# Supplementary material for: mQTL-seq delineates functionally relevant candidate gene harbouring a major QTL regulating pod number in chickpea
Source: PubMed Central journal article supplement — DNA Res. 2015 Dec 19;23(1):53–65. doi: 10.1093/dnares/dsv036 (PMC4755527; doi:10.1093/dnares/dsv036), 2015-12-19
Supplement: supp_dsv036_dsv036supp_table5.pdf [file supp_dsv036_dsv036supp_table5.pdf]

**Table S5:** SNPs differentiating high pod number-containing parental accession (Pusa 256) and homozygous bulk (HPNB) of mapping population (Pusa 256 x ILWC 46) from reference *kabuli* accession (CDC Frontier)

| SNPs IDs         | Chromosome IDs | Chromosomes     | Physical positions (bp) | CDC Frontier (Reference genome) | (Pusa 256 & HPNB) | NCBI SNPdb Accession IDs |
|------------------|----------------|-----------------|-------------------------|---------------------------------|-------------------|--------------------------|
| SNP_P3_1_72      | NC_021160.1    | Ca_kabuli_chr01 | 72                      | TT                              | CC                | 1945872954               |
| SNP_P3_2_288     | NC_021160.1    | Ca_kabuli_chr01 | 288                     | CC                              | AA                | 1945872956               |
| SNP_P3_3_435     | NC_021160.1    | Ca_kabuli_chr01 | 435                     | AA                              | GG                | 1945872958               |
| SNP_P3_4_445     | NC_021160.1    | Ca_kabuli_chr01 | 445                     | TT                              | AA                | 1945872959               |
| SNP_P3_5_893     | NC_021160.1    | Ca_kabuli_chr01 | 893                     | GG                              | TT                | 1945872961               |
| SNP_P3_6_7223    | NC_021160.1    | Ca_kabuli_chr01 | 7223                    | AA                              | TT                | 1945872963               |
| SNP_P3_7_8862    | NC_021160.1    | Ca_kabuli_chr01 | 8862                    | AA                              | GG                | 1945872965               |
| SNP_P3_9_9408    | NC_021160.1    | Ca_kabuli_chr01 | 9408                    | CC                              | TT                | 1945872966               |
| SNP_P3_10_13820  | NC_021160.1    | Ca_kabuli_chr01 | 13820                   | CC                              | GG                | 1945872968               |
| SNP_P3_11_14072  | NC_021160.1    | Ca_kabuli_chr01 | 14072                   | TT                              | CC                | 1945872970               |
| SNP_P3_12_14125  | NC_021160.1    | Ca_kabuli_chr01 | 14125                   | TT                              | CC                | 1945872972               |
| SNP_P3_13_14155  | NC_021160.1    | Ca_kabuli_chr01 | 14155                   | AA                              | GG                | 1945872973               |
| SNP_P3_14_14189  | NC_021160.1    | Ca_kabuli_chr01 | 14189                   | TT                              | CC                | 1945872975               |
| SNP_P3_15_14696  | NC_021160.1    | Ca_kabuli_chr01 | 14696                   | CC                              | AA                | 1945872977               |
| SNP_P3_16_17726  | NC_021160.1    | Ca_kabuli_chr01 | 17726                   | CC                              | TT                | 1945872979               |
| SNP_P3_17_17801  | NC_021160.1    | Ca_kabuli_chr01 | 17801                   | TT                              | CC                | 1945872980               |
| SNP_P3_19_18899  | NC_021160.1    | Ca_kabuli_chr01 | 18899                   | CC                              | TT                | 1945872982               |
| SNP_P3_20_18902  | NC_021160.1    | Ca_kabuli_chr01 | 18902                   | AA                              | GG                | 1945872984               |
| SNP_P3_21_18957  | NC_021160.1    | Ca_kabuli_chr01 | 18957                   | AA                              | CC                | 1945872986               |
| SNP_P3_22_19160  | NC_021160.1    | Ca_kabuli_chr01 | 19160                   | CC                              | TT                | 1945872988               |
| SNP_P3_24_19418  | NC_021160.1    | Ca_kabuli_chr01 | 19418                   | GG                              | AA                | 1945872989               |
| SNP_P3_25_23268  | NC_021160.1    | Ca_kabuli_chr01 | 23268                   | GG                              | AA                | 1945872991               |
| SNP_P3_26_23290  | NC_021160.1    | Ca_kabuli_chr01 | 23290                   | CC                              | TT                | 1945872993               |
| SNP_P3_27_37526  | NC_021160.1    | Ca_kabuli_chr01 | 37526                   | CC                              | AA                | 1945872995               |
| SNP_P3_28_39232  | NC_021160.1    | Ca_kabuli_chr01 | 39232                   | CC                              | TT                | 1945872996               |
| SNP_P3_29_39247  | NC_021160.1    | Ca_kabuli_chr01 | 39247                   | TT                              | CC                | 1945872998               |
| SNP_P3_30_47435  | NC_021160.1    | Ca_kabuli_chr01 | 47435                   | TT                              | CC                | 1945873000               |
| SNP_P3_31_49429  | NC_021160.1    | Ca_kabuli_chr01 | 49429                   | TT                              | CC                | 1945873002               |
| SNP_P3_33_114647 | NC_021160.1    | Ca_kabuli_chr01 | 114647                  | AA                              | GG                | 1945873003               |
| SNP_P3_34_117177 | NC_021160.1    | Ca_kabuli_chr01 | 117177                  | AA                              | TT                | 1945873005               |
| SNP_P3_35_117178 | NC_021160.1    | Ca_kabuli_chr01 | 117178                  | GG                              | TT                | 1945873007               |
| SNP_P3_36_117506 | NC_021160.1    | Ca_kabuli_chr01 | 117506                  | AA                              | GG                | 1945873009               |
| SNP_P3_37_125036 | NC_021160.1    | Ca_kabuli_chr01 | 125036                  | AA                              | GG                | 1945873011               |
| SNP_P3_38_125312 | NC_021160.1    | Ca_kabuli_chr01 | 125312                  | CC                              | TT                | 1945873012               |
| SNP_P3_40_186312 | NC_021160.1    | Ca_kabuli_chr01 | 186312                  | TT                              | GG                | 1945873014               |
| SNP_P3_41_186321 | NC_021160.1    | Ca_kabuli_chr01 | 186321                  | AA                              | TT                | 1945873016               |
| SNP_P3_42_186363 | NC_021160.1    | Ca_kabuli_chr01 | 186363                  | AA                              | TT                | 1945873018               |
| SNP_P3_43_186377 | NC_021160.1    | Ca_kabuli_chr01 | 186377                  | AA                              | GG                | 1945873019               |
| SNP_P3_44_186564 | NC_021160.1    | Ca_kabuli_chr01 | 186564                  | AA                              | TT                | 1945873021               |

| SNPs IDs         | Chromosome IDs | Chromosomes     | Physical positions (bp) | CDC Frontier (Reference genome) | (Pusa 256 & HPNB) | NCBI SNPdb Accession IDs |
|------------------|----------------|-----------------|-------------------------|---------------------------------|-------------------|--------------------------|
| SNP_P3_45_186626 | NC_021160.1    | Ca_kabuli_chr01 | 186626                  | TT                              | CC                | 1945873023               |
| SNP_P3_46_186725 | NC_021160.1    | Ca_kabuli_chr01 | 186725                  | GG                              | TT                | 1945873025               |
| SNP_P3_47_186749 | NC_021160.1    | Ca_kabuli_chr01 | 186749                  | GG                              | AA                | 1945873026               |
| SNP_P3_49_186964 | NC_021160.1    | Ca_kabuli_chr01 | 186964                  | CC                              | GG                | 1945873028               |
| SNP_P3_50_186979 | NC_021160.1    | Ca_kabuli_chr01 | 186979                  | CC                              | TT                | 1945873030               |
| SNP_P3_51_205013 | NC_021160.1    | Ca_kabuli_chr01 | 205013                  | GG                              | AA                | 1945873032               |
| SNP_P3_52_205044 | NC_021160.1    | Ca_kabuli_chr01 | 205044                  | GG                              | TT                | 1945873034               |
| SNP_P3_54_249828 | NC_021160.1    | Ca_kabuli_chr01 | 249828                  | CC                              | TT                | 1945873035               |
| SNP_P3_55_288188 | NC_021160.1    | Ca_kabuli_chr01 | 288188                  | TT                              | CC                | 1945873037               |
| SNP_P3_56_291985 | NC_021160.1    | Ca_kabuli_chr01 | 291985                  | CC                              | TT                | 1945873039               |
| SNP_P3_57_308419 | NC_021160.1    | Ca_kabuli_chr01 | 308419                  | TT                              | GG                | 1945873041               |
| SNP_P3_58_308422 | NC_021160.1    | Ca_kabuli_chr01 | 308422                  | AA                              | TT                | 1945873042               |
| SNP_P3_59_308455 | NC_021160.1    | Ca_kabuli_chr01 | 308455                  | CC                              | AA                | 1945873044               |
| SNP_P3_60_312198 | NC_021160.1    | Ca_kabuli_chr01 | 312198                  | AA                              | GG                | 1945873046               |
| SNP_P3_61_328464 | NC_021160.1    | Ca_kabuli_chr01 | 328464                  | CC                              | TT                | 1945873048               |
| SNP_P3_63_336903 | NC_021160.1    | Ca_kabuli_chr01 | 336903                  | AA                              | TT                | 1945873049               |
| SNP_P3_64_338707 | NC_021160.1    | Ca_kabuli_chr01 | 338707                  | CC                              | AA                | 1945873051               |
| SNP_P3_65_338735 | NC_021160.1    | Ca_kabuli_chr01 | 338735                  | AA                              | TT                | 1945873053               |
| SNP_P3_66_338739 | NC_021160.1    | Ca_kabuli_chr01 | 338739                  | TT                              | AA                | 1945873055               |
| SNP_P3_67_339462 | NC_021160.1    | Ca_kabuli_chr01 | 339462                  | CC                              | TT                | 1945873057               |
| SNP_P3_68_339660 | NC_021160.1    | Ca_kabuli_chr01 | 339660                  | CC                              | TT                | 1945873058               |
| SNP_P3_69_340962 | NC_021160.1    | Ca_kabuli_chr01 | 340962                  | CC                              | TT                | 1945873060               |
| SNP_P3_70_341433 | NC_021160.1    | Ca_kabuli_chr01 | 341433                  | GG                              | AA                | 1945873062               |
| SNP_P3_72_341865 | NC_021160.1    | Ca_kabuli_chr01 | 341865                  | AA                              | TT                | 1945873064               |
| SNP_P3_73_342441 | NC_021160.1    | Ca_kabuli_chr01 | 342441                  | TT                              | CC                | 1945873065               |
| SNP_P3_74_342991 | NC_021160.1    | Ca_kabuli_chr01 | 342991                  | CC                              | TT                | 1945873067               |
| SNP_P3_75_342995 | NC_021160.1    | Ca_kabuli_chr01 | 342995                  | CC                              | TT                | 1945873069               |
| SNP_P3_76_342996 | NC_021160.1    | Ca_kabuli_chr01 | 342996                  | TT                              | GG                | 1945873071               |
| SNP_P3_77_343326 | NC_021160.1    | Ca_kabuli_chr01 | 343326                  | GG                              | AA                | 1945873072               |
| SNP_P3_78_343368 | NC_021160.1    | Ca_kabuli_chr01 | 343368                  | GG                              | AA                | 1945873074               |
| SNP_P3_79_343401 | NC_021160.1    | Ca_kabuli_chr01 | 343401                  | GG                              | AA                | 1945873076               |
| SNP_P3_81_343588 | NC_021160.1    | Ca_kabuli_chr01 | 343588                  | TT                              | CC                | 1945873078               |
| SNP_P3_82_343877 | NC_021160.1    | Ca_kabuli_chr01 | 343877                  | GG                              | AA                | 1945873079               |
| SNP_P3_84_343939 | NC_021160.1    | Ca_kabuli_chr01 | 343939                  | GG                              | AA                | 1945873081               |
| SNP_P3_85_344082 | NC_021160.1    | Ca_kabuli_chr01 | 344082                  | CC                              | TT                | 1945873083               |
| SNP_P3_86_344091 | NC_021160.1    | Ca_kabuli_chr01 | 344091                  | GG                              | AA                | 1945873085               |
| SNP_P3_87_344322 | NC_021160.1    | Ca_kabuli_chr01 | 344322                  | AA                              | TT                | 1945873087               |
| SNP_P3_89_345135 | NC_021160.1    | Ca_kabuli_chr01 | 345135                  | TT                              | CC                | 1945873088               |
| SNP_P3_90_345147 | NC_021160.1    | Ca_kabuli_chr01 | 345147                  | GG                              | TT                | 1945873090               |
| SNP_P3_92_345353 | NC_021160.1    | Ca_kabuli_chr01 | 345353                  | TT                              | AA                | 1945873092               |
| SNP_P3_93_345356 | NC_021160.1    | Ca_kabuli_chr01 | 345356                  | GG                              | CC                | 1945873094               |
| SNP_P3_96_346130 | NC_021160.1    | Ca_kabuli_chr01 | 346130                  | TT                              | CC                | 1945873095               |

| SNPs IDs          | Chromosome IDs | Chromosomes     | Physical positions (bp) | CDC Frontier (Reference genome) | (Pusa 256 & HPNB) | NCBI SNPdb Accession IDs |
|-------------------|----------------|-----------------|-------------------------|---------------------------------|-------------------|--------------------------|
| SNP_P3_97_346261  | NC_021160.1    | Ca_kabuli_chr01 | 346261                  | AA                              | TT                | 1945873097               |
| SNP_P3_98_346813  | NC_021160.1    | Ca_kabuli_chr01 | 346813                  | GG                              | AA                | 1945873099               |
| SNP_P3_99_346827  | NC_021160.1    | Ca_kabuli_chr01 | 346827                  | AA                              | TT                | 1945873101               |
| SNP_P3_101_349319 | NC_021160.1    | Ca_kabuli_chr01 | 349319                  | AA                              | GG                | 1945873102               |
| SNP_P3_103_354908 | NC_021160.1    | Ca_kabuli_chr01 | 354908                  | GG                              | AA                | 1945873104               |
| SNP_P3_104_355056 | NC_021160.1    | Ca_kabuli_chr01 | 355056                  | AA                              | CC                | 1945873106               |
| SNP_P3_105_355086 | NC_021160.1    | Ca_kabuli_chr01 | 355086                  | AA                              | GG                | 1945873108               |
| SNP_P3_106_355537 | NC_021160.1    | Ca_kabuli_chr01 | 355537                  | AA                              | GG                | 1945873109               |
| SNP_P3_107_355795 | NC_021160.1    | Ca_kabuli_chr01 | 355795                  | AA                              | GG                | 1945873111               |
| SNP_P3_108_355829 | NC_021160.1    | Ca_kabuli_chr01 | 355829                  | AA                              | GG                | 1945873113               |
| SNP_P3_109_356466 | NC_021160.1    | Ca_kabuli_chr01 | 356466                  | CC                              | TT                | 1945873115               |
| SNP_P3_110_357002 | NC_021160.1    | Ca_kabuli_chr01 | 357002                  | CC                              | TT                | 1945873117               |
| SNP_P3_111_358741 | NC_021160.1    | Ca_kabuli_chr01 | 358741                  | GG                              | AA                | 1945873118               |
| SNP_P3_112_358914 | NC_021160.1    | Ca_kabuli_chr01 | 358914                  | CC                              | TT                | 1945873120               |
| SNP_P3_113_358983 | NC_021160.1    | Ca_kabuli_chr01 | 358983                  | CC                              | TT                | 1945873122               |
| SNP_P3_115_362902 | NC_021160.1    | Ca_kabuli_chr01 | 362902                  | GG                              | AA                | 1945873124               |
| SNP_P3_116_363287 | NC_021160.1    | Ca_kabuli_chr01 | 363287                  | TT                              | GG                | 1945873125               |
| SNP_P3_117_363505 | NC_021160.1    | Ca_kabuli_chr01 | 363505                  | AA                              | GG                | 1945873127               |
| SNP_P3_118_363525 | NC_021160.1    | Ca_kabuli_chr01 | 363525                  | TT                              | CC                | 1945873129               |
| SNP_P3_119_363704 | NC_021160.1    | Ca_kabuli_chr01 | 363704                  | TT                              | AA                | 1945873131               |
| SNP_P3_120_363717 | NC_021160.1    | Ca_kabuli_chr01 | 363717                  | TT                              | CC                | 1945873132               |
| SNP_P3_121_368545 | NC_021160.1    | Ca_kabuli_chr01 | 368545                  | TT                              | CC                | 1945873134               |
| SNP_P3_122_368546 | NC_021160.1    | Ca_kabuli_chr01 | 368546                  | AA                              | GG                | 1945873136               |
| SNP_P3_123_371768 | NC_021160.1    | Ca_kabuli_chr01 | 371768                  | CC                              | TT                | 1945873138               |
| SNP_P3_124_372530 | NC_021160.1    | Ca_kabuli_chr01 | 372530                  | AA                              | GG                | 1945873139               |
| SNP_P3_125_373118 | NC_021160.1    | Ca_kabuli_chr01 | 373118                  | TT                              | CC                | 1945873141               |
| SNP_P3_128_374791 | NC_021160.1    | Ca_kabuli_chr01 | 374791                  | CC                              | TT                | 1945873143               |
| SNP_P3_129_377599 | NC_021160.1    | Ca_kabuli_chr01 | 377599                  | AA                              | GG                | 1945873145               |
| SNP_P3_130_378289 | NC_021160.1    | Ca_kabuli_chr01 | 378289                  | AA                              | TT                | 1945873147               |
| SNP_P3_131_379304 | NC_021160.1    | Ca_kabuli_chr01 | 379304                  | CC                              | TT                | 1945873148               |
| SNP_P3_132_379937 | NC_021160.1    | Ca_kabuli_chr01 | 379937                  | AA                              | TT                | 1945873150               |
| SNP_P3_133_381922 | NC_021160.1    | Ca_kabuli_chr01 | 381922                  | AA                              | CC                | 1945873152               |
| SNP_P3_134_382554 | NC_021160.1    | Ca_kabuli_chr01 | 382554                  | TT                              | CC                | 1945873154               |
| SNP_P3_135_384319 | NC_021160.1    | Ca_kabuli_chr01 | 384319                  | AA                              | TT                | 1945873155               |
| SNP_P3_136_384342 | NC_021160.1    | Ca_kabuli_chr01 | 384342                  | CC                              | TT                | 1945873157               |
| SNP_P3_137_384350 | NC_021160.1    | Ca_kabuli_chr01 | 384350                  | CC                              | GG                | 1945873159               |
| SNP_P3_138_384615 | NC_021160.1    | Ca_kabuli_chr01 | 384615                  | CC                              | TT                | 1945873161               |
| SNP_P3_140_385099 | NC_021160.1    | Ca_kabuli_chr01 | 385099                  | GG                              | AA                | 1945873162               |
| SNP_P3_141_388257 | NC_021160.1    | Ca_kabuli_chr01 | 388257                  | GG                              | CC                | 1945873164               |
| SNP_P3_142_388380 | NC_021160.1    | Ca_kabuli_chr01 | 388380                  | GG                              | CC                | 1945873166               |
| SNP_P3_144_389227 | NC_021160.1    | Ca_kabuli_chr01 | 389227                  | CC                              | TT                | 1945873167               |
| SNP_P3_145_389239 | NC_021160.1    | Ca_kabuli_chr01 | 389239                  | AA                              | TT                | 1945873169               |

| SNPs IDs          | Chromosome IDs | Chromosomes     | Physical positions (bp) | CDC Frontier (Reference genome) | (Pusa 256 & HPNB) | NCBI SNPdb Accession IDs |
|-------------------|----------------|-----------------|-------------------------|---------------------------------|-------------------|--------------------------|
| SNP_P3_147_390919 | NC_021160.1    | Ca_kabuli_chr01 | 390919                  | TT                              | GG                | 1945873171               |
| SNP_P3_149_394948 | NC_021160.1    | Ca_kabuli_chr01 | 394948                  | GG                              | AA                | 1945873173               |
| SNP_P3_150_395121 | NC_021160.1    | Ca_kabuli_chr01 | 395121                  | TT                              | AA                | 1945873174               |
| SNP_P3_151_395277 | NC_021160.1    | Ca_kabuli_chr01 | 395277                  | TT                              | AA                | 1945873176               |
| SNP_P3_152_395293 | NC_021160.1    | Ca_kabuli_chr01 | 395293                  | AA                              | GG                | 1945873178               |
| SNP_P3_153_395496 | NC_021160.1    | Ca_kabuli_chr01 | 395496                  | GG                              | AA                | 1945873180               |
| SNP_P3_154_395670 | NC_021160.1    | Ca_kabuli_chr01 | 395670                  | AA                              | CC                | 1945873181               |
| SNP_P3_155_395799 | NC_021160.1    | Ca_kabuli_chr01 | 395799                  | GG                              | TT                | 1945873183               |
| SNP_P3_157_400647 | NC_021160.1    | Ca_kabuli_chr01 | 400647                  | GG                              | CC                | 1945873185               |
| SNP_P3_158_400686 | NC_021160.1    | Ca_kabuli_chr01 | 400686                  | CC                              | GG                | 1945873186               |
| SNP_P3_159_400715 | NC_021160.1    | Ca_kabuli_chr01 | 400715                  | CC                              | AA                | 1945873188               |
| SNP_P3_160_400793 | NC_021160.1    | Ca_kabuli_chr01 | 400793                  | GG                              | AA                | 1945873190               |
| SNP_P3_161_400963 | NC_021160.1    | Ca_kabuli_chr01 | 400963                  | AA                              | TT                | 1945873192               |
| SNP_P3_162_401583 | NC_021160.1    | Ca_kabuli_chr01 | 401583                  | TT                              | AA                | 1945873193               |
| SNP_P3_163_401612 | NC_021160.1    | Ca_kabuli_chr01 | 401612                  | TT                              | CC                | 1945873195               |
| SNP_P3_164_401649 | NC_021160.1    | Ca_kabuli_chr01 | 401649                  | AA                              | TT                | 1945873197               |
| SNP_P3_166_401952 | NC_021160.1    | Ca_kabuli_chr01 | 401952                  | TT                              | GG                | 1945873199               |
| SNP_P3_167_402408 | NC_021160.1    | Ca_kabuli_chr01 | 402408                  | GG                              | TT                | 1945873200               |
| SNP_P3_168_403320 | NC_021160.1    | Ca_kabuli_chr01 | 403320                  | TT                              | CC                | 1945873202               |
| SNP_P3_169_403325 | NC_021160.1    | Ca_kabuli_chr01 | 403325                  | AA                              | GG                | 1945873204               |
| SNP_P3_170_403779 | NC_021160.1    | Ca_kabuli_chr01 | 403779                  | GG                              | AA                | 1945873206               |
| SNP_P3_171_403809 | NC_021160.1    | Ca_kabuli_chr01 | 403809                  | CC                              | AA                | 1945873207               |
| SNP_P3_172_403930 | NC_021160.1    | Ca_kabuli_chr01 | 403930                  | CC                              | GG                | 1945873209               |
| SNP_P3_173_403936 | NC_021160.1    | Ca_kabuli_chr01 | 403936                  | TT                              | CC                | 1945873211               |
| SNP_P3_174_403942 | NC_021160.1    | Ca_kabuli_chr01 | 403942                  | TT                              | CC                | 1945873213               |
| SNP_P3_176_404244 | NC_021160.1    | Ca_kabuli_chr01 | 404244                  | AA                              | CC                | 1945873215               |
| SNP_P3_177_405055 | NC_021160.1    | Ca_kabuli_chr01 | 405055                  | CC                              | TT                | 1945873216               |
| SNP_P3_178_406789 | NC_021160.1    | Ca_kabuli_chr01 | 406789                  | CC                              | AA                | 1945873218               |
| SNP_P3_180_407494 | NC_021160.1    | Ca_kabuli_chr01 | 407494                  | AA                              | CC                | 1945873220               |
| SNP_P3_181_410328 | NC_021160.1    | Ca_kabuli_chr01 | 410328                  | TT                              | AA                | 1945873222               |
| SNP_P3_182_410333 | NC_021160.1    | Ca_kabuli_chr01 | 410333                  | GG                              | AA                | 1945873223               |
| SNP_P3_183_410541 | NC_021160.1    | Ca_kabuli_chr01 | 410541                  | CC                              | TT                | 1945873225               |
| SNP_P3_184_412887 | NC_021160.1    | Ca_kabuli_chr01 | 412887                  | AA                              | TT                | 1945873227               |
| SNP_P3_185_412894 | NC_021160.1    | Ca_kabuli_chr01 | 412894                  | TT                              | AA                | 1945873229               |
| SNP_P3_186_416404 | NC_021160.1    | Ca_kabuli_chr01 | 416404                  | CC                              | AA                | 1945873230               |
| SNP_P3_187_417016 | NC_021160.1    | Ca_kabuli_chr01 | 417016                  | CC                              | GG                | 1945873232               |
| SNP_P3_189_418033 | NC_021160.1    | Ca_kabuli_chr01 | 418033                  | CC                              | TT                | 1945873234               |
| SNP_P3_190_418043 | NC_021160.1    | Ca_kabuli_chr01 | 418043                  | CC                              | AA                | 1945873236               |
| SNP_P3_191_418072 | NC_021160.1    | Ca_kabuli_chr01 | 418072                  | GG                              | AA                | 1945873237               |
| SNP_P3_192_418100 | NC_021160.1    | Ca_kabuli_chr01 | 418100                  | GG                              | CC                | 1945873239               |
| SNP_P3_193_418118 | NC_021160.1    | Ca_kabuli_chr01 | 418118                  | TT                              | CC                | 1945873241               |
| SNP_P3_194_418555 | NC_021160.1    | Ca_kabuli_chr01 | 418555                  | GG                              | AA                | 1945873243               |



| SNPs IDs          | Chromosome IDs | Chromosomes     | Physical positions (bp) | CDC Frontier (Reference genome) | (Pusa 256 & HPNB) | NCBI SNPdb Accession IDs |
|-------------------|----------------|-----------------|-------------------------|---------------------------------|-------------------|--------------------------|
| SNP_P3_195_418578 | NC_021160.1    | Ca_kabuli_chr01 | 418578                  | AA                              | GG                | 1945873245               |
| SNP_P3_196_418610 | NC_021160.1    | Ca_kabuli_chr01 | 418610                  | GG                              | TT                | 1945873246               |
| SNP_P3_197_418625 | NC_021160.1    | Ca_kabuli_chr01 | 418625                  | CC                              | TT                | 1945873248               |
| SNP_P3_198_419020 | NC_021160.1    | Ca_kabuli_chr01 | 419020                  | AA                              | GG                | 1945873250               |
| SNP_P3_199_419139 | NC_021160.1    | Ca_kabuli_chr01 | 419139                  | TT                              | GG                | 1945873252               |
| SNP_P3_200_419287 | NC_021160.1    | Ca_kabuli_chr01 | 419287                  | AA                              | GG                | 1945873253               |
| SNP_P3_201_419305 | NC_021160.1    | Ca_kabuli_chr01 | 419305                  | CC                              | TT                | 1945873255               |
| SNP_P3_202_419335 | NC_021160.1    | Ca_kabuli_chr01 | 419335                  | CC                              | TT                | 1945873257               |
| SNP_P3_203_419339 | NC_021160.1    | Ca_kabuli_chr01 | 419339                  | AA                              | CC                | 1945873259               |
| SNP_P3_204_421422 | NC_021160.1    | Ca_kabuli_chr01 | 421422                  | GG                              | AA                | 1945873260               |
| SNP_P3_205_422010 | NC_021160.1    | Ca_kabuli_chr01 | 422010                  | TT                              | CC                | 1945873262               |
| SNP_P3_207_422466 | NC_021160.1    | Ca_kabuli_chr01 | 422466                  | AA                              | TT                | 1945873264               |
| SNP_P3_208_422745 | NC_021160.1    | Ca_kabuli_chr01 | 422745                  | GG                              | AA                | 1945873266               |
| SNP_P3_210_423005 | NC_021160.1    | Ca_kabuli_chr01 | 423005                  | CC                              | TT                | 1945873268               |
| SNP_P3_211_423189 | NC_021160.1    | Ca_kabuli_chr01 | 423189                  | GG                              | AA                | 1945873269               |
| SNP_P3_212_423568 | NC_021160.1    | Ca_kabuli_chr01 | 423568                  | GG                              | AA                | 1945873271               |
| SNP_P3_213_423613 | NC_021160.1    | Ca_kabuli_chr01 | 423613                  | AA                              | GG                | 1945873273               |
| SNP_P3_214_423911 | NC_021160.1    | Ca_kabuli_chr01 | 423911                  | TT                              | AA                | 1945873275               |
| SNP_P3_215_423991 | NC_021160.1    | Ca_kabuli_chr01 | 423991                  | CC                              | TT                | 1945873276               |
| SNP_P3_217_424643 | NC_021160.1    | Ca_kabuli_chr01 | 424643                  | GG                              | CC                | 1945873278               |
| SNP_P3_218_425408 | NC_021160.1    | Ca_kabuli_chr01 | 425408                  | GG                              | AA                | 1945873280               |
| SNP_P3_219_425453 | NC_021160.1    | Ca_kabuli_chr01 | 425453                  | GG                              | AA                | 1945873282               |
| SNP_P3_221_426167 | NC_021160.1    | Ca_kabuli_chr01 | 426167                  | AA                              | GG                | 1945873283               |
| SNP_P3_222_428517 | NC_021160.1    | Ca_kabuli_chr01 | 428517                  | AA                              | GG                | 1945873285               |
| SNP_P3_223_429498 | NC_021160.1    | Ca_kabuli_chr01 | 429498                  | TT                              | AA                | 1945873287               |
| SNP_P3_224_430773 | NC_021160.1    | Ca_kabuli_chr01 | 430773                  | GG                              | AA                | 1945873289               |
| SNP_P3_225_431646 | NC_021160.1    | Ca_kabuli_chr01 | 431646                  | AA                              | GG                | 1945873290               |
| SNP_P3_226_431978 | NC_021160.1    | Ca_kabuli_chr01 | 431978                  | AA                              | GG                | 1945873292               |
| SNP_P3_227_432108 | NC_021160.1    | Ca_kabuli_chr01 | 432108                  | TT                              | CC                | 1945873294               |
| SNP_P3_228_432122 | NC_021160.1    | Ca_kabuli_chr01 | 432122                  | GG                              | AA                | 1945873296               |
| SNP_P3_229_444036 | NC_021160.1    | Ca_kabuli_chr01 | 444036                  | CC                              | AA                | 1945873298               |
| SNP_P3_230_454406 | NC_021160.1    | Ca_kabuli_chr01 | 454406                  | AA                              | GG                | 1945873299               |
| SNP_P3_231_455050 | NC_021160.1    | Ca_kabuli_chr01 | 455050                  | GG                              | AA                | 1945873301               |
| SNP_P3_232_502524 | NC_021160.1    | Ca_kabuli_chr01 | 502524                  | GG                              | AA                | 1945873303               |
| SNP_P3_235_634593 | NC_021160.1    | Ca_kabuli_chr01 | 634593                  | GG                              | AA                | 1945873305               |
| SNP_P3_236_634594 | NC_021160.1    | Ca_kabuli_chr01 | 634594                  | TT                              | AA                | 1945873306               |
| SNP_P3_237_651479 | NC_021160.1    | Ca_kabuli_chr01 | 651479                  | AA                              | GG                | 1945873308               |
| SNP_P3_238_755162 | NC_021160.1    | Ca_kabuli_chr01 | 755162                  | AA                              | GG                | 1945873310               |
| SNP_P3_239_797199 | NC_021160.1    | Ca_kabuli_chr01 | 797199                  | AA                              | GG                | 1945873312               |
| SNP_P3_241_833752 | NC_021160.1    | Ca_kabuli_chr01 | 833752                  | TT                              | AA                | 1945873313               |
| SNP_P3_242_833753 | NC_021160.1    | Ca_kabuli_chr01 | 833753                  | TT                              | GG                | 1945873315               |
| SNP_P3_243_834090 | NC_021160.1    | Ca_kabuli_chr01 | 834090                  | GG                              | AA                | 1945873317               |

| SNPs IDs           | Chromosome IDs | Chromosomes     | Physical positions (bp) | CDC Frontier (Reference genome) | (Pusa 256 & HPNB) | NCBI SNPdb Accession IDs |
|--------------------|----------------|-----------------|-------------------------|---------------------------------|-------------------|--------------------------|
| SNP_P3_245_855519  | NC_021160.1    | Ca_kabuli_chr01 | 855519                  | GG                              | AA                | 1945873319               |
| SNP_P3_246_856120  | NC_021160.1    | Ca_kabuli_chr01 | 856120                  | AA                              | TT                | 1945873321               |
| SNP_P3_247_882651  | NC_021160.1    | Ca_kabuli_chr01 | 882651                  | TT                              | AA                | 1945873322               |
| SNP_P3_248_884497  | NC_021160.1    | Ca_kabuli_chr01 | 884497                  | AA                              | GG                | 1945873324               |
| SNP_P3_249_894157  | NC_021160.1    | Ca_kabuli_chr01 | 894157                  | GG                              | AA                | 1945873326               |
| SNP_P3_250_894161  | NC_021160.1    | Ca_kabuli_chr01 | 894161                  | AA                              | TT                | 1945873328               |
| SNP_P3_251_906464  | NC_021160.1    | Ca_kabuli_chr01 | 906464                  | GG                              | AA                | 1945873329               |
| SNP_P3_253_918579  | NC_021160.1    | Ca_kabuli_chr01 | 918579                  | TT                              | CC                | 1945873331               |
| SNP_P3_254_938637  | NC_021160.1    | Ca_kabuli_chr01 | 938637                  | CC                              | GG                | 1945873333               |
| SNP_P3_255_978050  | NC_021160.1    | Ca_kabuli_chr01 | 978050                  | AA                              | CC                | 1945873335               |
| SNP_P3_256_986931  | NC_021160.1    | Ca_kabuli_chr01 | 986931                  | TT                              | GG                | 1945873336               |
| SNP_P3_257_993126  | NC_021160.1    | Ca_kabuli_chr01 | 993126                  | GG                              | AA                | 1945873338               |
| SNP_P3_258_993154  | NC_021160.1    | Ca_kabuli_chr01 | 993154                  | CC                              | AA                | 1945873340               |
| SNP_P3_259_993182  | NC_021160.1    | Ca_kabuli_chr01 | 993182                  | AA                              | GG                | 1945873342               |
| SNP_P3_260_993196  | NC_021160.1    | Ca_kabuli_chr01 | 993196                  | GG                              | TT                | 1945873343               |
| SNP_P3_261_993206  | NC_021160.1    | Ca_kabuli_chr01 | 993206                  | CC                              | TT                | 1945873345               |
| SNP_P3_262_993220  | NC_021160.1    | Ca_kabuli_chr01 | 993220                  | CC                              | AA                | 1945873347               |
| SNP_P3_263_993225  | NC_021160.1    | Ca_kabuli_chr01 | 993225                  | GG                              | TT                | 1945873349               |
| SNP_P3_264_1016732 | NC_021160.1    | Ca_kabuli_chr01 | 1016732                 | CC                              | AA                | 1945873351               |
| SNP_P3_265_1048663 | NC_021160.1    | Ca_kabuli_chr01 | 1048663                 | TT                              | CC                | 1945873352               |
| SNP_P3_266_1143403 | NC_021160.1    | Ca_kabuli_chr01 | 1143403                 | CC                              | TT                | 1945873354               |
| SNP_P3_267_1169866 | NC_021160.1    | Ca_kabuli_chr01 | 1169866                 | TT                              | AA                | 1945873356               |
| SNP_P3_268_1169870 | NC_021160.1    | Ca_kabuli_chr01 | 1169870                 | TT                              | AA                | 1945873358               |
| SNP_P3_270_1209154 | NC_021160.1    | Ca_kabuli_chr01 | 1209154                 | TT                              | CC                | 1945873359               |
| SNP_P3_271_1209216 | NC_021160.1    | Ca_kabuli_chr01 | 1209216                 | AA                              | CC                | 1945873361               |
| SNP_P3_272_1209233 | NC_021160.1    | Ca_kabuli_chr01 | 1209233                 | TT                              | GG                | 1945873363               |
| SNP_P3_273_1209934 | NC_021160.1    | Ca_kabuli_chr01 | 1209934                 | GG                              | CC                | 1945873365               |
| SNP_P3_275_1314833 | NC_021160.1    | Ca_kabuli_chr01 | 1314833                 | AA                              | GG                | 1945873366               |
| SNP_P3_276_1314857 | NC_021160.1    | Ca_kabuli_chr01 | 1314857                 | TT                              | AA                | 1945873368               |
| SNP_P3_277_1314860 | NC_021160.1    | Ca_kabuli_chr01 | 1314860                 | AA                              | GG                | 1945873370               |
| SNP_P3_278_1314863 | NC_021160.1    | Ca_kabuli_chr01 | 1314863                 | TT                              | GG                | 1945873372               |
| SNP_P3_279_1314866 | NC_021160.1    | Ca_kabuli_chr01 | 1314866                 | AA                              | GG                | 1945873373               |
| SNP_P3_280_1327548 | NC_021160.1    | Ca_kabuli_chr01 | 1327548                 | GG                              | AA                | 1945873375               |
| SNP_P3_281_1329222 | NC_021160.1    | Ca_kabuli_chr01 | 1329222                 | TT                              | CC                | 1945873377               |
| SNP_P3_282_1348871 | NC_021160.1    | Ca_kabuli_chr01 | 1348871                 | GG                              | AA                | 1945873378               |
| SNP_P3_283_1349492 | NC_021160.1    | Ca_kabuli_chr01 | 1349492                 | GG                              | AA                | 1945873380               |
| SNP_P3_284_1356338 | NC_021160.1    | Ca_kabuli_chr01 | 1356338                 | AA                              | CC                | 1945873382               |
| SNP_P3_285_1372270 | NC_021160.1    | Ca_kabuli_chr01 | 1372270                 | GG                              | CC                | 1945873384               |
| SNP_P3_286_1383603 | NC_021160.1    | Ca_kabuli_chr01 | 1383603                 | TT                              | CC                | 1945873385               |
| SNP_P3_288_1443829 | NC_021160.1    | Ca_kabuli_chr01 | 1443829                 | AA                              | CC                | 1945873387               |
| SNP_P3_290_1500574 | NC_021160.1    | Ca_kabuli_chr01 | 1500574                 | GG                              | AA                | 1945873389               |
| SNP_P3_291_1519057 | NC_021160.1    | Ca_kabuli_chr01 | 1519057                 | AA                              | GG                | 1945873391               |

| SNPs IDs           | Chromosome IDs | Chromosomes     | Physical positions (bp) | CDC Frontier (Reference genome) | (Pusa 256 & HPNB) | NCBI SNPdb Accession IDs |
|--------------------|----------------|-----------------|-------------------------|---------------------------------|-------------------|--------------------------|
| SNP_P3_292_1540564 | NC_021160.1    | Ca_kabuli_chr01 | 1540564                 | TT                              | CC                | 1945873392               |
| SNP_P3_293_1572340 | NC_021160.1    | Ca_kabuli_chr01 | 1572340                 | CC                              | TT                | 1945873394               |
| SNP_P3_294_1682002 | NC_021160.1    | Ca_kabuli_chr01 | 1682002                 | AA                              | GG                | 1945873396               |
| SNP_P3_295_1687884 | NC_021160.1    | Ca_kabuli_chr01 | 1687884                 | TT                              | CC                | 1945873398               |
| SNP_P3_297_1703754 | NC_021160.1    | Ca_kabuli_chr01 | 1703754                 | CC                              | TT                | 1945873400               |
| SNP_P3_300_1726190 | NC_021160.1    | Ca_kabuli_chr01 | 1726190                 | GG                              | TT                | 1945873401               |
| SNP_P3_301_1731918 | NC_021160.1    | Ca_kabuli_chr01 | 1731918                 | GG                              | AA                | 1945873403               |
| SNP_P3_302_1731946 | NC_021160.1    | Ca_kabuli_chr01 | 1731946                 | TT                              | CC                | 1945873405               |
| SNP_P3_303_1732614 | NC_021160.1    | Ca_kabuli_chr01 | 1732614                 | AA                              | GG                | 1945873407               |
| SNP_P3_304_1732647 | NC_021160.1    | Ca_kabuli_chr01 | 1732647                 | CC                              | TT                | 1945873409               |
| SNP_P3_305_1732667 | NC_021160.1    | Ca_kabuli_chr01 | 1732667                 | GG                              | AA                | 1945873410               |
| SNP_P3_306_1732877 | NC_021160.1    | Ca_kabuli_chr01 | 1732877                 | TT                              | CC                | 1945873412               |
| SNP_P3_307_1732879 | NC_021160.1    | Ca_kabuli_chr01 | 1732879                 | CC                              | GG                | 1945873414               |
| SNP_P3_308_1732919 | NC_021160.1    | Ca_kabuli_chr01 | 1732919                 | TT                              | AA                | 1945873416               |
| SNP_P3_309_1732937 | NC_021160.1    | Ca_kabuli_chr01 | 1732937                 | TT                              | CC                | 1945873417               |
| SNP_P3_310_1732946 | NC_021160.1    | Ca_kabuli_chr01 | 1732946                 | AA                              | GG                | 1945873419               |
| SNP_P3_312_1733230 | NC_021160.1    | Ca_kabuli_chr01 | 1733230                 | TT                              | CC                | 1945873421               |
| SNP_P3_313_1733235 | NC_021160.1    | Ca_kabuli_chr01 | 1733235                 | AA                              | GG                | 1945873423               |
| SNP_P3_314_1733457 | NC_021160.1    | Ca_kabuli_chr01 | 1733457                 | GG                              | AA                | 1945873424               |
| SNP_P3_315_1735385 | NC_021160.1    | Ca_kabuli_chr01 | 1735385                 | CC                              | TT                | 1945873426               |
| SNP_P3_316_1735623 | NC_021160.1    | Ca_kabuli_chr01 | 1735623                 | CC                              | TT                | 1945873428               |
| SNP_P3_317_1735682 | NC_021160.1    | Ca_kabuli_chr01 | 1735682                 | CC                              | TT                | 1945873430               |
| SNP_P3_318_1735860 | NC_021160.1    | Ca_kabuli_chr01 | 1735860                 | GG                              | AA                | 1945873432               |
| SNP_P3_319_1735883 | NC_021160.1    | Ca_kabuli_chr01 | 1735883                 | AA                              | TT                | 1945873433               |
| SNP_P3_321_1736912 | NC_021160.1    | Ca_kabuli_chr01 | 1736912                 | TT                              | GG                | 1945873435               |
| SNP_P3_322_1737637 | NC_021160.1    | Ca_kabuli_chr01 | 1737637                 | TT                              | CC                | 1945873437               |
| SNP_P3_323_1737708 | NC_021160.1    | Ca_kabuli_chr01 | 1737708                 | TT                              | CC                | 1945873439               |
| SNP_P3_324_1737730 | NC_021160.1    | Ca_kabuli_chr01 | 1737730                 | CC                              | GG                | 1945873440               |
| SNP_P3_325_1737731 | NC_021160.1    | Ca_kabuli_chr01 | 1737731                 | GG                              | AA                | 1945873442               |
| SNP_P3_326_1737735 | NC_021160.1    | Ca_kabuli_chr01 | 1737735                 | GG                              | AA                | 1945873444               |
| SNP_P3_327_1737743 | NC_021160.1    | Ca_kabuli_chr01 | 1737743                 | AA                              | GG                | 1945873446               |
| SNP_P3_328_1737915 | NC_021160.1    | Ca_kabuli_chr01 | 1737915                 | CC                              | GG                | 1945873447               |
| SNP_P3_329_1737927 | NC_021160.1    | Ca_kabuli_chr01 | 1737927                 | GG                              | AA                | 1945873449               |
| SNP_P3_330_1737929 | NC_021160.1    | Ca_kabuli_chr01 | 1737929                 | TT                              | CC                | 1945873451               |
| SNP_P3_331_1737970 | NC_021160.1    | Ca_kabuli_chr01 | 1737970                 | CC                              | TT                | 1945873453               |
| SNP_P3_333_1738056 | NC_021160.1    | Ca_kabuli_chr01 | 1738056                 | TT                              | CC                | 1945873455               |
| SNP_P3_334_1738266 | NC_021160.1    | Ca_kabuli_chr01 | 1738266                 | GG                              | AA                | 1945873456               |
| SNP_P3_335_1738267 | NC_021160.1    | Ca_kabuli_chr01 | 1738267                 | TT                              | GG                | 1945873458               |
| SNP_P3_336_1738268 | NC_021160.1    | Ca_kabuli_chr01 | 1738268                 | AA                              | TT                | 1945873460               |
| SNP_P3_337_1738269 | NC_021160.1    | Ca_kabuli_chr01 | 1738269                 | CC                              | TT                | 1945873462               |
| SNP_P3_338_1738431 | NC_021160.1    | Ca_kabuli_chr01 | 1738431                 | AA                              | GG                | 1945873463               |
| SNP_P3_339_1738858 | NC_021160.1    | Ca_kabuli_chr01 | 1738858                 | AA                              | TT                | 1945873465               |

| SNPs IDs           | Chromosome IDs | Chromosomes     | Physical positions (bp) | CDC Frontier (Reference genome) | (Pusa 256 & HPNB) | NCBI SNPdb Accession IDs |
|--------------------|----------------|-----------------|-------------------------|---------------------------------|-------------------|--------------------------|
| SNP_P3_340_1740641 | NC_021160.1    | Ca_kabuli_chr01 | 1740641                 | GG                              | TT                | 1945873467               |
| SNP_P3_342_1741536 | NC_021160.1    | Ca_kabuli_chr01 | 1741536                 | TT                              | GG                | 1945873469               |
| SNP_P3_343_1742036 | NC_021160.1    | Ca_kabuli_chr01 | 1742036                 | CC                              | TT                | 1945873471               |
| SNP_P3_344_1742095 | NC_021160.1    | Ca_kabuli_chr01 | 1742095                 | GG                              | AA                | 1945873472               |
| SNP_P3_345_1742104 | NC_021160.1    | Ca_kabuli_chr01 | 1742104                 | AA                              | TT                | 1945873474               |
| SNP_P3_346_1742121 | NC_021160.1    | Ca_kabuli_chr01 | 1742121                 | TT                              | AA                | 1945873476               |
| SNP_P3_347_1742621 | NC_021160.1    | Ca_kabuli_chr01 | 1742621                 | GG                              | TT                | 1945873478               |
| SNP_P3_348_1743421 | NC_021160.1    | Ca_kabuli_chr01 | 1743421                 | AA                              | GG                | 1945873480               |
| SNP_P3_349_1743941 | NC_021160.1    | Ca_kabuli_chr01 | 1743941                 | AA                              | GG                | 1945873481               |
| SNP_P3_350_1744238 | NC_021160.1    | Ca_kabuli_chr01 | 1744238                 | AA                              | TT                | 1945873483               |
| SNP_P3_351_1744240 | NC_021160.1    | Ca_kabuli_chr01 | 1744240                 | CC                              | TT                | 1945873485               |
| SNP_P3_352_1744393 | NC_021160.1    | Ca_kabuli_chr01 | 1744393                 | TT                              | AA                | 1945873487               |
| SNP_P3_353_1744911 | NC_021160.1    | Ca_kabuli_chr01 | 1744911                 | AA                              | CC                | 1945873488               |
| SNP_P3_355_1745063 | NC_021160.1    | Ca_kabuli_chr01 | 1745063                 | GG                              | AA                | 1945873490               |
| SNP_P3_356_1745287 | NC_021160.1    | Ca_kabuli_chr01 | 1745287                 | CC                              | GG                | 1945873492               |
| SNP_P3_357_1745940 | NC_021160.1    | Ca_kabuli_chr01 | 1745940                 | GG                              | CC                | 1945873494               |
| SNP_P3_358_1746195 | NC_021160.1    | Ca_kabuli_chr01 | 1746195                 | TT                              | GG                | 1945873496               |
| SNP_P3_361_1746708 | NC_021160.1    | Ca_kabuli_chr01 | 1746708                 | TT                              | GG                | 1945873497               |
| SNP_P3_362_1746723 | NC_021160.1    | Ca_kabuli_chr01 | 1746723                 | AA                              | TT                | 1945873499               |
| SNP_P3_363_1746738 | NC_021160.1    | Ca_kabuli_chr01 | 1746738                 | TT                              | AA                | 1945873501               |
| SNP_P3_364_1746865 | NC_021160.1    | Ca_kabuli_chr01 | 1746865                 | GG                              | AA                | 1945873503               |
| SNP_P3_366_1756525 | NC_021160.1    | Ca_kabuli_chr01 | 1756525                 | AA                              | GG                | 1945873504               |
| SNP_P3_367_1757035 | NC_021160.1    | Ca_kabuli_chr01 | 1757035                 | GG                              | AA                | 1945873506               |
| SNP_P3_368_1768906 | NC_021160.1    | Ca_kabuli_chr01 | 1768906                 | AA                              | CC                | 1945873508               |
| SNP_P3_369_1777689 | NC_021160.1    | Ca_kabuli_chr01 | 1777689                 | TT                              | CC                | 1945873510               |
| SNP_P3_370_1777742 | NC_021160.1    | Ca_kabuli_chr01 | 1777742                 | CC                              | AA                | 1945873512               |
| SNP_P3_373_1777857 | NC_021160.1    | Ca_kabuli_chr01 | 1777857                 | CC                              | TT                | 1945873513               |
| SNP_P3_376_1779969 | NC_021160.1    | Ca_kabuli_chr01 | 1779969                 | TT                              | CC                | 1945873515               |
| SNP_P3_377_1780129 | NC_021160.1    | Ca_kabuli_chr01 | 1780129                 | GG                              | AA                | 1945873517               |
| SNP_P3_378_1780133 | NC_021160.1    | Ca_kabuli_chr01 | 1780133                 | TT                              | CC                | 1945873519               |
| SNP_P3_379_1780145 | NC_021160.1    | Ca_kabuli_chr01 | 1780145                 | TT                              | CC                | 1945873520               |
| SNP_P3_381_1780191 | NC_021160.1    | Ca_kabuli_chr01 | 1780191                 | TT                              | CC                | 1945873522               |
| SNP_P3_382_1780303 | NC_021160.1    | Ca_kabuli_chr01 | 1780303                 | GG                              | AA                | 1945873524               |
| SNP_P3_383_1780333 | NC_021160.1    | Ca_kabuli_chr01 | 1780333                 | AA                              | GG                | 1945873526               |
| SNP_P3_384_1780347 | NC_021160.1    | Ca_kabuli_chr01 | 1780347                 | GG                              | AA                | 1945873527               |
| SNP_P3_385_1781485 | NC_021160.1    | Ca_kabuli_chr01 | 1781485                 | CC                              | TT                | 1945873529               |
| SNP_P3_386_1781833 | NC_021160.1    | Ca_kabuli_chr01 | 1781833                 | AA                              | GG                | 1945873531               |
| SNP_P3_387_1781850 | NC_021160.1    | Ca_kabuli_chr01 | 1781850                 | GG                              | TT                | 1945873533               |
| SNP_P3_389_1781884 | NC_021160.1    | Ca_kabuli_chr01 | 1781884                 | TT                              | GG                | 1945873534               |
| SNP_P3_390_1781909 | NC_021160.1    | Ca_kabuli_chr01 | 1781909                 | TT                              | AA                | 1945873536               |
| SNP_P3_392_1782311 | NC_021160.1    | Ca_kabuli_chr01 | 1782311                 | CC                              | AA                | 1945873538               |
| SNP_P3_393_1782335 | NC_021160.1    | Ca_kabuli_chr01 | 1782335                 | AA                              | CC                | 1945873540               |

| SNPs IDs           | Chromosome IDs | Chromosomes     | Physical positions (bp) | CDC Frontier (Reference genome) | (Pusa 256 & HPNB) | NCBI SNPdb Accession IDs |
|--------------------|----------------|-----------------|-------------------------|---------------------------------|-------------------|--------------------------|
| SNP_P3_394_1783094 | NC_021160.1    | Ca_kabuli_chr01 | 1783094                 | GG                              | AA                | 1945873542               |
| SNP_P3_395_1784006 | NC_021160.1    | Ca_kabuli_chr01 | 1784006                 | CC                              | TT                | 1945873543               |
| SNP_P3_396_1785122 | NC_021160.1    | Ca_kabuli_chr01 | 1785122                 | TT                              | CC                | 1945873545               |
| SNP_P3_400_1789266 | NC_021160.1    | Ca_kabuli_chr01 | 1789266                 | TT                              | CC                | 1945873547               |
| SNP_P3_401_1792852 | NC_021160.1    | Ca_kabuli_chr01 | 1792852                 | GG                              | AA                | 1945873549               |
| SNP_P3_402_1792853 | NC_021160.1    | Ca_kabuli_chr01 | 1792853                 | CC                              | TT                | 1945873550               |
| SNP_P3_404_1793156 | NC_021160.1    | Ca_kabuli_chr01 | 1793156                 | GG                              | TT                | 1945873552               |
| SNP_P3_405_1793184 | NC_021160.1    | Ca_kabuli_chr01 | 1793184                 | AA                              | GG                | 1945873554               |
| SNP_P3_406_1793203 | NC_021160.1    | Ca_kabuli_chr01 | 1793203                 | GG                              | AA                | 1945873556               |
| SNP_P3_407_1793218 | NC_021160.1    | Ca_kabuli_chr01 | 1793218                 | TT                              | CC                | 1945873557               |
| SNP_P3_408_1794094 | NC_021160.1    | Ca_kabuli_chr01 | 1794094                 | GG                              | AA                | 1945873559               |
| SNP_P3_410_1794916 | NC_021160.1    | Ca_kabuli_chr01 | 1794916                 | CC                              | TT                | 1945873561               |
| SNP_P3_411_1794926 | NC_021160.1    | Ca_kabuli_chr01 | 1794926                 | TT                              | AA                | 1945873563               |
| SNP_P3_412_1795514 | NC_021160.1    | Ca_kabuli_chr01 | 1795514                 | CC                              | TT                | 1945873564               |
| SNP_P3_413_1795545 | NC_021160.1    | Ca_kabuli_chr01 | 1795545                 | TT                              | AA                | 1945873566               |
| SNP_P3_414_1797157 | NC_021160.1    | Ca_kabuli_chr01 | 1797157                 | AA                              | TT                | 1945873568               |
| SNP_P3_415_1797210 | NC_021160.1    | Ca_kabuli_chr01 | 1797210                 | GG                              | AA                | 1945873570               |
| SNP_P3_416_1797215 | NC_021160.1    | Ca_kabuli_chr01 | 1797215                 | GG                              | AA                | 1945873572               |
| SNP_P3_417_1797275 | NC_021160.1    | Ca_kabuli_chr01 | 1797275                 | CC                              | GG                | 1945873573               |
| SNP_P3_418_1797620 | NC_021160.1    | Ca_kabuli_chr01 | 1797620                 | TT                              | GG                | 1945873575               |
| SNP_P3_419_1798269 | NC_021160.1    | Ca_kabuli_chr01 | 1798269                 | AA                              | GG                | 1945873577               |
| SNP_P3_420_1799951 | NC_021160.1    | Ca_kabuli_chr01 | 1799951                 | CC                              | TT                | 1945873579               |
| SNP_P3_422_1800424 | NC_021160.1    | Ca_kabuli_chr01 | 1800424                 | AA                              | GG                | 1945873580               |
| SNP_P3_423_1800587 | NC_021160.1    | Ca_kabuli_chr01 | 1800587                 | GG                              | AA                | 1945873582               |
| SNP_P3_424_1800710 | NC_021160.1    | Ca_kabuli_chr01 | 1800710                 | AA                              | GG                | 1945873584               |
| SNP_P3_425_1800935 | NC_021160.1    | Ca_kabuli_chr01 | 1800935                 | TT                              | CC                | 1945873586               |
| SNP_P3_428_1802075 | NC_021160.1    | Ca_kabuli_chr01 | 1802075                 | TT                              | CC                | 1945873587               |
| SNP_P3_429_1802307 | NC_021160.1    | Ca_kabuli_chr01 | 1802307                 | TT                              | CC                | 1945873589               |
| SNP_P3_430_1802612 | NC_021160.1    | Ca_kabuli_chr01 | 1802612                 | TT                              | CC                | 1945873591               |
| SNP_P3_431_1802992 | NC_021160.1    | Ca_kabuli_chr01 | 1802992                 | GG                              | CC                | 1945873593               |
| SNP_P3_432_1803230 | NC_021160.1    | Ca_kabuli_chr01 | 1803230                 | AA                              | GG                | 1945873595               |
| SNP_P3_433_1803257 | NC_021160.1    | Ca_kabuli_chr01 | 1803257                 | GG                              | CC                | 1945873596               |
| SNP_P3_434_1803273 | NC_021160.1    | Ca_kabuli_chr01 | 1803273                 | TT                              | CC                | 1945873598               |
| SNP_P3_435_1803532 | NC_021160.1    | Ca_kabuli_chr01 | 1803532                 | GG                              | AA                | 1945873600               |
| SNP_P3_436_1805738 | NC_021160.1    | Ca_kabuli_chr01 | 1805738                 | CC                              | TT                | 1945873602               |
| SNP_P3_437_1805743 | NC_021160.1    | Ca_kabuli_chr01 | 1805743                 | AA                              | GG                | 1945873603               |
| SNP_P3_438_1805769 | NC_021160.1    | Ca_kabuli_chr01 | 1805769                 | AA                              | GG                | 1945873605               |
| SNP_P3_439_1807389 | NC_021160.1    | Ca_kabuli_chr01 | 1807389                 | CC                              | TT                | 1945873607               |
| SNP_P3_440_1807392 | NC_021160.1    | Ca_kabuli_chr01 | 1807392                 | AA                              | GG                | 1945873609               |
| SNP_P3_441_1807515 | NC_021160.1    | Ca_kabuli_chr01 | 1807515                 | AA                              | TT                | 1945873610               |
| SNP_P3_442_1807689 | NC_021160.1    | Ca_kabuli_chr01 | 1807689                 | AA                              | GG                | 1945873612               |
| SNP_P3_443_1807694 | NC_021160.1    | Ca_kabuli_chr01 | 1807694                 | TT                              | CC                | 1945873614               |

| SNPs IDs           | Chromosome IDs | Chromosomes     | Physical positions (bp) | CDC Frontier (Reference genome) | (Pusa 256 & HPNB) | NCBI SNPdb Accession IDs |
|--------------------|----------------|-----------------|-------------------------|---------------------------------|-------------------|--------------------------|
| SNP_P3_444_1807701 | NC_021160.1    | Ca_kabuli_chr01 | 1807701                 | TT                              | CC                | 1945873616               |
| SNP_P3_445_1807758 | NC_021160.1    | Ca_kabuli_chr01 | 1807758                 | CC                              | TT                | 1945873618               |
| SNP_P3_446_1807768 | NC_021160.1    | Ca_kabuli_chr01 | 1807768                 | TT                              | CC                | 1945873619               |
| SNP_P3_447_1807806 | NC_021160.1    | Ca_kabuli_chr01 | 1807806                 | CC                              | TT                | 1945873621               |
| SNP_P3_448_1808047 | NC_021160.1    | Ca_kabuli_chr01 | 1808047                 | CC                              | TT                | 1945873623               |
| SNP_P3_449_1808240 | NC_021160.1    | Ca_kabuli_chr01 | 1808240                 | GG                              | CC                | 1945873625               |
| SNP_P3_450_1808736 | NC_021160.1    | Ca_kabuli_chr01 | 1808736                 | TT                              | CC                | 1945873626               |
| SNP_P3_451_1808763 | NC_021160.1    | Ca_kabuli_chr01 | 1808763                 | TT                              | CC                | 1945873628               |
| SNP_P3_452_1808821 | NC_021160.1    | Ca_kabuli_chr01 | 1808821                 | TT                              | AA                | 1945873630               |
| SNP_P3_453_1808832 | NC_021160.1    | Ca_kabuli_chr01 | 1808832                 | TT                              | CC                | 1945873632               |
| SNP_P3_454_1808835 | NC_021160.1    | Ca_kabuli_chr01 | 1808835                 | GG                              | AA                | 1945873633               |
| SNP_P3_457_1813046 | NC_021160.1    | Ca_kabuli_chr01 | 1813046                 | GG                              | AA                | 1945873635               |
| SNP_P3_458_1813097 | NC_021160.1    | Ca_kabuli_chr01 | 1813097                 | AA                              | TT                | 1945873637               |
| SNP_P3_459_1813109 | NC_021160.1    | Ca_kabuli_chr01 | 1813109                 | TT                              | GG                | 1945873639               |
| SNP_P3_460_1817746 | NC_021160.1    | Ca_kabuli_chr01 | 1817746                 | GG                              | AA                | 1945873640               |
| SNP_P3_461_1817758 | NC_021160.1    | Ca_kabuli_chr01 | 1817758                 | GG                              | CC                | 1945873642               |
| SNP_P3_462_1817805 | NC_021160.1    | Ca_kabuli_chr01 | 1817805                 | CC                              | TT                | 1945873644               |
| SNP_P3_463_1817903 | NC_021160.1    | Ca_kabuli_chr01 | 1817903                 | TT                              | AA                | 1945873646               |
| SNP_P3_465_1818016 | NC_021160.1    | Ca_kabuli_chr01 | 1818016                 | TT                              | AA                | 1945873647               |
| SNP_P3_466_1818017 | NC_021160.1    | Ca_kabuli_chr01 | 1818017                 | GG                              | TT                | 1945873649               |
| SNP_P3_467_1818023 | NC_021160.1    | Ca_kabuli_chr01 | 1818023                 | AA                              | CC                | 1945873651               |
| SNP_P3_468_1818035 | NC_021160.1    | Ca_kabuli_chr01 | 1818035                 | CC                              | GG                | 1945873653               |
| SNP_P3_469_1818290 | NC_021160.1    | Ca_kabuli_chr01 | 1818290                 | TT                              | CC                | 1945873655               |
| SNP_P3_470_1818752 | NC_021160.1    | Ca_kabuli_chr01 | 1818752                 | TT                              | CC                | 1945873656               |
| SNP_P3_471_1818773 | NC_021160.1    | Ca_kabuli_chr01 | 1818773                 | CC                              | TT                | 1945873658               |
| SNP_P3_472_1819026 | NC_021160.1    | Ca_kabuli_chr01 | 1819026                 | CC                              | GG                | 1945873660               |
| SNP_P3_473_1819287 | NC_021160.1    | Ca_kabuli_chr01 | 1819287                 | TT                              | CC                | 1945873662               |
| SNP_P3_474_1819347 | NC_021160.1    | Ca_kabuli_chr01 | 1819347                 | GG                              | CC                | 1945873663               |
| SNP_P3_475_1819349 | NC_021160.1    | Ca_kabuli_chr01 | 1819349                 | CC                              | TT                | 1945873665               |
| SNP_P3_476_1819388 | NC_021160.1    | Ca_kabuli_chr01 | 1819388                 | CC                              | TT                | 1945873667               |
| SNP_P3_477_1819391 | NC_021160.1    | Ca_kabuli_chr01 | 1819391                 | TT                              | CC                | 1945873669               |
| SNP_P3_478_1819468 | NC_021160.1    | Ca_kabuli_chr01 | 1819468                 | AA                              | GG                | 1945873670               |
| SNP_P3_480_1820351 | NC_021160.1    | Ca_kabuli_chr01 | 1820351                 | TT                              | CC                | 1945873672               |
| SNP_P3_481_1820590 | NC_021160.1    | Ca_kabuli_chr01 | 1820590                 | AA                              | TT                | 1945873674               |
| SNP_P3_482_1820616 | NC_021160.1    | Ca_kabuli_chr01 | 1820616                 | CC                              | TT                | 1945873676               |
| SNP_P3_483_1820632 | NC_021160.1    | Ca_kabuli_chr01 | 1820632                 | CC                              | GG                | 1945873677               |
| SNP_P3_485_1823248 | NC_021160.1    | Ca_kabuli_chr01 | 1823248                 | TT                              | AA                | 1945873679               |
| SNP_P3_487_1824611 | NC_021160.1    | Ca_kabuli_chr01 | 1824611                 | CC                              | AA                | 1945873681               |
| SNP_P3_488_1824779 | NC_021160.1    | Ca_kabuli_chr01 | 1824779                 | GG                              | AA                | 1945873683               |
| SNP_P3_489_1824810 | NC_021160.1    | Ca_kabuli_chr01 | 1824810                 | GG                              | CC                | 1945873685               |
| SNP_P3_491_1836111 | NC_021160.1    | Ca_kabuli_chr01 | 1836111                 | TT                              | AA                | 1945873686               |
| SNP_P3_492_1836817 | NC_021160.1    | Ca_kabuli_chr01 | 1836817                 | AA                              | TT                | 1945873688               |

| SNPs IDs           | Chromosome IDs | Chromosomes     | Physical positions (bp) | CDC Frontier (Reference genome) | (Pusa 256 & HPNB) | NCBI SNPdb Accession IDs |
|--------------------|----------------|-----------------|-------------------------|---------------------------------|-------------------|--------------------------|
| SNP_P3_494_1836863 | NC_021160.1    | Ca_kabuli_chr01 | 1836863                 | GG                              | AA                | 1945873690               |
| SNP_P3_495_1836918 | NC_021160.1    | Ca_kabuli_chr01 | 1836918                 | TT                              | AA                | 1945873692               |
| SNP_P3_496_1837125 | NC_021160.1    | Ca_kabuli_chr01 | 1837125                 | GG                              | AA                | 1945873693               |
| SNP_P3_499_1837969 | NC_021160.1    | Ca_kabuli_chr01 | 1837969                 | CC                              | AA                | 1945873695               |
| SNP_P3_502_1840139 | NC_021160.1    | Ca_kabuli_chr01 | 1840139                 | TT                              | GG                | 1945873697               |
| SNP_P3_503_1840151 | NC_021160.1    | Ca_kabuli_chr01 | 1840151                 | AA                              | TT                | 1945873699               |
| SNP_P3_504_1840158 | NC_021160.1    | Ca_kabuli_chr01 | 1840158                 | AA                              | TT                | 1945873701               |
| SNP_P3_505_1840272 | NC_021160.1    | Ca_kabuli_chr01 | 1840272                 | CC                              | TT                | 1945873702               |
| SNP_P3_506_1840433 | NC_021160.1    | Ca_kabuli_chr01 | 1840433                 | CC                              | TT                | 1945873704               |
| SNP_P3_507_1840623 | NC_021160.1    | Ca_kabuli_chr01 | 1840623                 | TT                              | AA                | 1945873706               |
| SNP_P3_508_1840627 | NC_021160.1    | Ca_kabuli_chr01 | 1840627                 | CC                              | TT                | 1945873708               |
| SNP_P3_509_1840629 | NC_021160.1    | Ca_kabuli_chr01 | 1840629                 | GG                              | AA                | 1945873709               |
| SNP_P3_510_1840641 | NC_021160.1    | Ca_kabuli_chr01 | 1840641                 | AA                              | GG                | 1945873711               |
| SNP_P3_511_1840660 | NC_021160.1    | Ca_kabuli_chr01 | 1840660                 | TT                              | CC                | 1945873713               |
| SNP_P3_512_1840668 | NC_021160.1    | Ca_kabuli_chr01 | 1840668                 | TT                              | CC                | 1945873715               |
| SNP_P3_513_1840799 | NC_021160.1    | Ca_kabuli_chr01 | 1840799                 | AA                              | CC                | 1945873716               |
| SNP_P3_514_1840818 | NC_021160.1    | Ca_kabuli_chr01 | 1840818                 | CC                              | TT                | 1945873718               |
| SNP_P3_515_1840824 | NC_021160.1    | Ca_kabuli_chr01 | 1840824                 | AA                              | GG                | 1945873720               |
| SNP_P3_516_1840901 | NC_021160.1    | Ca_kabuli_chr01 | 1840901                 | AA                              | CC                | 1945873722               |
| SNP_P3_517_1840967 | NC_021160.1    | Ca_kabuli_chr01 | 1840967                 | CC                              | AA                | 1945873723               |
| SNP_P3_518_1840971 | NC_021160.1    | Ca_kabuli_chr01 | 1840971                 | TT                              | CC                | 1945873725               |
| SNP_P3_519_1840980 | NC_021160.1    | Ca_kabuli_chr01 | 1840980                 | TT                              | CC                | 1945873727               |
| SNP_P3_522_1841306 | NC_021160.1    | Ca_kabuli_chr01 | 1841306                 | GG                              | TT                | 1945873729               |
| SNP_P3_523_1841321 | NC_021160.1    | Ca_kabuli_chr01 | 1841321                 | AA                              | GG                | 1945873731               |
| SNP_P3_524_1841324 | NC_021160.1    | Ca_kabuli_chr01 | 1841324                 | TT                              | CC                | 1945873732               |
| SNP_P3_525_1841325 | NC_021160.1    | Ca_kabuli_chr01 | 1841325                 | CC                              | GG                | 1945873734               |
| SNP_P3_526_1841358 | NC_021160.1    | Ca_kabuli_chr01 | 1841358                 | AA                              | CC                | 1945873736               |
| SNP_P3_527_1841377 | NC_021160.1    | Ca_kabuli_chr01 | 1841377                 | TT                              | AA                | 1945873738               |
| SNP_P3_530_1842328 | NC_021160.1    | Ca_kabuli_chr01 | 1842328                 | TT                              | CC                | 1945873739               |
| SNP_P3_531_1842336 | NC_021160.1    | Ca_kabuli_chr01 | 1842336                 | GG                              | AA                | 1945873741               |
| SNP_P3_532_1842635 | NC_021160.1    | Ca_kabuli_chr01 | 1842635                 | GG                              | AA                | 1945873743               |
| SNP_P3_533_1843778 | NC_021160.1    | Ca_kabuli_chr01 | 1843778                 | CC                              | AA                | 1945873745               |
| SNP_P3_534_1843797 | NC_021160.1    | Ca_kabuli_chr01 | 1843797                 | TT                              | GG                | 1945873746               |
| SNP_P3_535_1843798 | NC_021160.1    | Ca_kabuli_chr01 | 1843798                 | AA                              | GG                | 1945873748               |
| SNP_P3_536_1843976 | NC_021160.1    | Ca_kabuli_chr01 | 1843976                 | AA                              | CC                | 1945873750               |
| SNP_P3_538_1844416 | NC_021160.1    | Ca_kabuli_chr01 | 1844416                 | AA                              | GG                | 1945873752               |
| SNP_P3_539_1844424 | NC_021160.1    | Ca_kabuli_chr01 | 1844424                 | CC                              | AA                | 1945873753               |
| SNP_P3_540_1844429 | NC_021160.1    | Ca_kabuli_chr01 | 1844429                 | GG                              | AA                | 1945873755               |
| SNP_P3_541_1844447 | NC_021160.1    | Ca_kabuli_chr01 | 1844447                 | TT                              | CC                | 1945873757               |
| SNP_P3_542_1844473 | NC_021160.1    | Ca_kabuli_chr01 | 1844473                 | TT                              | AA                | 1945873759               |
| SNP_P3_543_1844767 | NC_021160.1    | Ca_kabuli_chr01 | 1844767                 | GG                              | TT                | 1945873760               |
| SNP_P3_544_1844995 | NC_021160.1    | Ca_kabuli_chr01 | 1844995                 | CC                              | TT                | 1945873762               |

| SNPs IDs           | Chromosome IDs | Chromosomes     | Physical positions (bp) | CDC Frontier (Reference genome) | (Pusa 256 & HPNB) | NCBI SNPdb Accession IDs |
|--------------------|----------------|-----------------|-------------------------|---------------------------------|-------------------|--------------------------|
| SNP_P3_545_1845096 | NC_021160.1    | Ca_kabuli_chr01 | 1845096                 | CC                              | TT                | 1945873764               |
| SNP_P3_546_1845199 | NC_021160.1    | Ca_kabuli_chr01 | 1845199                 | CC                              | TT                | 1945873766               |
| SNP_P3_547_1846081 | NC_021160.1    | Ca_kabuli_chr01 | 1846081                 | TT                              | AA                | 1945873767               |
| SNP_P3_548_1846085 | NC_021160.1    | Ca_kabuli_chr01 | 1846085                 | GG                              | AA                | 1945873769               |
| SNP_P3_549_1846133 | NC_021160.1    | Ca_kabuli_chr01 | 1846133                 | AA                              | GG                | 1945873771               |
| SNP_P3_550_1846138 | NC_021160.1    | Ca_kabuli_chr01 | 1846138                 | TT                              | CC                | 1945873772               |
| SNP_P3_551_1846799 | NC_021160.1    | Ca_kabuli_chr01 | 1846799                 | TT                              | CC                | 1945873774               |
| SNP_P3_552_1846838 | NC_021160.1    | Ca_kabuli_chr01 | 1846838                 | CC                              | AA                | 1945873776               |
| SNP_P3_553_1847032 | NC_021160.1    | Ca_kabuli_chr01 | 1847032                 | TT                              | GG                | 1945873778               |
| SNP_P3_554_1847057 | NC_021160.1    | Ca_kabuli_chr01 | 1847057                 | GG                              | AA                | 1945873779               |
| SNP_P3_555_1847120 | NC_021160.1    | Ca_kabuli_chr01 | 1847120                 | GG                              | AA                | 1945873781               |
| SNP_P3_556_1847121 | NC_021160.1    | Ca_kabuli_chr01 | 1847121                 | AA                              | GG                | 1945873783               |
| SNP_P3_557_1847122 | NC_021160.1    | Ca_kabuli_chr01 | 1847122                 | CC                              | TT                | 1945873785               |
| SNP_P3_558_1847529 | NC_021160.1    | Ca_kabuli_chr01 | 1847529                 | TT                              | CC                | 1945873787               |
| SNP_P3_560_1847764 | NC_021160.1    | Ca_kabuli_chr01 | 1847764                 | CC                              | AA                | 1945873788               |
| SNP_P3_562_1848272 | NC_021160.1    | Ca_kabuli_chr01 | 1848272                 | TT                              | AA                | 1945873790               |
| SNP_P3_563_1848277 | NC_021160.1    | Ca_kabuli_chr01 | 1848277                 | GG                              | TT                | 1945873792               |
| SNP_P3_564_1848312 | NC_021160.1    | Ca_kabuli_chr01 | 1848312                 | GG                              | TT                | 1945873794               |
| SNP_P3_565_1848332 | NC_021160.1    | Ca_kabuli_chr01 | 1848332                 | TT                              | CC                | 1945873795               |
| SNP_P3_566_1848347 | NC_021160.1    | Ca_kabuli_chr01 | 1848347                 | AA                              | GG                | 1945873797               |
| SNP_P3_567_1848351 | NC_021160.1    | Ca_kabuli_chr01 | 1848351                 | GG                              | TT                | 1945873799               |
| SNP_P3_568_1849741 | NC_021160.1    | Ca_kabuli_chr01 | 1849741                 | CC                              | GG                | 1945873801               |
| SNP_P3_569_1849755 | NC_021160.1    | Ca_kabuli_chr01 | 1849755                 | CC                              | AA                | 1945873802               |
| SNP_P3_570_1849773 | NC_021160.1    | Ca_kabuli_chr01 | 1849773                 | GG                              | TT                | 1945873804               |
| SNP_P3_571_1849809 | NC_021160.1    | Ca_kabuli_chr01 | 1849809                 | AA                              | GG                | 1945873806               |
| SNP_P3_572_1849836 | NC_021160.1    | Ca_kabuli_chr01 | 1849836                 | AA                              | GG                | 1945873808               |
| SNP_P3_573_1849847 | NC_021160.1    | Ca_kabuli_chr01 | 1849847                 | GG                              | AA                | 1945873810               |
| SNP_P3_574_1849856 | NC_021160.1    | Ca_kabuli_chr01 | 1849856                 | GG                              | CC                | 1945873811               |
| SNP_P3_575_1849877 | NC_021160.1    | Ca_kabuli_chr01 | 1849877                 | AA                              | GG                | 1945873813               |
| SNP_P3_577_1851618 | NC_021160.1    | Ca_kabuli_chr01 | 1851618                 | TT                              | GG                | 1945873815               |
| SNP_P3_578_1851673 | NC_021160.1    | Ca_kabuli_chr01 | 1851673                 | CC                              | TT                | 1945873817               |
| SNP_P3_580_1852687 | NC_021160.1    | Ca_kabuli_chr01 | 1852687                 | TT                              | CC                | 1945873818               |
| SNP_P3_581_1852768 | NC_021160.1    | Ca_kabuli_chr01 | 1852768                 | AA                              | GG                | 1945873820               |
| SNP_P3_582_1852785 | NC_021160.1    | Ca_kabuli_chr01 | 1852785                 | GG                              | AA                | 1945873822               |
| SNP_P3_583_1852794 | NC_021160.1    | Ca_kabuli_chr01 | 1852794                 | AA                              | TT                | 1945873824               |
| SNP_P3_585_1853690 | NC_021160.1    | Ca_kabuli_chr01 | 1853690                 | GG                              | AA                | 1945873825               |
| SNP_P3_586_1856344 | NC_021160.1    | Ca_kabuli_chr01 | 1856344                 | CC                              | TT                | 1945873827               |
| SNP_P3_587_1856395 | NC_021160.1    | Ca_kabuli_chr01 | 1856395                 | CC                              | AA                | 1945873829               |
| SNP_P3_588_1856423 | NC_021160.1    | Ca_kabuli_chr01 | 1856423                 | TT                              | AA                | 1945873831               |
| SNP_P3_589_1856690 | NC_021160.1    | Ca_kabuli_chr01 | 1856690                 | CC                              | TT                | 1945873833               |
| SNP_P3_590_1856724 | NC_021160.1    | Ca_kabuli_chr01 | 1856724                 | CC                              | GG                | 1945873834               |
| SNP_P3_591_1857063 | NC_021160.1    | Ca_kabuli_chr01 | 1857063                 | TT                              | AA                | 1945873836               |



| SNPs IDs           | Chromosome IDs | Chromosomes     | Physical positions (bp) | CDC Frontier (Reference genome) | (Pusa 256 & HPNB) | NCBI SNPdb Accession IDs |
|--------------------|----------------|-----------------|-------------------------|---------------------------------|-------------------|--------------------------|
| SNP_P3_592_1857775 | NC_021160.1    | Ca_kabuli_chr01 | 1857775                 | GG                              | TT                | 1945873838               |
| SNP_P3_593_1857837 | NC_021160.1    | Ca_kabuli_chr01 | 1857837                 | AA                              | TT                | 1945873840               |
| SNP_P3_594_1857860 | NC_021160.1    | Ca_kabuli_chr01 | 1857860                 | CC                              | TT                | 1945873841               |
| SNP_P3_595_1858041 | NC_021160.1    | Ca_kabuli_chr01 | 1858041                 | TT                              | AA                | 1945873843               |
| SNP_P3_596_1858064 | NC_021160.1    | Ca_kabuli_chr01 | 1858064                 | TT                              | AA                | 1945873845               |
| SNP_P3_597_1858073 | NC_021160.1    | Ca_kabuli_chr01 | 1858073                 | TT                              | CC                | 1945873847               |
| SNP_P3_598_1858078 | NC_021160.1    | Ca_kabuli_chr01 | 1858078                 | CC                              | TT                | 1945873848               |
| SNP_P3_599_1858084 | NC_021160.1    | Ca_kabuli_chr01 | 1858084                 | TT                              | CC                | 1945873850               |
| SNP_P3_600_1858132 | NC_021160.1    | Ca_kabuli_chr01 | 1858132                 | AA                              | TT                | 1945873852               |
| SNP_P3_601_1858156 | NC_021160.1    | Ca_kabuli_chr01 | 1858156                 | CC                              | TT                | 1945873854               |
| SNP_P3_602_1858159 | NC_021160.1    | Ca_kabuli_chr01 | 1858159                 | GG                              | AA                | 1945873856               |
| SNP_P3_603_1858509 | NC_021160.1    | Ca_kabuli_chr01 | 1858509                 | TT                              | CC                | 1945873857               |
| SNP_P3_604_1858600 | NC_021160.1    | Ca_kabuli_chr01 | 1858600                 | AA                              | GG                | 1945873859               |
| SNP_P3_605_1858608 | NC_021160.1    | Ca_kabuli_chr01 | 1858608                 | AA                              | TT                | 1945873861               |
| SNP_P3_606_1858838 | NC_021160.1    | Ca_kabuli_chr01 | 1858838                 | GG                              | CC                | 1945873863               |
| SNP_P3_608_1860072 | NC_021160.1    | Ca_kabuli_chr01 | 1860072                 | AA                              | GG                | 1945873864               |
| SNP_P3_609_1860313 | NC_021160.1    | Ca_kabuli_chr01 | 1860313                 | GG                              | TT                | 1945873866               |
| SNP_P3_610_1860317 | NC_021160.1    | Ca_kabuli_chr01 | 1860317                 | GG                              | AA                | 1945873868               |
| SNP_P3_611_1860838 | NC_021160.1    | Ca_kabuli_chr01 | 1860838                 | GG                              | AA                | 1945873870               |
| SNP_P3_613_1862644 | NC_021160.1    | Ca_kabuli_chr01 | 1862644                 | GG                              | CC                | 1945873871               |
| SNP_P3_614_1863248 | NC_021160.1    | Ca_kabuli_chr01 | 1863248                 | AA                              | TT                | 1945873873               |
| SNP_P3_615_1863616 | NC_021160.1    | Ca_kabuli_chr01 | 1863616                 | GG                              | CC                | 1945873875               |
| SNP_P3_616_1864397 | NC_021160.1    | Ca_kabuli_chr01 | 1864397                 | AA                              | GG                | 1945873877               |
| SNP_P3_617_1864909 | NC_021160.1    | Ca_kabuli_chr01 | 1864909                 | TT                              | GG                | 1945873878               |
| SNP_P3_619_1869845 | NC_021160.1    | Ca_kabuli_chr01 | 1869845                 | GG                              | AA                | 1945873880               |
| SNP_P3_620_1869849 | NC_021160.1    | Ca_kabuli_chr01 | 1869849                 | TT                              | CC                | 1945873882               |
| SNP_P3_622_1873894 | NC_021160.1    | Ca_kabuli_chr01 | 1873894                 | TT                              | GG                | 1945873884               |
| SNP_P3_623_1874928 | NC_021160.1    | Ca_kabuli_chr01 | 1874928                 | TT                              | CC                | 1945873886               |
| SNP_P3_626_1877832 | NC_021160.1    | Ca_kabuli_chr01 | 1877832                 | GG                              | AA                | 1945873887               |
| SNP_P3_627_1877845 | NC_021160.1    | Ca_kabuli_chr01 | 1877845                 | CC                              | TT                | 1945873889               |
| SNP_P3_628_1878766 | NC_021160.1    | Ca_kabuli_chr01 | 1878766                 | AA                              | TT                | 1945873891               |
| SNP_P3_629_1878771 | NC_021160.1    | Ca_kabuli_chr01 | 1878771                 | CC                              | TT                | 1945873893               |
| SNP_P3_630_1878793 | NC_021160.1    | Ca_kabuli_chr01 | 1878793                 | CC                              | GG                | 1945873894               |
| SNP_P3_631_1878834 | NC_021160.1    | Ca_kabuli_chr01 | 1878834                 | GG                              | CC                | 1945873896               |
| SNP_P3_632_1878874 | NC_021160.1    | Ca_kabuli_chr01 | 1878874                 | CC                              | GG                | 1945873898               |
| SNP_P3_633_1879449 | NC_021160.1    | Ca_kabuli_chr01 | 1879449                 | CC                              | TT                | 1945873900               |
| SNP_P3_634_1879814 | NC_021160.1    | Ca_kabuli_chr01 | 1879814                 | CC                              | TT                | 1945873902               |
| SNP_P3_635_1879824 | NC_021160.1    | Ca_kabuli_chr01 | 1879824                 | GG                              | CC                | 1945873903               |
| SNP_P3_636_1879828 | NC_021160.1    | Ca_kabuli_chr01 | 1879828                 | AA                              | TT                | 1945873905               |
| SNP_P3_637_1880674 | NC_021160.1    | Ca_kabuli_chr01 | 1880674                 | AA                              | CC                | 1945873907               |
| SNP_P3_638_1882014 | NC_021160.1    | Ca_kabuli_chr01 | 1882014                 | CC                              | TT                | 1945873909               |
| SNP_P3_639_1882048 | NC_021160.1    | Ca_kabuli_chr01 | 1882048                 | GG                              | TT                | 1945873911               |

| SNPs IDs           | Chromosome IDs | Chromosomes     | Physical positions (bp) | CDC Frontier (Reference genome) | (Pusa 256 & HPNB) | NCBI SNPdb Accession IDs |
|--------------------|----------------|-----------------|-------------------------|---------------------------------|-------------------|--------------------------|
| SNP_P3_640_1882062 | NC_021160.1    | Ca_kabuli_chr01 | 1882062                 | CC                              | TT                | 1945873912               |
| SNP_P3_642_1882119 | NC_021160.1    | Ca_kabuli_chr01 | 1882119                 | CC                              | TT                | 1945873914               |
| SNP_P3_643_1882273 | NC_021160.1    | Ca_kabuli_chr01 | 1882273                 | GG                              | AA                | 1945873916               |
| SNP_P3_646_1887388 | NC_021160.1    | Ca_kabuli_chr01 | 1887388                 | AA                              | GG                | 1945873918               |
| SNP_P3_647_1887823 | NC_021160.1    | Ca_kabuli_chr01 | 1887823                 | CC                              | TT                | 1945873920               |
| SNP_P3_648_1887832 | NC_021160.1    | Ca_kabuli_chr01 | 1887832                 | GG                              | AA                | 1945873921               |
| SNP_P3_649_1888775 | NC_021160.1    | Ca_kabuli_chr01 | 1888775                 | AA                              | TT                | 1945873923               |
| SNP_P3_650_1889110 | NC_021160.1    | Ca_kabuli_chr01 | 1889110                 | AA                              | CC                | 1945873925               |
| SNP_P3_651_1889168 | NC_021160.1    | Ca_kabuli_chr01 | 1889168                 | AA                              | GG                | 1945873927               |
| SNP_P3_652_1889185 | NC_021160.1    | Ca_kabuli_chr01 | 1889185                 | CC                              | TT                | 1945873928               |
| SNP_P3_653_1889999 | NC_021160.1    | Ca_kabuli_chr01 | 1889999                 | GG                              | CC                | 1945873930               |
| SNP_P3_656_1894395 | NC_021160.1    | Ca_kabuli_chr01 | 1894395                 | CC                              | TT                | 1945873932               |
| SNP_P3_657_1894424 | NC_021160.1    | Ca_kabuli_chr01 | 1894424                 | TT                              | CC                | 1945873934               |
| SNP_P3_659_1894665 | NC_021160.1    | Ca_kabuli_chr01 | 1894665                 | TT                              | AA                | 1945873935               |
| SNP_P3_660_1894845 | NC_021160.1    | Ca_kabuli_chr01 | 1894845                 | CC                              | TT                | 1945873937               |
| SNP_P3_661_1896847 | NC_021160.1    | Ca_kabuli_chr01 | 1896847                 | CC                              | TT                | 1945873939               |
| SNP_P3_662_1899074 | NC_021160.1    | Ca_kabuli_chr01 | 1899074                 | AA                              | TT                | 1945873941               |
| SNP_P3_663_1899787 | NC_021160.1    | Ca_kabuli_chr01 | 1899787                 | AA                              | GG                | 1945873943               |
| SNP_P3_664_1901283 | NC_021160.1    | Ca_kabuli_chr01 | 1901283                 | AA                              | GG                | 1945873944               |
| SNP_P3_665_1903277 | NC_021160.1    | Ca_kabuli_chr01 | 1903277                 | CC                              | TT                | 1945873946               |
| SNP_P3_666_1904696 | NC_021160.1    | Ca_kabuli_chr01 | 1904696                 | AA                              | CC                | 1945873948               |
| SNP_P3_667_1904956 | NC_021160.1    | Ca_kabuli_chr01 | 1904956                 | AA                              | GG                | 1945873950               |
| SNP_P3_668_1905719 | NC_021160.1    | Ca_kabuli_chr01 | 1905719                 | CC                              | GG                | 1945873951               |
| SNP_P3_669_1905740 | NC_021160.1    | Ca_kabuli_chr01 | 1905740                 | TT                              | AA                | 1945873953               |
| SNP_P3_670_1905924 | NC_021160.1    | Ca_kabuli_chr01 | 1905924                 | TT                              | GG                | 1945873955               |
| SNP_P3_671_1906006 | NC_021160.1    | Ca_kabuli_chr01 | 1906006                 | AA                              | GG                | 1945873957               |
| SNP_P3_672_1906078 | NC_021160.1    | Ca_kabuli_chr01 | 1906078                 | AA                              | TT                | 1945873958               |
| SNP_P3_673_1906270 | NC_021160.1    | Ca_kabuli_chr01 | 1906270                 | CC                              | AA                | 1945873960               |
| SNP_P3_675_1907380 | NC_021160.1    | Ca_kabuli_chr01 | 1907380                 | GG                              | CC                | 1945873962               |
| SNP_P3_676_1907408 | NC_021160.1    | Ca_kabuli_chr01 | 1907408                 | AA                              | GG                | 1945873964               |
| SNP_P3_677_1909781 | NC_021160.1    | Ca_kabuli_chr01 | 1909781                 | AA                              | GG                | 1945873966               |
| SNP_P3_678_1912473 | NC_021160.1    | Ca_kabuli_chr01 | 1912473                 | CC                              | TT                | 1945873967               |
| SNP_P3_679_1912637 | NC_021160.1    | Ca_kabuli_chr01 | 1912637                 | AA                              | GG                | 1945873969               |
| SNP_P3_680_1912719 | NC_021160.1    | Ca_kabuli_chr01 | 1912719                 | AA                              | GG                | 1945873971               |
| SNP_P3_681_1914403 | NC_021160.1    | Ca_kabuli_chr01 | 1914403                 | AA                              | CC                | 1945873973               |
| SNP_P3_682_1915734 | NC_021160.1    | Ca_kabuli_chr01 | 1915734                 | AA                              | TT                | 1945873974               |
| SNP_P3_683_1915762 | NC_021160.1    | Ca_kabuli_chr01 | 1915762                 | CC                              | GG                | 1945873976               |
| SNP_P3_684_1915783 | NC_021160.1    | Ca_kabuli_chr01 | 1915783                 | CC                              | TT                | 1945873978               |
| SNP_P3_685_1915973 | NC_021160.1    | Ca_kabuli_chr01 | 1915973                 | CC                              | GG                | 1945873980               |
| SNP_P3_686_1915989 | NC_021160.1    | Ca_kabuli_chr01 | 1915989                 | AA                              | TT                | 1945873981               |
| SNP_P3_687_1916190 | NC_021160.1    | Ca_kabuli_chr01 | 1916190                 | AA                              | GG                | 1945873983               |
| SNP_P3_688_1917563 | NC_021160.1    | Ca_kabuli_chr01 | 1917563                 | AA                              | TT                | 1945873985               |

| SNPs IDs           | Chromosome IDs | Chromosomes     | Physical positions (bp) | CDC Frontier (Reference genome) | (Pusa 256 & HPNB) | NCBI SNPdb Accession IDs |
|--------------------|----------------|-----------------|-------------------------|---------------------------------|-------------------|--------------------------|
| SNP_P3_689_1920598 | NC_021160.1    | Ca_kabuli_chr01 | 1920598                 | AA                              | TT                | 1945873987               |
| SNP_P3_690_1922854 | NC_021160.1    | Ca_kabuli_chr01 | 1922854                 | GG                              | AA                | 1945873988               |
| SNP_P3_691_1925595 | NC_021160.1    | Ca_kabuli_chr01 | 1925595                 | CC                              | TT                | 1945873990               |
| SNP_P3_692_1927368 | NC_021160.1    | Ca_kabuli_chr01 | 1927368                 | CC                              | GG                | 1945873992               |
| SNP_P3_694_1927827 | NC_021160.1    | Ca_kabuli_chr01 | 1927827                 | TT                              | CC                | 1945873994               |
| SNP_P3_696_1930487 | NC_021160.1    | Ca_kabuli_chr01 | 1930487                 | AA                              | GG                | 1945873996               |
| SNP_P3_697_1930508 | NC_021160.1    | Ca_kabuli_chr01 | 1930508                 | CC                              | TT                | 1945873997               |
| SNP_P3_698_1933576 | NC_021160.1    | Ca_kabuli_chr01 | 1933576                 | CC                              | TT                | 1945873999               |
| SNP_P3_699_1936595 | NC_021160.1    | Ca_kabuli_chr01 | 1936595                 | TT                              | AA                | 1945874001               |
| SNP_P3_700_1936660 | NC_021160.1    | Ca_kabuli_chr01 | 1936660                 | TT                              | CC                | 1945874003               |
| SNP_P3_701_1936712 | NC_021160.1    | Ca_kabuli_chr01 | 1936712                 | TT                              | AA                | 1945874004               |
| SNP_P3_702_1937270 | NC_021160.1    | Ca_kabuli_chr01 | 1937270                 | AA                              | CC                | 1945874006               |
| SNP_P3_703_1937601 | NC_021160.1    | Ca_kabuli_chr01 | 1937601                 | AA                              | GG                | 1945874008               |
| SNP_P3_704_1941964 | NC_021160.1    | Ca_kabuli_chr01 | 1941964                 | AA                              | CC                | 1945874010               |
| SNP_P3_705_1941987 | NC_021160.1    | Ca_kabuli_chr01 | 1941987                 | GG                              | TT                | 1945874011               |
| SNP_P3_706_1943307 | NC_021160.1    | Ca_kabuli_chr01 | 1943307                 | CC                              | GG                | 1945874013               |
| SNP_P3_707_1944117 | NC_021160.1    | Ca_kabuli_chr01 | 1944117                 | GG                              | AA                | 1945874015               |
| SNP_P3_708_1944118 | NC_021160.1    | Ca_kabuli_chr01 | 1944118                 | TT                              | CC                | 1945874017               |
| SNP_P3_709_1944162 | NC_021160.1    | Ca_kabuli_chr01 | 1944162                 | TT                              | AA                | 1945874019               |
| SNP_P3_710_1944186 | NC_021160.1    | Ca_kabuli_chr01 | 1944186                 | CC                              | AA                | 1945874020               |
| SNP_P3_711_1944194 | NC_021160.1    | Ca_kabuli_chr01 | 1944194                 | TT                              | GG                | 1945874022               |
| SNP_P3_712_1944196 | NC_021160.1    | Ca_kabuli_chr01 | 1944196                 | CC                              | GG                | 1945874024               |
| SNP_P3_713_1944207 | NC_021160.1    | Ca_kabuli_chr01 | 1944207                 | GG                              | CC                | 1945874026               |
| SNP_P3_714_1944289 | NC_021160.1    | Ca_kabuli_chr01 | 1944289                 | AA                              | GG                | 1945874027               |
| SNP_P3_715_1944290 | NC_021160.1    | Ca_kabuli_chr01 | 1944290                 | GG                              | CC                | 1945874029               |
| SNP_P3_716_1944294 | NC_021160.1    | Ca_kabuli_chr01 | 1944294                 | AA                              | GG                | 1945874031               |
| SNP_P3_717_1944330 | NC_021160.1    | Ca_kabuli_chr01 | 1944330                 | GG                              | TT                | 1945874033               |
| SNP_P3_718_1944427 | NC_021160.1    | Ca_kabuli_chr01 | 1944427                 | TT                              | GG                | 1945874034               |
| SNP_P3_719_1946263 | NC_021160.1    | Ca_kabuli_chr01 | 1946263                 | TT                              | AA                | 1945874036               |
| SNP_P3_720_1946264 | NC_021160.1    | Ca_kabuli_chr01 | 1946264                 | GG                              | TT                | 1945874038               |
| SNP_P3_721_1949826 | NC_021160.1    | Ca_kabuli_chr01 | 1949826                 | AA                              | CC                | 1945874040               |
| SNP_P3_722_1950827 | NC_021160.1    | Ca_kabuli_chr01 | 1950827                 | AA                              | TT                | 1945874041               |
| SNP_P3_723_1951140 | NC_021160.1    | Ca_kabuli_chr01 | 1951140                 | TT                              | AA                | 1945874043               |
| SNP_P3_724_1953238 | NC_021160.1    | Ca_kabuli_chr01 | 1953238                 | GG                              | AA                | 1945874045               |
| SNP_P3_725_1953576 | NC_021160.1    | Ca_kabuli_chr01 | 1953576                 | TT                              | AA                | 1945874047               |
| SNP_P3_726_1955024 | NC_021160.1    | Ca_kabuli_chr01 | 1955024                 | CC                              | GG                | 1945874049               |
| SNP_P3_727_1957060 | NC_021160.1    | Ca_kabuli_chr01 | 1957060                 | TT                              | CC                | 1945874050               |
| SNP_P3_728_1958005 | NC_021160.1    | Ca_kabuli_chr01 | 1958005                 | AA                              | GG                | 1945874052               |
| SNP_P3_729_1958038 | NC_021160.1    | Ca_kabuli_chr01 | 1958038                 | GG                              | CC                | 1945874054               |
| SNP_P3_730_1960008 | NC_021160.1    | Ca_kabuli_chr01 | 1960008                 | CC                              | GG                | 1945874056               |
| SNP_P3_731_1960845 | NC_021160.1    | Ca_kabuli_chr01 | 1960845                 | GG                              | TT                | 1945874057               |
| SNP_P3_732_1961700 | NC_021160.1    | Ca_kabuli_chr01 | 1961700                 | CC                              | AA                | 1945874059               |

| SNPs IDs           | Chromosome IDs | Chromosomes     | Physical positions (bp) | CDC Frontier (Reference genome) | (Pusa 256 & HPNB) | NCBI SNPdb Accession IDs |
|--------------------|----------------|-----------------|-------------------------|---------------------------------|-------------------|--------------------------|
| SNP_P3_733_1962348 | NC_021160.1    | Ca_kabuli_chr01 | 1962348                 | GG                              | AA                | 1945874061               |
| SNP_P3_735_1965043 | NC_021160.1    | Ca_kabuli_chr01 | 1965043                 | AA                              | CC                | 1945874063               |
| SNP_P3_736_1965071 | NC_021160.1    | Ca_kabuli_chr01 | 1965071                 | TT                              | CC                | 1945874065               |
| SNP_P3_737_1965956 | NC_021160.1    | Ca_kabuli_chr01 | 1965956                 | GG                              | AA                | 1945874066               |
| SNP_P3_738_1965964 | NC_021160.1    | Ca_kabuli_chr01 | 1965964                 | GG                              | CC                | 1945874068               |
| SNP_P3_739_1965979 | NC_021160.1    | Ca_kabuli_chr01 | 1965979                 | TT                              | GG                | 1945874070               |
| SNP_P3_740_1966823 | NC_021160.1    | Ca_kabuli_chr01 | 1966823                 | CC                              | TT                | 1945874072               |
| SNP_P3_741_1969232 | NC_021160.1    | Ca_kabuli_chr01 | 1969232                 | GG                              | AA                | 1945874073               |
| SNP_P3_745_1969689 | NC_021160.1    | Ca_kabuli_chr01 | 1969689                 | TT                              | GG                | 1945874075               |
| SNP_P3_746_1969771 | NC_021160.1    | Ca_kabuli_chr01 | 1969771                 | GG                              | AA                | 1945874077               |
| SNP_P3_747_1969825 | NC_021160.1    | Ca_kabuli_chr01 | 1969825                 | AA                              | GG                | 1945874079               |
| SNP_P3_748_1970646 | NC_021160.1    | Ca_kabuli_chr01 | 1970646                 | AA                              | GG                | 1945874081               |
| SNP_P3_749_1970785 | NC_021160.1    | Ca_kabuli_chr01 | 1970785                 | AA                              | GG                | 1945874082               |
| SNP_P3_750_1970798 | NC_021160.1    | Ca_kabuli_chr01 | 1970798                 | TT                              | GG                | 1945874084               |
| SNP_P3_751_1970970 | NC_021160.1    | Ca_kabuli_chr01 | 1970970                 | GG                              | AA                | 1945874086               |
| SNP_P3_752_1970976 | NC_021160.1    | Ca_kabuli_chr01 | 1970976                 | AA                              | TT                | 1945874088               |
| SNP_P3_753_1971039 | NC_021160.1    | Ca_kabuli_chr01 | 1971039                 | CC                              | TT                | 1945874089               |
| SNP_P3_754_1971041 | NC_021160.1    | Ca_kabuli_chr01 | 1971041                 | GG                              | AA                | 1945874091               |
| SNP_P3_755_1971043 | NC_021160.1    | Ca_kabuli_chr01 | 1971043                 | CC                              | TT                | 1945874093               |
| SNP_P3_756_1971071 | NC_021160.1    | Ca_kabuli_chr01 | 1971071                 | CC                              | TT                | 1945874095               |
| SNP_P3_757_1971167 | NC_021160.1    | Ca_kabuli_chr01 | 1971167                 | TT                              | CC                | 1945874097               |
| SNP_P3_758_1971171 | NC_021160.1    | Ca_kabuli_chr01 | 1971171                 | GG                              | AA                | 1945874098               |
| SNP_P3_759_1971176 | NC_021160.1    | Ca_kabuli_chr01 | 1971176                 | GG                              | AA                | 1945874100               |
| SNP_P3_760_1971193 | NC_021160.1    | Ca_kabuli_chr01 | 1971193                 | CC                              | TT                | 1945874102               |
| SNP_P3_761_1971273 | NC_021160.1    | Ca_kabuli_chr01 | 1971273                 | GG                              | AA                | 1945874104               |
| SNP_P3_762_1971281 | NC_021160.1    | Ca_kabuli_chr01 | 1971281                 | TT                              | CC                | 1945874105               |
| SNP_P3_763_1971317 | NC_021160.1    | Ca_kabuli_chr01 | 1971317                 | TT                              | CC                | 1945874107               |
| SNP_P3_765_1971415 | NC_021160.1    | Ca_kabuli_chr01 | 1971415                 | AA                              | GG                | 1945874109               |
| SNP_P3_766_1971470 | NC_021160.1    | Ca_kabuli_chr01 | 1971470                 | CC                              | TT                | 1945874111               |
| SNP_P3_769_1973556 | NC_021160.1    | Ca_kabuli_chr01 | 1973556                 | GG                              | AA                | 1945874112               |
| SNP_P3_771_1973908 | NC_021160.1    | Ca_kabuli_chr01 | 1973908                 | TT                              | CC                | 1945874114               |
| SNP_P3_772_1974276 | NC_021160.1    | Ca_kabuli_chr01 | 1974276                 | TT                              | GG                | 1945874116               |
| SNP_P3_773_1974290 | NC_021160.1    | Ca_kabuli_chr01 | 1974290                 | TT                              | CC                | 1945874118               |
| SNP_P3_774_1974676 | NC_021160.1    | Ca_kabuli_chr01 | 1974676                 | CC                              | TT                | 1945874120               |
| SNP_P3_775_1974714 | NC_021160.1    | Ca_kabuli_chr01 | 1974714                 | TT                              | CC                | 1945874121               |
| SNP_P3_776_1974838 | NC_021160.1    | Ca_kabuli_chr01 | 1974838                 | CC                              | AA                | 1945874123               |
| SNP_P3_777_1975258 | NC_021160.1    | Ca_kabuli_chr01 | 1975258                 | CC                              | TT                | 1945874125               |
| SNP_P3_778_1975296 | NC_021160.1    | Ca_kabuli_chr01 | 1975296                 | CC                              | GG                | 1945874127               |
| SNP_P3_779_1975314 | NC_021160.1    | Ca_kabuli_chr01 | 1975314                 | CC                              | TT                | 1945874128               |
| SNP_P3_780_1975782 | NC_021160.1    | Ca_kabuli_chr01 | 1975782                 | GG                              | AA                | 1945874130               |
| SNP_P3_781_1977191 | NC_021160.1    | Ca_kabuli_chr01 | 1977191                 | TT                              | AA                | 1945874132               |
| SNP_P3_782_1977217 | NC_021160.1    | Ca_kabuli_chr01 | 1977217                 | AA                              | GG                | 1945874134               |

| SNPs IDs           | Chromosome IDs | Chromosomes     | Physical positions (bp) | CDC Frontier (Reference genome) | (Pusa 256 & HPNB) | NCBI SNPdb Accession IDs |
|--------------------|----------------|-----------------|-------------------------|---------------------------------|-------------------|--------------------------|
| SNP_P3_783_1977359 | NC_021160.1    | Ca_kabuli_chr01 | 1977359                 | TT                              | CC                | 1945874136               |
| SNP_P3_784_1977404 | NC_021160.1    | Ca_kabuli_chr01 | 1977404                 | CC                              | GG                | 1945874137               |
| SNP_P3_785_1977546 | NC_021160.1    | Ca_kabuli_chr01 | 1977546                 | GG                              | TT                | 1945874139               |
| SNP_P3_786_1978149 | NC_021160.1    | Ca_kabuli_chr01 | 1978149                 | TT                              | GG                | 1945874141               |
| SNP_P3_787_1978473 | NC_021160.1    | Ca_kabuli_chr01 | 1978473                 | AA                              | TT                | 1945874143               |
| SNP_P3_788_1978644 | NC_021160.1    | Ca_kabuli_chr01 | 1978644                 | GG                              | TT                | 1945874145               |
| SNP_P3_789_1978645 | NC_021160.1    | Ca_kabuli_chr01 | 1978645                 | TT                              | GG                | 1945874147               |
| SNP_P3_790_1978647 | NC_021160.1    | Ca_kabuli_chr01 | 1978647                 | GG                              | AA                | 1945874148               |
| SNP_P3_792_1979523 | NC_021160.1    | Ca_kabuli_chr01 | 1979523                 | GG                              | CC                | 1945874150               |
| SNP_P3_793_1979537 | NC_021160.1    | Ca_kabuli_chr01 | 1979537                 | TT                              | CC                | 1945874152               |
| SNP_P3_794_1979814 | NC_021160.1    | Ca_kabuli_chr01 | 1979814                 | CC                              | TT                | 1945874154               |
| SNP_P3_795_1980604 | NC_021160.1    | Ca_kabuli_chr01 | 1980604                 | AA                              | TT                | 1945874155               |
| SNP_P3_796_1980689 | NC_021160.1    | Ca_kabuli_chr01 | 1980689                 | AA                              | GG                | 1945874157               |
| SNP_P3_797_1980801 | NC_021160.1    | Ca_kabuli_chr01 | 1980801                 | GG                              | AA                | 1945874159               |
| SNP_P3_798_1981080 | NC_021160.1    | Ca_kabuli_chr01 | 1981080                 | AA                              | TT                | 1945874161               |
| SNP_P3_799_1981229 | NC_021160.1    | Ca_kabuli_chr01 | 1981229                 | AA                              | GG                | 1945874163               |
| SNP_P3_800_1981231 | NC_021160.1    | Ca_kabuli_chr01 | 1981231                 | GG                              | AA                | 1945874164               |
| SNP_P3_801_1981284 | NC_021160.1    | Ca_kabuli_chr01 | 1981284                 | TT                              | AA                | 1945874166               |
| SNP_P3_803_1981339 | NC_021160.1    | Ca_kabuli_chr01 | 1981339                 | CC                              | TT                | 1945874168               |
| SNP_P3_804_1981575 | NC_021160.1    | Ca_kabuli_chr01 | 1981575                 | TT                              | CC                | 1945874170               |
| SNP_P3_805_1981659 | NC_021160.1    | Ca_kabuli_chr01 | 1981659                 | GG                              | AA                | 1945874171               |
| SNP_P3_807_1982630 | NC_021160.1    | Ca_kabuli_chr01 | 1982630                 | AA                              | CC                | 1945874173               |
| SNP_P3_808_1983435 | NC_021160.1    | Ca_kabuli_chr01 | 1983435                 | GG                              | AA                | 1945874175               |
| SNP_P3_809_1984090 | NC_021160.1    | Ca_kabuli_chr01 | 1984090                 | TT                              | CC                | 1945874177               |
| SNP_P3_810_1984095 | NC_021160.1    | Ca_kabuli_chr01 | 1984095                 | TT                              | CC                | 1945874179               |
| SNP_P3_811_1984100 | NC_021160.1    | Ca_kabuli_chr01 | 1984100                 | CC                              | AA                | 1945874180               |
| SNP_P3_812_1984344 | NC_021160.1    | Ca_kabuli_chr01 | 1984344                 | AA                              | GG                | 1945874182               |
| SNP_P3_813_1984384 | NC_021160.1    | Ca_kabuli_chr01 | 1984384                 | TT                              | CC                | 1945874184               |
| SNP_P3_814_1984386 | NC_021160.1    | Ca_kabuli_chr01 | 1984386                 | TT                              | AA                | 1945874186               |
| SNP_P3_815_1984404 | NC_021160.1    | Ca_kabuli_chr01 | 1984404                 | AA                              | CC                | 1945874187               |
| SNP_P3_816_1985732 | NC_021160.1    | Ca_kabuli_chr01 | 1985732                 | TT                              | CC                | 1945874189               |
| SNP_P3_817_1985967 | NC_021160.1    | Ca_kabuli_chr01 | 1985967                 | CC                              | AA                | 1945874191               |
| SNP_P3_818_1986138 | NC_021160.1    | Ca_kabuli_chr01 | 1986138                 | GG                              | AA                | 1945874193               |
| SNP_P3_819_1986144 | NC_021160.1    | Ca_kabuli_chr01 | 1986144                 | GG                              | AA                | 1945874194               |
| SNP_P3_820_1986153 | NC_021160.1    | Ca_kabuli_chr01 | 1986153                 | AA                              | GG                | 1945874196               |
| SNP_P3_821_1986380 | NC_021160.1    | Ca_kabuli_chr01 | 1986380                 | AA                              | TT                | 1945874198               |
| SNP_P3_822_1986445 | NC_021160.1    | Ca_kabuli_chr01 | 1986445                 | CC                              | AA                | 1945874200               |
| SNP_P3_823_1986647 | NC_021160.1    | Ca_kabuli_chr01 | 1986647                 | AA                              | TT                | 1945874202               |
| SNP_P3_825_1988053 | NC_021160.1    | Ca_kabuli_chr01 | 1988053                 | GG                              | CC                | 1945874203               |
| SNP_P3_826_1988193 | NC_021160.1    | Ca_kabuli_chr01 | 1988193                 | CC                              | TT                | 1945874205               |
| SNP_P3_827_1989099 | NC_021160.1    | Ca_kabuli_chr01 | 1989099                 | AA                              | CC                | 1945874207               |
| SNP_P3_828_1989283 | NC_021160.1    | Ca_kabuli_chr01 | 1989283                 | TT                              | CC                | 1945874209               |

| SNPs IDs           | Chromosome IDs | Chromosomes     | Physical positions (bp) | CDC Frontier (Reference genome) | (Pusa 256 & HPNB) | NCBI SNPdb Accession IDs |
|--------------------|----------------|-----------------|-------------------------|---------------------------------|-------------------|--------------------------|
| SNP_P3_829_1989313 | NC_021160.1    | Ca_kabuli_chr01 | 1989313                 | GG                              | CC                | 1945874210               |
| SNP_P3_830_1989336 | NC_021160.1    | Ca_kabuli_chr01 | 1989336                 | TT                              | CC                | 1945874212               |
| SNP_P3_833_1990478 | NC_021160.1    | Ca_kabuli_chr01 | 1990478                 | TT                              | CC                | 1945874214               |
| SNP_P3_834_1990548 | NC_021160.1    | Ca_kabuli_chr01 | 1990548                 | AA                              | CC                | 1945874216               |
| SNP_P3_835_1990595 | NC_021160.1    | Ca_kabuli_chr01 | 1990595                 | TT                              | AA                | 1945874218               |
| SNP_P3_836_1990966 | NC_021160.1    | Ca_kabuli_chr01 | 1990966                 | AA                              | TT                | 1945874219               |
| SNP_P3_837_1991111 | NC_021160.1    | Ca_kabuli_chr01 | 1991111                 | TT                              | CC                | 1945874221               |
| SNP_P3_838_1991152 | NC_021160.1    | Ca_kabuli_chr01 | 1991152                 | TT                              | CC                | 1945874223               |
| SNP_P3_839_1991331 | NC_021160.1    | Ca_kabuli_chr01 | 1991331                 | TT                              | CC                | 1945874225               |
| SNP_P3_841_1992993 | NC_021160.1    | Ca_kabuli_chr01 | 1992993                 | CC                              | AA                | 1945874226               |
| SNP_P3_842_1993482 | NC_021160.1    | Ca_kabuli_chr01 | 1993482                 | TT                              | CC                | 1945874228               |
| SNP_P3_843_1993513 | NC_021160.1    | Ca_kabuli_chr01 | 1993513                 | AA                              | GG                | 1945874230               |
| SNP_P3_844_1993520 | NC_021160.1    | Ca_kabuli_chr01 | 1993520                 | AA                              | CC                | 1945874232               |
| SNP_P3_845_1993568 | NC_021160.1    | Ca_kabuli_chr01 | 1993568                 | AA                              | TT                | 1945874234               |
| SNP_P3_846_1994386 | NC_021160.1    | Ca_kabuli_chr01 | 1994386                 | TT                              | GG                | 1945874235               |
| SNP_P3_847_1994650 | NC_021160.1    | Ca_kabuli_chr01 | 1994650                 | TT                              | CC                | 1945874237               |
| SNP_P3_848_1994818 | NC_021160.1    | Ca_kabuli_chr01 | 1994818                 | CC                              | TT                | 1945874239               |
| SNP_P3_849_1995924 | NC_021160.1    | Ca_kabuli_chr01 | 1995924                 | TT                              | CC                | 1945874241               |
| SNP_P3_850_1996268 | NC_021160.1    | Ca_kabuli_chr01 | 1996268                 | TT                              | AA                | 1945874242               |
| SNP_P3_851_1996304 | NC_021160.1    | Ca_kabuli_chr01 | 1996304                 | CC                              | TT                | 1945874244               |
| SNP_P3_852_1996789 | NC_021160.1    | Ca_kabuli_chr01 | 1996789                 | AA                              | GG                | 1945874246               |
| SNP_P3_853_1996833 | NC_021160.1    | Ca_kabuli_chr01 | 1996833                 | CC                              | TT                | 1945874248               |
| SNP_P3_854_1996856 | NC_021160.1    | Ca_kabuli_chr01 | 1996856                 | TT                              | GG                | 1945874250               |
| SNP_P3_855_1997403 | NC_021160.1    | Ca_kabuli_chr01 | 1997403                 | GG                              | AA                | 1945874251               |
| SNP_P3_856_1997984 | NC_021160.1    | Ca_kabuli_chr01 | 1997984                 | TT                              | CC                | 1945874253               |
| SNP_P3_857_1998012 | NC_021160.1    | Ca_kabuli_chr01 | 1998012                 | TT                              | GG                | 1945874255               |
| SNP_P3_858_1998068 | NC_021160.1    | Ca_kabuli_chr01 | 1998068                 | AA                              | GG                | 1945874257               |
| SNP_P3_860_2000832 | NC_021160.1    | Ca_kabuli_chr01 | 2000832                 | GG                              | AA                | 1945874258               |
| SNP_P3_861_2000843 | NC_021160.1    | Ca_kabuli_chr01 | 2000843                 | AA                              | CC                | 1945874260               |
| SNP_P3_862_2001534 | NC_021160.1    | Ca_kabuli_chr01 | 2001534                 | AA                              | GG                | 1945874262               |
| SNP_P3_863_2001677 | NC_021160.1    | Ca_kabuli_chr01 | 2001677                 | TT                              | GG                | 1945874264               |
| SNP_P3_865_2004256 | NC_021160.1    | Ca_kabuli_chr01 | 2004256                 | CC                              | AA                | 1945874266               |
| SNP_P3_866_2004281 | NC_021160.1    | Ca_kabuli_chr01 | 2004281                 | AA                              | GG                | 1945874267               |
| SNP_P3_869_2004925 | NC_021160.1    | Ca_kabuli_chr01 | 2004925                 | CC                              | TT                | 1945874269               |
| SNP_P3_870_2006576 | NC_021160.1    | Ca_kabuli_chr01 | 2006576                 | TT                              | CC                | 1945874271               |
| SNP_P3_871_2006613 | NC_021160.1    | Ca_kabuli_chr01 | 2006613                 | CC                              | TT                | 1945874273               |
| SNP_P3_872_2006618 | NC_021160.1    | Ca_kabuli_chr01 | 2006618                 | GG                              | AA                | 1945874274               |
| SNP_P3_873_2006631 | NC_021160.1    | Ca_kabuli_chr01 | 2006631                 | TT                              | GG                | 1945874276               |
| SNP_P3_874_2006636 | NC_021160.1    | Ca_kabuli_chr01 | 2006636                 | TT                              | AA                | 1945874278               |
| SNP_P3_875_2006648 | NC_021160.1    | Ca_kabuli_chr01 | 2006648                 | CC                              | TT                | 1945874280               |
| SNP_P3_876_2006658 | NC_021160.1    | Ca_kabuli_chr01 | 2006658                 | AA                              | GG                | 1945874282               |
| SNP_P3_877_2006857 | NC_021160.1    | Ca_kabuli_chr01 | 2006857                 | TT                              | CC                | 1945874283               |

| SNPs IDs           | Chromosome IDs | Chromosomes     | Physical positions (bp) | CDC Frontier (Reference genome) | (Pusa 256 & HPNB) | NCBI SNPdb Accession IDs |
|--------------------|----------------|-----------------|-------------------------|---------------------------------|-------------------|--------------------------|
| SNP_P3_878_2006894 | NC_021160.1    | Ca_kabuli_chr01 | 2006894                 | CC                              | AA                | 1945874285               |
| SNP_P3_879_2006925 | NC_021160.1    | Ca_kabuli_chr01 | 2006925                 | CC                              | TT                | 1945874287               |
| SNP_P3_880_2006938 | NC_021160.1    | Ca_kabuli_chr01 | 2006938                 | AA                              | CC                | 1945874289               |
| SNP_P3_881_2007162 | NC_021160.1    | Ca_kabuli_chr01 | 2007162                 | GG                              | AA                | 1945874290               |
| SNP_P3_882_2007163 | NC_021160.1    | Ca_kabuli_chr01 | 2007163                 | TT                              | CC                | 1945874292               |
| SNP_P3_884_2007738 | NC_021160.1    | Ca_kabuli_chr01 | 2007738                 | TT                              | CC                | 1945874294               |
| SNP_P3_885_2007772 | NC_021160.1    | Ca_kabuli_chr01 | 2007772                 | TT                              | CC                | 1945874296               |
| SNP_P3_886_2007791 | NC_021160.1    | Ca_kabuli_chr01 | 2007791                 | AA                              | GG                | 1945874298               |
| SNP_P3_887_2007826 | NC_021160.1    | Ca_kabuli_chr01 | 2007826                 | TT                              | CC                | 1945874299               |
| SNP_P3_888_2008020 | NC_021160.1    | Ca_kabuli_chr01 | 2008020                 | TT                              | CC                | 1945874301               |
| SNP_P3_889_2008023 | NC_021160.1    | Ca_kabuli_chr01 | 2008023                 | CC                              | TT                | 1945874303               |
| SNP_P3_890_2008031 | NC_021160.1    | Ca_kabuli_chr01 | 2008031                 | CC                              | GG                | 1945874305               |
| SNP_P3_891_2008041 | NC_021160.1    | Ca_kabuli_chr01 | 2008041                 | CC                              | TT                | 1945874306               |
| SNP_P3_892_2008044 | NC_021160.1    | Ca_kabuli_chr01 | 2008044                 | GG                              | AA                | 1945874308               |
| SNP_P3_893_2008048 | NC_021160.1    | Ca_kabuli_chr01 | 2008048                 | AA                              | CC                | 1945874310               |
| SNP_P3_894_2008067 | NC_021160.1    | Ca_kabuli_chr01 | 2008067                 | CC                              | AA                | 1945874312               |
| SNP_P3_895_2008572 | NC_021160.1    | Ca_kabuli_chr01 | 2008572                 | CC                              | GG                | 1945874313               |
| SNP_P3_897_2008916 | NC_021160.1    | Ca_kabuli_chr01 | 2008916                 | TT                              | AA                | 1945874315               |
| SNP_P3_899_2011792 | NC_021160.1    | Ca_kabuli_chr01 | 2011792                 | AA                              | TT                | 1945874317               |
| SNP_P3_900_2011818 | NC_021160.1    | Ca_kabuli_chr01 | 2011818                 | GG                              | TT                | 1945874319               |
| SNP_P3_901_2014599 | NC_021160.1    | Ca_kabuli_chr01 | 2014599                 | CC                              | TT                | 1945874321               |
| SNP_P3_902_2014602 | NC_021160.1    | Ca_kabuli_chr01 | 2014602                 | TT                              | AA                | 1945874322               |
| SNP_P3_904_2015716 | NC_021160.1    | Ca_kabuli_chr01 | 2015716                 | CC                              | TT                | 1945874324               |
| SNP_P3_905_2016096 | NC_021160.1    | Ca_kabuli_chr01 | 2016096                 | AA                              | CC                | 1945874326               |
| SNP_P3_908_2018461 | NC_021160.1    | Ca_kabuli_chr01 | 2018461                 | CC                              | TT                | 1945874328               |
| SNP_P3_909_2018737 | NC_021160.1    | Ca_kabuli_chr01 | 2018737                 | CC                              | TT                | 1945874329               |
| SNP_P3_910_2018755 | NC_021160.1    | Ca_kabuli_chr01 | 2018755                 | AA                              | GG                | 1945874331               |
| SNP_P3_911_2019073 | NC_021160.1    | Ca_kabuli_chr01 | 2019073                 | CC                              | TT                | 1945874333               |
| SNP_P3_912_2019088 | NC_021160.1    | Ca_kabuli_chr01 | 2019088                 | CC                              | TT                | 1945874335               |
| SNP_P3_913_2019613 | NC_021160.1    | Ca_kabuli_chr01 | 2019613                 | AA                              | TT                | 1945874337               |
| SNP_P3_915_2019773 | NC_021160.1    | Ca_kabuli_chr01 | 2019773                 | TT                              | CC                | 1945874338               |
| SNP_P3_916_2022908 | NC_021160.1    | Ca_kabuli_chr01 | 2022908                 | CC                              | TT                | 1945874340               |
| SNP_P3_917_2024377 | NC_021160.1    | Ca_kabuli_chr01 | 2024377                 | CC                              | TT                | 1945874342               |
| SNP_P3_918_2024381 | NC_021160.1    | Ca_kabuli_chr01 | 2024381                 | AA                              | GG                | 1945874344               |
| SNP_P3_919_2024412 | NC_021160.1    | Ca_kabuli_chr01 | 2024412                 | AA                              | GG                | 1945874345               |
| SNP_P3_920_2024423 | NC_021160.1    | Ca_kabuli_chr01 | 2024423                 | AA                              | GG                | 1945874347               |
| SNP_P3_921_2024442 | NC_021160.1    | Ca_kabuli_chr01 | 2024442                 | CC                              | TT                | 1945874349               |
| SNP_P3_922_2024456 | NC_021160.1    | Ca_kabuli_chr01 | 2024456                 | TT                              | AA                | 1945874351               |
| SNP_P3_923_2024457 | NC_021160.1    | Ca_kabuli_chr01 | 2024457                 | GG                              | AA                | 1945874353               |
| SNP_P3_924_2024480 | NC_021160.1    | Ca_kabuli_chr01 | 2024480                 | GG                              | AA                | 1945874354               |
| SNP_P3_925_2027307 | NC_021160.1    | Ca_kabuli_chr01 | 2027307                 | AA                              | TT                | 1945874356               |
| SNP_P3_926_2027596 | NC_021160.1    | Ca_kabuli_chr01 | 2027596                 | GG                              | CC                | 1945874358               |

| SNPs IDs           | Chromosome IDs | Chromosomes     | Physical positions (bp) | CDC Frontier (Reference genome) | (Pusa 256 & HPNB) | NCBI SNPdb Accession IDs |
|--------------------|----------------|-----------------|-------------------------|---------------------------------|-------------------|--------------------------|
| SNP_P3_927_2029313 | NC_021160.1    | Ca_kabuli_chr01 | 2029313                 | CC                              | TT                | 1945874360               |
| SNP_P3_928_2032763 | NC_021160.1    | Ca_kabuli_chr01 | 2032763                 | TT                              | CC                | 1945874361               |
| SNP_P3_929_2032788 | NC_021160.1    | Ca_kabuli_chr01 | 2032788                 | AA                              | GG                | 1945874363               |
| SNP_P3_930_2032805 | NC_021160.1    | Ca_kabuli_chr01 | 2032805                 | CC                              | TT                | 1945874365               |
| SNP_P3_931_2032818 | NC_021160.1    | Ca_kabuli_chr01 | 2032818                 | GG                              | AA                | 1945874367               |
| SNP_P3_932_2032820 | NC_021160.1    | Ca_kabuli_chr01 | 2032820                 | GG                              | AA                | 1945874368               |
| SNP_P3_933_2032935 | NC_021160.1    | Ca_kabuli_chr01 | 2032935                 | TT                              | CC                | 1945874370               |
| SNP_P3_934_2032962 | NC_021160.1    | Ca_kabuli_chr01 | 2032962                 | GG                              | AA                | 1945874372               |
| SNP_P3_935_2032963 | NC_021160.1    | Ca_kabuli_chr01 | 2032963                 | GG                              | TT                | 1945874374               |
| SNP_P3_936_2032975 | NC_021160.1    | Ca_kabuli_chr01 | 2032975                 | TT                              | CC                | 1945874376               |
| SNP_P3_937_2033029 | NC_021160.1    | Ca_kabuli_chr01 | 2033029                 | CC                              | GG                | 1945874377               |
| SNP_P3_938_2033096 | NC_021160.1    | Ca_kabuli_chr01 | 2033096                 | GG                              | AA                | 1945874379               |
| SNP_P3_939_2042452 | NC_021160.1    | Ca_kabuli_chr01 | 2042452                 | TT                              | CC                | 1945874381               |
| SNP_P3_940_2042480 | NC_021160.1    | Ca_kabuli_chr01 | 2042480                 | GG                              | AA                | 1945874383               |
| SNP_P3_941_2042894 | NC_021160.1    | Ca_kabuli_chr01 | 2042894                 | TT                              | AA                | 1945874384               |
| SNP_P3_942_2043045 | NC_021160.1    | Ca_kabuli_chr01 | 2043045                 | CC                              | TT                | 1945874386               |
| SNP_P3_943_2043078 | NC_021160.1    | Ca_kabuli_chr01 | 2043078                 | AA                              | GG                | 1945874388               |
| SNP_P3_944_2043455 | NC_021160.1    | Ca_kabuli_chr01 | 2043455                 | AA                              | TT                | 1945874390               |
| SNP_P3_945_2043541 | NC_021160.1    | Ca_kabuli_chr01 | 2043541                 | CC                              | TT                | 1945874392               |
| SNP_P3_946_2043624 | NC_021160.1    | Ca_kabuli_chr01 | 2043624                 | AA                              | TT                | 1945874393               |
| SNP_P3_947_2043626 | NC_021160.1    | Ca_kabuli_chr01 | 2043626                 | GG                              | AA                | 1945874395               |
| SNP_P3_948_2043652 | NC_021160.1    | Ca_kabuli_chr01 | 2043652                 | CC                              | TT                | 1945874397               |
| SNP_P3_949_2043671 | NC_021160.1    | Ca_kabuli_chr01 | 2043671                 | CC                              | GG                | 1945874399               |
| SNP_P3_950_2043690 | NC_021160.1    | Ca_kabuli_chr01 | 2043690                 | AA                              | GG                | 1945874400               |
| SNP_P3_951_2043716 | NC_021160.1    | Ca_kabuli_chr01 | 2043716                 | TT                              | CC                | 1945874402               |
| SNP_P3_952_2043763 | NC_021160.1    | Ca_kabuli_chr01 | 2043763                 | GG                              | AA                | 1945874404               |
| SNP_P3_953_2043781 | NC_021160.1    | Ca_kabuli_chr01 | 2043781                 | AA                              | CC                | 1945874406               |
| SNP_P3_954_2043838 | NC_021160.1    | Ca_kabuli_chr01 | 2043838                 | TT                              | CC                | 1945874408               |
| SNP_P3_955_2044680 | NC_021160.1    | Ca_kabuli_chr01 | 2044680                 | AA                              | TT                | 1945874409               |
| SNP_P3_956_2044684 | NC_021160.1    | Ca_kabuli_chr01 | 2044684                 | GG                              | AA                | 1945874411               |
| SNP_P3_957_2044693 | NC_021160.1    | Ca_kabuli_chr01 | 2044693                 | AA                              | GG                | 1945874413               |
| SNP_P3_958_2044717 | NC_021160.1    | Ca_kabuli_chr01 | 2044717                 | TT                              | AA                | 1945874415               |
| SNP_P3_959_2044723 | NC_021160.1    | Ca_kabuli_chr01 | 2044723                 | CC                              | TT                | 1945874416               |
| SNP_P3_960_2044937 | NC_021160.1    | Ca_kabuli_chr01 | 2044937                 | TT                              | CC                | 1945874418               |
| SNP_P3_961_2044939 | NC_021160.1    | Ca_kabuli_chr01 | 2044939                 | CC                              | AA                | 1945874420               |
| SNP_P3_962_2044940 | NC_021160.1    | Ca_kabuli_chr01 | 2044940                 | CC                              | AA                | 1945874422               |
| SNP_P3_963_2044999 | NC_021160.1    | Ca_kabuli_chr01 | 2044999                 | TT                              | CC                | 1945874424               |
| SNP_P3_964_2049729 | NC_021160.1    | Ca_kabuli_chr01 | 2049729                 | GG                              | AA                | 1945874425               |
| SNP_P3_965_2050835 | NC_021160.1    | Ca_kabuli_chr01 | 2050835                 | GG                              | TT                | 1945874427               |
| SNP_P3_966_2054795 | NC_021160.1    | Ca_kabuli_chr01 | 2054795                 | TT                              | GG                | 1945874429               |
| SNP_P3_968_2055193 | NC_021160.1    | Ca_kabuli_chr01 | 2055193                 | GG                              | AA                | 1945874431               |
| SNP_P3_969_2055194 | NC_021160.1    | Ca_kabuli_chr01 | 2055194                 | CC                              | TT                | 1945874432               |



| SNPs IDs            | Chromosome IDs | Chromosomes     | Physical positions (bp) | CDC Frontier (Reference genome) | (Pusa 256 & HPNB) | NCBI SNPdb Accession IDs |
|---------------------|----------------|-----------------|-------------------------|---------------------------------|-------------------|--------------------------|
| SNP_P3_970_2055389  | NC_021160.1    | Ca_kabuli_chr01 | 2055389                 | CC                              | TT                | 1945874434               |
| SNP_P3_971_2055531  | NC_021160.1    | Ca_kabuli_chr01 | 2055531                 | AA                              | GG                | 1945874436               |
| SNP_P3_972_2055540  | NC_021160.1    | Ca_kabuli_chr01 | 2055540                 | CC                              | TT                | 1945874438               |
| SNP_P3_973_2055558  | NC_021160.1    | Ca_kabuli_chr01 | 2055558                 | CC                              | AA                | 1945874439               |
| SNP_P3_974_2055686  | NC_021160.1    | Ca_kabuli_chr01 | 2055686                 | AA                              | GG                | 1945874441               |
| SNP_P3_975_2056003  | NC_021160.1    | Ca_kabuli_chr01 | 2056003                 | GG                              | AA                | 1945874443               |
| SNP_P3_976_2056026  | NC_021160.1    | Ca_kabuli_chr01 | 2056026                 | AA                              | GG                | 1945874445               |
| SNP_P3_977_2056260  | NC_021160.1    | Ca_kabuli_chr01 | 2056260                 | TT                              | AA                | 1945874447               |
| SNP_P3_978_2056581  | NC_021160.1    | Ca_kabuli_chr01 | 2056581                 | GG                              | AA                | 1945874448               |
| SNP_P3_980_2056708  | NC_021160.1    | Ca_kabuli_chr01 | 2056708                 | CC                              | TT                | 1945874450               |
| SNP_P3_981_2057861  | NC_021160.1    | Ca_kabuli_chr01 | 2057861                 | AA                              | CC                | 1945874452               |
| SNP_P3_983_2058135  | NC_021160.1    | Ca_kabuli_chr01 | 2058135                 | GG                              | AA                | 1945874454               |
| SNP_P3_984_2058506  | NC_021160.1    | Ca_kabuli_chr01 | 2058506                 | TT                              | AA                | 1945874455               |
| SNP_P3_985_2058749  | NC_021160.1    | Ca_kabuli_chr01 | 2058749                 | AA                              | GG                | 1945874457               |
| SNP_P3_987_2058874  | NC_021160.1    | Ca_kabuli_chr01 | 2058874                 | TT                              | GG                | 1945874459               |
| SNP_P3_988_2058965  | NC_021160.1    | Ca_kabuli_chr01 | 2058965                 | CC                              | TT                | 1945874461               |
| SNP_P3_989_2058969  | NC_021160.1    | Ca_kabuli_chr01 | 2058969                 | GG                              | AA                | 1945874463               |
| SNP_P3_990_2058988  | NC_021160.1    | Ca_kabuli_chr01 | 2058988                 | AA                              | GG                | 1945874464               |
| SNP_P3_991_2059011  | NC_021160.1    | Ca_kabuli_chr01 | 2059011                 | GG                              | AA                | 1945874466               |
| SNP_P3_992_2059032  | NC_021160.1    | Ca_kabuli_chr01 | 2059032                 | GG                              | AA                | 1945874468               |
| SNP_P3_993_2059065  | NC_021160.1    | Ca_kabuli_chr01 | 2059065                 | GG                              | AA                | 1945874470               |
| SNP_P3_994_2059085  | NC_021160.1    | Ca_kabuli_chr01 | 2059085                 | GG                              | TT                | 1945874471               |
| SNP_P3_995_2059101  | NC_021160.1    | Ca_kabuli_chr01 | 2059101                 | GG                              | AA                | 1945874473               |
| SNP_P3_996_2059109  | NC_021160.1    | Ca_kabuli_chr01 | 2059109                 | CC                              | GG                | 1945874475               |
| SNP_P3_997_2059110  | NC_021160.1    | Ca_kabuli_chr01 | 2059110                 | AA                              | CC                | 1945874477               |
| SNP_P3_998_2059136  | NC_021160.1    | Ca_kabuli_chr01 | 2059136                 | AA                              | GG                | 1945874479               |
| SNP_P3_999_2059140  | NC_021160.1    | Ca_kabuli_chr01 | 2059140                 | TT                              | CC                | 1945874480               |
| SNP_P3_1000_2059141 | NC_021160.1    | Ca_kabuli_chr01 | 2059141                 | AA                              | CC                | 1945874482               |
| SNP_P3_1001_2066418 | NC_021160.1    | Ca_kabuli_chr01 | 2066418                 | TT                              | CC                | 1945874484               |
| SNP_P3_1002_2067356 | NC_021160.1    | Ca_kabuli_chr01 | 2067356                 | AA                              | GG                | 1945874486               |
| SNP_P3_1003_2067552 | NC_021160.1    | Ca_kabuli_chr01 | 2067552                 | GG                              | TT                | 1945874487               |
| SNP_P3_1004_2067569 | NC_021160.1    | Ca_kabuli_chr01 | 2067569                 | TT                              | GG                | 1945874489               |
| SNP_P3_1005_2068028 | NC_021160.1    | Ca_kabuli_chr01 | 2068028                 | AA                              | CC                | 1945874491               |
| SNP_P3_1006_2069368 | NC_021160.1    | Ca_kabuli_chr01 | 2069368                 | GG                              | AA                | 1945874493               |
| SNP_P3_1007_2071411 | NC_021160.1    | Ca_kabuli_chr01 | 2071411                 | CC                              | GG                | 1945874494               |
| SNP_P3_1008_2071879 | NC_021160.1    | Ca_kabuli_chr01 | 2071879                 | CC                              | TT                | 1945874496               |
| SNP_P3_1009_2073049 | NC_021160.1    | Ca_kabuli_chr01 | 2073049                 | TT                              | AA                | 1945874498               |
| SNP_P3_1010_2073062 | NC_021160.1    | Ca_kabuli_chr01 | 2073062                 | GG                              | AA                | 1945874500               |
| SNP_P3_1011_2073184 | NC_021160.1    | Ca_kabuli_chr01 | 2073184                 | AA                              | GG                | 1945874502               |
| SNP_P3_1012_2073210 | NC_021160.1    | Ca_kabuli_chr01 | 2073210                 | GG                              | TT                | 1945874503               |
| SNP_P3_1013_2073955 | NC_021160.1    | Ca_kabuli_chr01 | 2073955                 | AA                              | GG                | 1945874505               |
| SNP_P3_1015_2074332 | NC_021160.1    | Ca_kabuli_chr01 | 2074332                 | AA                              | GG                | 1945874507               |

| SNPs IDs            | Chromosome IDs | Chromosomes     | Physical positions (bp) | CDC Frontier (Reference genome) | (Pusa 256 & HPNB) | NCBI SNPdb Accession IDs |
|---------------------|----------------|-----------------|-------------------------|---------------------------------|-------------------|--------------------------|
| SNP_P3_1016_2074334 | NC_021160.1    | Ca_kabuli_chr01 | 2074334                 | CC                              | GG                | 1945874509               |
| SNP_P3_1017_2080203 | NC_021160.1    | Ca_kabuli_chr01 | 2080203                 | TT                              | AA                | 1945874510               |
| SNP_P3_1018_2080487 | NC_021160.1    | Ca_kabuli_chr01 | 2080487                 | CC                              | TT                | 1945874512               |
| SNP_P3_1019_2080686 | NC_021160.1    | Ca_kabuli_chr01 | 2080686                 | CC                              | AA                | 1945874514               |
| SNP_P3_1020_2080876 | NC_021160.1    | Ca_kabuli_chr01 | 2080876                 | CC                              | TT                | 1945874516               |
| SNP_P3_1021_2081015 | NC_021160.1    | Ca_kabuli_chr01 | 2081015                 | GG                              | AA                | 1945874518               |
| SNP_P3_1022_2081050 | NC_021160.1    | Ca_kabuli_chr01 | 2081050                 | AA                              | CC                | 1945874519               |
| SNP_P3_1023_2081552 | NC_021160.1    | Ca_kabuli_chr01 | 2081552                 | CC                              | TT                | 1945874521               |
| SNP_P3_1024_2081607 | NC_021160.1    | Ca_kabuli_chr01 | 2081607                 | AA                              | GG                | 1945874523               |
| SNP_P3_1025_2083416 | NC_021160.1    | Ca_kabuli_chr01 | 2083416                 | AA                              | GG                | 1945874525               |
| SNP_P3_1026_2083627 | NC_021160.1    | Ca_kabuli_chr01 | 2083627                 | TT                              | GG                | 1945874526               |
| SNP_P3_1028_2084568 | NC_021160.1    | Ca_kabuli_chr01 | 2084568                 | AA                              | GG                | 1945874528               |
| SNP_P3_1029_2085059 | NC_021160.1    | Ca_kabuli_chr01 | 2085059                 | GG                              | CC                | 1945874530               |
| SNP_P3_1031_2085547 | NC_021160.1    | Ca_kabuli_chr01 | 2085547                 | TT                              | CC                | 1945874532               |
| SNP_P3_1032_2085820 | NC_021160.1    | Ca_kabuli_chr01 | 2085820                 | TT                              | CC                | 1945874534               |
| SNP_P3_1033_2085839 | NC_021160.1    | Ca_kabuli_chr01 | 2085839                 | GG                              | AA                | 1945874535               |
| SNP_P3_1035_2085910 | NC_021160.1    | Ca_kabuli_chr01 | 2085910                 | CC                              | AA                | 1945874537               |
| SNP_P3_1039_2089245 | NC_021160.1    | Ca_kabuli_chr01 | 2089245                 | AA                              | GG                | 1945874539               |
| SNP_P3_1040_2090872 | NC_021160.1    | Ca_kabuli_chr01 | 2090872                 | GG                              | AA                | 1945874541               |
| SNP_P3_1041_2091561 | NC_021160.1    | Ca_kabuli_chr01 | 2091561                 | GG                              | CC                | 1945874542               |
| SNP_P3_1042_2092746 | NC_021160.1    | Ca_kabuli_chr01 | 2092746                 | AA                              | GG                | 1945874544               |
| SNP_P3_1043_2095150 | NC_021160.1    | Ca_kabuli_chr01 | 2095150                 | GG                              | TT                | 1945874546               |
| SNP_P3_1044_2096101 | NC_021160.1    | Ca_kabuli_chr01 | 2096101                 | GG                              | AA                | 1945874548               |
| SNP_P3_1045_2096102 | NC_021160.1    | Ca_kabuli_chr01 | 2096102                 | AA                              | GG                | 1945874550               |
| SNP_P3_1046_2096158 | NC_021160.1    | Ca_kabuli_chr01 | 2096158                 | TT                              | GG                | 1945874551               |
| SNP_P3_1047_2096275 | NC_021160.1    | Ca_kabuli_chr01 | 2096275                 | AA                              | GG                | 1945874553               |
| SNP_P3_1048_2096926 | NC_021160.1    | Ca_kabuli_chr01 | 2096926                 | AA                              | TT                | 1945874555               |
| SNP_P3_1049_2096964 | NC_021160.1    | Ca_kabuli_chr01 | 2096964                 | TT                              | AA                | 1945874557               |
| SNP_P3_1050_2096970 | NC_021160.1    | Ca_kabuli_chr01 | 2096970                 | CC                              | GG                | 1945874558               |
| SNP_P3_1051_2097165 | NC_021160.1    | Ca_kabuli_chr01 | 2097165                 | AA                              | TT                | 1945874560               |
| SNP_P3_1052_2099029 | NC_021160.1    | Ca_kabuli_chr01 | 2099029                 | GG                              | TT                | 1945874562               |
| SNP_P3_1054_2099708 | NC_021160.1    | Ca_kabuli_chr01 | 2099708                 | TT                              | CC                | 1945874564               |
| SNP_P3_1056_2100960 | NC_021160.1    | Ca_kabuli_chr01 | 2100960                 | TT                              | CC                | 1945874566               |
| SNP_P3_1057_2100986 | NC_021160.1    | Ca_kabuli_chr01 | 2100986                 | CC                              | TT                | 1945874567               |
| SNP_P3_1058_2101296 | NC_021160.1    | Ca_kabuli_chr01 | 2101296                 | CC                              | TT                | 1945874569               |
| SNP_P3_1059_2101306 | NC_021160.1    | Ca_kabuli_chr01 | 2101306                 | AA                              | GG                | 1945874571               |
| SNP_P3_1060_2101313 | NC_021160.1    | Ca_kabuli_chr01 | 2101313                 | CC                              | TT                | 1945874573               |
| SNP_P3_1061_2101325 | NC_021160.1    | Ca_kabuli_chr01 | 2101325                 | TT                              | CC                | 1945874574               |
| SNP_P3_1062_2102032 | NC_021160.1    | Ca_kabuli_chr01 | 2102032                 | GG                              | CC                | 1945874576               |
| SNP_P3_1063_2102245 | NC_021160.1    | Ca_kabuli_chr01 | 2102245                 | AA                              | GG                | 1945874578               |
| SNP_P3_1064_2102520 | NC_021160.1    | Ca_kabuli_chr01 | 2102520                 | AA                              | GG                | 1945874580               |
| SNP_P3_1066_2105045 | NC_021160.1    | Ca_kabuli_chr01 | 2105045                 | CC                              | GG                | 1945874582               |

| SNPs IDs            | Chromosome IDs | Chromosomes     | Physical positions (bp) | CDC Frontier (Reference genome) | (Pusa 256 & HPNB) | NCBI SNPdb Accession IDs |
|---------------------|----------------|-----------------|-------------------------|---------------------------------|-------------------|--------------------------|
| SNP_P3_1067_2106571 | NC_021160.1    | Ca_kabuli_chr01 | 2106571                 | AA                              | TT                | 1945874583               |
| SNP_P3_1068_2106582 | NC_021160.1    | Ca_kabuli_chr01 | 2106582                 | GG                              | CC                | 1945874585               |
| SNP_P3_1069_2107529 | NC_021160.1    | Ca_kabuli_chr01 | 2107529                 | TT                              | GG                | 1945874587               |
| SNP_P3_1070_2108882 | NC_021160.1    | Ca_kabuli_chr01 | 2108882                 | GG                              | AA                | 1945874589               |
| SNP_P3_1071_2108913 | NC_021160.1    | Ca_kabuli_chr01 | 2108913                 | AA                              | CC                | 1945874590               |
| SNP_P3_1072_2109008 | NC_021160.1    | Ca_kabuli_chr01 | 2109008                 | AA                              | GG                | 1945874592               |
| SNP_P3_1073_2109142 | NC_021160.1    | Ca_kabuli_chr01 | 2109142                 | TT                              | CC                | 1945874594               |
| SNP_P3_1074_2112399 | NC_021160.1    | Ca_kabuli_chr01 | 2112399                 | AA                              | TT                | 1945874596               |
| SNP_P3_1076_2113196 | NC_021160.1    | Ca_kabuli_chr01 | 2113196                 | TT                              | AA                | 1945874598               |
| SNP_P3_1077_2114820 | NC_021160.1    | Ca_kabuli_chr01 | 2114820                 | TT                              | CC                | 1945874599               |
| SNP_P3_1079_2115154 | NC_021160.1    | Ca_kabuli_chr01 | 2115154                 | CC                              | TT                | 1945874601               |
| SNP_P3_1080_2115185 | NC_021160.1    | Ca_kabuli_chr01 | 2115185                 | CC                              | TT                | 1945874603               |
| SNP_P3_1081_2116461 | NC_021160.1    | Ca_kabuli_chr01 | 2116461                 | GG                              | AA                | 1945874605               |
| SNP_P3_1082_2116539 | NC_021160.1    | Ca_kabuli_chr01 | 2116539                 | GG                              | AA                | 1945874606               |
| SNP_P3_1083_2116540 | NC_021160.1    | Ca_kabuli_chr01 | 2116540                 | AA                              | GG                | 1945874608               |
| SNP_P3_1084_2116624 | NC_021160.1    | Ca_kabuli_chr01 | 2116624                 | CC                              | TT                | 1945874610               |
| SNP_P3_1087_2117407 | NC_021160.1    | Ca_kabuli_chr01 | 2117407                 | GG                              | AA                | 1945874612               |
| SNP_P3_1088_2117811 | NC_021160.1    | Ca_kabuli_chr01 | 2117811                 | CC                              | TT                | 1945874614               |
| SNP_P3_1090_2118249 | NC_021160.1    | Ca_kabuli_chr01 | 2118249                 | CC                              | TT                | 1945874615               |
| SNP_P3_1091_2118299 | NC_021160.1    | Ca_kabuli_chr01 | 2118299                 | TT                              | GG                | 1945874617               |
| SNP_P3_1092_2118321 | NC_021160.1    | Ca_kabuli_chr01 | 2118321                 | CC                              | TT                | 1945874619               |
| SNP_P3_1093_2118336 | NC_021160.1    | Ca_kabuli_chr01 | 2118336                 | GG                              | AA                | 1945874621               |
| SNP_P3_1094_2118417 | NC_021160.1    | Ca_kabuli_chr01 | 2118417                 | CC                              | AA                | 1945874622               |
| SNP_P3_1095_2118440 | NC_021160.1    | Ca_kabuli_chr01 | 2118440                 | TT                              | AA                | 1945874624               |
| SNP_P3_1096_2118599 | NC_021160.1    | Ca_kabuli_chr01 | 2118599                 | GG                              | TT                | 1945874626               |
| SNP_P3_1097_2118609 | NC_021160.1    | Ca_kabuli_chr01 | 2118609                 | TT                              | CC                | 1945874628               |
| SNP_P3_1098_2118652 | NC_021160.1    | Ca_kabuli_chr01 | 2118652                 | GG                              | TT                | 1945874629               |
| SNP_P3_1099_2118664 | NC_021160.1    | Ca_kabuli_chr01 | 2118664                 | CC                              | TT                | 1945874631               |
| SNP_P3_1100_2118693 | NC_021160.1    | Ca_kabuli_chr01 | 2118693                 | GG                              | TT                | 1945874633               |
| SNP_P3_1101_2118887 | NC_021160.1    | Ca_kabuli_chr01 | 2118887                 | TT                              | GG                | 1945874635               |
| SNP_P3_1102_2119208 | NC_021160.1    | Ca_kabuli_chr01 | 2119208                 | CC                              | TT                | 1945874637               |
| SNP_P3_1103_2119239 | NC_021160.1    | Ca_kabuli_chr01 | 2119239                 | TT                              | AA                | 1945874638               |
| SNP_P3_1105_2119973 | NC_021160.1    | Ca_kabuli_chr01 | 2119973                 | GG                              | AA                | 1945874640               |
| SNP_P3_1106_2119989 | NC_021160.1    | Ca_kabuli_chr01 | 2119989                 | TT                              | AA                | 1945874642               |
| SNP_P3_1108_2121467 | NC_021160.1    | Ca_kabuli_chr01 | 2121467                 | TT                              | AA                | 1945874644               |
| SNP_P3_1110_2124581 | NC_021160.1    | Ca_kabuli_chr01 | 2124581                 | AA                              | GG                | 1945874645               |
| SNP_P3_1111_2124921 | NC_021160.1    | Ca_kabuli_chr01 | 2124921                 | CC                              | TT                | 1945874647               |
| SNP_P3_1112_2130654 | NC_021160.1    | Ca_kabuli_chr01 | 2130654                 | TT                              | CC                | 1945874649               |
| SNP_P3_1113_2130674 | NC_021160.1    | Ca_kabuli_chr01 | 2130674                 | CC                              | TT                | 1945874651               |
| SNP_P3_1114_2130677 | NC_021160.1    | Ca_kabuli_chr01 | 2130677                 | AA                              | GG                | 1945874653               |
| SNP_P3_1116_2130975 | NC_021160.1    | Ca_kabuli_chr01 | 2130975                 | GG                              | AA                | 1945874654               |
| SNP_P3_1117_2131009 | NC_021160.1    | Ca_kabuli_chr01 | 2131009                 | CC                              | GG                | 1945874656               |

| SNPs IDs            | Chromosome IDs | Chromosomes     | Physical positions (bp) | CDC Frontier (Reference genome) | (Pusa 256 & HPNB) | NCBI SNPdb Accession IDs |
|---------------------|----------------|-----------------|-------------------------|---------------------------------|-------------------|--------------------------|
| SNP_P3_1118_2131010 | NC_021160.1    | Ca_kabuli_chr01 | 2131010                 | AA                              | GG                | 1945874658               |
| SNP_P3_1119_2131016 | NC_021160.1    | Ca_kabuli_chr01 | 2131016                 | AA                              | GG                | 1945874660               |
| SNP_P3_1120_2131027 | NC_021160.1    | Ca_kabuli_chr01 | 2131027                 | AA                              | TT                | 1945874661               |
| SNP_P3_1121_2131028 | NC_021160.1    | Ca_kabuli_chr01 | 2131028                 | AA                              | TT                | 1945874663               |
| SNP_P3_1123_2131955 | NC_021160.1    | Ca_kabuli_chr01 | 2131955                 | TT                              | GG                | 1945874665               |
| SNP_P3_1124_2131997 | NC_021160.1    | Ca_kabuli_chr01 | 2131997                 | GG                              | AA                | 1945874667               |
| SNP_P3_1126_2133703 | NC_021160.1    | Ca_kabuli_chr01 | 2133703                 | TT                              | CC                | 1945874669               |
| SNP_P3_1127_2140040 | NC_021160.1    | Ca_kabuli_chr01 | 2140040                 | AA                              | TT                | 1945874670               |
| SNP_P3_1128_2140045 | NC_021160.1    | Ca_kabuli_chr01 | 2140045                 | GG                              | CC                | 1945874672               |
| SNP_P3_1129_2140047 | NC_021160.1    | Ca_kabuli_chr01 | 2140047                 | TT                              | CC                | 1945874674               |
| SNP_P3_1130_2140065 | NC_021160.1    | Ca_kabuli_chr01 | 2140065                 | TT                              | GG                | 1945874676               |
| SNP_P3_1131_2140068 | NC_021160.1    | Ca_kabuli_chr01 | 2140068                 | AA                              | TT                | 1945874677               |
| SNP_P3_1133_2140550 | NC_021160.1    | Ca_kabuli_chr01 | 2140550                 | AA                              | GG                | 1945874679               |
| SNP_P3_1134_2165951 | NC_021160.1    | Ca_kabuli_chr01 | 2165951                 | CC                              | AA                | 1945874681               |
| SNP_P3_1135_2166790 | NC_021160.1    | Ca_kabuli_chr01 | 2166790                 | AA                              | TT                | 1945874683               |
| SNP_P3_1137_2192915 | NC_021160.1    | Ca_kabuli_chr01 | 2192915                 | GG                              | AA                | 1945874685               |
| SNP_P3_1138_2199559 | NC_021160.1    | Ca_kabuli_chr01 | 2199559                 | TT                              | CC                | 1945874686               |
| SNP_P3_1139_2200321 | NC_021160.1    | Ca_kabuli_chr01 | 2200321                 | CC                              | TT                | 1945874688               |
| SNP_P3_1140_2215098 | NC_021160.1    | Ca_kabuli_chr01 | 2215098                 | TT                              | GG                | 1945874690               |
| SNP_P3_1141_2217467 | NC_021160.1    | Ca_kabuli_chr01 | 2217467                 | TT                              | AA                | 1945874692               |
| SNP_P3_1142_2217570 | NC_021160.1    | Ca_kabuli_chr01 | 2217570                 | AA                              | TT                | 1945874693               |
| SNP_P3_1143_2217904 | NC_021160.1    | Ca_kabuli_chr01 | 2217904                 | CC                              | AA                | 1945874695               |
| SNP_P3_1144_2218509 | NC_021160.1    | Ca_kabuli_chr01 | 2218509                 | GG                              | AA                | 1945874697               |
| SNP_P3_1145_2219820 | NC_021160.1    | Ca_kabuli_chr01 | 2219820                 | AA                              | GG                | 1945874699               |
| SNP_P3_1146_2221006 | NC_021160.1    | Ca_kabuli_chr01 | 2221006                 | CC                              | TT                | 1945874701               |
| SNP_P3_1147_2221020 | NC_021160.1    | Ca_kabuli_chr01 | 2221020                 | CC                              | GG                | 1945874702               |
| SNP_P3_1148_2222168 | NC_021160.1    | Ca_kabuli_chr01 | 2222168                 | AA                              | GG                | 1945874704               |
| SNP_P3_1149_2222448 | NC_021160.1    | Ca_kabuli_chr01 | 2222448                 | GG                              | AA                | 1945874706               |
| SNP_P3_1150_2222475 | NC_021160.1    | Ca_kabuli_chr01 | 2222475                 | TT                              | CC                | 1945874708               |
| SNP_P3_1151_2222497 | NC_021160.1    | Ca_kabuli_chr01 | 2222497                 | CC                              | TT                | 1945874709               |
| SNP_P3_1153_2223208 | NC_021160.1    | Ca_kabuli_chr01 | 2223208                 | GG                              | AA                | 1945874711               |
| SNP_P3_1154_2225676 | NC_021160.1    | Ca_kabuli_chr01 | 2225676                 | AA                              | GG                | 1945874713               |
| SNP_P3_1155_2228217 | NC_021160.1    | Ca_kabuli_chr01 | 2228217                 | TT                              | CC                | 1945874715               |
| SNP_P3_1156_2230563 | NC_021160.1    | Ca_kabuli_chr01 | 2230563                 | GG                              | AA                | 1945874717               |
| SNP_P3_1157_2230689 | NC_021160.1    | Ca_kabuli_chr01 | 2230689                 | GG                              | TT                | 1945874718               |
| SNP_P3_1158_2230887 | NC_021160.1    | Ca_kabuli_chr01 | 2230887                 | CC                              | TT                | 1945874720               |
| SNP_P3_1159_2230951 | NC_021160.1    | Ca_kabuli_chr01 | 2230951                 | TT                              | CC                | 1945874722               |
| SNP_P3_1160_2231939 | NC_021160.1    | Ca_kabuli_chr01 | 2231939                 | TT                              | GG                | 1945874724               |
| SNP_P3_1161_2232218 | NC_021160.1    | Ca_kabuli_chr01 | 2232218                 | GG                              | AA                | 1945874725               |
| SNP_P3_1162_2232220 | NC_021160.1    | Ca_kabuli_chr01 | 2232220                 | CC                              | AA                | 1945874727               |
| SNP_P3_1163_2234553 | NC_021160.1    | Ca_kabuli_chr01 | 2234553                 | CC                              | TT                | 1945874729               |
| SNP_P3_1164_2235006 | NC_021160.1    | Ca_kabuli_chr01 | 2235006                 | CC                              | AA                | 1945874731               |

| SNPs IDs            | Chromosome IDs | Chromosomes     | Physical positions (bp) | CDC Frontier (Reference genome) | (Pusa 256 & HPNB) | NCBI SNPdb Accession IDs |
|---------------------|----------------|-----------------|-------------------------|---------------------------------|-------------------|--------------------------|
| SNP_P3_1165_2235641 | NC_021160.1    | Ca_kabuli_chr01 | 2235641                 | TT                              | AA                | 1945874733               |
| SNP_P3_1166_2235652 | NC_021160.1    | Ca_kabuli_chr01 | 2235652                 | GG                              | TT                | 1945874734               |
| SNP_P3_1167_2235938 | NC_021160.1    | Ca_kabuli_chr01 | 2235938                 | TT                              | CC                | 1945874736               |
| SNP_P3_1169_2236277 | NC_021160.1    | Ca_kabuli_chr01 | 2236277                 | GG                              | AA                | 1945874738               |
| SNP_P3_1170_2236302 | NC_021160.1    | Ca_kabuli_chr01 | 2236302                 | GG                              | AA                | 1945874740               |
| SNP_P3_1171_2236428 | NC_021160.1    | Ca_kabuli_chr01 | 2236428                 | TT                              | GG                | 1945874741               |
| SNP_P3_1172_2236435 | NC_021160.1    | Ca_kabuli_chr01 | 2236435                 | TT                              | CC                | 1945874743               |
| SNP_P3_1173_2236495 | NC_021160.1    | Ca_kabuli_chr01 | 2236495                 | GG                              | TT                | 1945874745               |
| SNP_P3_1174_2236501 | NC_021160.1    | Ca_kabuli_chr01 | 2236501                 | TT                              | CC                | 1945874747               |
| SNP_P3_1175_2236690 | NC_021160.1    | Ca_kabuli_chr01 | 2236690                 | GG                              | CC                | 1945874749               |
| SNP_P3_1176_2236844 | NC_021160.1    | Ca_kabuli_chr01 | 2236844                 | AA                              | GG                | 1945874750               |
| SNP_P3_1177_2237589 | NC_021160.1    | Ca_kabuli_chr01 | 2237589                 | GG                              | CC                | 1945874752               |
| SNP_P3_1178_2238114 | NC_021160.1    | Ca_kabuli_chr01 | 2238114                 | GG                              | AA                | 1945874754               |
| SNP_P3_1179_2238492 | NC_021160.1    | Ca_kabuli_chr01 | 2238492                 | AA                              | GG                | 1945874756               |
| SNP_P3_1180_2242070 | NC_021160.1    | Ca_kabuli_chr01 | 2242070                 | AA                              | TT                | 1945874757               |
| SNP_P3_1181_2242134 | NC_021160.1    | Ca_kabuli_chr01 | 2242134                 | GG                              | CC                | 1945874759               |
| SNP_P3_1182_2242203 | NC_021160.1    | Ca_kabuli_chr01 | 2242203                 | TT                              | CC                | 1945874761               |
| SNP_P3_1183_2246160 | NC_021160.1    | Ca_kabuli_chr01 | 2246160                 | AA                              | GG                | 1945874763               |
| SNP_P3_1184_2246636 | NC_021160.1    | Ca_kabuli_chr01 | 2246636                 | CC                              | TT                | 1945874764               |
| SNP_P3_1185_2246684 | NC_021160.1    | Ca_kabuli_chr01 | 2246684                 | TT                              | CC                | 1945874766               |
| SNP_P3_1186_2246686 | NC_021160.1    | Ca_kabuli_chr01 | 2246686                 | TT                              | GG                | 1945874768               |
| SNP_P3_1187_2246689 | NC_021160.1    | Ca_kabuli_chr01 | 2246689                 | TT                              | AA                | 1945874770               |
| SNP_P3_1188_2246697 | NC_021160.1    | Ca_kabuli_chr01 | 2246697                 | TT                              | CC                | 1945874771               |
| SNP_P3_1189_2247806 | NC_021160.1    | Ca_kabuli_chr01 | 2247806                 | GG                              | AA                | 1945874773               |
| SNP_P3_1190_2248077 | NC_021160.1    | Ca_kabuli_chr01 | 2248077                 | AA                              | GG                | 1945874775               |
| SNP_P3_1191_2248081 | NC_021160.1    | Ca_kabuli_chr01 | 2248081                 | CC                              | TT                | 1945874777               |
| SNP_P3_1192_2248193 | NC_021160.1    | Ca_kabuli_chr01 | 2248193                 | TT                              | CC                | 1945874778               |
| SNP_P3_1193_2248445 | NC_021160.1    | Ca_kabuli_chr01 | 2248445                 | GG                              | AA                | 1945874780               |
| SNP_P3_1194_2248984 | NC_021160.1    | Ca_kabuli_chr01 | 2248984                 | CC                              | AA                | 1945874782               |
| SNP_P3_1196_2250263 | NC_021160.1    | Ca_kabuli_chr01 | 2250263                 | CC                              | TT                | 1945874784               |
| SNP_P3_1197_2250297 | NC_021160.1    | Ca_kabuli_chr01 | 2250297                 | TT                              | AA                | 1945874785               |
| SNP_P3_1199_2252229 | NC_021160.1    | Ca_kabuli_chr01 | 2252229                 | CC                              | TT                | 1945874787               |
| SNP_P3_1200_2253061 | NC_021160.1    | Ca_kabuli_chr01 | 2253061                 | GG                              | AA                | 1945874789               |
| SNP_P3_1201_2253078 | NC_021160.1    | Ca_kabuli_chr01 | 2253078                 | TT                              | GG                | 1945874791               |
| SNP_P3_1202_2255846 | NC_021160.1    | Ca_kabuli_chr01 | 2255846                 | CC                              | TT                | 1945874792               |
| SNP_P3_1203_2255967 | NC_021160.1    | Ca_kabuli_chr01 | 2255967                 | TT                              | CC                | 1945874794               |
| SNP_P3_1204_2256032 | NC_021160.1    | Ca_kabuli_chr01 | 2256032                 | AA                              | CC                | 1945874796               |
| SNP_P3_1205_2256151 | NC_021160.1    | Ca_kabuli_chr01 | 2256151                 | CC                              | TT                | 1945874798               |
| SNP_P3_1206_2256152 | NC_021160.1    | Ca_kabuli_chr01 | 2256152                 | AA                              | GG                | 1945874799               |
| SNP_P3_1207_2256259 | NC_021160.1    | Ca_kabuli_chr01 | 2256259                 | CC                              | TT                | 1945874801               |
| SNP_P3_1208_2256269 | NC_021160.1    | Ca_kabuli_chr01 | 2256269                 | TT                              | CC                | 1945874803               |
| SNP_P3_1209_2256294 | NC_021160.1    | Ca_kabuli_chr01 | 2256294                 | AA                              | TT                | 1945874805               |

| SNPs IDs            | Chromosome IDs | Chromosomes     | Physical positions (bp) | CDC Frontier (Reference genome) | (Pusa 256 & HPNB) | NCBI SNPdb Accession IDs |
|---------------------|----------------|-----------------|-------------------------|---------------------------------|-------------------|--------------------------|
| SNP_P3_1211_2257422 | NC_021160.1    | Ca_kabuli_chr01 | 2257422                 | TT                              | GG                | 1945874807               |
| SNP_P3_1212_2259032 | NC_021160.1    | Ca_kabuli_chr01 | 2259032                 | AA                              | CC                | 1945874808               |
| SNP_P3_1213_2263439 | NC_021160.1    | Ca_kabuli_chr01 | 2263439                 | AA                              | TT                | 1945874810               |
| SNP_P3_1214_2263472 | NC_021160.1    | Ca_kabuli_chr01 | 2263472                 | AA                              | GG                | 1945874812               |
| SNP_P3_1216_2263778 | NC_021160.1    | Ca_kabuli_chr01 | 2263778                 | TT                              | GG                | 1945874814               |
| SNP_P3_1217_2263908 | NC_021160.1    | Ca_kabuli_chr01 | 2263908                 | GG                              | TT                | 1945874816               |
| SNP_P3_1218_2264347 | NC_021160.1    | Ca_kabuli_chr01 | 2264347                 | GG                              | AA                | 1945874817               |
| SNP_P3_1219_2264642 | NC_021160.1    | Ca_kabuli_chr01 | 2264642                 | GG                              | AA                | 1945874819               |
| SNP_P3_1220_2264647 | NC_021160.1    | Ca_kabuli_chr01 | 2264647                 | GG                              | AA                | 1945874821               |
| SNP_P3_1221_2264740 | NC_021160.1    | Ca_kabuli_chr01 | 2264740                 | CC                              | AA                | 1945874823               |
| SNP_P3_1222_2264741 | NC_021160.1    | Ca_kabuli_chr01 | 2264741                 | TT                              | CC                | 1945874825               |
| SNP_P3_1223_2264963 | NC_021160.1    | Ca_kabuli_chr01 | 2264963                 | GG                              | AA                | 1945874826               |
| SNP_P3_1224_2265007 | NC_021160.1    | Ca_kabuli_chr01 | 2265007                 | AA                              | CC                | 1945874828               |
| SNP_P3_1225_2265206 | NC_021160.1    | Ca_kabuli_chr01 | 2265206                 | CC                              | TT                | 1945874830               |
| SNP_P3_1226_2265207 | NC_021160.1    | Ca_kabuli_chr01 | 2265207                 | AA                              | GG                | 1945874832               |
| SNP_P3_1227_2265215 | NC_021160.1    | Ca_kabuli_chr01 | 2265215                 | TT                              | AA                | 1945874834               |
| SNP_P3_1228_2271253 | NC_021160.1    | Ca_kabuli_chr01 | 2271253                 | CC                              | TT                | 1945874835               |
| SNP_P3_1229_2271254 | NC_021160.1    | Ca_kabuli_chr01 | 2271254                 | TT                              | CC                | 1945874837               |
| SNP_P3_1230_2271421 | NC_021160.1    | Ca_kabuli_chr01 | 2271421                 | TT                              | CC                | 1945874839               |
| SNP_P3_1231_2271879 | NC_021160.1    | Ca_kabuli_chr01 | 2271879                 | TT                              | AA                | 1945874841               |
| SNP_P3_1233_2274654 | NC_021160.1    | Ca_kabuli_chr01 | 2274654                 | GG                              | AA                | 1945874843               |
| SNP_P3_1234_2275834 | NC_021160.1    | Ca_kabuli_chr01 | 2275834                 | GG                              | AA                | 1945874844               |
| SNP_P3_1235_2276016 | NC_021160.1    | Ca_kabuli_chr01 | 2276016                 | CC                              | AA                | 1945874846               |
| SNP_P3_1236_2276747 | NC_021160.1    | Ca_kabuli_chr01 | 2276747                 | AA                              | GG                | 1945874848               |
| SNP_P3_1237_2276810 | NC_021160.1    | Ca_kabuli_chr01 | 2276810                 | GG                              | CC                | 1945874850               |
| SNP_P3_1238_2278951 | NC_021160.1    | Ca_kabuli_chr01 | 2278951                 | TT                              | CC                | 1945874851               |
| SNP_P3_1239_2280478 | NC_021160.1    | Ca_kabuli_chr01 | 2280478                 | AA                              | CC                | 1945874853               |
| SNP_P3_1241_2282166 | NC_021160.1    | Ca_kabuli_chr01 | 2282166                 | TT                              | AA                | 1945874855               |
| SNP_P3_1242_2282168 | NC_021160.1    | Ca_kabuli_chr01 | 2282168                 | GG                              | AA                | 1945874857               |
| SNP_P3_1243_2282171 | NC_021160.1    | Ca_kabuli_chr01 | 2282171                 | AA                              | GG                | 1945874859               |
| SNP_P3_1244_2282213 | NC_021160.1    | Ca_kabuli_chr01 | 2282213                 | TT                              | CC                | 1945874860               |
| SNP_P3_1245_2283511 | NC_021160.1    | Ca_kabuli_chr01 | 2283511                 | GG                              | AA                | 1945874862               |
| SNP_P3_1246_2283859 | NC_021160.1    | Ca_kabuli_chr01 | 2283859                 | AA                              | GG                | 1945874864               |
| SNP_P3_1247_2289275 | NC_021160.1    | Ca_kabuli_chr01 | 2289275                 | GG                              | AA                | 1945874866               |
| SNP_P3_1248_2290092 | NC_021160.1    | Ca_kabuli_chr01 | 2290092                 | AA                              | GG                | 1945874867               |
| SNP_P3_1249_2290150 | NC_021160.1    | Ca_kabuli_chr01 | 2290150                 | CC                              | AA                | 1945874869               |
| SNP_P3_1250_2293031 | NC_021160.1    | Ca_kabuli_chr01 | 2293031                 | TT                              | AA                | 1945874871               |
| SNP_P3_1251_2293136 | NC_021160.1    | Ca_kabuli_chr01 | 2293136                 | TT                              | CC                | 1945874873               |
| SNP_P3_1252_2293217 | NC_021160.1    | Ca_kabuli_chr01 | 2293217                 | AA                              | GG                | 1945874875               |
| SNP_P3_1254_2295274 | NC_021160.1    | Ca_kabuli_chr01 | 2295274                 | CC                              | TT                | 1945874876               |
| SNP_P3_1255_2295326 | NC_021160.1    | Ca_kabuli_chr01 | 2295326                 | AA                              | TT                | 1945874878               |
| SNP_P3_1256_2295505 | NC_021160.1    | Ca_kabuli_chr01 | 2295505                 | TT                              | CC                | 1945874880               |

| SNPs IDs            | Chromosome IDs | Chromosomes     | Physical positions (bp) | CDC Frontier (Reference genome) | (Pusa 256 & HPNB) | NCBI SNPdb Accession IDs |
|---------------------|----------------|-----------------|-------------------------|---------------------------------|-------------------|--------------------------|
| SNP_P3_1257_2297144 | NC_021160.1    | Ca_kabuli_chr01 | 2297144                 | AA                              | TT                | 1945874882               |
| SNP_P3_1258_2297499 | NC_021160.1    | Ca_kabuli_chr01 | 2297499                 | CC                              | TT                | 1945874883               |
| SNP_P3_1259_2298490 | NC_021160.1    | Ca_kabuli_chr01 | 2298490                 | GG                              | TT                | 1945874885               |
| SNP_P3_1260_2299658 | NC_021160.1    | Ca_kabuli_chr01 | 2299658                 | TT                              | CC                | 1945874887               |
| SNP_P3_1261_2300079 | NC_021160.1    | Ca_kabuli_chr01 | 2300079                 | AA                              | CC                | 1945874889               |
| SNP_P3_1262_2300084 | NC_021160.1    | Ca_kabuli_chr01 | 2300084                 | GG                              | AA                | 1945874891               |
| SNP_P3_1263_2300095 | NC_021160.1    | Ca_kabuli_chr01 | 2300095                 | CC                              | TT                | 1945874892               |
| SNP_P3_1264_2300122 | NC_021160.1    | Ca_kabuli_chr01 | 2300122                 | AA                              | TT                | 1945874894               |
| SNP_P3_1265_2300338 | NC_021160.1    | Ca_kabuli_chr01 | 2300338                 | TT                              | GG                | 1945874896               |
| SNP_P3_1266_2300351 | NC_021160.1    | Ca_kabuli_chr01 | 2300351                 | TT                              | CC                | 1945874898               |
| SNP_P3_1267_2301415 | NC_021160.1    | Ca_kabuli_chr01 | 2301415                 | TT                              | CC                | 1945874899               |
| SNP_P3_1268_2301418 | NC_021160.1    | Ca_kabuli_chr01 | 2301418                 | AA                              | GG                | 1945874901               |
| SNP_P3_1269_2301564 | NC_021160.1    | Ca_kabuli_chr01 | 2301564                 | AA                              | GG                | 1945874903               |
| SNP_P3_1270_2301566 | NC_021160.1    | Ca_kabuli_chr01 | 2301566                 | CC                              | AA                | 1945874905               |
| SNP_P3_1271_2301583 | NC_021160.1    | Ca_kabuli_chr01 | 2301583                 | CC                              | AA                | 1945874906               |
| SNP_P3_1272_2301950 | NC_021160.1    | Ca_kabuli_chr01 | 2301950                 | CC                              | AA                | 1945874908               |
| SNP_P3_1273_2302309 | NC_021160.1    | Ca_kabuli_chr01 | 2302309                 | CC                              | TT                | 1945874910               |
| SNP_P3_1274_2304877 | NC_021160.1    | Ca_kabuli_chr01 | 2304877                 | AA                              | CC                | 1945874912               |
| SNP_P3_1275_2305477 | NC_021160.1    | Ca_kabuli_chr01 | 2305477                 | CC                              | TT                | 1945874914               |
| SNP_P3_1276_2306287 | NC_021160.1    | Ca_kabuli_chr01 | 2306287                 | GG                              | AA                | 1945874915               |
| SNP_P3_1277_2306323 | NC_021160.1    | Ca_kabuli_chr01 | 2306323                 | CC                              | TT                | 1945874917               |
| SNP_P3_1278_2306340 | NC_021160.1    | Ca_kabuli_chr01 | 2306340                 | TT                              | CC                | 1945874919               |
| SNP_P3_1279_2308150 | NC_021160.1    | Ca_kabuli_chr01 | 2308150                 | AA                              | GG                | 1945874921               |
| SNP_P3_1280_2308151 | NC_021160.1    | Ca_kabuli_chr01 | 2308151                 | TT                              | CC                | 1945874922               |
| SNP_P3_1281_2308194 | NC_021160.1    | Ca_kabuli_chr01 | 2308194                 | CC                              | AA                | 1945874924               |
| SNP_P3_1282_2308878 | NC_021160.1    | Ca_kabuli_chr01 | 2308878                 | GG                              | TT                | 1945874926               |
| SNP_P3_1283_2308900 | NC_021160.1    | Ca_kabuli_chr01 | 2308900                 | GG                              | AA                | 1945874928               |
| SNP_P3_1284_2309179 | NC_021160.1    | Ca_kabuli_chr01 | 2309179                 | AA                              | GG                | 1945874930               |
| SNP_P3_1285_2309394 | NC_021160.1    | Ca_kabuli_chr01 | 2309394                 | GG                              | AA                | 1945874931               |
| SNP_P3_1286_2310721 | NC_021160.1    | Ca_kabuli_chr01 | 2310721                 | CC                              | TT                | 1945874933               |
| SNP_P3_1287_2310732 | NC_021160.1    | Ca_kabuli_chr01 | 2310732                 | TT                              | CC                | 1945874935               |
| SNP_P3_1288_2310999 | NC_021160.1    | Ca_kabuli_chr01 | 2310999                 | GG                              | AA                | 1945874937               |
| SNP_P3_1290_2313615 | NC_021160.1    | Ca_kabuli_chr01 | 2313615                 | AA                              | GG                | 1945874938               |
| SNP_P3_1291_2314325 | NC_021160.1    | Ca_kabuli_chr01 | 2314325                 | TT                              | CC                | 1945874940               |
| SNP_P3_1292_2314831 | NC_021160.1    | Ca_kabuli_chr01 | 2314831                 | TT                              | CC                | 1945874942               |
| SNP_P3_1293_2314875 | NC_021160.1    | Ca_kabuli_chr01 | 2314875                 | TT                              | CC                | 1945874944               |
| SNP_P3_1294_2314876 | NC_021160.1    | Ca_kabuli_chr01 | 2314876                 | GG                              | AA                | 1945874946               |
| SNP_P3_1295_2315178 | NC_021160.1    | Ca_kabuli_chr01 | 2315178                 | TT                              | CC                | 1945874947               |
| SNP_P3_1296_2315218 | NC_021160.1    | Ca_kabuli_chr01 | 2315218                 | GG                              | AA                | 1945874949               |
| SNP_P3_1297_2315883 | NC_021160.1    | Ca_kabuli_chr01 | 2315883                 | TT                              | CC                | 1945874951               |
| SNP_P3_1300_2317125 | NC_021160.1    | Ca_kabuli_chr01 | 2317125                 | GG                              | AA                | 1945874953               |
| SNP_P3_1301_2317154 | NC_021160.1    | Ca_kabuli_chr01 | 2317154                 | TT                              | GG                | 1945874954               |

| SNPs IDs            | Chromosome IDs | Chromosomes     | Physical positions (bp) | CDC Frontier (Reference genome) | (Pusa 256 & HPNB) | NCBI SNPdb Accession IDs |
|---------------------|----------------|-----------------|-------------------------|---------------------------------|-------------------|--------------------------|
| SNP_P3_1302_2317439 | NC_021160.1    | Ca_kabuli_chr01 | 2317439                 | TT                              | AA                | 1945874956               |
| SNP_P3_1303_2317443 | NC_021160.1    | Ca_kabuli_chr01 | 2317443                 | TT                              | AA                | 1945874958               |
| SNP_P3_1304_2317656 | NC_021160.1    | Ca_kabuli_chr01 | 2317656                 | AA                              | GG                | 1945874960               |
| SNP_P3_1305_2320073 | NC_021160.1    | Ca_kabuli_chr01 | 2320073                 | CC                              | TT                | 1945874962               |
| SNP_P3_1306_2323250 | NC_021160.1    | Ca_kabuli_chr01 | 2323250                 | TT                              | CC                | 1945874963               |
| SNP_P3_1307_2323262 | NC_021160.1    | Ca_kabuli_chr01 | 2323262                 | CC                              | TT                | 1945874965               |
| SNP_P3_1309_2324363 | NC_021160.1    | Ca_kabuli_chr01 | 2324363                 | TT                              | CC                | 1945874967               |
| SNP_P3_1310_2324373 | NC_021160.1    | Ca_kabuli_chr01 | 2324373                 | CC                              | GG                | 1945874969               |
| SNP_P3_1311_2324409 | NC_021160.1    | Ca_kabuli_chr01 | 2324409                 | AA                              | TT                | 1945874971               |
| SNP_P3_1313_2327424 | NC_021160.1    | Ca_kabuli_chr01 | 2327424                 | GG                              | AA                | 1945874972               |
| SNP_P3_1314_2327457 | NC_021160.1    | Ca_kabuli_chr01 | 2327457                 | GG                              | AA                | 1945874974               |
| SNP_P3_1315_2328799 | NC_021160.1    | Ca_kabuli_chr01 | 2328799                 | TT                              | CC                | 1945874976               |
| SNP_P3_1316_2328806 | NC_021160.1    | Ca_kabuli_chr01 | 2328806                 | GG                              | AA                | 1945874978               |
| SNP_P3_1317_2328844 | NC_021160.1    | Ca_kabuli_chr01 | 2328844                 | TT                              | CC                | 1945874980               |
| SNP_P3_1318_2328979 | NC_021160.1    | Ca_kabuli_chr01 | 2328979                 | AA                              | GG                | 1945874981               |
| SNP_P3_1319_2329155 | NC_021160.1    | Ca_kabuli_chr01 | 2329155                 | TT                              | GG                | 1945874983               |
| SNP_P3_1320_2330446 | NC_021160.1    | Ca_kabuli_chr01 | 2330446                 | TT                              | GG                | 1945874985               |
| SNP_P3_1321_2330452 | NC_021160.1    | Ca_kabuli_chr01 | 2330452                 | AA                              | GG                | 1945874987               |
| SNP_P3_1322_2332156 | NC_021160.1    | Ca_kabuli_chr01 | 2332156                 | CC                              | GG                | 1945874989               |
| SNP_P3_1323_2332190 | NC_021160.1    | Ca_kabuli_chr01 | 2332190                 | GG                              | TT                | 1945874990               |
| SNP_P3_1326_2332944 | NC_021160.1    | Ca_kabuli_chr01 | 2332944                 | TT                              | AA                | 1945874992               |
| SNP_P3_1327_2333929 | NC_021160.1    | Ca_kabuli_chr01 | 2333929                 | CC                              | TT                | 1945874994               |
| SNP_P3_1328_2334228 | NC_021160.1    | Ca_kabuli_chr01 | 2334228                 | CC                              | AA                | 1945874996               |
| SNP_P3_1329_2334290 | NC_021160.1    | Ca_kabuli_chr01 | 2334290                 | GG                              | AA                | 1945874997               |
| SNP_P3_1330_2334765 | NC_021160.1    | Ca_kabuli_chr01 | 2334765                 | TT                              | CC                | 1945874999               |
| SNP_P3_1331_2336856 | NC_021160.1    | Ca_kabuli_chr01 | 2336856                 | CC                              | TT                | 1945875001               |
| SNP_P3_1332_2337983 | NC_021160.1    | Ca_kabuli_chr01 | 2337983                 | TT                              | CC                | 1945875003               |
| SNP_P3_1333_2339629 | NC_021160.1    | Ca_kabuli_chr01 | 2339629                 | CC                              | TT                | 1945875005               |
| SNP_P3_1334_2340214 | NC_021160.1    | Ca_kabuli_chr01 | 2340214                 | GG                              | AA                | 1945875006               |
| SNP_P3_1335_2340237 | NC_021160.1    | Ca_kabuli_chr01 | 2340237                 | TT                              | GG                | 1945875008               |
| SNP_P3_1336_2341448 | NC_021160.1    | Ca_kabuli_chr01 | 2341448                 | GG                              | AA                | 1945875010               |
| SNP_P3_1337_2341692 | NC_021160.1    | Ca_kabuli_chr01 | 2341692                 | CC                              | TT                | 1945875012               |
| SNP_P3_1338_2343203 | NC_021160.1    | Ca_kabuli_chr01 | 2343203                 | TT                              | GG                | 1945875013               |
| SNP_P3_1339_2343249 | NC_021160.1    | Ca_kabuli_chr01 | 2343249                 | AA                              | CC                | 1945875015               |
| SNP_P3_1340_2343377 | NC_021160.1    | Ca_kabuli_chr01 | 2343377                 | TT                              | AA                | 1945875017               |
| SNP_P3_1341_2343390 | NC_021160.1    | Ca_kabuli_chr01 | 2343390                 | AA                              | CC                | 1945875019               |
| SNP_P3_1342_2343404 | NC_021160.1    | Ca_kabuli_chr01 | 2343404                 | AA                              | GG                | 1945875021               |
| SNP_P3_1343_2343864 | NC_021160.1    | Ca_kabuli_chr01 | 2343864                 | GG                              | AA                | 1945875022               |
| SNP_P3_1344_2344016 | NC_021160.1    | Ca_kabuli_chr01 | 2344016                 | TT                              | CC                | 1945875024               |
| SNP_P3_1345_2344044 | NC_021160.1    | Ca_kabuli_chr01 | 2344044                 | AA                              | GG                | 1945875026               |
| SNP_P3_1346_2344324 | NC_021160.1    | Ca_kabuli_chr01 | 2344324                 | AA                              | GG                | 1945875028               |
| SNP_P3_1348_2344923 | NC_021160.1    | Ca_kabuli_chr01 | 2344923                 | AA                              | GG                | 1945875029               |



| SNPs IDs            | Chromosome IDs | Chromosomes     | Physical positions (bp) | CDC Frontier (Reference genome) | (Pusa 256 & HPNB) | NCBI SNPdb Accession IDs |
|---------------------|----------------|-----------------|-------------------------|---------------------------------|-------------------|--------------------------|
| SNP_P3_1349_2346466 | NC_021160.1    | Ca_kabuli_chr01 | 2346466                 | CC                              | AA                | 1945875031               |
| SNP_P3_1350_2346539 | NC_021160.1    | Ca_kabuli_chr01 | 2346539                 | AA                              | TT                | 1945875033               |
| SNP_P3_1351_2347462 | NC_021160.1    | Ca_kabuli_chr01 | 2347462                 | CC                              | TT                | 1945875035               |
| SNP_P3_1354_2350414 | NC_021160.1    | Ca_kabuli_chr01 | 2350414                 | GG                              | AA                | 1945875037               |
| SNP_P3_1355_2351106 | NC_021160.1    | Ca_kabuli_chr01 | 2351106                 | AA                              | GG                | 1945875038               |
| SNP_P3_1356_2351408 | NC_021160.1    | Ca_kabuli_chr01 | 2351408                 | AA                              | GG                | 1945875040               |
| SNP_P3_1357_2351563 | NC_021160.1    | Ca_kabuli_chr01 | 2351563                 | AA                              | GG                | 1945875042               |
| SNP_P3_1359_2351594 | NC_021160.1    | Ca_kabuli_chr01 | 2351594                 | GG                              | AA                | 1945875044               |
| SNP_P3_1360_2351911 | NC_021160.1    | Ca_kabuli_chr01 | 2351911                 | GG                              | TT                | 1945875045               |
| SNP_P3_1361_2351938 | NC_021160.1    | Ca_kabuli_chr01 | 2351938                 | AA                              | GG                | 1945875047               |
| SNP_P3_1362_2351972 | NC_021160.1    | Ca_kabuli_chr01 | 2351972                 | TT                              | CC                | 1945875049               |
| SNP_P3_1363_2351998 | NC_021160.1    | Ca_kabuli_chr01 | 2351998                 | TT                              | CC                | 1945875051               |
| SNP_P3_1365_2354393 | NC_021160.1    | Ca_kabuli_chr01 | 2354393                 | GG                              | TT                | 1945875053               |
| SNP_P3_1366_2354436 | NC_021160.1    | Ca_kabuli_chr01 | 2354436                 | TT                              | GG                | 1945875054               |
| SNP_P3_1367_2354439 | NC_021160.1    | Ca_kabuli_chr01 | 2354439                 | AA                              | TT                | 1945875056               |
| SNP_P3_1368_2354838 | NC_021160.1    | Ca_kabuli_chr01 | 2354838                 | GG                              | CC                | 1945875058               |
| SNP_P3_1369_2356027 | NC_021160.1    | Ca_kabuli_chr01 | 2356027                 | CC                              | AA                | 1945875060               |
| SNP_P3_1370_2357683 | NC_021160.1    | Ca_kabuli_chr01 | 2357683                 | CC                              | AA                | 1945875061               |
| SNP_P3_1371_2358894 | NC_021160.1    | Ca_kabuli_chr01 | 2358894                 | AA                              | CC                | 1945875063               |
| SNP_P3_1373_2359045 | NC_021160.1    | Ca_kabuli_chr01 | 2359045                 | GG                              | AA                | 1945875065               |
| SNP_P3_1374_2360198 | NC_021160.1    | Ca_kabuli_chr01 | 2360198                 | TT                              | CC                | 1945875067               |
| SNP_P3_1375_2360202 | NC_021160.1    | Ca_kabuli_chr01 | 2360202                 | AA                              | TT                | 1945875068               |
| SNP_P3_1376_2360215 | NC_021160.1    | Ca_kabuli_chr01 | 2360215                 | TT                              | CC                | 1945875070               |
| SNP_P3_1377_2360856 | NC_021160.1    | Ca_kabuli_chr01 | 2360856                 | TT                              | AA                | 1945875072               |
| SNP_P3_1378_2361791 | NC_021160.1    | Ca_kabuli_chr01 | 2361791                 | AA                              | GG                | 1945875074               |
| SNP_P3_1379_2361983 | NC_021160.1    | Ca_kabuli_chr01 | 2361983                 | TT                              | CC                | 1945875076               |
| SNP_P3_1380_2362153 | NC_021160.1    | Ca_kabuli_chr01 | 2362153                 | TT                              | CC                | 1945875077               |
| SNP_P3_1383_2363434 | NC_021160.1    | Ca_kabuli_chr01 | 2363434                 | CC                              | GG                | 1945875079               |
| SNP_P3_1384_2363436 | NC_021160.1    | Ca_kabuli_chr01 | 2363436                 | TT                              | CC                | 1945875081               |
| SNP_P3_1385_2364101 | NC_021160.1    | Ca_kabuli_chr01 | 2364101                 | CC                              | TT                | 1945875083               |
| SNP_P3_1386_2364111 | NC_021160.1    | Ca_kabuli_chr01 | 2364111                 | CC                              | TT                | 1945875084               |
| SNP_P3_1388_2364196 | NC_021160.1    | Ca_kabuli_chr01 | 2364196                 | GG                              | AA                | 1945875086               |
| SNP_P3_1389_2364460 | NC_021160.1    | Ca_kabuli_chr01 | 2364460                 | AA                              | GG                | 1945875088               |
| SNP_P3_1390_2364523 | NC_021160.1    | Ca_kabuli_chr01 | 2364523                 | CC                              | GG                | 1945875090               |
| SNP_P3_1391_2364753 | NC_021160.1    | Ca_kabuli_chr01 | 2364753                 | TT                              | CC                | 1945875092               |
| SNP_P3_1392_2365029 | NC_021160.1    | Ca_kabuli_chr01 | 2365029                 | TT                              | CC                | 1945875094               |
| SNP_P3_1393_2367748 | NC_021160.1    | Ca_kabuli_chr01 | 2367748                 | AA                              | GG                | 1945875095               |
| SNP_P3_1394_2368107 | NC_021160.1    | Ca_kabuli_chr01 | 2368107                 | GG                              | AA                | 1945875097               |
| SNP_P3_1395_2368140 | NC_021160.1    | Ca_kabuli_chr01 | 2368140                 | CC                              | TT                | 1945875099               |
| SNP_P3_1396_2368144 | NC_021160.1    | Ca_kabuli_chr01 | 2368144                 | CC                              | TT                | 1945875101               |
| SNP_P3_1397_2368150 | NC_021160.1    | Ca_kabuli_chr01 | 2368150                 | AA                              | TT                | 1945875103               |
| SNP_P3_1398_2368154 | NC_021160.1    | Ca_kabuli_chr01 | 2368154                 | CC                              | AA                | 1945875104               |

| SNPs IDs            | Chromosome IDs | Chromosomes     | Physical positions (bp) | CDC Frontier (Reference genome) | (Pusa 256 & HPNB) | NCBI SNPdb Accession IDs |
|---------------------|----------------|-----------------|-------------------------|---------------------------------|-------------------|--------------------------|
| SNP_P3_1400_2372454 | NC_021160.1    | Ca_kabuli_chr01 | 2372454                 | CC                              | TT                | 1945875106               |
| SNP_P3_1401_2372521 | NC_021160.1    | Ca_kabuli_chr01 | 2372521                 | AA                              | GG                | 1945875108               |
| SNP_P3_1402_2375461 | NC_021160.1    | Ca_kabuli_chr01 | 2375461                 | TT                              | CC                | 1945875110               |
| SNP_P3_1403_2376131 | NC_021160.1    | Ca_kabuli_chr01 | 2376131                 | GG                              | TT                | 1945875112               |
| SNP_P3_1404_2376469 | NC_021160.1    | Ca_kabuli_chr01 | 2376469                 | TT                              | AA                | 1945875113               |
| SNP_P3_1405_2376505 | NC_021160.1    | Ca_kabuli_chr01 | 2376505                 | AA                              | TT                | 1945875115               |
| SNP_P3_1407_2378405 | NC_021160.1    | Ca_kabuli_chr01 | 2378405                 | GG                              | TT                | 1945875117               |
| SNP_P3_1408_2378411 | NC_021160.1    | Ca_kabuli_chr01 | 2378411                 | CC                              | GG                | 1945875119               |
| SNP_P3_1409_2378412 | NC_021160.1    | Ca_kabuli_chr01 | 2378412                 | CC                              | TT                | 1945875121               |
| SNP_P3_1410_2380205 | NC_021160.1    | Ca_kabuli_chr01 | 2380205                 | TT                              | AA                | 1945875122               |
| SNP_P3_1411_2380218 | NC_021160.1    | Ca_kabuli_chr01 | 2380218                 | CC                              | AA                | 1945875124               |
| SNP_P3_1412_2380256 | NC_021160.1    | Ca_kabuli_chr01 | 2380256                 | TT                              | AA                | 1945875126               |
| SNP_P3_1413_2381783 | NC_021160.1    | Ca_kabuli_chr01 | 2381783                 | CC                              | GG                | 1945875128               |
| SNP_P3_1414_2381920 | NC_021160.1    | Ca_kabuli_chr01 | 2381920                 | GG                              | AA                | 1945875130               |
| SNP_P3_1415_2382006 | NC_021160.1    | Ca_kabuli_chr01 | 2382006                 | CC                              | TT                | 1945875131               |
| SNP_P3_1416_2382572 | NC_021160.1    | Ca_kabuli_chr01 | 2382572                 | AA                              | GG                | 1945875133               |
| SNP_P3_1417_2384012 | NC_021160.1    | Ca_kabuli_chr01 | 2384012                 | TT                              | CC                | 1945875135               |
| SNP_P3_1418_2384051 | NC_021160.1    | Ca_kabuli_chr01 | 2384051                 | CC                              | TT                | 1945875137               |
| SNP_P3_1419_2384310 | NC_021160.1    | Ca_kabuli_chr01 | 2384310                 | TT                              | AA                | 1945875139               |
| SNP_P3_1420_2384375 | NC_021160.1    | Ca_kabuli_chr01 | 2384375                 | CC                              | TT                | 1945875140               |
| SNP_P3_1421_2384492 | NC_021160.1    | Ca_kabuli_chr01 | 2384492                 | GG                              | TT                | 1945875142               |
| SNP_P3_1422_2385354 | NC_021160.1    | Ca_kabuli_chr01 | 2385354                 | CC                              | TT                | 1945875144               |
| SNP_P3_1423_2385374 | NC_021160.1    | Ca_kabuli_chr01 | 2385374                 | GG                              | AA                | 1945875146               |
| SNP_P3_1424_2385568 | NC_021160.1    | Ca_kabuli_chr01 | 2385568                 | GG                              | CC                | 1945875148               |
| SNP_P3_1426_2386925 | NC_021160.1    | Ca_kabuli_chr01 | 2386925                 | GG                              | CC                | 1945875149               |
| SNP_P3_1427_2395490 | NC_021160.1    | Ca_kabuli_chr01 | 2395490                 | CC                              | TT                | 1945875151               |
| SNP_P3_1428_2395985 | NC_021160.1    | Ca_kabuli_chr01 | 2395985                 | CC                              | AA                | 1945875153               |
| SNP_P3_1429_2398988 | NC_021160.1    | Ca_kabuli_chr01 | 2398988                 | AA                              | GG                | 1945875155               |
| SNP_P3_1430_2399798 | NC_021160.1    | Ca_kabuli_chr01 | 2399798                 | TT                              | GG                | 1945875156               |
| SNP_P3_1431_2400182 | NC_021160.1    | Ca_kabuli_chr01 | 2400182                 | AA                              | TT                | 1945875158               |
| SNP_P3_1432_2400188 | NC_021160.1    | Ca_kabuli_chr01 | 2400188                 | GG                              | TT                | 1945875160               |
| SNP_P3_1433_2400213 | NC_021160.1    | Ca_kabuli_chr01 | 2400213                 | AA                              | TT                | 1945875162               |
| SNP_P3_1434_2400248 | NC_021160.1    | Ca_kabuli_chr01 | 2400248                 | CC                              | AA                | 1945875164               |
| SNP_P3_1435_2400287 | NC_021160.1    | Ca_kabuli_chr01 | 2400287                 | CC                              | AA                | 1945875165               |
| SNP_P3_1436_2403814 | NC_021160.1    | Ca_kabuli_chr01 | 2403814                 | AA                              | GG                | 1945875167               |
| SNP_P3_1437_2405052 | NC_021160.1    | Ca_kabuli_chr01 | 2405052                 | AA                              | TT                | 1945875169               |
| SNP_P3_1438_2405942 | NC_021160.1    | Ca_kabuli_chr01 | 2405942                 | TT                              | CC                | 1945875171               |
| SNP_P3_1439_2406284 | NC_021160.1    | Ca_kabuli_chr01 | 2406284                 | CC                              | TT                | 1945875172               |
| SNP_P3_1440_2406670 | NC_021160.1    | Ca_kabuli_chr01 | 2406670                 | GG                              | TT                | 1945875174               |
| SNP_P3_1442_2408637 | NC_021160.1    | Ca_kabuli_chr01 | 2408637                 | GG                              | AA                | 1945875176               |
| SNP_P3_1443_2408652 | NC_021160.1    | Ca_kabuli_chr01 | 2408652                 | GG                              | AA                | 1945875178               |
| SNP_P3_1444_2408710 | NC_021160.1    | Ca_kabuli_chr01 | 2408710                 | TT                              | CC                | 1945875180               |

| SNPs IDs            | Chromosome IDs | Chromosomes     | Physical positions (bp) | CDC Frontier (Reference genome) | (Pusa 256 & HPNB) | NCBI SNPdb Accession IDs |
|---------------------|----------------|-----------------|-------------------------|---------------------------------|-------------------|--------------------------|
| SNP_P3_1445_2408731 | NC_021160.1    | Ca_kabuli_chr01 | 2408731                 | AA                              | GG                | 1945875181               |
| SNP_P3_1446_2410771 | NC_021160.1    | Ca_kabuli_chr01 | 2410771                 | TT                              | CC                | 1945875183               |
| SNP_P3_1447_2410772 | NC_021160.1    | Ca_kabuli_chr01 | 2410772                 | AA                              | GG                | 1945875185               |
| SNP_P3_1448_2411350 | NC_021160.1    | Ca_kabuli_chr01 | 2411350                 | TT                              | GG                | 1945875187               |
| SNP_P3_1449_2411365 | NC_021160.1    | Ca_kabuli_chr01 | 2411365                 | GG                              | AA                | 1945875188               |
| SNP_P3_1450_2411545 | NC_021160.1    | Ca_kabuli_chr01 | 2411545                 | TT                              | AA                | 1945875190               |
| SNP_P3_1451_2411605 | NC_021160.1    | Ca_kabuli_chr01 | 2411605                 | CC                              | TT                | 1945875192               |
| SNP_P3_1452_2411607 | NC_021160.1    | Ca_kabuli_chr01 | 2411607                 | AA                              | TT                | 1945875194               |
| SNP_P3_1453_2411629 | NC_021160.1    | Ca_kabuli_chr01 | 2411629                 | GG                              | AA                | 1945875196               |
| SNP_P3_1454_2411641 | NC_021160.1    | Ca_kabuli_chr01 | 2411641                 | GG                              | AA                | 1945875197               |
| SNP_P3_1456_2411993 | NC_021160.1    | Ca_kabuli_chr01 | 2411993                 | AA                              | GG                | 1945875199               |
| SNP_P3_1457_2412341 | NC_021160.1    | Ca_kabuli_chr01 | 2412341                 | CC                              | TT                | 1945875201               |
| SNP_P3_1459_2413502 | NC_021160.1    | Ca_kabuli_chr01 | 2413502                 | AA                              | GG                | 1945875203               |
| SNP_P3_1460_2413504 | NC_021160.1    | Ca_kabuli_chr01 | 2413504                 | GG                              | AA                | 1945875204               |
| SNP_P3_1461_2413544 | NC_021160.1    | Ca_kabuli_chr01 | 2413544                 | TT                              | CC                | 1945875206               |
| SNP_P3_1462_2413937 | NC_021160.1    | Ca_kabuli_chr01 | 2413937                 | TT                              | AA                | 1945875208               |
| SNP_P3_1463_2413949 | NC_021160.1    | Ca_kabuli_chr01 | 2413949                 | AA                              | GG                | 1945875210               |
| SNP_P3_1464_2414279 | NC_021160.1    | Ca_kabuli_chr01 | 2414279                 | AA                              | GG                | 1945875212               |
| SNP_P3_1465_2414516 | NC_021160.1    | Ca_kabuli_chr01 | 2414516                 | AA                              | TT                | 1945875213               |
| SNP_P3_1467_2417327 | NC_021160.1    | Ca_kabuli_chr01 | 2417327                 | TT                              | AA                | 1945875215               |
| SNP_P3_1468_2417619 | NC_021160.1    | Ca_kabuli_chr01 | 2417619                 | CC                              | TT                | 1945875217               |
| SNP_P3_1469_2418326 | NC_021160.1    | Ca_kabuli_chr01 | 2418326                 | AA                              | GG                | 1945875219               |
| SNP_P3_1470_2418939 | NC_021160.1    | Ca_kabuli_chr01 | 2418939                 | TT                              | CC                | 1945875220               |
| SNP_P3_1471_2420574 | NC_021160.1    | Ca_kabuli_chr01 | 2420574                 | CC                              | TT                | 1945875222               |
| SNP_P3_1472_2420610 | NC_021160.1    | Ca_kabuli_chr01 | 2420610                 | GG                              | AA                | 1945875224               |
| SNP_P3_1473_2421233 | NC_021160.1    | Ca_kabuli_chr01 | 2421233                 | TT                              | CC                | 1945875226               |
| SNP_P3_1474_2422179 | NC_021160.1    | Ca_kabuli_chr01 | 2422179                 | AA                              | TT                | 1945875227               |
| SNP_P3_1475_2424140 | NC_021160.1    | Ca_kabuli_chr01 | 2424140                 | CC                              | TT                | 1945875229               |
| SNP_P3_1476_2429476 | NC_021160.1    | Ca_kabuli_chr01 | 2429476                 | CC                              | TT                | 1945875231               |
| SNP_P3_1477_2429501 | NC_021160.1    | Ca_kabuli_chr01 | 2429501                 | AA                              | GG                | 1945875233               |
| SNP_P3_1478_2429758 | NC_021160.1    | Ca_kabuli_chr01 | 2429758                 | CC                              | GG                | 1945875234               |
| SNP_P3_1479_2429980 | NC_021160.1    | Ca_kabuli_chr01 | 2429980                 | CC                              | AA                | 1945875236               |
| SNP_P3_1480_2431345 | NC_021160.1    | Ca_kabuli_chr01 | 2431345                 | AA                              | GG                | 1945875238               |
| SNP_P3_1481_2431366 | NC_021160.1    | Ca_kabuli_chr01 | 2431366                 | GG                              | AA                | 1945875240               |
| SNP_P3_1482_2432866 | NC_021160.1    | Ca_kabuli_chr01 | 2432866                 | TT                              | CC                | 1945875241               |
| SNP_P3_1483_2432871 | NC_021160.1    | Ca_kabuli_chr01 | 2432871                 | CC                              | AA                | 1945875243               |
| SNP_P3_1484_2432877 | NC_021160.1    | Ca_kabuli_chr01 | 2432877                 | CC                              | TT                | 1945875245               |
| SNP_P3_1485_2432891 | NC_021160.1    | Ca_kabuli_chr01 | 2432891                 | CC                              | AA                | 1945875247               |
| SNP_P3_1486_2433180 | NC_021160.1    | Ca_kabuli_chr01 | 2433180                 | CC                              | TT                | 1945875248               |
| SNP_P3_1487_2433224 | NC_021160.1    | Ca_kabuli_chr01 | 2433224                 | GG                              | AA                | 1945875250               |
| SNP_P3_1488_2433421 | NC_021160.1    | Ca_kabuli_chr01 | 2433421                 | GG                              | CC                | 1945875252               |
| SNP_P3_1489_2433432 | NC_021160.1    | Ca_kabuli_chr01 | 2433432                 | AA                              | CC                | 1945875254               |

| SNPs IDs            | Chromosome IDs | Chromosomes     | Physical positions (bp) | CDC Frontier (Reference genome) | (Pusa 256 & HPNB) | NCBI SNPdb Accession IDs |
|---------------------|----------------|-----------------|-------------------------|---------------------------------|-------------------|--------------------------|
| SNP_P3_1490_2433440 | NC_021160.1    | Ca_kabuli_chr01 | 2433440                 | TT                              | CC                | 1945875256               |
| SNP_P3_1491_2433930 | NC_021160.1    | Ca_kabuli_chr01 | 2433930                 | GG                              | AA                | 1945875257               |
| SNP_P3_1492_2433955 | NC_021160.1    | Ca_kabuli_chr01 | 2433955                 | TT                              | GG                | 1945875259               |
| SNP_P3_1493_2433980 | NC_021160.1    | Ca_kabuli_chr01 | 2433980                 | GG                              | CC                | 1945875261               |
| SNP_P3_1494_2434132 | NC_021160.1    | Ca_kabuli_chr01 | 2434132                 | TT                              | CC                | 1945875263               |
| SNP_P3_1495_2434133 | NC_021160.1    | Ca_kabuli_chr01 | 2434133                 | GG                              | AA                | 1945875264               |
| SNP_P3_1496_2434887 | NC_021160.1    | Ca_kabuli_chr01 | 2434887                 | GG                              | TT                | 1945875266               |
| SNP_P3_1497_2434904 | NC_021160.1    | Ca_kabuli_chr01 | 2434904                 | TT                              | CC                | 1945875268               |
| SNP_P3_1498_2435016 | NC_021160.1    | Ca_kabuli_chr01 | 2435016                 | GG                              | AA                | 1945875270               |
| SNP_P3_1499_2435026 | NC_021160.1    | Ca_kabuli_chr01 | 2435026                 | GG                              | AA                | 1945875272               |
| SNP_P3_1500_2436181 | NC_021160.1    | Ca_kabuli_chr01 | 2436181                 | CC                              | GG                | 1945875273               |
| SNP_P3_1501_2436520 | NC_021160.1    | Ca_kabuli_chr01 | 2436520                 | TT                              | CC                | 1945875275               |
| SNP_P3_1502_2436596 | NC_021160.1    | Ca_kabuli_chr01 | 2436596                 | CC                              | TT                | 1945875277               |
| SNP_P3_1503_2436629 | NC_021160.1    | Ca_kabuli_chr01 | 2436629                 | TT                              | CC                | 1945875279               |
| SNP_P3_1504_2437077 | NC_021160.1    | Ca_kabuli_chr01 | 2437077                 | GG                              | AA                | 1945875280               |
| SNP_P3_1505_2437106 | NC_021160.1    | Ca_kabuli_chr01 | 2437106                 | GG                              | AA                | 1945875282               |
| SNP_P3_1506_2437208 | NC_021160.1    | Ca_kabuli_chr01 | 2437208                 | GG                              | TT                | 1945875284               |
| SNP_P3_1507_2437269 | NC_021160.1    | Ca_kabuli_chr01 | 2437269                 | GG                              | AA                | 1945875286               |
| SNP_P3_1508_2437522 | NC_021160.1    | Ca_kabuli_chr01 | 2437522                 | TT                              | AA                | 1945875287               |
| SNP_P3_1509_2437535 | NC_021160.1    | Ca_kabuli_chr01 | 2437535                 | GG                              | AA                | 1945875289               |
| SNP_P3_1510_2437540 | NC_021160.1    | Ca_kabuli_chr01 | 2437540                 | TT                              | CC                | 1945875291               |
| SNP_P3_1511_2437555 | NC_021160.1    | Ca_kabuli_chr01 | 2437555                 | CC                              | TT                | 1945875293               |
| SNP_P3_1512_2437900 | NC_021160.1    | Ca_kabuli_chr01 | 2437900                 | TT                              | CC                | 1945875294               |
| SNP_P3_1513_2438257 | NC_021160.1    | Ca_kabuli_chr01 | 2438257                 | GG                              | TT                | 1945875296               |
| SNP_P3_1514_2438553 | NC_021160.1    | Ca_kabuli_chr01 | 2438553                 | GG                              | CC                | 1945875298               |
| SNP_P3_1515_2438555 | NC_021160.1    | Ca_kabuli_chr01 | 2438555                 | TT                              | CC                | 1945875300               |
| SNP_P3_1516_2439144 | NC_021160.1    | Ca_kabuli_chr01 | 2439144                 | TT                              | CC                | 1945875301               |
| SNP_P3_1517_2439172 | NC_021160.1    | Ca_kabuli_chr01 | 2439172                 | AA                              | GG                | 1945875303               |
| SNP_P3_1518_2439775 | NC_021160.1    | Ca_kabuli_chr01 | 2439775                 | AA                              | CC                | 1945875305               |
| SNP_P3_1519_2439783 | NC_021160.1    | Ca_kabuli_chr01 | 2439783                 | TT                              | GG                | 1945875307               |
| SNP_P3_1520_2439784 | NC_021160.1    | Ca_kabuli_chr01 | 2439784                 | CC                              | TT                | 1945875308               |
| SNP_P3_1521_2440476 | NC_021160.1    | Ca_kabuli_chr01 | 2440476                 | CC                              | TT                | 1945875310               |
| SNP_P3_1522_2440621 | NC_021160.1    | Ca_kabuli_chr01 | 2440621                 | CC                              | TT                | 1945875312               |
| SNP_P3_1523_2440639 | NC_021160.1    | Ca_kabuli_chr01 | 2440639                 | CC                              | TT                | 1945875314               |
| SNP_P3_1524_2440647 | NC_021160.1    | Ca_kabuli_chr01 | 2440647                 | GG                              | AA                | 1945875316               |
| SNP_P3_1525_2440649 | NC_021160.1    | Ca_kabuli_chr01 | 2440649                 | CC                              | TT                | 1945875317               |
| SNP_P3_1526_2440803 | NC_021160.1    | Ca_kabuli_chr01 | 2440803                 | AA                              | GG                | 1945875319               |
| SNP_P3_1527_2441534 | NC_021160.1    | Ca_kabuli_chr01 | 2441534                 | GG                              | AA                | 1945875321               |
| SNP_P3_1528_2442380 | NC_021160.1    | Ca_kabuli_chr01 | 2442380                 | AA                              | CC                | 1945875323               |
| SNP_P3_1529_2442428 | NC_021160.1    | Ca_kabuli_chr01 | 2442428                 | GG                              | AA                | 1945875324               |
| SNP_P3_1530_2443669 | NC_021160.1    | Ca_kabuli_chr01 | 2443669                 | CC                              | TT                | 1945875326               |
| SNP_P3_1531_2444637 | NC_021160.1    | Ca_kabuli_chr01 | 2444637                 | CC                              | AA                | 1945875328               |

| SNPs IDs            | Chromosome IDs | Chromosomes     | Physical positions (bp) | CDC Frontier (Reference genome) | (Pusa 256 & HPNB) | NCBI SNPdb Accession IDs |
|---------------------|----------------|-----------------|-------------------------|---------------------------------|-------------------|--------------------------|
| SNP_P3_1533_2447595 | NC_021160.1    | Ca_kabuli_chr01 | 2447595                 | TT                              | CC                | 1945875330               |
| SNP_P3_1535_2447813 | NC_021160.1    | Ca_kabuli_chr01 | 2447813                 | GG                              | CC                | 1945875332               |
| SNP_P3_1537_2447939 | NC_021160.1    | Ca_kabuli_chr01 | 2447939                 | TT                              | CC                | 1945875333               |
| SNP_P3_1538_2448191 | NC_021160.1    | Ca_kabuli_chr01 | 2448191                 | TT                              | AA                | 1945875335               |
| SNP_P3_1539_2448766 | NC_021160.1    | Ca_kabuli_chr01 | 2448766                 | AA                              | TT                | 1945875337               |
| SNP_P3_1540_2448790 | NC_021160.1    | Ca_kabuli_chr01 | 2448790                 | CC                              | TT                | 1945875339               |
| SNP_P3_1541_2449905 | NC_021160.1    | Ca_kabuli_chr01 | 2449905                 | AA                              | TT                | 1945875340               |
| SNP_P3_1542_2450341 | NC_021160.1    | Ca_kabuli_chr01 | 2450341                 | GG                              | CC                | 1945875342               |
| SNP_P3_1543_2450609 | NC_021160.1    | Ca_kabuli_chr01 | 2450609                 | GG                              | TT                | 1945875344               |
| SNP_P3_1544_2450685 | NC_021160.1    | Ca_kabuli_chr01 | 2450685                 | AA                              | GG                | 1945875346               |
| SNP_P3_1545_2450687 | NC_021160.1    | Ca_kabuli_chr01 | 2450687                 | TT                              | GG                | 1945875348               |
| SNP_P3_1546_2450737 | NC_021160.1    | Ca_kabuli_chr01 | 2450737                 | TT                              | AA                | 1945875349               |
| SNP_P3_1547_2450892 | NC_021160.1    | Ca_kabuli_chr01 | 2450892                 | TT                              | GG                | 1945875351               |
| SNP_P3_1548_2450919 | NC_021160.1    | Ca_kabuli_chr01 | 2450919                 | GG                              | AA                | 1945875353               |
| SNP_P3_1549_2451185 | NC_021160.1    | Ca_kabuli_chr01 | 2451185                 | TT                              | CC                | 1945875355               |
| SNP_P3_1550_2451188 | NC_021160.1    | Ca_kabuli_chr01 | 2451188                 | TT                              | CC                | 1945875356               |
| SNP_P3_1552_2452510 | NC_021160.1    | Ca_kabuli_chr01 | 2452510                 | CC                              | AA                | 1945875358               |
| SNP_P3_1553_2452591 | NC_021160.1    | Ca_kabuli_chr01 | 2452591                 | GG                              | AA                | 1945875360               |
| SNP_P3_1554_2452592 | NC_021160.1    | Ca_kabuli_chr01 | 2452592                 | AA                              | GG                | 1945875362               |
| SNP_P3_1556_2452807 | NC_021160.1    | Ca_kabuli_chr01 | 2452807                 | TT                              | CC                | 1945875363               |
| SNP_P3_1557_2452828 | NC_021160.1    | Ca_kabuli_chr01 | 2452828                 | TT                              | CC                | 1945875365               |
| SNP_P3_1558_2452839 | NC_021160.1    | Ca_kabuli_chr01 | 2452839                 | TT                              | CC                | 1945875367               |
| SNP_P3_1559_2452852 | NC_021160.1    | Ca_kabuli_chr01 | 2452852                 | AA                              | GG                | 1945875369               |
| SNP_P3_1560_2452894 | NC_021160.1    | Ca_kabuli_chr01 | 2452894                 | TT                              | CC                | 1945875371               |
| SNP_P3_1561_2452976 | NC_021160.1    | Ca_kabuli_chr01 | 2452976                 | AA                              | GG                | 1945875372               |
| SNP_P3_1562_2453154 | NC_021160.1    | Ca_kabuli_chr01 | 2453154                 | AA                              | TT                | 1945875374               |
| SNP_P3_1563_2453182 | NC_021160.1    | Ca_kabuli_chr01 | 2453182                 | AA                              | TT                | 1945875376               |
| SNP_P3_1564_2453195 | NC_021160.1    | Ca_kabuli_chr01 | 2453195                 | GG                              | AA                | 1945875378               |
| SNP_P3_1565_2453384 | NC_021160.1    | Ca_kabuli_chr01 | 2453384                 | TT                              | AA                | 1945875380               |
| SNP_P3_1566_2453477 | NC_021160.1    | Ca_kabuli_chr01 | 2453477                 | GG                              | AA                | 1945875381               |
| SNP_P3_1567_2453560 | NC_021160.1    | Ca_kabuli_chr01 | 2453560                 | GG                              | AA                | 1945875383               |
| SNP_P3_1568_2453569 | NC_021160.1    | Ca_kabuli_chr01 | 2453569                 | TT                              | CC                | 1945875385               |
| SNP_P3_1569_2453582 | NC_021160.1    | Ca_kabuli_chr01 | 2453582                 | GG                              | AA                | 1945875387               |
| SNP_P3_1570_2453661 | NC_021160.1    | Ca_kabuli_chr01 | 2453661                 | CC                              | TT                | 1945875389               |
| SNP_P3_1571_2455334 | NC_021160.1    | Ca_kabuli_chr01 | 2455334                 | CC                              | TT                | 1945875391               |
| SNP_P3_1572_2455640 | NC_021160.1    | Ca_kabuli_chr01 | 2455640                 | GG                              | AA                | 1945875392               |
| SNP_P3_1573_2455665 | NC_021160.1    | Ca_kabuli_chr01 | 2455665                 | GG                              | TT                | 1945875394               |
| SNP_P3_1574_2460551 | NC_021160.1    | Ca_kabuli_chr01 | 2460551                 | TT                              | AA                | 1945875396               |
| SNP_P3_1575_2463383 | NC_021160.1    | Ca_kabuli_chr01 | 2463383                 | GG                              | TT                | 1945875398               |
| SNP_P3_1576_2465927 | NC_021160.1    | Ca_kabuli_chr01 | 2465927                 | AA                              | GG                | 1945875399               |
| SNP_P3_1577_2466158 | NC_021160.1    | Ca_kabuli_chr01 | 2466158                 | GG                              | AA                | 1945875401               |
| SNP_P3_1578_2466165 | NC_021160.1    | Ca_kabuli_chr01 | 2466165                 | CC                              | AA                | 1945875403               |

| SNPs IDs            | Chromosome IDs | Chromosomes     | Physical positions (bp) | CDC Frontier (Reference genome) | (Pusa 256 & HPNB) | NCBI SNPdb Accession IDs |
|---------------------|----------------|-----------------|-------------------------|---------------------------------|-------------------|--------------------------|
| SNP_P3_1579_2466313 | NC_021160.1    | Ca_kabuli_chr01 | 2466313                 | TT                              | CC                | 1945875405               |
| SNP_P3_1580_2466331 | NC_021160.1    | Ca_kabuli_chr01 | 2466331                 | AA                              | GG                | 1945875407               |
| SNP_P3_1581_2466351 | NC_021160.1    | Ca_kabuli_chr01 | 2466351                 | CC                              | AA                | 1945875408               |
| SNP_P3_1582_2466365 | NC_021160.1    | Ca_kabuli_chr01 | 2466365                 | GG                              | CC                | 1945875410               |
| SNP_P3_1583_2468161 | NC_021160.1    | Ca_kabuli_chr01 | 2468161                 | TT                              | CC                | 1945875412               |
| SNP_P3_1584_2470276 | NC_021160.1    | Ca_kabuli_chr01 | 2470276                 | AA                              | CC                | 1945875414               |
| SNP_P3_1585_2470288 | NC_021160.1    | Ca_kabuli_chr01 | 2470288                 | CC                              | TT                | 1945875415               |
| SNP_P3_1586_2470990 | NC_021160.1    | Ca_kabuli_chr01 | 2470990                 | AA                              | CC                | 1945875417               |
| SNP_P3_1587_2471005 | NC_021160.1    | Ca_kabuli_chr01 | 2471005                 | GG                              | AA                | 1945875419               |
| SNP_P3_1588_2471235 | NC_021160.1    | Ca_kabuli_chr01 | 2471235                 | TT                              | CC                | 1945875421               |
| SNP_P3_1589_2471240 | NC_021160.1    | Ca_kabuli_chr01 | 2471240                 | CC                              | AA                | 1945875423               |
| SNP_P3_1590_2471807 | NC_021160.1    | Ca_kabuli_chr01 | 2471807                 | CC                              | GG                | 1945875424               |
| SNP_P3_1591_2474493 | NC_021160.1    | Ca_kabuli_chr01 | 2474493                 | CC                              | TT                | 1945875426               |
| SNP_P3_1592_2474531 | NC_021160.1    | Ca_kabuli_chr01 | 2474531                 | AA                              | GG                | 1945875428               |
| SNP_P3_1593_2474605 | NC_021160.1    | Ca_kabuli_chr01 | 2474605                 | AA                              | TT                | 1945875430               |
| SNP_P3_1594_2474607 | NC_021160.1    | Ca_kabuli_chr01 | 2474607                 | AA                              | GG                | 1945875432               |
| SNP_P3_1595_2474769 | NC_021160.1    | Ca_kabuli_chr01 | 2474769                 | CC                              | TT                | 1945875433               |
| SNP_P3_1596_2474798 | NC_021160.1    | Ca_kabuli_chr01 | 2474798                 | CC                              | TT                | 1945875435               |
| SNP_P3_1597_2485703 | NC_021160.1    | Ca_kabuli_chr01 | 2485703                 | AA                              | TT                | 1945875437               |
| SNP_P3_1598_2485705 | NC_021160.1    | Ca_kabuli_chr01 | 2485705                 | AA                              | TT                | 1945875439               |
| SNP_P3_1599_2492728 | NC_021160.1    | Ca_kabuli_chr01 | 2492728                 | TT                              | AA                | 1945875441               |
| SNP_P3_1600_2529027 | NC_021160.1    | Ca_kabuli_chr01 | 2529027                 | TT                              | AA                | 1945875442               |
| SNP_P3_1602_2545109 | NC_021160.1    | Ca_kabuli_chr01 | 2545109                 | CC                              | GG                | 1945875444               |
| SNP_P3_1603_2560421 | NC_021160.1    | Ca_kabuli_chr01 | 2560421                 | GG                              | CC                | 1945875446               |
| SNP_P3_1604_2585248 | NC_021160.1    | Ca_kabuli_chr01 | 2585248                 | GG                              | AA                | 1945875448               |
| SNP_P3_1605_2614959 | NC_021160.1    | Ca_kabuli_chr01 | 2614959                 | CC                              | TT                | 1945875450               |
| SNP_P3_1606_2623032 | NC_021160.1    | Ca_kabuli_chr01 | 2623032                 | CC                              | AA                | 1945875451               |
| SNP_P3_1608_2637176 | NC_021160.1    | Ca_kabuli_chr01 | 2637176                 | TT                              | CC                | 1945875453               |
| SNP_P3_1609_2637183 | NC_021160.1    | Ca_kabuli_chr01 | 2637183                 | CC                              | TT                | 1945875455               |
| SNP_P3_1610_2637201 | NC_021160.1    | Ca_kabuli_chr01 | 2637201                 | AA                              | TT                | 1945875457               |
| SNP_P3_1611_2643741 | NC_021160.1    | Ca_kabuli_chr01 | 2643741                 | CC                              | TT                | 1945875459               |
| SNP_P3_1612_2646169 | NC_021160.1    | Ca_kabuli_chr01 | 2646169                 | AA                              | GG                | 1945875460               |
| SNP_P3_1613_2647014 | NC_021160.1    | Ca_kabuli_chr01 | 2647014                 | TT                              | CC                | 1945875462               |
| SNP_P3_1614_2647026 | NC_021160.1    | Ca_kabuli_chr01 | 2647026                 | GG                              | TT                | 1945875464               |
| SNP_P3_1615_2647059 | NC_021160.1    | Ca_kabuli_chr01 | 2647059                 | CC                              | TT                | 1945875466               |
| SNP_P3_1616_2647079 | NC_021160.1    | Ca_kabuli_chr01 | 2647079                 | AA                              | GG                | 1945875467               |
| SNP_P3_1617_2647821 | NC_021160.1    | Ca_kabuli_chr01 | 2647821                 | TT                              | AA                | 1945875469               |
| SNP_P3_1618_2650443 | NC_021160.1    | Ca_kabuli_chr01 | 2650443                 | GG                              | AA                | 1945875471               |
| SNP_P3_1619_2650448 | NC_021160.1    | Ca_kabuli_chr01 | 2650448                 | GG                              | AA                | 1945875473               |
| SNP_P3_1620_2651532 | NC_021160.1    | Ca_kabuli_chr01 | 2651532                 | TT                              | AA                | 1945875475               |
| SNP_P3_1621_2651537 | NC_021160.1    | Ca_kabuli_chr01 | 2651537                 | CC                              | TT                | 1945875476               |
| SNP_P3_1622_2652437 | NC_021160.1    | Ca_kabuli_chr01 | 2652437                 | AA                              | GG                | 1945875478               |

| SNPs IDs            | Chromosome IDs | Chromosomes     | Physical positions (bp) | CDC Frontier (Reference genome) | (Pusa 256 & HPNB) | NCBI SNPdb Accession IDs |
|---------------------|----------------|-----------------|-------------------------|---------------------------------|-------------------|--------------------------|
| SNP_P3_1623_2652448 | NC_021160.1    | Ca_kabuli_chr01 | 2652448                 | AA                              | GG                | 1945875480               |
| SNP_P3_1624_2652454 | NC_021160.1    | Ca_kabuli_chr01 | 2652454                 | CC                              | TT                | 1945875482               |
| SNP_P3_1625_2653227 | NC_021160.1    | Ca_kabuli_chr01 | 2653227                 | GG                              | AA                | 1945875483               |
| SNP_P3_1627_2655183 | NC_021160.1    | Ca_kabuli_chr01 | 2655183                 | CC                              | TT                | 1945875485               |
| SNP_P3_1629_2655520 | NC_021160.1    | Ca_kabuli_chr01 | 2655520                 | TT                              | CC                | 1945875487               |
| SNP_P3_1630_2655951 | NC_021160.1    | Ca_kabuli_chr01 | 2655951                 | TT                              | CC                | 1945875489               |
| SNP_P3_1631_2655952 | NC_021160.1    | Ca_kabuli_chr01 | 2655952                 | AA                              | TT                | 1945875491               |
| SNP_P3_1632_2655976 | NC_021160.1    | Ca_kabuli_chr01 | 2655976                 | GG                              | AA                | 1945875492               |
| SNP_P3_1633_2656318 | NC_021160.1    | Ca_kabuli_chr01 | 2656318                 | CC                              | TT                | 1945875494               |
| SNP_P3_1635_2656460 | NC_021160.1    | Ca_kabuli_chr01 | 2656460                 | AA                              | GG                | 1945875496               |
| SNP_P3_1637_2656519 | NC_021160.1    | Ca_kabuli_chr01 | 2656519                 | TT                              | CC                | 1945875498               |
| SNP_P3_1638_2656771 | NC_021160.1    | Ca_kabuli_chr01 | 2656771                 | TT                              | AA                | 1945875499               |
| SNP_P3_1639_2660979 | NC_021160.1    | Ca_kabuli_chr01 | 2660979                 | AA                              | CC                | 1945875501               |
| SNP_P3_1640_2660992 | NC_021160.1    | Ca_kabuli_chr01 | 2660992                 | GG                              | AA                | 1945875503               |
| SNP_P3_1641_2661014 | NC_021160.1    | Ca_kabuli_chr01 | 2661014                 | GG                              | TT                | 1945875505               |
| SNP_P3_1642_2661058 | NC_021160.1    | Ca_kabuli_chr01 | 2661058                 | TT                              | AA                | 1945875507               |
| SNP_P3_1643_2661102 | NC_021160.1    | Ca_kabuli_chr01 | 2661102                 | TT                              | AA                | 1945875508               |
| SNP_P3_1644_2661153 | NC_021160.1    | Ca_kabuli_chr01 | 2661153                 | AA                              | CC                | 1945875510               |
| SNP_P3_1645_2661232 | NC_021160.1    | Ca_kabuli_chr01 | 2661232                 | TT                              | CC                | 1945875512               |
| SNP_P3_1646_2661237 | NC_021160.1    | Ca_kabuli_chr01 | 2661237                 | AA                              | TT                | 1945875514               |
| SNP_P3_1647_2661239 | NC_021160.1    | Ca_kabuli_chr01 | 2661239                 | AA                              | GG                | 1945875515               |
| SNP_P3_1648_2661245 | NC_021160.1    | Ca_kabuli_chr01 | 2661245                 | GG                              | AA                | 1945875517               |
| SNP_P3_1649_2661266 | NC_021160.1    | Ca_kabuli_chr01 | 2661266                 | TT                              | CC                | 1945875519               |
| SNP_P3_1650_2661268 | NC_021160.1    | Ca_kabuli_chr01 | 2661268                 | GG                              | AA                | 1945875521               |
| SNP_P3_1651_2661315 | NC_021160.1    | Ca_kabuli_chr01 | 2661315                 | CC                              | TT                | 1945875523               |
| SNP_P3_1653_2661527 | NC_021160.1    | Ca_kabuli_chr01 | 2661527                 | GG                              | AA                | 1945875524               |
| SNP_P3_1655_2661655 | NC_021160.1    | Ca_kabuli_chr01 | 2661655                 | AA                              | GG                | 1945875526               |
| SNP_P3_1656_2661706 | NC_021160.1    | Ca_kabuli_chr01 | 2661706                 | TT                              | AA                | 1945875528               |
| SNP_P3_1657_2661714 | NC_021160.1    | Ca_kabuli_chr01 | 2661714                 | CC                              | AA                | 1945875530               |
| SNP_P3_1658_2661769 | NC_021160.1    | Ca_kabuli_chr01 | 2661769                 | AA                              | GG                | 1945875531               |
| SNP_P3_1659_2662108 | NC_021160.1    | Ca_kabuli_chr01 | 2662108                 | TT                              | CC                | 1945875533               |
| SNP_P3_1660_2662135 | NC_021160.1    | Ca_kabuli_chr01 | 2662135                 | TT                              | AA                | 1945875535               |
| SNP_P3_1661_2662151 | NC_021160.1    | Ca_kabuli_chr01 | 2662151                 | TT                              | AA                | 1945875537               |
| SNP_P3_1662_2662172 | NC_021160.1    | Ca_kabuli_chr01 | 2662172                 | AA                              | GG                | 1945875539               |
| SNP_P3_1665_2665441 | NC_021160.1    | Ca_kabuli_chr01 | 2665441                 | AA                              | GG                | 1945875540               |
| SNP_P3_1666_2666866 | NC_021160.1    | Ca_kabuli_chr01 | 2666866                 | GG                              | TT                | 1945875542               |
| SNP_P3_1667_2667197 | NC_021160.1    | Ca_kabuli_chr01 | 2667197                 | AA                              | GG                | 1945875544               |
| SNP_P3_1668_2667749 | NC_021160.1    | Ca_kabuli_chr01 | 2667749                 | AA                              | TT                | 1945875546               |
| SNP_P3_1669_2667750 | NC_021160.1    | Ca_kabuli_chr01 | 2667750                 | TT                              | CC                | 1945875548               |
| SNP_P3_1670_2667752 | NC_021160.1    | Ca_kabuli_chr01 | 2667752                 | CC                              | TT                | 1945875550               |
| SNP_P3_1671_2668052 | NC_021160.1    | Ca_kabuli_chr01 | 2668052                 | TT                              | CC                | 1945875551               |
| SNP_P3_1673_2668184 | NC_021160.1    | Ca_kabuli_chr01 | 2668184                 | TT                              | CC                | 1945875553               |

| SNPs IDs            | Chromosome IDs | Chromosomes     | Physical positions (bp) | CDC Frontier (Reference genome) | (Pusa 256 & HPNB) | NCBI SNPdb Accession IDs |
|---------------------|----------------|-----------------|-------------------------|---------------------------------|-------------------|--------------------------|
| SNP_P3_1675_2669221 | NC_021160.1    | Ca_kabuli_chr01 | 2669221                 | GG                              | TT                | 1945875555               |
| SNP_P3_1676_2669222 | NC_021160.1    | Ca_kabuli_chr01 | 2669222                 | AA                              | TT                | 1945875557               |
| SNP_P3_1677_2669250 | NC_021160.1    | Ca_kabuli_chr01 | 2669250                 | CC                              | TT                | 1945875558               |
| SNP_P3_1679_2669482 | NC_021160.1    | Ca_kabuli_chr01 | 2669482                 | GG                              | TT                | 1945875560               |
| SNP_P3_1680_2669565 | NC_021160.1    | Ca_kabuli_chr01 | 2669565                 | AA                              | TT                | 1945875562               |
| SNP_P3_1681_2669572 | NC_021160.1    | Ca_kabuli_chr01 | 2669572                 | TT                              | CC                | 1945875564               |
| SNP_P3_1683_2669906 | NC_021160.1    | Ca_kabuli_chr01 | 2669906                 | CC                              | TT                | 1945875566               |
| SNP_P3_1684_2669926 | NC_021160.1    | Ca_kabuli_chr01 | 2669926                 | CC                              | AA                | 1945875567               |
| SNP_P3_1687_2671059 | NC_021160.1    | Ca_kabuli_chr01 | 2671059                 | CC                              | GG                | 1945875569               |
| SNP_P3_1688_2671308 | NC_021160.1    | Ca_kabuli_chr01 | 2671308                 | GG                              | AA                | 1945875571               |
| SNP_P3_1689_2672088 | NC_021160.1    | Ca_kabuli_chr01 | 2672088                 | CC                              | GG                | 1945875573               |
| SNP_P3_1690_2672089 | NC_021160.1    | Ca_kabuli_chr01 | 2672089                 | GG                              | TT                | 1945875574               |
| SNP_P3_1691_2673896 | NC_021160.1    | Ca_kabuli_chr01 | 2673896                 | GG                              | TT                | 1945875576               |
| SNP_P3_1692_2674128 | NC_021160.1    | Ca_kabuli_chr01 | 2674128                 | AA                              | CC                | 1945875578               |
| SNP_P3_1693_2674501 | NC_021160.1    | Ca_kabuli_chr01 | 2674501                 | TT                              | CC                | 1945875580               |
| SNP_P3_1695_2674739 | NC_021160.1    | Ca_kabuli_chr01 | 2674739                 | TT                              | AA                | 1945875582               |
| SNP_P3_1696_2674754 | NC_021160.1    | Ca_kabuli_chr01 | 2674754                 | TT                              | AA                | 1945875583               |
| SNP_P3_1697_2677586 | NC_021160.1    | Ca_kabuli_chr01 | 2677586                 | TT                              | GG                | 1945875585               |
| SNP_P3_1698_2678884 | NC_021160.1    | Ca_kabuli_chr01 | 2678884                 | AA                              | GG                | 1945875587               |
| SNP_P3_1700_2679064 | NC_021160.1    | Ca_kabuli_chr01 | 2679064                 | CC                              | TT                | 1945875589               |
| SNP_P3_1702_2680186 | NC_021160.1    | Ca_kabuli_chr01 | 2680186                 | TT                              | CC                | 1945875590               |
| SNP_P3_1704_2683581 | NC_021160.1    | Ca_kabuli_chr01 | 2683581                 | TT                              | CC                | 1945875592               |
| SNP_P3_1705_2684471 | NC_021160.1    | Ca_kabuli_chr01 | 2684471                 | AA                              | CC                | 1945875594               |
| SNP_P3_1706_2684830 | NC_021160.1    | Ca_kabuli_chr01 | 2684830                 | TT                              | CC                | 1945875596               |
| SNP_P3_1707_2684836 | NC_021160.1    | Ca_kabuli_chr01 | 2684836                 | AA                              | TT                | 1945875597               |
| SNP_P3_1708_2684843 | NC_021160.1    | Ca_kabuli_chr01 | 2684843                 | CC                              | GG                | 1945875599               |
| SNP_P3_1709_2684889 | NC_021160.1    | Ca_kabuli_chr01 | 2684889                 | GG                              | AA                | 1945875601               |
| SNP_P3_1710_2684911 | NC_021160.1    | Ca_kabuli_chr01 | 2684911                 | AA                              | GG                | 1945875603               |
| SNP_P3_1711_2684963 | NC_021160.1    | Ca_kabuli_chr01 | 2684963                 | TT                              | CC                | 1945875604               |
| SNP_P3_1712_2685018 | NC_021160.1    | Ca_kabuli_chr01 | 2685018                 | TT                              | AA                | 1945875606               |
| SNP_P3_1713_2685812 | NC_021160.1    | Ca_kabuli_chr01 | 2685812                 | TT                              | AA                | 1945875608               |
| SNP_P3_1714_2686709 | NC_021160.1    | Ca_kabuli_chr01 | 2686709                 | AA                              | CC                | 1945875610               |
| SNP_P3_1716_2686808 | NC_021160.1    | Ca_kabuli_chr01 | 2686808                 | AA                              | GG                | 1945875611               |
| SNP_P3_1717_2687595 | NC_021160.1    | Ca_kabuli_chr01 | 2687595                 | GG                              | TT                | 1945875613               |
| SNP_P3_1718_2687616 | NC_021160.1    | Ca_kabuli_chr01 | 2687616                 | TT                              | GG                | 1945875615               |
| SNP_P3_1719_2687620 | NC_021160.1    | Ca_kabuli_chr01 | 2687620                 | AA                              | GG                | 1945875617               |
| SNP_P3_1720_2687625 | NC_021160.1    | Ca_kabuli_chr01 | 2687625                 | TT                              | GG                | 1945875618               |
| SNP_P3_1721_2687634 | NC_021160.1    | Ca_kabuli_chr01 | 2687634                 | CC                              | TT                | 1945875620               |
| SNP_P3_1722_2687771 | NC_021160.1    | Ca_kabuli_chr01 | 2687771                 | CC                              | GG                | 1945875622               |
| SNP_P3_1723_2688281 | NC_021160.1    | Ca_kabuli_chr01 | 2688281                 | CC                              | GG                | 1945875624               |
| SNP_P3_1724_2688639 | NC_021160.1    | Ca_kabuli_chr01 | 2688639                 | GG                              | AA                | 1945875625               |
| SNP_P3_1725_2688717 | NC_021160.1    | Ca_kabuli_chr01 | 2688717                 | CC                              | TT                | 1945875627               |



| SNPs IDs            | Chromosome IDs | Chromosomes     | Physical positions (bp) | CDC Frontier (Reference genome) | (Pusa 256 & HPNB) | NCBI SNPdb Accession IDs |
|---------------------|----------------|-----------------|-------------------------|---------------------------------|-------------------|--------------------------|
| SNP_P3_1727_2691610 | NC_021160.1    | Ca_kabuli_chr01 | 2691610                 | TT                              | CC                | 1945875629               |
| SNP_P3_1729_2692373 | NC_021160.1    | Ca_kabuli_chr01 | 2692373                 | TT                              | CC                | 1945875631               |
| SNP_P3_1730_2692408 | NC_021160.1    | Ca_kabuli_chr01 | 2692408                 | AA                              | GG                | 1945875633               |
| SNP_P3_1731_2692422 | NC_021160.1    | Ca_kabuli_chr01 | 2692422                 | TT                              | CC                | 1945875634               |
| SNP_P3_1732_2692522 | NC_021160.1    | Ca_kabuli_chr01 | 2692522                 | GG                              | AA                | 1945875636               |
| SNP_P3_1733_2692718 | NC_021160.1    | Ca_kabuli_chr01 | 2692718                 | CC                              | AA                | 1945875638               |
| SNP_P3_1734_2692759 | NC_021160.1    | Ca_kabuli_chr01 | 2692759                 | GG                              | AA                | 1945875640               |
| SNP_P3_1735_2692775 | NC_021160.1    | Ca_kabuli_chr01 | 2692775                 | AA                              | TT                | 1945875641               |
| SNP_P3_1736_2692798 | NC_021160.1    | Ca_kabuli_chr01 | 2692798                 | GG                              | AA                | 1945875643               |
| SNP_P3_1738_2696211 | NC_021160.1    | Ca_kabuli_chr01 | 2696211                 | GG                              | CC                | 1945875645               |
| SNP_P3_1739_2696215 | NC_021160.1    | Ca_kabuli_chr01 | 2696215                 | AA                              | GG                | 1945875647               |
| SNP_P3_1740_2696222 | NC_021160.1    | Ca_kabuli_chr01 | 2696222                 | AA                              | GG                | 1945875648               |
| SNP_P3_1741_2697804 | NC_021160.1    | Ca_kabuli_chr01 | 2697804                 | CC                              | TT                | 1945875650               |
| SNP_P3_1742_2697816 | NC_021160.1    | Ca_kabuli_chr01 | 2697816                 | AA                              | TT                | 1945875652               |
| SNP_P3_1743_2698141 | NC_021160.1    | Ca_kabuli_chr01 | 2698141                 | CC                              | AA                | 1945875654               |
| SNP_P3_1744_2698163 | NC_021160.1    | Ca_kabuli_chr01 | 2698163                 | AA                              | GG                | 1945875655               |
| SNP_P3_1746_2699087 | NC_021160.1    | Ca_kabuli_chr01 | 2699087                 | AA                              | GG                | 1945875657               |
| SNP_P3_1747_2699174 | NC_021160.1    | Ca_kabuli_chr01 | 2699174                 | TT                              | CC                | 1945875659               |
| SNP_P3_1751_2700364 | NC_021160.1    | Ca_kabuli_chr01 | 2700364                 | CC                              | TT                | 1945875661               |
| SNP_P3_1752_2701592 | NC_021160.1    | Ca_kabuli_chr01 | 2701592                 | CC                              | TT                | 1945875663               |
| SNP_P3_1753_2702322 | NC_021160.1    | Ca_kabuli_chr01 | 2702322                 | CC                              | TT                | 1945875664               |
| SNP_P3_1754_2702513 | NC_021160.1    | Ca_kabuli_chr01 | 2702513                 | GG                              | TT                | 1945875666               |
| SNP_P3_1755_2704247 | NC_021160.1    | Ca_kabuli_chr01 | 2704247                 | AA                              | GG                | 1945875668               |
| SNP_P3_1756_2704321 | NC_021160.1    | Ca_kabuli_chr01 | 2704321                 | CC                              | AA                | 1945875670               |
| SNP_P3_1757_2704699 | NC_021160.1    | Ca_kabuli_chr01 | 2704699                 | TT                              | CC                | 1945875671               |
| SNP_P3_1758_2707824 | NC_021160.1    | Ca_kabuli_chr01 | 2707824                 | CC                              | GG                | 1945875673               |
| SNP_P3_1759_2708464 | NC_021160.1    | Ca_kabuli_chr01 | 2708464                 | GG                              | AA                | 1945875675               |
| SNP_P3_1761_2712070 | NC_021160.1    | Ca_kabuli_chr01 | 2712070                 | AA                              | CC                | 1945875677               |
| SNP_P3_1762_2712087 | NC_021160.1    | Ca_kabuli_chr01 | 2712087                 | GG                              | AA                | 1945875679               |
| SNP_P3_1763_2712089 | NC_021160.1    | Ca_kabuli_chr01 | 2712089                 | AA                              | CC                | 1945875680               |
| SNP_P3_1766_2715481 | NC_021160.1    | Ca_kabuli_chr01 | 2715481                 | AA                              | TT                | 1945875682               |
| SNP_P3_1767_2715861 | NC_021160.1    | Ca_kabuli_chr01 | 2715861                 | CC                              | GG                | 1945875684               |
| SNP_P3_1768_2724533 | NC_021160.1    | Ca_kabuli_chr01 | 2724533                 | CC                              | GG                | 1945875686               |
| SNP_P3_1770_2725538 | NC_021160.1    | Ca_kabuli_chr01 | 2725538                 | CC                              | TT                | 1945875687               |
| SNP_P3_1771_2726410 | NC_021160.1    | Ca_kabuli_chr01 | 2726410                 | GG                              | AA                | 1945875689               |
| SNP_P3_1772_2726530 | NC_021160.1    | Ca_kabuli_chr01 | 2726530                 | AA                              | CC                | 1945875691               |
| SNP_P3_1773_2726742 | NC_021160.1    | Ca_kabuli_chr01 | 2726742                 | TT                              | CC                | 1945875693               |
| SNP_P3_1774_2727919 | NC_021160.1    | Ca_kabuli_chr01 | 2727919                 | AA                              | GG                | 1945875695               |
| SNP_P3_1777_2728018 | NC_021160.1    | Ca_kabuli_chr01 | 2728018                 | TT                              | CC                | 1945875696               |
| SNP_P3_1778_2728152 | NC_021160.1    | Ca_kabuli_chr01 | 2728152                 | CC                              | TT                | 1945875698               |
| SNP_P3_1779_2728154 | NC_021160.1    | Ca_kabuli_chr01 | 2728154                 | AA                              | CC                | 1945875700               |
| SNP_P3_1780_2728312 | NC_021160.1    | Ca_kabuli_chr01 | 2728312                 | TT                              | CC                | 1945875702               |

| SNPs IDs            | Chromosome IDs | Chromosomes     | Physical positions (bp) | CDC Frontier (Reference genome) | (Pusa 256 & HPNB) | NCBI SNPdb Accession IDs |
|---------------------|----------------|-----------------|-------------------------|---------------------------------|-------------------|--------------------------|
| SNP_P3_1781_2728582 | NC_021160.1    | Ca_kabuli_chr01 | 2728582                 | AA                              | TT                | 1945875703               |
| SNP_P3_1783_2729452 | NC_021160.1    | Ca_kabuli_chr01 | 2729452                 | AA                              | TT                | 1945875705               |
| SNP_P3_1784_2729487 | NC_021160.1    | Ca_kabuli_chr01 | 2729487                 | CC                              | TT                | 1945875707               |
| SNP_P3_1785_2730812 | NC_021160.1    | Ca_kabuli_chr01 | 2730812                 | TT                              | AA                | 1945875709               |
| SNP_P3_1787_2745514 | NC_021160.1    | Ca_kabuli_chr01 | 2745514                 | CC                              | AA                | 1945875711               |
| SNP_P3_1788_2745519 | NC_021160.1    | Ca_kabuli_chr01 | 2745519                 | CC                              | GG                | 1945875712               |
| SNP_P3_1789_2746188 | NC_021160.1    | Ca_kabuli_chr01 | 2746188                 | AA                              | GG                | 1945875714               |
| SNP_P3_1790_2746741 | NC_021160.1    | Ca_kabuli_chr01 | 2746741                 | GG                              | AA                | 1945875716               |
| SNP_P3_1791_2746794 | NC_021160.1    | Ca_kabuli_chr01 | 2746794                 | AA                              | GG                | 1945875718               |
| SNP_P3_1792_2747669 | NC_021160.1    | Ca_kabuli_chr01 | 2747669                 | CC                              | TT                | 1945875719               |
| SNP_P3_1794_2755880 | NC_021160.1    | Ca_kabuli_chr01 | 2755880                 | TT                              | CC                | 1945875721               |
| SNP_P3_1795_2755888 | NC_021160.1    | Ca_kabuli_chr01 | 2755888                 | TT                              | CC                | 1945875723               |
| SNP_P3_1796_2760896 | NC_021160.1    | Ca_kabuli_chr01 | 2760896                 | AA                              | GG                | 1945875725               |
| SNP_P3_1797_2761252 | NC_021160.1    | Ca_kabuli_chr01 | 2761252                 | TT                              | GG                | 1945875726               |
| SNP_P3_1798_2761297 | NC_021160.1    | Ca_kabuli_chr01 | 2761297                 | TT                              | CC                | 1945875728               |
| SNP_P3_1799_2761371 | NC_021160.1    | Ca_kabuli_chr01 | 2761371                 | TT                              | AA                | 1945875730               |
| SNP_P3_1800_2761384 | NC_021160.1    | Ca_kabuli_chr01 | 2761384                 | GG                              | TT                | 1945875732               |
| SNP_P3_1801_2761693 | NC_021160.1    | Ca_kabuli_chr01 | 2761693                 | CC                              | TT                | 1945875733               |
| SNP_P3_1802_2761788 | NC_021160.1    | Ca_kabuli_chr01 | 2761788                 | CC                              | TT                | 1945875735               |
| SNP_P3_1803_2761798 | NC_021160.1    | Ca_kabuli_chr01 | 2761798                 | AA                              | CC                | 1945875737               |
| SNP_P3_1804_2761883 | NC_021160.1    | Ca_kabuli_chr01 | 2761883                 | TT                              | CC                | 1945875739               |
| SNP_P3_1805_2761936 | NC_021160.1    | Ca_kabuli_chr01 | 2761936                 | AA                              | GG                | 1945875740               |
| SNP_P3_1806_2761962 | NC_021160.1    | Ca_kabuli_chr01 | 2761962                 | AA                              | CC                | 1945875742               |
| SNP_P3_1807_2761980 | NC_021160.1    | Ca_kabuli_chr01 | 2761980                 | AA                              | GG                | 1945875744               |
| SNP_P3_1808_2762005 | NC_021160.1    | Ca_kabuli_chr01 | 2762005                 | TT                              | CC                | 1945875746               |
| SNP_P3_1809_2762008 | NC_021160.1    | Ca_kabuli_chr01 | 2762008                 | CC                              | TT                | 1945875747               |
| SNP_P3_1810_2762038 | NC_021160.1    | Ca_kabuli_chr01 | 2762038                 | CC                              | TT                | 1945875749               |
| SNP_P3_1811_2762071 | NC_021160.1    | Ca_kabuli_chr01 | 2762071                 | TT                              | CC                | 1945875751               |
| SNP_P3_1812_2762090 | NC_021160.1    | Ca_kabuli_chr01 | 2762090                 | TT                              | CC                | 1945875753               |
| SNP_P3_1813_2762093 | NC_021160.1    | Ca_kabuli_chr01 | 2762093                 | GG                              | CC                | 1945875754               |
| SNP_P3_1814_2762111 | NC_021160.1    | Ca_kabuli_chr01 | 2762111                 | TT                              | CC                | 1945875756               |
| SNP_P3_1815_2762112 | NC_021160.1    | Ca_kabuli_chr01 | 2762112                 | AA                              | TT                | 1945875758               |
| SNP_P3_1816_2762167 | NC_021160.1    | Ca_kabuli_chr01 | 2762167                 | TT                              | CC                | 1945875760               |
| SNP_P3_1818_2762222 | NC_021160.1    | Ca_kabuli_chr01 | 2762222                 | GG                              | AA                | 1945875761               |
| SNP_P3_1820_2762581 | NC_021160.1    | Ca_kabuli_chr01 | 2762581                 | AA                              | GG                | 1945875763               |
| SNP_P3_1821_2762586 | NC_021160.1    | Ca_kabuli_chr01 | 2762586                 | GG                              | TT                | 1945875765               |
| SNP_P3_1822_2762970 | NC_021160.1    | Ca_kabuli_chr01 | 2762970                 | TT                              | GG                | 1945875767               |
| SNP_P3_1823_2764015 | NC_021160.1    | Ca_kabuli_chr01 | 2764015                 | TT                              | CC                | 1945875768               |
| SNP_P3_1824_2764466 | NC_021160.1    | Ca_kabuli_chr01 | 2764466                 | GG                              | AA                | 1945875770               |
| SNP_P3_1825_2764501 | NC_021160.1    | Ca_kabuli_chr01 | 2764501                 | AA                              | GG                | 1945875772               |
| SNP_P3_1826_2764570 | NC_021160.1    | Ca_kabuli_chr01 | 2764570                 | TT                              | AA                | 1945875774               |
| SNP_P3_1827_2764666 | NC_021160.1    | Ca_kabuli_chr01 | 2764666                 | AA                              | TT                | 1945875775               |

| SNPs IDs            | Chromosome IDs | Chromosomes     | Physical positions (bp) | CDC Frontier (Reference genome) | (Pusa 256 & HPNB) | NCBI SNPdb Accession IDs |
|---------------------|----------------|-----------------|-------------------------|---------------------------------|-------------------|--------------------------|
| SNP_P3_1828_2764672 | NC_021160.1    | Ca_kabuli_chr01 | 2764672                 | GG                              | TT                | 1945875777               |
| SNP_P3_1829_2764732 | NC_021160.1    | Ca_kabuli_chr01 | 2764732                 | GG                              | CC                | 1945875779               |
| SNP_P3_1830_2765082 | NC_021160.1    | Ca_kabuli_chr01 | 2765082                 | TT                              | CC                | 1945875781               |
| SNP_P3_1831_2765595 | NC_021160.1    | Ca_kabuli_chr01 | 2765595                 | TT                              | CC                | 1945875782               |
| SNP_P3_1832_2765617 | NC_021160.1    | Ca_kabuli_chr01 | 2765617                 | CC                              | AA                | 1945875784               |
| SNP_P3_1834_2765897 | NC_021160.1    | Ca_kabuli_chr01 | 2765897                 | TT                              | GG                | 1945875786               |
| SNP_P3_1837_2766203 | NC_021160.1    | Ca_kabuli_chr01 | 2766203                 | CC                              | TT                | 1945875788               |
| SNP_P3_1840_2766684 | NC_021160.1    | Ca_kabuli_chr01 | 2766684                 | GG                              | TT                | 1945875789               |
| SNP_P3_1841_2766718 | NC_021160.1    | Ca_kabuli_chr01 | 2766718                 | TT                              | AA                | 1945875791               |
| SNP_P3_1842_2766738 | NC_021160.1    | Ca_kabuli_chr01 | 2766738                 | GG                              | AA                | 1945875793               |
| SNP_P3_1843_2766743 | NC_021160.1    | Ca_kabuli_chr01 | 2766743                 | TT                              | CC                | 1945875795               |
| SNP_P3_1844_2766765 | NC_021160.1    | Ca_kabuli_chr01 | 2766765                 | GG                              | AA                | 1945875796               |
| SNP_P3_1845_2766790 | NC_021160.1    | Ca_kabuli_chr01 | 2766790                 | CC                              | TT                | 1945875798               |
| SNP_P3_1846_2766854 | NC_021160.1    | Ca_kabuli_chr01 | 2766854                 | AA                              | GG                | 1945875800               |
| SNP_P3_1847_2766873 | NC_021160.1    | Ca_kabuli_chr01 | 2766873                 | CC                              | TT                | 1945875802               |
| SNP_P3_1848_2766911 | NC_021160.1    | Ca_kabuli_chr01 | 2766911                 | CC                              | TT                | 1945875803               |
| SNP_P3_1849_2766928 | NC_021160.1    | Ca_kabuli_chr01 | 2766928                 | TT                              | CC                | 1945875805               |
| SNP_P3_1851_2766974 | NC_021160.1    | Ca_kabuli_chr01 | 2766974                 | TT                              | AA                | 1945875807               |
| SNP_P3_1852_2767042 | NC_021160.1    | Ca_kabuli_chr01 | 2767042                 | GG                              | AA                | 1945875809               |
| SNP_P3_1853_2769065 | NC_021160.1    | Ca_kabuli_chr01 | 2769065                 | AA                              | GG                | 1945875811               |
| SNP_P3_1854_2769134 | NC_021160.1    | Ca_kabuli_chr01 | 2769134                 | AA                              | GG                | 1945875812               |
| SNP_P3_1857_2769374 | NC_021160.1    | Ca_kabuli_chr01 | 2769374                 | GG                              | AA                | 1945875814               |
| SNP_P3_1858_2769412 | NC_021160.1    | Ca_kabuli_chr01 | 2769412                 | GG                              | AA                | 1945875816               |
| SNP_P3_1859_2772709 | NC_021160.1    | Ca_kabuli_chr01 | 2772709                 | CC                              | GG                | 1945875818               |
| SNP_P3_1860_2773326 | NC_021160.1    | Ca_kabuli_chr01 | 2773326                 | CC                              | TT                | 1945875819               |
| SNP_P3_1861_2773327 | NC_021160.1    | Ca_kabuli_chr01 | 2773327                 | AA                              | TT                | 1945875821               |
| SNP_P3_1862_2773329 | NC_021160.1    | Ca_kabuli_chr01 | 2773329                 | TT                              | CC                | 1945875823               |
| SNP_P3_1863_2773356 | NC_021160.1    | Ca_kabuli_chr01 | 2773356                 | CC                              | AA                | 1945875825               |
| SNP_P3_1864_2773393 | NC_021160.1    | Ca_kabuli_chr01 | 2773393                 | GG                              | TT                | 1945875827               |
| SNP_P3_1865_2773514 | NC_021160.1    | Ca_kabuli_chr01 | 2773514                 | AA                              | TT                | 1945875828               |
| SNP_P3_1866_2773542 | NC_021160.1    | Ca_kabuli_chr01 | 2773542                 | TT                              | AA                | 1945875830               |
| SNP_P3_1867_2773560 | NC_021160.1    | Ca_kabuli_chr01 | 2773560                 | AA                              | GG                | 1945875832               |
| SNP_P3_1868_2773563 | NC_021160.1    | Ca_kabuli_chr01 | 2773563                 | TT                              | CC                | 1945875834               |
| SNP_P3_1869_2773582 | NC_021160.1    | Ca_kabuli_chr01 | 2773582                 | GG                              | TT                | 1945875835               |
| SNP_P3_1871_2774646 | NC_021160.1    | Ca_kabuli_chr01 | 2774646                 | AA                              | GG                | 1945875837               |
| SNP_P3_1872_2774673 | NC_021160.1    | Ca_kabuli_chr01 | 2774673                 | GG                              | AA                | 1945875839               |
| SNP_P3_1874_2778112 | NC_021160.1    | Ca_kabuli_chr01 | 2778112                 | AA                              | GG                | 1945875841               |
| SNP_P3_1875_2778169 | NC_021160.1    | Ca_kabuli_chr01 | 2778169                 | AA                              | GG                | 1945875843               |
| SNP_P3_1876_2778986 | NC_021160.1    | Ca_kabuli_chr01 | 2778986                 | CC                              | TT                | 1945875844               |
| SNP_P3_1877_2779005 | NC_021160.1    | Ca_kabuli_chr01 | 2779005                 | AA                              | GG                | 1945875846               |
| SNP_P3_1879_2779200 | NC_021160.1    | Ca_kabuli_chr01 | 2779200                 | TT                              | GG                | 1945875848               |
| SNP_P3_1880_2779213 | NC_021160.1    | Ca_kabuli_chr01 | 2779213                 | GG                              | CC                | 1945875850               |

| SNPs IDs            | Chromosome IDs | Chromosomes     | Physical positions (bp) | CDC Frontier (Reference genome) | (Pusa 256 & HPNB) | NCBI SNPdb Accession IDs |
|---------------------|----------------|-----------------|-------------------------|---------------------------------|-------------------|--------------------------|
| SNP_P3_1881_2779363 | NC_021160.1    | Ca_kabuli_chr01 | 2779363                 | CC                              | TT                | 1945875851               |
| SNP_P3_1883_2780305 | NC_021160.1    | Ca_kabuli_chr01 | 2780305                 | CC                              | TT                | 1945875853               |
| SNP_P3_1884_2780867 | NC_021160.1    | Ca_kabuli_chr01 | 2780867                 | AA                              | TT                | 1945875855               |
| SNP_P3_1885_2785963 | NC_021160.1    | Ca_kabuli_chr01 | 2785963                 | GG                              | TT                | 1945875857               |
| SNP_P3_1886_2788336 | NC_021160.1    | Ca_kabuli_chr01 | 2788336                 | AA                              | GG                | 1945875859               |
| SNP_P3_1887_2788348 | NC_021160.1    | Ca_kabuli_chr01 | 2788348                 | AA                              | TT                | 1945875860               |
| SNP_P3_1888_2788481 | NC_021160.1    | Ca_kabuli_chr01 | 2788481                 | TT                              | CC                | 1945875862               |
| SNP_P3_1889_2788536 | NC_021160.1    | Ca_kabuli_chr01 | 2788536                 | GG                              | AA                | 1945875864               |
| SNP_P3_1890_2788788 | NC_021160.1    | Ca_kabuli_chr01 | 2788788                 | CC                              | GG                | 1945875866               |
| SNP_P3_1891_2789332 | NC_021160.1    | Ca_kabuli_chr01 | 2789332                 | AA                              | GG                | 1945875867               |
| SNP_P3_1892_2789385 | NC_021160.1    | Ca_kabuli_chr01 | 2789385                 | TT                              | CC                | 1945875869               |
| SNP_P3_1893_2789644 | NC_021160.1    | Ca_kabuli_chr01 | 2789644                 | CC                              | TT                | 1945875871               |
| SNP_P3_1894_2790466 | NC_021160.1    | Ca_kabuli_chr01 | 2790466                 | AA                              | GG                | 1945875873               |
| SNP_P3_1895_2790504 | NC_021160.1    | Ca_kabuli_chr01 | 2790504                 | CC                              | TT                | 1945875875               |
| SNP_P3_1896_2790522 | NC_021160.1    | Ca_kabuli_chr01 | 2790522                 | GG                              | AA                | 1945875876               |
| SNP_P3_1897_2790545 | NC_021160.1    | Ca_kabuli_chr01 | 2790545                 | GG                              | TT                | 1945875878               |
| SNP_P3_1898_2790547 | NC_021160.1    | Ca_kabuli_chr01 | 2790547                 | AA                              | GG                | 1945875880               |
| SNP_P3_1899_2790548 | NC_021160.1    | Ca_kabuli_chr01 | 2790548                 | AA                              | TT                | 1945875882               |
| SNP_P3_1900_2790555 | NC_021160.1    | Ca_kabuli_chr01 | 2790555                 | TT                              | AA                | 1945875883               |
| SNP_P3_1901_2791164 | NC_021160.1    | Ca_kabuli_chr01 | 2791164                 | CC                              | GG                | 1945875885               |
| SNP_P3_1902_2793434 | NC_021160.1    | Ca_kabuli_chr01 | 2793434                 | AA                              | TT                | 1945875887               |
| SNP_P3_1904_2793659 | NC_021160.1    | Ca_kabuli_chr01 | 2793659                 | TT                              | AA                | 1945875889               |
| SNP_P3_1906_2795960 | NC_021160.1    | Ca_kabuli_chr01 | 2795960                 | CC                              | TT                | 1945875891               |
| SNP_P3_1907_2797217 | NC_021160.1    | Ca_kabuli_chr01 | 2797217                 | CC                              | TT                | 1945875892               |
| SNP_P3_1909_2797704 | NC_021160.1    | Ca_kabuli_chr01 | 2797704                 | TT                              | AA                | 1945875894               |
| SNP_P3_1910_2797781 | NC_021160.1    | Ca_kabuli_chr01 | 2797781                 | TT                              | AA                | 1945875896               |
| SNP_P3_1912_2798102 | NC_021160.1    | Ca_kabuli_chr01 | 2798102                 | TT                              | AA                | 1945875898               |
| SNP_P3_1913_2798492 | NC_021160.1    | Ca_kabuli_chr01 | 2798492                 | CC                              | TT                | 1945875900               |
| SNP_P3_1914_2799758 | NC_021160.1    | Ca_kabuli_chr01 | 2799758                 | GG                              | AA                | 1945875901               |
| SNP_P3_1916_2800092 | NC_021160.1    | Ca_kabuli_chr01 | 2800092                 | GG                              | CC                | 1945875903               |
| SNP_P3_1917_2801402 | NC_021160.1    | Ca_kabuli_chr01 | 2801402                 | GG                              | AA                | 1945875905               |
| SNP_P3_1918_2801701 | NC_021160.1    | Ca_kabuli_chr01 | 2801701                 | GG                              | AA                | 1945875907               |
| SNP_P3_1920_2802472 | NC_021160.1    | Ca_kabuli_chr01 | 2802472                 | TT                              | CC                | 1945875909               |
| SNP_P3_1921_2802706 | NC_021160.1    | Ca_kabuli_chr01 | 2802706                 | CC                              | TT                | 1945875910               |
| SNP_P3_1922_2802737 | NC_021160.1    | Ca_kabuli_chr01 | 2802737                 | TT                              | CC                | 1945875912               |
| SNP_P3_1923_2802799 | NC_021160.1    | Ca_kabuli_chr01 | 2802799                 | AA                              | TT                | 1945875914               |
| SNP_P3_1924_2802834 | NC_021160.1    | Ca_kabuli_chr01 | 2802834                 | GG                              | AA                | 1945875916               |
| SNP_P3_1925_2802867 | NC_021160.1    | Ca_kabuli_chr01 | 2802867                 | AA                              | GG                | 1945875918               |
| SNP_P3_1926_2802901 | NC_021160.1    | Ca_kabuli_chr01 | 2802901                 | AA                              | GG                | 1945875919               |
| SNP_P3_1927_2802927 | NC_021160.1    | Ca_kabuli_chr01 | 2802927                 | CC                              | TT                | 1945875921               |
| SNP_P3_1928_2802950 | NC_021160.1    | Ca_kabuli_chr01 | 2802950                 | AA                              | GG                | 1945875923               |
| SNP_P3_1929_2802952 | NC_021160.1    | Ca_kabuli_chr01 | 2802952                 | CC                              | AA                | 1945875925               |

| SNPs IDs            | Chromosome IDs | Chromosomes     | Physical positions (bp) | CDC Frontier (Reference genome) | (Pusa 256 & HPNB) | NCBI SNPdb Accession IDs |
|---------------------|----------------|-----------------|-------------------------|---------------------------------|-------------------|--------------------------|
| SNP_P3_1930_2803016 | NC_021160.1    | Ca_kabuli_chr01 | 2803016                 | AA                              | GG                | 1945875926               |
| SNP_P3_1931_2803054 | NC_021160.1    | Ca_kabuli_chr01 | 2803054                 | CC                              | TT                | 1945875928               |
| SNP_P3_1932_2803069 | NC_021160.1    | Ca_kabuli_chr01 | 2803069                 | TT                              | CC                | 1945875930               |
| SNP_P3_1933_2803129 | NC_021160.1    | Ca_kabuli_chr01 | 2803129                 | CC                              | TT                | 1945875932               |
| SNP_P3_1934_2803154 | NC_021160.1    | Ca_kabuli_chr01 | 2803154                 | GG                              | AA                | 1945875933               |
| SNP_P3_1935_2803181 | NC_021160.1    | Ca_kabuli_chr01 | 2803181                 | CC                              | TT                | 1945875935               |
| SNP_P3_1936_2803183 | NC_021160.1    | Ca_kabuli_chr01 | 2803183                 | GG                              | AA                | 1945875937               |
| SNP_P3_1937_2803184 | NC_021160.1    | Ca_kabuli_chr01 | 2803184                 | CC                              | TT                | 1945875939               |
| SNP_P3_1938_2803243 | NC_021160.1    | Ca_kabuli_chr01 | 2803243                 | CC                              | TT                | 1945875940               |
| SNP_P3_1939_2803256 | NC_021160.1    | Ca_kabuli_chr01 | 2803256                 | GG                              | AA                | 1945875942               |
| SNP_P3_1940_2803326 | NC_021160.1    | Ca_kabuli_chr01 | 2803326                 | AA                              | GG                | 1945875944               |
| SNP_P3_1941_2803391 | NC_021160.1    | Ca_kabuli_chr01 | 2803391                 | GG                              | AA                | 1945875946               |
| SNP_P3_1943_2803410 | NC_021160.1    | Ca_kabuli_chr01 | 2803410                 | TT                              | AA                | 1945875947               |
| SNP_P3_1944_2803436 | NC_021160.1    | Ca_kabuli_chr01 | 2803436                 | CC                              | TT                | 1945875949               |
| SNP_P3_1945_2803440 | NC_021160.1    | Ca_kabuli_chr01 | 2803440                 | AA                              | GG                | 1945875951               |
| SNP_P3_1946_2808904 | NC_021160.1    | Ca_kabuli_chr01 | 2808904                 | GG                              | CC                | 1945875953               |
| SNP_P3_1947_2808963 | NC_021160.1    | Ca_kabuli_chr01 | 2808963                 | TT                              | GG                | 1945875955               |
| SNP_P3_1948_2810030 | NC_021160.1    | Ca_kabuli_chr01 | 2810030                 | TT                              | AA                | 1945875956               |
| SNP_P3_1949_2810064 | NC_021160.1    | Ca_kabuli_chr01 | 2810064                 | GG                              | TT                | 1945875958               |
| SNP_P3_1950_2810237 | NC_021160.1    | Ca_kabuli_chr01 | 2810237                 | CC                              | AA                | 1945875960               |
| SNP_P3_1951_2810270 | NC_021160.1    | Ca_kabuli_chr01 | 2810270                 | AA                              | TT                | 1945875962               |
| SNP_P3_1952_2810271 | NC_021160.1    | Ca_kabuli_chr01 | 2810271                 | CC                              | GG                | 1945875963               |
| SNP_P3_1953_2814429 | NC_021160.1    | Ca_kabuli_chr01 | 2814429                 | AA                              | GG                | 1945875965               |
| SNP_P3_1954_2814901 | NC_021160.1    | Ca_kabuli_chr01 | 2814901                 | CC                              | AA                | 1945875967               |
| SNP_P3_1955_2814918 | NC_021160.1    | Ca_kabuli_chr01 | 2814918                 | TT                              | CC                | 1945875969               |
| SNP_P3_1956_2814972 | NC_021160.1    | Ca_kabuli_chr01 | 2814972                 | TT                              | CC                | 1945875971               |
| SNP_P3_1957_2814994 | NC_021160.1    | Ca_kabuli_chr01 | 2814994                 | TT                              | CC                | 1945875972               |
| SNP_P3_1958_2815008 | NC_021160.1    | Ca_kabuli_chr01 | 2815008                 | AA                              | TT                | 1945875974               |
| SNP_P3_1959_2815010 | NC_021160.1    | Ca_kabuli_chr01 | 2815010                 | AA                              | CC                | 1945875976               |
| SNP_P3_1961_2815038 | NC_021160.1    | Ca_kabuli_chr01 | 2815038                 | CC                              | TT                | 1945875978               |
| SNP_P3_1962_2815039 | NC_021160.1    | Ca_kabuli_chr01 | 2815039                 | AA                              | GG                | 1945875979               |
| SNP_P3_1963_2815135 | NC_021160.1    | Ca_kabuli_chr01 | 2815135                 | TT                              | CC                | 1945875981               |
| SNP_P3_1964_2815211 | NC_021160.1    | Ca_kabuli_chr01 | 2815211                 | CC                              | GG                | 1945875983               |
| SNP_P3_1966_2826745 | NC_021160.1    | Ca_kabuli_chr01 | 2826745                 | CC                              | TT                | 1945875985               |
| SNP_P3_1967_2826891 | NC_021160.1    | Ca_kabuli_chr01 | 2826891                 | TT                              | CC                | 1945875986               |
| SNP_P3_1971_2828733 | NC_021160.1    | Ca_kabuli_chr01 | 2828733                 | AA                              | GG                | 1945875988               |
| SNP_P3_1972_2829043 | NC_021160.1    | Ca_kabuli_chr01 | 2829043                 | TT                              | AA                | 1945875990               |
| SNP_P3_1974_2830194 | NC_021160.1    | Ca_kabuli_chr01 | 2830194                 | TT                              | AA                | 1945875992               |
| SNP_P3_1975_2830222 | NC_021160.1    | Ca_kabuli_chr01 | 2830222                 | AA                              | GG                | 1945875994               |
| SNP_P3_1976_2830932 | NC_021160.1    | Ca_kabuli_chr01 | 2830932                 | CC                              | TT                | 1945875995               |
| SNP_P3_1977_2830942 | NC_021160.1    | Ca_kabuli_chr01 | 2830942                 | CC                              | TT                | 1945875997               |
| SNP_P3_1978_2830960 | NC_021160.1    | Ca_kabuli_chr01 | 2830960                 | AA                              | TT                | 1945875999               |

| SNPs IDs            | Chromosome IDs | Chromosomes     | Physical positions (bp) | CDC Frontier (Reference genome) | (Pusa 256 & HPNB) | NCBI SNPdb Accession IDs |
|---------------------|----------------|-----------------|-------------------------|---------------------------------|-------------------|--------------------------|
| SNP_P3_1979_2831002 | NC_021160.1    | Ca_kabuli_chr01 | 2831002                 | GG                              | CC                | 1945876001               |
| SNP_P3_1980_2831200 | NC_021160.1    | Ca_kabuli_chr01 | 2831200                 | GG                              | AA                | 1945876002               |
| SNP_P3_1981_2831436 | NC_021160.1    | Ca_kabuli_chr01 | 2831436                 | AA                              | GG                | 1945876004               |
| SNP_P3_1983_2834171 | NC_021160.1    | Ca_kabuli_chr01 | 2834171                 | GG                              | AA                | 1945876006               |
| SNP_P3_1984_2834216 | NC_021160.1    | Ca_kabuli_chr01 | 2834216                 | TT                              | AA                | 1945876008               |
| SNP_P3_1985_2834456 | NC_021160.1    | Ca_kabuli_chr01 | 2834456                 | AA                              | TT                | 1945876010               |
| SNP_P3_1987_2838380 | NC_021160.1    | Ca_kabuli_chr01 | 2838380                 | AA                              | TT                | 1945876011               |
| SNP_P3_1988_2838540 | NC_021160.1    | Ca_kabuli_chr01 | 2838540                 | AA                              | TT                | 1945876013               |
| SNP_P3_1990_2840956 | NC_021160.1    | Ca_kabuli_chr01 | 2840956                 | GG                              | AA                | 1945876015               |
| SNP_P3_1992_2841105 | NC_021160.1    | Ca_kabuli_chr01 | 2841105                 | CC                              | TT                | 1945876017               |
| SNP_P3_1993_2841296 | NC_021160.1    | Ca_kabuli_chr01 | 2841296                 | CC                              | TT                | 1945876018               |
| SNP_P3_1994_2841317 | NC_021160.1    | Ca_kabuli_chr01 | 2841317                 | TT                              | CC                | 1945876020               |
| SNP_P3_1995_2842371 | NC_021160.1    | Ca_kabuli_chr01 | 2842371                 | CC                              | TT                | 1945876022               |
| SNP_P3_1997_2842695 | NC_021160.1    | Ca_kabuli_chr01 | 2842695                 | GG                              | AA                | 1945876024               |
| SNP_P3_2000_2844164 | NC_021160.1    | Ca_kabuli_chr01 | 2844164                 | TT                              | CC                | 1945876025               |
| SNP_P3_2001_2844470 | NC_021160.1    | Ca_kabuli_chr01 | 2844470                 | TT                              | CC                | 1945876027               |
| SNP_P3_2002_2844484 | NC_021160.1    | Ca_kabuli_chr01 | 2844484                 | GG                              | AA                | 1945876029               |
| SNP_P3_2003_2844519 | NC_021160.1    | Ca_kabuli_chr01 | 2844519                 | CC                              | TT                | 1945876031               |
| SNP_P3_2004_2844527 | NC_021160.1    | Ca_kabuli_chr01 | 2844527                 | GG                              | AA                | 1945876032               |
| SNP_P3_2005_2844534 | NC_021160.1    | Ca_kabuli_chr01 | 2844534                 | AA                              | GG                | 1945876034               |
| SNP_P3_2006_2844536 | NC_021160.1    | Ca_kabuli_chr01 | 2844536                 | TT                              | CC                | 1945876036               |
| SNP_P3_2007_2844594 | NC_021160.1    | Ca_kabuli_chr01 | 2844594                 | AA                              | GG                | 1945876038               |
| SNP_P3_2009_2844647 | NC_021160.1    | Ca_kabuli_chr01 | 2844647                 | TT                              | CC                | 1945876039               |
| SNP_P3_2010_2844664 | NC_021160.1    | Ca_kabuli_chr01 | 2844664                 | TT                              | GG                | 1945876041               |
| SNP_P3_2011_2844683 | NC_021160.1    | Ca_kabuli_chr01 | 2844683                 | CC                              | TT                | 1945876043               |
| SNP_P3_2012_2844831 | NC_021160.1    | Ca_kabuli_chr01 | 2844831                 | AA                              | TT                | 1945876045               |
| SNP_P3_2013_2844960 | NC_021160.1    | Ca_kabuli_chr01 | 2844960                 | GG                              | AA                | 1945876047               |
| SNP_P3_2014_2844963 | NC_021160.1    | Ca_kabuli_chr01 | 2844963                 | AA                              | GG                | 1945876048               |
| SNP_P3_2015_2844978 | NC_021160.1    | Ca_kabuli_chr01 | 2844978                 | TT                              | AA                | 1945876050               |
| SNP_P3_2017_2845126 | NC_021160.1    | Ca_kabuli_chr01 | 2845126                 | GG                              | AA                | 1945876052               |
| SNP_P3_2018_2845148 | NC_021160.1    | Ca_kabuli_chr01 | 2845148                 | GG                              | AA                | 1945876054               |
| SNP_P3_2020_2845192 | NC_021160.1    | Ca_kabuli_chr01 | 2845192                 | TT                              | CC                | 1945876055               |
| SNP_P3_2021_2846429 | NC_021160.1    | Ca_kabuli_chr01 | 2846429                 | CC                              | GG                | 1945876057               |
| SNP_P3_2023_2847883 | NC_021160.1    | Ca_kabuli_chr01 | 2847883                 | CC                              | AA                | 1945876059               |
| SNP_P3_2024_2848032 | NC_021160.1    | Ca_kabuli_chr01 | 2848032                 | GG                              | AA                | 1945876061               |
| SNP_P3_2027_2851545 | NC_021160.1    | Ca_kabuli_chr01 | 2851545                 | TT                              | GG                | 1945876063               |
| SNP_P3_2028_2855927 | NC_021160.1    | Ca_kabuli_chr01 | 2855927                 | AA                              | TT                | 1945876064               |
| SNP_P3_2029_2856079 | NC_021160.1    | Ca_kabuli_chr01 | 2856079                 | TT                              | GG                | 1945876066               |
| SNP_P3_2030_2857333 | NC_021160.1    | Ca_kabuli_chr01 | 2857333                 | TT                              | CC                | 1945876068               |
| SNP_P3_2031_2858621 | NC_021160.1    | Ca_kabuli_chr01 | 2858621                 | CC                              | TT                | 1945876070               |
| SNP_P3_2032_2858679 | NC_021160.1    | Ca_kabuli_chr01 | 2858679                 | AA                              | GG                | 1945876071               |
| SNP_P3_2033_2858706 | NC_021160.1    | Ca_kabuli_chr01 | 2858706                 | TT                              | AA                | 1945876073               |

| SNPs IDs            | Chromosome IDs | Chromosomes     | Physical positions (bp) | CDC Frontier (Reference genome) | (Pusa 256 & HPNB) | NCBI SNPdb Accession IDs |
|---------------------|----------------|-----------------|-------------------------|---------------------------------|-------------------|--------------------------|
| SNP_P3_2034_2859297 | NC_021160.1    | Ca_kabuli_chr01 | 2859297                 | GG                              | CC                | 1945876075               |
| SNP_P3_2035_2861191 | NC_021160.1    | Ca_kabuli_chr01 | 2861191                 | GG                              | AA                | 1945876077               |
| SNP_P3_2037_2861866 | NC_021160.1    | Ca_kabuli_chr01 | 2861866                 | GG                              | AA                | 1945876079               |
| SNP_P3_2039_2861917 | NC_021160.1    | Ca_kabuli_chr01 | 2861917                 | GG                              | AA                | 1945876080               |
| SNP_P3_2040_2862128 | NC_021160.1    | Ca_kabuli_chr01 | 2862128                 | CC                              | TT                | 1945876082               |
| SNP_P3_2041_2862152 | NC_021160.1    | Ca_kabuli_chr01 | 2862152                 | CC                              | TT                | 1945876084               |
| SNP_P3_2042_2862180 | NC_021160.1    | Ca_kabuli_chr01 | 2862180                 | GG                              | TT                | 1945876086               |
| SNP_P3_2043_2862208 | NC_021160.1    | Ca_kabuli_chr01 | 2862208                 | GG                              | AA                | 1945876087               |
| SNP_P3_2045_2864141 | NC_021160.1    | Ca_kabuli_chr01 | 2864141                 | CC                              | TT                | 1945876089               |
| SNP_P3_2046_2864720 | NC_021160.1    | Ca_kabuli_chr01 | 2864720                 | TT                              | AA                | 1945876091               |
| SNP_P3_2047_2865160 | NC_021160.1    | Ca_kabuli_chr01 | 2865160                 | CC                              | TT                | 1945876093               |
| SNP_P3_2048_2865512 | NC_021160.1    | Ca_kabuli_chr01 | 2865512                 | GG                              | TT                | 1945876095               |
| SNP_P3_2049_2866754 | NC_021160.1    | Ca_kabuli_chr01 | 2866754                 | AA                              | TT                | 1945876096               |
| SNP_P3_2050_2867286 | NC_021160.1    | Ca_kabuli_chr01 | 2867286                 | GG                              | AA                | 1945876098               |
| SNP_P3_2051_2867393 | NC_021160.1    | Ca_kabuli_chr01 | 2867393                 | CC                              | TT                | 1945876100               |
| SNP_P3_2052_2867693 | NC_021160.1    | Ca_kabuli_chr01 | 2867693                 | AA                              | GG                | 1945876102               |
| SNP_P3_2053_2867707 | NC_021160.1    | Ca_kabuli_chr01 | 2867707                 | AA                              | GG                | 1945876103               |
| SNP_P3_2054_2867709 | NC_021160.1    | Ca_kabuli_chr01 | 2867709                 | TT                              | CC                | 1945876105               |
| SNP_P3_2055_2867730 | NC_021160.1    | Ca_kabuli_chr01 | 2867730                 | AA                              | GG                | 1945876107               |
| SNP_P3_2056_2867736 | NC_021160.1    | Ca_kabuli_chr01 | 2867736                 | CC                              | AA                | 1945876109               |
| SNP_P3_2057_2867918 | NC_021160.1    | Ca_kabuli_chr01 | 2867918                 | TT                              | GG                | 1945876110               |
| SNP_P3_2058_2867920 | NC_021160.1    | Ca_kabuli_chr01 | 2867920                 | GG                              | TT                | 1945876112               |
| SNP_P3_2059_2867948 | NC_021160.1    | Ca_kabuli_chr01 | 2867948                 | CC                              | TT                | 1945876114               |
| SNP_P3_2061_2867991 | NC_021160.1    | Ca_kabuli_chr01 | 2867991                 | GG                              | AA                | 1945876116               |
| SNP_P3_2063_2868991 | NC_021160.1    | Ca_kabuli_chr01 | 2868991                 | GG                              | TT                | 1945876117               |
| SNP_P3_2064_2871342 | NC_021160.1    | Ca_kabuli_chr01 | 2871342                 | CC                              | AA                | 1945876119               |
| SNP_P3_2065_2872251 | NC_021160.1    | Ca_kabuli_chr01 | 2872251                 | TT                              | CC                | 1945876121               |
| SNP_P3_2066_2874401 | NC_021160.1    | Ca_kabuli_chr01 | 2874401                 | CC                              | TT                | 1945876123               |
| SNP_P3_2067_2874413 | NC_021160.1    | Ca_kabuli_chr01 | 2874413                 | GG                              | TT                | 1945876125               |
| SNP_P3_2068_2874666 | NC_021160.1    | Ca_kabuli_chr01 | 2874666                 | TT                              | AA                | 1945876126               |
| SNP_P3_2069_2874955 | NC_021160.1    | Ca_kabuli_chr01 | 2874955                 | TT                              | CC                | 1945876128               |
| SNP_P3_2070_2874978 | NC_021160.1    | Ca_kabuli_chr01 | 2874978                 | AA                              | TT                | 1945876130               |
| SNP_P3_2072_2875048 | NC_021160.1    | Ca_kabuli_chr01 | 2875048                 | GG                              | AA                | 1945876132               |
| SNP_P3_2073_2875087 | NC_021160.1    | Ca_kabuli_chr01 | 2875087                 | AA                              | TT                | 1945876133               |
| SNP_P3_2074_2875140 | NC_021160.1    | Ca_kabuli_chr01 | 2875140                 | CC                              | TT                | 1945876135               |
| SNP_P3_2075_2875161 | NC_021160.1    | Ca_kabuli_chr01 | 2875161                 | GG                              | TT                | 1945876137               |
| SNP_P3_2077_2875358 | NC_021160.1    | Ca_kabuli_chr01 | 2875358                 | GG                              | TT                | 1945876139               |
| SNP_P3_2079_2875471 | NC_021160.1    | Ca_kabuli_chr01 | 2875471                 | GG                              | AA                | 1945876141               |
| SNP_P3_2080_2875490 | NC_021160.1    | Ca_kabuli_chr01 | 2875490                 | GG                              | AA                | 1945876142               |
| SNP_P3_2081_2875505 | NC_021160.1    | Ca_kabuli_chr01 | 2875505                 | GG                              | AA                | 1945876144               |
| SNP_P3_2082_2875922 | NC_021160.1    | Ca_kabuli_chr01 | 2875922                 | AA                              | GG                | 1945876146               |
| SNP_P3_2083_2875929 | NC_021160.1    | Ca_kabuli_chr01 | 2875929                 | CC                              | GG                | 1945876148               |

| SNPs IDs            | Chromosome IDs | Chromosomes     | Physical positions (bp) | CDC Frontier (Reference genome) | (Pusa 256 & HPNB) | NCBI SNPdb Accession IDs |
|---------------------|----------------|-----------------|-------------------------|---------------------------------|-------------------|--------------------------|
| SNP_P3_2084_2877187 | NC_021160.1    | Ca_kabuli_chr01 | 2877187                 | CC                              | GG                | 1945876150               |
| SNP_P3_2085_2877200 | NC_021160.1    | Ca_kabuli_chr01 | 2877200                 | AA                              | GG                | 1945876151               |
| SNP_P3_2086_2877240 | NC_021160.1    | Ca_kabuli_chr01 | 2877240                 | AA                              | GG                | 1945876153               |
| SNP_P3_2087_2877257 | NC_021160.1    | Ca_kabuli_chr01 | 2877257                 | GG                              | AA                | 1945876155               |
| SNP_P3_2088_2877267 | NC_021160.1    | Ca_kabuli_chr01 | 2877267                 | TT                              | GG                | 1945876157               |
| SNP_P3_2089_2877278 | NC_021160.1    | Ca_kabuli_chr01 | 2877278                 | AA                              | CC                | 1945876159               |
| SNP_P3_2090_2877483 | NC_021160.1    | Ca_kabuli_chr01 | 2877483                 | AA                              | CC                | 1945876160               |
| SNP_P3_2091_2877501 | NC_021160.1    | Ca_kabuli_chr01 | 2877501                 | CC                              | TT                | 1945876162               |
| SNP_P3_2092_2877502 | NC_021160.1    | Ca_kabuli_chr01 | 2877502                 | AA                              | GG                | 1945876164               |
| SNP_P3_2093_2878534 | NC_021160.1    | Ca_kabuli_chr01 | 2878534                 | TT                              | CC                | 1945876166               |
| SNP_P3_2094_2879499 | NC_021160.1    | Ca_kabuli_chr01 | 2879499                 | TT                              | CC                | 1945876168               |
| SNP_P3_2095_2880775 | NC_021160.1    | Ca_kabuli_chr01 | 2880775                 | CC                              | TT                | 1945876169               |
| SNP_P3_2096_2880963 | NC_021160.1    | Ca_kabuli_chr01 | 2880963                 | CC                              | GG                | 1945876171               |
| SNP_P3_2097_2882670 | NC_021160.1    | Ca_kabuli_chr01 | 2882670                 | CC                              | AA                | 1945876173               |
| SNP_P3_2098_2883684 | NC_021160.1    | Ca_kabuli_chr01 | 2883684                 | GG                              | TT                | 1945876175               |
| SNP_P3_2099_2883940 | NC_021160.1    | Ca_kabuli_chr01 | 2883940                 | CC                              | AA                | 1945876176               |
| SNP_P3_2100_2883943 | NC_021160.1    | Ca_kabuli_chr01 | 2883943                 | CC                              | TT                | 1945876178               |
| SNP_P3_2101_2883944 | NC_021160.1    | Ca_kabuli_chr01 | 2883944                 | CC                              | TT                | 1945876180               |
| SNP_P3_2102_2884013 | NC_021160.1    | Ca_kabuli_chr01 | 2884013                 | TT                              | GG                | 1945876182               |
| SNP_P3_2104_2884056 | NC_021160.1    | Ca_kabuli_chr01 | 2884056                 | AA                              | GG                | 1945876184               |
| SNP_P3_2105_2884070 | NC_021160.1    | Ca_kabuli_chr01 | 2884070                 | GG                              | AA                | 1945876185               |
| SNP_P3_2106_2884174 | NC_021160.1    | Ca_kabuli_chr01 | 2884174                 | TT                              | CC                | 1945876187               |
| SNP_P3_2107_2884185 | NC_021160.1    | Ca_kabuli_chr01 | 2884185                 | CC                              | AA                | 1945876189               |
| SNP_P3_2108_2884200 | NC_021160.1    | Ca_kabuli_chr01 | 2884200                 | CC                              | AA                | 1945876191               |
| SNP_P3_2109_2884251 | NC_021160.1    | Ca_kabuli_chr01 | 2884251                 | GG                              | AA                | 1945876193               |
| SNP_P3_2110_2884253 | NC_021160.1    | Ca_kabuli_chr01 | 2884253                 | AA                              | GG                | 1945876194               |
| SNP_P3_2111_2884276 | NC_021160.1    | Ca_kabuli_chr01 | 2884276                 | AA                              | GG                | 1945876196               |
| SNP_P3_2112_2884285 | NC_021160.1    | Ca_kabuli_chr01 | 2884285                 | CC                              | TT                | 1945876198               |
| SNP_P3_2113_2884300 | NC_021160.1    | Ca_kabuli_chr01 | 2884300                 | AA                              | CC                | 1945876200               |
| SNP_P3_2114_2884330 | NC_021160.1    | Ca_kabuli_chr01 | 2884330                 | CC                              | AA                | 1945876202               |
| SNP_P3_2115_2884338 | NC_021160.1    | Ca_kabuli_chr01 | 2884338                 | GG                              | TT                | 1945876203               |
| SNP_P3_2116_2884362 | NC_021160.1    | Ca_kabuli_chr01 | 2884362                 | CC                              | TT                | 1945876205               |
| SNP_P3_2118_2884476 | NC_021160.1    | Ca_kabuli_chr01 | 2884476                 | CC                              | TT                | 1945876207               |
| SNP_P3_2119_2884477 | NC_021160.1    | Ca_kabuli_chr01 | 2884477                 | AA                              | GG                | 1945876209               |
| SNP_P3_2120_2884616 | NC_021160.1    | Ca_kabuli_chr01 | 2884616                 | AA                              | GG                | 1945876211               |
| SNP_P3_2121_2884626 | NC_021160.1    | Ca_kabuli_chr01 | 2884626                 | AA                              | TT                | 1945876212               |
| SNP_P3_2122_2884710 | NC_021160.1    | Ca_kabuli_chr01 | 2884710                 | GG                              | TT                | 1945876214               |
| SNP_P3_2123_2884713 | NC_021160.1    | Ca_kabuli_chr01 | 2884713                 | GG                              | TT                | 1945876216               |
| SNP_P3_2124_2884747 | NC_021160.1    | Ca_kabuli_chr01 | 2884747                 | AA                              | GG                | 1945876218               |
| SNP_P3_2125_2884748 | NC_021160.1    | Ca_kabuli_chr01 | 2884748                 | CC                              | GG                | 1945876220               |
| SNP_P3_2126_2884774 | NC_021160.1    | Ca_kabuli_chr01 | 2884774                 | AA                              | GG                | 1945876221               |
| SNP_P3_2127_2884775 | NC_021160.1    | Ca_kabuli_chr01 | 2884775                 | TT                              | GG                | 1945876223               |



| SNPs IDs            | Chromosome IDs | Chromosomes     | Physical positions (bp) | CDC Frontier (Reference genome) | (Pusa 256 & HPNB) | NCBI SNPdb Accession IDs |
|---------------------|----------------|-----------------|-------------------------|---------------------------------|-------------------|--------------------------|
| SNP_P3_2128_2884788 | NC_021160.1    | Ca_kabuli_chr01 | 2884788                 | TT                              | AA                | 1945876225               |
| SNP_P3_2130_2884895 | NC_021160.1    | Ca_kabuli_chr01 | 2884895                 | TT                              | CC                | 1945876227               |
| SNP_P3_2131_2884915 | NC_021160.1    | Ca_kabuli_chr01 | 2884915                 | AA                              | GG                | 1945876228               |
| SNP_P3_2132_2884918 | NC_021160.1    | Ca_kabuli_chr01 | 2884918                 | GG                              | AA                | 1945876230               |
| SNP_P3_2133_2884926 | NC_021160.1    | Ca_kabuli_chr01 | 2884926                 | TT                              | CC                | 1945876232               |
| SNP_P3_2134_2885013 | NC_021160.1    | Ca_kabuli_chr01 | 2885013                 | GG                              | AA                | 1945876234               |
| SNP_P3_2135_2885111 | NC_021160.1    | Ca_kabuli_chr01 | 2885111                 | AA                              | GG                | 1945876236               |
| SNP_P3_2136_2885175 | NC_021160.1    | Ca_kabuli_chr01 | 2885175                 | TT                              | CC                | 1945876237               |
| SNP_P3_2137_2885242 | NC_021160.1    | Ca_kabuli_chr01 | 2885242                 | AA                              | CC                | 1945876239               |
| SNP_P3_2138_2885262 | NC_021160.1    | Ca_kabuli_chr01 | 2885262                 | TT                              | CC                | 1945876241               |
| SNP_P3_2139_2885302 | NC_021160.1    | Ca_kabuli_chr01 | 2885302                 | GG                              | CC                | 1945876243               |
| SNP_P3_2140_2885317 | NC_021160.1    | Ca_kabuli_chr01 | 2885317                 | TT                              | AA                | 1945876244               |
| SNP_P3_2141_2885321 | NC_021160.1    | Ca_kabuli_chr01 | 2885321                 | AA                              | CC                | 1945876246               |
| SNP_P3_2142_2885347 | NC_021160.1    | Ca_kabuli_chr01 | 2885347                 | GG                              | AA                | 1945876248               |
| SNP_P3_2144_2885508 | NC_021160.1    | Ca_kabuli_chr01 | 2885508                 | TT                              | CC                | 1945876250               |
| SNP_P3_2145_2885525 | NC_021160.1    | Ca_kabuli_chr01 | 2885525                 | TT                              | CC                | 1945876252               |
| SNP_P3_2146_2885531 | NC_021160.1    | Ca_kabuli_chr01 | 2885531                 | CC                              | TT                | 1945876253               |
| SNP_P3_2147_2885580 | NC_021160.1    | Ca_kabuli_chr01 | 2885580                 | AA                              | GG                | 1945876255               |
| SNP_P3_2148_2885657 | NC_021160.1    | Ca_kabuli_chr01 | 2885657                 | AA                              | GG                | 1945876257               |
| SNP_P3_2149_2885702 | NC_021160.1    | Ca_kabuli_chr01 | 2885702                 | AA                              | TT                | 1945876259               |
| SNP_P3_2151_2886555 | NC_021160.1    | Ca_kabuli_chr01 | 2886555                 | TT                              | CC                | 1945876260               |
| SNP_P3_2153_2886729 | NC_021160.1    | Ca_kabuli_chr01 | 2886729                 | AA                              | GG                | 1945876262               |
| SNP_P3_2154_2886753 | NC_021160.1    | Ca_kabuli_chr01 | 2886753                 | GG                              | AA                | 1945876264               |
| SNP_P3_2155_2886818 | NC_021160.1    | Ca_kabuli_chr01 | 2886818                 | GG                              | AA                | 1945876266               |
| SNP_P3_2156_2886856 | NC_021160.1    | Ca_kabuli_chr01 | 2886856                 | TT                              | CC                | 1945876268               |
| SNP_P3_2157_2886957 | NC_021160.1    | Ca_kabuli_chr01 | 2886957                 | CC                              | AA                | 1945876269               |
| SNP_P3_2158_2886965 | NC_021160.1    | Ca_kabuli_chr01 | 2886965                 | CC                              | TT                | 1945876271               |
| SNP_P3_2159_2887020 | NC_021160.1    | Ca_kabuli_chr01 | 2887020                 | TT                              | CC                | 1945876273               |
| SNP_P3_2160_2887036 | NC_021160.1    | Ca_kabuli_chr01 | 2887036                 | TT                              | CC                | 1945876275               |
| SNP_P3_2161_2887148 | NC_021160.1    | Ca_kabuli_chr01 | 2887148                 | AA                              | TT                | 1945876276               |
| SNP_P3_2162_2887152 | NC_021160.1    | Ca_kabuli_chr01 | 2887152                 | TT                              | AA                | 1945876278               |
| SNP_P3_2163_2887372 | NC_021160.1    | Ca_kabuli_chr01 | 2887372                 | CC                              | TT                | 1945876280               |
| SNP_P3_2164_2887595 | NC_021160.1    | Ca_kabuli_chr01 | 2887595                 | AA                              | TT                | 1945876282               |
| SNP_P3_2165_2887994 | NC_021160.1    | Ca_kabuli_chr01 | 2887994                 | GG                              | AA                | 1945876284               |
| SNP_P3_2166_2889370 | NC_021160.1    | Ca_kabuli_chr01 | 2889370                 | AA                              | CC                | 1945876285               |
| SNP_P3_2167_2890064 | NC_021160.1    | Ca_kabuli_chr01 | 2890064                 | AA                              | GG                | 1945876287               |
| SNP_P3_2168_2890067 | NC_021160.1    | Ca_kabuli_chr01 | 2890067                 | GG                              | AA                | 1945876289               |
| SNP_P3_2169_2890093 | NC_021160.1    | Ca_kabuli_chr01 | 2890093                 | AA                              | TT                | 1945876291               |
| SNP_P3_2170_2890223 | NC_021160.1    | Ca_kabuli_chr01 | 2890223                 | CC                              | TT                | 1945876293               |
| SNP_P3_2171_2890522 | NC_021160.1    | Ca_kabuli_chr01 | 2890522                 | CC                              | GG                | 1945876294               |
| SNP_P3_2172_2890762 | NC_021160.1    | Ca_kabuli_chr01 | 2890762                 | TT                              | CC                | 1945876296               |
| SNP_P3_2173_2891260 | NC_021160.1    | Ca_kabuli_chr01 | 2891260                 | AA                              | GG                | 1945876298               |

| SNPs IDs            | Chromosome IDs | Chromosomes     | Physical positions (bp) | CDC Frontier (Reference genome) | (Pusa 256 & HPNB) | NCBI SNPdb Accession IDs |
|---------------------|----------------|-----------------|-------------------------|---------------------------------|-------------------|--------------------------|
| SNP_P3_2174_2892836 | NC_021160.1    | Ca_kabuli_chr01 | 2892836                 | GG                              | CC                | 1945876300               |
| SNP_P3_2175_2893570 | NC_021160.1    | Ca_kabuli_chr01 | 2893570                 | GG                              | CC                | 1945876301               |
| SNP_P3_2176_2893884 | NC_021160.1    | Ca_kabuli_chr01 | 2893884                 | TT                              | CC                | 1945876303               |
| SNP_P3_2177_2896647 | NC_021160.1    | Ca_kabuli_chr01 | 2896647                 | GG                              | AA                | 1945876305               |
| SNP_P3_2178_2897359 | NC_021160.1    | Ca_kabuli_chr01 | 2897359                 | TT                              | GG                | 1945876307               |
| SNP_P3_2180_2898414 | NC_021160.1    | Ca_kabuli_chr01 | 2898414                 | AA                              | GG                | 1945876309               |
| SNP_P3_2181_2898621 | NC_021160.1    | Ca_kabuli_chr01 | 2898621                 | CC                              | AA                | 1945876310               |
| SNP_P3_2182_2898661 | NC_021160.1    | Ca_kabuli_chr01 | 2898661                 | AA                              | GG                | 1945876312               |
| SNP_P3_2183_2898902 | NC_021160.1    | Ca_kabuli_chr01 | 2898902                 | AA                              | GG                | 1945876314               |
| SNP_P3_2184_2899002 | NC_021160.1    | Ca_kabuli_chr01 | 2899002                 | TT                              | AA                | 1945876316               |
| SNP_P3_2185_2899205 | NC_021160.1    | Ca_kabuli_chr01 | 2899205                 | TT                              | AA                | 1945876317               |
| SNP_P3_2186_2899928 | NC_021160.1    | Ca_kabuli_chr01 | 2899928                 | CC                              | AA                | 1945876319               |
| SNP_P3_2187_2899962 | NC_021160.1    | Ca_kabuli_chr01 | 2899962                 | GG                              | AA                | 1945876321               |
| SNP_P3_2188_2900699 | NC_021160.1    | Ca_kabuli_chr01 | 2900699                 | TT                              | CC                | 1945876323               |
| SNP_P3_2190_2900990 | NC_021160.1    | Ca_kabuli_chr01 | 2900990                 | CC                              | TT                | 1945876325               |
| SNP_P3_2191_2900991 | NC_021160.1    | Ca_kabuli_chr01 | 2900991                 | AA                              | GG                | 1945876326               |
| SNP_P3_2192_2901730 | NC_021160.1    | Ca_kabuli_chr01 | 2901730                 | AA                              | GG                | 1945876328               |
| SNP_P3_2193_2902723 | NC_021160.1    | Ca_kabuli_chr01 | 2902723                 | CC                              | TT                | 1945876330               |
| SNP_P3_2194_2902744 | NC_021160.1    | Ca_kabuli_chr01 | 2902744                 | AA                              | CC                | 1945876332               |
| SNP_P3_2195_2902775 | NC_021160.1    | Ca_kabuli_chr01 | 2902775                 | CC                              | GG                | 1945876333               |
| SNP_P3_2196_2903058 | NC_021160.1    | Ca_kabuli_chr01 | 2903058                 | TT                              | AA                | 1945876335               |
| SNP_P3_2197_2903059 | NC_021160.1    | Ca_kabuli_chr01 | 2903059                 | CC                              | AA                | 1945876337               |
| SNP_P3_2198_2903095 | NC_021160.1    | Ca_kabuli_chr01 | 2903095                 | GG                              | TT                | 1945876339               |
| SNP_P3_2199_2903930 | NC_021160.1    | Ca_kabuli_chr01 | 2903930                 | TT                              | CC                | 1945876341               |
| SNP_P3_2200_2904337 | NC_021160.1    | Ca_kabuli_chr01 | 2904337                 | AA                              | TT                | 1945876342               |
| SNP_P3_2202_2906045 | NC_021160.1    | Ca_kabuli_chr01 | 2906045                 | GG                              | CC                | 1945876344               |
| SNP_P3_2203_2906265 | NC_021160.1    | Ca_kabuli_chr01 | 2906265                 | CC                              | TT                | 1945876346               |
| SNP_P3_2204_2906516 | NC_021160.1    | Ca_kabuli_chr01 | 2906516                 | CC                              | GG                | 1945876348               |
| SNP_P3_2205_2907356 | NC_021160.1    | Ca_kabuli_chr01 | 2907356                 | CC                              | TT                | 1945876349               |
| SNP_P3_2206_2907412 | NC_021160.1    | Ca_kabuli_chr01 | 2907412                 | CC                              | TT                | 1945876351               |
| SNP_P3_2208_2909076 | NC_021160.1    | Ca_kabuli_chr01 | 2909076                 | GG                              | CC                | 1945876353               |
| SNP_P3_2209_2909146 | NC_021160.1    | Ca_kabuli_chr01 | 2909146                 | CC                              | TT                | 1945876355               |
| SNP_P3_2210_2909481 | NC_021160.1    | Ca_kabuli_chr01 | 2909481                 | GG                              | AA                | 1945876357               |
| SNP_P3_2211_2909737 | NC_021160.1    | Ca_kabuli_chr01 | 2909737                 | CC                              | AA                | 1945876358               |
| SNP_P3_2212_2909739 | NC_021160.1    | Ca_kabuli_chr01 | 2909739                 | GG                              | AA                | 1945876360               |
| SNP_P3_2214_2910512 | NC_021160.1    | Ca_kabuli_chr01 | 2910512                 | AA                              | TT                | 1945876362               |
| SNP_P3_2215_2910637 | NC_021160.1    | Ca_kabuli_chr01 | 2910637                 | TT                              | AA                | 1945876364               |
| SNP_P3_2217_2910723 | NC_021160.1    | Ca_kabuli_chr01 | 2910723                 | TT                              | AA                | 1945876365               |
| SNP_P3_2218_2910724 | NC_021160.1    | Ca_kabuli_chr01 | 2910724                 | TT                              | AA                | 1945876367               |
| SNP_P3_2219_2910786 | NC_021160.1    | Ca_kabuli_chr01 | 2910786                 | AA                              | CC                | 1945876369               |
| SNP_P3_2223_2913286 | NC_021160.1    | Ca_kabuli_chr01 | 2913286                 | TT                              | CC                | 1945876371               |
| SNP_P3_2224_2914531 | NC_021160.1    | Ca_kabuli_chr01 | 2914531                 | GG                              | CC                | 1945876373               |

| SNPs IDs            | Chromosome IDs | Chromosomes     | Physical positions (bp) | CDC Frontier (Reference genome) | (Pusa 256 & HPNB) | NCBI SNPdb Accession IDs |
|---------------------|----------------|-----------------|-------------------------|---------------------------------|-------------------|--------------------------|
| SNP_P3_2228_2916041 | NC_021160.1    | Ca_kabuli_chr01 | 2916041                 | TT                              | CC                | 1945876374               |
| SNP_P3_2229_2917521 | NC_021160.1    | Ca_kabuli_chr01 | 2917521                 | CC                              | AA                | 1945876376               |
| SNP_P3_2231_2920251 | NC_021160.1    | Ca_kabuli_chr01 | 2920251                 | CC                              | TT                | 1945876378               |
| SNP_P3_2234_2921385 | NC_021160.1    | Ca_kabuli_chr01 | 2921385                 | CC                              | TT                | 1945876380               |
| SNP_P3_2235_2921389 | NC_021160.1    | Ca_kabuli_chr01 | 2921389                 | TT                              | CC                | 1945876381               |
| SNP_P3_2236_2921393 | NC_021160.1    | Ca_kabuli_chr01 | 2921393                 | TT                              | CC                | 1945876383               |
| SNP_P3_2237_2921410 | NC_021160.1    | Ca_kabuli_chr01 | 2921410                 | CC                              | TT                | 1945876385               |
| SNP_P3_2238_2921458 | NC_021160.1    | Ca_kabuli_chr01 | 2921458                 | GG                              | AA                | 1945876387               |
| SNP_P3_2239_2921620 | NC_021160.1    | Ca_kabuli_chr01 | 2921620                 | TT                              | CC                | 1945876389               |
| SNP_P3_2240_2921694 | NC_021160.1    | Ca_kabuli_chr01 | 2921694                 | AA                              | TT                | 1945876390               |
| SNP_P3_2242_2921976 | NC_021160.1    | Ca_kabuli_chr01 | 2921976                 | CC                              | TT                | 1945876392               |
| SNP_P3_2243_2922007 | NC_021160.1    | Ca_kabuli_chr01 | 2922007                 | TT                              | CC                | 1945876394               |
| SNP_P3_2244_2922021 | NC_021160.1    | Ca_kabuli_chr01 | 2922021                 | TT                              | CC                | 1945876396               |
| SNP_P3_2245_2922038 | NC_021160.1    | Ca_kabuli_chr01 | 2922038                 | TT                              | CC                | 1945876397               |
| SNP_P3_2246_2922750 | NC_021160.1    | Ca_kabuli_chr01 | 2922750                 | TT                              | CC                | 1945876399               |
| SNP_P3_2250_2923064 | NC_021160.1    | Ca_kabuli_chr01 | 2923064                 | GG                              | AA                | 1945876401               |
| SNP_P3_2252_2923287 | NC_021160.1    | Ca_kabuli_chr01 | 2923287                 | TT                              | AA                | 1945876403               |
| SNP_P3_2254_2923853 | NC_021160.1    | Ca_kabuli_chr01 | 2923853                 | CC                              | GG                | 1945876405               |
| SNP_P3_2257_2923982 | NC_021160.1    | Ca_kabuli_chr01 | 2923982                 | AA                              | TT                | 1945876406               |
| SNP_P3_2259_2924034 | NC_021160.1    | Ca_kabuli_chr01 | 2924034                 | CC                              | AA                | 1945876408               |
| SNP_P3_2260_2924036 | NC_021160.1    | Ca_kabuli_chr01 | 2924036                 | GG                              | AA                | 1945876410               |
| SNP_P3_2261_2924436 | NC_021160.1    | Ca_kabuli_chr01 | 2924436                 | TT                              | CC                | 1945876412               |
| SNP_P3_2263_2925135 | NC_021160.1    | Ca_kabuli_chr01 | 2925135                 | AA                              | GG                | 1945876413               |
| SNP_P3_2264_2926037 | NC_021160.1    | Ca_kabuli_chr01 | 2926037                 | TT                              | CC                | 1945876415               |
| SNP_P3_2265_2926221 | NC_021160.1    | Ca_kabuli_chr01 | 2926221                 | CC                              | TT                | 1945876417               |
| SNP_P3_2266_2926978 | NC_021160.1    | Ca_kabuli_chr01 | 2926978                 | GG                              | TT                | 1945876419               |
| SNP_P3_2267_2927445 | NC_021160.1    | Ca_kabuli_chr01 | 2927445                 | CC                              | TT                | 1945876421               |
| SNP_P3_2268_2927769 | NC_021160.1    | Ca_kabuli_chr01 | 2927769                 | AA                              | TT                | 1945876422               |
| SNP_P3_2269_2927770 | NC_021160.1    | Ca_kabuli_chr01 | 2927770                 | AA                              | TT                | 1945876424               |
| SNP_P3_2270_2928022 | NC_021160.1    | Ca_kabuli_chr01 | 2928022                 | AA                              | TT                | 1945876426               |
| SNP_P3_2271_2928024 | NC_021160.1    | Ca_kabuli_chr01 | 2928024                 | AA                              | TT                | 1945876428               |
| SNP_P3_2272_2928038 | NC_021160.1    | Ca_kabuli_chr01 | 2928038                 | AA                              | GG                | 1945876429               |
| SNP_P3_2273_2928042 | NC_021160.1    | Ca_kabuli_chr01 | 2928042                 | CC                              | TT                | 1945876431               |
| SNP_P3_2274_2928050 | NC_021160.1    | Ca_kabuli_chr01 | 2928050                 | GG                              | AA                | 1945876433               |
| SNP_P3_2275_2929001 | NC_021160.1    | Ca_kabuli_chr01 | 2929001                 | GG                              | AA                | 1945876435               |
| SNP_P3_2277_2932313 | NC_021160.1    | Ca_kabuli_chr01 | 2932313                 | AA                              | TT                | 1945876437               |
| SNP_P3_2279_2932738 | NC_021160.1    | Ca_kabuli_chr01 | 2932738                 | GG                              | TT                | 1945876438               |
| SNP_P3_2280_2933253 | NC_021160.1    | Ca_kabuli_chr01 | 2933253                 | TT                              | CC                | 1945876440               |
| SNP_P3_2281_2933298 | NC_021160.1    | Ca_kabuli_chr01 | 2933298                 | AA                              | GG                | 1945876442               |
| SNP_P3_2284_2933973 | NC_021160.1    | Ca_kabuli_chr01 | 2933973                 | CC                              | TT                | 1945876444               |
| SNP_P3_2285_2934256 | NC_021160.1    | Ca_kabuli_chr01 | 2934256                 | CC                              | TT                | 1945876445               |
| SNP_P3_2287_2934291 | NC_021160.1    | Ca_kabuli_chr01 | 2934291                 | CC                              | AA                | 1945876447               |

| SNPs IDs            | Chromosome IDs | Chromosomes     | Physical positions (bp) | CDC Frontier (Reference genome) | (Pusa 256 & HPNB) | NCBI SNPdb Accession IDs |
|---------------------|----------------|-----------------|-------------------------|---------------------------------|-------------------|--------------------------|
| SNP_P3_2289_2936389 | NC_021160.1    | Ca_kabuli_chr01 | 2936389                 | CC                              | TT                | 1945876449               |
| SNP_P3_2292_2938832 | NC_021160.1    | Ca_kabuli_chr01 | 2938832                 | TT                              | AA                | 1945876451               |
| SNP_P3_2294_2939033 | NC_021160.1    | Ca_kabuli_chr01 | 2939033                 | AA                              | GG                | 1945876453               |
| SNP_P3_2295_2939100 | NC_021160.1    | Ca_kabuli_chr01 | 2939100                 | AA                              | GG                | 1945876454               |
| SNP_P3_2296_2939141 | NC_021160.1    | Ca_kabuli_chr01 | 2939141                 | CC                              | TT                | 1945876456               |
| SNP_P3_2297_2939161 | NC_021160.1    | Ca_kabuli_chr01 | 2939161                 | GG                              | AA                | 1945876458               |
| SNP_P3_2298_2939189 | NC_021160.1    | Ca_kabuli_chr01 | 2939189                 | AA                              | GG                | 1945876460               |
| SNP_P3_2299_2940043 | NC_021160.1    | Ca_kabuli_chr01 | 2940043                 | AA                              | GG                | 1945876462               |
| SNP_P3_2300_2940051 | NC_021160.1    | Ca_kabuli_chr01 | 2940051                 | TT                              | CC                | 1945876463               |
| SNP_P3_2301_2940111 | NC_021160.1    | Ca_kabuli_chr01 | 2940111                 | CC                              | TT                | 1945876465               |
| SNP_P3_2302_2940117 | NC_021160.1    | Ca_kabuli_chr01 | 2940117                 | AA                              | GG                | 1945876467               |
| SNP_P3_2303_2940840 | NC_021160.1    | Ca_kabuli_chr01 | 2940840                 | CC                              | AA                | 1945876469               |
| SNP_P3_2304_2940888 | NC_021160.1    | Ca_kabuli_chr01 | 2940888                 | GG                              | TT                | 1945876470               |
| SNP_P3_2306_2940955 | NC_021160.1    | Ca_kabuli_chr01 | 2940955                 | TT                              | GG                | 1945876472               |
| SNP_P3_2307_2941019 | NC_021160.1    | Ca_kabuli_chr01 | 2941019                 | TT                              | CC                | 1945876474               |
| SNP_P3_2308_2941097 | NC_021160.1    | Ca_kabuli_chr01 | 2941097                 | GG                              | TT                | 1945876476               |
| SNP_P3_2309_2941283 | NC_021160.1    | Ca_kabuli_chr01 | 2941283                 | TT                              | GG                | 1945876478               |
| SNP_P3_2310_2941595 | NC_021160.1    | Ca_kabuli_chr01 | 2941595                 | CC                              | GG                | 1945876479               |
| SNP_P3_2311_2942657 | NC_021160.1    | Ca_kabuli_chr01 | 2942657                 | CC                              | TT                | 1945876481               |
| SNP_P3_2312_2942658 | NC_021160.1    | Ca_kabuli_chr01 | 2942658                 | AA                              | TT                | 1945876483               |
| SNP_P3_2313_2943632 | NC_021160.1    | Ca_kabuli_chr01 | 2943632                 | GG                              | CC                | 1945876485               |
| SNP_P3_2314_2943966 | NC_021160.1    | Ca_kabuli_chr01 | 2943966                 | AA                              | TT                | 1945876486               |
| SNP_P3_2315_2943978 | NC_021160.1    | Ca_kabuli_chr01 | 2943978                 | TT                              | GG                | 1945876488               |
| SNP_P3_2316_2943979 | NC_021160.1    | Ca_kabuli_chr01 | 2943979                 | CC                              | TT                | 1945876490               |
| SNP_P3_2317_2943982 | NC_021160.1    | Ca_kabuli_chr01 | 2943982                 | TT                              | CC                | 1945876492               |
| SNP_P3_2318_2945256 | NC_021160.1    | Ca_kabuli_chr01 | 2945256                 | AA                              | CC                | 1945876494               |
| SNP_P3_2319_2945258 | NC_021160.1    | Ca_kabuli_chr01 | 2945258                 | GG                              | AA                | 1945876495               |
| SNP_P3_2320_2945278 | NC_021160.1    | Ca_kabuli_chr01 | 2945278                 | CC                              | TT                | 1945876497               |
| SNP_P3_2321_2945311 | NC_021160.1    | Ca_kabuli_chr01 | 2945311                 | AA                              | TT                | 1945876499               |
| SNP_P3_2323_2946254 | NC_021160.1    | Ca_kabuli_chr01 | 2946254                 | GG                              | AA                | 1945876501               |
| SNP_P3_2324_2947448 | NC_021160.1    | Ca_kabuli_chr01 | 2947448                 | CC                              | TT                | 1945876502               |
| SNP_P3_2325_2947461 | NC_021160.1    | Ca_kabuli_chr01 | 2947461                 | GG                              | AA                | 1945876504               |
| SNP_P3_2327_2947485 | NC_021160.1    | Ca_kabuli_chr01 | 2947485                 | TT                              | GG                | 1945876506               |
| SNP_P3_2328_2949853 | NC_021160.1    | Ca_kabuli_chr01 | 2949853                 | TT                              | GG                | 1945876508               |
| SNP_P3_2329_2949862 | NC_021160.1    | Ca_kabuli_chr01 | 2949862                 | GG                              | CC                | 1945876510               |
| SNP_P3_2330_2949987 | NC_021160.1    | Ca_kabuli_chr01 | 2949987                 | GG                              | CC                | 1945876511               |
| SNP_P3_2331_2950040 | NC_021160.1    | Ca_kabuli_chr01 | 2950040                 | TT                              | AA                | 1945876513               |
| SNP_P3_2332_2950071 | NC_021160.1    | Ca_kabuli_chr01 | 2950071                 | GG                              | CC                | 1945876515               |
| SNP_P3_2333_2950073 | NC_021160.1    | Ca_kabuli_chr01 | 2950073                 | AA                              | GG                | 1945876517               |
| SNP_P3_2334_2950076 | NC_021160.1    | Ca_kabuli_chr01 | 2950076                 | GG                              | AA                | 1945876518               |
| SNP_P3_2335_2950247 | NC_021160.1    | Ca_kabuli_chr01 | 2950247                 | AA                              | CC                | 1945876520               |
| SNP_P3_2336_2950271 | NC_021160.1    | Ca_kabuli_chr01 | 2950271                 | TT                              | AA                | 1945876522               |

| SNPs IDs            | Chromosome IDs | Chromosomes     | Physical positions (bp) | CDC Frontier (Reference genome) | (Pusa 256 & HPNB) | NCBI SNPdb Accession IDs |
|---------------------|----------------|-----------------|-------------------------|---------------------------------|-------------------|--------------------------|
| SNP_P3_2337_2950288 | NC_021160.1    | Ca_kabuli_chr01 | 2950288                 | CC                              | TT                | 1945876524               |
| SNP_P3_2338_2950352 | NC_021160.1    | Ca_kabuli_chr01 | 2950352                 | TT                              | CC                | 1945876525               |
| SNP_P3_2339_2950394 | NC_021160.1    | Ca_kabuli_chr01 | 2950394                 | TT                              | CC                | 1945876527               |
| SNP_P3_2340_2950440 | NC_021160.1    | Ca_kabuli_chr01 | 2950440                 | CC                              | TT                | 1945876529               |
| SNP_P3_2341_2950444 | NC_021160.1    | Ca_kabuli_chr01 | 2950444                 | TT                              | GG                | 1945876531               |
| SNP_P3_2342_2950468 | NC_021160.1    | Ca_kabuli_chr01 | 2950468                 | AA                              | TT                | 1945876532               |
| SNP_P3_2343_2950469 | NC_021160.1    | Ca_kabuli_chr01 | 2950469                 | GG                              | TT                | 1945876534               |
| SNP_P3_2344_2950477 | NC_021160.1    | Ca_kabuli_chr01 | 2950477                 | CC                              | TT                | 1945876536               |
| SNP_P3_2345_2950747 | NC_021160.1    | Ca_kabuli_chr01 | 2950747                 | GG                              | CC                | 1945876538               |
| SNP_P3_2346_2950848 | NC_021160.1    | Ca_kabuli_chr01 | 2950848                 | CC                              | TT                | 1945876539               |
| SNP_P3_2348_2954747 | NC_021160.1    | Ca_kabuli_chr01 | 2954747                 | GG                              | AA                | 1945876541               |
| SNP_P3_2349_2955366 | NC_021160.1    | Ca_kabuli_chr01 | 2955366                 | AA                              | GG                | 1945876543               |
| SNP_P3_2350_2955841 | NC_021160.1    | Ca_kabuli_chr01 | 2955841                 | CC                              | GG                | 1945876545               |
| SNP_P3_2352_2957785 | NC_021160.1    | Ca_kabuli_chr01 | 2957785                 | AA                              | GG                | 1945876547               |
| SNP_P3_2353_2958486 | NC_021160.1    | Ca_kabuli_chr01 | 2958486                 | AA                              | GG                | 1945876548               |
| SNP_P3_2354_2958512 | NC_021160.1    | Ca_kabuli_chr01 | 2958512                 | GG                              | TT                | 1945876550               |
| SNP_P3_2357_2960183 | NC_021160.1    | Ca_kabuli_chr01 | 2960183                 | GG                              | AA                | 1945876552               |
| SNP_P3_2358_2961327 | NC_021160.1    | Ca_kabuli_chr01 | 2961327                 | AA                              | TT                | 1945876554               |
| SNP_P3_2360_2966317 | NC_021160.1    | Ca_kabuli_chr01 | 2966317                 | CC                              | TT                | 1945876555               |
| SNP_P3_2361_2966327 | NC_021160.1    | Ca_kabuli_chr01 | 2966327                 | TT                              | CC                | 1945876557               |
| SNP_P3_2362_2966919 | NC_021160.1    | Ca_kabuli_chr01 | 2966919                 | CC                              | TT                | 1945876559               |
| SNP_P3_2363_2967120 | NC_021160.1    | Ca_kabuli_chr01 | 2967120                 | GG                              | AA                | 1945876561               |
| SNP_P3_2364_2967164 | NC_021160.1    | Ca_kabuli_chr01 | 2967164                 | TT                              | GG                | 1945876563               |
| SNP_P3_2365_2967182 | NC_021160.1    | Ca_kabuli_chr01 | 2967182                 | AA                              | GG                | 1945876564               |
| SNP_P3_2366_2967692 | NC_021160.1    | Ca_kabuli_chr01 | 2967692                 | GG                              | CC                | 1945876566               |
| SNP_P3_2367_2970489 | NC_021160.1    | Ca_kabuli_chr01 | 2970489                 | TT                              | CC                | 1945876568               |
| SNP_P3_2368_2971307 | NC_021160.1    | Ca_kabuli_chr01 | 2971307                 | TT                              | CC                | 1945876570               |
| SNP_P3_2369_2971309 | NC_021160.1    | Ca_kabuli_chr01 | 2971309                 | TT                              | AA                | 1945876571               |
| SNP_P3_2370_2971634 | NC_021160.1    | Ca_kabuli_chr01 | 2971634                 | GG                              | AA                | 1945876573               |
| SNP_P3_2371_2973052 | NC_021160.1    | Ca_kabuli_chr01 | 2973052                 | GG                              | TT                | 1945876575               |
| SNP_P3_2372_2975976 | NC_021160.1    | Ca_kabuli_chr01 | 2975976                 | GG                              | AA                | 1945876577               |
| SNP_P3_2373_2975992 | NC_021160.1    | Ca_kabuli_chr01 | 2975992                 | GG                              | AA                | 1945876579               |
| SNP_P3_2374_2976297 | NC_021160.1    | Ca_kabuli_chr01 | 2976297                 | AA                              | GG                | 1945876580               |
| SNP_P3_2376_2979104 | NC_021160.1    | Ca_kabuli_chr01 | 2979104                 | AA                              | TT                | 1945876582               |
| SNP_P3_2377_2980019 | NC_021160.1    | Ca_kabuli_chr01 | 2980019                 | AA                              | CC                | 1945876584               |
| SNP_P3_2378_2980559 | NC_021160.1    | Ca_kabuli_chr01 | 2980559                 | GG                              | AA                | 1945876586               |
| SNP_P3_2379_2984277 | NC_021160.1    | Ca_kabuli_chr01 | 2984277                 | AA                              | CC                | 1945876587               |
| SNP_P3_2380_2988398 | NC_021160.1    | Ca_kabuli_chr01 | 2988398                 | AA                              | TT                | 1945876589               |
| SNP_P3_2382_2989247 | NC_021160.1    | Ca_kabuli_chr01 | 2989247                 | AA                              | GG                | 1945876591               |
| SNP_P3_2383_2989941 | NC_021160.1    | Ca_kabuli_chr01 | 2989941                 | AA                              | GG                | 1945876593               |
| SNP_P3_2384_2990042 | NC_021160.1    | Ca_kabuli_chr01 | 2990042                 | CC                              | TT                | 1945876595               |
| SNP_P3_2385_2990104 | NC_021160.1    | Ca_kabuli_chr01 | 2990104                 | CC                              | TT                | 1945876596               |

| SNPs IDs            | Chromosome IDs | Chromosomes     | Physical positions (bp) | CDC Frontier (Reference genome) | (Pusa 256 & HPNB) | NCBI SNPdb Accession IDs |
|---------------------|----------------|-----------------|-------------------------|---------------------------------|-------------------|--------------------------|
| SNP_P3_2386_2990337 | NC_021160.1    | Ca_kabuli_chr01 | 2990337                 | AA                              | GG                | 1945876598               |
| SNP_P3_2387_2990342 | NC_021160.1    | Ca_kabuli_chr01 | 2990342                 | TT                              | CC                | 1945876600               |
| SNP_P3_2388_2990353 | NC_021160.1    | Ca_kabuli_chr01 | 2990353                 | GG                              | CC                | 1945876602               |
| SNP_P3_2389_2990755 | NC_021160.1    | Ca_kabuli_chr01 | 2990755                 | GG                              | AA                | 1945876603               |
| SNP_P3_2390_2990921 | NC_021160.1    | Ca_kabuli_chr01 | 2990921                 | TT                              | AA                | 1945876605               |
| SNP_P3_2391_2991103 | NC_021160.1    | Ca_kabuli_chr01 | 2991103                 | AA                              | GG                | 1945876607               |
| SNP_P3_2392_2992876 | NC_021160.1    | Ca_kabuli_chr01 | 2992876                 | CC                              | TT                | 1945876609               |
| SNP_P3_2393_2993257 | NC_021160.1    | Ca_kabuli_chr01 | 2993257                 | AA                              | TT                | 1945876610               |
| SNP_P3_2395_2993647 | NC_021160.1    | Ca_kabuli_chr01 | 2993647                 | TT                              | AA                | 1945876612               |
| SNP_P3_2396_2993652 | NC_021160.1    | Ca_kabuli_chr01 | 2993652                 | GG                              | TT                | 1945876614               |
| SNP_P3_2397_2993660 | NC_021160.1    | Ca_kabuli_chr01 | 2993660                 | AA                              | GG                | 1945876616               |
| SNP_P3_2398_2994096 | NC_021160.1    | Ca_kabuli_chr01 | 2994096                 | TT                              | CC                | 1945876618               |
| SNP_P3_2399_2995399 | NC_021160.1    | Ca_kabuli_chr01 | 2995399                 | AA                              | GG                | 1945876619               |
| SNP_P3_2400_2999391 | NC_021160.1    | Ca_kabuli_chr01 | 2999391                 | AA                              | GG                | 1945876621               |
| SNP_P3_2401_3000217 | NC_021160.1    | Ca_kabuli_chr01 | 3000217                 | CC                              | TT                | 1945876623               |
| SNP_P3_2402_3002580 | NC_021160.1    | Ca_kabuli_chr01 | 3002580                 | GG                              | AA                | 1945876625               |
| SNP_P3_2405_3004106 | NC_021160.1    | Ca_kabuli_chr01 | 3004106                 | CC                              | TT                | 1945876626               |
| SNP_P3_2406_3004344 | NC_021160.1    | Ca_kabuli_chr01 | 3004344                 | AA                              | GG                | 1945876628               |
| SNP_P3_2407_3004487 | NC_021160.1    | Ca_kabuli_chr01 | 3004487                 | GG                              | CC                | 1945876630               |
| SNP_P3_2408_3004488 | NC_021160.1    | Ca_kabuli_chr01 | 3004488                 | TT                              | CC                | 1945876632               |
| SNP_P3_2409_3004554 | NC_021160.1    | Ca_kabuli_chr01 | 3004554                 | TT                              | CC                | 1945876634               |
| SNP_P3_2410_3004589 | NC_021160.1    | Ca_kabuli_chr01 | 3004589                 | CC                              | AA                | 1945876635               |
| SNP_P3_2411_3004599 | NC_021160.1    | Ca_kabuli_chr01 | 3004599                 | GG                              | AA                | 1945876637               |
| SNP_P3_2412_3004663 | NC_021160.1    | Ca_kabuli_chr01 | 3004663                 | AA                              | GG                | 1945876639               |
| SNP_P3_2413_3004815 | NC_021160.1    | Ca_kabuli_chr01 | 3004815                 | AA                              | GG                | 1945876641               |
| SNP_P3_2414_3004858 | NC_021160.1    | Ca_kabuli_chr01 | 3004858                 | AA                              | CC                | 1945876642               |
| SNP_P3_2415_3009894 | NC_021160.1    | Ca_kabuli_chr01 | 3009894                 | TT                              | CC                | 1945876644               |
| SNP_P3_2416_3010694 | NC_021160.1    | Ca_kabuli_chr01 | 3010694                 | TT                              | GG                | 1945876646               |
| SNP_P3_2417_3011312 | NC_021160.1    | Ca_kabuli_chr01 | 3011312                 | AA                              | GG                | 1945876648               |
| SNP_P3_2419_3013626 | NC_021160.1    | Ca_kabuli_chr01 | 3013626                 | CC                              | AA                | 1945876650               |
| SNP_P3_2421_3014335 | NC_021160.1    | Ca_kabuli_chr01 | 3014335                 | AA                              | CC                | 1945876651               |
| SNP_P3_2422_3014342 | NC_021160.1    | Ca_kabuli_chr01 | 3014342                 | TT                              | CC                | 1945876653               |
| SNP_P3_2423_3015513 | NC_021160.1    | Ca_kabuli_chr01 | 3015513                 | GG                              | TT                | 1945876655               |
| SNP_P3_2425_3016305 | NC_021160.1    | Ca_kabuli_chr01 | 3016305                 | GG                              | CC                | 1945876657               |
| SNP_P3_2426_3017086 | NC_021160.1    | Ca_kabuli_chr01 | 3017086                 | TT                              | CC                | 1945876658               |
| SNP_P3_2427_3017159 | NC_021160.1    | Ca_kabuli_chr01 | 3017159                 | GG                              | AA                | 1945876660               |
| SNP_P3_2429_3018628 | NC_021160.1    | Ca_kabuli_chr01 | 3018628                 | TT                              | GG                | 1945876662               |
| SNP_P3_2430_3018632 | NC_021160.1    | Ca_kabuli_chr01 | 3018632                 | TT                              | GG                | 1945876664               |
| SNP_P3_2431_3020135 | NC_021160.1    | Ca_kabuli_chr01 | 3020135                 | GG                              | AA                | 1945876666               |
| SNP_P3_2432_3020154 | NC_021160.1    | Ca_kabuli_chr01 | 3020154                 | GG                              | AA                | 1945876667               |
| SNP_P3_2433_3020269 | NC_021160.1    | Ca_kabuli_chr01 | 3020269                 | AA                              | TT                | 1945876669               |
| SNP_P3_2437_3020410 | NC_021160.1    | Ca_kabuli_chr01 | 3020410                 | CC                              | TT                | 1945876671               |

| SNPs IDs            | Chromosome IDs | Chromosomes     | Physical positions (bp) | CDC Frontier (Reference genome) | (Pusa 256 & HPNB) | NCBI SNPdb Accession IDs |
|---------------------|----------------|-----------------|-------------------------|---------------------------------|-------------------|--------------------------|
| SNP_P3_2438_3020486 | NC_021160.1    | Ca_kabuli_chr01 | 3020486                 | AA                              | GG                | 1945876673               |
| SNP_P3_2440_3020832 | NC_021160.1    | Ca_kabuli_chr01 | 3020832                 | GG                              | AA                | 1945876674               |
| SNP_P3_2441_3020833 | NC_021160.1    | Ca_kabuli_chr01 | 3020833                 | AA                              | TT                | 1945876676               |
| SNP_P3_2443_3021078 | NC_021160.1    | Ca_kabuli_chr01 | 3021078                 | AA                              | TT                | 1945876678               |
| SNP_P3_2444_3021123 | NC_021160.1    | Ca_kabuli_chr01 | 3021123                 | AA                              | TT                | 1945876680               |
| SNP_P3_2445_3024221 | NC_021160.1    | Ca_kabuli_chr01 | 3024221                 | GG                              | AA                | 1945876682               |
| SNP_P3_2446_3024252 | NC_021160.1    | Ca_kabuli_chr01 | 3024252                 | CC                              | TT                | 1945876683               |
| SNP_P3_2447_3024540 | NC_021160.1    | Ca_kabuli_chr01 | 3024540                 | GG                              | AA                | 1945876685               |
| SNP_P3_2448_3025874 | NC_021160.1    | Ca_kabuli_chr01 | 3025874                 | GG                              | AA                | 1945876687               |
| SNP_P3_2449_3026096 | NC_021160.1    | Ca_kabuli_chr01 | 3026096                 | AA                              | CC                | 1945876689               |
| SNP_P3_2450_3026138 | NC_021160.1    | Ca_kabuli_chr01 | 3026138                 | GG                              | CC                | 1945876690               |
| SNP_P3_2451_3027637 | NC_021160.1    | Ca_kabuli_chr01 | 3027637                 | CC                              | TT                | 1945876692               |
| SNP_P3_2452_3027918 | NC_021160.1    | Ca_kabuli_chr01 | 3027918                 | CC                              | AA                | 1945876694               |
| SNP_P3_2453_3027988 | NC_021160.1    | Ca_kabuli_chr01 | 3027988                 | CC                              | AA                | 1945876696               |
| SNP_P3_2454_3028055 | NC_021160.1    | Ca_kabuli_chr01 | 3028055                 | TT                              | AA                | 1945876698               |
| SNP_P3_2455_3029533 | NC_021160.1    | Ca_kabuli_chr01 | 3029533                 | AA                              | GG                | 1945876699               |
| SNP_P3_2457_3032297 | NC_021160.1    | Ca_kabuli_chr01 | 3032297                 | AA                              | TT                | 1945876701               |
| SNP_P3_2458_3032816 | NC_021160.1    | Ca_kabuli_chr01 | 3032816                 | AA                              | TT                | 1945876703               |
| SNP_P3_2459_3033272 | NC_021160.1    | Ca_kabuli_chr01 | 3033272                 | TT                              | CC                | 1945876705               |
| SNP_P3_2460_3033452 | NC_021160.1    | Ca_kabuli_chr01 | 3033452                 | TT                              | CC                | 1945876706               |
| SNP_P3_2461_3033459 | NC_021160.1    | Ca_kabuli_chr01 | 3033459                 | TT                              | GG                | 1945876708               |
| SNP_P3_2462_3033788 | NC_021160.1    | Ca_kabuli_chr01 | 3033788                 | GG                              | AA                | 1945876710               |
| SNP_P3_2464_3035096 | NC_021160.1    | Ca_kabuli_chr01 | 3035096                 | CC                              | TT                | 1945876712               |
| SNP_P3_2465_3035851 | NC_021160.1    | Ca_kabuli_chr01 | 3035851                 | AA                              | GG                | 1945876714               |
| SNP_P3_2470_3039962 | NC_021160.1    | Ca_kabuli_chr01 | 3039962                 | CC                              | AA                | 1945876715               |
| SNP_P3_2472_3040362 | NC_021160.1    | Ca_kabuli_chr01 | 3040362                 | TT                              | CC                | 1945876717               |
| SNP_P3_2473_3041535 | NC_021160.1    | Ca_kabuli_chr01 | 3041535                 | AA                              | GG                | 1945876719               |
| SNP_P3_2474_3044989 | NC_021160.1    | Ca_kabuli_chr01 | 3044989                 | CC                              | AA                | 1945876721               |
| SNP_P3_2475_3045002 | NC_021160.1    | Ca_kabuli_chr01 | 3045002                 | CC                              | AA                | 1945876722               |
| SNP_P3_2476_3045047 | NC_021160.1    | Ca_kabuli_chr01 | 3045047                 | GG                              | AA                | 1945876724               |
| SNP_P3_2477_3045143 | NC_021160.1    | Ca_kabuli_chr01 | 3045143                 | CC                              | TT                | 1945876726               |
| SNP_P3_2478_3045315 | NC_021160.1    | Ca_kabuli_chr01 | 3045315                 | AA                              | GG                | 1945876728               |
| SNP_P3_2479_3045381 | NC_021160.1    | Ca_kabuli_chr01 | 3045381                 | AA                              | GG                | 1945876730               |
| SNP_P3_2480_3045878 | NC_021160.1    | Ca_kabuli_chr01 | 3045878                 | AA                              | GG                | 1945876731               |
| SNP_P3_2481_3045921 | NC_021160.1    | Ca_kabuli_chr01 | 3045921                 | CC                              | AA                | 1945876733               |
| SNP_P3_2483_3046171 | NC_021160.1    | Ca_kabuli_chr01 | 3046171                 | GG                              | AA                | 1945876735               |
| SNP_P3_2484_3047634 | NC_021160.1    | Ca_kabuli_chr01 | 3047634                 | GG                              | AA                | 1945876737               |
| SNP_P3_2485_3048038 | NC_021160.1    | Ca_kabuli_chr01 | 3048038                 | TT                              | AA                | 1945876738               |
| SNP_P3_2486_3049263 | NC_021160.1    | Ca_kabuli_chr01 | 3049263                 | CC                              | AA                | 1945876740               |
| SNP_P3_2489_3049583 | NC_021160.1    | Ca_kabuli_chr01 | 3049583                 | AA                              | TT                | 1945876742               |
| SNP_P3_2490_3049728 | NC_021160.1    | Ca_kabuli_chr01 | 3049728                 | AA                              | TT                | 1945876744               |
| SNP_P3_2491_3050744 | NC_021160.1    | Ca_kabuli_chr01 | 3050744                 | CC                              | TT                | 1945876746               |

| SNPs IDs            | Chromosome IDs | Chromosomes     | Physical positions (bp) | CDC Frontier (Reference genome) | (Pusa 256 & HPNB) | NCBI SNPdb Accession IDs |
|---------------------|----------------|-----------------|-------------------------|---------------------------------|-------------------|--------------------------|
| SNP_P3_2493_3051422 | NC_021160.1    | Ca_kabuli_chr01 | 3051422                 | GG                              | AA                | 1945876747               |
| SNP_P3_2494_3051726 | NC_021160.1    | Ca_kabuli_chr01 | 3051726                 | AA                              | GG                | 1945876749               |
| SNP_P3_2495_3051741 | NC_021160.1    | Ca_kabuli_chr01 | 3051741                 | GG                              | AA                | 1945876751               |
| SNP_P3_2497_3051969 | NC_021160.1    | Ca_kabuli_chr01 | 3051969                 | AA                              | CC                | 1945876753               |
| SNP_P3_2498_3052183 | NC_021160.1    | Ca_kabuli_chr01 | 3052183                 | AA                              | TT                | 1945876754               |
| SNP_P3_2499_3052234 | NC_021160.1    | Ca_kabuli_chr01 | 3052234                 | AA                              | GG                | 1945876756               |
| SNP_P3_2500_3053286 | NC_021160.1    | Ca_kabuli_chr01 | 3053286                 | TT                              | CC                | 1945876758               |
| SNP_P3_2501_3053287 | NC_021160.1    | Ca_kabuli_chr01 | 3053287                 | TT                              | CC                | 1945876760               |
| SNP_P3_2502_3053293 | NC_021160.1    | Ca_kabuli_chr01 | 3053293                 | AA                              | CC                | 1945876762               |
| SNP_P3_2503_3053507 | NC_021160.1    | Ca_kabuli_chr01 | 3053507                 | AA                              | GG                | 1945876763               |
| SNP_P3_2504_3053513 | NC_021160.1    | Ca_kabuli_chr01 | 3053513                 | CC                              | TT                | 1945876765               |
| SNP_P3_2505_3053548 | NC_021160.1    | Ca_kabuli_chr01 | 3053548                 | TT                              | CC                | 1945876767               |
| SNP_P3_2506_3053615 | NC_021160.1    | Ca_kabuli_chr01 | 3053615                 | TT                              | CC                | 1945876769               |
| SNP_P3_2507_3053662 | NC_021160.1    | Ca_kabuli_chr01 | 3053662                 | TT                              | CC                | 1945876770               |
| SNP_P3_2508_3053871 | NC_021160.1    | Ca_kabuli_chr01 | 3053871                 | GG                              | AA                | 1945876772               |
| SNP_P3_2509_3053918 | NC_021160.1    | Ca_kabuli_chr01 | 3053918                 | AA                              | GG                | 1945876774               |
| SNP_P3_2510_3054598 | NC_021160.1    | Ca_kabuli_chr01 | 3054598                 | AA                              | TT                | 1945876776               |
| SNP_P3_2513_3055367 | NC_021160.1    | Ca_kabuli_chr01 | 3055367                 | GG                              | TT                | 1945876778               |
| SNP_P3_2514_3057679 | NC_021160.1    | Ca_kabuli_chr01 | 3057679                 | GG                              | TT                | 1945876779               |
| SNP_P3_2515_3061695 | NC_021160.1    | Ca_kabuli_chr01 | 3061695                 | TT                              | CC                | 1945876781               |
| SNP_P3_2516_3061717 | NC_021160.1    | Ca_kabuli_chr01 | 3061717                 | TT                              | CC                | 1945876783               |
| SNP_P3_2517_3062252 | NC_021160.1    | Ca_kabuli_chr01 | 3062252                 | CC                              | TT                | 1945876785               |
| SNP_P3_2518_3062372 | NC_021160.1    | Ca_kabuli_chr01 | 3062372                 | TT                              | CC                | 1945876787               |
| SNP_P3_2519_3065476 | NC_021160.1    | Ca_kabuli_chr01 | 3065476                 | AA                              | TT                | 1945876788               |
| SNP_P3_2520_3065609 | NC_021160.1    | Ca_kabuli_chr01 | 3065609                 | GG                              | TT                | 1945876790               |
| SNP_P3_2521_3065613 | NC_021160.1    | Ca_kabuli_chr01 | 3065613                 | TT                              | GG                | 1945876792               |
| SNP_P3_2522_3065736 | NC_021160.1    | Ca_kabuli_chr01 | 3065736                 | GG                              | TT                | 1945876794               |
| SNP_P3_2523_3066861 | NC_021160.1    | Ca_kabuli_chr01 | 3066861                 | CC                              | TT                | 1945876796               |
| SNP_P3_2524_3066903 | NC_021160.1    | Ca_kabuli_chr01 | 3066903                 | TT                              | CC                | 1945876797               |
| SNP_P3_2525_3066933 | NC_021160.1    | Ca_kabuli_chr01 | 3066933                 | TT                              | CC                | 1945876799               |
| SNP_P3_2526_3068568 | NC_021160.1    | Ca_kabuli_chr01 | 3068568                 | AA                              | TT                | 1945876801               |
| SNP_P3_2527_3068579 | NC_021160.1    | Ca_kabuli_chr01 | 3068579                 | AA                              | GG                | 1945876803               |
| SNP_P3_2529_3069357 | NC_021160.1    | Ca_kabuli_chr01 | 3069357                 | AA                              | GG                | 1945876805               |
| SNP_P3_2530_3069465 | NC_021160.1    | Ca_kabuli_chr01 | 3069465                 | CC                              | TT                | 1945876806               |
| SNP_P3_2531_3069497 | NC_021160.1    | Ca_kabuli_chr01 | 3069497                 | CC                              | TT                | 1945876808               |
| SNP_P3_2532_3069557 | NC_021160.1    | Ca_kabuli_chr01 | 3069557                 | AA                              | GG                | 1945876810               |
| SNP_P3_2533_3069575 | NC_021160.1    | Ca_kabuli_chr01 | 3069575                 | CC                              | AA                | 1945876812               |
| SNP_P3_2534_3070665 | NC_021160.1    | Ca_kabuli_chr01 | 3070665                 | TT                              | GG                | 1945876813               |
| SNP_P3_2535_3070678 | NC_021160.1    | Ca_kabuli_chr01 | 3070678                 | AA                              | CC                | 1945876815               |
| SNP_P3_2536_3070697 | NC_021160.1    | Ca_kabuli_chr01 | 3070697                 | CC                              | AA                | 1945876817               |
| SNP_P3_2537_3070699 | NC_021160.1    | Ca_kabuli_chr01 | 3070699                 | AA                              | GG                | 1945876819               |
| SNP_P3_2538_3071007 | NC_021160.1    | Ca_kabuli_chr01 | 3071007                 | GG                              | TT                | 1945876821               |



| SNPs IDs            | Chromosome IDs | Chromosomes     | Physical positions (bp) | CDC Frontier (Reference genome) | (Pusa 256 & HPNB) | NCBI SNPdb Accession IDs |
|---------------------|----------------|-----------------|-------------------------|---------------------------------|-------------------|--------------------------|
| SNP_P3_2539_3071158 | NC_021160.1    | Ca_kabuli_chr01 | 3071158                 | GG                              | AA                | 1945876822               |
| SNP_P3_2541_3071516 | NC_021160.1    | Ca_kabuli_chr01 | 3071516                 | AA                              | GG                | 1945876824               |
| SNP_P3_2542_3072171 | NC_021160.1    | Ca_kabuli_chr01 | 3072171                 | GG                              | AA                | 1945876826               |
| SNP_P3_2543_3072450 | NC_021160.1    | Ca_kabuli_chr01 | 3072450                 | GG                              | AA                | 1945876828               |
| SNP_P3_2544_3072472 | NC_021160.1    | Ca_kabuli_chr01 | 3072472                 | CC                              | TT                | 1945876829               |
| SNP_P3_2545_3072474 | NC_021160.1    | Ca_kabuli_chr01 | 3072474                 | GG                              | AA                | 1945876831               |
| SNP_P3_2546_3072680 | NC_021160.1    | Ca_kabuli_chr01 | 3072680                 | GG                              | TT                | 1945876833               |
| SNP_P3_2548_3073047 | NC_021160.1    | Ca_kabuli_chr01 | 3073047                 | CC                              | AA                | 1945876835               |
| SNP_P3_2549_3073426 | NC_021160.1    | Ca_kabuli_chr01 | 3073426                 | CC                              | GG                | 1945876837               |
| SNP_P3_2552_3074526 | NC_021160.1    | Ca_kabuli_chr01 | 3074526                 | TT                              | CC                | 1945876838               |
| SNP_P3_2553_3074596 | NC_021160.1    | Ca_kabuli_chr01 | 3074596                 | GG                              | AA                | 1945876840               |
| SNP_P3_2555_3074863 | NC_021160.1    | Ca_kabuli_chr01 | 3074863                 | AA                              | TT                | 1945876842               |
| SNP_P3_2556_3074897 | NC_021160.1    | Ca_kabuli_chr01 | 3074897                 | GG                              | CC                | 1945876844               |
| SNP_P3_2557_3074967 | NC_021160.1    | Ca_kabuli_chr01 | 3074967                 | AA                              | GG                | 1945876845               |
| SNP_P3_2559_3075053 | NC_021160.1    | Ca_kabuli_chr01 | 3075053                 | TT                              | AA                | 1945876847               |
| SNP_P3_2560_3075170 | NC_021160.1    | Ca_kabuli_chr01 | 3075170                 | GG                              | AA                | 1945876849               |
| SNP_P3_2562_3075363 | NC_021160.1    | Ca_kabuli_chr01 | 3075363                 | GG                              | AA                | 1945876851               |
| SNP_P3_2564_3075408 | NC_021160.1    | Ca_kabuli_chr01 | 3075408                 | GG                              | AA                | 1945876853               |
| SNP_P3_2565_3075425 | NC_021160.1    | Ca_kabuli_chr01 | 3075425                 | CC                              | AA                | 1945876854               |
| SNP_P3_2566_3075869 | NC_021160.1    | Ca_kabuli_chr01 | 3075869                 | TT                              | GG                | 1945876856               |
| SNP_P3_2567_3076052 | NC_021160.1    | Ca_kabuli_chr01 | 3076052                 | CC                              | GG                | 1945876858               |
| SNP_P3_2568_3076073 | NC_021160.1    | Ca_kabuli_chr01 | 3076073                 | CC                              | TT                | 1945876860               |
| SNP_P3_2569_3078554 | NC_021160.1    | Ca_kabuli_chr01 | 3078554                 | CC                              | TT                | 1945876861               |
| SNP_P3_2570_3079234 | NC_021160.1    | Ca_kabuli_chr01 | 3079234                 | TT                              | CC                | 1945876863               |
| SNP_P3_2571_3079281 | NC_021160.1    | Ca_kabuli_chr01 | 3079281                 | TT                              | CC                | 1945876865               |
| SNP_P3_2572_3079286 | NC_021160.1    | Ca_kabuli_chr01 | 3079286                 | TT                              | CC                | 1945876867               |
| SNP_P3_2573_3079294 | NC_021160.1    | Ca_kabuli_chr01 | 3079294                 | AA                              | GG                | 1945876869               |
| SNP_P3_2574_3079297 | NC_021160.1    | Ca_kabuli_chr01 | 3079297                 | TT                              | CC                | 1945876870               |
| SNP_P3_2575_3079319 | NC_021160.1    | Ca_kabuli_chr01 | 3079319                 | CC                              | TT                | 1945876872               |
| SNP_P3_2576_3079368 | NC_021160.1    | Ca_kabuli_chr01 | 3079368                 | CC                              | TT                | 1945876874               |
| SNP_P3_2577_3079370 | NC_021160.1    | Ca_kabuli_chr01 | 3079370                 | TT                              | CC                | 1945876876               |
| SNP_P3_2578_3079402 | NC_021160.1    | Ca_kabuli_chr01 | 3079402                 | GG                              | TT                | 1945876877               |
| SNP_P3_2579_3079415 | NC_021160.1    | Ca_kabuli_chr01 | 3079415                 | AA                              | GG                | 1945876879               |
| SNP_P3_2580_3079566 | NC_021160.1    | Ca_kabuli_chr01 | 3079566                 | TT                              | CC                | 1945876881               |
| SNP_P3_2581_3079576 | NC_021160.1    | Ca_kabuli_chr01 | 3079576                 | TT                              | CC                | 1945876883               |
| SNP_P3_2583_3080445 | NC_021160.1    | Ca_kabuli_chr01 | 3080445                 | CC                              | GG                | 1945876884               |
| SNP_P3_2584_3080992 | NC_021160.1    | Ca_kabuli_chr01 | 3080992                 | TT                              | CC                | 1945876886               |
| SNP_P3_2585_3081945 | NC_021160.1    | Ca_kabuli_chr01 | 3081945                 | GG                              | AA                | 1945876888               |
| SNP_P3_2586_3081954 | NC_021160.1    | Ca_kabuli_chr01 | 3081954                 | AA                              | GG                | 1945876890               |
| SNP_P3_2587_3081968 | NC_021160.1    | Ca_kabuli_chr01 | 3081968                 | CC                              | TT                | 1945876891               |
| SNP_P3_2588_3082280 | NC_021160.1    | Ca_kabuli_chr01 | 3082280                 | AA                              | GG                | 1945876893               |
| SNP_P3_2589_3082587 | NC_021160.1    | Ca_kabuli_chr01 | 3082587                 | AA                              | GG                | 1945876895               |

| SNPs IDs            | Chromosome IDs | Chromosomes     | Physical positions (bp) | CDC Frontier (Reference genome) | (Pusa 256 & HPNB) | NCBI SNPdb Accession IDs |
|---------------------|----------------|-----------------|-------------------------|---------------------------------|-------------------|--------------------------|
| SNP_P3_2590_3082719 | NC_021160.1    | Ca_kabuli_chr01 | 3082719                 | AA                              | TT                | 1945876897               |
| SNP_P3_2591_3083755 | NC_021160.1    | Ca_kabuli_chr01 | 3083755                 | GG                              | CC                | 1945876899               |
| SNP_P3_2592_3083852 | NC_021160.1    | Ca_kabuli_chr01 | 3083852                 | AA                              | CC                | 1945876900               |
| SNP_P3_2593_3084163 | NC_021160.1    | Ca_kabuli_chr01 | 3084163                 | AA                              | CC                | 1945876902               |
| SNP_P3_2594_3084182 | NC_021160.1    | Ca_kabuli_chr01 | 3084182                 | GG                              | AA                | 1945876904               |
| SNP_P3_2595_3084224 | NC_021160.1    | Ca_kabuli_chr01 | 3084224                 | CC                              | TT                | 1945876906               |
| SNP_P3_2596_3084234 | NC_021160.1    | Ca_kabuli_chr01 | 3084234                 | TT                              | AA                | 1945876907               |
| SNP_P3_2598_3084555 | NC_021160.1    | Ca_kabuli_chr01 | 3084555                 | TT                              | CC                | 1945876909               |
| SNP_P3_2599_3084562 | NC_021160.1    | Ca_kabuli_chr01 | 3084562                 | CC                              | AA                | 1945876911               |
| SNP_P3_2600_3086434 | NC_021160.1    | Ca_kabuli_chr01 | 3086434                 | AA                              | TT                | 1945876913               |
| SNP_P3_2601_3086839 | NC_021160.1    | Ca_kabuli_chr01 | 3086839                 | TT                              | AA                | 1945876914               |
| SNP_P3_2602_3088749 | NC_021160.1    | Ca_kabuli_chr01 | 3088749                 | TT                              | GG                | 1945876916               |
| SNP_P3_2603_3088814 | NC_021160.1    | Ca_kabuli_chr01 | 3088814                 | GG                              | CC                | 1945876918               |
| SNP_P3_2604_3089201 | NC_021160.1    | Ca_kabuli_chr01 | 3089201                 | AA                              | TT                | 1945876920               |
| SNP_P3_2605_3089205 | NC_021160.1    | Ca_kabuli_chr01 | 3089205                 | CC                              | AA                | 1945876922               |
| SNP_P3_2606_3089223 | NC_021160.1    | Ca_kabuli_chr01 | 3089223                 | AA                              | TT                | 1945876923               |
| SNP_P3_2609_3091178 | NC_021160.1    | Ca_kabuli_chr01 | 3091178                 | GG                              | TT                | 1945876925               |
| SNP_P3_2610_3091227 | NC_021160.1    | Ca_kabuli_chr01 | 3091227                 | CC                              | GG                | 1945876927               |
| SNP_P3_2612_3091567 | NC_021160.1    | Ca_kabuli_chr01 | 3091567                 | TT                              | CC                | 1945876929               |
| SNP_P3_2613_3091639 | NC_021160.1    | Ca_kabuli_chr01 | 3091639                 | CC                              | GG                | 1945876930               |
| SNP_P3_2616_3093089 | NC_021160.1    | Ca_kabuli_chr01 | 3093089                 | CC                              | TT                | 1945876932               |
| SNP_P3_2617_3099385 | NC_021160.1    | Ca_kabuli_chr01 | 3099385                 | TT                              | CC                | 1945876934               |
| SNP_P3_2618_3100260 | NC_021160.1    | Ca_kabuli_chr01 | 3100260                 | CC                              | TT                | 1945876936               |
| SNP_P3_2619_3100481 | NC_021160.1    | Ca_kabuli_chr01 | 3100481                 | AA                              | GG                | 1945876938               |
| SNP_P3_2620_3101925 | NC_021160.1    | Ca_kabuli_chr01 | 3101925                 | CC                              | TT                | 1945876939               |
| SNP_P3_2623_3106838 | NC_021160.1    | Ca_kabuli_chr01 | 3106838                 | GG                              | AA                | 1945876941               |
| SNP_P3_2625_3108544 | NC_021160.1    | Ca_kabuli_chr01 | 3108544                 | TT                              | CC                | 1945876943               |
| SNP_P3_2626_3109145 | NC_021160.1    | Ca_kabuli_chr01 | 3109145                 | CC                              | GG                | 1945876945               |
| SNP_P3_2629_3111069 | NC_021160.1    | Ca_kabuli_chr01 | 3111069                 | CC                              | AA                | 1945876946               |
| SNP_P3_2630_3111387 | NC_021160.1    | Ca_kabuli_chr01 | 3111387                 | TT                              | CC                | 1945876948               |
| SNP_P3_2632_3111449 | NC_021160.1    | Ca_kabuli_chr01 | 3111449                 | AA                              | TT                | 1945876950               |
| SNP_P3_2634_3112244 | NC_021160.1    | Ca_kabuli_chr01 | 3112244                 | TT                              | CC                | 1945876952               |
| SNP_P3_2635_3112624 | NC_021160.1    | Ca_kabuli_chr01 | 3112624                 | TT                              | CC                | 1945876954               |
| SNP_P3_2636_3112917 | NC_021160.1    | Ca_kabuli_chr01 | 3112917                 | AA                              | CC                | 1945876955               |
| SNP_P3_2637_3112920 | NC_021160.1    | Ca_kabuli_chr01 | 3112920                 | AA                              | GG                | 1945876957               |
| SNP_P3_2638_3114278 | NC_021160.1    | Ca_kabuli_chr01 | 3114278                 | TT                              | AA                | 1945876959               |
| SNP_P3_2639_3114282 | NC_021160.1    | Ca_kabuli_chr01 | 3114282                 | CC                              | TT                | 1945876961               |
| SNP_P3_2640_3114283 | NC_021160.1    | Ca_kabuli_chr01 | 3114283                 | AA                              | GG                | 1945876962               |
| SNP_P3_2641_3114303 | NC_021160.1    | Ca_kabuli_chr01 | 3114303                 | TT                              | CC                | 1945876964               |
| SNP_P3_2642_3117922 | NC_021160.1    | Ca_kabuli_chr01 | 3117922                 | CC                              | TT                | 1945876966               |
| SNP_P3_2643_3117943 | NC_021160.1    | Ca_kabuli_chr01 | 3117943                 | GG                              | TT                | 1945876968               |
| SNP_P3_2644_3118009 | NC_021160.1    | Ca_kabuli_chr01 | 3118009                 | CC                              | GG                | 1945876970               |

| SNPs IDs            | Chromosome IDs | Chromosomes     | Physical positions (bp) | CDC Frontier (Reference genome) | (Pusa 256 & HPNB) | NCBI SNPdb Accession IDs |
|---------------------|----------------|-----------------|-------------------------|---------------------------------|-------------------|--------------------------|
| SNP_P3_2645_3118065 | NC_021160.1    | Ca_kabuli_chr01 | 3118065                 | GG                              | CC                | 1945876971               |
| SNP_P3_2646_3118399 | NC_021160.1    | Ca_kabuli_chr01 | 3118399                 | TT                              | AA                | 1945876973               |
| SNP_P3_2647_3121550 | NC_021160.1    | Ca_kabuli_chr01 | 3121550                 | AA                              | GG                | 1945876975               |
| SNP_P3_2648_3121564 | NC_021160.1    | Ca_kabuli_chr01 | 3121564                 | CC                              | GG                | 1945876977               |
| SNP_P3_2649_3122519 | NC_021160.1    | Ca_kabuli_chr01 | 3122519                 | CC                              | GG                | 1945876978               |
| SNP_P3_2650_3123997 | NC_021160.1    | Ca_kabuli_chr01 | 3123997                 | CC                              | GG                | 1945876980               |
| SNP_P3_2651_3124020 | NC_021160.1    | Ca_kabuli_chr01 | 3124020                 | GG                              | CC                | 1945876982               |
| SNP_P3_2652_3124284 | NC_021160.1    | Ca_kabuli_chr01 | 3124284                 | TT                              | CC                | 1945876984               |
| SNP_P3_2655_3124775 | NC_021160.1    | Ca_kabuli_chr01 | 3124775                 | AA                              | TT                | 1945876985               |
| SNP_P3_2656_3124804 | NC_021160.1    | Ca_kabuli_chr01 | 3124804                 | TT                              | GG                | 1945876987               |
| SNP_P3_2657_3124819 | NC_021160.1    | Ca_kabuli_chr01 | 3124819                 | GG                              | CC                | 1945876989               |
| SNP_P3_2658_3125080 | NC_021160.1    | Ca_kabuli_chr01 | 3125080                 | TT                              | CC                | 1945876991               |
| SNP_P3_2660_3125715 | NC_021160.1    | Ca_kabuli_chr01 | 3125715                 | AA                              | TT                | 1945876992               |
| SNP_P3_2661_3125890 | NC_021160.1    | Ca_kabuli_chr01 | 3125890                 | GG                              | AA                | 1945876994               |
| SNP_P3_2664_3126589 | NC_021160.1    | Ca_kabuli_chr01 | 3126589                 | TT                              | GG                | 1945876996               |
| SNP_P3_2665_3126593 | NC_021160.1    | Ca_kabuli_chr01 | 3126593                 | CC                              | GG                | 1945876998               |
| SNP_P3_2666_3126940 | NC_021160.1    | Ca_kabuli_chr01 | 3126940                 | TT                              | AA                | 1945876999               |
| SNP_P3_2667_3127002 | NC_021160.1    | Ca_kabuli_chr01 | 3127002                 | GG                              | TT                | 1945877001               |
| SNP_P3_2668_3127975 | NC_021160.1    | Ca_kabuli_chr01 | 3127975                 | CC                              | TT                | 1945877003               |
| SNP_P3_2669_3128312 | NC_021160.1    | Ca_kabuli_chr01 | 3128312                 | CC                              | TT                | 1945877005               |
| SNP_P3_2670_3128321 | NC_021160.1    | Ca_kabuli_chr01 | 3128321                 | AA                              | GG                | 1945877007               |
| SNP_P3_2671_3128349 | NC_021160.1    | Ca_kabuli_chr01 | 3128349                 | GG                              | AA                | 1945877008               |
| SNP_P3_2672_3128369 | NC_021160.1    | Ca_kabuli_chr01 | 3128369                 | GG                              | AA                | 1945877010               |
| SNP_P3_2673_3130373 | NC_021160.1    | Ca_kabuli_chr01 | 3130373                 | TT                              | CC                | 1945877012               |
| SNP_P3_2674_3130382 | NC_021160.1    | Ca_kabuli_chr01 | 3130382                 | CC                              | TT                | 1945877014               |
| SNP_P3_2676_3130386 | NC_021160.1    | Ca_kabuli_chr01 | 3130386                 | TT                              | CC                | 1945877015               |
| SNP_P3_2677_3130615 | NC_021160.1    | Ca_kabuli_chr01 | 3130615                 | GG                              | AA                | 1945877017               |
| SNP_P3_2678_3130653 | NC_021160.1    | Ca_kabuli_chr01 | 3130653                 | GG                              | CC                | 1945877019               |
| SNP_P3_2679_3130753 | NC_021160.1    | Ca_kabuli_chr01 | 3130753                 | CC                              | TT                | 1945877021               |
| SNP_P3_2680_3130769 | NC_021160.1    | Ca_kabuli_chr01 | 3130769                 | TT                              | AA                | 1945877023               |
| SNP_P3_2681_3130785 | NC_021160.1    | Ca_kabuli_chr01 | 3130785                 | CC                              | AA                | 1945877024               |
| SNP_P3_2682_3130786 | NC_021160.1    | Ca_kabuli_chr01 | 3130786                 | GG                              | AA                | 1945877026               |
| SNP_P3_2683_3130801 | NC_021160.1    | Ca_kabuli_chr01 | 3130801                 | GG                              | AA                | 1945877028               |
| SNP_P3_2684_3130976 | NC_021160.1    | Ca_kabuli_chr01 | 3130976                 | GG                              | AA                | 1945877030               |
| SNP_P3_2685_3131068 | NC_021160.1    | Ca_kabuli_chr01 | 3131068                 | CC                              | TT                | 1945877031               |
| SNP_P3_2686_3131437 | NC_021160.1    | Ca_kabuli_chr01 | 3131437                 | GG                              | TT                | 1945877033               |
| SNP_P3_2687_3131807 | NC_021160.1    | Ca_kabuli_chr01 | 3131807                 | GG                              | TT                | 1945877035               |
| SNP_P3_2688_3132163 | NC_021160.1    | Ca_kabuli_chr01 | 3132163                 | CC                              | TT                | 1945877037               |
| SNP_P3_2689_3132358 | NC_021160.1    | Ca_kabuli_chr01 | 3132358                 | GG                              | CC                | 1945877038               |
| SNP_P3_2690_3132376 | NC_021160.1    | Ca_kabuli_chr01 | 3132376                 | GG                              | AA                | 1945877040               |
| SNP_P3_2691_3132377 | NC_021160.1    | Ca_kabuli_chr01 | 3132377                 | AA                              | GG                | 1945877042               |
| SNP_P3_2692_3132386 | NC_021160.1    | Ca_kabuli_chr01 | 3132386                 | AA                              | CC                | 1945877044               |

| SNPs IDs            | Chromosome IDs | Chromosomes     | Physical positions (bp) | CDC Frontier (Reference genome) | (Pusa 256 & HPNB) | NCBI SNPdb Accession IDs |
|---------------------|----------------|-----------------|-------------------------|---------------------------------|-------------------|--------------------------|
| SNP_P3_2693_3132395 | NC_021160.1    | Ca_kabuli_chr01 | 3132395                 | CC                              | TT                | 1945877046               |
| SNP_P3_2694_3132425 | NC_021160.1    | Ca_kabuli_chr01 | 3132425                 | AA                              | GG                | 1945877047               |
| SNP_P3_2695_3132518 | NC_021160.1    | Ca_kabuli_chr01 | 3132518                 | GG                              | AA                | 1945877049               |
| SNP_P3_2696_3132720 | NC_021160.1    | Ca_kabuli_chr01 | 3132720                 | CC                              | TT                | 1945877051               |
| SNP_P3_2697_3132771 | NC_021160.1    | Ca_kabuli_chr01 | 3132771                 | TT                              | CC                | 1945877053               |
| SNP_P3_2698_3132800 | NC_021160.1    | Ca_kabuli_chr01 | 3132800                 | CC                              | TT                | 1945877054               |
| SNP_P3_2699_3132806 | NC_021160.1    | Ca_kabuli_chr01 | 3132806                 | CC                              | TT                | 1945877056               |
| SNP_P3_2700_3132980 | NC_021160.1    | Ca_kabuli_chr01 | 3132980                 | TT                              | AA                | 1945877058               |
| SNP_P3_2701_3133018 | NC_021160.1    | Ca_kabuli_chr01 | 3133018                 | CC                              | GG                | 1945877060               |
| SNP_P3_2702_3133028 | NC_021160.1    | Ca_kabuli_chr01 | 3133028                 | CC                              | TT                | 1945877062               |
| SNP_P3_2703_3133065 | NC_021160.1    | Ca_kabuli_chr01 | 3133065                 | CC                              | TT                | 1945877063               |
| SNP_P3_2704_3133394 | NC_021160.1    | Ca_kabuli_chr01 | 3133394                 | GG                              | TT                | 1945877065               |
| SNP_P3_2706_3133685 | NC_021160.1    | Ca_kabuli_chr01 | 3133685                 | TT                              | GG                | 1945877067               |
| SNP_P3_2707_3133689 | NC_021160.1    | Ca_kabuli_chr01 | 3133689                 | GG                              | CC                | 1945877069               |
| SNP_P3_2708_3133763 | NC_021160.1    | Ca_kabuli_chr01 | 3133763                 | AA                              | GG                | 1945877070               |
| SNP_P3_2709_3134357 | NC_021160.1    | Ca_kabuli_chr01 | 3134357                 | TT                              | AA                | 1945877072               |
| SNP_P3_2710_3134455 | NC_021160.1    | Ca_kabuli_chr01 | 3134455                 | AA                              | CC                | 1945877074               |
| SNP_P3_2711_3134894 | NC_021160.1    | Ca_kabuli_chr01 | 3134894                 | AA                              | CC                | 1945877076               |
| SNP_P3_2712_3136285 | NC_021160.1    | Ca_kabuli_chr01 | 3136285                 | CC                              | TT                | 1945877078               |
| SNP_P3_2713_3137488 | NC_021160.1    | Ca_kabuli_chr01 | 3137488                 | CC                              | GG                | 1945877079               |
| SNP_P3_2717_3138472 | NC_021160.1    | Ca_kabuli_chr01 | 3138472                 | GG                              | CC                | 1945877081               |
| SNP_P3_2718_3138483 | NC_021160.1    | Ca_kabuli_chr01 | 3138483                 | AA                              | GG                | 1945877083               |
| SNP_P3_2719_3138515 | NC_021160.1    | Ca_kabuli_chr01 | 3138515                 | AA                              | TT                | 1945877085               |
| SNP_P3_2720_3138522 | NC_021160.1    | Ca_kabuli_chr01 | 3138522                 | AA                              | TT                | 1945877086               |
| SNP_P3_2721_3138667 | NC_021160.1    | Ca_kabuli_chr01 | 3138667                 | AA                              | GG                | 1945877088               |
| SNP_P3_2722_3139564 | NC_021160.1    | Ca_kabuli_chr01 | 3139564                 | AA                              | GG                | 1945877090               |
| SNP_P3_2723_3139588 | NC_021160.1    | Ca_kabuli_chr01 | 3139588                 | AA                              | GG                | 1945877092               |
| SNP_P3_2725_3149437 | NC_021160.1    | Ca_kabuli_chr01 | 3149437                 | CC                              | TT                | 1945877094               |
| SNP_P3_2726_3150322 | NC_021160.1    | Ca_kabuli_chr01 | 3150322                 | CC                              | TT                | 1945877095               |
| SNP_P3_2727_3150341 | NC_021160.1    | Ca_kabuli_chr01 | 3150341                 | TT                              | CC                | 1945877097               |
| SNP_P3_2728_3150356 | NC_021160.1    | Ca_kabuli_chr01 | 3150356                 | GG                              | AA                | 1945877099               |
| SNP_P3_2729_3150360 | NC_021160.1    | Ca_kabuli_chr01 | 3150360                 | GG                              | AA                | 1945877101               |
| SNP_P3_2730_3150362 | NC_021160.1    | Ca_kabuli_chr01 | 3150362                 | CC                              | TT                | 1945877102               |
| SNP_P3_2731_3150381 | NC_021160.1    | Ca_kabuli_chr01 | 3150381                 | TT                              | GG                | 1945877104               |
| SNP_P3_2732_3150386 | NC_021160.1    | Ca_kabuli_chr01 | 3150386                 | TT                              | GG                | 1945877106               |
| SNP_P3_2733_3150397 | NC_021160.1    | Ca_kabuli_chr01 | 3150397                 | AA                              | GG                | 1945877108               |
| SNP_P3_2734_3150422 | NC_021160.1    | Ca_kabuli_chr01 | 3150422                 | GG                              | AA                | 1945877110               |
| SNP_P3_2735_3150487 | NC_021160.1    | Ca_kabuli_chr01 | 3150487                 | TT                              | GG                | 1945877111               |
| SNP_P3_2736_3150491 | NC_021160.1    | Ca_kabuli_chr01 | 3150491                 | AA                              | CC                | 1945877113               |
| SNP_P3_2737_3150639 | NC_021160.1    | Ca_kabuli_chr01 | 3150639                 | TT                              | AA                | 1945877115               |
| SNP_P3_2738_3150664 | NC_021160.1    | Ca_kabuli_chr01 | 3150664                 | CC                              | TT                | 1945877117               |
| SNP_P3_2739_3150683 | NC_021160.1    | Ca_kabuli_chr01 | 3150683                 | AA                              | TT                | 1945877118               |

| SNPs IDs            | Chromosome IDs | Chromosomes     | Physical positions (bp) | CDC Frontier (Reference genome) | (Pusa 256 & HPNB) | NCBI SNPdb Accession IDs |
|---------------------|----------------|-----------------|-------------------------|---------------------------------|-------------------|--------------------------|
| SNP_P3_2740_3150870 | NC_021160.1    | Ca_kabuli_chr01 | 3150870                 | CC                              | TT                | 1945877120               |
| SNP_P3_2741_3153130 | NC_021160.1    | Ca_kabuli_chr01 | 3153130                 | AA                              | GG                | 1945877122               |
| SNP_P3_2742_3153144 | NC_021160.1    | Ca_kabuli_chr01 | 3153144                 | CC                              | TT                | 1945877124               |
| SNP_P3_2743_3154307 | NC_021160.1    | Ca_kabuli_chr01 | 3154307                 | CC                              | GG                | 1945877126               |
| SNP_P3_2744_3154361 | NC_021160.1    | Ca_kabuli_chr01 | 3154361                 | CC                              | TT                | 1945877127               |
| SNP_P3_2745_3154386 | NC_021160.1    | Ca_kabuli_chr01 | 3154386                 | TT                              | GG                | 1945877129               |
| SNP_P3_2747_3155160 | NC_021160.1    | Ca_kabuli_chr01 | 3155160                 | AA                              | GG                | 1945877131               |
| SNP_P3_2748_3155203 | NC_021160.1    | Ca_kabuli_chr01 | 3155203                 | TT                              | CC                | 1945877133               |
| SNP_P3_2749_3155214 | NC_021160.1    | Ca_kabuli_chr01 | 3155214                 | AA                              | GG                | 1945877134               |
| SNP_P3_2750_3155230 | NC_021160.1    | Ca_kabuli_chr01 | 3155230                 | AA                              | TT                | 1945877136               |
| SNP_P3_2752_3155445 | NC_021160.1    | Ca_kabuli_chr01 | 3155445                 | AA                              | GG                | 1945877138               |
| SNP_P3_2753_3155451 | NC_021160.1    | Ca_kabuli_chr01 | 3155451                 | AA                              | TT                | 1945877140               |
| SNP_P3_2754_3155504 | NC_021160.1    | Ca_kabuli_chr01 | 3155504                 | AA                              | GG                | 1945877142               |
| SNP_P3_2755_3155554 | NC_021160.1    | Ca_kabuli_chr01 | 3155554                 | GG                              | CC                | 1945877143               |
| SNP_P3_2756_3155752 | NC_021160.1    | Ca_kabuli_chr01 | 3155752                 | AA                              | GG                | 1945877145               |
| SNP_P3_2757_3156450 | NC_021160.1    | Ca_kabuli_chr01 | 3156450                 | CC                              | GG                | 1945877147               |
| SNP_P3_2758_3156813 | NC_021160.1    | Ca_kabuli_chr01 | 3156813                 | GG                              | AA                | 1945877149               |
| SNP_P3_2759_3158064 | NC_021160.1    | Ca_kabuli_chr01 | 3158064                 | TT                              | CC                | 1945877150               |
| SNP_P3_2760_3168629 | NC_021160.1    | Ca_kabuli_chr01 | 3168629                 | AA                              | GG                | 1945877152               |
| SNP_P3_2761_3191585 | NC_021160.1    | Ca_kabuli_chr01 | 3191585                 | GG                              | AA                | 1945877154               |
| SNP_P3_2762_3206268 | NC_021160.1    | Ca_kabuli_chr01 | 3206268                 | AA                              | GG                | 1945877156               |
| SNP_P3_2763_3209537 | NC_021160.1    | Ca_kabuli_chr01 | 3209537                 | AA                              | GG                | 1945877158               |
| SNP_P3_2765_3223206 | NC_021160.1    | Ca_kabuli_chr01 | 3223206                 | TT                              | CC                | 1945877159               |
| SNP_P3_2766_3238176 | NC_021160.1    | Ca_kabuli_chr01 | 3238176                 | CC                              | TT                | 1945877161               |
| SNP_P3_2768_3262562 | NC_021160.1    | Ca_kabuli_chr01 | 3262562                 | AA                              | TT                | 1945877163               |
| SNP_P3_2769_3274530 | NC_021160.1    | Ca_kabuli_chr01 | 3274530                 | AA                              | TT                | 1945877165               |
| SNP_P3_2771_3289615 | NC_021160.1    | Ca_kabuli_chr01 | 3289615                 | AA                              | TT                | 1945877166               |
| SNP_P3_2772_3289718 | NC_021160.1    | Ca_kabuli_chr01 | 3289718                 | TT                              | GG                | 1945877168               |
| SNP_P3_2773_3289719 | NC_021160.1    | Ca_kabuli_chr01 | 3289719                 | AA                              | TT                | 1945877170               |
| SNP_P3_2774_3314071 | NC_021160.1    | Ca_kabuli_chr01 | 3314071                 | GG                              | TT                | 1945877172               |
| SNP_P3_2775_3324490 | NC_021160.1    | Ca_kabuli_chr01 | 3324490                 | AA                              | GG                | 1945877173               |
| SNP_P3_2776_3341148 | NC_021160.1    | Ca_kabuli_chr01 | 3341148                 | AA                              | GG                | 1945877175               |
| SNP_P3_2778_3355891 | NC_021160.1    | Ca_kabuli_chr01 | 3355891                 | AA                              | CC                | 1945877177               |
| SNP_P3_2779_3367513 | NC_021160.1    | Ca_kabuli_chr01 | 3367513                 | GG                              | CC                | 1945877179               |
| SNP_P3_2780_3415176 | NC_021160.1    | Ca_kabuli_chr01 | 3415176                 | CC                              | AA                | 1945877180               |
| SNP_P3_2781_3417467 | NC_021160.1    | Ca_kabuli_chr01 | 3417467                 | AA                              | GG                | 1945877182               |
| SNP_P3_2782_3433079 | NC_021160.1    | Ca_kabuli_chr01 | 3433079                 | TT                              | CC                | 1945877184               |
| SNP_P3_2783_3456582 | NC_021160.1    | Ca_kabuli_chr01 | 3456582                 | TT                              | CC                | 1945877186               |
| SNP_P3_2784_3456589 | NC_021160.1    | Ca_kabuli_chr01 | 3456589                 | TT                              | CC                | 1945877188               |
| SNP_P3_2785_3456621 | NC_021160.1    | Ca_kabuli_chr01 | 3456621                 | AA                              | GG                | 1945877189               |
| SNP_P3_2786_3456839 | NC_021160.1    | Ca_kabuli_chr01 | 3456839                 | GG                              | TT                | 1945877191               |
| SNP_P3_2787_3476661 | NC_021160.1    | Ca_kabuli_chr01 | 3476661                 | CC                              | TT                | 1945877193               |

| SNPs IDs            | Chromosome IDs | Chromosomes     | Physical positions (bp) | CDC Frontier (Reference genome) | (Pusa 256 & HPNB) | NCBI SNPdb Accession IDs |
|---------------------|----------------|-----------------|-------------------------|---------------------------------|-------------------|--------------------------|
| SNP_P3_2788_3498129 | NC_021160.1    | Ca_kabuli_chr01 | 3498129                 | CC                              | GG                | 1945877195               |
| SNP_P3_2789_3498807 | NC_021160.1    | Ca_kabuli_chr01 | 3498807                 | TT                              | AA                | 1945877197               |
| SNP_P3_2790_3518469 | NC_021160.1    | Ca_kabuli_chr01 | 3518469                 | TT                              | CC                | 1945877198               |
| SNP_P3_2791_3518631 | NC_021160.1    | Ca_kabuli_chr01 | 3518631                 | TT                              | CC                | 1945877200               |
| SNP_P3_2792_3518848 | NC_021160.1    | Ca_kabuli_chr01 | 3518848                 | GG                              | AA                | 1945877202               |
| SNP_P3_2794_3529016 | NC_021160.1    | Ca_kabuli_chr01 | 3529016                 | CC                              | GG                | 1945877204               |
| SNP_P3_2795_3568570 | NC_021160.1    | Ca_kabuli_chr01 | 3568570                 | GG                              | AA                | 1945877205               |
| SNP_P3_2796_3589578 | NC_021160.1    | Ca_kabuli_chr01 | 3589578                 | AA                              | TT                | 1945877207               |
| SNP_P3_2797_3601325 | NC_021160.1    | Ca_kabuli_chr01 | 3601325                 | TT                              | AA                | 1945877209               |
| SNP_P3_2798_3601326 | NC_021160.1    | Ca_kabuli_chr01 | 3601326                 | AA                              | TT                | 1945877211               |
| SNP_P3_2799_3629038 | NC_021160.1    | Ca_kabuli_chr01 | 3629038                 | AA                              | GG                | 1945877213               |
| SNP_P3_2800_3678428 | NC_021160.1    | Ca_kabuli_chr01 | 3678428                 | AA                              | TT                | 1945877214               |
| SNP_P3_2801_3678430 | NC_021160.1    | Ca_kabuli_chr01 | 3678430                 | TT                              | AA                | 1945877216               |
| SNP_P3_2802_3722777 | NC_021160.1    | Ca_kabuli_chr01 | 3722777                 | AA                              | GG                | 1945877218               |
| SNP_P3_2803_3746079 | NC_021160.1    | Ca_kabuli_chr01 | 3746079                 | GG                              | CC                | 1945877220               |
| SNP_P3_2804_3746130 | NC_021160.1    | Ca_kabuli_chr01 | 3746130                 | TT                              | AA                | 1945877221               |
| SNP_P3_2805_3758069 | NC_021160.1    | Ca_kabuli_chr01 | 3758069                 | CC                              | TT                | 1945877223               |
| SNP_P3_2806_3758370 | NC_021160.1    | Ca_kabuli_chr01 | 3758370                 | GG                              | TT                | 1945877225               |
| SNP_P3_2807_3758532 | NC_021160.1    | Ca_kabuli_chr01 | 3758532                 | GG                              | AA                | 1945877227               |
| SNP_P3_2809_3769569 | NC_021160.1    | Ca_kabuli_chr01 | 3769569                 | GG                              | AA                | 1945877229               |
| SNP_P3_2810_3783527 | NC_021160.1    | Ca_kabuli_chr01 | 3783527                 | TT                              | AA                | 1945877230               |
| SNP_P3_2811_3783528 | NC_021160.1    | Ca_kabuli_chr01 | 3783528                 | TT                              | AA                | 1945877232               |
| SNP_P3_2812_3783532 | NC_021160.1    | Ca_kabuli_chr01 | 3783532                 | TT                              | CC                | 1945877234               |
| SNP_P3_2814_3783646 | NC_021160.1    | Ca_kabuli_chr01 | 3783646                 | GG                              | TT                | 1945877236               |
| SNP_P3_2815_3809234 | NC_021160.1    | Ca_kabuli_chr01 | 3809234                 | CC                              | GG                | 1945877237               |
| SNP_P3_2816_3809258 | NC_021160.1    | Ca_kabuli_chr01 | 3809258                 | TT                              | CC                | 1945877239               |
| SNP_P3_2817_3809273 | NC_021160.1    | Ca_kabuli_chr01 | 3809273                 | TT                              | CC                | 1945877241               |
| SNP_P3_2818_3809778 | NC_021160.1    | Ca_kabuli_chr01 | 3809778                 | TT                              | CC                | 1945877243               |
| SNP_P3_2819_3809789 | NC_021160.1    | Ca_kabuli_chr01 | 3809789                 | AA                              | GG                | 1945877245               |
| SNP_P3_2820_3848296 | NC_021160.1    | Ca_kabuli_chr01 | 3848296                 | AA                              | GG                | 1945877246               |
| SNP_P3_2821_3856206 | NC_021160.1    | Ca_kabuli_chr01 | 3856206                 | TT                              | CC                | 1945877248               |
| SNP_P3_2822_3879160 | NC_021160.1    | Ca_kabuli_chr01 | 3879160                 | CC                              | TT                | 1945877250               |
| SNP_P3_2824_3938778 | NC_021160.1    | Ca_kabuli_chr01 | 3938778                 | CC                              | TT                | 1945877252               |
| SNP_P3_2825_3958762 | NC_021160.1    | Ca_kabuli_chr01 | 3958762                 | CC                              | TT                | 1945877253               |
| SNP_P3_2826_3966049 | NC_021160.1    | Ca_kabuli_chr01 | 3966049                 | CC                              | TT                | 1945877255               |
| SNP_P3_2827_4003142 | NC_021160.1    | Ca_kabuli_chr01 | 4003142                 | CC                              | TT                | 1945877257               |
| SNP_P3_2829_4019907 | NC_021160.1    | Ca_kabuli_chr01 | 4019907                 | TT                              | GG                | 1945877259               |
| SNP_P3_2831_4044096 | NC_021160.1    | Ca_kabuli_chr01 | 4044096                 | CC                              | TT                | 1945877261               |
| SNP_P3_2832_4047353 | NC_021160.1    | Ca_kabuli_chr01 | 4047353                 | GG                              | CC                | 1945877262               |
| SNP_P3_2834_4053445 | NC_021160.1    | Ca_kabuli_chr01 | 4053445                 | CC                              | TT                | 1945877264               |
| SNP_P3_2836_4078924 | NC_021160.1    | Ca_kabuli_chr01 | 4078924                 | AA                              | GG                | 1945877266               |
| SNP_P3_2838_4126938 | NC_021160.1    | Ca_kabuli_chr01 | 4126938                 | AA                              | GG                | 1945877268               |

| SNPs IDs            | Chromosome IDs | Chromosomes     | Physical positions (bp) | CDC Frontier (Reference genome) | (Pusa 256 & HPNB) | NCBI SNPdb Accession IDs |
|---------------------|----------------|-----------------|-------------------------|---------------------------------|-------------------|--------------------------|
| SNP_P3_2839_4126940 | NC_021160.1    | Ca_kabuli_chr01 | 4126940                 | CC                              | TT                | 1945877269               |
| SNP_P3_2840_4138377 | NC_021160.1    | Ca_kabuli_chr01 | 4138377                 | GG                              | TT                | 1945877271               |
| SNP_P3_2841_4138378 | NC_021160.1    | Ca_kabuli_chr01 | 4138378                 | AA                              | GG                | 1945877273               |
| SNP_P3_2842_4142618 | NC_021160.1    | Ca_kabuli_chr01 | 4142618                 | TT                              | AA                | 1945877275               |
| SNP_P3_2843_4149635 | NC_021160.1    | Ca_kabuli_chr01 | 4149635                 | AA                              | GG                | 1945877277               |
| SNP_P3_2844_4150828 | NC_021160.1    | Ca_kabuli_chr01 | 4150828                 | TT                              | AA                | 1945877278               |
| SNP_P3_2845_4153720 | NC_021160.1    | Ca_kabuli_chr01 | 4153720                 | GG                              | AA                | 1945877280               |
| SNP_P3_2846_4158149 | NC_021160.1    | Ca_kabuli_chr01 | 4158149                 | AA                              | TT                | 1945877282               |
| SNP_P3_2847_4159378 | NC_021160.1    | Ca_kabuli_chr01 | 4159378                 | TT                              | GG                | 1945877284               |
| SNP_P3_2848_4161319 | NC_021160.1    | Ca_kabuli_chr01 | 4161319                 | GG                              | AA                | 1945877286               |
| SNP_P3_2849_4161330 | NC_021160.1    | Ca_kabuli_chr01 | 4161330                 | CC                              | GG                | 1945877287               |
| SNP_P3_2850_4164095 | NC_021160.1    | Ca_kabuli_chr01 | 4164095                 | GG                              | AA                | 1945877289               |
| SNP_P3_2853_4165726 | NC_021160.1    | Ca_kabuli_chr01 | 4165726                 | AA                              | GG                | 1945877291               |
| SNP_P3_2854_4171261 | NC_021160.1    | Ca_kabuli_chr01 | 4171261                 | CC                              | AA                | 1945877293               |
| SNP_P3_2856_4173998 | NC_021160.1    | Ca_kabuli_chr01 | 4173998                 | AA                              | CC                | 1945877295               |
| SNP_P3_2857_4176218 | NC_021160.1    | Ca_kabuli_chr01 | 4176218                 | CC                              | TT                | 1945877296               |
| SNP_P3_2858_4176343 | NC_021160.1    | Ca_kabuli_chr01 | 4176343                 | AA                              | GG                | 1945877298               |
| SNP_P3_2859_4176358 | NC_021160.1    | Ca_kabuli_chr01 | 4176358                 | TT                              | CC                | 1945877300               |
| SNP_P3_2860_4185019 | NC_021160.1    | Ca_kabuli_chr01 | 4185019                 | TT                              | AA                | 1945877302               |
| SNP_P3_2861_4216754 | NC_021160.1    | Ca_kabuli_chr01 | 4216754                 | GG                              | AA                | 1945877304               |
| SNP_P3_2862_4217853 | NC_021160.1    | Ca_kabuli_chr01 | 4217853                 | GG                              | AA                | 1945877305               |
| SNP_P3_2863_4218349 | NC_021160.1    | Ca_kabuli_chr01 | 4218349                 | CC                              | TT                | 1945877307               |
| SNP_P3_2865_4229411 | NC_021160.1    | Ca_kabuli_chr01 | 4229411                 | GG                              | AA                | 1945877309               |
| SNP_P3_2866_4230132 | NC_021160.1    | Ca_kabuli_chr01 | 4230132                 | GG                              | TT                | 1945877311               |
| SNP_P3_2867_4230143 | NC_021160.1    | Ca_kabuli_chr01 | 4230143                 | TT                              | CC                | 1945877312               |
| SNP_P3_2868_4231002 | NC_021160.1    | Ca_kabuli_chr01 | 4231002                 | CC                              | TT                | 1945877314               |
| SNP_P3_2869_4231032 | NC_021160.1    | Ca_kabuli_chr01 | 4231032                 | CC                              | AA                | 1945877316               |
| SNP_P3_2872_4234887 | NC_021160.1    | Ca_kabuli_chr01 | 4234887                 | TT                              | AA                | 1945877318               |
| SNP_P3_2873_4234889 | NC_021160.1    | Ca_kabuli_chr01 | 4234889                 | GG                              | CC                | 1945877320               |
| SNP_P3_2875_4238114 | NC_021160.1    | Ca_kabuli_chr01 | 4238114                 | TT                              | AA                | 1945877321               |
| SNP_P3_2876_4238119 | NC_021160.1    | Ca_kabuli_chr01 | 4238119                 | TT                              | AA                | 1945877323               |
| SNP_P3_2877_4238485 | NC_021160.1    | Ca_kabuli_chr01 | 4238485                 | CC                              | GG                | 1945877325               |
| SNP_P3_2878_4238527 | NC_021160.1    | Ca_kabuli_chr01 | 4238527                 | CC                              | GG                | 1945877327               |
| SNP_P3_2879_4238528 | NC_021160.1    | Ca_kabuli_chr01 | 4238528                 | CC                              | TT                | 1945877328               |
| SNP_P3_2880_4238849 | NC_021160.1    | Ca_kabuli_chr01 | 4238849                 | TT                              | CC                | 1945877330               |
| SNP_P3_2881_4238861 | NC_021160.1    | Ca_kabuli_chr01 | 4238861                 | AA                              | GG                | 1945877332               |
| SNP_P3_2882_4238979 | NC_021160.1    | Ca_kabuli_chr01 | 4238979                 | GG                              | TT                | 1945877334               |
| SNP_P3_2883_4238981 | NC_021160.1    | Ca_kabuli_chr01 | 4238981                 | CC                              | TT                | 1945877336               |
| SNP_P3_2884_4238997 | NC_021160.1    | Ca_kabuli_chr01 | 4238997                 | AA                              | GG                | 1945877337               |
| SNP_P3_2885_4239573 | NC_021160.1    | Ca_kabuli_chr01 | 4239573                 | TT                              | CC                | 1945877339               |
| SNP_P3_2887_4240236 | NC_021160.1    | Ca_kabuli_chr01 | 4240236                 | GG                              | AA                | 1945877341               |
| SNP_P3_2888_4240259 | NC_021160.1    | Ca_kabuli_chr01 | 4240259                 | TT                              | CC                | 1945877343               |

| SNPs IDs            | Chromosome IDs | Chromosomes     | Physical positions (bp) | CDC Frontier (Reference genome) | (Pusa 256 & HPNB) | NCBI SNPdb Accession IDs |
|---------------------|----------------|-----------------|-------------------------|---------------------------------|-------------------|--------------------------|
| SNP_P3_2889_4240299 | NC_021160.1    | Ca_kabuli_chr01 | 4240299                 | TT                              | CC                | 1945877344               |
| SNP_P3_2891_4240370 | NC_021160.1    | Ca_kabuli_chr01 | 4240370                 | CC                              | GG                | 1945877346               |
| SNP_P3_2892_4240412 | NC_021160.1    | Ca_kabuli_chr01 | 4240412                 | CC                              | TT                | 1945877348               |
| SNP_P3_2893_4240691 | NC_021160.1    | Ca_kabuli_chr01 | 4240691                 | CC                              | GG                | 1945877350               |
| SNP_P3_2894_4240695 | NC_021160.1    | Ca_kabuli_chr01 | 4240695                 | CC                              | TT                | 1945877352               |
| SNP_P3_2895_4240796 | NC_021160.1    | Ca_kabuli_chr01 | 4240796                 | TT                              | CC                | 1945877353               |
| SNP_P3_2896_4240797 | NC_021160.1    | Ca_kabuli_chr01 | 4240797                 | CC                              | TT                | 1945877355               |
| SNP_P3_2897_4240800 | NC_021160.1    | Ca_kabuli_chr01 | 4240800                 | GG                              | AA                | 1945877357               |
| SNP_P3_2898_4240850 | NC_021160.1    | Ca_kabuli_chr01 | 4240850                 | CC                              | GG                | 1945877359               |
| SNP_P3_2899_4240859 | NC_021160.1    | Ca_kabuli_chr01 | 4240859                 | GG                              | AA                | 1945877360               |
| SNP_P3_2900_4240891 | NC_021160.1    | Ca_kabuli_chr01 | 4240891                 | TT                              | CC                | 1945877362               |
| SNP_P3_2901_4240943 | NC_021160.1    | Ca_kabuli_chr01 | 4240943                 | GG                              | TT                | 1945877364               |
| SNP_P3_2902_4240989 | NC_021160.1    | Ca_kabuli_chr01 | 4240989                 | GG                              | AA                | 1945877366               |
| SNP_P3_2903_4241099 | NC_021160.1    | Ca_kabuli_chr01 | 4241099                 | AA                              | GG                | 1945877368               |
| SNP_P3_2904_4241155 | NC_021160.1    | Ca_kabuli_chr01 | 4241155                 | GG                              | TT                | 1945877369               |
| SNP_P3_2905_4242903 | NC_021160.1    | Ca_kabuli_chr01 | 4242903                 | GG                              | CC                | 1945877371               |
| SNP_P3_2906_4242907 | NC_021160.1    | Ca_kabuli_chr01 | 4242907                 | GG                              | AA                | 1945877373               |
| SNP_P3_2907_4243162 | NC_021160.1    | Ca_kabuli_chr01 | 4243162                 | TT                              | AA                | 1945877375               |
| SNP_P3_2908_4243550 | NC_021160.1    | Ca_kabuli_chr01 | 4243550                 | AA                              | CC                | 1945877376               |
| SNP_P3_2909_4243565 | NC_021160.1    | Ca_kabuli_chr01 | 4243565                 | AA                              | GG                | 1945877378               |
| SNP_P3_2910_4243593 | NC_021160.1    | Ca_kabuli_chr01 | 4243593                 | AA                              | GG                | 1945877380               |
| SNP_P3_2911_4244206 | NC_021160.1    | Ca_kabuli_chr01 | 4244206                 | AA                              | GG                | 1945877382               |
| SNP_P3_2913_4245736 | NC_021160.1    | Ca_kabuli_chr01 | 4245736                 | GG                              | TT                | 1945877384               |
| SNP_P3_2914_4251291 | NC_021160.1    | Ca_kabuli_chr01 | 4251291                 | TT                              | CC                | 1945877385               |
| SNP_P3_2915_4253345 | NC_021160.1    | Ca_kabuli_chr01 | 4253345                 | GG                              | AA                | 1945877387               |
| SNP_P3_2916_4254174 | NC_021160.1    | Ca_kabuli_chr01 | 4254174                 | CC                              | TT                | 1945877389               |
| SNP_P3_2917_4254627 | NC_021160.1    | Ca_kabuli_chr01 | 4254627                 | GG                              | AA                | 1945877391               |
| SNP_P3_2918_4255246 | NC_021160.1    | Ca_kabuli_chr01 | 4255246                 | CC                              | TT                | 1945877392               |
| SNP_P3_2920_4261257 | NC_021160.1    | Ca_kabuli_chr01 | 4261257                 | CC                              | AA                | 1945877394               |
| SNP_P3_2921_4261651 | NC_021160.1    | Ca_kabuli_chr01 | 4261651                 | CC                              | TT                | 1945877396               |
| SNP_P3_2922_4263645 | NC_021160.1    | Ca_kabuli_chr01 | 4263645                 | GG                              | AA                | 1945877398               |
| SNP_P3_2923_4266057 | NC_021160.1    | Ca_kabuli_chr01 | 4266057                 | AA                              | GG                | 1945877400               |
| SNP_P3_2925_4280322 | NC_021160.1    | Ca_kabuli_chr01 | 4280322                 | CC                              | TT                | 1945877401               |
| SNP_P3_2927_4287878 | NC_021160.1    | Ca_kabuli_chr01 | 4287878                 | CC                              | GG                | 1945877403               |
| SNP_P3_2928_4291926 | NC_021160.1    | Ca_kabuli_chr01 | 4291926                 | TT                              | CC                | 1945877405               |
| SNP_P3_2929_4306627 | NC_021160.1    | Ca_kabuli_chr01 | 4306627                 | AA                              | TT                | 1945877407               |
| SNP_P3_2930_4306665 | NC_021160.1    | Ca_kabuli_chr01 | 4306665                 | TT                              | CC                | 1945877408               |
| SNP_P3_2931_4316834 | NC_021160.1    | Ca_kabuli_chr01 | 4316834                 | AA                              | TT                | 1945877410               |
| SNP_P3_2932_4328323 | NC_021160.1    | Ca_kabuli_chr01 | 4328323                 | GG                              | AA                | 1945877412               |
| SNP_P3_2933_4358405 | NC_021160.1    | Ca_kabuli_chr01 | 4358405                 | TT                              | AA                | 1945877414               |
| SNP_P3_2934_4387548 | NC_021160.1    | Ca_kabuli_chr01 | 4387548                 | TT                              | GG                | 1945877416               |
| SNP_P3_2935_4393976 | NC_021160.1    | Ca_kabuli_chr01 | 4393976                 | CC                              | TT                | 1945877417               |



| SNPs IDs            | Chromosome IDs | Chromosomes     | Physical positions (bp) | CDC Frontier (Reference genome) | (Pusa 256 & HPNB) | NCBI SNPdb Accession IDs |
|---------------------|----------------|-----------------|-------------------------|---------------------------------|-------------------|--------------------------|
| SNP_P3_2936_4395942 | NC_021160.1    | Ca_kabuli_chr01 | 4395942                 | TT                              | CC                | 1945877419               |
| SNP_P3_2937_4431578 | NC_021160.1    | Ca_kabuli_chr01 | 4431578                 | TT                              | GG                | 1945877421               |
| SNP_P3_2938_4435104 | NC_021160.1    | Ca_kabuli_chr01 | 4435104                 | GG                              | AA                | 1945877423               |
| SNP_P3_2939_4435290 | NC_021160.1    | Ca_kabuli_chr01 | 4435290                 | TT                              | CC                | 1945877424               |
| SNP_P3_2940_4435322 | NC_021160.1    | Ca_kabuli_chr01 | 4435322                 | AA                              | GG                | 1945877426               |
| SNP_P3_2942_4444899 | NC_021160.1    | Ca_kabuli_chr01 | 4444899                 | GG                              | TT                | 1945877428               |
| SNP_P3_2943_4447836 | NC_021160.1    | Ca_kabuli_chr01 | 4447836                 | CC                              | TT                | 1945877430               |
| SNP_P3_2944_4448068 | NC_021160.1    | Ca_kabuli_chr01 | 4448068                 | CC                              | AA                | 1945877432               |
| SNP_P3_2945_4516382 | NC_021160.1    | Ca_kabuli_chr01 | 4516382                 | TT                              | AA                | 1945877433               |
| SNP_P3_2946_4521045 | NC_021160.1    | Ca_kabuli_chr01 | 4521045                 | TT                              | CC                | 1945877435               |
| SNP_P3_2947_4539486 | NC_021160.1    | Ca_kabuli_chr01 | 4539486                 | AA                              | TT                | 1945877437               |
| SNP_P3_2948_4539495 | NC_021160.1    | Ca_kabuli_chr01 | 4539495                 | GG                              | TT                | 1945877439               |
| SNP_P3_2949_4612109 | NC_021160.1    | Ca_kabuli_chr01 | 4612109                 | GG                              | AA                | 1945877440               |
| SNP_P3_2952_4649591 | NC_021160.1    | Ca_kabuli_chr01 | 4649591                 | AA                              | GG                | 1945877442               |
| SNP_P3_2953_4680078 | NC_021160.1    | Ca_kabuli_chr01 | 4680078                 | TT                              | CC                | 1945877444               |
| SNP_P3_2955_4691092 | NC_021160.1    | Ca_kabuli_chr01 | 4691092                 | AA                              | GG                | 1945877446               |
| SNP_P3_2956_4694098 | NC_021160.1    | Ca_kabuli_chr01 | 4694098                 | CC                              | TT                | 1945877448               |
| SNP_P3_2957_4713019 | NC_021160.1    | Ca_kabuli_chr01 | 4713019                 | AA                              | GG                | 1945877449               |
| SNP_P3_2958_4713028 | NC_021160.1    | Ca_kabuli_chr01 | 4713028                 | CC                              | TT                | 1945877451               |
| SNP_P3_2959_4713347 | NC_021160.1    | Ca_kabuli_chr01 | 4713347                 | GG                              | AA                | 1945877453               |
| SNP_P3_2960_4713995 | NC_021160.1    | Ca_kabuli_chr01 | 4713995                 | GG                              | AA                | 1945877455               |
| SNP_P3_2961_4714299 | NC_021160.1    | Ca_kabuli_chr01 | 4714299                 | AA                              | TT                | 1945877456               |
| SNP_P3_2962_4714317 | NC_021160.1    | Ca_kabuli_chr01 | 4714317                 | CC                              | AA                | 1945877458               |
| SNP_P3_2963_4714346 | NC_021160.1    | Ca_kabuli_chr01 | 4714346                 | CC                              | TT                | 1945877460               |
| SNP_P3_2964_4714770 | NC_021160.1    | Ca_kabuli_chr01 | 4714770                 | AA                              | TT                | 1945877462               |
| SNP_P3_2965_4714834 | NC_021160.1    | Ca_kabuli_chr01 | 4714834                 | TT                              | AA                | 1945877464               |
| SNP_P3_2966_4715708 | NC_021160.1    | Ca_kabuli_chr01 | 4715708                 | TT                              | CC                | 1945877465               |
| SNP_P3_2968_4719262 | NC_021160.1    | Ca_kabuli_chr01 | 4719262                 | GG                              | AA                | 1945877467               |
| SNP_P3_2969_4719267 | NC_021160.1    | Ca_kabuli_chr01 | 4719267                 | AA                              | CC                | 1945877469               |
| SNP_P3_2970_4719871 | NC_021160.1    | Ca_kabuli_chr01 | 4719871                 | CC                              | GG                | 1945877471               |
| SNP_P3_2971_4720136 | NC_021160.1    | Ca_kabuli_chr01 | 4720136                 | GG                              | CC                | 1945877472               |
| SNP_P3_2972_4720141 | NC_021160.1    | Ca_kabuli_chr01 | 4720141                 | TT                              | AA                | 1945877474               |
| SNP_P3_2975_4721976 | NC_021160.1    | Ca_kabuli_chr01 | 4721976                 | AA                              | GG                | 1945877476               |
| SNP_P3_2977_4722469 | NC_021160.1    | Ca_kabuli_chr01 | 4722469                 | TT                              | GG                | 1945877478               |
| SNP_P3_2978_4722483 | NC_021160.1    | Ca_kabuli_chr01 | 4722483                 | CC                              | TT                | 1945877480               |
| SNP_P3_2979_4723434 | NC_021160.1    | Ca_kabuli_chr01 | 4723434                 | AA                              | TT                | 1945877481               |
| SNP_P3_2980_4724630 | NC_021160.1    | Ca_kabuli_chr01 | 4724630                 | GG                              | CC                | 1945877483               |
| SNP_P3_2981_4741659 | NC_021160.1    | Ca_kabuli_chr01 | 4741659                 | AA                              | TT                | 1945877485               |
| SNP_P3_2982_4741695 | NC_021160.1    | Ca_kabuli_chr01 | 4741695                 | AA                              | TT                | 1945877487               |
| SNP_P3_2983_4742079 | NC_021160.1    | Ca_kabuli_chr01 | 4742079                 | AA                              | GG                | 1945877489               |
| SNP_P3_2984_4742080 | NC_021160.1    | Ca_kabuli_chr01 | 4742080                 | GG                              | TT                | 1945877490               |
| SNP_P3_2986_4746953 | NC_021160.1    | Ca_kabuli_chr01 | 4746953                 | TT                              | AA                | 1945877492               |

| SNPs IDs            | Chromosome IDs | Chromosomes     | Physical positions (bp) | CDC Frontier (Reference genome) | (Pusa 256 & HPNB) | NCBI SNPdb Accession IDs |
|---------------------|----------------|-----------------|-------------------------|---------------------------------|-------------------|--------------------------|
| SNP_P3_2987_4784330 | NC_021160.1    | Ca_kabuli_chr01 | 4784330                 | CC                              | TT                | 1945877494               |
| SNP_P3_2988_4801578 | NC_021160.1    | Ca_kabuli_chr01 | 4801578                 | GG                              | CC                | 1945877496               |
| SNP_P3_2989_4809028 | NC_021160.1    | Ca_kabuli_chr01 | 4809028                 | AA                              | CC                | 1945877497               |
| SNP_P3_2990_4809063 | NC_021160.1    | Ca_kabuli_chr01 | 4809063                 | GG                              | CC                | 1945877499               |
| SNP_P3_2991_4809081 | NC_021160.1    | Ca_kabuli_chr01 | 4809081                 | TT                              | CC                | 1945877501               |
| SNP_P3_2992_4811350 | NC_021160.1    | Ca_kabuli_chr01 | 4811350                 | GG                              | AA                | 1945877503               |
| SNP_P3_2993_4819878 | NC_021160.1    | Ca_kabuli_chr01 | 4819878                 | AA                              | CC                | 1945877505               |
| SNP_P3_2994_4828606 | NC_021160.1    | Ca_kabuli_chr01 | 4828606                 | GG                              | TT                | 1945877506               |
| SNP_P3_2995_4834117 | NC_021160.1    | Ca_kabuli_chr01 | 4834117                 | AA                              | GG                | 1945877508               |
| SNP_P3_2996_4870206 | NC_021160.1    | Ca_kabuli_chr01 | 4870206                 | TT                              | AA                | 1945877510               |
| SNP_P3_2997_4896552 | NC_021160.1    | Ca_kabuli_chr01 | 4896552                 | GG                              | AA                | 1945877512               |
| SNP_P3_2998_4896756 | NC_021160.1    | Ca_kabuli_chr01 | 4896756                 | TT                              | CC                | 1945877513               |
| SNP_P3_2999_4899506 | NC_021160.1    | Ca_kabuli_chr01 | 4899506                 | AA                              | TT                | 1945877515               |
| SNP_P3_3000_4899531 | NC_021160.1    | Ca_kabuli_chr01 | 4899531                 | CC                              | TT                | 1945877517               |
| SNP_P3_3001_4899805 | NC_021160.1    | Ca_kabuli_chr01 | 4899805                 | CC                              | TT                | 1945877519               |
| SNP_P3_3003_4900256 | NC_021160.1    | Ca_kabuli_chr01 | 4900256                 | AA                              | TT                | 1945877521               |
| SNP_P3_3004_4900334 | NC_021160.1    | Ca_kabuli_chr01 | 4900334                 | AA                              | CC                | 1945877522               |
| SNP_P3_3005_4900373 | NC_021160.1    | Ca_kabuli_chr01 | 4900373                 | TT                              | CC                | 1945877524               |
| SNP_P3_3006_4900379 | NC_021160.1    | Ca_kabuli_chr01 | 4900379                 | AA                              | GG                | 1945877526               |
| SNP_P3_3007_4900380 | NC_021160.1    | Ca_kabuli_chr01 | 4900380                 | AA                              | GG                | 1945877528               |
| SNP_P3_3008_4900659 | NC_021160.1    | Ca_kabuli_chr01 | 4900659                 | AA                              | GG                | 1945877529               |
| SNP_P3_3009_4900697 | NC_021160.1    | Ca_kabuli_chr01 | 4900697                 | CC                              | TT                | 1945877531               |
| SNP_P3_3010_4900727 | NC_021160.1    | Ca_kabuli_chr01 | 4900727                 | CC                              | TT                | 1945877533               |
| SNP_P3_3011_4906142 | NC_021160.1    | Ca_kabuli_chr01 | 4906142                 | TT                              | AA                | 1945877535               |
| SNP_P3_3012_4906147 | NC_021160.1    | Ca_kabuli_chr01 | 4906147                 | CC                              | GG                | 1945877537               |
| SNP_P3_3013_4906531 | NC_021160.1    | Ca_kabuli_chr01 | 4906531                 | AA                              | GG                | 1945877538               |
| SNP_P3_3014_4906532 | NC_021160.1    | Ca_kabuli_chr01 | 4906532                 | GG                              | CC                | 1945877540               |
| SNP_P3_3015_4906626 | NC_021160.1    | Ca_kabuli_chr01 | 4906626                 | AA                              | TT                | 1945877542               |
| SNP_P3_3016_4907987 | NC_021160.1    | Ca_kabuli_chr01 | 4907987                 | TT                              | CC                | 1945877544               |
| SNP_P3_3017_4916548 | NC_021160.1    | Ca_kabuli_chr01 | 4916548                 | AA                              | GG                | 1945877545               |
| SNP_P3_3018_4933936 | NC_021160.1    | Ca_kabuli_chr01 | 4933936                 | CC                              | GG                | 1945877547               |
| SNP_P3_3019_4933962 | NC_021160.1    | Ca_kabuli_chr01 | 4933962                 | AA                              | CC                | 1945877549               |
| SNP_P3_3020_4933963 | NC_021160.1    | Ca_kabuli_chr01 | 4933963                 | CC                              | GG                | 1945877551               |
| SNP_P3_3021_4934187 | NC_021160.1    | Ca_kabuli_chr01 | 4934187                 | AA                              | GG                | 1945877553               |
| SNP_P3_3022_4934210 | NC_021160.1    | Ca_kabuli_chr01 | 4934210                 | TT                              | GG                | 1945877554               |
| SNP_P3_3023_4951988 | NC_021160.1    | Ca_kabuli_chr01 | 4951988                 | TT                              | CC                | 1945877556               |
| SNP_P3_3026_4958431 | NC_021160.1    | Ca_kabuli_chr01 | 4958431                 | AA                              | CC                | 1945877558               |
| SNP_P3_3027_5016659 | NC_021160.1    | Ca_kabuli_chr01 | 5016659                 | CC                              | TT                | 1945877560               |
| SNP_P3_3028_5024400 | NC_021160.1    | Ca_kabuli_chr01 | 5024400                 | TT                              | CC                | 1945877561               |
| SNP_P3_3029_5031354 | NC_021160.1    | Ca_kabuli_chr01 | 5031354                 | AA                              | GG                | 1945877563               |
| SNP_P3_3030_5040401 | NC_021160.1    | Ca_kabuli_chr01 | 5040401                 | AA                              | GG                | 1945877565               |
| SNP_P3_3031_5040408 | NC_021160.1    | Ca_kabuli_chr01 | 5040408                 | CC                              | TT                | 1945877567               |

| SNPs IDs            | Chromosome IDs | Chromosomes     | Physical positions (bp) | CDC Frontier (Reference genome) | (Pusa 256 & HPNB) | NCBI SNPdb Accession IDs |
|---------------------|----------------|-----------------|-------------------------|---------------------------------|-------------------|--------------------------|
| SNP_P3_3033_5040476 | NC_021160.1    | Ca_kabuli_chr01 | 5040476                 | TT                              | CC                | 1945877569               |
| SNP_P3_3034_5040537 | NC_021160.1    | Ca_kabuli_chr01 | 5040537                 | TT                              | CC                | 1945877570               |
| SNP_P3_3035_5040699 | NC_021160.1    | Ca_kabuli_chr01 | 5040699                 | GG                              | CC                | 1945877572               |
| SNP_P3_3036_5040706 | NC_021160.1    | Ca_kabuli_chr01 | 5040706                 | CC                              | TT                | 1945877574               |
| SNP_P3_3037_5040725 | NC_021160.1    | Ca_kabuli_chr01 | 5040725                 | GG                              | AA                | 1945877576               |
| SNP_P3_3038_5040908 | NC_021160.1    | Ca_kabuli_chr01 | 5040908                 | CC                              | TT                | 1945877578               |
| SNP_P3_3039_5040942 | NC_021160.1    | Ca_kabuli_chr01 | 5040942                 | CC                              | TT                | 1945877579               |
| SNP_P3_3040_5041124 | NC_021160.1    | Ca_kabuli_chr01 | 5041124                 | GG                              | AA                | 1945877581               |
| SNP_P3_3041_5041243 | NC_021160.1    | Ca_kabuli_chr01 | 5041243                 | AA                              | GG                | 1945877583               |
| SNP_P3_3042_5041321 | NC_021160.1    | Ca_kabuli_chr01 | 5041321                 | GG                              | TT                | 1945877585               |
| SNP_P3_3043_5066674 | NC_021160.1    | Ca_kabuli_chr01 | 5066674                 | GG                              | AA                | 1945877587               |
| SNP_P3_3045_5133142 | NC_021160.1    | Ca_kabuli_chr01 | 5133142                 | AA                              | GG                | 1945877588               |
| SNP_P3_3046_5136659 | NC_021160.1    | Ca_kabuli_chr01 | 5136659                 | GG                              | AA                | 1945877590               |
| SNP_P3_3050_5186919 | NC_021160.1    | Ca_kabuli_chr01 | 5186919                 | CC                              | TT                | 1945877592               |
| SNP_P3_3051_5196999 | NC_021160.1    | Ca_kabuli_chr01 | 5196999                 | GG                              | CC                | 1945877594               |
| SNP_P3_3052_5197126 | NC_021160.1    | Ca_kabuli_chr01 | 5197126                 | TT                              | AA                | 1945877596               |
| SNP_P3_3053_5197409 | NC_021160.1    | Ca_kabuli_chr01 | 5197409                 | TT                              | GG                | 1945877597               |
| SNP_P3_3054_5229265 | NC_021160.1    | Ca_kabuli_chr01 | 5229265                 | AA                              | CC                | 1945877599               |
| SNP_P3_3056_5247458 | NC_021160.1    | Ca_kabuli_chr01 | 5247458                 | AA                              | TT                | 1945877601               |
| SNP_P3_3057_5247460 | NC_021160.1    | Ca_kabuli_chr01 | 5247460                 | AA                              | GG                | 1945877603               |
| SNP_P3_3058_5254662 | NC_021160.1    | Ca_kabuli_chr01 | 5254662                 | TT                              | CC                | 1945877605               |
| SNP_P3_3059_5254926 | NC_021160.1    | Ca_kabuli_chr01 | 5254926                 | AA                              | GG                | 1945877606               |
| SNP_P3_3060_5255007 | NC_021160.1    | Ca_kabuli_chr01 | 5255007                 | CC                              | TT                | 1945877608               |
| SNP_P3_3061_5255049 | NC_021160.1    | Ca_kabuli_chr01 | 5255049                 | TT                              | CC                | 1945877610               |
| SNP_P3_3062_5255065 | NC_021160.1    | Ca_kabuli_chr01 | 5255065                 | GG                              | AA                | 1945877612               |
| SNP_P3_3063_5255066 | NC_021160.1    | Ca_kabuli_chr01 | 5255066                 | AA                              | GG                | 1945877613               |
| SNP_P3_3064_5273285 | NC_021160.1    | Ca_kabuli_chr01 | 5273285                 | TT                              | AA                | 1945877615               |
| SNP_P3_3067_5277792 | NC_021160.1    | Ca_kabuli_chr01 | 5277792                 | AA                              | GG                | 1945877617               |
| SNP_P3_3069_5312457 | NC_021160.1    | Ca_kabuli_chr01 | 5312457                 | AA                              | CC                | 1945877619               |
| SNP_P3_3070_5312691 | NC_021160.1    | Ca_kabuli_chr01 | 5312691                 | GG                              | AA                | 1945877621               |
| SNP_P3_3071_5312718 | NC_021160.1    | Ca_kabuli_chr01 | 5312718                 | AA                              | GG                | 1945877622               |
| SNP_P3_3072_5345400 | NC_021160.1    | Ca_kabuli_chr01 | 5345400                 | CC                              | AA                | 1945877624               |
| SNP_P3_3073_5345405 | NC_021160.1    | Ca_kabuli_chr01 | 5345405                 | AA                              | TT                | 1945877626               |
| SNP_P3_3074_5345409 | NC_021160.1    | Ca_kabuli_chr01 | 5345409                 | CC                              | TT                | 1945877628               |
| SNP_P3_3075_5345435 | NC_021160.1    | Ca_kabuli_chr01 | 5345435                 | TT                              | CC                | 1945877629               |
| SNP_P3_3076_5345793 | NC_021160.1    | Ca_kabuli_chr01 | 5345793                 | GG                              | TT                | 1945877631               |
| SNP_P3_3077_5345840 | NC_021160.1    | Ca_kabuli_chr01 | 5345840                 | CC                              | TT                | 1945877633               |
| SNP_P3_3078_5345844 | NC_021160.1    | Ca_kabuli_chr01 | 5345844                 | AA                              | GG                | 1945877635               |
| SNP_P3_3079_5345850 | NC_021160.1    | Ca_kabuli_chr01 | 5345850                 | AA                              | GG                | 1945877637               |
| SNP_P3_3080_5346058 | NC_021160.1    | Ca_kabuli_chr01 | 5346058                 | TT                              | AA                | 1945877638               |
| SNP_P3_3081_5346065 | NC_021160.1    | Ca_kabuli_chr01 | 5346065                 | AA                              | TT                | 1945877640               |
| SNP_P3_3082_5347774 | NC_021160.1    | Ca_kabuli_chr01 | 5347774                 | TT                              | AA                | 1945877642               |

| SNPs IDs            | Chromosome IDs | Chromosomes     | Physical positions (bp) | CDC Frontier (Reference genome) | (Pusa 256 & HPNB) | NCBI SNPdb Accession IDs |
|---------------------|----------------|-----------------|-------------------------|---------------------------------|-------------------|--------------------------|
| SNP_P3_3084_5348600 | NC_021160.1    | Ca_kabuli_chr01 | 5348600                 | AA                              | GG                | 1945877644               |
| SNP_P3_3085_5348652 | NC_021160.1    | Ca_kabuli_chr01 | 5348652                 | TT                              | CC                | 1945877645               |
| SNP_P3_3086_5348660 | NC_021160.1    | Ca_kabuli_chr01 | 5348660                 | AA                              | GG                | 1945877647               |
| SNP_P3_3087_5349091 | NC_021160.1    | Ca_kabuli_chr01 | 5349091                 | GG                              | TT                | 1945877649               |
| SNP_P3_3088_5349107 | NC_021160.1    | Ca_kabuli_chr01 | 5349107                 | CC                              | AA                | 1945877651               |
| SNP_P3_3089_5349271 | NC_021160.1    | Ca_kabuli_chr01 | 5349271                 | GG                              | AA                | 1945877653               |
| SNP_P3_3090_5349295 | NC_021160.1    | Ca_kabuli_chr01 | 5349295                 | AA                              | TT                | 1945877654               |
| SNP_P3_3092_5349837 | NC_021160.1    | Ca_kabuli_chr01 | 5349837                 | CC                              | GG                | 1945877656               |
| SNP_P3_3093_5350527 | NC_021160.1    | Ca_kabuli_chr01 | 5350527                 | AA                              | GG                | 1945877658               |
| SNP_P3_3095_5352064 | NC_021160.1    | Ca_kabuli_chr01 | 5352064                 | TT                              | CC                | 1945877660               |
| SNP_P3_3096_5352165 | NC_021160.1    | Ca_kabuli_chr01 | 5352165                 | AA                              | GG                | 1945877661               |
| SNP_P3_3097_5357484 | NC_021160.1    | Ca_kabuli_chr01 | 5357484                 | TT                              | CC                | 1945877663               |
| SNP_P3_3098_5357983 | NC_021160.1    | Ca_kabuli_chr01 | 5357983                 | CC                              | TT                | 1945877665               |
| SNP_P3_3099_5358383 | NC_021160.1    | Ca_kabuli_chr01 | 5358383                 | CC                              | AA                | 1945877667               |
| SNP_P3_3100_5358401 | NC_021160.1    | Ca_kabuli_chr01 | 5358401                 | GG                              | TT                | 1945877669               |
| SNP_P3_3101_5358444 | NC_021160.1    | Ca_kabuli_chr01 | 5358444                 | GG                              | AA                | 1945877670               |
| SNP_P3_3102_5358539 | NC_021160.1    | Ca_kabuli_chr01 | 5358539                 | TT                              | AA                | 1945877672               |
| SNP_P3_3103_5359065 | NC_021160.1    | Ca_kabuli_chr01 | 5359065                 | GG                              | AA                | 1945877674               |
| SNP_P3_3104_5359075 | NC_021160.1    | Ca_kabuli_chr01 | 5359075                 | TT                              | AA                | 1945877676               |
| SNP_P3_3105_5364525 | NC_021160.1    | Ca_kabuli_chr01 | 5364525                 | CC                              | TT                | 1945877677               |
| SNP_P3_3106_5366042 | NC_021160.1    | Ca_kabuli_chr01 | 5366042                 | AA                              | TT                | 1945877679               |
| SNP_P3_3107_5366181 | NC_021160.1    | Ca_kabuli_chr01 | 5366181                 | TT                              | CC                | 1945877681               |
| SNP_P3_3108_5366836 | NC_021160.1    | Ca_kabuli_chr01 | 5366836                 | GG                              | AA                | 1945877683               |
| SNP_P3_3109_5366866 | NC_021160.1    | Ca_kabuli_chr01 | 5366866                 | TT                              | GG                | 1945877685               |
| SNP_P3_3111_5371236 | NC_021160.1    | Ca_kabuli_chr01 | 5371236                 | CC                              | TT                | 1945877686               |
| SNP_P3_3112_5371366 | NC_021160.1    | Ca_kabuli_chr01 | 5371366                 | TT                              | GG                | 1945877688               |
| SNP_P3_3114_5373028 | NC_021160.1    | Ca_kabuli_chr01 | 5373028                 | CC                              | TT                | 1945877690               |
| SNP_P3_3115_5373254 | NC_021160.1    | Ca_kabuli_chr01 | 5373254                 | AA                              | CC                | 1945877692               |
| SNP_P3_3116_5373260 | NC_021160.1    | Ca_kabuli_chr01 | 5373260                 | AA                              | GG                | 1945877693               |
| SNP_P3_3117_5375278 | NC_021160.1    | Ca_kabuli_chr01 | 5375278                 | CC                              | GG                | 1945877695               |
| SNP_P3_3119_5375999 | NC_021160.1    | Ca_kabuli_chr01 | 5375999                 | GG                              | TT                | 1945877697               |
| SNP_P3_3120_5376001 | NC_021160.1    | Ca_kabuli_chr01 | 5376001                 | TT                              | AA                | 1945877699               |
| SNP_P3_3121_5376716 | NC_021160.1    | Ca_kabuli_chr01 | 5376716                 | TT                              | AA                | 1945877701               |
| SNP_P3_3122_5376907 | NC_021160.1    | Ca_kabuli_chr01 | 5376907                 | CC                              | TT                | 1945877702               |
| SNP_P3_3123_5377199 | NC_021160.1    | Ca_kabuli_chr01 | 5377199                 | TT                              | GG                | 1945877704               |
| SNP_P3_3124_5377202 | NC_021160.1    | Ca_kabuli_chr01 | 5377202                 | AA                              | GG                | 1945877706               |
| SNP_P3_3125_5378150 | NC_021160.1    | Ca_kabuli_chr01 | 5378150                 | GG                              | TT                | 1945877708               |
| SNP_P3_3126_5378177 | NC_021160.1    | Ca_kabuli_chr01 | 5378177                 | TT                              | CC                | 1945877710               |
| SNP_P3_3127_5378184 | NC_021160.1    | Ca_kabuli_chr01 | 5378184                 | GG                              | AA                | 1945877711               |
| SNP_P3_3128_5378607 | NC_021160.1    | Ca_kabuli_chr01 | 5378607                 | GG                              | AA                | 1945877713               |
| SNP_P3_3129_5381693 | NC_021160.1    | Ca_kabuli_chr01 | 5381693                 | CC                              | AA                | 1945877715               |
| SNP_P3_3130_5381721 | NC_021160.1    | Ca_kabuli_chr01 | 5381721                 | AA                              | GG                | 1945877717               |

| SNPs IDs            | Chromosome IDs | Chromosomes     | Physical positions (bp) | CDC Frontier (Reference genome) | (Pusa 256 & HPNB) | NCBI SNPdb Accession IDs |
|---------------------|----------------|-----------------|-------------------------|---------------------------------|-------------------|--------------------------|
| SNP_P3_3131_5389764 | NC_021160.1    | Ca_kabuli_chr01 | 5389764                 | AA                              | GG                | 1945877719               |
| SNP_P3_3132_5390894 | NC_021160.1    | Ca_kabuli_chr01 | 5390894                 | AA                              | CC                | 1945877720               |
| SNP_P3_3134_5391054 | NC_021160.1    | Ca_kabuli_chr01 | 5391054                 | TT                              | CC                | 1945877722               |
| SNP_P3_3135_5391137 | NC_021160.1    | Ca_kabuli_chr01 | 5391137                 | GG                              | TT                | 1945877724               |
| SNP_P3_3136_5391354 | NC_021160.1    | Ca_kabuli_chr01 | 5391354                 | TT                              | GG                | 1945877726               |
| SNP_P3_3137_5391371 | NC_021160.1    | Ca_kabuli_chr01 | 5391371                 | CC                              | TT                | 1945877728               |
| SNP_P3_3138_5391463 | NC_021160.1    | Ca_kabuli_chr01 | 5391463                 | TT                              | AA                | 1945877729               |
| SNP_P3_3139_5391761 | NC_021160.1    | Ca_kabuli_chr01 | 5391761                 | GG                              | AA                | 1945877731               |
| SNP_P3_3143_5393400 | NC_021160.1    | Ca_kabuli_chr01 | 5393400                 | GG                              | AA                | 1945877733               |
| SNP_P3_3144_5393520 | NC_021160.1    | Ca_kabuli_chr01 | 5393520                 | AA                              | TT                | 1945877735               |
| SNP_P3_3145_5393621 | NC_021160.1    | Ca_kabuli_chr01 | 5393621                 | TT                              | CC                | 1945877737               |
| SNP_P3_3146_5393660 | NC_021160.1    | Ca_kabuli_chr01 | 5393660                 | CC                              | TT                | 1945877738               |
| SNP_P3_3147_5393684 | NC_021160.1    | Ca_kabuli_chr01 | 5393684                 | TT                              | AA                | 1945877740               |
| SNP_P3_3148_5394157 | NC_021160.1    | Ca_kabuli_chr01 | 5394157                 | CC                              | AA                | 1945877742               |
| SNP_P3_3149_5394314 | NC_021160.1    | Ca_kabuli_chr01 | 5394314                 | TT                              | CC                | 1945877744               |
| SNP_P3_3150_5394411 | NC_021160.1    | Ca_kabuli_chr01 | 5394411                 | GG                              | AA                | 1945877746               |
| SNP_P3_3151_5394468 | NC_021160.1    | Ca_kabuli_chr01 | 5394468                 | CC                              | AA                | 1945877747               |
| SNP_P3_3152_5395908 | NC_021160.1    | Ca_kabuli_chr01 | 5395908                 | GG                              | AA                | 1945877749               |
| SNP_P3_3153_5396056 | NC_021160.1    | Ca_kabuli_chr01 | 5396056                 | CC                              | TT                | 1945877751               |
| SNP_P3_3154_5398502 | NC_021160.1    | Ca_kabuli_chr01 | 5398502                 | GG                              | AA                | 1945877753               |
| SNP_P3_3155_5398992 | NC_021160.1    | Ca_kabuli_chr01 | 5398992                 | CC                              | GG                | 1945877755               |
| SNP_P3_3156_5400157 | NC_021160.1    | Ca_kabuli_chr01 | 5400157                 | TT                              | CC                | 1945877756               |
| SNP_P3_3157_5400378 | NC_021160.1    | Ca_kabuli_chr01 | 5400378                 | AA                              | CC                | 1945877758               |
| SNP_P3_3158_5410582 | NC_021160.1    | Ca_kabuli_chr01 | 5410582                 | CC                              | AA                | 1945877760               |
| SNP_P3_3159_5412118 | NC_021160.1    | Ca_kabuli_chr01 | 5412118                 | TT                              | CC                | 1945877762               |
| SNP_P3_3161_5412575 | NC_021160.1    | Ca_kabuli_chr01 | 5412575                 | AA                              | GG                | 1945877763               |
| SNP_P3_3162_5414531 | NC_021160.1    | Ca_kabuli_chr01 | 5414531                 | TT                              | CC                | 1945877765               |
| SNP_P3_3163_5415119 | NC_021160.1    | Ca_kabuli_chr01 | 5415119                 | GG                              | AA                | 1945877767               |
| SNP_P3_3164_5415130 | NC_021160.1    | Ca_kabuli_chr01 | 5415130                 | CC                              | TT                | 1945877769               |
| SNP_P3_3165_5415154 | NC_021160.1    | Ca_kabuli_chr01 | 5415154                 | AA                              | GG                | 1945877771               |
| SNP_P3_3166_5417348 | NC_021160.1    | Ca_kabuli_chr01 | 5417348                 | TT                              | AA                | 1945877772               |
| SNP_P3_3168_5418769 | NC_021160.1    | Ca_kabuli_chr01 | 5418769                 | GG                              | TT                | 1945877774               |
| SNP_P3_3169_5420394 | NC_021160.1    | Ca_kabuli_chr01 | 5420394                 | CC                              | TT                | 1945877776               |
| SNP_P3_3170_5420431 | NC_021160.1    | Ca_kabuli_chr01 | 5420431                 | AA                              | GG                | 1945877778               |
| SNP_P3_3171_5420673 | NC_021160.1    | Ca_kabuli_chr01 | 5420673                 | AA                              | CC                | 1945877779               |
| SNP_P3_3172_5420769 | NC_021160.1    | Ca_kabuli_chr01 | 5420769                 | GG                              | AA                | 1945877781               |
| SNP_P3_3173_5421285 | NC_021160.1    | Ca_kabuli_chr01 | 5421285                 | GG                              | TT                | 1945877783               |
| SNP_P3_3174_5421349 | NC_021160.1    | Ca_kabuli_chr01 | 5421349                 | CC                              | AA                | 1945877785               |
| SNP_P3_3175_5421363 | NC_021160.1    | Ca_kabuli_chr01 | 5421363                 | TT                              | AA                | 1945877787               |
| SNP_P3_3177_5421650 | NC_021160.1    | Ca_kabuli_chr01 | 5421650                 | AA                              | GG                | 1945877788               |
| SNP_P3_3178_5421652 | NC_021160.1    | Ca_kabuli_chr01 | 5421652                 | AA                              | GG                | 1945877790               |
| SNP_P3_3179_5421666 | NC_021160.1    | Ca_kabuli_chr01 | 5421666                 | GG                              | AA                | 1945877792               |

| SNPs IDs            | Chromosome IDs | Chromosomes     | Physical positions (bp) | CDC Frontier (Reference genome) | (Pusa 256 & HPNB) | NCBI SNPdb Accession IDs |
|---------------------|----------------|-----------------|-------------------------|---------------------------------|-------------------|--------------------------|
| SNP_P3_3180_5421758 | NC_021160.1    | Ca_kabuli_chr01 | 5421758                 | AA                              | GG                | 1945877794               |
| SNP_P3_3181_5422310 | NC_021160.1    | Ca_kabuli_chr01 | 5422310                 | GG                              | TT                | 1945877795               |
| SNP_P3_3185_5422892 | NC_021160.1    | Ca_kabuli_chr01 | 5422892                 | CC                              | TT                | 1945877797               |
| SNP_P3_3186_5423443 | NC_021160.1    | Ca_kabuli_chr01 | 5423443                 | GG                              | AA                | 1945877799               |
| SNP_P3_3189_5427142 | NC_021160.1    | Ca_kabuli_chr01 | 5427142                 | TT                              | CC                | 1945877801               |
| SNP_P3_3191_5427186 | NC_021160.1    | Ca_kabuli_chr01 | 5427186                 | CC                              | TT                | 1945877803               |
| SNP_P3_3192_5427190 | NC_021160.1    | Ca_kabuli_chr01 | 5427190                 | AA                              | GG                | 1945877804               |
| SNP_P3_3193_5427194 | NC_021160.1    | Ca_kabuli_chr01 | 5427194                 | AA                              | TT                | 1945877806               |
| SNP_P3_3194_5427197 | NC_021160.1    | Ca_kabuli_chr01 | 5427197                 | TT                              | GG                | 1945877808               |
| SNP_P3_3195_5427697 | NC_021160.1    | Ca_kabuli_chr01 | 5427697                 | CC                              | TT                | 1945877810               |
| SNP_P3_3197_5429055 | NC_021160.1    | Ca_kabuli_chr01 | 5429055                 | CC                              | TT                | 1945877811               |
| SNP_P3_3198_5429079 | NC_021160.1    | Ca_kabuli_chr01 | 5429079                 | GG                              | AA                | 1945877813               |
| SNP_P3_3199_5429091 | NC_021160.1    | Ca_kabuli_chr01 | 5429091                 | TT                              | CC                | 1945877815               |
| SNP_P3_3200_5429127 | NC_021160.1    | Ca_kabuli_chr01 | 5429127                 | TT                              | CC                | 1945877817               |
| SNP_P3_3201_5429141 | NC_021160.1    | Ca_kabuli_chr01 | 5429141                 | TT                              | CC                | 1945877819               |
| SNP_P3_3202_5429227 | NC_021160.1    | Ca_kabuli_chr01 | 5429227                 | TT                              | CC                | 1945877820               |
| SNP_P3_3203_5429549 | NC_021160.1    | Ca_kabuli_chr01 | 5429549                 | GG                              | AA                | 1945877822               |
| SNP_P3_3204_5429637 | NC_021160.1    | Ca_kabuli_chr01 | 5429637                 | GG                              | AA                | 1945877824               |
| SNP_P3_3205_5429692 | NC_021160.1    | Ca_kabuli_chr01 | 5429692                 | TT                              | AA                | 1945877826               |
| SNP_P3_3207_5433130 | NC_021160.1    | Ca_kabuli_chr01 | 5433130                 | GG                              | AA                | 1945877828               |
| SNP_P3_3208_5433173 | NC_021160.1    | Ca_kabuli_chr01 | 5433173                 | AA                              | GG                | 1945877829               |
| SNP_P3_3209_5433377 | NC_021160.1    | Ca_kabuli_chr01 | 5433377                 | TT                              | CC                | 1945877831               |
| SNP_P3_3210_5433434 | NC_021160.1    | Ca_kabuli_chr01 | 5433434                 | GG                              | AA                | 1945877833               |
| SNP_P3_3212_5433693 | NC_021160.1    | Ca_kabuli_chr01 | 5433693                 | TT                              | CC                | 1945877835               |
| SNP_P3_3213_5433710 | NC_021160.1    | Ca_kabuli_chr01 | 5433710                 | TT                              | CC                | 1945877837               |
| SNP_P3_3214_5435961 | NC_021160.1    | Ca_kabuli_chr01 | 5435961                 | TT                              | AA                | 1945877838               |
| SNP_P3_3215_5436217 | NC_021160.1    | Ca_kabuli_chr01 | 5436217                 | TT                              | AA                | 1945877840               |
| SNP_P3_3216_5436265 | NC_021160.1    | Ca_kabuli_chr01 | 5436265                 | TT                              | CC                | 1945877842               |
| SNP_P3_3218_5436918 | NC_021160.1    | Ca_kabuli_chr01 | 5436918                 | CC                              | TT                | 1945877844               |
| SNP_P3_3219_5436922 | NC_021160.1    | Ca_kabuli_chr01 | 5436922                 | AA                              | CC                | 1945877846               |
| SNP_P3_3220_5436951 | NC_021160.1    | Ca_kabuli_chr01 | 5436951                 | AA                              | TT                | 1945877847               |
| SNP_P3_3221_5440636 | NC_021160.1    | Ca_kabuli_chr01 | 5440636                 | GG                              | TT                | 1945877849               |
| SNP_P3_3222_5440685 | NC_021160.1    | Ca_kabuli_chr01 | 5440685                 | TT                              | GG                | 1945877851               |
| SNP_P3_3223_5440858 | NC_021160.1    | Ca_kabuli_chr01 | 5440858                 | GG                              | CC                | 1945877853               |
| SNP_P3_3224_5440955 | NC_021160.1    | Ca_kabuli_chr01 | 5440955                 | AA                              | GG                | 1945877855               |
| SNP_P3_3225_5440974 | NC_021160.1    | Ca_kabuli_chr01 | 5440974                 | AA                              | GG                | 1945877856               |
| SNP_P3_3226_5441570 | NC_021160.1    | Ca_kabuli_chr01 | 5441570                 | CC                              | TT                | 1945877858               |
| SNP_P3_3227_5441650 | NC_021160.1    | Ca_kabuli_chr01 | 5441650                 | AA                              | GG                | 1945877860               |
| SNP_P3_3228_5443259 | NC_021160.1    | Ca_kabuli_chr01 | 5443259                 | TT                              | CC                | 1945877862               |
| SNP_P3_3229_5443775 | NC_021160.1    | Ca_kabuli_chr01 | 5443775                 | AA                              | CC                | 1945877863               |
| SNP_P3_3230_5445253 | NC_021160.1    | Ca_kabuli_chr01 | 5445253                 | GG                              | AA                | 1945877865               |
| SNP_P3_3231_5445808 | NC_021160.1    | Ca_kabuli_chr01 | 5445808                 | AA                              | TT                | 1945877867               |

| SNPs IDs            | Chromosome IDs | Chromosomes     | Physical positions (bp) | CDC Frontier (Reference genome) | (Pusa 256 & HPNB) | NCBI SNPdb Accession IDs |
|---------------------|----------------|-----------------|-------------------------|---------------------------------|-------------------|--------------------------|
| SNP_P3_3233_5446854 | NC_021160.1    | Ca_kabuli_chr01 | 5446854                 | CC                              | TT                | 1945877869               |
| SNP_P3_3234_5447025 | NC_021160.1    | Ca_kabuli_chr01 | 5447025                 | GG                              | TT                | 1945877871               |
| SNP_P3_3235_5449189 | NC_021160.1    | Ca_kabuli_chr01 | 5449189                 | AA                              | GG                | 1945877872               |
| SNP_P3_3236_5449422 | NC_021160.1    | Ca_kabuli_chr01 | 5449422                 | AA                              | GG                | 1945877874               |
| SNP_P3_3237_5449438 | NC_021160.1    | Ca_kabuli_chr01 | 5449438                 | AA                              | CC                | 1945877876               |
| SNP_P3_3238_5449586 | NC_021160.1    | Ca_kabuli_chr01 | 5449586                 | AA                              | GG                | 1945877878               |
| SNP_P3_3239_5449639 | NC_021160.1    | Ca_kabuli_chr01 | 5449639                 | AA                              | CC                | 1945877879               |
| SNP_P3_3240_5449818 | NC_021160.1    | Ca_kabuli_chr01 | 5449818                 | GG                              | AA                | 1945877881               |
| SNP_P3_3241_5449968 | NC_021160.1    | Ca_kabuli_chr01 | 5449968                 | TT                              | CC                | 1945877883               |
| SNP_P3_3242_5450535 | NC_021160.1    | Ca_kabuli_chr01 | 5450535                 | AA                              | GG                | 1945877885               |
| SNP_P3_3243_5453110 | NC_021160.1    | Ca_kabuli_chr01 | 5453110                 | AA                              | TT                | 1945877887               |
| SNP_P3_3245_5457729 | NC_021160.1    | Ca_kabuli_chr01 | 5457729                 | AA                              | GG                | 1945877888               |
| SNP_P3_3246_5457733 | NC_021160.1    | Ca_kabuli_chr01 | 5457733                 | AA                              | GG                | 1945877890               |
| SNP_P3_3248_5457751 | NC_021160.1    | Ca_kabuli_chr01 | 5457751                 | CC                              | TT                | 1945877892               |
| SNP_P3_3249_5457923 | NC_021160.1    | Ca_kabuli_chr01 | 5457923                 | CC                              | TT                | 1945877894               |
| SNP_P3_3250_5457941 | NC_021160.1    | Ca_kabuli_chr01 | 5457941                 | CC                              | AA                | 1945877895               |
| SNP_P3_3251_5459434 | NC_021160.1    | Ca_kabuli_chr01 | 5459434                 | TT                              | GG                | 1945877897               |
| SNP_P3_3252_5460221 | NC_021160.1    | Ca_kabuli_chr01 | 5460221                 | CC                              | AA                | 1945877899               |
| SNP_P3_3253_5460745 | NC_021160.1    | Ca_kabuli_chr01 | 5460745                 | GG                              | TT                | 1945877901               |
| SNP_P3_3255_5460817 | NC_021160.1    | Ca_kabuli_chr01 | 5460817                 | TT                              | AA                | 1945877903               |
| SNP_P3_3256_5461187 | NC_021160.1    | Ca_kabuli_chr01 | 5461187                 | TT                              | AA                | 1945877904               |
| SNP_P3_3257_5461477 | NC_021160.1    | Ca_kabuli_chr01 | 5461477                 | GG                              | AA                | 1945877906               |
| SNP_P3_3258_5461488 | NC_021160.1    | Ca_kabuli_chr01 | 5461488                 | GG                              | TT                | 1945877908               |
| SNP_P3_3259_5461505 | NC_021160.1    | Ca_kabuli_chr01 | 5461505                 | CC                              | TT                | 1945877910               |
| SNP_P3_3260_5463349 | NC_021160.1    | Ca_kabuli_chr01 | 5463349                 | CC                              | TT                | 1945877911               |
| SNP_P3_3261_5463941 | NC_021160.1    | Ca_kabuli_chr01 | 5463941                 | GG                              | AA                | 1945877913               |
| SNP_P3_3262_5464054 | NC_021160.1    | Ca_kabuli_chr01 | 5464054                 | TT                              | CC                | 1945877915               |
| SNP_P3_3263_5464062 | NC_021160.1    | Ca_kabuli_chr01 | 5464062                 | CC                              | TT                | 1945877917               |
| SNP_P3_3264_5464161 | NC_021160.1    | Ca_kabuli_chr01 | 5464161                 | TT                              | GG                | 1945877919               |
| SNP_P3_3265_5464228 | NC_021160.1    | Ca_kabuli_chr01 | 5464228                 | CC                              | TT                | 1945877920               |
| SNP_P3_3266_5464264 | NC_021160.1    | Ca_kabuli_chr01 | 5464264                 | TT                              | CC                | 1945877922               |
| SNP_P3_3267_5464267 | NC_021160.1    | Ca_kabuli_chr01 | 5464267                 | AA                              | GG                | 1945877924               |
| SNP_P3_3268_5464274 | NC_021160.1    | Ca_kabuli_chr01 | 5464274                 | CC                              | TT                | 1945877926               |
| SNP_P3_3269_5464342 | NC_021160.1    | Ca_kabuli_chr01 | 5464342                 | AA                              | GG                | 1945877927               |
| SNP_P3_3271_5470305 | NC_021160.1    | Ca_kabuli_chr01 | 5470305                 | AA                              | TT                | 1945877929               |
| SNP_P3_3273_5471701 | NC_021160.1    | Ca_kabuli_chr01 | 5471701                 | CC                              | TT                | 1945877931               |
| SNP_P3_3274_5471945 | NC_021160.1    | Ca_kabuli_chr01 | 5471945                 | AA                              | TT                | 1945877933               |
| SNP_P3_3275_5471950 | NC_021160.1    | Ca_kabuli_chr01 | 5471950                 | AA                              | GG                | 1945877935               |
| SNP_P3_3276_5477920 | NC_021160.1    | Ca_kabuli_chr01 | 5477920                 | TT                              | GG                | 1945877936               |
| SNP_P3_3277_5477965 | NC_021160.1    | Ca_kabuli_chr01 | 5477965                 | CC                              | GG                | 1945877938               |
| SNP_P3_3278_5479472 | NC_021160.1    | Ca_kabuli_chr01 | 5479472                 | AA                              | GG                | 1945877940               |
| SNP_P3_3279_5479493 | NC_021160.1    | Ca_kabuli_chr01 | 5479493                 | TT                              | GG                | 1945877942               |

| SNPs IDs            | Chromosome IDs | Chromosomes     | Physical positions (bp) | CDC Frontier (Reference genome) | (Pusa 256 & HPNB) | NCBI SNPdb Accession IDs |
|---------------------|----------------|-----------------|-------------------------|---------------------------------|-------------------|--------------------------|
| SNP_P3_3280_5480709 | NC_021160.1    | Ca_kabuli_chr01 | 5480709                 | GG                              | CC                | 1945877943               |
| SNP_P3_3281_5480820 | NC_021160.1    | Ca_kabuli_chr01 | 5480820                 | AA                              | GG                | 1945877945               |
| SNP_P3_3282_5482337 | NC_021160.1    | Ca_kabuli_chr01 | 5482337                 | AA                              | CC                | 1945877947               |
| SNP_P3_3284_5482976 | NC_021160.1    | Ca_kabuli_chr01 | 5482976                 | GG                              | AA                | 1945877949               |
| SNP_P3_3285_5482982 | NC_021160.1    | Ca_kabuli_chr01 | 5482982                 | GG                              | AA                | 1945877950               |
| SNP_P3_3286_5482991 | NC_021160.1    | Ca_kabuli_chr01 | 5482991                 | CC                              | AA                | 1945877952               |
| SNP_P3_3287_5483040 | NC_021160.1    | Ca_kabuli_chr01 | 5483040                 | GG                              | AA                | 1945877954               |
| SNP_P3_3288_5483179 | NC_021160.1    | Ca_kabuli_chr01 | 5483179                 | CC                              | TT                | 1945877956               |
| SNP_P3_3289_5483248 | NC_021160.1    | Ca_kabuli_chr01 | 5483248                 | CC                              | AA                | 1945877958               |
| SNP_P3_3290_5483267 | NC_021160.1    | Ca_kabuli_chr01 | 5483267                 | TT                              | CC                | 1945877960               |
| SNP_P3_3291_5483292 | NC_021160.1    | Ca_kabuli_chr01 | 5483292                 | TT                              | CC                | 1945877961               |
| SNP_P3_3292_5484517 | NC_021160.1    | Ca_kabuli_chr01 | 5484517                 | CC                              | TT                | 1945877963               |
| SNP_P3_3295_5485244 | NC_021160.1    | Ca_kabuli_chr01 | 5485244                 | GG                              | CC                | 1945877965               |
| SNP_P3_3296_5486320 | NC_021160.1    | Ca_kabuli_chr01 | 5486320                 | AA                              | CC                | 1945877967               |
| SNP_P3_3297_5487759 | NC_021160.1    | Ca_kabuli_chr01 | 5487759                 | CC                              | TT                | 1945877968               |
| SNP_P3_3298_5494787 | NC_021160.1    | Ca_kabuli_chr01 | 5494787                 | TT                              | CC                | 1945877970               |
| SNP_P3_3299_5497866 | NC_021160.1    | Ca_kabuli_chr01 | 5497866                 | GG                              | CC                | 1945877972               |
| SNP_P3_3300_5497926 | NC_021160.1    | Ca_kabuli_chr01 | 5497926                 | AA                              | GG                | 1945877974               |
| SNP_P3_3301_5498150 | NC_021160.1    | Ca_kabuli_chr01 | 5498150                 | GG                              | AA                | 1945877976               |
| SNP_P3_3302_5498164 | NC_021160.1    | Ca_kabuli_chr01 | 5498164                 | CC                              | TT                | 1945877977               |
| SNP_P3_3303_5498186 | NC_021160.1    | Ca_kabuli_chr01 | 5498186                 | GG                              | TT                | 1945877979               |
| SNP_P3_3304_5498926 | NC_021160.1    | Ca_kabuli_chr01 | 5498926                 | CC                              | AA                | 1945877981               |
| SNP_P3_3305_5498986 | NC_021160.1    | Ca_kabuli_chr01 | 5498986                 | GG                              | TT                | 1945877983               |
| SNP_P3_3306_5500258 | NC_021160.1    | Ca_kabuli_chr01 | 5500258                 | CC                              | TT                | 1945877984               |
| SNP_P3_3307_5500290 | NC_021160.1    | Ca_kabuli_chr01 | 5500290                 | TT                              | AA                | 1945877986               |
| SNP_P3_3309_5500859 | NC_021160.1    | Ca_kabuli_chr01 | 5500859                 | CC                              | TT                | 1945877988               |
| SNP_P3_3310_5500864 | NC_021160.1    | Ca_kabuli_chr01 | 5500864                 | CC                              | GG                | 1945877990               |
| SNP_P3_3311_5501072 | NC_021160.1    | Ca_kabuli_chr01 | 5501072                 | TT                              | CC                | 1945877992               |
| SNP_P3_3313_5504171 | NC_021160.1    | Ca_kabuli_chr01 | 5504171                 | TT                              | CC                | 1945877993               |
| SNP_P3_3314_5504178 | NC_021160.1    | Ca_kabuli_chr01 | 5504178                 | GG                              | TT                | 1945877995               |
| SNP_P3_3315_5504181 | NC_021160.1    | Ca_kabuli_chr01 | 5504181                 | GG                              | AA                | 1945877997               |
| SNP_P3_3316_5508980 | NC_021160.1    | Ca_kabuli_chr01 | 5508980                 | AA                              | TT                | 1945877999               |
| SNP_P3_3317_5509275 | NC_021160.1    | Ca_kabuli_chr01 | 5509275                 | GG                              | AA                | 1945878000               |
| SNP_P3_3318_5509488 | NC_021160.1    | Ca_kabuli_chr01 | 5509488                 | GG                              | AA                | 1945878002               |
| SNP_P3_3319_5509567 | NC_021160.1    | Ca_kabuli_chr01 | 5509567                 | GG                              | AA                | 1945878004               |
| SNP_P3_3320_5509847 | NC_021160.1    | Ca_kabuli_chr01 | 5509847                 | CC                              | GG                | 1945878006               |
| SNP_P3_3322_5511614 | NC_021160.1    | Ca_kabuli_chr01 | 5511614                 | CC                              | TT                | 1945878008               |
| SNP_P3_3323_5511919 | NC_021160.1    | Ca_kabuli_chr01 | 5511919                 | CC                              | TT                | 1945878009               |
| SNP_P3_3324_5512581 | NC_021160.1    | Ca_kabuli_chr01 | 5512581                 | AA                              | GG                | 1945878011               |
| SNP_P3_3325_5512614 | NC_021160.1    | Ca_kabuli_chr01 | 5512614                 | CC                              | AA                | 1945878013               |
| SNP_P3_3326_5512706 | NC_021160.1    | Ca_kabuli_chr01 | 5512706                 | AA                              | GG                | 1945878015               |
| SNP_P3_3327_5512907 | NC_021160.1    | Ca_kabuli_chr01 | 5512907                 | CC                              | TT                | 1945878016               |



| SNPs IDs            | Chromosome IDs | Chromosomes     | Physical positions (bp) | CDC Frontier (Reference genome) | (Pusa 256 & HPNB) | NCBI SNPdb Accession IDs |
|---------------------|----------------|-----------------|-------------------------|---------------------------------|-------------------|--------------------------|
| SNP_P3_3328_5512965 | NC_021160.1    | Ca_kabuli_chr01 | 5512965                 | AA                              | GG                | 1945878018               |
| SNP_P3_3329_5512970 | NC_021160.1    | Ca_kabuli_chr01 | 5512970                 | GG                              | CC                | 1945878020               |
| SNP_P3_3330_5513100 | NC_021160.1    | Ca_kabuli_chr01 | 5513100                 | GG                              | AA                | 1945878022               |
| SNP_P3_3331_5513292 | NC_021160.1    | Ca_kabuli_chr01 | 5513292                 | CC                              | TT                | 1945878024               |
| SNP_P3_3333_5514230 | NC_021160.1    | Ca_kabuli_chr01 | 5514230                 | GG                              | AA                | 1945878025               |
| SNP_P3_3334_5516716 | NC_021160.1    | Ca_kabuli_chr01 | 5516716                 | GG                              | AA                | 1945878027               |
| SNP_P3_3335_5516727 | NC_021160.1    | Ca_kabuli_chr01 | 5516727                 | GG                              | AA                | 1945878029               |
| SNP_P3_3336_5517123 | NC_021160.1    | Ca_kabuli_chr01 | 5517123                 | AA                              | TT                | 1945878031               |
| SNP_P3_3337_5517408 | NC_021160.1    | Ca_kabuli_chr01 | 5517408                 | AA                              | GG                | 1945878032               |
| SNP_P3_3338_5517489 | NC_021160.1    | Ca_kabuli_chr01 | 5517489                 | GG                              | TT                | 1945878034               |
| SNP_P3_3339_5520020 | NC_021160.1    | Ca_kabuli_chr01 | 5520020                 | GG                              | AA                | 1945878036               |
| SNP_P3_3340_5520420 | NC_021160.1    | Ca_kabuli_chr01 | 5520420                 | CC                              | AA                | 1945878038               |
| SNP_P3_3341_5520460 | NC_021160.1    | Ca_kabuli_chr01 | 5520460                 | CC                              | AA                | 1945878040               |
| SNP_P3_3342_5520478 | NC_021160.1    | Ca_kabuli_chr01 | 5520478                 | CC                              | TT                | 1945878041               |
| SNP_P3_3343_5520618 | NC_021160.1    | Ca_kabuli_chr01 | 5520618                 | TT                              | CC                | 1945878043               |
| SNP_P3_3344_5520686 | NC_021160.1    | Ca_kabuli_chr01 | 5520686                 | GG                              | AA                | 1945878045               |
| SNP_P3_3345_5520699 | NC_021160.1    | Ca_kabuli_chr01 | 5520699                 | TT                              | AA                | 1945878047               |
| SNP_P3_3346_5520830 | NC_021160.1    | Ca_kabuli_chr01 | 5520830                 | TT                              | AA                | 1945878048               |
| SNP_P3_3347_5521223 | NC_021160.1    | Ca_kabuli_chr01 | 5521223                 | CC                              | AA                | 1945878050               |
| SNP_P3_3348_5521590 | NC_021160.1    | Ca_kabuli_chr01 | 5521590                 | AA                              | GG                | 1945878052               |
| SNP_P3_3349_5521596 | NC_021160.1    | Ca_kabuli_chr01 | 5521596                 | GG                              | AA                | 1945878054               |
| SNP_P3_3350_5521668 | NC_021160.1    | Ca_kabuli_chr01 | 5521668                 | TT                              | CC                | 1945878056               |
| SNP_P3_3351_5528698 | NC_021160.1    | Ca_kabuli_chr01 | 5528698                 | GG                              | TT                | 1945878057               |
| SNP_P3_3352_5528774 | NC_021160.1    | Ca_kabuli_chr01 | 5528774                 | GG                              | CC                | 1945878059               |
| SNP_P3_3353_5528825 | NC_021160.1    | Ca_kabuli_chr01 | 5528825                 | AA                              | GG                | 1945878061               |
| SNP_P3_3354_5529216 | NC_021160.1    | Ca_kabuli_chr01 | 5529216                 | AA                              | TT                | 1945878063               |
| SNP_P3_3355_5529425 | NC_021160.1    | Ca_kabuli_chr01 | 5529425                 | AA                              | TT                | 1945878065               |
| SNP_P3_3356_5529451 | NC_021160.1    | Ca_kabuli_chr01 | 5529451                 | TT                              | CC                | 1945878066               |
| SNP_P3_3357_5529458 | NC_021160.1    | Ca_kabuli_chr01 | 5529458                 | TT                              | AA                | 1945878068               |
| SNP_P3_3358_5529478 | NC_021160.1    | Ca_kabuli_chr01 | 5529478                 | GG                              | AA                | 1945878070               |
| SNP_P3_3359_5529488 | NC_021160.1    | Ca_kabuli_chr01 | 5529488                 | GG                              | AA                | 1945878072               |
| SNP_P3_3360_5531079 | NC_021160.1    | Ca_kabuli_chr01 | 5531079                 | TT                              | AA                | 1945878074               |
| SNP_P3_3361_5531082 | NC_021160.1    | Ca_kabuli_chr01 | 5531082                 | TT                              | AA                | 1945878076               |
| SNP_P3_3362_5531431 | NC_021160.1    | Ca_kabuli_chr01 | 5531431                 | TT                              | AA                | 1945878077               |
| SNP_P3_3363_5532239 | NC_021160.1    | Ca_kabuli_chr01 | 5532239                 | AA                              | TT                | 1945878079               |
| SNP_P3_3364_5545508 | NC_021160.1    | Ca_kabuli_chr01 | 5545508                 | CC                              | GG                | 1945878081               |
| SNP_P3_3365_5547439 | NC_021160.1    | Ca_kabuli_chr01 | 5547439                 | TT                              | CC                | 1945878083               |
| SNP_P3_3366_5547593 | NC_021160.1    | Ca_kabuli_chr01 | 5547593                 | CC                              | TT                | 1945878085               |
| SNP_P3_3367_5586269 | NC_021160.1    | Ca_kabuli_chr01 | 5586269                 | CC                              | AA                | 1945878086               |
| SNP_P3_3368_5602580 | NC_021160.1    | Ca_kabuli_chr01 | 5602580                 | AA                              | GG                | 1945878088               |
| SNP_P3_3369_5613871 | NC_021160.1    | Ca_kabuli_chr01 | 5613871                 | AA                              | TT                | 1945878090               |
| SNP_P3_3370_5613941 | NC_021160.1    | Ca_kabuli_chr01 | 5613941                 | GG                              | CC                | 1945878092               |

| SNPs IDs            | Chromosome IDs | Chromosomes     | Physical positions (bp) | CDC Frontier (Reference genome) | (Pusa 256 & HPNB) | NCBI SNPdb Accession IDs |
|---------------------|----------------|-----------------|-------------------------|---------------------------------|-------------------|--------------------------|
| SNP_P3_3372_5655701 | NC_021160.1    | Ca_kabuli_chr01 | 5655701                 | TT                              | CC                | 1945878093               |
| SNP_P3_3375_5677519 | NC_021160.1    | Ca_kabuli_chr01 | 5677519                 | CC                              | TT                | 1945878095               |
| SNP_P3_3376_5687891 | NC_021160.1    | Ca_kabuli_chr01 | 5687891                 | AA                              | CC                | 1945878097               |
| SNP_P3_3377_5729235 | NC_021160.1    | Ca_kabuli_chr01 | 5729235                 | GG                              | CC                | 1945878099               |
| SNP_P3_3378_5738739 | NC_021160.1    | Ca_kabuli_chr01 | 5738739                 | GG                              | CC                | 1945878101               |
| SNP_P3_3379_5741451 | NC_021160.1    | Ca_kabuli_chr01 | 5741451                 | TT                              | CC                | 1945878102               |
| SNP_P3_3380_5752016 | NC_021160.1    | Ca_kabuli_chr01 | 5752016                 | CC                              | TT                | 1945878104               |
| SNP_P3_3381_5752760 | NC_021160.1    | Ca_kabuli_chr01 | 5752760                 | AA                              | CC                | 1945878106               |
| SNP_P3_3383_5781429 | NC_021160.1    | Ca_kabuli_chr01 | 5781429                 | GG                              | AA                | 1945878108               |
| SNP_P3_3384_5784428 | NC_021160.1    | Ca_kabuli_chr01 | 5784428                 | CC                              | AA                | 1945878109               |
| SNP_P3_3385_5793815 | NC_021160.1    | Ca_kabuli_chr01 | 5793815                 | GG                              | AA                | 1945878111               |
| SNP_P3_3386_5793912 | NC_021160.1    | Ca_kabuli_chr01 | 5793912                 | GG                              | CC                | 1945878113               |
| SNP_P3_3387_5803240 | NC_021160.1    | Ca_kabuli_chr01 | 5803240                 | CC                              | TT                | 1945878115               |
| SNP_P3_3388_5803260 | NC_021160.1    | Ca_kabuli_chr01 | 5803260                 | GG                              | AA                | 1945878116               |
| SNP_P3_3389_5803429 | NC_021160.1    | Ca_kabuli_chr01 | 5803429                 | TT                              | AA                | 1945878118               |
| SNP_P3_3390_5803435 | NC_021160.1    | Ca_kabuli_chr01 | 5803435                 | AA                              | CC                | 1945878120               |
| SNP_P3_3392_5803683 | NC_021160.1    | Ca_kabuli_chr01 | 5803683                 | GG                              | AA                | 1945878122               |
| SNP_P3_3393_5803933 | NC_021160.1    | Ca_kabuli_chr01 | 5803933                 | GG                              | AA                | 1945878123               |
| SNP_P3_3394_5803985 | NC_021160.1    | Ca_kabuli_chr01 | 5803985                 | AA                              | GG                | 1945878125               |
| SNP_P3_3396_5804097 | NC_021160.1    | Ca_kabuli_chr01 | 5804097                 | CC                              | AA                | 1945878127               |
| SNP_P3_3398_5804227 | NC_021160.1    | Ca_kabuli_chr01 | 5804227                 | GG                              | AA                | 1945878129               |
| SNP_P3_3399_5804381 | NC_021160.1    | Ca_kabuli_chr01 | 5804381                 | TT                              | AA                | 1945878130               |
| SNP_P3_3400_5819238 | NC_021160.1    | Ca_kabuli_chr01 | 5819238                 | AA                              | TT                | 1945878132               |
| SNP_P3_3401_5819239 | NC_021160.1    | Ca_kabuli_chr01 | 5819239                 | TT                              | CC                | 1945878134               |
| SNP_P3_3402_5821799 | NC_021160.1    | Ca_kabuli_chr01 | 5821799                 | GG                              | AA                | 1945878136               |
| SNP_P3_3403_5870619 | NC_021160.1    | Ca_kabuli_chr01 | 5870619                 | CC                              | TT                | 1945878137               |
| SNP_P3_3404_5897656 | NC_021160.1    | Ca_kabuli_chr01 | 5897656                 | TT                              | GG                | 1945878139               |
| SNP_P3_3405_5897738 | NC_021160.1    | Ca_kabuli_chr01 | 5897738                 | GG                              | TT                | 1945878141               |
| SNP_P3_3406_5898025 | NC_021160.1    | Ca_kabuli_chr01 | 5898025                 | TT                              | AA                | 1945878143               |
| SNP_P3_3407_5898046 | NC_021160.1    | Ca_kabuli_chr01 | 5898046                 | GG                              | AA                | 1945878144               |
| SNP_P3_3408_5900489 | NC_021160.1    | Ca_kabuli_chr01 | 5900489                 | TT                              | CC                | 1945878146               |
| SNP_P3_3409_5929501 | NC_021160.1    | Ca_kabuli_chr01 | 5929501                 | GG                              | TT                | 1945878148               |
| SNP_P3_3410_5941313 | NC_021160.1    | Ca_kabuli_chr01 | 5941313                 | GG                              | AA                | 1945878150               |
| SNP_P3_3412_5961350 | NC_021160.1    | Ca_kabuli_chr01 | 5961350                 | CC                              | GG                | 1945878151               |
| SNP_P3_3413_5970065 | NC_021160.1    | Ca_kabuli_chr01 | 5970065                 | CC                              | AA                | 1945878153               |
| SNP_P3_3414_5986235 | NC_021160.1    | Ca_kabuli_chr01 | 5986235                 | GG                              | TT                | 1945878155               |
| SNP_P3_3415_5986521 | NC_021160.1    | Ca_kabuli_chr01 | 5986521                 | AA                              | TT                | 1945878157               |
| SNP_P3_3416_5986857 | NC_021160.1    | Ca_kabuli_chr01 | 5986857                 | CC                              | TT                | 1945878159               |
| SNP_P3_3417_5988429 | NC_021160.1    | Ca_kabuli_chr01 | 5988429                 | GG                              | AA                | 1945878160               |
| SNP_P3_3418_5988434 | NC_021160.1    | Ca_kabuli_chr01 | 5988434                 | AA                              | GG                | 1945878162               |
| SNP_P3_3419_5991169 | NC_021160.1    | Ca_kabuli_chr01 | 5991169                 | CC                              | AA                | 1945878164               |
| SNP_P3_3421_6015508 | NC_021160.1    | Ca_kabuli_chr01 | 6015508                 | TT                              | AA                | 1945878166               |

| SNPs IDs            | Chromosome IDs | Chromosomes     | Physical positions (bp) | CDC Frontier (Reference genome) | (Pusa 256 & HPNB) | NCBI SNPdb Accession IDs |
|---------------------|----------------|-----------------|-------------------------|---------------------------------|-------------------|--------------------------|
| SNP_P3_3422_6070477 | NC_021160.1    | Ca_kabuli_chr01 | 6070477                 | CC                              | TT                | 1945878168               |
| SNP_P3_3423_6071977 | NC_021160.1    | Ca_kabuli_chr01 | 6071977                 | CC                              | TT                | 1945878169               |
| SNP_P3_3424_6072387 | NC_021160.1    | Ca_kabuli_chr01 | 6072387                 | CC                              | TT                | 1945878171               |
| SNP_P3_3425_6072590 | NC_021160.1    | Ca_kabuli_chr01 | 6072590                 | TT                              | CC                | 1945878173               |
| SNP_P3_3426_6072859 | NC_021160.1    | Ca_kabuli_chr01 | 6072859                 | CC                              | TT                | 1945878175               |
| SNP_P3_3427_6072875 | NC_021160.1    | Ca_kabuli_chr01 | 6072875                 | CC                              | TT                | 1945878176               |
| SNP_P3_3428_6106185 | NC_021160.1    | Ca_kabuli_chr01 | 6106185                 | CC                              | TT                | 1945878178               |
| SNP_P3_3429_6106211 | NC_021160.1    | Ca_kabuli_chr01 | 6106211                 | CC                              | TT                | 1945878180               |
| SNP_P3_3430_6106227 | NC_021160.1    | Ca_kabuli_chr01 | 6106227                 | AA                              | GG                | 1945878182               |
| SNP_P3_3431_6106280 | NC_021160.1    | Ca_kabuli_chr01 | 6106280                 | AA                              | TT                | 1945878184               |
| SNP_P3_3432_6106287 | NC_021160.1    | Ca_kabuli_chr01 | 6106287                 | TT                              | CC                | 1945878185               |
| SNP_P3_3433_6106304 | NC_021160.1    | Ca_kabuli_chr01 | 6106304                 | GG                              | AA                | 1945878187               |
| SNP_P3_3434_6106315 | NC_021160.1    | Ca_kabuli_chr01 | 6106315                 | CC                              | TT                | 1945878189               |
| SNP_P3_3435_6106328 | NC_021160.1    | Ca_kabuli_chr01 | 6106328                 | TT                              | CC                | 1945878191               |
| SNP_P3_3436_6106338 | NC_021160.1    | Ca_kabuli_chr01 | 6106338                 | AA                              | TT                | 1945878192               |
| SNP_P3_3437_6106339 | NC_021160.1    | Ca_kabuli_chr01 | 6106339                 | GG                              | CC                | 1945878194               |
| SNP_P3_3438_6106350 | NC_021160.1    | Ca_kabuli_chr01 | 6106350                 | TT                              | CC                | 1945878196               |
| SNP_P3_3439_6106351 | NC_021160.1    | Ca_kabuli_chr01 | 6106351                 | AA                              | TT                | 1945878198               |
| SNP_P3_3440_6106470 | NC_021160.1    | Ca_kabuli_chr01 | 6106470                 | TT                              | CC                | 1945878200               |
| SNP_P3_3441_6106563 | NC_021160.1    | Ca_kabuli_chr01 | 6106563                 | TT                              | GG                | 1945878201               |
| SNP_P3_3442_6106564 | NC_021160.1    | Ca_kabuli_chr01 | 6106564                 | AA                              | GG                | 1945878203               |
| SNP_P3_3443_6106599 | NC_021160.1    | Ca_kabuli_chr01 | 6106599                 | TT                              | CC                | 1945878205               |
| SNP_P3_3444_6110318 | NC_021160.1    | Ca_kabuli_chr01 | 6110318                 | CC                              | TT                | 1945878207               |
| SNP_P3_3445_6110462 | NC_021160.1    | Ca_kabuli_chr01 | 6110462                 | TT                              | AA                | 1945878208               |
| SNP_P3_3446_6112933 | NC_021160.1    | Ca_kabuli_chr01 | 6112933                 | TT                              | GG                | 1945878210               |
| SNP_P3_3447_6121223 | NC_021160.1    | Ca_kabuli_chr01 | 6121223                 | CC                              | TT                | 1945878212               |
| SNP_P3_3448_6121229 | NC_021160.1    | Ca_kabuli_chr01 | 6121229                 | CC                              | GG                | 1945878214               |
| SNP_P3_3449_6123408 | NC_021160.1    | Ca_kabuli_chr01 | 6123408                 | TT                              | CC                | 1945878216               |
| SNP_P3_3450_6126136 | NC_021160.1    | Ca_kabuli_chr01 | 6126136                 | AA                              | TT                | 1945878217               |
| SNP_P3_3451_6126427 | NC_021160.1    | Ca_kabuli_chr01 | 6126427                 | TT                              | AA                | 1945878219               |
| SNP_P3_3452_6127083 | NC_021160.1    | Ca_kabuli_chr01 | 6127083                 | CC                              | TT                | 1945878221               |
| SNP_P3_3453_6127093 | NC_021160.1    | Ca_kabuli_chr01 | 6127093                 | AA                              | GG                | 1945878223               |
| SNP_P3_3454_6127094 | NC_021160.1    | Ca_kabuli_chr01 | 6127094                 | CC                              | AA                | 1945878224               |
| SNP_P3_3455_6127113 | NC_021160.1    | Ca_kabuli_chr01 | 6127113                 | TT                              | AA                | 1945878226               |
| SNP_P3_3456_6128769 | NC_021160.1    | Ca_kabuli_chr01 | 6128769                 | CC                              | AA                | 1945878228               |
| SNP_P3_3458_6129408 | NC_021160.1    | Ca_kabuli_chr01 | 6129408                 | GG                              | AA                | 1945878230               |
| SNP_P3_3459_6129419 | NC_021160.1    | Ca_kabuli_chr01 | 6129419                 | CC                              | TT                | 1945878232               |
| SNP_P3_3460_6130489 | NC_021160.1    | Ca_kabuli_chr01 | 6130489                 | TT                              | AA                | 1945878233               |
| SNP_P3_3461_6130677 | NC_021160.1    | Ca_kabuli_chr01 | 6130677                 | CC                              | TT                | 1945878235               |
| SNP_P3_3462_6130691 | NC_021160.1    | Ca_kabuli_chr01 | 6130691                 | AA                              | TT                | 1945878237               |
| SNP_P3_3464_6131766 | NC_021160.1    | Ca_kabuli_chr01 | 6131766                 | CC                              | AA                | 1945878239               |
| SNP_P3_3465_6132693 | NC_021160.1    | Ca_kabuli_chr01 | 6132693                 | AA                              | GG                | 1945878240               |

| SNPs IDs            | Chromosome IDs | Chromosomes     | Physical positions (bp) | CDC Frontier (Reference genome) | (Pusa 256 & HPNB) | NCBI SNPdb Accession IDs |
|---------------------|----------------|-----------------|-------------------------|---------------------------------|-------------------|--------------------------|
| SNP_P3_3466_6132718 | NC_021160.1    | Ca_kabuli_chr01 | 6132718                 | AA                              | GG                | 1945878242               |
| SNP_P3_3467_6132961 | NC_021160.1    | Ca_kabuli_chr01 | 6132961                 | AA                              | CC                | 1945878244               |
| SNP_P3_3468_6133695 | NC_021160.1    | Ca_kabuli_chr01 | 6133695                 | GG                              | TT                | 1945878246               |
| SNP_P3_3470_6135529 | NC_021160.1    | Ca_kabuli_chr01 | 6135529                 | CC                              | GG                | 1945878248               |
| SNP_P3_3471_6135547 | NC_021160.1    | Ca_kabuli_chr01 | 6135547                 | GG                              | AA                | 1945878249               |
| SNP_P3_3472_6135575 | NC_021160.1    | Ca_kabuli_chr01 | 6135575                 | AA                              | TT                | 1945878251               |
| SNP_P3_3473_6135579 | NC_021160.1    | Ca_kabuli_chr01 | 6135579                 | TT                              | AA                | 1945878253               |
| SNP_P3_3475_6135783 | NC_021160.1    | Ca_kabuli_chr01 | 6135783                 | AA                              | GG                | 1945878255               |
| SNP_P3_3476_6135793 | NC_021160.1    | Ca_kabuli_chr01 | 6135793                 | GG                              | AA                | 1945878256               |
| SNP_P3_3477_6137222 | NC_021160.1    | Ca_kabuli_chr01 | 6137222                 | TT                              | AA                | 1945878258               |
| SNP_P3_3478_6137249 | NC_021160.1    | Ca_kabuli_chr01 | 6137249                 | CC                              | AA                | 1945878260               |
| SNP_P3_3479_6137250 | NC_021160.1    | Ca_kabuli_chr01 | 6137250                 | AA                              | GG                | 1945878262               |
| SNP_P3_3480_6137892 | NC_021160.1    | Ca_kabuli_chr01 | 6137892                 | TT                              | CC                | 1945878263               |
| SNP_P3_3481_6137930 | NC_021160.1    | Ca_kabuli_chr01 | 6137930                 | CC                              | TT                | 1945878265               |
| SNP_P3_3482_6137964 | NC_021160.1    | Ca_kabuli_chr01 | 6137964                 | GG                              | TT                | 1945878267               |
| SNP_P3_3483_6137970 | NC_021160.1    | Ca_kabuli_chr01 | 6137970                 | TT                              | CC                | 1945878269               |
| SNP_P3_3484_6138019 | NC_021160.1    | Ca_kabuli_chr01 | 6138019                 | TT                              | CC                | 1945878271               |
| SNP_P3_3485_6138159 | NC_021160.1    | Ca_kabuli_chr01 | 6138159                 | AA                              | GG                | 1945878272               |
| SNP_P3_3486_6138175 | NC_021160.1    | Ca_kabuli_chr01 | 6138175                 | TT                              | CC                | 1945878274               |
| SNP_P3_3488_6138704 | NC_021160.1    | Ca_kabuli_chr01 | 6138704                 | GG                              | AA                | 1945878276               |
| SNP_P3_3489_6138939 | NC_021160.1    | Ca_kabuli_chr01 | 6138939                 | CC                              | TT                | 1945878278               |
| SNP_P3_3490_6139021 | NC_021160.1    | Ca_kabuli_chr01 | 6139021                 | AA                              | GG                | 1945878279               |
| SNP_P3_3491_6141438 | NC_021160.1    | Ca_kabuli_chr01 | 6141438                 | AA                              | GG                | 1945878281               |
| SNP_P3_3493_6141487 | NC_021160.1    | Ca_kabuli_chr01 | 6141487                 | CC                              | TT                | 1945878283               |
| SNP_P3_3494_6141718 | NC_021160.1    | Ca_kabuli_chr01 | 6141718                 | CC                              | TT                | 1945878285               |
| SNP_P3_3495_6141938 | NC_021160.1    | Ca_kabuli_chr01 | 6141938                 | AA                              | TT                | 1945878287               |
| SNP_P3_3496_6142386 | NC_021160.1    | Ca_kabuli_chr01 | 6142386                 | TT                              | GG                | 1945878288               |
| SNP_P3_3497_6142435 | NC_021160.1    | Ca_kabuli_chr01 | 6142435                 | GG                              | CC                | 1945878290               |
| SNP_P3_3498_6142456 | NC_021160.1    | Ca_kabuli_chr01 | 6142456                 | CC                              | GG                | 1945878292               |
| SNP_P3_3499_6142470 | NC_021160.1    | Ca_kabuli_chr01 | 6142470                 | CC                              | TT                | 1945878294               |
| SNP_P3_3500_6142729 | NC_021160.1    | Ca_kabuli_chr01 | 6142729                 | GG                              | AA                | 1945878295               |
| SNP_P3_3501_6143188 | NC_021160.1    | Ca_kabuli_chr01 | 6143188                 | TT                              | CC                | 1945878297               |
| SNP_P3_3502_6147774 | NC_021160.1    | Ca_kabuli_chr01 | 6147774                 | GG                              | AA                | 1945878299               |
| SNP_P3_3503_6147828 | NC_021160.1    | Ca_kabuli_chr01 | 6147828                 | TT                              | GG                | 1945878301               |
| SNP_P3_3504_6147837 | NC_021160.1    | Ca_kabuli_chr01 | 6147837                 | GG                              | TT                | 1945878303               |
| SNP_P3_3506_6148366 | NC_021160.1    | Ca_kabuli_chr01 | 6148366                 | GG                              | AA                | 1945878304               |
| SNP_P3_3507_6148555 | NC_021160.1    | Ca_kabuli_chr01 | 6148555                 | GG                              | AA                | 1945878306               |
| SNP_P3_3508_6149516 | NC_021160.1    | Ca_kabuli_chr01 | 6149516                 | GG                              | CC                | 1945878308               |
| SNP_P3_3509_6149576 | NC_021160.1    | Ca_kabuli_chr01 | 6149576                 | TT                              | CC                | 1945878310               |
| SNP_P3_3510_6149804 | NC_021160.1    | Ca_kabuli_chr01 | 6149804                 | AA                              | GG                | 1945878311               |
| SNP_P3_3511_6150034 | NC_021160.1    | Ca_kabuli_chr01 | 6150034                 | TT                              | CC                | 1945878313               |
| SNP_P3_3512_6150056 | NC_021160.1    | Ca_kabuli_chr01 | 6150056                 | TT                              | CC                | 1945878315               |

| SNPs IDs            | Chromosome IDs | Chromosomes     | Physical positions (bp) | CDC Frontier (Reference genome) | (Pusa 256 & HPNB) | NCBI SNPdb Accession IDs |
|---------------------|----------------|-----------------|-------------------------|---------------------------------|-------------------|--------------------------|
| SNP_P3_3513_6150335 | NC_021160.1    | Ca_kabuli_chr01 | 6150335                 | TT                              | AA                | 1945878317               |
| SNP_P3_3514_6150378 | NC_021160.1    | Ca_kabuli_chr01 | 6150378                 | GG                              | AA                | 1945878319               |
| SNP_P3_3516_6154257 | NC_021160.1    | Ca_kabuli_chr01 | 6154257                 | AA                              | CC                | 1945878320               |
| SNP_P3_3517_6155651 | NC_021160.1    | Ca_kabuli_chr01 | 6155651                 | GG                              | AA                | 1945878322               |
| SNP_P3_3518_6156008 | NC_021160.1    | Ca_kabuli_chr01 | 6156008                 | AA                              | GG                | 1945878324               |
| SNP_P3_3520_6156266 | NC_021160.1    | Ca_kabuli_chr01 | 6156266                 | GG                              | AA                | 1945878326               |
| SNP_P3_3521_6156272 | NC_021160.1    | Ca_kabuli_chr01 | 6156272                 | GG                              | TT                | 1945878327               |
| SNP_P3_3522_6156297 | NC_021160.1    | Ca_kabuli_chr01 | 6156297                 | TT                              | CC                | 1945878329               |
| SNP_P3_3523_6156320 | NC_021160.1    | Ca_kabuli_chr01 | 6156320                 | AA                              | GG                | 1945878331               |
| SNP_P3_3525_6156615 | NC_021160.1    | Ca_kabuli_chr01 | 6156615                 | TT                              | CC                | 1945878333               |
| SNP_P3_3526_6156640 | NC_021160.1    | Ca_kabuli_chr01 | 6156640                 | AA                              | GG                | 1945878335               |
| SNP_P3_3527_6156792 | NC_021160.1    | Ca_kabuli_chr01 | 6156792                 | CC                              | AA                | 1945878336               |
| SNP_P3_3528_6157013 | NC_021160.1    | Ca_kabuli_chr01 | 6157013                 | CC                              | TT                | 1945878338               |
| SNP_P3_3529_6157049 | NC_021160.1    | Ca_kabuli_chr01 | 6157049                 | GG                              | AA                | 1945878340               |
| SNP_P3_3530_6157057 | NC_021160.1    | Ca_kabuli_chr01 | 6157057                 | CC                              | TT                | 1945878342               |
| SNP_P3_3531_6157493 | NC_021160.1    | Ca_kabuli_chr01 | 6157493                 | GG                              | AA                | 1945878343               |
| SNP_P3_3534_6158461 | NC_021160.1    | Ca_kabuli_chr01 | 6158461                 | CC                              | AA                | 1945878345               |
| SNP_P3_3535_6158780 | NC_021160.1    | Ca_kabuli_chr01 | 6158780                 | GG                              | AA                | 1945878347               |
| SNP_P3_3536_6158905 | NC_021160.1    | Ca_kabuli_chr01 | 6158905                 | GG                              | AA                | 1945878349               |
| SNP_P3_3537_6158921 | NC_021160.1    | Ca_kabuli_chr01 | 6158921                 | TT                              | AA                | 1945878351               |
| SNP_P3_3538_6158961 | NC_021160.1    | Ca_kabuli_chr01 | 6158961                 | AA                              | TT                | 1945878352               |
| SNP_P3_3539_6160475 | NC_021160.1    | Ca_kabuli_chr01 | 6160475                 | GG                              | TT                | 1945878354               |
| SNP_P3_3540_6162019 | NC_021160.1    | Ca_kabuli_chr01 | 6162019                 | GG                              | AA                | 1945878356               |
| SNP_P3_3541_6162033 | NC_021160.1    | Ca_kabuli_chr01 | 6162033                 | CC                              | TT                | 1945878358               |
| SNP_P3_3542_6162034 | NC_021160.1    | Ca_kabuli_chr01 | 6162034                 | GG                              | AA                | 1945878359               |
| SNP_P3_3543_6162693 | NC_021160.1    | Ca_kabuli_chr01 | 6162693                 | TT                              | CC                | 1945878361               |
| SNP_P3_3544_6163026 | NC_021160.1    | Ca_kabuli_chr01 | 6163026                 | TT                              | CC                | 1945878363               |
| SNP_P3_3545_6165245 | NC_021160.1    | Ca_kabuli_chr01 | 6165245                 | TT                              | CC                | 1945878365               |
| SNP_P3_3546_6166038 | NC_021160.1    | Ca_kabuli_chr01 | 6166038                 | GG                              | AA                | 1945878367               |
| SNP_P3_3547_6166104 | NC_021160.1    | Ca_kabuli_chr01 | 6166104                 | AA                              | GG                | 1945878368               |
| SNP_P3_3548_6166117 | NC_021160.1    | Ca_kabuli_chr01 | 6166117                 | AA                              | TT                | 1945878370               |
| SNP_P3_3550_6166375 | NC_021160.1    | Ca_kabuli_chr01 | 6166375                 | CC                              | GG                | 1945878372               |
| SNP_P3_3551_6166445 | NC_021160.1    | Ca_kabuli_chr01 | 6166445                 | CC                              | AA                | 1945878374               |
| SNP_P3_3552_6166670 | NC_021160.1    | Ca_kabuli_chr01 | 6166670                 | GG                              | AA                | 1945878375               |
| SNP_P3_3553_6166674 | NC_021160.1    | Ca_kabuli_chr01 | 6166674                 | CC                              | TT                | 1945878377               |
| SNP_P3_3554_6167226 | NC_021160.1    | Ca_kabuli_chr01 | 6167226                 | AA                              | TT                | 1945878379               |
| SNP_P3_3555_6170668 | NC_021160.1    | Ca_kabuli_chr01 | 6170668                 | AA                              | TT                | 1945878381               |
| SNP_P3_3556_6170679 | NC_021160.1    | Ca_kabuli_chr01 | 6170679                 | GG                              | TT                | 1945878383               |
| SNP_P3_3557_6170681 | NC_021160.1    | Ca_kabuli_chr01 | 6170681                 | AA                              | GG                | 1945878384               |
| SNP_P3_3558_6170996 | NC_021160.1    | Ca_kabuli_chr01 | 6170996                 | TT                              | AA                | 1945878386               |
| SNP_P3_3559_6171249 | NC_021160.1    | Ca_kabuli_chr01 | 6171249                 | AA                              | TT                | 1945878388               |
| SNP_P3_3560_6171318 | NC_021160.1    | Ca_kabuli_chr01 | 6171318                 | GG                              | TT                | 1945878390               |

| SNPs IDs            | Chromosome IDs | Chromosomes     | Physical positions (bp) | CDC Frontier (Reference genome) | (Pusa 256 & HPNB) | NCBI SNPdb Accession IDs |
|---------------------|----------------|-----------------|-------------------------|---------------------------------|-------------------|--------------------------|
| SNP_P3_3561_6174191 | NC_021160.1    | Ca_kabuli_chr01 | 6174191                 | GG                              | AA                | 1945878391               |
| SNP_P3_3562_6174448 | NC_021160.1    | Ca_kabuli_chr01 | 6174448                 | TT                              | CC                | 1945878393               |
| SNP_P3_3563_6174524 | NC_021160.1    | Ca_kabuli_chr01 | 6174524                 | TT                              | CC                | 1945878395               |
| SNP_P3_3564_6174846 | NC_021160.1    | Ca_kabuli_chr01 | 6174846                 | CC                              | TT                | 1945878397               |
| SNP_P3_3567_6177304 | NC_021160.1    | Ca_kabuli_chr01 | 6177304                 | TT                              | GG                | 1945878399               |
| SNP_P3_3568_6178055 | NC_021160.1    | Ca_kabuli_chr01 | 6178055                 | CC                              | TT                | 1945878400               |
| SNP_P3_3569_6178270 | NC_021160.1    | Ca_kabuli_chr01 | 6178270                 | GG                              | AA                | 1945878402               |
| SNP_P3_3570_6190926 | NC_021160.1    | Ca_kabuli_chr01 | 6190926                 | TT                              | GG                | 1945878404               |
| SNP_P3_3571_6190999 | NC_021160.1    | Ca_kabuli_chr01 | 6190999                 | TT                              | AA                | 1945878406               |
| SNP_P3_3572_6191022 | NC_021160.1    | Ca_kabuli_chr01 | 6191022                 | AA                              | TT                | 1945878407               |
| SNP_P3_3573_6193367 | NC_021160.1    | Ca_kabuli_chr01 | 6193367                 | CC                              | TT                | 1945878409               |
| SNP_P3_3574_6193476 | NC_021160.1    | Ca_kabuli_chr01 | 6193476                 | GG                              | TT                | 1945878411               |
| SNP_P3_3575_6193698 | NC_021160.1    | Ca_kabuli_chr01 | 6193698                 | AA                              | GG                | 1945878413               |
| SNP_P3_3576_6193716 | NC_021160.1    | Ca_kabuli_chr01 | 6193716                 | GG                              | AA                | 1945878415               |
| SNP_P3_3577_6201219 | NC_021160.1    | Ca_kabuli_chr01 | 6201219                 | CC                              | TT                | 1945878416               |
| SNP_P3_3578_6201310 | NC_021160.1    | Ca_kabuli_chr01 | 6201310                 | TT                              | CC                | 1945878418               |
| SNP_P3_3579_6201354 | NC_021160.1    | Ca_kabuli_chr01 | 6201354                 | AA                              | GG                | 1945878420               |
| SNP_P3_3580_6201579 | NC_021160.1    | Ca_kabuli_chr01 | 6201579                 | AA                              | GG                | 1945878422               |
| SNP_P3_3581_6201594 | NC_021160.1    | Ca_kabuli_chr01 | 6201594                 | CC                              | TT                | 1945878423               |
| SNP_P3_3582_6201697 | NC_021160.1    | Ca_kabuli_chr01 | 6201697                 | GG                              | AA                | 1945878425               |
| SNP_P3_3583_6201917 | NC_021160.1    | Ca_kabuli_chr01 | 6201917                 | TT                              | CC                | 1945878427               |
| SNP_P3_3584_6201992 | NC_021160.1    | Ca_kabuli_chr01 | 6201992                 | AA                              | TT                | 1945878429               |
| SNP_P3_3585_6202062 | NC_021160.1    | Ca_kabuli_chr01 | 6202062                 | AA                              | CC                | 1945878431               |
| SNP_P3_3586_6202067 | NC_021160.1    | Ca_kabuli_chr01 | 6202067                 | GG                              | AA                | 1945878432               |
| SNP_P3_3587_6202070 | NC_021160.1    | Ca_kabuli_chr01 | 6202070                 | TT                              | CC                | 1945878434               |
| SNP_P3_3588_6202084 | NC_021160.1    | Ca_kabuli_chr01 | 6202084                 | GG                              | TT                | 1945878436               |
| SNP_P3_3589_6202096 | NC_021160.1    | Ca_kabuli_chr01 | 6202096                 | AA                              | GG                | 1945878438               |
| SNP_P3_3590_6202237 | NC_021160.1    | Ca_kabuli_chr01 | 6202237                 | GG                              | AA                | 1945878439               |
| SNP_P3_3591_6202279 | NC_021160.1    | Ca_kabuli_chr01 | 6202279                 | GG                              | CC                | 1945878441               |
| SNP_P3_3592_6202343 | NC_021160.1    | Ca_kabuli_chr01 | 6202343                 | AA                              | CC                | 1945878443               |
| SNP_P3_3593_6202445 | NC_021160.1    | Ca_kabuli_chr01 | 6202445                 | GG                              | CC                | 1945878445               |
| SNP_P3_3594_6202448 | NC_021160.1    | Ca_kabuli_chr01 | 6202448                 | GG                              | AA                | 1945878447               |
| SNP_P3_3595_6202450 | NC_021160.1    | Ca_kabuli_chr01 | 6202450                 | CC                              | GG                | 1945878448               |
| SNP_P3_3596_6202600 | NC_021160.1    | Ca_kabuli_chr01 | 6202600                 | TT                              | AA                | 1945878450               |
| SNP_P3_3597_6202613 | NC_021160.1    | Ca_kabuli_chr01 | 6202613                 | AA                              | GG                | 1945878452               |
| SNP_P3_3599_6203193 | NC_021160.1    | Ca_kabuli_chr01 | 6203193                 | CC                              | AA                | 1945878454               |
| SNP_P3_3601_6203637 | NC_021160.1    | Ca_kabuli_chr01 | 6203637                 | CC                              | TT                | 1945878456               |
| SNP_P3_3602_6203679 | NC_021160.1    | Ca_kabuli_chr01 | 6203679                 | AA                              | GG                | 1945878457               |
| SNP_P3_3603_6203794 | NC_021160.1    | Ca_kabuli_chr01 | 6203794                 | GG                              | CC                | 1945878459               |
| SNP_P3_3604_6204048 | NC_021160.1    | Ca_kabuli_chr01 | 6204048                 | GG                              | TT                | 1945878461               |
| SNP_P3_3605_6204049 | NC_021160.1    | Ca_kabuli_chr01 | 6204049                 | TT                              | AA                | 1945878463               |
| SNP_P3_3606_6204360 | NC_021160.1    | Ca_kabuli_chr01 | 6204360                 | GG                              | AA                | 1945878464               |

| SNPs IDs            | Chromosome IDs | Chromosomes     | Physical positions (bp) | CDC Frontier (Reference genome) | (Pusa 256 & HPNB) | NCBI SNPdb Accession IDs |
|---------------------|----------------|-----------------|-------------------------|---------------------------------|-------------------|--------------------------|
| SNP_P3_3607_6204471 | NC_021160.1    | Ca_kabuli_chr01 | 6204471                 | AA                              | TT                | 1945878466               |
| SNP_P3_3608_6204589 | NC_021160.1    | Ca_kabuli_chr01 | 6204589                 | TT                              | CC                | 1945878468               |
| SNP_P3_3610_6205079 | NC_021160.1    | Ca_kabuli_chr01 | 6205079                 | AA                              | GG                | 1945878470               |
| SNP_P3_3612_6205421 | NC_021160.1    | Ca_kabuli_chr01 | 6205421                 | AA                              | GG                | 1945878472               |
| SNP_P3_3613_6205506 | NC_021160.1    | Ca_kabuli_chr01 | 6205506                 | CC                              | TT                | 1945878473               |
| SNP_P3_3614_6205630 | NC_021160.1    | Ca_kabuli_chr01 | 6205630                 | GG                              | AA                | 1945878475               |
| SNP_P3_3616_6206101 | NC_021160.1    | Ca_kabuli_chr01 | 6206101                 | GG                              | TT                | 1945878477               |
| SNP_P3_3617_6206224 | NC_021160.1    | Ca_kabuli_chr01 | 6206224                 | AA                              | GG                | 1945878479               |
| SNP_P3_3618_6206306 | NC_021160.1    | Ca_kabuli_chr01 | 6206306                 | TT                              | GG                | 1945878480               |
| SNP_P3_3619_6206325 | NC_021160.1    | Ca_kabuli_chr01 | 6206325                 | AA                              | CC                | 1945878482               |
| SNP_P3_3620_6206334 | NC_021160.1    | Ca_kabuli_chr01 | 6206334                 | GG                              | TT                | 1945878484               |
| SNP_P3_3622_6206387 | NC_021160.1    | Ca_kabuli_chr01 | 6206387                 | GG                              | AA                | 1945878486               |
| SNP_P3_3623_6206414 | NC_021160.1    | Ca_kabuli_chr01 | 6206414                 | TT                              | CC                | 1945878487               |
| SNP_P3_3624_6206425 | NC_021160.1    | Ca_kabuli_chr01 | 6206425                 | GG                              | TT                | 1945878489               |
| SNP_P3_3625_6206426 | NC_021160.1    | Ca_kabuli_chr01 | 6206426                 | CC                              | TT                | 1945878491               |
| SNP_P3_3626_6206449 | NC_021160.1    | Ca_kabuli_chr01 | 6206449                 | CC                              | TT                | 1945878493               |
| SNP_P3_3627_6206495 | NC_021160.1    | Ca_kabuli_chr01 | 6206495                 | TT                              | CC                | 1945878495               |
| SNP_P3_3628_6206543 | NC_021160.1    | Ca_kabuli_chr01 | 6206543                 | AA                              | CC                | 1945878496               |
| SNP_P3_3630_6212950 | NC_021160.1    | Ca_kabuli_chr01 | 6212950                 | AA                              | CC                | 1945878498               |
| SNP_P3_3633_6214513 | NC_021160.1    | Ca_kabuli_chr01 | 6214513                 | AA                              | GG                | 1945878500               |
| SNP_P3_3634_6216047 | NC_021160.1    | Ca_kabuli_chr01 | 6216047                 | GG                              | AA                | 1945878502               |
| SNP_P3_3635_6217733 | NC_021160.1    | Ca_kabuli_chr01 | 6217733                 | AA                              | TT                | 1945878503               |
| SNP_P3_3636_6221033 | NC_021160.1    | Ca_kabuli_chr01 | 6221033                 | TT                              | GG                | 1945878505               |
| SNP_P3_3637_6221323 | NC_021160.1    | Ca_kabuli_chr01 | 6221323                 | AA                              | CC                | 1945878507               |
| SNP_P3_3638_6221595 | NC_021160.1    | Ca_kabuli_chr01 | 6221595                 | CC                              | TT                | 1945878509               |
| SNP_P3_3639_6222265 | NC_021160.1    | Ca_kabuli_chr01 | 6222265                 | AA                              | GG                | 1945878511               |
| SNP_P3_3640_6222279 | NC_021160.1    | Ca_kabuli_chr01 | 6222279                 | AA                              | GG                | 1945878512               |
| SNP_P3_3641_6222386 | NC_021160.1    | Ca_kabuli_chr01 | 6222386                 | GG                              | AA                | 1945878514               |
| SNP_P3_3642_6222394 | NC_021160.1    | Ca_kabuli_chr01 | 6222394                 | CC                              | TT                | 1945878516               |
| SNP_P3_3643_6222515 | NC_021160.1    | Ca_kabuli_chr01 | 6222515                 | TT                              | CC                | 1945878518               |
| SNP_P3_3644_6222519 | NC_021160.1    | Ca_kabuli_chr01 | 6222519                 | GG                              | AA                | 1945878519               |
| SNP_P3_3645_6222529 | NC_021160.1    | Ca_kabuli_chr01 | 6222529                 | GG                              | AA                | 1945878521               |
| SNP_P3_3646_6222593 | NC_021160.1    | Ca_kabuli_chr01 | 6222593                 | TT                              | CC                | 1945878523               |
| SNP_P3_3647_6222935 | NC_021160.1    | Ca_kabuli_chr01 | 6222935                 | TT                              | AA                | 1945878525               |
| SNP_P3_3648_6224010 | NC_021160.1    | Ca_kabuli_chr01 | 6224010                 | CC                              | GG                | 1945878527               |
| SNP_P3_3649_6224015 | NC_021160.1    | Ca_kabuli_chr01 | 6224015                 | CC                              | TT                | 1945878528               |
| SNP_P3_3650_6229744 | NC_021160.1    | Ca_kabuli_chr01 | 6229744                 | GG                              | CC                | 1945878530               |
| SNP_P3_3651_6244457 | NC_021160.1    | Ca_kabuli_chr01 | 6244457                 | GG                              | AA                | 1945878532               |
| SNP_P3_3652_6255112 | NC_021160.1    | Ca_kabuli_chr01 | 6255112                 | AA                              | TT                | 1945878534               |
| SNP_P3_3653_6255138 | NC_021160.1    | Ca_kabuli_chr01 | 6255138                 | TT                              | AA                | 1945878535               |
| SNP_P3_3654_6255346 | NC_021160.1    | Ca_kabuli_chr01 | 6255346                 | TT                              | CC                | 1945878537               |
| SNP_P3_3655_6255367 | NC_021160.1    | Ca_kabuli_chr01 | 6255367                 | CC                              | GG                | 1945878539               |

| SNPs IDs            | Chromosome IDs | Chromosomes     | Physical positions (bp) | CDC Frontier (Reference genome) | (Pusa 256 & HPNB) | NCBI SNPdb Accession IDs |
|---------------------|----------------|-----------------|-------------------------|---------------------------------|-------------------|--------------------------|
| SNP_P3_3656_6256136 | NC_021160.1    | Ca_kabuli_chr01 | 6256136                 | CC                              | AA                | 1945878541               |
| SNP_P3_3657_6257050 | NC_021160.1    | Ca_kabuli_chr01 | 6257050                 | TT                              | CC                | 1945878542               |
| SNP_P3_3658_6258586 | NC_021160.1    | Ca_kabuli_chr01 | 6258586                 | GG                              | AA                | 1945878544               |
| SNP_P3_3659_6258597 | NC_021160.1    | Ca_kabuli_chr01 | 6258597                 | TT                              | GG                | 1945878546               |
| SNP_P3_3661_6259958 | NC_021160.1    | Ca_kabuli_chr01 | 6259958                 | GG                              | AA                | 1945878548               |
| SNP_P3_3662_6260370 | NC_021160.1    | Ca_kabuli_chr01 | 6260370                 | TT                              | CC                | 1945878549               |
| SNP_P3_3663_6261660 | NC_021160.1    | Ca_kabuli_chr01 | 6261660                 | AA                              | CC                | 1945878551               |
| SNP_P3_3664_6262461 | NC_021160.1    | Ca_kabuli_chr01 | 6262461                 | AA                              | GG                | 1945878553               |
| SNP_P3_3665_6262529 | NC_021160.1    | Ca_kabuli_chr01 | 6262529                 | TT                              | GG                | 1945878555               |
| SNP_P3_3666_6263598 | NC_021160.1    | Ca_kabuli_chr01 | 6263598                 | GG                              | AA                | 1945878556               |
| SNP_P3_3667_6265463 | NC_021160.1    | Ca_kabuli_chr01 | 6265463                 | AA                              | GG                | 1945878558               |
| SNP_P3_3668_6265483 | NC_021160.1    | Ca_kabuli_chr01 | 6265483                 | CC                              | TT                | 1945878560               |
| SNP_P3_3669_6266509 | NC_021160.1    | Ca_kabuli_chr01 | 6266509                 | AA                              | GG                | 1945878562               |
| SNP_P3_3671_6268514 | NC_021160.1    | Ca_kabuli_chr01 | 6268514                 | TT                              | CC                | 1945878563               |
| SNP_P3_3672_6268519 | NC_021160.1    | Ca_kabuli_chr01 | 6268519                 | CC                              | TT                | 1945878565               |
| SNP_P3_3674_6270501 | NC_021160.1    | Ca_kabuli_chr01 | 6270501                 | CC                              | TT                | 1945878567               |
| SNP_P3_3675_6270824 | NC_021160.1    | Ca_kabuli_chr01 | 6270824                 | TT                              | CC                | 1945878569               |
| SNP_P3_3676_6270834 | NC_021160.1    | Ca_kabuli_chr01 | 6270834                 | GG                              | AA                | 1945878571               |
| SNP_P3_3677_6270861 | NC_021160.1    | Ca_kabuli_chr01 | 6270861                 | AA                              | CC                | 1945878572               |
| SNP_P3_3678_6276043 | NC_021160.1    | Ca_kabuli_chr01 | 6276043                 | CC                              | AA                | 1945878574               |
| SNP_P3_3680_6279375 | NC_021160.1    | Ca_kabuli_chr01 | 6279375                 | CC                              | AA                | 1945878576               |
| SNP_P3_3681_6279413 | NC_021160.1    | Ca_kabuli_chr01 | 6279413                 | AA                              | GG                | 1945878578               |
| SNP_P3_3682_6279440 | NC_021160.1    | Ca_kabuli_chr01 | 6279440                 | AA                              | GG                | 1945878580               |
| SNP_P3_3683_6279445 | NC_021160.1    | Ca_kabuli_chr01 | 6279445                 | AA                              | TT                | 1945878581               |
| SNP_P3_3685_6279844 | NC_021160.1    | Ca_kabuli_chr01 | 6279844                 | CC                              | AA                | 1945878583               |
| SNP_P3_3686_6280165 | NC_021160.1    | Ca_kabuli_chr01 | 6280165                 | GG                              | AA                | 1945878585               |
| SNP_P3_3687_6280985 | NC_021160.1    | Ca_kabuli_chr01 | 6280985                 | CC                              | TT                | 1945878587               |
| SNP_P3_3688_6280993 | NC_021160.1    | Ca_kabuli_chr01 | 6280993                 | GG                              | AA                | 1945878589               |
| SNP_P3_3689_6281007 | NC_021160.1    | Ca_kabuli_chr01 | 6281007                 | CC                              | GG                | 1945878590               |
| SNP_P3_3690_6281429 | NC_021160.1    | Ca_kabuli_chr01 | 6281429                 | CC                              | TT                | 1945878592               |
| SNP_P3_3691_6281656 | NC_021160.1    | Ca_kabuli_chr01 | 6281656                 | TT                              | AA                | 1945878594               |
| SNP_P3_3692_6282439 | NC_021160.1    | Ca_kabuli_chr01 | 6282439                 | AA                              | GG                | 1945878596               |
| SNP_P3_3693_6282442 | NC_021160.1    | Ca_kabuli_chr01 | 6282442                 | AA                              | GG                | 1945878598               |
| SNP_P3_3695_6285590 | NC_021160.1    | Ca_kabuli_chr01 | 6285590                 | CC                              | TT                | 1945878599               |
| SNP_P3_3696_6286190 | NC_021160.1    | Ca_kabuli_chr01 | 6286190                 | GG                              | AA                | 1945878601               |
| SNP_P3_3697_6286227 | NC_021160.1    | Ca_kabuli_chr01 | 6286227                 | AA                              | TT                | 1945878603               |
| SNP_P3_3698_6286519 | NC_021160.1    | Ca_kabuli_chr01 | 6286519                 | AA                              | GG                | 1945878605               |
| SNP_P3_3699_6288062 | NC_021160.1    | Ca_kabuli_chr01 | 6288062                 | CC                              | TT                | 1945878607               |
| SNP_P3_3700_6288288 | NC_021160.1    | Ca_kabuli_chr01 | 6288288                 | GG                              | AA                | 1945878608               |
| SNP_P3_3701_6288779 | NC_021160.1    | Ca_kabuli_chr01 | 6288779                 | GG                              | AA                | 1945878610               |
| SNP_P3_3702_6289058 | NC_021160.1    | Ca_kabuli_chr01 | 6289058                 | AA                              | TT                | 1945878612               |
| SNP_P3_3704_6291829 | NC_021160.1    | Ca_kabuli_chr01 | 6291829                 | TT                              | CC                | 1945878614               |



| SNPs IDs            | Chromosome IDs | Chromosomes     | Physical positions (bp) | CDC Frontier (Reference genome) | (Pusa 256 & HPNB) | NCBI SNPdb Accession IDs |
|---------------------|----------------|-----------------|-------------------------|---------------------------------|-------------------|--------------------------|
| SNP_P3_3705_6291841 | NC_021160.1    | Ca_kabuli_chr01 | 6291841                 | AA                              | GG                | 1945878616               |
| SNP_P3_3707_6292103 | NC_021160.1    | Ca_kabuli_chr01 | 6292103                 | GG                              | AA                | 1945878617               |
| SNP_P3_3708_6292138 | NC_021160.1    | Ca_kabuli_chr01 | 6292138                 | GG                              | AA                | 1945878619               |
| SNP_P3_3709_6292142 | NC_021160.1    | Ca_kabuli_chr01 | 6292142                 | GG                              | CC                | 1945878621               |
| SNP_P3_3710_6292143 | NC_021160.1    | Ca_kabuli_chr01 | 6292143                 | GG                              | AA                | 1945878623               |
| SNP_P3_3712_6292171 | NC_021160.1    | Ca_kabuli_chr01 | 6292171                 | AA                              | GG                | 1945878624               |
| SNP_P3_3713_6292364 | NC_021160.1    | Ca_kabuli_chr01 | 6292364                 | AA                              | CC                | 1945878626               |
| SNP_P3_3714_6292636 | NC_021160.1    | Ca_kabuli_chr01 | 6292636                 | TT                              | CC                | 1945878628               |
| SNP_P3_3716_6293554 | NC_021160.1    | Ca_kabuli_chr01 | 6293554                 | AA                              | GG                | 1945878630               |
| SNP_P3_3717_6293602 | NC_021160.1    | Ca_kabuli_chr01 | 6293602                 | CC                              | TT                | 1945878632               |
| SNP_P3_3720_6294466 | NC_021160.1    | Ca_kabuli_chr01 | 6294466                 | AA                              | GG                | 1945878633               |
| SNP_P3_3721_6294468 | NC_021160.1    | Ca_kabuli_chr01 | 6294468                 | TT                              | AA                | 1945878635               |
| SNP_P3_3723_6294895 | NC_021160.1    | Ca_kabuli_chr01 | 6294895                 | GG                              | AA                | 1945878637               |
| SNP_P3_3724_6298006 | NC_021160.1    | Ca_kabuli_chr01 | 6298006                 | TT                              | CC                | 1945878639               |
| SNP_P3_3725_6298028 | NC_021160.1    | Ca_kabuli_chr01 | 6298028                 | GG                              | TT                | 1945878640               |
| SNP_P3_3726_6298160 | NC_021160.1    | Ca_kabuli_chr01 | 6298160                 | AA                              | TT                | 1945878642               |
| SNP_P3_3728_6298191 | NC_021160.1    | Ca_kabuli_chr01 | 6298191                 | AA                              | TT                | 1945878644               |
| SNP_P3_3729_6298232 | NC_021160.1    | Ca_kabuli_chr01 | 6298232                 | GG                              | CC                | 1945878646               |
| SNP_P3_3730_6298319 | NC_021160.1    | Ca_kabuli_chr01 | 6298319                 | GG                              | AA                | 1945878648               |
| SNP_P3_3733_6298974 | NC_021160.1    | Ca_kabuli_chr01 | 6298974                 | TT                              | AA                | 1945878649               |
| SNP_P3_3734_6298996 | NC_021160.1    | Ca_kabuli_chr01 | 6298996                 | GG                              | CC                | 1945878651               |
| SNP_P3_3735_6299108 | NC_021160.1    | Ca_kabuli_chr01 | 6299108                 | TT                              | CC                | 1945878653               |
| SNP_P3_3737_6299193 | NC_021160.1    | Ca_kabuli_chr01 | 6299193                 | GG                              | AA                | 1945878655               |
| SNP_P3_3738_6299231 | NC_021160.1    | Ca_kabuli_chr01 | 6299231                 | AA                              | GG                | 1945878656               |
| SNP_P3_3739_6299234 | NC_021160.1    | Ca_kabuli_chr01 | 6299234                 | CC                              | TT                | 1945878658               |
| SNP_P3_3740_6299236 | NC_021160.1    | Ca_kabuli_chr01 | 6299236                 | CC                              | TT                | 1945878660               |
| SNP_P3_3741_6299237 | NC_021160.1    | Ca_kabuli_chr01 | 6299237                 | CC                              | TT                | 1945878662               |
| SNP_P3_3742_6299258 | NC_021160.1    | Ca_kabuli_chr01 | 6299258                 | TT                              | CC                | 1945878664               |
| SNP_P3_3743_6299279 | NC_021160.1    | Ca_kabuli_chr01 | 6299279                 | AA                              | GG                | 1945878665               |
| SNP_P3_3744_6299314 | NC_021160.1    | Ca_kabuli_chr01 | 6299314                 | AA                              | GG                | 1945878667               |
| SNP_P3_3745_6299322 | NC_021160.1    | Ca_kabuli_chr01 | 6299322                 | CC                              | TT                | 1945878669               |
| SNP_P3_3746_6299604 | NC_021160.1    | Ca_kabuli_chr01 | 6299604                 | GG                              | AA                | 1945878671               |
| SNP_P3_3748_6299719 | NC_021160.1    | Ca_kabuli_chr01 | 6299719                 | AA                              | GG                | 1945878672               |
| SNP_P3_3750_6299799 | NC_021160.1    | Ca_kabuli_chr01 | 6299799                 | TT                              | AA                | 1945878674               |
| SNP_P3_3751_6299802 | NC_021160.1    | Ca_kabuli_chr01 | 6299802                 | AA                              | CC                | 1945878676               |
| SNP_P3_3752_6299810 | NC_021160.1    | Ca_kabuli_chr01 | 6299810                 | AA                              | GG                | 1945878678               |
| SNP_P3_3754_6301129 | NC_021160.1    | Ca_kabuli_chr01 | 6301129                 | CC                              | GG                | 1945878680               |
| SNP_P3_3755_6301138 | NC_021160.1    | Ca_kabuli_chr01 | 6301138                 | CC                              | TT                | 1945878681               |
| SNP_P3_3756_6302661 | NC_021160.1    | Ca_kabuli_chr01 | 6302661                 | GG                              | CC                | 1945878683               |
| SNP_P3_3757_6303037 | NC_021160.1    | Ca_kabuli_chr01 | 6303037                 | TT                              | AA                | 1945878685               |
| SNP_P3_3758_6303289 | NC_021160.1    | Ca_kabuli_chr01 | 6303289                 | TT                              | AA                | 1945878687               |
| SNP_P3_3759_6303509 | NC_021160.1    | Ca_kabuli_chr01 | 6303509                 | AA                              | CC                | 1945878689               |

| SNPs IDs            | Chromosome IDs | Chromosomes     | Physical positions (bp) | CDC Frontier (Reference genome) | (Pusa 256 & HPNB) | NCBI SNPdb Accession IDs |
|---------------------|----------------|-----------------|-------------------------|---------------------------------|-------------------|--------------------------|
| SNP_P3_3760_6304904 | NC_021160.1    | Ca_kabuli_chr01 | 6304904                 | AA                              | GG                | 1945878690               |
| SNP_P3_3761_6304919 | NC_021160.1    | Ca_kabuli_chr01 | 6304919                 | CC                              | AA                | 1945878692               |
| SNP_P3_3762_6304983 | NC_021160.1    | Ca_kabuli_chr01 | 6304983                 | CC                              | TT                | 1945878694               |
| SNP_P3_3763_6305315 | NC_021160.1    | Ca_kabuli_chr01 | 6305315                 | TT                              | CC                | 1945878696               |
| SNP_P3_3764_6305316 | NC_021160.1    | Ca_kabuli_chr01 | 6305316                 | AA                              | GG                | 1945878697               |
| SNP_P3_3765_6305317 | NC_021160.1    | Ca_kabuli_chr01 | 6305317                 | AA                              | GG                | 1945878699               |
| SNP_P3_3766_6305320 | NC_021160.1    | Ca_kabuli_chr01 | 6305320                 | AA                              | TT                | 1945878701               |
| SNP_P3_3767_6305822 | NC_021160.1    | Ca_kabuli_chr01 | 6305822                 | CC                              | TT                | 1945878703               |
| SNP_P3_3768_6306659 | NC_021160.1    | Ca_kabuli_chr01 | 6306659                 | CC                              | TT                | 1945878705               |
| SNP_P3_3769_6306743 | NC_021160.1    | Ca_kabuli_chr01 | 6306743                 | TT                              | AA                | 1945878706               |
| SNP_P3_3770_6307249 | NC_021160.1    | Ca_kabuli_chr01 | 6307249                 | TT                              | CC                | 1945878708               |
| SNP_P3_3771_6307267 | NC_021160.1    | Ca_kabuli_chr01 | 6307267                 | TT                              | GG                | 1945878710               |
| SNP_P3_3773_6307372 | NC_021160.1    | Ca_kabuli_chr01 | 6307372                 | AA                              | GG                | 1945878712               |
| SNP_P3_3774_6307682 | NC_021160.1    | Ca_kabuli_chr01 | 6307682                 | TT                              | CC                | 1945878713               |
| SNP_P3_3775_6307953 | NC_021160.1    | Ca_kabuli_chr01 | 6307953                 | AA                              | GG                | 1945878715               |
| SNP_P3_3776_6308339 | NC_021160.1    | Ca_kabuli_chr01 | 6308339                 | AA                              | GG                | 1945878717               |
| SNP_P3_3778_6311157 | NC_021160.1    | Ca_kabuli_chr01 | 6311157                 | GG                              | AA                | 1945878719               |
| SNP_P3_3779_6311421 | NC_021160.1    | Ca_kabuli_chr01 | 6311421                 | TT                              | CC                | 1945878720               |
| SNP_P3_3780_6311592 | NC_021160.1    | Ca_kabuli_chr01 | 6311592                 | TT                              | AA                | 1945878722               |
| SNP_P3_3781_6311623 | NC_021160.1    | Ca_kabuli_chr01 | 6311623                 | GG                              | CC                | 1945878724               |
| SNP_P3_3782_6311668 | NC_021160.1    | Ca_kabuli_chr01 | 6311668                 | CC                              | AA                | 1945878726               |
| SNP_P3_3785_6312571 | NC_021160.1    | Ca_kabuli_chr01 | 6312571                 | AA                              | CC                | 1945878728               |
| SNP_P3_3786_6312580 | NC_021160.1    | Ca_kabuli_chr01 | 6312580                 | AA                              | GG                | 1945878729               |
| SNP_P3_3787_6312599 | NC_021160.1    | Ca_kabuli_chr01 | 6312599                 | GG                              | TT                | 1945878731               |
| SNP_P3_3788_6312790 | NC_021160.1    | Ca_kabuli_chr01 | 6312790                 | CC                              | TT                | 1945878733               |
| SNP_P3_3789_6315399 | NC_021160.1    | Ca_kabuli_chr01 | 6315399                 | TT                              | GG                | 1945878735               |
| SNP_P3_3790_6315402 | NC_021160.1    | Ca_kabuli_chr01 | 6315402                 | CC                              | TT                | 1945878736               |
| SNP_P3_3791_6315706 | NC_021160.1    | Ca_kabuli_chr01 | 6315706                 | GG                              | AA                | 1945878738               |
| SNP_P3_3792_6316086 | NC_021160.1    | Ca_kabuli_chr01 | 6316086                 | CC                              | TT                | 1945878740               |
| SNP_P3_3794_6317901 | NC_021160.1    | Ca_kabuli_chr01 | 6317901                 | CC                              | TT                | 1945878742               |
| SNP_P3_3795_6319513 | NC_021160.1    | Ca_kabuli_chr01 | 6319513                 | GG                              | CC                | 1945878743               |
| SNP_P3_3796_6320307 | NC_021160.1    | Ca_kabuli_chr01 | 6320307                 | AA                              | GG                | 1945878745               |
| SNP_P3_3797_6320315 | NC_021160.1    | Ca_kabuli_chr01 | 6320315                 | CC                              | AA                | 1945878747               |
| SNP_P3_3798_6320989 | NC_021160.1    | Ca_kabuli_chr01 | 6320989                 | TT                              | CC                | 1945878749               |
| SNP_P3_3799_6322889 | NC_021160.1    | Ca_kabuli_chr01 | 6322889                 | AA                              | CC                | 1945878750               |
| SNP_P3_3800_6326100 | NC_021160.1    | Ca_kabuli_chr01 | 6326100                 | AA                              | GG                | 1945878752               |
| SNP_P3_3801_6326176 | NC_021160.1    | Ca_kabuli_chr01 | 6326176                 | TT                              | CC                | 1945878754               |
| SNP_P3_3802_6326344 | NC_021160.1    | Ca_kabuli_chr01 | 6326344                 | TT                              | AA                | 1945878756               |
| SNP_P3_3803_6326345 | NC_021160.1    | Ca_kabuli_chr01 | 6326345                 | AA                              | TT                | 1945878757               |
| SNP_P3_3804_6326390 | NC_021160.1    | Ca_kabuli_chr01 | 6326390                 | TT                              | AA                | 1945878759               |
| SNP_P3_3805_6326496 | NC_021160.1    | Ca_kabuli_chr01 | 6326496                 | CC                              | TT                | 1945878761               |
| SNP_P3_3806_6326757 | NC_021160.1    | Ca_kabuli_chr01 | 6326757                 | TT                              | CC                | 1945878763               |

| SNPs IDs            | Chromosome IDs | Chromosomes     | Physical positions (bp) | CDC Frontier (Reference genome) | (Pusa 256 & HPNB) | NCBI SNPdb Accession IDs |
|---------------------|----------------|-----------------|-------------------------|---------------------------------|-------------------|--------------------------|
| SNP_P3_3807_6326887 | NC_021160.1    | Ca_kabuli_chr01 | 6326887                 | GG                              | AA                | 1945878765               |
| SNP_P3_3808_6326898 | NC_021160.1    | Ca_kabuli_chr01 | 6326898                 | GG                              | AA                | 1945878766               |
| SNP_P3_3809_6326931 | NC_021160.1    | Ca_kabuli_chr01 | 6326931                 | GG                              | TT                | 1945878768               |
| SNP_P3_3810_6326934 | NC_021160.1    | Ca_kabuli_chr01 | 6326934                 | CC                              | TT                | 1945878770               |
| SNP_P3_3811_6326941 | NC_021160.1    | Ca_kabuli_chr01 | 6326941                 | CC                              | AA                | 1945878772               |
| SNP_P3_3812_6326948 | NC_021160.1    | Ca_kabuli_chr01 | 6326948                 | GG                              | TT                | 1945878773               |
| SNP_P3_3813_6326983 | NC_021160.1    | Ca_kabuli_chr01 | 6326983                 | TT                              | CC                | 1945878775               |
| SNP_P3_3814_6327109 | NC_021160.1    | Ca_kabuli_chr01 | 6327109                 | CC                              | TT                | 1945878777               |
| SNP_P3_3815_6328112 | NC_021160.1    | Ca_kabuli_chr01 | 6328112                 | GG                              | CC                | 1945878779               |
| SNP_P3_3817_6328714 | NC_021160.1    | Ca_kabuli_chr01 | 6328714                 | TT                              | CC                | 1945878781               |
| SNP_P3_3818_6331093 | NC_021160.1    | Ca_kabuli_chr01 | 6331093                 | GG                              | CC                | 1945878782               |
| SNP_P3_3819_6332474 | NC_021160.1    | Ca_kabuli_chr01 | 6332474                 | GG                              | AA                | 1945878784               |
| SNP_P3_3821_6332807 | NC_021160.1    | Ca_kabuli_chr01 | 6332807                 | TT                              | AA                | 1945878786               |
| SNP_P3_3822_6333063 | NC_021160.1    | Ca_kabuli_chr01 | 6333063                 | AA                              | GG                | 1945878788               |
| SNP_P3_3823_6334018 | NC_021160.1    | Ca_kabuli_chr01 | 6334018                 | AA                              | CC                | 1945878789               |
| SNP_P3_3824_6334084 | NC_021160.1    | Ca_kabuli_chr01 | 6334084                 | TT                              | CC                | 1945878791               |
| SNP_P3_3825_6334161 | NC_021160.1    | Ca_kabuli_chr01 | 6334161                 | AA                              | GG                | 1945878793               |
| SNP_P3_3826_6334205 | NC_021160.1    | Ca_kabuli_chr01 | 6334205                 | AA                              | TT                | 1945878795               |
| SNP_P3_3827_6334288 | NC_021160.1    | Ca_kabuli_chr01 | 6334288                 | TT                              | CC                | 1945878797               |
| SNP_P3_3828_6334473 | NC_021160.1    | Ca_kabuli_chr01 | 6334473                 | AA                              | TT                | 1945878798               |
| SNP_P3_3829_6335143 | NC_021160.1    | Ca_kabuli_chr01 | 6335143                 | GG                              | AA                | 1945878800               |
| SNP_P3_3830_6335173 | NC_021160.1    | Ca_kabuli_chr01 | 6335173                 | AA                              | GG                | 1945878802               |
| SNP_P3_3831_6335408 | NC_021160.1    | Ca_kabuli_chr01 | 6335408                 | GG                              | AA                | 1945878804               |
| SNP_P3_3832_6335489 | NC_021160.1    | Ca_kabuli_chr01 | 6335489                 | CC                              | TT                | 1945878806               |
| SNP_P3_3833_6336527 | NC_021160.1    | Ca_kabuli_chr01 | 6336527                 | GG                              | TT                | 1945878807               |
| SNP_P3_3834_6336908 | NC_021160.1    | Ca_kabuli_chr01 | 6336908                 | TT                              | GG                | 1945878809               |
| SNP_P3_3836_6336957 | NC_021160.1    | Ca_kabuli_chr01 | 6336957                 | CC                              | TT                | 1945878811               |
| SNP_P3_3838_6337150 | NC_021160.1    | Ca_kabuli_chr01 | 6337150                 | TT                              | GG                | 1945878813               |
| SNP_P3_3839_6337161 | NC_021160.1    | Ca_kabuli_chr01 | 6337161                 | AA                              | GG                | 1945878815               |
| SNP_P3_3840_6337184 | NC_021160.1    | Ca_kabuli_chr01 | 6337184                 | CC                              | AA                | 1945878816               |
| SNP_P3_3841_6337219 | NC_021160.1    | Ca_kabuli_chr01 | 6337219                 | CC                              | TT                | 1945878818               |
| SNP_P3_3842_6337225 | NC_021160.1    | Ca_kabuli_chr01 | 6337225                 | GG                              | AA                | 1945878820               |
| SNP_P3_3843_6337230 | NC_021160.1    | Ca_kabuli_chr01 | 6337230                 | GG                              | AA                | 1945878822               |
| SNP_P3_3844_6337440 | NC_021160.1    | Ca_kabuli_chr01 | 6337440                 | CC                              | TT                | 1945878824               |
| SNP_P3_3845_6337615 | NC_021160.1    | Ca_kabuli_chr01 | 6337615                 | GG                              | AA                | 1945878825               |
| SNP_P3_3846_6337641 | NC_021160.1    | Ca_kabuli_chr01 | 6337641                 | TT                              | CC                | 1945878827               |
| SNP_P3_3847_6337661 | NC_021160.1    | Ca_kabuli_chr01 | 6337661                 | TT                              | CC                | 1945878829               |
| SNP_P3_3848_6337807 | NC_021160.1    | Ca_kabuli_chr01 | 6337807                 | CC                              | AA                | 1945878831               |
| SNP_P3_3849_6337889 | NC_021160.1    | Ca_kabuli_chr01 | 6337889                 | TT                              | AA                | 1945878833               |
| SNP_P3_3850_6337918 | NC_021160.1    | Ca_kabuli_chr01 | 6337918                 | AA                              | GG                | 1945878834               |
| SNP_P3_3851_6337969 | NC_021160.1    | Ca_kabuli_chr01 | 6337969                 | TT                              | AA                | 1945878836               |
| SNP_P3_3852_6338193 | NC_021160.1    | Ca_kabuli_chr01 | 6338193                 | AA                              | CC                | 1945878838               |

| SNPs IDs            | Chromosome IDs | Chromosomes     | Physical positions (bp) | CDC Frontier (Reference genome) | (Pusa 256 & HPNB) | NCBI SNPdb Accession IDs |
|---------------------|----------------|-----------------|-------------------------|---------------------------------|-------------------|--------------------------|
| SNP_P3_3853_6338223 | NC_021160.1    | Ca_kabuli_chr01 | 6338223                 | TT                              | AA                | 1945878840               |
| SNP_P3_3854_6339073 | NC_021160.1    | Ca_kabuli_chr01 | 6339073                 | TT                              | CC                | 1945878842               |
| SNP_P3_3855_6339253 | NC_021160.1    | Ca_kabuli_chr01 | 6339253                 | TT                              | CC                | 1945878843               |
| SNP_P3_3856_6343035 | NC_021160.1    | Ca_kabuli_chr01 | 6343035                 | GG                              | CC                | 1945878845               |
| SNP_P3_3857_6344770 | NC_021160.1    | Ca_kabuli_chr01 | 6344770                 | AA                              | GG                | 1945878847               |
| SNP_P3_3858_6345391 | NC_021160.1    | Ca_kabuli_chr01 | 6345391                 | GG                              | TT                | 1945878849               |
| SNP_P3_3859_6345402 | NC_021160.1    | Ca_kabuli_chr01 | 6345402                 | CC                              | GG                | 1945878850               |
| SNP_P3_3860_6346690 | NC_021160.1    | Ca_kabuli_chr01 | 6346690                 | GG                              | AA                | 1945878852               |
| SNP_P3_3861_6346702 | NC_021160.1    | Ca_kabuli_chr01 | 6346702                 | AA                              | TT                | 1945878854               |
| SNP_P3_3862_6350643 | NC_021160.1    | Ca_kabuli_chr01 | 6350643                 | TT                              | CC                | 1945878856               |
| SNP_P3_3863_6350647 | NC_021160.1    | Ca_kabuli_chr01 | 6350647                 | TT                              | AA                | 1945878858               |
| SNP_P3_3864_6351455 | NC_021160.1    | Ca_kabuli_chr01 | 6351455                 | CC                              | TT                | 1945878859               |
| SNP_P3_3865_6351460 | NC_021160.1    | Ca_kabuli_chr01 | 6351460                 | AA                              | GG                | 1945878861               |
| SNP_P3_3866_6352483 | NC_021160.1    | Ca_kabuli_chr01 | 6352483                 | CC                              | TT                | 1945878863               |
| SNP_P3_3867_6353007 | NC_021160.1    | Ca_kabuli_chr01 | 6353007                 | GG                              | AA                | 1945878865               |
| SNP_P3_3868_6353350 | NC_021160.1    | Ca_kabuli_chr01 | 6353350                 | TT                              | AA                | 1945878866               |
| SNP_P3_3869_6353357 | NC_021160.1    | Ca_kabuli_chr01 | 6353357                 | TT                              | CC                | 1945878868               |
| SNP_P3_3870_6353795 | NC_021160.1    | Ca_kabuli_chr01 | 6353795                 | GG                              | CC                | 1945878870               |
| SNP_P3_3871_6353888 | NC_021160.1    | Ca_kabuli_chr01 | 6353888                 | CC                              | AA                | 1945878872               |
| SNP_P3_3872_6353891 | NC_021160.1    | Ca_kabuli_chr01 | 6353891                 | GG                              | TT                | 1945878874               |
| SNP_P3_3873_6354151 | NC_021160.1    | Ca_kabuli_chr01 | 6354151                 | GG                              | AA                | 1945878875               |
| SNP_P3_3875_6354200 | NC_021160.1    | Ca_kabuli_chr01 | 6354200                 | GG                              | TT                | 1945878877               |
| SNP_P3_3876_6354239 | NC_021160.1    | Ca_kabuli_chr01 | 6354239                 | TT                              | CC                | 1945878879               |
| SNP_P3_3878_6358852 | NC_021160.1    | Ca_kabuli_chr01 | 6358852                 | AA                              | GG                | 1945878881               |
| SNP_P3_3879_6358859 | NC_021160.1    | Ca_kabuli_chr01 | 6358859                 | AA                              | GG                | 1945878882               |
| SNP_P3_3880_6358882 | NC_021160.1    | Ca_kabuli_chr01 | 6358882                 | GG                              | AA                | 1945878884               |
| SNP_P3_3881_6358888 | NC_021160.1    | Ca_kabuli_chr01 | 6358888                 | CC                              | GG                | 1945878886               |
| SNP_P3_3882_6358922 | NC_021160.1    | Ca_kabuli_chr01 | 6358922                 | GG                              | TT                | 1945878888               |
| SNP_P3_3883_6359080 | NC_021160.1    | Ca_kabuli_chr01 | 6359080                 | TT                              | AA                | 1945878890               |
| SNP_P3_3884_6359432 | NC_021160.1    | Ca_kabuli_chr01 | 6359432                 | TT                              | CC                | 1945878891               |
| SNP_P3_3885_6359760 | NC_021160.1    | Ca_kabuli_chr01 | 6359760                 | AA                              | GG                | 1945878893               |
| SNP_P3_3886_6359784 | NC_021160.1    | Ca_kabuli_chr01 | 6359784                 | GG                              | AA                | 1945878895               |
| SNP_P3_3887_6359877 | NC_021160.1    | Ca_kabuli_chr01 | 6359877                 | GG                              | AA                | 1945878897               |
| SNP_P3_3888_6359891 | NC_021160.1    | Ca_kabuli_chr01 | 6359891                 | TT                              | AA                | 1945878898               |
| SNP_P3_3889_6359900 | NC_021160.1    | Ca_kabuli_chr01 | 6359900                 | CC                              | AA                | 1945878900               |
| SNP_P3_3890_6360432 | NC_021160.1    | Ca_kabuli_chr01 | 6360432                 | GG                              | TT                | 1945878902               |
| SNP_P3_3891_6362107 | NC_021160.1    | Ca_kabuli_chr01 | 6362107                 | CC                              | AA                | 1945878904               |
| SNP_P3_3892_6362108 | NC_021160.1    | Ca_kabuli_chr01 | 6362108                 | AA                              | TT                | 1945878906               |
| SNP_P3_3893_6362115 | NC_021160.1    | Ca_kabuli_chr01 | 6362115                 | GG                              | AA                | 1945878907               |
| SNP_P3_3895_6362379 | NC_021160.1    | Ca_kabuli_chr01 | 6362379                 | TT                              | CC                | 1945878909               |
| SNP_P3_3896_6362388 | NC_021160.1    | Ca_kabuli_chr01 | 6362388                 | CC                              | TT                | 1945878911               |
| SNP_P3_3897_6362397 | NC_021160.1    | Ca_kabuli_chr01 | 6362397                 | GG                              | TT                | 1945878913               |

| SNPs IDs            | Chromosome IDs | Chromosomes     | Physical positions (bp) | CDC Frontier (Reference genome) | (Pusa 256 & HPNB) | NCBI SNPdb Accession IDs |
|---------------------|----------------|-----------------|-------------------------|---------------------------------|-------------------|--------------------------|
| SNP_P3_3898_6362413 | NC_021160.1    | Ca_kabuli_chr01 | 6362413                 | TT                              | AA                | 1945878915               |
| SNP_P3_3900_6362535 | NC_021160.1    | Ca_kabuli_chr01 | 6362535                 | CC                              | TT                | 1945878916               |
| SNP_P3_3901_6362550 | NC_021160.1    | Ca_kabuli_chr01 | 6362550                 | TT                              | CC                | 1945878918               |
| SNP_P3_3902_6363060 | NC_021160.1    | Ca_kabuli_chr01 | 6363060                 | TT                              | CC                | 1945878920               |
| SNP_P3_3903_6363291 | NC_021160.1    | Ca_kabuli_chr01 | 6363291                 | TT                              | GG                | 1945878922               |
| SNP_P3_3904_6363301 | NC_021160.1    | Ca_kabuli_chr01 | 6363301                 | GG                              | AA                | 1945878923               |
| SNP_P3_3906_6363656 | NC_021160.1    | Ca_kabuli_chr01 | 6363656                 | GG                              | AA                | 1945878925               |
| SNP_P3_3907_6363687 | NC_021160.1    | Ca_kabuli_chr01 | 6363687                 | CC                              | TT                | 1945878927               |
| SNP_P3_3908_6364313 | NC_021160.1    | Ca_kabuli_chr01 | 6364313                 | AA                              | GG                | 1945878929               |
| SNP_P3_3909_6364345 | NC_021160.1    | Ca_kabuli_chr01 | 6364345                 | TT                              | CC                | 1945878931               |
| SNP_P3_3910_6364655 | NC_021160.1    | Ca_kabuli_chr01 | 6364655                 | AA                              | TT                | 1945878932               |
| SNP_P3_3911_6364945 | NC_021160.1    | Ca_kabuli_chr01 | 6364945                 | AA                              | GG                | 1945878934               |
| SNP_P3_3912_6365461 | NC_021160.1    | Ca_kabuli_chr01 | 6365461                 | GG                              | AA                | 1945878936               |
| SNP_P3_3913_6365626 | NC_021160.1    | Ca_kabuli_chr01 | 6365626                 | GG                              | TT                | 1945878938               |
| SNP_P3_3914_6365643 | NC_021160.1    | Ca_kabuli_chr01 | 6365643                 | AA                              | CC                | 1945878939               |
| SNP_P3_3915_6365808 | NC_021160.1    | Ca_kabuli_chr01 | 6365808                 | GG                              | AA                | 1945878941               |
| SNP_P3_3916_6366063 | NC_021160.1    | Ca_kabuli_chr01 | 6366063                 | GG                              | AA                | 1945878943               |
| SNP_P3_3917_6366086 | NC_021160.1    | Ca_kabuli_chr01 | 6366086                 | AA                              | GG                | 1945878945               |
| SNP_P3_3918_6366088 | NC_021160.1    | Ca_kabuli_chr01 | 6366088                 | GG                              | TT                | 1945878947               |
| SNP_P3_3919_6366089 | NC_021160.1    | Ca_kabuli_chr01 | 6366089                 | AA                              | GG                | 1945878948               |
| SNP_P3_3920_6366254 | NC_021160.1    | Ca_kabuli_chr01 | 6366254                 | AA                              | GG                | 1945878950               |
| SNP_P3_3921_6366260 | NC_021160.1    | Ca_kabuli_chr01 | 6366260                 | AA                              | CC                | 1945878952               |
| SNP_P3_3922_6366266 | NC_021160.1    | Ca_kabuli_chr01 | 6366266                 | GG                              | AA                | 1945878954               |
| SNP_P3_3923_6366605 | NC_021160.1    | Ca_kabuli_chr01 | 6366605                 | TT                              | CC                | 1945878955               |
| SNP_P3_3924_6366674 | NC_021160.1    | Ca_kabuli_chr01 | 6366674                 | CC                              | TT                | 1945878957               |
| SNP_P3_3925_6366690 | NC_021160.1    | Ca_kabuli_chr01 | 6366690                 | AA                              | GG                | 1945878959               |
| SNP_P3_3926_6366701 | NC_021160.1    | Ca_kabuli_chr01 | 6366701                 | TT                              | CC                | 1945878961               |
| SNP_P3_3927_6366984 | NC_021160.1    | Ca_kabuli_chr01 | 6366984                 | GG                              | TT                | 1945878963               |
| SNP_P3_3928_6367123 | NC_021160.1    | Ca_kabuli_chr01 | 6367123                 | GG                              | AA                | 1945878964               |
| SNP_P3_3929_6367139 | NC_021160.1    | Ca_kabuli_chr01 | 6367139                 | AA                              | GG                | 1945878966               |
| SNP_P3_3930_6367169 | NC_021160.1    | Ca_kabuli_chr01 | 6367169                 | CC                              | AA                | 1945878968               |
| SNP_P3_3931_6367422 | NC_021160.1    | Ca_kabuli_chr01 | 6367422                 | TT                              | CC                | 1945878970               |
| SNP_P3_3932_6367423 | NC_021160.1    | Ca_kabuli_chr01 | 6367423                 | GG                              | AA                | 1945878971               |
| SNP_P3_3933_6368425 | NC_021160.1    | Ca_kabuli_chr01 | 6368425                 | GG                              | AA                | 1945878973               |
| SNP_P3_3934_6369179 | NC_021160.1    | Ca_kabuli_chr01 | 6369179                 | CC                              | AA                | 1945878975               |
| SNP_P3_3936_6369486 | NC_021160.1    | Ca_kabuli_chr01 | 6369486                 | GG                              | AA                | 1945878977               |
| SNP_P3_3937_6369768 | NC_021160.1    | Ca_kabuli_chr01 | 6369768                 | CC                              | TT                | 1945878979               |
| SNP_P3_3938_6369813 | NC_021160.1    | Ca_kabuli_chr01 | 6369813                 | TT                              | CC                | 1945878980               |
| SNP_P3_3942_6374209 | NC_021160.1    | Ca_kabuli_chr01 | 6374209                 | TT                              | CC                | 1945878982               |
| SNP_P3_3943_6374324 | NC_021160.1    | Ca_kabuli_chr01 | 6374324                 | TT                              | GG                | 1945878984               |
| SNP_P3_3945_6374641 | NC_021160.1    | Ca_kabuli_chr01 | 6374641                 | CC                              | AA                | 1945878986               |
| SNP_P3_3948_6383320 | NC_021160.1    | Ca_kabuli_chr01 | 6383320                 | CC                              | TT                | 1945878988               |

| SNPs IDs            | Chromosome IDs | Chromosomes     | Physical positions (bp) | CDC Frontier (Reference genome) | (Pusa 256 & HPNB) | NCBI SNPdb Accession IDs |
|---------------------|----------------|-----------------|-------------------------|---------------------------------|-------------------|--------------------------|
| SNP_P3_3950_6383446 | NC_021160.1    | Ca_kabuli_chr01 | 6383446                 | AA                              | CC                | 1945878989               |
| SNP_P3_3951_6383624 | NC_021160.1    | Ca_kabuli_chr01 | 6383624                 | GG                              | AA                | 1945878991               |
| SNP_P3_3952_6383688 | NC_021160.1    | Ca_kabuli_chr01 | 6383688                 | AA                              | TT                | 1945878993               |
| SNP_P3_3953_6383995 | NC_021160.1    | Ca_kabuli_chr01 | 6383995                 | GG                              | AA                | 1945878995               |
| SNP_P3_3954_6384000 | NC_021160.1    | Ca_kabuli_chr01 | 6384000                 | CC                              | TT                | 1945878996               |
| SNP_P3_3956_6384406 | NC_021160.1    | Ca_kabuli_chr01 | 6384406                 | TT                              | CC                | 1945878998               |
| SNP_P3_3957_6384407 | NC_021160.1    | Ca_kabuli_chr01 | 6384407                 | AA                              | GG                | 1945879000               |
| SNP_P3_3958_6384408 | NC_021160.1    | Ca_kabuli_chr01 | 6384408                 | AA                              | TT                | 1945879002               |
| SNP_P3_3959_6384854 | NC_021160.1    | Ca_kabuli_chr01 | 6384854                 | GG                              | AA                | 1945879004               |
| SNP_P3_3960_6385059 | NC_021160.1    | Ca_kabuli_chr01 | 6385059                 | CC                              | TT                | 1945879005               |
| SNP_P3_3961_6385160 | NC_021160.1    | Ca_kabuli_chr01 | 6385160                 | GG                              | CC                | 1945879007               |
| SNP_P3_3962_6385221 | NC_021160.1    | Ca_kabuli_chr01 | 6385221                 | GG                              | AA                | 1945879009               |
| SNP_P3_3963_6385275 | NC_021160.1    | Ca_kabuli_chr01 | 6385275                 | GG                              | AA                | 1945879011               |
| SNP_P3_3964_6385694 | NC_021160.1    | Ca_kabuli_chr01 | 6385694                 | TT                              | CC                | 1945879012               |
| SNP_P3_3965_6386551 | NC_021160.1    | Ca_kabuli_chr01 | 6386551                 | GG                              | TT                | 1945879014               |
| SNP_P3_3967_6394311 | NC_021160.1    | Ca_kabuli_chr01 | 6394311                 | CC                              | TT                | 1945879016               |
| SNP_P3_3968_6394314 | NC_021160.1    | Ca_kabuli_chr01 | 6394314                 | AA                              | GG                | 1945879018               |
| SNP_P3_3969_6394347 | NC_021160.1    | Ca_kabuli_chr01 | 6394347                 | TT                              | CC                | 1945879020               |
| SNP_P3_3970_6394370 | NC_021160.1    | Ca_kabuli_chr01 | 6394370                 | CC                              | TT                | 1945879021               |
| SNP_P3_3971_6394401 | NC_021160.1    | Ca_kabuli_chr01 | 6394401                 | TT                              | CC                | 1945879023               |
| SNP_P3_3972_6394419 | NC_021160.1    | Ca_kabuli_chr01 | 6394419                 | TT                              | CC                | 1945879025               |
| SNP_P3_3973_6394460 | NC_021160.1    | Ca_kabuli_chr01 | 6394460                 | AA                              | GG                | 1945879027               |
| SNP_P3_3974_6394465 | NC_021160.1    | Ca_kabuli_chr01 | 6394465                 | TT                              | CC                | 1945879029               |
| SNP_P3_3975_6394552 | NC_021160.1    | Ca_kabuli_chr01 | 6394552                 | GG                              | AA                | 1945879030               |
| SNP_P3_3976_6394568 | NC_021160.1    | Ca_kabuli_chr01 | 6394568                 | AA                              | GG                | 1945879032               |
| SNP_P3_3977_6394600 | NC_021160.1    | Ca_kabuli_chr01 | 6394600                 | TT                              | CC                | 1945879034               |
| SNP_P3_3978_6394606 | NC_021160.1    | Ca_kabuli_chr01 | 6394606                 | AA                              | GG                | 1945879036               |
| SNP_P3_3979_6394742 | NC_021160.1    | Ca_kabuli_chr01 | 6394742                 | AA                              | CC                | 1945879037               |
| SNP_P3_3980_6394765 | NC_021160.1    | Ca_kabuli_chr01 | 6394765                 | TT                              | GG                | 1945879039               |
| SNP_P3_3981_6394844 | NC_021160.1    | Ca_kabuli_chr01 | 6394844                 | CC                              | TT                | 1945879041               |
| SNP_P3_3982_6397416 | NC_021160.1    | Ca_kabuli_chr01 | 6397416                 | CC                              | TT                | 1945879043               |
| SNP_P3_3983_6398672 | NC_021160.1    | Ca_kabuli_chr01 | 6398672                 | TT                              | CC                | 1945879045               |
| SNP_P3_3984_6398684 | NC_021160.1    | Ca_kabuli_chr01 | 6398684                 | AA                              | CC                | 1945879046               |
| SNP_P3_3985_6399252 | NC_021160.1    | Ca_kabuli_chr01 | 6399252                 | CC                              | TT                | 1945879048               |
| SNP_P3_3987_6403383 | NC_021160.1    | Ca_kabuli_chr01 | 6403383                 | GG                              | TT                | 1945879050               |
| SNP_P3_3989_6407592 | NC_021160.1    | Ca_kabuli_chr01 | 6407592                 | TT                              | AA                | 1945879052               |
| SNP_P3_3990_6407740 | NC_021160.1    | Ca_kabuli_chr01 | 6407740                 | AA                              | CC                | 1945879053               |
| SNP_P3_3991_6408001 | NC_021160.1    | Ca_kabuli_chr01 | 6408001                 | TT                              | CC                | 1945879055               |
| SNP_P3_3992_6408266 | NC_021160.1    | Ca_kabuli_chr01 | 6408266                 | TT                              | GG                | 1945879057               |
| SNP_P3_3993_6408298 | NC_021160.1    | Ca_kabuli_chr01 | 6408298                 | TT                              | AA                | 1945879059               |
| SNP_P3_3994_6408465 | NC_021160.1    | Ca_kabuli_chr01 | 6408465                 | GG                              | TT                | 1945879061               |
| SNP_P3_3995_6408536 | NC_021160.1    | Ca_kabuli_chr01 | 6408536                 | GG                              | TT                | 1945879062               |

| SNPs IDs            | Chromosome IDs | Chromosomes     | Physical positions (bp) | CDC Frontier (Reference genome) | (Pusa 256 & HPNB) | NCBI SNPdb Accession IDs |
|---------------------|----------------|-----------------|-------------------------|---------------------------------|-------------------|--------------------------|
| SNP_P3_3996_6410576 | NC_021160.1    | Ca_kabuli_chr01 | 6410576                 | TT                              | AA                | 1945879064               |
| SNP_P3_3997_6410657 | NC_021160.1    | Ca_kabuli_chr01 | 6410657                 | CC                              | TT                | 1945879066               |
| SNP_P3_3998_6410681 | NC_021160.1    | Ca_kabuli_chr01 | 6410681                 | GG                              | AA                | 1945879068               |
| SNP_P3_3999_6410813 | NC_021160.1    | Ca_kabuli_chr01 | 6410813                 | TT                              | AA                | 1945879069               |
| SNP_P3_4000_6410814 | NC_021160.1    | Ca_kabuli_chr01 | 6410814                 | GG                              | CC                | 1945879071               |
| SNP_P3_4001_6412966 | NC_021160.1    | Ca_kabuli_chr01 | 6412966                 | CC                              | GG                | 1945879073               |
| SNP_P3_4002_6413001 | NC_021160.1    | Ca_kabuli_chr01 | 6413001                 | GG                              | AA                | 1945879075               |
| SNP_P3_4003_6413003 | NC_021160.1    | Ca_kabuli_chr01 | 6413003                 | TT                              | CC                | 1945879077               |
| SNP_P3_4004_6413266 | NC_021160.1    | Ca_kabuli_chr01 | 6413266                 | TT                              | CC                | 1945879078               |
| SNP_P3_4005_6413293 | NC_021160.1    | Ca_kabuli_chr01 | 6413293                 | AA                              | GG                | 1945879080               |
| SNP_P3_4006_6413310 | NC_021160.1    | Ca_kabuli_chr01 | 6413310                 | TT                              | AA                | 1945879082               |
| SNP_P3_4007_6413320 | NC_021160.1    | Ca_kabuli_chr01 | 6413320                 | CC                              | TT                | 1945879084               |
| SNP_P3_4008_6413359 | NC_021160.1    | Ca_kabuli_chr01 | 6413359                 | TT                              | GG                | 1945879085               |
| SNP_P3_4009_6413536 | NC_021160.1    | Ca_kabuli_chr01 | 6413536                 | AA                              | GG                | 1945879087               |
| SNP_P3_4012_6416260 | NC_021160.1    | Ca_kabuli_chr01 | 6416260                 | TT                              | CC                | 1945879089               |
| SNP_P3_4013_6417230 | NC_021160.1    | Ca_kabuli_chr01 | 6417230                 | AA                              | TT                | 1945879091               |
| SNP_P3_4014_6424666 | NC_021160.1    | Ca_kabuli_chr01 | 6424666                 | CC                              | GG                | 1945879093               |
| SNP_P3_4017_6425441 | NC_021160.1    | Ca_kabuli_chr01 | 6425441                 | AA                              | GG                | 1945879094               |
| SNP_P3_4018_6425486 | NC_021160.1    | Ca_kabuli_chr01 | 6425486                 | TT                              | CC                | 1945879096               |
| SNP_P3_4020_6425902 | NC_021160.1    | Ca_kabuli_chr01 | 6425902                 | GG                              | AA                | 1945879098               |
| SNP_P3_4021_6425905 | NC_021160.1    | Ca_kabuli_chr01 | 6425905                 | CC                              | TT                | 1945879100               |
| SNP_P3_4022_6425921 | NC_021160.1    | Ca_kabuli_chr01 | 6425921                 | AA                              | GG                | 1945879102               |
| SNP_P3_4023_6425929 | NC_021160.1    | Ca_kabuli_chr01 | 6425929                 | GG                              | AA                | 1945879103               |
| SNP_P3_4024_6426009 | NC_021160.1    | Ca_kabuli_chr01 | 6426009                 | TT                              | CC                | 1945879105               |
| SNP_P3_4025_6426677 | NC_021160.1    | Ca_kabuli_chr01 | 6426677                 | TT                              | CC                | 1945879107               |
| SNP_P3_4027_6426704 | NC_021160.1    | Ca_kabuli_chr01 | 6426704                 | CC                              | TT                | 1945879109               |
| SNP_P3_4028_6427419 | NC_021160.1    | Ca_kabuli_chr01 | 6427419                 | AA                              | GG                | 1945879110               |
| SNP_P3_4029_6427783 | NC_021160.1    | Ca_kabuli_chr01 | 6427783                 | GG                              | TT                | 1945879112               |
| SNP_P3_4030_6427784 | NC_021160.1    | Ca_kabuli_chr01 | 6427784                 | GG                              | TT                | 1945879114               |
| SNP_P3_4031_6427785 | NC_021160.1    | Ca_kabuli_chr01 | 6427785                 | AA                              | CC                | 1945879116               |
| SNP_P3_4032_6427967 | NC_021160.1    | Ca_kabuli_chr01 | 6427967                 | CC                              | TT                | 1945879118               |
| SNP_P3_4033_6428693 | NC_021160.1    | Ca_kabuli_chr01 | 6428693                 | CC                              | AA                | 1945879119               |
| SNP_P3_4034_6428942 | NC_021160.1    | Ca_kabuli_chr01 | 6428942                 | GG                              | AA                | 1945879121               |
| SNP_P3_4035_6428965 | NC_021160.1    | Ca_kabuli_chr01 | 6428965                 | CC                              | TT                | 1945879123               |
| SNP_P3_4036_6428967 | NC_021160.1    | Ca_kabuli_chr01 | 6428967                 | AA                              | GG                | 1945879125               |
| SNP_P3_4037_6428996 | NC_021160.1    | Ca_kabuli_chr01 | 6428996                 | TT                              | GG                | 1945879127               |
| SNP_P3_4038_6429148 | NC_021160.1    | Ca_kabuli_chr01 | 6429148                 | CC                              | GG                | 1945879128               |
| SNP_P3_4039_6429974 | NC_021160.1    | Ca_kabuli_chr01 | 6429974                 | AA                              | GG                | 1945879130               |
| SNP_P3_4040_6430276 | NC_021160.1    | Ca_kabuli_chr01 | 6430276                 | CC                              | TT                | 1945879132               |
| SNP_P3_4041_6430297 | NC_021160.1    | Ca_kabuli_chr01 | 6430297                 | AA                              | GG                | 1945879134               |
| SNP_P3_4042_6430304 | NC_021160.1    | Ca_kabuli_chr01 | 6430304                 | TT                              | GG                | 1945879135               |
| SNP_P3_4043_6430590 | NC_021160.1    | Ca_kabuli_chr01 | 6430590                 | CC                              | TT                | 1945879137               |

| SNPs IDs            | Chromosome IDs | Chromosomes     | Physical positions (bp) | CDC Frontier (Reference genome) | (Pusa 256 & HPNB) | NCBI SNPdb Accession IDs |
|---------------------|----------------|-----------------|-------------------------|---------------------------------|-------------------|--------------------------|
| SNP_P3_4044_6431015 | NC_021160.1    | Ca_kabuli_chr01 | 6431015                 | CC                              | TT                | 1945879139               |
| SNP_P3_4045_6431096 | NC_021160.1    | Ca_kabuli_chr01 | 6431096                 | AA                              | GG                | 1945879141               |
| SNP_P3_4046_6431110 | NC_021160.1    | Ca_kabuli_chr01 | 6431110                 | CC                              | TT                | 1945879143               |
| SNP_P3_4047_6431112 | NC_021160.1    | Ca_kabuli_chr01 | 6431112                 | GG                              | AA                | 1945879144               |
| SNP_P3_4048_6431144 | NC_021160.1    | Ca_kabuli_chr01 | 6431144                 | TT                              | AA                | 1945879146               |
| SNP_P3_4049_6434732 | NC_021160.1    | Ca_kabuli_chr01 | 6434732                 | CC                              | TT                | 1945879148               |
| SNP_P3_4050_6434740 | NC_021160.1    | Ca_kabuli_chr01 | 6434740                 | GG                              | CC                | 1945879150               |
| SNP_P3_4051_6435598 | NC_021160.1    | Ca_kabuli_chr01 | 6435598                 | TT                              | AA                | 1945879152               |
| SNP_P3_4052_6435622 | NC_021160.1    | Ca_kabuli_chr01 | 6435622                 | TT                              | CC                | 1945879153               |
| SNP_P3_4053_6435627 | NC_021160.1    | Ca_kabuli_chr01 | 6435627                 | CC                              | GG                | 1945879155               |
| SNP_P3_4054_6435671 | NC_021160.1    | Ca_kabuli_chr01 | 6435671                 | GG                              | AA                | 1945879157               |
| SNP_P3_4055_6435877 | NC_021160.1    | Ca_kabuli_chr01 | 6435877                 | CC                              | TT                | 1945879159               |
| SNP_P3_4056_6435896 | NC_021160.1    | Ca_kabuli_chr01 | 6435896                 | CC                              | TT                | 1945879161               |
| SNP_P3_4057_6435955 | NC_021160.1    | Ca_kabuli_chr01 | 6435955                 | TT                              | GG                | 1945879162               |
| SNP_P3_4058_6436317 | NC_021160.1    | Ca_kabuli_chr01 | 6436317                 | CC                              | GG                | 1945879164               |
| SNP_P3_4060_6436533 | NC_021160.1    | Ca_kabuli_chr01 | 6436533                 | GG                              | AA                | 1945879166               |
| SNP_P3_4061_6436557 | NC_021160.1    | Ca_kabuli_chr01 | 6436557                 | GG                              | CC                | 1945879168               |
| SNP_P3_4062_6436858 | NC_021160.1    | Ca_kabuli_chr01 | 6436858                 | TT                              | CC                | 1945879170               |
| SNP_P3_4064_6437632 | NC_021160.1    | Ca_kabuli_chr01 | 6437632                 | TT                              | AA                | 1945879172               |
| SNP_P3_4065_6437643 | NC_021160.1    | Ca_kabuli_chr01 | 6437643                 | GG                              | AA                | 1945879173               |
| SNP_P3_4066_6438063 | NC_021160.1    | Ca_kabuli_chr01 | 6438063                 | CC                              | GG                | 1945879175               |
| SNP_P3_4067_6438113 | NC_021160.1    | Ca_kabuli_chr01 | 6438113                 | GG                              | CC                | 1945879177               |
| SNP_P3_4068_6438713 | NC_021160.1    | Ca_kabuli_chr01 | 6438713                 | AA                              | GG                | 1945879179               |
| SNP_P3_4069_6438756 | NC_021160.1    | Ca_kabuli_chr01 | 6438756                 | CC                              | TT                | 1945879181               |
| SNP_P3_4070_6438770 | NC_021160.1    | Ca_kabuli_chr01 | 6438770                 | TT                              | AA                | 1945879182               |
| SNP_P3_4071_6438930 | NC_021160.1    | Ca_kabuli_chr01 | 6438930                 | AA                              | CC                | 1945879184               |
| SNP_P3_4072_6438958 | NC_021160.1    | Ca_kabuli_chr01 | 6438958                 | CC                              | TT                | 1945879186               |
| SNP_P3_4073_6438959 | NC_021160.1    | Ca_kabuli_chr01 | 6438959                 | TT                              | GG                | 1945879188               |
| SNP_P3_4074_6438988 | NC_021160.1    | Ca_kabuli_chr01 | 6438988                 | CC                              | TT                | 1945879189               |
| SNP_P3_4075_6439002 | NC_021160.1    | Ca_kabuli_chr01 | 6439002                 | AA                              | GG                | 1945879191               |
| SNP_P3_4076_6439011 | NC_021160.1    | Ca_kabuli_chr01 | 6439011                 | GG                              | AA                | 1945879193               |
| SNP_P3_4077_6439014 | NC_021160.1    | Ca_kabuli_chr01 | 6439014                 | TT                              | AA                | 1945879195               |
| SNP_P3_4078_6439072 | NC_021160.1    | Ca_kabuli_chr01 | 6439072                 | CC                              | TT                | 1945879197               |
| SNP_P3_4079_6439273 | NC_021160.1    | Ca_kabuli_chr01 | 6439273                 | AA                              | GG                | 1945879198               |
| SNP_P3_4080_6439344 | NC_021160.1    | Ca_kabuli_chr01 | 6439344                 | CC                              | AA                | 1945879200               |
| SNP_P3_4081_6439570 | NC_021160.1    | Ca_kabuli_chr01 | 6439570                 | AA                              | CC                | 1945879202               |
| SNP_P3_4082_6445059 | NC_021160.1    | Ca_kabuli_chr01 | 6445059                 | TT                              | AA                | 1945879204               |
| SNP_P3_4083_6445360 | NC_021160.1    | Ca_kabuli_chr01 | 6445360                 | TT                              | GG                | 1945879205               |
| SNP_P3_4084_6445385 | NC_021160.1    | Ca_kabuli_chr01 | 6445385                 | CC                              | TT                | 1945879207               |
| SNP_P3_4085_6446384 | NC_021160.1    | Ca_kabuli_chr01 | 6446384                 | AA                              | GG                | 1945879209               |
| SNP_P3_4086_6446667 | NC_021160.1    | Ca_kabuli_chr01 | 6446667                 | AA                              | GG                | 1945879211               |
| SNP_P3_4087_6446688 | NC_021160.1    | Ca_kabuli_chr01 | 6446688                 | CC                              | TT                | 1945879213               |



| SNPs IDs            | Chromosome IDs | Chromosomes     | Physical positions (bp) | CDC Frontier (Reference genome) | (Pusa 256 & HPNB) | NCBI SNPdb Accession IDs |
|---------------------|----------------|-----------------|-------------------------|---------------------------------|-------------------|--------------------------|
| SNP_P3_4088_6446729 | NC_021160.1    | Ca_kabuli_chr01 | 6446729                 | TT                              | CC                | 1945879214               |
| SNP_P3_4089_6446865 | NC_021160.1    | Ca_kabuli_chr01 | 6446865                 | TT                              | GG                | 1945879216               |
| SNP_P3_4091_6446938 | NC_021160.1    | Ca_kabuli_chr01 | 6446938                 | CC                              | TT                | 1945879218               |
| SNP_P3_4092_6446944 | NC_021160.1    | Ca_kabuli_chr01 | 6446944                 | CC                              | TT                | 1945879220               |
| SNP_P3_4093_6447192 | NC_021160.1    | Ca_kabuli_chr01 | 6447192                 | AA                              | TT                | 1945879221               |
| SNP_P3_4094_6447252 | NC_021160.1    | Ca_kabuli_chr01 | 6447252                 | TT                              | CC                | 1945879223               |
| SNP_P3_4095_6447293 | NC_021160.1    | Ca_kabuli_chr01 | 6447293                 | TT                              | AA                | 1945879225               |
| SNP_P3_4096_6447296 | NC_021160.1    | Ca_kabuli_chr01 | 6447296                 | AA                              | GG                | 1945879227               |
| SNP_P3_4097_6452804 | NC_021160.1    | Ca_kabuli_chr01 | 6452804                 | CC                              | AA                | 1945879228               |
| SNP_P3_4099_6453045 | NC_021160.1    | Ca_kabuli_chr01 | 6453045                 | TT                              | AA                | 1945879230               |
| SNP_P3_4101_6453978 | NC_021160.1    | Ca_kabuli_chr01 | 6453978                 | GG                              | AA                | 1945879232               |
| SNP_P3_4102_6454387 | NC_021160.1    | Ca_kabuli_chr01 | 6454387                 | TT                              | CC                | 1945879234               |
| SNP_P3_4103_6454404 | NC_021160.1    | Ca_kabuli_chr01 | 6454404                 | GG                              | AA                | 1945879235               |
| SNP_P3_4104_6459278 | NC_021160.1    | Ca_kabuli_chr01 | 6459278                 | GG                              | AA                | 1945879237               |
| SNP_P3_4105_6460488 | NC_021160.1    | Ca_kabuli_chr01 | 6460488                 | AA                              | CC                | 1945879239               |
| SNP_P3_4106_6461621 | NC_021160.1    | Ca_kabuli_chr01 | 6461621                 | AA                              | GG                | 1945879241               |
| SNP_P3_4107_6461994 | NC_021160.1    | Ca_kabuli_chr01 | 6461994                 | TT                              | CC                | 1945879242               |
| SNP_P3_4108_6462003 | NC_021160.1    | Ca_kabuli_chr01 | 6462003                 | AA                              | GG                | 1945879244               |
| SNP_P3_4109_6462019 | NC_021160.1    | Ca_kabuli_chr01 | 6462019                 | AA                              | GG                | 1945879246               |
| SNP_P3_4111_6462455 | NC_021160.1    | Ca_kabuli_chr01 | 6462455                 | AA                              | TT                | 1945879248               |
| SNP_P3_4112_6462474 | NC_021160.1    | Ca_kabuli_chr01 | 6462474                 | AA                              | GG                | 1945879249               |
| SNP_P3_4113_6462727 | NC_021160.1    | Ca_kabuli_chr01 | 6462727                 | TT                              | CC                | 1945879251               |
| SNP_P3_4114_6462731 | NC_021160.1    | Ca_kabuli_chr01 | 6462731                 | TT                              | CC                | 1945879253               |
| SNP_P3_4115_6462739 | NC_021160.1    | Ca_kabuli_chr01 | 6462739                 | TT                              | CC                | 1945879255               |
| SNP_P3_4117_6463145 | NC_021160.1    | Ca_kabuli_chr01 | 6463145                 | GG                              | AA                | 1945879257               |
| SNP_P3_4118_6464861 | NC_021160.1    | Ca_kabuli_chr01 | 6464861                 | TT                              | CC                | 1945879258               |
| SNP_P3_4120_6466149 | NC_021160.1    | Ca_kabuli_chr01 | 6466149                 | AA                              | GG                | 1945879260               |
| SNP_P3_4121_6466683 | NC_021160.1    | Ca_kabuli_chr01 | 6466683                 | TT                              | CC                | 1945879262               |
| SNP_P3_4122_6466751 | NC_021160.1    | Ca_kabuli_chr01 | 6466751                 | CC                              | GG                | 1945879264               |
| SNP_P3_4123_6468597 | NC_021160.1    | Ca_kabuli_chr01 | 6468597                 | CC                              | TT                | 1945879265               |
| SNP_P3_4125_6469192 | NC_021160.1    | Ca_kabuli_chr01 | 6469192                 | CC                              | AA                | 1945879267               |
| SNP_P3_4126_6469951 | NC_021160.1    | Ca_kabuli_chr01 | 6469951                 | GG                              | AA                | 1945879269               |
| SNP_P3_4127_6470190 | NC_021160.1    | Ca_kabuli_chr01 | 6470190                 | TT                              | CC                | 1945879271               |
| SNP_P3_4128_6470376 | NC_021160.1    | Ca_kabuli_chr01 | 6470376                 | TT                              | CC                | 1945879273               |
| SNP_P3_4129_6470386 | NC_021160.1    | Ca_kabuli_chr01 | 6470386                 | AA                              | TT                | 1945879274               |
| SNP_P3_4131_6470708 | NC_021160.1    | Ca_kabuli_chr01 | 6470708                 | TT                              | CC                | 1945879276               |
| SNP_P3_4132_6471079 | NC_021160.1    | Ca_kabuli_chr01 | 6471079                 | GG                              | AA                | 1945879278               |
| SNP_P3_4133_6471403 | NC_021160.1    | Ca_kabuli_chr01 | 6471403                 | GG                              | AA                | 1945879280               |
| SNP_P3_4134_6471413 | NC_021160.1    | Ca_kabuli_chr01 | 6471413                 | AA                              | GG                | 1945879281               |
| SNP_P3_4135_6471452 | NC_021160.1    | Ca_kabuli_chr01 | 6471452                 | AA                              | GG                | 1945879283               |
| SNP_P3_4136_6471492 | NC_021160.1    | Ca_kabuli_chr01 | 6471492                 | CC                              | GG                | 1945879285               |
| SNP_P3_4138_6471658 | NC_021160.1    | Ca_kabuli_chr01 | 6471658                 | AA                              | TT                | 1945879287               |

| SNPs IDs            | Chromosome IDs | Chromosomes     | Physical positions (bp) | CDC Frontier (Reference genome) | (Pusa 256 & HPNB) | NCBI SNPdb Accession IDs |
|---------------------|----------------|-----------------|-------------------------|---------------------------------|-------------------|--------------------------|
| SNP_P3_4139_6471865 | NC_021160.1    | Ca_kabuli_chr01 | 6471865                 | CC                              | TT                | 1945879289               |
| SNP_P3_4140_6472014 | NC_021160.1    | Ca_kabuli_chr01 | 6472014                 | TT                              | CC                | 1945879290               |
| SNP_P3_4141_6472749 | NC_021160.1    | Ca_kabuli_chr01 | 6472749                 | TT                              | GG                | 1945879292               |
| SNP_P3_4142_6473045 | NC_021160.1    | Ca_kabuli_chr01 | 6473045                 | CC                              | TT                | 1945879294               |
| SNP_P3_4143_6473063 | NC_021160.1    | Ca_kabuli_chr01 | 6473063                 | AA                              | GG                | 1945879296               |
| SNP_P3_4144_6473129 | NC_021160.1    | Ca_kabuli_chr01 | 6473129                 | CC                              | TT                | 1945879297               |
| SNP_P3_4145_6473691 | NC_021160.1    | Ca_kabuli_chr01 | 6473691                 | GG                              | AA                | 1945879299               |
| SNP_P3_4146_6475120 | NC_021160.1    | Ca_kabuli_chr01 | 6475120                 | GG                              | AA                | 1945879301               |
| SNP_P3_4147_6475810 | NC_021160.1    | Ca_kabuli_chr01 | 6475810                 | CC                              | TT                | 1945879303               |
| SNP_P3_4148_6475825 | NC_021160.1    | Ca_kabuli_chr01 | 6475825                 | AA                              | GG                | 1945879305               |
| SNP_P3_4150_6475935 | NC_021160.1    | Ca_kabuli_chr01 | 6475935                 | CC                              | GG                | 1945879306               |
| SNP_P3_4151_6475940 | NC_021160.1    | Ca_kabuli_chr01 | 6475940                 | GG                              | CC                | 1945879308               |
| SNP_P3_4152_6475961 | NC_021160.1    | Ca_kabuli_chr01 | 6475961                 | CC                              | GG                | 1945879310               |
| SNP_P3_4153_6476034 | NC_021160.1    | Ca_kabuli_chr01 | 6476034                 | CC                              | TT                | 1945879312               |
| SNP_P3_4154_6476040 | NC_021160.1    | Ca_kabuli_chr01 | 6476040                 | TT                              | GG                | 1945879314               |
| SNP_P3_4156_6476559 | NC_021160.1    | Ca_kabuli_chr01 | 6476559                 | GG                              | TT                | 1945879315               |
| SNP_P3_4157_6476805 | NC_021160.1    | Ca_kabuli_chr01 | 6476805                 | TT                              | CC                | 1945879317               |
| SNP_P3_4158_6476866 | NC_021160.1    | Ca_kabuli_chr01 | 6476866                 | TT                              | AA                | 1945879319               |
| SNP_P3_4159_6477059 | NC_021160.1    | Ca_kabuli_chr01 | 6477059                 | CC                              | TT                | 1945879321               |
| SNP_P3_4160_6478266 | NC_021160.1    | Ca_kabuli_chr01 | 6478266                 | CC                              | TT                | 1945879322               |
| SNP_P3_4161_6478272 | NC_021160.1    | Ca_kabuli_chr01 | 6478272                 | TT                              | AA                | 1945879324               |
| SNP_P3_4162_6479815 | NC_021160.1    | Ca_kabuli_chr01 | 6479815                 | TT                              | CC                | 1945879326               |
| SNP_P3_4164_6480461 | NC_021160.1    | Ca_kabuli_chr01 | 6480461                 | AA                              | TT                | 1945879328               |
| SNP_P3_4165_6480485 | NC_021160.1    | Ca_kabuli_chr01 | 6480485                 | CC                              | TT                | 1945879330               |
| SNP_P3_4167_6481077 | NC_021160.1    | Ca_kabuli_chr01 | 6481077                 | CC                              | TT                | 1945879331               |
| SNP_P3_4168_6481815 | NC_021160.1    | Ca_kabuli_chr01 | 6481815                 | CC                              | AA                | 1945879333               |
| SNP_P3_4169_6481879 | NC_021160.1    | Ca_kabuli_chr01 | 6481879                 | AA                              | GG                | 1945879335               |
| SNP_P3_4170_6482100 | NC_021160.1    | Ca_kabuli_chr01 | 6482100                 | GG                              | TT                | 1945879337               |
| SNP_P3_4171_6482235 | NC_021160.1    | Ca_kabuli_chr01 | 6482235                 | TT                              | AA                | 1945879338               |
| SNP_P3_4172_6482274 | NC_021160.1    | Ca_kabuli_chr01 | 6482274                 | GG                              | TT                | 1945879340               |
| SNP_P3_4173_6482483 | NC_021160.1    | Ca_kabuli_chr01 | 6482483                 | GG                              | AA                | 1945879342               |
| SNP_P3_4174_6483574 | NC_021160.1    | Ca_kabuli_chr01 | 6483574                 | CC                              | AA                | 1945879344               |
| SNP_P3_4175_6483806 | NC_021160.1    | Ca_kabuli_chr01 | 6483806                 | AA                              | GG                | 1945879346               |
| SNP_P3_4176_6484016 | NC_021160.1    | Ca_kabuli_chr01 | 6484016                 | AA                              | CC                | 1945879347               |
| SNP_P3_4177_6484065 | NC_021160.1    | Ca_kabuli_chr01 | 6484065                 | CC                              | TT                | 1945879349               |
| SNP_P3_4178_6484066 | NC_021160.1    | Ca_kabuli_chr01 | 6484066                 | GG                              | AA                | 1945879351               |
| SNP_P3_4179_6485675 | NC_021160.1    | Ca_kabuli_chr01 | 6485675                 | GG                              | CC                | 1945879353               |
| SNP_P3_4180_6486770 | NC_021160.1    | Ca_kabuli_chr01 | 6486770                 | TT                              | CC                | 1945879354               |
| SNP_P3_4181_6487135 | NC_021160.1    | Ca_kabuli_chr01 | 6487135                 | TT                              | GG                | 1945879356               |
| SNP_P3_4182_6487673 | NC_021160.1    | Ca_kabuli_chr01 | 6487673                 | GG                              | AA                | 1945879358               |
| SNP_P3_4183_6488001 | NC_021160.1    | Ca_kabuli_chr01 | 6488001                 | AA                              | GG                | 1945879360               |
| SNP_P3_4184_6488386 | NC_021160.1    | Ca_kabuli_chr01 | 6488386                 | GG                              | TT                | 1945879362               |

| SNPs IDs            | Chromosome IDs | Chromosomes     | Physical positions (bp) | CDC Frontier (Reference genome) | (Pusa 256 & HPNB) | NCBI SNPdb Accession IDs |
|---------------------|----------------|-----------------|-------------------------|---------------------------------|-------------------|--------------------------|
| SNP_P3_4185_6488418 | NC_021160.1    | Ca_kabuli_chr01 | 6488418                 | GG                              | TT                | 1945879363               |
| SNP_P3_4186_6488599 | NC_021160.1    | Ca_kabuli_chr01 | 6488599                 | CC                              | AA                | 1945879365               |
| SNP_P3_4187_6488910 | NC_021160.1    | Ca_kabuli_chr01 | 6488910                 | TT                              | CC                | 1945879367               |
| SNP_P3_4188_6488916 | NC_021160.1    | Ca_kabuli_chr01 | 6488916                 | AA                              | GG                | 1945879369               |
| SNP_P3_4189_6488947 | NC_021160.1    | Ca_kabuli_chr01 | 6488947                 | GG                              | TT                | 1945879370               |
| SNP_P3_4191_6489353 | NC_021160.1    | Ca_kabuli_chr01 | 6489353                 | CC                              | TT                | 1945879372               |
| SNP_P3_4192_6489589 | NC_021160.1    | Ca_kabuli_chr01 | 6489589                 | CC                              | TT                | 1945879374               |
| SNP_P3_4193_6489632 | NC_021160.1    | Ca_kabuli_chr01 | 6489632                 | TT                              | CC                | 1945879376               |
| SNP_P3_4194_6492216 | NC_021160.1    | Ca_kabuli_chr01 | 6492216                 | CC                              | AA                | 1945879378               |
| SNP_P3_4195_6492226 | NC_021160.1    | Ca_kabuli_chr01 | 6492226                 | TT                              | AA                | 1945879380               |
| SNP_P3_4196_6492985 | NC_021160.1    | Ca_kabuli_chr01 | 6492985                 | AA                              | GG                | 1945879381               |
| SNP_P3_4198_6493615 | NC_021160.1    | Ca_kabuli_chr01 | 6493615                 | CC                              | AA                | 1945879383               |
| SNP_P3_4199_6499754 | NC_021160.1    | Ca_kabuli_chr01 | 6499754                 | CC                              | TT                | 1945879385               |
| SNP_P3_4200_6500011 | NC_021160.1    | Ca_kabuli_chr01 | 6500011                 | TT                              | AA                | 1945879387               |
| SNP_P3_4201_6512022 | NC_021160.1    | Ca_kabuli_chr01 | 6512022                 | TT                              | CC                | 1945879389               |
| SNP_P3_4202_6512030 | NC_021160.1    | Ca_kabuli_chr01 | 6512030                 | GG                              | CC                | 1945879390               |
| SNP_P3_4203_6512031 | NC_021160.1    | Ca_kabuli_chr01 | 6512031                 | GG                              | AA                | 1945879392               |
| SNP_P3_4204_6512926 | NC_021160.1    | Ca_kabuli_chr01 | 6512926                 | CC                              | GG                | 1945879394               |
| SNP_P3_4206_6513211 | NC_021160.1    | Ca_kabuli_chr01 | 6513211                 | CC                              | TT                | 1945879396               |
| SNP_P3_4207_6513222 | NC_021160.1    | Ca_kabuli_chr01 | 6513222                 | GG                              | AA                | 1945879398               |
| SNP_P3_4208_6513223 | NC_021160.1    | Ca_kabuli_chr01 | 6513223                 | AA                              | GG                | 1945879399               |
| SNP_P3_4209_6513228 | NC_021160.1    | Ca_kabuli_chr01 | 6513228                 | GG                              | AA                | 1945879401               |
| SNP_P3_4210_6513797 | NC_021160.1    | Ca_kabuli_chr01 | 6513797                 | GG                              | CC                | 1945879403               |
| SNP_P3_4211_6514055 | NC_021160.1    | Ca_kabuli_chr01 | 6514055                 | GG                              | AA                | 1945879405               |
| SNP_P3_4212_6514057 | NC_021160.1    | Ca_kabuli_chr01 | 6514057                 | CC                              | AA                | 1945879407               |
| SNP_P3_4215_6516070 | NC_021160.1    | Ca_kabuli_chr01 | 6516070                 | TT                              | CC                | 1945879408               |
| SNP_P3_4217_6517084 | NC_021160.1    | Ca_kabuli_chr01 | 6517084                 | GG                              | TT                | 1945879410               |
| SNP_P3_4218_6517374 | NC_021160.1    | Ca_kabuli_chr01 | 6517374                 | TT                              | CC                | 1945879412               |
| SNP_P3_4219_6517559 | NC_021160.1    | Ca_kabuli_chr01 | 6517559                 | TT                              | CC                | 1945879414               |
| SNP_P3_4220_6517691 | NC_021160.1    | Ca_kabuli_chr01 | 6517691                 | CC                              | TT                | 1945879415               |
| SNP_P3_4221_6518478 | NC_021160.1    | Ca_kabuli_chr01 | 6518478                 | CC                              | TT                | 1945879417               |
| SNP_P3_4223_6518529 | NC_021160.1    | Ca_kabuli_chr01 | 6518529                 | GG                              | AA                | 1945879419               |
| SNP_P3_4224_6518530 | NC_021160.1    | Ca_kabuli_chr01 | 6518530                 | AA                              | CC                | 1945879421               |
| SNP_P3_4225_6518585 | NC_021160.1    | Ca_kabuli_chr01 | 6518585                 | CC                              | TT                | 1945879422               |
| SNP_P3_4226_6518620 | NC_021160.1    | Ca_kabuli_chr01 | 6518620                 | CC                              | TT                | 1945879424               |
| SNP_P3_4227_6518648 | NC_021160.1    | Ca_kabuli_chr01 | 6518648                 | TT                              | AA                | 1945879426               |
| SNP_P3_4229_6518839 | NC_021160.1    | Ca_kabuli_chr01 | 6518839                 | AA                              | TT                | 1945879428               |
| SNP_P3_4230_6523815 | NC_021160.1    | Ca_kabuli_chr01 | 6523815                 | TT                              | AA                | 1945879429               |
| SNP_P3_4231_6524377 | NC_021160.1    | Ca_kabuli_chr01 | 6524377                 | AA                              | GG                | 1945879431               |
| SNP_P3_4232_6524398 | NC_021160.1    | Ca_kabuli_chr01 | 6524398                 | CC                              | TT                | 1945879433               |
| SNP_P3_4233_6525917 | NC_021160.1    | Ca_kabuli_chr01 | 6525917                 | TT                              | CC                | 1945879435               |
| SNP_P3_4234_6526023 | NC_021160.1    | Ca_kabuli_chr01 | 6526023                 | AA                              | GG                | 1945879436               |

| SNPs IDs            | Chromosome IDs | Chromosomes     | Physical positions (bp) | CDC Frontier (Reference genome) | (Pusa 256 & HPNB) | NCBI SNPdb Accession IDs |
|---------------------|----------------|-----------------|-------------------------|---------------------------------|-------------------|--------------------------|
| SNP_P3_4237_6527669 | NC_021160.1    | Ca_kabuli_chr01 | 6527669                 | GG                              | AA                | 1945879438               |
| SNP_P3_4238_6527683 | NC_021160.1    | Ca_kabuli_chr01 | 6527683                 | TT                              | GG                | 1945879440               |
| SNP_P3_4239_6527697 | NC_021160.1    | Ca_kabuli_chr01 | 6527697                 | AA                              | TT                | 1945879442               |
| SNP_P3_4240_6527702 | NC_021160.1    | Ca_kabuli_chr01 | 6527702                 | GG                              | AA                | 1945879443               |
| SNP_P3_4241_6527713 | NC_021160.1    | Ca_kabuli_chr01 | 6527713                 | CC                              | TT                | 1945879445               |
| SNP_P3_4242_6527724 | NC_021160.1    | Ca_kabuli_chr01 | 6527724                 | TT                              | CC                | 1945879447               |
| SNP_P3_4243_6527736 | NC_021160.1    | Ca_kabuli_chr01 | 6527736                 | TT                              | CC                | 1945879449               |
| SNP_P3_4244_6529079 | NC_021160.1    | Ca_kabuli_chr01 | 6529079                 | TT                              | GG                | 1945879451               |
| SNP_P3_4245_6529107 | NC_021160.1    | Ca_kabuli_chr01 | 6529107                 | AA                              | GG                | 1945879452               |
| SNP_P3_4246_6529130 | NC_021160.1    | Ca_kabuli_chr01 | 6529130                 | GG                              | AA                | 1945879454               |
| SNP_P3_4247_6530489 | NC_021160.1    | Ca_kabuli_chr01 | 6530489                 | TT                              | CC                | 1945879456               |
| SNP_P3_4248_6531937 | NC_021160.1    | Ca_kabuli_chr01 | 6531937                 | TT                              | GG                | 1945879458               |
| SNP_P3_4249_6531955 | NC_021160.1    | Ca_kabuli_chr01 | 6531955                 | CC                              | AA                | 1945879459               |
| SNP_P3_4250_6531960 | NC_021160.1    | Ca_kabuli_chr01 | 6531960                 | TT                              | GG                | 1945879461               |
| SNP_P3_4251_6531983 | NC_021160.1    | Ca_kabuli_chr01 | 6531983                 | AA                              | TT                | 1945879463               |
| SNP_P3_4252_6531987 | NC_021160.1    | Ca_kabuli_chr01 | 6531987                 | AA                              | GG                | 1945879465               |
| SNP_P3_4253_6531994 | NC_021160.1    | Ca_kabuli_chr01 | 6531994                 | TT                              | AA                | 1945879467               |
| SNP_P3_4254_6532323 | NC_021160.1    | Ca_kabuli_chr01 | 6532323                 | AA                              | TT                | 1945879468               |
| SNP_P3_4255_6532331 | NC_021160.1    | Ca_kabuli_chr01 | 6532331                 | CC                              | GG                | 1945879470               |
| SNP_P3_4256_6532363 | NC_021160.1    | Ca_kabuli_chr01 | 6532363                 | TT                              | AA                | 1945879472               |
| SNP_P3_4257_6532445 | NC_021160.1    | Ca_kabuli_chr01 | 6532445                 | TT                              | GG                | 1945879474               |
| SNP_P3_4260_6532881 | NC_021160.1    | Ca_kabuli_chr01 | 6532881                 | TT                              | CC                | 1945879475               |
| SNP_P3_4261_6532900 | NC_021160.1    | Ca_kabuli_chr01 | 6532900                 | CC                              | TT                | 1945879477               |
| SNP_P3_4262_6533109 | NC_021160.1    | Ca_kabuli_chr01 | 6533109                 | AA                              | TT                | 1945879479               |
| SNP_P3_4263_6533111 | NC_021160.1    | Ca_kabuli_chr01 | 6533111                 | AA                              | GG                | 1945879481               |
| SNP_P3_4264_6534226 | NC_021160.1    | Ca_kabuli_chr01 | 6534226                 | AA                              | GG                | 1945879483               |
| SNP_P3_4267_6534450 | NC_021160.1    | Ca_kabuli_chr01 | 6534450                 | GG                              | AA                | 1945879484               |
| SNP_P3_4269_6536118 | NC_021160.1    | Ca_kabuli_chr01 | 6536118                 | CC                              | TT                | 1945879486               |
| SNP_P3_4271_6538417 | NC_021160.1    | Ca_kabuli_chr01 | 6538417                 | TT                              | AA                | 1945879488               |
| SNP_P3_4272_6538418 | NC_021160.1    | Ca_kabuli_chr01 | 6538418                 | AA                              | TT                | 1945879490               |
| SNP_P3_4273_6538485 | NC_021160.1    | Ca_kabuli_chr01 | 6538485                 | AA                              | GG                | 1945879491               |
| SNP_P3_4275_6538849 | NC_021160.1    | Ca_kabuli_chr01 | 6538849                 | TT                              | CC                | 1945879493               |
| SNP_P3_4276_6538850 | NC_021160.1    | Ca_kabuli_chr01 | 6538850                 | TT                              | GG                | 1945879495               |
| SNP_P3_4277_6539121 | NC_021160.1    | Ca_kabuli_chr01 | 6539121                 | CC                              | GG                | 1945879497               |
| SNP_P3_4278_6539469 | NC_021160.1    | Ca_kabuli_chr01 | 6539469                 | TT                              | CC                | 1945879498               |
| SNP_P3_4279_6539481 | NC_021160.1    | Ca_kabuli_chr01 | 6539481                 | GG                              | CC                | 1945879500               |
| SNP_P3_4280_6540013 | NC_021160.1    | Ca_kabuli_chr01 | 6540013                 | GG                              | CC                | 1945879502               |
| SNP_P3_4281_6540035 | NC_021160.1    | Ca_kabuli_chr01 | 6540035                 | AA                              | GG                | 1945879504               |
| SNP_P3_4282_6545322 | NC_021160.1    | Ca_kabuli_chr01 | 6545322                 | AA                              | GG                | 1945879505               |
| SNP_P3_4283_6546601 | NC_021160.1    | Ca_kabuli_chr01 | 6546601                 | CC                              | TT                | 1945879507               |
| SNP_P3_4285_6546849 | NC_021160.1    | Ca_kabuli_chr01 | 6546849                 | AA                              | CC                | 1945879509               |
| SNP_P3_4287_6546892 | NC_021160.1    | Ca_kabuli_chr01 | 6546892                 | GG                              | CC                | 1945879511               |

| SNPs IDs            | Chromosome IDs | Chromosomes     | Physical positions (bp) | CDC Frontier (Reference genome) | (Pusa 256 & HPNB) | NCBI SNPdb Accession IDs |
|---------------------|----------------|-----------------|-------------------------|---------------------------------|-------------------|--------------------------|
| SNP_P3_4288_6546955 | NC_021160.1    | Ca_kabuli_chr01 | 6546955                 | CC                              | TT                | 1945879512               |
| SNP_P3_4289_6546958 | NC_021160.1    | Ca_kabuli_chr01 | 6546958                 | CC                              | TT                | 1945879514               |
| SNP_P3_4290_6546978 | NC_021160.1    | Ca_kabuli_chr01 | 6546978                 | CC                              | TT                | 1945879516               |
| SNP_P3_4291_6546988 | NC_021160.1    | Ca_kabuli_chr01 | 6546988                 | AA                              | GG                | 1945879518               |
| SNP_P3_4292_6547382 | NC_021160.1    | Ca_kabuli_chr01 | 6547382                 | AA                              | CC                | 1945879520               |
| SNP_P3_4293_6547402 | NC_021160.1    | Ca_kabuli_chr01 | 6547402                 | AA                              | GG                | 1945879521               |
| SNP_P3_4294_6547409 | NC_021160.1    | Ca_kabuli_chr01 | 6547409                 | AA                              | GG                | 1945879523               |
| SNP_P3_4295_6547413 | NC_021160.1    | Ca_kabuli_chr01 | 6547413                 | CC                              | TT                | 1945879525               |
| SNP_P3_4297_6551979 | NC_021160.1    | Ca_kabuli_chr01 | 6551979                 | AA                              | CC                | 1945879527               |
| SNP_P3_4298_6551981 | NC_021160.1    | Ca_kabuli_chr01 | 6551981                 | TT                              | CC                | 1945879528               |
| SNP_P3_4299_6559343 | NC_021160.1    | Ca_kabuli_chr01 | 6559343                 | GG                              | AA                | 1945879530               |
| SNP_P3_4300_6578685 | NC_021160.1    | Ca_kabuli_chr01 | 6578685                 | AA                              | TT                | 1945879532               |
| SNP_P3_4301_6589459 | NC_021160.1    | Ca_kabuli_chr01 | 6589459                 | CC                              | TT                | 1945879534               |
| SNP_P3_4302_6620799 | NC_021160.1    | Ca_kabuli_chr01 | 6620799                 | GG                              | AA                | 1945879536               |
| SNP_P3_4303_6652241 | NC_021160.1    | Ca_kabuli_chr01 | 6652241                 | TT                              | CC                | 1945879537               |
| SNP_P3_4304_6655417 | NC_021160.1    | Ca_kabuli_chr01 | 6655417                 | AA                              | TT                | 1945879539               |
| SNP_P3_4305_6692085 | NC_021160.1    | Ca_kabuli_chr01 | 6692085                 | TT                              | CC                | 1945879541               |
| SNP_P3_4306_6694522 | NC_021160.1    | Ca_kabuli_chr01 | 6694522                 | TT                              | CC                | 1945879543               |
| SNP_P3_4307_6694524 | NC_021160.1    | Ca_kabuli_chr01 | 6694524                 | AA                              | GG                | 1945879544               |
| SNP_P3_4308_6697393 | NC_021160.1    | Ca_kabuli_chr01 | 6697393                 | GG                              | AA                | 1945879546               |
| SNP_P3_4309_6713212 | NC_021160.1    | Ca_kabuli_chr01 | 6713212                 | AA                              | CC                | 1945879548               |
| SNP_P3_4310_6713216 | NC_021160.1    | Ca_kabuli_chr01 | 6713216                 | AA                              | GG                | 1945879550               |
| SNP_P3_4312_6741440 | NC_021160.1    | Ca_kabuli_chr01 | 6741440                 | CC                              | TT                | 1945879552               |
| SNP_P3_4313_6744541 | NC_021160.1    | Ca_kabuli_chr01 | 6744541                 | TT                              | CC                | 1945879553               |
| SNP_P3_4314_6773045 | NC_021160.1    | Ca_kabuli_chr01 | 6773045                 | AA                              | CC                | 1945879555               |
| SNP_P3_4315_6775061 | NC_021160.1    | Ca_kabuli_chr01 | 6775061                 | GG                              | AA                | 1945879557               |
| SNP_P3_4316_6775062 | NC_021160.1    | Ca_kabuli_chr01 | 6775062                 | TT                              | AA                | 1945879559               |
| SNP_P3_4317_6775491 | NC_021160.1    | Ca_kabuli_chr01 | 6775491                 | AA                              | GG                | 1945879560               |
| SNP_P3_4318_6775821 | NC_021160.1    | Ca_kabuli_chr01 | 6775821                 | CC                              | TT                | 1945879562               |
| SNP_P3_4319_6775889 | NC_021160.1    | Ca_kabuli_chr01 | 6775889                 | AA                              | GG                | 1945879564               |
| SNP_P3_4320_6776210 | NC_021160.1    | Ca_kabuli_chr01 | 6776210                 | AA                              | GG                | 1945879566               |
| SNP_P3_4321_6778094 | NC_021160.1    | Ca_kabuli_chr01 | 6778094                 | AA                              | GG                | 1945879568               |
| SNP_P3_4322_6778128 | NC_021160.1    | Ca_kabuli_chr01 | 6778128                 | AA                              | GG                | 1945879569               |
| SNP_P3_4323_6778168 | NC_021160.1    | Ca_kabuli_chr01 | 6778168                 | CC                              | TT                | 1945879571               |
| SNP_P3_4324_6778276 | NC_021160.1    | Ca_kabuli_chr01 | 6778276                 | TT                              | CC                | 1945879573               |
| SNP_P3_4325_6778498 | NC_021160.1    | Ca_kabuli_chr01 | 6778498                 | TT                              | GG                | 1945879575               |
| SNP_P3_4326_6778517 | NC_021160.1    | Ca_kabuli_chr01 | 6778517                 | CC                              | TT                | 1945879576               |
| SNP_P3_4327_6779880 | NC_021160.1    | Ca_kabuli_chr01 | 6779880                 | AA                              | GG                | 1945879578               |
| SNP_P3_4328_6788730 | NC_021160.1    | Ca_kabuli_chr01 | 6788730                 | TT                              | CC                | 1945879580               |
| SNP_P3_4329_6795728 | NC_021160.1    | Ca_kabuli_chr01 | 6795728                 | GG                              | TT                | 1945879582               |
| SNP_P3_4331_6826030 | NC_021160.1    | Ca_kabuli_chr01 | 6826030                 | GG                              | AA                | 1945879584               |
| SNP_P3_4332_6827129 | NC_021160.1    | Ca_kabuli_chr01 | 6827129                 | AA                              | GG                | 1945879585               |

| SNPs IDs            | Chromosome IDs | Chromosomes     | Physical positions (bp) | CDC Frontier (Reference genome) | (Pusa 256 & HPNB) | NCBI SNPdb Accession IDs |
|---------------------|----------------|-----------------|-------------------------|---------------------------------|-------------------|--------------------------|
| SNP_P3_4333_6829694 | NC_021160.1    | Ca_kabuli_chr01 | 6829694                 | AA                              | GG                | 1945879587               |
| SNP_P3_4334_6841029 | NC_021160.1    | Ca_kabuli_chr01 | 6841029                 | CC                              | TT                | 1945879589               |
| SNP_P3_4335_6841031 | NC_021160.1    | Ca_kabuli_chr01 | 6841031                 | AA                              | GG                | 1945879591               |
| SNP_P3_4336_6841040 | NC_021160.1    | Ca_kabuli_chr01 | 6841040                 | AA                              | GG                | 1945879592               |
| SNP_P3_4337_6841045 | NC_021160.1    | Ca_kabuli_chr01 | 6841045                 | AA                              | TT                | 1945879594               |
| SNP_P3_4338_6869736 | NC_021160.1    | Ca_kabuli_chr01 | 6869736                 | CC                              | GG                | 1945879596               |
| SNP_P3_4339_6898177 | NC_021160.1    | Ca_kabuli_chr01 | 6898177                 | CC                              | TT                | 1945879598               |
| SNP_P3_4340_6898333 | NC_021160.1    | Ca_kabuli_chr01 | 6898333                 | GG                              | AA                | 1945879600               |
| SNP_P3_4341_6926337 | NC_021160.1    | Ca_kabuli_chr01 | 6926337                 | TT                              | GG                | 1945879601               |
| SNP_P3_4342_6952186 | NC_021160.1    | Ca_kabuli_chr01 | 6952186                 | CC                              | TT                | 1945879603               |
| SNP_P3_4343_6955455 | NC_021160.1    | Ca_kabuli_chr01 | 6955455                 | TT                              | CC                | 1945879605               |
| SNP_P3_4344_6959105 | NC_021160.1    | Ca_kabuli_chr01 | 6959105                 | GG                              | TT                | 1945879607               |
| SNP_P3_4345_6961914 | NC_021160.1    | Ca_kabuli_chr01 | 6961914                 | AA                              | CC                | 1945879608               |
| SNP_P3_4346_6963423 | NC_021160.1    | Ca_kabuli_chr01 | 6963423                 | GG                              | AA                | 1945879610               |
| SNP_P3_4347_6967442 | NC_021160.1    | Ca_kabuli_chr01 | 6967442                 | GG                              | AA                | 1945879612               |
| SNP_P3_4349_6977645 | NC_021160.1    | Ca_kabuli_chr01 | 6977645                 | TT                              | CC                | 1945879614               |
| SNP_P3_4351_7008958 | NC_021160.1    | Ca_kabuli_chr01 | 7008958                 | CC                              | AA                | 1945879616               |
| SNP_P3_4352_7012691 | NC_021160.1    | Ca_kabuli_chr01 | 7012691                 | GG                              | AA                | 1945879617               |
| SNP_P3_4353_7019752 | NC_021160.1    | Ca_kabuli_chr01 | 7019752                 | GG                              | AA                | 1945879619               |
| SNP_P3_4354_7026710 | NC_021160.1    | Ca_kabuli_chr01 | 7026710                 | CC                              | GG                | 1945879621               |
| SNP_P3_4355_7045089 | NC_021160.1    | Ca_kabuli_chr01 | 7045089                 | AA                              | GG                | 1945879623               |
| SNP_P3_4356_7053497 | NC_021160.1    | Ca_kabuli_chr01 | 7053497                 | CC                              | TT                | 1945879624               |
| SNP_P3_4357_7059822 | NC_021160.1    | Ca_kabuli_chr01 | 7059822                 | TT                              | AA                | 1945879626               |
| SNP_P3_4358_7059863 | NC_021160.1    | Ca_kabuli_chr01 | 7059863                 | TT                              | CC                | 1945879628               |
| SNP_P3_4359_7059877 | NC_021160.1    | Ca_kabuli_chr01 | 7059877                 | CC                              | TT                | 1945879630               |
| SNP_P3_4360_7059907 | NC_021160.1    | Ca_kabuli_chr01 | 7059907                 | CC                              | TT                | 1945879632               |
| SNP_P3_4361_7059927 | NC_021160.1    | Ca_kabuli_chr01 | 7059927                 | GG                              | AA                | 1945879633               |
| SNP_P3_4362_7059928 | NC_021160.1    | Ca_kabuli_chr01 | 7059928                 | GG                              | AA                | 1945879635               |
| SNP_P3_4363_7059945 | NC_021160.1    | Ca_kabuli_chr01 | 7059945                 | TT                              | CC                | 1945879637               |
| SNP_P3_4364_7059963 | NC_021160.1    | Ca_kabuli_chr01 | 7059963                 | AA                              | GG                | 1945879639               |
| SNP_P3_4365_7059964 | NC_021160.1    | Ca_kabuli_chr01 | 7059964                 | AA                              | CC                | 1945879640               |
| SNP_P3_4366_7095225 | NC_021160.1    | Ca_kabuli_chr01 | 7095225                 | CC                              | TT                | 1945879642               |
| SNP_P3_4367_7116283 | NC_021160.1    | Ca_kabuli_chr01 | 7116283                 | TT                              | GG                | 1945879644               |
| SNP_P3_4368_7154857 | NC_021160.1    | Ca_kabuli_chr01 | 7154857                 | TT                              | CC                | 1945879646               |
| SNP_P3_4369_7171835 | NC_021160.1    | Ca_kabuli_chr01 | 7171835                 | TT                              | AA                | 1945879648               |
| SNP_P3_4370_7212004 | NC_021160.1    | Ca_kabuli_chr01 | 7212004                 | CC                              | TT                | 1945879649               |
| SNP_P3_4372_7217621 | NC_021160.1    | Ca_kabuli_chr01 | 7217621                 | CC                              | TT                | 1945879651               |
| SNP_P3_4373_7245784 | NC_021160.1    | Ca_kabuli_chr01 | 7245784                 | GG                              | AA                | 1945879653               |
| SNP_P3_4374_7252686 | NC_021160.1    | Ca_kabuli_chr01 | 7252686                 | AA                              | GG                | 1945879655               |
| SNP_P3_4375_7252688 | NC_021160.1    | Ca_kabuli_chr01 | 7252688                 | AA                              | GG                | 1945879657               |
| SNP_P3_4377_7298873 | NC_021160.1    | Ca_kabuli_chr01 | 7298873                 | AA                              | GG                | 1945879658               |
| SNP_P3_4378_7299782 | NC_021160.1    | Ca_kabuli_chr01 | 7299782                 | GG                              | AA                | 1945879660               |

| SNPs IDs            | Chromosome IDs | Chromosomes     | Physical positions (bp) | CDC Frontier (Reference genome) | (Pusa 256 & HPNB) | NCBI SNPdb Accession IDs |
|---------------------|----------------|-----------------|-------------------------|---------------------------------|-------------------|--------------------------|
| SNP_P3_4379_7316209 | NC_021160.1    | Ca_kabuli_chr01 | 7316209                 | GG                              | AA                | 1945879662               |
| SNP_P3_4380_7347573 | NC_021160.1    | Ca_kabuli_chr01 | 7347573                 | GG                              | TT                | 1945879664               |
| SNP_P3_4381_7353092 | NC_021160.1    | Ca_kabuli_chr01 | 7353092                 | AA                              | GG                | 1945879665               |
| SNP_P3_4382_7353101 | NC_021160.1    | Ca_kabuli_chr01 | 7353101                 | GG                              | AA                | 1945879667               |
| SNP_P3_4383_7377535 | NC_021160.1    | Ca_kabuli_chr01 | 7377535                 | TT                              | CC                | 1945879669               |
| SNP_P3_4384_7378088 | NC_021160.1    | Ca_kabuli_chr01 | 7378088                 | CC                              | TT                | 1945879671               |
| SNP_P3_4386_7404580 | NC_021160.1    | Ca_kabuli_chr01 | 7404580                 | TT                              | GG                | 1945879673               |
| SNP_P3_4388_7406160 | NC_021160.1    | Ca_kabuli_chr01 | 7406160                 | CC                              | GG                | 1945879674               |
| SNP_P3_4389_7470176 | NC_021160.1    | Ca_kabuli_chr01 | 7470176                 | AA                              | TT                | 1945879676               |
| SNP_P3_4390_7518429 | NC_021160.1    | Ca_kabuli_chr01 | 7518429                 | TT                              | GG                | 1945879678               |
| SNP_P3_4391_7518441 | NC_021160.1    | Ca_kabuli_chr01 | 7518441                 | TT                              | CC                | 1945879680               |
| SNP_P3_4392_7518511 | NC_021160.1    | Ca_kabuli_chr01 | 7518511                 | TT                              | GG                | 1945879681               |
| SNP_P3_4393_7544224 | NC_021160.1    | Ca_kabuli_chr01 | 7544224                 | GG                              | AA                | 1945879683               |
| SNP_P3_4395_7590782 | NC_021160.1    | Ca_kabuli_chr01 | 7590782                 | AA                              | GG                | 1945879685               |
| SNP_P3_4396_7590816 | NC_021160.1    | Ca_kabuli_chr01 | 7590816                 | CC                              | AA                | 1945879687               |
| SNP_P3_4397_7590994 | NC_021160.1    | Ca_kabuli_chr01 | 7590994                 | CC                              | TT                | 1945879689               |
| SNP_P3_4398_7590999 | NC_021160.1    | Ca_kabuli_chr01 | 7590999                 | GG                              | TT                | 1945879690               |
| SNP_P3_4399_7591025 | NC_021160.1    | Ca_kabuli_chr01 | 7591025                 | TT                              | GG                | 1945879692               |
| SNP_P3_4400_7591069 | NC_021160.1    | Ca_kabuli_chr01 | 7591069                 | AA                              | TT                | 1945879694               |
| SNP_P3_4401_7591189 | NC_021160.1    | Ca_kabuli_chr01 | 7591189                 | AA                              | CC                | 1945879696               |
| SNP_P3_4402_7591307 | NC_021160.1    | Ca_kabuli_chr01 | 7591307                 | TT                              | CC                | 1945879698               |
| SNP_P3_4403_7591311 | NC_021160.1    | Ca_kabuli_chr01 | 7591311                 | GG                              | TT                | 1945879699               |
| SNP_P3_4404_7591358 | NC_021160.1    | Ca_kabuli_chr01 | 7591358                 | AA                              | GG                | 1945879701               |
| SNP_P3_4405_7591388 | NC_021160.1    | Ca_kabuli_chr01 | 7591388                 | CC                              | TT                | 1945879703               |
| SNP_P3_4406_7591398 | NC_021160.1    | Ca_kabuli_chr01 | 7591398                 | GG                              | AA                | 1945879705               |
| SNP_P3_4407_7591535 | NC_021160.1    | Ca_kabuli_chr01 | 7591535                 | AA                              | GG                | 1945879707               |
| SNP_P3_4408_7591536 | NC_021160.1    | Ca_kabuli_chr01 | 7591536                 | CC                              | TT                | 1945879708               |
| SNP_P3_4409_7591542 | NC_021160.1    | Ca_kabuli_chr01 | 7591542                 | GG                              | AA                | 1945879710               |
| SNP_P3_4410_7591548 | NC_021160.1    | Ca_kabuli_chr01 | 7591548                 | GG                              | CC                | 1945879712               |
| SNP_P3_4411_7591589 | NC_021160.1    | Ca_kabuli_chr01 | 7591589                 | GG                              | AA                | 1945879714               |
| SNP_P3_4412_7591623 | NC_021160.1    | Ca_kabuli_chr01 | 7591623                 | CC                              | TT                | 1945879716               |
| SNP_P3_4413_7591627 | NC_021160.1    | Ca_kabuli_chr01 | 7591627                 | GG                              | AA                | 1945879718               |
| SNP_P3_4414_7591874 | NC_021160.1    | Ca_kabuli_chr01 | 7591874                 | AA                              | GG                | 1945879719               |
| SNP_P3_4415_7591896 | NC_021160.1    | Ca_kabuli_chr01 | 7591896                 | GG                              | AA                | 1945879721               |
| SNP_P3_4416_7609411 | NC_021160.1    | Ca_kabuli_chr01 | 7609411                 | TT                              | CC                | 1945879723               |
| SNP_P3_4417_7627213 | NC_021160.1    | Ca_kabuli_chr01 | 7627213                 | CC                              | TT                | 1945879725               |
| SNP_P3_4418_7629992 | NC_021160.1    | Ca_kabuli_chr01 | 7629992                 | TT                              | AA                | 1945879727               |
| SNP_P3_4419_7630242 | NC_021160.1    | Ca_kabuli_chr01 | 7630242                 | GG                              | CC                | 1945879729               |
| SNP_P3_4421_7630449 | NC_021160.1    | Ca_kabuli_chr01 | 7630449                 | CC                              | AA                | 1945879730               |
| SNP_P3_4422_7630592 | NC_021160.1    | Ca_kabuli_chr01 | 7630592                 | TT                              | CC                | 1945879732               |
| SNP_P3_4423_7630819 | NC_021160.1    | Ca_kabuli_chr01 | 7630819                 | GG                              | TT                | 1945879734               |
| SNP_P3_4424_7631295 | NC_021160.1    | Ca_kabuli_chr01 | 7631295                 | TT                              | AA                | 1945879736               |

| SNPs IDs            | Chromosome IDs | Chromosomes     | Physical positions (bp) | CDC Frontier (Reference genome) | (Pusa 256 & HPNB) | NCBI SNPdb Accession IDs |
|---------------------|----------------|-----------------|-------------------------|---------------------------------|-------------------|--------------------------|
| SNP_P3_4425_7631650 | NC_021160.1    | Ca_kabuli_chr01 | 7631650                 | TT                              | AA                | 1945879737               |
| SNP_P3_4427_7635633 | NC_021160.1    | Ca_kabuli_chr01 | 7635633                 | AA                              | TT                | 1945879739               |
| SNP_P3_4428_7635673 | NC_021160.1    | Ca_kabuli_chr01 | 7635673                 | TT                              | GG                | 1945879741               |
| SNP_P3_4429_7635730 | NC_021160.1    | Ca_kabuli_chr01 | 7635730                 | TT                              | AA                | 1945879743               |
| SNP_P3_4430_7635928 | NC_021160.1    | Ca_kabuli_chr01 | 7635928                 | CC                              | TT                | 1945879745               |
| SNP_P3_4431_7635942 | NC_021160.1    | Ca_kabuli_chr01 | 7635942                 | AA                              | GG                | 1945879746               |
| SNP_P3_4432_7636006 | NC_021160.1    | Ca_kabuli_chr01 | 7636006                 | GG                              | AA                | 1945879748               |
| SNP_P3_4433_7636017 | NC_021160.1    | Ca_kabuli_chr01 | 7636017                 | GG                              | AA                | 1945879750               |
| SNP_P3_4434_7636026 | NC_021160.1    | Ca_kabuli_chr01 | 7636026                 | TT                              | AA                | 1945879752               |
| SNP_P3_4436_7636121 | NC_021160.1    | Ca_kabuli_chr01 | 7636121                 | GG                              | AA                | 1945879753               |
| SNP_P3_4437_7636125 | NC_021160.1    | Ca_kabuli_chr01 | 7636125                 | TT                              | CC                | 1945879755               |
| SNP_P3_4438_7636134 | NC_021160.1    | Ca_kabuli_chr01 | 7636134                 | TT                              | CC                | 1945879757               |
| SNP_P3_4439_7636233 | NC_021160.1    | Ca_kabuli_chr01 | 7636233                 | GG                              | TT                | 1945879759               |
| SNP_P3_4440_7636238 | NC_021160.1    | Ca_kabuli_chr01 | 7636238                 | CC                              | GG                | 1945879761               |
| SNP_P3_4441_7636290 | NC_021160.1    | Ca_kabuli_chr01 | 7636290                 | AA                              | GG                | 1945879762               |
| SNP_P3_4442_7636495 | NC_021160.1    | Ca_kabuli_chr01 | 7636495                 | TT                              | CC                | 1945879764               |
| SNP_P3_4443_7636596 | NC_021160.1    | Ca_kabuli_chr01 | 7636596                 | AA                              | GG                | 1945879766               |
| SNP_P3_4444_7636624 | NC_021160.1    | Ca_kabuli_chr01 | 7636624                 | AA                              | GG                | 1945879768               |
| SNP_P3_4445_7636638 | NC_021160.1    | Ca_kabuli_chr01 | 7636638                 | GG                              | AA                | 1945879769               |
| SNP_P3_4446_7637265 | NC_021160.1    | Ca_kabuli_chr01 | 7637265                 | GG                              | AA                | 1945879771               |
| SNP_P3_4447_7637301 | NC_021160.1    | Ca_kabuli_chr01 | 7637301                 | GG                              | AA                | 1945879773               |
| SNP_P3_4448_7637307 | NC_021160.1    | Ca_kabuli_chr01 | 7637307                 | GG                              | AA                | 1945879775               |
| SNP_P3_4449_7637329 | NC_021160.1    | Ca_kabuli_chr01 | 7637329                 | TT                              | AA                | 1945879777               |
| SNP_P3_4450_7637351 | NC_021160.1    | Ca_kabuli_chr01 | 7637351                 | GG                              | AA                | 1945879778               |
| SNP_P3_4451_7637542 | NC_021160.1    | Ca_kabuli_chr01 | 7637542                 | TT                              | CC                | 1945879780               |
| SNP_P3_4452_7637565 | NC_021160.1    | Ca_kabuli_chr01 | 7637565                 | AA                              | CC                | 1945879782               |
| SNP_P3_4453_7637718 | NC_021160.1    | Ca_kabuli_chr01 | 7637718                 | GG                              | CC                | 1945879784               |
| SNP_P3_4454_7637751 | NC_021160.1    | Ca_kabuli_chr01 | 7637751                 | CC                              | TT                | 1945879785               |
| SNP_P3_4455_7637850 | NC_021160.1    | Ca_kabuli_chr01 | 7637850                 | TT                              | CC                | 1945879787               |
| SNP_P3_4456_7637876 | NC_021160.1    | Ca_kabuli_chr01 | 7637876                 | AA                              | GG                | 1945879789               |
| SNP_P3_4457_7637973 | NC_021160.1    | Ca_kabuli_chr01 | 7637973                 | CC                              | GG                | 1945879791               |
| SNP_P3_4458_7638200 | NC_021160.1    | Ca_kabuli_chr01 | 7638200                 | AA                              | GG                | 1945879793               |
| SNP_P3_4459_7638582 | NC_021160.1    | Ca_kabuli_chr01 | 7638582                 | GG                              | AA                | 1945879794               |
| SNP_P3_4460_7639236 | NC_021160.1    | Ca_kabuli_chr01 | 7639236                 | GG                              | AA                | 1945879796               |
| SNP_P3_4461_7640371 | NC_021160.1    | Ca_kabuli_chr01 | 7640371                 | AA                              | TT                | 1945879798               |
| SNP_P3_4462_7641105 | NC_021160.1    | Ca_kabuli_chr01 | 7641105                 | TT                              | AA                | 1945879800               |
| SNP_P3_4463_7641123 | NC_021160.1    | Ca_kabuli_chr01 | 7641123                 | GG                              | TT                | 1945879801               |
| SNP_P3_4464_7642118 | NC_021160.1    | Ca_kabuli_chr01 | 7642118                 | GG                              | AA                | 1945879803               |
| SNP_P3_4466_7647299 | NC_021160.1    | Ca_kabuli_chr01 | 7647299                 | AA                              | GG                | 1945879805               |
| SNP_P3_4469_7649529 | NC_021160.1    | Ca_kabuli_chr01 | 7649529                 | AA                              | GG                | 1945879807               |
| SNP_P3_4470_7649530 | NC_021160.1    | Ca_kabuli_chr01 | 7649530                 | TT                              | GG                | 1945879809               |
| SNP_P3_4471_7649552 | NC_021160.1    | Ca_kabuli_chr01 | 7649552                 | AA                              | CC                | 1945879810               |



| SNPs IDs            | Chromosome IDs | Chromosomes     | Physical positions (bp) | CDC Frontier (Reference genome) | (Pusa 256 & HPNB) | NCBI SNPdb Accession IDs |
|---------------------|----------------|-----------------|-------------------------|---------------------------------|-------------------|--------------------------|
| SNP_P3_4472_7649558 | NC_021160.1    | Ca_kabuli_chr01 | 7649558                 | CC                              | GG                | 1945879812               |
| SNP_P3_4473_7651970 | NC_021160.1    | Ca_kabuli_chr01 | 7651970                 | AA                              | GG                | 1945879814               |
| SNP_P3_4475_7653656 | NC_021160.1    | Ca_kabuli_chr01 | 7653656                 | AA                              | GG                | 1945879816               |
| SNP_P3_4476_7653675 | NC_021160.1    | Ca_kabuli_chr01 | 7653675                 | CC                              | TT                | 1945879817               |
| SNP_P3_4477_7653778 | NC_021160.1    | Ca_kabuli_chr01 | 7653778                 | GG                              | CC                | 1945879819               |
| SNP_P3_4478_7654103 | NC_021160.1    | Ca_kabuli_chr01 | 7654103                 | CC                              | GG                | 1945879821               |
| SNP_P3_4479_7655207 | NC_021160.1    | Ca_kabuli_chr01 | 7655207                 | GG                              | TT                | 1945879823               |
| SNP_P3_4480_7655476 | NC_021160.1    | Ca_kabuli_chr01 | 7655476                 | TT                              | AA                | 1945879825               |
| SNP_P3_4481_7655477 | NC_021160.1    | Ca_kabuli_chr01 | 7655477                 | TT                              | CC                | 1945879826               |
| SNP_P3_4482_7657051 | NC_021160.1    | Ca_kabuli_chr01 | 7657051                 | CC                              | AA                | 1945879828               |
| SNP_P3_4483_7657115 | NC_021160.1    | Ca_kabuli_chr01 | 7657115                 | AA                              | GG                | 1945879830               |
| SNP_P3_4484_7657903 | NC_021160.1    | Ca_kabuli_chr01 | 7657903                 | AA                              | CC                | 1945879832               |
| SNP_P3_4485_7657905 | NC_021160.1    | Ca_kabuli_chr01 | 7657905                 | GG                              | TT                | 1945879834               |
| SNP_P3_4486_7658157 | NC_021160.1    | Ca_kabuli_chr01 | 7658157                 | AA                              | CC                | 1945879835               |
| SNP_P3_4487_7658654 | NC_021160.1    | Ca_kabuli_chr01 | 7658654                 | TT                              | CC                | 1945879837               |
| SNP_P3_4489_7659715 | NC_021160.1    | Ca_kabuli_chr01 | 7659715                 | AA                              | GG                | 1945879839               |
| SNP_P3_4490_7659859 | NC_021160.1    | Ca_kabuli_chr01 | 7659859                 | AA                              | GG                | 1945879841               |
| SNP_P3_4491_7659992 | NC_021160.1    | Ca_kabuli_chr01 | 7659992                 | AA                              | GG                | 1945879843               |
| SNP_P3_4493_7660422 | NC_021160.1    | Ca_kabuli_chr01 | 7660422                 | CC                              | AA                | 1945879844               |
| SNP_P3_4494_7660446 | NC_021160.1    | Ca_kabuli_chr01 | 7660446                 | GG                              | AA                | 1945879846               |
| SNP_P3_4495_7661133 | NC_021160.1    | Ca_kabuli_chr01 | 7661133                 | CC                              | AA                | 1945879848               |
| SNP_P3_4496_7661355 | NC_021160.1    | Ca_kabuli_chr01 | 7661355                 | AA                              | GG                | 1945879850               |
| SNP_P3_4497_7662823 | NC_021160.1    | Ca_kabuli_chr01 | 7662823                 | CC                              | GG                | 1945879852               |
| SNP_P3_4498_7663174 | NC_021160.1    | Ca_kabuli_chr01 | 7663174                 | AA                              | CC                | 1945879854               |
| SNP_P3_4499_7663858 | NC_021160.1    | Ca_kabuli_chr01 | 7663858                 | CC                              | TT                | 1945879855               |
| SNP_P3_4500_7663939 | NC_021160.1    | Ca_kabuli_chr01 | 7663939                 | TT                              | CC                | 1945879857               |
| SNP_P3_4501_7664080 | NC_021160.1    | Ca_kabuli_chr01 | 7664080                 | AA                              | GG                | 1945879859               |
| SNP_P3_4502_7664101 | NC_021160.1    | Ca_kabuli_chr01 | 7664101                 | TT                              | CC                | 1945879861               |
| SNP_P3_4503_7664108 | NC_021160.1    | Ca_kabuli_chr01 | 7664108                 | GG                              | AA                | 1945879863               |
| SNP_P3_4504_7664109 | NC_021160.1    | Ca_kabuli_chr01 | 7664109                 | AA                              | GG                | 1945879864               |
| SNP_P3_4506_7670098 | NC_021160.1    | Ca_kabuli_chr01 | 7670098                 | GG                              | AA                | 1945879866               |
| SNP_P3_4509_7670322 | NC_021160.1    | Ca_kabuli_chr01 | 7670322                 | TT                              | CC                | 1945879868               |
| SNP_P3_4510_7671166 | NC_021160.1    | Ca_kabuli_chr01 | 7671166                 | AA                              | TT                | 1945879870               |
| SNP_P3_4511_7671193 | NC_021160.1    | Ca_kabuli_chr01 | 7671193                 | CC                              | TT                | 1945879872               |
| SNP_P3_4512_7671195 | NC_021160.1    | Ca_kabuli_chr01 | 7671195                 | TT                              | CC                | 1945879873               |
| SNP_P3_4515_7672549 | NC_021160.1    | Ca_kabuli_chr01 | 7672549                 | AA                              | GG                | 1945879875               |
| SNP_P3_4516_7673047 | NC_021160.1    | Ca_kabuli_chr01 | 7673047                 | CC                              | AA                | 1945879877               |
| SNP_P3_4517_7673092 | NC_021160.1    | Ca_kabuli_chr01 | 7673092                 | CC                              | TT                | 1945879879               |
| SNP_P3_4518_7673239 | NC_021160.1    | Ca_kabuli_chr01 | 7673239                 | CC                              | AA                | 1945879880               |
| SNP_P3_4519_7674223 | NC_021160.1    | Ca_kabuli_chr01 | 7674223                 | CC                              | TT                | 1945879882               |
| SNP_P3_4520_7674251 | NC_021160.1    | Ca_kabuli_chr01 | 7674251                 | TT                              | GG                | 1945879884               |
| SNP_P3_4523_7677987 | NC_021160.1    | Ca_kabuli_chr01 | 7677987                 | GG                              | AA                | 1945879886               |

| SNPs IDs            | Chromosome IDs | Chromosomes     | Physical positions (bp) | CDC Frontier (Reference genome) | (Pusa 256 & HPNB) | NCBI SNPdb Accession IDs |
|---------------------|----------------|-----------------|-------------------------|---------------------------------|-------------------|--------------------------|
| SNP_P3_4525_7678087 | NC_021160.1    | Ca_kabuli_chr01 | 7678087                 | CC                              | TT                | 1945879888               |
| SNP_P3_4526_7679875 | NC_021160.1    | Ca_kabuli_chr01 | 7679875                 | GG                              | AA                | 1945879889               |
| SNP_P3_4527_7680133 | NC_021160.1    | Ca_kabuli_chr01 | 7680133                 | TT                              | CC                | 1945879891               |
| SNP_P3_4528_7680375 | NC_021160.1    | Ca_kabuli_chr01 | 7680375                 | TT                              | CC                | 1945879893               |
| SNP_P3_4529_7680814 | NC_021160.1    | Ca_kabuli_chr01 | 7680814                 | AA                              | GG                | 1945879895               |
| SNP_P3_4530_7682115 | NC_021160.1    | Ca_kabuli_chr01 | 7682115                 | CC                              | TT                | 1945879896               |
| SNP_P3_4531_7682469 | NC_021160.1    | Ca_kabuli_chr01 | 7682469                 | TT                              | AA                | 1945879898               |
| SNP_P3_4532_7682995 | NC_021160.1    | Ca_kabuli_chr01 | 7682995                 | AA                              | TT                | 1945879900               |
| SNP_P3_4535_7687930 | NC_021160.1    | Ca_kabuli_chr01 | 7687930                 | GG                              | AA                | 1945879902               |
| SNP_P3_4536_7687959 | NC_021160.1    | Ca_kabuli_chr01 | 7687959                 | CC                              | GG                | 1945879904               |
| SNP_P3_4537_7687963 | NC_021160.1    | Ca_kabuli_chr01 | 7687963                 | AA                              | CC                | 1945879905               |
| SNP_P3_4538_7687975 | NC_021160.1    | Ca_kabuli_chr01 | 7687975                 | AA                              | TT                | 1945879907               |
| SNP_P3_4539_7688019 | NC_021160.1    | Ca_kabuli_chr01 | 7688019                 | CC                              | TT                | 1945879909               |
| SNP_P3_4540_7688061 | NC_021160.1    | Ca_kabuli_chr01 | 7688061                 | CC                              | TT                | 1945879911               |
| SNP_P3_4541_7688261 | NC_021160.1    | Ca_kabuli_chr01 | 7688261                 | CC                              | TT                | 1945879912               |
| SNP_P3_4542_7691334 | NC_021160.1    | Ca_kabuli_chr01 | 7691334                 | TT                              | AA                | 1945879914               |
| SNP_P3_4543_7694225 | NC_021160.1    | Ca_kabuli_chr01 | 7694225                 | AA                              | GG                | 1945879916               |
| SNP_P3_4544_7699319 | NC_021160.1    | Ca_kabuli_chr01 | 7699319                 | GG                              | AA                | 1945879918               |
| SNP_P3_4545_7700312 | NC_021160.1    | Ca_kabuli_chr01 | 7700312                 | TT                              | AA                | 1945879920               |
| SNP_P3_4546_7700313 | NC_021160.1    | Ca_kabuli_chr01 | 7700313                 | CC                              | TT                | 1945879921               |
| SNP_P3_4547_7700320 | NC_021160.1    | Ca_kabuli_chr01 | 7700320                 | AA                              | TT                | 1945879923               |
| SNP_P3_4548_7700342 | NC_021160.1    | Ca_kabuli_chr01 | 7700342                 | CC                              | TT                | 1945879925               |
| SNP_P3_4549_7700383 | NC_021160.1    | Ca_kabuli_chr01 | 7700383                 | GG                              | AA                | 1945879927               |
| SNP_P3_4550_7700396 | NC_021160.1    | Ca_kabuli_chr01 | 7700396                 | AA                              | GG                | 1945879928               |
| SNP_P3_4552_7700424 | NC_021160.1    | Ca_kabuli_chr01 | 7700424                 | TT                              | CC                | 1945879930               |
| SNP_P3_4553_7700715 | NC_021160.1    | Ca_kabuli_chr01 | 7700715                 | TT                              | AA                | 1945879932               |
| SNP_P3_4554_7700720 | NC_021160.1    | Ca_kabuli_chr01 | 7700720                 | TT                              | GG                | 1945879934               |
| SNP_P3_4555_7700726 | NC_021160.1    | Ca_kabuli_chr01 | 7700726                 | CC                              | TT                | 1945879936               |
| SNP_P3_4556_7700763 | NC_021160.1    | Ca_kabuli_chr01 | 7700763                 | CC                              | AA                | 1945879937               |
| SNP_P3_4557_7700791 | NC_021160.1    | Ca_kabuli_chr01 | 7700791                 | AA                              | GG                | 1945879939               |
| SNP_P3_4558_7700803 | NC_021160.1    | Ca_kabuli_chr01 | 7700803                 | CC                              | TT                | 1945879941               |
| SNP_P3_4559_7701192 | NC_021160.1    | Ca_kabuli_chr01 | 7701192                 | CC                              | TT                | 1945879943               |
| SNP_P3_4560_7703706 | NC_021160.1    | Ca_kabuli_chr01 | 7703706                 | GG                              | AA                | 1945879945               |
| SNP_P3_4561_7703707 | NC_021160.1    | Ca_kabuli_chr01 | 7703707                 | CC                              | TT                | 1945879946               |
| SNP_P3_4562_7703874 | NC_021160.1    | Ca_kabuli_chr01 | 7703874                 | AA                              | TT                | 1945879948               |
| SNP_P3_4563_7703904 | NC_021160.1    | Ca_kabuli_chr01 | 7703904                 | GG                              | AA                | 1945879950               |
| SNP_P3_4564_7703919 | NC_021160.1    | Ca_kabuli_chr01 | 7703919                 | AA                              | GG                | 1945879952               |
| SNP_P3_4565_7703936 | NC_021160.1    | Ca_kabuli_chr01 | 7703936                 | AA                              | GG                | 1945879954               |
| SNP_P3_4566_7703937 | NC_021160.1    | Ca_kabuli_chr01 | 7703937                 | GG                              | AA                | 1945879955               |
| SNP_P3_4567_7703955 | NC_021160.1    | Ca_kabuli_chr01 | 7703955                 | TT                              | CC                | 1945879957               |
| SNP_P3_4568_7704207 | NC_021160.1    | Ca_kabuli_chr01 | 7704207                 | AA                              | TT                | 1945879959               |
| SNP_P3_4569_7706242 | NC_021160.1    | Ca_kabuli_chr01 | 7706242                 | GG                              | AA                | 1945879961               |

| SNPs IDs            | Chromosome IDs | Chromosomes     | Physical positions (bp) | CDC Frontier (Reference genome) | (Pusa 256 & HPNB) | NCBI SNPdb Accession IDs |
|---------------------|----------------|-----------------|-------------------------|---------------------------------|-------------------|--------------------------|
| SNP_P3_4571_7706671 | NC_021160.1    | Ca_kabuli_chr01 | 7706671                 | CC                              | TT                | 1945879963               |
| SNP_P3_4572_7706678 | NC_021160.1    | Ca_kabuli_chr01 | 7706678                 | GG                              | AA                | 1945879965               |
| SNP_P3_4573_7706913 | NC_021160.1    | Ca_kabuli_chr01 | 7706913                 | GG                              | AA                | 1945879966               |
| SNP_P3_4574_7706914 | NC_021160.1    | Ca_kabuli_chr01 | 7706914                 | AA                              | TT                | 1945879968               |
| SNP_P3_4576_7707689 | NC_021160.1    | Ca_kabuli_chr01 | 7707689                 | TT                              | CC                | 1945879970               |
| SNP_P3_4577_7707692 | NC_021160.1    | Ca_kabuli_chr01 | 7707692                 | TT                              | GG                | 1945879972               |
| SNP_P3_4578_7707875 | NC_021160.1    | Ca_kabuli_chr01 | 7707875                 | TT                              | AA                | 1945879974               |
| SNP_P3_4579_7707929 | NC_021160.1    | Ca_kabuli_chr01 | 7707929                 | TT                              | GG                | 1945879975               |
| SNP_P3_4580_7707930 | NC_021160.1    | Ca_kabuli_chr01 | 7707930                 | TT                              | AA                | 1945879977               |
| SNP_P3_4581_7708362 | NC_021160.1    | Ca_kabuli_chr01 | 7708362                 | AA                              | CC                | 1945879979               |
| SNP_P3_4582_7709838 | NC_021160.1    | Ca_kabuli_chr01 | 7709838                 | GG                              | TT                | 1945879981               |
| SNP_P3_4583_7710066 | NC_021160.1    | Ca_kabuli_chr01 | 7710066                 | CC                              | TT                | 1945879983               |
| SNP_P3_4584_7710431 | NC_021160.1    | Ca_kabuli_chr01 | 7710431                 | CC                              | GG                | 1945879984               |
| SNP_P3_4585_7710613 | NC_021160.1    | Ca_kabuli_chr01 | 7710613                 | GG                              | AA                | 1945879986               |
| SNP_P3_4586_7711886 | NC_021160.1    | Ca_kabuli_chr01 | 7711886                 | AA                              | TT                | 1945879988               |
| SNP_P3_4589_7713302 | NC_021160.1    | Ca_kabuli_chr01 | 7713302                 | TT                              | GG                | 1945879990               |
| SNP_P3_4590_7714186 | NC_021160.1    | Ca_kabuli_chr01 | 7714186                 | CC                              | TT                | 1945879991               |
| SNP_P3_4591_7716074 | NC_021160.1    | Ca_kabuli_chr01 | 7716074                 | CC                              | TT                | 1945879993               |
| SNP_P3_4592_7716580 | NC_021160.1    | Ca_kabuli_chr01 | 7716580                 | TT                              | CC                | 1945879995               |
| SNP_P3_4593_7716590 | NC_021160.1    | Ca_kabuli_chr01 | 7716590                 | TT                              | CC                | 1945879997               |
| SNP_P3_4594_7716622 | NC_021160.1    | Ca_kabuli_chr01 | 7716622                 | TT                              | CC                | 1945879999               |
| SNP_P3_4595_7716625 | NC_021160.1    | Ca_kabuli_chr01 | 7716625                 | TT                              | CC                | 1945880000               |
| SNP_P3_4596_7716847 | NC_021160.1    | Ca_kabuli_chr01 | 7716847                 | GG                              | AA                | 1945880002               |
| SNP_P3_4597_7716909 | NC_021160.1    | Ca_kabuli_chr01 | 7716909                 | AA                              | GG                | 1945880004               |
| SNP_P3_4598_7716921 | NC_021160.1    | Ca_kabuli_chr01 | 7716921                 | CC                              | TT                | 1945880006               |
| SNP_P3_4599_7720413 | NC_021160.1    | Ca_kabuli_chr01 | 7720413                 | AA                              | GG                | 1945880007               |
| SNP_P3_4600_7723790 | NC_021160.1    | Ca_kabuli_chr01 | 7723790                 | CC                              | TT                | 1945880009               |
| SNP_P3_4601_7725260 | NC_021160.1    | Ca_kabuli_chr01 | 7725260                 | TT                              | CC                | 1945880011               |
| SNP_P3_4602_7725312 | NC_021160.1    | Ca_kabuli_chr01 | 7725312                 | TT                              | GG                | 1945880013               |
| SNP_P3_4603_7725374 | NC_021160.1    | Ca_kabuli_chr01 | 7725374                 | CC                              | TT                | 1945880014               |
| SNP_P3_4604_7725599 | NC_021160.1    | Ca_kabuli_chr01 | 7725599                 | AA                              | GG                | 1945880016               |
| SNP_P3_4605_7725610 | NC_021160.1    | Ca_kabuli_chr01 | 7725610                 | TT                              | AA                | 1945880018               |
| SNP_P3_4607_7726423 | NC_021160.1    | Ca_kabuli_chr01 | 7726423                 | GG                              | AA                | 1945880020               |
| SNP_P3_4609_7726689 | NC_021160.1    | Ca_kabuli_chr01 | 7726689                 | GG                              | AA                | 1945880022               |
| SNP_P3_4610_7726752 | NC_021160.1    | Ca_kabuli_chr01 | 7726752                 | AA                              | TT                | 1945880023               |
| SNP_P3_4612_7728497 | NC_021160.1    | Ca_kabuli_chr01 | 7728497                 | AA                              | GG                | 1945880025               |
| SNP_P3_4613_7728693 | NC_021160.1    | Ca_kabuli_chr01 | 7728693                 | AA                              | GG                | 1945880027               |
| SNP_P3_4615_7728925 | NC_021160.1    | Ca_kabuli_chr01 | 7728925                 | GG                              | AA                | 1945880029               |
| SNP_P3_4616_7729033 | NC_021160.1    | Ca_kabuli_chr01 | 7729033                 | TT                              | CC                | 1945880030               |
| SNP_P3_4617_7729034 | NC_021160.1    | Ca_kabuli_chr01 | 7729034                 | GG                              | TT                | 1945880032               |
| SNP_P3_4618_7729038 | NC_021160.1    | Ca_kabuli_chr01 | 7729038                 | GG                              | AA                | 1945880034               |
| SNP_P3_4619_7729076 | NC_021160.1    | Ca_kabuli_chr01 | 7729076                 | GG                              | AA                | 1945880036               |

| SNPs IDs            | Chromosome IDs | Chromosomes     | Physical positions (bp) | CDC Frontier (Reference genome) | (Pusa 256 & HPNB) | NCBI SNPdb Accession IDs |
|---------------------|----------------|-----------------|-------------------------|---------------------------------|-------------------|--------------------------|
| SNP_P3_4620_7729697 | NC_021160.1    | Ca_kabuli_chr01 | 7729697                 | GG                              | AA                | 1945880038               |
| SNP_P3_4621_7729953 | NC_021160.1    | Ca_kabuli_chr01 | 7729953                 | GG                              | AA                | 1945880039               |
| SNP_P3_4622_7730004 | NC_021160.1    | Ca_kabuli_chr01 | 7730004                 | GG                              | TT                | 1945880041               |
| SNP_P3_4623_7730505 | NC_021160.1    | Ca_kabuli_chr01 | 7730505                 | CC                              | TT                | 1945880043               |
| SNP_P3_4624_7730557 | NC_021160.1    | Ca_kabuli_chr01 | 7730557                 | TT                              | CC                | 1945880045               |
| SNP_P3_4625_7730567 | NC_021160.1    | Ca_kabuli_chr01 | 7730567                 | TT                              | CC                | 1945880046               |
| SNP_P3_4626_7730612 | NC_021160.1    | Ca_kabuli_chr01 | 7730612                 | GG                              | AA                | 1945880048               |
| SNP_P3_4627_7730616 | NC_021160.1    | Ca_kabuli_chr01 | 7730616                 | CC                              | AA                | 1945880050               |
| SNP_P3_4628_7730715 | NC_021160.1    | Ca_kabuli_chr01 | 7730715                 | TT                              | CC                | 1945880052               |
| SNP_P3_4629_7730884 | NC_021160.1    | Ca_kabuli_chr01 | 7730884                 | TT                              | CC                | 1945880054               |
| SNP_P3_4630_7730979 | NC_021160.1    | Ca_kabuli_chr01 | 7730979                 | GG                              | AA                | 1945880055               |
| SNP_P3_4631_7730994 | NC_021160.1    | Ca_kabuli_chr01 | 7730994                 | GG                              | TT                | 1945880057               |
| SNP_P3_4632_7731089 | NC_021160.1    | Ca_kabuli_chr01 | 7731089                 | AA                              | TT                | 1945880059               |
| SNP_P3_4633_7731203 | NC_021160.1    | Ca_kabuli_chr01 | 7731203                 | AA                              | TT                | 1945880061               |
| SNP_P3_4634_7731810 | NC_021160.1    | Ca_kabuli_chr01 | 7731810                 | CC                              | TT                | 1945880062               |
| SNP_P3_4635_7731819 | NC_021160.1    | Ca_kabuli_chr01 | 7731819                 | GG                              | TT                | 1945880064               |
| SNP_P3_4636_7731926 | NC_021160.1    | Ca_kabuli_chr01 | 7731926                 | GG                              | TT                | 1945880066               |
| SNP_P3_4637_7732997 | NC_021160.1    | Ca_kabuli_chr01 | 7732997                 | CC                              | TT                | 1945880068               |
| SNP_P3_4638_7733274 | NC_021160.1    | Ca_kabuli_chr01 | 7733274                 | TT                              | AA                | 1945880070               |
| SNP_P3_4639_7733291 | NC_021160.1    | Ca_kabuli_chr01 | 7733291                 | TT                              | CC                | 1945880071               |
| SNP_P3_4640_7733395 | NC_021160.1    | Ca_kabuli_chr01 | 7733395                 | CC                              | TT                | 1945880073               |
| SNP_P3_4641_7733470 | NC_021160.1    | Ca_kabuli_chr01 | 7733470                 | GG                              | AA                | 1945880075               |
| SNP_P3_4642_7733590 | NC_021160.1    | Ca_kabuli_chr01 | 7733590                 | CC                              | AA                | 1945880077               |
| SNP_P3_4643_7733740 | NC_021160.1    | Ca_kabuli_chr01 | 7733740                 | CC                              | TT                | 1945880078               |
| SNP_P3_4644_7734168 | NC_021160.1    | Ca_kabuli_chr01 | 7734168                 | CC                              | AA                | 1945880080               |
| SNP_P3_4645_7734180 | NC_021160.1    | Ca_kabuli_chr01 | 7734180                 | CC                              | GG                | 1945880082               |
| SNP_P3_4646_7734221 | NC_021160.1    | Ca_kabuli_chr01 | 7734221                 | AA                              | TT                | 1945880084               |
| SNP_P3_4647_7734306 | NC_021160.1    | Ca_kabuli_chr01 | 7734306                 | AA                              | GG                | 1945880086               |
| SNP_P3_4648_7741187 | NC_021160.1    | Ca_kabuli_chr01 | 7741187                 | CC                              | TT                | 1945880087               |
| SNP_P3_4649_7741941 | NC_021160.1    | Ca_kabuli_chr01 | 7741941                 | TT                              | CC                | 1945880089               |
| SNP_P3_4650_7745573 | NC_021160.1    | Ca_kabuli_chr01 | 7745573                 | TT                              | CC                | 1945880091               |
| SNP_P3_4651_7745740 | NC_021160.1    | Ca_kabuli_chr01 | 7745740                 | GG                              | CC                | 1945880093               |
| SNP_P3_4652_7745743 | NC_021160.1    | Ca_kabuli_chr01 | 7745743                 | AA                              | CC                | 1945880094               |
| SNP_P3_4653_7745754 | NC_021160.1    | Ca_kabuli_chr01 | 7745754                 | TT                              | CC                | 1945880096               |
| SNP_P3_4654_7745767 | NC_021160.1    | Ca_kabuli_chr01 | 7745767                 | CC                              | TT                | 1945880098               |
| SNP_P3_4655_7745785 | NC_021160.1    | Ca_kabuli_chr01 | 7745785                 | AA                              | GG                | 1945880100               |
| SNP_P3_4656_7745810 | NC_021160.1    | Ca_kabuli_chr01 | 7745810                 | CC                              | AA                | 1945880102               |
| SNP_P3_4657_7746325 | NC_021160.1    | Ca_kabuli_chr01 | 7746325                 | GG                              | AA                | 1945880103               |
| SNP_P3_4658_7746358 | NC_021160.1    | Ca_kabuli_chr01 | 7746358                 | TT                              | CC                | 1945880105               |
| SNP_P3_4659_7746363 | NC_021160.1    | Ca_kabuli_chr01 | 7746363                 | GG                              | CC                | 1945880107               |
| SNP_P3_4660_7746384 | NC_021160.1    | Ca_kabuli_chr01 | 7746384                 | CC                              | TT                | 1945880109               |
| SNP_P3_4661_7746444 | NC_021160.1    | Ca_kabuli_chr01 | 7746444                 | AA                              | GG                | 1945880110               |

| SNPs IDs            | Chromosome IDs | Chromosomes     | Physical positions (bp) | CDC Frontier (Reference genome) | (Pusa 256 & HPNB) | NCBI SNPdb Accession IDs |
|---------------------|----------------|-----------------|-------------------------|---------------------------------|-------------------|--------------------------|
| SNP_P3_4662_7746536 | NC_021160.1    | Ca_kabuli_chr01 | 7746536                 | TT                              | GG                | 1945880112               |
| SNP_P3_4663_7746553 | NC_021160.1    | Ca_kabuli_chr01 | 7746553                 | TT                              | GG                | 1945880114               |
| SNP_P3_4664_7746584 | NC_021160.1    | Ca_kabuli_chr01 | 7746584                 | AA                              | TT                | 1945880116               |
| SNP_P3_4665_7746622 | NC_021160.1    | Ca_kabuli_chr01 | 7746622                 | GG                              | AA                | 1945880117               |
| SNP_P3_4666_7746633 | NC_021160.1    | Ca_kabuli_chr01 | 7746633                 | AA                              | GG                | 1945880119               |
| SNP_P3_4667_7746639 | NC_021160.1    | Ca_kabuli_chr01 | 7746639                 | AA                              | GG                | 1945880121               |
| SNP_P3_4668_7746786 | NC_021160.1    | Ca_kabuli_chr01 | 7746786                 | AA                              | GG                | 1945880123               |
| SNP_P3_4669_7746938 | NC_021160.1    | Ca_kabuli_chr01 | 7746938                 | CC                              | AA                | 1945880125               |
| SNP_P3_4671_7749545 | NC_021160.1    | Ca_kabuli_chr01 | 7749545                 | CC                              | GG                | 1945880126               |
| SNP_P3_4672_7749882 | NC_021160.1    | Ca_kabuli_chr01 | 7749882                 | AA                              | TT                | 1945880128               |
| SNP_P3_4675_7752073 | NC_021160.1    | Ca_kabuli_chr01 | 7752073                 | TT                              | GG                | 1945880130               |
| SNP_P3_4676_7752095 | NC_021160.1    | Ca_kabuli_chr01 | 7752095                 | AA                              | TT                | 1945880132               |
| SNP_P3_4677_7752405 | NC_021160.1    | Ca_kabuli_chr01 | 7752405                 | TT                              | CC                | 1945880133               |
| SNP_P3_4678_7752424 | NC_021160.1    | Ca_kabuli_chr01 | 7752424                 | GG                              | AA                | 1945880135               |
| SNP_P3_4679_7752507 | NC_021160.1    | Ca_kabuli_chr01 | 7752507                 | AA                              | GG                | 1945880137               |
| SNP_P3_4681_7752718 | NC_021160.1    | Ca_kabuli_chr01 | 7752718                 | CC                              | AA                | 1945880139               |
| SNP_P3_4682_7752977 | NC_021160.1    | Ca_kabuli_chr01 | 7752977                 | GG                              | AA                | 1945880141               |
| SNP_P3_4683_7753010 | NC_021160.1    | Ca_kabuli_chr01 | 7753010                 | TT                              | AA                | 1945880142               |
| SNP_P3_4684_7753188 | NC_021160.1    | Ca_kabuli_chr01 | 7753188                 | TT                              | CC                | 1945880144               |
| SNP_P3_4685_7753225 | NC_021160.1    | Ca_kabuli_chr01 | 7753225                 | AA                              | GG                | 1945880146               |
| SNP_P3_4687_7753369 | NC_021160.1    | Ca_kabuli_chr01 | 7753369                 | TT                              | CC                | 1945880148               |
| SNP_P3_4688_7753395 | NC_021160.1    | Ca_kabuli_chr01 | 7753395                 | AA                              | GG                | 1945880149               |
| SNP_P3_4689_7753417 | NC_021160.1    | Ca_kabuli_chr01 | 7753417                 | TT                              | GG                | 1945880151               |
| SNP_P3_4690_7753501 | NC_021160.1    | Ca_kabuli_chr01 | 7753501                 | TT                              | CC                | 1945880153               |
| SNP_P3_4691_7753688 | NC_021160.1    | Ca_kabuli_chr01 | 7753688                 | GG                              | CC                | 1945880155               |
| SNP_P3_4692_7753772 | NC_021160.1    | Ca_kabuli_chr01 | 7753772                 | TT                              | GG                | 1945880157               |
| SNP_P3_4693_7753862 | NC_021160.1    | Ca_kabuli_chr01 | 7753862                 | TT                              | CC                | 1945880158               |
| SNP_P3_4694_7753931 | NC_021160.1    | Ca_kabuli_chr01 | 7753931                 | AA                              | CC                | 1945880160               |
| SNP_P3_4695_7754071 | NC_021160.1    | Ca_kabuli_chr01 | 7754071                 | CC                              | TT                | 1945880162               |
| SNP_P3_4696_7754442 | NC_021160.1    | Ca_kabuli_chr01 | 7754442                 | CC                              | TT                | 1945880164               |
| SNP_P3_4697_7754607 | NC_021160.1    | Ca_kabuli_chr01 | 7754607                 | GG                              | AA                | 1945880165               |
| SNP_P3_4698_7756080 | NC_021160.1    | Ca_kabuli_chr01 | 7756080                 | TT                              | CC                | 1945880167               |
| SNP_P3_4699_7756084 | NC_021160.1    | Ca_kabuli_chr01 | 7756084                 | AA                              | TT                | 1945880169               |
| SNP_P3_4700_7756213 | NC_021160.1    | Ca_kabuli_chr01 | 7756213                 | TT                              | AA                | 1945880171               |
| SNP_P3_4702_7756902 | NC_021160.1    | Ca_kabuli_chr01 | 7756902                 | GG                              | AA                | 1945880173               |
| SNP_P3_4703_7757301 | NC_021160.1    | Ca_kabuli_chr01 | 7757301                 | GG                              | AA                | 1945880174               |
| SNP_P3_4704_7757566 | NC_021160.1    | Ca_kabuli_chr01 | 7757566                 | GG                              | AA                | 1945880176               |
| SNP_P3_4705_7763378 | NC_021160.1    | Ca_kabuli_chr01 | 7763378                 | TT                              | AA                | 1945880178               |
| SNP_P3_4707_7772763 | NC_021160.1    | Ca_kabuli_chr01 | 7772763                 | GG                              | TT                | 1945880180               |
| SNP_P3_4708_7772776 | NC_021160.1    | Ca_kabuli_chr01 | 7772776                 | AA                              | GG                | 1945880181               |
| SNP_P3_4709_7772867 | NC_021160.1    | Ca_kabuli_chr01 | 7772867                 | GG                              | TT                | 1945880183               |
| SNP_P3_4710_7773127 | NC_021160.1    | Ca_kabuli_chr01 | 7773127                 | TT                              | CC                | 1945880185               |

| SNPs IDs            | Chromosome IDs | Chromosomes     | Physical positions (bp) | CDC Frontier (Reference genome) | (Pusa 256 & HPNB) | NCBI SNPdb Accession IDs |
|---------------------|----------------|-----------------|-------------------------|---------------------------------|-------------------|--------------------------|
| SNP_P3_4711_7773134 | NC_021160.1    | Ca_kabuli_chr01 | 7773134                 | GG                              | CC                | 1945880187               |
| SNP_P3_4712_7773151 | NC_021160.1    | Ca_kabuli_chr01 | 7773151                 | TT                              | CC                | 1945880189               |
| SNP_P3_4713_7773183 | NC_021160.1    | Ca_kabuli_chr01 | 7773183                 | AA                              | GG                | 1945880190               |
| SNP_P3_4714_7774610 | NC_021160.1    | Ca_kabuli_chr01 | 7774610                 | AA                              | TT                | 1945880192               |
| SNP_P3_4716_7774982 | NC_021160.1    | Ca_kabuli_chr01 | 7774982                 | GG                              | AA                | 1945880194               |
| SNP_P3_4717_7775039 | NC_021160.1    | Ca_kabuli_chr01 | 7775039                 | GG                              | AA                | 1945880196               |
| SNP_P3_4718_7775153 | NC_021160.1    | Ca_kabuli_chr01 | 7775153                 | TT                              | CC                | 1945880198               |
| SNP_P3_4719_7775342 | NC_021160.1    | Ca_kabuli_chr01 | 7775342                 | GG                              | TT                | 1945880199               |
| SNP_P3_4720_7776525 | NC_021160.1    | Ca_kabuli_chr01 | 7776525                 | AA                              | TT                | 1945880201               |
| SNP_P3_4721_7776709 | NC_021160.1    | Ca_kabuli_chr01 | 7776709                 | TT                              | CC                | 1945880203               |
| SNP_P3_4722_7776986 | NC_021160.1    | Ca_kabuli_chr01 | 7776986                 | CC                              | TT                | 1945880205               |
| SNP_P3_4723_7777118 | NC_021160.1    | Ca_kabuli_chr01 | 7777118                 | TT                              | AA                | 1945880206               |
| SNP_P3_4725_7777823 | NC_021160.1    | Ca_kabuli_chr01 | 7777823                 | AA                              | TT                | 1945880208               |
| SNP_P3_4726_7777843 | NC_021160.1    | Ca_kabuli_chr01 | 7777843                 | GG                              | CC                | 1945880210               |
| SNP_P3_4727_7777845 | NC_021160.1    | Ca_kabuli_chr01 | 7777845                 | AA                              | GG                | 1945880212               |
| SNP_P3_4728_7777856 | NC_021160.1    | Ca_kabuli_chr01 | 7777856                 | GG                              | CC                | 1945880214               |
| SNP_P3_4729_7777858 | NC_021160.1    | Ca_kabuli_chr01 | 7777858                 | AA                              | TT                | 1945880216               |
| SNP_P3_4730_7777928 | NC_021160.1    | Ca_kabuli_chr01 | 7777928                 | GG                              | AA                | 1945880217               |
| SNP_P3_4731_7778082 | NC_021160.1    | Ca_kabuli_chr01 | 7778082                 | AA                              | GG                | 1945880219               |
| SNP_P3_4732_7778083 | NC_021160.1    | Ca_kabuli_chr01 | 7778083                 | CC                              | TT                | 1945880221               |
| SNP_P3_4733_7778625 | NC_021160.1    | Ca_kabuli_chr01 | 7778625                 | AA                              | GG                | 1945880223               |
| SNP_P3_4735_7778874 | NC_021160.1    | Ca_kabuli_chr01 | 7778874                 | TT                              | CC                | 1945880225               |
| SNP_P3_4736_7778887 | NC_021160.1    | Ca_kabuli_chr01 | 7778887                 | TT                              | AA                | 1945880226               |
| SNP_P3_4737_7778896 | NC_021160.1    | Ca_kabuli_chr01 | 7778896                 | CC                              | AA                | 1945880228               |
| SNP_P3_4738_7778912 | NC_021160.1    | Ca_kabuli_chr01 | 7778912                 | GG                              | AA                | 1945880230               |
| SNP_P3_4739_7778919 | NC_021160.1    | Ca_kabuli_chr01 | 7778919                 | GG                              | AA                | 1945880232               |
| SNP_P3_4740_7778929 | NC_021160.1    | Ca_kabuli_chr01 | 7778929                 | AA                              | GG                | 1945880234               |
| SNP_P3_4742_7784615 | NC_021160.1    | Ca_kabuli_chr01 | 7784615                 | AA                              | GG                | 1945880235               |
| SNP_P3_4744_7784763 | NC_021160.1    | Ca_kabuli_chr01 | 7784763                 | GG                              | AA                | 1945880237               |
| SNP_P3_4745_7784804 | NC_021160.1    | Ca_kabuli_chr01 | 7784804                 | AA                              | CC                | 1945880239               |
| SNP_P3_4747_7785442 | NC_021160.1    | Ca_kabuli_chr01 | 7785442                 | CC                              | TT                | 1945880241               |
| SNP_P3_4748_7785651 | NC_021160.1    | Ca_kabuli_chr01 | 7785651                 | AA                              | CC                | 1945880243               |
| SNP_P3_4749_7786008 | NC_021160.1    | Ca_kabuli_chr01 | 7786008                 | GG                              | AA                | 1945880244               |
| SNP_P3_4750_7786014 | NC_021160.1    | Ca_kabuli_chr01 | 7786014                 | CC                              | TT                | 1945880246               |
| SNP_P3_4752_7786106 | NC_021160.1    | Ca_kabuli_chr01 | 7786106                 | GG                              | AA                | 1945880248               |
| SNP_P3_4753_7786595 | NC_021160.1    | Ca_kabuli_chr01 | 7786595                 | CC                              | AA                | 1945880250               |
| SNP_P3_4754_7786602 | NC_021160.1    | Ca_kabuli_chr01 | 7786602                 | CC                              | GG                | 1945880252               |
| SNP_P3_4755_7787188 | NC_021160.1    | Ca_kabuli_chr01 | 7787188                 | CC                              | TT                | 1945880253               |
| SNP_P3_4756_7787206 | NC_021160.1    | Ca_kabuli_chr01 | 7787206                 | CC                              | TT                | 1945880255               |
| SNP_P3_4757_7787215 | NC_021160.1    | Ca_kabuli_chr01 | 7787215                 | AA                              | GG                | 1945880257               |
| SNP_P3_4758_7787241 | NC_021160.1    | Ca_kabuli_chr01 | 7787241                 | AA                              | GG                | 1945880259               |
| SNP_P3_4759_7787247 | NC_021160.1    | Ca_kabuli_chr01 | 7787247                 | GG                              | AA                | 1945880260               |

| SNPs IDs            | Chromosome IDs | Chromosomes     | Physical positions (bp) | CDC Frontier (Reference genome) | (Pusa 256 & HPNB) | NCBI SNPdb Accession IDs |
|---------------------|----------------|-----------------|-------------------------|---------------------------------|-------------------|--------------------------|
| SNP_P3_4760_7787495 | NC_021160.1    | Ca_kabuli_chr01 | 7787495                 | GG                              | TT                | 1945880262               |
| SNP_P3_4761_7787496 | NC_021160.1    | Ca_kabuli_chr01 | 7787496                 | TT                              | AA                | 1945880264               |
| SNP_P3_4762_7787497 | NC_021160.1    | Ca_kabuli_chr01 | 7787497                 | CC                              | TT                | 1945880266               |
| SNP_P3_4763_7787538 | NC_021160.1    | Ca_kabuli_chr01 | 7787538                 | TT                              | AA                | 1945880268               |
| SNP_P3_4764_7787581 | NC_021160.1    | Ca_kabuli_chr01 | 7787581                 | TT                              | GG                | 1945880269               |
| SNP_P3_4765_7787702 | NC_021160.1    | Ca_kabuli_chr01 | 7787702                 | AA                              | CC                | 1945880271               |
| SNP_P3_4766_7788498 | NC_021160.1    | Ca_kabuli_chr01 | 7788498                 | CC                              | TT                | 1945880273               |
| SNP_P3_4767_7788508 | NC_021160.1    | Ca_kabuli_chr01 | 7788508                 | AA                              | GG                | 1945880275               |
| SNP_P3_4768_7788533 | NC_021160.1    | Ca_kabuli_chr01 | 7788533                 | TT                              | CC                | 1945880276               |
| SNP_P3_4769_7788607 | NC_021160.1    | Ca_kabuli_chr01 | 7788607                 | AA                              | GG                | 1945880278               |
| SNP_P3_4770_7788644 | NC_021160.1    | Ca_kabuli_chr01 | 7788644                 | CC                              | TT                | 1945880280               |
| SNP_P3_4771_7788645 | NC_021160.1    | Ca_kabuli_chr01 | 7788645                 | AA                              | GG                | 1945880282               |
| SNP_P3_4772_7788684 | NC_021160.1    | Ca_kabuli_chr01 | 7788684                 | TT                              | CC                | 1945880284               |
| SNP_P3_4773_7788701 | NC_021160.1    | Ca_kabuli_chr01 | 7788701                 | TT                              | CC                | 1945880285               |
| SNP_P3_4774_7788799 | NC_021160.1    | Ca_kabuli_chr01 | 7788799                 | TT                              | CC                | 1945880287               |
| SNP_P3_4775_7788993 | NC_021160.1    | Ca_kabuli_chr01 | 7788993                 | TT                              | GG                | 1945880289               |
| SNP_P3_4777_7790293 | NC_021160.1    | Ca_kabuli_chr01 | 7790293                 | GG                              | AA                | 1945880291               |
| SNP_P3_4778_7790621 | NC_021160.1    | Ca_kabuli_chr01 | 7790621                 | AA                              | GG                | 1945880292               |
| SNP_P3_4779_7790976 | NC_021160.1    | Ca_kabuli_chr01 | 7790976                 | GG                              | TT                | 1945880294               |
| SNP_P3_4780_7791235 | NC_021160.1    | Ca_kabuli_chr01 | 7791235                 | CC                              | TT                | 1945880296               |
| SNP_P3_4782_7791778 | NC_021160.1    | Ca_kabuli_chr01 | 7791778                 | AA                              | GG                | 1945880298               |
| SNP_P3_4783_7791783 | NC_021160.1    | Ca_kabuli_chr01 | 7791783                 | GG                              | AA                | 1945880300               |
| SNP_P3_4784_7791784 | NC_021160.1    | Ca_kabuli_chr01 | 7791784                 | AA                              | CC                | 1945880301               |
| SNP_P3_4785_7791794 | NC_021160.1    | Ca_kabuli_chr01 | 7791794                 | TT                              | CC                | 1945880303               |
| SNP_P3_4786_7792928 | NC_021160.1    | Ca_kabuli_chr01 | 7792928                 | AA                              | GG                | 1945880305               |
| SNP_P3_4787_7805805 | NC_021160.1    | Ca_kabuli_chr01 | 7805805                 | AA                              | CC                | 1945880307               |
| SNP_P3_4788_7806052 | NC_021160.1    | Ca_kabuli_chr01 | 7806052                 | AA                              | GG                | 1945880309               |
| SNP_P3_4789_7806133 | NC_021160.1    | Ca_kabuli_chr01 | 7806133                 | CC                              | TT                | 1945880310               |
| SNP_P3_4790_7806398 | NC_021160.1    | Ca_kabuli_chr01 | 7806398                 | CC                              | TT                | 1945880312               |
| SNP_P3_4791_7806612 | NC_021160.1    | Ca_kabuli_chr01 | 7806612                 | CC                              | TT                | 1945880314               |
| SNP_P3_4792_7807749 | NC_021160.1    | Ca_kabuli_chr01 | 7807749                 | GG                              | AA                | 1945880316               |
| SNP_P3_4793_7808724 | NC_021160.1    | Ca_kabuli_chr01 | 7808724                 | CC                              | TT                | 1945880318               |
| SNP_P3_4794_7809854 | NC_021160.1    | Ca_kabuli_chr01 | 7809854                 | GG                              | AA                | 1945880320               |
| SNP_P3_4796_7811388 | NC_021160.1    | Ca_kabuli_chr01 | 7811388                 | CC                              | TT                | 1945880321               |
| SNP_P3_4797_7811444 | NC_021160.1    | Ca_kabuli_chr01 | 7811444                 | GG                              | TT                | 1945880323               |
| SNP_P3_4798_7814059 | NC_021160.1    | Ca_kabuli_chr01 | 7814059                 | TT                              | GG                | 1945880325               |
| SNP_P3_4799_7814237 | NC_021160.1    | Ca_kabuli_chr01 | 7814237                 | TT                              | AA                | 1945880327               |
| SNP_P3_4800_7819432 | NC_021160.1    | Ca_kabuli_chr01 | 7819432                 | CC                              | TT                | 1945880328               |
| SNP_P3_4801_7820546 | NC_021160.1    | Ca_kabuli_chr01 | 7820546                 | AA                              | TT                | 1945880330               |
| SNP_P3_4802_7821420 | NC_021160.1    | Ca_kabuli_chr01 | 7821420                 | CC                              | TT                | 1945880332               |
| SNP_P3_4803_7821433 | NC_021160.1    | Ca_kabuli_chr01 | 7821433                 | CC                              | AA                | 1945880334               |
| SNP_P3_4804_7821473 | NC_021160.1    | Ca_kabuli_chr01 | 7821473                 | GG                              | TT                | 1945880335               |

| SNPs IDs            | Chromosome IDs | Chromosomes     | Physical positions (bp) | CDC Frontier (Reference genome) | (Pusa 256 & HPNB) | NCBI SNPdb Accession IDs |
|---------------------|----------------|-----------------|-------------------------|---------------------------------|-------------------|--------------------------|
| SNP_P3_4805_7822461 | NC_021160.1    | Ca_kabuli_chr01 | 7822461                 | CC                              | AA                | 1945880337               |
| SNP_P3_4806_7824527 | NC_021160.1    | Ca_kabuli_chr01 | 7824527                 | CC                              | TT                | 1945880339               |
| SNP_P3_4807_7824533 | NC_021160.1    | Ca_kabuli_chr01 | 7824533                 | CC                              | AA                | 1945880341               |
| SNP_P3_4808_7824557 | NC_021160.1    | Ca_kabuli_chr01 | 7824557                 | GG                              | AA                | 1945880343               |
| SNP_P3_4809_7824652 | NC_021160.1    | Ca_kabuli_chr01 | 7824652                 | CC                              | GG                | 1945880344               |
| SNP_P3_4810_7824697 | NC_021160.1    | Ca_kabuli_chr01 | 7824697                 | CC                              | TT                | 1945880346               |
| SNP_P3_4811_7824715 | NC_021160.1    | Ca_kabuli_chr01 | 7824715                 | CC                              | TT                | 1945880348               |
| SNP_P3_4812_7824793 | NC_021160.1    | Ca_kabuli_chr01 | 7824793                 | TT                              | CC                | 1945880350               |
| SNP_P3_4813_7824864 | NC_021160.1    | Ca_kabuli_chr01 | 7824864                 | CC                              | TT                | 1945880351               |
| SNP_P3_4814_7824878 | NC_021160.1    | Ca_kabuli_chr01 | 7824878                 | TT                              | AA                | 1945880353               |
| SNP_P3_4815_7840156 | NC_021160.1    | Ca_kabuli_chr01 | 7840156                 | CC                              | TT                | 1945880355               |
| SNP_P3_4816_7840176 | NC_021160.1    | Ca_kabuli_chr01 | 7840176                 | TT                              | CC                | 1945880357               |
| SNP_P3_4817_7840890 | NC_021160.1    | Ca_kabuli_chr01 | 7840890                 | TT                              | GG                | 1945880358               |
| SNP_P3_4818_7841161 | NC_021160.1    | Ca_kabuli_chr01 | 7841161                 | AA                              | GG                | 1945880360               |
| SNP_P3_4820_7841207 | NC_021160.1    | Ca_kabuli_chr01 | 7841207                 | TT                              | CC                | 1945880362               |
| SNP_P3_4821_7841274 | NC_021160.1    | Ca_kabuli_chr01 | 7841274                 | GG                              | AA                | 1945880363               |
| SNP_P3_4822_7841275 | NC_021160.1    | Ca_kabuli_chr01 | 7841275                 | GG                              | AA                | 1945880365               |
| SNP_P3_4824_7841694 | NC_021160.1    | Ca_kabuli_chr01 | 7841694                 | GG                              | AA                | 1945880367               |
| SNP_P3_4825_7844854 | NC_021160.1    | Ca_kabuli_chr01 | 7844854                 | AA                              | TT                | 1945880369               |
| SNP_P3_4826_7844884 | NC_021160.1    | Ca_kabuli_chr01 | 7844884                 | AA                              | GG                | 1945880370               |
| SNP_P3_4828_7847161 | NC_021160.1    | Ca_kabuli_chr01 | 7847161                 | AA                              | GG                | 1945880372               |
| SNP_P3_4829_7854285 | NC_021160.1    | Ca_kabuli_chr01 | 7854285                 | AA                              | GG                | 1945880374               |
| SNP_P3_4830_7862934 | NC_021160.1    | Ca_kabuli_chr01 | 7862934                 | GG                              | AA                | 1945880376               |
| SNP_P3_4831_7862938 | NC_021160.1    | Ca_kabuli_chr01 | 7862938                 | TT                              | CC                | 1945880378               |
| SNP_P3_4832_7862941 | NC_021160.1    | Ca_kabuli_chr01 | 7862941                 | GG                              | AA                | 1945880379               |
| SNP_P3_4833_7862947 | NC_021160.1    | Ca_kabuli_chr01 | 7862947                 | TT                              | CC                | 1945880381               |
| SNP_P3_4834_7868866 | NC_021160.1    | Ca_kabuli_chr01 | 7868866                 | GG                              | AA                | 1945880383               |
| SNP_P3_4835_7868885 | NC_021160.1    | Ca_kabuli_chr01 | 7868885                 | AA                              | GG                | 1945880385               |
| SNP_P3_4836_7869016 | NC_021160.1    | Ca_kabuli_chr01 | 7869016                 | AA                              | GG                | 1945880386               |
| SNP_P3_4837_7869022 | NC_021160.1    | Ca_kabuli_chr01 | 7869022                 | CC                              | TT                | 1945880388               |
| SNP_P3_4838_7869024 | NC_021160.1    | Ca_kabuli_chr01 | 7869024                 | AA                              | GG                | 1945880390               |
| SNP_P3_4839_7871879 | NC_021160.1    | Ca_kabuli_chr01 | 7871879                 | TT                              | CC                | 1945880392               |
| SNP_P3_4840_7873267 | NC_021160.1    | Ca_kabuli_chr01 | 7873267                 | CC                              | GG                | 1945880393               |
| SNP_P3_4841_7873450 | NC_021160.1    | Ca_kabuli_chr01 | 7873450                 | CC                              | GG                | 1945880395               |
| SNP_P3_4842_7875273 | NC_021160.1    | Ca_kabuli_chr01 | 7875273                 | TT                              | CC                | 1945880397               |
| SNP_P3_4843_7875299 | NC_021160.1    | Ca_kabuli_chr01 | 7875299                 | GG                              | AA                | 1945880399               |
| SNP_P3_4844_7884500 | NC_021160.1    | Ca_kabuli_chr01 | 7884500                 | GG                              | CC                | 1945880400               |
| SNP_P3_4845_7884509 | NC_021160.1    | Ca_kabuli_chr01 | 7884509                 | GG                              | AA                | 1945880402               |
| SNP_P3_4846_7884593 | NC_021160.1    | Ca_kabuli_chr01 | 7884593                 | CC                              | TT                | 1945880404               |
| SNP_P3_4847_7885037 | NC_021160.1    | Ca_kabuli_chr01 | 7885037                 | TT                              | CC                | 1945880406               |
| SNP_P3_4848_7885111 | NC_021160.1    | Ca_kabuli_chr01 | 7885111                 | AA                              | GG                | 1945880407               |
| SNP_P3_4849_7885370 | NC_021160.1    | Ca_kabuli_chr01 | 7885370                 | CC                              | AA                | 1945880409               |



| SNPs IDs            | Chromosome IDs | Chromosomes     | Physical positions (bp) | CDC Frontier (Reference genome) | (Pusa 256 & HPNB) | NCBI SNPdb Accession IDs |
|---------------------|----------------|-----------------|-------------------------|---------------------------------|-------------------|--------------------------|
| SNP_P3_4850_7886469 | NC_021160.1    | Ca_kabuli_chr01 | 7886469                 | CC                              | TT                | 1945880411               |
| SNP_P3_4851_7886475 | NC_021160.1    | Ca_kabuli_chr01 | 7886475                 | AA                              | TT                | 1945880413               |
| SNP_P3_4852_7886477 | NC_021160.1    | Ca_kabuli_chr01 | 7886477                 | AA                              | TT                | 1945880415               |
| SNP_P3_4853_7886781 | NC_021160.1    | Ca_kabuli_chr01 | 7886781                 | AA                              | GG                | 1945880417               |
| SNP_P3_4854_7887025 | NC_021160.1    | Ca_kabuli_chr01 | 7887025                 | AA                              | CC                | 1945880419               |
| SNP_P3_4855_7887036 | NC_021160.1    | Ca_kabuli_chr01 | 7887036                 | CC                              | GG                | 1945880420               |
| SNP_P3_4856_7887060 | NC_021160.1    | Ca_kabuli_chr01 | 7887060                 | TT                              | AA                | 1945880422               |
| SNP_P3_4857_7887068 | NC_021160.1    | Ca_kabuli_chr01 | 7887068                 | AA                              | TT                | 1945880424               |
| SNP_P3_4858_7887079 | NC_021160.1    | Ca_kabuli_chr01 | 7887079                 | TT                              | CC                | 1945880426               |
| SNP_P3_4859_7887088 | NC_021160.1    | Ca_kabuli_chr01 | 7887088                 | TT                              | CC                | 1945880428               |
| SNP_P3_4860_7887106 | NC_021160.1    | Ca_kabuli_chr01 | 7887106                 | GG                              | TT                | 1945880429               |
| SNP_P3_4861_7888358 | NC_021160.1    | Ca_kabuli_chr01 | 7888358                 | TT                              | GG                | 1945880431               |
| SNP_P3_4862_7888794 | NC_021160.1    | Ca_kabuli_chr01 | 7888794                 | TT                              | AA                | 1945880433               |
| SNP_P3_4863_7889746 | NC_021160.1    | Ca_kabuli_chr01 | 7889746                 | GG                              | AA                | 1945880435               |
| SNP_P3_4864_7889771 | NC_021160.1    | Ca_kabuli_chr01 | 7889771                 | GG                              | AA                | 1945880437               |
| SNP_P3_4865_7889796 | NC_021160.1    | Ca_kabuli_chr01 | 7889796                 | TT                              | CC                | 1945880439               |
| SNP_P3_4866_7890112 | NC_021160.1    | Ca_kabuli_chr01 | 7890112                 | CC                              | TT                | 1945880440               |
| SNP_P3_4867_7890145 | NC_021160.1    | Ca_kabuli_chr01 | 7890145                 | AA                              | GG                | 1945880442               |
| SNP_P3_4868_7893331 | NC_021160.1    | Ca_kabuli_chr01 | 7893331                 | GG                              | AA                | 1945880444               |
| SNP_P3_4869_7893334 | NC_021160.1    | Ca_kabuli_chr01 | 7893334                 | AA                              | CC                | 1945880446               |
| SNP_P3_4870_7893340 | NC_021160.1    | Ca_kabuli_chr01 | 7893340                 | TT                              | AA                | 1945880447               |
| SNP_P3_4871_7893350 | NC_021160.1    | Ca_kabuli_chr01 | 7893350                 | TT                              | AA                | 1945880449               |
| SNP_P3_4872_7893415 | NC_021160.1    | Ca_kabuli_chr01 | 7893415                 | AA                              | GG                | 1945880451               |
| SNP_P3_4873_7893439 | NC_021160.1    | Ca_kabuli_chr01 | 7893439                 | CC                              | TT                | 1945880453               |
| SNP_P3_4874_7893446 | NC_021160.1    | Ca_kabuli_chr01 | 7893446                 | AA                              | GG                | 1945880455               |
| SNP_P3_4875_7893507 | NC_021160.1    | Ca_kabuli_chr01 | 7893507                 | CC                              | TT                | 1945880456               |
| SNP_P3_4877_7894076 | NC_021160.1    | Ca_kabuli_chr01 | 7894076                 | GG                              | AA                | 1945880458               |
| SNP_P3_4878_7895896 | NC_021160.1    | Ca_kabuli_chr01 | 7895896                 | CC                              | TT                | 1945880460               |
| SNP_P3_4879_7896429 | NC_021160.1    | Ca_kabuli_chr01 | 7896429                 | CC                              | TT                | 1945880462               |
| SNP_P3_4880_7896705 | NC_021160.1    | Ca_kabuli_chr01 | 7896705                 | CC                              | GG                | 1945880463               |
| SNP_P3_4881_7897482 | NC_021160.1    | Ca_kabuli_chr01 | 7897482                 | TT                              | CC                | 1945880465               |
| SNP_P3_4882_7897500 | NC_021160.1    | Ca_kabuli_chr01 | 7897500                 | GG                              | AA                | 1945880467               |
| SNP_P3_4883_7898825 | NC_021160.1    | Ca_kabuli_chr01 | 7898825                 | CC                              | TT                | 1945880468               |
| SNP_P3_4885_7900536 | NC_021160.1    | Ca_kabuli_chr01 | 7900536                 | CC                              | TT                | 1945880470               |
| SNP_P3_4886_7901450 | NC_021160.1    | Ca_kabuli_chr01 | 7901450                 | GG                              | AA                | 1945880472               |
| SNP_P3_4887_7905352 | NC_021160.1    | Ca_kabuli_chr01 | 7905352                 | CC                              | GG                | 1945880474               |
| SNP_P3_4888_7905362 | NC_021160.1    | Ca_kabuli_chr01 | 7905362                 | AA                              | GG                | 1945880476               |
| SNP_P3_4889_7905779 | NC_021160.1    | Ca_kabuli_chr01 | 7905779                 | TT                              | GG                | 1945880477               |
| SNP_P3_4890_7910066 | NC_021160.1    | Ca_kabuli_chr01 | 7910066                 | TT                              | AA                | 1945880479               |
| SNP_P3_4891_7913073 | NC_021160.1    | Ca_kabuli_chr01 | 7913073                 | TT                              | CC                | 1945880481               |
| SNP_P3_4892_7913121 | NC_021160.1    | Ca_kabuli_chr01 | 7913121                 | TT                              | GG                | 1945880483               |
| SNP_P3_4893_7913584 | NC_021160.1    | Ca_kabuli_chr01 | 7913584                 | CC                              | TT                | 1945880485               |

| SNPs IDs            | Chromosome IDs | Chromosomes     | Physical positions (bp) | CDC Frontier (Reference genome) | (Pusa 256 & HPNB) | NCBI SNPdb Accession IDs |
|---------------------|----------------|-----------------|-------------------------|---------------------------------|-------------------|--------------------------|
| SNP_P3_4894_7913613 | NC_021160.1    | Ca_kabuli_chr01 | 7913613                 | AA                              | GG                | 1945880486               |
| SNP_P3_4896_7914206 | NC_021160.1    | Ca_kabuli_chr01 | 7914206                 | TT                              | CC                | 1945880488               |
| SNP_P3_4897_7914223 | NC_021160.1    | Ca_kabuli_chr01 | 7914223                 | CC                              | TT                | 1945880490               |
| SNP_P3_4898_7914496 | NC_021160.1    | Ca_kabuli_chr01 | 7914496                 | GG                              | AA                | 1945880492               |
| SNP_P3_4899_7914503 | NC_021160.1    | Ca_kabuli_chr01 | 7914503                 | AA                              | GG                | 1945880494               |
| SNP_P3_4900_7914504 | NC_021160.1    | Ca_kabuli_chr01 | 7914504                 | AA                              | GG                | 1945880495               |
| SNP_P3_4901_7914513 | NC_021160.1    | Ca_kabuli_chr01 | 7914513                 | GG                              | TT                | 1945880497               |
| SNP_P3_4902_7914561 | NC_021160.1    | Ca_kabuli_chr01 | 7914561                 | TT                              | CC                | 1945880499               |
| SNP_P3_4903_7914569 | NC_021160.1    | Ca_kabuli_chr01 | 7914569                 | GG                              | AA                | 1945880501               |
| SNP_P3_4904_7914606 | NC_021160.1    | Ca_kabuli_chr01 | 7914606                 | TT                              | CC                | 1945880503               |
| SNP_P3_4905_7914761 | NC_021160.1    | Ca_kabuli_chr01 | 7914761                 | AA                              | CC                | 1945880504               |
| SNP_P3_4906_7915822 | NC_021160.1    | Ca_kabuli_chr01 | 7915822                 | TT                              | GG                | 1945880506               |
| SNP_P3_4907_7915837 | NC_021160.1    | Ca_kabuli_chr01 | 7915837                 | GG                              | AA                | 1945880508               |
| SNP_P3_4908_7915839 | NC_021160.1    | Ca_kabuli_chr01 | 7915839                 | GG                              | CC                | 1945880509               |
| SNP_P3_4910_7916143 | NC_021160.1    | Ca_kabuli_chr01 | 7916143                 | GG                              | TT                | 1945880511               |
| SNP_P3_4911_7916152 | NC_021160.1    | Ca_kabuli_chr01 | 7916152                 | AA                              | GG                | 1945880513               |
| SNP_P3_4912_7917029 | NC_021160.1    | Ca_kabuli_chr01 | 7917029                 | CC                              | TT                | 1945880514               |
| SNP_P3_4913_7917098 | NC_021160.1    | Ca_kabuli_chr01 | 7917098                 | TT                              | CC                | 1945880516               |
| SNP_P3_4914_7917413 | NC_021160.1    | Ca_kabuli_chr01 | 7917413                 | AA                              | CC                | 1945880518               |
| SNP_P3_4915_7917518 | NC_021160.1    | Ca_kabuli_chr01 | 7917518                 | AA                              | GG                | 1945880520               |
| SNP_P3_4916_7917535 | NC_021160.1    | Ca_kabuli_chr01 | 7917535                 | CC                              | TT                | 1945880522               |
| SNP_P3_4917_7917561 | NC_021160.1    | Ca_kabuli_chr01 | 7917561                 | AA                              | CC                | 1945880523               |
| SNP_P3_4918_7917568 | NC_021160.1    | Ca_kabuli_chr01 | 7917568                 | CC                              | TT                | 1945880525               |
| SNP_P3_4919_7917637 | NC_021160.1    | Ca_kabuli_chr01 | 7917637                 | AA                              | TT                | 1945880527               |
| SNP_P3_4920_7917666 | NC_021160.1    | Ca_kabuli_chr01 | 7917666                 | GG                              | TT                | 1945880529               |
| SNP_P3_4921_7918435 | NC_021160.1    | Ca_kabuli_chr01 | 7918435                 | TT                              | CC                | 1945880531               |
| SNP_P3_4922_7918457 | NC_021160.1    | Ca_kabuli_chr01 | 7918457                 | TT                              | GG                | 1945880532               |
| SNP_P3_4923_7918687 | NC_021160.1    | Ca_kabuli_chr01 | 7918687                 | GG                              | AA                | 1945880534               |
| SNP_P3_4924_7918689 | NC_021160.1    | Ca_kabuli_chr01 | 7918689                 | GG                              | AA                | 1945880536               |
| SNP_P3_4925_7918709 | NC_021160.1    | Ca_kabuli_chr01 | 7918709                 | TT                              | CC                | 1945880538               |
| SNP_P3_4927_7927736 | NC_021160.1    | Ca_kabuli_chr01 | 7927736                 | CC                              | TT                | 1945880539               |
| SNP_P3_4928_7928080 | NC_021160.1    | Ca_kabuli_chr01 | 7928080                 | GG                              | AA                | 1945880541               |
| SNP_P3_4931_7930083 | NC_021160.1    | Ca_kabuli_chr01 | 7930083                 | TT                              | GG                | 1945880543               |
| SNP_P3_4933_7930448 | NC_021160.1    | Ca_kabuli_chr01 | 7930448                 | TT                              | GG                | 1945880545               |
| SNP_P3_4934_7930496 | NC_021160.1    | Ca_kabuli_chr01 | 7930496                 | TT                              | GG                | 1945880547               |
| SNP_P3_4935_7932727 | NC_021160.1    | Ca_kabuli_chr01 | 7932727                 | GG                              | CC                | 1945880548               |
| SNP_P3_4936_7932773 | NC_021160.1    | Ca_kabuli_chr01 | 7932773                 | CC                              | AA                | 1945880550               |
| SNP_P3_4937_7932774 | NC_021160.1    | Ca_kabuli_chr01 | 7932774                 | AA                              | TT                | 1945880552               |
| SNP_P3_4939_7933416 | NC_021160.1    | Ca_kabuli_chr01 | 7933416                 | AA                              | TT                | 1945880554               |
| SNP_P3_4940_7933430 | NC_021160.1    | Ca_kabuli_chr01 | 7933430                 | AA                              | CC                | 1945880555               |
| SNP_P3_4942_7933468 | NC_021160.1    | Ca_kabuli_chr01 | 7933468                 | AA                              | TT                | 1945880557               |
| SNP_P3_4943_7936326 | NC_021160.1    | Ca_kabuli_chr01 | 7936326                 | GG                              | TT                | 1945880559               |

| SNPs IDs            | Chromosome IDs | Chromosomes     | Physical positions (bp) | CDC Frontier (Reference genome) | (Pusa 256 & HPNB) | NCBI SNPdb Accession IDs |
|---------------------|----------------|-----------------|-------------------------|---------------------------------|-------------------|--------------------------|
| SNP_P3_4944_7936361 | NC_021160.1    | Ca_kabuli_chr01 | 7936361                 | GG                              | TT                | 1945880561               |
| SNP_P3_4945_7937895 | NC_021160.1    | Ca_kabuli_chr01 | 7937895                 | TT                              | GG                | 1945880562               |
| SNP_P3_4946_7940489 | NC_021160.1    | Ca_kabuli_chr01 | 7940489                 | CC                              | TT                | 1945880564               |
| SNP_P3_4947_7941364 | NC_021160.1    | Ca_kabuli_chr01 | 7941364                 | TT                              | GG                | 1945880566               |
| SNP_P3_4948_7941368 | NC_021160.1    | Ca_kabuli_chr01 | 7941368                 | CC                              | TT                | 1945880567               |
| SNP_P3_4949_7941382 | NC_021160.1    | Ca_kabuli_chr01 | 7941382                 | CC                              | TT                | 1945880569               |
| SNP_P3_4950_7941388 | NC_021160.1    | Ca_kabuli_chr01 | 7941388                 | TT                              | CC                | 1945880571               |
| SNP_P3_4951_7941389 | NC_021160.1    | Ca_kabuli_chr01 | 7941389                 | CC                              | TT                | 1945880573               |
| SNP_P3_4952_7941676 | NC_021160.1    | Ca_kabuli_chr01 | 7941676                 | CC                              | TT                | 1945880574               |
| SNP_P3_4953_7941725 | NC_021160.1    | Ca_kabuli_chr01 | 7941725                 | TT                              | CC                | 1945880576               |
| SNP_P3_4954_7941761 | NC_021160.1    | Ca_kabuli_chr01 | 7941761                 | CC                              | AA                | 1945880578               |
| SNP_P3_4956_7942609 | NC_021160.1    | Ca_kabuli_chr01 | 7942609                 | GG                              | AA                | 1945880580               |
| SNP_P3_4957_7942610 | NC_021160.1    | Ca_kabuli_chr01 | 7942610                 | TT                              | GG                | 1945880581               |
| SNP_P3_4958_7942923 | NC_021160.1    | Ca_kabuli_chr01 | 7942923                 | AA                              | GG                | 1945880583               |
| SNP_P3_4959_7942932 | NC_021160.1    | Ca_kabuli_chr01 | 7942932                 | AA                              | CC                | 1945880585               |
| SNP_P3_4961_7943201 | NC_021160.1    | Ca_kabuli_chr01 | 7943201                 | AA                              | GG                | 1945880587               |
| SNP_P3_4962_7945054 | NC_021160.1    | Ca_kabuli_chr01 | 7945054                 | TT                              | CC                | 1945880588               |
| SNP_P3_4963_7945914 | NC_021160.1    | Ca_kabuli_chr01 | 7945914                 | CC                              | TT                | 1945880590               |
| SNP_P3_4964_7946179 | NC_021160.1    | Ca_kabuli_chr01 | 7946179                 | TT                              | CC                | 1945880592               |
| SNP_P3_4965_7946342 | NC_021160.1    | Ca_kabuli_chr01 | 7946342                 | AA                              | TT                | 1945880594               |
| SNP_P3_4967_7947695 | NC_021160.1    | Ca_kabuli_chr01 | 7947695                 | GG                              | AA                | 1945880595               |
| SNP_P3_4969_7948539 | NC_021160.1    | Ca_kabuli_chr01 | 7948539                 | TT                              | AA                | 1945880597               |
| SNP_P3_4970_7949554 | NC_021160.1    | Ca_kabuli_chr01 | 7949554                 | AA                              | TT                | 1945880599               |
| SNP_P3_4971_7950433 | NC_021160.1    | Ca_kabuli_chr01 | 7950433                 | CC                              | GG                | 1945880601               |
| SNP_P3_4972_7950460 | NC_021160.1    | Ca_kabuli_chr01 | 7950460                 | CC                              | GG                | 1945880603               |
| SNP_P3_4973_7950482 | NC_021160.1    | Ca_kabuli_chr01 | 7950482                 | CC                              | GG                | 1945880604               |
| SNP_P3_4974_7950489 | NC_021160.1    | Ca_kabuli_chr01 | 7950489                 | AA                              | CC                | 1945880606               |
| SNP_P3_4975_7951084 | NC_021160.1    | Ca_kabuli_chr01 | 7951084                 | GG                              | AA                | 1945880608               |
| SNP_P3_4978_7952948 | NC_021160.1    | Ca_kabuli_chr01 | 7952948                 | GG                              | AA                | 1945880610               |
| SNP_P3_4979_7953083 | NC_021160.1    | Ca_kabuli_chr01 | 7953083                 | AA                              | TT                | 1945880611               |
| SNP_P3_4980_7953194 | NC_021160.1    | Ca_kabuli_chr01 | 7953194                 | CC                              | TT                | 1945880613               |
| SNP_P3_4981_7953219 | NC_021160.1    | Ca_kabuli_chr01 | 7953219                 | CC                              | GG                | 1945880615               |
| SNP_P3_4984_7957684 | NC_021160.1    | Ca_kabuli_chr01 | 7957684                 | CC                              | GG                | 1945880617               |
| SNP_P3_4985_7957896 | NC_021160.1    | Ca_kabuli_chr01 | 7957896                 | AA                              | GG                | 1945880619               |
| SNP_P3_4987_7958030 | NC_021160.1    | Ca_kabuli_chr01 | 7958030                 | CC                              | TT                | 1945880620               |
| SNP_P3_4988_7963150 | NC_021160.1    | Ca_kabuli_chr01 | 7963150                 | CC                              | AA                | 1945880622               |
| SNP_P3_4989_7963175 | NC_021160.1    | Ca_kabuli_chr01 | 7963175                 | AA                              | GG                | 1945880624               |
| SNP_P3_4990_7963349 | NC_021160.1    | Ca_kabuli_chr01 | 7963349                 | AA                              | TT                | 1945880626               |
| SNP_P3_4991_7963361 | NC_021160.1    | Ca_kabuli_chr01 | 7963361                 | CC                              | AA                | 1945880627               |
| SNP_P3_4992_7963488 | NC_021160.1    | Ca_kabuli_chr01 | 7963488                 | GG                              | AA                | 1945880629               |
| SNP_P3_4993_7964341 | NC_021160.1    | Ca_kabuli_chr01 | 7964341                 | GG                              | AA                | 1945880631               |
| SNP_P3_4994_7964343 | NC_021160.1    | Ca_kabuli_chr01 | 7964343                 | TT                              | GG                | 1945880633               |

| SNPs IDs            | Chromosome IDs | Chromosomes     | Physical positions (bp) | CDC Frontier (Reference genome) | (Pusa 256 & HPNB) | NCBI SNPdb Accession IDs |
|---------------------|----------------|-----------------|-------------------------|---------------------------------|-------------------|--------------------------|
| SNP_P3_4995_7964456 | NC_021160.1    | Ca_kabuli_chr01 | 7964456                 | CC                              | GG                | 1945880635               |
| SNP_P3_4997_7967835 | NC_021160.1    | Ca_kabuli_chr01 | 7967835                 | TT                              | CC                | 1945880636               |
| SNP_P3_4998_7968051 | NC_021160.1    | Ca_kabuli_chr01 | 7968051                 | GG                              | TT                | 1945880638               |
| SNP_P3_4999_7968740 | NC_021160.1    | Ca_kabuli_chr01 | 7968740                 | TT                              | CC                | 1945880640               |
| SNP_P3_5000_7968801 | NC_021160.1    | Ca_kabuli_chr01 | 7968801                 | GG                              | CC                | 1945880642               |
| SNP_P3_5001_7969778 | NC_021160.1    | Ca_kabuli_chr01 | 7969778                 | CC                              | AA                | 1945880643               |
| SNP_P3_5002_7970041 | NC_021160.1    | Ca_kabuli_chr01 | 7970041                 | TT                              | AA                | 1945880645               |
| SNP_P3_5003_7970055 | NC_021160.1    | Ca_kabuli_chr01 | 7970055                 | AA                              | GG                | 1945880647               |
| SNP_P3_5004_7972037 | NC_021160.1    | Ca_kabuli_chr01 | 7972037                 | GG                              | AA                | 1945880649               |
| SNP_P3_5005_7972322 | NC_021160.1    | Ca_kabuli_chr01 | 7972322                 | GG                              | AA                | 1945880650               |
| SNP_P3_5006_7974404 | NC_021160.1    | Ca_kabuli_chr01 | 7974404                 | CC                              | GG                | 1945880652               |
| SNP_P3_5007_7974729 | NC_021160.1    | Ca_kabuli_chr01 | 7974729                 | CC                              | TT                | 1945880654               |
| SNP_P3_5008_7975145 | NC_021160.1    | Ca_kabuli_chr01 | 7975145                 | TT                              | CC                | 1945880656               |
| SNP_P3_5009_7975148 | NC_021160.1    | Ca_kabuli_chr01 | 7975148                 | CC                              | TT                | 1945880658               |
| SNP_P3_5010_7975173 | NC_021160.1    | Ca_kabuli_chr01 | 7975173                 | GG                              | AA                | 1945880659               |
| SNP_P3_5011_7975450 | NC_021160.1    | Ca_kabuli_chr01 | 7975450                 | CC                              | AA                | 1945880661               |
| SNP_P3_5012_7975484 | NC_021160.1    | Ca_kabuli_chr01 | 7975484                 | AA                              | TT                | 1945880663               |
| SNP_P3_5013_7975538 | NC_021160.1    | Ca_kabuli_chr01 | 7975538                 | TT                              | AA                | 1945880665               |
| SNP_P3_5014_7975670 | NC_021160.1    | Ca_kabuli_chr01 | 7975670                 | AA                              | GG                | 1945880666               |
| SNP_P3_5015_7975702 | NC_021160.1    | Ca_kabuli_chr01 | 7975702                 | CC                              | AA                | 1945880668               |
| SNP_P3_5017_7976879 | NC_021160.1    | Ca_kabuli_chr01 | 7976879                 | AA                              | TT                | 1945880670               |
| SNP_P3_5018_7976882 | NC_021160.1    | Ca_kabuli_chr01 | 7976882                 | TT                              | GG                | 1945880672               |
| SNP_P3_5019_7979640 | NC_021160.1    | Ca_kabuli_chr01 | 7979640                 | GG                              | AA                | 1945880673               |
| SNP_P3_5020_7979650 | NC_021160.1    | Ca_kabuli_chr01 | 7979650                 | GG                              | CC                | 1945880675               |
| SNP_P3_5021_7979651 | NC_021160.1    | Ca_kabuli_chr01 | 7979651                 | GG                              | AA                | 1945880677               |
| SNP_P3_5022_7979667 | NC_021160.1    | Ca_kabuli_chr01 | 7979667                 | AA                              | GG                | 1945880679               |
| SNP_P3_5023_7979669 | NC_021160.1    | Ca_kabuli_chr01 | 7979669                 | AA                              | GG                | 1945880681               |
| SNP_P3_5024_7979671 | NC_021160.1    | Ca_kabuli_chr01 | 7979671                 | CC                              | TT                | 1945880682               |
| SNP_P3_5025_7980328 | NC_021160.1    | Ca_kabuli_chr01 | 7980328                 | AA                              | GG                | 1945880684               |
| SNP_P3_5026_7980333 | NC_021160.1    | Ca_kabuli_chr01 | 7980333                 | AA                              | GG                | 1945880686               |
| SNP_P3_5027_7980458 | NC_021160.1    | Ca_kabuli_chr01 | 7980458                 | GG                              | CC                | 1945880688               |
| SNP_P3_5028_7980488 | NC_021160.1    | Ca_kabuli_chr01 | 7980488                 | TT                              | CC                | 1945880689               |
| SNP_P3_5029_7980889 | NC_021160.1    | Ca_kabuli_chr01 | 7980889                 | TT                              | GG                | 1945880691               |
| SNP_P3_5030_7981219 | NC_021160.1    | Ca_kabuli_chr01 | 7981219                 | AA                              | GG                | 1945880693               |
| SNP_P3_5031_7981667 | NC_021160.1    | Ca_kabuli_chr01 | 7981667                 | TT                              | GG                | 1945880695               |
| SNP_P3_5032_7981693 | NC_021160.1    | Ca_kabuli_chr01 | 7981693                 | GG                              | AA                | 1945880697               |
| SNP_P3_5033_7981912 | NC_021160.1    | Ca_kabuli_chr01 | 7981912                 | AA                              | TT                | 1945880698               |
| SNP_P3_5034_7981917 | NC_021160.1    | Ca_kabuli_chr01 | 7981917                 | CC                              | TT                | 1945880700               |
| SNP_P3_5035_7983104 | NC_021160.1    | Ca_kabuli_chr01 | 7983104                 | TT                              | CC                | 1945880702               |
| SNP_P3_5036_7983130 | NC_021160.1    | Ca_kabuli_chr01 | 7983130                 | TT                              | CC                | 1945880704               |
| SNP_P3_5037_7983960 | NC_021160.1    | Ca_kabuli_chr01 | 7983960                 | TT                              | CC                | 1945880705               |
| SNP_P3_5038_7987113 | NC_021160.1    | Ca_kabuli_chr01 | 7987113                 | CC                              | GG                | 1945880707               |

| SNPs IDs            | Chromosome IDs | Chromosomes     | Physical positions (bp) | CDC Frontier (Reference genome) | (Pusa 256 & HPNB) | NCBI SNPdb Accession IDs |
|---------------------|----------------|-----------------|-------------------------|---------------------------------|-------------------|--------------------------|
| SNP_P3_5039_7987426 | NC_021160.1    | Ca_kabuli_chr01 | 7987426                 | CC                              | AA                | 1945880709               |
| SNP_P3_5041_7987531 | NC_021160.1    | Ca_kabuli_chr01 | 7987531                 | GG                              | AA                | 1945880711               |
| SNP_P3_5043_7987970 | NC_021160.1    | Ca_kabuli_chr01 | 7987970                 | TT                              | AA                | 1945880712               |
| SNP_P3_5044_7988004 | NC_021160.1    | Ca_kabuli_chr01 | 7988004                 | AA                              | TT                | 1945880714               |
| SNP_P3_5046_7988403 | NC_021160.1    | Ca_kabuli_chr01 | 7988403                 | CC                              | AA                | 1945880716               |
| SNP_P3_5047_7989451 | NC_021160.1    | Ca_kabuli_chr01 | 7989451                 | TT                              | AA                | 1945880718               |
| SNP_P3_5048_7989471 | NC_021160.1    | Ca_kabuli_chr01 | 7989471                 | TT                              | CC                | 1945880720               |
| SNP_P3_5054_7992821 | NC_021160.1    | Ca_kabuli_chr01 | 7992821                 | TT                              | AA                | 1945880721               |
| SNP_P3_5055_7993561 | NC_021160.1    | Ca_kabuli_chr01 | 7993561                 | AA                              | GG                | 1945880723               |
| SNP_P3_5058_7994727 | NC_021160.1    | Ca_kabuli_chr01 | 7994727                 | AA                              | GG                | 1945880725               |
| SNP_P3_5059_7994773 | NC_021160.1    | Ca_kabuli_chr01 | 7994773                 | TT                              | CC                | 1945880727               |
| SNP_P3_5060_7994783 | NC_021160.1    | Ca_kabuli_chr01 | 7994783                 | CC                              | GG                | 1945880729               |
| SNP_P3_5063_7995562 | NC_021160.1    | Ca_kabuli_chr01 | 7995562                 | AA                              | GG                | 1945880730               |
| SNP_P3_5064_7995573 | NC_021160.1    | Ca_kabuli_chr01 | 7995573                 | AA                              | GG                | 1945880732               |
| SNP_P3_5066_7995640 | NC_021160.1    | Ca_kabuli_chr01 | 7995640                 | TT                              | CC                | 1945880734               |
| SNP_P3_5067_7995648 | NC_021160.1    | Ca_kabuli_chr01 | 7995648                 | CC                              | TT                | 1945880736               |
| SNP_P3_5068_7995669 | NC_021160.1    | Ca_kabuli_chr01 | 7995669                 | TT                              | CC                | 1945880738               |
| SNP_P3_5071_7995912 | NC_021160.1    | Ca_kabuli_chr01 | 7995912                 | CC                              | TT                | 1945880739               |
| SNP_P3_5072_7995949 | NC_021160.1    | Ca_kabuli_chr01 | 7995949                 | AA                              | GG                | 1945880741               |
| SNP_P3_5073_7995956 | NC_021160.1    | Ca_kabuli_chr01 | 7995956                 | CC                              | TT                | 1945880743               |
| SNP_P3_5074_7995972 | NC_021160.1    | Ca_kabuli_chr01 | 7995972                 | AA                              | TT                | 1945880745               |
| SNP_P3_5075_7996355 | NC_021160.1    | Ca_kabuli_chr01 | 7996355                 | TT                              | CC                | 1945880747               |
| SNP_P3_5076_7996357 | NC_021160.1    | Ca_kabuli_chr01 | 7996357                 | AA                              | CC                | 1945880748               |
| SNP_P3_5077_7996359 | NC_021160.1    | Ca_kabuli_chr01 | 7996359                 | GG                              | AA                | 1945880750               |
| SNP_P3_5078_7996372 | NC_021160.1    | Ca_kabuli_chr01 | 7996372                 | TT                              | CC                | 1945880752               |
| SNP_P3_5080_7996978 | NC_021160.1    | Ca_kabuli_chr01 | 7996978                 | TT                              | CC                | 1945880754               |
| SNP_P3_5081_8000739 | NC_021160.1    | Ca_kabuli_chr01 | 8000739                 | GG                              | CC                | 1945880756               |
| SNP_P3_5083_8002637 | NC_021160.1    | Ca_kabuli_chr01 | 8002637                 | GG                              | AA                | 1945880758               |
| SNP_P3_5084_8002651 | NC_021160.1    | Ca_kabuli_chr01 | 8002651                 | CC                              | TT                | 1945880759               |
| SNP_P3_5085_8003536 | NC_021160.1    | Ca_kabuli_chr01 | 8003536                 | TT                              | CC                | 1945880761               |
| SNP_P3_5087_8003616 | NC_021160.1    | Ca_kabuli_chr01 | 8003616                 | AA                              | TT                | 1945880763               |
| SNP_P3_5089_8003897 | NC_021160.1    | Ca_kabuli_chr01 | 8003897                 | AA                              | CC                | 1945880765               |
| SNP_P3_5090_8004041 | NC_021160.1    | Ca_kabuli_chr01 | 8004041                 | GG                              | AA                | 1945880767               |
| SNP_P3_5092_8005090 | NC_021160.1    | Ca_kabuli_chr01 | 8005090                 | GG                              | CC                | 1945880768               |
| SNP_P3_5093_8007074 | NC_021160.1    | Ca_kabuli_chr01 | 8007074                 | TT                              | GG                | 1945880770               |
| SNP_P3_5094_8007221 | NC_021160.1    | Ca_kabuli_chr01 | 8007221                 | GG                              | AA                | 1945880772               |
| SNP_P3_5095_8007524 | NC_021160.1    | Ca_kabuli_chr01 | 8007524                 | AA                              | TT                | 1945880774               |
| SNP_P3_5096_8007542 | NC_021160.1    | Ca_kabuli_chr01 | 8007542                 | CC                              | TT                | 1945880775               |
| SNP_P3_5097_8007935 | NC_021160.1    | Ca_kabuli_chr01 | 8007935                 | GG                              | AA                | 1945880777               |
| SNP_P3_5098_8008532 | NC_021160.1    | Ca_kabuli_chr01 | 8008532                 | AA                              | TT                | 1945880779               |
| SNP_P3_5099_8009657 | NC_021160.1    | Ca_kabuli_chr01 | 8009657                 | AA                              | CC                | 1945880781               |
| SNP_P3_5100_8010928 | NC_021160.1    | Ca_kabuli_chr01 | 8010928                 | GG                              | AA                | 1945880782               |

| SNPs IDs            | Chromosome IDs | Chromosomes     | Physical positions (bp) | CDC Frontier (Reference genome) | (Pusa 256 & HPNB) | NCBI SNPdb Accession IDs |
|---------------------|----------------|-----------------|-------------------------|---------------------------------|-------------------|--------------------------|
| SNP_P3_5101_8010950 | NC_021160.1    | Ca_kabuli_chr01 | 8010950                 | GG                              | AA                | 1945880784               |
| SNP_P3_5102_8010960 | NC_021160.1    | Ca_kabuli_chr01 | 8010960                 | TT                              | CC                | 1945880786               |
| SNP_P3_5103_8011033 | NC_021160.1    | Ca_kabuli_chr01 | 8011033                 | CC                              | TT                | 1945880788               |
| SNP_P3_5104_8011349 | NC_021160.1    | Ca_kabuli_chr01 | 8011349                 | TT                              | CC                | 1945880789               |
| SNP_P3_5105_8011477 | NC_021160.1    | Ca_kabuli_chr01 | 8011477                 | GG                              | CC                | 1945880791               |
| SNP_P3_5106_8011506 | NC_021160.1    | Ca_kabuli_chr01 | 8011506                 | GG                              | TT                | 1945880793               |
| SNP_P3_5107_8011546 | NC_021160.1    | Ca_kabuli_chr01 | 8011546                 | AA                              | TT                | 1945880795               |
| SNP_P3_5108_8011567 | NC_021160.1    | Ca_kabuli_chr01 | 8011567                 | TT                              | CC                | 1945880796               |
| SNP_P3_5109_8011782 | NC_021160.1    | Ca_kabuli_chr01 | 8011782                 | TT                              | CC                | 1945880798               |
| SNP_P3_5110_8012757 | NC_021160.1    | Ca_kabuli_chr01 | 8012757                 | CC                              | TT                | 1945880800               |
| SNP_P3_5111_8012799 | NC_021160.1    | Ca_kabuli_chr01 | 8012799                 | AA                              | TT                | 1945880802               |
| SNP_P3_5112_8012846 | NC_021160.1    | Ca_kabuli_chr01 | 8012846                 | TT                              | AA                | 1945880803               |
| SNP_P3_5113_8016380 | NC_021160.1    | Ca_kabuli_chr01 | 8016380                 | TT                              | CC                | 1945880805               |
| SNP_P3_5116_8017583 | NC_021160.1    | Ca_kabuli_chr01 | 8017583                 | GG                              | AA                | 1945880807               |
| SNP_P3_5117_8017831 | NC_021160.1    | Ca_kabuli_chr01 | 8017831                 | TT                              | AA                | 1945880809               |
| SNP_P3_5118_8017989 | NC_021160.1    | Ca_kabuli_chr01 | 8017989                 | AA                              | GG                | 1945880811               |
| SNP_P3_5119_8018001 | NC_021160.1    | Ca_kabuli_chr01 | 8018001                 | AA                              | GG                | 1945880812               |
| SNP_P3_5120_8018011 | NC_021160.1    | Ca_kabuli_chr01 | 8018011                 | TT                              | AA                | 1945880814               |
| SNP_P3_5122_8018054 | NC_021160.1    | Ca_kabuli_chr01 | 8018054                 | AA                              | TT                | 1945880816               |
| SNP_P3_5124_8018330 | NC_021160.1    | Ca_kabuli_chr01 | 8018330                 | AA                              | GG                | 1945880818               |
| SNP_P3_5125_8018348 | NC_021160.1    | Ca_kabuli_chr01 | 8018348                 | AA                              | CC                | 1945880819               |
| SNP_P3_5126_8018402 | NC_021160.1    | Ca_kabuli_chr01 | 8018402                 | GG                              | AA                | 1945880821               |
| SNP_P3_5127_8019048 | NC_021160.1    | Ca_kabuli_chr01 | 8019048                 | CC                              | GG                | 1945880823               |
| SNP_P3_5129_8019335 | NC_021160.1    | Ca_kabuli_chr01 | 8019335                 | TT                              | CC                | 1945880825               |
| SNP_P3_5131_8020378 | NC_021160.1    | Ca_kabuli_chr01 | 8020378                 | TT                              | CC                | 1945880827               |
| SNP_P3_5132_8020616 | NC_021160.1    | Ca_kabuli_chr01 | 8020616                 | TT                              | CC                | 1945880829               |
| SNP_P3_5133_8021268 | NC_021160.1    | Ca_kabuli_chr01 | 8021268                 | GG                              | AA                | 1945880830               |
| SNP_P3_5134_8023157 | NC_021160.1    | Ca_kabuli_chr01 | 8023157                 | GG                              | AA                | 1945880832               |
| SNP_P3_5136_8023974 | NC_021160.1    | Ca_kabuli_chr01 | 8023974                 | GG                              | AA                | 1945880834               |
| SNP_P3_5137_8024122 | NC_021160.1    | Ca_kabuli_chr01 | 8024122                 | GG                              | AA                | 1945880836               |
| SNP_P3_5138_8024341 | NC_021160.1    | Ca_kabuli_chr01 | 8024341                 | AA                              | GG                | 1945880838               |
| SNP_P3_5139_8024471 | NC_021160.1    | Ca_kabuli_chr01 | 8024471                 | TT                              | AA                | 1945880839               |
| SNP_P3_5140_8024635 | NC_021160.1    | Ca_kabuli_chr01 | 8024635                 | AA                              | GG                | 1945880841               |
| SNP_P3_5141_8024703 | NC_021160.1    | Ca_kabuli_chr01 | 8024703                 | AA                              | GG                | 1945880843               |
| SNP_P3_5142_8024716 | NC_021160.1    | Ca_kabuli_chr01 | 8024716                 | GG                              | AA                | 1945880845               |
| SNP_P3_5143_8025714 | NC_021160.1    | Ca_kabuli_chr01 | 8025714                 | CC                              | TT                | 1945880847               |
| SNP_P3_5144_8025831 | NC_021160.1    | Ca_kabuli_chr01 | 8025831                 | CC                              | AA                | 1945880849               |
| SNP_P3_5145_8025871 | NC_021160.1    | Ca_kabuli_chr01 | 8025871                 | GG                              | AA                | 1945880850               |
| SNP_P3_5146_8026207 | NC_021160.1    | Ca_kabuli_chr01 | 8026207                 | TT                              | CC                | 1945880852               |
| SNP_P3_5147_8026760 | NC_021160.1    | Ca_kabuli_chr01 | 8026760                 | GG                              | TT                | 1945880854               |
| SNP_P3_5148_8028157 | NC_021160.1    | Ca_kabuli_chr01 | 8028157                 | AA                              | TT                | 1945880856               |
| SNP_P3_5149_8028251 | NC_021160.1    | Ca_kabuli_chr01 | 8028251                 | GG                              | TT                | 1945880857               |

| SNPs IDs            | Chromosome IDs | Chromosomes     | Physical positions (bp) | CDC Frontier (Reference genome) | (Pusa 256 & HPNB) | NCBI SNPdb Accession IDs |
|---------------------|----------------|-----------------|-------------------------|---------------------------------|-------------------|--------------------------|
| SNP_P3_5150_8029254 | NC_021160.1    | Ca_kabuli_chr01 | 8029254                 | GG                              | AA                | 1945880859               |
| SNP_P3_5151_8029511 | NC_021160.1    | Ca_kabuli_chr01 | 8029511                 | TT                              | CC                | 1945880861               |
| SNP_P3_5152_8029899 | NC_021160.1    | Ca_kabuli_chr01 | 8029899                 | GG                              | AA                | 1945880863               |
| SNP_P3_5153_8029980 | NC_021160.1    | Ca_kabuli_chr01 | 8029980                 | CC                              | TT                | 1945880865               |
| SNP_P3_5154_8029990 | NC_021160.1    | Ca_kabuli_chr01 | 8029990                 | AA                              | GG                | 1945880866               |
| SNP_P3_5155_8030027 | NC_021160.1    | Ca_kabuli_chr01 | 8030027                 | AA                              | GG                | 1945880868               |
| SNP_P3_5156_8030943 | NC_021160.1    | Ca_kabuli_chr01 | 8030943                 | TT                              | CC                | 1945880870               |
| SNP_P3_5159_8031812 | NC_021160.1    | Ca_kabuli_chr01 | 8031812                 | TT                              | GG                | 1945880872               |
| SNP_P3_5160_8031831 | NC_021160.1    | Ca_kabuli_chr01 | 8031831                 | GG                              | CC                | 1945880874               |
| SNP_P3_5161_8031890 | NC_021160.1    | Ca_kabuli_chr01 | 8031890                 | CC                              | TT                | 1945880875               |
| SNP_P3_5163_8032390 | NC_021160.1    | Ca_kabuli_chr01 | 8032390                 | TT                              | CC                | 1945880877               |
| SNP_P3_5164_8032391 | NC_021160.1    | Ca_kabuli_chr01 | 8032391                 | CC                              | TT                | 1945880879               |
| SNP_P3_5165_8032402 | NC_021160.1    | Ca_kabuli_chr01 | 8032402                 | AA                              | GG                | 1945880881               |
| SNP_P3_5166_8032423 | NC_021160.1    | Ca_kabuli_chr01 | 8032423                 | AA                              | CC                | 1945880883               |
| SNP_P3_5168_8034136 | NC_021160.1    | Ca_kabuli_chr01 | 8034136                 | TT                              | CC                | 1945880884               |
| SNP_P3_5169_8034896 | NC_021160.1    | Ca_kabuli_chr01 | 8034896                 | CC                              | GG                | 1945880886               |
| SNP_P3_5170_8035655 | NC_021160.1    | Ca_kabuli_chr01 | 8035655                 | AA                              | GG                | 1945880888               |
| SNP_P3_5171_8035656 | NC_021160.1    | Ca_kabuli_chr01 | 8035656                 | TT                              | AA                | 1945880890               |
| SNP_P3_5172_8035849 | NC_021160.1    | Ca_kabuli_chr01 | 8035849                 | GG                              | AA                | 1945880892               |
| SNP_P3_5173_8036281 | NC_021160.1    | Ca_kabuli_chr01 | 8036281                 | TT                              | AA                | 1945880893               |
| SNP_P3_5174_8036302 | NC_021160.1    | Ca_kabuli_chr01 | 8036302                 | TT                              | AA                | 1945880895               |
| SNP_P3_5175_8036363 | NC_021160.1    | Ca_kabuli_chr01 | 8036363                 | GG                              | AA                | 1945880897               |
| SNP_P3_5176_8036371 | NC_021160.1    | Ca_kabuli_chr01 | 8036371                 | GG                              | AA                | 1945880899               |
| SNP_P3_5178_8038220 | NC_021160.1    | Ca_kabuli_chr01 | 8038220                 | TT                              | GG                | 1945880901               |
| SNP_P3_5179_8038356 | NC_021160.1    | Ca_kabuli_chr01 | 8038356                 | TT                              | GG                | 1945880902               |
| SNP_P3_5180_8038407 | NC_021160.1    | Ca_kabuli_chr01 | 8038407                 | TT                              | AA                | 1945880904               |
| SNP_P3_5182_8038675 | NC_021160.1    | Ca_kabuli_chr01 | 8038675                 | CC                              | TT                | 1945880906               |
| SNP_P3_5184_8041056 | NC_021160.1    | Ca_kabuli_chr01 | 8041056                 | AA                              | TT                | 1945880908               |
| SNP_P3_5185_8041076 | NC_021160.1    | Ca_kabuli_chr01 | 8041076                 | CC                              | AA                | 1945880909               |
| SNP_P3_5186_8041091 | NC_021160.1    | Ca_kabuli_chr01 | 8041091                 | TT                              | CC                | 1945880911               |
| SNP_P3_5187_8041100 | NC_021160.1    | Ca_kabuli_chr01 | 8041100                 | TT                              | CC                | 1945880913               |
| SNP_P3_5188_8041101 | NC_021160.1    | Ca_kabuli_chr01 | 8041101                 | GG                              | AA                | 1945880915               |
| SNP_P3_5189_8041181 | NC_021160.1    | Ca_kabuli_chr01 | 8041181                 | TT                              | CC                | 1945880917               |
| SNP_P3_5191_8041334 | NC_021160.1    | Ca_kabuli_chr01 | 8041334                 | GG                              | CC                | 1945880919               |
| SNP_P3_5193_8041483 | NC_021160.1    | Ca_kabuli_chr01 | 8041483                 | AA                              | TT                | 1945880920               |
| SNP_P3_5194_8041495 | NC_021160.1    | Ca_kabuli_chr01 | 8041495                 | TT                              | GG                | 1945880922               |
| SNP_P3_5195_8041527 | NC_021160.1    | Ca_kabuli_chr01 | 8041527                 | TT                              | CC                | 1945880924               |
| SNP_P3_5197_8041694 | NC_021160.1    | Ca_kabuli_chr01 | 8041694                 | CC                              | TT                | 1945880926               |
| SNP_P3_5198_8041935 | NC_021160.1    | Ca_kabuli_chr01 | 8041935                 | TT                              | CC                | 1945880927               |
| SNP_P3_5199_8041944 | NC_021160.1    | Ca_kabuli_chr01 | 8041944                 | GG                              | CC                | 1945880929               |
| SNP_P3_5200_8042753 | NC_021160.1    | Ca_kabuli_chr01 | 8042753                 | TT                              | CC                | 1945880931               |
| SNP_P3_5201_8042899 | NC_021160.1    | Ca_kabuli_chr01 | 8042899                 | CC                              | TT                | 1945880933               |

| SNPs IDs            | Chromosome IDs | Chromosomes     | Physical positions (bp) | CDC Frontier (Reference genome) | (Pusa 256 & HPNB) | NCBI SNPdb Accession IDs |
|---------------------|----------------|-----------------|-------------------------|---------------------------------|-------------------|--------------------------|
| SNP_P3_5202_8042923 | NC_021160.1    | Ca_kabuli_chr01 | 8042923                 | CC                              | TT                | 1945880935               |
| SNP_P3_5203_8042982 | NC_021160.1    | Ca_kabuli_chr01 | 8042982                 | GG                              | AA                | 1945880936               |
| SNP_P3_5204_8045139 | NC_021160.1    | Ca_kabuli_chr01 | 8045139                 | GG                              | TT                | 1945880938               |
| SNP_P3_5205_8046261 | NC_021160.1    | Ca_kabuli_chr01 | 8046261                 | CC                              | GG                | 1945880940               |
| SNP_P3_5206_8048269 | NC_021160.1    | Ca_kabuli_chr01 | 8048269                 | TT                              | AA                | 1945880942               |
| SNP_P3_5207_8048270 | NC_021160.1    | Ca_kabuli_chr01 | 8048270                 | TT                              | AA                | 1945880944               |
| SNP_P3_5208_8048271 | NC_021160.1    | Ca_kabuli_chr01 | 8048271                 | TT                              | AA                | 1945880945               |
| SNP_P3_5209_8049258 | NC_021160.1    | Ca_kabuli_chr01 | 8049258                 | GG                              | CC                | 1945880947               |
| SNP_P3_5210_8050058 | NC_021160.1    | Ca_kabuli_chr01 | 8050058                 | CC                              | TT                | 1945880949               |
| SNP_P3_5211_8050062 | NC_021160.1    | Ca_kabuli_chr01 | 8050062                 | TT                              | CC                | 1945880951               |
| SNP_P3_5213_8050267 | NC_021160.1    | Ca_kabuli_chr01 | 8050267                 | CC                              | GG                | 1945880952               |
| SNP_P3_5214_8050564 | NC_021160.1    | Ca_kabuli_chr01 | 8050564                 | GG                              | AA                | 1945880954               |
| SNP_P3_5215_8054262 | NC_021160.1    | Ca_kabuli_chr01 | 8054262                 | CC                              | TT                | 1945880956               |
| SNP_P3_5217_8061315 | NC_021160.1    | Ca_kabuli_chr01 | 8061315                 | TT                              | AA                | 1945880958               |
| SNP_P3_5218_8061944 | NC_021160.1    | Ca_kabuli_chr01 | 8061944                 | TT                              | CC                | 1945880960               |
| SNP_P3_5219_8061964 | NC_021160.1    | Ca_kabuli_chr01 | 8061964                 | CC                              | GG                | 1945880961               |
| SNP_P3_5220_8062026 | NC_021160.1    | Ca_kabuli_chr01 | 8062026                 | CC                              | TT                | 1945880963               |
| SNP_P3_5221_8062047 | NC_021160.1    | Ca_kabuli_chr01 | 8062047                 | CC                              | TT                | 1945880965               |
| SNP_P3_5223_8062262 | NC_021160.1    | Ca_kabuli_chr01 | 8062262                 | TT                              | AA                | 1945880967               |
| SNP_P3_5224_8062277 | NC_021160.1    | Ca_kabuli_chr01 | 8062277                 | CC                              | TT                | 1945880969               |
| SNP_P3_5226_8062336 | NC_021160.1    | Ca_kabuli_chr01 | 8062336                 | CC                              | GG                | 1945880970               |
| SNP_P3_5227_8062380 | NC_021160.1    | Ca_kabuli_chr01 | 8062380                 | TT                              | CC                | 1945880972               |
| SNP_P3_5228_8062413 | NC_021160.1    | Ca_kabuli_chr01 | 8062413                 | TT                              | CC                | 1945880974               |
| SNP_P3_5229_8062446 | NC_021160.1    | Ca_kabuli_chr01 | 8062446                 | TT                              | CC                | 1945880976               |
| SNP_P3_5230_8062447 | NC_021160.1    | Ca_kabuli_chr01 | 8062447                 | CC                              | AA                | 1945880977               |
| SNP_P3_5231_8062448 | NC_021160.1    | Ca_kabuli_chr01 | 8062448                 | CC                              | GG                | 1945880979               |
| SNP_P3_5232_8062493 | NC_021160.1    | Ca_kabuli_chr01 | 8062493                 | CC                              | TT                | 1945880981               |
| SNP_P3_5233_8062494 | NC_021160.1    | Ca_kabuli_chr01 | 8062494                 | TT                              | GG                | 1945880983               |
| SNP_P3_5234_8062746 | NC_021160.1    | Ca_kabuli_chr01 | 8062746                 | GG                              | AA                | 1945880985               |
| SNP_P3_5236_8064894 | NC_021160.1    | Ca_kabuli_chr01 | 8064894                 | AA                              | GG                | 1945880986               |
| SNP_P3_5237_8069104 | NC_021160.1    | Ca_kabuli_chr01 | 8069104                 | CC                              | GG                | 1945880988               |
| SNP_P3_5238_8075412 | NC_021160.1    | Ca_kabuli_chr01 | 8075412                 | TT                              | CC                | 1945880990               |
| SNP_P3_5239_8079932 | NC_021160.1    | Ca_kabuli_chr01 | 8079932                 | AA                              | GG                | 1945880992               |
| SNP_P3_5240_8088337 | NC_021160.1    | Ca_kabuli_chr01 | 8088337                 | TT                              | AA                | 1945880994               |
| SNP_P3_5241_8088706 | NC_021160.1    | Ca_kabuli_chr01 | 8088706                 | TT                              | CC                | 1945880995               |
| SNP_P3_5242_8088708 | NC_021160.1    | Ca_kabuli_chr01 | 8088708                 | CC                              | TT                | 1945880997               |
| SNP_P3_5243_8088710 | NC_021160.1    | Ca_kabuli_chr01 | 8088710                 | TT                              | GG                | 1945880999               |
| SNP_P3_5244_8088726 | NC_021160.1    | Ca_kabuli_chr01 | 8088726                 | GG                              | CC                | 1945881001               |
| SNP_P3_5245_8089515 | NC_021160.1    | Ca_kabuli_chr01 | 8089515                 | AA                              | TT                | 1945881002               |
| SNP_P3_5246_8090228 | NC_021160.1    | Ca_kabuli_chr01 | 8090228                 | AA                              | GG                | 1945881004               |
| SNP_P3_5248_8090729 | NC_021160.1    | Ca_kabuli_chr01 | 8090729                 | GG                              | AA                | 1945881006               |
| SNP_P3_5250_8092089 | NC_021160.1    | Ca_kabuli_chr01 | 8092089                 | CC                              | AA                | 1945881008               |



| SNPs IDs            | Chromosome IDs | Chromosomes     | Physical positions (bp) | CDC Frontier (Reference genome) | (Pusa 256 & HPNB) | NCBI SNPdb Accession IDs |
|---------------------|----------------|-----------------|-------------------------|---------------------------------|-------------------|--------------------------|
| SNP_P3_5251_8092178 | NC_021160.1    | Ca_kabuli_chr01 | 8092178                 | GG                              | AA                | 1945881010               |
| SNP_P3_5252_8092180 | NC_021160.1    | Ca_kabuli_chr01 | 8092180                 | GG                              | AA                | 1945881011               |
| SNP_P3_5253_8094267 | NC_021160.1    | Ca_kabuli_chr01 | 8094267                 | AA                              | GG                | 1945881013               |
| SNP_P3_5254_8094323 | NC_021160.1    | Ca_kabuli_chr01 | 8094323                 | TT                              | CC                | 1945881015               |
| SNP_P3_5255_8094400 | NC_021160.1    | Ca_kabuli_chr01 | 8094400                 | TT                              | CC                | 1945881017               |
| SNP_P3_5256_8096772 | NC_021160.1    | Ca_kabuli_chr01 | 8096772                 | TT                              | CC                | 1945881019               |
| SNP_P3_5257_8096774 | NC_021160.1    | Ca_kabuli_chr01 | 8096774                 | AA                              | GG                | 1945881020               |
| SNP_P3_5258_8097042 | NC_021160.1    | Ca_kabuli_chr01 | 8097042                 | TT                              | CC                | 1945881022               |
| SNP_P3_5259_8097083 | NC_021160.1    | Ca_kabuli_chr01 | 8097083                 | CC                              | TT                | 1945881024               |
| SNP_P3_5260_8097127 | NC_021160.1    | Ca_kabuli_chr01 | 8097127                 | TT                              | CC                | 1945881026               |
| SNP_P3_5261_8097131 | NC_021160.1    | Ca_kabuli_chr01 | 8097131                 | GG                              | AA                | 1945881027               |
| SNP_P3_5262_8101072 | NC_021160.1    | Ca_kabuli_chr01 | 8101072                 | CC                              | TT                | 1945881029               |
| SNP_P3_5264_8102641 | NC_021160.1    | Ca_kabuli_chr01 | 8102641                 | TT                              | CC                | 1945881031               |
| SNP_P3_5265_8104985 | NC_021160.1    | Ca_kabuli_chr01 | 8104985                 | GG                              | AA                | 1945881033               |
| SNP_P3_5266_8105636 | NC_021160.1    | Ca_kabuli_chr01 | 8105636                 | TT                              | CC                | 1945881035               |
| SNP_P3_5267_8105663 | NC_021160.1    | Ca_kabuli_chr01 | 8105663                 | CC                              | TT                | 1945881036               |
| SNP_P3_5268_8106699 | NC_021160.1    | Ca_kabuli_chr01 | 8106699                 | GG                              | AA                | 1945881038               |
| SNP_P3_5269_8106999 | NC_021160.1    | Ca_kabuli_chr01 | 8106999                 | CC                              | TT                | 1945881040               |
| SNP_P3_5270_8107001 | NC_021160.1    | Ca_kabuli_chr01 | 8107001                 | AA                              | GG                | 1945881042               |
| SNP_P3_5271_8107030 | NC_021160.1    | Ca_kabuli_chr01 | 8107030                 | TT                              | GG                | 1945881043               |
| SNP_P3_5272_8107045 | NC_021160.1    | Ca_kabuli_chr01 | 8107045                 | CC                              | TT                | 1945881045               |
| SNP_P3_5273_8107673 | NC_021160.1    | Ca_kabuli_chr01 | 8107673                 | TT                              | CC                | 1945881047               |
| SNP_P3_5274_8109321 | NC_021160.1    | Ca_kabuli_chr01 | 8109321                 | AA                              | GG                | 1945881049               |
| SNP_P3_5275_8109486 | NC_021160.1    | Ca_kabuli_chr01 | 8109486                 | CC                              | TT                | 1945881051               |
| SNP_P3_5276_8111844 | NC_021160.1    | Ca_kabuli_chr01 | 8111844                 | AA                              | GG                | 1945881052               |
| SNP_P3_5277_8115979 | NC_021160.1    | Ca_kabuli_chr01 | 8115979                 | CC                              | TT                | 1945881054               |
| SNP_P3_5278_8116060 | NC_021160.1    | Ca_kabuli_chr01 | 8116060                 | CC                              | TT                | 1945881056               |
| SNP_P3_5279_8117548 | NC_021160.1    | Ca_kabuli_chr01 | 8117548                 | TT                              | AA                | 1945881058               |
| SNP_P3_5280_8117608 | NC_021160.1    | Ca_kabuli_chr01 | 8117608                 | AA                              | GG                | 1945881060               |
| SNP_P3_5281_8117727 | NC_021160.1    | Ca_kabuli_chr01 | 8117727                 | TT                              | AA                | 1945881061               |
| SNP_P3_5282_8117757 | NC_021160.1    | Ca_kabuli_chr01 | 8117757                 | CC                              | TT                | 1945881063               |
| SNP_P3_5283_8117780 | NC_021160.1    | Ca_kabuli_chr01 | 8117780                 | AA                              | GG                | 1945881065               |
| SNP_P3_5284_8117791 | NC_021160.1    | Ca_kabuli_chr01 | 8117791                 | GG                              | AA                | 1945881067               |
| SNP_P3_5285_8117942 | NC_021160.1    | Ca_kabuli_chr01 | 8117942                 | TT                              | CC                | 1945881069               |
| SNP_P3_5286_8117953 | NC_021160.1    | Ca_kabuli_chr01 | 8117953                 | GG                              | AA                | 1945881070               |
| SNP_P3_5287_8117967 | NC_021160.1    | Ca_kabuli_chr01 | 8117967                 | AA                              | GG                | 1945881072               |
| SNP_P3_5288_8118011 | NC_021160.1    | Ca_kabuli_chr01 | 8118011                 | TT                              | GG                | 1945881074               |
| SNP_P3_5289_8118063 | NC_021160.1    | Ca_kabuli_chr01 | 8118063                 | GG                              | AA                | 1945881076               |
| SNP_P3_5290_8118064 | NC_021160.1    | Ca_kabuli_chr01 | 8118064                 | GG                              | AA                | 1945881078               |
| SNP_P3_5291_8118109 | NC_021160.1    | Ca_kabuli_chr01 | 8118109                 | AA                              | GG                | 1945881079               |
| SNP_P3_5292_8119466 | NC_021160.1    | Ca_kabuli_chr01 | 8119466                 | GG                              | AA                | 1945881081               |
| SNP_P3_5293_8119717 | NC_021160.1    | Ca_kabuli_chr01 | 8119717                 | TT                              | CC                | 1945881083               |

| SNPs IDs            | Chromosome IDs | Chromosomes     | Physical positions (bp) | CDC Frontier (Reference genome) | (Pusa 256 & HPNB) | NCBI SNPdb Accession IDs |
|---------------------|----------------|-----------------|-------------------------|---------------------------------|-------------------|--------------------------|
| SNP_P3_5294_8120070 | NC_021160.1    | Ca_kabuli_chr01 | 8120070                 | GG                              | TT                | 1945881085               |
| SNP_P3_5295_8121710 | NC_021160.1    | Ca_kabuli_chr01 | 8121710                 | AA                              | TT                | 1945881087               |
| SNP_P3_5296_8122312 | NC_021160.1    | Ca_kabuli_chr01 | 8122312                 | GG                              | CC                | 1945881088               |
| SNP_P3_5297_8122516 | NC_021160.1    | Ca_kabuli_chr01 | 8122516                 | AA                              | GG                | 1945881090               |
| SNP_P3_5298_8122534 | NC_021160.1    | Ca_kabuli_chr01 | 8122534                 | GG                              | AA                | 1945881092               |
| SNP_P3_5299_8122576 | NC_021160.1    | Ca_kabuli_chr01 | 8122576                 | AA                              | CC                | 1945881094               |
| SNP_P3_5301_8123098 | NC_021160.1    | Ca_kabuli_chr01 | 8123098                 | GG                              | CC                | 1945881095               |
| SNP_P3_5302_8123865 | NC_021160.1    | Ca_kabuli_chr01 | 8123865                 | TT                              | GG                | 1945881097               |
| SNP_P3_5303_8123877 | NC_021160.1    | Ca_kabuli_chr01 | 8123877                 | TT                              | CC                | 1945881099               |
| SNP_P3_5304_8124667 | NC_021160.1    | Ca_kabuli_chr01 | 8124667                 | TT                              | CC                | 1945881101               |
| SNP_P3_5305_8124679 | NC_021160.1    | Ca_kabuli_chr01 | 8124679                 | GG                              | AA                | 1945881103               |
| SNP_P3_5306_8124713 | NC_021160.1    | Ca_kabuli_chr01 | 8124713                 | AA                              | GG                | 1945881104               |
| SNP_P3_5307_8124754 | NC_021160.1    | Ca_kabuli_chr01 | 8124754                 | GG                              | AA                | 1945881106               |
| SNP_P3_5308_8125002 | NC_021160.1    | Ca_kabuli_chr01 | 8125002                 | GG                              | AA                | 1945881108               |
| SNP_P3_5309_8125298 | NC_021160.1    | Ca_kabuli_chr01 | 8125298                 | TT                              | GG                | 1945881110               |
| SNP_P3_5310_8125309 | NC_021160.1    | Ca_kabuli_chr01 | 8125309                 | AA                              | CC                | 1945881112               |
| SNP_P3_5311_8125325 | NC_021160.1    | Ca_kabuli_chr01 | 8125325                 | AA                              | CC                | 1945881113               |
| SNP_P3_5312_8125515 | NC_021160.1    | Ca_kabuli_chr01 | 8125515                 | AA                              | CC                | 1945881115               |
| SNP_P3_5313_8125606 | NC_021160.1    | Ca_kabuli_chr01 | 8125606                 | GG                              | AA                | 1945881117               |
| SNP_P3_5315_8125968 | NC_021160.1    | Ca_kabuli_chr01 | 8125968                 | TT                              | CC                | 1945881119               |
| SNP_P3_5316_8125972 | NC_021160.1    | Ca_kabuli_chr01 | 8125972                 | GG                              | AA                | 1945881121               |
| SNP_P3_5318_8126188 | NC_021160.1    | Ca_kabuli_chr01 | 8126188                 | AA                              | TT                | 1945881122               |
| SNP_P3_5319_8126199 | NC_021160.1    | Ca_kabuli_chr01 | 8126199                 | AA                              | TT                | 1945881124               |
| SNP_P3_5320_8126503 | NC_021160.1    | Ca_kabuli_chr01 | 8126503                 | AA                              | TT                | 1945881126               |
| SNP_P3_5321_8126547 | NC_021160.1    | Ca_kabuli_chr01 | 8126547                 | GG                              | AA                | 1945881128               |
| SNP_P3_5322_8126574 | NC_021160.1    | Ca_kabuli_chr01 | 8126574                 | TT                              | AA                | 1945881130               |
| SNP_P3_5323_8126608 | NC_021160.1    | Ca_kabuli_chr01 | 8126608                 | TT                              | CC                | 1945881131               |
| SNP_P3_5324_8126728 | NC_021160.1    | Ca_kabuli_chr01 | 8126728                 | TT                              | AA                | 1945881133               |
| SNP_P3_5325_8127143 | NC_021160.1    | Ca_kabuli_chr01 | 8127143                 | TT                              | CC                | 1945881135               |
| SNP_P3_5328_8127802 | NC_021160.1    | Ca_kabuli_chr01 | 8127802                 | CC                              | AA                | 1945881137               |
| SNP_P3_5329_8127840 | NC_021160.1    | Ca_kabuli_chr01 | 8127840                 | TT                              | CC                | 1945881138               |
| SNP_P3_5330_8128607 | NC_021160.1    | Ca_kabuli_chr01 | 8128607                 | TT                              | CC                | 1945881140               |
| SNP_P3_5331_8128861 | NC_021160.1    | Ca_kabuli_chr01 | 8128861                 | GG                              | TT                | 1945881142               |
| SNP_P3_5332_8128878 | NC_021160.1    | Ca_kabuli_chr01 | 8128878                 | CC                              | AA                | 1945881144               |
| SNP_P3_5333_8128886 | NC_021160.1    | Ca_kabuli_chr01 | 8128886                 | CC                              | TT                | 1945881146               |
| SNP_P3_5334_8128923 | NC_021160.1    | Ca_kabuli_chr01 | 8128923                 | TT                              | CC                | 1945881147               |
| SNP_P3_5335_8128951 | NC_021160.1    | Ca_kabuli_chr01 | 8128951                 | TT                              | CC                | 1945881149               |
| SNP_P3_5336_8129199 | NC_021160.1    | Ca_kabuli_chr01 | 8129199                 | AA                              | TT                | 1945881151               |
| SNP_P3_5337_8129262 | NC_021160.1    | Ca_kabuli_chr01 | 8129262                 | TT                              | GG                | 1945881153               |
| SNP_P3_5338_8129313 | NC_021160.1    | Ca_kabuli_chr01 | 8129313                 | CC                              | TT                | 1945881154               |
| SNP_P3_5339_8129633 | NC_021160.1    | Ca_kabuli_chr01 | 8129633                 | TT                              | GG                | 1945881156               |
| SNP_P3_5340_8129689 | NC_021160.1    | Ca_kabuli_chr01 | 8129689                 | AA                              | TT                | 1945881158               |

| SNPs IDs            | Chromosome IDs | Chromosomes     | Physical positions (bp) | CDC Frontier (Reference genome) | (Pusa 256 & HPNB) | NCBI SNPdb Accession IDs |
|---------------------|----------------|-----------------|-------------------------|---------------------------------|-------------------|--------------------------|
| SNP_P3_5341_8129878 | NC_021160.1    | Ca_kabuli_chr01 | 8129878                 | GG                              | CC                | 1945881160               |
| SNP_P3_5342_8129904 | NC_021160.1    | Ca_kabuli_chr01 | 8129904                 | TT                              | AA                | 1945881162               |
| SNP_P3_5343_8129937 | NC_021160.1    | Ca_kabuli_chr01 | 8129937                 | CC                              | TT                | 1945881163               |
| SNP_P3_5344_8130119 | NC_021160.1    | Ca_kabuli_chr01 | 8130119                 | AA                              | TT                | 1945881165               |
| SNP_P3_5345_8130179 | NC_021160.1    | Ca_kabuli_chr01 | 8130179                 | CC                              | AA                | 1945881167               |
| SNP_P3_5346_8130303 | NC_021160.1    | Ca_kabuli_chr01 | 8130303                 | GG                              | AA                | 1945881169               |
| SNP_P3_5349_8130459 | NC_021160.1    | Ca_kabuli_chr01 | 8130459                 | AA                              | GG                | 1945881171               |
| SNP_P3_5350_8130462 | NC_021160.1    | Ca_kabuli_chr01 | 8130462                 | CC                              | TT                | 1945881172               |
| SNP_P3_5351_8130900 | NC_021160.1    | Ca_kabuli_chr01 | 8130900                 | GG                              | CC                | 1945881174               |
| SNP_P3_5352_8131225 | NC_021160.1    | Ca_kabuli_chr01 | 8131225                 | CC                              | TT                | 1945881176               |
| SNP_P3_5353_8131499 | NC_021160.1    | Ca_kabuli_chr01 | 8131499                 | TT                              | CC                | 1945881178               |
| SNP_P3_5354_8133239 | NC_021160.1    | Ca_kabuli_chr01 | 8133239                 | GG                              | AA                | 1945881180               |
| SNP_P3_5355_8133316 | NC_021160.1    | Ca_kabuli_chr01 | 8133316                 | GG                              | AA                | 1945881181               |
| SNP_P3_5356_8134368 | NC_021160.1    | Ca_kabuli_chr01 | 8134368                 | TT                              | CC                | 1945881183               |
| SNP_P3_5357_8136614 | NC_021160.1    | Ca_kabuli_chr01 | 8136614                 | TT                              | CC                | 1945881185               |
| SNP_P3_5358_8136615 | NC_021160.1    | Ca_kabuli_chr01 | 8136615                 | CC                              | TT                | 1945881187               |
| SNP_P3_5359_8136824 | NC_021160.1    | Ca_kabuli_chr01 | 8136824                 | AA                              | TT                | 1945881189               |
| SNP_P3_5360_8136903 | NC_021160.1    | Ca_kabuli_chr01 | 8136903                 | TT                              | AA                | 1945881190               |
| SNP_P3_5361_8136977 | NC_021160.1    | Ca_kabuli_chr01 | 8136977                 | CC                              | TT                | 1945881192               |
| SNP_P3_5362_8137350 | NC_021160.1    | Ca_kabuli_chr01 | 8137350                 | AA                              | GG                | 1945881194               |
| SNP_P3_5364_8142731 | NC_021160.1    | Ca_kabuli_chr01 | 8142731                 | GG                              | AA                | 1945881196               |
| SNP_P3_5365_8142915 | NC_021160.1    | Ca_kabuli_chr01 | 8142915                 | AA                              | TT                | 1945881198               |
| SNP_P3_5366_8143493 | NC_021160.1    | Ca_kabuli_chr01 | 8143493                 | CC                              | TT                | 1945881199               |
| SNP_P3_5367_8143543 | NC_021160.1    | Ca_kabuli_chr01 | 8143543                 | AA                              | GG                | 1945881201               |
| SNP_P3_5368_8143745 | NC_021160.1    | Ca_kabuli_chr01 | 8143745                 | CC                              | TT                | 1945881203               |
| SNP_P3_5369_8151197 | NC_021160.1    | Ca_kabuli_chr01 | 8151197                 | AA                              | GG                | 1945881205               |
| SNP_P3_5370_8159777 | NC_021160.1    | Ca_kabuli_chr01 | 8159777                 | AA                              | GG                | 1945881206               |
| SNP_P3_5371_8159812 | NC_021160.1    | Ca_kabuli_chr01 | 8159812                 | AA                              | CC                | 1945881208               |
| SNP_P3_5372_8159867 | NC_021160.1    | Ca_kabuli_chr01 | 8159867                 | CC                              | TT                | 1945881210               |
| SNP_P3_5373_8170936 | NC_021160.1    | Ca_kabuli_chr01 | 8170936                 | TT                              | CC                | 1945881212               |
| SNP_P3_5374_8180770 | NC_021160.1    | Ca_kabuli_chr01 | 8180770                 | AA                              | GG                | 1945881214               |
| SNP_P3_5376_8185657 | NC_021160.1    | Ca_kabuli_chr01 | 8185657                 | TT                              | AA                | 1945881215               |
| SNP_P3_5377_8185658 | NC_021160.1    | Ca_kabuli_chr01 | 8185658                 | TT                              | AA                | 1945881217               |
| SNP_P3_5378_8193461 | NC_021160.1    | Ca_kabuli_chr01 | 8193461                 | CC                              | AA                | 1945881219               |
| SNP_P3_5379_8197697 | NC_021160.1    | Ca_kabuli_chr01 | 8197697                 | TT                              | AA                | 1945881221               |
| SNP_P3_5380_8197698 | NC_021160.1    | Ca_kabuli_chr01 | 8197698                 | AA                              | TT                | 1945881222               |
| SNP_P3_5381_8264980 | NC_021160.1    | Ca_kabuli_chr01 | 8264980                 | CC                              | AA                | 1945881224               |
| SNP_P3_5382_8281005 | NC_021160.1    | Ca_kabuli_chr01 | 8281005                 | TT                              | CC                | 1945881226               |
| SNP_P3_5384_8318379 | NC_021160.1    | Ca_kabuli_chr01 | 8318379                 | GG                              | AA                | 1945881228               |
| SNP_P3_5385_8321733 | NC_021160.1    | Ca_kabuli_chr01 | 8321733                 | TT                              | GG                | 1945881230               |
| SNP_P3_5386_8321760 | NC_021160.1    | Ca_kabuli_chr01 | 8321760                 | GG                              | TT                | 1945881231               |
| SNP_P3_5387_8336331 | NC_021160.1    | Ca_kabuli_chr01 | 8336331                 | TT                              | GG                | 1945881233               |

| SNPs IDs            | Chromosome IDs | Chromosomes     | Physical positions (bp) | CDC Frontier (Reference genome) | (Pusa 256 & HPNB) | NCBI SNPdb Accession IDs |
|---------------------|----------------|-----------------|-------------------------|---------------------------------|-------------------|--------------------------|
| SNP_P3_5388_8336335 | NC_021160.1    | Ca_kabuli_chr01 | 8336335                 | TT                              | GG                | 1945881235               |
| SNP_P3_5389_8355267 | NC_021160.1    | Ca_kabuli_chr01 | 8355267                 | TT                              | CC                | 1945881237               |
| SNP_P3_5390_8372128 | NC_021160.1    | Ca_kabuli_chr01 | 8372128                 | CC                              | TT                | 1945881238               |
| SNP_P3_5391_8410255 | NC_021160.1    | Ca_kabuli_chr01 | 8410255                 | GG                              | AA                | 1945881240               |
| SNP_P3_5392_8420581 | NC_021160.1    | Ca_kabuli_chr01 | 8420581                 | TT                              | GG                | 1945881242               |
| SNP_P3_5393_8426430 | NC_021160.1    | Ca_kabuli_chr01 | 8426430                 | CC                              | AA                | 1945881244               |
| SNP_P3_5394_8426511 | NC_021160.1    | Ca_kabuli_chr01 | 8426511                 | AA                              | TT                | 1945881246               |
| SNP_P3_5395_8427606 | NC_021160.1    | Ca_kabuli_chr01 | 8427606                 | TT                              | GG                | 1945881247               |
| SNP_P3_5396_8427825 | NC_021160.1    | Ca_kabuli_chr01 | 8427825                 | CC                              | TT                | 1945881249               |
| SNP_P3_5397_8427898 | NC_021160.1    | Ca_kabuli_chr01 | 8427898                 | GG                              | TT                | 1945881251               |
| SNP_P3_5398_8427967 | NC_021160.1    | Ca_kabuli_chr01 | 8427967                 | TT                              | CC                | 1945881253               |
| SNP_P3_5399_8428083 | NC_021160.1    | Ca_kabuli_chr01 | 8428083                 | TT                              | CC                | 1945881254               |
| SNP_P3_5400_8428095 | NC_021160.1    | Ca_kabuli_chr01 | 8428095                 | AA                              | GG                | 1945881256               |
| SNP_P3_5401_8428141 | NC_021160.1    | Ca_kabuli_chr01 | 8428141                 | TT                              | CC                | 1945881258               |
| SNP_P3_5402_8428211 | NC_021160.1    | Ca_kabuli_chr01 | 8428211                 | CC                              | TT                | 1945881260               |
| SNP_P3_5403_8428237 | NC_021160.1    | Ca_kabuli_chr01 | 8428237                 | TT                              | CC                | 1945881262               |
| SNP_P3_5406_8434679 | NC_021160.1    | Ca_kabuli_chr01 | 8434679                 | TT                              | CC                | 1945881263               |
| SNP_P3_5407_8434873 | NC_021160.1    | Ca_kabuli_chr01 | 8434873                 | CC                              | TT                | 1945881265               |
| SNP_P3_5408_8434909 | NC_021160.1    | Ca_kabuli_chr01 | 8434909                 | GG                              | TT                | 1945881267               |
| SNP_P3_5409_8434995 | NC_021160.1    | Ca_kabuli_chr01 | 8434995                 | AA                              | GG                | 1945881269               |
| SNP_P3_5410_8435015 | NC_021160.1    | Ca_kabuli_chr01 | 8435015                 | GG                              | AA                | 1945881270               |
| SNP_P3_5411_8435018 | NC_021160.1    | Ca_kabuli_chr01 | 8435018                 | AA                              | GG                | 1945881272               |
| SNP_P3_5412_8435102 | NC_021160.1    | Ca_kabuli_chr01 | 8435102                 | AA                              | CC                | 1945881274               |
| SNP_P3_5413_8435134 | NC_021160.1    | Ca_kabuli_chr01 | 8435134                 | GG                              | AA                | 1945881276               |
| SNP_P3_5414_8435167 | NC_021160.1    | Ca_kabuli_chr01 | 8435167                 | GG                              | AA                | 1945881278               |
| SNP_P3_5415_8435168 | NC_021160.1    | Ca_kabuli_chr01 | 8435168                 | AA                              | GG                | 1945881279               |
| SNP_P3_5417_8486690 | NC_021160.1    | Ca_kabuli_chr01 | 8486690                 | TT                              | AA                | 1945881281               |
| SNP_P3_5418_8524059 | NC_021160.1    | Ca_kabuli_chr01 | 8524059                 | TT                              | AA                | 1945881283               |
| SNP_P3_5419_8524061 | NC_021160.1    | Ca_kabuli_chr01 | 8524061                 | TT                              | CC                | 1945881285               |
| SNP_P3_5420_8558192 | NC_021160.1    | Ca_kabuli_chr01 | 8558192                 | CC                              | TT                | 1945881286               |
| SNP_P3_5421_8558214 | NC_021160.1    | Ca_kabuli_chr01 | 8558214                 | AA                              | GG                | 1945881288               |
| SNP_P3_5422_8558226 | NC_021160.1    | Ca_kabuli_chr01 | 8558226                 | GG                              | AA                | 1945881290               |
| SNP_P3_5423_8558380 | NC_021160.1    | Ca_kabuli_chr01 | 8558380                 | CC                              | GG                | 1945881292               |
| SNP_P3_5424_8558520 | NC_021160.1    | Ca_kabuli_chr01 | 8558520                 | TT                              | CC                | 1945881293               |
| SNP_P3_5425_8558584 | NC_021160.1    | Ca_kabuli_chr01 | 8558584                 | TT                              | AA                | 1945881295               |
| SNP_P3_5426_8558600 | NC_021160.1    | Ca_kabuli_chr01 | 8558600                 | CC                              | GG                | 1945881297               |
| SNP_P3_5427_8562669 | NC_021160.1    | Ca_kabuli_chr01 | 8562669                 | CC                              | TT                | 1945881299               |
| SNP_P3_5428_8566494 | NC_021160.1    | Ca_kabuli_chr01 | 8566494                 | CC                              | GG                | 1945881301               |
| SNP_P3_5429_8575110 | NC_021160.1    | Ca_kabuli_chr01 | 8575110                 | AA                              | CC                | 1945881302               |
| SNP_P3_5430_8577594 | NC_021160.1    | Ca_kabuli_chr01 | 8577594                 | AA                              | GG                | 1945881304               |
| SNP_P3_5431_8594261 | NC_021160.1    | Ca_kabuli_chr01 | 8594261                 | GG                              | AA                | 1945881306               |
| SNP_P3_5432_8621200 | NC_021160.1    | Ca_kabuli_chr01 | 8621200                 | CC                              | TT                | 1945881308               |

| SNPs IDs            | Chromosome IDs | Chromosomes     | Physical positions (bp) | CDC Frontier (Reference genome) | (Pusa 256 & HPNB) | NCBI SNPdb Accession IDs |
|---------------------|----------------|-----------------|-------------------------|---------------------------------|-------------------|--------------------------|
| SNP_P3_5433_8621486 | NC_021160.1    | Ca_kabuli_chr01 | 8621486                 | AA                              | GG                | 1945881310               |
| SNP_P3_5434_8637007 | NC_021160.1    | Ca_kabuli_chr01 | 8637007                 | AA                              | GG                | 1945881311               |
| SNP_P3_5435_8637048 | NC_021160.1    | Ca_kabuli_chr01 | 8637048                 | AA                              | GG                | 1945881313               |
| SNP_P3_5436_8637446 | NC_021160.1    | Ca_kabuli_chr01 | 8637446                 | TT                              | CC                | 1945881315               |
| SNP_P3_5437_8659231 | NC_021160.1    | Ca_kabuli_chr01 | 8659231                 | TT                              | CC                | 1945881317               |
| SNP_P3_5438_8659427 | NC_021160.1    | Ca_kabuli_chr01 | 8659427                 | TT                              | CC                | 1945881318               |
| SNP_P3_5439_8659443 | NC_021160.1    | Ca_kabuli_chr01 | 8659443                 | GG                              | TT                | 1945881320               |
| SNP_P3_5440_8659875 | NC_021160.1    | Ca_kabuli_chr01 | 8659875                 | GG                              | AA                | 1945881322               |
| SNP_P3_5441_8660773 | NC_021160.1    | Ca_kabuli_chr01 | 8660773                 | CC                              | TT                | 1945881324               |
| SNP_P3_5442_8661179 | NC_021160.1    | Ca_kabuli_chr01 | 8661179                 | AA                              | GG                | 1945881325               |
| SNP_P3_5443_8661415 | NC_021160.1    | Ca_kabuli_chr01 | 8661415                 | CC                              | TT                | 1945881327               |
| SNP_P3_5444_8661470 | NC_021160.1    | Ca_kabuli_chr01 | 8661470                 | GG                              | TT                | 1945881329               |
| SNP_P3_5445_8661667 | NC_021160.1    | Ca_kabuli_chr01 | 8661667                 | AA                              | GG                | 1945881331               |
| SNP_P3_5446_8661670 | NC_021160.1    | Ca_kabuli_chr01 | 8661670                 | AA                              | GG                | 1945881333               |
| SNP_P3_5448_8714406 | NC_021160.1    | Ca_kabuli_chr01 | 8714406                 | TT                              | AA                | 1945881334               |
| SNP_P3_5449_8756934 | NC_021160.1    | Ca_kabuli_chr01 | 8756934                 | CC                              | TT                | 1945881336               |
| SNP_P3_5450_8835306 | NC_021160.1    | Ca_kabuli_chr01 | 8835306                 | CC                              | TT                | 1945881338               |
| SNP_P3_5451_8863822 | NC_021160.1    | Ca_kabuli_chr01 | 8863822                 | TT                              | AA                | 1945881340               |
| SNP_P3_5452_8878277 | NC_021160.1    | Ca_kabuli_chr01 | 8878277                 | TT                              | CC                | 1945881341               |
| SNP_P3_5453_8878281 | NC_021160.1    | Ca_kabuli_chr01 | 8878281                 | TT                              | GG                | 1945881343               |
| SNP_P3_5454_8879006 | NC_021160.1    | Ca_kabuli_chr01 | 8879006                 | AA                              | GG                | 1945881345               |
| SNP_P3_5455_8955428 | NC_021160.1    | Ca_kabuli_chr01 | 8955428                 | AA                              | GG                | 1945881347               |
| SNP_P3_5457_8968145 | NC_021160.1    | Ca_kabuli_chr01 | 8968145                 | CC                              | AA                | 1945881349               |
| SNP_P3_5458_8980669 | NC_021160.1    | Ca_kabuli_chr01 | 8980669                 | TT                              | CC                | 1945881350               |
| SNP_P3_5459_8981234 | NC_021160.1    | Ca_kabuli_chr01 | 8981234                 | CC                              | AA                | 1945881352               |
| SNP_P3_5460_8984325 | NC_021160.1    | Ca_kabuli_chr01 | 8984325                 | TT                              | CC                | 1945881354               |
| SNP_P3_5461_9013283 | NC_021160.1    | Ca_kabuli_chr01 | 9013283                 | AA                              | GG                | 1945881356               |
| SNP_P3_5462_9028524 | NC_021160.1    | Ca_kabuli_chr01 | 9028524                 | CC                              | GG                | 1945881357               |
| SNP_P3_5463_9055723 | NC_021160.1    | Ca_kabuli_chr01 | 9055723                 | TT                              | CC                | 1945881359               |
| SNP_P3_5464_9082410 | NC_021160.1    | Ca_kabuli_chr01 | 9082410                 | GG                              | AA                | 1945881361               |
| SNP_P3_5466_9110454 | NC_021160.1    | Ca_kabuli_chr01 | 9110454                 | GG                              | AA                | 1945881363               |
| SNP_P3_5468_9148295 | NC_021160.1    | Ca_kabuli_chr01 | 9148295                 | AA                              | CC                | 1945881365               |
| SNP_P3_5469_9178510 | NC_021160.1    | Ca_kabuli_chr01 | 9178510                 | GG                              | AA                | 1945881367               |
| SNP_P3_5470_9223619 | NC_021160.1    | Ca_kabuli_chr01 | 9223619                 | CC                              | TT                | 1945881368               |
| SNP_P3_5472_9232195 | NC_021160.1    | Ca_kabuli_chr01 | 9232195                 | TT                              | CC                | 1945881370               |
| SNP_P3_5473_9232378 | NC_021160.1    | Ca_kabuli_chr01 | 9232378                 | GG                              | AA                | 1945881372               |
| SNP_P3_5474_9232406 | NC_021160.1    | Ca_kabuli_chr01 | 9232406                 | TT                              | GG                | 1945881374               |
| SNP_P3_5475_9232817 | NC_021160.1    | Ca_kabuli_chr01 | 9232817                 | CC                              | TT                | 1945881376               |
| SNP_P3_5476_9232992 | NC_021160.1    | Ca_kabuli_chr01 | 9232992                 | GG                              | AA                | 1945881377               |
| SNP_P3_5477_9232994 | NC_021160.1    | Ca_kabuli_chr01 | 9232994                 | CC                              | TT                | 1945881379               |
| SNP_P3_5478_9233030 | NC_021160.1    | Ca_kabuli_chr01 | 9233030                 | AA                              | CC                | 1945881381               |
| SNP_P3_5479_9233050 | NC_021160.1    | Ca_kabuli_chr01 | 9233050                 | TT                              | CC                | 1945881383               |

| SNPs IDs            | Chromosome IDs | Chromosomes     | Physical positions (bp) | CDC Frontier (Reference genome) | (Pusa 256 & HPNB) | NCBI SNPdb Accession IDs |
|---------------------|----------------|-----------------|-------------------------|---------------------------------|-------------------|--------------------------|
| SNP_P3_5480_9233058 | NC_021160.1    | Ca_kabuli_chr01 | 9233058                 | TT                              | CC                | 1945881384               |
| SNP_P3_5481_9233093 | NC_021160.1    | Ca_kabuli_chr01 | 9233093                 | CC                              | TT                | 1945881386               |
| SNP_P3_5482_9233104 | NC_021160.1    | Ca_kabuli_chr01 | 9233104                 | CC                              | TT                | 1945881388               |
| SNP_P3_5483_9233276 | NC_021160.1    | Ca_kabuli_chr01 | 9233276                 | CC                              | TT                | 1945881390               |
| SNP_P3_5484_9233284 | NC_021160.1    | Ca_kabuli_chr01 | 9233284                 | CC                              | TT                | 1945881392               |
| SNP_P3_5485_9233305 | NC_021160.1    | Ca_kabuli_chr01 | 9233305                 | CC                              | TT                | 1945881394               |
| SNP_P3_5486_9233316 | NC_021160.1    | Ca_kabuli_chr01 | 9233316                 | TT                              | CC                | 1945881395               |
| SNP_P3_5487_9233391 | NC_021160.1    | Ca_kabuli_chr01 | 9233391                 | TT                              | CC                | 1945881397               |
| SNP_P3_5488_9233430 | NC_021160.1    | Ca_kabuli_chr01 | 9233430                 | TT                              | CC                | 1945881399               |
| SNP_P3_5489_9233445 | NC_021160.1    | Ca_kabuli_chr01 | 9233445                 | AA                              | TT                | 1945881401               |
| SNP_P3_5490_9233489 | NC_021160.1    | Ca_kabuli_chr01 | 9233489                 | GG                              | AA                | 1945881402               |
| SNP_P3_5491_9233679 | NC_021160.1    | Ca_kabuli_chr01 | 9233679                 | GG                              | AA                | 1945881404               |
| SNP_P3_5492_9233682 | NC_021160.1    | Ca_kabuli_chr01 | 9233682                 | GG                              | TT                | 1945881406               |
| SNP_P3_5493_9233913 | NC_021160.1    | Ca_kabuli_chr01 | 9233913                 | TT                              | AA                | 1945881408               |
| SNP_P3_5494_9233918 | NC_021160.1    | Ca_kabuli_chr01 | 9233918                 | TT                              | AA                | 1945881409               |
| SNP_P3_5495_9233999 | NC_021160.1    | Ca_kabuli_chr01 | 9233999                 | TT                              | CC                | 1945881411               |
| SNP_P3_5496_9236408 | NC_021160.1    | Ca_kabuli_chr01 | 9236408                 | TT                              | GG                | 1945881413               |
| SNP_P3_5498_9241900 | NC_021160.1    | Ca_kabuli_chr01 | 9241900                 | CC                              | AA                | 1945881415               |
| SNP_P3_5499_9244042 | NC_021160.1    | Ca_kabuli_chr01 | 9244042                 | GG                              | AA                | 1945881417               |
| SNP_P3_5500_9252874 | NC_021160.1    | Ca_kabuli_chr01 | 9252874                 | GG                              | CC                | 1945881418               |
| SNP_P3_5501_9317029 | NC_021160.1    | Ca_kabuli_chr01 | 9317029                 | GG                              | AA                | 1945881420               |
| SNP_P3_5502_9356955 | NC_021160.1    | Ca_kabuli_chr01 | 9356955                 | TT                              | CC                | 1945881422               |
| SNP_P3_5503_9359258 | NC_021160.1    | Ca_kabuli_chr01 | 9359258                 | GG                              | AA                | 1945881424               |
| SNP_P3_5507_9492924 | NC_021160.1    | Ca_kabuli_chr01 | 9492924                 | GG                              | AA                | 1945881425               |
| SNP_P3_5508_9511719 | NC_021160.1    | Ca_kabuli_chr01 | 9511719                 | TT                              | CC                | 1945881427               |
| SNP_P3_5509_9526471 | NC_021160.1    | Ca_kabuli_chr01 | 9526471                 | TT                              | AA                | 1945881429               |
| SNP_P3_5510_9526474 | NC_021160.1    | Ca_kabuli_chr01 | 9526474                 | TT                              | GG                | 1945881431               |
| SNP_P3_5511_9527415 | NC_021160.1    | Ca_kabuli_chr01 | 9527415                 | AA                              | GG                | 1945881433               |
| SNP_P3_5512_9561913 | NC_021160.1    | Ca_kabuli_chr01 | 9561913                 | AA                              | GG                | 1945881434               |
| SNP_P3_5513_9562148 | NC_021160.1    | Ca_kabuli_chr01 | 9562148                 | GG                              | AA                | 1945881436               |
| SNP_P3_5514_9614091 | NC_021160.1    | Ca_kabuli_chr01 | 9614091                 | GG                              | TT                | 1945881438               |
| SNP_P3_5515_9652109 | NC_021160.1    | Ca_kabuli_chr01 | 9652109                 | TT                              | GG                | 1945881440               |
| SNP_P3_5517_9687150 | NC_021160.1    | Ca_kabuli_chr01 | 9687150                 | AA                              | GG                | 1945881441               |
| SNP_P3_5518_9761975 | NC_021160.1    | Ca_kabuli_chr01 | 9761975                 | TT                              | AA                | 1945881443               |
| SNP_P3_5519_9762830 | NC_021160.1    | Ca_kabuli_chr01 | 9762830                 | AA                              | GG                | 1945881445               |
| SNP_P3_5520_9774720 | NC_021160.1    | Ca_kabuli_chr01 | 9774720                 | AA                              | GG                | 1945881447               |
| SNP_P3_5521_9775809 | NC_021160.1    | Ca_kabuli_chr01 | 9775809                 | GG                              | AA                | 1945881449               |
| SNP_P3_5522_9810784 | NC_021160.1    | Ca_kabuli_chr01 | 9810784                 | GG                              | AA                | 1945881450               |
| SNP_P3_5523_9821582 | NC_021160.1    | Ca_kabuli_chr01 | 9821582                 | TT                              | AA                | 1945881452               |
| SNP_P3_5524_9837245 | NC_021160.1    | Ca_kabuli_chr01 | 9837245                 | CC                              | TT                | 1945881454               |
| SNP_P3_5525_9840941 | NC_021160.1    | Ca_kabuli_chr01 | 9840941                 | CC                              | TT                | 1945881456               |
| SNP_P3_5526_9841259 | NC_021160.1    | Ca_kabuli_chr01 | 9841259                 | CC                              | TT                | 1945881457               |

| SNPs IDs             | Chromosome IDs | Chromosomes     | Physical positions (bp) | CDC Frontier (Reference genome) | (Pusa 256 & HPNB) | NCBI SNPdb Accession IDs |
|----------------------|----------------|-----------------|-------------------------|---------------------------------|-------------------|--------------------------|
| SNP_P3_5528_9873043  | NC_021160.1    | Ca_kabuli_chr01 | 9873043                 | AA                              | TT                | 1945881459               |
| SNP_P3_5529_9874192  | NC_021160.1    | Ca_kabuli_chr01 | 9874192                 | TT                              | AA                | 1945881461               |
| SNP_P3_5530_9874209  | NC_021160.1    | Ca_kabuli_chr01 | 9874209                 | AA                              | GG                | 1945881463               |
| SNP_P3_5531_9882598  | NC_021160.1    | Ca_kabuli_chr01 | 9882598                 | TT                              | CC                | 1945881465               |
| SNP_P3_5532_9894156  | NC_021160.1    | Ca_kabuli_chr01 | 9894156                 | GG                              | AA                | 1945881466               |
| SNP_P3_5533_9919137  | NC_021160.1    | Ca_kabuli_chr01 | 9919137                 | TT                              | CC                | 1945881468               |
| SNP_P3_5535_9947980  | NC_021160.1    | Ca_kabuli_chr01 | 9947980                 | CC                              | TT                | 1945881470               |
| SNP_P3_5536_9967265  | NC_021160.1    | Ca_kabuli_chr01 | 9967265                 | GG                              | AA                | 1945881472               |
| SNP_P3_5537_9977301  | NC_021160.1    | Ca_kabuli_chr01 | 9977301                 | TT                              | CC                | 1945881474               |
| SNP_P3_5538_9980556  | NC_021160.1    | Ca_kabuli_chr01 | 9980556                 | AA                              | GG                | 1945881475               |
| SNP_P3_5539_10002414 | NC_021160.1    | Ca_kabuli_chr01 | 10002414                | AA                              | TT                | 1945881477               |
| SNP_P3_5540_10027751 | NC_021160.1    | Ca_kabuli_chr01 | 10027751                | GG                              | AA                | 1945881479               |
| SNP_P3_5541_10036603 | NC_021160.1    | Ca_kabuli_chr01 | 10036603                | AA                              | GG                | 1945881481               |
| SNP_P3_5542_10044738 | NC_021160.1    | Ca_kabuli_chr01 | 10044738                | TT                              | GG                | 1945881482               |
| SNP_P3_5544_10077249 | NC_021160.1    | Ca_kabuli_chr01 | 10077249                | TT                              | AA                | 1945881484               |
| SNP_P3_5545_10090731 | NC_021160.1    | Ca_kabuli_chr01 | 10090731                | AA                              | CC                | 1945881486               |
| SNP_P3_5546_10116349 | NC_021160.1    | Ca_kabuli_chr01 | 10116349                | TT                              | CC                | 1945881488               |
| SNP_P3_5547_10116353 | NC_021160.1    | Ca_kabuli_chr01 | 10116353                | AA                              | GG                | 1945881490               |
| SNP_P3_5548_10116384 | NC_021160.1    | Ca_kabuli_chr01 | 10116384                | AA                              | CC                | 1945881491               |
| SNP_P3_5549_10116552 | NC_021160.1    | Ca_kabuli_chr01 | 10116552                | GG                              | AA                | 1945881493               |
| SNP_P3_5550_10120335 | NC_021160.1    | Ca_kabuli_chr01 | 10120335                | AA                              | GG                | 1945881495               |
| SNP_P3_5551_10120759 | NC_021160.1    | Ca_kabuli_chr01 | 10120759                | AA                              | GG                | 1945881497               |
| SNP_P3_5553_10202307 | NC_021160.1    | Ca_kabuli_chr01 | 10202307                | CC                              | TT                | 1945881498               |
| SNP_P3_5554_10231978 | NC_021160.1    | Ca_kabuli_chr01 | 10231978                | CC                              | AA                | 1945881500               |
| SNP_P3_5555_10236797 | NC_021160.1    | Ca_kabuli_chr01 | 10236797                | TT                              | CC                | 1945881502               |
| SNP_P3_5556_10236814 | NC_021160.1    | Ca_kabuli_chr01 | 10236814                | AA                              | CC                | 1945881504               |
| SNP_P3_5557_10236815 | NC_021160.1    | Ca_kabuli_chr01 | 10236815                | AA                              | GG                | 1945881506               |
| SNP_P3_5558_10253938 | NC_021160.1    | Ca_kabuli_chr01 | 10253938                | TT                              | CC                | 1945881507               |
| SNP_P3_5559_10256061 | NC_021160.1    | Ca_kabuli_chr01 | 10256061                | AA                              | GG                | 1945881509               |
| SNP_P3_5560_10256062 | NC_021160.1    | Ca_kabuli_chr01 | 10256062                | TT                              | GG                | 1945881511               |
| SNP_P3_5561_10267838 | NC_021160.1    | Ca_kabuli_chr01 | 10267838                | GG                              | AA                | 1945881513               |
| SNP_P3_5562_10285446 | NC_021160.1    | Ca_kabuli_chr01 | 10285446                | CC                              | TT                | 1945881515               |
| SNP_P3_5563_10345078 | NC_021160.1    | Ca_kabuli_chr01 | 10345078                | CC                              | AA                | 1945881516               |
| SNP_P3_5564_10345118 | NC_021160.1    | Ca_kabuli_chr01 | 10345118                | CC                              | TT                | 1945881518               |
| SNP_P3_5565_10353925 | NC_021160.1    | Ca_kabuli_chr01 | 10353925                | AA                              | GG                | 1945881520               |
| SNP_P3_5566_10367101 | NC_021160.1    | Ca_kabuli_chr01 | 10367101                | AA                              | GG                | 1945881522               |
| SNP_P3_5567_10418064 | NC_021160.1    | Ca_kabuli_chr01 | 10418064                | TT                              | GG                | 1945881523               |
| SNP_P3_5568_10418082 | NC_021160.1    | Ca_kabuli_chr01 | 10418082                | CC                              | TT                | 1945881525               |
| SNP_P3_5569_10418100 | NC_021160.1    | Ca_kabuli_chr01 | 10418100                | AA                              | TT                | 1945881527               |
| SNP_P3_5570_10418108 | NC_021160.1    | Ca_kabuli_chr01 | 10418108                | GG                              | TT                | 1945881529               |
| SNP_P3_5572_10450170 | NC_021160.1    | Ca_kabuli_chr01 | 10450170                | TT                              | AA                | 1945881531               |
| SNP_P3_5573_10453662 | NC_021160.1    | Ca_kabuli_chr01 | 10453662                | CC                              | TT                | 1945881532               |

| SNPs IDs             | Chromosome IDs | Chromosomes     | Physical positions (bp) | CDC Frontier (Reference genome) | (Pusa 256 & HPNB) | NCBI SNPdb Accession IDs |
|----------------------|----------------|-----------------|-------------------------|---------------------------------|-------------------|--------------------------|
| SNP_P3_5574_10489931 | NC_021160.1    | Ca_kabuli_chr01 | 10489931                | AA                              | TT                | 1945881534               |
| SNP_P3_5575_10508424 | NC_021160.1    | Ca_kabuli_chr01 | 10508424                | TT                              | GG                | 1945881536               |
| SNP_P3_5576_10513603 | NC_021160.1    | Ca_kabuli_chr01 | 10513603                | GG                              | AA                | 1945881538               |
| SNP_P3_5578_10519816 | NC_021160.1    | Ca_kabuli_chr01 | 10519816                | TT                              | CC                | 1945881540               |
| SNP_P3_5579_10530749 | NC_021160.1    | Ca_kabuli_chr01 | 10530749                | TT                              | CC                | 1945881541               |
| SNP_P3_5581_10577389 | NC_021160.1    | Ca_kabuli_chr01 | 10577389                | TT                              | CC                | 1945881543               |
| SNP_P3_5582_10577390 | NC_021160.1    | Ca_kabuli_chr01 | 10577390                | TT                              | GG                | 1945881545               |
| SNP_P3_5583_10577407 | NC_021160.1    | Ca_kabuli_chr01 | 10577407                | GG                              | AA                | 1945881547               |
| SNP_P3_5584_10586902 | NC_021160.1    | Ca_kabuli_chr01 | 10586902                | CC                              | AA                | 1945881548               |
| SNP_P3_5585_10671664 | NC_021160.1    | Ca_kabuli_chr01 | 10671664                | TT                              | AA                | 1945881550               |
| SNP_P3_5587_10715185 | NC_021160.1    | Ca_kabuli_chr01 | 10715185                | GG                              | AA                | 1945881552               |
| SNP_P3_5588_10732181 | NC_021160.1    | Ca_kabuli_chr01 | 10732181                | AA                              | GG                | 1945881554               |
| SNP_P3_5589_10732754 | NC_021160.1    | Ca_kabuli_chr01 | 10732754                | GG                              | TT                | 1945881556               |
| SNP_P3_5590_10740341 | NC_021160.1    | Ca_kabuli_chr01 | 10740341                | AA                              | GG                | 1945881557               |
| SNP_P3_5591_10756172 | NC_021160.1    | Ca_kabuli_chr01 | 10756172                | GG                              | AA                | 1945881559               |
| SNP_P3_5592_10781563 | NC_021160.1    | Ca_kabuli_chr01 | 10781563                | GG                              | AA                | 1945881561               |
| SNP_P3_5593_10815789 | NC_021160.1    | Ca_kabuli_chr01 | 10815789                | CC                              | TT                | 1945881563               |
| SNP_P3_5594_10817327 | NC_021160.1    | Ca_kabuli_chr01 | 10817327                | TT                              | CC                | 1945881564               |
| SNP_P3_5595_10829213 | NC_021160.1    | Ca_kabuli_chr01 | 10829213                | TT                              | CC                | 1945881566               |
| SNP_P3_5597_10850629 | NC_021160.1    | Ca_kabuli_chr01 | 10850629                | CC                              | TT                | 1945881568               |
| SNP_P3_5598_10851077 | NC_021160.1    | Ca_kabuli_chr01 | 10851077                | AA                              | TT                | 1945881570               |
| SNP_P3_5599_10856530 | NC_021160.1    | Ca_kabuli_chr01 | 10856530                | TT                              | CC                | 1945881572               |
| SNP_P3_5600_10856558 | NC_021160.1    | Ca_kabuli_chr01 | 10856558                | AA                              | CC                | 1945881573               |
| SNP_P3_5601_10856593 | NC_021160.1    | Ca_kabuli_chr01 | 10856593                | AA                              | GG                | 1945881575               |
| SNP_P3_5602_10856616 | NC_021160.1    | Ca_kabuli_chr01 | 10856616                | TT                              | GG                | 1945881577               |
| SNP_P3_5603_10856841 | NC_021160.1    | Ca_kabuli_chr01 | 10856841                | AA                              | GG                | 1945881579               |
| SNP_P3_5604_10856862 | NC_021160.1    | Ca_kabuli_chr01 | 10856862                | AA                              | GG                | 1945881581               |
| SNP_P3_5606_10858194 | NC_021160.1    | Ca_kabuli_chr01 | 10858194                | TT                              | CC                | 1945881582               |
| SNP_P3_5607_10859060 | NC_021160.1    | Ca_kabuli_chr01 | 10859060                | CC                              | AA                | 1945881584               |
| SNP_P3_5608_10867095 | NC_021160.1    | Ca_kabuli_chr01 | 10867095                | CC                              | TT                | 1945881586               |
| SNP_P3_5610_10901444 | NC_021160.1    | Ca_kabuli_chr01 | 10901444                | CC                              | TT                | 1945881588               |
| SNP_P3_5611_10916473 | NC_021160.1    | Ca_kabuli_chr01 | 10916473                | TT                              | CC                | 1945881589               |
| SNP_P3_5612_10916542 | NC_021160.1    | Ca_kabuli_chr01 | 10916542                | AA                              | TT                | 1945881591               |
| SNP_P3_5613_10926882 | NC_021160.1    | Ca_kabuli_chr01 | 10926882                | CC                              | GG                | 1945881593               |
| SNP_P3_5615_10936167 | NC_021160.1    | Ca_kabuli_chr01 | 10936167                | AA                              | TT                | 1945881595               |
| SNP_P3_5616_10942931 | NC_021160.1    | Ca_kabuli_chr01 | 10942931                | AA                              | TT                | 1945881596               |
| SNP_P3_5617_10944321 | NC_021160.1    | Ca_kabuli_chr01 | 10944321                | CC                              | TT                | 1945881598               |
| SNP_P3_5619_10953982 | NC_021160.1    | Ca_kabuli_chr01 | 10953982                | TT                              | AA                | 1945881600               |
| SNP_P3_5620_10972103 | NC_021160.1    | Ca_kabuli_chr01 | 10972103                | CC                              | AA                | 1945881602               |
| SNP_P3_5621_10973362 | NC_021160.1    | Ca_kabuli_chr01 | 10973362                | GG                              | CC                | 1945881603               |
| SNP_P3_5622_11051741 | NC_021160.1    | Ca_kabuli_chr01 | 11051741                | TT                              | CC                | 1945881605               |
| SNP_P3_5624_11112572 | NC_021160.1    | Ca_kabuli_chr01 | 11112572                | AA                              | CC                | 1945881607               |



| SNPs IDs             | Chromosome IDs | Chromosomes     | Physical positions (bp) | CDC Frontier (Reference genome) | (Pusa 256 & HPNB) | NCBI SNPdb Accession IDs |
|----------------------|----------------|-----------------|-------------------------|---------------------------------|-------------------|--------------------------|
| SNP_P3_5628_11176118 | NC_021160.1    | Ca_kabuli_chr01 | 11176118                | CC                              | AA                | 1945881609               |
| SNP_P3_5631_11215569 | NC_021160.1    | Ca_kabuli_chr01 | 11215569                | CC                              | TT                | 1945881610               |
| SNP_P3_5632_11217664 | NC_021160.1    | Ca_kabuli_chr01 | 11217664                | AA                              | GG                | 1945881612               |
| SNP_P3_5633_11217730 | NC_021160.1    | Ca_kabuli_chr01 | 11217730                | TT                              | GG                | 1945881614               |
| SNP_P3_5634_11217838 | NC_021160.1    | Ca_kabuli_chr01 | 11217838                | AA                              | GG                | 1945881616               |
| SNP_P3_5635_11217846 | NC_021160.1    | Ca_kabuli_chr01 | 11217846                | TT                              | CC                | 1945881618               |
| SNP_P3_5636_11218110 | NC_021160.1    | Ca_kabuli_chr01 | 11218110                | CC                              | TT                | 1945881619               |
| SNP_P3_5637_11218149 | NC_021160.1    | Ca_kabuli_chr01 | 11218149                | TT                              | CC                | 1945881621               |
| SNP_P3_5638_11234518 | NC_021160.1    | Ca_kabuli_chr01 | 11234518                | TT                              | AA                | 1945881623               |
| SNP_P3_5639_11235853 | NC_021160.1    | Ca_kabuli_chr01 | 11235853                | AA                              | GG                | 1945881625               |
| SNP_P3_5640_11244739 | NC_021160.1    | Ca_kabuli_chr01 | 11244739                | AA                              | TT                | 1945881627               |
| SNP_P3_5641_11255784 | NC_021160.1    | Ca_kabuli_chr01 | 11255784                | TT                              | CC                | 1945881628               |
| SNP_P3_5642_11280266 | NC_021160.1    | Ca_kabuli_chr01 | 11280266                | CC                              | TT                | 1945881630               |
| SNP_P3_5644_11295942 | NC_021160.1    | Ca_kabuli_chr01 | 11295942                | CC                              | TT                | 1945881632               |
| SNP_P3_5645_11297868 | NC_021160.1    | Ca_kabuli_chr01 | 11297868                | AA                              | TT                | 1945881634               |
| SNP_P3_5646_11301553 | NC_021160.1    | Ca_kabuli_chr01 | 11301553                | TT                              | GG                | 1945881635               |
| SNP_P3_5647_11302753 | NC_021160.1    | Ca_kabuli_chr01 | 11302753                | CC                              | TT                | 1945881637               |
| SNP_P3_5649_11345988 | NC_021160.1    | Ca_kabuli_chr01 | 11345988                | TT                              | CC                | 1945881639               |
| SNP_P3_5650_11347294 | NC_021160.1    | Ca_kabuli_chr01 | 11347294                | CC                              | TT                | 1945881641               |
| SNP_P3_5651_11382730 | NC_021160.1    | Ca_kabuli_chr01 | 11382730                | AA                              | GG                | 1945881643               |
| SNP_P3_5652_11383103 | NC_021160.1    | Ca_kabuli_chr01 | 11383103                | AA                              | GG                | 1945881644               |
| SNP_P3_5653_11409541 | NC_021160.1    | Ca_kabuli_chr01 | 11409541                | CC                              | TT                | 1945881646               |
| SNP_P3_5654_11409695 | NC_021160.1    | Ca_kabuli_chr01 | 11409695                | AA                              | GG                | 1945881648               |
| SNP_P3_5655_11415195 | NC_021160.1    | Ca_kabuli_chr01 | 11415195                | AA                              | GG                | 1945881650               |
| SNP_P3_5656_11415378 | NC_021160.1    | Ca_kabuli_chr01 | 11415378                | TT                              | CC                | 1945881652               |
| SNP_P3_5659_11466924 | NC_021160.1    | Ca_kabuli_chr01 | 11466924                | TT                              | CC                | 1945881653               |
| SNP_P3_5660_11507866 | NC_021160.1    | Ca_kabuli_chr01 | 11507866                | CC                              | TT                | 1945881655               |
| SNP_P3_5662_11548910 | NC_021160.1    | Ca_kabuli_chr01 | 11548910                | TT                              | AA                | 1945881657               |
| SNP_P3_5663_11548912 | NC_021160.1    | Ca_kabuli_chr01 | 11548912                | AA                              | TT                | 1945881659               |
| SNP_P3_5664_11554554 | NC_021160.1    | Ca_kabuli_chr01 | 11554554                | AA                              | GG                | 1945881660               |
| SNP_P3_5666_11562870 | NC_021160.1    | Ca_kabuli_chr01 | 11562870                | TT                              | AA                | 1945881662               |
| SNP_P3_5667_11570566 | NC_021160.1    | Ca_kabuli_chr01 | 11570566                | GG                              | AA                | 1945881664               |
| SNP_P3_5668_11613339 | NC_021160.1    | Ca_kabuli_chr01 | 11613339                | TT                              | CC                | 1945881666               |
| SNP_P3_5669_11651637 | NC_021160.1    | Ca_kabuli_chr01 | 11651637                | GG                              | AA                | 1945881668               |
| SNP_P3_5670_11668577 | NC_021160.1    | Ca_kabuli_chr01 | 11668577                | TT                              | CC                | 1945881670               |
| SNP_P3_5672_11668660 | NC_021160.1    | Ca_kabuli_chr01 | 11668660                | GG                              | TT                | 1945881671               |
| SNP_P3_5673_11668747 | NC_021160.1    | Ca_kabuli_chr01 | 11668747                | CC                              | AA                | 1945881673               |
| SNP_P3_5674_11668944 | NC_021160.1    | Ca_kabuli_chr01 | 11668944                | TT                              | CC                | 1945881675               |
| SNP_P3_5675_11669332 | NC_021160.1    | Ca_kabuli_chr01 | 11669332                | AA                              | TT                | 1945881677               |
| SNP_P3_5676_11721524 | NC_021160.1    | Ca_kabuli_chr01 | 11721524                | AA                              | TT                | 1945881679               |
| SNP_P3_5677_11734465 | NC_021160.1    | Ca_kabuli_chr01 | 11734465                | TT                              | CC                | 1945881680               |
| SNP_P3_5679_11738501 | NC_021160.1    | Ca_kabuli_chr01 | 11738501                | TT                              | GG                | 1945881682               |

| SNPs IDs             | Chromosome IDs | Chromosomes     | Physical positions (bp) | CDC Frontier (Reference genome) | (Pusa 256 & HPNB) | NCBI SNPdb Accession IDs |
|----------------------|----------------|-----------------|-------------------------|---------------------------------|-------------------|--------------------------|
| SNP_P3_5680_11773578 | NC_021160.1    | Ca_kabuli_chr01 | 11773578                | AA                              | TT                | 1945881684               |
| SNP_P3_5681_11786382 | NC_021160.1    | Ca_kabuli_chr01 | 11786382                | CC                              | TT                | 1945881686               |
| SNP_P3_5683_11802528 | NC_021160.1    | Ca_kabuli_chr01 | 11802528                | AA                              | TT                | 1945881688               |
| SNP_P3_5684_11864141 | NC_021160.1    | Ca_kabuli_chr01 | 11864141                | CC                              | GG                | 1945881689               |
| SNP_P3_5685_11873755 | NC_021160.1    | Ca_kabuli_chr01 | 11873755                | AA                              | TT                | 1945881691               |
| SNP_P3_5686_11875369 | NC_021160.1    | Ca_kabuli_chr01 | 11875369                | AA                              | CC                | 1945881693               |
| SNP_P3_5687_11923992 | NC_021160.1    | Ca_kabuli_chr01 | 11923992                | CC                              | TT                | 1945881695               |
| SNP_P3_5688_11940656 | NC_021160.1    | Ca_kabuli_chr01 | 11940656                | CC                              | TT                | 1945881697               |
| SNP_P3_5689_11940701 | NC_021160.1    | Ca_kabuli_chr01 | 11940701                | TT                              | CC                | 1945881698               |
| SNP_P3_5690_11945747 | NC_021160.1    | Ca_kabuli_chr01 | 11945747                | CC                              | TT                | 1945881700               |
| SNP_P3_5691_11978359 | NC_021160.1    | Ca_kabuli_chr01 | 11978359                | TT                              | CC                | 1945881702               |
| SNP_P3_5692_11978387 | NC_021160.1    | Ca_kabuli_chr01 | 11978387                | AA                              | CC                | 1945881704               |
| SNP_P3_5693_12004772 | NC_021160.1    | Ca_kabuli_chr01 | 12004772                | AA                              | CC                | 1945881705               |
| SNP_P3_5694_12004998 | NC_021160.1    | Ca_kabuli_chr01 | 12004998                | TT                              | CC                | 1945881707               |
| SNP_P3_5695_12005324 | NC_021160.1    | Ca_kabuli_chr01 | 12005324                | TT                              | CC                | 1945881709               |
| SNP_P3_5696_12005338 | NC_021160.1    | Ca_kabuli_chr01 | 12005338                | TT                              | GG                | 1945881711               |
| SNP_P3_5697_12036552 | NC_021160.1    | Ca_kabuli_chr01 | 12036552                | AA                              | GG                | 1945881712               |
| SNP_P3_5698_12073966 | NC_021160.1    | Ca_kabuli_chr01 | 12073966                | CC                              | GG                | 1945881714               |
| SNP_P3_5699_12073970 | NC_021160.1    | Ca_kabuli_chr01 | 12073970                | TT                              | AA                | 1945881716               |
| SNP_P3_5703_12110121 | NC_021160.1    | Ca_kabuli_chr01 | 12110121                | AA                              | TT                | 1945881718               |
| SNP_P3_5706_12120720 | NC_021160.1    | Ca_kabuli_chr01 | 12120720                | GG                              | AA                | 1945881720               |
| SNP_P3_5707_12123133 | NC_021160.1    | Ca_kabuli_chr01 | 12123133                | TT                              | CC                | 1945881721               |
| SNP_P3_5708_12124731 | NC_021160.1    | Ca_kabuli_chr01 | 12124731                | TT                              | AA                | 1945881723               |
| SNP_P3_5709_12124735 | NC_021160.1    | Ca_kabuli_chr01 | 12124735                | TT                              | GG                | 1945881725               |
| SNP_P3_5710_12124859 | NC_021160.1    | Ca_kabuli_chr01 | 12124859                | TT                              | AA                | 1945881727               |
| SNP_P3_5711_12137726 | NC_021160.1    | Ca_kabuli_chr01 | 12137726                | AA                              | CC                | 1945881729               |
| SNP_P3_5712_12141945 | NC_021160.1    | Ca_kabuli_chr01 | 12141945                | GG                              | AA                | 1945881730               |
| SNP_P3_5713_12149219 | NC_021160.1    | Ca_kabuli_chr01 | 12149219                | AA                              | GG                | 1945881732               |
| SNP_P3_5714_12172747 | NC_021160.1    | Ca_kabuli_chr01 | 12172747                | TT                              | CC                | 1945881734               |
| SNP_P3_5715_12178889 | NC_021160.1    | Ca_kabuli_chr01 | 12178889                | TT                              | CC                | 1945881736               |
| SNP_P3_5716_12181545 | NC_021160.1    | Ca_kabuli_chr01 | 12181545                | TT                              | GG                | 1945881738               |
| SNP_P3_5717_12181547 | NC_021160.1    | Ca_kabuli_chr01 | 12181547                | TT                              | GG                | 1945881739               |
| SNP_P3_5718_12231553 | NC_021160.1    | Ca_kabuli_chr01 | 12231553                | AA                              | TT                | 1945881741               |
| SNP_P3_5721_12260585 | NC_021160.1    | Ca_kabuli_chr01 | 12260585                | TT                              | GG                | 1945881743               |
| SNP_P3_5722_12365816 | NC_021160.1    | Ca_kabuli_chr01 | 12365816                | CC                              | TT                | 1945881745               |
| SNP_P3_5723_12372169 | NC_021160.1    | Ca_kabuli_chr01 | 12372169                | AA                              | GG                | 1945881746               |
| SNP_P3_5724_12372225 | NC_021160.1    | Ca_kabuli_chr01 | 12372225                | GG                              | AA                | 1945881748               |
| SNP_P3_5725_12372332 | NC_021160.1    | Ca_kabuli_chr01 | 12372332                | GG                              | CC                | 1945881750               |
| SNP_P3_5726_12372520 | NC_021160.1    | Ca_kabuli_chr01 | 12372520                | AA                              | CC                | 1945881752               |
| SNP_P3_5727_12372584 | NC_021160.1    | Ca_kabuli_chr01 | 12372584                | TT                              | CC                | 1945881754               |
| SNP_P3_5729_12377270 | NC_021160.1    | Ca_kabuli_chr01 | 12377270                | TT                              | CC                | 1945881755               |
| SNP_P3_5731_12422552 | NC_021160.1    | Ca_kabuli_chr01 | 12422552                | AA                              | GG                | 1945881757               |

| SNPs IDs             | Chromosome IDs | Chromosomes     | Physical positions (bp) | CDC Frontier (Reference genome) | (Pusa 256 & HPNB) | NCBI SNPdb Accession IDs |
|----------------------|----------------|-----------------|-------------------------|---------------------------------|-------------------|--------------------------|
| SNP_P3_5734_12463517 | NC_021160.1    | Ca_kabuli_chr01 | 12463517                | GG                              | AA                | 1945881759               |
| SNP_P3_5735_12464321 | NC_021160.1    | Ca_kabuli_chr01 | 12464321                | TT                              | CC                | 1945881761               |
| SNP_P3_5736_12465301 | NC_021160.1    | Ca_kabuli_chr01 | 12465301                | CC                              | TT                | 1945881762               |
| SNP_P3_5737_12486992 | NC_021160.1    | Ca_kabuli_chr01 | 12486992                | GG                              | CC                | 1945881764               |
| SNP_P3_5738_12487762 | NC_021160.1    | Ca_kabuli_chr01 | 12487762                | TT                              | CC                | 1945881766               |
| SNP_P3_5739_12507073 | NC_021160.1    | Ca_kabuli_chr01 | 12507073                | CC                              | AA                | 1945881768               |
| SNP_P3_5741_12531507 | NC_021160.1    | Ca_kabuli_chr01 | 12531507                | AA                              | TT                | 1945881769               |
| SNP_P3_5744_12551793 | NC_021160.1    | Ca_kabuli_chr01 | 12551793                | AA                              | GG                | 1945881771               |
| SNP_P3_5745_12552458 | NC_021160.1    | Ca_kabuli_chr01 | 12552458                | AA                              | GG                | 1945881773               |
| SNP_P3_5747_12572939 | NC_021160.1    | Ca_kabuli_chr01 | 12572939                | TT                              | CC                | 1945881775               |
| SNP_P3_5748_12616099 | NC_021160.1    | Ca_kabuli_chr01 | 12616099                | AA                              | GG                | 1945881776               |
| SNP_P3_5750_12629456 | NC_021160.1    | Ca_kabuli_chr01 | 12629456                | TT                              | CC                | 1945881778               |
| SNP_P3_5751_12630751 | NC_021160.1    | Ca_kabuli_chr01 | 12630751                | TT                              | GG                | 1945881780               |
| SNP_P3_5752_12631249 | NC_021160.1    | Ca_kabuli_chr01 | 12631249                | GG                              | TT                | 1945881782               |
| SNP_P3_5755_12644747 | NC_021160.1    | Ca_kabuli_chr01 | 12644747                | AA                              | GG                | 1945881784               |
| SNP_P3_5756_12644761 | NC_021160.1    | Ca_kabuli_chr01 | 12644761                | CC                              | TT                | 1945881785               |
| SNP_P3_5758_12644911 | NC_021160.1    | Ca_kabuli_chr01 | 12644911                | AA                              | GG                | 1945881787               |
| SNP_P3_5760_12645042 | NC_021160.1    | Ca_kabuli_chr01 | 12645042                | CC                              | TT                | 1945881789               |
| SNP_P3_5761_12645047 | NC_021160.1    | Ca_kabuli_chr01 | 12645047                | AA                              | GG                | 1945881791               |
| SNP_P3_5763_12645801 | NC_021160.1    | Ca_kabuli_chr01 | 12645801                | AA                              | GG                | 1945881792               |
| SNP_P3_5765_12653684 | NC_021160.1    | Ca_kabuli_chr01 | 12653684                | CC                              | GG                | 1945881794               |
| SNP_P3_5767_12654007 | NC_021160.1    | Ca_kabuli_chr01 | 12654007                | TT                              | CC                | 1945881796               |
| SNP_P3_5768_12654010 | NC_021160.1    | Ca_kabuli_chr01 | 12654010                | TT                              | AA                | 1945881798               |
| SNP_P3_5769_12654032 | NC_021160.1    | Ca_kabuli_chr01 | 12654032                | AA                              | CC                | 1945881799               |
| SNP_P3_5770_12654064 | NC_021160.1    | Ca_kabuli_chr01 | 12654064                | TT                              | AA                | 1945881801               |
| SNP_P3_5771_12654065 | NC_021160.1    | Ca_kabuli_chr01 | 12654065                | AA                              | GG                | 1945881803               |
| SNP_P3_5772_12654075 | NC_021160.1    | Ca_kabuli_chr01 | 12654075                | TT                              | CC                | 1945881805               |
| SNP_P3_5773_12665204 | NC_021160.1    | Ca_kabuli_chr01 | 12665204                | TT                              | AA                | 1945881806               |
| SNP_P3_5774_12665269 | NC_021160.1    | Ca_kabuli_chr01 | 12665269                | TT                              | CC                | 1945881808               |
| SNP_P3_5776_12696140 | NC_021160.1    | Ca_kabuli_chr01 | 12696140                | CC                              | TT                | 1945881810               |
| SNP_P3_5777_12716587 | NC_021160.1    | Ca_kabuli_chr01 | 12716587                | TT                              | AA                | 1945881812               |
| SNP_P3_5780_12741887 | NC_021160.1    | Ca_kabuli_chr01 | 12741887                | CC                              | TT                | 1945881814               |
| SNP_P3_5781_12763863 | NC_021160.1    | Ca_kabuli_chr01 | 12763863                | GG                              | AA                | 1945881815               |
| SNP_P3_5782_12766494 | NC_021160.1    | Ca_kabuli_chr01 | 12766494                | CC                              | TT                | 1945881817               |
| SNP_P3_5783_12766739 | NC_021160.1    | Ca_kabuli_chr01 | 12766739                | TT                              | CC                | 1945881819               |
| SNP_P3_5784_12767427 | NC_021160.1    | Ca_kabuli_chr01 | 12767427                | GG                              | TT                | 1945881821               |
| SNP_P3_5785_12767631 | NC_021160.1    | Ca_kabuli_chr01 | 12767631                | TT                              | CC                | 1945881822               |
| SNP_P3_5786_12768244 | NC_021160.1    | Ca_kabuli_chr01 | 12768244                | TT                              | AA                | 1945881824               |
| SNP_P3_5787_12769403 | NC_021160.1    | Ca_kabuli_chr01 | 12769403                | AA                              | GG                | 1945881826               |
| SNP_P3_5788_12769564 | NC_021160.1    | Ca_kabuli_chr01 | 12769564                | CC                              | AA                | 1945881828               |
| SNP_P3_5789_12771171 | NC_021160.1    | Ca_kabuli_chr01 | 12771171                | TT                              | CC                | 1945881829               |
| SNP_P3_5790_12771325 | NC_021160.1    | Ca_kabuli_chr01 | 12771325                | AA                              | CC                | 1945881831               |

| SNPs IDs             | Chromosome IDs | Chromosomes     | Physical positions (bp) | CDC Frontier (Reference genome) | (Pusa 256 & HPNB) | NCBI SNPdb Accession IDs |
|----------------------|----------------|-----------------|-------------------------|---------------------------------|-------------------|--------------------------|
| SNP_P3_5791_12772160 | NC_021160.1    | Ca_kabuli_chr01 | 12772160                | GG                              | AA                | 1945881833               |
| SNP_P3_5792_12772178 | NC_021160.1    | Ca_kabuli_chr01 | 12772178                | TT                              | AA                | 1945881835               |
| SNP_P3_5793_12772559 | NC_021160.1    | Ca_kabuli_chr01 | 12772559                | CC                              | GG                | 1945881836               |
| SNP_P3_5794_12772762 | NC_021160.1    | Ca_kabuli_chr01 | 12772762                | CC                              | TT                | 1945881838               |
| SNP_P3_5795_12772780 | NC_021160.1    | Ca_kabuli_chr01 | 12772780                | GG                              | AA                | 1945881840               |
| SNP_P3_5796_12772795 | NC_021160.1    | Ca_kabuli_chr01 | 12772795                | GG                              | TT                | 1945881842               |
| SNP_P3_5797_12772805 | NC_021160.1    | Ca_kabuli_chr01 | 12772805                | TT                              | CC                | 1945881843               |
| SNP_P3_5798_12772813 | NC_021160.1    | Ca_kabuli_chr01 | 12772813                | AA                              | TT                | 1945881845               |
| SNP_P3_5799_12772819 | NC_021160.1    | Ca_kabuli_chr01 | 12772819                | AA                              | GG                | 1945881847               |
| SNP_P3_5800_12772833 | NC_021160.1    | Ca_kabuli_chr01 | 12772833                | CC                              | TT                | 1945881849               |
| SNP_P3_5801_12773041 | NC_021160.1    | Ca_kabuli_chr01 | 12773041                | AA                              | GG                | 1945881850               |
| SNP_P3_5803_12774350 | NC_021160.1    | Ca_kabuli_chr01 | 12774350                | TT                              | AA                | 1945881852               |
| SNP_P3_5804_12774355 | NC_021160.1    | Ca_kabuli_chr01 | 12774355                | AA                              | TT                | 1945881854               |
| SNP_P3_5805_12774385 | NC_021160.1    | Ca_kabuli_chr01 | 12774385                | CC                              | TT                | 1945881856               |
| SNP_P3_5806_12774407 | NC_021160.1    | Ca_kabuli_chr01 | 12774407                | TT                              | AA                | 1945881857               |
| SNP_P3_5807_12774414 | NC_021160.1    | Ca_kabuli_chr01 | 12774414                | AA                              | TT                | 1945881859               |
| SNP_P3_5808_12774459 | NC_021160.1    | Ca_kabuli_chr01 | 12774459                | TT                              | CC                | 1945881861               |
| SNP_P3_5809_12776043 | NC_021160.1    | Ca_kabuli_chr01 | 12776043                | CC                              | TT                | 1945881863               |
| SNP_P3_5812_12776943 | NC_021160.1    | Ca_kabuli_chr01 | 12776943                | GG                              | AA                | 1945881864               |
| SNP_P3_5813_12776959 | NC_021160.1    | Ca_kabuli_chr01 | 12776959                | CC                              | TT                | 1945881866               |
| SNP_P3_5814_12777148 | NC_021160.1    | Ca_kabuli_chr01 | 12777148                | TT                              | AA                | 1945881868               |
| SNP_P3_5815_12777165 | NC_021160.1    | Ca_kabuli_chr01 | 12777165                | AA                              | TT                | 1945881870               |
| SNP_P3_5816_12777171 | NC_021160.1    | Ca_kabuli_chr01 | 12777171                | TT                              | CC                | 1945881871               |
| SNP_P3_5817_12778229 | NC_021160.1    | Ca_kabuli_chr01 | 12778229                | CC                              | TT                | 1945881873               |
| SNP_P3_5818_12778308 | NC_021160.1    | Ca_kabuli_chr01 | 12778308                | AA                              | GG                | 1945881875               |
| SNP_P3_5819_12778337 | NC_021160.1    | Ca_kabuli_chr01 | 12778337                | CC                              | TT                | 1945881877               |
| SNP_P3_5820_12778344 | NC_021160.1    | Ca_kabuli_chr01 | 12778344                | AA                              | GG                | 1945881879               |
| SNP_P3_5821_12781044 | NC_021160.1    | Ca_kabuli_chr01 | 12781044                | CC                              | AA                | 1945881880               |
| SNP_P3_5822_12781045 | NC_021160.1    | Ca_kabuli_chr01 | 12781045                | CC                              | AA                | 1945881882               |
| SNP_P3_5823_12783332 | NC_021160.1    | Ca_kabuli_chr01 | 12783332                | GG                              | AA                | 1945881884               |
| SNP_P3_5825_12895063 | NC_021160.1    | Ca_kabuli_chr01 | 12895063                | AA                              | GG                | 1945881886               |
| SNP_P3_5826_12897485 | NC_021160.1    | Ca_kabuli_chr01 | 12897485                | CC                              | AA                | 1945881887               |
| SNP_P3_5828_12927337 | NC_021160.1    | Ca_kabuli_chr01 | 12927337                | TT                              | GG                | 1945881889               |
| SNP_P3_5830_12934095 | NC_021160.1    | Ca_kabuli_chr01 | 12934095                | TT                              | AA                | 1945881891               |
| SNP_P3_5831_12947342 | NC_021160.1    | Ca_kabuli_chr01 | 12947342                | GG                              | AA                | 1945881893               |
| SNP_P3_5832_12947368 | NC_021160.1    | Ca_kabuli_chr01 | 12947368                | CC                              | TT                | 1945881894               |
| SNP_P3_5833_12947398 | NC_021160.1    | Ca_kabuli_chr01 | 12947398                | GG                              | AA                | 1945881896               |
| SNP_P3_5834_12947448 | NC_021160.1    | Ca_kabuli_chr01 | 12947448                | CC                              | TT                | 1945881898               |
| SNP_P3_5835_12947468 | NC_021160.1    | Ca_kabuli_chr01 | 12947468                | CC                              | TT                | 1945881900               |
| SNP_P3_5836_12947486 | NC_021160.1    | Ca_kabuli_chr01 | 12947486                | AA                              | GG                | 1945881901               |
| SNP_P3_5837_12947534 | NC_021160.1    | Ca_kabuli_chr01 | 12947534                | CC                              | TT                | 1945881903               |
| SNP_P3_5838_12947539 | NC_021160.1    | Ca_kabuli_chr01 | 12947539                | GG                              | AA                | 1945881905               |

| SNPs IDs             | Chromosome IDs | Chromosomes     | Physical positions (bp) | CDC Frontier (Reference genome) | (Pusa 256 & HPNB) | NCBI SNPdb Accession IDs |
|----------------------|----------------|-----------------|-------------------------|---------------------------------|-------------------|--------------------------|
| SNP_P3_5839_12947557 | NC_021160.1    | Ca_kabuli_chr01 | 12947557                | AA                              | GG                | 1945881907               |
| SNP_P3_5841_12947755 | NC_021160.1    | Ca_kabuli_chr01 | 12947755                | TT                              | CC                | 1945881908               |
| SNP_P3_5842_12947981 | NC_021160.1    | Ca_kabuli_chr01 | 12947981                | AA                              | GG                | 1945881910               |
| SNP_P3_5843_12950905 | NC_021160.1    | Ca_kabuli_chr01 | 12950905                | CC                              | TT                | 1945881912               |
| SNP_P3_5844_12950906 | NC_021160.1    | Ca_kabuli_chr01 | 12950906                | TT                              | CC                | 1945881914               |
| SNP_P3_5845_12950909 | NC_021160.1    | Ca_kabuli_chr01 | 12950909                | CC                              | GG                | 1945881915               |
| SNP_P3_5846_12950918 | NC_021160.1    | Ca_kabuli_chr01 | 12950918                | TT                              | CC                | 1945881917               |
| SNP_P3_5847_12950936 | NC_021160.1    | Ca_kabuli_chr01 | 12950936                | AA                              | GG                | 1945881919               |
| SNP_P3_5848_12951110 | NC_021160.1    | Ca_kabuli_chr01 | 12951110                | TT                              | CC                | 1945881921               |
| SNP_P3_5849_12951124 | NC_021160.1    | Ca_kabuli_chr01 | 12951124                | AA                              | CC                | 1945881922               |
| SNP_P3_5852_12956156 | NC_021160.1    | Ca_kabuli_chr01 | 12956156                | CC                              | AA                | 1945881924               |
| SNP_P3_5853_12956302 | NC_021160.1    | Ca_kabuli_chr01 | 12956302                | CC                              | TT                | 1945881926               |
| SNP_P3_5854_12956336 | NC_021160.1    | Ca_kabuli_chr01 | 12956336                | GG                              | AA                | 1945881928               |
| SNP_P3_5855_12956354 | NC_021160.1    | Ca_kabuli_chr01 | 12956354                | AA                              | GG                | 1945881929               |
| SNP_P3_5856_12956372 | NC_021160.1    | Ca_kabuli_chr01 | 12956372                | AA                              | GG                | 1945881931               |
| SNP_P3_5858_12956802 | NC_021160.1    | Ca_kabuli_chr01 | 12956802                | TT                              | CC                | 1945881933               |
| SNP_P3_5859_12956869 | NC_021160.1    | Ca_kabuli_chr01 | 12956869                | AA                              | GG                | 1945881935               |
| SNP_P3_5860_12956950 | NC_021160.1    | Ca_kabuli_chr01 | 12956950                | CC                              | TT                | 1945881936               |
| SNP_P3_5861_12965080 | NC_021160.1    | Ca_kabuli_chr01 | 12965080                | TT                              | CC                | 1945881938               |
| SNP_P3_5862_12979201 | NC_021160.1    | Ca_kabuli_chr01 | 12979201                | CC                              | AA                | 1945881940               |
| SNP_P3_5863_12979534 | NC_021160.1    | Ca_kabuli_chr01 | 12979534                | TT                              | CC                | 1945881942               |
| SNP_P3_5864_12984099 | NC_021160.1    | Ca_kabuli_chr01 | 12984099                | CC                              | TT                | 1945881943               |
| SNP_P3_5865_12984100 | NC_021160.1    | Ca_kabuli_chr01 | 12984100                | GG                              | AA                | 1945881945               |
| SNP_P3_5867_12985997 | NC_021160.1    | Ca_kabuli_chr01 | 12985997                | GG                              | CC                | 1945881947               |
| SNP_P3_5869_12991478 | NC_021160.1    | Ca_kabuli_chr01 | 12991478                | TT                              | AA                | 1945881949               |
| SNP_P3_5870_13006291 | NC_021160.1    | Ca_kabuli_chr01 | 13006291                | CC                              | TT                | 1945881950               |
| SNP_P3_5871_13007082 | NC_021160.1    | Ca_kabuli_chr01 | 13007082                | AA                              | GG                | 1945881952               |
| SNP_P3_5872_13007215 | NC_021160.1    | Ca_kabuli_chr01 | 13007215                | AA                              | GG                | 1945881954               |
| SNP_P3_5873_13007244 | NC_021160.1    | Ca_kabuli_chr01 | 13007244                | AA                              | GG                | 1945881956               |
| SNP_P3_5874_13007294 | NC_021160.1    | Ca_kabuli_chr01 | 13007294                | CC                              | GG                | 1945881958               |
| SNP_P3_5875_13007347 | NC_021160.1    | Ca_kabuli_chr01 | 13007347                | TT                              | AA                | 1945881959               |
| SNP_P3_5876_13007352 | NC_021160.1    | Ca_kabuli_chr01 | 13007352                | AA                              | GG                | 1945881961               |
| SNP_P3_5877_13007480 | NC_021160.1    | Ca_kabuli_chr01 | 13007480                | GG                              | AA                | 1945881963               |
| SNP_P3_5879_13007533 | NC_021160.1    | Ca_kabuli_chr01 | 13007533                | GG                              | AA                | 1945881965               |
| SNP_P3_5880_13007590 | NC_021160.1    | Ca_kabuli_chr01 | 13007590                | CC                              | AA                | 1945881966               |
| SNP_P3_5881_13007861 | NC_021160.1    | Ca_kabuli_chr01 | 13007861                | TT                              | GG                | 1945881968               |
| SNP_P3_5882_13008096 | NC_021160.1    | Ca_kabuli_chr01 | 13008096                | CC                              | TT                | 1945881970               |
| SNP_P3_5883_13008103 | NC_021160.1    | Ca_kabuli_chr01 | 13008103                | CC                              | TT                | 1945881972               |
| SNP_P3_5884_13008136 | NC_021160.1    | Ca_kabuli_chr01 | 13008136                | CC                              | AA                | 1945881973               |
| SNP_P3_5885_13008184 | NC_021160.1    | Ca_kabuli_chr01 | 13008184                | TT                              | CC                | 1945881975               |
| SNP_P3_5886_13008220 | NC_021160.1    | Ca_kabuli_chr01 | 13008220                | CC                              | TT                | 1945881977               |
| SNP_P3_5887_13008592 | NC_021160.1    | Ca_kabuli_chr01 | 13008592                | CC                              | AA                | 1945881979               |

| SNPs IDs             | Chromosome IDs | Chromosomes     | Physical positions (bp) | CDC Frontier (Reference genome) | (Pusa 256 & HPNB) | NCBI SNPdb Accession IDs |
|----------------------|----------------|-----------------|-------------------------|---------------------------------|-------------------|--------------------------|
| SNP_P3_5888_13008740 | NC_021160.1    | Ca_kabuli_chr01 | 13008740                | CC                              | GG                | 1945881980               |
| SNP_P3_5889_13008816 | NC_021160.1    | Ca_kabuli_chr01 | 13008816                | TT                              | CC                | 1945881982               |
| SNP_P3_5890_13009592 | NC_021160.1    | Ca_kabuli_chr01 | 13009592                | GG                              | AA                | 1945881984               |
| SNP_P3_5891_13012574 | NC_021160.1    | Ca_kabuli_chr01 | 13012574                | TT                              | CC                | 1945881986               |
| SNP_P3_5893_13024000 | NC_021160.1    | Ca_kabuli_chr01 | 13024000                | CC                              | TT                | 1945881987               |
| SNP_P3_5894_13056832 | NC_021160.1    | Ca_kabuli_chr01 | 13056832                | GG                              | TT                | 1945881989               |
| SNP_P3_5897_13089918 | NC_021160.1    | Ca_kabuli_chr01 | 13089918                | GG                              | CC                | 1945881991               |
| SNP_P3_5898_13116083 | NC_021160.1    | Ca_kabuli_chr01 | 13116083                | AA                              | GG                | 1945881993               |
| SNP_P3_5900_13124920 | NC_021160.1    | Ca_kabuli_chr01 | 13124920                | CC                              | TT                | 1945881994               |
| SNP_P3_5901_13124951 | NC_021160.1    | Ca_kabuli_chr01 | 13124951                | TT                              | CC                | 1945881996               |
| SNP_P3_5902_13124956 | NC_021160.1    | Ca_kabuli_chr01 | 13124956                | CC                              | TT                | 1945881998               |
| SNP_P3_5903_13125068 | NC_021160.1    | Ca_kabuli_chr01 | 13125068                | TT                              | CC                | 1945882000               |
| SNP_P3_5904_13125410 | NC_021160.1    | Ca_kabuli_chr01 | 13125410                | GG                              | AA                | 1945882001               |
| SNP_P3_5905_13174737 | NC_021160.1    | Ca_kabuli_chr01 | 13174737                | CC                              | TT                | 1945882003               |
| SNP_P3_5906_13187925 | NC_021160.1    | Ca_kabuli_chr01 | 13187925                | CC                              | TT                | 1945882005               |
| SNP_P3_5907_13222918 | NC_021160.1    | Ca_kabuli_chr01 | 13222918                | CC                              | AA                | 1945882007               |
| SNP_P3_5908_13308534 | NC_021160.1    | Ca_kabuli_chr01 | 13308534                | CC                              | TT                | 1945882009               |
| SNP_P3_5909_13333029 | NC_021160.1    | Ca_kabuli_chr01 | 13333029                | AA                              | CC                | 1945882010               |
| SNP_P3_5910_13333030 | NC_021160.1    | Ca_kabuli_chr01 | 13333030                | TT                              | AA                | 1945882012               |
| SNP_P3_5911_13342389 | NC_021160.1    | Ca_kabuli_chr01 | 13342389                | TT                              | AA                | 1945882014               |
| SNP_P3_5912_13342393 | NC_021160.1    | Ca_kabuli_chr01 | 13342393                | AA                              | TT                | 1945882016               |
| SNP_P3_5913_13351101 | NC_021160.1    | Ca_kabuli_chr01 | 13351101                | GG                              | AA                | 1945882017               |
| SNP_P3_5914_13392850 | NC_021160.1    | Ca_kabuli_chr01 | 13392850                | GG                              | AA                | 1945882019               |
| SNP_P3_5915_13396683 | NC_021160.1    | Ca_kabuli_chr01 | 13396683                | AA                              | CC                | 1945882021               |
| SNP_P3_5916_13424684 | NC_021160.1    | Ca_kabuli_chr01 | 13424684                | TT                              | AA                | 1945882023               |
| SNP_P3_5917_13475768 | NC_021160.1    | Ca_kabuli_chr01 | 13475768                | TT                              | CC                | 1945882024               |
| SNP_P3_5919_13487455 | NC_021160.1    | Ca_kabuli_chr01 | 13487455                | TT                              | AA                | 1945882026               |
| SNP_P3_5920_13487457 | NC_021160.1    | Ca_kabuli_chr01 | 13487457                | AA                              | TT                | 1945882028               |
| SNP_P3_5921_13528573 | NC_021160.1    | Ca_kabuli_chr01 | 13528573                | AA                              | TT                | 1945882030               |
| SNP_P3_5922_13528576 | NC_021160.1    | Ca_kabuli_chr01 | 13528576                | AA                              | TT                | 1945882032               |
| SNP_P3_5923_13551900 | NC_021160.1    | Ca_kabuli_chr01 | 13551900                | CC                              | TT                | 1945882033               |
| SNP_P3_5924_13570702 | NC_021160.1    | Ca_kabuli_chr01 | 13570702                | TT                              | AA                | 1945882035               |
| SNP_P3_5925_13570734 | NC_021160.1    | Ca_kabuli_chr01 | 13570734                | CC                              | TT                | 1945882037               |
| SNP_P3_5927_13570757 | NC_021160.1    | Ca_kabuli_chr01 | 13570757                | TT                              | CC                | 1945882039               |
| SNP_P3_5928_13615337 | NC_021160.1    | Ca_kabuli_chr01 | 13615337                | TT                              | GG                | 1945882040               |
| SNP_P3_5929_13628502 | NC_021160.1    | Ca_kabuli_chr01 | 13628502                | CC                              | TT                | 1945882042               |
| SNP_P3_5930_13660570 | NC_021160.1    | Ca_kabuli_chr01 | 13660570                | AA                              | GG                | 1945882044               |
| SNP_P3_5931_13660714 | NC_021160.1    | Ca_kabuli_chr01 | 13660714                | CC                              | TT                | 1945882046               |
| SNP_P3_5932_13660730 | NC_021160.1    | Ca_kabuli_chr01 | 13660730                | CC                              | AA                | 1945882048               |
| SNP_P3_5933_13660748 | NC_021160.1    | Ca_kabuli_chr01 | 13660748                | CC                              | TT                | 1945882049               |
| SNP_P3_5934_13660968 | NC_021160.1    | Ca_kabuli_chr01 | 13660968                | TT                              | CC                | 1945882051               |
| SNP_P3_5935_13661038 | NC_021160.1    | Ca_kabuli_chr01 | 13661038                | TT                              | CC                | 1945882053               |

| SNPs IDs             | Chromosome IDs | Chromosomes     | Physical positions (bp) | CDC Frontier (Reference genome) | (Pusa 256 & HPNB) | NCBI SNPdb Accession IDs |
|----------------------|----------------|-----------------|-------------------------|---------------------------------|-------------------|--------------------------|
| SNP_P3_5936_13661039 | NC_021160.1    | Ca_kabuli_chr01 | 13661039                | TT                              | CC                | 1945882054               |
| SNP_P3_5937_13661040 | NC_021160.1    | Ca_kabuli_chr01 | 13661040                | TT                              | AA                | 1945882056               |
| SNP_P3_5938_13661061 | NC_021160.1    | Ca_kabuli_chr01 | 13661061                | TT                              | CC                | 1945882058               |
| SNP_P3_5939_13661116 | NC_021160.1    | Ca_kabuli_chr01 | 13661116                | AA                              | GG                | 1945882060               |
| SNP_P3_5941_13671524 | NC_021160.1    | Ca_kabuli_chr01 | 13671524                | CC                              | AA                | 1945882062               |
| SNP_P3_5942_13671652 | NC_021160.1    | Ca_kabuli_chr01 | 13671652                | CC                              | TT                | 1945882063               |
| SNP_P3_5943_13671693 | NC_021160.1    | Ca_kabuli_chr01 | 13671693                | AA                              | GG                | 1945882065               |
| SNP_P3_5944_13671803 | NC_021160.1    | Ca_kabuli_chr01 | 13671803                | AA                              | GG                | 1945882067               |
| SNP_P3_5945_13671824 | NC_021160.1    | Ca_kabuli_chr01 | 13671824                | AA                              | GG                | 1945882069               |
| SNP_P3_5946_13671867 | NC_021160.1    | Ca_kabuli_chr01 | 13671867                | GG                              | AA                | 1945882070               |
| SNP_P3_5948_13672155 | NC_021160.1    | Ca_kabuli_chr01 | 13672155                | GG                              | CC                | 1945882072               |
| SNP_P3_5949_13672324 | NC_021160.1    | Ca_kabuli_chr01 | 13672324                | TT                              | AA                | 1945882074               |
| SNP_P3_5950_13672334 | NC_021160.1    | Ca_kabuli_chr01 | 13672334                | AA                              | TT                | 1945882076               |
| SNP_P3_5951_13672335 | NC_021160.1    | Ca_kabuli_chr01 | 13672335                | AA                              | GG                | 1945882077               |
| SNP_P3_5952_13672600 | NC_021160.1    | Ca_kabuli_chr01 | 13672600                | GG                              | AA                | 1945882079               |
| SNP_P3_5954_13672669 | NC_021160.1    | Ca_kabuli_chr01 | 13672669                | TT                              | CC                | 1945882081               |
| SNP_P3_5955_13675250 | NC_021160.1    | Ca_kabuli_chr01 | 13675250                | TT                              | CC                | 1945882083               |
| SNP_P3_5956_13677284 | NC_021160.1    | Ca_kabuli_chr01 | 13677284                | TT                              | AA                | 1945882085               |
| SNP_P3_5957_13677583 | NC_021160.1    | Ca_kabuli_chr01 | 13677583                | GG                              | AA                | 1945882086               |
| SNP_P3_5958_13677585 | NC_021160.1    | Ca_kabuli_chr01 | 13677585                | GG                              | AA                | 1945882088               |
| SNP_P3_5959_13678797 | NC_021160.1    | Ca_kabuli_chr01 | 13678797                | GG                              | AA                | 1945882090               |
| SNP_P3_5960_13679015 | NC_021160.1    | Ca_kabuli_chr01 | 13679015                | CC                              | GG                | 1945882092               |
| SNP_P3_5961_13679252 | NC_021160.1    | Ca_kabuli_chr01 | 13679252                | CC                              | AA                | 1945882093               |
| SNP_P3_5962_13679267 | NC_021160.1    | Ca_kabuli_chr01 | 13679267                | AA                              | CC                | 1945882095               |
| SNP_P3_5963_13679280 | NC_021160.1    | Ca_kabuli_chr01 | 13679280                | AA                              | GG                | 1945882097               |
| SNP_P3_5964_13679364 | NC_021160.1    | Ca_kabuli_chr01 | 13679364                | CC                              | AA                | 1945882099               |
| SNP_P3_5966_13682858 | NC_021160.1    | Ca_kabuli_chr01 | 13682858                | CC                              | TT                | 1945882100               |
| SNP_P3_5967_13683201 | NC_021160.1    | Ca_kabuli_chr01 | 13683201                | CC                              | TT                | 1945882102               |
| SNP_P3_5968_13683240 | NC_021160.1    | Ca_kabuli_chr01 | 13683240                | TT                              | CC                | 1945882104               |
| SNP_P3_5969_13683727 | NC_021160.1    | Ca_kabuli_chr01 | 13683727                | AA                              | CC                | 1945882106               |
| SNP_P3_5971_13684049 | NC_021160.1    | Ca_kabuli_chr01 | 13684049                | AA                              | TT                | 1945882107               |
| SNP_P3_5972_13687313 | NC_021160.1    | Ca_kabuli_chr01 | 13687313                | AA                              | GG                | 1945882109               |
| SNP_P3_5973_13689461 | NC_021160.1    | Ca_kabuli_chr01 | 13689461                | TT                              | CC                | 1945882111               |
| SNP_P3_5974_13689847 | NC_021160.1    | Ca_kabuli_chr01 | 13689847                | AA                              | GG                | 1945882113               |
| SNP_P3_5975_13690797 | NC_021160.1    | Ca_kabuli_chr01 | 13690797                | GG                              | AA                | 1945882114               |
| SNP_P3_5976_13691640 | NC_021160.1    | Ca_kabuli_chr01 | 13691640                | AA                              | GG                | 1945882116               |
| SNP_P3_5977_13691658 | NC_021160.1    | Ca_kabuli_chr01 | 13691658                | TT                              | CC                | 1945882118               |
| SNP_P3_5978_13691951 | NC_021160.1    | Ca_kabuli_chr01 | 13691951                | TT                              | CC                | 1945882120               |
| SNP_P3_5979_13691967 | NC_021160.1    | Ca_kabuli_chr01 | 13691967                | GG                              | AA                | 1945882121               |
| SNP_P3_5981_13692774 | NC_021160.1    | Ca_kabuli_chr01 | 13692774                | GG                              | AA                | 1945882123               |
| SNP_P3_5982_13692843 | NC_021160.1    | Ca_kabuli_chr01 | 13692843                | AA                              | GG                | 1945882125               |
| SNP_P3_5983_13693149 | NC_021160.1    | Ca_kabuli_chr01 | 13693149                | GG                              | CC                | 1945882127               |

| SNPs IDs             | Chromosome IDs | Chromosomes     | Physical positions (bp) | CDC Frontier (Reference genome) | (Pusa 256 & HPNB) | NCBI SNPdb Accession IDs |
|----------------------|----------------|-----------------|-------------------------|---------------------------------|-------------------|--------------------------|
| SNP_P3_5984_13693781 | NC_021160.1    | Ca_kabuli_chr01 | 13693781                | TT                              | AA                | 1945882129               |
| SNP_P3_5985_13693827 | NC_021160.1    | Ca_kabuli_chr01 | 13693827                | CC                              | AA                | 1945882130               |
| SNP_P3_5986_13695788 | NC_021160.1    | Ca_kabuli_chr01 | 13695788                | CC                              | GG                | 1945882132               |
| SNP_P3_5987_13695792 | NC_021160.1    | Ca_kabuli_chr01 | 13695792                | CC                              | TT                | 1945882134               |
| SNP_P3_5988_13695871 | NC_021160.1    | Ca_kabuli_chr01 | 13695871                | TT                              | CC                | 1945882136               |
| SNP_P3_5991_13698268 | NC_021160.1    | Ca_kabuli_chr01 | 13698268                | TT                              | CC                | 1945882137               |
| SNP_P3_5992_13698333 | NC_021160.1    | Ca_kabuli_chr01 | 13698333                | GG                              | TT                | 1945882139               |
| SNP_P3_5993_13698349 | NC_021160.1    | Ca_kabuli_chr01 | 13698349                | CC                              | AA                | 1945882141               |
| SNP_P3_5994_13698548 | NC_021160.1    | Ca_kabuli_chr01 | 13698548                | AA                              | TT                | 1945882142               |
| SNP_P3_5995_13698944 | NC_021160.1    | Ca_kabuli_chr01 | 13698944                | AA                              | GG                | 1945882144               |
| SNP_P3_5996_13699547 | NC_021160.1    | Ca_kabuli_chr01 | 13699547                | AA                              | GG                | 1945882146               |
| SNP_P3_5997_13699617 | NC_021160.1    | Ca_kabuli_chr01 | 13699617                | TT                              | AA                | 1945882148               |
| SNP_P3_5998_13699742 | NC_021160.1    | Ca_kabuli_chr01 | 13699742                | AA                              | GG                | 1945882149               |
| SNP_P3_6000_13701864 | NC_021160.1    | Ca_kabuli_chr01 | 13701864                | TT                              | GG                | 1945882151               |
| SNP_P3_6001_13702188 | NC_021160.1    | Ca_kabuli_chr01 | 13702188                | TT                              | CC                | 1945882153               |
| SNP_P3_6002_13702807 | NC_021160.1    | Ca_kabuli_chr01 | 13702807                | GG                              | AA                | 1945882155               |
| SNP_P3_6003_13702808 | NC_021160.1    | Ca_kabuli_chr01 | 13702808                | TT                              | AA                | 1945882156               |
| SNP_P3_6004_13703097 | NC_021160.1    | Ca_kabuli_chr01 | 13703097                | CC                              | GG                | 1945882158               |
| SNP_P3_6005_13703099 | NC_021160.1    | Ca_kabuli_chr01 | 13703099                | AA                              | CC                | 1945882160               |
| SNP_P3_6006_13703107 | NC_021160.1    | Ca_kabuli_chr01 | 13703107                | GG                              | CC                | 1945882161               |
| SNP_P3_6007_13703140 | NC_021160.1    | Ca_kabuli_chr01 | 13703140                | GG                              | AA                | 1945882163               |
| SNP_P3_6009_13704129 | NC_021160.1    | Ca_kabuli_chr01 | 13704129                | AA                              | CC                | 1945882165               |
| SNP_P3_6011_13704568 | NC_021160.1    | Ca_kabuli_chr01 | 13704568                | TT                              | CC                | 1945882167               |
| SNP_P3_6012_13706173 | NC_021160.1    | Ca_kabuli_chr01 | 13706173                | TT                              | AA                | 1945882168               |
| SNP_P3_6014_13716400 | NC_021160.1    | Ca_kabuli_chr01 | 13716400                | TT                              | GG                | 1945882170               |
| SNP_P3_6015_13716843 | NC_021160.1    | Ca_kabuli_chr01 | 13716843                | AA                              | GG                | 1945882172               |
| SNP_P3_6016_13734538 | NC_021160.1    | Ca_kabuli_chr01 | 13734538                | AA                              | GG                | 1945882174               |
| SNP_P3_6017_13745197 | NC_021160.1    | Ca_kabuli_chr01 | 13745197                | CC                              | TT                | 1945882176               |
| SNP_P3_6018_13745284 | NC_021160.1    | Ca_kabuli_chr01 | 13745284                | AA                              | TT                | 1945882177               |
| SNP_P3_6019_13746120 | NC_021160.1    | Ca_kabuli_chr01 | 13746120                | TT                              | AA                | 1945882179               |
| SNP_P3_6020_13748781 | NC_021160.1    | Ca_kabuli_chr01 | 13748781                | AA                              | TT                | 1945882181               |
| SNP_P3_6021_13769176 | NC_021160.1    | Ca_kabuli_chr01 | 13769176                | TT                              | AA                | 1945882183               |
| SNP_P3_6022_13777492 | NC_021160.1    | Ca_kabuli_chr01 | 13777492                | AA                              | TT                | 1945882184               |
| SNP_P3_6023_13798878 | NC_021160.1    | Ca_kabuli_chr01 | 13798878                | AA                              | GG                | 1945882186               |
| SNP_P3_6025_13859410 | NC_021160.1    | Ca_kabuli_chr01 | 13859410                | TT                              | CC                | 1945882188               |
| SNP_P3_6026_13863196 | NC_021160.1    | Ca_kabuli_chr01 | 13863196                | AA                              | GG                | 1945882190               |
| SNP_P3_6027_13863203 | NC_021160.1    | Ca_kabuli_chr01 | 13863203                | CC                              | AA                | 1945882191               |
| SNP_P3_6028_13863493 | NC_021160.1    | Ca_kabuli_chr01 | 13863493                | TT                              | CC                | 1945882193               |
| SNP_P3_6029_13863525 | NC_021160.1    | Ca_kabuli_chr01 | 13863525                | AA                              | GG                | 1945882195               |
| SNP_P3_6030_13863526 | NC_021160.1    | Ca_kabuli_chr01 | 13863526                | CC                              | TT                | 1945882197               |
| SNP_P3_6031_13891228 | NC_021160.1    | Ca_kabuli_chr01 | 13891228                | TT                              | AA                | 1945882198               |
| SNP_P3_6032_13903314 | NC_021160.1    | Ca_kabuli_chr01 | 13903314                | AA                              | GG                | 1945882200               |



| SNPs IDs             | Chromosome IDs | Chromosomes     | Physical positions (bp) | CDC Frontier (Reference genome) | (Pusa 256 & HPNB) | NCBI SNPdb Accession IDs |
|----------------------|----------------|-----------------|-------------------------|---------------------------------|-------------------|--------------------------|
| SNP_P3_6034_13930032 | NC_021160.1    | Ca_kabuli_chr01 | 13930032                | GG                              | AA                | 1945882202               |
| SNP_P3_6035_13930258 | NC_021160.1    | Ca_kabuli_chr01 | 13930258                | CC                              | AA                | 1945882204               |
| SNP_P3_6037_13940138 | NC_021160.1    | Ca_kabuli_chr01 | 13940138                | AA                              | GG                | 1945882206               |
| SNP_P3_6038_13950046 | NC_021160.1    | Ca_kabuli_chr01 | 13950046                | CC                              | TT                | 1945882207               |
| SNP_P3_6039_13950098 | NC_021160.1    | Ca_kabuli_chr01 | 13950098                | GG                              | AA                | 1945882209               |
| SNP_P3_6041_13960731 | NC_021160.1    | Ca_kabuli_chr01 | 13960731                | GG                              | AA                | 1945882211               |
| SNP_P3_6042_13960994 | NC_021160.1    | Ca_kabuli_chr01 | 13960994                | GG                              | TT                | 1945882213               |
| SNP_P3_6043_13961023 | NC_021160.1    | Ca_kabuli_chr01 | 13961023                | GG                              | AA                | 1945882214               |
| SNP_P3_6044_13961089 | NC_021160.1    | Ca_kabuli_chr01 | 13961089                | AA                              | GG                | 1945882216               |
| SNP_P3_6045_13966040 | NC_021160.1    | Ca_kabuli_chr01 | 13966040                | AA                              | GG                | 1945882218               |
| SNP_P3_6046_14015757 | NC_021160.1    | Ca_kabuli_chr01 | 14015757                | TT                              | CC                | 1945882220               |
| SNP_P3_6047_14020611 | NC_021160.1    | Ca_kabuli_chr01 | 14020611                | TT                              | AA                | 1945882221               |
| SNP_P3_6048_14059017 | NC_021160.1    | Ca_kabuli_chr01 | 14059017                | CC                              | TT                | 1945882223               |
| SNP_P3_6049_14062041 | NC_021160.1    | Ca_kabuli_chr01 | 14062041                | TT                              | CC                | 1945882225               |
| SNP_P3_6050_14079439 | NC_021160.1    | Ca_kabuli_chr01 | 14079439                | GG                              | AA                | 1945882227               |
| SNP_P3_6052_14094129 | NC_021160.1    | Ca_kabuli_chr01 | 14094129                | AA                              | TT                | 1945882229               |
| SNP_P3_6053_14116386 | NC_021160.1    | Ca_kabuli_chr01 | 14116386                | CC                              | TT                | 1945882230               |
| SNP_P3_6054_14126072 | NC_021160.1    | Ca_kabuli_chr01 | 14126072                | TT                              | CC                | 1945882232               |
| SNP_P3_6055_14175125 | NC_021160.1    | Ca_kabuli_chr01 | 14175125                | GG                              | AA                | 1945882234               |
| SNP_P3_6057_14207015 | NC_021160.1    | Ca_kabuli_chr01 | 14207015                | AA                              | GG                | 1945882236               |
| SNP_P3_6058_14207226 | NC_021160.1    | Ca_kabuli_chr01 | 14207226                | GG                              | TT                | 1945882237               |
| SNP_P3_6059_14207229 | NC_021160.1    | Ca_kabuli_chr01 | 14207229                | AA                              | TT                | 1945882239               |
| SNP_P3_6060_14207485 | NC_021160.1    | Ca_kabuli_chr01 | 14207485                | GG                              | TT                | 1945882241               |
| SNP_P3_6061_14207491 | NC_021160.1    | Ca_kabuli_chr01 | 14207491                | GG                              | CC                | 1945882243               |
| SNP_P3_6062_14207527 | NC_021160.1    | Ca_kabuli_chr01 | 14207527                | GG                              | AA                | 1945882244               |
| SNP_P3_6063_14209667 | NC_021160.1    | Ca_kabuli_chr01 | 14209667                | TT                              | CC                | 1945882246               |
| SNP_P3_6064_14209683 | NC_021160.1    | Ca_kabuli_chr01 | 14209683                | TT                              | AA                | 1945882248               |
| SNP_P3_6065_14209701 | NC_021160.1    | Ca_kabuli_chr01 | 14209701                | AA                              | TT                | 1945882250               |
| SNP_P3_6066_14209762 | NC_021160.1    | Ca_kabuli_chr01 | 14209762                | TT                              | GG                | 1945882252               |
| SNP_P3_6067_14209764 | NC_021160.1    | Ca_kabuli_chr01 | 14209764                | GG                              | AA                | 1945882253               |
| SNP_P3_6068_14209774 | NC_021160.1    | Ca_kabuli_chr01 | 14209774                | GG                              | AA                | 1945882255               |
| SNP_P3_6069_14209786 | NC_021160.1    | Ca_kabuli_chr01 | 14209786                | AA                              | GG                | 1945882257               |
| SNP_P3_6070_14209806 | NC_021160.1    | Ca_kabuli_chr01 | 14209806                | AA                              | GG                | 1945882259               |
| SNP_P3_6071_14209815 | NC_021160.1    | Ca_kabuli_chr01 | 14209815                | AA                              | GG                | 1945882261               |
| SNP_P3_6072_14209821 | NC_021160.1    | Ca_kabuli_chr01 | 14209821                | CC                              | GG                | 1945882262               |
| SNP_P3_6073_14209825 | NC_021160.1    | Ca_kabuli_chr01 | 14209825                | TT                              | GG                | 1945882264               |
| SNP_P3_6074_14209840 | NC_021160.1    | Ca_kabuli_chr01 | 14209840                | AA                              | GG                | 1945882266               |
| SNP_P3_6075_14209862 | NC_021160.1    | Ca_kabuli_chr01 | 14209862                | TT                              | AA                | 1945882268               |
| SNP_P3_6076_14209877 | NC_021160.1    | Ca_kabuli_chr01 | 14209877                | AA                              | TT                | 1945882269               |
| SNP_P3_6077_14209890 | NC_021160.1    | Ca_kabuli_chr01 | 14209890                | CC                              | AA                | 1945882271               |
| SNP_P3_6078_14209903 | NC_021160.1    | Ca_kabuli_chr01 | 14209903                | AA                              | GG                | 1945882273               |
| SNP_P3_6079_14209905 | NC_021160.1    | Ca_kabuli_chr01 | 14209905                | GG                              | TT                | 1945882275               |

| SNPs IDs             | Chromosome IDs | Chromosomes     | Physical positions (bp) | CDC Frontier (Reference genome) | (Pusa 256 & HPNB) | NCBI SNPdb Accession IDs |
|----------------------|----------------|-----------------|-------------------------|---------------------------------|-------------------|--------------------------|
| SNP_P3_6080_14209940 | NC_021160.1    | Ca_kabuli_chr01 | 14209940                | AA                              | TT                | 1945882276               |
| SNP_P3_6081_14209943 | NC_021160.1    | Ca_kabuli_chr01 | 14209943                | TT                              | AA                | 1945882278               |
| SNP_P3_6082_14210042 | NC_021160.1    | Ca_kabuli_chr01 | 14210042                | AA                              | CC                | 1945882280               |
| SNP_P3_6083_14210121 | NC_021160.1    | Ca_kabuli_chr01 | 14210121                | AA                              | TT                | 1945882282               |
| SNP_P3_6084_14210134 | NC_021160.1    | Ca_kabuli_chr01 | 14210134                | AA                              | CC                | 1945882283               |
| SNP_P3_6085_14210192 | NC_021160.1    | Ca_kabuli_chr01 | 14210192                | AA                              | CC                | 1945882285               |
| SNP_P3_6086_14210194 | NC_021160.1    | Ca_kabuli_chr01 | 14210194                | CC                              | TT                | 1945882287               |
| SNP_P3_6087_14210195 | NC_021160.1    | Ca_kabuli_chr01 | 14210195                | AA                              | GG                | 1945882289               |
| SNP_P3_6088_14210197 | NC_021160.1    | Ca_kabuli_chr01 | 14210197                | AA                              | GG                | 1945882291               |
| SNP_P3_6089_14210206 | NC_021160.1    | Ca_kabuli_chr01 | 14210206                | GG                              | AA                | 1945882292               |
| SNP_P3_6090_14210210 | NC_021160.1    | Ca_kabuli_chr01 | 14210210                | CC                              | GG                | 1945882294               |
| SNP_P3_6091_14210227 | NC_021160.1    | Ca_kabuli_chr01 | 14210227                | TT                              | CC                | 1945882296               |
| SNP_P3_6092_14210232 | NC_021160.1    | Ca_kabuli_chr01 | 14210232                | TT                              | CC                | 1945882298               |
| SNP_P3_6093_14210275 | NC_021160.1    | Ca_kabuli_chr01 | 14210275                | CC                              | TT                | 1945882299               |
| SNP_P3_6094_14210278 | NC_021160.1    | Ca_kabuli_chr01 | 14210278                | CC                              | TT                | 1945882301               |
| SNP_P3_6095_14210327 | NC_021160.1    | Ca_kabuli_chr01 | 14210327                | GG                              | AA                | 1945882303               |
| SNP_P3_6096_14265934 | NC_021160.1    | Ca_kabuli_chr01 | 14265934                | CC                              | AA                | 1945882305               |
| SNP_P3_6098_14382112 | NC_021160.1    | Ca_kabuli_chr01 | 14382112                | AA                              | CC                | 1945882306               |
| SNP_P3_6099_14382149 | NC_021160.1    | Ca_kabuli_chr01 | 14382149                | TT                              | CC                | 1945882308               |
| SNP_P3_6100_14382276 | NC_021160.1    | Ca_kabuli_chr01 | 14382276                | GG                              | TT                | 1945882310               |
| SNP_P3_6101_14382327 | NC_021160.1    | Ca_kabuli_chr01 | 14382327                | GG                              | AA                | 1945882312               |
| SNP_P3_6102_14382367 | NC_021160.1    | Ca_kabuli_chr01 | 14382367                | TT                              | CC                | 1945882314               |
| SNP_P3_6103_14382370 | NC_021160.1    | Ca_kabuli_chr01 | 14382370                | TT                              | CC                | 1945882315               |
| SNP_P3_6104_14382402 | NC_021160.1    | Ca_kabuli_chr01 | 14382402                | CC                              | TT                | 1945882317               |
| SNP_P3_6105_14382424 | NC_021160.1    | Ca_kabuli_chr01 | 14382424                | AA                              | GG                | 1945882319               |
| SNP_P3_6106_14382512 | NC_021160.1    | Ca_kabuli_chr01 | 14382512                | TT                              | CC                | 1945882321               |
| SNP_P3_6107_14382549 | NC_021160.1    | Ca_kabuli_chr01 | 14382549                | AA                              | CC                | 1945882322               |
| SNP_P3_6108_14382550 | NC_021160.1    | Ca_kabuli_chr01 | 14382550                | TT                              | CC                | 1945882324               |
| SNP_P3_6109_14382606 | NC_021160.1    | Ca_kabuli_chr01 | 14382606                | GG                              | AA                | 1945882326               |
| SNP_P3_6110_14382659 | NC_021160.1    | Ca_kabuli_chr01 | 14382659                | CC                              | TT                | 1945882328               |
| SNP_P3_6114_14448393 | NC_021160.1    | Ca_kabuli_chr01 | 14448393                | CC                              | AA                | 1945882329               |
| SNP_P3_6115_14559095 | NC_021160.1    | Ca_kabuli_chr01 | 14559095                | CC                              | TT                | 1945882331               |
| SNP_P3_6117_14607827 | NC_021160.1    | Ca_kabuli_chr01 | 14607827                | GG                              | AA                | 1945882333               |
| SNP_P3_6119_14680655 | NC_021160.1    | Ca_kabuli_chr01 | 14680655                | CC                              | AA                | 1945882335               |
| SNP_P3_6122_14693359 | NC_021160.1    | Ca_kabuli_chr01 | 14693359                | AA                              | GG                | 1945882336               |
| SNP_P3_6124_14701055 | NC_021160.1    | Ca_kabuli_chr01 | 14701055                | CC                              | TT                | 1945882338               |
| SNP_P3_6125_14706863 | NC_021160.1    | Ca_kabuli_chr01 | 14706863                | GG                              | AA                | 1945882340               |
| SNP_P3_6126_14706887 | NC_021160.1    | Ca_kabuli_chr01 | 14706887                | TT                              | CC                | 1945882342               |
| SNP_P3_6127_14706890 | NC_021160.1    | Ca_kabuli_chr01 | 14706890                | TT                              | CC                | 1945882344               |
| SNP_P3_6129_14765406 | NC_021160.1    | Ca_kabuli_chr01 | 14765406                | CC                              | TT                | 1945882345               |
| SNP_P3_6130_14765822 | NC_021160.1    | Ca_kabuli_chr01 | 14765822                | TT                              | AA                | 1945882347               |
| SNP_P3_6131_14766205 | NC_021160.1    | Ca_kabuli_chr01 | 14766205                | TT                              | CC                | 1945882349               |

| SNPs IDs             | Chromosome IDs | Chromosomes     | Physical positions (bp) | CDC Frontier (Reference genome) | (Pusa 256 & HPNB) | NCBI SNPdb Accession IDs |
|----------------------|----------------|-----------------|-------------------------|---------------------------------|-------------------|--------------------------|
| SNP_P3_6132_14767582 | NC_021160.1    | Ca_kabuli_chr01 | 14767582                | TT                              | CC                | 1945882351               |
| SNP_P3_6133_14769542 | NC_021160.1    | Ca_kabuli_chr01 | 14769542                | CC                              | TT                | 1945882353               |
| SNP_P3_6134_14771041 | NC_021160.1    | Ca_kabuli_chr01 | 14771041                | AA                              | CC                | 1945882354               |
| SNP_P3_6135_14771058 | NC_021160.1    | Ca_kabuli_chr01 | 14771058                | AA                              | GG                | 1945882356               |
| SNP_P3_6136_14843128 | NC_021160.1    | Ca_kabuli_chr01 | 14843128                | CC                              | GG                | 1945882358               |
| SNP_P3_6137_14843227 | NC_021160.1    | Ca_kabuli_chr01 | 14843227                | TT                              | AA                | 1945882360               |
| SNP_P3_6138_14843255 | NC_021160.1    | Ca_kabuli_chr01 | 14843255                | AA                              | GG                | 1945882362               |
| SNP_P3_6140_14843322 | NC_021160.1    | Ca_kabuli_chr01 | 14843322                | AA                              | TT                | 1945882363               |
| SNP_P3_6142_14866741 | NC_021160.1    | Ca_kabuli_chr01 | 14866741                | AA                              | GG                | 1945882365               |
| SNP_P3_6145_14902398 | NC_021160.1    | Ca_kabuli_chr01 | 14902398                | AA                              | GG                | 1945882367               |
| SNP_P3_6146_14974631 | NC_021160.1    | Ca_kabuli_chr01 | 14974631                | AA                              | CC                | 1945882369               |
| SNP_P3_6147_14991023 | NC_021160.1    | Ca_kabuli_chr01 | 14991023                | AA                              | GG                | 1945882371               |
| SNP_P3_6148_14991131 | NC_021160.1    | Ca_kabuli_chr01 | 14991131                | CC                              | GG                | 1945882373               |
| SNP_P3_6149_14995637 | NC_021160.1    | Ca_kabuli_chr01 | 14995637                | CC                              | TT                | 1945882374               |
| SNP_P3_6152_14996172 | NC_021160.1    | Ca_kabuli_chr01 | 14996172                | GG                              | TT                | 1945882376               |
| SNP_P3_6154_15065749 | NC_021160.1    | Ca_kabuli_chr01 | 15065749                | AA                              | GG                | 1945882378               |
| SNP_P3_6155_15065763 | NC_021160.1    | Ca_kabuli_chr01 | 15065763                | AA                              | CC                | 1945882380               |
| SNP_P3_6156_15065772 | NC_021160.1    | Ca_kabuli_chr01 | 15065772                | TT                              | CC                | 1945882381               |
| SNP_P3_6157_15065805 | NC_021160.1    | Ca_kabuli_chr01 | 15065805                | AA                              | TT                | 1945882383               |
| SNP_P3_6158_15065815 | NC_021160.1    | Ca_kabuli_chr01 | 15065815                | CC                              | TT                | 1945882385               |
| SNP_P3_6159_15065859 | NC_021160.1    | Ca_kabuli_chr01 | 15065859                | TT                              | AA                | 1945882387               |
| SNP_P3_6160_15065889 | NC_021160.1    | Ca_kabuli_chr01 | 15065889                | CC                              | TT                | 1945882389               |
| SNP_P3_6161_15065907 | NC_021160.1    | Ca_kabuli_chr01 | 15065907                | AA                              | TT                | 1945882390               |
| SNP_P3_6162_15066012 | NC_021160.1    | Ca_kabuli_chr01 | 15066012                | AA                              | CC                | 1945882392               |
| SNP_P3_6163_15077443 | NC_021160.1    | Ca_kabuli_chr01 | 15077443                | CC                              | TT                | 1945882394               |
| SNP_P3_6164_15083183 | NC_021160.1    | Ca_kabuli_chr01 | 15083183                | TT                              | GG                | 1945882396               |
| SNP_P3_6165_15142156 | NC_021160.1    | Ca_kabuli_chr01 | 15142156                | TT                              | CC                | 1945882397               |
| SNP_P3_6166_15217752 | NC_021160.1    | Ca_kabuli_chr01 | 15217752                | GG                              | TT                | 1945882399               |
| SNP_P3_6167_15226973 | NC_021160.1    | Ca_kabuli_chr01 | 15226973                | CC                              | TT                | 1945882401               |
| SNP_P3_6168_15245605 | NC_021160.1    | Ca_kabuli_chr01 | 15245605                | CC                              | AA                | 1945882403               |
| SNP_P3_6169_15245642 | NC_021160.1    | Ca_kabuli_chr01 | 15245642                | GG                              | AA                | 1945882405               |
| SNP_P3_6170_15247352 | NC_021160.1    | Ca_kabuli_chr01 | 15247352                | AA                              | CC                | 1945882406               |
| SNP_P3_6171_15247364 | NC_021160.1    | Ca_kabuli_chr01 | 15247364                | GG                              | AA                | 1945882408               |
| SNP_P3_6172_15247385 | NC_021160.1    | Ca_kabuli_chr01 | 15247385                | GG                              | AA                | 1945882410               |
| SNP_P3_6173_15247407 | NC_021160.1    | Ca_kabuli_chr01 | 15247407                | AA                              | GG                | 1945882412               |
| SNP_P3_6174_15247420 | NC_021160.1    | Ca_kabuli_chr01 | 15247420                | AA                              | CC                | 1945882413               |
| SNP_P3_6175_15247576 | NC_021160.1    | Ca_kabuli_chr01 | 15247576                | CC                              | AA                | 1945882415               |
| SNP_P3_6176_15247587 | NC_021160.1    | Ca_kabuli_chr01 | 15247587                | CC                              | AA                | 1945882417               |
| SNP_P3_6177_15247600 | NC_021160.1    | Ca_kabuli_chr01 | 15247600                | TT                              | CC                | 1945882419               |
| SNP_P3_6178_15247732 | NC_021160.1    | Ca_kabuli_chr01 | 15247732                | AA                              | TT                | 1945882420               |
| SNP_P3_6179_15247807 | NC_021160.1    | Ca_kabuli_chr01 | 15247807                | TT                              | CC                | 1945882422               |
| SNP_P3_6180_15247820 | NC_021160.1    | Ca_kabuli_chr01 | 15247820                | GG                              | AA                | 1945882424               |

| SNPs IDs             | Chromosome IDs | Chromosomes     | Physical positions (bp) | CDC Frontier (Reference genome) | (Pusa 256 & HPNB) | NCBI SNPdb Accession IDs |
|----------------------|----------------|-----------------|-------------------------|---------------------------------|-------------------|--------------------------|
| SNP_P3_6181_15247832 | NC_021160.1    | Ca_kabuli_chr01 | 15247832                | AA                              | CC                | 1945882426               |
| SNP_P3_6182_15263117 | NC_021160.1    | Ca_kabuli_chr01 | 15263117                | CC                              | AA                | 1945882428               |
| SNP_P3_6183_15267578 | NC_021160.1    | Ca_kabuli_chr01 | 15267578                | AA                              | GG                | 1945882429               |
| SNP_P3_6184_15311447 | NC_021160.1    | Ca_kabuli_chr01 | 15311447                | AA                              | GG                | 1945882431               |
| SNP_P3_6185_15339703 | NC_021160.1    | Ca_kabuli_chr01 | 15339703                | GG                              | CC                | 1945882433               |
| SNP_P3_6186_15342817 | NC_021160.1    | Ca_kabuli_chr01 | 15342817                | GG                              | TT                | 1945882435               |
| SNP_P3_6188_15399462 | NC_021160.1    | Ca_kabuli_chr01 | 15399462                | GG                              | AA                | 1945882436               |
| SNP_P3_6189_15401540 | NC_021160.1    | Ca_kabuli_chr01 | 15401540                | GG                              | AA                | 1945882438               |
| SNP_P3_6190_15404820 | NC_021160.1    | Ca_kabuli_chr01 | 15404820                | AA                              | CC                | 1945882440               |
| SNP_P3_6191_15434592 | NC_021160.1    | Ca_kabuli_chr01 | 15434592                | GG                              | CC                | 1945882442               |
| SNP_P3_6192_15466176 | NC_021160.1    | Ca_kabuli_chr01 | 15466176                | TT                              | CC                | 1945882443               |
| SNP_P3_6193_15466179 | NC_021160.1    | Ca_kabuli_chr01 | 15466179                | TT                              | CC                | 1945882445               |
| SNP_P3_6194_15492298 | NC_021160.1    | Ca_kabuli_chr01 | 15492298                | GG                              | TT                | 1945882447               |
| SNP_P3_6195_15506726 | NC_021160.1    | Ca_kabuli_chr01 | 15506726                | GG                              | AA                | 1945882449               |
| SNP_P3_6196_15508441 | NC_021160.1    | Ca_kabuli_chr01 | 15508441                | CC                              | TT                | 1945882451               |
| SNP_P3_6197_15508482 | NC_021160.1    | Ca_kabuli_chr01 | 15508482                | GG                              | TT                | 1945882452               |
| SNP_P3_6198_15519565 | NC_021160.1    | Ca_kabuli_chr01 | 15519565                | GG                              | AA                | 1945882454               |
| SNP_P3_6199_15558380 | NC_021160.1    | Ca_kabuli_chr01 | 15558380                | CC                              | AA                | 1945882456               |
| SNP_P3_6200_15572467 | NC_021160.1    | Ca_kabuli_chr01 | 15572467                | TT                              | CC                | 1945882457               |
| SNP_P3_6201_15572488 | NC_021160.1    | Ca_kabuli_chr01 | 15572488                | CC                              | TT                | 1945882459               |
| SNP_P3_6202_15572506 | NC_021160.1    | Ca_kabuli_chr01 | 15572506                | TT                              | CC                | 1945882461               |
| SNP_P3_6203_15577955 | NC_021160.1    | Ca_kabuli_chr01 | 15577955                | AA                              | GG                | 1945882463               |
| SNP_P3_6204_15615216 | NC_021160.1    | Ca_kabuli_chr01 | 15615216                | TT                              | AA                | 1945882464               |
| SNP_P3_6205_15615459 | NC_021160.1    | Ca_kabuli_chr01 | 15615459                | GG                              | AA                | 1945882466               |
| SNP_P3_6206_15657163 | NC_021160.1    | Ca_kabuli_chr01 | 15657163                | CC                              | TT                | 1945882468               |
| SNP_P3_6207_15657181 | NC_021160.1    | Ca_kabuli_chr01 | 15657181                | GG                              | TT                | 1945882470               |
| SNP_P3_6208_15667133 | NC_021160.1    | Ca_kabuli_chr01 | 15667133                | GG                              | AA                | 1945882471               |
| SNP_P3_6209_15667234 | NC_021160.1    | Ca_kabuli_chr01 | 15667234                | AA                              | GG                | 1945882473               |
| SNP_P3_6211_15667528 | NC_021160.1    | Ca_kabuli_chr01 | 15667528                | AA                              | CC                | 1945882475               |
| SNP_P3_6212_15667544 | NC_021160.1    | Ca_kabuli_chr01 | 15667544                | AA                              | GG                | 1945882477               |
| SNP_P3_6213_15667651 | NC_021160.1    | Ca_kabuli_chr01 | 15667651                | CC                              | TT                | 1945882479               |
| SNP_P3_6214_15667668 | NC_021160.1    | Ca_kabuli_chr01 | 15667668                | TT                              | GG                | 1945882480               |
| SNP_P3_6215_15672190 | NC_021160.1    | Ca_kabuli_chr01 | 15672190                | TT                              | GG                | 1945882482               |
| SNP_P3_6216_15684708 | NC_021160.1    | Ca_kabuli_chr01 | 15684708                | CC                              | TT                | 1945882484               |
| SNP_P3_6217_15714153 | NC_021160.1    | Ca_kabuli_chr01 | 15714153                | TT                              | CC                | 1945882486               |
| SNP_P3_6218_15714532 | NC_021160.1    | Ca_kabuli_chr01 | 15714532                | AA                              | CC                | 1945882487               |
| SNP_P3_6219_15715433 | NC_021160.1    | Ca_kabuli_chr01 | 15715433                | CC                              | GG                | 1945882489               |
| SNP_P3_6220_15717445 | NC_021160.1    | Ca_kabuli_chr01 | 15717445                | TT                              | AA                | 1945882491               |
| SNP_P3_6221_15722252 | NC_021160.1    | Ca_kabuli_chr01 | 15722252                | TT                              | CC                | 1945882493               |
| SNP_P3_6222_15753773 | NC_021160.1    | Ca_kabuli_chr01 | 15753773                | GG                              | TT                | 1945882494               |
| SNP_P3_6223_15764910 | NC_021160.1    | Ca_kabuli_chr01 | 15764910                | AA                              | CC                | 1945882496               |
| SNP_P3_6225_15814920 | NC_021160.1    | Ca_kabuli_chr01 | 15814920                | TT                              | CC                | 1945882498               |

| SNPs IDs             | Chromosome IDs | Chromosomes     | Physical positions (bp) | CDC Frontier (Reference genome) | (Pusa 256 & HPNB) | NCBI SNPdb Accession IDs |
|----------------------|----------------|-----------------|-------------------------|---------------------------------|-------------------|--------------------------|
| SNP_P3_6226_15817683 | NC_021160.1    | Ca_kabuli_chr01 | 15817683                | CC                              | TT                | 1945882500               |
| SNP_P3_6227_15832151 | NC_021160.1    | Ca_kabuli_chr01 | 15832151                | AA                              | TT                | 1945882501               |
| SNP_P3_6229_15838350 | NC_021160.1    | Ca_kabuli_chr01 | 15838350                | AA                              | GG                | 1945882503               |
| SNP_P3_6230_15848552 | NC_021160.1    | Ca_kabuli_chr01 | 15848552                | AA                              | GG                | 1945882505               |
| SNP_P3_6231_15868696 | NC_021160.1    | Ca_kabuli_chr01 | 15868696                | CC                              | TT                | 1945882507               |
| SNP_P3_6232_15881240 | NC_021160.1    | Ca_kabuli_chr01 | 15881240                | GG                              | AA                | 1945882509               |
| SNP_P3_6234_15897879 | NC_021160.1    | Ca_kabuli_chr01 | 15897879                | GG                              | AA                | 1945882510               |
| SNP_P3_6235_15919904 | NC_021160.1    | Ca_kabuli_chr01 | 15919904                | AA                              | TT                | 1945882512               |
| SNP_P3_6238_15953620 | NC_021160.1    | Ca_kabuli_chr01 | 15953620                | AA                              | TT                | 1945882514               |
| SNP_P3_6239_15963327 | NC_021160.1    | Ca_kabuli_chr01 | 15963327                | CC                              | TT                | 1945882516               |
| SNP_P3_6240_16019946 | NC_021160.1    | Ca_kabuli_chr01 | 16019946                | GG                              | AA                | 1945882517               |
| SNP_P3_6241_16035316 | NC_021160.1    | Ca_kabuli_chr01 | 16035316                | TT                              | CC                | 1945882519               |
| SNP_P3_6242_16043608 | NC_021160.1    | Ca_kabuli_chr01 | 16043608                | TT                              | GG                | 1945882521               |
| SNP_P3_6243_16048238 | NC_021160.1    | Ca_kabuli_chr01 | 16048238                | TT                              | CC                | 1945882523               |
| SNP_P3_6244_16064332 | NC_021160.1    | Ca_kabuli_chr01 | 16064332                | TT                              | CC                | 1945882524               |
| SNP_P3_6245_16064334 | NC_021160.1    | Ca_kabuli_chr01 | 16064334                | TT                              | GG                | 1945882526               |
| SNP_P3_6246_16064553 | NC_021160.1    | Ca_kabuli_chr01 | 16064553                | TT                              | GG                | 1945882528               |
| SNP_P3_6247_16064555 | NC_021160.1    | Ca_kabuli_chr01 | 16064555                | TT                              | CC                | 1945882530               |
| SNP_P3_6248_16070616 | NC_021160.1    | Ca_kabuli_chr01 | 16070616                | AA                              | GG                | 1945882531               |
| SNP_P3_6249_16078189 | NC_021160.1    | Ca_kabuli_chr01 | 16078189                | GG                              | TT                | 1945882533               |
| SNP_P3_6250_16085252 | NC_021160.1    | Ca_kabuli_chr01 | 16085252                | AA                              | GG                | 1945882535               |
| SNP_P3_6251_16085276 | NC_021160.1    | Ca_kabuli_chr01 | 16085276                | AA                              | TT                | 1945882537               |
| SNP_P3_6252_16085324 | NC_021160.1    | Ca_kabuli_chr01 | 16085324                | TT                              | CC                | 1945882538               |
| SNP_P3_6253_16086269 | NC_021160.1    | Ca_kabuli_chr01 | 16086269                | TT                              | CC                | 1945882540               |
| SNP_P3_6254_16087846 | NC_021160.1    | Ca_kabuli_chr01 | 16087846                | AA                              | TT                | 1945882542               |
| SNP_P3_6255_16087852 | NC_021160.1    | Ca_kabuli_chr01 | 16087852                | AA                              | TT                | 1945882544               |
| SNP_P3_6256_16087862 | NC_021160.1    | Ca_kabuli_chr01 | 16087862                | GG                              | AA                | 1945882546               |
| SNP_P3_6257_16087911 | NC_021160.1    | Ca_kabuli_chr01 | 16087911                | GG                              | AA                | 1945882547               |
| SNP_P3_6258_16087918 | NC_021160.1    | Ca_kabuli_chr01 | 16087918                | GG                              | CC                | 1945882549               |
| SNP_P3_6259_16089047 | NC_021160.1    | Ca_kabuli_chr01 | 16089047                | TT                              | CC                | 1945882551               |
| SNP_P3_6260_16089814 | NC_021160.1    | Ca_kabuli_chr01 | 16089814                | AA                              | TT                | 1945882553               |
| SNP_P3_6261_16090134 | NC_021160.1    | Ca_kabuli_chr01 | 16090134                | CC                              | TT                | 1945882554               |
| SNP_P3_6262_16091465 | NC_021160.1    | Ca_kabuli_chr01 | 16091465                | CC                              | GG                | 1945882556               |
| SNP_P3_6263_16091907 | NC_021160.1    | Ca_kabuli_chr01 | 16091907                | GG                              | AA                | 1945882558               |
| SNP_P3_6264_16091908 | NC_021160.1    | Ca_kabuli_chr01 | 16091908                | GG                              | AA                | 1945882560               |
| SNP_P3_6265_16094507 | NC_021160.1    | Ca_kabuli_chr01 | 16094507                | CC                              | GG                | 1945882562               |
| SNP_P3_6266_16094529 | NC_021160.1    | Ca_kabuli_chr01 | 16094529                | CC                              | TT                | 1945882563               |
| SNP_P3_6267_16094695 | NC_021160.1    | Ca_kabuli_chr01 | 16094695                | GG                              | AA                | 1945882565               |
| SNP_P3_6268_16094721 | NC_021160.1    | Ca_kabuli_chr01 | 16094721                | CC                              | TT                | 1945882567               |
| SNP_P3_6269_16094847 | NC_021160.1    | Ca_kabuli_chr01 | 16094847                | CC                              | TT                | 1945882569               |
| SNP_P3_6270_16096179 | NC_021160.1    | Ca_kabuli_chr01 | 16096179                | GG                              | AA                | 1945882570               |
| SNP_P3_6271_16105233 | NC_021160.1    | Ca_kabuli_chr01 | 16105233                | TT                              | GG                | 1945882572               |

| SNPs IDs             | Chromosome IDs | Chromosomes     | Physical positions (bp) | CDC Frontier (Reference genome) | (Pusa 256 & HPNB) | NCBI SNPdb Accession IDs |
|----------------------|----------------|-----------------|-------------------------|---------------------------------|-------------------|--------------------------|
| SNP_P3_6272_16105261 | NC_021160.1    | Ca_kabuli_chr01 | 16105261                | CC                              | TT                | 1945882574               |
| SNP_P3_6273_16105353 | NC_021160.1    | Ca_kabuli_chr01 | 16105353                | AA                              | GG                | 1945882576               |
| SNP_P3_6274_16106432 | NC_021160.1    | Ca_kabuli_chr01 | 16106432                | GG                              | TT                | 1945882577               |
| SNP_P3_6275_16106447 | NC_021160.1    | Ca_kabuli_chr01 | 16106447                | GG                              | TT                | 1945882579               |
| SNP_P3_6278_16110402 | NC_021160.1    | Ca_kabuli_chr01 | 16110402                | TT                              | AA                | 1945882581               |
| SNP_P3_6279_16110907 | NC_021160.1    | Ca_kabuli_chr01 | 16110907                | AA                              | GG                | 1945882583               |
| SNP_P3_6280_16110920 | NC_021160.1    | Ca_kabuli_chr01 | 16110920                | TT                              | GG                | 1945882585               |
| SNP_P3_6281_16111152 | NC_021160.1    | Ca_kabuli_chr01 | 16111152                | CC                              | TT                | 1945882586               |
| SNP_P3_6282_16111212 | NC_021160.1    | Ca_kabuli_chr01 | 16111212                | AA                              | CC                | 1945882588               |
| SNP_P3_6283_16111703 | NC_021160.1    | Ca_kabuli_chr01 | 16111703                | CC                              | TT                | 1945882590               |
| SNP_P3_6284_16115872 | NC_021160.1    | Ca_kabuli_chr01 | 16115872                | TT                              | AA                | 1945882592               |
| SNP_P3_6285_16117457 | NC_021160.1    | Ca_kabuli_chr01 | 16117457                | TT                              | CC                | 1945882593               |
| SNP_P3_6286_16118850 | NC_021160.1    | Ca_kabuli_chr01 | 16118850                | AA                              | GG                | 1945882595               |
| SNP_P3_6287_16119051 | NC_021160.1    | Ca_kabuli_chr01 | 16119051                | CC                              | TT                | 1945882597               |
| SNP_P3_6288_16119087 | NC_021160.1    | Ca_kabuli_chr01 | 16119087                | TT                              | GG                | 1945882599               |
| SNP_P3_6289_16120783 | NC_021160.1    | Ca_kabuli_chr01 | 16120783                | TT                              | AA                | 1945882600               |
| SNP_P3_6290_16121379 | NC_021160.1    | Ca_kabuli_chr01 | 16121379                | GG                              | TT                | 1945882602               |
| SNP_P3_6291_16121399 | NC_021160.1    | Ca_kabuli_chr01 | 16121399                | TT                              | GG                | 1945882604               |
| SNP_P3_6292_16121796 | NC_021160.1    | Ca_kabuli_chr01 | 16121796                | TT                              | AA                | 1945882606               |
| SNP_P3_6293_16123261 | NC_021160.1    | Ca_kabuli_chr01 | 16123261                | AA                              | CC                | 1945882607               |
| SNP_P3_6294_16133030 | NC_021160.1    | Ca_kabuli_chr01 | 16133030                | AA                              | TT                | 1945882609               |
| SNP_P3_6295_16133461 | NC_021160.1    | Ca_kabuli_chr01 | 16133461                | CC                              | TT                | 1945882611               |
| SNP_P3_6296_16133739 | NC_021160.1    | Ca_kabuli_chr01 | 16133739                | AA                              | GG                | 1945882612               |
| SNP_P3_6297_16133778 | NC_021160.1    | Ca_kabuli_chr01 | 16133778                | AA                              | GG                | 1945882614               |
| SNP_P3_6298_16133808 | NC_021160.1    | Ca_kabuli_chr01 | 16133808                | TT                              | AA                | 1945882616               |
| SNP_P3_6299_16134109 | NC_021160.1    | Ca_kabuli_chr01 | 16134109                | CC                              | AA                | 1945882618               |
| SNP_P3_6300_16134131 | NC_021160.1    | Ca_kabuli_chr01 | 16134131                | CC                              | TT                | 1945882619               |
| SNP_P3_6301_16145206 | NC_021160.1    | Ca_kabuli_chr01 | 16145206                | CC                              | TT                | 1945882621               |
| SNP_P3_6302_16145375 | NC_021160.1    | Ca_kabuli_chr01 | 16145375                | TT                              | AA                | 1945882623               |
| SNP_P3_6303_16145545 | NC_021160.1    | Ca_kabuli_chr01 | 16145545                | AA                              | CC                | 1945882625               |
| SNP_P3_6304_16146071 | NC_021160.1    | Ca_kabuli_chr01 | 16146071                | GG                              | AA                | 1945882626               |
| SNP_P3_6305_16146110 | NC_021160.1    | Ca_kabuli_chr01 | 16146110                | GG                              | TT                | 1945882628               |
| SNP_P3_6307_16154431 | NC_021160.1    | Ca_kabuli_chr01 | 16154431                | AA                              | TT                | 1945882630               |
| SNP_P3_6308_16154437 | NC_021160.1    | Ca_kabuli_chr01 | 16154437                | TT                              | AA                | 1945882632               |
| SNP_P3_6309_16154927 | NC_021160.1    | Ca_kabuli_chr01 | 16154927                | TT                              | CC                | 1945882634               |
| SNP_P3_6310_16154930 | NC_021160.1    | Ca_kabuli_chr01 | 16154930                | AA                              | CC                | 1945882635               |
| SNP_P3_6311_16154946 | NC_021160.1    | Ca_kabuli_chr01 | 16154946                | AA                              | GG                | 1945882637               |
| SNP_P3_6312_16154992 | NC_021160.1    | Ca_kabuli_chr01 | 16154992                | TT                              | CC                | 1945882639               |
| SNP_P3_6313_16155237 | NC_021160.1    | Ca_kabuli_chr01 | 16155237                | AA                              | GG                | 1945882641               |
| SNP_P3_6314_16155295 | NC_021160.1    | Ca_kabuli_chr01 | 16155295                | AA                              | GG                | 1945882642               |
| SNP_P3_6315_16157167 | NC_021160.1    | Ca_kabuli_chr01 | 16157167                | AA                              | GG                | 1945882644               |
| SNP_P3_6316_16157375 | NC_021160.1    | Ca_kabuli_chr01 | 16157375                | AA                              | TT                | 1945882646               |

| SNPs IDs             | Chromosome IDs | Chromosomes     | Physical positions (bp) | CDC Frontier (Reference genome) | (Pusa 256 & HPNB) | NCBI SNPdb Accession IDs |
|----------------------|----------------|-----------------|-------------------------|---------------------------------|-------------------|--------------------------|
| SNP_P3_6317_16157440 | NC_021160.1    | Ca_kabuli_chr01 | 16157440                | TT                              | CC                | 1945882648               |
| SNP_P3_6318_16157526 | NC_021160.1    | Ca_kabuli_chr01 | 16157526                | AA                              | GG                | 1945882649               |
| SNP_P3_6319_16157890 | NC_021160.1    | Ca_kabuli_chr01 | 16157890                | AA                              | GG                | 1945882651               |
| SNP_P3_6320_16157943 | NC_021160.1    | Ca_kabuli_chr01 | 16157943                | TT                              | AA                | 1945882653               |
| SNP_P3_6323_16160748 | NC_021160.1    | Ca_kabuli_chr01 | 16160748                | CC                              | TT                | 1945882655               |
| SNP_P3_6324_16160749 | NC_021160.1    | Ca_kabuli_chr01 | 16160749                | AA                              | TT                | 1945882657               |
| SNP_P3_6325_16160750 | NC_021160.1    | Ca_kabuli_chr01 | 16160750                | AA                              | TT                | 1945882658               |
| SNP_P3_6326_16160751 | NC_021160.1    | Ca_kabuli_chr01 | 16160751                | AA                              | GG                | 1945882660               |
| SNP_P3_6327_16161356 | NC_021160.1    | Ca_kabuli_chr01 | 16161356                | TT                              | CC                | 1945882662               |
| SNP_P3_6328_16161811 | NC_021160.1    | Ca_kabuli_chr01 | 16161811                | AA                              | TT                | 1945882664               |
| SNP_P3_6329_16161832 | NC_021160.1    | Ca_kabuli_chr01 | 16161832                | CC                              | GG                | 1945882666               |
| SNP_P3_6330_16162137 | NC_021160.1    | Ca_kabuli_chr01 | 16162137                | TT                              | AA                | 1945882667               |
| SNP_P3_6331_16162155 | NC_021160.1    | Ca_kabuli_chr01 | 16162155                | GG                              | CC                | 1945882669               |
| SNP_P3_6332_16165960 | NC_021160.1    | Ca_kabuli_chr01 | 16165960                | AA                              | TT                | 1945882671               |
| SNP_P3_6333_16166471 | NC_021160.1    | Ca_kabuli_chr01 | 16166471                | TT                              | GG                | 1945882673               |
| SNP_P3_6335_16166802 | NC_021160.1    | Ca_kabuli_chr01 | 16166802                | TT                              | CC                | 1945882675               |
| SNP_P3_6336_16166835 | NC_021160.1    | Ca_kabuli_chr01 | 16166835                | CC                              | TT                | 1945882676               |
| SNP_P3_6338_16166913 | NC_021160.1    | Ca_kabuli_chr01 | 16166913                | TT                              | GG                | 1945882678               |
| SNP_P3_6339_16166919 | NC_021160.1    | Ca_kabuli_chr01 | 16166919                | AA                              | GG                | 1945882680               |
| SNP_P3_6340_16166967 | NC_021160.1    | Ca_kabuli_chr01 | 16166967                | TT                              | CC                | 1945882682               |
| SNP_P3_6341_16166975 | NC_021160.1    | Ca_kabuli_chr01 | 16166975                | TT                              | AA                | 1945882683               |
| SNP_P3_6342_16167137 | NC_021160.1    | Ca_kabuli_chr01 | 16167137                | TT                              | AA                | 1945882685               |
| SNP_P3_6343_16167158 | NC_021160.1    | Ca_kabuli_chr01 | 16167158                | TT                              | AA                | 1945882687               |
| SNP_P3_6344_16167189 | NC_021160.1    | Ca_kabuli_chr01 | 16167189                | AA                              | TT                | 1945882689               |
| SNP_P3_6345_16168489 | NC_021160.1    | Ca_kabuli_chr01 | 16168489                | TT                              | CC                | 1945882691               |
| SNP_P3_6346_16168505 | NC_021160.1    | Ca_kabuli_chr01 | 16168505                | CC                              | TT                | 1945882692               |
| SNP_P3_6347_16170720 | NC_021160.1    | Ca_kabuli_chr01 | 16170720                | AA                              | GG                | 1945882694               |
| SNP_P3_6348_16170742 | NC_021160.1    | Ca_kabuli_chr01 | 16170742                | TT                              | GG                | 1945882696               |
| SNP_P3_6349_16173915 | NC_021160.1    | Ca_kabuli_chr01 | 16173915                | CC                              | GG                | 1945882697               |
| SNP_P3_6350_16173926 | NC_021160.1    | Ca_kabuli_chr01 | 16173926                | AA                              | TT                | 1945882699               |
| SNP_P3_6351_16173932 | NC_021160.1    | Ca_kabuli_chr01 | 16173932                | AA                              | GG                | 1945882701               |
| SNP_P3_6353_16174001 | NC_021160.1    | Ca_kabuli_chr01 | 16174001                | GG                              | AA                | 1945882703               |
| SNP_P3_6354_16174003 | NC_021160.1    | Ca_kabuli_chr01 | 16174003                | TT                              | AA                | 1945882704               |
| SNP_P3_6355_16174304 | NC_021160.1    | Ca_kabuli_chr01 | 16174304                | TT                              | CC                | 1945882706               |
| SNP_P3_6356_16174345 | NC_021160.1    | Ca_kabuli_chr01 | 16174345                | GG                              | CC                | 1945882708               |
| SNP_P3_6357_16174779 | NC_021160.1    | Ca_kabuli_chr01 | 16174779                | TT                              | CC                | 1945882709               |
| SNP_P3_6358_16174798 | NC_021160.1    | Ca_kabuli_chr01 | 16174798                | AA                              | GG                | 1945882711               |
| SNP_P3_6359_16177952 | NC_021160.1    | Ca_kabuli_chr01 | 16177952                | TT                              | CC                | 1945882713               |
| SNP_P3_6360_16177969 | NC_021160.1    | Ca_kabuli_chr01 | 16177969                | AA                              | GG                | 1945882715               |
| SNP_P3_6361_16182852 | NC_021160.1    | Ca_kabuli_chr01 | 16182852                | GG                              | AA                | 1945882716               |
| SNP_P3_6362_16183239 | NC_021160.1    | Ca_kabuli_chr01 | 16183239                | AA                              | CC                | 1945882718               |
| SNP_P3_6363_16185354 | NC_021160.1    | Ca_kabuli_chr01 | 16185354                | CC                              | TT                | 1945882720               |

| SNPs IDs             | Chromosome IDs | Chromosomes     | Physical positions (bp) | CDC Frontier (Reference genome) | (Pusa 256 & HPNB) | NCBI SNPdb Accession IDs |
|----------------------|----------------|-----------------|-------------------------|---------------------------------|-------------------|--------------------------|
| SNP_P3_6364_16190817 | NC_021160.1    | Ca_kabuli_chr01 | 16190817                | AA                              | GG                | 1945882722               |
| SNP_P3_6365_16190841 | NC_021160.1    | Ca_kabuli_chr01 | 16190841                | CC                              | AA                | 1945882723               |
| SNP_P3_6366_16190865 | NC_021160.1    | Ca_kabuli_chr01 | 16190865                | TT                              | CC                | 1945882725               |
| SNP_P3_6367_16190883 | NC_021160.1    | Ca_kabuli_chr01 | 16190883                | GG                              | AA                | 1945882727               |
| SNP_P3_6368_16190885 | NC_021160.1    | Ca_kabuli_chr01 | 16190885                | CC                              | TT                | 1945882729               |
| SNP_P3_6369_16190888 | NC_021160.1    | Ca_kabuli_chr01 | 16190888                | CC                              | TT                | 1945882730               |
| SNP_P3_6370_16192946 | NC_021160.1    | Ca_kabuli_chr01 | 16192946                | AA                              | TT                | 1945882732               |
| SNP_P3_6371_16193196 | NC_021160.1    | Ca_kabuli_chr01 | 16193196                | TT                              | CC                | 1945882734               |
| SNP_P3_6372_16193943 | NC_021160.1    | Ca_kabuli_chr01 | 16193943                | TT                              | CC                | 1945882736               |
| SNP_P3_6373_16194244 | NC_021160.1    | Ca_kabuli_chr01 | 16194244                | AA                              | CC                | 1945882738               |
| SNP_P3_6374_16194252 | NC_021160.1    | Ca_kabuli_chr01 | 16194252                | AA                              | GG                | 1945882739               |
| SNP_P3_6375_16194266 | NC_021160.1    | Ca_kabuli_chr01 | 16194266                | CC                              | GG                | 1945882741               |
| SNP_P3_6376_16194276 | NC_021160.1    | Ca_kabuli_chr01 | 16194276                | CC                              | AA                | 1945882743               |
| SNP_P3_6377_16194455 | NC_021160.1    | Ca_kabuli_chr01 | 16194455                | TT                              | CC                | 1945882745               |
| SNP_P3_6378_16194773 | NC_021160.1    | Ca_kabuli_chr01 | 16194773                | TT                              | CC                | 1945882747               |
| SNP_P3_6379_16195013 | NC_021160.1    | Ca_kabuli_chr01 | 16195013                | TT                              | AA                | 1945882748               |
| SNP_P3_6380_16195014 | NC_021160.1    | Ca_kabuli_chr01 | 16195014                | TT                              | AA                | 1945882750               |
| SNP_P3_6381_16196930 | NC_021160.1    | Ca_kabuli_chr01 | 16196930                | AA                              | GG                | 1945882752               |
| SNP_P3_6382_16197358 | NC_021160.1    | Ca_kabuli_chr01 | 16197358                | TT                              | AA                | 1945882754               |
| SNP_P3_6383_16197366 | NC_021160.1    | Ca_kabuli_chr01 | 16197366                | TT                              | AA                | 1945882755               |
| SNP_P3_6384_16197381 | NC_021160.1    | Ca_kabuli_chr01 | 16197381                | GG                              | CC                | 1945882757               |
| SNP_P3_6385_16197388 | NC_021160.1    | Ca_kabuli_chr01 | 16197388                | CC                              | TT                | 1945882759               |
| SNP_P3_6386_16197390 | NC_021160.1    | Ca_kabuli_chr01 | 16197390                | CC                              | GG                | 1945882761               |
| SNP_P3_6387_16197391 | NC_021160.1    | Ca_kabuli_chr01 | 16197391                | AA                              | GG                | 1945882763               |
| SNP_P3_6388_16197402 | NC_021160.1    | Ca_kabuli_chr01 | 16197402                | TT                              | AA                | 1945882764               |
| SNP_P3_6390_16197686 | NC_021160.1    | Ca_kabuli_chr01 | 16197686                | TT                              | AA                | 1945882766               |
| SNP_P3_6391_16197704 | NC_021160.1    | Ca_kabuli_chr01 | 16197704                | CC                              | TT                | 1945882768               |
| SNP_P3_6392_16197829 | NC_021160.1    | Ca_kabuli_chr01 | 16197829                | TT                              | AA                | 1945882769               |
| SNP_P3_6393_16197855 | NC_021160.1    | Ca_kabuli_chr01 | 16197855                | CC                              | TT                | 1945882771               |
| SNP_P3_6394_16197895 | NC_021160.1    | Ca_kabuli_chr01 | 16197895                | TT                              | CC                | 1945882773               |
| SNP_P3_6395_16198137 | NC_021160.1    | Ca_kabuli_chr01 | 16198137                | CC                              | AA                | 1945882775               |
| SNP_P3_6396_16198142 | NC_021160.1    | Ca_kabuli_chr01 | 16198142                | AA                              | TT                | 1945882776               |
| SNP_P3_6397_16201058 | NC_021160.1    | Ca_kabuli_chr01 | 16201058                | GG                              | AA                | 1945882778               |
| SNP_P3_6398_16202217 | NC_021160.1    | Ca_kabuli_chr01 | 16202217                | AA                              | CC                | 1945882780               |
| SNP_P3_6399_16202399 | NC_021160.1    | Ca_kabuli_chr01 | 16202399                | AA                              | GG                | 1945882782               |
| SNP_P3_6400_16202796 | NC_021160.1    | Ca_kabuli_chr01 | 16202796                | AA                              | GG                | 1945882783               |
| SNP_P3_6401_16202870 | NC_021160.1    | Ca_kabuli_chr01 | 16202870                | AA                              | GG                | 1945882785               |
| SNP_P3_6402_16203412 | NC_021160.1    | Ca_kabuli_chr01 | 16203412                | AA                              | TT                | 1945882787               |
| SNP_P3_6403_16206114 | NC_021160.1    | Ca_kabuli_chr01 | 16206114                | AA                              | GG                | 1945882789               |
| SNP_P3_6406_16207210 | NC_021160.1    | Ca_kabuli_chr01 | 16207210                | GG                              | AA                | 1945882790               |
| SNP_P3_6407_16207235 | NC_021160.1    | Ca_kabuli_chr01 | 16207235                | AA                              | GG                | 1945882792               |
| SNP_P3_6408_16210649 | NC_021160.1    | Ca_kabuli_chr01 | 16210649                | TT                              | CC                | 1945882794               |



| SNPs IDs             | Chromosome IDs | Chromosomes     | Physical positions (bp) | CDC Frontier (Reference genome) | (Pusa 256 & HPNB) | NCBI SNPdb Accession IDs |
|----------------------|----------------|-----------------|-------------------------|---------------------------------|-------------------|--------------------------|
| SNP_P3_6409_16212996 | NC_021160.1    | Ca_kabuli_chr01 | 16212996                | GG                              | AA                | 1945882796               |
| SNP_P3_6410_16213004 | NC_021160.1    | Ca_kabuli_chr01 | 16213004                | AA                              | CC                | 1945882797               |
| SNP_P3_6412_16213059 | NC_021160.1    | Ca_kabuli_chr01 | 16213059                | AA                              | TT                | 1945882799               |
| SNP_P3_6413_16213065 | NC_021160.1    | Ca_kabuli_chr01 | 16213065                | TT                              | CC                | 1945882801               |
| SNP_P3_6414_16213703 | NC_021160.1    | Ca_kabuli_chr01 | 16213703                | TT                              | CC                | 1945882803               |
| SNP_P3_6415_16214016 | NC_021160.1    | Ca_kabuli_chr01 | 16214016                | TT                              | AA                | 1945882804               |
| SNP_P3_6416_16214030 | NC_021160.1    | Ca_kabuli_chr01 | 16214030                | CC                              | TT                | 1945882806               |
| SNP_P3_6417_16255491 | NC_021160.1    | Ca_kabuli_chr01 | 16255491                | GG                              | AA                | 1945882808               |
| SNP_P3_6418_16264479 | NC_021160.1    | Ca_kabuli_chr01 | 16264479                | AA                              | GG                | 1945882810               |
| SNP_P3_6420_16274976 | NC_021160.1    | Ca_kabuli_chr01 | 16274976                | CC                              | TT                | 1945882811               |
| SNP_P3_6421_16288186 | NC_021160.1    | Ca_kabuli_chr01 | 16288186                | TT                              | CC                | 1945882813               |
| SNP_P3_6422_16288524 | NC_021160.1    | Ca_kabuli_chr01 | 16288524                | TT                              | CC                | 1945882815               |
| SNP_P3_6423_16293568 | NC_021160.1    | Ca_kabuli_chr01 | 16293568                | AA                              | GG                | 1945882817               |
| SNP_P3_6424_16293701 | NC_021160.1    | Ca_kabuli_chr01 | 16293701                | AA                              | TT                | 1945882819               |
| SNP_P3_6425_16300675 | NC_021160.1    | Ca_kabuli_chr01 | 16300675                | TT                              | GG                | 1945882820               |
| SNP_P3_6426_16301410 | NC_021160.1    | Ca_kabuli_chr01 | 16301410                | GG                              | AA                | 1945882822               |
| SNP_P3_6427_16303650 | NC_021160.1    | Ca_kabuli_chr01 | 16303650                | TT                              | CC                | 1945882824               |
| SNP_P3_6428_16305188 | NC_021160.1    | Ca_kabuli_chr01 | 16305188                | TT                              | GG                | 1945882826               |
| SNP_P3_6429_16305189 | NC_021160.1    | Ca_kabuli_chr01 | 16305189                | TT                              | CC                | 1945882827               |
| SNP_P3_6431_16376341 | NC_021160.1    | Ca_kabuli_chr01 | 16376341                | GG                              | AA                | 1945882829               |
| SNP_P3_6432_16413957 | NC_021160.1    | Ca_kabuli_chr01 | 16413957                | CC                              | TT                | 1945882831               |
| SNP_P3_6434_16497589 | NC_021160.1    | Ca_kabuli_chr01 | 16497589                | TT                              | CC                | 1945882833               |
| SNP_P3_6435_16498315 | NC_021160.1    | Ca_kabuli_chr01 | 16498315                | TT                              | CC                | 1945882835               |
| SNP_P3_6436_16499444 | NC_021160.1    | Ca_kabuli_chr01 | 16499444                | AA                              | GG                | 1945882836               |
| SNP_P3_6437_16499955 | NC_021160.1    | Ca_kabuli_chr01 | 16499955                | GG                              | TT                | 1945882838               |
| SNP_P3_6440_16535672 | NC_021160.1    | Ca_kabuli_chr01 | 16535672                | GG                              | AA                | 1945882840               |
| SNP_P3_6441_16566037 | NC_021160.1    | Ca_kabuli_chr01 | 16566037                | TT                              | CC                | 1945882842               |
| SNP_P3_6442_16579095 | NC_021160.1    | Ca_kabuli_chr01 | 16579095                | TT                              | CC                | 1945882843               |
| SNP_P3_6445_16636021 | NC_021160.1    | Ca_kabuli_chr01 | 16636021                | AA                              | TT                | 1945882845               |
| SNP_P3_6446_16636130 | NC_021160.1    | Ca_kabuli_chr01 | 16636130                | CC                              | GG                | 1945882847               |
| SNP_P3_6447_16636131 | NC_021160.1    | Ca_kabuli_chr01 | 16636131                | CC                              | AA                | 1945882849               |
| SNP_P3_6448_16636132 | NC_021160.1    | Ca_kabuli_chr01 | 16636132                | CC                              | AA                | 1945882851               |
| SNP_P3_6449_16639202 | NC_021160.1    | Ca_kabuli_chr01 | 16639202                | AA                              | TT                | 1945882852               |
| SNP_P3_6450_16644135 | NC_021160.1    | Ca_kabuli_chr01 | 16644135                | GG                              | AA                | 1945882854               |
| SNP_P3_6452_16672779 | NC_021160.1    | Ca_kabuli_chr01 | 16672779                | AA                              | CC                | 1945882856               |
| SNP_P3_6453_16696087 | NC_021160.1    | Ca_kabuli_chr01 | 16696087                | GG                              | AA                | 1945882858               |
| SNP_P3_6454_16721286 | NC_021160.1    | Ca_kabuli_chr01 | 16721286                | GG                              | AA                | 1945882860               |
| SNP_P3_6455_16721544 | NC_021160.1    | Ca_kabuli_chr01 | 16721544                | CC                              | TT                | 1945882861               |
| SNP_P3_6458_16747874 | NC_021160.1    | Ca_kabuli_chr01 | 16747874                | TT                              | GG                | 1945882863               |
| SNP_P3_6462_16806981 | NC_021160.1    | Ca_kabuli_chr01 | 16806981                | TT                              | CC                | 1945882865               |
| SNP_P3_6463_16808251 | NC_021160.1    | Ca_kabuli_chr01 | 16808251                | TT                              | CC                | 1945882867               |
| SNP_P3_6464_16808262 | NC_021160.1    | Ca_kabuli_chr01 | 16808262                | AA                              | GG                | 1945882868               |

| SNPs IDs             | Chromosome IDs | Chromosomes     | Physical positions (bp) | CDC Frontier (Reference genome) | (Pusa 256 & HPNB) | NCBI SNPdb Accession IDs |
|----------------------|----------------|-----------------|-------------------------|---------------------------------|-------------------|--------------------------|
| SNP_P3_6465_16816076 | NC_021160.1    | Ca_kabuli_chr01 | 16816076                | CC                              | TT                | 1945882870               |
| SNP_P3_6466_16841097 | NC_021160.1    | Ca_kabuli_chr01 | 16841097                | AA                              | GG                | 1945882872               |
| SNP_P3_6467_16843929 | NC_021160.1    | Ca_kabuli_chr01 | 16843929                | AA                              | TT                | 1945882874               |
| SNP_P3_6468_16847870 | NC_021160.1    | Ca_kabuli_chr01 | 16847870                | GG                              | AA                | 1945882875               |
| SNP_P3_6470_16862993 | NC_021160.1    | Ca_kabuli_chr01 | 16862993                | CC                              | GG                | 1945882877               |
| SNP_P3_6471_16875850 | NC_021160.1    | Ca_kabuli_chr01 | 16875850                | AA                              | GG                | 1945882879               |
| SNP_P3_6472_16896569 | NC_021160.1    | Ca_kabuli_chr01 | 16896569                | AA                              | TT                | 1945882881               |
| SNP_P3_6473_16910271 | NC_021160.1    | Ca_kabuli_chr01 | 16910271                | CC                              | AA                | 1945882883               |
| SNP_P3_6474_16941006 | NC_021160.1    | Ca_kabuli_chr01 | 16941006                | CC                              | TT                | 1945882884               |
| SNP_P3_6475_16942573 | NC_021160.1    | Ca_kabuli_chr01 | 16942573                | CC                              | GG                | 1945882886               |
| SNP_P3_6476_16955618 | NC_021160.1    | Ca_kabuli_chr01 | 16955618                | TT                              | CC                | 1945882888               |
| SNP_P3_6477_16956034 | NC_021160.1    | Ca_kabuli_chr01 | 16956034                | GG                              | AA                | 1945882890               |
| SNP_P3_6478_16984650 | NC_021160.1    | Ca_kabuli_chr01 | 16984650                | AA                              | GG                | 1945882891               |
| SNP_P3_6479_16984678 | NC_021160.1    | Ca_kabuli_chr01 | 16984678                | CC                              | AA                | 1945882893               |
| SNP_P3_6480_17000949 | NC_021160.1    | Ca_kabuli_chr01 | 17000949                | GG                              | TT                | 1945882895               |
| SNP_P3_6481_17120793 | NC_021160.1    | Ca_kabuli_chr01 | 17120793                | AA                              | TT                | 1945882897               |
| SNP_P3_6482_17125069 | NC_021160.1    | Ca_kabuli_chr01 | 17125069                | TT                              | CC                | 1945882898               |
| SNP_P3_6483_17125425 | NC_021160.1    | Ca_kabuli_chr01 | 17125425                | AA                              | GG                | 1945882900               |
| SNP_P3_6484_17125577 | NC_021160.1    | Ca_kabuli_chr01 | 17125577                | AA                              | TT                | 1945882902               |
| SNP_P3_6485_17125767 | NC_021160.1    | Ca_kabuli_chr01 | 17125767                | GG                              | AA                | 1945882904               |
| SNP_P3_6486_17125768 | NC_021160.1    | Ca_kabuli_chr01 | 17125768                | TT                              | CC                | 1945882906               |
| SNP_P3_6487_17127920 | NC_021160.1    | Ca_kabuli_chr01 | 17127920                | GG                              | CC                | 1945882907               |
| SNP_P3_6488_17127940 | NC_021160.1    | Ca_kabuli_chr01 | 17127940                | GG                              | AA                | 1945882909               |
| SNP_P3_6489_17127942 | NC_021160.1    | Ca_kabuli_chr01 | 17127942                | GG                              | AA                | 1945882911               |
| SNP_P3_6490_17128078 | NC_021160.1    | Ca_kabuli_chr01 | 17128078                | GG                              | AA                | 1945882913               |
| SNP_P3_6491_17128122 | NC_021160.1    | Ca_kabuli_chr01 | 17128122                | AA                              | TT                | 1945882914               |
| SNP_P3_6492_17128204 | NC_021160.1    | Ca_kabuli_chr01 | 17128204                | TT                              | AA                | 1945882916               |
| SNP_P3_6493_17128237 | NC_021160.1    | Ca_kabuli_chr01 | 17128237                | TT                              | GG                | 1945882918               |
| SNP_P3_6494_17128290 | NC_021160.1    | Ca_kabuli_chr01 | 17128290                | CC                              | TT                | 1945882920               |
| SNP_P3_6495_17128352 | NC_021160.1    | Ca_kabuli_chr01 | 17128352                | GG                              | AA                | 1945882922               |
| SNP_P3_6496_17134437 | NC_021160.1    | Ca_kabuli_chr01 | 17134437                | GG                              | TT                | 1945882923               |
| SNP_P3_6497_17134472 | NC_021160.1    | Ca_kabuli_chr01 | 17134472                | TT                              | CC                | 1945882925               |
| SNP_P3_6498_17134501 | NC_021160.1    | Ca_kabuli_chr01 | 17134501                | CC                              | TT                | 1945882927               |
| SNP_P3_6499_17134839 | NC_021160.1    | Ca_kabuli_chr01 | 17134839                | TT                              | CC                | 1945882929               |
| SNP_P3_6500_17157687 | NC_021160.1    | Ca_kabuli_chr01 | 17157687                | TT                              | CC                | 1945882930               |
| SNP_P3_6501_17157908 | NC_021160.1    | Ca_kabuli_chr01 | 17157908                | CC                              | TT                | 1945882932               |
| SNP_P3_6502_17158072 | NC_021160.1    | Ca_kabuli_chr01 | 17158072                | GG                              | AA                | 1945882934               |
| SNP_P3_6503_17158314 | NC_021160.1    | Ca_kabuli_chr01 | 17158314                | AA                              | GG                | 1945882936               |
| SNP_P3_6504_17158316 | NC_021160.1    | Ca_kabuli_chr01 | 17158316                | TT                              | CC                | 1945882937               |
| SNP_P3_6505_17158339 | NC_021160.1    | Ca_kabuli_chr01 | 17158339                | AA                              | GG                | 1945882939               |
| SNP_P3_6506_17158343 | NC_021160.1    | Ca_kabuli_chr01 | 17158343                | TT                              | CC                | 1945882941               |
| SNP_P3_6507_17158347 | NC_021160.1    | Ca_kabuli_chr01 | 17158347                | TT                              | GG                | 1945882943               |

| SNPs IDs             | Chromosome IDs | Chromosomes     | Physical positions (bp) | CDC Frontier (Reference genome) | (Pusa 256 & HPNB) | NCBI SNPdb Accession IDs |
|----------------------|----------------|-----------------|-------------------------|---------------------------------|-------------------|--------------------------|
| SNP_P3_6508_17165920 | NC_021160.1    | Ca_kabuli_chr01 | 17165920                | AA                              | CC                | 1945882945               |
| SNP_P3_6509_17165921 | NC_021160.1    | Ca_kabuli_chr01 | 17165921                | TT                              | GG                | 1945882946               |
| SNP_P3_6510_17187067 | NC_021160.1    | Ca_kabuli_chr01 | 17187067                | AA                              | TT                | 1945882948               |
| SNP_P3_6511_17187218 | NC_021160.1    | Ca_kabuli_chr01 | 17187218                | AA                              | GG                | 1945882950               |
| SNP_P3_6512_17187605 | NC_021160.1    | Ca_kabuli_chr01 | 17187605                | TT                              | CC                | 1945882952               |
| SNP_P3_6513_17187619 | NC_021160.1    | Ca_kabuli_chr01 | 17187619                | GG                              | AA                | 1945882953               |
| SNP_P3_6514_17187674 | NC_021160.1    | Ca_kabuli_chr01 | 17187674                | TT                              | AA                | 1945882955               |
| SNP_P3_6515_17187857 | NC_021160.1    | Ca_kabuli_chr01 | 17187857                | CC                              | TT                | 1945882957               |
| SNP_P3_6516_17187871 | NC_021160.1    | Ca_kabuli_chr01 | 17187871                | GG                              | AA                | 1945882959               |
| SNP_P3_6518_17188094 | NC_021160.1    | Ca_kabuli_chr01 | 17188094                | GG                              | TT                | 1945882961               |
| SNP_P3_6519_17188104 | NC_021160.1    | Ca_kabuli_chr01 | 17188104                | GG                              | AA                | 1945882962               |
| SNP_P3_6520_17200122 | NC_021160.1    | Ca_kabuli_chr01 | 17200122                | CC                              | TT                | 1945882964               |
| SNP_P3_6521_17244304 | NC_021160.1    | Ca_kabuli_chr01 | 17244304                | AA                              | GG                | 1945882966               |
| SNP_P3_6522_17244340 | NC_021160.1    | Ca_kabuli_chr01 | 17244340                | AA                              | CC                | 1945882968               |
| SNP_P3_6523_17244353 | NC_021160.1    | Ca_kabuli_chr01 | 17244353                | TT                              | GG                | 1945882969               |
| SNP_P3_6524_17244512 | NC_021160.1    | Ca_kabuli_chr01 | 17244512                | TT                              | CC                | 1945882971               |
| SNP_P3_6525_17248177 | NC_021160.1    | Ca_kabuli_chr01 | 17248177                | GG                              | AA                | 1945882973               |
| SNP_P3_6526_17255068 | NC_021160.1    | Ca_kabuli_chr01 | 17255068                | TT                              | CC                | 1945882975               |
| SNP_P3_6527_17255073 | NC_021160.1    | Ca_kabuli_chr01 | 17255073                | GG                              | CC                | 1945882976               |
| SNP_P3_6528_17255074 | NC_021160.1    | Ca_kabuli_chr01 | 17255074                | GG                              | AA                | 1945882978               |
| SNP_P3_6529_17255075 | NC_021160.1    | Ca_kabuli_chr01 | 17255075                | CC                              | TT                | 1945882980               |
| SNP_P3_6530_17255286 | NC_021160.1    | Ca_kabuli_chr01 | 17255286                | CC                              | AA                | 1945882982               |
| SNP_P3_6531_17255322 | NC_021160.1    | Ca_kabuli_chr01 | 17255322                | AA                              | CC                | 1945882984               |
| SNP_P3_6532_17255325 | NC_021160.1    | Ca_kabuli_chr01 | 17255325                | CC                              | AA                | 1945882985               |
| SNP_P3_6533_17255346 | NC_021160.1    | Ca_kabuli_chr01 | 17255346                | AA                              | GG                | 1945882987               |
| SNP_P3_6534_17255390 | NC_021160.1    | Ca_kabuli_chr01 | 17255390                | AA                              | CC                | 1945882989               |
| SNP_P3_6536_17322614 | NC_021160.1    | Ca_kabuli_chr01 | 17322614                | CC                              | GG                | 1945882991               |
| SNP_P3_6537_17324498 | NC_021160.1    | Ca_kabuli_chr01 | 17324498                | GG                              | AA                | 1945882992               |
| SNP_P3_6538_17328056 | NC_021160.1    | Ca_kabuli_chr01 | 17328056                | AA                              | GG                | 1945882994               |
| SNP_P3_6539_17337037 | NC_021160.1    | Ca_kabuli_chr01 | 17337037                | TT                              | AA                | 1945882996               |
| SNP_P3_6541_17355426 | NC_021160.1    | Ca_kabuli_chr01 | 17355426                | TT                              | CC                | 1945882998               |
| SNP_P3_6542_17361055 | NC_021160.1    | Ca_kabuli_chr01 | 17361055                | AA                              | TT                | 1945883000               |
| SNP_P3_6543_17361056 | NC_021160.1    | Ca_kabuli_chr01 | 17361056                | TT                              | AA                | 1945883001               |
| SNP_P3_6544_17362509 | NC_021160.1    | Ca_kabuli_chr01 | 17362509                | GG                              | AA                | 1945883003               |
| SNP_P3_6545_17393852 | NC_021160.1    | Ca_kabuli_chr01 | 17393852                | TT                              | AA                | 1945883005               |
| SNP_P3_6546_17397148 | NC_021160.1    | Ca_kabuli_chr01 | 17397148                | CC                              | TT                | 1945883007               |
| SNP_P3_6547_17409706 | NC_021160.1    | Ca_kabuli_chr01 | 17409706                | TT                              | CC                | 1945883008               |
| SNP_P3_6548_17431627 | NC_021160.1    | Ca_kabuli_chr01 | 17431627                | GG                              | AA                | 1945883010               |
| SNP_P3_6549_17431662 | NC_021160.1    | Ca_kabuli_chr01 | 17431662                | TT                              | CC                | 1945883012               |
| SNP_P3_6553_17519149 | NC_021160.1    | Ca_kabuli_chr01 | 17519149                | AA                              | CC                | 1945883014               |
| SNP_P3_6555_17550937 | NC_021160.1    | Ca_kabuli_chr01 | 17550937                | AA                              | TT                | 1945883016               |
| SNP_P3_6556_17572955 | NC_021160.1    | Ca_kabuli_chr01 | 17572955                | TT                              | GG                | 1945883017               |

| SNPs IDs             | Chromosome IDs | Chromosomes     | Physical positions (bp) | CDC Frontier (Reference genome) | (Pusa 256 & HPNB) | NCBI SNPdb Accession IDs |
|----------------------|----------------|-----------------|-------------------------|---------------------------------|-------------------|--------------------------|
| SNP_P3_6557_17572967 | NC_021160.1    | Ca_kabuli_chr01 | 17572967                | TT                              | GG                | 1945883019               |
| SNP_P3_6558_17588008 | NC_021160.1    | Ca_kabuli_chr01 | 17588008                | CC                              | AA                | 1945883021               |
| SNP_P3_6559_17595651 | NC_021160.1    | Ca_kabuli_chr01 | 17595651                | CC                              | TT                | 1945883023               |
| SNP_P3_6561_17621547 | NC_021160.1    | Ca_kabuli_chr01 | 17621547                | GG                              | CC                | 1945883024               |
| SNP_P3_6562_17621565 | NC_021160.1    | Ca_kabuli_chr01 | 17621565                | CC                              | GG                | 1945883026               |
| SNP_P3_6563_17621706 | NC_021160.1    | Ca_kabuli_chr01 | 17621706                | AA                              | TT                | 1945883028               |
| SNP_P3_6564_17621710 | NC_021160.1    | Ca_kabuli_chr01 | 17621710                | CC                              | TT                | 1945883030               |
| SNP_P3_6565_17621739 | NC_021160.1    | Ca_kabuli_chr01 | 17621739                | TT                              | CC                | 1945883032               |
| SNP_P3_6566_17621755 | NC_021160.1    | Ca_kabuli_chr01 | 17621755                | TT                              | CC                | 1945883033               |
| SNP_P3_6567_17621852 | NC_021160.1    | Ca_kabuli_chr01 | 17621852                | CC                              | AA                | 1945883035               |
| SNP_P3_6568_17621891 | NC_021160.1    | Ca_kabuli_chr01 | 17621891                | GG                              | AA                | 1945883037               |
| SNP_P3_6569_17623909 | NC_021160.1    | Ca_kabuli_chr01 | 17623909                | TT                              | CC                | 1945883038               |
| SNP_P3_6570_17630677 | NC_021160.1    | Ca_kabuli_chr01 | 17630677                | GG                              | AA                | 1945883040               |
| SNP_P3_6571_17633174 | NC_021160.1    | Ca_kabuli_chr01 | 17633174                | CC                              | TT                | 1945883042               |
| SNP_P3_6573_17639741 | NC_021160.1    | Ca_kabuli_chr01 | 17639741                | TT                              | AA                | 1945883044               |
| SNP_P3_6574_17642187 | NC_021160.1    | Ca_kabuli_chr01 | 17642187                | CC                              | TT                | 1945883046               |
| SNP_P3_6575_17653623 | NC_021160.1    | Ca_kabuli_chr01 | 17653623                | CC                              | TT                | 1945883047               |
| SNP_P3_6576_17653625 | NC_021160.1    | Ca_kabuli_chr01 | 17653625                | CC                              | AA                | 1945883049               |
| SNP_P3_6577_17653642 | NC_021160.1    | Ca_kabuli_chr01 | 17653642                | CC                              | AA                | 1945883051               |
| SNP_P3_6578_17719636 | NC_021160.1    | Ca_kabuli_chr01 | 17719636                | AA                              | GG                | 1945883053               |
| SNP_P3_6579_17719641 | NC_021160.1    | Ca_kabuli_chr01 | 17719641                | TT                              | GG                | 1945883054               |
| SNP_P3_6580_17740243 | NC_021160.1    | Ca_kabuli_chr01 | 17740243                | GG                              | AA                | 1945883056               |
| SNP_P3_6581_17746312 | NC_021160.1    | Ca_kabuli_chr01 | 17746312                | CC                              | TT                | 1945883058               |
| SNP_P3_6582_17762429 | NC_021160.1    | Ca_kabuli_chr01 | 17762429                | CC                              | AA                | 1945883060               |
| SNP_P3_6583_17778991 | NC_021160.1    | Ca_kabuli_chr01 | 17778991                | GG                              | AA                | 1945883062               |
| SNP_P3_6584_17779028 | NC_021160.1    | Ca_kabuli_chr01 | 17779028                | TT                              | GG                | 1945883063               |
| SNP_P3_6586_17800550 | NC_021160.1    | Ca_kabuli_chr01 | 17800550                | TT                              | AA                | 1945883065               |
| SNP_P3_6587_17802830 | NC_021160.1    | Ca_kabuli_chr01 | 17802830                | AA                              | GG                | 1945883067               |
| SNP_P3_6588_17803977 | NC_021160.1    | Ca_kabuli_chr01 | 17803977                | AA                              | CC                | 1945883069               |
| SNP_P3_6590_17882664 | NC_021160.1    | Ca_kabuli_chr01 | 17882664                | CC                              | TT                | 1945883070               |
| SNP_P3_6591_17910812 | NC_021160.1    | Ca_kabuli_chr01 | 17910812                | TT                              | AA                | 1945883072               |
| SNP_P3_6592_17911181 | NC_021160.1    | Ca_kabuli_chr01 | 17911181                | TT                              | CC                | 1945883074               |
| SNP_P3_6594_18006061 | NC_021160.1    | Ca_kabuli_chr01 | 18006061                | GG                              | AA                | 1945883076               |
| SNP_P3_6595_18039322 | NC_021160.1    | Ca_kabuli_chr01 | 18039322                | TT                              | AA                | 1945883077               |
| SNP_P3_6596_18058061 | NC_021160.1    | Ca_kabuli_chr01 | 18058061                | CC                              | TT                | 1945883079               |
| SNP_P3_6597_18122007 | NC_021160.1    | Ca_kabuli_chr01 | 18122007                | TT                              | CC                | 1945883081               |
| SNP_P3_6598_18122013 | NC_021160.1    | Ca_kabuli_chr01 | 18122013                | TT                              | CC                | 1945883083               |
| SNP_P3_6599_18122027 | NC_021160.1    | Ca_kabuli_chr01 | 18122027                | AA                              | GG                | 1945883085               |
| SNP_P3_6601_18201840 | NC_021160.1    | Ca_kabuli_chr01 | 18201840                | AA                              | GG                | 1945883086               |
| SNP_P3_6602_18249074 | NC_021160.1    | Ca_kabuli_chr01 | 18249074                | TT                              | CC                | 1945883088               |
| SNP_P3_6603_18279152 | NC_021160.1    | Ca_kabuli_chr01 | 18279152                | TT                              | CC                | 1945883090               |
| SNP_P3_6604_18279233 | NC_021160.1    | Ca_kabuli_chr01 | 18279233                | GG                              | AA                | 1945883092               |

| SNPs IDs             | Chromosome IDs | Chromosomes     | Physical positions (bp) | CDC Frontier (Reference genome) | (Pusa 256 & HPNB) | NCBI SNPdb Accession IDs |
|----------------------|----------------|-----------------|-------------------------|---------------------------------|-------------------|--------------------------|
| SNP_P3_6605_18279554 | NC_021160.1    | Ca_kabuli_chr01 | 18279554                | CC                              | AA                | 1945883093               |
| SNP_P3_6606_18295124 | NC_021160.1    | Ca_kabuli_chr01 | 18295124                | GG                              | TT                | 1945883095               |
| SNP_P3_6607_18296907 | NC_021160.1    | Ca_kabuli_chr01 | 18296907                | GG                              | CC                | 1945883097               |
| SNP_P3_6608_18296916 | NC_021160.1    | Ca_kabuli_chr01 | 18296916                | CC                              | AA                | 1945883099               |
| SNP_P3_6609_18297153 | NC_021160.1    | Ca_kabuli_chr01 | 18297153                | GG                              | AA                | 1945883101               |
| SNP_P3_6610_18297178 | NC_021160.1    | Ca_kabuli_chr01 | 18297178                | TT                              | CC                | 1945883102               |
| SNP_P3_6611_18297273 | NC_021160.1    | Ca_kabuli_chr01 | 18297273                | CC                              | TT                | 1945883104               |
| SNP_P3_6612_18297657 | NC_021160.1    | Ca_kabuli_chr01 | 18297657                | TT                              | CC                | 1945883106               |
| SNP_P3_6613_18297674 | NC_021160.1    | Ca_kabuli_chr01 | 18297674                | TT                              | GG                | 1945883108               |
| SNP_P3_6614_18297704 | NC_021160.1    | Ca_kabuli_chr01 | 18297704                | CC                              | TT                | 1945883109               |
| SNP_P3_6616_18298741 | NC_021160.1    | Ca_kabuli_chr01 | 18298741                | TT                              | CC                | 1945883111               |
| SNP_P3_6617_18298798 | NC_021160.1    | Ca_kabuli_chr01 | 18298798                | AA                              | TT                | 1945883113               |
| SNP_P3_6618_18299789 | NC_021160.1    | Ca_kabuli_chr01 | 18299789                | TT                              | CC                | 1945883115               |
| SNP_P3_6620_18299933 | NC_021160.1    | Ca_kabuli_chr01 | 18299933                | CC                              | TT                | 1945883117               |
| SNP_P3_6621_18299945 | NC_021160.1    | Ca_kabuli_chr01 | 18299945                | AA                              | CC                | 1945883118               |
| SNP_P3_6622_18299962 | NC_021160.1    | Ca_kabuli_chr01 | 18299962                | TT                              | CC                | 1945883120               |
| SNP_P3_6623_18299987 | NC_021160.1    | Ca_kabuli_chr01 | 18299987                | TT                              | CC                | 1945883122               |
| SNP_P3_6624_18300031 | NC_021160.1    | Ca_kabuli_chr01 | 18300031                | TT                              | AA                | 1945883123               |
| SNP_P3_6625_18300032 | NC_021160.1    | Ca_kabuli_chr01 | 18300032                | AA                              | GG                | 1945883125               |
| SNP_P3_6626_18300065 | NC_021160.1    | Ca_kabuli_chr01 | 18300065                | AA                              | GG                | 1945883127               |
| SNP_P3_6627_18300162 | NC_021160.1    | Ca_kabuli_chr01 | 18300162                | TT                              | CC                | 1945883129               |
| SNP_P3_6628_18300561 | NC_021160.1    | Ca_kabuli_chr01 | 18300561                | TT                              | GG                | 1945883130               |
| SNP_P3_6629_18300578 | NC_021160.1    | Ca_kabuli_chr01 | 18300578                | GG                              | CC                | 1945883132               |
| SNP_P3_6630_18300596 | NC_021160.1    | Ca_kabuli_chr01 | 18300596                | CC                              | TT                | 1945883134               |
| SNP_P3_6632_18300686 | NC_021160.1    | Ca_kabuli_chr01 | 18300686                | CC                              | TT                | 1945883136               |
| SNP_P3_6634_18301160 | NC_021160.1    | Ca_kabuli_chr01 | 18301160                | TT                              | AA                | 1945883137               |
| SNP_P3_6635_18301228 | NC_021160.1    | Ca_kabuli_chr01 | 18301228                | AA                              | GG                | 1945883139               |
| SNP_P3_6636_18301275 | NC_021160.1    | Ca_kabuli_chr01 | 18301275                | GG                              | CC                | 1945883141               |
| SNP_P3_6637_18301292 | NC_021160.1    | Ca_kabuli_chr01 | 18301292                | TT                              | CC                | 1945883143               |
| SNP_P3_6638_18301295 | NC_021160.1    | Ca_kabuli_chr01 | 18301295                | TT                              | CC                | 1945883144               |
| SNP_P3_6639_18301305 | NC_021160.1    | Ca_kabuli_chr01 | 18301305                | GG                              | TT                | 1945883146               |
| SNP_P3_6640_18301653 | NC_021160.1    | Ca_kabuli_chr01 | 18301653                | AA                              | TT                | 1945883148               |
| SNP_P3_6641_18301697 | NC_021160.1    | Ca_kabuli_chr01 | 18301697                | TT                              | CC                | 1945883150               |
| SNP_P3_6642_18301900 | NC_021160.1    | Ca_kabuli_chr01 | 18301900                | CC                              | TT                | 1945883152               |
| SNP_P3_6643_18302162 | NC_021160.1    | Ca_kabuli_chr01 | 18302162                | CC                              | TT                | 1945883153               |
| SNP_P3_6644_18316918 | NC_021160.1    | Ca_kabuli_chr01 | 18316918                | TT                              | CC                | 1945883155               |
| SNP_P3_6645_18316931 | NC_021160.1    | Ca_kabuli_chr01 | 18316931                | TT                              | AA                | 1945883157               |
| SNP_P3_6646_18316970 | NC_021160.1    | Ca_kabuli_chr01 | 18316970                | AA                              | TT                | 1945883159               |
| SNP_P3_6647_18317626 | NC_021160.1    | Ca_kabuli_chr01 | 18317626                | TT                              | CC                | 1945883160               |
| SNP_P3_6648_18317676 | NC_021160.1    | Ca_kabuli_chr01 | 18317676                | CC                              | AA                | 1945883162               |
| SNP_P3_6649_18317939 | NC_021160.1    | Ca_kabuli_chr01 | 18317939                | GG                              | AA                | 1945883164               |
| SNP_P3_6650_18318994 | NC_021160.1    | Ca_kabuli_chr01 | 18318994                | GG                              | TT                | 1945883166               |

| SNPs IDs             | Chromosome IDs | Chromosomes     | Physical positions (bp) | CDC Frontier (Reference genome) | (Pusa 256 & HPNB) | NCBI SNPdb Accession IDs |
|----------------------|----------------|-----------------|-------------------------|---------------------------------|-------------------|--------------------------|
| SNP_P3_6651_18319342 | NC_021160.1    | Ca_kabuli_chr01 | 18319342                | TT                              | GG                | 1945883168               |
| SNP_P3_6652_18319391 | NC_021160.1    | Ca_kabuli_chr01 | 18319391                | CC                              | TT                | 1945883169               |
| SNP_P3_6653_18320136 | NC_021160.1    | Ca_kabuli_chr01 | 18320136                | CC                              | TT                | 1945883171               |
| SNP_P3_6654_18325295 | NC_021160.1    | Ca_kabuli_chr01 | 18325295                | GG                              | AA                | 1945883173               |
| SNP_P3_6656_18325628 | NC_021160.1    | Ca_kabuli_chr01 | 18325628                | GG                              | TT                | 1945883175               |
| SNP_P3_6657_18326309 | NC_021160.1    | Ca_kabuli_chr01 | 18326309                | GG                              | CC                | 1945883176               |
| SNP_P3_6658_18326588 | NC_021160.1    | Ca_kabuli_chr01 | 18326588                | AA                              | TT                | 1945883178               |
| SNP_P3_6659_18326649 | NC_021160.1    | Ca_kabuli_chr01 | 18326649                | AA                              | GG                | 1945883180               |
| SNP_P3_6660_18327274 | NC_021160.1    | Ca_kabuli_chr01 | 18327274                | TT                              | CC                | 1945883182               |
| SNP_P3_6661_18327300 | NC_021160.1    | Ca_kabuli_chr01 | 18327300                | TT                              | AA                | 1945883184               |
| SNP_P3_6662_18327304 | NC_021160.1    | Ca_kabuli_chr01 | 18327304                | AA                              | GG                | 1945883185               |
| SNP_P3_6663_18327379 | NC_021160.1    | Ca_kabuli_chr01 | 18327379                | GG                              | CC                | 1945883187               |
| SNP_P3_6664_18327549 | NC_021160.1    | Ca_kabuli_chr01 | 18327549                | CC                              | AA                | 1945883189               |
| SNP_P3_6665_18327571 | NC_021160.1    | Ca_kabuli_chr01 | 18327571                | GG                              | AA                | 1945883191               |
| SNP_P3_6666_18327577 | NC_021160.1    | Ca_kabuli_chr01 | 18327577                | AA                              | GG                | 1945883192               |
| SNP_P3_6667_18327618 | NC_021160.1    | Ca_kabuli_chr01 | 18327618                | CC                              | TT                | 1945883194               |
| SNP_P3_6668_18327623 | NC_021160.1    | Ca_kabuli_chr01 | 18327623                | GG                              | AA                | 1945883196               |
| SNP_P3_6669_18327706 | NC_021160.1    | Ca_kabuli_chr01 | 18327706                | CC                              | AA                | 1945883198               |
| SNP_P3_6670_18327710 | NC_021160.1    | Ca_kabuli_chr01 | 18327710                | CC                              | AA                | 1945883200               |
| SNP_P3_6671_18327724 | NC_021160.1    | Ca_kabuli_chr01 | 18327724                | AA                              | GG                | 1945883201               |
| SNP_P3_6672_18327732 | NC_021160.1    | Ca_kabuli_chr01 | 18327732                | AA                              | CC                | 1945883203               |
| SNP_P3_6673_18327747 | NC_021160.1    | Ca_kabuli_chr01 | 18327747                | TT                              | CC                | 1945883205               |
| SNP_P3_6674_18327797 | NC_021160.1    | Ca_kabuli_chr01 | 18327797                | AA                              | CC                | 1945883207               |
| SNP_P3_6675_18327852 | NC_021160.1    | Ca_kabuli_chr01 | 18327852                | CC                              | TT                | 1945883208               |
| SNP_P3_6676_18327889 | NC_021160.1    | Ca_kabuli_chr01 | 18327889                | GG                              | AA                | 1945883210               |
| SNP_P3_6677_18327944 | NC_021160.1    | Ca_kabuli_chr01 | 18327944                | TT                              | AA                | 1945883212               |
| SNP_P3_6678_18327945 | NC_021160.1    | Ca_kabuli_chr01 | 18327945                | CC                              | TT                | 1945883214               |
| SNP_P3_6679_18327946 | NC_021160.1    | Ca_kabuli_chr01 | 18327946                | GG                              | AA                | 1945883216               |
| SNP_P3_6680_18327969 | NC_021160.1    | Ca_kabuli_chr01 | 18327969                | TT                              | CC                | 1945883217               |
| SNP_P3_6681_18328006 | NC_021160.1    | Ca_kabuli_chr01 | 18328006                | GG                              | TT                | 1945883219               |
| SNP_P3_6682_18328012 | NC_021160.1    | Ca_kabuli_chr01 | 18328012                | AA                              | TT                | 1945883221               |
| SNP_P3_6683_18328043 | NC_021160.1    | Ca_kabuli_chr01 | 18328043                | CC                              | TT                | 1945883223               |
| SNP_P3_6684_18328084 | NC_021160.1    | Ca_kabuli_chr01 | 18328084                | GG                              | TT                | 1945883224               |
| SNP_P3_6687_18328245 | NC_021160.1    | Ca_kabuli_chr01 | 18328245                | GG                              | AA                | 1945883226               |
| SNP_P3_6688_18328288 | NC_021160.1    | Ca_kabuli_chr01 | 18328288                | AA                              | TT                | 1945883228               |
| SNP_P3_6689_18328316 | NC_021160.1    | Ca_kabuli_chr01 | 18328316                | CC                              | TT                | 1945883230               |
| SNP_P3_6690_18328374 | NC_021160.1    | Ca_kabuli_chr01 | 18328374                | GG                              | AA                | 1945883232               |
| SNP_P3_6691_18328423 | NC_021160.1    | Ca_kabuli_chr01 | 18328423                | CC                              | TT                | 1945883233               |
| SNP_P3_6692_18363608 | NC_021160.1    | Ca_kabuli_chr01 | 18363608                | GG                              | AA                | 1945883235               |
| SNP_P3_6693_18363694 | NC_021160.1    | Ca_kabuli_chr01 | 18363694                | AA                              | GG                | 1945883237               |
| SNP_P3_6694_18363764 | NC_021160.1    | Ca_kabuli_chr01 | 18363764                | GG                              | AA                | 1945883239               |
| SNP_P3_6695_18363926 | NC_021160.1    | Ca_kabuli_chr01 | 18363926                | CC                              | TT                | 1945883240               |

| SNPs IDs             | Chromosome IDs | Chromosomes     | Physical positions (bp) | CDC Frontier (Reference genome) | (Pusa 256 & HPNB) | NCBI SNPdb Accession IDs |
|----------------------|----------------|-----------------|-------------------------|---------------------------------|-------------------|--------------------------|
| SNP_P3_6696_18363952 | NC_021160.1    | Ca_kabuli_chr01 | 18363952                | CC                              | TT                | 1945883242               |
| SNP_P3_6697_18363986 | NC_021160.1    | Ca_kabuli_chr01 | 18363986                | GG                              | AA                | 1945883244               |
| SNP_P3_6698_18363995 | NC_021160.1    | Ca_kabuli_chr01 | 18363995                | GG                              | AA                | 1945883246               |
| SNP_P3_6699_18363998 | NC_021160.1    | Ca_kabuli_chr01 | 18363998                | AA                              | GG                | 1945883247               |
| SNP_P3_6700_18364006 | NC_021160.1    | Ca_kabuli_chr01 | 18364006                | AA                              | TT                | 1945883249               |
| SNP_P3_6701_18364007 | NC_021160.1    | Ca_kabuli_chr01 | 18364007                | AA                              | GG                | 1945883251               |
| SNP_P3_6702_18364019 | NC_021160.1    | Ca_kabuli_chr01 | 18364019                | TT                              | AA                | 1945883253               |
| SNP_P3_6703_18364025 | NC_021160.1    | Ca_kabuli_chr01 | 18364025                | AA                              | CC                | 1945883254               |
| SNP_P3_6704_18364034 | NC_021160.1    | Ca_kabuli_chr01 | 18364034                | AA                              | TT                | 1945883256               |
| SNP_P3_6705_18364037 | NC_021160.1    | Ca_kabuli_chr01 | 18364037                | CC                              | AA                | 1945883258               |
| SNP_P3_6707_18364099 | NC_021160.1    | Ca_kabuli_chr01 | 18364099                | CC                              | GG                | 1945883260               |
| SNP_P3_6708_18364106 | NC_021160.1    | Ca_kabuli_chr01 | 18364106                | CC                              | AA                | 1945883261               |
| SNP_P3_6709_18364147 | NC_021160.1    | Ca_kabuli_chr01 | 18364147                | GG                              | AA                | 1945883263               |
| SNP_P3_6710_18368567 | NC_021160.1    | Ca_kabuli_chr01 | 18368567                | CC                              | TT                | 1945883265               |
| SNP_P3_6711_18368633 | NC_021160.1    | Ca_kabuli_chr01 | 18368633                | TT                              | GG                | 1945883267               |
| SNP_P3_6712_18368634 | NC_021160.1    | Ca_kabuli_chr01 | 18368634                | GG                              | TT                | 1945883269               |
| SNP_P3_6713_18368668 | NC_021160.1    | Ca_kabuli_chr01 | 18368668                | CC                              | TT                | 1945883270               |
| SNP_P3_6714_18368773 | NC_021160.1    | Ca_kabuli_chr01 | 18368773                | AA                              | GG                | 1945883272               |
| SNP_P3_6715_18368795 | NC_021160.1    | Ca_kabuli_chr01 | 18368795                | TT                              | CC                | 1945883274               |
| SNP_P3_6716_18368817 | NC_021160.1    | Ca_kabuli_chr01 | 18368817                | CC                              | GG                | 1945883276               |
| SNP_P3_6717_18368839 | NC_021160.1    | Ca_kabuli_chr01 | 18368839                | AA                              | GG                | 1945883277               |
| SNP_P3_6718_18398418 | NC_021160.1    | Ca_kabuli_chr01 | 18398418                | AA                              | CC                | 1945883279               |
| SNP_P3_6719_18398419 | NC_021160.1    | Ca_kabuli_chr01 | 18398419                | TT                              | CC                | 1945883281               |
| SNP_P3_6720_18407483 | NC_021160.1    | Ca_kabuli_chr01 | 18407483                | TT                              | CC                | 1945883283               |
| SNP_P3_6721_18407748 | NC_021160.1    | Ca_kabuli_chr01 | 18407748                | CC                              | TT                | 1945883284               |
| SNP_P3_6722_18407824 | NC_021160.1    | Ca_kabuli_chr01 | 18407824                | GG                              | AA                | 1945883286               |
| SNP_P3_6723_18407829 | NC_021160.1    | Ca_kabuli_chr01 | 18407829                | GG                              | CC                | 1945883288               |
| SNP_P3_6724_18407852 | NC_021160.1    | Ca_kabuli_chr01 | 18407852                | CC                              | TT                | 1945883290               |
| SNP_P3_6725_18407938 | NC_021160.1    | Ca_kabuli_chr01 | 18407938                | GG                              | AA                | 1945883292               |
| SNP_P3_6726_18408121 | NC_021160.1    | Ca_kabuli_chr01 | 18408121                | AA                              | GG                | 1945883293               |
| SNP_P3_6727_18425471 | NC_021160.1    | Ca_kabuli_chr01 | 18425471                | TT                              | AA                | 1945883295               |
| SNP_P3_6729_18456625 | NC_021160.1    | Ca_kabuli_chr01 | 18456625                | TT                              | CC                | 1945883297               |
| SNP_P3_6730_18466077 | NC_021160.1    | Ca_kabuli_chr01 | 18466077                | TT                              | CC                | 1945883299               |
| SNP_P3_6731_18466093 | NC_021160.1    | Ca_kabuli_chr01 | 18466093                | TT                              | CC                | 1945883300               |
| SNP_P3_6732_18466498 | NC_021160.1    | Ca_kabuli_chr01 | 18466498                | CC                              | TT                | 1945883302               |
| SNP_P3_6733_18467046 | NC_021160.1    | Ca_kabuli_chr01 | 18467046                | GG                              | AA                | 1945883304               |
| SNP_P3_6735_18515141 | NC_021160.1    | Ca_kabuli_chr01 | 18515141                | TT                              | CC                | 1945883306               |
| SNP_P3_6736_18527748 | NC_021160.1    | Ca_kabuli_chr01 | 18527748                | GG                              | TT                | 1945883308               |
| SNP_P3_6737_18527828 | NC_021160.1    | Ca_kabuli_chr01 | 18527828                | AA                              | CC                | 1945883309               |
| SNP_P3_6738_18527941 | NC_021160.1    | Ca_kabuli_chr01 | 18527941                | TT                              | CC                | 1945883311               |
| SNP_P3_6739_18528700 | NC_021160.1    | Ca_kabuli_chr01 | 18528700                | GG                              | CC                | 1945883313               |
| SNP_P3_6740_18552339 | NC_021160.1    | Ca_kabuli_chr01 | 18552339                | GG                              | AA                | 1945883315               |

| SNPs IDs             | Chromosome IDs | Chromosomes     | Physical positions (bp) | CDC Frontier (Reference genome) | (Pusa 256 & HPNB) | NCBI SNPdb Accession IDs |
|----------------------|----------------|-----------------|-------------------------|---------------------------------|-------------------|--------------------------|
| SNP_P3_6741_18582856 | NC_021160.1    | Ca_kabuli_chr01 | 18582856                | GG                              | TT                | 1945883316               |
| SNP_P3_6742_18601270 | NC_021160.1    | Ca_kabuli_chr01 | 18601270                | GG                              | TT                | 1945883318               |
| SNP_P3_6743_18601271 | NC_021160.1    | Ca_kabuli_chr01 | 18601271                | AA                              | TT                | 1945883320               |
| SNP_P3_6744_18601389 | NC_021160.1    | Ca_kabuli_chr01 | 18601389                | AA                              | GG                | 1945883322               |
| SNP_P3_6745_18601396 | NC_021160.1    | Ca_kabuli_chr01 | 18601396                | CC                              | TT                | 1945883323               |
| SNP_P3_6746_18601399 | NC_021160.1    | Ca_kabuli_chr01 | 18601399                | AA                              | CC                | 1945883325               |
| SNP_P3_6747_18601413 | NC_021160.1    | Ca_kabuli_chr01 | 18601413                | AA                              | GG                | 1945883327               |
| SNP_P3_6748_18601680 | NC_021160.1    | Ca_kabuli_chr01 | 18601680                | TT                              | CC                | 1945883329               |
| SNP_P3_6749_18601785 | NC_021160.1    | Ca_kabuli_chr01 | 18601785                | CC                              | TT                | 1945883331               |
| SNP_P3_6752_18633243 | NC_021160.1    | Ca_kabuli_chr01 | 18633243                | CC                              | TT                | 1945883332               |
| SNP_P3_6753_18637998 | NC_021160.1    | Ca_kabuli_chr01 | 18637998                | GG                              | TT                | 1945883334               |
| SNP_P3_6754_18637999 | NC_021160.1    | Ca_kabuli_chr01 | 18637999                | GG                              | AA                | 1945883336               |
| SNP_P3_6755_18668622 | NC_021160.1    | Ca_kabuli_chr01 | 18668622                | TT                              | CC                | 1945883338               |
| SNP_P3_6756_18676736 | NC_021160.1    | Ca_kabuli_chr01 | 18676736                | CC                              | TT                | 1945883340               |
| SNP_P3_6758_18688504 | NC_021160.1    | Ca_kabuli_chr01 | 18688504                | AA                              | GG                | 1945883341               |
| SNP_P3_6759_18695340 | NC_021160.1    | Ca_kabuli_chr01 | 18695340                | TT                              | CC                | 1945883343               |
| SNP_P3_6760_18695690 | NC_021160.1    | Ca_kabuli_chr01 | 18695690                | GG                              | AA                | 1945883345               |
| SNP_P3_6761_18708232 | NC_021160.1    | Ca_kabuli_chr01 | 18708232                | GG                              | AA                | 1945883347               |
| SNP_P3_6762_18738368 | NC_021160.1    | Ca_kabuli_chr01 | 18738368                | TT                              | AA                | 1945883348               |
| SNP_P3_6763_18738370 | NC_021160.1    | Ca_kabuli_chr01 | 18738370                | GG                              | AA                | 1945883350               |
| SNP_P3_6764_18738382 | NC_021160.1    | Ca_kabuli_chr01 | 18738382                | TT                              | CC                | 1945883352               |
| SNP_P3_6765_18739712 | NC_021160.1    | Ca_kabuli_chr01 | 18739712                | TT                              | GG                | 1945883354               |
| SNP_P3_6766_18750718 | NC_021160.1    | Ca_kabuli_chr01 | 18750718                | TT                              | CC                | 1945883356               |
| SNP_P3_6767_18795277 | NC_021160.1    | Ca_kabuli_chr01 | 18795277                | AA                              | GG                | 1945883357               |
| SNP_P3_6769_18824051 | NC_021160.1    | Ca_kabuli_chr01 | 18824051                | AA                              | GG                | 1945883359               |
| SNP_P3_6770_18824205 | NC_021160.1    | Ca_kabuli_chr01 | 18824205                | TT                              | CC                | 1945883361               |
| SNP_P3_6772_18824447 | NC_021160.1    | Ca_kabuli_chr01 | 18824447                | CC                              | TT                | 1945883363               |
| SNP_P3_6773_18824489 | NC_021160.1    | Ca_kabuli_chr01 | 18824489                | TT                              | CC                | 1945883364               |
| SNP_P3_6774_18824543 | NC_021160.1    | Ca_kabuli_chr01 | 18824543                | TT                              | CC                | 1945883366               |
| SNP_P3_6776_18861230 | NC_021160.1    | Ca_kabuli_chr01 | 18861230                | GG                              | AA                | 1945883368               |
| SNP_P3_6777_18868457 | NC_021160.1    | Ca_kabuli_chr01 | 18868457                | AA                              | TT                | 1945883370               |
| SNP_P3_6778_18868484 | NC_021160.1    | Ca_kabuli_chr01 | 18868484                | GG                              | AA                | 1945883372               |
| SNP_P3_6779_18868557 | NC_021160.1    | Ca_kabuli_chr01 | 18868557                | TT                              | CC                | 1945883373               |
| SNP_P3_6781_18868667 | NC_021160.1    | Ca_kabuli_chr01 | 18868667                | AA                              | GG                | 1945883375               |
| SNP_P3_6782_18868679 | NC_021160.1    | Ca_kabuli_chr01 | 18868679                | AA                              | GG                | 1945883377               |
| SNP_P3_6783_18868684 | NC_021160.1    | Ca_kabuli_chr01 | 18868684                | CC                              | TT                | 1945883379               |
| SNP_P3_6784_18868861 | NC_021160.1    | Ca_kabuli_chr01 | 18868861                | GG                              | AA                | 1945883381               |
| SNP_P3_6785_18881034 | NC_021160.1    | Ca_kabuli_chr01 | 18881034                | GG                              | AA                | 1945883382               |
| SNP_P3_6786_18893815 | NC_021160.1    | Ca_kabuli_chr01 | 18893815                | AA                              | GG                | 1945883384               |
| SNP_P3_6787_18897998 | NC_021160.1    | Ca_kabuli_chr01 | 18897998                | CC                              | GG                | 1945883386               |
| SNP_P3_6788_19019269 | NC_021160.1    | Ca_kabuli_chr01 | 19019269                | TT                              | CC                | 1945883388               |
| SNP_P3_6789_19019270 | NC_021160.1    | Ca_kabuli_chr01 | 19019270                | TT                              | AA                | 1945883390               |



| SNPs IDs             | Chromosome IDs | Chromosomes     | Physical positions (bp) | CDC Frontier (Reference genome) | (Pusa 256 & HPNB) | NCBI SNPdb Accession IDs |
|----------------------|----------------|-----------------|-------------------------|---------------------------------|-------------------|--------------------------|
| SNP_P3_6790_19025169 | NC_021160.1    | Ca_kabuli_chr01 | 19025169                | AA                              | TT                | 1945883391               |
| SNP_P3_6791_19025170 | NC_021160.1    | Ca_kabuli_chr01 | 19025170                | AA                              | TT                | 1945883393               |
| SNP_P3_6792_19025172 | NC_021160.1    | Ca_kabuli_chr01 | 19025172                | CC                              | AA                | 1945883395               |
| SNP_P3_6793_19025173 | NC_021160.1    | Ca_kabuli_chr01 | 19025173                | TT                              | AA                | 1945883397               |
| SNP_P3_6794_19025177 | NC_021160.1    | Ca_kabuli_chr01 | 19025177                | TT                              | CC                | 1945883399               |
| SNP_P3_6795_19025180 | NC_021160.1    | Ca_kabuli_chr01 | 19025180                | CC                              | TT                | 1945883400               |
| SNP_P3_6797_19026305 | NC_021160.1    | Ca_kabuli_chr01 | 19026305                | TT                              | CC                | 1945883402               |
| SNP_P3_6798_19027822 | NC_021160.1    | Ca_kabuli_chr01 | 19027822                | CC                              | GG                | 1945883404               |
| SNP_P3_6800_19050155 | NC_021160.1    | Ca_kabuli_chr01 | 19050155                | TT                              | AA                | 1945883406               |
| SNP_P3_6801_19064551 | NC_021160.1    | Ca_kabuli_chr01 | 19064551                | CC                              | TT                | 1945883408               |
| SNP_P3_6802_19111747 | NC_021160.1    | Ca_kabuli_chr01 | 19111747                | TT                              | CC                | 1945883409               |
| SNP_P3_6803_19130703 | NC_021160.1    | Ca_kabuli_chr01 | 19130703                | TT                              | AA                | 1945883411               |
| SNP_P3_6804_19133050 | NC_021160.1    | Ca_kabuli_chr01 | 19133050                | CC                              | TT                | 1945883413               |
| SNP_P3_6805_19134859 | NC_021160.1    | Ca_kabuli_chr01 | 19134859                | AA                              | GG                | 1945883415               |
| SNP_P3_6806_19134931 | NC_021160.1    | Ca_kabuli_chr01 | 19134931                | TT                              | GG                | 1945883417               |
| SNP_P3_6807_19135276 | NC_021160.1    | Ca_kabuli_chr01 | 19135276                | GG                              | CC                | 1945883418               |
| SNP_P3_6808_19150894 | NC_021160.1    | Ca_kabuli_chr01 | 19150894                | CC                              | TT                | 1945883420               |
| SNP_P3_6809_19150902 | NC_021160.1    | Ca_kabuli_chr01 | 19150902                | CC                              | TT                | 1945883422               |
| SNP_P3_6810_19150913 | NC_021160.1    | Ca_kabuli_chr01 | 19150913                | GG                              | AA                | 1945883424               |
| SNP_P3_6811_19150960 | NC_021160.1    | Ca_kabuli_chr01 | 19150960                | GG                              | AA                | 1945883425               |
| SNP_P3_6812_19151037 | NC_021160.1    | Ca_kabuli_chr01 | 19151037                | TT                              | AA                | 1945883427               |
| SNP_P3_6813_19151103 | NC_021160.1    | Ca_kabuli_chr01 | 19151103                | GG                              | AA                | 1945883429               |
| SNP_P3_6814_19151104 | NC_021160.1    | Ca_kabuli_chr01 | 19151104                | GG                              | AA                | 1945883431               |
| SNP_P3_6815_19151112 | NC_021160.1    | Ca_kabuli_chr01 | 19151112                | AA                              | GG                | 1945883433               |
| SNP_P3_6816_19151134 | NC_021160.1    | Ca_kabuli_chr01 | 19151134                | TT                              | CC                | 1945883434               |
| SNP_P3_6817_19151152 | NC_021160.1    | Ca_kabuli_chr01 | 19151152                | AA                              | TT                | 1945883436               |
| SNP_P3_6819_19153235 | NC_021160.1    | Ca_kabuli_chr01 | 19153235                | AA                              | GG                | 1945883438               |
| SNP_P3_6820_19153273 | NC_021160.1    | Ca_kabuli_chr01 | 19153273                | TT                              | CC                | 1945883440               |
| SNP_P3_6821_19178401 | NC_021160.1    | Ca_kabuli_chr01 | 19178401                | GG                              | CC                | 1945883442               |
| SNP_P3_6822_19221892 | NC_021160.1    | Ca_kabuli_chr01 | 19221892                | AA                              | GG                | 1945883443               |
| SNP_P3_6823_19221958 | NC_021160.1    | Ca_kabuli_chr01 | 19221958                | AA                              | GG                | 1945883445               |
| SNP_P3_6824_19221959 | NC_021160.1    | Ca_kabuli_chr01 | 19221959                | CC                              | TT                | 1945883447               |
| SNP_P3_6825_19222109 | NC_021160.1    | Ca_kabuli_chr01 | 19222109                | AA                              | CC                | 1945883449               |
| SNP_P3_6826_19226988 | NC_021160.1    | Ca_kabuli_chr01 | 19226988                | AA                              | GG                | 1945883450               |
| SNP_P3_6827_19266889 | NC_021160.1    | Ca_kabuli_chr01 | 19266889                | GG                              | AA                | 1945883452               |
| SNP_P3_6828_19273418 | NC_021160.1    | Ca_kabuli_chr01 | 19273418                | TT                              | CC                | 1945883454               |
| SNP_P3_6829_19307885 | NC_021160.1    | Ca_kabuli_chr01 | 19307885                | TT                              | CC                | 1945883456               |
| SNP_P3_6830_19331228 | NC_021160.1    | Ca_kabuli_chr01 | 19331228                | AA                              | TT                | 1945883458               |
| SNP_P3_6831_19332449 | NC_021160.1    | Ca_kabuli_chr01 | 19332449                | GG                              | AA                | 1945883459               |
| SNP_P3_6832_19334971 | NC_021160.1    | Ca_kabuli_chr01 | 19334971                | AA                              | GG                | 1945883461               |
| SNP_P3_6833_19353024 | NC_021160.1    | Ca_kabuli_chr01 | 19353024                | GG                              | AA                | 1945883463               |
| SNP_P3_6834_19361233 | NC_021160.1    | Ca_kabuli_chr01 | 19361233                | GG                              | TT                | 1945883465               |

| SNPs IDs             | Chromosome IDs | Chromosomes     | Physical positions (bp) | CDC Frontier (Reference genome) | (Pusa 256 & HPNB) | NCBI SNPdb Accession IDs |
|----------------------|----------------|-----------------|-------------------------|---------------------------------|-------------------|--------------------------|
| SNP_P3_6835_19361263 | NC_021160.1    | Ca_kabuli_chr01 | 19361263                | TT                              | AA                | 1945883466               |
| SNP_P3_6836_19361264 | NC_021160.1    | Ca_kabuli_chr01 | 19361264                | TT                              | CC                | 1945883468               |
| SNP_P3_6837_19363829 | NC_021160.1    | Ca_kabuli_chr01 | 19363829                | GG                              | TT                | 1945883470               |
| SNP_P3_6838_19376030 | NC_021160.1    | Ca_kabuli_chr01 | 19376030                | AA                              | CC                | 1945883472               |
| SNP_P3_6839_19376702 | NC_021160.1    | Ca_kabuli_chr01 | 19376702                | AA                              | TT                | 1945883474               |
| SNP_P3_6840_19376705 | NC_021160.1    | Ca_kabuli_chr01 | 19376705                | TT                              | GG                | 1945883475               |
| SNP_P3_6841_19382383 | NC_021160.1    | Ca_kabuli_chr01 | 19382383                | AA                              | CC                | 1945883477               |
| SNP_P3_6842_19392577 | NC_021160.1    | Ca_kabuli_chr01 | 19392577                | TT                              | GG                | 1945883479               |
| SNP_P3_6843_19420935 | NC_021160.1    | Ca_kabuli_chr01 | 19420935                | TT                              | CC                | 1945883481               |
| SNP_P3_6844_19422493 | NC_021160.1    | Ca_kabuli_chr01 | 19422493                | TT                              | CC                | 1945883482               |
| SNP_P3_6845_19422499 | NC_021160.1    | Ca_kabuli_chr01 | 19422499                | CC                              | TT                | 1945883484               |
| SNP_P3_6846_19422853 | NC_021160.1    | Ca_kabuli_chr01 | 19422853                | TT                              | CC                | 1945883486               |
| SNP_P3_6849_19423090 | NC_021160.1    | Ca_kabuli_chr01 | 19423090                | AA                              | CC                | 1945883488               |
| SNP_P3_6850_19423123 | NC_021160.1    | Ca_kabuli_chr01 | 19423123                | CC                              | TT                | 1945883489               |
| SNP_P3_6851_19423192 | NC_021160.1    | Ca_kabuli_chr01 | 19423192                | TT                              | CC                | 1945883491               |
| SNP_P3_6853_19424185 | NC_021160.1    | Ca_kabuli_chr01 | 19424185                | CC                              | TT                | 1945883493               |
| SNP_P3_6854_19424262 | NC_021160.1    | Ca_kabuli_chr01 | 19424262                | CC                              | TT                | 1945883495               |
| SNP_P3_6855_19424307 | NC_021160.1    | Ca_kabuli_chr01 | 19424307                | TT                              | GG                | 1945883497               |
| SNP_P3_6856_19427178 | NC_021160.1    | Ca_kabuli_chr01 | 19427178                | GG                              | TT                | 1945883498               |
| SNP_P3_6857_19427244 | NC_021160.1    | Ca_kabuli_chr01 | 19427244                | AA                              | GG                | 1945883500               |
| SNP_P3_6858_19427335 | NC_021160.1    | Ca_kabuli_chr01 | 19427335                | CC                              | GG                | 1945883502               |
| SNP_P3_6859_19427557 | NC_021160.1    | Ca_kabuli_chr01 | 19427557                | AA                              | GG                | 1945883503               |
| SNP_P3_6860_19427623 | NC_021160.1    | Ca_kabuli_chr01 | 19427623                | TT                              | CC                | 1945883505               |
| SNP_P3_6861_19431345 | NC_021160.1    | Ca_kabuli_chr01 | 19431345                | GG                              | AA                | 1945883507               |
| SNP_P3_6862_19431349 | NC_021160.1    | Ca_kabuli_chr01 | 19431349                | GG                              | AA                | 1945883509               |
| SNP_P3_6863_19431381 | NC_021160.1    | Ca_kabuli_chr01 | 19431381                | TT                              | CC                | 1945883511               |
| SNP_P3_6864_19431426 | NC_021160.1    | Ca_kabuli_chr01 | 19431426                | CC                              | GG                | 1945883512               |
| SNP_P3_6866_19431554 | NC_021160.1    | Ca_kabuli_chr01 | 19431554                | AA                              | TT                | 1945883514               |
| SNP_P3_6867_19431710 | NC_021160.1    | Ca_kabuli_chr01 | 19431710                | AA                              | TT                | 1945883516               |
| SNP_P3_6868_19432006 | NC_021160.1    | Ca_kabuli_chr01 | 19432006                | GG                              | CC                | 1945883518               |
| SNP_P3_6869_19432008 | NC_021160.1    | Ca_kabuli_chr01 | 19432008                | GG                              | AA                | 1945883519               |
| SNP_P3_6870_19436879 | NC_021160.1    | Ca_kabuli_chr01 | 19436879                | GG                              | CC                | 1945883521               |
| SNP_P3_6871_19444097 | NC_021160.1    | Ca_kabuli_chr01 | 19444097                | GG                              | AA                | 1945883523               |
| SNP_P3_6872_19445947 | NC_021160.1    | Ca_kabuli_chr01 | 19445947                | GG                              | AA                | 1945883525               |
| SNP_P3_6873_19454907 | NC_021160.1    | Ca_kabuli_chr01 | 19454907                | CC                              | TT                | 1945883526               |
| SNP_P3_6874_19460866 | NC_021160.1    | Ca_kabuli_chr01 | 19460866                | GG                              | TT                | 1945883528               |
| SNP_P3_6875_19461154 | NC_021160.1    | Ca_kabuli_chr01 | 19461154                | AA                              | GG                | 1945883530               |
| SNP_P3_6877_19499056 | NC_021160.1    | Ca_kabuli_chr01 | 19499056                | AA                              | GG                | 1945883532               |
| SNP_P3_6878_19499093 | NC_021160.1    | Ca_kabuli_chr01 | 19499093                | TT                              | AA                | 1945883534               |
| SNP_P3_6879_19499108 | NC_021160.1    | Ca_kabuli_chr01 | 19499108                | AA                              | CC                | 1945883535               |
| SNP_P3_6880_19499117 | NC_021160.1    | Ca_kabuli_chr01 | 19499117                | AA                              | TT                | 1945883537               |
| SNP_P3_6881_19499140 | NC_021160.1    | Ca_kabuli_chr01 | 19499140                | CC                              | GG                | 1945883539               |

| SNPs IDs             | Chromosome IDs | Chromosomes     | Physical positions (bp) | CDC Frontier (Reference genome) | (Pusa 256 & HPNB) | NCBI SNPdb Accession IDs |
|----------------------|----------------|-----------------|-------------------------|---------------------------------|-------------------|--------------------------|
| SNP_P3_6882_19499186 | NC_021160.1    | Ca_kabuli_chr01 | 19499186                | AA                              | CC                | 1945883541               |
| SNP_P3_6883_19499194 | NC_021160.1    | Ca_kabuli_chr01 | 19499194                | GG                              | TT                | 1945883542               |
| SNP_P3_6884_19507376 | NC_021160.1    | Ca_kabuli_chr01 | 19507376                | AA                              | CC                | 1945883544               |
| SNP_P3_6885_19547929 | NC_021160.1    | Ca_kabuli_chr01 | 19547929                | GG                              | TT                | 1945883546               |
| SNP_P3_6887_19586986 | NC_021160.1    | Ca_kabuli_chr01 | 19586986                | CC                              | TT                | 1945883548               |
| SNP_P3_6888_19619575 | NC_021160.1    | Ca_kabuli_chr01 | 19619575                | CC                              | TT                | 1945883549               |
| SNP_P3_6889_19619792 | NC_021160.1    | Ca_kabuli_chr01 | 19619792                | AA                              | GG                | 1945883551               |
| SNP_P3_6890_19619861 | NC_021160.1    | Ca_kabuli_chr01 | 19619861                | TT                              | CC                | 1945883553               |
| SNP_P3_6891_19619866 | NC_021160.1    | Ca_kabuli_chr01 | 19619866                | AA                              | CC                | 1945883555               |
| SNP_P3_6892_19619915 | NC_021160.1    | Ca_kabuli_chr01 | 19619915                | TT                              | CC                | 1945883556               |
| SNP_P3_6893_19619921 | NC_021160.1    | Ca_kabuli_chr01 | 19619921                | TT                              | CC                | 1945883558               |
| SNP_P3_6894_19619928 | NC_021160.1    | Ca_kabuli_chr01 | 19619928                | AA                              | GG                | 1945883560               |
| SNP_P3_6895_19619929 | NC_021160.1    | Ca_kabuli_chr01 | 19619929                | TT                              | CC                | 1945883562               |
| SNP_P3_6896_19619954 | NC_021160.1    | Ca_kabuli_chr01 | 19619954                | AA                              | GG                | 1945883564               |
| SNP_P3_6897_19619985 | NC_021160.1    | Ca_kabuli_chr01 | 19619985                | GG                              | AA                | 1945883565               |
| SNP_P3_6898_19619999 | NC_021160.1    | Ca_kabuli_chr01 | 19619999                | CC                              | GG                | 1945883567               |
| SNP_P3_6899_19620012 | NC_021160.1    | Ca_kabuli_chr01 | 19620012                | GG                              | AA                | 1945883569               |
| SNP_P3_6900_19620052 | NC_021160.1    | Ca_kabuli_chr01 | 19620052                | AA                              | TT                | 1945883571               |
| SNP_P3_6901_19620071 | NC_021160.1    | Ca_kabuli_chr01 | 19620071                | TT                              | AA                | 1945883572               |
| SNP_P3_6902_19626514 | NC_021160.1    | Ca_kabuli_chr01 | 19626514                | AA                              | GG                | 1945883574               |
| SNP_P3_6903_19627513 | NC_021160.1    | Ca_kabuli_chr01 | 19627513                | AA                              | GG                | 1945883576               |
| SNP_P3_6904_19627543 | NC_021160.1    | Ca_kabuli_chr01 | 19627543                | TT                              | CC                | 1945883578               |
| SNP_P3_6905_19627951 | NC_021160.1    | Ca_kabuli_chr01 | 19627951                | TT                              | CC                | 1945883579               |
| SNP_P3_6906_19627959 | NC_021160.1    | Ca_kabuli_chr01 | 19627959                | CC                              | TT                | 1945883581               |
| SNP_P3_6907_19642620 | NC_021160.1    | Ca_kabuli_chr01 | 19642620                | AA                              | CC                | 1945883583               |
| SNP_P3_6908_19649710 | NC_021160.1    | Ca_kabuli_chr01 | 19649710                | CC                              | TT                | 1945883585               |
| SNP_P3_6909_19649770 | NC_021160.1    | Ca_kabuli_chr01 | 19649770                | TT                              | AA                | 1945883586               |
| SNP_P3_6910_19649778 | NC_021160.1    | Ca_kabuli_chr01 | 19649778                | GG                              | AA                | 1945883588               |
| SNP_P3_6911_19650012 | NC_021160.1    | Ca_kabuli_chr01 | 19650012                | AA                              | TT                | 1945883590               |
| SNP_P3_6912_19650051 | NC_021160.1    | Ca_kabuli_chr01 | 19650051                | AA                              | GG                | 1945883592               |
| SNP_P3_6913_19650062 | NC_021160.1    | Ca_kabuli_chr01 | 19650062                | TT                              | GG                | 1945883594               |
| SNP_P3_6916_19672199 | NC_021160.1    | Ca_kabuli_chr01 | 19672199                | AA                              | TT                | 1945883595               |
| SNP_P3_6917_19672200 | NC_021160.1    | Ca_kabuli_chr01 | 19672200                | AA                              | CC                | 1945883597               |
| SNP_P3_6919_19697171 | NC_021160.1    | Ca_kabuli_chr01 | 19697171                | CC                              | TT                | 1945883599               |
| SNP_P3_6920_19697184 | NC_021160.1    | Ca_kabuli_chr01 | 19697184                | CC                              | TT                | 1945883601               |
| SNP_P3_6921_19697200 | NC_021160.1    | Ca_kabuli_chr01 | 19697200                | AA                              | GG                | 1945883602               |
| SNP_P3_6922_19697538 | NC_021160.1    | Ca_kabuli_chr01 | 19697538                | CC                              | TT                | 1945883604               |
| SNP_P3_6923_19697674 | NC_021160.1    | Ca_kabuli_chr01 | 19697674                | AA                              | GG                | 1945883606               |
| SNP_P3_6924_19719284 | NC_021160.1    | Ca_kabuli_chr01 | 19719284                | AA                              | GG                | 1945883608               |
| SNP_P3_6925_19728698 | NC_021160.1    | Ca_kabuli_chr01 | 19728698                | AA                              | GG                | 1945883609               |
| SNP_P3_6927_19806317 | NC_021160.1    | Ca_kabuli_chr01 | 19806317                | CC                              | TT                | 1945883611               |
| SNP_P3_6928_19812633 | NC_021160.1    | Ca_kabuli_chr01 | 19812633                | GG                              | AA                | 1945883613               |

| SNPs IDs             | Chromosome IDs | Chromosomes     | Physical positions (bp) | CDC Frontier (Reference genome) | (Pusa 256 & HPNB) | NCBI SNPdb Accession IDs |
|----------------------|----------------|-----------------|-------------------------|---------------------------------|-------------------|--------------------------|
| SNP_P3_6929_19812909 | NC_021160.1    | Ca_kabuli_chr01 | 19812909                | GG                              | AA                | 1945883615               |
| SNP_P3_6930_19812938 | NC_021160.1    | Ca_kabuli_chr01 | 19812938                | CC                              | TT                | 1945883616               |
| SNP_P3_6931_19812981 | NC_021160.1    | Ca_kabuli_chr01 | 19812981                | TT                              | CC                | 1945883618               |
| SNP_P3_6932_19812997 | NC_021160.1    | Ca_kabuli_chr01 | 19812997                | CC                              | TT                | 1945883620               |
| SNP_P3_6933_19831733 | NC_021160.1    | Ca_kabuli_chr01 | 19831733                | AA                              | GG                | 1945883622               |
| SNP_P3_6934_19840273 | NC_021160.1    | Ca_kabuli_chr01 | 19840273                | CC                              | AA                | 1945883624               |
| SNP_P3_6935_19851384 | NC_021160.1    | Ca_kabuli_chr01 | 19851384                | AA                              | TT                | 1945883625               |
| SNP_P3_6936_19851826 | NC_021160.1    | Ca_kabuli_chr01 | 19851826                | TT                              | CC                | 1945883627               |
| SNP_P3_6937_19851841 | NC_021160.1    | Ca_kabuli_chr01 | 19851841                | GG                              | AA                | 1945883629               |
| SNP_P3_6938_19852177 | NC_021160.1    | Ca_kabuli_chr01 | 19852177                | AA                              | GG                | 1945883631               |
| SNP_P3_6939_19852193 | NC_021160.1    | Ca_kabuli_chr01 | 19852193                | AA                              | CC                | 1945883632               |
| SNP_P3_6940_19852225 | NC_021160.1    | Ca_kabuli_chr01 | 19852225                | TT                              | AA                | 1945883634               |
| SNP_P3_6941_19864282 | NC_021160.1    | Ca_kabuli_chr01 | 19864282                | GG                              | TT                | 1945883636               |
| SNP_P3_6942_19899106 | NC_021160.1    | Ca_kabuli_chr01 | 19899106                | CC                              | TT                | 1945883638               |
| SNP_P3_6944_19918717 | NC_021160.1    | Ca_kabuli_chr01 | 19918717                | AA                              | GG                | 1945883639               |
| SNP_P3_6945_19931308 | NC_021160.1    | Ca_kabuli_chr01 | 19931308                | GG                              | TT                | 1945883641               |
| SNP_P3_6946_19956139 | NC_021160.1    | Ca_kabuli_chr01 | 19956139                | AA                              | GG                | 1945883643               |
| SNP_P3_6947_20002066 | NC_021160.1    | Ca_kabuli_chr01 | 20002066                | GG                              | TT                | 1945883645               |
| SNP_P3_6948_20038952 | NC_021160.1    | Ca_kabuli_chr01 | 20038952                | GG                              | AA                | 1945883646               |
| SNP_P3_6949_20039824 | NC_021160.1    | Ca_kabuli_chr01 | 20039824                | TT                              | GG                | 1945883648               |
| SNP_P3_6951_20132099 | NC_021160.1    | Ca_kabuli_chr01 | 20132099                | TT                              | AA                | 1945883650               |
| SNP_P3_6952_20132104 | NC_021160.1    | Ca_kabuli_chr01 | 20132104                | CC                              | AA                | 1945883652               |
| SNP_P3_6953_20132107 | NC_021160.1    | Ca_kabuli_chr01 | 20132107                | TT                              | CC                | 1945883654               |
| SNP_P3_6954_20132114 | NC_021160.1    | Ca_kabuli_chr01 | 20132114                | TT                              | AA                | 1945883655               |
| SNP_P3_6955_20132115 | NC_021160.1    | Ca_kabuli_chr01 | 20132115                | GG                              | AA                | 1945883657               |
| SNP_P3_6956_20132334 | NC_021160.1    | Ca_kabuli_chr01 | 20132334                | TT                              | CC                | 1945883659               |
| SNP_P3_6957_20132520 | NC_021160.1    | Ca_kabuli_chr01 | 20132520                | AA                              | GG                | 1945883661               |
| SNP_P3_6958_21570091 | NC_021160.1    | Ca_kabuli_chr01 | 21570091                | CC                              | TT                | 1945883662               |
| SNP_P3_6959_21570093 | NC_021160.1    | Ca_kabuli_chr01 | 21570093                | AA                              | GG                | 1945883664               |
| SNP_P3_6960_21570342 | NC_021160.1    | Ca_kabuli_chr01 | 21570342                | TT                              | CC                | 1945883666               |
| SNP_P3_6961_21570459 | NC_021160.1    | Ca_kabuli_chr01 | 21570459                | TT                              | CC                | 1945883668               |
| SNP_P3_6964_21647285 | NC_021160.1    | Ca_kabuli_chr01 | 21647285                | GG                              | AA                | 1945883669               |
| SNP_P3_6965_21649932 | NC_021160.1    | Ca_kabuli_chr01 | 21649932                | GG                              | AA                | 1945883671               |
| SNP_P3_6966_21654141 | NC_021160.1    | Ca_kabuli_chr01 | 21654141                | GG                              | TT                | 1945883673               |
| SNP_P3_6967_21654171 | NC_021160.1    | Ca_kabuli_chr01 | 21654171                | AA                              | GG                | 1945883675               |
| SNP_P3_6968_21656636 | NC_021160.1    | Ca_kabuli_chr01 | 21656636                | GG                              | AA                | 1945883676               |
| SNP_P3_6969_21657089 | NC_021160.1    | Ca_kabuli_chr01 | 21657089                | AA                              | GG                | 1945883678               |
| SNP_P3_6970_21657102 | NC_021160.1    | Ca_kabuli_chr01 | 21657102                | AA                              | CC                | 1945883680               |
| SNP_P3_6971_21657337 | NC_021160.1    | Ca_kabuli_chr01 | 21657337                | AA                              | TT                | 1945883682               |
| SNP_P3_6972_21657610 | NC_021160.1    | Ca_kabuli_chr01 | 21657610                | AA                              | GG                | 1945883683               |
| SNP_P3_6973_21657625 | NC_021160.1    | Ca_kabuli_chr01 | 21657625                | AA                              | GG                | 1945883685               |
| SNP_P3_6974_21657643 | NC_021160.1    | Ca_kabuli_chr01 | 21657643                | TT                              | GG                | 1945883687               |

| SNPs IDs             | Chromosome IDs | Chromosomes     | Physical positions (bp) | CDC Frontier (Reference genome) | (Pusa 256 & HPNB) | NCBI SNPdb Accession IDs |
|----------------------|----------------|-----------------|-------------------------|---------------------------------|-------------------|--------------------------|
| SNP_P3_6975_21657661 | NC_021160.1    | Ca_kabuli_chr01 | 21657661                | GG                              | TT                | 1945883689               |
| SNP_P3_6976_21657667 | NC_021160.1    | Ca_kabuli_chr01 | 21657667                | GG                              | AA                | 1945883691               |
| SNP_P3_6977_21657697 | NC_021160.1    | Ca_kabuli_chr01 | 21657697                | AA                              | GG                | 1945883692               |
| SNP_P3_6978_21657714 | NC_021160.1    | Ca_kabuli_chr01 | 21657714                | GG                              | AA                | 1945883694               |
| SNP_P3_6979_21657715 | NC_021160.1    | Ca_kabuli_chr01 | 21657715                | GG                              | AA                | 1945883696               |
| SNP_P3_6980_21657732 | NC_021160.1    | Ca_kabuli_chr01 | 21657732                | AA                              | GG                | 1945883698               |
| SNP_P3_6981_21657733 | NC_021160.1    | Ca_kabuli_chr01 | 21657733                | GG                              | AA                | 1945883699               |
| SNP_P3_6982_21657769 | NC_021160.1    | Ca_kabuli_chr01 | 21657769                | GG                              | AA                | 1945883701               |
| SNP_P3_6983_21657775 | NC_021160.1    | Ca_kabuli_chr01 | 21657775                | TT                              | AA                | 1945883703               |
| SNP_P3_6984_21657787 | NC_021160.1    | Ca_kabuli_chr01 | 21657787                | AA                              | TT                | 1945883704               |
| SNP_P3_6985_21657811 | NC_021160.1    | Ca_kabuli_chr01 | 21657811                | AA                              | GG                | 1945883706               |
| SNP_P3_6986_21657817 | NC_021160.1    | Ca_kabuli_chr01 | 21657817                | GG                              | AA                | 1945883708               |
| SNP_P3_6987_21657838 | NC_021160.1    | Ca_kabuli_chr01 | 21657838                | TT                              | CC                | 1945883710               |
| SNP_P3_6988_21657847 | NC_021160.1    | Ca_kabuli_chr01 | 21657847                | TT                              | AA                | 1945883712               |
| SNP_P3_6989_21657850 | NC_021160.1    | Ca_kabuli_chr01 | 21657850                | AA                              | TT                | 1945883713               |
| SNP_P3_6990_21657859 | NC_021160.1    | Ca_kabuli_chr01 | 21657859                | GG                              | AA                | 1945883715               |
| SNP_P3_6991_21657862 | NC_021160.1    | Ca_kabuli_chr01 | 21657862                | CC                              | TT                | 1945883717               |
| SNP_P3_6992_21657865 | NC_021160.1    | Ca_kabuli_chr01 | 21657865                | TT                              | CC                | 1945883719               |
| SNP_P3_6994_21694511 | NC_021160.1    | Ca_kabuli_chr01 | 21694511                | TT                              | CC                | 1945883720               |
| SNP_P3_6995_21699877 | NC_021160.1    | Ca_kabuli_chr01 | 21699877                | AA                              | GG                | 1945883722               |
| SNP_P3_6996_21700172 | NC_021160.1    | Ca_kabuli_chr01 | 21700172                | TT                              | CC                | 1945883724               |
| SNP_P3_6997_21703194 | NC_021160.1    | Ca_kabuli_chr01 | 21703194                | AA                              | TT                | 1945883726               |
| SNP_P3_6998_21703195 | NC_021160.1    | Ca_kabuli_chr01 | 21703195                | AA                              | TT                | 1945883727               |
| SNP_P3_6999_21716090 | NC_021160.1    | Ca_kabuli_chr01 | 21716090                | GG                              | TT                | 1945883729               |
| SNP_P3_7000_21716092 | NC_021160.1    | Ca_kabuli_chr01 | 21716092                | GG                              | TT                | 1945883731               |
| SNP_P3_7003_21777576 | NC_021160.1    | Ca_kabuli_chr01 | 21777576                | TT                              | CC                | 1945883733               |
| SNP_P3_7004_21777968 | NC_021160.1    | Ca_kabuli_chr01 | 21777968                | AA                              | GG                | 1945883734               |
| SNP_P3_7005_21786339 | NC_021160.1    | Ca_kabuli_chr01 | 21786339                | AA                              | GG                | 1945883736               |
| SNP_P3_7006_21806769 | NC_021160.1    | Ca_kabuli_chr01 | 21806769                | AA                              | GG                | 1945883738               |
| SNP_P3_7007_21806782 | NC_021160.1    | Ca_kabuli_chr01 | 21806782                | TT                              | GG                | 1945883740               |
| SNP_P3_7008_21806783 | NC_021160.1    | Ca_kabuli_chr01 | 21806783                | TT                              | AA                | 1945883741               |
| SNP_P3_7009_21808111 | NC_021160.1    | Ca_kabuli_chr01 | 21808111                | AA                              | GG                | 1945883743               |
| SNP_P3_7010_21810552 | NC_021160.1    | Ca_kabuli_chr01 | 21810552                | AA                              | GG                | 1945883745               |
| SNP_P3_7011_21813852 | NC_021160.1    | Ca_kabuli_chr01 | 21813852                | AA                              | CC                | 1945883747               |
| SNP_P3_7012_21817151 | NC_021160.1    | Ca_kabuli_chr01 | 21817151                | AA                              | CC                | 1945883748               |
| SNP_P3_7013_21829805 | NC_021160.1    | Ca_kabuli_chr01 | 21829805                | TT                              | CC                | 1945883750               |
| SNP_P3_7014_21829806 | NC_021160.1    | Ca_kabuli_chr01 | 21829806                | TT                              | AA                | 1945883752               |
| SNP_P3_7017_21867857 | NC_021160.1    | Ca_kabuli_chr01 | 21867857                | CC                              | AA                | 1945883754               |
| SNP_P3_7018_21890899 | NC_021160.1    | Ca_kabuli_chr01 | 21890899                | CC                              | TT                | 1945883755               |
| SNP_P3_7019_21891203 | NC_021160.1    | Ca_kabuli_chr01 | 21891203                | GG                              | AA                | 1945883757               |
| SNP_P3_7020_21891706 | NC_021160.1    | Ca_kabuli_chr01 | 21891706                | CC                              | TT                | 1945883759               |
| SNP_P3_7023_21977854 | NC_021160.1    | Ca_kabuli_chr01 | 21977854                | CC                              | AA                | 1945883760               |

| SNPs IDs             | Chromosome IDs | Chromosomes     | Physical positions (bp) | CDC Frontier (Reference genome) | (Pusa 256 & HPNB) | NCBI SNPdb Accession IDs |
|----------------------|----------------|-----------------|-------------------------|---------------------------------|-------------------|--------------------------|
| SNP_P3_7025_22012537 | NC_021160.1    | Ca_kabuli_chr01 | 22012537                | GG                              | AA                | 1945883762               |
| SNP_P3_7026_22023190 | NC_021160.1    | Ca_kabuli_chr01 | 22023190                | GG                              | CC                | 1945883764               |
| SNP_P3_7028_22069342 | NC_021160.1    | Ca_kabuli_chr01 | 22069342                | CC                              | AA                | 1945883766               |
| SNP_P3_7029_22069475 | NC_021160.1    | Ca_kabuli_chr01 | 22069475                | AA                              | GG                | 1945883767               |
| SNP_P3_7030_22070133 | NC_021160.1    | Ca_kabuli_chr01 | 22070133                | GG                              | TT                | 1945883769               |
| SNP_P3_7031_22070192 | NC_021160.1    | Ca_kabuli_chr01 | 22070192                | AA                              | TT                | 1945883771               |
| SNP_P3_7032_22070203 | NC_021160.1    | Ca_kabuli_chr01 | 22070203                | AA                              | TT                | 1945883773               |
| SNP_P3_7033_22070437 | NC_021160.1    | Ca_kabuli_chr01 | 22070437                | AA                              | GG                | 1945883774               |
| SNP_P3_7034_22070637 | NC_021160.1    | Ca_kabuli_chr01 | 22070637                | AA                              | TT                | 1945883776               |
| SNP_P3_7035_22070648 | NC_021160.1    | Ca_kabuli_chr01 | 22070648                | GG                              | AA                | 1945883778               |
| SNP_P3_7036_22070706 | NC_021160.1    | Ca_kabuli_chr01 | 22070706                | AA                              | TT                | 1945883780               |
| SNP_P3_7037_22070725 | NC_021160.1    | Ca_kabuli_chr01 | 22070725                | TT                              | GG                | 1945883782               |
| SNP_P3_7038_22070779 | NC_021160.1    | Ca_kabuli_chr01 | 22070779                | TT                              | GG                | 1945883783               |
| SNP_P3_7039_22071007 | NC_021160.1    | Ca_kabuli_chr01 | 22071007                | GG                              | CC                | 1945883785               |
| SNP_P3_7040_22071039 | NC_021160.1    | Ca_kabuli_chr01 | 22071039                | TT                              | AA                | 1945883787               |
| SNP_P3_7041_22071052 | NC_021160.1    | Ca_kabuli_chr01 | 22071052                | CC                              | AA                | 1945883789               |
| SNP_P3_7042_22071071 | NC_021160.1    | Ca_kabuli_chr01 | 22071071                | CC                              | TT                | 1945883790               |
| SNP_P3_7043_22071314 | NC_021160.1    | Ca_kabuli_chr01 | 22071314                | CC                              | TT                | 1945883792               |
| SNP_P3_7044_22071320 | NC_021160.1    | Ca_kabuli_chr01 | 22071320                | CC                              | TT                | 1945883794               |
| SNP_P3_7045_22071366 | NC_021160.1    | Ca_kabuli_chr01 | 22071366                | AA                              | GG                | 1945883796               |
| SNP_P3_7046_22071381 | NC_021160.1    | Ca_kabuli_chr01 | 22071381                | GG                              | AA                | 1945883798               |
| SNP_P3_7047_22071565 | NC_021160.1    | Ca_kabuli_chr01 | 22071565                | AA                              | GG                | 1945883799               |
| SNP_P3_7048_22071614 | NC_021160.1    | Ca_kabuli_chr01 | 22071614                | AA                              | TT                | 1945883801               |
| SNP_P3_7049_22071805 | NC_021160.1    | Ca_kabuli_chr01 | 22071805                | GG                              | AA                | 1945883803               |
| SNP_P3_7050_22105441 | NC_021160.1    | Ca_kabuli_chr01 | 22105441                | CC                              | TT                | 1945883805               |
| SNP_P3_7051_22125816 | NC_021160.1    | Ca_kabuli_chr01 | 22125816                | AA                              | CC                | 1945883806               |
| SNP_P3_7052_22130637 | NC_021160.1    | Ca_kabuli_chr01 | 22130637                | TT                              | CC                | 1945883808               |
| SNP_P3_7053_22130871 | NC_021160.1    | Ca_kabuli_chr01 | 22130871                | AA                              | TT                | 1945883810               |
| SNP_P3_7054_22131043 | NC_021160.1    | Ca_kabuli_chr01 | 22131043                | CC                              | TT                | 1945883812               |
| SNP_P3_7055_22131124 | NC_021160.1    | Ca_kabuli_chr01 | 22131124                | CC                              | TT                | 1945883814               |
| SNP_P3_7056_22131225 | NC_021160.1    | Ca_kabuli_chr01 | 22131225                | CC                              | AA                | 1945883815               |
| SNP_P3_7058_22131347 | NC_021160.1    | Ca_kabuli_chr01 | 22131347                | AA                              | GG                | 1945883817               |
| SNP_P3_7059_22131419 | NC_021160.1    | Ca_kabuli_chr01 | 22131419                | GG                              | AA                | 1945883819               |
| SNP_P3_7060_22131488 | NC_021160.1    | Ca_kabuli_chr01 | 22131488                | CC                              | TT                | 1945883821               |
| SNP_P3_7062_22131677 | NC_021160.1    | Ca_kabuli_chr01 | 22131677                | AA                              | GG                | 1945883823               |
| SNP_P3_7063_22131740 | NC_021160.1    | Ca_kabuli_chr01 | 22131740                | TT                              | CC                | 1945883824               |
| SNP_P3_7064_22131743 | NC_021160.1    | Ca_kabuli_chr01 | 22131743                | TT                              | CC                | 1945883826               |
| SNP_P3_7065_22131861 | NC_021160.1    | Ca_kabuli_chr01 | 22131861                | GG                              | AA                | 1945883828               |
| SNP_P3_7066_22132010 | NC_021160.1    | Ca_kabuli_chr01 | 22132010                | AA                              | CC                | 1945883830               |
| SNP_P3_7067_22132172 | NC_021160.1    | Ca_kabuli_chr01 | 22132172                | AA                              | GG                | 1945883831               |
| SNP_P3_7068_22132229 | NC_021160.1    | Ca_kabuli_chr01 | 22132229                | CC                              | TT                | 1945883833               |
| SNP_P3_7069_22132495 | NC_021160.1    | Ca_kabuli_chr01 | 22132495                | AA                              | GG                | 1945883835               |

| SNPs IDs             | Chromosome IDs | Chromosomes     | Physical positions (bp) | CDC Frontier (Reference genome) | (Pusa 256 & HPNB) | NCBI SNPdb Accession IDs |
|----------------------|----------------|-----------------|-------------------------|---------------------------------|-------------------|--------------------------|
| SNP_P3_7070_22132506 | NC_021160.1    | Ca_kabuli_chr01 | 22132506                | CC                              | TT                | 1945883837               |
| SNP_P3_7071_22132542 | NC_021160.1    | Ca_kabuli_chr01 | 22132542                | AA                              | GG                | 1945883839               |
| SNP_P3_7072_22132550 | NC_021160.1    | Ca_kabuli_chr01 | 22132550                | AA                              | TT                | 1945883840               |
| SNP_P3_7073_22132578 | NC_021160.1    | Ca_kabuli_chr01 | 22132578                | CC                              | TT                | 1945883842               |
| SNP_P3_7074_22132810 | NC_021160.1    | Ca_kabuli_chr01 | 22132810                | GG                              | AA                | 1945883844               |
| SNP_P3_7075_22132899 | NC_021160.1    | Ca_kabuli_chr01 | 22132899                | AA                              | GG                | 1945883846               |
| SNP_P3_7076_22132980 | NC_021160.1    | Ca_kabuli_chr01 | 22132980                | AA                              | GG                | 1945883847               |
| SNP_P3_7077_22133067 | NC_021160.1    | Ca_kabuli_chr01 | 22133067                | AA                              | GG                | 1945883849               |
| SNP_P3_7078_22133069 | NC_021160.1    | Ca_kabuli_chr01 | 22133069                | GG                              | AA                | 1945883851               |
| SNP_P3_7079_22133117 | NC_021160.1    | Ca_kabuli_chr01 | 22133117                | CC                              | TT                | 1945883853               |
| SNP_P3_7080_22133125 | NC_021160.1    | Ca_kabuli_chr01 | 22133125                | GG                              | AA                | 1945883854               |
| SNP_P3_7081_22133130 | NC_021160.1    | Ca_kabuli_chr01 | 22133130                | AA                              | TT                | 1945883856               |
| SNP_P3_7082_22133140 | NC_021160.1    | Ca_kabuli_chr01 | 22133140                | TT                              | AA                | 1945883858               |
| SNP_P3_7083_22133171 | NC_021160.1    | Ca_kabuli_chr01 | 22133171                | GG                              | AA                | 1945883860               |
| SNP_P3_7084_22133214 | NC_021160.1    | Ca_kabuli_chr01 | 22133214                | TT                              | CC                | 1945883862               |
| SNP_P3_7085_22133389 | NC_021160.1    | Ca_kabuli_chr01 | 22133389                | AA                              | GG                | 1945883863               |
| SNP_P3_7086_22165772 | NC_021160.1    | Ca_kabuli_chr01 | 22165772                | AA                              | TT                | 1945883865               |
| SNP_P3_7087_22200846 | NC_021160.1    | Ca_kabuli_chr01 | 22200846                | TT                              | GG                | 1945883867               |
| SNP_P3_7088_22200852 | NC_021160.1    | Ca_kabuli_chr01 | 22200852                | AA                              | TT                | 1945883869               |
| SNP_P3_7090_22201071 | NC_021160.1    | Ca_kabuli_chr01 | 22201071                | CC                              | AA                | 1945883870               |
| SNP_P3_7092_22225204 | NC_021160.1    | Ca_kabuli_chr01 | 22225204                | AA                              | GG                | 1945883872               |
| SNP_P3_7093_22241501 | NC_021160.1    | Ca_kabuli_chr01 | 22241501                | CC                              | GG                | 1945883874               |
| SNP_P3_7094_22241534 | NC_021160.1    | Ca_kabuli_chr01 | 22241534                | TT                              | CC                | 1945883876               |
| SNP_P3_7095_22241602 | NC_021160.1    | Ca_kabuli_chr01 | 22241602                | GG                              | AA                | 1945883878               |
| SNP_P3_7096_22241632 | NC_021160.1    | Ca_kabuli_chr01 | 22241632                | AA                              | GG                | 1945883879               |
| SNP_P3_7097_22241634 | NC_021160.1    | Ca_kabuli_chr01 | 22241634                | GG                              | AA                | 1945883881               |
| SNP_P3_7098_22241753 | NC_021160.1    | Ca_kabuli_chr01 | 22241753                | CC                              | GG                | 1945883883               |
| SNP_P3_7099_22241848 | NC_021160.1    | Ca_kabuli_chr01 | 22241848                | TT                              | AA                | 1945883885               |
| SNP_P3_7100_22241925 | NC_021160.1    | Ca_kabuli_chr01 | 22241925                | GG                              | TT                | 1945883886               |
| SNP_P3_7101_22242083 | NC_021160.1    | Ca_kabuli_chr01 | 22242083                | AA                              | CC                | 1945883888               |
| SNP_P3_7102_22242085 | NC_021160.1    | Ca_kabuli_chr01 | 22242085                | TT                              | AA                | 1945883890               |
| SNP_P3_7103_22242086 | NC_021160.1    | Ca_kabuli_chr01 | 22242086                | TT                              | GG                | 1945883892               |
| SNP_P3_7105_22244040 | NC_021160.1    | Ca_kabuli_chr01 | 22244040                | TT                              | CC                | 1945883894               |
| SNP_P3_7106_22244563 | NC_021160.1    | Ca_kabuli_chr01 | 22244563                | CC                              | GG                | 1945883895               |
| SNP_P3_7107_22244565 | NC_021160.1    | Ca_kabuli_chr01 | 22244565                | CC                              | TT                | 1945883897               |
| SNP_P3_7108_22244596 | NC_021160.1    | Ca_kabuli_chr01 | 22244596                | TT                              | AA                | 1945883899               |
| SNP_P3_7109_22244666 | NC_021160.1    | Ca_kabuli_chr01 | 22244666                | TT                              | AA                | 1945883901               |
| SNP_P3_7110_22244724 | NC_021160.1    | Ca_kabuli_chr01 | 22244724                | AA                              | GG                | 1945883902               |
| SNP_P3_7111_22244729 | NC_021160.1    | Ca_kabuli_chr01 | 22244729                | TT                              | GG                | 1945883904               |
| SNP_P3_7112_22244797 | NC_021160.1    | Ca_kabuli_chr01 | 22244797                | AA                              | TT                | 1945883906               |
| SNP_P3_7113_22244835 | NC_021160.1    | Ca_kabuli_chr01 | 22244835                | GG                              | AA                | 1945883908               |
| SNP_P3_7114_22244937 | NC_021160.1    | Ca_kabuli_chr01 | 22244937                | GG                              | AA                | 1945883909               |

| SNPs IDs             | Chromosome IDs | Chromosomes     | Physical positions (bp) | CDC Frontier (Reference genome) | (Pusa 256 & HPNB) | NCBI SNPdb Accession IDs |
|----------------------|----------------|-----------------|-------------------------|---------------------------------|-------------------|--------------------------|
| SNP_P3_7115_22244999 | NC_021160.1    | Ca_kabuli_chr01 | 22244999                | TT                              | AA                | 1945883911               |
| SNP_P3_7116_22245000 | NC_021160.1    | Ca_kabuli_chr01 | 22245000                | TT                              | GG                | 1945883913               |
| SNP_P3_7117_22245001 | NC_021160.1    | Ca_kabuli_chr01 | 22245001                | TT                              | GG                | 1945883915               |
| SNP_P3_7118_22245002 | NC_021160.1    | Ca_kabuli_chr01 | 22245002                | GG                              | CC                | 1945883917               |
| SNP_P3_7119_22245071 | NC_021160.1    | Ca_kabuli_chr01 | 22245071                | GG                              | AA                | 1945883918               |
| SNP_P3_7120_22245076 | NC_021160.1    | Ca_kabuli_chr01 | 22245076                | CC                              | AA                | 1945883920               |
| SNP_P3_7121_22245077 | NC_021160.1    | Ca_kabuli_chr01 | 22245077                | CC                              | TT                | 1945883922               |
| SNP_P3_7122_22245103 | NC_021160.1    | Ca_kabuli_chr01 | 22245103                | AA                              | TT                | 1945883924               |
| SNP_P3_7123_22245299 | NC_021160.1    | Ca_kabuli_chr01 | 22245299                | AA                              | CC                | 1945883925               |
| SNP_P3_7124_22247047 | NC_021160.1    | Ca_kabuli_chr01 | 22247047                | TT                              | CC                | 1945883927               |
| SNP_P3_7125_22260283 | NC_021160.1    | Ca_kabuli_chr01 | 22260283                | TT                              | AA                | 1945883929               |
| SNP_P3_7126_22270895 | NC_021160.1    | Ca_kabuli_chr01 | 22270895                | GG                              | AA                | 1945883931               |
| SNP_P3_7127_22271048 | NC_021160.1    | Ca_kabuli_chr01 | 22271048                | AA                              | GG                | 1945883933               |
| SNP_P3_7128_22285649 | NC_021160.1    | Ca_kabuli_chr01 | 22285649                | CC                              | TT                | 1945883934               |
| SNP_P3_7129_22285729 | NC_021160.1    | Ca_kabuli_chr01 | 22285729                | TT                              | CC                | 1945883936               |
| SNP_P3_7130_22285765 | NC_021160.1    | Ca_kabuli_chr01 | 22285765                | TT                              | CC                | 1945883938               |
| SNP_P3_7131_22285902 | NC_021160.1    | Ca_kabuli_chr01 | 22285902                | AA                              | GG                | 1945883940               |
| SNP_P3_7132_22293517 | NC_021160.1    | Ca_kabuli_chr01 | 22293517                | AA                              | CC                | 1945883942               |
| SNP_P3_7133_22293654 | NC_021160.1    | Ca_kabuli_chr01 | 22293654                | AA                              | CC                | 1945883943               |
| SNP_P3_7134_22293696 | NC_021160.1    | Ca_kabuli_chr01 | 22293696                | GG                              | AA                | 1945883945               |
| SNP_P3_7135_22293747 | NC_021160.1    | Ca_kabuli_chr01 | 22293747                | TT                              | GG                | 1945883947               |
| SNP_P3_7136_22297586 | NC_021160.1    | Ca_kabuli_chr01 | 22297586                | AA                              | CC                | 1945883949               |
| SNP_P3_7137_22297592 | NC_021160.1    | Ca_kabuli_chr01 | 22297592                | GG                              | AA                | 1945883950               |
| SNP_P3_7138_22297604 | NC_021160.1    | Ca_kabuli_chr01 | 22297604                | TT                              | CC                | 1945883952               |
| SNP_P3_7140_22311368 | NC_021160.1    | Ca_kabuli_chr01 | 22311368                | CC                              | AA                | 1945883954               |
| SNP_P3_7141_22314517 | NC_021160.1    | Ca_kabuli_chr01 | 22314517                | AA                              | GG                | 1945883956               |
| SNP_P3_7142_22319108 | NC_021160.1    | Ca_kabuli_chr01 | 22319108                | AA                              | TT                | 1945883958               |
| SNP_P3_7143_22329238 | NC_021160.1    | Ca_kabuli_chr01 | 22329238                | AA                              | TT                | 1945883959               |
| SNP_P3_7144_22329266 | NC_021160.1    | Ca_kabuli_chr01 | 22329266                | CC                              | TT                | 1945883961               |
| SNP_P3_7145_22329273 | NC_021160.1    | Ca_kabuli_chr01 | 22329273                | TT                              | CC                | 1945883963               |
| SNP_P3_7146_22329459 | NC_021160.1    | Ca_kabuli_chr01 | 22329459                | TT                              | CC                | 1945883965               |
| SNP_P3_7147_22329464 | NC_021160.1    | Ca_kabuli_chr01 | 22329464                | TT                              | CC                | 1945883967               |
| SNP_P3_7148_22329488 | NC_021160.1    | Ca_kabuli_chr01 | 22329488                | TT                              | AA                | 1945883968               |
| SNP_P3_7149_22329665 | NC_021160.1    | Ca_kabuli_chr01 | 22329665                | CC                              | AA                | 1945883970               |
| SNP_P3_7150_22329668 | NC_021160.1    | Ca_kabuli_chr01 | 22329668                | TT                              | CC                | 1945883972               |
| SNP_P3_7151_22329681 | NC_021160.1    | Ca_kabuli_chr01 | 22329681                | TT                              | CC                | 1945883974               |
| SNP_P3_7152_22329691 | NC_021160.1    | Ca_kabuli_chr01 | 22329691                | CC                              | TT                | 1945883975               |
| SNP_P3_7153_22329707 | NC_021160.1    | Ca_kabuli_chr01 | 22329707                | TT                              | AA                | 1945883977               |
| SNP_P3_7154_22329747 | NC_021160.1    | Ca_kabuli_chr01 | 22329747                | TT                              | CC                | 1945883979               |
| SNP_P3_7155_22329806 | NC_021160.1    | Ca_kabuli_chr01 | 22329806                | TT                              | CC                | 1945883981               |
| SNP_P3_7156_22376245 | NC_021160.1    | Ca_kabuli_chr01 | 22376245                | CC                              | TT                | 1945883983               |
| SNP_P3_7158_22419214 | NC_021160.1    | Ca_kabuli_chr01 | 22419214                | TT                              | CC                | 1945883984               |



| SNPs IDs             | Chromosome IDs | Chromosomes     | Physical positions (bp) | CDC Frontier (Reference genome) | (Pusa 256 & HPNB) | NCBI SNPdb Accession IDs |
|----------------------|----------------|-----------------|-------------------------|---------------------------------|-------------------|--------------------------|
| SNP_P3_7159_22444156 | NC_021160.1    | Ca_kabuli_chr01 | 22444156                | GG                              | CC                | 1945883986               |
| SNP_P3_7160_22444159 | NC_021160.1    | Ca_kabuli_chr01 | 22444159                | TT                              | CC                | 1945883988               |
| SNP_P3_7161_22444415 | NC_021160.1    | Ca_kabuli_chr01 | 22444415                | GG                              | AA                | 1945883990               |
| SNP_P3_7162_22478565 | NC_021160.1    | Ca_kabuli_chr01 | 22478565                | AA                              | GG                | 1945883991               |
| SNP_P3_7163_22488675 | NC_021160.1    | Ca_kabuli_chr01 | 22488675                | GG                              | AA                | 1945883993               |
| SNP_P3_7164_22489951 | NC_021160.1    | Ca_kabuli_chr01 | 22489951                | TT                              | CC                | 1945883995               |
| SNP_P3_7165_22489998 | NC_021160.1    | Ca_kabuli_chr01 | 22489998                | TT                              | CC                | 1945883997               |
| SNP_P3_7166_22494619 | NC_021160.1    | Ca_kabuli_chr01 | 22494619                | GG                              | AA                | 1945883999               |
| SNP_P3_7167_22500884 | NC_021160.1    | Ca_kabuli_chr01 | 22500884                | AA                              | CC                | 1945884000               |
| SNP_P3_7169_22525564 | NC_021160.1    | Ca_kabuli_chr01 | 22525564                | AA                              | GG                | 1945884002               |
| SNP_P3_7170_22525569 | NC_021160.1    | Ca_kabuli_chr01 | 22525569                | GG                              | AA                | 1945884004               |
| SNP_P3_7171_22525610 | NC_021160.1    | Ca_kabuli_chr01 | 22525610                | AA                              | GG                | 1945884006               |
| SNP_P3_7172_22542378 | NC_021160.1    | Ca_kabuli_chr01 | 22542378                | GG                              | AA                | 1945884007               |
| SNP_P3_7173_22547058 | NC_021160.1    | Ca_kabuli_chr01 | 22547058                | TT                              | CC                | 1945884009               |
| SNP_P3_7174_22547065 | NC_021160.1    | Ca_kabuli_chr01 | 22547065                | TT                              | AA                | 1945884011               |
| SNP_P3_7175_22547089 | NC_021160.1    | Ca_kabuli_chr01 | 22547089                | CC                              | TT                | 1945884013               |
| SNP_P3_7176_22547115 | NC_021160.1    | Ca_kabuli_chr01 | 22547115                | AA                              | CC                | 1945884014               |
| SNP_P3_7177_22547158 | NC_021160.1    | Ca_kabuli_chr01 | 22547158                | TT                              | CC                | 1945884016               |
| SNP_P3_7178_22547524 | NC_021160.1    | Ca_kabuli_chr01 | 22547524                | TT                              | CC                | 1945884018               |
| SNP_P3_7179_22553940 | NC_021160.1    | Ca_kabuli_chr01 | 22553940                | TT                              | CC                | 1945884020               |
| SNP_P3_7180_22553956 | NC_021160.1    | Ca_kabuli_chr01 | 22553956                | CC                              | TT                | 1945884021               |
| SNP_P3_7181_22554027 | NC_021160.1    | Ca_kabuli_chr01 | 22554027                | TT                              | CC                | 1945884023               |
| SNP_P3_7182_22554028 | NC_021160.1    | Ca_kabuli_chr01 | 22554028                | TT                              | CC                | 1945884025               |
| SNP_P3_7183_22554053 | NC_021160.1    | Ca_kabuli_chr01 | 22554053                | CC                              | TT                | 1945884027               |
| SNP_P3_7184_22554093 | NC_021160.1    | Ca_kabuli_chr01 | 22554093                | TT                              | GG                | 1945884028               |
| SNP_P3_7185_22554103 | NC_021160.1    | Ca_kabuli_chr01 | 22554103                | AA                              | GG                | 1945884030               |
| SNP_P3_7186_22554122 | NC_021160.1    | Ca_kabuli_chr01 | 22554122                | CC                              | TT                | 1945884032               |
| SNP_P3_7187_22554135 | NC_021160.1    | Ca_kabuli_chr01 | 22554135                | TT                              | CC                | 1945884034               |
| SNP_P3_7188_22554161 | NC_021160.1    | Ca_kabuli_chr01 | 22554161                | TT                              | AA                | 1945884035               |
| SNP_P3_7189_22554299 | NC_021160.1    | Ca_kabuli_chr01 | 22554299                | TT                              | GG                | 1945884037               |
| SNP_P3_7190_22554325 | NC_021160.1    | Ca_kabuli_chr01 | 22554325                | GG                              | TT                | 1945884039               |
| SNP_P3_7191_22554339 | NC_021160.1    | Ca_kabuli_chr01 | 22554339                | AA                              | GG                | 1945884041               |
| SNP_P3_7192_22554347 | NC_021160.1    | Ca_kabuli_chr01 | 22554347                | CC                              | GG                | 1945884043               |
| SNP_P3_7193_22554399 | NC_021160.1    | Ca_kabuli_chr01 | 22554399                | GG                              | AA                | 1945884044               |
| SNP_P3_7194_22554467 | NC_021160.1    | Ca_kabuli_chr01 | 22554467                | TT                              | CC                | 1945884046               |
| SNP_P3_7195_22554476 | NC_021160.1    | Ca_kabuli_chr01 | 22554476                | GG                              | AA                | 1945884048               |
| SNP_P3_7196_22554513 | NC_021160.1    | Ca_kabuli_chr01 | 22554513                | AA                              | GG                | 1945884050               |
| SNP_P3_7197_22561017 | NC_021160.1    | Ca_kabuli_chr01 | 22561017                | CC                              | GG                | 1945884052               |
| SNP_P3_7198_22572485 | NC_021160.1    | Ca_kabuli_chr01 | 22572485                | CC                              | GG                | 1945884053               |
| SNP_P3_7199_22575127 | NC_021160.1    | Ca_kabuli_chr01 | 22575127                | AA                              | TT                | 1945884055               |
| SNP_P3_7200_22575128 | NC_021160.1    | Ca_kabuli_chr01 | 22575128                | TT                              | GG                | 1945884057               |
| SNP_P3_7201_22575132 | NC_021160.1    | Ca_kabuli_chr01 | 22575132                | AA                              | TT                | 1945884059               |

| SNPs IDs             | Chromosome IDs | Chromosomes     | Physical positions (bp) | CDC Frontier (Reference genome) | (Pusa 256 & HPNB) | NCBI SNPdb Accession IDs |
|----------------------|----------------|-----------------|-------------------------|---------------------------------|-------------------|--------------------------|
| SNP_P3_7202_22575138 | NC_021160.1    | Ca_kabuli_chr01 | 22575138                | TT                              | CC                | 1945884060               |
| SNP_P3_7203_22577288 | NC_021160.1    | Ca_kabuli_chr01 | 22577288                | CC                              | AA                | 1945884062               |
| SNP_P3_7204_22581367 | NC_021160.1    | Ca_kabuli_chr01 | 22581367                | GG                              | TT                | 1945884064               |
| SNP_P3_7205_22586409 | NC_021160.1    | Ca_kabuli_chr01 | 22586409                | CC                              | TT                | 1945884066               |
| SNP_P3_7207_22653976 | NC_021160.1    | Ca_kabuli_chr01 | 22653976                | CC                              | TT                | 1945884068               |
| SNP_P3_7208_22661067 | NC_021160.1    | Ca_kabuli_chr01 | 22661067                | AA                              | GG                | 1945884069               |
| SNP_P3_7209_22661495 | NC_021160.1    | Ca_kabuli_chr01 | 22661495                | CC                              | AA                | 1945884071               |
| SNP_P3_7211_22664001 | NC_021160.1    | Ca_kabuli_chr01 | 22664001                | AA                              | CC                | 1945884073               |
| SNP_P3_7212_22664215 | NC_021160.1    | Ca_kabuli_chr01 | 22664215                | GG                              | AA                | 1945884075               |
| SNP_P3_7213_22664245 | NC_021160.1    | Ca_kabuli_chr01 | 22664245                | GG                              | AA                | 1945884077               |
| SNP_P3_7214_22682652 | NC_021160.1    | Ca_kabuli_chr01 | 22682652                | TT                              | AA                | 1945884078               |
| SNP_P3_7215_22707390 | NC_021160.1    | Ca_kabuli_chr01 | 22707390                | TT                              | CC                | 1945884080               |
| SNP_P3_7216_22712835 | NC_021160.1    | Ca_kabuli_chr01 | 22712835                | CC                              | TT                | 1945884082               |
| SNP_P3_7217_22738733 | NC_021160.1    | Ca_kabuli_chr01 | 22738733                | TT                              | AA                | 1945884084               |
| SNP_P3_7218_22738734 | NC_021160.1    | Ca_kabuli_chr01 | 22738734                | TT                              | GG                | 1945884085               |
| SNP_P3_7219_22767085 | NC_021160.1    | Ca_kabuli_chr01 | 22767085                | AA                              | GG                | 1945884087               |
| SNP_P3_7220_22776731 | NC_021160.1    | Ca_kabuli_chr01 | 22776731                | AA                              | GG                | 1945884089               |
| SNP_P3_7221_22776762 | NC_021160.1    | Ca_kabuli_chr01 | 22776762                | GG                              | AA                | 1945884091               |
| SNP_P3_7222_22782586 | NC_021160.1    | Ca_kabuli_chr01 | 22782586                | CC                              | TT                | 1945884093               |
| SNP_P3_7223_22782627 | NC_021160.1    | Ca_kabuli_chr01 | 22782627                | AA                              | TT                | 1945884094               |
| SNP_P3_7224_22798313 | NC_021160.1    | Ca_kabuli_chr01 | 22798313                | TT                              | CC                | 1945884096               |
| SNP_P3_7225_22805065 | NC_021160.1    | Ca_kabuli_chr01 | 22805065                | AA                              | GG                | 1945884098               |
| SNP_P3_7226_22805096 | NC_021160.1    | Ca_kabuli_chr01 | 22805096                | GG                              | AA                | 1945884100               |
| SNP_P3_7227_22805121 | NC_021160.1    | Ca_kabuli_chr01 | 22805121                | GG                              | CC                | 1945884101               |
| SNP_P3_7228_22807464 | NC_021160.1    | Ca_kabuli_chr01 | 22807464                | CC                              | TT                | 1945884103               |
| SNP_P3_7229_22824910 | NC_021160.1    | Ca_kabuli_chr01 | 22824910                | TT                              | GG                | 1945884105               |
| SNP_P3_7230_22825241 | NC_021160.1    | Ca_kabuli_chr01 | 22825241                | AA                              | CC                | 1945884107               |
| SNP_P3_7231_22834883 | NC_021160.1    | Ca_kabuli_chr01 | 22834883                | CC                              | TT                | 1945884109               |
| SNP_P3_7232_22834985 | NC_021160.1    | Ca_kabuli_chr01 | 22834985                | CC                              | TT                | 1945884110               |
| SNP_P3_7233_22835161 | NC_021160.1    | Ca_kabuli_chr01 | 22835161                | GG                              | AA                | 1945884112               |
| SNP_P3_7234_22835167 | NC_021160.1    | Ca_kabuli_chr01 | 22835167                | AA                              | GG                | 1945884114               |
| SNP_P3_7235_22835168 | NC_021160.1    | Ca_kabuli_chr01 | 22835168                | AA                              | CC                | 1945884116               |
| SNP_P3_7236_22835176 | NC_021160.1    | Ca_kabuli_chr01 | 22835176                | AA                              | TT                | 1945884117               |
| SNP_P3_7237_22835298 | NC_021160.1    | Ca_kabuli_chr01 | 22835298                | TT                              | CC                | 1945884119               |
| SNP_P3_7238_22845306 | NC_021160.1    | Ca_kabuli_chr01 | 22845306                | GG                              | AA                | 1945884121               |
| SNP_P3_7239_22853298 | NC_021160.1    | Ca_kabuli_chr01 | 22853298                | CC                              | AA                | 1945884123               |
| SNP_P3_7240_22853300 | NC_021160.1    | Ca_kabuli_chr01 | 22853300                | AA                              | GG                | 1945884125               |
| SNP_P3_7241_22862846 | NC_021160.1    | Ca_kabuli_chr01 | 22862846                | TT                              | CC                | 1945884126               |
| SNP_P3_7242_22863489 | NC_021160.1    | Ca_kabuli_chr01 | 22863489                | CC                              | TT                | 1945884128               |
| SNP_P3_7244_22884913 | NC_021160.1    | Ca_kabuli_chr01 | 22884913                | TT                              | CC                | 1945884130               |
| SNP_P3_7245_22885790 | NC_021160.1    | Ca_kabuli_chr01 | 22885790                | AA                              | TT                | 1945884132               |
| SNP_P3_7247_22885881 | NC_021160.1    | Ca_kabuli_chr01 | 22885881                | TT                              | AA                | 1945884134               |

| SNPs IDs             | Chromosome IDs | Chromosomes     | Physical positions (bp) | CDC Frontier (Reference genome) | (Pusa 256 & HPNB) | NCBI SNPdb Accession IDs |
|----------------------|----------------|-----------------|-------------------------|---------------------------------|-------------------|--------------------------|
| SNP_P3_7248_22886030 | NC_021160.1    | Ca_kabuli_chr01 | 22886030                | GG                              | AA                | 1945884135               |
| SNP_P3_7249_22886047 | NC_021160.1    | Ca_kabuli_chr01 | 22886047                | CC                              | TT                | 1945884137               |
| SNP_P3_7250_22886106 | NC_021160.1    | Ca_kabuli_chr01 | 22886106                | GG                              | AA                | 1945884139               |
| SNP_P3_7252_22886144 | NC_021160.1    | Ca_kabuli_chr01 | 22886144                | AA                              | GG                | 1945884141               |
| SNP_P3_7253_22886154 | NC_021160.1    | Ca_kabuli_chr01 | 22886154                | AA                              | TT                | 1945884142               |
| SNP_P3_7254_22886166 | NC_021160.1    | Ca_kabuli_chr01 | 22886166                | AA                              | GG                | 1945884144               |
| SNP_P3_7255_22886176 | NC_021160.1    | Ca_kabuli_chr01 | 22886176                | AA                              | GG                | 1945884146               |
| SNP_P3_7256_22886280 | NC_021160.1    | Ca_kabuli_chr01 | 22886280                | TT                              | CC                | 1945884148               |
| SNP_P3_7257_22886301 | NC_021160.1    | Ca_kabuli_chr01 | 22886301                | GG                              | AA                | 1945884150               |
| SNP_P3_7258_22886319 | NC_021160.1    | Ca_kabuli_chr01 | 22886319                | TT                              | CC                | 1945884151               |
| SNP_P3_7259_22886407 | NC_021160.1    | Ca_kabuli_chr01 | 22886407                | TT                              | AA                | 1945884153               |
| SNP_P3_7260_22889157 | NC_021160.1    | Ca_kabuli_chr01 | 22889157                | CC                              | TT                | 1945884155               |
| SNP_P3_7261_22896289 | NC_021160.1    | Ca_kabuli_chr01 | 22896289                | CC                              | TT                | 1945884157               |
| SNP_P3_7263_22896744 | NC_021160.1    | Ca_kabuli_chr01 | 22896744                | CC                              | TT                | 1945884158               |
| SNP_P3_7264_22896861 | NC_021160.1    | Ca_kabuli_chr01 | 22896861                | GG                              | AA                | 1945884160               |
| SNP_P3_7265_22896981 | NC_021160.1    | Ca_kabuli_chr01 | 22896981                | TT                              | GG                | 1945884162               |
| SNP_P3_7266_22897036 | NC_021160.1    | Ca_kabuli_chr01 | 22897036                | CC                              | GG                | 1945884164               |
| SNP_P3_7267_22897071 | NC_021160.1    | Ca_kabuli_chr01 | 22897071                | TT                              | CC                | 1945884166               |
| SNP_P3_7268_22897090 | NC_021160.1    | Ca_kabuli_chr01 | 22897090                | GG                              | AA                | 1945884167               |
| SNP_P3_7269_22897110 | NC_021160.1    | Ca_kabuli_chr01 | 22897110                | TT                              | GG                | 1945884169               |
| SNP_P3_7270_22897113 | NC_021160.1    | Ca_kabuli_chr01 | 22897113                | AA                              | GG                | 1945884171               |
| SNP_P3_7271_22897129 | NC_021160.1    | Ca_kabuli_chr01 | 22897129                | GG                              | AA                | 1945884173               |
| SNP_P3_7272_22897143 | NC_021160.1    | Ca_kabuli_chr01 | 22897143                | GG                              | CC                | 1945884174               |
| SNP_P3_7273_22897164 | NC_021160.1    | Ca_kabuli_chr01 | 22897164                | CC                              | AA                | 1945884176               |
| SNP_P3_7274_22897196 | NC_021160.1    | Ca_kabuli_chr01 | 22897196                | TT                              | CC                | 1945884178               |
| SNP_P3_7275_22897222 | NC_021160.1    | Ca_kabuli_chr01 | 22897222                | CC                              | GG                | 1945884180               |
| SNP_P3_7276_22897323 | NC_021160.1    | Ca_kabuli_chr01 | 22897323                | GG                              | AA                | 1945884181               |
| SNP_P3_7277_22897393 | NC_021160.1    | Ca_kabuli_chr01 | 22897393                | AA                              | TT                | 1945884183               |
| SNP_P3_7278_22897398 | NC_021160.1    | Ca_kabuli_chr01 | 22897398                | GG                              | AA                | 1945884185               |
| SNP_P3_7279_22897462 | NC_021160.1    | Ca_kabuli_chr01 | 22897462                | CC                              | TT                | 1945884187               |
| SNP_P3_7280_22897719 | NC_021160.1    | Ca_kabuli_chr01 | 22897719                | TT                              | GG                | 1945884188               |
| SNP_P3_7281_22936040 | NC_021160.1    | Ca_kabuli_chr01 | 22936040                | GG                              | AA                | 1945884190               |
| SNP_P3_7282_22936045 | NC_021160.1    | Ca_kabuli_chr01 | 22936045                | CC                              | TT                | 1945884192               |
| SNP_P3_7283_22936430 | NC_021160.1    | Ca_kabuli_chr01 | 22936430                | TT                              | CC                | 1945884194               |
| SNP_P3_7284_22936689 | NC_021160.1    | Ca_kabuli_chr01 | 22936689                | GG                              | TT                | 1945884196               |
| SNP_P3_7285_22943244 | NC_021160.1    | Ca_kabuli_chr01 | 22943244                | TT                              | CC                | 1945884197               |
| SNP_P3_7286_22943735 | NC_021160.1    | Ca_kabuli_chr01 | 22943735                | TT                              | GG                | 1945884199               |
| SNP_P3_7287_22943802 | NC_021160.1    | Ca_kabuli_chr01 | 22943802                | AA                              | GG                | 1945884201               |
| SNP_P3_7288_22944187 | NC_021160.1    | Ca_kabuli_chr01 | 22944187                | TT                              | GG                | 1945884203               |
| SNP_P3_7289_22944199 | NC_021160.1    | Ca_kabuli_chr01 | 22944199                | AA                              | CC                | 1945884204               |
| SNP_P3_7290_22944208 | NC_021160.1    | Ca_kabuli_chr01 | 22944208                | AA                              | GG                | 1945884206               |
| SNP_P3_7291_22971265 | NC_021160.1    | Ca_kabuli_chr01 | 22971265                | TT                              | CC                | 1945884208               |

| SNPs IDs             | Chromosome IDs | Chromosomes     | Physical positions (bp) | CDC Frontier (Reference genome) | (Pusa 256 & HPNB) | NCBI SNPdb Accession IDs |
|----------------------|----------------|-----------------|-------------------------|---------------------------------|-------------------|--------------------------|
| SNP_P3_7292_23006480 | NC_021160.1    | Ca_kabuli_chr01 | 23006480                | GG                              | AA                | 1945884210               |
| SNP_P3_7294_23006786 | NC_021160.1    | Ca_kabuli_chr01 | 23006786                | AA                              | TT                | 1945884212               |
| SNP_P3_7295_23006787 | NC_021160.1    | Ca_kabuli_chr01 | 23006787                | AA                              | CC                | 1945884214               |
| SNP_P3_7296_23011673 | NC_021160.1    | Ca_kabuli_chr01 | 23011673                | AA                              | GG                | 1945884215               |
| SNP_P3_7298_23011773 | NC_021160.1    | Ca_kabuli_chr01 | 23011773                | AA                              | GG                | 1945884217               |
| SNP_P3_7300_23057802 | NC_021160.1    | Ca_kabuli_chr01 | 23057802                | GG                              | AA                | 1945884219               |
| SNP_P3_7301_23058281 | NC_021160.1    | Ca_kabuli_chr01 | 23058281                | AA                              | TT                | 1945884221               |
| SNP_P3_7302_23073322 | NC_021160.1    | Ca_kabuli_chr01 | 23073322                | GG                              | TT                | 1945884222               |
| SNP_P3_7303_23078126 | NC_021160.1    | Ca_kabuli_chr01 | 23078126                | AA                              | GG                | 1945884224               |
| SNP_P3_7304_23078981 | NC_021160.1    | Ca_kabuli_chr01 | 23078981                | AA                              | GG                | 1945884226               |
| SNP_P3_7305_23079034 | NC_021160.1    | Ca_kabuli_chr01 | 23079034                | CC                              | TT                | 1945884228               |
| SNP_P3_7306_23079251 | NC_021160.1    | Ca_kabuli_chr01 | 23079251                | AA                              | GG                | 1945884229               |
| SNP_P3_7307_23087801 | NC_021160.1    | Ca_kabuli_chr01 | 23087801                | TT                              | AA                | 1945884231               |
| SNP_P3_7308_23087807 | NC_021160.1    | Ca_kabuli_chr01 | 23087807                | TT                              | CC                | 1945884233               |
| SNP_P3_7309_23087877 | NC_021160.1    | Ca_kabuli_chr01 | 23087877                | GG                              | CC                | 1945884235               |
| SNP_P3_7310_23087966 | NC_021160.1    | Ca_kabuli_chr01 | 23087966                | TT                              | CC                | 1945884236               |
| SNP_P3_7311_23087987 | NC_021160.1    | Ca_kabuli_chr01 | 23087987                | TT                              | CC                | 1945884238               |
| SNP_P3_7312_23096761 | NC_021160.1    | Ca_kabuli_chr01 | 23096761                | CC                              | TT                | 1945884240               |
| SNP_P3_7313_23106643 | NC_021160.1    | Ca_kabuli_chr01 | 23106643                | TT                              | CC                | 1945884242               |
| SNP_P3_7314_23127971 | NC_021160.1    | Ca_kabuli_chr01 | 23127971                | GG                              | AA                | 1945884243               |
| SNP_P3_7315_23215975 | NC_021160.1    | Ca_kabuli_chr01 | 23215975                | CC                              | TT                | 1945884245               |
| SNP_P3_7316_23218183 | NC_021160.1    | Ca_kabuli_chr01 | 23218183                | TT                              | AA                | 1945884247               |
| SNP_P3_7317_23251070 | NC_021160.1    | Ca_kabuli_chr01 | 23251070                | AA                              | GG                | 1945884249               |
| SNP_P3_7318_23264600 | NC_021160.1    | Ca_kabuli_chr01 | 23264600                | AA                              | GG                | 1945884250               |
| SNP_P3_7319_23269988 | NC_021160.1    | Ca_kabuli_chr01 | 23269988                | AA                              | GG                | 1945884252               |
| SNP_P3_7320_23270165 | NC_021160.1    | Ca_kabuli_chr01 | 23270165                | AA                              | GG                | 1945884254               |
| SNP_P3_7321_23279928 | NC_021160.1    | Ca_kabuli_chr01 | 23279928                | GG                              | AA                | 1945884256               |
| SNP_P3_7322_23286158 | NC_021160.1    | Ca_kabuli_chr01 | 23286158                | CC                              | AA                | 1945884258               |
| SNP_P3_7324_23421701 | NC_021160.1    | Ca_kabuli_chr01 | 23421701                | GG                              | CC                | 1945884259               |
| SNP_P3_7325_23425803 | NC_021160.1    | Ca_kabuli_chr01 | 23425803                | CC                              | TT                | 1945884261               |
| SNP_P3_7326_23425818 | NC_021160.1    | Ca_kabuli_chr01 | 23425818                | TT                              | AA                | 1945884263               |
| SNP_P3_7327_23426167 | NC_021160.1    | Ca_kabuli_chr01 | 23426167                | TT                              | AA                | 1945884265               |
| SNP_P3_7328_23426222 | NC_021160.1    | Ca_kabuli_chr01 | 23426222                | GG                              | AA                | 1945884266               |
| SNP_P3_7329_23426232 | NC_021160.1    | Ca_kabuli_chr01 | 23426232                | TT                              | AA                | 1945884268               |
| SNP_P3_7331_23426725 | NC_021160.1    | Ca_kabuli_chr01 | 23426725                | TT                              | CC                | 1945884270               |
| SNP_P3_7332_23433197 | NC_021160.1    | Ca_kabuli_chr01 | 23433197                | CC                              | TT                | 1945884272               |
| SNP_P3_7333_23433238 | NC_021160.1    | Ca_kabuli_chr01 | 23433238                | CC                              | AA                | 1945884273               |
| SNP_P3_7334_23433249 | NC_021160.1    | Ca_kabuli_chr01 | 23433249                | TT                              | GG                | 1945884275               |
| SNP_P3_7335_23433252 | NC_021160.1    | Ca_kabuli_chr01 | 23433252                | AA                              | TT                | 1945884277               |
| SNP_P3_7336_23433282 | NC_021160.1    | Ca_kabuli_chr01 | 23433282                | AA                              | GG                | 1945884279               |
| SNP_P3_7337_23433601 | NC_021160.1    | Ca_kabuli_chr01 | 23433601                | AA                              | GG                | 1945884280               |
| SNP_P3_7338_23474377 | NC_021160.1    | Ca_kabuli_chr01 | 23474377                | CC                              | GG                | 1945884282               |

| SNPs IDs             | Chromosome IDs | Chromosomes     | Physical positions (bp) | CDC Frontier (Reference genome) | (Pusa 256 & HPNB) | NCBI SNPdb Accession IDs |
|----------------------|----------------|-----------------|-------------------------|---------------------------------|-------------------|--------------------------|
| SNP_P3_7339_23474403 | NC_021160.1    | Ca_kabuli_chr01 | 23474403                | AA                              | GG                | 1945884284               |
| SNP_P3_7340_23499526 | NC_021160.1    | Ca_kabuli_chr01 | 23499526                | CC                              | AA                | 1945884286               |
| SNP_P3_7341_23514383 | NC_021160.1    | Ca_kabuli_chr01 | 23514383                | GG                              | AA                | 1945884288               |
| SNP_P3_7343_23516990 | NC_021160.1    | Ca_kabuli_chr01 | 23516990                | CC                              | TT                | 1945884289               |
| SNP_P3_7344_23535461 | NC_021160.1    | Ca_kabuli_chr01 | 23535461                | TT                              | CC                | 1945884291               |
| SNP_P3_7345_23541051 | NC_021160.1    | Ca_kabuli_chr01 | 23541051                | AA                              | CC                | 1945884293               |
| SNP_P3_7348_23577718 | NC_021160.1    | Ca_kabuli_chr01 | 23577718                | TT                              | CC                | 1945884295               |
| SNP_P3_7349_23580360 | NC_021160.1    | Ca_kabuli_chr01 | 23580360                | TT                              | CC                | 1945884296               |
| SNP_P3_7350_23581373 | NC_021160.1    | Ca_kabuli_chr01 | 23581373                | TT                              | CC                | 1945884298               |
| SNP_P3_7351_23612028 | NC_021160.1    | Ca_kabuli_chr01 | 23612028                | AA                              | CC                | 1945884300               |
| SNP_P3_7352_23612029 | NC_021160.1    | Ca_kabuli_chr01 | 23612029                | TT                              | CC                | 1945884302               |
| SNP_P3_7353_23612036 | NC_021160.1    | Ca_kabuli_chr01 | 23612036                | AA                              | TT                | 1945884303               |
| SNP_P3_7354_23616042 | NC_021160.1    | Ca_kabuli_chr01 | 23616042                | GG                              | TT                | 1945884305               |
| SNP_P3_7355_23616742 | NC_021160.1    | Ca_kabuli_chr01 | 23616742                | GG                              | CC                | 1945884307               |
| SNP_P3_7356_23622421 | NC_021160.1    | Ca_kabuli_chr01 | 23622421                | CC                              | TT                | 1945884309               |
| SNP_P3_7357_23624732 | NC_021160.1    | Ca_kabuli_chr01 | 23624732                | TT                              | AA                | 1945884311               |
| SNP_P3_7358_23627224 | NC_021160.1    | Ca_kabuli_chr01 | 23627224                | TT                              | GG                | 1945884312               |
| SNP_P3_7359_23627225 | NC_021160.1    | Ca_kabuli_chr01 | 23627225                | TT                              | CC                | 1945884314               |
| SNP_P3_7360_23630879 | NC_021160.1    | Ca_kabuli_chr01 | 23630879                | AA                              | GG                | 1945884316               |
| SNP_P3_7361_23631581 | NC_021160.1    | Ca_kabuli_chr01 | 23631581                | AA                              | GG                | 1945884317               |
| SNP_P3_7363_23643636 | NC_021160.1    | Ca_kabuli_chr01 | 23643636                | CC                              | GG                | 1945884319               |
| SNP_P3_7364_23643671 | NC_021160.1    | Ca_kabuli_chr01 | 23643671                | CC                              | TT                | 1945884321               |
| SNP_P3_7365_23643683 | NC_021160.1    | Ca_kabuli_chr01 | 23643683                | TT                              | CC                | 1945884323               |
| SNP_P3_7366_23643793 | NC_021160.1    | Ca_kabuli_chr01 | 23643793                | AA                              | TT                | 1945884324               |
| SNP_P3_7367_23643871 | NC_021160.1    | Ca_kabuli_chr01 | 23643871                | TT                              | CC                | 1945884326               |
| SNP_P3_7368_23643873 | NC_021160.1    | Ca_kabuli_chr01 | 23643873                | TT                              | AA                | 1945884328               |
| SNP_P3_7369_23643939 | NC_021160.1    | Ca_kabuli_chr01 | 23643939                | AA                              | CC                | 1945884330               |
| SNP_P3_7370_23643947 | NC_021160.1    | Ca_kabuli_chr01 | 23643947                | AA                              | TT                | 1945884331               |
| SNP_P3_7371_23643966 | NC_021160.1    | Ca_kabuli_chr01 | 23643966                | TT                              | CC                | 1945884333               |
| SNP_P3_7372_23643997 | NC_021160.1    | Ca_kabuli_chr01 | 23643997                | GG                              | AA                | 1945884335               |
| SNP_P3_7374_23654392 | NC_021160.1    | Ca_kabuli_chr01 | 23654392                | CC                              | TT                | 1945884337               |
| SNP_P3_7375_23658976 | NC_021160.1    | Ca_kabuli_chr01 | 23658976                | AA                              | GG                | 1945884338               |
| SNP_P3_7377_23695163 | NC_021160.1    | Ca_kabuli_chr01 | 23695163                | GG                              | CC                | 1945884340               |
| SNP_P3_7378_23698117 | NC_021160.1    | Ca_kabuli_chr01 | 23698117                | GG                              | AA                | 1945884342               |
| SNP_P3_7379_23716063 | NC_021160.1    | Ca_kabuli_chr01 | 23716063                | TT                              | CC                | 1945884344               |
| SNP_P3_7380_23720983 | NC_021160.1    | Ca_kabuli_chr01 | 23720983                | AA                              | CC                | 1945884345               |
| SNP_P3_7381_23721196 | NC_021160.1    | Ca_kabuli_chr01 | 23721196                | TT                              | CC                | 1945884347               |
| SNP_P3_7382_23721197 | NC_021160.1    | Ca_kabuli_chr01 | 23721197                | TT                              | AA                | 1945884349               |
| SNP_P3_7383_23722395 | NC_021160.1    | Ca_kabuli_chr01 | 23722395                | GG                              | AA                | 1945884351               |
| SNP_P3_7385_23722450 | NC_021160.1    | Ca_kabuli_chr01 | 23722450                | TT                              | GG                | 1945884352               |
| SNP_P3_7386_23722738 | NC_021160.1    | Ca_kabuli_chr01 | 23722738                | GG                              | TT                | 1945884354               |
| SNP_P3_7387_23722746 | NC_021160.1    | Ca_kabuli_chr01 | 23722746                | GG                              | CC                | 1945884356               |

| SNPs IDs             | Chromosome IDs | Chromosomes     | Physical positions (bp) | CDC Frontier (Reference genome) | (Pusa 256 & HPNB) | NCBI SNPdb Accession IDs |
|----------------------|----------------|-----------------|-------------------------|---------------------------------|-------------------|--------------------------|
| SNP_P3_7388_23728867 | NC_021160.1    | Ca_kabuli_chr01 | 23728867                | AA                              | CC                | 1945884358               |
| SNP_P3_7389_23731823 | NC_021160.1    | Ca_kabuli_chr01 | 23731823                | GG                              | TT                | 1945884359               |
| SNP_P3_7390_23732089 | NC_021160.1    | Ca_kabuli_chr01 | 23732089                | CC                              | AA                | 1945884361               |
| SNP_P3_7391_23732091 | NC_021160.1    | Ca_kabuli_chr01 | 23732091                | AA                              | GG                | 1945884363               |
| SNP_P3_7392_23732129 | NC_021160.1    | Ca_kabuli_chr01 | 23732129                | CC                              | TT                | 1945884365               |
| SNP_P3_7394_23748141 | NC_021160.1    | Ca_kabuli_chr01 | 23748141                | AA                              | GG                | 1945884366               |
| SNP_P3_7395_23755516 | NC_021160.1    | Ca_kabuli_chr01 | 23755516                | CC                              | TT                | 1945884368               |
| SNP_P3_7397_23782439 | NC_021160.1    | Ca_kabuli_chr01 | 23782439                | TT                              | CC                | 1945884370               |
| SNP_P3_7398_23782467 | NC_021160.1    | Ca_kabuli_chr01 | 23782467                | TT                              | GG                | 1945884372               |
| SNP_P3_7399_23782511 | NC_021160.1    | Ca_kabuli_chr01 | 23782511                | AA                              | GG                | 1945884373               |
| SNP_P3_7400_23782551 | NC_021160.1    | Ca_kabuli_chr01 | 23782551                | GG                              | AA                | 1945884375               |
| SNP_P3_7401_23784678 | NC_021160.1    | Ca_kabuli_chr01 | 23784678                | GG                              | AA                | 1945884377               |
| SNP_P3_7403_23784996 | NC_021160.1    | Ca_kabuli_chr01 | 23784996                | GG                              | AA                | 1945884379               |
| SNP_P3_7404_23785030 | NC_021160.1    | Ca_kabuli_chr01 | 23785030                | GG                              | CC                | 1945884380               |
| SNP_P3_7405_23797441 | NC_021160.1    | Ca_kabuli_chr01 | 23797441                | TT                              | CC                | 1945884382               |
| SNP_P3_7406_23799287 | NC_021160.1    | Ca_kabuli_chr01 | 23799287                | AA                              | GG                | 1945884384               |
| SNP_P3_7407_23804444 | NC_021160.1    | Ca_kabuli_chr01 | 23804444                | TT                              | GG                | 1945884386               |
| SNP_P3_7408_23804661 | NC_021160.1    | Ca_kabuli_chr01 | 23804661                | GG                              | AA                | 1945884388               |
| SNP_P3_7409_23823218 | NC_021160.1    | Ca_kabuli_chr01 | 23823218                | AA                              | GG                | 1945884389               |
| SNP_P3_7410_23823240 | NC_021160.1    | Ca_kabuli_chr01 | 23823240                | TT                              | CC                | 1945884391               |
| SNP_P3_7411_23823246 | NC_021160.1    | Ca_kabuli_chr01 | 23823246                | AA                              | CC                | 1945884393               |
| SNP_P3_7412_23823272 | NC_021160.1    | Ca_kabuli_chr01 | 23823272                | CC                              | GG                | 1945884395               |
| SNP_P3_7413_23823286 | NC_021160.1    | Ca_kabuli_chr01 | 23823286                | TT                              | CC                | 1945884397               |
| SNP_P3_7414_23823296 | NC_021160.1    | Ca_kabuli_chr01 | 23823296                | GG                              | CC                | 1945884398               |
| SNP_P3_7415_23823316 | NC_021160.1    | Ca_kabuli_chr01 | 23823316                | AA                              | GG                | 1945884400               |
| SNP_P3_7417_23824997 | NC_021160.1    | Ca_kabuli_chr01 | 23824997                | CC                              | TT                | 1945884402               |
| SNP_P3_7418_23828692 | NC_021160.1    | Ca_kabuli_chr01 | 23828692                | AA                              | CC                | 1945884404               |
| SNP_P3_7419_23838600 | NC_021160.1    | Ca_kabuli_chr01 | 23838600                | TT                              | CC                | 1945884406               |
| SNP_P3_7420_23838664 | NC_021160.1    | Ca_kabuli_chr01 | 23838664                | GG                              | TT                | 1945884407               |
| SNP_P3_7423_23919245 | NC_021160.1    | Ca_kabuli_chr01 | 23919245                | TT                              | CC                | 1945884409               |
| SNP_P3_7424_23919272 | NC_021160.1    | Ca_kabuli_chr01 | 23919272                | TT                              | CC                | 1945884411               |
| SNP_P3_7425_23938064 | NC_021160.1    | Ca_kabuli_chr01 | 23938064                | TT                              | AA                | 1945884413               |
| SNP_P3_7426_23938072 | NC_021160.1    | Ca_kabuli_chr01 | 23938072                | AA                              | CC                | 1945884414               |
| SNP_P3_7427_23938126 | NC_021160.1    | Ca_kabuli_chr01 | 23938126                | TT                              | AA                | 1945884416               |
| SNP_P3_7428_23947122 | NC_021160.1    | Ca_kabuli_chr01 | 23947122                | CC                              | TT                | 1945884418               |
| SNP_P3_7429_23962283 | NC_021160.1    | Ca_kabuli_chr01 | 23962283                | AA                              | GG                | 1945884420               |
| SNP_P3_7430_23964216 | NC_021160.1    | Ca_kabuli_chr01 | 23964216                | TT                              | AA                | 1945884422               |
| SNP_P3_7432_23967267 | NC_021160.1    | Ca_kabuli_chr01 | 23967267                | CC                              | TT                | 1945884423               |
| SNP_P3_7433_23967778 | NC_021160.1    | Ca_kabuli_chr01 | 23967778                | TT                              | CC                | 1945884425               |
| SNP_P3_7434_23998474 | NC_021160.1    | Ca_kabuli_chr01 | 23998474                | GG                              | CC                | 1945884427               |
| SNP_P3_7435_24002281 | NC_021160.1    | Ca_kabuli_chr01 | 24002281                | CC                              | GG                | 1945884429               |
| SNP_P3_7436_24018437 | NC_021160.1    | Ca_kabuli_chr01 | 24018437                | TT                              | AA                | 1945884430               |

| SNPs IDs             | Chromosome IDs | Chromosomes     | Physical positions (bp) | CDC Frontier (Reference genome) | (Pusa 256 & HPNB) | NCBI SNPdb Accession IDs |
|----------------------|----------------|-----------------|-------------------------|---------------------------------|-------------------|--------------------------|
| SNP_P3_7437_24026714 | NC_021160.1    | Ca_kabuli_chr01 | 24026714                | CC                              | AA                | 1945884432               |
| SNP_P3_7438_24026900 | NC_021160.1    | Ca_kabuli_chr01 | 24026900                | AA                              | GG                | 1945884434               |
| SNP_P3_7439_24030399 | NC_021160.1    | Ca_kabuli_chr01 | 24030399                | CC                              | TT                | 1945884436               |
| SNP_P3_7440_24030435 | NC_021160.1    | Ca_kabuli_chr01 | 24030435                | GG                              | CC                | 1945884437               |
| SNP_P3_7442_24030538 | NC_021160.1    | Ca_kabuli_chr01 | 24030538                | TT                              | GG                | 1945884439               |
| SNP_P3_7443_24030577 | NC_021160.1    | Ca_kabuli_chr01 | 24030577                | CC                              | TT                | 1945884441               |
| SNP_P3_7444_24030796 | NC_021160.1    | Ca_kabuli_chr01 | 24030796                | CC                              | TT                | 1945884443               |
| SNP_P3_7445_24031098 | NC_021160.1    | Ca_kabuli_chr01 | 24031098                | AA                              | GG                | 1945884445               |
| SNP_P3_7446_24031144 | NC_021160.1    | Ca_kabuli_chr01 | 24031144                | TT                              | CC                | 1945884446               |
| SNP_P3_7447_24031378 | NC_021160.1    | Ca_kabuli_chr01 | 24031378                | AA                              | GG                | 1945884448               |
| SNP_P3_7448_24032746 | NC_021160.1    | Ca_kabuli_chr01 | 24032746                | AA                              | GG                | 1945884450               |
| SNP_P3_7449_24032882 | NC_021160.1    | Ca_kabuli_chr01 | 24032882                | GG                              | AA                | 1945884452               |
| SNP_P3_7450_24035057 | NC_021160.1    | Ca_kabuli_chr01 | 24035057                | AA                              | TT                | 1945884453               |
| SNP_P3_7451_24035222 | NC_021160.1    | Ca_kabuli_chr01 | 24035222                | GG                              | TT                | 1945884455               |
| SNP_P3_7452_24035417 | NC_021160.1    | Ca_kabuli_chr01 | 24035417                | AA                              | GG                | 1945884457               |
| SNP_P3_7453_24035478 | NC_021160.1    | Ca_kabuli_chr01 | 24035478                | AA                              | GG                | 1945884459               |
| SNP_P3_7454_24035483 | NC_021160.1    | Ca_kabuli_chr01 | 24035483                | TT                              | CC                | 1945884461               |
| SNP_P3_7455_24035488 | NC_021160.1    | Ca_kabuli_chr01 | 24035488                | AA                              | GG                | 1945884462               |
| SNP_P3_7456_24035503 | NC_021160.1    | Ca_kabuli_chr01 | 24035503                | CC                              | GG                | 1945884464               |
| SNP_P3_7457_24035508 | NC_021160.1    | Ca_kabuli_chr01 | 24035508                | CC                              | TT                | 1945884466               |
| SNP_P3_7458_24035521 | NC_021160.1    | Ca_kabuli_chr01 | 24035521                | AA                              | CC                | 1945884468               |
| SNP_P3_7459_24035609 | NC_021160.1    | Ca_kabuli_chr01 | 24035609                | AA                              | TT                | 1945884470               |
| SNP_P3_7460_24035673 | NC_021160.1    | Ca_kabuli_chr01 | 24035673                | TT                              | CC                | 1945884471               |
| SNP_P3_7461_24035676 | NC_021160.1    | Ca_kabuli_chr01 | 24035676                | TT                              | CC                | 1945884473               |
| SNP_P3_7462_24035767 | NC_021160.1    | Ca_kabuli_chr01 | 24035767                | TT                              | CC                | 1945884475               |
| SNP_P3_7463_24035781 | NC_021160.1    | Ca_kabuli_chr01 | 24035781                | TT                              | GG                | 1945884477               |
| SNP_P3_7464_24082724 | NC_021160.1    | Ca_kabuli_chr01 | 24082724                | TT                              | CC                | 1945884478               |
| SNP_P3_7466_24112036 | NC_021160.1    | Ca_kabuli_chr01 | 24112036                | GG                              | TT                | 1945884480               |
| SNP_P3_7467_24112965 | NC_021160.1    | Ca_kabuli_chr01 | 24112965                | AA                              | CC                | 1945884482               |
| SNP_P3_7468_24113245 | NC_021160.1    | Ca_kabuli_chr01 | 24113245                | AA                              | GG                | 1945884484               |
| SNP_P3_7469_24113591 | NC_021160.1    | Ca_kabuli_chr01 | 24113591                | TT                              | CC                | 1945884486               |
| SNP_P3_7470_24135653 | NC_021160.1    | Ca_kabuli_chr01 | 24135653                | AA                              | GG                | 1945884487               |
| SNP_P3_7472_24157977 | NC_021160.1    | Ca_kabuli_chr01 | 24157977                | TT                              | GG                | 1945884489               |
| SNP_P3_7473_24172058 | NC_021160.1    | Ca_kabuli_chr01 | 24172058                | AA                              | GG                | 1945884491               |
| SNP_P3_7474_24179555 | NC_021160.1    | Ca_kabuli_chr01 | 24179555                | AA                              | GG                | 1945884493               |
| SNP_P3_7476_24194399 | NC_021160.1    | Ca_kabuli_chr01 | 24194399                | CC                              | TT                | 1945884494               |
| SNP_P3_7477_24194416 | NC_021160.1    | Ca_kabuli_chr01 | 24194416                | TT                              | CC                | 1945884496               |
| SNP_P3_7478_24194706 | NC_021160.1    | Ca_kabuli_chr01 | 24194706                | AA                              | CC                | 1945884498               |
| SNP_P3_7479_24199224 | NC_021160.1    | Ca_kabuli_chr01 | 24199224                | CC                              | TT                | 1945884500               |
| SNP_P3_7480_24228569 | NC_021160.1    | Ca_kabuli_chr01 | 24228569                | GG                              | TT                | 1945884502               |
| SNP_P3_7481_24230046 | NC_021160.1    | Ca_kabuli_chr01 | 24230046                | TT                              | GG                | 1945884503               |
| SNP_P3_7483_24255782 | NC_021160.1    | Ca_kabuli_chr01 | 24255782                | AA                              | CC                | 1945884505               |

| SNPs IDs             | Chromosome IDs | Chromosomes     | Physical positions (bp) | CDC Frontier (Reference genome) | (Pusa 256 & HPNB) | NCBI SNPdb Accession IDs |
|----------------------|----------------|-----------------|-------------------------|---------------------------------|-------------------|--------------------------|
| SNP_P3_7484_24255992 | NC_021160.1    | Ca_kabuli_chr01 | 24255992                | GG                              | AA                | 1945884507               |
| SNP_P3_7485_24255994 | NC_021160.1    | Ca_kabuli_chr01 | 24255994                | AA                              | GG                | 1945884509               |
| SNP_P3_7486_24256029 | NC_021160.1    | Ca_kabuli_chr01 | 24256029                | AA                              | TT                | 1945884510               |
| SNP_P3_7487_24256034 | NC_021160.1    | Ca_kabuli_chr01 | 24256034                | TT                              | CC                | 1945884512               |
| SNP_P3_7488_24256222 | NC_021160.1    | Ca_kabuli_chr01 | 24256222                | AA                              | CC                | 1945884514               |
| SNP_P3_7489_24256317 | NC_021160.1    | Ca_kabuli_chr01 | 24256317                | CC                              | TT                | 1945884516               |
| SNP_P3_7490_24267264 | NC_021160.1    | Ca_kabuli_chr01 | 24267264                | TT                              | CC                | 1945884518               |
| SNP_P3_7491_24293453 | NC_021160.1    | Ca_kabuli_chr01 | 24293453                | TT                              | CC                | 1945884519               |
| SNP_P3_7492_24294815 | NC_021160.1    | Ca_kabuli_chr01 | 24294815                | CC                              | TT                | 1945884521               |
| SNP_P3_7493_24294832 | NC_021160.1    | Ca_kabuli_chr01 | 24294832                | TT                              | GG                | 1945884523               |
| SNP_P3_7494_24301183 | NC_021160.1    | Ca_kabuli_chr01 | 24301183                | CC                              | AA                | 1945884525               |
| SNP_P3_7495_24305536 | NC_021160.1    | Ca_kabuli_chr01 | 24305536                | TT                              | CC                | 1945884527               |
| SNP_P3_7496_24330706 | NC_021160.1    | Ca_kabuli_chr01 | 24330706                | CC                              | TT                | 1945884528               |
| SNP_P3_7497_24330776 | NC_021160.1    | Ca_kabuli_chr01 | 24330776                | AA                              | TT                | 1945884530               |
| SNP_P3_7498_24330789 | NC_021160.1    | Ca_kabuli_chr01 | 24330789                | GG                              | AA                | 1945884532               |
| SNP_P3_7499_24331290 | NC_021160.1    | Ca_kabuli_chr01 | 24331290                | TT                              | CC                | 1945884534               |
| SNP_P3_7500_24331330 | NC_021160.1    | Ca_kabuli_chr01 | 24331330                | TT                              | CC                | 1945884535               |
| SNP_P3_7501_24331349 | NC_021160.1    | Ca_kabuli_chr01 | 24331349                | TT                              | CC                | 1945884537               |
| SNP_P3_7502_24331376 | NC_021160.1    | Ca_kabuli_chr01 | 24331376                | AA                              | GG                | 1945884539               |
| SNP_P3_7503_24331533 | NC_021160.1    | Ca_kabuli_chr01 | 24331533                | AA                              | GG                | 1945884541               |
| SNP_P3_7504_24331583 | NC_021160.1    | Ca_kabuli_chr01 | 24331583                | AA                              | GG                | 1945884543               |
| SNP_P3_7505_24331593 | NC_021160.1    | Ca_kabuli_chr01 | 24331593                | GG                              | AA                | 1945884544               |
| SNP_P3_7506_24361914 | NC_021160.1    | Ca_kabuli_chr01 | 24361914                | GG                              | AA                | 1945884546               |
| SNP_P3_7507_24368558 | NC_021160.1    | Ca_kabuli_chr01 | 24368558                | TT                              | CC                | 1945884548               |
| SNP_P3_7508_24369550 | NC_021160.1    | Ca_kabuli_chr01 | 24369550                | TT                              | AA                | 1945884550               |
| SNP_P3_7509_24369558 | NC_021160.1    | Ca_kabuli_chr01 | 24369558                | TT                              | CC                | 1945884552               |
| SNP_P3_7510_24369584 | NC_021160.1    | Ca_kabuli_chr01 | 24369584                | GG                              | CC                | 1945884553               |
| SNP_P3_7511_24369588 | NC_021160.1    | Ca_kabuli_chr01 | 24369588                | TT                              | CC                | 1945884555               |
| SNP_P3_7512_24388437 | NC_021160.1    | Ca_kabuli_chr01 | 24388437                | GG                              | AA                | 1945884557               |
| SNP_P3_7514_24394795 | NC_021160.1    | Ca_kabuli_chr01 | 24394795                | GG                              | AA                | 1945884559               |
| SNP_P3_7515_24395418 | NC_021160.1    | Ca_kabuli_chr01 | 24395418                | AA                              | GG                | 1945884561               |
| SNP_P3_7516_24456459 | NC_021160.1    | Ca_kabuli_chr01 | 24456459                | AA                              | GG                | 1945884562               |
| SNP_P3_7517_24460833 | NC_021160.1    | Ca_kabuli_chr01 | 24460833                | CC                              | TT                | 1945884564               |
| SNP_P3_7518_24501626 | NC_021160.1    | Ca_kabuli_chr01 | 24501626                | AA                              | TT                | 1945884566               |
| SNP_P3_7519_24502035 | NC_021160.1    | Ca_kabuli_chr01 | 24502035                | TT                              | CC                | 1945884568               |
| SNP_P3_7520_24502055 | NC_021160.1    | Ca_kabuli_chr01 | 24502055                | AA                              | CC                | 1945884569               |
| SNP_P3_7521_24508584 | NC_021160.1    | Ca_kabuli_chr01 | 24508584                | AA                              | GG                | 1945884571               |
| SNP_P3_7522_24516544 | NC_021160.1    | Ca_kabuli_chr01 | 24516544                | CC                              | TT                | 1945884573               |
| SNP_P3_7523_24516702 | NC_021160.1    | Ca_kabuli_chr01 | 24516702                | GG                              | AA                | 1945884575               |
| SNP_P3_7524_24516706 | NC_021160.1    | Ca_kabuli_chr01 | 24516706                | GG                              | AA                | 1945884577               |
| SNP_P3_7525_24543871 | NC_021160.1    | Ca_kabuli_chr01 | 24543871                | TT                              | GG                | 1945884578               |
| SNP_P3_7526_24564086 | NC_021160.1    | Ca_kabuli_chr01 | 24564086                | CC                              | TT                | 1945884580               |



| SNPs IDs             | Chromosome IDs | Chromosomes     | Physical positions (bp) | CDC Frontier (Reference genome) | (Pusa 256 & HPNB) | NCBI SNPdb Accession IDs |
|----------------------|----------------|-----------------|-------------------------|---------------------------------|-------------------|--------------------------|
| SNP_P3_7527_24564088 | NC_021160.1    | Ca_kabuli_chr01 | 24564088                | AA                              | CC                | 1945884582               |
| SNP_P3_7528_24564091 | NC_021160.1    | Ca_kabuli_chr01 | 24564091                | GG                              | AA                | 1945884583               |
| SNP_P3_7529_24564092 | NC_021160.1    | Ca_kabuli_chr01 | 24564092                | GG                              | AA                | 1945884584               |
| SNP_P3_7530_24592164 | NC_021160.1    | Ca_kabuli_chr01 | 24592164                | CC                              | TT                | 1945884586               |
| SNP_P3_7531_24592227 | NC_021160.1    | Ca_kabuli_chr01 | 24592227                | AA                              | GG                | 1945884588               |
| SNP_P3_7532_24592252 | NC_021160.1    | Ca_kabuli_chr01 | 24592252                | AA                              | TT                | 1945884590               |
| SNP_P3_7533_24592270 | NC_021160.1    | Ca_kabuli_chr01 | 24592270                | GG                              | AA                | 1945884592               |
| SNP_P3_7534_24592457 | NC_021160.1    | Ca_kabuli_chr01 | 24592457                | AA                              | TT                | 1945884593               |
| SNP_P3_7535_24592463 | NC_021160.1    | Ca_kabuli_chr01 | 24592463                | TT                              | CC                | 1945884595               |
| SNP_P3_7536_24603254 | NC_021160.1    | Ca_kabuli_chr01 | 24603254                | TT                              | CC                | 1945884597               |
| SNP_P3_7537_24603276 | NC_021160.1    | Ca_kabuli_chr01 | 24603276                | TT                              | CC                | 1945884599               |
| SNP_P3_7538_24603693 | NC_021160.1    | Ca_kabuli_chr01 | 24603693                | TT                              | CC                | 1945884600               |
| SNP_P3_7539_24610641 | NC_021160.1    | Ca_kabuli_chr01 | 24610641                | TT                              | CC                | 1945884602               |
| SNP_P3_7540_24626603 | NC_021160.1    | Ca_kabuli_chr01 | 24626603                | TT                              | AA                | 1945884604               |
| SNP_P3_7541_24632212 | NC_021160.1    | Ca_kabuli_chr01 | 24632212                | AA                              | GG                | 1945884606               |
| SNP_P3_7542_24632220 | NC_021160.1    | Ca_kabuli_chr01 | 24632220                | CC                              | TT                | 1945884608               |
| SNP_P3_7543_24634696 | NC_021160.1    | Ca_kabuli_chr01 | 24634696                | CC                              | AA                | 1945884609               |
| SNP_P3_7544_24681277 | NC_021160.1    | Ca_kabuli_chr01 | 24681277                | CC                              | AA                | 1945884611               |
| SNP_P3_7546_24720461 | NC_021160.1    | Ca_kabuli_chr01 | 24720461                | TT                              | CC                | 1945884613               |
| SNP_P3_7547_24757088 | NC_021160.1    | Ca_kabuli_chr01 | 24757088                | AA                              | GG                | 1945884615               |
| SNP_P3_7549_24812610 | NC_021160.1    | Ca_kabuli_chr01 | 24812610                | TT                              | AA                | 1945884617               |
| SNP_P3_7550_24840030 | NC_021160.1    | Ca_kabuli_chr01 | 24840030                | GG                              | AA                | 1945884618               |
| SNP_P3_7551_24850715 | NC_021160.1    | Ca_kabuli_chr01 | 24850715                | CC                              | TT                | 1945884620               |
| SNP_P3_7553_24912699 | NC_021160.1    | Ca_kabuli_chr01 | 24912699                | TT                              | CC                | 1945884622               |
| SNP_P3_7554_24915544 | NC_021160.1    | Ca_kabuli_chr01 | 24915544                | TT                              | CC                | 1945884624               |
| SNP_P3_7555_24916365 | NC_021160.1    | Ca_kabuli_chr01 | 24916365                | TT                              | GG                | 1945884625               |
| SNP_P3_7556_24933220 | NC_021160.1    | Ca_kabuli_chr01 | 24933220                | AA                              | GG                | 1945884627               |
| SNP_P3_7557_24965369 | NC_021160.1    | Ca_kabuli_chr01 | 24965369                | TT                              | AA                | 1945884629               |
| SNP_P3_7558_24966954 | NC_021160.1    | Ca_kabuli_chr01 | 24966954                | AA                              | GG                | 1945884631               |
| SNP_P3_7559_24967221 | NC_021160.1    | Ca_kabuli_chr01 | 24967221                | AA                              | GG                | 1945884633               |
| SNP_P3_7560_24967273 | NC_021160.1    | Ca_kabuli_chr01 | 24967273                | CC                              | TT                | 1945884634               |
| SNP_P3_7562_25004909 | NC_021160.1    | Ca_kabuli_chr01 | 25004909                | AA                              | GG                | 1945884636               |
| SNP_P3_7563_25004910 | NC_021160.1    | Ca_kabuli_chr01 | 25004910                | CC                              | GG                | 1945884638               |
| SNP_P3_7564_25006545 | NC_021160.1    | Ca_kabuli_chr01 | 25006545                | TT                              | CC                | 1945884640               |
| SNP_P3_7565_25014375 | NC_021160.1    | Ca_kabuli_chr01 | 25014375                | TT                              | CC                | 1945884641               |
| SNP_P3_7566_25014433 | NC_021160.1    | Ca_kabuli_chr01 | 25014433                | AA                              | GG                | 1945884643               |
| SNP_P3_7567_25014520 | NC_021160.1    | Ca_kabuli_chr01 | 25014520                | AA                              | GG                | 1945884645               |
| SNP_P3_7568_25037706 | NC_021160.1    | Ca_kabuli_chr01 | 25037706                | AA                              | GG                | 1945884647               |
| SNP_P3_7569_25055665 | NC_021160.1    | Ca_kabuli_chr01 | 25055665                | CC                              | TT                | 1945884649               |
| SNP_P3_7570_25058117 | NC_021160.1    | Ca_kabuli_chr01 | 25058117                | GG                              | AA                | 1945884650               |
| SNP_P3_7571_25058144 | NC_021160.1    | Ca_kabuli_chr01 | 25058144                | AA                              | GG                | 1945884652               |
| SNP_P3_7572_25058362 | NC_021160.1    | Ca_kabuli_chr01 | 25058362                | AA                              | CC                | 1945884654               |

| SNPs IDs             | Chromosome IDs | Chromosomes     | Physical positions (bp) | CDC Frontier (Reference genome) | (Pusa 256 & HPNB) | NCBI SNPdb Accession IDs |
|----------------------|----------------|-----------------|-------------------------|---------------------------------|-------------------|--------------------------|
| SNP_P3_7573_25095861 | NC_021160.1    | Ca_kabuli_chr01 | 25095861                | TT                              | AA                | 1945884656               |
| SNP_P3_7574_25120316 | NC_021160.1    | Ca_kabuli_chr01 | 25120316                | GG                              | AA                | 1945884657               |
| SNP_P3_7575_25136774 | NC_021160.1    | Ca_kabuli_chr01 | 25136774                | GG                              | AA                | 1945884659               |
| SNP_P3_7576_25136777 | NC_021160.1    | Ca_kabuli_chr01 | 25136777                | TT                              | AA                | 1945884661               |
| SNP_P3_7577_25137093 | NC_021160.1    | Ca_kabuli_chr01 | 25137093                | TT                              | CC                | 1945884663               |
| SNP_P3_7578_25137095 | NC_021160.1    | Ca_kabuli_chr01 | 25137095                | TT                              | GG                | 1945884664               |
| SNP_P3_7579_25184409 | NC_021160.1    | Ca_kabuli_chr01 | 25184409                | CC                              | TT                | 1945884666               |
| SNP_P3_7580_25209678 | NC_021160.1    | Ca_kabuli_chr01 | 25209678                | TT                              | CC                | 1945884668               |
| SNP_P3_7581_25209831 | NC_021160.1    | Ca_kabuli_chr01 | 25209831                | TT                              | GG                | 1945884670               |
| SNP_P3_7582_25212911 | NC_021160.1    | Ca_kabuli_chr01 | 25212911                | GG                              | AA                | 1945884671               |
| SNP_P3_7583_25233425 | NC_021160.1    | Ca_kabuli_chr01 | 25233425                | AA                              | GG                | 1945884673               |
| SNP_P3_7584_25234184 | NC_021160.1    | Ca_kabuli_chr01 | 25234184                | TT                              | CC                | 1945884675               |
| SNP_P3_7585_25234279 | NC_021160.1    | Ca_kabuli_chr01 | 25234279                | TT                              | CC                | 1945884677               |
| SNP_P3_7586_25234352 | NC_021160.1    | Ca_kabuli_chr01 | 25234352                | GG                              | AA                | 1945884679               |
| SNP_P3_7587_25250227 | NC_021160.1    | Ca_kabuli_chr01 | 25250227                | TT                              | AA                | 1945884680               |
| SNP_P3_7588_25250231 | NC_021160.1    | Ca_kabuli_chr01 | 25250231                | TT                              | AA                | 1945884682               |
| SNP_P3_7589_25260462 | NC_021160.1    | Ca_kabuli_chr01 | 25260462                | CC                              | AA                | 1945884684               |
| SNP_P3_7590_25272285 | NC_021160.1    | Ca_kabuli_chr01 | 25272285                | GG                              | AA                | 1945884686               |
| SNP_P3_7591_25296114 | NC_021160.1    | Ca_kabuli_chr01 | 25296114                | TT                              | CC                | 1945884687               |
| SNP_P3_7593_25296409 | NC_021160.1    | Ca_kabuli_chr01 | 25296409                | CC                              | TT                | 1945884689               |
| SNP_P3_7595_25296532 | NC_021160.1    | Ca_kabuli_chr01 | 25296532                | CC                              | TT                | 1945884691               |
| SNP_P3_7596_25296685 | NC_021160.1    | Ca_kabuli_chr01 | 25296685                | AA                              | GG                | 1945884693               |
| SNP_P3_7597_25348065 | NC_021160.1    | Ca_kabuli_chr01 | 25348065                | TT                              | CC                | 1945884694               |
| SNP_P3_7598_25373788 | NC_021160.1    | Ca_kabuli_chr01 | 25373788                | GG                              | TT                | 1945884696               |
| SNP_P3_7599_25373824 | NC_021160.1    | Ca_kabuli_chr01 | 25373824                | AA                              | GG                | 1945884698               |
| SNP_P3_7600_25374026 | NC_021160.1    | Ca_kabuli_chr01 | 25374026                | GG                              | TT                | 1945884700               |
| SNP_P3_7601_25374686 | NC_021160.1    | Ca_kabuli_chr01 | 25374686                | TT                              | AA                | 1945884701               |
| SNP_P3_7602_25374712 | NC_021160.1    | Ca_kabuli_chr01 | 25374712                | AA                              | TT                | 1945884703               |
| SNP_P3_7605_25381737 | NC_021160.1    | Ca_kabuli_chr01 | 25381737                | CC                              | TT                | 1945884705               |
| SNP_P3_7606_25381860 | NC_021160.1    | Ca_kabuli_chr01 | 25381860                | TT                              | CC                | 1945884707               |
| SNP_P3_7608_25382186 | NC_021160.1    | Ca_kabuli_chr01 | 25382186                | GG                              | AA                | 1945884708               |
| SNP_P3_7609_25382187 | NC_021160.1    | Ca_kabuli_chr01 | 25382187                | CC                              | TT                | 1945884710               |
| SNP_P3_7610_25382189 | NC_021160.1    | Ca_kabuli_chr01 | 25382189                | AA                              | CC                | 1945884712               |
| SNP_P3_7611_25382190 | NC_021160.1    | Ca_kabuli_chr01 | 25382190                | CC                              | AA                | 1945884714               |
| SNP_P3_7613_25382445 | NC_021160.1    | Ca_kabuli_chr01 | 25382445                | GG                              | TT                | 1945884715               |
| SNP_P3_7614_25382447 | NC_021160.1    | Ca_kabuli_chr01 | 25382447                | TT                              | CC                | 1945884717               |
| SNP_P3_7615_25382597 | NC_021160.1    | Ca_kabuli_chr01 | 25382597                | GG                              | AA                | 1945884719               |
| SNP_P3_7616_25382604 | NC_021160.1    | Ca_kabuli_chr01 | 25382604                | TT                              | AA                | 1945884721               |
| SNP_P3_7617_25387739 | NC_021160.1    | Ca_kabuli_chr01 | 25387739                | AA                              | CC                | 1945884722               |
| SNP_P3_7619_25410971 | NC_021160.1    | Ca_kabuli_chr01 | 25410971                | GG                              | AA                | 1945884724               |
| SNP_P3_7621_25452169 | NC_021160.1    | Ca_kabuli_chr01 | 25452169                | CC                              | AA                | 1945884726               |
| SNP_P3_7622_25460258 | NC_021160.1    | Ca_kabuli_chr01 | 25460258                | GG                              | AA                | 1945884728               |

| SNPs IDs             | Chromosome IDs | Chromosomes     | Physical positions (bp) | CDC Frontier (Reference genome) | (Pusa 256 & HPNB) | NCBI SNPdb Accession IDs |
|----------------------|----------------|-----------------|-------------------------|---------------------------------|-------------------|--------------------------|
| SNP_P3_7624_25507696 | NC_021160.1    | Ca_kabuli_chr01 | 25507696                | TT                              | CC                | 1945884730               |
| SNP_P3_7626_25510060 | NC_021160.1    | Ca_kabuli_chr01 | 25510060                | AA                              | GG                | 1945884731               |
| SNP_P3_7627_25511373 | NC_021160.1    | Ca_kabuli_chr01 | 25511373                | GG                              | AA                | 1945884733               |
| SNP_P3_7629_25511419 | NC_021160.1    | Ca_kabuli_chr01 | 25511419                | CC                              | TT                | 1945884735               |
| SNP_P3_7631_25519837 | NC_021160.1    | Ca_kabuli_chr01 | 25519837                | CC                              | TT                | 1945884737               |
| SNP_P3_7632_25520864 | NC_021160.1    | Ca_kabuli_chr01 | 25520864                | TT                              | AA                | 1945884738               |
| SNP_P3_7633_25522119 | NC_021160.1    | Ca_kabuli_chr01 | 25522119                | AA                              | TT                | 1945884740               |
| SNP_P3_7634_25542181 | NC_021160.1    | Ca_kabuli_chr01 | 25542181                | CC                              | TT                | 1945884742               |
| SNP_P3_7635_25571945 | NC_021160.1    | Ca_kabuli_chr01 | 25571945                | CC                              | AA                | 1945884744               |
| SNP_P3_7636_25571968 | NC_021160.1    | Ca_kabuli_chr01 | 25571968                | AA                              | GG                | 1945884745               |
| SNP_P3_7637_25572027 | NC_021160.1    | Ca_kabuli_chr01 | 25572027                | AA                              | GG                | 1945884747               |
| SNP_P3_7638_25578630 | NC_021160.1    | Ca_kabuli_chr01 | 25578630                | GG                              | AA                | 1945884749               |
| SNP_P3_7639_25584021 | NC_021160.1    | Ca_kabuli_chr01 | 25584021                | TT                              | AA                | 1945884750               |
| SNP_P3_7640_25584050 | NC_021160.1    | Ca_kabuli_chr01 | 25584050                | AA                              | GG                | 1945884752               |
| SNP_P3_7641_25584093 | NC_021160.1    | Ca_kabuli_chr01 | 25584093                | GG                              | AA                | 1945884754               |
| SNP_P3_7642_25584213 | NC_021160.1    | Ca_kabuli_chr01 | 25584213                | AA                              | CC                | 1945884756               |
| SNP_P3_7643_25584250 | NC_021160.1    | Ca_kabuli_chr01 | 25584250                | AA                              | TT                | 1945884757               |
| SNP_P3_7644_25592029 | NC_021160.1    | Ca_kabuli_chr01 | 25592029                | AA                              | GG                | 1945884759               |
| SNP_P3_7645_25608434 | NC_021160.1    | Ca_kabuli_chr01 | 25608434                | TT                              | CC                | 1945884761               |
| SNP_P3_7646_25612830 | NC_021160.1    | Ca_kabuli_chr01 | 25612830                | TT                              | AA                | 1945884763               |
| SNP_P3_7647_25612844 | NC_021160.1    | Ca_kabuli_chr01 | 25612844                | TT                              | AA                | 1945884765               |
| SNP_P3_7648_25612893 | NC_021160.1    | Ca_kabuli_chr01 | 25612893                | GG                              | CC                | 1945884766               |
| SNP_P3_7650_25639893 | NC_021160.1    | Ca_kabuli_chr01 | 25639893                | AA                              | GG                | 1945884768               |
| SNP_P3_7651_25681649 | NC_021160.1    | Ca_kabuli_chr01 | 25681649                | AA                              | GG                | 1945884770               |
| SNP_P3_7652_25685386 | NC_021160.1    | Ca_kabuli_chr01 | 25685386                | GG                              | TT                | 1945884772               |
| SNP_P3_7653_25693933 | NC_021160.1    | Ca_kabuli_chr01 | 25693933                | AA                              | GG                | 1945884773               |
| SNP_P3_7654_25693936 | NC_021160.1    | Ca_kabuli_chr01 | 25693936                | GG                              | TT                | 1945884775               |
| SNP_P3_7655_25693960 | NC_021160.1    | Ca_kabuli_chr01 | 25693960                | AA                              | GG                | 1945884777               |
| SNP_P3_7656_25693961 | NC_021160.1    | Ca_kabuli_chr01 | 25693961                | GG                              | AA                | 1945884779               |
| SNP_P3_7657_25693968 | NC_021160.1    | Ca_kabuli_chr01 | 25693968                | TT                              | GG                | 1945884780               |
| SNP_P3_7658_25693975 | NC_021160.1    | Ca_kabuli_chr01 | 25693975                | TT                              | AA                | 1945884782               |
| SNP_P3_7659_25693986 | NC_021160.1    | Ca_kabuli_chr01 | 25693986                | CC                              | AA                | 1945884784               |
| SNP_P3_7660_25693987 | NC_021160.1    | Ca_kabuli_chr01 | 25693987                | TT                              | CC                | 1945884786               |
| SNP_P3_7661_25694346 | NC_021160.1    | Ca_kabuli_chr01 | 25694346                | TT                              | CC                | 1945884788               |
| SNP_P3_7662_25720536 | NC_021160.1    | Ca_kabuli_chr01 | 25720536                | TT                              | CC                | 1945884789               |
| SNP_P3_7663_25721763 | NC_021160.1    | Ca_kabuli_chr01 | 25721763                | CC                              | GG                | 1945884791               |
| SNP_P3_7664_25769069 | NC_021160.1    | Ca_kabuli_chr01 | 25769069                | TT                              | CC                | 1945884793               |
| SNP_P3_7665_25774824 | NC_021160.1    | Ca_kabuli_chr01 | 25774824                | TT                              | CC                | 1945884795               |
| SNP_P3_7666_25774825 | NC_021160.1    | Ca_kabuli_chr01 | 25774825                | TT                              | AA                | 1945884796               |
| SNP_P3_7667_25774829 | NC_021160.1    | Ca_kabuli_chr01 | 25774829                | TT                              | AA                | 1945884798               |
| SNP_P3_7668_25778810 | NC_021160.1    | Ca_kabuli_chr01 | 25778810                | AA                              | CC                | 1945884800               |
| SNP_P3_7669_25786446 | NC_021160.1    | Ca_kabuli_chr01 | 25786446                | CC                              | TT                | 1945884802               |

| SNPs IDs             | Chromosome IDs | Chromosomes     | Physical positions (bp) | CDC Frontier (Reference genome) | (Pusa 256 & HPNB) | NCBI SNPdb Accession IDs |
|----------------------|----------------|-----------------|-------------------------|---------------------------------|-------------------|--------------------------|
| SNP_P3_7670_25786513 | NC_021160.1    | Ca_kabuli_chr01 | 25786513                | GG                              | AA                | 1945884804               |
| SNP_P3_7671_25786523 | NC_021160.1    | Ca_kabuli_chr01 | 25786523                | TT                              | CC                | 1945884805               |
| SNP_P3_7672_25786531 | NC_021160.1    | Ca_kabuli_chr01 | 25786531                | CC                              | GG                | 1945884807               |
| SNP_P3_7674_25786888 | NC_021160.1    | Ca_kabuli_chr01 | 25786888                | GG                              | TT                | 1945884809               |
| SNP_P3_7675_25796334 | NC_021160.1    | Ca_kabuli_chr01 | 25796334                | AA                              | GG                | 1945884811               |
| SNP_P3_7677_25802448 | NC_021160.1    | Ca_kabuli_chr01 | 25802448                | GG                              | AA                | 1945884812               |
| SNP_P3_7678_25802460 | NC_021160.1    | Ca_kabuli_chr01 | 25802460                | GG                              | AA                | 1945884814               |
| SNP_P3_7679_25802461 | NC_021160.1    | Ca_kabuli_chr01 | 25802461                | AA                              | GG                | 1945884816               |
| SNP_P3_7680_25802895 | NC_021160.1    | Ca_kabuli_chr01 | 25802895                | TT                              | GG                | 1945884818               |
| SNP_P3_7681_25806142 | NC_021160.1    | Ca_kabuli_chr01 | 25806142                | GG                              | AA                | 1945884820               |
| SNP_P3_7682_25824861 | NC_021160.1    | Ca_kabuli_chr01 | 25824861                | TT                              | GG                | 1945884821               |
| SNP_P3_7683_25824930 | NC_021160.1    | Ca_kabuli_chr01 | 25824930                | TT                              | CC                | 1945884823               |
| SNP_P3_7684_25824937 | NC_021160.1    | Ca_kabuli_chr01 | 25824937                | TT                              | CC                | 1945884825               |
| SNP_P3_7685_25824956 | NC_021160.1    | Ca_kabuli_chr01 | 25824956                | TT                              | CC                | 1945884827               |
| SNP_P3_7686_25824984 | NC_021160.1    | Ca_kabuli_chr01 | 25824984                | GG                              | TT                | 1945884828               |
| SNP_P3_7687_25824995 | NC_021160.1    | Ca_kabuli_chr01 | 25824995                | CC                              | TT                | 1945884830               |
| SNP_P3_7688_25825009 | NC_021160.1    | Ca_kabuli_chr01 | 25825009                | TT                              | GG                | 1945884832               |
| SNP_P3_7689_25825037 | NC_021160.1    | Ca_kabuli_chr01 | 25825037                | CC                              | TT                | 1945884834               |
| SNP_P3_7690_25825052 | NC_021160.1    | Ca_kabuli_chr01 | 25825052                | TT                              | AA                | 1945884835               |
| SNP_P3_7691_25825062 | NC_021160.1    | Ca_kabuli_chr01 | 25825062                | AA                              | GG                | 1945884837               |
| SNP_P3_7692_25832940 | NC_021160.1    | Ca_kabuli_chr01 | 25832940                | TT                              | CC                | 1945884839               |
| SNP_P3_7693_25832941 | NC_021160.1    | Ca_kabuli_chr01 | 25832941                | TT                              | GG                | 1945884841               |
| SNP_P3_7694_25833239 | NC_021160.1    | Ca_kabuli_chr01 | 25833239                | CC                              | TT                | 1945884842               |
| SNP_P3_7695_25833552 | NC_021160.1    | Ca_kabuli_chr01 | 25833552                | AA                              | CC                | 1945884844               |
| SNP_P3_7696_25833571 | NC_021160.1    | Ca_kabuli_chr01 | 25833571                | CC                              | AA                | 1945884846               |
| SNP_P3_7697_25834298 | NC_021160.1    | Ca_kabuli_chr01 | 25834298                | GG                              | TT                | 1945884848               |
| SNP_P3_7698_25837300 | NC_021160.1    | Ca_kabuli_chr01 | 25837300                | AA                              | GG                | 1945884850               |
| SNP_P3_7699_25852183 | NC_021160.1    | Ca_kabuli_chr01 | 25852183                | CC                              | AA                | 1945884851               |
| SNP_P3_7700_25874341 | NC_021160.1    | Ca_kabuli_chr01 | 25874341                | GG                              | AA                | 1945884853               |
| SNP_P3_7701_25874369 | NC_021160.1    | Ca_kabuli_chr01 | 25874369                | AA                              | GG                | 1945884855               |
| SNP_P3_7703_25890677 | NC_021160.1    | Ca_kabuli_chr01 | 25890677                | AA                              | GG                | 1945884857               |
| SNP_P3_7704_25909057 | NC_021160.1    | Ca_kabuli_chr01 | 25909057                | CC                              | AA                | 1945884858               |
| SNP_P3_7705_25913651 | NC_021160.1    | Ca_kabuli_chr01 | 25913651                | CC                              | AA                | 1945884860               |
| SNP_P3_7706_25920677 | NC_021160.1    | Ca_kabuli_chr01 | 25920677                | GG                              | AA                | 1945884862               |
| SNP_P3_7707_26006854 | NC_021160.1    | Ca_kabuli_chr01 | 26006854                | CC                              | TT                | 1945884864               |
| SNP_P3_7708_26014195 | NC_021160.1    | Ca_kabuli_chr01 | 26014195                | TT                              | AA                | 1945884866               |
| SNP_P3_7709_26014202 | NC_021160.1    | Ca_kabuli_chr01 | 26014202                | TT                              | CC                | 1945884867               |
| SNP_P3_7710_26014210 | NC_021160.1    | Ca_kabuli_chr01 | 26014210                | TT                              | CC                | 1945884869               |
| SNP_P3_7711_26014596 | NC_021160.1    | Ca_kabuli_chr01 | 26014596                | TT                              | AA                | 1945884871               |
| SNP_P3_7712_26016683 | NC_021160.1    | Ca_kabuli_chr01 | 26016683                | GG                              | AA                | 1945884873               |
| SNP_P3_7714_26045739 | NC_021160.1    | Ca_kabuli_chr01 | 26045739                | AA                              | TT                | 1945884874               |
| SNP_P3_7715_26075350 | NC_021160.1    | Ca_kabuli_chr01 | 26075350                | CC                              | TT                | 1945884876               |

| SNPs IDs             | Chromosome IDs | Chromosomes     | Physical positions (bp) | CDC Frontier (Reference genome) | (Pusa 256 & HPNB) | NCBI SNPdb Accession IDs |
|----------------------|----------------|-----------------|-------------------------|---------------------------------|-------------------|--------------------------|
| SNP_P3_7716_26075351 | NC_021160.1    | Ca_kabuli_chr01 | 26075351                | CC                              | TT                | 1945884878               |
| SNP_P3_7717_26075494 | NC_021160.1    | Ca_kabuli_chr01 | 26075494                | AA                              | TT                | 1945884880               |
| SNP_P3_7718_26075501 | NC_021160.1    | Ca_kabuli_chr01 | 26075501                | CC                              | TT                | 1945884881               |
| SNP_P3_7719_26075503 | NC_021160.1    | Ca_kabuli_chr01 | 26075503                | TT                              | CC                | 1945884883               |
| SNP_P3_7720_26075504 | NC_021160.1    | Ca_kabuli_chr01 | 26075504                | CC                              | TT                | 1945884885               |
| SNP_P3_7721_26075533 | NC_021160.1    | Ca_kabuli_chr01 | 26075533                | GG                              | CC                | 1945884887               |
| SNP_P3_7722_26075553 | NC_021160.1    | Ca_kabuli_chr01 | 26075553                | GG                              | AA                | 1945884889               |
| SNP_P3_7723_26075561 | NC_021160.1    | Ca_kabuli_chr01 | 26075561                | GG                              | AA                | 1945884890               |
| SNP_P3_7724_26075565 | NC_021160.1    | Ca_kabuli_chr01 | 26075565                | AA                              | GG                | 1945884892               |
| SNP_P3_7725_26075570 | NC_021160.1    | Ca_kabuli_chr01 | 26075570                | AA                              | CC                | 1945884894               |
| SNP_P3_7726_26075694 | NC_021160.1    | Ca_kabuli_chr01 | 26075694                | GG                              | TT                | 1945884896               |
| SNP_P3_7727_26077437 | NC_021160.1    | Ca_kabuli_chr01 | 26077437                | AA                              | GG                | 1945884897               |
| SNP_P3_7728_26077443 | NC_021160.1    | Ca_kabuli_chr01 | 26077443                | GG                              | AA                | 1945884899               |
| SNP_P3_7729_26077473 | NC_021160.1    | Ca_kabuli_chr01 | 26077473                | GG                              | AA                | 1945884901               |
| SNP_P3_7730_26077521 | NC_021160.1    | Ca_kabuli_chr01 | 26077521                | CC                              | TT                | 1945884903               |
| SNP_P3_7731_26077524 | NC_021160.1    | Ca_kabuli_chr01 | 26077524                | TT                              | CC                | 1945884905               |
| SNP_P3_7732_26091944 | NC_021160.1    | Ca_kabuli_chr01 | 26091944                | GG                              | AA                | 1945884906               |
| SNP_P3_7733_26099394 | NC_021160.1    | Ca_kabuli_chr01 | 26099394                | CC                              | TT                | 1945884908               |
| SNP_P3_7734_26099401 | NC_021160.1    | Ca_kabuli_chr01 | 26099401                | CC                              | AA                | 1945884910               |
| SNP_P3_7735_26099439 | NC_021160.1    | Ca_kabuli_chr01 | 26099439                | CC                              | AA                | 1945884912               |
| SNP_P3_7736_26099447 | NC_021160.1    | Ca_kabuli_chr01 | 26099447                | CC                              | TT                | 1945884913               |
| SNP_P3_7737_26108615 | NC_021160.1    | Ca_kabuli_chr01 | 26108615                | CC                              | AA                | 1945884915               |
| SNP_P3_7738_26125747 | NC_021160.1    | Ca_kabuli_chr01 | 26125747                | AA                              | GG                | 1945884917               |
| SNP_P3_7739_26125777 | NC_021160.1    | Ca_kabuli_chr01 | 26125777                | GG                              | CC                | 1945884919               |
| SNP_P3_7740_26125819 | NC_021160.1    | Ca_kabuli_chr01 | 26125819                | AA                              | GG                | 1945884921               |
| SNP_P3_7741_26125826 | NC_021160.1    | Ca_kabuli_chr01 | 26125826                | TT                              | GG                | 1945884922               |
| SNP_P3_7742_26125855 | NC_021160.1    | Ca_kabuli_chr01 | 26125855                | AA                              | GG                | 1945884924               |
| SNP_P3_7743_26125886 | NC_021160.1    | Ca_kabuli_chr01 | 26125886                | AA                              | GG                | 1945884926               |
| SNP_P3_7744_26125956 | NC_021160.1    | Ca_kabuli_chr01 | 26125956                | CC                              | TT                | 1945884928               |
| SNP_P3_7746_26143694 | NC_021160.1    | Ca_kabuli_chr01 | 26143694                | GG                              | AA                | 1945884930               |
| SNP_P3_7747_26143696 | NC_021160.1    | Ca_kabuli_chr01 | 26143696                | GG                              | AA                | 1945884931               |
| SNP_P3_7748_26155179 | NC_021160.1    | Ca_kabuli_chr01 | 26155179                | AA                              | TT                | 1945884933               |
| SNP_P3_7749_26168154 | NC_021160.1    | Ca_kabuli_chr01 | 26168154                | CC                              | TT                | 1945884935               |
| SNP_P3_7750_26186033 | NC_021160.1    | Ca_kabuli_chr01 | 26186033                | TT                              | AA                | 1945884937               |
| SNP_P3_7751_26186034 | NC_021160.1    | Ca_kabuli_chr01 | 26186034                | TT                              | CC                | 1945884938               |
| SNP_P3_7752_26193293 | NC_021160.1    | Ca_kabuli_chr01 | 26193293                | AA                              | CC                | 1945884940               |
| SNP_P3_7753_26202204 | NC_021160.1    | Ca_kabuli_chr01 | 26202204                | CC                              | TT                | 1945884942               |
| SNP_P3_7754_26202344 | NC_021160.1    | Ca_kabuli_chr01 | 26202344                | TT                              | CC                | 1945884944               |
| SNP_P3_7755_26202911 | NC_021160.1    | Ca_kabuli_chr01 | 26202911                | TT                              | AA                | 1945884945               |
| SNP_P3_7756_26202942 | NC_021160.1    | Ca_kabuli_chr01 | 26202942                | CC                              | TT                | 1945884947               |
| SNP_P3_7757_26203013 | NC_021160.1    | Ca_kabuli_chr01 | 26203013                | TT                              | CC                | 1945884949               |
| SNP_P3_7758_26203069 | NC_021160.1    | Ca_kabuli_chr01 | 26203069                | GG                              | AA                | 1945884951               |

| SNPs IDs             | Chromosome IDs | Chromosomes     | Physical positions (bp) | CDC Frontier (Reference genome) | (Pusa 256 & HPNB) | NCBI SNPdb Accession IDs |
|----------------------|----------------|-----------------|-------------------------|---------------------------------|-------------------|--------------------------|
| SNP_P3_7759_26210734 | NC_021160.1    | Ca_kabuli_chr01 | 26210734                | AA                              | CC                | 1945884952               |
| SNP_P3_7760_26217479 | NC_021160.1    | Ca_kabuli_chr01 | 26217479                | TT                              | GG                | 1945884954               |
| SNP_P3_7761_26220810 | NC_021160.1    | Ca_kabuli_chr01 | 26220810                | AA                              | GG                | 1945884956               |
| SNP_P3_7762_26220815 | NC_021160.1    | Ca_kabuli_chr01 | 26220815                | TT                              | AA                | 1945884958               |
| SNP_P3_7763_26223091 | NC_021160.1    | Ca_kabuli_chr01 | 26223091                | TT                              | AA                | 1945884960               |
| SNP_P3_7764_26224039 | NC_021160.1    | Ca_kabuli_chr01 | 26224039                | GG                              | AA                | 1945884961               |
| SNP_P3_7765_26224154 | NC_021160.1    | Ca_kabuli_chr01 | 26224154                | AA                              | TT                | 1945884963               |
| SNP_P3_7766_26224174 | NC_021160.1    | Ca_kabuli_chr01 | 26224174                | TT                              | CC                | 1945884965               |
| SNP_P3_7767_26224177 | NC_021160.1    | Ca_kabuli_chr01 | 26224177                | CC                              | AA                | 1945884967               |
| SNP_P3_7768_26224276 | NC_021160.1    | Ca_kabuli_chr01 | 26224276                | CC                              | TT                | 1945884968               |
| SNP_P3_7769_26224291 | NC_021160.1    | Ca_kabuli_chr01 | 26224291                | TT                              | CC                | 1945884970               |
| SNP_P3_7770_26238027 | NC_021160.1    | Ca_kabuli_chr01 | 26238027                | TT                              | CC                | 1945884972               |
| SNP_P3_7771_26245841 | NC_021160.1    | Ca_kabuli_chr01 | 26245841                | AA                              | GG                | 1945884974               |
| SNP_P3_7772_26245860 | NC_021160.1    | Ca_kabuli_chr01 | 26245860                | TT                              | CC                | 1945884975               |
| SNP_P3_7773_26245915 | NC_021160.1    | Ca_kabuli_chr01 | 26245915                | TT                              | CC                | 1945884977               |
| SNP_P3_7774_26245928 | NC_021160.1    | Ca_kabuli_chr01 | 26245928                | GG                              | AA                | 1945884979               |
| SNP_P3_7775_26245970 | NC_021160.1    | Ca_kabuli_chr01 | 26245970                | AA                              | TT                | 1945884981               |
| SNP_P3_7776_26246104 | NC_021160.1    | Ca_kabuli_chr01 | 26246104                | GG                              | TT                | 1945884982               |
| SNP_P3_7777_26246189 | NC_021160.1    | Ca_kabuli_chr01 | 26246189                | CC                              | TT                | 1945884984               |
| SNP_P3_7778_26246231 | NC_021160.1    | Ca_kabuli_chr01 | 26246231                | AA                              | GG                | 1945884986               |
| SNP_P3_7780_26246535 | NC_021160.1    | Ca_kabuli_chr01 | 26246535                | GG                              | AA                | 1945884987               |
| SNP_P3_7781_26246604 | NC_021160.1    | Ca_kabuli_chr01 | 26246604                | TT                              | CC                | 1945884989               |
| SNP_P3_7782_26246629 | NC_021160.1    | Ca_kabuli_chr01 | 26246629                | GG                              | CC                | 1945884991               |
| SNP_P3_7783_26246636 | NC_021160.1    | Ca_kabuli_chr01 | 26246636                | AA                              | CC                | 1945884993               |
| SNP_P3_7784_26246699 | NC_021160.1    | Ca_kabuli_chr01 | 26246699                | TT                              | CC                | 1945884994               |
| SNP_P3_7785_26246714 | NC_021160.1    | Ca_kabuli_chr01 | 26246714                | TT                              | AA                | 1945884996               |
| SNP_P3_7786_26247149 | NC_021160.1    | Ca_kabuli_chr01 | 26247149                | CC                              | TT                | 1945884998               |
| SNP_P3_7787_26247152 | NC_021160.1    | Ca_kabuli_chr01 | 26247152                | AA                              | TT                | 1945885000               |
| SNP_P3_7788_26247157 | NC_021160.1    | Ca_kabuli_chr01 | 26247157                | TT                              | CC                | 1945885002               |
| SNP_P3_7790_26247575 | NC_021160.1    | Ca_kabuli_chr01 | 26247575                | CC                              | TT                | 1945885003               |
| SNP_P3_7791_26252281 | NC_021160.1    | Ca_kabuli_chr01 | 26252281                | AA                              | CC                | 1945885005               |
| SNP_P3_7792_26278947 | NC_021160.1    | Ca_kabuli_chr01 | 26278947                | AA                              | CC                | 1945885007               |
| SNP_P3_7794_26291191 | NC_021160.1    | Ca_kabuli_chr01 | 26291191                | CC                              | TT                | 1945885009               |
| SNP_P3_7795_26291221 | NC_021160.1    | Ca_kabuli_chr01 | 26291221                | AA                              | CC                | 1945885010               |
| SNP_P3_7796_26291618 | NC_021160.1    | Ca_kabuli_chr01 | 26291618                | AA                              | GG                | 1945885012               |
| SNP_P3_7797_26291639 | NC_021160.1    | Ca_kabuli_chr01 | 26291639                | GG                              | CC                | 1945885014               |
| SNP_P3_7798_26291644 | NC_021160.1    | Ca_kabuli_chr01 | 26291644                | AA                              | TT                | 1945885016               |
| SNP_P3_7799_26296494 | NC_021160.1    | Ca_kabuli_chr01 | 26296494                | TT                              | CC                | 1945885017               |
| SNP_P3_7800_26297843 | NC_021160.1    | Ca_kabuli_chr01 | 26297843                | AA                              | GG                | 1945885019               |
| SNP_P3_7801_26297965 | NC_021160.1    | Ca_kabuli_chr01 | 26297965                | CC                              | TT                | 1945885021               |
| SNP_P3_7802_26298051 | NC_021160.1    | Ca_kabuli_chr01 | 26298051                | AA                              | GG                | 1945885023               |
| SNP_P3_7803_26298122 | NC_021160.1    | Ca_kabuli_chr01 | 26298122                | CC                              | TT                | 1945885024               |

| SNPs IDs             | Chromosome IDs | Chromosomes     | Physical positions (bp) | CDC Frontier (Reference genome) | (Pusa 256 & HPNB) | NCBI SNPdb Accession IDs |
|----------------------|----------------|-----------------|-------------------------|---------------------------------|-------------------|--------------------------|
| SNP_P3_7804_26298196 | NC_021160.1    | Ca_kabuli_chr01 | 26298196                | TT                              | CC                | 1945885026               |
| SNP_P3_7805_26298446 | NC_021160.1    | Ca_kabuli_chr01 | 26298446                | TT                              | CC                | 1945885028               |
| SNP_P3_7806_26302138 | NC_021160.1    | Ca_kabuli_chr01 | 26302138                | CC                              | TT                | 1945885030               |
| SNP_P3_7807_26302205 | NC_021160.1    | Ca_kabuli_chr01 | 26302205                | GG                              | AA                | 1945885031               |
| SNP_P3_7808_26309217 | NC_021160.1    | Ca_kabuli_chr01 | 26309217                | GG                              | CC                | 1945885033               |
| SNP_P3_7809_26309225 | NC_021160.1    | Ca_kabuli_chr01 | 26309225                | TT                              | AA                | 1945885035               |
| SNP_P3_7810_26309253 | NC_021160.1    | Ca_kabuli_chr01 | 26309253                | CC                              | TT                | 1945885037               |
| SNP_P3_7811_26309292 | NC_021160.1    | Ca_kabuli_chr01 | 26309292                | AA                              | GG                | 1945885038               |
| SNP_P3_7812_26309293 | NC_021160.1    | Ca_kabuli_chr01 | 26309293                | CC                              | TT                | 1945885040               |
| SNP_P3_7813_26309302 | NC_021160.1    | Ca_kabuli_chr01 | 26309302                | TT                              | GG                | 1945885042               |
| SNP_P3_7814_26309592 | NC_021160.1    | Ca_kabuli_chr01 | 26309592                | TT                              | GG                | 1945885044               |
| SNP_P3_7815_26309697 | NC_021160.1    | Ca_kabuli_chr01 | 26309697                | CC                              | TT                | 1945885046               |
| SNP_P3_7816_26319237 | NC_021160.1    | Ca_kabuli_chr01 | 26319237                | TT                              | CC                | 1945885047               |
| SNP_P3_7817_26319330 | NC_021160.1    | Ca_kabuli_chr01 | 26319330                | CC                              | TT                | 1945885049               |
| SNP_P3_7818_26319355 | NC_021160.1    | Ca_kabuli_chr01 | 26319355                | TT                              | CC                | 1945885051               |
| SNP_P3_7819_26319404 | NC_021160.1    | Ca_kabuli_chr01 | 26319404                | GG                              | AA                | 1945885053               |
| SNP_P3_7820_26319429 | NC_021160.1    | Ca_kabuli_chr01 | 26319429                | CC                              | TT                | 1945885054               |
| SNP_P3_7821_26319444 | NC_021160.1    | Ca_kabuli_chr01 | 26319444                | GG                              | AA                | 1945885056               |
| SNP_P3_7822_26347641 | NC_021160.1    | Ca_kabuli_chr01 | 26347641                | TT                              | CC                | 1945885058               |
| SNP_P3_7823_26348023 | NC_021160.1    | Ca_kabuli_chr01 | 26348023                | AA                              | GG                | 1945885060               |
| SNP_P3_7824_26348027 | NC_021160.1    | Ca_kabuli_chr01 | 26348027                | TT                              | CC                | 1945885061               |
| SNP_P3_7825_26366587 | NC_021160.1    | Ca_kabuli_chr01 | 26366587                | AA                              | CC                | 1945885063               |
| SNP_P3_7827_26405766 | NC_021160.1    | Ca_kabuli_chr01 | 26405766                | TT                              | CC                | 1945885065               |
| SNP_P3_7828_26405773 | NC_021160.1    | Ca_kabuli_chr01 | 26405773                | GG                              | CC                | 1945885067               |
| SNP_P3_7829_26406273 | NC_021160.1    | Ca_kabuli_chr01 | 26406273                | TT                              | CC                | 1945885069               |
| SNP_P3_7830_26407617 | NC_021160.1    | Ca_kabuli_chr01 | 26407617                | CC                              | TT                | 1945885070               |
| SNP_P3_7831_26407632 | NC_021160.1    | Ca_kabuli_chr01 | 26407632                | CC                              | TT                | 1945885072               |
| SNP_P3_7832_26415970 | NC_021160.1    | Ca_kabuli_chr01 | 26415970                | AA                              | GG                | 1945885074               |
| SNP_P3_7833_26438162 | NC_021160.1    | Ca_kabuli_chr01 | 26438162                | AA                              | GG                | 1945885076               |
| SNP_P3_7834_26438192 | NC_021160.1    | Ca_kabuli_chr01 | 26438192                | AA                              | GG                | 1945885077               |
| SNP_P3_7836_26447892 | NC_021160.1    | Ca_kabuli_chr01 | 26447892                | CC                              | TT                | 1945885079               |
| SNP_P3_7840_26488755 | NC_021160.1    | Ca_kabuli_chr01 | 26488755                | CC                              | TT                | 1945885081               |
| SNP_P3_7841_26489570 | NC_021160.1    | Ca_kabuli_chr01 | 26489570                | TT                              | GG                | 1945885083               |
| SNP_P3_7842_26489583 | NC_021160.1    | Ca_kabuli_chr01 | 26489583                | GG                              | AA                | 1945885084               |
| SNP_P3_7843_26489584 | NC_021160.1    | Ca_kabuli_chr01 | 26489584                | TT                              | CC                | 1945885086               |
| SNP_P3_7844_26492578 | NC_021160.1    | Ca_kabuli_chr01 | 26492578                | AA                              | CC                | 1945885088               |
| SNP_P3_7845_26493179 | NC_021160.1    | Ca_kabuli_chr01 | 26493179                | TT                              | GG                | 1945885090               |
| SNP_P3_7846_26493196 | NC_021160.1    | Ca_kabuli_chr01 | 26493196                | GG                              | AA                | 1945885092               |
| SNP_P3_7847_26494182 | NC_021160.1    | Ca_kabuli_chr01 | 26494182                | TT                              | CC                | 1945885093               |
| SNP_P3_7848_26494333 | NC_021160.1    | Ca_kabuli_chr01 | 26494333                | AA                              | GG                | 1945885095               |
| SNP_P3_7849_26494703 | NC_021160.1    | Ca_kabuli_chr01 | 26494703                | TT                              | AA                | 1945885097               |
| SNP_P3_7850_26494708 | NC_021160.1    | Ca_kabuli_chr01 | 26494708                | AA                              | GG                | 1945885099               |

| SNPs IDs             | Chromosome IDs | Chromosomes     | Physical positions (bp) | CDC Frontier (Reference genome) | (Pusa 256 & HPNB) | NCBI SNPdb Accession IDs |
|----------------------|----------------|-----------------|-------------------------|---------------------------------|-------------------|--------------------------|
| SNP_P3_7851_26496897 | NC_021160.1    | Ca_kabuli_chr01 | 26496897                | TT                              | CC                | 1945885100               |
| SNP_P3_7852_26502764 | NC_021160.1    | Ca_kabuli_chr01 | 26502764                | GG                              | AA                | 1945885102               |
| SNP_P3_7853_26504631 | NC_021160.1    | Ca_kabuli_chr01 | 26504631                | GG                              | TT                | 1945885104               |
| SNP_P3_7854_26505972 | NC_021160.1    | Ca_kabuli_chr01 | 26505972                | AA                              | GG                | 1945885106               |
| SNP_P3_7855_26507964 | NC_021160.1    | Ca_kabuli_chr01 | 26507964                | GG                              | TT                | 1945885107               |
| SNP_P3_7856_26512477 | NC_021160.1    | Ca_kabuli_chr01 | 26512477                | CC                              | TT                | 1945885109               |
| SNP_P3_7857_26512851 | NC_021160.1    | Ca_kabuli_chr01 | 26512851                | GG                              | AA                | 1945885111               |
| SNP_P3_7858_26521805 | NC_021160.1    | Ca_kabuli_chr01 | 26521805                | TT                              | AA                | 1945885113               |
| SNP_P3_7859_26523310 | NC_021160.1    | Ca_kabuli_chr01 | 26523310                | AA                              | GG                | 1945885114               |
| SNP_P3_7860_26526581 | NC_021160.1    | Ca_kabuli_chr01 | 26526581                | GG                              | AA                | 1945885116               |
| SNP_P3_7861_26543295 | NC_021160.1    | Ca_kabuli_chr01 | 26543295                | TT                              | AA                | 1945885118               |
| SNP_P3_7862_26590900 | NC_021160.1    | Ca_kabuli_chr01 | 26590900                | TT                              | GG                | 1945885120               |
| SNP_P3_7863_26591096 | NC_021160.1    | Ca_kabuli_chr01 | 26591096                | AA                              | GG                | 1945885121               |
| SNP_P3_7864_26591111 | NC_021160.1    | Ca_kabuli_chr01 | 26591111                | AA                              | CC                | 1945885123               |
| SNP_P3_7865_26591243 | NC_021160.1    | Ca_kabuli_chr01 | 26591243                | GG                              | AA                | 1945885125               |
| SNP_P3_7866_26603234 | NC_021160.1    | Ca_kabuli_chr01 | 26603234                | TT                              | AA                | 1945885127               |
| SNP_P3_7867_26611170 | NC_021160.1    | Ca_kabuli_chr01 | 26611170                | CC                              | GG                | 1945885128               |
| SNP_P3_7868_26611341 | NC_021160.1    | Ca_kabuli_chr01 | 26611341                | GG                              | AA                | 1945885130               |
| SNP_P3_7869_26615980 | NC_021160.1    | Ca_kabuli_chr01 | 26615980                | CC                              | TT                | 1945885132               |
| SNP_P3_7870_26615981 | NC_021160.1    | Ca_kabuli_chr01 | 26615981                | AA                              | GG                | 1945885134               |
| SNP_P3_7871_26615998 | NC_021160.1    | Ca_kabuli_chr01 | 26615998                | TT                              | CC                | 1945885136               |
| SNP_P3_7872_26634952 | NC_021160.1    | Ca_kabuli_chr01 | 26634952                | TT                              | CC                | 1945885137               |
| SNP_P3_7873_26656944 | NC_021160.1    | Ca_kabuli_chr01 | 26656944                | AA                              | TT                | 1945885139               |
| SNP_P3_7874_26656962 | NC_021160.1    | Ca_kabuli_chr01 | 26656962                | GG                              | AA                | 1945885141               |
| SNP_P3_7875_26657125 | NC_021160.1    | Ca_kabuli_chr01 | 26657125                | TT                              | AA                | 1945885143               |
| SNP_P3_7876_26657126 | NC_021160.1    | Ca_kabuli_chr01 | 26657126                | TT                              | CC                | 1945885144               |
| SNP_P3_7877_26657203 | NC_021160.1    | Ca_kabuli_chr01 | 26657203                | TT                              | GG                | 1945885146               |
| SNP_P3_7878_26660661 | NC_021160.1    | Ca_kabuli_chr01 | 26660661                | CC                              | TT                | 1945885148               |
| SNP_P3_7880_26682972 | NC_021160.1    | Ca_kabuli_chr01 | 26682972                | TT                              | GG                | 1945885150               |
| SNP_P3_7881_26683102 | NC_021160.1    | Ca_kabuli_chr01 | 26683102                | TT                              | CC                | 1945885151               |
| SNP_P3_7884_26690987 | NC_021160.1    | Ca_kabuli_chr01 | 26690987                | AA                              | GG                | 1945885153               |
| SNP_P3_7885_26691640 | NC_021160.1    | Ca_kabuli_chr01 | 26691640                | AA                              | CC                | 1945885155               |
| SNP_P3_7886_26691649 | NC_021160.1    | Ca_kabuli_chr01 | 26691649                | GG                              | TT                | 1945885157               |
| SNP_P3_7887_26704086 | NC_021160.1    | Ca_kabuli_chr01 | 26704086                | CC                              | TT                | 1945885159               |
| SNP_P3_7888_26705819 | NC_021160.1    | Ca_kabuli_chr01 | 26705819                | CC                              | TT                | 1945885160               |
| SNP_P3_7891_26741109 | NC_021160.1    | Ca_kabuli_chr01 | 26741109                | AA                              | GG                | 1945885162               |
| SNP_P3_7892_26741457 | NC_021160.1    | Ca_kabuli_chr01 | 26741457                | TT                              | CC                | 1945885164               |
| SNP_P3_7893_26741503 | NC_021160.1    | Ca_kabuli_chr01 | 26741503                | AA                              | GG                | 1945885166               |
| SNP_P3_7894_26741550 | NC_021160.1    | Ca_kabuli_chr01 | 26741550                | GG                              | AA                | 1945885167               |
| SNP_P3_7895_26741553 | NC_021160.1    | Ca_kabuli_chr01 | 26741553                | GG                              | AA                | 1945885169               |
| SNP_P3_7896_26741593 | NC_021160.1    | Ca_kabuli_chr01 | 26741593                | CC                              | AA                | 1945885171               |
| SNP_P3_7897_26741605 | NC_021160.1    | Ca_kabuli_chr01 | 26741605                | GG                              | AA                | 1945885173               |



| SNPs IDs             | Chromosome IDs | Chromosomes     | Physical positions (bp) | CDC Frontier (Reference genome) | (Pusa 256 & HPNB) | NCBI SNPdb Accession IDs |
|----------------------|----------------|-----------------|-------------------------|---------------------------------|-------------------|--------------------------|
| SNP_P3_7898_26764883 | NC_021160.1    | Ca_kabuli_chr01 | 26764883                | AA                              | TT                | 1945885175               |
| SNP_P3_7899_26802498 | NC_021160.1    | Ca_kabuli_chr01 | 26802498                | AA                              | TT                | 1945885176               |
| SNP_P3_7902_26826634 | NC_021160.1    | Ca_kabuli_chr01 | 26826634                | TT                              | CC                | 1945885178               |
| SNP_P3_7904_26859896 | NC_021160.1    | Ca_kabuli_chr01 | 26859896                | AA                              | GG                | 1945885180               |
| SNP_P3_7906_26881101 | NC_021160.1    | Ca_kabuli_chr01 | 26881101                | TT                              | AA                | 1945885182               |
| SNP_P3_7907_26886964 | NC_021160.1    | Ca_kabuli_chr01 | 26886964                | TT                              | GG                | 1945885183               |
| SNP_P3_7910_26905662 | NC_021160.1    | Ca_kabuli_chr01 | 26905662                | AA                              | GG                | 1945885185               |
| SNP_P3_7911_26936143 | NC_021160.1    | Ca_kabuli_chr01 | 26936143                | CC                              | TT                | 1945885187               |
| SNP_P3_7914_26997317 | NC_021160.1    | Ca_kabuli_chr01 | 26997317                | GG                              | AA                | 1945885189               |
| SNP_P3_7915_26997442 | NC_021160.1    | Ca_kabuli_chr01 | 26997442                | GG                              | AA                | 1945885190               |
| SNP_P3_7917_27034584 | NC_021160.1    | Ca_kabuli_chr01 | 27034584                | TT                              | AA                | 1945885192               |
| SNP_P3_7918_27034593 | NC_021160.1    | Ca_kabuli_chr01 | 27034593                | GG                              | AA                | 1945885194               |
| SNP_P3_7920_27039048 | NC_021160.1    | Ca_kabuli_chr01 | 27039048                | CC                              | TT                | 1945885196               |
| SNP_P3_7922_27052763 | NC_021160.1    | Ca_kabuli_chr01 | 27052763                | CC                              | AA                | 1945885197               |
| SNP_P3_7923_27058978 | NC_021160.1    | Ca_kabuli_chr01 | 27058978                | AA                              | CC                | 1945885199               |
| SNP_P3_7924_27059024 | NC_021160.1    | Ca_kabuli_chr01 | 27059024                | TT                              | CC                | 1945885201               |
| SNP_P3_7925_27059039 | NC_021160.1    | Ca_kabuli_chr01 | 27059039                | TT                              | CC                | 1945885203               |
| SNP_P3_7926_27059089 | NC_021160.1    | Ca_kabuli_chr01 | 27059089                | GG                              | AA                | 1945885204               |
| SNP_P3_7927_27059448 | NC_021160.1    | Ca_kabuli_chr01 | 27059448                | TT                              | AA                | 1945885206               |
| SNP_P3_7928_27059509 | NC_021160.1    | Ca_kabuli_chr01 | 27059509                | AA                              | GG                | 1945885208               |
| SNP_P3_7929_27071575 | NC_021160.1    | Ca_kabuli_chr01 | 27071575                | GG                              | CC                | 1945885210               |
| SNP_P3_7931_27107180 | NC_021160.1    | Ca_kabuli_chr01 | 27107180                | AA                              | GG                | 1945885212               |
| SNP_P3_7932_27107189 | NC_021160.1    | Ca_kabuli_chr01 | 27107189                | AA                              | TT                | 1945885213               |
| SNP_P3_7933_27107190 | NC_021160.1    | Ca_kabuli_chr01 | 27107190                | TT                              | GG                | 1945885215               |
| SNP_P3_7934_27107208 | NC_021160.1    | Ca_kabuli_chr01 | 27107208                | GG                              | AA                | 1945885217               |
| SNP_P3_7935_27107264 | NC_021160.1    | Ca_kabuli_chr01 | 27107264                | CC                              | TT                | 1945885219               |
| SNP_P3_7936_27107598 | NC_021160.1    | Ca_kabuli_chr01 | 27107598                | TT                              | GG                | 1945885221               |
| SNP_P3_7937_27107808 | NC_021160.1    | Ca_kabuli_chr01 | 27107808                | CC                              | GG                | 1945885222               |
| SNP_P3_7938_27125167 | NC_021160.1    | Ca_kabuli_chr01 | 27125167                | AA                              | GG                | 1945885224               |
| SNP_P3_7939_27126126 | NC_021160.1    | Ca_kabuli_chr01 | 27126126                | AA                              | GG                | 1945885226               |
| SNP_P3_7940_27126169 | NC_021160.1    | Ca_kabuli_chr01 | 27126169                | TT                              | CC                | 1945885228               |
| SNP_P3_7941_27126170 | NC_021160.1    | Ca_kabuli_chr01 | 27126170                | CC                              | TT                | 1945885229               |
| SNP_P3_7942_27131821 | NC_021160.1    | Ca_kabuli_chr01 | 27131821                | AA                              | GG                | 1945885231               |
| SNP_P3_7943_27134346 | NC_021160.1    | Ca_kabuli_chr01 | 27134346                | CC                              | TT                | 1945885233               |
| SNP_P3_7944_27134360 | NC_021160.1    | Ca_kabuli_chr01 | 27134360                | GG                              | TT                | 1945885235               |
| SNP_P3_7945_27134384 | NC_021160.1    | Ca_kabuli_chr01 | 27134384                | CC                              | TT                | 1945885236               |
| SNP_P3_7946_27134395 | NC_021160.1    | Ca_kabuli_chr01 | 27134395                | CC                              | TT                | 1945885238               |
| SNP_P3_7947_27134409 | NC_021160.1    | Ca_kabuli_chr01 | 27134409                | GG                              | CC                | 1945885240               |
| SNP_P3_7948_27135175 | NC_021160.1    | Ca_kabuli_chr01 | 27135175                | GG                              | CC                | 1945885242               |
| SNP_P3_7950_27139918 | NC_021160.1    | Ca_kabuli_chr01 | 27139918                | AA                              | TT                | 1945885243               |
| SNP_P3_7951_27139972 | NC_021160.1    | Ca_kabuli_chr01 | 27139972                | TT                              | GG                | 1945885245               |
| SNP_P3_7952_27143553 | NC_021160.1    | Ca_kabuli_chr01 | 27143553                | TT                              | CC                | 1945885247               |

| SNPs IDs             | Chromosome IDs | Chromosomes     | Physical positions (bp) | CDC Frontier (Reference genome) | (Pusa 256 & HPNB) | NCBI SNPdb Accession IDs |
|----------------------|----------------|-----------------|-------------------------|---------------------------------|-------------------|--------------------------|
| SNP_P3_7954_27160411 | NC_021160.1    | Ca_kabuli_chr01 | 27160411                | CC                              | AA                | 1945885249               |
| SNP_P3_7955_27160445 | NC_021160.1    | Ca_kabuli_chr01 | 27160445                | TT                              | CC                | 1945885251               |
| SNP_P3_7956_27160625 | NC_021160.1    | Ca_kabuli_chr01 | 27160625                | GG                              | CC                | 1945885252               |
| SNP_P3_7957_27160694 | NC_021160.1    | Ca_kabuli_chr01 | 27160694                | AA                              | GG                | 1945885254               |
| SNP_P3_7958_27160710 | NC_021160.1    | Ca_kabuli_chr01 | 27160710                | GG                              | AA                | 1945885256               |
| SNP_P3_7959_27160730 | NC_021160.1    | Ca_kabuli_chr01 | 27160730                | TT                              | CC                | 1945885258               |
| SNP_P3_7960_27203593 | NC_021160.1    | Ca_kabuli_chr01 | 27203593                | CC                              | TT                | 1945885259               |
| SNP_P3_7961_27203614 | NC_021160.1    | Ca_kabuli_chr01 | 27203614                | GG                              | CC                | 1945885261               |
| SNP_P3_7962_27203799 | NC_021160.1    | Ca_kabuli_chr01 | 27203799                | AA                              | GG                | 1945885263               |
| SNP_P3_7964_27208354 | NC_021160.1    | Ca_kabuli_chr01 | 27208354                | CC                              | TT                | 1945885265               |
| SNP_P3_7965_27209046 | NC_021160.1    | Ca_kabuli_chr01 | 27209046                | AA                              | GG                | 1945885267               |
| SNP_P3_7967_27225883 | NC_021160.1    | Ca_kabuli_chr01 | 27225883                | CC                              | AA                | 1945885268               |
| SNP_P3_7968_27226169 | NC_021160.1    | Ca_kabuli_chr01 | 27226169                | AA                              | GG                | 1945885270               |
| SNP_P3_7970_27234063 | NC_021160.1    | Ca_kabuli_chr01 | 27234063                | GG                              | AA                | 1945885272               |
| SNP_P3_7971_27234064 | NC_021160.1    | Ca_kabuli_chr01 | 27234064                | GG                              | AA                | 1945885274               |
| SNP_P3_7972_27234072 | NC_021160.1    | Ca_kabuli_chr01 | 27234072                | AA                              | TT                | 1945885275               |
| SNP_P3_7973_27243728 | NC_021160.1    | Ca_kabuli_chr01 | 27243728                | CC                              | TT                | 1945885277               |
| SNP_P3_7974_27254703 | NC_021160.1    | Ca_kabuli_chr01 | 27254703                | AA                              | GG                | 1945885279               |
| SNP_P3_7975_27254710 | NC_021160.1    | Ca_kabuli_chr01 | 27254710                | TT                              | CC                | 1945885281               |
| SNP_P3_7976_27254727 | NC_021160.1    | Ca_kabuli_chr01 | 27254727                | AA                              | GG                | 1945885282               |
| SNP_P3_7977_27254732 | NC_021160.1    | Ca_kabuli_chr01 | 27254732                | TT                              | CC                | 1945885284               |
| SNP_P3_7978_27254949 | NC_021160.1    | Ca_kabuli_chr01 | 27254949                | AA                              | GG                | 1945885286               |
| SNP_P3_7979_27254950 | NC_021160.1    | Ca_kabuli_chr01 | 27254950                | AA                              | GG                | 1945885288               |
| SNP_P3_7980_27254957 | NC_021160.1    | Ca_kabuli_chr01 | 27254957                | AA                              | GG                | 1945885290               |
| SNP_P3_7982_27255088 | NC_021160.1    | Ca_kabuli_chr01 | 27255088                | GG                              | TT                | 1945885291               |
| SNP_P3_7983_27257825 | NC_021160.1    | Ca_kabuli_chr01 | 27257825                | GG                              | TT                | 1945885293               |
| SNP_P3_7984_27263574 | NC_021160.1    | Ca_kabuli_chr01 | 27263574                | CC                              | AA                | 1945885295               |
| SNP_P3_7985_27263682 | NC_021160.1    | Ca_kabuli_chr01 | 27263682                | AA                              | GG                | 1945885297               |
| SNP_P3_7986_27263704 | NC_021160.1    | Ca_kabuli_chr01 | 27263704                | AA                              | GG                | 1945885298               |
| SNP_P3_7987_27263791 | NC_021160.1    | Ca_kabuli_chr01 | 27263791                | CC                              | TT                | 1945885300               |
| SNP_P3_7988_27263915 | NC_021160.1    | Ca_kabuli_chr01 | 27263915                | TT                              | CC                | 1945885302               |
| SNP_P3_7989_27263955 | NC_021160.1    | Ca_kabuli_chr01 | 27263955                | AA                              | CC                | 1945885304               |
| SNP_P3_7990_27263988 | NC_021160.1    | Ca_kabuli_chr01 | 27263988                | TT                              | CC                | 1945885306               |
| SNP_P3_7991_27264040 | NC_021160.1    | Ca_kabuli_chr01 | 27264040                | AA                              | GG                | 1945885307               |
| SNP_P3_7992_27264069 | NC_021160.1    | Ca_kabuli_chr01 | 27264069                | AA                              | CC                | 1945885309               |
| SNP_P3_7993_27264091 | NC_021160.1    | Ca_kabuli_chr01 | 27264091                | TT                              | CC                | 1945885311               |
| SNP_P3_7994_27264125 | NC_021160.1    | Ca_kabuli_chr01 | 27264125                | TT                              | CC                | 1945885313               |
| SNP_P3_7995_27264174 | NC_021160.1    | Ca_kabuli_chr01 | 27264174                | GG                              | AA                | 1945885315               |
| SNP_P3_7996_27264177 | NC_021160.1    | Ca_kabuli_chr01 | 27264177                | AA                              | TT                | 1945885316               |
| SNP_P3_7997_27264179 | NC_021160.1    | Ca_kabuli_chr01 | 27264179                | TT                              | CC                | 1945885318               |
| SNP_P3_7998_27264187 | NC_021160.1    | Ca_kabuli_chr01 | 27264187                | GG                              | AA                | 1945885320               |
| SNP_P3_7999_27264256 | NC_021160.1    | Ca_kabuli_chr01 | 27264256                | AA                              | GG                | 1945885322               |

| SNPs IDs             | Chromosome IDs | Chromosomes     | Physical positions (bp) | CDC Frontier (Reference genome) | (Pusa 256 & HPNB) | NCBI SNPdb Accession IDs |
|----------------------|----------------|-----------------|-------------------------|---------------------------------|-------------------|--------------------------|
| SNP_P3_8000_27264262 | NC_021160.1    | Ca_kabuli_chr01 | 27264262                | AA                              | GG                | 1945885323               |
| SNP_P3_8001_27264854 | NC_021160.1    | Ca_kabuli_chr01 | 27264854                | TT                              | GG                | 1945885325               |
| SNP_P3_8002_27266855 | NC_021160.1    | Ca_kabuli_chr01 | 27266855                | TT                              | CC                | 1945885327               |
| SNP_P3_8003_27266856 | NC_021160.1    | Ca_kabuli_chr01 | 27266856                | GG                              | AA                | 1945885329               |
| SNP_P3_8004_27277877 | NC_021160.1    | Ca_kabuli_chr01 | 27277877                | TT                              | CC                | 1945885330               |
| SNP_P3_8005_27277902 | NC_021160.1    | Ca_kabuli_chr01 | 27277902                | GG                              | AA                | 1945885332               |
| SNP_P3_8006_27277919 | NC_021160.1    | Ca_kabuli_chr01 | 27277919                | TT                              | CC                | 1945885334               |
| SNP_P3_8007_27282619 | NC_021160.1    | Ca_kabuli_chr01 | 27282619                | AA                              | TT                | 1945885336               |
| SNP_P3_8008_27282641 | NC_021160.1    | Ca_kabuli_chr01 | 27282641                | TT                              | GG                | 1945885337               |
| SNP_P3_8009_27282654 | NC_021160.1    | Ca_kabuli_chr01 | 27282654                | AA                              | GG                | 1945885339               |
| SNP_P3_8010_27282683 | NC_021160.1    | Ca_kabuli_chr01 | 27282683                | TT                              | CC                | 1945885341               |
| SNP_P3_8011_27282716 | NC_021160.1    | Ca_kabuli_chr01 | 27282716                | CC                              | TT                | 1945885343               |
| SNP_P3_8012_27282731 | NC_021160.1    | Ca_kabuli_chr01 | 27282731                | GG                              | AA                | 1945885345               |
| SNP_P3_8013_27282736 | NC_021160.1    | Ca_kabuli_chr01 | 27282736                | AA                              | TT                | 1945885346               |
| SNP_P3_8017_27282970 | NC_021160.1    | Ca_kabuli_chr01 | 27282970                | AA                              | TT                | 1945885348               |
| SNP_P3_8018_27292057 | NC_021160.1    | Ca_kabuli_chr01 | 27292057                | GG                              | AA                | 1945885350               |
| SNP_P3_8019_27296645 | NC_021160.1    | Ca_kabuli_chr01 | 27296645                | TT                              | AA                | 1945885352               |
| SNP_P3_8020_27296678 | NC_021160.1    | Ca_kabuli_chr01 | 27296678                | AA                              | GG                | 1945885354               |
| SNP_P3_8021_27296939 | NC_021160.1    | Ca_kabuli_chr01 | 27296939                | TT                              | CC                | 1945885355               |
| SNP_P3_8022_27297057 | NC_021160.1    | Ca_kabuli_chr01 | 27297057                | TT                              | CC                | 1945885357               |
| SNP_P3_8023_27300714 | NC_021160.1    | Ca_kabuli_chr01 | 27300714                | AA                              | CC                | 1945885359               |
| SNP_P3_8024_27300848 | NC_021160.1    | Ca_kabuli_chr01 | 27300848                | TT                              | CC                | 1945885361               |
| SNP_P3_8025_27301072 | NC_021160.1    | Ca_kabuli_chr01 | 27301072                | AA                              | GG                | 1945885362               |
| SNP_P3_8026_27301079 | NC_021160.1    | Ca_kabuli_chr01 | 27301079                | TT                              | CC                | 1945885364               |
| SNP_P3_8027_27301390 | NC_021160.1    | Ca_kabuli_chr01 | 27301390                | AA                              | GG                | 1945885366               |
| SNP_P3_8028_27301438 | NC_021160.1    | Ca_kabuli_chr01 | 27301438                | GG                              | TT                | 1945885368               |
| SNP_P3_8029_27311215 | NC_021160.1    | Ca_kabuli_chr01 | 27311215                | CC                              | TT                | 1945885370               |
| SNP_P3_8030_27320006 | NC_021160.1    | Ca_kabuli_chr01 | 27320006                | AA                              | GG                | 1945885371               |
| SNP_P3_8031_27320057 | NC_021160.1    | Ca_kabuli_chr01 | 27320057                | CC                              | TT                | 1945885373               |
| SNP_P3_8032_27320063 | NC_021160.1    | Ca_kabuli_chr01 | 27320063                | AA                              | GG                | 1945885375               |
| SNP_P3_8033_27320373 | NC_021160.1    | Ca_kabuli_chr01 | 27320373                | GG                              | CC                | 1945885377               |
| SNP_P3_8034_27320641 | NC_021160.1    | Ca_kabuli_chr01 | 27320641                | TT                              | CC                | 1945885378               |
| SNP_P3_8035_27320642 | NC_021160.1    | Ca_kabuli_chr01 | 27320642                | TT                              | AA                | 1945885380               |
| SNP_P3_8036_27320650 | NC_021160.1    | Ca_kabuli_chr01 | 27320650                | GG                              | AA                | 1945885382               |
| SNP_P3_8037_27320987 | NC_021160.1    | Ca_kabuli_chr01 | 27320987                | AA                              | GG                | 1945885384               |
| SNP_P3_8038_27326546 | NC_021160.1    | Ca_kabuli_chr01 | 27326546                | GG                              | AA                | 1945885385               |
| SNP_P3_8040_27336234 | NC_021160.1    | Ca_kabuli_chr01 | 27336234                | AA                              | TT                | 1945885387               |
| SNP_P3_8042_27348313 | NC_021160.1    | Ca_kabuli_chr01 | 27348313                | GG                              | AA                | 1945885389               |
| SNP_P3_8043_27350237 | NC_021160.1    | Ca_kabuli_chr01 | 27350237                | AA                              | GG                | 1945885391               |
| SNP_P3_8044_27350249 | NC_021160.1    | Ca_kabuli_chr01 | 27350249                | TT                              | CC                | 1945885392               |
| SNP_P3_8045_27366486 | NC_021160.1    | Ca_kabuli_chr01 | 27366486                | TT                              | AA                | 1945885394               |
| SNP_P3_8046_27376263 | NC_021160.1    | Ca_kabuli_chr01 | 27376263                | TT                              | AA                | 1945885396               |

| SNPs IDs             | Chromosome IDs | Chromosomes     | Physical positions (bp) | CDC Frontier (Reference genome) | (Pusa 256 & HPNB) | NCBI SNPdb Accession IDs |
|----------------------|----------------|-----------------|-------------------------|---------------------------------|-------------------|--------------------------|
| SNP_P3_8047_27379180 | NC_021160.1    | Ca_kabuli_chr01 | 27379180                | CC                              | TT                | 1945885398               |
| SNP_P3_8048_27379182 | NC_021160.1    | Ca_kabuli_chr01 | 27379182                | AA                              | CC                | 1945885399               |
| SNP_P3_8049_27394081 | NC_021160.1    | Ca_kabuli_chr01 | 27394081                | AA                              | CC                | 1945885401               |
| SNP_P3_8050_27394221 | NC_021160.1    | Ca_kabuli_chr01 | 27394221                | AA                              | CC                | 1945885403               |
| SNP_P3_8051_27401565 | NC_021160.1    | Ca_kabuli_chr01 | 27401565                | TT                              | AA                | 1945885405               |
| SNP_P3_8052_27401761 | NC_021160.1    | Ca_kabuli_chr01 | 27401761                | GG                              | AA                | 1945885407               |
| SNP_P3_8053_27401812 | NC_021160.1    | Ca_kabuli_chr01 | 27401812                | AA                              | TT                | 1945885408               |
| SNP_P3_8054_27402994 | NC_021160.1    | Ca_kabuli_chr01 | 27402994                | CC                              | TT                | 1945885410               |
| SNP_P3_8055_27403397 | NC_021160.1    | Ca_kabuli_chr01 | 27403397                | AA                              | TT                | 1945885412               |
| SNP_P3_8056_27403436 | NC_021160.1    | Ca_kabuli_chr01 | 27403436                | TT                              | GG                | 1945885414               |
| SNP_P3_8057_27403500 | NC_021160.1    | Ca_kabuli_chr01 | 27403500                | AA                              | CC                | 1945885415               |
| SNP_P3_8058_27403604 | NC_021160.1    | Ca_kabuli_chr01 | 27403604                | AA                              | GG                | 1945885417               |
| SNP_P3_8059_27403646 | NC_021160.1    | Ca_kabuli_chr01 | 27403646                | AA                              | CC                | 1945885419               |
| SNP_P3_8060_27403921 | NC_021160.1    | Ca_kabuli_chr01 | 27403921                | GG                              | AA                | 1945885421               |
| SNP_P3_8061_27410745 | NC_021160.1    | Ca_kabuli_chr01 | 27410745                | TT                              | AA                | 1945885423               |
| SNP_P3_8062_27414167 | NC_021160.1    | Ca_kabuli_chr01 | 27414167                | TT                              | GG                | 1945885424               |
| SNP_P3_8063_27414525 | NC_021160.1    | Ca_kabuli_chr01 | 27414525                | AA                              | TT                | 1945885426               |
| SNP_P3_8064_27417129 | NC_021160.1    | Ca_kabuli_chr01 | 27417129                | CC                              | AA                | 1945885428               |
| SNP_P3_8065_27418715 | NC_021160.1    | Ca_kabuli_chr01 | 27418715                | TT                              | AA                | 1945885430               |
| SNP_P3_8066_27419907 | NC_021160.1    | Ca_kabuli_chr01 | 27419907                | TT                              | GG                | 1945885432               |
| SNP_P3_8067_27438396 | NC_021160.1    | Ca_kabuli_chr01 | 27438396                | CC                              | AA                | 1945885433               |
| SNP_P3_8068_27443821 | NC_021160.1    | Ca_kabuli_chr01 | 27443821                | AA                              | CC                | 1945885435               |
| SNP_P3_8069_27454929 | NC_021160.1    | Ca_kabuli_chr01 | 27454929                | GG                              | AA                | 1945885437               |
| SNP_P3_8070_27487677 | NC_021160.1    | Ca_kabuli_chr01 | 27487677                | AA                              | TT                | 1945885439               |
| SNP_P3_8071_27490154 | NC_021160.1    | Ca_kabuli_chr01 | 27490154                | AA                              | GG                | 1945885440               |
| SNP_P3_8072_27493294 | NC_021160.1    | Ca_kabuli_chr01 | 27493294                | TT                              | CC                | 1945885442               |
| SNP_P3_8073_27522092 | NC_021160.1    | Ca_kabuli_chr01 | 27522092                | TT                              | AA                | 1945885444               |
| SNP_P3_8074_27523314 | NC_021160.1    | Ca_kabuli_chr01 | 27523314                | CC                              | TT                | 1945885446               |
| SNP_P3_8075_27534447 | NC_021160.1    | Ca_kabuli_chr01 | 27534447                | TT                              | AA                | 1945885447               |
| SNP_P3_8076_27549819 | NC_021160.1    | Ca_kabuli_chr01 | 27549819                | GG                              | AA                | 1945885449               |
| SNP_P3_8077_27564545 | NC_021160.1    | Ca_kabuli_chr01 | 27564545                | AA                              | GG                | 1945885451               |
| SNP_P3_8078_27577614 | NC_021160.1    | Ca_kabuli_chr01 | 27577614                | CC                              | AA                | 1945885453               |
| SNP_P3_8079_27589292 | NC_021160.1    | Ca_kabuli_chr01 | 27589292                | GG                              | AA                | 1945885454               |
| SNP_P3_8080_27596559 | NC_021160.1    | Ca_kabuli_chr01 | 27596559                | CC                              | GG                | 1945885456               |
| SNP_P3_8081_27597008 | NC_021160.1    | Ca_kabuli_chr01 | 27597008                | GG                              | TT                | 1945885458               |
| SNP_P3_8082_27597049 | NC_021160.1    | Ca_kabuli_chr01 | 27597049                | AA                              | TT                | 1945885460               |
| SNP_P3_8083_27597070 | NC_021160.1    | Ca_kabuli_chr01 | 27597070                | GG                              | AA                | 1945885461               |
| SNP_P3_8084_27597170 | NC_021160.1    | Ca_kabuli_chr01 | 27597170                | TT                              | CC                | 1945885463               |
| SNP_P3_8086_27597526 | NC_021160.1    | Ca_kabuli_chr01 | 27597526                | AA                              | GG                | 1945885465               |
| SNP_P3_8087_27597542 | NC_021160.1    | Ca_kabuli_chr01 | 27597542                | GG                              | CC                | 1945885467               |
| SNP_P3_8088_27597550 | NC_021160.1    | Ca_kabuli_chr01 | 27597550                | TT                              | CC                | 1945885469               |
| SNP_P3_8089_27622431 | NC_021160.1    | Ca_kabuli_chr01 | 27622431                | TT                              | AA                | 1945885470               |

| SNPs IDs             | Chromosome IDs | Chromosomes     | Physical positions (bp) | CDC Frontier (Reference genome) | (Pusa 256 & HPNB) | NCBI SNPdb Accession IDs |
|----------------------|----------------|-----------------|-------------------------|---------------------------------|-------------------|--------------------------|
| SNP_P3_8090_27633468 | NC_021160.1    | Ca_kabuli_chr01 | 27633468                | TT                              | CC                | 1945885472               |
| SNP_P3_8091_27637343 | NC_021160.1    | Ca_kabuli_chr01 | 27637343                | TT                              | AA                | 1945885474               |
| SNP_P3_8092_27637393 | NC_021160.1    | Ca_kabuli_chr01 | 27637393                | CC                              | TT                | 1945885476               |
| SNP_P3_8093_27637395 | NC_021160.1    | Ca_kabuli_chr01 | 27637395                | AA                              | TT                | 1945885477               |
| SNP_P3_8095_27637644 | NC_021160.1    | Ca_kabuli_chr01 | 27637644                | TT                              | AA                | 1945885479               |
| SNP_P3_8096_27637675 | NC_021160.1    | Ca_kabuli_chr01 | 27637675                | TT                              | CC                | 1945885481               |
| SNP_P3_8097_27639888 | NC_021160.1    | Ca_kabuli_chr01 | 27639888                | AA                              | GG                | 1945885483               |
| SNP_P3_8098_27646576 | NC_021160.1    | Ca_kabuli_chr01 | 27646576                | GG                              | CC                | 1945885485               |
| SNP_P3_8099_27665428 | NC_021160.1    | Ca_kabuli_chr01 | 27665428                | AA                              | GG                | 1945885486               |
| SNP_P3_8101_27666919 | NC_021160.1    | Ca_kabuli_chr01 | 27666919                | TT                              | CC                | 1945885488               |
| SNP_P3_8102_27668010 | NC_021160.1    | Ca_kabuli_chr01 | 27668010                | AA                              | TT                | 1945885490               |
| SNP_P3_8104_27683202 | NC_021160.1    | Ca_kabuli_chr01 | 27683202                | AA                              | TT                | 1945885492               |
| SNP_P3_8105_27689064 | NC_021160.1    | Ca_kabuli_chr01 | 27689064                | AA                              | GG                | 1945885493               |
| SNP_P3_8106_27689073 | NC_021160.1    | Ca_kabuli_chr01 | 27689073                | GG                              | TT                | 1945885495               |
| SNP_P3_8107_27689109 | NC_021160.1    | Ca_kabuli_chr01 | 27689109                | CC                              | TT                | 1945885497               |
| SNP_P3_8108_27689180 | NC_021160.1    | Ca_kabuli_chr01 | 27689180                | TT                              | CC                | 1945885499               |
| SNP_P3_8109_27689211 | NC_021160.1    | Ca_kabuli_chr01 | 27689211                | AA                              | GG                | 1945885501               |
| SNP_P3_8110_27689307 | NC_021160.1    | Ca_kabuli_chr01 | 27689307                | CC                              | TT                | 1945885502               |
| SNP_P3_8111_27689308 | NC_021160.1    | Ca_kabuli_chr01 | 27689308                | AA                              | CC                | 1945885504               |
| SNP_P3_8112_27689443 | NC_021160.1    | Ca_kabuli_chr01 | 27689443                | TT                              | AA                | 1945885506               |
| SNP_P3_8113_27689579 | NC_021160.1    | Ca_kabuli_chr01 | 27689579                | AA                              | GG                | 1945885508               |
| SNP_P3_8114_27719487 | NC_021160.1    | Ca_kabuli_chr01 | 27719487                | GG                              | AA                | 1945885509               |
| SNP_P3_8115_27754723 | NC_021160.1    | Ca_kabuli_chr01 | 27754723                | AA                              | GG                | 1945885511               |
| SNP_P3_8116_27770460 | NC_021160.1    | Ca_kabuli_chr01 | 27770460                | CC                              | TT                | 1945885513               |
| SNP_P3_8117_27770662 | NC_021160.1    | Ca_kabuli_chr01 | 27770662                | AA                              | GG                | 1945885515               |
| SNP_P3_8118_27770680 | NC_021160.1    | Ca_kabuli_chr01 | 27770680                | AA                              | GG                | 1945885516               |
| SNP_P3_8119_27772990 | NC_021160.1    | Ca_kabuli_chr01 | 27772990                | AA                              | CC                | 1945885518               |
| SNP_P3_8120_27773061 | NC_021160.1    | Ca_kabuli_chr01 | 27773061                | GG                              | AA                | 1945885520               |
| SNP_P3_8121_27773141 | NC_021160.1    | Ca_kabuli_chr01 | 27773141                | CC                              | TT                | 1945885522               |
| SNP_P3_8122_27773147 | NC_021160.1    | Ca_kabuli_chr01 | 27773147                | TT                              | CC                | 1945885524               |
| SNP_P3_8123_27773283 | NC_021160.1    | Ca_kabuli_chr01 | 27773283                | GG                              | TT                | 1945885525               |
| SNP_P3_8124_27773318 | NC_021160.1    | Ca_kabuli_chr01 | 27773318                | TT                              | CC                | 1945885527               |
| SNP_P3_8125_27773686 | NC_021160.1    | Ca_kabuli_chr01 | 27773686                | TT                              | AA                | 1945885529               |
| SNP_P3_8126_27773802 | NC_021160.1    | Ca_kabuli_chr01 | 27773802                | AA                              | GG                | 1945885530               |
| SNP_P3_8127_27808301 | NC_021160.1    | Ca_kabuli_chr01 | 27808301                | CC                              | TT                | 1945885532               |
| SNP_P3_8128_27816367 | NC_021160.1    | Ca_kabuli_chr01 | 27816367                | TT                              | AA                | 1945885534               |
| SNP_P3_8129_27818999 | NC_021160.1    | Ca_kabuli_chr01 | 27818999                | AA                              | TT                | 1945885536               |
| SNP_P3_8130_27819057 | NC_021160.1    | Ca_kabuli_chr01 | 27819057                | AA                              | CC                | 1945885538               |
| SNP_P3_8131_27819248 | NC_021160.1    | Ca_kabuli_chr01 | 27819248                | TT                              | CC                | 1945885539               |
| SNP_P3_8132_27819303 | NC_021160.1    | Ca_kabuli_chr01 | 27819303                | TT                              | CC                | 1945885541               |
| SNP_P3_8133_27819345 | NC_021160.1    | Ca_kabuli_chr01 | 27819345                | TT                              | CC                | 1945885543               |
| SNP_P3_8134_27819352 | NC_021160.1    | Ca_kabuli_chr01 | 27819352                | TT                              | CC                | 1945885545               |

| SNPs IDs             | Chromosome IDs | Chromosomes     | Physical positions (bp) | CDC Frontier (Reference genome) | (Pusa 256 & HPNB) | NCBI SNPdb Accession IDs |
|----------------------|----------------|-----------------|-------------------------|---------------------------------|-------------------|--------------------------|
| SNP_P3_8135_27819369 | NC_021160.1    | Ca_kabuli_chr01 | 27819369                | AA                              | GG                | 1945885546               |
| SNP_P3_8136_27819896 | NC_021160.1    | Ca_kabuli_chr01 | 27819896                | GG                              | CC                | 1945885548               |
| SNP_P3_8137_27830633 | NC_021160.1    | Ca_kabuli_chr01 | 27830633                | TT                              | AA                | 1945885550               |
| SNP_P3_8138_27850324 | NC_021160.1    | Ca_kabuli_chr01 | 27850324                | CC                              | TT                | 1945885552               |
| SNP_P3_8139_27855795 | NC_021160.1    | Ca_kabuli_chr01 | 27855795                | TT                              | GG                | 1945885553               |
| SNP_P3_8140_27857598 | NC_021160.1    | Ca_kabuli_chr01 | 27857598                | CC                              | TT                | 1945885555               |
| SNP_P3_8141_27863523 | NC_021160.1    | Ca_kabuli_chr01 | 27863523                | AA                              | GG                | 1945885557               |
| SNP_P3_8142_27863534 | NC_021160.1    | Ca_kabuli_chr01 | 27863534                | AA                              | GG                | 1945885559               |
| SNP_P3_8143_27896611 | NC_021160.1    | Ca_kabuli_chr01 | 27896611                | CC                              | TT                | 1945885561               |
| SNP_P3_8145_27902781 | NC_021160.1    | Ca_kabuli_chr01 | 27902781                | AA                              | GG                | 1945885562               |
| SNP_P3_8146_27904692 | NC_021160.1    | Ca_kabuli_chr01 | 27904692                | CC                              | TT                | 1945885564               |
| SNP_P3_8147_27904706 | NC_021160.1    | Ca_kabuli_chr01 | 27904706                | CC                              | GG                | 1945885566               |
| SNP_P3_8148_27904829 | NC_021160.1    | Ca_kabuli_chr01 | 27904829                | GG                              | AA                | 1945885567               |
| SNP_P3_8149_27931231 | NC_021160.1    | Ca_kabuli_chr01 | 27931231                | AA                              | CC                | 1945885569               |
| SNP_P3_8150_27988253 | NC_021160.1    | Ca_kabuli_chr01 | 27988253                | TT                              | AA                | 1945885571               |
| SNP_P3_8151_27998371 | NC_021160.1    | Ca_kabuli_chr01 | 27998371                | TT                              | CC                | 1945885573               |
| SNP_P3_8152_27998387 | NC_021160.1    | Ca_kabuli_chr01 | 27998387                | TT                              | CC                | 1945885575               |
| SNP_P3_8153_28010321 | NC_021160.1    | Ca_kabuli_chr01 | 28010321                | AA                              | GG                | 1945885576               |
| SNP_P3_8154_28010557 | NC_021160.1    | Ca_kabuli_chr01 | 28010557                | GG                              | AA                | 1945885578               |
| SNP_P3_8155_28010612 | NC_021160.1    | Ca_kabuli_chr01 | 28010612                | TT                              | CC                | 1945885580               |
| SNP_P3_8156_28010620 | NC_021160.1    | Ca_kabuli_chr01 | 28010620                | CC                              | TT                | 1945885582               |
| SNP_P3_8157_28010626 | NC_021160.1    | Ca_kabuli_chr01 | 28010626                | CC                              | TT                | 1945885583               |
| SNP_P3_8158_28010806 | NC_021160.1    | Ca_kabuli_chr01 | 28010806                | GG                              | AA                | 1945885585               |
| SNP_P3_8159_28010833 | NC_021160.1    | Ca_kabuli_chr01 | 28010833                | TT                              | CC                | 1945885587               |
| SNP_P3_8160_28043627 | NC_021160.1    | Ca_kabuli_chr01 | 28043627                | CC                              | TT                | 1945885589               |
| SNP_P3_8161_28047103 | NC_021160.1    | Ca_kabuli_chr01 | 28047103                | TT                              | CC                | 1945885591               |
| SNP_P3_8162_28086024 | NC_021160.1    | Ca_kabuli_chr01 | 28086024                | GG                              | AA                | 1945885592               |
| SNP_P3_8163_28090122 | NC_021160.1    | Ca_kabuli_chr01 | 28090122                | AA                              | TT                | 1945885594               |
| SNP_P3_8164_28095427 | NC_021160.1    | Ca_kabuli_chr01 | 28095427                | TT                              | GG                | 1945885596               |
| SNP_P3_8165_28096172 | NC_021160.1    | Ca_kabuli_chr01 | 28096172                | GG                              | AA                | 1945885597               |
| SNP_P3_8166_28096207 | NC_021160.1    | Ca_kabuli_chr01 | 28096207                | AA                              | GG                | 1945885599               |
| SNP_P3_8167_28096208 | NC_021160.1    | Ca_kabuli_chr01 | 28096208                | AA                              | TT                | 1945885601               |
| SNP_P3_8168_28096256 | NC_021160.1    | Ca_kabuli_chr01 | 28096256                | TT                              | CC                | 1945885603               |
| SNP_P3_8169_28096304 | NC_021160.1    | Ca_kabuli_chr01 | 28096304                | GG                              | AA                | 1945885605               |
| SNP_P3_8170_28108134 | NC_021160.1    | Ca_kabuli_chr01 | 28108134                | TT                              | CC                | 1945885606               |
| SNP_P3_8171_28111624 | NC_021160.1    | Ca_kabuli_chr01 | 28111624                | CC                              | TT                | 1945885608               |
| SNP_P3_8172_28116879 | NC_021160.1    | Ca_kabuli_chr01 | 28116879                | CC                              | AA                | 1945885610               |
| SNP_P3_8173_28130471 | NC_021160.1    | Ca_kabuli_chr01 | 28130471                | GG                              | TT                | 1945885612               |
| SNP_P3_8175_28170291 | NC_021160.1    | Ca_kabuli_chr01 | 28170291                | AA                              | CC                | 1945885613               |
| SNP_P3_8176_28171032 | NC_021160.1    | Ca_kabuli_chr01 | 28171032                | CC                              | TT                | 1945885615               |
| SNP_P3_8177_28174092 | NC_021160.1    | Ca_kabuli_chr01 | 28174092                | CC                              | TT                | 1945885617               |
| SNP_P3_8178_28182770 | NC_021160.1    | Ca_kabuli_chr01 | 28182770                | AA                              | TT                | 1945885619               |

| SNPs IDs             | Chromosome IDs | Chromosomes     | Physical positions (bp) | CDC Frontier (Reference genome) | (Pusa 256 & HPNB) | NCBI SNPdb Accession IDs |
|----------------------|----------------|-----------------|-------------------------|---------------------------------|-------------------|--------------------------|
| SNP_P3_8179_28185275 | NC_021160.1    | Ca_kabuli_chr01 | 28185275                | TT                              | CC                | 1945885621               |
| SNP_P3_8180_28199668 | NC_021160.1    | Ca_kabuli_chr01 | 28199668                | CC                              | TT                | 1945885622               |
| SNP_P3_8181_28222629 | NC_021160.1    | Ca_kabuli_chr01 | 28222629                | AA                              | GG                | 1945885624               |
| SNP_P3_8182_28225582 | NC_021160.1    | Ca_kabuli_chr01 | 28225582                | CC                              | AA                | 1945885626               |
| SNP_P3_8183_28270720 | NC_021160.1    | Ca_kabuli_chr01 | 28270720                | TT                              | CC                | 1945885628               |
| SNP_P3_8184_28270723 | NC_021160.1    | Ca_kabuli_chr01 | 28270723                | AA                              | CC                | 1945885629               |
| SNP_P3_8185_28281403 | NC_021160.1    | Ca_kabuli_chr01 | 28281403                | GG                              | AA                | 1945885631               |
| SNP_P3_8186_28316309 | NC_021160.1    | Ca_kabuli_chr01 | 28316309                | TT                              | CC                | 1945885633               |
| SNP_P3_8187_28316404 | NC_021160.1    | Ca_kabuli_chr01 | 28316404                | AA                              | GG                | 1945885635               |
| SNP_P3_8188_28316575 | NC_021160.1    | Ca_kabuli_chr01 | 28316575                | TT                              | CC                | 1945885636               |
| SNP_P3_8189_28316579 | NC_021160.1    | Ca_kabuli_chr01 | 28316579                | CC                              | TT                | 1945885638               |
| SNP_P3_8190_28316726 | NC_021160.1    | Ca_kabuli_chr01 | 28316726                | AA                              | GG                | 1945885640               |
| SNP_P3_8191_28316910 | NC_021160.1    | Ca_kabuli_chr01 | 28316910                | AA                              | GG                | 1945885642               |
| SNP_P3_8194_28346379 | NC_021160.1    | Ca_kabuli_chr01 | 28346379                | CC                              | TT                | 1945885643               |
| SNP_P3_8195_28353602 | NC_021160.1    | Ca_kabuli_chr01 | 28353602                | TT                              | CC                | 1945885645               |
| SNP_P3_8196_28353603 | NC_021160.1    | Ca_kabuli_chr01 | 28353603                | TT                              | CC                | 1945885647               |
| SNP_P3_8197_28387979 | NC_021160.1    | Ca_kabuli_chr01 | 28387979                | GG                              | AA                | 1945885649               |
| SNP_P3_8198_28447780 | NC_021160.1    | Ca_kabuli_chr01 | 28447780                | TT                              | GG                | 1945885650               |
| SNP_P3_8199_28447815 | NC_021160.1    | Ca_kabuli_chr01 | 28447815                | CC                              | TT                | 1945885652               |
| SNP_P3_8200_28447835 | NC_021160.1    | Ca_kabuli_chr01 | 28447835                | TT                              | CC                | 1945885654               |
| SNP_P3_8201_28448029 | NC_021160.1    | Ca_kabuli_chr01 | 28448029                | GG                              | AA                | 1945885656               |
| SNP_P3_8202_28449331 | NC_021160.1    | Ca_kabuli_chr01 | 28449331                | AA                              | GG                | 1945885658               |
| SNP_P3_8203_28449352 | NC_021160.1    | Ca_kabuli_chr01 | 28449352                | TT                              | GG                | 1945885659               |
| SNP_P3_8204_28449457 | NC_021160.1    | Ca_kabuli_chr01 | 28449457                | AA                              | GG                | 1945885661               |
| SNP_P3_8205_28449474 | NC_021160.1    | Ca_kabuli_chr01 | 28449474                | TT                              | CC                | 1945885663               |
| SNP_P3_8206_28449562 | NC_021160.1    | Ca_kabuli_chr01 | 28449562                | AA                              | GG                | 1945885665               |
| SNP_P3_8207_28449597 | NC_021160.1    | Ca_kabuli_chr01 | 28449597                | AA                              | CC                | 1945885666               |
| SNP_P3_8208_28449611 | NC_021160.1    | Ca_kabuli_chr01 | 28449611                | AA                              | GG                | 1945885668               |
| SNP_P3_8209_28449676 | NC_021160.1    | Ca_kabuli_chr01 | 28449676                | AA                              | GG                | 1945885670               |
| SNP_P3_8210_28449773 | NC_021160.1    | Ca_kabuli_chr01 | 28449773                | TT                              | CC                | 1945885672               |
| SNP_P3_8211_28449779 | NC_021160.1    | Ca_kabuli_chr01 | 28449779                | AA                              | GG                | 1945885673               |
| SNP_P3_8212_28449793 | NC_021160.1    | Ca_kabuli_chr01 | 28449793                | AA                              | GG                | 1945885675               |
| SNP_P3_8213_28449806 | NC_021160.1    | Ca_kabuli_chr01 | 28449806                | CC                              | GG                | 1945885677               |
| SNP_P3_8214_28449869 | NC_021160.1    | Ca_kabuli_chr01 | 28449869                | TT                              | CC                | 1945885679               |
| SNP_P3_8216_28466095 | NC_021160.1    | Ca_kabuli_chr01 | 28466095                | TT                              | CC                | 1945885681               |
| SNP_P3_8217_28468089 | NC_021160.1    | Ca_kabuli_chr01 | 28468089                | GG                              | AA                | 1945885682               |
| SNP_P3_8218_28468135 | NC_021160.1    | Ca_kabuli_chr01 | 28468135                | CC                              | AA                | 1945885684               |
| SNP_P3_8219_28468299 | NC_021160.1    | Ca_kabuli_chr01 | 28468299                | CC                              | AA                | 1945885686               |
| SNP_P3_8220_28468426 | NC_021160.1    | Ca_kabuli_chr01 | 28468426                | AA                              | CC                | 1945885688               |
| SNP_P3_8221_28468438 | NC_021160.1    | Ca_kabuli_chr01 | 28468438                | CC                              | TT                | 1945885690               |
| SNP_P3_8222_28468452 | NC_021160.1    | Ca_kabuli_chr01 | 28468452                | CC                              | TT                | 1945885691               |
| SNP_P3_8223_28468483 | NC_021160.1    | Ca_kabuli_chr01 | 28468483                | TT                              | CC                | 1945885693               |

| SNPs IDs             | Chromosome IDs | Chromosomes     | Physical positions (bp) | CDC Frontier (Reference genome) | (Pusa 256 & HPNB) | NCBI SNPdb Accession IDs |
|----------------------|----------------|-----------------|-------------------------|---------------------------------|-------------------|--------------------------|
| SNP_P3_8224_28468513 | NC_021160.1    | Ca_kabuli_chr01 | 28468513                | CC                              | AA                | 1945885695               |
| SNP_P3_8225_28469091 | NC_021160.1    | Ca_kabuli_chr01 | 28469091                | TT                              | AA                | 1945885697               |
| SNP_P3_8227_28550166 | NC_021160.1    | Ca_kabuli_chr01 | 28550166                | CC                              | AA                | 1945885698               |
| SNP_P3_8229_28550404 | NC_021160.1    | Ca_kabuli_chr01 | 28550404                | GG                              | AA                | 1945885700               |
| SNP_P3_8230_28550408 | NC_021160.1    | Ca_kabuli_chr01 | 28550408                | AA                              | TT                | 1945885702               |
| SNP_P3_8231_28550467 | NC_021160.1    | Ca_kabuli_chr01 | 28550467                | AA                              | TT                | 1945885704               |
| SNP_P3_8232_28550468 | NC_021160.1    | Ca_kabuli_chr01 | 28550468                | TT                              | CC                | 1945885706               |
| SNP_P3_8233_28550494 | NC_021160.1    | Ca_kabuli_chr01 | 28550494                | AA                              | CC                | 1945885707               |
| SNP_P3_8234_28550517 | NC_021160.1    | Ca_kabuli_chr01 | 28550517                | TT                              | CC                | 1945885709               |
| SNP_P3_8235_28582905 | NC_021160.1    | Ca_kabuli_chr01 | 28582905                | TT                              | GG                | 1945885711               |
| SNP_P3_8236_28616673 | NC_021160.1    | Ca_kabuli_chr01 | 28616673                | CC                              | AA                | 1945885713               |
| SNP_P3_8237_28625905 | NC_021160.1    | Ca_kabuli_chr01 | 28625905                | AA                              | GG                | 1945885715               |
| SNP_P3_8238_28633637 | NC_021160.1    | Ca_kabuli_chr01 | 28633637                | GG                              | AA                | 1945885716               |
| SNP_P3_8239_28633658 | NC_021160.1    | Ca_kabuli_chr01 | 28633658                | TT                              | CC                | 1945885718               |
| SNP_P3_8240_28641797 | NC_021160.1    | Ca_kabuli_chr01 | 28641797                | GG                              | AA                | 1945885720               |
| SNP_P3_8241_28657171 | NC_021160.1    | Ca_kabuli_chr01 | 28657171                | GG                              | CC                | 1945885722               |
| SNP_P3_8242_28659848 | NC_021160.1    | Ca_kabuli_chr01 | 28659848                | AA                              | TT                | 1945885723               |
| SNP_P3_8243_28688429 | NC_021160.1    | Ca_kabuli_chr01 | 28688429                | AA                              | GG                | 1945885725               |
| SNP_P3_8244_28696286 | NC_021160.1    | Ca_kabuli_chr01 | 28696286                | GG                              | AA                | 1945885727               |
| SNP_P3_8245_28710582 | NC_021160.1    | Ca_kabuli_chr01 | 28710582                | GG                              | AA                | 1945885729               |
| SNP_P3_8248_28713232 | NC_021160.1    | Ca_kabuli_chr01 | 28713232                | GG                              | TT                | 1945885730               |
| SNP_P3_8250_28734998 | NC_021160.1    | Ca_kabuli_chr01 | 28734998                | GG                              | AA                | 1945885732               |
| SNP_P3_8251_28735006 | NC_021160.1    | Ca_kabuli_chr01 | 28735006                | TT                              | CC                | 1945885734               |
| SNP_P3_8252_28735015 | NC_021160.1    | Ca_kabuli_chr01 | 28735015                | CC                              | TT                | 1945885736               |
| SNP_P3_8253_28735016 | NC_021160.1    | Ca_kabuli_chr01 | 28735016                | CC                              | GG                | 1945885738               |
| SNP_P3_8254_28736089 | NC_021160.1    | Ca_kabuli_chr01 | 28736089                | AA                              | GG                | 1945885739               |
| SNP_P3_8255_28793899 | NC_021160.1    | Ca_kabuli_chr01 | 28793899                | CC                              | TT                | 1945885741               |
| SNP_P3_8256_28796506 | NC_021160.1    | Ca_kabuli_chr01 | 28796506                | TT                              | CC                | 1945885743               |
| SNP_P3_8257_28807520 | NC_021160.1    | Ca_kabuli_chr01 | 28807520                | AA                              | TT                | 1945885745               |
| SNP_P3_8258_28807607 | NC_021160.1    | Ca_kabuli_chr01 | 28807607                | AA                              | TT                | 1945885746               |
| SNP_P3_8259_28807772 | NC_021160.1    | Ca_kabuli_chr01 | 28807772                | AA                              | CC                | 1945885748               |
| SNP_P3_8260_28826413 | NC_021160.1    | Ca_kabuli_chr01 | 28826413                | TT                              | AA                | 1945885750               |
| SNP_P3_8261_28837370 | NC_021160.1    | Ca_kabuli_chr01 | 28837370                | TT                              | CC                | 1945885752               |
| SNP_P3_8262_28852678 | NC_021160.1    | Ca_kabuli_chr01 | 28852678                | CC                              | TT                | 1945885754               |
| SNP_P3_8263_28856697 | NC_021160.1    | Ca_kabuli_chr01 | 28856697                | CC                              | TT                | 1945885756               |
| SNP_P3_8264_28866569 | NC_021160.1    | Ca_kabuli_chr01 | 28866569                | CC                              | TT                | 1945885757               |
| SNP_P3_8265_28866676 | NC_021160.1    | Ca_kabuli_chr01 | 28866676                | CC                              | GG                | 1945885759               |
| SNP_P3_8266_28866701 | NC_021160.1    | Ca_kabuli_chr01 | 28866701                | AA                              | GG                | 1945885761               |
| SNP_P3_8267_28866707 | NC_021160.1    | Ca_kabuli_chr01 | 28866707                | GG                              | AA                | 1945885763               |
| SNP_P3_8268_28866718 | NC_021160.1    | Ca_kabuli_chr01 | 28866718                | CC                              | AA                | 1945885764               |
| SNP_P3_8269_28866910 | NC_021160.1    | Ca_kabuli_chr01 | 28866910                | TT                              | CC                | 1945885766               |
| SNP_P3_8270_28869299 | NC_021160.1    | Ca_kabuli_chr01 | 28869299                | GG                              | AA                | 1945885768               |



| SNPs IDs             | Chromosome IDs | Chromosomes     | Physical positions (bp) | CDC Frontier (Reference genome) | (Pusa 256 & HPNB) | NCBI SNPdb Accession IDs |
|----------------------|----------------|-----------------|-------------------------|---------------------------------|-------------------|--------------------------|
| SNP_P3_8271_28869595 | NC_021160.1    | Ca_kabuli_chr01 | 28869595                | GG                              | TT                | 1945885769               |
| SNP_P3_8272_28869659 | NC_021160.1    | Ca_kabuli_chr01 | 28869659                | AA                              | GG                | 1945885771               |
| SNP_P3_8273_28869942 | NC_021160.1    | Ca_kabuli_chr01 | 28869942                | TT                              | CC                | 1945885773               |
| SNP_P3_8274_28870318 | NC_021160.1    | Ca_kabuli_chr01 | 28870318                | CC                              | GG                | 1945885775               |
| SNP_P3_8275_28871198 | NC_021160.1    | Ca_kabuli_chr01 | 28871198                | AA                              | TT                | 1945885776               |
| SNP_P3_8276_28871334 | NC_021160.1    | Ca_kabuli_chr01 | 28871334                | CC                              | TT                | 1945885778               |
| SNP_P3_8277_28871558 | NC_021160.1    | Ca_kabuli_chr01 | 28871558                | CC                              | TT                | 1945885780               |
| SNP_P3_8278_28871603 | NC_021160.1    | Ca_kabuli_chr01 | 28871603                | TT                              | CC                | 1945885782               |
| SNP_P3_8279_28891037 | NC_021160.1    | Ca_kabuli_chr01 | 28891037                | TT                              | CC                | 1945885783               |
| SNP_P3_8280_28891060 | NC_021160.1    | Ca_kabuli_chr01 | 28891060                | AA                              | GG                | 1945885785               |
| SNP_P3_8281_28891076 | NC_021160.1    | Ca_kabuli_chr01 | 28891076                | AA                              | GG                | 1945885787               |
| SNP_P3_8282_28891079 | NC_021160.1    | Ca_kabuli_chr01 | 28891079                | GG                              | TT                | 1945885789               |
| SNP_P3_8283_28891083 | NC_021160.1    | Ca_kabuli_chr01 | 28891083                | AA                              | GG                | 1945885791               |
| SNP_P3_8284_28891118 | NC_021160.1    | Ca_kabuli_chr01 | 28891118                | TT                              | AA                | 1945885792               |
| SNP_P3_8285_28891176 | NC_021160.1    | Ca_kabuli_chr01 | 28891176                | AA                              | GG                | 1945885794               |
| SNP_P3_8286_28891339 | NC_021160.1    | Ca_kabuli_chr01 | 28891339                | TT                              | CC                | 1945885796               |
| SNP_P3_8287_28891544 | NC_021160.1    | Ca_kabuli_chr01 | 28891544                | GG                              | AA                | 1945885798               |
| SNP_P3_8288_28892001 | NC_021160.1    | Ca_kabuli_chr01 | 28892001                | AA                              | TT                | 1945885800               |
| SNP_P3_8289_28892184 | NC_021160.1    | Ca_kabuli_chr01 | 28892184                | TT                              | AA                | 1945885801               |
| SNP_P3_8290_28905200 | NC_021160.1    | Ca_kabuli_chr01 | 28905200                | GG                              | TT                | 1945885803               |
| SNP_P3_8291_28905217 | NC_021160.1    | Ca_kabuli_chr01 | 28905217                | GG                              | AA                | 1945885805               |
| SNP_P3_8292_28905278 | NC_021160.1    | Ca_kabuli_chr01 | 28905278                | TT                              | AA                | 1945885807               |
| SNP_P3_8293_28905307 | NC_021160.1    | Ca_kabuli_chr01 | 28905307                | GG                              | AA                | 1945885808               |
| SNP_P3_8294_28905318 | NC_021160.1    | Ca_kabuli_chr01 | 28905318                | AA                              | TT                | 1945885810               |
| SNP_P3_8295_28905393 | NC_021160.1    | Ca_kabuli_chr01 | 28905393                | TT                              | CC                | 1945885812               |
| SNP_P3_8296_28905422 | NC_021160.1    | Ca_kabuli_chr01 | 28905422                | AA                              | GG                | 1945885814               |
| SNP_P3_8297_28905426 | NC_021160.1    | Ca_kabuli_chr01 | 28905426                | GG                              | AA                | 1945885815               |
| SNP_P3_8298_28905467 | NC_021160.1    | Ca_kabuli_chr01 | 28905467                | AA                              | CC                | 1945885817               |
| SNP_P3_8299_28905490 | NC_021160.1    | Ca_kabuli_chr01 | 28905490                | CC                              | AA                | 1945885819               |
| SNP_P3_8300_28905531 | NC_021160.1    | Ca_kabuli_chr01 | 28905531                | CC                              | TT                | 1945885821               |
| SNP_P3_8301_28905542 | NC_021160.1    | Ca_kabuli_chr01 | 28905542                | TT                              | CC                | 1945885823               |
| SNP_P3_8302_28905560 | NC_021160.1    | Ca_kabuli_chr01 | 28905560                | TT                              | CC                | 1945885824               |
| SNP_P3_8303_28905606 | NC_021160.1    | Ca_kabuli_chr01 | 28905606                | AA                              | GG                | 1945885826               |
| SNP_P3_8304_28905638 | NC_021160.1    | Ca_kabuli_chr01 | 28905638                | GG                              | AA                | 1945885828               |
| SNP_P3_8305_28905681 | NC_021160.1    | Ca_kabuli_chr01 | 28905681                | CC                              | TT                | 1945885830               |
| SNP_P3_8306_28905770 | NC_021160.1    | Ca_kabuli_chr01 | 28905770                | TT                              | GG                | 1945885831               |
| SNP_P3_8307_28905795 | NC_021160.1    | Ca_kabuli_chr01 | 28905795                | GG                              | AA                | 1945885833               |
| SNP_P3_8308_28905952 | NC_021160.1    | Ca_kabuli_chr01 | 28905952                | CC                              | AA                | 1945885835               |
| SNP_P3_8309_28905958 | NC_021160.1    | Ca_kabuli_chr01 | 28905958                | AA                              | TT                | 1945885837               |
| SNP_P3_8310_28906046 | NC_021160.1    | Ca_kabuli_chr01 | 28906046                | TT                              | AA                | 1945885839               |
| SNP_P3_8311_28906083 | NC_021160.1    | Ca_kabuli_chr01 | 28906083                | TT                              | GG                | 1945885840               |
| SNP_P3_8312_28906209 | NC_021160.1    | Ca_kabuli_chr01 | 28906209                | TT                              | AA                | 1945885842               |

| SNPs IDs             | Chromosome IDs | Chromosomes     | Physical positions (bp) | CDC Frontier (Reference genome) | (Pusa 256 & HPNB) | NCBI SNPdb Accession IDs |
|----------------------|----------------|-----------------|-------------------------|---------------------------------|-------------------|--------------------------|
| SNP_P3_8313_28906216 | NC_021160.1    | Ca_kabuli_chr01 | 28906216                | GG                              | TT                | 1945885844               |
| SNP_P3_8314_28906260 | NC_021160.1    | Ca_kabuli_chr01 | 28906260                | AA                              | GG                | 1945885846               |
| SNP_P3_8315_28906605 | NC_021160.1    | Ca_kabuli_chr01 | 28906605                | AA                              | TT                | 1945885847               |
| SNP_P3_8316_28906642 | NC_021160.1    | Ca_kabuli_chr01 | 28906642                | AA                              | GG                | 1945885849               |
| SNP_P3_8318_28906731 | NC_021160.1    | Ca_kabuli_chr01 | 28906731                | AA                              | GG                | 1945885851               |
| SNP_P3_8319_28906864 | NC_021160.1    | Ca_kabuli_chr01 | 28906864                | TT                              | CC                | 1945885853               |
| SNP_P3_8320_28906869 | NC_021160.1    | Ca_kabuli_chr01 | 28906869                | AA                              | CC                | 1945885854               |
| SNP_P3_8321_28906886 | NC_021160.1    | Ca_kabuli_chr01 | 28906886                | CC                              | AA                | 1945885856               |
| SNP_P3_8322_28906892 | NC_021160.1    | Ca_kabuli_chr01 | 28906892                | CC                              | GG                | 1945885858               |
| SNP_P3_8323_28906919 | NC_021160.1    | Ca_kabuli_chr01 | 28906919                | AA                              | GG                | 1945885860               |
| SNP_P3_8324_28906929 | NC_021160.1    | Ca_kabuli_chr01 | 28906929                | GG                              | TT                | 1945885861               |
| SNP_P3_8325_28906961 | NC_021160.1    | Ca_kabuli_chr01 | 28906961                | AA                              | GG                | 1945885863               |
| SNP_P3_8326_28909932 | NC_021160.1    | Ca_kabuli_chr01 | 28909932                | AA                              | CC                | 1945885865               |
| SNP_P3_8327_28909941 | NC_021160.1    | Ca_kabuli_chr01 | 28909941                | CC                              | TT                | 1945885867               |
| SNP_P3_8328_28910026 | NC_021160.1    | Ca_kabuli_chr01 | 28910026                | CC                              | AA                | 1945885868               |
| SNP_P3_8329_28910058 | NC_021160.1    | Ca_kabuli_chr01 | 28910058                | GG                              | TT                | 1945885870               |
| SNP_P3_8330_28910069 | NC_021160.1    | Ca_kabuli_chr01 | 28910069                | CC                              | AA                | 1945885872               |
| SNP_P3_8331_28910152 | NC_021160.1    | Ca_kabuli_chr01 | 28910152                | GG                              | TT                | 1945885874               |
| SNP_P3_8332_28910235 | NC_021160.1    | Ca_kabuli_chr01 | 28910235                | GG                              | CC                | 1945885875               |
| SNP_P3_8333_28910243 | NC_021160.1    | Ca_kabuli_chr01 | 28910243                | CC                              | TT                | 1945885877               |
| SNP_P3_8335_28910355 | NC_021160.1    | Ca_kabuli_chr01 | 28910355                | CC                              | TT                | 1945885879               |
| SNP_P3_8336_28910409 | NC_021160.1    | Ca_kabuli_chr01 | 28910409                | TT                              | GG                | 1945885881               |
| SNP_P3_8338_28910472 | NC_021160.1    | Ca_kabuli_chr01 | 28910472                | AA                              | TT                | 1945885883               |
| SNP_P3_8340_28910512 | NC_021160.1    | Ca_kabuli_chr01 | 28910512                | TT                              | CC                | 1945885884               |
| SNP_P3_8341_28910677 | NC_021160.1    | Ca_kabuli_chr01 | 28910677                | AA                              | GG                | 1945885886               |
| SNP_P3_8342_28910700 | NC_021160.1    | Ca_kabuli_chr01 | 28910700                | AA                              | GG                | 1945885888               |
| SNP_P3_8343_28910757 | NC_021160.1    | Ca_kabuli_chr01 | 28910757                | TT                              | GG                | 1945885890               |
| SNP_P3_8344_28910779 | NC_021160.1    | Ca_kabuli_chr01 | 28910779                | AA                              | TT                | 1945885891               |
| SNP_P3_8345_28910980 | NC_021160.1    | Ca_kabuli_chr01 | 28910980                | CC                              | AA                | 1945885893               |
| SNP_P3_8346_28910998 | NC_021160.1    | Ca_kabuli_chr01 | 28910998                | AA                              | TT                | 1945885895               |
| SNP_P3_8347_28911004 | NC_021160.1    | Ca_kabuli_chr01 | 28911004                | TT                              | CC                | 1945885897               |
| SNP_P3_8348_28911072 | NC_021160.1    | Ca_kabuli_chr01 | 28911072                | AA                              | CC                | 1945885898               |
| SNP_P3_8349_28911098 | NC_021160.1    | Ca_kabuli_chr01 | 28911098                | GG                              | CC                | 1945885900               |
| SNP_P3_8350_28911365 | NC_021160.1    | Ca_kabuli_chr01 | 28911365                | AA                              | GG                | 1945885902               |
| SNP_P3_8351_28911383 | NC_021160.1    | Ca_kabuli_chr01 | 28911383                | AA                              | CC                | 1945885904               |
| SNP_P3_8352_28911416 | NC_021160.1    | Ca_kabuli_chr01 | 28911416                | GG                              | AA                | 1945885906               |
| SNP_P3_8353_28911419 | NC_021160.1    | Ca_kabuli_chr01 | 28911419                | TT                              | AA                | 1945885907               |
| SNP_P3_8354_28911448 | NC_021160.1    | Ca_kabuli_chr01 | 28911448                | CC                              | TT                | 1945885909               |
| SNP_P3_8355_28911562 | NC_021160.1    | Ca_kabuli_chr01 | 28911562                | CC                              | TT                | 1945885911               |
| SNP_P3_8356_28913149 | NC_021160.1    | Ca_kabuli_chr01 | 28913149                | CC                              | TT                | 1945885913               |
| SNP_P3_8357_28915324 | NC_021160.1    | Ca_kabuli_chr01 | 28915324                | CC                              | TT                | 1945885914               |
| SNP_P3_8358_28915395 | NC_021160.1    | Ca_kabuli_chr01 | 28915395                | AA                              | GG                | 1945885916               |

| SNPs IDs             | Chromosome IDs | Chromosomes     | Physical positions (bp) | CDC Frontier (Reference genome) | (Pusa 256 & HPNB) | NCBI SNPdb Accession IDs |
|----------------------|----------------|-----------------|-------------------------|---------------------------------|-------------------|--------------------------|
| SNP_P3_8359_28915429 | NC_021160.1    | Ca_kabuli_chr01 | 28915429                | GG                              | AA                | 1945885918               |
| SNP_P3_8360_28915440 | NC_021160.1    | Ca_kabuli_chr01 | 28915440                | GG                              | AA                | 1945885920               |
| SNP_P3_8361_28915453 | NC_021160.1    | Ca_kabuli_chr01 | 28915453                | CC                              | TT                | 1945885921               |
| SNP_P3_8362_28915596 | NC_021160.1    | Ca_kabuli_chr01 | 28915596                | GG                              | TT                | 1945885923               |
| SNP_P3_8363_28915623 | NC_021160.1    | Ca_kabuli_chr01 | 28915623                | GG                              | AA                | 1945885925               |
| SNP_P3_8364_28916002 | NC_021160.1    | Ca_kabuli_chr01 | 28916002                | TT                              | CC                | 1945885927               |
| SNP_P3_8365_28916008 | NC_021160.1    | Ca_kabuli_chr01 | 28916008                | AA                              | GG                | 1945885928               |
| SNP_P3_8366_28916548 | NC_021160.1    | Ca_kabuli_chr01 | 28916548                | AA                              | CC                | 1945885930               |
| SNP_P3_8367_28916651 | NC_021160.1    | Ca_kabuli_chr01 | 28916651                | TT                              | CC                | 1945885932               |
| SNP_P3_8368_28916679 | NC_021160.1    | Ca_kabuli_chr01 | 28916679                | AA                              | CC                | 1945885934               |
| SNP_P3_8369_28916692 | NC_021160.1    | Ca_kabuli_chr01 | 28916692                | CC                              | TT                | 1945885935               |
| SNP_P3_8370_28916786 | NC_021160.1    | Ca_kabuli_chr01 | 28916786                | TT                              | CC                | 1945885937               |
| SNP_P3_8371_28916813 | NC_021160.1    | Ca_kabuli_chr01 | 28916813                | GG                              | AA                | 1945885939               |
| SNP_P3_8372_28916839 | NC_021160.1    | Ca_kabuli_chr01 | 28916839                | CC                              | GG                | 1945885941               |
| SNP_P3_8373_28916864 | NC_021160.1    | Ca_kabuli_chr01 | 28916864                | AA                              | CC                | 1945885942               |
| SNP_P3_8374_28917064 | NC_021160.1    | Ca_kabuli_chr01 | 28917064                | CC                              | TT                | 1945885944               |
| SNP_P3_8375_28917083 | NC_021160.1    | Ca_kabuli_chr01 | 28917083                | CC                              | AA                | 1945885946               |
| SNP_P3_8376_28917364 | NC_021160.1    | Ca_kabuli_chr01 | 28917364                | AA                              | GG                | 1945885948               |
| SNP_P3_8377_28917393 | NC_021160.1    | Ca_kabuli_chr01 | 28917393                | TT                              | CC                | 1945885950               |
| SNP_P3_8378_28917601 | NC_021160.1    | Ca_kabuli_chr01 | 28917601                | CC                              | TT                | 1945885951               |
| SNP_P3_8379_28917820 | NC_021160.1    | Ca_kabuli_chr01 | 28917820                | TT                              | GG                | 1945885953               |
| SNP_P3_8380_28917886 | NC_021160.1    | Ca_kabuli_chr01 | 28917886                | TT                              | CC                | 1945885955               |
| SNP_P3_8381_28918020 | NC_021160.1    | Ca_kabuli_chr01 | 28918020                | CC                              | AA                | 1945885957               |
| SNP_P3_8382_28918109 | NC_021160.1    | Ca_kabuli_chr01 | 28918109                | AA                              | CC                | 1945885959               |
| SNP_P3_8383_28927896 | NC_021160.1    | Ca_kabuli_chr01 | 28927896                | TT                              | AA                | 1945885960               |
| SNP_P3_8384_28927984 | NC_021160.1    | Ca_kabuli_chr01 | 28927984                | AA                              | TT                | 1945885962               |
| SNP_P3_8385_28929192 | NC_021160.1    | Ca_kabuli_chr01 | 28929192                | TT                              | AA                | 1945885964               |
| SNP_P3_8386_28929193 | NC_021160.1    | Ca_kabuli_chr01 | 28929193                | GG                              | TT                | 1945885966               |
| SNP_P3_8387_28929204 | NC_021160.1    | Ca_kabuli_chr01 | 28929204                | CC                              | TT                | 1945885967               |
| SNP_P3_8388_28929247 | NC_021160.1    | Ca_kabuli_chr01 | 28929247                | CC                              | TT                | 1945885969               |
| SNP_P3_8389_28929562 | NC_021160.1    | Ca_kabuli_chr01 | 28929562                | AA                              | CC                | 1945885971               |
| SNP_P3_8390_28929642 | NC_021160.1    | Ca_kabuli_chr01 | 28929642                | GG                              | AA                | 1945885973               |
| SNP_P3_8391_28929764 | NC_021160.1    | Ca_kabuli_chr01 | 28929764                | CC                              | TT                | 1945885975               |
| SNP_P3_8392_28929809 | NC_021160.1    | Ca_kabuli_chr01 | 28929809                | GG                              | AA                | 1945885976               |
| SNP_P3_8393_28929823 | NC_021160.1    | Ca_kabuli_chr01 | 28929823                | CC                              | GG                | 1945885978               |
| SNP_P3_8394_28929995 | NC_021160.1    | Ca_kabuli_chr01 | 28929995                | CC                              | TT                | 1945885980               |
| SNP_P3_8395_28930070 | NC_021160.1    | Ca_kabuli_chr01 | 28930070                | TT                              | AA                | 1945885982               |
| SNP_P3_8396_28930079 | NC_021160.1    | Ca_kabuli_chr01 | 28930079                | AA                              | GG                | 1945885983               |
| SNP_P3_8397_28930093 | NC_021160.1    | Ca_kabuli_chr01 | 28930093                | AA                              | GG                | 1945885985               |
| SNP_P3_8398_28930140 | NC_021160.1    | Ca_kabuli_chr01 | 28930140                | AA                              | GG                | 1945885987               |
| SNP_P3_8399_28930167 | NC_021160.1    | Ca_kabuli_chr01 | 28930167                | GG                              | AA                | 1945885989               |
| SNP_P3_8400_28930225 | NC_021160.1    | Ca_kabuli_chr01 | 28930225                | GG                              | TT                | 1945885991               |

| SNPs IDs             | Chromosome IDs | Chromosomes     | Physical positions (bp) | CDC Frontier (Reference genome) | (Pusa 256 & HPNB) | NCBI SNPdb Accession IDs |
|----------------------|----------------|-----------------|-------------------------|---------------------------------|-------------------|--------------------------|
| SNP_P3_8401_28930252 | NC_021160.1    | Ca_kabuli_chr01 | 28930252                | AA                              | GG                | 1945885992               |
| SNP_P3_8402_28930310 | NC_021160.1    | Ca_kabuli_chr01 | 28930310                | CC                              | TT                | 1945885994               |
| SNP_P3_8403_28930318 | NC_021160.1    | Ca_kabuli_chr01 | 28930318                | CC                              | GG                | 1945885996               |
| SNP_P3_8405_28930718 | NC_021160.1    | Ca_kabuli_chr01 | 28930718                | GG                              | AA                | 1945885998               |
| SNP_P3_8406_28931124 | NC_021160.1    | Ca_kabuli_chr01 | 28931124                | TT                              | GG                | 1945885999               |
| SNP_P3_8407_28935796 | NC_021160.1    | Ca_kabuli_chr01 | 28935796                | AA                              | TT                | 1945886001               |
| SNP_P3_8408_28935849 | NC_021160.1    | Ca_kabuli_chr01 | 28935849                | AA                              | GG                | 1945886003               |
| SNP_P3_8409_28935858 | NC_021160.1    | Ca_kabuli_chr01 | 28935858                | AA                              | GG                | 1945886005               |
| SNP_P3_8410_28935939 | NC_021160.1    | Ca_kabuli_chr01 | 28935939                | CC                              | TT                | 1945886007               |
| SNP_P3_8411_28935940 | NC_021160.1    | Ca_kabuli_chr01 | 28935940                | AA                              | TT                | 1945886008               |
| SNP_P3_8412_28935993 | NC_021160.1    | Ca_kabuli_chr01 | 28935993                | TT                              | AA                | 1945886010               |
| SNP_P3_8413_28936044 | NC_021160.1    | Ca_kabuli_chr01 | 28936044                | CC                              | AA                | 1945886012               |
| SNP_P3_8414_28936045 | NC_021160.1    | Ca_kabuli_chr01 | 28936045                | AA                              | TT                | 1945886014               |
| SNP_P3_8415_28936061 | NC_021160.1    | Ca_kabuli_chr01 | 28936061                | CC                              | TT                | 1945886015               |
| SNP_P3_8417_28936166 | NC_021160.1    | Ca_kabuli_chr01 | 28936166                | AA                              | GG                | 1945886017               |
| SNP_P3_8418_28936174 | NC_021160.1    | Ca_kabuli_chr01 | 28936174                | AA                              | GG                | 1945886019               |
| SNP_P3_8419_28936319 | NC_021160.1    | Ca_kabuli_chr01 | 28936319                | TT                              | CC                | 1945886021               |
| SNP_P3_8420_28936474 | NC_021160.1    | Ca_kabuli_chr01 | 28936474                | CC                              | TT                | 1945886023               |
| SNP_P3_8422_28939299 | NC_021160.1    | Ca_kabuli_chr01 | 28939299                | CC                              | TT                | 1945886024               |
| SNP_P3_8423_28939389 | NC_021160.1    | Ca_kabuli_chr01 | 28939389                | TT                              | AA                | 1945886026               |
| SNP_P3_8424_28939493 | NC_021160.1    | Ca_kabuli_chr01 | 28939493                | GG                              | AA                | 1945886028               |
| SNP_P3_8425_28939505 | NC_021160.1    | Ca_kabuli_chr01 | 28939505                | GG                              | CC                | 1945886030               |
| SNP_P3_8426_28939509 | NC_021160.1    | Ca_kabuli_chr01 | 28939509                | GG                              | AA                | 1945886031               |
| SNP_P3_8427_28939530 | NC_021160.1    | Ca_kabuli_chr01 | 28939530                | CC                              | AA                | 1945886033               |
| SNP_P3_8428_28939552 | NC_021160.1    | Ca_kabuli_chr01 | 28939552                | GG                              | AA                | 1945886035               |
| SNP_P3_8429_28939588 | NC_021160.1    | Ca_kabuli_chr01 | 28939588                | CC                              | AA                | 1945886037               |
| SNP_P3_8430_28939628 | NC_021160.1    | Ca_kabuli_chr01 | 28939628                | GG                              | CC                | 1945886039               |
| SNP_P3_8431_28939679 | NC_021160.1    | Ca_kabuli_chr01 | 28939679                | AA                              | TT                | 1945886040               |
| SNP_P3_8432_28939701 | NC_021160.1    | Ca_kabuli_chr01 | 28939701                | TT                              | CC                | 1945886042               |
| SNP_P3_8433_28939756 | NC_021160.1    | Ca_kabuli_chr01 | 28939756                | AA                              | GG                | 1945886044               |
| SNP_P3_8434_28939757 | NC_021160.1    | Ca_kabuli_chr01 | 28939757                | CC                              | TT                | 1945886046               |
| SNP_P3_8435_28939777 | NC_021160.1    | Ca_kabuli_chr01 | 28939777                | CC                              | AA                | 1945886047               |
| SNP_P3_8436_28939817 | NC_021160.1    | Ca_kabuli_chr01 | 28939817                | AA                              | GG                | 1945886049               |
| SNP_P3_8437_28939832 | NC_021160.1    | Ca_kabuli_chr01 | 28939832                | CC                              | TT                | 1945886051               |
| SNP_P3_8438_28939860 | NC_021160.1    | Ca_kabuli_chr01 | 28939860                | AA                              | GG                | 1945886053               |
| SNP_P3_8439_28939866 | NC_021160.1    | Ca_kabuli_chr01 | 28939866                | CC                              | TT                | 1945886054               |
| SNP_P3_8440_28939983 | NC_021160.1    | Ca_kabuli_chr01 | 28939983                | AA                              | TT                | 1945886056               |
| SNP_P3_8441_28940012 | NC_021160.1    | Ca_kabuli_chr01 | 28940012                | AA                              | GG                | 1945886058               |
| SNP_P3_8442_28940049 | NC_021160.1    | Ca_kabuli_chr01 | 28940049                | TT                              | GG                | 1945886060               |
| SNP_P3_8443_28940078 | NC_021160.1    | Ca_kabuli_chr01 | 28940078                | GG                              | CC                | 1945886062               |
| SNP_P3_8444_28940085 | NC_021160.1    | Ca_kabuli_chr01 | 28940085                | TT                              | CC                | 1945886063               |
| SNP_P3_8445_28940357 | NC_021160.1    | Ca_kabuli_chr01 | 28940357                | GG                              | TT                | 1945886065               |

| SNPs IDs             | Chromosome IDs | Chromosomes     | Physical positions (bp) | CDC Frontier (Reference genome) | (Pusa 256 & HPNB) | NCBI SNPdb Accession IDs |
|----------------------|----------------|-----------------|-------------------------|---------------------------------|-------------------|--------------------------|
| SNP_P3_8446_28940402 | NC_021160.1    | Ca_kabuli_chr01 | 28940402                | AA                              | GG                | 1945886067               |
| SNP_P3_8447_28940584 | NC_021160.1    | Ca_kabuli_chr01 | 28940584                | CC                              | TT                | 1945886069               |
| SNP_P3_8448_28940760 | NC_021160.1    | Ca_kabuli_chr01 | 28940760                | AA                              | GG                | 1945886070               |
| SNP_P3_8449_28940903 | NC_021160.1    | Ca_kabuli_chr01 | 28940903                | GG                              | AA                | 1945886072               |
| SNP_P3_8450_28940911 | NC_021160.1    | Ca_kabuli_chr01 | 28940911                | AA                              | GG                | 1945886074               |
| SNP_P3_8451_28941153 | NC_021160.1    | Ca_kabuli_chr01 | 28941153                | GG                              | AA                | 1945886076               |
| SNP_P3_8452_28941193 | NC_021160.1    | Ca_kabuli_chr01 | 28941193                | CC                              | AA                | 1945886077               |
| SNP_P3_8453_28941278 | NC_021160.1    | Ca_kabuli_chr01 | 28941278                | TT                              | GG                | 1945886079               |
| SNP_P3_8454_28941379 | NC_021160.1    | Ca_kabuli_chr01 | 28941379                | CC                              | TT                | 1945886081               |
| SNP_P3_8455_28941429 | NC_021160.1    | Ca_kabuli_chr01 | 28941429                | GG                              | AA                | 1945886083               |
| SNP_P3_8456_28941466 | NC_021160.1    | Ca_kabuli_chr01 | 28941466                | CC                              | TT                | 1945886084               |
| SNP_P3_8458_28941659 | NC_021160.1    | Ca_kabuli_chr01 | 28941659                | CC                              | AA                | 1945886086               |
| SNP_P3_8459_28941662 | NC_021160.1    | Ca_kabuli_chr01 | 28941662                | CC                              | TT                | 1945886088               |
| SNP_P3_8460_28941663 | NC_021160.1    | Ca_kabuli_chr01 | 28941663                | AA                              | GG                | 1945886090               |
| SNP_P3_8461_28941670 | NC_021160.1    | Ca_kabuli_chr01 | 28941670                | TT                              | AA                | 1945886091               |
| SNP_P3_8462_28941742 | NC_021160.1    | Ca_kabuli_chr01 | 28941742                | CC                              | AA                | 1945886093               |
| SNP_P3_8463_28941762 | NC_021160.1    | Ca_kabuli_chr01 | 28941762                | TT                              | CC                | 1945886095               |
| SNP_P3_8464_28941771 | NC_021160.1    | Ca_kabuli_chr01 | 28941771                | CC                              | TT                | 1945886097               |
| SNP_P3_8466_28942004 | NC_021160.1    | Ca_kabuli_chr01 | 28942004                | GG                              | AA                | 1945886098               |
| SNP_P3_8467_28942045 | NC_021160.1    | Ca_kabuli_chr01 | 28942045                | GG                              | TT                | 1945886100               |
| SNP_P3_8468_28942180 | NC_021160.1    | Ca_kabuli_chr01 | 28942180                | AA                              | CC                | 1945886102               |
| SNP_P3_8469_28942266 | NC_021160.1    | Ca_kabuli_chr01 | 28942266                | AA                              | GG                | 1945886104               |
| SNP_P3_8470_28943412 | NC_021160.1    | Ca_kabuli_chr01 | 28943412                | GG                              | AA                | 1945886106               |
| SNP_P3_8471_28943535 | NC_021160.1    | Ca_kabuli_chr01 | 28943535                | AA                              | TT                | 1945886107               |
| SNP_P3_8472_28943538 | NC_021160.1    | Ca_kabuli_chr01 | 28943538                | AA                              | GG                | 1945886109               |
| SNP_P3_8474_28943569 | NC_021160.1    | Ca_kabuli_chr01 | 28943569                | TT                              | CC                | 1945886111               |
| SNP_P3_8475_28943671 | NC_021160.1    | Ca_kabuli_chr01 | 28943671                | CC                              | AA                | 1945886113               |
| SNP_P3_8476_28943779 | NC_021160.1    | Ca_kabuli_chr01 | 28943779                | AA                              | GG                | 1945886114               |
| SNP_P3_8477_28943789 | NC_021160.1    | Ca_kabuli_chr01 | 28943789                | AA                              | TT                | 1945886116               |
| SNP_P3_8478_28943893 | NC_021160.1    | Ca_kabuli_chr01 | 28943893                | CC                              | TT                | 1945886118               |
| SNP_P3_8479_28943947 | NC_021160.1    | Ca_kabuli_chr01 | 28943947                | AA                              | TT                | 1945886120               |
| SNP_P3_8480_28944007 | NC_021160.1    | Ca_kabuli_chr01 | 28944007                | GG                              | AA                | 1945886122               |
| SNP_P3_8482_28944080 | NC_021160.1    | Ca_kabuli_chr01 | 28944080                | GG                              | TT                | 1945886123               |
| SNP_P3_8483_28944126 | NC_021160.1    | Ca_kabuli_chr01 | 28944126                | AA                              | TT                | 1945886125               |
| SNP_P3_8484_28944156 | NC_021160.1    | Ca_kabuli_chr01 | 28944156                | GG                              | AA                | 1945886127               |
| SNP_P3_8485_28944300 | NC_021160.1    | Ca_kabuli_chr01 | 28944300                | TT                              | CC                | 1945886129               |
| SNP_P3_8486_28944329 | NC_021160.1    | Ca_kabuli_chr01 | 28944329                | GG                              | TT                | 1945886130               |
| SNP_P3_8487_28944413 | NC_021160.1    | Ca_kabuli_chr01 | 28944413                | AA                              | TT                | 1945886132               |
| SNP_P3_8488_28944414 | NC_021160.1    | Ca_kabuli_chr01 | 28944414                | CC                              | AA                | 1945886134               |
| SNP_P3_8490_28944579 | NC_021160.1    | Ca_kabuli_chr01 | 28944579                | AA                              | GG                | 1945886136               |
| SNP_P3_8491_28944631 | NC_021160.1    | Ca_kabuli_chr01 | 28944631                | CC                              | TT                | 1945886137               |
| SNP_P3_8492_28944672 | NC_021160.1    | Ca_kabuli_chr01 | 28944672                | GG                              | TT                | 1945886139               |

| SNPs IDs             | Chromosome IDs | Chromosomes     | Physical positions (bp) | CDC Frontier (Reference genome) | (Pusa 256 & HPNB) | NCBI SNPdb Accession IDs |
|----------------------|----------------|-----------------|-------------------------|---------------------------------|-------------------|--------------------------|
| SNP_P3_8493_28944675 | NC_021160.1    | Ca_kabuli_chr01 | 28944675                | AA                              | GG                | 1945886141               |
| SNP_P3_8494_28944714 | NC_021160.1    | Ca_kabuli_chr01 | 28944714                | GG                              | TT                | 1945886143               |
| SNP_P3_8496_28945152 | NC_021160.1    | Ca_kabuli_chr01 | 28945152                | TT                              | AA                | 1945886144               |
| SNP_P3_8498_28945184 | NC_021160.1    | Ca_kabuli_chr01 | 28945184                | TT                              | CC                | 1945886146               |
| SNP_P3_8499_28979776 | NC_021160.1    | Ca_kabuli_chr01 | 28979776                | GG                              | AA                | 1945886148               |
| SNP_P3_8500_29029014 | NC_021160.1    | Ca_kabuli_chr01 | 29029014                | TT                              | CC                | 1945886150               |
| SNP_P3_8501_29029030 | NC_021160.1    | Ca_kabuli_chr01 | 29029030                | AA                              | TT                | 1945886151               |
| SNP_P3_8502_29029054 | NC_021160.1    | Ca_kabuli_chr01 | 29029054                | TT                              | CC                | 1945886153               |
| SNP_P3_8503_29029074 | NC_021160.1    | Ca_kabuli_chr01 | 29029074                | CC                              | TT                | 1945886155               |
| SNP_P3_8504_29029393 | NC_021160.1    | Ca_kabuli_chr01 | 29029393                | TT                              | CC                | 1945886157               |
| SNP_P3_8505_29101646 | NC_021160.1    | Ca_kabuli_chr01 | 29101646                | GG                              | CC                | 1945886159               |
| SNP_P3_8507_29156241 | NC_021160.1    | Ca_kabuli_chr01 | 29156241                | AA                              | TT                | 1945886160               |
| SNP_P3_8508_29157356 | NC_021160.1    | Ca_kabuli_chr01 | 29157356                | GG                              | TT                | 1945886162               |
| SNP_P3_8509_29157397 | NC_021160.1    | Ca_kabuli_chr01 | 29157397                | AA                              | TT                | 1945886164               |
| SNP_P3_8510_29162567 | NC_021160.1    | Ca_kabuli_chr01 | 29162567                | CC                              | TT                | 1945886166               |
| SNP_P3_8511_29163335 | NC_021160.1    | Ca_kabuli_chr01 | 29163335                | CC                              | TT                | 1945886167               |
| SNP_P3_8512_29163338 | NC_021160.1    | Ca_kabuli_chr01 | 29163338                | GG                              | AA                | 1945886169               |
| SNP_P3_8513_29163398 | NC_021160.1    | Ca_kabuli_chr01 | 29163398                | CC                              | TT                | 1945886171               |
| SNP_P3_8514_29163405 | NC_021160.1    | Ca_kabuli_chr01 | 29163405                | GG                              | CC                | 1945886173               |
| SNP_P3_8515_29163423 | NC_021160.1    | Ca_kabuli_chr01 | 29163423                | TT                              | GG                | 1945886174               |
| SNP_P3_8516_29163482 | NC_021160.1    | Ca_kabuli_chr01 | 29163482                | AA                              | GG                | 1945886176               |
| SNP_P3_8517_29172831 | NC_021160.1    | Ca_kabuli_chr01 | 29172831                | CC                              | AA                | 1945886178               |
| SNP_P3_8518_29176817 | NC_021160.1    | Ca_kabuli_chr01 | 29176817                | CC                              | AA                | 1945886180               |
| SNP_P3_8519_29202852 | NC_021160.1    | Ca_kabuli_chr01 | 29202852                | CC                              | TT                | 1945886181               |
| SNP_P3_8520_29210416 | NC_021160.1    | Ca_kabuli_chr01 | 29210416                | GG                              | AA                | 1945886183               |
| SNP_P3_8521_29212983 | NC_021160.1    | Ca_kabuli_chr01 | 29212983                | GG                              | AA                | 1945886185               |
| SNP_P3_8522_29224124 | NC_021160.1    | Ca_kabuli_chr01 | 29224124                | TT                              | AA                | 1945886187               |
| SNP_P3_8523_29226961 | NC_021160.1    | Ca_kabuli_chr01 | 29226961                | CC                              | TT                | 1945886189               |
| SNP_P3_8524_29246111 | NC_021160.1    | Ca_kabuli_chr01 | 29246111                | AA                              | GG                | 1945886190               |
| SNP_P3_8525_29246112 | NC_021160.1    | Ca_kabuli_chr01 | 29246112                | TT                              | AA                | 1945886192               |
| SNP_P3_8526_29262943 | NC_021160.1    | Ca_kabuli_chr01 | 29262943                | TT                              | CC                | 1945886194               |
| SNP_P3_8527_29262956 | NC_021160.1    | Ca_kabuli_chr01 | 29262956                | AA                              | GG                | 1945886196               |
| SNP_P3_8528_29266078 | NC_021160.1    | Ca_kabuli_chr01 | 29266078                | AA                              | TT                | 1945886197               |
| SNP_P3_8529_29266087 | NC_021160.1    | Ca_kabuli_chr01 | 29266087                | AA                              | GG                | 1945886199               |
| SNP_P3_8530_29266383 | NC_021160.1    | Ca_kabuli_chr01 | 29266383                | GG                              | CC                | 1945886201               |
| SNP_P3_8531_29266428 | NC_021160.1    | Ca_kabuli_chr01 | 29266428                | AA                              | GG                | 1945886203               |
| SNP_P3_8532_29310724 | NC_021160.1    | Ca_kabuli_chr01 | 29310724                | GG                              | TT                | 1945886205               |
| SNP_P3_8533_29310726 | NC_021160.1    | Ca_kabuli_chr01 | 29310726                | CC                              | AA                | 1945886206               |
| SNP_P3_8534_29314980 | NC_021160.1    | Ca_kabuli_chr01 | 29314980                | CC                              | GG                | 1945886208               |
| SNP_P3_8535_29316538 | NC_021160.1    | Ca_kabuli_chr01 | 29316538                | CC                              | AA                | 1945886210               |
| SNP_P3_8536_29321341 | NC_021160.1    | Ca_kabuli_chr01 | 29321341                | AA                              | GG                | 1945886212               |
| SNP_P3_8537_29331955 | NC_021160.1    | Ca_kabuli_chr01 | 29331955                | GG                              | AA                | 1945886214               |

| SNPs IDs             | Chromosome IDs | Chromosomes     | Physical positions (bp) | CDC Frontier (Reference genome) | (Pusa 256 & HPNB) | NCBI SNPdb Accession IDs |
|----------------------|----------------|-----------------|-------------------------|---------------------------------|-------------------|--------------------------|
| SNP_P3_8538_29335376 | NC_021160.1    | Ca_kabuli_chr01 | 29335376                | TT                              | GG                | 1945886215               |
| SNP_P3_8539_29335557 | NC_021160.1    | Ca_kabuli_chr01 | 29335557                | AA                              | CC                | 1945886217               |
| SNP_P3_8540_29335559 | NC_021160.1    | Ca_kabuli_chr01 | 29335559                | AA                              | GG                | 1945886219               |
| SNP_P3_8541_29335568 | NC_021160.1    | Ca_kabuli_chr01 | 29335568                | AA                              | GG                | 1945886221               |
| SNP_P3_8542_29335712 | NC_021160.1    | Ca_kabuli_chr01 | 29335712                | AA                              | GG                | 1945886222               |
| SNP_P3_8544_29353309 | NC_021160.1    | Ca_kabuli_chr01 | 29353309                | CC                              | TT                | 1945886224               |
| SNP_P3_8545_29353312 | NC_021160.1    | Ca_kabuli_chr01 | 29353312                | TT                              | AA                | 1945886226               |
| SNP_P3_8546_29353579 | NC_021160.1    | Ca_kabuli_chr01 | 29353579                | GG                              | AA                | 1945886228               |
| SNP_P3_8547_29353595 | NC_021160.1    | Ca_kabuli_chr01 | 29353595                | AA                              | GG                | 1945886230               |
| SNP_P3_8548_29360043 | NC_021160.1    | Ca_kabuli_chr01 | 29360043                | TT                              | CC                | 1945886231               |
| SNP_P3_8550_29386769 | NC_021160.1    | Ca_kabuli_chr01 | 29386769                | AA                              | TT                | 1945886233               |
| SNP_P3_8551_29386772 | NC_021160.1    | Ca_kabuli_chr01 | 29386772                | TT                              | AA                | 1945886235               |
| SNP_P3_8552_29386833 | NC_021160.1    | Ca_kabuli_chr01 | 29386833                | TT                              | AA                | 1945886237               |
| SNP_P3_8554_29390858 | NC_021160.1    | Ca_kabuli_chr01 | 29390858                | TT                              | CC                | 1945886238               |
| SNP_P3_8555_29391270 | NC_021160.1    | Ca_kabuli_chr01 | 29391270                | GG                              | AA                | 1945886240               |
| SNP_P3_8556_29391285 | NC_021160.1    | Ca_kabuli_chr01 | 29391285                | CC                              | TT                | 1945886242               |
| SNP_P3_8557_29391316 | NC_021160.1    | Ca_kabuli_chr01 | 29391316                | TT                              | CC                | 1945886244               |
| SNP_P3_8558_29391717 | NC_021160.1    | Ca_kabuli_chr01 | 29391717                | TT                              | CC                | 1945886246               |
| SNP_P3_8561_29422282 | NC_021160.1    | Ca_kabuli_chr01 | 29422282                | AA                              | GG                | 1945886247               |
| SNP_P3_8563_29422611 | NC_021160.1    | Ca_kabuli_chr01 | 29422611                | TT                              | CC                | 1945886249               |
| SNP_P3_8564_29422614 | NC_021160.1    | Ca_kabuli_chr01 | 29422614                | GG                              | AA                | 1945886251               |
| SNP_P3_8565_29422625 | NC_021160.1    | Ca_kabuli_chr01 | 29422625                | TT                              | AA                | 1945886253               |
| SNP_P3_8566_29454922 | NC_021160.1    | Ca_kabuli_chr01 | 29454922                | AA                              | CC                | 1945886254               |
| SNP_P3_8567_29454923 | NC_021160.1    | Ca_kabuli_chr01 | 29454923                | GG                              | AA                | 1945886256               |
| SNP_P3_8568_29455281 | NC_021160.1    | Ca_kabuli_chr01 | 29455281                | TT                              | CC                | 1945886258               |
| SNP_P3_8569_29455349 | NC_021160.1    | Ca_kabuli_chr01 | 29455349                | AA                              | GG                | 1945886260               |
| SNP_P3_8570_29505805 | NC_021160.1    | Ca_kabuli_chr01 | 29505805                | TT                              | AA                | 1945886262               |
| SNP_P3_8571_29505832 | NC_021160.1    | Ca_kabuli_chr01 | 29505832                | CC                              | TT                | 1945886263               |
| SNP_P3_8572_29505833 | NC_021160.1    | Ca_kabuli_chr01 | 29505833                | AA                              | GG                | 1945886265               |
| SNP_P3_8573_29505861 | NC_021160.1    | Ca_kabuli_chr01 | 29505861                | GG                              | AA                | 1945886267               |
| SNP_P3_8574_29515783 | NC_021160.1    | Ca_kabuli_chr01 | 29515783                | TT                              | GG                | 1945886269               |
| SNP_P3_8575_29515808 | NC_021160.1    | Ca_kabuli_chr01 | 29515808                | GG                              | AA                | 1945886270               |
| SNP_P3_8576_29516499 | NC_021160.1    | Ca_kabuli_chr01 | 29516499                | TT                              | CC                | 1945886272               |
| SNP_P3_8577_29523803 | NC_021160.1    | Ca_kabuli_chr01 | 29523803                | GG                              | TT                | 1945886274               |
| SNP_P3_8579_29524402 | NC_021160.1    | Ca_kabuli_chr01 | 29524402                | AA                              | GG                | 1945886276               |
| SNP_P3_8580_29525008 | NC_021160.1    | Ca_kabuli_chr01 | 29525008                | CC                              | TT                | 1945886278               |
| SNP_P3_8581_29525017 | NC_021160.1    | Ca_kabuli_chr01 | 29525017                | CC                              | TT                | 1945886280               |
| SNP_P3_8582_29525026 | NC_021160.1    | Ca_kabuli_chr01 | 29525026                | CC                              | TT                | 1945886281               |
| SNP_P3_8583_29525035 | NC_021160.1    | Ca_kabuli_chr01 | 29525035                | CC                              | TT                | 1945886283               |
| SNP_P3_8584_29525053 | NC_021160.1    | Ca_kabuli_chr01 | 29525053                | CC                              | TT                | 1945886285               |
| SNP_P3_8585_29526338 | NC_021160.1    | Ca_kabuli_chr01 | 29526338                | AA                              | TT                | 1945886287               |
| SNP_P3_8586_29527533 | NC_021160.1    | Ca_kabuli_chr01 | 29527533                | GG                              | CC                | 1945886289               |

| SNPs IDs             | Chromosome IDs | Chromosomes     | Physical positions (bp) | CDC Frontier (Reference genome) | (Pusa 256 & HPNB) | NCBI SNPdb Accession IDs |
|----------------------|----------------|-----------------|-------------------------|---------------------------------|-------------------|--------------------------|
| SNP_P3_8587_29538853 | NC_021160.1    | Ca_kabuli_chr01 | 29538853                | AA                              | TT                | 1945886290               |
| SNP_P3_8588_29538882 | NC_021160.1    | Ca_kabuli_chr01 | 29538882                | CC                              | TT                | 1945886292               |
| SNP_P3_8589_29539002 | NC_021160.1    | Ca_kabuli_chr01 | 29539002                | GG                              | AA                | 1945886294               |
| SNP_P3_8590_29539009 | NC_021160.1    | Ca_kabuli_chr01 | 29539009                | AA                              | GG                | 1945886296               |
| SNP_P3_8591_29539159 | NC_021160.1    | Ca_kabuli_chr01 | 29539159                | GG                              | AA                | 1945886297               |
| SNP_P3_8592_29539228 | NC_021160.1    | Ca_kabuli_chr01 | 29539228                | TT                              | CC                | 1945886299               |
| SNP_P3_8594_29540142 | NC_021160.1    | Ca_kabuli_chr01 | 29540142                | AA                              | GG                | 1945886301               |
| SNP_P3_8595_29572249 | NC_021160.1    | Ca_kabuli_chr01 | 29572249                | AA                              | GG                | 1945886303               |
| SNP_P3_8596_29572311 | NC_021160.1    | Ca_kabuli_chr01 | 29572311                | TT                              | CC                | 1945886305               |
| SNP_P3_8597_29572422 | NC_021160.1    | Ca_kabuli_chr01 | 29572422                | GG                              | AA                | 1945886306               |
| SNP_P3_8598_29572442 | NC_021160.1    | Ca_kabuli_chr01 | 29572442                | GG                              | AA                | 1945886308               |
| SNP_P3_8599_29576180 | NC_021160.1    | Ca_kabuli_chr01 | 29576180                | TT                              | CC                | 1945886310               |
| SNP_P3_8600_29587375 | NC_021160.1    | Ca_kabuli_chr01 | 29587375                | GG                              | AA                | 1945886312               |
| SNP_P3_8601_29587399 | NC_021160.1    | Ca_kabuli_chr01 | 29587399                | GG                              | AA                | 1945886313               |
| SNP_P3_8602_29587747 | NC_021160.1    | Ca_kabuli_chr01 | 29587747                | AA                              | CC                | 1945886315               |
| SNP_P3_8603_29587948 | NC_021160.1    | Ca_kabuli_chr01 | 29587948                | AA                              | TT                | 1945886317               |
| SNP_P3_8604_29587988 | NC_021160.1    | Ca_kabuli_chr01 | 29587988                | TT                              | AA                | 1945886319               |
| SNP_P3_8605_29588022 | NC_021160.1    | Ca_kabuli_chr01 | 29588022                | GG                              | TT                | 1945886320               |
| SNP_P3_8606_29589521 | NC_021160.1    | Ca_kabuli_chr01 | 29589521                | AA                              | CC                | 1945886322               |
| SNP_P3_8607_29589535 | NC_021160.1    | Ca_kabuli_chr01 | 29589535                | AA                              | GG                | 1945886324               |
| SNP_P3_8608_29596090 | NC_021160.1    | Ca_kabuli_chr01 | 29596090                | GG                              | CC                | 1945886326               |
| SNP_P3_8609_29601480 | NC_021160.1    | Ca_kabuli_chr01 | 29601480                | CC                              | AA                | 1945886328               |
| SNP_P3_8610_29601481 | NC_021160.1    | Ca_kabuli_chr01 | 29601481                | CC                              | AA                | 1945886329               |
| SNP_P3_8611_29602906 | NC_021160.1    | Ca_kabuli_chr01 | 29602906                | CC                              | TT                | 1945886331               |
| SNP_P3_8612_29618095 | NC_021160.1    | Ca_kabuli_chr01 | 29618095                | CC                              | TT                | 1945886333               |
| SNP_P3_8613_29618108 | NC_021160.1    | Ca_kabuli_chr01 | 29618108                | AA                              | GG                | 1945886335               |
| SNP_P3_8615_29619593 | NC_021160.1    | Ca_kabuli_chr01 | 29619593                | CC                              | AA                | 1945886336               |
| SNP_P3_8616_29619849 | NC_021160.1    | Ca_kabuli_chr01 | 29619849                | GG                              | TT                | 1945886338               |
| SNP_P3_8617_29620230 | NC_021160.1    | Ca_kabuli_chr01 | 29620230                | GG                              | TT                | 1945886340               |
| SNP_P3_8618_29632122 | NC_021160.1    | Ca_kabuli_chr01 | 29632122                | AA                              | GG                | 1945886342               |
| SNP_P3_8619_29636599 | NC_021160.1    | Ca_kabuli_chr01 | 29636599                | CC                              | TT                | 1945886343               |
| SNP_P3_8620_29636688 | NC_021160.1    | Ca_kabuli_chr01 | 29636688                | GG                              | CC                | 1945886345               |
| SNP_P3_8622_29636959 | NC_021160.1    | Ca_kabuli_chr01 | 29636959                | AA                              | GG                | 1945886347               |
| SNP_P3_8624_29637110 | NC_021160.1    | Ca_kabuli_chr01 | 29637110                | CC                              | TT                | 1945886349               |
| SNP_P3_8625_29637157 | NC_021160.1    | Ca_kabuli_chr01 | 29637157                | AA                              | GG                | 1945886351               |
| SNP_P3_8626_29637236 | NC_021160.1    | Ca_kabuli_chr01 | 29637236                | AA                              | CC                | 1945886352               |
| SNP_P3_8627_29637239 | NC_021160.1    | Ca_kabuli_chr01 | 29637239                | CC                              | TT                | 1945886354               |
| SNP_P3_8628_29637342 | NC_021160.1    | Ca_kabuli_chr01 | 29637342                | AA                              | GG                | 1945886356               |
| SNP_P3_8629_29643475 | NC_021160.1    | Ca_kabuli_chr01 | 29643475                | TT                              | CC                | 1945886358               |
| SNP_P3_8630_29643488 | NC_021160.1    | Ca_kabuli_chr01 | 29643488                | TT                              | CC                | 1945886359               |
| SNP_P3_8631_29644159 | NC_021160.1    | Ca_kabuli_chr01 | 29644159                | GG                              | CC                | 1945886361               |
| SNP_P3_8632_29649889 | NC_021160.1    | Ca_kabuli_chr01 | 29649889                | AA                              | GG                | 1945886363               |



| SNPs IDs             | Chromosome IDs | Chromosomes     | Physical positions (bp) | CDC Frontier (Reference genome) | (Pusa 256 & HPNB) | NCBI SNPdb Accession IDs |
|----------------------|----------------|-----------------|-------------------------|---------------------------------|-------------------|--------------------------|
| SNP_P3_8634_29651019 | NC_021160.1    | Ca_kabuli_chr01 | 29651019                | TT                              | CC                | 1945886365               |
| SNP_P3_8635_29651022 | NC_021160.1    | Ca_kabuli_chr01 | 29651022                | CC                              | TT                | 1945886367               |
| SNP_P3_8636_29651843 | NC_021160.1    | Ca_kabuli_chr01 | 29651843                | TT                              | CC                | 1945886368               |
| SNP_P3_8637_29662577 | NC_021160.1    | Ca_kabuli_chr01 | 29662577                | AA                              | GG                | 1945886370               |
| SNP_P3_8638_29680010 | NC_021160.1    | Ca_kabuli_chr01 | 29680010                | CC                              | AA                | 1945886372               |
| SNP_P3_8639_29680014 | NC_021160.1    | Ca_kabuli_chr01 | 29680014                | GG                              | TT                | 1945886374               |
| SNP_P3_8640_29681668 | NC_021160.1    | Ca_kabuli_chr01 | 29681668                | GG                              | AA                | 1945886375               |
| SNP_P3_8641_29681676 | NC_021160.1    | Ca_kabuli_chr01 | 29681676                | AA                              | GG                | 1945886377               |
| SNP_P3_8642_29693149 | NC_021160.1    | Ca_kabuli_chr01 | 29693149                | TT                              | GG                | 1945886379               |
| SNP_P3_8643_29708494 | NC_021160.1    | Ca_kabuli_chr01 | 29708494                | CC                              | TT                | 1945886381               |
| SNP_P3_8644_29708521 | NC_021160.1    | Ca_kabuli_chr01 | 29708521                | GG                              | AA                | 1945886382               |
| SNP_P3_8645_29709019 | NC_021160.1    | Ca_kabuli_chr01 | 29709019                | GG                              | AA                | 1945886384               |
| SNP_P3_8647_29712296 | NC_021160.1    | Ca_kabuli_chr01 | 29712296                | GG                              | AA                | 1945886386               |
| SNP_P3_8648_29716937 | NC_021160.1    | Ca_kabuli_chr01 | 29716937                | GG                              | TT                | 1945886388               |
| SNP_P3_8649_29748203 | NC_021160.1    | Ca_kabuli_chr01 | 29748203                | TT                              | AA                | 1945886389               |
| SNP_P3_8650_29764296 | NC_021160.1    | Ca_kabuli_chr01 | 29764296                | TT                              | CC                | 1945886391               |
| SNP_P3_8651_29764326 | NC_021160.1    | Ca_kabuli_chr01 | 29764326                | CC                              | TT                | 1945886393               |
| SNP_P3_8652_29764389 | NC_021160.1    | Ca_kabuli_chr01 | 29764389                | GG                              | TT                | 1945886395               |
| SNP_P3_8653_29764741 | NC_021160.1    | Ca_kabuli_chr01 | 29764741                | TT                              | GG                | 1945886396               |
| SNP_P3_8654_29766312 | NC_021160.1    | Ca_kabuli_chr01 | 29766312                | AA                              | GG                | 1945886398               |
| SNP_P3_8655_29766390 | NC_021160.1    | Ca_kabuli_chr01 | 29766390                | TT                              | CC                | 1945886400               |
| SNP_P3_8656_29766648 | NC_021160.1    | Ca_kabuli_chr01 | 29766648                | TT                              | CC                | 1945886402               |
| SNP_P3_8657_29766658 | NC_021160.1    | Ca_kabuli_chr01 | 29766658                | CC                              | TT                | 1945886403               |
| SNP_P3_8658_29781733 | NC_021160.1    | Ca_kabuli_chr01 | 29781733                | GG                              | AA                | 1945886405               |
| SNP_P3_8659_29781738 | NC_021160.1    | Ca_kabuli_chr01 | 29781738                | AA                              | CC                | 1945886407               |
| SNP_P3_8660_29781810 | NC_021160.1    | Ca_kabuli_chr01 | 29781810                | TT                              | CC                | 1945886409               |
| SNP_P3_8661_29781834 | NC_021160.1    | Ca_kabuli_chr01 | 29781834                | TT                              | AA                | 1945886411               |
| SNP_P3_8662_29781870 | NC_021160.1    | Ca_kabuli_chr01 | 29781870                | GG                              | AA                | 1945886412               |
| SNP_P3_8663_29781963 | NC_021160.1    | Ca_kabuli_chr01 | 29781963                | AA                              | CC                | 1945886414               |
| SNP_P3_8664_29781970 | NC_021160.1    | Ca_kabuli_chr01 | 29781970                | TT                              | CC                | 1945886416               |
| SNP_P3_8665_29782248 | NC_021160.1    | Ca_kabuli_chr01 | 29782248                | GG                              | AA                | 1945886418               |
| SNP_P3_8666_29790795 | NC_021160.1    | Ca_kabuli_chr01 | 29790795                | CC                              | AA                | 1945886420               |
| SNP_P3_8667_29790799 | NC_021160.1    | Ca_kabuli_chr01 | 29790799                | GG                              | AA                | 1945886421               |
| SNP_P3_8669_29791606 | NC_021160.1    | Ca_kabuli_chr01 | 29791606                | TT                              | AA                | 1945886423               |
| SNP_P3_8670_29792166 | NC_021160.1    | Ca_kabuli_chr01 | 29792166                | TT                              | CC                | 1945886425               |
| SNP_P3_8671_29792284 | NC_021160.1    | Ca_kabuli_chr01 | 29792284                | GG                              | AA                | 1945886426               |
| SNP_P3_8672_29792735 | NC_021160.1    | Ca_kabuli_chr01 | 29792735                | GG                              | AA                | 1945886428               |
| SNP_P3_8674_29812427 | NC_021160.1    | Ca_kabuli_chr01 | 29812427                | TT                              | GG                | 1945886430               |
| SNP_P3_8675_29817150 | NC_021160.1    | Ca_kabuli_chr01 | 29817150                | GG                              | CC                | 1945886432               |
| SNP_P3_8676_29817437 | NC_021160.1    | Ca_kabuli_chr01 | 29817437                | CC                              | AA                | 1945886434               |
| SNP_P3_8677_29817460 | NC_021160.1    | Ca_kabuli_chr01 | 29817460                | AA                              | GG                | 1945886435               |
| SNP_P3_8678_29817514 | NC_021160.1    | Ca_kabuli_chr01 | 29817514                | CC                              | AA                | 1945886437               |

| SNPs IDs             | Chromosome IDs | Chromosomes     | Physical positions (bp) | CDC Frontier (Reference genome) | (Pusa 256 & HPNB) | NCBI SNPdb Accession IDs |
|----------------------|----------------|-----------------|-------------------------|---------------------------------|-------------------|--------------------------|
| SNP_P3_8679_29817516 | NC_021160.1    | Ca_kabuli_chr01 | 29817516                | TT                              | CC                | 1945886439               |
| SNP_P3_8680_29817658 | NC_021160.1    | Ca_kabuli_chr01 | 29817658                | CC                              | TT                | 1945886441               |
| SNP_P3_8681_29817901 | NC_021160.1    | Ca_kabuli_chr01 | 29817901                | TT                              | CC                | 1945886443               |
| SNP_P3_8682_29817948 | NC_021160.1    | Ca_kabuli_chr01 | 29817948                | GG                              | AA                | 1945886444               |
| SNP_P3_8683_29817982 | NC_021160.1    | Ca_kabuli_chr01 | 29817982                | CC                              | TT                | 1945886446               |
| SNP_P3_8684_29818025 | NC_021160.1    | Ca_kabuli_chr01 | 29818025                | TT                              | CC                | 1945886448               |
| SNP_P3_8685_29818196 | NC_021160.1    | Ca_kabuli_chr01 | 29818196                | CC                              | AA                | 1945886450               |
| SNP_P3_8686_29818233 | NC_021160.1    | Ca_kabuli_chr01 | 29818233                | AA                              | GG                | 1945886452               |
| SNP_P3_8687_29818311 | NC_021160.1    | Ca_kabuli_chr01 | 29818311                | TT                              | CC                | 1945886453               |
| SNP_P3_8688_29818367 | NC_021160.1    | Ca_kabuli_chr01 | 29818367                | AA                              | GG                | 1945886455               |
| SNP_P3_8689_29818390 | NC_021160.1    | Ca_kabuli_chr01 | 29818390                | AA                              | GG                | 1945886457               |
| SNP_P3_8690_29818474 | NC_021160.1    | Ca_kabuli_chr01 | 29818474                | AA                              | GG                | 1945886459               |
| SNP_P3_8691_29818597 | NC_021160.1    | Ca_kabuli_chr01 | 29818597                | TT                              | CC                | 1945886461               |
| SNP_P3_8692_29818601 | NC_021160.1    | Ca_kabuli_chr01 | 29818601                | AA                              | GG                | 1945886462               |
| SNP_P3_8693_29818605 | NC_021160.1    | Ca_kabuli_chr01 | 29818605                | AA                              | CC                | 1945886464               |
| SNP_P3_8694_29818615 | NC_021160.1    | Ca_kabuli_chr01 | 29818615                | TT                              | CC                | 1945886466               |
| SNP_P3_8697_29821538 | NC_021160.1    | Ca_kabuli_chr01 | 29821538                | CC                              | TT                | 1945886468               |
| SNP_P3_8698_29821705 | NC_021160.1    | Ca_kabuli_chr01 | 29821705                | AA                              | CC                | 1945886470               |
| SNP_P3_8699_29821738 | NC_021160.1    | Ca_kabuli_chr01 | 29821738                | CC                              | TT                | 1945886471               |
| SNP_P3_8700_29823411 | NC_021160.1    | Ca_kabuli_chr01 | 29823411                | GG                              | AA                | 1945886473               |
| SNP_P3_8701_29823495 | NC_021160.1    | Ca_kabuli_chr01 | 29823495                | AA                              | TT                | 1945886475               |
| SNP_P3_8702_29823496 | NC_021160.1    | Ca_kabuli_chr01 | 29823496                | TT                              | CC                | 1945886477               |
| SNP_P3_8703_29823570 | NC_021160.1    | Ca_kabuli_chr01 | 29823570                | CC                              | TT                | 1945886479               |
| SNP_P3_8704_29823595 | NC_021160.1    | Ca_kabuli_chr01 | 29823595                | CC                              | TT                | 1945886481               |
| SNP_P3_8705_29823812 | NC_021160.1    | Ca_kabuli_chr01 | 29823812                | CC                              | AA                | 1945886482               |
| SNP_P3_8706_29824286 | NC_021160.1    | Ca_kabuli_chr01 | 29824286                | CC                              | TT                | 1945886484               |
| SNP_P3_8707_29824320 | NC_021160.1    | Ca_kabuli_chr01 | 29824320                | TT                              | AA                | 1945886486               |
| SNP_P3_8708_29824668 | NC_021160.1    | Ca_kabuli_chr01 | 29824668                | TT                              | CC                | 1945886488               |
| SNP_P3_8709_29824738 | NC_021160.1    | Ca_kabuli_chr01 | 29824738                | GG                              | AA                | 1945886490               |
| SNP_P3_8710_29824753 | NC_021160.1    | Ca_kabuli_chr01 | 29824753                | AA                              | TT                | 1945886491               |
| SNP_P3_8711_29824798 | NC_021160.1    | Ca_kabuli_chr01 | 29824798                | CC                              | TT                | 1945886493               |
| SNP_P3_8712_29824840 | NC_021160.1    | Ca_kabuli_chr01 | 29824840                | TT                              | CC                | 1945886495               |
| SNP_P3_8713_29824861 | NC_021160.1    | Ca_kabuli_chr01 | 29824861                | GG                              | TT                | 1945886497               |
| SNP_P3_8714_29824933 | NC_021160.1    | Ca_kabuli_chr01 | 29824933                | GG                              | AA                | 1945886498               |
| SNP_P3_8715_29824987 | NC_021160.1    | Ca_kabuli_chr01 | 29824987                | GG                              | AA                | 1945886500               |
| SNP_P3_8716_29825002 | NC_021160.1    | Ca_kabuli_chr01 | 29825002                | CC                              | TT                | 1945886502               |
| SNP_P3_8717_29825092 | NC_021160.1    | Ca_kabuli_chr01 | 29825092                | GG                              | AA                | 1945886504               |
| SNP_P3_8718_29825125 | NC_021160.1    | Ca_kabuli_chr01 | 29825125                | GG                              | AA                | 1945886506               |
| SNP_P3_8719_29825128 | NC_021160.1    | Ca_kabuli_chr01 | 29825128                | TT                              | GG                | 1945886507               |
| SNP_P3_8721_29825588 | NC_021160.1    | Ca_kabuli_chr01 | 29825588                | AA                              | TT                | 1945886509               |
| SNP_P3_8722_29830227 | NC_021160.1    | Ca_kabuli_chr01 | 29830227                | TT                              | GG                | 1945886511               |
| SNP_P3_8723_29841456 | NC_021160.1    | Ca_kabuli_chr01 | 29841456                | TT                              | CC                | 1945886513               |

| SNPs IDs             | Chromosome IDs | Chromosomes     | Physical positions (bp) | CDC Frontier (Reference genome) | (Pusa 256 & HPNB) | NCBI SNPdb Accession IDs |
|----------------------|----------------|-----------------|-------------------------|---------------------------------|-------------------|--------------------------|
| SNP_P3_8724_29841629 | NC_021160.1    | Ca_kabuli_chr01 | 29841629                | AA                              | CC                | 1945886514               |
| SNP_P3_8725_29841835 | NC_021160.1    | Ca_kabuli_chr01 | 29841835                | CC                              | TT                | 1945886516               |
| SNP_P3_8726_29841895 | NC_021160.1    | Ca_kabuli_chr01 | 29841895                | AA                              | GG                | 1945886518               |
| SNP_P3_8727_29841949 | NC_021160.1    | Ca_kabuli_chr01 | 29841949                | CC                              | AA                | 1945886520               |
| SNP_P3_8728_29842165 | NC_021160.1    | Ca_kabuli_chr01 | 29842165                | TT                              | CC                | 1945886522               |
| SNP_P3_8729_29842342 | NC_021160.1    | Ca_kabuli_chr01 | 29842342                | TT                              | AA                | 1945886523               |
| SNP_P3_8730_29842387 | NC_021160.1    | Ca_kabuli_chr01 | 29842387                | GG                              | AA                | 1945886525               |
| SNP_P3_8731_29842394 | NC_021160.1    | Ca_kabuli_chr01 | 29842394                | AA                              | GG                | 1945886527               |
| SNP_P3_8732_29842411 | NC_021160.1    | Ca_kabuli_chr01 | 29842411                | TT                              | GG                | 1945886529               |
| SNP_P3_8734_29842580 | NC_021160.1    | Ca_kabuli_chr01 | 29842580                | AA                              | CC                | 1945886531               |
| SNP_P3_8735_29842636 | NC_021160.1    | Ca_kabuli_chr01 | 29842636                | TT                              | CC                | 1945886533               |
| SNP_P3_8736_29842637 | NC_021160.1    | Ca_kabuli_chr01 | 29842637                | TT                              | CC                | 1945886534               |
| SNP_P3_8737_29842658 | NC_021160.1    | Ca_kabuli_chr01 | 29842658                | TT                              | AA                | 1945886536               |
| SNP_P3_8738_29842683 | NC_021160.1    | Ca_kabuli_chr01 | 29842683                | AA                              | CC                | 1945886538               |
| SNP_P3_8739_29842732 | NC_021160.1    | Ca_kabuli_chr01 | 29842732                | TT                              | CC                | 1945886540               |
| SNP_P3_8740_29842772 | NC_021160.1    | Ca_kabuli_chr01 | 29842772                | AA                              | GG                | 1945886542               |
| SNP_P3_8741_29842906 | NC_021160.1    | Ca_kabuli_chr01 | 29842906                | AA                              | GG                | 1945886543               |
| SNP_P3_8742_29842922 | NC_021160.1    | Ca_kabuli_chr01 | 29842922                | GG                              | AA                | 1945886545               |
| SNP_P3_8743_29842952 | NC_021160.1    | Ca_kabuli_chr01 | 29842952                | CC                              | TT                | 1945886546               |
| SNP_P3_8744_29843494 | NC_021160.1    | Ca_kabuli_chr01 | 29843494                | CC                              | AA                | 1945886548               |
| SNP_P3_8745_29843549 | NC_021160.1    | Ca_kabuli_chr01 | 29843549                | CC                              | TT                | 1945886550               |
| SNP_P3_8746_29843748 | NC_021160.1    | Ca_kabuli_chr01 | 29843748                | AA                              | TT                | 1945886552               |
| SNP_P3_8748_29843889 | NC_021160.1    | Ca_kabuli_chr01 | 29843889                | TT                              | CC                | 1945886553               |
| SNP_P3_8749_29844046 | NC_021160.1    | Ca_kabuli_chr01 | 29844046                | AA                              | GG                | 1945886555               |
| SNP_P3_8751_29844512 | NC_021160.1    | Ca_kabuli_chr01 | 29844512                | TT                              | GG                | 1945886557               |
| SNP_P3_8752_29844633 | NC_021160.1    | Ca_kabuli_chr01 | 29844633                | CC                              | TT                | 1945886559               |
| SNP_P3_8753_29845069 | NC_021160.1    | Ca_kabuli_chr01 | 29845069                | TT                              | GG                | 1945886560               |
| SNP_P3_8754_29845249 | NC_021160.1    | Ca_kabuli_chr01 | 29845249                | AA                              | TT                | 1945886562               |
| SNP_P3_8755_29845517 | NC_021160.1    | Ca_kabuli_chr01 | 29845517                | TT                              | AA                | 1945886564               |
| SNP_P3_8756_29845533 | NC_021160.1    | Ca_kabuli_chr01 | 29845533                | TT                              | CC                | 1945886566               |
| SNP_P3_8757_29845806 | NC_021160.1    | Ca_kabuli_chr01 | 29845806                | AA                              | CC                | 1945886567               |
| SNP_P3_8758_29845918 | NC_021160.1    | Ca_kabuli_chr01 | 29845918                | TT                              | CC                | 1945886569               |
| SNP_P3_8759_29845923 | NC_021160.1    | Ca_kabuli_chr01 | 29845923                | AA                              | TT                | 1945886571               |
| SNP_P3_8760_29846237 | NC_021160.1    | Ca_kabuli_chr01 | 29846237                | TT                              | CC                | 1945886573               |
| SNP_P3_8761_29846270 | NC_021160.1    | Ca_kabuli_chr01 | 29846270                | GG                              | AA                | 1945886574               |
| SNP_P3_8762_29846295 | NC_021160.1    | Ca_kabuli_chr01 | 29846295                | TT                              | CC                | 1945886576               |
| SNP_P3_8763_29846392 | NC_021160.1    | Ca_kabuli_chr01 | 29846392                | TT                              | GG                | 1945886578               |
| SNP_P3_8764_29846434 | NC_021160.1    | Ca_kabuli_chr01 | 29846434                | TT                              | GG                | 1945886580               |
| SNP_P3_8766_29846574 | NC_021160.1    | Ca_kabuli_chr01 | 29846574                | TT                              | AA                | 1945886582               |
| SNP_P3_8769_29847045 | NC_021160.1    | Ca_kabuli_chr01 | 29847045                | AA                              | TT                | 1945886583               |
| SNP_P3_8770_29847336 | NC_021160.1    | Ca_kabuli_chr01 | 29847336                | AA                              | GG                | 1945886585               |
| SNP_P3_8771_29847500 | NC_021160.1    | Ca_kabuli_chr01 | 29847500                | TT                              | CC                | 1945886587               |

| SNPs IDs             | Chromosome IDs | Chromosomes     | Physical positions (bp) | CDC Frontier (Reference genome) | (Pusa 256 & HPNB) | NCBI SNPdb Accession IDs |
|----------------------|----------------|-----------------|-------------------------|---------------------------------|-------------------|--------------------------|
| SNP_P3_8772_29847534 | NC_021160.1    | Ca_kabuli_chr01 | 29847534                | CC                              | TT                | 1945886589               |
| SNP_P3_8773_29847570 | NC_021160.1    | Ca_kabuli_chr01 | 29847570                | TT                              | CC                | 1945886590               |
| SNP_P3_8774_29847608 | NC_021160.1    | Ca_kabuli_chr01 | 29847608                | GG                              | AA                | 1945886592               |
| SNP_P3_8775_29847701 | NC_021160.1    | Ca_kabuli_chr01 | 29847701                | GG                              | AA                | 1945886594               |
| SNP_P3_8776_29847781 | NC_021160.1    | Ca_kabuli_chr01 | 29847781                | CC                              | GG                | 1945886596               |
| SNP_P3_8777_29847831 | NC_021160.1    | Ca_kabuli_chr01 | 29847831                | AA                              | GG                | 1945886597               |
| SNP_P3_8778_29847861 | NC_021160.1    | Ca_kabuli_chr01 | 29847861                | TT                              | CC                | 1945886599               |
| SNP_P3_8779_29847918 | NC_021160.1    | Ca_kabuli_chr01 | 29847918                | GG                              | TT                | 1945886601               |
| SNP_P3_8782_29848169 | NC_021160.1    | Ca_kabuli_chr01 | 29848169                | CC                              | TT                | 1945886603               |
| SNP_P3_8783_29848317 | NC_021160.1    | Ca_kabuli_chr01 | 29848317                | AA                              | TT                | 1945886605               |
| SNP_P3_8784_29848320 | NC_021160.1    | Ca_kabuli_chr01 | 29848320                | TT                              | CC                | 1945886606               |
| SNP_P3_8785_29848428 | NC_021160.1    | Ca_kabuli_chr01 | 29848428                | CC                              | AA                | 1945886608               |
| SNP_P3_8786_29848466 | NC_021160.1    | Ca_kabuli_chr01 | 29848466                | GG                              | AA                | 1945886610               |
| SNP_P3_8787_29848485 | NC_021160.1    | Ca_kabuli_chr01 | 29848485                | CC                              | TT                | 1945886612               |
| SNP_P3_8788_29848512 | NC_021160.1    | Ca_kabuli_chr01 | 29848512                | GG                              | TT                | 1945886613               |
| SNP_P3_8789_29848826 | NC_021160.1    | Ca_kabuli_chr01 | 29848826                | TT                              | CC                | 1945886615               |
| SNP_P3_8790_29848856 | NC_021160.1    | Ca_kabuli_chr01 | 29848856                | GG                              | AA                | 1945886617               |
| SNP_P3_8791_29848868 | NC_021160.1    | Ca_kabuli_chr01 | 29848868                | GG                              | AA                | 1945886619               |
| SNP_P3_8792_29848871 | NC_021160.1    | Ca_kabuli_chr01 | 29848871                | GG                              | AA                | 1945886621               |
| SNP_P3_8793_29848880 | NC_021160.1    | Ca_kabuli_chr01 | 29848880                | GG                              | AA                | 1945886622               |
| SNP_P3_8794_29848899 | NC_021160.1    | Ca_kabuli_chr01 | 29848899                | GG                              | AA                | 1945886624               |
| SNP_P3_8795_29849049 | NC_021160.1    | Ca_kabuli_chr01 | 29849049                | GG                              | AA                | 1945886626               |
| SNP_P3_8796_29849050 | NC_021160.1    | Ca_kabuli_chr01 | 29849050                | CC                              | GG                | 1945886628               |
| SNP_P3_8797_29849052 | NC_021160.1    | Ca_kabuli_chr01 | 29849052                | AA                              | GG                | 1945886629               |
| SNP_P3_8798_29849056 | NC_021160.1    | Ca_kabuli_chr01 | 29849056                | GG                              | AA                | 1945886631               |
| SNP_P3_8799_29849068 | NC_021160.1    | Ca_kabuli_chr01 | 29849068                | AA                              | GG                | 1945886633               |
| SNP_P3_8800_29849081 | NC_021160.1    | Ca_kabuli_chr01 | 29849081                | AA                              | TT                | 1945886635               |
| SNP_P3_8801_29849116 | NC_021160.1    | Ca_kabuli_chr01 | 29849116                | CC                              | TT                | 1945886636               |
| SNP_P3_8802_29849121 | NC_021160.1    | Ca_kabuli_chr01 | 29849121                | TT                              | CC                | 1945886638               |
| SNP_P3_8803_29849234 | NC_021160.1    | Ca_kabuli_chr01 | 29849234                | GG                              | AA                | 1945886640               |
| SNP_P3_8804_29849255 | NC_021160.1    | Ca_kabuli_chr01 | 29849255                | GG                              | AA                | 1945886642               |
| SNP_P3_8805_29849257 | NC_021160.1    | Ca_kabuli_chr01 | 29849257                | GG                              | CC                | 1945886644               |
| SNP_P3_8806_29849342 | NC_021160.1    | Ca_kabuli_chr01 | 29849342                | CC                              | TT                | 1945886645               |
| SNP_P3_8807_29849362 | NC_021160.1    | Ca_kabuli_chr01 | 29849362                | CC                              | TT                | 1945886647               |
| SNP_P3_8808_29849441 | NC_021160.1    | Ca_kabuli_chr01 | 29849441                | CC                              | AA                | 1945886649               |
| SNP_P3_8809_29849553 | NC_021160.1    | Ca_kabuli_chr01 | 29849553                | GG                              | AA                | 1945886651               |
| SNP_P3_8810_29849617 | NC_021160.1    | Ca_kabuli_chr01 | 29849617                | AA                              | GG                | 1945886652               |
| SNP_P3_8811_29849659 | NC_021160.1    | Ca_kabuli_chr01 | 29849659                | GG                              | AA                | 1945886654               |
| SNP_P3_8812_29850105 | NC_021160.1    | Ca_kabuli_chr01 | 29850105                | GG                              | AA                | 1945886656               |
| SNP_P3_8813_29852030 | NC_021160.1    | Ca_kabuli_chr01 | 29852030                | TT                              | CC                | 1945886658               |
| SNP_P3_8814_29852202 | NC_021160.1    | Ca_kabuli_chr01 | 29852202                | CC                              | TT                | 1945886659               |
| SNP_P3_8815_29852204 | NC_021160.1    | Ca_kabuli_chr01 | 29852204                | TT                              | AA                | 1945886661               |

| SNPs IDs             | Chromosome IDs | Chromosomes     | Physical positions (bp) | CDC Frontier (Reference genome) | (Pusa 256 & HPNB) | NCBI SNPdb Accession IDs |
|----------------------|----------------|-----------------|-------------------------|---------------------------------|-------------------|--------------------------|
| SNP_P3_8816_29852212 | NC_021160.1    | Ca_kabuli_chr01 | 29852212                | AA                              | TT                | 1945886663               |
| SNP_P3_8817_29852340 | NC_021160.1    | Ca_kabuli_chr01 | 29852340                | TT                              | CC                | 1945886665               |
| SNP_P3_8818_29852469 | NC_021160.1    | Ca_kabuli_chr01 | 29852469                | TT                              | GG                | 1945886667               |
| SNP_P3_8819_29852480 | NC_021160.1    | Ca_kabuli_chr01 | 29852480                | AA                              | GG                | 1945886668               |
| SNP_P3_8820_29852482 | NC_021160.1    | Ca_kabuli_chr01 | 29852482                | AA                              | TT                | 1945886670               |
| SNP_P3_8821_29852517 | NC_021160.1    | Ca_kabuli_chr01 | 29852517                | TT                              | CC                | 1945886672               |
| SNP_P3_8822_29852946 | NC_021160.1    | Ca_kabuli_chr01 | 29852946                | AA                              | CC                | 1945886674               |
| SNP_P3_8823_29852947 | NC_021160.1    | Ca_kabuli_chr01 | 29852947                | TT                              | AA                | 1945886675               |
| SNP_P3_8824_29853003 | NC_021160.1    | Ca_kabuli_chr01 | 29853003                | TT                              | AA                | 1945886677               |
| SNP_P3_8826_29853554 | NC_021160.1    | Ca_kabuli_chr01 | 29853554                | AA                              | CC                | 1945886679               |
| SNP_P3_8828_29853836 | NC_021160.1    | Ca_kabuli_chr01 | 29853836                | CC                              | AA                | 1945886681               |
| SNP_P3_8829_29853930 | NC_021160.1    | Ca_kabuli_chr01 | 29853930                | AA                              | CC                | 1945886682               |
| SNP_P3_8830_29854080 | NC_021160.1    | Ca_kabuli_chr01 | 29854080                | CC                              | AA                | 1945886684               |
| SNP_P3_8831_29854109 | NC_021160.1    | Ca_kabuli_chr01 | 29854109                | AA                              | GG                | 1945886686               |
| SNP_P3_8832_29854145 | NC_021160.1    | Ca_kabuli_chr01 | 29854145                | CC                              | AA                | 1945886688               |
| SNP_P3_8833_29854146 | NC_021160.1    | Ca_kabuli_chr01 | 29854146                | AA                              | CC                | 1945886690               |
| SNP_P3_8834_29854356 | NC_021160.1    | Ca_kabuli_chr01 | 29854356                | GG                              | AA                | 1945886691               |
| SNP_P3_8835_29854408 | NC_021160.1    | Ca_kabuli_chr01 | 29854408                | TT                              | AA                | 1945886693               |
| SNP_P3_8836_29854484 | NC_021160.1    | Ca_kabuli_chr01 | 29854484                | TT                              | AA                | 1945886695               |
| SNP_P3_8837_29854489 | NC_021160.1    | Ca_kabuli_chr01 | 29854489                | AA                              | GG                | 1945886697               |
| SNP_P3_8838_29854493 | NC_021160.1    | Ca_kabuli_chr01 | 29854493                | AA                              | GG                | 1945886699               |
| SNP_P3_8839_29854515 | NC_021160.1    | Ca_kabuli_chr01 | 29854515                | CC                              | TT                | 1945886700               |
| SNP_P3_8840_29854518 | NC_021160.1    | Ca_kabuli_chr01 | 29854518                | AA                              | TT                | 1945886702               |
| SNP_P3_8841_29854595 | NC_021160.1    | Ca_kabuli_chr01 | 29854595                | CC                              | TT                | 1945886704               |
| SNP_P3_8842_29854835 | NC_021160.1    | Ca_kabuli_chr01 | 29854835                | GG                              | TT                | 1945886706               |
| SNP_P3_8843_29854972 | NC_021160.1    | Ca_kabuli_chr01 | 29854972                | AA                              | CC                | 1945886707               |
| SNP_P3_8844_29854973 | NC_021160.1    | Ca_kabuli_chr01 | 29854973                | TT                              | AA                | 1945886709               |
| SNP_P3_8845_29855017 | NC_021160.1    | Ca_kabuli_chr01 | 29855017                | GG                              | AA                | 1945886711               |
| SNP_P3_8846_29855106 | NC_021160.1    | Ca_kabuli_chr01 | 29855106                | CC                              | GG                | 1945886713               |
| SNP_P3_8847_29855124 | NC_021160.1    | Ca_kabuli_chr01 | 29855124                | TT                              | CC                | 1945886715               |
| SNP_P3_8848_29855139 | NC_021160.1    | Ca_kabuli_chr01 | 29855139                | CC                              | TT                | 1945886716               |
| SNP_P3_8849_29855200 | NC_021160.1    | Ca_kabuli_chr01 | 29855200                | TT                              | GG                | 1945886718               |
| SNP_P3_8850_29855353 | NC_021160.1    | Ca_kabuli_chr01 | 29855353                | TT                              | CC                | 1945886720               |
| SNP_P3_8851_29855477 | NC_021160.1    | Ca_kabuli_chr01 | 29855477                | CC                              | TT                | 1945886722               |
| SNP_P3_8852_29855594 | NC_021160.1    | Ca_kabuli_chr01 | 29855594                | AA                              | GG                | 1945886723               |
| SNP_P3_8853_29855951 | NC_021160.1    | Ca_kabuli_chr01 | 29855951                | GG                              | CC                | 1945886725               |
| SNP_P3_8854_29856030 | NC_021160.1    | Ca_kabuli_chr01 | 29856030                | CC                              | TT                | 1945886727               |
| SNP_P3_8855_29856064 | NC_021160.1    | Ca_kabuli_chr01 | 29856064                | TT                              | GG                | 1945886729               |
| SNP_P3_8856_29856202 | NC_021160.1    | Ca_kabuli_chr01 | 29856202                | CC                              | GG                | 1945886731               |
| SNP_P3_8857_29856247 | NC_021160.1    | Ca_kabuli_chr01 | 29856247                | CC                              | TT                | 1945886732               |
| SNP_P3_8858_29856319 | NC_021160.1    | Ca_kabuli_chr01 | 29856319                | TT                              | GG                | 1945886734               |
| SNP_P3_8859_29856405 | NC_021160.1    | Ca_kabuli_chr01 | 29856405                | GG                              | AA                | 1945886736               |

| SNPs IDs             | Chromosome IDs | Chromosomes     | Physical positions (bp) | CDC Frontier (Reference genome) | (Pusa 256 & HPNB) | NCBI SNPdb Accession IDs |
|----------------------|----------------|-----------------|-------------------------|---------------------------------|-------------------|--------------------------|
| SNP_P3_8860_29856439 | NC_021160.1    | Ca_kabuli_chr01 | 29856439                | GG                              | AA                | 1945886738               |
| SNP_P3_8862_29856845 | NC_021160.1    | Ca_kabuli_chr01 | 29856845                | AA                              | TT                | 1945886739               |
| SNP_P3_8863_29856986 | NC_021160.1    | Ca_kabuli_chr01 | 29856986                | TT                              | CC                | 1945886741               |
| SNP_P3_8864_29857084 | NC_021160.1    | Ca_kabuli_chr01 | 29857084                | AA                              | TT                | 1945886743               |
| SNP_P3_8865_29857164 | NC_021160.1    | Ca_kabuli_chr01 | 29857164                | TT                              | GG                | 1945886745               |
| SNP_P3_8866_29857237 | NC_021160.1    | Ca_kabuli_chr01 | 29857237                | CC                              | TT                | 1945886746               |
| SNP_P3_8867_29858495 | NC_021160.1    | Ca_kabuli_chr01 | 29858495                | AA                              | GG                | 1945886748               |
| SNP_P3_8868_29861422 | NC_021160.1    | Ca_kabuli_chr01 | 29861422                | GG                              | AA                | 1945886750               |
| SNP_P3_8869_29861433 | NC_021160.1    | Ca_kabuli_chr01 | 29861433                | CC                              | TT                | 1945886752               |
| SNP_P3_8870_29861701 | NC_021160.1    | Ca_kabuli_chr01 | 29861701                | TT                              | AA                | 1945886754               |
| SNP_P3_8871_29861761 | NC_021160.1    | Ca_kabuli_chr01 | 29861761                | TT                              | CC                | 1945886755               |
| SNP_P3_8872_29861763 | NC_021160.1    | Ca_kabuli_chr01 | 29861763                | AA                              | CC                | 1945886757               |
| SNP_P3_8873_29863093 | NC_021160.1    | Ca_kabuli_chr01 | 29863093                | AA                              | GG                | 1945886759               |
| SNP_P3_8874_29866984 | NC_021160.1    | Ca_kabuli_chr01 | 29866984                | CC                              | GG                | 1945886761               |
| SNP_P3_8876_29881186 | NC_021160.1    | Ca_kabuli_chr01 | 29881186                | GG                              | AA                | 1945886763               |
| SNP_P3_8877_29881207 | NC_021160.1    | Ca_kabuli_chr01 | 29881207                | CC                              | TT                | 1945886764               |
| SNP_P3_8878_29888831 | NC_021160.1    | Ca_kabuli_chr01 | 29888831                | TT                              | CC                | 1945886766               |
| SNP_P3_8879_29922062 | NC_021160.1    | Ca_kabuli_chr01 | 29922062                | AA                              | TT                | 1945886768               |
| SNP_P3_8880_29932336 | NC_021160.1    | Ca_kabuli_chr01 | 29932336                | GG                              | AA                | 1945886770               |
| SNP_P3_8881_29936628 | NC_021160.1    | Ca_kabuli_chr01 | 29936628                | AA                              | TT                | 1945886771               |
| SNP_P3_8882_29936738 | NC_021160.1    | Ca_kabuli_chr01 | 29936738                | TT                              | CC                | 1945886773               |
| SNP_P3_8883_29936749 | NC_021160.1    | Ca_kabuli_chr01 | 29936749                | TT                              | CC                | 1945886775               |
| SNP_P3_8884_29936754 | NC_021160.1    | Ca_kabuli_chr01 | 29936754                | GG                              | AA                | 1945886777               |
| SNP_P3_8885_29942122 | NC_021160.1    | Ca_kabuli_chr01 | 29942122                | TT                              | GG                | 1945886779               |
| SNP_P3_8886_29942404 | NC_021160.1    | Ca_kabuli_chr01 | 29942404                | TT                              | AA                | 1945886780               |
| SNP_P3_8887_29942490 | NC_021160.1    | Ca_kabuli_chr01 | 29942490                | GG                              | CC                | 1945886782               |
| SNP_P3_8889_29948114 | NC_021160.1    | Ca_kabuli_chr01 | 29948114                | AA                              | TT                | 1945886784               |
| SNP_P3_8890_29961897 | NC_021160.1    | Ca_kabuli_chr01 | 29961897                | TT                              | CC                | 1945886786               |
| SNP_P3_8891_29961900 | NC_021160.1    | Ca_kabuli_chr01 | 29961900                | GG                              | AA                | 1945886788               |
| SNP_P3_8892_29961912 | NC_021160.1    | Ca_kabuli_chr01 | 29961912                | TT                              | GG                | 1945886789               |
| SNP_P3_8893_29966247 | NC_021160.1    | Ca_kabuli_chr01 | 29966247                | AA                              | GG                | 1945886791               |
| SNP_P3_8894_29972024 | NC_021160.1    | Ca_kabuli_chr01 | 29972024                | GG                              | AA                | 1945886793               |
| SNP_P3_8895_29974691 | NC_021160.1    | Ca_kabuli_chr01 | 29974691                | CC                              | AA                | 1945886795               |
| SNP_P3_8896_29974843 | NC_021160.1    | Ca_kabuli_chr01 | 29974843                | CC                              | AA                | 1945886797               |
| SNP_P3_8897_29976714 | NC_021160.1    | Ca_kabuli_chr01 | 29976714                | CC                              | TT                | 1945886798               |
| SNP_P3_8898_29977134 | NC_021160.1    | Ca_kabuli_chr01 | 29977134                | TT                              | AA                | 1945886800               |
| SNP_P3_8899_29977150 | NC_021160.1    | Ca_kabuli_chr01 | 29977150                | AA                              | TT                | 1945886802               |
| SNP_P3_8900_29980732 | NC_021160.1    | Ca_kabuli_chr01 | 29980732                | GG                              | AA                | 1945886804               |
| SNP_P3_8901_29980983 | NC_021160.1    | Ca_kabuli_chr01 | 29980983                | CC                              | TT                | 1945886805               |
| SNP_P3_8902_29980993 | NC_021160.1    | Ca_kabuli_chr01 | 29980993                | AA                              | GG                | 1945886807               |
| SNP_P3_8903_29980996 | NC_021160.1    | Ca_kabuli_chr01 | 29980996                | TT                              | AA                | 1945886809               |
| SNP_P3_8904_29980998 | NC_021160.1    | Ca_kabuli_chr01 | 29980998                | TT                              | AA                | 1945886811               |

| SNPs IDs             | Chromosome IDs | Chromosomes     | Physical positions (bp) | CDC Frontier (Reference genome) | (Pusa 256 & HPNB) | NCBI SNPdb Accession IDs |
|----------------------|----------------|-----------------|-------------------------|---------------------------------|-------------------|--------------------------|
| SNP_P3_8905_29981001 | NC_021160.1    | Ca_kabuli_chr01 | 29981001                | CC                              | TT                | 1945886812               |
| SNP_P3_8906_29981082 | NC_021160.1    | Ca_kabuli_chr01 | 29981082                | GG                              | TT                | 1945886813               |
| SNP_P3_8907_29981726 | NC_021160.1    | Ca_kabuli_chr01 | 29981726                | TT                              | GG                | 1945886814               |
| SNP_P3_8908_29984997 | NC_021160.1    | Ca_kabuli_chr01 | 29984997                | CC                              | TT                | 1945886816               |
| SNP_P3_8909_29994028 | NC_021160.1    | Ca_kabuli_chr01 | 29994028                | TT                              | AA                | 1945886818               |
| SNP_P3_8910_29994030 | NC_021160.1    | Ca_kabuli_chr01 | 29994030                | TT                              | CC                | 1945886819               |
| SNP_P3_8911_29994032 | NC_021160.1    | Ca_kabuli_chr01 | 29994032                | GG                              | AA                | 1945886821               |
| SNP_P3_8912_29994039 | NC_021160.1    | Ca_kabuli_chr01 | 29994039                | AA                              | GG                | 1945886823               |
| SNP_P3_8913_29994040 | NC_021160.1    | Ca_kabuli_chr01 | 29994040                | GG                              | TT                | 1945886825               |
| SNP_P3_8914_29994082 | NC_021160.1    | Ca_kabuli_chr01 | 29994082                | AA                              | GG                | 1945886826               |
| SNP_P3_8915_29994106 | NC_021160.1    | Ca_kabuli_chr01 | 29994106                | AA                              | TT                | 1945886828               |
| SNP_P3_8916_29994364 | NC_021160.1    | Ca_kabuli_chr01 | 29994364                | AA                              | GG                | 1945886830               |
| SNP_P3_8917_29994369 | NC_021160.1    | Ca_kabuli_chr01 | 29994369                | AA                              | GG                | 1945886832               |
| SNP_P3_8919_30001520 | NC_021160.1    | Ca_kabuli_chr01 | 30001520                | AA                              | CC                | 1945886833               |
| SNP_P3_8920_30006036 | NC_021160.1    | Ca_kabuli_chr01 | 30006036                | CC                              | AA                | 1945886835               |
| SNP_P3_8921_30007568 | NC_021160.1    | Ca_kabuli_chr01 | 30007568                | TT                              | AA                | 1945886837               |
| SNP_P3_8922_30007768 | NC_021160.1    | Ca_kabuli_chr01 | 30007768                | GG                              | TT                | 1945886839               |
| SNP_P3_8923_30007816 | NC_021160.1    | Ca_kabuli_chr01 | 30007816                | CC                              | TT                | 1945886841               |
| SNP_P3_8924_30007844 | NC_021160.1    | Ca_kabuli_chr01 | 30007844                | AA                              | CC                | 1945886842               |
| SNP_P3_8925_30034991 | NC_021160.1    | Ca_kabuli_chr01 | 30034991                | AA                              | GG                | 1945886844               |
| SNP_P3_8926_30037287 | NC_021160.1    | Ca_kabuli_chr01 | 30037287                | TT                              | AA                | 1945886846               |
| SNP_P3_8927_30037878 | NC_021160.1    | Ca_kabuli_chr01 | 30037878                | CC                              | AA                | 1945886848               |
| SNP_P3_8928_30037932 | NC_021160.1    | Ca_kabuli_chr01 | 30037932                | AA                              | CC                | 1945886849               |
| SNP_P3_8929_30037947 | NC_021160.1    | Ca_kabuli_chr01 | 30037947                | CC                              | TT                | 1945886851               |
| SNP_P3_8930_30038463 | NC_021160.1    | Ca_kabuli_chr01 | 30038463                | TT                              | CC                | 1945886853               |
| SNP_P3_8931_30038464 | NC_021160.1    | Ca_kabuli_chr01 | 30038464                | AA                              | CC                | 1945886855               |
| SNP_P3_8932_30038540 | NC_021160.1    | Ca_kabuli_chr01 | 30038540                | AA                              | GG                | 1945886857               |
| SNP_P3_8933_30043699 | NC_021160.1    | Ca_kabuli_chr01 | 30043699                | CC                              | AA                | 1945886858               |
| SNP_P3_8934_30048000 | NC_021160.1    | Ca_kabuli_chr01 | 30048000                | AA                              | GG                | 1945886860               |
| SNP_P3_8935_30048355 | NC_021160.1    | Ca_kabuli_chr01 | 30048355                | AA                              | GG                | 1945886862               |
| SNP_P3_8936_30051013 | NC_021160.1    | Ca_kabuli_chr01 | 30051013                | CC                              | GG                | 1945886864               |
| SNP_P3_8937_30051363 | NC_021160.1    | Ca_kabuli_chr01 | 30051363                | TT                              | AA                | 1945886865               |
| SNP_P3_8938_30051399 | NC_021160.1    | Ca_kabuli_chr01 | 30051399                | AA                              | TT                | 1945886867               |
| SNP_P3_8939_30057582 | NC_021160.1    | Ca_kabuli_chr01 | 30057582                | AA                              | GG                | 1945886869               |
| SNP_P3_8940_30057604 | NC_021160.1    | Ca_kabuli_chr01 | 30057604                | AA                              | GG                | 1945886871               |
| SNP_P3_8941_30057612 | NC_021160.1    | Ca_kabuli_chr01 | 30057612                | AA                              | GG                | 1945886873               |
| SNP_P3_8942_30070222 | NC_021160.1    | Ca_kabuli_chr01 | 30070222                | AA                              | TT                | 1945886874               |
| SNP_P3_8944_30087904 | NC_021160.1    | Ca_kabuli_chr01 | 30087904                | CC                              | AA                | 1945886876               |
| SNP_P3_8945_30091502 | NC_021160.1    | Ca_kabuli_chr01 | 30091502                | CC                              | GG                | 1945886878               |
| SNP_P3_8948_30108550 | NC_021160.1    | Ca_kabuli_chr01 | 30108550                | CC                              | TT                | 1945886880               |
| SNP_P3_8949_30108592 | NC_021160.1    | Ca_kabuli_chr01 | 30108592                | GG                              | AA                | 1945886881               |
| SNP_P3_8950_30111332 | NC_021160.1    | Ca_kabuli_chr01 | 30111332                | TT                              | CC                | 1945886883               |

| SNPs IDs             | Chromosome IDs | Chromosomes     | Physical positions (bp) | CDC Frontier (Reference genome) | (Pusa 256 & HPNB) | NCBI SNPdb Accession IDs |
|----------------------|----------------|-----------------|-------------------------|---------------------------------|-------------------|--------------------------|
| SNP_P3_8951_30111341 | NC_021160.1    | Ca_kabuli_chr01 | 30111341                | AA                              | GG                | 1945886885               |
| SNP_P3_8952_30111344 | NC_021160.1    | Ca_kabuli_chr01 | 30111344                | CC                              | TT                | 1945886887               |
| SNP_P3_8953_30111347 | NC_021160.1    | Ca_kabuli_chr01 | 30111347                | TT                              | GG                | 1945886888               |
| SNP_P3_8954_30111359 | NC_021160.1    | Ca_kabuli_chr01 | 30111359                | TT                              | GG                | 1945886890               |
| SNP_P3_8955_30111377 | NC_021160.1    | Ca_kabuli_chr01 | 30111377                | TT                              | AA                | 1945886892               |
| SNP_P3_8956_30111416 | NC_021160.1    | Ca_kabuli_chr01 | 30111416                | TT                              | CC                | 1945886894               |
| SNP_P3_8957_30111434 | NC_021160.1    | Ca_kabuli_chr01 | 30111434                | AA                              | GG                | 1945886895               |
| SNP_P3_8958_30111437 | NC_021160.1    | Ca_kabuli_chr01 | 30111437                | AA                              | GG                | 1945886897               |
| SNP_P3_8959_30111441 | NC_021160.1    | Ca_kabuli_chr01 | 30111441                | TT                              | GG                | 1945886899               |
| SNP_P3_8960_30111444 | NC_021160.1    | Ca_kabuli_chr01 | 30111444                | CC                              | TT                | 1945886901               |
| SNP_P3_8961_30117244 | NC_021160.1    | Ca_kabuli_chr01 | 30117244                | GG                              | TT                | 1945886903               |
| SNP_P3_8962_30117309 | NC_021160.1    | Ca_kabuli_chr01 | 30117309                | AA                              | GG                | 1945886904               |
| SNP_P3_8963_30117613 | NC_021160.1    | Ca_kabuli_chr01 | 30117613                | AA                              | GG                | 1945886906               |
| SNP_P3_8964_30120895 | NC_021160.1    | Ca_kabuli_chr01 | 30120895                | CC                              | TT                | 1945886908               |
| SNP_P3_8965_30128204 | NC_021160.1    | Ca_kabuli_chr01 | 30128204                | CC                              | GG                | 1945886910               |
| SNP_P3_8966_30128588 | NC_021160.1    | Ca_kabuli_chr01 | 30128588                | AA                              | GG                | 1945886911               |
| SNP_P3_8967_30131601 | NC_021160.1    | Ca_kabuli_chr01 | 30131601                | TT                              | CC                | 1945886913               |
| SNP_P3_8968_30132571 | NC_021160.1    | Ca_kabuli_chr01 | 30132571                | AA                              | GG                | 1945886915               |
| SNP_P3_8969_30134753 | NC_021160.1    | Ca_kabuli_chr01 | 30134753                | CC                              | TT                | 1945886917               |
| SNP_P3_8970_30135836 | NC_021160.1    | Ca_kabuli_chr01 | 30135836                | TT                              | CC                | 1945886918               |
| SNP_P3_8971_30137861 | NC_021160.1    | Ca_kabuli_chr01 | 30137861                | GG                              | TT                | 1945886920               |
| SNP_P3_8972_30150228 | NC_021160.1    | Ca_kabuli_chr01 | 30150228                | TT                              | CC                | 1945886922               |
| SNP_P3_8973_30151130 | NC_021160.1    | Ca_kabuli_chr01 | 30151130                | AA                              | GG                | 1945886924               |
| SNP_P3_8974_30151402 | NC_021160.1    | Ca_kabuli_chr01 | 30151402                | AA                              | GG                | 1945886926               |
| SNP_P3_8976_30153614 | NC_021160.1    | Ca_kabuli_chr01 | 30153614                | CC                              | TT                | 1945886927               |
| SNP_P3_8977_30153657 | NC_021160.1    | Ca_kabuli_chr01 | 30153657                | AA                              | CC                | 1945886929               |
| SNP_P3_8979_30154893 | NC_021160.1    | Ca_kabuli_chr01 | 30154893                | TT                              | GG                | 1945886931               |
| SNP_P3_8980_30166899 | NC_021160.1    | Ca_kabuli_chr01 | 30166899                | CC                              | AA                | 1945886933               |
| SNP_P3_8981_30175876 | NC_021160.1    | Ca_kabuli_chr01 | 30175876                | TT                              | CC                | 1945886934               |
| SNP_P3_8982_30181338 | NC_021160.1    | Ca_kabuli_chr01 | 30181338                | CC                              | TT                | 1945886936               |
| SNP_P3_8983_30182769 | NC_021160.1    | Ca_kabuli_chr01 | 30182769                | AA                              | GG                | 1945886938               |
| SNP_P3_8984_30196462 | NC_021160.1    | Ca_kabuli_chr01 | 30196462                | GG                              | AA                | 1945886940               |
| SNP_P3_8985_30196718 | NC_021160.1    | Ca_kabuli_chr01 | 30196718                | GG                              | AA                | 1945886942               |
| SNP_P3_8986_30196760 | NC_021160.1    | Ca_kabuli_chr01 | 30196760                | GG                              | AA                | 1945886943               |
| SNP_P3_8987_30205439 | NC_021160.1    | Ca_kabuli_chr01 | 30205439                | GG                              | AA                | 1945886945               |
| SNP_P3_8988_30213101 | NC_021160.1    | Ca_kabuli_chr01 | 30213101                | GG                              | TT                | 1945886947               |
| SNP_P3_8989_30215951 | NC_021160.1    | Ca_kabuli_chr01 | 30215951                | AA                              | CC                | 1945886949               |
| SNP_P3_8990_30219780 | NC_021160.1    | Ca_kabuli_chr01 | 30219780                | GG                              | TT                | 1945886950               |
| SNP_P3_8991_30229151 | NC_021160.1    | Ca_kabuli_chr01 | 30229151                | CC                              | TT                | 1945886952               |
| SNP_P3_8992_30236405 | NC_021160.1    | Ca_kabuli_chr01 | 30236405                | AA                              | CC                | 1945886954               |
| SNP_P3_8993_30241285 | NC_021160.1    | Ca_kabuli_chr01 | 30241285                | GG                              | AA                | 1945886956               |
| SNP_P3_8995_30249845 | NC_021160.1    | Ca_kabuli_chr01 | 30249845                | GG                              | AA                | 1945886958               |



| SNPs IDs             | Chromosome IDs | Chromosomes     | Physical positions (bp) | CDC Frontier (Reference genome) | (Pusa 256 & HPNB) | NCBI SNPdb Accession IDs |
|----------------------|----------------|-----------------|-------------------------|---------------------------------|-------------------|--------------------------|
| SNP_P3_8996_30249903 | NC_021160.1    | Ca_kabuli_chr01 | 30249903                | GG                              | AA                | 1945886959               |
| SNP_P3_8997_30255590 | NC_021160.1    | Ca_kabuli_chr01 | 30255590                | AA                              | CC                | 1945886961               |
| SNP_P3_8998_30255705 | NC_021160.1    | Ca_kabuli_chr01 | 30255705                | GG                              | TT                | 1945886963               |
| SNP_P3_8999_30256415 | NC_021160.1    | Ca_kabuli_chr01 | 30256415                | AA                              | GG                | 1945886965               |
| SNP_P3_9000_30262929 | NC_021160.1    | Ca_kabuli_chr01 | 30262929                | CC                              | TT                | 1945886966               |
| SNP_P3_9001_30263227 | NC_021160.1    | Ca_kabuli_chr01 | 30263227                | GG                              | AA                | 1945886968               |
| SNP_P3_9002_30263244 | NC_021160.1    | Ca_kabuli_chr01 | 30263244                | TT                              | AA                | 1945886970               |
| SNP_P3_9003_30263625 | NC_021160.1    | Ca_kabuli_chr01 | 30263625                | CC                              | TT                | 1945886972               |
| SNP_P3_9004_30263633 | NC_021160.1    | Ca_kabuli_chr01 | 30263633                | GG                              | AA                | 1945886974               |
| SNP_P3_9005_30263994 | NC_021160.1    | Ca_kabuli_chr01 | 30263994                | CC                              | GG                | 1945886975               |
| SNP_P3_9006_30264021 | NC_021160.1    | Ca_kabuli_chr01 | 30264021                | GG                              | AA                | 1945886977               |
| SNP_P3_9007_30264023 | NC_021160.1    | Ca_kabuli_chr01 | 30264023                | CC                              | AA                | 1945886979               |
| SNP_P3_9009_30264672 | NC_021160.1    | Ca_kabuli_chr01 | 30264672                | AA                              | TT                | 1945886981               |
| SNP_P3_9011_30280031 | NC_021160.1    | Ca_kabuli_chr01 | 30280031                | CC                              | TT                | 1945886983               |
| SNP_P3_9012_30284107 | NC_021160.1    | Ca_kabuli_chr01 | 30284107                | TT                              | CC                | 1945886984               |
| SNP_P3_9013_30284156 | NC_021160.1    | Ca_kabuli_chr01 | 30284156                | GG                              | AA                | 1945886986               |
| SNP_P3_9014_30284348 | NC_021160.1    | Ca_kabuli_chr01 | 30284348                | TT                              | GG                | 1945886988               |
| SNP_P3_9016_30290644 | NC_021160.1    | Ca_kabuli_chr01 | 30290644                | CC                              | AA                | 1945886990               |
| SNP_P3_9018_30323434 | NC_021160.1    | Ca_kabuli_chr01 | 30323434                | TT                              | CC                | 1945886991               |
| SNP_P3_9019_30340470 | NC_021160.1    | Ca_kabuli_chr01 | 30340470                | CC                              | TT                | 1945886993               |
| SNP_P3_9022_30379619 | NC_021160.1    | Ca_kabuli_chr01 | 30379619                | TT                              | AA                | 1945886995               |
| SNP_P3_9023_30397449 | NC_021160.1    | Ca_kabuli_chr01 | 30397449                | AA                              | GG                | 1945886997               |
| SNP_P3_9027_30412202 | NC_021160.1    | Ca_kabuli_chr01 | 30412202                | AA                              | GG                | 1945886998               |
| SNP_P3_9028_30418458 | NC_021160.1    | Ca_kabuli_chr01 | 30418458                | AA                              | GG                | 1945887000               |
| SNP_P3_9029_30418461 | NC_021160.1    | Ca_kabuli_chr01 | 30418461                | TT                              | GG                | 1945887002               |
| SNP_P3_9030_30418474 | NC_021160.1    | Ca_kabuli_chr01 | 30418474                | GG                              | AA                | 1945887004               |
| SNP_P3_9031_30419764 | NC_021160.1    | Ca_kabuli_chr01 | 30419764                | AA                              | GG                | 1945887005               |
| SNP_P3_9032_30421355 | NC_021160.1    | Ca_kabuli_chr01 | 30421355                | TT                              | CC                | 1945887007               |
| SNP_P3_9033_30421363 | NC_021160.1    | Ca_kabuli_chr01 | 30421363                | TT                              | CC                | 1945887009               |
| SNP_P3_9034_30421396 | NC_021160.1    | Ca_kabuli_chr01 | 30421396                | AA                              | CC                | 1945887011               |
| SNP_P3_9035_30421417 | NC_021160.1    | Ca_kabuli_chr01 | 30421417                | GG                              | CC                | 1945887012               |
| SNP_P3_9036_30423065 | NC_021160.1    | Ca_kabuli_chr01 | 30423065                | TT                              | AA                | 1945887014               |
| SNP_P3_9037_30423108 | NC_021160.1    | Ca_kabuli_chr01 | 30423108                | AA                              | CC                | 1945887016               |
| SNP_P3_9038_30424150 | NC_021160.1    | Ca_kabuli_chr01 | 30424150                | TT                              | CC                | 1945887018               |
| SNP_P3_9039_30424222 | NC_021160.1    | Ca_kabuli_chr01 | 30424222                | GG                              | AA                | 1945887019               |
| SNP_P3_9041_30446785 | NC_021160.1    | Ca_kabuli_chr01 | 30446785                | CC                              | TT                | 1945887021               |
| SNP_P3_9042_30450832 | NC_021160.1    | Ca_kabuli_chr01 | 30450832                | GG                              | AA                | 1945887023               |
| SNP_P3_9043_30451294 | NC_021160.1    | Ca_kabuli_chr01 | 30451294                | TT                              | AA                | 1945887025               |
| SNP_P3_9044_30452790 | NC_021160.1    | Ca_kabuli_chr01 | 30452790                | CC                              | TT                | 1945887027               |
| SNP_P3_9045_30460857 | NC_021160.1    | Ca_kabuli_chr01 | 30460857                | TT                              | CC                | 1945887028               |
| SNP_P3_9046_30460879 | NC_021160.1    | Ca_kabuli_chr01 | 30460879                | TT                              | CC                | 1945887030               |
| SNP_P3_9047_30460891 | NC_021160.1    | Ca_kabuli_chr01 | 30460891                | GG                              | TT                | 1945887032               |

| SNPs IDs             | Chromosome IDs | Chromosomes     | Physical positions (bp) | CDC Frontier (Reference genome) | (Pusa 256 & HPNB) | NCBI SNPdb Accession IDs |
|----------------------|----------------|-----------------|-------------------------|---------------------------------|-------------------|--------------------------|
| SNP_P3_9048_30460892 | NC_021160.1    | Ca_kabuli_chr01 | 30460892                | TT                              | CC                | 1945887034               |
| SNP_P3_9049_30460933 | NC_021160.1    | Ca_kabuli_chr01 | 30460933                | TT                              | CC                | 1945887035               |
| SNP_P3_9050_30461178 | NC_021160.1    | Ca_kabuli_chr01 | 30461178                | GG                              | AA                | 1945887037               |
| SNP_P3_9051_30461207 | NC_021160.1    | Ca_kabuli_chr01 | 30461207                | TT                              | CC                | 1945887039               |
| SNP_P3_9052_30461279 | NC_021160.1    | Ca_kabuli_chr01 | 30461279                | GG                              | AA                | 1945887041               |
| SNP_P3_9053_30461292 | NC_021160.1    | Ca_kabuli_chr01 | 30461292                | AA                              | TT                | 1945887043               |
| SNP_P3_9054_30461297 | NC_021160.1    | Ca_kabuli_chr01 | 30461297                | GG                              | AA                | 1945887044               |
| SNP_P3_9055_30461336 | NC_021160.1    | Ca_kabuli_chr01 | 30461336                | CC                              | TT                | 1945887046               |
| SNP_P3_9056_30461380 | NC_021160.1    | Ca_kabuli_chr01 | 30461380                | AA                              | GG                | 1945887048               |
| SNP_P3_9057_30474981 | NC_021160.1    | Ca_kabuli_chr01 | 30474981                | AA                              | CC                | 1945887050               |
| SNP_P3_9058_30475004 | NC_021160.1    | Ca_kabuli_chr01 | 30475004                | TT                              | CC                | 1945887051               |
| SNP_P3_9059_30475014 | NC_021160.1    | Ca_kabuli_chr01 | 30475014                | AA                              | CC                | 1945887053               |
| SNP_P3_9061_30475446 | NC_021160.1    | Ca_kabuli_chr01 | 30475446                | AA                              | GG                | 1945887055               |
| SNP_P3_9062_30475485 | NC_021160.1    | Ca_kabuli_chr01 | 30475485                | AA                              | GG                | 1945887057               |
| SNP_P3_9064_30475540 | NC_021160.1    | Ca_kabuli_chr01 | 30475540                | TT                              | CC                | 1945887059               |
| SNP_P3_9065_30475581 | NC_021160.1    | Ca_kabuli_chr01 | 30475581                | TT                              | AA                | 1945887060               |
| SNP_P3_9066_30475588 | NC_021160.1    | Ca_kabuli_chr01 | 30475588                | TT                              | CC                | 1945887062               |
| SNP_P3_9067_30475617 | NC_021160.1    | Ca_kabuli_chr01 | 30475617                | TT                              | CC                | 1945887064               |
| SNP_P3_9068_30475623 | NC_021160.1    | Ca_kabuli_chr01 | 30475623                | CC                              | TT                | 1945887066               |
| SNP_P3_9069_30475635 | NC_021160.1    | Ca_kabuli_chr01 | 30475635                | GG                              | AA                | 1945887067               |
| SNP_P3_9070_30500460 | NC_021160.1    | Ca_kabuli_chr01 | 30500460                | AA                              | GG                | 1945887069               |
| SNP_P3_9072_30528836 | NC_021160.1    | Ca_kabuli_chr01 | 30528836                | TT                              | CC                | 1945887071               |
| SNP_P3_9073_30575704 | NC_021160.1    | Ca_kabuli_chr01 | 30575704                | TT                              | CC                | 1945887073               |
| SNP_P3_9074_30603992 | NC_021160.1    | Ca_kabuli_chr01 | 30603992                | AA                              | TT                | 1945887074               |
| SNP_P3_9075_30620632 | NC_021160.1    | Ca_kabuli_chr01 | 30620632                | TT                              | AA                | 1945887076               |
| SNP_P3_9076_30624943 | NC_021160.1    | Ca_kabuli_chr01 | 30624943                | GG                              | AA                | 1945887078               |
| SNP_P3_9077_30625618 | NC_021160.1    | Ca_kabuli_chr01 | 30625618                | GG                              | AA                | 1945887080               |
| SNP_P3_9078_30657377 | NC_021160.1    | Ca_kabuli_chr01 | 30657377                | TT                              | GG                | 1945887081               |
| SNP_P3_9080_30725547 | NC_021160.1    | Ca_kabuli_chr01 | 30725547                | TT                              | GG                | 1945887083               |
| SNP_P3_9081_30725822 | NC_021160.1    | Ca_kabuli_chr01 | 30725822                | TT                              | GG                | 1945887085               |
| SNP_P3_9082_30725829 | NC_021160.1    | Ca_kabuli_chr01 | 30725829                | CC                              | TT                | 1945887087               |
| SNP_P3_9083_30725830 | NC_021160.1    | Ca_kabuli_chr01 | 30725830                | TT                              | CC                | 1945887089               |
| SNP_P3_9084_30725845 | NC_021160.1    | Ca_kabuli_chr01 | 30725845                | AA                              | GG                | 1945887090               |
| SNP_P3_9086_30738240 | NC_021160.1    | Ca_kabuli_chr01 | 30738240                | AA                              | GG                | 1945887092               |
| SNP_P3_9087_30738244 | NC_021160.1    | Ca_kabuli_chr01 | 30738244                | AA                              | TT                | 1945887094               |
| SNP_P3_9088_30738524 | NC_021160.1    | Ca_kabuli_chr01 | 30738524                | CC                              | AA                | 1945887096               |
| SNP_P3_9091_30740232 | NC_021160.1    | Ca_kabuli_chr01 | 30740232                | GG                              | TT                | 1945887097               |
| SNP_P3_9092_30740325 | NC_021160.1    | Ca_kabuli_chr01 | 30740325                | CC                              | AA                | 1945887099               |
| SNP_P3_9093_30740326 | NC_021160.1    | Ca_kabuli_chr01 | 30740326                | GG                              | CC                | 1945887101               |
| SNP_P3_9094_30740444 | NC_021160.1    | Ca_kabuli_chr01 | 30740444                | TT                              | CC                | 1945887103               |
| SNP_P3_9095_30740502 | NC_021160.1    | Ca_kabuli_chr01 | 30740502                | AA                              | TT                | 1945887104               |
| SNP_P3_9096_30740835 | NC_021160.1    | Ca_kabuli_chr01 | 30740835                | GG                              | TT                | 1945887106               |

| SNPs IDs             | Chromosome IDs | Chromosomes     | Physical positions (bp) | CDC Frontier (Reference genome) | (Pusa 256 & HPNB) | NCBI SNPdb Accession IDs |
|----------------------|----------------|-----------------|-------------------------|---------------------------------|-------------------|--------------------------|
| SNP_P3_9097_30740872 | NC_021160.1    | Ca_kabuli_chr01 | 30740872                | CC                              | TT                | 1945887108               |
| SNP_P3_9098_30741262 | NC_021160.1    | Ca_kabuli_chr01 | 30741262                | AA                              | GG                | 1945887110               |
| SNP_P3_9099_30745162 | NC_021160.1    | Ca_kabuli_chr01 | 30745162                | CC                              | TT                | 1945887112               |
| SNP_P3_9100_30745215 | NC_021160.1    | Ca_kabuli_chr01 | 30745215                | AA                              | GG                | 1945887113               |
| SNP_P3_9101_30745232 | NC_021160.1    | Ca_kabuli_chr01 | 30745232                | CC                              | TT                | 1945887115               |
| SNP_P3_9102_30745237 | NC_021160.1    | Ca_kabuli_chr01 | 30745237                | AA                              | GG                | 1945887117               |
| SNP_P3_9103_30745269 | NC_021160.1    | Ca_kabuli_chr01 | 30745269                | TT                              | CC                | 1945887119               |
| SNP_P3_9104_30745270 | NC_021160.1    | Ca_kabuli_chr01 | 30745270                | TT                              | AA                | 1945887120               |
| SNP_P3_9105_30745317 | NC_021160.1    | Ca_kabuli_chr01 | 30745317                | TT                              | CC                | 1945887122               |
| SNP_P3_9106_30745338 | NC_021160.1    | Ca_kabuli_chr01 | 30745338                | GG                              | AA                | 1945887124               |
| SNP_P3_9107_30745342 | NC_021160.1    | Ca_kabuli_chr01 | 30745342                | GG                              | AA                | 1945887126               |
| SNP_P3_9108_30745398 | NC_021160.1    | Ca_kabuli_chr01 | 30745398                | TT                              | CC                | 1945887128               |
| SNP_P3_9109_30745402 | NC_021160.1    | Ca_kabuli_chr01 | 30745402                | CC                              | TT                | 1945887129               |
| SNP_P3_9110_30745473 | NC_021160.1    | Ca_kabuli_chr01 | 30745473                | GG                              | CC                | 1945887131               |
| SNP_P3_9112_30745732 | NC_021160.1    | Ca_kabuli_chr01 | 30745732                | TT                              | CC                | 1945887133               |
| SNP_P3_9113_30745796 | NC_021160.1    | Ca_kabuli_chr01 | 30745796                | GG                              | TT                | 1945887135               |
| SNP_P3_9114_30746111 | NC_021160.1    | Ca_kabuli_chr01 | 30746111                | CC                              | AA                | 1945887136               |
| SNP_P3_9116_30756175 | NC_021160.1    | Ca_kabuli_chr01 | 30756175                | TT                              | CC                | 1945887138               |
| SNP_P3_9117_30756178 | NC_021160.1    | Ca_kabuli_chr01 | 30756178                | GG                              | TT                | 1945887140               |
| SNP_P3_9118_30756962 | NC_021160.1    | Ca_kabuli_chr01 | 30756962                | CC                              | AA                | 1945887142               |
| SNP_P3_9119_30762315 | NC_021160.1    | Ca_kabuli_chr01 | 30762315                | GG                              | AA                | 1945887144               |
| SNP_P3_9120_30762343 | NC_021160.1    | Ca_kabuli_chr01 | 30762343                | TT                              | CC                | 1945887145               |
| SNP_P3_9121_30762370 | NC_021160.1    | Ca_kabuli_chr01 | 30762370                | CC                              | TT                | 1945887147               |
| SNP_P3_9122_30762386 | NC_021160.1    | Ca_kabuli_chr01 | 30762386                | GG                              | AA                | 1945887149               |
| SNP_P3_9123_30762418 | NC_021160.1    | Ca_kabuli_chr01 | 30762418                | AA                              | GG                | 1945887151               |
| SNP_P3_9124_30762570 | NC_021160.1    | Ca_kabuli_chr01 | 30762570                | TT                              | CC                | 1945887153               |
| SNP_P3_9125_30762645 | NC_021160.1    | Ca_kabuli_chr01 | 30762645                | TT                              | GG                | 1945887154               |
| SNP_P3_9126_30762652 | NC_021160.1    | Ca_kabuli_chr01 | 30762652                | AA                              | GG                | 1945887156               |
| SNP_P3_9127_30762653 | NC_021160.1    | Ca_kabuli_chr01 | 30762653                | TT                              | CC                | 1945887158               |
| SNP_P3_9128_30762737 | NC_021160.1    | Ca_kabuli_chr01 | 30762737                | AA                              | GG                | 1945887160               |
| SNP_P3_9129_30762750 | NC_021160.1    | Ca_kabuli_chr01 | 30762750                | GG                              | TT                | 1945887161               |
| SNP_P3_9130_30762761 | NC_021160.1    | Ca_kabuli_chr01 | 30762761                | GG                              | TT                | 1945887163               |
| SNP_P3_9131_30762791 | NC_021160.1    | Ca_kabuli_chr01 | 30762791                | CC                              | AA                | 1945887165               |
| SNP_P3_9132_30762935 | NC_021160.1    | Ca_kabuli_chr01 | 30762935                | TT                              | AA                | 1945887167               |
| SNP_P3_9133_30765829 | NC_021160.1    | Ca_kabuli_chr01 | 30765829                | CC                              | GG                | 1945887168               |
| SNP_P3_9134_30766734 | NC_021160.1    | Ca_kabuli_chr01 | 30766734                | CC                              | TT                | 1945887170               |
| SNP_P3_9135_30767740 | NC_021160.1    | Ca_kabuli_chr01 | 30767740                | CC                              | TT                | 1945887172               |
| SNP_P3_9136_30769844 | NC_021160.1    | Ca_kabuli_chr01 | 30769844                | GG                              | AA                | 1945887174               |
| SNP_P3_9137_30769894 | NC_021160.1    | Ca_kabuli_chr01 | 30769894                | GG                              | AA                | 1945887175               |
| SNP_P3_9138_30770137 | NC_021160.1    | Ca_kabuli_chr01 | 30770137                | CC                              | TT                | 1945887177               |
| SNP_P3_9140_30770392 | NC_021160.1    | Ca_kabuli_chr01 | 30770392                | GG                              | AA                | 1945887179               |
| SNP_P3_9141_30770958 | NC_021160.1    | Ca_kabuli_chr01 | 30770958                | CC                              | GG                | 1945887181               |

| SNPs IDs             | Chromosome IDs | Chromosomes     | Physical positions (bp) | CDC Frontier (Reference genome) | (Pusa 256 & HPNB) | NCBI SNPdb Accession IDs |
|----------------------|----------------|-----------------|-------------------------|---------------------------------|-------------------|--------------------------|
| SNP_P3_9142_30771037 | NC_021160.1    | Ca_kabuli_chr01 | 30771037                | GG                              | TT                | 1945887182               |
| SNP_P3_9143_30771411 | NC_021160.1    | Ca_kabuli_chr01 | 30771411                | GG                              | AA                | 1945887184               |
| SNP_P3_9144_30771743 | NC_021160.1    | Ca_kabuli_chr01 | 30771743                | TT                              | CC                | 1945887186               |
| SNP_P3_9145_30788499 | NC_021160.1    | Ca_kabuli_chr01 | 30788499                | GG                              | TT                | 1945887188               |
| SNP_P3_9146_30792382 | NC_021160.1    | Ca_kabuli_chr01 | 30792382                | CC                              | TT                | 1945887190               |
| SNP_P3_9147_30792409 | NC_021160.1    | Ca_kabuli_chr01 | 30792409                | TT                              | CC                | 1945887191               |
| SNP_P3_9148_30800311 | NC_021160.1    | Ca_kabuli_chr01 | 30800311                | CC                              | TT                | 1945887193               |
| SNP_P3_9149_30801120 | NC_021160.1    | Ca_kabuli_chr01 | 30801120                | TT                              | AA                | 1945887195               |
| SNP_P3_9150_30801153 | NC_021160.1    | Ca_kabuli_chr01 | 30801153                | TT                              | CC                | 1945887197               |
| SNP_P3_9151_30801216 | NC_021160.1    | Ca_kabuli_chr01 | 30801216                | CC                              | TT                | 1945887199               |
| SNP_P3_9152_30803690 | NC_021160.1    | Ca_kabuli_chr01 | 30803690                | TT                              | CC                | 1945887200               |
| SNP_P3_9153_30804101 | NC_021160.1    | Ca_kabuli_chr01 | 30804101                | CC                              | TT                | 1945887201               |
| SNP_P3_9154_30805840 | NC_021160.1    | Ca_kabuli_chr01 | 30805840                | AA                              | GG                | 1945887203               |
| SNP_P3_9155_30805920 | NC_021160.1    | Ca_kabuli_chr01 | 30805920                | CC                              | AA                | 1945887205               |
| SNP_P3_9156_30806227 | NC_021160.1    | Ca_kabuli_chr01 | 30806227                | CC                              | TT                | 1945887206               |
| SNP_P3_9157_30806363 | NC_021160.1    | Ca_kabuli_chr01 | 30806363                | TT                              | GG                | 1945887208               |
| SNP_P3_9158_30808038 | NC_021160.1    | Ca_kabuli_chr01 | 30808038                | TT                              | CC                | 1945887210               |
| SNP_P3_9159_30808058 | NC_021160.1    | Ca_kabuli_chr01 | 30808058                | AA                              | CC                | 1945887212               |
| SNP_P3_9160_30808062 | NC_021160.1    | Ca_kabuli_chr01 | 30808062                | AA                              | TT                | 1945887214               |
| SNP_P3_9161_30808368 | NC_021160.1    | Ca_kabuli_chr01 | 30808368                | TT                              | CC                | 1945887215               |
| SNP_P3_9162_30820541 | NC_021160.1    | Ca_kabuli_chr01 | 30820541                | TT                              | CC                | 1945887217               |
| SNP_P3_9163_30821504 | NC_021160.1    | Ca_kabuli_chr01 | 30821504                | GG                              | TT                | 1945887219               |
| SNP_P3_9164_30822117 | NC_021160.1    | Ca_kabuli_chr01 | 30822117                | TT                              | GG                | 1945887221               |
| SNP_P3_9165_30822173 | NC_021160.1    | Ca_kabuli_chr01 | 30822173                | CC                              | TT                | 1945887222               |
| SNP_P3_9166_30823653 | NC_021160.1    | Ca_kabuli_chr01 | 30823653                | GG                              | AA                | 1945887224               |
| SNP_P3_9167_30825227 | NC_021160.1    | Ca_kabuli_chr01 | 30825227                | CC                              | TT                | 1945887226               |
| SNP_P3_9168_30827678 | NC_021160.1    | Ca_kabuli_chr01 | 30827678                | GG                              | AA                | 1945887228               |
| SNP_P3_9169_30830953 | NC_021160.1    | Ca_kabuli_chr01 | 30830953                | AA                              | GG                | 1945887229               |
| SNP_P3_9170_30831900 | NC_021160.1    | Ca_kabuli_chr01 | 30831900                | AA                              | CC                | 1945887231               |
| SNP_P3_9171_30844305 | NC_021160.1    | Ca_kabuli_chr01 | 30844305                | AA                              | TT                | 1945887233               |
| SNP_P3_9172_30849145 | NC_021160.1    | Ca_kabuli_chr01 | 30849145                | AA                              | TT                | 1945887235               |
| SNP_P3_9173_30858926 | NC_021160.1    | Ca_kabuli_chr01 | 30858926                | CC                              | TT                | 1945887236               |
| SNP_P3_9174_30859715 | NC_021160.1    | Ca_kabuli_chr01 | 30859715                | GG                              | TT                | 1945887238               |
| SNP_P3_9175_30859931 | NC_021160.1    | Ca_kabuli_chr01 | 30859931                | TT                              | CC                | 1945887240               |
| SNP_P3_9176_30863158 | NC_021160.1    | Ca_kabuli_chr01 | 30863158                | CC                              | GG                | 1945887242               |
| SNP_P3_9177_30863253 | NC_021160.1    | Ca_kabuli_chr01 | 30863253                | AA                              | GG                | 1945887244               |
| SNP_P3_9178_30863392 | NC_021160.1    | Ca_kabuli_chr01 | 30863392                | AA                              | GG                | 1945887245               |
| SNP_P3_9179_30866717 | NC_021160.1    | Ca_kabuli_chr01 | 30866717                | CC                              | TT                | 1945887247               |
| SNP_P3_9180_30867183 | NC_021160.1    | Ca_kabuli_chr01 | 30867183                | TT                              | CC                | 1945887249               |
| SNP_P3_9181_30874521 | NC_021160.1    | Ca_kabuli_chr01 | 30874521                | AA                              | GG                | 1945887251               |
| SNP_P3_9182_30881017 | NC_021160.1    | Ca_kabuli_chr01 | 30881017                | GG                              | AA                | 1945887252               |
| SNP_P3_9183_30881024 | NC_021160.1    | Ca_kabuli_chr01 | 30881024                | GG                              | AA                | 1945887254               |

| SNPs IDs             | Chromosome IDs | Chromosomes     | Physical positions (bp) | CDC Frontier (Reference genome) | (Pusa 256 & HPNB) | NCBI SNPdb Accession IDs |
|----------------------|----------------|-----------------|-------------------------|---------------------------------|-------------------|--------------------------|
| SNP_P3_9184_30881361 | NC_021160.1    | Ca_kabuli_chr01 | 30881361                | CC                              | TT                | 1945887256               |
| SNP_P3_9185_30881386 | NC_021160.1    | Ca_kabuli_chr01 | 30881386                | AA                              | GG                | 1945887258               |
| SNP_P3_9186_30881394 | NC_021160.1    | Ca_kabuli_chr01 | 30881394                | TT                              | CC                | 1945887260               |
| SNP_P3_9187_30881395 | NC_021160.1    | Ca_kabuli_chr01 | 30881395                | CC                              | TT                | 1945887261               |
| SNP_P3_9188_30882786 | NC_021160.1    | Ca_kabuli_chr01 | 30882786                | TT                              | CC                | 1945887263               |
| SNP_P3_9189_30887888 | NC_021160.1    | Ca_kabuli_chr01 | 30887888                | CC                              | TT                | 1945887265               |
| SNP_P3_9190_30889096 | NC_021160.1    | Ca_kabuli_chr01 | 30889096                | GG                              | CC                | 1945887267               |
| SNP_P3_9191_30889327 | NC_021160.1    | Ca_kabuli_chr01 | 30889327                | TT                              | CC                | 1945887269               |
| SNP_P3_9192_30889349 | NC_021160.1    | Ca_kabuli_chr01 | 30889349                | AA                              | GG                | 1945887270               |
| SNP_P3_9193_30889430 | NC_021160.1    | Ca_kabuli_chr01 | 30889430                | AA                              | CC                | 1945887272               |
| SNP_P3_9194_30889823 | NC_021160.1    | Ca_kabuli_chr01 | 30889823                | CC                              | TT                | 1945887274               |
| SNP_P3_9195_30889869 | NC_021160.1    | Ca_kabuli_chr01 | 30889869                | GG                              | AA                | 1945887276               |
| SNP_P3_9196_30890783 | NC_021160.1    | Ca_kabuli_chr01 | 30890783                | AA                              | GG                | 1945887277               |
| SNP_P3_9197_30912769 | NC_021160.1    | Ca_kabuli_chr01 | 30912769                | GG                              | AA                | 1945887279               |
| SNP_P3_9198_30916170 | NC_021160.1    | Ca_kabuli_chr01 | 30916170                | GG                              | AA                | 1945887281               |
| SNP_P3_9199_30918686 | NC_021160.1    | Ca_kabuli_chr01 | 30918686                | GG                              | CC                | 1945887283               |
| SNP_P3_9200_30923723 | NC_021160.1    | Ca_kabuli_chr01 | 30923723                | AA                              | TT                | 1945887284               |
| SNP_P3_9201_30923952 | NC_021160.1    | Ca_kabuli_chr01 | 30923952                | TT                              | CC                | 1945887286               |
| SNP_P3_9202_30926882 | NC_021160.1    | Ca_kabuli_chr01 | 30926882                | CC                              | GG                | 1945887288               |
| SNP_P3_9203_30926948 | NC_021160.1    | Ca_kabuli_chr01 | 30926948                | AA                              | GG                | 1945887290               |
| SNP_P3_9204_30929726 | NC_021160.1    | Ca_kabuli_chr01 | 30929726                | AA                              | CC                | 1945887292               |
| SNP_P3_9205_30934419 | NC_021160.1    | Ca_kabuli_chr01 | 30934419                | AA                              | GG                | 1945887293               |
| SNP_P3_9206_30934491 | NC_021160.1    | Ca_kabuli_chr01 | 30934491                | GG                              | TT                | 1945887294               |
| SNP_P3_9207_30934522 | NC_021160.1    | Ca_kabuli_chr01 | 30934522                | TT                              | CC                | 1945887296               |
| SNP_P3_9208_30934525 | NC_021160.1    | Ca_kabuli_chr01 | 30934525                | GG                              | TT                | 1945887298               |
| SNP_P3_9209_30934585 | NC_021160.1    | Ca_kabuli_chr01 | 30934585                | TT                              | CC                | 1945887299               |
| SNP_P3_9211_30937951 | NC_021160.1    | Ca_kabuli_chr01 | 30937951                | GG                              | AA                | 1945887301               |
| SNP_P3_9212_30938086 | NC_021160.1    | Ca_kabuli_chr01 | 30938086                | AA                              | CC                | 1945887303               |
| SNP_P3_9213_30938094 | NC_021160.1    | Ca_kabuli_chr01 | 30938094                | TT                              | CC                | 1945887305               |
| SNP_P3_9214_30938106 | NC_021160.1    | Ca_kabuli_chr01 | 30938106                | TT                              | CC                | 1945887306               |
| SNP_P3_9215_30938125 | NC_021160.1    | Ca_kabuli_chr01 | 30938125                | GG                              | TT                | 1945887308               |
| SNP_P3_9216_30938197 | NC_021160.1    | Ca_kabuli_chr01 | 30938197                | AA                              | GG                | 1945887310               |
| SNP_P3_9217_30938199 | NC_021160.1    | Ca_kabuli_chr01 | 30938199                | TT                              | CC                | 1945887312               |
| SNP_P3_9218_30938210 | NC_021160.1    | Ca_kabuli_chr01 | 30938210                | TT                              | CC                | 1945887314               |
| SNP_P3_9219_30938426 | NC_021160.1    | Ca_kabuli_chr01 | 30938426                | AA                              | TT                | 1945887315               |
| SNP_P3_9220_30938489 | NC_021160.1    | Ca_kabuli_chr01 | 30938489                | GG                              | AA                | 1945887317               |
| SNP_P3_9221_30938529 | NC_021160.1    | Ca_kabuli_chr01 | 30938529                | GG                              | AA                | 1945887319               |
| SNP_P3_9222_30938583 | NC_021160.1    | Ca_kabuli_chr01 | 30938583                | TT                              | AA                | 1945887321               |
| SNP_P3_9223_30938607 | NC_021160.1    | Ca_kabuli_chr01 | 30938607                | CC                              | TT                | 1945887322               |
| SNP_P3_9225_30943544 | NC_021160.1    | Ca_kabuli_chr01 | 30943544                | GG                              | AA                | 1945887324               |
| SNP_P3_9226_30945972 | NC_021160.1    | Ca_kabuli_chr01 | 30945972                | GG                              | AA                | 1945887326               |
| SNP_P3_9227_30946231 | NC_021160.1    | Ca_kabuli_chr01 | 30946231                | AA                              | GG                | 1945887328               |

| SNPs IDs             | Chromosome IDs | Chromosomes     | Physical positions (bp) | CDC Frontier (Reference genome) | (Pusa 256 & HPNB) | NCBI SNPdb Accession IDs |
|----------------------|----------------|-----------------|-------------------------|---------------------------------|-------------------|--------------------------|
| SNP_P3_9228_30947575 | NC_021160.1    | Ca_kabuli_chr01 | 30947575                | AA                              | GG                | 1945887329               |
| SNP_P3_9229_30947943 | NC_021160.1    | Ca_kabuli_chr01 | 30947943                | CC                              | GG                | 1945887331               |
| SNP_P3_9230_30956859 | NC_021160.1    | Ca_kabuli_chr01 | 30956859                | TT                              | GG                | 1945887333               |
| SNP_P3_9231_30956899 | NC_021160.1    | Ca_kabuli_chr01 | 30956899                | AA                              | GG                | 1945887335               |
| SNP_P3_9233_30960285 | NC_021160.1    | Ca_kabuli_chr01 | 30960285                | TT                              | CC                | 1945887337               |
| SNP_P3_9234_30960535 | NC_021160.1    | Ca_kabuli_chr01 | 30960535                | AA                              | CC                | 1945887338               |
| SNP_P3_9235_30960726 | NC_021160.1    | Ca_kabuli_chr01 | 30960726                | TT                              | CC                | 1945887340               |
| SNP_P3_9236_30963760 | NC_021160.1    | Ca_kabuli_chr01 | 30963760                | AA                              | CC                | 1945887342               |
| SNP_P3_9237_30967131 | NC_021160.1    | Ca_kabuli_chr01 | 30967131                | TT                              | AA                | 1945887344               |
| SNP_P3_9239_30970043 | NC_021160.1    | Ca_kabuli_chr01 | 30970043                | TT                              | GG                | 1945887345               |
| SNP_P3_9240_30970085 | NC_021160.1    | Ca_kabuli_chr01 | 30970085                | AA                              | CC                | 1945887347               |
| SNP_P3_9241_30970104 | NC_021160.1    | Ca_kabuli_chr01 | 30970104                | AA                              | CC                | 1945887349               |
| SNP_P3_9242_30970277 | NC_021160.1    | Ca_kabuli_chr01 | 30970277                | AA                              | GG                | 1945887351               |
| SNP_P3_9243_30974837 | NC_021160.1    | Ca_kabuli_chr01 | 30974837                | CC                              | AA                | 1945887353               |
| SNP_P3_9244_30979834 | NC_021160.1    | Ca_kabuli_chr01 | 30979834                | CC                              | AA                | 1945887354               |
| SNP_P3_9245_30981962 | NC_021160.1    | Ca_kabuli_chr01 | 30981962                | AA                              | TT                | 1945887356               |
| SNP_P3_9246_30982977 | NC_021160.1    | Ca_kabuli_chr01 | 30982977                | GG                              | CC                | 1945887358               |
| SNP_P3_9247_30983034 | NC_021160.1    | Ca_kabuli_chr01 | 30983034                | TT                              | CC                | 1945887360               |
| SNP_P3_9248_30983061 | NC_021160.1    | Ca_kabuli_chr01 | 30983061                | AA                              | TT                | 1945887361               |
| SNP_P3_9249_30986517 | NC_021160.1    | Ca_kabuli_chr01 | 30986517                | AA                              | TT                | 1945887363               |
| SNP_P3_9250_30987798 | NC_021160.1    | Ca_kabuli_chr01 | 30987798                | CC                              | TT                | 1945887365               |
| SNP_P3_9251_30994221 | NC_021160.1    | Ca_kabuli_chr01 | 30994221                | TT                              | GG                | 1945887367               |
| SNP_P3_9252_31000129 | NC_021160.1    | Ca_kabuli_chr01 | 31000129                | GG                              | AA                | 1945887368               |
| SNP_P3_9254_31005993 | NC_021160.1    | Ca_kabuli_chr01 | 31005993                | TT                              | GG                | 1945887370               |
| SNP_P3_9255_31006574 | NC_021160.1    | Ca_kabuli_chr01 | 31006574                | TT                              | GG                | 1945887372               |
| SNP_P3_9256_31006610 | NC_021160.1    | Ca_kabuli_chr01 | 31006610                | TT                              | GG                | 1945887374               |
| SNP_P3_9257_31015934 | NC_021160.1    | Ca_kabuli_chr01 | 31015934                | AA                              | TT                | 1945887376               |
| SNP_P3_9258_31017944 | NC_021160.1    | Ca_kabuli_chr01 | 31017944                | CC                              | AA                | 1945887377               |
| SNP_P3_9259_31020650 | NC_021160.1    | Ca_kabuli_chr01 | 31020650                | AA                              | GG                | 1945887379               |
| SNP_P3_9260_31022049 | NC_021160.1    | Ca_kabuli_chr01 | 31022049                | GG                              | AA                | 1945887381               |
| SNP_P3_9261_31022078 | NC_021160.1    | Ca_kabuli_chr01 | 31022078                | TT                              | CC                | 1945887383               |
| SNP_P3_9262_31022085 | NC_021160.1    | Ca_kabuli_chr01 | 31022085                | AA                              | GG                | 1945887384               |
| SNP_P3_9263_31022122 | NC_021160.1    | Ca_kabuli_chr01 | 31022122                | TT                              | CC                | 1945887386               |
| SNP_P3_9264_31022238 | NC_021160.1    | Ca_kabuli_chr01 | 31022238                | AA                              | GG                | 1945887388               |
| SNP_P3_9265_31022254 | NC_021160.1    | Ca_kabuli_chr01 | 31022254                | CC                              | TT                | 1945887390               |
| SNP_P3_9266_31022266 | NC_021160.1    | Ca_kabuli_chr01 | 31022266                | AA                              | GG                | 1945887391               |
| SNP_P3_9267_31022285 | NC_021160.1    | Ca_kabuli_chr01 | 31022285                | TT                              | CC                | 1945887392               |
| SNP_P3_9268_31022299 | NC_021160.1    | Ca_kabuli_chr01 | 31022299                | TT                              | AA                | 1945887393               |
| SNP_P3_9269_31022314 | NC_021160.1    | Ca_kabuli_chr01 | 31022314                | AA                              | CC                | 1945887395               |
| SNP_P3_9270_31022455 | NC_021160.1    | Ca_kabuli_chr01 | 31022455                | GG                              | AA                | 1945887397               |
| SNP_P3_9271_31023730 | NC_021160.1    | Ca_kabuli_chr01 | 31023730                | CC                              | TT                | 1945887398               |
| SNP_P3_9272_31029297 | NC_021160.1    | Ca_kabuli_chr01 | 31029297                | CC                              | TT                | 1945887400               |

| SNPs IDs             | Chromosome IDs | Chromosomes     | Physical positions (bp) | CDC Frontier (Reference genome) | (Pusa 256 & HPNB) | NCBI SNPdb Accession IDs |
|----------------------|----------------|-----------------|-------------------------|---------------------------------|-------------------|--------------------------|
| SNP_P3_9273_31029547 | NC_021160.1    | Ca_kabuli_chr01 | 31029547                | GG                              | AA                | 1945887402               |
| SNP_P3_9274_31050802 | NC_021160.1    | Ca_kabuli_chr01 | 31050802                | CC                              | TT                | 1945887404               |
| SNP_P3_9275_31050805 | NC_021160.1    | Ca_kabuli_chr01 | 31050805                | GG                              | AA                | 1945887405               |
| SNP_P3_9276_31050832 | NC_021160.1    | Ca_kabuli_chr01 | 31050832                | CC                              | AA                | 1945887407               |
| SNP_P3_9277_31050853 | NC_021160.1    | Ca_kabuli_chr01 | 31050853                | CC                              | TT                | 1945887409               |
| SNP_P3_9278_31050900 | NC_021160.1    | Ca_kabuli_chr01 | 31050900                | TT                              | CC                | 1945887411               |
| SNP_P3_9279_31050925 | NC_021160.1    | Ca_kabuli_chr01 | 31050925                | TT                              | CC                | 1945887412               |
| SNP_P3_9280_31050928 | NC_021160.1    | Ca_kabuli_chr01 | 31050928                | AA                              | GG                | 1945887414               |
| SNP_P3_9281_31050961 | NC_021160.1    | Ca_kabuli_chr01 | 31050961                | GG                              | AA                | 1945887416               |
| SNP_P3_9282_31050981 | NC_021160.1    | Ca_kabuli_chr01 | 31050981                | TT                              | CC                | 1945887418               |
| SNP_P3_9283_31051182 | NC_021160.1    | Ca_kabuli_chr01 | 31051182                | TT                              | CC                | 1945887420               |
| SNP_P3_9284_31051217 | NC_021160.1    | Ca_kabuli_chr01 | 31051217                | GG                              | AA                | 1945887421               |
| SNP_P3_9285_31051309 | NC_021160.1    | Ca_kabuli_chr01 | 31051309                | CC                              | TT                | 1945887423               |
| SNP_P3_9286_31051369 | NC_021160.1    | Ca_kabuli_chr01 | 31051369                | TT                              | CC                | 1945887425               |
| SNP_P3_9287_31051392 | NC_021160.1    | Ca_kabuli_chr01 | 31051392                | CC                              | TT                | 1945887427               |
| SNP_P3_9288_31056561 | NC_021160.1    | Ca_kabuli_chr01 | 31056561                | GG                              | AA                | 1945887428               |
| SNP_P3_9289_31069144 | NC_021160.1    | Ca_kabuli_chr01 | 31069144                | AA                              | CC                | 1945887430               |
| SNP_P3_9291_31073882 | NC_021160.1    | Ca_kabuli_chr01 | 31073882                | GG                              | CC                | 1945887432               |
| SNP_P3_9292_31078685 | NC_021160.1    | Ca_kabuli_chr01 | 31078685                | AA                              | CC                | 1945887434               |
| SNP_P3_9293_31085437 | NC_021160.1    | Ca_kabuli_chr01 | 31085437                | AA                              | GG                | 1945887435               |
| SNP_P3_9294_31086336 | NC_021160.1    | Ca_kabuli_chr01 | 31086336                | AA                              | CC                | 1945887437               |
| SNP_P3_9295_31086337 | NC_021160.1    | Ca_kabuli_chr01 | 31086337                | AA                              | CC                | 1945887439               |
| SNP_P3_9297_31101544 | NC_021160.1    | Ca_kabuli_chr01 | 31101544                | AA                              | GG                | 1945887441               |
| SNP_P3_9298_31105263 | NC_021160.1    | Ca_kabuli_chr01 | 31105263                | GG                              | TT                | 1945887443               |
| SNP_P3_9299_31105265 | NC_021160.1    | Ca_kabuli_chr01 | 31105265                | TT                              | GG                | 1945887444               |
| SNP_P3_9300_31105272 | NC_021160.1    | Ca_kabuli_chr01 | 31105272                | GG                              | CC                | 1945887446               |
| SNP_P3_9303_31118852 | NC_021160.1    | Ca_kabuli_chr01 | 31118852                | GG                              | AA                | 1945887448               |
| SNP_P3_9304_31119307 | NC_021160.1    | Ca_kabuli_chr01 | 31119307                | TT                              | AA                | 1945887450               |
| SNP_P3_9306_31130065 | NC_021160.1    | Ca_kabuli_chr01 | 31130065                | CC                              | TT                | 1945887452               |
| SNP_P3_9307_31130452 | NC_021160.1    | Ca_kabuli_chr01 | 31130452                | TT                              | CC                | 1945887453               |
| SNP_P3_9308_31134841 | NC_021160.1    | Ca_kabuli_chr01 | 31134841                | GG                              | AA                | 1945887455               |
| SNP_P3_9309_31134842 | NC_021160.1    | Ca_kabuli_chr01 | 31134842                | CC                              | TT                | 1945887457               |
| SNP_P3_9311_31147712 | NC_021160.1    | Ca_kabuli_chr01 | 31147712                | GG                              | CC                | 1945887459               |
| SNP_P3_9312_31150324 | NC_021160.1    | Ca_kabuli_chr01 | 31150324                | AA                              | GG                | 1945887460               |
| SNP_P3_9313_31162909 | NC_021160.1    | Ca_kabuli_chr01 | 31162909                | AA                              | TT                | 1945887462               |
| SNP_P3_9314_31162948 | NC_021160.1    | Ca_kabuli_chr01 | 31162948                | GG                              | AA                | 1945887464               |
| SNP_P3_9315_31162952 | NC_021160.1    | Ca_kabuli_chr01 | 31162952                | CC                              | GG                | 1945887466               |
| SNP_P3_9317_31163570 | NC_021160.1    | Ca_kabuli_chr01 | 31163570                | TT                              | CC                | 1945887468               |
| SNP_P3_9318_31168141 | NC_021160.1    | Ca_kabuli_chr01 | 31168141                | AA                              | GG                | 1945887469               |
| SNP_P3_9319_31181453 | NC_021160.1    | Ca_kabuli_chr01 | 31181453                | AA                              | GG                | 1945887471               |
| SNP_P3_9320_31184209 | NC_021160.1    | Ca_kabuli_chr01 | 31184209                | CC                              | TT                | 1945887473               |
| SNP_P3_9321_31185873 | NC_021160.1    | Ca_kabuli_chr01 | 31185873                | GG                              | AA                | 1945887475               |

| SNPs IDs             | Chromosome IDs | Chromosomes     | Physical positions (bp) | CDC Frontier (Reference genome) | (Pusa 256 & HPNB) | NCBI SNPdb Accession IDs |
|----------------------|----------------|-----------------|-------------------------|---------------------------------|-------------------|--------------------------|
| SNP_P3_9322_31185950 | NC_021160.1    | Ca_kabuli_chr01 | 31185950                | TT                              | CC                | 1945887476               |
| SNP_P3_9323_31187827 | NC_021160.1    | Ca_kabuli_chr01 | 31187827                | CC                              | TT                | 1945887478               |
| SNP_P3_9324_31188019 | NC_021160.1    | Ca_kabuli_chr01 | 31188019                | GG                              | AA                | 1945887480               |
| SNP_P3_9326_31191945 | NC_021160.1    | Ca_kabuli_chr01 | 31191945                | AA                              | GG                | 1945887482               |
| SNP_P3_9327_31193203 | NC_021160.1    | Ca_kabuli_chr01 | 31193203                | GG                              | AA                | 1945887484               |
| SNP_P3_9329_31195585 | NC_021160.1    | Ca_kabuli_chr01 | 31195585                | AA                              | CC                | 1945887485               |
| SNP_P3_9330_31201354 | NC_021160.1    | Ca_kabuli_chr01 | 31201354                | CC                              | TT                | 1945887487               |
| SNP_P3_9331_31201391 | NC_021160.1    | Ca_kabuli_chr01 | 31201391                | AA                              | GG                | 1945887489               |
| SNP_P3_9332_31201392 | NC_021160.1    | Ca_kabuli_chr01 | 31201392                | CC                              | TT                | 1945887491               |
| SNP_P3_9333_31201395 | NC_021160.1    | Ca_kabuli_chr01 | 31201395                | CC                              | TT                | 1945887493               |
| SNP_P3_9334_31201398 | NC_021160.1    | Ca_kabuli_chr01 | 31201398                | CC                              | TT                | 1945887494               |
| SNP_P3_9335_31201538 | NC_021160.1    | Ca_kabuli_chr01 | 31201538                | TT                              | CC                | 1945887496               |
| SNP_P3_9336_31204994 | NC_021160.1    | Ca_kabuli_chr01 | 31204994                | TT                              | CC                | 1945887498               |
| SNP_P3_9337_31206215 | NC_021160.1    | Ca_kabuli_chr01 | 31206215                | CC                              | TT                | 1945887500               |
| SNP_P3_9338_31206480 | NC_021160.1    | Ca_kabuli_chr01 | 31206480                | AA                              | TT                | 1945887501               |
| SNP_P3_9339_31217742 | NC_021160.1    | Ca_kabuli_chr01 | 31217742                | AA                              | CC                | 1945887503               |
| SNP_P3_9340_31218110 | NC_021160.1    | Ca_kabuli_chr01 | 31218110                | AA                              | GG                | 1945887505               |
| SNP_P3_9341_31218387 | NC_021160.1    | Ca_kabuli_chr01 | 31218387                | TT                              | AA                | 1945887507               |
| SNP_P3_9342_31218396 | NC_021160.1    | Ca_kabuli_chr01 | 31218396                | GG                              | TT                | 1945887509               |
| SNP_P3_9343_31218464 | NC_021160.1    | Ca_kabuli_chr01 | 31218464                | CC                              | AA                | 1945887510               |
| SNP_P3_9344_31218768 | NC_021160.1    | Ca_kabuli_chr01 | 31218768                | GG                              | TT                | 1945887512               |
| SNP_P3_9345_31223636 | NC_021160.1    | Ca_kabuli_chr01 | 31223636                | CC                              | TT                | 1945887514               |
| SNP_P3_9346_31225907 | NC_021160.1    | Ca_kabuli_chr01 | 31225907                | GG                              | AA                | 1945887516               |
| SNP_P3_9347_31225965 | NC_021160.1    | Ca_kabuli_chr01 | 31225965                | CC                              | TT                | 1945887518               |
| SNP_P3_9348_31225967 | NC_021160.1    | Ca_kabuli_chr01 | 31225967                | GG                              | AA                | 1945887519               |
| SNP_P3_9349_31227364 | NC_021160.1    | Ca_kabuli_chr01 | 31227364                | TT                              | GG                | 1945887521               |
| SNP_P3_9350_31232956 | NC_021160.1    | Ca_kabuli_chr01 | 31232956                | CC                              | AA                | 1945887523               |
| SNP_P3_9351_31236022 | NC_021160.1    | Ca_kabuli_chr01 | 31236022                | CC                              | TT                | 1945887525               |
| SNP_P3_9352_31236289 | NC_021160.1    | Ca_kabuli_chr01 | 31236289                | CC                              | TT                | 1945887527               |
| SNP_P3_9353_31248743 | NC_021160.1    | Ca_kabuli_chr01 | 31248743                | GG                              | CC                | 1945887528               |
| SNP_P3_9354_31252970 | NC_021160.1    | Ca_kabuli_chr01 | 31252970                | TT                              | CC                | 1945887530               |
| SNP_P3_9355_31263529 | NC_021160.1    | Ca_kabuli_chr01 | 31263529                | TT                              | AA                | 1945887532               |
| SNP_P3_9356_31279625 | NC_021160.1    | Ca_kabuli_chr01 | 31279625                | AA                              | CC                | 1945887534               |
| SNP_P3_9357_31279737 | NC_021160.1    | Ca_kabuli_chr01 | 31279737                | CC                              | TT                | 1945887535               |
| SNP_P3_9358_31280293 | NC_021160.1    | Ca_kabuli_chr01 | 31280293                | AA                              | GG                | 1945887537               |
| SNP_P3_9359_31280424 | NC_021160.1    | Ca_kabuli_chr01 | 31280424                | TT                              | GG                | 1945887539               |
| SNP_P3_9360_31280429 | NC_021160.1    | Ca_kabuli_chr01 | 31280429                | AA                              | GG                | 1945887541               |
| SNP_P3_9361_31280437 | NC_021160.1    | Ca_kabuli_chr01 | 31280437                | CC                              | TT                | 1945887543               |
| SNP_P3_9362_31280443 | NC_021160.1    | Ca_kabuli_chr01 | 31280443                | AA                              | GG                | 1945887544               |
| SNP_P3_9363_31281017 | NC_021160.1    | Ca_kabuli_chr01 | 31281017                | TT                              | AA                | 1945887546               |
| SNP_P3_9364_31281127 | NC_021160.1    | Ca_kabuli_chr01 | 31281127                | AA                              | GG                | 1945887548               |
| SNP_P3_9365_31281163 | NC_021160.1    | Ca_kabuli_chr01 | 31281163                | TT                              | CC                | 1945887550               |



| SNPs IDs             | Chromosome IDs | Chromosomes     | Physical positions (bp) | CDC Frontier (Reference genome) | (Pusa 256 & HPNB) | NCBI SNPdb Accession IDs |
|----------------------|----------------|-----------------|-------------------------|---------------------------------|-------------------|--------------------------|
| SNP_P3_9366_31281486 | NC_021160.1    | Ca_kabuli_chr01 | 31281486                | TT                              | CC                | 1945887551               |
| SNP_P3_9367_31281487 | NC_021160.1    | Ca_kabuli_chr01 | 31281487                | TT                              | CC                | 1945887553               |
| SNP_P3_9368_31283548 | NC_021160.1    | Ca_kabuli_chr01 | 31283548                | AA                              | GG                | 1945887555               |
| SNP_P3_9369_31286998 | NC_021160.1    | Ca_kabuli_chr01 | 31286998                | GG                              | TT                | 1945887557               |
| SNP_P3_9370_31288743 | NC_021160.1    | Ca_kabuli_chr01 | 31288743                | GG                              | CC                | 1945887559               |
| SNP_P3_9371_31295346 | NC_021160.1    | Ca_kabuli_chr01 | 31295346                | CC                              | GG                | 1945887560               |
| SNP_P3_9373_31307239 | NC_021160.1    | Ca_kabuli_chr01 | 31307239                | AA                              | TT                | 1945887562               |
| SNP_P3_9374_31307322 | NC_021160.1    | Ca_kabuli_chr01 | 31307322                | GG                              | AA                | 1945887564               |
| SNP_P3_9375_31307549 | NC_021160.1    | Ca_kabuli_chr01 | 31307549                | AA                              | GG                | 1945887566               |
| SNP_P3_9376_31307700 | NC_021160.1    | Ca_kabuli_chr01 | 31307700                | AA                              | GG                | 1945887567               |
| SNP_P3_9377_31307717 | NC_021160.1    | Ca_kabuli_chr01 | 31307717                | GG                              | AA                | 1945887569               |
| SNP_P3_9378_31307734 | NC_021160.1    | Ca_kabuli_chr01 | 31307734                | AA                              | TT                | 1945887571               |
| SNP_P3_9379_31308037 | NC_021160.1    | Ca_kabuli_chr01 | 31308037                | AA                              | TT                | 1945887573               |
| SNP_P3_9380_31308038 | NC_021160.1    | Ca_kabuli_chr01 | 31308038                | AA                              | TT                | 1945887575               |
| SNP_P3_9381_31310022 | NC_021160.1    | Ca_kabuli_chr01 | 31310022                | AA                              | GG                | 1945887576               |
| SNP_P3_9382_31310042 | NC_021160.1    | Ca_kabuli_chr01 | 31310042                | GG                              | TT                | 1945887578               |
| SNP_P3_9383_31310260 | NC_021160.1    | Ca_kabuli_chr01 | 31310260                | AA                              | GG                | 1945887580               |
| SNP_P3_9384_31310323 | NC_021160.1    | Ca_kabuli_chr01 | 31310323                | TT                              | GG                | 1945887582               |
| SNP_P3_9385_31310338 | NC_021160.1    | Ca_kabuli_chr01 | 31310338                | GG                              | AA                | 1945887583               |
| SNP_P3_9386_31310412 | NC_021160.1    | Ca_kabuli_chr01 | 31310412                | CC                              | TT                | 1945887585               |
| SNP_P3_9387_31314083 | NC_021160.1    | Ca_kabuli_chr01 | 31314083                | CC                              | TT                | 1945887587               |
| SNP_P3_9388_31319042 | NC_021160.1    | Ca_kabuli_chr01 | 31319042                | CC                              | GG                | 1945887589               |
| SNP_P3_9389_31319954 | NC_021160.1    | Ca_kabuli_chr01 | 31319954                | TT                              | CC                | 1945887590               |
| SNP_P3_9390_31324229 | NC_021160.1    | Ca_kabuli_chr01 | 31324229                | TT                              | CC                | 1945887592               |
| SNP_P3_9391_31326115 | NC_021160.1    | Ca_kabuli_chr01 | 31326115                | TT                              | GG                | 1945887594               |
| SNP_P3_9392_31326793 | NC_021160.1    | Ca_kabuli_chr01 | 31326793                | AA                              | GG                | 1945887596               |
| SNP_P3_9393_31329542 | NC_021160.1    | Ca_kabuli_chr01 | 31329542                | AA                              | TT                | 1945887598               |
| SNP_P3_9395_31332773 | NC_021160.1    | Ca_kabuli_chr01 | 31332773                | AA                              | TT                | 1945887599               |
| SNP_P3_9396_31333068 | NC_021160.1    | Ca_kabuli_chr01 | 31333068                | AA                              | TT                | 1945887601               |
| SNP_P3_9397_31333069 | NC_021160.1    | Ca_kabuli_chr01 | 31333069                | TT                              | AA                | 1945887603               |
| SNP_P3_9398_31333086 | NC_021160.1    | Ca_kabuli_chr01 | 31333086                | GG                              | AA                | 1945887605               |
| SNP_P3_9399_31340238 | NC_021160.1    | Ca_kabuli_chr01 | 31340238                | AA                              | CC                | 1945887606               |
| SNP_P3_9400_31340249 | NC_021160.1    | Ca_kabuli_chr01 | 31340249                | TT                              | GG                | 1945887608               |
| SNP_P3_9401_31340259 | NC_021160.1    | Ca_kabuli_chr01 | 31340259                | AA                              | GG                | 1945887610               |
| SNP_P3_9402_31340453 | NC_021160.1    | Ca_kabuli_chr01 | 31340453                | CC                              | TT                | 1945887612               |
| SNP_P3_9403_31340694 | NC_021160.1    | Ca_kabuli_chr01 | 31340694                | AA                              | CC                | 1945887614               |
| SNP_P3_9405_31344984 | NC_021160.1    | Ca_kabuli_chr01 | 31344984                | GG                              | TT                | 1945887615               |
| SNP_P3_9406_31354785 | NC_021160.1    | Ca_kabuli_chr01 | 31354785                | GG                              | AA                | 1945887617               |
| SNP_P3_9407_31354786 | NC_021160.1    | Ca_kabuli_chr01 | 31354786                | GG                              | AA                | 1945887619               |
| SNP_P3_9408_31354816 | NC_021160.1    | Ca_kabuli_chr01 | 31354816                | AA                              | GG                | 1945887621               |
| SNP_P3_9410_31355583 | NC_021160.1    | Ca_kabuli_chr01 | 31355583                | AA                              | GG                | 1945887622               |
| SNP_P3_9411_31357897 | NC_021160.1    | Ca_kabuli_chr01 | 31357897                | TT                              | AA                | 1945887624               |

| SNPs IDs             | Chromosome IDs | Chromosomes     | Physical positions (bp) | CDC Frontier (Reference genome) | (Pusa 256 & HPNB) | NCBI SNPdb Accession IDs |
|----------------------|----------------|-----------------|-------------------------|---------------------------------|-------------------|--------------------------|
| SNP_P3_9412_31360119 | NC_021160.1    | Ca_kabuli_chr01 | 31360119                | TT                              | CC                | 1945887626               |
| SNP_P3_9414_31374063 | NC_021160.1    | Ca_kabuli_chr01 | 31374063                | CC                              | GG                | 1945887628               |
| SNP_P3_9415_31377432 | NC_021160.1    | Ca_kabuli_chr01 | 31377432                | AA                              | GG                | 1945887630               |
| SNP_P3_9416_31378909 | NC_021160.1    | Ca_kabuli_chr01 | 31378909                | TT                              | AA                | 1945887631               |
| SNP_P3_9417_31379215 | NC_021160.1    | Ca_kabuli_chr01 | 31379215                | AA                              | GG                | 1945887633               |
| SNP_P3_9419_31392295 | NC_021160.1    | Ca_kabuli_chr01 | 31392295                | CC                              | TT                | 1945887635               |
| SNP_P3_9420_31398241 | NC_021160.1    | Ca_kabuli_chr01 | 31398241                | TT                              | CC                | 1945887637               |
| SNP_P3_9421_31410579 | NC_021160.1    | Ca_kabuli_chr01 | 31410579                | TT                              | CC                | 1945887639               |
| SNP_P3_9422_31410671 | NC_021160.1    | Ca_kabuli_chr01 | 31410671                | CC                              | AA                | 1945887640               |
| SNP_P3_9423_31414678 | NC_021160.1    | Ca_kabuli_chr01 | 31414678                | GG                              | CC                | 1945887642               |
| SNP_P3_9424_31423891 | NC_021160.1    | Ca_kabuli_chr01 | 31423891                | GG                              | AA                | 1945887644               |
| SNP_P3_9425_31432738 | NC_021160.1    | Ca_kabuli_chr01 | 31432738                | AA                              | GG                | 1945887646               |
| SNP_P3_9426_31434139 | NC_021160.1    | Ca_kabuli_chr01 | 31434139                | CC                              | TT                | 1945887648               |
| SNP_P3_9427_31434681 | NC_021160.1    | Ca_kabuli_chr01 | 31434681                | CC                              | AA                | 1945887649               |
| SNP_P3_9428_31438269 | NC_021160.1    | Ca_kabuli_chr01 | 31438269                | CC                              | TT                | 1945887651               |
| SNP_P3_9430_31442975 | NC_021160.1    | Ca_kabuli_chr01 | 31442975                | TT                              | CC                | 1945887653               |
| SNP_P3_9432_31448079 | NC_021160.1    | Ca_kabuli_chr01 | 31448079                | GG                              | TT                | 1945887655               |
| SNP_P3_9434_31450553 | NC_021160.1    | Ca_kabuli_chr01 | 31450553                | TT                              | AA                | 1945887657               |
| SNP_P3_9435_31451252 | NC_021160.1    | Ca_kabuli_chr01 | 31451252                | CC                              | GG                | 1945887658               |
| SNP_P3_9436_31455004 | NC_021160.1    | Ca_kabuli_chr01 | 31455004                | AA                              | TT                | 1945887660               |
| SNP_P3_9437_31455211 | NC_021160.1    | Ca_kabuli_chr01 | 31455211                | TT                              | CC                | 1945887662               |
| SNP_P3_9438_31455543 | NC_021160.1    | Ca_kabuli_chr01 | 31455543                | GG                              | AA                | 1945887664               |
| SNP_P3_9439_31464013 | NC_021160.1    | Ca_kabuli_chr01 | 31464013                | AA                              | GG                | 1945887666               |
| SNP_P3_9440_31473768 | NC_021160.1    | Ca_kabuli_chr01 | 31473768                | AA                              | GG                | 1945887667               |
| SNP_P3_9443_31482142 | NC_021160.1    | Ca_kabuli_chr01 | 31482142                | TT                              | CC                | 1945887669               |
| SNP_P3_9444_31482201 | NC_021160.1    | Ca_kabuli_chr01 | 31482201                | TT                              | CC                | 1945887671               |
| SNP_P3_9445_31482268 | NC_021160.1    | Ca_kabuli_chr01 | 31482268                | GG                              | AA                | 1945887673               |
| SNP_P3_9446_31482375 | NC_021160.1    | Ca_kabuli_chr01 | 31482375                | TT                              | AA                | 1945887675               |
| SNP_P3_9447_31490456 | NC_021160.1    | Ca_kabuli_chr01 | 31490456                | AA                              | GG                | 1945887676               |
| SNP_P3_9450_31491822 | NC_021160.1    | Ca_kabuli_chr01 | 31491822                | TT                              | CC                | 1945887678               |
| SNP_P3_9452_31492865 | NC_021160.1    | Ca_kabuli_chr01 | 31492865                | TT                              | AA                | 1945887680               |
| SNP_P3_9453_31492869 | NC_021160.1    | Ca_kabuli_chr01 | 31492869                | CC                              | AA                | 1945887682               |
| SNP_P3_9454_31494120 | NC_021160.1    | Ca_kabuli_chr01 | 31494120                | AA                              | CC                | 1945887683               |
| SNP_P3_9455_31495076 | NC_021160.1    | Ca_kabuli_chr01 | 31495076                | CC                              | TT                | 1945887685               |
| SNP_P3_9456_31498392 | NC_021160.1    | Ca_kabuli_chr01 | 31498392                | GG                              | AA                | 1945887687               |
| SNP_P3_9458_31499014 | NC_021160.1    | Ca_kabuli_chr01 | 31499014                | AA                              | GG                | 1945887689               |
| SNP_P3_9459_31505179 | NC_021160.1    | Ca_kabuli_chr01 | 31505179                | AA                              | TT                | 1945887691               |
| SNP_P3_9460_31505183 | NC_021160.1    | Ca_kabuli_chr01 | 31505183                | GG                              | TT                | 1945887692               |
| SNP_P3_9461_31505191 | NC_021160.1    | Ca_kabuli_chr01 | 31505191                | TT                              | CC                | 1945887694               |
| SNP_P3_9462_31511910 | NC_021160.1    | Ca_kabuli_chr01 | 31511910                | TT                              | CC                | 1945887696               |
| SNP_P3_9463_31512866 | NC_021160.1    | Ca_kabuli_chr01 | 31512866                | AA                              | GG                | 1945887698               |
| SNP_P3_9464_31514070 | NC_021160.1    | Ca_kabuli_chr01 | 31514070                | TT                              | AA                | 1945887700               |

| SNPs IDs             | Chromosome IDs | Chromosomes     | Physical positions (bp) | CDC Frontier (Reference genome) | (Pusa 256 & HPNB) | NCBI SNPdb Accession IDs |
|----------------------|----------------|-----------------|-------------------------|---------------------------------|-------------------|--------------------------|
| SNP_P3_9465_31516391 | NC_021160.1    | Ca_kabuli_chr01 | 31516391                | CC                              | AA                | 1945887701               |
| SNP_P3_9466_31516393 | NC_021160.1    | Ca_kabuli_chr01 | 31516393                | AA                              | TT                | 1945887703               |
| SNP_P3_9467_31517589 | NC_021160.1    | Ca_kabuli_chr01 | 31517589                | AA                              | GG                | 1945887705               |
| SNP_P3_9468_31524546 | NC_021160.1    | Ca_kabuli_chr01 | 31524546                | AA                              | GG                | 1945887707               |
| SNP_P3_9469_31538793 | NC_021160.1    | Ca_kabuli_chr01 | 31538793                | CC                              | TT                | 1945887709               |
| SNP_P3_9470_31538873 | NC_021160.1    | Ca_kabuli_chr01 | 31538873                | AA                              | GG                | 1945887711               |
| SNP_P3_9471_31544293 | NC_021160.1    | Ca_kabuli_chr01 | 31544293                | AA                              | GG                | 1945887712               |
| SNP_P3_9472_31544294 | NC_021160.1    | Ca_kabuli_chr01 | 31544294                | GG                              | TT                | 1945887714               |
| SNP_P3_9473_31548962 | NC_021160.1    | Ca_kabuli_chr01 | 31548962                | CC                              | AA                | 1945887716               |
| SNP_P3_9474_31550922 | NC_021160.1    | Ca_kabuli_chr01 | 31550922                | GG                              | AA                | 1945887718               |
| SNP_P3_9475_31551072 | NC_021160.1    | Ca_kabuli_chr01 | 31551072                | CC                              | AA                | 1945887720               |
| SNP_P3_9476_31559894 | NC_021160.1    | Ca_kabuli_chr01 | 31559894                | TT                              | CC                | 1945887721               |
| SNP_P3_9477_31562953 | NC_021160.1    | Ca_kabuli_chr01 | 31562953                | CC                              | TT                | 1945887723               |
| SNP_P3_9478_31568011 | NC_021160.1    | Ca_kabuli_chr01 | 31568011                | TT                              | AA                | 1945887725               |
| SNP_P3_9479_31568012 | NC_021160.1    | Ca_kabuli_chr01 | 31568012                | GG                              | TT                | 1945887727               |
| SNP_P3_9480_31571337 | NC_021160.1    | Ca_kabuli_chr01 | 31571337                | CC                              | TT                | 1945887729               |
| SNP_P3_9481_31573906 | NC_021160.1    | Ca_kabuli_chr01 | 31573906                | CC                              | AA                | 1945887730               |
| SNP_P3_9482_31583052 | NC_021160.1    | Ca_kabuli_chr01 | 31583052                | CC                              | TT                | 1945887732               |
| SNP_P3_9483_31584675 | NC_021160.1    | Ca_kabuli_chr01 | 31584675                | GG                              | TT                | 1945887734               |
| SNP_P3_9484_31584731 | NC_021160.1    | Ca_kabuli_chr01 | 31584731                | GG                              | AA                | 1945887736               |
| SNP_P3_9485_31585130 | NC_021160.1    | Ca_kabuli_chr01 | 31585130                | CC                              | AA                | 1945887738               |
| SNP_P3_9486_31585140 | NC_021160.1    | Ca_kabuli_chr01 | 31585140                | GG                              | AA                | 1945887740               |
| SNP_P3_9487_31585144 | NC_021160.1    | Ca_kabuli_chr01 | 31585144                | CC                              | TT                | 1945887741               |
| SNP_P3_9488_31586184 | NC_021160.1    | Ca_kabuli_chr01 | 31586184                | GG                              | TT                | 1945887743               |
| SNP_P3_9489_31586770 | NC_021160.1    | Ca_kabuli_chr01 | 31586770                | CC                              | TT                | 1945887745               |
| SNP_P3_9490_31587347 | NC_021160.1    | Ca_kabuli_chr01 | 31587347                | TT                              | AA                | 1945887747               |
| SNP_P3_9491_31588010 | NC_021160.1    | Ca_kabuli_chr01 | 31588010                | GG                              | TT                | 1945887749               |
| SNP_P3_9492_31588367 | NC_021160.1    | Ca_kabuli_chr01 | 31588367                | AA                              | GG                | 1945887750               |
| SNP_P3_9493_31588380 | NC_021160.1    | Ca_kabuli_chr01 | 31588380                | GG                              | AA                | 1945887752               |
| SNP_P3_9494_31588409 | NC_021160.1    | Ca_kabuli_chr01 | 31588409                | TT                              | AA                | 1945887754               |
| SNP_P3_9495_31592077 | NC_021160.1    | Ca_kabuli_chr01 | 31592077                | GG                              | CC                | 1945887756               |
| SNP_P3_9498_31592205 | NC_021160.1    | Ca_kabuli_chr01 | 31592205                | AA                              | CC                | 1945887758               |
| SNP_P3_9499_31592328 | NC_021160.1    | Ca_kabuli_chr01 | 31592328                | AA                              | GG                | 1945887759               |
| SNP_P3_9501_31592502 | NC_021160.1    | Ca_kabuli_chr01 | 31592502                | AA                              | CC                | 1945887761               |
| SNP_P3_9502_31592541 | NC_021160.1    | Ca_kabuli_chr01 | 31592541                | GG                              | AA                | 1945887763               |
| SNP_P3_9503_31592670 | NC_021160.1    | Ca_kabuli_chr01 | 31592670                | AA                              | GG                | 1945887765               |
| SNP_P3_9504_31592742 | NC_021160.1    | Ca_kabuli_chr01 | 31592742                | AA                              | TT                | 1945887767               |
| SNP_P3_9505_31592835 | NC_021160.1    | Ca_kabuli_chr01 | 31592835                | GG                              | AA                | 1945887769               |
| SNP_P3_9506_31593013 | NC_021160.1    | Ca_kabuli_chr01 | 31593013                | AA                              | GG                | 1945887770               |
| SNP_P3_9507_31593767 | NC_021160.1    | Ca_kabuli_chr01 | 31593767                | CC                              | AA                | 1945887772               |
| SNP_P3_9508_31598295 | NC_021160.1    | Ca_kabuli_chr01 | 31598295                | CC                              | GG                | 1945887774               |
| SNP_P3_9509_31599512 | NC_021160.1    | Ca_kabuli_chr01 | 31599512                | TT                              | CC                | 1945887776               |

| SNPs IDs             | Chromosome IDs | Chromosomes     | Physical positions (bp) | CDC Frontier (Reference genome) | (Pusa 256 & HPNB) | NCBI SNPdb Accession IDs |
|----------------------|----------------|-----------------|-------------------------|---------------------------------|-------------------|--------------------------|
| SNP_P3_9510_31599546 | NC_021160.1    | Ca_kabuli_chr01 | 31599546                | TT                              | GG                | 1945887778               |
| SNP_P3_9511_31599560 | NC_021160.1    | Ca_kabuli_chr01 | 31599560                | TT                              | CC                | 1945887779               |
| SNP_P3_9512_31599582 | NC_021160.1    | Ca_kabuli_chr01 | 31599582                | TT                              | AA                | 1945887781               |
| SNP_P3_9513_31599612 | NC_021160.1    | Ca_kabuli_chr01 | 31599612                | TT                              | GG                | 1945887783               |
| SNP_P3_9514_31599649 | NC_021160.1    | Ca_kabuli_chr01 | 31599649                | AA                              | GG                | 1945887785               |
| SNP_P3_9515_31599797 | NC_021160.1    | Ca_kabuli_chr01 | 31599797                | TT                              | CC                | 1945887787               |
| SNP_P3_9516_31599834 | NC_021160.1    | Ca_kabuli_chr01 | 31599834                | CC                              | GG                | 1945887789               |
| SNP_P3_9517_31599841 | NC_021160.1    | Ca_kabuli_chr01 | 31599841                | CC                              | TT                | 1945887790               |
| SNP_P3_9518_31599920 | NC_021160.1    | Ca_kabuli_chr01 | 31599920                | GG                              | CC                | 1945887792               |
| SNP_P3_9519_31600395 | NC_021160.1    | Ca_kabuli_chr01 | 31600395                | AA                              | GG                | 1945887794               |
| SNP_P3_9520_31600409 | NC_021160.1    | Ca_kabuli_chr01 | 31600409                | CC                              | TT                | 1945887796               |
| SNP_P3_9521_31600501 | NC_021160.1    | Ca_kabuli_chr01 | 31600501                | GG                              | AA                | 1945887798               |
| SNP_P3_9522_31600637 | NC_021160.1    | Ca_kabuli_chr01 | 31600637                | TT                              | AA                | 1945887799               |
| SNP_P3_9524_31600704 | NC_021160.1    | Ca_kabuli_chr01 | 31600704                | CC                              | TT                | 1945887801               |
| SNP_P3_9525_31601690 | NC_021160.1    | Ca_kabuli_chr01 | 31601690                | AA                              | TT                | 1945887803               |
| SNP_P3_9526_31601691 | NC_021160.1    | Ca_kabuli_chr01 | 31601691                | TT                              | GG                | 1945887804               |
| SNP_P3_9528_31602550 | NC_021160.1    | Ca_kabuli_chr01 | 31602550                | TT                              | AA                | 1945887806               |
| SNP_P3_9529_31605726 | NC_021160.1    | Ca_kabuli_chr01 | 31605726                | AA                              | GG                | 1945887808               |
| SNP_P3_9530_31606995 | NC_021160.1    | Ca_kabuli_chr01 | 31606995                | GG                              | AA                | 1945887810               |
| SNP_P3_9531_31607086 | NC_021160.1    | Ca_kabuli_chr01 | 31607086                | TT                              | CC                | 1945887812               |
| SNP_P3_9532_31610509 | NC_021160.1    | Ca_kabuli_chr01 | 31610509                | AA                              | TT                | 1945887814               |
| SNP_P3_9533_31615700 | NC_021160.1    | Ca_kabuli_chr01 | 31615700                | TT                              | CC                | 1945887815               |
| SNP_P3_9534_31626511 | NC_021160.1    | Ca_kabuli_chr01 | 31626511                | GG                              | AA                | 1945887817               |
| SNP_P3_9535_31627019 | NC_021160.1    | Ca_kabuli_chr01 | 31627019                | AA                              | CC                | 1945887819               |
| SNP_P3_9536_31627028 | NC_021160.1    | Ca_kabuli_chr01 | 31627028                | AA                              | GG                | 1945887821               |
| SNP_P3_9537_31627067 | NC_021160.1    | Ca_kabuli_chr01 | 31627067                | GG                              | CC                | 1945887823               |
| SNP_P3_9538_31627092 | NC_021160.1    | Ca_kabuli_chr01 | 31627092                | CC                              | TT                | 1945887824               |
| SNP_P3_9539_31627102 | NC_021160.1    | Ca_kabuli_chr01 | 31627102                | CC                              | TT                | 1945887826               |
| SNP_P3_9540_31627410 | NC_021160.1    | Ca_kabuli_chr01 | 31627410                | GG                              | AA                | 1945887828               |
| SNP_P3_9541_31627441 | NC_021160.1    | Ca_kabuli_chr01 | 31627441                | GG                              | AA                | 1945887830               |
| SNP_P3_9542_31627507 | NC_021160.1    | Ca_kabuli_chr01 | 31627507                | CC                              | TT                | 1945887832               |
| SNP_P3_9543_31627508 | NC_021160.1    | Ca_kabuli_chr01 | 31627508                | CC                              | TT                | 1945887833               |
| SNP_P3_9544_31627512 | NC_021160.1    | Ca_kabuli_chr01 | 31627512                | AA                              | GG                | 1945887835               |
| SNP_P3_9545_31627522 | NC_021160.1    | Ca_kabuli_chr01 | 31627522                | TT                              | GG                | 1945887837               |
| SNP_P3_9546_31627605 | NC_021160.1    | Ca_kabuli_chr01 | 31627605                | GG                              | TT                | 1945887839               |
| SNP_P3_9547_31627637 | NC_021160.1    | Ca_kabuli_chr01 | 31627637                | GG                              | TT                | 1945887841               |
| SNP_P3_9548_31627689 | NC_021160.1    | Ca_kabuli_chr01 | 31627689                | AA                              | GG                | 1945887842               |
| SNP_P3_9549_31627733 | NC_021160.1    | Ca_kabuli_chr01 | 31627733                | TT                              | CC                | 1945887844               |
| SNP_P3_9550_31627736 | NC_021160.1    | Ca_kabuli_chr01 | 31627736                | CC                              | TT                | 1945887846               |
| SNP_P3_9551_31627791 | NC_021160.1    | Ca_kabuli_chr01 | 31627791                | AA                              | TT                | 1945887848               |
| SNP_P3_9552_31627793 | NC_021160.1    | Ca_kabuli_chr01 | 31627793                | AA                              | CC                | 1945887850               |
| SNP_P3_9553_31633359 | NC_021160.1    | Ca_kabuli_chr01 | 31633359                | GG                              | TT                | 1945887851               |

| SNPs IDs             | Chromosome IDs | Chromosomes     | Physical positions (bp) | CDC Frontier (Reference genome) | (Pusa 256 & HPNB) | NCBI SNPdb Accession IDs |
|----------------------|----------------|-----------------|-------------------------|---------------------------------|-------------------|--------------------------|
| SNP_P3_9554_31646318 | NC_021160.1    | Ca_kabuli_chr01 | 31646318                | TT                              | GG                | 1945887853               |
| SNP_P3_9557_31650166 | NC_021160.1    | Ca_kabuli_chr01 | 31650166                | TT                              | CC                | 1945887855               |
| SNP_P3_9558_31654973 | NC_021160.1    | Ca_kabuli_chr01 | 31654973                | GG                              | AA                | 1945887857               |
| SNP_P3_9559_31654976 | NC_021160.1    | Ca_kabuli_chr01 | 31654976                | CC                              | TT                | 1945887859               |
| SNP_P3_9560_31654981 | NC_021160.1    | Ca_kabuli_chr01 | 31654981                | AA                              | CC                | 1945887860               |
| SNP_P3_9561_31654994 | NC_021160.1    | Ca_kabuli_chr01 | 31654994                | TT                              | CC                | 1945887862               |
| SNP_P3_9562_31655889 | NC_021160.1    | Ca_kabuli_chr01 | 31655889                | CC                              | AA                | 1945887864               |
| SNP_P3_9563_31656357 | NC_021160.1    | Ca_kabuli_chr01 | 31656357                | CC                              | AA                | 1945887866               |
| SNP_P3_9564_31664276 | NC_021160.1    | Ca_kabuli_chr01 | 31664276                | GG                              | AA                | 1945887868               |
| SNP_P3_9566_31664949 | NC_021160.1    | Ca_kabuli_chr01 | 31664949                | AA                              | GG                | 1945887870               |
| SNP_P3_9568_31665544 | NC_021160.1    | Ca_kabuli_chr01 | 31665544                | AA                              | TT                | 1945887871               |
| SNP_P3_9569_31665682 | NC_021160.1    | Ca_kabuli_chr01 | 31665682                | GG                              | AA                | 1945887873               |
| SNP_P3_9570_31667537 | NC_021160.1    | Ca_kabuli_chr01 | 31667537                | TT                              | AA                | 1945887875               |
| SNP_P3_9571_31667915 | NC_021160.1    | Ca_kabuli_chr01 | 31667915                | TT                              | AA                | 1945887877               |
| SNP_P3_9572_31693352 | NC_021160.1    | Ca_kabuli_chr01 | 31693352                | CC                              | GG                | 1945887879               |
| SNP_P3_9573_31694035 | NC_021160.1    | Ca_kabuli_chr01 | 31694035                | CC                              | AA                | 1945887880               |
| SNP_P3_9574_31695358 | NC_021160.1    | Ca_kabuli_chr01 | 31695358                | TT                              | AA                | 1945887882               |
| SNP_P3_9575_31699661 | NC_021160.1    | Ca_kabuli_chr01 | 31699661                | TT                              | AA                | 1945887884               |
| SNP_P3_9576_31710522 | NC_021160.1    | Ca_kabuli_chr01 | 31710522                | GG                              | AA                | 1945887886               |
| SNP_P3_9577_31710532 | NC_021160.1    | Ca_kabuli_chr01 | 31710532                | GG                              | TT                | 1945887888               |
| SNP_P3_9578_31710552 | NC_021160.1    | Ca_kabuli_chr01 | 31710552                | GG                              | TT                | 1945887889               |
| SNP_P3_9579_31710578 | NC_021160.1    | Ca_kabuli_chr01 | 31710578                | CC                              | TT                | 1945887891               |
| SNP_P3_9580_31716096 | NC_021160.1    | Ca_kabuli_chr01 | 31716096                | AA                              | GG                | 1945887893               |
| SNP_P3_9581_31716139 | NC_021160.1    | Ca_kabuli_chr01 | 31716139                | TT                              | CC                | 1945887895               |
| SNP_P3_9582_31716183 | NC_021160.1    | Ca_kabuli_chr01 | 31716183                | TT                              | AA                | 1945887897               |
| SNP_P3_9583_31716414 | NC_021160.1    | Ca_kabuli_chr01 | 31716414                | GG                              | AA                | 1945887898               |
| SNP_P3_9584_31716482 | NC_021160.1    | Ca_kabuli_chr01 | 31716482                | AA                              | GG                | 1945887900               |
| SNP_P3_9585_31716594 | NC_021160.1    | Ca_kabuli_chr01 | 31716594                | CC                              | TT                | 1945887902               |
| SNP_P3_9586_31716618 | NC_021160.1    | Ca_kabuli_chr01 | 31716618                | CC                              | GG                | 1945887904               |
| SNP_P3_9587_31716633 | NC_021160.1    | Ca_kabuli_chr01 | 31716633                | GG                              | TT                | 1945887906               |
| SNP_P3_9588_31716642 | NC_021160.1    | Ca_kabuli_chr01 | 31716642                | TT                              | CC                | 1945887907               |
| SNP_P3_9589_31721618 | NC_021160.1    | Ca_kabuli_chr01 | 31721618                | AA                              | TT                | 1945887909               |
| SNP_P3_9590_31721915 | NC_021160.1    | Ca_kabuli_chr01 | 31721915                | AA                              | GG                | 1945887911               |
| SNP_P3_9591_31725769 | NC_021160.1    | Ca_kabuli_chr01 | 31725769                | TT                              | CC                | 1945887913               |
| SNP_P3_9592_31725817 | NC_021160.1    | Ca_kabuli_chr01 | 31725817                | TT                              | CC                | 1945887914               |
| SNP_P3_9593_31726022 | NC_021160.1    | Ca_kabuli_chr01 | 31726022                | CC                              | TT                | 1945887916               |
| SNP_P3_9594_31726028 | NC_021160.1    | Ca_kabuli_chr01 | 31726028                | AA                              | GG                | 1945887918               |
| SNP_P3_9595_31726050 | NC_021160.1    | Ca_kabuli_chr01 | 31726050                | TT                              | CC                | 1945887920               |
| SNP_P3_9596_31726067 | NC_021160.1    | Ca_kabuli_chr01 | 31726067                | CC                              | AA                | 1945887922               |
| SNP_P3_9597_31726091 | NC_021160.1    | Ca_kabuli_chr01 | 31726091                | CC                              | TT                | 1945887923               |
| SNP_P3_9598_31726096 | NC_021160.1    | Ca_kabuli_chr01 | 31726096                | AA                              | CC                | 1945887925               |
| SNP_P3_9599_31726097 | NC_021160.1    | Ca_kabuli_chr01 | 31726097                | AA                              | GG                | 1945887927               |

| SNPs IDs             | Chromosome IDs | Chromosomes     | Physical positions (bp) | CDC Frontier (Reference genome) | (Pusa 256 & HPNB) | NCBI SNPdb Accession IDs |
|----------------------|----------------|-----------------|-------------------------|---------------------------------|-------------------|--------------------------|
| SNP_P3_9600_31726142 | NC_021160.1    | Ca_kabuli_chr01 | 31726142                | TT                              | GG                | 1945887929               |
| SNP_P3_9601_31726151 | NC_021160.1    | Ca_kabuli_chr01 | 31726151                | CC                              | TT                | 1945887930               |
| SNP_P3_9602_31726157 | NC_021160.1    | Ca_kabuli_chr01 | 31726157                | TT                              | CC                | 1945887932               |
| SNP_P3_9603_31726189 | NC_021160.1    | Ca_kabuli_chr01 | 31726189                | GG                              | TT                | 1945887934               |
| SNP_P3_9604_31726224 | NC_021160.1    | Ca_kabuli_chr01 | 31726224                | AA                              | GG                | 1945887936               |
| SNP_P3_9605_31726241 | NC_021160.1    | Ca_kabuli_chr01 | 31726241                | GG                              | AA                | 1945887938               |
| SNP_P3_9606_31726250 | NC_021160.1    | Ca_kabuli_chr01 | 31726250                | AA                              | CC                | 1945887939               |
| SNP_P3_9607_31726262 | NC_021160.1    | Ca_kabuli_chr01 | 31726262                | GG                              | AA                | 1945887941               |
| SNP_P3_9608_31726265 | NC_021160.1    | Ca_kabuli_chr01 | 31726265                | TT                              | CC                | 1945887943               |
| SNP_P3_9609_31726273 | NC_021160.1    | Ca_kabuli_chr01 | 31726273                | TT                              | GG                | 1945887945               |
| SNP_P3_9610_31726286 | NC_021160.1    | Ca_kabuli_chr01 | 31726286                | GG                              | TT                | 1945887947               |
| SNP_P3_9611_31726287 | NC_021160.1    | Ca_kabuli_chr01 | 31726287                | AA                              | TT                | 1945887948               |
| SNP_P3_9612_31726313 | NC_021160.1    | Ca_kabuli_chr01 | 31726313                | TT                              | CC                | 1945887950               |
| SNP_P3_9613_31728371 | NC_021160.1    | Ca_kabuli_chr01 | 31728371                | GG                              | TT                | 1945887952               |
| SNP_P3_9614_31768458 | NC_021160.1    | Ca_kabuli_chr01 | 31768458                | GG                              | AA                | 1945887954               |
| SNP_P3_9616_31772055 | NC_021160.1    | Ca_kabuli_chr01 | 31772055                | CC                              | TT                | 1945887956               |
| SNP_P3_9617_31778803 | NC_021160.1    | Ca_kabuli_chr01 | 31778803                | AA                              | TT                | 1945887957               |
| SNP_P3_9618_31778865 | NC_021160.1    | Ca_kabuli_chr01 | 31778865                | AA                              | GG                | 1945887959               |
| SNP_P3_9619_31778898 | NC_021160.1    | Ca_kabuli_chr01 | 31778898                | CC                              | GG                | 1945887961               |
| SNP_P3_9620_31778976 | NC_021160.1    | Ca_kabuli_chr01 | 31778976                | AA                              | GG                | 1945887963               |
| SNP_P3_9621_31778982 | NC_021160.1    | Ca_kabuli_chr01 | 31778982                | CC                              | TT                | 1945887965               |
| SNP_P3_9622_31779039 | NC_021160.1    | Ca_kabuli_chr01 | 31779039                | TT                              | CC                | 1945887966               |
| SNP_P3_9623_31779046 | NC_021160.1    | Ca_kabuli_chr01 | 31779046                | TT                              | CC                | 1945887968               |
| SNP_P3_9624_31779048 | NC_021160.1    | Ca_kabuli_chr01 | 31779048                | AA                              | GG                | 1945887970               |
| SNP_P3_9625_31779054 | NC_021160.1    | Ca_kabuli_chr01 | 31779054                | GG                              | AA                | 1945887972               |
| SNP_P3_9626_31779306 | NC_021160.1    | Ca_kabuli_chr01 | 31779306                | GG                              | TT                | 1945887974               |
| SNP_P3_9627_31779376 | NC_021160.1    | Ca_kabuli_chr01 | 31779376                | AA                              | GG                | 1945887975               |
| SNP_P3_9628_31779467 | NC_021160.1    | Ca_kabuli_chr01 | 31779467                | CC                              | TT                | 1945887977               |
| SNP_P3_9629_31779547 | NC_021160.1    | Ca_kabuli_chr01 | 31779547                | TT                              | GG                | 1945887979               |
| SNP_P3_9630_31779587 | NC_021160.1    | Ca_kabuli_chr01 | 31779587                | CC                              | TT                | 1945887981               |
| SNP_P3_9631_31779601 | NC_021160.1    | Ca_kabuli_chr01 | 31779601                | TT                              | CC                | 1945887983               |
| SNP_P3_9632_31779617 | NC_021160.1    | Ca_kabuli_chr01 | 31779617                | AA                              | CC                | 1945887984               |
| SNP_P3_9633_31779693 | NC_021160.1    | Ca_kabuli_chr01 | 31779693                | TT                              | AA                | 1945887986               |
| SNP_P3_9634_31779720 | NC_021160.1    | Ca_kabuli_chr01 | 31779720                | TT                              | AA                | 1945887988               |
| SNP_P3_9635_31779764 | NC_021160.1    | Ca_kabuli_chr01 | 31779764                | AA                              | TT                | 1945887990               |
| SNP_P3_9636_31779946 | NC_021160.1    | Ca_kabuli_chr01 | 31779946                | TT                              | CC                | 1945887991               |
| SNP_P3_9637_31780000 | NC_021160.1    | Ca_kabuli_chr01 | 31780000                | TT                              | GG                | 1945887993               |
| SNP_P3_9638_31780013 | NC_021160.1    | Ca_kabuli_chr01 | 31780013                | GG                              | TT                | 1945887995               |
| SNP_P3_9639_31780017 | NC_021160.1    | Ca_kabuli_chr01 | 31780017                | AA                              | TT                | 1945887997               |
| SNP_P3_9640_31780018 | NC_021160.1    | Ca_kabuli_chr01 | 31780018                | AA                              | GG                | 1945887999               |
| SNP_P3_9641_31780045 | NC_021160.1    | Ca_kabuli_chr01 | 31780045                | CC                              | AA                | 1945888000               |
| SNP_P3_9642_31783236 | NC_021160.1    | Ca_kabuli_chr01 | 31783236                | TT                              | CC                | 1945888002               |

| SNPs IDs             | Chromosome IDs | Chromosomes     | Physical positions (bp) | CDC Frontier (Reference genome) | (Pusa 256 & HPNB) | NCBI SNPdb Accession IDs |
|----------------------|----------------|-----------------|-------------------------|---------------------------------|-------------------|--------------------------|
| SNP_P3_9643_31783355 | NC_021160.1    | Ca_kabuli_chr01 | 31783355                | AA                              | GG                | 1945888004               |
| SNP_P3_9644_31783381 | NC_021160.1    | Ca_kabuli_chr01 | 31783381                | TT                              | CC                | 1945888006               |
| SNP_P3_9646_31783604 | NC_021160.1    | Ca_kabuli_chr01 | 31783604                | GG                              | AA                | 1945888008               |
| SNP_P3_9647_31783644 | NC_021160.1    | Ca_kabuli_chr01 | 31783644                | GG                              | AA                | 1945888009               |
| SNP_P3_9648_31783648 | NC_021160.1    | Ca_kabuli_chr01 | 31783648                | CC                              | GG                | 1945888011               |
| SNP_P3_9649_31783653 | NC_021160.1    | Ca_kabuli_chr01 | 31783653                | CC                              | TT                | 1945888013               |
| SNP_P3_9650_31783700 | NC_021160.1    | Ca_kabuli_chr01 | 31783700                | GG                              | AA                | 1945888015               |
| SNP_P3_9652_31783867 | NC_021160.1    | Ca_kabuli_chr01 | 31783867                | GG                              | TT                | 1945888017               |
| SNP_P3_9653_31783910 | NC_021160.1    | Ca_kabuli_chr01 | 31783910                | GG                              | AA                | 1945888018               |
| SNP_P3_9654_31784089 | NC_021160.1    | Ca_kabuli_chr01 | 31784089                | CC                              | GG                | 1945888020               |
| SNP_P3_9655_31784148 | NC_021160.1    | Ca_kabuli_chr01 | 31784148                | AA                              | CC                | 1945888022               |
| SNP_P3_9656_31784244 | NC_021160.1    | Ca_kabuli_chr01 | 31784244                | GG                              | AA                | 1945888024               |
| SNP_P3_9657_31784411 | NC_021160.1    | Ca_kabuli_chr01 | 31784411                | GG                              | AA                | 1945888026               |
| SNP_P3_9658_31784441 | NC_021160.1    | Ca_kabuli_chr01 | 31784441                | TT                              | CC                | 1945888027               |
| SNP_P3_9659_31784486 | NC_021160.1    | Ca_kabuli_chr01 | 31784486                | TT                              | CC                | 1945888029               |
| SNP_P3_9660_31784609 | NC_021160.1    | Ca_kabuli_chr01 | 31784609                | CC                              | TT                | 1945888031               |
| SNP_P3_9661_31784665 | NC_021160.1    | Ca_kabuli_chr01 | 31784665                | GG                              | AA                | 1945888033               |
| SNP_P3_9662_31784685 | NC_021160.1    | Ca_kabuli_chr01 | 31784685                | GG                              | AA                | 1945888035               |
| SNP_P3_9663_31784718 | NC_021160.1    | Ca_kabuli_chr01 | 31784718                | CC                              | GG                | 1945888036               |
| SNP_P3_9664_31784803 | NC_021160.1    | Ca_kabuli_chr01 | 31784803                | GG                              | AA                | 1945888038               |
| SNP_P3_9665_31784851 | NC_021160.1    | Ca_kabuli_chr01 | 31784851                | TT                              | CC                | 1945888040               |
| SNP_P3_9666_31784886 | NC_021160.1    | Ca_kabuli_chr01 | 31784886                | CC                              | TT                | 1945888042               |
| SNP_P3_9667_31785061 | NC_021160.1    | Ca_kabuli_chr01 | 31785061                | AA                              | GG                | 1945888044               |
| SNP_P3_9668_31785115 | NC_021160.1    | Ca_kabuli_chr01 | 31785115                | AA                              | TT                | 1945888046               |
| SNP_P3_9669_31785154 | NC_021160.1    | Ca_kabuli_chr01 | 31785154                | AA                              | TT                | 1945888047               |
| SNP_P3_9670_31785186 | NC_021160.1    | Ca_kabuli_chr01 | 31785186                | CC                              | GG                | 1945888049               |
| SNP_P3_9671_31785187 | NC_021160.1    | Ca_kabuli_chr01 | 31785187                | CC                              | TT                | 1945888051               |
| SNP_P3_9672_31785298 | NC_021160.1    | Ca_kabuli_chr01 | 31785298                | TT                              | GG                | 1945888053               |
| SNP_P3_9673_31785322 | NC_021160.1    | Ca_kabuli_chr01 | 31785322                | CC                              | TT                | 1945888054               |
| SNP_P3_9674_31785336 | NC_021160.1    | Ca_kabuli_chr01 | 31785336                | GG                              | AA                | 1945888056               |
| SNP_P3_9675_31785386 | NC_021160.1    | Ca_kabuli_chr01 | 31785386                | GG                              | AA                | 1945888058               |
| SNP_P3_9676_31785396 | NC_021160.1    | Ca_kabuli_chr01 | 31785396                | AA                              | TT                | 1945888060               |
| SNP_P3_9677_31785448 | NC_021160.1    | Ca_kabuli_chr01 | 31785448                | TT                              | GG                | 1945888062               |
| SNP_P3_9678_31785449 | NC_021160.1    | Ca_kabuli_chr01 | 31785449                | AA                              | TT                | 1945888063               |
| SNP_P3_9679_31785496 | NC_021160.1    | Ca_kabuli_chr01 | 31785496                | CC                              | TT                | 1945888065               |
| SNP_P3_9680_31785537 | NC_021160.1    | Ca_kabuli_chr01 | 31785537                | GG                              | AA                | 1945888067               |
| SNP_P3_9681_31785582 | NC_021160.1    | Ca_kabuli_chr01 | 31785582                | TT                              | CC                | 1945888069               |
| SNP_P3_9682_31785585 | NC_021160.1    | Ca_kabuli_chr01 | 31785585                | GG                              | CC                | 1945888070               |
| SNP_P3_9683_31785628 | NC_021160.1    | Ca_kabuli_chr01 | 31785628                | CC                              | AA                | 1945888072               |
| SNP_P3_9684_31785648 | NC_021160.1    | Ca_kabuli_chr01 | 31785648                | TT                              | GG                | 1945888074               |
| SNP_P3_9685_31785664 | NC_021160.1    | Ca_kabuli_chr01 | 31785664                | AA                              | CC                | 1945888076               |
| SNP_P3_9686_31785704 | NC_021160.1    | Ca_kabuli_chr01 | 31785704                | GG                              | AA                | 1945888078               |

| SNPs IDs             | Chromosome IDs | Chromosomes     | Physical positions (bp) | CDC Frontier (Reference genome) | (Pusa 256 & HPNB) | NCBI SNPdb Accession IDs |
|----------------------|----------------|-----------------|-------------------------|---------------------------------|-------------------|--------------------------|
| SNP_P3_9687_31785864 | NC_021160.1    | Ca_kabuli_chr01 | 31785864                | AA                              | CC                | 1945888079               |
| SNP_P3_9688_31785905 | NC_021160.1    | Ca_kabuli_chr01 | 31785905                | CC                              | TT                | 1945888081               |
| SNP_P3_9689_31786032 | NC_021160.1    | Ca_kabuli_chr01 | 31786032                | GG                              | CC                | 1945888083               |
| SNP_P3_9690_31786048 | NC_021160.1    | Ca_kabuli_chr01 | 31786048                | AA                              | CC                | 1945888085               |
| SNP_P3_9691_31786108 | NC_021160.1    | Ca_kabuli_chr01 | 31786108                | AA                              | CC                | 1945888086               |
| SNP_P3_9692_31786136 | NC_021160.1    | Ca_kabuli_chr01 | 31786136                | TT                              | CC                | 1945888088               |
| SNP_P3_9693_31786181 | NC_021160.1    | Ca_kabuli_chr01 | 31786181                | AA                              | TT                | 1945888090               |
| SNP_P3_9694_31786269 | NC_021160.1    | Ca_kabuli_chr01 | 31786269                | AA                              | TT                | 1945888092               |
| SNP_P3_9695_31786303 | NC_021160.1    | Ca_kabuli_chr01 | 31786303                | TT                              | AA                | 1945888094               |
| SNP_P3_9696_31786347 | NC_021160.1    | Ca_kabuli_chr01 | 31786347                | AA                              | GG                | 1945888095               |
| SNP_P3_9697_31786402 | NC_021160.1    | Ca_kabuli_chr01 | 31786402                | CC                              | AA                | 1945888097               |
| SNP_P3_9698_31786406 | NC_021160.1    | Ca_kabuli_chr01 | 31786406                | AA                              | TT                | 1945888099               |
| SNP_P3_9699_31786451 | NC_021160.1    | Ca_kabuli_chr01 | 31786451                | TT                              | CC                | 1945888101               |
| SNP_P3_9700_31786452 | NC_021160.1    | Ca_kabuli_chr01 | 31786452                | CC                              | TT                | 1945888103               |
| SNP_P3_9701_31786475 | NC_021160.1    | Ca_kabuli_chr01 | 31786475                | TT                              | CC                | 1945888104               |
| SNP_P3_9702_31786479 | NC_021160.1    | Ca_kabuli_chr01 | 31786479                | AA                              | TT                | 1945888106               |
| SNP_P3_9703_31786709 | NC_021160.1    | Ca_kabuli_chr01 | 31786709                | TT                              | AA                | 1945888108               |
| SNP_P3_9704_31794450 | NC_021160.1    | Ca_kabuli_chr01 | 31794450                | GG                              | TT                | 1945888110               |
| SNP_P3_9705_31795436 | NC_021160.1    | Ca_kabuli_chr01 | 31795436                | GG                              | AA                | 1945888111               |
| SNP_P3_9706_31795456 | NC_021160.1    | Ca_kabuli_chr01 | 31795456                | GG                              | AA                | 1945888113               |
| SNP_P3_9707_31795631 | NC_021160.1    | Ca_kabuli_chr01 | 31795631                | TT                              | GG                | 1945888115               |
| SNP_P3_9708_31795655 | NC_021160.1    | Ca_kabuli_chr01 | 31795655                | TT                              | AA                | 1945888117               |
| SNP_P3_9709_31795660 | NC_021160.1    | Ca_kabuli_chr01 | 31795660                | AA                              | TT                | 1945888119               |
| SNP_P3_9710_31795682 | NC_021160.1    | Ca_kabuli_chr01 | 31795682                | CC                              | TT                | 1945888120               |
| SNP_P3_9711_31795690 | NC_021160.1    | Ca_kabuli_chr01 | 31795690                | GG                              | AA                | 1945888122               |
| SNP_P3_9712_31795695 | NC_021160.1    | Ca_kabuli_chr01 | 31795695                | GG                              | AA                | 1945888124               |
| SNP_P3_9713_31795739 | NC_021160.1    | Ca_kabuli_chr01 | 31795739                | CC                              | AA                | 1945888126               |
| SNP_P3_9714_31795940 | NC_021160.1    | Ca_kabuli_chr01 | 31795940                | GG                              | TT                | 1945888128               |
| SNP_P3_9715_31806177 | NC_021160.1    | Ca_kabuli_chr01 | 31806177                | TT                              | AA                | 1945888129               |
| SNP_P3_9716_31806460 | NC_021160.1    | Ca_kabuli_chr01 | 31806460                | GG                              | TT                | 1945888131               |
| SNP_P3_9717_31824421 | NC_021160.1    | Ca_kabuli_chr01 | 31824421                | AA                              | GG                | 1945888133               |
| SNP_P3_9718_31833536 | NC_021160.1    | Ca_kabuli_chr01 | 31833536                | AA                              | GG                | 1945888135               |
| SNP_P3_9719_31833562 | NC_021160.1    | Ca_kabuli_chr01 | 31833562                | TT                              | GG                | 1945888137               |
| SNP_P3_9720_31833818 | NC_021160.1    | Ca_kabuli_chr01 | 31833818                | TT                              | AA                | 1945888138               |
| SNP_P3_9721_31833851 | NC_021160.1    | Ca_kabuli_chr01 | 31833851                | TT                              | CC                | 1945888140               |
| SNP_P3_9722_31833863 | NC_021160.1    | Ca_kabuli_chr01 | 31833863                | GG                              | AA                | 1945888142               |
| SNP_P3_9723_31833885 | NC_021160.1    | Ca_kabuli_chr01 | 31833885                | GG                              | AA                | 1945888144               |
| SNP_P3_9724_31833888 | NC_021160.1    | Ca_kabuli_chr01 | 31833888                | CC                              | AA                | 1945888146               |
| SNP_P3_9725_31833916 | NC_021160.1    | Ca_kabuli_chr01 | 31833916                | TT                              | AA                | 1945888147               |
| SNP_P3_9726_31834902 | NC_021160.1    | Ca_kabuli_chr01 | 31834902                | AA                              | CC                | 1945888149               |
| SNP_P3_9727_31868061 | NC_021160.1    | Ca_kabuli_chr01 | 31868061                | AA                              | GG                | 1945888151               |
| SNP_P3_9728_31869899 | NC_021160.1    | Ca_kabuli_chr01 | 31869899                | GG                              | TT                | 1945888153               |



| SNPs IDs             | Chromosome IDs | Chromosomes     | Physical positions (bp) | CDC Frontier (Reference genome) | (Pusa 256 & HPNB) | NCBI SNPdb Accession IDs |
|----------------------|----------------|-----------------|-------------------------|---------------------------------|-------------------|--------------------------|
| SNP_P3_9729_31869908 | NC_021160.1    | Ca_kabuli_chr01 | 31869908                | CC                              | AA                | 1945888155               |
| SNP_P3_9730_31869911 | NC_021160.1    | Ca_kabuli_chr01 | 31869911                | AA                              | TT                | 1945888156               |
| SNP_P3_9732_31894983 | NC_021160.1    | Ca_kabuli_chr01 | 31894983                | TT                              | CC                | 1945888158               |
| SNP_P3_9733_31900190 | NC_021160.1    | Ca_kabuli_chr01 | 31900190                | CC                              | TT                | 1945888160               |
| SNP_P3_9734_31904644 | NC_021160.1    | Ca_kabuli_chr01 | 31904644                | CC                              | TT                | 1945888162               |
| SNP_P3_9735_31913718 | NC_021160.1    | Ca_kabuli_chr01 | 31913718                | GG                              | AA                | 1945888164               |
| SNP_P3_9736_31917425 | NC_021160.1    | Ca_kabuli_chr01 | 31917425                | AA                              | GG                | 1945888165               |
| SNP_P3_9737_31926842 | NC_021160.1    | Ca_kabuli_chr01 | 31926842                | AA                              | GG                | 1945888167               |
| SNP_P3_9738_31941007 | NC_021160.1    | Ca_kabuli_chr01 | 31941007                | GG                              | CC                | 1945888169               |
| SNP_P3_9739_31941819 | NC_021160.1    | Ca_kabuli_chr01 | 31941819                | GG                              | AA                | 1945888171               |
| SNP_P3_9740_31946706 | NC_021160.1    | Ca_kabuli_chr01 | 31946706                | AA                              | GG                | 1945888172               |
| SNP_P3_9741_31946717 | NC_021160.1    | Ca_kabuli_chr01 | 31946717                | AA                              | GG                | 1945888174               |
| SNP_P3_9742_31946725 | NC_021160.1    | Ca_kabuli_chr01 | 31946725                | AA                              | TT                | 1945888176               |
| SNP_P3_9743_31946746 | NC_021160.1    | Ca_kabuli_chr01 | 31946746                | TT                              | GG                | 1945888178               |
| SNP_P3_9744_31946750 | NC_021160.1    | Ca_kabuli_chr01 | 31946750                | AA                              | GG                | 1945888180               |
| SNP_P3_9745_31967203 | NC_021160.1    | Ca_kabuli_chr01 | 31967203                | CC                              | TT                | 1945888181               |
| SNP_P3_9746_31974245 | NC_021160.1    | Ca_kabuli_chr01 | 31974245                | AA                              | TT                | 1945888183               |
| SNP_P3_9747_31994687 | NC_021160.1    | Ca_kabuli_chr01 | 31994687                | AA                              | GG                | 1945888185               |
| SNP_P3_9748_31994712 | NC_021160.1    | Ca_kabuli_chr01 | 31994712                | CC                              | AA                | 1945888187               |
| SNP_P3_9749_31994720 | NC_021160.1    | Ca_kabuli_chr01 | 31994720                | CC                              | TT                | 1945888188               |
| SNP_P3_9750_31994739 | NC_021160.1    | Ca_kabuli_chr01 | 31994739                | CC                              | TT                | 1945888190               |
| SNP_P3_9751_31995158 | NC_021160.1    | Ca_kabuli_chr01 | 31995158                | GG                              | AA                | 1945888192               |
| SNP_P3_9752_31995168 | NC_021160.1    | Ca_kabuli_chr01 | 31995168                | AA                              | TT                | 1945888194               |
| SNP_P3_9753_31995256 | NC_021160.1    | Ca_kabuli_chr01 | 31995256                | CC                              | TT                | 1945888195               |
| SNP_P3_9754_31995258 | NC_021160.1    | Ca_kabuli_chr01 | 31995258                | AA                              | GG                | 1945888197               |
| SNP_P3_9755_31995290 | NC_021160.1    | Ca_kabuli_chr01 | 31995290                | TT                              | CC                | 1945888199               |
| SNP_P3_9756_31995301 | NC_021160.1    | Ca_kabuli_chr01 | 31995301                | GG                              | AA                | 1945888201               |
| SNP_P3_9757_31995364 | NC_021160.1    | Ca_kabuli_chr01 | 31995364                | TT                              | GG                | 1945888203               |
| SNP_P3_9758_31995371 | NC_021160.1    | Ca_kabuli_chr01 | 31995371                | TT                              | GG                | 1945888204               |
| SNP_P3_9759_31995388 | NC_021160.1    | Ca_kabuli_chr01 | 31995388                | CC                              | TT                | 1945888206               |
| SNP_P3_9760_31995397 | NC_021160.1    | Ca_kabuli_chr01 | 31995397                | TT                              | AA                | 1945888208               |
| SNP_P3_9761_31995400 | NC_021160.1    | Ca_kabuli_chr01 | 31995400                | TT                              | CC                | 1945888210               |
| SNP_P3_9762_31995426 | NC_021160.1    | Ca_kabuli_chr01 | 31995426                | TT                              | CC                | 1945888211               |
| SNP_P3_9764_31995540 | NC_021160.1    | Ca_kabuli_chr01 | 31995540                | AA                              | TT                | 1945888213               |
| SNP_P3_9765_31995565 | NC_021160.1    | Ca_kabuli_chr01 | 31995565                | AA                              | GG                | 1945888215               |
| SNP_P3_9766_31995597 | NC_021160.1    | Ca_kabuli_chr01 | 31995597                | CC                              | TT                | 1945888217               |
| SNP_P3_9767_31995655 | NC_021160.1    | Ca_kabuli_chr01 | 31995655                | GG                              | AA                | 1945888219               |
| SNP_P3_9768_31995681 | NC_021160.1    | Ca_kabuli_chr01 | 31995681                | AA                              | TT                | 1945888220               |
| SNP_P3_9769_31995700 | NC_021160.1    | Ca_kabuli_chr01 | 31995700                | GG                              | AA                | 1945888222               |
| SNP_P3_9770_31995719 | NC_021160.1    | Ca_kabuli_chr01 | 31995719                | TT                              | CC                | 1945888224               |
| SNP_P3_9771_31995729 | NC_021160.1    | Ca_kabuli_chr01 | 31995729                | TT                              | CC                | 1945888226               |
| SNP_P3_9772_31995757 | NC_021160.1    | Ca_kabuli_chr01 | 31995757                | CC                              | TT                | 1945888227               |

| SNPs IDs             | Chromosome IDs | Chromosomes     | Physical positions (bp) | CDC Frontier (Reference genome) | (Pusa 256 & HPNB) | NCBI SNPdb Accession IDs |
|----------------------|----------------|-----------------|-------------------------|---------------------------------|-------------------|--------------------------|
| SNP_P3_9773_31995874 | NC_021160.1    | Ca_kabuli_chr01 | 31995874                | AA                              | CC                | 1945888229               |
| SNP_P3_9774_31995881 | NC_021160.1    | Ca_kabuli_chr01 | 31995881                | CC                              | TT                | 1945888231               |
| SNP_P3_9775_32001243 | NC_021160.1    | Ca_kabuli_chr01 | 32001243                | CC                              | AA                | 1945888233               |
| SNP_P3_9776_32004283 | NC_021160.1    | Ca_kabuli_chr01 | 32004283                | AA                              | TT                | 1945888235               |
| SNP_P3_9777_32012287 | NC_021160.1    | Ca_kabuli_chr01 | 32012287                | TT                              | CC                | 1945888236               |
| SNP_P3_9778_32013710 | NC_021160.1    | Ca_kabuli_chr01 | 32013710                | CC                              | AA                | 1945888238               |
| SNP_P3_9779_32013723 | NC_021160.1    | Ca_kabuli_chr01 | 32013723                | GG                              | CC                | 1945888240               |
| SNP_P3_9780_32014806 | NC_021160.1    | Ca_kabuli_chr01 | 32014806                | AA                              | CC                | 1945888242               |
| SNP_P3_9782_32021885 | NC_021160.1    | Ca_kabuli_chr01 | 32021885                | GG                              | CC                | 1945888243               |
| SNP_P3_9783_32021912 | NC_021160.1    | Ca_kabuli_chr01 | 32021912                | AA                              | GG                | 1945888245               |
| SNP_P3_9785_32031054 | NC_021160.1    | Ca_kabuli_chr01 | 32031054                | AA                              | CC                | 1945888247               |
| SNP_P3_9786_32037059 | NC_021160.1    | Ca_kabuli_chr01 | 32037059                | AA                              | GG                | 1945888249               |
| SNP_P3_9787_32037065 | NC_021160.1    | Ca_kabuli_chr01 | 32037065                | CC                              | TT                | 1945888251               |
| SNP_P3_9788_32037081 | NC_021160.1    | Ca_kabuli_chr01 | 32037081                | AA                              | TT                | 1945888252               |
| SNP_P3_9789_32037112 | NC_021160.1    | Ca_kabuli_chr01 | 32037112                | TT                              | CC                | 1945888254               |
| SNP_P3_9790_32037139 | NC_021160.1    | Ca_kabuli_chr01 | 32037139                | CC                              | TT                | 1945888256               |
| SNP_P3_9791_32037156 | NC_021160.1    | Ca_kabuli_chr01 | 32037156                | GG                              | AA                | 1945888258               |
| SNP_P3_9792_32037171 | NC_021160.1    | Ca_kabuli_chr01 | 32037171                | TT                              | AA                | 1945888259               |
| SNP_P3_9794_32037275 | NC_021160.1    | Ca_kabuli_chr01 | 32037275                | CC                              | TT                | 1945888261               |
| SNP_P3_9795_32037330 | NC_021160.1    | Ca_kabuli_chr01 | 32037330                | AA                              | CC                | 1945888263               |
| SNP_P3_9797_32037412 | NC_021160.1    | Ca_kabuli_chr01 | 32037412                | GG                              | AA                | 1945888265               |
| SNP_P3_9798_32038345 | NC_021160.1    | Ca_kabuli_chr01 | 32038345                | AA                              | GG                | 1945888266               |
| SNP_P3_9800_32038775 | NC_021160.1    | Ca_kabuli_chr01 | 32038775                | TT                              | CC                | 1945888268               |
| SNP_P3_9801_32038848 | NC_021160.1    | Ca_kabuli_chr01 | 32038848                | TT                              | CC                | 1945888270               |
| SNP_P3_9802_32038856 | NC_021160.1    | Ca_kabuli_chr01 | 32038856                | GG                              | TT                | 1945888272               |
| SNP_P3_9803_32038946 | NC_021160.1    | Ca_kabuli_chr01 | 32038946                | CC                              | GG                | 1945888274               |
| SNP_P3_9804_32043856 | NC_021160.1    | Ca_kabuli_chr01 | 32043856                | CC                              | AA                | 1945888275               |
| SNP_P3_9805_32047361 | NC_021160.1    | Ca_kabuli_chr01 | 32047361                | CC                              | TT                | 1945888277               |
| SNP_P3_9806_32047392 | NC_021160.1    | Ca_kabuli_chr01 | 32047392                | AA                              | GG                | 1945888279               |
| SNP_P3_9807_32047483 | NC_021160.1    | Ca_kabuli_chr01 | 32047483                | AA                              | GG                | 1945888281               |
| SNP_P3_9809_32079242 | NC_021160.1    | Ca_kabuli_chr01 | 32079242                | AA                              | TT                | 1945888282               |
| SNP_P3_9811_32079523 | NC_021160.1    | Ca_kabuli_chr01 | 32079523                | CC                              | GG                | 1945888284               |
| SNP_P3_9812_32079534 | NC_021160.1    | Ca_kabuli_chr01 | 32079534                | CC                              | TT                | 1945888286               |
| SNP_P3_9813_32079596 | NC_021160.1    | Ca_kabuli_chr01 | 32079596                | TT                              | AA                | 1945888288               |
| SNP_P3_9814_32079599 | NC_021160.1    | Ca_kabuli_chr01 | 32079599                | TT                              | CC                | 1945888289               |
| SNP_P3_9815_32079617 | NC_021160.1    | Ca_kabuli_chr01 | 32079617                | TT                              | AA                | 1945888291               |
| SNP_P3_9816_32079661 | NC_021160.1    | Ca_kabuli_chr01 | 32079661                | AA                              | GG                | 1945888293               |
| SNP_P3_9817_32079675 | NC_021160.1    | Ca_kabuli_chr01 | 32079675                | AA                              | CC                | 1945888295               |
| SNP_P3_9818_32079717 | NC_021160.1    | Ca_kabuli_chr01 | 32079717                | TT                              | CC                | 1945888296               |
| SNP_P3_9819_32079786 | NC_021160.1    | Ca_kabuli_chr01 | 32079786                | TT                              | CC                | 1945888298               |
| SNP_P3_9820_32079800 | NC_021160.1    | Ca_kabuli_chr01 | 32079800                | AA                              | GG                | 1945888300               |
| SNP_P3_9821_32079816 | NC_021160.1    | Ca_kabuli_chr01 | 32079816                | AA                              | GG                | 1945888302               |

| SNPs IDs             | Chromosome IDs | Chromosomes     | Physical positions (bp) | CDC Frontier (Reference genome) | (Pusa 256 & HPNB) | NCBI SNPdb Accession IDs |
|----------------------|----------------|-----------------|-------------------------|---------------------------------|-------------------|--------------------------|
| SNP_P3_9822_32079823 | NC_021160.1    | Ca_kabuli_chr01 | 32079823                | TT                              | CC                | 1945888304               |
| SNP_P3_9823_32079914 | NC_021160.1    | Ca_kabuli_chr01 | 32079914                | TT                              | GG                | 1945888305               |
| SNP_P3_9824_32079954 | NC_021160.1    | Ca_kabuli_chr01 | 32079954                | TT                              | CC                | 1945888307               |
| SNP_P3_9825_32079987 | NC_021160.1    | Ca_kabuli_chr01 | 32079987                | TT                              | CC                | 1945888309               |
| SNP_P3_9826_32080004 | NC_021160.1    | Ca_kabuli_chr01 | 32080004                | AA                              | GG                | 1945888311               |
| SNP_P3_9827_32080019 | NC_021160.1    | Ca_kabuli_chr01 | 32080019                | TT                              | CC                | 1945888312               |
| SNP_P3_9828_32080028 | NC_021160.1    | Ca_kabuli_chr01 | 32080028                | TT                              | CC                | 1945888314               |
| SNP_P3_9829_32080067 | NC_021160.1    | Ca_kabuli_chr01 | 32080067                | AA                              | GG                | 1945888316               |
| SNP_P3_9830_32080139 | NC_021160.1    | Ca_kabuli_chr01 | 32080139                | AA                              | GG                | 1945888318               |
| SNP_P3_9831_32080153 | NC_021160.1    | Ca_kabuli_chr01 | 32080153                | TT                              | CC                | 1945888320               |
| SNP_P3_9832_32080263 | NC_021160.1    | Ca_kabuli_chr01 | 32080263                | TT                              | CC                | 1945888321               |
| SNP_P3_9833_32080264 | NC_021160.1    | Ca_kabuli_chr01 | 32080264                | AA                              | GG                | 1945888323               |
| SNP_P3_9834_32080282 | NC_021160.1    | Ca_kabuli_chr01 | 32080282                | AA                              | CC                | 1945888325               |
| SNP_P3_9835_32080283 | NC_021160.1    | Ca_kabuli_chr01 | 32080283                | TT                              | CC                | 1945888327               |
| SNP_P3_9836_32080285 | NC_021160.1    | Ca_kabuli_chr01 | 32080285                | TT                              | GG                | 1945888328               |
| SNP_P3_9837_32080315 | NC_021160.1    | Ca_kabuli_chr01 | 32080315                | GG                              | AA                | 1945888330               |
| SNP_P3_9838_32080352 | NC_021160.1    | Ca_kabuli_chr01 | 32080352                | TT                              | CC                | 1945888332               |
| SNP_P3_9839_32080356 | NC_021160.1    | Ca_kabuli_chr01 | 32080356                | AA                              | GG                | 1945888334               |
| SNP_P3_9840_32080368 | NC_021160.1    | Ca_kabuli_chr01 | 32080368                | AA                              | GG                | 1945888336               |
| SNP_P3_9841_32080371 | NC_021160.1    | Ca_kabuli_chr01 | 32080371                | AA                              | GG                | 1945888337               |
| SNP_P3_9842_32080412 | NC_021160.1    | Ca_kabuli_chr01 | 32080412                | AA                              | GG                | 1945888339               |
| SNP_P3_9843_32080439 | NC_021160.1    | Ca_kabuli_chr01 | 32080439                | TT                              | CC                | 1945888341               |
| SNP_P3_9844_32080453 | NC_021160.1    | Ca_kabuli_chr01 | 32080453                | TT                              | GG                | 1945888343               |
| SNP_P3_9845_32080456 | NC_021160.1    | Ca_kabuli_chr01 | 32080456                | GG                              | CC                | 1945888344               |
| SNP_P3_9846_32080459 | NC_021160.1    | Ca_kabuli_chr01 | 32080459                | GG                              | AA                | 1945888346               |
| SNP_P3_9847_32080525 | NC_021160.1    | Ca_kabuli_chr01 | 32080525                | TT                              | CC                | 1945888348               |
| SNP_P3_9848_32080665 | NC_021160.1    | Ca_kabuli_chr01 | 32080665                | TT                              | AA                | 1945888350               |
| SNP_P3_9849_32080696 | NC_021160.1    | Ca_kabuli_chr01 | 32080696                | AA                              | GG                | 1945888352               |
| SNP_P3_9850_32080739 | NC_021160.1    | Ca_kabuli_chr01 | 32080739                | AA                              | CC                | 1945888353               |
| SNP_P3_9851_32080765 | NC_021160.1    | Ca_kabuli_chr01 | 32080765                | TT                              | CC                | 1945888355               |
| SNP_P3_9852_32080766 | NC_021160.1    | Ca_kabuli_chr01 | 32080766                | AA                              | GG                | 1945888357               |
| SNP_P3_9853_32080774 | NC_021160.1    | Ca_kabuli_chr01 | 32080774                | AA                              | GG                | 1945888359               |
| SNP_P3_9854_32081437 | NC_021160.1    | Ca_kabuli_chr01 | 32081437                | AA                              | TT                | 1945888361               |
| SNP_P3_9855_32081450 | NC_021160.1    | Ca_kabuli_chr01 | 32081450                | CC                              | TT                | 1945888362               |
| SNP_P3_9856_32083453 | NC_021160.1    | Ca_kabuli_chr01 | 32083453                | CC                              | TT                | 1945888364               |
| SNP_P3_9857_32083459 | NC_021160.1    | Ca_kabuli_chr01 | 32083459                | CC                              | TT                | 1945888366               |
| SNP_P3_9858_32087525 | NC_021160.1    | Ca_kabuli_chr01 | 32087525                | TT                              | AA                | 1945888368               |
| SNP_P3_9859_32087724 | NC_021160.1    | Ca_kabuli_chr01 | 32087724                | GG                              | AA                | 1945888369               |
| SNP_P3_9860_32124624 | NC_021160.1    | Ca_kabuli_chr01 | 32124624                | CC                              | TT                | 1945888371               |
| SNP_P3_9861_32124810 | NC_021160.1    | Ca_kabuli_chr01 | 32124810                | TT                              | GG                | 1945888373               |
| SNP_P3_9862_32125358 | NC_021160.1    | Ca_kabuli_chr01 | 32125358                | GG                              | AA                | 1945888375               |
| SNP_P3_9863_32126767 | NC_021160.1    | Ca_kabuli_chr01 | 32126767                | CC                              | AA                | 1945888377               |

| SNPs IDs             | Chromosome IDs | Chromosomes     | Physical positions (bp) | CDC Frontier (Reference genome) | (Pusa 256 & HPNB) | NCBI SNPdb Accession IDs |
|----------------------|----------------|-----------------|-------------------------|---------------------------------|-------------------|--------------------------|
| SNP_P3_9864_32126860 | NC_021160.1    | Ca_kabuli_chr01 | 32126860                | TT                              | GG                | 1945888378               |
| SNP_P3_9865_32126900 | NC_021160.1    | Ca_kabuli_chr01 | 32126900                | CC                              | TT                | 1945888380               |
| SNP_P3_9866_32128231 | NC_021160.1    | Ca_kabuli_chr01 | 32128231                | GG                              | AA                | 1945888382               |
| SNP_P3_9867_32139298 | NC_021160.1    | Ca_kabuli_chr01 | 32139298                | AA                              | TT                | 1945888384               |
| SNP_P3_9868_32139790 | NC_021160.1    | Ca_kabuli_chr01 | 32139790                | GG                              | AA                | 1945888385               |
| SNP_P3_9869_32141179 | NC_021160.1    | Ca_kabuli_chr01 | 32141179                | GG                              | AA                | 1945888387               |
| SNP_P3_9870_32141194 | NC_021160.1    | Ca_kabuli_chr01 | 32141194                | GG                              | AA                | 1945888389               |
| SNP_P3_9871_32141246 | NC_021160.1    | Ca_kabuli_chr01 | 32141246                | TT                              | CC                | 1945888391               |
| SNP_P3_9872_32141253 | NC_021160.1    | Ca_kabuli_chr01 | 32141253                | CC                              | TT                | 1945888392               |
| SNP_P3_9873_32141321 | NC_021160.1    | Ca_kabuli_chr01 | 32141321                | GG                              | AA                | 1945888394               |
| SNP_P3_9874_32141349 | NC_021160.1    | Ca_kabuli_chr01 | 32141349                | CC                              | TT                | 1945888396               |
| SNP_P3_9875_32141350 | NC_021160.1    | Ca_kabuli_chr01 | 32141350                | TT                              | CC                | 1945888398               |
| SNP_P3_9876_32141356 | NC_021160.1    | Ca_kabuli_chr01 | 32141356                | TT                              | GG                | 1945888399               |
| SNP_P3_9877_32141365 | NC_021160.1    | Ca_kabuli_chr01 | 32141365                | TT                              | CC                | 1945888401               |
| SNP_P3_9878_32141457 | NC_021160.1    | Ca_kabuli_chr01 | 32141457                | CC                              | TT                | 1945888403               |
| SNP_P3_9879_32141775 | NC_021160.1    | Ca_kabuli_chr01 | 32141775                | AA                              | CC                | 1945888405               |
| SNP_P3_9880_32141822 | NC_021160.1    | Ca_kabuli_chr01 | 32141822                | CC                              | TT                | 1945888407               |
| SNP_P3_9882_32145583 | NC_021160.1    | Ca_kabuli_chr01 | 32145583                | CC                              | TT                | 1945888408               |
| SNP_P3_9883_32145938 | NC_021160.1    | Ca_kabuli_chr01 | 32145938                | GG                              | AA                | 1945888410               |
| SNP_P3_9884_32146643 | NC_021160.1    | Ca_kabuli_chr01 | 32146643                | CC                              | AA                | 1945888412               |
| SNP_P3_9886_32150287 | NC_021160.1    | Ca_kabuli_chr01 | 32150287                | AA                              | TT                | 1945888414               |
| SNP_P3_9887_32150288 | NC_021160.1    | Ca_kabuli_chr01 | 32150288                | TT                              | GG                | 1945888415               |
| SNP_P3_9888_32150355 | NC_021160.1    | Ca_kabuli_chr01 | 32150355                | GG                              | AA                | 1945888417               |
| SNP_P3_9889_32150510 | NC_021160.1    | Ca_kabuli_chr01 | 32150510                | AA                              | GG                | 1945888419               |
| SNP_P3_9890_32150603 | NC_021160.1    | Ca_kabuli_chr01 | 32150603                | TT                              | CC                | 1945888421               |
| SNP_P3_9891_32150639 | NC_021160.1    | Ca_kabuli_chr01 | 32150639                | CC                              | AA                | 1945888423               |
| SNP_P3_9892_32150819 | NC_021160.1    | Ca_kabuli_chr01 | 32150819                | GG                              | AA                | 1945888424               |
| SNP_P3_9893_32151737 | NC_021160.1    | Ca_kabuli_chr01 | 32151737                | TT                              | GG                | 1945888426               |
| SNP_P3_9894_32152033 | NC_021160.1    | Ca_kabuli_chr01 | 32152033                | GG                              | AA                | 1945888428               |
| SNP_P3_9895_32152241 | NC_021160.1    | Ca_kabuli_chr01 | 32152241                | CC                              | TT                | 1945888430               |
| SNP_P3_9899_32154834 | NC_021160.1    | Ca_kabuli_chr01 | 32154834                | AA                              | CC                | 1945888432               |
| SNP_P3_9900_32154876 | NC_021160.1    | Ca_kabuli_chr01 | 32154876                | AA                              | CC                | 1945888434               |
| SNP_P3_9901_32155025 | NC_021160.1    | Ca_kabuli_chr01 | 32155025                | CC                              | TT                | 1945888435               |
| SNP_P3_9902_32155031 | NC_021160.1    | Ca_kabuli_chr01 | 32155031                | TT                              | CC                | 1945888437               |
| SNP_P3_9903_32156378 | NC_021160.1    | Ca_kabuli_chr01 | 32156378                | GG                              | CC                | 1945888439               |
| SNP_P3_9904_32158328 | NC_021160.1    | Ca_kabuli_chr01 | 32158328                | AA                              | GG                | 1945888441               |
| SNP_P3_9905_32159539 | NC_021160.1    | Ca_kabuli_chr01 | 32159539                | TT                              | CC                | 1945888442               |
| SNP_P3_9906_32160754 | NC_021160.1    | Ca_kabuli_chr01 | 32160754                | TT                              | CC                | 1945888444               |
| SNP_P3_9907_32173888 | NC_021160.1    | Ca_kabuli_chr01 | 32173888                | CC                              | GG                | 1945888446               |
| SNP_P3_9908_32175176 | NC_021160.1    | Ca_kabuli_chr01 | 32175176                | GG                              | AA                | 1945888448               |
| SNP_P3_9909_32175202 | NC_021160.1    | Ca_kabuli_chr01 | 32175202                | CC                              | AA                | 1945888449               |
| SNP_P3_9910_32175229 | NC_021160.1    | Ca_kabuli_chr01 | 32175229                | AA                              | GG                | 1945888451               |

| SNPs IDs             | Chromosome IDs | Chromosomes     | Physical positions (bp) | CDC Frontier (Reference genome) | (Pusa 256 & HPNB) | NCBI SNPdb Accession IDs |
|----------------------|----------------|-----------------|-------------------------|---------------------------------|-------------------|--------------------------|
| SNP_P3_9911_32175241 | NC_021160.1    | Ca_kabuli_chr01 | 32175241                | AA                              | CC                | 1945888453               |
| SNP_P3_9912_32175687 | NC_021160.1    | Ca_kabuli_chr01 | 32175687                | AA                              | TT                | 1945888455               |
| SNP_P3_9913_32176124 | NC_021160.1    | Ca_kabuli_chr01 | 32176124                | TT                              | CC                | 1945888456               |
| SNP_P3_9914_32177250 | NC_021160.1    | Ca_kabuli_chr01 | 32177250                | TT                              | CC                | 1945888458               |
| SNP_P3_9915_32177347 | NC_021160.1    | Ca_kabuli_chr01 | 32177347                | TT                              | GG                | 1945888460               |
| SNP_P3_9916_32179696 | NC_021160.1    | Ca_kabuli_chr01 | 32179696                | AA                              | TT                | 1945888462               |
| SNP_P3_9917_32179927 | NC_021160.1    | Ca_kabuli_chr01 | 32179927                | CC                              | TT                | 1945888464               |
| SNP_P3_9918_32179929 | NC_021160.1    | Ca_kabuli_chr01 | 32179929                | AA                              | GG                | 1945888465               |
| SNP_P3_9920_32179933 | NC_021160.1    | Ca_kabuli_chr01 | 32179933                | AA                              | CC                | 1945888467               |
| SNP_P3_9921_32179935 | NC_021160.1    | Ca_kabuli_chr01 | 32179935                | TT                              | GG                | 1945888469               |
| SNP_P3_9922_32179980 | NC_021160.1    | Ca_kabuli_chr01 | 32179980                | CC                              | TT                | 1945888471               |
| SNP_P3_9923_32180045 | NC_021160.1    | Ca_kabuli_chr01 | 32180045                | AA                              | TT                | 1945888472               |
| SNP_P3_9924_32180064 | NC_021160.1    | Ca_kabuli_chr01 | 32180064                | AA                              | GG                | 1945888474               |
| SNP_P3_9925_32183847 | NC_021160.1    | Ca_kabuli_chr01 | 32183847                | TT                              | AA                | 1945888476               |
| SNP_P3_9926_32183849 | NC_021160.1    | Ca_kabuli_chr01 | 32183849                | TT                              | CC                | 1945888478               |
| SNP_P3_9927_32183878 | NC_021160.1    | Ca_kabuli_chr01 | 32183878                | GG                              | AA                | 1945888480               |
| SNP_P3_9928_32186801 | NC_021160.1    | Ca_kabuli_chr01 | 32186801                | AA                              | TT                | 1945888481               |
| SNP_P3_9929_32186837 | NC_021160.1    | Ca_kabuli_chr01 | 32186837                | TT                              | CC                | 1945888483               |
| SNP_P3_9930_32186860 | NC_021160.1    | Ca_kabuli_chr01 | 32186860                | GG                              | AA                | 1945888485               |
| SNP_P3_9931_32186878 | NC_021160.1    | Ca_kabuli_chr01 | 32186878                | AA                              | GG                | 1945888487               |
| SNP_P3_9933_32189078 | NC_021160.1    | Ca_kabuli_chr01 | 32189078                | TT                              | GG                | 1945888488               |
| SNP_P3_9935_32193178 | NC_021160.1    | Ca_kabuli_chr01 | 32193178                | AA                              | CC                | 1945888490               |
| SNP_P3_9936_32193373 | NC_021160.1    | Ca_kabuli_chr01 | 32193373                | CC                              | GG                | 1945888492               |
| SNP_P3_9937_32193378 | NC_021160.1    | Ca_kabuli_chr01 | 32193378                | CC                              | AA                | 1945888494               |
| SNP_P3_9938_32194468 | NC_021160.1    | Ca_kabuli_chr01 | 32194468                | CC                              | TT                | 1945888495               |
| SNP_P3_9939_32194708 | NC_021160.1    | Ca_kabuli_chr01 | 32194708                | GG                              | CC                | 1945888497               |
| SNP_P3_9940_32195318 | NC_021160.1    | Ca_kabuli_chr01 | 32195318                | CC                              | GG                | 1945888499               |
| SNP_P3_9941_32195336 | NC_021160.1    | Ca_kabuli_chr01 | 32195336                | AA                              | CC                | 1945888501               |
| SNP_P3_9942_32195371 | NC_021160.1    | Ca_kabuli_chr01 | 32195371                | CC                              | TT                | 1945888503               |
| SNP_P3_9943_32195392 | NC_021160.1    | Ca_kabuli_chr01 | 32195392                | TT                              | CC                | 1945888504               |
| SNP_P3_9944_32195636 | NC_021160.1    | Ca_kabuli_chr01 | 32195636                | AA                              | CC                | 1945888506               |
| SNP_P3_9945_32201304 | NC_021160.1    | Ca_kabuli_chr01 | 32201304                | AA                              | GG                | 1945888508               |
| SNP_P3_9946_32201316 | NC_021160.1    | Ca_kabuli_chr01 | 32201316                | TT                              | GG                | 1945888510               |
| SNP_P3_9947_32201323 | NC_021160.1    | Ca_kabuli_chr01 | 32201323                | AA                              | GG                | 1945888512               |
| SNP_P3_9948_32201470 | NC_021160.1    | Ca_kabuli_chr01 | 32201470                | CC                              | GG                | 1945888513               |
| SNP_P3_9949_32203215 | NC_021160.1    | Ca_kabuli_chr01 | 32203215                | CC                              | TT                | 1945888515               |
| SNP_P3_9950_32203230 | NC_021160.1    | Ca_kabuli_chr01 | 32203230                | CC                              | GG                | 1945888517               |
| SNP_P3_9951_32204161 | NC_021160.1    | Ca_kabuli_chr01 | 32204161                | AA                              | TT                | 1945888519               |
| SNP_P3_9952_32204436 | NC_021160.1    | Ca_kabuli_chr01 | 32204436                | GG                              | AA                | 1945888520               |
| SNP_P3_9953_32205335 | NC_021160.1    | Ca_kabuli_chr01 | 32205335                | CC                              | TT                | 1945888522               |
| SNP_P3_9954_32221523 | NC_021160.1    | Ca_kabuli_chr01 | 32221523                | CC                              | AA                | 1945888524               |
| SNP_P3_9955_32229410 | NC_021160.1    | Ca_kabuli_chr01 | 32229410                | AA                              | CC                | 1945888526               |

| SNPs IDs             | Chromosome IDs | Chromosomes     | Physical positions (bp) | CDC Frontier (Reference genome) | (Pusa 256 & HPNB) | NCBI SNPdb Accession IDs |
|----------------------|----------------|-----------------|-------------------------|---------------------------------|-------------------|--------------------------|
| SNP_P3_9956_32244132 | NC_021160.1    | Ca_kabuli_chr01 | 32244132                | TT                              | CC                | 1945888527               |
| SNP_P3_9957_32244133 | NC_021160.1    | Ca_kabuli_chr01 | 32244133                | CC                              | TT                | 1945888529               |
| SNP_P3_9958_32244175 | NC_021160.1    | Ca_kabuli_chr01 | 32244175                | CC                              | TT                | 1945888531               |
| SNP_P3_9960_32244212 | NC_021160.1    | Ca_kabuli_chr01 | 32244212                | CC                              | TT                | 1945888533               |
| SNP_P3_9961_32244389 | NC_021160.1    | Ca_kabuli_chr01 | 32244389                | CC                              | TT                | 1945888535               |
| SNP_P3_9962_32245557 | NC_021160.1    | Ca_kabuli_chr01 | 32245557                | GG                              | AA                | 1945888536               |
| SNP_P3_9963_32246644 | NC_021160.1    | Ca_kabuli_chr01 | 32246644                | TT                              | AA                | 1945888538               |
| SNP_P3_9964_32246911 | NC_021160.1    | Ca_kabuli_chr01 | 32246911                | AA                              | TT                | 1945888540               |
| SNP_P3_9965_32246914 | NC_021160.1    | Ca_kabuli_chr01 | 32246914                | TT                              | CC                | 1945888542               |
| SNP_P3_9966_32247547 | NC_021160.1    | Ca_kabuli_chr01 | 32247547                | AA                              | CC                | 1945888543               |
| SNP_P3_9967_32253988 | NC_021160.1    | Ca_kabuli_chr01 | 32253988                | TT                              | CC                | 1945888545               |
| SNP_P3_9968_32254602 | NC_021160.1    | Ca_kabuli_chr01 | 32254602                | TT                              | CC                | 1945888547               |
| SNP_P3_9969_32256013 | NC_021160.1    | Ca_kabuli_chr01 | 32256013                | CC                              | TT                | 1945888549               |
| SNP_P3_9970_32256822 | NC_021160.1    | Ca_kabuli_chr01 | 32256822                | GG                              | TT                | 1945888551               |
| SNP_P3_9971_32259626 | NC_021160.1    | Ca_kabuli_chr01 | 32259626                | GG                              | CC                | 1945888552               |
| SNP_P3_9973_32265067 | NC_021160.1    | Ca_kabuli_chr01 | 32265067                | AA                              | GG                | 1945888554               |
| SNP_P3_9974_32265257 | NC_021160.1    | Ca_kabuli_chr01 | 32265257                | GG                              | CC                | 1945888556               |
| SNP_P3_9975_32265282 | NC_021160.1    | Ca_kabuli_chr01 | 32265282                | CC                              | TT                | 1945888558               |
| SNP_P3_9976_32265283 | NC_021160.1    | Ca_kabuli_chr01 | 32265283                | TT                              | CC                | 1945888560               |
| SNP_P3_9977_32269779 | NC_021160.1    | Ca_kabuli_chr01 | 32269779                | CC                              | AA                | 1945888561               |
| SNP_P3_9978_32270835 | NC_021160.1    | Ca_kabuli_chr01 | 32270835                | GG                              | AA                | 1945888563               |
| SNP_P3_9979_32271402 | NC_021160.1    | Ca_kabuli_chr01 | 32271402                | TT                              | CC                | 1945888565               |
| SNP_P3_9980_32271763 | NC_021160.1    | Ca_kabuli_chr01 | 32271763                | TT                              | CC                | 1945888567               |
| SNP_P3_9981_32271834 | NC_021160.1    | Ca_kabuli_chr01 | 32271834                | GG                              | AA                | 1945888568               |
| SNP_P3_9982_32277523 | NC_021160.1    | Ca_kabuli_chr01 | 32277523                | AA                              | TT                | 1945888570               |
| SNP_P3_9983_32278800 | NC_021160.1    | Ca_kabuli_chr01 | 32278800                | TT                              | CC                | 1945888572               |
| SNP_P3_9984_32278837 | NC_021160.1    | Ca_kabuli_chr01 | 32278837                | AA                              | GG                | 1945888574               |
| SNP_P3_9985_32278873 | NC_021160.1    | Ca_kabuli_chr01 | 32278873                | AA                              | GG                | 1945888576               |
| SNP_P3_9986_32279632 | NC_021160.1    | Ca_kabuli_chr01 | 32279632                | CC                              | TT                | 1945888577               |
| SNP_P3_9987_32280538 | NC_021160.1    | Ca_kabuli_chr01 | 32280538                | CC                              | TT                | 1945888579               |
| SNP_P3_9988_32280752 | NC_021160.1    | Ca_kabuli_chr01 | 32280752                | AA                              | TT                | 1945888581               |
| SNP_P3_9989_32281797 | NC_021160.1    | Ca_kabuli_chr01 | 32281797                | GG                              | AA                | 1945888583               |
| SNP_P3_9990_32281800 | NC_021160.1    | Ca_kabuli_chr01 | 32281800                | TT                              | AA                | 1945888584               |
| SNP_P3_9991_32282005 | NC_021160.1    | Ca_kabuli_chr01 | 32282005                | TT                              | GG                | 1945888586               |
| SNP_P3_9992_32282059 | NC_021160.1    | Ca_kabuli_chr01 | 32282059                | GG                              | AA                | 1945888588               |
| SNP_P3_9993_32282193 | NC_021160.1    | Ca_kabuli_chr01 | 32282193                | GG                              | AA                | 1945888590               |
| SNP_P3_9994_32283198 | NC_021160.1    | Ca_kabuli_chr01 | 32283198                | CC                              | GG                | 1945888591               |
| SNP_P3_9995_32284073 | NC_021160.1    | Ca_kabuli_chr01 | 32284073                | TT                              | CC                | 1945888593               |
| SNP_P3_9996_32284091 | NC_021160.1    | Ca_kabuli_chr01 | 32284091                | TT                              | CC                | 1945888595               |
| SNP_P3_9997_32284110 | NC_021160.1    | Ca_kabuli_chr01 | 32284110                | TT                              | CC                | 1945888597               |
| SNP_P3_9998_32284149 | NC_021160.1    | Ca_kabuli_chr01 | 32284149                | TT                              | AA                | 1945888599               |
| SNP_P3_9999_32286534 | NC_021160.1    | Ca_kabuli_chr01 | 32286534                | GG                              | CC                | 1945888600               |

| SNPs IDs              | Chromosome IDs | Chromosomes     | Physical positions (bp) | CDC Frontier (Reference genome) | (Pusa 256 & HPNB) | NCBI SNPdb Accession IDs |
|-----------------------|----------------|-----------------|-------------------------|---------------------------------|-------------------|--------------------------|
| SNP_P3_10000_32286535 | NC_021160.1    | Ca_kabuli_chr01 | 32286535                | GG                              | AA                | 1945888602               |
| SNP_P3_10001_32286544 | NC_021160.1    | Ca_kabuli_chr01 | 32286544                | GG                              | AA                | 1945888604               |
| SNP_P3_10002_32286545 | NC_021160.1    | Ca_kabuli_chr01 | 32286545                | AA                              | GG                | 1945888606               |
| SNP_P3_10003_32286555 | NC_021160.1    | Ca_kabuli_chr01 | 32286555                | TT                              | CC                | 1945888607               |
| SNP_P3_10004_32300319 | NC_021160.1    | Ca_kabuli_chr01 | 32300319                | CC                              | TT                | 1945888609               |
| SNP_P3_10005_32300529 | NC_021160.1    | Ca_kabuli_chr01 | 32300529                | CC                              | GG                | 1945888611               |
| SNP_P3_10006_32300532 | NC_021160.1    | Ca_kabuli_chr01 | 32300532                | CC                              | AA                | 1945888613               |
| SNP_P3_10007_32300935 | NC_021160.1    | Ca_kabuli_chr01 | 32300935                | TT                              | CC                | 1945888615               |
| SNP_P3_10008_32300952 | NC_021160.1    | Ca_kabuli_chr01 | 32300952                | GG                              | CC                | 1945888616               |
| SNP_P3_10009_32301100 | NC_021160.1    | Ca_kabuli_chr01 | 32301100                | TT                              | CC                | 1945888618               |
| SNP_P3_10010_32301103 | NC_021160.1    | Ca_kabuli_chr01 | 32301103                | AA                              | CC                | 1945888620               |
| SNP_P3_10011_32301234 | NC_021160.1    | Ca_kabuli_chr01 | 32301234                | TT                              | CC                | 1945888622               |
| SNP_P3_10012_32301267 | NC_021160.1    | Ca_kabuli_chr01 | 32301267                | TT                              | CC                | 1945888623               |
| SNP_P3_10013_32309975 | NC_021160.1    | Ca_kabuli_chr01 | 32309975                | TT                              | AA                | 1945888625               |
| SNP_P3_10014_32309993 | NC_021160.1    | Ca_kabuli_chr01 | 32309993                | GG                              | AA                | 1945888627               |
| SNP_P3_10015_32310006 | NC_021160.1    | Ca_kabuli_chr01 | 32310006                | GG                              | AA                | 1945888629               |
| SNP_P3_10016_32310021 | NC_021160.1    | Ca_kabuli_chr01 | 32310021                | CC                              | TT                | 1945888631               |
| SNP_P3_10017_32310048 | NC_021160.1    | Ca_kabuli_chr01 | 32310048                | GG                              | CC                | 1945888632               |
| SNP_P3_10020_32313054 | NC_021160.1    | Ca_kabuli_chr01 | 32313054                | CC                              | TT                | 1945888634               |
| SNP_P3_10021_32360064 | NC_021160.1    | Ca_kabuli_chr01 | 32360064                | TT                              | CC                | 1945888636               |
| SNP_P3_10022_32360066 | NC_021160.1    | Ca_kabuli_chr01 | 32360066                | GG                              | AA                | 1945888638               |
| SNP_P3_10023_32367105 | NC_021160.1    | Ca_kabuli_chr01 | 32367105                | CC                              | TT                | 1945888639               |
| SNP_P3_10024_32369058 | NC_021160.1    | Ca_kabuli_chr01 | 32369058                | GG                              | AA                | 1945888641               |
| SNP_P3_10025_32369082 | NC_021160.1    | Ca_kabuli_chr01 | 32369082                | TT                              | CC                | 1945888643               |
| SNP_P3_10026_32370538 | NC_021160.1    | Ca_kabuli_chr01 | 32370538                | TT                              | AA                | 1945888645               |
| SNP_P3_10027_32370548 | NC_021160.1    | Ca_kabuli_chr01 | 32370548                | AA                              | GG                | 1945888646               |
| SNP_P3_10028_32370566 | NC_021160.1    | Ca_kabuli_chr01 | 32370566                | TT                              | CC                | 1945888648               |
| SNP_P3_10030_32388424 | NC_021160.1    | Ca_kabuli_chr01 | 32388424                | AA                              | TT                | 1945888650               |
| SNP_P3_10031_32392828 | NC_021160.1    | Ca_kabuli_chr01 | 32392828                | CC                              | AA                | 1945888652               |
| SNP_P3_10032_32419853 | NC_021160.1    | Ca_kabuli_chr01 | 32419853                | GG                              | AA                | 1945888654               |
| SNP_P3_10033_32424628 | NC_021160.1    | Ca_kabuli_chr01 | 32424628                | GG                              | AA                | 1945888655               |
| SNP_P3_10034_32428589 | NC_021160.1    | Ca_kabuli_chr01 | 32428589                | TT                              | CC                | 1945888657               |
| SNP_P3_10036_32454431 | NC_021160.1    | Ca_kabuli_chr01 | 32454431                | AA                              | TT                | 1945888659               |
| SNP_P3_10037_32454432 | NC_021160.1    | Ca_kabuli_chr01 | 32454432                | AA                              | TT                | 1945888661               |
| SNP_P3_10038_32454434 | NC_021160.1    | Ca_kabuli_chr01 | 32454434                | TT                              | CC                | 1945888662               |
| SNP_P3_10039_32454438 | NC_021160.1    | Ca_kabuli_chr01 | 32454438                | GG                              | AA                | 1945888664               |
| SNP_P3_10040_32454477 | NC_021160.1    | Ca_kabuli_chr01 | 32454477                | CC                              | AA                | 1945888666               |
| SNP_P3_10041_32457169 | NC_021160.1    | Ca_kabuli_chr01 | 32457169                | AA                              | GG                | 1945888668               |
| SNP_P3_10042_32459136 | NC_021160.1    | Ca_kabuli_chr01 | 32459136                | TT                              | AA                | 1945888670               |
| SNP_P3_10043_32467072 | NC_021160.1    | Ca_kabuli_chr01 | 32467072                | GG                              | TT                | 1945888671               |
| SNP_P3_10044_32467095 | NC_021160.1    | Ca_kabuli_chr01 | 32467095                | TT                              | GG                | 1945888673               |
| SNP_P3_10046_32497044 | NC_021160.1    | Ca_kabuli_chr01 | 32497044                | AA                              | GG                | 1945888675               |

| SNPs IDs              | Chromosome IDs | Chromosomes     | Physical positions (bp) | CDC Frontier (Reference genome) | (Pusa 256 & HPNB) | NCBI SNPdb Accession IDs |
|-----------------------|----------------|-----------------|-------------------------|---------------------------------|-------------------|--------------------------|
| SNP_P3_10047_32512066 | NC_021160.1    | Ca_kabuli_chr01 | 32512066                | CC                              | TT                | 1945888677               |
| SNP_P3_10048_32537684 | NC_021160.1    | Ca_kabuli_chr01 | 32537684                | GG                              | CC                | 1945888678               |
| SNP_P3_10049_32537762 | NC_021160.1    | Ca_kabuli_chr01 | 32537762                | TT                              | CC                | 1945888680               |
| SNP_P3_10050_32537880 | NC_021160.1    | Ca_kabuli_chr01 | 32537880                | AA                              | CC                | 1945888682               |
| SNP_P3_10051_32538114 | NC_021160.1    | Ca_kabuli_chr01 | 32538114                | AA                              | GG                | 1945888684               |
| SNP_P3_10052_32538158 | NC_021160.1    | Ca_kabuli_chr01 | 32538158                | TT                              | CC                | 1945888685               |
| SNP_P3_10053_32555197 | NC_021160.1    | Ca_kabuli_chr01 | 32555197                | AA                              | TT                | 1945888687               |
| SNP_P3_10054_32555206 | NC_021160.1    | Ca_kabuli_chr01 | 32555206                | GG                              | CC                | 1945888689               |
| SNP_P3_10055_32603340 | NC_021160.1    | Ca_kabuli_chr01 | 32603340                | AA                              | GG                | 1945888691               |
| SNP_P3_10056_32742677 | NC_021160.1    | Ca_kabuli_chr01 | 32742677                | CC                              | TT                | 1945888692               |
| SNP_P3_10057_32755252 | NC_021160.1    | Ca_kabuli_chr01 | 32755252                | GG                              | AA                | 1945888694               |
| SNP_P3_10058_32756373 | NC_021160.1    | Ca_kabuli_chr01 | 32756373                | GG                              | CC                | 1945888696               |
| SNP_P3_10059_32758491 | NC_021160.1    | Ca_kabuli_chr01 | 32758491                | AA                              | GG                | 1945888698               |
| SNP_P3_10060_32758587 | NC_021160.1    | Ca_kabuli_chr01 | 32758587                | AA                              | TT                | 1945888700               |
| SNP_P3_10061_32758640 | NC_021160.1    | Ca_kabuli_chr01 | 32758640                | CC                              | TT                | 1945888701               |
| SNP_P3_10062_32758642 | NC_021160.1    | Ca_kabuli_chr01 | 32758642                | AA                              | TT                | 1945888703               |
| SNP_P3_10063_32758692 | NC_021160.1    | Ca_kabuli_chr01 | 32758692                | GG                              | AA                | 1945888705               |
| SNP_P3_10064_32758715 | NC_021160.1    | Ca_kabuli_chr01 | 32758715                | GG                              | CC                | 1945888707               |
| SNP_P3_10065_32758718 | NC_021160.1    | Ca_kabuli_chr01 | 32758718                | AA                              | GG                | 1945888709               |
| SNP_P3_10066_32758734 | NC_021160.1    | Ca_kabuli_chr01 | 32758734                | TT                              | AA                | 1945888710               |
| SNP_P3_10067_32758770 | NC_021160.1    | Ca_kabuli_chr01 | 32758770                | GG                              | AA                | 1945888712               |
| SNP_P3_10068_32758773 | NC_021160.1    | Ca_kabuli_chr01 | 32758773                | AA                              | GG                | 1945888714               |
| SNP_P3_10069_32758781 | NC_021160.1    | Ca_kabuli_chr01 | 32758781                | CC                              | TT                | 1945888716               |
| SNP_P3_10070_32758861 | NC_021160.1    | Ca_kabuli_chr01 | 32758861                | TT                              | AA                | 1945888717               |
| SNP_P3_10071_32764621 | NC_021160.1    | Ca_kabuli_chr01 | 32764621                | CC                              | GG                | 1945888719               |
| SNP_P3_10072_32767827 | NC_021160.1    | Ca_kabuli_chr01 | 32767827                | CC                              | TT                | 1945888721               |
| SNP_P3_10073_32768049 | NC_021160.1    | Ca_kabuli_chr01 | 32768049                | AA                              | CC                | 1945888723               |
| SNP_P3_10074_32770299 | NC_021160.1    | Ca_kabuli_chr01 | 32770299                | AA                              | GG                | 1945888725               |
| SNP_P3_10075_32771185 | NC_021160.1    | Ca_kabuli_chr01 | 32771185                | CC                              | TT                | 1945888726               |
| SNP_P3_10076_32780328 | NC_021160.1    | Ca_kabuli_chr01 | 32780328                | AA                              | CC                | 1945888728               |
| SNP_P3_10077_32784244 | NC_021160.1    | Ca_kabuli_chr01 | 32784244                | TT                              | CC                | 1945888730               |
| SNP_P3_10078_32784630 | NC_021160.1    | Ca_kabuli_chr01 | 32784630                | TT                              | CC                | 1945888732               |
| SNP_P3_10079_32784727 | NC_021160.1    | Ca_kabuli_chr01 | 32784727                | TT                              | CC                | 1945888733               |
| SNP_P3_10080_32784883 | NC_021160.1    | Ca_kabuli_chr01 | 32784883                | GG                              | AA                | 1945888735               |
| SNP_P3_10081_32788553 | NC_021160.1    | Ca_kabuli_chr01 | 32788553                | AA                              | TT                | 1945888737               |
| SNP_P3_10082_32796080 | NC_021160.1    | Ca_kabuli_chr01 | 32796080                | TT                              | GG                | 1945888739               |
| SNP_P3_10083_32796086 | NC_021160.1    | Ca_kabuli_chr01 | 32796086                | TT                              | CC                | 1945888741               |
| SNP_P3_10084_32796135 | NC_021160.1    | Ca_kabuli_chr01 | 32796135                | TT                              | GG                | 1945888742               |
| SNP_P3_10085_32799379 | NC_021160.1    | Ca_kabuli_chr01 | 32799379                | GG                              | CC                | 1945888744               |
| SNP_P3_10086_32801467 | NC_021160.1    | Ca_kabuli_chr01 | 32801467                | CC                              | TT                | 1945888746               |
| SNP_P3_10088_32804258 | NC_021160.1    | Ca_kabuli_chr01 | 32804258                | GG                              | AA                | 1945888748               |
| SNP_P3_10089_32804404 | NC_021160.1    | Ca_kabuli_chr01 | 32804404                | TT                              | CC                | 1945888749               |



| SNPs IDs              | Chromosome IDs | Chromosomes     | Physical positions (bp) | CDC Frontier (Reference genome) | (Pusa 256 & HPNB) | NCBI SNPdb Accession IDs |
|-----------------------|----------------|-----------------|-------------------------|---------------------------------|-------------------|--------------------------|
| SNP_P3_10090_32804405 | NC_021160.1    | Ca_kabuli_chr01 | 32804405                | CC                              | AA                | 1945888751               |
| SNP_P3_10091_32807873 | NC_021160.1    | Ca_kabuli_chr01 | 32807873                | AA                              | GG                | 1945888753               |
| SNP_P3_10092_32808763 | NC_021160.1    | Ca_kabuli_chr01 | 32808763                | GG                              | CC                | 1945888755               |
| SNP_P3_10093_32810187 | NC_021160.1    | Ca_kabuli_chr01 | 32810187                | CC                              | GG                | 1945888756               |
| SNP_P3_10094_32810503 | NC_021160.1    | Ca_kabuli_chr01 | 32810503                | AA                              | GG                | 1945888758               |
| SNP_P3_10095_32812311 | NC_021160.1    | Ca_kabuli_chr01 | 32812311                | AA                              | GG                | 1945888760               |
| SNP_P3_10096_32817831 | NC_021160.1    | Ca_kabuli_chr01 | 32817831                | GG                              | AA                | 1945888762               |
| SNP_P3_10097_32817841 | NC_021160.1    | Ca_kabuli_chr01 | 32817841                | TT                              | GG                | 1945888764               |
| SNP_P3_10098_32820706 | NC_021160.1    | Ca_kabuli_chr01 | 32820706                | GG                              | AA                | 1945888765               |
| SNP_P3_10099_32823244 | NC_021160.1    | Ca_kabuli_chr01 | 32823244                | GG                              | TT                | 1945888767               |
| SNP_P3_10100_32823957 | NC_021160.1    | Ca_kabuli_chr01 | 32823957                | TT                              | CC                | 1945888769               |
| SNP_P3_10101_32834033 | NC_021160.1    | Ca_kabuli_chr01 | 32834033                | TT                              | CC                | 1945888771               |
| SNP_P3_10102_32834099 | NC_021160.1    | Ca_kabuli_chr01 | 32834099                | AA                              | GG                | 1945888773               |
| SNP_P3_10103_32834111 | NC_021160.1    | Ca_kabuli_chr01 | 32834111                | AA                              | GG                | 1945888774               |
| SNP_P3_10104_32835838 | NC_021160.1    | Ca_kabuli_chr01 | 32835838                | CC                              | TT                | 1945888776               |
| SNP_P3_10105_32836344 | NC_021160.1    | Ca_kabuli_chr01 | 32836344                | AA                              | GG                | 1945888778               |
| SNP_P3_10106_32839503 | NC_021160.1    | Ca_kabuli_chr01 | 32839503                | TT                              | AA                | 1945888780               |
| SNP_P3_10107_32839634 | NC_021160.1    | Ca_kabuli_chr01 | 32839634                | AA                              | CC                | 1945888781               |
| SNP_P3_10108_32847694 | NC_021160.1    | Ca_kabuli_chr01 | 32847694                | AA                              | GG                | 1945888783               |
| SNP_P3_10109_32849558 | NC_021160.1    | Ca_kabuli_chr01 | 32849558                | TT                              | CC                | 1945888785               |
| SNP_P3_10111_32852770 | NC_021160.1    | Ca_kabuli_chr01 | 32852770                | CC                              | TT                | 1945888787               |
| SNP_P3_10112_32852776 | NC_021160.1    | Ca_kabuli_chr01 | 32852776                | AA                              | GG                | 1945888789               |
| SNP_P3_10113_32854591 | NC_021160.1    | Ca_kabuli_chr01 | 32854591                | AA                              | GG                | 1945888790               |
| SNP_P3_10114_32855328 | NC_021160.1    | Ca_kabuli_chr01 | 32855328                | GG                              | CC                | 1945888792               |
| SNP_P3_10115_32855477 | NC_021160.1    | Ca_kabuli_chr01 | 32855477                | GG                              | AA                | 1945888794               |
| SNP_P3_10116_32858085 | NC_021160.1    | Ca_kabuli_chr01 | 32858085                | TT                              | CC                | 1945888796               |
| SNP_P3_10117_32860564 | NC_021160.1    | Ca_kabuli_chr01 | 32860564                | AA                              | TT                | 1945888798               |
| SNP_P3_10118_32864100 | NC_021160.1    | Ca_kabuli_chr01 | 32864100                | AA                              | GG                | 1945888799               |
| SNP_P3_10119_32866905 | NC_021160.1    | Ca_kabuli_chr01 | 32866905                | TT                              | GG                | 1945888801               |
| SNP_P3_10120_32867829 | NC_021160.1    | Ca_kabuli_chr01 | 32867829                | GG                              | AA                | 1945888803               |
| SNP_P3_10121_32868520 | NC_021160.1    | Ca_kabuli_chr01 | 32868520                | AA                              | TT                | 1945888805               |
| SNP_P3_10122_32868553 | NC_021160.1    | Ca_kabuli_chr01 | 32868553                | CC                              | GG                | 1945888806               |
| SNP_P3_10124_32875601 | NC_021160.1    | Ca_kabuli_chr01 | 32875601                | AA                              | TT                | 1945888808               |
| SNP_P3_10126_32877825 | NC_021160.1    | Ca_kabuli_chr01 | 32877825                | TT                              | AA                | 1945888810               |
| SNP_P3_10127_32885133 | NC_021160.1    | Ca_kabuli_chr01 | 32885133                | GG                              | AA                | 1945888812               |
| SNP_P3_10128_32893509 | NC_021160.1    | Ca_kabuli_chr01 | 32893509                | AA                              | GG                | 1945888813               |
| SNP_P3_10129_32897029 | NC_021160.1    | Ca_kabuli_chr01 | 32897029                | AA                              | GG                | 1945888815               |
| SNP_P3_10131_32906362 | NC_021160.1    | Ca_kabuli_chr01 | 32906362                | AA                              | CC                | 1945888817               |
| SNP_P3_10132_32914427 | NC_021160.1    | Ca_kabuli_chr01 | 32914427                | TT                              | CC                | 1945888819               |
| SNP_P3_10133_32914665 | NC_021160.1    | Ca_kabuli_chr01 | 32914665                | CC                              | TT                | 1945888821               |
| SNP_P3_10134_32925005 | NC_021160.1    | Ca_kabuli_chr01 | 32925005                | TT                              | GG                | 1945888822               |
| SNP_P3_10135_32937921 | NC_021160.1    | Ca_kabuli_chr01 | 32937921                | AA                              | GG                | 1945888824               |

| SNPs IDs              | Chromosome IDs | Chromosomes     | Physical positions (bp) | CDC Frontier (Reference genome) | (Pusa 256 & HPNB) | NCBI SNPdb Accession IDs |
|-----------------------|----------------|-----------------|-------------------------|---------------------------------|-------------------|--------------------------|
| SNP_P3_10136_32940906 | NC_021160.1    | Ca_kabuli_chr01 | 32940906                | GG                              | AA                | 1945888826               |
| SNP_P3_10137_32940969 | NC_021160.1    | Ca_kabuli_chr01 | 32940969                | TT                              | CC                | 1945888828               |
| SNP_P3_10138_32941061 | NC_021160.1    | Ca_kabuli_chr01 | 32941061                | AA                              | GG                | 1945888830               |
| SNP_P3_10139_32941157 | NC_021160.1    | Ca_kabuli_chr01 | 32941157                | TT                              | CC                | 1945888831               |
| SNP_P3_10140_32941412 | NC_021160.1    | Ca_kabuli_chr01 | 32941412                | GG                              | CC                | 1945888833               |
| SNP_P3_10142_32949227 | NC_021160.1    | Ca_kabuli_chr01 | 32949227                | AA                              | CC                | 1945888835               |
| SNP_P3_10143_32950484 | NC_021160.1    | Ca_kabuli_chr01 | 32950484                | GG                              | AA                | 1945888837               |
| SNP_P3_10144_32950551 | NC_021160.1    | Ca_kabuli_chr01 | 32950551                | AA                              | GG                | 1945888838               |
| SNP_P3_10145_32956552 | NC_021160.1    | Ca_kabuli_chr01 | 32956552                | TT                              | CC                | 1945888840               |
| SNP_P3_10146_32957577 | NC_021160.1    | Ca_kabuli_chr01 | 32957577                | TT                              | AA                | 1945888842               |
| SNP_P3_10147_32957590 | NC_021160.1    | Ca_kabuli_chr01 | 32957590                | GG                              | CC                | 1945888844               |
| SNP_P3_10148_32957728 | NC_021160.1    | Ca_kabuli_chr01 | 32957728                | AA                              | GG                | 1945888845               |
| SNP_P3_10149_32959687 | NC_021160.1    | Ca_kabuli_chr01 | 32959687                | CC                              | TT                | 1945888847               |
| SNP_P3_10150_32960217 | NC_021160.1    | Ca_kabuli_chr01 | 32960217                | AA                              | CC                | 1945888849               |
| SNP_P3_10152_32960851 | NC_021160.1    | Ca_kabuli_chr01 | 32960851                | AA                              | GG                | 1945888851               |
| SNP_P3_10153_32966007 | NC_021160.1    | Ca_kabuli_chr01 | 32966007                | AA                              | TT                | 1945888853               |
| SNP_P3_10154_32966684 | NC_021160.1    | Ca_kabuli_chr01 | 32966684                | TT                              | AA                | 1945888854               |
| SNP_P3_10155_32973886 | NC_021160.1    | Ca_kabuli_chr01 | 32973886                | GG                              | CC                | 1945888856               |
| SNP_P3_10156_32974240 | NC_021160.1    | Ca_kabuli_chr01 | 32974240                | CC                              | TT                | 1945888858               |
| SNP_P3_10157_32977228 | NC_021160.1    | Ca_kabuli_chr01 | 32977228                | GG                              | TT                | 1945888860               |
| SNP_P3_10158_32978023 | NC_021160.1    | Ca_kabuli_chr01 | 32978023                | CC                              | AA                | 1945888862               |
| SNP_P3_10159_32978109 | NC_021160.1    | Ca_kabuli_chr01 | 32978109                | AA                              | GG                | 1945888863               |
| SNP_P3_10160_32981502 | NC_021160.1    | Ca_kabuli_chr01 | 32981502                | TT                              | CC                | 1945888865               |
| SNP_P3_10161_32981504 | NC_021160.1    | Ca_kabuli_chr01 | 32981504                | GG                              | AA                | 1945888867               |
| SNP_P3_10162_32981562 | NC_021160.1    | Ca_kabuli_chr01 | 32981562                | GG                              | AA                | 1945888869               |
| SNP_P3_10163_32983440 | NC_021160.1    | Ca_kabuli_chr01 | 32983440                | GG                              | CC                | 1945888870               |
| SNP_P3_10164_32983454 | NC_021160.1    | Ca_kabuli_chr01 | 32983454                | CC                              | TT                | 1945888872               |
| SNP_P3_10165_32983455 | NC_021160.1    | Ca_kabuli_chr01 | 32983455                | GG                              | AA                | 1945888874               |
| SNP_P3_10166_32984014 | NC_021160.1    | Ca_kabuli_chr01 | 32984014                | GG                              | AA                | 1945888876               |
| SNP_P3_10167_32984037 | NC_021160.1    | Ca_kabuli_chr01 | 32984037                | AA                              | TT                | 1945888878               |
| SNP_P3_10168_32984041 | NC_021160.1    | Ca_kabuli_chr01 | 32984041                | CC                              | TT                | 1945888879               |
| SNP_P3_10169_32984050 | NC_021160.1    | Ca_kabuli_chr01 | 32984050                | TT                              | CC                | 1945888881               |
| SNP_P3_10170_32984066 | NC_021160.1    | Ca_kabuli_chr01 | 32984066                | TT                              | AA                | 1945888883               |
| SNP_P3_10171_32984083 | NC_021160.1    | Ca_kabuli_chr01 | 32984083                | GG                              | TT                | 1945888885               |
| SNP_P3_10172_32984112 | NC_021160.1    | Ca_kabuli_chr01 | 32984112                | AA                              | TT                | 1945888886               |
| SNP_P3_10173_32984121 | NC_021160.1    | Ca_kabuli_chr01 | 32984121                | AA                              | GG                | 1945888888               |
| SNP_P3_10174_32995675 | NC_021160.1    | Ca_kabuli_chr01 | 32995675                | AA                              | CC                | 1945888890               |
| SNP_P3_10175_32995837 | NC_021160.1    | Ca_kabuli_chr01 | 32995837                | TT                              | CC                | 1945888892               |
| SNP_P3_10176_32998589 | NC_021160.1    | Ca_kabuli_chr01 | 32998589                | CC                              | TT                | 1945888894               |
| SNP_P3_10177_33006065 | NC_021160.1    | Ca_kabuli_chr01 | 33006065                | CC                              | TT                | 1945888895               |
| SNP_P3_10178_33007752 | NC_021160.1    | Ca_kabuli_chr01 | 33007752                | GG                              | AA                | 1945888897               |
| SNP_P3_10179_33008475 | NC_021160.1    | Ca_kabuli_chr01 | 33008475                | AA                              | GG                | 1945888899               |

| SNPs IDs              | Chromosome IDs | Chromosomes     | Physical positions (bp) | CDC Frontier (Reference genome) | (Pusa 256 & HPNB) | NCBI SNPdb Accession IDs |
|-----------------------|----------------|-----------------|-------------------------|---------------------------------|-------------------|--------------------------|
| SNP_P3_10180_33017781 | NC_021160.1    | Ca_kabuli_chr01 | 33017781                | TT                              | CC                | 1945888901               |
| SNP_P3_10181_33018063 | NC_021160.1    | Ca_kabuli_chr01 | 33018063                | CC                              | TT                | 1945888902               |
| SNP_P3_10183_33019147 | NC_021160.1    | Ca_kabuli_chr01 | 33019147                | AA                              | CC                | 1945888904               |
| SNP_P3_10184_33019157 | NC_021160.1    | Ca_kabuli_chr01 | 33019157                | AA                              | GG                | 1945888906               |
| SNP_P3_10185_33019214 | NC_021160.1    | Ca_kabuli_chr01 | 33019214                | CC                              | TT                | 1945888908               |
| SNP_P3_10186_33019333 | NC_021160.1    | Ca_kabuli_chr01 | 33019333                | AA                              | GG                | 1945888909               |
| SNP_P3_10187_33019614 | NC_021160.1    | Ca_kabuli_chr01 | 33019614                | CC                              | TT                | 1945888911               |
| SNP_P3_10188_33019649 | NC_021160.1    | Ca_kabuli_chr01 | 33019649                | TT                              | CC                | 1945888913               |
| SNP_P3_10189_33019665 | NC_021160.1    | Ca_kabuli_chr01 | 33019665                | AA                              | GG                | 1945888915               |
| SNP_P3_10191_33039879 | NC_021160.1    | Ca_kabuli_chr01 | 33039879                | AA                              | CC                | 1945888916               |
| SNP_P3_10192_33041047 | NC_021160.1    | Ca_kabuli_chr01 | 33041047                | AA                              | GG                | 1945888918               |
| SNP_P3_10193_33041219 | NC_021160.1    | Ca_kabuli_chr01 | 33041219                | GG                              | TT                | 1945888920               |
| SNP_P3_10194_33042717 | NC_021160.1    | Ca_kabuli_chr01 | 33042717                | AA                              | GG                | 1945888922               |
| SNP_P3_10195_33045531 | NC_021160.1    | Ca_kabuli_chr01 | 33045531                | GG                              | AA                | 1945888924               |
| SNP_P3_10196_33054193 | NC_021160.1    | Ca_kabuli_chr01 | 33054193                | AA                              | TT                | 1945888925               |
| SNP_P3_10197_33060298 | NC_021160.1    | Ca_kabuli_chr01 | 33060298                | TT                              | CC                | 1945888927               |
| SNP_P3_10198_33076300 | NC_021160.1    | Ca_kabuli_chr01 | 33076300                | TT                              | CC                | 1945888929               |
| SNP_P3_10199_33076326 | NC_021160.1    | Ca_kabuli_chr01 | 33076326                | GG                              | CC                | 1945888931               |
| SNP_P3_10200_33077196 | NC_021160.1    | Ca_kabuli_chr01 | 33077196                | AA                              | GG                | 1945888932               |
| SNP_P3_10201_33077660 | NC_021160.1    | Ca_kabuli_chr01 | 33077660                | TT                              | AA                | 1945888934               |
| SNP_P3_10202_33077661 | NC_021160.1    | Ca_kabuli_chr01 | 33077661                | TT                              | AA                | 1945888936               |
| SNP_P3_10203_33079039 | NC_021160.1    | Ca_kabuli_chr01 | 33079039                | TT                              | CC                | 1945888938               |
| SNP_P3_10204_33080524 | NC_021160.1    | Ca_kabuli_chr01 | 33080524                | GG                              | TT                | 1945888940               |
| SNP_P3_10205_33083100 | NC_021160.1    | Ca_kabuli_chr01 | 33083100                | AA                              | TT                | 1945888941               |
| SNP_P3_10206_33085801 | NC_021160.1    | Ca_kabuli_chr01 | 33085801                | TT                              | AA                | 1945888943               |
| SNP_P3_10207_33085803 | NC_021160.1    | Ca_kabuli_chr01 | 33085803                | GG                              | TT                | 1945888945               |
| SNP_P3_10208_33088946 | NC_021160.1    | Ca_kabuli_chr01 | 33088946                | CC                              | TT                | 1945888947               |
| SNP_P3_10209_33089485 | NC_021160.1    | Ca_kabuli_chr01 | 33089485                | GG                              | TT                | 1945888949               |
| SNP_P3_10210_33089487 | NC_021160.1    | Ca_kabuli_chr01 | 33089487                | TT                              | CC                | 1945888950               |
| SNP_P3_10211_33089513 | NC_021160.1    | Ca_kabuli_chr01 | 33089513                | CC                              | TT                | 1945888952               |
| SNP_P3_10212_33090124 | NC_021160.1    | Ca_kabuli_chr01 | 33090124                | GG                              | AA                | 1945888954               |
| SNP_P3_10213_33099628 | NC_021160.1    | Ca_kabuli_chr01 | 33099628                | CC                              | TT                | 1945888956               |
| SNP_P3_10215_33102894 | NC_021160.1    | Ca_kabuli_chr01 | 33102894                | AA                              | CC                | 1945888957               |
| SNP_P3_10216_33108936 | NC_021160.1    | Ca_kabuli_chr01 | 33108936                | GG                              | AA                | 1945888959               |
| SNP_P3_10217_33112505 | NC_021160.1    | Ca_kabuli_chr01 | 33112505                | TT                              | CC                | 1945888961               |
| SNP_P3_10218_33112654 | NC_021160.1    | Ca_kabuli_chr01 | 33112654                | AA                              | TT                | 1945888963               |
| SNP_P3_10219_33112701 | NC_021160.1    | Ca_kabuli_chr01 | 33112701                | CC                              | TT                | 1945888965               |
| SNP_P3_10220_33120242 | NC_021160.1    | Ca_kabuli_chr01 | 33120242                | CC                              | TT                | 1945888966               |
| SNP_P3_10221_33120433 | NC_021160.1    | Ca_kabuli_chr01 | 33120433                | GG                              | CC                | 1945888968               |
| SNP_P3_10222_33124683 | NC_021160.1    | Ca_kabuli_chr01 | 33124683                | TT                              | CC                | 1945888970               |
| SNP_P3_10223_33124950 | NC_021160.1    | Ca_kabuli_chr01 | 33124950                | GG                              | AA                | 1945888972               |
| SNP_P3_10224_33126752 | NC_021160.1    | Ca_kabuli_chr01 | 33126752                | CC                              | TT                | 1945888973               |

| SNPs IDs              | Chromosome IDs | Chromosomes     | Physical positions (bp) | CDC Frontier (Reference genome) | (Pusa 256 & HPNB) | NCBI SNPdb Accession IDs |
|-----------------------|----------------|-----------------|-------------------------|---------------------------------|-------------------|--------------------------|
| SNP_P3_10225_33129493 | NC_021160.1    | Ca_kabuli_chr01 | 33129493                | GG                              | TT                | 1945888975               |
| SNP_P3_10226_33130149 | NC_021160.1    | Ca_kabuli_chr01 | 33130149                | AA                              | GG                | 1945888977               |
| SNP_P3_10227_33130204 | NC_021160.1    | Ca_kabuli_chr01 | 33130204                | AA                              | CC                | 1945888979               |
| SNP_P3_10228_33130899 | NC_021160.1    | Ca_kabuli_chr01 | 33130899                | AA                              | GG                | 1945888981               |
| SNP_P3_10229_33130933 | NC_021160.1    | Ca_kabuli_chr01 | 33130933                | CC                              | TT                | 1945888982               |
| SNP_P3_10230_33131233 | NC_021160.1    | Ca_kabuli_chr01 | 33131233                | GG                              | AA                | 1945888984               |
| SNP_P3_10231_33131235 | NC_021160.1    | Ca_kabuli_chr01 | 33131235                | CC                              | AA                | 1945888986               |
| SNP_P3_10232_33131585 | NC_021160.1    | Ca_kabuli_chr01 | 33131585                | CC                              | TT                | 1945888988               |
| SNP_P3_10234_33133110 | NC_021160.1    | Ca_kabuli_chr01 | 33133110                | GG                              | TT                | 1945888989               |
| SNP_P3_10235_33135174 | NC_021160.1    | Ca_kabuli_chr01 | 33135174                | AA                              | TT                | 1945888991               |
| SNP_P3_10236_33138393 | NC_021160.1    | Ca_kabuli_chr01 | 33138393                | TT                              | AA                | 1945888993               |
| SNP_P3_10237_33138787 | NC_021160.1    | Ca_kabuli_chr01 | 33138787                | GG                              | AA                | 1945888995               |
| SNP_P3_10238_33140157 | NC_021160.1    | Ca_kabuli_chr01 | 33140157                | GG                              | AA                | 1945888997               |
| SNP_P3_10239_33140444 | NC_021160.1    | Ca_kabuli_chr01 | 33140444                | CC                              | AA                | 1945888998               |
| SNP_P3_10240_33140501 | NC_021160.1    | Ca_kabuli_chr01 | 33140501                | AA                              | GG                | 1945889000               |
| SNP_P3_10241_33140840 | NC_021160.1    | Ca_kabuli_chr01 | 33140840                | CC                              | TT                | 1945889002               |
| SNP_P3_10242_33141315 | NC_021160.1    | Ca_kabuli_chr01 | 33141315                | AA                              | GG                | 1945889004               |
| SNP_P3_10243_33142146 | NC_021160.1    | Ca_kabuli_chr01 | 33142146                | TT                              | CC                | 1945889005               |
| SNP_P3_10246_33159709 | NC_021160.1    | Ca_kabuli_chr01 | 33159709                | CC                              | TT                | 1945889007               |
| SNP_P3_10247_33159757 | NC_021160.1    | Ca_kabuli_chr01 | 33159757                | GG                              | TT                | 1945889009               |
| SNP_P3_10249_33165495 | NC_021160.1    | Ca_kabuli_chr01 | 33165495                | TT                              | CC                | 1945889011               |
| SNP_P3_10250_33167731 | NC_021160.1    | Ca_kabuli_chr01 | 33167731                | AA                              | TT                | 1945889012               |
| SNP_P3_10251_33168819 | NC_021160.1    | Ca_kabuli_chr01 | 33168819                | AA                              | GG                | 1945889014               |
| SNP_P3_10252_33172369 | NC_021160.1    | Ca_kabuli_chr01 | 33172369                | AA                              | TT                | 1945889016               |
| SNP_P3_10253_33172880 | NC_021160.1    | Ca_kabuli_chr01 | 33172880                | AA                              | CC                | 1945889018               |
| SNP_P3_10254_33181552 | NC_021160.1    | Ca_kabuli_chr01 | 33181552                | GG                              | CC                | 1945889020               |
| SNP_P3_10255_33181738 | NC_021160.1    | Ca_kabuli_chr01 | 33181738                | GG                              | AA                | 1945889021               |
| SNP_P3_10257_33184163 | NC_021160.1    | Ca_kabuli_chr01 | 33184163                | AA                              | GG                | 1945889023               |
| SNP_P3_10259_33187543 | NC_021160.1    | Ca_kabuli_chr01 | 33187543                | TT                              | CC                | 1945889025               |
| SNP_P3_10260_33197142 | NC_021160.1    | Ca_kabuli_chr01 | 33197142                | TT                              | CC                | 1945889027               |
| SNP_P3_10261_33203865 | NC_021160.1    | Ca_kabuli_chr01 | 33203865                | TT                              | GG                | 1945889028               |
| SNP_P3_10262_33210696 | NC_021160.1    | Ca_kabuli_chr01 | 33210696                | CC                              | TT                | 1945889030               |
| SNP_P3_10263_33223958 | NC_021160.1    | Ca_kabuli_chr01 | 33223958                | TT                              | AA                | 1945889032               |
| SNP_P3_10265_33231150 | NC_021160.1    | Ca_kabuli_chr01 | 33231150                | GG                              | AA                | 1945889034               |
| SNP_P3_10266_33241402 | NC_021160.1    | Ca_kabuli_chr01 | 33241402                | CC                              | TT                | 1945889036               |
| SNP_P3_10267_33241421 | NC_021160.1    | Ca_kabuli_chr01 | 33241421                | CC                              | TT                | 1945889037               |
| SNP_P3_10268_33241489 | NC_021160.1    | Ca_kabuli_chr01 | 33241489                | TT                              | GG                | 1945889039               |
| SNP_P3_10269_33241726 | NC_021160.1    | Ca_kabuli_chr01 | 33241726                | TT                              | CC                | 1945889041               |
| SNP_P3_10270_33241821 | NC_021160.1    | Ca_kabuli_chr01 | 33241821                | TT                              | CC                | 1945889043               |
| SNP_P3_10271_33243396 | NC_021160.1    | Ca_kabuli_chr01 | 33243396                | AA                              | GG                | 1945889044               |
| SNP_P3_10272_33243397 | NC_021160.1    | Ca_kabuli_chr01 | 33243397                | GG                              | TT                | 1945889046               |
| SNP_P3_10273_33243398 | NC_021160.1    | Ca_kabuli_chr01 | 33243398                | TT                              | AA                | 1945889048               |

| SNPs IDs              | Chromosome IDs | Chromosomes     | Physical positions (bp) | CDC Frontier (Reference genome) | (Pusa 256 & HPNB) | NCBI SNPdb Accession IDs |
|-----------------------|----------------|-----------------|-------------------------|---------------------------------|-------------------|--------------------------|
| SNP_P3_10274_33243716 | NC_021160.1    | Ca_kabuli_chr01 | 33243716                | AA                              | GG                | 1945889050               |
| SNP_P3_10275_33244781 | NC_021160.1    | Ca_kabuli_chr01 | 33244781                | TT                              | GG                | 1945889052               |
| SNP_P3_10276_33244795 | NC_021160.1    | Ca_kabuli_chr01 | 33244795                | GG                              | TT                | 1945889053               |
| SNP_P3_10277_33245175 | NC_021160.1    | Ca_kabuli_chr01 | 33245175                | CC                              | TT                | 1945889055               |
| SNP_P3_10278_33245384 | NC_021160.1    | Ca_kabuli_chr01 | 33245384                | AA                              | TT                | 1945889057               |
| SNP_P3_10279_33245797 | NC_021160.1    | Ca_kabuli_chr01 | 33245797                | TT                              | GG                | 1945889059               |
| SNP_P3_10280_33245848 | NC_021160.1    | Ca_kabuli_chr01 | 33245848                | GG                              | AA                | 1945889061               |
| SNP_P3_10282_33247694 | NC_021160.1    | Ca_kabuli_chr01 | 33247694                | GG                              | AA                | 1945889062               |
| SNP_P3_10283_33251052 | NC_021160.1    | Ca_kabuli_chr01 | 33251052                | GG                              | CC                | 1945889064               |
| SNP_P3_10284_33253309 | NC_021160.1    | Ca_kabuli_chr01 | 33253309                | GG                              | CC                | 1945889066               |
| SNP_P3_10285_33253349 | NC_021160.1    | Ca_kabuli_chr01 | 33253349                | TT                              | GG                | 1945889068               |
| SNP_P3_10286_33253354 | NC_021160.1    | Ca_kabuli_chr01 | 33253354                | AA                              | GG                | 1945889069               |
| SNP_P3_10287_33253402 | NC_021160.1    | Ca_kabuli_chr01 | 33253402                | CC                              | AA                | 1945889071               |
| SNP_P3_10288_33253433 | NC_021160.1    | Ca_kabuli_chr01 | 33253433                | TT                              | CC                | 1945889073               |
| SNP_P3_10289_33253737 | NC_021160.1    | Ca_kabuli_chr01 | 33253737                | TT                              | CC                | 1945889075               |
| SNP_P3_10290_33257298 | NC_021160.1    | Ca_kabuli_chr01 | 33257298                | GG                              | AA                | 1945889076               |
| SNP_P3_10291_33258718 | NC_021160.1    | Ca_kabuli_chr01 | 33258718                | TT                              | CC                | 1945889078               |
| SNP_P3_10292_33261838 | NC_021160.1    | Ca_kabuli_chr01 | 33261838                | CC                              | TT                | 1945889080               |
| SNP_P3_10293_33261846 | NC_021160.1    | Ca_kabuli_chr01 | 33261846                | AA                              | GG                | 1945889082               |
| SNP_P3_10294_33261870 | NC_021160.1    | Ca_kabuli_chr01 | 33261870                | GG                              | AA                | 1945889084               |
| SNP_P3_10295_33261877 | NC_021160.1    | Ca_kabuli_chr01 | 33261877                | CC                              | TT                | 1945889085               |
| SNP_P3_10296_33261889 | NC_021160.1    | Ca_kabuli_chr01 | 33261889                | TT                              | CC                | 1945889087               |
| SNP_P3_10297_33262019 | NC_021160.1    | Ca_kabuli_chr01 | 33262019                | GG                              | CC                | 1945889089               |
| SNP_P3_10298_33266974 | NC_021160.1    | Ca_kabuli_chr01 | 33266974                | GG                              | AA                | 1945889091               |
| SNP_P3_10299_33267038 | NC_021160.1    | Ca_kabuli_chr01 | 33267038                | TT                              | CC                | 1945889093               |
| SNP_P3_10300_33269607 | NC_021160.1    | Ca_kabuli_chr01 | 33269607                | GG                              | TT                | 1945889094               |
| SNP_P3_10301_33271867 | NC_021160.1    | Ca_kabuli_chr01 | 33271867                | AA                              | GG                | 1945889096               |
| SNP_P3_10302_33271868 | NC_021160.1    | Ca_kabuli_chr01 | 33271868                | TT                              | CC                | 1945889098               |
| SNP_P3_10303_33271892 | NC_021160.1    | Ca_kabuli_chr01 | 33271892                | AA                              | GG                | 1945889100               |
| SNP_P3_10304_33278944 | NC_021160.1    | Ca_kabuli_chr01 | 33278944                | CC                              | TT                | 1945889101               |
| SNP_P3_10305_33281766 | NC_021160.1    | Ca_kabuli_chr01 | 33281766                | AA                              | GG                | 1945889103               |
| SNP_P3_10306_33282603 | NC_021160.1    | Ca_kabuli_chr01 | 33282603                | GG                              | TT                | 1945889105               |
| SNP_P3_10307_33282843 | NC_021160.1    | Ca_kabuli_chr01 | 33282843                | CC                              | TT                | 1945889107               |
| SNP_P3_10308_33283333 | NC_021160.1    | Ca_kabuli_chr01 | 33283333                | GG                              | TT                | 1945889109               |
| SNP_P3_10309_33283486 | NC_021160.1    | Ca_kabuli_chr01 | 33283486                | CC                              | TT                | 1945889110               |
| SNP_P3_10311_33286736 | NC_021160.1    | Ca_kabuli_chr01 | 33286736                | AA                              | CC                | 1945889112               |
| SNP_P3_10312_33286771 | NC_021160.1    | Ca_kabuli_chr01 | 33286771                | AA                              | GG                | 1945889114               |
| SNP_P3_10313_33288039 | NC_021160.1    | Ca_kabuli_chr01 | 33288039                | TT                              | CC                | 1945889116               |
| SNP_P3_10314_33288159 | NC_021160.1    | Ca_kabuli_chr01 | 33288159                | TT                              | GG                | 1945889118               |
| SNP_P3_10315_33288297 | NC_021160.1    | Ca_kabuli_chr01 | 33288297                | CC                              | AA                | 1945889119               |
| SNP_P3_10317_33294781 | NC_021160.1    | Ca_kabuli_chr01 | 33294781                | TT                              | CC                | 1945889121               |
| SNP_P3_10318_33295210 | NC_021160.1    | Ca_kabuli_chr01 | 33295210                | TT                              | CC                | 1945889123               |

| SNPs IDs              | Chromosome IDs | Chromosomes     | Physical positions (bp) | CDC Frontier (Reference genome) | (Pusa 256 & HPNB) | NCBI SNPdb Accession IDs |
|-----------------------|----------------|-----------------|-------------------------|---------------------------------|-------------------|--------------------------|
| SNP_P3_10319_33299159 | NC_021160.1    | Ca_kabuli_chr01 | 33299159                | AA                              | GG                | 1945889125               |
| SNP_P3_10320_33299919 | NC_021160.1    | Ca_kabuli_chr01 | 33299919                | TT                              | GG                | 1945889126               |
| SNP_P3_10321_33302299 | NC_021160.1    | Ca_kabuli_chr01 | 33302299                | TT                              | GG                | 1945889128               |
| SNP_P3_10322_33303330 | NC_021160.1    | Ca_kabuli_chr01 | 33303330                | AA                              | GG                | 1945889130               |
| SNP_P3_10323_33303653 | NC_021160.1    | Ca_kabuli_chr01 | 33303653                | AA                              | GG                | 1945889132               |
| SNP_P3_10324_33304035 | NC_021160.1    | Ca_kabuli_chr01 | 33304035                | GG                              | CC                | 1945889134               |
| SNP_P3_10326_33306121 | NC_021160.1    | Ca_kabuli_chr01 | 33306121                | AA                              | TT                | 1945889135               |
| SNP_P3_10327_33306126 | NC_021160.1    | Ca_kabuli_chr01 | 33306126                | AA                              | GG                | 1945889137               |
| SNP_P3_10328_33307334 | NC_021160.1    | Ca_kabuli_chr01 | 33307334                | CC                              | TT                | 1945889139               |
| SNP_P3_10329_33307490 | NC_021160.1    | Ca_kabuli_chr01 | 33307490                | AA                              | TT                | 1945889141               |
| SNP_P3_10330_33307511 | NC_021160.1    | Ca_kabuli_chr01 | 33307511                | TT                              | CC                | 1945889143               |
| SNP_P3_10331_33307771 | NC_021160.1    | Ca_kabuli_chr01 | 33307771                | AA                              | CC                | 1945889144               |
| SNP_P3_10332_33307844 | NC_021160.1    | Ca_kabuli_chr01 | 33307844                | TT                              | CC                | 1945889146               |
| SNP_P3_10333_33307868 | NC_021160.1    | Ca_kabuli_chr01 | 33307868                | TT                              | CC                | 1945889148               |
| SNP_P3_10334_33307870 | NC_021160.1    | Ca_kabuli_chr01 | 33307870                | GG                              | AA                | 1945889150               |
| SNP_P3_10335_33307920 | NC_021160.1    | Ca_kabuli_chr01 | 33307920                | AA                              | GG                | 1945889151               |
| SNP_P3_10336_33307928 | NC_021160.1    | Ca_kabuli_chr01 | 33307928                | GG                              | TT                | 1945889153               |
| SNP_P3_10337_33307940 | NC_021160.1    | Ca_kabuli_chr01 | 33307940                | AA                              | GG                | 1945889155               |
| SNP_P3_10338_33316258 | NC_021160.1    | Ca_kabuli_chr01 | 33316258                | AA                              | CC                | 1945889157               |
| SNP_P3_10339_33316501 | NC_021160.1    | Ca_kabuli_chr01 | 33316501                | GG                              | CC                | 1945889159               |
| SNP_P3_10340_33317310 | NC_021160.1    | Ca_kabuli_chr01 | 33317310                | TT                              | GG                | 1945889160               |
| SNP_P3_10341_33320320 | NC_021160.1    | Ca_kabuli_chr01 | 33320320                | GG                              | TT                | 1945889162               |
| SNP_P3_10343_33327687 | NC_021160.1    | Ca_kabuli_chr01 | 33327687                | AA                              | TT                | 1945889164               |
| SNP_P3_10344_33328642 | NC_021160.1    | Ca_kabuli_chr01 | 33328642                | CC                              | TT                | 1945889166               |
| SNP_P3_10345_33329949 | NC_021160.1    | Ca_kabuli_chr01 | 33329949                | AA                              | GG                | 1945889167               |
| SNP_P3_10346_33330122 | NC_021160.1    | Ca_kabuli_chr01 | 33330122                | CC                              | TT                | 1945889169               |
| SNP_P3_10347_33330749 | NC_021160.1    | Ca_kabuli_chr01 | 33330749                | TT                              | CC                | 1945889171               |
| SNP_P3_10348_33330983 | NC_021160.1    | Ca_kabuli_chr01 | 33330983                | GG                              | AA                | 1945889173               |
| SNP_P3_10349_33334847 | NC_021160.1    | Ca_kabuli_chr01 | 33334847                | TT                              | AA                | 1945889175               |
| SNP_P3_10350_33334849 | NC_021160.1    | Ca_kabuli_chr01 | 33334849                | TT                              | CC                | 1945889176               |
| SNP_P3_10351_33335111 | NC_021160.1    | Ca_kabuli_chr01 | 33335111                | AA                              | GG                | 1945889178               |
| SNP_P3_10352_33336588 | NC_021160.1    | Ca_kabuli_chr01 | 33336588                | TT                              | CC                | 1945889180               |
| SNP_P3_10353_33336609 | NC_021160.1    | Ca_kabuli_chr01 | 33336609                | CC                              | TT                | 1945889182               |
| SNP_P3_10355_33339141 | NC_021160.1    | Ca_kabuli_chr01 | 33339141                | CC                              | TT                | 1945889183               |
| SNP_P3_10356_33340255 | NC_021160.1    | Ca_kabuli_chr01 | 33340255                | TT                              | CC                | 1945889185               |
| SNP_P3_10357_33342220 | NC_021160.1    | Ca_kabuli_chr01 | 33342220                | AA                              | TT                | 1945889187               |
| SNP_P3_10358_33342224 | NC_021160.1    | Ca_kabuli_chr01 | 33342224                | AA                              | GG                | 1945889189               |
| SNP_P3_10359_33345703 | NC_021160.1    | Ca_kabuli_chr01 | 33345703                | TT                              | CC                | 1945889191               |
| SNP_P3_10361_33347969 | NC_021160.1    | Ca_kabuli_chr01 | 33347969                | GG                              | TT                | 1945889192               |
| SNP_P3_10362_33350431 | NC_021160.1    | Ca_kabuli_chr01 | 33350431                | CC                              | TT                | 1945889194               |
| SNP_P3_10363_33350458 | NC_021160.1    | Ca_kabuli_chr01 | 33350458                | TT                              | CC                | 1945889196               |
| SNP_P3_10364_33351774 | NC_021160.1    | Ca_kabuli_chr01 | 33351774                | GG                              | CC                | 1945889198               |

| SNPs IDs              | Chromosome IDs | Chromosomes     | Physical positions (bp) | CDC Frontier (Reference genome) | (Pusa 256 & HPNB) | NCBI SNPdb Accession IDs |
|-----------------------|----------------|-----------------|-------------------------|---------------------------------|-------------------|--------------------------|
| SNP_P3_10365_33353454 | NC_021160.1    | Ca_kabuli_chr01 | 33353454                | AA                              | GG                | 1945889200               |
| SNP_P3_10366_33354074 | NC_021160.1    | Ca_kabuli_chr01 | 33354074                | AA                              | TT                | 1945889201               |
| SNP_P3_10367_33357648 | NC_021160.1    | Ca_kabuli_chr01 | 33357648                | TT                              | GG                | 1945889203               |
| SNP_P3_10368_33357708 | NC_021160.1    | Ca_kabuli_chr01 | 33357708                | TT                              | GG                | 1945889205               |
| SNP_P3_10369_33358195 | NC_021160.1    | Ca_kabuli_chr01 | 33358195                | CC                              | AA                | 1945889207               |
| SNP_P3_10370_33359281 | NC_021160.1    | Ca_kabuli_chr01 | 33359281                | TT                              | CC                | 1945889208               |
| SNP_P3_10371_33361022 | NC_021160.1    | Ca_kabuli_chr01 | 33361022                | GG                              | AA                | 1945889210               |
| SNP_P3_10372_33361039 | NC_021160.1    | Ca_kabuli_chr01 | 33361039                | AA                              | GG                | 1945889212               |
| SNP_P3_10373_33362341 | NC_021160.1    | Ca_kabuli_chr01 | 33362341                | GG                              | AA                | 1945889214               |
| SNP_P3_10376_33370158 | NC_021160.1    | Ca_kabuli_chr01 | 33370158                | GG                              | CC                | 1945889215               |
| SNP_P3_10377_33371454 | NC_021160.1    | Ca_kabuli_chr01 | 33371454                | GG                              | AA                | 1945889217               |
| SNP_P3_10378_33374696 | NC_021160.1    | Ca_kabuli_chr01 | 33374696                | TT                              | CC                | 1945889219               |
| SNP_P3_10379_33385508 | NC_021160.1    | Ca_kabuli_chr01 | 33385508                | GG                              | AA                | 1945889221               |
| SNP_P3_10380_33388334 | NC_021160.1    | Ca_kabuli_chr01 | 33388334                | TT                              | CC                | 1945889222               |
| SNP_P3_10381_33388460 | NC_021160.1    | Ca_kabuli_chr01 | 33388460                | AA                              | TT                | 1945889224               |
| SNP_P3_10382_33389271 | NC_021160.1    | Ca_kabuli_chr01 | 33389271                | AA                              | GG                | 1945889226               |
| SNP_P3_10383_33389356 | NC_021160.1    | Ca_kabuli_chr01 | 33389356                | GG                              | AA                | 1945889228               |
| SNP_P3_10384_33389554 | NC_021160.1    | Ca_kabuli_chr01 | 33389554                | CC                              | GG                | 1945889230               |
| SNP_P3_10385_33389892 | NC_021160.1    | Ca_kabuli_chr01 | 33389892                | TT                              | CC                | 1945889231               |
| SNP_P3_10386_33390678 | NC_021160.1    | Ca_kabuli_chr01 | 33390678                | AA                              | CC                | 1945889233               |
| SNP_P3_10387_33391117 | NC_021160.1    | Ca_kabuli_chr01 | 33391117                | CC                              | AA                | 1945889235               |
| SNP_P3_10388_33391649 | NC_021160.1    | Ca_kabuli_chr01 | 33391649                | CC                              | AA                | 1945889237               |
| SNP_P3_10389_33393879 | NC_021160.1    | Ca_kabuli_chr01 | 33393879                | AA                              | GG                | 1945889239               |
| SNP_P3_10390_33394216 | NC_021160.1    | Ca_kabuli_chr01 | 33394216                | GG                              | TT                | 1945889240               |
| SNP_P3_10391_33394607 | NC_021160.1    | Ca_kabuli_chr01 | 33394607                | GG                              | AA                | 1945889242               |
| SNP_P3_10392_33394634 | NC_021160.1    | Ca_kabuli_chr01 | 33394634                | CC                              | TT                | 1945889244               |
| SNP_P3_10393_33394863 | NC_021160.1    | Ca_kabuli_chr01 | 33394863                | TT                              | CC                | 1945889246               |
| SNP_P3_10394_33395056 | NC_021160.1    | Ca_kabuli_chr01 | 33395056                | CC                              | TT                | 1945889247               |
| SNP_P3_10395_33395225 | NC_021160.1    | Ca_kabuli_chr01 | 33395225                | CC                              | TT                | 1945889249               |
| SNP_P3_10396_33400603 | NC_021160.1    | Ca_kabuli_chr01 | 33400603                | TT                              | CC                | 1945889251               |
| SNP_P3_10397_33401640 | NC_021160.1    | Ca_kabuli_chr01 | 33401640                | CC                              | TT                | 1945889253               |
| SNP_P3_10398_33402115 | NC_021160.1    | Ca_kabuli_chr01 | 33402115                | TT                              | CC                | 1945889254               |
| SNP_P3_10400_33407796 | NC_021160.1    | Ca_kabuli_chr01 | 33407796                | AA                              | GG                | 1945889256               |
| SNP_P3_10401_33407949 | NC_021160.1    | Ca_kabuli_chr01 | 33407949                | TT                              | AA                | 1945889258               |
| SNP_P3_10402_33408467 | NC_021160.1    | Ca_kabuli_chr01 | 33408467                | AA                              | GG                | 1945889260               |
| SNP_P3_10403_33408748 | NC_021160.1    | Ca_kabuli_chr01 | 33408748                | GG                              | CC                | 1945889262               |
| SNP_P3_10405_33442242 | NC_021160.1    | Ca_kabuli_chr01 | 33442242                | TT                              | AA                | 1945889263               |
| SNP_P3_10406_33446000 | NC_021160.1    | Ca_kabuli_chr01 | 33446000                | GG                              | AA                | 1945889265               |
| SNP_P3_10407_33451023 | NC_021160.1    | Ca_kabuli_chr01 | 33451023                | TT                              | CC                | 1945889267               |
| SNP_P3_10408_33451317 | NC_021160.1    | Ca_kabuli_chr01 | 33451317                | TT                              | CC                | 1945889269               |
| SNP_P3_10409_33452685 | NC_021160.1    | Ca_kabuli_chr01 | 33452685                | GG                              | TT                | 1945889271               |
| SNP_P3_10411_33454831 | NC_021160.1    | Ca_kabuli_chr01 | 33454831                | TT                              | CC                | 1945889272               |

| SNPs IDs              | Chromosome IDs | Chromosomes     | Physical positions (bp) | CDC Frontier (Reference genome) | (Pusa 256 & HPNB) | NCBI SNPdb Accession IDs |
|-----------------------|----------------|-----------------|-------------------------|---------------------------------|-------------------|--------------------------|
| SNP_P3_10412_33458852 | NC_021160.1    | Ca_kabuli_chr01 | 33458852                | GG                              | TT                | 1945889274               |
| SNP_P3_10413_33459083 | NC_021160.1    | Ca_kabuli_chr01 | 33459083                | CC                              | TT                | 1945889276               |
| SNP_P3_10414_33459119 | NC_021160.1    | Ca_kabuli_chr01 | 33459119                | AA                              | GG                | 1945889278               |
| SNP_P3_10415_33459129 | NC_021160.1    | Ca_kabuli_chr01 | 33459129                | TT                              | CC                | 1945889279               |
| SNP_P3_10416_33459195 | NC_021160.1    | Ca_kabuli_chr01 | 33459195                | AA                              | GG                | 1945889281               |
| SNP_P3_10417_33459378 | NC_021160.1    | Ca_kabuli_chr01 | 33459378                | AA                              | GG                | 1945889283               |
| SNP_P3_10418_33462830 | NC_021160.1    | Ca_kabuli_chr01 | 33462830                | GG                              | AA                | 1945889285               |
| SNP_P3_10419_33462887 | NC_021160.1    | Ca_kabuli_chr01 | 33462887                | AA                              | GG                | 1945889287               |
| SNP_P3_10420_33465500 | NC_021160.1    | Ca_kabuli_chr01 | 33465500                | CC                              | TT                | 1945889288               |
| SNP_P3_10421_33466578 | NC_021160.1    | Ca_kabuli_chr01 | 33466578                | GG                              | CC                | 1945889290               |
| SNP_P3_10422_33473846 | NC_021160.1    | Ca_kabuli_chr01 | 33473846                | GG                              | TT                | 1945889292               |
| SNP_P3_10424_33476896 | NC_021160.1    | Ca_kabuli_chr01 | 33476896                | CC                              | TT                | 1945889294               |
| SNP_P3_10425_33476903 | NC_021160.1    | Ca_kabuli_chr01 | 33476903                | GG                              | AA                | 1945889295               |
| SNP_P3_10426_33476933 | NC_021160.1    | Ca_kabuli_chr01 | 33476933                | CC                              | AA                | 1945889297               |
| SNP_P3_10427_33477314 | NC_021160.1    | Ca_kabuli_chr01 | 33477314                | AA                              | CC                | 1945889299               |
| SNP_P3_10428_33488462 | NC_021160.1    | Ca_kabuli_chr01 | 33488462                | AA                              | TT                | 1945889301               |
| SNP_P3_10429_33488476 | NC_021160.1    | Ca_kabuli_chr01 | 33488476                | TT                              | CC                | 1945889303               |
| SNP_P3_10430_33488482 | NC_021160.1    | Ca_kabuli_chr01 | 33488482                | AA                              | GG                | 1945889304               |
| SNP_P3_10431_33488565 | NC_021160.1    | Ca_kabuli_chr01 | 33488565                | AA                              | GG                | 1945889306               |
| SNP_P3_10432_33488626 | NC_021160.1    | Ca_kabuli_chr01 | 33488626                | CC                              | AA                | 1945889308               |
| SNP_P3_10433_33488663 | NC_021160.1    | Ca_kabuli_chr01 | 33488663                | TT                              | CC                | 1945889310               |
| SNP_P3_10434_33488691 | NC_021160.1    | Ca_kabuli_chr01 | 33488691                | AA                              | CC                | 1945889311               |
| SNP_P3_10435_33488706 | NC_021160.1    | Ca_kabuli_chr01 | 33488706                | AA                              | GG                | 1945889313               |
| SNP_P3_10436_33488784 | NC_021160.1    | Ca_kabuli_chr01 | 33488784                | TT                              | GG                | 1945889315               |
| SNP_P3_10437_33488809 | NC_021160.1    | Ca_kabuli_chr01 | 33488809                | CC                              | GG                | 1945889317               |
| SNP_P3_10438_33488965 | NC_021160.1    | Ca_kabuli_chr01 | 33488965                | TT                              | GG                | 1945889319               |
| SNP_P3_10439_33489005 | NC_021160.1    | Ca_kabuli_chr01 | 33489005                | TT                              | GG                | 1945889320               |
| SNP_P3_10440_33489086 | NC_021160.1    | Ca_kabuli_chr01 | 33489086                | CC                              | AA                | 1945889322               |
| SNP_P3_10441_33489291 | NC_021160.1    | Ca_kabuli_chr01 | 33489291                | AA                              | CC                | 1945889324               |
| SNP_P3_10442_33489551 | NC_021160.1    | Ca_kabuli_chr01 | 33489551                | GG                              | TT                | 1945889326               |
| SNP_P3_10443_33493040 | NC_021160.1    | Ca_kabuli_chr01 | 33493040                | CC                              | TT                | 1945889328               |
| SNP_P3_10444_33493044 | NC_021160.1    | Ca_kabuli_chr01 | 33493044                | GG                              | TT                | 1945889329               |
| SNP_P3_10445_33493426 | NC_021160.1    | Ca_kabuli_chr01 | 33493426                | CC                              | TT                | 1945889331               |
| SNP_P3_10446_33493444 | NC_021160.1    | Ca_kabuli_chr01 | 33493444                | GG                              | CC                | 1945889333               |
| SNP_P3_10447_33501466 | NC_021160.1    | Ca_kabuli_chr01 | 33501466                | TT                              | GG                | 1945889335               |
| SNP_P3_10449_33504145 | NC_021160.1    | Ca_kabuli_chr01 | 33504145                | GG                              | AA                | 1945889336               |
| SNP_P3_10450_33505962 | NC_021160.1    | Ca_kabuli_chr01 | 33505962                | TT                              | CC                | 1945889338               |
| SNP_P3_10451_33506013 | NC_021160.1    | Ca_kabuli_chr01 | 33506013                | AA                              | GG                | 1945889340               |
| SNP_P3_10452_33506168 | NC_021160.1    | Ca_kabuli_chr01 | 33506168                | GG                              | AA                | 1945889342               |
| SNP_P3_10453_33506425 | NC_021160.1    | Ca_kabuli_chr01 | 33506425                | TT                              | CC                | 1945889343               |
| SNP_P3_10454_33506439 | NC_021160.1    | Ca_kabuli_chr01 | 33506439                | TT                              | GG                | 1945889345               |
| SNP_P3_10455_33506500 | NC_021160.1    | Ca_kabuli_chr01 | 33506500                | GG                              | AA                | 1945889347               |



| SNPs IDs              | Chromosome IDs | Chromosomes     | Physical positions (bp) | CDC Frontier (Reference genome) | (Pusa 256 & HPNB) | NCBI SNPdb Accession IDs |
|-----------------------|----------------|-----------------|-------------------------|---------------------------------|-------------------|--------------------------|
| SNP_P3_10456_33506556 | NC_021160.1    | Ca_kabuli_chr01 | 33506556                | AA                              | CC                | 1945889349               |
| SNP_P3_10457_33506606 | NC_021160.1    | Ca_kabuli_chr01 | 33506606                | GG                              | AA                | 1945889351               |
| SNP_P3_10458_33508255 | NC_021160.1    | Ca_kabuli_chr01 | 33508255                | GG                              | AA                | 1945889352               |
| SNP_P3_10459_33511215 | NC_021160.1    | Ca_kabuli_chr01 | 33511215                | AA                              | TT                | 1945889354               |
| SNP_P3_10460_33512409 | NC_021160.1    | Ca_kabuli_chr01 | 33512409                | CC                              | TT                | 1945889356               |
| SNP_P3_10461_33513123 | NC_021160.1    | Ca_kabuli_chr01 | 33513123                | AA                              | GG                | 1945889358               |
| SNP_P3_10462_33514088 | NC_021160.1    | Ca_kabuli_chr01 | 33514088                | TT                              | CC                | 1945889359               |
| SNP_P3_10464_33514983 | NC_021160.1    | Ca_kabuli_chr01 | 33514983                | CC                              | TT                | 1945889361               |
| SNP_P3_10465_33526951 | NC_021160.1    | Ca_kabuli_chr01 | 33526951                | TT                              | CC                | 1945889363               |
| SNP_P3_10466_33544826 | NC_021160.1    | Ca_kabuli_chr01 | 33544826                | TT                              | CC                | 1945889365               |
| SNP_P3_10467_33545206 | NC_021160.1    | Ca_kabuli_chr01 | 33545206                | TT                              | CC                | 1945889366               |
| SNP_P3_10468_33549801 | NC_021160.1    | Ca_kabuli_chr01 | 33549801                | TT                              | CC                | 1945889368               |
| SNP_P3_10469_33549831 | NC_021160.1    | Ca_kabuli_chr01 | 33549831                | CC                              | AA                | 1945889370               |
| SNP_P3_10470_33550208 | NC_021160.1    | Ca_kabuli_chr01 | 33550208                | CC                              | TT                | 1945889372               |
| SNP_P3_10471_33557020 | NC_021160.1    | Ca_kabuli_chr01 | 33557020                | AA                              | TT                | 1945889374               |
| SNP_P3_10472_33562059 | NC_021160.1    | Ca_kabuli_chr01 | 33562059                | TT                              | AA                | 1945889375               |
| SNP_P3_10474_33565243 | NC_021160.1    | Ca_kabuli_chr01 | 33565243                | CC                              | TT                | 1945889377               |
| SNP_P3_10475_33565641 | NC_021160.1    | Ca_kabuli_chr01 | 33565641                | AA                              | GG                | 1945889379               |
| SNP_P3_10476_33565811 | NC_021160.1    | Ca_kabuli_chr01 | 33565811                | TT                              | CC                | 1945889381               |
| SNP_P3_10477_33566085 | NC_021160.1    | Ca_kabuli_chr01 | 33566085                | TT                              | GG                | 1945889382               |
| SNP_P3_10478_33566275 | NC_021160.1    | Ca_kabuli_chr01 | 33566275                | CC                              | TT                | 1945889384               |
| SNP_P3_10480_33570599 | NC_021160.1    | Ca_kabuli_chr01 | 33570599                | AA                              | GG                | 1945889386               |
| SNP_P3_10481_33573283 | NC_021160.1    | Ca_kabuli_chr01 | 33573283                | GG                              | AA                | 1945889388               |
| SNP_P3_10482_33603003 | NC_021160.1    | Ca_kabuli_chr01 | 33603003                | AA                              | CC                | 1945889390               |
| SNP_P3_10484_33603813 | NC_021160.1    | Ca_kabuli_chr01 | 33603813                | TT                              | CC                | 1945889391               |
| SNP_P3_10486_33605147 | NC_021160.1    | Ca_kabuli_chr01 | 33605147                | CC                              | AA                | 1945889393               |
| SNP_P3_10487_33609846 | NC_021160.1    | Ca_kabuli_chr01 | 33609846                | TT                              | AA                | 1945889395               |
| SNP_P3_10488_33619710 | NC_021160.1    | Ca_kabuli_chr01 | 33619710                | TT                              | CC                | 1945889397               |
| SNP_P3_10489_33621424 | NC_021160.1    | Ca_kabuli_chr01 | 33621424                | TT                              | GG                | 1945889398               |
| SNP_P3_10490_33621426 | NC_021160.1    | Ca_kabuli_chr01 | 33621426                | TT                              | GG                | 1945889400               |
| SNP_P3_10491_33621471 | NC_021160.1    | Ca_kabuli_chr01 | 33621471                | GG                              | CC                | 1945889402               |
| SNP_P3_10492_33630870 | NC_021160.1    | Ca_kabuli_chr01 | 33630870                | AA                              | GG                | 1945889404               |
| SNP_P3_10493_33630883 | NC_021160.1    | Ca_kabuli_chr01 | 33630883                | TT                              | CC                | 1945889406               |
| SNP_P3_10494_33631201 | NC_021160.1    | Ca_kabuli_chr01 | 33631201                | AA                              | TT                | 1945889407               |
| SNP_P3_10495_33632350 | NC_021160.1    | Ca_kabuli_chr01 | 33632350                | TT                              | GG                | 1945889409               |
| SNP_P3_10496_33638175 | NC_021160.1    | Ca_kabuli_chr01 | 33638175                | GG                              | CC                | 1945889411               |
| SNP_P3_10498_33639342 | NC_021160.1    | Ca_kabuli_chr01 | 33639342                | AA                              | CC                | 1945889413               |
| SNP_P3_10499_33639426 | NC_021160.1    | Ca_kabuli_chr01 | 33639426                | AA                              | GG                | 1945889415               |
| SNP_P3_10500_33639686 | NC_021160.1    | Ca_kabuli_chr01 | 33639686                | TT                              | AA                | 1945889416               |
| SNP_P3_10501_33639798 | NC_021160.1    | Ca_kabuli_chr01 | 33639798                | AA                              | GG                | 1945889418               |
| SNP_P3_10502_33640262 | NC_021160.1    | Ca_kabuli_chr01 | 33640262                | GG                              | AA                | 1945889420               |
| SNP_P3_10503_33640263 | NC_021160.1    | Ca_kabuli_chr01 | 33640263                | TT                              | CC                | 1945889422               |

| SNPs IDs              | Chromosome IDs | Chromosomes     | Physical positions (bp) | CDC Frontier (Reference genome) | (Pusa 256 & HPNB) | NCBI SNPdb Accession IDs |
|-----------------------|----------------|-----------------|-------------------------|---------------------------------|-------------------|--------------------------|
| SNP_P3_10505_33640373 | NC_021160.1    | Ca_kabuli_chr01 | 33640373                | CC                              | TT                | 1945889423               |
| SNP_P3_10506_33640416 | NC_021160.1    | Ca_kabuli_chr01 | 33640416                | GG                              | AA                | 1945889425               |
| SNP_P3_10507_33640674 | NC_021160.1    | Ca_kabuli_chr01 | 33640674                | TT                              | AA                | 1945889427               |
| SNP_P3_10508_33640698 | NC_021160.1    | Ca_kabuli_chr01 | 33640698                | GG                              | AA                | 1945889429               |
| SNP_P3_10509_33640776 | NC_021160.1    | Ca_kabuli_chr01 | 33640776                | GG                              | AA                | 1945889431               |
| SNP_P3_10510_33647293 | NC_021160.1    | Ca_kabuli_chr01 | 33647293                | AA                              | GG                | 1945889432               |
| SNP_P3_10511_33650709 | NC_021160.1    | Ca_kabuli_chr01 | 33650709                | TT                              | CC                | 1945889434               |
| SNP_P3_10512_33652218 | NC_021160.1    | Ca_kabuli_chr01 | 33652218                | TT                              | CC                | 1945889436               |
| SNP_P3_10514_33654644 | NC_021160.1    | Ca_kabuli_chr01 | 33654644                | AA                              | GG                | 1945889438               |
| SNP_P3_10517_33669069 | NC_021160.1    | Ca_kabuli_chr01 | 33669069                | GG                              | AA                | 1945889439               |
| SNP_P3_10518_33671763 | NC_021160.1    | Ca_kabuli_chr01 | 33671763                | AA                              | GG                | 1945889441               |
| SNP_P3_10520_33681818 | NC_021160.1    | Ca_kabuli_chr01 | 33681818                | GG                              | AA                | 1945889443               |
| SNP_P3_10521_33682109 | NC_021160.1    | Ca_kabuli_chr01 | 33682109                | GG                              | AA                | 1945889445               |
| SNP_P3_10522_33684376 | NC_021160.1    | Ca_kabuli_chr01 | 33684376                | AA                              | TT                | 1945889447               |
| SNP_P3_10523_33684520 | NC_021160.1    | Ca_kabuli_chr01 | 33684520                | TT                              | GG                | 1945889448               |
| SNP_P3_10524_33688936 | NC_021160.1    | Ca_kabuli_chr01 | 33688936                | TT                              | CC                | 1945889450               |
| SNP_P3_10525_33688947 | NC_021160.1    | Ca_kabuli_chr01 | 33688947                | TT                              | GG                | 1945889452               |
| SNP_P3_10526_33688956 | NC_021160.1    | Ca_kabuli_chr01 | 33688956                | CC                              | AA                | 1945889454               |
| SNP_P3_10527_33688984 | NC_021160.1    | Ca_kabuli_chr01 | 33688984                | CC                              | TT                | 1945889455               |
| SNP_P3_10528_33689818 | NC_021160.1    | Ca_kabuli_chr01 | 33689818                | TT                              | GG                | 1945889457               |
| SNP_P3_10529_33696558 | NC_021160.1    | Ca_kabuli_chr01 | 33696558                | AA                              | GG                | 1945889459               |
| SNP_P3_10530_33698929 | NC_021160.1    | Ca_kabuli_chr01 | 33698929                | TT                              | GG                | 1945889461               |
| SNP_P3_10531_33699087 | NC_021160.1    | Ca_kabuli_chr01 | 33699087                | AA                              | GG                | 1945889462               |
| SNP_P3_10532_33699652 | NC_021160.1    | Ca_kabuli_chr01 | 33699652                | AA                              | TT                | 1945889464               |
| SNP_P3_10533_33699803 | NC_021160.1    | Ca_kabuli_chr01 | 33699803                | TT                              | AA                | 1945889466               |
| SNP_P3_10534_33700031 | NC_021160.1    | Ca_kabuli_chr01 | 33700031                | AA                              | TT                | 1945889468               |
| SNP_P3_10535_33700032 | NC_021160.1    | Ca_kabuli_chr01 | 33700032                | GG                              | AA                | 1945889470               |
| SNP_P3_10536_33700035 | NC_021160.1    | Ca_kabuli_chr01 | 33700035                | TT                              | CC                | 1945889471               |
| SNP_P3_10537_33700042 | NC_021160.1    | Ca_kabuli_chr01 | 33700042                | AA                              | CC                | 1945889473               |
| SNP_P3_10538_33700050 | NC_021160.1    | Ca_kabuli_chr01 | 33700050                | CC                              | AA                | 1945889475               |
| SNP_P3_10539_33700065 | NC_021160.1    | Ca_kabuli_chr01 | 33700065                | AA                              | CC                | 1945889477               |
| SNP_P3_10540_33732061 | NC_021160.1    | Ca_kabuli_chr01 | 33732061                | TT                              | CC                | 1945889478               |
| SNP_P3_10541_33732892 | NC_021160.1    | Ca_kabuli_chr01 | 33732892                | TT                              | AA                | 1945889480               |
| SNP_P3_10542_33736069 | NC_021160.1    | Ca_kabuli_chr01 | 33736069                | AA                              | GG                | 1945889482               |
| SNP_P3_10543_33737055 | NC_021160.1    | Ca_kabuli_chr01 | 33737055                | TT                              | CC                | 1945889484               |
| SNP_P3_10545_33749811 | NC_021160.1    | Ca_kabuli_chr01 | 33749811                | GG                              | AA                | 1945889485               |
| SNP_P3_10546_33756118 | NC_021160.1    | Ca_kabuli_chr01 | 33756118                | CC                              | TT                | 1945889487               |
| SNP_P3_10547_33756709 | NC_021160.1    | Ca_kabuli_chr01 | 33756709                | CC                              | TT                | 1945889489               |
| SNP_P3_10548_33766872 | NC_021160.1    | Ca_kabuli_chr01 | 33766872                | CC                              | AA                | 1945889491               |
| SNP_P3_10549_33770181 | NC_021160.1    | Ca_kabuli_chr01 | 33770181                | GG                              | AA                | 1945889493               |
| SNP_P3_10550_33770807 | NC_021160.1    | Ca_kabuli_chr01 | 33770807                | CC                              | TT                | 1945889494               |
| SNP_P3_10551_33772398 | NC_021160.1    | Ca_kabuli_chr01 | 33772398                | GG                              | AA                | 1945889496               |

| SNPs IDs              | Chromosome IDs | Chromosomes     | Physical positions (bp) | CDC Frontier (Reference genome) | (Pusa 256 & HPNB) | NCBI SNPdb Accession IDs |
|-----------------------|----------------|-----------------|-------------------------|---------------------------------|-------------------|--------------------------|
| SNP_P3_10552_33773467 | NC_021160.1    | Ca_kabuli_chr01 | 33773467                | TT                              | CC                | 1945889498               |
| SNP_P3_10553_33774860 | NC_021160.1    | Ca_kabuli_chr01 | 33774860                | GG                              | TT                | 1945889500               |
| SNP_P3_10555_33778992 | NC_021160.1    | Ca_kabuli_chr01 | 33778992                | GG                              | TT                | 1945889501               |
| SNP_P3_10556_33779969 | NC_021160.1    | Ca_kabuli_chr01 | 33779969                | TT                              | CC                | 1945889503               |
| SNP_P3_10557_33780296 | NC_021160.1    | Ca_kabuli_chr01 | 33780296                | TT                              | CC                | 1945889505               |
| SNP_P3_10559_33782230 | NC_021160.1    | Ca_kabuli_chr01 | 33782230                | GG                              | AA                | 1945889507               |
| SNP_P3_10560_33782240 | NC_021160.1    | Ca_kabuli_chr01 | 33782240                | AA                              | GG                | 1945889509               |
| SNP_P3_10561_33782247 | NC_021160.1    | Ca_kabuli_chr01 | 33782247                | GG                              | CC                | 1945889510               |
| SNP_P3_10562_33791964 | NC_021160.1    | Ca_kabuli_chr01 | 33791964                | AA                              | GG                | 1945889512               |
| SNP_P3_10563_33792093 | NC_021160.1    | Ca_kabuli_chr01 | 33792093                | TT                              | CC                | 1945889514               |
| SNP_P3_10564_33792104 | NC_021160.1    | Ca_kabuli_chr01 | 33792104                | AA                              | GG                | 1945889516               |
| SNP_P3_10565_33792138 | NC_021160.1    | Ca_kabuli_chr01 | 33792138                | TT                              | GG                | 1945889517               |
| SNP_P3_10566_33792461 | NC_021160.1    | Ca_kabuli_chr01 | 33792461                | CC                              | TT                | 1945889519               |
| SNP_P3_10567_33792462 | NC_021160.1    | Ca_kabuli_chr01 | 33792462                | AA                              | TT                | 1945889521               |
| SNP_P3_10568_33792463 | NC_021160.1    | Ca_kabuli_chr01 | 33792463                | CC                              | TT                | 1945889523               |
| SNP_P3_10569_33792558 | NC_021160.1    | Ca_kabuli_chr01 | 33792558                | AA                              | GG                | 1945889524               |
| SNP_P3_10571_33796679 | NC_021160.1    | Ca_kabuli_chr01 | 33796679                | GG                              | AA                | 1945889526               |
| SNP_P3_10572_33797335 | NC_021160.1    | Ca_kabuli_chr01 | 33797335                | CC                              | TT                | 1945889528               |
| SNP_P3_10573_33802135 | NC_021160.1    | Ca_kabuli_chr01 | 33802135                | CC                              | TT                | 1945889530               |
| SNP_P3_10574_33802827 | NC_021160.1    | Ca_kabuli_chr01 | 33802827                | AA                              | GG                | 1945889532               |
| SNP_P3_10575_33802890 | NC_021160.1    | Ca_kabuli_chr01 | 33802890                | GG                              | CC                | 1945889533               |
| SNP_P3_10576_33803223 | NC_021160.1    | Ca_kabuli_chr01 | 33803223                | GG                              | CC                | 1945889535               |
| SNP_P3_10577_33803252 | NC_021160.1    | Ca_kabuli_chr01 | 33803252                | TT                              | CC                | 1945889537               |
| SNP_P3_10578_33803294 | NC_021160.1    | Ca_kabuli_chr01 | 33803294                | GG                              | AA                | 1945889539               |
| SNP_P3_10579_33803416 | NC_021160.1    | Ca_kabuli_chr01 | 33803416                | CC                              | TT                | 1945889540               |
| SNP_P3_10581_33803666 | NC_021160.1    | Ca_kabuli_chr01 | 33803666                | GG                              | CC                | 1945889542               |
| SNP_P3_10582_33803946 | NC_021160.1    | Ca_kabuli_chr01 | 33803946                | CC                              | AA                | 1945889544               |
| SNP_P3_10584_33814964 | NC_021160.1    | Ca_kabuli_chr01 | 33814964                | GG                              | AA                | 1945889546               |
| SNP_P3_10585_33823358 | NC_021160.1    | Ca_kabuli_chr01 | 33823358                | CC                              | TT                | 1945889548               |
| SNP_P3_10586_33826248 | NC_021160.1    | Ca_kabuli_chr01 | 33826248                | TT                              | CC                | 1945889549               |
| SNP_P3_10587_33826683 | NC_021160.1    | Ca_kabuli_chr01 | 33826683                | TT                              | CC                | 1945889551               |
| SNP_P3_10588_33826773 | NC_021160.1    | Ca_kabuli_chr01 | 33826773                | TT                              | AA                | 1945889553               |
| SNP_P3_10589_33831764 | NC_021160.1    | Ca_kabuli_chr01 | 33831764                | AA                              | GG                | 1945889555               |
| SNP_P3_10590_33836300 | NC_021160.1    | Ca_kabuli_chr01 | 33836300                | CC                              | TT                | 1945889556               |
| SNP_P3_10591_33844768 | NC_021160.1    | Ca_kabuli_chr01 | 33844768                | AA                              | GG                | 1945889558               |
| SNP_P3_10592_33844839 | NC_021160.1    | Ca_kabuli_chr01 | 33844839                | TT                              | CC                | 1945889560               |
| SNP_P3_10593_33844861 | NC_021160.1    | Ca_kabuli_chr01 | 33844861                | AA                              | CC                | 1945889562               |
| SNP_P3_10594_33844879 | NC_021160.1    | Ca_kabuli_chr01 | 33844879                | AA                              | GG                | 1945889563               |
| SNP_P3_10595_33844940 | NC_021160.1    | Ca_kabuli_chr01 | 33844940                | AA                              | CC                | 1945889565               |
| SNP_P3_10597_33848304 | NC_021160.1    | Ca_kabuli_chr01 | 33848304                | GG                              | AA                | 1945889567               |
| SNP_P3_10598_33848713 | NC_021160.1    | Ca_kabuli_chr01 | 33848713                | CC                              | AA                | 1945889569               |
| SNP_P3_10599_33854791 | NC_021160.1    | Ca_kabuli_chr01 | 33854791                | GG                              | AA                | 1945889571               |

| SNPs IDs              | Chromosome IDs | Chromosomes     | Physical positions (bp) | CDC Frontier (Reference genome) | (Pusa 256 & HPNB) | NCBI SNPdb Accession IDs |
|-----------------------|----------------|-----------------|-------------------------|---------------------------------|-------------------|--------------------------|
| SNP_P3_10600_33857243 | NC_021160.1    | Ca_kabuli_chr01 | 33857243                | GG                              | AA                | 1945889572               |
| SNP_P3_10601_33857905 | NC_021160.1    | Ca_kabuli_chr01 | 33857905                | TT                              | CC                | 1945889574               |
| SNP_P3_10602_33859760 | NC_021160.1    | Ca_kabuli_chr01 | 33859760                | GG                              | CC                | 1945889576               |
| SNP_P3_10603_33863185 | NC_021160.1    | Ca_kabuli_chr01 | 33863185                | TT                              | GG                | 1945889578               |
| SNP_P3_10604_33867978 | NC_021160.1    | Ca_kabuli_chr01 | 33867978                | TT                              | GG                | 1945889579               |
| SNP_P3_10605_33872298 | NC_021160.1    | Ca_kabuli_chr01 | 33872298                | AA                              | GG                | 1945889581               |
| SNP_P3_10606_33882969 | NC_021160.1    | Ca_kabuli_chr01 | 33882969                | AA                              | GG                | 1945889583               |
| SNP_P3_10607_33883097 | NC_021160.1    | Ca_kabuli_chr01 | 33883097                | TT                              | CC                | 1945889585               |
| SNP_P3_10608_33883200 | NC_021160.1    | Ca_kabuli_chr01 | 33883200                | TT                              | AA                | 1945889587               |
| SNP_P3_10609_33883344 | NC_021160.1    | Ca_kabuli_chr01 | 33883344                | TT                              | CC                | 1945889588               |
| SNP_P3_10610_33883459 | NC_021160.1    | Ca_kabuli_chr01 | 33883459                | TT                              | CC                | 1945889590               |
| SNP_P3_10611_33884269 | NC_021160.1    | Ca_kabuli_chr01 | 33884269                | CC                              | TT                | 1945889592               |
| SNP_P3_10612_33884284 | NC_021160.1    | Ca_kabuli_chr01 | 33884284                | AA                              | CC                | 1945889594               |
| SNP_P3_10613_33896886 | NC_021160.1    | Ca_kabuli_chr01 | 33896886                | CC                              | TT                | 1945889595               |
| SNP_P3_10615_33912235 | NC_021160.1    | Ca_kabuli_chr01 | 33912235                | TT                              | GG                | 1945889597               |
| SNP_P3_10616_33915951 | NC_021160.1    | Ca_kabuli_chr01 | 33915951                | TT                              | CC                | 1945889599               |
| SNP_P3_10617_33915985 | NC_021160.1    | Ca_kabuli_chr01 | 33915985                | AA                              | GG                | 1945889601               |
| SNP_P3_10618_33916007 | NC_021160.1    | Ca_kabuli_chr01 | 33916007                | AA                              | GG                | 1945889602               |
| SNP_P3_10619_33916181 | NC_021160.1    | Ca_kabuli_chr01 | 33916181                | AA                              | GG                | 1945889604               |
| SNP_P3_10620_33916735 | NC_021160.1    | Ca_kabuli_chr01 | 33916735                | AA                              | CC                | 1945889606               |
| SNP_P3_10621_33916740 | NC_021160.1    | Ca_kabuli_chr01 | 33916740                | GG                              | AA                | 1945889608               |
| SNP_P3_10622_33916794 | NC_021160.1    | Ca_kabuli_chr01 | 33916794                | GG                              | AA                | 1945889609               |
| SNP_P3_10623_33923270 | NC_021160.1    | Ca_kabuli_chr01 | 33923270                | TT                              | CC                | 1945889611               |
| SNP_P3_10624_33931656 | NC_021160.1    | Ca_kabuli_chr01 | 33931656                | CC                              | TT                | 1945889613               |
| SNP_P3_10625_33932010 | NC_021160.1    | Ca_kabuli_chr01 | 33932010                | CC                              | GG                | 1945889615               |
| SNP_P3_10626_33932056 | NC_021160.1    | Ca_kabuli_chr01 | 33932056                | TT                              | CC                | 1945889616               |
| SNP_P3_10627_33932063 | NC_021160.1    | Ca_kabuli_chr01 | 33932063                | TT                              | GG                | 1945889618               |
| SNP_P3_10628_33934360 | NC_021160.1    | Ca_kabuli_chr01 | 33934360                | AA                              | TT                | 1945889620               |
| SNP_P3_10629_33934363 | NC_021160.1    | Ca_kabuli_chr01 | 33934363                | TT                              | GG                | 1945889622               |
| SNP_P3_10630_33934369 | NC_021160.1    | Ca_kabuli_chr01 | 33934369                | TT                              | CC                | 1945889623               |
| SNP_P3_10631_33935474 | NC_021160.1    | Ca_kabuli_chr01 | 33935474                | CC                              | TT                | 1945889625               |
| SNP_P3_10632_33941760 | NC_021160.1    | Ca_kabuli_chr01 | 33941760                | TT                              | GG                | 1945889627               |
| SNP_P3_10633_33943980 | NC_021160.1    | Ca_kabuli_chr01 | 33943980                | CC                              | TT                | 1945889629               |
| SNP_P3_10634_33971240 | NC_021160.1    | Ca_kabuli_chr01 | 33971240                | AA                              | GG                | 1945889630               |
| SNP_P3_10635_33973795 | NC_021160.1    | Ca_kabuli_chr01 | 33973795                | GG                              | AA                | 1945889632               |
| SNP_P3_10636_34000056 | NC_021160.1    | Ca_kabuli_chr01 | 34000056                | CC                              | TT                | 1945889634               |
| SNP_P3_10637_34003541 | NC_021160.1    | Ca_kabuli_chr01 | 34003541                | GG                              | AA                | 1945889636               |
| SNP_P3_10638_34039014 | NC_021160.1    | Ca_kabuli_chr01 | 34039014                | AA                              | GG                | 1945889637               |
| SNP_P3_10639_34039509 | NC_021160.1    | Ca_kabuli_chr01 | 34039509                | AA                              | TT                | 1945889639               |
| SNP_P3_10640_34042922 | NC_021160.1    | Ca_kabuli_chr01 | 34042922                | AA                              | GG                | 1945889641               |
| SNP_P3_10641_34043402 | NC_021160.1    | Ca_kabuli_chr01 | 34043402                | CC                              | TT                | 1945889643               |
| SNP_P3_10642_34072534 | NC_021160.1    | Ca_kabuli_chr01 | 34072534                | AA                              | TT                | 1945889645               |

| SNPs IDs              | Chromosome IDs | Chromosomes     | Physical positions (bp) | CDC Frontier (Reference genome) | (Pusa 256 & HPNB) | NCBI SNPdb Accession IDs |
|-----------------------|----------------|-----------------|-------------------------|---------------------------------|-------------------|--------------------------|
| SNP_P3_10643_34104804 | NC_021160.1    | Ca_kabuli_chr01 | 34104804                | GG                              | AA                | 1945889646               |
| SNP_P3_10644_34127802 | NC_021160.1    | Ca_kabuli_chr01 | 34127802                | AA                              | GG                | 1945889648               |
| SNP_P3_10645_34127881 | NC_021160.1    | Ca_kabuli_chr01 | 34127881                | CC                              | GG                | 1945889650               |
| SNP_P3_10646_34128012 | NC_021160.1    | Ca_kabuli_chr01 | 34128012                | TT                              | CC                | 1945889652               |
| SNP_P3_10647_34128014 | NC_021160.1    | Ca_kabuli_chr01 | 34128014                | TT                              | AA                | 1945889653               |
| SNP_P3_10648_34128053 | NC_021160.1    | Ca_kabuli_chr01 | 34128053                | CC                              | AA                | 1945889655               |
| SNP_P3_10649_34128121 | NC_021160.1    | Ca_kabuli_chr01 | 34128121                | CC                              | TT                | 1945889657               |
| SNP_P3_10650_34128146 | NC_021160.1    | Ca_kabuli_chr01 | 34128146                | TT                              | AA                | 1945889659               |
| SNP_P3_10651_34128161 | NC_021160.1    | Ca_kabuli_chr01 | 34128161                | TT                              | AA                | 1945889660               |
| SNP_P3_10652_34128194 | NC_021160.1    | Ca_kabuli_chr01 | 34128194                | TT                              | AA                | 1945889662               |
| SNP_P3_10653_34128206 | NC_021160.1    | Ca_kabuli_chr01 | 34128206                | AA                              | GG                | 1945889664               |
| SNP_P3_10654_34128295 | NC_021160.1    | Ca_kabuli_chr01 | 34128295                | CC                              | TT                | 1945889666               |
| SNP_P3_10655_34128310 | NC_021160.1    | Ca_kabuli_chr01 | 34128310                | AA                              | CC                | 1945889668               |
| SNP_P3_10656_34128316 | NC_021160.1    | Ca_kabuli_chr01 | 34128316                | CC                              | TT                | 1945889669               |
| SNP_P3_10657_34128387 | NC_021160.1    | Ca_kabuli_chr01 | 34128387                | AA                              | TT                | 1945889671               |
| SNP_P3_10658_34128390 | NC_021160.1    | Ca_kabuli_chr01 | 34128390                | TT                              | CC                | 1945889673               |
| SNP_P3_10659_34129173 | NC_021160.1    | Ca_kabuli_chr01 | 34129173                | AA                              | GG                | 1945889675               |
| SNP_P3_10660_34129408 | NC_021160.1    | Ca_kabuli_chr01 | 34129408                | TT                              | AA                | 1945889676               |
| SNP_P3_10661_34129410 | NC_021160.1    | Ca_kabuli_chr01 | 34129410                | GG                              | TT                | 1945889678               |
| SNP_P3_10662_34129497 | NC_021160.1    | Ca_kabuli_chr01 | 34129497                | TT                              | GG                | 1945889680               |
| SNP_P3_10663_34129502 | NC_021160.1    | Ca_kabuli_chr01 | 34129502                | AA                              | CC                | 1945889682               |
| SNP_P3_10664_34129531 | NC_021160.1    | Ca_kabuli_chr01 | 34129531                | GG                              | AA                | 1945889683               |
| SNP_P3_10665_34132580 | NC_021160.1    | Ca_kabuli_chr01 | 34132580                | CC                              | AA                | 1945889685               |
| SNP_P3_10666_34133915 | NC_021160.1    | Ca_kabuli_chr01 | 34133915                | GG                              | AA                | 1945889687               |
| SNP_P3_10667_34134129 | NC_021160.1    | Ca_kabuli_chr01 | 34134129                | GG                              | TT                | 1945889689               |
| SNP_P3_10668_34134453 | NC_021160.1    | Ca_kabuli_chr01 | 34134453                | GG                              | AA                | 1945889690               |
| SNP_P3_10669_34134852 | NC_021160.1    | Ca_kabuli_chr01 | 34134852                | GG                              | AA                | 1945889692               |
| SNP_P3_10670_34135282 | NC_021160.1    | Ca_kabuli_chr01 | 34135282                | TT                              | CC                | 1945889694               |
| SNP_P3_10671_34135696 | NC_021160.1    | Ca_kabuli_chr01 | 34135696                | AA                              | GG                | 1945889696               |
| SNP_P3_10672_34136294 | NC_021160.1    | Ca_kabuli_chr01 | 34136294                | GG                              | CC                | 1945889698               |
| SNP_P3_10673_34136299 | NC_021160.1    | Ca_kabuli_chr01 | 34136299                | GG                              | AA                | 1945889699               |
| SNP_P3_10675_34139893 | NC_021160.1    | Ca_kabuli_chr01 | 34139893                | CC                              | AA                | 1945889701               |
| SNP_P3_10676_34139941 | NC_021160.1    | Ca_kabuli_chr01 | 34139941                | TT                              | AA                | 1945889703               |
| SNP_P3_10677_34139950 | NC_021160.1    | Ca_kabuli_chr01 | 34139950                | CC                              | AA                | 1945889705               |
| SNP_P3_10679_34141424 | NC_021160.1    | Ca_kabuli_chr01 | 34141424                | GG                              | AA                | 1945889707               |
| SNP_P3_10680_34142990 | NC_021160.1    | Ca_kabuli_chr01 | 34142990                | TT                              | AA                | 1945889708               |
| SNP_P3_10681_34144024 | NC_021160.1    | Ca_kabuli_chr01 | 34144024                | AA                              | GG                | 1945889710               |
| SNP_P3_10682_34144030 | NC_021160.1    | Ca_kabuli_chr01 | 34144030                | AA                              | GG                | 1945889712               |
| SNP_P3_10683_34144040 | NC_021160.1    | Ca_kabuli_chr01 | 34144040                | GG                              | AA                | 1945889713               |
| SNP_P3_10684_34144043 | NC_021160.1    | Ca_kabuli_chr01 | 34144043                | AA                              | CC                | 1945889715               |
| SNP_P3_10685_34144224 | NC_021160.1    | Ca_kabuli_chr01 | 34144224                | GG                              | TT                | 1945889717               |
| SNP_P3_10686_34144576 | NC_021160.1    | Ca_kabuli_chr01 | 34144576                | TT                              | CC                | 1945889719               |

| SNPs IDs              | Chromosome IDs | Chromosomes     | Physical positions (bp) | CDC Frontier (Reference genome) | (Pusa 256 & HPNB) | NCBI SNPdb Accession IDs |
|-----------------------|----------------|-----------------|-------------------------|---------------------------------|-------------------|--------------------------|
| SNP_P3_10687_34144585 | NC_021160.1    | Ca_kabuli_chr01 | 34144585                | CC                              | TT                | 1945889720               |
| SNP_P3_10688_34145081 | NC_021160.1    | Ca_kabuli_chr01 | 34145081                | GG                              | AA                | 1945889722               |
| SNP_P3_10689_34145416 | NC_021160.1    | Ca_kabuli_chr01 | 34145416                | AA                              | GG                | 1945889724               |
| SNP_P3_10690_34145480 | NC_021160.1    | Ca_kabuli_chr01 | 34145480                | CC                              | TT                | 1945889726               |
| SNP_P3_10691_34145482 | NC_021160.1    | Ca_kabuli_chr01 | 34145482                | AA                              | GG                | 1945889727               |
| SNP_P3_10693_34145850 | NC_021160.1    | Ca_kabuli_chr01 | 34145850                | TT                              | CC                | 1945889729               |
| SNP_P3_10694_34145892 | NC_021160.1    | Ca_kabuli_chr01 | 34145892                | GG                              | AA                | 1945889731               |
| SNP_P3_10695_34146272 | NC_021160.1    | Ca_kabuli_chr01 | 34146272                | CC                              | TT                | 1945889733               |
| SNP_P3_10696_34146382 | NC_021160.1    | Ca_kabuli_chr01 | 34146382                | CC                              | AA                | 1945889735               |
| SNP_P3_10697_34146513 | NC_021160.1    | Ca_kabuli_chr01 | 34146513                | AA                              | GG                | 1945889736               |
| SNP_P3_10698_34146519 | NC_021160.1    | Ca_kabuli_chr01 | 34146519                | AA                              | GG                | 1945889738               |
| SNP_P3_10699_34146682 | NC_021160.1    | Ca_kabuli_chr01 | 34146682                | AA                              | GG                | 1945889740               |
| SNP_P3_10700_34147298 | NC_021160.1    | Ca_kabuli_chr01 | 34147298                | CC                              | TT                | 1945889742               |
| SNP_P3_10701_34147316 | NC_021160.1    | Ca_kabuli_chr01 | 34147316                | AA                              | TT                | 1945889743               |
| SNP_P3_10702_34147323 | NC_021160.1    | Ca_kabuli_chr01 | 34147323                | TT                              | AA                | 1945889745               |
| SNP_P3_10703_34147326 | NC_021160.1    | Ca_kabuli_chr01 | 34147326                | TT                              | AA                | 1945889747               |
| SNP_P3_10704_34147616 | NC_021160.1    | Ca_kabuli_chr01 | 34147616                | CC                              | TT                | 1945889749               |
| SNP_P3_10705_34147617 | NC_021160.1    | Ca_kabuli_chr01 | 34147617                | TT                              | CC                | 1945889750               |
| SNP_P3_10706_34148693 | NC_021160.1    | Ca_kabuli_chr01 | 34148693                | AA                              | TT                | 1945889752               |
| SNP_P3_10707_34151518 | NC_021160.1    | Ca_kabuli_chr01 | 34151518                | CC                              | TT                | 1945889754               |
| SNP_P3_10708_34152035 | NC_021160.1    | Ca_kabuli_chr01 | 34152035                | TT                              | AA                | 1945889756               |
| SNP_P3_10709_34153940 | NC_021160.1    | Ca_kabuli_chr01 | 34153940                | GG                              | TT                | 1945889758               |
| SNP_P3_10710_34153973 | NC_021160.1    | Ca_kabuli_chr01 | 34153973                | GG                              | AA                | 1945889759               |
| SNP_P3_10711_34155615 | NC_021160.1    | Ca_kabuli_chr01 | 34155615                | GG                              | AA                | 1945889761               |
| SNP_P3_10712_34155871 | NC_021160.1    | Ca_kabuli_chr01 | 34155871                | TT                              | CC                | 1945889763               |
| SNP_P3_10713_34157696 | NC_021160.1    | Ca_kabuli_chr01 | 34157696                | CC                              | TT                | 1945889765               |
| SNP_P3_10714_34157719 | NC_021160.1    | Ca_kabuli_chr01 | 34157719                | GG                              | TT                | 1945889766               |
| SNP_P3_10715_34158702 | NC_021160.1    | Ca_kabuli_chr01 | 34158702                | TT                              | CC                | 1945889768               |
| SNP_P3_10716_34158707 | NC_021160.1    | Ca_kabuli_chr01 | 34158707                | GG                              | AA                | 1945889770               |
| SNP_P3_10717_34159991 | NC_021160.1    | Ca_kabuli_chr01 | 34159991                | CC                              | TT                | 1945889772               |
| SNP_P3_10719_34160466 | NC_021160.1    | Ca_kabuli_chr01 | 34160466                | TT                              | CC                | 1945889773               |
| SNP_P3_10721_34160916 | NC_021160.1    | Ca_kabuli_chr01 | 34160916                | CC                              | TT                | 1945889775               |
| SNP_P3_10722_34161998 | NC_021160.1    | Ca_kabuli_chr01 | 34161998                | AA                              | GG                | 1945889777               |
| SNP_P3_10723_34164592 | NC_021160.1    | Ca_kabuli_chr01 | 34164592                | CC                              | TT                | 1945889779               |
| SNP_P3_10724_34164622 | NC_021160.1    | Ca_kabuli_chr01 | 34164622                | GG                              | AA                | 1945889780               |
| SNP_P3_10726_34165517 | NC_021160.1    | Ca_kabuli_chr01 | 34165517                | TT                              | CC                | 1945889782               |
| SNP_P3_10727_34165922 | NC_021160.1    | Ca_kabuli_chr01 | 34165922                | CC                              | TT                | 1945889784               |
| SNP_P3_10728_34166276 | NC_021160.1    | Ca_kabuli_chr01 | 34166276                | GG                              | AA                | 1945889786               |
| SNP_P3_10729_34167722 | NC_021160.1    | Ca_kabuli_chr01 | 34167722                | CC                              | TT                | 1945889787               |
| SNP_P3_10730_34167863 | NC_021160.1    | Ca_kabuli_chr01 | 34167863                | CC                              | AA                | 1945889789               |
| SNP_P3_10731_34169837 | NC_021160.1    | Ca_kabuli_chr01 | 34169837                | CC                              | AA                | 1945889791               |
| SNP_P3_10733_34170000 | NC_021160.1    | Ca_kabuli_chr01 | 34170000                | TT                              | CC                | 1945889793               |

| SNPs IDs              | Chromosome IDs | Chromosomes     | Physical positions (bp) | CDC Frontier (Reference genome) | (Pusa 256 & HPNB) | NCBI SNPdb Accession IDs |
|-----------------------|----------------|-----------------|-------------------------|---------------------------------|-------------------|--------------------------|
| SNP_P3_10734_34170005 | NC_021160.1    | Ca_kabuli_chr01 | 34170005                | TT                              | GG                | 1945889795               |
| SNP_P3_10735_34170713 | NC_021160.1    | Ca_kabuli_chr01 | 34170713                | CC                              | AA                | 1945889796               |
| SNP_P3_10736_34172721 | NC_021160.1    | Ca_kabuli_chr01 | 34172721                | GG                              | AA                | 1945889798               |
| SNP_P3_10737_34172769 | NC_021160.1    | Ca_kabuli_chr01 | 34172769                | TT                              | CC                | 1945889800               |
| SNP_P3_10738_34172787 | NC_021160.1    | Ca_kabuli_chr01 | 34172787                | GG                              | AA                | 1945889802               |
| SNP_P3_10739_34172969 | NC_021160.1    | Ca_kabuli_chr01 | 34172969                | CC                              | TT                | 1945889803               |
| SNP_P3_10740_34172974 | NC_021160.1    | Ca_kabuli_chr01 | 34172974                | CC                              | TT                | 1945889805               |
| SNP_P3_10741_34173008 | NC_021160.1    | Ca_kabuli_chr01 | 34173008                | AA                              | CC                | 1945889807               |
| SNP_P3_10742_34173130 | NC_021160.1    | Ca_kabuli_chr01 | 34173130                | AA                              | GG                | 1945889809               |
| SNP_P3_10743_34173359 | NC_021160.1    | Ca_kabuli_chr01 | 34173359                | CC                              | TT                | 1945889811               |
| SNP_P3_10744_34174830 | NC_021160.1    | Ca_kabuli_chr01 | 34174830                | CC                              | TT                | 1945889812               |
| SNP_P3_10746_34179577 | NC_021160.1    | Ca_kabuli_chr01 | 34179577                | AA                              | GG                | 1945889814               |
| SNP_P3_10747_34179599 | NC_021160.1    | Ca_kabuli_chr01 | 34179599                | AA                              | GG                | 1945889816               |
| SNP_P3_10749_34182708 | NC_021160.1    | Ca_kabuli_chr01 | 34182708                | CC                              | TT                | 1945889818               |
| SNP_P3_10750_34183243 | NC_021160.1    | Ca_kabuli_chr01 | 34183243                | CC                              | TT                | 1945889820               |
| SNP_P3_10751_34183244 | NC_021160.1    | Ca_kabuli_chr01 | 34183244                | CC                              | TT                | 1945889821               |
| SNP_P3_10752_34183248 | NC_021160.1    | Ca_kabuli_chr01 | 34183248                | CC                              | TT                | 1945889823               |
| SNP_P3_10753_34183256 | NC_021160.1    | Ca_kabuli_chr01 | 34183256                | GG                              | AA                | 1945889825               |
| SNP_P3_10754_34183262 | NC_021160.1    | Ca_kabuli_chr01 | 34183262                | CC                              | TT                | 1945889827               |
| SNP_P3_10755_34183278 | NC_021160.1    | Ca_kabuli_chr01 | 34183278                | CC                              | AA                | 1945889828               |
| SNP_P3_10756_34183297 | NC_021160.1    | Ca_kabuli_chr01 | 34183297                | TT                              | CC                | 1945889830               |
| SNP_P3_10757_34183309 | NC_021160.1    | Ca_kabuli_chr01 | 34183309                | CC                              | TT                | 1945889832               |
| SNP_P3_10758_34183335 | NC_021160.1    | Ca_kabuli_chr01 | 34183335                | GG                              | TT                | 1945889834               |
| SNP_P3_10759_34183343 | NC_021160.1    | Ca_kabuli_chr01 | 34183343                | TT                              | CC                | 1945889836               |
| SNP_P3_10760_34192289 | NC_021160.1    | Ca_kabuli_chr01 | 34192289                | CC                              | TT                | 1945889837               |
| SNP_P3_10761_34192584 | NC_021160.1    | Ca_kabuli_chr01 | 34192584                | GG                              | AA                | 1945889839               |
| SNP_P3_10762_34192813 | NC_021160.1    | Ca_kabuli_chr01 | 34192813                | CC                              | AA                | 1945889841               |
| SNP_P3_10763_34195627 | NC_021160.1    | Ca_kabuli_chr01 | 34195627                | GG                              | AA                | 1945889843               |
| SNP_P3_10764_34196053 | NC_021160.1    | Ca_kabuli_chr01 | 34196053                | TT                              | CC                | 1945889844               |
| SNP_P3_10765_34196279 | NC_021160.1    | Ca_kabuli_chr01 | 34196279                | CC                              | AA                | 1945889846               |
| SNP_P3_10766_34196567 | NC_021160.1    | Ca_kabuli_chr01 | 34196567                | AA                              | GG                | 1945889848               |
| SNP_P3_10767_34196632 | NC_021160.1    | Ca_kabuli_chr01 | 34196632                | TT                              | CC                | 1945889850               |
| SNP_P3_10768_34197105 | NC_021160.1    | Ca_kabuli_chr01 | 34197105                | CC                              | AA                | 1945889852               |
| SNP_P3_10769_34198557 | NC_021160.1    | Ca_kabuli_chr01 | 34198557                | TT                              | GG                | 1945889853               |
| SNP_P3_10770_34198749 | NC_021160.1    | Ca_kabuli_chr01 | 34198749                | CC                              | TT                | 1945889855               |
| SNP_P3_10771_34200069 | NC_021160.1    | Ca_kabuli_chr01 | 34200069                | AA                              | TT                | 1945889857               |
| SNP_P3_10772_34200139 | NC_021160.1    | Ca_kabuli_chr01 | 34200139                | CC                              | TT                | 1945889859               |
| SNP_P3_10773_34200292 | NC_021160.1    | Ca_kabuli_chr01 | 34200292                | CC                              | AA                | 1945889860               |
| SNP_P3_10774_34200341 | NC_021160.1    | Ca_kabuli_chr01 | 34200341                | TT                              | GG                | 1945889862               |
| SNP_P3_10775_34203238 | NC_021160.1    | Ca_kabuli_chr01 | 34203238                | AA                              | CC                | 1945889864               |
| SNP_P3_10776_34203281 | NC_021160.1    | Ca_kabuli_chr01 | 34203281                | GG                              | CC                | 1945889866               |
| SNP_P3_10777_34203527 | NC_021160.1    | Ca_kabuli_chr01 | 34203527                | AA                              | CC                | 1945889868               |

| SNPs IDs              | Chromosome IDs | Chromosomes     | Physical positions (bp) | CDC Frontier (Reference genome) | (Pusa 256 & HPNB) | NCBI SNPdb Accession IDs |
|-----------------------|----------------|-----------------|-------------------------|---------------------------------|-------------------|--------------------------|
| SNP_P3_10778_34203799 | NC_021160.1    | Ca_kabuli_chr01 | 34203799                | GG                              | TT                | 1945889869               |
| SNP_P3_10779_34205408 | NC_021160.1    | Ca_kabuli_chr01 | 34205408                | CC                              | TT                | 1945889871               |
| SNP_P3_10780_34205696 | NC_021160.1    | Ca_kabuli_chr01 | 34205696                | GG                              | AA                | 1945889873               |
| SNP_P3_10782_34215873 | NC_021160.1    | Ca_kabuli_chr01 | 34215873                | TT                              | GG                | 1945889875               |
| SNP_P3_10783_34219016 | NC_021160.1    | Ca_kabuli_chr01 | 34219016                | CC                              | AA                | 1945889876               |
| SNP_P3_10784_34219385 | NC_021160.1    | Ca_kabuli_chr01 | 34219385                | CC                              | TT                | 1945889878               |
| SNP_P3_10785_34224458 | NC_021160.1    | Ca_kabuli_chr01 | 34224458                | AA                              | CC                | 1945889880               |
| SNP_P3_10786_34229179 | NC_021160.1    | Ca_kabuli_chr01 | 34229179                | AA                              | CC                | 1945889882               |
| SNP_P3_10787_34231365 | NC_021160.1    | Ca_kabuli_chr01 | 34231365                | TT                              | AA                | 1945889883               |
| SNP_P3_10788_34231396 | NC_021160.1    | Ca_kabuli_chr01 | 34231396                | GG                              | TT                | 1945889885               |
| SNP_P3_10790_34231695 | NC_021160.1    | Ca_kabuli_chr01 | 34231695                | TT                              | CC                | 1945889887               |
| SNP_P3_10791_34232587 | NC_021160.1    | Ca_kabuli_chr01 | 34232587                | GG                              | AA                | 1945889889               |
| SNP_P3_10792_34232856 | NC_021160.1    | Ca_kabuli_chr01 | 34232856                | TT                              | CC                | 1945889890               |
| SNP_P3_10793_34237366 | NC_021160.1    | Ca_kabuli_chr01 | 34237366                | AA                              | GG                | 1945889892               |
| SNP_P3_10794_34243012 | NC_021160.1    | Ca_kabuli_chr01 | 34243012                | CC                              | TT                | 1945889894               |
| SNP_P3_10795_34246158 | NC_021160.1    | Ca_kabuli_chr01 | 34246158                | TT                              | CC                | 1945889896               |
| SNP_P3_10796_34247737 | NC_021160.1    | Ca_kabuli_chr01 | 34247737                | GG                              | AA                | 1945889898               |
| SNP_P3_10797_34248083 | NC_021160.1    | Ca_kabuli_chr01 | 34248083                | CC                              | TT                | 1945889899               |
| SNP_P3_10798_34250459 | NC_021160.1    | Ca_kabuli_chr01 | 34250459                | AA                              | CC                | 1945889901               |
| SNP_P3_10800_34250995 | NC_021160.1    | Ca_kabuli_chr01 | 34250995                | TT                              | GG                | 1945889903               |
| SNP_P3_10801_34251838 | NC_021160.1    | Ca_kabuli_chr01 | 34251838                | GG                              | TT                | 1945889905               |
| SNP_P3_10803_34269745 | NC_021160.1    | Ca_kabuli_chr01 | 34269745                | TT                              | CC                | 1945889907               |
| SNP_P3_10804_34269779 | NC_021160.1    | Ca_kabuli_chr01 | 34269779                | CC                              | TT                | 1945889908               |
| SNP_P3_10805_34272001 | NC_021160.1    | Ca_kabuli_chr01 | 34272001                | CC                              | GG                | 1945889910               |
| SNP_P3_10806_34272024 | NC_021160.1    | Ca_kabuli_chr01 | 34272024                | AA                              | GG                | 1945889912               |
| SNP_P3_10807_34272025 | NC_021160.1    | Ca_kabuli_chr01 | 34272025                | AA                              | GG                | 1945889914               |
| SNP_P3_10810_34279486 | NC_021160.1    | Ca_kabuli_chr01 | 34279486                | TT                              | CC                | 1945889916               |
| SNP_P3_10812_34281015 | NC_021160.1    | Ca_kabuli_chr01 | 34281015                | AA                              | GG                | 1945889917               |
| SNP_P3_10814_34283298 | NC_021160.1    | Ca_kabuli_chr01 | 34283298                | TT                              | CC                | 1945889919               |
| SNP_P3_10815_34286788 | NC_021160.1    | Ca_kabuli_chr01 | 34286788                | CC                              | AA                | 1945889921               |
| SNP_P3_10816_34287685 | NC_021160.1    | Ca_kabuli_chr01 | 34287685                | TT                              | AA                | 1945889923               |
| SNP_P3_10817_34288424 | NC_021160.1    | Ca_kabuli_chr01 | 34288424                | AA                              | GG                | 1945889925               |
| SNP_P3_10818_34288785 | NC_021160.1    | Ca_kabuli_chr01 | 34288785                | AA                              | GG                | 1945889926               |
| SNP_P3_10819_34289212 | NC_021160.1    | Ca_kabuli_chr01 | 34289212                | GG                              | AA                | 1945889928               |
| SNP_P3_10820_34289563 | NC_021160.1    | Ca_kabuli_chr01 | 34289563                | CC                              | TT                | 1945889930               |
| SNP_P3_10821_34292162 | NC_021160.1    | Ca_kabuli_chr01 | 34292162                | GG                              | AA                | 1945889932               |
| SNP_P3_10822_34293627 | NC_021160.1    | Ca_kabuli_chr01 | 34293627                | AA                              | GG                | 1945889933               |
| SNP_P3_10823_34294326 | NC_021160.1    | Ca_kabuli_chr01 | 34294326                | TT                              | CC                | 1945889935               |
| SNP_P3_10825_34302483 | NC_021160.1    | Ca_kabuli_chr01 | 34302483                | GG                              | AA                | 1945889937               |
| SNP_P3_10826_34306329 | NC_021160.1    | Ca_kabuli_chr01 | 34306329                | GG                              | AA                | 1945889939               |
| SNP_P3_10827_34306393 | NC_021160.1    | Ca_kabuli_chr01 | 34306393                | AA                              | CC                | 1945889941               |
| SNP_P3_10828_34310071 | NC_021160.1    | Ca_kabuli_chr01 | 34310071                | CC                              | TT                | 1945889942               |



| SNPs IDs              | Chromosome IDs | Chromosomes     | Physical positions (bp) | CDC Frontier (Reference genome) | (Pusa 256 & HPNB) | NCBI SNPdb Accession IDs |
|-----------------------|----------------|-----------------|-------------------------|---------------------------------|-------------------|--------------------------|
| SNP_P3_10829_34310079 | NC_021160.1    | Ca_kabuli_chr01 | 34310079                | TT                              | CC                | 1945889944               |
| SNP_P3_10830_34310680 | NC_021160.1    | Ca_kabuli_chr01 | 34310680                | GG                              | AA                | 1945889946               |
| SNP_P3_10831_34311145 | NC_021160.1    | Ca_kabuli_chr01 | 34311145                | TT                              | GG                | 1945889948               |
| SNP_P3_10832_34311268 | NC_021160.1    | Ca_kabuli_chr01 | 34311268                | CC                              | AA                | 1945889949               |
| SNP_P3_10834_34316306 | NC_021160.1    | Ca_kabuli_chr01 | 34316306                | GG                              | AA                | 1945889951               |
| SNP_P3_10835_34317878 | NC_021160.1    | Ca_kabuli_chr01 | 34317878                | GG                              | AA                | 1945889953               |
| SNP_P3_10836_34319170 | NC_021160.1    | Ca_kabuli_chr01 | 34319170                | AA                              | TT                | 1945889955               |
| SNP_P3_10837_34323127 | NC_021160.1    | Ca_kabuli_chr01 | 34323127                | AA                              | TT                | 1945889956               |
| SNP_P3_10838_34324763 | NC_021160.1    | Ca_kabuli_chr01 | 34324763                | GG                              | AA                | 1945889958               |
| SNP_P3_10839_34328740 | NC_021160.1    | Ca_kabuli_chr01 | 34328740                | AA                              | TT                | 1945889960               |
| SNP_P3_10840_34331716 | NC_021160.1    | Ca_kabuli_chr01 | 34331716                | GG                              | TT                | 1945889962               |
| SNP_P3_10843_34332762 | NC_021160.1    | Ca_kabuli_chr01 | 34332762                | CC                              | TT                | 1945889964               |
| SNP_P3_10844_34333017 | NC_021160.1    | Ca_kabuli_chr01 | 34333017                | AA                              | GG                | 1945889965               |
| SNP_P3_10845_34334226 | NC_021160.1    | Ca_kabuli_chr01 | 34334226                | AA                              | GG                | 1945889967               |
| SNP_P3_10846_34334618 | NC_021160.1    | Ca_kabuli_chr01 | 34334618                | CC                              | AA                | 1945889969               |
| SNP_P3_10847_34337926 | NC_021160.1    | Ca_kabuli_chr01 | 34337926                | TT                              | CC                | 1945889971               |
| SNP_P3_10848_34338189 | NC_021160.1    | Ca_kabuli_chr01 | 34338189                | AA                              | GG                | 1945889972               |
| SNP_P3_10849_34342563 | NC_021160.1    | Ca_kabuli_chr01 | 34342563                | GG                              | AA                | 1945889974               |
| SNP_P3_10850_34342987 | NC_021160.1    | Ca_kabuli_chr01 | 34342987                | CC                              | AA                | 1945889976               |
| SNP_P3_10851_34344307 | NC_021160.1    | Ca_kabuli_chr01 | 34344307                | AA                              | GG                | 1945889978               |
| SNP_P3_10852_34344884 | NC_021160.1    | Ca_kabuli_chr01 | 34344884                | AA                              | GG                | 1945889980               |
| SNP_P3_10853_34345872 | NC_021160.1    | Ca_kabuli_chr01 | 34345872                | AA                              | TT                | 1945889981               |
| SNP_P3_10854_34346333 | NC_021160.1    | Ca_kabuli_chr01 | 34346333                | CC                              | TT                | 1945889983               |
| SNP_P3_10855_34346496 | NC_021160.1    | Ca_kabuli_chr01 | 34346496                | TT                              | GG                | 1945889985               |
| SNP_P3_10856_34347430 | NC_021160.1    | Ca_kabuli_chr01 | 34347430                | AA                              | GG                | 1945889987               |
| SNP_P3_10857_34348173 | NC_021160.1    | Ca_kabuli_chr01 | 34348173                | GG                              | AA                | 1945889989               |
| SNP_P3_10859_34351698 | NC_021160.1    | Ca_kabuli_chr01 | 34351698                | CC                              | TT                | 1945889990               |
| SNP_P3_10861_34356196 | NC_021160.1    | Ca_kabuli_chr01 | 34356196                | CC                              | GG                | 1945889992               |
| SNP_P3_10862_34358994 | NC_021160.1    | Ca_kabuli_chr01 | 34358994                | AA                              | TT                | 1945889994               |
| SNP_P3_10863_34359500 | NC_021160.1    | Ca_kabuli_chr01 | 34359500                | GG                              | AA                | 1945889996               |
| SNP_P3_10864_34361108 | NC_021160.1    | Ca_kabuli_chr01 | 34361108                | AA                              | GG                | 1945889997               |
| SNP_P3_10865_34361700 | NC_021160.1    | Ca_kabuli_chr01 | 34361700                | AA                              | GG                | 1945889999               |
| SNP_P3_10866_34362165 | NC_021160.1    | Ca_kabuli_chr01 | 34362165                | GG                              | AA                | 1945890001               |
| SNP_P3_10868_34363823 | NC_021160.1    | Ca_kabuli_chr01 | 34363823                | TT                              | AA                | 1945890003               |
| SNP_P3_10869_34364130 | NC_021160.1    | Ca_kabuli_chr01 | 34364130                | CC                              | TT                | 1945890005               |
| SNP_P3_10870_34364217 | NC_021160.1    | Ca_kabuli_chr01 | 34364217                | CC                              | GG                | 1945890006               |
| SNP_P3_10872_34367715 | NC_021160.1    | Ca_kabuli_chr01 | 34367715                | AA                              | TT                | 1945890008               |
| SNP_P3_10873_34367719 | NC_021160.1    | Ca_kabuli_chr01 | 34367719                | AA                              | GG                | 1945890010               |
| SNP_P3_10874_34367721 | NC_021160.1    | Ca_kabuli_chr01 | 34367721                | GG                              | AA                | 1945890012               |
| SNP_P3_10875_34367738 | NC_021160.1    | Ca_kabuli_chr01 | 34367738                | TT                              | CC                | 1945890013               |
| SNP_P3_10876_34367742 | NC_021160.1    | Ca_kabuli_chr01 | 34367742                | TT                              | GG                | 1945890015               |
| SNP_P3_10877_34369815 | NC_021160.1    | Ca_kabuli_chr01 | 34369815                | AA                              | GG                | 1945890017               |

| SNPs IDs              | Chromosome IDs | Chromosomes     | Physical positions (bp) | CDC Frontier (Reference genome) | (Pusa 256 & HPNB) | NCBI SNPdb Accession IDs |
|-----------------------|----------------|-----------------|-------------------------|---------------------------------|-------------------|--------------------------|
| SNP_P3_10878_34370008 | NC_021160.1    | Ca_kabuli_chr01 | 34370008                | CC                              | AA                | 1945890019               |
| SNP_P3_10879_34370084 | NC_021160.1    | Ca_kabuli_chr01 | 34370084                | AA                              | TT                | 1945890021               |
| SNP_P3_10880_34375342 | NC_021160.1    | Ca_kabuli_chr01 | 34375342                | AA                              | GG                | 1945890022               |
| SNP_P3_10881_34377574 | NC_021160.1    | Ca_kabuli_chr01 | 34377574                | CC                              | TT                | 1945890024               |
| SNP_P3_10882_34384300 | NC_021160.1    | Ca_kabuli_chr01 | 34384300                | CC                              | TT                | 1945890026               |
| SNP_P3_10884_34386314 | NC_021160.1    | Ca_kabuli_chr01 | 34386314                | GG                              | AA                | 1945890028               |
| SNP_P3_10885_34386957 | NC_021160.1    | Ca_kabuli_chr01 | 34386957                | GG                              | TT                | 1945890029               |
| SNP_P3_10886_34387006 | NC_021160.1    | Ca_kabuli_chr01 | 34387006                | AA                              | GG                | 1945890031               |
| SNP_P3_10887_34391094 | NC_021160.1    | Ca_kabuli_chr01 | 34391094                | CC                              | TT                | 1945890033               |
| SNP_P3_10888_34391480 | NC_021160.1    | Ca_kabuli_chr01 | 34391480                | AA                              | GG                | 1945890035               |
| SNP_P3_10889_34395216 | NC_021160.1    | Ca_kabuli_chr01 | 34395216                | CC                              | TT                | 1945890036               |
| SNP_P3_10890_34400464 | NC_021160.1    | Ca_kabuli_chr01 | 34400464                | AA                              | GG                | 1945890038               |
| SNP_P3_10891_34403422 | NC_021160.1    | Ca_kabuli_chr01 | 34403422                | AA                              | GG                | 1945890040               |
| SNP_P3_10892_34405699 | NC_021160.1    | Ca_kabuli_chr01 | 34405699                | TT                              | CC                | 1945890042               |
| SNP_P3_10893_34408059 | NC_021160.1    | Ca_kabuli_chr01 | 34408059                | TT                              | GG                | 1945890044               |
| SNP_P3_10894_34413656 | NC_021160.1    | Ca_kabuli_chr01 | 34413656                | AA                              | GG                | 1945890045               |
| SNP_P3_10895_34415174 | NC_021160.1    | Ca_kabuli_chr01 | 34415174                | TT                              | CC                | 1945890047               |
| SNP_P3_10896_34415680 | NC_021160.1    | Ca_kabuli_chr01 | 34415680                | GG                              | AA                | 1945890049               |
| SNP_P3_10897_34415779 | NC_021160.1    | Ca_kabuli_chr01 | 34415779                | CC                              | GG                | 1945890051               |
| SNP_P3_10898_34418709 | NC_021160.1    | Ca_kabuli_chr01 | 34418709                | CC                              | TT                | 1945890052               |
| SNP_P3_10899_34425407 | NC_021160.1    | Ca_kabuli_chr01 | 34425407                | GG                              | AA                | 1945890054               |
| SNP_P3_10900_34426157 | NC_021160.1    | Ca_kabuli_chr01 | 34426157                | CC                              | AA                | 1945890056               |
| SNP_P3_10901_34426171 | NC_021160.1    | Ca_kabuli_chr01 | 34426171                | TT                              | CC                | 1945890058               |
| SNP_P3_10902_34426852 | NC_021160.1    | Ca_kabuli_chr01 | 34426852                | CC                              | TT                | 1945890060               |
| SNP_P3_10903_34426973 | NC_021160.1    | Ca_kabuli_chr01 | 34426973                | GG                              | AA                | 1945890061               |
| SNP_P3_10904_34431949 | NC_021160.1    | Ca_kabuli_chr01 | 34431949                | AA                              | GG                | 1945890063               |
| SNP_P3_10905_34432064 | NC_021160.1    | Ca_kabuli_chr01 | 34432064                | GG                              | CC                | 1945890065               |
| SNP_P3_10906_34432247 | NC_021160.1    | Ca_kabuli_chr01 | 34432247                | AA                              | GG                | 1945890067               |
| SNP_P3_10908_34459739 | NC_021160.1    | Ca_kabuli_chr01 | 34459739                | TT                              | CC                | 1945890068               |
| SNP_P3_10909_34460401 | NC_021160.1    | Ca_kabuli_chr01 | 34460401                | AA                              | CC                | 1945890070               |
| SNP_P3_10911_34479170 | NC_021160.1    | Ca_kabuli_chr01 | 34479170                | CC                              | AA                | 1945890072               |
| SNP_P3_10912_34487148 | NC_021160.1    | Ca_kabuli_chr01 | 34487148                | TT                              | CC                | 1945890074               |
| SNP_P3_10914_34498483 | NC_021160.1    | Ca_kabuli_chr01 | 34498483                | CC                              | TT                | 1945890076               |
| SNP_P3_10915_34498500 | NC_021160.1    | Ca_kabuli_chr01 | 34498500                | CC                              | TT                | 1945890077               |
| SNP_P3_10916_34498529 | NC_021160.1    | Ca_kabuli_chr01 | 34498529                | GG                              | TT                | 1945890079               |
| SNP_P3_10918_34513574 | NC_021160.1    | Ca_kabuli_chr01 | 34513574                | CC                              | TT                | 1945890081               |
| SNP_P3_10919_34513588 | NC_021160.1    | Ca_kabuli_chr01 | 34513588                | TT                              | CC                | 1945890083               |
| SNP_P3_10920_34547748 | NC_021160.1    | Ca_kabuli_chr01 | 34547748                | AA                              | GG                | 1945890084               |
| SNP_P3_10921_34561180 | NC_021160.1    | Ca_kabuli_chr01 | 34561180                | TT                              | AA                | 1945890086               |
| SNP_P3_10922_34575217 | NC_021160.1    | Ca_kabuli_chr01 | 34575217                | TT                              | CC                | 1945890088               |
| SNP_P3_10923_34575272 | NC_021160.1    | Ca_kabuli_chr01 | 34575272                | CC                              | TT                | 1945890090               |
| SNP_P3_10924_34575522 | NC_021160.1    | Ca_kabuli_chr01 | 34575522                | AA                              | CC                | 1945890091               |

| SNPs IDs              | Chromosome IDs | Chromosomes     | Physical positions (bp) | CDC Frontier (Reference genome) | (Pusa 256 & HPNB) | NCBI SNPdb Accession IDs |
|-----------------------|----------------|-----------------|-------------------------|---------------------------------|-------------------|--------------------------|
| SNP_P3_10925_34576577 | NC_021160.1    | Ca_kabuli_chr01 | 34576577                | GG                              | AA                | 1945890093               |
| SNP_P3_10926_34580303 | NC_021160.1    | Ca_kabuli_chr01 | 34580303                | TT                              | CC                | 1945890095               |
| SNP_P3_10927_34580348 | NC_021160.1    | Ca_kabuli_chr01 | 34580348                | CC                              | TT                | 1945890097               |
| SNP_P3_10928_34584992 | NC_021160.1    | Ca_kabuli_chr01 | 34584992                | TT                              | CC                | 1945890099               |
| SNP_P3_10929_34586013 | NC_021160.1    | Ca_kabuli_chr01 | 34586013                | AA                              | GG                | 1945890100               |
| SNP_P3_10930_34588185 | NC_021160.1    | Ca_kabuli_chr01 | 34588185                | GG                              | AA                | 1945890102               |
| SNP_P3_10931_34588191 | NC_021160.1    | Ca_kabuli_chr01 | 34588191                | TT                              | CC                | 1945890104               |
| SNP_P3_10932_34588200 | NC_021160.1    | Ca_kabuli_chr01 | 34588200                | TT                              | CC                | 1945890106               |
| SNP_P3_10933_34588209 | NC_021160.1    | Ca_kabuli_chr01 | 34588209                | TT                              | CC                | 1945890107               |
| SNP_P3_10934_34595087 | NC_021160.1    | Ca_kabuli_chr01 | 34595087                | AA                              | GG                | 1945890109               |
| SNP_P3_10935_34599657 | NC_021160.1    | Ca_kabuli_chr01 | 34599657                | GG                              | AA                | 1945890111               |
| SNP_P3_10936_34599848 | NC_021160.1    | Ca_kabuli_chr01 | 34599848                | CC                              | TT                | 1945890113               |
| SNP_P3_10937_34614288 | NC_021160.1    | Ca_kabuli_chr01 | 34614288                | TT                              | CC                | 1945890114               |
| SNP_P3_10938_34614324 | NC_021160.1    | Ca_kabuli_chr01 | 34614324                | AA                              | GG                | 1945890116               |
| SNP_P3_10939_34614351 | NC_021160.1    | Ca_kabuli_chr01 | 34614351                | GG                              | AA                | 1945890118               |
| SNP_P3_10940_34617300 | NC_021160.1    | Ca_kabuli_chr01 | 34617300                | AA                              | GG                | 1945890120               |
| SNP_P3_10941_34620372 | NC_021160.1    | Ca_kabuli_chr01 | 34620372                | TT                              | AA                | 1945890122               |
| SNP_P3_10942_34620589 | NC_021160.1    | Ca_kabuli_chr01 | 34620589                | TT                              | CC                | 1945890123               |
| SNP_P3_10943_34624062 | NC_021160.1    | Ca_kabuli_chr01 | 34624062                | AA                              | GG                | 1945890125               |
| SNP_P3_10944_34625562 | NC_021160.1    | Ca_kabuli_chr01 | 34625562                | GG                              | CC                | 1945890127               |
| SNP_P3_10945_34634658 | NC_021160.1    | Ca_kabuli_chr01 | 34634658                | GG                              | AA                | 1945890129               |
| SNP_P3_10946_34641826 | NC_021160.1    | Ca_kabuli_chr01 | 34641826                | AA                              | GG                | 1945890130               |
| SNP_P3_10948_34646152 | NC_021160.1    | Ca_kabuli_chr01 | 34646152                | TT                              | GG                | 1945890132               |
| SNP_P3_10950_34653542 | NC_021160.1    | Ca_kabuli_chr01 | 34653542                | TT                              | CC                | 1945890134               |
| SNP_P3_10951_34657203 | NC_021160.1    | Ca_kabuli_chr01 | 34657203                | TT                              | CC                | 1945890136               |
| SNP_P3_10952_34657526 | NC_021160.1    | Ca_kabuli_chr01 | 34657526                | TT                              | CC                | 1945890137               |
| SNP_P3_10953_34664354 | NC_021160.1    | Ca_kabuli_chr01 | 34664354                | GG                              | AA                | 1945890139               |
| SNP_P3_10954_34664371 | NC_021160.1    | Ca_kabuli_chr01 | 34664371                | TT                              | AA                | 1945890141               |
| SNP_P3_10955_34664729 | NC_021160.1    | Ca_kabuli_chr01 | 34664729                | TT                              | CC                | 1945890143               |
| SNP_P3_10957_34672002 | NC_021160.1    | Ca_kabuli_chr01 | 34672002                | TT                              | GG                | 1945890145               |
| SNP_P3_10958_34672355 | NC_021160.1    | Ca_kabuli_chr01 | 34672355                | CC                              | AA                | 1945890146               |
| SNP_P3_10959_34675273 | NC_021160.1    | Ca_kabuli_chr01 | 34675273                | GG                              | AA                | 1945890148               |
| SNP_P3_10960_34675432 | NC_021160.1    | Ca_kabuli_chr01 | 34675432                | TT                              | AA                | 1945890150               |
| SNP_P3_10961_34677954 | NC_021160.1    | Ca_kabuli_chr01 | 34677954                | GG                              | AA                | 1945890152               |
| SNP_P3_10964_34682778 | NC_021160.1    | Ca_kabuli_chr01 | 34682778                | CC                              | GG                | 1945890153               |
| SNP_P3_10965_34687197 | NC_021160.1    | Ca_kabuli_chr01 | 34687197                | CC                              | TT                | 1945890155               |
| SNP_P3_10966_34687477 | NC_021160.1    | Ca_kabuli_chr01 | 34687477                | AA                              | CC                | 1945890157               |
| SNP_P3_10967_34691216 | NC_021160.1    | Ca_kabuli_chr01 | 34691216                | AA                              | GG                | 1945890159               |
| SNP_P3_10968_34691592 | NC_021160.1    | Ca_kabuli_chr01 | 34691592                | TT                              | GG                | 1945890161               |
| SNP_P3_10969_34691598 | NC_021160.1    | Ca_kabuli_chr01 | 34691598                | TT                              | CC                | 1945890162               |
| SNP_P3_10970_34701641 | NC_021160.1    | Ca_kabuli_chr01 | 34701641                | GG                              | AA                | 1945890164               |
| SNP_P3_10971_34709417 | NC_021160.1    | Ca_kabuli_chr01 | 34709417                | CC                              | AA                | 1945890166               |

| SNPs IDs              | Chromosome IDs | Chromosomes     | Physical positions (bp) | CDC Frontier (Reference genome) | (Pusa 256 & HPNB) | NCBI SNPdb Accession IDs |
|-----------------------|----------------|-----------------|-------------------------|---------------------------------|-------------------|--------------------------|
| SNP_P3_10972_34710100 | NC_021160.1    | Ca_kabuli_chr01 | 34710100                | CC                              | TT                | 1945890168               |
| SNP_P3_10973_34713825 | NC_021160.1    | Ca_kabuli_chr01 | 34713825                | TT                              | GG                | 1945890169               |
| SNP_P3_10974_34715814 | NC_021160.1    | Ca_kabuli_chr01 | 34715814                | TT                              | CC                | 1945890171               |
| SNP_P3_10975_34731177 | NC_021160.1    | Ca_kabuli_chr01 | 34731177                | AA                              | GG                | 1945890173               |
| SNP_P3_10976_34731348 | NC_021160.1    | Ca_kabuli_chr01 | 34731348                | AA                              | GG                | 1945890175               |
| SNP_P3_10977_34741532 | NC_021160.1    | Ca_kabuli_chr01 | 34741532                | GG                              | TT                | 1945890176               |
| SNP_P3_10978_34743188 | NC_021160.1    | Ca_kabuli_chr01 | 34743188                | AA                              | TT                | 1945890178               |
| SNP_P3_10979_34747286 | NC_021160.1    | Ca_kabuli_chr01 | 34747286                | TT                              | CC                | 1945890180               |
| SNP_P3_10980_34754575 | NC_021160.1    | Ca_kabuli_chr01 | 34754575                | CC                              | GG                | 1945890182               |
| SNP_P3_10981_34754596 | NC_021160.1    | Ca_kabuli_chr01 | 34754596                | TT                              | AA                | 1945890184               |
| SNP_P3_10982_34757966 | NC_021160.1    | Ca_kabuli_chr01 | 34757966                | CC                              | AA                | 1945890185               |
| SNP_P3_10984_34768514 | NC_021160.1    | Ca_kabuli_chr01 | 34768514                | AA                              | CC                | 1945890187               |
| SNP_P3_10985_34769530 | NC_021160.1    | Ca_kabuli_chr01 | 34769530                | GG                              | AA                | 1945890189               |
| SNP_P3_10986_34770670 | NC_021160.1    | Ca_kabuli_chr01 | 34770670                | TT                              | CC                | 1945890191               |
| SNP_P3_10987_34774902 | NC_021160.1    | Ca_kabuli_chr01 | 34774902                | CC                              | TT                | 1945890192               |
| SNP_P3_10988_34775116 | NC_021160.1    | Ca_kabuli_chr01 | 34775116                | GG                              | AA                | 1945890194               |
| SNP_P3_10989_34784314 | NC_021160.1    | Ca_kabuli_chr01 | 34784314                | AA                              | TT                | 1945890196               |
| SNP_P3_10990_34784376 | NC_021160.1    | Ca_kabuli_chr01 | 34784376                | AA                              | GG                | 1945890198               |
| SNP_P3_10991_34788148 | NC_021160.1    | Ca_kabuli_chr01 | 34788148                | TT                              | GG                | 1945890199               |
| SNP_P3_10992_34800069 | NC_021160.1    | Ca_kabuli_chr01 | 34800069                | TT                              | CC                | 1945890201               |
| SNP_P3_10993_34800495 | NC_021160.1    | Ca_kabuli_chr01 | 34800495                | AA                              | CC                | 1945890203               |
| SNP_P3_10994_34800566 | NC_021160.1    | Ca_kabuli_chr01 | 34800566                | CC                              | TT                | 1945890205               |
| SNP_P3_10995_34802467 | NC_021160.1    | Ca_kabuli_chr01 | 34802467                | GG                              | AA                | 1945890207               |
| SNP_P3_10996_34802498 | NC_021160.1    | Ca_kabuli_chr01 | 34802498                | CC                              | TT                | 1945890208               |
| SNP_P3_10997_34804616 | NC_021160.1    | Ca_kabuli_chr01 | 34804616                | AA                              | CC                | 1945890210               |
| SNP_P3_10998_34804829 | NC_021160.1    | Ca_kabuli_chr01 | 34804829                | CC                              | TT                | 1945890212               |
| SNP_P3_10999_34806663 | NC_021160.1    | Ca_kabuli_chr01 | 34806663                | AA                              | TT                | 1945890214               |
| SNP_P3_11001_34812167 | NC_021160.1    | Ca_kabuli_chr01 | 34812167                | TT                              | CC                | 1945890215               |
| SNP_P3_11002_34814077 | NC_021160.1    | Ca_kabuli_chr01 | 34814077                | TT                              | CC                | 1945890217               |
| SNP_P3_11004_34825902 | NC_021160.1    | Ca_kabuli_chr01 | 34825902                | AA                              | GG                | 1945890219               |
| SNP_P3_11005_34828422 | NC_021160.1    | Ca_kabuli_chr01 | 34828422                | CC                              | TT                | 1945890221               |
| SNP_P3_11006_34834271 | NC_021160.1    | Ca_kabuli_chr01 | 34834271                | CC                              | TT                | 1945890222               |
| SNP_P3_11007_34852527 | NC_021160.1    | Ca_kabuli_chr01 | 34852527                | AA                              | CC                | 1945890224               |
| SNP_P3_11010_34865652 | NC_021160.1    | Ca_kabuli_chr01 | 34865652                | AA                              | GG                | 1945890226               |
| SNP_P3_11012_34879215 | NC_021160.1    | Ca_kabuli_chr01 | 34879215                | AA                              | CC                | 1945890228               |
| SNP_P3_11013_34882082 | NC_021160.1    | Ca_kabuli_chr01 | 34882082                | TT                              | GG                | 1945890230               |
| SNP_P3_11014_34882083 | NC_021160.1    | Ca_kabuli_chr01 | 34882083                | TT                              | CC                | 1945890231               |
| SNP_P3_11015_34884148 | NC_021160.1    | Ca_kabuli_chr01 | 34884148                | CC                              | TT                | 1945890233               |
| SNP_P3_11016_34884710 | NC_021160.1    | Ca_kabuli_chr01 | 34884710                | TT                              | CC                | 1945890235               |
| SNP_P3_11017_34885296 | NC_021160.1    | Ca_kabuli_chr01 | 34885296                | TT                              | AA                | 1945890237               |
| SNP_P3_11018_34886314 | NC_021160.1    | Ca_kabuli_chr01 | 34886314                | AA                              | GG                | 1945890238               |
| SNP_P3_11019_34893957 | NC_021160.1    | Ca_kabuli_chr01 | 34893957                | GG                              | TT                | 1945890240               |

| SNPs IDs              | Chromosome IDs | Chromosomes     | Physical positions (bp) | CDC Frontier (Reference genome) | (Pusa 256 & HPNB) | NCBI SNPdb Accession IDs |
|-----------------------|----------------|-----------------|-------------------------|---------------------------------|-------------------|--------------------------|
| SNP_P3_11021_34896539 | NC_021160.1    | Ca_kabuli_chr01 | 34896539                | AA                              | CC                | 1945890242               |
| SNP_P3_11022_34903757 | NC_021160.1    | Ca_kabuli_chr01 | 34903757                | GG                              | AA                | 1945890244               |
| SNP_P3_11023_34906272 | NC_021160.1    | Ca_kabuli_chr01 | 34906272                | GG                              | AA                | 1945890245               |
| SNP_P3_11024_34908640 | NC_021160.1    | Ca_kabuli_chr01 | 34908640                | AA                              | TT                | 1945890247               |
| SNP_P3_11025_34909253 | NC_021160.1    | Ca_kabuli_chr01 | 34909253                | CC                              | AA                | 1945890249               |
| SNP_P3_11026_34913243 | NC_021160.1    | Ca_kabuli_chr01 | 34913243                | TT                              | CC                | 1945890251               |
| SNP_P3_11028_34913713 | NC_021160.1    | Ca_kabuli_chr01 | 34913713                | CC                              | AA                | 1945890253               |
| SNP_P3_11029_34917577 | NC_021160.1    | Ca_kabuli_chr01 | 34917577                | TT                              | CC                | 1945890254               |
| SNP_P3_11030_34921142 | NC_021160.1    | Ca_kabuli_chr01 | 34921142                | AA                              | CC                | 1945890256               |
| SNP_P3_11031_34921840 | NC_021160.1    | Ca_kabuli_chr01 | 34921840                | TT                              | CC                | 1945890258               |
| SNP_P3_11032_34923930 | NC_021160.1    | Ca_kabuli_chr01 | 34923930                | GG                              | AA                | 1945890260               |
| SNP_P3_11033_34932013 | NC_021160.1    | Ca_kabuli_chr01 | 34932013                | TT                              | CC                | 1945890261               |
| SNP_P3_11034_34932380 | NC_021160.1    | Ca_kabuli_chr01 | 34932380                | AA                              | TT                | 1945890263               |
| SNP_P3_11035_34945618 | NC_021160.1    | Ca_kabuli_chr01 | 34945618                | AA                              | GG                | 1945890265               |
| SNP_P3_11036_34951368 | NC_021160.1    | Ca_kabuli_chr01 | 34951368                | CC                              | TT                | 1945890267               |
| SNP_P3_11038_34954829 | NC_021160.1    | Ca_kabuli_chr01 | 34954829                | CC                              | AA                | 1945890269               |
| SNP_P3_11039_34957116 | NC_021160.1    | Ca_kabuli_chr01 | 34957116                | CC                              | TT                | 1945890270               |
| SNP_P3_11040_34957141 | NC_021160.1    | Ca_kabuli_chr01 | 34957141                | TT                              | CC                | 1945890272               |
| SNP_P3_11041_34958345 | NC_021160.1    | Ca_kabuli_chr01 | 34958345                | CC                              | AA                | 1945890274               |
| SNP_P3_11042_34970266 | NC_021160.1    | Ca_kabuli_chr01 | 34970266                | TT                              | GG                | 1945890276               |
| SNP_P3_11043_34970993 | NC_021160.1    | Ca_kabuli_chr01 | 34970993                | AA                              | TT                | 1945890277               |
| SNP_P3_11045_34971458 | NC_021160.1    | Ca_kabuli_chr01 | 34971458                | TT                              | GG                | 1945890279               |
| SNP_P3_11046_34971481 | NC_021160.1    | Ca_kabuli_chr01 | 34971481                | GG                              | AA                | 1945890281               |
| SNP_P3_11047_34971488 | NC_021160.1    | Ca_kabuli_chr01 | 34971488                | GG                              | AA                | 1945890283               |
| SNP_P3_11048_34978020 | NC_021160.1    | Ca_kabuli_chr01 | 34978020                | AA                              | TT                | 1945890284               |
| SNP_P3_11050_34986181 | NC_021160.1    | Ca_kabuli_chr01 | 34986181                | CC                              | AA                | 1945890286               |
| SNP_P3_11051_34988988 | NC_021160.1    | Ca_kabuli_chr01 | 34988988                | AA                              | TT                | 1945890288               |
| SNP_P3_11052_34988990 | NC_021160.1    | Ca_kabuli_chr01 | 34988990                | TT                              | CC                | 1945890290               |
| SNP_P3_11053_34989029 | NC_021160.1    | Ca_kabuli_chr01 | 34989029                | GG                              | AA                | 1945890292               |
| SNP_P3_11054_34989034 | NC_021160.1    | Ca_kabuli_chr01 | 34989034                | CC                              | TT                | 1945890293               |
| SNP_P3_11055_34989057 | NC_021160.1    | Ca_kabuli_chr01 | 34989057                | TT                              | CC                | 1945890295               |
| SNP_P3_11056_34989064 | NC_021160.1    | Ca_kabuli_chr01 | 34989064                | AA                              | GG                | 1945890297               |
| SNP_P3_11057_34989079 | NC_021160.1    | Ca_kabuli_chr01 | 34989079                | AA                              | CC                | 1945890299               |
| SNP_P3_11058_34989095 | NC_021160.1    | Ca_kabuli_chr01 | 34989095                | TT                              | CC                | 1945890300               |
| SNP_P3_11060_34989128 | NC_021160.1    | Ca_kabuli_chr01 | 34989128                | GG                              | AA                | 1945890302               |
| SNP_P3_11061_34991465 | NC_021160.1    | Ca_kabuli_chr01 | 34991465                | CC                              | GG                | 1945890304               |
| SNP_P3_11062_34991735 | NC_021160.1    | Ca_kabuli_chr01 | 34991735                | TT                              | CC                | 1945890306               |
| SNP_P3_11063_34991768 | NC_021160.1    | Ca_kabuli_chr01 | 34991768                | AA                              | GG                | 1945890308               |
| SNP_P3_11064_34991785 | NC_021160.1    | Ca_kabuli_chr01 | 34991785                | AA                              | GG                | 1945890309               |
| SNP_P3_11065_34991822 | NC_021160.1    | Ca_kabuli_chr01 | 34991822                | CC                              | TT                | 1945890311               |
| SNP_P3_11066_34991825 | NC_021160.1    | Ca_kabuli_chr01 | 34991825                | CC                              | TT                | 1945890313               |
| SNP_P3_11068_34996644 | NC_021160.1    | Ca_kabuli_chr01 | 34996644                | GG                              | AA                | 1945890315               |

| SNPs IDs              | Chromosome IDs | Chromosomes     | Physical positions (bp) | CDC Frontier (Reference genome) | (Pusa 256 & HPNB) | NCBI SNPdb Accession IDs |
|-----------------------|----------------|-----------------|-------------------------|---------------------------------|-------------------|--------------------------|
| SNP_P3_11069_34996650 | NC_021160.1    | Ca_kabuli_chr01 | 34996650                | AA                              | GG                | 1945890316               |
| SNP_P3_11070_34996667 | NC_021160.1    | Ca_kabuli_chr01 | 34996667                | AA                              | GG                | 1945890318               |
| SNP_P3_11071_34996722 | NC_021160.1    | Ca_kabuli_chr01 | 34996722                | CC                              | AA                | 1945890320               |
| SNP_P3_11072_34996723 | NC_021160.1    | Ca_kabuli_chr01 | 34996723                | CC                              | TT                | 1945890322               |
| SNP_P3_11073_34996725 | NC_021160.1    | Ca_kabuli_chr01 | 34996725                | AA                              | GG                | 1945890323               |
| SNP_P3_11074_34996732 | NC_021160.1    | Ca_kabuli_chr01 | 34996732                | CC                              | TT                | 1945890325               |
| SNP_P3_11075_34996830 | NC_021160.1    | Ca_kabuli_chr01 | 34996830                | GG                              | AA                | 1945890327               |
| SNP_P3_11076_34996912 | NC_021160.1    | Ca_kabuli_chr01 | 34996912                | CC                              | TT                | 1945890329               |
| SNP_P3_11077_34996925 | NC_021160.1    | Ca_kabuli_chr01 | 34996925                | GG                              | TT                | 1945890330               |
| SNP_P3_11078_34996946 | NC_021160.1    | Ca_kabuli_chr01 | 34996946                | TT                              | AA                | 1945890332               |
| SNP_P3_11079_34996970 | NC_021160.1    | Ca_kabuli_chr01 | 34996970                | GG                              | TT                | 1945890334               |
| SNP_P3_11080_34996975 | NC_021160.1    | Ca_kabuli_chr01 | 34996975                | GG                              | AA                | 1945890336               |
| SNP_P3_11081_34997012 | NC_021160.1    | Ca_kabuli_chr01 | 34997012                | CC                              | TT                | 1945890338               |
| SNP_P3_11082_34997060 | NC_021160.1    | Ca_kabuli_chr01 | 34997060                | GG                              | AA                | 1945890339               |
| SNP_P3_11083_34997070 | NC_021160.1    | Ca_kabuli_chr01 | 34997070                | GG                              | AA                | 1945890341               |
| SNP_P3_11084_34997096 | NC_021160.1    | Ca_kabuli_chr01 | 34997096                | GG                              | AA                | 1945890343               |
| SNP_P3_11085_34998131 | NC_021160.1    | Ca_kabuli_chr01 | 34998131                | GG                              | AA                | 1945890345               |
| SNP_P3_11086_35000035 | NC_021160.1    | Ca_kabuli_chr01 | 35000035                | GG                              | AA                | 1945890346               |
| SNP_P3_11087_35003812 | NC_021160.1    | Ca_kabuli_chr01 | 35003812                | CC                              | TT                | 1945890348               |
| SNP_P3_11088_35005582 | NC_021160.1    | Ca_kabuli_chr01 | 35005582                | AA                              | GG                | 1945890350               |
| SNP_P3_11089_35006498 | NC_021160.1    | Ca_kabuli_chr01 | 35006498                | TT                              | GG                | 1945890352               |
| SNP_P3_11090_35007314 | NC_021160.1    | Ca_kabuli_chr01 | 35007314                | AA                              | TT                | 1945890353               |
| SNP_P3_11091_35007373 | NC_021160.1    | Ca_kabuli_chr01 | 35007373                | TT                              | AA                | 1945890355               |
| SNP_P3_11092_35007713 | NC_021160.1    | Ca_kabuli_chr01 | 35007713                | GG                              | TT                | 1945890357               |
| SNP_P3_11093_35009445 | NC_021160.1    | Ca_kabuli_chr01 | 35009445                | TT                              | CC                | 1945890359               |
| SNP_P3_11094_35009504 | NC_021160.1    | Ca_kabuli_chr01 | 35009504                | GG                              | CC                | 1945890361               |
| SNP_P3_11095_35009542 | NC_021160.1    | Ca_kabuli_chr01 | 35009542                | TT                              | CC                | 1945890362               |
| SNP_P3_11096_35010124 | NC_021160.1    | Ca_kabuli_chr01 | 35010124                | CC                              | AA                | 1945890364               |
| SNP_P3_11097_35010470 | NC_021160.1    | Ca_kabuli_chr01 | 35010470                | GG                              | AA                | 1945890366               |
| SNP_P3_11098_35011571 | NC_021160.1    | Ca_kabuli_chr01 | 35011571                | TT                              | AA                | 1945890368               |
| SNP_P3_11099_35012039 | NC_021160.1    | Ca_kabuli_chr01 | 35012039                | CC                              | AA                | 1945890369               |
| SNP_P3_11101_35038844 | NC_021160.1    | Ca_kabuli_chr01 | 35038844                | TT                              | AA                | 1945890371               |
| SNP_P3_11103_35045524 | NC_021160.1    | Ca_kabuli_chr01 | 35045524                | TT                              | CC                | 1945890373               |
| SNP_P3_11104_35046629 | NC_021160.1    | Ca_kabuli_chr01 | 35046629                | TT                              | CC                | 1945890375               |
| SNP_P3_11105_35047839 | NC_021160.1    | Ca_kabuli_chr01 | 35047839                | GG                              | AA                | 1945890377               |
| SNP_P3_11106_35047873 | NC_021160.1    | Ca_kabuli_chr01 | 35047873                | AA                              | GG                | 1945890378               |
| SNP_P3_11107_35049875 | NC_021160.1    | Ca_kabuli_chr01 | 35049875                | TT                              | AA                | 1945890380               |
| SNP_P3_11108_35054805 | NC_021160.1    | Ca_kabuli_chr01 | 35054805                | AA                              | GG                | 1945890382               |
| SNP_P3_11109_35054839 | NC_021160.1    | Ca_kabuli_chr01 | 35054839                | TT                              | CC                | 1945890384               |
| SNP_P3_11113_35057468 | NC_021160.1    | Ca_kabuli_chr01 | 35057468                | TT                              | CC                | 1945890385               |
| SNP_P3_11114_35063685 | NC_021160.1    | Ca_kabuli_chr01 | 35063685                | CC                              | TT                | 1945890387               |
| SNP_P3_11116_35068581 | NC_021160.1    | Ca_kabuli_chr01 | 35068581                | TT                              | CC                | 1945890389               |

| SNPs IDs              | Chromosome IDs | Chromosomes     | Physical positions (bp) | CDC Frontier (Reference genome) | (Pusa 256 & HPNB) | NCBI SNPdb Accession IDs |
|-----------------------|----------------|-----------------|-------------------------|---------------------------------|-------------------|--------------------------|
| SNP_P3_11117_35069674 | NC_021160.1    | Ca_kabuli_chr01 | 35069674                | CC                              | GG                | 1945890391               |
| SNP_P3_11118_35070287 | NC_021160.1    | Ca_kabuli_chr01 | 35070287                | GG                              | AA                | 1945890393               |
| SNP_P3_11119_35071441 | NC_021160.1    | Ca_kabuli_chr01 | 35071441                | TT                              | CC                | 1945890394               |
| SNP_P3_11120_35072158 | NC_021160.1    | Ca_kabuli_chr01 | 35072158                | CC                              | TT                | 1945890396               |
| SNP_P3_11122_35073057 | NC_021160.1    | Ca_kabuli_chr01 | 35073057                | AA                              | TT                | 1945890398               |
| SNP_P3_11123_35075531 | NC_021160.1    | Ca_kabuli_chr01 | 35075531                | AA                              | TT                | 1945890400               |
| SNP_P3_11124_35077260 | NC_021160.1    | Ca_kabuli_chr01 | 35077260                | AA                              | GG                | 1945890401               |
| SNP_P3_11125_35078734 | NC_021160.1    | Ca_kabuli_chr01 | 35078734                | AA                              | CC                | 1945890403               |
| SNP_P3_11126_35078768 | NC_021160.1    | Ca_kabuli_chr01 | 35078768                | CC                              | AA                | 1945890405               |
| SNP_P3_11127_35079774 | NC_021160.1    | Ca_kabuli_chr01 | 35079774                | AA                              | GG                | 1945890407               |
| SNP_P3_11128_35084600 | NC_021160.1    | Ca_kabuli_chr01 | 35084600                | GG                              | AA                | 1945890409               |
| SNP_P3_11129_35084615 | NC_021160.1    | Ca_kabuli_chr01 | 35084615                | GG                              | AA                | 1945890410               |
| SNP_P3_11131_35087846 | NC_021160.1    | Ca_kabuli_chr01 | 35087846                | TT                              | GG                | 1945890412               |
| SNP_P3_11132_35095899 | NC_021160.1    | Ca_kabuli_chr01 | 35095899                | GG                              | AA                | 1945890414               |
| SNP_P3_11133_35096525 | NC_021160.1    | Ca_kabuli_chr01 | 35096525                | TT                              | CC                | 1945890416               |
| SNP_P3_11134_35100894 | NC_021160.1    | Ca_kabuli_chr01 | 35100894                | GG                              | AA                | 1945890417               |
| SNP_P3_11135_35100895 | NC_021160.1    | Ca_kabuli_chr01 | 35100895                | AA                              | TT                | 1945890419               |
| SNP_P3_11136_35108351 | NC_021160.1    | Ca_kabuli_chr01 | 35108351                | GG                              | CC                | 1945890421               |
| SNP_P3_11137_35109321 | NC_021160.1    | Ca_kabuli_chr01 | 35109321                | CC                              | AA                | 1945890423               |
| SNP_P3_11138_35111608 | NC_021160.1    | Ca_kabuli_chr01 | 35111608                | TT                              | AA                | 1945890425               |
| SNP_P3_11139_35111629 | NC_021160.1    | Ca_kabuli_chr01 | 35111629                | CC                              | TT                | 1945890426               |
| SNP_P3_11140_35111644 | NC_021160.1    | Ca_kabuli_chr01 | 35111644                | AA                              | GG                | 1945890428               |
| SNP_P3_11141_35112740 | NC_021160.1    | Ca_kabuli_chr01 | 35112740                | CC                              | AA                | 1945890430               |
| SNP_P3_11142_35114491 | NC_021160.1    | Ca_kabuli_chr01 | 35114491                | CC                              | TT                | 1945890432               |
| SNP_P3_11143_35116498 | NC_021160.1    | Ca_kabuli_chr01 | 35116498                | TT                              | CC                | 1945890433               |
| SNP_P3_11144_35124736 | NC_021160.1    | Ca_kabuli_chr01 | 35124736                | GG                              | AA                | 1945890435               |
| SNP_P3_11145_35124764 | NC_021160.1    | Ca_kabuli_chr01 | 35124764                | AA                              | GG                | 1945890437               |
| SNP_P3_11146_35124773 | NC_021160.1    | Ca_kabuli_chr01 | 35124773                | AA                              | GG                | 1945890439               |
| SNP_P3_11147_35125701 | NC_021160.1    | Ca_kabuli_chr01 | 35125701                | GG                              | TT                | 1945890440               |
| SNP_P3_11148_35125775 | NC_021160.1    | Ca_kabuli_chr01 | 35125775                | AA                              | GG                | 1945890442               |
| SNP_P3_11149_35128500 | NC_021160.1    | Ca_kabuli_chr01 | 35128500                | GG                              | AA                | 1945890444               |
| SNP_P3_11150_35128884 | NC_021160.1    | Ca_kabuli_chr01 | 35128884                | CC                              | TT                | 1945890446               |
| SNP_P3_11151_35131474 | NC_021160.1    | Ca_kabuli_chr01 | 35131474                | CC                              | TT                | 1945890448               |
| SNP_P3_11152_35132375 | NC_021160.1    | Ca_kabuli_chr01 | 35132375                | GG                              | AA                | 1945890449               |
| SNP_P3_11153_35132744 | NC_021160.1    | Ca_kabuli_chr01 | 35132744                | CC                              | TT                | 1945890451               |
| SNP_P3_11154_35135772 | NC_021160.1    | Ca_kabuli_chr01 | 35135772                | CC                              | TT                | 1945890453               |
| SNP_P3_11155_35141769 | NC_021160.1    | Ca_kabuli_chr01 | 35141769                | TT                              | GG                | 1945890455               |
| SNP_P3_11156_35142562 | NC_021160.1    | Ca_kabuli_chr01 | 35142562                | TT                              | CC                | 1945890456               |
| SNP_P3_11157_35142569 | NC_021160.1    | Ca_kabuli_chr01 | 35142569                | TT                              | AA                | 1945890458               |
| SNP_P3_11158_35142581 | NC_021160.1    | Ca_kabuli_chr01 | 35142581                | AA                              | CC                | 1945890460               |
| SNP_P3_11159_35142587 | NC_021160.1    | Ca_kabuli_chr01 | 35142587                | CC                              | TT                | 1945890462               |
| SNP_P3_11160_35143331 | NC_021160.1    | Ca_kabuli_chr01 | 35143331                | GG                              | AA                | 1945890464               |

| SNPs IDs              | Chromosome IDs | Chromosomes     | Physical positions (bp) | CDC Frontier (Reference genome) | (Pusa 256 & HPNB) | NCBI SNPdb Accession IDs |
|-----------------------|----------------|-----------------|-------------------------|---------------------------------|-------------------|--------------------------|
| SNP_P3_11161_35143410 | NC_021160.1    | Ca_kabuli_chr01 | 35143410                | TT                              | CC                | 1945890465               |
| SNP_P3_11162_35143606 | NC_021160.1    | Ca_kabuli_chr01 | 35143606                | GG                              | AA                | 1945890467               |
| SNP_P3_11163_35143615 | NC_021160.1    | Ca_kabuli_chr01 | 35143615                | TT                              | AA                | 1945890469               |
| SNP_P3_11164_35143682 | NC_021160.1    | Ca_kabuli_chr01 | 35143682                | CC                              | TT                | 1945890471               |
| SNP_P3_11165_35143738 | NC_021160.1    | Ca_kabuli_chr01 | 35143738                | GG                              | AA                | 1945890472               |
| SNP_P3_11166_35143855 | NC_021160.1    | Ca_kabuli_chr01 | 35143855                | CC                              | TT                | 1945890474               |
| SNP_P3_11167_35143872 | NC_021160.1    | Ca_kabuli_chr01 | 35143872                | CC                              | TT                | 1945890476               |
| SNP_P3_11169_35144753 | NC_021160.1    | Ca_kabuli_chr01 | 35144753                | TT                              | CC                | 1945890478               |
| SNP_P3_11170_35145702 | NC_021160.1    | Ca_kabuli_chr01 | 35145702                | TT                              | AA                | 1945890480               |
| SNP_P3_11171_35145703 | NC_021160.1    | Ca_kabuli_chr01 | 35145703                | TT                              | GG                | 1945890481               |
| SNP_P3_11172_35146003 | NC_021160.1    | Ca_kabuli_chr01 | 35146003                | AA                              | TT                | 1945890483               |
| SNP_P3_11173_35146591 | NC_021160.1    | Ca_kabuli_chr01 | 35146591                | CC                              | TT                | 1945890485               |
| SNP_P3_11174_35146592 | NC_021160.1    | Ca_kabuli_chr01 | 35146592                | AA                              | GG                | 1945890487               |
| SNP_P3_11175_35146891 | NC_021160.1    | Ca_kabuli_chr01 | 35146891                | AA                              | TT                | 1945890488               |
| SNP_P3_11176_35147011 | NC_021160.1    | Ca_kabuli_chr01 | 35147011                | AA                              | GG                | 1945890490               |
| SNP_P3_11177_35147365 | NC_021160.1    | Ca_kabuli_chr01 | 35147365                | AA                              | CC                | 1945890492               |
| SNP_P3_11179_35147377 | NC_021160.1    | Ca_kabuli_chr01 | 35147377                | TT                              | CC                | 1945890494               |
| SNP_P3_11180_35147876 | NC_021160.1    | Ca_kabuli_chr01 | 35147876                | AA                              | TT                | 1945890495               |
| SNP_P3_11181_35147878 | NC_021160.1    | Ca_kabuli_chr01 | 35147878                | TT                              | CC                | 1945890497               |
| SNP_P3_11182_35147880 | NC_021160.1    | Ca_kabuli_chr01 | 35147880                | AA                              | GG                | 1945890499               |
| SNP_P3_11183_35147891 | NC_021160.1    | Ca_kabuli_chr01 | 35147891                | CC                              | AA                | 1945890501               |
| SNP_P3_11184_35147898 | NC_021160.1    | Ca_kabuli_chr01 | 35147898                | AA                              | GG                | 1945890503               |
| SNP_P3_11185_35147899 | NC_021160.1    | Ca_kabuli_chr01 | 35147899                | AA                              | GG                | 1945890504               |
| SNP_P3_11186_35147963 | NC_021160.1    | Ca_kabuli_chr01 | 35147963                | CC                              | TT                | 1945890506               |
| SNP_P3_11187_35148020 | NC_021160.1    | Ca_kabuli_chr01 | 35148020                | GG                              | AA                | 1945890508               |
| SNP_P3_11188_35148035 | NC_021160.1    | Ca_kabuli_chr01 | 35148035                | AA                              | GG                | 1945890510               |
| SNP_P3_11189_35148246 | NC_021160.1    | Ca_kabuli_chr01 | 35148246                | CC                              | AA                | 1945890511               |
| SNP_P3_11190_35148276 | NC_021160.1    | Ca_kabuli_chr01 | 35148276                | CC                              | TT                | 1945890513               |
| SNP_P3_11191_35148292 | NC_021160.1    | Ca_kabuli_chr01 | 35148292                | AA                              | GG                | 1945890515               |
| SNP_P3_11192_35149339 | NC_021160.1    | Ca_kabuli_chr01 | 35149339                | TT                              | AA                | 1945890517               |
| SNP_P3_11193_35149763 | NC_021160.1    | Ca_kabuli_chr01 | 35149763                | AA                              | TT                | 1945890519               |
| SNP_P3_11194_35149801 | NC_021160.1    | Ca_kabuli_chr01 | 35149801                | CC                              | TT                | 1945890520               |
| SNP_P3_11195_35149837 | NC_021160.1    | Ca_kabuli_chr01 | 35149837                | CC                              | GG                | 1945890522               |
| SNP_P3_11196_35149840 | NC_021160.1    | Ca_kabuli_chr01 | 35149840                | GG                              | AA                | 1945890524               |
| SNP_P3_11197_35150117 | NC_021160.1    | Ca_kabuli_chr01 | 35150117                | TT                              | CC                | 1945890526               |
| SNP_P3_11198_35150148 | NC_021160.1    | Ca_kabuli_chr01 | 35150148                | TT                              | CC                | 1945890527               |
| SNP_P3_11199_35150201 | NC_021160.1    | Ca_kabuli_chr01 | 35150201                | AA                              | GG                | 1945890529               |
| SNP_P3_11200_35150208 | NC_021160.1    | Ca_kabuli_chr01 | 35150208                | CC                              | TT                | 1945890531               |
| SNP_P3_11202_35150447 | NC_021160.1    | Ca_kabuli_chr01 | 35150447                | GG                              | TT                | 1945890533               |
| SNP_P3_11203_35150484 | NC_021160.1    | Ca_kabuli_chr01 | 35150484                | GG                              | AA                | 1945890534               |
| SNP_P3_11204_35150516 | NC_021160.1    | Ca_kabuli_chr01 | 35150516                | AA                              | CC                | 1945890536               |
| SNP_P3_11206_35150797 | NC_021160.1    | Ca_kabuli_chr01 | 35150797                | GG                              | TT                | 1945890538               |



| SNPs IDs              | Chromosome IDs | Chromosomes     | Physical positions (bp) | CDC Frontier (Reference genome) | (Pusa 256 & HPNB) | NCBI SNPdb Accession IDs |
|-----------------------|----------------|-----------------|-------------------------|---------------------------------|-------------------|--------------------------|
| SNP_P3_11207_35150815 | NC_021160.1    | Ca_kabuli_chr01 | 35150815                | AA                              | GG                | 1945890540               |
| SNP_P3_11208_35151054 | NC_021160.1    | Ca_kabuli_chr01 | 35151054                | AA                              | GG                | 1945890541               |
| SNP_P3_11209_35152793 | NC_021160.1    | Ca_kabuli_chr01 | 35152793                | CC                              | GG                | 1945890543               |
| SNP_P3_11210_35152805 | NC_021160.1    | Ca_kabuli_chr01 | 35152805                | CC                              | TT                | 1945890545               |
| SNP_P3_11211_35152834 | NC_021160.1    | Ca_kabuli_chr01 | 35152834                | TT                              | GG                | 1945890547               |
| SNP_P3_11212_35152842 | NC_021160.1    | Ca_kabuli_chr01 | 35152842                | CC                              | TT                | 1945890548               |
| SNP_P3_11213_35153471 | NC_021160.1    | Ca_kabuli_chr01 | 35153471                | CC                              | TT                | 1945890550               |
| SNP_P3_11214_35153635 | NC_021160.1    | Ca_kabuli_chr01 | 35153635                | CC                              | AA                | 1945890552               |
| SNP_P3_11215_35153721 | NC_021160.1    | Ca_kabuli_chr01 | 35153721                | AA                              | TT                | 1945890554               |
| SNP_P3_11216_35153751 | NC_021160.1    | Ca_kabuli_chr01 | 35153751                | TT                              | GG                | 1945890555               |
| SNP_P3_11217_35153759 | NC_021160.1    | Ca_kabuli_chr01 | 35153759                | CC                              | AA                | 1945890557               |
| SNP_P3_11218_35153868 | NC_021160.1    | Ca_kabuli_chr01 | 35153868                | GG                              | TT                | 1945890559               |
| SNP_P3_11219_35153913 | NC_021160.1    | Ca_kabuli_chr01 | 35153913                | AA                              | GG                | 1945890561               |
| SNP_P3_11220_35154047 | NC_021160.1    | Ca_kabuli_chr01 | 35154047                | TT                              | GG                | 1945890562               |
| SNP_P3_11221_35154202 | NC_021160.1    | Ca_kabuli_chr01 | 35154202                | CC                              | GG                | 1945890564               |
| SNP_P3_11222_35154338 | NC_021160.1    | Ca_kabuli_chr01 | 35154338                | GG                              | TT                | 1945890566               |
| SNP_P3_11223_35154374 | NC_021160.1    | Ca_kabuli_chr01 | 35154374                | AA                              | GG                | 1945890568               |
| SNP_P3_11224_35154386 | NC_021160.1    | Ca_kabuli_chr01 | 35154386                | GG                              | TT                | 1945890569               |
| SNP_P3_11225_35154394 | NC_021160.1    | Ca_kabuli_chr01 | 35154394                | AA                              | GG                | 1945890571               |
| SNP_P3_11226_35154426 | NC_021160.1    | Ca_kabuli_chr01 | 35154426                | GG                              | AA                | 1945890573               |
| SNP_P3_11227_35154534 | NC_021160.1    | Ca_kabuli_chr01 | 35154534                | TT                              | CC                | 1945890575               |
| SNP_P3_11228_35154541 | NC_021160.1    | Ca_kabuli_chr01 | 35154541                | AA                              | GG                | 1945890577               |
| SNP_P3_11229_35154573 | NC_021160.1    | Ca_kabuli_chr01 | 35154573                | GG                              | AA                | 1945890578               |
| SNP_P3_11230_35154585 | NC_021160.1    | Ca_kabuli_chr01 | 35154585                | TT                              | CC                | 1945890580               |
| SNP_P3_11231_35154878 | NC_021160.1    | Ca_kabuli_chr01 | 35154878                | AA                              | GG                | 1945890582               |
| SNP_P3_11232_35156996 | NC_021160.1    | Ca_kabuli_chr01 | 35156996                | TT                              | GG                | 1945890584               |
| SNP_P3_11233_35157292 | NC_021160.1    | Ca_kabuli_chr01 | 35157292                | CC                              | TT                | 1945890585               |
| SNP_P3_11234_35157294 | NC_021160.1    | Ca_kabuli_chr01 | 35157294                | GG                              | CC                | 1945890587               |
| SNP_P3_11235_35157322 | NC_021160.1    | Ca_kabuli_chr01 | 35157322                | CC                              | TT                | 1945890589               |
| SNP_P3_11236_35157343 | NC_021160.1    | Ca_kabuli_chr01 | 35157343                | CC                              | AA                | 1945890591               |
| SNP_P3_11237_35157361 | NC_021160.1    | Ca_kabuli_chr01 | 35157361                | AA                              | GG                | 1945890592               |
| SNP_P3_11238_35157379 | NC_021160.1    | Ca_kabuli_chr01 | 35157379                | CC                              | TT                | 1945890594               |
| SNP_P3_11239_35158393 | NC_021160.1    | Ca_kabuli_chr01 | 35158393                | AA                              | GG                | 1945890596               |
| SNP_P3_11240_35158409 | NC_021160.1    | Ca_kabuli_chr01 | 35158409                | CC                              | TT                | 1945890598               |
| SNP_P3_11241_35158413 | NC_021160.1    | Ca_kabuli_chr01 | 35158413                | TT                              | CC                | 1945890599               |
| SNP_P3_11242_35158449 | NC_021160.1    | Ca_kabuli_chr01 | 35158449                | GG                              | AA                | 1945890601               |
| SNP_P3_11243_35159101 | NC_021160.1    | Ca_kabuli_chr01 | 35159101                | TT                              | AA                | 1945890603               |
| SNP_P3_11244_35159146 | NC_021160.1    | Ca_kabuli_chr01 | 35159146                | TT                              | CC                | 1945890605               |
| SNP_P3_11246_35159878 | NC_021160.1    | Ca_kabuli_chr01 | 35159878                | CC                              | AA                | 1945890607               |
| SNP_P3_11247_35165890 | NC_021160.1    | Ca_kabuli_chr01 | 35165890                | CC                              | TT                | 1945890608               |
| SNP_P3_11249_35166124 | NC_021160.1    | Ca_kabuli_chr01 | 35166124                | CC                              | TT                | 1945890610               |
| SNP_P3_11251_35166413 | NC_021160.1    | Ca_kabuli_chr01 | 35166413                | CC                              | GG                | 1945890612               |

| SNPs IDs              | Chromosome IDs | Chromosomes     | Physical positions (bp) | CDC Frontier (Reference genome) | (Pusa 256 & HPNB) | NCBI SNPdb Accession IDs |
|-----------------------|----------------|-----------------|-------------------------|---------------------------------|-------------------|--------------------------|
| SNP_P3_11252_35166414 | NC_021160.1    | Ca_kabuli_chr01 | 35166414                | CC                              | AA                | 1945890614               |
| SNP_P3_11253_35168954 | NC_021160.1    | Ca_kabuli_chr01 | 35168954                | AA                              | TT                | 1945890615               |
| SNP_P3_11257_35169690 | NC_021160.1    | Ca_kabuli_chr01 | 35169690                | GG                              | AA                | 1945890617               |
| SNP_P3_11258_35169706 | NC_021160.1    | Ca_kabuli_chr01 | 35169706                | CC                              | TT                | 1945890619               |
| SNP_P3_11259_35169720 | NC_021160.1    | Ca_kabuli_chr01 | 35169720                | TT                              | CC                | 1945890621               |
| SNP_P3_11260_35169721 | NC_021160.1    | Ca_kabuli_chr01 | 35169721                | CC                              | TT                | 1945890622               |
| SNP_P3_11261_35171451 | NC_021160.1    | Ca_kabuli_chr01 | 35171451                | CC                              | TT                | 1945890624               |
| SNP_P3_11262_35176032 | NC_021160.1    | Ca_kabuli_chr01 | 35176032                | AA                              | GG                | 1945890626               |
| SNP_P3_11263_35176325 | NC_021160.1    | Ca_kabuli_chr01 | 35176325                | TT                              | AA                | 1945890628               |
| SNP_P3_11264_35176350 | NC_021160.1    | Ca_kabuli_chr01 | 35176350                | TT                              | GG                | 1945890630               |
| SNP_P3_11265_35176362 | NC_021160.1    | Ca_kabuli_chr01 | 35176362                | TT                              | CC                | 1945890631               |
| SNP_P3_11266_35176383 | NC_021160.1    | Ca_kabuli_chr01 | 35176383                | GG                              | AA                | 1945890633               |
| SNP_P3_11267_35176601 | NC_021160.1    | Ca_kabuli_chr01 | 35176601                | AA                              | GG                | 1945890635               |
| SNP_P3_11268_35176630 | NC_021160.1    | Ca_kabuli_chr01 | 35176630                | GG                              | TT                | 1945890637               |
| SNP_P3_11269_35176660 | NC_021160.1    | Ca_kabuli_chr01 | 35176660                | GG                              | AA                | 1945890638               |
| SNP_P3_11270_35176763 | NC_021160.1    | Ca_kabuli_chr01 | 35176763                | TT                              | CC                | 1945890640               |
| SNP_P3_11271_35176781 | NC_021160.1    | Ca_kabuli_chr01 | 35176781                | CC                              | AA                | 1945890642               |
| SNP_P3_11272_35177045 | NC_021160.1    | Ca_kabuli_chr01 | 35177045                | TT                              | CC                | 1945890644               |
| SNP_P3_11273_35177800 | NC_021160.1    | Ca_kabuli_chr01 | 35177800                | TT                              | CC                | 1945890645               |
| SNP_P3_11274_35178587 | NC_021160.1    | Ca_kabuli_chr01 | 35178587                | AA                              | TT                | 1945890647               |
| SNP_P3_11276_35179204 | NC_021160.1    | Ca_kabuli_chr01 | 35179204                | CC                              | GG                | 1945890649               |
| SNP_P3_11277_35179252 | NC_021160.1    | Ca_kabuli_chr01 | 35179252                | GG                              | AA                | 1945890651               |
| SNP_P3_11279_35181651 | NC_021160.1    | Ca_kabuli_chr01 | 35181651                | AA                              | CC                | 1945890653               |
| SNP_P3_11280_35182504 | NC_021160.1    | Ca_kabuli_chr01 | 35182504                | CC                              | TT                | 1945890654               |
| SNP_P3_11281_35182526 | NC_021160.1    | Ca_kabuli_chr01 | 35182526                | GG                              | AA                | 1945890656               |
| SNP_P3_11282_35183921 | NC_021160.1    | Ca_kabuli_chr01 | 35183921                | TT                              | CC                | 1945890658               |
| SNP_P3_11283_35183973 | NC_021160.1    | Ca_kabuli_chr01 | 35183973                | CC                              | TT                | 1945890660               |
| SNP_P3_11284_35184256 | NC_021160.1    | Ca_kabuli_chr01 | 35184256                | TT                              | CC                | 1945890661               |
| SNP_P3_11285_35184258 | NC_021160.1    | Ca_kabuli_chr01 | 35184258                | GG                              | TT                | 1945890663               |
| SNP_P3_11286_35184293 | NC_021160.1    | Ca_kabuli_chr01 | 35184293                | AA                              | TT                | 1945890665               |
| SNP_P3_11287_35184514 | NC_021160.1    | Ca_kabuli_chr01 | 35184514                | CC                              | TT                | 1945890667               |
| SNP_P3_11288_35184558 | NC_021160.1    | Ca_kabuli_chr01 | 35184558                | TT                              | CC                | 1945890669               |
| SNP_P3_11289_35184584 | NC_021160.1    | Ca_kabuli_chr01 | 35184584                | GG                              | AA                | 1945890670               |
| SNP_P3_11290_35185344 | NC_021160.1    | Ca_kabuli_chr01 | 35185344                | AA                              | TT                | 1945890672               |
| SNP_P3_11291_35185376 | NC_021160.1    | Ca_kabuli_chr01 | 35185376                | TT                              | CC                | 1945890674               |
| SNP_P3_11292_35185844 | NC_021160.1    | Ca_kabuli_chr01 | 35185844                | AA                              | GG                | 1945890676               |
| SNP_P3_11293_35185876 | NC_021160.1    | Ca_kabuli_chr01 | 35185876                | AA                              | GG                | 1945890677               |
| SNP_P3_11294_35185960 | NC_021160.1    | Ca_kabuli_chr01 | 35185960                | AA                              | GG                | 1945890679               |
| SNP_P3_11295_35186103 | NC_021160.1    | Ca_kabuli_chr01 | 35186103                | CC                              | GG                | 1945890681               |
| SNP_P3_11297_35215595 | NC_021160.1    | Ca_kabuli_chr01 | 35215595                | AA                              | GG                | 1945890683               |
| SNP_P3_11298_35215596 | NC_021160.1    | Ca_kabuli_chr01 | 35215596                | GG                              | TT                | 1945890685               |
| SNP_P3_11299_35215654 | NC_021160.1    | Ca_kabuli_chr01 | 35215654                | CC                              | TT                | 1945890686               |

| SNPs IDs              | Chromosome IDs | Chromosomes     | Physical positions (bp) | CDC Frontier (Reference genome) | (Pusa 256 & HPNB) | NCBI SNPdb Accession IDs |
|-----------------------|----------------|-----------------|-------------------------|---------------------------------|-------------------|--------------------------|
| SNP_P3_11300_35216106 | NC_021160.1    | Ca_kabuli_chr01 | 35216106                | GG                              | AA                | 1945890688               |
| SNP_P3_11301_35216153 | NC_021160.1    | Ca_kabuli_chr01 | 35216153                | GG                              | AA                | 1945890690               |
| SNP_P3_11302_35216163 | NC_021160.1    | Ca_kabuli_chr01 | 35216163                | GG                              | AA                | 1945890692               |
| SNP_P3_11303_35216171 | NC_021160.1    | Ca_kabuli_chr01 | 35216171                | CC                              | GG                | 1945890693               |
| SNP_P3_11304_35216235 | NC_021160.1    | Ca_kabuli_chr01 | 35216235                | AA                              | GG                | 1945890695               |
| SNP_P3_11305_35216444 | NC_021160.1    | Ca_kabuli_chr01 | 35216444                | TT                              | AA                | 1945890697               |
| SNP_P3_11306_35216477 | NC_021160.1    | Ca_kabuli_chr01 | 35216477                | TT                              | CC                | 1945890699               |
| SNP_P3_11307_35216502 | NC_021160.1    | Ca_kabuli_chr01 | 35216502                | AA                              | GG                | 1945890701               |
| SNP_P3_11308_35216547 | NC_021160.1    | Ca_kabuli_chr01 | 35216547                | GG                              | AA                | 1945890702               |
| SNP_P3_11309_35216552 | NC_021160.1    | Ca_kabuli_chr01 | 35216552                | TT                              | GG                | 1945890704               |
| SNP_P3_11310_35216696 | NC_021160.1    | Ca_kabuli_chr01 | 35216696                | AA                              | CC                | 1945890706               |
| SNP_P3_11311_35217854 | NC_021160.1    | Ca_kabuli_chr01 | 35217854                | CC                              | TT                | 1945890708               |
| SNP_P3_11312_35221030 | NC_021160.1    | Ca_kabuli_chr01 | 35221030                | AA                              | CC                | 1945890709               |
| SNP_P3_11313_35221107 | NC_021160.1    | Ca_kabuli_chr01 | 35221107                | GG                              | TT                | 1945890711               |
| SNP_P3_11314_35221621 | NC_021160.1    | Ca_kabuli_chr01 | 35221621                | GG                              | AA                | 1945890713               |
| SNP_P3_11315_35222502 | NC_021160.1    | Ca_kabuli_chr01 | 35222502                | GG                              | AA                | 1945890715               |
| SNP_P3_11316_35222521 | NC_021160.1    | Ca_kabuli_chr01 | 35222521                | AA                              | GG                | 1945890717               |
| SNP_P3_11317_35223226 | NC_021160.1    | Ca_kabuli_chr01 | 35223226                | CC                              | TT                | 1945890718               |
| SNP_P3_11318_35223251 | NC_021160.1    | Ca_kabuli_chr01 | 35223251                | GG                              | AA                | 1945890720               |
| SNP_P3_11319_35223304 | NC_021160.1    | Ca_kabuli_chr01 | 35223304                | CC                              | GG                | 1945890722               |
| SNP_P3_11320_35223322 | NC_021160.1    | Ca_kabuli_chr01 | 35223322                | TT                              | CC                | 1945890724               |
| SNP_P3_11321_35225122 | NC_021160.1    | Ca_kabuli_chr01 | 35225122                | CC                              | GG                | 1945890725               |
| SNP_P3_11322_35225162 | NC_021160.1    | Ca_kabuli_chr01 | 35225162                | GG                              | AA                | 1945890727               |
| SNP_P3_11323_35225171 | NC_021160.1    | Ca_kabuli_chr01 | 35225171                | CC                              | AA                | 1945890729               |
| SNP_P3_11324_35227532 | NC_021160.1    | Ca_kabuli_chr01 | 35227532                | GG                              | AA                | 1945890731               |
| SNP_P3_11325_35229128 | NC_021160.1    | Ca_kabuli_chr01 | 35229128                | CC                              | TT                | 1945890733               |
| SNP_P3_11326_35232782 | NC_021160.1    | Ca_kabuli_chr01 | 35232782                | TT                              | GG                | 1945890734               |
| SNP_P3_11327_35232895 | NC_021160.1    | Ca_kabuli_chr01 | 35232895                | AA                              | TT                | 1945890736               |
| SNP_P3_11328_35232933 | NC_021160.1    | Ca_kabuli_chr01 | 35232933                | CC                              | GG                | 1945890738               |
| SNP_P3_11330_35233053 | NC_021160.1    | Ca_kabuli_chr01 | 35233053                | GG                              | AA                | 1945890740               |
| SNP_P3_11331_35233067 | NC_021160.1    | Ca_kabuli_chr01 | 35233067                | AA                              | GG                | 1945890741               |
| SNP_P3_11332_35233115 | NC_021160.1    | Ca_kabuli_chr01 | 35233115                | TT                              | AA                | 1945890743               |
| SNP_P3_11333_35233412 | NC_021160.1    | Ca_kabuli_chr01 | 35233412                | TT                              | CC                | 1945890745               |
| SNP_P3_11334_35233742 | NC_021160.1    | Ca_kabuli_chr01 | 35233742                | TT                              | CC                | 1945890747               |
| SNP_P3_11336_35238890 | NC_021160.1    | Ca_kabuli_chr01 | 35238890                | GG                              | TT                | 1945890748               |
| SNP_P3_11338_35239303 | NC_021160.1    | Ca_kabuli_chr01 | 35239303                | TT                              | CC                | 1945890750               |
| SNP_P3_11339_35239360 | NC_021160.1    | Ca_kabuli_chr01 | 35239360                | GG                              | CC                | 1945890752               |
| SNP_P3_11340_35239754 | NC_021160.1    | Ca_kabuli_chr01 | 35239754                | GG                              | CC                | 1945890754               |
| SNP_P3_11341_35240077 | NC_021160.1    | Ca_kabuli_chr01 | 35240077                | GG                              | AA                | 1945890756               |
| SNP_P3_11342_35240104 | NC_021160.1    | Ca_kabuli_chr01 | 35240104                | CC                              | AA                | 1945890757               |
| SNP_P3_11343_35240142 | NC_021160.1    | Ca_kabuli_chr01 | 35240142                | GG                              | AA                | 1945890759               |
| SNP_P3_11344_35240162 | NC_021160.1    | Ca_kabuli_chr01 | 35240162                | AA                              | GG                | 1945890761               |

| SNPs IDs              | Chromosome IDs | Chromosomes     | Physical positions (bp) | CDC Frontier (Reference genome) | (Pusa 256 & HPNB) | NCBI SNPdb Accession IDs |
|-----------------------|----------------|-----------------|-------------------------|---------------------------------|-------------------|--------------------------|
| SNP_P3_11345_35240163 | NC_021160.1    | Ca_kabuli_chr01 | 35240163                | TT                              | CC                | 1945890763               |
| SNP_P3_11347_35240238 | NC_021160.1    | Ca_kabuli_chr01 | 35240238                | GG                              | AA                | 1945890764               |
| SNP_P3_11348_35240315 | NC_021160.1    | Ca_kabuli_chr01 | 35240315                | GG                              | AA                | 1945890766               |
| SNP_P3_11349_35240330 | NC_021160.1    | Ca_kabuli_chr01 | 35240330                | TT                              | GG                | 1945890768               |
| SNP_P3_11350_35240359 | NC_021160.1    | Ca_kabuli_chr01 | 35240359                | AA                              | CC                | 1945890770               |
| SNP_P3_11351_35240383 | NC_021160.1    | Ca_kabuli_chr01 | 35240383                | AA                              | GG                | 1945890772               |
| SNP_P3_11352_35240424 | NC_021160.1    | Ca_kabuli_chr01 | 35240424                | AA                              | TT                | 1945890773               |
| SNP_P3_11353_35240455 | NC_021160.1    | Ca_kabuli_chr01 | 35240455                | GG                              | TT                | 1945890775               |
| SNP_P3_11354_35240470 | NC_021160.1    | Ca_kabuli_chr01 | 35240470                | GG                              | AA                | 1945890777               |
| SNP_P3_11355_35240543 | NC_021160.1    | Ca_kabuli_chr01 | 35240543                | CC                              | TT                | 1945890779               |
| SNP_P3_11356_35240562 | NC_021160.1    | Ca_kabuli_chr01 | 35240562                | AA                              | CC                | 1945890780               |
| SNP_P3_11357_35240603 | NC_021160.1    | Ca_kabuli_chr01 | 35240603                | AA                              | CC                | 1945890782               |
| SNP_P3_11358_35240714 | NC_021160.1    | Ca_kabuli_chr01 | 35240714                | CC                              | AA                | 1945890784               |
| SNP_P3_11359_35241022 | NC_021160.1    | Ca_kabuli_chr01 | 35241022                | GG                              | AA                | 1945890786               |
| SNP_P3_11360_35242978 | NC_021160.1    | Ca_kabuli_chr01 | 35242978                | AA                              | CC                | 1945890788               |
| SNP_P3_11361_35243736 | NC_021160.1    | Ca_kabuli_chr01 | 35243736                | TT                              | AA                | 1945890789               |
| SNP_P3_11362_35243773 | NC_021160.1    | Ca_kabuli_chr01 | 35243773                | GG                              | TT                | 1945890791               |
| SNP_P3_11363_35243804 | NC_021160.1    | Ca_kabuli_chr01 | 35243804                | CC                              | AA                | 1945890793               |
| SNP_P3_11364_35244099 | NC_021160.1    | Ca_kabuli_chr01 | 35244099                | TT                              | GG                | 1945890795               |
| SNP_P3_11365_35244145 | NC_021160.1    | Ca_kabuli_chr01 | 35244145                | GG                              | AA                | 1945890796               |
| SNP_P3_11367_35244497 | NC_021160.1    | Ca_kabuli_chr01 | 35244497                | AA                              | GG                | 1945890798               |
| SNP_P3_11368_35245094 | NC_021160.1    | Ca_kabuli_chr01 | 35245094                | CC                              | TT                | 1945890800               |
| SNP_P3_11369_35245569 | NC_021160.1    | Ca_kabuli_chr01 | 35245569                | CC                              | GG                | 1945890802               |
| SNP_P3_11371_35251712 | NC_021160.1    | Ca_kabuli_chr01 | 35251712                | AA                              | GG                | 1945890804               |
| SNP_P3_11372_35251845 | NC_021160.1    | Ca_kabuli_chr01 | 35251845                | GG                              | AA                | 1945890805               |
| SNP_P3_11373_35252264 | NC_021160.1    | Ca_kabuli_chr01 | 35252264                | CC                              | AA                | 1945890807               |
| SNP_P3_11374_35252272 | NC_021160.1    | Ca_kabuli_chr01 | 35252272                | TT                              | GG                | 1945890809               |
| SNP_P3_11375_35252552 | NC_021160.1    | Ca_kabuli_chr01 | 35252552                | GG                              | AA                | 1945890811               |
| SNP_P3_11376_35254428 | NC_021160.1    | Ca_kabuli_chr01 | 35254428                | GG                              | AA                | 1945890812               |
| SNP_P3_11377_35254455 | NC_021160.1    | Ca_kabuli_chr01 | 35254455                | AA                              | TT                | 1945890814               |
| SNP_P3_11378_35254456 | NC_021160.1    | Ca_kabuli_chr01 | 35254456                | CC                              | TT                | 1945890816               |
| SNP_P3_11379_35257641 | NC_021160.1    | Ca_kabuli_chr01 | 35257641                | AA                              | GG                | 1945890818               |
| SNP_P3_11381_35258711 | NC_021160.1    | Ca_kabuli_chr01 | 35258711                | AA                              | GG                | 1945890820               |
| SNP_P3_11382_35258997 | NC_021160.1    | Ca_kabuli_chr01 | 35258997                | GG                              | AA                | 1945890821               |
| SNP_P3_11383_35259182 | NC_021160.1    | Ca_kabuli_chr01 | 35259182                | TT                              | CC                | 1945890823               |
| SNP_P3_11384_35259244 | NC_021160.1    | Ca_kabuli_chr01 | 35259244                | GG                              | AA                | 1945890825               |
| SNP_P3_11385_35259290 | NC_021160.1    | Ca_kabuli_chr01 | 35259290                | GG                              | AA                | 1945890827               |
| SNP_P3_11386_35259627 | NC_021160.1    | Ca_kabuli_chr01 | 35259627                | GG                              | AA                | 1945890828               |
| SNP_P3_11387_35259781 | NC_021160.1    | Ca_kabuli_chr01 | 35259781                | AA                              | GG                | 1945890830               |
| SNP_P3_11388_35259812 | NC_021160.1    | Ca_kabuli_chr01 | 35259812                | GG                              | CC                | 1945890832               |
| SNP_P3_11389_35259856 | NC_021160.1    | Ca_kabuli_chr01 | 35259856                | TT                              | AA                | 1945890834               |
| SNP_P3_11390_35260260 | NC_021160.1    | Ca_kabuli_chr01 | 35260260                | GG                              | AA                | 1945890835               |

| SNPs IDs              | Chromosome IDs | Chromosomes     | Physical positions (bp) | CDC Frontier (Reference genome) | (Pusa 256 & HPNB) | NCBI SNPdb Accession IDs |
|-----------------------|----------------|-----------------|-------------------------|---------------------------------|-------------------|--------------------------|
| SNP_P3_11391_35260430 | NC_021160.1    | Ca_kabuli_chr01 | 35260430                | CC                              | AA                | 1945890837               |
| SNP_P3_11393_35260510 | NC_021160.1    | Ca_kabuli_chr01 | 35260510                | AA                              | CC                | 1945890839               |
| SNP_P3_11394_35260627 | NC_021160.1    | Ca_kabuli_chr01 | 35260627                | TT                              | CC                | 1945890841               |
| SNP_P3_11395_35260684 | NC_021160.1    | Ca_kabuli_chr01 | 35260684                | GG                              | TT                | 1945890843               |
| SNP_P3_11396_35260785 | NC_021160.1    | Ca_kabuli_chr01 | 35260785                | CC                              | TT                | 1945890844               |
| SNP_P3_11397_35260808 | NC_021160.1    | Ca_kabuli_chr01 | 35260808                | GG                              | AA                | 1945890846               |
| SNP_P3_11398_35260848 | NC_021160.1    | Ca_kabuli_chr01 | 35260848                | AA                              | GG                | 1945890848               |
| SNP_P3_11399_35260874 | NC_021160.1    | Ca_kabuli_chr01 | 35260874                | CC                              | TT                | 1945890850               |
| SNP_P3_11400_35260910 | NC_021160.1    | Ca_kabuli_chr01 | 35260910                | TT                              | CC                | 1945890851               |
| SNP_P3_11401_35260912 | NC_021160.1    | Ca_kabuli_chr01 | 35260912                | GG                              | AA                | 1945890853               |
| SNP_P3_11402_35260922 | NC_021160.1    | Ca_kabuli_chr01 | 35260922                | TT                              | CC                | 1945890855               |
| SNP_P3_11403_35260991 | NC_021160.1    | Ca_kabuli_chr01 | 35260991                | CC                              | AA                | 1945890857               |
| SNP_P3_11404_35261004 | NC_021160.1    | Ca_kabuli_chr01 | 35261004                | AA                              | CC                | 1945890859               |
| SNP_P3_11405_35261030 | NC_021160.1    | Ca_kabuli_chr01 | 35261030                | TT                              | GG                | 1945890860               |
| SNP_P3_11406_35261045 | NC_021160.1    | Ca_kabuli_chr01 | 35261045                | GG                              | TT                | 1945890862               |
| SNP_P3_11407_35261093 | NC_021160.1    | Ca_kabuli_chr01 | 35261093                | CC                              | AA                | 1945890864               |
| SNP_P3_11408_35261112 | NC_021160.1    | Ca_kabuli_chr01 | 35261112                | GG                              | AA                | 1945890866               |
| SNP_P3_11409_35261211 | NC_021160.1    | Ca_kabuli_chr01 | 35261211                | GG                              | AA                | 1945890867               |
| SNP_P3_11410_35261240 | NC_021160.1    | Ca_kabuli_chr01 | 35261240                | CC                              | TT                | 1945890869               |
| SNP_P3_11411_35261245 | NC_021160.1    | Ca_kabuli_chr01 | 35261245                | AA                              | GG                | 1945890871               |
| SNP_P3_11412_35261272 | NC_021160.1    | Ca_kabuli_chr01 | 35261272                | GG                              | AA                | 1945890873               |
| SNP_P3_11413_35261327 | NC_021160.1    | Ca_kabuli_chr01 | 35261327                | AA                              | GG                | 1945890874               |
| SNP_P3_11414_35261349 | NC_021160.1    | Ca_kabuli_chr01 | 35261349                | AA                              | TT                | 1945890876               |
| SNP_P3_11415_35261403 | NC_021160.1    | Ca_kabuli_chr01 | 35261403                | TT                              | AA                | 1945890878               |
| SNP_P3_11416_35261404 | NC_021160.1    | Ca_kabuli_chr01 | 35261404                | TT                              | AA                | 1945890880               |
| SNP_P3_11417_35261406 | NC_021160.1    | Ca_kabuli_chr01 | 35261406                | TT                              | AA                | 1945890882               |
| SNP_P3_11418_35261407 | NC_021160.1    | Ca_kabuli_chr01 | 35261407                | CC                              | TT                | 1945890883               |
| SNP_P3_11419_35261432 | NC_021160.1    | Ca_kabuli_chr01 | 35261432                | CC                              | AA                | 1945890885               |
| SNP_P3_11420_35261484 | NC_021160.1    | Ca_kabuli_chr01 | 35261484                | AA                              | TT                | 1945890887               |
| SNP_P3_11421_35261509 | NC_021160.1    | Ca_kabuli_chr01 | 35261509                | TT                              | AA                | 1945890889               |
| SNP_P3_11422_35261560 | NC_021160.1    | Ca_kabuli_chr01 | 35261560                | TT                              | CC                | 1945890890               |
| SNP_P3_11423_35261686 | NC_021160.1    | Ca_kabuli_chr01 | 35261686                | GG                              | AA                | 1945890892               |
| SNP_P3_11425_35261858 | NC_021160.1    | Ca_kabuli_chr01 | 35261858                | AA                              | CC                | 1945890894               |
| SNP_P3_11426_35261886 | NC_021160.1    | Ca_kabuli_chr01 | 35261886                | AA                              | CC                | 1945890896               |
| SNP_P3_11427_35261890 | NC_021160.1    | Ca_kabuli_chr01 | 35261890                | CC                              | GG                | 1945890898               |
| SNP_P3_11428_35261997 | NC_021160.1    | Ca_kabuli_chr01 | 35261997                | TT                              | CC                | 1945890899               |
| SNP_P3_11429_35262071 | NC_021160.1    | Ca_kabuli_chr01 | 35262071                | GG                              | AA                | 1945890901               |
| SNP_P3_11430_35262110 | NC_021160.1    | Ca_kabuli_chr01 | 35262110                | TT                              | CC                | 1945890903               |
| SNP_P3_11431_35264078 | NC_021160.1    | Ca_kabuli_chr01 | 35264078                | CC                              | TT                | 1945890905               |
| SNP_P3_11432_35264367 | NC_021160.1    | Ca_kabuli_chr01 | 35264367                | CC                              | TT                | 1945890906               |
| SNP_P3_11433_35264447 | NC_021160.1    | Ca_kabuli_chr01 | 35264447                | AA                              | CC                | 1945890908               |
| SNP_P3_11434_35264877 | NC_021160.1    | Ca_kabuli_chr01 | 35264877                | AA                              | CC                | 1945890910               |

| SNPs IDs              | Chromosome IDs | Chromosomes     | Physical positions (bp) | CDC Frontier (Reference genome) | (Pusa 256 & HPNB) | NCBI SNPdb Accession IDs |
|-----------------------|----------------|-----------------|-------------------------|---------------------------------|-------------------|--------------------------|
| SNP_P3_11435_35264922 | NC_021160.1    | Ca_kabuli_chr01 | 35264922                | AA                              | GG                | 1945890912               |
| SNP_P3_11436_35264924 | NC_021160.1    | Ca_kabuli_chr01 | 35264924                | TT                              | CC                | 1945890914               |
| SNP_P3_11437_35264960 | NC_021160.1    | Ca_kabuli_chr01 | 35264960                | CC                              | TT                | 1945890915               |
| SNP_P3_11438_35264961 | NC_021160.1    | Ca_kabuli_chr01 | 35264961                | CC                              | TT                | 1945890917               |
| SNP_P3_11439_35264982 | NC_021160.1    | Ca_kabuli_chr01 | 35264982                | GG                              | AA                | 1945890919               |
| SNP_P3_11440_35265004 | NC_021160.1    | Ca_kabuli_chr01 | 35265004                | GG                              | TT                | 1945890921               |
| SNP_P3_11441_35265008 | NC_021160.1    | Ca_kabuli_chr01 | 35265008                | CC                              | AA                | 1945890922               |
| SNP_P3_11442_35265016 | NC_021160.1    | Ca_kabuli_chr01 | 35265016                | AA                              | TT                | 1945890924               |
| SNP_P3_11443_35265046 | NC_021160.1    | Ca_kabuli_chr01 | 35265046                | TT                              | CC                | 1945890926               |
| SNP_P3_11444_35265059 | NC_021160.1    | Ca_kabuli_chr01 | 35265059                | GG                              | AA                | 1945890928               |
| SNP_P3_11445_35265150 | NC_021160.1    | Ca_kabuli_chr01 | 35265150                | CC                              | TT                | 1945890930               |
| SNP_P3_11446_35265274 | NC_021160.1    | Ca_kabuli_chr01 | 35265274                | CC                              | TT                | 1945890931               |
| SNP_P3_11447_35265303 | NC_021160.1    | Ca_kabuli_chr01 | 35265303                | CC                              | GG                | 1945890933               |
| SNP_P3_11448_35265304 | NC_021160.1    | Ca_kabuli_chr01 | 35265304                | GG                              | AA                | 1945890935               |
| SNP_P3_11449_35265374 | NC_021160.1    | Ca_kabuli_chr01 | 35265374                | GG                              | AA                | 1945890937               |
| SNP_P3_11450_35265433 | NC_021160.1    | Ca_kabuli_chr01 | 35265433                | CC                              | TT                | 1945890938               |
| SNP_P3_11451_35265449 | NC_021160.1    | Ca_kabuli_chr01 | 35265449                | CC                              | GG                | 1945890940               |
| SNP_P3_11452_35265467 | NC_021160.1    | Ca_kabuli_chr01 | 35265467                | CC                              | TT                | 1945890942               |
| SNP_P3_11454_35265540 | NC_021160.1    | Ca_kabuli_chr01 | 35265540                | AA                              | CC                | 1945890944               |
| SNP_P3_11455_35265545 | NC_021160.1    | Ca_kabuli_chr01 | 35265545                | CC                              | TT                | 1945890946               |
| SNP_P3_11456_35265645 | NC_021160.1    | Ca_kabuli_chr01 | 35265645                | GG                              | AA                | 1945890947               |
| SNP_P3_11457_35265646 | NC_021160.1    | Ca_kabuli_chr01 | 35265646                | CC                              | AA                | 1945890949               |
| SNP_P3_11458_35265724 | NC_021160.1    | Ca_kabuli_chr01 | 35265724                | GG                              | AA                | 1945890951               |
| SNP_P3_11459_35265852 | NC_021160.1    | Ca_kabuli_chr01 | 35265852                | TT                              | GG                | 1945890953               |
| SNP_P3_11460_35265887 | NC_021160.1    | Ca_kabuli_chr01 | 35265887                | AA                              | TT                | 1945890955               |
| SNP_P3_11461_35265916 | NC_021160.1    | Ca_kabuli_chr01 | 35265916                | TT                              | CC                | 1945890956               |
| SNP_P3_11462_35266005 | NC_021160.1    | Ca_kabuli_chr01 | 35266005                | CC                              | GG                | 1945890958               |
| SNP_P3_11463_35266006 | NC_021160.1    | Ca_kabuli_chr01 | 35266006                | AA                              | GG                | 1945890960               |
| SNP_P3_11464_35266060 | NC_021160.1    | Ca_kabuli_chr01 | 35266060                | AA                              | TT                | 1945890962               |
| SNP_P3_11465_35266088 | NC_021160.1    | Ca_kabuli_chr01 | 35266088                | CC                              | TT                | 1945890963               |
| SNP_P3_11466_35272700 | NC_021160.1    | Ca_kabuli_chr01 | 35272700                | AA                              | GG                | 1945890965               |
| SNP_P3_11467_35272795 | NC_021160.1    | Ca_kabuli_chr01 | 35272795                | GG                              | AA                | 1945890967               |
| SNP_P3_11468_35273178 | NC_021160.1    | Ca_kabuli_chr01 | 35273178                | AA                              | GG                | 1945890969               |
| SNP_P3_11469_35281147 | NC_021160.1    | Ca_kabuli_chr01 | 35281147                | GG                              | CC                | 1945890971               |
| SNP_P3_11470_35281262 | NC_021160.1    | Ca_kabuli_chr01 | 35281262                | CC                              | TT                | 1945890972               |
| SNP_P3_11471_35281288 | NC_021160.1    | Ca_kabuli_chr01 | 35281288                | CC                              | TT                | 1945890974               |
| SNP_P3_11472_35281315 | NC_021160.1    | Ca_kabuli_chr01 | 35281315                | GG                              | AA                | 1945890976               |
| SNP_P3_11473_35281322 | NC_021160.1    | Ca_kabuli_chr01 | 35281322                | CC                              | GG                | 1945890978               |
| SNP_P3_11474_35281425 | NC_021160.1    | Ca_kabuli_chr01 | 35281425                | AA                              | TT                | 1945890979               |
| SNP_P3_11475_35281431 | NC_021160.1    | Ca_kabuli_chr01 | 35281431                | TT                              | AA                | 1945890981               |
| SNP_P3_11477_35281461 | NC_021160.1    | Ca_kabuli_chr01 | 35281461                | AA                              | GG                | 1945890983               |
| SNP_P3_11478_35281532 | NC_021160.1    | Ca_kabuli_chr01 | 35281532                | AA                              | CC                | 1945890985               |

| SNPs IDs              | Chromosome IDs | Chromosomes     | Physical positions (bp) | CDC Frontier (Reference genome) | (Pusa 256 & HPNB) | NCBI SNPdb Accession IDs |
|-----------------------|----------------|-----------------|-------------------------|---------------------------------|-------------------|--------------------------|
| SNP_P3_11480_35281605 | NC_021160.1    | Ca_kabuli_chr01 | 35281605                | AA                              | GG                | 1945890987               |
| SNP_P3_11481_35281664 | NC_021160.1    | Ca_kabuli_chr01 | 35281664                | AA                              | TT                | 1945890988               |
| SNP_P3_11482_35281713 | NC_021160.1    | Ca_kabuli_chr01 | 35281713                | GG                              | CC                | 1945890990               |
| SNP_P3_11483_35281716 | NC_021160.1    | Ca_kabuli_chr01 | 35281716                | GG                              | CC                | 1945890992               |
| SNP_P3_11484_35281719 | NC_021160.1    | Ca_kabuli_chr01 | 35281719                | CC                              | TT                | 1945890994               |
| SNP_P3_11485_35281766 | NC_021160.1    | Ca_kabuli_chr01 | 35281766                | GG                              | AA                | 1945890995               |
| SNP_P3_11486_35281770 | NC_021160.1    | Ca_kabuli_chr01 | 35281770                | CC                              | TT                | 1945890997               |
| SNP_P3_11487_35281863 | NC_021160.1    | Ca_kabuli_chr01 | 35281863                | CC                              | AA                | 1945890999               |
| SNP_P3_11488_35281869 | NC_021160.1    | Ca_kabuli_chr01 | 35281869                | AA                              | GG                | 1945891001               |
| SNP_P3_11489_35281873 | NC_021160.1    | Ca_kabuli_chr01 | 35281873                | AA                              | TT                | 1945891003               |
| SNP_P3_11491_35281954 | NC_021160.1    | Ca_kabuli_chr01 | 35281954                | TT                              | AA                | 1945891004               |
| SNP_P3_11492_35281965 | NC_021160.1    | Ca_kabuli_chr01 | 35281965                | AA                              | CC                | 1945891006               |
| SNP_P3_11493_35282203 | NC_021160.1    | Ca_kabuli_chr01 | 35282203                | GG                              | AA                | 1945891008               |
| SNP_P3_11494_35282302 | NC_021160.1    | Ca_kabuli_chr01 | 35282302                | TT                              | CC                | 1945891010               |
| SNP_P3_11495_35282339 | NC_021160.1    | Ca_kabuli_chr01 | 35282339                | TT                              | CC                | 1945891011               |
| SNP_P3_11496_35282348 | NC_021160.1    | Ca_kabuli_chr01 | 35282348                | CC                              | TT                | 1945891013               |
| SNP_P3_11497_35282360 | NC_021160.1    | Ca_kabuli_chr01 | 35282360                | AA                              | TT                | 1945891015               |
| SNP_P3_11498_35282481 | NC_021160.1    | Ca_kabuli_chr01 | 35282481                | TT                              | CC                | 1945891017               |
| SNP_P3_11499_35282547 | NC_021160.1    | Ca_kabuli_chr01 | 35282547                | AA                              | GG                | 1945891019               |
| SNP_P3_11500_35282657 | NC_021160.1    | Ca_kabuli_chr01 | 35282657                | GG                              | CC                | 1945891020               |
| SNP_P3_11501_35282714 | NC_021160.1    | Ca_kabuli_chr01 | 35282714                | CC                              | TT                | 1945891022               |
| SNP_P3_11502_35282732 | NC_021160.1    | Ca_kabuli_chr01 | 35282732                | GG                              | AA                | 1945891024               |
| SNP_P3_11503_35283014 | NC_021160.1    | Ca_kabuli_chr01 | 35283014                | AA                              | TT                | 1945891026               |
| SNP_P3_11504_35283061 | NC_021160.1    | Ca_kabuli_chr01 | 35283061                | AA                              | TT                | 1945891027               |
| SNP_P3_11505_35283079 | NC_021160.1    | Ca_kabuli_chr01 | 35283079                | TT                              | GG                | 1945891029               |
| SNP_P3_11507_35283259 | NC_021160.1    | Ca_kabuli_chr01 | 35283259                | AA                              | GG                | 1945891031               |
| SNP_P3_11508_35283309 | NC_021160.1    | Ca_kabuli_chr01 | 35283309                | AA                              | GG                | 1945891033               |
| SNP_P3_11509_35283338 | NC_021160.1    | Ca_kabuli_chr01 | 35283338                | GG                              | TT                | 1945891035               |
| SNP_P3_11510_35283409 | NC_021160.1    | Ca_kabuli_chr01 | 35283409                | AA                              | GG                | 1945891036               |
| SNP_P3_11511_35283430 | NC_021160.1    | Ca_kabuli_chr01 | 35283430                | CC                              | GG                | 1945891038               |
| SNP_P3_11512_35283521 | NC_021160.1    | Ca_kabuli_chr01 | 35283521                | GG                              | TT                | 1945891040               |
| SNP_P3_11513_35283676 | NC_021160.1    | Ca_kabuli_chr01 | 35283676                | AA                              | TT                | 1945891042               |
| SNP_P3_11514_35283677 | NC_021160.1    | Ca_kabuli_chr01 | 35283677                | AA                              | CC                | 1945891043               |
| SNP_P3_11515_35283706 | NC_021160.1    | Ca_kabuli_chr01 | 35283706                | TT                              | AA                | 1945891045               |
| SNP_P3_11516_35283729 | NC_021160.1    | Ca_kabuli_chr01 | 35283729                | AA                              | CC                | 1945891047               |
| SNP_P3_11518_35283879 | NC_021160.1    | Ca_kabuli_chr01 | 35283879                | TT                              | GG                | 1945891049               |
| SNP_P3_11519_35283960 | NC_021160.1    | Ca_kabuli_chr01 | 35283960                | AA                              | GG                | 1945891051               |
| SNP_P3_11520_35283963 | NC_021160.1    | Ca_kabuli_chr01 | 35283963                | GG                              | AA                | 1945891052               |
| SNP_P3_11522_35284024 | NC_021160.1    | Ca_kabuli_chr01 | 35284024                | CC                              | TT                | 1945891054               |
| SNP_P3_11523_35284065 | NC_021160.1    | Ca_kabuli_chr01 | 35284065                | CC                              | TT                | 1945891056               |
| SNP_P3_11524_35284182 | NC_021160.1    | Ca_kabuli_chr01 | 35284182                | TT                              | AA                | 1945891058               |
| SNP_P3_11526_35284347 | NC_021160.1    | Ca_kabuli_chr01 | 35284347                | AA                              | TT                | 1945891059               |

| SNPs IDs              | Chromosome IDs | Chromosomes     | Physical positions (bp) | CDC Frontier (Reference genome) | (Pusa 256 & HPNB) | NCBI SNPdb Accession IDs |
|-----------------------|----------------|-----------------|-------------------------|---------------------------------|-------------------|--------------------------|
| SNP_P3_11527_35284364 | NC_021160.1    | Ca_kabuli_chr01 | 35284364                | TT                              | AA                | 1945891061               |
| SNP_P3_11528_35284377 | NC_021160.1    | Ca_kabuli_chr01 | 35284377                | TT                              | AA                | 1945891063               |
| SNP_P3_11529_35284393 | NC_021160.1    | Ca_kabuli_chr01 | 35284393                | GG                              | TT                | 1945891065               |
| SNP_P3_11530_35284469 | NC_021160.1    | Ca_kabuli_chr01 | 35284469                | GG                              | TT                | 1945891067               |
| SNP_P3_11531_35284485 | NC_021160.1    | Ca_kabuli_chr01 | 35284485                | GG                              | AA                | 1945891068               |
| SNP_P3_11532_35284553 | NC_021160.1    | Ca_kabuli_chr01 | 35284553                | GG                              | AA                | 1945891070               |
| SNP_P3_11533_35284572 | NC_021160.1    | Ca_kabuli_chr01 | 35284572                | GG                              | AA                | 1945891072               |
| SNP_P3_11534_35284620 | NC_021160.1    | Ca_kabuli_chr01 | 35284620                | GG                              | AA                | 1945891074               |
| SNP_P3_11535_35284628 | NC_021160.1    | Ca_kabuli_chr01 | 35284628                | AA                              | CC                | 1945891075               |
| SNP_P3_11536_35284680 | NC_021160.1    | Ca_kabuli_chr01 | 35284680                | AA                              | GG                | 1945891077               |
| SNP_P3_11538_35284918 | NC_021160.1    | Ca_kabuli_chr01 | 35284918                | GG                              | TT                | 1945891079               |
| SNP_P3_11539_35285596 | NC_021160.1    | Ca_kabuli_chr01 | 35285596                | CC                              | TT                | 1945891081               |
| SNP_P3_11541_35285680 | NC_021160.1    | Ca_kabuli_chr01 | 35285680                | TT                              | CC                | 1945891083               |
| SNP_P3_11542_35285709 | NC_021160.1    | Ca_kabuli_chr01 | 35285709                | AA                              | GG                | 1945891084               |
| SNP_P3_11543_35285940 | NC_021160.1    | Ca_kabuli_chr01 | 35285940                | TT                              | CC                | 1945891086               |
| SNP_P3_11544_35286044 | NC_021160.1    | Ca_kabuli_chr01 | 35286044                | GG                              | AA                | 1945891088               |
| SNP_P3_11545_35286087 | NC_021160.1    | Ca_kabuli_chr01 | 35286087                | AA                              | TT                | 1945891090               |
| SNP_P3_11546_35287872 | NC_021160.1    | Ca_kabuli_chr01 | 35287872                | CC                              | TT                | 1945891091               |
| SNP_P3_11547_35288000 | NC_021160.1    | Ca_kabuli_chr01 | 35288000                | CC                              | TT                | 1945891093               |
| SNP_P3_11548_35288018 | NC_021160.1    | Ca_kabuli_chr01 | 35288018                | GG                              | AA                | 1945891095               |
| SNP_P3_11549_35288206 | NC_021160.1    | Ca_kabuli_chr01 | 35288206                | CC                              | TT                | 1945891097               |
| SNP_P3_11550_35288438 | NC_021160.1    | Ca_kabuli_chr01 | 35288438                | AA                              | GG                | 1945891099               |
| SNP_P3_11551_35288821 | NC_021160.1    | Ca_kabuli_chr01 | 35288821                | CC                              | AA                | 1945891100               |
| SNP_P3_11552_35288840 | NC_021160.1    | Ca_kabuli_chr01 | 35288840                | TT                              | AA                | 1945891102               |
| SNP_P3_11553_35288850 | NC_021160.1    | Ca_kabuli_chr01 | 35288850                | GG                              | AA                | 1945891104               |
| SNP_P3_11554_35288873 | NC_021160.1    | Ca_kabuli_chr01 | 35288873                | TT                              | GG                | 1945891106               |
| SNP_P3_11555_35289295 | NC_021160.1    | Ca_kabuli_chr01 | 35289295                | TT                              | CC                | 1945891107               |
| SNP_P3_11556_35289538 | NC_021160.1    | Ca_kabuli_chr01 | 35289538                | GG                              | AA                | 1945891109               |
| SNP_P3_11557_35289761 | NC_021160.1    | Ca_kabuli_chr01 | 35289761                | CC                              | TT                | 1945891111               |
| SNP_P3_11558_35289825 | NC_021160.1    | Ca_kabuli_chr01 | 35289825                | TT                              | CC                | 1945891113               |
| SNP_P3_11559_35290196 | NC_021160.1    | Ca_kabuli_chr01 | 35290196                | CC                              | TT                | 1945891115               |
| SNP_P3_11560_35290299 | NC_021160.1    | Ca_kabuli_chr01 | 35290299                | TT                              | GG                | 1945891116               |
| SNP_P3_11561_35290342 | NC_021160.1    | Ca_kabuli_chr01 | 35290342                | AA                              | GG                | 1945891118               |
| SNP_P3_11562_35290632 | NC_021160.1    | Ca_kabuli_chr01 | 35290632                | AA                              | GG                | 1945891120               |
| SNP_P3_11563_35290637 | NC_021160.1    | Ca_kabuli_chr01 | 35290637                | CC                              | TT                | 1945891122               |
| SNP_P3_11564_35290673 | NC_021160.1    | Ca_kabuli_chr01 | 35290673                | AA                              | TT                | 1945891123               |
| SNP_P3_11566_35290944 | NC_021160.1    | Ca_kabuli_chr01 | 35290944                | TT                              | CC                | 1945891125               |
| SNP_P3_11567_35290990 | NC_021160.1    | Ca_kabuli_chr01 | 35290990                | TT                              | CC                | 1945891127               |
| SNP_P3_11568_35291107 | NC_021160.1    | Ca_kabuli_chr01 | 35291107                | TT                              | CC                | 1945891129               |
| SNP_P3_11570_35292034 | NC_021160.1    | Ca_kabuli_chr01 | 35292034                | GG                              | AA                | 1945891130               |
| SNP_P3_11571_35292700 | NC_021160.1    | Ca_kabuli_chr01 | 35292700                | AA                              | GG                | 1945891132               |
| SNP_P3_11572_35292880 | NC_021160.1    | Ca_kabuli_chr01 | 35292880                | AA                              | TT                | 1945891134               |



| SNPs IDs              | Chromosome IDs | Chromosomes     | Physical positions (bp) | CDC Frontier (Reference genome) | (Pusa 256 & HPNB) | NCBI SNPdb Accession IDs |
|-----------------------|----------------|-----------------|-------------------------|---------------------------------|-------------------|--------------------------|
| SNP_P3_11573_35292881 | NC_021160.1    | Ca_kabuli_chr01 | 35292881                | CC                              | TT                | 1945891136               |
| SNP_P3_11574_35293027 | NC_021160.1    | Ca_kabuli_chr01 | 35293027                | AA                              | GG                | 1945891137               |
| SNP_P3_11575_35293261 | NC_021160.1    | Ca_kabuli_chr01 | 35293261                | AA                              | CC                | 1945891139               |
| SNP_P3_11576_35293263 | NC_021160.1    | Ca_kabuli_chr01 | 35293263                | TT                              | CC                | 1945891141               |
| SNP_P3_11577_35293447 | NC_021160.1    | Ca_kabuli_chr01 | 35293447                | CC                              | AA                | 1945891143               |
| SNP_P3_11578_35293516 | NC_021160.1    | Ca_kabuli_chr01 | 35293516                | TT                              | CC                | 1945891145               |
| SNP_P3_11579_35293656 | NC_021160.1    | Ca_kabuli_chr01 | 35293656                | CC                              | AA                | 1945891146               |
| SNP_P3_11580_35293664 | NC_021160.1    | Ca_kabuli_chr01 | 35293664                | TT                              | AA                | 1945891148               |
| SNP_P3_11581_35294702 | NC_021160.1    | Ca_kabuli_chr01 | 35294702                | CC                              | TT                | 1945891150               |
| SNP_P3_11582_35294793 | NC_021160.1    | Ca_kabuli_chr01 | 35294793                | CC                              | TT                | 1945891152               |
| SNP_P3_11583_35295336 | NC_021160.1    | Ca_kabuli_chr01 | 35295336                | TT                              | AA                | 1945891153               |
| SNP_P3_11584_35295364 | NC_021160.1    | Ca_kabuli_chr01 | 35295364                | GG                              | AA                | 1945891155               |
| SNP_P3_11585_35295387 | NC_021160.1    | Ca_kabuli_chr01 | 35295387                | GG                              | AA                | 1945891157               |
| SNP_P3_11586_35295429 | NC_021160.1    | Ca_kabuli_chr01 | 35295429                | GG                              | TT                | 1945891159               |
| SNP_P3_11587_35295662 | NC_021160.1    | Ca_kabuli_chr01 | 35295662                | CC                              | GG                | 1945891161               |
| SNP_P3_11588_35296279 | NC_021160.1    | Ca_kabuli_chr01 | 35296279                | TT                              | CC                | 1945891162               |
| SNP_P3_11589_35296358 | NC_021160.1    | Ca_kabuli_chr01 | 35296358                | CC                              | TT                | 1945891164               |
| SNP_P3_11590_35296365 | NC_021160.1    | Ca_kabuli_chr01 | 35296365                | GG                              | CC                | 1945891166               |
| SNP_P3_11591_35296683 | NC_021160.1    | Ca_kabuli_chr01 | 35296683                | TT                              | CC                | 1945891168               |
| SNP_P3_11592_35296950 | NC_021160.1    | Ca_kabuli_chr01 | 35296950                | TT                              | CC                | 1945891169               |
| SNP_P3_11593_35297028 | NC_021160.1    | Ca_kabuli_chr01 | 35297028                | CC                              | TT                | 1945891171               |
| SNP_P3_11594_35299406 | NC_021160.1    | Ca_kabuli_chr01 | 35299406                | CC                              | AA                | 1945891173               |
| SNP_P3_11596_35301486 | NC_021160.1    | Ca_kabuli_chr01 | 35301486                | GG                              | AA                | 1945891175               |
| SNP_P3_11597_35301828 | NC_021160.1    | Ca_kabuli_chr01 | 35301828                | CC                              | TT                | 1945891176               |
| SNP_P3_11598_35301849 | NC_021160.1    | Ca_kabuli_chr01 | 35301849                | TT                              | CC                | 1945891178               |
| SNP_P3_11599_35302963 | NC_021160.1    | Ca_kabuli_chr01 | 35302963                | GG                              | AA                | 1945891180               |
| SNP_P3_11600_35303739 | NC_021160.1    | Ca_kabuli_chr01 | 35303739                | CC                              | TT                | 1945891182               |
| SNP_P3_11601_35304431 | NC_021160.1    | Ca_kabuli_chr01 | 35304431                | AA                              | GG                | 1945891184               |
| SNP_P3_11602_35305144 | NC_021160.1    | Ca_kabuli_chr01 | 35305144                | TT                              | GG                | 1945891185               |
| SNP_P3_11603_35305259 | NC_021160.1    | Ca_kabuli_chr01 | 35305259                | CC                              | TT                | 1945891187               |
| SNP_P3_11604_35305391 | NC_021160.1    | Ca_kabuli_chr01 | 35305391                | AA                              | GG                | 1945891189               |
| SNP_P3_11605_35305421 | NC_021160.1    | Ca_kabuli_chr01 | 35305421                | AA                              | TT                | 1945891191               |
| SNP_P3_11606_35305449 | NC_021160.1    | Ca_kabuli_chr01 | 35305449                | CC                              | TT                | 1945891192               |
| SNP_P3_11607_35308516 | NC_021160.1    | Ca_kabuli_chr01 | 35308516                | AA                              | GG                | 1945891194               |
| SNP_P3_11608_35309249 | NC_021160.1    | Ca_kabuli_chr01 | 35309249                | GG                              | AA                | 1945891196               |
| SNP_P3_11609_35309254 | NC_021160.1    | Ca_kabuli_chr01 | 35309254                | CC                              | TT                | 1945891198               |
| SNP_P3_11610_35309834 | NC_021160.1    | Ca_kabuli_chr01 | 35309834                | TT                              | CC                | 1945891200               |
| SNP_P3_11611_35309997 | NC_021160.1    | Ca_kabuli_chr01 | 35309997                | AA                              | GG                | 1945891201               |
| SNP_P3_11612_35310168 | NC_021160.1    | Ca_kabuli_chr01 | 35310168                | TT                              | AA                | 1945891203               |
| SNP_P3_11613_35310176 | NC_021160.1    | Ca_kabuli_chr01 | 35310176                | CC                              | TT                | 1945891205               |
| SNP_P3_11614_35310177 | NC_021160.1    | Ca_kabuli_chr01 | 35310177                | AA                              | GG                | 1945891207               |
| SNP_P3_11615_35310329 | NC_021160.1    | Ca_kabuli_chr01 | 35310329                | TT                              | GG                | 1945891208               |

| SNPs IDs              | Chromosome IDs | Chromosomes     | Physical positions (bp) | CDC Frontier (Reference genome) | (Pusa 256 & HPNB) | NCBI SNPdb Accession IDs |
|-----------------------|----------------|-----------------|-------------------------|---------------------------------|-------------------|--------------------------|
| SNP_P3_11616_35310332 | NC_021160.1    | Ca_kabuli_chr01 | 35310332                | TT                              | AA                | 1945891210               |
| SNP_P3_11617_35310363 | NC_021160.1    | Ca_kabuli_chr01 | 35310363                | AA                              | TT                | 1945891212               |
| SNP_P3_11618_35310388 | NC_021160.1    | Ca_kabuli_chr01 | 35310388                | AA                              | TT                | 1945891214               |
| SNP_P3_11619_35310429 | NC_021160.1    | Ca_kabuli_chr01 | 35310429                | TT                              | AA                | 1945891216               |
| SNP_P3_11620_35310443 | NC_021160.1    | Ca_kabuli_chr01 | 35310443                | AA                              | GG                | 1945891217               |
| SNP_P3_11621_35310540 | NC_021160.1    | Ca_kabuli_chr01 | 35310540                | TT                              | CC                | 1945891219               |
| SNP_P3_11622_35310549 | NC_021160.1    | Ca_kabuli_chr01 | 35310549                | CC                              | GG                | 1945891221               |
| SNP_P3_11623_35310561 | NC_021160.1    | Ca_kabuli_chr01 | 35310561                | CC                              | TT                | 1945891223               |
| SNP_P3_11624_35310583 | NC_021160.1    | Ca_kabuli_chr01 | 35310583                | TT                              | GG                | 1945891224               |
| SNP_P3_11625_35310603 | NC_021160.1    | Ca_kabuli_chr01 | 35310603                | AA                              | GG                | 1945891226               |
| SNP_P3_11626_35310607 | NC_021160.1    | Ca_kabuli_chr01 | 35310607                | TT                              | CC                | 1945891228               |
| SNP_P3_11627_35310692 | NC_021160.1    | Ca_kabuli_chr01 | 35310692                | TT                              | AA                | 1945891230               |
| SNP_P3_11628_35310726 | NC_021160.1    | Ca_kabuli_chr01 | 35310726                | GG                              | AA                | 1945891232               |
| SNP_P3_11631_35310767 | NC_021160.1    | Ca_kabuli_chr01 | 35310767                | AA                              | TT                | 1945891233               |
| SNP_P3_11632_35310793 | NC_021160.1    | Ca_kabuli_chr01 | 35310793                | TT                              | AA                | 1945891235               |
| SNP_P3_11633_35310825 | NC_021160.1    | Ca_kabuli_chr01 | 35310825                | GG                              | AA                | 1945891237               |
| SNP_P3_11634_35310850 | NC_021160.1    | Ca_kabuli_chr01 | 35310850                | TT                              | GG                | 1945891239               |
| SNP_P3_11635_35310853 | NC_021160.1    | Ca_kabuli_chr01 | 35310853                | AA                              | TT                | 1945891240               |
| SNP_P3_11636_35310879 | NC_021160.1    | Ca_kabuli_chr01 | 35310879                | AA                              | TT                | 1945891242               |
| SNP_P3_11637_35310887 | NC_021160.1    | Ca_kabuli_chr01 | 35310887                | AA                              | GG                | 1945891244               |
| SNP_P3_11638_35310944 | NC_021160.1    | Ca_kabuli_chr01 | 35310944                | TT                              | GG                | 1945891246               |
| SNP_P3_11639_35310948 | NC_021160.1    | Ca_kabuli_chr01 | 35310948                | AA                              | GG                | 1945891247               |
| SNP_P3_11640_35310991 | NC_021160.1    | Ca_kabuli_chr01 | 35310991                | AA                              | GG                | 1945891249               |
| SNP_P3_11641_35311016 | NC_021160.1    | Ca_kabuli_chr01 | 35311016                | CC                              | GG                | 1945891251               |
| SNP_P3_11642_35311017 | NC_021160.1    | Ca_kabuli_chr01 | 35311017                | TT                              | CC                | 1945891253               |
| SNP_P3_11643_35311039 | NC_021160.1    | Ca_kabuli_chr01 | 35311039                | CC                              | TT                | 1945891255               |
| SNP_P3_11644_35311057 | NC_021160.1    | Ca_kabuli_chr01 | 35311057                | CC                              | GG                | 1945891256               |
| SNP_P3_11645_35311058 | NC_021160.1    | Ca_kabuli_chr01 | 35311058                | CC                              | GG                | 1945891258               |
| SNP_P3_11646_35311085 | NC_021160.1    | Ca_kabuli_chr01 | 35311085                | TT                              | CC                | 1945891260               |
| SNP_P3_11647_35311099 | NC_021160.1    | Ca_kabuli_chr01 | 35311099                | AA                              | TT                | 1945891262               |
| SNP_P3_11648_35311114 | NC_021160.1    | Ca_kabuli_chr01 | 35311114                | AA                              | CC                | 1945891263               |
| SNP_P3_11649_35311127 | NC_021160.1    | Ca_kabuli_chr01 | 35311127                | CC                              | TT                | 1945891265               |
| SNP_P3_11650_35311149 | NC_021160.1    | Ca_kabuli_chr01 | 35311149                | AA                              | GG                | 1945891267               |
| SNP_P3_11651_35311154 | NC_021160.1    | Ca_kabuli_chr01 | 35311154                | GG                              | AA                | 1945891269               |
| SNP_P3_11652_35311271 | NC_021160.1    | Ca_kabuli_chr01 | 35311271                | CC                              | TT                | 1945891271               |
| SNP_P3_11653_35311277 | NC_021160.1    | Ca_kabuli_chr01 | 35311277                | CC                              | TT                | 1945891272               |
| SNP_P3_11654_35311307 | NC_021160.1    | Ca_kabuli_chr01 | 35311307                | GG                              | AA                | 1945891274               |
| SNP_P3_11655_35311334 | NC_021160.1    | Ca_kabuli_chr01 | 35311334                | GG                              | AA                | 1945891276               |
| SNP_P3_11656_35311644 | NC_021160.1    | Ca_kabuli_chr01 | 35311644                | TT                              | GG                | 1945891278               |
| SNP_P3_11657_35311672 | NC_021160.1    | Ca_kabuli_chr01 | 35311672                | GG                              | TT                | 1945891279               |
| SNP_P3_11658_35311681 | NC_021160.1    | Ca_kabuli_chr01 | 35311681                | GG                              | AA                | 1945891281               |
| SNP_P3_11659_35311711 | NC_021160.1    | Ca_kabuli_chr01 | 35311711                | TT                              | GG                | 1945891283               |

| SNPs IDs              | Chromosome IDs | Chromosomes     | Physical positions (bp) | CDC Frontier (Reference genome) | (Pusa 256 & HPNB) | NCBI SNPdb Accession IDs |
|-----------------------|----------------|-----------------|-------------------------|---------------------------------|-------------------|--------------------------|
| SNP_P3_11660_35311712 | NC_021160.1    | Ca_kabuli_chr01 | 35311712                | GG                              | AA                | 1945891285               |
| SNP_P3_11661_35311713 | NC_021160.1    | Ca_kabuli_chr01 | 35311713                | CC                              | TT                | 1945891287               |
| SNP_P3_11662_35311715 | NC_021160.1    | Ca_kabuli_chr01 | 35311715                | CC                              | TT                | 1945891288               |
| SNP_P3_11663_35311758 | NC_021160.1    | Ca_kabuli_chr01 | 35311758                | TT                              | CC                | 1945891290               |
| SNP_P3_11664_35312148 | NC_021160.1    | Ca_kabuli_chr01 | 35312148                | GG                              | TT                | 1945891292               |
| SNP_P3_11665_35312154 | NC_021160.1    | Ca_kabuli_chr01 | 35312154                | CC                              | AA                | 1945891294               |
| SNP_P3_11666_35312171 | NC_021160.1    | Ca_kabuli_chr01 | 35312171                | TT                              | GG                | 1945891295               |
| SNP_P3_11667_35312211 | NC_021160.1    | Ca_kabuli_chr01 | 35312211                | GG                              | AA                | 1945891297               |
| SNP_P3_11668_35312607 | NC_021160.1    | Ca_kabuli_chr01 | 35312607                | TT                              | GG                | 1945891299               |
| SNP_P3_11669_35312877 | NC_021160.1    | Ca_kabuli_chr01 | 35312877                | CC                              | GG                | 1945891301               |
| SNP_P3_11670_35312892 | NC_021160.1    | Ca_kabuli_chr01 | 35312892                | GG                              | AA                | 1945891302               |
| SNP_P3_11671_35313136 | NC_021160.1    | Ca_kabuli_chr01 | 35313136                | TT                              | CC                | 1945891304               |
| SNP_P3_11672_35315698 | NC_021160.1    | Ca_kabuli_chr01 | 35315698                | TT                              | AA                | 1945891306               |
| SNP_P3_11673_35316387 | NC_021160.1    | Ca_kabuli_chr01 | 35316387                | GG                              | AA                | 1945891308               |
| SNP_P3_11674_35316427 | NC_021160.1    | Ca_kabuli_chr01 | 35316427                | CC                              | TT                | 1945891310               |
| SNP_P3_11675_35316601 | NC_021160.1    | Ca_kabuli_chr01 | 35316601                | AA                              | TT                | 1945891311               |
| SNP_P3_11676_35316662 | NC_021160.1    | Ca_kabuli_chr01 | 35316662                | CC                              | GG                | 1945891313               |
| SNP_P3_11677_35316773 | NC_021160.1    | Ca_kabuli_chr01 | 35316773                | AA                              | GG                | 1945891315               |
| SNP_P3_11678_35316851 | NC_021160.1    | Ca_kabuli_chr01 | 35316851                | GG                              | AA                | 1945891317               |
| SNP_P3_11679_35316894 | NC_021160.1    | Ca_kabuli_chr01 | 35316894                | GG                              | CC                | 1945891318               |
| SNP_P3_11680_35316899 | NC_021160.1    | Ca_kabuli_chr01 | 35316899                | TT                              | CC                | 1945891320               |
| SNP_P3_11681_35316903 | NC_021160.1    | Ca_kabuli_chr01 | 35316903                | TT                              | CC                | 1945891322               |
| SNP_P3_11682_35316904 | NC_021160.1    | Ca_kabuli_chr01 | 35316904                | TT                              | GG                | 1945891324               |
| SNP_P3_11683_35316905 | NC_021160.1    | Ca_kabuli_chr01 | 35316905                | GG                              | CC                | 1945891326               |
| SNP_P3_11684_35316931 | NC_021160.1    | Ca_kabuli_chr01 | 35316931                | AA                              | CC                | 1945891327               |
| SNP_P3_11685_35316969 | NC_021160.1    | Ca_kabuli_chr01 | 35316969                | TT                              | GG                | 1945891329               |
| SNP_P3_11686_35316995 | NC_021160.1    | Ca_kabuli_chr01 | 35316995                | CC                              | TT                | 1945891331               |
| SNP_P3_11687_35317003 | NC_021160.1    | Ca_kabuli_chr01 | 35317003                | AA                              | GG                | 1945891333               |
| SNP_P3_11688_35317034 | NC_021160.1    | Ca_kabuli_chr01 | 35317034                | CC                              | TT                | 1945891334               |
| SNP_P3_11689_35317036 | NC_021160.1    | Ca_kabuli_chr01 | 35317036                | AA                              | GG                | 1945891336               |
| SNP_P3_11690_35317039 | NC_021160.1    | Ca_kabuli_chr01 | 35317039                | CC                              | TT                | 1945891338               |
| SNP_P3_11691_35317049 | NC_021160.1    | Ca_kabuli_chr01 | 35317049                | GG                              | AA                | 1945891340               |
| SNP_P3_11692_35317066 | NC_021160.1    | Ca_kabuli_chr01 | 35317066                | TT                              | CC                | 1945891342               |
| SNP_P3_11693_35317067 | NC_021160.1    | Ca_kabuli_chr01 | 35317067                | AA                              | TT                | 1945891343               |
| SNP_P3_11694_35317095 | NC_021160.1    | Ca_kabuli_chr01 | 35317095                | AA                              | TT                | 1945891345               |
| SNP_P3_11695_35317134 | NC_021160.1    | Ca_kabuli_chr01 | 35317134                | TT                              | CC                | 1945891347               |
| SNP_P3_11696_35317258 | NC_021160.1    | Ca_kabuli_chr01 | 35317258                | AA                              | TT                | 1945891349               |
| SNP_P3_11697_35317277 | NC_021160.1    | Ca_kabuli_chr01 | 35317277                | GG                              | AA                | 1945891350               |
| SNP_P3_11698_35317288 | NC_021160.1    | Ca_kabuli_chr01 | 35317288                | CC                              | TT                | 1945891352               |
| SNP_P3_11699_35317315 | NC_021160.1    | Ca_kabuli_chr01 | 35317315                | TT                              | CC                | 1945891354               |
| SNP_P3_11700_35323423 | NC_021160.1    | Ca_kabuli_chr01 | 35323423                | TT                              | CC                | 1945891356               |
| SNP_P3_11701_35324913 | NC_021160.1    | Ca_kabuli_chr01 | 35324913                | AA                              | GG                | 1945891358               |

| SNPs IDs              | Chromosome IDs | Chromosomes     | Physical positions (bp) | CDC Frontier (Reference genome) | (Pusa 256 & HPNB) | NCBI SNPdb Accession IDs |
|-----------------------|----------------|-----------------|-------------------------|---------------------------------|-------------------|--------------------------|
| SNP_P3_11702_35325136 | NC_021160.1    | Ca_kabuli_chr01 | 35325136                | GG                              | TT                | 1945891359               |
| SNP_P3_11703_35326762 | NC_021160.1    | Ca_kabuli_chr01 | 35326762                | CC                              | GG                | 1945891361               |
| SNP_P3_11704_35327524 | NC_021160.1    | Ca_kabuli_chr01 | 35327524                | CC                              | AA                | 1945891363               |
| SNP_P3_11705_35327841 | NC_021160.1    | Ca_kabuli_chr01 | 35327841                | AA                              | GG                | 1945891365               |
| SNP_P3_11706_35328630 | NC_021160.1    | Ca_kabuli_chr01 | 35328630                | AA                              | GG                | 1945891366               |
| SNP_P3_11707_35332653 | NC_021160.1    | Ca_kabuli_chr01 | 35332653                | TT                              | CC                | 1945891368               |
| SNP_P3_11708_35332905 | NC_021160.1    | Ca_kabuli_chr01 | 35332905                | CC                              | GG                | 1945891370               |
| SNP_P3_11709_35332928 | NC_021160.1    | Ca_kabuli_chr01 | 35332928                | CC                              | TT                | 1945891372               |
| SNP_P3_11710_35336546 | NC_021160.1    | Ca_kabuli_chr01 | 35336546                | TT                              | CC                | 1945891374               |
| SNP_P3_11711_35337042 | NC_021160.1    | Ca_kabuli_chr01 | 35337042                | AA                              | GG                | 1945891375               |
| SNP_P3_11713_35337297 | NC_021160.1    | Ca_kabuli_chr01 | 35337297                | TT                              | GG                | 1945891377               |
| SNP_P3_11714_35337515 | NC_021160.1    | Ca_kabuli_chr01 | 35337515                | CC                              | TT                | 1945891379               |
| SNP_P3_11715_35339651 | NC_021160.1    | Ca_kabuli_chr01 | 35339651                | AA                              | CC                | 1945891381               |
| SNP_P3_11716_35339669 | NC_021160.1    | Ca_kabuli_chr01 | 35339669                | CC                              | TT                | 1945891382               |
| SNP_P3_11717_35340847 | NC_021160.1    | Ca_kabuli_chr01 | 35340847                | CC                              | GG                | 1945891384               |
| SNP_P3_11718_35343102 | NC_021160.1    | Ca_kabuli_chr01 | 35343102                | AA                              | GG                | 1945891386               |
| SNP_P3_11719_35344176 | NC_021160.1    | Ca_kabuli_chr01 | 35344176                | CC                              | GG                | 1945891388               |
| SNP_P3_11720_35344335 | NC_021160.1    | Ca_kabuli_chr01 | 35344335                | GG                              | AA                | 1945891389               |
| SNP_P3_11721_35344552 | NC_021160.1    | Ca_kabuli_chr01 | 35344552                | GG                              | AA                | 1945891391               |
| SNP_P3_11722_35345152 | NC_021160.1    | Ca_kabuli_chr01 | 35345152                | GG                              | TT                | 1945891393               |
| SNP_P3_11723_35345348 | NC_021160.1    | Ca_kabuli_chr01 | 35345348                | CC                              | TT                | 1945891395               |
| SNP_P3_11724_35347957 | NC_021160.1    | Ca_kabuli_chr01 | 35347957                | AA                              | GG                | 1945891397               |
| SNP_P3_11725_35348457 | NC_021160.1    | Ca_kabuli_chr01 | 35348457                | GG                              | CC                | 1945891398               |
| SNP_P3_11726_35348594 | NC_021160.1    | Ca_kabuli_chr01 | 35348594                | GG                              | AA                | 1945891400               |
| SNP_P3_11727_35348674 | NC_021160.1    | Ca_kabuli_chr01 | 35348674                | CC                              | GG                | 1945891402               |
| SNP_P3_11728_35349792 | NC_021160.1    | Ca_kabuli_chr01 | 35349792                | CC                              | TT                | 1945891404               |
| SNP_P3_11729_35350835 | NC_021160.1    | Ca_kabuli_chr01 | 35350835                | TT                              | CC                | 1945891406               |
| SNP_P3_11730_35350934 | NC_021160.1    | Ca_kabuli_chr01 | 35350934                | GG                              | AA                | 1945891407               |
| SNP_P3_11731_35352937 | NC_021160.1    | Ca_kabuli_chr01 | 35352937                | GG                              | AA                | 1945891409               |
| SNP_P3_11732_35352975 | NC_021160.1    | Ca_kabuli_chr01 | 35352975                | AA                              | CC                | 1945891411               |
| SNP_P3_11733_35352981 | NC_021160.1    | Ca_kabuli_chr01 | 35352981                | AA                              | GG                | 1945891413               |
| SNP_P3_11735_35353210 | NC_021160.1    | Ca_kabuli_chr01 | 35353210                | AA                              | GG                | 1945891415               |
| SNP_P3_11737_35353719 | NC_021160.1    | Ca_kabuli_chr01 | 35353719                | CC                              | TT                | 1945891416               |
| SNP_P3_11738_35355657 | NC_021160.1    | Ca_kabuli_chr01 | 35355657                | TT                              | GG                | 1945891418               |
| SNP_P3_11739_35357655 | NC_021160.1    | Ca_kabuli_chr01 | 35357655                | GG                              | TT                | 1945891420               |
| SNP_P3_11740_35357692 | NC_021160.1    | Ca_kabuli_chr01 | 35357692                | AA                              | GG                | 1945891422               |
| SNP_P3_11741_35359301 | NC_021160.1    | Ca_kabuli_chr01 | 35359301                | TT                              | CC                | 1945891424               |
| SNP_P3_11742_35359340 | NC_021160.1    | Ca_kabuli_chr01 | 35359340                | GG                              | AA                | 1945891425               |
| SNP_P3_11743_35359571 | NC_021160.1    | Ca_kabuli_chr01 | 35359571                | CC                              | AA                | 1945891427               |
| SNP_P3_11744_35359640 | NC_021160.1    | Ca_kabuli_chr01 | 35359640                | AA                              | GG                | 1945891429               |
| SNP_P3_11745_35359691 | NC_021160.1    | Ca_kabuli_chr01 | 35359691                | GG                              | TT                | 1945891430               |
| SNP_P3_11746_35359696 | NC_021160.1    | Ca_kabuli_chr01 | 35359696                | TT                              | GG                | 1945891432               |

| SNPs IDs              | Chromosome IDs | Chromosomes     | Physical positions (bp) | CDC Frontier (Reference genome) | (Pusa 256 & HPNB) | NCBI SNPdb Accession IDs |
|-----------------------|----------------|-----------------|-------------------------|---------------------------------|-------------------|--------------------------|
| SNP_P3_11747_35359766 | NC_021160.1    | Ca_kabuli_chr01 | 35359766                | TT                              | CC                | 1945891434               |
| SNP_P3_11748_35360216 | NC_021160.1    | Ca_kabuli_chr01 | 35360216                | GG                              | AA                | 1945891436               |
| SNP_P3_11749_35360818 | NC_021160.1    | Ca_kabuli_chr01 | 35360818                | AA                              | GG                | 1945891438               |
| SNP_P3_11750_35361074 | NC_021160.1    | Ca_kabuli_chr01 | 35361074                | AA                              | GG                | 1945891439               |
| SNP_P3_11751_35361317 | NC_021160.1    | Ca_kabuli_chr01 | 35361317                | CC                              | AA                | 1945891441               |
| SNP_P3_11752_35361371 | NC_021160.1    | Ca_kabuli_chr01 | 35361371                | AA                              | CC                | 1945891443               |
| SNP_P3_11753_35361783 | NC_021160.1    | Ca_kabuli_chr01 | 35361783                | TT                              | CC                | 1945891445               |
| SNP_P3_11754_35362979 | NC_021160.1    | Ca_kabuli_chr01 | 35362979                | TT                              | CC                | 1945891446               |
| SNP_P3_11755_35362991 | NC_021160.1    | Ca_kabuli_chr01 | 35362991                | AA                              | GG                | 1945891448               |
| SNP_P3_11756_35363220 | NC_021160.1    | Ca_kabuli_chr01 | 35363220                | AA                              | GG                | 1945891450               |
| SNP_P3_11757_35363301 | NC_021160.1    | Ca_kabuli_chr01 | 35363301                | TT                              | CC                | 1945891452               |
| SNP_P3_11758_35363341 | NC_021160.1    | Ca_kabuli_chr01 | 35363341                | CC                              | GG                | 1945891454               |
| SNP_P3_11759_35363533 | NC_021160.1    | Ca_kabuli_chr01 | 35363533                | TT                              | GG                | 1945891455               |
| SNP_P3_11760_35363565 | NC_021160.1    | Ca_kabuli_chr01 | 35363565                | AA                              | CC                | 1945891457               |
| SNP_P3_11761_35366449 | NC_021160.1    | Ca_kabuli_chr01 | 35366449                | TT                              | AA                | 1945891459               |
| SNP_P3_11762_35366969 | NC_021160.1    | Ca_kabuli_chr01 | 35366969                | CC                              | TT                | 1945891461               |
| SNP_P3_11763_35369950 | NC_021160.1    | Ca_kabuli_chr01 | 35369950                | AA                              | CC                | 1945891462               |
| SNP_P3_11765_35374449 | NC_021160.1    | Ca_kabuli_chr01 | 35374449                | AA                              | TT                | 1945891464               |
| SNP_P3_11766_35374627 | NC_021160.1    | Ca_kabuli_chr01 | 35374627                | TT                              | CC                | 1945891466               |
| SNP_P3_11767_35374760 | NC_021160.1    | Ca_kabuli_chr01 | 35374760                | CC                              | TT                | 1945891468               |
| SNP_P3_11768_35378504 | NC_021160.1    | Ca_kabuli_chr01 | 35378504                | AA                              | GG                | 1945891469               |
| SNP_P3_11769_35379828 | NC_021160.1    | Ca_kabuli_chr01 | 35379828                | AA                              | GG                | 1945891471               |
| SNP_P3_11770_35382803 | NC_021160.1    | Ca_kabuli_chr01 | 35382803                | AA                              | TT                | 1945891473               |
| SNP_P3_11771_35383202 | NC_021160.1    | Ca_kabuli_chr01 | 35383202                | CC                              | AA                | 1945891475               |
| SNP_P3_11772_35384057 | NC_021160.1    | Ca_kabuli_chr01 | 35384057                | CC                              | TT                | 1945891477               |
| SNP_P3_11773_35402918 | NC_021160.1    | Ca_kabuli_chr01 | 35402918                | CC                              | TT                | 1945891478               |
| SNP_P3_11774_35404252 | NC_021160.1    | Ca_kabuli_chr01 | 35404252                | AA                              | GG                | 1945891480               |
| SNP_P3_11775_35404262 | NC_021160.1    | Ca_kabuli_chr01 | 35404262                | TT                              | AA                | 1945891482               |
| SNP_P3_11776_35404461 | NC_021160.1    | Ca_kabuli_chr01 | 35404461                | GG                              | AA                | 1945891484               |
| SNP_P3_11777_35404493 | NC_021160.1    | Ca_kabuli_chr01 | 35404493                | GG                              | AA                | 1945891485               |
| SNP_P3_11778_35404812 | NC_021160.1    | Ca_kabuli_chr01 | 35404812                | AA                              | TT                | 1945891487               |
| SNP_P3_11779_35404861 | NC_021160.1    | Ca_kabuli_chr01 | 35404861                | AA                              | GG                | 1945891489               |
| SNP_P3_11780_35404862 | NC_021160.1    | Ca_kabuli_chr01 | 35404862                | GG                              | AA                | 1945891491               |
| SNP_P3_11781_35404984 | NC_021160.1    | Ca_kabuli_chr01 | 35404984                | AA                              | CC                | 1945891493               |
| SNP_P3_11782_35404985 | NC_021160.1    | Ca_kabuli_chr01 | 35404985                | AA                              | GG                | 1945891494               |
| SNP_P3_11783_35405004 | NC_021160.1    | Ca_kabuli_chr01 | 35405004                | GG                              | AA                | 1945891496               |
| SNP_P3_11785_35405216 | NC_021160.1    | Ca_kabuli_chr01 | 35405216                | CC                              | TT                | 1945891498               |
| SNP_P3_11786_35405218 | NC_021160.1    | Ca_kabuli_chr01 | 35405218                | AA                              | TT                | 1945891500               |
| SNP_P3_11787_35405269 | NC_021160.1    | Ca_kabuli_chr01 | 35405269                | CC                              | AA                | 1945891501               |
| SNP_P3_11788_35405288 | NC_021160.1    | Ca_kabuli_chr01 | 35405288                | TT                              | AA                | 1945891503               |
| SNP_P3_11789_35405290 | NC_021160.1    | Ca_kabuli_chr01 | 35405290                | TT                              | CC                | 1945891505               |
| SNP_P3_11790_35405291 | NC_021160.1    | Ca_kabuli_chr01 | 35405291                | TT                              | GG                | 1945891507               |

| SNPs IDs              | Chromosome IDs | Chromosomes     | Physical positions (bp) | CDC Frontier (Reference genome) | (Pusa 256 & HPNB) | NCBI SNPdb Accession IDs |
|-----------------------|----------------|-----------------|-------------------------|---------------------------------|-------------------|--------------------------|
| SNP_P3_11791_35405304 | NC_021160.1    | Ca_kabuli_chr01 | 35405304                | TT                              | AA                | 1945891509               |
| SNP_P3_11792_35405363 | NC_021160.1    | Ca_kabuli_chr01 | 35405363                | GG                              | AA                | 1945891510               |
| SNP_P3_11793_35405407 | NC_021160.1    | Ca_kabuli_chr01 | 35405407                | TT                              | AA                | 1945891512               |
| SNP_P3_11794_35405409 | NC_021160.1    | Ca_kabuli_chr01 | 35405409                | TT                              | CC                | 1945891514               |
| SNP_P3_11795_35405419 | NC_021160.1    | Ca_kabuli_chr01 | 35405419                | GG                              | TT                | 1945891516               |
| SNP_P3_11796_35405422 | NC_021160.1    | Ca_kabuli_chr01 | 35405422                | AA                              | GG                | 1945891517               |
| SNP_P3_11797_35405446 | NC_021160.1    | Ca_kabuli_chr01 | 35405446                | AA                              | TT                | 1945891519               |
| SNP_P3_11798_35405496 | NC_021160.1    | Ca_kabuli_chr01 | 35405496                | GG                              | AA                | 1945891521               |
| SNP_P3_11799_35405531 | NC_021160.1    | Ca_kabuli_chr01 | 35405531                | TT                              | GG                | 1945891523               |
| SNP_P3_11800_35405571 | NC_021160.1    | Ca_kabuli_chr01 | 35405571                | AA                              | TT                | 1945891524               |
| SNP_P3_11801_35405583 | NC_021160.1    | Ca_kabuli_chr01 | 35405583                | CC                              | TT                | 1945891526               |
| SNP_P3_11802_35405634 | NC_021160.1    | Ca_kabuli_chr01 | 35405634                | AA                              | GG                | 1945891528               |
| SNP_P3_11803_35405657 | NC_021160.1    | Ca_kabuli_chr01 | 35405657                | AA                              | CC                | 1945891530               |
| SNP_P3_11804_35424385 | NC_021160.1    | Ca_kabuli_chr01 | 35424385                | CC                              | GG                | 1945891532               |
| SNP_P3_11805_35425339 | NC_021160.1    | Ca_kabuli_chr01 | 35425339                | AA                              | GG                | 1945891533               |
| SNP_P3_11806_35425848 | NC_021160.1    | Ca_kabuli_chr01 | 35425848                | TT                              | AA                | 1945891535               |
| SNP_P3_11807_35429368 | NC_021160.1    | Ca_kabuli_chr01 | 35429368                | CC                              | AA                | 1945891537               |
| SNP_P3_11809_35432897 | NC_021160.1    | Ca_kabuli_chr01 | 35432897                | GG                              | AA                | 1945891539               |
| SNP_P3_11810_35432936 | NC_021160.1    | Ca_kabuli_chr01 | 35432936                | CC                              | TT                | 1945891540               |
| SNP_P3_11811_35432996 | NC_021160.1    | Ca_kabuli_chr01 | 35432996                | TT                              | CC                | 1945891542               |
| SNP_P3_11812_35433001 | NC_021160.1    | Ca_kabuli_chr01 | 35433001                | TT                              | CC                | 1945891544               |
| SNP_P3_11813_35434294 | NC_021160.1    | Ca_kabuli_chr01 | 35434294                | CC                              | GG                | 1945891546               |
| SNP_P3_11814_35435453 | NC_021160.1    | Ca_kabuli_chr01 | 35435453                | CC                              | TT                | 1945891548               |
| SNP_P3_11815_35438872 | NC_021160.1    | Ca_kabuli_chr01 | 35438872                | GG                              | AA                | 1945891549               |
| SNP_P3_11816_35438929 | NC_021160.1    | Ca_kabuli_chr01 | 35438929                | AA                              | GG                | 1945891551               |
| SNP_P3_11817_35450156 | NC_021160.1    | Ca_kabuli_chr01 | 35450156                | GG                              | AA                | 1945891553               |
| SNP_P3_11818_35450226 | NC_021160.1    | Ca_kabuli_chr01 | 35450226                | TT                              | CC                | 1945891555               |
| SNP_P3_11819_35450290 | NC_021160.1    | Ca_kabuli_chr01 | 35450290                | TT                              | CC                | 1945891557               |
| SNP_P3_11820_35450311 | NC_021160.1    | Ca_kabuli_chr01 | 35450311                | CC                              | TT                | 1945891558               |
| SNP_P3_11821_35450313 | NC_021160.1    | Ca_kabuli_chr01 | 35450313                | AA                              | GG                | 1945891560               |
| SNP_P3_11822_35450317 | NC_021160.1    | Ca_kabuli_chr01 | 35450317                | TT                              | CC                | 1945891562               |
| SNP_P3_11823_35450318 | NC_021160.1    | Ca_kabuli_chr01 | 35450318                | AA                              | GG                | 1945891564               |
| SNP_P3_11824_35450550 | NC_021160.1    | Ca_kabuli_chr01 | 35450550                | CC                              | GG                | 1945891565               |
| SNP_P3_11825_35451982 | NC_021160.1    | Ca_kabuli_chr01 | 35451982                | AA                              | GG                | 1945891567               |
| SNP_P3_11826_35453162 | NC_021160.1    | Ca_kabuli_chr01 | 35453162                | AA                              | CC                | 1945891569               |
| SNP_P3_11828_35474512 | NC_021160.1    | Ca_kabuli_chr01 | 35474512                | GG                              | TT                | 1945891571               |
| SNP_P3_11829_35481289 | NC_021160.1    | Ca_kabuli_chr01 | 35481289                | GG                              | AA                | 1945891572               |
| SNP_P3_11830_35482465 | NC_021160.1    | Ca_kabuli_chr01 | 35482465                | AA                              | TT                | 1945891574               |
| SNP_P3_11831_35491005 | NC_021160.1    | Ca_kabuli_chr01 | 35491005                | TT                              | GG                | 1945891576               |
| SNP_P3_11832_35492854 | NC_021160.1    | Ca_kabuli_chr01 | 35492854                | TT                              | CC                | 1945891578               |
| SNP_P3_11833_35496867 | NC_021160.1    | Ca_kabuli_chr01 | 35496867                | AA                              | GG                | 1945891580               |
| SNP_P3_11834_35496869 | NC_021160.1    | Ca_kabuli_chr01 | 35496869                | TT                              | CC                | 1945891581               |

| SNPs IDs              | Chromosome IDs | Chromosomes     | Physical positions (bp) | CDC Frontier (Reference genome) | (Pusa 256 & HPNB) | NCBI SNPdb Accession IDs |
|-----------------------|----------------|-----------------|-------------------------|---------------------------------|-------------------|--------------------------|
| SNP_P3_11835_35497362 | NC_021160.1    | Ca_kabuli_chr01 | 35497362                | AA                              | CC                | 1945891583               |
| SNP_P3_11836_35499809 | NC_021160.1    | Ca_kabuli_chr01 | 35499809                | CC                              | TT                | 1945891585               |
| SNP_P3_11837_35500897 | NC_021160.1    | Ca_kabuli_chr01 | 35500897                | TT                              | CC                | 1945891587               |
| SNP_P3_11838_35505695 | NC_021160.1    | Ca_kabuli_chr01 | 35505695                | CC                              | AA                | 1945891588               |
| SNP_P3_11839_35508325 | NC_021160.1    | Ca_kabuli_chr01 | 35508325                | AA                              | GG                | 1945891590               |
| SNP_P3_11840_35510662 | NC_021160.1    | Ca_kabuli_chr01 | 35510662                | TT                              | CC                | 1945891592               |
| SNP_P3_11841_35510938 | NC_021160.1    | Ca_kabuli_chr01 | 35510938                | CC                              | TT                | 1945891594               |
| SNP_P3_11842_35520439 | NC_021160.1    | Ca_kabuli_chr01 | 35520439                | GG                              | CC                | 1945891595               |
| SNP_P3_11843_35537254 | NC_021160.1    | Ca_kabuli_chr01 | 35537254                | CC                              | AA                | 1945891597               |
| SNP_P3_11845_35537601 | NC_021160.1    | Ca_kabuli_chr01 | 35537601                | GG                              | AA                | 1945891599               |
| SNP_P3_11846_35546005 | NC_021160.1    | Ca_kabuli_chr01 | 35546005                | TT                              | GG                | 1945891601               |
| SNP_P3_11849_35553828 | NC_021160.1    | Ca_kabuli_chr01 | 35553828                | CC                              | TT                | 1945891603               |
| SNP_P3_11850_35560843 | NC_021160.1    | Ca_kabuli_chr01 | 35560843                | TT                              | AA                | 1945891604               |
| SNP_P3_11851_35560889 | NC_021160.1    | Ca_kabuli_chr01 | 35560889                | AA                              | GG                | 1945891606               |
| SNP_P3_11852_35563731 | NC_021160.1    | Ca_kabuli_chr01 | 35563731                | AA                              | TT                | 1945891608               |
| SNP_P3_11853_35564575 | NC_021160.1    | Ca_kabuli_chr01 | 35564575                | AA                              | GG                | 1945891610               |
| SNP_P3_11854_35564581 | NC_021160.1    | Ca_kabuli_chr01 | 35564581                | AA                              | GG                | 1945891611               |
| SNP_P3_11855_35564583 | NC_021160.1    | Ca_kabuli_chr01 | 35564583                | AA                              | TT                | 1945891613               |
| SNP_P3_11856_35564963 | NC_021160.1    | Ca_kabuli_chr01 | 35564963                | AA                              | GG                | 1945891615               |
| SNP_P3_11857_35565481 | NC_021160.1    | Ca_kabuli_chr01 | 35565481                | AA                              | CC                | 1945891617               |
| SNP_P3_11858_35565730 | NC_021160.1    | Ca_kabuli_chr01 | 35565730                | TT                              | CC                | 1945891618               |
| SNP_P3_11859_35566319 | NC_021160.1    | Ca_kabuli_chr01 | 35566319                | TT                              | GG                | 1945891620               |
| SNP_P3_11860_35567486 | NC_021160.1    | Ca_kabuli_chr01 | 35567486                | AA                              | TT                | 1945891622               |
| SNP_P3_11861_35567996 | NC_021160.1    | Ca_kabuli_chr01 | 35567996                | TT                              | CC                | 1945891624               |
| SNP_P3_11862_35568194 | NC_021160.1    | Ca_kabuli_chr01 | 35568194                | CC                              | TT                | 1945891626               |
| SNP_P3_11865_35574174 | NC_021160.1    | Ca_kabuli_chr01 | 35574174                | GG                              | AA                | 1945891627               |
| SNP_P3_11866_35574401 | NC_021160.1    | Ca_kabuli_chr01 | 35574401                | TT                              | AA                | 1945891629               |
| SNP_P3_11867_35574598 | NC_021160.1    | Ca_kabuli_chr01 | 35574598                | GG                              | AA                | 1945891631               |
| SNP_P3_11868_35574787 | NC_021160.1    | Ca_kabuli_chr01 | 35574787                | TT                              | AA                | 1945891633               |
| SNP_P3_11869_35576651 | NC_021160.1    | Ca_kabuli_chr01 | 35576651                | TT                              | AA                | 1945891634               |
| SNP_P3_11870_35585498 | NC_021160.1    | Ca_kabuli_chr01 | 35585498                | TT                              | CC                | 1945891636               |
| SNP_P3_11871_35598938 | NC_021160.1    | Ca_kabuli_chr01 | 35598938                | AA                              | TT                | 1945891638               |
| SNP_P3_11872_35599089 | NC_021160.1    | Ca_kabuli_chr01 | 35599089                | TT                              | AA                | 1945891640               |
| SNP_P3_11873_35599440 | NC_021160.1    | Ca_kabuli_chr01 | 35599440                | GG                              | AA                | 1945891641               |
| SNP_P3_11874_35599723 | NC_021160.1    | Ca_kabuli_chr01 | 35599723                | AA                              | CC                | 1945891643               |
| SNP_P3_11875_35600276 | NC_021160.1    | Ca_kabuli_chr01 | 35600276                | TT                              | CC                | 1945891645               |
| SNP_P3_11876_35603548 | NC_021160.1    | Ca_kabuli_chr01 | 35603548                | TT                              | AA                | 1945891647               |
| SNP_P3_11877_35603597 | NC_021160.1    | Ca_kabuli_chr01 | 35603597                | AA                              | GG                | 1945891649               |
| SNP_P3_11878_35604086 | NC_021160.1    | Ca_kabuli_chr01 | 35604086                | AA                              | CC                | 1945891650               |
| SNP_P3_11879_35604113 | NC_021160.1    | Ca_kabuli_chr01 | 35604113                | AA                              | TT                | 1945891652               |
| SNP_P3_11880_35604130 | NC_021160.1    | Ca_kabuli_chr01 | 35604130                | TT                              | AA                | 1945891654               |
| SNP_P3_11881_35604162 | NC_021160.1    | Ca_kabuli_chr01 | 35604162                | AA                              | TT                | 1945891656               |

| SNPs IDs              | Chromosome IDs | Chromosomes     | Physical positions (bp) | CDC Frontier (Reference genome) | (Pusa 256 & HPNB) | NCBI SNPdb Accession IDs |
|-----------------------|----------------|-----------------|-------------------------|---------------------------------|-------------------|--------------------------|
| SNP_P3_11882_35605598 | NC_021160.1    | Ca_kabuli_chr01 | 35605598                | CC                              | TT                | 1945891657               |
| SNP_P3_11883_35606185 | NC_021160.1    | Ca_kabuli_chr01 | 35606185                | CC                              | AA                | 1945891659               |
| SNP_P3_11884_35606853 | NC_021160.1    | Ca_kabuli_chr01 | 35606853                | CC                              | TT                | 1945891661               |
| SNP_P3_11886_35613671 | NC_021160.1    | Ca_kabuli_chr01 | 35613671                | AA                              | GG                | 1945891663               |
| SNP_P3_11887_35613720 | NC_021160.1    | Ca_kabuli_chr01 | 35613720                | TT                              | CC                | 1945891664               |
| SNP_P3_11888_35613730 | NC_021160.1    | Ca_kabuli_chr01 | 35613730                | CC                              | AA                | 1945891666               |
| SNP_P3_11890_35613739 | NC_021160.1    | Ca_kabuli_chr01 | 35613739                | CC                              | TT                | 1945891668               |
| SNP_P3_11891_35613740 | NC_021160.1    | Ca_kabuli_chr01 | 35613740                | TT                              | GG                | 1945891670               |
| SNP_P3_11892_35613978 | NC_021160.1    | Ca_kabuli_chr01 | 35613978                | GG                              | AA                | 1945891672               |
| SNP_P3_11893_35614055 | NC_021160.1    | Ca_kabuli_chr01 | 35614055                | GG                              | AA                | 1945891673               |
| SNP_P3_11894_35614124 | NC_021160.1    | Ca_kabuli_chr01 | 35614124                | TT                              | AA                | 1945891675               |
| SNP_P3_11895_35614152 | NC_021160.1    | Ca_kabuli_chr01 | 35614152                | TT                              | CC                | 1945891677               |
| SNP_P3_11896_35614164 | NC_021160.1    | Ca_kabuli_chr01 | 35614164                | AA                              | GG                | 1945891679               |
| SNP_P3_11897_35614173 | NC_021160.1    | Ca_kabuli_chr01 | 35614173                | CC                              | TT                | 1945891680               |
| SNP_P3_11898_35621523 | NC_021160.1    | Ca_kabuli_chr01 | 35621523                | AA                              | GG                | 1945891682               |
| SNP_P3_11899_35622006 | NC_021160.1    | Ca_kabuli_chr01 | 35622006                | GG                              | AA                | 1945891684               |
| SNP_P3_11900_35624337 | NC_021160.1    | Ca_kabuli_chr01 | 35624337                | GG                              | AA                | 1945891686               |
| SNP_P3_11902_35624413 | NC_021160.1    | Ca_kabuli_chr01 | 35624413                | AA                              | GG                | 1945891687               |
| SNP_P3_11903_35624775 | NC_021160.1    | Ca_kabuli_chr01 | 35624775                | GG                              | AA                | 1945891689               |
| SNP_P3_11904_35627969 | NC_021160.1    | Ca_kabuli_chr01 | 35627969                | CC                              | TT                | 1945891691               |
| SNP_P3_11905_35631968 | NC_021160.1    | Ca_kabuli_chr01 | 35631968                | TT                              | CC                | 1945891693               |
| SNP_P3_11906_35631980 | NC_021160.1    | Ca_kabuli_chr01 | 35631980                | TT                              | CC                | 1945891695               |
| SNP_P3_11907_35633174 | NC_021160.1    | Ca_kabuli_chr01 | 35633174                | TT                              | CC                | 1945891696               |
| SNP_P3_11908_35633478 | NC_021160.1    | Ca_kabuli_chr01 | 35633478                | AA                              | CC                | 1945891698               |
| SNP_P3_11909_35635848 | NC_021160.1    | Ca_kabuli_chr01 | 35635848                | GG                              | AA                | 1945891700               |
| SNP_P3_11910_35636074 | NC_021160.1    | Ca_kabuli_chr01 | 35636074                | TT                              | CC                | 1945891702               |
| SNP_P3_11911_35636477 | NC_021160.1    | Ca_kabuli_chr01 | 35636477                | TT                              | CC                | 1945891703               |
| SNP_P3_11912_35636707 | NC_021160.1    | Ca_kabuli_chr01 | 35636707                | GG                              | TT                | 1945891705               |
| SNP_P3_11913_35637062 | NC_021160.1    | Ca_kabuli_chr01 | 35637062                | TT                              | AA                | 1945891707               |
| SNP_P3_11914_35637131 | NC_021160.1    | Ca_kabuli_chr01 | 35637131                | TT                              | GG                | 1945891709               |
| SNP_P3_11915_35637212 | NC_021160.1    | Ca_kabuli_chr01 | 35637212                | GG                              | AA                | 1945891711               |
| SNP_P3_11916_35637222 | NC_021160.1    | Ca_kabuli_chr01 | 35637222                | AA                              | CC                | 1945891712               |
| SNP_P3_11917_35637224 | NC_021160.1    | Ca_kabuli_chr01 | 35637224                | AA                              | GG                | 1945891714               |
| SNP_P3_11918_35639135 | NC_021160.1    | Ca_kabuli_chr01 | 35639135                | GG                              | AA                | 1945891716               |
| SNP_P3_11919_35645315 | NC_021160.1    | Ca_kabuli_chr01 | 35645315                | TT                              | GG                | 1945891718               |
| SNP_P3_11921_35647110 | NC_021160.1    | Ca_kabuli_chr01 | 35647110                | CC                              | TT                | 1945891719               |
| SNP_P3_11922_35655891 | NC_021160.1    | Ca_kabuli_chr01 | 35655891                | GG                              | AA                | 1945891721               |
| SNP_P3_11923_35656443 | NC_021160.1    | Ca_kabuli_chr01 | 35656443                | GG                              | AA                | 1945891723               |
| SNP_P3_11924_35656941 | NC_021160.1    | Ca_kabuli_chr01 | 35656941                | GG                              | TT                | 1945891725               |
| SNP_P3_11925_35658587 | NC_021160.1    | Ca_kabuli_chr01 | 35658587                | GG                              | AA                | 1945891727               |
| SNP_P3_11926_35658941 | NC_021160.1    | Ca_kabuli_chr01 | 35658941                | CC                              | TT                | 1945891728               |
| SNP_P3_11927_35658978 | NC_021160.1    | Ca_kabuli_chr01 | 35658978                | AA                              | TT                | 1945891730               |



| SNPs IDs              | Chromosome IDs | Chromosomes     | Physical positions (bp) | CDC Frontier (Reference genome) | (Pusa 256 & HPNB) | NCBI SNPdb Accession IDs |
|-----------------------|----------------|-----------------|-------------------------|---------------------------------|-------------------|--------------------------|
| SNP_P3_11928_35659336 | NC_021160.1    | Ca_kabuli_chr01 | 35659336                | TT                              | CC                | 1945891732               |
| SNP_P3_11929_35659408 | NC_021160.1    | Ca_kabuli_chr01 | 35659408                | GG                              | TT                | 1945891734               |
| SNP_P3_11930_35660402 | NC_021160.1    | Ca_kabuli_chr01 | 35660402                | GG                              | AA                | 1945891735               |
| SNP_P3_11931_35660467 | NC_021160.1    | Ca_kabuli_chr01 | 35660467                | GG                              | AA                | 1945891737               |
| SNP_P3_11932_35662063 | NC_021160.1    | Ca_kabuli_chr01 | 35662063                | GG                              | AA                | 1945891739               |
| SNP_P3_11933_35662073 | NC_021160.1    | Ca_kabuli_chr01 | 35662073                | GG                              | AA                | 1945891741               |
| SNP_P3_11934_35662135 | NC_021160.1    | Ca_kabuli_chr01 | 35662135                | CC                              | AA                | 1945891743               |
| SNP_P3_11935_35662165 | NC_021160.1    | Ca_kabuli_chr01 | 35662165                | AA                              | GG                | 1945891744               |
| SNP_P3_11936_35662222 | NC_021160.1    | Ca_kabuli_chr01 | 35662222                | GG                              | TT                | 1945891746               |
| SNP_P3_11937_35663117 | NC_021160.1    | Ca_kabuli_chr01 | 35663117                | GG                              | CC                | 1945891748               |
| SNP_P3_11938_35663358 | NC_021160.1    | Ca_kabuli_chr01 | 35663358                | GG                              | CC                | 1945891750               |
| SNP_P3_11939_35663894 | NC_021160.1    | Ca_kabuli_chr01 | 35663894                | TT                              | CC                | 1945891751               |
| SNP_P3_11941_35681443 | NC_021160.1    | Ca_kabuli_chr01 | 35681443                | GG                              | AA                | 1945891753               |
| SNP_P3_11942_35681586 | NC_021160.1    | Ca_kabuli_chr01 | 35681586                | GG                              | CC                | 1945891755               |
| SNP_P3_11943_35682704 | NC_021160.1    | Ca_kabuli_chr01 | 35682704                | TT                              | AA                | 1945891757               |
| SNP_P3_11944_35689730 | NC_021160.1    | Ca_kabuli_chr01 | 35689730                | TT                              | CC                | 1945891759               |
| SNP_P3_11945_35690035 | NC_021160.1    | Ca_kabuli_chr01 | 35690035                | AA                              | CC                | 1945891760               |
| SNP_P3_11946_35691000 | NC_021160.1    | Ca_kabuli_chr01 | 35691000                | TT                              | CC                | 1945891762               |
| SNP_P3_11947_35692660 | NC_021160.1    | Ca_kabuli_chr01 | 35692660                | CC                              | TT                | 1945891764               |
| SNP_P3_11948_35700565 | NC_021160.1    | Ca_kabuli_chr01 | 35700565                | CC                              | TT                | 1945891766               |
| SNP_P3_11949_35704737 | NC_021160.1    | Ca_kabuli_chr01 | 35704737                | CC                              | TT                | 1945891767               |
| SNP_P3_11951_35713952 | NC_021160.1    | Ca_kabuli_chr01 | 35713952                | TT                              | CC                | 1945891769               |
| SNP_P3_11952_35714038 | NC_021160.1    | Ca_kabuli_chr01 | 35714038                | TT                              | CC                | 1945891771               |
| SNP_P3_11953_35717750 | NC_021160.1    | Ca_kabuli_chr01 | 35717750                | TT                              | GG                | 1945891773               |
| SNP_P3_11954_35718970 | NC_021160.1    | Ca_kabuli_chr01 | 35718970                | GG                              | AA                | 1945891775               |
| SNP_P3_11955_35725037 | NC_021160.1    | Ca_kabuli_chr01 | 35725037                | GG                              | AA                | 1945891776               |
| SNP_P3_11956_35725438 | NC_021160.1    | Ca_kabuli_chr01 | 35725438                | TT                              | AA                | 1945891778               |
| SNP_P3_11957_35725440 | NC_021160.1    | Ca_kabuli_chr01 | 35725440                | TT                              | CC                | 1945891780               |
| SNP_P3_11958_35727503 | NC_021160.1    | Ca_kabuli_chr01 | 35727503                | TT                              | GG                | 1945891782               |
| SNP_P3_11959_35729921 | NC_021160.1    | Ca_kabuli_chr01 | 35729921                | GG                              | CC                | 1945891783               |
| SNP_P3_11960_35730857 | NC_021160.1    | Ca_kabuli_chr01 | 35730857                | TT                              | CC                | 1945891785               |
| SNP_P3_11961_35743539 | NC_021160.1    | Ca_kabuli_chr01 | 35743539                | GG                              | AA                | 1945891787               |
| SNP_P3_11962_35747792 | NC_021160.1    | Ca_kabuli_chr01 | 35747792                | GG                              | AA                | 1945891789               |
| SNP_P3_11963_35749137 | NC_021160.1    | Ca_kabuli_chr01 | 35749137                | GG                              | AA                | 1945891791               |
| SNP_P3_11964_35759020 | NC_021160.1    | Ca_kabuli_chr01 | 35759020                | AA                              | TT                | 1945891792               |
| SNP_P3_11965_35769448 | NC_021160.1    | Ca_kabuli_chr01 | 35769448                | AA                              | TT                | 1945891794               |
| SNP_P3_11966_35781307 | NC_021160.1    | Ca_kabuli_chr01 | 35781307                | AA                              | GG                | 1945891796               |
| SNP_P3_11967_35784710 | NC_021160.1    | Ca_kabuli_chr01 | 35784710                | GG                              | TT                | 1945891798               |
| SNP_P3_11968_35786276 | NC_021160.1    | Ca_kabuli_chr01 | 35786276                | GG                              | AA                | 1945891799               |
| SNP_P3_11969_35787968 | NC_021160.1    | Ca_kabuli_chr01 | 35787968                | GG                              | CC                | 1945891801               |
| SNP_P3_11970_35787998 | NC_021160.1    | Ca_kabuli_chr01 | 35787998                | CC                              | TT                | 1945891803               |
| SNP_P3_11971_35788029 | NC_021160.1    | Ca_kabuli_chr01 | 35788029                | TT                              | GG                | 1945891805               |

| SNPs IDs              | Chromosome IDs | Chromosomes     | Physical positions (bp) | CDC Frontier (Reference genome) | (Pusa 256 & HPNB) | NCBI SNPdb Accession IDs |
|-----------------------|----------------|-----------------|-------------------------|---------------------------------|-------------------|--------------------------|
| SNP_P3_11972_35788565 | NC_021160.1    | Ca_kabuli_chr01 | 35788565                | AA                              | GG                | 1945891807               |
| SNP_P3_11973_35788808 | NC_021160.1    | Ca_kabuli_chr01 | 35788808                | GG                              | AA                | 1945891808               |
| SNP_P3_11974_35788854 | NC_021160.1    | Ca_kabuli_chr01 | 35788854                | CC                              | TT                | 1945891810               |
| SNP_P3_11975_35791669 | NC_021160.1    | Ca_kabuli_chr01 | 35791669                | CC                              | TT                | 1945891812               |
| SNP_P3_11976_35800045 | NC_021160.1    | Ca_kabuli_chr01 | 35800045                | GG                              | AA                | 1945891814               |
| SNP_P3_11977_35800347 | NC_021160.1    | Ca_kabuli_chr01 | 35800347                | CC                              | GG                | 1945891816               |
| SNP_P3_11978_35801347 | NC_021160.1    | Ca_kabuli_chr01 | 35801347                | CC                              | TT                | 1945891817               |
| SNP_P3_11979_35805946 | NC_021160.1    | Ca_kabuli_chr01 | 35805946                | GG                              | AA                | 1945891819               |
| SNP_P3_11980_35806411 | NC_021160.1    | Ca_kabuli_chr01 | 35806411                | CC                              | TT                | 1945891821               |
| SNP_P3_11981_35812068 | NC_021160.1    | Ca_kabuli_chr01 | 35812068                | CC                              | TT                | 1945891823               |
| SNP_P3_11982_35813415 | NC_021160.1    | Ca_kabuli_chr01 | 35813415                | TT                              | CC                | 1945891824               |
| SNP_P3_11983_35818391 | NC_021160.1    | Ca_kabuli_chr01 | 35818391                | CC                              | TT                | 1945891826               |
| SNP_P3_11984_35818426 | NC_021160.1    | Ca_kabuli_chr01 | 35818426                | CC                              | TT                | 1945891828               |
| SNP_P3_11985_35823100 | NC_021160.1    | Ca_kabuli_chr01 | 35823100                | CC                              | TT                | 1945891830               |
| SNP_P3_11986_35824044 | NC_021160.1    | Ca_kabuli_chr01 | 35824044                | AA                              | GG                | 1945891832               |
| SNP_P3_11987_35830823 | NC_021160.1    | Ca_kabuli_chr01 | 35830823                | TT                              | AA                | 1945891833               |
| SNP_P3_11988_35841834 | NC_021160.1    | Ca_kabuli_chr01 | 35841834                | TT                              | AA                | 1945891835               |
| SNP_P3_11989_35842140 | NC_021160.1    | Ca_kabuli_chr01 | 35842140                | AA                              | TT                | 1945891837               |
| SNP_P3_11990_35843975 | NC_021160.1    | Ca_kabuli_chr01 | 35843975                | TT                              | CC                | 1945891839               |
| SNP_P3_11991_35849917 | NC_021160.1    | Ca_kabuli_chr01 | 35849917                | AA                              | CC                | 1945891840               |
| SNP_P3_11992_35850265 | NC_021160.1    | Ca_kabuli_chr01 | 35850265                | GG                              | AA                | 1945891842               |
| SNP_P3_11993_35853730 | NC_021160.1    | Ca_kabuli_chr01 | 35853730                | GG                              | AA                | 1945891844               |
| SNP_P3_11994_35855907 | NC_021160.1    | Ca_kabuli_chr01 | 35855907                | GG                              | AA                | 1945891846               |
| SNP_P3_11995_35856259 | NC_021160.1    | Ca_kabuli_chr01 | 35856259                | GG                              | AA                | 1945891848               |
| SNP_P3_11996_35856328 | NC_021160.1    | Ca_kabuli_chr01 | 35856328                | TT                              | CC                | 1945891849               |
| SNP_P3_11997_35856355 | NC_021160.1    | Ca_kabuli_chr01 | 35856355                | GG                              | AA                | 1945891851               |
| SNP_P3_11998_35856373 | NC_021160.1    | Ca_kabuli_chr01 | 35856373                | TT                              | AA                | 1945891853               |
| SNP_P3_11999_35856424 | NC_021160.1    | Ca_kabuli_chr01 | 35856424                | GG                              | CC                | 1945891855               |
| SNP_P3_12000_35856427 | NC_021160.1    | Ca_kabuli_chr01 | 35856427                | GG                              | AA                | 1945891856               |
| SNP_P3_12001_35856635 | NC_021160.1    | Ca_kabuli_chr01 | 35856635                | GG                              | CC                | 1945891858               |
| SNP_P3_12002_35856779 | NC_021160.1    | Ca_kabuli_chr01 | 35856779                | CC                              | TT                | 1945891860               |
| SNP_P3_12003_35857612 | NC_021160.1    | Ca_kabuli_chr01 | 35857612                | TT                              | AA                | 1945891862               |
| SNP_P3_12004_35858893 | NC_021160.1    | Ca_kabuli_chr01 | 35858893                | GG                              | CC                | 1945891864               |
| SNP_P3_12005_35865971 | NC_021160.1    | Ca_kabuli_chr01 | 35865971                | TT                              | CC                | 1945891865               |
| SNP_P3_12006_35867971 | NC_021160.1    | Ca_kabuli_chr01 | 35867971                | TT                              | CC                | 1945891867               |
| SNP_P3_12007_35871912 | NC_021160.1    | Ca_kabuli_chr01 | 35871912                | CC                              | AA                | 1945891869               |
| SNP_P3_12008_35872865 | NC_021160.1    | Ca_kabuli_chr01 | 35872865                | CC                              | AA                | 1945891871               |
| SNP_P3_12009_35878654 | NC_021160.1    | Ca_kabuli_chr01 | 35878654                | GG                              | AA                | 1945891872               |
| SNP_P3_12010_35885054 | NC_021160.1    | Ca_kabuli_chr01 | 35885054                | AA                              | CC                | 1945891874               |
| SNP_P3_12011_35885072 | NC_021160.1    | Ca_kabuli_chr01 | 35885072                | AA                              | TT                | 1945891876               |
| SNP_P3_12012_35885094 | NC_021160.1    | Ca_kabuli_chr01 | 35885094                | GG                              | AA                | 1945891878               |
| SNP_P3_12013_35886546 | NC_021160.1    | Ca_kabuli_chr01 | 35886546                | TT                              | AA                | 1945891880               |

| SNPs IDs              | Chromosome IDs | Chromosomes     | Physical positions (bp) | CDC Frontier (Reference genome) | (Pusa 256 & HPNB) | NCBI SNPdb Accession IDs |
|-----------------------|----------------|-----------------|-------------------------|---------------------------------|-------------------|--------------------------|
| SNP_P3_12014_35887628 | NC_021160.1    | Ca_kabuli_chr01 | 35887628                | GG                              | CC                | 1945891881               |
| SNP_P3_12015_35889331 | NC_021160.1    | Ca_kabuli_chr01 | 35889331                | TT                              | AA                | 1945891883               |
| SNP_P3_12016_35890404 | NC_021160.1    | Ca_kabuli_chr01 | 35890404                | CC                              | TT                | 1945891885               |
| SNP_P3_12017_35900401 | NC_021160.1    | Ca_kabuli_chr01 | 35900401                | CC                              | TT                | 1945891887               |
| SNP_P3_12018_35903016 | NC_021160.1    | Ca_kabuli_chr01 | 35903016                | TT                              | CC                | 1945891888               |
| SNP_P3_12019_35903511 | NC_021160.1    | Ca_kabuli_chr01 | 35903511                | AA                              | GG                | 1945891890               |
| SNP_P3_12020_35908761 | NC_021160.1    | Ca_kabuli_chr01 | 35908761                | TT                              | AA                | 1945891892               |
| SNP_P3_12022_35915046 | NC_021160.1    | Ca_kabuli_chr01 | 35915046                | AA                              | GG                | 1945891894               |
| SNP_P3_12023_35917736 | NC_021160.1    | Ca_kabuli_chr01 | 35917736                | GG                              | TT                | 1945891896               |
| SNP_P3_12024_35922476 | NC_021160.1    | Ca_kabuli_chr01 | 35922476                | AA                              | CC                | 1945891897               |
| SNP_P3_12025_35923274 | NC_021160.1    | Ca_kabuli_chr01 | 35923274                | TT                              | CC                | 1945891899               |
| SNP_P3_12026_35926666 | NC_021160.1    | Ca_kabuli_chr01 | 35926666                | CC                              | TT                | 1945891901               |
| SNP_P3_12027_35929920 | NC_021160.1    | Ca_kabuli_chr01 | 35929920                | GG                              | AA                | 1945891903               |
| SNP_P3_12028_35930314 | NC_021160.1    | Ca_kabuli_chr01 | 35930314                | GG                              | CC                | 1945891904               |
| SNP_P3_12029_35933111 | NC_021160.1    | Ca_kabuli_chr01 | 35933111                | CC                              | TT                | 1945891906               |
| SNP_P3_12030_35946059 | NC_021160.1    | Ca_kabuli_chr01 | 35946059                | AA                              | GG                | 1945891908               |
| SNP_P3_12031_35946076 | NC_021160.1    | Ca_kabuli_chr01 | 35946076                | AA                              | TT                | 1945891910               |
| SNP_P3_12032_35946082 | NC_021160.1    | Ca_kabuli_chr01 | 35946082                | CC                              | GG                | 1945891912               |
| SNP_P3_12033_35946554 | NC_021160.1    | Ca_kabuli_chr01 | 35946554                | AA                              | TT                | 1945891913               |
| SNP_P3_12034_35946766 | NC_021160.1    | Ca_kabuli_chr01 | 35946766                | GG                              | AA                | 1945891915               |
| SNP_P3_12035_35946795 | NC_021160.1    | Ca_kabuli_chr01 | 35946795                | AA                              | GG                | 1945891917               |
| SNP_P3_12036_35946836 | NC_021160.1    | Ca_kabuli_chr01 | 35946836                | TT                              | CC                | 1945891919               |
| SNP_P3_12037_35946837 | NC_021160.1    | Ca_kabuli_chr01 | 35946837                | GG                              | AA                | 1945891920               |
| SNP_P3_12038_35946951 | NC_021160.1    | Ca_kabuli_chr01 | 35946951                | AA                              | GG                | 1945891922               |
| SNP_P3_12039_35946984 | NC_021160.1    | Ca_kabuli_chr01 | 35946984                | AA                              | GG                | 1945891924               |
| SNP_P3_12040_35947016 | NC_021160.1    | Ca_kabuli_chr01 | 35947016                | AA                              | GG                | 1945891926               |
| SNP_P3_12042_35947059 | NC_021160.1    | Ca_kabuli_chr01 | 35947059                | TT                              | GG                | 1945891928               |
| SNP_P3_12043_35947087 | NC_021160.1    | Ca_kabuli_chr01 | 35947087                | AA                              | GG                | 1945891929               |
| SNP_P3_12044_35947252 | NC_021160.1    | Ca_kabuli_chr01 | 35947252                | GG                              | AA                | 1945891931               |
| SNP_P3_12045_35947330 | NC_021160.1    | Ca_kabuli_chr01 | 35947330                | GG                              | AA                | 1945891933               |
| SNP_P3_12046_35947341 | NC_021160.1    | Ca_kabuli_chr01 | 35947341                | AA                              | TT                | 1945891935               |
| SNP_P3_12047_35959170 | NC_021160.1    | Ca_kabuli_chr01 | 35959170                | AA                              | CC                | 1945891936               |
| SNP_P3_12048_35959172 | NC_021160.1    | Ca_kabuli_chr01 | 35959172                | CC                              | AA                | 1945891938               |
| SNP_P3_12049_35959215 | NC_021160.1    | Ca_kabuli_chr01 | 35959215                | TT                              | CC                | 1945891940               |
| SNP_P3_12050_35974040 | NC_021160.1    | Ca_kabuli_chr01 | 35974040                | CC                              | AA                | 1945891942               |
| SNP_P3_12052_35977337 | NC_021160.1    | Ca_kabuli_chr01 | 35977337                | AA                              | GG                | 1945891944               |
| SNP_P3_12053_35977371 | NC_021160.1    | Ca_kabuli_chr01 | 35977371                | CC                              | TT                | 1945891945               |
| SNP_P3_12054_35977378 | NC_021160.1    | Ca_kabuli_chr01 | 35977378                | TT                              | GG                | 1945891947               |
| SNP_P3_12055_35977446 | NC_021160.1    | Ca_kabuli_chr01 | 35977446                | AA                              | GG                | 1945891949               |
| SNP_P3_12056_35977447 | NC_021160.1    | Ca_kabuli_chr01 | 35977447                | GG                              | TT                | 1945891951               |
| SNP_P3_12057_35977601 | NC_021160.1    | Ca_kabuli_chr01 | 35977601                | GG                              | CC                | 1945891952               |
| SNP_P3_12058_35994689 | NC_021160.1    | Ca_kabuli_chr01 | 35994689                | TT                              | CC                | 1945891954               |

| SNPs IDs              | Chromosome IDs | Chromosomes     | Physical positions (bp) | CDC Frontier (Reference genome) | (Pusa 256 & HPNB) | NCBI SNPdb Accession IDs |
|-----------------------|----------------|-----------------|-------------------------|---------------------------------|-------------------|--------------------------|
| SNP_P3_12059_36009129 | NC_021160.1    | Ca_kabuli_chr01 | 36009129                | AA                              | CC                | 1945891956               |
| SNP_P3_12060_36012896 | NC_021160.1    | Ca_kabuli_chr01 | 36012896                | TT                              | AA                | 1945891958               |
| SNP_P3_12061_36012956 | NC_021160.1    | Ca_kabuli_chr01 | 36012956                | TT                              | AA                | 1945891959               |
| SNP_P3_12062_36012971 | NC_021160.1    | Ca_kabuli_chr01 | 36012971                | GG                              | AA                | 1945891961               |
| SNP_P3_12063_36012985 | NC_021160.1    | Ca_kabuli_chr01 | 36012985                | AA                              | GG                | 1945891963               |
| SNP_P3_12064_36012995 | NC_021160.1    | Ca_kabuli_chr01 | 36012995                | AA                              | GG                | 1945891965               |
| SNP_P3_12065_36012998 | NC_021160.1    | Ca_kabuli_chr01 | 36012998                | CC                              | TT                | 1945891967               |
| SNP_P3_12066_36013001 | NC_021160.1    | Ca_kabuli_chr01 | 36013001                | AA                              | CC                | 1945891968               |
| SNP_P3_12067_36013071 | NC_021160.1    | Ca_kabuli_chr01 | 36013071                | GG                              | TT                | 1945891970               |
| SNP_P3_12068_36013119 | NC_021160.1    | Ca_kabuli_chr01 | 36013119                | TT                              | CC                | 1945891972               |
| SNP_P3_12069_36013254 | NC_021160.1    | Ca_kabuli_chr01 | 36013254                | GG                              | AA                | 1945891974               |
| SNP_P3_12070_36013263 | NC_021160.1    | Ca_kabuli_chr01 | 36013263                | TT                              | CC                | 1945891975               |
| SNP_P3_12071_36013344 | NC_021160.1    | Ca_kabuli_chr01 | 36013344                | CC                              | TT                | 1945891977               |
| SNP_P3_12072_36013359 | NC_021160.1    | Ca_kabuli_chr01 | 36013359                | TT                              | AA                | 1945891979               |
| SNP_P3_12073_36013365 | NC_021160.1    | Ca_kabuli_chr01 | 36013365                | AA                              | CC                | 1945891981               |
| SNP_P3_12074_36013368 | NC_021160.1    | Ca_kabuli_chr01 | 36013368                | TT                              | CC                | 1945891983               |
| SNP_P3_12075_36015894 | NC_021160.1    | Ca_kabuli_chr01 | 36015894                | CC                              | TT                | 1945891984               |
| SNP_P3_12076_36042706 | NC_021160.1    | Ca_kabuli_chr01 | 36042706                | CC                              | TT                | 1945891986               |
| SNP_P3_12077_36044204 | NC_021160.1    | Ca_kabuli_chr01 | 36044204                | AA                              | GG                | 1945891988               |
| SNP_P3_12079_36046044 | NC_021160.1    | Ca_kabuli_chr01 | 36046044                | TT                              | AA                | 1945891990               |
| SNP_P3_12080_36068882 | NC_021160.1    | Ca_kabuli_chr01 | 36068882                | CC                              | TT                | 1945891991               |
| SNP_P3_12081_36081439 | NC_021160.1    | Ca_kabuli_chr01 | 36081439                | CC                              | TT                | 1945891993               |
| SNP_P3_12082_36081441 | NC_021160.1    | Ca_kabuli_chr01 | 36081441                | AA                              | GG                | 1945891995               |
| SNP_P3_12083_36081454 | NC_021160.1    | Ca_kabuli_chr01 | 36081454                | CC                              | TT                | 1945891997               |
| SNP_P3_12084_36081457 | NC_021160.1    | Ca_kabuli_chr01 | 36081457                | AA                              | GG                | 1945891999               |
| SNP_P3_12085_36081483 | NC_021160.1    | Ca_kabuli_chr01 | 36081483                | TT                              | CC                | 1945892000               |
| SNP_P3_12086_36081485 | NC_021160.1    | Ca_kabuli_chr01 | 36081485                | AA                              | GG                | 1945892002               |
| SNP_P3_12087_36081496 | NC_021160.1    | Ca_kabuli_chr01 | 36081496                | AA                              | GG                | 1945892004               |
| SNP_P3_12088_36081502 | NC_021160.1    | Ca_kabuli_chr01 | 36081502                | CC                              | AA                | 1945892006               |
| SNP_P3_12090_36081589 | NC_021160.1    | Ca_kabuli_chr01 | 36081589                | AA                              | GG                | 1945892007               |
| SNP_P3_12091_36081590 | NC_021160.1    | Ca_kabuli_chr01 | 36081590                | CC                              | TT                | 1945892009               |
| SNP_P3_12092_36081775 | NC_021160.1    | Ca_kabuli_chr01 | 36081775                | AA                              | GG                | 1945892011               |
| SNP_P3_12093_36081851 | NC_021160.1    | Ca_kabuli_chr01 | 36081851                | TT                              | CC                | 1945892013               |
| SNP_P3_12094_36081988 | NC_021160.1    | Ca_kabuli_chr01 | 36081988                | AA                              | CC                | 1945892015               |
| SNP_P3_12095_36082048 | NC_021160.1    | Ca_kabuli_chr01 | 36082048                | TT                              | GG                | 1945892016               |
| SNP_P3_12096_36103959 | NC_021160.1    | Ca_kabuli_chr01 | 36103959                | AA                              | TT                | 1945892018               |
| SNP_P3_12097_36117902 | NC_021160.1    | Ca_kabuli_chr01 | 36117902                | GG                              | AA                | 1945892020               |
| SNP_P3_12098_36149154 | NC_021160.1    | Ca_kabuli_chr01 | 36149154                | GG                              | AA                | 1945892022               |
| SNP_P3_12099_36167492 | NC_021160.1    | Ca_kabuli_chr01 | 36167492                | GG                              | AA                | 1945892023               |
| SNP_P3_12100_36171107 | NC_021160.1    | Ca_kabuli_chr01 | 36171107                | TT                              | AA                | 1945892025               |
| SNP_P3_12102_36172019 | NC_021160.1    | Ca_kabuli_chr01 | 36172019                | GG                              | TT                | 1945892027               |
| SNP_P3_12103_36216297 | NC_021160.1    | Ca_kabuli_chr01 | 36216297                | AA                              | TT                | 1945892029               |

| SNPs IDs              | Chromosome IDs | Chromosomes     | Physical positions (bp) | CDC Frontier (Reference genome) | (Pusa 256 & HPNB) | NCBI SNPdb Accession IDs |
|-----------------------|----------------|-----------------|-------------------------|---------------------------------|-------------------|--------------------------|
| SNP_P3_12105_36245277 | NC_021160.1    | Ca_kabuli_chr01 | 36245277                | AA                              | TT                | 1945892031               |
| SNP_P3_12106_36249351 | NC_021160.1    | Ca_kabuli_chr01 | 36249351                | AA                              | CC                | 1945892032               |
| SNP_P3_12107_36249358 | NC_021160.1    | Ca_kabuli_chr01 | 36249358                | CC                              | AA                | 1945892034               |
| SNP_P3_12108_36282959 | NC_021160.1    | Ca_kabuli_chr01 | 36282959                | GG                              | AA                | 1945892036               |
| SNP_P3_12109_36283032 | NC_021160.1    | Ca_kabuli_chr01 | 36283032                | GG                              | TT                | 1945892038               |
| SNP_P3_12110_36283052 | NC_021160.1    | Ca_kabuli_chr01 | 36283052                | CC                              | GG                | 1945892039               |
| SNP_P3_12111_36283284 | NC_021160.1    | Ca_kabuli_chr01 | 36283284                | AA                              | GG                | 1945892041               |
| SNP_P3_12113_36283366 | NC_021160.1    | Ca_kabuli_chr01 | 36283366                | TT                              | GG                | 1945892043               |
| SNP_P3_12114_36283607 | NC_021160.1    | Ca_kabuli_chr01 | 36283607                | GG                              | AA                | 1945892045               |
| SNP_P3_12115_36283648 | NC_021160.1    | Ca_kabuli_chr01 | 36283648                | AA                              | GG                | 1945892046               |
| SNP_P3_12116_36290593 | NC_021160.1    | Ca_kabuli_chr01 | 36290593                | CC                              | TT                | 1945892048               |
| SNP_P3_12117_36290827 | NC_021160.1    | Ca_kabuli_chr01 | 36290827                | CC                              | TT                | 1945892050               |
| SNP_P3_12118_36290831 | NC_021160.1    | Ca_kabuli_chr01 | 36290831                | CC                              | TT                | 1945892052               |
| SNP_P3_12119_36290841 | NC_021160.1    | Ca_kabuli_chr01 | 36290841                | AA                              | GG                | 1945892054               |
| SNP_P3_12120_36291127 | NC_021160.1    | Ca_kabuli_chr01 | 36291127                | CC                              | TT                | 1945892055               |
| SNP_P3_12121_36292448 | NC_021160.1    | Ca_kabuli_chr01 | 36292448                | CC                              | TT                | 1945892057               |
| SNP_P3_12122_36296809 | NC_021160.1    | Ca_kabuli_chr01 | 36296809                | CC                              | TT                | 1945892059               |
| SNP_P3_12123_36296912 | NC_021160.1    | Ca_kabuli_chr01 | 36296912                | AA                              | GG                | 1945892061               |
| SNP_P3_12124_36297148 | NC_021160.1    | Ca_kabuli_chr01 | 36297148                | GG                              | CC                | 1945892063               |
| SNP_P3_12125_36297183 | NC_021160.1    | Ca_kabuli_chr01 | 36297183                | TT                              | CC                | 1945892064               |
| SNP_P3_12126_36297212 | NC_021160.1    | Ca_kabuli_chr01 | 36297212                | CC                              | TT                | 1945892066               |
| SNP_P3_12127_36297248 | NC_021160.1    | Ca_kabuli_chr01 | 36297248                | GG                              | AA                | 1945892068               |
| SNP_P3_12128_36297251 | NC_021160.1    | Ca_kabuli_chr01 | 36297251                | AA                              | TT                | 1945892070               |
| SNP_P3_12129_36297274 | NC_021160.1    | Ca_kabuli_chr01 | 36297274                | TT                              | GG                | 1945892071               |
| SNP_P3_12130_36297324 | NC_021160.1    | Ca_kabuli_chr01 | 36297324                | GG                              | AA                | 1945892073               |
| SNP_P3_12131_36297325 | NC_021160.1    | Ca_kabuli_chr01 | 36297325                | AA                              | GG                | 1945892075               |
| SNP_P3_12132_36297331 | NC_021160.1    | Ca_kabuli_chr01 | 36297331                | CC                              | GG                | 1945892077               |
| SNP_P3_12133_36300734 | NC_021160.1    | Ca_kabuli_chr01 | 36300734                | CC                              | AA                | 1945892078               |
| SNP_P3_12134_36300739 | NC_021160.1    | Ca_kabuli_chr01 | 36300739                | CC                              | GG                | 1945892080               |
| SNP_P3_12135_36312296 | NC_021160.1    | Ca_kabuli_chr01 | 36312296                | GG                              | TT                | 1945892082               |
| SNP_P3_12136_36319226 | NC_021160.1    | Ca_kabuli_chr01 | 36319226                | CC                              | TT                | 1945892084               |
| SNP_P3_12137_36343779 | NC_021160.1    | Ca_kabuli_chr01 | 36343779                | CC                              | TT                | 1945892086               |
| SNP_P3_12138_36345364 | NC_021160.1    | Ca_kabuli_chr01 | 36345364                | CC                              | TT                | 1945892087               |
| SNP_P3_12139_36346299 | NC_021160.1    | Ca_kabuli_chr01 | 36346299                | GG                              | AA                | 1945892089               |
| SNP_P3_12140_36356669 | NC_021160.1    | Ca_kabuli_chr01 | 36356669                | CC                              | TT                | 1945892091               |
| SNP_P3_12141_36380433 | NC_021160.1    | Ca_kabuli_chr01 | 36380433                | GG                              | AA                | 1945892093               |
| SNP_P3_12142_36412185 | NC_021160.1    | Ca_kabuli_chr01 | 36412185                | AA                              | TT                | 1945892094               |
| SNP_P3_12143_36431914 | NC_021160.1    | Ca_kabuli_chr01 | 36431914                | GG                              | AA                | 1945892096               |
| SNP_P3_12144_36433446 | NC_021160.1    | Ca_kabuli_chr01 | 36433446                | TT                              | CC                | 1945892098               |
| SNP_P3_12145_36443094 | NC_021160.1    | Ca_kabuli_chr01 | 36443094                | CC                              | GG                | 1945892100               |
| SNP_P3_12146_36444698 | NC_021160.1    | Ca_kabuli_chr01 | 36444698                | GG                              | CC                | 1945892102               |
| SNP_P3_12149_36502427 | NC_021160.1    | Ca_kabuli_chr01 | 36502427                | TT                              | CC                | 1945892103               |

| SNPs IDs              | Chromosome IDs | Chromosomes     | Physical positions (bp) | CDC Frontier (Reference genome) | (Pusa 256 & HPNB) | NCBI SNPdb Accession IDs |
|-----------------------|----------------|-----------------|-------------------------|---------------------------------|-------------------|--------------------------|
| SNP_P3_12150_36532215 | NC_021160.1    | Ca_kabuli_chr01 | 36532215                | AA                              | GG                | 1945892105               |
| SNP_P3_12151_36553671 | NC_021160.1    | Ca_kabuli_chr01 | 36553671                | TT                              | GG                | 1945892107               |
| SNP_P3_12152_36570459 | NC_021160.1    | Ca_kabuli_chr01 | 36570459                | AA                              | GG                | 1945892109               |
| SNP_P3_12153_36572403 | NC_021160.1    | Ca_kabuli_chr01 | 36572403                | CC                              | TT                | 1945892110               |
| SNP_P3_12154_36594295 | NC_021160.1    | Ca_kabuli_chr01 | 36594295                | AA                              | GG                | 1945892112               |
| SNP_P3_12155_36600310 | NC_021160.1    | Ca_kabuli_chr01 | 36600310                | TT                              | CC                | 1945892114               |
| SNP_P3_12156_36641227 | NC_021160.1    | Ca_kabuli_chr01 | 36641227                | TT                              | AA                | 1945892116               |
| SNP_P3_12157_36642427 | NC_021160.1    | Ca_kabuli_chr01 | 36642427                | GG                              | TT                | 1945892118               |
| SNP_P3_12158_36661127 | NC_021160.1    | Ca_kabuli_chr01 | 36661127                | CC                              | TT                | 1945892119               |
| SNP_P3_12159_36661673 | NC_021160.1    | Ca_kabuli_chr01 | 36661673                | TT                              | AA                | 1945892121               |
| SNP_P3_12160_36671623 | NC_021160.1    | Ca_kabuli_chr01 | 36671623                | AA                              | GG                | 1945892123               |
| SNP_P3_12161_36671981 | NC_021160.1    | Ca_kabuli_chr01 | 36671981                | AA                              | CC                | 1945892125               |
| SNP_P3_12162_36672042 | NC_021160.1    | Ca_kabuli_chr01 | 36672042                | TT                              | CC                | 1945892126               |
| SNP_P3_12163_36672054 | NC_021160.1    | Ca_kabuli_chr01 | 36672054                | TT                              | GG                | 1945892128               |
| SNP_P3_12164_36672699 | NC_021160.1    | Ca_kabuli_chr01 | 36672699                | AA                              | GG                | 1945892130               |
| SNP_P3_12165_36711602 | NC_021160.1    | Ca_kabuli_chr01 | 36711602                | CC                              | TT                | 1945892132               |
| SNP_P3_12166_36716787 | NC_021160.1    | Ca_kabuli_chr01 | 36716787                | GG                              | AA                | 1945892134               |
| SNP_P3_12167_36717123 | NC_021160.1    | Ca_kabuli_chr01 | 36717123                | TT                              | CC                | 1945892135               |
| SNP_P3_12168_36717124 | NC_021160.1    | Ca_kabuli_chr01 | 36717124                | GG                              | AA                | 1945892137               |
| SNP_P3_12169_36717166 | NC_021160.1    | Ca_kabuli_chr01 | 36717166                | AA                              | GG                | 1945892139               |
| SNP_P3_12170_36719818 | NC_021160.1    | Ca_kabuli_chr01 | 36719818                | GG                              | CC                | 1945892141               |
| SNP_P3_12171_36720129 | NC_021160.1    | Ca_kabuli_chr01 | 36720129                | CC                              | TT                | 1945892142               |
| SNP_P3_12172_36720183 | NC_021160.1    | Ca_kabuli_chr01 | 36720183                | GG                              | AA                | 1945892144               |
| SNP_P3_12173_36720238 | NC_021160.1    | Ca_kabuli_chr01 | 36720238                | TT                              | GG                | 1945892146               |
| SNP_P3_12174_36720362 | NC_021160.1    | Ca_kabuli_chr01 | 36720362                | CC                              | GG                | 1945892148               |
| SNP_P3_12175_36720396 | NC_021160.1    | Ca_kabuli_chr01 | 36720396                | GG                              | AA                | 1945892150               |
| SNP_P3_12176_36720512 | NC_021160.1    | Ca_kabuli_chr01 | 36720512                | AA                              | CC                | 1945892151               |
| SNP_P3_12177_36720676 | NC_021160.1    | Ca_kabuli_chr01 | 36720676                | CC                              | TT                | 1945892153               |
| SNP_P3_12178_36720726 | NC_021160.1    | Ca_kabuli_chr01 | 36720726                | AA                              | TT                | 1945892155               |
| SNP_P3_12179_36720753 | NC_021160.1    | Ca_kabuli_chr01 | 36720753                | AA                              | GG                | 1945892157               |
| SNP_P3_12180_36720771 | NC_021160.1    | Ca_kabuli_chr01 | 36720771                | CC                              | GG                | 1945892158               |
| SNP_P3_12181_36720797 | NC_021160.1    | Ca_kabuli_chr01 | 36720797                | TT                              | CC                | 1945892160               |
| SNP_P3_12182_36721516 | NC_021160.1    | Ca_kabuli_chr01 | 36721516                | AA                              | GG                | 1945892162               |
| SNP_P3_12183_36721673 | NC_021160.1    | Ca_kabuli_chr01 | 36721673                | CC                              | TT                | 1945892164               |
| SNP_P3_12184_36721695 | NC_021160.1    | Ca_kabuli_chr01 | 36721695                | GG                              | AA                | 1945892166               |
| SNP_P3_12185_36721905 | NC_021160.1    | Ca_kabuli_chr01 | 36721905                | TT                              | CC                | 1945892167               |
| SNP_P3_12186_36724371 | NC_021160.1    | Ca_kabuli_chr01 | 36724371                | CC                              | GG                | 1945892169               |
| SNP_P3_12187_36724411 | NC_021160.1    | Ca_kabuli_chr01 | 36724411                | TT                              | GG                | 1945892171               |
| SNP_P3_12188_36724418 | NC_021160.1    | Ca_kabuli_chr01 | 36724418                | GG                              | TT                | 1945892173               |
| SNP_P3_12189_36724484 | NC_021160.1    | Ca_kabuli_chr01 | 36724484                | CC                              | AA                | 1945892174               |
| SNP_P3_12190_36724490 | NC_021160.1    | Ca_kabuli_chr01 | 36724490                | TT                              | AA                | 1945892176               |
| SNP_P3_12191_36724549 | NC_021160.1    | Ca_kabuli_chr01 | 36724549                | GG                              | AA                | 1945892178               |

| SNPs IDs              | Chromosome IDs | Chromosomes     | Physical positions (bp) | CDC Frontier (Reference genome) | (Pusa 256 & HPNB) | NCBI SNPdb Accession IDs |
|-----------------------|----------------|-----------------|-------------------------|---------------------------------|-------------------|--------------------------|
| SNP_P3_12192_36724560 | NC_021160.1    | Ca_kabuli_chr01 | 36724560                | GG                              | AA                | 1945892180               |
| SNP_P3_12193_36724578 | NC_021160.1    | Ca_kabuli_chr01 | 36724578                | CC                              | TT                | 1945892182               |
| SNP_P3_12194_36724627 | NC_021160.1    | Ca_kabuli_chr01 | 36724627                | AA                              | GG                | 1945892183               |
| SNP_P3_12195_36724684 | NC_021160.1    | Ca_kabuli_chr01 | 36724684                | TT                              | AA                | 1945892185               |
| SNP_P3_12196_36724691 | NC_021160.1    | Ca_kabuli_chr01 | 36724691                | GG                              | TT                | 1945892187               |
| SNP_P3_12197_36724698 | NC_021160.1    | Ca_kabuli_chr01 | 36724698                | TT                              | CC                | 1945892189               |
| SNP_P3_12198_36724701 | NC_021160.1    | Ca_kabuli_chr01 | 36724701                | CC                              | TT                | 1945892190               |
| SNP_P3_12200_36724815 | NC_021160.1    | Ca_kabuli_chr01 | 36724815                | GG                              | AA                | 1945892192               |
| SNP_P3_12201_36724821 | NC_021160.1    | Ca_kabuli_chr01 | 36724821                | GG                              | TT                | 1945892194               |
| SNP_P3_12202_36725129 | NC_021160.1    | Ca_kabuli_chr01 | 36725129                | TT                              | CC                | 1945892196               |
| SNP_P3_12203_36725172 | NC_021160.1    | Ca_kabuli_chr01 | 36725172                | TT                              | CC                | 1945892198               |
| SNP_P3_12204_36725211 | NC_021160.1    | Ca_kabuli_chr01 | 36725211                | TT                              | CC                | 1945892199               |
| SNP_P3_12205_36725374 | NC_021160.1    | Ca_kabuli_chr01 | 36725374                | TT                              | GG                | 1945892201               |
| SNP_P3_12206_36725414 | NC_021160.1    | Ca_kabuli_chr01 | 36725414                | TT                              | CC                | 1945892203               |
| SNP_P3_12207_36725466 | NC_021160.1    | Ca_kabuli_chr01 | 36725466                | AA                              | GG                | 1945892205               |
| SNP_P3_12208_36725496 | NC_021160.1    | Ca_kabuli_chr01 | 36725496                | TT                              | AA                | 1945892206               |
| SNP_P3_12209_36725513 | NC_021160.1    | Ca_kabuli_chr01 | 36725513                | CC                              | TT                | 1945892208               |
| SNP_P3_12210_36725570 | NC_021160.1    | Ca_kabuli_chr01 | 36725570                | CC                              | TT                | 1945892210               |
| SNP_P3_12211_36725615 | NC_021160.1    | Ca_kabuli_chr01 | 36725615                | CC                              | GG                | 1945892212               |
| SNP_P3_12212_36725674 | NC_021160.1    | Ca_kabuli_chr01 | 36725674                | TT                              | CC                | 1945892214               |
| SNP_P3_12213_36725740 | NC_021160.1    | Ca_kabuli_chr01 | 36725740                | GG                              | TT                | 1945892215               |
| SNP_P3_12214_36725888 | NC_021160.1    | Ca_kabuli_chr01 | 36725888                | CC                              | TT                | 1945892217               |
| SNP_P3_12215_36725954 | NC_021160.1    | Ca_kabuli_chr01 | 36725954                | GG                              | TT                | 1945892219               |
| SNP_P3_12216_36725986 | NC_021160.1    | Ca_kabuli_chr01 | 36725986                | AA                              | GG                | 1945892221               |
| SNP_P3_12217_36726109 | NC_021160.1    | Ca_kabuli_chr01 | 36726109                | CC                              | TT                | 1945892222               |
| SNP_P3_12218_36726144 | NC_021160.1    | Ca_kabuli_chr01 | 36726144                | CC                              | TT                | 1945892224               |
| SNP_P3_12219_36726147 | NC_021160.1    | Ca_kabuli_chr01 | 36726147                | TT                              | CC                | 1945892226               |
| SNP_P3_12220_36726188 | NC_021160.1    | Ca_kabuli_chr01 | 36726188                | AA                              | CC                | 1945892228               |
| SNP_P3_12221_36726213 | NC_021160.1    | Ca_kabuli_chr01 | 36726213                | CC                              | TT                | 1945892229               |
| SNP_P3_12222_36726216 | NC_021160.1    | Ca_kabuli_chr01 | 36726216                | CC                              | AA                | 1945892231               |
| SNP_P3_12223_36726228 | NC_021160.1    | Ca_kabuli_chr01 | 36726228                | AA                              | GG                | 1945892233               |
| SNP_P3_12224_36726281 | NC_021160.1    | Ca_kabuli_chr01 | 36726281                | AA                              | GG                | 1945892235               |
| SNP_P3_12225_36726298 | NC_021160.1    | Ca_kabuli_chr01 | 36726298                | TT                              | CC                | 1945892237               |
| SNP_P3_12226_36726312 | NC_021160.1    | Ca_kabuli_chr01 | 36726312                | AA                              | CC                | 1945892238               |
| SNP_P3_12227_36726518 | NC_021160.1    | Ca_kabuli_chr01 | 36726518                | AA                              | GG                | 1945892240               |
| SNP_P3_12228_36726535 | NC_021160.1    | Ca_kabuli_chr01 | 36726535                | CC                              | TT                | 1945892242               |
| SNP_P3_12229_36726641 | NC_021160.1    | Ca_kabuli_chr01 | 36726641                | GG                              | AA                | 1945892244               |
| SNP_P3_12230_36726647 | NC_021160.1    | Ca_kabuli_chr01 | 36726647                | TT                              | CC                | 1945892245               |
| SNP_P3_12231_36726731 | NC_021160.1    | Ca_kabuli_chr01 | 36726731                | TT                              | CC                | 1945892247               |
| SNP_P3_12232_36726979 | NC_021160.1    | Ca_kabuli_chr01 | 36726979                | AA                              | GG                | 1945892249               |
| SNP_P3_12233_36727688 | NC_021160.1    | Ca_kabuli_chr01 | 36727688                | AA                              | GG                | 1945892251               |
| SNP_P3_12235_36727827 | NC_021160.1    | Ca_kabuli_chr01 | 36727827                | CC                              | AA                | 1945892253               |

| SNPs IDs              | Chromosome IDs | Chromosomes     | Physical positions (bp) | CDC Frontier (Reference genome) | (Pusa 256 & HPNB) | NCBI SNPdb Accession IDs |
|-----------------------|----------------|-----------------|-------------------------|---------------------------------|-------------------|--------------------------|
| SNP_P3_12236_36727840 | NC_021160.1    | Ca_kabuli_chr01 | 36727840                | GG                              | AA                | 1945892254               |
| SNP_P3_12237_36727843 | NC_021160.1    | Ca_kabuli_chr01 | 36727843                | GG                              | CC                | 1945892256               |
| SNP_P3_12238_36727911 | NC_021160.1    | Ca_kabuli_chr01 | 36727911                | TT                              | CC                | 1945892258               |
| SNP_P3_12239_36727949 | NC_021160.1    | Ca_kabuli_chr01 | 36727949                | CC                              | GG                | 1945892260               |
| SNP_P3_12240_36728056 | NC_021160.1    | Ca_kabuli_chr01 | 36728056                | AA                              | CC                | 1945892261               |
| SNP_P3_12241_36728060 | NC_021160.1    | Ca_kabuli_chr01 | 36728060                | TT                              | CC                | 1945892263               |
| SNP_P3_12242_36728086 | NC_021160.1    | Ca_kabuli_chr01 | 36728086                | GG                              | TT                | 1945892265               |
| SNP_P3_12243_36728148 | NC_021160.1    | Ca_kabuli_chr01 | 36728148                | AA                              | GG                | 1945892267               |
| SNP_P3_12244_36728207 | NC_021160.1    | Ca_kabuli_chr01 | 36728207                | GG                              | AA                | 1945892268               |
| SNP_P3_12245_36728235 | NC_021160.1    | Ca_kabuli_chr01 | 36728235                | AA                              | TT                | 1945892270               |
| SNP_P3_12246_36728412 | NC_021160.1    | Ca_kabuli_chr01 | 36728412                | CC                              | TT                | 1945892272               |
| SNP_P3_12247_36728519 | NC_021160.1    | Ca_kabuli_chr01 | 36728519                | CC                              | TT                | 1945892274               |
| SNP_P3_12248_36728583 | NC_021160.1    | Ca_kabuli_chr01 | 36728583                | TT                              | GG                | 1945892276               |
| SNP_P3_12249_36737904 | NC_021160.1    | Ca_kabuli_chr01 | 36737904                | AA                              | GG                | 1945892277               |
| SNP_P3_12250_36737930 | NC_021160.1    | Ca_kabuli_chr01 | 36737930                | AA                              | GG                | 1945892279               |
| SNP_P3_12251_36737934 | NC_021160.1    | Ca_kabuli_chr01 | 36737934                | GG                              | CC                | 1945892281               |
| SNP_P3_12252_36738279 | NC_021160.1    | Ca_kabuli_chr01 | 36738279                | CC                              | AA                | 1945892283               |
| SNP_P3_12253_36745815 | NC_021160.1    | Ca_kabuli_chr01 | 36745815                | TT                              | CC                | 1945892284               |
| SNP_P3_12254_36746132 | NC_021160.1    | Ca_kabuli_chr01 | 36746132                | GG                              | AA                | 1945892286               |
| SNP_P3_12255_36764824 | NC_021160.1    | Ca_kabuli_chr01 | 36764824                | GG                              | AA                | 1945892288               |
| SNP_P3_12256_36769858 | NC_021160.1    | Ca_kabuli_chr01 | 36769858                | GG                              | TT                | 1945892290               |
| SNP_P3_12257_36789713 | NC_021160.1    | Ca_kabuli_chr01 | 36789713                | CC                              | TT                | 1945892291               |
| SNP_P3_12258_36791053 | NC_021160.1    | Ca_kabuli_chr01 | 36791053                | TT                              | CC                | 1945892293               |
| SNP_P3_12259_36813615 | NC_021160.1    | Ca_kabuli_chr01 | 36813615                | AA                              | CC                | 1945892295               |
| SNP_P3_12260_36842671 | NC_021160.1    | Ca_kabuli_chr01 | 36842671                | CC                              | TT                | 1945892297               |
| SNP_P3_12261_36846500 | NC_021160.1    | Ca_kabuli_chr01 | 36846500                | CC                              | GG                | 1945892298               |
| SNP_P3_12262_36846609 | NC_021160.1    | Ca_kabuli_chr01 | 36846609                | TT                              | CC                | 1945892300               |
| SNP_P3_12263_36846622 | NC_021160.1    | Ca_kabuli_chr01 | 36846622                | AA                              | TT                | 1945892302               |
| SNP_P3_12264_36846642 | NC_021160.1    | Ca_kabuli_chr01 | 36846642                | CC                              | TT                | 1945892304               |
| SNP_P3_12265_36846649 | NC_021160.1    | Ca_kabuli_chr01 | 36846649                | TT                              | CC                | 1945892306               |
| SNP_P3_12266_36846666 | NC_021160.1    | Ca_kabuli_chr01 | 36846666                | TT                              | CC                | 1945892307               |
| SNP_P3_12267_36846677 | NC_021160.1    | Ca_kabuli_chr01 | 36846677                | TT                              | CC                | 1945892309               |
| SNP_P3_12269_36869020 | NC_021160.1    | Ca_kabuli_chr01 | 36869020                | AA                              | GG                | 1945892311               |
| SNP_P3_12271_36869134 | NC_021160.1    | Ca_kabuli_chr01 | 36869134                | GG                              | TT                | 1945892313               |
| SNP_P3_12272_36869170 | NC_021160.1    | Ca_kabuli_chr01 | 36869170                | TT                              | GG                | 1945892314               |
| SNP_P3_12273_36869173 | NC_021160.1    | Ca_kabuli_chr01 | 36869173                | AA                              | CC                | 1945892316               |
| SNP_P3_12274_36869204 | NC_021160.1    | Ca_kabuli_chr01 | 36869204                | TT                              | AA                | 1945892318               |
| SNP_P3_12275_36869208 | NC_021160.1    | Ca_kabuli_chr01 | 36869208                | TT                              | CC                | 1945892320               |
| SNP_P3_12276_36869213 | NC_021160.1    | Ca_kabuli_chr01 | 36869213                | GG                              | AA                | 1945892322               |
| SNP_P3_12277_36869214 | NC_021160.1    | Ca_kabuli_chr01 | 36869214                | TT                              | GG                | 1945892323               |
| SNP_P3_12278_36869217 | NC_021160.1    | Ca_kabuli_chr01 | 36869217                | AA                              | GG                | 1945892325               |
| SNP_P3_12279_36869233 | NC_021160.1    | Ca_kabuli_chr01 | 36869233                | CC                              | AA                | 1945892327               |



| SNPs IDs              | Chromosome IDs | Chromosomes     | Physical positions (bp) | CDC Frontier (Reference genome) | (Pusa 256 & HPNB) | NCBI SNPdb Accession IDs |
|-----------------------|----------------|-----------------|-------------------------|---------------------------------|-------------------|--------------------------|
| SNP_P3_12280_36869334 | NC_021160.1    | Ca_kabuli_chr01 | 36869334                | GG                              | AA                | 1945892329               |
| SNP_P3_12281_36869338 | NC_021160.1    | Ca_kabuli_chr01 | 36869338                | TT                              | AA                | 1945892330               |
| SNP_P3_12282_36869355 | NC_021160.1    | Ca_kabuli_chr01 | 36869355                | GG                              | TT                | 1945892332               |
| SNP_P3_12283_36876884 | NC_021160.1    | Ca_kabuli_chr01 | 36876884                | CC                              | TT                | 1945892334               |
| SNP_P3_12285_36918847 | NC_021160.1    | Ca_kabuli_chr01 | 36918847                | TT                              | GG                | 1945892336               |
| SNP_P3_12286_36950089 | NC_021160.1    | Ca_kabuli_chr01 | 36950089                | AA                              | CC                | 1945892337               |
| SNP_P3_12287_36950102 | NC_021160.1    | Ca_kabuli_chr01 | 36950102                | AA                              | GG                | 1945892339               |
| SNP_P3_12288_36950114 | NC_021160.1    | Ca_kabuli_chr01 | 36950114                | GG                              | AA                | 1945892341               |
| SNP_P3_12289_36950140 | NC_021160.1    | Ca_kabuli_chr01 | 36950140                | GG                              | AA                | 1945892343               |
| SNP_P3_12290_36950141 | NC_021160.1    | Ca_kabuli_chr01 | 36950141                | CC                              | GG                | 1945892344               |
| SNP_P3_12291_36950145 | NC_021160.1    | Ca_kabuli_chr01 | 36950145                | AA                              | TT                | 1945892346               |
| SNP_P3_12292_36950150 | NC_021160.1    | Ca_kabuli_chr01 | 36950150                | CC                              | GG                | 1945892348               |
| SNP_P3_12293_36950177 | NC_021160.1    | Ca_kabuli_chr01 | 36950177                | TT                              | AA                | 1945892350               |
| SNP_P3_12294_36950222 | NC_021160.1    | Ca_kabuli_chr01 | 36950222                | CC                              | TT                | 1945892352               |
| SNP_P3_12295_36950225 | NC_021160.1    | Ca_kabuli_chr01 | 36950225                | TT                              | GG                | 1945892353               |
| SNP_P3_12296_36950239 | NC_021160.1    | Ca_kabuli_chr01 | 36950239                | AA                              | GG                | 1945892355               |
| SNP_P3_12297_36950252 | NC_021160.1    | Ca_kabuli_chr01 | 36950252                | GG                              | AA                | 1945892357               |
| SNP_P3_12298_36950310 | NC_021160.1    | Ca_kabuli_chr01 | 36950310                | AA                              | GG                | 1945892359               |
| SNP_P3_12299_36950318 | NC_021160.1    | Ca_kabuli_chr01 | 36950318                | AA                              | CC                | 1945892360               |
| SNP_P3_12300_36950329 | NC_021160.1    | Ca_kabuli_chr01 | 36950329                | AA                              | GG                | 1945892362               |
| SNP_P3_12301_36950600 | NC_021160.1    | Ca_kabuli_chr01 | 36950600                | TT                              | GG                | 1945892364               |
| SNP_P3_12302_36950701 | NC_021160.1    | Ca_kabuli_chr01 | 36950701                | AA                              | GG                | 1945892366               |
| SNP_P3_12303_36956307 | NC_021160.1    | Ca_kabuli_chr01 | 36956307                | AA                              | TT                | 1945892368               |
| SNP_P3_12304_37005616 | NC_021160.1    | Ca_kabuli_chr01 | 37005616                | TT                              | GG                | 1945892369               |
| SNP_P3_12306_37032712 | NC_021160.1    | Ca_kabuli_chr01 | 37032712                | TT                              | GG                | 1945892371               |
| SNP_P3_12307_37032911 | NC_021160.1    | Ca_kabuli_chr01 | 37032911                | CC                              | GG                | 1945892373               |
| SNP_P3_12308_37036764 | NC_021160.1    | Ca_kabuli_chr01 | 37036764                | AA                              | GG                | 1945892375               |
| SNP_P3_12309_37036777 | NC_021160.1    | Ca_kabuli_chr01 | 37036777                | TT                              | CC                | 1945892376               |
| SNP_P3_12310_37037111 | NC_021160.1    | Ca_kabuli_chr01 | 37037111                | TT                              | CC                | 1945892378               |
| SNP_P3_12311_37037162 | NC_021160.1    | Ca_kabuli_chr01 | 37037162                | AA                              | GG                | 1945892380               |
| SNP_P3_12312_37037459 | NC_021160.1    | Ca_kabuli_chr01 | 37037459                | TT                              | CC                | 1945892382               |
| SNP_P3_12313_37037862 | NC_021160.1    | Ca_kabuli_chr01 | 37037862                | TT                              | CC                | 1945892383               |
| SNP_P3_12314_37042806 | NC_021160.1    | Ca_kabuli_chr01 | 37042806                | CC                              | TT                | 1945892385               |
| SNP_P3_12315_37043198 | NC_021160.1    | Ca_kabuli_chr01 | 37043198                | CC                              | TT                | 1945892387               |
| SNP_P3_12316_37050877 | NC_021160.1    | Ca_kabuli_chr01 | 37050877                | CC                              | AA                | 1945892389               |
| SNP_P3_12317_37050927 | NC_021160.1    | Ca_kabuli_chr01 | 37050927                | TT                              | CC                | 1945892391               |
| SNP_P3_12318_37050940 | NC_021160.1    | Ca_kabuli_chr01 | 37050940                | TT                              | CC                | 1945892392               |
| SNP_P3_12319_37051242 | NC_021160.1    | Ca_kabuli_chr01 | 37051242                | TT                              | AA                | 1945892394               |
| SNP_P3_12320_37054604 | NC_021160.1    | Ca_kabuli_chr01 | 37054604                | GG                              | AA                | 1945892396               |
| SNP_P3_12321_37054623 | NC_021160.1    | Ca_kabuli_chr01 | 37054623                | CC                              | AA                | 1945892398               |
| SNP_P3_12322_37054693 | NC_021160.1    | Ca_kabuli_chr01 | 37054693                | TT                              | CC                | 1945892399               |
| SNP_P3_12323_37054956 | NC_021160.1    | Ca_kabuli_chr01 | 37054956                | CC                              | TT                | 1945892401               |

| SNPs IDs              | Chromosome IDs | Chromosomes     | Physical positions (bp) | CDC Frontier (Reference genome) | (Pusa 256 & HPNB) | NCBI SNPdb Accession IDs |
|-----------------------|----------------|-----------------|-------------------------|---------------------------------|-------------------|--------------------------|
| SNP_P3_12324_37054965 | NC_021160.1    | Ca_kabuli_chr01 | 37054965                | GG                              | AA                | 1945892403               |
| SNP_P3_12325_37054970 | NC_021160.1    | Ca_kabuli_chr01 | 37054970                | CC                              | AA                | 1945892405               |
| SNP_P3_12326_37054978 | NC_021160.1    | Ca_kabuli_chr01 | 37054978                | CC                              | AA                | 1945892407               |
| SNP_P3_12327_37054979 | NC_021160.1    | Ca_kabuli_chr01 | 37054979                | CC                              | TT                | 1945892408               |
| SNP_P3_12328_37055062 | NC_021160.1    | Ca_kabuli_chr01 | 37055062                | CC                              | TT                | 1945892410               |
| SNP_P3_12329_37078520 | NC_021160.1    | Ca_kabuli_chr01 | 37078520                | CC                              | TT                | 1945892412               |
| SNP_P3_12330_37078526 | NC_021160.1    | Ca_kabuli_chr01 | 37078526                | GG                              | AA                | 1945892414               |
| SNP_P3_12331_37078539 | NC_021160.1    | Ca_kabuli_chr01 | 37078539                | TT                              | CC                | 1945892415               |
| SNP_P3_12332_37078592 | NC_021160.1    | Ca_kabuli_chr01 | 37078592                | TT                              | GG                | 1945892417               |
| SNP_P3_12333_37078593 | NC_021160.1    | Ca_kabuli_chr01 | 37078593                | AA                              | TT                | 1945892419               |
| SNP_P3_12334_37078596 | NC_021160.1    | Ca_kabuli_chr01 | 37078596                | GG                              | AA                | 1945892421               |
| SNP_P3_12335_37078606 | NC_021160.1    | Ca_kabuli_chr01 | 37078606                | TT                              | GG                | 1945892423               |
| SNP_P3_12336_37078640 | NC_021160.1    | Ca_kabuli_chr01 | 37078640                | CC                              | TT                | 1945892424               |
| SNP_P3_12337_37078663 | NC_021160.1    | Ca_kabuli_chr01 | 37078663                | AA                              | TT                | 1945892426               |
| SNP_P3_12338_37078668 | NC_021160.1    | Ca_kabuli_chr01 | 37078668                | AA                              | GG                | 1945892428               |
| SNP_P3_12339_37078718 | NC_021160.1    | Ca_kabuli_chr01 | 37078718                | CC                              | AA                | 1945892430               |
| SNP_P3_12340_37078729 | NC_021160.1    | Ca_kabuli_chr01 | 37078729                | AA                              | TT                | 1945892431               |
| SNP_P3_12341_37078743 | NC_021160.1    | Ca_kabuli_chr01 | 37078743                | AA                              | GG                | 1945892433               |
| SNP_P3_12342_37078790 | NC_021160.1    | Ca_kabuli_chr01 | 37078790                | AA                              | GG                | 1945892435               |
| SNP_P3_12343_37078851 | NC_021160.1    | Ca_kabuli_chr01 | 37078851                | TT                              | CC                | 1945892437               |
| SNP_P3_12344_37078862 | NC_021160.1    | Ca_kabuli_chr01 | 37078862                | AA                              | TT                | 1945892438               |
| SNP_P3_12346_37078986 | NC_021160.1    | Ca_kabuli_chr01 | 37078986                | CC                              | AA                | 1945892440               |
| SNP_P3_12347_37079000 | NC_021160.1    | Ca_kabuli_chr01 | 37079000                | TT                              | GG                | 1945892442               |
| SNP_P3_12348_37079031 | NC_021160.1    | Ca_kabuli_chr01 | 37079031                | AA                              | CC                | 1945892444               |
| SNP_P3_12349_37079038 | NC_021160.1    | Ca_kabuli_chr01 | 37079038                | CC                              | GG                | 1945892446               |
| SNP_P3_12350_37079090 | NC_021160.1    | Ca_kabuli_chr01 | 37079090                | AA                              | TT                | 1945892447               |
| SNP_P3_12351_37079115 | NC_021160.1    | Ca_kabuli_chr01 | 37079115                | AA                              | GG                | 1945892449               |
| SNP_P3_12352_37079395 | NC_021160.1    | Ca_kabuli_chr01 | 37079395                | GG                              | AA                | 1945892451               |
| SNP_P3_12353_37081578 | NC_021160.1    | Ca_kabuli_chr01 | 37081578                | GG                              | CC                | 1945892453               |
| SNP_P3_12354_37081722 | NC_021160.1    | Ca_kabuli_chr01 | 37081722                | CC                              | TT                | 1945892454               |
| SNP_P3_12356_37081772 | NC_021160.1    | Ca_kabuli_chr01 | 37081772                | GG                              | TT                | 1945892456               |
| SNP_P3_12357_37082315 | NC_021160.1    | Ca_kabuli_chr01 | 37082315                | TT                              | AA                | 1945892458               |
| SNP_P3_12358_37086666 | NC_021160.1    | Ca_kabuli_chr01 | 37086666                | TT                              | AA                | 1945892460               |
| SNP_P3_12359_37089216 | NC_021160.1    | Ca_kabuli_chr01 | 37089216                | GG                              | TT                | 1945892462               |
| SNP_P3_12360_37093770 | NC_021160.1    | Ca_kabuli_chr01 | 37093770                | AA                              | GG                | 1945892463               |
| SNP_P3_12361_37093771 | NC_021160.1    | Ca_kabuli_chr01 | 37093771                | TT                              | AA                | 1945892465               |
| SNP_P3_12363_37110291 | NC_021160.1    | Ca_kabuli_chr01 | 37110291                | GG                              | TT                | 1945892467               |
| SNP_P3_12364_37113028 | NC_021160.1    | Ca_kabuli_chr01 | 37113028                | TT                              | AA                | 1945892469               |
| SNP_P3_12365_37113270 | NC_021160.1    | Ca_kabuli_chr01 | 37113270                | TT                              | CC                | 1945892470               |
| SNP_P3_12366_37120676 | NC_021160.1    | Ca_kabuli_chr01 | 37120676                | AA                              | CC                | 1945892472               |
| SNP_P3_12367_37120760 | NC_021160.1    | Ca_kabuli_chr01 | 37120760                | TT                              | AA                | 1945892474               |
| SNP_P3_12368_37120833 | NC_021160.1    | Ca_kabuli_chr01 | 37120833                | AA                              | CC                | 1945892476               |

| SNPs IDs              | Chromosome IDs | Chromosomes     | Physical positions (bp) | CDC Frontier (Reference genome) | (Pusa 256 & HPNB) | NCBI SNPdb Accession IDs |
|-----------------------|----------------|-----------------|-------------------------|---------------------------------|-------------------|--------------------------|
| SNP_P3_12369_37120844 | NC_021160.1    | Ca_kabuli_chr01 | 37120844                | GG                              | TT                | 1945892477               |
| SNP_P3_12370_37120867 | NC_021160.1    | Ca_kabuli_chr01 | 37120867                | TT                              | AA                | 1945892479               |
| SNP_P3_12371_37120925 | NC_021160.1    | Ca_kabuli_chr01 | 37120925                | AA                              | GG                | 1945892481               |
| SNP_P3_12372_37120966 | NC_021160.1    | Ca_kabuli_chr01 | 37120966                | AA                              | GG                | 1945892483               |
| SNP_P3_12373_37120967 | NC_021160.1    | Ca_kabuli_chr01 | 37120967                | TT                              | GG                | 1945892485               |
| SNP_P3_12374_37121059 | NC_021160.1    | Ca_kabuli_chr01 | 37121059                | AA                              | GG                | 1945892486               |
| SNP_P3_12375_37121094 | NC_021160.1    | Ca_kabuli_chr01 | 37121094                | TT                              | CC                | 1945892488               |
| SNP_P3_12376_37121100 | NC_021160.1    | Ca_kabuli_chr01 | 37121100                | GG                              | AA                | 1945892490               |
| SNP_P3_12377_37121121 | NC_021160.1    | Ca_kabuli_chr01 | 37121121                | TT                              | CC                | 1945892492               |
| SNP_P3_12378_37121152 | NC_021160.1    | Ca_kabuli_chr01 | 37121152                | GG                              | AA                | 1945892493               |
| SNP_P3_12379_37121197 | NC_021160.1    | Ca_kabuli_chr01 | 37121197                | GG                              | AA                | 1945892495               |
| SNP_P3_12380_37121213 | NC_021160.1    | Ca_kabuli_chr01 | 37121213                | TT                              | AA                | 1945892497               |
| SNP_P3_12381_37121360 | NC_021160.1    | Ca_kabuli_chr01 | 37121360                | AA                              | GG                | 1945892499               |
| SNP_P3_12382_37121638 | NC_021160.1    | Ca_kabuli_chr01 | 37121638                | TT                              | AA                | 1945892500               |
| SNP_P3_12383_37121663 | NC_021160.1    | Ca_kabuli_chr01 | 37121663                | GG                              | AA                | 1945892502               |
| SNP_P3_12384_37121682 | NC_021160.1    | Ca_kabuli_chr01 | 37121682                | TT                              | CC                | 1945892504               |
| SNP_P3_12385_37121704 | NC_021160.1    | Ca_kabuli_chr01 | 37121704                | AA                              | TT                | 1945892506               |
| SNP_P3_12386_37121762 | NC_021160.1    | Ca_kabuli_chr01 | 37121762                | TT                              | CC                | 1945892508               |
| SNP_P3_12387_37121830 | NC_021160.1    | Ca_kabuli_chr01 | 37121830                | CC                              | TT                | 1945892509               |
| SNP_P3_12388_37121835 | NC_021160.1    | Ca_kabuli_chr01 | 37121835                | CC                              | AA                | 1945892511               |
| SNP_P3_12389_37121858 | NC_021160.1    | Ca_kabuli_chr01 | 37121858                | TT                              | CC                | 1945892513               |
| SNP_P3_12390_37121872 | NC_021160.1    | Ca_kabuli_chr01 | 37121872                | GG                              | AA                | 1945892515               |
| SNP_P3_12391_37121893 | NC_021160.1    | Ca_kabuli_chr01 | 37121893                | GG                              | AA                | 1945892516               |
| SNP_P3_12392_37121901 | NC_021160.1    | Ca_kabuli_chr01 | 37121901                | AA                              | GG                | 1945892518               |
| SNP_P3_12393_37121996 | NC_021160.1    | Ca_kabuli_chr01 | 37121996                | TT                              | CC                | 1945892520               |
| SNP_P3_12395_37122241 | NC_021160.1    | Ca_kabuli_chr01 | 37122241                | CC                              | TT                | 1945892522               |
| SNP_P3_12396_37122245 | NC_021160.1    | Ca_kabuli_chr01 | 37122245                | AA                              | CC                | 1945892524               |
| SNP_P3_12397_37122252 | NC_021160.1    | Ca_kabuli_chr01 | 37122252                | CC                              | TT                | 1945892525               |
| SNP_P3_12398_37122254 | NC_021160.1    | Ca_kabuli_chr01 | 37122254                | AA                              | TT                | 1945892527               |
| SNP_P3_12399_37122278 | NC_021160.1    | Ca_kabuli_chr01 | 37122278                | AA                              | CC                | 1945892529               |
| SNP_P3_12400_37122355 | NC_021160.1    | Ca_kabuli_chr01 | 37122355                | GG                              | AA                | 1945892531               |
| SNP_P3_12401_37122380 | NC_021160.1    | Ca_kabuli_chr01 | 37122380                | CC                              | TT                | 1945892532               |
| SNP_P3_12402_37122468 | NC_021160.1    | Ca_kabuli_chr01 | 37122468                | GG                              | CC                | 1945892534               |
| SNP_P3_12403_37122479 | NC_021160.1    | Ca_kabuli_chr01 | 37122479                | TT                              | AA                | 1945892536               |
| SNP_P3_12405_37122670 | NC_021160.1    | Ca_kabuli_chr01 | 37122670                | AA                              | TT                | 1945892538               |
| SNP_P3_12406_37122693 | NC_021160.1    | Ca_kabuli_chr01 | 37122693                | AA                              | GG                | 1945892539               |
| SNP_P3_12408_37122755 | NC_021160.1    | Ca_kabuli_chr01 | 37122755                | TT                              | GG                | 1945892541               |
| SNP_P3_12409_37122764 | NC_021160.1    | Ca_kabuli_chr01 | 37122764                | TT                              | CC                | 1945892543               |
| SNP_P3_12410_37122783 | NC_021160.1    | Ca_kabuli_chr01 | 37122783                | GG                              | AA                | 1945892545               |
| SNP_P3_12411_37122797 | NC_021160.1    | Ca_kabuli_chr01 | 37122797                | CC                              | TT                | 1945892547               |
| SNP_P3_12413_37122886 | NC_021160.1    | Ca_kabuli_chr01 | 37122886                | GG                              | AA                | 1945892548               |
| SNP_P3_12414_37122903 | NC_021160.1    | Ca_kabuli_chr01 | 37122903                | TT                              | CC                | 1945892550               |

| SNPs IDs              | Chromosome IDs | Chromosomes     | Physical positions (bp) | CDC Frontier (Reference genome) | (Pusa 256 & HPNB) | NCBI SNPdb Accession IDs |
|-----------------------|----------------|-----------------|-------------------------|---------------------------------|-------------------|--------------------------|
| SNP_P3_12415_37122921 | NC_021160.1    | Ca_kabuli_chr01 | 37122921                | AA                              | GG                | 1945892552               |
| SNP_P3_12416_37122983 | NC_021160.1    | Ca_kabuli_chr01 | 37122983                | TT                              | CC                | 1945892554               |
| SNP_P3_12417_37122986 | NC_021160.1    | Ca_kabuli_chr01 | 37122986                | GG                              | TT                | 1945892555               |
| SNP_P3_12418_37122993 | NC_021160.1    | Ca_kabuli_chr01 | 37122993                | GG                              | AA                | 1945892557               |
| SNP_P3_12419_37123014 | NC_021160.1    | Ca_kabuli_chr01 | 37123014                | TT                              | CC                | 1945892559               |
| SNP_P3_12420_37123090 | NC_021160.1    | Ca_kabuli_chr01 | 37123090                | TT                              | AA                | 1945892561               |
| SNP_P3_12421_37123091 | NC_021160.1    | Ca_kabuli_chr01 | 37123091                | TT                              | AA                | 1945892563               |
| SNP_P3_12422_37123224 | NC_021160.1    | Ca_kabuli_chr01 | 37123224                | GG                              | TT                | 1945892564               |
| SNP_P3_12423_37126557 | NC_021160.1    | Ca_kabuli_chr01 | 37126557                | GG                              | AA                | 1945892566               |
| SNP_P3_12424_37128375 | NC_021160.1    | Ca_kabuli_chr01 | 37128375                | CC                              | TT                | 1945892568               |
| SNP_P3_12426_37128771 | NC_021160.1    | Ca_kabuli_chr01 | 37128771                | TT                              | CC                | 1945892570               |
| SNP_P3_12427_37128912 | NC_021160.1    | Ca_kabuli_chr01 | 37128912                | AA                              | TT                | 1945892571               |
| SNP_P3_12428_37128921 | NC_021160.1    | Ca_kabuli_chr01 | 37128921                | AA                              | CC                | 1945892573               |
| SNP_P3_12429_37128931 | NC_021160.1    | Ca_kabuli_chr01 | 37128931                | TT                              | CC                | 1945892575               |
| SNP_P3_12430_37128964 | NC_021160.1    | Ca_kabuli_chr01 | 37128964                | TT                              | CC                | 1945892577               |
| SNP_P3_12431_37129025 | NC_021160.1    | Ca_kabuli_chr01 | 37129025                | TT                              | CC                | 1945892578               |
| SNP_P3_12432_37129151 | NC_021160.1    | Ca_kabuli_chr01 | 37129151                | GG                              | AA                | 1945892580               |
| SNP_P3_12433_37129752 | NC_021160.1    | Ca_kabuli_chr01 | 37129752                | TT                              | AA                | 1945892582               |
| SNP_P3_12434_37130856 | NC_021160.1    | Ca_kabuli_chr01 | 37130856                | TT                              | AA                | 1945892584               |
| SNP_P3_12435_37133517 | NC_021160.1    | Ca_kabuli_chr01 | 37133517                | GG                              | CC                | 1945892586               |
| SNP_P3_12436_37157084 | NC_021160.1    | Ca_kabuli_chr01 | 37157084                | GG                              | TT                | 1945892587               |
| SNP_P3_12437_37157285 | NC_021160.1    | Ca_kabuli_chr01 | 37157285                | CC                              | TT                | 1945892589               |
| SNP_P3_12438_37157298 | NC_021160.1    | Ca_kabuli_chr01 | 37157298                | TT                              | CC                | 1945892591               |
| SNP_P3_12439_37157320 | NC_021160.1    | Ca_kabuli_chr01 | 37157320                | AA                              | GG                | 1945892593               |
| SNP_P3_12440_37157449 | NC_021160.1    | Ca_kabuli_chr01 | 37157449                | TT                              | AA                | 1945892594               |
| SNP_P3_12441_37157450 | NC_021160.1    | Ca_kabuli_chr01 | 37157450                | TT                              | AA                | 1945892596               |
| SNP_P3_12442_37157451 | NC_021160.1    | Ca_kabuli_chr01 | 37157451                | TT                              | AA                | 1945892598               |
| SNP_P3_12443_37157493 | NC_021160.1    | Ca_kabuli_chr01 | 37157493                | AA                              | GG                | 1945892600               |
| SNP_P3_12444_37190446 | NC_021160.1    | Ca_kabuli_chr01 | 37190446                | TT                              | CC                | 1945892602               |
| SNP_P3_12445_37197508 | NC_021160.1    | Ca_kabuli_chr01 | 37197508                | GG                              | TT                | 1945892603               |
| SNP_P3_12447_37203135 | NC_021160.1    | Ca_kabuli_chr01 | 37203135                | TT                              | GG                | 1945892605               |
| SNP_P3_12448_37205312 | NC_021160.1    | Ca_kabuli_chr01 | 37205312                | AA                              | CC                | 1945892607               |
| SNP_P3_12449_37206621 | NC_021160.1    | Ca_kabuli_chr01 | 37206621                | CC                              | TT                | 1945892609               |
| SNP_P3_12451_37212502 | NC_021160.1    | Ca_kabuli_chr01 | 37212502                | AA                              | GG                | 1945892610               |
| SNP_P3_12452_37219764 | NC_021160.1    | Ca_kabuli_chr01 | 37219764                | CC                              | TT                | 1945892612               |
| SNP_P3_12453_37242818 | NC_021160.1    | Ca_kabuli_chr01 | 37242818                | GG                              | TT                | 1945892614               |
| SNP_P3_12455_37243095 | NC_021160.1    | Ca_kabuli_chr01 | 37243095                | AA                              | GG                | 1945892616               |
| SNP_P3_12456_37243424 | NC_021160.1    | Ca_kabuli_chr01 | 37243424                | GG                              | AA                | 1945892618               |
| SNP_P3_12457_37279850 | NC_021160.1    | Ca_kabuli_chr01 | 37279850                | TT                              | AA                | 1945892619               |
| SNP_P3_12458_37279854 | NC_021160.1    | Ca_kabuli_chr01 | 37279854                | CC                              | TT                | 1945892621               |
| SNP_P3_12459_37343151 | NC_021160.1    | Ca_kabuli_chr01 | 37343151                | CC                              | TT                | 1945892623               |
| SNP_P3_12460_37351390 | NC_021160.1    | Ca_kabuli_chr01 | 37351390                | AA                              | CC                | 1945892625               |

| SNPs IDs              | Chromosome IDs | Chromosomes     | Physical positions (bp) | CDC Frontier (Reference genome) | (Pusa 256 & HPNB) | NCBI SNPdb Accession IDs |
|-----------------------|----------------|-----------------|-------------------------|---------------------------------|-------------------|--------------------------|
| SNP_P3_12461_37353430 | NC_021160.1    | Ca_kabuli_chr01 | 37353430                | AA                              | TT                | 1945892626               |
| SNP_P3_12462_37353435 | NC_021160.1    | Ca_kabuli_chr01 | 37353435                | GG                              | CC                | 1945892628               |
| SNP_P3_12463_37392789 | NC_021160.1    | Ca_kabuli_chr01 | 37392789                | CC                              | AA                | 1945892630               |
| SNP_P3_12464_37406084 | NC_021160.1    | Ca_kabuli_chr01 | 37406084                | CC                              | TT                | 1945892632               |
| SNP_P3_12465_37406094 | NC_021160.1    | Ca_kabuli_chr01 | 37406094                | CC                              | TT                | 1945892634               |
| SNP_P3_12466_37406101 | NC_021160.1    | Ca_kabuli_chr01 | 37406101                | TT                              | CC                | 1945892635               |
| SNP_P3_12467_37406232 | NC_021160.1    | Ca_kabuli_chr01 | 37406232                | AA                              | CC                | 1945892637               |
| SNP_P3_12468_37406323 | NC_021160.1    | Ca_kabuli_chr01 | 37406323                | TT                              | CC                | 1945892639               |
| SNP_P3_12469_37406566 | NC_021160.1    | Ca_kabuli_chr01 | 37406566                | CC                              | TT                | 1945892641               |
| SNP_P3_12470_37406575 | NC_021160.1    | Ca_kabuli_chr01 | 37406575                | TT                              | AA                | 1945892642               |
| SNP_P3_12471_37406586 | NC_021160.1    | Ca_kabuli_chr01 | 37406586                | TT                              | CC                | 1945892644               |
| SNP_P3_12472_37406623 | NC_021160.1    | Ca_kabuli_chr01 | 37406623                | GG                              | AA                | 1945892646               |
| SNP_P3_12473_37406624 | NC_021160.1    | Ca_kabuli_chr01 | 37406624                | CC                              | TT                | 1945892648               |
| SNP_P3_12474_37409796 | NC_021160.1    | Ca_kabuli_chr01 | 37409796                | GG                              | AA                | 1945892650               |
| SNP_P3_12475_37409823 | NC_021160.1    | Ca_kabuli_chr01 | 37409823                | GG                              | AA                | 1945892651               |
| SNP_P3_12476_37409842 | NC_021160.1    | Ca_kabuli_chr01 | 37409842                | GG                              | AA                | 1945892653               |
| SNP_P3_12477_37409886 | NC_021160.1    | Ca_kabuli_chr01 | 37409886                | GG                              | AA                | 1945892655               |
| SNP_P3_12478_37409892 | NC_021160.1    | Ca_kabuli_chr01 | 37409892                | GG                              | TT                | 1945892657               |
| SNP_P3_12479_37409918 | NC_021160.1    | Ca_kabuli_chr01 | 37409918                | TT                              | CC                | 1945892658               |
| SNP_P3_12480_37409960 | NC_021160.1    | Ca_kabuli_chr01 | 37409960                | TT                              | CC                | 1945892660               |
| SNP_P3_12481_37409983 | NC_021160.1    | Ca_kabuli_chr01 | 37409983                | AA                              | GG                | 1945892662               |
| SNP_P3_12482_37410020 | NC_021160.1    | Ca_kabuli_chr01 | 37410020                | TT                              | CC                | 1945892664               |
| SNP_P3_12483_37410040 | NC_021160.1    | Ca_kabuli_chr01 | 37410040                | TT                              | CC                | 1945892666               |
| SNP_P3_12484_37410061 | NC_021160.1    | Ca_kabuli_chr01 | 37410061                | GG                              | AA                | 1945892667               |
| SNP_P3_12485_37410106 | NC_021160.1    | Ca_kabuli_chr01 | 37410106                | AA                              | GG                | 1945892669               |
| SNP_P3_12486_37410115 | NC_021160.1    | Ca_kabuli_chr01 | 37410115                | TT                              | CC                | 1945892671               |
| SNP_P3_12487_37410117 | NC_021160.1    | Ca_kabuli_chr01 | 37410117                | AA                              | GG                | 1945892673               |
| SNP_P3_12488_37410118 | NC_021160.1    | Ca_kabuli_chr01 | 37410118                | TT                              | AA                | 1945892674               |
| SNP_P3_12489_37410140 | NC_021160.1    | Ca_kabuli_chr01 | 37410140                | GG                              | AA                | 1945892676               |
| SNP_P3_12490_37410145 | NC_021160.1    | Ca_kabuli_chr01 | 37410145                | GG                              | TT                | 1945892678               |
| SNP_P3_12491_37410194 | NC_021160.1    | Ca_kabuli_chr01 | 37410194                | AA                              | GG                | 1945892680               |
| SNP_P3_12492_37410203 | NC_021160.1    | Ca_kabuli_chr01 | 37410203                | GG                              | AA                | 1945892682               |
| SNP_P3_12493_37410247 | NC_021160.1    | Ca_kabuli_chr01 | 37410247                | TT                              | GG                | 1945892683               |
| SNP_P3_12494_37410269 | NC_021160.1    | Ca_kabuli_chr01 | 37410269                | TT                              | CC                | 1945892685               |
| SNP_P3_12495_37410277 | NC_021160.1    | Ca_kabuli_chr01 | 37410277                | GG                              | CC                | 1945892687               |
| SNP_P3_12496_37410353 | NC_021160.1    | Ca_kabuli_chr01 | 37410353                | CC                              | GG                | 1945892689               |
| SNP_P3_12497_37410355 | NC_021160.1    | Ca_kabuli_chr01 | 37410355                | AA                              | GG                | 1945892690               |
| SNP_P3_12498_37410457 | NC_021160.1    | Ca_kabuli_chr01 | 37410457                | CC                              | TT                | 1945892692               |
| SNP_P3_12499_37410514 | NC_021160.1    | Ca_kabuli_chr01 | 37410514                | GG                              | TT                | 1945892694               |
| SNP_P3_12500_37412205 | NC_021160.1    | Ca_kabuli_chr01 | 37412205                | CC                              | AA                | 1945892696               |
| SNP_P3_12502_37412443 | NC_021160.1    | Ca_kabuli_chr01 | 37412443                | TT                              | GG                | 1945892698               |
| SNP_P3_12503_37419467 | NC_021160.1    | Ca_kabuli_chr01 | 37419467                | AA                              | GG                | 1945892699               |

| SNPs IDs              | Chromosome IDs | Chromosomes     | Physical positions (bp) | CDC Frontier (Reference genome) | (Pusa 256 & HPNB) | NCBI SNPdb Accession IDs |
|-----------------------|----------------|-----------------|-------------------------|---------------------------------|-------------------|--------------------------|
| SNP_P3_12504_37420091 | NC_021160.1    | Ca_kabuli_chr01 | 37420091                | GG                              | AA                | 1945892701               |
| SNP_P3_12505_37420129 | NC_021160.1    | Ca_kabuli_chr01 | 37420129                | TT                              | CC                | 1945892703               |
| SNP_P3_12506_37420247 | NC_021160.1    | Ca_kabuli_chr01 | 37420247                | GG                              | TT                | 1945892705               |
| SNP_P3_12507_37420372 | NC_021160.1    | Ca_kabuli_chr01 | 37420372                | AA                              | TT                | 1945892706               |
| SNP_P3_12509_37420521 | NC_021160.1    | Ca_kabuli_chr01 | 37420521                | CC                              | AA                | 1945892708               |
| SNP_P3_12510_37420570 | NC_021160.1    | Ca_kabuli_chr01 | 37420570                | TT                              | GG                | 1945892710               |
| SNP_P3_12512_37420755 | NC_021160.1    | Ca_kabuli_chr01 | 37420755                | GG                              | CC                | 1945892712               |
| SNP_P3_12513_37421055 | NC_021160.1    | Ca_kabuli_chr01 | 37421055                | AA                              | CC                | 1945892714               |
| SNP_P3_12515_37421134 | NC_021160.1    | Ca_kabuli_chr01 | 37421134                | GG                              | AA                | 1945892715               |
| SNP_P3_12516_37421230 | NC_021160.1    | Ca_kabuli_chr01 | 37421230                | TT                              | CC                | 1945892717               |
| SNP_P3_12517_37421603 | NC_021160.1    | Ca_kabuli_chr01 | 37421603                | TT                              | AA                | 1945892719               |
| SNP_P3_12518_37421986 | NC_021160.1    | Ca_kabuli_chr01 | 37421986                | AA                              | TT                | 1945892721               |
| SNP_P3_12519_37422161 | NC_021160.1    | Ca_kabuli_chr01 | 37422161                | GG                              | AA                | 1945892722               |
| SNP_P3_12520_37422166 | NC_021160.1    | Ca_kabuli_chr01 | 37422166                | TT                              | CC                | 1945892724               |
| SNP_P3_12521_37422380 | NC_021160.1    | Ca_kabuli_chr01 | 37422380                | TT                              | AA                | 1945892726               |
| SNP_P3_12522_37422419 | NC_021160.1    | Ca_kabuli_chr01 | 37422419                | TT                              | AA                | 1945892728               |
| SNP_P3_12523_37422561 | NC_021160.1    | Ca_kabuli_chr01 | 37422561                | AA                              | TT                | 1945892729               |
| SNP_P3_12524_37422569 | NC_021160.1    | Ca_kabuli_chr01 | 37422569                | AA                              | TT                | 1945892731               |
| SNP_P3_12525_37422583 | NC_021160.1    | Ca_kabuli_chr01 | 37422583                | TT                              | AA                | 1945892733               |
| SNP_P3_12526_37422692 | NC_021160.1    | Ca_kabuli_chr01 | 37422692                | CC                              | TT                | 1945892735               |
| SNP_P3_12527_37422966 | NC_021160.1    | Ca_kabuli_chr01 | 37422966                | TT                              | AA                | 1945892737               |
| SNP_P3_12528_37423969 | NC_021160.1    | Ca_kabuli_chr01 | 37423969                | GG                              | AA                | 1945892738               |
| SNP_P3_12529_37424240 | NC_021160.1    | Ca_kabuli_chr01 | 37424240                | CC                              | TT                | 1945892740               |
| SNP_P3_12531_37424379 | NC_021160.1    | Ca_kabuli_chr01 | 37424379                | TT                              | CC                | 1945892742               |
| SNP_P3_12532_37424411 | NC_021160.1    | Ca_kabuli_chr01 | 37424411                | GG                              | TT                | 1945892744               |
| SNP_P3_12533_37424486 | NC_021160.1    | Ca_kabuli_chr01 | 37424486                | CC                              | GG                | 1945892745               |
| SNP_P3_12534_37424513 | NC_021160.1    | Ca_kabuli_chr01 | 37424513                | TT                              | GG                | 1945892747               |
| SNP_P3_12535_37424550 | NC_021160.1    | Ca_kabuli_chr01 | 37424550                | CC                              | TT                | 1945892749               |
| SNP_P3_12536_37424582 | NC_021160.1    | Ca_kabuli_chr01 | 37424582                | GG                              | TT                | 1945892751               |
| SNP_P3_12537_37424592 | NC_021160.1    | Ca_kabuli_chr01 | 37424592                | TT                              | CC                | 1945892753               |
| SNP_P3_12538_37424599 | NC_021160.1    | Ca_kabuli_chr01 | 37424599                | TT                              | GG                | 1945892754               |
| SNP_P3_12539_37424646 | NC_021160.1    | Ca_kabuli_chr01 | 37424646                | AA                              | GG                | 1945892756               |
| SNP_P3_12541_37424797 | NC_021160.1    | Ca_kabuli_chr01 | 37424797                | TT                              | GG                | 1945892758               |
| SNP_P3_12542_37424857 | NC_021160.1    | Ca_kabuli_chr01 | 37424857                | CC                              | TT                | 1945892760               |
| SNP_P3_12543_37424873 | NC_021160.1    | Ca_kabuli_chr01 | 37424873                | GG                              | TT                | 1945892761               |
| SNP_P3_12544_37424903 | NC_021160.1    | Ca_kabuli_chr01 | 37424903                | GG                              | AA                | 1945892763               |
| SNP_P3_12545_37424945 | NC_021160.1    | Ca_kabuli_chr01 | 37424945                | GG                              | TT                | 1945892765               |
| SNP_P3_12547_37424995 | NC_021160.1    | Ca_kabuli_chr01 | 37424995                | AA                              | GG                | 1945892767               |
| SNP_P3_12548_37425011 | NC_021160.1    | Ca_kabuli_chr01 | 37425011                | AA                              | GG                | 1945892768               |
| SNP_P3_12549_37425061 | NC_021160.1    | Ca_kabuli_chr01 | 37425061                | TT                              | GG                | 1945892770               |
| SNP_P3_12551_37425092 | NC_021160.1    | Ca_kabuli_chr01 | 37425092                | CC                              | TT                | 1945892772               |
| SNP_P3_12554_37425240 | NC_021160.1    | Ca_kabuli_chr01 | 37425240                | TT                              | GG                | 1945892774               |

| SNPs IDs              | Chromosome IDs | Chromosomes     | Physical positions (bp) | CDC Frontier (Reference genome) | (Pusa 256 & HPNB) | NCBI SNPdb Accession IDs |
|-----------------------|----------------|-----------------|-------------------------|---------------------------------|-------------------|--------------------------|
| SNP_P3_12556_37425536 | NC_021160.1    | Ca_kabuli_chr01 | 37425536                | CC                              | AA                | 1945892776               |
| SNP_P3_12557_37425559 | NC_021160.1    | Ca_kabuli_chr01 | 37425559                | TT                              | GG                | 1945892777               |
| SNP_P3_12558_37425577 | NC_021160.1    | Ca_kabuli_chr01 | 37425577                | AA                              | GG                | 1945892779               |
| SNP_P3_12559_37425586 | NC_021160.1    | Ca_kabuli_chr01 | 37425586                | CC                              | TT                | 1945892781               |
| SNP_P3_12562_37425690 | NC_021160.1    | Ca_kabuli_chr01 | 37425690                | TT                              | CC                | 1945892783               |
| SNP_P3_12563_37426517 | NC_021160.1    | Ca_kabuli_chr01 | 37426517                | AA                              | CC                | 1945892784               |
| SNP_P3_12565_37426557 | NC_021160.1    | Ca_kabuli_chr01 | 37426557                | AA                              | TT                | 1945892786               |
| SNP_P3_12566_37426567 | NC_021160.1    | Ca_kabuli_chr01 | 37426567                | TT                              | AA                | 1945892788               |
| SNP_P3_12567_37432441 | NC_021160.1    | Ca_kabuli_chr01 | 37432441                | GG                              | AA                | 1945892790               |
| SNP_P3_12568_37432577 | NC_021160.1    | Ca_kabuli_chr01 | 37432577                | CC                              | TT                | 1945892791               |
| SNP_P3_12569_37432623 | NC_021160.1    | Ca_kabuli_chr01 | 37432623                | TT                              | AA                | 1945892793               |
| SNP_P3_12570_37432685 | NC_021160.1    | Ca_kabuli_chr01 | 37432685                | CC                              | TT                | 1945892795               |
| SNP_P3_12571_37432724 | NC_021160.1    | Ca_kabuli_chr01 | 37432724                | TT                              | CC                | 1945892797               |
| SNP_P3_12572_37432891 | NC_021160.1    | Ca_kabuli_chr01 | 37432891                | CC                              | TT                | 1945892799               |
| SNP_P3_12573_37433005 | NC_021160.1    | Ca_kabuli_chr01 | 37433005                | AA                              | TT                | 1945892800               |
| SNP_P3_12574_37433074 | NC_021160.1    | Ca_kabuli_chr01 | 37433074                | TT                              | CC                | 1945892802               |
| SNP_P3_12575_37433319 | NC_021160.1    | Ca_kabuli_chr01 | 37433319                | CC                              | AA                | 1945892804               |
| SNP_P3_12576_37433340 | NC_021160.1    | Ca_kabuli_chr01 | 37433340                | TT                              | AA                | 1945892806               |
| SNP_P3_12577_37433354 | NC_021160.1    | Ca_kabuli_chr01 | 37433354                | CC                              | TT                | 1945892807               |
| SNP_P3_12579_37433394 | NC_021160.1    | Ca_kabuli_chr01 | 37433394                | CC                              | AA                | 1945892809               |
| SNP_P3_12580_37433505 | NC_021160.1    | Ca_kabuli_chr01 | 37433505                | TT                              | CC                | 1945892811               |
| SNP_P3_12581_37433622 | NC_021160.1    | Ca_kabuli_chr01 | 37433622                | CC                              | TT                | 1945892813               |
| SNP_P3_12582_37433639 | NC_021160.1    | Ca_kabuli_chr01 | 37433639                | AA                              | GG                | 1945892814               |
| SNP_P3_12583_37450145 | NC_021160.1    | Ca_kabuli_chr01 | 37450145                | AA                              | TT                | 1945892816               |
| SNP_P3_12584_37450161 | NC_021160.1    | Ca_kabuli_chr01 | 37450161                | CC                              | GG                | 1945892818               |
| SNP_P3_12585_37450211 | NC_021160.1    | Ca_kabuli_chr01 | 37450211                | CC                              | TT                | 1945892820               |
| SNP_P3_12586_37450463 | NC_021160.1    | Ca_kabuli_chr01 | 37450463                | TT                              | GG                | 1945892822               |
| SNP_P3_12587_37450485 | NC_021160.1    | Ca_kabuli_chr01 | 37450485                | AA                              | CC                | 1945892823               |
| SNP_P3_12588_37450558 | NC_021160.1    | Ca_kabuli_chr01 | 37450558                | AA                              | CC                | 1945892825               |
| SNP_P3_12589_37450596 | NC_021160.1    | Ca_kabuli_chr01 | 37450596                | CC                              | TT                | 1945892827               |
| SNP_P3_12590_37450636 | NC_021160.1    | Ca_kabuli_chr01 | 37450636                | GG                              | CC                | 1945892829               |
| SNP_P3_12591_37450647 | NC_021160.1    | Ca_kabuli_chr01 | 37450647                | AA                              | CC                | 1945892830               |
| SNP_P3_12592_37450648 | NC_021160.1    | Ca_kabuli_chr01 | 37450648                | CC                              | AA                | 1945892832               |
| SNP_P3_12593_37450660 | NC_021160.1    | Ca_kabuli_chr01 | 37450660                | GG                              | TT                | 1945892834               |
| SNP_P3_12594_37450706 | NC_021160.1    | Ca_kabuli_chr01 | 37450706                | CC                              | TT                | 1945892836               |
| SNP_P3_12595_37450734 | NC_021160.1    | Ca_kabuli_chr01 | 37450734                | TT                              | AA                | 1945892837               |
| SNP_P3_12596_37450833 | NC_021160.1    | Ca_kabuli_chr01 | 37450833                | AA                              | TT                | 1945892839               |
| SNP_P3_12597_37452761 | NC_021160.1    | Ca_kabuli_chr01 | 37452761                | AA                              | CC                | 1945892841               |
| SNP_P3_12598_37453008 | NC_021160.1    | Ca_kabuli_chr01 | 37453008                | AA                              | TT                | 1945892843               |
| SNP_P3_12599_37459151 | NC_021160.1    | Ca_kabuli_chr01 | 37459151                | CC                              | GG                | 1945892845               |
| SNP_P3_12600_37461832 | NC_021160.1    | Ca_kabuli_chr01 | 37461832                | AA                              | TT                | 1945892846               |
| SNP_P3_12601_37465413 | NC_021160.1    | Ca_kabuli_chr01 | 37465413                | CC                              | AA                | 1945892848               |

| SNPs IDs              | Chromosome IDs | Chromosomes     | Physical positions (bp) | CDC Frontier (Reference genome) | (Pusa 256 & HPNB) | NCBI SNPdb Accession IDs |
|-----------------------|----------------|-----------------|-------------------------|---------------------------------|-------------------|--------------------------|
| SNP_P3_12602_37465597 | NC_021160.1    | Ca_kabuli_chr01 | 37465597                | GG                              | AA                | 1945892850               |
| SNP_P3_12603_37465604 | NC_021160.1    | Ca_kabuli_chr01 | 37465604                | AA                              | TT                | 1945892852               |
| SNP_P3_12604_37466336 | NC_021160.1    | Ca_kabuli_chr01 | 37466336                | TT                              | CC                | 1945892853               |
| SNP_P3_12605_37466341 | NC_021160.1    | Ca_kabuli_chr01 | 37466341                | AA                              | TT                | 1945892855               |
| SNP_P3_12606_37466347 | NC_021160.1    | Ca_kabuli_chr01 | 37466347                | GG                              | TT                | 1945892857               |
| SNP_P3_12607_37466358 | NC_021160.1    | Ca_kabuli_chr01 | 37466358                | TT                              | GG                | 1945892859               |
| SNP_P3_12608_37466359 | NC_021160.1    | Ca_kabuli_chr01 | 37466359                | GG                              | TT                | 1945892861               |
| SNP_P3_12609_37466440 | NC_021160.1    | Ca_kabuli_chr01 | 37466440                | TT                              | GG                | 1945892862               |
| SNP_P3_12610_37466599 | NC_021160.1    | Ca_kabuli_chr01 | 37466599                | GG                              | AA                | 1945892864               |
| SNP_P3_12611_37466619 | NC_021160.1    | Ca_kabuli_chr01 | 37466619                | TT                              | CC                | 1945892866               |
| SNP_P3_12612_37466627 | NC_021160.1    | Ca_kabuli_chr01 | 37466627                | CC                              | AA                | 1945892868               |
| SNP_P3_12613_37466705 | NC_021160.1    | Ca_kabuli_chr01 | 37466705                | AA                              | GG                | 1945892869               |
| SNP_P3_12614_37468434 | NC_021160.1    | Ca_kabuli_chr01 | 37468434                | CC                              | TT                | 1945892871               |
| SNP_P3_12615_37468439 | NC_021160.1    | Ca_kabuli_chr01 | 37468439                | TT                              | GG                | 1945892873               |
| SNP_P3_12616_37468753 | NC_021160.1    | Ca_kabuli_chr01 | 37468753                | TT                              | AA                | 1945892875               |
| SNP_P3_12617_37468852 | NC_021160.1    | Ca_kabuli_chr01 | 37468852                | AA                              | TT                | 1945892876               |
| SNP_P3_12618_37468916 | NC_021160.1    | Ca_kabuli_chr01 | 37468916                | CC                              | AA                | 1945892878               |
| SNP_P3_12619_37468930 | NC_021160.1    | Ca_kabuli_chr01 | 37468930                | AA                              | GG                | 1945892880               |
| SNP_P3_12620_37468951 | NC_021160.1    | Ca_kabuli_chr01 | 37468951                | TT                              | AA                | 1945892882               |
| SNP_P3_12621_37469053 | NC_021160.1    | Ca_kabuli_chr01 | 37469053                | TT                              | AA                | 1945892884               |
| SNP_P3_12622_37469069 | NC_021160.1    | Ca_kabuli_chr01 | 37469069                | AA                              | GG                | 1945892885               |
| SNP_P3_12623_37469081 | NC_021160.1    | Ca_kabuli_chr01 | 37469081                | TT                              | CC                | 1945892887               |
| SNP_P3_12624_37469094 | NC_021160.1    | Ca_kabuli_chr01 | 37469094                | TT                              | AA                | 1945892889               |
| SNP_P3_12625_37469135 | NC_021160.1    | Ca_kabuli_chr01 | 37469135                | AA                              | TT                | 1945892891               |
| SNP_P3_12626_37469153 | NC_021160.1    | Ca_kabuli_chr01 | 37469153                | TT                              | AA                | 1945892892               |
| SNP_P3_12627_37469180 | NC_021160.1    | Ca_kabuli_chr01 | 37469180                | TT                              | AA                | 1945892894               |
| SNP_P3_12628_37469189 | NC_021160.1    | Ca_kabuli_chr01 | 37469189                | CC                              | AA                | 1945892896               |
| SNP_P3_12629_37469274 | NC_021160.1    | Ca_kabuli_chr01 | 37469274                | CC                              | GG                | 1945892898               |
| SNP_P3_12630_37475151 | NC_021160.1    | Ca_kabuli_chr01 | 37475151                | CC                              | GG                | 1945892899               |
| SNP_P3_12631_37481110 | NC_021160.1    | Ca_kabuli_chr01 | 37481110                | CC                              | AA                | 1945892901               |
| SNP_P3_12632_37489456 | NC_021160.1    | Ca_kabuli_chr01 | 37489456                | GG                              | AA                | 1945892903               |
| SNP_P3_12633_37489596 | NC_021160.1    | Ca_kabuli_chr01 | 37489596                | TT                              | AA                | 1945892905               |
| SNP_P3_12634_37489703 | NC_021160.1    | Ca_kabuli_chr01 | 37489703                | CC                              | AA                | 1945892907               |
| SNP_P3_12635_37489857 | NC_021160.1    | Ca_kabuli_chr01 | 37489857                | TT                              | CC                | 1945892908               |
| SNP_P3_12638_37490042 | NC_021160.1    | Ca_kabuli_chr01 | 37490042                | AA                              | TT                | 1945892910               |
| SNP_P3_12640_37498745 | NC_021160.1    | Ca_kabuli_chr01 | 37498745                | CC                              | TT                | 1945892912               |
| SNP_P3_12641_37500950 | NC_021160.1    | Ca_kabuli_chr01 | 37500950                | TT                              | AA                | 1945892914               |
| SNP_P3_12642_37500992 | NC_021160.1    | Ca_kabuli_chr01 | 37500992                | TT                              | AA                | 1945892915               |
| SNP_P3_12643_37501614 | NC_021160.1    | Ca_kabuli_chr01 | 37501614                | TT                              | AA                | 1945892917               |
| SNP_P3_12644_37501700 | NC_021160.1    | Ca_kabuli_chr01 | 37501700                | TT                              | CC                | 1945892919               |
| SNP_P3_12645_37501814 | NC_021160.1    | Ca_kabuli_chr01 | 37501814                | TT                              | AA                | 1945892921               |
| SNP_P3_12646_37501821 | NC_021160.1    | Ca_kabuli_chr01 | 37501821                | TT                              | AA                | 1945892922               |



| SNPs IDs              | Chromosome IDs | Chromosomes     | Physical positions (bp) | CDC Frontier (Reference genome) | (Pusa 256 & HPNB) | NCBI SNPdb Accession IDs |
|-----------------------|----------------|-----------------|-------------------------|---------------------------------|-------------------|--------------------------|
| SNP_P3_12647_37501826 | NC_021160.1    | Ca_kabuli_chr01 | 37501826                | GG                              | AA                | 1945892924               |
| SNP_P3_12648_37506284 | NC_021160.1    | Ca_kabuli_chr01 | 37506284                | AA                              | CC                | 1945892926               |
| SNP_P3_12649_37506423 | NC_021160.1    | Ca_kabuli_chr01 | 37506423                | CC                              | AA                | 1945892928               |
| SNP_P3_12650_37506741 | NC_021160.1    | Ca_kabuli_chr01 | 37506741                | TT                              | CC                | 1945892930               |
| SNP_P3_12651_37506780 | NC_021160.1    | Ca_kabuli_chr01 | 37506780                | CC                              | TT                | 1945892931               |
| SNP_P3_12652_37507938 | NC_021160.1    | Ca_kabuli_chr01 | 37507938                | CC                              | TT                | 1945892933               |
| SNP_P3_12653_37512951 | NC_021160.1    | Ca_kabuli_chr01 | 37512951                | TT                              | CC                | 1945892935               |
| SNP_P3_12654_37512968 | NC_021160.1    | Ca_kabuli_chr01 | 37512968                | AA                              | GG                | 1945892937               |
| SNP_P3_12655_37529679 | NC_021160.1    | Ca_kabuli_chr01 | 37529679                | AA                              | TT                | 1945892938               |
| SNP_P3_12656_37530882 | NC_021160.1    | Ca_kabuli_chr01 | 37530882                | CC                              | TT                | 1945892940               |
| SNP_P3_12657_37554343 | NC_021160.1    | Ca_kabuli_chr01 | 37554343                | CC                              | TT                | 1945892942               |
| SNP_P3_12658_37574927 | NC_021160.1    | Ca_kabuli_chr01 | 37574927                | GG                              | AA                | 1945892944               |
| SNP_P3_12659_37578253 | NC_021160.1    | Ca_kabuli_chr01 | 37578253                | AA                              | GG                | 1945892945               |
| SNP_P3_12660_37584720 | NC_021160.1    | Ca_kabuli_chr01 | 37584720                | AA                              | TT                | 1945892947               |
| SNP_P3_12661_37600731 | NC_021160.1    | Ca_kabuli_chr01 | 37600731                | GG                              | TT                | 1945892949               |
| SNP_P3_12662_37660573 | NC_021160.1    | Ca_kabuli_chr01 | 37660573                | CC                              | TT                | 1945892951               |
| SNP_P3_12663_37672144 | NC_021160.1    | Ca_kabuli_chr01 | 37672144                | TT                              | CC                | 1945892953               |
| SNP_P3_12664_37690416 | NC_021160.1    | Ca_kabuli_chr01 | 37690416                | GG                              | AA                | 1945892954               |
| SNP_P3_12665_37690591 | NC_021160.1    | Ca_kabuli_chr01 | 37690591                | TT                              | CC                | 1945892956               |
| SNP_P3_12666_37691374 | NC_021160.1    | Ca_kabuli_chr01 | 37691374                | TT                              | CC                | 1945892958               |
| SNP_P3_12667_37691381 | NC_021160.1    | Ca_kabuli_chr01 | 37691381                | GG                              | AA                | 1945892960               |
| SNP_P3_12668_37691386 | NC_021160.1    | Ca_kabuli_chr01 | 37691386                | TT                              | CC                | 1945892961               |
| SNP_P3_12669_37691415 | NC_021160.1    | Ca_kabuli_chr01 | 37691415                | TT                              | CC                | 1945892963               |
| SNP_P3_12670_37691443 | NC_021160.1    | Ca_kabuli_chr01 | 37691443                | AA                              | GG                | 1945892965               |
| SNP_P3_12671_37691450 | NC_021160.1    | Ca_kabuli_chr01 | 37691450                | TT                              | CC                | 1945892967               |
| SNP_P3_12672_37691462 | NC_021160.1    | Ca_kabuli_chr01 | 37691462                | GG                              | TT                | 1945892968               |
| SNP_P3_12673_37691522 | NC_021160.1    | Ca_kabuli_chr01 | 37691522                | TT                              | AA                | 1945892970               |
| SNP_P3_12674_37691523 | NC_021160.1    | Ca_kabuli_chr01 | 37691523                | TT                              | AA                | 1945892972               |
| SNP_P3_12675_37691537 | NC_021160.1    | Ca_kabuli_chr01 | 37691537                | TT                              | AA                | 1945892974               |
| SNP_P3_12676_37691542 | NC_021160.1    | Ca_kabuli_chr01 | 37691542                | AA                              | GG                | 1945892976               |
| SNP_P3_12677_37691571 | NC_021160.1    | Ca_kabuli_chr01 | 37691571                | CC                              | TT                | 1945892977               |
| SNP_P3_12678_37693118 | NC_021160.1    | Ca_kabuli_chr01 | 37693118                | GG                              | TT                | 1945892979               |
| SNP_P3_12679_37693132 | NC_021160.1    | Ca_kabuli_chr01 | 37693132                | TT                              | AA                | 1945892981               |
| SNP_P3_12681_37693379 | NC_021160.1    | Ca_kabuli_chr01 | 37693379                | GG                              | TT                | 1945892983               |
| SNP_P3_12682_37694016 | NC_021160.1    | Ca_kabuli_chr01 | 37694016                | CC                              | TT                | 1945892984               |
| SNP_P3_12683_37697382 | NC_021160.1    | Ca_kabuli_chr01 | 37697382                | TT                              | CC                | 1945892986               |
| SNP_P3_12685_37697752 | NC_021160.1    | Ca_kabuli_chr01 | 37697752                | TT                              | AA                | 1945892988               |
| SNP_P3_12686_37697864 | NC_021160.1    | Ca_kabuli_chr01 | 37697864                | AA                              | GG                | 1945892990               |
| SNP_P3_12687_37697883 | NC_021160.1    | Ca_kabuli_chr01 | 37697883                | AA                              | CC                | 1945892992               |
| SNP_P3_12689_37701633 | NC_021160.1    | Ca_kabuli_chr01 | 37701633                | TT                              | CC                | 1945892993               |
| SNP_P3_12691_37702666 | NC_021160.1    | Ca_kabuli_chr01 | 37702666                | TT                              | AA                | 1945892995               |
| SNP_P3_12692_37702768 | NC_021160.1    | Ca_kabuli_chr01 | 37702768                | TT                              | GG                | 1945892997               |

| SNPs IDs              | Chromosome IDs | Chromosomes     | Physical positions (bp) | CDC Frontier (Reference genome) | (Pusa 256 & HPNB) | NCBI SNPdb Accession IDs |
|-----------------------|----------------|-----------------|-------------------------|---------------------------------|-------------------|--------------------------|
| SNP_P3_12693_37702790 | NC_021160.1    | Ca_kabuli_chr01 | 37702790                | TT                              | CC                | 1945892999               |
| SNP_P3_12694_37704945 | NC_021160.1    | Ca_kabuli_chr01 | 37704945                | TT                              | CC                | 1945893000               |
| SNP_P3_12695_37704970 | NC_021160.1    | Ca_kabuli_chr01 | 37704970                | AA                              | GG                | 1945893002               |
| SNP_P3_12698_37714795 | NC_021160.1    | Ca_kabuli_chr01 | 37714795                | CC                              | TT                | 1945893004               |
| SNP_P3_12700_37714994 | NC_021160.1    | Ca_kabuli_chr01 | 37714994                | TT                              | CC                | 1945893006               |
| SNP_P3_12701_37714998 | NC_021160.1    | Ca_kabuli_chr01 | 37714998                | GG                              | AA                | 1945893007               |
| SNP_P3_12702_37715027 | NC_021160.1    | Ca_kabuli_chr01 | 37715027                | CC                              | TT                | 1945893009               |
| SNP_P3_12703_37715080 | NC_021160.1    | Ca_kabuli_chr01 | 37715080                | AA                              | TT                | 1945893011               |
| SNP_P3_12704_37715309 | NC_021160.1    | Ca_kabuli_chr01 | 37715309                | AA                              | CC                | 1945893013               |
| SNP_P3_12706_37715533 | NC_021160.1    | Ca_kabuli_chr01 | 37715533                | AA                              | TT                | 1945893015               |
| SNP_P3_12707_37715553 | NC_021160.1    | Ca_kabuli_chr01 | 37715553                | CC                              | GG                | 1945893016               |
| SNP_P3_12708_37715890 | NC_021160.1    | Ca_kabuli_chr01 | 37715890                | GG                              | AA                | 1945893018               |
| SNP_P3_12709_37715919 | NC_021160.1    | Ca_kabuli_chr01 | 37715919                | AA                              | TT                | 1945893020               |
| SNP_P3_12710_37715928 | NC_021160.1    | Ca_kabuli_chr01 | 37715928                | AA                              | TT                | 1945893022               |
| SNP_P3_12711_37715931 | NC_021160.1    | Ca_kabuli_chr01 | 37715931                | GG                              | AA                | 1945893023               |
| SNP_P3_12712_37715961 | NC_021160.1    | Ca_kabuli_chr01 | 37715961                | CC                              | AA                | 1945893025               |
| SNP_P3_12713_37716038 | NC_021160.1    | Ca_kabuli_chr01 | 37716038                | CC                              | TT                | 1945893027               |
| SNP_P3_12714_37716041 | NC_021160.1    | Ca_kabuli_chr01 | 37716041                | GG                              | AA                | 1945893029               |
| SNP_P3_12715_37716046 | NC_021160.1    | Ca_kabuli_chr01 | 37716046                | CC                              | TT                | 1945893030               |
| SNP_P3_12716_37716186 | NC_021160.1    | Ca_kabuli_chr01 | 37716186                | AA                              | GG                | 1945893032               |
| SNP_P3_12717_37721352 | NC_021160.1    | Ca_kabuli_chr01 | 37721352                | CC                              | TT                | 1945893034               |
| SNP_P3_12720_37725540 | NC_021160.1    | Ca_kabuli_chr01 | 37725540                | AA                              | TT                | 1945893036               |
| SNP_P3_12721_37725826 | NC_021160.1    | Ca_kabuli_chr01 | 37725826                | GG                              | AA                | 1945893038               |
| SNP_P3_12722_37729698 | NC_021160.1    | Ca_kabuli_chr01 | 37729698                | CC                              | TT                | 1945893039               |
| SNP_P3_12723_37729731 | NC_021160.1    | Ca_kabuli_chr01 | 37729731                | CC                              | TT                | 1945893041               |
| SNP_P3_12724_37732701 | NC_021160.1    | Ca_kabuli_chr01 | 37732701                | TT                              | CC                | 1945893043               |
| SNP_P3_12726_37738367 | NC_021160.1    | Ca_kabuli_chr01 | 37738367                | GG                              | AA                | 1945893045               |
| SNP_P3_12728_37740494 | NC_021160.1    | Ca_kabuli_chr01 | 37740494                | CC                              | GG                | 1945893046               |
| SNP_P3_12729_37740496 | NC_021160.1    | Ca_kabuli_chr01 | 37740496                | CC                              | TT                | 1945893048               |
| SNP_P3_12730_37740556 | NC_021160.1    | Ca_kabuli_chr01 | 37740556                | CC                              | AA                | 1945893050               |
| SNP_P3_12731_37740658 | NC_021160.1    | Ca_kabuli_chr01 | 37740658                | TT                              | CC                | 1945893052               |
| SNP_P3_12732_37742001 | NC_021160.1    | Ca_kabuli_chr01 | 37742001                | CC                              | TT                | 1945893054               |
| SNP_P3_12733_37744249 | NC_021160.1    | Ca_kabuli_chr01 | 37744249                | GG                              | AA                | 1945893055               |
| SNP_P3_12734_37744334 | NC_021160.1    | Ca_kabuli_chr01 | 37744334                | TT                              | GG                | 1945893057               |
| SNP_P3_12735_37745191 | NC_021160.1    | Ca_kabuli_chr01 | 37745191                | AA                              | TT                | 1945893059               |
| SNP_P3_12736_37745192 | NC_021160.1    | Ca_kabuli_chr01 | 37745192                | TT                              | GG                | 1945893061               |
| SNP_P3_12737_37745428 | NC_021160.1    | Ca_kabuli_chr01 | 37745428                | TT                              | CC                | 1945893062               |
| SNP_P3_12740_37747823 | NC_021160.1    | Ca_kabuli_chr01 | 37747823                | AA                              | TT                | 1945893064               |
| SNP_P3_12742_37754014 | NC_021160.1    | Ca_kabuli_chr01 | 37754014                | GG                              | AA                | 1945893066               |
| SNP_P3_12743_37754419 | NC_021160.1    | Ca_kabuli_chr01 | 37754419                | CC                              | TT                | 1945893068               |
| SNP_P3_12744_37755984 | NC_021160.1    | Ca_kabuli_chr01 | 37755984                | AA                              | CC                | 1945893069               |
| SNP_P3_12745_37756174 | NC_021160.1    | Ca_kabuli_chr01 | 37756174                | TT                              | CC                | 1945893071               |

| SNPs IDs              | Chromosome IDs | Chromosomes     | Physical positions (bp) | CDC Frontier (Reference genome) | (Pusa 256 & HPNB) | NCBI SNPdb Accession IDs |
|-----------------------|----------------|-----------------|-------------------------|---------------------------------|-------------------|--------------------------|
| SNP_P3_12746_37756206 | NC_021160.1    | Ca_kabuli_chr01 | 37756206                | TT                              | AA                | 1945893073               |
| SNP_P3_12747_37756245 | NC_021160.1    | Ca_kabuli_chr01 | 37756245                | AA                              | TT                | 1945893075               |
| SNP_P3_12748_37756273 | NC_021160.1    | Ca_kabuli_chr01 | 37756273                | CC                              | TT                | 1945893077               |
| SNP_P3_12749_37756292 | NC_021160.1    | Ca_kabuli_chr01 | 37756292                | GG                              | AA                | 1945893078               |
| SNP_P3_12750_37756327 | NC_021160.1    | Ca_kabuli_chr01 | 37756327                | TT                              | CC                | 1945893080               |
| SNP_P3_12751_37758136 | NC_021160.1    | Ca_kabuli_chr01 | 37758136                | GG                              | AA                | 1945893082               |
| SNP_P3_12752_37758363 | NC_021160.1    | Ca_kabuli_chr01 | 37758363                | CC                              | TT                | 1945893084               |
| SNP_P3_12753_37758384 | NC_021160.1    | Ca_kabuli_chr01 | 37758384                | TT                              | CC                | 1945893085               |
| SNP_P3_12754_37758400 | NC_021160.1    | Ca_kabuli_chr01 | 37758400                | GG                              | TT                | 1945893087               |
| SNP_P3_12756_37758465 | NC_021160.1    | Ca_kabuli_chr01 | 37758465                | TT                              | AA                | 1945893089               |
| SNP_P3_12758_37758842 | NC_021160.1    | Ca_kabuli_chr01 | 37758842                | TT                              | CC                | 1945893091               |
| SNP_P3_12759_37758960 | NC_021160.1    | Ca_kabuli_chr01 | 37758960                | AA                              | GG                | 1945893092               |
| SNP_P3_12760_37759244 | NC_021160.1    | Ca_kabuli_chr01 | 37759244                | CC                              | TT                | 1945893094               |
| SNP_P3_12762_37759423 | NC_021160.1    | Ca_kabuli_chr01 | 37759423                | CC                              | TT                | 1945893096               |
| SNP_P3_12763_37759551 | NC_021160.1    | Ca_kabuli_chr01 | 37759551                | AA                              | GG                | 1945893098               |
| SNP_P3_12764_37760970 | NC_021160.1    | Ca_kabuli_chr01 | 37760970                | CC                              | TT                | 1945893100               |
| SNP_P3_12765_37760978 | NC_021160.1    | Ca_kabuli_chr01 | 37760978                | CC                              | TT                | 1945893101               |
| SNP_P3_12766_37761039 | NC_021160.1    | Ca_kabuli_chr01 | 37761039                | GG                              | TT                | 1945893103               |
| SNP_P3_12767_37761041 | NC_021160.1    | Ca_kabuli_chr01 | 37761041                | TT                              | GG                | 1945893105               |
| SNP_P3_12768_37761059 | NC_021160.1    | Ca_kabuli_chr01 | 37761059                | AA                              | TT                | 1945893107               |
| SNP_P3_12769_37761354 | NC_021160.1    | Ca_kabuli_chr01 | 37761354                | GG                              | AA                | 1945893108               |
| SNP_P3_12770_37761388 | NC_021160.1    | Ca_kabuli_chr01 | 37761388                | TT                              | CC                | 1945893110               |
| SNP_P3_12771_37761416 | NC_021160.1    | Ca_kabuli_chr01 | 37761416                | TT                              | CC                | 1945893112               |
| SNP_P3_12772_37761427 | NC_021160.1    | Ca_kabuli_chr01 | 37761427                | CC                              | TT                | 1945893114               |
| SNP_P3_12773_37761716 | NC_021160.1    | Ca_kabuli_chr01 | 37761716                | AA                              | GG                | 1945893116               |
| SNP_P3_12774_37761728 | NC_021160.1    | Ca_kabuli_chr01 | 37761728                | CC                              | TT                | 1945893117               |
| SNP_P3_12775_37761767 | NC_021160.1    | Ca_kabuli_chr01 | 37761767                | TT                              | CC                | 1945893119               |
| SNP_P3_12776_37761830 | NC_021160.1    | Ca_kabuli_chr01 | 37761830                | TT                              | AA                | 1945893121               |
| SNP_P3_12777_37761851 | NC_021160.1    | Ca_kabuli_chr01 | 37761851                | TT                              | AA                | 1945893123               |
| SNP_P3_12778_37761871 | NC_021160.1    | Ca_kabuli_chr01 | 37761871                | TT                              | CC                | 1945893124               |
| SNP_P3_12779_37761884 | NC_021160.1    | Ca_kabuli_chr01 | 37761884                | CC                              | TT                | 1945893126               |
| SNP_P3_12780_37764205 | NC_021160.1    | Ca_kabuli_chr01 | 37764205                | TT                              | CC                | 1945893128               |
| SNP_P3_12781_37766738 | NC_021160.1    | Ca_kabuli_chr01 | 37766738                | CC                              | TT                | 1945893130               |
| SNP_P3_12782_37766999 | NC_021160.1    | Ca_kabuli_chr01 | 37766999                | GG                              | TT                | 1945893131               |
| SNP_P3_12783_37767248 | NC_021160.1    | Ca_kabuli_chr01 | 37767248                | TT                              | CC                | 1945893133               |
| SNP_P3_12784_37767252 | NC_021160.1    | Ca_kabuli_chr01 | 37767252                | CC                              | TT                | 1945893135               |
| SNP_P3_12785_37767267 | NC_021160.1    | Ca_kabuli_chr01 | 37767267                | TT                              | CC                | 1945893137               |
| SNP_P3_12786_37767291 | NC_021160.1    | Ca_kabuli_chr01 | 37767291                | TT                              | CC                | 1945893139               |
| SNP_P3_12787_37767489 | NC_021160.1    | Ca_kabuli_chr01 | 37767489                | TT                              | GG                | 1945893140               |
| SNP_P3_12788_37767716 | NC_021160.1    | Ca_kabuli_chr01 | 37767716                | GG                              | AA                | 1945893142               |
| SNP_P3_12789_37768875 | NC_021160.1    | Ca_kabuli_chr01 | 37768875                | AA                              | TT                | 1945893144               |
| SNP_P3_12790_37769237 | NC_021160.1    | Ca_kabuli_chr01 | 37769237                | CC                              | TT                | 1945893146               |

| SNPs IDs              | Chromosome IDs | Chromosomes     | Physical positions (bp) | CDC Frontier (Reference genome) | (Pusa 256 & HPNB) | NCBI SNPdb Accession IDs |
|-----------------------|----------------|-----------------|-------------------------|---------------------------------|-------------------|--------------------------|
| SNP_P3_12791_37769246 | NC_021160.1    | Ca_kabuli_chr01 | 37769246                | GG                              | CC                | 1945893147               |
| SNP_P3_12792_37769267 | NC_021160.1    | Ca_kabuli_chr01 | 37769267                | TT                              | CC                | 1945893149               |
| SNP_P3_12793_37769324 | NC_021160.1    | Ca_kabuli_chr01 | 37769324                | GG                              | TT                | 1945893151               |
| SNP_P3_12794_37770069 | NC_021160.1    | Ca_kabuli_chr01 | 37770069                | GG                              | TT                | 1945893153               |
| SNP_P3_12795_37770340 | NC_021160.1    | Ca_kabuli_chr01 | 37770340                | AA                              | GG                | 1945893155               |
| SNP_P3_12796_37770484 | NC_021160.1    | Ca_kabuli_chr01 | 37770484                | CC                              | TT                | 1945893156               |
| SNP_P3_12797_37770504 | NC_021160.1    | Ca_kabuli_chr01 | 37770504                | CC                              | GG                | 1945893158               |
| SNP_P3_12798_37770643 | NC_021160.1    | Ca_kabuli_chr01 | 37770643                | GG                              | AA                | 1945893160               |
| SNP_P3_12799_37770830 | NC_021160.1    | Ca_kabuli_chr01 | 37770830                | CC                              | TT                | 1945893162               |
| SNP_P3_12800_37770845 | NC_021160.1    | Ca_kabuli_chr01 | 37770845                | CC                              | AA                | 1945893163               |
| SNP_P3_12801_37771087 | NC_021160.1    | Ca_kabuli_chr01 | 37771087                | AA                              | GG                | 1945893165               |
| SNP_P3_12802_37771854 | NC_021160.1    | Ca_kabuli_chr01 | 37771854                | CC                              | TT                | 1945893167               |
| SNP_P3_12803_37772805 | NC_021160.1    | Ca_kabuli_chr01 | 37772805                | CC                              | TT                | 1945893169               |
| SNP_P3_12804_37772813 | NC_021160.1    | Ca_kabuli_chr01 | 37772813                | AA                              | GG                | 1945893171               |
| SNP_P3_12805_37772814 | NC_021160.1    | Ca_kabuli_chr01 | 37772814                | TT                              | CC                | 1945893172               |
| SNP_P3_12806_37772854 | NC_021160.1    | Ca_kabuli_chr01 | 37772854                | AA                              | CC                | 1945893174               |
| SNP_P3_12807_37772903 | NC_021160.1    | Ca_kabuli_chr01 | 37772903                | AA                              | GG                | 1945893176               |
| SNP_P3_12808_37773295 | NC_021160.1    | Ca_kabuli_chr01 | 37773295                | CC                              | TT                | 1945893178               |
| SNP_P3_12809_37775343 | NC_021160.1    | Ca_kabuli_chr01 | 37775343                | TT                              | CC                | 1945893179               |
| SNP_P3_12810_37775344 | NC_021160.1    | Ca_kabuli_chr01 | 37775344                | TT                              | AA                | 1945893181               |
| SNP_P3_12811_37775350 | NC_021160.1    | Ca_kabuli_chr01 | 37775350                | TT                              | CC                | 1945893183               |
| SNP_P3_12812_37776114 | NC_021160.1    | Ca_kabuli_chr01 | 37776114                | TT                              | AA                | 1945893185               |
| SNP_P3_12813_37777198 | NC_021160.1    | Ca_kabuli_chr01 | 37777198                | TT                              | AA                | 1945893187               |
| SNP_P3_12814_37777549 | NC_021160.1    | Ca_kabuli_chr01 | 37777549                | GG                              | AA                | 1945893188               |
| SNP_P3_12815_37777595 | NC_021160.1    | Ca_kabuli_chr01 | 37777595                | GG                              | AA                | 1945893190               |
| SNP_P3_12816_37777642 | NC_021160.1    | Ca_kabuli_chr01 | 37777642                | TT                              | CC                | 1945893192               |
| SNP_P3_12818_37783194 | NC_021160.1    | Ca_kabuli_chr01 | 37783194                | CC                              | TT                | 1945893194               |
| SNP_P3_12819_37785499 | NC_021160.1    | Ca_kabuli_chr01 | 37785499                | AA                              | GG                | 1945893195               |
| SNP_P3_12820_37785633 | NC_021160.1    | Ca_kabuli_chr01 | 37785633                | GG                              | AA                | 1945893197               |
| SNP_P3_12821_37785696 | NC_021160.1    | Ca_kabuli_chr01 | 37785696                | GG                              | AA                | 1945893199               |
| SNP_P3_12822_37785793 | NC_021160.1    | Ca_kabuli_chr01 | 37785793                | TT                              | CC                | 1945893201               |
| SNP_P3_12823_37785801 | NC_021160.1    | Ca_kabuli_chr01 | 37785801                | AA                              | GG                | 1945893203               |
| SNP_P3_12824_37785824 | NC_021160.1    | Ca_kabuli_chr01 | 37785824                | CC                              | TT                | 1945893204               |
| SNP_P3_12825_37793904 | NC_021160.1    | Ca_kabuli_chr01 | 37793904                | GG                              | AA                | 1945893206               |
| SNP_P3_12826_37794067 | NC_021160.1    | Ca_kabuli_chr01 | 37794067                | CC                              | TT                | 1945893208               |
| SNP_P3_12827_37794118 | NC_021160.1    | Ca_kabuli_chr01 | 37794118                | GG                              | AA                | 1945893210               |
| SNP_P3_12829_37794512 | NC_021160.1    | Ca_kabuli_chr01 | 37794512                | TT                              | AA                | 1945893211               |
| SNP_P3_12831_37795509 | NC_021160.1    | Ca_kabuli_chr01 | 37795509                | CC                              | TT                | 1945893213               |
| SNP_P3_12832_37795614 | NC_021160.1    | Ca_kabuli_chr01 | 37795614                | GG                              | AA                | 1945893215               |
| SNP_P3_12833_37795638 | NC_021160.1    | Ca_kabuli_chr01 | 37795638                | GG                              | AA                | 1945893217               |
| SNP_P3_12836_37796090 | NC_021160.1    | Ca_kabuli_chr01 | 37796090                | TT                              | GG                | 1945893218               |
| SNP_P3_12837_37798545 | NC_021160.1    | Ca_kabuli_chr01 | 37798545                | CC                              | TT                | 1945893220               |

| SNPs IDs              | Chromosome IDs | Chromosomes     | Physical positions (bp) | CDC Frontier (Reference genome) | (Pusa 256 & HPNB) | NCBI SNPdb Accession IDs |
|-----------------------|----------------|-----------------|-------------------------|---------------------------------|-------------------|--------------------------|
| SNP_P3_12838_37798548 | NC_021160.1    | Ca_kabuli_chr01 | 37798548                | AA                              | GG                | 1945893222               |
| SNP_P3_12840_37798770 | NC_021160.1    | Ca_kabuli_chr01 | 37798770                | CC                              | TT                | 1945893224               |
| SNP_P3_12843_37801373 | NC_021160.1    | Ca_kabuli_chr01 | 37801373                | CC                              | TT                | 1945893226               |
| SNP_P3_12844_37801613 | NC_021160.1    | Ca_kabuli_chr01 | 37801613                | CC                              | TT                | 1945893227               |
| SNP_P3_12845_37801976 | NC_021160.1    | Ca_kabuli_chr01 | 37801976                | AA                              | GG                | 1945893229               |
| SNP_P3_12846_37802251 | NC_021160.1    | Ca_kabuli_chr01 | 37802251                | GG                              | AA                | 1945893231               |
| SNP_P3_12847_37803791 | NC_021160.1    | Ca_kabuli_chr01 | 37803791                | CC                              | TT                | 1945893233               |
| SNP_P3_12848_37803826 | NC_021160.1    | Ca_kabuli_chr01 | 37803826                | CC                              | AA                | 1945893234               |
| SNP_P3_12849_37803853 | NC_021160.1    | Ca_kabuli_chr01 | 37803853                | TT                              | GG                | 1945893236               |
| SNP_P3_12850_37804408 | NC_021160.1    | Ca_kabuli_chr01 | 37804408                | TT                              | GG                | 1945893238               |
| SNP_P3_12851_37804428 | NC_021160.1    | Ca_kabuli_chr01 | 37804428                | CC                              | TT                | 1945893240               |
| SNP_P3_12852_37804446 | NC_021160.1    | Ca_kabuli_chr01 | 37804446                | GG                              | TT                | 1945893242               |
| SNP_P3_12853_37804496 | NC_021160.1    | Ca_kabuli_chr01 | 37804496                | GG                              | AA                | 1945893243               |
| SNP_P3_12854_37804705 | NC_021160.1    | Ca_kabuli_chr01 | 37804705                | TT                              | CC                | 1945893245               |
| SNP_P3_12855_37806569 | NC_021160.1    | Ca_kabuli_chr01 | 37806569                | CC                              | TT                | 1945893247               |
| SNP_P3_12856_37806940 | NC_021160.1    | Ca_kabuli_chr01 | 37806940                | TT                              | GG                | 1945893249               |
| SNP_P3_12857_37807014 | NC_021160.1    | Ca_kabuli_chr01 | 37807014                | CC                              | AA                | 1945893250               |
| SNP_P3_12858_37808497 | NC_021160.1    | Ca_kabuli_chr01 | 37808497                | AA                              | CC                | 1945893252               |
| SNP_P3_12859_37808682 | NC_021160.1    | Ca_kabuli_chr01 | 37808682                | TT                              | CC                | 1945893254               |
| SNP_P3_12860_37808721 | NC_021160.1    | Ca_kabuli_chr01 | 37808721                | GG                              | CC                | 1945893256               |
| SNP_P3_12861_37809205 | NC_021160.1    | Ca_kabuli_chr01 | 37809205                | TT                              | CC                | 1945893258               |
| SNP_P3_12862_37809246 | NC_021160.1    | Ca_kabuli_chr01 | 37809246                | GG                              | TT                | 1945893259               |
| SNP_P3_12865_37812692 | NC_021160.1    | Ca_kabuli_chr01 | 37812692                | TT                              | GG                | 1945893261               |
| SNP_P3_12866_37824323 | NC_021160.1    | Ca_kabuli_chr01 | 37824323                | AA                              | GG                | 1945893263               |
| SNP_P3_12867_37824330 | NC_021160.1    | Ca_kabuli_chr01 | 37824330                | TT                              | CC                | 1945893265               |
| SNP_P3_12868_37825975 | NC_021160.1    | Ca_kabuli_chr01 | 37825975                | TT                              | AA                | 1945893266               |
| SNP_P3_12869_37828376 | NC_021160.1    | Ca_kabuli_chr01 | 37828376                | CC                              | TT                | 1945893268               |
| SNP_P3_12870_37828784 | NC_021160.1    | Ca_kabuli_chr01 | 37828784                | CC                              | TT                | 1945893270               |
| SNP_P3_12871_37829213 | NC_021160.1    | Ca_kabuli_chr01 | 37829213                | TT                              | CC                | 1945893272               |
| SNP_P3_12872_37829321 | NC_021160.1    | Ca_kabuli_chr01 | 37829321                | CC                              | GG                | 1945893274               |
| SNP_P3_12873_37829496 | NC_021160.1    | Ca_kabuli_chr01 | 37829496                | GG                              | AA                | 1945893275               |
| SNP_P3_12874_37830153 | NC_021160.1    | Ca_kabuli_chr01 | 37830153                | GG                              | TT                | 1945893277               |
| SNP_P3_12875_37832669 | NC_021160.1    | Ca_kabuli_chr01 | 37832669                | TT                              | CC                | 1945893279               |
| SNP_P3_12876_37835663 | NC_021160.1    | Ca_kabuli_chr01 | 37835663                | AA                              | TT                | 1945893281               |
| SNP_P3_12878_37837669 | NC_021160.1    | Ca_kabuli_chr01 | 37837669                | CC                              | TT                | 1945893282               |
| SNP_P3_12880_37838783 | NC_021160.1    | Ca_kabuli_chr01 | 37838783                | TT                              | CC                | 1945893284               |
| SNP_P3_12881_37838874 | NC_021160.1    | Ca_kabuli_chr01 | 37838874                | GG                              | AA                | 1945893286               |
| SNP_P3_12882_37838935 | NC_021160.1    | Ca_kabuli_chr01 | 37838935                | GG                              | TT                | 1945893288               |
| SNP_P3_12883_37845800 | NC_021160.1    | Ca_kabuli_chr01 | 37845800                | TT                              | CC                | 1945893289               |
| SNP_P3_12884_37847559 | NC_021160.1    | Ca_kabuli_chr01 | 37847559                | GG                              | AA                | 1945893291               |
| SNP_P3_12885_37847571 | NC_021160.1    | Ca_kabuli_chr01 | 37847571                | CC                              | TT                | 1945893293               |
| SNP_P3_12886_37847596 | NC_021160.1    | Ca_kabuli_chr01 | 37847596                | AA                              | GG                | 1945893295               |

| SNPs IDs              | Chromosome IDs | Chromosomes     | Physical positions (bp) | CDC Frontier (Reference genome) | (Pusa 256 & HPNB) | NCBI SNPdb Accession IDs |
|-----------------------|----------------|-----------------|-------------------------|---------------------------------|-------------------|--------------------------|
| SNP_P3_12887_37847599 | NC_021160.1    | Ca_kabuli_chr01 | 37847599                | TT                              | CC                | 1945893297               |
| SNP_P3_12888_37848749 | NC_021160.1    | Ca_kabuli_chr01 | 37848749                | AA                              | GG                | 1945893298               |
| SNP_P3_12889_37848751 | NC_021160.1    | Ca_kabuli_chr01 | 37848751                | GG                              | TT                | 1945893300               |
| SNP_P3_12890_37849018 | NC_021160.1    | Ca_kabuli_chr01 | 37849018                | GG                              | AA                | 1945893302               |
| SNP_P3_12891_37849057 | NC_021160.1    | Ca_kabuli_chr01 | 37849057                | GG                              | TT                | 1945893304               |
| SNP_P3_12892_37849067 | NC_021160.1    | Ca_kabuli_chr01 | 37849067                | TT                              | CC                | 1945893305               |
| SNP_P3_12893_37849069 | NC_021160.1    | Ca_kabuli_chr01 | 37849069                | CC                              | TT                | 1945893307               |
| SNP_P3_12894_37849070 | NC_021160.1    | Ca_kabuli_chr01 | 37849070                | TT                              | CC                | 1945893309               |
| SNP_P3_12895_37849089 | NC_021160.1    | Ca_kabuli_chr01 | 37849089                | CC                              | AA                | 1945893311               |
| SNP_P3_12896_37849097 | NC_021160.1    | Ca_kabuli_chr01 | 37849097                | AA                              | GG                | 1945893313               |
| SNP_P3_12897_37850528 | NC_021160.1    | Ca_kabuli_chr01 | 37850528                | TT                              | CC                | 1945893314               |
| SNP_P3_12898_37851847 | NC_021160.1    | Ca_kabuli_chr01 | 37851847                | AA                              | TT                | 1945893316               |
| SNP_P3_12899_37852202 | NC_021160.1    | Ca_kabuli_chr01 | 37852202                | CC                              | TT                | 1945893318               |
| SNP_P3_12901_37852804 | NC_021160.1    | Ca_kabuli_chr01 | 37852804                | AA                              | CC                | 1945893320               |
| SNP_P3_12903_37852846 | NC_021160.1    | Ca_kabuli_chr01 | 37852846                | TT                              | CC                | 1945893321               |
| SNP_P3_12904_37853186 | NC_021160.1    | Ca_kabuli_chr01 | 37853186                | AA                              | GG                | 1945893323               |
| SNP_P3_12905_37853224 | NC_021160.1    | Ca_kabuli_chr01 | 37853224                | CC                              | TT                | 1945893325               |
| SNP_P3_12906_37853615 | NC_021160.1    | Ca_kabuli_chr01 | 37853615                | CC                              | TT                | 1945893327               |
| SNP_P3_12907_37854594 | NC_021160.1    | Ca_kabuli_chr01 | 37854594                | AA                              | TT                | 1945893329               |
| SNP_P3_12908_37854803 | NC_021160.1    | Ca_kabuli_chr01 | 37854803                | CC                              | AA                | 1945893330               |
| SNP_P3_12909_37856146 | NC_021160.1    | Ca_kabuli_chr01 | 37856146                | CC                              | TT                | 1945893332               |
| SNP_P3_12910_37856459 | NC_021160.1    | Ca_kabuli_chr01 | 37856459                | TT                              | AA                | 1945893334               |
| SNP_P3_12911_37860527 | NC_021160.1    | Ca_kabuli_chr01 | 37860527                | GG                              | AA                | 1945893336               |
| SNP_P3_12912_37861706 | NC_021160.1    | Ca_kabuli_chr01 | 37861706                | AA                              | TT                | 1945893337               |
| SNP_P3_12913_37861902 | NC_021160.1    | Ca_kabuli_chr01 | 37861902                | GG                              | AA                | 1945893339               |
| SNP_P3_12915_37862538 | NC_021160.1    | Ca_kabuli_chr01 | 37862538                | GG                              | CC                | 1945893341               |
| SNP_P3_12916_37863217 | NC_021160.1    | Ca_kabuli_chr01 | 37863217                | GG                              | TT                | 1945893343               |
| SNP_P3_12917_37865373 | NC_021160.1    | Ca_kabuli_chr01 | 37865373                | AA                              | TT                | 1945893345               |
| SNP_P3_12918_37867090 | NC_021160.1    | Ca_kabuli_chr01 | 37867090                | AA                              | CC                | 1945893346               |
| SNP_P3_12919_37868461 | NC_021160.1    | Ca_kabuli_chr01 | 37868461                | CC                              | TT                | 1945893348               |
| SNP_P3_12920_37868463 | NC_021160.1    | Ca_kabuli_chr01 | 37868463                | AA                              | GG                | 1945893350               |
| SNP_P3_12921_37868745 | NC_021160.1    | Ca_kabuli_chr01 | 37868745                | TT                              | GG                | 1945893352               |
| SNP_P3_12922_37869723 | NC_021160.1    | Ca_kabuli_chr01 | 37869723                | CC                              | TT                | 1945893353               |
| SNP_P3_12924_37870342 | NC_021160.1    | Ca_kabuli_chr01 | 37870342                | GG                              | AA                | 1945893355               |
| SNP_P3_12925_37870485 | NC_021160.1    | Ca_kabuli_chr01 | 37870485                | TT                              | CC                | 1945893357               |
| SNP_P3_12926_37870538 | NC_021160.1    | Ca_kabuli_chr01 | 37870538                | TT                              | GG                | 1945893359               |
| SNP_P3_12927_37872197 | NC_021160.1    | Ca_kabuli_chr01 | 37872197                | GG                              | TT                | 1945893361               |
| SNP_P3_12928_37874180 | NC_021160.1    | Ca_kabuli_chr01 | 37874180                | CC                              | TT                | 1945893362               |
| SNP_P3_12930_37877005 | NC_021160.1    | Ca_kabuli_chr01 | 37877005                | CC                              | TT                | 1945893364               |
| SNP_P3_12931_37877059 | NC_021160.1    | Ca_kabuli_chr01 | 37877059                | GG                              | TT                | 1945893366               |
| SNP_P3_12932_37879061 | NC_021160.1    | Ca_kabuli_chr01 | 37879061                | CC                              | AA                | 1945893368               |
| SNP_P3_12933_37882519 | NC_021160.1    | Ca_kabuli_chr01 | 37882519                | CC                              | TT                | 1945893369               |

| SNPs IDs              | Chromosome IDs | Chromosomes     | Physical positions (bp) | CDC Frontier (Reference genome) | (Pusa 256 & HPNB) | NCBI SNPdb Accession IDs |
|-----------------------|----------------|-----------------|-------------------------|---------------------------------|-------------------|--------------------------|
| SNP_P3_12934_37884157 | NC_021160.1    | Ca_kabuli_chr01 | 37884157                | GG                              | TT                | 1945893371               |
| SNP_P3_12935_37885315 | NC_021160.1    | Ca_kabuli_chr01 | 37885315                | GG                              | CC                | 1945893373               |
| SNP_P3_12936_37886951 | NC_021160.1    | Ca_kabuli_chr01 | 37886951                | AA                              | TT                | 1945893375               |
| SNP_P3_12937_37887470 | NC_021160.1    | Ca_kabuli_chr01 | 37887470                | CC                              | TT                | 1945893377               |
| SNP_P3_12939_37888095 | NC_021160.1    | Ca_kabuli_chr01 | 37888095                | AA                              | GG                | 1945893378               |
| SNP_P3_12940_37889419 | NC_021160.1    | Ca_kabuli_chr01 | 37889419                | GG                              | CC                | 1945893380               |
| SNP_P3_12941_37889429 | NC_021160.1    | Ca_kabuli_chr01 | 37889429                | GG                              | AA                | 1945893382               |
| SNP_P3_12942_37889662 | NC_021160.1    | Ca_kabuli_chr01 | 37889662                | TT                              | CC                | 1945893384               |
| SNP_P3_12943_37890344 | NC_021160.1    | Ca_kabuli_chr01 | 37890344                | GG                              | TT                | 1945893385               |
| SNP_P3_12944_37896728 | NC_021160.1    | Ca_kabuli_chr01 | 37896728                | GG                              | AA                | 1945893387               |
| SNP_P3_12945_37898375 | NC_021160.1    | Ca_kabuli_chr01 | 37898375                | TT                              | CC                | 1945893389               |
| SNP_P3_12946_37898386 | NC_021160.1    | Ca_kabuli_chr01 | 37898386                | GG                              | TT                | 1945893391               |
| SNP_P3_12947_37898836 | NC_021160.1    | Ca_kabuli_chr01 | 37898836                | CC                              | TT                | 1945893393               |
| SNP_P3_12948_37899075 | NC_021160.1    | Ca_kabuli_chr01 | 37899075                | TT                              | CC                | 1945893394               |
| SNP_P3_12949_37899603 | NC_021160.1    | Ca_kabuli_chr01 | 37899603                | AA                              | GG                | 1945893396               |
| SNP_P3_12950_37901402 | NC_021160.1    | Ca_kabuli_chr01 | 37901402                | GG                              | CC                | 1945893398               |
| SNP_P3_12951_37901447 | NC_021160.1    | Ca_kabuli_chr01 | 37901447                | CC                              | AA                | 1945893400               |
| SNP_P3_12952_37903462 | NC_021160.1    | Ca_kabuli_chr01 | 37903462                | AA                              | GG                | 1945893401               |
| SNP_P3_12953_37906084 | NC_021160.1    | Ca_kabuli_chr01 | 37906084                | GG                              | CC                | 1945893403               |
| SNP_P3_12954_37913504 | NC_021160.1    | Ca_kabuli_chr01 | 37913504                | GG                              | AA                | 1945893405               |
| SNP_P3_12955_37913600 | NC_021160.1    | Ca_kabuli_chr01 | 37913600                | TT                              | AA                | 1945893407               |
| SNP_P3_12957_37913690 | NC_021160.1    | Ca_kabuli_chr01 | 37913690                | AA                              | CC                | 1945893409               |
| SNP_P3_12959_37913916 | NC_021160.1    | Ca_kabuli_chr01 | 37913916                | CC                              | TT                | 1945893410               |
| SNP_P3_12961_37917411 | NC_021160.1    | Ca_kabuli_chr01 | 37917411                | GG                              | AA                | 1945893412               |
| SNP_P3_12962_37917563 | NC_021160.1    | Ca_kabuli_chr01 | 37917563                | AA                              | TT                | 1945893414               |
| SNP_P3_12963_37917571 | NC_021160.1    | Ca_kabuli_chr01 | 37917571                | GG                              | AA                | 1945893416               |
| SNP_P3_12964_37917700 | NC_021160.1    | Ca_kabuli_chr01 | 37917700                | TT                              | AA                | 1945893417               |
| SNP_P3_12965_37917741 | NC_021160.1    | Ca_kabuli_chr01 | 37917741                | TT                              | CC                | 1945893419               |
| SNP_P3_12966_37917767 | NC_021160.1    | Ca_kabuli_chr01 | 37917767                | AA                              | TT                | 1945893421               |
| SNP_P3_12967_37917770 | NC_021160.1    | Ca_kabuli_chr01 | 37917770                | AA                              | GG                | 1945893423               |
| SNP_P3_12968_37917827 | NC_021160.1    | Ca_kabuli_chr01 | 37917827                | GG                              | TT                | 1945893425               |
| SNP_P3_12969_37917845 | NC_021160.1    | Ca_kabuli_chr01 | 37917845                | CC                              | AA                | 1945893426               |
| SNP_P3_12970_37917886 | NC_021160.1    | Ca_kabuli_chr01 | 37917886                | AA                              | TT                | 1945893428               |
| SNP_P3_12971_37917962 | NC_021160.1    | Ca_kabuli_chr01 | 37917962                | GG                              | CC                | 1945893430               |
| SNP_P3_12973_37918033 | NC_021160.1    | Ca_kabuli_chr01 | 37918033                | AA                              | GG                | 1945893432               |
| SNP_P3_12974_37918086 | NC_021160.1    | Ca_kabuli_chr01 | 37918086                | TT                              | CC                | 1945893433               |
| SNP_P3_12975_37918089 | NC_021160.1    | Ca_kabuli_chr01 | 37918089                | TT                              | AA                | 1945893435               |
| SNP_P3_12976_37918173 | NC_021160.1    | Ca_kabuli_chr01 | 37918173                | AA                              | CC                | 1945893437               |
| SNP_P3_12977_37918211 | NC_021160.1    | Ca_kabuli_chr01 | 37918211                | TT                              | CC                | 1945893439               |
| SNP_P3_12978_37918296 | NC_021160.1    | Ca_kabuli_chr01 | 37918296                | CC                              | TT                | 1945893441               |
| SNP_P3_12979_37918494 | NC_021160.1    | Ca_kabuli_chr01 | 37918494                | TT                              | GG                | 1945893442               |
| SNP_P3_12980_37922120 | NC_021160.1    | Ca_kabuli_chr01 | 37922120                | GG                              | AA                | 1945893444               |

| SNPs IDs              | Chromosome IDs | Chromosomes     | Physical positions (bp) | CDC Frontier (Reference genome) | (Pusa 256 & HPNB) | NCBI SNPdb Accession IDs |
|-----------------------|----------------|-----------------|-------------------------|---------------------------------|-------------------|--------------------------|
| SNP_P3_12981_37925723 | NC_021160.1    | Ca_kabuli_chr01 | 37925723                | AA                              | GG                | 1945893446               |
| SNP_P3_12982_37925953 | NC_021160.1    | Ca_kabuli_chr01 | 37925953                | AA                              | GG                | 1945893448               |
| SNP_P3_12983_37925988 | NC_021160.1    | Ca_kabuli_chr01 | 37925988                | TT                              | CC                | 1945893449               |
| SNP_P3_12984_37925998 | NC_021160.1    | Ca_kabuli_chr01 | 37925998                | CC                              | TT                | 1945893451               |
| SNP_P3_12986_37926283 | NC_021160.1    | Ca_kabuli_chr01 | 37926283                | GG                              | TT                | 1945893453               |
| SNP_P3_12987_37926526 | NC_021160.1    | Ca_kabuli_chr01 | 37926526                | CC                              | GG                | 1945893455               |
| SNP_P3_12988_37926591 | NC_021160.1    | Ca_kabuli_chr01 | 37926591                | TT                              | GG                | 1945893457               |
| SNP_P3_12989_37926983 | NC_021160.1    | Ca_kabuli_chr01 | 37926983                | CC                              | GG                | 1945893458               |
| SNP_P3_12990_37927042 | NC_021160.1    | Ca_kabuli_chr01 | 37927042                | TT                              | AA                | 1945893460               |
| SNP_P3_12991_37927070 | NC_021160.1    | Ca_kabuli_chr01 | 37927070                | GG                              | TT                | 1945893462               |
| SNP_P3_12992_37927110 | NC_021160.1    | Ca_kabuli_chr01 | 37927110                | CC                              | TT                | 1945893464               |
| SNP_P3_12993_37927127 | NC_021160.1    | Ca_kabuli_chr01 | 37927127                | TT                              | CC                | 1945893465               |
| SNP_P3_12994_37927130 | NC_021160.1    | Ca_kabuli_chr01 | 37927130                | TT                              | GG                | 1945893467               |
| SNP_P3_12995_37927207 | NC_021160.1    | Ca_kabuli_chr01 | 37927207                | GG                              | AA                | 1945893469               |
| SNP_P3_12996_37927227 | NC_021160.1    | Ca_kabuli_chr01 | 37927227                | GG                              | AA                | 1945893471               |
| SNP_P3_12997_37927230 | NC_021160.1    | Ca_kabuli_chr01 | 37927230                | AA                              | GG                | 1945893473               |
| SNP_P3_12998_37927234 | NC_021160.1    | Ca_kabuli_chr01 | 37927234                | AA                              | GG                | 1945893474               |
| SNP_P3_12999_37927235 | NC_021160.1    | Ca_kabuli_chr01 | 37927235                | AA                              | GG                | 1945893476               |
| SNP_P3_13000_37927252 | NC_021160.1    | Ca_kabuli_chr01 | 37927252                | TT                              | CC                | 1945893478               |
| SNP_P3_13001_37927306 | NC_021160.1    | Ca_kabuli_chr01 | 37927306                | CC                              | GG                | 1945893480               |
| SNP_P3_13003_37927384 | NC_021160.1    | Ca_kabuli_chr01 | 37927384                | GG                              | CC                | 1945893481               |
| SNP_P3_13004_37927393 | NC_021160.1    | Ca_kabuli_chr01 | 37927393                | TT                              | AA                | 1945893483               |
| SNP_P3_13006_37927577 | NC_021160.1    | Ca_kabuli_chr01 | 37927577                | CC                              | GG                | 1945893485               |
| SNP_P3_13007_37927609 | NC_021160.1    | Ca_kabuli_chr01 | 37927609                | CC                              | GG                | 1945893487               |
| SNP_P3_13008_37927658 | NC_021160.1    | Ca_kabuli_chr01 | 37927658                | TT                              | AA                | 1945893489               |
| SNP_P3_13009_37927679 | NC_021160.1    | Ca_kabuli_chr01 | 37927679                | TT                              | CC                | 1945893490               |
| SNP_P3_13010_37927711 | NC_021160.1    | Ca_kabuli_chr01 | 37927711                | TT                              | AA                | 1945893492               |
| SNP_P3_13011_37927731 | NC_021160.1    | Ca_kabuli_chr01 | 37927731                | AA                              | CC                | 1945893494               |
| SNP_P3_13012_37927772 | NC_021160.1    | Ca_kabuli_chr01 | 37927772                | AA                              | GG                | 1945893496               |
| SNP_P3_13013_37927801 | NC_021160.1    | Ca_kabuli_chr01 | 37927801                | AA                              | GG                | 1945893497               |
| SNP_P3_13014_37927829 | NC_021160.1    | Ca_kabuli_chr01 | 37927829                | AA                              | TT                | 1945893499               |
| SNP_P3_13016_37927978 | NC_021160.1    | Ca_kabuli_chr01 | 37927978                | GG                              | AA                | 1945893501               |
| SNP_P3_13017_37928063 | NC_021160.1    | Ca_kabuli_chr01 | 37928063                | TT                              | GG                | 1945893503               |
| SNP_P3_13018_37928138 | NC_021160.1    | Ca_kabuli_chr01 | 37928138                | CC                              | TT                | 1945893504               |
| SNP_P3_13019_37928144 | NC_021160.1    | Ca_kabuli_chr01 | 37928144                | CC                              | TT                | 1945893506               |
| SNP_P3_13020_37928164 | NC_021160.1    | Ca_kabuli_chr01 | 37928164                | AA                              | TT                | 1945893508               |
| SNP_P3_13021_37928246 | NC_021160.1    | Ca_kabuli_chr01 | 37928246                | TT                              | GG                | 1945893510               |
| SNP_P3_13022_37928384 | NC_021160.1    | Ca_kabuli_chr01 | 37928384                | GG                              | AA                | 1945893511               |
| SNP_P3_13023_37928398 | NC_021160.1    | Ca_kabuli_chr01 | 37928398                | AA                              | GG                | 1945893513               |
| SNP_P3_13024_37928617 | NC_021160.1    | Ca_kabuli_chr01 | 37928617                | CC                              | AA                | 1945893515               |
| SNP_P3_13025_37928712 | NC_021160.1    | Ca_kabuli_chr01 | 37928712                | AA                              | GG                | 1945893517               |
| SNP_P3_13027_37928782 | NC_021160.1    | Ca_kabuli_chr01 | 37928782                | CC                              | TT                | 1945893519               |



| SNPs IDs              | Chromosome IDs | Chromosomes     | Physical positions (bp) | CDC Frontier (Reference genome) | (Pusa 256 & HPNB) | NCBI SNPdb Accession IDs |
|-----------------------|----------------|-----------------|-------------------------|---------------------------------|-------------------|--------------------------|
| SNP_P3_13028_37928887 | NC_021160.1    | Ca_kabuli_chr01 | 37928887                | CC                              | TT                | 1945893520               |
| SNP_P3_13029_37928919 | NC_021160.1    | Ca_kabuli_chr01 | 37928919                | AA                              | CC                | 1945893522               |
| SNP_P3_13030_37929028 | NC_021160.1    | Ca_kabuli_chr01 | 37929028                | GG                              | TT                | 1945893524               |
| SNP_P3_13031_37929079 | NC_021160.1    | Ca_kabuli_chr01 | 37929079                | CC                              | AA                | 1945893526               |
| SNP_P3_13032_37929215 | NC_021160.1    | Ca_kabuli_chr01 | 37929215                | CC                              | TT                | 1945893527               |
| SNP_P3_13033_37929221 | NC_021160.1    | Ca_kabuli_chr01 | 37929221                | CC                              | GG                | 1945893529               |
| SNP_P3_13034_37929247 | NC_021160.1    | Ca_kabuli_chr01 | 37929247                | GG                              | TT                | 1945893531               |
| SNP_P3_13035_37929322 | NC_021160.1    | Ca_kabuli_chr01 | 37929322                | GG                              | TT                | 1945893533               |
| SNP_P3_13036_37929608 | NC_021160.1    | Ca_kabuli_chr01 | 37929608                | AA                              | GG                | 1945893535               |
| SNP_P3_13037_37929621 | NC_021160.1    | Ca_kabuli_chr01 | 37929621                | CC                              | AA                | 1945893536               |
| SNP_P3_13038_37929639 | NC_021160.1    | Ca_kabuli_chr01 | 37929639                | CC                              | GG                | 1945893538               |
| SNP_P3_13039_37929641 | NC_021160.1    | Ca_kabuli_chr01 | 37929641                | AA                              | GG                | 1945893540               |
| SNP_P3_13041_37929749 | NC_021160.1    | Ca_kabuli_chr01 | 37929749                | TT                              | GG                | 1945893542               |
| SNP_P3_13043_37929847 | NC_021160.1    | Ca_kabuli_chr01 | 37929847                | AA                              | TT                | 1945893543               |
| SNP_P3_13044_37929865 | NC_021160.1    | Ca_kabuli_chr01 | 37929865                | TT                              | CC                | 1945893545               |
| SNP_P3_13045_37929884 | NC_021160.1    | Ca_kabuli_chr01 | 37929884                | GG                              | AA                | 1945893547               |
| SNP_P3_13046_37929913 | NC_021160.1    | Ca_kabuli_chr01 | 37929913                | AA                              | TT                | 1945893549               |
| SNP_P3_13047_37930051 | NC_021160.1    | Ca_kabuli_chr01 | 37930051                | AA                              | TT                | 1945893551               |
| SNP_P3_13048_37930064 | NC_021160.1    | Ca_kabuli_chr01 | 37930064                | CC                              | AA                | 1945893552               |
| SNP_P3_13049_37930199 | NC_021160.1    | Ca_kabuli_chr01 | 37930199                | AA                              | TT                | 1945893554               |
| SNP_P3_13050_37930205 | NC_021160.1    | Ca_kabuli_chr01 | 37930205                | CC                              | TT                | 1945893556               |
| SNP_P3_13051_37930255 | NC_021160.1    | Ca_kabuli_chr01 | 37930255                | AA                              | GG                | 1945893558               |
| SNP_P3_13052_37930303 | NC_021160.1    | Ca_kabuli_chr01 | 37930303                | AA                              | GG                | 1945893560               |
| SNP_P3_13053_37935887 | NC_021160.1    | Ca_kabuli_chr01 | 37935887                | AA                              | GG                | 1945893561               |
| SNP_P3_13054_37936129 | NC_021160.1    | Ca_kabuli_chr01 | 37936129                | GG                              | TT                | 1945893563               |
| SNP_P3_13055_37948041 | NC_021160.1    | Ca_kabuli_chr01 | 37948041                | CC                              | AA                | 1945893565               |
| SNP_P3_13056_37948105 | NC_021160.1    | Ca_kabuli_chr01 | 37948105                | CC                              | GG                | 1945893567               |
| SNP_P3_13057_37948651 | NC_021160.1    | Ca_kabuli_chr01 | 37948651                | AA                              | TT                | 1945893568               |
| SNP_P3_13058_37948683 | NC_021160.1    | Ca_kabuli_chr01 | 37948683                | CC                              | AA                | 1945893570               |
| SNP_P3_13061_37954400 | NC_021160.1    | Ca_kabuli_chr01 | 37954400                | CC                              | TT                | 1945893572               |
| SNP_P3_13062_37954566 | NC_021160.1    | Ca_kabuli_chr01 | 37954566                | CC                              | TT                | 1945893574               |
| SNP_P3_13063_37954586 | NC_021160.1    | Ca_kabuli_chr01 | 37954586                | AA                              | GG                | 1945893576               |
| SNP_P3_13064_37993289 | NC_021160.1    | Ca_kabuli_chr01 | 37993289                | TT                              | CC                | 1945893577               |
| SNP_P3_13066_37993340 | NC_021160.1    | Ca_kabuli_chr01 | 37993340                | GG                              | AA                | 1945893579               |
| SNP_P3_13067_37993382 | NC_021160.1    | Ca_kabuli_chr01 | 37993382                | CC                              | TT                | 1945893581               |
| SNP_P3_13068_37993407 | NC_021160.1    | Ca_kabuli_chr01 | 37993407                | AA                              | GG                | 1945893583               |
| SNP_P3_13069_37993447 | NC_021160.1    | Ca_kabuli_chr01 | 37993447                | CC                              | TT                | 1945893584               |
| SNP_P3_13071_37993864 | NC_021160.1    | Ca_kabuli_chr01 | 37993864                | AA                              | CC                | 1945893586               |
| SNP_P3_13072_38022056 | NC_021160.1    | Ca_kabuli_chr01 | 38022056                | TT                              | CC                | 1945893588               |
| SNP_P3_13073_38022106 | NC_021160.1    | Ca_kabuli_chr01 | 38022106                | AA                              | GG                | 1945893590               |
| SNP_P3_13074_38022128 | NC_021160.1    | Ca_kabuli_chr01 | 38022128                | AA                              | GG                | 1945893592               |
| SNP_P3_13075_38022160 | NC_021160.1    | Ca_kabuli_chr01 | 38022160                | GG                              | AA                | 1945893593               |

| SNPs IDs              | Chromosome IDs | Chromosomes     | Physical positions (bp) | CDC Frontier (Reference genome) | (Pusa 256 & HPNB) | NCBI SNPdb Accession IDs |
|-----------------------|----------------|-----------------|-------------------------|---------------------------------|-------------------|--------------------------|
| SNP_P3_13076_38022172 | NC_021160.1    | Ca_kabuli_chr01 | 38022172                | GG                              | AA                | 1945893595               |
| SNP_P3_13077_38022212 | NC_021160.1    | Ca_kabuli_chr01 | 38022212                | GG                              | AA                | 1945893597               |
| SNP_P3_13078_38022324 | NC_021160.1    | Ca_kabuli_chr01 | 38022324                | AA                              | GG                | 1945893599               |
| SNP_P3_13079_38022500 | NC_021160.1    | Ca_kabuli_chr01 | 38022500                | CC                              | TT                | 1945893600               |
| SNP_P3_13080_38022517 | NC_021160.1    | Ca_kabuli_chr01 | 38022517                | CC                              | TT                | 1945893602               |
| SNP_P3_13081_38022519 | NC_021160.1    | Ca_kabuli_chr01 | 38022519                | GG                              | AA                | 1945893604               |
| SNP_P3_13082_38022536 | NC_021160.1    | Ca_kabuli_chr01 | 38022536                | CC                              | GG                | 1945893606               |
| SNP_P3_13083_38022542 | NC_021160.1    | Ca_kabuli_chr01 | 38022542                | CC                              | AA                | 1945893608               |
| SNP_P3_13084_38022554 | NC_021160.1    | Ca_kabuli_chr01 | 38022554                | CC                              | TT                | 1945893609               |
| SNP_P3_13085_38023637 | NC_021160.1    | Ca_kabuli_chr01 | 38023637                | CC                              | TT                | 1945893611               |
| SNP_P3_13087_38025100 | NC_021160.1    | Ca_kabuli_chr01 | 38025100                | AA                              | GG                | 1945893613               |
| SNP_P3_13088_38028176 | NC_021160.1    | Ca_kabuli_chr01 | 38028176                | GG                              | AA                | 1945893615               |
| SNP_P3_13090_38065005 | NC_021160.1    | Ca_kabuli_chr01 | 38065005                | GG                              | AA                | 1945893617               |
| SNP_P3_13091_38065060 | NC_021160.1    | Ca_kabuli_chr01 | 38065060                | GG                              | AA                | 1945893619               |
| SNP_P3_13092_38065284 | NC_021160.1    | Ca_kabuli_chr01 | 38065284                | TT                              | CC                | 1945893620               |
| SNP_P3_13093_38065291 | NC_021160.1    | Ca_kabuli_chr01 | 38065291                | GG                              | TT                | 1945893622               |
| SNP_P3_13094_38065884 | NC_021160.1    | Ca_kabuli_chr01 | 38065884                | AA                              | GG                | 1945893624               |
| SNP_P3_13095_38066127 | NC_021160.1    | Ca_kabuli_chr01 | 38066127                | CC                              | GG                | 1945893626               |
| SNP_P3_13096_38066224 | NC_021160.1    | Ca_kabuli_chr01 | 38066224                | GG                              | AA                | 1945893627               |
| SNP_P3_13097_38066629 | NC_021160.1    | Ca_kabuli_chr01 | 38066629                | TT                              | GG                | 1945893629               |
| SNP_P3_13098_38066745 | NC_021160.1    | Ca_kabuli_chr01 | 38066745                | TT                              | CC                | 1945893631               |
| SNP_P3_13099_38067082 | NC_021160.1    | Ca_kabuli_chr01 | 38067082                | GG                              | AA                | 1945893633               |
| SNP_P3_13100_38067092 | NC_021160.1    | Ca_kabuli_chr01 | 38067092                | AA                              | GG                | 1945893634               |
| SNP_P3_13101_38067177 | NC_021160.1    | Ca_kabuli_chr01 | 38067177                | AA                              | TT                | 1945893636               |
| SNP_P3_13102_38067288 | NC_021160.1    | Ca_kabuli_chr01 | 38067288                | AA                              | CC                | 1945893638               |
| SNP_P3_13103_38067360 | NC_021160.1    | Ca_kabuli_chr01 | 38067360                | TT                              | CC                | 1945893640               |
| SNP_P3_13104_38067361 | NC_021160.1    | Ca_kabuli_chr01 | 38067361                | AA                              | TT                | 1945893642               |
| SNP_P3_13105_38067743 | NC_021160.1    | Ca_kabuli_chr01 | 38067743                | GG                              | AA                | 1945893643               |
| SNP_P3_13106_38069896 | NC_021160.1    | Ca_kabuli_chr01 | 38069896                | CC                              | TT                | 1945893645               |
| SNP_P3_13107_38069917 | NC_021160.1    | Ca_kabuli_chr01 | 38069917                | AA                              | GG                | 1945893647               |
| SNP_P3_13108_38070062 | NC_021160.1    | Ca_kabuli_chr01 | 38070062                | AA                              | TT                | 1945893649               |
| SNP_P3_13109_38070565 | NC_021160.1    | Ca_kabuli_chr01 | 38070565                | TT                              | CC                | 1945893650               |
| SNP_P3_13110_38070572 | NC_021160.1    | Ca_kabuli_chr01 | 38070572                | CC                              | GG                | 1945893652               |
| SNP_P3_13111_38070584 | NC_021160.1    | Ca_kabuli_chr01 | 38070584                | TT                              | GG                | 1945893654               |
| SNP_P3_13113_38070843 | NC_021160.1    | Ca_kabuli_chr01 | 38070843                | TT                              | CC                | 1945893656               |
| SNP_P3_13116_38071652 | NC_021160.1    | Ca_kabuli_chr01 | 38071652                | TT                              | CC                | 1945893658               |
| SNP_P3_13117_38089057 | NC_021160.1    | Ca_kabuli_chr01 | 38089057                | AA                              | GG                | 1945893659               |
| SNP_P3_13118_38089084 | NC_021160.1    | Ca_kabuli_chr01 | 38089084                | AA                              | GG                | 1945893661               |
| SNP_P3_13119_38090117 | NC_021160.1    | Ca_kabuli_chr01 | 38090117                | AA                              | TT                | 1945893663               |
| SNP_P3_13120_38104193 | NC_021160.1    | Ca_kabuli_chr01 | 38104193                | CC                              | TT                | 1945893665               |
| SNP_P3_13121_38104202 | NC_021160.1    | Ca_kabuli_chr01 | 38104202                | TT                              | GG                | 1945893666               |
| SNP_P3_13122_38104222 | NC_021160.1    | Ca_kabuli_chr01 | 38104222                | AA                              | GG                | 1945893668               |

| SNPs IDs              | Chromosome IDs | Chromosomes     | Physical positions (bp) | CDC Frontier (Reference genome) | (Pusa 256 & HPNB) | NCBI SNPdb Accession IDs |
|-----------------------|----------------|-----------------|-------------------------|---------------------------------|-------------------|--------------------------|
| SNP_P3_13123_38105369 | NC_021160.1    | Ca_kabuli_chr01 | 38105369                | AA                              | GG                | 1945893670               |
| SNP_P3_13124_38105410 | NC_021160.1    | Ca_kabuli_chr01 | 38105410                | AA                              | GG                | 1945893672               |
| SNP_P3_13125_38105429 | NC_021160.1    | Ca_kabuli_chr01 | 38105429                | CC                              | TT                | 1945893674               |
| SNP_P3_13126_38105801 | NC_021160.1    | Ca_kabuli_chr01 | 38105801                | CC                              | TT                | 1945893675               |
| SNP_P3_13127_38105809 | NC_021160.1    | Ca_kabuli_chr01 | 38105809                | GG                              | AA                | 1945893677               |
| SNP_P3_13129_38105996 | NC_021160.1    | Ca_kabuli_chr01 | 38105996                | GG                              | AA                | 1945893679               |
| SNP_P3_13130_38106513 | NC_021160.1    | Ca_kabuli_chr01 | 38106513                | TT                              | CC                | 1945893681               |
| SNP_P3_13131_38106837 | NC_021160.1    | Ca_kabuli_chr01 | 38106837                | AA                              | TT                | 1945893682               |
| SNP_P3_13132_38107128 | NC_021160.1    | Ca_kabuli_chr01 | 38107128                | AA                              | GG                | 1945893684               |
| SNP_P3_13133_38107394 | NC_021160.1    | Ca_kabuli_chr01 | 38107394                | GG                              | AA                | 1945893686               |
| SNP_P3_13134_38107408 | NC_021160.1    | Ca_kabuli_chr01 | 38107408                | TT                              | CC                | 1945893688               |
| SNP_P3_13135_38108465 | NC_021160.1    | Ca_kabuli_chr01 | 38108465                | GG                              | AA                | 1945893690               |
| SNP_P3_13136_38108477 | NC_021160.1    | Ca_kabuli_chr01 | 38108477                | AA                              | GG                | 1945893691               |
| SNP_P3_13138_38109987 | NC_021160.1    | Ca_kabuli_chr01 | 38109987                | GG                              | AA                | 1945893693               |
| SNP_P3_13139_38110102 | NC_021160.1    | Ca_kabuli_chr01 | 38110102                | GG                              | AA                | 1945893695               |
| SNP_P3_13140_38113280 | NC_021160.1    | Ca_kabuli_chr01 | 38113280                | GG                              | AA                | 1945893697               |
| SNP_P3_13141_38113828 | NC_021160.1    | Ca_kabuli_chr01 | 38113828                | GG                              | CC                | 1945893698               |
| SNP_P3_13142_38113833 | NC_021160.1    | Ca_kabuli_chr01 | 38113833                | GG                              | TT                | 1945893700               |
| SNP_P3_13143_38116372 | NC_021160.1    | Ca_kabuli_chr01 | 38116372                | AA                              | GG                | 1945893702               |
| SNP_P3_13144_38116430 | NC_021160.1    | Ca_kabuli_chr01 | 38116430                | CC                              | TT                | 1945893704               |
| SNP_P3_13145_38116567 | NC_021160.1    | Ca_kabuli_chr01 | 38116567                | GG                              | AA                | 1945893705               |
| SNP_P3_13146_38116573 | NC_021160.1    | Ca_kabuli_chr01 | 38116573                | CC                              | AA                | 1945893707               |
| SNP_P3_13147_38116587 | NC_021160.1    | Ca_kabuli_chr01 | 38116587                | GG                              | AA                | 1945893709               |
| SNP_P3_13148_38125044 | NC_021160.1    | Ca_kabuli_chr01 | 38125044                | AA                              | TT                | 1945893711               |
| SNP_P3_13149_38125046 | NC_021160.1    | Ca_kabuli_chr01 | 38125046                | AA                              | TT                | 1945893713               |
| SNP_P3_13150_38126506 | NC_021160.1    | Ca_kabuli_chr01 | 38126506                | GG                              | AA                | 1945893714               |
| SNP_P3_13151_38126753 | NC_021160.1    | Ca_kabuli_chr01 | 38126753                | AA                              | GG                | 1945893716               |
| SNP_P3_13152_38126817 | NC_021160.1    | Ca_kabuli_chr01 | 38126817                | AA                              | GG                | 1945893718               |
| SNP_P3_13153_38126827 | NC_021160.1    | Ca_kabuli_chr01 | 38126827                | TT                              | CC                | 1945893720               |
| SNP_P3_13154_38127001 | NC_021160.1    | Ca_kabuli_chr01 | 38127001                | TT                              | CC                | 1945893721               |
| SNP_P3_13155_38127026 | NC_021160.1    | Ca_kabuli_chr01 | 38127026                | CC                              | TT                | 1945893723               |
| SNP_P3_13156_38130274 | NC_021160.1    | Ca_kabuli_chr01 | 38130274                | AA                              | GG                | 1945893725               |
| SNP_P3_13158_38130322 | NC_021160.1    | Ca_kabuli_chr01 | 38130322                | TT                              | CC                | 1945893727               |
| SNP_P3_13159_38130364 | NC_021160.1    | Ca_kabuli_chr01 | 38130364                | TT                              | GG                | 1945893729               |
| SNP_P3_13160_38130366 | NC_021160.1    | Ca_kabuli_chr01 | 38130366                | TT                              | CC                | 1945893730               |
| SNP_P3_13161_38130370 | NC_021160.1    | Ca_kabuli_chr01 | 38130370                | GG                              | TT                | 1945893732               |
| SNP_P3_13162_38130613 | NC_021160.1    | Ca_kabuli_chr01 | 38130613                | AA                              | CC                | 1945893734               |
| SNP_P3_13163_38130619 | NC_021160.1    | Ca_kabuli_chr01 | 38130619                | AA                              | GG                | 1945893736               |
| SNP_P3_13164_38130706 | NC_021160.1    | Ca_kabuli_chr01 | 38130706                | TT                              | AA                | 1945893737               |
| SNP_P3_13166_38131988 | NC_021160.1    | Ca_kabuli_chr01 | 38131988                | AA                              | GG                | 1945893739               |
| SNP_P3_13167_38132001 | NC_021160.1    | Ca_kabuli_chr01 | 38132001                | GG                              | TT                | 1945893741               |
| SNP_P3_13168_38133046 | NC_021160.1    | Ca_kabuli_chr01 | 38133046                | TT                              | GG                | 1945893743               |

| SNPs IDs              | Chromosome IDs | Chromosomes     | Physical positions (bp) | CDC Frontier (Reference genome) | (Pusa 256 & HPNB) | NCBI SNPdb Accession IDs |
|-----------------------|----------------|-----------------|-------------------------|---------------------------------|-------------------|--------------------------|
| SNP_P3_13169_38134339 | NC_021160.1    | Ca_kabuli_chr01 | 38134339                | AA                              | GG                | 1945893745               |
| SNP_P3_13170_38139656 | NC_021160.1    | Ca_kabuli_chr01 | 38139656                | AA                              | GG                | 1945893746               |
| SNP_P3_13171_38139957 | NC_021160.1    | Ca_kabuli_chr01 | 38139957                | TT                              | CC                | 1945893748               |
| SNP_P3_13172_38140024 | NC_021160.1    | Ca_kabuli_chr01 | 38140024                | GG                              | TT                | 1945893750               |
| SNP_P3_13174_38143252 | NC_021160.1    | Ca_kabuli_chr01 | 38143252                | GG                              | AA                | 1945893752               |
| SNP_P3_13175_38143278 | NC_021160.1    | Ca_kabuli_chr01 | 38143278                | GG                              | AA                | 1945893753               |
| SNP_P3_13176_38143284 | NC_021160.1    | Ca_kabuli_chr01 | 38143284                | GG                              | AA                | 1945893755               |
| SNP_P3_13177_38143625 | NC_021160.1    | Ca_kabuli_chr01 | 38143625                | TT                              | CC                | 1945893757               |
| SNP_P3_13178_38146438 | NC_021160.1    | Ca_kabuli_chr01 | 38146438                | TT                              | GG                | 1945893759               |
| SNP_P3_13181_38148307 | NC_021160.1    | Ca_kabuli_chr01 | 38148307                | GG                              | AA                | 1945893760               |
| SNP_P3_13182_38148421 | NC_021160.1    | Ca_kabuli_chr01 | 38148421                | CC                              | TT                | 1945893762               |
| SNP_P3_13183_38148541 | NC_021160.1    | Ca_kabuli_chr01 | 38148541                | AA                              | TT                | 1945893764               |
| SNP_P3_13184_38150146 | NC_021160.1    | Ca_kabuli_chr01 | 38150146                | AA                              | TT                | 1945893766               |
| SNP_P3_13185_38150150 | NC_021160.1    | Ca_kabuli_chr01 | 38150150                | AA                              | GG                | 1945893768               |
| SNP_P3_13186_38150152 | NC_021160.1    | Ca_kabuli_chr01 | 38150152                | AA                              | GG                | 1945893769               |
| SNP_P3_13187_38150157 | NC_021160.1    | Ca_kabuli_chr01 | 38150157                | AA                              | GG                | 1945893771               |
| SNP_P3_13188_38150454 | NC_021160.1    | Ca_kabuli_chr01 | 38150454                | GG                              | AA                | 1945893773               |
| SNP_P3_13189_38150525 | NC_021160.1    | Ca_kabuli_chr01 | 38150525                | AA                              | CC                | 1945893775               |
| SNP_P3_13190_38163291 | NC_021160.1    | Ca_kabuli_chr01 | 38163291                | GG                              | AA                | 1945893776               |
| SNP_P3_13191_38167694 | NC_021160.1    | Ca_kabuli_chr01 | 38167694                | CC                              | TT                | 1945893778               |
| SNP_P3_13192_38167696 | NC_021160.1    | Ca_kabuli_chr01 | 38167696                | TT                              | GG                | 1945893780               |
| SNP_P3_13194_38169461 | NC_021160.1    | Ca_kabuli_chr01 | 38169461                | AA                              | GG                | 1945893782               |
| SNP_P3_13195_38169858 | NC_021160.1    | Ca_kabuli_chr01 | 38169858                | TT                              | CC                | 1945893784               |
| SNP_P3_13196_38169925 | NC_021160.1    | Ca_kabuli_chr01 | 38169925                | CC                              | TT                | 1945893785               |
| SNP_P3_13197_38177573 | NC_021160.1    | Ca_kabuli_chr01 | 38177573                | AA                              | GG                | 1945893787               |
| SNP_P3_13198_38177665 | NC_021160.1    | Ca_kabuli_chr01 | 38177665                | CC                              | TT                | 1945893789               |
| SNP_P3_13199_38177701 | NC_021160.1    | Ca_kabuli_chr01 | 38177701                | AA                              | CC                | 1945893791               |
| SNP_P3_13200_38178275 | NC_021160.1    | Ca_kabuli_chr01 | 38178275                | TT                              | CC                | 1945893792               |
| SNP_P3_13201_38179886 | NC_021160.1    | Ca_kabuli_chr01 | 38179886                | TT                              | CC                | 1945893794               |
| SNP_P3_13202_38179898 | NC_021160.1    | Ca_kabuli_chr01 | 38179898                | GG                              | AA                | 1945893796               |
| SNP_P3_13203_38180189 | NC_021160.1    | Ca_kabuli_chr01 | 38180189                | CC                              | TT                | 1945893798               |
| SNP_P3_13204_38180206 | NC_021160.1    | Ca_kabuli_chr01 | 38180206                | CC                              | AA                | 1945893800               |
| SNP_P3_13205_38180277 | NC_021160.1    | Ca_kabuli_chr01 | 38180277                | AA                              | GG                | 1945893801               |
| SNP_P3_13206_38180458 | NC_021160.1    | Ca_kabuli_chr01 | 38180458                | TT                              | CC                | 1945893803               |
| SNP_P3_13207_38181850 | NC_021160.1    | Ca_kabuli_chr01 | 38181850                | TT                              | CC                | 1945893805               |
| SNP_P3_13208_38182154 | NC_021160.1    | Ca_kabuli_chr01 | 38182154                | CC                              | TT                | 1945893807               |
| SNP_P3_13209_38182198 | NC_021160.1    | Ca_kabuli_chr01 | 38182198                | CC                              | TT                | 1945893808               |
| SNP_P3_13210_38182242 | NC_021160.1    | Ca_kabuli_chr01 | 38182242                | CC                              | GG                | 1945893810               |
| SNP_P3_13211_38182743 | NC_021160.1    | Ca_kabuli_chr01 | 38182743                | GG                              | AA                | 1945893812               |
| SNP_P3_13212_38182752 | NC_021160.1    | Ca_kabuli_chr01 | 38182752                | GG                              | AA                | 1945893814               |
| SNP_P3_13213_38185161 | NC_021160.1    | Ca_kabuli_chr01 | 38185161                | GG                              | AA                | 1945893815               |
| SNP_P3_13214_38185171 | NC_021160.1    | Ca_kabuli_chr01 | 38185171                | GG                              | AA                | 1945893817               |

| SNPs IDs              | Chromosome IDs | Chromosomes     | Physical positions (bp) | CDC Frontier (Reference genome) | (Pusa 256 & HPNB) | NCBI SNPdb Accession IDs |
|-----------------------|----------------|-----------------|-------------------------|---------------------------------|-------------------|--------------------------|
| SNP_P3_13216_38185395 | NC_021160.1    | Ca_kabuli_chr01 | 38185395                | CC                              | TT                | 1945893819               |
| SNP_P3_13217_38185440 | NC_021160.1    | Ca_kabuli_chr01 | 38185440                | AA                              | TT                | 1945893821               |
| SNP_P3_13219_38187372 | NC_021160.1    | Ca_kabuli_chr01 | 38187372                | TT                              | GG                | 1945893823               |
| SNP_P3_13220_38189317 | NC_021160.1    | Ca_kabuli_chr01 | 38189317                | GG                              | TT                | 1945893824               |
| SNP_P3_13221_38191285 | NC_021160.1    | Ca_kabuli_chr01 | 38191285                | AA                              | GG                | 1945893826               |
| SNP_P3_13222_38191354 | NC_021160.1    | Ca_kabuli_chr01 | 38191354                | TT                              | CC                | 1945893828               |
| SNP_P3_13223_38191429 | NC_021160.1    | Ca_kabuli_chr01 | 38191429                | GG                              | AA                | 1945893830               |
| SNP_P3_13224_38191443 | NC_021160.1    | Ca_kabuli_chr01 | 38191443                | GG                              | AA                | 1945893831               |
| SNP_P3_13225_38191492 | NC_021160.1    | Ca_kabuli_chr01 | 38191492                | AA                              | TT                | 1945893833               |
| SNP_P3_13226_38192046 | NC_021160.1    | Ca_kabuli_chr01 | 38192046                | GG                              | AA                | 1945893835               |
| SNP_P3_13227_38193253 | NC_021160.1    | Ca_kabuli_chr01 | 38193253                | AA                              | TT                | 1945893837               |
| SNP_P3_13229_38197924 | NC_021160.1    | Ca_kabuli_chr01 | 38197924                | CC                              | TT                | 1945893839               |
| SNP_P3_13230_38197929 | NC_021160.1    | Ca_kabuli_chr01 | 38197929                | AA                              | TT                | 1945893840               |
| SNP_P3_13232_38201951 | NC_021160.1    | Ca_kabuli_chr01 | 38201951                | AA                              | GG                | 1945893842               |
| SNP_P3_13233_38201975 | NC_021160.1    | Ca_kabuli_chr01 | 38201975                | GG                              | AA                | 1945893844               |
| SNP_P3_13234_38202019 | NC_021160.1    | Ca_kabuli_chr01 | 38202019                | AA                              | CC                | 1945893846               |
| SNP_P3_13235_38202202 | NC_021160.1    | Ca_kabuli_chr01 | 38202202                | GG                              | AA                | 1945893847               |
| SNP_P3_13236_38202245 | NC_021160.1    | Ca_kabuli_chr01 | 38202245                | TT                              | AA                | 1945893849               |
| SNP_P3_13237_38202301 | NC_021160.1    | Ca_kabuli_chr01 | 38202301                | AA                              | GG                | 1945893851               |
| SNP_P3_13238_38203110 | NC_021160.1    | Ca_kabuli_chr01 | 38203110                | AA                              | GG                | 1945893853               |
| SNP_P3_13239_38203391 | NC_021160.1    | Ca_kabuli_chr01 | 38203391                | CC                              | GG                | 1945893855               |
| SNP_P3_13241_38214881 | NC_021160.1    | Ca_kabuli_chr01 | 38214881                | CC                              | GG                | 1945893856               |
| SNP_P3_13242_38214884 | NC_021160.1    | Ca_kabuli_chr01 | 38214884                | AA                              | TT                | 1945893858               |
| SNP_P3_13243_38215027 | NC_021160.1    | Ca_kabuli_chr01 | 38215027                | AA                              | GG                | 1945893860               |
| SNP_P3_13244_38215361 | NC_021160.1    | Ca_kabuli_chr01 | 38215361                | TT                              | AA                | 1945893862               |
| SNP_P3_13245_38215498 | NC_021160.1    | Ca_kabuli_chr01 | 38215498                | TT                              | CC                | 1945893863               |
| SNP_P3_13246_38219048 | NC_021160.1    | Ca_kabuli_chr01 | 38219048                | TT                              | CC                | 1945893865               |
| SNP_P3_13247_38222740 | NC_021160.1    | Ca_kabuli_chr01 | 38222740                | AA                              | GG                | 1945893867               |
| SNP_P3_13248_38222747 | NC_021160.1    | Ca_kabuli_chr01 | 38222747                | CC                              | TT                | 1945893869               |
| SNP_P3_13249_38222783 | NC_021160.1    | Ca_kabuli_chr01 | 38222783                | CC                              | TT                | 1945893871               |
| SNP_P3_13250_38223314 | NC_021160.1    | Ca_kabuli_chr01 | 38223314                | GG                              | TT                | 1945893872               |
| SNP_P3_13251_38223332 | NC_021160.1    | Ca_kabuli_chr01 | 38223332                | AA                              | GG                | 1945893874               |
| SNP_P3_13252_38225872 | NC_021160.1    | Ca_kabuli_chr01 | 38225872                | TT                              | AA                | 1945893876               |
| SNP_P3_13253_38226172 | NC_021160.1    | Ca_kabuli_chr01 | 38226172                | TT                              | CC                | 1945893878               |
| SNP_P3_13254_38226178 | NC_021160.1    | Ca_kabuli_chr01 | 38226178                | TT                              | AA                | 1945893879               |
| SNP_P3_13255_38226400 | NC_021160.1    | Ca_kabuli_chr01 | 38226400                | CC                              | GG                | 1945893881               |
| SNP_P3_13256_38227938 | NC_021160.1    | Ca_kabuli_chr01 | 38227938                | AA                              | GG                | 1945893883               |
| SNP_P3_13257_38227957 | NC_021160.1    | Ca_kabuli_chr01 | 38227957                | AA                              | CC                | 1945893885               |
| SNP_P3_13258_38228103 | NC_021160.1    | Ca_kabuli_chr01 | 38228103                | AA                              | GG                | 1945893887               |
| SNP_P3_13259_38228130 | NC_021160.1    | Ca_kabuli_chr01 | 38228130                | CC                              | GG                | 1945893888               |
| SNP_P3_13260_38228612 | NC_021160.1    | Ca_kabuli_chr01 | 38228612                | GG                              | TT                | 1945893890               |
| SNP_P3_13261_38229379 | NC_021160.1    | Ca_kabuli_chr01 | 38229379                | CC                              | TT                | 1945893892               |

| SNPs IDs              | Chromosome IDs | Chromosomes     | Physical positions (bp) | CDC Frontier (Reference genome) | (Pusa 256 & HPNB) | NCBI SNPdb Accession IDs |
|-----------------------|----------------|-----------------|-------------------------|---------------------------------|-------------------|--------------------------|
| SNP_P3_13262_38230357 | NC_021160.1    | Ca_kabuli_chr01 | 38230357                | GG                              | TT                | 1945893894               |
| SNP_P3_13263_38230721 | NC_021160.1    | Ca_kabuli_chr01 | 38230721                | TT                              | AA                | 1945893895               |
| SNP_P3_13264_38230990 | NC_021160.1    | Ca_kabuli_chr01 | 38230990                | TT                              | AA                | 1945893897               |
| SNP_P3_13265_38231027 | NC_021160.1    | Ca_kabuli_chr01 | 38231027                | TT                              | CC                | 1945893899               |
| SNP_P3_13266_38231097 | NC_021160.1    | Ca_kabuli_chr01 | 38231097                | CC                              | TT                | 1945893901               |
| SNP_P3_13267_38236891 | NC_021160.1    | Ca_kabuli_chr01 | 38236891                | TT                              | AA                | 1945893902               |
| SNP_P3_13268_38237128 | NC_021160.1    | Ca_kabuli_chr01 | 38237128                | CC                              | AA                | 1945893904               |
| SNP_P3_13269_38237129 | NC_021160.1    | Ca_kabuli_chr01 | 38237129                | AA                              | TT                | 1945893906               |
| SNP_P3_13270_38237130 | NC_021160.1    | Ca_kabuli_chr01 | 38237130                | AA                              | GG                | 1945893908               |
| SNP_P3_13271_38237177 | NC_021160.1    | Ca_kabuli_chr01 | 38237177                | CC                              | TT                | 1945893910               |
| SNP_P3_13272_38239946 | NC_021160.1    | Ca_kabuli_chr01 | 38239946                | AA                              | GG                | 1945893911               |
| SNP_P3_13273_38241387 | NC_021160.1    | Ca_kabuli_chr01 | 38241387                | CC                              | AA                | 1945893913               |
| SNP_P3_13275_38241626 | NC_021160.1    | Ca_kabuli_chr01 | 38241626                | AA                              | GG                | 1945893915               |
| SNP_P3_13276_38242060 | NC_021160.1    | Ca_kabuli_chr01 | 38242060                | TT                              | GG                | 1945893917               |
| SNP_P3_13277_38242066 | NC_021160.1    | Ca_kabuli_chr01 | 38242066                | TT                              | CC                | 1945893918               |
| SNP_P3_13278_38242295 | NC_021160.1    | Ca_kabuli_chr01 | 38242295                | TT                              | CC                | 1945893920               |
| SNP_P3_13279_38242297 | NC_021160.1    | Ca_kabuli_chr01 | 38242297                | AA                              | CC                | 1945893922               |
| SNP_P3_13280_38242304 | NC_021160.1    | Ca_kabuli_chr01 | 38242304                | AA                              | GG                | 1945893924               |
| SNP_P3_13281_38242330 | NC_021160.1    | Ca_kabuli_chr01 | 38242330                | AA                              | CC                | 1945893926               |
| SNP_P3_13282_38242366 | NC_021160.1    | Ca_kabuli_chr01 | 38242366                | TT                              | CC                | 1945893927               |
| SNP_P3_13283_38242415 | NC_021160.1    | Ca_kabuli_chr01 | 38242415                | AA                              | GG                | 1945893929               |
| SNP_P3_13284_38242479 | NC_021160.1    | Ca_kabuli_chr01 | 38242479                | AA                              | GG                | 1945893931               |
| SNP_P3_13285_38243580 | NC_021160.1    | Ca_kabuli_chr01 | 38243580                | AA                              | GG                | 1945893933               |
| SNP_P3_13286_38244385 | NC_021160.1    | Ca_kabuli_chr01 | 38244385                | GG                              | AA                | 1945893934               |
| SNP_P3_13289_38244820 | NC_021160.1    | Ca_kabuli_chr01 | 38244820                | TT                              | GG                | 1945893936               |
| SNP_P3_13290_38244931 | NC_021160.1    | Ca_kabuli_chr01 | 38244931                | AA                              | GG                | 1945893938               |
| SNP_P3_13291_38245036 | NC_021160.1    | Ca_kabuli_chr01 | 38245036                | TT                              | CC                | 1945893940               |
| SNP_P3_13292_38245050 | NC_021160.1    | Ca_kabuli_chr01 | 38245050                | GG                              | AA                | 1945893942               |
| SNP_P3_13294_38248515 | NC_021160.1    | Ca_kabuli_chr01 | 38248515                | TT                              | CC                | 1945893943               |
| SNP_P3_13295_38248644 | NC_021160.1    | Ca_kabuli_chr01 | 38248644                | GG                              | TT                | 1945893945               |
| SNP_P3_13296_38248668 | NC_021160.1    | Ca_kabuli_chr01 | 38248668                | GG                              | CC                | 1945893947               |
| SNP_P3_13297_38251953 | NC_021160.1    | Ca_kabuli_chr01 | 38251953                | AA                              | GG                | 1945893949               |
| SNP_P3_13298_38262450 | NC_021160.1    | Ca_kabuli_chr01 | 38262450                | TT                              | CC                | 1945893950               |
| SNP_P3_13299_38262655 | NC_021160.1    | Ca_kabuli_chr01 | 38262655                | AA                              | GG                | 1945893952               |
| SNP_P3_13300_38262914 | NC_021160.1    | Ca_kabuli_chr01 | 38262914                | TT                              | CC                | 1945893954               |
| SNP_P3_13301_38262937 | NC_021160.1    | Ca_kabuli_chr01 | 38262937                | TT                              | CC                | 1945893956               |
| SNP_P3_13302_38266136 | NC_021160.1    | Ca_kabuli_chr01 | 38266136                | TT                              | CC                | 1945893958               |
| SNP_P3_13303_38266149 | NC_021160.1    | Ca_kabuli_chr01 | 38266149                | CC                              | AA                | 1945893959               |
| SNP_P3_13304_38266909 | NC_021160.1    | Ca_kabuli_chr01 | 38266909                | CC                              | AA                | 1945893961               |
| SNP_P3_13305_38268123 | NC_021160.1    | Ca_kabuli_chr01 | 38268123                | GG                              | AA                | 1945893963               |
| SNP_P3_13306_38270139 | NC_021160.1    | Ca_kabuli_chr01 | 38270139                | GG                              | TT                | 1945893965               |
| SNP_P3_13307_38273910 | NC_021160.1    | Ca_kabuli_chr01 | 38273910                | TT                              | AA                | 1945893966               |

| SNPs IDs              | Chromosome IDs | Chromosomes     | Physical positions (bp) | CDC Frontier (Reference genome) | (Pusa 256 & HPNB) | NCBI SNPdb Accession IDs |
|-----------------------|----------------|-----------------|-------------------------|---------------------------------|-------------------|--------------------------|
| SNP_P3_13308_38273911 | NC_021160.1    | Ca_kabuli_chr01 | 38273911                | TT                              | AA                | 1945893968               |
| SNP_P3_13309_38274100 | NC_021160.1    | Ca_kabuli_chr01 | 38274100                | TT                              | AA                | 1945893970               |
| SNP_P3_13310_38274278 | NC_021160.1    | Ca_kabuli_chr01 | 38274278                | AA                              | TT                | 1945893972               |
| SNP_P3_13311_38274292 | NC_021160.1    | Ca_kabuli_chr01 | 38274292                | TT                              | GG                | 1945893973               |
| SNP_P3_13312_38274595 | NC_021160.1    | Ca_kabuli_chr01 | 38274595                | AA                              | GG                | 1945893975               |
| SNP_P3_13315_38283068 | NC_021160.1    | Ca_kabuli_chr01 | 38283068                | AA                              | TT                | 1945893977               |
| SNP_P3_13318_38284286 | NC_021160.1    | Ca_kabuli_chr01 | 38284286                | TT                              | CC                | 1945893979               |
| SNP_P3_13319_38284373 | NC_021160.1    | Ca_kabuli_chr01 | 38284373                | GG                              | TT                | 1945893981               |
| SNP_P3_13320_38284375 | NC_021160.1    | Ca_kabuli_chr01 | 38284375                | GG                              | AA                | 1945893982               |
| SNP_P3_13321_38284482 | NC_021160.1    | Ca_kabuli_chr01 | 38284482                | TT                              | CC                | 1945893984               |
| SNP_P3_13322_38284506 | NC_021160.1    | Ca_kabuli_chr01 | 38284506                | AA                              | TT                | 1945893986               |
| SNP_P3_13323_38284548 | NC_021160.1    | Ca_kabuli_chr01 | 38284548                | TT                              | CC                | 1945893988               |
| SNP_P3_13324_38285568 | NC_021160.1    | Ca_kabuli_chr01 | 38285568                | TT                              | AA                | 1945893989               |
| SNP_P3_13325_38285586 | NC_021160.1    | Ca_kabuli_chr01 | 38285586                | TT                              | CC                | 1945893991               |
| SNP_P3_13326_38285725 | NC_021160.1    | Ca_kabuli_chr01 | 38285725                | TT                              | CC                | 1945893993               |
| SNP_P3_13327_38285726 | NC_021160.1    | Ca_kabuli_chr01 | 38285726                | TT                              | CC                | 1945893995               |
| SNP_P3_13328_38285739 | NC_021160.1    | Ca_kabuli_chr01 | 38285739                | CC                              | TT                | 1945893997               |
| SNP_P3_13329_38285803 | NC_021160.1    | Ca_kabuli_chr01 | 38285803                | CC                              | TT                | 1945893998               |
| SNP_P3_13330_38285878 | NC_021160.1    | Ca_kabuli_chr01 | 38285878                | TT                              | AA                | 1945894000               |
| SNP_P3_13332_38286322 | NC_021160.1    | Ca_kabuli_chr01 | 38286322                | GG                              | AA                | 1945894002               |
| SNP_P3_13333_38286326 | NC_021160.1    | Ca_kabuli_chr01 | 38286326                | GG                              | AA                | 1945894004               |
| SNP_P3_13335_38303594 | NC_021160.1    | Ca_kabuli_chr01 | 38303594                | AA                              | CC                | 1945894005               |
| SNP_P3_13336_38311262 | NC_021160.1    | Ca_kabuli_chr01 | 38311262                | GG                              | TT                | 1945894007               |
| SNP_P3_13337_38311318 | NC_021160.1    | Ca_kabuli_chr01 | 38311318                | CC                              | TT                | 1945894009               |
| SNP_P3_13338_38316390 | NC_021160.1    | Ca_kabuli_chr01 | 38316390                | TT                              | CC                | 1945894011               |
| SNP_P3_13339_38316505 | NC_021160.1    | Ca_kabuli_chr01 | 38316505                | AA                              | CC                | 1945894012               |
| SNP_P3_13340_38316574 | NC_021160.1    | Ca_kabuli_chr01 | 38316574                | CC                              | TT                | 1945894014               |
| SNP_P3_13341_38317234 | NC_021160.1    | Ca_kabuli_chr01 | 38317234                | AA                              | GG                | 1945894016               |
| SNP_P3_13342_38318615 | NC_021160.1    | Ca_kabuli_chr01 | 38318615                | AA                              | TT                | 1945894018               |
| SNP_P3_13343_38318796 | NC_021160.1    | Ca_kabuli_chr01 | 38318796                | GG                              | AA                | 1945894020               |
| SNP_P3_13344_38318804 | NC_021160.1    | Ca_kabuli_chr01 | 38318804                | GG                              | TT                | 1945894021               |
| SNP_P3_13345_38320183 | NC_021160.1    | Ca_kabuli_chr01 | 38320183                | GG                              | AA                | 1945894023               |
| SNP_P3_13346_38320185 | NC_021160.1    | Ca_kabuli_chr01 | 38320185                | GG                              | AA                | 1945894025               |
| SNP_P3_13347_38320297 | NC_021160.1    | Ca_kabuli_chr01 | 38320297                | TT                              | CC                | 1945894027               |
| SNP_P3_13348_38320303 | NC_021160.1    | Ca_kabuli_chr01 | 38320303                | GG                              | AA                | 1945894028               |
| SNP_P3_13349_38320313 | NC_021160.1    | Ca_kabuli_chr01 | 38320313                | GG                              | AA                | 1945894030               |
| SNP_P3_13350_38320331 | NC_021160.1    | Ca_kabuli_chr01 | 38320331                | AA                              | GG                | 1945894032               |
| SNP_P3_13351_38320437 | NC_021160.1    | Ca_kabuli_chr01 | 38320437                | TT                              | CC                | 1945894034               |
| SNP_P3_13352_38320570 | NC_021160.1    | Ca_kabuli_chr01 | 38320570                | TT                              | CC                | 1945894035               |
| SNP_P3_13353_38320589 | NC_021160.1    | Ca_kabuli_chr01 | 38320589                | CC                              | TT                | 1945894037               |
| SNP_P3_13354_38320860 | NC_021160.1    | Ca_kabuli_chr01 | 38320860                | AA                              | GG                | 1945894039               |
| SNP_P3_13355_38320869 | NC_021160.1    | Ca_kabuli_chr01 | 38320869                | TT                              | CC                | 1945894041               |

| SNPs IDs              | Chromosome IDs | Chromosomes     | Physical positions (bp) | CDC Frontier (Reference genome) | (Pusa 256 & HPNB) | NCBI SNPdb Accession IDs |
|-----------------------|----------------|-----------------|-------------------------|---------------------------------|-------------------|--------------------------|
| SNP_P3_13356_38321058 | NC_021160.1    | Ca_kabuli_chr01 | 38321058                | TT                              | AA                | 1945894043               |
| SNP_P3_13357_38321060 | NC_021160.1    | Ca_kabuli_chr01 | 38321060                | GG                              | CC                | 1945894044               |
| SNP_P3_13358_38321596 | NC_021160.1    | Ca_kabuli_chr01 | 38321596                | TT                              | CC                | 1945894046               |
| SNP_P3_13359_38321641 | NC_021160.1    | Ca_kabuli_chr01 | 38321641                | TT                              | CC                | 1945894048               |
| SNP_P3_13360_38321643 | NC_021160.1    | Ca_kabuli_chr01 | 38321643                | GG                              | TT                | 1945894050               |
| SNP_P3_13361_38321647 | NC_021160.1    | Ca_kabuli_chr01 | 38321647                | CC                              | TT                | 1945894051               |
| SNP_P3_13362_38321648 | NC_021160.1    | Ca_kabuli_chr01 | 38321648                | AA                              | GG                | 1945894053               |
| SNP_P3_13363_38322044 | NC_021160.1    | Ca_kabuli_chr01 | 38322044                | CC                              | TT                | 1945894055               |
| SNP_P3_13364_38322050 | NC_021160.1    | Ca_kabuli_chr01 | 38322050                | CC                              | AA                | 1945894057               |
| SNP_P3_13365_38322052 | NC_021160.1    | Ca_kabuli_chr01 | 38322052                | AA                              | GG                | 1945894059               |
| SNP_P3_13366_38322058 | NC_021160.1    | Ca_kabuli_chr01 | 38322058                | TT                              | GG                | 1945894060               |
| SNP_P3_13367_38322068 | NC_021160.1    | Ca_kabuli_chr01 | 38322068                | CC                              | AA                | 1945894062               |
| SNP_P3_13368_38322837 | NC_021160.1    | Ca_kabuli_chr01 | 38322837                | TT                              | CC                | 1945894064               |
| SNP_P3_13369_38323154 | NC_021160.1    | Ca_kabuli_chr01 | 38323154                | AA                              | GG                | 1945894066               |
| SNP_P3_13370_38323188 | NC_021160.1    | Ca_kabuli_chr01 | 38323188                | TT                              | CC                | 1945894067               |
| SNP_P3_13371_38323201 | NC_021160.1    | Ca_kabuli_chr01 | 38323201                | TT                              | CC                | 1945894069               |
| SNP_P3_13372_38323206 | NC_021160.1    | Ca_kabuli_chr01 | 38323206                | TT                              | CC                | 1945894071               |
| SNP_P3_13373_38326917 | NC_021160.1    | Ca_kabuli_chr01 | 38326917                | TT                              | CC                | 1945894073               |
| SNP_P3_13374_38328935 | NC_021160.1    | Ca_kabuli_chr01 | 38328935                | GG                              | CC                | 1945894074               |
| SNP_P3_13375_38328978 | NC_021160.1    | Ca_kabuli_chr01 | 38328978                | AA                              | CC                | 1945894076               |
| SNP_P3_13377_38338703 | NC_021160.1    | Ca_kabuli_chr01 | 38338703                | AA                              | GG                | 1945894078               |
| SNP_P3_13379_38338800 | NC_021160.1    | Ca_kabuli_chr01 | 38338800                | CC                              | TT                | 1945894080               |
| SNP_P3_13380_38339010 | NC_021160.1    | Ca_kabuli_chr01 | 38339010                | TT                              | CC                | 1945894082               |
| SNP_P3_13382_38339628 | NC_021160.1    | Ca_kabuli_chr01 | 38339628                | CC                              | TT                | 1945894083               |
| SNP_P3_13383_38340176 | NC_021160.1    | Ca_kabuli_chr01 | 38340176                | GG                              | CC                | 1945894085               |
| SNP_P3_13384_38340380 | NC_021160.1    | Ca_kabuli_chr01 | 38340380                | TT                              | GG                | 1945894087               |
| SNP_P3_13385_38340557 | NC_021160.1    | Ca_kabuli_chr01 | 38340557                | CC                              | AA                | 1945894089               |
| SNP_P3_13387_38340681 | NC_021160.1    | Ca_kabuli_chr01 | 38340681                | CC                              | TT                | 1945894090               |
| SNP_P3_13388_38340690 | NC_021160.1    | Ca_kabuli_chr01 | 38340690                | TT                              | GG                | 1945894092               |
| SNP_P3_13389_38341182 | NC_021160.1    | Ca_kabuli_chr01 | 38341182                | CC                              | AA                | 1945894094               |
| SNP_P3_13390_38341696 | NC_021160.1    | Ca_kabuli_chr01 | 38341696                | CC                              | AA                | 1945894096               |
| SNP_P3_13391_38341720 | NC_021160.1    | Ca_kabuli_chr01 | 38341720                | CC                              | TT                | 1945894098               |
| SNP_P3_13392_38342012 | NC_021160.1    | Ca_kabuli_chr01 | 38342012                | TT                              | GG                | 1945894099               |
| SNP_P3_13393_38342080 | NC_021160.1    | Ca_kabuli_chr01 | 38342080                | TT                              | CC                | 1945894101               |
| SNP_P3_13394_38342085 | NC_021160.1    | Ca_kabuli_chr01 | 38342085                | CC                              | GG                | 1945894103               |
| SNP_P3_13395_38342113 | NC_021160.1    | Ca_kabuli_chr01 | 38342113                | AA                              | GG                | 1945894105               |
| SNP_P3_13396_38342354 | NC_021160.1    | Ca_kabuli_chr01 | 38342354                | AA                              | GG                | 1945894106               |
| SNP_P3_13397_38342474 | NC_021160.1    | Ca_kabuli_chr01 | 38342474                | TT                              | GG                | 1945894108               |
| SNP_P3_13398_38342494 | NC_021160.1    | Ca_kabuli_chr01 | 38342494                | TT                              | CC                | 1945894110               |
| SNP_P3_13399_38342570 | NC_021160.1    | Ca_kabuli_chr01 | 38342570                | GG                              | TT                | 1945894112               |
| SNP_P3_13400_38342585 | NC_021160.1    | Ca_kabuli_chr01 | 38342585                | GG                              | TT                | 1945894113               |
| SNP_P3_13401_38342845 | NC_021160.1    | Ca_kabuli_chr01 | 38342845                | AA                              | GG                | 1945894115               |



| SNPs IDs              | Chromosome IDs | Chromosomes     | Physical positions (bp) | CDC Frontier (Reference genome) | (Pusa 256 & HPNB) | NCBI SNPdb Accession IDs |
|-----------------------|----------------|-----------------|-------------------------|---------------------------------|-------------------|--------------------------|
| SNP_P3_13402_38342856 | NC_021160.1    | Ca_kabuli_chr01 | 38342856                | AA                              | GG                | 1945894117               |
| SNP_P3_13403_38344067 | NC_021160.1    | Ca_kabuli_chr01 | 38344067                | AA                              | CC                | 1945894119               |
| SNP_P3_13404_38344092 | NC_021160.1    | Ca_kabuli_chr01 | 38344092                | AA                              | GG                | 1945894121               |
| SNP_P3_13405_38345035 | NC_021160.1    | Ca_kabuli_chr01 | 38345035                | AA                              | TT                | 1945894122               |
| SNP_P3_13406_38345043 | NC_021160.1    | Ca_kabuli_chr01 | 38345043                | TT                              | CC                | 1945894124               |
| SNP_P3_13407_38345044 | NC_021160.1    | Ca_kabuli_chr01 | 38345044                | CC                              | TT                | 1945894126               |
| SNP_P3_13408_38346168 | NC_021160.1    | Ca_kabuli_chr01 | 38346168                | CC                              | TT                | 1945894128               |
| SNP_P3_13409_38346178 | NC_021160.1    | Ca_kabuli_chr01 | 38346178                | TT                              | CC                | 1945894129               |
| SNP_P3_13410_38346407 | NC_021160.1    | Ca_kabuli_chr01 | 38346407                | TT                              | CC                | 1945894131               |
| SNP_P3_13411_38347566 | NC_021160.1    | Ca_kabuli_chr01 | 38347566                | GG                              | AA                | 1945894133               |
| SNP_P3_13412_38347645 | NC_021160.1    | Ca_kabuli_chr01 | 38347645                | CC                              | TT                | 1945894135               |
| SNP_P3_13413_38348862 | NC_021160.1    | Ca_kabuli_chr01 | 38348862                | TT                              | GG                | 1945894137               |
| SNP_P3_13414_38349217 | NC_021160.1    | Ca_kabuli_chr01 | 38349217                | CC                              | TT                | 1945894138               |
| SNP_P3_13415_38352614 | NC_021160.1    | Ca_kabuli_chr01 | 38352614                | GG                              | AA                | 1945894140               |
| SNP_P3_13416_38352641 | NC_021160.1    | Ca_kabuli_chr01 | 38352641                | GG                              | AA                | 1945894142               |
| SNP_P3_13417_38352736 | NC_021160.1    | Ca_kabuli_chr01 | 38352736                | CC                              | TT                | 1945894144               |
| SNP_P3_13418_38352971 | NC_021160.1    | Ca_kabuli_chr01 | 38352971                | AA                              | TT                | 1945894145               |
| SNP_P3_13420_38355232 | NC_021160.1    | Ca_kabuli_chr01 | 38355232                | GG                              | AA                | 1945894147               |
| SNP_P3_13421_38358467 | NC_021160.1    | Ca_kabuli_chr01 | 38358467                | CC                              | TT                | 1945894149               |
| SNP_P3_13422_38359986 | NC_021160.1    | Ca_kabuli_chr01 | 38359986                | GG                              | CC                | 1945894151               |
| SNP_P3_13423_38360378 | NC_021160.1    | Ca_kabuli_chr01 | 38360378                | AA                              | GG                | 1945894153               |
| SNP_P3_13424_38360381 | NC_021160.1    | Ca_kabuli_chr01 | 38360381                | CC                              | AA                | 1945894154               |
| SNP_P3_13425_38360386 | NC_021160.1    | Ca_kabuli_chr01 | 38360386                | TT                              | CC                | 1945894156               |
| SNP_P3_13426_38360410 | NC_021160.1    | Ca_kabuli_chr01 | 38360410                | CC                              | GG                | 1945894158               |
| SNP_P3_13427_38360534 | NC_021160.1    | Ca_kabuli_chr01 | 38360534                | AA                              | GG                | 1945894160               |
| SNP_P3_13428_38360558 | NC_021160.1    | Ca_kabuli_chr01 | 38360558                | GG                              | TT                | 1945894161               |
| SNP_P3_13429_38360559 | NC_021160.1    | Ca_kabuli_chr01 | 38360559                | GG                              | CC                | 1945894163               |
| SNP_P3_13430_38362056 | NC_021160.1    | Ca_kabuli_chr01 | 38362056                | GG                              | AA                | 1945894165               |
| SNP_P3_13431_38363688 | NC_021160.1    | Ca_kabuli_chr01 | 38363688                | AA                              | GG                | 1945894167               |
| SNP_P3_13432_38363693 | NC_021160.1    | Ca_kabuli_chr01 | 38363693                | GG                              | CC                | 1945894168               |
| SNP_P3_13433_38363703 | NC_021160.1    | Ca_kabuli_chr01 | 38363703                | AA                              | GG                | 1945894170               |
| SNP_P3_13434_38363758 | NC_021160.1    | Ca_kabuli_chr01 | 38363758                | AA                              | GG                | 1945894172               |
| SNP_P3_13435_38363926 | NC_021160.1    | Ca_kabuli_chr01 | 38363926                | AA                              | CC                | 1945894174               |
| SNP_P3_13436_38363929 | NC_021160.1    | Ca_kabuli_chr01 | 38363929                | CC                              | TT                | 1945894176               |
| SNP_P3_13437_38367637 | NC_021160.1    | Ca_kabuli_chr01 | 38367637                | GG                              | TT                | 1945894177               |
| SNP_P3_13438_38385088 | NC_021160.1    | Ca_kabuli_chr01 | 38385088                | GG                              | AA                | 1945894179               |
| SNP_P3_13439_38386348 | NC_021160.1    | Ca_kabuli_chr01 | 38386348                | AA                              | TT                | 1945894181               |
| SNP_P3_13440_38389337 | NC_021160.1    | Ca_kabuli_chr01 | 38389337                | CC                              | TT                | 1945894183               |
| SNP_P3_13441_38393063 | NC_021160.1    | Ca_kabuli_chr01 | 38393063                | TT                              | CC                | 1945894184               |
| SNP_P3_13443_38395345 | NC_021160.1    | Ca_kabuli_chr01 | 38395345                | CC                              | AA                | 1945894186               |
| SNP_P3_13444_38395565 | NC_021160.1    | Ca_kabuli_chr01 | 38395565                | GG                              | AA                | 1945894188               |
| SNP_P3_13445_38395799 | NC_021160.1    | Ca_kabuli_chr01 | 38395799                | AA                              | GG                | 1945894190               |

| SNPs IDs              | Chromosome IDs | Chromosomes     | Physical positions (bp) | CDC Frontier (Reference genome) | (Pusa 256 & HPNB) | NCBI SNPdb Accession IDs |
|-----------------------|----------------|-----------------|-------------------------|---------------------------------|-------------------|--------------------------|
| SNP_P3_13446_38395837 | NC_021160.1    | Ca_kabuli_chr01 | 38395837                | AA                              | GG                | 1945894192               |
| SNP_P3_13447_38396926 | NC_021160.1    | Ca_kabuli_chr01 | 38396926                | TT                              | CC                | 1945894193               |
| SNP_P3_13448_38397460 | NC_021160.1    | Ca_kabuli_chr01 | 38397460                | AA                              | GG                | 1945894195               |
| SNP_P3_13449_38397476 | NC_021160.1    | Ca_kabuli_chr01 | 38397476                | TT                              | GG                | 1945894197               |
| SNP_P3_13450_38420444 | NC_021160.1    | Ca_kabuli_chr01 | 38420444                | CC                              | AA                | 1945894199               |
| SNP_P3_13451_38420916 | NC_021160.1    | Ca_kabuli_chr01 | 38420916                | TT                              | CC                | 1945894200               |
| SNP_P3_13452_38420937 | NC_021160.1    | Ca_kabuli_chr01 | 38420937                | GG                              | AA                | 1945894202               |
| SNP_P3_13453_38426687 | NC_021160.1    | Ca_kabuli_chr01 | 38426687                | AA                              | GG                | 1945894204               |
| SNP_P3_13454_38437142 | NC_021160.1    | Ca_kabuli_chr01 | 38437142                | GG                              | AA                | 1945894206               |
| SNP_P3_13455_38437252 | NC_021160.1    | Ca_kabuli_chr01 | 38437252                | TT                              | CC                | 1945894208               |
| SNP_P3_13456_38442796 | NC_021160.1    | Ca_kabuli_chr01 | 38442796                | CC                              | TT                | 1945894209               |
| SNP_P3_13457_38448745 | NC_021160.1    | Ca_kabuli_chr01 | 38448745                | GG                              | AA                | 1945894211               |
| SNP_P3_13458_38453741 | NC_021160.1    | Ca_kabuli_chr01 | 38453741                | AA                              | GG                | 1945894213               |
| SNP_P3_13459_38463308 | NC_021160.1    | Ca_kabuli_chr01 | 38463308                | AA                              | CC                | 1945894215               |
| SNP_P3_13460_38463331 | NC_021160.1    | Ca_kabuli_chr01 | 38463331                | AA                              | GG                | 1945894216               |
| SNP_P3_13461_38465878 | NC_021160.1    | Ca_kabuli_chr01 | 38465878                | TT                              | AA                | 1945894218               |
| SNP_P3_13462_38465895 | NC_021160.1    | Ca_kabuli_chr01 | 38465895                | TT                              | CC                | 1945894220               |
| SNP_P3_13463_38468240 | NC_021160.1    | Ca_kabuli_chr01 | 38468240                | TT                              | CC                | 1945894222               |
| SNP_P3_13464_38472171 | NC_021160.1    | Ca_kabuli_chr01 | 38472171                | GG                              | TT                | 1945894224               |
| SNP_P3_13467_38479384 | NC_021160.1    | Ca_kabuli_chr01 | 38479384                | TT                              | AA                | 1945894225               |
| SNP_P3_13468_38484573 | NC_021160.1    | Ca_kabuli_chr01 | 38484573                | TT                              | CC                | 1945894227               |
| SNP_P3_13471_38498062 | NC_021160.1    | Ca_kabuli_chr01 | 38498062                | TT                              | AA                | 1945894229               |
| SNP_P3_13472_38499147 | NC_021160.1    | Ca_kabuli_chr01 | 38499147                | GG                              | AA                | 1945894231               |
| SNP_P3_13473_38503785 | NC_021160.1    | Ca_kabuli_chr01 | 38503785                | CC                              | AA                | 1945894232               |
| SNP_P3_13475_38523238 | NC_021160.1    | Ca_kabuli_chr01 | 38523238                | TT                              | CC                | 1945894234               |
| SNP_P3_13476_38524375 | NC_021160.1    | Ca_kabuli_chr01 | 38524375                | CC                              | TT                | 1945894236               |
| SNP_P3_13477_38526959 | NC_021160.1    | Ca_kabuli_chr01 | 38526959                | GG                              | AA                | 1945894238               |
| SNP_P3_13479_38535455 | NC_021160.1    | Ca_kabuli_chr01 | 38535455                | GG                              | AA                | 1945894239               |
| SNP_P3_13480_38535517 | NC_021160.1    | Ca_kabuli_chr01 | 38535517                | TT                              | CC                | 1945894241               |
| SNP_P3_13481_38535984 | NC_021160.1    | Ca_kabuli_chr01 | 38535984                | CC                              | GG                | 1945894243               |
| SNP_P3_13482_38536712 | NC_021160.1    | Ca_kabuli_chr01 | 38536712                | CC                              | TT                | 1945894245               |
| SNP_P3_13483_38537518 | NC_021160.1    | Ca_kabuli_chr01 | 38537518                | GG                              | AA                | 1945894247               |
| SNP_P3_13484_38537536 | NC_021160.1    | Ca_kabuli_chr01 | 38537536                | GG                              | AA                | 1945894248               |
| SNP_P3_13485_38538781 | NC_021160.1    | Ca_kabuli_chr01 | 38538781                | GG                              | AA                | 1945894250               |
| SNP_P3_13486_38539139 | NC_021160.1    | Ca_kabuli_chr01 | 38539139                | AA                              | GG                | 1945894252               |
| SNP_P3_13487_38539389 | NC_021160.1    | Ca_kabuli_chr01 | 38539389                | GG                              | CC                | 1945894254               |
| SNP_P3_13488_38539450 | NC_021160.1    | Ca_kabuli_chr01 | 38539450                | GG                              | TT                | 1945894255               |
| SNP_P3_13489_38539598 | NC_021160.1    | Ca_kabuli_chr01 | 38539598                | GG                              | AA                | 1945894257               |
| SNP_P3_13490_38545817 | NC_021160.1    | Ca_kabuli_chr01 | 38545817                | TT                              | CC                | 1945894259               |
| SNP_P3_13491_38547819 | NC_021160.1    | Ca_kabuli_chr01 | 38547819                | AA                              | GG                | 1945894261               |
| SNP_P3_13492_38548932 | NC_021160.1    | Ca_kabuli_chr01 | 38548932                | AA                              | GG                | 1945894263               |
| SNP_P3_13494_38553951 | NC_021160.1    | Ca_kabuli_chr01 | 38553951                | AA                              | GG                | 1945894264               |

| SNPs IDs              | Chromosome IDs | Chromosomes     | Physical positions (bp) | CDC Frontier (Reference genome) | (Pusa 256 & HPNB) | NCBI SNPdb Accession IDs |
|-----------------------|----------------|-----------------|-------------------------|---------------------------------|-------------------|--------------------------|
| SNP_P3_13495_38555018 | NC_021160.1    | Ca_kabuli_chr01 | 38555018                | CC                              | TT                | 1945894266               |
| SNP_P3_13497_38558497 | NC_021160.1    | Ca_kabuli_chr01 | 38558497                | GG                              | CC                | 1945894268               |
| SNP_P3_13498_38558720 | NC_021160.1    | Ca_kabuli_chr01 | 38558720                | AA                              | GG                | 1945894270               |
| SNP_P3_13501_38560871 | NC_021160.1    | Ca_kabuli_chr01 | 38560871                | AA                              | GG                | 1945894272               |
| SNP_P3_13502_38561261 | NC_021160.1    | Ca_kabuli_chr01 | 38561261                | GG                              | AA                | 1945894273               |
| SNP_P3_13503_38562136 | NC_021160.1    | Ca_kabuli_chr01 | 38562136                | GG                              | AA                | 1945894275               |
| SNP_P3_13504_38562495 | NC_021160.1    | Ca_kabuli_chr01 | 38562495                | TT                              | CC                | 1945894277               |
| SNP_P3_13505_38562551 | NC_021160.1    | Ca_kabuli_chr01 | 38562551                | AA                              | GG                | 1945894279               |
| SNP_P3_13506_38563877 | NC_021160.1    | Ca_kabuli_chr01 | 38563877                | TT                              | CC                | 1945894280               |
| SNP_P3_13507_38564217 | NC_021160.1    | Ca_kabuli_chr01 | 38564217                | TT                              | CC                | 1945894282               |
| SNP_P3_13509_38565349 | NC_021160.1    | Ca_kabuli_chr01 | 38565349                | CC                              | TT                | 1945894284               |
| SNP_P3_13510_38569793 | NC_021160.1    | Ca_kabuli_chr01 | 38569793                | AA                              | GG                | 1945894286               |
| SNP_P3_13511_38569850 | NC_021160.1    | Ca_kabuli_chr01 | 38569850                | TT                              | CC                | 1945894287               |
| SNP_P3_13512_38569858 | NC_021160.1    | Ca_kabuli_chr01 | 38569858                | CC                              | TT                | 1945894289               |
| SNP_P3_13513_38570059 | NC_021160.1    | Ca_kabuli_chr01 | 38570059                | TT                              | GG                | 1945894291               |
| SNP_P3_13514_38571122 | NC_021160.1    | Ca_kabuli_chr01 | 38571122                | AA                              | GG                | 1945894293               |
| SNP_P3_13515_38571185 | NC_021160.1    | Ca_kabuli_chr01 | 38571185                | CC                              | TT                | 1945894295               |
| SNP_P3_13516_38571255 | NC_021160.1    | Ca_kabuli_chr01 | 38571255                | GG                              | AA                | 1945894296               |
| SNP_P3_13517_38571276 | NC_021160.1    | Ca_kabuli_chr01 | 38571276                | AA                              | GG                | 1945894298               |
| SNP_P3_13518_38571828 | NC_021160.1    | Ca_kabuli_chr01 | 38571828                | CC                              | TT                | 1945894300               |
| SNP_P3_13520_38572965 | NC_021160.1    | Ca_kabuli_chr01 | 38572965                | AA                              | CC                | 1945894302               |
| SNP_P3_13522_38573270 | NC_021160.1    | Ca_kabuli_chr01 | 38573270                | TT                              | GG                | 1945894303               |
| SNP_P3_13523_38573327 | NC_021160.1    | Ca_kabuli_chr01 | 38573327                | CC                              | GG                | 1945894305               |
| SNP_P3_13524_38573341 | NC_021160.1    | Ca_kabuli_chr01 | 38573341                | GG                              | TT                | 1945894307               |
| SNP_P3_13525_38573356 | NC_021160.1    | Ca_kabuli_chr01 | 38573356                | AA                              | CC                | 1945894309               |
| SNP_P3_13526_38573392 | NC_021160.1    | Ca_kabuli_chr01 | 38573392                | CC                              | TT                | 1945894311               |
| SNP_P3_13527_38573433 | NC_021160.1    | Ca_kabuli_chr01 | 38573433                | CC                              | TT                | 1945894312               |
| SNP_P3_13528_38573658 | NC_021160.1    | Ca_kabuli_chr01 | 38573658                | TT                              | CC                | 1945894314               |
| SNP_P3_13529_38573924 | NC_021160.1    | Ca_kabuli_chr01 | 38573924                | CC                              | AA                | 1945894316               |
| SNP_P3_13530_38575159 | NC_021160.1    | Ca_kabuli_chr01 | 38575159                | AA                              | GG                | 1945894318               |
| SNP_P3_13531_38575573 | NC_021160.1    | Ca_kabuli_chr01 | 38575573                | AA                              | CC                | 1945894319               |
| SNP_P3_13532_38576525 | NC_021160.1    | Ca_kabuli_chr01 | 38576525                | GG                              | CC                | 1945894321               |
| SNP_P3_13533_38576552 | NC_021160.1    | Ca_kabuli_chr01 | 38576552                | AA                              | GG                | 1945894323               |
| SNP_P3_13534_38578112 | NC_021160.1    | Ca_kabuli_chr01 | 38578112                | TT                              | CC                | 1945894325               |
| SNP_P3_13535_38578117 | NC_021160.1    | Ca_kabuli_chr01 | 38578117                | GG                              | TT                | 1945894327               |
| SNP_P3_13536_38578265 | NC_021160.1    | Ca_kabuli_chr01 | 38578265                | GG                              | AA                | 1945894328               |
| SNP_P3_13537_38578282 | NC_021160.1    | Ca_kabuli_chr01 | 38578282                | AA                              | GG                | 1945894330               |
| SNP_P3_13538_38578325 | NC_021160.1    | Ca_kabuli_chr01 | 38578325                | GG                              | AA                | 1945894332               |
| SNP_P3_13539_38592070 | NC_021160.1    | Ca_kabuli_chr01 | 38592070                | CC                              | TT                | 1945894334               |
| SNP_P3_13540_38596448 | NC_021160.1    | Ca_kabuli_chr01 | 38596448                | GG                              | AA                | 1945894335               |
| SNP_P3_13543_38597884 | NC_021160.1    | Ca_kabuli_chr01 | 38597884                | AA                              | TT                | 1945894337               |
| SNP_P3_13545_38597989 | NC_021160.1    | Ca_kabuli_chr01 | 38597989                | TT                              | AA                | 1945894339               |

| SNPs IDs              | Chromosome IDs | Chromosomes     | Physical positions (bp) | CDC Frontier (Reference genome) | (Pusa 256 & HPNB) | NCBI SNPdb Accession IDs |
|-----------------------|----------------|-----------------|-------------------------|---------------------------------|-------------------|--------------------------|
| SNP_P3_13546_38598553 | NC_021160.1    | Ca_kabuli_chr01 | 38598553                | CC                              | TT                | 1945894341               |
| SNP_P3_13547_38598566 | NC_021160.1    | Ca_kabuli_chr01 | 38598566                | GG                              | AA                | 1945894343               |
| SNP_P3_13548_38598879 | NC_021160.1    | Ca_kabuli_chr01 | 38598879                | TT                              | CC                | 1945894344               |
| SNP_P3_13549_38598895 | NC_021160.1    | Ca_kabuli_chr01 | 38598895                | TT                              | CC                | 1945894346               |
| SNP_P3_13550_38604227 | NC_021160.1    | Ca_kabuli_chr01 | 38604227                | CC                              | TT                | 1945894348               |
| SNP_P3_13551_38609929 | NC_021160.1    | Ca_kabuli_chr01 | 38609929                | GG                              | AA                | 1945894350               |
| SNP_P3_13552_38610070 | NC_021160.1    | Ca_kabuli_chr01 | 38610070                | GG                              | AA                | 1945894351               |
| SNP_P3_13553_38610190 | NC_021160.1    | Ca_kabuli_chr01 | 38610190                | TT                              | GG                | 1945894353               |
| SNP_P3_13556_38616327 | NC_021160.1    | Ca_kabuli_chr01 | 38616327                | TT                              | CC                | 1945894355               |
| SNP_P3_13557_38616338 | NC_021160.1    | Ca_kabuli_chr01 | 38616338                | TT                              | CC                | 1945894357               |
| SNP_P3_13558_38624700 | NC_021160.1    | Ca_kabuli_chr01 | 38624700                | AA                              | TT                | 1945894358               |
| SNP_P3_13559_38626634 | NC_021160.1    | Ca_kabuli_chr01 | 38626634                | CC                              | TT                | 1945894360               |
| SNP_P3_13560_38629300 | NC_021160.1    | Ca_kabuli_chr01 | 38629300                | GG                              | AA                | 1945894362               |
| SNP_P3_13561_38631139 | NC_021160.1    | Ca_kabuli_chr01 | 38631139                | AA                              | GG                | 1945894364               |
| SNP_P3_13562_38631165 | NC_021160.1    | Ca_kabuli_chr01 | 38631165                | AA                              | CC                | 1945894366               |
| SNP_P3_13563_38631476 | NC_021160.1    | Ca_kabuli_chr01 | 38631476                | AA                              | CC                | 1945894367               |
| SNP_P3_13565_38634118 | NC_021160.1    | Ca_kabuli_chr01 | 38634118                | AA                              | TT                | 1945894369               |
| SNP_P3_13567_38638485 | NC_021160.1    | Ca_kabuli_chr01 | 38638485                | AA                              | GG                | 1945894371               |
| SNP_P3_13568_38638532 | NC_021160.1    | Ca_kabuli_chr01 | 38638532                | GG                              | AA                | 1945894373               |
| SNP_P3_13569_38638927 | NC_021160.1    | Ca_kabuli_chr01 | 38638927                | GG                              | AA                | 1945894374               |
| SNP_P3_13570_38641393 | NC_021160.1    | Ca_kabuli_chr01 | 38641393                | TT                              | AA                | 1945894376               |
| SNP_P3_13571_38642018 | NC_021160.1    | Ca_kabuli_chr01 | 38642018                | TT                              | AA                | 1945894378               |
| SNP_P3_13572_38642030 | NC_021160.1    | Ca_kabuli_chr01 | 38642030                | GG                              | AA                | 1945894380               |
| SNP_P3_13573_38644067 | NC_021160.1    | Ca_kabuli_chr01 | 38644067                | TT                              | CC                | 1945894382               |
| SNP_P3_13574_38644816 | NC_021160.1    | Ca_kabuli_chr01 | 38644816                | GG                              | CC                | 1945894383               |
| SNP_P3_13575_38644822 | NC_021160.1    | Ca_kabuli_chr01 | 38644822                | AA                              | GG                | 1945894385               |
| SNP_P3_13576_38645070 | NC_021160.1    | Ca_kabuli_chr01 | 38645070                | CC                              | TT                | 1945894387               |
| SNP_P3_13577_38645172 | NC_021160.1    | Ca_kabuli_chr01 | 38645172                | CC                              | TT                | 1945894389               |
| SNP_P3_13578_38645197 | NC_021160.1    | Ca_kabuli_chr01 | 38645197                | TT                              | AA                | 1945894390               |
| SNP_P3_13579_38650667 | NC_021160.1    | Ca_kabuli_chr01 | 38650667                | TT                              | CC                | 1945894392               |
| SNP_P3_13580_38650783 | NC_021160.1    | Ca_kabuli_chr01 | 38650783                | TT                              | CC                | 1945894394               |
| SNP_P3_13581_38650826 | NC_021160.1    | Ca_kabuli_chr01 | 38650826                | TT                              | GG                | 1945894396               |
| SNP_P3_13582_38650883 | NC_021160.1    | Ca_kabuli_chr01 | 38650883                | TT                              | CC                | 1945894398               |
| SNP_P3_13583_38650966 | NC_021160.1    | Ca_kabuli_chr01 | 38650966                | TT                              | CC                | 1945894399               |
| SNP_P3_13584_38651048 | NC_021160.1    | Ca_kabuli_chr01 | 38651048                | TT                              | CC                | 1945894401               |
| SNP_P3_13585_38651082 | NC_021160.1    | Ca_kabuli_chr01 | 38651082                | CC                              | TT                | 1945894403               |
| SNP_P3_13586_38651092 | NC_021160.1    | Ca_kabuli_chr01 | 38651092                | AA                              | GG                | 1945894405               |
| SNP_P3_13587_38651098 | NC_021160.1    | Ca_kabuli_chr01 | 38651098                | AA                              | CC                | 1945894406               |
| SNP_P3_13588_38651137 | NC_021160.1    | Ca_kabuli_chr01 | 38651137                | GG                              | TT                | 1945894408               |
| SNP_P3_13589_38651178 | NC_021160.1    | Ca_kabuli_chr01 | 38651178                | AA                              | TT                | 1945894410               |
| SNP_P3_13590_38651197 | NC_021160.1    | Ca_kabuli_chr01 | 38651197                | CC                              | AA                | 1945894412               |
| SNP_P3_13591_38651237 | NC_021160.1    | Ca_kabuli_chr01 | 38651237                | TT                              | CC                | 1945894413               |

| SNPs IDs              | Chromosome IDs | Chromosomes     | Physical positions (bp) | CDC Frontier (Reference genome) | (Pusa 256 & HPNB) | NCBI SNPdb Accession IDs |
|-----------------------|----------------|-----------------|-------------------------|---------------------------------|-------------------|--------------------------|
| SNP_P3_13592_38651832 | NC_021160.1    | Ca_kabuli_chr01 | 38651832                | TT                              | CC                | 1945894415               |
| SNP_P3_13593_38651833 | NC_021160.1    | Ca_kabuli_chr01 | 38651833                | CC                              | TT                | 1945894417               |
| SNP_P3_13594_38651834 | NC_021160.1    | Ca_kabuli_chr01 | 38651834                | TT                              | AA                | 1945894419               |
| SNP_P3_13595_38652079 | NC_021160.1    | Ca_kabuli_chr01 | 38652079                | AA                              | GG                | 1945894421               |
| SNP_P3_13596_38652110 | NC_021160.1    | Ca_kabuli_chr01 | 38652110                | GG                              | CC                | 1945894422               |
| SNP_P3_13597_38655574 | NC_021160.1    | Ca_kabuli_chr01 | 38655574                | AA                              | GG                | 1945894424               |
| SNP_P3_13600_38659057 | NC_021160.1    | Ca_kabuli_chr01 | 38659057                | CC                              | GG                | 1945894426               |
| SNP_P3_13601_38660602 | NC_021160.1    | Ca_kabuli_chr01 | 38660602                | GG                              | TT                | 1945894428               |
| SNP_P3_13602_38660681 | NC_021160.1    | Ca_kabuli_chr01 | 38660681                | TT                              | AA                | 1945894429               |
| SNP_P3_13603_38662166 | NC_021160.1    | Ca_kabuli_chr01 | 38662166                | AA                              | GG                | 1945894431               |
| SNP_P3_13604_38663875 | NC_021160.1    | Ca_kabuli_chr01 | 38663875                | TT                              | CC                | 1945894433               |
| SNP_P3_13605_38663916 | NC_021160.1    | Ca_kabuli_chr01 | 38663916                | GG                              | AA                | 1945894435               |
| SNP_P3_13606_38663985 | NC_021160.1    | Ca_kabuli_chr01 | 38663985                | TT                              | CC                | 1945894437               |
| SNP_P3_13607_38664011 | NC_021160.1    | Ca_kabuli_chr01 | 38664011                | CC                              | TT                | 1945894438               |
| SNP_P3_13608_38665411 | NC_021160.1    | Ca_kabuli_chr01 | 38665411                | GG                              | AA                | 1945894440               |
| SNP_P3_13609_38666750 | NC_021160.1    | Ca_kabuli_chr01 | 38666750                | CC                              | TT                | 1945894442               |
| SNP_P3_13610_38667514 | NC_021160.1    | Ca_kabuli_chr01 | 38667514                | TT                              | CC                | 1945894444               |
| SNP_P3_13611_38670376 | NC_021160.1    | Ca_kabuli_chr01 | 38670376                | AA                              | TT                | 1945894445               |
| SNP_P3_13613_38671155 | NC_021160.1    | Ca_kabuli_chr01 | 38671155                | AA                              | GG                | 1945894447               |
| SNP_P3_13614_38671448 | NC_021160.1    | Ca_kabuli_chr01 | 38671448                | GG                              | AA                | 1945894449               |
| SNP_P3_13616_38672925 | NC_021160.1    | Ca_kabuli_chr01 | 38672925                | CC                              | TT                | 1945894451               |
| SNP_P3_13617_38673403 | NC_021160.1    | Ca_kabuli_chr01 | 38673403                | GG                              | AA                | 1945894453               |
| SNP_P3_13618_38673437 | NC_021160.1    | Ca_kabuli_chr01 | 38673437                | AA                              | GG                | 1945894454               |
| SNP_P3_13619_38677173 | NC_021160.1    | Ca_kabuli_chr01 | 38677173                | GG                              | TT                | 1945894456               |
| SNP_P3_13620_38677343 | NC_021160.1    | Ca_kabuli_chr01 | 38677343                | AA                              | CC                | 1945894458               |
| SNP_P3_13621_38677402 | NC_021160.1    | Ca_kabuli_chr01 | 38677402                | AA                              | CC                | 1945894460               |
| SNP_P3_13622_38677414 | NC_021160.1    | Ca_kabuli_chr01 | 38677414                | CC                              | TT                | 1945894461               |
| SNP_P3_13623_38677420 | NC_021160.1    | Ca_kabuli_chr01 | 38677420                | GG                              | AA                | 1945894463               |
| SNP_P3_13624_38677449 | NC_021160.1    | Ca_kabuli_chr01 | 38677449                | AA                              | GG                | 1945894465               |
| SNP_P3_13625_38677476 | NC_021160.1    | Ca_kabuli_chr01 | 38677476                | AA                              | GG                | 1945894467               |
| SNP_P3_13626_38677496 | NC_021160.1    | Ca_kabuli_chr01 | 38677496                | AA                              | CC                | 1945894468               |
| SNP_P3_13627_38677514 | NC_021160.1    | Ca_kabuli_chr01 | 38677514                | AA                              | GG                | 1945894470               |
| SNP_P3_13628_38677534 | NC_021160.1    | Ca_kabuli_chr01 | 38677534                | GG                              | AA                | 1945894472               |
| SNP_P3_13629_38677577 | NC_021160.1    | Ca_kabuli_chr01 | 38677577                | AA                              | GG                | 1945894474               |
| SNP_P3_13630_38677591 | NC_021160.1    | Ca_kabuli_chr01 | 38677591                | AA                              | GG                | 1945894476               |
| SNP_P3_13631_38677622 | NC_021160.1    | Ca_kabuli_chr01 | 38677622                | AA                              | CC                | 1945894477               |
| SNP_P3_13632_38677646 | NC_021160.1    | Ca_kabuli_chr01 | 38677646                | TT                              | CC                | 1945894479               |
| SNP_P3_13633_38679009 | NC_021160.1    | Ca_kabuli_chr01 | 38679009                | AA                              | GG                | 1945894481               |
| SNP_P3_13634_38679213 | NC_021160.1    | Ca_kabuli_chr01 | 38679213                | GG                              | TT                | 1945894483               |
| SNP_P3_13635_38680817 | NC_021160.1    | Ca_kabuli_chr01 | 38680817                | GG                              | AA                | 1945894484               |
| SNP_P3_13636_38695930 | NC_021160.1    | Ca_kabuli_chr01 | 38695930                | AA                              | GG                | 1945894486               |
| SNP_P3_13637_38695951 | NC_021160.1    | Ca_kabuli_chr01 | 38695951                | TT                              | CC                | 1945894488               |

| SNPs IDs              | Chromosome IDs | Chromosomes     | Physical positions (bp) | CDC Frontier (Reference genome) | (Pusa 256 & HPNB) | NCBI SNPdb Accession IDs |
|-----------------------|----------------|-----------------|-------------------------|---------------------------------|-------------------|--------------------------|
| SNP_P3_13638_38698894 | NC_021160.1    | Ca_kabuli_chr01 | 38698894                | TT                              | GG                | 1945894490               |
| SNP_P3_13639_38698916 | NC_021160.1    | Ca_kabuli_chr01 | 38698916                | TT                              | CC                | 1945894491               |
| SNP_P3_13640_38698932 | NC_021160.1    | Ca_kabuli_chr01 | 38698932                | GG                              | TT                | 1945894493               |
| SNP_P3_13641_38699004 | NC_021160.1    | Ca_kabuli_chr01 | 38699004                | AA                              | GG                | 1945894495               |
| SNP_P3_13642_38699020 | NC_021160.1    | Ca_kabuli_chr01 | 38699020                | TT                              | CC                | 1945894497               |
| SNP_P3_13643_38699194 | NC_021160.1    | Ca_kabuli_chr01 | 38699194                | AA                              | GG                | 1945894499               |
| SNP_P3_13644_38706328 | NC_021160.1    | Ca_kabuli_chr01 | 38706328                | TT                              | CC                | 1945894500               |
| SNP_P3_13646_38709676 | NC_021160.1    | Ca_kabuli_chr01 | 38709676                | AA                              | CC                | 1945894502               |
| SNP_P3_13647_38710000 | NC_021160.1    | Ca_kabuli_chr01 | 38710000                | CC                              | TT                | 1945894504               |
| SNP_P3_13648_38715112 | NC_021160.1    | Ca_kabuli_chr01 | 38715112                | AA                              | TT                | 1945894506               |
| SNP_P3_13649_38716083 | NC_021160.1    | Ca_kabuli_chr01 | 38716083                | TT                              | GG                | 1945894507               |
| SNP_P3_13650_38716409 | NC_021160.1    | Ca_kabuli_chr01 | 38716409                | TT                              | CC                | 1945894509               |
| SNP_P3_13651_38717770 | NC_021160.1    | Ca_kabuli_chr01 | 38717770                | AA                              | CC                | 1945894511               |
| SNP_P3_13652_38717983 | NC_021160.1    | Ca_kabuli_chr01 | 38717983                | GG                              | AA                | 1945894513               |
| SNP_P3_13653_38718011 | NC_021160.1    | Ca_kabuli_chr01 | 38718011                | CC                              | AA                | 1945894515               |
| SNP_P3_13654_38718041 | NC_021160.1    | Ca_kabuli_chr01 | 38718041                | TT                              | CC                | 1945894516               |
| SNP_P3_13655_38718110 | NC_021160.1    | Ca_kabuli_chr01 | 38718110                | GG                              | AA                | 1945894518               |
| SNP_P3_13656_38723171 | NC_021160.1    | Ca_kabuli_chr01 | 38723171                | AA                              | GG                | 1945894520               |
| SNP_P3_13657_38733196 | NC_021160.1    | Ca_kabuli_chr01 | 38733196                | GG                              | TT                | 1945894522               |
| SNP_P3_13658_38734692 | NC_021160.1    | Ca_kabuli_chr01 | 38734692                | TT                              | GG                | 1945894523               |
| SNP_P3_13659_38735802 | NC_021160.1    | Ca_kabuli_chr01 | 38735802                | TT                              | CC                | 1945894525               |
| SNP_P3_13660_38735915 | NC_021160.1    | Ca_kabuli_chr01 | 38735915                | TT                              | AA                | 1945894527               |
| SNP_P3_13662_38736306 | NC_021160.1    | Ca_kabuli_chr01 | 38736306                | GG                              | CC                | 1945894529               |
| SNP_P3_13663_38736349 | NC_021160.1    | Ca_kabuli_chr01 | 38736349                | AA                              | CC                | 1945894530               |
| SNP_P3_13665_38736414 | NC_021160.1    | Ca_kabuli_chr01 | 38736414                | CC                              | TT                | 1945894532               |
| SNP_P3_13666_38736426 | NC_021160.1    | Ca_kabuli_chr01 | 38736426                | AA                              | GG                | 1945894534               |
| SNP_P3_13667_38736435 | NC_021160.1    | Ca_kabuli_chr01 | 38736435                | CC                              | AA                | 1945894536               |
| SNP_P3_13668_38736691 | NC_021160.1    | Ca_kabuli_chr01 | 38736691                | TT                              | CC                | 1945894538               |
| SNP_P3_13669_38737796 | NC_021160.1    | Ca_kabuli_chr01 | 38737796                | AA                              | CC                | 1945894539               |
| SNP_P3_13670_38737890 | NC_021160.1    | Ca_kabuli_chr01 | 38737890                | TT                              | AA                | 1945894541               |
| SNP_P3_13671_38740439 | NC_021160.1    | Ca_kabuli_chr01 | 38740439                | TT                              | GG                | 1945894543               |
| SNP_P3_13672_38740718 | NC_021160.1    | Ca_kabuli_chr01 | 38740718                | CC                              | GG                | 1945894545               |
| SNP_P3_13673_38741400 | NC_021160.1    | Ca_kabuli_chr01 | 38741400                | CC                              | TT                | 1945894546               |
| SNP_P3_13674_38743067 | NC_021160.1    | Ca_kabuli_chr01 | 38743067                | CC                              | TT                | 1945894548               |
| SNP_P3_13675_38743068 | NC_021160.1    | Ca_kabuli_chr01 | 38743068                | CC                              | GG                | 1945894550               |
| SNP_P3_13676_38743072 | NC_021160.1    | Ca_kabuli_chr01 | 38743072                | CC                              | AA                | 1945894552               |
| SNP_P3_13677_38743344 | NC_021160.1    | Ca_kabuli_chr01 | 38743344                | TT                              | CC                | 1945894554               |
| SNP_P3_13678_38743362 | NC_021160.1    | Ca_kabuli_chr01 | 38743362                | TT                              | AA                | 1945894555               |
| SNP_P3_13680_38744096 | NC_021160.1    | Ca_kabuli_chr01 | 38744096                | AA                              | CC                | 1945894557               |
| SNP_P3_13681_38745751 | NC_021160.1    | Ca_kabuli_chr01 | 38745751                | TT                              | AA                | 1945894559               |
| SNP_P3_13682_38749473 | NC_021160.1    | Ca_kabuli_chr01 | 38749473                | TT                              | CC                | 1945894561               |
| SNP_P3_13683_38750207 | NC_021160.1    | Ca_kabuli_chr01 | 38750207                | AA                              | GG                | 1945894562               |

| SNPs IDs              | Chromosome IDs | Chromosomes     | Physical positions (bp) | CDC Frontier (Reference genome) | (Pusa 256 & HPNB) | NCBI SNPdb Accession IDs |
|-----------------------|----------------|-----------------|-------------------------|---------------------------------|-------------------|--------------------------|
| SNP_P3_13684_38751165 | NC_021160.1    | Ca_kabuli_chr01 | 38751165                | GG                              | AA                | 1945894564               |
| SNP_P3_13685_38751199 | NC_021160.1    | Ca_kabuli_chr01 | 38751199                | AA                              | TT                | 1945894566               |
| SNP_P3_13686_38751427 | NC_021160.1    | Ca_kabuli_chr01 | 38751427                | TT                              | AA                | 1945894568               |
| SNP_P3_13687_38751467 | NC_021160.1    | Ca_kabuli_chr01 | 38751467                | CC                              | TT                | 1945894569               |
| SNP_P3_13689_38752269 | NC_021160.1    | Ca_kabuli_chr01 | 38752269                | GG                              | AA                | 1945894571               |
| SNP_P3_13690_38752316 | NC_021160.1    | Ca_kabuli_chr01 | 38752316                | AA                              | GG                | 1945894573               |
| SNP_P3_13691_38752341 | NC_021160.1    | Ca_kabuli_chr01 | 38752341                | GG                              | AA                | 1945894575               |
| SNP_P3_13692_38752688 | NC_021160.1    | Ca_kabuli_chr01 | 38752688                | CC                              | TT                | 1945894577               |
| SNP_P3_13693_38752717 | NC_021160.1    | Ca_kabuli_chr01 | 38752717                | GG                              | AA                | 1945894578               |
| SNP_P3_13694_38753585 | NC_021160.1    | Ca_kabuli_chr01 | 38753585                | AA                              | CC                | 1945894580               |
| SNP_P3_13695_38753866 | NC_021160.1    | Ca_kabuli_chr01 | 38753866                | TT                              | CC                | 1945894582               |
| SNP_P3_13696_38754091 | NC_021160.1    | Ca_kabuli_chr01 | 38754091                | TT                              | CC                | 1945894584               |
| SNP_P3_13697_38754552 | NC_021160.1    | Ca_kabuli_chr01 | 38754552                | GG                              | AA                | 1945894585               |
| SNP_P3_13698_38754569 | NC_021160.1    | Ca_kabuli_chr01 | 38754569                | CC                              | TT                | 1945894587               |
| SNP_P3_13699_38754762 | NC_021160.1    | Ca_kabuli_chr01 | 38754762                | AA                              | TT                | 1945894589               |
| SNP_P3_13700_38754840 | NC_021160.1    | Ca_kabuli_chr01 | 38754840                | TT                              | GG                | 1945894591               |
| SNP_P3_13701_38754853 | NC_021160.1    | Ca_kabuli_chr01 | 38754853                | TT                              | AA                | 1945894592               |
| SNP_P3_13702_38755789 | NC_021160.1    | Ca_kabuli_chr01 | 38755789                | AA                              | TT                | 1945894594               |
| SNP_P3_13703_38757328 | NC_021160.1    | Ca_kabuli_chr01 | 38757328                | TT                              | CC                | 1945894596               |
| SNP_P3_13704_38757537 | NC_021160.1    | Ca_kabuli_chr01 | 38757537                | CC                              | TT                | 1945894598               |
| SNP_P3_13705_38758561 | NC_021160.1    | Ca_kabuli_chr01 | 38758561                | TT                              | CC                | 1945894600               |
| SNP_P3_13706_38759156 | NC_021160.1    | Ca_kabuli_chr01 | 38759156                | AA                              | GG                | 1945894601               |
| SNP_P3_13708_38759498 | NC_021160.1    | Ca_kabuli_chr01 | 38759498                | CC                              | TT                | 1945894603               |
| SNP_P3_13709_38759604 | NC_021160.1    | Ca_kabuli_chr01 | 38759604                | AA                              | CC                | 1945894605               |
| SNP_P3_13711_38761808 | NC_021160.1    | Ca_kabuli_chr01 | 38761808                | GG                              | TT                | 1945894607               |
| SNP_P3_13712_38761860 | NC_021160.1    | Ca_kabuli_chr01 | 38761860                | CC                              | TT                | 1945894608               |
| SNP_P3_13713_38762013 | NC_021160.1    | Ca_kabuli_chr01 | 38762013                | CC                              | TT                | 1945894610               |
| SNP_P3_13714_38762136 | NC_021160.1    | Ca_kabuli_chr01 | 38762136                | AA                              | TT                | 1945894612               |
| SNP_P3_13715_38765056 | NC_021160.1    | Ca_kabuli_chr01 | 38765056                | AA                              | TT                | 1945894614               |
| SNP_P3_13716_38765458 | NC_021160.1    | Ca_kabuli_chr01 | 38765458                | AA                              | TT                | 1945894616               |
| SNP_P3_13717_38765497 | NC_021160.1    | Ca_kabuli_chr01 | 38765497                | AA                              | GG                | 1945894617               |
| SNP_P3_13718_38766710 | NC_021160.1    | Ca_kabuli_chr01 | 38766710                | AA                              | GG                | 1945894619               |
| SNP_P3_13719_38766934 | NC_021160.1    | Ca_kabuli_chr01 | 38766934                | CC                              | TT                | 1945894621               |
| SNP_P3_13720_38767531 | NC_021160.1    | Ca_kabuli_chr01 | 38767531                | TT                              | GG                | 1945894623               |
| SNP_P3_13721_38767554 | NC_021160.1    | Ca_kabuli_chr01 | 38767554                | GG                              | AA                | 1945894624               |
| SNP_P3_13722_38768917 | NC_021160.1    | Ca_kabuli_chr01 | 38768917                | TT                              | AA                | 1945894626               |
| SNP_P3_13723_38768963 | NC_021160.1    | Ca_kabuli_chr01 | 38768963                | GG                              | AA                | 1945894628               |
| SNP_P3_13724_38770178 | NC_021160.1    | Ca_kabuli_chr01 | 38770178                | AA                              | GG                | 1945894630               |
| SNP_P3_13725_38770208 | NC_021160.1    | Ca_kabuli_chr01 | 38770208                | TT                              | GG                | 1945894632               |
| SNP_P3_13726_38770243 | NC_021160.1    | Ca_kabuli_chr01 | 38770243                | CC                              | AA                | 1945894633               |
| SNP_P3_13727_38770244 | NC_021160.1    | Ca_kabuli_chr01 | 38770244                | AA                              | TT                | 1945894635               |
| SNP_P3_13728_38770529 | NC_021160.1    | Ca_kabuli_chr01 | 38770529                | TT                              | CC                | 1945894637               |

| SNPs IDs              | Chromosome IDs | Chromosomes     | Physical positions (bp) | CDC Frontier (Reference genome) | (Pusa 256 & HPNB) | NCBI SNPdb Accession IDs |
|-----------------------|----------------|-----------------|-------------------------|---------------------------------|-------------------|--------------------------|
| SNP_P3_13729_38770588 | NC_021160.1    | Ca_kabuli_chr01 | 38770588                | AA                              | GG                | 1945894639               |
| SNP_P3_13730_38770702 | NC_021160.1    | Ca_kabuli_chr01 | 38770702                | GG                              | TT                | 1945894640               |
| SNP_P3_13731_38770874 | NC_021160.1    | Ca_kabuli_chr01 | 38770874                | CC                              | TT                | 1945894642               |
| SNP_P3_13732_38770918 | NC_021160.1    | Ca_kabuli_chr01 | 38770918                | TT                              | AA                | 1945894644               |
| SNP_P3_13734_38771150 | NC_021160.1    | Ca_kabuli_chr01 | 38771150                | CC                              | TT                | 1945894646               |
| SNP_P3_13735_38771151 | NC_021160.1    | Ca_kabuli_chr01 | 38771151                | TT                              | CC                | 1945894647               |
| SNP_P3_13736_38771597 | NC_021160.1    | Ca_kabuli_chr01 | 38771597                | CC                              | GG                | 1945894649               |
| SNP_P3_13737_38771621 | NC_021160.1    | Ca_kabuli_chr01 | 38771621                | AA                              | CC                | 1945894651               |
| SNP_P3_13738_38773116 | NC_021160.1    | Ca_kabuli_chr01 | 38773116                | TT                              | AA                | 1945894653               |
| SNP_P3_13739_38773262 | NC_021160.1    | Ca_kabuli_chr01 | 38773262                | CC                              | TT                | 1945894655               |
| SNP_P3_13740_38773264 | NC_021160.1    | Ca_kabuli_chr01 | 38773264                | TT                              | GG                | 1945894656               |
| SNP_P3_13741_38773271 | NC_021160.1    | Ca_kabuli_chr01 | 38773271                | CC                              | TT                | 1945894658               |
| SNP_P3_13742_38773884 | NC_021160.1    | Ca_kabuli_chr01 | 38773884                | TT                              | CC                | 1945894660               |
| SNP_P3_13743_38774012 | NC_021160.1    | Ca_kabuli_chr01 | 38774012                | GG                              | AA                | 1945894662               |
| SNP_P3_13744_38774194 | NC_021160.1    | Ca_kabuli_chr01 | 38774194                | TT                              | AA                | 1945894663               |
| SNP_P3_13745_38774262 | NC_021160.1    | Ca_kabuli_chr01 | 38774262                | CC                              | TT                | 1945894665               |
| SNP_P3_13746_38774274 | NC_021160.1    | Ca_kabuli_chr01 | 38774274                | TT                              | CC                | 1945894667               |
| SNP_P3_13747_38774778 | NC_021160.1    | Ca_kabuli_chr01 | 38774778                | CC                              | GG                | 1945894669               |
| SNP_P3_13748_38774980 | NC_021160.1    | Ca_kabuli_chr01 | 38774980                | AA                              | TT                | 1945894670               |
| SNP_P3_13749_38776199 | NC_021160.1    | Ca_kabuli_chr01 | 38776199                | TT                              | AA                | 1945894672               |
| SNP_P3_13750_38776209 | NC_021160.1    | Ca_kabuli_chr01 | 38776209                | TT                              | CC                | 1945894674               |
| SNP_P3_13751_38776230 | NC_021160.1    | Ca_kabuli_chr01 | 38776230                | TT                              | GG                | 1945894676               |
| SNP_P3_13752_38776476 | NC_021160.1    | Ca_kabuli_chr01 | 38776476                | GG                              | AA                | 1945894677               |
| SNP_P3_13753_38776501 | NC_021160.1    | Ca_kabuli_chr01 | 38776501                | AA                              | TT                | 1945894679               |
| SNP_P3_13754_38777216 | NC_021160.1    | Ca_kabuli_chr01 | 38777216                | GG                              | AA                | 1945894681               |
| SNP_P3_13755_38778069 | NC_021160.1    | Ca_kabuli_chr01 | 38778069                | CC                              | TT                | 1945894683               |
| SNP_P3_13756_38778636 | NC_021160.1    | Ca_kabuli_chr01 | 38778636                | AA                              | GG                | 1945894685               |
| SNP_P3_13757_38779432 | NC_021160.1    | Ca_kabuli_chr01 | 38779432                | CC                              | TT                | 1945894686               |
| SNP_P3_13758_38779440 | NC_021160.1    | Ca_kabuli_chr01 | 38779440                | GG                              | AA                | 1945894688               |
| SNP_P3_13759_38779481 | NC_021160.1    | Ca_kabuli_chr01 | 38779481                | AA                              | CC                | 1945894690               |
| SNP_P3_13760_38779525 | NC_021160.1    | Ca_kabuli_chr01 | 38779525                | GG                              | AA                | 1945894692               |
| SNP_P3_13761_38779709 | NC_021160.1    | Ca_kabuli_chr01 | 38779709                | TT                              | AA                | 1945894693               |
| SNP_P3_13762_38779818 | NC_021160.1    | Ca_kabuli_chr01 | 38779818                | CC                              | TT                | 1945894695               |
| SNP_P3_13763_38780530 | NC_021160.1    | Ca_kabuli_chr01 | 38780530                | AA                              | CC                | 1945894697               |
| SNP_P3_13764_38780554 | NC_021160.1    | Ca_kabuli_chr01 | 38780554                | GG                              | TT                | 1945894699               |
| SNP_P3_13765_38781166 | NC_021160.1    | Ca_kabuli_chr01 | 38781166                | GG                              | AA                | 1945894701               |
| SNP_P3_13766_38781384 | NC_021160.1    | Ca_kabuli_chr01 | 38781384                | CC                              | TT                | 1945894702               |
| SNP_P3_13767_38781487 | NC_021160.1    | Ca_kabuli_chr01 | 38781487                | AA                              | CC                | 1945894704               |
| SNP_P3_13768_38781537 | NC_021160.1    | Ca_kabuli_chr01 | 38781537                | GG                              | AA                | 1945894706               |
| SNP_P3_13769_38789729 | NC_021160.1    | Ca_kabuli_chr01 | 38789729                | TT                              | CC                | 1945894708               |
| SNP_P3_13770_38789943 | NC_021160.1    | Ca_kabuli_chr01 | 38789943                | TT                              | CC                | 1945894709               |
| SNP_P3_13771_38789978 | NC_021160.1    | Ca_kabuli_chr01 | 38789978                | TT                              | CC                | 1945894711               |



| SNPs IDs              | Chromosome IDs | Chromosomes     | Physical positions (bp) | CDC Frontier (Reference genome) | (Pusa 256 & HPNB) | NCBI SNPdb Accession IDs |
|-----------------------|----------------|-----------------|-------------------------|---------------------------------|-------------------|--------------------------|
| SNP_P3_13772_38790060 | NC_021160.1    | Ca_kabuli_chr01 | 38790060                | GG                              | AA                | 1945894713               |
| SNP_P3_13773_38793743 | NC_021160.1    | Ca_kabuli_chr01 | 38793743                | GG                              | AA                | 1945894715               |
| SNP_P3_13774_38793753 | NC_021160.1    | Ca_kabuli_chr01 | 38793753                | GG                              | AA                | 1945894716               |
| SNP_P3_13775_38794853 | NC_021160.1    | Ca_kabuli_chr01 | 38794853                | TT                              | GG                | 1945894718               |
| SNP_P3_13776_38796012 | NC_021160.1    | Ca_kabuli_chr01 | 38796012                | AA                              | CC                | 1945894720               |
| SNP_P3_13778_38797860 | NC_021160.1    | Ca_kabuli_chr01 | 38797860                | GG                              | AA                | 1945894722               |
| SNP_P3_13780_38798468 | NC_021160.1    | Ca_kabuli_chr01 | 38798468                | CC                              | TT                | 1945894724               |
| SNP_P3_13781_38798569 | NC_021160.1    | Ca_kabuli_chr01 | 38798569                | GG                              | AA                | 1945894725               |
| SNP_P3_13782_38798587 | NC_021160.1    | Ca_kabuli_chr01 | 38798587                | GG                              | AA                | 1945894727               |
| SNP_P3_13783_38799213 | NC_021160.1    | Ca_kabuli_chr01 | 38799213                | AA                              | GG                | 1945894729               |
| SNP_P3_13784_38800453 | NC_021160.1    | Ca_kabuli_chr01 | 38800453                | AA                              | GG                | 1945894731               |
| SNP_P3_13785_38800633 | NC_021160.1    | Ca_kabuli_chr01 | 38800633                | TT                              | AA                | 1945894732               |
| SNP_P3_13786_38800719 | NC_021160.1    | Ca_kabuli_chr01 | 38800719                | AA                              | GG                | 1945894734               |
| SNP_P3_13787_38801607 | NC_021160.1    | Ca_kabuli_chr01 | 38801607                | TT                              | AA                | 1945894736               |
| SNP_P3_13788_38801675 | NC_021160.1    | Ca_kabuli_chr01 | 38801675                | CC                              | TT                | 1945894738               |
| SNP_P3_13789_38811939 | NC_021160.1    | Ca_kabuli_chr01 | 38811939                | AA                              | GG                | 1945894739               |
| SNP_P3_13790_38811946 | NC_021160.1    | Ca_kabuli_chr01 | 38811946                | CC                              | AA                | 1945894741               |
| SNP_P3_13791_38811964 | NC_021160.1    | Ca_kabuli_chr01 | 38811964                | CC                              | TT                | 1945894743               |
| SNP_P3_13792_38811965 | NC_021160.1    | Ca_kabuli_chr01 | 38811965                | AA                              | GG                | 1945894745               |
| SNP_P3_13793_38812180 | NC_021160.1    | Ca_kabuli_chr01 | 38812180                | GG                              | AA                | 1945894747               |
| SNP_P3_13794_38812945 | NC_021160.1    | Ca_kabuli_chr01 | 38812945                | CC                              | TT                | 1945894748               |
| SNP_P3_13795_38813177 | NC_021160.1    | Ca_kabuli_chr01 | 38813177                | AA                              | CC                | 1945894750               |
| SNP_P3_13796_38813346 | NC_021160.1    | Ca_kabuli_chr01 | 38813346                | AA                              | GG                | 1945894752               |
| SNP_P3_13797_38813479 | NC_021160.1    | Ca_kabuli_chr01 | 38813479                | CC                              | AA                | 1945894754               |
| SNP_P3_13798_38814974 | NC_021160.1    | Ca_kabuli_chr01 | 38814974                | CC                              | TT                | 1945894755               |
| SNP_P3_13799_38815936 | NC_021160.1    | Ca_kabuli_chr01 | 38815936                | AA                              | TT                | 1945894757               |
| SNP_P3_13800_38817114 | NC_021160.1    | Ca_kabuli_chr01 | 38817114                | CC                              | TT                | 1945894759               |
| SNP_P3_13801_38835374 | NC_021160.1    | Ca_kabuli_chr01 | 38835374                | AA                              | GG                | 1945894761               |
| SNP_P3_13802_38841443 | NC_021160.1    | Ca_kabuli_chr01 | 38841443                | TT                              | GG                | 1945894763               |
| SNP_P3_13803_38841491 | NC_021160.1    | Ca_kabuli_chr01 | 38841491                | AA                              | GG                | 1945894764               |
| SNP_P3_13804_38842432 | NC_021160.1    | Ca_kabuli_chr01 | 38842432                | AA                              | GG                | 1945894766               |
| SNP_P3_13805_38842433 | NC_021160.1    | Ca_kabuli_chr01 | 38842433                | AA                              | CC                | 1945894768               |
| SNP_P3_13806_38842492 | NC_021160.1    | Ca_kabuli_chr01 | 38842492                | AA                              | CC                | 1945894770               |
| SNP_P3_13807_38842541 | NC_021160.1    | Ca_kabuli_chr01 | 38842541                | TT                              | AA                | 1945894771               |
| SNP_P3_13808_38846840 | NC_021160.1    | Ca_kabuli_chr01 | 38846840                | TT                              | GG                | 1945894773               |
| SNP_P3_13809_38847274 | NC_021160.1    | Ca_kabuli_chr01 | 38847274                | CC                              | TT                | 1945894775               |
| SNP_P3_13810_38847407 | NC_021160.1    | Ca_kabuli_chr01 | 38847407                | TT                              | CC                | 1945894777               |
| SNP_P3_13811_38851343 | NC_021160.1    | Ca_kabuli_chr01 | 38851343                | AA                              | GG                | 1945894779               |
| SNP_P3_13812_38853256 | NC_021160.1    | Ca_kabuli_chr01 | 38853256                | CC                              | TT                | 1945894780               |
| SNP_P3_13813_38854563 | NC_021160.1    | Ca_kabuli_chr01 | 38854563                | CC                              | TT                | 1945894782               |
| SNP_P3_13814_38854579 | NC_021160.1    | Ca_kabuli_chr01 | 38854579                | AA                              | TT                | 1945894784               |
| SNP_P3_13816_38858543 | NC_021160.1    | Ca_kabuli_chr01 | 38858543                | AA                              | GG                | 1945894786               |

| SNPs IDs              | Chromosome IDs | Chromosomes     | Physical positions (bp) | CDC Frontier (Reference genome) | (Pusa 256 & HPNB) | NCBI SNPdb Accession IDs |
|-----------------------|----------------|-----------------|-------------------------|---------------------------------|-------------------|--------------------------|
| SNP_P3_13817_38858714 | NC_021160.1    | Ca_kabuli_chr01 | 38858714                | TT                              | CC                | 1945894787               |
| SNP_P3_13818_38872124 | NC_021160.1    | Ca_kabuli_chr01 | 38872124                | GG                              | TT                | 1945894789               |
| SNP_P3_13819_38872455 | NC_021160.1    | Ca_kabuli_chr01 | 38872455                | TT                              | CC                | 1945894791               |
| SNP_P3_13820_38872490 | NC_021160.1    | Ca_kabuli_chr01 | 38872490                | TT                              | CC                | 1945894793               |
| SNP_P3_13821_38872497 | NC_021160.1    | Ca_kabuli_chr01 | 38872497                | AA                              | TT                | 1945894795               |
| SNP_P3_13822_38872924 | NC_021160.1    | Ca_kabuli_chr01 | 38872924                | TT                              | AA                | 1945894796               |
| SNP_P3_13823_38873246 | NC_021160.1    | Ca_kabuli_chr01 | 38873246                | GG                              | TT                | 1945894798               |
| SNP_P3_13824_38873327 | NC_021160.1    | Ca_kabuli_chr01 | 38873327                | GG                              | AA                | 1945894800               |
| SNP_P3_13825_38873860 | NC_021160.1    | Ca_kabuli_chr01 | 38873860                | TT                              | CC                | 1945894802               |
| SNP_P3_13828_38875631 | NC_021160.1    | Ca_kabuli_chr01 | 38875631                | GG                              | AA                | 1945894803               |
| SNP_P3_13829_38877498 | NC_021160.1    | Ca_kabuli_chr01 | 38877498                | AA                              | TT                | 1945894805               |
| SNP_P3_13830_38878767 | NC_021160.1    | Ca_kabuli_chr01 | 38878767                | AA                              | CC                | 1945894807               |
| SNP_P3_13831_38878786 | NC_021160.1    | Ca_kabuli_chr01 | 38878786                | TT                              | AA                | 1945894809               |
| SNP_P3_13832_38879273 | NC_021160.1    | Ca_kabuli_chr01 | 38879273                | GG                              | TT                | 1945894811               |
| SNP_P3_13834_38885074 | NC_021160.1    | Ca_kabuli_chr01 | 38885074                | GG                              | TT                | 1945894812               |
| SNP_P3_13837_38886603 | NC_021160.1    | Ca_kabuli_chr01 | 38886603                | CC                              | TT                | 1945894814               |
| SNP_P3_13838_38886632 | NC_021160.1    | Ca_kabuli_chr01 | 38886632                | AA                              | GG                | 1945894816               |
| SNP_P3_13839_38886657 | NC_021160.1    | Ca_kabuli_chr01 | 38886657                | CC                              | TT                | 1945894818               |
| SNP_P3_13840_38886848 | NC_021160.1    | Ca_kabuli_chr01 | 38886848                | GG                              | AA                | 1945894819               |
| SNP_P3_13841_38886950 | NC_021160.1    | Ca_kabuli_chr01 | 38886950                | TT                              | CC                | 1945894821               |
| SNP_P3_13842_38887347 | NC_021160.1    | Ca_kabuli_chr01 | 38887347                | AA                              | GG                | 1945894823               |
| SNP_P3_13843_38892999 | NC_021160.1    | Ca_kabuli_chr01 | 38892999                | CC                              | TT                | 1945894825               |
| SNP_P3_13844_38893474 | NC_021160.1    | Ca_kabuli_chr01 | 38893474                | CC                              | TT                | 1945894826               |
| SNP_P3_13845_38893652 | NC_021160.1    | Ca_kabuli_chr01 | 38893652                | GG                              | AA                | 1945894828               |
| SNP_P3_13846_38893900 | NC_021160.1    | Ca_kabuli_chr01 | 38893900                | GG                              | AA                | 1945894830               |
| SNP_P3_13847_38894879 | NC_021160.1    | Ca_kabuli_chr01 | 38894879                | TT                              | AA                | 1945894832               |
| SNP_P3_13848_38896290 | NC_021160.1    | Ca_kabuli_chr01 | 38896290                | AA                              | GG                | 1945894834               |
| SNP_P3_13849_38897126 | NC_021160.1    | Ca_kabuli_chr01 | 38897126                | CC                              | GG                | 1945894835               |
| SNP_P3_13850_38897402 | NC_021160.1    | Ca_kabuli_chr01 | 38897402                | AA                              | CC                | 1945894837               |
| SNP_P3_13851_38897499 | NC_021160.1    | Ca_kabuli_chr01 | 38897499                | AA                              | GG                | 1945894839               |
| SNP_P3_13852_38911358 | NC_021160.1    | Ca_kabuli_chr01 | 38911358                | AA                              | CC                | 1945894841               |
| SNP_P3_13853_38911386 | NC_021160.1    | Ca_kabuli_chr01 | 38911386                | TT                              | CC                | 1945894842               |
| SNP_P3_13854_38911392 | NC_021160.1    | Ca_kabuli_chr01 | 38911392                | GG                              | AA                | 1945894844               |
| SNP_P3_13855_38911448 | NC_021160.1    | Ca_kabuli_chr01 | 38911448                | GG                              | AA                | 1945894846               |
| SNP_P3_13857_38914834 | NC_021160.1    | Ca_kabuli_chr01 | 38914834                | GG                              | TT                | 1945894848               |
| SNP_P3_13858_38914841 | NC_021160.1    | Ca_kabuli_chr01 | 38914841                | TT                              | AA                | 1945894849               |
| SNP_P3_13859_38914851 | NC_021160.1    | Ca_kabuli_chr01 | 38914851                | TT                              | CC                | 1945894851               |
| SNP_P3_13860_38917237 | NC_021160.1    | Ca_kabuli_chr01 | 38917237                | TT                              | AA                | 1945894853               |
| SNP_P3_13861_38918761 | NC_021160.1    | Ca_kabuli_chr01 | 38918761                | TT                              | AA                | 1945894855               |
| SNP_P3_13862_38918811 | NC_021160.1    | Ca_kabuli_chr01 | 38918811                | TT                              | GG                | 1945894857               |
| SNP_P3_13863_38919267 | NC_021160.1    | Ca_kabuli_chr01 | 38919267                | TT                              | CC                | 1945894858               |
| SNP_P3_13864_38921258 | NC_021160.1    | Ca_kabuli_chr01 | 38921258                | TT                              | CC                | 1945894860               |

| SNPs IDs              | Chromosome IDs | Chromosomes     | Physical positions (bp) | CDC Frontier (Reference genome) | (Pusa 256 & HPNB) | NCBI SNPdb Accession IDs |
|-----------------------|----------------|-----------------|-------------------------|---------------------------------|-------------------|--------------------------|
| SNP_P3_13865_38921300 | NC_021160.1    | Ca_kabuli_chr01 | 38921300                | TT                              | CC                | 1945894862               |
| SNP_P3_13866_38921513 | NC_021160.1    | Ca_kabuli_chr01 | 38921513                | GG                              | AA                | 1945894864               |
| SNP_P3_13867_38921725 | NC_021160.1    | Ca_kabuli_chr01 | 38921725                | GG                              | TT                | 1945894865               |
| SNP_P3_13869_38922836 | NC_021160.1    | Ca_kabuli_chr01 | 38922836                | AA                              | TT                | 1945894867               |
| SNP_P3_13871_38923467 | NC_021160.1    | Ca_kabuli_chr01 | 38923467                | CC                              | TT                | 1945894869               |
| SNP_P3_13872_38923552 | NC_021160.1    | Ca_kabuli_chr01 | 38923552                | AA                              | GG                | 1945894871               |
| SNP_P3_13874_38931380 | NC_021160.1    | Ca_kabuli_chr01 | 38931380                | AA                              | GG                | 1945894873               |
| SNP_P3_13876_38932960 | NC_021160.1    | Ca_kabuli_chr01 | 38932960                | GG                              | CC                | 1945894874               |
| SNP_P3_13877_38933487 | NC_021160.1    | Ca_kabuli_chr01 | 38933487                | CC                              | TT                | 1945894876               |
| SNP_P3_13880_38942638 | NC_021160.1    | Ca_kabuli_chr01 | 38942638                | CC                              | AA                | 1945894878               |
| SNP_P3_13881_38943000 | NC_021160.1    | Ca_kabuli_chr01 | 38943000                | GG                              | TT                | 1945894880               |
| SNP_P3_13882_38943117 | NC_021160.1    | Ca_kabuli_chr01 | 38943117                | AA                              | GG                | 1945894881               |
| SNP_P3_13885_38944752 | NC_021160.1    | Ca_kabuli_chr01 | 38944752                | AA                              | CC                | 1945894883               |
| SNP_P3_13886_38944865 | NC_021160.1    | Ca_kabuli_chr01 | 38944865                | CC                              | TT                | 1945894885               |
| SNP_P3_13887_38945320 | NC_021160.1    | Ca_kabuli_chr01 | 38945320                | CC                              | GG                | 1945894887               |
| SNP_P3_13888_38948311 | NC_021160.1    | Ca_kabuli_chr01 | 38948311                | AA                              | GG                | 1945894888               |
| SNP_P3_13889_38948609 | NC_021160.1    | Ca_kabuli_chr01 | 38948609                | GG                              | AA                | 1945894890               |
| SNP_P3_13890_38948627 | NC_021160.1    | Ca_kabuli_chr01 | 38948627                | TT                              | AA                | 1945894892               |
| SNP_P3_13891_38948675 | NC_021160.1    | Ca_kabuli_chr01 | 38948675                | GG                              | AA                | 1945894894               |
| SNP_P3_13892_38948736 | NC_021160.1    | Ca_kabuli_chr01 | 38948736                | AA                              | GG                | 1945894896               |
| SNP_P3_13893_38949715 | NC_021160.1    | Ca_kabuli_chr01 | 38949715                | GG                              | AA                | 1945894897               |
| SNP_P3_13894_38950623 | NC_021160.1    | Ca_kabuli_chr01 | 38950623                | AA                              | GG                | 1945894899               |
| SNP_P3_13896_38951847 | NC_021160.1    | Ca_kabuli_chr01 | 38951847                | TT                              | GG                | 1945894901               |
| SNP_P3_13897_38955809 | NC_021160.1    | Ca_kabuli_chr01 | 38955809                | GG                              | CC                | 1945894903               |
| SNP_P3_13898_38957444 | NC_021160.1    | Ca_kabuli_chr01 | 38957444                | AA                              | TT                | 1945894904               |
| SNP_P3_13899_38958837 | NC_021160.1    | Ca_kabuli_chr01 | 38958837                | CC                              | GG                | 1945894906               |
| SNP_P3_13900_38960230 | NC_021160.1    | Ca_kabuli_chr01 | 38960230                | TT                              | CC                | 1945894908               |
| SNP_P3_13901_38961654 | NC_021160.1    | Ca_kabuli_chr01 | 38961654                | CC                              | TT                | 1945894910               |
| SNP_P3_13902_38962007 | NC_021160.1    | Ca_kabuli_chr01 | 38962007                | TT                              | CC                | 1945894912               |
| SNP_P3_13903_38964524 | NC_021160.1    | Ca_kabuli_chr01 | 38964524                | AA                              | GG                | 1945894913               |
| SNP_P3_13904_38964680 | NC_021160.1    | Ca_kabuli_chr01 | 38964680                | AA                              | CC                | 1945894915               |
| SNP_P3_13905_38968902 | NC_021160.1    | Ca_kabuli_chr01 | 38968902                | AA                              | GG                | 1945894917               |
| SNP_P3_13906_38968926 | NC_021160.1    | Ca_kabuli_chr01 | 38968926                | TT                              | CC                | 1945894919               |
| SNP_P3_13907_38970300 | NC_021160.1    | Ca_kabuli_chr01 | 38970300                | AA                              | GG                | 1945894920               |
| SNP_P3_13908_38970482 | NC_021160.1    | Ca_kabuli_chr01 | 38970482                | TT                              | CC                | 1945894922               |
| SNP_P3_13909_38970731 | NC_021160.1    | Ca_kabuli_chr01 | 38970731                | TT                              | GG                | 1945894924               |
| SNP_P3_13910_38971367 | NC_021160.1    | Ca_kabuli_chr01 | 38971367                | CC                              | TT                | 1945894926               |
| SNP_P3_13911_38971380 | NC_021160.1    | Ca_kabuli_chr01 | 38971380                | GG                              | TT                | 1945894928               |
| SNP_P3_13912_39002482 | NC_021160.1    | Ca_kabuli_chr01 | 39002482                | CC                              | TT                | 1945894929               |
| SNP_P3_13913_39002532 | NC_021160.1    | Ca_kabuli_chr01 | 39002532                | GG                              | CC                | 1945894931               |
| SNP_P3_13914_39003618 | NC_021160.1    | Ca_kabuli_chr01 | 39003618                | GG                              | TT                | 1945894933               |
| SNP_P3_13915_39003776 | NC_021160.1    | Ca_kabuli_chr01 | 39003776                | TT                              | CC                | 1945894935               |

| SNPs IDs              | Chromosome IDs | Chromosomes     | Physical positions (bp) | CDC Frontier (Reference genome) | (Pusa 256 & HPNB) | NCBI SNPdb Accession IDs |
|-----------------------|----------------|-----------------|-------------------------|---------------------------------|-------------------|--------------------------|
| SNP_P3_13916_39003817 | NC_021160.1    | Ca_kabuli_chr01 | 39003817                | AA                              | CC                | 1945894937               |
| SNP_P3_13917_39004328 | NC_021160.1    | Ca_kabuli_chr01 | 39004328                | GG                              | TT                | 1945894938               |
| SNP_P3_13918_39006407 | NC_021160.1    | Ca_kabuli_chr01 | 39006407                | CC                              | TT                | 1945894940               |
| SNP_P3_13919_39006688 | NC_021160.1    | Ca_kabuli_chr01 | 39006688                | TT                              | CC                | 1945894942               |
| SNP_P3_13920_39006747 | NC_021160.1    | Ca_kabuli_chr01 | 39006747                | AA                              | TT                | 1945894944               |
| SNP_P3_13921_39007244 | NC_021160.1    | Ca_kabuli_chr01 | 39007244                | AA                              | GG                | 1945894945               |
| SNP_P3_13922_39007275 | NC_021160.1    | Ca_kabuli_chr01 | 39007275                | AA                              | GG                | 1945894947               |
| SNP_P3_13923_39008598 | NC_021160.1    | Ca_kabuli_chr01 | 39008598                | AA                              | CC                | 1945894949               |
| SNP_P3_13924_39008648 | NC_021160.1    | Ca_kabuli_chr01 | 39008648                | TT                              | CC                | 1945894951               |
| SNP_P3_13925_39008827 | NC_021160.1    | Ca_kabuli_chr01 | 39008827                | TT                              | AA                | 1945894952               |
| SNP_P3_13926_39009730 | NC_021160.1    | Ca_kabuli_chr01 | 39009730                | GG                              | AA                | 1945894954               |
| SNP_P3_13927_39009761 | NC_021160.1    | Ca_kabuli_chr01 | 39009761                | CC                              | TT                | 1945894956               |
| SNP_P3_13928_39010254 | NC_021160.1    | Ca_kabuli_chr01 | 39010254                | CC                              | AA                | 1945894958               |
| SNP_P3_13929_39018283 | NC_021160.1    | Ca_kabuli_chr01 | 39018283                | GG                              | AA                | 1945894960               |
| SNP_P3_13930_39018303 | NC_021160.1    | Ca_kabuli_chr01 | 39018303                | CC                              | TT                | 1945894961               |
| SNP_P3_13931_39018305 | NC_021160.1    | Ca_kabuli_chr01 | 39018305                | CC                              | TT                | 1945894963               |
| SNP_P3_13932_39019527 | NC_021160.1    | Ca_kabuli_chr01 | 39019527                | TT                              | CC                | 1945894965               |
| SNP_P3_13935_39020771 | NC_021160.1    | Ca_kabuli_chr01 | 39020771                | GG                              | AA                | 1945894967               |
| SNP_P3_13936_39020937 | NC_021160.1    | Ca_kabuli_chr01 | 39020937                | AA                              | GG                | 1945894968               |
| SNP_P3_13937_39022492 | NC_021160.1    | Ca_kabuli_chr01 | 39022492                | TT                              | CC                | 1945894970               |
| SNP_P3_13938_39023828 | NC_021160.1    | Ca_kabuli_chr01 | 39023828                | TT                              | CC                | 1945894972               |
| SNP_P3_13939_39025304 | NC_021160.1    | Ca_kabuli_chr01 | 39025304                | CC                              | TT                | 1945894974               |
| SNP_P3_13940_39025307 | NC_021160.1    | Ca_kabuli_chr01 | 39025307                | CC                              | TT                | 1945894976               |
| SNP_P3_13941_39025321 | NC_021160.1    | Ca_kabuli_chr01 | 39025321                | CC                              | TT                | 1945894977               |
| SNP_P3_13943_39027508 | NC_021160.1    | Ca_kabuli_chr01 | 39027508                | CC                              | TT                | 1945894979               |
| SNP_P3_13945_39028347 | NC_021160.1    | Ca_kabuli_chr01 | 39028347                | CC                              | TT                | 1945894981               |
| SNP_P3_13946_39032234 | NC_021160.1    | Ca_kabuli_chr01 | 39032234                | AA                              | TT                | 1945894983               |
| SNP_P3_13947_39032448 | NC_021160.1    | Ca_kabuli_chr01 | 39032448                | GG                              | AA                | 1945894984               |
| SNP_P3_13948_39032897 | NC_021160.1    | Ca_kabuli_chr01 | 39032897                | TT                              | GG                | 1945894986               |
| SNP_P3_13949_39033601 | NC_021160.1    | Ca_kabuli_chr01 | 39033601                | AA                              | GG                | 1945894988               |
| SNP_P3_13950_39033628 | NC_021160.1    | Ca_kabuli_chr01 | 39033628                | TT                              | CC                | 1945894990               |
| SNP_P3_13951_39033635 | NC_021160.1    | Ca_kabuli_chr01 | 39033635                | CC                              | TT                | 1945894991               |
| SNP_P3_13952_39037094 | NC_021160.1    | Ca_kabuli_chr01 | 39037094                | TT                              | CC                | 1945894993               |
| SNP_P3_13953_39039012 | NC_021160.1    | Ca_kabuli_chr01 | 39039012                | CC                              | GG                | 1945894995               |
| SNP_P3_13954_39040207 | NC_021160.1    | Ca_kabuli_chr01 | 39040207                | TT                              | CC                | 1945894997               |
| SNP_P3_13955_39040247 | NC_021160.1    | Ca_kabuli_chr01 | 39040247                | AA                              | TT                | 1945894999               |
| SNP_P3_13956_39041299 | NC_021160.1    | Ca_kabuli_chr01 | 39041299                | AA                              | CC                | 1945895000               |
| SNP_P3_13957_39041514 | NC_021160.1    | Ca_kabuli_chr01 | 39041514                | CC                              | TT                | 1945895002               |
| SNP_P3_13959_39042097 | NC_021160.1    | Ca_kabuli_chr01 | 39042097                | AA                              | GG                | 1945895004               |
| SNP_P3_13960_39042562 | NC_021160.1    | Ca_kabuli_chr01 | 39042562                | GG                              | AA                | 1945895006               |
| SNP_P3_13961_39043084 | NC_021160.1    | Ca_kabuli_chr01 | 39043084                | CC                              | TT                | 1945895007               |
| SNP_P3_13962_39050832 | NC_021160.1    | Ca_kabuli_chr01 | 39050832                | CC                              | AA                | 1945895009               |

| SNPs IDs              | Chromosome IDs | Chromosomes     | Physical positions (bp) | CDC Frontier (Reference genome) | (Pusa 256 & HPNB) | NCBI SNPdb Accession IDs |
|-----------------------|----------------|-----------------|-------------------------|---------------------------------|-------------------|--------------------------|
| SNP_P3_13963_39051000 | NC_021160.1    | Ca_kabuli_chr01 | 39051000                | AA                              | GG                | 1945895011               |
| SNP_P3_13964_39051017 | NC_021160.1    | Ca_kabuli_chr01 | 39051017                | CC                              | AA                | 1945895013               |
| SNP_P3_13965_39051141 | NC_021160.1    | Ca_kabuli_chr01 | 39051141                | AA                              | GG                | 1945895014               |
| SNP_P3_13966_39051202 | NC_021160.1    | Ca_kabuli_chr01 | 39051202                | TT                              | CC                | 1945895016               |
| SNP_P3_13967_39051214 | NC_021160.1    | Ca_kabuli_chr01 | 39051214                | AA                              | CC                | 1945895018               |
| SNP_P3_13968_39051233 | NC_021160.1    | Ca_kabuli_chr01 | 39051233                | TT                              | CC                | 1945895020               |
| SNP_P3_13969_39051236 | NC_021160.1    | Ca_kabuli_chr01 | 39051236                | AA                              | GG                | 1945895022               |
| SNP_P3_13970_39051244 | NC_021160.1    | Ca_kabuli_chr01 | 39051244                | AA                              | CC                | 1945895023               |
| SNP_P3_13971_39051247 | NC_021160.1    | Ca_kabuli_chr01 | 39051247                | AA                              | CC                | 1945895025               |
| SNP_P3_13972_39051277 | NC_021160.1    | Ca_kabuli_chr01 | 39051277                | AA                              | GG                | 1945895027               |
| SNP_P3_13973_39051316 | NC_021160.1    | Ca_kabuli_chr01 | 39051316                | TT                              | CC                | 1945895029               |
| SNP_P3_13974_39051318 | NC_021160.1    | Ca_kabuli_chr01 | 39051318                | TT                              | GG                | 1945895030               |
| SNP_P3_13975_39051336 | NC_021160.1    | Ca_kabuli_chr01 | 39051336                | GG                              | TT                | 1945895032               |
| SNP_P3_13976_39051406 | NC_021160.1    | Ca_kabuli_chr01 | 39051406                | AA                              | GG                | 1945895034               |
| SNP_P3_13977_39051420 | NC_021160.1    | Ca_kabuli_chr01 | 39051420                | TT                              | AA                | 1945895036               |
| SNP_P3_13978_39051431 | NC_021160.1    | Ca_kabuli_chr01 | 39051431                | AA                              | TT                | 1945895038               |
| SNP_P3_13979_39051434 | NC_021160.1    | Ca_kabuli_chr01 | 39051434                | AA                              | CC                | 1945895039               |
| SNP_P3_13980_39051438 | NC_021160.1    | Ca_kabuli_chr01 | 39051438                | GG                              | AA                | 1945895041               |
| SNP_P3_13981_39051466 | NC_021160.1    | Ca_kabuli_chr01 | 39051466                | CC                              | AA                | 1945895043               |
| SNP_P3_13982_39051468 | NC_021160.1    | Ca_kabuli_chr01 | 39051468                | GG                              | TT                | 1945895045               |
| SNP_P3_13983_39051498 | NC_021160.1    | Ca_kabuli_chr01 | 39051498                | TT                              | CC                | 1945895046               |
| SNP_P3_13985_39053490 | NC_021160.1    | Ca_kabuli_chr01 | 39053490                | CC                              | TT                | 1945895048               |
| SNP_P3_13987_39057461 | NC_021160.1    | Ca_kabuli_chr01 | 39057461                | GG                              | AA                | 1945895050               |
| SNP_P3_13988_39057976 | NC_021160.1    | Ca_kabuli_chr01 | 39057976                | CC                              | TT                | 1945895052               |
| SNP_P3_13989_39057982 | NC_021160.1    | Ca_kabuli_chr01 | 39057982                | CC                              | TT                | 1945895053               |
| SNP_P3_13990_39058164 | NC_021160.1    | Ca_kabuli_chr01 | 39058164                | TT                              | AA                | 1945895055               |
| SNP_P3_13991_39058409 | NC_021160.1    | Ca_kabuli_chr01 | 39058409                | TT                              | AA                | 1945895057               |
| SNP_P3_13992_39061714 | NC_021160.1    | Ca_kabuli_chr01 | 39061714                | GG                              | AA                | 1945895059               |
| SNP_P3_13993_39061724 | NC_021160.1    | Ca_kabuli_chr01 | 39061724                | AA                              | GG                | 1945895061               |
| SNP_P3_13994_39062279 | NC_021160.1    | Ca_kabuli_chr01 | 39062279                | AA                              | TT                | 1945895062               |
| SNP_P3_13995_39062282 | NC_021160.1    | Ca_kabuli_chr01 | 39062282                | AA                              | TT                | 1945895064               |
| SNP_P3_13996_39062448 | NC_021160.1    | Ca_kabuli_chr01 | 39062448                | CC                              | AA                | 1945895066               |
| SNP_P3_13997_39062461 | NC_021160.1    | Ca_kabuli_chr01 | 39062461                | AA                              | GG                | 1945895068               |
| SNP_P3_13998_39062462 | NC_021160.1    | Ca_kabuli_chr01 | 39062462                | CC                              | TT                | 1945895069               |
| SNP_P3_13999_39063127 | NC_021160.1    | Ca_kabuli_chr01 | 39063127                | GG                              | AA                | 1945895071               |
| SNP_P3_14000_39063436 | NC_021160.1    | Ca_kabuli_chr01 | 39063436                | AA                              | TT                | 1945895073               |
| SNP_P3_14001_39063580 | NC_021160.1    | Ca_kabuli_chr01 | 39063580                | AA                              | TT                | 1945895075               |
| SNP_P3_14002_39065011 | NC_021160.1    | Ca_kabuli_chr01 | 39065011                | TT                              | CC                | 1945895077               |
| SNP_P3_14003_39065015 | NC_021160.1    | Ca_kabuli_chr01 | 39065015                | CC                              | TT                | 1945895078               |
| SNP_P3_14004_39066364 | NC_021160.1    | Ca_kabuli_chr01 | 39066364                | GG                              | AA                | 1945895080               |
| SNP_P3_14006_39070040 | NC_021160.1    | Ca_kabuli_chr01 | 39070040                | CC                              | TT                | 1945895082               |
| SNP_P3_14007_39070367 | NC_021160.1    | Ca_kabuli_chr01 | 39070367                | AA                              | CC                | 1945895084               |

| SNPs IDs              | Chromosome IDs | Chromosomes     | Physical positions (bp) | CDC Frontier (Reference genome) | (Pusa 256 & HPNB) | NCBI SNPdb Accession IDs |
|-----------------------|----------------|-----------------|-------------------------|---------------------------------|-------------------|--------------------------|
| SNP_P3_14008_39070454 | NC_021160.1    | Ca_kabuli_chr01 | 39070454                | TT                              | AA                | 1945895085               |
| SNP_P3_14009_39070455 | NC_021160.1    | Ca_kabuli_chr01 | 39070455                | CC                              | AA                | 1945895087               |
| SNP_P3_14011_39070745 | NC_021160.1    | Ca_kabuli_chr01 | 39070745                | TT                              | CC                | 1945895089               |
| SNP_P3_14013_39072616 | NC_021160.1    | Ca_kabuli_chr01 | 39072616                | CC                              | AA                | 1945895091               |
| SNP_P3_14014_39072875 | NC_021160.1    | Ca_kabuli_chr01 | 39072875                | AA                              | TT                | 1945895093               |
| SNP_P3_14015_39072964 | NC_021160.1    | Ca_kabuli_chr01 | 39072964                | GG                              | AA                | 1945895094               |
| SNP_P3_14016_39073309 | NC_021160.1    | Ca_kabuli_chr01 | 39073309                | GG                              | CC                | 1945895096               |
| SNP_P3_14018_39073417 | NC_021160.1    | Ca_kabuli_chr01 | 39073417                | TT                              | AA                | 1945895098               |
| SNP_P3_14019_39073598 | NC_021160.1    | Ca_kabuli_chr01 | 39073598                | TT                              | GG                | 1945895100               |
| SNP_P3_14020_39073734 | NC_021160.1    | Ca_kabuli_chr01 | 39073734                | TT                              | AA                | 1945895101               |
| SNP_P3_14022_39074428 | NC_021160.1    | Ca_kabuli_chr01 | 39074428                | GG                              | AA                | 1945895103               |
| SNP_P3_14023_39074435 | NC_021160.1    | Ca_kabuli_chr01 | 39074435                | TT                              | GG                | 1945895105               |
| SNP_P3_14024_39074479 | NC_021160.1    | Ca_kabuli_chr01 | 39074479                | TT                              | CC                | 1945895107               |
| SNP_P3_14025_39074503 | NC_021160.1    | Ca_kabuli_chr01 | 39074503                | CC                              | GG                | 1945895109               |
| SNP_P3_14026_39074506 | NC_021160.1    | Ca_kabuli_chr01 | 39074506                | AA                              | TT                | 1945895110               |
| SNP_P3_14027_39074518 | NC_021160.1    | Ca_kabuli_chr01 | 39074518                | TT                              | AA                | 1945895112               |
| SNP_P3_14028_39074793 | NC_021160.1    | Ca_kabuli_chr01 | 39074793                | TT                              | CC                | 1945895114               |
| SNP_P3_14029_39074798 | NC_021160.1    | Ca_kabuli_chr01 | 39074798                | AA                              | CC                | 1945895116               |
| SNP_P3_14030_39074841 | NC_021160.1    | Ca_kabuli_chr01 | 39074841                | TT                              | CC                | 1945895117               |
| SNP_P3_14031_39074856 | NC_021160.1    | Ca_kabuli_chr01 | 39074856                | CC                              | TT                | 1945895119               |
| SNP_P3_14032_39074878 | NC_021160.1    | Ca_kabuli_chr01 | 39074878                | AA                              | TT                | 1945895121               |
| SNP_P3_14033_39074881 | NC_021160.1    | Ca_kabuli_chr01 | 39074881                | AA                              | TT                | 1945895123               |
| SNP_P3_14034_39074897 | NC_021160.1    | Ca_kabuli_chr01 | 39074897                | GG                              | TT                | 1945895125               |
| SNP_P3_14035_39074908 | NC_021160.1    | Ca_kabuli_chr01 | 39074908                | TT                              | CC                | 1945895126               |
| SNP_P3_14036_39074919 | NC_021160.1    | Ca_kabuli_chr01 | 39074919                | GG                              | TT                | 1945895128               |
| SNP_P3_14037_39074930 | NC_021160.1    | Ca_kabuli_chr01 | 39074930                | CC                              | TT                | 1945895130               |
| SNP_P3_14038_39075192 | NC_021160.1    | Ca_kabuli_chr01 | 39075192                | CC                              | TT                | 1945895132               |
| SNP_P3_14040_39075294 | NC_021160.1    | Ca_kabuli_chr01 | 39075294                | GG                              | TT                | 1945895133               |
| SNP_P3_14041_39075342 | NC_021160.1    | Ca_kabuli_chr01 | 39075342                | CC                              | TT                | 1945895135               |
| SNP_P3_14043_39078015 | NC_021160.1    | Ca_kabuli_chr01 | 39078015                | TT                              | CC                | 1945895137               |
| SNP_P3_14044_39078269 | NC_021160.1    | Ca_kabuli_chr01 | 39078269                | TT                              | AA                | 1945895139               |
| SNP_P3_14045_39078409 | NC_021160.1    | Ca_kabuli_chr01 | 39078409                | CC                              | TT                | 1945895141               |
| SNP_P3_14046_39082917 | NC_021160.1    | Ca_kabuli_chr01 | 39082917                | AA                              | TT                | 1945895142               |
| SNP_P3_14047_39083207 | NC_021160.1    | Ca_kabuli_chr01 | 39083207                | GG                              | TT                | 1945895144               |
| SNP_P3_14048_39083306 | NC_021160.1    | Ca_kabuli_chr01 | 39083306                | AA                              | TT                | 1945895146               |
| SNP_P3_14049_39095495 | NC_021160.1    | Ca_kabuli_chr01 | 39095495                | AA                              | TT                | 1945895148               |
| SNP_P3_14050_39099779 | NC_021160.1    | Ca_kabuli_chr01 | 39099779                | AA                              | TT                | 1945895149               |
| SNP_P3_14051_39100067 | NC_021160.1    | Ca_kabuli_chr01 | 39100067                | AA                              | CC                | 1945895151               |
| SNP_P3_14052_39100269 | NC_021160.1    | Ca_kabuli_chr01 | 39100269                | CC                              | GG                | 1945895153               |
| SNP_P3_14053_39100380 | NC_021160.1    | Ca_kabuli_chr01 | 39100380                | AA                              | GG                | 1945895155               |
| SNP_P3_14054_39100390 | NC_021160.1    | Ca_kabuli_chr01 | 39100390                | AA                              | GG                | 1945895157               |
| SNP_P3_14055_39100628 | NC_021160.1    | Ca_kabuli_chr01 | 39100628                | TT                              | CC                | 1945895158               |

| SNPs IDs              | Chromosome IDs | Chromosomes     | Physical positions (bp) | CDC Frontier (Reference genome) | (Pusa 256 & HPNB) | NCBI SNPdb Accession IDs |
|-----------------------|----------------|-----------------|-------------------------|---------------------------------|-------------------|--------------------------|
| SNP_P3_14056_39100680 | NC_021160.1    | Ca_kabuli_chr01 | 39100680                | AA                              | CC                | 1945895160               |
| SNP_P3_14057_39101157 | NC_021160.1    | Ca_kabuli_chr01 | 39101157                | TT                              | CC                | 1945895162               |
| SNP_P3_14058_39101196 | NC_021160.1    | Ca_kabuli_chr01 | 39101196                | CC                              | TT                | 1945895164               |
| SNP_P3_14059_39101249 | NC_021160.1    | Ca_kabuli_chr01 | 39101249                | AA                              | GG                | 1945895165               |
| SNP_P3_14060_39101793 | NC_021160.1    | Ca_kabuli_chr01 | 39101793                | CC                              | AA                | 1945895167               |
| SNP_P3_14061_39105122 | NC_021160.1    | Ca_kabuli_chr01 | 39105122                | GG                              | AA                | 1945895169               |
| SNP_P3_14062_39105127 | NC_021160.1    | Ca_kabuli_chr01 | 39105127                | TT                              | AA                | 1945895171               |
| SNP_P3_14063_39105157 | NC_021160.1    | Ca_kabuli_chr01 | 39105157                | AA                              | CC                | 1945895173               |
| SNP_P3_14064_39105183 | NC_021160.1    | Ca_kabuli_chr01 | 39105183                | GG                              | CC                | 1945895174               |
| SNP_P3_14065_39105210 | NC_021160.1    | Ca_kabuli_chr01 | 39105210                | AA                              | GG                | 1945895176               |
| SNP_P3_14066_39105217 | NC_021160.1    | Ca_kabuli_chr01 | 39105217                | TT                              | CC                | 1945895178               |
| SNP_P3_14067_39105246 | NC_021160.1    | Ca_kabuli_chr01 | 39105246                | AA                              | GG                | 1945895180               |
| SNP_P3_14068_39105581 | NC_021160.1    | Ca_kabuli_chr01 | 39105581                | CC                              | AA                | 1945895181               |
| SNP_P3_14069_39105584 | NC_021160.1    | Ca_kabuli_chr01 | 39105584                | GG                              | AA                | 1945895183               |
| SNP_P3_14070_39107402 | NC_021160.1    | Ca_kabuli_chr01 | 39107402                | GG                              | AA                | 1945895185               |
| SNP_P3_14071_39108313 | NC_021160.1    | Ca_kabuli_chr01 | 39108313                | AA                              | GG                | 1945895187               |
| SNP_P3_14073_39110862 | NC_021160.1    | Ca_kabuli_chr01 | 39110862                | TT                              | CC                | 1945895189               |
| SNP_P3_14074_39111853 | NC_021160.1    | Ca_kabuli_chr01 | 39111853                | CC                              | TT                | 1945895190               |
| SNP_P3_14076_39118819 | NC_021160.1    | Ca_kabuli_chr01 | 39118819                | TT                              | GG                | 1945895192               |
| SNP_P3_14077_39118834 | NC_021160.1    | Ca_kabuli_chr01 | 39118834                | TT                              | CC                | 1945895194               |
| SNP_P3_14078_39119058 | NC_021160.1    | Ca_kabuli_chr01 | 39119058                | AA                              | CC                | 1945895196               |
| SNP_P3_14079_39126036 | NC_021160.1    | Ca_kabuli_chr01 | 39126036                | TT                              | CC                | 1945895197               |
| SNP_P3_14080_39126083 | NC_021160.1    | Ca_kabuli_chr01 | 39126083                | TT                              | AA                | 1945895199               |
| SNP_P3_14081_39133613 | NC_021160.1    | Ca_kabuli_chr01 | 39133613                | GG                              | AA                | 1945895201               |
| SNP_P3_14082_39133659 | NC_021160.1    | Ca_kabuli_chr01 | 39133659                | CC                              | AA                | 1945895203               |
| SNP_P3_14084_39138457 | NC_021160.1    | Ca_kabuli_chr01 | 39138457                | AA                              | GG                | 1945895205               |
| SNP_P3_14085_39138465 | NC_021160.1    | Ca_kabuli_chr01 | 39138465                | AA                              | CC                | 1945895206               |
| SNP_P3_14086_39138466 | NC_021160.1    | Ca_kabuli_chr01 | 39138466                | CC                              | TT                | 1945895208               |
| SNP_P3_14087_39138623 | NC_021160.1    | Ca_kabuli_chr01 | 39138623                | AA                              | GG                | 1945895210               |
| SNP_P3_14088_39138649 | NC_021160.1    | Ca_kabuli_chr01 | 39138649                | CC                              | TT                | 1945895212               |
| SNP_P3_14089_39138650 | NC_021160.1    | Ca_kabuli_chr01 | 39138650                | AA                              | CC                | 1945895213               |
| SNP_P3_14090_39138698 | NC_021160.1    | Ca_kabuli_chr01 | 39138698                | CC                              | TT                | 1945895215               |
| SNP_P3_14091_39138715 | NC_021160.1    | Ca_kabuli_chr01 | 39138715                | GG                              | AA                | 1945895217               |
| SNP_P3_14092_39138728 | NC_021160.1    | Ca_kabuli_chr01 | 39138728                | TT                              | CC                | 1945895219               |
| SNP_P3_14093_39138747 | NC_021160.1    | Ca_kabuli_chr01 | 39138747                | AA                              | TT                | 1945895220               |
| SNP_P3_14094_39138755 | NC_021160.1    | Ca_kabuli_chr01 | 39138755                | TT                              | CC                | 1945895222               |
| SNP_P3_14095_39138759 | NC_021160.1    | Ca_kabuli_chr01 | 39138759                | AA                              | CC                | 1945895224               |
| SNP_P3_14096_39138787 | NC_021160.1    | Ca_kabuli_chr01 | 39138787                | CC                              | TT                | 1945895226               |
| SNP_P3_14097_39138863 | NC_021160.1    | Ca_kabuli_chr01 | 39138863                | TT                              | CC                | 1945895228               |
| SNP_P3_14098_39138965 | NC_021160.1    | Ca_kabuli_chr01 | 39138965                | GG                              | AA                | 1945895229               |
| SNP_P3_14099_39139016 | NC_021160.1    | Ca_kabuli_chr01 | 39139016                | AA                              | GG                | 1945895231               |
| SNP_P3_14100_39139025 | NC_021160.1    | Ca_kabuli_chr01 | 39139025                | GG                              | AA                | 1945895233               |

| SNPs IDs              | Chromosome IDs | Chromosomes     | Physical positions (bp) | CDC Frontier (Reference genome) | (Pusa 256 & HPNB) | NCBI SNPdb Accession IDs |
|-----------------------|----------------|-----------------|-------------------------|---------------------------------|-------------------|--------------------------|
| SNP_P3_14101_39139032 | NC_021160.1    | Ca_kabuli_chr01 | 39139032                | CC                              | TT                | 1945895235               |
| SNP_P3_14102_39139080 | NC_021160.1    | Ca_kabuli_chr01 | 39139080                | AA                              | TT                | 1945895236               |
| SNP_P3_14103_39139087 | NC_021160.1    | Ca_kabuli_chr01 | 39139087                | GG                              | CC                | 1945895238               |
| SNP_P3_14104_39139097 | NC_021160.1    | Ca_kabuli_chr01 | 39139097                | TT                              | CC                | 1945895240               |
| SNP_P3_14105_39139110 | NC_021160.1    | Ca_kabuli_chr01 | 39139110                | AA                              | TT                | 1945895242               |
| SNP_P3_14106_39139146 | NC_021160.1    | Ca_kabuli_chr01 | 39139146                | AA                              | TT                | 1945895244               |
| SNP_P3_14107_39139159 | NC_021160.1    | Ca_kabuli_chr01 | 39139159                | AA                              | CC                | 1945895245               |
| SNP_P3_14108_39139230 | NC_021160.1    | Ca_kabuli_chr01 | 39139230                | GG                              | TT                | 1945895247               |
| SNP_P3_14109_39139275 | NC_021160.1    | Ca_kabuli_chr01 | 39139275                | GG                              | AA                | 1945895249               |
| SNP_P3_14110_39139658 | NC_021160.1    | Ca_kabuli_chr01 | 39139658                | CC                              | TT                | 1945895251               |
| SNP_P3_14111_39140147 | NC_021160.1    | Ca_kabuli_chr01 | 39140147                | TT                              | CC                | 1945895252               |
| SNP_P3_14112_39140202 | NC_021160.1    | Ca_kabuli_chr01 | 39140202                | CC                              | TT                | 1945895254               |
| SNP_P3_14113_39140327 | NC_021160.1    | Ca_kabuli_chr01 | 39140327                | CC                              | AA                | 1945895256               |
| SNP_P3_14114_39140328 | NC_021160.1    | Ca_kabuli_chr01 | 39140328                | AA                              | TT                | 1945895258               |
| SNP_P3_14115_39140389 | NC_021160.1    | Ca_kabuli_chr01 | 39140389                | AA                              | CC                | 1945895259               |
| SNP_P3_14116_39140455 | NC_021160.1    | Ca_kabuli_chr01 | 39140455                | CC                              | GG                | 1945895261               |
| SNP_P3_14117_39140473 | NC_021160.1    | Ca_kabuli_chr01 | 39140473                | CC                              | AA                | 1945895263               |
| SNP_P3_14118_39140520 | NC_021160.1    | Ca_kabuli_chr01 | 39140520                | TT                              | CC                | 1945895265               |
| SNP_P3_14119_39140654 | NC_021160.1    | Ca_kabuli_chr01 | 39140654                | CC                              | TT                | 1945895266               |
| SNP_P3_14120_39140797 | NC_021160.1    | Ca_kabuli_chr01 | 39140797                | TT                              | AA                | 1945895268               |
| SNP_P3_14121_39140802 | NC_021160.1    | Ca_kabuli_chr01 | 39140802                | CC                              | AA                | 1945895270               |
| SNP_P3_14122_39141069 | NC_021160.1    | Ca_kabuli_chr01 | 39141069                | GG                              | TT                | 1945895272               |
| SNP_P3_14123_39141070 | NC_021160.1    | Ca_kabuli_chr01 | 39141070                | CC                              | TT                | 1945895274               |
| SNP_P3_14124_39141077 | NC_021160.1    | Ca_kabuli_chr01 | 39141077                | GG                              | AA                | 1945895275               |
| SNP_P3_14125_39141081 | NC_021160.1    | Ca_kabuli_chr01 | 39141081                | TT                              | CC                | 1945895277               |
| SNP_P3_14126_39141092 | NC_021160.1    | Ca_kabuli_chr01 | 39141092                | CC                              | TT                | 1945895279               |
| SNP_P3_14127_39141109 | NC_021160.1    | Ca_kabuli_chr01 | 39141109                | TT                              | GG                | 1945895281               |
| SNP_P3_14128_39141118 | NC_021160.1    | Ca_kabuli_chr01 | 39141118                | GG                              | AA                | 1945895282               |
| SNP_P3_14130_39142994 | NC_021160.1    | Ca_kabuli_chr01 | 39142994                | CC                              | TT                | 1945895284               |
| SNP_P3_14131_39143270 | NC_021160.1    | Ca_kabuli_chr01 | 39143270                | AA                              | GG                | 1945895286               |
| SNP_P3_14132_39143963 | NC_021160.1    | Ca_kabuli_chr01 | 39143963                | GG                              | TT                | 1945895288               |
| SNP_P3_14133_39144305 | NC_021160.1    | Ca_kabuli_chr01 | 39144305                | CC                              | GG                | 1945895289               |
| SNP_P3_14134_39146667 | NC_021160.1    | Ca_kabuli_chr01 | 39146667                | TT                              | CC                | 1945895291               |
| SNP_P3_14136_39147243 | NC_021160.1    | Ca_kabuli_chr01 | 39147243                | CC                              | TT                | 1945895293               |
| SNP_P3_14137_39149669 | NC_021160.1    | Ca_kabuli_chr01 | 39149669                | AA                              | GG                | 1945895295               |
| SNP_P3_14138_39149980 | NC_021160.1    | Ca_kabuli_chr01 | 39149980                | TT                              | CC                | 1945895297               |
| SNP_P3_14139_39149999 | NC_021160.1    | Ca_kabuli_chr01 | 39149999                | AA                              | CC                | 1945895298               |
| SNP_P3_14140_39150007 | NC_021160.1    | Ca_kabuli_chr01 | 39150007                | TT                              | GG                | 1945895300               |
| SNP_P3_14141_39150039 | NC_021160.1    | Ca_kabuli_chr01 | 39150039                | TT                              | CC                | 1945895302               |
| SNP_P3_14142_39159370 | NC_021160.1    | Ca_kabuli_chr01 | 39159370                | GG                              | AA                | 1945895304               |
| SNP_P3_14143_39161233 | NC_021160.1    | Ca_kabuli_chr01 | 39161233                | GG                              | TT                | 1945895305               |
| SNP_P3_14144_39166535 | NC_021160.1    | Ca_kabuli_chr01 | 39166535                | GG                              | AA                | 1945895307               |



| SNPs IDs              | Chromosome IDs | Chromosomes     | Physical positions (bp) | CDC Frontier (Reference genome) | (Pusa 256 & HPNB) | NCBI SNPdb Accession IDs |
|-----------------------|----------------|-----------------|-------------------------|---------------------------------|-------------------|--------------------------|
| SNP_P3_14145_39166570 | NC_021160.1    | Ca_kabuli_chr01 | 39166570                | AA                              | TT                | 1945895309               |
| SNP_P3_14146_39166600 | NC_021160.1    | Ca_kabuli_chr01 | 39166600                | CC                              | AA                | 1945895311               |
| SNP_P3_14147_39166603 | NC_021160.1    | Ca_kabuli_chr01 | 39166603                | CC                              | AA                | 1945895313               |
| SNP_P3_14148_39166634 | NC_021160.1    | Ca_kabuli_chr01 | 39166634                | CC                              | GG                | 1945895314               |
| SNP_P3_14149_39166660 | NC_021160.1    | Ca_kabuli_chr01 | 39166660                | CC                              | TT                | 1945895316               |
| SNP_P3_14150_39166704 | NC_021160.1    | Ca_kabuli_chr01 | 39166704                | GG                              | CC                | 1945895318               |
| SNP_P3_14151_39166716 | NC_021160.1    | Ca_kabuli_chr01 | 39166716                | GG                              | AA                | 1945895320               |
| SNP_P3_14152_39166823 | NC_021160.1    | Ca_kabuli_chr01 | 39166823                | CC                              | TT                | 1945895321               |
| SNP_P3_14153_39166827 | NC_021160.1    | Ca_kabuli_chr01 | 39166827                | CC                              | TT                | 1945895323               |
| SNP_P3_14155_39166953 | NC_021160.1    | Ca_kabuli_chr01 | 39166953                | AA                              | GG                | 1945895325               |
| SNP_P3_14156_39166980 | NC_021160.1    | Ca_kabuli_chr01 | 39166980                | AA                              | GG                | 1945895327               |
| SNP_P3_14157_39180407 | NC_021160.1    | Ca_kabuli_chr01 | 39180407                | AA                              | GG                | 1945895328               |
| SNP_P3_14159_39196280 | NC_021160.1    | Ca_kabuli_chr01 | 39196280                | TT                              | AA                | 1945895330               |
| SNP_P3_14160_39226257 | NC_021160.1    | Ca_kabuli_chr01 | 39226257                | CC                              | AA                | 1945895332               |
| SNP_P3_14161_39226326 | NC_021160.1    | Ca_kabuli_chr01 | 39226326                | CC                              | AA                | 1945895334               |
| SNP_P3_14162_39226342 | NC_021160.1    | Ca_kabuli_chr01 | 39226342                | CC                              | TT                | 1945895336               |
| SNP_P3_14163_39227909 | NC_021160.1    | Ca_kabuli_chr01 | 39227909                | TT                              | AA                | 1945895337               |
| SNP_P3_14164_39239597 | NC_021160.1    | Ca_kabuli_chr01 | 39239597                | AA                              | TT                | 1945895339               |
| SNP_P3_14165_39239870 | NC_021160.1    | Ca_kabuli_chr01 | 39239870                | TT                              | AA                | 1945895341               |
| SNP_P3_14166_39240369 | NC_021160.1    | Ca_kabuli_chr01 | 39240369                | CC                              | TT                | 1945895343               |
| SNP_P3_14167_39250147 | NC_021160.1    | Ca_kabuli_chr01 | 39250147                | CC                              | TT                | 1945895345               |
| SNP_P3_14169_39257320 | NC_021160.1    | Ca_kabuli_chr01 | 39257320                | AA                              | CC                | 1945895346               |
| SNP_P3_14170_39261348 | NC_021160.1    | Ca_kabuli_chr01 | 39261348                | AA                              | GG                | 1945895348               |
| SNP_P3_14171_39261356 | NC_021160.1    | Ca_kabuli_chr01 | 39261356                | GG                              | AA                | 1945895350               |
| SNP_P3_14172_39261821 | NC_021160.1    | Ca_kabuli_chr01 | 39261821                | GG                              | CC                | 1945895352               |
| SNP_P3_14173_39261875 | NC_021160.1    | Ca_kabuli_chr01 | 39261875                | GG                              | AA                | 1945895353               |
| SNP_P3_14175_39262032 | NC_021160.1    | Ca_kabuli_chr01 | 39262032                | AA                              | GG                | 1945895355               |
| SNP_P3_14176_39262095 | NC_021160.1    | Ca_kabuli_chr01 | 39262095                | CC                              | GG                | 1945895357               |
| SNP_P3_14177_39262114 | NC_021160.1    | Ca_kabuli_chr01 | 39262114                | AA                              | TT                | 1945895359               |
| SNP_P3_14178_39262138 | NC_021160.1    | Ca_kabuli_chr01 | 39262138                | AA                              | TT                | 1945895361               |
| SNP_P3_14179_39262440 | NC_021160.1    | Ca_kabuli_chr01 | 39262440                | GG                              | AA                | 1945895362               |
| SNP_P3_14180_39264722 | NC_021160.1    | Ca_kabuli_chr01 | 39264722                | AA                              | CC                | 1945895364               |
| SNP_P3_14181_39264950 | NC_021160.1    | Ca_kabuli_chr01 | 39264950                | TT                              | CC                | 1945895366               |
| SNP_P3_14182_39265052 | NC_021160.1    | Ca_kabuli_chr01 | 39265052                | GG                              | AA                | 1945895368               |
| SNP_P3_14183_39265224 | NC_021160.1    | Ca_kabuli_chr01 | 39265224                | CC                              | GG                | 1945895370               |
| SNP_P3_14184_39265303 | NC_021160.1    | Ca_kabuli_chr01 | 39265303                | CC                              | TT                | 1945895371               |
| SNP_P3_14185_39268793 | NC_021160.1    | Ca_kabuli_chr01 | 39268793                | GG                              | AA                | 1945895373               |
| SNP_P3_14186_39272458 | NC_021160.1    | Ca_kabuli_chr01 | 39272458                | GG                              | AA                | 1945895375               |
| SNP_P3_14187_39275470 | NC_021160.1    | Ca_kabuli_chr01 | 39275470                | GG                              | AA                | 1945895377               |
| SNP_P3_14188_39279543 | NC_021160.1    | Ca_kabuli_chr01 | 39279543                | GG                              | TT                | 1945895379               |
| SNP_P3_14189_39281418 | NC_021160.1    | Ca_kabuli_chr01 | 39281418                | CC                              | TT                | 1945895380               |
| SNP_P3_14190_39282779 | NC_021160.1    | Ca_kabuli_chr01 | 39282779                | GG                              | AA                | 1945895382               |

| SNPs IDs              | Chromosome IDs | Chromosomes     | Physical positions (bp) | CDC Frontier (Reference genome) | (Pusa 256 & HPNB) | NCBI SNPdb Accession IDs |
|-----------------------|----------------|-----------------|-------------------------|---------------------------------|-------------------|--------------------------|
| SNP_P3_14191_39283460 | NC_021160.1    | Ca_kabuli_chr01 | 39283460                | AA                              | TT                | 1945895384               |
| SNP_P3_14192_39294339 | NC_021160.1    | Ca_kabuli_chr01 | 39294339                | AA                              | GG                | 1945895386               |
| SNP_P3_14193_39294439 | NC_021160.1    | Ca_kabuli_chr01 | 39294439                | TT                              | GG                | 1945895388               |
| SNP_P3_14194_39294685 | NC_021160.1    | Ca_kabuli_chr01 | 39294685                | AA                              | GG                | 1945895389               |
| SNP_P3_14195_39297874 | NC_021160.1    | Ca_kabuli_chr01 | 39297874                | CC                              | AA                | 1945895391               |
| SNP_P3_14196_39299004 | NC_021160.1    | Ca_kabuli_chr01 | 39299004                | CC                              | TT                | 1945895393               |
| SNP_P3_14197_39302604 | NC_021160.1    | Ca_kabuli_chr01 | 39302604                | TT                              | CC                | 1945895395               |
| SNP_P3_14198_39310818 | NC_021160.1    | Ca_kabuli_chr01 | 39310818                | TT                              | CC                | 1945895397               |
| SNP_P3_14199_39311243 | NC_021160.1    | Ca_kabuli_chr01 | 39311243                | CC                              | TT                | 1945895398               |
| SNP_P3_14200_39311516 | NC_021160.1    | Ca_kabuli_chr01 | 39311516                | CC                              | TT                | 1945895400               |
| SNP_P3_14201_39311714 | NC_021160.1    | Ca_kabuli_chr01 | 39311714                | AA                              | CC                | 1945895402               |
| SNP_P3_14202_39316305 | NC_021160.1    | Ca_kabuli_chr01 | 39316305                | CC                              | AA                | 1945895404               |
| SNP_P3_14203_39317717 | NC_021160.1    | Ca_kabuli_chr01 | 39317717                | TT                              | GG                | 1945895406               |
| SNP_P3_14204_39318092 | NC_021160.1    | Ca_kabuli_chr01 | 39318092                | TT                              | GG                | 1945895407               |
| SNP_P3_14205_39318104 | NC_021160.1    | Ca_kabuli_chr01 | 39318104                | TT                              | CC                | 1945895409               |
| SNP_P3_14206_39318118 | NC_021160.1    | Ca_kabuli_chr01 | 39318118                | AA                              | GG                | 1945895411               |
| SNP_P3_14207_39318123 | NC_021160.1    | Ca_kabuli_chr01 | 39318123                | AA                              | GG                | 1945895413               |
| SNP_P3_14208_39318945 | NC_021160.1    | Ca_kabuli_chr01 | 39318945                | CC                              | TT                | 1945895415               |
| SNP_P3_14210_39320412 | NC_021160.1    | Ca_kabuli_chr01 | 39320412                | TT                              | CC                | 1945895416               |
| SNP_P3_14211_39331055 | NC_021160.1    | Ca_kabuli_chr01 | 39331055                | TT                              | CC                | 1945895418               |
| SNP_P3_14212_39331732 | NC_021160.1    | Ca_kabuli_chr01 | 39331732                | AA                              | TT                | 1945895420               |
| SNP_P3_14213_39331752 | NC_021160.1    | Ca_kabuli_chr01 | 39331752                | AA                              | GG                | 1945895422               |
| SNP_P3_14214_39334436 | NC_021160.1    | Ca_kabuli_chr01 | 39334436                | GG                              | TT                | 1945895424               |
| SNP_P3_14215_39334579 | NC_021160.1    | Ca_kabuli_chr01 | 39334579                | TT                              | CC                | 1945895425               |
| SNP_P3_14216_39334585 | NC_021160.1    | Ca_kabuli_chr01 | 39334585                | TT                              | AA                | 1945895427               |
| SNP_P3_14217_39334810 | NC_021160.1    | Ca_kabuli_chr01 | 39334810                | AA                              | GG                | 1945895429               |
| SNP_P3_14218_39334812 | NC_021160.1    | Ca_kabuli_chr01 | 39334812                | GG                              | AA                | 1945895431               |
| SNP_P3_14219_39334823 | NC_021160.1    | Ca_kabuli_chr01 | 39334823                | AA                              | CC                | 1945895433               |
| SNP_P3_14220_39334831 | NC_021160.1    | Ca_kabuli_chr01 | 39334831                | AA                              | CC                | 1945895435               |
| SNP_P3_14221_39334835 | NC_021160.1    | Ca_kabuli_chr01 | 39334835                | AA                              | TT                | 1945895436               |
| SNP_P3_14222_39334869 | NC_021160.1    | Ca_kabuli_chr01 | 39334869                | CC                              | TT                | 1945895438               |
| SNP_P3_14223_39334932 | NC_021160.1    | Ca_kabuli_chr01 | 39334932                | CC                              | TT                | 1945895440               |
| SNP_P3_14224_39366286 | NC_021160.1    | Ca_kabuli_chr01 | 39366286                | GG                              | AA                | 1945895441               |
| SNP_P3_14225_39366305 | NC_021160.1    | Ca_kabuli_chr01 | 39366305                | TT                              | AA                | 1945895443               |
| SNP_P3_14226_39366712 | NC_021160.1    | Ca_kabuli_chr01 | 39366712                | TT                              | CC                | 1945895445               |
| SNP_P3_14227_39385067 | NC_021160.1    | Ca_kabuli_chr01 | 39385067                | CC                              | GG                | 1945895447               |
| SNP_P3_14228_39385099 | NC_021160.1    | Ca_kabuli_chr01 | 39385099                | GG                              | AA                | 1945895448               |
| SNP_P3_14229_39385114 | NC_021160.1    | Ca_kabuli_chr01 | 39385114                | TT                              | CC                | 1945895450               |
| SNP_P3_14230_39385115 | NC_021160.1    | Ca_kabuli_chr01 | 39385115                | CC                              | AA                | 1945895452               |
| SNP_P3_14231_39386977 | NC_021160.1    | Ca_kabuli_chr01 | 39386977                | TT                              | CC                | 1945895454               |
| SNP_P3_14232_39387026 | NC_021160.1    | Ca_kabuli_chr01 | 39387026                | TT                              | GG                | 1945895455               |
| SNP_P3_14233_39388079 | NC_021160.1    | Ca_kabuli_chr01 | 39388079                | AA                              | GG                | 1945895457               |

| SNPs IDs              | Chromosome IDs | Chromosomes     | Physical positions (bp) | CDC Frontier (Reference genome) | (Pusa 256 & HPNB) | NCBI SNPdb Accession IDs |
|-----------------------|----------------|-----------------|-------------------------|---------------------------------|-------------------|--------------------------|
| SNP_P3_14234_39388085 | NC_021160.1    | Ca_kabuli_chr01 | 39388085                | GG                              | AA                | 1945895459               |
| SNP_P3_14235_39388380 | NC_021160.1    | Ca_kabuli_chr01 | 39388380                | AA                              | GG                | 1945895461               |
| SNP_P3_14236_39388392 | NC_021160.1    | Ca_kabuli_chr01 | 39388392                | CC                              | TT                | 1945895462               |
| SNP_P3_14237_39389026 | NC_021160.1    | Ca_kabuli_chr01 | 39389026                | TT                              | CC                | 1945895464               |
| SNP_P3_14238_39389345 | NC_021160.1    | Ca_kabuli_chr01 | 39389345                | AA                              | GG                | 1945895466               |
| SNP_P3_14239_39389451 | NC_021160.1    | Ca_kabuli_chr01 | 39389451                | CC                              | AA                | 1945895468               |
| SNP_P3_14240_39389477 | NC_021160.1    | Ca_kabuli_chr01 | 39389477                | GG                              | AA                | 1945895470               |
| SNP_P3_14241_39389557 | NC_021160.1    | Ca_kabuli_chr01 | 39389557                | AA                              | GG                | 1945895471               |
| SNP_P3_14242_39389566 | NC_021160.1    | Ca_kabuli_chr01 | 39389566                | TT                              | GG                | 1945895473               |
| SNP_P3_14243_39389924 | NC_021160.1    | Ca_kabuli_chr01 | 39389924                | TT                              | CC                | 1945895475               |
| SNP_P3_14244_39389940 | NC_021160.1    | Ca_kabuli_chr01 | 39389940                | GG                              | AA                | 1945895477               |
| SNP_P3_14245_39390158 | NC_021160.1    | Ca_kabuli_chr01 | 39390158                | CC                              | TT                | 1945895478               |
| SNP_P3_14246_39390195 | NC_021160.1    | Ca_kabuli_chr01 | 39390195                | AA                              | GG                | 1945895480               |
| SNP_P3_14247_39390266 | NC_021160.1    | Ca_kabuli_chr01 | 39390266                | CC                              | AA                | 1945895482               |
| SNP_P3_14248_39390310 | NC_021160.1    | Ca_kabuli_chr01 | 39390310                | TT                              | CC                | 1945895483               |
| SNP_P3_14249_39390705 | NC_021160.1    | Ca_kabuli_chr01 | 39390705                | CC                              | TT                | 1945895485               |
| SNP_P3_14251_39392543 | NC_021160.1    | Ca_kabuli_chr01 | 39392543                | TT                              | GG                | 1945895487               |
| SNP_P3_14252_39397538 | NC_021160.1    | Ca_kabuli_chr01 | 39397538                | CC                              | TT                | 1945895489               |
| SNP_P3_14253_39398466 | NC_021160.1    | Ca_kabuli_chr01 | 39398466                | AA                              | TT                | 1945895490               |
| SNP_P3_14254_39399382 | NC_021160.1    | Ca_kabuli_chr01 | 39399382                | CC                              | TT                | 1945895492               |
| SNP_P3_14255_39399856 | NC_021160.1    | Ca_kabuli_chr01 | 39399856                | CC                              | TT                | 1945895494               |
| SNP_P3_14256_39400952 | NC_021160.1    | Ca_kabuli_chr01 | 39400952                | CC                              | TT                | 1945895496               |
| SNP_P3_14257_39401147 | NC_021160.1    | Ca_kabuli_chr01 | 39401147                | TT                              | GG                | 1945895497               |
| SNP_P3_14258_39402297 | NC_021160.1    | Ca_kabuli_chr01 | 39402297                | AA                              | CC                | 1945895499               |
| SNP_P3_14259_39402387 | NC_021160.1    | Ca_kabuli_chr01 | 39402387                | GG                              | AA                | 1945895501               |
| SNP_P3_14261_39402772 | NC_021160.1    | Ca_kabuli_chr01 | 39402772                | AA                              | CC                | 1945895502               |
| SNP_P3_14262_39404550 | NC_021160.1    | Ca_kabuli_chr01 | 39404550                | TT                              | GG                | 1945895504               |
| SNP_P3_14263_39404783 | NC_021160.1    | Ca_kabuli_chr01 | 39404783                | AA                              | CC                | 1945895506               |
| SNP_P3_14264_39404917 | NC_021160.1    | Ca_kabuli_chr01 | 39404917                | GG                              | AA                | 1945895508               |
| SNP_P3_14265_39407258 | NC_021160.1    | Ca_kabuli_chr01 | 39407258                | AA                              | GG                | 1945895509               |
| SNP_P3_14266_39407700 | NC_021160.1    | Ca_kabuli_chr01 | 39407700                | TT                              | GG                | 1945895511               |
| SNP_P3_14267_39409917 | NC_021160.1    | Ca_kabuli_chr01 | 39409917                | GG                              | AA                | 1945895513               |
| SNP_P3_14268_39411629 | NC_021160.1    | Ca_kabuli_chr01 | 39411629                | GG                              | AA                | 1945895515               |
| SNP_P3_14269_39412361 | NC_021160.1    | Ca_kabuli_chr01 | 39412361                | TT                              | GG                | 1945895516               |
| SNP_P3_14270_39412377 | NC_021160.1    | Ca_kabuli_chr01 | 39412377                | GG                              | CC                | 1945895518               |
| SNP_P3_14271_39415361 | NC_021160.1    | Ca_kabuli_chr01 | 39415361                | CC                              | TT                | 1945895520               |
| SNP_P3_14272_39416818 | NC_021160.1    | Ca_kabuli_chr01 | 39416818                | AA                              | GG                | 1945895522               |
| SNP_P3_14273_39416828 | NC_021160.1    | Ca_kabuli_chr01 | 39416828                | AA                              | CC                | 1945895523               |
| SNP_P3_14274_39416833 | NC_021160.1    | Ca_kabuli_chr01 | 39416833                | AA                              | GG                | 1945895525               |
| SNP_P3_14275_39418829 | NC_021160.1    | Ca_kabuli_chr01 | 39418829                | CC                              | AA                | 1945895527               |
| SNP_P3_14276_39419144 | NC_021160.1    | Ca_kabuli_chr01 | 39419144                | GG                              | AA                | 1945895529               |
| SNP_P3_14277_39419600 | NC_021160.1    | Ca_kabuli_chr01 | 39419600                | TT                              | CC                | 1945895531               |

| SNPs IDs              | Chromosome IDs | Chromosomes     | Physical positions (bp) | CDC Frontier (Reference genome) | (Pusa 256 & HPNB) | NCBI SNPdb Accession IDs |
|-----------------------|----------------|-----------------|-------------------------|---------------------------------|-------------------|--------------------------|
| SNP_P3_14278_39420992 | NC_021160.1    | Ca_kabuli_chr01 | 39420992                | TT                              | AA                | 1945895532               |
| SNP_P3_14279_39422335 | NC_021160.1    | Ca_kabuli_chr01 | 39422335                | CC                              | TT                | 1945895534               |
| SNP_P3_14280_39422589 | NC_021160.1    | Ca_kabuli_chr01 | 39422589                | CC                              | TT                | 1945895536               |
| SNP_P3_14283_39423834 | NC_021160.1    | Ca_kabuli_chr01 | 39423834                | TT                              | CC                | 1945895538               |
| SNP_P3_14284_39423852 | NC_021160.1    | Ca_kabuli_chr01 | 39423852                | GG                              | AA                | 1945895540               |
| SNP_P3_14285_39423884 | NC_021160.1    | Ca_kabuli_chr01 | 39423884                | TT                              | CC                | 1945895541               |
| SNP_P3_14286_39424166 | NC_021160.1    | Ca_kabuli_chr01 | 39424166                | TT                              | AA                | 1945895543               |
| SNP_P3_14287_39424444 | NC_021160.1    | Ca_kabuli_chr01 | 39424444                | GG                              | AA                | 1945895545               |
| SNP_P3_14288_39424470 | NC_021160.1    | Ca_kabuli_chr01 | 39424470                | CC                              | TT                | 1945895547               |
| SNP_P3_14289_39425487 | NC_021160.1    | Ca_kabuli_chr01 | 39425487                | CC                              | GG                | 1945895549               |
| SNP_P3_14290_39425488 | NC_021160.1    | Ca_kabuli_chr01 | 39425488                | GG                              | TT                | 1945895550               |
| SNP_P3_14291_39426958 | NC_021160.1    | Ca_kabuli_chr01 | 39426958                | AA                              | CC                | 1945895552               |
| SNP_P3_14292_39430316 | NC_021160.1    | Ca_kabuli_chr01 | 39430316                | CC                              | TT                | 1945895554               |
| SNP_P3_14293_39430338 | NC_021160.1    | Ca_kabuli_chr01 | 39430338                | TT                              | GG                | 1945895556               |
| SNP_P3_14294_39430499 | NC_021160.1    | Ca_kabuli_chr01 | 39430499                | TT                              | GG                | 1945895558               |
| SNP_P3_14296_39430519 | NC_021160.1    | Ca_kabuli_chr01 | 39430519                | TT                              | CC                | 1945895559               |
| SNP_P3_14297_39430614 | NC_021160.1    | Ca_kabuli_chr01 | 39430614                | AA                              | TT                | 1945895561               |
| SNP_P3_14298_39431622 | NC_021160.1    | Ca_kabuli_chr01 | 39431622                | CC                              | GG                | 1945895563               |
| SNP_P3_14299_39431662 | NC_021160.1    | Ca_kabuli_chr01 | 39431662                | TT                              | GG                | 1945895565               |
| SNP_P3_14300_39431852 | NC_021160.1    | Ca_kabuli_chr01 | 39431852                | AA                              | GG                | 1945895567               |
| SNP_P3_14302_39432022 | NC_021160.1    | Ca_kabuli_chr01 | 39432022                | TT                              | CC                | 1945895568               |
| SNP_P3_14304_39433009 | NC_021160.1    | Ca_kabuli_chr01 | 39433009                | AA                              | CC                | 1945895570               |
| SNP_P3_14305_39433010 | NC_021160.1    | Ca_kabuli_chr01 | 39433010                | TT                              | AA                | 1945895572               |
| SNP_P3_14306_39433176 | NC_021160.1    | Ca_kabuli_chr01 | 39433176                | AA                              | TT                | 1945895574               |
| SNP_P3_14307_39433258 | NC_021160.1    | Ca_kabuli_chr01 | 39433258                | AA                              | TT                | 1945895576               |
| SNP_P3_14308_39433273 | NC_021160.1    | Ca_kabuli_chr01 | 39433273                | TT                              | CC                | 1945895577               |
| SNP_P3_14309_39433299 | NC_021160.1    | Ca_kabuli_chr01 | 39433299                | TT                              | AA                | 1945895579               |
| SNP_P3_14310_39433329 | NC_021160.1    | Ca_kabuli_chr01 | 39433329                | GG                              | AA                | 1945895581               |
| SNP_P3_14311_39433373 | NC_021160.1    | Ca_kabuli_chr01 | 39433373                | GG                              | AA                | 1945895583               |
| SNP_P3_14313_39434251 | NC_021160.1    | Ca_kabuli_chr01 | 39434251                | AA                              | CC                | 1945895585               |
| SNP_P3_14314_39434262 | NC_021160.1    | Ca_kabuli_chr01 | 39434262                | AA                              | GG                | 1945895586               |
| SNP_P3_14315_39434519 | NC_021160.1    | Ca_kabuli_chr01 | 39434519                | TT                              | AA                | 1945895588               |
| SNP_P3_14316_39435073 | NC_021160.1    | Ca_kabuli_chr01 | 39435073                | AA                              | GG                | 1945895590               |
| SNP_P3_14317_39435134 | NC_021160.1    | Ca_kabuli_chr01 | 39435134                | CC                              | AA                | 1945895592               |
| SNP_P3_14318_39436699 | NC_021160.1    | Ca_kabuli_chr01 | 39436699                | GG                              | CC                | 1945895594               |
| SNP_P3_14319_39436863 | NC_021160.1    | Ca_kabuli_chr01 | 39436863                | AA                              | GG                | 1945895595               |
| SNP_P3_14320_39437933 | NC_021160.1    | Ca_kabuli_chr01 | 39437933                | GG                              | AA                | 1945895597               |
| SNP_P3_14321_39437936 | NC_021160.1    | Ca_kabuli_chr01 | 39437936                | CC                              | AA                | 1945895599               |
| SNP_P3_14322_39437976 | NC_021160.1    | Ca_kabuli_chr01 | 39437976                | AA                              | GG                | 1945895601               |
| SNP_P3_14323_39437985 | NC_021160.1    | Ca_kabuli_chr01 | 39437985                | GG                              | TT                | 1945895603               |
| SNP_P3_14324_39438196 | NC_021160.1    | Ca_kabuli_chr01 | 39438196                | GG                              | AA                | 1945895604               |
| SNP_P3_14325_39438204 | NC_021160.1    | Ca_kabuli_chr01 | 39438204                | TT                              | CC                | 1945895606               |

| SNPs IDs              | Chromosome IDs | Chromosomes     | Physical positions (bp) | CDC Frontier (Reference genome) | (Pusa 256 & HPNB) | NCBI SNPdb Accession IDs |
|-----------------------|----------------|-----------------|-------------------------|---------------------------------|-------------------|--------------------------|
| SNP_P3_14326_39438206 | NC_021160.1    | Ca_kabuli_chr01 | 39438206                | TT                              | CC                | 1945895608               |
| SNP_P3_14327_39438212 | NC_021160.1    | Ca_kabuli_chr01 | 39438212                | CC                              | GG                | 1945895610               |
| SNP_P3_14328_39438214 | NC_021160.1    | Ca_kabuli_chr01 | 39438214                | CC                              | GG                | 1945895612               |
| SNP_P3_14329_39439574 | NC_021160.1    | Ca_kabuli_chr01 | 39439574                | CC                              | TT                | 1945895613               |
| SNP_P3_14330_39439616 | NC_021160.1    | Ca_kabuli_chr01 | 39439616                | GG                              | AA                | 1945895615               |
| SNP_P3_14331_39439660 | NC_021160.1    | Ca_kabuli_chr01 | 39439660                | AA                              | GG                | 1945895617               |
| SNP_P3_14332_39440742 | NC_021160.1    | Ca_kabuli_chr01 | 39440742                | TT                              | CC                | 1945895619               |
| SNP_P3_14333_39441360 | NC_021160.1    | Ca_kabuli_chr01 | 39441360                | TT                              | CC                | 1945895621               |
| SNP_P3_14334_39441579 | NC_021160.1    | Ca_kabuli_chr01 | 39441579                | AA                              | GG                | 1945895622               |
| SNP_P3_14335_39442784 | NC_021160.1    | Ca_kabuli_chr01 | 39442784                | TT                              | CC                | 1945895624               |
| SNP_P3_14337_39443800 | NC_021160.1    | Ca_kabuli_chr01 | 39443800                | TT                              | AA                | 1945895626               |
| SNP_P3_14339_39444109 | NC_021160.1    | Ca_kabuli_chr01 | 39444109                | GG                              | AA                | 1945895628               |
| SNP_P3_14340_39445828 | NC_021160.1    | Ca_kabuli_chr01 | 39445828                | GG                              | CC                | 1945895630               |
| SNP_P3_14341_39445839 | NC_021160.1    | Ca_kabuli_chr01 | 39445839                | TT                              | GG                | 1945895631               |
| SNP_P3_14342_39445870 | NC_021160.1    | Ca_kabuli_chr01 | 39445870                | AA                              | GG                | 1945895633               |
| SNP_P3_14343_39446756 | NC_021160.1    | Ca_kabuli_chr01 | 39446756                | CC                              | TT                | 1945895635               |
| SNP_P3_14344_39446767 | NC_021160.1    | Ca_kabuli_chr01 | 39446767                | AA                              | GG                | 1945895637               |
| SNP_P3_14346_39447029 | NC_021160.1    | Ca_kabuli_chr01 | 39447029                | CC                              | TT                | 1945895639               |
| SNP_P3_14347_39447040 | NC_021160.1    | Ca_kabuli_chr01 | 39447040                | CC                              | TT                | 1945895640               |
| SNP_P3_14349_39447496 | NC_021160.1    | Ca_kabuli_chr01 | 39447496                | AA                              | GG                | 1945895642               |
| SNP_P3_14350_39448764 | NC_021160.1    | Ca_kabuli_chr01 | 39448764                | GG                              | AA                | 1945895644               |
| SNP_P3_14351_39448880 | NC_021160.1    | Ca_kabuli_chr01 | 39448880                | AA                              | GG                | 1945895646               |
| SNP_P3_14352_39448895 | NC_021160.1    | Ca_kabuli_chr01 | 39448895                | GG                              | AA                | 1945895648               |
| SNP_P3_14353_39449043 | NC_021160.1    | Ca_kabuli_chr01 | 39449043                | GG                              | AA                | 1945895649               |
| SNP_P3_14354_39449100 | NC_021160.1    | Ca_kabuli_chr01 | 39449100                | CC                              | TT                | 1945895651               |
| SNP_P3_14355_39449110 | NC_021160.1    | Ca_kabuli_chr01 | 39449110                | AA                              | GG                | 1945895653               |
| SNP_P3_14356_39449111 | NC_021160.1    | Ca_kabuli_chr01 | 39449111                | GG                              | AA                | 1945895655               |
| SNP_P3_14357_39449117 | NC_021160.1    | Ca_kabuli_chr01 | 39449117                | CC                              | TT                | 1945895657               |
| SNP_P3_14358_39449153 | NC_021160.1    | Ca_kabuli_chr01 | 39449153                | CC                              | TT                | 1945895658               |
| SNP_P3_14359_39449165 | NC_021160.1    | Ca_kabuli_chr01 | 39449165                | TT                              | CC                | 1945895660               |
| SNP_P3_14360_39449329 | NC_021160.1    | Ca_kabuli_chr01 | 39449329                | GG                              | CC                | 1945895662               |
| SNP_P3_14361_39449330 | NC_021160.1    | Ca_kabuli_chr01 | 39449330                | CC                              | AA                | 1945895664               |
| SNP_P3_14362_39449354 | NC_021160.1    | Ca_kabuli_chr01 | 39449354                | AA                              | GG                | 1945895666               |
| SNP_P3_14363_39449365 | NC_021160.1    | Ca_kabuli_chr01 | 39449365                | CC                              | TT                | 1945895667               |
| SNP_P3_14364_39449370 | NC_021160.1    | Ca_kabuli_chr01 | 39449370                | CC                              | AA                | 1945895669               |
| SNP_P3_14365_39449393 | NC_021160.1    | Ca_kabuli_chr01 | 39449393                | CC                              | TT                | 1945895671               |
| SNP_P3_14366_39449394 | NC_021160.1    | Ca_kabuli_chr01 | 39449394                | AA                              | CC                | 1945895673               |
| SNP_P3_14367_39450359 | NC_021160.1    | Ca_kabuli_chr01 | 39450359                | CC                              | TT                | 1945895675               |
| SNP_P3_14368_39450369 | NC_021160.1    | Ca_kabuli_chr01 | 39450369                | AA                              | GG                | 1945895676               |
| SNP_P3_14369_39450395 | NC_021160.1    | Ca_kabuli_chr01 | 39450395                | TT                              | CC                | 1945895678               |
| SNP_P3_14371_39452376 | NC_021160.1    | Ca_kabuli_chr01 | 39452376                | TT                              | CC                | 1945895680               |
| SNP_P3_14372_39455089 | NC_021160.1    | Ca_kabuli_chr01 | 39455089                | AA                              | GG                | 1945895682               |

| SNPs IDs              | Chromosome IDs | Chromosomes     | Physical positions (bp) | CDC Frontier (Reference genome) | (Pusa 256 & HPNB) | NCBI SNPdb Accession IDs |
|-----------------------|----------------|-----------------|-------------------------|---------------------------------|-------------------|--------------------------|
| SNP_P3_14373_39455748 | NC_021160.1    | Ca_kabuli_chr01 | 39455748                | TT                              | CC                | 1945895684               |
| SNP_P3_14374_39455800 | NC_021160.1    | Ca_kabuli_chr01 | 39455800                | TT                              | CC                | 1945895685               |
| SNP_P3_14375_39456042 | NC_021160.1    | Ca_kabuli_chr01 | 39456042                | TT                              | CC                | 1945895687               |
| SNP_P3_14376_39456388 | NC_021160.1    | Ca_kabuli_chr01 | 39456388                | GG                              | TT                | 1945895689               |
| SNP_P3_14377_39456449 | NC_021160.1    | Ca_kabuli_chr01 | 39456449                | CC                              | TT                | 1945895691               |
| SNP_P3_14378_39456535 | NC_021160.1    | Ca_kabuli_chr01 | 39456535                | TT                              | GG                | 1945895693               |
| SNP_P3_14379_39456537 | NC_021160.1    | Ca_kabuli_chr01 | 39456537                | TT                              | GG                | 1945895694               |
| SNP_P3_14380_39457753 | NC_021160.1    | Ca_kabuli_chr01 | 39457753                | CC                              | TT                | 1945895696               |
| SNP_P3_14381_39457924 | NC_021160.1    | Ca_kabuli_chr01 | 39457924                | GG                              | AA                | 1945895698               |
| SNP_P3_14382_39457939 | NC_021160.1    | Ca_kabuli_chr01 | 39457939                | CC                              | TT                | 1945895700               |
| SNP_P3_14383_39458077 | NC_021160.1    | Ca_kabuli_chr01 | 39458077                | TT                              | CC                | 1945895701               |
| SNP_P3_14384_39458081 | NC_021160.1    | Ca_kabuli_chr01 | 39458081                | GG                              | AA                | 1945895703               |
| SNP_P3_14385_39458123 | NC_021160.1    | Ca_kabuli_chr01 | 39458123                | TT                              | CC                | 1945895705               |
| SNP_P3_14386_39458183 | NC_021160.1    | Ca_kabuli_chr01 | 39458183                | TT                              | GG                | 1945895707               |
| SNP_P3_14387_39458388 | NC_021160.1    | Ca_kabuli_chr01 | 39458388                | AA                              | GG                | 1945895709               |
| SNP_P3_14388_39458441 | NC_021160.1    | Ca_kabuli_chr01 | 39458441                | TT                              | CC                | 1945895710               |
| SNP_P3_14389_39458774 | NC_021160.1    | Ca_kabuli_chr01 | 39458774                | TT                              | CC                | 1945895712               |
| SNP_P3_14390_39458858 | NC_021160.1    | Ca_kabuli_chr01 | 39458858                | AA                              | GG                | 1945895714               |
| SNP_P3_14391_39459073 | NC_021160.1    | Ca_kabuli_chr01 | 39459073                | CC                              | AA                | 1945895716               |
| SNP_P3_14392_39460946 | NC_021160.1    | Ca_kabuli_chr01 | 39460946                | AA                              | GG                | 1945895717               |
| SNP_P3_14393_39461072 | NC_021160.1    | Ca_kabuli_chr01 | 39461072                | GG                              | CC                | 1945895719               |
| SNP_P3_14394_39461226 | NC_021160.1    | Ca_kabuli_chr01 | 39461226                | TT                              | AA                | 1945895721               |
| SNP_P3_14395_39461230 | NC_021160.1    | Ca_kabuli_chr01 | 39461230                | AA                              | GG                | 1945895723               |
| SNP_P3_14396_39461275 | NC_021160.1    | Ca_kabuli_chr01 | 39461275                | AA                              | GG                | 1945895725               |
| SNP_P3_14397_39461430 | NC_021160.1    | Ca_kabuli_chr01 | 39461430                | GG                              | AA                | 1945895726               |
| SNP_P3_14398_39462610 | NC_021160.1    | Ca_kabuli_chr01 | 39462610                | TT                              | CC                | 1945895728               |
| SNP_P3_14399_39462751 | NC_021160.1    | Ca_kabuli_chr01 | 39462751                | CC                              | TT                | 1945895730               |
| SNP_P3_14402_39464048 | NC_021160.1    | Ca_kabuli_chr01 | 39464048                | AA                              | CC                | 1945895732               |
| SNP_P3_14403_39464073 | NC_021160.1    | Ca_kabuli_chr01 | 39464073                | TT                              | GG                | 1945895733               |
| SNP_P3_14405_39464366 | NC_021160.1    | Ca_kabuli_chr01 | 39464366                | TT                              | CC                | 1945895735               |
| SNP_P3_14406_39465037 | NC_021160.1    | Ca_kabuli_chr01 | 39465037                | TT                              | AA                | 1945895737               |
| SNP_P3_14407_39465078 | NC_021160.1    | Ca_kabuli_chr01 | 39465078                | AA                              | GG                | 1945895739               |
| SNP_P3_14408_39465627 | NC_021160.1    | Ca_kabuli_chr01 | 39465627                | AA                              | TT                | 1945895741               |
| SNP_P3_14409_39466875 | NC_021160.1    | Ca_kabuli_chr01 | 39466875                | TT                              | CC                | 1945895742               |
| SNP_P3_14410_39466944 | NC_021160.1    | Ca_kabuli_chr01 | 39466944                | AA                              | GG                | 1945895744               |
| SNP_P3_14411_39468627 | NC_021160.1    | Ca_kabuli_chr01 | 39468627                | AA                              | TT                | 1945895746               |
| SNP_P3_14413_39469829 | NC_021160.1    | Ca_kabuli_chr01 | 39469829                | TT                              | CC                | 1945895748               |
| SNP_P3_14414_39472183 | NC_021160.1    | Ca_kabuli_chr01 | 39472183                | GG                              | AA                | 1945895749               |
| SNP_P3_14415_39472825 | NC_021160.1    | Ca_kabuli_chr01 | 39472825                | AA                              | CC                | 1945895751               |
| SNP_P3_14416_39473035 | NC_021160.1    | Ca_kabuli_chr01 | 39473035                | AA                              | TT                | 1945895753               |
| SNP_P3_14417_39473040 | NC_021160.1    | Ca_kabuli_chr01 | 39473040                | CC                              | TT                | 1945895755               |
| SNP_P3_14418_39474228 | NC_021160.1    | Ca_kabuli_chr01 | 39474228                | AA                              | GG                | 1945895757               |

| SNPs IDs              | Chromosome IDs | Chromosomes     | Physical positions (bp) | CDC Frontier (Reference genome) | (Pusa 256 & HPNB) | NCBI SNPdb Accession IDs |
|-----------------------|----------------|-----------------|-------------------------|---------------------------------|-------------------|--------------------------|
| SNP_P3_14419_39481017 | NC_021160.1    | Ca_kabuli_chr01 | 39481017                | GG                              | AA                | 1945895758               |
| SNP_P3_14420_39483768 | NC_021160.1    | Ca_kabuli_chr01 | 39483768                | GG                              | TT                | 1945895760               |
| SNP_P3_14421_39487522 | NC_021160.1    | Ca_kabuli_chr01 | 39487522                | CC                              | GG                | 1945895762               |
| SNP_P3_14422_39488085 | NC_021160.1    | Ca_kabuli_chr01 | 39488085                | AA                              | GG                | 1945895764               |
| SNP_P3_14423_39488140 | NC_021160.1    | Ca_kabuli_chr01 | 39488140                | TT                              | GG                | 1945895765               |
| SNP_P3_14424_39488339 | NC_021160.1    | Ca_kabuli_chr01 | 39488339                | CC                              | TT                | 1945895767               |
| SNP_P3_14425_39488463 | NC_021160.1    | Ca_kabuli_chr01 | 39488463                | GG                              | AA                | 1945895769               |
| SNP_P3_14426_39489281 | NC_021160.1    | Ca_kabuli_chr01 | 39489281                | TT                              | AA                | 1945895771               |
| SNP_P3_14427_39489470 | NC_021160.1    | Ca_kabuli_chr01 | 39489470                | GG                              | AA                | 1945895773               |
| SNP_P3_14428_39489671 | NC_021160.1    | Ca_kabuli_chr01 | 39489671                | AA                              | TT                | 1945895774               |
| SNP_P3_14429_39489687 | NC_021160.1    | Ca_kabuli_chr01 | 39489687                | GG                              | AA                | 1945895776               |
| SNP_P3_14430_39489798 | NC_021160.1    | Ca_kabuli_chr01 | 39489798                | AA                              | TT                | 1945895778               |
| SNP_P3_14431_39490456 | NC_021160.1    | Ca_kabuli_chr01 | 39490456                | GG                              | AA                | 1945895780               |
| SNP_P3_14432_39490946 | NC_021160.1    | Ca_kabuli_chr01 | 39490946                | CC                              | TT                | 1945895781               |
| SNP_P3_14434_39493844 | NC_021160.1    | Ca_kabuli_chr01 | 39493844                | TT                              | CC                | 1945895783               |
| SNP_P3_14435_39494124 | NC_021160.1    | Ca_kabuli_chr01 | 39494124                | AA                              | GG                | 1945895785               |
| SNP_P3_14436_39494152 | NC_021160.1    | Ca_kabuli_chr01 | 39494152                | AA                              | CC                | 1945895787               |
| SNP_P3_14437_39497032 | NC_021160.1    | Ca_kabuli_chr01 | 39497032                | TT                              | GG                | 1945895788               |
| SNP_P3_14438_39497404 | NC_021160.1    | Ca_kabuli_chr01 | 39497404                | CC                              | TT                | 1945895790               |
| SNP_P3_14439_39498019 | NC_021160.1    | Ca_kabuli_chr01 | 39498019                | TT                              | CC                | 1945895792               |
| SNP_P3_14440_39498321 | NC_021160.1    | Ca_kabuli_chr01 | 39498321                | CC                              | TT                | 1945895794               |
| SNP_P3_14441_39498325 | NC_021160.1    | Ca_kabuli_chr01 | 39498325                | TT                              | CC                | 1945895796               |
| SNP_P3_14442_39498333 | NC_021160.1    | Ca_kabuli_chr01 | 39498333                | GG                              | AA                | 1945895797               |
| SNP_P3_14443_39498508 | NC_021160.1    | Ca_kabuli_chr01 | 39498508                | GG                              | AA                | 1945895799               |
| SNP_P3_14444_39499074 | NC_021160.1    | Ca_kabuli_chr01 | 39499074                | CC                              | TT                | 1945895801               |
| SNP_P3_14445_39499087 | NC_021160.1    | Ca_kabuli_chr01 | 39499087                | AA                              | CC                | 1945895803               |
| SNP_P3_14446_39499475 | NC_021160.1    | Ca_kabuli_chr01 | 39499475                | GG                              | TT                | 1945895804               |
| SNP_P3_14447_39500432 | NC_021160.1    | Ca_kabuli_chr01 | 39500432                | GG                              | AA                | 1945895806               |
| SNP_P3_14448_39501158 | NC_021160.1    | Ca_kabuli_chr01 | 39501158                | AA                              | CC                | 1945895808               |
| SNP_P3_14449_39501368 | NC_021160.1    | Ca_kabuli_chr01 | 39501368                | AA                              | GG                | 1945895810               |
| SNP_P3_14450_39505459 | NC_021160.1    | Ca_kabuli_chr01 | 39505459                | CC                              | TT                | 1945895811               |
| SNP_P3_14451_39505662 | NC_021160.1    | Ca_kabuli_chr01 | 39505662                | AA                              | TT                | 1945895813               |
| SNP_P3_14452_39508031 | NC_021160.1    | Ca_kabuli_chr01 | 39508031                | AA                              | CC                | 1945895815               |
| SNP_P3_14454_39510029 | NC_021160.1    | Ca_kabuli_chr01 | 39510029                | AA                              | GG                | 1945895817               |
| SNP_P3_14455_39511007 | NC_021160.1    | Ca_kabuli_chr01 | 39511007                | GG                              | AA                | 1945895819               |
| SNP_P3_14456_39511335 | NC_021160.1    | Ca_kabuli_chr01 | 39511335                | TT                              | CC                | 1945895820               |
| SNP_P3_14458_39511703 | NC_021160.1    | Ca_kabuli_chr01 | 39511703                | TT                              | CC                | 1945895822               |
| SNP_P3_14459_39516171 | NC_021160.1    | Ca_kabuli_chr01 | 39516171                | TT                              | CC                | 1945895824               |
| SNP_P3_14460_39516210 | NC_021160.1    | Ca_kabuli_chr01 | 39516210                | CC                              | TT                | 1945895826               |
| SNP_P3_14461_39516211 | NC_021160.1    | Ca_kabuli_chr01 | 39516211                | GG                              | AA                | 1945895827               |
| SNP_P3_14462_39516404 | NC_021160.1    | Ca_kabuli_chr01 | 39516404                | AA                              | TT                | 1945895829               |
| SNP_P3_14463_39518284 | NC_021160.1    | Ca_kabuli_chr01 | 39518284                | AA                              | GG                | 1945895831               |

| SNPs IDs              | Chromosome IDs | Chromosomes     | Physical positions (bp) | CDC Frontier (Reference genome) | (Pusa 256 & HPNB) | NCBI SNPdb Accession IDs |
|-----------------------|----------------|-----------------|-------------------------|---------------------------------|-------------------|--------------------------|
| SNP_P3_14464_39518743 | NC_021160.1    | Ca_kabuli_chr01 | 39518743                | AA                              | CC                | 1945895833               |
| SNP_P3_14465_39519174 | NC_021160.1    | Ca_kabuli_chr01 | 39519174                | AA                              | GG                | 1945895835               |
| SNP_P3_14466_39525654 | NC_021160.1    | Ca_kabuli_chr01 | 39525654                | AA                              | TT                | 1945895836               |
| SNP_P3_14467_39526049 | NC_021160.1    | Ca_kabuli_chr01 | 39526049                | TT                              | CC                | 1945895838               |
| SNP_P3_14468_39527813 | NC_021160.1    | Ca_kabuli_chr01 | 39527813                | GG                              | TT                | 1945895840               |
| SNP_P3_14469_39528853 | NC_021160.1    | Ca_kabuli_chr01 | 39528853                | CC                              | AA                | 1945895842               |
| SNP_P3_14470_39528889 | NC_021160.1    | Ca_kabuli_chr01 | 39528889                | AA                              | TT                | 1945895843               |
| SNP_P3_14471_39529164 | NC_021160.1    | Ca_kabuli_chr01 | 39529164                | CC                              | GG                | 1945895845               |
| SNP_P3_14472_39529667 | NC_021160.1    | Ca_kabuli_chr01 | 39529667                | GG                              | AA                | 1945895847               |
| SNP_P3_14473_39541095 | NC_021160.1    | Ca_kabuli_chr01 | 39541095                | GG                              | TT                | 1945895849               |
| SNP_P3_14475_39541466 | NC_021160.1    | Ca_kabuli_chr01 | 39541466                | CC                              | AA                | 1945895851               |
| SNP_P3_14476_39541594 | NC_021160.1    | Ca_kabuli_chr01 | 39541594                | AA                              | GG                | 1945895852               |
| SNP_P3_14477_39541942 | NC_021160.1    | Ca_kabuli_chr01 | 39541942                | TT                              | AA                | 1945895854               |
| SNP_P3_14478_39547075 | NC_021160.1    | Ca_kabuli_chr01 | 39547075                | TT                              | CC                | 1945895856               |
| SNP_P3_14479_39547376 | NC_021160.1    | Ca_kabuli_chr01 | 39547376                | CC                              | TT                | 1945895858               |
| SNP_P3_14480_39547415 | NC_021160.1    | Ca_kabuli_chr01 | 39547415                | TT                              | CC                | 1945895859               |
| SNP_P3_14481_39547527 | NC_021160.1    | Ca_kabuli_chr01 | 39547527                | CC                              | TT                | 1945895861               |
| SNP_P3_14482_39550681 | NC_021160.1    | Ca_kabuli_chr01 | 39550681                | CC                              | TT                | 1945895863               |
| SNP_P3_14484_39552305 | NC_021160.1    | Ca_kabuli_chr01 | 39552305                | AA                              | CC                | 1945895865               |
| SNP_P3_14485_39552336 | NC_021160.1    | Ca_kabuli_chr01 | 39552336                | TT                              | CC                | 1945895867               |
| SNP_P3_14486_39552408 | NC_021160.1    | Ca_kabuli_chr01 | 39552408                | TT                              | CC                | 1945895868               |
| SNP_P3_14487_39552452 | NC_021160.1    | Ca_kabuli_chr01 | 39552452                | AA                              | GG                | 1945895870               |
| SNP_P3_14488_39552482 | NC_021160.1    | Ca_kabuli_chr01 | 39552482                | TT                              | CC                | 1945895872               |
| SNP_P3_14489_39552526 | NC_021160.1    | Ca_kabuli_chr01 | 39552526                | AA                              | GG                | 1945895874               |
| SNP_P3_14490_39552748 | NC_021160.1    | Ca_kabuli_chr01 | 39552748                | TT                              | CC                | 1945895875               |
| SNP_P3_14491_39552759 | NC_021160.1    | Ca_kabuli_chr01 | 39552759                | TT                              | CC                | 1945895877               |
| SNP_P3_14492_39552989 | NC_021160.1    | Ca_kabuli_chr01 | 39552989                | CC                              | GG                | 1945895879               |
| SNP_P3_14493_39554304 | NC_021160.1    | Ca_kabuli_chr01 | 39554304                | GG                              | AA                | 1945895881               |
| SNP_P3_14494_39556922 | NC_021160.1    | Ca_kabuli_chr01 | 39556922                | AA                              | GG                | 1945895882               |
| SNP_P3_14495_39557055 | NC_021160.1    | Ca_kabuli_chr01 | 39557055                | GG                              | AA                | 1945895884               |
| SNP_P3_14496_39557347 | NC_021160.1    | Ca_kabuli_chr01 | 39557347                | TT                              | CC                | 1945895886               |
| SNP_P3_14497_39563266 | NC_021160.1    | Ca_kabuli_chr01 | 39563266                | AA                              | TT                | 1945895888               |
| SNP_P3_14498_39563563 | NC_021160.1    | Ca_kabuli_chr01 | 39563563                | GG                              | AA                | 1945895890               |
| SNP_P3_14499_39565139 | NC_021160.1    | Ca_kabuli_chr01 | 39565139                | GG                              | CC                | 1945895891               |
| SNP_P3_14500_39565341 | NC_021160.1    | Ca_kabuli_chr01 | 39565341                | GG                              | AA                | 1945895893               |
| SNP_P3_14501_39565976 | NC_021160.1    | Ca_kabuli_chr01 | 39565976                | GG                              | TT                | 1945895895               |
| SNP_P3_14502_39566154 | NC_021160.1    | Ca_kabuli_chr01 | 39566154                | GG                              | CC                | 1945895897               |
| SNP_P3_14503_39566307 | NC_021160.1    | Ca_kabuli_chr01 | 39566307                | GG                              | AA                | 1945895898               |
| SNP_P3_14504_39568677 | NC_021160.1    | Ca_kabuli_chr01 | 39568677                | GG                              | AA                | 1945895900               |
| SNP_P3_14505_39569143 | NC_021160.1    | Ca_kabuli_chr01 | 39569143                | AA                              | TT                | 1945895902               |
| SNP_P3_14506_39569455 | NC_021160.1    | Ca_kabuli_chr01 | 39569455                | AA                              | GG                | 1945895904               |
| SNP_P3_14507_39569808 | NC_021160.1    | Ca_kabuli_chr01 | 39569808                | TT                              | CC                | 1945895906               |



| SNPs IDs              | Chromosome IDs | Chromosomes     | Physical positions (bp) | CDC Frontier (Reference genome) | (Pusa 256 & HPNB) | NCBI SNPdb Accession IDs |
|-----------------------|----------------|-----------------|-------------------------|---------------------------------|-------------------|--------------------------|
| SNP_P3_14509_39570464 | NC_021160.1    | Ca_kabuli_chr01 | 39570464                | TT                              | CC                | 1945895907               |
| SNP_P3_14510_39570842 | NC_021160.1    | Ca_kabuli_chr01 | 39570842                | CC                              | TT                | 1945895909               |
| SNP_P3_14511_39571156 | NC_021160.1    | Ca_kabuli_chr01 | 39571156                | CC                              | GG                | 1945895911               |
| SNP_P3_14512_39571934 | NC_021160.1    | Ca_kabuli_chr01 | 39571934                | GG                              | AA                | 1945895913               |
| SNP_P3_14513_39572120 | NC_021160.1    | Ca_kabuli_chr01 | 39572120                | TT                              | GG                | 1945895914               |
| SNP_P3_14514_39572132 | NC_021160.1    | Ca_kabuli_chr01 | 39572132                | AA                              | GG                | 1945895916               |
| SNP_P3_14515_39572383 | NC_021160.1    | Ca_kabuli_chr01 | 39572383                | GG                              | AA                | 1945895918               |
| SNP_P3_14516_39575413 | NC_021160.1    | Ca_kabuli_chr01 | 39575413                | GG                              | AA                | 1945895920               |
| SNP_P3_14517_39575435 | NC_021160.1    | Ca_kabuli_chr01 | 39575435                | TT                              | CC                | 1945895922               |
| SNP_P3_14518_39575643 | NC_021160.1    | Ca_kabuli_chr01 | 39575643                | CC                              | AA                | 1945895923               |
| SNP_P3_14519_39577412 | NC_021160.1    | Ca_kabuli_chr01 | 39577412                | GG                              | AA                | 1945895925               |
| SNP_P3_14520_39578059 | NC_021160.1    | Ca_kabuli_chr01 | 39578059                | TT                              | CC                | 1945895927               |
| SNP_P3_14521_39578141 | NC_021160.1    | Ca_kabuli_chr01 | 39578141                | TT                              | GG                | 1945895929               |
| SNP_P3_14522_39579101 | NC_021160.1    | Ca_kabuli_chr01 | 39579101                | CC                              | AA                | 1945895930               |
| SNP_P3_14523_39580379 | NC_021160.1    | Ca_kabuli_chr01 | 39580379                | GG                              | AA                | 1945895932               |
| SNP_P3_14524_39581578 | NC_021160.1    | Ca_kabuli_chr01 | 39581578                | GG                              | TT                | 1945895934               |
| SNP_P3_14525_39582084 | NC_021160.1    | Ca_kabuli_chr01 | 39582084                | GG                              | AA                | 1945895936               |
| SNP_P3_14526_39582481 | NC_021160.1    | Ca_kabuli_chr01 | 39582481                | TT                              | AA                | 1945895938               |
| SNP_P3_14527_39582672 | NC_021160.1    | Ca_kabuli_chr01 | 39582672                | CC                              | TT                | 1945895939               |
| SNP_P3_14528_39584616 | NC_021160.1    | Ca_kabuli_chr01 | 39584616                | TT                              | CC                | 1945895941               |
| SNP_P3_14529_39584942 | NC_021160.1    | Ca_kabuli_chr01 | 39584942                | CC                              | TT                | 1945895943               |
| SNP_P3_14530_39585225 | NC_021160.1    | Ca_kabuli_chr01 | 39585225                | TT                              | CC                | 1945895945               |
| SNP_P3_14531_39585807 | NC_021160.1    | Ca_kabuli_chr01 | 39585807                | CC                              | AA                | 1945895946               |
| SNP_P3_14532_39587055 | NC_021160.1    | Ca_kabuli_chr01 | 39587055                | TT                              | CC                | 1945895948               |
| SNP_P3_14533_39587100 | NC_021160.1    | Ca_kabuli_chr01 | 39587100                | AA                              | GG                | 1945895950               |
| SNP_P3_14534_39587286 | NC_021160.1    | Ca_kabuli_chr01 | 39587286                | CC                              | TT                | 1945895952               |
| SNP_P3_14535_39587534 | NC_021160.1    | Ca_kabuli_chr01 | 39587534                | AA                              | GG                | 1945895953               |
| SNP_P3_14536_39587683 | NC_021160.1    | Ca_kabuli_chr01 | 39587683                | AA                              | TT                | 1945895955               |
| SNP_P3_14537_39588153 | NC_021160.1    | Ca_kabuli_chr01 | 39588153                | AA                              | GG                | 1945895957               |
| SNP_P3_14538_39589278 | NC_021160.1    | Ca_kabuli_chr01 | 39589278                | CC                              | TT                | 1945895959               |
| SNP_P3_14539_39589296 | NC_021160.1    | Ca_kabuli_chr01 | 39589296                | TT                              | CC                | 1945895961               |
| SNP_P3_14540_39590412 | NC_021160.1    | Ca_kabuli_chr01 | 39590412                | TT                              | CC                | 1945895962               |
| SNP_P3_14541_39591557 | NC_021160.1    | Ca_kabuli_chr01 | 39591557                | AA                              | GG                | 1945895964               |
| SNP_P3_14542_39593553 | NC_021160.1    | Ca_kabuli_chr01 | 39593553                | GG                              | AA                | 1945895966               |
| SNP_P3_14543_39594153 | NC_021160.1    | Ca_kabuli_chr01 | 39594153                | AA                              | GG                | 1945895968               |
| SNP_P3_14545_39594445 | NC_021160.1    | Ca_kabuli_chr01 | 39594445                | GG                              | AA                | 1945895969               |
| SNP_P3_14546_39594983 | NC_021160.1    | Ca_kabuli_chr01 | 39594983                | CC                              | TT                | 1945895971               |
| SNP_P3_14547_39595606 | NC_021160.1    | Ca_kabuli_chr01 | 39595606                | TT                              | AA                | 1945895973               |
| SNP_P3_14548_39595742 | NC_021160.1    | Ca_kabuli_chr01 | 39595742                | TT                              | GG                | 1945895975               |
| SNP_P3_14549_39595746 | NC_021160.1    | Ca_kabuli_chr01 | 39595746                | AA                              | GG                | 1945895977               |
| SNP_P3_14550_39597400 | NC_021160.1    | Ca_kabuli_chr01 | 39597400                | GG                              | AA                | 1945895978               |
| SNP_P3_14552_39599193 | NC_021160.1    | Ca_kabuli_chr01 | 39599193                | AA                              | CC                | 1945895980               |

| SNPs IDs              | Chromosome IDs | Chromosomes     | Physical positions (bp) | CDC Frontier (Reference genome) | (Pusa 256 & HPNB) | NCBI SNPdb Accession IDs |
|-----------------------|----------------|-----------------|-------------------------|---------------------------------|-------------------|--------------------------|
| SNP_P3_14553_39599205 | NC_021160.1    | Ca_kabuli_chr01 | 39599205                | TT                              | CC                | 1945895982               |
| SNP_P3_14554_39601051 | NC_021160.1    | Ca_kabuli_chr01 | 39601051                | GG                              | CC                | 1945895984               |
| SNP_P3_14555_39601079 | NC_021160.1    | Ca_kabuli_chr01 | 39601079                | TT                              | CC                | 1945895985               |
| SNP_P3_14556_39601080 | NC_021160.1    | Ca_kabuli_chr01 | 39601080                | GG                              | CC                | 1945895987               |
| SNP_P3_14557_39605967 | NC_021160.1    | Ca_kabuli_chr01 | 39605967                | CC                              | TT                | 1945895989               |
| SNP_P3_14558_39606044 | NC_021160.1    | Ca_kabuli_chr01 | 39606044                | CC                              | AA                | 1945895991               |
| SNP_P3_14559_39607434 | NC_021160.1    | Ca_kabuli_chr01 | 39607434                | TT                              | CC                | 1945895993               |
| SNP_P3_14560_39607521 | NC_021160.1    | Ca_kabuli_chr01 | 39607521                | GG                              | AA                | 1945895994               |
| SNP_P3_14562_39609698 | NC_021160.1    | Ca_kabuli_chr01 | 39609698                | TT                              | CC                | 1945895996               |
| SNP_P3_14563_39612230 | NC_021160.1    | Ca_kabuli_chr01 | 39612230                | CC                              | GG                | 1945895998               |
| SNP_P3_14564_39612938 | NC_021160.1    | Ca_kabuli_chr01 | 39612938                | GG                              | TT                | 1945896000               |
| SNP_P3_14565_39614336 | NC_021160.1    | Ca_kabuli_chr01 | 39614336                | GG                              | AA                | 1945896001               |
| SNP_P3_14566_39615400 | NC_021160.1    | Ca_kabuli_chr01 | 39615400                | TT                              | CC                | 1945896003               |
| SNP_P3_14567_39615527 | NC_021160.1    | Ca_kabuli_chr01 | 39615527                | GG                              | TT                | 1945896005               |
| SNP_P3_14568_39616827 | NC_021160.1    | Ca_kabuli_chr01 | 39616827                | TT                              | CC                | 1945896007               |
| SNP_P3_14569_39621685 | NC_021160.1    | Ca_kabuli_chr01 | 39621685                | TT                              | GG                | 1945896009               |
| SNP_P3_14570_39621729 | NC_021160.1    | Ca_kabuli_chr01 | 39621729                | AA                              | TT                | 1945896010               |
| SNP_P3_14571_39634763 | NC_021160.1    | Ca_kabuli_chr01 | 39634763                | GG                              | AA                | 1945896012               |
| SNP_P3_14572_39637890 | NC_021160.1    | Ca_kabuli_chr01 | 39637890                | GG                              | CC                | 1945896014               |
| SNP_P3_14573_39639181 | NC_021160.1    | Ca_kabuli_chr01 | 39639181                | CC                              | TT                | 1945896016               |
| SNP_P3_14574_39639844 | NC_021160.1    | Ca_kabuli_chr01 | 39639844                | AA                              | TT                | 1945896017               |
| SNP_P3_14575_39640159 | NC_021160.1    | Ca_kabuli_chr01 | 39640159                | GG                              | TT                | 1945896019               |
| SNP_P3_14576_39642680 | NC_021160.1    | Ca_kabuli_chr01 | 39642680                | AA                              | CC                | 1945896021               |
| SNP_P3_14577_39644022 | NC_021160.1    | Ca_kabuli_chr01 | 39644022                | GG                              | AA                | 1945896023               |
| SNP_P3_14578_39644306 | NC_021160.1    | Ca_kabuli_chr01 | 39644306                | GG                              | AA                | 1945896024               |
| SNP_P3_14579_39644964 | NC_021160.1    | Ca_kabuli_chr01 | 39644964                | GG                              | AA                | 1945896026               |
| SNP_P3_14580_39645013 | NC_021160.1    | Ca_kabuli_chr01 | 39645013                | GG                              | AA                | 1945896028               |
| SNP_P3_14581_39645539 | NC_021160.1    | Ca_kabuli_chr01 | 39645539                | GG                              | AA                | 1945896030               |
| SNP_P3_14582_39646137 | NC_021160.1    | Ca_kabuli_chr01 | 39646137                | CC                              | TT                | 1945896032               |
| SNP_P3_14583_39649700 | NC_021160.1    | Ca_kabuli_chr01 | 39649700                | AA                              | GG                | 1945896033               |
| SNP_P3_14584_39649959 | NC_021160.1    | Ca_kabuli_chr01 | 39649959                | CC                              | TT                | 1945896035               |
| SNP_P3_14585_39650316 | NC_021160.1    | Ca_kabuli_chr01 | 39650316                | AA                              | GG                | 1945896037               |
| SNP_P3_14586_39650697 | NC_021160.1    | Ca_kabuli_chr01 | 39650697                | CC                              | AA                | 1945896039               |
| SNP_P3_14588_39652788 | NC_021160.1    | Ca_kabuli_chr01 | 39652788                | AA                              | TT                | 1945896040               |
| SNP_P3_14589_39653946 | NC_021160.1    | Ca_kabuli_chr01 | 39653946                | TT                              | AA                | 1945896042               |
| SNP_P3_14590_39655165 | NC_021160.1    | Ca_kabuli_chr01 | 39655165                | AA                              | GG                | 1945896044               |
| SNP_P3_14591_39655409 | NC_021160.1    | Ca_kabuli_chr01 | 39655409                | TT                              | CC                | 1945896046               |
| SNP_P3_14593_39661856 | NC_021160.1    | Ca_kabuli_chr01 | 39661856                | TT                              | CC                | 1945896048               |
| SNP_P3_14594_39662155 | NC_021160.1    | Ca_kabuli_chr01 | 39662155                | TT                              | CC                | 1945896049               |
| SNP_P3_14595_39669255 | NC_021160.1    | Ca_kabuli_chr01 | 39669255                | CC                              | TT                | 1945896051               |
| SNP_P3_14596_39669745 | NC_021160.1    | Ca_kabuli_chr01 | 39669745                | TT                              | CC                | 1945896053               |
| SNP_P3_14597_39673379 | NC_021160.1    | Ca_kabuli_chr01 | 39673379                | AA                              | GG                | 1945896055               |

| SNPs IDs              | Chromosome IDs | Chromosomes     | Physical positions (bp) | CDC Frontier (Reference genome) | (Pusa 256 & HPNB) | NCBI SNPdb Accession IDs |
|-----------------------|----------------|-----------------|-------------------------|---------------------------------|-------------------|--------------------------|
| SNP_P3_14598_39673517 | NC_021160.1    | Ca_kabuli_chr01 | 39673517                | TT                              | GG                | 1945896056               |
| SNP_P3_14601_39676477 | NC_021160.1    | Ca_kabuli_chr01 | 39676477                | GG                              | AA                | 1945896058               |
| SNP_P3_14602_39676522 | NC_021160.1    | Ca_kabuli_chr01 | 39676522                | GG                              | AA                | 1945896060               |
| SNP_P3_14603_39678522 | NC_021160.1    | Ca_kabuli_chr01 | 39678522                | GG                              | AA                | 1945896062               |
| SNP_P3_14604_39680542 | NC_021160.1    | Ca_kabuli_chr01 | 39680542                | TT                              | CC                | 1945896063               |
| SNP_P3_14605_39680554 | NC_021160.1    | Ca_kabuli_chr01 | 39680554                | GG                              | CC                | 1945896065               |
| SNP_P3_14606_39680862 | NC_021160.1    | Ca_kabuli_chr01 | 39680862                | CC                              | TT                | 1945896067               |
| SNP_P3_14607_39681255 | NC_021160.1    | Ca_kabuli_chr01 | 39681255                | GG                              | TT                | 1945896069               |
| SNP_P3_14609_39683044 | NC_021160.1    | Ca_kabuli_chr01 | 39683044                | GG                              | AA                | 1945896071               |
| SNP_P3_14610_39686205 | NC_021160.1    | Ca_kabuli_chr01 | 39686205                | GG                              | TT                | 1945896072               |
| SNP_P3_14611_39694253 | NC_021160.1    | Ca_kabuli_chr01 | 39694253                | GG                              | AA                | 1945896074               |
| SNP_P3_14612_39694573 | NC_021160.1    | Ca_kabuli_chr01 | 39694573                | TT                              | CC                | 1945896076               |
| SNP_P3_14613_39694836 | NC_021160.1    | Ca_kabuli_chr01 | 39694836                | GG                              | TT                | 1945896078               |
| SNP_P3_14614_39696647 | NC_021160.1    | Ca_kabuli_chr01 | 39696647                | CC                              | AA                | 1945896079               |
| SNP_P3_14615_39697328 | NC_021160.1    | Ca_kabuli_chr01 | 39697328                | CC                              | AA                | 1945896081               |
| SNP_P3_14616_39697370 | NC_021160.1    | Ca_kabuli_chr01 | 39697370                | AA                              | GG                | 1945896083               |
| SNP_P3_14617_39697436 | NC_021160.1    | Ca_kabuli_chr01 | 39697436                | TT                              | CC                | 1945896085               |
| SNP_P3_14618_39697642 | NC_021160.1    | Ca_kabuli_chr01 | 39697642                | GG                              | CC                | 1945896087               |
| SNP_P3_14619_39698941 | NC_021160.1    | Ca_kabuli_chr01 | 39698941                | CC                              | TT                | 1945896088               |
| SNP_P3_14620_39700012 | NC_021160.1    | Ca_kabuli_chr01 | 39700012                | AA                              | TT                | 1945896090               |
| SNP_P3_14621_39700450 | NC_021160.1    | Ca_kabuli_chr01 | 39700450                | AA                              | GG                | 1945896092               |
| SNP_P3_14622_39702043 | NC_021160.1    | Ca_kabuli_chr01 | 39702043                | TT                              | CC                | 1945896094               |
| SNP_P3_14624_39702464 | NC_021160.1    | Ca_kabuli_chr01 | 39702464                | TT                              | CC                | 1945896095               |
| SNP_P3_14625_39703782 | NC_021160.1    | Ca_kabuli_chr01 | 39703782                | TT                              | AA                | 1945896097               |
| SNP_P3_14626_39703804 | NC_021160.1    | Ca_kabuli_chr01 | 39703804                | GG                              | AA                | 1945896099               |
| SNP_P3_14627_39703805 | NC_021160.1    | Ca_kabuli_chr01 | 39703805                | AA                              | TT                | 1945896101               |
| SNP_P3_14628_39704478 | NC_021160.1    | Ca_kabuli_chr01 | 39704478                | GG                              | AA                | 1945896103               |
| SNP_P3_14629_39715601 | NC_021160.1    | Ca_kabuli_chr01 | 39715601                | CC                              | GG                | 1945896104               |
| SNP_P3_14630_39716741 | NC_021160.1    | Ca_kabuli_chr01 | 39716741                | CC                              | GG                | 1945896106               |
| SNP_P3_14631_39720857 | NC_021160.1    | Ca_kabuli_chr01 | 39720857                | AA                              | GG                | 1945896108               |
| SNP_P3_14632_39725479 | NC_021160.1    | Ca_kabuli_chr01 | 39725479                | AA                              | GG                | 1945896110               |
| SNP_P3_14634_39729048 | NC_021160.1    | Ca_kabuli_chr01 | 39729048                | AA                              | TT                | 1945896111               |
| SNP_P3_14635_39731001 | NC_021160.1    | Ca_kabuli_chr01 | 39731001                | AA                              | TT                | 1945896113               |
| SNP_P3_14636_39737866 | NC_021160.1    | Ca_kabuli_chr01 | 39737866                | AA                              | TT                | 1945896115               |
| SNP_P3_14637_39740272 | NC_021160.1    | Ca_kabuli_chr01 | 39740272                | GG                              | AA                | 1945896117               |
| SNP_P3_14638_39741202 | NC_021160.1    | Ca_kabuli_chr01 | 39741202                | TT                              | CC                | 1945896119               |
| SNP_P3_14639_39741358 | NC_021160.1    | Ca_kabuli_chr01 | 39741358                | CC                              | TT                | 1945896120               |
| SNP_P3_14640_39741364 | NC_021160.1    | Ca_kabuli_chr01 | 39741364                | TT                              | CC                | 1945896122               |
| SNP_P3_14641_39741367 | NC_021160.1    | Ca_kabuli_chr01 | 39741367                | CC                              | AA                | 1945896124               |
| SNP_P3_14642_39741654 | NC_021160.1    | Ca_kabuli_chr01 | 39741654                | AA                              | TT                | 1945896126               |
| SNP_P3_14643_39743370 | NC_021160.1    | Ca_kabuli_chr01 | 39743370                | AA                              | TT                | 1945896127               |
| SNP_P3_14646_39748799 | NC_021160.1    | Ca_kabuli_chr01 | 39748799                | GG                              | AA                | 1945896129               |

| SNPs IDs              | Chromosome IDs | Chromosomes     | Physical positions (bp) | CDC Frontier (Reference genome) | (Pusa 256 & HPNB) | NCBI SNPdb Accession IDs |
|-----------------------|----------------|-----------------|-------------------------|---------------------------------|-------------------|--------------------------|
| SNP_P3_14647_39755832 | NC_021160.1    | Ca_kabuli_chr01 | 39755832                | CC                              | AA                | 1945896131               |
| SNP_P3_14648_39756040 | NC_021160.1    | Ca_kabuli_chr01 | 39756040                | TT                              | CC                | 1945896133               |
| SNP_P3_14649_39757531 | NC_021160.1    | Ca_kabuli_chr01 | 39757531                | CC                              | TT                | 1945896134               |
| SNP_P3_14650_39757804 | NC_021160.1    | Ca_kabuli_chr01 | 39757804                | AA                              | GG                | 1945896136               |
| SNP_P3_14651_39763429 | NC_021160.1    | Ca_kabuli_chr01 | 39763429                | GG                              | AA                | 1945896138               |
| SNP_P3_14652_39766414 | NC_021160.1    | Ca_kabuli_chr01 | 39766414                | TT                              | CC                | 1945896140               |
| SNP_P3_14654_39768251 | NC_021160.1    | Ca_kabuli_chr01 | 39768251                | TT                              | GG                | 1945896142               |
| SNP_P3_14655_39768352 | NC_021160.1    | Ca_kabuli_chr01 | 39768352                | TT                              | CC                | 1945896143               |
| SNP_P3_14656_39768633 | NC_021160.1    | Ca_kabuli_chr01 | 39768633                | CC                              | TT                | 1945896145               |
| SNP_P3_14657_39770818 | NC_021160.1    | Ca_kabuli_chr01 | 39770818                | AA                              | GG                | 1945896147               |
| SNP_P3_14658_39776247 | NC_021160.1    | Ca_kabuli_chr01 | 39776247                | GG                              | AA                | 1945896149               |
| SNP_P3_14659_39776269 | NC_021160.1    | Ca_kabuli_chr01 | 39776269                | AA                              | CC                | 1945896150               |
| SNP_P3_14661_39784563 | NC_021160.1    | Ca_kabuli_chr01 | 39784563                | CC                              | AA                | 1945896152               |
| SNP_P3_14662_39784611 | NC_021160.1    | Ca_kabuli_chr01 | 39784611                | AA                              | TT                | 1945896154               |
| SNP_P3_14663_39784838 | NC_021160.1    | Ca_kabuli_chr01 | 39784838                | GG                              | AA                | 1945896156               |
| SNP_P3_14664_39789153 | NC_021160.1    | Ca_kabuli_chr01 | 39789153                | GG                              | TT                | 1945896158               |
| SNP_P3_14665_39792360 | NC_021160.1    | Ca_kabuli_chr01 | 39792360                | CC                              | TT                | 1945896159               |
| SNP_P3_14666_39795142 | NC_021160.1    | Ca_kabuli_chr01 | 39795142                | AA                              | GG                | 1945896161               |
| SNP_P3_14667_39800282 | NC_021160.1    | Ca_kabuli_chr01 | 39800282                | GG                              | AA                | 1945896163               |
| SNP_P3_14668_39801893 | NC_021160.1    | Ca_kabuli_chr01 | 39801893                | AA                              | GG                | 1945896165               |
| SNP_P3_14669_39801896 | NC_021160.1    | Ca_kabuli_chr01 | 39801896                | AA                              | CC                | 1945896166               |
| SNP_P3_14670_39802069 | NC_021160.1    | Ca_kabuli_chr01 | 39802069                | CC                              | TT                | 1945896168               |
| SNP_P3_14671_39804673 | NC_021160.1    | Ca_kabuli_chr01 | 39804673                | CC                              | AA                | 1945896170               |
| SNP_P3_14672_39806412 | NC_021160.1    | Ca_kabuli_chr01 | 39806412                | AA                              | CC                | 1945896172               |
| SNP_P3_14673_39806422 | NC_021160.1    | Ca_kabuli_chr01 | 39806422                | TT                              | AA                | 1945896173               |
| SNP_P3_14674_39806471 | NC_021160.1    | Ca_kabuli_chr01 | 39806471                | CC                              | TT                | 1945896175               |
| SNP_P3_14675_39811373 | NC_021160.1    | Ca_kabuli_chr01 | 39811373                | GG                              | AA                | 1945896177               |
| SNP_P3_14676_39812275 | NC_021160.1    | Ca_kabuli_chr01 | 39812275                | GG                              | AA                | 1945896179               |
| SNP_P3_14677_39812801 | NC_021160.1    | Ca_kabuli_chr01 | 39812801                | AA                              | CC                | 1945896181               |
| SNP_P3_14678_39814704 | NC_021160.1    | Ca_kabuli_chr01 | 39814704                | GG                              | TT                | 1945896182               |
| SNP_P3_14680_39819991 | NC_021160.1    | Ca_kabuli_chr01 | 39819991                | AA                              | CC                | 1945896184               |
| SNP_P3_14681_39821169 | NC_021160.1    | Ca_kabuli_chr01 | 39821169                | TT                              | CC                | 1945896186               |
| SNP_P3_14682_39821211 | NC_021160.1    | Ca_kabuli_chr01 | 39821211                | TT                              | CC                | 1945896188               |
| SNP_P3_14683_39821745 | NC_021160.1    | Ca_kabuli_chr01 | 39821745                | CC                              | TT                | 1945896189               |
| SNP_P3_14684_39822608 | NC_021160.1    | Ca_kabuli_chr01 | 39822608                | TT                              | GG                | 1945896191               |
| SNP_P3_14685_39822646 | NC_021160.1    | Ca_kabuli_chr01 | 39822646                | TT                              | CC                | 1945896193               |
| SNP_P3_14686_39823348 | NC_021160.1    | Ca_kabuli_chr01 | 39823348                | TT                              | GG                | 1945896195               |
| SNP_P3_14687_39823541 | NC_021160.1    | Ca_kabuli_chr01 | 39823541                | AA                              | TT                | 1945896196               |
| SNP_P3_14688_39823627 | NC_021160.1    | Ca_kabuli_chr01 | 39823627                | GG                              | AA                | 1945896198               |
| SNP_P3_14689_39833481 | NC_021160.1    | Ca_kabuli_chr01 | 39833481                | TT                              | CC                | 1945896200               |
| SNP_P3_14690_39834157 | NC_021160.1    | Ca_kabuli_chr01 | 39834157                | AA                              | GG                | 1945896202               |
| SNP_P3_14691_39837538 | NC_021160.1    | Ca_kabuli_chr01 | 39837538                | CC                              | TT                | 1945896204               |

| SNPs IDs              | Chromosome IDs | Chromosomes     | Physical positions (bp) | CDC Frontier (Reference genome) | (Pusa 256 & HPNB) | NCBI SNPdb Accession IDs |
|-----------------------|----------------|-----------------|-------------------------|---------------------------------|-------------------|--------------------------|
| SNP_P3_14692_39837554 | NC_021160.1    | Ca_kabuli_chr01 | 39837554                | GG                              | TT                | 1945896205               |
| SNP_P3_14693_39837555 | NC_021160.1    | Ca_kabuli_chr01 | 39837555                | CC                              | TT                | 1945896207               |
| SNP_P3_14694_39837556 | NC_021160.1    | Ca_kabuli_chr01 | 39837556                | TT                              | CC                | 1945896209               |
| SNP_P3_14695_39837561 | NC_021160.1    | Ca_kabuli_chr01 | 39837561                | AA                              | CC                | 1945896211               |
| SNP_P3_14696_39837858 | NC_021160.1    | Ca_kabuli_chr01 | 39837858                | GG                              | AA                | 1945896212               |
| SNP_P3_14697_39842458 | NC_021160.1    | Ca_kabuli_chr01 | 39842458                | GG                              | AA                | 1945896214               |
| SNP_P3_14698_39843039 | NC_021160.1    | Ca_kabuli_chr01 | 39843039                | CC                              | AA                | 1945896216               |
| SNP_P3_14699_39843040 | NC_021160.1    | Ca_kabuli_chr01 | 39843040                | CC                              | TT                | 1945896218               |
| SNP_P3_14700_39843047 | NC_021160.1    | Ca_kabuli_chr01 | 39843047                | TT                              | GG                | 1945896220               |
| SNP_P3_14701_39843646 | NC_021160.1    | Ca_kabuli_chr01 | 39843646                | CC                              | TT                | 1945896221               |
| SNP_P3_14705_39849056 | NC_021160.1    | Ca_kabuli_chr01 | 39849056                | CC                              | TT                | 1945896223               |
| SNP_P3_14707_39850919 | NC_021160.1    | Ca_kabuli_chr01 | 39850919                | GG                              | CC                | 1945896225               |
| SNP_P3_14708_39856614 | NC_021160.1    | Ca_kabuli_chr01 | 39856614                | TT                              | CC                | 1945896227               |
| SNP_P3_14709_39856655 | NC_021160.1    | Ca_kabuli_chr01 | 39856655                | CC                              | TT                | 1945896228               |
| SNP_P3_14710_39856899 | NC_021160.1    | Ca_kabuli_chr01 | 39856899                | AA                              | GG                | 1945896230               |
| SNP_P3_14711_39858955 | NC_021160.1    | Ca_kabuli_chr01 | 39858955                | AA                              | GG                | 1945896232               |
| SNP_P3_14712_39863549 | NC_021160.1    | Ca_kabuli_chr01 | 39863549                | GG                              | TT                | 1945896234               |
| SNP_P3_14713_39883367 | NC_021160.1    | Ca_kabuli_chr01 | 39883367                | TT                              | CC                | 1945896235               |
| SNP_P3_14714_39890663 | NC_021160.1    | Ca_kabuli_chr01 | 39890663                | AA                              | CC                | 1945896237               |
| SNP_P3_14715_39891044 | NC_021160.1    | Ca_kabuli_chr01 | 39891044                | TT                              | CC                | 1945896239               |
| SNP_P3_14716_39893609 | NC_021160.1    | Ca_kabuli_chr01 | 39893609                | TT                              | CC                | 1945896241               |
| SNP_P3_14717_39896728 | NC_021160.1    | Ca_kabuli_chr01 | 39896728                | CC                              | TT                | 1945896243               |
| SNP_P3_14718_39896731 | NC_021160.1    | Ca_kabuli_chr01 | 39896731                | CC                              | AA                | 1945896244               |
| SNP_P3_14719_39896872 | NC_021160.1    | Ca_kabuli_chr01 | 39896872                | CC                              | GG                | 1945896246               |
| SNP_P3_14720_39901783 | NC_021160.1    | Ca_kabuli_chr01 | 39901783                | CC                              | TT                | 1945896248               |
| SNP_P3_14721_39902597 | NC_021160.1    | Ca_kabuli_chr01 | 39902597                | AA                              | CC                | 1945896250               |
| SNP_P3_14722_39902612 | NC_021160.1    | Ca_kabuli_chr01 | 39902612                | CC                              | AA                | 1945896251               |
| SNP_P3_14723_39904179 | NC_021160.1    | Ca_kabuli_chr01 | 39904179                | CC                              | TT                | 1945896253               |
| SNP_P3_14724_39904184 | NC_021160.1    | Ca_kabuli_chr01 | 39904184                | CC                              | TT                | 1945896255               |
| SNP_P3_14727_39913649 | NC_021160.1    | Ca_kabuli_chr01 | 39913649                | TT                              | AA                | 1945896257               |
| SNP_P3_14728_39915935 | NC_021160.1    | Ca_kabuli_chr01 | 39915935                | AA                              | CC                | 1945896259               |
| SNP_P3_14729_39924253 | NC_021160.1    | Ca_kabuli_chr01 | 39924253                | TT                              | CC                | 1945896260               |
| SNP_P3_14730_39925336 | NC_021160.1    | Ca_kabuli_chr01 | 39925336                | AA                              | GG                | 1945896262               |
| SNP_P3_14731_39925855 | NC_021160.1    | Ca_kabuli_chr01 | 39925855                | GG                              | AA                | 1945896264               |
| SNP_P3_14732_39926068 | NC_021160.1    | Ca_kabuli_chr01 | 39926068                | TT                              | CC                | 1945896266               |
| SNP_P3_14733_39927198 | NC_021160.1    | Ca_kabuli_chr01 | 39927198                | AA                              | TT                | 1945896267               |
| SNP_P3_14734_39927500 | NC_021160.1    | Ca_kabuli_chr01 | 39927500                | GG                              | TT                | 1945896269               |
| SNP_P3_14735_39928120 | NC_021160.1    | Ca_kabuli_chr01 | 39928120                | CC                              | AA                | 1945896271               |
| SNP_P3_14736_39929987 | NC_021160.1    | Ca_kabuli_chr01 | 39929987                | TT                              | AA                | 1945896273               |
| SNP_P3_14737_39930666 | NC_021160.1    | Ca_kabuli_chr01 | 39930666                | TT                              | GG                | 1945896275               |
| SNP_P3_14738_39930758 | NC_021160.1    | Ca_kabuli_chr01 | 39930758                | GG                              | AA                | 1945896276               |
| SNP_P3_14739_39930953 | NC_021160.1    | Ca_kabuli_chr01 | 39930953                | TT                              | AA                | 1945896278               |

| SNPs IDs              | Chromosome IDs | Chromosomes     | Physical positions (bp) | CDC Frontier (Reference genome) | (Pusa 256 & HPNB) | NCBI SNPdb Accession IDs |
|-----------------------|----------------|-----------------|-------------------------|---------------------------------|-------------------|--------------------------|
| SNP_P3_14740_39931327 | NC_021160.1    | Ca_kabuli_chr01 | 39931327                | TT                              | GG                | 1945896280               |
| SNP_P3_14741_39931637 | NC_021160.1    | Ca_kabuli_chr01 | 39931637                | TT                              | AA                | 1945896282               |
| SNP_P3_14742_39937632 | NC_021160.1    | Ca_kabuli_chr01 | 39937632                | AA                              | GG                | 1945896283               |
| SNP_P3_14743_39948097 | NC_021160.1    | Ca_kabuli_chr01 | 39948097                | CC                              | GG                | 1945896285               |
| SNP_P3_14745_39952506 | NC_021160.1    | Ca_kabuli_chr01 | 39952506                | AA                              | CC                | 1945896287               |
| SNP_P3_14746_39954446 | NC_021160.1    | Ca_kabuli_chr01 | 39954446                | TT                              | CC                | 1945896289               |
| SNP_P3_14747_39954795 | NC_021160.1    | Ca_kabuli_chr01 | 39954795                | AA                              | GG                | 1945896291               |
| SNP_P3_14748_39955181 | NC_021160.1    | Ca_kabuli_chr01 | 39955181                | AA                              | CC                | 1945896292               |
| SNP_P3_14750_39966725 | NC_021160.1    | Ca_kabuli_chr01 | 39966725                | AA                              | TT                | 1945896294               |
| SNP_P3_14751_39966739 | NC_021160.1    | Ca_kabuli_chr01 | 39966739                | AA                              | TT                | 1945896296               |
| SNP_P3_14752_39966750 | NC_021160.1    | Ca_kabuli_chr01 | 39966750                | TT                              | CC                | 1945896298               |
| SNP_P3_14753_39966797 | NC_021160.1    | Ca_kabuli_chr01 | 39966797                | CC                              | TT                | 1945896299               |
| SNP_P3_14754_39967000 | NC_021160.1    | Ca_kabuli_chr01 | 39967000                | CC                              | TT                | 1945896301               |
| SNP_P3_14755_39967118 | NC_021160.1    | Ca_kabuli_chr01 | 39967118                | AA                              | CC                | 1945896303               |
| SNP_P3_14756_39967782 | NC_021160.1    | Ca_kabuli_chr01 | 39967782                | TT                              | CC                | 1945896305               |
| SNP_P3_14757_39968066 | NC_021160.1    | Ca_kabuli_chr01 | 39968066                | AA                              | GG                | 1945896307               |
| SNP_P3_14758_39968088 | NC_021160.1    | Ca_kabuli_chr01 | 39968088                | TT                              | CC                | 1945896308               |
| SNP_P3_14759_39968638 | NC_021160.1    | Ca_kabuli_chr01 | 39968638                | TT                              | CC                | 1945896310               |
| SNP_P3_14760_39970186 | NC_021160.1    | Ca_kabuli_chr01 | 39970186                | GG                              | AA                | 1945896312               |
| SNP_P3_14761_39970222 | NC_021160.1    | Ca_kabuli_chr01 | 39970222                | AA                              | GG                | 1945896314               |
| SNP_P3_14762_39972018 | NC_021160.1    | Ca_kabuli_chr01 | 39972018                | CC                              | TT                | 1945896315               |
| SNP_P3_14763_39973177 | NC_021160.1    | Ca_kabuli_chr01 | 39973177                | CC                              | TT                | 1945896317               |
| SNP_P3_14764_39973251 | NC_021160.1    | Ca_kabuli_chr01 | 39973251                | AA                              | GG                | 1945896319               |
| SNP_P3_14765_39973255 | NC_021160.1    | Ca_kabuli_chr01 | 39973255                | TT                              | CC                | 1945896321               |
| SNP_P3_14766_39973851 | NC_021160.1    | Ca_kabuli_chr01 | 39973851                | AA                              | GG                | 1945896323               |
| SNP_P3_14767_39973870 | NC_021160.1    | Ca_kabuli_chr01 | 39973870                | AA                              | GG                | 1945896324               |
| SNP_P3_14768_39973905 | NC_021160.1    | Ca_kabuli_chr01 | 39973905                | AA                              | GG                | 1945896326               |
| SNP_P3_14769_39979426 | NC_021160.1    | Ca_kabuli_chr01 | 39979426                | CC                              | TT                | 1945896328               |
| SNP_P3_14770_39982060 | NC_021160.1    | Ca_kabuli_chr01 | 39982060                | CC                              | TT                | 1945896330               |
| SNP_P3_14771_39982085 | NC_021160.1    | Ca_kabuli_chr01 | 39982085                | CC                              | TT                | 1945896331               |
| SNP_P3_14773_39994352 | NC_021160.1    | Ca_kabuli_chr01 | 39994352                | TT                              | CC                | 1945896333               |
| SNP_P3_14774_39994667 | NC_021160.1    | Ca_kabuli_chr01 | 39994667                | AA                              | GG                | 1945896335               |
| SNP_P3_14775_39994734 | NC_021160.1    | Ca_kabuli_chr01 | 39994734                | TT                              | GG                | 1945896337               |
| SNP_P3_14776_39994765 | NC_021160.1    | Ca_kabuli_chr01 | 39994765                | GG                              | TT                | 1945896339               |
| SNP_P3_14777_39994926 | NC_021160.1    | Ca_kabuli_chr01 | 39994926                | CC                              | AA                | 1945896340               |
| SNP_P3_14778_39997200 | NC_021160.1    | Ca_kabuli_chr01 | 39997200                | AA                              | GG                | 1945896342               |
| SNP_P3_14779_40000549 | NC_021160.1    | Ca_kabuli_chr01 | 40000549                | TT                              | AA                | 1945896344               |
| SNP_P3_14780_40004625 | NC_021160.1    | Ca_kabuli_chr01 | 40004625                | AA                              | GG                | 1945896346               |
| SNP_P3_14781_40009553 | NC_021160.1    | Ca_kabuli_chr01 | 40009553                | TT                              | CC                | 1945896347               |
| SNP_P3_14782_40010497 | NC_021160.1    | Ca_kabuli_chr01 | 40010497                | TT                              | AA                | 1945896349               |
| SNP_P3_14783_40013406 | NC_021160.1    | Ca_kabuli_chr01 | 40013406                | CC                              | AA                | 1945896351               |
| SNP_P3_14785_40015753 | NC_021160.1    | Ca_kabuli_chr01 | 40015753                | GG                              | TT                | 1945896353               |

| SNPs IDs              | Chromosome IDs | Chromosomes     | Physical positions (bp) | CDC Frontier (Reference genome) | (Pusa 256 & HPNB) | NCBI SNPdb Accession IDs |
|-----------------------|----------------|-----------------|-------------------------|---------------------------------|-------------------|--------------------------|
| SNP_P3_14786_40016521 | NC_021160.1    | Ca_kabuli_chr01 | 40016521                | TT                              | AA                | 1945896355               |
| SNP_P3_14787_40017999 | NC_021160.1    | Ca_kabuli_chr01 | 40017999                | AA                              | TT                | 1945896356               |
| SNP_P3_14788_40022489 | NC_021160.1    | Ca_kabuli_chr01 | 40022489                | TT                              | GG                | 1945896358               |
| SNP_P3_14790_40026266 | NC_021160.1    | Ca_kabuli_chr01 | 40026266                | GG                              | AA                | 1945896360               |
| SNP_P3_14791_40026282 | NC_021160.1    | Ca_kabuli_chr01 | 40026282                | GG                              | AA                | 1945896362               |
| SNP_P3_14792_40030645 | NC_021160.1    | Ca_kabuli_chr01 | 40030645                | CC                              | GG                | 1945896363               |
| SNP_P3_14794_40032796 | NC_021160.1    | Ca_kabuli_chr01 | 40032796                | AA                              | CC                | 1945896365               |
| SNP_P3_14796_40035916 | NC_021160.1    | Ca_kabuli_chr01 | 40035916                | AA                              | GG                | 1945896367               |
| SNP_P3_14797_40037506 | NC_021160.1    | Ca_kabuli_chr01 | 40037506                | AA                              | TT                | 1945896369               |
| SNP_P3_14798_40037507 | NC_021160.1    | Ca_kabuli_chr01 | 40037507                | CC                              | TT                | 1945896370               |
| SNP_P3_14799_40037652 | NC_021160.1    | Ca_kabuli_chr01 | 40037652                | CC                              | TT                | 1945896372               |
| SNP_P3_14800_40037682 | NC_021160.1    | Ca_kabuli_chr01 | 40037682                | GG                              | AA                | 1945896374               |
| SNP_P3_14801_40037692 | NC_021160.1    | Ca_kabuli_chr01 | 40037692                | GG                              | AA                | 1945896376               |
| SNP_P3_14802_40045167 | NC_021160.1    | Ca_kabuli_chr01 | 40045167                | AA                              | CC                | 1945896378               |
| SNP_P3_14803_40048296 | NC_021160.1    | Ca_kabuli_chr01 | 40048296                | CC                              | GG                | 1945896379               |
| SNP_P3_14804_40050164 | NC_021160.1    | Ca_kabuli_chr01 | 40050164                | GG                              | AA                | 1945896381               |
| SNP_P3_14805_40050826 | NC_021160.1    | Ca_kabuli_chr01 | 40050826                | GG                              | AA                | 1945896383               |
| SNP_P3_14806_40050922 | NC_021160.1    | Ca_kabuli_chr01 | 40050922                | AA                              | GG                | 1945896385               |
| SNP_P3_14807_40052636 | NC_021160.1    | Ca_kabuli_chr01 | 40052636                | AA                              | GG                | 1945896386               |
| SNP_P3_14808_40052846 | NC_021160.1    | Ca_kabuli_chr01 | 40052846                | GG                              | AA                | 1945896388               |
| SNP_P3_14809_40054611 | NC_021160.1    | Ca_kabuli_chr01 | 40054611                | GG                              | AA                | 1945896390               |
| SNP_P3_14810_40055461 | NC_021160.1    | Ca_kabuli_chr01 | 40055461                | TT                              | GG                | 1945896392               |
| SNP_P3_14811_40057007 | NC_021160.1    | Ca_kabuli_chr01 | 40057007                | AA                              | GG                | 1945896394               |
| SNP_P3_14812_40058508 | NC_021160.1    | Ca_kabuli_chr01 | 40058508                | CC                              | TT                | 1945896395               |
| SNP_P3_14813_40058901 | NC_021160.1    | Ca_kabuli_chr01 | 40058901                | AA                              | CC                | 1945896397               |
| SNP_P3_14814_40063574 | NC_021160.1    | Ca_kabuli_chr01 | 40063574                | TT                              | CC                | 1945896399               |
| SNP_P3_14815_40067444 | NC_021160.1    | Ca_kabuli_chr01 | 40067444                | TT                              | AA                | 1945896401               |
| SNP_P3_14816_40068371 | NC_021160.1    | Ca_kabuli_chr01 | 40068371                | GG                              | TT                | 1945896402               |
| SNP_P3_14817_40068408 | NC_021160.1    | Ca_kabuli_chr01 | 40068408                | TT                              | GG                | 1945896404               |
| SNP_P3_14818_40068410 | NC_021160.1    | Ca_kabuli_chr01 | 40068410                | TT                              | AA                | 1945896406               |
| SNP_P3_14819_40068681 | NC_021160.1    | Ca_kabuli_chr01 | 40068681                | AA                              | CC                | 1945896408               |
| SNP_P3_14820_40068715 | NC_021160.1    | Ca_kabuli_chr01 | 40068715                | AA                              | GG                | 1945896410               |
| SNP_P3_14821_40068727 | NC_021160.1    | Ca_kabuli_chr01 | 40068727                | TT                              | CC                | 1945896411               |
| SNP_P3_14822_40068875 | NC_021160.1    | Ca_kabuli_chr01 | 40068875                | CC                              | AA                | 1945896413               |
| SNP_P3_14823_40068891 | NC_021160.1    | Ca_kabuli_chr01 | 40068891                | TT                              | CC                | 1945896415               |
| SNP_P3_14824_40070781 | NC_021160.1    | Ca_kabuli_chr01 | 40070781                | TT                              | GG                | 1945896417               |
| SNP_P3_14825_40071622 | NC_021160.1    | Ca_kabuli_chr01 | 40071622                | GG                              | AA                | 1945896418               |
| SNP_P3_14826_40071690 | NC_021160.1    | Ca_kabuli_chr01 | 40071690                | AA                              | CC                | 1945896420               |
| SNP_P3_14827_40073477 | NC_021160.1    | Ca_kabuli_chr01 | 40073477                | GG                              | AA                | 1945896422               |
| SNP_P3_14828_40073505 | NC_021160.1    | Ca_kabuli_chr01 | 40073505                | CC                              | TT                | 1945896424               |
| SNP_P3_14829_40073515 | NC_021160.1    | Ca_kabuli_chr01 | 40073515                | TT                              | CC                | 1945896426               |
| SNP_P3_14831_40074427 | NC_021160.1    | Ca_kabuli_chr01 | 40074427                | GG                              | CC                | 1945896427               |

| SNPs IDs              | Chromosome IDs | Chromosomes     | Physical positions (bp) | CDC Frontier (Reference genome) | (Pusa 256 & HPNB) | NCBI SNPdb Accession IDs |
|-----------------------|----------------|-----------------|-------------------------|---------------------------------|-------------------|--------------------------|
| SNP_P3_14832_40074467 | NC_021160.1    | Ca_kabuli_chr01 | 40074467                | CC                              | TT                | 1945896429               |
| SNP_P3_14833_40074696 | NC_021160.1    | Ca_kabuli_chr01 | 40074696                | CC                              | TT                | 1945896431               |
| SNP_P3_14834_40074784 | NC_021160.1    | Ca_kabuli_chr01 | 40074784                | TT                              | CC                | 1945896433               |
| SNP_P3_14835_40075144 | NC_021160.1    | Ca_kabuli_chr01 | 40075144                | AA                              | GG                | 1945896434               |
| SNP_P3_14836_40079098 | NC_021160.1    | Ca_kabuli_chr01 | 40079098                | AA                              | CC                | 1945896436               |
| SNP_P3_14837_40079535 | NC_021160.1    | Ca_kabuli_chr01 | 40079535                | CC                              | TT                | 1945896438               |
| SNP_P3_14839_40084593 | NC_021160.1    | Ca_kabuli_chr01 | 40084593                | GG                              | AA                | 1945896440               |
| SNP_P3_14841_40097519 | NC_021160.1    | Ca_kabuli_chr01 | 40097519                | TT                              | AA                | 1945896442               |
| SNP_P3_14842_40098842 | NC_021160.1    | Ca_kabuli_chr01 | 40098842                | GG                              | AA                | 1945896443               |
| SNP_P3_14843_40099059 | NC_021160.1    | Ca_kabuli_chr01 | 40099059                | TT                              | CC                | 1945896445               |
| SNP_P3_14844_40099060 | NC_021160.1    | Ca_kabuli_chr01 | 40099060                | TT                              | CC                | 1945896447               |
| SNP_P3_14845_40099932 | NC_021160.1    | Ca_kabuli_chr01 | 40099932                | CC                              | TT                | 1945896449               |
| SNP_P3_14846_40101710 | NC_021160.1    | Ca_kabuli_chr01 | 40101710                | TT                              | CC                | 1945896450               |
| SNP_P3_14847_40103290 | NC_021160.1    | Ca_kabuli_chr01 | 40103290                | CC                              | GG                | 1945896452               |
| SNP_P3_14848_40103713 | NC_021160.1    | Ca_kabuli_chr01 | 40103713                | AA                              | GG                | 1945896454               |
| SNP_P3_14849_40104621 | NC_021160.1    | Ca_kabuli_chr01 | 40104621                | GG                              | TT                | 1945896456               |
| SNP_P3_14850_40107670 | NC_021160.1    | Ca_kabuli_chr01 | 40107670                | GG                              | TT                | 1945896458               |
| SNP_P3_14851_40110276 | NC_021160.1    | Ca_kabuli_chr01 | 40110276                | TT                              | CC                | 1945896459               |
| SNP_P3_14852_40118839 | NC_021160.1    | Ca_kabuli_chr01 | 40118839                | CC                              | AA                | 1945896461               |
| SNP_P3_14853_40119231 | NC_021160.1    | Ca_kabuli_chr01 | 40119231                | GG                              | CC                | 1945896463               |
| SNP_P3_14854_40119297 | NC_021160.1    | Ca_kabuli_chr01 | 40119297                | GG                              | AA                | 1945896465               |
| SNP_P3_14855_40119677 | NC_021160.1    | Ca_kabuli_chr01 | 40119677                | AA                              | GG                | 1945896466               |
| SNP_P3_14856_40121979 | NC_021160.1    | Ca_kabuli_chr01 | 40121979                | GG                              | AA                | 1945896468               |
| SNP_P3_14857_40122698 | NC_021160.1    | Ca_kabuli_chr01 | 40122698                | CC                              | AA                | 1945896470               |
| SNP_P3_14858_40122704 | NC_021160.1    | Ca_kabuli_chr01 | 40122704                | AA                              | GG                | 1945896472               |
| SNP_P3_14859_40125403 | NC_021160.1    | Ca_kabuli_chr01 | 40125403                | TT                              | CC                | 1945896474               |
| SNP_P3_14860_40129065 | NC_021160.1    | Ca_kabuli_chr01 | 40129065                | AA                              | TT                | 1945896475               |
| SNP_P3_14861_40131600 | NC_021160.1    | Ca_kabuli_chr01 | 40131600                | AA                              | GG                | 1945896477               |
| SNP_P3_14862_40134782 | NC_021160.1    | Ca_kabuli_chr01 | 40134782                | GG                              | AA                | 1945896479               |
| SNP_P3_14863_40135344 | NC_021160.1    | Ca_kabuli_chr01 | 40135344                | TT                              | CC                | 1945896481               |
| SNP_P3_14864_40140370 | NC_021160.1    | Ca_kabuli_chr01 | 40140370                | TT                              | CC                | 1945896482               |
| SNP_P3_14865_40140506 | NC_021160.1    | Ca_kabuli_chr01 | 40140506                | TT                              | CC                | 1945896484               |
| SNP_P3_14866_40141855 | NC_021160.1    | Ca_kabuli_chr01 | 40141855                | TT                              | AA                | 1945896486               |
| SNP_P3_14867_40142184 | NC_021160.1    | Ca_kabuli_chr01 | 40142184                | TT                              | CC                | 1945896488               |
| SNP_P3_14868_40142188 | NC_021160.1    | Ca_kabuli_chr01 | 40142188                | AA                              | GG                | 1945896490               |
| SNP_P3_14869_40142220 | NC_021160.1    | Ca_kabuli_chr01 | 40142220                | GG                              | AA                | 1945896491               |
| SNP_P3_14870_40142251 | NC_021160.1    | Ca_kabuli_chr01 | 40142251                | TT                              | CC                | 1945896493               |
| SNP_P3_14871_40142259 | NC_021160.1    | Ca_kabuli_chr01 | 40142259                | TT                              | CC                | 1945896495               |
| SNP_P3_14872_40142261 | NC_021160.1    | Ca_kabuli_chr01 | 40142261                | GG                              | AA                | 1945896497               |
| SNP_P3_14874_40142680 | NC_021160.1    | Ca_kabuli_chr01 | 40142680                | CC                              | TT                | 1945896498               |
| SNP_P3_14875_40146976 | NC_021160.1    | Ca_kabuli_chr01 | 40146976                | TT                              | CC                | 1945896500               |
| SNP_P3_14877_40152039 | NC_021160.1    | Ca_kabuli_chr01 | 40152039                | CC                              | TT                | 1945896502               |



| SNPs IDs              | Chromosome IDs | Chromosomes     | Physical positions (bp) | CDC Frontier (Reference genome) | (Pusa 256 & HPNB) | NCBI SNPdb Accession IDs |
|-----------------------|----------------|-----------------|-------------------------|---------------------------------|-------------------|--------------------------|
| SNP_P3_14878_40152945 | NC_021160.1    | Ca_kabuli_chr01 | 40152945                | AA                              | TT                | 1945896504               |
| SNP_P3_14879_40153104 | NC_021160.1    | Ca_kabuli_chr01 | 40153104                | CC                              | AA                | 1945896506               |
| SNP_P3_14880_40155981 | NC_021160.1    | Ca_kabuli_chr01 | 40155981                | CC                              | TT                | 1945896507               |
| SNP_P3_14881_40157663 | NC_021160.1    | Ca_kabuli_chr01 | 40157663                | CC                              | TT                | 1945896509               |
| SNP_P3_14882_40159203 | NC_021160.1    | Ca_kabuli_chr01 | 40159203                | GG                              | TT                | 1945896511               |
| SNP_P3_14883_40159403 | NC_021160.1    | Ca_kabuli_chr01 | 40159403                | CC                              | TT                | 1945896513               |
| SNP_P3_14884_40159567 | NC_021160.1    | Ca_kabuli_chr01 | 40159567                | AA                              | GG                | 1945896514               |
| SNP_P3_14885_40160252 | NC_021160.1    | Ca_kabuli_chr01 | 40160252                | AA                              | GG                | 1945896516               |
| SNP_P3_14886_40160261 | NC_021160.1    | Ca_kabuli_chr01 | 40160261                | GG                              | AA                | 1945896518               |
| SNP_P3_14887_40161091 | NC_021160.1    | Ca_kabuli_chr01 | 40161091                | GG                              | AA                | 1945896520               |
| SNP_P3_14888_40161110 | NC_021160.1    | Ca_kabuli_chr01 | 40161110                | TT                              | CC                | 1945896521               |
| SNP_P3_14889_40162434 | NC_021160.1    | Ca_kabuli_chr01 | 40162434                | AA                              | GG                | 1945896523               |
| SNP_P3_14890_40162594 | NC_021160.1    | Ca_kabuli_chr01 | 40162594                | AA                              | GG                | 1945896525               |
| SNP_P3_14891_40162655 | NC_021160.1    | Ca_kabuli_chr01 | 40162655                | AA                              | GG                | 1945896527               |
| SNP_P3_14892_40162980 | NC_021160.1    | Ca_kabuli_chr01 | 40162980                | CC                              | TT                | 1945896529               |
| SNP_P3_14893_40164690 | NC_021160.1    | Ca_kabuli_chr01 | 40164690                | AA                              | CC                | 1945896530               |
| SNP_P3_14894_40164867 | NC_021160.1    | Ca_kabuli_chr01 | 40164867                | AA                              | CC                | 1945896532               |
| SNP_P3_14895_40164948 | NC_021160.1    | Ca_kabuli_chr01 | 40164948                | GG                              | AA                | 1945896534               |
| SNP_P3_14896_40164962 | NC_021160.1    | Ca_kabuli_chr01 | 40164962                | AA                              | GG                | 1945896536               |
| SNP_P3_14897_40165567 | NC_021160.1    | Ca_kabuli_chr01 | 40165567                | TT                              | CC                | 1945896537               |
| SNP_P3_14898_40166509 | NC_021160.1    | Ca_kabuli_chr01 | 40166509                | GG                              | TT                | 1945896539               |
| SNP_P3_14899_40166850 | NC_021160.1    | Ca_kabuli_chr01 | 40166850                | GG                              | AA                | 1945896541               |
| SNP_P3_14900_40167273 | NC_021160.1    | Ca_kabuli_chr01 | 40167273                | CC                              | TT                | 1945896543               |
| SNP_P3_14902_40170244 | NC_021160.1    | Ca_kabuli_chr01 | 40170244                | CC                              | TT                | 1945896544               |
| SNP_P3_14903_40175851 | NC_021160.1    | Ca_kabuli_chr01 | 40175851                | TT                              | CC                | 1945896546               |
| SNP_P3_14904_40177196 | NC_021160.1    | Ca_kabuli_chr01 | 40177196                | GG                              | TT                | 1945896548               |
| SNP_P3_14905_40177525 | NC_021160.1    | Ca_kabuli_chr01 | 40177525                | TT                              | GG                | 1945896550               |
| SNP_P3_14906_40177715 | NC_021160.1    | Ca_kabuli_chr01 | 40177715                | CC                              | AA                | 1945896552               |
| SNP_P3_14907_40180814 | NC_021160.1    | Ca_kabuli_chr01 | 40180814                | CC                              | TT                | 1945896553               |
| SNP_P3_14908_40180815 | NC_021160.1    | Ca_kabuli_chr01 | 40180815                | AA                              | TT                | 1945896555               |
| SNP_P3_14909_40182362 | NC_021160.1    | Ca_kabuli_chr01 | 40182362                | CC                              | TT                | 1945896557               |
| SNP_P3_14910_40183044 | NC_021160.1    | Ca_kabuli_chr01 | 40183044                | CC                              | GG                | 1945896559               |
| SNP_P3_14911_40183046 | NC_021160.1    | Ca_kabuli_chr01 | 40183046                | TT                              | CC                | 1945896560               |
| SNP_P3_14912_40183056 | NC_021160.1    | Ca_kabuli_chr01 | 40183056                | TT                              | CC                | 1945896562               |
| SNP_P3_14913_40186721 | NC_021160.1    | Ca_kabuli_chr01 | 40186721                | AA                              | GG                | 1945896564               |
| SNP_P3_14914_40188539 | NC_021160.1    | Ca_kabuli_chr01 | 40188539                | TT                              | AA                | 1945896566               |
| SNP_P3_14915_40188621 | NC_021160.1    | Ca_kabuli_chr01 | 40188621                | CC                              | TT                | 1945896567               |
| SNP_P3_14916_40188675 | NC_021160.1    | Ca_kabuli_chr01 | 40188675                | TT                              | CC                | 1945896569               |
| SNP_P3_14917_40188688 | NC_021160.1    | Ca_kabuli_chr01 | 40188688                | TT                              | CC                | 1945896571               |
| SNP_P3_14918_40188938 | NC_021160.1    | Ca_kabuli_chr01 | 40188938                | AA                              | CC                | 1945896573               |
| SNP_P3_14919_40193944 | NC_021160.1    | Ca_kabuli_chr01 | 40193944                | CC                              | TT                | 1945896575               |
| SNP_P3_14920_40193952 | NC_021160.1    | Ca_kabuli_chr01 | 40193952                | CC                              | TT                | 1945896576               |

| SNPs IDs              | Chromosome IDs | Chromosomes     | Physical positions (bp) | CDC Frontier (Reference genome) | (Pusa 256 & HPNB) | NCBI SNPdb Accession IDs |
|-----------------------|----------------|-----------------|-------------------------|---------------------------------|-------------------|--------------------------|
| SNP_P3_14922_40206927 | NC_021160.1    | Ca_kabuli_chr01 | 40206927                | AA                              | GG                | 1945896578               |
| SNP_P3_14923_40207314 | NC_021160.1    | Ca_kabuli_chr01 | 40207314                | CC                              | TT                | 1945896580               |
| SNP_P3_14924_40209170 | NC_021160.1    | Ca_kabuli_chr01 | 40209170                | TT                              | GG                | 1945896582               |
| SNP_P3_14925_40209225 | NC_021160.1    | Ca_kabuli_chr01 | 40209225                | TT                              | CC                | 1945896583               |
| SNP_P3_14926_40209291 | NC_021160.1    | Ca_kabuli_chr01 | 40209291                | GG                              | AA                | 1945896585               |
| SNP_P3_14927_40209296 | NC_021160.1    | Ca_kabuli_chr01 | 40209296                | TT                              | CC                | 1945896587               |
| SNP_P3_14928_40209315 | NC_021160.1    | Ca_kabuli_chr01 | 40209315                | TT                              | CC                | 1945896589               |
| SNP_P3_14929_40209338 | NC_021160.1    | Ca_kabuli_chr01 | 40209338                | AA                              | GG                | 1945896591               |
| SNP_P3_14930_40209340 | NC_021160.1    | Ca_kabuli_chr01 | 40209340                | CC                              | AA                | 1945896592               |
| SNP_P3_14932_40209803 | NC_021160.1    | Ca_kabuli_chr01 | 40209803                | TT                              | CC                | 1945896594               |
| SNP_P3_14933_40210986 | NC_021160.1    | Ca_kabuli_chr01 | 40210986                | AA                              | GG                | 1945896596               |
| SNP_P3_14934_40214049 | NC_021160.1    | Ca_kabuli_chr01 | 40214049                | GG                              | TT                | 1945896598               |
| SNP_P3_14935_40215203 | NC_021160.1    | Ca_kabuli_chr01 | 40215203                | CC                              | AA                | 1945896599               |
| SNP_P3_14936_40216684 | NC_021160.1    | Ca_kabuli_chr01 | 40216684                | TT                              | CC                | 1945896601               |
| SNP_P3_14937_40216897 | NC_021160.1    | Ca_kabuli_chr01 | 40216897                | TT                              | CC                | 1945896603               |
| SNP_P3_14938_40218390 | NC_021160.1    | Ca_kabuli_chr01 | 40218390                | AA                              | GG                | 1945896605               |
| SNP_P3_14939_40218922 | NC_021160.1    | Ca_kabuli_chr01 | 40218922                | GG                              | AA                | 1945896606               |
| SNP_P3_14940_40219500 | NC_021160.1    | Ca_kabuli_chr01 | 40219500                | AA                              | CC                | 1945896608               |
| SNP_P3_14941_40219581 | NC_021160.1    | Ca_kabuli_chr01 | 40219581                | GG                              | AA                | 1945896610               |
| SNP_P3_14942_40219857 | NC_021160.1    | Ca_kabuli_chr01 | 40219857                | GG                              | AA                | 1945896612               |
| SNP_P3_14943_40220391 | NC_021160.1    | Ca_kabuli_chr01 | 40220391                | GG                              | TT                | 1945896614               |
| SNP_P3_14944_40220643 | NC_021160.1    | Ca_kabuli_chr01 | 40220643                | AA                              | GG                | 1945896615               |
| SNP_P3_14945_40224010 | NC_021160.1    | Ca_kabuli_chr01 | 40224010                | AA                              | TT                | 1945896617               |
| SNP_P3_14946_40224037 | NC_021160.1    | Ca_kabuli_chr01 | 40224037                | GG                              | TT                | 1945896619               |
| SNP_P3_14947_40224051 | NC_021160.1    | Ca_kabuli_chr01 | 40224051                | CC                              | TT                | 1945896621               |
| SNP_P3_14948_40224173 | NC_021160.1    | Ca_kabuli_chr01 | 40224173                | AA                              | CC                | 1945896622               |
| SNP_P3_14950_40225650 | NC_021160.1    | Ca_kabuli_chr01 | 40225650                | TT                              | AA                | 1945896624               |
| SNP_P3_14951_40228299 | NC_021160.1    | Ca_kabuli_chr01 | 40228299                | TT                              | CC                | 1945896626               |
| SNP_P3_14952_40230760 | NC_021160.1    | Ca_kabuli_chr01 | 40230760                | AA                              | GG                | 1945896628               |
| SNP_P3_14953_40231498 | NC_021160.1    | Ca_kabuli_chr01 | 40231498                | TT                              | GG                | 1945896629               |
| SNP_P3_14954_40231501 | NC_021160.1    | Ca_kabuli_chr01 | 40231501                | GG                              | TT                | 1945896631               |
| SNP_P3_14955_40231506 | NC_021160.1    | Ca_kabuli_chr01 | 40231506                | TT                              | CC                | 1945896633               |
| SNP_P3_14956_40231513 | NC_021160.1    | Ca_kabuli_chr01 | 40231513                | AA                              | GG                | 1945896635               |
| SNP_P3_14958_40235830 | NC_021160.1    | Ca_kabuli_chr01 | 40235830                | TT                              | CC                | 1945896637               |
| SNP_P3_14959_40240281 | NC_021160.1    | Ca_kabuli_chr01 | 40240281                | TT                              | CC                | 1945896638               |
| SNP_P3_14960_40248694 | NC_021160.1    | Ca_kabuli_chr01 | 40248694                | AA                              | GG                | 1945896640               |
| SNP_P3_14961_40249278 | NC_021160.1    | Ca_kabuli_chr01 | 40249278                | CC                              | TT                | 1945896642               |
| SNP_P3_14962_40252396 | NC_021160.1    | Ca_kabuli_chr01 | 40252396                | CC                              | TT                | 1945896644               |
| SNP_P3_14963_40252886 | NC_021160.1    | Ca_kabuli_chr01 | 40252886                | TT                              | CC                | 1945896645               |
| SNP_P3_14964_40256772 | NC_021160.1    | Ca_kabuli_chr01 | 40256772                | TT                              | AA                | 1945896647               |
| SNP_P3_14965_40257220 | NC_021160.1    | Ca_kabuli_chr01 | 40257220                | GG                              | AA                | 1945896649               |
| SNP_P3_14966_40258604 | NC_021160.1    | Ca_kabuli_chr01 | 40258604                | AA                              | GG                | 1945896651               |

| SNPs IDs              | Chromosome IDs | Chromosomes     | Physical positions (bp) | CDC Frontier (Reference genome) | (Pusa 256 & HPNB) | NCBI SNPdb Accession IDs |
|-----------------------|----------------|-----------------|-------------------------|---------------------------------|-------------------|--------------------------|
| SNP_P3_14967_40258656 | NC_021160.1    | Ca_kabuli_chr01 | 40258656                | CC                              | TT                | 1945896653               |
| SNP_P3_14968_40258663 | NC_021160.1    | Ca_kabuli_chr01 | 40258663                | GG                              | AA                | 1945896654               |
| SNP_P3_14969_40258940 | NC_021160.1    | Ca_kabuli_chr01 | 40258940                | CC                              | AA                | 1945896656               |
| SNP_P3_14970_40260777 | NC_021160.1    | Ca_kabuli_chr01 | 40260777                | AA                              | GG                | 1945896658               |
| SNP_P3_14971_40261169 | NC_021160.1    | Ca_kabuli_chr01 | 40261169                | CC                              | AA                | 1945896660               |
| SNP_P3_14972_40262357 | NC_021160.1    | Ca_kabuli_chr01 | 40262357                | CC                              | GG                | 1945896661               |
| SNP_P3_14973_40262409 | NC_021160.1    | Ca_kabuli_chr01 | 40262409                | TT                              | CC                | 1945896663               |
| SNP_P3_14974_40262447 | NC_021160.1    | Ca_kabuli_chr01 | 40262447                | GG                              | AA                | 1945896665               |
| SNP_P3_14975_40264100 | NC_021160.1    | Ca_kabuli_chr01 | 40264100                | TT                              | CC                | 1945896667               |
| SNP_P3_14976_40264484 | NC_021160.1    | Ca_kabuli_chr01 | 40264484                | GG                              | TT                | 1945896668               |
| SNP_P3_14977_40264561 | NC_021160.1    | Ca_kabuli_chr01 | 40264561                | AA                              | CC                | 1945896670               |
| SNP_P3_14978_40264562 | NC_021160.1    | Ca_kabuli_chr01 | 40264562                | TT                              | AA                | 1945896672               |
| SNP_P3_14979_40264783 | NC_021160.1    | Ca_kabuli_chr01 | 40264783                | CC                              | TT                | 1945896674               |
| SNP_P3_14980_40264981 | NC_021160.1    | Ca_kabuli_chr01 | 40264981                | GG                              | TT                | 1945896676               |
| SNP_P3_14981_40266571 | NC_021160.1    | Ca_kabuli_chr01 | 40266571                | CC                              | TT                | 1945896677               |
| SNP_P3_14982_40266572 | NC_021160.1    | Ca_kabuli_chr01 | 40266572                | GG                              | TT                | 1945896679               |
| SNP_P3_14983_40266584 | NC_021160.1    | Ca_kabuli_chr01 | 40266584                | AA                              | GG                | 1945896681               |
| SNP_P3_14984_40266593 | NC_021160.1    | Ca_kabuli_chr01 | 40266593                | CC                              | AA                | 1945896683               |
| SNP_P3_14985_40266838 | NC_021160.1    | Ca_kabuli_chr01 | 40266838                | CC                              | TT                | 1945896684               |
| SNP_P3_14986_40266888 | NC_021160.1    | Ca_kabuli_chr01 | 40266888                | TT                              | CC                | 1945896686               |
| SNP_P3_14987_40266918 | NC_021160.1    | Ca_kabuli_chr01 | 40266918                | CC                              | GG                | 1945896688               |
| SNP_P3_14988_40267255 | NC_021160.1    | Ca_kabuli_chr01 | 40267255                | AA                              | GG                | 1945896690               |
| SNP_P3_14989_40267278 | NC_021160.1    | Ca_kabuli_chr01 | 40267278                | CC                              | TT                | 1945896691               |
| SNP_P3_14990_40270668 | NC_021160.1    | Ca_kabuli_chr01 | 40270668                | GG                              | AA                | 1945896693               |
| SNP_P3_14991_40270998 | NC_021160.1    | Ca_kabuli_chr01 | 40270998                | GG                              | AA                | 1945896695               |
| SNP_P3_14992_40271083 | NC_021160.1    | Ca_kabuli_chr01 | 40271083                | CC                              | TT                | 1945896697               |
| SNP_P3_14993_40272024 | NC_021160.1    | Ca_kabuli_chr01 | 40272024                | AA                              | GG                | 1945896699               |
| SNP_P3_14994_40272026 | NC_021160.1    | Ca_kabuli_chr01 | 40272026                | AA                              | GG                | 1945896700               |
| SNP_P3_14995_40273163 | NC_021160.1    | Ca_kabuli_chr01 | 40273163                | CC                              | TT                | 1945896702               |
| SNP_P3_14996_40273311 | NC_021160.1    | Ca_kabuli_chr01 | 40273311                | GG                              | TT                | 1945896704               |
| SNP_P3_14997_40273459 | NC_021160.1    | Ca_kabuli_chr01 | 40273459                | CC                              | GG                | 1945896706               |
| SNP_P3_14998_40276774 | NC_021160.1    | Ca_kabuli_chr01 | 40276774                | CC                              | TT                | 1945896708               |
| SNP_P3_14999_40279618 | NC_021160.1    | Ca_kabuli_chr01 | 40279618                | CC                              | TT                | 1945896709               |
| SNP_P3_15000_40281024 | NC_021160.1    | Ca_kabuli_chr01 | 40281024                | GG                              | AA                | 1945896711               |
| SNP_P3_15001_40295723 | NC_021160.1    | Ca_kabuli_chr01 | 40295723                | CC                              | TT                | 1945896713               |
| SNP_P3_15002_40295940 | NC_021160.1    | Ca_kabuli_chr01 | 40295940                | CC                              | TT                | 1945896715               |
| SNP_P3_15003_40296205 | NC_021160.1    | Ca_kabuli_chr01 | 40296205                | TT                              | CC                | 1945896716               |
| SNP_P3_15004_40296223 | NC_021160.1    | Ca_kabuli_chr01 | 40296223                | GG                              | AA                | 1945896718               |
| SNP_P3_15005_40296999 | NC_021160.1    | Ca_kabuli_chr01 | 40296999                | GG                              | AA                | 1945896720               |
| SNP_P3_15007_40298263 | NC_021160.1    | Ca_kabuli_chr01 | 40298263                | CC                              | TT                | 1945896722               |
| SNP_P3_15009_40298834 | NC_021160.1    | Ca_kabuli_chr01 | 40298834                | AA                              | GG                | 1945896724               |
| SNP_P3_15010_40298843 | NC_021160.1    | Ca_kabuli_chr01 | 40298843                | TT                              | GG                | 1945896725               |

| SNPs IDs              | Chromosome IDs | Chromosomes     | Physical positions (bp) | CDC Frontier (Reference genome) | (Pusa 256 & HPNB) | NCBI SNPdb Accession IDs |
|-----------------------|----------------|-----------------|-------------------------|---------------------------------|-------------------|--------------------------|
| SNP_P3_15011_40298844 | NC_021160.1    | Ca_kabuli_chr01 | 40298844                | AA                              | TT                | 1945896727               |
| SNP_P3_15012_40298866 | NC_021160.1    | Ca_kabuli_chr01 | 40298866                | CC                              | TT                | 1945896729               |
| SNP_P3_15013_40298894 | NC_021160.1    | Ca_kabuli_chr01 | 40298894                | AA                              | TT                | 1945896731               |
| SNP_P3_15016_40299654 | NC_021160.1    | Ca_kabuli_chr01 | 40299654                | TT                              | CC                | 1945896732               |
| SNP_P3_15017_40299870 | NC_021160.1    | Ca_kabuli_chr01 | 40299870                | GG                              | CC                | 1945896734               |
| SNP_P3_15018_40300692 | NC_021160.1    | Ca_kabuli_chr01 | 40300692                | TT                              | GG                | 1945896736               |
| SNP_P3_15019_40301371 | NC_021160.1    | Ca_kabuli_chr01 | 40301371                | AA                              | GG                | 1945896738               |
| SNP_P3_15020_40302448 | NC_021160.1    | Ca_kabuli_chr01 | 40302448                | AA                              | CC                | 1945896740               |
| SNP_P3_15021_40302727 | NC_021160.1    | Ca_kabuli_chr01 | 40302727                | AA                              | GG                | 1945896741               |
| SNP_P3_15023_40304335 | NC_021160.1    | Ca_kabuli_chr01 | 40304335                | GG                              | AA                | 1945896743               |
| SNP_P3_15024_40304681 | NC_021160.1    | Ca_kabuli_chr01 | 40304681                | AA                              | CC                | 1945896745               |
| SNP_P3_15025_40312382 | NC_021160.1    | Ca_kabuli_chr01 | 40312382                | TT                              | CC                | 1945896747               |
| SNP_P3_15026_40312397 | NC_021160.1    | Ca_kabuli_chr01 | 40312397                | TT                              | GG                | 1945896748               |
| SNP_P3_15027_40312399 | NC_021160.1    | Ca_kabuli_chr01 | 40312399                | AA                              | GG                | 1945896750               |
| SNP_P3_15028_40319605 | NC_021160.1    | Ca_kabuli_chr01 | 40319605                | TT                              | AA                | 1945896752               |
| SNP_P3_15030_40319802 | NC_021160.1    | Ca_kabuli_chr01 | 40319802                | GG                              | AA                | 1945896754               |
| SNP_P3_15031_40319803 | NC_021160.1    | Ca_kabuli_chr01 | 40319803                | AA                              | GG                | 1945896755               |
| SNP_P3_15032_40319966 | NC_021160.1    | Ca_kabuli_chr01 | 40319966                | GG                              | AA                | 1945896757               |
| SNP_P3_15034_40320157 | NC_021160.1    | Ca_kabuli_chr01 | 40320157                | TT                              | AA                | 1945896759               |
| SNP_P3_15035_40320184 | NC_021160.1    | Ca_kabuli_chr01 | 40320184                | TT                              | CC                | 1945896761               |
| SNP_P3_15036_40321255 | NC_021160.1    | Ca_kabuli_chr01 | 40321255                | CC                              | TT                | 1945896763               |
| SNP_P3_15037_40321733 | NC_021160.1    | Ca_kabuli_chr01 | 40321733                | CC                              | GG                | 1945896764               |
| SNP_P3_15038_40324597 | NC_021160.1    | Ca_kabuli_chr01 | 40324597                | CC                              | GG                | 1945896766               |
| SNP_P3_15039_40324833 | NC_021160.1    | Ca_kabuli_chr01 | 40324833                | AA                              | CC                | 1945896768               |
| SNP_P3_15040_40325034 | NC_021160.1    | Ca_kabuli_chr01 | 40325034                | GG                              | AA                | 1945896770               |
| SNP_P3_15041_40325200 | NC_021160.1    | Ca_kabuli_chr01 | 40325200                | CC                              | TT                | 1945896771               |
| SNP_P3_15042_40325968 | NC_021160.1    | Ca_kabuli_chr01 | 40325968                | CC                              | AA                | 1945896773               |
| SNP_P3_15043_40325993 | NC_021160.1    | Ca_kabuli_chr01 | 40325993                | AA                              | GG                | 1945896775               |
| SNP_P3_15044_40326238 | NC_021160.1    | Ca_kabuli_chr01 | 40326238                | GG                              | TT                | 1945896777               |
| SNP_P3_15045_40326276 | NC_021160.1    | Ca_kabuli_chr01 | 40326276                | AA                              | TT                | 1945896779               |
| SNP_P3_15046_40326525 | NC_021160.1    | Ca_kabuli_chr01 | 40326525                | CC                              | GG                | 1945896780               |
| SNP_P3_15048_40326831 | NC_021160.1    | Ca_kabuli_chr01 | 40326831                | AA                              | TT                | 1945896782               |
| SNP_P3_15049_40326877 | NC_021160.1    | Ca_kabuli_chr01 | 40326877                | CC                              | TT                | 1945896784               |
| SNP_P3_15050_40326886 | NC_021160.1    | Ca_kabuli_chr01 | 40326886                | AA                              | GG                | 1945896786               |
| SNP_P3_15051_40326966 | NC_021160.1    | Ca_kabuli_chr01 | 40326966                | TT                              | CC                | 1945896787               |
| SNP_P3_15052_40327192 | NC_021160.1    | Ca_kabuli_chr01 | 40327192                | AA                              | CC                | 1945896789               |
| SNP_P3_15053_40327437 | NC_021160.1    | Ca_kabuli_chr01 | 40327437                | AA                              | GG                | 1945896791               |
| SNP_P3_15054_40327448 | NC_021160.1    | Ca_kabuli_chr01 | 40327448                | GG                              | CC                | 1945896793               |
| SNP_P3_15055_40327771 | NC_021160.1    | Ca_kabuli_chr01 | 40327771                | TT                              | GG                | 1945896795               |
| SNP_P3_15057_40330045 | NC_021160.1    | Ca_kabuli_chr01 | 40330045                | AA                              | GG                | 1945896796               |
| SNP_P3_15058_40330247 | NC_021160.1    | Ca_kabuli_chr01 | 40330247                | AA                              | GG                | 1945896798               |
| SNP_P3_15059_40330263 | NC_021160.1    | Ca_kabuli_chr01 | 40330263                | CC                              | TT                | 1945896800               |

| SNPs IDs              | Chromosome IDs | Chromosomes     | Physical positions (bp) | CDC Frontier (Reference genome) | (Pusa 256 & HPNB) | NCBI SNPdb Accession IDs |
|-----------------------|----------------|-----------------|-------------------------|---------------------------------|-------------------|--------------------------|
| SNP_P3_15060_40330981 | NC_021160.1    | Ca_kabuli_chr01 | 40330981                | AA                              | GG                | 1945896802               |
| SNP_P3_15061_40331287 | NC_021160.1    | Ca_kabuli_chr01 | 40331287                | GG                              | TT                | 1945896803               |
| SNP_P3_15062_40331300 | NC_021160.1    | Ca_kabuli_chr01 | 40331300                | CC                              | AA                | 1945896805               |
| SNP_P3_15063_40332138 | NC_021160.1    | Ca_kabuli_chr01 | 40332138                | GG                              | AA                | 1945896807               |
| SNP_P3_15064_40332158 | NC_021160.1    | Ca_kabuli_chr01 | 40332158                | TT                              | CC                | 1945896809               |
| SNP_P3_15065_40332421 | NC_021160.1    | Ca_kabuli_chr01 | 40332421                | CC                              | TT                | 1945896811               |
| SNP_P3_15066_40332461 | NC_021160.1    | Ca_kabuli_chr01 | 40332461                | AA                              | GG                | 1945896812               |
| SNP_P3_15067_40332860 | NC_021160.1    | Ca_kabuli_chr01 | 40332860                | CC                              | AA                | 1945896814               |
| SNP_P3_15068_40332968 | NC_021160.1    | Ca_kabuli_chr01 | 40332968                | CC                              | TT                | 1945896816               |
| SNP_P3_15069_40333255 | NC_021160.1    | Ca_kabuli_chr01 | 40333255                | CC                              | TT                | 1945896818               |
| SNP_P3_15070_40333326 | NC_021160.1    | Ca_kabuli_chr01 | 40333326                | AA                              | CC                | 1945896819               |
| SNP_P3_15071_40333694 | NC_021160.1    | Ca_kabuli_chr01 | 40333694                | AA                              | CC                | 1945896821               |
| SNP_P3_15072_40333697 | NC_021160.1    | Ca_kabuli_chr01 | 40333697                | CC                              | TT                | 1945896823               |
| SNP_P3_15073_40333705 | NC_021160.1    | Ca_kabuli_chr01 | 40333705                | TT                              | CC                | 1945896825               |
| SNP_P3_15074_40334387 | NC_021160.1    | Ca_kabuli_chr01 | 40334387                | GG                              | AA                | 1945896826               |
| SNP_P3_15076_40340160 | NC_021160.1    | Ca_kabuli_chr01 | 40340160                | CC                              | AA                | 1945896828               |
| SNP_P3_15077_40340183 | NC_021160.1    | Ca_kabuli_chr01 | 40340183                | TT                              | CC                | 1945896830               |
| SNP_P3_15078_40340212 | NC_021160.1    | Ca_kabuli_chr01 | 40340212                | TT                              | CC                | 1945896832               |
| SNP_P3_15079_40340740 | NC_021160.1    | Ca_kabuli_chr01 | 40340740                | GG                              | AA                | 1945896834               |
| SNP_P3_15080_40340791 | NC_021160.1    | Ca_kabuli_chr01 | 40340791                | TT                              | CC                | 1945896835               |
| SNP_P3_15081_40342527 | NC_021160.1    | Ca_kabuli_chr01 | 40342527                | AA                              | GG                | 1945896837               |
| SNP_P3_15082_40345679 | NC_021160.1    | Ca_kabuli_chr01 | 40345679                | TT                              | CC                | 1945896839               |
| SNP_P3_15083_40348670 | NC_021160.1    | Ca_kabuli_chr01 | 40348670                | TT                              | CC                | 1945896841               |
| SNP_P3_15084_40348746 | NC_021160.1    | Ca_kabuli_chr01 | 40348746                | TT                              | AA                | 1945896842               |
| SNP_P3_15085_40349520 | NC_021160.1    | Ca_kabuli_chr01 | 40349520                | GG                              | AA                | 1945896844               |
| SNP_P3_15086_40350639 | NC_021160.1    | Ca_kabuli_chr01 | 40350639                | TT                              | AA                | 1945896846               |
| SNP_P3_15087_40353933 | NC_021160.1    | Ca_kabuli_chr01 | 40353933                | CC                              | TT                | 1945896848               |
| SNP_P3_15088_40353978 | NC_021160.1    | Ca_kabuli_chr01 | 40353978                | GG                              | AA                | 1945896850               |
| SNP_P3_15089_40354887 | NC_021160.1    | Ca_kabuli_chr01 | 40354887                | CC                              | GG                | 1945896851               |
| SNP_P3_15090_40355426 | NC_021160.1    | Ca_kabuli_chr01 | 40355426                | AA                              | TT                | 1945896853               |
| SNP_P3_15092_40357085 | NC_021160.1    | Ca_kabuli_chr01 | 40357085                | CC                              | TT                | 1945896855               |
| SNP_P3_15093_40357098 | NC_021160.1    | Ca_kabuli_chr01 | 40357098                | AA                              | GG                | 1945896857               |
| SNP_P3_15094_40357488 | NC_021160.1    | Ca_kabuli_chr01 | 40357488                | TT                              | CC                | 1945896858               |
| SNP_P3_15095_40357978 | NC_021160.1    | Ca_kabuli_chr01 | 40357978                | AA                              | GG                | 1945896860               |
| SNP_P3_15096_40358693 | NC_021160.1    | Ca_kabuli_chr01 | 40358693                | CC                              | TT                | 1945896862               |
| SNP_P3_15097_40363576 | NC_021160.1    | Ca_kabuli_chr01 | 40363576                | GG                              | AA                | 1945896864               |
| SNP_P3_15098_40363712 | NC_021160.1    | Ca_kabuli_chr01 | 40363712                | GG                              | AA                | 1945896865               |
| SNP_P3_15099_40363822 | NC_021160.1    | Ca_kabuli_chr01 | 40363822                | AA                              | CC                | 1945896867               |
| SNP_P3_15100_40365171 | NC_021160.1    | Ca_kabuli_chr01 | 40365171                | GG                              | AA                | 1945896869               |
| SNP_P3_15101_40365400 | NC_021160.1    | Ca_kabuli_chr01 | 40365400                | GG                              | TT                | 1945896871               |
| SNP_P3_15102_40365778 | NC_021160.1    | Ca_kabuli_chr01 | 40365778                | TT                              | CC                | 1945896873               |
| SNP_P3_15103_40365836 | NC_021160.1    | Ca_kabuli_chr01 | 40365836                | TT                              | AA                | 1945896874               |

| SNPs IDs              | Chromosome IDs | Chromosomes     | Physical positions (bp) | CDC Frontier (Reference genome) | (Pusa 256 & HPNB) | NCBI SNPdb Accession IDs |
|-----------------------|----------------|-----------------|-------------------------|---------------------------------|-------------------|--------------------------|
| SNP_P3_15104_40366006 | NC_021160.1    | Ca_kabuli_chr01 | 40366006                | GG                              | CC                | 1945896876               |
| SNP_P3_15105_40368684 | NC_021160.1    | Ca_kabuli_chr01 | 40368684                | GG                              | AA                | 1945896878               |
| SNP_P3_15106_40369994 | NC_021160.1    | Ca_kabuli_chr01 | 40369994                | AA                              | GG                | 1945896880               |
| SNP_P3_15108_40371268 | NC_021160.1    | Ca_kabuli_chr01 | 40371268                | TT                              | CC                | 1945896881               |
| SNP_P3_15109_40371277 | NC_021160.1    | Ca_kabuli_chr01 | 40371277                | GG                              | CC                | 1945896883               |
| SNP_P3_15110_40373242 | NC_021160.1    | Ca_kabuli_chr01 | 40373242                | AA                              | TT                | 1945896885               |
| SNP_P3_15111_40373313 | NC_021160.1    | Ca_kabuli_chr01 | 40373313                | AA                              | TT                | 1945896887               |
| SNP_P3_15112_40373554 | NC_021160.1    | Ca_kabuli_chr01 | 40373554                | GG                              | AA                | 1945896889               |
| SNP_P3_15113_40373860 | NC_021160.1    | Ca_kabuli_chr01 | 40373860                | TT                              | AA                | 1945896890               |
| SNP_P3_15114_40392362 | NC_021160.1    | Ca_kabuli_chr01 | 40392362                | GG                              | AA                | 1945896892               |
| SNP_P3_15115_40392487 | NC_021160.1    | Ca_kabuli_chr01 | 40392487                | TT                              | CC                | 1945896894               |
| SNP_P3_15116_40392823 | NC_021160.1    | Ca_kabuli_chr01 | 40392823                | TT                              | CC                | 1945896896               |
| SNP_P3_15117_40392889 | NC_021160.1    | Ca_kabuli_chr01 | 40392889                | CC                              | AA                | 1945896897               |
| SNP_P3_15119_40393080 | NC_021160.1    | Ca_kabuli_chr01 | 40393080                | GG                              | TT                | 1945896899               |
| SNP_P3_15120_40393102 | NC_021160.1    | Ca_kabuli_chr01 | 40393102                | CC                              | GG                | 1945896901               |
| SNP_P3_15121_40393916 | NC_021160.1    | Ca_kabuli_chr01 | 40393916                | TT                              | CC                | 1945896903               |
| SNP_P3_15122_40393945 | NC_021160.1    | Ca_kabuli_chr01 | 40393945                | AA                              | GG                | 1945896905               |
| SNP_P3_15123_40394039 | NC_021160.1    | Ca_kabuli_chr01 | 40394039                | AA                              | GG                | 1945896906               |
| SNP_P3_15124_40394081 | NC_021160.1    | Ca_kabuli_chr01 | 40394081                | TT                              | CC                | 1945896908               |
| SNP_P3_15125_40394101 | NC_021160.1    | Ca_kabuli_chr01 | 40394101                | TT                              | CC                | 1945896910               |
| SNP_P3_15126_40394350 | NC_021160.1    | Ca_kabuli_chr01 | 40394350                | GG                              | TT                | 1945896912               |
| SNP_P3_15127_40394377 | NC_021160.1    | Ca_kabuli_chr01 | 40394377                | GG                              | AA                | 1945896913               |
| SNP_P3_15128_40394414 | NC_021160.1    | Ca_kabuli_chr01 | 40394414                | GG                              | AA                | 1945896915               |
| SNP_P3_15129_40395021 | NC_021160.1    | Ca_kabuli_chr01 | 40395021                | CC                              | TT                | 1945896917               |
| SNP_P3_15130_40395366 | NC_021160.1    | Ca_kabuli_chr01 | 40395366                | AA                              | GG                | 1945896919               |
| SNP_P3_15131_40395373 | NC_021160.1    | Ca_kabuli_chr01 | 40395373                | AA                              | GG                | 1945896920               |
| SNP_P3_15132_40395593 | NC_021160.1    | Ca_kabuli_chr01 | 40395593                | AA                              | GG                | 1945896922               |
| SNP_P3_15133_40395649 | NC_021160.1    | Ca_kabuli_chr01 | 40395649                | AA                              | GG                | 1945896924               |
| SNP_P3_15134_40395898 | NC_021160.1    | Ca_kabuli_chr01 | 40395898                | TT                              | CC                | 1945896926               |
| SNP_P3_15135_40396009 | NC_021160.1    | Ca_kabuli_chr01 | 40396009                | CC                              | AA                | 1945896928               |
| SNP_P3_15136_40396244 | NC_021160.1    | Ca_kabuli_chr01 | 40396244                | GG                              | AA                | 1945896929               |
| SNP_P3_15137_40396794 | NC_021160.1    | Ca_kabuli_chr01 | 40396794                | TT                              | GG                | 1945896931               |
| SNP_P3_15138_40396851 | NC_021160.1    | Ca_kabuli_chr01 | 40396851                | GG                              | AA                | 1945896933               |
| SNP_P3_15139_40397169 | NC_021160.1    | Ca_kabuli_chr01 | 40397169                | CC                              | TT                | 1945896935               |
| SNP_P3_15140_40397232 | NC_021160.1    | Ca_kabuli_chr01 | 40397232                | AA                              | GG                | 1945896936               |
| SNP_P3_15141_40397237 | NC_021160.1    | Ca_kabuli_chr01 | 40397237                | TT                              | CC                | 1945896938               |
| SNP_P3_15142_40397474 | NC_021160.1    | Ca_kabuli_chr01 | 40397474                | TT                              | GG                | 1945896940               |
| SNP_P3_15143_40397875 | NC_021160.1    | Ca_kabuli_chr01 | 40397875                | CC                              | AA                | 1945896942               |
| SNP_P3_15144_40398123 | NC_021160.1    | Ca_kabuli_chr01 | 40398123                | CC                              | TT                | 1945896943               |
| SNP_P3_15145_40398192 | NC_021160.1    | Ca_kabuli_chr01 | 40398192                | TT                              | CC                | 1945896945               |
| SNP_P3_15146_40398256 | NC_021160.1    | Ca_kabuli_chr01 | 40398256                | AA                              | TT                | 1945896947               |
| SNP_P3_15147_40398371 | NC_021160.1    | Ca_kabuli_chr01 | 40398371                | AA                              | CC                | 1945896949               |

| SNPs IDs              | Chromosome IDs | Chromosomes     | Physical positions (bp) | CDC Frontier (Reference genome) | (Pusa 256 & HPNB) | NCBI SNPdb Accession IDs |
|-----------------------|----------------|-----------------|-------------------------|---------------------------------|-------------------|--------------------------|
| SNP_P3_15149_40398393 | NC_021160.1    | Ca_kabuli_chr01 | 40398393                | GG                              | AA                | 1945896951               |
| SNP_P3_15150_40398405 | NC_021160.1    | Ca_kabuli_chr01 | 40398405                | AA                              | CC                | 1945896952               |
| SNP_P3_15151_40398414 | NC_021160.1    | Ca_kabuli_chr01 | 40398414                | TT                              | AA                | 1945896954               |
| SNP_P3_15152_40398635 | NC_021160.1    | Ca_kabuli_chr01 | 40398635                | TT                              | CC                | 1945896956               |
| SNP_P3_15153_40398748 | NC_021160.1    | Ca_kabuli_chr01 | 40398748                | TT                              | CC                | 1945896958               |
| SNP_P3_15154_40398749 | NC_021160.1    | Ca_kabuli_chr01 | 40398749                | CC                              | TT                | 1945896959               |
| SNP_P3_15155_40399327 | NC_021160.1    | Ca_kabuli_chr01 | 40399327                | CC                              | TT                | 1945896961               |
| SNP_P3_15156_40399366 | NC_021160.1    | Ca_kabuli_chr01 | 40399366                | GG                              | CC                | 1945896963               |
| SNP_P3_15157_40399380 | NC_021160.1    | Ca_kabuli_chr01 | 40399380                | GG                              | AA                | 1945896965               |
| SNP_P3_15158_40401927 | NC_021160.1    | Ca_kabuli_chr01 | 40401927                | GG                              | CC                | 1945896967               |
| SNP_P3_15159_40401933 | NC_021160.1    | Ca_kabuli_chr01 | 40401933                | TT                              | CC                | 1945896968               |
| SNP_P3_15160_40401972 | NC_021160.1    | Ca_kabuli_chr01 | 40401972                | TT                              | CC                | 1945896970               |
| SNP_P3_15161_40402364 | NC_021160.1    | Ca_kabuli_chr01 | 40402364                | AA                              | GG                | 1945896972               |
| SNP_P3_15162_40402394 | NC_021160.1    | Ca_kabuli_chr01 | 40402394                | AA                              | GG                | 1945896974               |
| SNP_P3_15163_40405173 | NC_021160.1    | Ca_kabuli_chr01 | 40405173                | AA                              | TT                | 1945896975               |
| SNP_P3_15164_40405224 | NC_021160.1    | Ca_kabuli_chr01 | 40405224                | CC                              | TT                | 1945896977               |
| SNP_P3_15165_40407751 | NC_021160.1    | Ca_kabuli_chr01 | 40407751                | TT                              | CC                | 1945896979               |
| SNP_P3_15167_40408392 | NC_021160.1    | Ca_kabuli_chr01 | 40408392                | GG                              | AA                | 1945896981               |
| SNP_P3_15168_40408455 | NC_021160.1    | Ca_kabuli_chr01 | 40408455                | GG                              | TT                | 1945896982               |
| SNP_P3_15170_40408549 | NC_021160.1    | Ca_kabuli_chr01 | 40408549                | GG                              | AA                | 1945896984               |
| SNP_P3_15172_40409296 | NC_021160.1    | Ca_kabuli_chr01 | 40409296                | TT                              | GG                | 1945896986               |
| SNP_P3_15173_40409297 | NC_021160.1    | Ca_kabuli_chr01 | 40409297                | AA                              | GG                | 1945896988               |
| SNP_P3_15174_40410074 | NC_021160.1    | Ca_kabuli_chr01 | 40410074                | TT                              | CC                | 1945896990               |
| SNP_P3_15175_40410407 | NC_021160.1    | Ca_kabuli_chr01 | 40410407                | GG                              | CC                | 1945896991               |
| SNP_P3_15178_40412294 | NC_021160.1    | Ca_kabuli_chr01 | 40412294                | CC                              | TT                | 1945896993               |
| SNP_P3_15179_40412611 | NC_021160.1    | Ca_kabuli_chr01 | 40412611                | GG                              | AA                | 1945896995               |
| SNP_P3_15180_40413722 | NC_021160.1    | Ca_kabuli_chr01 | 40413722                | GG                              | AA                | 1945896997               |
| SNP_P3_15181_40413741 | NC_021160.1    | Ca_kabuli_chr01 | 40413741                | GG                              | CC                | 1945896998               |
| SNP_P3_15182_40414049 | NC_021160.1    | Ca_kabuli_chr01 | 40414049                | AA                              | GG                | 1945897000               |
| SNP_P3_15183_40414088 | NC_021160.1    | Ca_kabuli_chr01 | 40414088                | AA                              | TT                | 1945897002               |
| SNP_P3_15184_40415781 | NC_021160.1    | Ca_kabuli_chr01 | 40415781                | GG                              | CC                | 1945897004               |
| SNP_P3_15185_40416914 | NC_021160.1    | Ca_kabuli_chr01 | 40416914                | CC                              | AA                | 1945897005               |
| SNP_P3_15186_40417256 | NC_021160.1    | Ca_kabuli_chr01 | 40417256                | TT                              | CC                | 1945897007               |
| SNP_P3_15187_40417398 | NC_021160.1    | Ca_kabuli_chr01 | 40417398                | GG                              | CC                | 1945897009               |
| SNP_P3_15188_40419029 | NC_021160.1    | Ca_kabuli_chr01 | 40419029                | AA                              | GG                | 1945897011               |
| SNP_P3_15189_40419032 | NC_021160.1    | Ca_kabuli_chr01 | 40419032                | TT                              | CC                | 1945897013               |
| SNP_P3_15190_40419540 | NC_021160.1    | Ca_kabuli_chr01 | 40419540                | AA                              | GG                | 1945897014               |
| SNP_P3_15191_40420523 | NC_021160.1    | Ca_kabuli_chr01 | 40420523                | GG                              | TT                | 1945897016               |
| SNP_P3_15192_40420528 | NC_021160.1    | Ca_kabuli_chr01 | 40420528                | CC                              | TT                | 1945897018               |
| SNP_P3_15194_40421504 | NC_021160.1    | Ca_kabuli_chr01 | 40421504                | GG                              | AA                | 1945897020               |
| SNP_P3_15195_40421528 | NC_021160.1    | Ca_kabuli_chr01 | 40421528                | AA                              | GG                | 1945897021               |
| SNP_P3_15196_40421529 | NC_021160.1    | Ca_kabuli_chr01 | 40421529                | TT                              | AA                | 1945897023               |

| SNPs IDs              | Chromosome IDs | Chromosomes     | Physical positions (bp) | CDC Frontier (Reference genome) | (Pusa 256 & HPNB) | NCBI SNPdb Accession IDs |
|-----------------------|----------------|-----------------|-------------------------|---------------------------------|-------------------|--------------------------|
| SNP_P3_15197_40421537 | NC_021160.1    | Ca_kabuli_chr01 | 40421537                | TT                              | CC                | 1945897025               |
| SNP_P3_15199_40422082 | NC_021160.1    | Ca_kabuli_chr01 | 40422082                | AA                              | GG                | 1945897027               |
| SNP_P3_15200_40422400 | NC_021160.1    | Ca_kabuli_chr01 | 40422400                | GG                              | CC                | 1945897029               |
| SNP_P3_15201_40422741 | NC_021160.1    | Ca_kabuli_chr01 | 40422741                | GG                              | AA                | 1945897030               |
| SNP_P3_15203_40425111 | NC_021160.1    | Ca_kabuli_chr01 | 40425111                | CC                              | TT                | 1945897032               |
| SNP_P3_15204_40425222 | NC_021160.1    | Ca_kabuli_chr01 | 40425222                | AA                              | CC                | 1945897034               |
| SNP_P3_15208_40425617 | NC_021160.1    | Ca_kabuli_chr01 | 40425617                | CC                              | TT                | 1945897036               |
| SNP_P3_15209_40425657 | NC_021160.1    | Ca_kabuli_chr01 | 40425657                | CC                              | AA                | 1945897037               |
| SNP_P3_15210_40425895 | NC_021160.1    | Ca_kabuli_chr01 | 40425895                | AA                              | TT                | 1945897039               |
| SNP_P3_15211_40426185 | NC_021160.1    | Ca_kabuli_chr01 | 40426185                | TT                              | AA                | 1945897041               |
| SNP_P3_15212_40429584 | NC_021160.1    | Ca_kabuli_chr01 | 40429584                | CC                              | TT                | 1945897043               |
| SNP_P3_15213_40429606 | NC_021160.1    | Ca_kabuli_chr01 | 40429606                | AA                              | GG                | 1945897044               |
| SNP_P3_15214_40429614 | NC_021160.1    | Ca_kabuli_chr01 | 40429614                | AA                              | CC                | 1945897046               |
| SNP_P3_15215_40430570 | NC_021160.1    | Ca_kabuli_chr01 | 40430570                | GG                              | AA                | 1945897048               |
| SNP_P3_15216_40430603 | NC_021160.1    | Ca_kabuli_chr01 | 40430603                | AA                              | GG                | 1945897050               |
| SNP_P3_15217_40430854 | NC_021160.1    | Ca_kabuli_chr01 | 40430854                | CC                              | GG                | 1945897052               |
| SNP_P3_15218_40433497 | NC_021160.1    | Ca_kabuli_chr01 | 40433497                | TT                              | AA                | 1945897053               |
| SNP_P3_15219_40433518 | NC_021160.1    | Ca_kabuli_chr01 | 40433518                | CC                              | TT                | 1945897055               |
| SNP_P3_15220_40433800 | NC_021160.1    | Ca_kabuli_chr01 | 40433800                | CC                              | TT                | 1945897057               |
| SNP_P3_15221_40434214 | NC_021160.1    | Ca_kabuli_chr01 | 40434214                | TT                              | CC                | 1945897059               |
| SNP_P3_15222_40444723 | NC_021160.1    | Ca_kabuli_chr01 | 40444723                | GG                              | AA                | 1945897061               |
| SNP_P3_15223_40445006 | NC_021160.1    | Ca_kabuli_chr01 | 40445006                | TT                              | CC                | 1945897062               |
| SNP_P3_15224_40454461 | NC_021160.1    | Ca_kabuli_chr01 | 40454461                | CC                              | AA                | 1945897064               |
| SNP_P3_15225_40483777 | NC_021160.1    | Ca_kabuli_chr01 | 40483777                | AA                              | GG                | 1945897066               |
| SNP_P3_15226_40522939 | NC_021160.1    | Ca_kabuli_chr01 | 40522939                | CC                              | AA                | 1945897068               |
| SNP_P3_15227_40522941 | NC_021160.1    | Ca_kabuli_chr01 | 40522941                | TT                              | GG                | 1945897069               |
| SNP_P3_15229_40538435 | NC_021160.1    | Ca_kabuli_chr01 | 40538435                | CC                              | AA                | 1945897071               |
| SNP_P3_15231_40543474 | NC_021160.1    | Ca_kabuli_chr01 | 40543474                | TT                              | AA                | 1945897073               |
| SNP_P3_15232_40543475 | NC_021160.1    | Ca_kabuli_chr01 | 40543475                | AA                              | TT                | 1945897075               |
| SNP_P3_15233_40543476 | NC_021160.1    | Ca_kabuli_chr01 | 40543476                | AA                              | TT                | 1945897077               |
| SNP_P3_15234_40543507 | NC_021160.1    | Ca_kabuli_chr01 | 40543507                | GG                              | TT                | 1945897078               |
| SNP_P3_15235_40543543 | NC_021160.1    | Ca_kabuli_chr01 | 40543543                | CC                              | TT                | 1945897080               |
| SNP_P3_15236_40543556 | NC_021160.1    | Ca_kabuli_chr01 | 40543556                | AA                              | CC                | 1945897082               |
| SNP_P3_15237_40543689 | NC_021160.1    | Ca_kabuli_chr01 | 40543689                | AA                              | TT                | 1945897084               |
| SNP_P3_15238_40592654 | NC_021160.1    | Ca_kabuli_chr01 | 40592654                | TT                              | AA                | 1945897085               |
| SNP_P3_15239_40618895 | NC_021160.1    | Ca_kabuli_chr01 | 40618895                | TT                              | GG                | 1945897087               |
| SNP_P3_15240_40618903 | NC_021160.1    | Ca_kabuli_chr01 | 40618903                | TT                              | CC                | 1945897089               |
| SNP_P3_15241_40674507 | NC_021160.1    | Ca_kabuli_chr01 | 40674507                | TT                              | AA                | 1945897091               |
| SNP_P3_15242_40674866 | NC_021160.1    | Ca_kabuli_chr01 | 40674866                | TT                              | AA                | 1945897093               |
| SNP_P3_15243_40725472 | NC_021160.1    | Ca_kabuli_chr01 | 40725472                | TT                              | CC                | 1945897094               |
| SNP_P3_15245_40736618 | NC_021160.1    | Ca_kabuli_chr01 | 40736618                | TT                              | CC                | 1945897096               |
| SNP_P3_15246_40736620 | NC_021160.1    | Ca_kabuli_chr01 | 40736620                | AA                              | CC                | 1945897098               |



| SNPs IDs              | Chromosome IDs | Chromosomes     | Physical positions (bp) | CDC Frontier (Reference genome) | (Pusa 256 & HPNB) | NCBI SNPdb Accession IDs |
|-----------------------|----------------|-----------------|-------------------------|---------------------------------|-------------------|--------------------------|
| SNP_P3_15247_40747601 | NC_021160.1    | Ca_kabuli_chr01 | 40747601                | TT                              | AA                | 1945897100               |
| SNP_P3_15248_40747881 | NC_021160.1    | Ca_kabuli_chr01 | 40747881                | GG                              | CC                | 1945897101               |
| SNP_P3_15249_40747903 | NC_021160.1    | Ca_kabuli_chr01 | 40747903                | GG                              | AA                | 1945897103               |
| SNP_P3_15250_40785395 | NC_021160.1    | Ca_kabuli_chr01 | 40785395                | TT                              | CC                | 1945897105               |
| SNP_P3_15251_40785466 | NC_021160.1    | Ca_kabuli_chr01 | 40785466                | AA                              | GG                | 1945897107               |
| SNP_P3_15252_40785817 | NC_021160.1    | Ca_kabuli_chr01 | 40785817                | AA                              | CC                | 1945897109               |
| SNP_P3_15253_40790003 | NC_021160.1    | Ca_kabuli_chr01 | 40790003                | GG                              | AA                | 1945897110               |
| SNP_P3_15254_40792254 | NC_021160.1    | Ca_kabuli_chr01 | 40792254                | CC                              | TT                | 1945897112               |
| SNP_P3_15255_40792263 | NC_021160.1    | Ca_kabuli_chr01 | 40792263                | TT                              | CC                | 1945897114               |
| SNP_P3_15256_40792270 | NC_021160.1    | Ca_kabuli_chr01 | 40792270                | AA                              | TT                | 1945897116               |
| SNP_P3_15257_40798922 | NC_021160.1    | Ca_kabuli_chr01 | 40798922                | AA                              | GG                | 1945897117               |
| SNP_P3_15258_40801221 | NC_021160.1    | Ca_kabuli_chr01 | 40801221                | AA                              | GG                | 1945897119               |
| SNP_P3_15259_40801224 | NC_021160.1    | Ca_kabuli_chr01 | 40801224                | TT                              | CC                | 1945897121               |
| SNP_P3_15260_40814686 | NC_021160.1    | Ca_kabuli_chr01 | 40814686                | TT                              | CC                | 1945897123               |
| SNP_P3_15261_40814731 | NC_021160.1    | Ca_kabuli_chr01 | 40814731                | GG                              | AA                | 1945897125               |
| SNP_P3_15262_40814750 | NC_021160.1    | Ca_kabuli_chr01 | 40814750                | GG                              | AA                | 1945897126               |
| SNP_P3_15263_40814759 | NC_021160.1    | Ca_kabuli_chr01 | 40814759                | TT                              | CC                | 1945897128               |
| SNP_P3_15264_40814760 | NC_021160.1    | Ca_kabuli_chr01 | 40814760                | TT                              | CC                | 1945897130               |
| SNP_P3_15265_40814778 | NC_021160.1    | Ca_kabuli_chr01 | 40814778                | GG                              | TT                | 1945897132               |
| SNP_P3_15266_40814833 | NC_021160.1    | Ca_kabuli_chr01 | 40814833                | TT                              | CC                | 1945897133               |
| SNP_P3_15267_40814899 | NC_021160.1    | Ca_kabuli_chr01 | 40814899                | AA                              | GG                | 1945897135               |
| SNP_P3_15268_40814942 | NC_021160.1    | Ca_kabuli_chr01 | 40814942                | TT                              | GG                | 1945897137               |
| SNP_P3_15269_40814943 | NC_021160.1    | Ca_kabuli_chr01 | 40814943                | GG                              | TT                | 1945897139               |
| SNP_P3_15270_40815387 | NC_021160.1    | Ca_kabuli_chr01 | 40815387                | TT                              | CC                | 1945897141               |
| SNP_P3_15271_40820004 | NC_021160.1    | Ca_kabuli_chr01 | 40820004                | AA                              | GG                | 1945897142               |
| SNP_P3_15272_40820393 | NC_021160.1    | Ca_kabuli_chr01 | 40820393                | GG                              | AA                | 1945897144               |
| SNP_P3_15273_40820410 | NC_021160.1    | Ca_kabuli_chr01 | 40820410                | TT                              | CC                | 1945897146               |
| SNP_P3_15274_40827735 | NC_021160.1    | Ca_kabuli_chr01 | 40827735                | TT                              | AA                | 1945897148               |
| SNP_P3_15275_40827819 | NC_021160.1    | Ca_kabuli_chr01 | 40827819                | CC                              | TT                | 1945897150               |
| SNP_P3_15276_40827843 | NC_021160.1    | Ca_kabuli_chr01 | 40827843                | CC                              | GG                | 1945897151               |
| SNP_P3_15277_40828101 | NC_021160.1    | Ca_kabuli_chr01 | 40828101                | TT                              | CC                | 1945897153               |
| SNP_P3_15278_40838245 | NC_021160.1    | Ca_kabuli_chr01 | 40838245                | AA                              | TT                | 1945897155               |
| SNP_P3_15279_40838269 | NC_021160.1    | Ca_kabuli_chr01 | 40838269                | TT                              | AA                | 1945897157               |
| SNP_P3_15280_40838282 | NC_021160.1    | Ca_kabuli_chr01 | 40838282                | GG                              | TT                | 1945897158               |
| SNP_P3_15281_40838510 | NC_021160.1    | Ca_kabuli_chr01 | 40838510                | GG                              | AA                | 1945897160               |
| SNP_P3_15282_40838604 | NC_021160.1    | Ca_kabuli_chr01 | 40838604                | TT                              | CC                | 1945897162               |
| SNP_P3_15283_40851091 | NC_021160.1    | Ca_kabuli_chr01 | 40851091                | AA                              | TT                | 1945897164               |
| SNP_P3_15284_40859520 | NC_021160.1    | Ca_kabuli_chr01 | 40859520                | AA                              | GG                | 1945897166               |
| SNP_P3_15285_40859763 | NC_021160.1    | Ca_kabuli_chr01 | 40859763                | CC                              | AA                | 1945897167               |
| SNP_P3_15286_40859858 | NC_021160.1    | Ca_kabuli_chr01 | 40859858                | GG                              | AA                | 1945897169               |
| SNP_P3_15287_40859880 | NC_021160.1    | Ca_kabuli_chr01 | 40859880                | AA                              | TT                | 1945897171               |
| SNP_P3_15288_40861357 | NC_021160.1    | Ca_kabuli_chr01 | 40861357                | TT                              | CC                | 1945897173               |

| SNPs IDs              | Chromosome IDs | Chromosomes     | Physical positions (bp) | CDC Frontier (Reference genome) | (Pusa 256 & HPNB) | NCBI SNPdb Accession IDs |
|-----------------------|----------------|-----------------|-------------------------|---------------------------------|-------------------|--------------------------|
| SNP_P3_15289_40862017 | NC_021160.1    | Ca_kabuli_chr01 | 40862017                | AA                              | GG                | 1945897174               |
| SNP_P3_15290_40862018 | NC_021160.1    | Ca_kabuli_chr01 | 40862018                | CC                              | TT                | 1945897176               |
| SNP_P3_15291_40869111 | NC_021160.1    | Ca_kabuli_chr01 | 40869111                | TT                              | AA                | 1945897178               |
| SNP_P3_15292_40870128 | NC_021160.1    | Ca_kabuli_chr01 | 40870128                | AA                              | GG                | 1945897180               |
| SNP_P3_15293_40871861 | NC_021160.1    | Ca_kabuli_chr01 | 40871861                | CC                              | TT                | 1945897182               |
| SNP_P3_15294_40871869 | NC_021160.1    | Ca_kabuli_chr01 | 40871869                | AA                              | CC                | 1945897183               |
| SNP_P3_15295_40872330 | NC_021160.1    | Ca_kabuli_chr01 | 40872330                | AA                              | GG                | 1945897185               |
| SNP_P3_15296_40872333 | NC_021160.1    | Ca_kabuli_chr01 | 40872333                | CC                              | TT                | 1945897187               |
| SNP_P3_15297_40872354 | NC_021160.1    | Ca_kabuli_chr01 | 40872354                | TT                              | GG                | 1945897189               |
| SNP_P3_15298_40872402 | NC_021160.1    | Ca_kabuli_chr01 | 40872402                | AA                              | GG                | 1945897190               |
| SNP_P3_15299_40872406 | NC_021160.1    | Ca_kabuli_chr01 | 40872406                | AA                              | GG                | 1945897192               |
| SNP_P3_15300_40872426 | NC_021160.1    | Ca_kabuli_chr01 | 40872426                | AA                              | GG                | 1945897194               |
| SNP_P3_15301_40872442 | NC_021160.1    | Ca_kabuli_chr01 | 40872442                | TT                              | CC                | 1945897196               |
| SNP_P3_15302_40872459 | NC_021160.1    | Ca_kabuli_chr01 | 40872459                | AA                              | CC                | 1945897197               |
| SNP_P3_15303_40880002 | NC_021160.1    | Ca_kabuli_chr01 | 40880002                | AA                              | GG                | 1945897199               |
| SNP_P3_15304_40881399 | NC_021160.1    | Ca_kabuli_chr01 | 40881399                | TT                              | CC                | 1945897201               |
| SNP_P3_15305_40886957 | NC_021160.1    | Ca_kabuli_chr01 | 40886957                | TT                              | GG                | 1945897203               |
| SNP_P3_15306_40887554 | NC_021160.1    | Ca_kabuli_chr01 | 40887554                | CC                              | TT                | 1945897205               |
| SNP_P3_15307_40887567 | NC_021160.1    | Ca_kabuli_chr01 | 40887567                | GG                              | AA                | 1945897206               |
| SNP_P3_15308_40887714 | NC_021160.1    | Ca_kabuli_chr01 | 40887714                | AA                              | GG                | 1945897208               |
| SNP_P3_15309_40887765 | NC_021160.1    | Ca_kabuli_chr01 | 40887765                | AA                              | TT                | 1945897210               |
| SNP_P3_15310_40888085 | NC_021160.1    | Ca_kabuli_chr01 | 40888085                | CC                              | AA                | 1945897212               |
| SNP_P3_15311_40888194 | NC_021160.1    | Ca_kabuli_chr01 | 40888194                | CC                              | TT                | 1945897213               |
| SNP_P3_15312_40889660 | NC_021160.1    | Ca_kabuli_chr01 | 40889660                | GG                              | TT                | 1945897215               |
| SNP_P3_15313_40889662 | NC_021160.1    | Ca_kabuli_chr01 | 40889662                | AA                              | TT                | 1945897217               |
| SNP_P3_15314_40889664 | NC_021160.1    | Ca_kabuli_chr01 | 40889664                | CC                              | TT                | 1945897219               |
| SNP_P3_15315_40889742 | NC_021160.1    | Ca_kabuli_chr01 | 40889742                | AA                              | GG                | 1945897221               |
| SNP_P3_15317_40889817 | NC_021160.1    | Ca_kabuli_chr01 | 40889817                | TT                              | AA                | 1945897222               |
| SNP_P3_15319_40890118 | NC_021160.1    | Ca_kabuli_chr01 | 40890118                | GG                              | CC                | 1945897224               |
| SNP_P3_15320_40890134 | NC_021160.1    | Ca_kabuli_chr01 | 40890134                | CC                              | AA                | 1945897226               |
| SNP_P3_15321_40890162 | NC_021160.1    | Ca_kabuli_chr01 | 40890162                | GG                              | TT                | 1945897228               |
| SNP_P3_15322_40890181 | NC_021160.1    | Ca_kabuli_chr01 | 40890181                | AA                              | TT                | 1945897229               |
| SNP_P3_15323_40890183 | NC_021160.1    | Ca_kabuli_chr01 | 40890183                | TT                              | CC                | 1945897231               |
| SNP_P3_15324_40890201 | NC_021160.1    | Ca_kabuli_chr01 | 40890201                | TT                              | CC                | 1945897233               |
| SNP_P3_15325_40890259 | NC_021160.1    | Ca_kabuli_chr01 | 40890259                | TT                              | AA                | 1945897235               |
| SNP_P3_15326_40890260 | NC_021160.1    | Ca_kabuli_chr01 | 40890260                | TT                              | AA                | 1945897236               |
| SNP_P3_15327_40890357 | NC_021160.1    | Ca_kabuli_chr01 | 40890357                | AA                              | GG                | 1945897238               |
| SNP_P3_15328_40890419 | NC_021160.1    | Ca_kabuli_chr01 | 40890419                | CC                              | TT                | 1945897240               |
| SNP_P3_15329_40890432 | NC_021160.1    | Ca_kabuli_chr01 | 40890432                | CC                              | TT                | 1945897242               |
| SNP_P3_15330_40890472 | NC_021160.1    | Ca_kabuli_chr01 | 40890472                | GG                              | AA                | 1945897244               |
| SNP_P3_15332_40890650 | NC_021160.1    | Ca_kabuli_chr01 | 40890650                | AA                              | TT                | 1945897245               |
| SNP_P3_15333_40890656 | NC_021160.1    | Ca_kabuli_chr01 | 40890656                | TT                              | CC                | 1945897247               |

| SNPs IDs              | Chromosome IDs | Chromosomes     | Physical positions (bp) | CDC Frontier (Reference genome) | (Pusa 256 & HPNB) | NCBI SNPdb Accession IDs |
|-----------------------|----------------|-----------------|-------------------------|---------------------------------|-------------------|--------------------------|
| SNP_P3_15335_40890729 | NC_021160.1    | Ca_kabuli_chr01 | 40890729                | TT                              | GG                | 1945897249               |
| SNP_P3_15336_40891283 | NC_021160.1    | Ca_kabuli_chr01 | 40891283                | TT                              | CC                | 1945897251               |
| SNP_P3_15337_40896539 | NC_021160.1    | Ca_kabuli_chr01 | 40896539                | TT                              | CC                | 1945897252               |
| SNP_P3_15338_40899123 | NC_021160.1    | Ca_kabuli_chr01 | 40899123                | GG                              | TT                | 1945897254               |
| SNP_P3_15339_40908237 | NC_021160.1    | Ca_kabuli_chr01 | 40908237                | CC                              | TT                | 1945897256               |
| SNP_P3_15340_40908249 | NC_021160.1    | Ca_kabuli_chr01 | 40908249                | AA                              | TT                | 1945897258               |
| SNP_P3_15341_41029498 | NC_021160.1    | Ca_kabuli_chr01 | 41029498                | AA                              | CC                | 1945897260               |
| SNP_P3_15344_41076464 | NC_021160.1    | Ca_kabuli_chr01 | 41076464                | GG                              | AA                | 1945897261               |
| SNP_P3_15345_41082880 | NC_021160.1    | Ca_kabuli_chr01 | 41082880                | TT                              | CC                | 1945897263               |
| SNP_P3_15346_41083207 | NC_021160.1    | Ca_kabuli_chr01 | 41083207                | CC                              | TT                | 1945897265               |
| SNP_P3_15347_41085126 | NC_021160.1    | Ca_kabuli_chr01 | 41085126                | GG                              | AA                | 1945897267               |
| SNP_P3_15348_41085135 | NC_021160.1    | Ca_kabuli_chr01 | 41085135                | TT                              | CC                | 1945897268               |
| SNP_P3_15349_41085146 | NC_021160.1    | Ca_kabuli_chr01 | 41085146                | CC                              | TT                | 1945897270               |
| SNP_P3_15350_41085147 | NC_021160.1    | Ca_kabuli_chr01 | 41085147                | GG                              | AA                | 1945897272               |
| SNP_P3_15351_41103408 | NC_021160.1    | Ca_kabuli_chr01 | 41103408                | AA                              | GG                | 1945897274               |
| SNP_P3_15352_41103731 | NC_021160.1    | Ca_kabuli_chr01 | 41103731                | TT                              | CC                | 1945897276               |
| SNP_P3_15353_41103766 | NC_021160.1    | Ca_kabuli_chr01 | 41103766                | TT                              | CC                | 1945897277               |
| SNP_P3_15354_41136378 | NC_021160.1    | Ca_kabuli_chr01 | 41136378                | AA                              | GG                | 1945897279               |
| SNP_P3_15355_41187580 | NC_021160.1    | Ca_kabuli_chr01 | 41187580                | GG                              | AA                | 1945897281               |
| SNP_P3_15356_41205413 | NC_021160.1    | Ca_kabuli_chr01 | 41205413                | CC                              | TT                | 1945897283               |
| SNP_P3_15357_41228110 | NC_021160.1    | Ca_kabuli_chr01 | 41228110                | GG                              | CC                | 1945897285               |
| SNP_P3_15358_41234842 | NC_021160.1    | Ca_kabuli_chr01 | 41234842                | CC                              | GG                | 1945897286               |
| SNP_P3_15359_41234855 | NC_021160.1    | Ca_kabuli_chr01 | 41234855                | CC                              | GG                | 1945897288               |
| SNP_P3_15360_41234860 | NC_021160.1    | Ca_kabuli_chr01 | 41234860                | CC                              | TT                | 1945897290               |
| SNP_P3_15361_41234861 | NC_021160.1    | Ca_kabuli_chr01 | 41234861                | GG                              | AA                | 1945897292               |
| SNP_P3_15362_41234880 | NC_021160.1    | Ca_kabuli_chr01 | 41234880                | TT                              | CC                | 1945897293               |
| SNP_P3_15363_41237292 | NC_021160.1    | Ca_kabuli_chr01 | 41237292                | TT                              | CC                | 1945897295               |
| SNP_P3_15364_41240413 | NC_021160.1    | Ca_kabuli_chr01 | 41240413                | TT                              | AA                | 1945897297               |
| SNP_P3_15366_41247658 | NC_021160.1    | Ca_kabuli_chr01 | 41247658                | CC                              | AA                | 1945897299               |
| SNP_P3_15367_41247672 | NC_021160.1    | Ca_kabuli_chr01 | 41247672                | CC                              | TT                | 1945897300               |
| SNP_P3_15368_41247733 | NC_021160.1    | Ca_kabuli_chr01 | 41247733                | GG                              | TT                | 1945897302               |
| SNP_P3_15369_41248481 | NC_021160.1    | Ca_kabuli_chr01 | 41248481                | AA                              | GG                | 1945897304               |
| SNP_P3_15370_41248505 | NC_021160.1    | Ca_kabuli_chr01 | 41248505                | TT                              | GG                | 1945897306               |
| SNP_P3_15371_41248535 | NC_021160.1    | Ca_kabuli_chr01 | 41248535                | GG                              | TT                | 1945897307               |
| SNP_P3_15372_41248542 | NC_021160.1    | Ca_kabuli_chr01 | 41248542                | CC                              | AA                | 1945897309               |
| SNP_P3_15373_41248554 | NC_021160.1    | Ca_kabuli_chr01 | 41248554                | AA                              | TT                | 1945897311               |
| SNP_P3_15374_41248745 | NC_021160.1    | Ca_kabuli_chr01 | 41248745                | AA                              | GG                | 1945897313               |
| SNP_P3_15375_41256347 | NC_021160.1    | Ca_kabuli_chr01 | 41256347                | GG                              | AA                | 1945897314               |
| SNP_P3_15376_41256671 | NC_021160.1    | Ca_kabuli_chr01 | 41256671                | TT                              | AA                | 1945897316               |
| SNP_P3_15377_41265808 | NC_021160.1    | Ca_kabuli_chr01 | 41265808                | CC                              | TT                | 1945897318               |
| SNP_P3_15378_41265817 | NC_021160.1    | Ca_kabuli_chr01 | 41265817                | TT                              | GG                | 1945897320               |
| SNP_P3_15379_41265883 | NC_021160.1    | Ca_kabuli_chr01 | 41265883                | GG                              | AA                | 1945897321               |

| SNPs IDs              | Chromosome IDs | Chromosomes     | Physical positions (bp) | CDC Frontier (Reference genome) | (Pusa 256 & HPNB) | NCBI SNPdb Accession IDs |
|-----------------------|----------------|-----------------|-------------------------|---------------------------------|-------------------|--------------------------|
| SNP_P3_15380_41265902 | NC_021160.1    | Ca_kabuli_chr01 | 41265902                | AA                              | CC                | 1945897323               |
| SNP_P3_15381_41265916 | NC_021160.1    | Ca_kabuli_chr01 | 41265916                | TT                              | CC                | 1945897325               |
| SNP_P3_15382_41266165 | NC_021160.1    | Ca_kabuli_chr01 | 41266165                | TT                              | CC                | 1945897327               |
| SNP_P3_15383_41266170 | NC_021160.1    | Ca_kabuli_chr01 | 41266170                | TT                              | CC                | 1945897329               |
| SNP_P3_15384_41266186 | NC_021160.1    | Ca_kabuli_chr01 | 41266186                | CC                              | GG                | 1945897330               |
| SNP_P3_15385_41266566 | NC_021160.1    | Ca_kabuli_chr01 | 41266566                | AA                              | GG                | 1945897332               |
| SNP_P3_15386_41266580 | NC_021160.1    | Ca_kabuli_chr01 | 41266580                | GG                              | AA                | 1945897334               |
| SNP_P3_15388_41302823 | NC_021160.1    | Ca_kabuli_chr01 | 41302823                | CC                              | TT                | 1945897336               |
| SNP_P3_15389_41316345 | NC_021160.1    | Ca_kabuli_chr01 | 41316345                | TT                              | GG                | 1945897337               |
| SNP_P3_15390_41323530 | NC_021160.1    | Ca_kabuli_chr01 | 41323530                | GG                              | AA                | 1945897339               |
| SNP_P3_15391_41361440 | NC_021160.1    | Ca_kabuli_chr01 | 41361440                | TT                              | GG                | 1945897341               |
| SNP_P3_15392_41361441 | NC_021160.1    | Ca_kabuli_chr01 | 41361441                | AA                              | CC                | 1945897343               |
| SNP_P3_15393_41363977 | NC_021160.1    | Ca_kabuli_chr01 | 41363977                | CC                              | TT                | 1945897344               |
| SNP_P3_15394_41364005 | NC_021160.1    | Ca_kabuli_chr01 | 41364005                | GG                              | AA                | 1945897346               |
| SNP_P3_15395_41406982 | NC_021160.1    | Ca_kabuli_chr01 | 41406982                | TT                              | AA                | 1945897348               |
| SNP_P3_15396_41415741 | NC_021160.1    | Ca_kabuli_chr01 | 41415741                | GG                              | TT                | 1945897350               |
| SNP_P3_15397_41416035 | NC_021160.1    | Ca_kabuli_chr01 | 41416035                | AA                              | CC                | 1945897351               |
| SNP_P3_15398_41416048 | NC_021160.1    | Ca_kabuli_chr01 | 41416048                | TT                              | GG                | 1945897353               |
| SNP_P3_15399_41416397 | NC_021160.1    | Ca_kabuli_chr01 | 41416397                | CC                              | AA                | 1945897355               |
| SNP_P3_15400_41450454 | NC_021160.1    | Ca_kabuli_chr01 | 41450454                | TT                              | CC                | 1945897357               |
| SNP_P3_15401_41450808 | NC_021160.1    | Ca_kabuli_chr01 | 41450808                | GG                              | AA                | 1945897358               |
| SNP_P3_15402_41450818 | NC_021160.1    | Ca_kabuli_chr01 | 41450818                | CC                              | TT                | 1945897360               |
| SNP_P3_15403_41450840 | NC_021160.1    | Ca_kabuli_chr01 | 41450840                | TT                              | GG                | 1945897362               |
| SNP_P3_15404_41452590 | NC_021160.1    | Ca_kabuli_chr01 | 41452590                | GG                              | TT                | 1945897364               |
| SNP_P3_15405_41452736 | NC_021160.1    | Ca_kabuli_chr01 | 41452736                | AA                              | CC                | 1945897365               |
| SNP_P3_15406_41452788 | NC_021160.1    | Ca_kabuli_chr01 | 41452788                | CC                              | AA                | 1945897367               |
| SNP_P3_15407_41452800 | NC_021160.1    | Ca_kabuli_chr01 | 41452800                | TT                              | CC                | 1945897369               |
| SNP_P3_15408_41458855 | NC_021160.1    | Ca_kabuli_chr01 | 41458855                | GG                              | AA                | 1945897371               |
| SNP_P3_15409_41465403 | NC_021160.1    | Ca_kabuli_chr01 | 41465403                | AA                              | GG                | 1945897373               |
| SNP_P3_15410_41471888 | NC_021160.1    | Ca_kabuli_chr01 | 41471888                | AA                              | TT                | 1945897374               |
| SNP_P3_15411_41472048 | NC_021160.1    | Ca_kabuli_chr01 | 41472048                | TT                              | AA                | 1945897376               |
| SNP_P3_15412_41472055 | NC_021160.1    | Ca_kabuli_chr01 | 41472055                | GG                              | AA                | 1945897378               |
| SNP_P3_15413_41472079 | NC_021160.1    | Ca_kabuli_chr01 | 41472079                | CC                              | GG                | 1945897380               |
| SNP_P3_15414_41472140 | NC_021160.1    | Ca_kabuli_chr01 | 41472140                | AA                              | TT                | 1945897381               |
| SNP_P3_15415_41500189 | NC_021160.1    | Ca_kabuli_chr01 | 41500189                | CC                              | TT                | 1945897383               |
| SNP_P3_15417_41502304 | NC_021160.1    | Ca_kabuli_chr01 | 41502304                | TT                              | CC                | 1945897385               |
| SNP_P3_15418_41502370 | NC_021160.1    | Ca_kabuli_chr01 | 41502370                | TT                              | CC                | 1945897387               |
| SNP_P3_15419_41504309 | NC_021160.1    | Ca_kabuli_chr01 | 41504309                | AA                              | TT                | 1945897388               |
| SNP_P3_15420_41504395 | NC_021160.1    | Ca_kabuli_chr01 | 41504395                | GG                              | AA                | 1945897390               |
| SNP_P3_15422_41584425 | NC_021160.1    | Ca_kabuli_chr01 | 41584425                | TT                              | CC                | 1945897392               |
| SNP_P3_15423_41603068 | NC_021160.1    | Ca_kabuli_chr01 | 41603068                | TT                              | AA                | 1945897394               |
| SNP_P3_15424_41610449 | NC_021160.1    | Ca_kabuli_chr01 | 41610449                | GG                              | AA                | 1945897395               |

| SNPs IDs              | Chromosome IDs | Chromosomes     | Physical positions (bp) | CDC Frontier (Reference genome) | (Pusa 256 & HPNB) | NCBI SNPdb Accession IDs |
|-----------------------|----------------|-----------------|-------------------------|---------------------------------|-------------------|--------------------------|
| SNP_P3_15426_41661736 | NC_021160.1    | Ca_kabuli_chr01 | 41661736                | TT                              | CC                | 1945897397               |
| SNP_P3_15427_41666761 | NC_021160.1    | Ca_kabuli_chr01 | 41666761                | AA                              | CC                | 1945897399               |
| SNP_P3_15428_41672953 | NC_021160.1    | Ca_kabuli_chr01 | 41672953                | TT                              | AA                | 1945897401               |
| SNP_P3_15429_41694808 | NC_021160.1    | Ca_kabuli_chr01 | 41694808                | TT                              | CC                | 1945897402               |
| SNP_P3_15430_41694942 | NC_021160.1    | Ca_kabuli_chr01 | 41694942                | GG                              | TT                | 1945897404               |
| SNP_P3_15431_41694965 | NC_021160.1    | Ca_kabuli_chr01 | 41694965                | AA                              | GG                | 1945897406               |
| SNP_P3_15432_41694969 | NC_021160.1    | Ca_kabuli_chr01 | 41694969                | CC                              | TT                | 1945897408               |
| SNP_P3_15433_41694972 | NC_021160.1    | Ca_kabuli_chr01 | 41694972                | CC                              | TT                | 1945897409               |
| SNP_P3_15434_41694997 | NC_021160.1    | Ca_kabuli_chr01 | 41694997                | CC                              | TT                | 1945897411               |
| SNP_P3_15435_41695044 | NC_021160.1    | Ca_kabuli_chr01 | 41695044                | GG                              | AA                | 1945897413               |
| SNP_P3_15436_41695347 | NC_021160.1    | Ca_kabuli_chr01 | 41695347                | CC                              | AA                | 1945897415               |
| SNP_P3_15438_41695387 | NC_021160.1    | Ca_kabuli_chr01 | 41695387                | GG                              | AA                | 1945897417               |
| SNP_P3_15440_41695474 | NC_021160.1    | Ca_kabuli_chr01 | 41695474                | TT                              | GG                | 1945897418               |
| SNP_P3_15441_41695682 | NC_021160.1    | Ca_kabuli_chr01 | 41695682                | TT                              | AA                | 1945897420               |
| SNP_P3_15442_41695683 | NC_021160.1    | Ca_kabuli_chr01 | 41695683                | TT                              | AA                | 1945897422               |
| SNP_P3_15443_41696840 | NC_021160.1    | Ca_kabuli_chr01 | 41696840                | TT                              | CC                | 1945897424               |
| SNP_P3_15444_41697054 | NC_021160.1    | Ca_kabuli_chr01 | 41697054                | AA                              | CC                | 1945897425               |
| SNP_P3_15445_41704168 | NC_021160.1    | Ca_kabuli_chr01 | 41704168                | GG                              | TT                | 1945897427               |
| SNP_P3_15446_41704176 | NC_021160.1    | Ca_kabuli_chr01 | 41704176                | CC                              | TT                | 1945897429               |
| SNP_P3_15447_41704228 | NC_021160.1    | Ca_kabuli_chr01 | 41704228                | GG                              | TT                | 1945897431               |
| SNP_P3_15448_41704268 | NC_021160.1    | Ca_kabuli_chr01 | 41704268                | GG                              | AA                | 1945897432               |
| SNP_P3_15449_41704301 | NC_021160.1    | Ca_kabuli_chr01 | 41704301                | TT                              | GG                | 1945897434               |
| SNP_P3_15450_41704316 | NC_021160.1    | Ca_kabuli_chr01 | 41704316                | GG                              | AA                | 1945897436               |
| SNP_P3_15451_41704385 | NC_021160.1    | Ca_kabuli_chr01 | 41704385                | CC                              | AA                | 1945897438               |
| SNP_P3_15452_41704411 | NC_021160.1    | Ca_kabuli_chr01 | 41704411                | AA                              | GG                | 1945897439               |
| SNP_P3_15455_41704550 | NC_021160.1    | Ca_kabuli_chr01 | 41704550                | TT                              | CC                | 1945897441               |
| SNP_P3_15456_41704553 | NC_021160.1    | Ca_kabuli_chr01 | 41704553                | AA                              | TT                | 1945897443               |
| SNP_P3_15457_41704603 | NC_021160.1    | Ca_kabuli_chr01 | 41704603                | AA                              | TT                | 1945897445               |
| SNP_P3_15458_41704624 | NC_021160.1    | Ca_kabuli_chr01 | 41704624                | TT                              | AA                | 1945897446               |
| SNP_P3_15459_41704633 | NC_021160.1    | Ca_kabuli_chr01 | 41704633                | CC                              | TT                | 1945897448               |
| SNP_P3_15460_41705392 | NC_021160.1    | Ca_kabuli_chr01 | 41705392                | CC                              | TT                | 1945897450               |
| SNP_P3_15461_41712203 | NC_021160.1    | Ca_kabuli_chr01 | 41712203                | GG                              | AA                | 1945897452               |
| SNP_P3_15462_41712284 | NC_021160.1    | Ca_kabuli_chr01 | 41712284                | GG                              | AA                | 1945897454               |
| SNP_P3_15463_41712423 | NC_021160.1    | Ca_kabuli_chr01 | 41712423                | AA                              | GG                | 1945897455               |
| SNP_P3_15464_41712529 | NC_021160.1    | Ca_kabuli_chr01 | 41712529                | GG                              | AA                | 1945897457               |
| SNP_P3_15465_41712688 | NC_021160.1    | Ca_kabuli_chr01 | 41712688                | GG                              | AA                | 1945897459               |
| SNP_P3_15466_41715048 | NC_021160.1    | Ca_kabuli_chr01 | 41715048                | CC                              | TT                | 1945897461               |
| SNP_P3_15467_41717409 | NC_021160.1    | Ca_kabuli_chr01 | 41717409                | GG                              | TT                | 1945897462               |
| SNP_P3_15468_41718481 | NC_021160.1    | Ca_kabuli_chr01 | 41718481                | CC                              | TT                | 1945897464               |
| SNP_P3_15469_41718553 | NC_021160.1    | Ca_kabuli_chr01 | 41718553                | AA                              | GG                | 1945897466               |
| SNP_P3_15470_41718571 | NC_021160.1    | Ca_kabuli_chr01 | 41718571                | AA                              | TT                | 1945897468               |
| SNP_P3_15471_41718683 | NC_021160.1    | Ca_kabuli_chr01 | 41718683                | CC                              | GG                | 1945897469               |

| SNPs IDs              | Chromosome IDs | Chromosomes     | Physical positions (bp) | CDC Frontier (Reference genome) | (Pusa 256 & HPNB) | NCBI SNPdb Accession IDs |
|-----------------------|----------------|-----------------|-------------------------|---------------------------------|-------------------|--------------------------|
| SNP_P3_15472_41718744 | NC_021160.1    | Ca_kabuli_chr01 | 41718744                | CC                              | AA                | 1945897471               |
| SNP_P3_15474_41718886 | NC_021160.1    | Ca_kabuli_chr01 | 41718886                | GG                              | AA                | 1945897473               |
| SNP_P3_15475_41718958 | NC_021160.1    | Ca_kabuli_chr01 | 41718958                | TT                              | AA                | 1945897475               |
| SNP_P3_15476_41718997 | NC_021160.1    | Ca_kabuli_chr01 | 41718997                | TT                              | CC                | 1945897477               |
| SNP_P3_15477_41718999 | NC_021160.1    | Ca_kabuli_chr01 | 41718999                | GG                              | AA                | 1945897478               |
| SNP_P3_15478_41721855 | NC_021160.1    | Ca_kabuli_chr01 | 41721855                | GG                              | TT                | 1945897480               |
| SNP_P3_15479_41721879 | NC_021160.1    | Ca_kabuli_chr01 | 41721879                | TT                              | GG                | 1945897482               |
| SNP_P3_15480_41721885 | NC_021160.1    | Ca_kabuli_chr01 | 41721885                | AA                              | TT                | 1945897484               |
| SNP_P3_15481_41721895 | NC_021160.1    | Ca_kabuli_chr01 | 41721895                | AA                              | GG                | 1945897486               |
| SNP_P3_15482_41721944 | NC_021160.1    | Ca_kabuli_chr01 | 41721944                | TT                              | GG                | 1945897487               |
| SNP_P3_15483_41722039 | NC_021160.1    | Ca_kabuli_chr01 | 41722039                | TT                              | AA                | 1945897489               |
| SNP_P3_15484_41722069 | NC_021160.1    | Ca_kabuli_chr01 | 41722069                | GG                              | AA                | 1945897491               |
| SNP_P3_15485_41722094 | NC_021160.1    | Ca_kabuli_chr01 | 41722094                | GG                              | TT                | 1945897493               |
| SNP_P3_15486_41722411 | NC_021160.1    | Ca_kabuli_chr01 | 41722411                | TT                              | AA                | 1945897494               |
| SNP_P3_15487_41727803 | NC_021160.1    | Ca_kabuli_chr01 | 41727803                | TT                              | AA                | 1945897496               |
| SNP_P3_15488_41727867 | NC_021160.1    | Ca_kabuli_chr01 | 41727867                | TT                              | CC                | 1945897498               |
| SNP_P3_15489_41727885 | NC_021160.1    | Ca_kabuli_chr01 | 41727885                | AA                              | CC                | 1945897500               |
| SNP_P3_15490_41728074 | NC_021160.1    | Ca_kabuli_chr01 | 41728074                | AA                              | CC                | 1945897502               |
| SNP_P3_15491_41732465 | NC_021160.1    | Ca_kabuli_chr01 | 41732465                | CC                              | TT                | 1945897503               |
| SNP_P3_15492_41739681 | NC_021160.1    | Ca_kabuli_chr01 | 41739681                | CC                              | TT                | 1945897505               |
| SNP_P3_15493_41746625 | NC_021160.1    | Ca_kabuli_chr01 | 41746625                | AA                              | TT                | 1945897507               |
| SNP_P3_15494_41746851 | NC_021160.1    | Ca_kabuli_chr01 | 41746851                | AA                              | GG                | 1945897509               |
| SNP_P3_15495_41748176 | NC_021160.1    | Ca_kabuli_chr01 | 41748176                | AA                              | GG                | 1945897511               |
| SNP_P3_15496_41748196 | NC_021160.1    | Ca_kabuli_chr01 | 41748196                | CC                              | TT                | 1945897512               |
| SNP_P3_15498_41801200 | NC_021160.1    | Ca_kabuli_chr01 | 41801200                | CC                              | AA                | 1945897514               |
| SNP_P3_15499_41801228 | NC_021160.1    | Ca_kabuli_chr01 | 41801228                | CC                              | TT                | 1945897516               |
| SNP_P3_15500_41801693 | NC_021160.1    | Ca_kabuli_chr01 | 41801693                | TT                              | GG                | 1945897518               |
| SNP_P3_15501_41810772 | NC_021160.1    | Ca_kabuli_chr01 | 41810772                | GG                              | AA                | 1945897519               |
| SNP_P3_15502_41811914 | NC_021160.1    | Ca_kabuli_chr01 | 41811914                | TT                              | GG                | 1945897521               |
| SNP_P3_15503_41812128 | NC_021160.1    | Ca_kabuli_chr01 | 41812128                | CC                              | GG                | 1945897523               |
| SNP_P3_15504_41817802 | NC_021160.1    | Ca_kabuli_chr01 | 41817802                | TT                              | AA                | 1945897525               |
| SNP_P3_15505_41833263 | NC_021160.1    | Ca_kabuli_chr01 | 41833263                | AA                              | GG                | 1945897527               |
| SNP_P3_15506_41841753 | NC_021160.1    | Ca_kabuli_chr01 | 41841753                | AA                              | GG                | 1945897528               |
| SNP_P3_15507_41842978 | NC_021160.1    | Ca_kabuli_chr01 | 41842978                | GG                              | AA                | 1945897530               |
| SNP_P3_15508_41846702 | NC_021160.1    | Ca_kabuli_chr01 | 41846702                | AA                              | CC                | 1945897532               |
| SNP_P3_15510_41908922 | NC_021160.1    | Ca_kabuli_chr01 | 41908922                | CC                              | TT                | 1945897534               |
| SNP_P3_15511_41909414 | NC_021160.1    | Ca_kabuli_chr01 | 41909414                | TT                              | CC                | 1945897535               |
| SNP_P3_15513_41946626 | NC_021160.1    | Ca_kabuli_chr01 | 41946626                | CC                              | TT                | 1945897537               |
| SNP_P3_15515_42000276 | NC_021160.1    | Ca_kabuli_chr01 | 42000276                | AA                              | GG                | 1945897539               |
| SNP_P3_15516_42021197 | NC_021160.1    | Ca_kabuli_chr01 | 42021197                | CC                              | TT                | 1945897541               |
| SNP_P3_15518_42021670 | NC_021160.1    | Ca_kabuli_chr01 | 42021670                | CC                              | AA                | 1945897543               |
| SNP_P3_15519_42021684 | NC_021160.1    | Ca_kabuli_chr01 | 42021684                | TT                              | AA                | 1945897544               |

| SNPs IDs              | Chromosome IDs | Chromosomes     | Physical positions (bp) | CDC Frontier (Reference genome) | (Pusa 256 & HPNB) | NCBI SNPdb Accession IDs |
|-----------------------|----------------|-----------------|-------------------------|---------------------------------|-------------------|--------------------------|
| SNP_P3_15520_42021707 | NC_021160.1    | Ca_kabuli_chr01 | 42021707                | AA                              | TT                | 1945897546               |
| SNP_P3_15522_42050502 | NC_021160.1    | Ca_kabuli_chr01 | 42050502                | GG                              | AA                | 1945897548               |
| SNP_P3_15524_42070693 | NC_021160.1    | Ca_kabuli_chr01 | 42070693                | TT                              | CC                | 1945897550               |
| SNP_P3_15525_42070871 | NC_021160.1    | Ca_kabuli_chr01 | 42070871                | TT                              | CC                | 1945897552               |
| SNP_P3_15526_42070873 | NC_021160.1    | Ca_kabuli_chr01 | 42070873                | TT                              | CC                | 1945897553               |
| SNP_P3_15528_42098103 | NC_021160.1    | Ca_kabuli_chr01 | 42098103                | GG                              | AA                | 1945897555               |
| SNP_P3_15529_42098268 | NC_021160.1    | Ca_kabuli_chr01 | 42098268                | TT                              | GG                | 1945897557               |
| SNP_P3_15531_42102351 | NC_021160.1    | Ca_kabuli_chr01 | 42102351                | AA                              | TT                | 1945897559               |
| SNP_P3_15532_42167043 | NC_021160.1    | Ca_kabuli_chr01 | 42167043                | TT                              | CC                | 1945897560               |
| SNP_P3_15533_42167509 | NC_021160.1    | Ca_kabuli_chr01 | 42167509                | CC                              | AA                | 1945897562               |
| SNP_P3_15534_42179465 | NC_021160.1    | Ca_kabuli_chr01 | 42179465                | GG                              | CC                | 1945897564               |
| SNP_P3_15535_42203345 | NC_021160.1    | Ca_kabuli_chr01 | 42203345                | TT                              | CC                | 1945897566               |
| SNP_P3_15537_42208405 | NC_021160.1    | Ca_kabuli_chr01 | 42208405                | GG                              | AA                | 1945897568               |
| SNP_P3_15538_42243850 | NC_021160.1    | Ca_kabuli_chr01 | 42243850                | GG                              | AA                | 1945897569               |
| SNP_P3_15539_42244275 | NC_021160.1    | Ca_kabuli_chr01 | 42244275                | TT                              | GG                | 1945897571               |
| SNP_P3_15540_42244312 | NC_021160.1    | Ca_kabuli_chr01 | 42244312                | TT                              | AA                | 1945897573               |
| SNP_P3_15541_42244339 | NC_021160.1    | Ca_kabuli_chr01 | 42244339                | TT                              | CC                | 1945897575               |
| SNP_P3_15542_42244347 | NC_021160.1    | Ca_kabuli_chr01 | 42244347                | GG                              | TT                | 1945897576               |
| SNP_P3_15543_42244358 | NC_021160.1    | Ca_kabuli_chr01 | 42244358                | AA                              | GG                | 1945897578               |
| SNP_P3_15544_42244400 | NC_021160.1    | Ca_kabuli_chr01 | 42244400                | AA                              | TT                | 1945897580               |
| SNP_P3_15545_42267581 | NC_021160.1    | Ca_kabuli_chr01 | 42267581                | CC                              | TT                | 1945897582               |
| SNP_P3_15546_42275645 | NC_021160.1    | Ca_kabuli_chr01 | 42275645                | CC                              | AA                | 1945897584               |
| SNP_P3_15547_42282016 | NC_021160.1    | Ca_kabuli_chr01 | 42282016                | AA                              | TT                | 1945897585               |
| SNP_P3_15548_42328725 | NC_021160.1    | Ca_kabuli_chr01 | 42328725                | GG                              | AA                | 1945897587               |
| SNP_P3_15549_42328988 | NC_021160.1    | Ca_kabuli_chr01 | 42328988                | TT                              | CC                | 1945897589               |
| SNP_P3_15550_42332097 | NC_021160.1    | Ca_kabuli_chr01 | 42332097                | AA                              | TT                | 1945897591               |
| SNP_P3_15551_42332150 | NC_021160.1    | Ca_kabuli_chr01 | 42332150                | CC                              | AA                | 1945897592               |
| SNP_P3_15552_42332224 | NC_021160.1    | Ca_kabuli_chr01 | 42332224                | GG                              | TT                | 1945897594               |
| SNP_P3_15553_42332407 | NC_021160.1    | Ca_kabuli_chr01 | 42332407                | AA                              | GG                | 1945897596               |
| SNP_P3_15554_42332483 | NC_021160.1    | Ca_kabuli_chr01 | 42332483                | TT                              | AA                | 1945897598               |
| SNP_P3_15555_42332579 | NC_021160.1    | Ca_kabuli_chr01 | 42332579                | TT                              | CC                | 1945897600               |
| SNP_P3_15556_42379521 | NC_021160.1    | Ca_kabuli_chr01 | 42379521                | AA                              | CC                | 1945897601               |
| SNP_P3_15557_42392320 | NC_021160.1    | Ca_kabuli_chr01 | 42392320                | CC                              | TT                | 1945897603               |
| SNP_P3_15558_42394814 | NC_021160.1    | Ca_kabuli_chr01 | 42394814                | AA                              | GG                | 1945897605               |
| SNP_P3_15559_42396243 | NC_021160.1    | Ca_kabuli_chr01 | 42396243                | TT                              | CC                | 1945897607               |
| SNP_P3_15560_42405386 | NC_021160.1    | Ca_kabuli_chr01 | 42405386                | TT                              | CC                | 1945897608               |
| SNP_P3_15562_42411139 | NC_021160.1    | Ca_kabuli_chr01 | 42411139                | AA                              | GG                | 1945897610               |
| SNP_P3_15563_42411155 | NC_021160.1    | Ca_kabuli_chr01 | 42411155                | CC                              | TT                | 1945897612               |
| SNP_P3_15564_42411173 | NC_021160.1    | Ca_kabuli_chr01 | 42411173                | GG                              | AA                | 1945897614               |
| SNP_P3_15565_42411186 | NC_021160.1    | Ca_kabuli_chr01 | 42411186                | AA                              | CC                | 1945897615               |
| SNP_P3_15566_42411196 | NC_021160.1    | Ca_kabuli_chr01 | 42411196                | AA                              | GG                | 1945897617               |
| SNP_P3_15567_42411215 | NC_021160.1    | Ca_kabuli_chr01 | 42411215                | AA                              | CC                | 1945897619               |

| SNPs IDs              | Chromosome IDs | Chromosomes     | Physical positions (bp) | CDC Frontier (Reference genome) | (Pusa 256 & HPNB) | NCBI SNPdb Accession IDs |
|-----------------------|----------------|-----------------|-------------------------|---------------------------------|-------------------|--------------------------|
| SNP_P3_15568_42411235 | NC_021160.1    | Ca_kabuli_chr01 | 42411235                | AA                              | CC                | 1945897621               |
| SNP_P3_15569_42411251 | NC_021160.1    | Ca_kabuli_chr01 | 42411251                | AA                              | GG                | 1945897622               |
| SNP_P3_15570_42413411 | NC_021160.1    | Ca_kabuli_chr01 | 42413411                | GG                              | AA                | 1945897624               |
| SNP_P3_15571_42530415 | NC_021160.1    | Ca_kabuli_chr01 | 42530415                | TT                              | CC                | 1945897626               |
| SNP_P3_15572_42530566 | NC_021160.1    | Ca_kabuli_chr01 | 42530566                | CC                              | AA                | 1945897628               |
| SNP_P3_15573_42538838 | NC_021160.1    | Ca_kabuli_chr01 | 42538838                | CC                              | TT                | 1945897630               |
| SNP_P3_15574_42538849 | NC_021160.1    | Ca_kabuli_chr01 | 42538849                | GG                              | TT                | 1945897631               |
| SNP_P3_15575_42538911 | NC_021160.1    | Ca_kabuli_chr01 | 42538911                | TT                              | AA                | 1945897633               |
| SNP_P3_15576_42538976 | NC_021160.1    | Ca_kabuli_chr01 | 42538976                | TT                              | AA                | 1945897635               |
| SNP_P3_15577_42539212 | NC_021160.1    | Ca_kabuli_chr01 | 42539212                | GG                              | TT                | 1945897637               |
| SNP_P3_15578_42540218 | NC_021160.1    | Ca_kabuli_chr01 | 42540218                | AA                              | GG                | 1945897638               |
| SNP_P3_15579_42540658 | NC_021160.1    | Ca_kabuli_chr01 | 42540658                | TT                              | CC                | 1945897640               |
| SNP_P3_15580_42547582 | NC_021160.1    | Ca_kabuli_chr01 | 42547582                | AA                              | GG                | 1945897642               |
| SNP_P3_15581_42547761 | NC_021160.1    | Ca_kabuli_chr01 | 42547761                | GG                              | AA                | 1945897644               |
| SNP_P3_15582_42548035 | NC_021160.1    | Ca_kabuli_chr01 | 42548035                | AA                              | CC                | 1945897646               |
| SNP_P3_15583_42550438 | NC_021160.1    | Ca_kabuli_chr01 | 42550438                | TT                              | CC                | 1945897647               |
| SNP_P3_15584_42550698 | NC_021160.1    | Ca_kabuli_chr01 | 42550698                | CC                              | TT                | 1945897649               |
| SNP_P3_15585_42572593 | NC_021160.1    | Ca_kabuli_chr01 | 42572593                | GG                              | AA                | 1945897651               |
| SNP_P3_15586_42572595 | NC_021160.1    | Ca_kabuli_chr01 | 42572595                | AA                              | GG                | 1945897653               |
| SNP_P3_15587_42591661 | NC_021160.1    | Ca_kabuli_chr01 | 42591661                | GG                              | CC                | 1945897655               |
| SNP_P3_15588_42595614 | NC_021160.1    | Ca_kabuli_chr01 | 42595614                | AA                              | CC                | 1945897656               |
| SNP_P3_15589_42595615 | NC_021160.1    | Ca_kabuli_chr01 | 42595615                | CC                              | GG                | 1945897658               |
| SNP_P3_15590_42595961 | NC_021160.1    | Ca_kabuli_chr01 | 42595961                | TT                              | AA                | 1945897660               |
| SNP_P3_15591_42605699 | NC_021160.1    | Ca_kabuli_chr01 | 42605699                | TT                              | AA                | 1945897662               |
| SNP_P3_15592_42605712 | NC_021160.1    | Ca_kabuli_chr01 | 42605712                | CC                              | TT                | 1945897663               |
| SNP_P3_15593_42606037 | NC_021160.1    | Ca_kabuli_chr01 | 42606037                | TT                              | AA                | 1945897665               |
| SNP_P3_15595_42635974 | NC_021160.1    | Ca_kabuli_chr01 | 42635974                | TT                              | AA                | 1945897667               |
| SNP_P3_15596_42635991 | NC_021160.1    | Ca_kabuli_chr01 | 42635991                | TT                              | CC                | 1945897669               |
| SNP_P3_15597_42636014 | NC_021160.1    | Ca_kabuli_chr01 | 42636014                | CC                              | TT                | 1945897671               |
| SNP_P3_15598_42636017 | NC_021160.1    | Ca_kabuli_chr01 | 42636017                | TT                              | AA                | 1945897672               |
| SNP_P3_15599_42641920 | NC_021160.1    | Ca_kabuli_chr01 | 42641920                | GG                              | AA                | 1945897674               |
| SNP_P3_15600_42642818 | NC_021160.1    | Ca_kabuli_chr01 | 42642818                | GG                              | AA                | 1945897676               |
| SNP_P3_15601_42657301 | NC_021160.1    | Ca_kabuli_chr01 | 42657301                | TT                              | GG                | 1945897678               |
| SNP_P3_15602_42692051 | NC_021160.1    | Ca_kabuli_chr01 | 42692051                | GG                              | AA                | 1945897679               |
| SNP_P3_15603_42740435 | NC_021160.1    | Ca_kabuli_chr01 | 42740435                | CC                              | TT                | 1945897681               |
| SNP_P3_15604_42740442 | NC_021160.1    | Ca_kabuli_chr01 | 42740442                | TT                              | CC                | 1945897683               |
| SNP_P3_15605_42762681 | NC_021160.1    | Ca_kabuli_chr01 | 42762681                | CC                              | GG                | 1945897685               |
| SNP_P3_15606_42791603 | NC_021160.1    | Ca_kabuli_chr01 | 42791603                | GG                              | AA                | 1945897687               |
| SNP_P3_15607_42793548 | NC_021160.1    | Ca_kabuli_chr01 | 42793548                | TT                              | CC                | 1945897688               |
| SNP_P3_15608_42793576 | NC_021160.1    | Ca_kabuli_chr01 | 42793576                | TT                              | CC                | 1945897690               |
| SNP_P3_15609_42793937 | NC_021160.1    | Ca_kabuli_chr01 | 42793937                | TT                              | CC                | 1945897692               |
| SNP_P3_15610_42794158 | NC_021160.1    | Ca_kabuli_chr01 | 42794158                | AA                              | GG                | 1945897694               |



| SNPs IDs              | Chromosome IDs | Chromosomes     | Physical positions (bp) | CDC Frontier (Reference genome) | (Pusa 256 & HPNB) | NCBI SNPdb Accession IDs |
|-----------------------|----------------|-----------------|-------------------------|---------------------------------|-------------------|--------------------------|
| SNP_P3_15611_42794178 | NC_021160.1    | Ca_kabuli_chr01 | 42794178                | CC                              | TT                | 1945897695               |
| SNP_P3_15612_42794185 | NC_021160.1    | Ca_kabuli_chr01 | 42794185                | CC                              | TT                | 1945897697               |
| SNP_P3_15613_42794199 | NC_021160.1    | Ca_kabuli_chr01 | 42794199                | GG                              | TT                | 1945897699               |
| SNP_P3_15614_42800189 | NC_021160.1    | Ca_kabuli_chr01 | 42800189                | GG                              | AA                | 1945897701               |
| SNP_P3_15616_42841587 | NC_021160.1    | Ca_kabuli_chr01 | 42841587                | GG                              | AA                | 1945897703               |
| SNP_P3_15617_42902926 | NC_021160.1    | Ca_kabuli_chr01 | 42902926                | TT                              | CC                | 1945897704               |
| SNP_P3_15618_42903314 | NC_021160.1    | Ca_kabuli_chr01 | 42903314                | AA                              | GG                | 1945897706               |
| SNP_P3_15619_42915868 | NC_021160.1    | Ca_kabuli_chr01 | 42915868                | AA                              | GG                | 1945897708               |
| SNP_P3_15620_42970533 | NC_021160.1    | Ca_kabuli_chr01 | 42970533                | AA                              | GG                | 1945897710               |
| SNP_P3_15621_42972243 | NC_021160.1    | Ca_kabuli_chr01 | 42972243                | GG                              | AA                | 1945897712               |
| SNP_P3_15622_42978330 | NC_021160.1    | Ca_kabuli_chr01 | 42978330                | TT                              | CC                | 1945897713               |
| SNP_P3_15623_42980605 | NC_021160.1    | Ca_kabuli_chr01 | 42980605                | AA                              | CC                | 1945897715               |
| SNP_P3_15624_42980750 | NC_021160.1    | Ca_kabuli_chr01 | 42980750                | CC                              | TT                | 1945897717               |
| SNP_P3_15625_43000860 | NC_021160.1    | Ca_kabuli_chr01 | 43000860                | GG                              | AA                | 1945897719               |
| SNP_P3_15626_43000939 | NC_021160.1    | Ca_kabuli_chr01 | 43000939                | TT                              | AA                | 1945897721               |
| SNP_P3_15627_43001071 | NC_021160.1    | Ca_kabuli_chr01 | 43001071                | TT                              | AA                | 1945897722               |
| SNP_P3_15628_43001079 | NC_021160.1    | Ca_kabuli_chr01 | 43001079                | CC                              | TT                | 1945897724               |
| SNP_P3_15629_43001242 | NC_021160.1    | Ca_kabuli_chr01 | 43001242                | CC                              | TT                | 1945897726               |
| SNP_P3_15630_43001252 | NC_021160.1    | Ca_kabuli_chr01 | 43001252                | TT                              | CC                | 1945897728               |
| SNP_P3_15631_43001279 | NC_021160.1    | Ca_kabuli_chr01 | 43001279                | AA                              | CC                | 1945897729               |
| SNP_P3_15632_43001798 | NC_021160.1    | Ca_kabuli_chr01 | 43001798                | CC                              | GG                | 1945897731               |
| SNP_P3_15633_43002920 | NC_021160.1    | Ca_kabuli_chr01 | 43002920                | CC                              | TT                | 1945897733               |
| SNP_P3_15634_43007783 | NC_021160.1    | Ca_kabuli_chr01 | 43007783                | TT                              | CC                | 1945897735               |
| SNP_P3_15635_43012709 | NC_021160.1    | Ca_kabuli_chr01 | 43012709                | GG                              | AA                | 1945897737               |
| SNP_P3_15636_43018761 | NC_021160.1    | Ca_kabuli_chr01 | 43018761                | AA                              | GG                | 1945897738               |
| SNP_P3_15637_43036326 | NC_021160.1    | Ca_kabuli_chr01 | 43036326                | GG                              | AA                | 1945897740               |
| SNP_P3_15638_43036391 | NC_021160.1    | Ca_kabuli_chr01 | 43036391                | GG                              | AA                | 1945897742               |
| SNP_P3_15640_43065715 | NC_021160.1    | Ca_kabuli_chr01 | 43065715                | GG                              | AA                | 1945897744               |
| SNP_P3_15641_43065724 | NC_021160.1    | Ca_kabuli_chr01 | 43065724                | CC                              | GG                | 1945897746               |
| SNP_P3_15642_43065746 | NC_021160.1    | Ca_kabuli_chr01 | 43065746                | AA                              | GG                | 1945897747               |
| SNP_P3_15643_43065779 | NC_021160.1    | Ca_kabuli_chr01 | 43065779                | AA                              | GG                | 1945897749               |
| SNP_P3_15644_43065792 | NC_021160.1    | Ca_kabuli_chr01 | 43065792                | GG                              | CC                | 1945897751               |
| SNP_P3_15645_43065818 | NC_021160.1    | Ca_kabuli_chr01 | 43065818                | AA                              | TT                | 1945897753               |
| SNP_P3_15646_43066111 | NC_021160.1    | Ca_kabuli_chr01 | 43066111                | AA                              | GG                | 1945897754               |
| SNP_P3_15647_43066179 | NC_021160.1    | Ca_kabuli_chr01 | 43066179                | TT                              | GG                | 1945897756               |
| SNP_P3_15648_43066267 | NC_021160.1    | Ca_kabuli_chr01 | 43066267                | TT                              | CC                | 1945897758               |
| SNP_P3_15649_43066976 | NC_021160.1    | Ca_kabuli_chr01 | 43066976                | TT                              | AA                | 1945897760               |
| SNP_P3_15650_43066978 | NC_021160.1    | Ca_kabuli_chr01 | 43066978                | CC                              | TT                | 1945897762               |
| SNP_P3_15651_43075224 | NC_021160.1    | Ca_kabuli_chr01 | 43075224                | TT                              | GG                | 1945897763               |
| SNP_P3_15653_43094300 | NC_021160.1    | Ca_kabuli_chr01 | 43094300                | TT                              | CC                | 1945897765               |
| SNP_P3_15655_43139915 | NC_021160.1    | Ca_kabuli_chr01 | 43139915                | GG                              | AA                | 1945897767               |
| SNP_P3_15656_43139941 | NC_021160.1    | Ca_kabuli_chr01 | 43139941                | AA                              | GG                | 1945897769               |

| SNPs IDs              | Chromosome IDs | Chromosomes     | Physical positions (bp) | CDC Frontier (Reference genome) | (Pusa 256 & HPNB) | NCBI SNPdb Accession IDs |
|-----------------------|----------------|-----------------|-------------------------|---------------------------------|-------------------|--------------------------|
| SNP_P3_15657_43139943 | NC_021160.1    | Ca_kabuli_chr01 | 43139943                | GG                              | TT                | 1945897771               |
| SNP_P3_15658_43157584 | NC_021160.1    | Ca_kabuli_chr01 | 43157584                | CC                              | TT                | 1945897772               |
| SNP_P3_15660_43222523 | NC_021160.1    | Ca_kabuli_chr01 | 43222523                | TT                              | CC                | 1945897774               |
| SNP_P3_15661_43235814 | NC_021160.1    | Ca_kabuli_chr01 | 43235814                | TT                              | CC                | 1945897776               |
| SNP_P3_15662_43251480 | NC_021160.1    | Ca_kabuli_chr01 | 43251480                | CC                              | TT                | 1945897778               |
| SNP_P3_15663_43261266 | NC_021160.1    | Ca_kabuli_chr01 | 43261266                | CC                              | AA                | 1945897779               |
| SNP_P3_15664_43262297 | NC_021160.1    | Ca_kabuli_chr01 | 43262297                | GG                              | AA                | 1945897781               |
| SNP_P3_15665_43262329 | NC_021160.1    | Ca_kabuli_chr01 | 43262329                | CC                              | TT                | 1945897783               |
| SNP_P3_15666_43262330 | NC_021160.1    | Ca_kabuli_chr01 | 43262330                | TT                              | CC                | 1945897785               |
| SNP_P3_15669_43272131 | NC_021160.1    | Ca_kabuli_chr01 | 43272131                | AA                              | TT                | 1945897787               |
| SNP_P3_15671_43300400 | NC_021160.1    | Ca_kabuli_chr01 | 43300400                | TT                              | GG                | 1945897788               |
| SNP_P3_15672_43309739 | NC_021160.1    | Ca_kabuli_chr01 | 43309739                | TT                              | CC                | 1945897790               |
| SNP_P3_15673_43362894 | NC_021160.1    | Ca_kabuli_chr01 | 43362894                | AA                              | GG                | 1945897792               |
| SNP_P3_15674_43362959 | NC_021160.1    | Ca_kabuli_chr01 | 43362959                | TT                              | AA                | 1945897794               |
| SNP_P3_15675_43362969 | NC_021160.1    | Ca_kabuli_chr01 | 43362969                | TT                              | GG                | 1945897796               |
| SNP_P3_15676_43362972 | NC_021160.1    | Ca_kabuli_chr01 | 43362972                | TT                              | CC                | 1945897797               |
| SNP_P3_15679_43418782 | NC_021160.1    | Ca_kabuli_chr01 | 43418782                | GG                              | AA                | 1945897799               |
| SNP_P3_15680_43420328 | NC_021160.1    | Ca_kabuli_chr01 | 43420328                | AA                              | GG                | 1945897801               |
| SNP_P3_15681_43430393 | NC_021160.1    | Ca_kabuli_chr01 | 43430393                | TT                              | CC                | 1945897803               |
| SNP_P3_15682_43430421 | NC_021160.1    | Ca_kabuli_chr01 | 43430421                | TT                              | CC                | 1945897804               |
| SNP_P3_15684_43438473 | NC_021160.1    | Ca_kabuli_chr01 | 43438473                | TT                              | AA                | 1945897806               |
| SNP_P3_15686_43438629 | NC_021160.1    | Ca_kabuli_chr01 | 43438629                | TT                              | CC                | 1945897808               |
| SNP_P3_15687_43438907 | NC_021160.1    | Ca_kabuli_chr01 | 43438907                | GG                              | AA                | 1945897810               |
| SNP_P3_15688_43440840 | NC_021160.1    | Ca_kabuli_chr01 | 43440840                | TT                              | CC                | 1945897812               |
| SNP_P3_15689_43440899 | NC_021160.1    | Ca_kabuli_chr01 | 43440899                | GG                              | AA                | 1945897813               |
| SNP_P3_15690_43441260 | NC_021160.1    | Ca_kabuli_chr01 | 43441260                | AA                              | GG                | 1945897815               |
| SNP_P3_15691_43441327 | NC_021160.1    | Ca_kabuli_chr01 | 43441327                | CC                              | TT                | 1945897817               |
| SNP_P3_15692_43441496 | NC_021160.1    | Ca_kabuli_chr01 | 43441496                | TT                              | CC                | 1945897819               |
| SNP_P3_15693_43441530 | NC_021160.1    | Ca_kabuli_chr01 | 43441530                | GG                              | AA                | 1945897820               |
| SNP_P3_15694_43451904 | NC_021160.1    | Ca_kabuli_chr01 | 43451904                | CC                              | TT                | 1945897822               |
| SNP_P3_15695_43451916 | NC_021160.1    | Ca_kabuli_chr01 | 43451916                | CC                              | AA                | 1945897824               |
| SNP_P3_15696_43451961 | NC_021160.1    | Ca_kabuli_chr01 | 43451961                | GG                              | AA                | 1945897826               |
| SNP_P3_15698_43468003 | NC_021160.1    | Ca_kabuli_chr01 | 43468003                | AA                              | TT                | 1945897828               |
| SNP_P3_15699_43468006 | NC_021160.1    | Ca_kabuli_chr01 | 43468006                | AA                              | TT                | 1945897829               |
| SNP_P3_15700_43474265 | NC_021160.1    | Ca_kabuli_chr01 | 43474265                | GG                              | AA                | 1945897831               |
| SNP_P3_15701_43474269 | NC_021160.1    | Ca_kabuli_chr01 | 43474269                | AA                              | GG                | 1945897833               |
| SNP_P3_15702_43493313 | NC_021160.1    | Ca_kabuli_chr01 | 43493313                | GG                              | TT                | 1945897835               |
| SNP_P3_15703_43496459 | NC_021160.1    | Ca_kabuli_chr01 | 43496459                | GG                              | AA                | 1945897837               |
| SNP_P3_15704_43499391 | NC_021160.1    | Ca_kabuli_chr01 | 43499391                | CC                              | TT                | 1945897838               |
| SNP_P3_15705_43517100 | NC_021160.1    | Ca_kabuli_chr01 | 43517100                | AA                              | TT                | 1945897840               |
| SNP_P3_15706_43517104 | NC_021160.1    | Ca_kabuli_chr01 | 43517104                | AA                              | CC                | 1945897842               |
| SNP_P3_15707_43530288 | NC_021160.1    | Ca_kabuli_chr01 | 43530288                | TT                              | CC                | 1945897844               |

| SNPs IDs              | Chromosome IDs | Chromosomes     | Physical positions (bp) | CDC Frontier (Reference genome) | (Pusa 256 & HPNB) | NCBI SNPdb Accession IDs |
|-----------------------|----------------|-----------------|-------------------------|---------------------------------|-------------------|--------------------------|
| SNP_P3_15708_43530496 | NC_021160.1    | Ca_kabuli_chr01 | 43530496                | TT                              | CC                | 1945897846               |
| SNP_P3_15709_43530510 | NC_021160.1    | Ca_kabuli_chr01 | 43530510                | CC                              | TT                | 1945897847               |
| SNP_P3_15710_43530539 | NC_021160.1    | Ca_kabuli_chr01 | 43530539                | TT                              | CC                | 1945897849               |
| SNP_P3_15711_43530540 | NC_021160.1    | Ca_kabuli_chr01 | 43530540                | TT                              | AA                | 1945897851               |
| SNP_P3_15712_43530542 | NC_021160.1    | Ca_kabuli_chr01 | 43530542                | TT                              | AA                | 1945897853               |
| SNP_P3_15713_43530551 | NC_021160.1    | Ca_kabuli_chr01 | 43530551                | TT                              | GG                | 1945897855               |
| SNP_P3_15714_43530583 | NC_021160.1    | Ca_kabuli_chr01 | 43530583                | TT                              | GG                | 1945897856               |
| SNP_P3_15715_43548076 | NC_021160.1    | Ca_kabuli_chr01 | 43548076                | GG                              | AA                | 1945897858               |
| SNP_P3_15717_43569231 | NC_021160.1    | Ca_kabuli_chr01 | 43569231                | AA                              | CC                | 1945897860               |
| SNP_P3_15718_43569283 | NC_021160.1    | Ca_kabuli_chr01 | 43569283                | AA                              | GG                | 1945897862               |
| SNP_P3_15719_43569311 | NC_021160.1    | Ca_kabuli_chr01 | 43569311                | AA                              | TT                | 1945897864               |
| SNP_P3_15720_43577928 | NC_021160.1    | Ca_kabuli_chr01 | 43577928                | TT                              | GG                | 1945897865               |
| SNP_P3_15722_43617692 | NC_021160.1    | Ca_kabuli_chr01 | 43617692                | GG                              | AA                | 1945897867               |
| SNP_P3_15723_43618073 | NC_021160.1    | Ca_kabuli_chr01 | 43618073                | CC                              | GG                | 1945897869               |
| SNP_P3_15724_43635450 | NC_021160.1    | Ca_kabuli_chr01 | 43635450                | AA                              | CC                | 1945897871               |
| SNP_P3_15726_43645575 | NC_021160.1    | Ca_kabuli_chr01 | 43645575                | TT                              | CC                | 1945897873               |
| SNP_P3_15727_43647333 | NC_021160.1    | Ca_kabuli_chr01 | 43647333                | CC                              | TT                | 1945897874               |
| SNP_P3_15730_43690265 | NC_021160.1    | Ca_kabuli_chr01 | 43690265                | CC                              | TT                | 1945897876               |
| SNP_P3_15731_43690272 | NC_021160.1    | Ca_kabuli_chr01 | 43690272                | CC                              | TT                | 1945897878               |
| SNP_P3_15732_43690281 | NC_021160.1    | Ca_kabuli_chr01 | 43690281                | AA                              | TT                | 1945897880               |
| SNP_P3_15733_43690411 | NC_021160.1    | Ca_kabuli_chr01 | 43690411                | AA                              | CC                | 1945897881               |
| SNP_P3_15734_43691303 | NC_021160.1    | Ca_kabuli_chr01 | 43691303                | CC                              | GG                | 1945897883               |
| SNP_P3_15735_43696290 | NC_021160.1    | Ca_kabuli_chr01 | 43696290                | CC                              | AA                | 1945897885               |
| SNP_P3_15736_43696314 | NC_021160.1    | Ca_kabuli_chr01 | 43696314                | TT                              | CC                | 1945897887               |
| SNP_P3_15737_43696329 | NC_021160.1    | Ca_kabuli_chr01 | 43696329                | TT                              | CC                | 1945897889               |
| SNP_P3_15739_43714608 | NC_021160.1    | Ca_kabuli_chr01 | 43714608                | AA                              | GG                | 1945897890               |
| SNP_P3_15740_43715207 | NC_021160.1    | Ca_kabuli_chr01 | 43715207                | AA                              | GG                | 1945897892               |
| SNP_P3_15741_43716261 | NC_021160.1    | Ca_kabuli_chr01 | 43716261                | GG                              | AA                | 1945897894               |
| SNP_P3_15742_43722142 | NC_021160.1    | Ca_kabuli_chr01 | 43722142                | GG                              | CC                | 1945897896               |
| SNP_P3_15743_43722807 | NC_021160.1    | Ca_kabuli_chr01 | 43722807                | TT                              | GG                | 1945897897               |
| SNP_P3_15746_43777000 | NC_021160.1    | Ca_kabuli_chr01 | 43777000                | AA                              | GG                | 1945897899               |
| SNP_P3_15747_43777005 | NC_021160.1    | Ca_kabuli_chr01 | 43777005                | TT                              | CC                | 1945897901               |
| SNP_P3_15748_43777281 | NC_021160.1    | Ca_kabuli_chr01 | 43777281                | AA                              | TT                | 1945897903               |
| SNP_P3_15749_43781074 | NC_021160.1    | Ca_kabuli_chr01 | 43781074                | CC                              | AA                | 1945897905               |
| SNP_P3_15753_43899281 | NC_021160.1    | Ca_kabuli_chr01 | 43899281                | TT                              | CC                | 1945897906               |
| SNP_P3_15754_43903927 | NC_021160.1    | Ca_kabuli_chr01 | 43903927                | TT                              | CC                | 1945897908               |
| SNP_P3_15755_43932871 | NC_021160.1    | Ca_kabuli_chr01 | 43932871                | TT                              | CC                | 1945897909               |
| SNP_P3_15756_43942441 | NC_021160.1    | Ca_kabuli_chr01 | 43942441                | TT                              | GG                | 1945897911               |
| SNP_P3_15758_43975572 | NC_021160.1    | Ca_kabuli_chr01 | 43975572                | TT                              | CC                | 1945897913               |
| SNP_P3_15759_43980057 | NC_021160.1    | Ca_kabuli_chr01 | 43980057                | GG                              | TT                | 1945897915               |
| SNP_P3_15760_43980312 | NC_021160.1    | Ca_kabuli_chr01 | 43980312                | CC                              | TT                | 1945897916               |
| SNP_P3_15761_43980492 | NC_021160.1    | Ca_kabuli_chr01 | 43980492                | TT                              | AA                | 1945897918               |

| SNPs IDs              | Chromosome IDs | Chromosomes     | Physical positions (bp) | CDC Frontier (Reference genome) | (Pusa 256 & HPNB) | NCBI SNPdb Accession IDs |
|-----------------------|----------------|-----------------|-------------------------|---------------------------------|-------------------|--------------------------|
| SNP_P3_15762_43980566 | NC_021160.1    | Ca_kabuli_chr01 | 43980566                | CC                              | TT                | 1945897920               |
| SNP_P3_15763_44043556 | NC_021160.1    | Ca_kabuli_chr01 | 44043556                | AA                              | GG                | 1945897922               |
| SNP_P3_15764_44051233 | NC_021160.1    | Ca_kabuli_chr01 | 44051233                | TT                              | GG                | 1945897923               |
| SNP_P3_15765_44051253 | NC_021160.1    | Ca_kabuli_chr01 | 44051253                | CC                              | TT                | 1945897925               |
| SNP_P3_15766_44079661 | NC_021160.1    | Ca_kabuli_chr01 | 44079661                | GG                              | TT                | 1945897927               |
| SNP_P3_15769_44128603 | NC_021160.1    | Ca_kabuli_chr01 | 44128603                | GG                              | AA                | 1945897929               |
| SNP_P3_15770_44128610 | NC_021160.1    | Ca_kabuli_chr01 | 44128610                | AA                              | GG                | 1945897930               |
| SNP_P3_15771_44129005 | NC_021160.1    | Ca_kabuli_chr01 | 44129005                | TT                              | CC                | 1945897932               |
| SNP_P3_15772_44129045 | NC_021160.1    | Ca_kabuli_chr01 | 44129045                | TT                              | AA                | 1945897934               |
| SNP_P3_15773_44129078 | NC_021160.1    | Ca_kabuli_chr01 | 44129078                | AA                              | GG                | 1945897936               |
| SNP_P3_15774_44129114 | NC_021160.1    | Ca_kabuli_chr01 | 44129114                | CC                              | TT                | 1945897938               |
| SNP_P3_15775_44129261 | NC_021160.1    | Ca_kabuli_chr01 | 44129261                | TT                              | CC                | 1945897939               |
| SNP_P3_15776_44129264 | NC_021160.1    | Ca_kabuli_chr01 | 44129264                | GG                              | CC                | 1945897941               |
| SNP_P3_15777_44144751 | NC_021160.1    | Ca_kabuli_chr01 | 44144751                | CC                              | TT                | 1945897943               |
| SNP_P3_15778_44162127 | NC_021160.1    | Ca_kabuli_chr01 | 44162127                | GG                              | AA                | 1945897945               |
| SNP_P3_15779_44186219 | NC_021160.1    | Ca_kabuli_chr01 | 44186219                | TT                              | AA                | 1945897946               |
| SNP_P3_15780_44186597 | NC_021160.1    | Ca_kabuli_chr01 | 44186597                | TT                              | CC                | 1945897948               |
| SNP_P3_15781_44187293 | NC_021160.1    | Ca_kabuli_chr01 | 44187293                | CC                              | AA                | 1945897950               |
| SNP_P3_15782_44187546 | NC_021160.1    | Ca_kabuli_chr01 | 44187546                | TT                              | CC                | 1945897952               |
| SNP_P3_15783_44187597 | NC_021160.1    | Ca_kabuli_chr01 | 44187597                | CC                              | AA                | 1945897954               |
| SNP_P3_15784_44194410 | NC_021160.1    | Ca_kabuli_chr01 | 44194410                | GG                              | CC                | 1945897955               |
| SNP_P3_15785_44204318 | NC_021160.1    | Ca_kabuli_chr01 | 44204318                | TT                              | CC                | 1945897957               |
| SNP_P3_15786_44204372 | NC_021160.1    | Ca_kabuli_chr01 | 44204372                | TT                              | CC                | 1945897959               |
| SNP_P3_15787_44205722 | NC_021160.1    | Ca_kabuli_chr01 | 44205722                | GG                              | AA                | 1945897961               |
| SNP_P3_15788_44205938 | NC_021160.1    | Ca_kabuli_chr01 | 44205938                | TT                              | AA                | 1945897962               |
| SNP_P3_15789_44205957 | NC_021160.1    | Ca_kabuli_chr01 | 44205957                | TT                              | AA                | 1945897964               |
| SNP_P3_15790_44205959 | NC_021160.1    | Ca_kabuli_chr01 | 44205959                | TT                              | CC                | 1945897966               |
| SNP_P3_15791_44205960 | NC_021160.1    | Ca_kabuli_chr01 | 44205960                | GG                              | AA                | 1945897968               |
| SNP_P3_15792_44205988 | NC_021160.1    | Ca_kabuli_chr01 | 44205988                | CC                              | TT                | 1945897970               |
| SNP_P3_15793_44206007 | NC_021160.1    | Ca_kabuli_chr01 | 44206007                | AA                              | TT                | 1945897971               |
| SNP_P3_15794_44206019 | NC_021160.1    | Ca_kabuli_chr01 | 44206019                | AA                              | TT                | 1945897973               |
| SNP_P3_15795_44207813 | NC_021160.1    | Ca_kabuli_chr01 | 44207813                | CC                              | TT                | 1945897975               |
| SNP_P3_15796_44209093 | NC_021160.1    | Ca_kabuli_chr01 | 44209093                | TT                              | GG                | 1945897977               |
| SNP_P3_15797_44214749 | NC_021160.1    | Ca_kabuli_chr01 | 44214749                | TT                              | AA                | 1945897978               |
| SNP_P3_15798_44215617 | NC_021160.1    | Ca_kabuli_chr01 | 44215617                | CC                              | TT                | 1945897980               |
| SNP_P3_15799_44216966 | NC_021160.1    | Ca_kabuli_chr01 | 44216966                | TT                              | CC                | 1945897982               |
| SNP_P3_15800_44219433 | NC_021160.1    | Ca_kabuli_chr01 | 44219433                | GG                              | AA                | 1945897984               |
| SNP_P3_15801_44234209 | NC_021160.1    | Ca_kabuli_chr01 | 44234209                | CC                              | GG                | 1945897985               |
| SNP_P3_15804_44248410 | NC_021160.1    | Ca_kabuli_chr01 | 44248410                | GG                              | TT                | 1945897987               |
| SNP_P3_15805_44266802 | NC_021160.1    | Ca_kabuli_chr01 | 44266802                | TT                              | CC                | 1945897989               |
| SNP_P3_15806_44268240 | NC_021160.1    | Ca_kabuli_chr01 | 44268240                | AA                              | GG                | 1945897991               |
| SNP_P3_15807_44274551 | NC_021160.1    | Ca_kabuli_chr01 | 44274551                | CC                              | TT                | 1945897993               |

| SNPs IDs              | Chromosome IDs | Chromosomes     | Physical positions (bp) | CDC Frontier (Reference genome) | (Pusa 256 & HPNB) | NCBI SNPdb Accession IDs |
|-----------------------|----------------|-----------------|-------------------------|---------------------------------|-------------------|--------------------------|
| SNP_P3_15808_44299925 | NC_021160.1    | Ca_kabuli_chr01 | 44299925                | GG                              | CC                | 1945897994               |
| SNP_P3_15809_44300198 | NC_021160.1    | Ca_kabuli_chr01 | 44300198                | GG                              | CC                | 1945897996               |
| SNP_P3_15810_44327005 | NC_021160.1    | Ca_kabuli_chr01 | 44327005                | AA                              | TT                | 1945897998               |
| SNP_P3_15811_44327216 | NC_021160.1    | Ca_kabuli_chr01 | 44327216                | CC                              | TT                | 1945898000               |
| SNP_P3_15814_44369547 | NC_021160.1    | Ca_kabuli_chr01 | 44369547                | TT                              | CC                | 1945898001               |
| SNP_P3_15815_44369615 | NC_021160.1    | Ca_kabuli_chr01 | 44369615                | TT                              | CC                | 1945898003               |
| SNP_P3_15816_44374180 | NC_021160.1    | Ca_kabuli_chr01 | 44374180                | CC                              | TT                | 1945898005               |
| SNP_P3_15817_44374687 | NC_021160.1    | Ca_kabuli_chr01 | 44374687                | TT                              | CC                | 1945898007               |
| SNP_P3_15818_44374697 | NC_021160.1    | Ca_kabuli_chr01 | 44374697                | TT                              | AA                | 1945898009               |
| SNP_P3_15819_44374998 | NC_021160.1    | Ca_kabuli_chr01 | 44374998                | AA                              | TT                | 1945898010               |
| SNP_P3_15820_44376340 | NC_021160.1    | Ca_kabuli_chr01 | 44376340                | CC                              | GG                | 1945898012               |
| SNP_P3_15821_44376431 | NC_021160.1    | Ca_kabuli_chr01 | 44376431                | AA                              | CC                | 1945898014               |
| SNP_P3_15822_44376464 | NC_021160.1    | Ca_kabuli_chr01 | 44376464                | CC                              | AA                | 1945898016               |
| SNP_P3_15823_44376467 | NC_021160.1    | Ca_kabuli_chr01 | 44376467                | TT                              | CC                | 1945898017               |
| SNP_P3_15824_44376506 | NC_021160.1    | Ca_kabuli_chr01 | 44376506                | TT                              | CC                | 1945898019               |
| SNP_P3_15825_44376512 | NC_021160.1    | Ca_kabuli_chr01 | 44376512                | GG                              | AA                | 1945898021               |
| SNP_P3_15826_44376690 | NC_021160.1    | Ca_kabuli_chr01 | 44376690                | AA                              | GG                | 1945898023               |
| SNP_P3_15827_44384548 | NC_021160.1    | Ca_kabuli_chr01 | 44384548                | CC                              | AA                | 1945898024               |
| SNP_P3_15828_44384549 | NC_021160.1    | Ca_kabuli_chr01 | 44384549                | TT                              | CC                | 1945898026               |
| SNP_P3_15829_44384701 | NC_021160.1    | Ca_kabuli_chr01 | 44384701                | CC                              | TT                | 1945898028               |
| SNP_P3_15830_44384708 | NC_021160.1    | Ca_kabuli_chr01 | 44384708                | TT                              | AA                | 1945898030               |
| SNP_P3_15831_44385004 | NC_021160.1    | Ca_kabuli_chr01 | 44385004                | TT                              | GG                | 1945898032               |
| SNP_P3_15832_44385027 | NC_021160.1    | Ca_kabuli_chr01 | 44385027                | AA                              | TT                | 1945898033               |
| SNP_P3_15833_44393372 | NC_021160.1    | Ca_kabuli_chr01 | 44393372                | AA                              | CC                | 1945898035               |
| SNP_P3_15834_44393679 | NC_021160.1    | Ca_kabuli_chr01 | 44393679                | GG                              | AA                | 1945898037               |
| SNP_P3_15835_44402989 | NC_021160.1    | Ca_kabuli_chr01 | 44402989                | TT                              | CC                | 1945898039               |
| SNP_P3_15836_44402997 | NC_021160.1    | Ca_kabuli_chr01 | 44402997                | TT                              | CC                | 1945898040               |
| SNP_P3_15837_44403045 | NC_021160.1    | Ca_kabuli_chr01 | 44403045                | TT                              | CC                | 1945898042               |
| SNP_P3_15838_44403069 | NC_021160.1    | Ca_kabuli_chr01 | 44403069                | TT                              | GG                | 1945898044               |
| SNP_P3_15839_44403376 | NC_021160.1    | Ca_kabuli_chr01 | 44403376                | GG                              | AA                | 1945898046               |
| SNP_P3_15840_44408023 | NC_021160.1    | Ca_kabuli_chr01 | 44408023                | CC                              | TT                | 1945898047               |
| SNP_P3_15841_44427725 | NC_021160.1    | Ca_kabuli_chr01 | 44427725                | GG                              | AA                | 1945898049               |
| SNP_P3_15842_44427728 | NC_021160.1    | Ca_kabuli_chr01 | 44427728                | GG                              | AA                | 1945898051               |
| SNP_P3_15843_44428187 | NC_021160.1    | Ca_kabuli_chr01 | 44428187                | AA                              | GG                | 1945898053               |
| SNP_P3_15844_44428567 | NC_021160.1    | Ca_kabuli_chr01 | 44428567                | TT                              | GG                | 1945898054               |
| SNP_P3_15845_44436504 | NC_021160.1    | Ca_kabuli_chr01 | 44436504                | GG                              | AA                | 1945898056               |
| SNP_P3_15846_44453392 | NC_021160.1    | Ca_kabuli_chr01 | 44453392                | TT                              | AA                | 1945898058               |
| SNP_P3_15847_44467080 | NC_021160.1    | Ca_kabuli_chr01 | 44467080                | AA                              | GG                | 1945898060               |
| SNP_P3_15849_44467145 | NC_021160.1    | Ca_kabuli_chr01 | 44467145                | CC                              | TT                | 1945898062               |
| SNP_P3_15851_44467462 | NC_021160.1    | Ca_kabuli_chr01 | 44467462                | TT                              | CC                | 1945898063               |
| SNP_P3_15852_44467579 | NC_021160.1    | Ca_kabuli_chr01 | 44467579                | TT                              | CC                | 1945898065               |
| SNP_P3_15853_44467582 | NC_021160.1    | Ca_kabuli_chr01 | 44467582                | GG                              | AA                | 1945898067               |

| SNPs IDs              | Chromosome IDs | Chromosomes     | Physical positions (bp) | CDC Frontier (Reference genome) | (Pusa 256 & HPNB) | NCBI SNPdb Accession IDs |
|-----------------------|----------------|-----------------|-------------------------|---------------------------------|-------------------|--------------------------|
| SNP_P3_15854_44468725 | NC_021160.1    | Ca_kabuli_chr01 | 44468725                | AA                              | GG                | 1945898069               |
| SNP_P3_15855_44480094 | NC_021160.1    | Ca_kabuli_chr01 | 44480094                | TT                              | CC                | 1945898070               |
| SNP_P3_15856_44487149 | NC_021160.1    | Ca_kabuli_chr01 | 44487149                | CC                              | TT                | 1945898072               |
| SNP_P3_15857_44490254 | NC_021160.1    | Ca_kabuli_chr01 | 44490254                | CC                              | TT                | 1945898074               |
| SNP_P3_15858_44496825 | NC_021160.1    | Ca_kabuli_chr01 | 44496825                | GG                              | AA                | 1945898076               |
| SNP_P3_15859_44537559 | NC_021160.1    | Ca_kabuli_chr01 | 44537559                | AA                              | GG                | 1945898078               |
| SNP_P3_15860_44537587 | NC_021160.1    | Ca_kabuli_chr01 | 44537587                | TT                              | AA                | 1945898079               |
| SNP_P3_15861_44537611 | NC_021160.1    | Ca_kabuli_chr01 | 44537611                | GG                              | AA                | 1945898081               |
| SNP_P3_15862_44537671 | NC_021160.1    | Ca_kabuli_chr01 | 44537671                | TT                              | CC                | 1945898083               |
| SNP_P3_15863_44537679 | NC_021160.1    | Ca_kabuli_chr01 | 44537679                | AA                              | GG                | 1945898085               |
| SNP_P3_15864_44537704 | NC_021160.1    | Ca_kabuli_chr01 | 44537704                | TT                              | CC                | 1945898086               |
| SNP_P3_15865_44537714 | NC_021160.1    | Ca_kabuli_chr01 | 44537714                | CC                              | AA                | 1945898088               |
| SNP_P3_15866_44537725 | NC_021160.1    | Ca_kabuli_chr01 | 44537725                | GG                              | AA                | 1945898090               |
| SNP_P3_15867_44537791 | NC_021160.1    | Ca_kabuli_chr01 | 44537791                | TT                              | CC                | 1945898092               |
| SNP_P3_15868_44538293 | NC_021160.1    | Ca_kabuli_chr01 | 44538293                | GG                              | AA                | 1945898093               |
| SNP_P3_15870_44588933 | NC_021160.1    | Ca_kabuli_chr01 | 44588933                | AA                              | GG                | 1945898095               |
| SNP_P3_15871_44588945 | NC_021160.1    | Ca_kabuli_chr01 | 44588945                | TT                              | CC                | 1945898097               |
| SNP_P3_15872_44588947 | NC_021160.1    | Ca_kabuli_chr01 | 44588947                | TT                              | CC                | 1945898099               |
| SNP_P3_15873_44588951 | NC_021160.1    | Ca_kabuli_chr01 | 44588951                | AA                              | CC                | 1945898101               |
| SNP_P3_15874_44588986 | NC_021160.1    | Ca_kabuli_chr01 | 44588986                | AA                              | GG                | 1945898102               |
| SNP_P3_15875_44588988 | NC_021160.1    | Ca_kabuli_chr01 | 44588988                | CC                              | TT                | 1945898104               |
| SNP_P3_15876_44589027 | NC_021160.1    | Ca_kabuli_chr01 | 44589027                | TT                              | GG                | 1945898106               |
| SNP_P3_15877_44589032 | NC_021160.1    | Ca_kabuli_chr01 | 44589032                | TT                              | GG                | 1945898108               |
| SNP_P3_15878_44592279 | NC_021160.1    | Ca_kabuli_chr01 | 44592279                | GG                              | AA                | 1945898109               |
| SNP_P3_15879_44592377 | NC_021160.1    | Ca_kabuli_chr01 | 44592377                | AA                              | GG                | 1945898111               |
| SNP_P3_15880_44592395 | NC_021160.1    | Ca_kabuli_chr01 | 44592395                | AA                              | CC                | 1945898113               |
| SNP_P3_15881_44592398 | NC_021160.1    | Ca_kabuli_chr01 | 44592398                | AA                              | CC                | 1945898115               |
| SNP_P3_15882_44592416 | NC_021160.1    | Ca_kabuli_chr01 | 44592416                | TT                              | GG                | 1945898116               |
| SNP_P3_15883_44592476 | NC_021160.1    | Ca_kabuli_chr01 | 44592476                | GG                              | AA                | 1945898118               |
| SNP_P3_15884_44592563 | NC_021160.1    | Ca_kabuli_chr01 | 44592563                | AA                              | GG                | 1945898120               |
| SNP_P3_15885_44592574 | NC_021160.1    | Ca_kabuli_chr01 | 44592574                | CC                              | AA                | 1945898122               |
| SNP_P3_15886_44592576 | NC_021160.1    | Ca_kabuli_chr01 | 44592576                | AA                              | TT                | 1945898124               |
| SNP_P3_15887_44592606 | NC_021160.1    | Ca_kabuli_chr01 | 44592606                | TT                              | CC                | 1945898125               |
| SNP_P3_15888_44592626 | NC_021160.1    | Ca_kabuli_chr01 | 44592626                | TT                              | CC                | 1945898127               |
| SNP_P3_15889_44592641 | NC_021160.1    | Ca_kabuli_chr01 | 44592641                | GG                              | AA                | 1945898129               |
| SNP_P3_15890_44592660 | NC_021160.1    | Ca_kabuli_chr01 | 44592660                | TT                              | CC                | 1945898131               |
| SNP_P3_15891_44592673 | NC_021160.1    | Ca_kabuli_chr01 | 44592673                | AA                              | GG                | 1945898132               |
| SNP_P3_15892_44592678 | NC_021160.1    | Ca_kabuli_chr01 | 44592678                | TT                              | GG                | 1945898134               |
| SNP_P3_15893_44592807 | NC_021160.1    | Ca_kabuli_chr01 | 44592807                | CC                              | TT                | 1945898136               |
| SNP_P3_15894_44592882 | NC_021160.1    | Ca_kabuli_chr01 | 44592882                | GG                              | AA                | 1945898138               |
| SNP_P3_15895_44602385 | NC_021160.1    | Ca_kabuli_chr01 | 44602385                | AA                              | GG                | 1945898139               |
| SNP_P3_15896_44636536 | NC_021160.1    | Ca_kabuli_chr01 | 44636536                | TT                              | CC                | 1945898141               |

| SNPs IDs              | Chromosome IDs | Chromosomes     | Physical positions (bp) | CDC Frontier (Reference genome) | (Pusa 256 & HPNB) | NCBI SNPdb Accession IDs |
|-----------------------|----------------|-----------------|-------------------------|---------------------------------|-------------------|--------------------------|
| SNP_P3_15897_44649226 | NC_021160.1    | Ca_kabuli_chr01 | 44649226                | GG                              | AA                | 1945898143               |
| SNP_P3_15898_44650041 | NC_021160.1    | Ca_kabuli_chr01 | 44650041                | TT                              | GG                | 1945898145               |
| SNP_P3_15899_44650125 | NC_021160.1    | Ca_kabuli_chr01 | 44650125                | GG                              | TT                | 1945898146               |
| SNP_P3_15901_44650377 | NC_021160.1    | Ca_kabuli_chr01 | 44650377                | CC                              | TT                | 1945898148               |
| SNP_P3_15902_44650459 | NC_021160.1    | Ca_kabuli_chr01 | 44650459                | GG                              | CC                | 1945898150               |
| SNP_P3_15903_44650756 | NC_021160.1    | Ca_kabuli_chr01 | 44650756                | AA                              | CC                | 1945898152               |
| SNP_P3_15904_44650825 | NC_021160.1    | Ca_kabuli_chr01 | 44650825                | AA                              | GG                | 1945898153               |
| SNP_P3_15905_44650855 | NC_021160.1    | Ca_kabuli_chr01 | 44650855                | CC                              | TT                | 1945898155               |
| SNP_P3_15906_44669709 | NC_021160.1    | Ca_kabuli_chr01 | 44669709                | AA                              | TT                | 1945898157               |
| SNP_P3_15911_44778653 | NC_021160.1    | Ca_kabuli_chr01 | 44778653                | AA                              | CC                | 1945898159               |
| SNP_P3_15912_44785467 | NC_021160.1    | Ca_kabuli_chr01 | 44785467                | CC                              | AA                | 1945898161               |
| SNP_P3_15913_44786318 | NC_021160.1    | Ca_kabuli_chr01 | 44786318                | GG                              | TT                | 1945898162               |
| SNP_P3_15914_44787874 | NC_021160.1    | Ca_kabuli_chr01 | 44787874                | GG                              | TT                | 1945898164               |
| SNP_P3_15915_44799619 | NC_021160.1    | Ca_kabuli_chr01 | 44799619                | TT                              | CC                | 1945898166               |
| SNP_P3_15916_44799632 | NC_021160.1    | Ca_kabuli_chr01 | 44799632                | AA                              | GG                | 1945898168               |
| SNP_P3_15917_44799652 | NC_021160.1    | Ca_kabuli_chr01 | 44799652                | AA                              | CC                | 1945898169               |
| SNP_P3_15918_44799665 | NC_021160.1    | Ca_kabuli_chr01 | 44799665                | AA                              | GG                | 1945898171               |
| SNP_P3_15919_44799723 | NC_021160.1    | Ca_kabuli_chr01 | 44799723                | AA                              | GG                | 1945898173               |
| SNP_P3_15920_44822591 | NC_021160.1    | Ca_kabuli_chr01 | 44822591                | GG                              | CC                | 1945898175               |
| SNP_P3_15921_44847011 | NC_021160.1    | Ca_kabuli_chr01 | 44847011                | TT                              | CC                | 1945898176               |
| SNP_P3_15923_44847118 | NC_021160.1    | Ca_kabuli_chr01 | 44847118                | TT                              | AA                | 1945898178               |
| SNP_P3_15924_44847153 | NC_021160.1    | Ca_kabuli_chr01 | 44847153                | TT                              | AA                | 1945898180               |
| SNP_P3_15925_44847154 | NC_021160.1    | Ca_kabuli_chr01 | 44847154                | TT                              | AA                | 1945898182               |
| SNP_P3_15926_44847222 | NC_021160.1    | Ca_kabuli_chr01 | 44847222                | CC                              | AA                | 1945898184               |
| SNP_P3_15927_44847294 | NC_021160.1    | Ca_kabuli_chr01 | 44847294                | GG                              | AA                | 1945898185               |
| SNP_P3_15928_44847307 | NC_021160.1    | Ca_kabuli_chr01 | 44847307                | TT                              | CC                | 1945898187               |
| SNP_P3_15930_44847540 | NC_021160.1    | Ca_kabuli_chr01 | 44847540                | AA                              | CC                | 1945898189               |
| SNP_P3_15931_44847551 | NC_021160.1    | Ca_kabuli_chr01 | 44847551                | GG                              | TT                | 1945898191               |
| SNP_P3_15932_44848422 | NC_021160.1    | Ca_kabuli_chr01 | 44848422                | TT                              | AA                | 1945898192               |
| SNP_P3_15933_44848430 | NC_021160.1    | Ca_kabuli_chr01 | 44848430                | AA                              | GG                | 1945898194               |
| SNP_P3_15934_44848477 | NC_021160.1    | Ca_kabuli_chr01 | 44848477                | CC                              | TT                | 1945898196               |
| SNP_P3_15935_44848538 | NC_021160.1    | Ca_kabuli_chr01 | 44848538                | AA                              | GG                | 1945898198               |
| SNP_P3_15936_44848563 | NC_021160.1    | Ca_kabuli_chr01 | 44848563                | CC                              | TT                | 1945898200               |
| SNP_P3_15937_44848568 | NC_021160.1    | Ca_kabuli_chr01 | 44848568                | AA                              | CC                | 1945898201               |
| SNP_P3_15938_44848570 | NC_021160.1    | Ca_kabuli_chr01 | 44848570                | CC                              | AA                | 1945898203               |
| SNP_P3_15939_44852912 | NC_021160.1    | Ca_kabuli_chr01 | 44852912                | GG                              | AA                | 1945898205               |
| SNP_P3_15940_44874854 | NC_021160.1    | Ca_kabuli_chr01 | 44874854                | GG                              | TT                | 1945898207               |
| SNP_P3_15941_44892510 | NC_021160.1    | Ca_kabuli_chr01 | 44892510                | AA                              | CC                | 1945898208               |
| SNP_P3_15942_44906802 | NC_021160.1    | Ca_kabuli_chr01 | 44906802                | CC                              | TT                | 1945898210               |
| SNP_P3_15943_44919716 | NC_021160.1    | Ca_kabuli_chr01 | 44919716                | AA                              | GG                | 1945898212               |
| SNP_P3_15944_44921039 | NC_021160.1    | Ca_kabuli_chr01 | 44921039                | CC                              | TT                | 1945898214               |
| SNP_P3_15945_44921048 | NC_021160.1    | Ca_kabuli_chr01 | 44921048                | TT                              | CC                | 1945898215               |

| SNPs IDs              | Chromosome IDs | Chromosomes     | Physical positions (bp) | CDC Frontier (Reference genome) | (Pusa 256 & HPNB) | NCBI SNPdb Accession IDs |
|-----------------------|----------------|-----------------|-------------------------|---------------------------------|-------------------|--------------------------|
| SNP_P3_15946_44921240 | NC_021160.1    | Ca_kabuli_chr01 | 44921240                | TT                              | CC                | 1945898217               |
| SNP_P3_15947_44921444 | NC_021160.1    | Ca_kabuli_chr01 | 44921444                | TT                              | CC                | 1945898219               |
| SNP_P3_15948_44921447 | NC_021160.1    | Ca_kabuli_chr01 | 44921447                | TT                              | CC                | 1945898221               |
| SNP_P3_15949_44921453 | NC_021160.1    | Ca_kabuli_chr01 | 44921453                | GG                              | AA                | 1945898223               |
| SNP_P3_15950_44921456 | NC_021160.1    | Ca_kabuli_chr01 | 44921456                | AA                              | GG                | 1945898224               |
| SNP_P3_15951_44921633 | NC_021160.1    | Ca_kabuli_chr01 | 44921633                | CC                              | TT                | 1945898226               |
| SNP_P3_15952_44921666 | NC_021160.1    | Ca_kabuli_chr01 | 44921666                | TT                              | CC                | 1945898228               |
| SNP_P3_15953_44925178 | NC_021160.1    | Ca_kabuli_chr01 | 44925178                | CC                              | AA                | 1945898230               |
| SNP_P3_15954_44925555 | NC_021160.1    | Ca_kabuli_chr01 | 44925555                | AA                              | CC                | 1945898231               |
| SNP_P3_15955_44939762 | NC_021160.1    | Ca_kabuli_chr01 | 44939762                | GG                              | AA                | 1945898233               |
| SNP_P3_15956_44944000 | NC_021160.1    | Ca_kabuli_chr01 | 44944000                | AA                              | GG                | 1945898235               |
| SNP_P3_15957_44952296 | NC_021160.1    | Ca_kabuli_chr01 | 44952296                | AA                              | GG                | 1945898237               |
| SNP_P3_15958_44952312 | NC_021160.1    | Ca_kabuli_chr01 | 44952312                | AA                              | GG                | 1945898239               |
| SNP_P3_15959_44963918 | NC_021160.1    | Ca_kabuli_chr01 | 44963918                | AA                              | GG                | 1945898240               |
| SNP_P3_15960_44971201 | NC_021160.1    | Ca_kabuli_chr01 | 44971201                | TT                              | CC                | 1945898242               |
| SNP_P3_15962_45021156 | NC_021160.1    | Ca_kabuli_chr01 | 45021156                | AA                              | CC                | 1945898244               |
| SNP_P3_15963_45046073 | NC_021160.1    | Ca_kabuli_chr01 | 45046073                | AA                              | TT                | 1945898246               |
| SNP_P3_15964_45047150 | NC_021160.1    | Ca_kabuli_chr01 | 45047150                | CC                              | GG                | 1945898247               |
| SNP_P3_15966_45057944 | NC_021160.1    | Ca_kabuli_chr01 | 45057944                | GG                              | TT                | 1945898249               |
| SNP_P3_15968_45058197 | NC_021160.1    | Ca_kabuli_chr01 | 45058197                | AA                              | GG                | 1945898251               |
| SNP_P3_15969_45058381 | NC_021160.1    | Ca_kabuli_chr01 | 45058381                | TT                              | GG                | 1945898253               |
| SNP_P3_15970_45058454 | NC_021160.1    | Ca_kabuli_chr01 | 45058454                | GG                              | AA                | 1945898254               |
| SNP_P3_15971_45090520 | NC_021160.1    | Ca_kabuli_chr01 | 45090520                | CC                              | TT                | 1945898256               |
| SNP_P3_15972_45093342 | NC_021160.1    | Ca_kabuli_chr01 | 45093342                | CC                              | TT                | 1945898258               |
| SNP_P3_15974_45113962 | NC_021160.1    | Ca_kabuli_chr01 | 45113962                | AA                              | GG                | 1945898260               |
| SNP_P3_15975_45114818 | NC_021160.1    | Ca_kabuli_chr01 | 45114818                | TT                              | AA                | 1945898261               |
| SNP_P3_15976_45115110 | NC_021160.1    | Ca_kabuli_chr01 | 45115110                | TT                              | AA                | 1945898263               |
| SNP_P3_15977_45115123 | NC_021160.1    | Ca_kabuli_chr01 | 45115123                | TT                              | AA                | 1945898265               |
| SNP_P3_15978_45115137 | NC_021160.1    | Ca_kabuli_chr01 | 45115137                | TT                              | CC                | 1945898267               |
| SNP_P3_15980_45126382 | NC_021160.1    | Ca_kabuli_chr01 | 45126382                | CC                              | TT                | 1945898269               |
| SNP_P3_15981_45127430 | NC_021160.1    | Ca_kabuli_chr01 | 45127430                | TT                              | CC                | 1945898270               |
| SNP_P3_15982_45168708 | NC_021160.1    | Ca_kabuli_chr01 | 45168708                | TT                              | CC                | 1945898272               |
| SNP_P3_15983_45169375 | NC_021160.1    | Ca_kabuli_chr01 | 45169375                | CC                              | TT                | 1945898274               |
| SNP_P3_15984_45177108 | NC_021160.1    | Ca_kabuli_chr01 | 45177108                | GG                              | CC                | 1945898276               |
| SNP_P3_15985_45177111 | NC_021160.1    | Ca_kabuli_chr01 | 45177111                | GG                              | AA                | 1945898277               |
| SNP_P3_15986_45184510 | NC_021160.1    | Ca_kabuli_chr01 | 45184510                | TT                              | GG                | 1945898279               |
| SNP_P3_15987_45184581 | NC_021160.1    | Ca_kabuli_chr01 | 45184581                | AA                              | TT                | 1945898281               |
| SNP_P3_15989_45204409 | NC_021160.1    | Ca_kabuli_chr01 | 45204409                | GG                              | AA                | 1945898283               |
| SNP_P3_15992_45232277 | NC_021160.1    | Ca_kabuli_chr01 | 45232277                | CC                              | GG                | 1945898285               |
| SNP_P3_15993_45232327 | NC_021160.1    | Ca_kabuli_chr01 | 45232327                | AA                              | GG                | 1945898286               |
| SNP_P3_15996_45241677 | NC_021160.1    | Ca_kabuli_chr01 | 45241677                | CC                              | GG                | 1945898288               |
| SNP_P3_15997_45241764 | NC_021160.1    | Ca_kabuli_chr01 | 45241764                | AA                              | GG                | 1945898290               |



| SNPs IDs              | Chromosome IDs | Chromosomes     | Physical positions (bp) | CDC Frontier (Reference genome) | (Pusa 256 & HPNB) | NCBI SNPdb Accession IDs |
|-----------------------|----------------|-----------------|-------------------------|---------------------------------|-------------------|--------------------------|
| SNP_P3_15998_45241791 | NC_021160.1    | Ca_kabuli_chr01 | 45241791                | TT                              | CC                | 1945898292               |
| SNP_P3_16000_45242168 | NC_021160.1    | Ca_kabuli_chr01 | 45242168                | CC                              | TT                | 1945898293               |
| SNP_P3_16001_45242172 | NC_021160.1    | Ca_kabuli_chr01 | 45242172                | AA                              | GG                | 1945898295               |
| SNP_P3_16002_45242175 | NC_021160.1    | Ca_kabuli_chr01 | 45242175                | TT                              | GG                | 1945898297               |
| SNP_P3_16003_45242195 | NC_021160.1    | Ca_kabuli_chr01 | 45242195                | TT                              | CC                | 1945898299               |
| SNP_P3_16004_45242209 | NC_021160.1    | Ca_kabuli_chr01 | 45242209                | CC                              | AA                | 1945898301               |
| SNP_P3_16005_45242256 | NC_021160.1    | Ca_kabuli_chr01 | 45242256                | TT                              | AA                | 1945898302               |
| SNP_P3_16006_45242288 | NC_021160.1    | Ca_kabuli_chr01 | 45242288                | AA                              | CC                | 1945898304               |
| SNP_P3_16007_45242303 | NC_021160.1    | Ca_kabuli_chr01 | 45242303                | TT                              | GG                | 1945898306               |
| SNP_P3_16009_45243808 | NC_021160.1    | Ca_kabuli_chr01 | 45243808                | GG                              | CC                | 1945898308               |
| SNP_P3_16010_45243814 | NC_021160.1    | Ca_kabuli_chr01 | 45243814                | GG                              | CC                | 1945898309               |
| SNP_P3_16011_45243855 | NC_021160.1    | Ca_kabuli_chr01 | 45243855                | TT                              | CC                | 1945898311               |
| SNP_P3_16012_45244149 | NC_021160.1    | Ca_kabuli_chr01 | 45244149                | CC                              | TT                | 1945898313               |
| SNP_P3_16017_45264226 | NC_021160.1    | Ca_kabuli_chr01 | 45264226                | CC                              | TT                | 1945898315               |
| SNP_P3_16018_45269355 | NC_021160.1    | Ca_kabuli_chr01 | 45269355                | TT                              | CC                | 1945898317               |
| SNP_P3_16019_45274187 | NC_021160.1    | Ca_kabuli_chr01 | 45274187                | AA                              | CC                | 1945898318               |
| SNP_P3_16020_45298883 | NC_021160.1    | Ca_kabuli_chr01 | 45298883                | TT                              | CC                | 1945898320               |
| SNP_P3_16021_45300592 | NC_021160.1    | Ca_kabuli_chr01 | 45300592                | GG                              | AA                | 1945898322               |
| SNP_P3_16022_45305441 | NC_021160.1    | Ca_kabuli_chr01 | 45305441                | TT                              | CC                | 1945898324               |
| SNP_P3_16023_45332478 | NC_021160.1    | Ca_kabuli_chr01 | 45332478                | GG                              | TT                | 1945898325               |
| SNP_P3_16024_45332489 | NC_021160.1    | Ca_kabuli_chr01 | 45332489                | TT                              | AA                | 1945898327               |
| SNP_P3_16025_45332510 | NC_021160.1    | Ca_kabuli_chr01 | 45332510                | AA                              | GG                | 1945898329               |
| SNP_P3_16026_45332532 | NC_021160.1    | Ca_kabuli_chr01 | 45332532                | TT                              | GG                | 1945898331               |
| SNP_P3_16027_45332621 | NC_021160.1    | Ca_kabuli_chr01 | 45332621                | AA                              | CC                | 1945898332               |
| SNP_P3_16028_45332635 | NC_021160.1    | Ca_kabuli_chr01 | 45332635                | AA                              | CC                | 1945898334               |
| SNP_P3_16029_45332718 | NC_021160.1    | Ca_kabuli_chr01 | 45332718                | CC                              | TT                | 1945898336               |
| SNP_P3_16030_45332724 | NC_021160.1    | Ca_kabuli_chr01 | 45332724                | CC                              | AA                | 1945898338               |
| SNP_P3_16031_45332740 | NC_021160.1    | Ca_kabuli_chr01 | 45332740                | AA                              | GG                | 1945898340               |
| SNP_P3_16032_45332745 | NC_021160.1    | Ca_kabuli_chr01 | 45332745                | TT                              | CC                | 1945898341               |
| SNP_P3_16033_45332778 | NC_021160.1    | Ca_kabuli_chr01 | 45332778                | GG                              | AA                | 1945898343               |
| SNP_P3_16034_45332796 | NC_021160.1    | Ca_kabuli_chr01 | 45332796                | CC                              | TT                | 1945898345               |
| SNP_P3_16035_45332820 | NC_021160.1    | Ca_kabuli_chr01 | 45332820                | AA                              | GG                | 1945898347               |
| SNP_P3_16036_45333122 | NC_021160.1    | Ca_kabuli_chr01 | 45333122                | TT                              | CC                | 1945898348               |
| SNP_P3_16037_45346498 | NC_021160.1    | Ca_kabuli_chr01 | 45346498                | CC                              | TT                | 1945898350               |
| SNP_P3_16038_45347595 | NC_021160.1    | Ca_kabuli_chr01 | 45347595                | TT                              | AA                | 1945898352               |
| SNP_P3_16039_45347616 | NC_021160.1    | Ca_kabuli_chr01 | 45347616                | AA                              | TT                | 1945898354               |
| SNP_P3_16040_45347619 | NC_021160.1    | Ca_kabuli_chr01 | 45347619                | AA                              | GG                | 1945898356               |
| SNP_P3_16041_45347637 | NC_021160.1    | Ca_kabuli_chr01 | 45347637                | AA                              | GG                | 1945898357               |
| SNP_P3_16042_45347917 | NC_021160.1    | Ca_kabuli_chr01 | 45347917                | AA                              | TT                | 1945898359               |
| SNP_P3_16043_45351633 | NC_021160.1    | Ca_kabuli_chr01 | 45351633                | CC                              | GG                | 1945898361               |
| SNP_P3_16044_45351639 | NC_021160.1    | Ca_kabuli_chr01 | 45351639                | GG                              | AA                | 1945898363               |
| SNP_P3_16045_45356061 | NC_021160.1    | Ca_kabuli_chr01 | 45356061                | AA                              | TT                | 1945898364               |

| SNPs IDs              | Chromosome IDs | Chromosomes     | Physical positions (bp) | CDC Frontier (Reference genome) | (Pusa 256 & HPNB) | NCBI SNPdb Accession IDs |
|-----------------------|----------------|-----------------|-------------------------|---------------------------------|-------------------|--------------------------|
| SNP_P3_16046_45358691 | NC_021160.1    | Ca_kabuli_chr01 | 45358691                | CC                              | TT                | 1945898366               |
| SNP_P3_16047_45372141 | NC_021160.1    | Ca_kabuli_chr01 | 45372141                | AA                              | GG                | 1945898368               |
| SNP_P3_16048_45372478 | NC_021160.1    | Ca_kabuli_chr01 | 45372478                | GG                              | TT                | 1945898370               |
| SNP_P3_16049_45372518 | NC_021160.1    | Ca_kabuli_chr01 | 45372518                | TT                              | CC                | 1945898371               |
| SNP_P3_16050_45372535 | NC_021160.1    | Ca_kabuli_chr01 | 45372535                | TT                              | GG                | 1945898373               |
| SNP_P3_16051_45372537 | NC_021160.1    | Ca_kabuli_chr01 | 45372537                | TT                              | GG                | 1945898375               |
| SNP_P3_16052_45372613 | NC_021160.1    | Ca_kabuli_chr01 | 45372613                | AA                              | GG                | 1945898377               |
| SNP_P3_16053_45372615 | NC_021160.1    | Ca_kabuli_chr01 | 45372615                | CC                              | TT                | 1945898378               |
| SNP_P3_16054_45372626 | NC_021160.1    | Ca_kabuli_chr01 | 45372626                | TT                              | CC                | 1945898380               |
| SNP_P3_16055_45378010 | NC_021160.1    | Ca_kabuli_chr01 | 45378010                | TT                              | CC                | 1945898382               |
| SNP_P3_16056_45378024 | NC_021160.1    | Ca_kabuli_chr01 | 45378024                | AA                              | GG                | 1945898384               |
| SNP_P3_16057_45378029 | NC_021160.1    | Ca_kabuli_chr01 | 45378029                | AA                              | GG                | 1945898385               |
| SNP_P3_16058_45378036 | NC_021160.1    | Ca_kabuli_chr01 | 45378036                | AA                              | GG                | 1945898387               |
| SNP_P3_16059_45380427 | NC_021160.1    | Ca_kabuli_chr01 | 45380427                | TT                              | AA                | 1945898389               |
| SNP_P3_16060_45392154 | NC_021160.1    | Ca_kabuli_chr01 | 45392154                | CC                              | TT                | 1945898391               |
| SNP_P3_16061_45392155 | NC_021160.1    | Ca_kabuli_chr01 | 45392155                | AA                              | GG                | 1945898392               |
| SNP_P3_16062_45392293 | NC_021160.1    | Ca_kabuli_chr01 | 45392293                | AA                              | CC                | 1945898394               |
| SNP_P3_16063_45392351 | NC_021160.1    | Ca_kabuli_chr01 | 45392351                | TT                              | AA                | 1945898396               |
| SNP_P3_16064_45392490 | NC_021160.1    | Ca_kabuli_chr01 | 45392490                | GG                              | CC                | 1945898398               |
| SNP_P3_16065_45392526 | NC_021160.1    | Ca_kabuli_chr01 | 45392526                | CC                              | TT                | 1945898400               |
| SNP_P3_16066_45392575 | NC_021160.1    | Ca_kabuli_chr01 | 45392575                | TT                              | AA                | 1945898401               |
| SNP_P3_16067_45392606 | NC_021160.1    | Ca_kabuli_chr01 | 45392606                | AA                              | TT                | 1945898403               |
| SNP_P3_16068_45392660 | NC_021160.1    | Ca_kabuli_chr01 | 45392660                | AA                              | GG                | 1945898405               |
| SNP_P3_16070_45392721 | NC_021160.1    | Ca_kabuli_chr01 | 45392721                | CC                              | TT                | 1945898407               |
| SNP_P3_16071_45392741 | NC_021160.1    | Ca_kabuli_chr01 | 45392741                | TT                              | CC                | 1945898408               |
| SNP_P3_16073_45398210 | NC_021160.1    | Ca_kabuli_chr01 | 45398210                | GG                              | TT                | 1945898410               |
| SNP_P3_16074_45399922 | NC_021160.1    | Ca_kabuli_chr01 | 45399922                | CC                              | AA                | 1945898412               |
| SNP_P3_16075_45416456 | NC_021160.1    | Ca_kabuli_chr01 | 45416456                | GG                              | TT                | 1945898414               |
| SNP_P3_16076_45438348 | NC_021160.1    | Ca_kabuli_chr01 | 45438348                | GG                              | AA                | 1945898416               |
| SNP_P3_16077_45438350 | NC_021160.1    | Ca_kabuli_chr01 | 45438350                | AA                              | GG                | 1945898417               |
| SNP_P3_16078_45438413 | NC_021160.1    | Ca_kabuli_chr01 | 45438413                | GG                              | AA                | 1945898419               |
| SNP_P3_16079_45438443 | NC_021160.1    | Ca_kabuli_chr01 | 45438443                | AA                              | GG                | 1945898421               |
| SNP_P3_16080_45438448 | NC_021160.1    | Ca_kabuli_chr01 | 45438448                | GG                              | TT                | 1945898423               |
| SNP_P3_16081_45438627 | NC_021160.1    | Ca_kabuli_chr01 | 45438627                | AA                              | GG                | 1945898425               |
| SNP_P3_16082_45438633 | NC_021160.1    | Ca_kabuli_chr01 | 45438633                | TT                              | GG                | 1945898426               |
| SNP_P3_16084_45455419 | NC_021160.1    | Ca_kabuli_chr01 | 45455419                | TT                              | GG                | 1945898428               |
| SNP_P3_16085_45455421 | NC_021160.1    | Ca_kabuli_chr01 | 45455421                | AA                              | GG                | 1945898430               |
| SNP_P3_16086_45497016 | NC_021160.1    | Ca_kabuli_chr01 | 45497016                | CC                              | TT                | 1945898432               |
| SNP_P3_16087_45497025 | NC_021160.1    | Ca_kabuli_chr01 | 45497025                | GG                              | AA                | 1945898434               |
| SNP_P3_16088_45497049 | NC_021160.1    | Ca_kabuli_chr01 | 45497049                | AA                              | GG                | 1945898435               |
| SNP_P3_16090_45497213 | NC_021160.1    | Ca_kabuli_chr01 | 45497213                | CC                              | AA                | 1945898437               |
| SNP_P3_16091_45497309 | NC_021160.1    | Ca_kabuli_chr01 | 45497309                | TT                              | CC                | 1945898439               |

| SNPs IDs              | Chromosome IDs | Chromosomes     | Physical positions (bp) | CDC Frontier (Reference genome) | (Pusa 256 & HPNB) | NCBI SNPdb Accession IDs |
|-----------------------|----------------|-----------------|-------------------------|---------------------------------|-------------------|--------------------------|
| SNP_P3_16092_45497346 | NC_021160.1    | Ca_kabuli_chr01 | 45497346                | AA                              | CC                | 1945898441               |
| SNP_P3_16093_45497483 | NC_021160.1    | Ca_kabuli_chr01 | 45497483                | CC                              | GG                | 1945898443               |
| SNP_P3_16094_45497510 | NC_021160.1    | Ca_kabuli_chr01 | 45497510                | TT                              | CC                | 1945898444               |
| SNP_P3_16095_45499289 | NC_021160.1    | Ca_kabuli_chr01 | 45499289                | GG                              | AA                | 1945898446               |
| SNP_P3_16096_45511915 | NC_021160.1    | Ca_kabuli_chr01 | 45511915                | TT                              | CC                | 1945898448               |
| SNP_P3_16097_45524774 | NC_021160.1    | Ca_kabuli_chr01 | 45524774                | AA                              | CC                | 1945898450               |
| SNP_P3_16098_45543634 | NC_021160.1    | Ca_kabuli_chr01 | 45543634                | CC                              | TT                | 1945898451               |
| SNP_P3_16099_45544034 | NC_021160.1    | Ca_kabuli_chr01 | 45544034                | GG                              | AA                | 1945898453               |
| SNP_P3_16100_45553150 | NC_021160.1    | Ca_kabuli_chr01 | 45553150                | TT                              | CC                | 1945898455               |
| SNP_P3_16101_45553220 | NC_021160.1    | Ca_kabuli_chr01 | 45553220                | TT                              | CC                | 1945898457               |
| SNP_P3_16102_45553234 | NC_021160.1    | Ca_kabuli_chr01 | 45553234                | TT                              | CC                | 1945898459               |
| SNP_P3_16103_45553262 | NC_021160.1    | Ca_kabuli_chr01 | 45553262                | CC                              | TT                | 1945898460               |
| SNP_P3_16104_45553278 | NC_021160.1    | Ca_kabuli_chr01 | 45553278                | CC                              | TT                | 1945898462               |
| SNP_P3_16105_45553283 | NC_021160.1    | Ca_kabuli_chr01 | 45553283                | AA                              | GG                | 1945898464               |
| SNP_P3_16106_45553476 | NC_021160.1    | Ca_kabuli_chr01 | 45553476                | TT                              | CC                | 1945898466               |
| SNP_P3_16107_45553477 | NC_021160.1    | Ca_kabuli_chr01 | 45553477                | TT                              | CC                | 1945898468               |
| SNP_P3_16108_45553495 | NC_021160.1    | Ca_kabuli_chr01 | 45553495                | AA                              | TT                | 1945898469               |
| SNP_P3_16109_45553545 | NC_021160.1    | Ca_kabuli_chr01 | 45553545                | TT                              | CC                | 1945898471               |
| SNP_P3_16110_45553595 | NC_021160.1    | Ca_kabuli_chr01 | 45553595                | CC                              | AA                | 1945898473               |
| SNP_P3_16111_45557525 | NC_021160.1    | Ca_kabuli_chr01 | 45557525                | CC                              | TT                | 1945898475               |
| SNP_P3_16113_45566276 | NC_021160.1    | Ca_kabuli_chr01 | 45566276                | TT                              | AA                | 1945898476               |
| SNP_P3_16114_45566524 | NC_021160.1    | Ca_kabuli_chr01 | 45566524                | CC                              | TT                | 1945898478               |
| SNP_P3_16115_45567957 | NC_021160.1    | Ca_kabuli_chr01 | 45567957                | CC                              | AA                | 1945898480               |
| SNP_P3_16116_45568196 | NC_021160.1    | Ca_kabuli_chr01 | 45568196                | TT                              | CC                | 1945898482               |
| SNP_P3_16117_45568212 | NC_021160.1    | Ca_kabuli_chr01 | 45568212                | GG                              | AA                | 1945898483               |
| SNP_P3_16119_45570673 | NC_021160.1    | Ca_kabuli_chr01 | 45570673                | GG                              | TT                | 1945898485               |
| SNP_P3_16120_45592663 | NC_021160.1    | Ca_kabuli_chr01 | 45592663                | AA                              | CC                | 1945898487               |
| SNP_P3_16121_45593051 | NC_021160.1    | Ca_kabuli_chr01 | 45593051                | CC                              | TT                | 1945898489               |
| SNP_P3_16122_45593053 | NC_021160.1    | Ca_kabuli_chr01 | 45593053                | AA                              | GG                | 1945898490               |
| SNP_P3_16123_45593070 | NC_021160.1    | Ca_kabuli_chr01 | 45593070                | GG                              | TT                | 1945898492               |
| SNP_P3_16124_45593076 | NC_021160.1    | Ca_kabuli_chr01 | 45593076                | CC                              | GG                | 1945898494               |
| SNP_P3_16125_45593089 | NC_021160.1    | Ca_kabuli_chr01 | 45593089                | CC                              | TT                | 1945898496               |
| SNP_P3_16126_45593118 | NC_021160.1    | Ca_kabuli_chr01 | 45593118                | TT                              | CC                | 1945898497               |
| SNP_P3_16127_45593138 | NC_021160.1    | Ca_kabuli_chr01 | 45593138                | AA                              | GG                | 1945898499               |
| SNP_P3_16128_45605000 | NC_021160.1    | Ca_kabuli_chr01 | 45605000                | TT                              | GG                | 1945898501               |
| SNP_P3_16131_45613797 | NC_021160.1    | Ca_kabuli_chr01 | 45613797                | GG                              | AA                | 1945898503               |
| SNP_P3_16132_45639646 | NC_021160.1    | Ca_kabuli_chr01 | 45639646                | AA                              | GG                | 1945898505               |
| SNP_P3_16133_45653907 | NC_021160.1    | Ca_kabuli_chr01 | 45653907                | TT                              | CC                | 1945898506               |
| SNP_P3_16134_45653927 | NC_021160.1    | Ca_kabuli_chr01 | 45653927                | GG                              | AA                | 1945898508               |
| SNP_P3_16135_45662723 | NC_021160.1    | Ca_kabuli_chr01 | 45662723                | GG                              | AA                | 1945898510               |
| SNP_P3_16136_45662781 | NC_021160.1    | Ca_kabuli_chr01 | 45662781                | AA                              | GG                | 1945898512               |
| SNP_P3_16137_45662788 | NC_021160.1    | Ca_kabuli_chr01 | 45662788                | CC                              | AA                | 1945898513               |

| SNPs IDs              | Chromosome IDs | Chromosomes     | Physical positions (bp) | CDC Frontier (Reference genome) | (Pusa 256 & HPNB) | NCBI SNPdb Accession IDs |
|-----------------------|----------------|-----------------|-------------------------|---------------------------------|-------------------|--------------------------|
| SNP_P3_16138_45662789 | NC_021160.1    | Ca_kabuli_chr01 | 45662789                | CC                              | TT                | 1945898515               |
| SNP_P3_16139_45663330 | NC_021160.1    | Ca_kabuli_chr01 | 45663330                | CC                              | TT                | 1945898517               |
| SNP_P3_16140_45663431 | NC_021160.1    | Ca_kabuli_chr01 | 45663431                | TT                              | GG                | 1945898519               |
| SNP_P3_16141_45663783 | NC_021160.1    | Ca_kabuli_chr01 | 45663783                | CC                              | GG                | 1945898520               |
| SNP_P3_16142_45663786 | NC_021160.1    | Ca_kabuli_chr01 | 45663786                | AA                              | GG                | 1945898522               |
| SNP_P3_16143_45663825 | NC_021160.1    | Ca_kabuli_chr01 | 45663825                | TT                              | CC                | 1945898524               |
| SNP_P3_16144_45720442 | NC_021160.1    | Ca_kabuli_chr01 | 45720442                | CC                              | GG                | 1945898526               |
| SNP_P3_16145_45760880 | NC_021160.1    | Ca_kabuli_chr01 | 45760880                | CC                              | TT                | 1945898527               |
| SNP_P3_16147_45788057 | NC_021160.1    | Ca_kabuli_chr01 | 45788057                | GG                              | AA                | 1945898529               |
| SNP_P3_16148_45788075 | NC_021160.1    | Ca_kabuli_chr01 | 45788075                | CC                              | TT                | 1945898531               |
| SNP_P3_16149_45788085 | NC_021160.1    | Ca_kabuli_chr01 | 45788085                | CC                              | TT                | 1945898533               |
| SNP_P3_16150_45792208 | NC_021160.1    | Ca_kabuli_chr01 | 45792208                | GG                              | AA                | 1945898534               |
| SNP_P3_16152_45846736 | NC_021160.1    | Ca_kabuli_chr01 | 45846736                | AA                              | TT                | 1945898536               |
| SNP_P3_16153_45850381 | NC_021160.1    | Ca_kabuli_chr01 | 45850381                | GG                              | TT                | 1945898538               |
| SNP_P3_16154_45899936 | NC_021160.1    | Ca_kabuli_chr01 | 45899936                | CC                              | AA                | 1945898540               |
| SNP_P3_16155_45913072 | NC_021160.1    | Ca_kabuli_chr01 | 45913072                | CC                              | TT                | 1945898542               |
| SNP_P3_16156_45914354 | NC_021160.1    | Ca_kabuli_chr01 | 45914354                | TT                              | CC                | 1945898543               |
| SNP_P3_16157_45914645 | NC_021160.1    | Ca_kabuli_chr01 | 45914645                | AA                              | GG                | 1945898545               |
| SNP_P3_16158_45914675 | NC_021160.1    | Ca_kabuli_chr01 | 45914675                | TT                              | AA                | 1945898547               |
| SNP_P3_16159_45958196 | NC_021160.1    | Ca_kabuli_chr01 | 45958196                | AA                              | TT                | 1945898549               |
| SNP_P3_16160_45958214 | NC_021160.1    | Ca_kabuli_chr01 | 45958214                | AA                              | TT                | 1945898550               |
| SNP_P3_16161_45993222 | NC_021160.1    | Ca_kabuli_chr01 | 45993222                | AA                              | CC                | 1945898552               |
| SNP_P3_16162_45993263 | NC_021160.1    | Ca_kabuli_chr01 | 45993263                | TT                              | CC                | 1945898554               |
| SNP_P3_16163_46031234 | NC_021160.1    | Ca_kabuli_chr01 | 46031234                | AA                              | GG                | 1945898556               |
| SNP_P3_16164_46051919 | NC_021160.1    | Ca_kabuli_chr01 | 46051919                | GG                              | TT                | 1945898558               |
| SNP_P3_16166_46065868 | NC_021160.1    | Ca_kabuli_chr01 | 46065868                | CC                              | TT                | 1945898559               |
| SNP_P3_16167_46065891 | NC_021160.1    | Ca_kabuli_chr01 | 46065891                | AA                              | GG                | 1945898561               |
| SNP_P3_16168_46066173 | NC_021160.1    | Ca_kabuli_chr01 | 46066173                | AA                              | CC                | 1945898563               |
| SNP_P3_16169_46066179 | NC_021160.1    | Ca_kabuli_chr01 | 46066179                | AA                              | CC                | 1945898565               |
| SNP_P3_16170_46066233 | NC_021160.1    | Ca_kabuli_chr01 | 46066233                | CC                              | TT                | 1945898567               |
| SNP_P3_16171_46066272 | NC_021160.1    | Ca_kabuli_chr01 | 46066272                | TT                              | CC                | 1945898568               |
| SNP_P3_16172_46066296 | NC_021160.1    | Ca_kabuli_chr01 | 46066296                | GG                              | AA                | 1945898570               |
| SNP_P3_16173_46066302 | NC_021160.1    | Ca_kabuli_chr01 | 46066302                | GG                              | TT                | 1945898572               |
| SNP_P3_16174_46066347 | NC_021160.1    | Ca_kabuli_chr01 | 46066347                | GG                              | TT                | 1945898574               |
| SNP_P3_16175_46066386 | NC_021160.1    | Ca_kabuli_chr01 | 46066386                | AA                              | CC                | 1945898576               |
| SNP_P3_16176_46068411 | NC_021160.1    | Ca_kabuli_chr01 | 46068411                | CC                              | AA                | 1945898577               |
| SNP_P3_16177_46068442 | NC_021160.1    | Ca_kabuli_chr01 | 46068442                | TT                              | CC                | 1945898579               |
| SNP_P3_16178_46068473 | NC_021160.1    | Ca_kabuli_chr01 | 46068473                | TT                              | CC                | 1945898581               |
| SNP_P3_16179_46082512 | NC_021160.1    | Ca_kabuli_chr01 | 46082512                | TT                              | CC                | 1945898583               |
| SNP_P3_16180_46083317 | NC_021160.1    | Ca_kabuli_chr01 | 46083317                | TT                              | CC                | 1945898585               |
| SNP_P3_16181_46083394 | NC_021160.1    | Ca_kabuli_chr01 | 46083394                | CC                              | TT                | 1945898586               |
| SNP_P3_16182_46083409 | NC_021160.1    | Ca_kabuli_chr01 | 46083409                | CC                              | AA                | 1945898588               |

| SNPs IDs              | Chromosome IDs | Chromosomes     | Physical positions (bp) | CDC Frontier (Reference genome) | (Pusa 256 & HPNB) | NCBI SNPdb Accession IDs |
|-----------------------|----------------|-----------------|-------------------------|---------------------------------|-------------------|--------------------------|
| SNP_P3_16183_46086816 | NC_021160.1    | Ca_kabuli_chr01 | 46086816                | GG                              | TT                | 1945898590               |
| SNP_P3_16184_46088009 | NC_021160.1    | Ca_kabuli_chr01 | 46088009                | AA                              | GG                | 1945898592               |
| SNP_P3_16186_46102480 | NC_021160.1    | Ca_kabuli_chr01 | 46102480                | AA                              | GG                | 1945898593               |
| SNP_P3_16188_46102751 | NC_021160.1    | Ca_kabuli_chr01 | 46102751                | TT                              | CC                | 1945898595               |
| SNP_P3_16190_46166539 | NC_021160.1    | Ca_kabuli_chr01 | 46166539                | GG                              | AA                | 1945898597               |
| SNP_P3_16191_46169977 | NC_021160.1    | Ca_kabuli_chr01 | 46169977                | GG                              | TT                | 1945898599               |
| SNP_P3_16192_46171346 | NC_021160.1    | Ca_kabuli_chr01 | 46171346                | AA                              | GG                | 1945898601               |
| SNP_P3_16193_46171497 | NC_021160.1    | Ca_kabuli_chr01 | 46171497                | TT                              | AA                | 1945898602               |
| SNP_P3_16194_46171498 | NC_021160.1    | Ca_kabuli_chr01 | 46171498                | AA                              | GG                | 1945898604               |
| SNP_P3_16195_46171677 | NC_021160.1    | Ca_kabuli_chr01 | 46171677                | CC                              | TT                | 1945898606               |
| SNP_P3_16196_46171753 | NC_021160.1    | Ca_kabuli_chr01 | 46171753                | TT                              | CC                | 1945898608               |
| SNP_P3_16197_46171756 | NC_021160.1    | Ca_kabuli_chr01 | 46171756                | AA                              | TT                | 1945898610               |
| SNP_P3_16198_46171765 | NC_021160.1    | Ca_kabuli_chr01 | 46171765                | AA                              | GG                | 1945898611               |
| SNP_P3_16199_46171771 | NC_021160.1    | Ca_kabuli_chr01 | 46171771                | GG                              | AA                | 1945898613               |
| SNP_P3_16200_46171807 | NC_021160.1    | Ca_kabuli_chr01 | 46171807                | GG                              | AA                | 1945898615               |
| SNP_P3_16201_46171810 | NC_021160.1    | Ca_kabuli_chr01 | 46171810                | CC                              | TT                | 1945898617               |
| SNP_P3_16202_46174172 | NC_021160.1    | Ca_kabuli_chr01 | 46174172                | TT                              | CC                | 1945898618               |
| SNP_P3_16203_46174560 | NC_021160.1    | Ca_kabuli_chr01 | 46174560                | AA                              | TT                | 1945898620               |
| SNP_P3_16204_46174581 | NC_021160.1    | Ca_kabuli_chr01 | 46174581                | AA                              | TT                | 1945898622               |
| SNP_P3_16205_46174605 | NC_021160.1    | Ca_kabuli_chr01 | 46174605                | AA                              | GG                | 1945898624               |
| SNP_P3_16206_46174692 | NC_021160.1    | Ca_kabuli_chr01 | 46174692                | AA                              | GG                | 1945898625               |
| SNP_P3_16207_46178178 | NC_021160.1    | Ca_kabuli_chr01 | 46178178                | CC                              | TT                | 1945898627               |
| SNP_P3_16208_46178183 | NC_021160.1    | Ca_kabuli_chr01 | 46178183                | CC                              | AA                | 1945898629               |
| SNP_P3_16209_46178188 | NC_021160.1    | Ca_kabuli_chr01 | 46178188                | AA                              | CC                | 1945898631               |
| SNP_P3_16211_46178302 | NC_021160.1    | Ca_kabuli_chr01 | 46178302                | CC                              | TT                | 1945898633               |
| SNP_P3_16212_46179595 | NC_021160.1    | Ca_kabuli_chr01 | 46179595                | AA                              | GG                | 1945898634               |
| SNP_P3_16213_46192223 | NC_021160.1    | Ca_kabuli_chr01 | 46192223                | AA                              | TT                | 1945898636               |
| SNP_P3_16214_46192576 | NC_021160.1    | Ca_kabuli_chr01 | 46192576                | TT                              | GG                | 1945898638               |
| SNP_P3_16215_46193264 | NC_021160.1    | Ca_kabuli_chr01 | 46193264                | CC                              | TT                | 1945898640               |
| SNP_P3_16216_46193265 | NC_021160.1    | Ca_kabuli_chr01 | 46193265                | AA                              | CC                | 1945898641               |
| SNP_P3_16217_46193286 | NC_021160.1    | Ca_kabuli_chr01 | 46193286                | CC                              | TT                | 1945898643               |
| SNP_P3_16218_46256318 | NC_021160.1    | Ca_kabuli_chr01 | 46256318                | TT                              | AA                | 1945898645               |
| SNP_P3_16219_46258915 | NC_021160.1    | Ca_kabuli_chr01 | 46258915                | AA                              | GG                | 1945898647               |
| SNP_P3_16220_46263292 | NC_021160.1    | Ca_kabuli_chr01 | 46263292                | AA                              | GG                | 1945898649               |
| SNP_P3_16223_46278110 | NC_021160.1    | Ca_kabuli_chr01 | 46278110                | TT                              | GG                | 1945898650               |
| SNP_P3_16224_46278154 | NC_021160.1    | Ca_kabuli_chr01 | 46278154                | GG                              | TT                | 1945898652               |
| SNP_P3_16225_46278258 | NC_021160.1    | Ca_kabuli_chr01 | 46278258                | TT                              | CC                | 1945898654               |
| SNP_P3_16226_46278391 | NC_021160.1    | Ca_kabuli_chr01 | 46278391                | GG                              | AA                | 1945898656               |
| SNP_P3_16228_46278990 | NC_021160.1    | Ca_kabuli_chr01 | 46278990                | GG                              | TT                | 1945898658               |
| SNP_P3_16229_46279213 | NC_021160.1    | Ca_kabuli_chr01 | 46279213                | TT                              | AA                | 1945898659               |
| SNP_P3_16230_46279214 | NC_021160.1    | Ca_kabuli_chr01 | 46279214                | TT                              | AA                | 1945898661               |
| SNP_P3_16231_46279263 | NC_021160.1    | Ca_kabuli_chr01 | 46279263                | TT                              | CC                | 1945898663               |

| SNPs IDs              | Chromosome IDs | Chromosomes     | Physical positions (bp) | CDC Frontier (Reference genome) | (Pusa 256 & HPNB) | NCBI SNPdb Accession IDs |
|-----------------------|----------------|-----------------|-------------------------|---------------------------------|-------------------|--------------------------|
| SNP_P3_16232_46279303 | NC_021160.1    | Ca_kabuli_chr01 | 46279303                | AA                              | CC                | 1945898665               |
| SNP_P3_16233_46279420 | NC_021160.1    | Ca_kabuli_chr01 | 46279420                | TT                              | CC                | 1945898667               |
| SNP_P3_16234_46279881 | NC_021160.1    | Ca_kabuli_chr01 | 46279881                | TT                              | CC                | 1945898668               |
| SNP_P3_16235_46279986 | NC_021160.1    | Ca_kabuli_chr01 | 46279986                | CC                              | TT                | 1945898670               |
| SNP_P3_16236_46280136 | NC_021160.1    | Ca_kabuli_chr01 | 46280136                | AA                              | CC                | 1945898672               |
| SNP_P3_16237_46280421 | NC_021160.1    | Ca_kabuli_chr01 | 46280421                | AA                              | GG                | 1945898674               |
| SNP_P3_16238_46280423 | NC_021160.1    | Ca_kabuli_chr01 | 46280423                | TT                              | CC                | 1945898676               |
| SNP_P3_16239_46280468 | NC_021160.1    | Ca_kabuli_chr01 | 46280468                | AA                              | CC                | 1945898677               |
| SNP_P3_16240_46280526 | NC_021160.1    | Ca_kabuli_chr01 | 46280526                | GG                              | AA                | 1945898679               |
| SNP_P3_16241_46280783 | NC_021160.1    | Ca_kabuli_chr01 | 46280783                | TT                              | GG                | 1945898681               |
| SNP_P3_16242_46281110 | NC_021160.1    | Ca_kabuli_chr01 | 46281110                | TT                              | CC                | 1945898683               |
| SNP_P3_16244_46283431 | NC_021160.1    | Ca_kabuli_chr01 | 46283431                | GG                              | AA                | 1945898685               |
| SNP_P3_16245_46283478 | NC_021160.1    | Ca_kabuli_chr01 | 46283478                | GG                              | TT                | 1945898686               |
| SNP_P3_16246_46284058 | NC_021160.1    | Ca_kabuli_chr01 | 46284058                | GG                              | AA                | 1945898688               |
| SNP_P3_16247_46284112 | NC_021160.1    | Ca_kabuli_chr01 | 46284112                | CC                              | TT                | 1945898690               |
| SNP_P3_16248_46284535 | NC_021160.1    | Ca_kabuli_chr01 | 46284535                | GG                              | AA                | 1945898692               |
| SNP_P3_16249_46284673 | NC_021160.1    | Ca_kabuli_chr01 | 46284673                | GG                              | AA                | 1945898693               |
| SNP_P3_16250_46284997 | NC_021160.1    | Ca_kabuli_chr01 | 46284997                | CC                              | TT                | 1945898695               |
| SNP_P3_16251_46285113 | NC_021160.1    | Ca_kabuli_chr01 | 46285113                | GG                              | AA                | 1945898697               |
| SNP_P3_16252_46285294 | NC_021160.1    | Ca_kabuli_chr01 | 46285294                | CC                              | TT                | 1945898699               |
| SNP_P3_16253_46285302 | NC_021160.1    | Ca_kabuli_chr01 | 46285302                | GG                              | AA                | 1945898701               |
| SNP_P3_16254_46285622 | NC_021160.1    | Ca_kabuli_chr01 | 46285622                | GG                              | TT                | 1945898702               |
| SNP_P3_16255_46285789 | NC_021160.1    | Ca_kabuli_chr01 | 46285789                | GG                              | CC                | 1945898704               |
| SNP_P3_16256_46285870 | NC_021160.1    | Ca_kabuli_chr01 | 46285870                | GG                              | CC                | 1945898706               |
| SNP_P3_16257_46286015 | NC_021160.1    | Ca_kabuli_chr01 | 46286015                | TT                              | GG                | 1945898708               |
| SNP_P3_16258_46286059 | NC_021160.1    | Ca_kabuli_chr01 | 46286059                | GG                              | TT                | 1945898709               |
| SNP_P3_16259_46286066 | NC_021160.1    | Ca_kabuli_chr01 | 46286066                | AA                              | GG                | 1945898711               |
| SNP_P3_16260_46286530 | NC_021160.1    | Ca_kabuli_chr01 | 46286530                | TT                              | GG                | 1945898713               |
| SNP_P3_16261_46286560 | NC_021160.1    | Ca_kabuli_chr01 | 46286560                | GG                              | CC                | 1945898715               |
| SNP_P3_16264_46286732 | NC_021160.1    | Ca_kabuli_chr01 | 46286732                | TT                              | GG                | 1945898717               |
| SNP_P3_16266_46302167 | NC_021160.1    | Ca_kabuli_chr01 | 46302167                | TT                              | CC                | 1945898718               |
| SNP_P3_16267_46324394 | NC_021160.1    | Ca_kabuli_chr01 | 46324394                | TT                              | GG                | 1945898720               |
| SNP_P3_16268_46325123 | NC_021160.1    | Ca_kabuli_chr01 | 46325123                | GG                              | TT                | 1945898722               |
| SNP_P3_16269_46325387 | NC_021160.1    | Ca_kabuli_chr01 | 46325387                | AA                              | GG                | 1945898724               |
| SNP_P3_16270_46328676 | NC_021160.1    | Ca_kabuli_chr01 | 46328676                | TT                              | CC                | 1945898725               |
| SNP_P3_16271_46342508 | NC_021160.1    | Ca_kabuli_chr01 | 46342508                | CC                              | TT                | 1945898727               |
| SNP_P3_16272_46342582 | NC_021160.1    | Ca_kabuli_chr01 | 46342582                | AA                              | GG                | 1945898729               |
| SNP_P3_16274_46351263 | NC_021160.1    | Ca_kabuli_chr01 | 46351263                | CC                              | TT                | 1945898731               |
| SNP_P3_16275_46351273 | NC_021160.1    | Ca_kabuli_chr01 | 46351273                | GG                              | AA                | 1945898732               |
| SNP_P3_16276_46351612 | NC_021160.1    | Ca_kabuli_chr01 | 46351612                | TT                              | GG                | 1945898734               |
| SNP_P3_16277_46351630 | NC_021160.1    | Ca_kabuli_chr01 | 46351630                | GG                              | AA                | 1945898736               |
| SNP_P3_16278_46351707 | NC_021160.1    | Ca_kabuli_chr01 | 46351707                | TT                              | AA                | 1945898738               |

| SNPs IDs              | Chromosome IDs | Chromosomes     | Physical positions (bp) | CDC Frontier (Reference genome) | (Pusa 256 & HPNB) | NCBI SNPdb Accession IDs |
|-----------------------|----------------|-----------------|-------------------------|---------------------------------|-------------------|--------------------------|
| SNP_P3_16279_46351731 | NC_021160.1    | Ca_kabuli_chr01 | 46351731                | GG                              | AA                | 1945898739               |
| SNP_P3_16280_46351864 | NC_021160.1    | Ca_kabuli_chr01 | 46351864                | TT                              | CC                | 1945898741               |
| SNP_P3_16281_46351929 | NC_021160.1    | Ca_kabuli_chr01 | 46351929                | TT                              | CC                | 1945898743               |
| SNP_P3_16282_46352020 | NC_021160.1    | Ca_kabuli_chr01 | 46352020                | AA                              | GG                | 1945898745               |
| SNP_P3_16283_46352041 | NC_021160.1    | Ca_kabuli_chr01 | 46352041                | GG                              | TT                | 1945898746               |
| SNP_P3_16284_46352044 | NC_021160.1    | Ca_kabuli_chr01 | 46352044                | GG                              | AA                | 1945898748               |
| SNP_P3_16285_46352057 | NC_021160.1    | Ca_kabuli_chr01 | 46352057                | AA                              | CC                | 1945898750               |
| SNP_P3_16286_46352070 | NC_021160.1    | Ca_kabuli_chr01 | 46352070                | AA                              | GG                | 1945898752               |
| SNP_P3_16287_46352104 | NC_021160.1    | Ca_kabuli_chr01 | 46352104                | AA                              | GG                | 1945898753               |
| SNP_P3_16289_46352220 | NC_021160.1    | Ca_kabuli_chr01 | 46352220                | TT                              | GG                | 1945898755               |
| SNP_P3_16290_46352257 | NC_021160.1    | Ca_kabuli_chr01 | 46352257                | CC                              | GG                | 1945898757               |
| SNP_P3_16291_46352258 | NC_021160.1    | Ca_kabuli_chr01 | 46352258                | CC                              | TT                | 1945898759               |
| SNP_P3_16292_46352262 | NC_021160.1    | Ca_kabuli_chr01 | 46352262                | TT                              | CC                | 1945898761               |
| SNP_P3_16293_46352291 | NC_021160.1    | Ca_kabuli_chr01 | 46352291                | CC                              | TT                | 1945898762               |
| SNP_P3_16294_46354158 | NC_021160.1    | Ca_kabuli_chr01 | 46354158                | AA                              | GG                | 1945898764               |
| SNP_P3_16295_46367692 | NC_021160.1    | Ca_kabuli_chr01 | 46367692                | GG                              | AA                | 1945898766               |
| SNP_P3_16296_46367694 | NC_021160.1    | Ca_kabuli_chr01 | 46367694                | TT                              | CC                | 1945898768               |
| SNP_P3_16297_46381762 | NC_021160.1    | Ca_kabuli_chr01 | 46381762                | TT                              | AA                | 1945898769               |
| SNP_P3_16298_46381776 | NC_021160.1    | Ca_kabuli_chr01 | 46381776                | TT                              | AA                | 1945898771               |
| SNP_P3_16300_46404427 | NC_021160.1    | Ca_kabuli_chr01 | 46404427                | GG                              | AA                | 1945898773               |
| SNP_P3_16301_46404450 | NC_021160.1    | Ca_kabuli_chr01 | 46404450                | TT                              | CC                | 1945898775               |
| SNP_P3_16303_46428126 | NC_021160.1    | Ca_kabuli_chr01 | 46428126                | TT                              | AA                | 1945898776               |
| SNP_P3_16304_46428127 | NC_021160.1    | Ca_kabuli_chr01 | 46428127                | AA                              | TT                | 1945898778               |
| SNP_P3_16305_46449950 | NC_021160.1    | Ca_kabuli_chr01 | 46449950                | TT                              | GG                | 1945898780               |
| SNP_P3_16306_46458634 | NC_021160.1    | Ca_kabuli_chr01 | 46458634                | AA                              | CC                | 1945898782               |
| SNP_P3_16307_46458698 | NC_021160.1    | Ca_kabuli_chr01 | 46458698                | TT                              | CC                | 1945898783               |
| SNP_P3_16308_46458701 | NC_021160.1    | Ca_kabuli_chr01 | 46458701                | AA                              | TT                | 1945898785               |
| SNP_P3_16309_46471967 | NC_021160.1    | Ca_kabuli_chr01 | 46471967                | CC                              | TT                | 1945898787               |
| SNP_P3_16311_46498990 | NC_021160.1    | Ca_kabuli_chr01 | 46498990                | CC                              | GG                | 1945898789               |
| SNP_P3_16312_46499525 | NC_021160.1    | Ca_kabuli_chr01 | 46499525                | AA                              | GG                | 1945898790               |
| SNP_P3_16313_46499546 | NC_021160.1    | Ca_kabuli_chr01 | 46499546                | TT                              | CC                | 1945898792               |
| SNP_P3_16314_46499742 | NC_021160.1    | Ca_kabuli_chr01 | 46499742                | GG                              | TT                | 1945898794               |
| SNP_P3_16315_46507224 | NC_021160.1    | Ca_kabuli_chr01 | 46507224                | GG                              | AA                | 1945898796               |
| SNP_P3_16317_46522740 | NC_021160.1    | Ca_kabuli_chr01 | 46522740                | AA                              | TT                | 1945898798               |
| SNP_P3_16318_46522767 | NC_021160.1    | Ca_kabuli_chr01 | 46522767                | TT                              | CC                | 1945898799               |
| SNP_P3_16319_46523221 | NC_021160.1    | Ca_kabuli_chr01 | 46523221                | TT                              | CC                | 1945898801               |
| SNP_P3_16320_46523387 | NC_021160.1    | Ca_kabuli_chr01 | 46523387                | TT                              | GG                | 1945898803               |
| SNP_P3_16322_46523582 | NC_021160.1    | Ca_kabuli_chr01 | 46523582                | AA                              | CC                | 1945898805               |
| SNP_P3_16324_46524525 | NC_021160.1    | Ca_kabuli_chr01 | 46524525                | TT                              | GG                | 1945898806               |
| SNP_P3_16325_46524689 | NC_021160.1    | Ca_kabuli_chr01 | 46524689                | CC                              | TT                | 1945898808               |
| SNP_P3_16326_46524696 | NC_021160.1    | Ca_kabuli_chr01 | 46524696                | CC                              | GG                | 1945898810               |
| SNP_P3_16327_46524740 | NC_021160.1    | Ca_kabuli_chr01 | 46524740                | GG                              | TT                | 1945898812               |

| SNPs IDs              | Chromosome IDs | Chromosomes     | Physical positions (bp) | CDC Frontier (Reference genome) | (Pusa 256 & HPNB) | NCBI SNPdb Accession IDs |
|-----------------------|----------------|-----------------|-------------------------|---------------------------------|-------------------|--------------------------|
| SNP_P3_16328_46525525 | NC_021160.1    | Ca_kabuli_chr01 | 46525525                | GG                              | AA                | 1945898814               |
| SNP_P3_16329_46525564 | NC_021160.1    | Ca_kabuli_chr01 | 46525564                | CC                              | TT                | 1945898815               |
| SNP_P3_16330_46526315 | NC_021160.1    | Ca_kabuli_chr01 | 46526315                | TT                              | CC                | 1945898817               |
| SNP_P3_16333_46527842 | NC_021160.1    | Ca_kabuli_chr01 | 46527842                | GG                              | TT                | 1945898819               |
| SNP_P3_16334_46527914 | NC_021160.1    | Ca_kabuli_chr01 | 46527914                | CC                              | TT                | 1945898821               |
| SNP_P3_16335_46528070 | NC_021160.1    | Ca_kabuli_chr01 | 46528070                | TT                              | CC                | 1945898823               |
| SNP_P3_16336_46528205 | NC_021160.1    | Ca_kabuli_chr01 | 46528205                | TT                              | CC                | 1945898824               |
| SNP_P3_16338_46528669 | NC_021160.1    | Ca_kabuli_chr01 | 46528669                | CC                              | TT                | 1945898826               |
| SNP_P3_16339_46528715 | NC_021160.1    | Ca_kabuli_chr01 | 46528715                | AA                              | GG                | 1945898828               |
| SNP_P3_16342_46528767 | NC_021160.1    | Ca_kabuli_chr01 | 46528767                | AA                              | GG                | 1945898830               |
| SNP_P3_16343_46529096 | NC_021160.1    | Ca_kabuli_chr01 | 46529096                | TT                              | CC                | 1945898832               |
| SNP_P3_16344_46529312 | NC_021160.1    | Ca_kabuli_chr01 | 46529312                | AA                              | GG                | 1945898833               |
| SNP_P3_16345_46529335 | NC_021160.1    | Ca_kabuli_chr01 | 46529335                | TT                              | CC                | 1945898835               |
| SNP_P3_16346_46529530 | NC_021160.1    | Ca_kabuli_chr01 | 46529530                | AA                              | GG                | 1945898837               |
| SNP_P3_16347_46529554 | NC_021160.1    | Ca_kabuli_chr01 | 46529554                | AA                              | GG                | 1945898839               |
| SNP_P3_16348_46529691 | NC_021160.1    | Ca_kabuli_chr01 | 46529691                | GG                              | AA                | 1945898841               |
| SNP_P3_16349_46529764 | NC_021160.1    | Ca_kabuli_chr01 | 46529764                | TT                              | GG                | 1945898842               |
| SNP_P3_16350_46529977 | NC_021160.1    | Ca_kabuli_chr01 | 46529977                | CC                              | TT                | 1945898844               |
| SNP_P3_16351_46530174 | NC_021160.1    | Ca_kabuli_chr01 | 46530174                | AA                              | GG                | 1945898846               |
| SNP_P3_16352_46530275 | NC_021160.1    | Ca_kabuli_chr01 | 46530275                | GG                              | AA                | 1945898848               |
| SNP_P3_16353_46530475 | NC_021160.1    | Ca_kabuli_chr01 | 46530475                | CC                              | GG                | 1945898849               |
| SNP_P3_16354_46530546 | NC_021160.1    | Ca_kabuli_chr01 | 46530546                | GG                              | AA                | 1945898851               |
| SNP_P3_16355_46530832 | NC_021160.1    | Ca_kabuli_chr01 | 46530832                | GG                              | AA                | 1945898853               |
| SNP_P3_16358_46531157 | NC_021160.1    | Ca_kabuli_chr01 | 46531157                | GG                              | AA                | 1945898855               |
| SNP_P3_16359_46531318 | NC_021160.1    | Ca_kabuli_chr01 | 46531318                | AA                              | GG                | 1945898857               |
| SNP_P3_16360_46534819 | NC_021160.1    | Ca_kabuli_chr01 | 46534819                | GG                              | AA                | 1945898858               |
| SNP_P3_16361_46534829 | NC_021160.1    | Ca_kabuli_chr01 | 46534829                | AA                              | TT                | 1945898860               |
| SNP_P3_16362_46538684 | NC_021160.1    | Ca_kabuli_chr01 | 46538684                | AA                              | TT                | 1945898862               |
| SNP_P3_16363_46538685 | NC_021160.1    | Ca_kabuli_chr01 | 46538685                | CC                              | GG                | 1945898864               |
| SNP_P3_16364_46538708 | NC_021160.1    | Ca_kabuli_chr01 | 46538708                | CC                              | GG                | 1945898866               |
| SNP_P3_16365_46538713 | NC_021160.1    | Ca_kabuli_chr01 | 46538713                | CC                              | TT                | 1945898867               |
| SNP_P3_16366_46538715 | NC_021160.1    | Ca_kabuli_chr01 | 46538715                | AA                              | GG                | 1945898869               |
| SNP_P3_16367_46538857 | NC_021160.1    | Ca_kabuli_chr01 | 46538857                | GG                              | TT                | 1945898871               |
| SNP_P3_16368_46538858 | NC_021160.1    | Ca_kabuli_chr01 | 46538858                | TT                              | CC                | 1945898873               |
| SNP_P3_16369_46539156 | NC_021160.1    | Ca_kabuli_chr01 | 46539156                | AA                              | GG                | 1945898875               |
| SNP_P3_16372_46539601 | NC_021160.1    | Ca_kabuli_chr01 | 46539601                | CC                              | TT                | 1945898876               |
| SNP_P3_16373_46565798 | NC_021160.1    | Ca_kabuli_chr01 | 46565798                | TT                              | CC                | 1945898878               |
| SNP_P3_16374_46566162 | NC_021160.1    | Ca_kabuli_chr01 | 46566162                | AA                              | TT                | 1945898880               |
| SNP_P3_16375_46566438 | NC_021160.1    | Ca_kabuli_chr01 | 46566438                | CC                              | AA                | 1945898882               |
| SNP_P3_16376_46567355 | NC_021160.1    | Ca_kabuli_chr01 | 46567355                | CC                              | TT                | 1945898884               |
| SNP_P3_16377_46567415 | NC_021160.1    | Ca_kabuli_chr01 | 46567415                | TT                              | CC                | 1945898885               |
| SNP_P3_16378_46568271 | NC_021160.1    | Ca_kabuli_chr01 | 46568271                | CC                              | TT                | 1945898887               |



| SNPs IDs              | Chromosome IDs | Chromosomes     | Physical positions (bp) | CDC Frontier (Reference genome) | (Pusa 256 & HPNB) | NCBI SNPdb Accession IDs |
|-----------------------|----------------|-----------------|-------------------------|---------------------------------|-------------------|--------------------------|
| SNP_P3_16379_46568456 | NC_021160.1    | Ca_kabuli_chr01 | 46568456                | TT                              | CC                | 1945898889               |
| SNP_P3_16380_46568457 | NC_021160.1    | Ca_kabuli_chr01 | 46568457                | GG                              | AA                | 1945898891               |
| SNP_P3_16381_46568471 | NC_021160.1    | Ca_kabuli_chr01 | 46568471                | CC                              | TT                | 1945898893               |
| SNP_P3_16382_46568707 | NC_021160.1    | Ca_kabuli_chr01 | 46568707                | TT                              | CC                | 1945898894               |
| SNP_P3_16383_46568743 | NC_021160.1    | Ca_kabuli_chr01 | 46568743                | GG                              | AA                | 1945898896               |
| SNP_P3_16384_46568793 | NC_021160.1    | Ca_kabuli_chr01 | 46568793                | TT                              | CC                | 1945898898               |
| SNP_P3_16385_46568917 | NC_021160.1    | Ca_kabuli_chr01 | 46568917                | TT                              | GG                | 1945898900               |
| SNP_P3_16386_46569042 | NC_021160.1    | Ca_kabuli_chr01 | 46569042                | CC                              | AA                | 1945898901               |
| SNP_P3_16387_46608718 | NC_021160.1    | Ca_kabuli_chr01 | 46608718                | TT                              | CC                | 1945898903               |
| SNP_P3_16388_46618670 | NC_021160.1    | Ca_kabuli_chr01 | 46618670                | CC                              | AA                | 1945898905               |
| SNP_P3_16389_46619680 | NC_021160.1    | Ca_kabuli_chr01 | 46619680                | CC                              | TT                | 1945898907               |
| SNP_P3_16391_46647291 | NC_021160.1    | Ca_kabuli_chr01 | 46647291                | GG                              | AA                | 1945898909               |
| SNP_P3_16392_46660539 | NC_021160.1    | Ca_kabuli_chr01 | 46660539                | AA                              | CC                | 1945898910               |
| SNP_P3_16393_46661129 | NC_021160.1    | Ca_kabuli_chr01 | 46661129                | AA                              | GG                | 1945898912               |
| SNP_P3_16394_46661624 | NC_021160.1    | Ca_kabuli_chr01 | 46661624                | TT                              | AA                | 1945898914               |
| SNP_P3_16395_46661658 | NC_021160.1    | Ca_kabuli_chr01 | 46661658                | TT                              | CC                | 1945898916               |
| SNP_P3_16396_46661756 | NC_021160.1    | Ca_kabuli_chr01 | 46661756                | GG                              | CC                | 1945898918               |
| SNP_P3_16398_46662080 | NC_021160.1    | Ca_kabuli_chr01 | 46662080                | CC                              | TT                | 1945898919               |
| SNP_P3_16399_46662324 | NC_021160.1    | Ca_kabuli_chr01 | 46662324                | GG                              | AA                | 1945898921               |
| SNP_P3_16400_46685588 | NC_021160.1    | Ca_kabuli_chr01 | 46685588                | AA                              | GG                | 1945898923               |
| SNP_P3_16401_46699359 | NC_021160.1    | Ca_kabuli_chr01 | 46699359                | AA                              | TT                | 1945898925               |
| SNP_P3_16402_46699362 | NC_021160.1    | Ca_kabuli_chr01 | 46699362                | GG                              | AA                | 1945898926               |
| SNP_P3_16403_46699365 | NC_021160.1    | Ca_kabuli_chr01 | 46699365                | TT                              | AA                | 1945898928               |
| SNP_P3_16404_46699371 | NC_021160.1    | Ca_kabuli_chr01 | 46699371                | AA                              | GG                | 1945898930               |
| SNP_P3_16405_46699381 | NC_021160.1    | Ca_kabuli_chr01 | 46699381                | TT                              | CC                | 1945898931               |
| SNP_P3_16406_46699386 | NC_021160.1    | Ca_kabuli_chr01 | 46699386                | GG                              | AA                | 1945898933               |
| SNP_P3_16407_46699389 | NC_021160.1    | Ca_kabuli_chr01 | 46699389                | CC                              | AA                | 1945898935               |
| SNP_P3_16408_46700865 | NC_021160.1    | Ca_kabuli_chr01 | 46700865                | AA                              | TT                | 1945898937               |
| SNP_P3_16409_46700995 | NC_021160.1    | Ca_kabuli_chr01 | 46700995                | TT                              | CC                | 1945898938               |
| SNP_P3_16410_46701149 | NC_021160.1    | Ca_kabuli_chr01 | 46701149                | AA                              | TT                | 1945898940               |
| SNP_P3_16411_46701278 | NC_021160.1    | Ca_kabuli_chr01 | 46701278                | AA                              | GG                | 1945898942               |
| SNP_P3_16412_46701420 | NC_021160.1    | Ca_kabuli_chr01 | 46701420                | GG                              | TT                | 1945898944               |
| SNP_P3_16413_46701575 | NC_021160.1    | Ca_kabuli_chr01 | 46701575                | GG                              | AA                | 1945898946               |
| SNP_P3_16414_46746953 | NC_021160.1    | Ca_kabuli_chr01 | 46746953                | TT                              | CC                | 1945898947               |
| SNP_P3_16415_46801179 | NC_021160.1    | Ca_kabuli_chr01 | 46801179                | AA                              | GG                | 1945898949               |
| SNP_P3_16416_46801543 | NC_021160.1    | Ca_kabuli_chr01 | 46801543                | TT                              | AA                | 1945898951               |
| SNP_P3_16417_46801706 | NC_021160.1    | Ca_kabuli_chr01 | 46801706                | CC                              | AA                | 1945898953               |
| SNP_P3_16418_46818903 | NC_021160.1    | Ca_kabuli_chr01 | 46818903                | TT                              | CC                | 1945898954               |
| SNP_P3_16419_46819036 | NC_021160.1    | Ca_kabuli_chr01 | 46819036                | CC                              | TT                | 1945898956               |
| SNP_P3_16420_46819052 | NC_021160.1    | Ca_kabuli_chr01 | 46819052                | CC                              | TT                | 1945898958               |
| SNP_P3_16421_46819079 | NC_021160.1    | Ca_kabuli_chr01 | 46819079                | TT                              | AA                | 1945898960               |
| SNP_P3_16422_46819223 | NC_021160.1    | Ca_kabuli_chr01 | 46819223                | AA                              | GG                | 1945898961               |

| SNPs IDs              | Chromosome IDs | Chromosomes     | Physical positions (bp) | CDC Frontier (Reference genome) | (Pusa 256 & HPNB) | NCBI SNPdb Accession IDs |
|-----------------------|----------------|-----------------|-------------------------|---------------------------------|-------------------|--------------------------|
| SNP_P3_16423_46819439 | NC_021160.1    | Ca_kabuli_chr01 | 46819439                | GG                              | AA                | 1945898963               |
| SNP_P3_16424_46819853 | NC_021160.1    | Ca_kabuli_chr01 | 46819853                | CC                              | TT                | 1945898965               |
| SNP_P3_16425_46819949 | NC_021160.1    | Ca_kabuli_chr01 | 46819949                | GG                              | AA                | 1945898967               |
| SNP_P3_16426_46822788 | NC_021160.1    | Ca_kabuli_chr01 | 46822788                | CC                              | TT                | 1945898969               |
| SNP_P3_16427_46825013 | NC_021160.1    | Ca_kabuli_chr01 | 46825013                | GG                              | CC                | 1945898970               |
| SNP_P3_16428_46831609 | NC_021160.1    | Ca_kabuli_chr01 | 46831609                | TT                              | GG                | 1945898972               |
| SNP_P3_16429_46831616 | NC_021160.1    | Ca_kabuli_chr01 | 46831616                | GG                              | CC                | 1945898974               |
| SNP_P3_16430_46831661 | NC_021160.1    | Ca_kabuli_chr01 | 46831661                | AA                              | TT                | 1945898976               |
| SNP_P3_16431_46831811 | NC_021160.1    | Ca_kabuli_chr01 | 46831811                | TT                              | GG                | 1945898978               |
| SNP_P3_16432_46831922 | NC_021160.1    | Ca_kabuli_chr01 | 46831922                | GG                              | AA                | 1945898979               |
| SNP_P3_16434_46831978 | NC_021160.1    | Ca_kabuli_chr01 | 46831978                | AA                              | GG                | 1945898981               |
| SNP_P3_16435_46831997 | NC_021160.1    | Ca_kabuli_chr01 | 46831997                | GG                              | AA                | 1945898983               |
| SNP_P3_16436_46832007 | NC_021160.1    | Ca_kabuli_chr01 | 46832007                | CC                              | AA                | 1945898985               |
| SNP_P3_16437_46832040 | NC_021160.1    | Ca_kabuli_chr01 | 46832040                | TT                              | GG                | 1945898987               |
| SNP_P3_16438_46832058 | NC_021160.1    | Ca_kabuli_chr01 | 46832058                | GG                              | TT                | 1945898988               |
| SNP_P3_16439_46832198 | NC_021160.1    | Ca_kabuli_chr01 | 46832198                | GG                              | TT                | 1945898990               |
| SNP_P3_16440_46832202 | NC_021160.1    | Ca_kabuli_chr01 | 46832202                | CC                              | GG                | 1945898992               |
| SNP_P3_16441_46838214 | NC_021160.1    | Ca_kabuli_chr01 | 46838214                | GG                              | AA                | 1945898994               |
| SNP_P3_16442_46848921 | NC_021160.1    | Ca_kabuli_chr01 | 46848921                | AA                              | GG                | 1945898995               |
| SNP_P3_16443_46848940 | NC_021160.1    | Ca_kabuli_chr01 | 46848940                | AA                              | GG                | 1945898997               |
| SNP_P3_16444_46848952 | NC_021160.1    | Ca_kabuli_chr01 | 46848952                | AA                              | CC                | 1945898999               |
| SNP_P3_16445_46849448 | NC_021160.1    | Ca_kabuli_chr01 | 46849448                | CC                              | TT                | 1945899001               |
| SNP_P3_16446_46851437 | NC_021160.1    | Ca_kabuli_chr01 | 46851437                | AA                              | GG                | 1945899003               |
| SNP_P3_16447_46851438 | NC_021160.1    | Ca_kabuli_chr01 | 46851438                | GG                              | TT                | 1945899004               |
| SNP_P3_16448_46851446 | NC_021160.1    | Ca_kabuli_chr01 | 46851446                | CC                              | GG                | 1945899006               |
| SNP_P3_16449_46851810 | NC_021160.1    | Ca_kabuli_chr01 | 46851810                | AA                              | GG                | 1945899008               |
| SNP_P3_16450_46856189 | NC_021160.1    | Ca_kabuli_chr01 | 46856189                | TT                              | CC                | 1945899010               |
| SNP_P3_16451_46862754 | NC_021160.1    | Ca_kabuli_chr01 | 46862754                | GG                              | AA                | 1945899012               |
| SNP_P3_16452_46863098 | NC_021160.1    | Ca_kabuli_chr01 | 46863098                | CC                              | TT                | 1945899013               |
| SNP_P3_16453_46863103 | NC_021160.1    | Ca_kabuli_chr01 | 46863103                | AA                              | GG                | 1945899015               |
| SNP_P3_16454_46863113 | NC_021160.1    | Ca_kabuli_chr01 | 46863113                | AA                              | TT                | 1945899017               |
| SNP_P3_16455_46863134 | NC_021160.1    | Ca_kabuli_chr01 | 46863134                | GG                              | AA                | 1945899019               |
| SNP_P3_16456_46863144 | NC_021160.1    | Ca_kabuli_chr01 | 46863144                | AA                              | GG                | 1945899020               |
| SNP_P3_16457_46867324 | NC_021160.1    | Ca_kabuli_chr01 | 46867324                | AA                              | CC                | 1945899022               |
| SNP_P3_16458_46867345 | NC_021160.1    | Ca_kabuli_chr01 | 46867345                | TT                              | CC                | 1945899024               |
| SNP_P3_16460_46869133 | NC_021160.1    | Ca_kabuli_chr01 | 46869133                | GG                              | TT                | 1945899026               |
| SNP_P3_16461_46869159 | NC_021160.1    | Ca_kabuli_chr01 | 46869159                | GG                              | AA                | 1945899028               |
| SNP_P3_16462_46869168 | NC_021160.1    | Ca_kabuli_chr01 | 46869168                | GG                              | AA                | 1945899029               |
| SNP_P3_16463_46884109 | NC_021160.1    | Ca_kabuli_chr01 | 46884109                | GG                              | AA                | 1945899031               |
| SNP_P3_16464_46894681 | NC_021160.1    | Ca_kabuli_chr01 | 46894681                | GG                              | TT                | 1945899033               |
| SNP_P3_16465_46894685 | NC_021160.1    | Ca_kabuli_chr01 | 46894685                | AA                              | GG                | 1945899035               |
| SNP_P3_16466_46894709 | NC_021160.1    | Ca_kabuli_chr01 | 46894709                | GG                              | AA                | 1945899036               |

| SNPs IDs              | Chromosome IDs | Chromosomes     | Physical positions (bp) | CDC Frontier (Reference genome) | (Pusa 256 & HPNB) | NCBI SNPdb Accession IDs |
|-----------------------|----------------|-----------------|-------------------------|---------------------------------|-------------------|--------------------------|
| SNP_P3_16467_46894736 | NC_021160.1    | Ca_kabuli_chr01 | 46894736                | AA                              | CC                | 1945899038               |
| SNP_P3_16468_46894766 | NC_021160.1    | Ca_kabuli_chr01 | 46894766                | CC                              | TT                | 1945899040               |
| SNP_P3_16469_46894790 | NC_021160.1    | Ca_kabuli_chr01 | 46894790                | CC                              | TT                | 1945899042               |
| SNP_P3_16470_46894870 | NC_021160.1    | Ca_kabuli_chr01 | 46894870                | GG                              | AA                | 1945899043               |
| SNP_P3_16471_46894878 | NC_021160.1    | Ca_kabuli_chr01 | 46894878                | GG                              | TT                | 1945899045               |
| SNP_P3_16472_46895162 | NC_021160.1    | Ca_kabuli_chr01 | 46895162                | GG                              | AA                | 1945899047               |
| SNP_P3_16473_46895210 | NC_021160.1    | Ca_kabuli_chr01 | 46895210                | AA                              | GG                | 1945899049               |
| SNP_P3_16474_46895231 | NC_021160.1    | Ca_kabuli_chr01 | 46895231                | AA                              | GG                | 1945899051               |
| SNP_P3_16475_46895234 | NC_021160.1    | Ca_kabuli_chr01 | 46895234                | AA                              | GG                | 1945899052               |
| SNP_P3_16476_46895247 | NC_021160.1    | Ca_kabuli_chr01 | 46895247                | GG                              | AA                | 1945899054               |
| SNP_P3_16478_46978546 | NC_021160.1    | Ca_kabuli_chr01 | 46978546                | CC                              | AA                | 1945899056               |
| SNP_P3_16479_46988380 | NC_021160.1    | Ca_kabuli_chr01 | 46988380                | TT                              | AA                | 1945899058               |
| SNP_P3_16480_47029278 | NC_021160.1    | Ca_kabuli_chr01 | 47029278                | GG                              | TT                | 1945899059               |
| SNP_P3_16481_47058323 | NC_021160.1    | Ca_kabuli_chr01 | 47058323                | TT                              | AA                | 1945899061               |
| SNP_P3_16482_47058329 | NC_021160.1    | Ca_kabuli_chr01 | 47058329                | TT                              | GG                | 1945899063               |
| SNP_P3_16483_47058448 | NC_021160.1    | Ca_kabuli_chr01 | 47058448                | TT                              | CC                | 1945899065               |
| SNP_P3_16484_47058684 | NC_021160.1    | Ca_kabuli_chr01 | 47058684                | TT                              | GG                | 1945899067               |
| SNP_P3_16485_47059085 | NC_021160.1    | Ca_kabuli_chr01 | 47059085                | TT                              | CC                | 1945899068               |
| SNP_P3_16486_47059122 | NC_021160.1    | Ca_kabuli_chr01 | 47059122                | AA                              | GG                | 1945899070               |
| SNP_P3_16487_47059137 | NC_021160.1    | Ca_kabuli_chr01 | 47059137                | CC                              | GG                | 1945899072               |
| SNP_P3_16488_47059138 | NC_021160.1    | Ca_kabuli_chr01 | 47059138                | TT                              | CC                | 1945899074               |
| SNP_P3_16489_47059158 | NC_021160.1    | Ca_kabuli_chr01 | 47059158                | CC                              | TT                | 1945899075               |
| SNP_P3_16490_47059161 | NC_021160.1    | Ca_kabuli_chr01 | 47059161                | TT                              | CC                | 1945899077               |
| SNP_P3_16491_47059186 | NC_021160.1    | Ca_kabuli_chr01 | 47059186                | AA                              | CC                | 1945899079               |
| SNP_P3_16492_47059222 | NC_021160.1    | Ca_kabuli_chr01 | 47059222                | AA                              | GG                | 1945899081               |
| SNP_P3_16493_47059330 | NC_021160.1    | Ca_kabuli_chr01 | 47059330                | GG                              | TT                | 1945899082               |
| SNP_P3_16495_47061570 | NC_021160.1    | Ca_kabuli_chr01 | 47061570                | GG                              | AA                | 1945899084               |
| SNP_P3_16496_47069742 | NC_021160.1    | Ca_kabuli_chr01 | 47069742                | CC                              | GG                | 1945899086               |
| SNP_P3_16497_47069743 | NC_021160.1    | Ca_kabuli_chr01 | 47069743                | AA                              | TT                | 1945899088               |
| SNP_P3_16498_47079272 | NC_021160.1    | Ca_kabuli_chr01 | 47079272                | TT                              | AA                | 1945899090               |
| SNP_P3_16501_47086866 | NC_021160.1    | Ca_kabuli_chr01 | 47086866                | GG                              | AA                | 1945899091               |
| SNP_P3_16502_47096843 | NC_021160.1    | Ca_kabuli_chr01 | 47096843                | TT                              | CC                | 1945899093               |
| SNP_P3_16503_47109123 | NC_021160.1    | Ca_kabuli_chr01 | 47109123                | AA                              | GG                | 1945899095               |
| SNP_P3_16504_47155784 | NC_021160.1    | Ca_kabuli_chr01 | 47155784                | CC                              | TT                | 1945899097               |
| SNP_P3_16505_47155883 | NC_021160.1    | Ca_kabuli_chr01 | 47155883                | AA                              | GG                | 1945899098               |
| SNP_P3_16506_47155909 | NC_021160.1    | Ca_kabuli_chr01 | 47155909                | CC                              | TT                | 1945899100               |
| SNP_P3_16508_47209400 | NC_021160.1    | Ca_kabuli_chr01 | 47209400                | TT                              | GG                | 1945899102               |
| SNP_P3_16509_47237786 | NC_021160.1    | Ca_kabuli_chr01 | 47237786                | TT                              | GG                | 1945899104               |
| SNP_P3_16510_47237796 | NC_021160.1    | Ca_kabuli_chr01 | 47237796                | CC                              | TT                | 1945899106               |
| SNP_P3_16511_47240059 | NC_021160.1    | Ca_kabuli_chr01 | 47240059                | CC                              | AA                | 1945899107               |
| SNP_P3_16513_47274233 | NC_021160.1    | Ca_kabuli_chr01 | 47274233                | CC                              | TT                | 1945899109               |
| SNP_P3_16514_47277083 | NC_021160.1    | Ca_kabuli_chr01 | 47277083                | GG                              | TT                | 1945899111               |

| SNPs IDs              | Chromosome IDs | Chromosomes     | Physical positions (bp) | CDC Frontier (Reference genome) | (Pusa 256 & HPNB) | NCBI SNPdb Accession IDs |
|-----------------------|----------------|-----------------|-------------------------|---------------------------------|-------------------|--------------------------|
| SNP_P3_16515_47277271 | NC_021160.1    | Ca_kabuli_chr01 | 47277271                | CC                              | TT                | 1945899113               |
| SNP_P3_16516_47303762 | NC_021160.1    | Ca_kabuli_chr01 | 47303762                | AA                              | TT                | 1945899114               |
| SNP_P3_16520_47347414 | NC_021160.1    | Ca_kabuli_chr01 | 47347414                | AA                              | GG                | 1945899116               |
| SNP_P3_16521_47347810 | NC_021160.1    | Ca_kabuli_chr01 | 47347810                | TT                              | CC                | 1945899118               |
| SNP_P3_16523_47371140 | NC_021160.1    | Ca_kabuli_chr01 | 47371140                | TT                              | CC                | 1945899120               |
| SNP_P3_16524_47395852 | NC_021160.1    | Ca_kabuli_chr01 | 47395852                | GG                              | AA                | 1945899121               |
| SNP_P3_16525_47395866 | NC_021160.1    | Ca_kabuli_chr01 | 47395866                | GG                              | AA                | 1945899123               |
| SNP_P3_16526_47395896 | NC_021160.1    | Ca_kabuli_chr01 | 47395896                | AA                              | TT                | 1945899125               |
| SNP_P3_16527_47413388 | NC_021160.1    | Ca_kabuli_chr01 | 47413388                | AA                              | GG                | 1945899127               |
| SNP_P3_16528_47413466 | NC_021160.1    | Ca_kabuli_chr01 | 47413466                | AA                              | GG                | 1945899128               |
| SNP_P3_16529_47434210 | NC_021160.1    | Ca_kabuli_chr01 | 47434210                | AA                              | GG                | 1945899130               |
| SNP_P3_16530_47434211 | NC_021160.1    | Ca_kabuli_chr01 | 47434211                | CC                              | GG                | 1945899132               |
| SNP_P3_16531_47436109 | NC_021160.1    | Ca_kabuli_chr01 | 47436109                | GG                              | TT                | 1945899134               |
| SNP_P3_16532_47461521 | NC_021160.1    | Ca_kabuli_chr01 | 47461521                | AA                              | GG                | 1945899136               |
| SNP_P3_16533_47491907 | NC_021160.1    | Ca_kabuli_chr01 | 47491907                | GG                              | AA                | 1945899137               |
| SNP_P3_16534_47494765 | NC_021160.1    | Ca_kabuli_chr01 | 47494765                | AA                              | GG                | 1945899139               |
| SNP_P3_16535_47503191 | NC_021160.1    | Ca_kabuli_chr01 | 47503191                | GG                              | TT                | 1945899141               |
| SNP_P3_16536_47507721 | NC_021160.1    | Ca_kabuli_chr01 | 47507721                | CC                              | AA                | 1945899142               |
| SNP_P3_16537_47510901 | NC_021160.1    | Ca_kabuli_chr01 | 47510901                | AA                              | GG                | 1945899144               |
| SNP_P3_16538_47519418 | NC_021160.1    | Ca_kabuli_chr01 | 47519418                | CC                              | AA                | 1945899146               |
| SNP_P3_16539_47520250 | NC_021160.1    | Ca_kabuli_chr01 | 47520250                | TT                              | CC                | 1945899148               |
| SNP_P3_16540_47529233 | NC_021160.1    | Ca_kabuli_chr01 | 47529233                | TT                              | GG                | 1945899149               |
| SNP_P3_16541_47532900 | NC_021160.1    | Ca_kabuli_chr01 | 47532900                | GG                              | AA                | 1945899151               |
| SNP_P3_16542_47543671 | NC_021160.1    | Ca_kabuli_chr01 | 47543671                | TT                              | CC                | 1945899153               |
| SNP_P3_16544_47585085 | NC_021160.1    | Ca_kabuli_chr01 | 47585085                | CC                              | TT                | 1945899155               |
| SNP_P3_16545_47599373 | NC_021160.1    | Ca_kabuli_chr01 | 47599373                | TT                              | CC                | 1945899157               |
| SNP_P3_16547_47626951 | NC_021160.1    | Ca_kabuli_chr01 | 47626951                | CC                              | GG                | 1945899158               |
| SNP_P3_16548_47626954 | NC_021160.1    | Ca_kabuli_chr01 | 47626954                | CC                              | TT                | 1945899160               |
| SNP_P3_16549_47630499 | NC_021160.1    | Ca_kabuli_chr01 | 47630499                | TT                              | CC                | 1945899162               |
| SNP_P3_16550_47630502 | NC_021160.1    | Ca_kabuli_chr01 | 47630502                | CC                              | AA                | 1945899164               |
| SNP_P3_16552_47630795 | NC_021160.1    | Ca_kabuli_chr01 | 47630795                | AA                              | GG                | 1945899165               |
| SNP_P3_16553_47632764 | NC_021160.1    | Ca_kabuli_chr01 | 47632764                | AA                              | GG                | 1945899167               |
| SNP_P3_16554_47633364 | NC_021160.1    | Ca_kabuli_chr01 | 47633364                | CC                              | TT                | 1945899169               |
| SNP_P3_16555_47667542 | NC_021160.1    | Ca_kabuli_chr01 | 47667542                | GG                              | TT                | 1945899171               |
| SNP_P3_16558_47727750 | NC_021160.1    | Ca_kabuli_chr01 | 47727750                | AA                              | CC                | 1945899173               |
| SNP_P3_16560_47743401 | NC_021160.1    | Ca_kabuli_chr01 | 47743401                | TT                              | CC                | 1945899174               |
| SNP_P3_16561_47757892 | NC_021160.1    | Ca_kabuli_chr01 | 47757892                | CC                              | TT                | 1945899176               |
| SNP_P3_16562_47771112 | NC_021160.1    | Ca_kabuli_chr01 | 47771112                | AA                              | GG                | 1945899178               |
| SNP_P3_16563_47771205 | NC_021160.1    | Ca_kabuli_chr01 | 47771205                | AA                              | GG                | 1945899180               |
| SNP_P3_16564_47771253 | NC_021160.1    | Ca_kabuli_chr01 | 47771253                | AA                              | GG                | 1945899182               |
| SNP_P3_16565_47771256 | NC_021160.1    | Ca_kabuli_chr01 | 47771256                | AA                              | TT                | 1945899183               |
| SNP_P3_16567_47771271 | NC_021160.1    | Ca_kabuli_chr01 | 47771271                | TT                              | GG                | 1945899185               |

| SNPs IDs              | Chromosome IDs | Chromosomes     | Physical positions (bp) | CDC Frontier (Reference genome) | (Pusa 256 & HPNB) | NCBI SNPdb Accession IDs |
|-----------------------|----------------|-----------------|-------------------------|---------------------------------|-------------------|--------------------------|
| SNP_P3_16568_47771335 | NC_021160.1    | Ca_kabuli_chr01 | 47771335                | TT                              | AA                | 1945899187               |
| SNP_P3_16569_47771362 | NC_021160.1    | Ca_kabuli_chr01 | 47771362                | GG                              | TT                | 1945899189               |
| SNP_P3_16570_47771706 | NC_021160.1    | Ca_kabuli_chr01 | 47771706                | CC                              | TT                | 1945899190               |
| SNP_P3_16571_47786528 | NC_021160.1    | Ca_kabuli_chr01 | 47786528                | TT                              | CC                | 1945899192               |
| SNP_P3_16572_47786530 | NC_021160.1    | Ca_kabuli_chr01 | 47786530                | AA                              | GG                | 1945899194               |
| SNP_P3_16573_47786543 | NC_021160.1    | Ca_kabuli_chr01 | 47786543                | AA                              | GG                | 1945899196               |
| SNP_P3_16574_47786546 | NC_021160.1    | Ca_kabuli_chr01 | 47786546                | TT                              | AA                | 1945899197               |
| SNP_P3_16575_47838174 | NC_021160.1    | Ca_kabuli_chr01 | 47838174                | TT                              | CC                | 1945899199               |
| SNP_P3_16576_47838374 | NC_021160.1    | Ca_kabuli_chr01 | 47838374                | AA                              | GG                | 1945899201               |
| SNP_P3_16577_47838380 | NC_021160.1    | Ca_kabuli_chr01 | 47838380                | GG                              | AA                | 1945899203               |
| SNP_P3_16578_47838384 | NC_021160.1    | Ca_kabuli_chr01 | 47838384                | AA                              | GG                | 1945899205               |
| SNP_P3_16579_47839011 | NC_021160.1    | Ca_kabuli_chr01 | 47839011                | AA                              | GG                | 1945899206               |
| SNP_P3_16580_47839097 | NC_021160.1    | Ca_kabuli_chr01 | 47839097                | TT                              | CC                | 1945899208               |
| SNP_P3_16581_47839585 | NC_021160.1    | Ca_kabuli_chr01 | 47839585                | AA                              | GG                | 1945899210               |
| SNP_P3_16582_47839636 | NC_021160.1    | Ca_kabuli_chr01 | 47839636                | AA                              | GG                | 1945899212               |
| SNP_P3_16583_47839661 | NC_021160.1    | Ca_kabuli_chr01 | 47839661                | GG                              | TT                | 1945899213               |
| SNP_P3_16585_47847397 | NC_021160.1    | Ca_kabuli_chr01 | 47847397                | CC                              | TT                | 1945899215               |
| SNP_P3_16586_47859333 | NC_021160.1    | Ca_kabuli_chr01 | 47859333                | AA                              | GG                | 1945899217               |
| SNP_P3_16587_47859344 | NC_021160.1    | Ca_kabuli_chr01 | 47859344                | GG                              | TT                | 1945899219               |
| SNP_P3_16588_47859358 | NC_021160.1    | Ca_kabuli_chr01 | 47859358                | TT                              | CC                | 1945899220               |
| SNP_P3_16589_47859769 | NC_021160.1    | Ca_kabuli_chr01 | 47859769                | AA                              | GG                | 1945899222               |
| SNP_P3_16590_47871288 | NC_021160.1    | Ca_kabuli_chr01 | 47871288                | CC                              | TT                | 1945899224               |
| SNP_P3_16591_47875083 | NC_021160.1    | Ca_kabuli_chr01 | 47875083                | AA                              | TT                | 1945899226               |
| SNP_P3_16592_47875173 | NC_021160.1    | Ca_kabuli_chr01 | 47875173                | AA                              | GG                | 1945899228               |
| SNP_P3_16593_47875192 | NC_021160.1    | Ca_kabuli_chr01 | 47875192                | TT                              | AA                | 1945899229               |
| SNP_P3_16595_47875218 | NC_021160.1    | Ca_kabuli_chr01 | 47875218                | AA                              | TT                | 1945899231               |
| SNP_P3_16596_47875223 | NC_021160.1    | Ca_kabuli_chr01 | 47875223                | AA                              | GG                | 1945899233               |
| SNP_P3_16597_47875314 | NC_021160.1    | Ca_kabuli_chr01 | 47875314                | GG                              | TT                | 1945899235               |
| SNP_P3_16598_47875440 | NC_021160.1    | Ca_kabuli_chr01 | 47875440                | GG                              | AA                | 1945899237               |
| SNP_P3_16599_47875521 | NC_021160.1    | Ca_kabuli_chr01 | 47875521                | AA                              | GG                | 1945899238               |
| SNP_P3_16600_47875617 | NC_021160.1    | Ca_kabuli_chr01 | 47875617                | AA                              | TT                | 1945899240               |
| SNP_P3_16601_47913363 | NC_021160.1    | Ca_kabuli_chr01 | 47913363                | GG                              | AA                | 1945899242               |
| SNP_P3_16604_47921251 | NC_021160.1    | Ca_kabuli_chr01 | 47921251                | AA                              | TT                | 1945899244               |
| SNP_P3_16605_47960462 | NC_021160.1    | Ca_kabuli_chr01 | 47960462                | TT                              | AA                | 1945899246               |
| SNP_P3_16606_47960474 | NC_021160.1    | Ca_kabuli_chr01 | 47960474                | TT                              | CC                | 1945899247               |
| SNP_P3_16607_47960475 | NC_021160.1    | Ca_kabuli_chr01 | 47960475                | TT                              | GG                | 1945899249               |
| SNP_P3_16608_47999360 | NC_021160.1    | Ca_kabuli_chr01 | 47999360                | TT                              | AA                | 1945899251               |
| SNP_P3_16609_48023481 | NC_021160.1    | Ca_kabuli_chr01 | 48023481                | CC                              | TT                | 1945899253               |
| SNP_P3_16612_48069650 | NC_021160.1    | Ca_kabuli_chr01 | 48069650                | AA                              | CC                | 1945899255               |
| SNP_P3_16613_48071249 | NC_021160.1    | Ca_kabuli_chr01 | 48071249                | AA                              | GG                | 1945899256               |
| SNP_P3_16614_48071258 | NC_021160.1    | Ca_kabuli_chr01 | 48071258                | AA                              | CC                | 1945899258               |
| SNP_P3_16615_48071260 | NC_021160.1    | Ca_kabuli_chr01 | 48071260                | AA                              | GG                | 1945899260               |

| SNPs IDs              | Chromosome IDs | Chromosomes     | Physical positions (bp) | CDC Frontier (Reference genome) | (Pusa 256 & HPNB) | NCBI SNPdb Accession IDs |
|-----------------------|----------------|-----------------|-------------------------|---------------------------------|-------------------|--------------------------|
| SNP_P3_16616_48071274 | NC_021160.1    | Ca_kabuli_chr01 | 48071274                | AA                              | GG                | 1945899262               |
| SNP_P3_16617_48071289 | NC_021160.1    | Ca_kabuli_chr01 | 48071289                | GG                              | AA                | 1945899263               |
| SNP_P3_16618_48071290 | NC_021160.1    | Ca_kabuli_chr01 | 48071290                | TT                              | GG                | 1945899265               |
| SNP_P3_16619_48071373 | NC_021160.1    | Ca_kabuli_chr01 | 48071373                | AA                              | GG                | 1945899267               |
| SNP_P3_16620_48071479 | NC_021160.1    | Ca_kabuli_chr01 | 48071479                | TT                              | CC                | 1945899269               |
| SNP_P3_16622_48071840 | NC_021160.1    | Ca_kabuli_chr01 | 48071840                | GG                              | AA                | 1945899271               |
| SNP_P3_16623_48071904 | NC_021160.1    | Ca_kabuli_chr01 | 48071904                | CC                              | GG                | 1945899272               |
| SNP_P3_16624_48091753 | NC_021160.1    | Ca_kabuli_chr01 | 48091753                | TT                              | CC                | 1945899274               |
| SNP_P3_16627_48178780 | NC_021160.1    | Ca_kabuli_chr01 | 48178780                | TT                              | CC                | 1945899276               |
| SNP_P3_16630_48206744 | NC_021160.1    | Ca_kabuli_chr01 | 48206744                | CC                              | TT                | 1945899278               |
| SNP_P3_16631_48207104 | NC_021160.1    | Ca_kabuli_chr01 | 48207104                | TT                              | CC                | 1945899280               |
| SNP_P3_16632_48214359 | NC_021160.1    | Ca_kabuli_chr01 | 48214359                | CC                              | TT                | 1945899281               |
| SNP_P3_16634_48221691 | NC_021160.1    | Ca_kabuli_chr01 | 48221691                | AA                              | CC                | 1945899283               |
| SNP_P3_16635_48223068 | NC_021160.1    | Ca_kabuli_chr01 | 48223068                | AA                              | CC                | 1945899285               |
| SNP_P3_16636_48223110 | NC_021160.1    | Ca_kabuli_chr01 | 48223110                | CC                              | TT                | 1945899287               |
| SNP_P3_16637_48229504 | NC_021160.1    | Ca_kabuli_chr01 | 48229504                | GG                              | AA                | 1945899289               |
| SNP_P3_16639_48240297 | NC_021160.1    | Ca_kabuli_chr01 | 48240297                | TT                              | AA                | 1945899290               |
| SNP_P3_16640_48246915 | NC_021160.1    | Ca_kabuli_chr01 | 48246915                | GG                              | AA                | 1945899292               |
| SNP_P3_16641_48290803 | NC_021160.1    | Ca_kabuli_chr01 | 48290803                | AA                              | GG                | 1945899294               |
| SNP_P3_16642_48318867 | NC_021160.1    | Ca_kabuli_chr01 | 48318867                | TT                              | AA                | 1945899296               |
| SNP_P3_16643_48318868 | NC_021160.1    | Ca_kabuli_chr01 | 48318868                | TT                              | GG                | 1945899298               |
| SNP_P3_16645_48350311 | NC_021160.1    | Ca_kabuli_chr01 | 48350311                | TT                              | CC                | 1945899299               |
| SNP_P3_16646_14722    | NC_021161.1    | Ca_kabuli_chr02 | 14722                   | TT                              | CC                | 1945899301               |
| SNP_P3_16647_21166    | NC_021161.1    | Ca_kabuli_chr02 | 21166                   | TT                              | CC                | 1945899303               |
| SNP_P3_16649_42046    | NC_021161.1    | Ca_kabuli_chr02 | 42046                   | CC                              | TT                | 1945899305               |
| SNP_P3_16650_42119    | NC_021161.1    | Ca_kabuli_chr02 | 42119                   | GG                              | TT                | 1945899307               |
| SNP_P3_16652_42316    | NC_021161.1    | Ca_kabuli_chr02 | 42316                   | CC                              | TT                | 1945899308               |
| SNP_P3_16653_42433    | NC_021161.1    | Ca_kabuli_chr02 | 42433                   | AA                              | GG                | 1945899310               |
| SNP_P3_16654_42668    | NC_021161.1    | Ca_kabuli_chr02 | 42668                   | TT                              | GG                | 1945899312               |
| SNP_P3_16655_42678    | NC_021161.1    | Ca_kabuli_chr02 | 42678                   | AA                              | GG                | 1945899314               |
| SNP_P3_16656_42752    | NC_021161.1    | Ca_kabuli_chr02 | 42752                   | CC                              | AA                | 1945899315               |
| SNP_P3_16658_49284    | NC_021161.1    | Ca_kabuli_chr02 | 49284                   | CC                              | AA                | 1945899317               |
| SNP_P3_16659_70724    | NC_021161.1    | Ca_kabuli_chr02 | 70724                   | CC                              | TT                | 1945899319               |
| SNP_P3_16660_70737    | NC_021161.1    | Ca_kabuli_chr02 | 70737                   | TT                              | CC                | 1945899321               |
| SNP_P3_16662_88624    | NC_021161.1    | Ca_kabuli_chr02 | 88624                   | CC                              | TT                | 1945899323               |
| SNP_P3_16663_117053   | NC_021161.1    | Ca_kabuli_chr02 | 117053                  | TT                              | CC                | 1945899324               |
| SNP_P3_16664_126374   | NC_021161.1    | Ca_kabuli_chr02 | 126374                  | GG                              | AA                | 1945899326               |
| SNP_P3_16665_151695   | NC_021161.1    | Ca_kabuli_chr02 | 151695                  | CC                              | TT                | 1945899328               |
| SNP_P3_16666_168389   | NC_021161.1    | Ca_kabuli_chr02 | 168389                  | AA                              | GG                | 1945899330               |
| SNP_P3_16667_183021   | NC_021161.1    | Ca_kabuli_chr02 | 183021                  | GG                              | AA                | 1945899332               |
| SNP_P3_16668_183030   | NC_021161.1    | Ca_kabuli_chr02 | 183030                  | TT                              | CC                | 1945899333               |
| SNP_P3_16669_201151   | NC_021161.1    | Ca_kabuli_chr02 | 201151                  | GG                              | AA                | 1945899335               |

| SNPs IDs            | Chromosome IDs | Chromosomes     | Physical positions (bp) | CDC Frontier (Reference genome) | (Pusa 256 & HPNB) | NCBI SNPdb Accession IDs |
|---------------------|----------------|-----------------|-------------------------|---------------------------------|-------------------|--------------------------|
| SNP_P3_16670_201770 | NC_021161.1    | Ca_kabuli_chr02 | 201770                  | CC                              | TT                | 1945899337               |
| SNP_P3_16671_213709 | NC_021161.1    | Ca_kabuli_chr02 | 213709                  | CC                              | TT                | 1945899339               |
| SNP_P3_16673_252553 | NC_021161.1    | Ca_kabuli_chr02 | 252553                  | GG                              | AA                | 1945899341               |
| SNP_P3_16675_311641 | NC_021161.1    | Ca_kabuli_chr02 | 311641                  | GG                              | TT                | 1945899342               |
| SNP_P3_16676_322657 | NC_021161.1    | Ca_kabuli_chr02 | 322657                  | TT                              | CC                | 1945899344               |
| SNP_P3_16677_322881 | NC_021161.1    | Ca_kabuli_chr02 | 322881                  | CC                              | TT                | 1945899346               |
| SNP_P3_16679_390044 | NC_021161.1    | Ca_kabuli_chr02 | 390044                  | GG                              | AA                | 1945899348               |
| SNP_P3_16683_417338 | NC_021161.1    | Ca_kabuli_chr02 | 417338                  | AA                              | TT                | 1945899349               |
| SNP_P3_16684_418423 | NC_021161.1    | Ca_kabuli_chr02 | 418423                  | TT                              | CC                | 1945899351               |
| SNP_P3_16685_421743 | NC_021161.1    | Ca_kabuli_chr02 | 421743                  | TT                              | AA                | 1945899353               |
| SNP_P3_16686_435691 | NC_021161.1    | Ca_kabuli_chr02 | 435691                  | TT                              | AA                | 1945899355               |
| SNP_P3_16687_441078 | NC_021161.1    | Ca_kabuli_chr02 | 441078                  | AA                              | GG                | 1945899357               |
| SNP_P3_16689_458340 | NC_021161.1    | Ca_kabuli_chr02 | 458340                  | CC                              | TT                | 1945899358               |
| SNP_P3_16690_478241 | NC_021161.1    | Ca_kabuli_chr02 | 478241                  | TT                              | AA                | 1945899360               |
| SNP_P3_16691_488610 | NC_021161.1    | Ca_kabuli_chr02 | 488610                  | TT                              | CC                | 1945899362               |
| SNP_P3_16692_496324 | NC_021161.1    | Ca_kabuli_chr02 | 496324                  | GG                              | AA                | 1945899364               |
| SNP_P3_16693_496374 | NC_021161.1    | Ca_kabuli_chr02 | 496374                  | TT                              | GG                | 1945899366               |
| SNP_P3_16694_496787 | NC_021161.1    | Ca_kabuli_chr02 | 496787                  | AA                              | CC                | 1945899367               |
| SNP_P3_16695_496790 | NC_021161.1    | Ca_kabuli_chr02 | 496790                  | CC                              | AA                | 1945899369               |
| SNP_P3_16696_496793 | NC_021161.1    | Ca_kabuli_chr02 | 496793                  | AA                              | GG                | 1945899371               |
| SNP_P3_16697_496811 | NC_021161.1    | Ca_kabuli_chr02 | 496811                  | TT                              | CC                | 1945899373               |
| SNP_P3_16698_496841 | NC_021161.1    | Ca_kabuli_chr02 | 496841                  | TT                              | CC                | 1945899374               |
| SNP_P3_16699_500018 | NC_021161.1    | Ca_kabuli_chr02 | 500018                  | AA                              | CC                | 1945899376               |
| SNP_P3_16700_500256 | NC_021161.1    | Ca_kabuli_chr02 | 500256                  | TT                              | GG                | 1945899378               |
| SNP_P3_16701_500392 | NC_021161.1    | Ca_kabuli_chr02 | 500392                  | GG                              | TT                | 1945899380               |
| SNP_P3_16702_503369 | NC_021161.1    | Ca_kabuli_chr02 | 503369                  | CC                              | AA                | 1945899382               |
| SNP_P3_16703_503376 | NC_021161.1    | Ca_kabuli_chr02 | 503376                  | AA                              | TT                | 1945899383               |
| SNP_P3_16704_503377 | NC_021161.1    | Ca_kabuli_chr02 | 503377                  | GG                              | AA                | 1945899385               |
| SNP_P3_16705_527113 | NC_021161.1    | Ca_kabuli_chr02 | 527113                  | GG                              | AA                | 1945899387               |
| SNP_P3_16706_541470 | NC_021161.1    | Ca_kabuli_chr02 | 541470                  | AA                              | TT                | 1945899389               |
| SNP_P3_16707_551955 | NC_021161.1    | Ca_kabuli_chr02 | 551955                  | AA                              | GG                | 1945899390               |
| SNP_P3_16708_593423 | NC_021161.1    | Ca_kabuli_chr02 | 593423                  | GG                              | AA                | 1945899392               |
| SNP_P3_16709_596196 | NC_021161.1    | Ca_kabuli_chr02 | 596196                  | AA                              | GG                | 1945899394               |
| SNP_P3_16710_598699 | NC_021161.1    | Ca_kabuli_chr02 | 598699                  | GG                              | AA                | 1945899396               |
| SNP_P3_16711_600871 | NC_021161.1    | Ca_kabuli_chr02 | 600871                  | AA                              | TT                | 1945899397               |
| SNP_P3_16712_621681 | NC_021161.1    | Ca_kabuli_chr02 | 621681                  | AA                              | GG                | 1945899399               |
| SNP_P3_16713_621735 | NC_021161.1    | Ca_kabuli_chr02 | 621735                  | AA                              | GG                | 1945899401               |
| SNP_P3_16714_622070 | NC_021161.1    | Ca_kabuli_chr02 | 622070                  | AA                              | TT                | 1945899403               |
| SNP_P3_16715_622099 | NC_021161.1    | Ca_kabuli_chr02 | 622099                  | TT                              | CC                | 1945899404               |
| SNP_P3_16716_622252 | NC_021161.1    | Ca_kabuli_chr02 | 622252                  | GG                              | AA                | 1945899406               |
| SNP_P3_16717_622285 | NC_021161.1    | Ca_kabuli_chr02 | 622285                  | AA                              | GG                | 1945899408               |
| SNP_P3_16718_622304 | NC_021161.1    | Ca_kabuli_chr02 | 622304                  | AA                              | GG                | 1945899410               |

| SNPs IDs             | Chromosome IDs | Chromosomes     | Physical positions (bp) | CDC Frontier (Reference genome) | (Pusa 256 & HPNB) | NCBI SNPdb Accession IDs |
|----------------------|----------------|-----------------|-------------------------|---------------------------------|-------------------|--------------------------|
| SNP_P3_16719_622310  | NC_021161.1    | Ca_kabuli_chr02 | 622310                  | TT                              | CC                | 1945899412               |
| SNP_P3_16720_628526  | NC_021161.1    | Ca_kabuli_chr02 | 628526                  | AA                              | CC                | 1945899413               |
| SNP_P3_16721_628541  | NC_021161.1    | Ca_kabuli_chr02 | 628541                  | GG                              | AA                | 1945899415               |
| SNP_P3_16722_636222  | NC_021161.1    | Ca_kabuli_chr02 | 636222                  | GG                              | TT                | 1945899417               |
| SNP_P3_16724_636296  | NC_021161.1    | Ca_kabuli_chr02 | 636296                  | CC                              | TT                | 1945899419               |
| SNP_P3_16725_636336  | NC_021161.1    | Ca_kabuli_chr02 | 636336                  | TT                              | CC                | 1945899420               |
| SNP_P3_16726_636607  | NC_021161.1    | Ca_kabuli_chr02 | 636607                  | CC                              | TT                | 1945899422               |
| SNP_P3_16727_636944  | NC_021161.1    | Ca_kabuli_chr02 | 636944                  | CC                              | TT                | 1945899424               |
| SNP_P3_16728_636966  | NC_021161.1    | Ca_kabuli_chr02 | 636966                  | CC                              | AA                | 1945899426               |
| SNP_P3_16729_637003  | NC_021161.1    | Ca_kabuli_chr02 | 637003                  | CC                              | TT                | 1945899428               |
| SNP_P3_16730_637017  | NC_021161.1    | Ca_kabuli_chr02 | 637017                  | TT                              | CC                | 1945899429               |
| SNP_P3_16731_642840  | NC_021161.1    | Ca_kabuli_chr02 | 642840                  | TT                              | CC                | 1945899431               |
| SNP_P3_16732_643771  | NC_021161.1    | Ca_kabuli_chr02 | 643771                  | TT                              | CC                | 1945899433               |
| SNP_P3_16733_644114  | NC_021161.1    | Ca_kabuli_chr02 | 644114                  | AA                              | GG                | 1945899435               |
| SNP_P3_16734_644518  | NC_021161.1    | Ca_kabuli_chr02 | 644518                  | GG                              | AA                | 1945899436               |
| SNP_P3_16735_644590  | NC_021161.1    | Ca_kabuli_chr02 | 644590                  | CC                              | AA                | 1945899438               |
| SNP_P3_16736_680495  | NC_021161.1    | Ca_kabuli_chr02 | 680495                  | TT                              | CC                | 1945899440               |
| SNP_P3_16737_722961  | NC_021161.1    | Ca_kabuli_chr02 | 722961                  | CC                              | TT                | 1945899442               |
| SNP_P3_16738_745356  | NC_021161.1    | Ca_kabuli_chr02 | 745356                  | AA                              | CC                | 1945899444               |
| SNP_P3_16739_745357  | NC_021161.1    | Ca_kabuli_chr02 | 745357                  | CC                              | TT                | 1945899445               |
| SNP_P3_16740_746000  | NC_021161.1    | Ca_kabuli_chr02 | 746000                  | AA                              | GG                | 1945899447               |
| SNP_P3_16742_857169  | NC_021161.1    | Ca_kabuli_chr02 | 857169                  | TT                              | AA                | 1945899449               |
| SNP_P3_16743_866639  | NC_021161.1    | Ca_kabuli_chr02 | 866639                  | CC                              | TT                | 1945899451               |
| SNP_P3_16744_876243  | NC_021161.1    | Ca_kabuli_chr02 | 876243                  | AA                              | GG                | 1945899453               |
| SNP_P3_16746_931417  | NC_021161.1    | Ca_kabuli_chr02 | 931417                  | GG                              | AA                | 1945899454               |
| SNP_P3_16747_931426  | NC_021161.1    | Ca_kabuli_chr02 | 931426                  | AA                              | GG                | 1945899456               |
| SNP_P3_16748_935213  | NC_021161.1    | Ca_kabuli_chr02 | 935213                  | CC                              | AA                | 1945899458               |
| SNP_P3_16751_990811  | NC_021161.1    | Ca_kabuli_chr02 | 990811                  | AA                              | GG                | 1945899460               |
| SNP_P3_16752_990825  | NC_021161.1    | Ca_kabuli_chr02 | 990825                  | TT                              | CC                | 1945899462               |
| SNP_P3_16753_990849  | NC_021161.1    | Ca_kabuli_chr02 | 990849                  | TT                              | AA                | 1945899463               |
| SNP_P3_16754_1022363 | NC_021161.1    | Ca_kabuli_chr02 | 1022363                 | AA                              | TT                | 1945899465               |
| SNP_P3_16755_1022364 | NC_021161.1    | Ca_kabuli_chr02 | 1022364                 | AA                              | GG                | 1945899467               |
| SNP_P3_16758_1040110 | NC_021161.1    | Ca_kabuli_chr02 | 1040110                 | GG                              | CC                | 1945899469               |
| SNP_P3_16759_1040111 | NC_021161.1    | Ca_kabuli_chr02 | 1040111                 | TT                              | AA                | 1945899470               |
| SNP_P3_16760_1040116 | NC_021161.1    | Ca_kabuli_chr02 | 1040116                 | CC                              | TT                | 1945899472               |
| SNP_P3_16761_1040131 | NC_021161.1    | Ca_kabuli_chr02 | 1040131                 | TT                              | CC                | 1945899474               |
| SNP_P3_16762_1041083 | NC_021161.1    | Ca_kabuli_chr02 | 1041083                 | CC                              | TT                | 1945899476               |
| SNP_P3_16763_1041112 | NC_021161.1    | Ca_kabuli_chr02 | 1041112                 | AA                              | GG                | 1945899477               |
| SNP_P3_16764_1041136 | NC_021161.1    | Ca_kabuli_chr02 | 1041136                 | TT                              | AA                | 1945899479               |
| SNP_P3_16765_1041205 | NC_021161.1    | Ca_kabuli_chr02 | 1041205                 | AA                              | GG                | 1945899481               |
| SNP_P3_16766_1041366 | NC_021161.1    | Ca_kabuli_chr02 | 1041366                 | GG                              | AA                | 1945899482               |
| SNP_P3_16767_1041434 | NC_021161.1    | Ca_kabuli_chr02 | 1041434                 | AA                              | GG                | 1945899484               |



| SNPs IDs             | Chromosome IDs | Chromosomes     | Physical positions (bp) | CDC Frontier (Reference genome) | (Pusa 256 & HPNB) | NCBI SNPdb Accession IDs |
|----------------------|----------------|-----------------|-------------------------|---------------------------------|-------------------|--------------------------|
| SNP_P3_16768_1041900 | NC_021161.1    | Ca_kabuli_chr02 | 1041900                 | AA                              | TT                | 1945899486               |
| SNP_P3_16769_1047529 | NC_021161.1    | Ca_kabuli_chr02 | 1047529                 | AA                              | CC                | 1945899488               |
| SNP_P3_16770_1048410 | NC_021161.1    | Ca_kabuli_chr02 | 1048410                 | AA                              | TT                | 1945899489               |
| SNP_P3_16771_1048411 | NC_021161.1    | Ca_kabuli_chr02 | 1048411                 | AA                              | TT                | 1945899491               |
| SNP_P3_16772_1048412 | NC_021161.1    | Ca_kabuli_chr02 | 1048412                 | AA                              | TT                | 1945899493               |
| SNP_P3_16773_1048553 | NC_021161.1    | Ca_kabuli_chr02 | 1048553                 | TT                              | AA                | 1945899495               |
| SNP_P3_16774_1048661 | NC_021161.1    | Ca_kabuli_chr02 | 1048661                 | CC                              | GG                | 1945899496               |
| SNP_P3_16775_1048681 | NC_021161.1    | Ca_kabuli_chr02 | 1048681                 | TT                              | AA                | 1945899498               |
| SNP_P3_16776_1048683 | NC_021161.1    | Ca_kabuli_chr02 | 1048683                 | TT                              | AA                | 1945899500               |
| SNP_P3_16777_1048684 | NC_021161.1    | Ca_kabuli_chr02 | 1048684                 | TT                              | AA                | 1945899502               |
| SNP_P3_16778_1048696 | NC_021161.1    | Ca_kabuli_chr02 | 1048696                 | TT                              | CC                | 1945899503               |
| SNP_P3_16779_1049048 | NC_021161.1    | Ca_kabuli_chr02 | 1049048                 | TT                              | AA                | 1945899505               |
| SNP_P3_16780_1049331 | NC_021161.1    | Ca_kabuli_chr02 | 1049331                 | TT                              | CC                | 1945899507               |
| SNP_P3_16781_1049430 | NC_021161.1    | Ca_kabuli_chr02 | 1049430                 | CC                              | AA                | 1945899509               |
| SNP_P3_16782_1049431 | NC_021161.1    | Ca_kabuli_chr02 | 1049431                 | CC                              | TT                | 1945899510               |
| SNP_P3_16783_1073874 | NC_021161.1    | Ca_kabuli_chr02 | 1073874                 | TT                              | AA                | 1945899512               |
| SNP_P3_16784_1074221 | NC_021161.1    | Ca_kabuli_chr02 | 1074221                 | TT                              | CC                | 1945899514               |
| SNP_P3_16785_1074783 | NC_021161.1    | Ca_kabuli_chr02 | 1074783                 | TT                              | CC                | 1945899516               |
| SNP_P3_16786_1075717 | NC_021161.1    | Ca_kabuli_chr02 | 1075717                 | GG                              | AA                | 1945899517               |
| SNP_P3_16787_1098111 | NC_021161.1    | Ca_kabuli_chr02 | 1098111                 | AA                              | GG                | 1945899519               |
| SNP_P3_16788_1134133 | NC_021161.1    | Ca_kabuli_chr02 | 1134133                 | AA                              | TT                | 1945899521               |
| SNP_P3_16789_1143155 | NC_021161.1    | Ca_kabuli_chr02 | 1143155                 | CC                              | TT                | 1945899523               |
| SNP_P3_16790_1148438 | NC_021161.1    | Ca_kabuli_chr02 | 1148438                 | GG                              | AA                | 1945899524               |
| SNP_P3_16791_1161547 | NC_021161.1    | Ca_kabuli_chr02 | 1161547                 | TT                              | CC                | 1945899526               |
| SNP_P3_16792_1169740 | NC_021161.1    | Ca_kabuli_chr02 | 1169740                 | AA                              | CC                | 1945899528               |
| SNP_P3_16793_1170654 | NC_021161.1    | Ca_kabuli_chr02 | 1170654                 | AA                              | GG                | 1945899530               |
| SNP_P3_16794_1170685 | NC_021161.1    | Ca_kabuli_chr02 | 1170685                 | AA                              | GG                | 1945899531               |
| SNP_P3_16795_1170694 | NC_021161.1    | Ca_kabuli_chr02 | 1170694                 | CC                              | TT                | 1945899533               |
| SNP_P3_16796_1204400 | NC_021161.1    | Ca_kabuli_chr02 | 1204400                 | TT                              | CC                | 1945899535               |
| SNP_P3_16797_1204786 | NC_021161.1    | Ca_kabuli_chr02 | 1204786                 | GG                              | CC                | 1945899537               |
| SNP_P3_16798_1209401 | NC_021161.1    | Ca_kabuli_chr02 | 1209401                 | CC                              | AA                | 1945899538               |
| SNP_P3_16801_1230925 | NC_021161.1    | Ca_kabuli_chr02 | 1230925                 | TT                              | CC                | 1945899540               |
| SNP_P3_16802_1249028 | NC_021161.1    | Ca_kabuli_chr02 | 1249028                 | AA                              | CC                | 1945899542               |
| SNP_P3_16803_1257716 | NC_021161.1    | Ca_kabuli_chr02 | 1257716                 | AA                              | TT                | 1945899544               |
| SNP_P3_16804_1292114 | NC_021161.1    | Ca_kabuli_chr02 | 1292114                 | TT                              | AA                | 1945899546               |
| SNP_P3_16805_1298631 | NC_021161.1    | Ca_kabuli_chr02 | 1298631                 | AA                              | CC                | 1945899547               |
| SNP_P3_16806_1303231 | NC_021161.1    | Ca_kabuli_chr02 | 1303231                 | TT                              | GG                | 1945899549               |
| SNP_P3_16807_1303281 | NC_021161.1    | Ca_kabuli_chr02 | 1303281                 | AA                              | GG                | 1945899551               |
| SNP_P3_16808_1303430 | NC_021161.1    | Ca_kabuli_chr02 | 1303430                 | AA                              | GG                | 1945899553               |
| SNP_P3_16809_1303466 | NC_021161.1    | Ca_kabuli_chr02 | 1303466                 | TT                              | GG                | 1945899554               |
| SNP_P3_16810_1303484 | NC_021161.1    | Ca_kabuli_chr02 | 1303484                 | AA                              | GG                | 1945899556               |
| SNP_P3_16811_1303503 | NC_021161.1    | Ca_kabuli_chr02 | 1303503                 | AA                              | GG                | 1945899558               |

| SNPs IDs             | Chromosome IDs | Chromosomes     | Physical positions (bp) | CDC Frontier (Reference genome) | (Pusa 256 & HPNB) | NCBI SNPdb Accession IDs |
|----------------------|----------------|-----------------|-------------------------|---------------------------------|-------------------|--------------------------|
| SNP_P3_16812_1303510 | NC_021161.1    | Ca_kabuli_chr02 | 1303510                 | AA                              | GG                | 1945899560               |
| SNP_P3_16813_1303532 | NC_021161.1    | Ca_kabuli_chr02 | 1303532                 | GG                              | AA                | 1945899561               |
| SNP_P3_16814_1303601 | NC_021161.1    | Ca_kabuli_chr02 | 1303601                 | GG                              | AA                | 1945899563               |
| SNP_P3_16815_1321624 | NC_021161.1    | Ca_kabuli_chr02 | 1321624                 | TT                              | CC                | 1945899565               |
| SNP_P3_16816_1335737 | NC_021161.1    | Ca_kabuli_chr02 | 1335737                 | TT                              | AA                | 1945899567               |
| SNP_P3_16818_1382987 | NC_021161.1    | Ca_kabuli_chr02 | 1382987                 | TT                              | AA                | 1945899569               |
| SNP_P3_16819_1439976 | NC_021161.1    | Ca_kabuli_chr02 | 1439976                 | GG                              | AA                | 1945899570               |
| SNP_P3_16820_1461064 | NC_021161.1    | Ca_kabuli_chr02 | 1461064                 | TT                              | AA                | 1945899572               |
| SNP_P3_16821_1461130 | NC_021161.1    | Ca_kabuli_chr02 | 1461130                 | GG                              | AA                | 1945899574               |
| SNP_P3_16822_1461166 | NC_021161.1    | Ca_kabuli_chr02 | 1461166                 | AA                              | TT                | 1945899576               |
| SNP_P3_16823_1461181 | NC_021161.1    | Ca_kabuli_chr02 | 1461181                 | TT                              | CC                | 1945899577               |
| SNP_P3_16824_1461186 | NC_021161.1    | Ca_kabuli_chr02 | 1461186                 | CC                              | TT                | 1945899579               |
| SNP_P3_16825_1461351 | NC_021161.1    | Ca_kabuli_chr02 | 1461351                 | AA                              | GG                | 1945899581               |
| SNP_P3_16826_1461416 | NC_021161.1    | Ca_kabuli_chr02 | 1461416                 | CC                              | TT                | 1945899583               |
| SNP_P3_16827_1461498 | NC_021161.1    | Ca_kabuli_chr02 | 1461498                 | AA                              | GG                | 1945899584               |
| SNP_P3_16828_1461532 | NC_021161.1    | Ca_kabuli_chr02 | 1461532                 | CC                              | TT                | 1945899586               |
| SNP_P3_16829_1461565 | NC_021161.1    | Ca_kabuli_chr02 | 1461565                 | CC                              | AA                | 1945899588               |
| SNP_P3_16830_1461620 | NC_021161.1    | Ca_kabuli_chr02 | 1461620                 | CC                              | TT                | 1945899590               |
| SNP_P3_16831_1461633 | NC_021161.1    | Ca_kabuli_chr02 | 1461633                 | AA                              | GG                | 1945899591               |
| SNP_P3_16832_1461890 | NC_021161.1    | Ca_kabuli_chr02 | 1461890                 | TT                              | CC                | 1945899593               |
| SNP_P3_16833_1461927 | NC_021161.1    | Ca_kabuli_chr02 | 1461927                 | CC                              | GG                | 1945899595               |
| SNP_P3_16834_1462413 | NC_021161.1    | Ca_kabuli_chr02 | 1462413                 | AA                              | GG                | 1945899597               |
| SNP_P3_16835_1462422 | NC_021161.1    | Ca_kabuli_chr02 | 1462422                 | AA                              | GG                | 1945899598               |
| SNP_P3_16836_1462482 | NC_021161.1    | Ca_kabuli_chr02 | 1462482                 | TT                              | CC                | 1945899600               |
| SNP_P3_16837_1462484 | NC_021161.1    | Ca_kabuli_chr02 | 1462484                 | AA                              | CC                | 1945899602               |
| SNP_P3_16838_1462557 | NC_021161.1    | Ca_kabuli_chr02 | 1462557                 | GG                              | AA                | 1945899604               |
| SNP_P3_16839_1462573 | NC_021161.1    | Ca_kabuli_chr02 | 1462573                 | GG                              | AA                | 1945899606               |
| SNP_P3_16840_1464714 | NC_021161.1    | Ca_kabuli_chr02 | 1464714                 | AA                              | CC                | 1945899607               |
| SNP_P3_16841_1467349 | NC_021161.1    | Ca_kabuli_chr02 | 1467349                 | AA                              | TT                | 1945899609               |
| SNP_P3_16842_1468345 | NC_021161.1    | Ca_kabuli_chr02 | 1468345                 | CC                              | TT                | 1945899611               |
| SNP_P3_16843_1469712 | NC_021161.1    | Ca_kabuli_chr02 | 1469712                 | AA                              | GG                | 1945899613               |
| SNP_P3_16844_1479429 | NC_021161.1    | Ca_kabuli_chr02 | 1479429                 | CC                              | TT                | 1945899614               |
| SNP_P3_16845_1479720 | NC_021161.1    | Ca_kabuli_chr02 | 1479720                 | CC                              | AA                | 1945899616               |
| SNP_P3_16846_1480975 | NC_021161.1    | Ca_kabuli_chr02 | 1480975                 | CC                              | AA                | 1945899618               |
| SNP_P3_16847_1486616 | NC_021161.1    | Ca_kabuli_chr02 | 1486616                 | GG                              | AA                | 1945899620               |
| SNP_P3_16848_1486814 | NC_021161.1    | Ca_kabuli_chr02 | 1486814                 | CC                              | GG                | 1945899621               |
| SNP_P3_16849_1487116 | NC_021161.1    | Ca_kabuli_chr02 | 1487116                 | CC                              | GG                | 1945899623               |
| SNP_P3_16850_1487149 | NC_021161.1    | Ca_kabuli_chr02 | 1487149                 | TT                              | GG                | 1945899625               |
| SNP_P3_16851_1487155 | NC_021161.1    | Ca_kabuli_chr02 | 1487155                 | AA                              | CC                | 1945899627               |
| SNP_P3_16852_1487606 | NC_021161.1    | Ca_kabuli_chr02 | 1487606                 | CC                              | TT                | 1945899628               |
| SNP_P3_16853_1492302 | NC_021161.1    | Ca_kabuli_chr02 | 1492302                 | CC                              | TT                | 1945899630               |
| SNP_P3_16854_1530901 | NC_021161.1    | Ca_kabuli_chr02 | 1530901                 | CC                              | TT                | 1945899632               |

| SNPs IDs             | Chromosome IDs | Chromosomes     | Physical positions (bp) | CDC Frontier (Reference genome) | (Pusa 256 & HPNB) | NCBI SNPdb Accession IDs |
|----------------------|----------------|-----------------|-------------------------|---------------------------------|-------------------|--------------------------|
| SNP_P3_16855_1540827 | NC_021161.1    | Ca_kabuli_chr02 | 1540827                 | TT                              | AA                | 1945899634               |
| SNP_P3_16856_1541626 | NC_021161.1    | Ca_kabuli_chr02 | 1541626                 | CC                              | TT                | 1945899636               |
| SNP_P3_16857_1541708 | NC_021161.1    | Ca_kabuli_chr02 | 1541708                 | CC                              | TT                | 1945899637               |
| SNP_P3_16858_1541723 | NC_021161.1    | Ca_kabuli_chr02 | 1541723                 | AA                              | GG                | 1945899639               |
| SNP_P3_16859_1544105 | NC_021161.1    | Ca_kabuli_chr02 | 1544105                 | AA                              | GG                | 1945899641               |
| SNP_P3_16860_1545964 | NC_021161.1    | Ca_kabuli_chr02 | 1545964                 | TT                              | CC                | 1945899643               |
| SNP_P3_16861_1568531 | NC_021161.1    | Ca_kabuli_chr02 | 1568531                 | GG                              | AA                | 1945899644               |
| SNP_P3_16862_1579852 | NC_021161.1    | Ca_kabuli_chr02 | 1579852                 | GG                              | AA                | 1945899646               |
| SNP_P3_16863_1606696 | NC_021161.1    | Ca_kabuli_chr02 | 1606696                 | CC                              | TT                | 1945899648               |
| SNP_P3_16864_1639767 | NC_021161.1    | Ca_kabuli_chr02 | 1639767                 | CC                              | TT                | 1945899650               |
| SNP_P3_16865_1639786 | NC_021161.1    | Ca_kabuli_chr02 | 1639786                 | AA                              | TT                | 1945899652               |
| SNP_P3_16866_1640042 | NC_021161.1    | Ca_kabuli_chr02 | 1640042                 | GG                              | TT                | 1945899653               |
| SNP_P3_16867_1640052 | NC_021161.1    | Ca_kabuli_chr02 | 1640052                 | GG                              | TT                | 1945899655               |
| SNP_P3_16869_1640275 | NC_021161.1    | Ca_kabuli_chr02 | 1640275                 | AA                              | GG                | 1945899657               |
| SNP_P3_16870_1640440 | NC_021161.1    | Ca_kabuli_chr02 | 1640440                 | TT                              | AA                | 1945899659               |
| SNP_P3_16871_1640449 | NC_021161.1    | Ca_kabuli_chr02 | 1640449                 | CC                              | TT                | 1945899660               |
| SNP_P3_16872_1640532 | NC_021161.1    | Ca_kabuli_chr02 | 1640532                 | AA                              | TT                | 1945899662               |
| SNP_P3_16873_1640552 | NC_021161.1    | Ca_kabuli_chr02 | 1640552                 | TT                              | CC                | 1945899664               |
| SNP_P3_16874_1640907 | NC_021161.1    | Ca_kabuli_chr02 | 1640907                 | CC                              | GG                | 1945899666               |
| SNP_P3_16875_1640937 | NC_021161.1    | Ca_kabuli_chr02 | 1640937                 | TT                              | AA                | 1945899668               |
| SNP_P3_16876_1640940 | NC_021161.1    | Ca_kabuli_chr02 | 1640940                 | AA                              | GG                | 1945899669               |
| SNP_P3_16877_1640955 | NC_021161.1    | Ca_kabuli_chr02 | 1640955                 | TT                              | CC                | 1945899671               |
| SNP_P3_16878_1640961 | NC_021161.1    | Ca_kabuli_chr02 | 1640961                 | CC                              | TT                | 1945899673               |
| SNP_P3_16879_1640970 | NC_021161.1    | Ca_kabuli_chr02 | 1640970                 | CC                              | TT                | 1945899675               |
| SNP_P3_16880_1640985 | NC_021161.1    | Ca_kabuli_chr02 | 1640985                 | AA                              | GG                | 1945899676               |
| SNP_P3_16881_1650078 | NC_021161.1    | Ca_kabuli_chr02 | 1650078                 | AA                              | GG                | 1945899678               |
| SNP_P3_16882_1650101 | NC_021161.1    | Ca_kabuli_chr02 | 1650101                 | AA                              | TT                | 1945899680               |
| SNP_P3_16884_1727880 | NC_021161.1    | Ca_kabuli_chr02 | 1727880                 | GG                              | CC                | 1945899682               |
| SNP_P3_16885_1727905 | NC_021161.1    | Ca_kabuli_chr02 | 1727905                 | AA                              | CC                | 1945899684               |
| SNP_P3_16887_1730275 | NC_021161.1    | Ca_kabuli_chr02 | 1730275                 | GG                              | TT                | 1945899685               |
| SNP_P3_16888_1732102 | NC_021161.1    | Ca_kabuli_chr02 | 1732102                 | AA                              | TT                | 1945899687               |
| SNP_P3_16889_1735043 | NC_021161.1    | Ca_kabuli_chr02 | 1735043                 | CC                              | TT                | 1945899689               |
| SNP_P3_16890_1739085 | NC_021161.1    | Ca_kabuli_chr02 | 1739085                 | CC                              | TT                | 1945899691               |
| SNP_P3_16891_1754562 | NC_021161.1    | Ca_kabuli_chr02 | 1754562                 | TT                              | GG                | 1945899692               |
| SNP_P3_16892_1783629 | NC_021161.1    | Ca_kabuli_chr02 | 1783629                 | CC                              | TT                | 1945899694               |
| SNP_P3_16893_1785518 | NC_021161.1    | Ca_kabuli_chr02 | 1785518                 | CC                              | TT                | 1945899696               |
| SNP_P3_16894_1785623 | NC_021161.1    | Ca_kabuli_chr02 | 1785623                 | AA                              | CC                | 1945899698               |
| SNP_P3_16895_1792551 | NC_021161.1    | Ca_kabuli_chr02 | 1792551                 | CC                              | TT                | 1945899700               |
| SNP_P3_16896_1798523 | NC_021161.1    | Ca_kabuli_chr02 | 1798523                 | CC                              | TT                | 1945899701               |
| SNP_P3_16897_1809752 | NC_021161.1    | Ca_kabuli_chr02 | 1809752                 | TT                              | GG                | 1945899703               |
| SNP_P3_16901_1881737 | NC_021161.1    | Ca_kabuli_chr02 | 1881737                 | GG                              | AA                | 1945899705               |
| SNP_P3_16902_1909039 | NC_021161.1    | Ca_kabuli_chr02 | 1909039                 | CC                              | TT                | 1945899707               |

| SNPs IDs             | Chromosome IDs | Chromosomes     | Physical positions (bp) | CDC Frontier (Reference genome) | (Pusa 256 & HPNB) | NCBI SNPdb Accession IDs |
|----------------------|----------------|-----------------|-------------------------|---------------------------------|-------------------|--------------------------|
| SNP_P3_16904_1946863 | NC_021161.1    | Ca_kabuli_chr02 | 1946863                 | AA                              | CC                | 1945899708               |
| SNP_P3_16905_1985810 | NC_021161.1    | Ca_kabuli_chr02 | 1985810                 | CC                              | AA                | 1945899710               |
| SNP_P3_16906_2023366 | NC_021161.1    | Ca_kabuli_chr02 | 2023366                 | AA                              | GG                | 1945899712               |
| SNP_P3_16907_2073018 | NC_021161.1    | Ca_kabuli_chr02 | 2073018                 | AA                              | GG                | 1945899714               |
| SNP_P3_16908_2073063 | NC_021161.1    | Ca_kabuli_chr02 | 2073063                 | GG                              | TT                | 1945899716               |
| SNP_P3_16909_2074540 | NC_021161.1    | Ca_kabuli_chr02 | 2074540                 | AA                              | GG                | 1945899717               |
| SNP_P3_16910_2074543 | NC_021161.1    | Ca_kabuli_chr02 | 2074543                 | AA                              | TT                | 1945899719               |
| SNP_P3_16912_2081553 | NC_021161.1    | Ca_kabuli_chr02 | 2081553                 | AA                              | GG                | 1945899721               |
| SNP_P3_16913_2081555 | NC_021161.1    | Ca_kabuli_chr02 | 2081555                 | AA                              | GG                | 1945899723               |
| SNP_P3_16915_2156439 | NC_021161.1    | Ca_kabuli_chr02 | 2156439                 | AA                              | GG                | 1945899724               |
| SNP_P3_16916_2156477 | NC_021161.1    | Ca_kabuli_chr02 | 2156477                 | AA                              | CC                | 1945899726               |
| SNP_P3_16917_2156478 | NC_021161.1    | Ca_kabuli_chr02 | 2156478                 | TT                              | GG                | 1945899728               |
| SNP_P3_16919_2169178 | NC_021161.1    | Ca_kabuli_chr02 | 2169178                 | CC                              | TT                | 1945899730               |
| SNP_P3_16922_2186819 | NC_021161.1    | Ca_kabuli_chr02 | 2186819                 | CC                              | TT                | 1945899732               |
| SNP_P3_16923_2278649 | NC_021161.1    | Ca_kabuli_chr02 | 2278649                 | GG                              | AA                | 1945899733               |
| SNP_P3_16924_2278673 | NC_021161.1    | Ca_kabuli_chr02 | 2278673                 | TT                              | CC                | 1945899735               |
| SNP_P3_16925_2326382 | NC_021161.1    | Ca_kabuli_chr02 | 2326382                 | TT                              | CC                | 1945899737               |
| SNP_P3_16926_2328435 | NC_021161.1    | Ca_kabuli_chr02 | 2328435                 | AA                              | TT                | 1945899739               |
| SNP_P3_16928_2332422 | NC_021161.1    | Ca_kabuli_chr02 | 2332422                 | GG                              | AA                | 1945899740               |
| SNP_P3_16929_2338678 | NC_021161.1    | Ca_kabuli_chr02 | 2338678                 | AA                              | CC                | 1945899742               |
| SNP_P3_16931_2369686 | NC_021161.1    | Ca_kabuli_chr02 | 2369686                 | TT                              | CC                | 1945899744               |
| SNP_P3_16932_2370534 | NC_021161.1    | Ca_kabuli_chr02 | 2370534                 | GG                              | AA                | 1945899746               |
| SNP_P3_16933_2374795 | NC_021161.1    | Ca_kabuli_chr02 | 2374795                 | CC                              | TT                | 1945899748               |
| SNP_P3_16935_2394580 | NC_021161.1    | Ca_kabuli_chr02 | 2394580                 | TT                              | CC                | 1945899749               |
| SNP_P3_16936_2454658 | NC_021161.1    | Ca_kabuli_chr02 | 2454658                 | GG                              | AA                | 1945899751               |
| SNP_P3_16937_2460888 | NC_021161.1    | Ca_kabuli_chr02 | 2460888                 | CC                              | TT                | 1945899753               |
| SNP_P3_16938_2481720 | NC_021161.1    | Ca_kabuli_chr02 | 2481720                 | CC                              | GG                | 1945899755               |
| SNP_P3_16939_2500246 | NC_021161.1    | Ca_kabuli_chr02 | 2500246                 | AA                              | CC                | 1945899757               |
| SNP_P3_16942_2561827 | NC_021161.1    | Ca_kabuli_chr02 | 2561827                 | AA                              | GG                | 1945899758               |
| SNP_P3_16943_2589927 | NC_021161.1    | Ca_kabuli_chr02 | 2589927                 | GG                              | TT                | 1945899760               |
| SNP_P3_16944_2595082 | NC_021161.1    | Ca_kabuli_chr02 | 2595082                 | GG                              | AA                | 1945899762               |
| SNP_P3_16945_2599859 | NC_021161.1    | Ca_kabuli_chr02 | 2599859                 | GG                              | AA                | 1945899764               |
| SNP_P3_16946_2615458 | NC_021161.1    | Ca_kabuli_chr02 | 2615458                 | TT                              | AA                | 1945899766               |
| SNP_P3_16948_2626738 | NC_021161.1    | Ca_kabuli_chr02 | 2626738                 | GG                              | AA                | 1945899767               |
| SNP_P3_16949_2628676 | NC_021161.1    | Ca_kabuli_chr02 | 2628676                 | GG                              | TT                | 1945899769               |
| SNP_P3_16950_2639319 | NC_021161.1    | Ca_kabuli_chr02 | 2639319                 | GG                              | AA                | 1945899771               |
| SNP_P3_16951_2672825 | NC_021161.1    | Ca_kabuli_chr02 | 2672825                 | AA                              | GG                | 1945899773               |
| SNP_P3_16953_2694066 | NC_021161.1    | Ca_kabuli_chr02 | 2694066                 | CC                              | TT                | 1945899775               |
| SNP_P3_16954_2702342 | NC_021161.1    | Ca_kabuli_chr02 | 2702342                 | CC                              | TT                | 1945899776               |
| SNP_P3_16955_2708180 | NC_021161.1    | Ca_kabuli_chr02 | 2708180                 | TT                              | AA                | 1945899778               |
| SNP_P3_16956_2708182 | NC_021161.1    | Ca_kabuli_chr02 | 2708182                 | AA                              | TT                | 1945899780               |
| SNP_P3_16957_2720928 | NC_021161.1    | Ca_kabuli_chr02 | 2720928                 | TT                              | CC                | 1945899782               |

| SNPs IDs             | Chromosome IDs | Chromosomes     | Physical positions (bp) | CDC Frontier (Reference genome) | (Pusa 256 & HPNB) | NCBI SNPdb Accession IDs |
|----------------------|----------------|-----------------|-------------------------|---------------------------------|-------------------|--------------------------|
| SNP_P3_16959_2799416 | NC_021161.1    | Ca_kabuli_chr02 | 2799416                 | TT                              | GG                | 1945899784               |
| SNP_P3_16960_2799419 | NC_021161.1    | Ca_kabuli_chr02 | 2799419                 | TT                              | GG                | 1945899785               |
| SNP_P3_16962_2826155 | NC_021161.1    | Ca_kabuli_chr02 | 2826155                 | AA                              | TT                | 1945899787               |
| SNP_P3_16963_2852365 | NC_021161.1    | Ca_kabuli_chr02 | 2852365                 | TT                              | CC                | 1945899789               |
| SNP_P3_16964_2854535 | NC_021161.1    | Ca_kabuli_chr02 | 2854535                 | AA                              | GG                | 1945899791               |
| SNP_P3_16966_2879541 | NC_021161.1    | Ca_kabuli_chr02 | 2879541                 | AA                              | GG                | 1945899792               |
| SNP_P3_16968_2896046 | NC_021161.1    | Ca_kabuli_chr02 | 2896046                 | TT                              | AA                | 1945899794               |
| SNP_P3_16970_2918378 | NC_021161.1    | Ca_kabuli_chr02 | 2918378                 | AA                              | TT                | 1945899796               |
| SNP_P3_16971_2918386 | NC_021161.1    | Ca_kabuli_chr02 | 2918386                 | CC                              | TT                | 1945899798               |
| SNP_P3_16972_2919159 | NC_021161.1    | Ca_kabuli_chr02 | 2919159                 | TT                              | GG                | 1945899800               |
| SNP_P3_16973_2921467 | NC_021161.1    | Ca_kabuli_chr02 | 2921467                 | TT                              | CC                | 1945899801               |
| SNP_P3_16974_2930153 | NC_021161.1    | Ca_kabuli_chr02 | 2930153                 | TT                              | CC                | 1945899803               |
| SNP_P3_16975_2933134 | NC_021161.1    | Ca_kabuli_chr02 | 2933134                 | AA                              | GG                | 1945899805               |
| SNP_P3_16976_2934659 | NC_021161.1    | Ca_kabuli_chr02 | 2934659                 | AA                              | GG                | 1945899807               |
| SNP_P3_16977_2935058 | NC_021161.1    | Ca_kabuli_chr02 | 2935058                 | AA                              | TT                | 1945899808               |
| SNP_P3_16978_2935191 | NC_021161.1    | Ca_kabuli_chr02 | 2935191                 | AA                              | GG                | 1945899810               |
| SNP_P3_16979_2936803 | NC_021161.1    | Ca_kabuli_chr02 | 2936803                 | GG                              | CC                | 1945899812               |
| SNP_P3_16980_2940776 | NC_021161.1    | Ca_kabuli_chr02 | 2940776                 | CC                              | TT                | 1945899814               |
| SNP_P3_16981_2940778 | NC_021161.1    | Ca_kabuli_chr02 | 2940778                 | GG                              | AA                | 1945899816               |
| SNP_P3_16982_2940896 | NC_021161.1    | Ca_kabuli_chr02 | 2940896                 | TT                              | CC                | 1945899817               |
| SNP_P3_16984_2941609 | NC_021161.1    | Ca_kabuli_chr02 | 2941609                 | CC                              | TT                | 1945899819               |
| SNP_P3_16985_2942928 | NC_021161.1    | Ca_kabuli_chr02 | 2942928                 | AA                              | GG                | 1945899821               |
| SNP_P3_16986_2943511 | NC_021161.1    | Ca_kabuli_chr02 | 2943511                 | AA                              | TT                | 1945899823               |
| SNP_P3_16987_2948420 | NC_021161.1    | Ca_kabuli_chr02 | 2948420                 | TT                              | GG                | 1945899824               |
| SNP_P3_16988_2948846 | NC_021161.1    | Ca_kabuli_chr02 | 2948846                 | AA                              | GG                | 1945899826               |
| SNP_P3_16989_2949069 | NC_021161.1    | Ca_kabuli_chr02 | 2949069                 | AA                              | GG                | 1945899828               |
| SNP_P3_16990_2950321 | NC_021161.1    | Ca_kabuli_chr02 | 2950321                 | AA                              | CC                | 1945899830               |
| SNP_P3_16991_2950349 | NC_021161.1    | Ca_kabuli_chr02 | 2950349                 | AA                              | GG                | 1945899832               |
| SNP_P3_16992_2950863 | NC_021161.1    | Ca_kabuli_chr02 | 2950863                 | AA                              | GG                | 1945899833               |
| SNP_P3_16993_2950874 | NC_021161.1    | Ca_kabuli_chr02 | 2950874                 | AA                              | GG                | 1945899835               |
| SNP_P3_16995_2950943 | NC_021161.1    | Ca_kabuli_chr02 | 2950943                 | TT                              | CC                | 1945899837               |
| SNP_P3_16996_2951049 | NC_021161.1    | Ca_kabuli_chr02 | 2951049                 | TT                              | CC                | 1945899839               |
| SNP_P3_16997_2960357 | NC_021161.1    | Ca_kabuli_chr02 | 2960357                 | GG                              | CC                | 1945899841               |
| SNP_P3_16998_2960358 | NC_021161.1    | Ca_kabuli_chr02 | 2960358                 | GG                              | AA                | 1945899842               |
| SNP_P3_17000_2960483 | NC_021161.1    | Ca_kabuli_chr02 | 2960483                 | CC                              | TT                | 1945899844               |
| SNP_P3_17001_2960803 | NC_021161.1    | Ca_kabuli_chr02 | 2960803                 | TT                              | AA                | 1945899846               |
| SNP_P3_17002_2960804 | NC_021161.1    | Ca_kabuli_chr02 | 2960804                 | AA                              | TT                | 1945899848               |
| SNP_P3_17003_2960834 | NC_021161.1    | Ca_kabuli_chr02 | 2960834                 | CC                              | TT                | 1945899849               |
| SNP_P3_17005_2964905 | NC_021161.1    | Ca_kabuli_chr02 | 2964905                 | CC                              | AA                | 1945899851               |
| SNP_P3_17007_2972881 | NC_021161.1    | Ca_kabuli_chr02 | 2972881                 | TT                              | GG                | 1945899853               |
| SNP_P3_17009_2975104 | NC_021161.1    | Ca_kabuli_chr02 | 2975104                 | GG                              | TT                | 1945899855               |
| SNP_P3_17010_2975115 | NC_021161.1    | Ca_kabuli_chr02 | 2975115                 | GG                              | AA                | 1945899857               |

| SNPs IDs             | Chromosome IDs | Chromosomes     | Physical positions (bp) | CDC Frontier (Reference genome) | (Pusa 256 & HPNB) | NCBI SNPdb Accession IDs |
|----------------------|----------------|-----------------|-------------------------|---------------------------------|-------------------|--------------------------|
| SNP_P3_17012_2976748 | NC_021161.1    | Ca_kabuli_chr02 | 2976748                 | CC                              | TT                | 1945899858               |
| SNP_P3_17014_2980616 | NC_021161.1    | Ca_kabuli_chr02 | 2980616                 | CC                              | TT                | 1945899860               |
| SNP_P3_17015_2980617 | NC_021161.1    | Ca_kabuli_chr02 | 2980617                 | CC                              | TT                | 1945899862               |
| SNP_P3_17016_2980632 | NC_021161.1    | Ca_kabuli_chr02 | 2980632                 | TT                              | AA                | 1945899864               |
| SNP_P3_17017_2980653 | NC_021161.1    | Ca_kabuli_chr02 | 2980653                 | AA                              | GG                | 1945899865               |
| SNP_P3_17018_2982479 | NC_021161.1    | Ca_kabuli_chr02 | 2982479                 | TT                              | CC                | 1945899867               |
| SNP_P3_17019_2984036 | NC_021161.1    | Ca_kabuli_chr02 | 2984036                 | AA                              | GG                | 1945899869               |
| SNP_P3_17020_2984054 | NC_021161.1    | Ca_kabuli_chr02 | 2984054                 | AA                              | TT                | 1945899870               |
| SNP_P3_17021_2984188 | NC_021161.1    | Ca_kabuli_chr02 | 2984188                 | AA                              | TT                | 1945899872               |
| SNP_P3_17023_2984433 | NC_021161.1    | Ca_kabuli_chr02 | 2984433                 | AA                              | TT                | 1945899874               |
| SNP_P3_17024_2984676 | NC_021161.1    | Ca_kabuli_chr02 | 2984676                 | GG                              | AA                | 1945899876               |
| SNP_P3_17025_2984693 | NC_021161.1    | Ca_kabuli_chr02 | 2984693                 | CC                              | TT                | 1945899877               |
| SNP_P3_17026_2984763 | NC_021161.1    | Ca_kabuli_chr02 | 2984763                 | AA                              | GG                | 1945899879               |
| SNP_P3_17027_2984770 | NC_021161.1    | Ca_kabuli_chr02 | 2984770                 | TT                              | AA                | 1945899881               |
| SNP_P3_17028_2984776 | NC_021161.1    | Ca_kabuli_chr02 | 2984776                 | GG                              | AA                | 1945899883               |
| SNP_P3_17029_2985826 | NC_021161.1    | Ca_kabuli_chr02 | 2985826                 | TT                              | CC                | 1945899884               |
| SNP_P3_17030_2985967 | NC_021161.1    | Ca_kabuli_chr02 | 2985967                 | CC                              | TT                | 1945899886               |
| SNP_P3_17031_2986791 | NC_021161.1    | Ca_kabuli_chr02 | 2986791                 | GG                              | CC                | 1945899888               |
| SNP_P3_17032_2986820 | NC_021161.1    | Ca_kabuli_chr02 | 2986820                 | TT                              | GG                | 1945899890               |
| SNP_P3_17033_2986825 | NC_021161.1    | Ca_kabuli_chr02 | 2986825                 | GG                              | AA                | 1945899891               |
| SNP_P3_17034_2986857 | NC_021161.1    | Ca_kabuli_chr02 | 2986857                 | TT                              | CC                | 1945899893               |
| SNP_P3_17036_2988050 | NC_021161.1    | Ca_kabuli_chr02 | 2988050                 | TT                              | AA                | 1945899895               |
| SNP_P3_17037_2988089 | NC_021161.1    | Ca_kabuli_chr02 | 2988089                 | CC                              | TT                | 1945899897               |
| SNP_P3_17038_2988101 | NC_021161.1    | Ca_kabuli_chr02 | 2988101                 | AA                              | TT                | 1945899898               |
| SNP_P3_17039_2988243 | NC_021161.1    | Ca_kabuli_chr02 | 2988243                 | AA                              | CC                | 1945899900               |
| SNP_P3_17040_2988265 | NC_021161.1    | Ca_kabuli_chr02 | 2988265                 | CC                              | TT                | 1945899902               |
| SNP_P3_17041_2988354 | NC_021161.1    | Ca_kabuli_chr02 | 2988354                 | TT                              | CC                | 1945899904               |
| SNP_P3_17042_2989953 | NC_021161.1    | Ca_kabuli_chr02 | 2989953                 | CC                              | TT                | 1945899905               |
| SNP_P3_17043_2995143 | NC_021161.1    | Ca_kabuli_chr02 | 2995143                 | AA                              | CC                | 1945899907               |
| SNP_P3_17044_2995165 | NC_021161.1    | Ca_kabuli_chr02 | 2995165                 | AA                              | GG                | 1945899909               |
| SNP_P3_17045_2996162 | NC_021161.1    | Ca_kabuli_chr02 | 2996162                 | TT                              | CC                | 1945899911               |
| SNP_P3_17047_2996194 | NC_021161.1    | Ca_kabuli_chr02 | 2996194                 | AA                              | TT                | 1945899913               |
| SNP_P3_17048_2996217 | NC_021161.1    | Ca_kabuli_chr02 | 2996217                 | TT                              | AA                | 1945899914               |
| SNP_P3_17049_2996359 | NC_021161.1    | Ca_kabuli_chr02 | 2996359                 | CC                              | TT                | 1945899916               |
| SNP_P3_17050_2996606 | NC_021161.1    | Ca_kabuli_chr02 | 2996606                 | AA                              | CC                | 1945899918               |
| SNP_P3_17052_2997334 | NC_021161.1    | Ca_kabuli_chr02 | 2997334                 | GG                              | TT                | 1945899920               |
| SNP_P3_17053_2997616 | NC_021161.1    | Ca_kabuli_chr02 | 2997616                 | GG                              | TT                | 1945899921               |
| SNP_P3_17054_2998123 | NC_021161.1    | Ca_kabuli_chr02 | 2998123                 | CC                              | GG                | 1945899923               |
| SNP_P3_17055_2998171 | NC_021161.1    | Ca_kabuli_chr02 | 2998171                 | GG                              | AA                | 1945899925               |
| SNP_P3_17056_2998207 | NC_021161.1    | Ca_kabuli_chr02 | 2998207                 | TT                              | AA                | 1945899927               |
| SNP_P3_17057_2998262 | NC_021161.1    | Ca_kabuli_chr02 | 2998262                 | TT                              | GG                | 1945899929               |
| SNP_P3_17058_2998278 | NC_021161.1    | Ca_kabuli_chr02 | 2998278                 | AA                              | TT                | 1945899930               |

| SNPs IDs             | Chromosome IDs | Chromosomes     | Physical positions (bp) | CDC Frontier (Reference genome) | (Pusa 256 & HPNB) | NCBI SNPdb Accession IDs |
|----------------------|----------------|-----------------|-------------------------|---------------------------------|-------------------|--------------------------|
| SNP_P3_17059_2998285 | NC_021161.1    | Ca_kabuli_chr02 | 2998285                 | GG                              | AA                | 1945899932               |
| SNP_P3_17060_2998290 | NC_021161.1    | Ca_kabuli_chr02 | 2998290                 | AA                              | GG                | 1945899934               |
| SNP_P3_17061_2998291 | NC_021161.1    | Ca_kabuli_chr02 | 2998291                 | TT                              | AA                | 1945899936               |
| SNP_P3_17062_2998301 | NC_021161.1    | Ca_kabuli_chr02 | 2998301                 | GG                              | AA                | 1945899937               |
| SNP_P3_17063_2998308 | NC_021161.1    | Ca_kabuli_chr02 | 2998308                 | TT                              | CC                | 1945899939               |
| SNP_P3_17064_2998363 | NC_021161.1    | Ca_kabuli_chr02 | 2998363                 | GG                              | AA                | 1945899941               |
| SNP_P3_17065_2998469 | NC_021161.1    | Ca_kabuli_chr02 | 2998469                 | GG                              | AA                | 1945899943               |
| SNP_P3_17066_2998472 | NC_021161.1    | Ca_kabuli_chr02 | 2998472                 | CC                              | TT                | 1945899945               |
| SNP_P3_17067_2998476 | NC_021161.1    | Ca_kabuli_chr02 | 2998476                 | AA                              | TT                | 1945899946               |
| SNP_P3_17068_3000463 | NC_021161.1    | Ca_kabuli_chr02 | 3000463                 | CC                              | TT                | 1945899948               |
| SNP_P3_17069_3000466 | NC_021161.1    | Ca_kabuli_chr02 | 3000466                 | AA                              | GG                | 1945899950               |
| SNP_P3_17070_3000473 | NC_021161.1    | Ca_kabuli_chr02 | 3000473                 | CC                              | TT                | 1945899952               |
| SNP_P3_17071_3000486 | NC_021161.1    | Ca_kabuli_chr02 | 3000486                 | CC                              | AA                | 1945899954               |
| SNP_P3_17072_3000657 | NC_021161.1    | Ca_kabuli_chr02 | 3000657                 | AA                              | GG                | 1945899955               |
| SNP_P3_17073_3000668 | NC_021161.1    | Ca_kabuli_chr02 | 3000668                 | CC                              | TT                | 1945899957               |
| SNP_P3_17074_3002870 | NC_021161.1    | Ca_kabuli_chr02 | 3002870                 | AA                              | TT                | 1945899959               |
| SNP_P3_17075_3002872 | NC_021161.1    | Ca_kabuli_chr02 | 3002872                 | GG                              | CC                | 1945899961               |
| SNP_P3_17076_3004099 | NC_021161.1    | Ca_kabuli_chr02 | 3004099                 | GG                              | AA                | 1945899963               |
| SNP_P3_17077_3004103 | NC_021161.1    | Ca_kabuli_chr02 | 3004103                 | TT                              | AA                | 1945899965               |
| SNP_P3_17078_3004107 | NC_021161.1    | Ca_kabuli_chr02 | 3004107                 | AA                              | GG                | 1945899966               |
| SNP_P3_17079_3004351 | NC_021161.1    | Ca_kabuli_chr02 | 3004351                 | TT                              | CC                | 1945899968               |
| SNP_P3_17080_3004353 | NC_021161.1    | Ca_kabuli_chr02 | 3004353                 | GG                              | AA                | 1945899970               |
| SNP_P3_17082_3004700 | NC_021161.1    | Ca_kabuli_chr02 | 3004700                 | CC                              | TT                | 1945899972               |
| SNP_P3_17083_3005154 | NC_021161.1    | Ca_kabuli_chr02 | 3005154                 | TT                              | CC                | 1945899974               |
| SNP_P3_17084_3005220 | NC_021161.1    | Ca_kabuli_chr02 | 3005220                 | TT                              | CC                | 1945899975               |
| SNP_P3_17085_3005241 | NC_021161.1    | Ca_kabuli_chr02 | 3005241                 | GG                              | TT                | 1945899977               |
| SNP_P3_17086_3006049 | NC_021161.1    | Ca_kabuli_chr02 | 3006049                 | CC                              | AA                | 1945899979               |
| SNP_P3_17087_3006233 | NC_021161.1    | Ca_kabuli_chr02 | 3006233                 | TT                              | AA                | 1945899981               |
| SNP_P3_17088_3006252 | NC_021161.1    | Ca_kabuli_chr02 | 3006252                 | TT                              | CC                | 1945899983               |
| SNP_P3_17090_3007660 | NC_021161.1    | Ca_kabuli_chr02 | 3007660                 | TT                              | CC                | 1945899985               |
| SNP_P3_17091_3008601 | NC_021161.1    | Ca_kabuli_chr02 | 3008601                 | GG                              | AA                | 1945899986               |
| SNP_P3_17092_3008603 | NC_021161.1    | Ca_kabuli_chr02 | 3008603                 | GG                              | AA                | 1945899988               |
| SNP_P3_17093_3008780 | NC_021161.1    | Ca_kabuli_chr02 | 3008780                 | CC                              | TT                | 1945899990               |
| SNP_P3_17095_3009105 | NC_021161.1    | Ca_kabuli_chr02 | 3009105                 | AA                              | GG                | 1945899992               |
| SNP_P3_17096_3009107 | NC_021161.1    | Ca_kabuli_chr02 | 3009107                 | GG                              | TT                | 1945899993               |
| SNP_P3_17097_3009200 | NC_021161.1    | Ca_kabuli_chr02 | 3009200                 | CC                              | AA                | 1945899995               |
| SNP_P3_17098_3009525 | NC_021161.1    | Ca_kabuli_chr02 | 3009525                 | GG                              | AA                | 1945899997               |
| SNP_P3_17099_3009750 | NC_021161.1    | Ca_kabuli_chr02 | 3009750                 | AA                              | GG                | 1945899999               |
| SNP_P3_17100_3009786 | NC_021161.1    | Ca_kabuli_chr02 | 3009786                 | GG                              | AA                | 1945900001               |
| SNP_P3_17102_3012775 | NC_021161.1    | Ca_kabuli_chr02 | 3012775                 | GG                              | CC                | 1945900002               |
| SNP_P3_17103_3012901 | NC_021161.1    | Ca_kabuli_chr02 | 3012901                 | GG                              | CC                | 1945900004               |
| SNP_P3_17104_3013023 | NC_021161.1    | Ca_kabuli_chr02 | 3013023                 | TT                              | GG                | 1945900006               |

| SNPs IDs             | Chromosome IDs | Chromosomes     | Physical positions (bp) | CDC Frontier (Reference genome) | (Pusa 256 & HPNB) | NCBI SNPdb Accession IDs |
|----------------------|----------------|-----------------|-------------------------|---------------------------------|-------------------|--------------------------|
| SNP_P3_17105_3013821 | NC_021161.1    | Ca_kabuli_chr02 | 3013821                 | CC                              | TT                | 1945900008               |
| SNP_P3_17106_3013835 | NC_021161.1    | Ca_kabuli_chr02 | 3013835                 | AA                              | GG                | 1945900009               |
| SNP_P3_17107_3015948 | NC_021161.1    | Ca_kabuli_chr02 | 3015948                 | TT                              | GG                | 1945900011               |
| SNP_P3_17108_3016068 | NC_021161.1    | Ca_kabuli_chr02 | 3016068                 | TT                              | CC                | 1945900013               |
| SNP_P3_17109_3016069 | NC_021161.1    | Ca_kabuli_chr02 | 3016069                 | CC                              | AA                | 1945900015               |
| SNP_P3_17110_3016078 | NC_021161.1    | Ca_kabuli_chr02 | 3016078                 | TT                              | CC                | 1945900017               |
| SNP_P3_17111_3018719 | NC_021161.1    | Ca_kabuli_chr02 | 3018719                 | GG                              | AA                | 1945900018               |
| SNP_P3_17112_3018752 | NC_021161.1    | Ca_kabuli_chr02 | 3018752                 | AA                              | GG                | 1945900020               |
| SNP_P3_17113_3019057 | NC_021161.1    | Ca_kabuli_chr02 | 3019057                 | TT                              | AA                | 1945900022               |
| SNP_P3_17114_3019060 | NC_021161.1    | Ca_kabuli_chr02 | 3019060                 | GG                              | AA                | 1945900024               |
| SNP_P3_17115_3019077 | NC_021161.1    | Ca_kabuli_chr02 | 3019077                 | CC                              | TT                | 1945900025               |
| SNP_P3_17116_3019087 | NC_021161.1    | Ca_kabuli_chr02 | 3019087                 | AA                              | GG                | 1945900027               |
| SNP_P3_17117_3019117 | NC_021161.1    | Ca_kabuli_chr02 | 3019117                 | GG                              | CC                | 1945900029               |
| SNP_P3_17121_3020829 | NC_021161.1    | Ca_kabuli_chr02 | 3020829                 | GG                              | TT                | 1945900031               |
| SNP_P3_17123_3021173 | NC_021161.1    | Ca_kabuli_chr02 | 3021173                 | CC                              | TT                | 1945900032               |
| SNP_P3_17124_3021795 | NC_021161.1    | Ca_kabuli_chr02 | 3021795                 | AA                              | GG                | 1945900034               |
| SNP_P3_17125_3021805 | NC_021161.1    | Ca_kabuli_chr02 | 3021805                 | TT                              | GG                | 1945900036               |
| SNP_P3_17126_3021815 | NC_021161.1    | Ca_kabuli_chr02 | 3021815                 | CC                              | GG                | 1945900037               |
| SNP_P3_17127_3021817 | NC_021161.1    | Ca_kabuli_chr02 | 3021817                 | CC                              | TT                | 1945900039               |
| SNP_P3_17128_3021940 | NC_021161.1    | Ca_kabuli_chr02 | 3021940                 | TT                              | CC                | 1945900041               |
| SNP_P3_17130_3022067 | NC_021161.1    | Ca_kabuli_chr02 | 3022067                 | CC                              | TT                | 1945900043               |
| SNP_P3_17131_3022280 | NC_021161.1    | Ca_kabuli_chr02 | 3022280                 | GG                              | AA                | 1945900044               |
| SNP_P3_17132_3022287 | NC_021161.1    | Ca_kabuli_chr02 | 3022287                 | AA                              | TT                | 1945900046               |
| SNP_P3_17134_3022870 | NC_021161.1    | Ca_kabuli_chr02 | 3022870                 | AA                              | GG                | 1945900048               |
| SNP_P3_17135_3023227 | NC_021161.1    | Ca_kabuli_chr02 | 3023227                 | AA                              | GG                | 1945900050               |
| SNP_P3_17136_3023439 | NC_021161.1    | Ca_kabuli_chr02 | 3023439                 | TT                              | CC                | 1945900052               |
| SNP_P3_17137_3023452 | NC_021161.1    | Ca_kabuli_chr02 | 3023452                 | GG                              | CC                | 1945900053               |
| SNP_P3_17138_3023467 | NC_021161.1    | Ca_kabuli_chr02 | 3023467                 | AA                              | CC                | 1945900055               |
| SNP_P3_17139_3024426 | NC_021161.1    | Ca_kabuli_chr02 | 3024426                 | AA                              | GG                | 1945900057               |
| SNP_P3_17140_3024496 | NC_021161.1    | Ca_kabuli_chr02 | 3024496                 | TT                              | CC                | 1945900059               |
| SNP_P3_17141_3025626 | NC_021161.1    | Ca_kabuli_chr02 | 3025626                 | AA                              | TT                | 1945900060               |
| SNP_P3_17142_3025844 | NC_021161.1    | Ca_kabuli_chr02 | 3025844                 | TT                              | CC                | 1945900062               |
| SNP_P3_17143_3025867 | NC_021161.1    | Ca_kabuli_chr02 | 3025867                 | CC                              | TT                | 1945900064               |
| SNP_P3_17144_3025891 | NC_021161.1    | Ca_kabuli_chr02 | 3025891                 | CC                              | TT                | 1945900065               |
| SNP_P3_17145_3026408 | NC_021161.1    | Ca_kabuli_chr02 | 3026408                 | CC                              | TT                | 1945900067               |
| SNP_P3_17146_3026409 | NC_021161.1    | Ca_kabuli_chr02 | 3026409                 | CC                              | AA                | 1945900069               |
| SNP_P3_17148_3026771 | NC_021161.1    | Ca_kabuli_chr02 | 3026771                 | TT                              | AA                | 1945900071               |
| SNP_P3_17150_3027982 | NC_021161.1    | Ca_kabuli_chr02 | 3027982                 | AA                              | GG                | 1945900072               |
| SNP_P3_17151_3030953 | NC_021161.1    | Ca_kabuli_chr02 | 3030953                 | GG                              | CC                | 1945900074               |
| SNP_P3_17152_3031031 | NC_021161.1    | Ca_kabuli_chr02 | 3031031                 | CC                              | TT                | 1945900076               |
| SNP_P3_17153_3031036 | NC_021161.1    | Ca_kabuli_chr02 | 3031036                 | AA                              | CC                | 1945900078               |
| SNP_P3_17154_3031049 | NC_021161.1    | Ca_kabuli_chr02 | 3031049                 | AA                              | GG                | 1945900079               |



| SNPs IDs             | Chromosome IDs | Chromosomes     | Physical positions (bp) | CDC Frontier (Reference genome) | (Pusa 256 & HPNB) | NCBI SNPdb Accession IDs |
|----------------------|----------------|-----------------|-------------------------|---------------------------------|-------------------|--------------------------|
| SNP_P3_17155_3031083 | NC_021161.1    | Ca_kabuli_chr02 | 3031083                 | GG                              | AA                | 1945900081               |
| SNP_P3_17156_3031101 | NC_021161.1    | Ca_kabuli_chr02 | 3031101                 | TT                              | GG                | 1945900083               |
| SNP_P3_17157_3031197 | NC_021161.1    | Ca_kabuli_chr02 | 3031197                 | GG                              | CC                | 1945900084               |
| SNP_P3_17158_3031215 | NC_021161.1    | Ca_kabuli_chr02 | 3031215                 | CC                              | TT                | 1945900086               |
| SNP_P3_17160_3031310 | NC_021161.1    | Ca_kabuli_chr02 | 3031310                 | TT                              | AA                | 1945900088               |
| SNP_P3_17161_3031347 | NC_021161.1    | Ca_kabuli_chr02 | 3031347                 | GG                              | AA                | 1945900090               |
| SNP_P3_17162_3031361 | NC_021161.1    | Ca_kabuli_chr02 | 3031361                 | GG                              | CC                | 1945900091               |
| SNP_P3_17163_3031550 | NC_021161.1    | Ca_kabuli_chr02 | 3031550                 | AA                              | TT                | 1945900093               |
| SNP_P3_17165_3031624 | NC_021161.1    | Ca_kabuli_chr02 | 3031624                 | AA                              | CC                | 1945900095               |
| SNP_P3_17166_3031697 | NC_021161.1    | Ca_kabuli_chr02 | 3031697                 | AA                              | GG                | 1945900097               |
| SNP_P3_17167_3031726 | NC_021161.1    | Ca_kabuli_chr02 | 3031726                 | GG                              | AA                | 1945900098               |
| SNP_P3_17168_3033335 | NC_021161.1    | Ca_kabuli_chr02 | 3033335                 | AA                              | CC                | 1945900100               |
| SNP_P3_17170_3037843 | NC_021161.1    | Ca_kabuli_chr02 | 3037843                 | CC                              | TT                | 1945900102               |
| SNP_P3_17171_3037856 | NC_021161.1    | Ca_kabuli_chr02 | 3037856                 | CC                              | TT                | 1945900103               |
| SNP_P3_17173_3038203 | NC_021161.1    | Ca_kabuli_chr02 | 3038203                 | TT                              | AA                | 1945900105               |
| SNP_P3_17175_3038398 | NC_021161.1    | Ca_kabuli_chr02 | 3038398                 | AA                              | CC                | 1945900107               |
| SNP_P3_17176_3038461 | NC_021161.1    | Ca_kabuli_chr02 | 3038461                 | CC                              | TT                | 1945900109               |
| SNP_P3_17177_3038827 | NC_021161.1    | Ca_kabuli_chr02 | 3038827                 | CC                              | AA                | 1945900110               |
| SNP_P3_17178_3038971 | NC_021161.1    | Ca_kabuli_chr02 | 3038971                 | TT                              | GG                | 1945900112               |
| SNP_P3_17179_3041381 | NC_021161.1    | Ca_kabuli_chr02 | 3041381                 | GG                              | AA                | 1945900114               |
| SNP_P3_17180_3041598 | NC_021161.1    | Ca_kabuli_chr02 | 3041598                 | CC                              | AA                | 1945900116               |
| SNP_P3_17181_3041980 | NC_021161.1    | Ca_kabuli_chr02 | 3041980                 | AA                              | GG                | 1945900117               |
| SNP_P3_17182_3042020 | NC_021161.1    | Ca_kabuli_chr02 | 3042020                 | CC                              | TT                | 1945900119               |
| SNP_P3_17185_3045182 | NC_021161.1    | Ca_kabuli_chr02 | 3045182                 | AA                              | TT                | 1945900121               |
| SNP_P3_17186_3045224 | NC_021161.1    | Ca_kabuli_chr02 | 3045224                 | CC                              | TT                | 1945900122               |
| SNP_P3_17187_3045228 | NC_021161.1    | Ca_kabuli_chr02 | 3045228                 | TT                              | CC                | 1945900124               |
| SNP_P3_17188_3045283 | NC_021161.1    | Ca_kabuli_chr02 | 3045283                 | TT                              | GG                | 1945900126               |
| SNP_P3_17189_3045284 | NC_021161.1    | Ca_kabuli_chr02 | 3045284                 | GG                              | AA                | 1945900128               |
| SNP_P3_17191_3045486 | NC_021161.1    | Ca_kabuli_chr02 | 3045486                 | AA                              | GG                | 1945900129               |
| SNP_P3_17192_3046605 | NC_021161.1    | Ca_kabuli_chr02 | 3046605                 | AA                              | CC                | 1945900131               |
| SNP_P3_17193_3046623 | NC_021161.1    | Ca_kabuli_chr02 | 3046623                 | GG                              | AA                | 1945900133               |
| SNP_P3_17194_3047089 | NC_021161.1    | Ca_kabuli_chr02 | 3047089                 | TT                              | AA                | 1945900135               |
| SNP_P3_17195_3047102 | NC_021161.1    | Ca_kabuli_chr02 | 3047102                 | CC                              | AA                | 1945900137               |
| SNP_P3_17197_3047579 | NC_021161.1    | Ca_kabuli_chr02 | 3047579                 | GG                              | CC                | 1945900138               |
| SNP_P3_17198_3047580 | NC_021161.1    | Ca_kabuli_chr02 | 3047580                 | AA                              | CC                | 1945900140               |
| SNP_P3_17199_3047601 | NC_021161.1    | Ca_kabuli_chr02 | 3047601                 | AA                              | TT                | 1945900142               |
| SNP_P3_17201_3048545 | NC_021161.1    | Ca_kabuli_chr02 | 3048545                 | GG                              | CC                | 1945900144               |
| SNP_P3_17203_3049305 | NC_021161.1    | Ca_kabuli_chr02 | 3049305                 | AA                              | GG                | 1945900146               |
| SNP_P3_17204_3049345 | NC_021161.1    | Ca_kabuli_chr02 | 3049345                 | CC                              | GG                | 1945900147               |
| SNP_P3_17206_3050194 | NC_021161.1    | Ca_kabuli_chr02 | 3050194                 | TT                              | CC                | 1945900149               |
| SNP_P3_17207_3050198 | NC_021161.1    | Ca_kabuli_chr02 | 3050198                 | AA                              | GG                | 1945900151               |
| SNP_P3_17208_3050202 | NC_021161.1    | Ca_kabuli_chr02 | 3050202                 | CC                              | TT                | 1945900153               |

| SNPs IDs             | Chromosome IDs | Chromosomes     | Physical positions (bp) | CDC Frontier (Reference genome) | (Pusa 256 & HPNB) | NCBI SNPdb Accession IDs |
|----------------------|----------------|-----------------|-------------------------|---------------------------------|-------------------|--------------------------|
| SNP_P3_17209_3050205 | NC_021161.1    | Ca_kabuli_chr02 | 3050205                 | CC                              | TT                | 1945900155               |
| SNP_P3_17210_3050210 | NC_021161.1    | Ca_kabuli_chr02 | 3050210                 | CC                              | TT                | 1945900157               |
| SNP_P3_17211_3050250 | NC_021161.1    | Ca_kabuli_chr02 | 3050250                 | AA                              | CC                | 1945900158               |
| SNP_P3_17212_3050720 | NC_021161.1    | Ca_kabuli_chr02 | 3050720                 | AA                              | GG                | 1945900160               |
| SNP_P3_17214_3077688 | NC_021161.1    | Ca_kabuli_chr02 | 3077688                 | GG                              | TT                | 1945900162               |
| SNP_P3_17216_3088519 | NC_021161.1    | Ca_kabuli_chr02 | 3088519                 | TT                              | CC                | 1945900164               |
| SNP_P3_17219_3146906 | NC_021161.1    | Ca_kabuli_chr02 | 3146906                 | GG                              | AA                | 1945900166               |
| SNP_P3_17220_3198064 | NC_021161.1    | Ca_kabuli_chr02 | 3198064                 | AA                              | CC                | 1945900168               |
| SNP_P3_17221_3198068 | NC_021161.1    | Ca_kabuli_chr02 | 3198068                 | AA                              | CC                | 1945900169               |
| SNP_P3_17222_3233564 | NC_021161.1    | Ca_kabuli_chr02 | 3233564                 | AA                              | GG                | 1945900171               |
| SNP_P3_17223_3233568 | NC_021161.1    | Ca_kabuli_chr02 | 3233568                 | CC                              | TT                | 1945900173               |
| SNP_P3_17225_3254653 | NC_021161.1    | Ca_kabuli_chr02 | 3254653                 | GG                              | AA                | 1945900175               |
| SNP_P3_17227_3266056 | NC_021161.1    | Ca_kabuli_chr02 | 3266056                 | CC                              | TT                | 1945900176               |
| SNP_P3_17228_3282014 | NC_021161.1    | Ca_kabuli_chr02 | 3282014                 | GG                              | AA                | 1945900178               |
| SNP_P3_17229_3283404 | NC_021161.1    | Ca_kabuli_chr02 | 3283404                 | TT                              | AA                | 1945900180               |
| SNP_P3_17230_3283408 | NC_021161.1    | Ca_kabuli_chr02 | 3283408                 | TT                              | CC                | 1945900182               |
| SNP_P3_17232_3312329 | NC_021161.1    | Ca_kabuli_chr02 | 3312329                 | AA                              | GG                | 1945900184               |
| SNP_P3_17233_3321731 | NC_021161.1    | Ca_kabuli_chr02 | 3321731                 | TT                              | CC                | 1945900185               |
| SNP_P3_17235_3322829 | NC_021161.1    | Ca_kabuli_chr02 | 3322829                 | AA                              | CC                | 1945900187               |
| SNP_P3_17236_3341056 | NC_021161.1    | Ca_kabuli_chr02 | 3341056                 | TT                              | CC                | 1945900189               |
| SNP_P3_17237_3341410 | NC_021161.1    | Ca_kabuli_chr02 | 3341410                 | AA                              | TT                | 1945900191               |
| SNP_P3_17238_3379525 | NC_021161.1    | Ca_kabuli_chr02 | 3379525                 | TT                              | AA                | 1945900193               |
| SNP_P3_17239_3391694 | NC_021161.1    | Ca_kabuli_chr02 | 3391694                 | TT                              | CC                | 1945900195               |
| SNP_P3_17240_3400547 | NC_021161.1    | Ca_kabuli_chr02 | 3400547                 | TT                              | CC                | 1945900196               |
| SNP_P3_17241_3403994 | NC_021161.1    | Ca_kabuli_chr02 | 3403994                 | TT                              | CC                | 1945900198               |
| SNP_P3_17242_3404047 | NC_021161.1    | Ca_kabuli_chr02 | 3404047                 | GG                              | AA                | 1945900200               |
| SNP_P3_17243_3404060 | NC_021161.1    | Ca_kabuli_chr02 | 3404060                 | TT                              | CC                | 1945900202               |
| SNP_P3_17244_3424690 | NC_021161.1    | Ca_kabuli_chr02 | 3424690                 | TT                              | AA                | 1945900204               |
| SNP_P3_17246_3464758 | NC_021161.1    | Ca_kabuli_chr02 | 3464758                 | TT                              | CC                | 1945900205               |
| SNP_P3_17247_3464830 | NC_021161.1    | Ca_kabuli_chr02 | 3464830                 | GG                              | AA                | 1945900207               |
| SNP_P3_17248_3465184 | NC_021161.1    | Ca_kabuli_chr02 | 3465184                 | TT                              | CC                | 1945900209               |
| SNP_P3_17249_3465368 | NC_021161.1    | Ca_kabuli_chr02 | 3465368                 | TT                              | CC                | 1945900211               |
| SNP_P3_17250_3465370 | NC_021161.1    | Ca_kabuli_chr02 | 3465370                 | CC                              | TT                | 1945900213               |
| SNP_P3_17251_3465379 | NC_021161.1    | Ca_kabuli_chr02 | 3465379                 | GG                              | AA                | 1945900214               |
| SNP_P3_17252_3465395 | NC_021161.1    | Ca_kabuli_chr02 | 3465395                 | CC                              | AA                | 1945900216               |
| SNP_P3_17253_3465396 | NC_021161.1    | Ca_kabuli_chr02 | 3465396                 | GG                              | CC                | 1945900218               |
| SNP_P3_17254_3532699 | NC_021161.1    | Ca_kabuli_chr02 | 3532699                 | AA                              | GG                | 1945900220               |
| SNP_P3_17256_3577333 | NC_021161.1    | Ca_kabuli_chr02 | 3577333                 | TT                              | CC                | 1945900222               |
| SNP_P3_17257_3577335 | NC_021161.1    | Ca_kabuli_chr02 | 3577335                 | TT                              | GG                | 1945900223               |
| SNP_P3_17258_3609823 | NC_021161.1    | Ca_kabuli_chr02 | 3609823                 | GG                              | AA                | 1945900225               |
| SNP_P3_17259_3622195 | NC_021161.1    | Ca_kabuli_chr02 | 3622195                 | TT                              | CC                | 1945900227               |
| SNP_P3_17261_3667385 | NC_021161.1    | Ca_kabuli_chr02 | 3667385                 | AA                              | TT                | 1945900229               |

| SNPs IDs             | Chromosome IDs | Chromosomes     | Physical positions (bp) | CDC Frontier (Reference genome) | (Pusa 256 & HPNB) | NCBI SNPdb Accession IDs |
|----------------------|----------------|-----------------|-------------------------|---------------------------------|-------------------|--------------------------|
| SNP_P3_17262_3684780 | NC_021161.1    | Ca_kabuli_chr02 | 3684780                 | GG                              | AA                | 1945900231               |
| SNP_P3_17263_3692999 | NC_021161.1    | Ca_kabuli_chr02 | 3692999                 | CC                              | AA                | 1945900232               |
| SNP_P3_17264_3723075 | NC_021161.1    | Ca_kabuli_chr02 | 3723075                 | CC                              | AA                | 1945900234               |
| SNP_P3_17265_3724991 | NC_021161.1    | Ca_kabuli_chr02 | 3724991                 | TT                              | CC                | 1945900236               |
| SNP_P3_17266_3724997 | NC_021161.1    | Ca_kabuli_chr02 | 3724997                 | TT                              | CC                | 1945900238               |
| SNP_P3_17267_3746864 | NC_021161.1    | Ca_kabuli_chr02 | 3746864                 | AA                              | GG                | 1945900240               |
| SNP_P3_17269_3782293 | NC_021161.1    | Ca_kabuli_chr02 | 3782293                 | AA                              | CC                | 1945900241               |
| SNP_P3_17270_3787731 | NC_021161.1    | Ca_kabuli_chr02 | 3787731                 | GG                              | AA                | 1945900243               |
| SNP_P3_17272_3866863 | NC_021161.1    | Ca_kabuli_chr02 | 3866863                 | TT                              | CC                | 1945900245               |
| SNP_P3_17274_3877881 | NC_021161.1    | Ca_kabuli_chr02 | 3877881                 | TT                              | CC                | 1945900247               |
| SNP_P3_17275_3901632 | NC_021161.1    | Ca_kabuli_chr02 | 3901632                 | AA                              | GG                | 1945900249               |
| SNP_P3_17276_3901640 | NC_021161.1    | Ca_kabuli_chr02 | 3901640                 | TT                              | CC                | 1945900250               |
| SNP_P3_17277_3901712 | NC_021161.1    | Ca_kabuli_chr02 | 3901712                 | AA                              | CC                | 1945900252               |
| SNP_P3_17278_3901717 | NC_021161.1    | Ca_kabuli_chr02 | 3901717                 | TT                              | GG                | 1945900254               |
| SNP_P3_17279_3901729 | NC_021161.1    | Ca_kabuli_chr02 | 3901729                 | CC                              | AA                | 1945900256               |
| SNP_P3_17281_3918387 | NC_021161.1    | Ca_kabuli_chr02 | 3918387                 | GG                              | AA                | 1945900258               |
| SNP_P3_17282_3919050 | NC_021161.1    | Ca_kabuli_chr02 | 3919050                 | AA                              | GG                | 1945900259               |
| SNP_P3_17283_3926771 | NC_021161.1    | Ca_kabuli_chr02 | 3926771                 | TT                              | AA                | 1945900261               |
| SNP_P3_17284_3935308 | NC_021161.1    | Ca_kabuli_chr02 | 3935308                 | CC                              | GG                | 1945900263               |
| SNP_P3_17286_3950476 | NC_021161.1    | Ca_kabuli_chr02 | 3950476                 | TT                              | AA                | 1945900265               |
| SNP_P3_17287_3955480 | NC_021161.1    | Ca_kabuli_chr02 | 3955480                 | AA                              | GG                | 1945900267               |
| SNP_P3_17289_3965579 | NC_021161.1    | Ca_kabuli_chr02 | 3965579                 | AA                              | GG                | 1945900268               |
| SNP_P3_17290_3989184 | NC_021161.1    | Ca_kabuli_chr02 | 3989184                 | GG                              | TT                | 1945900270               |
| SNP_P3_17291_4000511 | NC_021161.1    | Ca_kabuli_chr02 | 4000511                 | AA                              | GG                | 1945900272               |
| SNP_P3_17292_4012541 | NC_021161.1    | Ca_kabuli_chr02 | 4012541                 | GG                              | AA                | 1945900274               |
| SNP_P3_17293_4018623 | NC_021161.1    | Ca_kabuli_chr02 | 4018623                 | TT                              | GG                | 1945900276               |
| SNP_P3_17294_4023643 | NC_021161.1    | Ca_kabuli_chr02 | 4023643                 | AA                              | TT                | 1945900277               |
| SNP_P3_17295_4024339 | NC_021161.1    | Ca_kabuli_chr02 | 4024339                 | GG                              | AA                | 1945900279               |
| SNP_P3_17297_4043559 | NC_021161.1    | Ca_kabuli_chr02 | 4043559                 | CC                              | TT                | 1945900281               |
| SNP_P3_17298_4061820 | NC_021161.1    | Ca_kabuli_chr02 | 4061820                 | AA                              | CC                | 1945900283               |
| SNP_P3_17299_4067430 | NC_021161.1    | Ca_kabuli_chr02 | 4067430                 | CC                              | TT                | 1945900285               |
| SNP_P3_17300_4069442 | NC_021161.1    | Ca_kabuli_chr02 | 4069442                 | AA                              | GG                | 1945900286               |
| SNP_P3_17301_4121682 | NC_021161.1    | Ca_kabuli_chr02 | 4121682                 | CC                              | TT                | 1945900288               |
| SNP_P3_17302_4163297 | NC_021161.1    | Ca_kabuli_chr02 | 4163297                 | GG                              | AA                | 1945900290               |
| SNP_P3_17303_4185139 | NC_021161.1    | Ca_kabuli_chr02 | 4185139                 | AA                              | TT                | 1945900292               |
| SNP_P3_17304_4186706 | NC_021161.1    | Ca_kabuli_chr02 | 4186706                 | AA                              | GG                | 1945900293               |
| SNP_P3_17305_4186902 | NC_021161.1    | Ca_kabuli_chr02 | 4186902                 | AA                              | GG                | 1945900295               |
| SNP_P3_17306_4187331 | NC_021161.1    | Ca_kabuli_chr02 | 4187331                 | AA                              | GG                | 1945900297               |
| SNP_P3_17307_4187429 | NC_021161.1    | Ca_kabuli_chr02 | 4187429                 | AA                              | GG                | 1945900299               |
| SNP_P3_17308_4187473 | NC_021161.1    | Ca_kabuli_chr02 | 4187473                 | AA                              | TT                | 1945900301               |
| SNP_P3_17309_4187474 | NC_021161.1    | Ca_kabuli_chr02 | 4187474                 | AA                              | TT                | 1945900302               |
| SNP_P3_17310_4187737 | NC_021161.1    | Ca_kabuli_chr02 | 4187737                 | CC                              | TT                | 1945900304               |

| SNPs IDs             | Chromosome IDs | Chromosomes     | Physical positions (bp) | CDC Frontier (Reference genome) | (Pusa 256 & HPNB) | NCBI SNPdb Accession IDs |
|----------------------|----------------|-----------------|-------------------------|---------------------------------|-------------------|--------------------------|
| SNP_P3_17311_4187748 | NC_021161.1    | Ca_kabuli_chr02 | 4187748                 | TT                              | AA                | 1945900306               |
| SNP_P3_17312_4187799 | NC_021161.1    | Ca_kabuli_chr02 | 4187799                 | TT                              | CC                | 1945900308               |
| SNP_P3_17313_4187840 | NC_021161.1    | Ca_kabuli_chr02 | 4187840                 | GG                              | AA                | 1945900309               |
| SNP_P3_17314_4191381 | NC_021161.1    | Ca_kabuli_chr02 | 4191381                 | CC                              | TT                | 1945900311               |
| SNP_P3_17315_4191385 | NC_021161.1    | Ca_kabuli_chr02 | 4191385                 | AA                              | CC                | 1945900313               |
| SNP_P3_17316_4192148 | NC_021161.1    | Ca_kabuli_chr02 | 4192148                 | AA                              | GG                | 1945900315               |
| SNP_P3_17317_4192171 | NC_021161.1    | Ca_kabuli_chr02 | 4192171                 | CC                              | TT                | 1945900316               |
| SNP_P3_17318_4192240 | NC_021161.1    | Ca_kabuli_chr02 | 4192240                 | AA                              | GG                | 1945900318               |
| SNP_P3_17319_4192590 | NC_021161.1    | Ca_kabuli_chr02 | 4192590                 | GG                              | AA                | 1945900320               |
| SNP_P3_17320_4192625 | NC_021161.1    | Ca_kabuli_chr02 | 4192625                 | CC                              | AA                | 1945900322               |
| SNP_P3_17321_4192693 | NC_021161.1    | Ca_kabuli_chr02 | 4192693                 | AA                              | CC                | 1945900323               |
| SNP_P3_17323_4199521 | NC_021161.1    | Ca_kabuli_chr02 | 4199521                 | TT                              | GG                | 1945900325               |
| SNP_P3_17324_4239436 | NC_021161.1    | Ca_kabuli_chr02 | 4239436                 | GG                              | TT                | 1945900327               |
| SNP_P3_17325_4242635 | NC_021161.1    | Ca_kabuli_chr02 | 4242635                 | AA                              | GG                | 1945900329               |
| SNP_P3_17326_4242923 | NC_021161.1    | Ca_kabuli_chr02 | 4242923                 | TT                              | GG                | 1945900331               |
| SNP_P3_17327_4242962 | NC_021161.1    | Ca_kabuli_chr02 | 4242962                 | GG                              | AA                | 1945900332               |
| SNP_P3_17328_4242997 | NC_021161.1    | Ca_kabuli_chr02 | 4242997                 | CC                              | TT                | 1945900334               |
| SNP_P3_17329_4243037 | NC_021161.1    | Ca_kabuli_chr02 | 4243037                 | GG                              | TT                | 1945900336               |
| SNP_P3_17330_4243038 | NC_021161.1    | Ca_kabuli_chr02 | 4243038                 | AA                              | GG                | 1945900338               |
| SNP_P3_17331_4243057 | NC_021161.1    | Ca_kabuli_chr02 | 4243057                 | GG                              | TT                | 1945900339               |
| SNP_P3_17332_4253384 | NC_021161.1    | Ca_kabuli_chr02 | 4253384                 | TT                              | AA                | 1945900341               |
| SNP_P3_17335_4277755 | NC_021161.1    | Ca_kabuli_chr02 | 4277755                 | GG                              | TT                | 1945900343               |
| SNP_P3_17336_4277777 | NC_021161.1    | Ca_kabuli_chr02 | 4277777                 | TT                              | GG                | 1945900345               |
| SNP_P3_17337_4277948 | NC_021161.1    | Ca_kabuli_chr02 | 4277948                 | GG                              | AA                | 1945900346               |
| SNP_P3_17338_4278158 | NC_021161.1    | Ca_kabuli_chr02 | 4278158                 | GG                              | TT                | 1945900348               |
| SNP_P3_17339_4278175 | NC_021161.1    | Ca_kabuli_chr02 | 4278175                 | TT                              | CC                | 1945900350               |
| SNP_P3_17340_4278192 | NC_021161.1    | Ca_kabuli_chr02 | 4278192                 | AA                              | GG                | 1945900352               |
| SNP_P3_17342_4285779 | NC_021161.1    | Ca_kabuli_chr02 | 4285779                 | CC                              | TT                | 1945900353               |
| SNP_P3_17343_4286165 | NC_021161.1    | Ca_kabuli_chr02 | 4286165                 | AA                              | CC                | 1945900355               |
| SNP_P3_17344_4286185 | NC_021161.1    | Ca_kabuli_chr02 | 4286185                 | GG                              | TT                | 1945900357               |
| SNP_P3_17345_4294997 | NC_021161.1    | Ca_kabuli_chr02 | 4294997                 | AA                              | CC                | 1945900359               |
| SNP_P3_17346_4297083 | NC_021161.1    | Ca_kabuli_chr02 | 4297083                 | TT                              | CC                | 1945900360               |
| SNP_P3_17347_4297410 | NC_021161.1    | Ca_kabuli_chr02 | 4297410                 | GG                              | TT                | 1945900362               |
| SNP_P3_17348_4305079 | NC_021161.1    | Ca_kabuli_chr02 | 4305079                 | CC                              | TT                | 1945900364               |
| SNP_P3_17349_4314906 | NC_021161.1    | Ca_kabuli_chr02 | 4314906                 | CC                              | AA                | 1945900366               |
| SNP_P3_17350_4342027 | NC_021161.1    | Ca_kabuli_chr02 | 4342027                 | GG                              | CC                | 1945900368               |
| SNP_P3_17351_4342031 | NC_021161.1    | Ca_kabuli_chr02 | 4342031                 | CC                              | TT                | 1945900369               |
| SNP_P3_17352_4342055 | NC_021161.1    | Ca_kabuli_chr02 | 4342055                 | CC                              | TT                | 1945900371               |
| SNP_P3_17353_4345032 | NC_021161.1    | Ca_kabuli_chr02 | 4345032                 | TT                              | CC                | 1945900373               |
| SNP_P3_17354_4345068 | NC_021161.1    | Ca_kabuli_chr02 | 4345068                 | TT                              | CC                | 1945900375               |
| SNP_P3_17356_4353937 | NC_021161.1    | Ca_kabuli_chr02 | 4353937                 | AA                              | GG                | 1945900376               |
| SNP_P3_17358_4380708 | NC_021161.1    | Ca_kabuli_chr02 | 4380708                 | CC                              | TT                | 1945900378               |

| SNPs IDs             | Chromosome IDs | Chromosomes     | Physical positions (bp) | CDC Frontier (Reference genome) | (Pusa 256 & HPNB) | NCBI SNPdb Accession IDs |
|----------------------|----------------|-----------------|-------------------------|---------------------------------|-------------------|--------------------------|
| SNP_P3_17360_4449356 | NC_021161.1    | Ca_kabuli_chr02 | 4449356                 | GG                              | AA                | 1945900380               |
| SNP_P3_17361_4450971 | NC_021161.1    | Ca_kabuli_chr02 | 4450971                 | AA                              | TT                | 1945900382               |
| SNP_P3_17362_4450985 | NC_021161.1    | Ca_kabuli_chr02 | 4450985                 | AA                              | GG                | 1945900383               |
| SNP_P3_17363_4454455 | NC_021161.1    | Ca_kabuli_chr02 | 4454455                 | TT                              | GG                | 1945900385               |
| SNP_P3_17365_4479881 | NC_021161.1    | Ca_kabuli_chr02 | 4479881                 | AA                              | GG                | 1945900387               |
| SNP_P3_17366_4479946 | NC_021161.1    | Ca_kabuli_chr02 | 4479946                 | GG                              | CC                | 1945900389               |
| SNP_P3_17367_4480107 | NC_021161.1    | Ca_kabuli_chr02 | 4480107                 | GG                              | CC                | 1945900391               |
| SNP_P3_17368_4480773 | NC_021161.1    | Ca_kabuli_chr02 | 4480773                 | CC                              | TT                | 1945900392               |
| SNP_P3_17369_4493301 | NC_021161.1    | Ca_kabuli_chr02 | 4493301                 | AA                              | GG                | 1945900394               |
| SNP_P3_17370_4493585 | NC_021161.1    | Ca_kabuli_chr02 | 4493585                 | GG                              | AA                | 1945900396               |
| SNP_P3_17373_4517608 | NC_021161.1    | Ca_kabuli_chr02 | 4517608                 | TT                              | CC                | 1945900398               |
| SNP_P3_17374_4521581 | NC_021161.1    | Ca_kabuli_chr02 | 4521581                 | CC                              | GG                | 1945900400               |
| SNP_P3_17375_4539182 | NC_021161.1    | Ca_kabuli_chr02 | 4539182                 | TT                              | CC                | 1945900401               |
| SNP_P3_17377_4539547 | NC_021161.1    | Ca_kabuli_chr02 | 4539547                 | CC                              | GG                | 1945900403               |
| SNP_P3_17378_4542229 | NC_021161.1    | Ca_kabuli_chr02 | 4542229                 | AA                              | GG                | 1945900405               |
| SNP_P3_17379_4542620 | NC_021161.1    | Ca_kabuli_chr02 | 4542620                 | AA                              | GG                | 1945900407               |
| SNP_P3_17382_4549766 | NC_021161.1    | Ca_kabuli_chr02 | 4549766                 | AA                              | CC                | 1945900409               |
| SNP_P3_17383_4549770 | NC_021161.1    | Ca_kabuli_chr02 | 4549770                 | GG                              | TT                | 1945900410               |
| SNP_P3_17384_4551277 | NC_021161.1    | Ca_kabuli_chr02 | 4551277                 | TT                              | AA                | 1945900412               |
| SNP_P3_17385_4551279 | NC_021161.1    | Ca_kabuli_chr02 | 4551279                 | TT                              | GG                | 1945900414               |
| SNP_P3_17386_4557141 | NC_021161.1    | Ca_kabuli_chr02 | 4557141                 | CC                              | TT                | 1945900416               |
| SNP_P3_17387_4557167 | NC_021161.1    | Ca_kabuli_chr02 | 4557167                 | AA                              | TT                | 1945900417               |
| SNP_P3_17388_4557347 | NC_021161.1    | Ca_kabuli_chr02 | 4557347                 | CC                              | TT                | 1945900419               |
| SNP_P3_17389_4557370 | NC_021161.1    | Ca_kabuli_chr02 | 4557370                 | CC                              | TT                | 1945900421               |
| SNP_P3_17390_4557481 | NC_021161.1    | Ca_kabuli_chr02 | 4557481                 | TT                              | CC                | 1945900423               |
| SNP_P3_17391_4557484 | NC_021161.1    | Ca_kabuli_chr02 | 4557484                 | TT                              | GG                | 1945900425               |
| SNP_P3_17392_4572796 | NC_021161.1    | Ca_kabuli_chr02 | 4572796                 | GG                              | CC                | 1945900426               |
| SNP_P3_17393_4590184 | NC_021161.1    | Ca_kabuli_chr02 | 4590184                 | CC                              | TT                | 1945900428               |
| SNP_P3_17394_4590188 | NC_021161.1    | Ca_kabuli_chr02 | 4590188                 | CC                              | TT                | 1945900430               |
| SNP_P3_17395_4594128 | NC_021161.1    | Ca_kabuli_chr02 | 4594128                 | CC                              | TT                | 1945900432               |
| SNP_P3_17397_4620728 | NC_021161.1    | Ca_kabuli_chr02 | 4620728                 | GG                              | AA                | 1945900433               |
| SNP_P3_17398_4620809 | NC_021161.1    | Ca_kabuli_chr02 | 4620809                 | AA                              | TT                | 1945900435               |
| SNP_P3_17399_4621147 | NC_021161.1    | Ca_kabuli_chr02 | 4621147                 | TT                              | CC                | 1945900437               |
| SNP_P3_17402_4655670 | NC_021161.1    | Ca_kabuli_chr02 | 4655670                 | TT                              | CC                | 1945900439               |
| SNP_P3_17403_4664278 | NC_021161.1    | Ca_kabuli_chr02 | 4664278                 | GG                              | AA                | 1945900441               |
| SNP_P3_17404_4677963 | NC_021161.1    | Ca_kabuli_chr02 | 4677963                 | AA                              | GG                | 1945900442               |
| SNP_P3_17405_4678076 | NC_021161.1    | Ca_kabuli_chr02 | 4678076                 | AA                              | GG                | 1945900444               |
| SNP_P3_17406_4678087 | NC_021161.1    | Ca_kabuli_chr02 | 4678087                 | AA                              | GG                | 1945900446               |
| SNP_P3_17407_4678099 | NC_021161.1    | Ca_kabuli_chr02 | 4678099                 | AA                              | GG                | 1945900448               |
| SNP_P3_17408_4678238 | NC_021161.1    | Ca_kabuli_chr02 | 4678238                 | GG                              | AA                | 1945900450               |
| SNP_P3_17409_4678270 | NC_021161.1    | Ca_kabuli_chr02 | 4678270                 | CC                              | TT                | 1945900451               |
| SNP_P3_17410_4678358 | NC_021161.1    | Ca_kabuli_chr02 | 4678358                 | CC                              | TT                | 1945900453               |

| SNPs IDs             | Chromosome IDs | Chromosomes     | Physical positions (bp) | CDC Frontier (Reference genome) | (Pusa 256 & HPNB) | NCBI SNPdb Accession IDs |
|----------------------|----------------|-----------------|-------------------------|---------------------------------|-------------------|--------------------------|
| SNP_P3_17411_4714993 | NC_021161.1    | Ca_kabuli_chr02 | 4714993                 | CC                              | AA                | 1945900455               |
| SNP_P3_17412_4728492 | NC_021161.1    | Ca_kabuli_chr02 | 4728492                 | AA                              | GG                | 1945900457               |
| SNP_P3_17413_4728494 | NC_021161.1    | Ca_kabuli_chr02 | 4728494                 | AA                              | TT                | 1945900458               |
| SNP_P3_17415_4731263 | NC_021161.1    | Ca_kabuli_chr02 | 4731263                 | TT                              | AA                | 1945900460               |
| SNP_P3_17416_4731266 | NC_021161.1    | Ca_kabuli_chr02 | 4731266                 | TT                              | CC                | 1945900462               |
| SNP_P3_17417_4731884 | NC_021161.1    | Ca_kabuli_chr02 | 4731884                 | AA                              | CC                | 1945900464               |
| SNP_P3_17418_4747812 | NC_021161.1    | Ca_kabuli_chr02 | 4747812                 | AA                              | TT                | 1945900466               |
| SNP_P3_17419_4750198 | NC_021161.1    | Ca_kabuli_chr02 | 4750198                 | CC                              | GG                | 1945900467               |
| SNP_P3_17420_4763789 | NC_021161.1    | Ca_kabuli_chr02 | 4763789                 | GG                              | TT                | 1945900469               |
| SNP_P3_17421_4764046 | NC_021161.1    | Ca_kabuli_chr02 | 4764046                 | AA                              | CC                | 1945900471               |
| SNP_P3_17422_4766082 | NC_021161.1    | Ca_kabuli_chr02 | 4766082                 | CC                              | TT                | 1945900473               |
| SNP_P3_17423_4766566 | NC_021161.1    | Ca_kabuli_chr02 | 4766566                 | TT                              | AA                | 1945900474               |
| SNP_P3_17424_4767130 | NC_021161.1    | Ca_kabuli_chr02 | 4767130                 | CC                              | TT                | 1945900476               |
| SNP_P3_17425_4767165 | NC_021161.1    | Ca_kabuli_chr02 | 4767165                 | AA                              | CC                | 1945900478               |
| SNP_P3_17426_4779477 | NC_021161.1    | Ca_kabuli_chr02 | 4779477                 | AA                              | GG                | 1945900480               |
| SNP_P3_17427_4812595 | NC_021161.1    | Ca_kabuli_chr02 | 4812595                 | CC                              | TT                | 1945900482               |
| SNP_P3_17428_4812788 | NC_021161.1    | Ca_kabuli_chr02 | 4812788                 | AA                              | GG                | 1945900483               |
| SNP_P3_17429_4812851 | NC_021161.1    | Ca_kabuli_chr02 | 4812851                 | CC                              | TT                | 1945900485               |
| SNP_P3_17431_4812911 | NC_021161.1    | Ca_kabuli_chr02 | 4812911                 | TT                              | CC                | 1945900487               |
| SNP_P3_17432_4812950 | NC_021161.1    | Ca_kabuli_chr02 | 4812950                 | GG                              | TT                | 1945900489               |
| SNP_P3_17433_4812979 | NC_021161.1    | Ca_kabuli_chr02 | 4812979                 | GG                              | AA                | 1945900491               |
| SNP_P3_17434_4813128 | NC_021161.1    | Ca_kabuli_chr02 | 4813128                 | AA                              | GG                | 1945900492               |
| SNP_P3_17435_4813151 | NC_021161.1    | Ca_kabuli_chr02 | 4813151                 | AA                              | TT                | 1945900494               |
| SNP_P3_17436_4813161 | NC_021161.1    | Ca_kabuli_chr02 | 4813161                 | GG                              | AA                | 1945900496               |
| SNP_P3_17437_4813168 | NC_021161.1    | Ca_kabuli_chr02 | 4813168                 | CC                              | TT                | 1945900498               |
| SNP_P3_17438_4813172 | NC_021161.1    | Ca_kabuli_chr02 | 4813172                 | AA                              | GG                | 1945900500               |
| SNP_P3_17439_4815473 | NC_021161.1    | Ca_kabuli_chr02 | 4815473                 | TT                              | GG                | 1945900501               |
| SNP_P3_17440_4815475 | NC_021161.1    | Ca_kabuli_chr02 | 4815475                 | AA                              | CC                | 1945900503               |
| SNP_P3_17441_4829772 | NC_021161.1    | Ca_kabuli_chr02 | 4829772                 | TT                              | CC                | 1945900505               |
| SNP_P3_17443_4890866 | NC_021161.1    | Ca_kabuli_chr02 | 4890866                 | GG                              | TT                | 1945900507               |
| SNP_P3_17444_4890869 | NC_021161.1    | Ca_kabuli_chr02 | 4890869                 | TT                              | GG                | 1945900509               |
| SNP_P3_17445_4890904 | NC_021161.1    | Ca_kabuli_chr02 | 4890904                 | TT                              | GG                | 1945900510               |
| SNP_P3_17446_4890940 | NC_021161.1    | Ca_kabuli_chr02 | 4890940                 | AA                              | TT                | 1945900512               |
| SNP_P3_17449_4891402 | NC_021161.1    | Ca_kabuli_chr02 | 4891402                 | GG                              | AA                | 1945900514               |
| SNP_P3_17450_4891487 | NC_021161.1    | Ca_kabuli_chr02 | 4891487                 | AA                              | GG                | 1945900516               |
| SNP_P3_17451_4891755 | NC_021161.1    | Ca_kabuli_chr02 | 4891755                 | GG                              | AA                | 1945900518               |
| SNP_P3_17452_4892429 | NC_021161.1    | Ca_kabuli_chr02 | 4892429                 | CC                              | TT                | 1945900520               |
| SNP_P3_17453_4892489 | NC_021161.1    | Ca_kabuli_chr02 | 4892489                 | AA                              | CC                | 1945900521               |
| SNP_P3_17454_4892541 | NC_021161.1    | Ca_kabuli_chr02 | 4892541                 | TT                              | AA                | 1945900523               |
| SNP_P3_17455_4892639 | NC_021161.1    | Ca_kabuli_chr02 | 4892639                 | GG                              | AA                | 1945900525               |
| SNP_P3_17457_4892894 | NC_021161.1    | Ca_kabuli_chr02 | 4892894                 | AA                              | TT                | 1945900527               |
| SNP_P3_17458_4893002 | NC_021161.1    | Ca_kabuli_chr02 | 4893002                 | TT                              | GG                | 1945900528               |

| SNPs IDs             | Chromosome IDs | Chromosomes     | Physical positions (bp) | CDC Frontier (Reference genome) | (Pusa 256 & HPNB) | NCBI SNPdb Accession IDs |
|----------------------|----------------|-----------------|-------------------------|---------------------------------|-------------------|--------------------------|
| SNP_P3_17459_4893011 | NC_021161.1    | Ca_kabuli_chr02 | 4893011                 | CC                              | TT                | 1945900530               |
| SNP_P3_17460_4893058 | NC_021161.1    | Ca_kabuli_chr02 | 4893058                 | CC                              | TT                | 1945900532               |
| SNP_P3_17461_4893356 | NC_021161.1    | Ca_kabuli_chr02 | 4893356                 | AA                              | GG                | 1945900534               |
| SNP_P3_17462_4893522 | NC_021161.1    | Ca_kabuli_chr02 | 4893522                 | CC                              | AA                | 1945900535               |
| SNP_P3_17463_4893783 | NC_021161.1    | Ca_kabuli_chr02 | 4893783                 | GG                              | AA                | 1945900537               |
| SNP_P3_17464_4893902 | NC_021161.1    | Ca_kabuli_chr02 | 4893902                 | CC                              | TT                | 1945900539               |
| SNP_P3_17465_4893941 | NC_021161.1    | Ca_kabuli_chr02 | 4893941                 | AA                              | GG                | 1945900541               |
| SNP_P3_17466_4894008 | NC_021161.1    | Ca_kabuli_chr02 | 4894008                 | AA                              | TT                | 1945900543               |
| SNP_P3_17467_4894049 | NC_021161.1    | Ca_kabuli_chr02 | 4894049                 | GG                              | AA                | 1945900544               |
| SNP_P3_17468_4894056 | NC_021161.1    | Ca_kabuli_chr02 | 4894056                 | GG                              | AA                | 1945900546               |
| SNP_P3_17470_4894188 | NC_021161.1    | Ca_kabuli_chr02 | 4894188                 | CC                              | TT                | 1945900548               |
| SNP_P3_17471_4894250 | NC_021161.1    | Ca_kabuli_chr02 | 4894250                 | CC                              | AA                | 1945900550               |
| SNP_P3_17472_4894300 | NC_021161.1    | Ca_kabuli_chr02 | 4894300                 | TT                              | GG                | 1945900552               |
| SNP_P3_17473_4894517 | NC_021161.1    | Ca_kabuli_chr02 | 4894517                 | TT                              | GG                | 1945900553               |
| SNP_P3_17474_4894639 | NC_021161.1    | Ca_kabuli_chr02 | 4894639                 | GG                              | TT                | 1945900555               |
| SNP_P3_17475_4894701 | NC_021161.1    | Ca_kabuli_chr02 | 4894701                 | CC                              | AA                | 1945900557               |
| SNP_P3_17478_4895096 | NC_021161.1    | Ca_kabuli_chr02 | 4895096                 | TT                              | GG                | 1945900559               |
| SNP_P3_17479_4895214 | NC_021161.1    | Ca_kabuli_chr02 | 4895214                 | TT                              | CC                | 1945900560               |
| SNP_P3_17480_4895307 | NC_021161.1    | Ca_kabuli_chr02 | 4895307                 | TT                              | AA                | 1945900562               |
| SNP_P3_17481_4895314 | NC_021161.1    | Ca_kabuli_chr02 | 4895314                 | GG                              | CC                | 1945900564               |
| SNP_P3_17482_4895463 | NC_021161.1    | Ca_kabuli_chr02 | 4895463                 | CC                              | TT                | 1945900566               |
| SNP_P3_17483_4895476 | NC_021161.1    | Ca_kabuli_chr02 | 4895476                 | CC                              | AA                | 1945900568               |
| SNP_P3_17484_4895477 | NC_021161.1    | Ca_kabuli_chr02 | 4895477                 | GG                              | AA                | 1945900569               |
| SNP_P3_17485_4895494 | NC_021161.1    | Ca_kabuli_chr02 | 4895494                 | AA                              | GG                | 1945900571               |
| SNP_P3_17486_4895497 | NC_021161.1    | Ca_kabuli_chr02 | 4895497                 | CC                              | TT                | 1945900573               |
| SNP_P3_17487_4895508 | NC_021161.1    | Ca_kabuli_chr02 | 4895508                 | GG                              | AA                | 1945900575               |
| SNP_P3_17488_4895575 | NC_021161.1    | Ca_kabuli_chr02 | 4895575                 | CC                              | TT                | 1945900577               |
| SNP_P3_17489_4895580 | NC_021161.1    | Ca_kabuli_chr02 | 4895580                 | GG                              | AA                | 1945900578               |
| SNP_P3_17490_4895614 | NC_021161.1    | Ca_kabuli_chr02 | 4895614                 | TT                              | CC                | 1945900580               |
| SNP_P3_17491_4895622 | NC_021161.1    | Ca_kabuli_chr02 | 4895622                 | TT                              | CC                | 1945900582               |
| SNP_P3_17492_4895627 | NC_021161.1    | Ca_kabuli_chr02 | 4895627                 | AA                              | GG                | 1945900584               |
| SNP_P3_17493_4895718 | NC_021161.1    | Ca_kabuli_chr02 | 4895718                 | GG                              | AA                | 1945900585               |
| SNP_P3_17494_4895728 | NC_021161.1    | Ca_kabuli_chr02 | 4895728                 | AA                              | GG                | 1945900587               |
| SNP_P3_17496_4919126 | NC_021161.1    | Ca_kabuli_chr02 | 4919126                 | CC                              | TT                | 1945900589               |
| SNP_P3_17497_4919161 | NC_021161.1    | Ca_kabuli_chr02 | 4919161                 | CC                              | AA                | 1945900591               |
| SNP_P3_17498_4919162 | NC_021161.1    | Ca_kabuli_chr02 | 4919162                 | GG                              | AA                | 1945900593               |
| SNP_P3_17499_4919511 | NC_021161.1    | Ca_kabuli_chr02 | 4919511                 | TT                              | CC                | 1945900594               |
| SNP_P3_17501_4964352 | NC_021161.1    | Ca_kabuli_chr02 | 4964352                 | CC                              | TT                | 1945900596               |
| SNP_P3_17502_4969523 | NC_021161.1    | Ca_kabuli_chr02 | 4969523                 | CC                              | AA                | 1945900598               |
| SNP_P3_17503_4974322 | NC_021161.1    | Ca_kabuli_chr02 | 4974322                 | AA                              | GG                | 1945900600               |
| SNP_P3_17504_5003733 | NC_021161.1    | Ca_kabuli_chr02 | 5003733                 | AA                              | CC                | 1945900602               |
| SNP_P3_17505_5003734 | NC_021161.1    | Ca_kabuli_chr02 | 5003734                 | AA                              | CC                | 1945900603               |

| SNPs IDs             | Chromosome IDs | Chromosomes     | Physical positions (bp) | CDC Frontier (Reference genome) | (Pusa 256 & HPNB) | NCBI SNPdb Accession IDs |
|----------------------|----------------|-----------------|-------------------------|---------------------------------|-------------------|--------------------------|
| SNP_P3_17506_5019641 | NC_021161.1    | Ca_kabuli_chr02 | 5019641                 | GG                              | AA                | 1945900605               |
| SNP_P3_17507_5019657 | NC_021161.1    | Ca_kabuli_chr02 | 5019657                 | AA                              | GG                | 1945900607               |
| SNP_P3_17508_5019661 | NC_021161.1    | Ca_kabuli_chr02 | 5019661                 | GG                              | AA                | 1945900609               |
| SNP_P3_17509_5054733 | NC_021161.1    | Ca_kabuli_chr02 | 5054733                 | GG                              | AA                | 1945900611               |
| SNP_P3_17510_5074185 | NC_021161.1    | Ca_kabuli_chr02 | 5074185                 | AA                              | TT                | 1945900612               |
| SNP_P3_17512_5107850 | NC_021161.1    | Ca_kabuli_chr02 | 5107850                 | TT                              | CC                | 1945900614               |
| SNP_P3_17514_5111072 | NC_021161.1    | Ca_kabuli_chr02 | 5111072                 | GG                              | AA                | 1945900616               |
| SNP_P3_17515_5111082 | NC_021161.1    | Ca_kabuli_chr02 | 5111082                 | GG                              | TT                | 1945900618               |
| SNP_P3_17516_5112614 | NC_021161.1    | Ca_kabuli_chr02 | 5112614                 | GG                              | AA                | 1945900619               |
| SNP_P3_17517_5112758 | NC_021161.1    | Ca_kabuli_chr02 | 5112758                 | AA                              | GG                | 1945900621               |
| SNP_P3_17518_5113099 | NC_021161.1    | Ca_kabuli_chr02 | 5113099                 | GG                              | AA                | 1945900623               |
| SNP_P3_17519_5135328 | NC_021161.1    | Ca_kabuli_chr02 | 5135328                 | AA                              | CC                | 1945900625               |
| SNP_P3_17520_5137995 | NC_021161.1    | Ca_kabuli_chr02 | 5137995                 | AA                              | TT                | 1945900627               |
| SNP_P3_17521_5137996 | NC_021161.1    | Ca_kabuli_chr02 | 5137996                 | TT                              | CC                | 1945900628               |
| SNP_P3_17523_5139400 | NC_021161.1    | Ca_kabuli_chr02 | 5139400                 | AA                              | TT                | 1945900630               |
| SNP_P3_17524_5147970 | NC_021161.1    | Ca_kabuli_chr02 | 5147970                 | CC                              | TT                | 1945900632               |
| SNP_P3_17525_5157175 | NC_021161.1    | Ca_kabuli_chr02 | 5157175                 | CC                              | TT                | 1945900634               |
| SNP_P3_17526_5158306 | NC_021161.1    | Ca_kabuli_chr02 | 5158306                 | AA                              | GG                | 1945900635               |
| SNP_P3_17527_5158316 | NC_021161.1    | Ca_kabuli_chr02 | 5158316                 | AA                              | GG                | 1945900637               |
| SNP_P3_17528_5158717 | NC_021161.1    | Ca_kabuli_chr02 | 5158717                 | AA                              | GG                | 1945900639               |
| SNP_P3_17529_5225266 | NC_021161.1    | Ca_kabuli_chr02 | 5225266                 | AA                              | CC                | 1945900641               |
| SNP_P3_17530_5233519 | NC_021161.1    | Ca_kabuli_chr02 | 5233519                 | TT                              | GG                | 1945900643               |
| SNP_P3_17531_5233520 | NC_021161.1    | Ca_kabuli_chr02 | 5233520                 | TT                              | CC                | 1945900644               |
| SNP_P3_17532_5234111 | NC_021161.1    | Ca_kabuli_chr02 | 5234111                 | AA                              | TT                | 1945900646               |
| SNP_P3_17533_5234112 | NC_021161.1    | Ca_kabuli_chr02 | 5234112                 | AA                              | TT                | 1945900648               |
| SNP_P3_17534_5234122 | NC_021161.1    | Ca_kabuli_chr02 | 5234122                 | AA                              | TT                | 1945900650               |
| SNP_P3_17535_5238540 | NC_021161.1    | Ca_kabuli_chr02 | 5238540                 | GG                              | AA                | 1945900652               |
| SNP_P3_17536_5312249 | NC_021161.1    | Ca_kabuli_chr02 | 5312249                 | AA                              | CC                | 1945900653               |
| SNP_P3_17537_5315852 | NC_021161.1    | Ca_kabuli_chr02 | 5315852                 | GG                              | AA                | 1945900655               |
| SNP_P3_17538_5315875 | NC_021161.1    | Ca_kabuli_chr02 | 5315875                 | CC                              | TT                | 1945900657               |
| SNP_P3_17539_5331008 | NC_021161.1    | Ca_kabuli_chr02 | 5331008                 | AA                              | GG                | 1945900659               |
| SNP_P3_17540_5331044 | NC_021161.1    | Ca_kabuli_chr02 | 5331044                 | TT                              | CC                | 1945900660               |
| SNP_P3_17541_5331410 | NC_021161.1    | Ca_kabuli_chr02 | 5331410                 | TT                              | CC                | 1945900662               |
| SNP_P3_17542_5336771 | NC_021161.1    | Ca_kabuli_chr02 | 5336771                 | GG                              | AA                | 1945900664               |
| SNP_P3_17543_5346798 | NC_021161.1    | Ca_kabuli_chr02 | 5346798                 | CC                              | TT                | 1945900666               |
| SNP_P3_17544_5347609 | NC_021161.1    | Ca_kabuli_chr02 | 5347609                 | GG                              | AA                | 1945900667               |
| SNP_P3_17545_5347610 | NC_021161.1    | Ca_kabuli_chr02 | 5347610                 | TT                              | CC                | 1945900669               |
| SNP_P3_17546_5347642 | NC_021161.1    | Ca_kabuli_chr02 | 5347642                 | AA                              | GG                | 1945900671               |
| SNP_P3_17547_5347931 | NC_021161.1    | Ca_kabuli_chr02 | 5347931                 | CC                              | TT                | 1945900673               |
| SNP_P3_17548_5347988 | NC_021161.1    | Ca_kabuli_chr02 | 5347988                 | GG                              | AA                | 1945900674               |
| SNP_P3_17549_5347997 | NC_021161.1    | Ca_kabuli_chr02 | 5347997                 | TT                              | AA                | 1945900676               |
| SNP_P3_17550_5406922 | NC_021161.1    | Ca_kabuli_chr02 | 5406922                 | TT                              | GG                | 1945900678               |



| SNPs IDs             | Chromosome IDs | Chromosomes     | Physical positions (bp) | CDC Frontier (Reference genome) | (Pusa 256 & HPNB) | NCBI SNPdb Accession IDs |
|----------------------|----------------|-----------------|-------------------------|---------------------------------|-------------------|--------------------------|
| SNP_P3_17551_5408008 | NC_021161.1    | Ca_kabuli_chr02 | 5408008                 | TT                              | CC                | 1945900680               |
| SNP_P3_17552_5419493 | NC_021161.1    | Ca_kabuli_chr02 | 5419493                 | CC                              | TT                | 1945900682               |
| SNP_P3_17553_5419532 | NC_021161.1    | Ca_kabuli_chr02 | 5419532                 | AA                              | TT                | 1945900683               |
| SNP_P3_17554_5419573 | NC_021161.1    | Ca_kabuli_chr02 | 5419573                 | CC                              | AA                | 1945900685               |
| SNP_P3_17555_5425471 | NC_021161.1    | Ca_kabuli_chr02 | 5425471                 | AA                              | CC                | 1945900687               |
| SNP_P3_17556_5467531 | NC_021161.1    | Ca_kabuli_chr02 | 5467531                 | GG                              | AA                | 1945900689               |
| SNP_P3_17557_5476879 | NC_021161.1    | Ca_kabuli_chr02 | 5476879                 | GG                              | AA                | 1945900690               |
| SNP_P3_17558_5519341 | NC_021161.1    | Ca_kabuli_chr02 | 5519341                 | CC                              | TT                | 1945900692               |
| SNP_P3_17559_5519354 | NC_021161.1    | Ca_kabuli_chr02 | 5519354                 | GG                              | TT                | 1945900694               |
| SNP_P3_17560_5519363 | NC_021161.1    | Ca_kabuli_chr02 | 5519363                 | CC                              | TT                | 1945900696               |
| SNP_P3_17561_5522691 | NC_021161.1    | Ca_kabuli_chr02 | 5522691                 | AA                              | GG                | 1945900697               |
| SNP_P3_17562_5522756 | NC_021161.1    | Ca_kabuli_chr02 | 5522756                 | GG                              | AA                | 1945900699               |
| SNP_P3_17563_5522765 | NC_021161.1    | Ca_kabuli_chr02 | 5522765                 | GG                              | AA                | 1945900701               |
| SNP_P3_17564_5522912 | NC_021161.1    | Ca_kabuli_chr02 | 5522912                 | AA                              | GG                | 1945900703               |
| SNP_P3_17565_5522930 | NC_021161.1    | Ca_kabuli_chr02 | 5522930                 | GG                              | TT                | 1945900705               |
| SNP_P3_17566_5522950 | NC_021161.1    | Ca_kabuli_chr02 | 5522950                 | AA                              | GG                | 1945900706               |
| SNP_P3_17567_5522954 | NC_021161.1    | Ca_kabuli_chr02 | 5522954                 | AA                              | CC                | 1945900708               |
| SNP_P3_17568_5523063 | NC_021161.1    | Ca_kabuli_chr02 | 5523063                 | TT                              | GG                | 1945900710               |
| SNP_P3_17569_5524037 | NC_021161.1    | Ca_kabuli_chr02 | 5524037                 | AA                              | GG                | 1945900712               |
| SNP_P3_17570_5524339 | NC_021161.1    | Ca_kabuli_chr02 | 5524339                 | TT                              | GG                | 1945900713               |
| SNP_P3_17571_5524431 | NC_021161.1    | Ca_kabuli_chr02 | 5524431                 | AA                              | GG                | 1945900715               |
| SNP_P3_17572_5524436 | NC_021161.1    | Ca_kabuli_chr02 | 5524436                 | GG                              | AA                | 1945900717               |
| SNP_P3_17573_5524451 | NC_021161.1    | Ca_kabuli_chr02 | 5524451                 | CC                              | TT                | 1945900719               |
| SNP_P3_17574_5524462 | NC_021161.1    | Ca_kabuli_chr02 | 5524462                 | AA                              | GG                | 1945900721               |
| SNP_P3_17575_5524465 | NC_021161.1    | Ca_kabuli_chr02 | 5524465                 | AA                              | TT                | 1945900722               |
| SNP_P3_17576_5524479 | NC_021161.1    | Ca_kabuli_chr02 | 5524479                 | AA                              | CC                | 1945900724               |
| SNP_P3_17577_5524636 | NC_021161.1    | Ca_kabuli_chr02 | 5524636                 | TT                              | AA                | 1945900726               |
| SNP_P3_17578_5524663 | NC_021161.1    | Ca_kabuli_chr02 | 5524663                 | TT                              | CC                | 1945900728               |
| SNP_P3_17579_5524783 | NC_021161.1    | Ca_kabuli_chr02 | 5524783                 | TT                              | AA                | 1945900729               |
| SNP_P3_17580_5526209 | NC_021161.1    | Ca_kabuli_chr02 | 5526209                 | CC                              | TT                | 1945900731               |
| SNP_P3_17581_5531976 | NC_021161.1    | Ca_kabuli_chr02 | 5531976                 | GG                              | AA                | 1945900733               |
| SNP_P3_17582_5551323 | NC_021161.1    | Ca_kabuli_chr02 | 5551323                 | AA                              | CC                | 1945900735               |
| SNP_P3_17584_5566157 | NC_021161.1    | Ca_kabuli_chr02 | 5566157                 | TT                              | CC                | 1945900736               |
| SNP_P3_17585_5566217 | NC_021161.1    | Ca_kabuli_chr02 | 5566217                 | GG                              | AA                | 1945900738               |
| SNP_P3_17586_5566225 | NC_021161.1    | Ca_kabuli_chr02 | 5566225                 | AA                              | CC                | 1945900740               |
| SNP_P3_17587_5566288 | NC_021161.1    | Ca_kabuli_chr02 | 5566288                 | CC                              | TT                | 1945900742               |
| SNP_P3_17589_5579488 | NC_021161.1    | Ca_kabuli_chr02 | 5579488                 | TT                              | CC                | 1945900744               |
| SNP_P3_17590_5579489 | NC_021161.1    | Ca_kabuli_chr02 | 5579489                 | TT                              | GG                | 1945900745               |
| SNP_P3_17591_5583089 | NC_021161.1    | Ca_kabuli_chr02 | 5583089                 | TT                              | GG                | 1945900747               |
| SNP_P3_17593_5620803 | NC_021161.1    | Ca_kabuli_chr02 | 5620803                 | GG                              | TT                | 1945900749               |
| SNP_P3_17594_5620806 | NC_021161.1    | Ca_kabuli_chr02 | 5620806                 | AA                              | TT                | 1945900751               |
| SNP_P3_17596_5669065 | NC_021161.1    | Ca_kabuli_chr02 | 5669065                 | CC                              | TT                | 1945900752               |

| SNPs IDs             | Chromosome IDs | Chromosomes     | Physical positions (bp) | CDC Frontier (Reference genome) | (Pusa 256 & HPNB) | NCBI SNPdb Accession IDs |
|----------------------|----------------|-----------------|-------------------------|---------------------------------|-------------------|--------------------------|
| SNP_P3_17598_5676434 | NC_021161.1    | Ca_kabuli_chr02 | 5676434                 | CC                              | TT                | 1945900754               |
| SNP_P3_17599_5703431 | NC_021161.1    | Ca_kabuli_chr02 | 5703431                 | CC                              | TT                | 1945900756               |
| SNP_P3_17600_5703482 | NC_021161.1    | Ca_kabuli_chr02 | 5703482                 | TT                              | CC                | 1945900758               |
| SNP_P3_17601_5703492 | NC_021161.1    | Ca_kabuli_chr02 | 5703492                 | AA                              | TT                | 1945900759               |
| SNP_P3_17602_5703508 | NC_021161.1    | Ca_kabuli_chr02 | 5703508                 | TT                              | CC                | 1945900761               |
| SNP_P3_17603_5703686 | NC_021161.1    | Ca_kabuli_chr02 | 5703686                 | TT                              | CC                | 1945900763               |
| SNP_P3_17604_5703719 | NC_021161.1    | Ca_kabuli_chr02 | 5703719                 | AA                              | TT                | 1945900765               |
| SNP_P3_17605_5703730 | NC_021161.1    | Ca_kabuli_chr02 | 5703730                 | GG                              | AA                | 1945900766               |
| SNP_P3_17606_5703750 | NC_021161.1    | Ca_kabuli_chr02 | 5703750                 | GG                              | AA                | 1945900768               |
| SNP_P3_17607_5706144 | NC_021161.1    | Ca_kabuli_chr02 | 5706144                 | AA                              | GG                | 1945900770               |
| SNP_P3_17608_5706190 | NC_021161.1    | Ca_kabuli_chr02 | 5706190                 | GG                              | AA                | 1945900772               |
| SNP_P3_17609_5706194 | NC_021161.1    | Ca_kabuli_chr02 | 5706194                 | CC                              | TT                | 1945900773               |
| SNP_P3_17610_5706389 | NC_021161.1    | Ca_kabuli_chr02 | 5706389                 | GG                              | AA                | 1945900775               |
| SNP_P3_17611_5706414 | NC_021161.1    | Ca_kabuli_chr02 | 5706414                 | AA                              | TT                | 1945900777               |
| SNP_P3_17612_5706552 | NC_021161.1    | Ca_kabuli_chr02 | 5706552                 | AA                              | GG                | 1945900779               |
| SNP_P3_17613_5706583 | NC_021161.1    | Ca_kabuli_chr02 | 5706583                 | CC                              | TT                | 1945900780               |
| SNP_P3_17614_5712018 | NC_021161.1    | Ca_kabuli_chr02 | 5712018                 | GG                              | AA                | 1945900782               |
| SNP_P3_17615_5712020 | NC_021161.1    | Ca_kabuli_chr02 | 5712020                 | CC                              | TT                | 1945900784               |
| SNP_P3_17616_5719684 | NC_021161.1    | Ca_kabuli_chr02 | 5719684                 | AA                              | GG                | 1945900786               |
| SNP_P3_17617_5720007 | NC_021161.1    | Ca_kabuli_chr02 | 5720007                 | AA                              | GG                | 1945900787               |
| SNP_P3_17618_5720055 | NC_021161.1    | Ca_kabuli_chr02 | 5720055                 | CC                              | TT                | 1945900789               |
| SNP_P3_17619_5720149 | NC_021161.1    | Ca_kabuli_chr02 | 5720149                 | GG                              | AA                | 1945900791               |
| SNP_P3_17620_5720340 | NC_021161.1    | Ca_kabuli_chr02 | 5720340                 | TT                              | CC                | 1945900793               |
| SNP_P3_17621_5725057 | NC_021161.1    | Ca_kabuli_chr02 | 5725057                 | AA                              | GG                | 1945900794               |
| SNP_P3_17622_5728899 | NC_021161.1    | Ca_kabuli_chr02 | 5728899                 | GG                              | CC                | 1945900796               |
| SNP_P3_17623_5734947 | NC_021161.1    | Ca_kabuli_chr02 | 5734947                 | TT                              | GG                | 1945900798               |
| SNP_P3_17624_5737647 | NC_021161.1    | Ca_kabuli_chr02 | 5737647                 | GG                              | AA                | 1945900800               |
| SNP_P3_17625_5737659 | NC_021161.1    | Ca_kabuli_chr02 | 5737659                 | CC                              | TT                | 1945900802               |
| SNP_P3_17626_5737665 | NC_021161.1    | Ca_kabuli_chr02 | 5737665                 | TT                              | CC                | 1945900803               |
| SNP_P3_17627_5737666 | NC_021161.1    | Ca_kabuli_chr02 | 5737666                 | CC                              | TT                | 1945900805               |
| SNP_P3_17628_5737702 | NC_021161.1    | Ca_kabuli_chr02 | 5737702                 | GG                              | AA                | 1945900807               |
| SNP_P3_17629_5751359 | NC_021161.1    | Ca_kabuli_chr02 | 5751359                 | CC                              | TT                | 1945900809               |
| SNP_P3_17630_5751552 | NC_021161.1    | Ca_kabuli_chr02 | 5751552                 | AA                              | GG                | 1945900810               |
| SNP_P3_17631_5751600 | NC_021161.1    | Ca_kabuli_chr02 | 5751600                 | TT                              | AA                | 1945900812               |
| SNP_P3_17632_5751629 | NC_021161.1    | Ca_kabuli_chr02 | 5751629                 | TT                              | GG                | 1945900814               |
| SNP_P3_17633_5751653 | NC_021161.1    | Ca_kabuli_chr02 | 5751653                 | TT                              | CC                | 1945900816               |
| SNP_P3_17634_5751733 | NC_021161.1    | Ca_kabuli_chr02 | 5751733                 | CC                              | TT                | 1945900817               |
| SNP_P3_17635_5751813 | NC_021161.1    | Ca_kabuli_chr02 | 5751813                 | GG                              | CC                | 1945900819               |
| SNP_P3_17636_5751814 | NC_021161.1    | Ca_kabuli_chr02 | 5751814                 | AA                              | GG                | 1945900821               |
| SNP_P3_17637_5751862 | NC_021161.1    | Ca_kabuli_chr02 | 5751862                 | GG                              | AA                | 1945900823               |
| SNP_P3_17638_5753041 | NC_021161.1    | Ca_kabuli_chr02 | 5753041                 | AA                              | TT                | 1945900824               |
| SNP_P3_17639_5753072 | NC_021161.1    | Ca_kabuli_chr02 | 5753072                 | AA                              | TT                | 1945900826               |

| SNPs IDs             | Chromosome IDs | Chromosomes     | Physical positions (bp) | CDC Frontier (Reference genome) | (Pusa 256 & HPNB) | NCBI SNPdb Accession IDs |
|----------------------|----------------|-----------------|-------------------------|---------------------------------|-------------------|--------------------------|
| SNP_P3_17640_5753111 | NC_021161.1    | Ca_kabuli_chr02 | 5753111                 | TT                              | AA                | 1945900828               |
| SNP_P3_17641_5753113 | NC_021161.1    | Ca_kabuli_chr02 | 5753113                 | GG                              | CC                | 1945900830               |
| SNP_P3_17642_5753177 | NC_021161.1    | Ca_kabuli_chr02 | 5753177                 | AA                              | CC                | 1945900831               |
| SNP_P3_17643_5753197 | NC_021161.1    | Ca_kabuli_chr02 | 5753197                 | CC                              | TT                | 1945900833               |
| SNP_P3_17644_5753212 | NC_021161.1    | Ca_kabuli_chr02 | 5753212                 | TT                              | CC                | 1945900835               |
| SNP_P3_17645_5753292 | NC_021161.1    | Ca_kabuli_chr02 | 5753292                 | TT                              | GG                | 1945900837               |
| SNP_P3_17646_5753309 | NC_021161.1    | Ca_kabuli_chr02 | 5753309                 | GG                              | CC                | 1945900838               |
| SNP_P3_17647_5753476 | NC_021161.1    | Ca_kabuli_chr02 | 5753476                 | CC                              | TT                | 1945900840               |
| SNP_P3_17648_5766091 | NC_021161.1    | Ca_kabuli_chr02 | 5766091                 | TT                              | AA                | 1945900842               |
| SNP_P3_17649_5767688 | NC_021161.1    | Ca_kabuli_chr02 | 5767688                 | CC                              | TT                | 1945900844               |
| SNP_P3_17650_5767704 | NC_021161.1    | Ca_kabuli_chr02 | 5767704                 | CC                              | TT                | 1945900845               |
| SNP_P3_17651_5767711 | NC_021161.1    | Ca_kabuli_chr02 | 5767711                 | AA                              | TT                | 1945900847               |
| SNP_P3_17652_5767803 | NC_021161.1    | Ca_kabuli_chr02 | 5767803                 | AA                              | TT                | 1945900849               |
| SNP_P3_17653_5767823 | NC_021161.1    | Ca_kabuli_chr02 | 5767823                 | GG                              | AA                | 1945900851               |
| SNP_P3_17654_5767843 | NC_021161.1    | Ca_kabuli_chr02 | 5767843                 | TT                              | AA                | 1945900853               |
| SNP_P3_17655_5768066 | NC_021161.1    | Ca_kabuli_chr02 | 5768066                 | TT                              | GG                | 1945900854               |
| SNP_P3_17656_5768122 | NC_021161.1    | Ca_kabuli_chr02 | 5768122                 | TT                              | GG                | 1945900856               |
| SNP_P3_17657_5768727 | NC_021161.1    | Ca_kabuli_chr02 | 5768727                 | TT                              | CC                | 1945900858               |
| SNP_P3_17658_5768730 | NC_021161.1    | Ca_kabuli_chr02 | 5768730                 | AA                              | GG                | 1945900860               |
| SNP_P3_17659_5768761 | NC_021161.1    | Ca_kabuli_chr02 | 5768761                 | GG                              | AA                | 1945900861               |
| SNP_P3_17660_5768805 | NC_021161.1    | Ca_kabuli_chr02 | 5768805                 | TT                              | CC                | 1945900863               |
| SNP_P3_17661_5768826 | NC_021161.1    | Ca_kabuli_chr02 | 5768826                 | CC                              | AA                | 1945900865               |
| SNP_P3_17662_5810819 | NC_021161.1    | Ca_kabuli_chr02 | 5810819                 | GG                              | AA                | 1945900867               |
| SNP_P3_17663_5814768 | NC_021161.1    | Ca_kabuli_chr02 | 5814768                 | GG                              | TT                | 1945900869               |
| SNP_P3_17665_5928311 | NC_021161.1    | Ca_kabuli_chr02 | 5928311                 | CC                              | TT                | 1945900870               |
| SNP_P3_17666_5958719 | NC_021161.1    | Ca_kabuli_chr02 | 5958719                 | CC                              | AA                | 1945900872               |
| SNP_P3_17668_6020369 | NC_021161.1    | Ca_kabuli_chr02 | 6020369                 | AA                              | GG                | 1945900874               |
| SNP_P3_17669_6023561 | NC_021161.1    | Ca_kabuli_chr02 | 6023561                 | AA                              | GG                | 1945900876               |
| SNP_P3_17672_6065402 | NC_021161.1    | Ca_kabuli_chr02 | 6065402                 | GG                              | AA                | 1945900877               |
| SNP_P3_17673_6065444 | NC_021161.1    | Ca_kabuli_chr02 | 6065444                 | AA                              | TT                | 1945900879               |
| SNP_P3_17675_6075504 | NC_021161.1    | Ca_kabuli_chr02 | 6075504                 | TT                              | CC                | 1945900881               |
| SNP_P3_17676_6075849 | NC_021161.1    | Ca_kabuli_chr02 | 6075849                 | TT                              | CC                | 1945900883               |
| SNP_P3_17677_6075859 | NC_021161.1    | Ca_kabuli_chr02 | 6075859                 | GG                              | AA                | 1945900884               |
| SNP_P3_17678_6075939 | NC_021161.1    | Ca_kabuli_chr02 | 6075939                 | CC                              | GG                | 1945900886               |
| SNP_P3_17679_6085079 | NC_021161.1    | Ca_kabuli_chr02 | 6085079                 | AA                              | GG                | 1945900888               |
| SNP_P3_17680_6119999 | NC_021161.1    | Ca_kabuli_chr02 | 6119999                 | TT                              | AA                | 1945900890               |
| SNP_P3_17681_6140154 | NC_021161.1    | Ca_kabuli_chr02 | 6140154                 | TT                              | GG                | 1945900892               |
| SNP_P3_17682_6179049 | NC_021161.1    | Ca_kabuli_chr02 | 6179049                 | AA                              | GG                | 1945900893               |
| SNP_P3_17683_6212977 | NC_021161.1    | Ca_kabuli_chr02 | 6212977                 | TT                              | CC                | 1945900895               |
| SNP_P3_17684_6261824 | NC_021161.1    | Ca_kabuli_chr02 | 6261824                 | CC                              | TT                | 1945900897               |
| SNP_P3_17685_6281776 | NC_021161.1    | Ca_kabuli_chr02 | 6281776                 | CC                              | TT                | 1945900899               |
| SNP_P3_17686_6319382 | NC_021161.1    | Ca_kabuli_chr02 | 6319382                 | GG                              | AA                | 1945900900               |

| SNPs IDs             | Chromosome IDs | Chromosomes     | Physical positions (bp) | CDC Frontier (Reference genome) | (Pusa 256 & HPNB) | NCBI SNPdb Accession IDs |
|----------------------|----------------|-----------------|-------------------------|---------------------------------|-------------------|--------------------------|
| SNP_P3_17687_6319618 | NC_021161.1    | Ca_kabuli_chr02 | 6319618                 | AA                              | TT                | 1945900902               |
| SNP_P3_17688_6319727 | NC_021161.1    | Ca_kabuli_chr02 | 6319727                 | TT                              | AA                | 1945900904               |
| SNP_P3_17689_6329061 | NC_021161.1    | Ca_kabuli_chr02 | 6329061                 | GG                              | AA                | 1945900905               |
| SNP_P3_17691_6329425 | NC_021161.1    | Ca_kabuli_chr02 | 6329425                 | AA                              | GG                | 1945900907               |
| SNP_P3_17692_6334362 | NC_021161.1    | Ca_kabuli_chr02 | 6334362                 | CC                              | AA                | 1945900909               |
| SNP_P3_17693_6334365 | NC_021161.1    | Ca_kabuli_chr02 | 6334365                 | TT                              | CC                | 1945900911               |
| SNP_P3_17694_6334367 | NC_021161.1    | Ca_kabuli_chr02 | 6334367                 | GG                              | AA                | 1945900912               |
| SNP_P3_17695_6334408 | NC_021161.1    | Ca_kabuli_chr02 | 6334408                 | TT                              | GG                | 1945900914               |
| SNP_P3_17696_6334417 | NC_021161.1    | Ca_kabuli_chr02 | 6334417                 | GG                              | CC                | 1945900916               |
| SNP_P3_17698_6357749 | NC_021161.1    | Ca_kabuli_chr02 | 6357749                 | CC                              | TT                | 1945900918               |
| SNP_P3_17699_6412924 | NC_021161.1    | Ca_kabuli_chr02 | 6412924                 | CC                              | TT                | 1945900919               |
| SNP_P3_17700_6419716 | NC_021161.1    | Ca_kabuli_chr02 | 6419716                 | GG                              | TT                | 1945900921               |
| SNP_P3_17701_6455880 | NC_021161.1    | Ca_kabuli_chr02 | 6455880                 | TT                              | AA                | 1945900923               |
| SNP_P3_17702_6455882 | NC_021161.1    | Ca_kabuli_chr02 | 6455882                 | AA                              | CC                | 1945900925               |
| SNP_P3_17703_6501954 | NC_021161.1    | Ca_kabuli_chr02 | 6501954                 | TT                              | AA                | 1945900927               |
| SNP_P3_17704_6505082 | NC_021161.1    | Ca_kabuli_chr02 | 6505082                 | AA                              | GG                | 1945900928               |
| SNP_P3_17705_6505170 | NC_021161.1    | Ca_kabuli_chr02 | 6505170                 | AA                              | TT                | 1945900930               |
| SNP_P3_17708_6538985 | NC_021161.1    | Ca_kabuli_chr02 | 6538985                 | CC                              | TT                | 1945900932               |
| SNP_P3_17709_6618334 | NC_021161.1    | Ca_kabuli_chr02 | 6618334                 | GG                              | AA                | 1945900934               |
| SNP_P3_17710_6618359 | NC_021161.1    | Ca_kabuli_chr02 | 6618359                 | AA                              | GG                | 1945900935               |
| SNP_P3_17711_6618369 | NC_021161.1    | Ca_kabuli_chr02 | 6618369                 | AA                              | GG                | 1945900937               |
| SNP_P3_17712_6618376 | NC_021161.1    | Ca_kabuli_chr02 | 6618376                 | AA                              | CC                | 1945900939               |
| SNP_P3_17713_6618378 | NC_021161.1    | Ca_kabuli_chr02 | 6618378                 | TT                              | CC                | 1945900940               |
| SNP_P3_17714_6638603 | NC_021161.1    | Ca_kabuli_chr02 | 6638603                 | AA                              | GG                | 1945900942               |
| SNP_P3_17715_6639137 | NC_021161.1    | Ca_kabuli_chr02 | 6639137                 | GG                              | AA                | 1945900944               |
| SNP_P3_17716_6639244 | NC_021161.1    | Ca_kabuli_chr02 | 6639244                 | AA                              | CC                | 1945900946               |
| SNP_P3_17717_6639484 | NC_021161.1    | Ca_kabuli_chr02 | 6639484                 | AA                              | GG                | 1945900947               |
| SNP_P3_17718_6640297 | NC_021161.1    | Ca_kabuli_chr02 | 6640297                 | GG                              | AA                | 1945900949               |
| SNP_P3_17720_6640408 | NC_021161.1    | Ca_kabuli_chr02 | 6640408                 | AA                              | CC                | 1945900951               |
| SNP_P3_17722_6640498 | NC_021161.1    | Ca_kabuli_chr02 | 6640498                 | AA                              | CC                | 1945900953               |
| SNP_P3_17723_6640533 | NC_021161.1    | Ca_kabuli_chr02 | 6640533                 | CC                              | TT                | 1945900954               |
| SNP_P3_17724_6640540 | NC_021161.1    | Ca_kabuli_chr02 | 6640540                 | CC                              | TT                | 1945900956               |
| SNP_P3_17725_6640571 | NC_021161.1    | Ca_kabuli_chr02 | 6640571                 | AA                              | GG                | 1945900958               |
| SNP_P3_17726_6640625 | NC_021161.1    | Ca_kabuli_chr02 | 6640625                 | CC                              | TT                | 1945900960               |
| SNP_P3_17727_6640702 | NC_021161.1    | Ca_kabuli_chr02 | 6640702                 | CC                              | TT                | 1945900962               |
| SNP_P3_17728_6640760 | NC_021161.1    | Ca_kabuli_chr02 | 6640760                 | AA                              | GG                | 1945900963               |
| SNP_P3_17729_6640779 | NC_021161.1    | Ca_kabuli_chr02 | 6640779                 | CC                              | TT                | 1945900965               |
| SNP_P3_17730_6640852 | NC_021161.1    | Ca_kabuli_chr02 | 6640852                 | CC                              | TT                | 1945900967               |
| SNP_P3_17731_6640889 | NC_021161.1    | Ca_kabuli_chr02 | 6640889                 | AA                              | TT                | 1945900969               |
| SNP_P3_17732_6640951 | NC_021161.1    | Ca_kabuli_chr02 | 6640951                 | TT                              | CC                | 1945900970               |
| SNP_P3_17733_6641068 | NC_021161.1    | Ca_kabuli_chr02 | 6641068                 | AA                              | GG                | 1945900972               |
| SNP_P3_17734_6641252 | NC_021161.1    | Ca_kabuli_chr02 | 6641252                 | GG                              | AA                | 1945900974               |

| SNPs IDs             | Chromosome IDs | Chromosomes     | Physical positions (bp) | CDC Frontier (Reference genome) | (Pusa 256 & HPNB) | NCBI SNPdb Accession IDs |
|----------------------|----------------|-----------------|-------------------------|---------------------------------|-------------------|--------------------------|
| SNP_P3_17735_6641353 | NC_021161.1    | Ca_kabuli_chr02 | 6641353                 | TT                              | CC                | 1945900976               |
| SNP_P3_17736_6641462 | NC_021161.1    | Ca_kabuli_chr02 | 6641462                 | CC                              | AA                | 1945900978               |
| SNP_P3_17737_6641550 | NC_021161.1    | Ca_kabuli_chr02 | 6641550                 | AA                              | TT                | 1945900979               |
| SNP_P3_17738_6641696 | NC_021161.1    | Ca_kabuli_chr02 | 6641696                 | GG                              | TT                | 1945900981               |
| SNP_P3_17740_6641754 | NC_021161.1    | Ca_kabuli_chr02 | 6641754                 | TT                              | CC                | 1945900983               |
| SNP_P3_17741_6641774 | NC_021161.1    | Ca_kabuli_chr02 | 6641774                 | GG                              | AA                | 1945900985               |
| SNP_P3_17742_6641798 | NC_021161.1    | Ca_kabuli_chr02 | 6641798                 | CC                              | TT                | 1945900986               |
| SNP_P3_17743_6641799 | NC_021161.1    | Ca_kabuli_chr02 | 6641799                 | GG                              | AA                | 1945900988               |
| SNP_P3_17744_6641836 | NC_021161.1    | Ca_kabuli_chr02 | 6641836                 | CC                              | TT                | 1945900990               |
| SNP_P3_17746_6642051 | NC_021161.1    | Ca_kabuli_chr02 | 6642051                 | GG                              | TT                | 1945900992               |
| SNP_P3_17747_6642168 | NC_021161.1    | Ca_kabuli_chr02 | 6642168                 | CC                              | AA                | 1945900993               |
| SNP_P3_17748_6642216 | NC_021161.1    | Ca_kabuli_chr02 | 6642216                 | AA                              | GG                | 1945900995               |
| SNP_P3_17749_6642298 | NC_021161.1    | Ca_kabuli_chr02 | 6642298                 | GG                              | TT                | 1945900997               |
| SNP_P3_17750_6642329 | NC_021161.1    | Ca_kabuli_chr02 | 6642329                 | TT                              | AA                | 1945900999               |
| SNP_P3_17751_6642359 | NC_021161.1    | Ca_kabuli_chr02 | 6642359                 | AA                              | CC                | 1945901001               |
| SNP_P3_17752_6642448 | NC_021161.1    | Ca_kabuli_chr02 | 6642448                 | GG                              | TT                | 1945901002               |
| SNP_P3_17753_6642481 | NC_021161.1    | Ca_kabuli_chr02 | 6642481                 | GG                              | AA                | 1945901004               |
| SNP_P3_17755_6642564 | NC_021161.1    | Ca_kabuli_chr02 | 6642564                 | CC                              | AA                | 1945901006               |
| SNP_P3_17756_6642720 | NC_021161.1    | Ca_kabuli_chr02 | 6642720                 | CC                              | TT                | 1945901008               |
| SNP_P3_17757_6642729 | NC_021161.1    | Ca_kabuli_chr02 | 6642729                 | TT                              | AA                | 1945901009               |
| SNP_P3_17758_6642762 | NC_021161.1    | Ca_kabuli_chr02 | 6642762                 | GG                              | TT                | 1945901011               |
| SNP_P3_17759_6642785 | NC_021161.1    | Ca_kabuli_chr02 | 6642785                 | AA                              | TT                | 1945901013               |
| SNP_P3_17760_6642929 | NC_021161.1    | Ca_kabuli_chr02 | 6642929                 | TT                              | GG                | 1945901015               |
| SNP_P3_17761_6643125 | NC_021161.1    | Ca_kabuli_chr02 | 6643125                 | CC                              | GG                | 1945901017               |
| SNP_P3_17762_6643264 | NC_021161.1    | Ca_kabuli_chr02 | 6643264                 | TT                              | AA                | 1945901018               |
| SNP_P3_17763_6643272 | NC_021161.1    | Ca_kabuli_chr02 | 6643272                 | AA                              | CC                | 1945901020               |
| SNP_P3_17764_6643331 | NC_021161.1    | Ca_kabuli_chr02 | 6643331                 | CC                              | AA                | 1945901022               |
| SNP_P3_17765_6643355 | NC_021161.1    | Ca_kabuli_chr02 | 6643355                 | AA                              | GG                | 1945901024               |
| SNP_P3_17766_6643418 | NC_021161.1    | Ca_kabuli_chr02 | 6643418                 | CC                              | TT                | 1945901025               |
| SNP_P3_17767_6643563 | NC_021161.1    | Ca_kabuli_chr02 | 6643563                 | AA                              | TT                | 1945901027               |
| SNP_P3_17768_6643589 | NC_021161.1    | Ca_kabuli_chr02 | 6643589                 | CC                              | TT                | 1945901029               |
| SNP_P3_17769_6643784 | NC_021161.1    | Ca_kabuli_chr02 | 6643784                 | CC                              | TT                | 1945901031               |
| SNP_P3_17771_6644610 | NC_021161.1    | Ca_kabuli_chr02 | 6644610                 | AA                              | GG                | 1945901033               |
| SNP_P3_17772_6644812 | NC_021161.1    | Ca_kabuli_chr02 | 6644812                 | CC                              | GG                | 1945901034               |
| SNP_P3_17773_6644903 | NC_021161.1    | Ca_kabuli_chr02 | 6644903                 | AA                              | CC                | 1945901036               |
| SNP_P3_17774_6644904 | NC_021161.1    | Ca_kabuli_chr02 | 6644904                 | CC                              | TT                | 1945901038               |
| SNP_P3_17775_6644964 | NC_021161.1    | Ca_kabuli_chr02 | 6644964                 | TT                              | CC                | 1945901040               |
| SNP_P3_17776_6645276 | NC_021161.1    | Ca_kabuli_chr02 | 6645276                 | AA                              | GG                | 1945901042               |
| SNP_P3_17777_6645291 | NC_021161.1    | Ca_kabuli_chr02 | 6645291                 | AA                              | GG                | 1945901044               |
| SNP_P3_17778_6645327 | NC_021161.1    | Ca_kabuli_chr02 | 6645327                 | CC                              | TT                | 1945901045               |
| SNP_P3_17779_6645440 | NC_021161.1    | Ca_kabuli_chr02 | 6645440                 | AA                              | GG                | 1945901047               |
| SNP_P3_17780_6645522 | NC_021161.1    | Ca_kabuli_chr02 | 6645522                 | TT                              | CC                | 1945901049               |

| SNPs IDs             | Chromosome IDs | Chromosomes     | Physical positions (bp) | CDC Frontier (Reference genome) | (Pusa 256 & HPNB) | NCBI SNPdb Accession IDs |
|----------------------|----------------|-----------------|-------------------------|---------------------------------|-------------------|--------------------------|
| SNP_P3_17781_6645595 | NC_021161.1    | Ca_kabuli_chr02 | 6645595                 | TT                              | AA                | 1945901051               |
| SNP_P3_17782_6645608 | NC_021161.1    | Ca_kabuli_chr02 | 6645608                 | AA                              | GG                | 1945901053               |
| SNP_P3_17783_6645737 | NC_021161.1    | Ca_kabuli_chr02 | 6645737                 | CC                              | GG                | 1945901054               |
| SNP_P3_17784_6645747 | NC_021161.1    | Ca_kabuli_chr02 | 6645747                 | TT                              | AA                | 1945901056               |
| SNP_P3_17785_6646210 | NC_021161.1    | Ca_kabuli_chr02 | 6646210                 | GG                              | AA                | 1945901058               |
| SNP_P3_17786_6647635 | NC_021161.1    | Ca_kabuli_chr02 | 6647635                 | TT                              | GG                | 1945901060               |
| SNP_P3_17787_6648216 | NC_021161.1    | Ca_kabuli_chr02 | 6648216                 | TT                              | CC                | 1945901062               |
| SNP_P3_17789_6648858 | NC_021161.1    | Ca_kabuli_chr02 | 6648858                 | AA                              | GG                | 1945901063               |
| SNP_P3_17790_6649839 | NC_021161.1    | Ca_kabuli_chr02 | 6649839                 | AA                              | TT                | 1945901065               |
| SNP_P3_17791_6650404 | NC_021161.1    | Ca_kabuli_chr02 | 6650404                 | GG                              | AA                | 1945901067               |
| SNP_P3_17792_6650405 | NC_021161.1    | Ca_kabuli_chr02 | 6650405                 | CC                              | TT                | 1945901069               |
| SNP_P3_17793_6655818 | NC_021161.1    | Ca_kabuli_chr02 | 6655818                 | GG                              | AA                | 1945901070               |
| SNP_P3_17794_6656084 | NC_021161.1    | Ca_kabuli_chr02 | 6656084                 | CC                              | TT                | 1945901072               |
| SNP_P3_17796_6656148 | NC_021161.1    | Ca_kabuli_chr02 | 6656148                 | GG                              | CC                | 1945901074               |
| SNP_P3_17797_6656227 | NC_021161.1    | Ca_kabuli_chr02 | 6656227                 | TT                              | GG                | 1945901076               |
| SNP_P3_17798_6656470 | NC_021161.1    | Ca_kabuli_chr02 | 6656470                 | GG                              | AA                | 1945901077               |
| SNP_P3_17799_6656696 | NC_021161.1    | Ca_kabuli_chr02 | 6656696                 | AA                              | TT                | 1945901079               |
| SNP_P3_17800_6656699 | NC_021161.1    | Ca_kabuli_chr02 | 6656699                 | CC                              | TT                | 1945901081               |
| SNP_P3_17802_6657771 | NC_021161.1    | Ca_kabuli_chr02 | 6657771                 | TT                              | AA                | 1945901083               |
| SNP_P3_17803_6659310 | NC_021161.1    | Ca_kabuli_chr02 | 6659310                 | GG                              | AA                | 1945901084               |
| SNP_P3_17804_6670897 | NC_021161.1    | Ca_kabuli_chr02 | 6670897                 | TT                              | AA                | 1945901086               |
| SNP_P3_17805_6680880 | NC_021161.1    | Ca_kabuli_chr02 | 6680880                 | CC                              | GG                | 1945901088               |
| SNP_P3_17807_6680993 | NC_021161.1    | Ca_kabuli_chr02 | 6680993                 | CC                              | TT                | 1945901090               |
| SNP_P3_17808_6681008 | NC_021161.1    | Ca_kabuli_chr02 | 6681008                 | GG                              | TT                | 1945901091               |
| SNP_P3_17809_6681207 | NC_021161.1    | Ca_kabuli_chr02 | 6681207                 | CC                              | TT                | 1945901093               |
| SNP_P3_17810_6681280 | NC_021161.1    | Ca_kabuli_chr02 | 6681280                 | GG                              | AA                | 1945901095               |
| SNP_P3_17811_6687449 | NC_021161.1    | Ca_kabuli_chr02 | 6687449                 | GG                              | AA                | 1945901097               |
| SNP_P3_17812_6687460 | NC_021161.1    | Ca_kabuli_chr02 | 6687460                 | CC                              | TT                | 1945901099               |
| SNP_P3_17813_6687463 | NC_021161.1    | Ca_kabuli_chr02 | 6687463                 | CC                              | TT                | 1945901100               |
| SNP_P3_17814_6687487 | NC_021161.1    | Ca_kabuli_chr02 | 6687487                 | TT                              | CC                | 1945901102               |
| SNP_P3_17815_6687518 | NC_021161.1    | Ca_kabuli_chr02 | 6687518                 | AA                              | TT                | 1945901104               |
| SNP_P3_17816_6687519 | NC_021161.1    | Ca_kabuli_chr02 | 6687519                 | AA                              | TT                | 1945901106               |
| SNP_P3_17817_6687523 | NC_021161.1    | Ca_kabuli_chr02 | 6687523                 | CC                              | TT                | 1945901107               |
| SNP_P3_17818_6687530 | NC_021161.1    | Ca_kabuli_chr02 | 6687530                 | TT                              | GG                | 1945901109               |
| SNP_P3_17819_6687606 | NC_021161.1    | Ca_kabuli_chr02 | 6687606                 | CC                              | TT                | 1945901111               |
| SNP_P3_17820_6687616 | NC_021161.1    | Ca_kabuli_chr02 | 6687616                 | AA                              | GG                | 1945901113               |
| SNP_P3_17821_6687635 | NC_021161.1    | Ca_kabuli_chr02 | 6687635                 | TT                              | CC                | 1945901114               |
| SNP_P3_17822_6687638 | NC_021161.1    | Ca_kabuli_chr02 | 6687638                 | TT                              | GG                | 1945901116               |
| SNP_P3_17823_6687652 | NC_021161.1    | Ca_kabuli_chr02 | 6687652                 | TT                              | CC                | 1945901118               |
| SNP_P3_17824_6687782 | NC_021161.1    | Ca_kabuli_chr02 | 6687782                 | CC                              | TT                | 1945901120               |
| SNP_P3_17825_6687791 | NC_021161.1    | Ca_kabuli_chr02 | 6687791                 | AA                              | GG                | 1945901122               |
| SNP_P3_17826_6687926 | NC_021161.1    | Ca_kabuli_chr02 | 6687926                 | TT                              | CC                | 1945901123               |

| SNPs IDs             | Chromosome IDs | Chromosomes     | Physical positions (bp) | CDC Frontier (Reference genome) | (Pusa 256 & HPNB) | NCBI SNPdb Accession IDs |
|----------------------|----------------|-----------------|-------------------------|---------------------------------|-------------------|--------------------------|
| SNP_P3_17827_6690146 | NC_021161.1    | Ca_kabuli_chr02 | 6690146                 | GG                              | AA                | 1945901125               |
| SNP_P3_17828_6691856 | NC_021161.1    | Ca_kabuli_chr02 | 6691856                 | TT                              | CC                | 1945901127               |
| SNP_P3_17829_6691858 | NC_021161.1    | Ca_kabuli_chr02 | 6691858                 | CC                              | TT                | 1945901129               |
| SNP_P3_17830_6691887 | NC_021161.1    | Ca_kabuli_chr02 | 6691887                 | GG                              | AA                | 1945901130               |
| SNP_P3_17831_6691892 | NC_021161.1    | Ca_kabuli_chr02 | 6691892                 | TT                              | GG                | 1945901132               |
| SNP_P3_17832_6691903 | NC_021161.1    | Ca_kabuli_chr02 | 6691903                 | AA                              | GG                | 1945901134               |
| SNP_P3_17833_6691922 | NC_021161.1    | Ca_kabuli_chr02 | 6691922                 | AA                              | GG                | 1945901136               |
| SNP_P3_17834_6691932 | NC_021161.1    | Ca_kabuli_chr02 | 6691932                 | GG                              | AA                | 1945901138               |
| SNP_P3_17835_6691939 | NC_021161.1    | Ca_kabuli_chr02 | 6691939                 | GG                              | TT                | 1945901139               |
| SNP_P3_17836_6691990 | NC_021161.1    | Ca_kabuli_chr02 | 6691990                 | GG                              | AA                | 1945901141               |
| SNP_P3_17837_6691997 | NC_021161.1    | Ca_kabuli_chr02 | 6691997                 | AA                              | GG                | 1945901143               |
| SNP_P3_17838_6692024 | NC_021161.1    | Ca_kabuli_chr02 | 6692024                 | AA                              | GG                | 1945901145               |
| SNP_P3_17839_6692172 | NC_021161.1    | Ca_kabuli_chr02 | 6692172                 | TT                              | AA                | 1945901146               |
| SNP_P3_17840_6703400 | NC_021161.1    | Ca_kabuli_chr02 | 6703400                 | GG                              | AA                | 1945901148               |
| SNP_P3_17841_6703662 | NC_021161.1    | Ca_kabuli_chr02 | 6703662                 | AA                              | GG                | 1945901150               |
| SNP_P3_17843_6769658 | NC_021161.1    | Ca_kabuli_chr02 | 6769658                 | TT                              | CC                | 1945901152               |
| SNP_P3_17844_6782056 | NC_021161.1    | Ca_kabuli_chr02 | 6782056                 | GG                              | AA                | 1945901154               |
| SNP_P3_17845_6782432 | NC_021161.1    | Ca_kabuli_chr02 | 6782432                 | CC                              | TT                | 1945901155               |
| SNP_P3_17846_6782466 | NC_021161.1    | Ca_kabuli_chr02 | 6782466                 | CC                              | AA                | 1945901157               |
| SNP_P3_17847_6782488 | NC_021161.1    | Ca_kabuli_chr02 | 6782488                 | CC                              | TT                | 1945901159               |
| SNP_P3_17848_6782492 | NC_021161.1    | Ca_kabuli_chr02 | 6782492                 | CC                              | TT                | 1945901161               |
| SNP_P3_17849_6782498 | NC_021161.1    | Ca_kabuli_chr02 | 6782498                 | CC                              | GG                | 1945901162               |
| SNP_P3_17850_6784987 | NC_021161.1    | Ca_kabuli_chr02 | 6784987                 | AA                              | GG                | 1945901164               |
| SNP_P3_17851_6784988 | NC_021161.1    | Ca_kabuli_chr02 | 6784988                 | GG                              | AA                | 1945901166               |
| SNP_P3_17852_6785020 | NC_021161.1    | Ca_kabuli_chr02 | 6785020                 | AA                              | TT                | 1945901168               |
| SNP_P3_17853_6788091 | NC_021161.1    | Ca_kabuli_chr02 | 6788091                 | TT                              | CC                | 1945901170               |
| SNP_P3_17854_6788297 | NC_021161.1    | Ca_kabuli_chr02 | 6788297                 | CC                              | AA                | 1945901171               |
| SNP_P3_17855_6788399 | NC_021161.1    | Ca_kabuli_chr02 | 6788399                 | AA                              | TT                | 1945901173               |
| SNP_P3_17856_6788409 | NC_021161.1    | Ca_kabuli_chr02 | 6788409                 | AA                              | GG                | 1945901175               |
| SNP_P3_17857_6788656 | NC_021161.1    | Ca_kabuli_chr02 | 6788656                 | AA                              | CC                | 1945901177               |
| SNP_P3_17858_6791791 | NC_021161.1    | Ca_kabuli_chr02 | 6791791                 | CC                              | TT                | 1945901178               |
| SNP_P3_17859_6811064 | NC_021161.1    | Ca_kabuli_chr02 | 6811064                 | TT                              | AA                | 1945901180               |
| SNP_P3_17860_6811065 | NC_021161.1    | Ca_kabuli_chr02 | 6811065                 | AA                              | TT                | 1945901182               |
| SNP_P3_17861_6811067 | NC_021161.1    | Ca_kabuli_chr02 | 6811067                 | AA                              | GG                | 1945901184               |
| SNP_P3_17862_6811084 | NC_021161.1    | Ca_kabuli_chr02 | 6811084                 | TT                              | CC                | 1945901185               |
| SNP_P3_17863_6811092 | NC_021161.1    | Ca_kabuli_chr02 | 6811092                 | CC                              | TT                | 1945901187               |
| SNP_P3_17865_6814275 | NC_021161.1    | Ca_kabuli_chr02 | 6814275                 | TT                              | AA                | 1945901189               |
| SNP_P3_17866_6815088 | NC_021161.1    | Ca_kabuli_chr02 | 6815088                 | AA                              | CC                | 1945901191               |
| SNP_P3_17867_6815091 | NC_021161.1    | Ca_kabuli_chr02 | 6815091                 | TT                              | CC                | 1945901193               |
| SNP_P3_17868_6815246 | NC_021161.1    | Ca_kabuli_chr02 | 6815246                 | AA                              | GG                | 1945901194               |
| SNP_P3_17869_6815432 | NC_021161.1    | Ca_kabuli_chr02 | 6815432                 | AA                              | GG                | 1945901196               |
| SNP_P3_17870_6815464 | NC_021161.1    | Ca_kabuli_chr02 | 6815464                 | TT                              | CC                | 1945901198               |

| SNPs IDs             | Chromosome IDs | Chromosomes     | Physical positions (bp) | CDC Frontier (Reference genome) | (Pusa 256 & HPNB) | NCBI SNPdb Accession IDs |
|----------------------|----------------|-----------------|-------------------------|---------------------------------|-------------------|--------------------------|
| SNP_P3_17871_6815492 | NC_021161.1    | Ca_kabuli_chr02 | 6815492                 | TT                              | CC                | 1945901200               |
| SNP_P3_17872_6815493 | NC_021161.1    | Ca_kabuli_chr02 | 6815493                 | GG                              | AA                | 1945901201               |
| SNP_P3_17873_6815499 | NC_021161.1    | Ca_kabuli_chr02 | 6815499                 | GG                              | AA                | 1945901203               |
| SNP_P3_17874_6815526 | NC_021161.1    | Ca_kabuli_chr02 | 6815526                 | GG                              | AA                | 1945901205               |
| SNP_P3_17875_6815556 | NC_021161.1    | Ca_kabuli_chr02 | 6815556                 | TT                              | CC                | 1945901207               |
| SNP_P3_17876_6815581 | NC_021161.1    | Ca_kabuli_chr02 | 6815581                 | TT                              | CC                | 1945901209               |
| SNP_P3_17877_6815582 | NC_021161.1    | Ca_kabuli_chr02 | 6815582                 | AA                              | GG                | 1945901210               |
| SNP_P3_17878_6815586 | NC_021161.1    | Ca_kabuli_chr02 | 6815586                 | GG                              | TT                | 1945901212               |
| SNP_P3_17879_6818717 | NC_021161.1    | Ca_kabuli_chr02 | 6818717                 | TT                              | CC                | 1945901214               |
| SNP_P3_17880_6820527 | NC_021161.1    | Ca_kabuli_chr02 | 6820527                 | AA                              | CC                | 1945901216               |
| SNP_P3_17881_6828384 | NC_021161.1    | Ca_kabuli_chr02 | 6828384                 | CC                              | TT                | 1945901217               |
| SNP_P3_17883_6918564 | NC_021161.1    | Ca_kabuli_chr02 | 6918564                 | AA                              | GG                | 1945901219               |
| SNP_P3_17884_6918567 | NC_021161.1    | Ca_kabuli_chr02 | 6918567                 | AA                              | GG                | 1945901221               |
| SNP_P3_17885_6995929 | NC_021161.1    | Ca_kabuli_chr02 | 6995929                 | CC                              | TT                | 1945901223               |
| SNP_P3_17886_7002435 | NC_021161.1    | Ca_kabuli_chr02 | 7002435                 | AA                              | GG                | 1945901224               |
| SNP_P3_17887_7002766 | NC_021161.1    | Ca_kabuli_chr02 | 7002766                 | GG                              | AA                | 1945901226               |
| SNP_P3_17888_7002783 | NC_021161.1    | Ca_kabuli_chr02 | 7002783                 | TT                              | GG                | 1945901228               |
| SNP_P3_17889_7002821 | NC_021161.1    | Ca_kabuli_chr02 | 7002821                 | CC                              | TT                | 1945901230               |
| SNP_P3_17890_7002840 | NC_021161.1    | Ca_kabuli_chr02 | 7002840                 | CC                              | TT                | 1945901231               |
| SNP_P3_17891_7002851 | NC_021161.1    | Ca_kabuli_chr02 | 7002851                 | GG                              | AA                | 1945901233               |
| SNP_P3_17892_7002862 | NC_021161.1    | Ca_kabuli_chr02 | 7002862                 | TT                              | AA                | 1945901235               |
| SNP_P3_17893_7026991 | NC_021161.1    | Ca_kabuli_chr02 | 7026991                 | CC                              | AA                | 1945901237               |
| SNP_P3_17895_7062808 | NC_021161.1    | Ca_kabuli_chr02 | 7062808                 | AA                              | GG                | 1945901239               |
| SNP_P3_17896_7062828 | NC_021161.1    | Ca_kabuli_chr02 | 7062828                 | TT                              | AA                | 1945901240               |
| SNP_P3_17897_7062829 | NC_021161.1    | Ca_kabuli_chr02 | 7062829                 | AA                              | TT                | 1945901242               |
| SNP_P3_17898_7062830 | NC_021161.1    | Ca_kabuli_chr02 | 7062830                 | AA                              | GG                | 1945901244               |
| SNP_P3_17899_7062831 | NC_021161.1    | Ca_kabuli_chr02 | 7062831                 | GG                              | TT                | 1945901246               |
| SNP_P3_17900_7062850 | NC_021161.1    | Ca_kabuli_chr02 | 7062850                 | CC                              | GG                | 1945901247               |
| SNP_P3_17901_7062851 | NC_021161.1    | Ca_kabuli_chr02 | 7062851                 | CC                              | TT                | 1945901249               |
| SNP_P3_17902_7075267 | NC_021161.1    | Ca_kabuli_chr02 | 7075267                 | GG                              | CC                | 1945901251               |
| SNP_P3_17903_7075498 | NC_021161.1    | Ca_kabuli_chr02 | 7075498                 | GG                              | TT                | 1945901253               |
| SNP_P3_17904_7075517 | NC_021161.1    | Ca_kabuli_chr02 | 7075517                 | AA                              | GG                | 1945901254               |
| SNP_P3_17905_7075601 | NC_021161.1    | Ca_kabuli_chr02 | 7075601                 | AA                              | GG                | 1945901256               |
| SNP_P3_17906_7075631 | NC_021161.1    | Ca_kabuli_chr02 | 7075631                 | GG                              | AA                | 1945901258               |
| SNP_P3_17907_7075939 | NC_021161.1    | Ca_kabuli_chr02 | 7075939                 | AA                              | GG                | 1945901260               |
| SNP_P3_17908_7106248 | NC_021161.1    | Ca_kabuli_chr02 | 7106248                 | AA                              | GG                | 1945901262               |
| SNP_P3_17909_7126937 | NC_021161.1    | Ca_kabuli_chr02 | 7126937                 | GG                              | AA                | 1945901263               |
| SNP_P3_17911_7151356 | NC_021161.1    | Ca_kabuli_chr02 | 7151356                 | AA                              | GG                | 1945901265               |
| SNP_P3_17912_7151392 | NC_021161.1    | Ca_kabuli_chr02 | 7151392                 | GG                              | CC                | 1945901267               |
| SNP_P3_17913_7151429 | NC_021161.1    | Ca_kabuli_chr02 | 7151429                 | CC                              | TT                | 1945901269               |
| SNP_P3_17914_7171728 | NC_021161.1    | Ca_kabuli_chr02 | 7171728                 | AA                              | CC                | 1945901270               |
| SNP_P3_17917_7171984 | NC_021161.1    | Ca_kabuli_chr02 | 7171984                 | TT                              | CC                | 1945901272               |



| SNPs IDs             | Chromosome IDs | Chromosomes     | Physical positions (bp) | CDC Frontier (Reference genome) | (Pusa 256 & HPNB) | NCBI SNPdb Accession IDs |
|----------------------|----------------|-----------------|-------------------------|---------------------------------|-------------------|--------------------------|
| SNP_P3_17920_7172745 | NC_021161.1    | Ca_kabuli_chr02 | 7172745                 | CC                              | TT                | 1945901274               |
| SNP_P3_17921_7173097 | NC_021161.1    | Ca_kabuli_chr02 | 7173097                 | AA                              | TT                | 1945901276               |
| SNP_P3_17922_7189740 | NC_021161.1    | Ca_kabuli_chr02 | 7189740                 | GG                              | AA                | 1945901277               |
| SNP_P3_17923_7189794 | NC_021161.1    | Ca_kabuli_chr02 | 7189794                 | GG                              | AA                | 1945901279               |
| SNP_P3_17924_7189843 | NC_021161.1    | Ca_kabuli_chr02 | 7189843                 | TT                              | CC                | 1945901281               |
| SNP_P3_17926_7248026 | NC_021161.1    | Ca_kabuli_chr02 | 7248026                 | GG                              | AA                | 1945901283               |
| SNP_P3_17927_7248030 | NC_021161.1    | Ca_kabuli_chr02 | 7248030                 | TT                              | CC                | 1945901285               |
| SNP_P3_17928_7248033 | NC_021161.1    | Ca_kabuli_chr02 | 7248033                 | GG                              | AA                | 1945901286               |
| SNP_P3_17929_7256688 | NC_021161.1    | Ca_kabuli_chr02 | 7256688                 | AA                              | GG                | 1945901288               |
| SNP_P3_17930_7256769 | NC_021161.1    | Ca_kabuli_chr02 | 7256769                 | TT                              | CC                | 1945901290               |
| SNP_P3_17931_7261353 | NC_021161.1    | Ca_kabuli_chr02 | 7261353                 | GG                              | AA                | 1945901292               |
| SNP_P3_17932_7261687 | NC_021161.1    | Ca_kabuli_chr02 | 7261687                 | CC                              | AA                | 1945901293               |
| SNP_P3_17933_7274640 | NC_021161.1    | Ca_kabuli_chr02 | 7274640                 | GG                              | AA                | 1945901295               |
| SNP_P3_17934_7274688 | NC_021161.1    | Ca_kabuli_chr02 | 7274688                 | CC                              | AA                | 1945901297               |
| SNP_P3_17935_7275018 | NC_021161.1    | Ca_kabuli_chr02 | 7275018                 | AA                              | TT                | 1945901299               |
| SNP_P3_17936_7275026 | NC_021161.1    | Ca_kabuli_chr02 | 7275026                 | AA                              | GG                | 1945901300               |
| SNP_P3_17938_7279236 | NC_021161.1    | Ca_kabuli_chr02 | 7279236                 | CC                              | AA                | 1945901302               |
| SNP_P3_17939_7279611 | NC_021161.1    | Ca_kabuli_chr02 | 7279611                 | TT                              | CC                | 1945901304               |
| SNP_P3_17940_7279653 | NC_021161.1    | Ca_kabuli_chr02 | 7279653                 | TT                              | CC                | 1945901306               |
| SNP_P3_17941_7279654 | NC_021161.1    | Ca_kabuli_chr02 | 7279654                 | GG                              | CC                | 1945901308               |
| SNP_P3_17942_7279664 | NC_021161.1    | Ca_kabuli_chr02 | 7279664                 | AA                              | CC                | 1945901309               |
| SNP_P3_17943_7280130 | NC_021161.1    | Ca_kabuli_chr02 | 7280130                 | AA                              | GG                | 1945901311               |
| SNP_P3_17944_7280160 | NC_021161.1    | Ca_kabuli_chr02 | 7280160                 | AA                              | GG                | 1945901313               |
| SNP_P3_17945_7280227 | NC_021161.1    | Ca_kabuli_chr02 | 7280227                 | GG                              | AA                | 1945901315               |
| SNP_P3_17947_7312259 | NC_021161.1    | Ca_kabuli_chr02 | 7312259                 | GG                              | AA                | 1945901316               |
| SNP_P3_17948_7312597 | NC_021161.1    | Ca_kabuli_chr02 | 7312597                 | CC                              | AA                | 1945901318               |
| SNP_P3_17950_7313247 | NC_021161.1    | Ca_kabuli_chr02 | 7313247                 | TT                              | CC                | 1945901320               |
| SNP_P3_17951_7320290 | NC_021161.1    | Ca_kabuli_chr02 | 7320290                 | AA                              | TT                | 1945901322               |
| SNP_P3_17952_7320545 | NC_021161.1    | Ca_kabuli_chr02 | 7320545                 | TT                              | AA                | 1945901323               |
| SNP_P3_17953_7321405 | NC_021161.1    | Ca_kabuli_chr02 | 7321405                 | GG                              | AA                | 1945901325               |
| SNP_P3_17954_7340706 | NC_021161.1    | Ca_kabuli_chr02 | 7340706                 | TT                              | AA                | 1945901327               |
| SNP_P3_17955_7340708 | NC_021161.1    | Ca_kabuli_chr02 | 7340708                 | AA                              | CC                | 1945901329               |
| SNP_P3_17956_7342830 | NC_021161.1    | Ca_kabuli_chr02 | 7342830                 | AA                              | GG                | 1945901330               |
| SNP_P3_17957_7343804 | NC_021161.1    | Ca_kabuli_chr02 | 7343804                 | GG                              | AA                | 1945901332               |
| SNP_P3_17958_7349219 | NC_021161.1    | Ca_kabuli_chr02 | 7349219                 | GG                              | CC                | 1945901334               |
| SNP_P3_17959_7362480 | NC_021161.1    | Ca_kabuli_chr02 | 7362480                 | TT                              | CC                | 1945901336               |
| SNP_P3_17960_7369667 | NC_021161.1    | Ca_kabuli_chr02 | 7369667                 | CC                              | TT                | 1945901338               |
| SNP_P3_17961_7369994 | NC_021161.1    | Ca_kabuli_chr02 | 7369994                 | TT                              | CC                | 1945901339               |
| SNP_P3_17962_7416441 | NC_021161.1    | Ca_kabuli_chr02 | 7416441                 | TT                              | AA                | 1945901341               |
| SNP_P3_17963_7417287 | NC_021161.1    | Ca_kabuli_chr02 | 7417287                 | CC                              | TT                | 1945901343               |
| SNP_P3_17964_7419304 | NC_021161.1    | Ca_kabuli_chr02 | 7419304                 | TT                              | CC                | 1945901345               |
| SNP_P3_17965_7437938 | NC_021161.1    | Ca_kabuli_chr02 | 7437938                 | CC                              | TT                | 1945901346               |

| SNPs IDs             | Chromosome IDs | Chromosomes     | Physical positions (bp) | CDC Frontier (Reference genome) | (Pusa 256 & HPNB) | NCBI SNPdb Accession IDs |
|----------------------|----------------|-----------------|-------------------------|---------------------------------|-------------------|--------------------------|
| SNP_P3_17966_7440248 | NC_021161.1    | Ca_kabuli_chr02 | 7440248                 | CC                              | TT                | 1945901348               |
| SNP_P3_17967_7452150 | NC_021161.1    | Ca_kabuli_chr02 | 7452150                 | AA                              | CC                | 1945901350               |
| SNP_P3_17968_7465575 | NC_021161.1    | Ca_kabuli_chr02 | 7465575                 | GG                              | CC                | 1945901352               |
| SNP_P3_17969_7494012 | NC_021161.1    | Ca_kabuli_chr02 | 7494012                 | TT                              | AA                | 1945901353               |
| SNP_P3_17970_7518636 | NC_021161.1    | Ca_kabuli_chr02 | 7518636                 | TT                              | AA                | 1945901355               |
| SNP_P3_17971_7524633 | NC_021161.1    | Ca_kabuli_chr02 | 7524633                 | TT                              | CC                | 1945901357               |
| SNP_P3_17972_7524638 | NC_021161.1    | Ca_kabuli_chr02 | 7524638                 | TT                              | CC                | 1945901359               |
| SNP_P3_17973_7524642 | NC_021161.1    | Ca_kabuli_chr02 | 7524642                 | TT                              | CC                | 1945901361               |
| SNP_P3_17974_7524644 | NC_021161.1    | Ca_kabuli_chr02 | 7524644                 | TT                              | AA                | 1945901362               |
| SNP_P3_17975_7524674 | NC_021161.1    | Ca_kabuli_chr02 | 7524674                 | AA                              | GG                | 1945901364               |
| SNP_P3_17976_7524675 | NC_021161.1    | Ca_kabuli_chr02 | 7524675                 | CC                              | TT                | 1945901366               |
| SNP_P3_17977_7524676 | NC_021161.1    | Ca_kabuli_chr02 | 7524676                 | AA                              | GG                | 1945901368               |
| SNP_P3_17978_7524991 | NC_021161.1    | Ca_kabuli_chr02 | 7524991                 | TT                              | CC                | 1945901369               |
| SNP_P3_17979_7525000 | NC_021161.1    | Ca_kabuli_chr02 | 7525000                 | AA                              | TT                | 1945901371               |
| SNP_P3_17980_7525006 | NC_021161.1    | Ca_kabuli_chr02 | 7525006                 | CC                              | TT                | 1945901373               |
| SNP_P3_17981_7525096 | NC_021161.1    | Ca_kabuli_chr02 | 7525096                 | TT                              | CC                | 1945901375               |
| SNP_P3_17982_7525134 | NC_021161.1    | Ca_kabuli_chr02 | 7525134                 | TT                              | CC                | 1945901376               |
| SNP_P3_17983_7525144 | NC_021161.1    | Ca_kabuli_chr02 | 7525144                 | CC                              | GG                | 1945901378               |
| SNP_P3_17984_7525216 | NC_021161.1    | Ca_kabuli_chr02 | 7525216                 | TT                              | AA                | 1945901380               |
| SNP_P3_17985_7525242 | NC_021161.1    | Ca_kabuli_chr02 | 7525242                 | CC                              | GG                | 1945901382               |
| SNP_P3_17986_7525247 | NC_021161.1    | Ca_kabuli_chr02 | 7525247                 | AA                              | GG                | 1945901383               |
| SNP_P3_17987_7525264 | NC_021161.1    | Ca_kabuli_chr02 | 7525264                 | TT                              | CC                | 1945901385               |
| SNP_P3_17988_7525288 | NC_021161.1    | Ca_kabuli_chr02 | 7525288                 | TT                              | AA                | 1945901387               |
| SNP_P3_17990_7543562 | NC_021161.1    | Ca_kabuli_chr02 | 7543562                 | CC                              | TT                | 1945901389               |
| SNP_P3_17993_7574703 | NC_021161.1    | Ca_kabuli_chr02 | 7574703                 | AA                              | GG                | 1945901391               |
| SNP_P3_17994_7595885 | NC_021161.1    | Ca_kabuli_chr02 | 7595885                 | AA                              | GG                | 1945901392               |
| SNP_P3_17995_7609226 | NC_021161.1    | Ca_kabuli_chr02 | 7609226                 | CC                              | TT                | 1945901394               |
| SNP_P3_17997_7645354 | NC_021161.1    | Ca_kabuli_chr02 | 7645354                 | CC                              | TT                | 1945901396               |
| SNP_P3_17998_7645538 | NC_021161.1    | Ca_kabuli_chr02 | 7645538                 | TT                              | CC                | 1945901398               |
| SNP_P3_17999_7651574 | NC_021161.1    | Ca_kabuli_chr02 | 7651574                 | AA                              | GG                | 1945901399               |
| SNP_P3_18000_7651635 | NC_021161.1    | Ca_kabuli_chr02 | 7651635                 | AA                              | GG                | 1945901401               |
| SNP_P3_18001_7654191 | NC_021161.1    | Ca_kabuli_chr02 | 7654191                 | AA                              | CC                | 1945901403               |
| SNP_P3_18002_7654195 | NC_021161.1    | Ca_kabuli_chr02 | 7654195                 | CC                              | TT                | 1945901405               |
| SNP_P3_18003_7654206 | NC_021161.1    | Ca_kabuli_chr02 | 7654206                 | GG                              | AA                | 1945901406               |
| SNP_P3_18004_7654222 | NC_021161.1    | Ca_kabuli_chr02 | 7654222                 | TT                              | CC                | 1945901408               |
| SNP_P3_18005_7654493 | NC_021161.1    | Ca_kabuli_chr02 | 7654493                 | TT                              | CC                | 1945901410               |
| SNP_P3_18006_7654494 | NC_021161.1    | Ca_kabuli_chr02 | 7654494                 | AA                              | CC                | 1945901412               |
| SNP_P3_18007_7656543 | NC_021161.1    | Ca_kabuli_chr02 | 7656543                 | AA                              | CC                | 1945901414               |
| SNP_P3_18008_7656585 | NC_021161.1    | Ca_kabuli_chr02 | 7656585                 | AA                              | GG                | 1945901415               |
| SNP_P3_18009_7656739 | NC_021161.1    | Ca_kabuli_chr02 | 7656739                 | AA                              | GG                | 1945901417               |
| SNP_P3_18010_7656989 | NC_021161.1    | Ca_kabuli_chr02 | 7656989                 | AA                              | GG                | 1945901419               |
| SNP_P3_18011_7657019 | NC_021161.1    | Ca_kabuli_chr02 | 7657019                 | CC                              | TT                | 1945901421               |

| SNPs IDs             | Chromosome IDs | Chromosomes     | Physical positions (bp) | CDC Frontier (Reference genome) | (Pusa 256 & HPNB) | NCBI SNPdb Accession IDs |
|----------------------|----------------|-----------------|-------------------------|---------------------------------|-------------------|--------------------------|
| SNP_P3_18014_7657166 | NC_021161.1    | Ca_kabuli_chr02 | 7657166                 | TT                              | CC                | 1945901422               |
| SNP_P3_18015_7657183 | NC_021161.1    | Ca_kabuli_chr02 | 7657183                 | GG                              | AA                | 1945901424               |
| SNP_P3_18016_7657185 | NC_021161.1    | Ca_kabuli_chr02 | 7657185                 | GG                              | AA                | 1945901426               |
| SNP_P3_18017_7657220 | NC_021161.1    | Ca_kabuli_chr02 | 7657220                 | TT                              | CC                | 1945901428               |
| SNP_P3_18018_7657226 | NC_021161.1    | Ca_kabuli_chr02 | 7657226                 | GG                              | AA                | 1945901429               |
| SNP_P3_18019_7657598 | NC_021161.1    | Ca_kabuli_chr02 | 7657598                 | TT                              | CC                | 1945901431               |
| SNP_P3_18020_7657664 | NC_021161.1    | Ca_kabuli_chr02 | 7657664                 | GG                              | AA                | 1945901433               |
| SNP_P3_18021_7657665 | NC_021161.1    | Ca_kabuli_chr02 | 7657665                 | GG                              | CC                | 1945901435               |
| SNP_P3_18023_7664798 | NC_021161.1    | Ca_kabuli_chr02 | 7664798                 | TT                              | GG                | 1945901437               |
| SNP_P3_18024_7665815 | NC_021161.1    | Ca_kabuli_chr02 | 7665815                 | TT                              | AA                | 1945901438               |
| SNP_P3_18025_7668478 | NC_021161.1    | Ca_kabuli_chr02 | 7668478                 | AA                              | CC                | 1945901440               |
| SNP_P3_18028_7669040 | NC_021161.1    | Ca_kabuli_chr02 | 7669040                 | AA                              | TT                | 1945901442               |
| SNP_P3_18029_7669043 | NC_021161.1    | Ca_kabuli_chr02 | 7669043                 | AA                              | TT                | 1945901444               |
| SNP_P3_18030_7669054 | NC_021161.1    | Ca_kabuli_chr02 | 7669054                 | CC                              | TT                | 1945901445               |
| SNP_P3_18031_7669067 | NC_021161.1    | Ca_kabuli_chr02 | 7669067                 | CC                              | TT                | 1945901447               |
| SNP_P3_18032_7669113 | NC_021161.1    | Ca_kabuli_chr02 | 7669113                 | GG                              | CC                | 1945901449               |
| SNP_P3_18034_7669973 | NC_021161.1    | Ca_kabuli_chr02 | 7669973                 | AA                              | TT                | 1945901451               |
| SNP_P3_18036_7670136 | NC_021161.1    | Ca_kabuli_chr02 | 7670136                 | TT                              | GG                | 1945901452               |
| SNP_P3_18037_7671033 | NC_021161.1    | Ca_kabuli_chr02 | 7671033                 | CC                              | TT                | 1945901454               |
| SNP_P3_18038_7671051 | NC_021161.1    | Ca_kabuli_chr02 | 7671051                 | AA                              | GG                | 1945901456               |
| SNP_P3_18039_7671057 | NC_021161.1    | Ca_kabuli_chr02 | 7671057                 | CC                              | GG                | 1945901458               |
| SNP_P3_18040_7671368 | NC_021161.1    | Ca_kabuli_chr02 | 7671368                 | TT                              | CC                | 1945901460               |
| SNP_P3_18041_7671465 | NC_021161.1    | Ca_kabuli_chr02 | 7671465                 | TT                              | CC                | 1945901461               |
| SNP_P3_18042_7674468 | NC_021161.1    | Ca_kabuli_chr02 | 7674468                 | TT                              | GG                | 1945901463               |
| SNP_P3_18043_7674489 | NC_021161.1    | Ca_kabuli_chr02 | 7674489                 | GG                              | TT                | 1945901465               |
| SNP_P3_18044_7674753 | NC_021161.1    | Ca_kabuli_chr02 | 7674753                 | TT                              | GG                | 1945901467               |
| SNP_P3_18045_7674754 | NC_021161.1    | Ca_kabuli_chr02 | 7674754                 | GG                              | TT                | 1945901468               |
| SNP_P3_18046_7674760 | NC_021161.1    | Ca_kabuli_chr02 | 7674760                 | AA                              | GG                | 1945901470               |
| SNP_P3_18047_7674769 | NC_021161.1    | Ca_kabuli_chr02 | 7674769                 | AA                              | TT                | 1945901472               |
| SNP_P3_18048_7676100 | NC_021161.1    | Ca_kabuli_chr02 | 7676100                 | AA                              | GG                | 1945901474               |
| SNP_P3_18051_7677277 | NC_021161.1    | Ca_kabuli_chr02 | 7677277                 | AA                              | GG                | 1945901475               |
| SNP_P3_18052_7677732 | NC_021161.1    | Ca_kabuli_chr02 | 7677732                 | GG                              | AA                | 1945901477               |
| SNP_P3_18053_7679317 | NC_021161.1    | Ca_kabuli_chr02 | 7679317                 | TT                              | CC                | 1945901479               |
| SNP_P3_18054_7680372 | NC_021161.1    | Ca_kabuli_chr02 | 7680372                 | AA                              | GG                | 1945901481               |
| SNP_P3_18055_7681056 | NC_021161.1    | Ca_kabuli_chr02 | 7681056                 | AA                              | CC                | 1945901483               |
| SNP_P3_18056_7682310 | NC_021161.1    | Ca_kabuli_chr02 | 7682310                 | AA                              | CC                | 1945901484               |
| SNP_P3_18057_7683548 | NC_021161.1    | Ca_kabuli_chr02 | 7683548                 | TT                              | AA                | 1945901486               |
| SNP_P3_18058_7684146 | NC_021161.1    | Ca_kabuli_chr02 | 7684146                 | GG                              | AA                | 1945901488               |
| SNP_P3_18060_7685067 | NC_021161.1    | Ca_kabuli_chr02 | 7685067                 | TT                              | CC                | 1945901490               |
| SNP_P3_18061_7686743 | NC_021161.1    | Ca_kabuli_chr02 | 7686743                 | GG                              | AA                | 1945901491               |
| SNP_P3_18062_7686780 | NC_021161.1    | Ca_kabuli_chr02 | 7686780                 | GG                              | CC                | 1945901493               |
| SNP_P3_18064_7689939 | NC_021161.1    | Ca_kabuli_chr02 | 7689939                 | GG                              | AA                | 1945901495               |

| SNPs IDs             | Chromosome IDs | Chromosomes     | Physical positions (bp) | CDC Frontier (Reference genome) | (Pusa 256 & HPNB) | NCBI SNPdb Accession IDs |
|----------------------|----------------|-----------------|-------------------------|---------------------------------|-------------------|--------------------------|
| SNP_P3_18065_7691410 | NC_021161.1    | Ca_kabuli_chr02 | 7691410                 | GG                              | TT                | 1945901497               |
| SNP_P3_18066_7691414 | NC_021161.1    | Ca_kabuli_chr02 | 7691414                 | CC                              | GG                | 1945901499               |
| SNP_P3_18067_7691415 | NC_021161.1    | Ca_kabuli_chr02 | 7691415                 | TT                              | CC                | 1945901500               |
| SNP_P3_18068_7691418 | NC_021161.1    | Ca_kabuli_chr02 | 7691418                 | AA                              | GG                | 1945901502               |
| SNP_P3_18069_7691448 | NC_021161.1    | Ca_kabuli_chr02 | 7691448                 | TT                              | CC                | 1945901504               |
| SNP_P3_18070_7691458 | NC_021161.1    | Ca_kabuli_chr02 | 7691458                 | GG                              | AA                | 1945901506               |
| SNP_P3_18071_7691463 | NC_021161.1    | Ca_kabuli_chr02 | 7691463                 | TT                              | CC                | 1945901507               |
| SNP_P3_18072_7694560 | NC_021161.1    | Ca_kabuli_chr02 | 7694560                 | AA                              | TT                | 1945901509               |
| SNP_P3_18073_7694983 | NC_021161.1    | Ca_kabuli_chr02 | 7694983                 | AA                              | TT                | 1945901511               |
| SNP_P3_18075_7697270 | NC_021161.1    | Ca_kabuli_chr02 | 7697270                 | CC                              | TT                | 1945901513               |
| SNP_P3_18078_7701722 | NC_021161.1    | Ca_kabuli_chr02 | 7701722                 | TT                              | CC                | 1945901514               |
| SNP_P3_18079_7702037 | NC_021161.1    | Ca_kabuli_chr02 | 7702037                 | TT                              | AA                | 1945901516               |
| SNP_P3_18080_7702066 | NC_021161.1    | Ca_kabuli_chr02 | 7702066                 | AA                              | GG                | 1945901518               |
| SNP_P3_18081_7702813 | NC_021161.1    | Ca_kabuli_chr02 | 7702813                 | AA                              | TT                | 1945901520               |
| SNP_P3_18082_7703082 | NC_021161.1    | Ca_kabuli_chr02 | 7703082                 | AA                              | GG                | 1945901521               |
| SNP_P3_18083_7705241 | NC_021161.1    | Ca_kabuli_chr02 | 7705241                 | TT                              | CC                | 1945901523               |
| SNP_P3_18085_7705682 | NC_021161.1    | Ca_kabuli_chr02 | 7705682                 | GG                              | AA                | 1945901525               |
| SNP_P3_18086_7705683 | NC_021161.1    | Ca_kabuli_chr02 | 7705683                 | AA                              | GG                | 1945901527               |
| SNP_P3_18088_7711949 | NC_021161.1    | Ca_kabuli_chr02 | 7711949                 | TT                              | GG                | 1945901529               |
| SNP_P3_18089_7712262 | NC_021161.1    | Ca_kabuli_chr02 | 7712262                 | AA                              | GG                | 1945901530               |
| SNP_P3_18090_7712313 | NC_021161.1    | Ca_kabuli_chr02 | 7712313                 | TT                              | CC                | 1945901532               |
| SNP_P3_18091_7713953 | NC_021161.1    | Ca_kabuli_chr02 | 7713953                 | GG                              | AA                | 1945901534               |
| SNP_P3_18092_7713962 | NC_021161.1    | Ca_kabuli_chr02 | 7713962                 | CC                              | GG                | 1945901536               |
| SNP_P3_18093_7714061 | NC_021161.1    | Ca_kabuli_chr02 | 7714061                 | TT                              | AA                | 1945901537               |
| SNP_P3_18095_7715065 | NC_021161.1    | Ca_kabuli_chr02 | 7715065                 | TT                              | CC                | 1945901539               |
| SNP_P3_18096_7715074 | NC_021161.1    | Ca_kabuli_chr02 | 7715074                 | AA                              | TT                | 1945901541               |
| SNP_P3_18097_7715446 | NC_021161.1    | Ca_kabuli_chr02 | 7715446                 | AA                              | GG                | 1945901543               |
| SNP_P3_18098_7715714 | NC_021161.1    | Ca_kabuli_chr02 | 7715714                 | GG                              | AA                | 1945901544               |
| SNP_P3_18099_7715949 | NC_021161.1    | Ca_kabuli_chr02 | 7715949                 | CC                              | TT                | 1945901546               |
| SNP_P3_18100_7715975 | NC_021161.1    | Ca_kabuli_chr02 | 7715975                 | AA                              | GG                | 1945901548               |
| SNP_P3_18101_7716145 | NC_021161.1    | Ca_kabuli_chr02 | 7716145                 | TT                              | CC                | 1945901550               |
| SNP_P3_18102_7717152 | NC_021161.1    | Ca_kabuli_chr02 | 7717152                 | TT                              | AA                | 1945901551               |
| SNP_P3_18104_7719206 | NC_021161.1    | Ca_kabuli_chr02 | 7719206                 | TT                              | CC                | 1945901553               |
| SNP_P3_18105_7719214 | NC_021161.1    | Ca_kabuli_chr02 | 7719214                 | TT                              | CC                | 1945901555               |
| SNP_P3_18106_7719220 | NC_021161.1    | Ca_kabuli_chr02 | 7719220                 | CC                              | TT                | 1945901557               |
| SNP_P3_18107_7719234 | NC_021161.1    | Ca_kabuli_chr02 | 7719234                 | CC                              | TT                | 1945901559               |
| SNP_P3_18108_7719243 | NC_021161.1    | Ca_kabuli_chr02 | 7719243                 | TT                              | AA                | 1945901560               |
| SNP_P3_18109_7719253 | NC_021161.1    | Ca_kabuli_chr02 | 7719253                 | TT                              | CC                | 1945901562               |
| SNP_P3_18110_7719277 | NC_021161.1    | Ca_kabuli_chr02 | 7719277                 | CC                              | TT                | 1945901564               |
| SNP_P3_18111_7720601 | NC_021161.1    | Ca_kabuli_chr02 | 7720601                 | AA                              | GG                | 1945901566               |
| SNP_P3_18114_7722117 | NC_021161.1    | Ca_kabuli_chr02 | 7722117                 | CC                              | TT                | 1945901567               |
| SNP_P3_18115_7723269 | NC_021161.1    | Ca_kabuli_chr02 | 7723269                 | GG                              | TT                | 1945901569               |

| SNPs IDs             | Chromosome IDs | Chromosomes     | Physical positions (bp) | CDC Frontier (Reference genome) | (Pusa 256 & HPNB) | NCBI SNPdb Accession IDs |
|----------------------|----------------|-----------------|-------------------------|---------------------------------|-------------------|--------------------------|
| SNP_P3_18117_7723620 | NC_021161.1    | Ca_kabuli_chr02 | 7723620                 | CC                              | TT                | 1945901571               |
| SNP_P3_18118_7723683 | NC_021161.1    | Ca_kabuli_chr02 | 7723683                 | TT                              | GG                | 1945901573               |
| SNP_P3_18119_7724688 | NC_021161.1    | Ca_kabuli_chr02 | 7724688                 | CC                              | GG                | 1945901574               |
| SNP_P3_18121_7724961 | NC_021161.1    | Ca_kabuli_chr02 | 7724961                 | AA                              | GG                | 1945901576               |
| SNP_P3_18122_7725117 | NC_021161.1    | Ca_kabuli_chr02 | 7725117                 | AA                              | TT                | 1945901578               |
| SNP_P3_18124_7727681 | NC_021161.1    | Ca_kabuli_chr02 | 7727681                 | GG                              | TT                | 1945901580               |
| SNP_P3_18125_7727899 | NC_021161.1    | Ca_kabuli_chr02 | 7727899                 | AA                              | GG                | 1945901582               |
| SNP_P3_18126_7727964 | NC_021161.1    | Ca_kabuli_chr02 | 7727964                 | TT                              | CC                | 1945901583               |
| SNP_P3_18127_7727982 | NC_021161.1    | Ca_kabuli_chr02 | 7727982                 | TT                              | CC                | 1945901585               |
| SNP_P3_18128_7728067 | NC_021161.1    | Ca_kabuli_chr02 | 7728067                 | CC                              | GG                | 1945901587               |
| SNP_P3_18129_7728069 | NC_021161.1    | Ca_kabuli_chr02 | 7728069                 | GG                              | AA                | 1945901589               |
| SNP_P3_18130_7728073 | NC_021161.1    | Ca_kabuli_chr02 | 7728073                 | AA                              | GG                | 1945901590               |
| SNP_P3_18131_7729042 | NC_021161.1    | Ca_kabuli_chr02 | 7729042                 | TT                              | CC                | 1945901592               |
| SNP_P3_18132_7729144 | NC_021161.1    | Ca_kabuli_chr02 | 7729144                 | GG                              | TT                | 1945901594               |
| SNP_P3_18133_7729473 | NC_021161.1    | Ca_kabuli_chr02 | 7729473                 | CC                              | AA                | 1945901596               |
| SNP_P3_18135_7735468 | NC_021161.1    | Ca_kabuli_chr02 | 7735468                 | GG                              | CC                | 1945901597               |
| SNP_P3_18136_7736132 | NC_021161.1    | Ca_kabuli_chr02 | 7736132                 | AA                              | CC                | 1945901599               |
| SNP_P3_18137_7738141 | NC_021161.1    | Ca_kabuli_chr02 | 7738141                 | CC                              | TT                | 1945901601               |
| SNP_P3_18138_7738269 | NC_021161.1    | Ca_kabuli_chr02 | 7738269                 | AA                              | GG                | 1945901603               |
| SNP_P3_18139_7738271 | NC_021161.1    | Ca_kabuli_chr02 | 7738271                 | AA                              | GG                | 1945901605               |
| SNP_P3_18140_7738281 | NC_021161.1    | Ca_kabuli_chr02 | 7738281                 | AA                              | GG                | 1945901606               |
| SNP_P3_18141_7738296 | NC_021161.1    | Ca_kabuli_chr02 | 7738296                 | GG                              | AA                | 1945901608               |
| SNP_P3_18142_7738423 | NC_021161.1    | Ca_kabuli_chr02 | 7738423                 | CC                              | GG                | 1945901610               |
| SNP_P3_18143_7738756 | NC_021161.1    | Ca_kabuli_chr02 | 7738756                 | TT                              | GG                | 1945901612               |
| SNP_P3_18144_7738816 | NC_021161.1    | Ca_kabuli_chr02 | 7738816                 | CC                              | TT                | 1945901613               |
| SNP_P3_18145_7739058 | NC_021161.1    | Ca_kabuli_chr02 | 7739058                 | AA                              | TT                | 1945901615               |
| SNP_P3_18147_7744969 | NC_021161.1    | Ca_kabuli_chr02 | 7744969                 | TT                              | GG                | 1945901617               |
| SNP_P3_18148_7744973 | NC_021161.1    | Ca_kabuli_chr02 | 7744973                 | GG                              | TT                | 1945901619               |
| SNP_P3_18150_7745268 | NC_021161.1    | Ca_kabuli_chr02 | 7745268                 | TT                              | AA                | 1945901620               |
| SNP_P3_18151_7745305 | NC_021161.1    | Ca_kabuli_chr02 | 7745305                 | TT                              | CC                | 1945901622               |
| SNP_P3_18152_7746725 | NC_021161.1    | Ca_kabuli_chr02 | 7746725                 | AA                              | GG                | 1945901624               |
| SNP_P3_18153_7748924 | NC_021161.1    | Ca_kabuli_chr02 | 7748924                 | CC                              | AA                | 1945901626               |
| SNP_P3_18154_7748926 | NC_021161.1    | Ca_kabuli_chr02 | 7748926                 | CC                              | AA                | 1945901627               |
| SNP_P3_18156_7749764 | NC_021161.1    | Ca_kabuli_chr02 | 7749764                 | TT                              | CC                | 1945901629               |
| SNP_P3_18157_7749930 | NC_021161.1    | Ca_kabuli_chr02 | 7749930                 | TT                              | CC                | 1945901631               |
| SNP_P3_18158_7749951 | NC_021161.1    | Ca_kabuli_chr02 | 7749951                 | CC                              | TT                | 1945901633               |
| SNP_P3_18159_7749954 | NC_021161.1    | Ca_kabuli_chr02 | 7749954                 | AA                              | GG                | 1945901635               |
| SNP_P3_18161_7750027 | NC_021161.1    | Ca_kabuli_chr02 | 7750027                 | AA                              | GG                | 1945901636               |
| SNP_P3_18162_7750044 | NC_021161.1    | Ca_kabuli_chr02 | 7750044                 | AA                              | GG                | 1945901638               |
| SNP_P3_18163_7750075 | NC_021161.1    | Ca_kabuli_chr02 | 7750075                 | TT                              | CC                | 1945901640               |
| SNP_P3_18164_7750167 | NC_021161.1    | Ca_kabuli_chr02 | 7750167                 | AA                              | CC                | 1945901642               |
| SNP_P3_18165_7750214 | NC_021161.1    | Ca_kabuli_chr02 | 7750214                 | AA                              | TT                | 1945901643               |

| SNPs IDs             | Chromosome IDs | Chromosomes     | Physical positions (bp) | CDC Frontier (Reference genome) | (Pusa 256 & HPNB) | NCBI SNPdb Accession IDs |
|----------------------|----------------|-----------------|-------------------------|---------------------------------|-------------------|--------------------------|
| SNP_P3_18166_7750216 | NC_021161.1    | Ca_kabuli_chr02 | 7750216                 | AA                              | GG                | 1945901645               |
| SNP_P3_18167_7750224 | NC_021161.1    | Ca_kabuli_chr02 | 7750224                 | TT                              | CC                | 1945901647               |
| SNP_P3_18168_7750233 | NC_021161.1    | Ca_kabuli_chr02 | 7750233                 | CC                              | AA                | 1945901649               |
| SNP_P3_18169_7750245 | NC_021161.1    | Ca_kabuli_chr02 | 7750245                 | AA                              | GG                | 1945901650               |
| SNP_P3_18170_7750251 | NC_021161.1    | Ca_kabuli_chr02 | 7750251                 | AA                              | GG                | 1945901652               |
| SNP_P3_18171_7750273 | NC_021161.1    | Ca_kabuli_chr02 | 7750273                 | GG                              | AA                | 1945901654               |
| SNP_P3_18172_7750298 | NC_021161.1    | Ca_kabuli_chr02 | 7750298                 | TT                              | CC                | 1945901656               |
| SNP_P3_18174_7750831 | NC_021161.1    | Ca_kabuli_chr02 | 7750831                 | CC                              | AA                | 1945901658               |
| SNP_P3_18175_7751405 | NC_021161.1    | Ca_kabuli_chr02 | 7751405                 | CC                              | TT                | 1945901659               |
| SNP_P3_18176_7752894 | NC_021161.1    | Ca_kabuli_chr02 | 7752894                 | TT                              | CC                | 1945901661               |
| SNP_P3_18177_7752958 | NC_021161.1    | Ca_kabuli_chr02 | 7752958                 | CC                              | TT                | 1945901663               |
| SNP_P3_18179_7753340 | NC_021161.1    | Ca_kabuli_chr02 | 7753340                 | TT                              | CC                | 1945901665               |
| SNP_P3_18180_7753353 | NC_021161.1    | Ca_kabuli_chr02 | 7753353                 | AA                              | CC                | 1945901666               |
| SNP_P3_18182_7753419 | NC_021161.1    | Ca_kabuli_chr02 | 7753419                 | GG                              | CC                | 1945901668               |
| SNP_P3_18183_7753425 | NC_021161.1    | Ca_kabuli_chr02 | 7753425                 | TT                              | CC                | 1945901670               |
| SNP_P3_18184_7755789 | NC_021161.1    | Ca_kabuli_chr02 | 7755789                 | AA                              | GG                | 1945901672               |
| SNP_P3_18185_7755829 | NC_021161.1    | Ca_kabuli_chr02 | 7755829                 | GG                              | AA                | 1945901673               |
| SNP_P3_18187_7756969 | NC_021161.1    | Ca_kabuli_chr02 | 7756969                 | AA                              | TT                | 1945901675               |
| SNP_P3_18188_7759184 | NC_021161.1    | Ca_kabuli_chr02 | 7759184                 | GG                              | AA                | 1945901677               |
| SNP_P3_18189_7759186 | NC_021161.1    | Ca_kabuli_chr02 | 7759186                 | GG                              | AA                | 1945901679               |
| SNP_P3_18191_7770688 | NC_021161.1    | Ca_kabuli_chr02 | 7770688                 | CC                              | TT                | 1945901680               |
| SNP_P3_18192_7770703 | NC_021161.1    | Ca_kabuli_chr02 | 7770703                 | TT                              | CC                | 1945901682               |
| SNP_P3_18193_7770717 | NC_021161.1    | Ca_kabuli_chr02 | 7770717                 | TT                              | AA                | 1945901684               |
| SNP_P3_18194_7771416 | NC_021161.1    | Ca_kabuli_chr02 | 7771416                 | AA                              | GG                | 1945901686               |
| SNP_P3_18195_7771601 | NC_021161.1    | Ca_kabuli_chr02 | 7771601                 | GG                              | AA                | 1945901688               |
| SNP_P3_18196_7771603 | NC_021161.1    | Ca_kabuli_chr02 | 7771603                 | AA                              | CC                | 1945901689               |
| SNP_P3_18199_7771795 | NC_021161.1    | Ca_kabuli_chr02 | 7771795                 | TT                              | CC                | 1945901691               |
| SNP_P3_18200_7772000 | NC_021161.1    | Ca_kabuli_chr02 | 7772000                 | TT                              | CC                | 1945901693               |
| SNP_P3_18202_7772308 | NC_021161.1    | Ca_kabuli_chr02 | 7772308                 | AA                              | GG                | 1945901695               |
| SNP_P3_18203_7772310 | NC_021161.1    | Ca_kabuli_chr02 | 7772310                 | CC                              | TT                | 1945901696               |
| SNP_P3_18205_7772542 | NC_021161.1    | Ca_kabuli_chr02 | 7772542                 | CC                              | AA                | 1945901698               |
| SNP_P3_18207_7772793 | NC_021161.1    | Ca_kabuli_chr02 | 7772793                 | CC                              | GG                | 1945901700               |
| SNP_P3_18208_7773454 | NC_021161.1    | Ca_kabuli_chr02 | 7773454                 | TT                              | CC                | 1945901702               |
| SNP_P3_18209_7773483 | NC_021161.1    | Ca_kabuli_chr02 | 7773483                 | TT                              | AA                | 1945901703               |
| SNP_P3_18213_7778919 | NC_021161.1    | Ca_kabuli_chr02 | 7778919                 | GG                              | TT                | 1945901705               |
| SNP_P3_18214_7778940 | NC_021161.1    | Ca_kabuli_chr02 | 7778940                 | CC                              | AA                | 1945901707               |
| SNP_P3_18215_7779390 | NC_021161.1    | Ca_kabuli_chr02 | 7779390                 | CC                              | TT                | 1945901709               |
| SNP_P3_18216_7780441 | NC_021161.1    | Ca_kabuli_chr02 | 7780441                 | AA                              | GG                | 1945901710               |
| SNP_P3_18218_7780817 | NC_021161.1    | Ca_kabuli_chr02 | 7780817                 | AA                              | CC                | 1945901712               |
| SNP_P3_18219_7783624 | NC_021161.1    | Ca_kabuli_chr02 | 7783624                 | TT                              | CC                | 1945901714               |
| SNP_P3_18220_7783647 | NC_021161.1    | Ca_kabuli_chr02 | 7783647                 | GG                              | AA                | 1945901716               |
| SNP_P3_18221_7783661 | NC_021161.1    | Ca_kabuli_chr02 | 7783661                 | TT                              | AA                | 1945901718               |

| SNPs IDs             | Chromosome IDs | Chromosomes     | Physical positions (bp) | CDC Frontier (Reference genome) | (Pusa 256 & HPNB) | NCBI SNPdb Accession IDs |
|----------------------|----------------|-----------------|-------------------------|---------------------------------|-------------------|--------------------------|
| SNP_P3_18222_7784226 | NC_021161.1    | Ca_kabuli_chr02 | 7784226                 | GG                              | CC                | 1945901719               |
| SNP_P3_18223_7784251 | NC_021161.1    | Ca_kabuli_chr02 | 7784251                 | GG                              | AA                | 1945901721               |
| SNP_P3_18224_7789252 | NC_021161.1    | Ca_kabuli_chr02 | 7789252                 | GG                              | CC                | 1945901723               |
| SNP_P3_18225_7789262 | NC_021161.1    | Ca_kabuli_chr02 | 7789262                 | CC                              | TT                | 1945901725               |
| SNP_P3_18226_7789264 | NC_021161.1    | Ca_kabuli_chr02 | 7789264                 | GG                              | TT                | 1945901726               |
| SNP_P3_18227_7789288 | NC_021161.1    | Ca_kabuli_chr02 | 7789288                 | GG                              | TT                | 1945901728               |
| SNP_P3_18229_7789550 | NC_021161.1    | Ca_kabuli_chr02 | 7789550                 | GG                              | TT                | 1945901730               |
| SNP_P3_18230_7792395 | NC_021161.1    | Ca_kabuli_chr02 | 7792395                 | TT                              | CC                | 1945901732               |
| SNP_P3_18231_7792936 | NC_021161.1    | Ca_kabuli_chr02 | 7792936                 | AA                              | GG                | 1945901733               |
| SNP_P3_18232_7792966 | NC_021161.1    | Ca_kabuli_chr02 | 7792966                 | AA                              | CC                | 1945901735               |
| SNP_P3_18233_7793083 | NC_021161.1    | Ca_kabuli_chr02 | 7793083                 | CC                              | TT                | 1945901737               |
| SNP_P3_18234_7793138 | NC_021161.1    | Ca_kabuli_chr02 | 7793138                 | TT                              | CC                | 1945901739               |
| SNP_P3_18235_7793178 | NC_021161.1    | Ca_kabuli_chr02 | 7793178                 | GG                              | AA                | 1945901740               |
| SNP_P3_18236_7793193 | NC_021161.1    | Ca_kabuli_chr02 | 7793193                 | CC                              | TT                | 1945901742               |
| SNP_P3_18238_7793472 | NC_021161.1    | Ca_kabuli_chr02 | 7793472                 | AA                              | TT                | 1945901744               |
| SNP_P3_18239_7793477 | NC_021161.1    | Ca_kabuli_chr02 | 7793477                 | TT                              | AA                | 1945901746               |
| SNP_P3_18240_7793487 | NC_021161.1    | Ca_kabuli_chr02 | 7793487                 | GG                              | TT                | 1945901748               |
| SNP_P3_18241_7795566 | NC_021161.1    | Ca_kabuli_chr02 | 7795566                 | GG                              | CC                | 1945901749               |
| SNP_P3_18242_7795570 | NC_021161.1    | Ca_kabuli_chr02 | 7795570                 | TT                              | CC                | 1945901751               |
| SNP_P3_18243_7795578 | NC_021161.1    | Ca_kabuli_chr02 | 7795578                 | CC                              | TT                | 1945901753               |
| SNP_P3_18244_7796953 | NC_021161.1    | Ca_kabuli_chr02 | 7796953                 | AA                              | GG                | 1945901755               |
| SNP_P3_18246_7797202 | NC_021161.1    | Ca_kabuli_chr02 | 7797202                 | TT                              | AA                | 1945901756               |
| SNP_P3_18247_7798746 | NC_021161.1    | Ca_kabuli_chr02 | 7798746                 | CC                              | TT                | 1945901758               |
| SNP_P3_18248_7798762 | NC_021161.1    | Ca_kabuli_chr02 | 7798762                 | AA                              | CC                | 1945901760               |
| SNP_P3_18250_7801126 | NC_021161.1    | Ca_kabuli_chr02 | 7801126                 | AA                              | CC                | 1945901762               |
| SNP_P3_18252_7802982 | NC_021161.1    | Ca_kabuli_chr02 | 7802982                 | CC                              | AA                | 1945901763               |
| SNP_P3_18253_7803032 | NC_021161.1    | Ca_kabuli_chr02 | 7803032                 | TT                              | CC                | 1945901765               |
| SNP_P3_18254_7803035 | NC_021161.1    | Ca_kabuli_chr02 | 7803035                 | CC                              | TT                | 1945901767               |
| SNP_P3_18255_7804995 | NC_021161.1    | Ca_kabuli_chr02 | 7804995                 | TT                              | AA                | 1945901769               |
| SNP_P3_18256_7807036 | NC_021161.1    | Ca_kabuli_chr02 | 7807036                 | AA                              | CC                | 1945901770               |
| SNP_P3_18257_7810039 | NC_021161.1    | Ca_kabuli_chr02 | 7810039                 | AA                              | TT                | 1945901772               |
| SNP_P3_18258_7810042 | NC_021161.1    | Ca_kabuli_chr02 | 7810042                 | TT                              | GG                | 1945901774               |
| SNP_P3_18259_7810122 | NC_021161.1    | Ca_kabuli_chr02 | 7810122                 | CC                              | TT                | 1945901776               |
| SNP_P3_18260_7810123 | NC_021161.1    | Ca_kabuli_chr02 | 7810123                 | AA                              | CC                | 1945901777               |
| SNP_P3_18261_7810792 | NC_021161.1    | Ca_kabuli_chr02 | 7810792                 | TT                              | GG                | 1945901779               |
| SNP_P3_18263_7812062 | NC_021161.1    | Ca_kabuli_chr02 | 7812062                 | AA                              | GG                | 1945901781               |
| SNP_P3_18264_7812232 | NC_021161.1    | Ca_kabuli_chr02 | 7812232                 | CC                              | TT                | 1945901783               |
| SNP_P3_18265_7812237 | NC_021161.1    | Ca_kabuli_chr02 | 7812237                 | GG                              | AA                | 1945901785               |
| SNP_P3_18266_7812298 | NC_021161.1    | Ca_kabuli_chr02 | 7812298                 | GG                              | AA                | 1945901786               |
| SNP_P3_18267_7812364 | NC_021161.1    | Ca_kabuli_chr02 | 7812364                 | GG                              | AA                | 1945901788               |
| SNP_P3_18268_7812500 | NC_021161.1    | Ca_kabuli_chr02 | 7812500                 | AA                              | GG                | 1945901790               |
| SNP_P3_18269_7812801 | NC_021161.1    | Ca_kabuli_chr02 | 7812801                 | GG                              | TT                | 1945901792               |

| SNPs IDs             | Chromosome IDs | Chromosomes     | Physical positions (bp) | CDC Frontier (Reference genome) | (Pusa 256 & HPNB) | NCBI SNPdb Accession IDs |
|----------------------|----------------|-----------------|-------------------------|---------------------------------|-------------------|--------------------------|
| SNP_P3_18270_7812809 | NC_021161.1    | Ca_kabuli_chr02 | 7812809                 | CC                              | TT                | 1945901793               |
| SNP_P3_18271_7812810 | NC_021161.1    | Ca_kabuli_chr02 | 7812810                 | TT                              | CC                | 1945901795               |
| SNP_P3_18272_7813155 | NC_021161.1    | Ca_kabuli_chr02 | 7813155                 | AA                              | GG                | 1945901797               |
| SNP_P3_18274_7813426 | NC_021161.1    | Ca_kabuli_chr02 | 7813426                 | AA                              | GG                | 1945901799               |
| SNP_P3_18275_7813429 | NC_021161.1    | Ca_kabuli_chr02 | 7813429                 | CC                              | TT                | 1945901800               |
| SNP_P3_18276_7813430 | NC_021161.1    | Ca_kabuli_chr02 | 7813430                 | TT                              | CC                | 1945901802               |
| SNP_P3_18277_7813459 | NC_021161.1    | Ca_kabuli_chr02 | 7813459                 | TT                              | CC                | 1945901804               |
| SNP_P3_18278_7813490 | NC_021161.1    | Ca_kabuli_chr02 | 7813490                 | CC                              | TT                | 1945901806               |
| SNP_P3_18279_7813498 | NC_021161.1    | Ca_kabuli_chr02 | 7813498                 | GG                              | AA                | 1945901807               |
| SNP_P3_18280_7813579 | NC_021161.1    | Ca_kabuli_chr02 | 7813579                 | GG                              | AA                | 1945901809               |
| SNP_P3_18281_7813584 | NC_021161.1    | Ca_kabuli_chr02 | 7813584                 | AA                              | GG                | 1945901811               |
| SNP_P3_18282_7813616 | NC_021161.1    | Ca_kabuli_chr02 | 7813616                 | TT                              | GG                | 1945901813               |
| SNP_P3_18283_7815564 | NC_021161.1    | Ca_kabuli_chr02 | 7815564                 | AA                              | GG                | 1945901814               |
| SNP_P3_18284_7815570 | NC_021161.1    | Ca_kabuli_chr02 | 7815570                 | CC                              | TT                | 1945901816               |
| SNP_P3_18285_7815575 | NC_021161.1    | Ca_kabuli_chr02 | 7815575                 | AA                              | CC                | 1945901818               |
| SNP_P3_18286_7815721 | NC_021161.1    | Ca_kabuli_chr02 | 7815721                 | TT                              | CC                | 1945901820               |
| SNP_P3_18287_7817260 | NC_021161.1    | Ca_kabuli_chr02 | 7817260                 | TT                              | GG                | 1945901821               |
| SNP_P3_18288_7817277 | NC_021161.1    | Ca_kabuli_chr02 | 7817277                 | TT                              | AA                | 1945901823               |
| SNP_P3_18289_7817305 | NC_021161.1    | Ca_kabuli_chr02 | 7817305                 | CC                              | TT                | 1945901825               |
| SNP_P3_18290_7817445 | NC_021161.1    | Ca_kabuli_chr02 | 7817445                 | TT                              | CC                | 1945901827               |
| SNP_P3_18291_7817515 | NC_021161.1    | Ca_kabuli_chr02 | 7817515                 | TT                              | AA                | 1945901829               |
| SNP_P3_18292_7817516 | NC_021161.1    | Ca_kabuli_chr02 | 7817516                 | TT                              | CC                | 1945901830               |
| SNP_P3_18294_7818114 | NC_021161.1    | Ca_kabuli_chr02 | 7818114                 | AA                              | CC                | 1945901832               |
| SNP_P3_18296_7818720 | NC_021161.1    | Ca_kabuli_chr02 | 7818720                 | AA                              | GG                | 1945901834               |
| SNP_P3_18297_7818722 | NC_021161.1    | Ca_kabuli_chr02 | 7818722                 | GG                              | AA                | 1945901836               |
| SNP_P3_18298_7818736 | NC_021161.1    | Ca_kabuli_chr02 | 7818736                 | TT                              | CC                | 1945901837               |
| SNP_P3_18299_7818742 | NC_021161.1    | Ca_kabuli_chr02 | 7818742                 | TT                              | CC                | 1945901839               |
| SNP_P3_18300_7818756 | NC_021161.1    | Ca_kabuli_chr02 | 7818756                 | AA                              | CC                | 1945901841               |
| SNP_P3_18301_7820502 | NC_021161.1    | Ca_kabuli_chr02 | 7820502                 | GG                              | CC                | 1945901843               |
| SNP_P3_18304_7825320 | NC_021161.1    | Ca_kabuli_chr02 | 7825320                 | CC                              | GG                | 1945901844               |
| SNP_P3_18305_7825360 | NC_021161.1    | Ca_kabuli_chr02 | 7825360                 | CC                              | TT                | 1945901846               |
| SNP_P3_18306_7825365 | NC_021161.1    | Ca_kabuli_chr02 | 7825365                 | CC                              | AA                | 1945901848               |
| SNP_P3_18307_7825366 | NC_021161.1    | Ca_kabuli_chr02 | 7825366                 | AA                              | TT                | 1945901850               |
| SNP_P3_18308_7825367 | NC_021161.1    | Ca_kabuli_chr02 | 7825367                 | AA                              | GG                | 1945901852               |
| SNP_P3_18309_7825380 | NC_021161.1    | Ca_kabuli_chr02 | 7825380                 | CC                              | TT                | 1945901853               |
| SNP_P3_18310_7844070 | NC_021161.1    | Ca_kabuli_chr02 | 7844070                 | CC                              | TT                | 1945901855               |
| SNP_P3_18313_7863068 | NC_021161.1    | Ca_kabuli_chr02 | 7863068                 | AA                              | TT                | 1945901857               |
| SNP_P3_18314_7864532 | NC_021161.1    | Ca_kabuli_chr02 | 7864532                 | GG                              | AA                | 1945901859               |
| SNP_P3_18315_7864535 | NC_021161.1    | Ca_kabuli_chr02 | 7864535                 | AA                              | TT                | 1945901860               |
| SNP_P3_18317_7882767 | NC_021161.1    | Ca_kabuli_chr02 | 7882767                 | TT                              | AA                | 1945901862               |
| SNP_P3_18318_7882768 | NC_021161.1    | Ca_kabuli_chr02 | 7882768                 | GG                              | AA                | 1945901864               |
| SNP_P3_18319_7883069 | NC_021161.1    | Ca_kabuli_chr02 | 7883069                 | GG                              | AA                | 1945901866               |



| SNPs IDs             | Chromosome IDs | Chromosomes     | Physical positions (bp) | CDC Frontier (Reference genome) | (Pusa 256 & HPNB) | NCBI SNPdb Accession IDs |
|----------------------|----------------|-----------------|-------------------------|---------------------------------|-------------------|--------------------------|
| SNP_P3_18320_7887079 | NC_021161.1    | Ca_kabuli_chr02 | 7887079                 | GG                              | CC                | 1945901867               |
| SNP_P3_18321_7887742 | NC_021161.1    | Ca_kabuli_chr02 | 7887742                 | GG                              | AA                | 1945901869               |
| SNP_P3_18322_7887765 | NC_021161.1    | Ca_kabuli_chr02 | 7887765                 | CC                              | GG                | 1945901871               |
| SNP_P3_18323_7887769 | NC_021161.1    | Ca_kabuli_chr02 | 7887769                 | TT                              | AA                | 1945901873               |
| SNP_P3_18324_7888898 | NC_021161.1    | Ca_kabuli_chr02 | 7888898                 | AA                              | GG                | 1945901874               |
| SNP_P3_18325_7889549 | NC_021161.1    | Ca_kabuli_chr02 | 7889549                 | TT                              | CC                | 1945901876               |
| SNP_P3_18326_7889578 | NC_021161.1    | Ca_kabuli_chr02 | 7889578                 | AA                              | GG                | 1945901878               |
| SNP_P3_18327_7890392 | NC_021161.1    | Ca_kabuli_chr02 | 7890392                 | AA                              | GG                | 1945901880               |
| SNP_P3_18328_7890828 | NC_021161.1    | Ca_kabuli_chr02 | 7890828                 | GG                              | AA                | 1945901882               |
| SNP_P3_18329_7891923 | NC_021161.1    | Ca_kabuli_chr02 | 7891923                 | GG                              | AA                | 1945901883               |
| SNP_P3_18330_7891929 | NC_021161.1    | Ca_kabuli_chr02 | 7891929                 | CC                              | AA                | 1945901885               |
| SNP_P3_18331_7892128 | NC_021161.1    | Ca_kabuli_chr02 | 7892128                 | TT                              | GG                | 1945901887               |
| SNP_P3_18332_7893074 | NC_021161.1    | Ca_kabuli_chr02 | 7893074                 | TT                              | CC                | 1945901889               |
| SNP_P3_18333_7893090 | NC_021161.1    | Ca_kabuli_chr02 | 7893090                 | TT                              | AA                | 1945901890               |
| SNP_P3_18335_7893156 | NC_021161.1    | Ca_kabuli_chr02 | 7893156                 | AA                              | TT                | 1945901892               |
| SNP_P3_18336_7893409 | NC_021161.1    | Ca_kabuli_chr02 | 7893409                 | TT                              | CC                | 1945901894               |
| SNP_P3_18338_7893507 | NC_021161.1    | Ca_kabuli_chr02 | 7893507                 | AA                              | TT                | 1945901896               |
| SNP_P3_18339_7893539 | NC_021161.1    | Ca_kabuli_chr02 | 7893539                 | AA                              | CC                | 1945901897               |
| SNP_P3_18340_7893713 | NC_021161.1    | Ca_kabuli_chr02 | 7893713                 | TT                              | CC                | 1945901899               |
| SNP_P3_18341_7894280 | NC_021161.1    | Ca_kabuli_chr02 | 7894280                 | CC                              | TT                | 1945901901               |
| SNP_P3_18342_7894513 | NC_021161.1    | Ca_kabuli_chr02 | 7894513                 | AA                              | GG                | 1945901903               |
| SNP_P3_18343_7894657 | NC_021161.1    | Ca_kabuli_chr02 | 7894657                 | TT                              | CC                | 1945901904               |
| SNP_P3_18344_7894691 | NC_021161.1    | Ca_kabuli_chr02 | 7894691                 | AA                              | TT                | 1945901906               |
| SNP_P3_18345_7894701 | NC_021161.1    | Ca_kabuli_chr02 | 7894701                 | AA                              | TT                | 1945901908               |
| SNP_P3_18346_7894728 | NC_021161.1    | Ca_kabuli_chr02 | 7894728                 | GG                              | AA                | 1945901910               |
| SNP_P3_18347_7894730 | NC_021161.1    | Ca_kabuli_chr02 | 7894730                 | GG                              | AA                | 1945901912               |
| SNP_P3_18349_7894766 | NC_021161.1    | Ca_kabuli_chr02 | 7894766                 | AA                              | GG                | 1945901913               |
| SNP_P3_18350_7897587 | NC_021161.1    | Ca_kabuli_chr02 | 7897587                 | AA                              | GG                | 1945901915               |
| SNP_P3_18351_7898310 | NC_021161.1    | Ca_kabuli_chr02 | 7898310                 | CC                              | TT                | 1945901917               |
| SNP_P3_18352_7898311 | NC_021161.1    | Ca_kabuli_chr02 | 7898311                 | AA                              | GG                | 1945901919               |
| SNP_P3_18353_7899381 | NC_021161.1    | Ca_kabuli_chr02 | 7899381                 | AA                              | GG                | 1945901920               |
| SNP_P3_18354_7899384 | NC_021161.1    | Ca_kabuli_chr02 | 7899384                 | AA                              | GG                | 1945901922               |
| SNP_P3_18355_7899578 | NC_021161.1    | Ca_kabuli_chr02 | 7899578                 | GG                              | AA                | 1945901924               |
| SNP_P3_18356_7899615 | NC_021161.1    | Ca_kabuli_chr02 | 7899615                 | GG                              | AA                | 1945901926               |
| SNP_P3_18357_7909611 | NC_021161.1    | Ca_kabuli_chr02 | 7909611                 | GG                              | AA                | 1945901927               |
| SNP_P3_18358_7913105 | NC_021161.1    | Ca_kabuli_chr02 | 7913105                 | GG                              | AA                | 1945901929               |
| SNP_P3_18359_7913577 | NC_021161.1    | Ca_kabuli_chr02 | 7913577                 | TT                              | CC                | 1945901931               |
| SNP_P3_18362_7915549 | NC_021161.1    | Ca_kabuli_chr02 | 7915549                 | GG                              | AA                | 1945901933               |
| SNP_P3_18363_7915569 | NC_021161.1    | Ca_kabuli_chr02 | 7915569                 | GG                              | CC                | 1945901935               |
| SNP_P3_18364_7915870 | NC_021161.1    | Ca_kabuli_chr02 | 7915870                 | AA                              | GG                | 1945901936               |
| SNP_P3_18365_7915874 | NC_021161.1    | Ca_kabuli_chr02 | 7915874                 | GG                              | AA                | 1945901938               |
| SNP_P3_18366_7915905 | NC_021161.1    | Ca_kabuli_chr02 | 7915905                 | GG                              | AA                | 1945901940               |

| SNPs IDs             | Chromosome IDs | Chromosomes     | Physical positions (bp) | CDC Frontier (Reference genome) | (Pusa 256 & HPNB) | NCBI SNPdb Accession IDs |
|----------------------|----------------|-----------------|-------------------------|---------------------------------|-------------------|--------------------------|
| SNP_P3_18367_7915910 | NC_021161.1    | Ca_kabuli_chr02 | 7915910                 | GG                              | AA                | 1945901942               |
| SNP_P3_18368_7916382 | NC_021161.1    | Ca_kabuli_chr02 | 7916382                 | CC                              | AA                | 1945901943               |
| SNP_P3_18370_7918799 | NC_021161.1    | Ca_kabuli_chr02 | 7918799                 | AA                              | TT                | 1945901945               |
| SNP_P3_18371_7918804 | NC_021161.1    | Ca_kabuli_chr02 | 7918804                 | CC                              | TT                | 1945901947               |
| SNP_P3_18372_7919044 | NC_021161.1    | Ca_kabuli_chr02 | 7919044                 | CC                              | AA                | 1945901949               |
| SNP_P3_18373_7919434 | NC_021161.1    | Ca_kabuli_chr02 | 7919434                 | TT                              | CC                | 1945901951               |
| SNP_P3_18374_7919447 | NC_021161.1    | Ca_kabuli_chr02 | 7919447                 | GG                              | CC                | 1945901952               |
| SNP_P3_18375_7919456 | NC_021161.1    | Ca_kabuli_chr02 | 7919456                 | TT                              | CC                | 1945901954               |
| SNP_P3_18376_7919605 | NC_021161.1    | Ca_kabuli_chr02 | 7919605                 | AA                              | TT                | 1945901956               |
| SNP_P3_18377_7919628 | NC_021161.1    | Ca_kabuli_chr02 | 7919628                 | TT                              | GG                | 1945901958               |
| SNP_P3_18378_7919630 | NC_021161.1    | Ca_kabuli_chr02 | 7919630                 | GG                              | AA                | 1945901959               |
| SNP_P3_18379_7920100 | NC_021161.1    | Ca_kabuli_chr02 | 7920100                 | AA                              | GG                | 1945901961               |
| SNP_P3_18380_7920385 | NC_021161.1    | Ca_kabuli_chr02 | 7920385                 | GG                              | AA                | 1945901963               |
| SNP_P3_18381_7920464 | NC_021161.1    | Ca_kabuli_chr02 | 7920464                 | CC                              | TT                | 1945901965               |
| SNP_P3_18382_7920611 | NC_021161.1    | Ca_kabuli_chr02 | 7920611                 | CC                              | GG                | 1945901966               |
| SNP_P3_18383_7920613 | NC_021161.1    | Ca_kabuli_chr02 | 7920613                 | TT                              | GG                | 1945901968               |
| SNP_P3_18384_7921314 | NC_021161.1    | Ca_kabuli_chr02 | 7921314                 | TT                              | CC                | 1945901970               |
| SNP_P3_18385_7921889 | NC_021161.1    | Ca_kabuli_chr02 | 7921889                 | AA                              | GG                | 1945901972               |
| SNP_P3_18386_7921905 | NC_021161.1    | Ca_kabuli_chr02 | 7921905                 | AA                              | CC                | 1945901974               |
| SNP_P3_18387_7921967 | NC_021161.1    | Ca_kabuli_chr02 | 7921967                 | TT                              | CC                | 1945901975               |
| SNP_P3_18388_7922256 | NC_021161.1    | Ca_kabuli_chr02 | 7922256                 | GG                              | AA                | 1945901977               |
| SNP_P3_18389_7922260 | NC_021161.1    | Ca_kabuli_chr02 | 7922260                 | CC                              | TT                | 1945901979               |
| SNP_P3_18390_7922297 | NC_021161.1    | Ca_kabuli_chr02 | 7922297                 | GG                              | AA                | 1945901981               |
| SNP_P3_18391_7922695 | NC_021161.1    | Ca_kabuli_chr02 | 7922695                 | CC                              | TT                | 1945901983               |
| SNP_P3_18392_7923101 | NC_021161.1    | Ca_kabuli_chr02 | 7923101                 | GG                              | AA                | 1945901984               |
| SNP_P3_18393_7923401 | NC_021161.1    | Ca_kabuli_chr02 | 7923401                 | GG                              | AA                | 1945901986               |
| SNP_P3_18394_7923414 | NC_021161.1    | Ca_kabuli_chr02 | 7923414                 | AA                              | CC                | 1945901988               |
| SNP_P3_18395_7923642 | NC_021161.1    | Ca_kabuli_chr02 | 7923642                 | AA                              | CC                | 1945901990               |
| SNP_P3_18396_7923654 | NC_021161.1    | Ca_kabuli_chr02 | 7923654                 | CC                              | TT                | 1945901992               |
| SNP_P3_18397_7924051 | NC_021161.1    | Ca_kabuli_chr02 | 7924051                 | GG                              | TT                | 1945901993               |
| SNP_P3_18398_7924210 | NC_021161.1    | Ca_kabuli_chr02 | 7924210                 | TT                              | AA                | 1945901995               |
| SNP_P3_18399_7924214 | NC_021161.1    | Ca_kabuli_chr02 | 7924214                 | TT                              | CC                | 1945901997               |
| SNP_P3_18400_7926366 | NC_021161.1    | Ca_kabuli_chr02 | 7926366                 | GG                              | AA                | 1945901999               |
| SNP_P3_18401_7926412 | NC_021161.1    | Ca_kabuli_chr02 | 7926412                 | AA                              | GG                | 1945902001               |
| SNP_P3_18403_7927459 | NC_021161.1    | Ca_kabuli_chr02 | 7927459                 | TT                              | CC                | 1945902002               |
| SNP_P3_18404_7927490 | NC_021161.1    | Ca_kabuli_chr02 | 7927490                 | TT                              | CC                | 1945902004               |
| SNP_P3_18405_7928034 | NC_021161.1    | Ca_kabuli_chr02 | 7928034                 | AA                              | GG                | 1945902006               |
| SNP_P3_18410_7933271 | NC_021161.1    | Ca_kabuli_chr02 | 7933271                 | CC                              | TT                | 1945902008               |
| SNP_P3_18412_7933957 | NC_021161.1    | Ca_kabuli_chr02 | 7933957                 | GG                              | AA                | 1945902010               |
| SNP_P3_18413_7934361 | NC_021161.1    | Ca_kabuli_chr02 | 7934361                 | CC                              | TT                | 1945902011               |
| SNP_P3_18414_7935407 | NC_021161.1    | Ca_kabuli_chr02 | 7935407                 | GG                              | AA                | 1945902013               |
| SNP_P3_18415_7935457 | NC_021161.1    | Ca_kabuli_chr02 | 7935457                 | TT                              | CC                | 1945902015               |

| SNPs IDs             | Chromosome IDs | Chromosomes     | Physical positions (bp) | CDC Frontier (Reference genome) | (Pusa 256 & HPNB) | NCBI SNPdb Accession IDs |
|----------------------|----------------|-----------------|-------------------------|---------------------------------|-------------------|--------------------------|
| SNP_P3_18416_7935690 | NC_021161.1    | Ca_kabuli_chr02 | 7935690                 | GG                              | AA                | 1945902017               |
| SNP_P3_18417_7935756 | NC_021161.1    | Ca_kabuli_chr02 | 7935756                 | CC                              | TT                | 1945902018               |
| SNP_P3_18418_7935767 | NC_021161.1    | Ca_kabuli_chr02 | 7935767                 | GG                              | AA                | 1945902020               |
| SNP_P3_18419_7935828 | NC_021161.1    | Ca_kabuli_chr02 | 7935828                 | TT                              | CC                | 1945902022               |
| SNP_P3_18420_7935836 | NC_021161.1    | Ca_kabuli_chr02 | 7935836                 | CC                              | TT                | 1945902024               |
| SNP_P3_18421_7935859 | NC_021161.1    | Ca_kabuli_chr02 | 7935859                 | TT                              | AA                | 1945902026               |
| SNP_P3_18422_7936013 | NC_021161.1    | Ca_kabuli_chr02 | 7936013                 | AA                              | TT                | 1945902027               |
| SNP_P3_18423_7936481 | NC_021161.1    | Ca_kabuli_chr02 | 7936481                 | CC                              | TT                | 1945902029               |
| SNP_P3_18424_7936493 | NC_021161.1    | Ca_kabuli_chr02 | 7936493                 | CC                              | TT                | 1945902031               |
| SNP_P3_18425_7936550 | NC_021161.1    | Ca_kabuli_chr02 | 7936550                 | CC                              | TT                | 1945902033               |
| SNP_P3_18426_7936551 | NC_021161.1    | Ca_kabuli_chr02 | 7936551                 | AA                              | GG                | 1945902034               |
| SNP_P3_18427_7936619 | NC_021161.1    | Ca_kabuli_chr02 | 7936619                 | TT                              | CC                | 1945902036               |
| SNP_P3_18428_7936950 | NC_021161.1    | Ca_kabuli_chr02 | 7936950                 | AA                              | CC                | 1945902038               |
| SNP_P3_18429_7936955 | NC_021161.1    | Ca_kabuli_chr02 | 7936955                 | AA                              | GG                | 1945902040               |
| SNP_P3_18430_7936957 | NC_021161.1    | Ca_kabuli_chr02 | 7936957                 | GG                              | TT                | 1945902042               |
| SNP_P3_18431_7936959 | NC_021161.1    | Ca_kabuli_chr02 | 7936959                 | GG                              | AA                | 1945902043               |
| SNP_P3_18432_7936965 | NC_021161.1    | Ca_kabuli_chr02 | 7936965                 | TT                              | CC                | 1945902045               |
| SNP_P3_18433_7937020 | NC_021161.1    | Ca_kabuli_chr02 | 7937020                 | TT                              | GG                | 1945902047               |
| SNP_P3_18434_7937024 | NC_021161.1    | Ca_kabuli_chr02 | 7937024                 | AA                              | GG                | 1945902049               |
| SNP_P3_18435_7937041 | NC_021161.1    | Ca_kabuli_chr02 | 7937041                 | AA                              | TT                | 1945902050               |
| SNP_P3_18436_7938128 | NC_021161.1    | Ca_kabuli_chr02 | 7938128                 | CC                              | GG                | 1945902052               |
| SNP_P3_18437_7938390 | NC_021161.1    | Ca_kabuli_chr02 | 7938390                 | GG                              | TT                | 1945902054               |
| SNP_P3_18438_7938466 | NC_021161.1    | Ca_kabuli_chr02 | 7938466                 | GG                              | CC                | 1945902056               |
| SNP_P3_18440_7938890 | NC_021161.1    | Ca_kabuli_chr02 | 7938890                 | TT                              | CC                | 1945902058               |
| SNP_P3_18441_7939316 | NC_021161.1    | Ca_kabuli_chr02 | 7939316                 | TT                              | CC                | 1945902059               |
| SNP_P3_18444_7940162 | NC_021161.1    | Ca_kabuli_chr02 | 7940162                 | AA                              | GG                | 1945902061               |
| SNP_P3_18445_7940197 | NC_021161.1    | Ca_kabuli_chr02 | 7940197                 | GG                              | CC                | 1945902063               |
| SNP_P3_18447_7941496 | NC_021161.1    | Ca_kabuli_chr02 | 7941496                 | GG                              | CC                | 1945902065               |
| SNP_P3_18449_7947469 | NC_021161.1    | Ca_kabuli_chr02 | 7947469                 | TT                              | CC                | 1945902066               |
| SNP_P3_18450_7947972 | NC_021161.1    | Ca_kabuli_chr02 | 7947972                 | AA                              | TT                | 1945902068               |
| SNP_P3_18451_7948021 | NC_021161.1    | Ca_kabuli_chr02 | 7948021                 | CC                              | GG                | 1945902070               |
| SNP_P3_18452_7948722 | NC_021161.1    | Ca_kabuli_chr02 | 7948722                 | TT                              | CC                | 1945902072               |
| SNP_P3_18453_7962686 | NC_021161.1    | Ca_kabuli_chr02 | 7962686                 | TT                              | CC                | 1945902074               |
| SNP_P3_18454_7976077 | NC_021161.1    | Ca_kabuli_chr02 | 7976077                 | AA                              | TT                | 1945902075               |
| SNP_P3_18455_7977506 | NC_021161.1    | Ca_kabuli_chr02 | 7977506                 | AA                              | GG                | 1945902077               |
| SNP_P3_18457_8000933 | NC_021161.1    | Ca_kabuli_chr02 | 8000933                 | GG                              | AA                | 1945902079               |
| SNP_P3_18458_8005170 | NC_021161.1    | Ca_kabuli_chr02 | 8005170                 | AA                              | GG                | 1945902081               |
| SNP_P3_18459_8005421 | NC_021161.1    | Ca_kabuli_chr02 | 8005421                 | CC                              | GG                | 1945902082               |
| SNP_P3_18460_8005445 | NC_021161.1    | Ca_kabuli_chr02 | 8005445                 | AA                              | TT                | 1945902084               |
| SNP_P3_18461_8005487 | NC_021161.1    | Ca_kabuli_chr02 | 8005487                 | GG                              | AA                | 1945902086               |
| SNP_P3_18462_8005500 | NC_021161.1    | Ca_kabuli_chr02 | 8005500                 | AA                              | GG                | 1945902088               |
| SNP_P3_18463_8005534 | NC_021161.1    | Ca_kabuli_chr02 | 8005534                 | GG                              | AA                | 1945902090               |

| SNPs IDs             | Chromosome IDs | Chromosomes     | Physical positions (bp) | CDC Frontier (Reference genome) | (Pusa 256 & HPNB) | NCBI SNPdb Accession IDs |
|----------------------|----------------|-----------------|-------------------------|---------------------------------|-------------------|--------------------------|
| SNP_P3_18464_8005544 | NC_021161.1    | Ca_kabuli_chr02 | 8005544                 | AA                              | GG                | 1945902091               |
| SNP_P3_18465_8005546 | NC_021161.1    | Ca_kabuli_chr02 | 8005546                 | CC                              | TT                | 1945902093               |
| SNP_P3_18466_8005614 | NC_021161.1    | Ca_kabuli_chr02 | 8005614                 | TT                              | AA                | 1945902095               |
| SNP_P3_18467_8005624 | NC_021161.1    | Ca_kabuli_chr02 | 8005624                 | TT                              | CC                | 1945902097               |
| SNP_P3_18468_8005637 | NC_021161.1    | Ca_kabuli_chr02 | 8005637                 | AA                              | CC                | 1945902098               |
| SNP_P3_18469_8005661 | NC_021161.1    | Ca_kabuli_chr02 | 8005661                 | AA                              | GG                | 1945902100               |
| SNP_P3_18470_8005704 | NC_021161.1    | Ca_kabuli_chr02 | 8005704                 | AA                              | CC                | 1945902102               |
| SNP_P3_18471_8005747 | NC_021161.1    | Ca_kabuli_chr02 | 8005747                 | AA                              | GG                | 1945902104               |
| SNP_P3_18472_8005852 | NC_021161.1    | Ca_kabuli_chr02 | 8005852                 | CC                              | GG                | 1945902106               |
| SNP_P3_18473_8006030 | NC_021161.1    | Ca_kabuli_chr02 | 8006030                 | TT                              | CC                | 1945902107               |
| SNP_P3_18474_8006201 | NC_021161.1    | Ca_kabuli_chr02 | 8006201                 | AA                              | GG                | 1945902109               |
| SNP_P3_18475_8010680 | NC_021161.1    | Ca_kabuli_chr02 | 8010680                 | TT                              | AA                | 1945902111               |
| SNP_P3_18476_8015625 | NC_021161.1    | Ca_kabuli_chr02 | 8015625                 | AA                              | GG                | 1945902113               |
| SNP_P3_18478_8025265 | NC_021161.1    | Ca_kabuli_chr02 | 8025265                 | TT                              | CC                | 1945902114               |
| SNP_P3_18479_8025283 | NC_021161.1    | Ca_kabuli_chr02 | 8025283                 | AA                              | GG                | 1945902116               |
| SNP_P3_18480_8042371 | NC_021161.1    | Ca_kabuli_chr02 | 8042371                 | TT                              | CC                | 1945902118               |
| SNP_P3_18481_8051540 | NC_021161.1    | Ca_kabuli_chr02 | 8051540                 | AA                              | CC                | 1945902120               |
| SNP_P3_18483_8068278 | NC_021161.1    | Ca_kabuli_chr02 | 8068278                 | TT                              | CC                | 1945902122               |
| SNP_P3_18486_8163190 | NC_021161.1    | Ca_kabuli_chr02 | 8163190                 | TT                              | CC                | 1945902123               |
| SNP_P3_18487_8163210 | NC_021161.1    | Ca_kabuli_chr02 | 8163210                 | GG                              | AA                | 1945902125               |
| SNP_P3_18488_8163246 | NC_021161.1    | Ca_kabuli_chr02 | 8163246                 | CC                              | TT                | 1945902127               |
| SNP_P3_18489_8163280 | NC_021161.1    | Ca_kabuli_chr02 | 8163280                 | GG                              | AA                | 1945902129               |
| SNP_P3_18491_8191792 | NC_021161.1    | Ca_kabuli_chr02 | 8191792                 | CC                              | AA                | 1945902130               |
| SNP_P3_18492_8191856 | NC_021161.1    | Ca_kabuli_chr02 | 8191856                 | AA                              | GG                | 1945902132               |
| SNP_P3_18493_8227771 | NC_021161.1    | Ca_kabuli_chr02 | 8227771                 | CC                              | TT                | 1945902134               |
| SNP_P3_18494_8228432 | NC_021161.1    | Ca_kabuli_chr02 | 8228432                 | CC                              | TT                | 1945902136               |
| SNP_P3_18495_8228471 | NC_021161.1    | Ca_kabuli_chr02 | 8228471                 | AA                              | GG                | 1945902138               |
| SNP_P3_18496_8228505 | NC_021161.1    | Ca_kabuli_chr02 | 8228505                 | CC                              | TT                | 1945902139               |
| SNP_P3_18497_8228506 | NC_021161.1    | Ca_kabuli_chr02 | 8228506                 | TT                              | GG                | 1945902141               |
| SNP_P3_18498_8228709 | NC_021161.1    | Ca_kabuli_chr02 | 8228709                 | AA                              | TT                | 1945902143               |
| SNP_P3_18499_8269876 | NC_021161.1    | Ca_kabuli_chr02 | 8269876                 | TT                              | GG                | 1945902145               |
| SNP_P3_18500_8269877 | NC_021161.1    | Ca_kabuli_chr02 | 8269877                 | TT                              | GG                | 1945902146               |
| SNP_P3_18501_8279069 | NC_021161.1    | Ca_kabuli_chr02 | 8279069                 | AA                              | CC                | 1945902148               |
| SNP_P3_18502_8291820 | NC_021161.1    | Ca_kabuli_chr02 | 8291820                 | AA                              | GG                | 1945902150               |
| SNP_P3_18509_8417944 | NC_021161.1    | Ca_kabuli_chr02 | 8417944                 | AA                              | CC                | 1945902152               |
| SNP_P3_18510_8420039 | NC_021161.1    | Ca_kabuli_chr02 | 8420039                 | AA                              | TT                | 1945902154               |
| SNP_P3_18511_8420048 | NC_021161.1    | Ca_kabuli_chr02 | 8420048                 | GG                              | AA                | 1945902155               |
| SNP_P3_18512_8420051 | NC_021161.1    | Ca_kabuli_chr02 | 8420051                 | GG                              | AA                | 1945902157               |
| SNP_P3_18514_8420352 | NC_021161.1    | Ca_kabuli_chr02 | 8420352                 | CC                              | TT                | 1945902159               |
| SNP_P3_18515_8420560 | NC_021161.1    | Ca_kabuli_chr02 | 8420560                 | AA                              | CC                | 1945902161               |
| SNP_P3_18516_8420671 | NC_021161.1    | Ca_kabuli_chr02 | 8420671                 | TT                              | AA                | 1945902162               |
| SNP_P3_18517_8423651 | NC_021161.1    | Ca_kabuli_chr02 | 8423651                 | AA                              | GG                | 1945902164               |

| SNPs IDs             | Chromosome IDs | Chromosomes     | Physical positions (bp) | CDC Frontier (Reference genome) | (Pusa 256 & HPNB) | NCBI SNPdb Accession IDs |
|----------------------|----------------|-----------------|-------------------------|---------------------------------|-------------------|--------------------------|
| SNP_P3_18518_8423683 | NC_021161.1    | Ca_kabuli_chr02 | 8423683                 | GG                              | AA                | 1945902166               |
| SNP_P3_18519_8425858 | NC_021161.1    | Ca_kabuli_chr02 | 8425858                 | AA                              | TT                | 1945902168               |
| SNP_P3_18520_8428868 | NC_021161.1    | Ca_kabuli_chr02 | 8428868                 | TT                              | CC                | 1945902169               |
| SNP_P3_18521_8433706 | NC_021161.1    | Ca_kabuli_chr02 | 8433706                 | GG                              | CC                | 1945902171               |
| SNP_P3_18522_8434653 | NC_021161.1    | Ca_kabuli_chr02 | 8434653                 | AA                              | TT                | 1945902173               |
| SNP_P3_18523_8435002 | NC_021161.1    | Ca_kabuli_chr02 | 8435002                 | TT                              | CC                | 1945902175               |
| SNP_P3_18524_8435038 | NC_021161.1    | Ca_kabuli_chr02 | 8435038                 | TT                              | CC                | 1945902177               |
| SNP_P3_18526_8462487 | NC_021161.1    | Ca_kabuli_chr02 | 8462487                 | TT                              | CC                | 1945902178               |
| SNP_P3_18527_8478740 | NC_021161.1    | Ca_kabuli_chr02 | 8478740                 | AA                              | CC                | 1945902180               |
| SNP_P3_18528_8478767 | NC_021161.1    | Ca_kabuli_chr02 | 8478767                 | GG                              | TT                | 1945902182               |
| SNP_P3_18530_8478860 | NC_021161.1    | Ca_kabuli_chr02 | 8478860                 | GG                              | CC                | 1945902184               |
| SNP_P3_18531_8478862 | NC_021161.1    | Ca_kabuli_chr02 | 8478862                 | GG                              | TT                | 1945902185               |
| SNP_P3_18533_8478939 | NC_021161.1    | Ca_kabuli_chr02 | 8478939                 | CC                              | AA                | 1945902187               |
| SNP_P3_18534_8479011 | NC_021161.1    | Ca_kabuli_chr02 | 8479011                 | GG                              | AA                | 1945902189               |
| SNP_P3_18535_8479012 | NC_021161.1    | Ca_kabuli_chr02 | 8479012                 | TT                              | AA                | 1945902191               |
| SNP_P3_18536_8479013 | NC_021161.1    | Ca_kabuli_chr02 | 8479013                 | GG                              | AA                | 1945902193               |
| SNP_P3_18537_8479119 | NC_021161.1    | Ca_kabuli_chr02 | 8479119                 | TT                              | AA                | 1945902194               |
| SNP_P3_18538_8479141 | NC_021161.1    | Ca_kabuli_chr02 | 8479141                 | TT                              | AA                | 1945902196               |
| SNP_P3_18539_8479455 | NC_021161.1    | Ca_kabuli_chr02 | 8479455                 | CC                              | TT                | 1945902198               |
| SNP_P3_18540_8479579 | NC_021161.1    | Ca_kabuli_chr02 | 8479579                 | CC                              | TT                | 1945902200               |
| SNP_P3_18541_8479616 | NC_021161.1    | Ca_kabuli_chr02 | 8479616                 | GG                              | AA                | 1945902201               |
| SNP_P3_18542_8479622 | NC_021161.1    | Ca_kabuli_chr02 | 8479622                 | GG                              | CC                | 1945902203               |
| SNP_P3_18543_8479643 | NC_021161.1    | Ca_kabuli_chr02 | 8479643                 | AA                              | GG                | 1945902205               |
| SNP_P3_18544_8479662 | NC_021161.1    | Ca_kabuli_chr02 | 8479662                 | GG                              | AA                | 1945902207               |
| SNP_P3_18545_8479675 | NC_021161.1    | Ca_kabuli_chr02 | 8479675                 | GG                              | AA                | 1945902209               |
| SNP_P3_18546_8479746 | NC_021161.1    | Ca_kabuli_chr02 | 8479746                 | AA                              | GG                | 1945902210               |
| SNP_P3_18547_8479768 | NC_021161.1    | Ca_kabuli_chr02 | 8479768                 | GG                              | AA                | 1945902212               |
| SNP_P3_18548_8479795 | NC_021161.1    | Ca_kabuli_chr02 | 8479795                 | AA                              | GG                | 1945902214               |
| SNP_P3_18549_8479829 | NC_021161.1    | Ca_kabuli_chr02 | 8479829                 | TT                              | CC                | 1945902216               |
| SNP_P3_18550_8479927 | NC_021161.1    | Ca_kabuli_chr02 | 8479927                 | TT                              | CC                | 1945902217               |
| SNP_P3_18551_8479947 | NC_021161.1    | Ca_kabuli_chr02 | 8479947                 | AA                              | GG                | 1945902219               |
| SNP_P3_18552_8480020 | NC_021161.1    | Ca_kabuli_chr02 | 8480020                 | GG                              | CC                | 1945902221               |
| SNP_P3_18553_8542285 | NC_021161.1    | Ca_kabuli_chr02 | 8542285                 | TT                              | CC                | 1945902223               |
| SNP_P3_18554_8548814 | NC_021161.1    | Ca_kabuli_chr02 | 8548814                 | CC                              | TT                | 1945902225               |
| SNP_P3_18555_8553269 | NC_021161.1    | Ca_kabuli_chr02 | 8553269                 | CC                              | TT                | 1945902226               |
| SNP_P3_18556_8553317 | NC_021161.1    | Ca_kabuli_chr02 | 8553317                 | GG                              | AA                | 1945902228               |
| SNP_P3_18557_8553321 | NC_021161.1    | Ca_kabuli_chr02 | 8553321                 | TT                              | AA                | 1945902230               |
| SNP_P3_18558_8553396 | NC_021161.1    | Ca_kabuli_chr02 | 8553396                 | AA                              | CC                | 1945902232               |
| SNP_P3_18559_8553397 | NC_021161.1    | Ca_kabuli_chr02 | 8553397                 | TT                              | CC                | 1945902233               |
| SNP_P3_18560_8554255 | NC_021161.1    | Ca_kabuli_chr02 | 8554255                 | CC                              | TT                | 1945902235               |
| SNP_P3_18561_8560038 | NC_021161.1    | Ca_kabuli_chr02 | 8560038                 | TT                              | GG                | 1945902237               |
| SNP_P3_18562_8586851 | NC_021161.1    | Ca_kabuli_chr02 | 8586851                 | AA                              | TT                | 1945902239               |

| SNPs IDs             | Chromosome IDs | Chromosomes     | Physical positions (bp) | CDC Frontier (Reference genome) | (Pusa 256 & HPNB) | NCBI SNPdb Accession IDs |
|----------------------|----------------|-----------------|-------------------------|---------------------------------|-------------------|--------------------------|
| SNP_P3_18563_8597129 | NC_021161.1    | Ca_kabuli_chr02 | 8597129                 | GG                              | AA                | 1945902241               |
| SNP_P3_18564_8664225 | NC_021161.1    | Ca_kabuli_chr02 | 8664225                 | TT                              | GG                | 1945902242               |
| SNP_P3_18565_8664332 | NC_021161.1    | Ca_kabuli_chr02 | 8664332                 | TT                              | GG                | 1945902244               |
| SNP_P3_18567_8699947 | NC_021161.1    | Ca_kabuli_chr02 | 8699947                 | AA                              | TT                | 1945902246               |
| SNP_P3_18568_8716399 | NC_021161.1    | Ca_kabuli_chr02 | 8716399                 | TT                              | CC                | 1945902248               |
| SNP_P3_18570_8723907 | NC_021161.1    | Ca_kabuli_chr02 | 8723907                 | GG                              | CC                | 1945902249               |
| SNP_P3_18571_8723930 | NC_021161.1    | Ca_kabuli_chr02 | 8723930                 | AA                              | GG                | 1945902251               |
| SNP_P3_18572_8723944 | NC_021161.1    | Ca_kabuli_chr02 | 8723944                 | TT                              | CC                | 1945902253               |
| SNP_P3_18573_8724174 | NC_021161.1    | Ca_kabuli_chr02 | 8724174                 | AA                              | GG                | 1945902255               |
| SNP_P3_18574_8749012 | NC_021161.1    | Ca_kabuli_chr02 | 8749012                 | AA                              | GG                | 1945902257               |
| SNP_P3_18575_8752454 | NC_021161.1    | Ca_kabuli_chr02 | 8752454                 | AA                              | GG                | 1945902258               |
| SNP_P3_18576_8752779 | NC_021161.1    | Ca_kabuli_chr02 | 8752779                 | AA                              | TT                | 1945902260               |
| SNP_P3_18577_8752783 | NC_021161.1    | Ca_kabuli_chr02 | 8752783                 | TT                              | CC                | 1945902262               |
| SNP_P3_18578_8761432 | NC_021161.1    | Ca_kabuli_chr02 | 8761432                 | GG                              | AA                | 1945902264               |
| SNP_P3_18579_8763351 | NC_021161.1    | Ca_kabuli_chr02 | 8763351                 | TT                              | GG                | 1945902265               |
| SNP_P3_18580_8808469 | NC_021161.1    | Ca_kabuli_chr02 | 8808469                 | TT                              | AA                | 1945902267               |
| SNP_P3_18581_8821604 | NC_021161.1    | Ca_kabuli_chr02 | 8821604                 | TT                              | GG                | 1945902269               |
| SNP_P3_18583_9256869 | NC_021161.1    | Ca_kabuli_chr02 | 9256869                 | CC                              | TT                | 1945902271               |
| SNP_P3_18584_9272879 | NC_021161.1    | Ca_kabuli_chr02 | 9272879                 | CC                              | GG                | 1945902273               |
| SNP_P3_18585_9291351 | NC_021161.1    | Ca_kabuli_chr02 | 9291351                 | GG                              | TT                | 1945902274               |
| SNP_P3_18586_9305088 | NC_021161.1    | Ca_kabuli_chr02 | 9305088                 | CC                              | GG                | 1945902276               |
| SNP_P3_18587_9311830 | NC_021161.1    | Ca_kabuli_chr02 | 9311830                 | CC                              | TT                | 1945902278               |
| SNP_P3_18588_9311834 | NC_021161.1    | Ca_kabuli_chr02 | 9311834                 | AA                              | GG                | 1945902280               |
| SNP_P3_18589_9311854 | NC_021161.1    | Ca_kabuli_chr02 | 9311854                 | CC                              | GG                | 1945902281               |
| SNP_P3_18590_9312947 | NC_021161.1    | Ca_kabuli_chr02 | 9312947                 | AA                              | GG                | 1945902283               |
| SNP_P3_18591_9324150 | NC_021161.1    | Ca_kabuli_chr02 | 9324150                 | GG                              | AA                | 1945902285               |
| SNP_P3_18592_9352304 | NC_021161.1    | Ca_kabuli_chr02 | 9352304                 | AA                              | GG                | 1945902287               |
| SNP_P3_18593_9360423 | NC_021161.1    | Ca_kabuli_chr02 | 9360423                 | TT                              | GG                | 1945902289               |
| SNP_P3_18595_9396760 | NC_021161.1    | Ca_kabuli_chr02 | 9396760                 | GG                              | AA                | 1945902290               |
| SNP_P3_18596_9400907 | NC_021161.1    | Ca_kabuli_chr02 | 9400907                 | CC                              | TT                | 1945902292               |
| SNP_P3_18597_9405386 | NC_021161.1    | Ca_kabuli_chr02 | 9405386                 | AA                              | GG                | 1945902294               |
| SNP_P3_18598_9407858 | NC_021161.1    | Ca_kabuli_chr02 | 9407858                 | TT                              | CC                | 1945902296               |
| SNP_P3_18599_9408298 | NC_021161.1    | Ca_kabuli_chr02 | 9408298                 | TT                              | CC                | 1945902297               |
| SNP_P3_18601_9468372 | NC_021161.1    | Ca_kabuli_chr02 | 9468372                 | AA                              | GG                | 1945902299               |
| SNP_P3_18602_9483519 | NC_021161.1    | Ca_kabuli_chr02 | 9483519                 | AA                              | GG                | 1945902301               |
| SNP_P3_18604_9494001 | NC_021161.1    | Ca_kabuli_chr02 | 9494001                 | CC                              | TT                | 1945902303               |
| SNP_P3_18606_9494121 | NC_021161.1    | Ca_kabuli_chr02 | 9494121                 | AA                              | GG                | 1945902305               |
| SNP_P3_18607_9494315 | NC_021161.1    | Ca_kabuli_chr02 | 9494315                 | CC                              | GG                | 1945902306               |
| SNP_P3_18608_9494327 | NC_021161.1    | Ca_kabuli_chr02 | 9494327                 | CC                              | GG                | 1945902308               |
| SNP_P3_18609_9494348 | NC_021161.1    | Ca_kabuli_chr02 | 9494348                 | AA                              | CC                | 1945902310               |
| SNP_P3_18610_9494377 | NC_021161.1    | Ca_kabuli_chr02 | 9494377                 | TT                              | CC                | 1945902312               |
| SNP_P3_18611_9494399 | NC_021161.1    | Ca_kabuli_chr02 | 9494399                 | CC                              | GG                | 1945902313               |

| SNPs IDs             | Chromosome IDs | Chromosomes     | Physical positions (bp) | CDC Frontier (Reference genome) | (Pusa 256 & HPNB) | NCBI SNPdb Accession IDs |
|----------------------|----------------|-----------------|-------------------------|---------------------------------|-------------------|--------------------------|
| SNP_P3_18612_9494402 | NC_021161.1    | Ca_kabuli_chr02 | 9494402                 | CC                              | AA                | 1945902316               |
| SNP_P3_18613_9494473 | NC_021161.1    | Ca_kabuli_chr02 | 9494473                 | CC                              | TT                | 1945902317               |
| SNP_P3_18614_9494765 | NC_021161.1    | Ca_kabuli_chr02 | 9494765                 | GG                              | CC                | 1945902319               |
| SNP_P3_18615_9498604 | NC_021161.1    | Ca_kabuli_chr02 | 9498604                 | AA                              | GG                | 1945902321               |
| SNP_P3_18616_9498620 | NC_021161.1    | Ca_kabuli_chr02 | 9498620                 | TT                              | CC                | 1945902323               |
| SNP_P3_18617_9498827 | NC_021161.1    | Ca_kabuli_chr02 | 9498827                 | TT                              | CC                | 1945902325               |
| SNP_P3_18618_9498863 | NC_021161.1    | Ca_kabuli_chr02 | 9498863                 | TT                              | AA                | 1945902326               |
| SNP_P3_18619_9498871 | NC_021161.1    | Ca_kabuli_chr02 | 9498871                 | TT                              | CC                | 1945902328               |
| SNP_P3_18620_9498915 | NC_021161.1    | Ca_kabuli_chr02 | 9498915                 | TT                              | CC                | 1945902330               |
| SNP_P3_18621_9498966 | NC_021161.1    | Ca_kabuli_chr02 | 9498966                 | AA                              | GG                | 1945902332               |
| SNP_P3_18622_9499135 | NC_021161.1    | Ca_kabuli_chr02 | 9499135                 | TT                              | AA                | 1945902333               |
| SNP_P3_18623_9499244 | NC_021161.1    | Ca_kabuli_chr02 | 9499244                 | AA                              | GG                | 1945902335               |
| SNP_P3_18624_9499339 | NC_021161.1    | Ca_kabuli_chr02 | 9499339                 | AA                              | GG                | 1945902337               |
| SNP_P3_18625_9499509 | NC_021161.1    | Ca_kabuli_chr02 | 9499509                 | CC                              | TT                | 1945902339               |
| SNP_P3_18626_9499847 | NC_021161.1    | Ca_kabuli_chr02 | 9499847                 | CC                              | TT                | 1945902341               |
| SNP_P3_18627_9499872 | NC_021161.1    | Ca_kabuli_chr02 | 9499872                 | AA                              | GG                | 1945902342               |
| SNP_P3_18629_9500251 | NC_021161.1    | Ca_kabuli_chr02 | 9500251                 | TT                              | CC                | 1945902344               |
| SNP_P3_18630_9600764 | NC_021161.1    | Ca_kabuli_chr02 | 9600764                 | AA                              | GG                | 1945902346               |
| SNP_P3_18631_9600765 | NC_021161.1    | Ca_kabuli_chr02 | 9600765                 | GG                              | AA                | 1945902348               |
| SNP_P3_18632_9600785 | NC_021161.1    | Ca_kabuli_chr02 | 9600785                 | AA                              | GG                | 1945902349               |
| SNP_P3_18633_9600789 | NC_021161.1    | Ca_kabuli_chr02 | 9600789                 | AA                              | GG                | 1945902351               |
| SNP_P3_18634_9601372 | NC_021161.1    | Ca_kabuli_chr02 | 9601372                 | CC                              | AA                | 1945902353               |
| SNP_P3_18635_9601373 | NC_021161.1    | Ca_kabuli_chr02 | 9601373                 | TT                              | AA                | 1945902355               |
| SNP_P3_18636_9605674 | NC_021161.1    | Ca_kabuli_chr02 | 9605674                 | TT                              | CC                | 1945902356               |
| SNP_P3_18637_9605675 | NC_021161.1    | Ca_kabuli_chr02 | 9605675                 | GG                              | TT                | 1945902358               |
| SNP_P3_18638_9605684 | NC_021161.1    | Ca_kabuli_chr02 | 9605684                 | GG                              | CC                | 1945902360               |
| SNP_P3_18639_9609062 | NC_021161.1    | Ca_kabuli_chr02 | 9609062                 | TT                              | AA                | 1945902362               |
| SNP_P3_18640_9609320 | NC_021161.1    | Ca_kabuli_chr02 | 9609320                 | TT                              | CC                | 1945902364               |
| SNP_P3_18641_9612949 | NC_021161.1    | Ca_kabuli_chr02 | 9612949                 | GG                              | AA                | 1945902365               |
| SNP_P3_18642_9612958 | NC_021161.1    | Ca_kabuli_chr02 | 9612958                 | AA                              | CC                | 1945902367               |
| SNP_P3_18643_9612976 | NC_021161.1    | Ca_kabuli_chr02 | 9612976                 | TT                              | CC                | 1945902369               |
| SNP_P3_18644_9613046 | NC_021161.1    | Ca_kabuli_chr02 | 9613046                 | AA                              | GG                | 1945902371               |
| SNP_P3_18645_9613070 | NC_021161.1    | Ca_kabuli_chr02 | 9613070                 | TT                              | CC                | 1945902372               |
| SNP_P3_18646_9613077 | NC_021161.1    | Ca_kabuli_chr02 | 9613077                 | TT                              | CC                | 1945902374               |
| SNP_P3_18647_9613101 | NC_021161.1    | Ca_kabuli_chr02 | 9613101                 | GG                              | AA                | 1945902376               |
| SNP_P3_18648_9613119 | NC_021161.1    | Ca_kabuli_chr02 | 9613119                 | TT                              | CC                | 1945902378               |
| SNP_P3_18649_9613180 | NC_021161.1    | Ca_kabuli_chr02 | 9613180                 | TT                              | CC                | 1945902380               |
| SNP_P3_18650_9613228 | NC_021161.1    | Ca_kabuli_chr02 | 9613228                 | TT                              | CC                | 1945902381               |
| SNP_P3_18651_9613235 | NC_021161.1    | Ca_kabuli_chr02 | 9613235                 | AA                              | GG                | 1945902383               |
| SNP_P3_18652_9613266 | NC_021161.1    | Ca_kabuli_chr02 | 9613266                 | CC                              | TT                | 1945902385               |
| SNP_P3_18653_9613343 | NC_021161.1    | Ca_kabuli_chr02 | 9613343                 | AA                              | GG                | 1945902387               |
| SNP_P3_18654_9613366 | NC_021161.1    | Ca_kabuli_chr02 | 9613366                 | GG                              | AA                | 1945902388               |

| SNPs IDs             | Chromosome IDs | Chromosomes     | Physical positions (bp) | CDC Frontier (Reference genome) | (Pusa 256 & HPNB) | NCBI SNPdb Accession IDs |
|----------------------|----------------|-----------------|-------------------------|---------------------------------|-------------------|--------------------------|
| SNP_P3_18655_9613372 | NC_021161.1    | Ca_kabuli_chr02 | 9613372                 | AA                              | GG                | 1945902390               |
| SNP_P3_18656_9613376 | NC_021161.1    | Ca_kabuli_chr02 | 9613376                 | TT                              | CC                | 1945902392               |
| SNP_P3_18657_9613422 | NC_021161.1    | Ca_kabuli_chr02 | 9613422                 | TT                              | CC                | 1945902394               |
| SNP_P3_18658_9614245 | NC_021161.1    | Ca_kabuli_chr02 | 9614245                 | CC                              | GG                | 1945902396               |
| SNP_P3_18659_9614274 | NC_021161.1    | Ca_kabuli_chr02 | 9614274                 | TT                              | CC                | 1945902397               |
| SNP_P3_18660_9614701 | NC_021161.1    | Ca_kabuli_chr02 | 9614701                 | TT                              | CC                | 1945902399               |
| SNP_P3_18661_9614779 | NC_021161.1    | Ca_kabuli_chr02 | 9614779                 | CC                              | TT                | 1945902401               |
| SNP_P3_18662_9615136 | NC_021161.1    | Ca_kabuli_chr02 | 9615136                 | CC                              | GG                | 1945902403               |
| SNP_P3_18663_9615137 | NC_021161.1    | Ca_kabuli_chr02 | 9615137                 | AA                              | TT                | 1945902404               |
| SNP_P3_18664_9615150 | NC_021161.1    | Ca_kabuli_chr02 | 9615150                 | TT                              | CC                | 1945902406               |
| SNP_P3_18665_9615155 | NC_021161.1    | Ca_kabuli_chr02 | 9615155                 | AA                              | CC                | 1945902408               |
| SNP_P3_18666_9615167 | NC_021161.1    | Ca_kabuli_chr02 | 9615167                 | TT                              | CC                | 1945902410               |
| SNP_P3_18667_9640246 | NC_021161.1    | Ca_kabuli_chr02 | 9640246                 | GG                              | AA                | 1945902412               |
| SNP_P3_18668_9647537 | NC_021161.1    | Ca_kabuli_chr02 | 9647537                 | TT                              | CC                | 1945902413               |
| SNP_P3_18669_9647556 | NC_021161.1    | Ca_kabuli_chr02 | 9647556                 | GG                              | AA                | 1945902415               |
| SNP_P3_18670_9647583 | NC_021161.1    | Ca_kabuli_chr02 | 9647583                 | AA                              | TT                | 1945902417               |
| SNP_P3_18671_9647585 | NC_021161.1    | Ca_kabuli_chr02 | 9647585                 | TT                              | AA                | 1945902419               |
| SNP_P3_18672_9647622 | NC_021161.1    | Ca_kabuli_chr02 | 9647622                 | TT                              | CC                | 1945902420               |
| SNP_P3_18673_9647627 | NC_021161.1    | Ca_kabuli_chr02 | 9647627                 | CC                              | AA                | 1945902422               |
| SNP_P3_18674_9647633 | NC_021161.1    | Ca_kabuli_chr02 | 9647633                 | GG                              | TT                | 1945902424               |
| SNP_P3_18675_9647647 | NC_021161.1    | Ca_kabuli_chr02 | 9647647                 | TT                              | CC                | 1945902426               |
| SNP_P3_18676_9647657 | NC_021161.1    | Ca_kabuli_chr02 | 9647657                 | AA                              | GG                | 1945902428               |
| SNP_P3_18677_9647944 | NC_021161.1    | Ca_kabuli_chr02 | 9647944                 | TT                              | GG                | 1945902429               |
| SNP_P3_18678_9649238 | NC_021161.1    | Ca_kabuli_chr02 | 9649238                 | CC                              | TT                | 1945902431               |
| SNP_P3_18679_9649254 | NC_021161.1    | Ca_kabuli_chr02 | 9649254                 | GG                              | AA                | 1945902433               |
| SNP_P3_18680_9652756 | NC_021161.1    | Ca_kabuli_chr02 | 9652756                 | TT                              | AA                | 1945902435               |
| SNP_P3_18681_9662240 | NC_021161.1    | Ca_kabuli_chr02 | 9662240                 | TT                              | AA                | 1945902436               |
| SNP_P3_18682_9662287 | NC_021161.1    | Ca_kabuli_chr02 | 9662287                 | AA                              | TT                | 1945902438               |
| SNP_P3_18684_9689649 | NC_021161.1    | Ca_kabuli_chr02 | 9689649                 | TT                              | CC                | 1945902440               |
| SNP_P3_18687_9694205 | NC_021161.1    | Ca_kabuli_chr02 | 9694205                 | AA                              | GG                | 1945902442               |
| SNP_P3_18689_9711750 | NC_021161.1    | Ca_kabuli_chr02 | 9711750                 | TT                              | GG                | 1945902444               |
| SNP_P3_18690_9723459 | NC_021161.1    | Ca_kabuli_chr02 | 9723459                 | GG                              | AA                | 1945902445               |
| SNP_P3_18691_9737338 | NC_021161.1    | Ca_kabuli_chr02 | 9737338                 | TT                              | CC                | 1945902447               |
| SNP_P3_18692_9737339 | NC_021161.1    | Ca_kabuli_chr02 | 9737339                 | GG                              | TT                | 1945902449               |
| SNP_P3_18693_9738889 | NC_021161.1    | Ca_kabuli_chr02 | 9738889                 | TT                              | CC                | 1945902451               |
| SNP_P3_18694_9738919 | NC_021161.1    | Ca_kabuli_chr02 | 9738919                 | TT                              | CC                | 1945902452               |
| SNP_P3_18695_9738955 | NC_021161.1    | Ca_kabuli_chr02 | 9738955                 | CC                              | TT                | 1945902454               |
| SNP_P3_18696_9776583 | NC_021161.1    | Ca_kabuli_chr02 | 9776583                 | TT                              | CC                | 1945902456               |
| SNP_P3_18697_9776726 | NC_021161.1    | Ca_kabuli_chr02 | 9776726                 | GG                              | TT                | 1945902458               |
| SNP_P3_18698_9782308 | NC_021161.1    | Ca_kabuli_chr02 | 9782308                 | CC                              | TT                | 1945902460               |
| SNP_P3_18699_9782636 | NC_021161.1    | Ca_kabuli_chr02 | 9782636                 | GG                              | TT                | 1945902461               |
| SNP_P3_18700_9782790 | NC_021161.1    | Ca_kabuli_chr02 | 9782790                 | CC                              | AA                | 1945902463               |



| SNPs IDs              | Chromosome IDs | Chromosomes     | Physical positions (bp) | CDC Frontier (Reference genome) | (Pusa 256 & HPNB) | NCBI SNPdb Accession IDs |
|-----------------------|----------------|-----------------|-------------------------|---------------------------------|-------------------|--------------------------|
| SNP_P3_18701_9782825  | NC_021161.1    | Ca_kabuli_chr02 | 9782825                 | AA                              | GG                | 1945902465               |
| SNP_P3_18702_9787866  | NC_021161.1    | Ca_kabuli_chr02 | 9787866                 | GG                              | AA                | 1945902467               |
| SNP_P3_18703_9788753  | NC_021161.1    | Ca_kabuli_chr02 | 9788753                 | CC                              | TT                | 1945902468               |
| SNP_P3_18704_9864682  | NC_021161.1    | Ca_kabuli_chr02 | 9864682                 | GG                              | AA                | 1945902470               |
| SNP_P3_18705_9881335  | NC_021161.1    | Ca_kabuli_chr02 | 9881335                 | CC                              | AA                | 1945902472               |
| SNP_P3_18706_9881706  | NC_021161.1    | Ca_kabuli_chr02 | 9881706                 | TT                              | CC                | 1945902474               |
| SNP_P3_18707_9884369  | NC_021161.1    | Ca_kabuli_chr02 | 9884369                 | CC                              | TT                | 1945902476               |
| SNP_P3_18708_9924009  | NC_021161.1    | Ca_kabuli_chr02 | 9924009                 | AA                              | GG                | 1945902477               |
| SNP_P3_18709_9929836  | NC_021161.1    | Ca_kabuli_chr02 | 9929836                 | AA                              | CC                | 1945902479               |
| SNP_P3_18710_9929845  | NC_021161.1    | Ca_kabuli_chr02 | 9929845                 | AA                              | GG                | 1945902481               |
| SNP_P3_18711_9929872  | NC_021161.1    | Ca_kabuli_chr02 | 9929872                 | TT                              | CC                | 1945902483               |
| SNP_P3_18712_9929873  | NC_021161.1    | Ca_kabuli_chr02 | 9929873                 | AA                              | GG                | 1945902484               |
| SNP_P3_18713_9929920  | NC_021161.1    | Ca_kabuli_chr02 | 9929920                 | TT                              | CC                | 1945902486               |
| SNP_P3_18714_9958083  | NC_021161.1    | Ca_kabuli_chr02 | 9958083                 | TT                              | CC                | 1945902488               |
| SNP_P3_18715_9970668  | NC_021161.1    | Ca_kabuli_chr02 | 9970668                 | TT                              | AA                | 1945902490               |
| SNP_P3_18717_9979301  | NC_021161.1    | Ca_kabuli_chr02 | 9979301                 | AA                              | CC                | 1945902492               |
| SNP_P3_18718_9979302  | NC_021161.1    | Ca_kabuli_chr02 | 9979302                 | AA                              | CC                | 1945902493               |
| SNP_P3_18721_10083364 | NC_021161.1    | Ca_kabuli_chr02 | 10083364                | TT                              | AA                | 1945902495               |
| SNP_P3_18722_10093485 | NC_021161.1    | Ca_kabuli_chr02 | 10093485                | GG                              | TT                | 1945902497               |
| SNP_P3_18723_10104782 | NC_021161.1    | Ca_kabuli_chr02 | 10104782                | AA                              | GG                | 1945902499               |
| SNP_P3_18724_10107292 | NC_021161.1    | Ca_kabuli_chr02 | 10107292                | GG                              | AA                | 1945902501               |
| SNP_P3_18725_10116693 | NC_021161.1    | Ca_kabuli_chr02 | 10116693                | GG                              | AA                | 1945902502               |
| SNP_P3_18726_10116712 | NC_021161.1    | Ca_kabuli_chr02 | 10116712                | TT                              | CC                | 1945902504               |
| SNP_P3_18727_10131531 | NC_021161.1    | Ca_kabuli_chr02 | 10131531                | CC                              | TT                | 1945902506               |
| SNP_P3_18728_10139055 | NC_021161.1    | Ca_kabuli_chr02 | 10139055                | CC                              | TT                | 1945902508               |
| SNP_P3_18729_10163709 | NC_021161.1    | Ca_kabuli_chr02 | 10163709                | TT                              | CC                | 1945902509               |
| SNP_P3_18730_10175093 | NC_021161.1    | Ca_kabuli_chr02 | 10175093                | CC                              | TT                | 1945902511               |
| SNP_P3_18732_10200751 | NC_021161.1    | Ca_kabuli_chr02 | 10200751                | TT                              | CC                | 1945902513               |
| SNP_P3_18733_10202073 | NC_021161.1    | Ca_kabuli_chr02 | 10202073                | TT                              | AA                | 1945902515               |
| SNP_P3_18734_10208016 | NC_021161.1    | Ca_kabuli_chr02 | 10208016                | AA                              | GG                | 1945902516               |
| SNP_P3_18735_10212846 | NC_021161.1    | Ca_kabuli_chr02 | 10212846                | AA                              | TT                | 1945902518               |
| SNP_P3_18736_10215777 | NC_021161.1    | Ca_kabuli_chr02 | 10215777                | GG                              | AA                | 1945902520               |
| SNP_P3_18737_10215786 | NC_021161.1    | Ca_kabuli_chr02 | 10215786                | GG                              | TT                | 1945902522               |
| SNP_P3_18738_10240057 | NC_021161.1    | Ca_kabuli_chr02 | 10240057                | AA                              | GG                | 1945902524               |
| SNP_P3_18739_10272104 | NC_021161.1    | Ca_kabuli_chr02 | 10272104                | CC                              | TT                | 1945902525               |
| SNP_P3_18740_10335912 | NC_021161.1    | Ca_kabuli_chr02 | 10335912                | TT                              | AA                | 1945902527               |
| SNP_P3_18741_10337796 | NC_021161.1    | Ca_kabuli_chr02 | 10337796                | CC                              | AA                | 1945902529               |
| SNP_P3_18742_10362088 | NC_021161.1    | Ca_kabuli_chr02 | 10362088                | TT                              | CC                | 1945902531               |
| SNP_P3_18743_10362144 | NC_021161.1    | Ca_kabuli_chr02 | 10362144                | AA                              | GG                | 1945902533               |
| SNP_P3_18744_10362153 | NC_021161.1    | Ca_kabuli_chr02 | 10362153                | TT                              | CC                | 1945902534               |
| SNP_P3_18745_10362194 | NC_021161.1    | Ca_kabuli_chr02 | 10362194                | CC                              | GG                | 1945902536               |
| SNP_P3_18746_10362505 | NC_021161.1    | Ca_kabuli_chr02 | 10362505                | TT                              | GG                | 1945902538               |

| SNPs IDs              | Chromosome IDs | Chromosomes     | Physical positions (bp) | CDC Frontier (Reference genome) | (Pusa 256 & HPNB) | NCBI SNPdb Accession IDs |
|-----------------------|----------------|-----------------|-------------------------|---------------------------------|-------------------|--------------------------|
| SNP_P3_18747_10362507 | NC_021161.1    | Ca_kabuli_chr02 | 10362507                | AA                              | TT                | 1945902540               |
| SNP_P3_18749_10473937 | NC_021161.1    | Ca_kabuli_chr02 | 10473937                | GG                              | TT                | 1945902541               |
| SNP_P3_18751_10540543 | NC_021161.1    | Ca_kabuli_chr02 | 10540543                | TT                              | CC                | 1945902543               |
| SNP_P3_18752_10540564 | NC_021161.1    | Ca_kabuli_chr02 | 10540564                | CC                              | AA                | 1945902545               |
| SNP_P3_18753_10540607 | NC_021161.1    | Ca_kabuli_chr02 | 10540607                | CC                              | GG                | 1945902547               |
| SNP_P3_18754_10540612 | NC_021161.1    | Ca_kabuli_chr02 | 10540612                | TT                              | CC                | 1945902549               |
| SNP_P3_18755_10540622 | NC_021161.1    | Ca_kabuli_chr02 | 10540622                | GG                              | CC                | 1945902550               |
| SNP_P3_18756_10540822 | NC_021161.1    | Ca_kabuli_chr02 | 10540822                | TT                              | CC                | 1945902552               |
| SNP_P3_18757_10541017 | NC_021161.1    | Ca_kabuli_chr02 | 10541017                | TT                              | GG                | 1945902554               |
| SNP_P3_18758_10541106 | NC_021161.1    | Ca_kabuli_chr02 | 10541106                | TT                              | GG                | 1945902556               |
| SNP_P3_18759_10541111 | NC_021161.1    | Ca_kabuli_chr02 | 10541111                | GG                              | TT                | 1945902557               |
| SNP_P3_18760_10541135 | NC_021161.1    | Ca_kabuli_chr02 | 10541135                | AA                              | TT                | 1945902559               |
| SNP_P3_18761_10541144 | NC_021161.1    | Ca_kabuli_chr02 | 10541144                | AA                              | GG                | 1945902561               |
| SNP_P3_18762_10541157 | NC_021161.1    | Ca_kabuli_chr02 | 10541157                | AA                              | GG                | 1945902563               |
| SNP_P3_18763_10541166 | NC_021161.1    | Ca_kabuli_chr02 | 10541166                | AA                              | CC                | 1945902565               |
| SNP_P3_18764_10541193 | NC_021161.1    | Ca_kabuli_chr02 | 10541193                | AA                              | GG                | 1945902566               |
| SNP_P3_18765_10544398 | NC_021161.1    | Ca_kabuli_chr02 | 10544398                | AA                              | TT                | 1945902568               |
| SNP_P3_18766_10544629 | NC_021161.1    | Ca_kabuli_chr02 | 10544629                | GG                              | AA                | 1945902570               |
| SNP_P3_18767_10544789 | NC_021161.1    | Ca_kabuli_chr02 | 10544789                | TT                              | GG                | 1945902572               |
| SNP_P3_18768_10548003 | NC_021161.1    | Ca_kabuli_chr02 | 10548003                | CC                              | AA                | 1945902573               |
| SNP_P3_18769_10554065 | NC_021161.1    | Ca_kabuli_chr02 | 10554065                | CC                              | TT                | 1945902575               |
| SNP_P3_18771_10599713 | NC_021161.1    | Ca_kabuli_chr02 | 10599713                | AA                              | CC                | 1945902577               |
| SNP_P3_18772_10599714 | NC_021161.1    | Ca_kabuli_chr02 | 10599714                | AA                              | TT                | 1945902579               |
| SNP_P3_18773_10647147 | NC_021161.1    | Ca_kabuli_chr02 | 10647147                | TT                              | CC                | 1945902581               |
| SNP_P3_18774_10661988 | NC_021161.1    | Ca_kabuli_chr02 | 10661988                | CC                              | TT                | 1945902582               |
| SNP_P3_18775_10661990 | NC_021161.1    | Ca_kabuli_chr02 | 10661990                | AA                              | GG                | 1945902584               |
| SNP_P3_18776_10662037 | NC_021161.1    | Ca_kabuli_chr02 | 10662037                | GG                              | CC                | 1945902586               |
| SNP_P3_18777_10662169 | NC_021161.1    | Ca_kabuli_chr02 | 10662169                | GG                              | AA                | 1945902588               |
| SNP_P3_18778_10664264 | NC_021161.1    | Ca_kabuli_chr02 | 10664264                | GG                              | CC                | 1945902589               |
| SNP_P3_18779_10664398 | NC_021161.1    | Ca_kabuli_chr02 | 10664398                | CC                              | GG                | 1945902591               |
| SNP_P3_18780_10664697 | NC_021161.1    | Ca_kabuli_chr02 | 10664697                | TT                              | CC                | 1945902593               |
| SNP_P3_18781_10664711 | NC_021161.1    | Ca_kabuli_chr02 | 10664711                | TT                              | CC                | 1945902595               |
| SNP_P3_18782_10664715 | NC_021161.1    | Ca_kabuli_chr02 | 10664715                | TT                              | GG                | 1945902597               |
| SNP_P3_18783_10664729 | NC_021161.1    | Ca_kabuli_chr02 | 10664729                | TT                              | CC                | 1945902598               |
| SNP_P3_18784_10664751 | NC_021161.1    | Ca_kabuli_chr02 | 10664751                | AA                              | GG                | 1945902600               |
| SNP_P3_18785_10664753 | NC_021161.1    | Ca_kabuli_chr02 | 10664753                | AA                              | CC                | 1945902602               |
| SNP_P3_18786_10681848 | NC_021161.1    | Ca_kabuli_chr02 | 10681848                | AA                              | TT                | 1945902604               |
| SNP_P3_18787_10682132 | NC_021161.1    | Ca_kabuli_chr02 | 10682132                | GG                              | AA                | 1945902606               |
| SNP_P3_18788_10682185 | NC_021161.1    | Ca_kabuli_chr02 | 10682185                | AA                              | CC                | 1945902607               |
| SNP_P3_18789_10696997 | NC_021161.1    | Ca_kabuli_chr02 | 10696997                | TT                              | CC                | 1945902609               |
| SNP_P3_18791_10714151 | NC_021161.1    | Ca_kabuli_chr02 | 10714151                | TT                              | CC                | 1945902611               |
| SNP_P3_18792_10719924 | NC_021161.1    | Ca_kabuli_chr02 | 10719924                | TT                              | CC                | 1945902613               |

| SNPs IDs              | Chromosome IDs | Chromosomes     | Physical positions (bp) | CDC Frontier (Reference genome) | (Pusa 256 & HPNB) | NCBI SNPdb Accession IDs |
|-----------------------|----------------|-----------------|-------------------------|---------------------------------|-------------------|--------------------------|
| SNP_P3_18794_10722930 | NC_021161.1    | Ca_kabuli_chr02 | 10722930                | GG                              | AA                | 1945902614               |
| SNP_P3_18795_10725083 | NC_021161.1    | Ca_kabuli_chr02 | 10725083                | TT                              | CC                | 1945902616               |
| SNP_P3_18796_10767213 | NC_021161.1    | Ca_kabuli_chr02 | 10767213                | AA                              | GG                | 1945902618               |
| SNP_P3_18797_10767548 | NC_021161.1    | Ca_kabuli_chr02 | 10767548                | AA                              | GG                | 1945902620               |
| SNP_P3_18798_10767568 | NC_021161.1    | Ca_kabuli_chr02 | 10767568                | GG                              | AA                | 1945902622               |
| SNP_P3_18799_10767569 | NC_021161.1    | Ca_kabuli_chr02 | 10767569                | AA                              | GG                | 1945902623               |
| SNP_P3_18800_10767573 | NC_021161.1    | Ca_kabuli_chr02 | 10767573                | GG                              | AA                | 1945902625               |
| SNP_P3_18801_10767614 | NC_021161.1    | Ca_kabuli_chr02 | 10767614                | TT                              | CC                | 1945902627               |
| SNP_P3_18802_10767631 | NC_021161.1    | Ca_kabuli_chr02 | 10767631                | TT                              | AA                | 1945902629               |
| SNP_P3_18803_10767634 | NC_021161.1    | Ca_kabuli_chr02 | 10767634                | AA                              | TT                | 1945902630               |
| SNP_P3_18804_10767640 | NC_021161.1    | Ca_kabuli_chr02 | 10767640                | AA                              | GG                | 1945902632               |
| SNP_P3_18805_10767653 | NC_021161.1    | Ca_kabuli_chr02 | 10767653                | GG                              | AA                | 1945902634               |
| SNP_P3_18806_10767785 | NC_021161.1    | Ca_kabuli_chr02 | 10767785                | AA                              | CC                | 1945902636               |
| SNP_P3_18807_10777522 | NC_021161.1    | Ca_kabuli_chr02 | 10777522                | TT                              | CC                | 1945902638               |
| SNP_P3_18808_10777577 | NC_021161.1    | Ca_kabuli_chr02 | 10777577                | GG                              | AA                | 1945902639               |
| SNP_P3_18809_10777582 | NC_021161.1    | Ca_kabuli_chr02 | 10777582                | AA                              | GG                | 1945902641               |
| SNP_P3_18810_10778739 | NC_021161.1    | Ca_kabuli_chr02 | 10778739                | AA                              | TT                | 1945902643               |
| SNP_P3_18811_10778744 | NC_021161.1    | Ca_kabuli_chr02 | 10778744                | TT                              | CC                | 1945902645               |
| SNP_P3_18812_10778745 | NC_021161.1    | Ca_kabuli_chr02 | 10778745                | CC                              | TT                | 1945902646               |
| SNP_P3_18813_10778781 | NC_021161.1    | Ca_kabuli_chr02 | 10778781                | TT                              | CC                | 1945902648               |
| SNP_P3_18814_10778787 | NC_021161.1    | Ca_kabuli_chr02 | 10778787                | AA                              | CC                | 1945902650               |
| SNP_P3_18815_10778789 | NC_021161.1    | Ca_kabuli_chr02 | 10778789                | AA                              | GG                | 1945902652               |
| SNP_P3_18816_10779028 | NC_021161.1    | Ca_kabuli_chr02 | 10779028                | CC                              | TT                | 1945902654               |
| SNP_P3_18817_10779054 | NC_021161.1    | Ca_kabuli_chr02 | 10779054                | TT                              | CC                | 1945902655               |
| SNP_P3_18818_10779060 | NC_021161.1    | Ca_kabuli_chr02 | 10779060                | GG                              | AA                | 1945902657               |
| SNP_P3_18819_10779069 | NC_021161.1    | Ca_kabuli_chr02 | 10779069                | TT                              | CC                | 1945902659               |
| SNP_P3_18821_10779270 | NC_021161.1    | Ca_kabuli_chr02 | 10779270                | GG                              | TT                | 1945902661               |
| SNP_P3_18822_10779304 | NC_021161.1    | Ca_kabuli_chr02 | 10779304                | TT                              | AA                | 1945902662               |
| SNP_P3_18823_10779312 | NC_021161.1    | Ca_kabuli_chr02 | 10779312                | TT                              | CC                | 1945902664               |
| SNP_P3_18824_10779338 | NC_021161.1    | Ca_kabuli_chr02 | 10779338                | CC                              | TT                | 1945902666               |
| SNP_P3_18825_10779374 | NC_021161.1    | Ca_kabuli_chr02 | 10779374                | TT                              | CC                | 1945902668               |
| SNP_P3_18826_10779384 | NC_021161.1    | Ca_kabuli_chr02 | 10779384                | TT                              | CC                | 1945902670               |
| SNP_P3_18827_10779528 | NC_021161.1    | Ca_kabuli_chr02 | 10779528                | CC                              | TT                | 1945902671               |
| SNP_P3_18828_10779600 | NC_021161.1    | Ca_kabuli_chr02 | 10779600                | GG                              | CC                | 1945902673               |
| SNP_P3_18829_10780048 | NC_021161.1    | Ca_kabuli_chr02 | 10780048                | TT                              | AA                | 1945902675               |
| SNP_P3_18830_10789453 | NC_021161.1    | Ca_kabuli_chr02 | 10789453                | AA                              | CC                | 1945902677               |
| SNP_P3_18832_10789973 | NC_021161.1    | Ca_kabuli_chr02 | 10789973                | AA                              | GG                | 1945902678               |
| SNP_P3_18833_10794596 | NC_021161.1    | Ca_kabuli_chr02 | 10794596                | GG                              | AA                | 1945902680               |
| SNP_P3_18834_10794943 | NC_021161.1    | Ca_kabuli_chr02 | 10794943                | AA                              | TT                | 1945902682               |
| SNP_P3_18835_10795817 | NC_021161.1    | Ca_kabuli_chr02 | 10795817                | CC                              | TT                | 1945902684               |
| SNP_P3_18836_10795820 | NC_021161.1    | Ca_kabuli_chr02 | 10795820                | AA                              | GG                | 1945902686               |
| SNP_P3_18837_10796725 | NC_021161.1    | Ca_kabuli_chr02 | 10796725                | GG                              | AA                | 1945902687               |

| SNPs IDs              | Chromosome IDs | Chromosomes     | Physical positions (bp) | CDC Frontier (Reference genome) | (Pusa 256 & HPNB) | NCBI SNPdb Accession IDs |
|-----------------------|----------------|-----------------|-------------------------|---------------------------------|-------------------|--------------------------|
| SNP_P3_18838_10796916 | NC_021161.1    | Ca_kabuli_chr02 | 10796916                | CC                              | TT                | 1945902689               |
| SNP_P3_18839_10816473 | NC_021161.1    | Ca_kabuli_chr02 | 10816473                | AA                              | GG                | 1945902691               |
| SNP_P3_18840_10820874 | NC_021161.1    | Ca_kabuli_chr02 | 10820874                | CC                              | TT                | 1945902693               |
| SNP_P3_18841_10830423 | NC_021161.1    | Ca_kabuli_chr02 | 10830423                | GG                              | AA                | 1945902694               |
| SNP_P3_18843_10834714 | NC_021161.1    | Ca_kabuli_chr02 | 10834714                | CC                              | TT                | 1945902696               |
| SNP_P3_18844_10834756 | NC_021161.1    | Ca_kabuli_chr02 | 10834756                | TT                              | CC                | 1945902698               |
| SNP_P3_18845_10834792 | NC_021161.1    | Ca_kabuli_chr02 | 10834792                | TT                              | CC                | 1945902700               |
| SNP_P3_18846_10834837 | NC_021161.1    | Ca_kabuli_chr02 | 10834837                | CC                              | TT                | 1945902702               |
| SNP_P3_18847_10834846 | NC_021161.1    | Ca_kabuli_chr02 | 10834846                | TT                              | CC                | 1945902703               |
| SNP_P3_18848_10834867 | NC_021161.1    | Ca_kabuli_chr02 | 10834867                | CC                              | TT                | 1945902705               |
| SNP_P3_18849_10834879 | NC_021161.1    | Ca_kabuli_chr02 | 10834879                | TT                              | CC                | 1945902707               |
| SNP_P3_18850_10834882 | NC_021161.1    | Ca_kabuli_chr02 | 10834882                | GG                              | AA                | 1945902709               |
| SNP_P3_18851_10834891 | NC_021161.1    | Ca_kabuli_chr02 | 10834891                | TT                              | CC                | 1945902710               |
| SNP_P3_18852_10835017 | NC_021161.1    | Ca_kabuli_chr02 | 10835017                | AA                              | GG                | 1945902712               |
| SNP_P3_18853_10835122 | NC_021161.1    | Ca_kabuli_chr02 | 10835122                | CC                              | TT                | 1945902714               |
| SNP_P3_18854_10835158 | NC_021161.1    | Ca_kabuli_chr02 | 10835158                | TT                              | CC                | 1945902716               |
| SNP_P3_18855_10835167 | NC_021161.1    | Ca_kabuli_chr02 | 10835167                | TT                              | CC                | 1945902718               |
| SNP_P3_18856_10835173 | NC_021161.1    | Ca_kabuli_chr02 | 10835173                | CC                              | TT                | 1945902719               |
| SNP_P3_18857_10835179 | NC_021161.1    | Ca_kabuli_chr02 | 10835179                | AA                              | GG                | 1945902721               |
| SNP_P3_18858_10835201 | NC_021161.1    | Ca_kabuli_chr02 | 10835201                | TT                              | CC                | 1945902723               |
| SNP_P3_18859_10839224 | NC_021161.1    | Ca_kabuli_chr02 | 10839224                | GG                              | AA                | 1945902725               |
| SNP_P3_18860_10840879 | NC_021161.1    | Ca_kabuli_chr02 | 10840879                | AA                              | GG                | 1945902726               |
| SNP_P3_18861_10840939 | NC_021161.1    | Ca_kabuli_chr02 | 10840939                | AA                              | GG                | 1945902728               |
| SNP_P3_18862_10841032 | NC_021161.1    | Ca_kabuli_chr02 | 10841032                | AA                              | GG                | 1945902730               |
| SNP_P3_18863_10841286 | NC_021161.1    | Ca_kabuli_chr02 | 10841286                | GG                              | AA                | 1945902732               |
| SNP_P3_18864_10850021 | NC_021161.1    | Ca_kabuli_chr02 | 10850021                | AA                              | CC                | 1945902734               |
| SNP_P3_18865_10850065 | NC_021161.1    | Ca_kabuli_chr02 | 10850065                | CC                              | AA                | 1945902735               |
| SNP_P3_18866_10851085 | NC_021161.1    | Ca_kabuli_chr02 | 10851085                | GG                              | AA                | 1945902737               |
| SNP_P3_18867_10851090 | NC_021161.1    | Ca_kabuli_chr02 | 10851090                | CC                              | TT                | 1945902739               |
| SNP_P3_18868_10851224 | NC_021161.1    | Ca_kabuli_chr02 | 10851224                | AA                              | GG                | 1945902741               |
| SNP_P3_18869_10851248 | NC_021161.1    | Ca_kabuli_chr02 | 10851248                | CC                              | TT                | 1945902742               |
| SNP_P3_18870_10851271 | NC_021161.1    | Ca_kabuli_chr02 | 10851271                | GG                              | AA                | 1945902744               |
| SNP_P3_18871_10851299 | NC_021161.1    | Ca_kabuli_chr02 | 10851299                | TT                              | CC                | 1945902746               |
| SNP_P3_18872_10868482 | NC_021161.1    | Ca_kabuli_chr02 | 10868482                | GG                              | TT                | 1945902748               |
| SNP_P3_18873_10878862 | NC_021161.1    | Ca_kabuli_chr02 | 10878862                | TT                              | CC                | 1945902750               |
| SNP_P3_18874_10878921 | NC_021161.1    | Ca_kabuli_chr02 | 10878921                | AA                              | GG                | 1945902751               |
| SNP_P3_18875_10879462 | NC_021161.1    | Ca_kabuli_chr02 | 10879462                | TT                              | CC                | 1945902753               |
| SNP_P3_18876_10879485 | NC_021161.1    | Ca_kabuli_chr02 | 10879485                | GG                              | AA                | 1945902755               |
| SNP_P3_18877_10879509 | NC_021161.1    | Ca_kabuli_chr02 | 10879509                | CC                              | AA                | 1945902757               |
| SNP_P3_18879_10880648 | NC_021161.1    | Ca_kabuli_chr02 | 10880648                | TT                              | CC                | 1945902758               |
| SNP_P3_18880_10888810 | NC_021161.1    | Ca_kabuli_chr02 | 10888810                | TT                              | CC                | 1945902760               |
| SNP_P3_18881_10888814 | NC_021161.1    | Ca_kabuli_chr02 | 10888814                | GG                              | AA                | 1945902762               |

| SNPs IDs              | Chromosome IDs | Chromosomes     | Physical positions (bp) | CDC Frontier (Reference genome) | (Pusa 256 & HPNB) | NCBI SNPdb Accession IDs |
|-----------------------|----------------|-----------------|-------------------------|---------------------------------|-------------------|--------------------------|
| SNP_P3_18882_10888820 | NC_021161.1    | Ca_kabuli_chr02 | 10888820                | CC                              | GG                | 1945902764               |
| SNP_P3_18883_10890774 | NC_021161.1    | Ca_kabuli_chr02 | 10890774                | AA                              | TT                | 1945902766               |
| SNP_P3_18884_10904384 | NC_021161.1    | Ca_kabuli_chr02 | 10904384                | CC                              | GG                | 1945902767               |
| SNP_P3_18885_10904511 | NC_021161.1    | Ca_kabuli_chr02 | 10904511                | GG                              | AA                | 1945902769               |
| SNP_P3_18887_10904666 | NC_021161.1    | Ca_kabuli_chr02 | 10904666                | TT                              | AA                | 1945902771               |
| SNP_P3_18888_10904667 | NC_021161.1    | Ca_kabuli_chr02 | 10904667                | GG                              | AA                | 1945902773               |
| SNP_P3_18889_10905352 | NC_021161.1    | Ca_kabuli_chr02 | 10905352                | GG                              | AA                | 1945902774               |
| SNP_P3_18893_10947995 | NC_021161.1    | Ca_kabuli_chr02 | 10947995                | AA                              | GG                | 1945902776               |
| SNP_P3_18895_10955709 | NC_021161.1    | Ca_kabuli_chr02 | 10955709                | GG                              | AA                | 1945902778               |
| SNP_P3_18896_10955765 | NC_021161.1    | Ca_kabuli_chr02 | 10955765                | GG                              | TT                | 1945902780               |
| SNP_P3_18897_10956051 | NC_021161.1    | Ca_kabuli_chr02 | 10956051                | TT                              | CC                | 1945902782               |
| SNP_P3_18898_11009850 | NC_021161.1    | Ca_kabuli_chr02 | 11009850                | CC                              | TT                | 1945902783               |
| SNP_P3_18899_11010066 | NC_021161.1    | Ca_kabuli_chr02 | 11010066                | GG                              | AA                | 1945902785               |
| SNP_P3_18900_11031029 | NC_021161.1    | Ca_kabuli_chr02 | 11031029                | AA                              | TT                | 1945902787               |
| SNP_P3_18901_11055805 | NC_021161.1    | Ca_kabuli_chr02 | 11055805                | AA                              | TT                | 1945902789               |
| SNP_P3_18902_11055829 | NC_021161.1    | Ca_kabuli_chr02 | 11055829                | GG                              | AA                | 1945902790               |
| SNP_P3_18903_11055863 | NC_021161.1    | Ca_kabuli_chr02 | 11055863                | GG                              | AA                | 1945902792               |
| SNP_P3_18904_11055915 | NC_021161.1    | Ca_kabuli_chr02 | 11055915                | AA                              | GG                | 1945902794               |
| SNP_P3_18905_11056205 | NC_021161.1    | Ca_kabuli_chr02 | 11056205                | AA                              | GG                | 1945902796               |
| SNP_P3_18906_11056215 | NC_021161.1    | Ca_kabuli_chr02 | 11056215                | AA                              | GG                | 1945902798               |
| SNP_P3_18907_11056309 | NC_021161.1    | Ca_kabuli_chr02 | 11056309                | AA                              | GG                | 1945902799               |
| SNP_P3_18908_11056315 | NC_021161.1    | Ca_kabuli_chr02 | 11056315                | TT                              | CC                | 1945902801               |
| SNP_P3_18909_11056326 | NC_021161.1    | Ca_kabuli_chr02 | 11056326                | AA                              | GG                | 1945902803               |
| SNP_P3_18910_11056356 | NC_021161.1    | Ca_kabuli_chr02 | 11056356                | AA                              | TT                | 1945902805               |
| SNP_P3_18911_11056372 | NC_021161.1    | Ca_kabuli_chr02 | 11056372                | TT                              | CC                | 1945902807               |
| SNP_P3_18912_11056375 | NC_021161.1    | Ca_kabuli_chr02 | 11056375                | GG                              | AA                | 1945902808               |
| SNP_P3_18913_11063567 | NC_021161.1    | Ca_kabuli_chr02 | 11063567                | CC                              | AA                | 1945902810               |
| SNP_P3_18914_11063568 | NC_021161.1    | Ca_kabuli_chr02 | 11063568                | TT                              | AA                | 1945902812               |
| SNP_P3_18915_11063571 | NC_021161.1    | Ca_kabuli_chr02 | 11063571                | GG                              | AA                | 1945902814               |
| SNP_P3_18916_11063613 | NC_021161.1    | Ca_kabuli_chr02 | 11063613                | TT                              | CC                | 1945902815               |
| SNP_P3_18917_11063629 | NC_021161.1    | Ca_kabuli_chr02 | 11063629                | TT                              | CC                | 1945902817               |
| SNP_P3_18918_11063638 | NC_021161.1    | Ca_kabuli_chr02 | 11063638                | AA                              | GG                | 1945902819               |
| SNP_P3_18919_11063643 | NC_021161.1    | Ca_kabuli_chr02 | 11063643                | CC                              | AA                | 1945902821               |
| SNP_P3_18921_11063706 | NC_021161.1    | Ca_kabuli_chr02 | 11063706                | CC                              | TT                | 1945902823               |
| SNP_P3_18922_11063719 | NC_021161.1    | Ca_kabuli_chr02 | 11063719                | GG                              | TT                | 1945902824               |
| SNP_P3_18923_11063749 | NC_021161.1    | Ca_kabuli_chr02 | 11063749                | GG                              | TT                | 1945902826               |
| SNP_P3_18924_11063764 | NC_021161.1    | Ca_kabuli_chr02 | 11063764                | GG                              | AA                | 1945902828               |
| SNP_P3_18925_11063774 | NC_021161.1    | Ca_kabuli_chr02 | 11063774                | TT                              | CC                | 1945902830               |
| SNP_P3_18926_11063914 | NC_021161.1    | Ca_kabuli_chr02 | 11063914                | AA                              | GG                | 1945902831               |
| SNP_P3_18927_11063931 | NC_021161.1    | Ca_kabuli_chr02 | 11063931                | TT                              | CC                | 1945902833               |
| SNP_P3_18929_11087459 | NC_021161.1    | Ca_kabuli_chr02 | 11087459                | AA                              | GG                | 1945902835               |
| SNP_P3_18931_11102666 | NC_021161.1    | Ca_kabuli_chr02 | 11102666                | AA                              | GG                | 1945902837               |

| SNPs IDs              | Chromosome IDs | Chromosomes     | Physical positions (bp) | CDC Frontier (Reference genome) | (Pusa 256 & HPNB) | NCBI SNPdb Accession IDs |
|-----------------------|----------------|-----------------|-------------------------|---------------------------------|-------------------|--------------------------|
| SNP_P3_18932_11106050 | NC_021161.1    | Ca_kabuli_chr02 | 11106050                | TT                              | AA                | 1945902839               |
| SNP_P3_18934_11142509 | NC_021161.1    | Ca_kabuli_chr02 | 11142509                | TT                              | CC                | 1945902840               |
| SNP_P3_18935_11143962 | NC_021161.1    | Ca_kabuli_chr02 | 11143962                | TT                              | GG                | 1945902842               |
| SNP_P3_18936_11143964 | NC_021161.1    | Ca_kabuli_chr02 | 11143964                | TT                              | GG                | 1945902844               |
| SNP_P3_18937_11143998 | NC_021161.1    | Ca_kabuli_chr02 | 11143998                | GG                              | CC                | 1945902846               |
| SNP_P3_18938_11144016 | NC_021161.1    | Ca_kabuli_chr02 | 11144016                | TT                              | CC                | 1945902847               |
| SNP_P3_18939_11144035 | NC_021161.1    | Ca_kabuli_chr02 | 11144035                | AA                              | GG                | 1945902849               |
| SNP_P3_18940_11144068 | NC_021161.1    | Ca_kabuli_chr02 | 11144068                | TT                              | CC                | 1945902851               |
| SNP_P3_18942_11144093 | NC_021161.1    | Ca_kabuli_chr02 | 11144093                | GG                              | AA                | 1945902853               |
| SNP_P3_18943_11144095 | NC_021161.1    | Ca_kabuli_chr02 | 11144095                | AA                              | GG                | 1945902855               |
| SNP_P3_18944_11144105 | NC_021161.1    | Ca_kabuli_chr02 | 11144105                | CC                              | TT                | 1945902856               |
| SNP_P3_18945_11144114 | NC_021161.1    | Ca_kabuli_chr02 | 11144114                | TT                              | CC                | 1945902858               |
| SNP_P3_18946_11144152 | NC_021161.1    | Ca_kabuli_chr02 | 11144152                | AA                              | GG                | 1945902860               |
| SNP_P3_18947_11144153 | NC_021161.1    | Ca_kabuli_chr02 | 11144153                | TT                              | CC                | 1945902862               |
| SNP_P3_18948_11144181 | NC_021161.1    | Ca_kabuli_chr02 | 11144181                | AA                              | GG                | 1945902864               |
| SNP_P3_18950_11144339 | NC_021161.1    | Ca_kabuli_chr02 | 11144339                | AA                              | GG                | 1945902865               |
| SNP_P3_18951_11144354 | NC_021161.1    | Ca_kabuli_chr02 | 11144354                | AA                              | GG                | 1945902867               |
| SNP_P3_18952_11144366 | NC_021161.1    | Ca_kabuli_chr02 | 11144366                | GG                              | TT                | 1945902869               |
| SNP_P3_18953_11144393 | NC_021161.1    | Ca_kabuli_chr02 | 11144393                | AA                              | CC                | 1945902871               |
| SNP_P3_18955_11157158 | NC_021161.1    | Ca_kabuli_chr02 | 11157158                | AA                              | CC                | 1945902872               |
| SNP_P3_18956_11157318 | NC_021161.1    | Ca_kabuli_chr02 | 11157318                | GG                              | TT                | 1945902874               |
| SNP_P3_18957_11157494 | NC_021161.1    | Ca_kabuli_chr02 | 11157494                | GG                              | AA                | 1945902876               |
| SNP_P3_18958_11157525 | NC_021161.1    | Ca_kabuli_chr02 | 11157525                | AA                              | GG                | 1945902878               |
| SNP_P3_18959_11202219 | NC_021161.1    | Ca_kabuli_chr02 | 11202219                | CC                              | TT                | 1945902880               |
| SNP_P3_18961_11218687 | NC_021161.1    | Ca_kabuli_chr02 | 11218687                | AA                              | CC                | 1945902881               |
| SNP_P3_18963_11223010 | NC_021161.1    | Ca_kabuli_chr02 | 11223010                | TT                              | AA                | 1945902883               |
| SNP_P3_18964_11236156 | NC_021161.1    | Ca_kabuli_chr02 | 11236156                | CC                              | TT                | 1945902885               |
| SNP_P3_18965_11240139 | NC_021161.1    | Ca_kabuli_chr02 | 11240139                | GG                              | TT                | 1945902887               |
| SNP_P3_18966_11240143 | NC_021161.1    | Ca_kabuli_chr02 | 11240143                | GG                              | AA                | 1945902888               |
| SNP_P3_18968_11246245 | NC_021161.1    | Ca_kabuli_chr02 | 11246245                | TT                              | AA                | 1945902890               |
| SNP_P3_18969_11246336 | NC_021161.1    | Ca_kabuli_chr02 | 11246336                | TT                              | GG                | 1945902892               |
| SNP_P3_18970_11246358 | NC_021161.1    | Ca_kabuli_chr02 | 11246358                | AA                              | GG                | 1945902894               |
| SNP_P3_18971_11246385 | NC_021161.1    | Ca_kabuli_chr02 | 11246385                | CC                              | TT                | 1945902896               |
| SNP_P3_18972_11246429 | NC_021161.1    | Ca_kabuli_chr02 | 11246429                | TT                              | CC                | 1945902897               |
| SNP_P3_18973_11246551 | NC_021161.1    | Ca_kabuli_chr02 | 11246551                | TT                              | CC                | 1945902899               |
| SNP_P3_18974_11246576 | NC_021161.1    | Ca_kabuli_chr02 | 11246576                | TT                              | CC                | 1945902901               |
| SNP_P3_18975_11246612 | NC_021161.1    | Ca_kabuli_chr02 | 11246612                | AA                              | GG                | 1945902903               |
| SNP_P3_18976_11246832 | NC_021161.1    | Ca_kabuli_chr02 | 11246832                | AA                              | GG                | 1945902904               |
| SNP_P3_18977_11246842 | NC_021161.1    | Ca_kabuli_chr02 | 11246842                | GG                              | AA                | 1945902906               |
| SNP_P3_18978_11246844 | NC_021161.1    | Ca_kabuli_chr02 | 11246844                | TT                              | CC                | 1945902908               |
| SNP_P3_18979_11246846 | NC_021161.1    | Ca_kabuli_chr02 | 11246846                | GG                              | AA                | 1945902910               |
| SNP_P3_18980_11246915 | NC_021161.1    | Ca_kabuli_chr02 | 11246915                | TT                              | GG                | 1945902912               |

| SNPs IDs              | Chromosome IDs | Chromosomes     | Physical positions (bp) | CDC Frontier (Reference genome) | (Pusa 256 & HPNB) | NCBI SNPdb Accession IDs |
|-----------------------|----------------|-----------------|-------------------------|---------------------------------|-------------------|--------------------------|
| SNP_P3_18982_11258261 | NC_021161.1    | Ca_kabuli_chr02 | 11258261                | GG                              | AA                | 1945902913               |
| SNP_P3_18983_11285761 | NC_021161.1    | Ca_kabuli_chr02 | 11285761                | CC                              | TT                | 1945902915               |
| SNP_P3_18984_11312434 | NC_021161.1    | Ca_kabuli_chr02 | 11312434                | AA                              | TT                | 1945902917               |
| SNP_P3_18985_11312800 | NC_021161.1    | Ca_kabuli_chr02 | 11312800                | GG                              | AA                | 1945902919               |
| SNP_P3_18986_11312837 | NC_021161.1    | Ca_kabuli_chr02 | 11312837                | AA                              | GG                | 1945902920               |
| SNP_P3_18987_11313272 | NC_021161.1    | Ca_kabuli_chr02 | 11313272                | AA                              | GG                | 1945902922               |
| SNP_P3_18988_11315277 | NC_021161.1    | Ca_kabuli_chr02 | 11315277                | CC                              | TT                | 1945902924               |
| SNP_P3_18989_11319404 | NC_021161.1    | Ca_kabuli_chr02 | 11319404                | CC                              | TT                | 1945902926               |
| SNP_P3_18990_11319469 | NC_021161.1    | Ca_kabuli_chr02 | 11319469                | AA                              | GG                | 1945902928               |
| SNP_P3_18992_11327567 | NC_021161.1    | Ca_kabuli_chr02 | 11327567                | CC                              | AA                | 1945902929               |
| SNP_P3_18993_11364249 | NC_021161.1    | Ca_kabuli_chr02 | 11364249                | TT                              | CC                | 1945902931               |
| SNP_P3_18994_11368243 | NC_021161.1    | Ca_kabuli_chr02 | 11368243                | CC                              | TT                | 1945902933               |
| SNP_P3_18995_11398170 | NC_021161.1    | Ca_kabuli_chr02 | 11398170                | CC                              | TT                | 1945902935               |
| SNP_P3_18996_11421412 | NC_021161.1    | Ca_kabuli_chr02 | 11421412                | CC                              | GG                | 1945902937               |
| SNP_P3_18997_11459569 | NC_021161.1    | Ca_kabuli_chr02 | 11459569                | CC                              | AA                | 1945902938               |
| SNP_P3_18998_11463390 | NC_021161.1    | Ca_kabuli_chr02 | 11463390                | AA                              | GG                | 1945902940               |
| SNP_P3_18999_11482428 | NC_021161.1    | Ca_kabuli_chr02 | 11482428                | TT                              | CC                | 1945902942               |
| SNP_P3_19000_11488464 | NC_021161.1    | Ca_kabuli_chr02 | 11488464                | CC                              | TT                | 1945902944               |
| SNP_P3_19001_11497599 | NC_021161.1    | Ca_kabuli_chr02 | 11497599                | TT                              | CC                | 1945902945               |
| SNP_P3_19002_11497992 | NC_021161.1    | Ca_kabuli_chr02 | 11497992                | AA                              | CC                | 1945902947               |
| SNP_P3_19003_11506983 | NC_021161.1    | Ca_kabuli_chr02 | 11506983                | CC                              | TT                | 1945902949               |
| SNP_P3_19004_11507000 | NC_021161.1    | Ca_kabuli_chr02 | 11507000                | CC                              | TT                | 1945902951               |
| SNP_P3_19005_11510120 | NC_021161.1    | Ca_kabuli_chr02 | 11510120                | TT                              | CC                | 1945902953               |
| SNP_P3_19006_11587033 | NC_021161.1    | Ca_kabuli_chr02 | 11587033                | AA                              | GG                | 1945902954               |
| SNP_P3_19007_11618699 | NC_021161.1    | Ca_kabuli_chr02 | 11618699                | AA                              | TT                | 1945902956               |
| SNP_P3_19009_11648754 | NC_021161.1    | Ca_kabuli_chr02 | 11648754                | AA                              | GG                | 1945902958               |
| SNP_P3_19010_11648758 | NC_021161.1    | Ca_kabuli_chr02 | 11648758                | AA                              | GG                | 1945902960               |
| SNP_P3_19011_11648825 | NC_021161.1    | Ca_kabuli_chr02 | 11648825                | GG                              | AA                | 1945902961               |
| SNP_P3_19012_11648826 | NC_021161.1    | Ca_kabuli_chr02 | 11648826                | CC                              | GG                | 1945902963               |
| SNP_P3_19013_11653666 | NC_021161.1    | Ca_kabuli_chr02 | 11653666                | TT                              | AA                | 1945902965               |
| SNP_P3_19014_11670804 | NC_021161.1    | Ca_kabuli_chr02 | 11670804                | GG                              | AA                | 1945902967               |
| SNP_P3_19015_11670811 | NC_021161.1    | Ca_kabuli_chr02 | 11670811                | AA                              | TT                | 1945902969               |
| SNP_P3_19016_11671192 | NC_021161.1    | Ca_kabuli_chr02 | 11671192                | CC                              | TT                | 1945902970               |
| SNP_P3_19017_11671404 | NC_021161.1    | Ca_kabuli_chr02 | 11671404                | TT                              | CC                | 1945902972               |
| SNP_P3_19018_11671582 | NC_021161.1    | Ca_kabuli_chr02 | 11671582                | TT                              | CC                | 1945902974               |
| SNP_P3_19019_11671783 | NC_021161.1    | Ca_kabuli_chr02 | 11671783                | TT                              | CC                | 1945902976               |
| SNP_P3_19020_11674423 | NC_021161.1    | Ca_kabuli_chr02 | 11674423                | AA                              | TT                | 1945902977               |
| SNP_P3_19021_11674426 | NC_021161.1    | Ca_kabuli_chr02 | 11674426                | AA                              | TT                | 1945902979               |
| SNP_P3_19022_11674461 | NC_021161.1    | Ca_kabuli_chr02 | 11674461                | TT                              | AA                | 1945902981               |
| SNP_P3_19023_11678996 | NC_021161.1    | Ca_kabuli_chr02 | 11678996                | TT                              | GG                | 1945902983               |
| SNP_P3_19024_11690234 | NC_021161.1    | Ca_kabuli_chr02 | 11690234                | CC                              | GG                | 1945902985               |
| SNP_P3_19025_11690677 | NC_021161.1    | Ca_kabuli_chr02 | 11690677                | AA                              | CC                | 1945902986               |

| SNPs IDs              | Chromosome IDs | Chromosomes     | Physical positions (bp) | CDC Frontier (Reference genome) | (Pusa 256 & HPNB) | NCBI SNPdb Accession IDs |
|-----------------------|----------------|-----------------|-------------------------|---------------------------------|-------------------|--------------------------|
| SNP_P3_19026_11726429 | NC_021161.1    | Ca_kabuli_chr02 | 11726429                | GG                              | AA                | 1945902988               |
| SNP_P3_19027_11726460 | NC_021161.1    | Ca_kabuli_chr02 | 11726460                | AA                              | TT                | 1945902990               |
| SNP_P3_19028_11728372 | NC_021161.1    | Ca_kabuli_chr02 | 11728372                | CC                              | TT                | 1945902992               |
| SNP_P3_19029_11728382 | NC_021161.1    | Ca_kabuli_chr02 | 11728382                | GG                              | CC                | 1945902994               |
| SNP_P3_19030_11728384 | NC_021161.1    | Ca_kabuli_chr02 | 11728384                | AA                              | GG                | 1945902995               |
| SNP_P3_19031_11730030 | NC_021161.1    | Ca_kabuli_chr02 | 11730030                | AA                              | GG                | 1945902997               |
| SNP_P3_19032_11732608 | NC_021161.1    | Ca_kabuli_chr02 | 11732608                | TT                              | AA                | 1945902999               |
| SNP_P3_19033_11745988 | NC_021161.1    | Ca_kabuli_chr02 | 11745988                | CC                              | TT                | 1945903001               |
| SNP_P3_19034_11775154 | NC_021161.1    | Ca_kabuli_chr02 | 11775154                | AA                              | TT                | 1945903002               |
| SNP_P3_19035_11786744 | NC_021161.1    | Ca_kabuli_chr02 | 11786744                | TT                              | AA                | 1945903004               |
| SNP_P3_19037_11875995 | NC_021161.1    | Ca_kabuli_chr02 | 11875995                | GG                              | CC                | 1945903006               |
| SNP_P3_19038_11876379 | NC_021161.1    | Ca_kabuli_chr02 | 11876379                | GG                              | TT                | 1945903008               |
| SNP_P3_19039_11894698 | NC_021161.1    | Ca_kabuli_chr02 | 11894698                | AA                              | GG                | 1945903010               |
| SNP_P3_19040_11894705 | NC_021161.1    | Ca_kabuli_chr02 | 11894705                | GG                              | AA                | 1945903011               |
| SNP_P3_19041_11896134 | NC_021161.1    | Ca_kabuli_chr02 | 11896134                | TT                              | AA                | 1945903013               |
| SNP_P3_19042_11905806 | NC_021161.1    | Ca_kabuli_chr02 | 11905806                | GG                              | AA                | 1945903015               |
| SNP_P3_19043_11940682 | NC_021161.1    | Ca_kabuli_chr02 | 11940682                | CC                              | TT                | 1945903017               |
| SNP_P3_19044_11940773 | NC_021161.1    | Ca_kabuli_chr02 | 11940773                | AA                              | GG                | 1945903018               |
| SNP_P3_19045_11940777 | NC_021161.1    | Ca_kabuli_chr02 | 11940777                | GG                              | AA                | 1945903020               |
| SNP_P3_19046_11950091 | NC_021161.1    | Ca_kabuli_chr02 | 11950091                | CC                              | TT                | 1945903022               |
| SNP_P3_19047_11950101 | NC_021161.1    | Ca_kabuli_chr02 | 11950101                | GG                              | AA                | 1945903024               |
| SNP_P3_19048_11950116 | NC_021161.1    | Ca_kabuli_chr02 | 11950116                | CC                              | TT                | 1945903026               |
| SNP_P3_19049_11950349 | NC_021161.1    | Ca_kabuli_chr02 | 11950349                | TT                              | CC                | 1945903027               |
| SNP_P3_19050_11950707 | NC_021161.1    | Ca_kabuli_chr02 | 11950707                | GG                              | AA                | 1945903029               |
| SNP_P3_19051_11970280 | NC_021161.1    | Ca_kabuli_chr02 | 11970280                | GG                              | AA                | 1945903031               |
| SNP_P3_19052_11974961 | NC_021161.1    | Ca_kabuli_chr02 | 11974961                | AA                              | GG                | 1945903033               |
| SNP_P3_19053_11977493 | NC_021161.1    | Ca_kabuli_chr02 | 11977493                | AA                              | GG                | 1945903034               |
| SNP_P3_19054_11977525 | NC_021161.1    | Ca_kabuli_chr02 | 11977525                | CC                              | TT                | 1945903036               |
| SNP_P3_19055_11977568 | NC_021161.1    | Ca_kabuli_chr02 | 11977568                | TT                              | AA                | 1945903038               |
| SNP_P3_19056_11977841 | NC_021161.1    | Ca_kabuli_chr02 | 11977841                | GG                              | TT                | 1945903040               |
| SNP_P3_19057_11977861 | NC_021161.1    | Ca_kabuli_chr02 | 11977861                | AA                              | TT                | 1945903042               |
| SNP_P3_19058_11977923 | NC_021161.1    | Ca_kabuli_chr02 | 11977923                | GG                              | AA                | 1945903043               |
| SNP_P3_19059_12040168 | NC_021161.1    | Ca_kabuli_chr02 | 12040168                | TT                              | AA                | 1945903045               |
| SNP_P3_19060_12040465 | NC_021161.1    | Ca_kabuli_chr02 | 12040465                | AA                              | TT                | 1945903047               |
| SNP_P3_19061_12040578 | NC_021161.1    | Ca_kabuli_chr02 | 12040578                | AA                              | TT                | 1945903049               |
| SNP_P3_19062_12040608 | NC_021161.1    | Ca_kabuli_chr02 | 12040608                | AA                              | GG                | 1945903050               |
| SNP_P3_19063_12040883 | NC_021161.1    | Ca_kabuli_chr02 | 12040883                | AA                              | CC                | 1945903052               |
| SNP_P3_19064_12040899 | NC_021161.1    | Ca_kabuli_chr02 | 12040899                | TT                              | AA                | 1945903054               |
| SNP_P3_19065_12041111 | NC_021161.1    | Ca_kabuli_chr02 | 12041111                | TT                              | CC                | 1945903056               |
| SNP_P3_19066_12041119 | NC_021161.1    | Ca_kabuli_chr02 | 12041119                | TT                              | CC                | 1945903058               |
| SNP_P3_19067_12041529 | NC_021161.1    | Ca_kabuli_chr02 | 12041529                | GG                              | AA                | 1945903059               |
| SNP_P3_19068_12041583 | NC_021161.1    | Ca_kabuli_chr02 | 12041583                | TT                              | CC                | 1945903061               |



| SNPs IDs              | Chromosome IDs | Chromosomes     | Physical positions (bp) | CDC Frontier (Reference genome) | (Pusa 256 & HPNB) | NCBI SNPdb Accession IDs |
|-----------------------|----------------|-----------------|-------------------------|---------------------------------|-------------------|--------------------------|
| SNP_P3_19069_12042031 | NC_021161.1    | Ca_kabuli_chr02 | 12042031                | CC                              | TT                | 1945903063               |
| SNP_P3_19070_12042054 | NC_021161.1    | Ca_kabuli_chr02 | 12042054                | TT                              | AA                | 1945903065               |
| SNP_P3_19071_12042070 | NC_021161.1    | Ca_kabuli_chr02 | 12042070                | TT                              | CC                | 1945903066               |
| SNP_P3_19072_12042071 | NC_021161.1    | Ca_kabuli_chr02 | 12042071                | CC                              | AA                | 1945903068               |
| SNP_P3_19073_12042252 | NC_021161.1    | Ca_kabuli_chr02 | 12042252                | AA                              | TT                | 1945903070               |
| SNP_P3_19074_12042279 | NC_021161.1    | Ca_kabuli_chr02 | 12042279                | CC                              | TT                | 1945903072               |
| SNP_P3_19075_12042305 | NC_021161.1    | Ca_kabuli_chr02 | 12042305                | CC                              | TT                | 1945903074               |
| SNP_P3_19076_12048433 | NC_021161.1    | Ca_kabuli_chr02 | 12048433                | TT                              | CC                | 1945903075               |
| SNP_P3_19077_12048443 | NC_021161.1    | Ca_kabuli_chr02 | 12048443                | GG                              | AA                | 1945903077               |
| SNP_P3_19078_12048453 | NC_021161.1    | Ca_kabuli_chr02 | 12048453                | TT                              | AA                | 1945903079               |
| SNP_P3_19079_12048467 | NC_021161.1    | Ca_kabuli_chr02 | 12048467                | TT                              | CC                | 1945903081               |
| SNP_P3_19080_12048499 | NC_021161.1    | Ca_kabuli_chr02 | 12048499                | CC                              | AA                | 1945903082               |
| SNP_P3_19081_12048501 | NC_021161.1    | Ca_kabuli_chr02 | 12048501                | TT                              | AA                | 1945903084               |
| SNP_P3_19082_12048536 | NC_021161.1    | Ca_kabuli_chr02 | 12048536                | TT                              | AA                | 1945903086               |
| SNP_P3_19083_12048571 | NC_021161.1    | Ca_kabuli_chr02 | 12048571                | CC                              | TT                | 1945903088               |
| SNP_P3_19085_12048735 | NC_021161.1    | Ca_kabuli_chr02 | 12048735                | TT                              | AA                | 1945903090               |
| SNP_P3_19086_12048736 | NC_021161.1    | Ca_kabuli_chr02 | 12048736                | TT                              | AA                | 1945903091               |
| SNP_P3_19087_12048759 | NC_021161.1    | Ca_kabuli_chr02 | 12048759                | CC                              | TT                | 1945903093               |
| SNP_P3_19088_12074805 | NC_021161.1    | Ca_kabuli_chr02 | 12074805                | CC                              | GG                | 1945903095               |
| SNP_P3_19089_12082882 | NC_021161.1    | Ca_kabuli_chr02 | 12082882                | GG                              | AA                | 1945903097               |
| SNP_P3_19090_12098509 | NC_021161.1    | Ca_kabuli_chr02 | 12098509                | CC                              | GG                | 1945903098               |
| SNP_P3_19091_12098957 | NC_021161.1    | Ca_kabuli_chr02 | 12098957                | TT                              | CC                | 1945903100               |
| SNP_P3_19092_12100509 | NC_021161.1    | Ca_kabuli_chr02 | 12100509                | TT                              | AA                | 1945903102               |
| SNP_P3_19093_12116605 | NC_021161.1    | Ca_kabuli_chr02 | 12116605                | TT                              | CC                | 1945903104               |
| SNP_P3_19094_12128684 | NC_021161.1    | Ca_kabuli_chr02 | 12128684                | AA                              | TT                | 1945903106               |
| SNP_P3_19095_12167010 | NC_021161.1    | Ca_kabuli_chr02 | 12167010                | CC                              | TT                | 1945903107               |
| SNP_P3_19096_12170946 | NC_021161.1    | Ca_kabuli_chr02 | 12170946                | AA                              | GG                | 1945903109               |
| SNP_P3_19098_12181577 | NC_021161.1    | Ca_kabuli_chr02 | 12181577                | TT                              | GG                | 1945903111               |
| SNP_P3_19099_12181578 | NC_021161.1    | Ca_kabuli_chr02 | 12181578                | AA                              | GG                | 1945903113               |
| SNP_P3_19100_12220236 | NC_021161.1    | Ca_kabuli_chr02 | 12220236                | GG                              | TT                | 1945903114               |
| SNP_P3_19101_12220454 | NC_021161.1    | Ca_kabuli_chr02 | 12220454                | GG                              | TT                | 1945903116               |
| SNP_P3_19102_12220529 | NC_021161.1    | Ca_kabuli_chr02 | 12220529                | AA                              | GG                | 1945903118               |
| SNP_P3_19103_12220537 | NC_021161.1    | Ca_kabuli_chr02 | 12220537                | TT                              | GG                | 1945903120               |
| SNP_P3_19104_12247043 | NC_021161.1    | Ca_kabuli_chr02 | 12247043                | CC                              | GG                | 1945903122               |
| SNP_P3_19105_12282751 | NC_021161.1    | Ca_kabuli_chr02 | 12282751                | AA                              | GG                | 1945903123               |
| SNP_P3_19106_12303588 | NC_021161.1    | Ca_kabuli_chr02 | 12303588                | CC                              | TT                | 1945903125               |
| SNP_P3_19107_12310529 | NC_021161.1    | Ca_kabuli_chr02 | 12310529                | AA                              | GG                | 1945903127               |
| SNP_P3_19108_12321229 | NC_021161.1    | Ca_kabuli_chr02 | 12321229                | TT                              | CC                | 1945903129               |
| SNP_P3_19109_12321261 | NC_021161.1    | Ca_kabuli_chr02 | 12321261                | CC                              | TT                | 1945903131               |
| SNP_P3_19110_12321873 | NC_021161.1    | Ca_kabuli_chr02 | 12321873                | TT                              | CC                | 1945903132               |
| SNP_P3_19112_12326658 | NC_021161.1    | Ca_kabuli_chr02 | 12326658                | AA                              | GG                | 1945903134               |
| SNP_P3_19113_12326757 | NC_021161.1    | Ca_kabuli_chr02 | 12326757                | CC                              | TT                | 1945903136               |

| SNPs IDs              | Chromosome IDs | Chromosomes     | Physical positions (bp) | CDC Frontier (Reference genome) | (Pusa 256 & HPNB) | NCBI SNPdb Accession IDs |
|-----------------------|----------------|-----------------|-------------------------|---------------------------------|-------------------|--------------------------|
| SNP_P3_19114_12326927 | NC_021161.1    | Ca_kabuli_chr02 | 12326927                | AA                              | GG                | 1945903138               |
| SNP_P3_19115_12333114 | NC_021161.1    | Ca_kabuli_chr02 | 12333114                | AA                              | GG                | 1945903139               |
| SNP_P3_19116_12333162 | NC_021161.1    | Ca_kabuli_chr02 | 12333162                | AA                              | TT                | 1945903141               |
| SNP_P3_19117_12333163 | NC_021161.1    | Ca_kabuli_chr02 | 12333163                | TT                              | CC                | 1945903143               |
| SNP_P3_19118_12333205 | NC_021161.1    | Ca_kabuli_chr02 | 12333205                | TT                              | AA                | 1945903145               |
| SNP_P3_19119_12333259 | NC_021161.1    | Ca_kabuli_chr02 | 12333259                | TT                              | GG                | 1945903147               |
| SNP_P3_19120_12333392 | NC_021161.1    | Ca_kabuli_chr02 | 12333392                | AA                              | TT                | 1945903148               |
| SNP_P3_19121_12333427 | NC_021161.1    | Ca_kabuli_chr02 | 12333427                | TT                              | AA                | 1945903150               |
| SNP_P3_19122_12333487 | NC_021161.1    | Ca_kabuli_chr02 | 12333487                | GG                              | CC                | 1945903152               |
| SNP_P3_19123_12345042 | NC_021161.1    | Ca_kabuli_chr02 | 12345042                | CC                              | AA                | 1945903154               |
| SNP_P3_19124_12345306 | NC_021161.1    | Ca_kabuli_chr02 | 12345306                | AA                              | GG                | 1945903155               |
| SNP_P3_19125_12345309 | NC_021161.1    | Ca_kabuli_chr02 | 12345309                | TT                              | GG                | 1945903157               |
| SNP_P3_19126_12345332 | NC_021161.1    | Ca_kabuli_chr02 | 12345332                | TT                              | CC                | 1945903159               |
| SNP_P3_19128_12367563 | NC_021161.1    | Ca_kabuli_chr02 | 12367563                | GG                              | TT                | 1945903161               |
| SNP_P3_19129_12379931 | NC_021161.1    | Ca_kabuli_chr02 | 12379931                | TT                              | CC                | 1945903163               |
| SNP_P3_19130_12379958 | NC_021161.1    | Ca_kabuli_chr02 | 12379958                | TT                              | CC                | 1945903164               |
| SNP_P3_19131_12380198 | NC_021161.1    | Ca_kabuli_chr02 | 12380198                | TT                              | CC                | 1945903166               |
| SNP_P3_19132_12380209 | NC_021161.1    | Ca_kabuli_chr02 | 12380209                | TT                              | CC                | 1945903168               |
| SNP_P3_19134_12380263 | NC_021161.1    | Ca_kabuli_chr02 | 12380263                | AA                              | GG                | 1945903170               |
| SNP_P3_19135_12380293 | NC_021161.1    | Ca_kabuli_chr02 | 12380293                | GG                              | AA                | 1945903171               |
| SNP_P3_19136_12380295 | NC_021161.1    | Ca_kabuli_chr02 | 12380295                | GG                              | CC                | 1945903173               |
| SNP_P3_19137_12380303 | NC_021161.1    | Ca_kabuli_chr02 | 12380303                | CC                              | TT                | 1945903175               |
| SNP_P3_19138_12380323 | NC_021161.1    | Ca_kabuli_chr02 | 12380323                | TT                              | CC                | 1945903177               |
| SNP_P3_19139_12380412 | NC_021161.1    | Ca_kabuli_chr02 | 12380412                | TT                              | CC                | 1945903179               |
| SNP_P3_19140_12380423 | NC_021161.1    | Ca_kabuli_chr02 | 12380423                | AA                              | CC                | 1945903180               |
| SNP_P3_19141_12384459 | NC_021161.1    | Ca_kabuli_chr02 | 12384459                | AA                              | CC                | 1945903182               |
| SNP_P3_19142_12384526 | NC_021161.1    | Ca_kabuli_chr02 | 12384526                | CC                              | TT                | 1945903184               |
| SNP_P3_19143_12384608 | NC_021161.1    | Ca_kabuli_chr02 | 12384608                | GG                              | AA                | 1945903186               |
| SNP_P3_19144_12384683 | NC_021161.1    | Ca_kabuli_chr02 | 12384683                | GG                              | AA                | 1945903187               |
| SNP_P3_19146_12384836 | NC_021161.1    | Ca_kabuli_chr02 | 12384836                | AA                              | TT                | 1945903189               |
| SNP_P3_19147_12384887 | NC_021161.1    | Ca_kabuli_chr02 | 12384887                | GG                              | CC                | 1945903191               |
| SNP_P3_19148_12384947 | NC_021161.1    | Ca_kabuli_chr02 | 12384947                | GG                              | AA                | 1945903193               |
| SNP_P3_19149_12385028 | NC_021161.1    | Ca_kabuli_chr02 | 12385028                | AA                              | CC                | 1945903195               |
| SNP_P3_19150_12385044 | NC_021161.1    | Ca_kabuli_chr02 | 12385044                | AA                              | CC                | 1945903196               |
| SNP_P3_19151_12399633 | NC_021161.1    | Ca_kabuli_chr02 | 12399633                | AA                              | TT                | 1945903198               |
| SNP_P3_19152_12399640 | NC_021161.1    | Ca_kabuli_chr02 | 12399640                | GG                              | AA                | 1945903200               |
| SNP_P3_19153_12399656 | NC_021161.1    | Ca_kabuli_chr02 | 12399656                | AA                              | GG                | 1945903202               |
| SNP_P3_19154_12400061 | NC_021161.1    | Ca_kabuli_chr02 | 12400061                | CC                              | TT                | 1945903203               |
| SNP_P3_19155_12400063 | NC_021161.1    | Ca_kabuli_chr02 | 12400063                | CC                              | TT                | 1945903205               |
| SNP_P3_19156_12400875 | NC_021161.1    | Ca_kabuli_chr02 | 12400875                | AA                              | TT                | 1945903207               |
| SNP_P3_19157_12435317 | NC_021161.1    | Ca_kabuli_chr02 | 12435317                | GG                              | AA                | 1945903209               |
| SNP_P3_19158_12435444 | NC_021161.1    | Ca_kabuli_chr02 | 12435444                | CC                              | AA                | 1945903211               |

| SNPs IDs              | Chromosome IDs | Chromosomes     | Physical positions (bp) | CDC Frontier (Reference genome) | (Pusa 256 & HPNB) | NCBI SNPdb Accession IDs |
|-----------------------|----------------|-----------------|-------------------------|---------------------------------|-------------------|--------------------------|
| SNP_P3_19159_12449210 | NC_021161.1    | Ca_kabuli_chr02 | 12449210                | AA                              | GG                | 1945903212               |
| SNP_P3_19160_12449229 | NC_021161.1    | Ca_kabuli_chr02 | 12449229                | CC                              | TT                | 1945903214               |
| SNP_P3_19161_12449243 | NC_021161.1    | Ca_kabuli_chr02 | 12449243                | TT                              | CC                | 1945903216               |
| SNP_P3_19162_12449255 | NC_021161.1    | Ca_kabuli_chr02 | 12449255                | GG                              | AA                | 1945903218               |
| SNP_P3_19163_12469608 | NC_021161.1    | Ca_kabuli_chr02 | 12469608                | AA                              | GG                | 1945903219               |
| SNP_P3_19164_12469624 | NC_021161.1    | Ca_kabuli_chr02 | 12469624                | CC                              | GG                | 1945903221               |
| SNP_P3_19165_12472187 | NC_021161.1    | Ca_kabuli_chr02 | 12472187                | CC                              | GG                | 1945903223               |
| SNP_P3_19166_12473336 | NC_021161.1    | Ca_kabuli_chr02 | 12473336                | AA                              | CC                | 1945903225               |
| SNP_P3_19167_12475594 | NC_021161.1    | Ca_kabuli_chr02 | 12475594                | CC                              | TT                | 1945903227               |
| SNP_P3_19168_12475600 | NC_021161.1    | Ca_kabuli_chr02 | 12475600                | CC                              | TT                | 1945903228               |
| SNP_P3_19171_12570713 | NC_021161.1    | Ca_kabuli_chr02 | 12570713                | TT                              | CC                | 1945903230               |
| SNP_P3_19172_12573855 | NC_021161.1    | Ca_kabuli_chr02 | 12573855                | AA                              | GG                | 1945903232               |
| SNP_P3_19173_12581622 | NC_021161.1    | Ca_kabuli_chr02 | 12581622                | TT                              | AA                | 1945903234               |
| SNP_P3_19174_12581754 | NC_021161.1    | Ca_kabuli_chr02 | 12581754                | GG                              | AA                | 1945903235               |
| SNP_P3_19176_12600701 | NC_021161.1    | Ca_kabuli_chr02 | 12600701                | CC                              | TT                | 1945903237               |
| SNP_P3_19177_12601076 | NC_021161.1    | Ca_kabuli_chr02 | 12601076                | AA                              | TT                | 1945903239               |
| SNP_P3_19178_12602433 | NC_021161.1    | Ca_kabuli_chr02 | 12602433                | TT                              | CC                | 1945903241               |
| SNP_P3_19180_12639796 | NC_021161.1    | Ca_kabuli_chr02 | 12639796                | TT                              | CC                | 1945903243               |
| SNP_P3_19181_12648404 | NC_021161.1    | Ca_kabuli_chr02 | 12648404                | CC                              | TT                | 1945903244               |
| SNP_P3_19182_12685704 | NC_021161.1    | Ca_kabuli_chr02 | 12685704                | CC                              | TT                | 1945903246               |
| SNP_P3_19183_12685772 | NC_021161.1    | Ca_kabuli_chr02 | 12685772                | GG                              | AA                | 1945903248               |
| SNP_P3_19184_12689932 | NC_021161.1    | Ca_kabuli_chr02 | 12689932                | GG                              | AA                | 1945903250               |
| SNP_P3_19185_12690161 | NC_021161.1    | Ca_kabuli_chr02 | 12690161                | AA                              | GG                | 1945903252               |
| SNP_P3_19186_12690235 | NC_021161.1    | Ca_kabuli_chr02 | 12690235                | TT                              | CC                | 1945903253               |
| SNP_P3_19187_12690571 | NC_021161.1    | Ca_kabuli_chr02 | 12690571                | TT                              | CC                | 1945903255               |
| SNP_P3_19188_12739898 | NC_021161.1    | Ca_kabuli_chr02 | 12739898                | TT                              | GG                | 1945903257               |
| SNP_P3_19189_12739899 | NC_021161.1    | Ca_kabuli_chr02 | 12739899                | AA                              | GG                | 1945903259               |
| SNP_P3_19190_12746958 | NC_021161.1    | Ca_kabuli_chr02 | 12746958                | AA                              | GG                | 1945903260               |
| SNP_P3_19191_12749335 | NC_021161.1    | Ca_kabuli_chr02 | 12749335                | TT                              | CC                | 1945903262               |
| SNP_P3_19192_12785112 | NC_021161.1    | Ca_kabuli_chr02 | 12785112                | GG                              | AA                | 1945903264               |
| SNP_P3_19193_12785145 | NC_021161.1    | Ca_kabuli_chr02 | 12785145                | TT                              | AA                | 1945903266               |
| SNP_P3_19194_12785199 | NC_021161.1    | Ca_kabuli_chr02 | 12785199                | GG                              | TT                | 1945903268               |
| SNP_P3_19195_12785226 | NC_021161.1    | Ca_kabuli_chr02 | 12785226                | CC                              | TT                | 1945903269               |
| SNP_P3_19196_12785232 | NC_021161.1    | Ca_kabuli_chr02 | 12785232                | GG                              | AA                | 1945903271               |
| SNP_P3_19197_12785271 | NC_021161.1    | Ca_kabuli_chr02 | 12785271                | GG                              | AA                | 1945903273               |
| SNP_P3_19198_12785412 | NC_021161.1    | Ca_kabuli_chr02 | 12785412                | GG                              | AA                | 1945903275               |
| SNP_P3_19199_12785471 | NC_021161.1    | Ca_kabuli_chr02 | 12785471                | TT                              | CC                | 1945903276               |
| SNP_P3_19200_12785480 | NC_021161.1    | Ca_kabuli_chr02 | 12785480                | AA                              | GG                | 1945903278               |
| SNP_P3_19201_12785492 | NC_021161.1    | Ca_kabuli_chr02 | 12785492                | AA                              | GG                | 1945903280               |
| SNP_P3_19202_12785520 | NC_021161.1    | Ca_kabuli_chr02 | 12785520                | GG                              | AA                | 1945903282               |
| SNP_P3_19203_12785522 | NC_021161.1    | Ca_kabuli_chr02 | 12785522                | GG                              | AA                | 1945903284               |
| SNP_P3_19205_12821345 | NC_021161.1    | Ca_kabuli_chr02 | 12821345                | CC                              | AA                | 1945903285               |

| SNPs IDs              | Chromosome IDs | Chromosomes     | Physical positions (bp) | CDC Frontier (Reference genome) | (Pusa 256 & HPNB) | NCBI SNPdb Accession IDs |
|-----------------------|----------------|-----------------|-------------------------|---------------------------------|-------------------|--------------------------|
| SNP_P3_19206_12843150 | NC_021161.1    | Ca_kabuli_chr02 | 12843150                | GG                              | AA                | 1945903287               |
| SNP_P3_19207_12885281 | NC_021161.1    | Ca_kabuli_chr02 | 12885281                | GG                              | AA                | 1945903289               |
| SNP_P3_19208_12919750 | NC_021161.1    | Ca_kabuli_chr02 | 12919750                | AA                              | CC                | 1945903291               |
| SNP_P3_19210_12931829 | NC_021161.1    | Ca_kabuli_chr02 | 12931829                | AA                              | CC                | 1945903292               |
| SNP_P3_19211_12931949 | NC_021161.1    | Ca_kabuli_chr02 | 12931949                | AA                              | TT                | 1945903294               |
| SNP_P3_19212_12932069 | NC_021161.1    | Ca_kabuli_chr02 | 12932069                | AA                              | GG                | 1945903296               |
| SNP_P3_19213_12932118 | NC_021161.1    | Ca_kabuli_chr02 | 12932118                | CC                              | TT                | 1945903298               |
| SNP_P3_19214_12932254 | NC_021161.1    | Ca_kabuli_chr02 | 12932254                | TT                              | AA                | 1945903299               |
| SNP_P3_19215_12932440 | NC_021161.1    | Ca_kabuli_chr02 | 12932440                | GG                              | TT                | 1945903301               |
| SNP_P3_19216_12932512 | NC_021161.1    | Ca_kabuli_chr02 | 12932512                | GG                              | AA                | 1945903303               |
| SNP_P3_19217_12932557 | NC_021161.1    | Ca_kabuli_chr02 | 12932557                | TT                              | AA                | 1945903304               |
| SNP_P3_19218_12932646 | NC_021161.1    | Ca_kabuli_chr02 | 12932646                | AA                              | CC                | 1945903306               |
| SNP_P3_19219_12932706 | NC_021161.1    | Ca_kabuli_chr02 | 12932706                | AA                              | GG                | 1945903308               |
| SNP_P3_19220_12932725 | NC_021161.1    | Ca_kabuli_chr02 | 12932725                | CC                              | TT                | 1945903310               |
| SNP_P3_19221_12932783 | NC_021161.1    | Ca_kabuli_chr02 | 12932783                | AA                              | GG                | 1945903312               |
| SNP_P3_19222_12932795 | NC_021161.1    | Ca_kabuli_chr02 | 12932795                | AA                              | GG                | 1945903313               |
| SNP_P3_19223_12932856 | NC_021161.1    | Ca_kabuli_chr02 | 12932856                | AA                              | GG                | 1945903315               |
| SNP_P3_19224_12932903 | NC_021161.1    | Ca_kabuli_chr02 | 12932903                | GG                              | CC                | 1945903317               |
| SNP_P3_19225_12933069 | NC_021161.1    | Ca_kabuli_chr02 | 12933069                | GG                              | AA                | 1945903319               |
| SNP_P3_19226_12933101 | NC_021161.1    | Ca_kabuli_chr02 | 12933101                | CC                              | TT                | 1945903320               |
| SNP_P3_19228_12933135 | NC_021161.1    | Ca_kabuli_chr02 | 12933135                | GG                              | AA                | 1945903322               |
| SNP_P3_19229_12933149 | NC_021161.1    | Ca_kabuli_chr02 | 12933149                | AA                              | GG                | 1945903324               |
| SNP_P3_19230_12933198 | NC_021161.1    | Ca_kabuli_chr02 | 12933198                | TT                              | CC                | 1945903326               |
| SNP_P3_19231_12933215 | NC_021161.1    | Ca_kabuli_chr02 | 12933215                | AA                              | TT                | 1945903328               |
| SNP_P3_19232_12933258 | NC_021161.1    | Ca_kabuli_chr02 | 12933258                | GG                              | CC                | 1945903329               |
| SNP_P3_19233_12933316 | NC_021161.1    | Ca_kabuli_chr02 | 12933316                | CC                              | AA                | 1945903331               |
| SNP_P3_19235_12933374 | NC_021161.1    | Ca_kabuli_chr02 | 12933374                | CC                              | GG                | 1945903333               |
| SNP_P3_19236_12933548 | NC_021161.1    | Ca_kabuli_chr02 | 12933548                | AA                              | CC                | 1945903335               |
| SNP_P3_19237_12933568 | NC_021161.1    | Ca_kabuli_chr02 | 12933568                | CC                              | TT                | 1945903337               |
| SNP_P3_19239_12933627 | NC_021161.1    | Ca_kabuli_chr02 | 12933627                | AA                              | GG                | 1945903338               |
| SNP_P3_19240_12933654 | NC_021161.1    | Ca_kabuli_chr02 | 12933654                | CC                              | TT                | 1945903340               |
| SNP_P3_19241_12933665 | NC_021161.1    | Ca_kabuli_chr02 | 12933665                | CC                              | TT                | 1945903342               |
| SNP_P3_19242_12933751 | NC_021161.1    | Ca_kabuli_chr02 | 12933751                | AA                              | TT                | 1945903344               |
| SNP_P3_19243_12933915 | NC_021161.1    | Ca_kabuli_chr02 | 12933915                | CC                              | GG                | 1945903345               |
| SNP_P3_19244_12934183 | NC_021161.1    | Ca_kabuli_chr02 | 12934183                | TT                              | AA                | 1945903347               |
| SNP_P3_19246_12934365 | NC_021161.1    | Ca_kabuli_chr02 | 12934365                | AA                              | GG                | 1945903349               |
| SNP_P3_19247_12934382 | NC_021161.1    | Ca_kabuli_chr02 | 12934382                | AA                              | CC                | 1945903351               |
| SNP_P3_19248_12934497 | NC_021161.1    | Ca_kabuli_chr02 | 12934497                | GG                              | AA                | 1945903353               |
| SNP_P3_19249_12934516 | NC_021161.1    | Ca_kabuli_chr02 | 12934516                | AA                              | TT                | 1945903354               |
| SNP_P3_19250_12934572 | NC_021161.1    | Ca_kabuli_chr02 | 12934572                | TT                              | GG                | 1945903356               |
| SNP_P3_19251_12934749 | NC_021161.1    | Ca_kabuli_chr02 | 12934749                | TT                              | AA                | 1945903358               |
| SNP_P3_19252_12934776 | NC_021161.1    | Ca_kabuli_chr02 | 12934776                | AA                              | CC                | 1945903360               |

| SNPs IDs              | Chromosome IDs | Chromosomes     | Physical positions (bp) | CDC Frontier (Reference genome) | (Pusa 256 & HPNB) | NCBI SNPdb Accession IDs |
|-----------------------|----------------|-----------------|-------------------------|---------------------------------|-------------------|--------------------------|
| SNP_P3_19253_12934794 | NC_021161.1    | Ca_kabuli_chr02 | 12934794                | AA                              | GG                | 1945903361               |
| SNP_P3_19254_12934802 | NC_021161.1    | Ca_kabuli_chr02 | 12934802                | GG                              | CC                | 1945903363               |
| SNP_P3_19256_12935442 | NC_021161.1    | Ca_kabuli_chr02 | 12935442                | TT                              | GG                | 1945903364               |
| SNP_P3_19257_12935449 | NC_021161.1    | Ca_kabuli_chr02 | 12935449                | CC                              | TT                | 1945903366               |
| SNP_P3_19258_12935582 | NC_021161.1    | Ca_kabuli_chr02 | 12935582                | CC                              | TT                | 1945903368               |
| SNP_P3_19259_12935639 | NC_021161.1    | Ca_kabuli_chr02 | 12935639                | AA                              | GG                | 1945903369               |
| SNP_P3_19260_12935645 | NC_021161.1    | Ca_kabuli_chr02 | 12935645                | AA                              | GG                | 1945903371               |
| SNP_P3_19261_12935664 | NC_021161.1    | Ca_kabuli_chr02 | 12935664                | GG                              | AA                | 1945903373               |
| SNP_P3_19262_12935805 | NC_021161.1    | Ca_kabuli_chr02 | 12935805                | GG                              | AA                | 1945903375               |
| SNP_P3_19263_12935824 | NC_021161.1    | Ca_kabuli_chr02 | 12935824                | TT                              | CC                | 1945903376               |
| SNP_P3_19264_12935932 | NC_021161.1    | Ca_kabuli_chr02 | 12935932                | TT                              | GG                | 1945903378               |
| SNP_P3_19265_12935948 | NC_021161.1    | Ca_kabuli_chr02 | 12935948                | TT                              | CC                | 1945903380               |
| SNP_P3_19266_12936060 | NC_021161.1    | Ca_kabuli_chr02 | 12936060                | CC                              | TT                | 1945903382               |
| SNP_P3_19267_12936096 | NC_021161.1    | Ca_kabuli_chr02 | 12936096                | TT                              | AA                | 1945903384               |
| SNP_P3_19268_12936177 | NC_021161.1    | Ca_kabuli_chr02 | 12936177                | AA                              | GG                | 1945903385               |
| SNP_P3_19269_12936246 | NC_021161.1    | Ca_kabuli_chr02 | 12936246                | AA                              | GG                | 1945903387               |
| SNP_P3_19270_12936360 | NC_021161.1    | Ca_kabuli_chr02 | 12936360                | GG                              | CC                | 1945903389               |
| SNP_P3_19271_12936542 | NC_021161.1    | Ca_kabuli_chr02 | 12936542                | CC                              | TT                | 1945903391               |
| SNP_P3_19272_12936559 | NC_021161.1    | Ca_kabuli_chr02 | 12936559                | TT                              | AA                | 1945903392               |
| SNP_P3_19273_12936662 | NC_021161.1    | Ca_kabuli_chr02 | 12936662                | GG                              | AA                | 1945903394               |
| SNP_P3_19274_12936741 | NC_021161.1    | Ca_kabuli_chr02 | 12936741                | AA                              | GG                | 1945903396               |
| SNP_P3_19275_12936805 | NC_021161.1    | Ca_kabuli_chr02 | 12936805                | CC                              | TT                | 1945903398               |
| SNP_P3_19276_12937028 | NC_021161.1    | Ca_kabuli_chr02 | 12937028                | AA                              | GG                | 1945903400               |
| SNP_P3_19277_12937051 | NC_021161.1    | Ca_kabuli_chr02 | 12937051                | CC                              | TT                | 1945903401               |
| SNP_P3_19278_12937059 | NC_021161.1    | Ca_kabuli_chr02 | 12937059                | CC                              | AA                | 1945903403               |
| SNP_P3_19279_12937070 | NC_021161.1    | Ca_kabuli_chr02 | 12937070                | TT                              | AA                | 1945903405               |
| SNP_P3_19280_12937071 | NC_021161.1    | Ca_kabuli_chr02 | 12937071                | GG                              | AA                | 1945903407               |
| SNP_P3_19281_12937177 | NC_021161.1    | Ca_kabuli_chr02 | 12937177                | CC                              | TT                | 1945903408               |
| SNP_P3_19282_12937180 | NC_021161.1    | Ca_kabuli_chr02 | 12937180                | AA                              | TT                | 1945903410               |
| SNP_P3_19283_12937185 | NC_021161.1    | Ca_kabuli_chr02 | 12937185                | CC                              | TT                | 1945903412               |
| SNP_P3_19284_12937265 | NC_021161.1    | Ca_kabuli_chr02 | 12937265                | TT                              | AA                | 1945903414               |
| SNP_P3_19285_12937368 | NC_021161.1    | Ca_kabuli_chr02 | 12937368                | AA                              | GG                | 1945903415               |
| SNP_P3_19286_12937377 | NC_021161.1    | Ca_kabuli_chr02 | 12937377                | TT                              | CC                | 1945903417               |
| SNP_P3_19287_12937379 | NC_021161.1    | Ca_kabuli_chr02 | 12937379                | AA                              | TT                | 1945903419               |
| SNP_P3_19288_12937426 | NC_021161.1    | Ca_kabuli_chr02 | 12937426                | CC                              | AA                | 1945903421               |
| SNP_P3_19289_12937445 | NC_021161.1    | Ca_kabuli_chr02 | 12937445                | CC                              | AA                | 1945903423               |
| SNP_P3_19290_12937451 | NC_021161.1    | Ca_kabuli_chr02 | 12937451                | CC                              | AA                | 1945903424               |
| SNP_P3_19291_12937472 | NC_021161.1    | Ca_kabuli_chr02 | 12937472                | CC                              | TT                | 1945903426               |
| SNP_P3_19292_12937522 | NC_021161.1    | Ca_kabuli_chr02 | 12937522                | TT                              | AA                | 1945903428               |
| SNP_P3_19293_12937572 | NC_021161.1    | Ca_kabuli_chr02 | 12937572                | AA                              | CC                | 1945903430               |
| SNP_P3_19295_12937663 | NC_021161.1    | Ca_kabuli_chr02 | 12937663                | AA                              | CC                | 1945903431               |
| SNP_P3_19296_12937683 | NC_021161.1    | Ca_kabuli_chr02 | 12937683                | CC                              | TT                | 1945903433               |

| SNPs IDs              | Chromosome IDs | Chromosomes     | Physical positions (bp) | CDC Frontier (Reference genome) | (Pusa 256 & HPNB) | NCBI SNPdb Accession IDs |
|-----------------------|----------------|-----------------|-------------------------|---------------------------------|-------------------|--------------------------|
| SNP_P3_19297_12937684 | NC_021161.1    | Ca_kabuli_chr02 | 12937684                | TT                              | CC                | 1945903435               |
| SNP_P3_19298_12937693 | NC_021161.1    | Ca_kabuli_chr02 | 12937693                | CC                              | TT                | 1945903437               |
| SNP_P3_19299_12937825 | NC_021161.1    | Ca_kabuli_chr02 | 12937825                | AA                              | TT                | 1945903439               |
| SNP_P3_19300_12937896 | NC_021161.1    | Ca_kabuli_chr02 | 12937896                | AA                              | GG                | 1945903440               |
| SNP_P3_19301_12937966 | NC_021161.1    | Ca_kabuli_chr02 | 12937966                | TT                              | AA                | 1945903442               |
| SNP_P3_19302_12938879 | NC_021161.1    | Ca_kabuli_chr02 | 12938879                | TT                              | GG                | 1945903444               |
| SNP_P3_19303_12939274 | NC_021161.1    | Ca_kabuli_chr02 | 12939274                | GG                              | CC                | 1945903446               |
| SNP_P3_19304_12939296 | NC_021161.1    | Ca_kabuli_chr02 | 12939296                | CC                              | GG                | 1945903447               |
| SNP_P3_19305_12939560 | NC_021161.1    | Ca_kabuli_chr02 | 12939560                | TT                              | CC                | 1945903449               |
| SNP_P3_19307_12939751 | NC_021161.1    | Ca_kabuli_chr02 | 12939751                | AA                              | TT                | 1945903451               |
| SNP_P3_19308_12939954 | NC_021161.1    | Ca_kabuli_chr02 | 12939954                | TT                              | AA                | 1945903453               |
| SNP_P3_19309_12940026 | NC_021161.1    | Ca_kabuli_chr02 | 12940026                | GG                              | AA                | 1945903455               |
| SNP_P3_19310_12940554 | NC_021161.1    | Ca_kabuli_chr02 | 12940554                | GG                              | CC                | 1945903456               |
| SNP_P3_19311_12940590 | NC_021161.1    | Ca_kabuli_chr02 | 12940590                | AA                              | GG                | 1945903458               |
| SNP_P3_19312_12940634 | NC_021161.1    | Ca_kabuli_chr02 | 12940634                | TT                              | AA                | 1945903460               |
| SNP_P3_19313_12940666 | NC_021161.1    | Ca_kabuli_chr02 | 12940666                | GG                              | AA                | 1945903462               |
| SNP_P3_19314_12940667 | NC_021161.1    | Ca_kabuli_chr02 | 12940667                | TT                              | CC                | 1945903464               |
| SNP_P3_19315_12940985 | NC_021161.1    | Ca_kabuli_chr02 | 12940985                | TT                              | CC                | 1945903465               |
| SNP_P3_19316_12941032 | NC_021161.1    | Ca_kabuli_chr02 | 12941032                | GG                              | AA                | 1945903467               |
| SNP_P3_19317_12941052 | NC_021161.1    | Ca_kabuli_chr02 | 12941052                | AA                              | GG                | 1945903469               |
| SNP_P3_19318_12941162 | NC_021161.1    | Ca_kabuli_chr02 | 12941162                | AA                              | GG                | 1945903471               |
| SNP_P3_19320_12941376 | NC_021161.1    | Ca_kabuli_chr02 | 12941376                | AA                              | CC                | 1945903472               |
| SNP_P3_19321_12941452 | NC_021161.1    | Ca_kabuli_chr02 | 12941452                | AA                              | TT                | 1945903474               |
| SNP_P3_19322_12941511 | NC_021161.1    | Ca_kabuli_chr02 | 12941511                | GG                              | AA                | 1945903476               |
| SNP_P3_19323_12941535 | NC_021161.1    | Ca_kabuli_chr02 | 12941535                | AA                              | GG                | 1945903478               |
| SNP_P3_19324_12941537 | NC_021161.1    | Ca_kabuli_chr02 | 12941537                | GG                              | CC                | 1945903480               |
| SNP_P3_19325_12941742 | NC_021161.1    | Ca_kabuli_chr02 | 12941742                | CC                              | AA                | 1945903481               |
| SNP_P3_19327_12941838 | NC_021161.1    | Ca_kabuli_chr02 | 12941838                | CC                              | TT                | 1945903483               |
| SNP_P3_19328_12941843 | NC_021161.1    | Ca_kabuli_chr02 | 12941843                | TT                              | CC                | 1945903485               |
| SNP_P3_19329_12941877 | NC_021161.1    | Ca_kabuli_chr02 | 12941877                | AA                              | CC                | 1945903487               |
| SNP_P3_19330_12941902 | NC_021161.1    | Ca_kabuli_chr02 | 12941902                | GG                              | AA                | 1945903488               |
| SNP_P3_19331_12942072 | NC_021161.1    | Ca_kabuli_chr02 | 12942072                | GG                              | TT                | 1945903490               |
| SNP_P3_19332_12942158 | NC_021161.1    | Ca_kabuli_chr02 | 12942158                | AA                              | GG                | 1945903492               |
| SNP_P3_19333_12942218 | NC_021161.1    | Ca_kabuli_chr02 | 12942218                | TT                              | GG                | 1945903494               |
| SNP_P3_19334_12942223 | NC_021161.1    | Ca_kabuli_chr02 | 12942223                | GG                              | AA                | 1945903496               |
| SNP_P3_19335_12942260 | NC_021161.1    | Ca_kabuli_chr02 | 12942260                | AA                              | CC                | 1945903497               |
| SNP_P3_19336_12942542 | NC_021161.1    | Ca_kabuli_chr02 | 12942542                | GG                              | AA                | 1945903499               |
| SNP_P3_19337_12942565 | NC_021161.1    | Ca_kabuli_chr02 | 12942565                | GG                              | AA                | 1945903501               |
| SNP_P3_19338_12947947 | NC_021161.1    | Ca_kabuli_chr02 | 12947947                | AA                              | GG                | 1945903503               |
| SNP_P3_19340_12948047 | NC_021161.1    | Ca_kabuli_chr02 | 12948047                | CC                              | TT                | 1945903504               |
| SNP_P3_19341_12948167 | NC_021161.1    | Ca_kabuli_chr02 | 12948167                | AA                              | GG                | 1945903506               |
| SNP_P3_19342_12948328 | NC_021161.1    | Ca_kabuli_chr02 | 12948328                | GG                              | TT                | 1945903508               |

| SNPs IDs              | Chromosome IDs | Chromosomes     | Physical positions (bp) | CDC Frontier (Reference genome) | (Pusa 256 & HPNB) | NCBI SNPdb Accession IDs |
|-----------------------|----------------|-----------------|-------------------------|---------------------------------|-------------------|--------------------------|
| SNP_P3_19343_12948329 | NC_021161.1    | Ca_kabuli_chr02 | 12948329                | TT                              | AA                | 1945903510               |
| SNP_P3_19344_12948606 | NC_021161.1    | Ca_kabuli_chr02 | 12948606                | CC                              | TT                | 1945903512               |
| SNP_P3_19345_12948609 | NC_021161.1    | Ca_kabuli_chr02 | 12948609                | CC                              | TT                | 1945903513               |
| SNP_P3_19346_12949123 | NC_021161.1    | Ca_kabuli_chr02 | 12949123                | AA                              | TT                | 1945903515               |
| SNP_P3_19347_12949132 | NC_021161.1    | Ca_kabuli_chr02 | 12949132                | GG                              | AA                | 1945903517               |
| SNP_P3_19348_12949188 | NC_021161.1    | Ca_kabuli_chr02 | 12949188                | GG                              | AA                | 1945903519               |
| SNP_P3_19349_12949192 | NC_021161.1    | Ca_kabuli_chr02 | 12949192                | GG                              | TT                | 1945903520               |
| SNP_P3_19350_12949603 | NC_021161.1    | Ca_kabuli_chr02 | 12949603                | CC                              | TT                | 1945903522               |
| SNP_P3_19351_12949628 | NC_021161.1    | Ca_kabuli_chr02 | 12949628                | CC                              | TT                | 1945903524               |
| SNP_P3_19352_12949637 | NC_021161.1    | Ca_kabuli_chr02 | 12949637                | CC                              | TT                | 1945903526               |
| SNP_P3_19353_12949881 | NC_021161.1    | Ca_kabuli_chr02 | 12949881                | GG                              | AA                | 1945903528               |
| SNP_P3_19354_12950095 | NC_021161.1    | Ca_kabuli_chr02 | 12950095                | CC                              | TT                | 1945903529               |
| SNP_P3_19355_12950303 | NC_021161.1    | Ca_kabuli_chr02 | 12950303                | AA                              | CC                | 1945903531               |
| SNP_P3_19356_12950357 | NC_021161.1    | Ca_kabuli_chr02 | 12950357                | TT                              | AA                | 1945903533               |
| SNP_P3_19357_12950375 | NC_021161.1    | Ca_kabuli_chr02 | 12950375                | AA                              | CC                | 1945903535               |
| SNP_P3_19358_12951621 | NC_021161.1    | Ca_kabuli_chr02 | 12951621                | CC                              | AA                | 1945903536               |
| SNP_P3_19359_12951649 | NC_021161.1    | Ca_kabuli_chr02 | 12951649                | TT                              | CC                | 1945903538               |
| SNP_P3_19360_12951684 | NC_021161.1    | Ca_kabuli_chr02 | 12951684                | GG                              | AA                | 1945903540               |
| SNP_P3_19361_12951701 | NC_021161.1    | Ca_kabuli_chr02 | 12951701                | GG                              | AA                | 1945903542               |
| SNP_P3_19362_12951955 | NC_021161.1    | Ca_kabuli_chr02 | 12951955                | GG                              | AA                | 1945903544               |
| SNP_P3_19363_12952122 | NC_021161.1    | Ca_kabuli_chr02 | 12952122                | TT                              | AA                | 1945903545               |
| SNP_P3_19364_12952300 | NC_021161.1    | Ca_kabuli_chr02 | 12952300                | TT                              | GG                | 1945903547               |
| SNP_P3_19365_12952375 | NC_021161.1    | Ca_kabuli_chr02 | 12952375                | TT                              | CC                | 1945903549               |
| SNP_P3_19366_12952438 | NC_021161.1    | Ca_kabuli_chr02 | 12952438                | GG                              | AA                | 1945903551               |
| SNP_P3_19368_12952924 | NC_021161.1    | Ca_kabuli_chr02 | 12952924                | GG                              | AA                | 1945903552               |
| SNP_P3_19370_12953136 | NC_021161.1    | Ca_kabuli_chr02 | 12953136                | TT                              | CC                | 1945903554               |
| SNP_P3_19371_12953578 | NC_021161.1    | Ca_kabuli_chr02 | 12953578                | AA                              | GG                | 1945903556               |
| SNP_P3_19372_12959961 | NC_021161.1    | Ca_kabuli_chr02 | 12959961                | AA                              | GG                | 1945903558               |
| SNP_P3_19373_12959975 | NC_021161.1    | Ca_kabuli_chr02 | 12959975                | CC                              | AA                | 1945903560               |
| SNP_P3_19374_12960138 | NC_021161.1    | Ca_kabuli_chr02 | 12960138                | AA                              | GG                | 1945903561               |
| SNP_P3_19376_12960309 | NC_021161.1    | Ca_kabuli_chr02 | 12960309                | TT                              | AA                | 1945903563               |
| SNP_P3_19377_12960530 | NC_021161.1    | Ca_kabuli_chr02 | 12960530                | CC                              | GG                | 1945903565               |
| SNP_P3_19378_12960568 | NC_021161.1    | Ca_kabuli_chr02 | 12960568                | AA                              | GG                | 1945903567               |
| SNP_P3_19379_12972950 | NC_021161.1    | Ca_kabuli_chr02 | 12972950                | AA                              | CC                | 1945903569               |
| SNP_P3_19380_12987750 | NC_021161.1    | Ca_kabuli_chr02 | 12987750                | AA                              | GG                | 1945903570               |
| SNP_P3_19381_12994044 | NC_021161.1    | Ca_kabuli_chr02 | 12994044                | AA                              | CC                | 1945903572               |
| SNP_P3_19382_12994069 | NC_021161.1    | Ca_kabuli_chr02 | 12994069                | CC                              | AA                | 1945903574               |
| SNP_P3_19383_12994214 | NC_021161.1    | Ca_kabuli_chr02 | 12994214                | GG                              | AA                | 1945903576               |
| SNP_P3_19384_12994250 | NC_021161.1    | Ca_kabuli_chr02 | 12994250                | AA                              | TT                | 1945903577               |
| SNP_P3_19385_12994262 | NC_021161.1    | Ca_kabuli_chr02 | 12994262                | GG                              | AA                | 1945903579               |
| SNP_P3_19386_12994277 | NC_021161.1    | Ca_kabuli_chr02 | 12994277                | AA                              | GG                | 1945903581               |
| SNP_P3_19387_13010891 | NC_021161.1    | Ca_kabuli_chr02 | 13010891                | CC                              | TT                | 1945903583               |

| SNPs IDs              | Chromosome IDs | Chromosomes     | Physical positions (bp) | CDC Frontier (Reference genome) | (Pusa 256 & HPNB) | NCBI SNPdb Accession IDs |
|-----------------------|----------------|-----------------|-------------------------|---------------------------------|-------------------|--------------------------|
| SNP_P3_19388_13010933 | NC_021161.1    | Ca_kabuli_chr02 | 13010933                | AA                              | GG                | 1945903585               |
| SNP_P3_19389_13011255 | NC_021161.1    | Ca_kabuli_chr02 | 13011255                | AA                              | GG                | 1945903586               |
| SNP_P3_19390_13011296 | NC_021161.1    | Ca_kabuli_chr02 | 13011296                | AA                              | CC                | 1945903588               |
| SNP_P3_19391_13011354 | NC_021161.1    | Ca_kabuli_chr02 | 13011354                | TT                              | CC                | 1945903590               |
| SNP_P3_19392_13026441 | NC_021161.1    | Ca_kabuli_chr02 | 13026441                | GG                              | TT                | 1945903592               |
| SNP_P3_19393_13026451 | NC_021161.1    | Ca_kabuli_chr02 | 13026451                | TT                              | CC                | 1945903593               |
| SNP_P3_19395_13026512 | NC_021161.1    | Ca_kabuli_chr02 | 13026512                | CC                              | TT                | 1945903595               |
| SNP_P3_19396_13026514 | NC_021161.1    | Ca_kabuli_chr02 | 13026514                | AA                              | GG                | 1945903597               |
| SNP_P3_19397_13026537 | NC_021161.1    | Ca_kabuli_chr02 | 13026537                | GG                              | AA                | 1945903599               |
| SNP_P3_19398_13027643 | NC_021161.1    | Ca_kabuli_chr02 | 13027643                | GG                              | AA                | 1945903601               |
| SNP_P3_19399_13028319 | NC_021161.1    | Ca_kabuli_chr02 | 13028319                | GG                              | TT                | 1945903602               |
| SNP_P3_19401_13115023 | NC_021161.1    | Ca_kabuli_chr02 | 13115023                | CC                              | AA                | 1945903604               |
| SNP_P3_19402_13120547 | NC_021161.1    | Ca_kabuli_chr02 | 13120547                | GG                              | CC                | 1945903606               |
| SNP_P3_19404_13141700 | NC_021161.1    | Ca_kabuli_chr02 | 13141700                | GG                              | AA                | 1945903608               |
| SNP_P3_19405_13182591 | NC_021161.1    | Ca_kabuli_chr02 | 13182591                | GG                              | CC                | 1945903610               |
| SNP_P3_19407_13188741 | NC_021161.1    | Ca_kabuli_chr02 | 13188741                | AA                              | GG                | 1945903611               |
| SNP_P3_19410_13234554 | NC_021161.1    | Ca_kabuli_chr02 | 13234554                | AA                              | GG                | 1945903613               |
| SNP_P3_19411_13234555 | NC_021161.1    | Ca_kabuli_chr02 | 13234555                | TT                              | GG                | 1945903615               |
| SNP_P3_19413_13262302 | NC_021161.1    | Ca_kabuli_chr02 | 13262302                | GG                              | AA                | 1945903617               |
| SNP_P3_19414_13265328 | NC_021161.1    | Ca_kabuli_chr02 | 13265328                | GG                              | AA                | 1945903618               |
| SNP_P3_19415_13270501 | NC_021161.1    | Ca_kabuli_chr02 | 13270501                | GG                              | AA                | 1945903620               |
| SNP_P3_19416_13270533 | NC_021161.1    | Ca_kabuli_chr02 | 13270533                | GG                              | CC                | 1945903622               |
| SNP_P3_19417_13297834 | NC_021161.1    | Ca_kabuli_chr02 | 13297834                | TT                              | CC                | 1945903624               |
| SNP_P3_19418_13297849 | NC_021161.1    | Ca_kabuli_chr02 | 13297849                | TT                              | CC                | 1945903625               |
| SNP_P3_19419_13297869 | NC_021161.1    | Ca_kabuli_chr02 | 13297869                | AA                              | GG                | 1945903627               |
| SNP_P3_19420_13347443 | NC_021161.1    | Ca_kabuli_chr02 | 13347443                | GG                              | AA                | 1945903629               |
| SNP_P3_19421_13365478 | NC_021161.1    | Ca_kabuli_chr02 | 13365478                | TT                              | CC                | 1945903631               |
| SNP_P3_19422_13365487 | NC_021161.1    | Ca_kabuli_chr02 | 13365487                | TT                              | GG                | 1945903633               |
| SNP_P3_19423_13365628 | NC_021161.1    | Ca_kabuli_chr02 | 13365628                | AA                              | GG                | 1945903634               |
| SNP_P3_19424_13365650 | NC_021161.1    | Ca_kabuli_chr02 | 13365650                | AA                              | TT                | 1945903636               |
| SNP_P3_19425_13365688 | NC_021161.1    | Ca_kabuli_chr02 | 13365688                | TT                              | AA                | 1945903638               |
| SNP_P3_19426_13365704 | NC_021161.1    | Ca_kabuli_chr02 | 13365704                | AA                              | CC                | 1945903640               |
| SNP_P3_19427_13365722 | NC_021161.1    | Ca_kabuli_chr02 | 13365722                | AA                              | CC                | 1945903641               |
| SNP_P3_19428_13365908 | NC_021161.1    | Ca_kabuli_chr02 | 13365908                | CC                              | AA                | 1945903643               |
| SNP_P3_19429_13365950 | NC_021161.1    | Ca_kabuli_chr02 | 13365950                | AA                              | GG                | 1945903645               |
| SNP_P3_19430_13366105 | NC_021161.1    | Ca_kabuli_chr02 | 13366105                | GG                              | AA                | 1945903647               |
| SNP_P3_19431_13400798 | NC_021161.1    | Ca_kabuli_chr02 | 13400798                | TT                              | GG                | 1945903649               |
| SNP_P3_19432_13400846 | NC_021161.1    | Ca_kabuli_chr02 | 13400846                | GG                              | AA                | 1945903650               |
| SNP_P3_19433_13402849 | NC_021161.1    | Ca_kabuli_chr02 | 13402849                | AA                              | CC                | 1945903652               |
| SNP_P3_19434_13460311 | NC_021161.1    | Ca_kabuli_chr02 | 13460311                | TT                              | CC                | 1945903654               |
| SNP_P3_19435_13460687 | NC_021161.1    | Ca_kabuli_chr02 | 13460687                | AA                              | GG                | 1945903656               |
| SNP_P3_19436_13460755 | NC_021161.1    | Ca_kabuli_chr02 | 13460755                | AA                              | CC                | 1945903657               |



| SNPs IDs              | Chromosome IDs | Chromosomes     | Physical positions (bp) | CDC Frontier (Reference genome) | (Pusa 256 & HPNB) | NCBI SNPdb Accession IDs |
|-----------------------|----------------|-----------------|-------------------------|---------------------------------|-------------------|--------------------------|
| SNP_P3_19437_13483863 | NC_021161.1    | Ca_kabuli_chr02 | 13483863                | TT                              | CC                | 1945903659               |
| SNP_P3_19438_13584155 | NC_021161.1    | Ca_kabuli_chr02 | 13584155                | GG                              | AA                | 1945903661               |
| SNP_P3_19439_13584547 | NC_021161.1    | Ca_kabuli_chr02 | 13584547                | TT                              | AA                | 1945903663               |
| SNP_P3_19440_13584593 | NC_021161.1    | Ca_kabuli_chr02 | 13584593                | TT                              | CC                | 1945903665               |
| SNP_P3_19443_13640264 | NC_021161.1    | Ca_kabuli_chr02 | 13640264                | AA                              | GG                | 1945903666               |
| SNP_P3_19445_13694933 | NC_021161.1    | Ca_kabuli_chr02 | 13694933                | TT                              | GG                | 1945903668               |
| SNP_P3_19446_13695383 | NC_021161.1    | Ca_kabuli_chr02 | 13695383                | AA                              | GG                | 1945903670               |
| SNP_P3_19447_13695415 | NC_021161.1    | Ca_kabuli_chr02 | 13695415                | TT                              | GG                | 1945903672               |
| SNP_P3_19448_13695430 | NC_021161.1    | Ca_kabuli_chr02 | 13695430                | TT                              | GG                | 1945903673               |
| SNP_P3_19449_13712656 | NC_021161.1    | Ca_kabuli_chr02 | 13712656                | AA                              | GG                | 1945903675               |
| SNP_P3_19451_13714040 | NC_021161.1    | Ca_kabuli_chr02 | 13714040                | TT                              | CC                | 1945903677               |
| SNP_P3_19452_13714912 | NC_021161.1    | Ca_kabuli_chr02 | 13714912                | AA                              | GG                | 1945903679               |
| SNP_P3_19455_13798142 | NC_021161.1    | Ca_kabuli_chr02 | 13798142                | GG                              | AA                | 1945903681               |
| SNP_P3_19456_13807594 | NC_021161.1    | Ca_kabuli_chr02 | 13807594                | GG                              | AA                | 1945903682               |
| SNP_P3_19457_13807814 | NC_021161.1    | Ca_kabuli_chr02 | 13807814                | GG                              | TT                | 1945903684               |
| SNP_P3_19458_13807849 | NC_021161.1    | Ca_kabuli_chr02 | 13807849                | GG                              | AA                | 1945903686               |
| SNP_P3_19459_13808093 | NC_021161.1    | Ca_kabuli_chr02 | 13808093                | CC                              | TT                | 1945903688               |
| SNP_P3_19460_13808127 | NC_021161.1    | Ca_kabuli_chr02 | 13808127                | CC                              | AA                | 1945903689               |
| SNP_P3_19461_13840541 | NC_021161.1    | Ca_kabuli_chr02 | 13840541                | GG                              | AA                | 1945903691               |
| SNP_P3_19462_13840564 | NC_021161.1    | Ca_kabuli_chr02 | 13840564                | TT                              | GG                | 1945903693               |
| SNP_P3_19463_13846907 | NC_021161.1    | Ca_kabuli_chr02 | 13846907                | TT                              | AA                | 1945903695               |
| SNP_P3_19464_13872286 | NC_021161.1    | Ca_kabuli_chr02 | 13872286                | TT                              | GG                | 1945903697               |
| SNP_P3_19465_13879387 | NC_021161.1    | Ca_kabuli_chr02 | 13879387                | CC                              | TT                | 1945903698               |
| SNP_P3_19466_13879404 | NC_021161.1    | Ca_kabuli_chr02 | 13879404                | CC                              | TT                | 1945903700               |
| SNP_P3_19467_13880251 | NC_021161.1    | Ca_kabuli_chr02 | 13880251                | GG                              | TT                | 1945903702               |
| SNP_P3_19468_13881577 | NC_021161.1    | Ca_kabuli_chr02 | 13881577                | CC                              | TT                | 1945903704               |
| SNP_P3_19469_13908415 | NC_021161.1    | Ca_kabuli_chr02 | 13908415                | TT                              | CC                | 1945903705               |
| SNP_P3_19470_13908430 | NC_021161.1    | Ca_kabuli_chr02 | 13908430                | GG                              | CC                | 1945903707               |
| SNP_P3_19471_13908449 | NC_021161.1    | Ca_kabuli_chr02 | 13908449                | TT                              | AA                | 1945903709               |
| SNP_P3_19472_13908450 | NC_021161.1    | Ca_kabuli_chr02 | 13908450                | CC                              | TT                | 1945903711               |
| SNP_P3_19473_13908546 | NC_021161.1    | Ca_kabuli_chr02 | 13908546                | GG                              | TT                | 1945903713               |
| SNP_P3_19474_13908547 | NC_021161.1    | Ca_kabuli_chr02 | 13908547                | AA                              | TT                | 1945903714               |
| SNP_P3_19475_13909164 | NC_021161.1    | Ca_kabuli_chr02 | 13909164                | TT                              | CC                | 1945903716               |
| SNP_P3_19476_13909449 | NC_021161.1    | Ca_kabuli_chr02 | 13909449                | AA                              | TT                | 1945903718               |
| SNP_P3_19477_13909466 | NC_021161.1    | Ca_kabuli_chr02 | 13909466                | TT                              | CC                | 1945903720               |
| SNP_P3_19478_13909471 | NC_021161.1    | Ca_kabuli_chr02 | 13909471                | CC                              | GG                | 1945903721               |
| SNP_P3_19479_13913898 | NC_021161.1    | Ca_kabuli_chr02 | 13913898                | GG                              | AA                | 1945903723               |
| SNP_P3_19480_13922742 | NC_021161.1    | Ca_kabuli_chr02 | 13922742                | AA                              | CC                | 1945903725               |
| SNP_P3_19481_13922764 | NC_021161.1    | Ca_kabuli_chr02 | 13922764                | AA                              | GG                | 1945903727               |
| SNP_P3_19482_13923342 | NC_021161.1    | Ca_kabuli_chr02 | 13923342                | TT                              | GG                | 1945903729               |
| SNP_P3_19483_13923419 | NC_021161.1    | Ca_kabuli_chr02 | 13923419                | GG                              | CC                | 1945903730               |
| SNP_P3_19484_13923474 | NC_021161.1    | Ca_kabuli_chr02 | 13923474                | GG                              | AA                | 1945903732               |

| SNPs IDs              | Chromosome IDs | Chromosomes     | Physical positions (bp) | CDC Frontier (Reference genome) | (Pusa 256 & HPNB) | NCBI SNPdb Accession IDs |
|-----------------------|----------------|-----------------|-------------------------|---------------------------------|-------------------|--------------------------|
| SNP_P3_19485_13923648 | NC_021161.1    | Ca_kabuli_chr02 | 13923648                | GG                              | CC                | 1945903734               |
| SNP_P3_19486_13925661 | NC_021161.1    | Ca_kabuli_chr02 | 13925661                | TT                              | CC                | 1945903736               |
| SNP_P3_19487_13925857 | NC_021161.1    | Ca_kabuli_chr02 | 13925857                | TT                              | GG                | 1945903737               |
| SNP_P3_19488_13955242 | NC_021161.1    | Ca_kabuli_chr02 | 13955242                | TT                              | AA                | 1945903739               |
| SNP_P3_19489_13956332 | NC_021161.1    | Ca_kabuli_chr02 | 13956332                | TT                              | CC                | 1945903741               |
| SNP_P3_19490_13956364 | NC_021161.1    | Ca_kabuli_chr02 | 13956364                | AA                              | CC                | 1945903743               |
| SNP_P3_19492_13957910 | NC_021161.1    | Ca_kabuli_chr02 | 13957910                | CC                              | AA                | 1945903745               |
| SNP_P3_19494_13957982 | NC_021161.1    | Ca_kabuli_chr02 | 13957982                | AA                              | CC                | 1945903746               |
| SNP_P3_19495_13983354 | NC_021161.1    | Ca_kabuli_chr02 | 13983354                | AA                              | GG                | 1945903748               |
| SNP_P3_19497_13989506 | NC_021161.1    | Ca_kabuli_chr02 | 13989506                | GG                              | AA                | 1945903750               |
| SNP_P3_19499_14025834 | NC_021161.1    | Ca_kabuli_chr02 | 14025834                | TT                              | AA                | 1945903752               |
| SNP_P3_19500_14029601 | NC_021161.1    | Ca_kabuli_chr02 | 14029601                | AA                              | GG                | 1945903753               |
| SNP_P3_19501_14042088 | NC_021161.1    | Ca_kabuli_chr02 | 14042088                | AA                              | CC                | 1945903755               |
| SNP_P3_19502_14042144 | NC_021161.1    | Ca_kabuli_chr02 | 14042144                | AA                              | GG                | 1945903757               |
| SNP_P3_19503_14044779 | NC_021161.1    | Ca_kabuli_chr02 | 14044779                | TT                              | CC                | 1945903759               |
| SNP_P3_19504_14044837 | NC_021161.1    | Ca_kabuli_chr02 | 14044837                | CC                              | TT                | 1945903761               |
| SNP_P3_19506_14082430 | NC_021161.1    | Ca_kabuli_chr02 | 14082430                | AA                              | TT                | 1945903762               |
| SNP_P3_19507_14086046 | NC_021161.1    | Ca_kabuli_chr02 | 14086046                | GG                              | AA                | 1945903764               |
| SNP_P3_19508_14086093 | NC_021161.1    | Ca_kabuli_chr02 | 14086093                | TT                              | CC                | 1945903766               |
| SNP_P3_19509_14086103 | NC_021161.1    | Ca_kabuli_chr02 | 14086103                | AA                              | GG                | 1945903768               |
| SNP_P3_19511_14086162 | NC_021161.1    | Ca_kabuli_chr02 | 14086162                | TT                              | CC                | 1945903770               |
| SNP_P3_19512_14086178 | NC_021161.1    | Ca_kabuli_chr02 | 14086178                | TT                              | CC                | 1945903771               |
| SNP_P3_19513_14086380 | NC_021161.1    | Ca_kabuli_chr02 | 14086380                | TT                              | CC                | 1945903773               |
| SNP_P3_19514_14086408 | NC_021161.1    | Ca_kabuli_chr02 | 14086408                | AA                              | GG                | 1945903775               |
| SNP_P3_19516_14117644 | NC_021161.1    | Ca_kabuli_chr02 | 14117644                | TT                              | CC                | 1945903777               |
| SNP_P3_19517_14131485 | NC_021161.1    | Ca_kabuli_chr02 | 14131485                | TT                              | CC                | 1945903778               |
| SNP_P3_19518_14144982 | NC_021161.1    | Ca_kabuli_chr02 | 14144982                | TT                              | CC                | 1945903780               |
| SNP_P3_19519_14150159 | NC_021161.1    | Ca_kabuli_chr02 | 14150159                | CC                              | TT                | 1945903782               |
| SNP_P3_19520_14150162 | NC_021161.1    | Ca_kabuli_chr02 | 14150162                | AA                              | TT                | 1945903784               |
| SNP_P3_19521_14171622 | NC_021161.1    | Ca_kabuli_chr02 | 14171622                | CC                              | TT                | 1945903786               |
| SNP_P3_19522_14195976 | NC_021161.1    | Ca_kabuli_chr02 | 14195976                | CC                              | GG                | 1945903787               |
| SNP_P3_19523_14196053 | NC_021161.1    | Ca_kabuli_chr02 | 14196053                | TT                              | GG                | 1945903789               |
| SNP_P3_19526_14209584 | NC_021161.1    | Ca_kabuli_chr02 | 14209584                | TT                              | CC                | 1945903791               |
| SNP_P3_19527_14212622 | NC_021161.1    | Ca_kabuli_chr02 | 14212622                | AA                              | GG                | 1945903793               |
| SNP_P3_19528_14212669 | NC_021161.1    | Ca_kabuli_chr02 | 14212669                | TT                              | CC                | 1945903794               |
| SNP_P3_19529_15107938 | NC_021161.1    | Ca_kabuli_chr02 | 15107938                | AA                              | GG                | 1945903796               |
| SNP_P3_19530_15107941 | NC_021161.1    | Ca_kabuli_chr02 | 15107941                | TT                              | CC                | 1945903798               |
| SNP_P3_19531_15119518 | NC_021161.1    | Ca_kabuli_chr02 | 15119518                | CC                              | TT                | 1945903800               |
| SNP_P3_19532_15151261 | NC_021161.1    | Ca_kabuli_chr02 | 15151261                | TT                              | GG                | 1945903802               |
| SNP_P3_19533_15151465 | NC_021161.1    | Ca_kabuli_chr02 | 15151465                | CC                              | AA                | 1945903803               |
| SNP_P3_19534_15153776 | NC_021161.1    | Ca_kabuli_chr02 | 15153776                | TT                              | CC                | 1945903805               |
| SNP_P3_19535_15200367 | NC_021161.1    | Ca_kabuli_chr02 | 15200367                | AA                              | CC                | 1945903807               |

| SNPs IDs              | Chromosome IDs | Chromosomes     | Physical positions (bp) | CDC Frontier (Reference genome) | (Pusa 256 & HPNB) | NCBI SNPdb Accession IDs |
|-----------------------|----------------|-----------------|-------------------------|---------------------------------|-------------------|--------------------------|
| SNP_P3_19536_15200378 | NC_021161.1    | Ca_kabuli_chr02 | 15200378                | AA                              | GG                | 1945903809               |
| SNP_P3_19537_15252799 | NC_021161.1    | Ca_kabuli_chr02 | 15252799                | AA                              | GG                | 1945903811               |
| SNP_P3_19538_15252815 | NC_021161.1    | Ca_kabuli_chr02 | 15252815                | CC                              | AA                | 1945903812               |
| SNP_P3_19540_15287307 | NC_021161.1    | Ca_kabuli_chr02 | 15287307                | GG                              | AA                | 1945903814               |
| SNP_P3_19544_15317985 | NC_021161.1    | Ca_kabuli_chr02 | 15317985                | AA                              | TT                | 1945903816               |
| SNP_P3_19545_15323015 | NC_021161.1    | Ca_kabuli_chr02 | 15323015                | GG                              | AA                | 1945903818               |
| SNP_P3_19546_15363231 | NC_021161.1    | Ca_kabuli_chr02 | 15363231                | AA                              | GG                | 1945903819               |
| SNP_P3_19547_15363526 | NC_021161.1    | Ca_kabuli_chr02 | 15363526                | AA                              | GG                | 1945903821               |
| SNP_P3_19548_15363570 | NC_021161.1    | Ca_kabuli_chr02 | 15363570                | AA                              | CC                | 1945903823               |
| SNP_P3_19549_15401206 | NC_021161.1    | Ca_kabuli_chr02 | 15401206                | AA                              | CC                | 1945903825               |
| SNP_P3_19550_15450231 | NC_021161.1    | Ca_kabuli_chr02 | 15450231                | AA                              | GG                | 1945903827               |
| SNP_P3_19551_15450233 | NC_021161.1    | Ca_kabuli_chr02 | 15450233                | AA                              | CC                | 1945903828               |
| SNP_P3_19552_15453885 | NC_021161.1    | Ca_kabuli_chr02 | 15453885                | GG                              | TT                | 1945903830               |
| SNP_P3_19553_15453909 | NC_021161.1    | Ca_kabuli_chr02 | 15453909                | GG                              | TT                | 1945903832               |
| SNP_P3_19554_15454027 | NC_021161.1    | Ca_kabuli_chr02 | 15454027                | AA                              | GG                | 1945903834               |
| SNP_P3_19555_15454042 | NC_021161.1    | Ca_kabuli_chr02 | 15454042                | CC                              | TT                | 1945903835               |
| SNP_P3_19556_15454074 | NC_021161.1    | Ca_kabuli_chr02 | 15454074                | GG                              | CC                | 1945903837               |
| SNP_P3_19557_15454146 | NC_021161.1    | Ca_kabuli_chr02 | 15454146                | CC                              | TT                | 1945903839               |
| SNP_P3_19558_15454160 | NC_021161.1    | Ca_kabuli_chr02 | 15454160                | TT                              | GG                | 1945903841               |
| SNP_P3_19559_15454328 | NC_021161.1    | Ca_kabuli_chr02 | 15454328                | TT                              | AA                | 1945903843               |
| SNP_P3_19560_15454350 | NC_021161.1    | Ca_kabuli_chr02 | 15454350                | TT                              | CC                | 1945903844               |
| SNP_P3_19563_15505552 | NC_021161.1    | Ca_kabuli_chr02 | 15505552                | TT                              | CC                | 1945903846               |
| SNP_P3_19564_15505554 | NC_021161.1    | Ca_kabuli_chr02 | 15505554                | AA                              | GG                | 1945903848               |
| SNP_P3_19565_15505558 | NC_021161.1    | Ca_kabuli_chr02 | 15505558                | GG                              | TT                | 1945903850               |
| SNP_P3_19566_15513304 | NC_021161.1    | Ca_kabuli_chr02 | 15513304                | AA                              | GG                | 1945903851               |
| SNP_P3_19567_15513331 | NC_021161.1    | Ca_kabuli_chr02 | 15513331                | AA                              | CC                | 1945903853               |
| SNP_P3_19568_15514982 | NC_021161.1    | Ca_kabuli_chr02 | 15514982                | CC                              | TT                | 1945903855               |
| SNP_P3_19569_15520903 | NC_021161.1    | Ca_kabuli_chr02 | 15520903                | TT                              | CC                | 1945903857               |
| SNP_P3_19570_15521276 | NC_021161.1    | Ca_kabuli_chr02 | 15521276                | TT                              | AA                | 1945903859               |
| SNP_P3_19571_15521344 | NC_021161.1    | Ca_kabuli_chr02 | 15521344                | CC                              | AA                | 1945903860               |
| SNP_P3_19572_15529278 | NC_021161.1    | Ca_kabuli_chr02 | 15529278                | TT                              | GG                | 1945903862               |
| SNP_P3_19573_15550147 | NC_021161.1    | Ca_kabuli_chr02 | 15550147                | AA                              | GG                | 1945903864               |
| SNP_P3_19574_15550249 | NC_021161.1    | Ca_kabuli_chr02 | 15550249                | GG                              | AA                | 1945903866               |
| SNP_P3_19575_15550296 | NC_021161.1    | Ca_kabuli_chr02 | 15550296                | AA                              | TT                | 1945903867               |
| SNP_P3_19576_15569689 | NC_021161.1    | Ca_kabuli_chr02 | 15569689                | TT                              | GG                | 1945903869               |
| SNP_P3_19577_15569700 | NC_021161.1    | Ca_kabuli_chr02 | 15569700                | AA                              | TT                | 1945903871               |
| SNP_P3_19578_15569707 | NC_021161.1    | Ca_kabuli_chr02 | 15569707                | AA                              | TT                | 1945903873               |
| SNP_P3_19579_15569768 | NC_021161.1    | Ca_kabuli_chr02 | 15569768                | AA                              | CC                | 1945903875               |
| SNP_P3_19581_15589189 | NC_021161.1    | Ca_kabuli_chr02 | 15589189                | CC                              | TT                | 1945903876               |
| SNP_P3_19582_15589406 | NC_021161.1    | Ca_kabuli_chr02 | 15589406                | CC                              | AA                | 1945903878               |
| SNP_P3_19583_15589436 | NC_021161.1    | Ca_kabuli_chr02 | 15589436                | GG                              | CC                | 1945903880               |
| SNP_P3_19584_15589603 | NC_021161.1    | Ca_kabuli_chr02 | 15589603                | CC                              | AA                | 1945903882               |

| SNPs IDs              | Chromosome IDs | Chromosomes     | Physical positions (bp) | CDC Frontier (Reference genome) | (Pusa 256 & HPNB) | NCBI SNPdb Accession IDs |
|-----------------------|----------------|-----------------|-------------------------|---------------------------------|-------------------|--------------------------|
| SNP_P3_19586_15595260 | NC_021161.1    | Ca_kabuli_chr02 | 15595260                | AA                              | GG                | 1945903884               |
| SNP_P3_19587_15596867 | NC_021161.1    | Ca_kabuli_chr02 | 15596867                | TT                              | CC                | 1945903885               |
| SNP_P3_19588_15598338 | NC_021161.1    | Ca_kabuli_chr02 | 15598338                | TT                              | CC                | 1945903887               |
| SNP_P3_19590_15598998 | NC_021161.1    | Ca_kabuli_chr02 | 15598998                | GG                              | TT                | 1945903889               |
| SNP_P3_19591_15615948 | NC_021161.1    | Ca_kabuli_chr02 | 15615948                | GG                              | AA                | 1945903891               |
| SNP_P3_19592_15717500 | NC_021161.1    | Ca_kabuli_chr02 | 15717500                | CC                              | AA                | 1945903892               |
| SNP_P3_19593_15717515 | NC_021161.1    | Ca_kabuli_chr02 | 15717515                | TT                              | CC                | 1945903894               |
| SNP_P3_19594_15717520 | NC_021161.1    | Ca_kabuli_chr02 | 15717520                | GG                              | AA                | 1945903895               |
| SNP_P3_19595_15735568 | NC_021161.1    | Ca_kabuli_chr02 | 15735568                | TT                              | CC                | 1945903897               |
| SNP_P3_19596_15737133 | NC_021161.1    | Ca_kabuli_chr02 | 15737133                | TT                              | GG                | 1945903899               |
| SNP_P3_19597_15737275 | NC_021161.1    | Ca_kabuli_chr02 | 15737275                | GG                              | TT                | 1945903901               |
| SNP_P3_19598_15737281 | NC_021161.1    | Ca_kabuli_chr02 | 15737281                | GG                              | AA                | 1945903903               |
| SNP_P3_19599_15737283 | NC_021161.1    | Ca_kabuli_chr02 | 15737283                | TT                              | CC                | 1945903904               |
| SNP_P3_19600_15737675 | NC_021161.1    | Ca_kabuli_chr02 | 15737675                | AA                              | GG                | 1945903906               |
| SNP_P3_19601_15737682 | NC_021161.1    | Ca_kabuli_chr02 | 15737682                | AA                              | GG                | 1945903908               |
| SNP_P3_19602_15737706 | NC_021161.1    | Ca_kabuli_chr02 | 15737706                | CC                              | TT                | 1945903910               |
| SNP_P3_19603_15737710 | NC_021161.1    | Ca_kabuli_chr02 | 15737710                | GG                              | AA                | 1945903911               |
| SNP_P3_19604_15737719 | NC_021161.1    | Ca_kabuli_chr02 | 15737719                | TT                              | CC                | 1945903913               |
| SNP_P3_19605_15737734 | NC_021161.1    | Ca_kabuli_chr02 | 15737734                | TT                              | CC                | 1945903915               |
| SNP_P3_19606_15737840 | NC_021161.1    | Ca_kabuli_chr02 | 15737840                | AA                              | TT                | 1945903917               |
| SNP_P3_19607_15737847 | NC_021161.1    | Ca_kabuli_chr02 | 15737847                | GG                              | AA                | 1945903919               |
| SNP_P3_19608_15769118 | NC_021161.1    | Ca_kabuli_chr02 | 15769118                | TT                              | AA                | 1945903920               |
| SNP_P3_19609_15788458 | NC_021161.1    | Ca_kabuli_chr02 | 15788458                | GG                              | AA                | 1945903922               |
| SNP_P3_19610_15788515 | NC_021161.1    | Ca_kabuli_chr02 | 15788515                | AA                              | GG                | 1945903924               |
| SNP_P3_19611_15795534 | NC_021161.1    | Ca_kabuli_chr02 | 15795534                | AA                              | GG                | 1945903926               |
| SNP_P3_19612_15795615 | NC_021161.1    | Ca_kabuli_chr02 | 15795615                | TT                              | CC                | 1945903927               |
| SNP_P3_19613_15795616 | NC_021161.1    | Ca_kabuli_chr02 | 15795616                | GG                              | AA                | 1945903929               |
| SNP_P3_19614_15795636 | NC_021161.1    | Ca_kabuli_chr02 | 15795636                | TT                              | CC                | 1945903931               |
| SNP_P3_19615_15795644 | NC_021161.1    | Ca_kabuli_chr02 | 15795644                | GG                              | AA                | 1945903933               |
| SNP_P3_19616_15795647 | NC_021161.1    | Ca_kabuli_chr02 | 15795647                | TT                              | CC                | 1945903935               |
| SNP_P3_19617_15795668 | NC_021161.1    | Ca_kabuli_chr02 | 15795668                | CC                              | TT                | 1945903936               |
| SNP_P3_19618_15804889 | NC_021161.1    | Ca_kabuli_chr02 | 15804889                | AA                              | GG                | 1945903938               |
| SNP_P3_19620_15814099 | NC_021161.1    | Ca_kabuli_chr02 | 15814099                | GG                              | TT                | 1945903940               |
| SNP_P3_19621_15837393 | NC_021161.1    | Ca_kabuli_chr02 | 15837393                | TT                              | CC                | 1945903942               |
| SNP_P3_19622_15888257 | NC_021161.1    | Ca_kabuli_chr02 | 15888257                | GG                              | AA                | 1945903943               |
| SNP_P3_19623_15889749 | NC_021161.1    | Ca_kabuli_chr02 | 15889749                | CC                              | GG                | 1945903945               |
| SNP_P3_19624_15902864 | NC_021161.1    | Ca_kabuli_chr02 | 15902864                | GG                              | CC                | 1945903947               |
| SNP_P3_19626_15915967 | NC_021161.1    | Ca_kabuli_chr02 | 15915967                | AA                              | CC                | 1945903949               |
| SNP_P3_19627_15916906 | NC_021161.1    | Ca_kabuli_chr02 | 15916906                | CC                              | TT                | 1945903951               |
| SNP_P3_19628_15916908 | NC_021161.1    | Ca_kabuli_chr02 | 15916908                | AA                              | GG                | 1945903952               |
| SNP_P3_19629_15916916 | NC_021161.1    | Ca_kabuli_chr02 | 15916916                | TT                              | CC                | 1945903954               |
| SNP_P3_19630_15917240 | NC_021161.1    | Ca_kabuli_chr02 | 15917240                | AA                              | TT                | 1945903956               |

| SNPs IDs              | Chromosome IDs | Chromosomes     | Physical positions (bp) | CDC Frontier (Reference genome) | (Pusa 256 & HPNB) | NCBI SNPdb Accession IDs |
|-----------------------|----------------|-----------------|-------------------------|---------------------------------|-------------------|--------------------------|
| SNP_P3_19631_15917479 | NC_021161.1    | Ca_kabuli_chr02 | 15917479                | CC                              | AA                | 1945903958               |
| SNP_P3_19634_15941138 | NC_021161.1    | Ca_kabuli_chr02 | 15941138                | TT                              | CC                | 1945903960               |
| SNP_P3_19635_15941156 | NC_021161.1    | Ca_kabuli_chr02 | 15941156                | GG                              | AA                | 1945903961               |
| SNP_P3_19636_15941158 | NC_021161.1    | Ca_kabuli_chr02 | 15941158                | TT                              | AA                | 1945903963               |
| SNP_P3_19637_15941159 | NC_021161.1    | Ca_kabuli_chr02 | 15941159                | GG                              | AA                | 1945903965               |
| SNP_P3_19638_15941176 | NC_021161.1    | Ca_kabuli_chr02 | 15941176                | TT                              | GG                | 1945903967               |
| SNP_P3_19639_15965177 | NC_021161.1    | Ca_kabuli_chr02 | 15965177                | TT                              | AA                | 1945903968               |
| SNP_P3_19640_15965181 | NC_021161.1    | Ca_kabuli_chr02 | 15965181                | AA                              | GG                | 1945903970               |
| SNP_P3_19641_16060610 | NC_021161.1    | Ca_kabuli_chr02 | 16060610                | AA                              | GG                | 1945903972               |
| SNP_P3_19642_16082137 | NC_021161.1    | Ca_kabuli_chr02 | 16082137                | GG                              | CC                | 1945903974               |
| SNP_P3_19643_16085981 | NC_021161.1    | Ca_kabuli_chr02 | 16085981                | CC                              | AA                | 1945903976               |
| SNP_P3_19644_16086219 | NC_021161.1    | Ca_kabuli_chr02 | 16086219                | CC                              | GG                | 1945903977               |
| SNP_P3_19645_16097098 | NC_021161.1    | Ca_kabuli_chr02 | 16097098                | GG                              | TT                | 1945903979               |
| SNP_P3_19646_16097215 | NC_021161.1    | Ca_kabuli_chr02 | 16097215                | TT                              | CC                | 1945903981               |
| SNP_P3_19647_16097516 | NC_021161.1    | Ca_kabuli_chr02 | 16097516                | AA                              | TT                | 1945903983               |
| SNP_P3_19648_16171087 | NC_021161.1    | Ca_kabuli_chr02 | 16171087                | CC                              | TT                | 1945903984               |
| SNP_P3_19649_16171088 | NC_021161.1    | Ca_kabuli_chr02 | 16171088                | CC                              | GG                | 1945903986               |
| SNP_P3_19650_16171156 | NC_021161.1    | Ca_kabuli_chr02 | 16171156                | CC                              | TT                | 1945903988               |
| SNP_P3_19651_16171632 | NC_021161.1    | Ca_kabuli_chr02 | 16171632                | AA                              | GG                | 1945903990               |
| SNP_P3_19652_16203417 | NC_021161.1    | Ca_kabuli_chr02 | 16203417                | GG                              | AA                | 1945903992               |
| SNP_P3_19653_16206428 | NC_021161.1    | Ca_kabuli_chr02 | 16206428                | TT                              | AA                | 1945903993               |
| SNP_P3_19654_16220849 | NC_021161.1    | Ca_kabuli_chr02 | 16220849                | CC                              | TT                | 1945903995               |
| SNP_P3_19655_16241630 | NC_021161.1    | Ca_kabuli_chr02 | 16241630                | GG                              | AA                | 1945903997               |
| SNP_P3_19656_16252132 | NC_021161.1    | Ca_kabuli_chr02 | 16252132                | AA                              | GG                | 1945903999               |
| SNP_P3_19657_16252175 | NC_021161.1    | Ca_kabuli_chr02 | 16252175                | TT                              | AA                | 1945904000               |
| SNP_P3_19658_16252501 | NC_021161.1    | Ca_kabuli_chr02 | 16252501                | TT                              | CC                | 1945904002               |
| SNP_P3_19659_16252534 | NC_021161.1    | Ca_kabuli_chr02 | 16252534                | CC                              | TT                | 1945904004               |
| SNP_P3_19660_16252603 | NC_021161.1    | Ca_kabuli_chr02 | 16252603                | TT                              | CC                | 1945904006               |
| SNP_P3_19661_16252668 | NC_021161.1    | Ca_kabuli_chr02 | 16252668                | TT                              | CC                | 1945904008               |
| SNP_P3_19662_16274486 | NC_021161.1    | Ca_kabuli_chr02 | 16274486                | GG                              | AA                | 1945904009               |
| SNP_P3_19663_16298725 | NC_021161.1    | Ca_kabuli_chr02 | 16298725                | CC                              | TT                | 1945904011               |
| SNP_P3_19664_16311377 | NC_021161.1    | Ca_kabuli_chr02 | 16311377                | AA                              | TT                | 1945904013               |
| SNP_P3_19666_16335402 | NC_021161.1    | Ca_kabuli_chr02 | 16335402                | AA                              | GG                | 1945904015               |
| SNP_P3_19667_16335418 | NC_021161.1    | Ca_kabuli_chr02 | 16335418                | GG                              | AA                | 1945904016               |
| SNP_P3_19668_16340977 | NC_021161.1    | Ca_kabuli_chr02 | 16340977                | GG                              | AA                | 1945904018               |
| SNP_P3_19669_16340998 | NC_021161.1    | Ca_kabuli_chr02 | 16340998                | CC                              | TT                | 1945904020               |
| SNP_P3_19670_16341058 | NC_021161.1    | Ca_kabuli_chr02 | 16341058                | GG                              | AA                | 1945904022               |
| SNP_P3_19671_16341321 | NC_021161.1    | Ca_kabuli_chr02 | 16341321                | AA                              | GG                | 1945904024               |
| SNP_P3_19672_16341342 | NC_021161.1    | Ca_kabuli_chr02 | 16341342                | GG                              | CC                | 1945904025               |
| SNP_P3_19673_16341343 | NC_021161.1    | Ca_kabuli_chr02 | 16341343                | AA                              | CC                | 1945904027               |
| SNP_P3_19674_16341392 | NC_021161.1    | Ca_kabuli_chr02 | 16341392                | TT                              | GG                | 1945904029               |
| SNP_P3_19675_16341460 | NC_021161.1    | Ca_kabuli_chr02 | 16341460                | GG                              | AA                | 1945904031               |

| SNPs IDs              | Chromosome IDs | Chromosomes     | Physical positions (bp) | CDC Frontier (Reference genome) | (Pusa 256 & HPNB) | NCBI SNPdb Accession IDs |
|-----------------------|----------------|-----------------|-------------------------|---------------------------------|-------------------|--------------------------|
| SNP_P3_19676_16341477 | NC_021161.1    | Ca_kabuli_chr02 | 16341477                | TT                              | CC                | 1945904032               |
| SNP_P3_19677_16365662 | NC_021161.1    | Ca_kabuli_chr02 | 16365662                | TT                              | CC                | 1945904034               |
| SNP_P3_19678_16368219 | NC_021161.1    | Ca_kabuli_chr02 | 16368219                | CC                              | AA                | 1945904036               |
| SNP_P3_19679_16416345 | NC_021161.1    | Ca_kabuli_chr02 | 16416345                | TT                              | CC                | 1945904038               |
| SNP_P3_19680_16423813 | NC_021161.1    | Ca_kabuli_chr02 | 16423813                | CC                              | TT                | 1945904040               |
| SNP_P3_19681_16433057 | NC_021161.1    | Ca_kabuli_chr02 | 16433057                | TT                              | CC                | 1945904041               |
| SNP_P3_19682_16433188 | NC_021161.1    | Ca_kabuli_chr02 | 16433188                | CC                              | AA                | 1945904043               |
| SNP_P3_19683_16433264 | NC_021161.1    | Ca_kabuli_chr02 | 16433264                | TT                              | CC                | 1945904045               |
| SNP_P3_19684_16433654 | NC_021161.1    | Ca_kabuli_chr02 | 16433654                | AA                              | GG                | 1945904047               |
| SNP_P3_19685_16447190 | NC_021161.1    | Ca_kabuli_chr02 | 16447190                | CC                              | GG                | 1945904048               |
| SNP_P3_19686_16456475 | NC_021161.1    | Ca_kabuli_chr02 | 16456475                | TT                              | CC                | 1945904050               |
| SNP_P3_19687_16456492 | NC_021161.1    | Ca_kabuli_chr02 | 16456492                | GG                              | AA                | 1945904052               |
| SNP_P3_19688_16456500 | NC_021161.1    | Ca_kabuli_chr02 | 16456500                | AA                              | GG                | 1945904054               |
| SNP_P3_19689_16456508 | NC_021161.1    | Ca_kabuli_chr02 | 16456508                | AA                              | CC                | 1945904056               |
| SNP_P3_19690_16456524 | NC_021161.1    | Ca_kabuli_chr02 | 16456524                | CC                              | AA                | 1945904057               |
| SNP_P3_19691_16456587 | NC_021161.1    | Ca_kabuli_chr02 | 16456587                | AA                              | GG                | 1945904059               |
| SNP_P3_19692_16456591 | NC_021161.1    | Ca_kabuli_chr02 | 16456591                | CC                              | TT                | 1945904061               |
| SNP_P3_19693_16456608 | NC_021161.1    | Ca_kabuli_chr02 | 16456608                | TT                              | GG                | 1945904063               |
| SNP_P3_19694_16456731 | NC_021161.1    | Ca_kabuli_chr02 | 16456731                | TT                              | CC                | 1945904064               |
| SNP_P3_19695_16456800 | NC_021161.1    | Ca_kabuli_chr02 | 16456800                | TT                              | CC                | 1945904066               |
| SNP_P3_19696_16458241 | NC_021161.1    | Ca_kabuli_chr02 | 16458241                | CC                              | TT                | 1945904068               |
| SNP_P3_19697_16465279 | NC_021161.1    | Ca_kabuli_chr02 | 16465279                | AA                              | CC                | 1945904070               |
| SNP_P3_19698_16465298 | NC_021161.1    | Ca_kabuli_chr02 | 16465298                | GG                              | AA                | 1945904072               |
| SNP_P3_19699_16465565 | NC_021161.1    | Ca_kabuli_chr02 | 16465565                | GG                              | TT                | 1945904073               |
| SNP_P3_19701_16507755 | NC_021161.1    | Ca_kabuli_chr02 | 16507755                | AA                              | TT                | 1945904075               |
| SNP_P3_19702_16508350 | NC_021161.1    | Ca_kabuli_chr02 | 16508350                | AA                              | GG                | 1945904077               |
| SNP_P3_19703_16508367 | NC_021161.1    | Ca_kabuli_chr02 | 16508367                | AA                              | TT                | 1945904079               |
| SNP_P3_19704_16508483 | NC_021161.1    | Ca_kabuli_chr02 | 16508483                | TT                              | CC                | 1945904080               |
| SNP_P3_19705_16508537 | NC_021161.1    | Ca_kabuli_chr02 | 16508537                | CC                              | GG                | 1945904082               |
| SNP_P3_19706_16508764 | NC_021161.1    | Ca_kabuli_chr02 | 16508764                | CC                              | TT                | 1945904084               |
| SNP_P3_19707_16509102 | NC_021161.1    | Ca_kabuli_chr02 | 16509102                | TT                              | CC                | 1945904086               |
| SNP_P3_19708_16509316 | NC_021161.1    | Ca_kabuli_chr02 | 16509316                | TT                              | CC                | 1945904088               |
| SNP_P3_19709_16509586 | NC_021161.1    | Ca_kabuli_chr02 | 16509586                | CC                              | TT                | 1945904089               |
| SNP_P3_19710_16509591 | NC_021161.1    | Ca_kabuli_chr02 | 16509591                | TT                              | CC                | 1945904091               |
| SNP_P3_19711_16510339 | NC_021161.1    | Ca_kabuli_chr02 | 16510339                | GG                              | AA                | 1945904093               |
| SNP_P3_19712_16510350 | NC_021161.1    | Ca_kabuli_chr02 | 16510350                | AA                              | GG                | 1945904095               |
| SNP_P3_19713_16511747 | NC_021161.1    | Ca_kabuli_chr02 | 16511747                | GG                              | AA                | 1945904096               |
| SNP_P3_19714_16513075 | NC_021161.1    | Ca_kabuli_chr02 | 16513075                | TT                              | GG                | 1945904098               |
| SNP_P3_19715_16514414 | NC_021161.1    | Ca_kabuli_chr02 | 16514414                | GG                              | AA                | 1945904100               |
| SNP_P3_19716_16514419 | NC_021161.1    | Ca_kabuli_chr02 | 16514419                | TT                              | AA                | 1945904102               |
| SNP_P3_19717_16514432 | NC_021161.1    | Ca_kabuli_chr02 | 16514432                | AA                              | GG                | 1945904104               |
| SNP_P3_19719_16514511 | NC_021161.1    | Ca_kabuli_chr02 | 16514511                | AA                              | GG                | 1945904105               |

| SNPs IDs              | Chromosome IDs | Chromosomes     | Physical positions (bp) | CDC Frontier (Reference genome) | (Pusa 256 & HPNB) | NCBI SNPdb Accession IDs |
|-----------------------|----------------|-----------------|-------------------------|---------------------------------|-------------------|--------------------------|
| SNP_P3_19721_16537493 | NC_021161.1    | Ca_kabuli_chr02 | 16537493                | AA                              | GG                | 1945904107               |
| SNP_P3_19722_16565488 | NC_021161.1    | Ca_kabuli_chr02 | 16565488                | TT                              | CC                | 1945904109               |
| SNP_P3_19723_16589786 | NC_021161.1    | Ca_kabuli_chr02 | 16589786                | CC                              | TT                | 1945904111               |
| SNP_P3_19724_16602863 | NC_021161.1    | Ca_kabuli_chr02 | 16602863                | TT                              | CC                | 1945904112               |
| SNP_P3_19725_16604893 | NC_021161.1    | Ca_kabuli_chr02 | 16604893                | GG                              | AA                | 1945904114               |
| SNP_P3_19726_16604909 | NC_021161.1    | Ca_kabuli_chr02 | 16604909                | TT                              | CC                | 1945904116               |
| SNP_P3_19729_16648117 | NC_021161.1    | Ca_kabuli_chr02 | 16648117                | AA                              | GG                | 1945904118               |
| SNP_P3_19731_16670481 | NC_021161.1    | Ca_kabuli_chr02 | 16670481                | TT                              | GG                | 1945904120               |
| SNP_P3_19732_16670484 | NC_021161.1    | Ca_kabuli_chr02 | 16670484                | AA                              | GG                | 1945904121               |
| SNP_P3_19735_16729145 | NC_021161.1    | Ca_kabuli_chr02 | 16729145                | GG                              | AA                | 1945904123               |
| SNP_P3_19736_16864595 | NC_021161.1    | Ca_kabuli_chr02 | 16864595                | CC                              | GG                | 1945904125               |
| SNP_P3_19737_16864702 | NC_021161.1    | Ca_kabuli_chr02 | 16864702                | AA                              | GG                | 1945904127               |
| SNP_P3_19738_16864729 | NC_021161.1    | Ca_kabuli_chr02 | 16864729                | TT                              | CC                | 1945904128               |
| SNP_P3_19739_16864811 | NC_021161.1    | Ca_kabuli_chr02 | 16864811                | GG                              | AA                | 1945904130               |
| SNP_P3_19740_16874163 | NC_021161.1    | Ca_kabuli_chr02 | 16874163                | GG                              | CC                | 1945904132               |
| SNP_P3_19741_16905687 | NC_021161.1    | Ca_kabuli_chr02 | 16905687                | TT                              | CC                | 1945904134               |
| SNP_P3_19742_16905744 | NC_021161.1    | Ca_kabuli_chr02 | 16905744                | GG                              | AA                | 1945904136               |
| SNP_P3_19744_16969036 | NC_021161.1    | Ca_kabuli_chr02 | 16969036                | TT                              | CC                | 1945904137               |
| SNP_P3_19745_16984374 | NC_021161.1    | Ca_kabuli_chr02 | 16984374                | CC                              | TT                | 1945904139               |
| SNP_P3_19746_16984547 | NC_021161.1    | Ca_kabuli_chr02 | 16984547                | CC                              | TT                | 1945904141               |
| SNP_P3_19747_16984549 | NC_021161.1    | Ca_kabuli_chr02 | 16984549                | GG                              | AA                | 1945904143               |
| SNP_P3_19748_16984570 | NC_021161.1    | Ca_kabuli_chr02 | 16984570                | TT                              | CC                | 1945904145               |
| SNP_P3_19749_16990075 | NC_021161.1    | Ca_kabuli_chr02 | 16990075                | AA                              | GG                | 1945904146               |
| SNP_P3_19750_16990291 | NC_021161.1    | Ca_kabuli_chr02 | 16990291                | AA                              | GG                | 1945904148               |
| SNP_P3_19751_16990496 | NC_021161.1    | Ca_kabuli_chr02 | 16990496                | CC                              | AA                | 1945904150               |
| SNP_P3_19752_16990516 | NC_021161.1    | Ca_kabuli_chr02 | 16990516                | TT                              | CC                | 1945904152               |
| SNP_P3_19753_16990553 | NC_021161.1    | Ca_kabuli_chr02 | 16990553                | AA                              | GG                | 1945904153               |
| SNP_P3_19754_16991059 | NC_021161.1    | Ca_kabuli_chr02 | 16991059                | TT                              | CC                | 1945904155               |
| SNP_P3_19755_16991077 | NC_021161.1    | Ca_kabuli_chr02 | 16991077                | TT                              | AA                | 1945904157               |
| SNP_P3_19756_16991088 | NC_021161.1    | Ca_kabuli_chr02 | 16991088                | GG                              | AA                | 1945904159               |
| SNP_P3_19757_16991361 | NC_021161.1    | Ca_kabuli_chr02 | 16991361                | CC                              | AA                | 1945904161               |
| SNP_P3_19758_16991365 | NC_021161.1    | Ca_kabuli_chr02 | 16991365                | CC                              | TT                | 1945904162               |
| SNP_P3_19759_16991367 | NC_021161.1    | Ca_kabuli_chr02 | 16991367                | CC                              | GG                | 1945904164               |
| SNP_P3_19760_16991372 | NC_021161.1    | Ca_kabuli_chr02 | 16991372                | CC                              | TT                | 1945904166               |
| SNP_P3_19761_16991409 | NC_021161.1    | Ca_kabuli_chr02 | 16991409                | GG                              | AA                | 1945904168               |
| SNP_P3_19763_17021593 | NC_021161.1    | Ca_kabuli_chr02 | 17021593                | AA                              | GG                | 1945904169               |
| SNP_P3_19764_17025538 | NC_021161.1    | Ca_kabuli_chr02 | 17025538                | CC                              | AA                | 1945904171               |
| SNP_P3_19765_17025553 | NC_021161.1    | Ca_kabuli_chr02 | 17025553                | CC                              | TT                | 1945904173               |
| SNP_P3_19766_17030318 | NC_021161.1    | Ca_kabuli_chr02 | 17030318                | CC                              | AA                | 1945904175               |
| SNP_P3_19767_17030380 | NC_021161.1    | Ca_kabuli_chr02 | 17030380                | AA                              | CC                | 1945904177               |
| SNP_P3_19768_17030590 | NC_021161.1    | Ca_kabuli_chr02 | 17030590                | CC                              | AA                | 1945904178               |
| SNP_P3_19769_17039027 | NC_021161.1    | Ca_kabuli_chr02 | 17039027                | GG                              | TT                | 1945904180               |

| SNPs IDs              | Chromosome IDs | Chromosomes     | Physical positions (bp) | CDC Frontier (Reference genome) | (Pusa 256 & HPNB) | NCBI SNPdb Accession IDs |
|-----------------------|----------------|-----------------|-------------------------|---------------------------------|-------------------|--------------------------|
| SNP_P3_19770_17049816 | NC_021161.1    | Ca_kabuli_chr02 | 17049816                | TT                              | AA                | 1945904182               |
| SNP_P3_19771_17050215 | NC_021161.1    | Ca_kabuli_chr02 | 17050215                | TT                              | CC                | 1945904184               |
| SNP_P3_19772_17050245 | NC_021161.1    | Ca_kabuli_chr02 | 17050245                | AA                              | GG                | 1945904185               |
| SNP_P3_19773_17050371 | NC_021161.1    | Ca_kabuli_chr02 | 17050371                | TT                              | GG                | 1945904187               |
| SNP_P3_19774_17051495 | NC_021161.1    | Ca_kabuli_chr02 | 17051495                | GG                              | AA                | 1945904189               |
| SNP_P3_19775_17051543 | NC_021161.1    | Ca_kabuli_chr02 | 17051543                | GG                              | AA                | 1945904191               |
| SNP_P3_19776_17051881 | NC_021161.1    | Ca_kabuli_chr02 | 17051881                | TT                              | CC                | 1945904193               |
| SNP_P3_19778_17061666 | NC_021161.1    | Ca_kabuli_chr02 | 17061666                | TT                              | CC                | 1945904194               |
| SNP_P3_19780_17061686 | NC_021161.1    | Ca_kabuli_chr02 | 17061686                | GG                              | AA                | 1945904196               |
| SNP_P3_19781_17061701 | NC_021161.1    | Ca_kabuli_chr02 | 17061701                | TT                              | AA                | 1945904198               |
| SNP_P3_19782_17061976 | NC_021161.1    | Ca_kabuli_chr02 | 17061976                | GG                              | AA                | 1945904200               |
| SNP_P3_19783_17062079 | NC_021161.1    | Ca_kabuli_chr02 | 17062079                | AA                              | GG                | 1945904201               |
| SNP_P3_19784_17080092 | NC_021161.1    | Ca_kabuli_chr02 | 17080092                | TT                              | CC                | 1945904203               |
| SNP_P3_19785_17087925 | NC_021161.1    | Ca_kabuli_chr02 | 17087925                | AA                              | GG                | 1945904205               |
| SNP_P3_19786_17161394 | NC_021161.1    | Ca_kabuli_chr02 | 17161394                | CC                              | AA                | 1945904207               |
| SNP_P3_19787_17161433 | NC_021161.1    | Ca_kabuli_chr02 | 17161433                | TT                              | CC                | 1945904209               |
| SNP_P3_19788_17161457 | NC_021161.1    | Ca_kabuli_chr02 | 17161457                | AA                              | TT                | 1945904210               |
| SNP_P3_19789_17161660 | NC_021161.1    | Ca_kabuli_chr02 | 17161660                | GG                              | AA                | 1945904212               |
| SNP_P3_19790_17161677 | NC_021161.1    | Ca_kabuli_chr02 | 17161677                | GG                              | AA                | 1945904214               |
| SNP_P3_19791_17161678 | NC_021161.1    | Ca_kabuli_chr02 | 17161678                | GG                              | AA                | 1945904216               |
| SNP_P3_19792_17161727 | NC_021161.1    | Ca_kabuli_chr02 | 17161727                | TT                              | CC                | 1945904217               |
| SNP_P3_19793_17161737 | NC_021161.1    | Ca_kabuli_chr02 | 17161737                | GG                              | AA                | 1945904219               |
| SNP_P3_19794_17161813 | NC_021161.1    | Ca_kabuli_chr02 | 17161813                | GG                              | CC                | 1945904221               |
| SNP_P3_19795_17162049 | NC_021161.1    | Ca_kabuli_chr02 | 17162049                | TT                              | CC                | 1945904223               |
| SNP_P3_19796_17195458 | NC_021161.1    | Ca_kabuli_chr02 | 17195458                | GG                              | AA                | 1945904224               |
| SNP_P3_19798_17203725 | NC_021161.1    | Ca_kabuli_chr02 | 17203725                | GG                              | AA                | 1945904226               |
| SNP_P3_19799_17203869 | NC_021161.1    | Ca_kabuli_chr02 | 17203869                | GG                              | AA                | 1945904228               |
| SNP_P3_19800_17206739 | NC_021161.1    | Ca_kabuli_chr02 | 17206739                | TT                              | AA                | 1945904230               |
| SNP_P3_19801_17208801 | NC_021161.1    | Ca_kabuli_chr02 | 17208801                | AA                              | GG                | 1945904231               |
| SNP_P3_19802_17208805 | NC_021161.1    | Ca_kabuli_chr02 | 17208805                | GG                              | AA                | 1945904233               |
| SNP_P3_19803_17208814 | NC_021161.1    | Ca_kabuli_chr02 | 17208814                | AA                              | CC                | 1945904235               |
| SNP_P3_19804_17208826 | NC_021161.1    | Ca_kabuli_chr02 | 17208826                | GG                              | AA                | 1945904237               |
| SNP_P3_19805_17208829 | NC_021161.1    | Ca_kabuli_chr02 | 17208829                | TT                              | CC                | 1945904239               |
| SNP_P3_19806_17208837 | NC_021161.1    | Ca_kabuli_chr02 | 17208837                | TT                              | GG                | 1945904240               |
| SNP_P3_19807_17208851 | NC_021161.1    | Ca_kabuli_chr02 | 17208851                | CC                              | TT                | 1945904242               |
| SNP_P3_19808_17208855 | NC_021161.1    | Ca_kabuli_chr02 | 17208855                | AA                              | GG                | 1945904244               |
| SNP_P3_19809_17209014 | NC_021161.1    | Ca_kabuli_chr02 | 17209014                | TT                              | CC                | 1945904246               |
| SNP_P3_19810_17209030 | NC_021161.1    | Ca_kabuli_chr02 | 17209030                | TT                              | CC                | 1945904247               |
| SNP_P3_19811_17209092 | NC_021161.1    | Ca_kabuli_chr02 | 17209092                | GG                              | AA                | 1945904249               |
| SNP_P3_19812_17209137 | NC_021161.1    | Ca_kabuli_chr02 | 17209137                | AA                              | GG                | 1945904251               |
| SNP_P3_19813_17209152 | NC_021161.1    | Ca_kabuli_chr02 | 17209152                | TT                              | CC                | 1945904253               |
| SNP_P3_19814_17209200 | NC_021161.1    | Ca_kabuli_chr02 | 17209200                | TT                              | CC                | 1945904255               |



| SNPs IDs              | Chromosome IDs | Chromosomes     | Physical positions (bp) | CDC Frontier (Reference genome) | (Pusa 256 & HPNB) | NCBI SNPdb Accession IDs |
|-----------------------|----------------|-----------------|-------------------------|---------------------------------|-------------------|--------------------------|
| SNP_P3_19815_17209236 | NC_021161.1    | Ca_kabuli_chr02 | 17209236                | TT                              | CC                | 1945904256               |
| SNP_P3_19816_17209271 | NC_021161.1    | Ca_kabuli_chr02 | 17209271                | TT                              | AA                | 1945904258               |
| SNP_P3_19817_17209272 | NC_021161.1    | Ca_kabuli_chr02 | 17209272                | AA                              | CC                | 1945904260               |
| SNP_P3_19818_17209316 | NC_021161.1    | Ca_kabuli_chr02 | 17209316                | GG                              | AA                | 1945904262               |
| SNP_P3_19819_17209350 | NC_021161.1    | Ca_kabuli_chr02 | 17209350                | CC                              | TT                | 1945904263               |
| SNP_P3_19820_17209361 | NC_021161.1    | Ca_kabuli_chr02 | 17209361                | AA                              | GG                | 1945904265               |
| SNP_P3_19821_17238401 | NC_021161.1    | Ca_kabuli_chr02 | 17238401                | TT                              | AA                | 1945904267               |
| SNP_P3_19822_17243263 | NC_021161.1    | Ca_kabuli_chr02 | 17243263                | TT                              | GG                | 1945904269               |
| SNP_P3_19823_17243269 | NC_021161.1    | Ca_kabuli_chr02 | 17243269                | AA                              | CC                | 1945904271               |
| SNP_P3_19824_17243278 | NC_021161.1    | Ca_kabuli_chr02 | 17243278                | AA                              | GG                | 1945904272               |
| SNP_P3_19825_17257270 | NC_021161.1    | Ca_kabuli_chr02 | 17257270                | TT                              | GG                | 1945904274               |
| SNP_P3_19826_17257421 | NC_021161.1    | Ca_kabuli_chr02 | 17257421                | GG                              | AA                | 1945904276               |
| SNP_P3_19827_17257469 | NC_021161.1    | Ca_kabuli_chr02 | 17257469                | AA                              | GG                | 1945904278               |
| SNP_P3_19828_17257480 | NC_021161.1    | Ca_kabuli_chr02 | 17257480                | AA                              | GG                | 1945904279               |
| SNP_P3_19829_17257544 | NC_021161.1    | Ca_kabuli_chr02 | 17257544                | AA                              | GG                | 1945904281               |
| SNP_P3_19830_17291283 | NC_021161.1    | Ca_kabuli_chr02 | 17291283                | TT                              | AA                | 1945904283               |
| SNP_P3_19831_17291295 | NC_021161.1    | Ca_kabuli_chr02 | 17291295                | GG                              | CC                | 1945904285               |
| SNP_P3_19832_17301938 | NC_021161.1    | Ca_kabuli_chr02 | 17301938                | GG                              | AA                | 1945904287               |
| SNP_P3_19833_17302282 | NC_021161.1    | Ca_kabuli_chr02 | 17302282                | AA                              | CC                | 1945904288               |
| SNP_P3_19835_17360972 | NC_021161.1    | Ca_kabuli_chr02 | 17360972                | CC                              | TT                | 1945904290               |
| SNP_P3_19836_17360976 | NC_021161.1    | Ca_kabuli_chr02 | 17360976                | TT                              | AA                | 1945904292               |
| SNP_P3_19838_17386129 | NC_021161.1    | Ca_kabuli_chr02 | 17386129                | GG                              | TT                | 1945904294               |
| SNP_P3_19839_17386139 | NC_021161.1    | Ca_kabuli_chr02 | 17386139                | TT                              | CC                | 1945904295               |
| SNP_P3_19840_17386148 | NC_021161.1    | Ca_kabuli_chr02 | 17386148                | TT                              | GG                | 1945904297               |
| SNP_P3_19841_17386175 | NC_021161.1    | Ca_kabuli_chr02 | 17386175                | TT                              | CC                | 1945904299               |
| SNP_P3_19842_17386862 | NC_021161.1    | Ca_kabuli_chr02 | 17386862                | CC                              | TT                | 1945904301               |
| SNP_P3_19843_17386863 | NC_021161.1    | Ca_kabuli_chr02 | 17386863                | AA                              | TT                | 1945904303               |
| SNP_P3_19844_17386864 | NC_021161.1    | Ca_kabuli_chr02 | 17386864                | AA                              | GG                | 1945904304               |
| SNP_P3_19846_17402394 | NC_021161.1    | Ca_kabuli_chr02 | 17402394                | AA                              | GG                | 1945904306               |
| SNP_P3_19847_17406919 | NC_021161.1    | Ca_kabuli_chr02 | 17406919                | AA                              | GG                | 1945904308               |
| SNP_P3_19848_17407107 | NC_021161.1    | Ca_kabuli_chr02 | 17407107                | GG                              | CC                | 1945904310               |
| SNP_P3_19849_17407109 | NC_021161.1    | Ca_kabuli_chr02 | 17407109                | AA                              | GG                | 1945904311               |
| SNP_P3_19850_17407152 | NC_021161.1    | Ca_kabuli_chr02 | 17407152                | TT                              | CC                | 1945904313               |
| SNP_P3_19851_17407191 | NC_021161.1    | Ca_kabuli_chr02 | 17407191                | TT                              | CC                | 1945904315               |
| SNP_P3_19852_17407192 | NC_021161.1    | Ca_kabuli_chr02 | 17407192                | TT                              | AA                | 1945904317               |
| SNP_P3_19853_17407228 | NC_021161.1    | Ca_kabuli_chr02 | 17407228                | TT                              | CC                | 1945904319               |
| SNP_P3_19854_17407243 | NC_021161.1    | Ca_kabuli_chr02 | 17407243                | TT                              | CC                | 1945904320               |
| SNP_P3_19855_17412122 | NC_021161.1    | Ca_kabuli_chr02 | 17412122                | CC                              | TT                | 1945904322               |
| SNP_P3_19856_17435982 | NC_021161.1    | Ca_kabuli_chr02 | 17435982                | CC                              | TT                | 1945904324               |
| SNP_P3_19857_17477923 | NC_021161.1    | Ca_kabuli_chr02 | 17477923                | GG                              | TT                | 1945904326               |
| SNP_P3_19858_17487189 | NC_021161.1    | Ca_kabuli_chr02 | 17487189                | TT                              | CC                | 1945904327               |
| SNP_P3_19859_17487287 | NC_021161.1    | Ca_kabuli_chr02 | 17487287                | TT                              | CC                | 1945904329               |

| SNPs IDs              | Chromosome IDs | Chromosomes     | Physical positions (bp) | CDC Frontier (Reference genome) | (Pusa 256 & HPNB) | NCBI SNPdb Accession IDs |
|-----------------------|----------------|-----------------|-------------------------|---------------------------------|-------------------|--------------------------|
| SNP_P3_19860_17490061 | NC_021161.1    | Ca_kabuli_chr02 | 17490061                | TT                              | GG                | 1945904331               |
| SNP_P3_19861_17490078 | NC_021161.1    | Ca_kabuli_chr02 | 17490078                | AA                              | GG                | 1945904333               |
| SNP_P3_19862_17491027 | NC_021161.1    | Ca_kabuli_chr02 | 17491027                | AA                              | GG                | 1945904335               |
| SNP_P3_19863_17491076 | NC_021161.1    | Ca_kabuli_chr02 | 17491076                | TT                              | CC                | 1945904336               |
| SNP_P3_19864_17491116 | NC_021161.1    | Ca_kabuli_chr02 | 17491116                | TT                              | CC                | 1945904338               |
| SNP_P3_19865_17491195 | NC_021161.1    | Ca_kabuli_chr02 | 17491195                | AA                              | CC                | 1945904340               |
| SNP_P3_19866_17522082 | NC_021161.1    | Ca_kabuli_chr02 | 17522082                | CC                              | TT                | 1945904342               |
| SNP_P3_19867_17551350 | NC_021161.1    | Ca_kabuli_chr02 | 17551350                | AA                              | CC                | 1945904343               |
| SNP_P3_19868_17551577 | NC_021161.1    | Ca_kabuli_chr02 | 17551577                | AA                              | CC                | 1945904345               |
| SNP_P3_19869_17551656 | NC_021161.1    | Ca_kabuli_chr02 | 17551656                | AA                              | GG                | 1945904347               |
| SNP_P3_19871_17551859 | NC_021161.1    | Ca_kabuli_chr02 | 17551859                | AA                              | CC                | 1945904349               |
| SNP_P3_19872_17551912 | NC_021161.1    | Ca_kabuli_chr02 | 17551912                | GG                              | AA                | 1945904351               |
| SNP_P3_19874_17562940 | NC_021161.1    | Ca_kabuli_chr02 | 17562940                | CC                              | TT                | 1945904352               |
| SNP_P3_19875_17563229 | NC_021161.1    | Ca_kabuli_chr02 | 17563229                | AA                              | TT                | 1945904354               |
| SNP_P3_19876_17565061 | NC_021161.1    | Ca_kabuli_chr02 | 17565061                | CC                              | GG                | 1945904356               |
| SNP_P3_19877_17565172 | NC_021161.1    | Ca_kabuli_chr02 | 17565172                | CC                              | AA                | 1945904358               |
| SNP_P3_19878_17587439 | NC_021161.1    | Ca_kabuli_chr02 | 17587439                | GG                              | CC                | 1945904359               |
| SNP_P3_19879_17587727 | NC_021161.1    | Ca_kabuli_chr02 | 17587727                | TT                              | CC                | 1945904361               |
| SNP_P3_19880_17595233 | NC_021161.1    | Ca_kabuli_chr02 | 17595233                | AA                              | GG                | 1945904363               |
| SNP_P3_19881_17673788 | NC_021161.1    | Ca_kabuli_chr02 | 17673788                | GG                              | TT                | 1945904365               |
| SNP_P3_19882_17673791 | NC_021161.1    | Ca_kabuli_chr02 | 17673791                | AA                              | TT                | 1945904367               |
| SNP_P3_19883_17674052 | NC_021161.1    | Ca_kabuli_chr02 | 17674052                | CC                              | AA                | 1945904368               |
| SNP_P3_19884_17704876 | NC_021161.1    | Ca_kabuli_chr02 | 17704876                | TT                              | CC                | 1945904370               |
| SNP_P3_19885_17704877 | NC_021161.1    | Ca_kabuli_chr02 | 17704877                | AA                              | TT                | 1945904372               |
| SNP_P3_19886_17704886 | NC_021161.1    | Ca_kabuli_chr02 | 17704886                | GG                              | AA                | 1945904374               |
| SNP_P3_19887_17704901 | NC_021161.1    | Ca_kabuli_chr02 | 17704901                | GG                              | AA                | 1945904375               |
| SNP_P3_19888_17704922 | NC_021161.1    | Ca_kabuli_chr02 | 17704922                | CC                              | TT                | 1945904377               |
| SNP_P3_19889_17704934 | NC_021161.1    | Ca_kabuli_chr02 | 17704934                | CC                              | TT                | 1945904379               |
| SNP_P3_19890_17708591 | NC_021161.1    | Ca_kabuli_chr02 | 17708591                | AA                              | GG                | 1945904381               |
| SNP_P3_19892_17854200 | NC_021161.1    | Ca_kabuli_chr02 | 17854200                | TT                              | CC                | 1945904383               |
| SNP_P3_19893_17854201 | NC_021161.1    | Ca_kabuli_chr02 | 17854201                | TT                              | CC                | 1945904384               |
| SNP_P3_19894_17868835 | NC_021161.1    | Ca_kabuli_chr02 | 17868835                | CC                              | TT                | 1945904386               |
| SNP_P3_19895_17877182 | NC_021161.1    | Ca_kabuli_chr02 | 17877182                | GG                              | CC                | 1945904388               |
| SNP_P3_19896_17892538 | NC_021161.1    | Ca_kabuli_chr02 | 17892538                | TT                              | CC                | 1945904390               |
| SNP_P3_19897_17892566 | NC_021161.1    | Ca_kabuli_chr02 | 17892566                | AA                              | GG                | 1945904391               |
| SNP_P3_19898_17892567 | NC_021161.1    | Ca_kabuli_chr02 | 17892567                | AA                              | GG                | 1945904393               |
| SNP_P3_19899_17892640 | NC_021161.1    | Ca_kabuli_chr02 | 17892640                | AA                              | GG                | 1945904395               |
| SNP_P3_19900_17892844 | NC_021161.1    | Ca_kabuli_chr02 | 17892844                | CC                              | TT                | 1945904397               |
| SNP_P3_19901_17892878 | NC_021161.1    | Ca_kabuli_chr02 | 17892878                | GG                              | AA                | 1945904399               |
| SNP_P3_19902_17892880 | NC_021161.1    | Ca_kabuli_chr02 | 17892880                | TT                              | AA                | 1945904400               |
| SNP_P3_19903_17895053 | NC_021161.1    | Ca_kabuli_chr02 | 17895053                | AA                              | CC                | 1945904402               |
| SNP_P3_19904_17895060 | NC_021161.1    | Ca_kabuli_chr02 | 17895060                | CC                              | AA                | 1945904404               |

| SNPs IDs              | Chromosome IDs | Chromosomes     | Physical positions (bp) | CDC Frontier (Reference genome) | (Pusa 256 & HPNB) | NCBI SNPdb Accession IDs |
|-----------------------|----------------|-----------------|-------------------------|---------------------------------|-------------------|--------------------------|
| SNP_P3_19905_17915067 | NC_021161.1    | Ca_kabuli_chr02 | 17915067                | TT                              | GG                | 1945904406               |
| SNP_P3_19906_17915098 | NC_021161.1    | Ca_kabuli_chr02 | 17915098                | CC                              | GG                | 1945904408               |
| SNP_P3_19907_17915721 | NC_021161.1    | Ca_kabuli_chr02 | 17915721                | TT                              | CC                | 1945904409               |
| SNP_P3_19908_17916155 | NC_021161.1    | Ca_kabuli_chr02 | 17916155                | AA                              | CC                | 1945904411               |
| SNP_P3_19910_17981411 | NC_021161.1    | Ca_kabuli_chr02 | 17981411                | CC                              | GG                | 1945904413               |
| SNP_P3_19911_17981432 | NC_021161.1    | Ca_kabuli_chr02 | 17981432                | CC                              | TT                | 1945904415               |
| SNP_P3_19912_17987546 | NC_021161.1    | Ca_kabuli_chr02 | 17987546                | CC                              | AA                | 1945904417               |
| SNP_P3_19913_17987558 | NC_021161.1    | Ca_kabuli_chr02 | 17987558                | AA                              | TT                | 1945904418               |
| SNP_P3_19915_17997551 | NC_021161.1    | Ca_kabuli_chr02 | 17997551                | AA                              | GG                | 1945904420               |
| SNP_P3_19916_17997698 | NC_021161.1    | Ca_kabuli_chr02 | 17997698                | AA                              | GG                | 1945904422               |
| SNP_P3_19917_17997753 | NC_021161.1    | Ca_kabuli_chr02 | 17997753                | CC                              | GG                | 1945904424               |
| SNP_P3_19918_17997757 | NC_021161.1    | Ca_kabuli_chr02 | 17997757                | CC                              | TT                | 1945904425               |
| SNP_P3_19919_17997822 | NC_021161.1    | Ca_kabuli_chr02 | 17997822                | TT                              | CC                | 1945904427               |
| SNP_P3_19920_17997827 | NC_021161.1    | Ca_kabuli_chr02 | 17997827                | GG                              | AA                | 1945904429               |
| SNP_P3_19921_18005221 | NC_021161.1    | Ca_kabuli_chr02 | 18005221                | TT                              | CC                | 1945904431               |
| SNP_P3_19922_18076068 | NC_021161.1    | Ca_kabuli_chr02 | 18076068                | TT                              | AA                | 1945904433               |
| SNP_P3_19923_18091481 | NC_021161.1    | Ca_kabuli_chr02 | 18091481                | AA                              | CC                | 1945904434               |
| SNP_P3_19924_18091495 | NC_021161.1    | Ca_kabuli_chr02 | 18091495                | CC                              | GG                | 1945904436               |
| SNP_P3_19925_18101286 | NC_021161.1    | Ca_kabuli_chr02 | 18101286                | TT                              | CC                | 1945904438               |
| SNP_P3_19927_18101390 | NC_021161.1    | Ca_kabuli_chr02 | 18101390                | AA                              | TT                | 1945904440               |
| SNP_P3_19928_18101391 | NC_021161.1    | Ca_kabuli_chr02 | 18101391                | AA                              | GG                | 1945904441               |
| SNP_P3_19929_18101647 | NC_021161.1    | Ca_kabuli_chr02 | 18101647                | CC                              | TT                | 1945904443               |
| SNP_P3_19930_18101673 | NC_021161.1    | Ca_kabuli_chr02 | 18101673                | CC                              | GG                | 1945904445               |
| SNP_P3_19931_18101680 | NC_021161.1    | Ca_kabuli_chr02 | 18101680                | GG                              | AA                | 1945904447               |
| SNP_P3_19932_18101688 | NC_021161.1    | Ca_kabuli_chr02 | 18101688                | CC                              | TT                | 1945904449               |
| SNP_P3_19933_18103069 | NC_021161.1    | Ca_kabuli_chr02 | 18103069                | GG                              | AA                | 1945904450               |
| SNP_P3_19934_18103825 | NC_021161.1    | Ca_kabuli_chr02 | 18103825                | GG                              | TT                | 1945904452               |
| SNP_P3_19935_18103853 | NC_021161.1    | Ca_kabuli_chr02 | 18103853                | GG                              | TT                | 1945904454               |
| SNP_P3_19936_18125100 | NC_021161.1    | Ca_kabuli_chr02 | 18125100                | TT                              | CC                | 1945904456               |
| SNP_P3_19937_18125103 | NC_021161.1    | Ca_kabuli_chr02 | 18125103                | CC                              | TT                | 1945904457               |
| SNP_P3_19938_18125104 | NC_021161.1    | Ca_kabuli_chr02 | 18125104                | AA                              | GG                | 1945904459               |
| SNP_P3_19939_18125117 | NC_021161.1    | Ca_kabuli_chr02 | 18125117                | CC                              | TT                | 1945904461               |
| SNP_P3_19940_18125123 | NC_021161.1    | Ca_kabuli_chr02 | 18125123                | CC                              | AA                | 1945904463               |
| SNP_P3_19941_18125153 | NC_021161.1    | Ca_kabuli_chr02 | 18125153                | TT                              | GG                | 1945904465               |
| SNP_P3_19942_18125171 | NC_021161.1    | Ca_kabuli_chr02 | 18125171                | CC                              | TT                | 1945904466               |
| SNP_P3_19943_18125177 | NC_021161.1    | Ca_kabuli_chr02 | 18125177                | CC                              | TT                | 1945904468               |
| SNP_P3_19944_18125317 | NC_021161.1    | Ca_kabuli_chr02 | 18125317                | AA                              | CC                | 1945904470               |
| SNP_P3_19945_18125352 | NC_021161.1    | Ca_kabuli_chr02 | 18125352                | CC                              | TT                | 1945904472               |
| SNP_P3_19946_18125360 | NC_021161.1    | Ca_kabuli_chr02 | 18125360                | CC                              | TT                | 1945904473               |
| SNP_P3_19947_18125602 | NC_021161.1    | Ca_kabuli_chr02 | 18125602                | TT                              | CC                | 1945904475               |
| SNP_P3_19948_18125617 | NC_021161.1    | Ca_kabuli_chr02 | 18125617                | TT                              | CC                | 1945904477               |
| SNP_P3_19949_18125635 | NC_021161.1    | Ca_kabuli_chr02 | 18125635                | TT                              | CC                | 1945904479               |

| SNPs IDs              | Chromosome IDs | Chromosomes     | Physical positions (bp) | CDC Frontier (Reference genome) | (Pusa 256 & HPNB) | NCBI SNPdb Accession IDs |
|-----------------------|----------------|-----------------|-------------------------|---------------------------------|-------------------|--------------------------|
| SNP_P3_19951_18169694 | NC_021161.1    | Ca_kabuli_chr02 | 18169694                | GG                              | AA                | 1945904481               |
| SNP_P3_19952_18169897 | NC_021161.1    | Ca_kabuli_chr02 | 18169897                | GG                              | AA                | 1945904482               |
| SNP_P3_19953_18169995 | NC_021161.1    | Ca_kabuli_chr02 | 18169995                | TT                              | CC                | 1945904484               |
| SNP_P3_19955_18170044 | NC_021161.1    | Ca_kabuli_chr02 | 18170044                | CC                              | TT                | 1945904486               |
| SNP_P3_19956_18170055 | NC_021161.1    | Ca_kabuli_chr02 | 18170055                | TT                              | AA                | 1945904488               |
| SNP_P3_19957_18170062 | NC_021161.1    | Ca_kabuli_chr02 | 18170062                | AA                              | CC                | 1945904489               |
| SNP_P3_19958_18170071 | NC_021161.1    | Ca_kabuli_chr02 | 18170071                | TT                              | AA                | 1945904491               |
| SNP_P3_19959_18175236 | NC_021161.1    | Ca_kabuli_chr02 | 18175236                | TT                              | CC                | 1945904493               |
| SNP_P3_19960_18211752 | NC_021161.1    | Ca_kabuli_chr02 | 18211752                | TT                              | CC                | 1945904495               |
| SNP_P3_19961_18211753 | NC_021161.1    | Ca_kabuli_chr02 | 18211753                | CC                              | TT                | 1945904497               |
| SNP_P3_19962_18211762 | NC_021161.1    | Ca_kabuli_chr02 | 18211762                | TT                              | CC                | 1945904498               |
| SNP_P3_19964_18250619 | NC_021161.1    | Ca_kabuli_chr02 | 18250619                | GG                              | TT                | 1945904500               |
| SNP_P3_19965_18326244 | NC_021161.1    | Ca_kabuli_chr02 | 18326244                | AA                              | GG                | 1945904502               |
| SNP_P3_19966_18326249 | NC_021161.1    | Ca_kabuli_chr02 | 18326249                | TT                              | AA                | 1945904504               |
| SNP_P3_19967_18329613 | NC_021161.1    | Ca_kabuli_chr02 | 18329613                | GG                              | AA                | 1945904505               |
| SNP_P3_19968_18344915 | NC_021161.1    | Ca_kabuli_chr02 | 18344915                | CC                              | AA                | 1945904507               |
| SNP_P3_19969_18353144 | NC_021161.1    | Ca_kabuli_chr02 | 18353144                | CC                              | AA                | 1945904509               |
| SNP_P3_19970_18378451 | NC_021161.1    | Ca_kabuli_chr02 | 18378451                | AA                              | TT                | 1945904511               |
| SNP_P3_19971_18381798 | NC_021161.1    | Ca_kabuli_chr02 | 18381798                | AA                              | GG                | 1945904513               |
| SNP_P3_19972_18385820 | NC_021161.1    | Ca_kabuli_chr02 | 18385820                | TT                              | AA                | 1945904514               |
| SNP_P3_19973_18397223 | NC_021161.1    | Ca_kabuli_chr02 | 18397223                | AA                              | TT                | 1945904516               |
| SNP_P3_19974_18400072 | NC_021161.1    | Ca_kabuli_chr02 | 18400072                | TT                              | CC                | 1945904518               |
| SNP_P3_19975_18400084 | NC_021161.1    | Ca_kabuli_chr02 | 18400084                | AA                              | GG                | 1945904520               |
| SNP_P3_19976_18400425 | NC_021161.1    | Ca_kabuli_chr02 | 18400425                | TT                              | AA                | 1945904522               |
| SNP_P3_19977_18400430 | NC_021161.1    | Ca_kabuli_chr02 | 18400430                | AA                              | GG                | 1945904523               |
| SNP_P3_19978_18400619 | NC_021161.1    | Ca_kabuli_chr02 | 18400619                | TT                              | CC                | 1945904525               |
| SNP_P3_19979_18409012 | NC_021161.1    | Ca_kabuli_chr02 | 18409012                | GG                              | CC                | 1945904527               |
| SNP_P3_19980_18409050 | NC_021161.1    | Ca_kabuli_chr02 | 18409050                | CC                              | TT                | 1945904529               |
| SNP_P3_19981_18409151 | NC_021161.1    | Ca_kabuli_chr02 | 18409151                | AA                              | TT                | 1945904530               |
| SNP_P3_19982_18409472 | NC_021161.1    | Ca_kabuli_chr02 | 18409472                | TT                              | CC                | 1945904532               |
| SNP_P3_19983_18409482 | NC_021161.1    | Ca_kabuli_chr02 | 18409482                | TT                              | CC                | 1945904534               |
| SNP_P3_19984_18409505 | NC_021161.1    | Ca_kabuli_chr02 | 18409505                | TT                              | AA                | 1945904536               |
| SNP_P3_19985_18410980 | NC_021161.1    | Ca_kabuli_chr02 | 18410980                | TT                              | CC                | 1945904538               |
| SNP_P3_19986_18438684 | NC_021161.1    | Ca_kabuli_chr02 | 18438684                | AA                              | GG                | 1945904539               |
| SNP_P3_19987_18516994 | NC_021161.1    | Ca_kabuli_chr02 | 18516994                | GG                              | AA                | 1945904541               |
| SNP_P3_19988_18517000 | NC_021161.1    | Ca_kabuli_chr02 | 18517000                | AA                              | GG                | 1945904543               |
| SNP_P3_19989_18517006 | NC_021161.1    | Ca_kabuli_chr02 | 18517006                | TT                              | CC                | 1945904545               |
| SNP_P3_19990_18517030 | NC_021161.1    | Ca_kabuli_chr02 | 18517030                | TT                              | CC                | 1945904546               |
| SNP_P3_19991_18523391 | NC_021161.1    | Ca_kabuli_chr02 | 18523391                | GG                              | AA                | 1945904548               |
| SNP_P3_19992_18587020 | NC_021161.1    | Ca_kabuli_chr02 | 18587020                | TT                              | CC                | 1945904550               |
| SNP_P3_19993_18587045 | NC_021161.1    | Ca_kabuli_chr02 | 18587045                | TT                              | CC                | 1945904552               |
| SNP_P3_19994_18587192 | NC_021161.1    | Ca_kabuli_chr02 | 18587192                | GG                              | AA                | 1945904554               |

| SNPs IDs              | Chromosome IDs | Chromosomes     | Physical positions (bp) | CDC Frontier (Reference genome) | (Pusa 256 & HPNB) | NCBI SNPdb Accession IDs |
|-----------------------|----------------|-----------------|-------------------------|---------------------------------|-------------------|--------------------------|
| SNP_P3_19995_18592936 | NC_021161.1    | Ca_kabuli_chr02 | 18592936                | CC                              | TT                | 1945904555               |
| SNP_P3_19997_18610013 | NC_021161.1    | Ca_kabuli_chr02 | 18610013                | TT                              | CC                | 1945904557               |
| SNP_P3_19998_18671832 | NC_021161.1    | Ca_kabuli_chr02 | 18671832                | CC                              | TT                | 1945904559               |
| SNP_P3_19999_18671834 | NC_021161.1    | Ca_kabuli_chr02 | 18671834                | TT                              | CC                | 1945904561               |
| SNP_P3_20000_18684931 | NC_021161.1    | Ca_kabuli_chr02 | 18684931                | CC                              | TT                | 1945904562               |
| SNP_P3_20001_18699301 | NC_021161.1    | Ca_kabuli_chr02 | 18699301                | CC                              | TT                | 1945904564               |
| SNP_P3_20002_18699335 | NC_021161.1    | Ca_kabuli_chr02 | 18699335                | CC                              | TT                | 1945904566               |
| SNP_P3_20003_18699680 | NC_021161.1    | Ca_kabuli_chr02 | 18699680                | TT                              | CC                | 1945904568               |
| SNP_P3_20004_18699681 | NC_021161.1    | Ca_kabuli_chr02 | 18699681                | GG                              | AA                | 1945904570               |
| SNP_P3_20005_18705936 | NC_021161.1    | Ca_kabuli_chr02 | 18705936                | TT                              | CC                | 1945904571               |
| SNP_P3_20006_18707482 | NC_021161.1    | Ca_kabuli_chr02 | 18707482                | GG                              | TT                | 1945904573               |
| SNP_P3_20007_18711955 | NC_021161.1    | Ca_kabuli_chr02 | 18711955                | CC                              | GG                | 1945904575               |
| SNP_P3_20008_18713763 | NC_021161.1    | Ca_kabuli_chr02 | 18713763                | TT                              | CC                | 1945904577               |
| SNP_P3_20010_18754890 | NC_021161.1    | Ca_kabuli_chr02 | 18754890                | TT                              | GG                | 1945904578               |
| SNP_P3_20011_18754902 | NC_021161.1    | Ca_kabuli_chr02 | 18754902                | TT                              | AA                | 1945904580               |
| SNP_P3_20012_18755446 | NC_021161.1    | Ca_kabuli_chr02 | 18755446                | CC                              | GG                | 1945904582               |
| SNP_P3_20013_18756358 | NC_021161.1    | Ca_kabuli_chr02 | 18756358                | TT                              | CC                | 1945904584               |
| SNP_P3_20014_18758121 | NC_021161.1    | Ca_kabuli_chr02 | 18758121                | AA                              | GG                | 1945904586               |
| SNP_P3_20015_18758133 | NC_021161.1    | Ca_kabuli_chr02 | 18758133                | CC                              | AA                | 1945904587               |
| SNP_P3_20016_18758782 | NC_021161.1    | Ca_kabuli_chr02 | 18758782                | GG                              | AA                | 1945904589               |
| SNP_P3_20017_18758784 | NC_021161.1    | Ca_kabuli_chr02 | 18758784                | CC                              | TT                | 1945904591               |
| SNP_P3_20018_18762258 | NC_021161.1    | Ca_kabuli_chr02 | 18762258                | AA                              | GG                | 1945904593               |
| SNP_P3_20020_18776434 | NC_021161.1    | Ca_kabuli_chr02 | 18776434                | GG                              | AA                | 1945904594               |
| SNP_P3_20021_18776445 | NC_021161.1    | Ca_kabuli_chr02 | 18776445                | TT                              | CC                | 1945904596               |
| SNP_P3_20022_18776632 | NC_021161.1    | Ca_kabuli_chr02 | 18776632                | TT                              | GG                | 1945904598               |
| SNP_P3_20023_18776637 | NC_021161.1    | Ca_kabuli_chr02 | 18776637                | CC                              | TT                | 1945904600               |
| SNP_P3_20024_18776649 | NC_021161.1    | Ca_kabuli_chr02 | 18776649                | GG                              | AA                | 1945904602               |
| SNP_P3_20025_18821746 | NC_021161.1    | Ca_kabuli_chr02 | 18821746                | TT                              | GG                | 1945904603               |
| SNP_P3_20027_18854188 | NC_021161.1    | Ca_kabuli_chr02 | 18854188                | TT                              | CC                | 1945904605               |
| SNP_P3_20028_18870056 | NC_021161.1    | Ca_kabuli_chr02 | 18870056                | CC                              | TT                | 1945904607               |
| SNP_P3_20029_18892676 | NC_021161.1    | Ca_kabuli_chr02 | 18892676                | AA                              | TT                | 1945904609               |
| SNP_P3_20031_18944165 | NC_021161.1    | Ca_kabuli_chr02 | 18944165                | CC                              | AA                | 1945904610               |
| SNP_P3_20033_18944612 | NC_021161.1    | Ca_kabuli_chr02 | 18944612                | TT                              | CC                | 1945904612               |
| SNP_P3_20034_18956655 | NC_021161.1    | Ca_kabuli_chr02 | 18956655                | AA                              | GG                | 1945904614               |
| SNP_P3_20035_19008991 | NC_021161.1    | Ca_kabuli_chr02 | 19008991                | GG                              | TT                | 1945904616               |
| SNP_P3_20036_19009078 | NC_021161.1    | Ca_kabuli_chr02 | 19009078                | GG                              | AA                | 1945904618               |
| SNP_P3_20037_19009112 | NC_021161.1    | Ca_kabuli_chr02 | 19009112                | GG                              | CC                | 1945904619               |
| SNP_P3_20038_19009207 | NC_021161.1    | Ca_kabuli_chr02 | 19009207                | CC                              | TT                | 1945904621               |
| SNP_P3_20039_19009219 | NC_021161.1    | Ca_kabuli_chr02 | 19009219                | GG                              | AA                | 1945904623               |
| SNP_P3_20040_19009234 | NC_021161.1    | Ca_kabuli_chr02 | 19009234                | AA                              | CC                | 1945904625               |
| SNP_P3_20041_19009310 | NC_021161.1    | Ca_kabuli_chr02 | 19009310                | TT                              | GG                | 1945904627               |
| SNP_P3_20042_19009436 | NC_021161.1    | Ca_kabuli_chr02 | 19009436                | CC                              | TT                | 1945904628               |

| SNPs IDs              | Chromosome IDs | Chromosomes     | Physical positions (bp) | CDC Frontier (Reference genome) | (Pusa 256 & HPNB) | NCBI SNPdb Accession IDs |
|-----------------------|----------------|-----------------|-------------------------|---------------------------------|-------------------|--------------------------|
| SNP_P3_20043_19015885 | NC_021161.1    | Ca_kabuli_chr02 | 19015885                | CC                              | TT                | 1945904630               |
| SNP_P3_20044_19015940 | NC_021161.1    | Ca_kabuli_chr02 | 19015940                | GG                              | TT                | 1945904632               |
| SNP_P3_20045_19016105 | NC_021161.1    | Ca_kabuli_chr02 | 19016105                | GG                              | CC                | 1945904634               |
| SNP_P3_20046_19016117 | NC_021161.1    | Ca_kabuli_chr02 | 19016117                | GG                              | AA                | 1945904635               |
| SNP_P3_20047_19016130 | NC_021161.1    | Ca_kabuli_chr02 | 19016130                | TT                              | CC                | 1945904637               |
| SNP_P3_20048_19016165 | NC_021161.1    | Ca_kabuli_chr02 | 19016165                | TT                              | CC                | 1945904639               |
| SNP_P3_20049_19016194 | NC_021161.1    | Ca_kabuli_chr02 | 19016194                | AA                              | GG                | 1945904641               |
| SNP_P3_20050_19016195 | NC_021161.1    | Ca_kabuli_chr02 | 19016195                | CC                              | TT                | 1945904643               |
| SNP_P3_20051_19016204 | NC_021161.1    | Ca_kabuli_chr02 | 19016204                | CC                              | GG                | 1945904644               |
| SNP_P3_20052_19016206 | NC_021161.1    | Ca_kabuli_chr02 | 19016206                | AA                              | GG                | 1945904646               |
| SNP_P3_20053_19016276 | NC_021161.1    | Ca_kabuli_chr02 | 19016276                | TT                              | GG                | 1945904648               |
| SNP_P3_20054_19016301 | NC_021161.1    | Ca_kabuli_chr02 | 19016301                | TT                              | CC                | 1945904650               |
| SNP_P3_20055_19016382 | NC_021161.1    | Ca_kabuli_chr02 | 19016382                | CC                              | TT                | 1945904651               |
| SNP_P3_20056_19016416 | NC_021161.1    | Ca_kabuli_chr02 | 19016416                | GG                              | AA                | 1945904653               |
| SNP_P3_20057_19016451 | NC_021161.1    | Ca_kabuli_chr02 | 19016451                | TT                              | CC                | 1945904655               |
| SNP_P3_20058_19016458 | NC_021161.1    | Ca_kabuli_chr02 | 19016458                | TT                              | CC                | 1945904657               |
| SNP_P3_20059_19016562 | NC_021161.1    | Ca_kabuli_chr02 | 19016562                | AA                              | CC                | 1945904659               |
| SNP_P3_20060_19016599 | NC_021161.1    | Ca_kabuli_chr02 | 19016599                | CC                              | AA                | 1945904660               |
| SNP_P3_20061_19026318 | NC_021161.1    | Ca_kabuli_chr02 | 19026318                | CC                              | TT                | 1945904662               |
| SNP_P3_20062_19026530 | NC_021161.1    | Ca_kabuli_chr02 | 19026530                | GG                              | AA                | 1945904664               |
| SNP_P3_20063_19026700 | NC_021161.1    | Ca_kabuli_chr02 | 19026700                | TT                              | CC                | 1945904666               |
| SNP_P3_20064_19053048 | NC_021161.1    | Ca_kabuli_chr02 | 19053048                | AA                              | TT                | 1945904667               |
| SNP_P3_20065_19070223 | NC_021161.1    | Ca_kabuli_chr02 | 19070223                | CC                              | TT                | 1945904669               |
| SNP_P3_20066_19081718 | NC_021161.1    | Ca_kabuli_chr02 | 19081718                | TT                              | CC                | 1945904671               |
| SNP_P3_20067_19101582 | NC_021161.1    | Ca_kabuli_chr02 | 19101582                | AA                              | CC                | 1945904673               |
| SNP_P3_20068_19101914 | NC_021161.1    | Ca_kabuli_chr02 | 19101914                | TT                              | GG                | 1945904675               |
| SNP_P3_20069_19130490 | NC_021161.1    | Ca_kabuli_chr02 | 19130490                | CC                              | TT                | 1945904676               |
| SNP_P3_20070_19134629 | NC_021161.1    | Ca_kabuli_chr02 | 19134629                | GG                              | AA                | 1945904678               |
| SNP_P3_20071_19134647 | NC_021161.1    | Ca_kabuli_chr02 | 19134647                | CC                              | GG                | 1945904680               |
| SNP_P3_20072_19134875 | NC_021161.1    | Ca_kabuli_chr02 | 19134875                | AA                              | CC                | 1945904682               |
| SNP_P3_20073_19135943 | NC_021161.1    | Ca_kabuli_chr02 | 19135943                | AA                              | GG                | 1945904683               |
| SNP_P3_20074_19138391 | NC_021161.1    | Ca_kabuli_chr02 | 19138391                | TT                              | GG                | 1945904685               |
| SNP_P3_20075_19138410 | NC_021161.1    | Ca_kabuli_chr02 | 19138410                | CC                              | TT                | 1945904687               |
| SNP_P3_20076_19139071 | NC_021161.1    | Ca_kabuli_chr02 | 19139071                | TT                              | CC                | 1945904689               |
| SNP_P3_20077_19139815 | NC_021161.1    | Ca_kabuli_chr02 | 19139815                | GG                              | AA                | 1945904691               |
| SNP_P3_20079_19164413 | NC_021161.1    | Ca_kabuli_chr02 | 19164413                | TT                              | AA                | 1945904692               |
| SNP_P3_20080_19164452 | NC_021161.1    | Ca_kabuli_chr02 | 19164452                | AA                              | CC                | 1945904694               |
| SNP_P3_20081_19180056 | NC_021161.1    | Ca_kabuli_chr02 | 19180056                | TT                              | GG                | 1945904696               |
| SNP_P3_20082_19180357 | NC_021161.1    | Ca_kabuli_chr02 | 19180357                | AA                              | GG                | 1945904698               |
| SNP_P3_20083_19180390 | NC_021161.1    | Ca_kabuli_chr02 | 19180390                | AA                              | CC                | 1945904700               |
| SNP_P3_20084_19180398 | NC_021161.1    | Ca_kabuli_chr02 | 19180398                | CC                              | GG                | 1945904701               |
| SNP_P3_20085_19192840 | NC_021161.1    | Ca_kabuli_chr02 | 19192840                | GG                              | AA                | 1945904703               |

| SNPs IDs              | Chromosome IDs | Chromosomes     | Physical positions (bp) | CDC Frontier (Reference genome) | (Pusa 256 & HPNB) | NCBI SNPdb Accession IDs |
|-----------------------|----------------|-----------------|-------------------------|---------------------------------|-------------------|--------------------------|
| SNP_P3_20086_19193612 | NC_021161.1    | Ca_kabuli_chr02 | 19193612                | TT                              | CC                | 1945904705               |
| SNP_P3_20087_19193739 | NC_021161.1    | Ca_kabuli_chr02 | 19193739                | GG                              | AA                | 1945904707               |
| SNP_P3_20088_19198280 | NC_021161.1    | Ca_kabuli_chr02 | 19198280                | AA                              | GG                | 1945904708               |
| SNP_P3_20089_19215494 | NC_021161.1    | Ca_kabuli_chr02 | 19215494                | GG                              | AA                | 1945904710               |
| SNP_P3_20090_19215518 | NC_021161.1    | Ca_kabuli_chr02 | 19215518                | AA                              | GG                | 1945904712               |
| SNP_P3_20091_19215595 | NC_021161.1    | Ca_kabuli_chr02 | 19215595                | TT                              | CC                | 1945904714               |
| SNP_P3_20092_19215675 | NC_021161.1    | Ca_kabuli_chr02 | 19215675                | TT                              | CC                | 1945904716               |
| SNP_P3_20093_19215695 | NC_021161.1    | Ca_kabuli_chr02 | 19215695                | TT                              | CC                | 1945904717               |
| SNP_P3_20094_19216100 | NC_021161.1    | Ca_kabuli_chr02 | 19216100                | AA                              | GG                | 1945904719               |
| SNP_P3_20096_19219073 | NC_021161.1    | Ca_kabuli_chr02 | 19219073                | GG                              | AA                | 1945904721               |
| SNP_P3_20097_19219080 | NC_021161.1    | Ca_kabuli_chr02 | 19219080                | GG                              | TT                | 1945904723               |
| SNP_P3_20098_19219109 | NC_021161.1    | Ca_kabuli_chr02 | 19219109                | TT                              | CC                | 1945904724               |
| SNP_P3_20099_19219139 | NC_021161.1    | Ca_kabuli_chr02 | 19219139                | TT                              | CC                | 1945904726               |
| SNP_P3_20100_19221834 | NC_021161.1    | Ca_kabuli_chr02 | 19221834                | TT                              | CC                | 1945904728               |
| SNP_P3_20101_19225388 | NC_021161.1    | Ca_kabuli_chr02 | 19225388                | CC                              | TT                | 1945904730               |
| SNP_P3_20102_19251509 | NC_021161.1    | Ca_kabuli_chr02 | 19251509                | TT                              | AA                | 1945904732               |
| SNP_P3_20103_19251538 | NC_021161.1    | Ca_kabuli_chr02 | 19251538                | AA                              | GG                | 1945904733               |
| SNP_P3_20104_19251580 | NC_021161.1    | Ca_kabuli_chr02 | 19251580                | AA                              | TT                | 1945904735               |
| SNP_P3_20105_19251940 | NC_021161.1    | Ca_kabuli_chr02 | 19251940                | GG                              | AA                | 1945904737               |
| SNP_P3_20106_19261293 | NC_021161.1    | Ca_kabuli_chr02 | 19261293                | TT                              | AA                | 1945904739               |
| SNP_P3_20107_19281257 | NC_021161.1    | Ca_kabuli_chr02 | 19281257                | AA                              | CC                | 1945904740               |
| SNP_P3_20108_19283924 | NC_021161.1    | Ca_kabuli_chr02 | 19283924                | CC                              | AA                | 1945904742               |
| SNP_P3_20109_19283926 | NC_021161.1    | Ca_kabuli_chr02 | 19283926                | GG                              | AA                | 1945904744               |
| SNP_P3_20110_19283931 | NC_021161.1    | Ca_kabuli_chr02 | 19283931                | CC                              | TT                | 1945904746               |
| SNP_P3_20111_19283935 | NC_021161.1    | Ca_kabuli_chr02 | 19283935                | AA                              | TT                | 1945904748               |
| SNP_P3_20112_19311350 | NC_021161.1    | Ca_kabuli_chr02 | 19311350                | TT                              | CC                | 1945904749               |
| SNP_P3_20113_19311649 | NC_021161.1    | Ca_kabuli_chr02 | 19311649                | AA                              | CC                | 1945904751               |
| SNP_P3_20114_19314605 | NC_021161.1    | Ca_kabuli_chr02 | 19314605                | TT                              | AA                | 1945904753               |
| SNP_P3_20115_19314641 | NC_021161.1    | Ca_kabuli_chr02 | 19314641                | AA                              | GG                | 1945904755               |
| SNP_P3_20116_19314681 | NC_021161.1    | Ca_kabuli_chr02 | 19314681                | TT                              | GG                | 1945904756               |
| SNP_P3_20117_19314728 | NC_021161.1    | Ca_kabuli_chr02 | 19314728                | TT                              | CC                | 1945904758               |
| SNP_P3_20118_19314740 | NC_021161.1    | Ca_kabuli_chr02 | 19314740                | GG                              | TT                | 1945904760               |
| SNP_P3_20119_19314821 | NC_021161.1    | Ca_kabuli_chr02 | 19314821                | TT                              | CC                | 1945904762               |
| SNP_P3_20120_19314870 | NC_021161.1    | Ca_kabuli_chr02 | 19314870                | AA                              | GG                | 1945904764               |
| SNP_P3_20121_19314945 | NC_021161.1    | Ca_kabuli_chr02 | 19314945                | GG                              | AA                | 1945904765               |
| SNP_P3_20122_19326624 | NC_021161.1    | Ca_kabuli_chr02 | 19326624                | TT                              | CC                | 1945904767               |
| SNP_P3_20123_19327297 | NC_021161.1    | Ca_kabuli_chr02 | 19327297                | GG                              | AA                | 1945904769               |
| SNP_P3_20124_19328010 | NC_021161.1    | Ca_kabuli_chr02 | 19328010                | CC                              | TT                | 1945904771               |
| SNP_P3_20125_19386795 | NC_021161.1    | Ca_kabuli_chr02 | 19386795                | CC                              | TT                | 1945904773               |
| SNP_P3_20126_19387153 | NC_021161.1    | Ca_kabuli_chr02 | 19387153                | CC                              | GG                | 1945904774               |
| SNP_P3_20127_19387162 | NC_021161.1    | Ca_kabuli_chr02 | 19387162                | TT                              | CC                | 1945904776               |
| SNP_P3_20129_19393578 | NC_021161.1    | Ca_kabuli_chr02 | 19393578                | GG                              | TT                | 1945904778               |

| SNPs IDs              | Chromosome IDs | Chromosomes     | Physical positions (bp) | CDC Frontier (Reference genome) | (Pusa 256 & HPNB) | NCBI SNPdb Accession IDs |
|-----------------------|----------------|-----------------|-------------------------|---------------------------------|-------------------|--------------------------|
| SNP_P3_20130_19402736 | NC_021161.1    | Ca_kabuli_chr02 | 19402736                | GG                              | CC                | 1945904780               |
| SNP_P3_20131_19408053 | NC_021161.1    | Ca_kabuli_chr02 | 19408053                | AA                              | CC                | 1945904781               |
| SNP_P3_20132_19447731 | NC_021161.1    | Ca_kabuli_chr02 | 19447731                | CC                              | AA                | 1945904783               |
| SNP_P3_20133_19461703 | NC_021161.1    | Ca_kabuli_chr02 | 19461703                | TT                              | CC                | 1945904785               |
| SNP_P3_20134_19461944 | NC_021161.1    | Ca_kabuli_chr02 | 19461944                | TT                              | CC                | 1945904787               |
| SNP_P3_20135_19462474 | NC_021161.1    | Ca_kabuli_chr02 | 19462474                | CC                              | TT                | 1945904789               |
| SNP_P3_20136_19462484 | NC_021161.1    | Ca_kabuli_chr02 | 19462484                | TT                              | GG                | 1945904790               |
| SNP_P3_20137_19478396 | NC_021161.1    | Ca_kabuli_chr02 | 19478396                | CC                              | TT                | 1945904792               |
| SNP_P3_20138_19500588 | NC_021161.1    | Ca_kabuli_chr02 | 19500588                | TT                              | CC                | 1945904794               |
| SNP_P3_20139_19500606 | NC_021161.1    | Ca_kabuli_chr02 | 19500606                | TT                              | CC                | 1945904796               |
| SNP_P3_20140_19500625 | NC_021161.1    | Ca_kabuli_chr02 | 19500625                | TT                              | CC                | 1945904797               |
| SNP_P3_20141_19501220 | NC_021161.1    | Ca_kabuli_chr02 | 19501220                | CC                              | TT                | 1945904799               |
| SNP_P3_20142_19501270 | NC_021161.1    | Ca_kabuli_chr02 | 19501270                | AA                              | CC                | 1945904801               |
| SNP_P3_20143_19501354 | NC_021161.1    | Ca_kabuli_chr02 | 19501354                | GG                              | AA                | 1945904803               |
| SNP_P3_20144_19506081 | NC_021161.1    | Ca_kabuli_chr02 | 19506081                | TT                              | AA                | 1945904805               |
| SNP_P3_20146_19516489 | NC_021161.1    | Ca_kabuli_chr02 | 19516489                | TT                              | AA                | 1945904806               |
| SNP_P3_20147_19516490 | NC_021161.1    | Ca_kabuli_chr02 | 19516490                | AA                              | TT                | 1945904808               |
| SNP_P3_20148_19516514 | NC_021161.1    | Ca_kabuli_chr02 | 19516514                | CC                              | TT                | 1945904810               |
| SNP_P3_20149_19516537 | NC_021161.1    | Ca_kabuli_chr02 | 19516537                | TT                              | CC                | 1945904812               |
| SNP_P3_20150_19516618 | NC_021161.1    | Ca_kabuli_chr02 | 19516618                | GG                              | AA                | 1945904813               |
| SNP_P3_20151_19516714 | NC_021161.1    | Ca_kabuli_chr02 | 19516714                | AA                              | GG                | 1945904815               |
| SNP_P3_20152_19516742 | NC_021161.1    | Ca_kabuli_chr02 | 19516742                | AA                              | TT                | 1945904817               |
| SNP_P3_20153_19516771 | NC_021161.1    | Ca_kabuli_chr02 | 19516771                | AA                              | CC                | 1945904819               |
| SNP_P3_20154_19516834 | NC_021161.1    | Ca_kabuli_chr02 | 19516834                | CC                              | TT                | 1945904821               |
| SNP_P3_20155_19517140 | NC_021161.1    | Ca_kabuli_chr02 | 19517140                | GG                              | AA                | 1945904822               |
| SNP_P3_20156_19517421 | NC_021161.1    | Ca_kabuli_chr02 | 19517421                | CC                              | AA                | 1945904824               |
| SNP_P3_20157_19517436 | NC_021161.1    | Ca_kabuli_chr02 | 19517436                | GG                              | TT                | 1945904826               |
| SNP_P3_20158_19517439 | NC_021161.1    | Ca_kabuli_chr02 | 19517439                | AA                              | TT                | 1945904828               |
| SNP_P3_20159_19517944 | NC_021161.1    | Ca_kabuli_chr02 | 19517944                | GG                              | AA                | 1945904829               |
| SNP_P3_20160_19524541 | NC_021161.1    | Ca_kabuli_chr02 | 19524541                | TT                              | AA                | 1945904831               |
| SNP_P3_20161_19529058 | NC_021161.1    | Ca_kabuli_chr02 | 19529058                | TT                              | CC                | 1945904833               |
| SNP_P3_20162_19529070 | NC_021161.1    | Ca_kabuli_chr02 | 19529070                | TT                              | AA                | 1945904835               |
| SNP_P3_20163_19538484 | NC_021161.1    | Ca_kabuli_chr02 | 19538484                | GG                              | CC                | 1945904837               |
| SNP_P3_20164_19538493 | NC_021161.1    | Ca_kabuli_chr02 | 19538493                | GG                              | CC                | 1945904838               |
| SNP_P3_20165_19570572 | NC_021161.1    | Ca_kabuli_chr02 | 19570572                | AA                              | CC                | 1945904840               |
| SNP_P3_20166_19570589 | NC_021161.1    | Ca_kabuli_chr02 | 19570589                | TT                              | CC                | 1945904842               |
| SNP_P3_20167_19570811 | NC_021161.1    | Ca_kabuli_chr02 | 19570811                | AA                              | GG                | 1945904844               |
| SNP_P3_20168_19573482 | NC_021161.1    | Ca_kabuli_chr02 | 19573482                | TT                              | GG                | 1945904845               |
| SNP_P3_20170_19590168 | NC_021161.1    | Ca_kabuli_chr02 | 19590168                | TT                              | CC                | 1945904847               |
| SNP_P3_20171_19590192 | NC_021161.1    | Ca_kabuli_chr02 | 19590192                | AA                              | CC                | 1945904849               |
| SNP_P3_20172_19590522 | NC_021161.1    | Ca_kabuli_chr02 | 19590522                | GG                              | CC                | 1945904851               |
| SNP_P3_20173_19590627 | NC_021161.1    | Ca_kabuli_chr02 | 19590627                | TT                              | GG                | 1945904853               |



| SNPs IDs              | Chromosome IDs | Chromosomes     | Physical positions (bp) | CDC Frontier (Reference genome) | (Pusa 256 & HPNB) | NCBI SNPdb Accession IDs |
|-----------------------|----------------|-----------------|-------------------------|---------------------------------|-------------------|--------------------------|
| SNP_P3_20174_19590633 | NC_021161.1    | Ca_kabuli_chr02 | 19590633                | CC                              | TT                | 1945904854               |
| SNP_P3_20175_19602666 | NC_021161.1    | Ca_kabuli_chr02 | 19602666                | AA                              | GG                | 1945904856               |
| SNP_P3_20176_19602674 | NC_021161.1    | Ca_kabuli_chr02 | 19602674                | TT                              | AA                | 1945904858               |
| SNP_P3_20177_19602728 | NC_021161.1    | Ca_kabuli_chr02 | 19602728                | CC                              | GG                | 1945904860               |
| SNP_P3_20178_19602798 | NC_021161.1    | Ca_kabuli_chr02 | 19602798                | TT                              | GG                | 1945904861               |
| SNP_P3_20179_19602813 | NC_021161.1    | Ca_kabuli_chr02 | 19602813                | GG                              | TT                | 1945904863               |
| SNP_P3_20180_19602823 | NC_021161.1    | Ca_kabuli_chr02 | 19602823                | GG                              | AA                | 1945904865               |
| SNP_P3_20181_19602862 | NC_021161.1    | Ca_kabuli_chr02 | 19602862                | TT                              | AA                | 1945904867               |
| SNP_P3_20182_19602891 | NC_021161.1    | Ca_kabuli_chr02 | 19602891                | AA                              | CC                | 1945904869               |
| SNP_P3_20183_19602988 | NC_021161.1    | Ca_kabuli_chr02 | 19602988                | GG                              | AA                | 1945904870               |
| SNP_P3_20184_19603085 | NC_021161.1    | Ca_kabuli_chr02 | 19603085                | GG                              | AA                | 1945904872               |
| SNP_P3_20185_19603097 | NC_021161.1    | Ca_kabuli_chr02 | 19603097                | GG                              | AA                | 1945904874               |
| SNP_P3_20186_19603219 | NC_021161.1    | Ca_kabuli_chr02 | 19603219                | AA                              | GG                | 1945904876               |
| SNP_P3_20187_19603231 | NC_021161.1    | Ca_kabuli_chr02 | 19603231                | TT                              | CC                | 1945904877               |
| SNP_P3_20188_19603243 | NC_021161.1    | Ca_kabuli_chr02 | 19603243                | TT                              | CC                | 1945904879               |
| SNP_P3_20189_19610090 | NC_021161.1    | Ca_kabuli_chr02 | 19610090                | TT                              | GG                | 1945904881               |
| SNP_P3_20190_19615219 | NC_021161.1    | Ca_kabuli_chr02 | 19615219                | GG                              | TT                | 1945904883               |
| SNP_P3_20191_19615414 | NC_021161.1    | Ca_kabuli_chr02 | 19615414                | AA                              | TT                | 1945904885               |
| SNP_P3_20192_19615434 | NC_021161.1    | Ca_kabuli_chr02 | 19615434                | CC                              | AA                | 1945904886               |
| SNP_P3_20193_19615472 | NC_021161.1    | Ca_kabuli_chr02 | 19615472                | AA                              | GG                | 1945904888               |
| SNP_P3_20194_19615493 | NC_021161.1    | Ca_kabuli_chr02 | 19615493                | GG                              | CC                | 1945904890               |
| SNP_P3_20195_19616927 | NC_021161.1    | Ca_kabuli_chr02 | 19616927                | TT                              | AA                | 1945904892               |
| SNP_P3_20196_19617026 | NC_021161.1    | Ca_kabuli_chr02 | 19617026                | AA                              | GG                | 1945904894               |
| SNP_P3_20197_19617047 | NC_021161.1    | Ca_kabuli_chr02 | 19617047                | AA                              | GG                | 1945904895               |
| SNP_P3_20198_19617390 | NC_021161.1    | Ca_kabuli_chr02 | 19617390                | AA                              | GG                | 1945904897               |
| SNP_P3_20199_19617438 | NC_021161.1    | Ca_kabuli_chr02 | 19617438                | TT                              | AA                | 1945904899               |
| SNP_P3_20200_19620639 | NC_021161.1    | Ca_kabuli_chr02 | 19620639                | TT                              | GG                | 1945904901               |
| SNP_P3_20201_19620882 | NC_021161.1    | Ca_kabuli_chr02 | 19620882                | AA                              | TT                | 1945904902               |
| SNP_P3_20202_19620937 | NC_021161.1    | Ca_kabuli_chr02 | 19620937                | TT                              | CC                | 1945904904               |
| SNP_P3_20203_19620942 | NC_021161.1    | Ca_kabuli_chr02 | 19620942                | TT                              | GG                | 1945904906               |
| SNP_P3_20204_19646093 | NC_021161.1    | Ca_kabuli_chr02 | 19646093                | GG                              | AA                | 1945904908               |
| SNP_P3_20205_19646095 | NC_021161.1    | Ca_kabuli_chr02 | 19646095                | CC                              | GG                | 1945904910               |
| SNP_P3_20206_19646119 | NC_021161.1    | Ca_kabuli_chr02 | 19646119                | TT                              | CC                | 1945904911               |
| SNP_P3_20207_19646159 | NC_021161.1    | Ca_kabuli_chr02 | 19646159                | TT                              | AA                | 1945904913               |
| SNP_P3_20208_19649729 | NC_021161.1    | Ca_kabuli_chr02 | 19649729                | TT                              | CC                | 1945904915               |
| SNP_P3_20209_19649822 | NC_021161.1    | Ca_kabuli_chr02 | 19649822                | GG                              | AA                | 1945904917               |
| SNP_P3_20210_19650121 | NC_021161.1    | Ca_kabuli_chr02 | 19650121                | AA                              | GG                | 1945904918               |
| SNP_P3_20211_19650137 | NC_021161.1    | Ca_kabuli_chr02 | 19650137                | CC                              | AA                | 1945904920               |
| SNP_P3_20212_19650150 | NC_021161.1    | Ca_kabuli_chr02 | 19650150                | CC                              | TT                | 1945904922               |
| SNP_P3_20213_19650154 | NC_021161.1    | Ca_kabuli_chr02 | 19650154                | GG                              | AA                | 1945904924               |
| SNP_P3_20214_19650171 | NC_021161.1    | Ca_kabuli_chr02 | 19650171                | AA                              | TT                | 1945904926               |
| SNP_P3_20215_19650204 | NC_021161.1    | Ca_kabuli_chr02 | 19650204                | AA                              | GG                | 1945904927               |

| SNPs IDs              | Chromosome IDs | Chromosomes     | Physical positions (bp) | CDC Frontier (Reference genome) | (Pusa 256 & HPNB) | NCBI SNPdb Accession IDs |
|-----------------------|----------------|-----------------|-------------------------|---------------------------------|-------------------|--------------------------|
| SNP_P3_20216_19650221 | NC_021161.1    | Ca_kabuli_chr02 | 19650221                | AA                              | GG                | 1945904929               |
| SNP_P3_20217_19705581 | NC_021161.1    | Ca_kabuli_chr02 | 19705581                | GG                              | AA                | 1945904931               |
| SNP_P3_20218_19705604 | NC_021161.1    | Ca_kabuli_chr02 | 19705604                | AA                              | TT                | 1945904933               |
| SNP_P3_20219_19706030 | NC_021161.1    | Ca_kabuli_chr02 | 19706030                | AA                              | CC                | 1945904934               |
| SNP_P3_20220_19706059 | NC_021161.1    | Ca_kabuli_chr02 | 19706059                | CC                              | TT                | 1945904936               |
| SNP_P3_20221_19711311 | NC_021161.1    | Ca_kabuli_chr02 | 19711311                | GG                              | CC                | 1945904938               |
| SNP_P3_20222_19728671 | NC_021161.1    | Ca_kabuli_chr02 | 19728671                | GG                              | AA                | 1945904940               |
| SNP_P3_20223_19728691 | NC_021161.1    | Ca_kabuli_chr02 | 19728691                | GG                              | AA                | 1945904942               |
| SNP_P3_20224_19728776 | NC_021161.1    | Ca_kabuli_chr02 | 19728776                | AA                              | GG                | 1945904943               |
| SNP_P3_20225_19767952 | NC_021161.1    | Ca_kabuli_chr02 | 19767952                | AA                              | GG                | 1945904945               |
| SNP_P3_20226_19767995 | NC_021161.1    | Ca_kabuli_chr02 | 19767995                | AA                              | GG                | 1945904947               |
| SNP_P3_20227_19768127 | NC_021161.1    | Ca_kabuli_chr02 | 19768127                | AA                              | GG                | 1945904949               |
| SNP_P3_20228_19768142 | NC_021161.1    | Ca_kabuli_chr02 | 19768142                | CC                              | TT                | 1945904950               |
| SNP_P3_20229_19768158 | NC_021161.1    | Ca_kabuli_chr02 | 19768158                | CC                              | TT                | 1945904952               |
| SNP_P3_20230_19768159 | NC_021161.1    | Ca_kabuli_chr02 | 19768159                | AA                              | GG                | 1945904954               |
| SNP_P3_20231_19768167 | NC_021161.1    | Ca_kabuli_chr02 | 19768167                | CC                              | TT                | 1945904956               |
| SNP_P3_20232_19768400 | NC_021161.1    | Ca_kabuli_chr02 | 19768400                | CC                              | TT                | 1945904958               |
| SNP_P3_20233_19769243 | NC_021161.1    | Ca_kabuli_chr02 | 19769243                | AA                              | GG                | 1945904959               |
| SNP_P3_20234_19769320 | NC_021161.1    | Ca_kabuli_chr02 | 19769320                | AA                              | CC                | 1945904961               |
| SNP_P3_20235_19769324 | NC_021161.1    | Ca_kabuli_chr02 | 19769324                | TT                              | CC                | 1945904963               |
| SNP_P3_20236_19769347 | NC_021161.1    | Ca_kabuli_chr02 | 19769347                | CC                              | TT                | 1945904965               |
| SNP_P3_20237_19769366 | NC_021161.1    | Ca_kabuli_chr02 | 19769366                | GG                              | TT                | 1945904967               |
| SNP_P3_20238_19769453 | NC_021161.1    | Ca_kabuli_chr02 | 19769453                | GG                              | AA                | 1945904968               |
| SNP_P3_20239_19769456 | NC_021161.1    | Ca_kabuli_chr02 | 19769456                | CC                              | TT                | 1945904970               |
| SNP_P3_20240_19769463 | NC_021161.1    | Ca_kabuli_chr02 | 19769463                | GG                              | AA                | 1945904972               |
| SNP_P3_20241_19769528 | NC_021161.1    | Ca_kabuli_chr02 | 19769528                | GG                              | AA                | 1945904974               |
| SNP_P3_20242_19769601 | NC_021161.1    | Ca_kabuli_chr02 | 19769601                | AA                              | CC                | 1945904975               |
| SNP_P3_20244_19769771 | NC_021161.1    | Ca_kabuli_chr02 | 19769771                | GG                              | AA                | 1945904977               |
| SNP_P3_20245_19769792 | NC_021161.1    | Ca_kabuli_chr02 | 19769792                | GG                              | AA                | 1945904979               |
| SNP_P3_20246_19769846 | NC_021161.1    | Ca_kabuli_chr02 | 19769846                | GG                              | AA                | 1945904981               |
| SNP_P3_20247_19769870 | NC_021161.1    | Ca_kabuli_chr02 | 19769870                | AA                              | GG                | 1945904983               |
| SNP_P3_20248_19772423 | NC_021161.1    | Ca_kabuli_chr02 | 19772423                | TT                              | CC                | 1945904984               |
| SNP_P3_20249_19772482 | NC_021161.1    | Ca_kabuli_chr02 | 19772482                | CC                              | TT                | 1945904986               |
| SNP_P3_20250_19772517 | NC_021161.1    | Ca_kabuli_chr02 | 19772517                | TT                              | AA                | 1945904988               |
| SNP_P3_20251_19772550 | NC_021161.1    | Ca_kabuli_chr02 | 19772550                | AA                              | CC                | 1945904990               |
| SNP_P3_20252_19772773 | NC_021161.1    | Ca_kabuli_chr02 | 19772773                | TT                              | GG                | 1945904991               |
| SNP_P3_20254_19772802 | NC_021161.1    | Ca_kabuli_chr02 | 19772802                | AA                              | GG                | 1945904993               |
| SNP_P3_20255_19772959 | NC_021161.1    | Ca_kabuli_chr02 | 19772959                | AA                              | GG                | 1945904995               |
| SNP_P3_20256_19772990 | NC_021161.1    | Ca_kabuli_chr02 | 19772990                | AA                              | GG                | 1945904997               |
| SNP_P3_20257_19782392 | NC_021161.1    | Ca_kabuli_chr02 | 19782392                | CC                              | TT                | 1945904999               |
| SNP_P3_20258_19786029 | NC_021161.1    | Ca_kabuli_chr02 | 19786029                | AA                              | CC                | 1945905000               |
| SNP_P3_20259_19786066 | NC_021161.1    | Ca_kabuli_chr02 | 19786066                | GG                              | AA                | 1945905002               |

| SNPs IDs              | Chromosome IDs | Chromosomes     | Physical positions (bp) | CDC Frontier (Reference genome) | (Pusa 256 & HPNB) | NCBI SNPdb Accession IDs |
|-----------------------|----------------|-----------------|-------------------------|---------------------------------|-------------------|--------------------------|
| SNP_P3_20260_19786067 | NC_021161.1    | Ca_kabuli_chr02 | 19786067                | GG                              | AA                | 1945905004               |
| SNP_P3_20261_19786073 | NC_021161.1    | Ca_kabuli_chr02 | 19786073                | GG                              | AA                | 1945905006               |
| SNP_P3_20262_19791288 | NC_021161.1    | Ca_kabuli_chr02 | 19791288                | CC                              | TT                | 1945905007               |
| SNP_P3_20263_19791497 | NC_021161.1    | Ca_kabuli_chr02 | 19791497                | TT                              | GG                | 1945905009               |
| SNP_P3_20265_19791817 | NC_021161.1    | Ca_kabuli_chr02 | 19791817                | TT                              | GG                | 1945905011               |
| SNP_P3_20266_19792024 | NC_021161.1    | Ca_kabuli_chr02 | 19792024                | CC                              | AA                | 1945905013               |
| SNP_P3_20267_19792025 | NC_021161.1    | Ca_kabuli_chr02 | 19792025                | AA                              | CC                | 1945905015               |
| SNP_P3_20268_19792095 | NC_021161.1    | Ca_kabuli_chr02 | 19792095                | GG                              | AA                | 1945905016               |
| SNP_P3_20269_19792113 | NC_021161.1    | Ca_kabuli_chr02 | 19792113                | TT                              | AA                | 1945905018               |
| SNP_P3_20270_19797071 | NC_021161.1    | Ca_kabuli_chr02 | 19797071                | TT                              | GG                | 1945905020               |
| SNP_P3_20271_19797166 | NC_021161.1    | Ca_kabuli_chr02 | 19797166                | TT                              | GG                | 1945905022               |
| SNP_P3_20272_19797174 | NC_021161.1    | Ca_kabuli_chr02 | 19797174                | CC                              | AA                | 1945905024               |
| SNP_P3_20273_19799529 | NC_021161.1    | Ca_kabuli_chr02 | 19799529                | GG                              | AA                | 1945905025               |
| SNP_P3_20274_19799599 | NC_021161.1    | Ca_kabuli_chr02 | 19799599                | AA                              | CC                | 1945905027               |
| SNP_P3_20275_19805797 | NC_021161.1    | Ca_kabuli_chr02 | 19805797                | AA                              | CC                | 1945905029               |
| SNP_P3_20276_19805801 | NC_021161.1    | Ca_kabuli_chr02 | 19805801                | AA                              | GG                | 1945905031               |
| SNP_P3_20277_19808952 | NC_021161.1    | Ca_kabuli_chr02 | 19808952                | AA                              | TT                | 1945905032               |
| SNP_P3_20278_19818580 | NC_021161.1    | Ca_kabuli_chr02 | 19818580                | CC                              | TT                | 1945905034               |
| SNP_P3_20279_19824392 | NC_021161.1    | Ca_kabuli_chr02 | 19824392                | TT                              | AA                | 1945905036               |
| SNP_P3_20280_19824469 | NC_021161.1    | Ca_kabuli_chr02 | 19824469                | AA                              | TT                | 1945905038               |
| SNP_P3_20281_19825207 | NC_021161.1    | Ca_kabuli_chr02 | 19825207                | TT                              | GG                | 1945905040               |
| SNP_P3_20282_19827855 | NC_021161.1    | Ca_kabuli_chr02 | 19827855                | AA                              | GG                | 1945905041               |
| SNP_P3_20283_19827859 | NC_021161.1    | Ca_kabuli_chr02 | 19827859                | GG                              | AA                | 1945905043               |
| SNP_P3_20284_19850902 | NC_021161.1    | Ca_kabuli_chr02 | 19850902                | GG                              | AA                | 1945905045               |
| SNP_P3_20285_19872860 | NC_021161.1    | Ca_kabuli_chr02 | 19872860                | AA                              | TT                | 1945905047               |
| SNP_P3_20286_19881320 | NC_021161.1    | Ca_kabuli_chr02 | 19881320                | GG                              | AA                | 1945905048               |
| SNP_P3_20287_19881322 | NC_021161.1    | Ca_kabuli_chr02 | 19881322                | TT                              | AA                | 1945905050               |
| SNP_P3_20288_19881323 | NC_021161.1    | Ca_kabuli_chr02 | 19881323                | CC                              | AA                | 1945905052               |
| SNP_P3_20289_19881330 | NC_021161.1    | Ca_kabuli_chr02 | 19881330                | TT                              | GG                | 1945905054               |
| SNP_P3_20290_19894073 | NC_021161.1    | Ca_kabuli_chr02 | 19894073                | TT                              | CC                | 1945905056               |
| SNP_P3_20291_19894224 | NC_021161.1    | Ca_kabuli_chr02 | 19894224                | CC                              | TT                | 1945905057               |
| SNP_P3_20292_19894336 | NC_021161.1    | Ca_kabuli_chr02 | 19894336                | GG                              | CC                | 1945905059               |
| SNP_P3_20293_19894346 | NC_021161.1    | Ca_kabuli_chr02 | 19894346                | GG                              | AA                | 1945905061               |
| SNP_P3_20294_19894353 | NC_021161.1    | Ca_kabuli_chr02 | 19894353                | AA                              | GG                | 1945905063               |
| SNP_P3_20295_19894375 | NC_021161.1    | Ca_kabuli_chr02 | 19894375                | TT                              | AA                | 1945905064               |
| SNP_P3_20296_19901092 | NC_021161.1    | Ca_kabuli_chr02 | 19901092                | AA                              | GG                | 1945905066               |
| SNP_P3_20297_19901124 | NC_021161.1    | Ca_kabuli_chr02 | 19901124                | AA                              | CC                | 1945905068               |
| SNP_P3_20298_19901298 | NC_021161.1    | Ca_kabuli_chr02 | 19901298                | TT                              | CC                | 1945905070               |
| SNP_P3_20299_19901304 | NC_021161.1    | Ca_kabuli_chr02 | 19901304                | TT                              | CC                | 1945905072               |
| SNP_P3_20300_19901438 | NC_021161.1    | Ca_kabuli_chr02 | 19901438                | TT                              | CC                | 1945905073               |
| SNP_P3_20301_19901492 | NC_021161.1    | Ca_kabuli_chr02 | 19901492                | TT                              | CC                | 1945905075               |
| SNP_P3_20302_19903903 | NC_021161.1    | Ca_kabuli_chr02 | 19903903                | AA                              | GG                | 1945905077               |

| SNPs IDs              | Chromosome IDs | Chromosomes     | Physical positions (bp) | CDC Frontier (Reference genome) | (Pusa 256 & HPNB) | NCBI SNPdb Accession IDs |
|-----------------------|----------------|-----------------|-------------------------|---------------------------------|-------------------|--------------------------|
| SNP_P3_20303_19904010 | NC_021161.1    | Ca_kabuli_chr02 | 19904010                | CC                              | TT                | 1945905079               |
| SNP_P3_20304_19908534 | NC_021161.1    | Ca_kabuli_chr02 | 19908534                | AA                              | CC                | 1945905081               |
| SNP_P3_20305_19908900 | NC_021161.1    | Ca_kabuli_chr02 | 19908900                | AA                              | TT                | 1945905082               |
| SNP_P3_20306_19927222 | NC_021161.1    | Ca_kabuli_chr02 | 19927222                | AA                              | CC                | 1945905084               |
| SNP_P3_20307_19927232 | NC_021161.1    | Ca_kabuli_chr02 | 19927232                | CC                              | TT                | 1945905086               |
| SNP_P3_20308_19927263 | NC_021161.1    | Ca_kabuli_chr02 | 19927263                | CC                              | TT                | 1945905088               |
| SNP_P3_20309_19927277 | NC_021161.1    | Ca_kabuli_chr02 | 19927277                | AA                              | GG                | 1945905089               |
| SNP_P3_20310_19931473 | NC_021161.1    | Ca_kabuli_chr02 | 19931473                | AA                              | GG                | 1945905091               |
| SNP_P3_20311_19931495 | NC_021161.1    | Ca_kabuli_chr02 | 19931495                | CC                              | TT                | 1945905093               |
| SNP_P3_20312_19963432 | NC_021161.1    | Ca_kabuli_chr02 | 19963432                | TT                              | CC                | 1945905095               |
| SNP_P3_20313_19966961 | NC_021161.1    | Ca_kabuli_chr02 | 19966961                | GG                              | TT                | 1945905097               |
| SNP_P3_20314_19971784 | NC_021161.1    | Ca_kabuli_chr02 | 19971784                | CC                              | TT                | 1945905098               |
| SNP_P3_20316_20069384 | NC_021161.1    | Ca_kabuli_chr02 | 20069384                | TT                              | AA                | 1945905100               |
| SNP_P3_20317_20069520 | NC_021161.1    | Ca_kabuli_chr02 | 20069520                | AA                              | GG                | 1945905102               |
| SNP_P3_20318_20069524 | NC_021161.1    | Ca_kabuli_chr02 | 20069524                | AA                              | GG                | 1945905104               |
| SNP_P3_20319_20069542 | NC_021161.1    | Ca_kabuli_chr02 | 20069542                | AA                              | CC                | 1945905105               |
| SNP_P3_20320_20069635 | NC_021161.1    | Ca_kabuli_chr02 | 20069635                | AA                              | GG                | 1945905107               |
| SNP_P3_20321_20069645 | NC_021161.1    | Ca_kabuli_chr02 | 20069645                | GG                              | AA                | 1945905109               |
| SNP_P3_20322_20069702 | NC_021161.1    | Ca_kabuli_chr02 | 20069702                | GG                              | AA                | 1945905111               |
| SNP_P3_20323_20074904 | NC_021161.1    | Ca_kabuli_chr02 | 20074904                | GG                              | AA                | 1945905113               |
| SNP_P3_20324_20074944 | NC_021161.1    | Ca_kabuli_chr02 | 20074944                | CC                              | TT                | 1945905114               |
| SNP_P3_20325_20075016 | NC_021161.1    | Ca_kabuli_chr02 | 20075016                | TT                              | CC                | 1945905116               |
| SNP_P3_20326_20077423 | NC_021161.1    | Ca_kabuli_chr02 | 20077423                | CC                              | GG                | 1945905118               |
| SNP_P3_20327_20077428 | NC_021161.1    | Ca_kabuli_chr02 | 20077428                | AA                              | GG                | 1945905120               |
| SNP_P3_20328_20077433 | NC_021161.1    | Ca_kabuli_chr02 | 20077433                | GG                              | AA                | 1945905122               |
| SNP_P3_20329_20077515 | NC_021161.1    | Ca_kabuli_chr02 | 20077515                | AA                              | GG                | 1945905123               |
| SNP_P3_20330_20078237 | NC_021161.1    | Ca_kabuli_chr02 | 20078237                | TT                              | AA                | 1945905125               |
| SNP_P3_20331_20078274 | NC_021161.1    | Ca_kabuli_chr02 | 20078274                | GG                              | AA                | 1945905127               |
| SNP_P3_20332_20078275 | NC_021161.1    | Ca_kabuli_chr02 | 20078275                | GG                              | AA                | 1945905129               |
| SNP_P3_20333_20078380 | NC_021161.1    | Ca_kabuli_chr02 | 20078380                | AA                              | GG                | 1945905130               |
| SNP_P3_20334_20078391 | NC_021161.1    | Ca_kabuli_chr02 | 20078391                | CC                              | AA                | 1945905132               |
| SNP_P3_20335_20078394 | NC_021161.1    | Ca_kabuli_chr02 | 20078394                | GG                              | AA                | 1945905134               |
| SNP_P3_20336_20078430 | NC_021161.1    | Ca_kabuli_chr02 | 20078430                | AA                              | GG                | 1945905136               |
| SNP_P3_20337_20084229 | NC_021161.1    | Ca_kabuli_chr02 | 20084229                | TT                              | AA                | 1945905137               |
| SNP_P3_20338_20085836 | NC_021161.1    | Ca_kabuli_chr02 | 20085836                | GG                              | AA                | 1945905139               |
| SNP_P3_20339_20085840 | NC_021161.1    | Ca_kabuli_chr02 | 20085840                | AA                              | GG                | 1945905141               |
| SNP_P3_20340_20087699 | NC_021161.1    | Ca_kabuli_chr02 | 20087699                | AA                              | GG                | 1945905143               |
| SNP_P3_20341_20088108 | NC_021161.1    | Ca_kabuli_chr02 | 20088108                | AA                              | GG                | 1945905145               |
| SNP_P3_20342_20088146 | NC_021161.1    | Ca_kabuli_chr02 | 20088146                | TT                              | CC                | 1945905146               |
| SNP_P3_20343_20088176 | NC_021161.1    | Ca_kabuli_chr02 | 20088176                | CC                              | AA                | 1945905148               |
| SNP_P3_20344_20088479 | NC_021161.1    | Ca_kabuli_chr02 | 20088479                | AA                              | GG                | 1945905150               |
| SNP_P3_20345_20150952 | NC_021161.1    | Ca_kabuli_chr02 | 20150952                | GG                              | AA                | 1945905152               |

| SNPs IDs              | Chromosome IDs | Chromosomes     | Physical positions (bp) | CDC Frontier (Reference genome) | (Pusa 256 & HPNB) | NCBI SNPdb Accession IDs |
|-----------------------|----------------|-----------------|-------------------------|---------------------------------|-------------------|--------------------------|
| SNP_P3_20346_20151212 | NC_021161.1    | Ca_kabuli_chr02 | 20151212                | TT                              | AA                | 1945905154               |
| SNP_P3_20347_20151581 | NC_021161.1    | Ca_kabuli_chr02 | 20151581                | AA                              | CC                | 1945905155               |
| SNP_P3_20348_20151689 | NC_021161.1    | Ca_kabuli_chr02 | 20151689                | GG                              | CC                | 1945905157               |
| SNP_P3_20349_20151693 | NC_021161.1    | Ca_kabuli_chr02 | 20151693                | GG                              | CC                | 1945905159               |
| SNP_P3_20350_20151716 | NC_021161.1    | Ca_kabuli_chr02 | 20151716                | GG                              | TT                | 1945905161               |
| SNP_P3_20351_20151773 | NC_021161.1    | Ca_kabuli_chr02 | 20151773                | CC                              | TT                | 1945905162               |
| SNP_P3_20352_20151779 | NC_021161.1    | Ca_kabuli_chr02 | 20151779                | GG                              | AA                | 1945905164               |
| SNP_P3_20353_20151811 | NC_021161.1    | Ca_kabuli_chr02 | 20151811                | TT                              | AA                | 1945905166               |
| SNP_P3_20354_20151849 | NC_021161.1    | Ca_kabuli_chr02 | 20151849                | AA                              | GG                | 1945905168               |
| SNP_P3_20355_20151865 | NC_021161.1    | Ca_kabuli_chr02 | 20151865                | GG                              | AA                | 1945905170               |
| SNP_P3_20356_20151878 | NC_021161.1    | Ca_kabuli_chr02 | 20151878                | AA                              | TT                | 1945905171               |
| SNP_P3_20357_20151988 | NC_021161.1    | Ca_kabuli_chr02 | 20151988                | TT                              | CC                | 1945905173               |
| SNP_P3_20358_20152105 | NC_021161.1    | Ca_kabuli_chr02 | 20152105                | AA                              | TT                | 1945905175               |
| SNP_P3_20359_20152244 | NC_021161.1    | Ca_kabuli_chr02 | 20152244                | CC                              | TT                | 1945905177               |
| SNP_P3_20360_20153101 | NC_021161.1    | Ca_kabuli_chr02 | 20153101                | GG                              | AA                | 1945905178               |
| SNP_P3_20361_20153803 | NC_021161.1    | Ca_kabuli_chr02 | 20153803                | CC                              | TT                | 1945905180               |
| SNP_P3_20362_20155363 | NC_021161.1    | Ca_kabuli_chr02 | 20155363                | GG                              | AA                | 1945905182               |
| SNP_P3_20363_20155366 | NC_021161.1    | Ca_kabuli_chr02 | 20155366                | AA                              | TT                | 1945905184               |
| SNP_P3_20364_20166203 | NC_021161.1    | Ca_kabuli_chr02 | 20166203                | AA                              | GG                | 1945905186               |
| SNP_P3_20365_20166759 | NC_021161.1    | Ca_kabuli_chr02 | 20166759                | CC                              | TT                | 1945905187               |
| SNP_P3_20366_20169428 | NC_021161.1    | Ca_kabuli_chr02 | 20169428                | AA                              | TT                | 1945905189               |
| SNP_P3_20367_20170691 | NC_021161.1    | Ca_kabuli_chr02 | 20170691                | AA                              | CC                | 1945905191               |
| SNP_P3_20368_20171788 | NC_021161.1    | Ca_kabuli_chr02 | 20171788                | AA                              | TT                | 1945905193               |
| SNP_P3_20369_20171798 | NC_021161.1    | Ca_kabuli_chr02 | 20171798                | TT                              | AA                | 1945905194               |
| SNP_P3_20370_20171807 | NC_021161.1    | Ca_kabuli_chr02 | 20171807                | CC                              | TT                | 1945905196               |
| SNP_P3_20371_20171813 | NC_021161.1    | Ca_kabuli_chr02 | 20171813                | TT                              | AA                | 1945905198               |
| SNP_P3_20372_20174840 | NC_021161.1    | Ca_kabuli_chr02 | 20174840                | AA                              | GG                | 1945905200               |
| SNP_P3_20373_20175141 | NC_021161.1    | Ca_kabuli_chr02 | 20175141                | GG                              | AA                | 1945905202               |
| SNP_P3_20375_20176382 | NC_021161.1    | Ca_kabuli_chr02 | 20176382                | GG                              | AA                | 1945905203               |
| SNP_P3_20376_20177692 | NC_021161.1    | Ca_kabuli_chr02 | 20177692                | TT                              | CC                | 1945905205               |
| SNP_P3_20377_20177743 | NC_021161.1    | Ca_kabuli_chr02 | 20177743                | AA                              | GG                | 1945905207               |
| SNP_P3_20378_20177855 | NC_021161.1    | Ca_kabuli_chr02 | 20177855                | TT                              | GG                | 1945905209               |
| SNP_P3_20379_20177903 | NC_021161.1    | Ca_kabuli_chr02 | 20177903                | CC                              | TT                | 1945905210               |
| SNP_P3_20380_20178169 | NC_021161.1    | Ca_kabuli_chr02 | 20178169                | GG                              | CC                | 1945905212               |
| SNP_P3_20381_20191468 | NC_021161.1    | Ca_kabuli_chr02 | 20191468                | TT                              | CC                | 1945905214               |
| SNP_P3_20382_20191497 | NC_021161.1    | Ca_kabuli_chr02 | 20191497                | CC                              | TT                | 1945905216               |
| SNP_P3_20383_20191667 | NC_021161.1    | Ca_kabuli_chr02 | 20191667                | AA                              | CC                | 1945905218               |
| SNP_P3_20384_20191716 | NC_021161.1    | Ca_kabuli_chr02 | 20191716                | AA                              | GG                | 1945905219               |
| SNP_P3_20385_20191809 | NC_021161.1    | Ca_kabuli_chr02 | 20191809                | TT                              | CC                | 1945905221               |
| SNP_P3_20386_20191906 | NC_021161.1    | Ca_kabuli_chr02 | 20191906                | TT                              | CC                | 1945905223               |
| SNP_P3_20387_20191911 | NC_021161.1    | Ca_kabuli_chr02 | 20191911                | GG                              | AA                | 1945905225               |
| SNP_P3_20388_20192073 | NC_021161.1    | Ca_kabuli_chr02 | 20192073                | GG                              | AA                | 1945905226               |

| SNPs IDs              | Chromosome IDs | Chromosomes     | Physical positions (bp) | CDC Frontier (Reference genome) | (Pusa 256 & HPNB) | NCBI SNPdb Accession IDs |
|-----------------------|----------------|-----------------|-------------------------|---------------------------------|-------------------|--------------------------|
| SNP_P3_20389_20192087 | NC_021161.1    | Ca_kabuli_chr02 | 20192087                | CC                              | TT                | 1945905228               |
| SNP_P3_20390_20192088 | NC_021161.1    | Ca_kabuli_chr02 | 20192088                | GG                              | TT                | 1945905230               |
| SNP_P3_20391_20192175 | NC_021161.1    | Ca_kabuli_chr02 | 20192175                | TT                              | CC                | 1945905232               |
| SNP_P3_20392_20192176 | NC_021161.1    | Ca_kabuli_chr02 | 20192176                | TT                              | CC                | 1945905234               |
| SNP_P3_20393_20192196 | NC_021161.1    | Ca_kabuli_chr02 | 20192196                | GG                              | TT                | 1945905235               |
| SNP_P3_20394_20192227 | NC_021161.1    | Ca_kabuli_chr02 | 20192227                | TT                              | GG                | 1945905237               |
| SNP_P3_20395_20192236 | NC_021161.1    | Ca_kabuli_chr02 | 20192236                | GG                              | CC                | 1945905239               |
| SNP_P3_20396_20192556 | NC_021161.1    | Ca_kabuli_chr02 | 20192556                | CC                              | TT                | 1945905241               |
| SNP_P3_20397_20192762 | NC_021161.1    | Ca_kabuli_chr02 | 20192762                | GG                              | AA                | 1945905242               |
| SNP_P3_20398_20210466 | NC_021161.1    | Ca_kabuli_chr02 | 20210466                | CC                              | TT                | 1945905244               |
| SNP_P3_20400_20235128 | NC_021161.1    | Ca_kabuli_chr02 | 20235128                | AA                              | TT                | 1945905246               |
| SNP_P3_20401_20313597 | NC_021161.1    | Ca_kabuli_chr02 | 20313597                | GG                              | CC                | 1945905248               |
| SNP_P3_20402_20321668 | NC_021161.1    | Ca_kabuli_chr02 | 20321668                | AA                              | TT                | 1945905250               |
| SNP_P3_20403_20337005 | NC_021161.1    | Ca_kabuli_chr02 | 20337005                | AA                              | TT                | 1945905251               |
| SNP_P3_20405_20353213 | NC_021161.1    | Ca_kabuli_chr02 | 20353213                | CC                              | TT                | 1945905253               |
| SNP_P3_20406_20353217 | NC_021161.1    | Ca_kabuli_chr02 | 20353217                | TT                              | AA                | 1945905255               |
| SNP_P3_20407_20353233 | NC_021161.1    | Ca_kabuli_chr02 | 20353233                | AA                              | GG                | 1945905257               |
| SNP_P3_20408_20353286 | NC_021161.1    | Ca_kabuli_chr02 | 20353286                | AA                              | GG                | 1945905258               |
| SNP_P3_20409_20353565 | NC_021161.1    | Ca_kabuli_chr02 | 20353565                | CC                              | GG                | 1945905260               |
| SNP_P3_20410_20355723 | NC_021161.1    | Ca_kabuli_chr02 | 20355723                | AA                              | GG                | 1945905262               |
| SNP_P3_20411_20355974 | NC_021161.1    | Ca_kabuli_chr02 | 20355974                | TT                              | GG                | 1945905264               |
| SNP_P3_20412_20357444 | NC_021161.1    | Ca_kabuli_chr02 | 20357444                | AA                              | GG                | 1945905266               |
| SNP_P3_20413_20365862 | NC_021161.1    | Ca_kabuli_chr02 | 20365862                | TT                              | CC                | 1945905267               |
| SNP_P3_20414_20382007 | NC_021161.1    | Ca_kabuli_chr02 | 20382007                | TT                              | CC                | 1945905269               |
| SNP_P3_20415_20403560 | NC_021161.1    | Ca_kabuli_chr02 | 20403560                | CC                              | GG                | 1945905271               |
| SNP_P3_20416_20424875 | NC_021161.1    | Ca_kabuli_chr02 | 20424875                | AA                              | GG                | 1945905273               |
| SNP_P3_20417_20448963 | NC_021161.1    | Ca_kabuli_chr02 | 20448963                | GG                              | TT                | 1945905274               |
| SNP_P3_20419_20474887 | NC_021161.1    | Ca_kabuli_chr02 | 20474887                | CC                              | GG                | 1945905276               |
| SNP_P3_20420_20475172 | NC_021161.1    | Ca_kabuli_chr02 | 20475172                | AA                              | CC                | 1945905278               |
| SNP_P3_20421_20475175 | NC_021161.1    | Ca_kabuli_chr02 | 20475175                | TT                              | CC                | 1945905280               |
| SNP_P3_20422_20479799 | NC_021161.1    | Ca_kabuli_chr02 | 20479799                | TT                              | CC                | 1945905282               |
| SNP_P3_20423_20490402 | NC_021161.1    | Ca_kabuli_chr02 | 20490402                | AA                              | GG                | 1945905283               |
| SNP_P3_20424_20490410 | NC_021161.1    | Ca_kabuli_chr02 | 20490410                | TT                              | CC                | 1945905285               |
| SNP_P3_20425_20490458 | NC_021161.1    | Ca_kabuli_chr02 | 20490458                | AA                              | GG                | 1945905287               |
| SNP_P3_20426_20490474 | NC_021161.1    | Ca_kabuli_chr02 | 20490474                | TT                              | CC                | 1945905289               |
| SNP_P3_20427_20490476 | NC_021161.1    | Ca_kabuli_chr02 | 20490476                | AA                              | GG                | 1945905291               |
| SNP_P3_20428_20490485 | NC_021161.1    | Ca_kabuli_chr02 | 20490485                | TT                              | CC                | 1945905292               |
| SNP_P3_20429_20490509 | NC_021161.1    | Ca_kabuli_chr02 | 20490509                | AA                              | TT                | 1945905294               |
| SNP_P3_20430_20490515 | NC_021161.1    | Ca_kabuli_chr02 | 20490515                | GG                              | AA                | 1945905296               |
| SNP_P3_20431_20490587 | NC_021161.1    | Ca_kabuli_chr02 | 20490587                | AA                              | GG                | 1945905298               |
| SNP_P3_20432_20490601 | NC_021161.1    | Ca_kabuli_chr02 | 20490601                | AA                              | GG                | 1945905299               |
| SNP_P3_20433_20490794 | NC_021161.1    | Ca_kabuli_chr02 | 20490794                | CC                              | TT                | 1945905301               |

| SNPs IDs              | Chromosome IDs | Chromosomes     | Physical positions (bp) | CDC Frontier (Reference genome) | (Pusa 256 & HPNB) | NCBI SNPdb Accession IDs |
|-----------------------|----------------|-----------------|-------------------------|---------------------------------|-------------------|--------------------------|
| SNP_P3_20434_20490971 | NC_021161.1    | Ca_kabuli_chr02 | 20490971                | CC                              | AA                | 1945905303               |
| SNP_P3_20435_20491355 | NC_021161.1    | Ca_kabuli_chr02 | 20491355                | GG                              | AA                | 1945905305               |
| SNP_P3_20436_20493706 | NC_021161.1    | Ca_kabuli_chr02 | 20493706                | TT                              | CC                | 1945905307               |
| SNP_P3_20437_20493738 | NC_021161.1    | Ca_kabuli_chr02 | 20493738                | CC                              | TT                | 1945905308               |
| SNP_P3_20438_20493742 | NC_021161.1    | Ca_kabuli_chr02 | 20493742                | TT                              | CC                | 1945905310               |
| SNP_P3_20439_20493746 | NC_021161.1    | Ca_kabuli_chr02 | 20493746                | TT                              | GG                | 1945905312               |
| SNP_P3_20440_20493772 | NC_021161.1    | Ca_kabuli_chr02 | 20493772                | CC                              | TT                | 1945905314               |
| SNP_P3_20441_20493778 | NC_021161.1    | Ca_kabuli_chr02 | 20493778                | TT                              | CC                | 1945905315               |
| SNP_P3_20442_20493782 | NC_021161.1    | Ca_kabuli_chr02 | 20493782                | AA                              | GG                | 1945905317               |
| SNP_P3_20443_20493784 | NC_021161.1    | Ca_kabuli_chr02 | 20493784                | AA                              | GG                | 1945905319               |
| SNP_P3_20444_20493801 | NC_021161.1    | Ca_kabuli_chr02 | 20493801                | TT                              | CC                | 1945905321               |
| SNP_P3_20445_20493815 | NC_021161.1    | Ca_kabuli_chr02 | 20493815                | GG                              | AA                | 1945905323               |
| SNP_P3_20446_20493844 | NC_021161.1    | Ca_kabuli_chr02 | 20493844                | AA                              | GG                | 1945905324               |
| SNP_P3_20447_20494250 | NC_021161.1    | Ca_kabuli_chr02 | 20494250                | CC                              | TT                | 1945905326               |
| SNP_P3_20448_20534388 | NC_021161.1    | Ca_kabuli_chr02 | 20534388                | GG                              | CC                | 1945905328               |
| SNP_P3_20450_20563656 | NC_021161.1    | Ca_kabuli_chr02 | 20563656                | CC                              | TT                | 1945905330               |
| SNP_P3_20451_20564559 | NC_021161.1    | Ca_kabuli_chr02 | 20564559                | GG                              | AA                | 1945905331               |
| SNP_P3_20452_20568619 | NC_021161.1    | Ca_kabuli_chr02 | 20568619                | GG                              | TT                | 1945905333               |
| SNP_P3_20453_20573565 | NC_021161.1    | Ca_kabuli_chr02 | 20573565                | TT                              | CC                | 1945905335               |
| SNP_P3_20454_20579014 | NC_021161.1    | Ca_kabuli_chr02 | 20579014                | CC                              | TT                | 1945905337               |
| SNP_P3_20455_20579269 | NC_021161.1    | Ca_kabuli_chr02 | 20579269                | CC                              | TT                | 1945905339               |
| SNP_P3_20456_20579482 | NC_021161.1    | Ca_kabuli_chr02 | 20579482                | AA                              | TT                | 1945905340               |
| SNP_P3_20457_20579513 | NC_021161.1    | Ca_kabuli_chr02 | 20579513                | TT                              | GG                | 1945905342               |
| SNP_P3_20458_20579556 | NC_021161.1    | Ca_kabuli_chr02 | 20579556                | CC                              | AA                | 1945905344               |
| SNP_P3_20459_20587697 | NC_021161.1    | Ca_kabuli_chr02 | 20587697                | AA                              | GG                | 1945905346               |
| SNP_P3_20460_20587704 | NC_021161.1    | Ca_kabuli_chr02 | 20587704                | AA                              | CC                | 1945905347               |
| SNP_P3_20461_20587737 | NC_021161.1    | Ca_kabuli_chr02 | 20587737                | TT                              | AA                | 1945905349               |
| SNP_P3_20462_20587744 | NC_021161.1    | Ca_kabuli_chr02 | 20587744                | TT                              | CC                | 1945905351               |
| SNP_P3_20463_20587746 | NC_021161.1    | Ca_kabuli_chr02 | 20587746                | AA                              | TT                | 1945905353               |
| SNP_P3_20464_20590864 | NC_021161.1    | Ca_kabuli_chr02 | 20590864                | GG                              | AA                | 1945905355               |
| SNP_P3_20465_20620733 | NC_021161.1    | Ca_kabuli_chr02 | 20620733                | CC                              | GG                | 1945905356               |
| SNP_P3_20466_20620736 | NC_021161.1    | Ca_kabuli_chr02 | 20620736                | AA                              | TT                | 1945905358               |
| SNP_P3_20467_20620745 | NC_021161.1    | Ca_kabuli_chr02 | 20620745                | GG                              | CC                | 1945905360               |
| SNP_P3_20468_20620781 | NC_021161.1    | Ca_kabuli_chr02 | 20620781                | GG                              | TT                | 1945905362               |
| SNP_P3_20469_20620782 | NC_021161.1    | Ca_kabuli_chr02 | 20620782                | TT                              | GG                | 1945905363               |
| SNP_P3_20470_20621015 | NC_021161.1    | Ca_kabuli_chr02 | 20621015                | GG                              | TT                | 1945905365               |
| SNP_P3_20471_20621016 | NC_021161.1    | Ca_kabuli_chr02 | 20621016                | TT                              | CC                | 1945905367               |
| SNP_P3_20472_20621082 | NC_021161.1    | Ca_kabuli_chr02 | 20621082                | GG                              | AA                | 1945905369               |
| SNP_P3_20473_20621757 | NC_021161.1    | Ca_kabuli_chr02 | 20621757                | TT                              | GG                | 1945905371               |
| SNP_P3_20474_20621766 | NC_021161.1    | Ca_kabuli_chr02 | 20621766                | CC                              | TT                | 1945905372               |
| SNP_P3_20475_20621772 | NC_021161.1    | Ca_kabuli_chr02 | 20621772                | TT                              | CC                | 1945905374               |
| SNP_P3_20476_20621820 | NC_021161.1    | Ca_kabuli_chr02 | 20621820                | GG                              | AA                | 1945905376               |

| SNPs IDs              | Chromosome IDs | Chromosomes     | Physical positions (bp) | CDC Frontier (Reference genome) | (Pusa 256 & HPNB) | NCBI SNPdb Accession IDs |
|-----------------------|----------------|-----------------|-------------------------|---------------------------------|-------------------|--------------------------|
| SNP_P3_20477_20621852 | NC_021161.1    | Ca_kabuli_chr02 | 20621852                | AA                              | GG                | 1945905378               |
| SNP_P3_20478_20621894 | NC_021161.1    | Ca_kabuli_chr02 | 20621894                | AA                              | CC                | 1945905380               |
| SNP_P3_20479_20621904 | NC_021161.1    | Ca_kabuli_chr02 | 20621904                | CC                              | TT                | 1945905381               |
| SNP_P3_20480_20621930 | NC_021161.1    | Ca_kabuli_chr02 | 20621930                | AA                              | GG                | 1945905383               |
| SNP_P3_20481_20622160 | NC_021161.1    | Ca_kabuli_chr02 | 20622160                | GG                              | AA                | 1945905385               |
| SNP_P3_20482_20622478 | NC_021161.1    | Ca_kabuli_chr02 | 20622478                | TT                              | AA                | 1945905387               |
| SNP_P3_20483_20622522 | NC_021161.1    | Ca_kabuli_chr02 | 20622522                | GG                              | AA                | 1945905388               |
| SNP_P3_20484_20622523 | NC_021161.1    | Ca_kabuli_chr02 | 20622523                | CC                              | TT                | 1945905390               |
| SNP_P3_20485_20622529 | NC_021161.1    | Ca_kabuli_chr02 | 20622529                | TT                              | CC                | 1945905392               |
| SNP_P3_20486_20622755 | NC_021161.1    | Ca_kabuli_chr02 | 20622755                | CC                              | TT                | 1945905394               |
| SNP_P3_20487_20622774 | NC_021161.1    | Ca_kabuli_chr02 | 20622774                | GG                              | TT                | 1945905396               |
| SNP_P3_20488_20622781 | NC_021161.1    | Ca_kabuli_chr02 | 20622781                | AA                              | CC                | 1945905397               |
| SNP_P3_20489_20622995 | NC_021161.1    | Ca_kabuli_chr02 | 20622995                | AA                              | GG                | 1945905399               |
| SNP_P3_20490_20625651 | NC_021161.1    | Ca_kabuli_chr02 | 20625651                | AA                              | TT                | 1945905401               |
| SNP_P3_20491_20625680 | NC_021161.1    | Ca_kabuli_chr02 | 20625680                | CC                              | TT                | 1945905403               |
| SNP_P3_20492_20628581 | NC_021161.1    | Ca_kabuli_chr02 | 20628581                | TT                              | CC                | 1945905404               |
| SNP_P3_20494_20648077 | NC_021161.1    | Ca_kabuli_chr02 | 20648077                | AA                              | GG                | 1945905406               |
| SNP_P3_20495_20649365 | NC_021161.1    | Ca_kabuli_chr02 | 20649365                | GG                              | TT                | 1945905408               |
| SNP_P3_20497_20649856 | NC_021161.1    | Ca_kabuli_chr02 | 20649856                | AA                              | GG                | 1945905410               |
| SNP_P3_20498_20650142 | NC_021161.1    | Ca_kabuli_chr02 | 20650142                | GG                              | AA                | 1945905412               |
| SNP_P3_20499_20650197 | NC_021161.1    | Ca_kabuli_chr02 | 20650197                | CC                              | TT                | 1945905413               |
| SNP_P3_20500_20650234 | NC_021161.1    | Ca_kabuli_chr02 | 20650234                | TT                              | CC                | 1945905415               |
| SNP_P3_20501_20650912 | NC_021161.1    | Ca_kabuli_chr02 | 20650912                | TT                              | CC                | 1945905417               |
| SNP_P3_20502_20650915 | NC_021161.1    | Ca_kabuli_chr02 | 20650915                | AA                              | GG                | 1945905419               |
| SNP_P3_20503_20651446 | NC_021161.1    | Ca_kabuli_chr02 | 20651446                | GG                              | CC                | 1945905420               |
| SNP_P3_20504_20657623 | NC_021161.1    | Ca_kabuli_chr02 | 20657623                | GG                              | AA                | 1945905422               |
| SNP_P3_20505_20657628 | NC_021161.1    | Ca_kabuli_chr02 | 20657628                | GG                              | AA                | 1945905424               |
| SNP_P3_20506_20657989 | NC_021161.1    | Ca_kabuli_chr02 | 20657989                | GG                              | AA                | 1945905426               |
| SNP_P3_20507_20658258 | NC_021161.1    | Ca_kabuli_chr02 | 20658258                | AA                              | CC                | 1945905428               |
| SNP_P3_20508_20660752 | NC_021161.1    | Ca_kabuli_chr02 | 20660752                | AA                              | GG                | 1945905429               |
| SNP_P3_20509_20660772 | NC_021161.1    | Ca_kabuli_chr02 | 20660772                | AA                              | GG                | 1945905431               |
| SNP_P3_20510_20667106 | NC_021161.1    | Ca_kabuli_chr02 | 20667106                | TT                              | GG                | 1945905433               |
| SNP_P3_20511_20669213 | NC_021161.1    | Ca_kabuli_chr02 | 20669213                | TT                              | AA                | 1945905435               |
| SNP_P3_20512_20669235 | NC_021161.1    | Ca_kabuli_chr02 | 20669235                | AA                              | CC                | 1945905436               |
| SNP_P3_20513_20669243 | NC_021161.1    | Ca_kabuli_chr02 | 20669243                | TT                              | AA                | 1945905438               |
| SNP_P3_20514_20680377 | NC_021161.1    | Ca_kabuli_chr02 | 20680377                | TT                              | CC                | 1945905440               |
| SNP_P3_20515_20680434 | NC_021161.1    | Ca_kabuli_chr02 | 20680434                | GG                              | AA                | 1945905442               |
| SNP_P3_20516_20680688 | NC_021161.1    | Ca_kabuli_chr02 | 20680688                | TT                              | GG                | 1945905444               |
| SNP_P3_20517_20680690 | NC_021161.1    | Ca_kabuli_chr02 | 20680690                | AA                              | CC                | 1945905445               |
| SNP_P3_20518_20680768 | NC_021161.1    | Ca_kabuli_chr02 | 20680768                | CC                              | AA                | 1945905447               |
| SNP_P3_20519_20687212 | NC_021161.1    | Ca_kabuli_chr02 | 20687212                | TT                              | AA                | 1945905449               |
| SNP_P3_20520_20715726 | NC_021161.1    | Ca_kabuli_chr02 | 20715726                | AA                              | GG                | 1945905451               |



| SNPs IDs              | Chromosome IDs | Chromosomes     | Physical positions (bp) | CDC Frontier (Reference genome) | (Pusa 256 & HPNB) | NCBI SNPdb Accession IDs |
|-----------------------|----------------|-----------------|-------------------------|---------------------------------|-------------------|--------------------------|
| SNP_P3_20521_20715741 | NC_021161.1    | Ca_kabuli_chr02 | 20715741                | AA                              | CC                | 1945905452               |
| SNP_P3_20522_20715765 | NC_021161.1    | Ca_kabuli_chr02 | 20715765                | TT                              | CC                | 1945905454               |
| SNP_P3_20524_20716070 | NC_021161.1    | Ca_kabuli_chr02 | 20716070                | CC                              | AA                | 1945905456               |
| SNP_P3_20525_20716088 | NC_021161.1    | Ca_kabuli_chr02 | 20716088                | TT                              | GG                | 1945905458               |
| SNP_P3_20526_20716111 | NC_021161.1    | Ca_kabuli_chr02 | 20716111                | AA                              | CC                | 1945905460               |
| SNP_P3_20527_20716113 | NC_021161.1    | Ca_kabuli_chr02 | 20716113                | TT                              | AA                | 1945905461               |
| SNP_P3_20528_20716119 | NC_021161.1    | Ca_kabuli_chr02 | 20716119                | AA                              | GG                | 1945905463               |
| SNP_P3_20529_20761847 | NC_021161.1    | Ca_kabuli_chr02 | 20761847                | GG                              | TT                | 1945905465               |
| SNP_P3_20530_20771439 | NC_021161.1    | Ca_kabuli_chr02 | 20771439                | AA                              | GG                | 1945905467               |
| SNP_P3_20531_20771465 | NC_021161.1    | Ca_kabuli_chr02 | 20771465                | AA                              | GG                | 1945905468               |
| SNP_P3_20532_20799481 | NC_021161.1    | Ca_kabuli_chr02 | 20799481                | TT                              | CC                | 1945905470               |
| SNP_P3_20533_20812728 | NC_021161.1    | Ca_kabuli_chr02 | 20812728                | GG                              | AA                | 1945905472               |
| SNP_P3_20534_20814354 | NC_021161.1    | Ca_kabuli_chr02 | 20814354                | AA                              | GG                | 1945905474               |
| SNP_P3_20535_20854115 | NC_021161.1    | Ca_kabuli_chr02 | 20854115                | AA                              | CC                | 1945905476               |
| SNP_P3_20536_20869172 | NC_021161.1    | Ca_kabuli_chr02 | 20869172                | CC                              | TT                | 1945905477               |
| SNP_P3_20537_20911258 | NC_021161.1    | Ca_kabuli_chr02 | 20911258                | AA                              | GG                | 1945905479               |
| SNP_P3_20538_20937792 | NC_021161.1    | Ca_kabuli_chr02 | 20937792                | GG                              | AA                | 1945905481               |
| SNP_P3_20539_20937863 | NC_021161.1    | Ca_kabuli_chr02 | 20937863                | GG                              | AA                | 1945905483               |
| SNP_P3_20540_20937875 | NC_021161.1    | Ca_kabuli_chr02 | 20937875                | TT                              | GG                | 1945905485               |
| SNP_P3_20541_20970685 | NC_021161.1    | Ca_kabuli_chr02 | 20970685                | TT                              | CC                | 1945905486               |
| SNP_P3_20542_20970782 | NC_021161.1    | Ca_kabuli_chr02 | 20970782                | AA                              | CC                | 1945905488               |
| SNP_P3_20543_20970806 | NC_021161.1    | Ca_kabuli_chr02 | 20970806                | GG                              | AA                | 1945905490               |
| SNP_P3_20544_20970848 | NC_021161.1    | Ca_kabuli_chr02 | 20970848                | TT                              | AA                | 1945905492               |
| SNP_P3_20545_20971747 | NC_021161.1    | Ca_kabuli_chr02 | 20971747                | CC                              | GG                | 1945905493               |
| SNP_P3_20546_20998047 | NC_021161.1    | Ca_kabuli_chr02 | 20998047                | AA                              | TT                | 1945905495               |
| SNP_P3_20548_21000336 | NC_021161.1    | Ca_kabuli_chr02 | 21000336                | CC                              | TT                | 1945905497               |
| SNP_P3_20549_21000385 | NC_021161.1    | Ca_kabuli_chr02 | 21000385                | AA                              | GG                | 1945905499               |
| SNP_P3_20550_21000433 | NC_021161.1    | Ca_kabuli_chr02 | 21000433                | TT                              | CC                | 1945905501               |
| SNP_P3_20551_21000680 | NC_021161.1    | Ca_kabuli_chr02 | 21000680                | CC                              | GG                | 1945905502               |
| SNP_P3_20552_21000717 | NC_021161.1    | Ca_kabuli_chr02 | 21000717                | TT                              | GG                | 1945905504               |
| SNP_P3_20553_21013240 | NC_021161.1    | Ca_kabuli_chr02 | 21013240                | AA                              | TT                | 1945905506               |
| SNP_P3_20554_21027416 | NC_021161.1    | Ca_kabuli_chr02 | 21027416                | AA                              | GG                | 1945905508               |
| SNP_P3_20555_21038520 | NC_021161.1    | Ca_kabuli_chr02 | 21038520                | GG                              | TT                | 1945905509               |
| SNP_P3_20556_21085708 | NC_021161.1    | Ca_kabuli_chr02 | 21085708                | GG                              | TT                | 1945905511               |
| SNP_P3_20557_21097104 | NC_021161.1    | Ca_kabuli_chr02 | 21097104                | CC                              | GG                | 1945905513               |
| SNP_P3_20558_21097704 | NC_021161.1    | Ca_kabuli_chr02 | 21097704                | TT                              | CC                | 1945905515               |
| SNP_P3_20559_21140187 | NC_021161.1    | Ca_kabuli_chr02 | 21140187                | GG                              | TT                | 1945905517               |
| SNP_P3_20560_21140188 | NC_021161.1    | Ca_kabuli_chr02 | 21140188                | TT                              | CC                | 1945905518               |
| SNP_P3_20561_21140208 | NC_021161.1    | Ca_kabuli_chr02 | 21140208                | AA                              | GG                | 1945905520               |
| SNP_P3_20562_21140210 | NC_021161.1    | Ca_kabuli_chr02 | 21140210                | AA                              | GG                | 1945905522               |
| SNP_P3_20563_21140224 | NC_021161.1    | Ca_kabuli_chr02 | 21140224                | GG                              | AA                | 1945905524               |
| SNP_P3_20564_21140225 | NC_021161.1    | Ca_kabuli_chr02 | 21140225                | AA                              | GG                | 1945905525               |

| SNPs IDs              | Chromosome IDs | Chromosomes     | Physical positions (bp) | CDC Frontier (Reference genome) | (Pusa 256 & HPNB) | NCBI SNPdb Accession IDs |
|-----------------------|----------------|-----------------|-------------------------|---------------------------------|-------------------|--------------------------|
| SNP_P3_20565_21140249 | NC_021161.1    | Ca_kabuli_chr02 | 21140249                | GG                              | TT                | 1945905527               |
| SNP_P3_20566_21140688 | NC_021161.1    | Ca_kabuli_chr02 | 21140688                | AA                              | GG                | 1945905529               |
| SNP_P3_20567_21161176 | NC_021161.1    | Ca_kabuli_chr02 | 21161176                | AA                              | TT                | 1945905531               |
| SNP_P3_20569_21161332 | NC_021161.1    | Ca_kabuli_chr02 | 21161332                | AA                              | CC                | 1945905533               |
| SNP_P3_20571_21176962 | NC_021161.1    | Ca_kabuli_chr02 | 21176962                | GG                              | AA                | 1945905534               |
| SNP_P3_20572_21176973 | NC_021161.1    | Ca_kabuli_chr02 | 21176973                | AA                              | GG                | 1945905536               |
| SNP_P3_20573_21176983 | NC_021161.1    | Ca_kabuli_chr02 | 21176983                | TT                              | AA                | 1945905538               |
| SNP_P3_20574_21176989 | NC_021161.1    | Ca_kabuli_chr02 | 21176989                | AA                              | CC                | 1945905540               |
| SNP_P3_20575_21177012 | NC_021161.1    | Ca_kabuli_chr02 | 21177012                | AA                              | TT                | 1945905542               |
| SNP_P3_20576_21177018 | NC_021161.1    | Ca_kabuli_chr02 | 21177018                | CC                              | GG                | 1945905543               |
| SNP_P3_20577_21177023 | NC_021161.1    | Ca_kabuli_chr02 | 21177023                | TT                              | AA                | 1945905545               |
| SNP_P3_20578_21177026 | NC_021161.1    | Ca_kabuli_chr02 | 21177026                | AA                              | CC                | 1945905547               |
| SNP_P3_20579_21204788 | NC_021161.1    | Ca_kabuli_chr02 | 21204788                | TT                              | CC                | 1945905549               |
| SNP_P3_20580_21204817 | NC_021161.1    | Ca_kabuli_chr02 | 21204817                | TT                              | CC                | 1945905550               |
| SNP_P3_20581_21205272 | NC_021161.1    | Ca_kabuli_chr02 | 21205272                | TT                              | GG                | 1945905552               |
| SNP_P3_20582_21205324 | NC_021161.1    | Ca_kabuli_chr02 | 21205324                | AA                              | GG                | 1945905554               |
| SNP_P3_20583_21205489 | NC_021161.1    | Ca_kabuli_chr02 | 21205489                | AA                              | CC                | 1945905556               |
| SNP_P3_20584_21208364 | NC_021161.1    | Ca_kabuli_chr02 | 21208364                | TT                              | AA                | 1945905558               |
| SNP_P3_20585_21208370 | NC_021161.1    | Ca_kabuli_chr02 | 21208370                | TT                              | CC                | 1945905559               |
| SNP_P3_20586_21208373 | NC_021161.1    | Ca_kabuli_chr02 | 21208373                | AA                              | GG                | 1945905561               |
| SNP_P3_20587_21208385 | NC_021161.1    | Ca_kabuli_chr02 | 21208385                | TT                              | AA                | 1945905563               |
| SNP_P3_20588_21208418 | NC_021161.1    | Ca_kabuli_chr02 | 21208418                | CC                              | TT                | 1945905565               |
| SNP_P3_20589_21208427 | NC_021161.1    | Ca_kabuli_chr02 | 21208427                | GG                              | AA                | 1945905566               |
| SNP_P3_20590_21208439 | NC_021161.1    | Ca_kabuli_chr02 | 21208439                | TT                              | AA                | 1945905568               |
| SNP_P3_20591_21208463 | NC_021161.1    | Ca_kabuli_chr02 | 21208463                | GG                              | AA                | 1945905570               |
| SNP_P3_20592_21208469 | NC_021161.1    | Ca_kabuli_chr02 | 21208469                | GG                              | AA                | 1945905572               |
| SNP_P3_20593_21208475 | NC_021161.1    | Ca_kabuli_chr02 | 21208475                | CC                              | TT                | 1945905574               |
| SNP_P3_20594_21208622 | NC_021161.1    | Ca_kabuli_chr02 | 21208622                | TT                              | AA                | 1945905575               |
| SNP_P3_20595_21208629 | NC_021161.1    | Ca_kabuli_chr02 | 21208629                | AA                              | GG                | 1945905577               |
| SNP_P3_20596_21208635 | NC_021161.1    | Ca_kabuli_chr02 | 21208635                | TT                              | CC                | 1945905579               |
| SNP_P3_20597_21208637 | NC_021161.1    | Ca_kabuli_chr02 | 21208637                | GG                              | TT                | 1945905581               |
| SNP_P3_20598_21208655 | NC_021161.1    | Ca_kabuli_chr02 | 21208655                | TT                              | CC                | 1945905582               |
| SNP_P3_20599_21208656 | NC_021161.1    | Ca_kabuli_chr02 | 21208656                | CC                              | TT                | 1945905584               |
| SNP_P3_20600_21208658 | NC_021161.1    | Ca_kabuli_chr02 | 21208658                | GG                              | AA                | 1945905586               |
| SNP_P3_20601_21208665 | NC_021161.1    | Ca_kabuli_chr02 | 21208665                | AA                              | GG                | 1945905588               |
| SNP_P3_20602_21208697 | NC_021161.1    | Ca_kabuli_chr02 | 21208697                | GG                              | AA                | 1945905590               |
| SNP_P3_20603_21208729 | NC_021161.1    | Ca_kabuli_chr02 | 21208729                | GG                              | CC                | 1945905591               |
| SNP_P3_20604_21208803 | NC_021161.1    | Ca_kabuli_chr02 | 21208803                | TT                              | AA                | 1945905593               |
| SNP_P3_20605_21208805 | NC_021161.1    | Ca_kabuli_chr02 | 21208805                | AA                              | GG                | 1945905595               |
| SNP_P3_20606_21208895 | NC_021161.1    | Ca_kabuli_chr02 | 21208895                | AA                              | TT                | 1945905597               |
| SNP_P3_20607_21209083 | NC_021161.1    | Ca_kabuli_chr02 | 21209083                | TT                              | CC                | 1945905598               |
| SNP_P3_20608_21246253 | NC_021161.1    | Ca_kabuli_chr02 | 21246253                | TT                              | CC                | 1945905600               |

| SNPs IDs              | Chromosome IDs | Chromosomes     | Physical positions (bp) | CDC Frontier (Reference genome) | (Pusa 256 & HPNB) | NCBI SNPdb Accession IDs |
|-----------------------|----------------|-----------------|-------------------------|---------------------------------|-------------------|--------------------------|
| SNP_P3_20609_21246255 | NC_021161.1    | Ca_kabuli_chr02 | 21246255                | CC                              | AA                | 1945905602               |
| SNP_P3_20610_21262806 | NC_021161.1    | Ca_kabuli_chr02 | 21262806                | CC                              | TT                | 1945905604               |
| SNP_P3_20611_21272089 | NC_021161.1    | Ca_kabuli_chr02 | 21272089                | CC                              | TT                | 1945905606               |
| SNP_P3_20612_21272107 | NC_021161.1    | Ca_kabuli_chr02 | 21272107                | GG                              | AA                | 1945905607               |
| SNP_P3_20613_21272168 | NC_021161.1    | Ca_kabuli_chr02 | 21272168                | TT                              | CC                | 1945905609               |
| SNP_P3_20614_21295107 | NC_021161.1    | Ca_kabuli_chr02 | 21295107                | TT                              | GG                | 1945905611               |
| SNP_P3_20615_21303121 | NC_021161.1    | Ca_kabuli_chr02 | 21303121                | GG                              | AA                | 1945905613               |
| SNP_P3_20616_21303164 | NC_021161.1    | Ca_kabuli_chr02 | 21303164                | AA                              | GG                | 1945905615               |
| SNP_P3_20617_21303216 | NC_021161.1    | Ca_kabuli_chr02 | 21303216                | TT                              | AA                | 1945905616               |
| SNP_P3_20618_21303226 | NC_021161.1    | Ca_kabuli_chr02 | 21303226                | AA                              | GG                | 1945905618               |
| SNP_P3_20619_21303232 | NC_021161.1    | Ca_kabuli_chr02 | 21303232                | TT                              | CC                | 1945905620               |
| SNP_P3_20620_21303281 | NC_021161.1    | Ca_kabuli_chr02 | 21303281                | AA                              | TT                | 1945905622               |
| SNP_P3_20621_21303293 | NC_021161.1    | Ca_kabuli_chr02 | 21303293                | TT                              | CC                | 1945905623               |
| SNP_P3_20622_21303360 | NC_021161.1    | Ca_kabuli_chr02 | 21303360                | AA                              | GG                | 1945905625               |
| SNP_P3_20623_21303362 | NC_021161.1    | Ca_kabuli_chr02 | 21303362                | GG                              | AA                | 1945905627               |
| SNP_P3_20624_21303406 | NC_021161.1    | Ca_kabuli_chr02 | 21303406                | TT                              | CC                | 1945905629               |
| SNP_P3_20625_21303416 | NC_021161.1    | Ca_kabuli_chr02 | 21303416                | TT                              | GG                | 1945905631               |
| SNP_P3_20626_21303435 | NC_021161.1    | Ca_kabuli_chr02 | 21303435                | AA                              | TT                | 1945905632               |
| SNP_P3_20627_21303447 | NC_021161.1    | Ca_kabuli_chr02 | 21303447                | CC                              | TT                | 1945905634               |
| SNP_P3_20628_21303468 | NC_021161.1    | Ca_kabuli_chr02 | 21303468                | CC                              | TT                | 1945905636               |
| SNP_P3_20629_21303504 | NC_021161.1    | Ca_kabuli_chr02 | 21303504                | AA                              | GG                | 1945905638               |
| SNP_P3_20630_21303507 | NC_021161.1    | Ca_kabuli_chr02 | 21303507                | CC                              | TT                | 1945905639               |
| SNP_P3_20631_21303510 | NC_021161.1    | Ca_kabuli_chr02 | 21303510                | GG                              | AA                | 1945905641               |
| SNP_P3_20632_21303611 | NC_021161.1    | Ca_kabuli_chr02 | 21303611                | TT                              | CC                | 1945905643               |
| SNP_P3_20633_21303710 | NC_021161.1    | Ca_kabuli_chr02 | 21303710                | GG                              | AA                | 1945905645               |
| SNP_P3_20634_21303865 | NC_021161.1    | Ca_kabuli_chr02 | 21303865                | GG                              | AA                | 1945905647               |
| SNP_P3_20635_21303902 | NC_021161.1    | Ca_kabuli_chr02 | 21303902                | GG                              | AA                | 1945905648               |
| SNP_P3_20636_21305085 | NC_021161.1    | Ca_kabuli_chr02 | 21305085                | GG                              | AA                | 1945905650               |
| SNP_P3_20637_21305115 | NC_021161.1    | Ca_kabuli_chr02 | 21305115                | TT                              | AA                | 1945905652               |
| SNP_P3_20638_21305146 | NC_021161.1    | Ca_kabuli_chr02 | 21305146                | GG                              | AA                | 1945905654               |
| SNP_P3_20639_21305156 | NC_021161.1    | Ca_kabuli_chr02 | 21305156                | GG                              | AA                | 1945905655               |
| SNP_P3_20640_21305159 | NC_021161.1    | Ca_kabuli_chr02 | 21305159                | CC                              | TT                | 1945905657               |
| SNP_P3_20641_21305163 | NC_021161.1    | Ca_kabuli_chr02 | 21305163                | AA                              | GG                | 1945905659               |
| SNP_P3_20642_21305174 | NC_021161.1    | Ca_kabuli_chr02 | 21305174                | AA                              | GG                | 1945905661               |
| SNP_P3_20643_21305737 | NC_021161.1    | Ca_kabuli_chr02 | 21305737                | AA                              | TT                | 1945905663               |
| SNP_P3_20647_21308765 | NC_021161.1    | Ca_kabuli_chr02 | 21308765                | TT                              | GG                | 1945905664               |
| SNP_P3_20648_21308797 | NC_021161.1    | Ca_kabuli_chr02 | 21308797                | GG                              | AA                | 1945905666               |
| SNP_P3_20649_21308948 | NC_021161.1    | Ca_kabuli_chr02 | 21308948                | CC                              | TT                | 1945905668               |
| SNP_P3_20650_21309174 | NC_021161.1    | Ca_kabuli_chr02 | 21309174                | AA                              | TT                | 1945905670               |
| SNP_P3_20651_21309198 | NC_021161.1    | Ca_kabuli_chr02 | 21309198                | AA                              | CC                | 1945905671               |
| SNP_P3_20652_21309378 | NC_021161.1    | Ca_kabuli_chr02 | 21309378                | CC                              | AA                | 1945905673               |
| SNP_P3_20653_21309429 | NC_021161.1    | Ca_kabuli_chr02 | 21309429                | AA                              | TT                | 1945905675               |

| SNPs IDs              | Chromosome IDs | Chromosomes     | Physical positions (bp) | CDC Frontier (Reference genome) | (Pusa 256 & HPNB) | NCBI SNPdb Accession IDs |
|-----------------------|----------------|-----------------|-------------------------|---------------------------------|-------------------|--------------------------|
| SNP_P3_20654_21309467 | NC_021161.1    | Ca_kabuli_chr02 | 21309467                | AA                              | TT                | 1945905677               |
| SNP_P3_20655_21309512 | NC_021161.1    | Ca_kabuli_chr02 | 21309512                | TT                              | CC                | 1945905679               |
| SNP_P3_20656_21309613 | NC_021161.1    | Ca_kabuli_chr02 | 21309613                | AA                              | GG                | 1945905680               |
| SNP_P3_20657_21309658 | NC_021161.1    | Ca_kabuli_chr02 | 21309658                | AA                              | GG                | 1945905682               |
| SNP_P3_20658_21309705 | NC_021161.1    | Ca_kabuli_chr02 | 21309705                | AA                              | GG                | 1945905684               |
| SNP_P3_20659_21309735 | NC_021161.1    | Ca_kabuli_chr02 | 21309735                | TT                              | CC                | 1945905686               |
| SNP_P3_20661_21310017 | NC_021161.1    | Ca_kabuli_chr02 | 21310017                | CC                              | TT                | 1945905687               |
| SNP_P3_20662_21310027 | NC_021161.1    | Ca_kabuli_chr02 | 21310027                | TT                              | CC                | 1945905689               |
| SNP_P3_20663_21310041 | NC_021161.1    | Ca_kabuli_chr02 | 21310041                | TT                              | CC                | 1945905691               |
| SNP_P3_20664_21310066 | NC_021161.1    | Ca_kabuli_chr02 | 21310066                | GG                              | AA                | 1945905693               |
| SNP_P3_20665_21310088 | NC_021161.1    | Ca_kabuli_chr02 | 21310088                | TT                              | CC                | 1945905695               |
| SNP_P3_20666_21310624 | NC_021161.1    | Ca_kabuli_chr02 | 21310624                | TT                              | AA                | 1945905696               |
| SNP_P3_20667_21310638 | NC_021161.1    | Ca_kabuli_chr02 | 21310638                | CC                              | TT                | 1945905698               |
| SNP_P3_20668_21312134 | NC_021161.1    | Ca_kabuli_chr02 | 21312134                | GG                              | AA                | 1945905700               |
| SNP_P3_20669_21313765 | NC_021161.1    | Ca_kabuli_chr02 | 21313765                | AA                              | CC                | 1945905702               |
| SNP_P3_20670_21313901 | NC_021161.1    | Ca_kabuli_chr02 | 21313901                | TT                              | CC                | 1945905703               |
| SNP_P3_20671_21314076 | NC_021161.1    | Ca_kabuli_chr02 | 21314076                | GG                              | CC                | 1945905705               |
| SNP_P3_20672_21314192 | NC_021161.1    | Ca_kabuli_chr02 | 21314192                | CC                              | TT                | 1945905707               |
| SNP_P3_20674_21314644 | NC_021161.1    | Ca_kabuli_chr02 | 21314644                | TT                              | GG                | 1945905709               |
| SNP_P3_20675_21314952 | NC_021161.1    | Ca_kabuli_chr02 | 21314952                | AA                              | TT                | 1945905711               |
| SNP_P3_20676_21314992 | NC_021161.1    | Ca_kabuli_chr02 | 21314992                | AA                              | TT                | 1945905712               |
| SNP_P3_20677_21315061 | NC_021161.1    | Ca_kabuli_chr02 | 21315061                | AA                              | TT                | 1945905714               |
| SNP_P3_20678_21315322 | NC_021161.1    | Ca_kabuli_chr02 | 21315322                | AA                              | GG                | 1945905716               |
| SNP_P3_20679_21315386 | NC_021161.1    | Ca_kabuli_chr02 | 21315386                | TT                              | AA                | 1945905718               |
| SNP_P3_20680_21317521 | NC_021161.1    | Ca_kabuli_chr02 | 21317521                | AA                              | GG                | 1945905720               |
| SNP_P3_20681_21318214 | NC_021161.1    | Ca_kabuli_chr02 | 21318214                | TT                              | CC                | 1945905721               |
| SNP_P3_20682_21318506 | NC_021161.1    | Ca_kabuli_chr02 | 21318506                | TT                              | GG                | 1945905723               |
| SNP_P3_20683_21318936 | NC_021161.1    | Ca_kabuli_chr02 | 21318936                | TT                              | AA                | 1945905725               |
| SNP_P3_20684_21319310 | NC_021161.1    | Ca_kabuli_chr02 | 21319310                | CC                              | AA                | 1945905727               |
| SNP_P3_20685_21321298 | NC_021161.1    | Ca_kabuli_chr02 | 21321298                | AA                              | CC                | 1945905728               |
| SNP_P3_20686_21321583 | NC_021161.1    | Ca_kabuli_chr02 | 21321583                | GG                              | AA                | 1945905730               |
| SNP_P3_20687_21321727 | NC_021161.1    | Ca_kabuli_chr02 | 21321727                | AA                              | GG                | 1945905732               |
| SNP_P3_20688_21324561 | NC_021161.1    | Ca_kabuli_chr02 | 21324561                | AA                              | GG                | 1945905734               |
| SNP_P3_20689_21324564 | NC_021161.1    | Ca_kabuli_chr02 | 21324564                | GG                              | AA                | 1945905736               |
| SNP_P3_20690_21355891 | NC_021161.1    | Ca_kabuli_chr02 | 21355891                | TT                              | CC                | 1945905737               |
| SNP_P3_20691_21420985 | NC_021161.1    | Ca_kabuli_chr02 | 21420985                | TT                              | GG                | 1945905739               |
| SNP_P3_20692_21468641 | NC_021161.1    | Ca_kabuli_chr02 | 21468641                | AA                              | TT                | 1945905741               |
| SNP_P3_20693_21491167 | NC_021161.1    | Ca_kabuli_chr02 | 21491167                | TT                              | AA                | 1945905743               |
| SNP_P3_20694_21491170 | NC_021161.1    | Ca_kabuli_chr02 | 21491170                | TT                              | AA                | 1945905744               |
| SNP_P3_20695_21524332 | NC_021161.1    | Ca_kabuli_chr02 | 21524332                | CC                              | GG                | 1945905746               |
| SNP_P3_20696_21524427 | NC_021161.1    | Ca_kabuli_chr02 | 21524427                | TT                              | GG                | 1945905748               |
| SNP_P3_20697_21524440 | NC_021161.1    | Ca_kabuli_chr02 | 21524440                | AA                              | GG                | 1945905750               |

| SNPs IDs              | Chromosome IDs | Chromosomes     | Physical positions (bp) | CDC Frontier (Reference genome) | (Pusa 256 & HPNB) | NCBI SNPdb Accession IDs |
|-----------------------|----------------|-----------------|-------------------------|---------------------------------|-------------------|--------------------------|
| SNP_P3_20698_21535975 | NC_021161.1    | Ca_kabuli_chr02 | 21535975                | AA                              | GG                | 1945905752               |
| SNP_P3_20699_21536027 | NC_021161.1    | Ca_kabuli_chr02 | 21536027                | GG                              | AA                | 1945905753               |
| SNP_P3_20700_21536337 | NC_021161.1    | Ca_kabuli_chr02 | 21536337                | TT                              | CC                | 1945905755               |
| SNP_P3_20701_21536342 | NC_021161.1    | Ca_kabuli_chr02 | 21536342                | TT                              | CC                | 1945905757               |
| SNP_P3_20702_21536461 | NC_021161.1    | Ca_kabuli_chr02 | 21536461                | AA                              | GG                | 1945905759               |
| SNP_P3_20703_21536526 | NC_021161.1    | Ca_kabuli_chr02 | 21536526                | AA                              | GG                | 1945905761               |
| SNP_P3_20704_21537510 | NC_021161.1    | Ca_kabuli_chr02 | 21537510                | CC                              | TT                | 1945905762               |
| SNP_P3_20705_21537511 | NC_021161.1    | Ca_kabuli_chr02 | 21537511                | TT                              | CC                | 1945905764               |
| SNP_P3_20706_21537513 | NC_021161.1    | Ca_kabuli_chr02 | 21537513                | CC                              | TT                | 1945905766               |
| SNP_P3_20707_21537517 | NC_021161.1    | Ca_kabuli_chr02 | 21537517                | GG                              | AA                | 1945905768               |
| SNP_P3_20708_21537521 | NC_021161.1    | Ca_kabuli_chr02 | 21537521                | CC                              | TT                | 1945905769               |
| SNP_P3_20709_21537524 | NC_021161.1    | Ca_kabuli_chr02 | 21537524                | TT                              | GG                | 1945905771               |
| SNP_P3_20710_21537922 | NC_021161.1    | Ca_kabuli_chr02 | 21537922                | AA                              | TT                | 1945905773               |
| SNP_P3_20711_21537944 | NC_021161.1    | Ca_kabuli_chr02 | 21537944                | AA                              | GG                | 1945905775               |
| SNP_P3_20712_21538258 | NC_021161.1    | Ca_kabuli_chr02 | 21538258                | TT                              | CC                | 1945905777               |
| SNP_P3_20713_21538462 | NC_021161.1    | Ca_kabuli_chr02 | 21538462                | AA                              | GG                | 1945905778               |
| SNP_P3_20714_21538526 | NC_021161.1    | Ca_kabuli_chr02 | 21538526                | AA                              | GG                | 1945905780               |
| SNP_P3_20715_21538559 | NC_021161.1    | Ca_kabuli_chr02 | 21538559                | AA                              | GG                | 1945905782               |
| SNP_P3_20716_21538562 | NC_021161.1    | Ca_kabuli_chr02 | 21538562                | AA                              | GG                | 1945905784               |
| SNP_P3_20717_21538652 | NC_021161.1    | Ca_kabuli_chr02 | 21538652                | AA                              | GG                | 1945905785               |
| SNP_P3_20718_21555300 | NC_021161.1    | Ca_kabuli_chr02 | 21555300                | GG                              | AA                | 1945905787               |
| SNP_P3_20719_21577937 | NC_021161.1    | Ca_kabuli_chr02 | 21577937                | TT                              | CC                | 1945905789               |
| SNP_P3_20720_21578411 | NC_021161.1    | Ca_kabuli_chr02 | 21578411                | AA                              | GG                | 1945905791               |
| SNP_P3_20721_21667217 | NC_021161.1    | Ca_kabuli_chr02 | 21667217                | AA                              | TT                | 1945905793               |
| SNP_P3_20722_21667246 | NC_021161.1    | Ca_kabuli_chr02 | 21667246                | CC                              | TT                | 1945905794               |
| SNP_P3_20723_21667255 | NC_021161.1    | Ca_kabuli_chr02 | 21667255                | GG                              | CC                | 1945905796               |
| SNP_P3_20724_21673192 | NC_021161.1    | Ca_kabuli_chr02 | 21673192                | TT                              | GG                | 1945905798               |
| SNP_P3_20725_21675194 | NC_021161.1    | Ca_kabuli_chr02 | 21675194                | TT                              | AA                | 1945905800               |
| SNP_P3_20726_21684565 | NC_021161.1    | Ca_kabuli_chr02 | 21684565                | TT                              | CC                | 1945905801               |
| SNP_P3_20727_21684570 | NC_021161.1    | Ca_kabuli_chr02 | 21684570                | TT                              | CC                | 1945905803               |
| SNP_P3_20728_21684574 | NC_021161.1    | Ca_kabuli_chr02 | 21684574                | AA                              | TT                | 1945905805               |
| SNP_P3_20729_21684599 | NC_021161.1    | Ca_kabuli_chr02 | 21684599                | GG                              | AA                | 1945905807               |
| SNP_P3_20730_21685734 | NC_021161.1    | Ca_kabuli_chr02 | 21685734                | TT                              | AA                | 1945905809               |
| SNP_P3_20731_21685945 | NC_021161.1    | Ca_kabuli_chr02 | 21685945                | AA                              | CC                | 1945905810               |
| SNP_P3_20732_21685968 | NC_021161.1    | Ca_kabuli_chr02 | 21685968                | AA                              | CC                | 1945905812               |
| SNP_P3_20736_21757833 | NC_021161.1    | Ca_kabuli_chr02 | 21757833                | CC                              | AA                | 1945905814               |
| SNP_P3_20737_21757845 | NC_021161.1    | Ca_kabuli_chr02 | 21757845                | CC                              | TT                | 1945905816               |
| SNP_P3_20738_21761755 | NC_021161.1    | Ca_kabuli_chr02 | 21761755                | TT                              | CC                | 1945905817               |
| SNP_P3_20739_21767500 | NC_021161.1    | Ca_kabuli_chr02 | 21767500                | TT                              | CC                | 1945905819               |
| SNP_P3_20740_21767611 | NC_021161.1    | Ca_kabuli_chr02 | 21767611                | CC                              | TT                | 1945905821               |
| SNP_P3_20741_21767641 | NC_021161.1    | Ca_kabuli_chr02 | 21767641                | TT                              | AA                | 1945905823               |
| SNP_P3_20742_21767709 | NC_021161.1    | Ca_kabuli_chr02 | 21767709                | CC                              | AA                | 1945905825               |

| SNPs IDs              | Chromosome IDs | Chromosomes     | Physical positions (bp) | CDC Frontier (Reference genome) | (Pusa 256 & HPNB) | NCBI SNPdb Accession IDs |
|-----------------------|----------------|-----------------|-------------------------|---------------------------------|-------------------|--------------------------|
| SNP_P3_20743_21767906 | NC_021161.1    | Ca_kabuli_chr02 | 21767906                | CC                              | TT                | 1945905826               |
| SNP_P3_20744_21767996 | NC_021161.1    | Ca_kabuli_chr02 | 21767996                | AA                              | CC                | 1945905828               |
| SNP_P3_20745_21768008 | NC_021161.1    | Ca_kabuli_chr02 | 21768008                | CC                              | AA                | 1945905830               |
| SNP_P3_20746_21774392 | NC_021161.1    | Ca_kabuli_chr02 | 21774392                | AA                              | GG                | 1945905832               |
| SNP_P3_20747_21774772 | NC_021161.1    | Ca_kabuli_chr02 | 21774772                | AA                              | GG                | 1945905833               |
| SNP_P3_20748_21774779 | NC_021161.1    | Ca_kabuli_chr02 | 21774779                | CC                              | TT                | 1945905835               |
| SNP_P3_20749_21778722 | NC_021161.1    | Ca_kabuli_chr02 | 21778722                | CC                              | AA                | 1945905837               |
| SNP_P3_20750_21778734 | NC_021161.1    | Ca_kabuli_chr02 | 21778734                | GG                              | TT                | 1945905839               |
| SNP_P3_20751_21778738 | NC_021161.1    | Ca_kabuli_chr02 | 21778738                | AA                              | GG                | 1945905841               |
| SNP_P3_20752_21784068 | NC_021161.1    | Ca_kabuli_chr02 | 21784068                | TT                              | CC                | 1945905842               |
| SNP_P3_20756_21902467 | NC_021161.1    | Ca_kabuli_chr02 | 21902467                | TT                              | CC                | 1945905844               |
| SNP_P3_20757_21902569 | NC_021161.1    | Ca_kabuli_chr02 | 21902569                | GG                              | AA                | 1945905846               |
| SNP_P3_20758_21902833 | NC_021161.1    | Ca_kabuli_chr02 | 21902833                | AA                              | GG                | 1945905848               |
| SNP_P3_20759_21902887 | NC_021161.1    | Ca_kabuli_chr02 | 21902887                | AA                              | GG                | 1945905850               |
| SNP_P3_20760_21902916 | NC_021161.1    | Ca_kabuli_chr02 | 21902916                | GG                              | AA                | 1945905851               |
| SNP_P3_20761_21902926 | NC_021161.1    | Ca_kabuli_chr02 | 21902926                | TT                              | CC                | 1945905853               |
| SNP_P3_20762_21928404 | NC_021161.1    | Ca_kabuli_chr02 | 21928404                | CC                              | TT                | 1945905855               |
| SNP_P3_20763_21928409 | NC_021161.1    | Ca_kabuli_chr02 | 21928409                | AA                              | CC                | 1945905857               |
| SNP_P3_20764_21928424 | NC_021161.1    | Ca_kabuli_chr02 | 21928424                | AA                              | CC                | 1945905858               |
| SNP_P3_20765_21930432 | NC_021161.1    | Ca_kabuli_chr02 | 21930432                | AA                              | GG                | 1945905860               |
| SNP_P3_20766_21943761 | NC_021161.1    | Ca_kabuli_chr02 | 21943761                | AA                              | GG                | 1945905862               |
| SNP_P3_20767_21943774 | NC_021161.1    | Ca_kabuli_chr02 | 21943774                | TT                              | GG                | 1945905864               |
| SNP_P3_20768_21948758 | NC_021161.1    | Ca_kabuli_chr02 | 21948758                | GG                              | AA                | 1945905866               |
| SNP_P3_20769_21956077 | NC_021161.1    | Ca_kabuli_chr02 | 21956077                | TT                              | CC                | 1945905867               |
| SNP_P3_20770_21956120 | NC_021161.1    | Ca_kabuli_chr02 | 21956120                | TT                              | CC                | 1945905869               |
| SNP_P3_20771_21956372 | NC_021161.1    | Ca_kabuli_chr02 | 21956372                | CC                              | AA                | 1945905871               |
| SNP_P3_20772_21956384 | NC_021161.1    | Ca_kabuli_chr02 | 21956384                | TT                              | AA                | 1945905873               |
| SNP_P3_20773_21956415 | NC_021161.1    | Ca_kabuli_chr02 | 21956415                | CC                              | AA                | 1945905874               |
| SNP_P3_20774_21960131 | NC_021161.1    | Ca_kabuli_chr02 | 21960131                | GG                              | AA                | 1945905876               |
| SNP_P3_20776_21997721 | NC_021161.1    | Ca_kabuli_chr02 | 21997721                | GG                              | AA                | 1945905878               |
| SNP_P3_20777_21998268 | NC_021161.1    | Ca_kabuli_chr02 | 21998268                | TT                              | CC                | 1945905880               |
| SNP_P3_20778_21998753 | NC_021161.1    | Ca_kabuli_chr02 | 21998753                | AA                              | CC                | 1945905882               |
| SNP_P3_20779_21998754 | NC_021161.1    | Ca_kabuli_chr02 | 21998754                | TT                              | CC                | 1945905883               |
| SNP_P3_20780_21999067 | NC_021161.1    | Ca_kabuli_chr02 | 21999067                | GG                              | AA                | 1945905885               |
| SNP_P3_20781_21999072 | NC_021161.1    | Ca_kabuli_chr02 | 21999072                | CC                              | TT                | 1945905887               |
| SNP_P3_20782_21999324 | NC_021161.1    | Ca_kabuli_chr02 | 21999324                | GG                              | AA                | 1945905889               |
| SNP_P3_20783_21999325 | NC_021161.1    | Ca_kabuli_chr02 | 21999325                | TT                              | CC                | 1945905890               |
| SNP_P3_20784_21999343 | NC_021161.1    | Ca_kabuli_chr02 | 21999343                | TT                              | AA                | 1945905892               |
| SNP_P3_20785_21999467 | NC_021161.1    | Ca_kabuli_chr02 | 21999467                | AA                              | GG                | 1945905894               |
| SNP_P3_20786_22045806 | NC_021161.1    | Ca_kabuli_chr02 | 22045806                | TT                              | CC                | 1945905896               |
| SNP_P3_20787_22055194 | NC_021161.1    | Ca_kabuli_chr02 | 22055194                | AA                              | TT                | 1945905898               |
| SNP_P3_20788_22064932 | NC_021161.1    | Ca_kabuli_chr02 | 22064932                | TT                              | CC                | 1945905899               |

| SNPs IDs              | Chromosome IDs | Chromosomes     | Physical positions (bp) | CDC Frontier (Reference genome) | (Pusa 256 & HPNB) | NCBI SNPdb Accession IDs |
|-----------------------|----------------|-----------------|-------------------------|---------------------------------|-------------------|--------------------------|
| SNP_P3_20789_22064948 | NC_021161.1    | Ca_kabuli_chr02 | 22064948                | TT                              | GG                | 1945905901               |
| SNP_P3_20790_22064962 | NC_021161.1    | Ca_kabuli_chr02 | 22064962                | TT                              | CC                | 1945905903               |
| SNP_P3_20791_22065018 | NC_021161.1    | Ca_kabuli_chr02 | 22065018                | TT                              | AA                | 1945905905               |
| SNP_P3_20792_22065261 | NC_021161.1    | Ca_kabuli_chr02 | 22065261                | GG                              | AA                | 1945905906               |
| SNP_P3_20793_22065308 | NC_021161.1    | Ca_kabuli_chr02 | 22065308                | GG                              | CC                | 1945905908               |
| SNP_P3_20794_22065399 | NC_021161.1    | Ca_kabuli_chr02 | 22065399                | GG                              | AA                | 1945905910               |
| SNP_P3_20795_22065545 | NC_021161.1    | Ca_kabuli_chr02 | 22065545                | GG                              | AA                | 1945905912               |
| SNP_P3_20796_22065558 | NC_021161.1    | Ca_kabuli_chr02 | 22065558                | CC                              | TT                | 1945905914               |
| SNP_P3_20797_22068011 | NC_021161.1    | Ca_kabuli_chr02 | 22068011                | CC                              | AA                | 1945905915               |
| SNP_P3_20798_22068025 | NC_021161.1    | Ca_kabuli_chr02 | 22068025                | TT                              | GG                | 1945905917               |
| SNP_P3_20799_22068088 | NC_021161.1    | Ca_kabuli_chr02 | 22068088                | CC                              | TT                | 1945905919               |
| SNP_P3_20800_22089319 | NC_021161.1    | Ca_kabuli_chr02 | 22089319                | CC                              | TT                | 1945905921               |
| SNP_P3_20801_22111422 | NC_021161.1    | Ca_kabuli_chr02 | 22111422                | GG                              | TT                | 1945905923               |
| SNP_P3_20803_22167164 | NC_021161.1    | Ca_kabuli_chr02 | 22167164                | TT                              | AA                | 1945905924               |
| SNP_P3_20804_22167165 | NC_021161.1    | Ca_kabuli_chr02 | 22167165                | TT                              | AA                | 1945905926               |
| SNP_P3_20805_22195346 | NC_021161.1    | Ca_kabuli_chr02 | 22195346                | AA                              | GG                | 1945905928               |
| SNP_P3_20806_22196616 | NC_021161.1    | Ca_kabuli_chr02 | 22196616                | GG                              | AA                | 1945905930               |
| SNP_P3_20807_22196671 | NC_021161.1    | Ca_kabuli_chr02 | 22196671                | TT                              | AA                | 1945905931               |
| SNP_P3_20808_22200734 | NC_021161.1    | Ca_kabuli_chr02 | 22200734                | GG                              | AA                | 1945905933               |
| SNP_P3_20809_22202134 | NC_021161.1    | Ca_kabuli_chr02 | 22202134                | AA                              | GG                | 1945905935               |
| SNP_P3_20810_22202173 | NC_021161.1    | Ca_kabuli_chr02 | 22202173                | AA                              | TT                | 1945905937               |
| SNP_P3_20811_22202179 | NC_021161.1    | Ca_kabuli_chr02 | 22202179                | AA                              | GG                | 1945905939               |
| SNP_P3_20812_22202206 | NC_021161.1    | Ca_kabuli_chr02 | 22202206                | GG                              | AA                | 1945905940               |
| SNP_P3_20813_22202207 | NC_021161.1    | Ca_kabuli_chr02 | 22202207                | CC                              | AA                | 1945905942               |
| SNP_P3_20814_22202209 | NC_021161.1    | Ca_kabuli_chr02 | 22202209                | TT                              | GG                | 1945905944               |
| SNP_P3_20815_22202215 | NC_021161.1    | Ca_kabuli_chr02 | 22202215                | CC                              | GG                | 1945905946               |
| SNP_P3_20816_22202230 | NC_021161.1    | Ca_kabuli_chr02 | 22202230                | CC                              | TT                | 1945905947               |
| SNP_P3_20817_22202240 | NC_021161.1    | Ca_kabuli_chr02 | 22202240                | TT                              | GG                | 1945905949               |
| SNP_P3_20818_22202266 | NC_021161.1    | Ca_kabuli_chr02 | 22202266                | TT                              | CC                | 1945905951               |
| SNP_P3_20819_22202272 | NC_021161.1    | Ca_kabuli_chr02 | 22202272                | TT                              | CC                | 1945905953               |
| SNP_P3_20820_22202282 | NC_021161.1    | Ca_kabuli_chr02 | 22202282                | TT                              | CC                | 1945905955               |
| SNP_P3_20821_22202402 | NC_021161.1    | Ca_kabuli_chr02 | 22202402                | AA                              | CC                | 1945905956               |
| SNP_P3_20822_22202404 | NC_021161.1    | Ca_kabuli_chr02 | 22202404                | AA                              | GG                | 1945905958               |
| SNP_P3_20823_22202518 | NC_021161.1    | Ca_kabuli_chr02 | 22202518                | GG                              | TT                | 1945905960               |
| SNP_P3_20824_22202550 | NC_021161.1    | Ca_kabuli_chr02 | 22202550                | CC                              | TT                | 1945905962               |
| SNP_P3_20825_22202596 | NC_021161.1    | Ca_kabuli_chr02 | 22202596                | CC                              | TT                | 1945905963               |
| SNP_P3_20826_22204462 | NC_021161.1    | Ca_kabuli_chr02 | 22204462                | CC                              | TT                | 1945905965               |
| SNP_P3_20827_22204612 | NC_021161.1    | Ca_kabuli_chr02 | 22204612                | GG                              | AA                | 1945905967               |
| SNP_P3_20828_22215614 | NC_021161.1    | Ca_kabuli_chr02 | 22215614                | AA                              | TT                | 1945905969               |
| SNP_P3_20829_22215618 | NC_021161.1    | Ca_kabuli_chr02 | 22215618                | AA                              | TT                | 1945905971               |
| SNP_P3_20830_22235495 | NC_021161.1    | Ca_kabuli_chr02 | 22235495                | TT                              | CC                | 1945905972               |
| SNP_P3_20831_22284811 | NC_021161.1    | Ca_kabuli_chr02 | 22284811                | AA                              | GG                | 1945905974               |

| SNPs IDs              | Chromosome IDs | Chromosomes     | Physical positions (bp) | CDC Frontier (Reference genome) | (Pusa 256 & HPNB) | NCBI SNPdb Accession IDs |
|-----------------------|----------------|-----------------|-------------------------|---------------------------------|-------------------|--------------------------|
| SNP_P3_20832_22284879 | NC_021161.1    | Ca_kabuli_chr02 | 22284879                | CC                              | TT                | 1945905976               |
| SNP_P3_20833_22284966 | NC_021161.1    | Ca_kabuli_chr02 | 22284966                | AA                              | GG                | 1945905978               |
| SNP_P3_20834_22285071 | NC_021161.1    | Ca_kabuli_chr02 | 22285071                | AA                              | GG                | 1945905979               |
| SNP_P3_20835_22285135 | NC_021161.1    | Ca_kabuli_chr02 | 22285135                | AA                              | GG                | 1945905981               |
| SNP_P3_20836_22285145 | NC_021161.1    | Ca_kabuli_chr02 | 22285145                | TT                              | CC                | 1945905983               |
| SNP_P3_20837_22285174 | NC_021161.1    | Ca_kabuli_chr02 | 22285174                | TT                              | CC                | 1945905985               |
| SNP_P3_20838_22285324 | NC_021161.1    | Ca_kabuli_chr02 | 22285324                | AA                              | CC                | 1945905987               |
| SNP_P3_20839_22285352 | NC_021161.1    | Ca_kabuli_chr02 | 22285352                | AA                              | GG                | 1945905988               |
| SNP_P3_20841_22331987 | NC_021161.1    | Ca_kabuli_chr02 | 22331987                | AA                              | GG                | 1945905990               |
| SNP_P3_20842_22359602 | NC_021161.1    | Ca_kabuli_chr02 | 22359602                | GG                              | CC                | 1945905992               |
| SNP_P3_20843_22367950 | NC_021161.1    | Ca_kabuli_chr02 | 22367950                | TT                              | CC                | 1945905994               |
| SNP_P3_20844_22377578 | NC_021161.1    | Ca_kabuli_chr02 | 22377578                | CC                              | AA                | 1945905995               |
| SNP_P3_20845_22412192 | NC_021161.1    | Ca_kabuli_chr02 | 22412192                | TT                              | CC                | 1945905997               |
| SNP_P3_20846_22412195 | NC_021161.1    | Ca_kabuli_chr02 | 22412195                | GG                              | AA                | 1945905999               |
| SNP_P3_20847_22451474 | NC_021161.1    | Ca_kabuli_chr02 | 22451474                | CC                              | TT                | 1945906001               |
| SNP_P3_20848_22455625 | NC_021161.1    | Ca_kabuli_chr02 | 22455625                | CC                              | TT                | 1945906003               |
| SNP_P3_20849_22455658 | NC_021161.1    | Ca_kabuli_chr02 | 22455658                | TT                              | CC                | 1945906004               |
| SNP_P3_20850_22455704 | NC_021161.1    | Ca_kabuli_chr02 | 22455704                | CC                              | GG                | 1945906006               |
| SNP_P3_20852_22456780 | NC_021161.1    | Ca_kabuli_chr02 | 22456780                | AA                              | GG                | 1945906008               |
| SNP_P3_20853_22456800 | NC_021161.1    | Ca_kabuli_chr02 | 22456800                | GG                              | CC                | 1945906010               |
| SNP_P3_20855_22482091 | NC_021161.1    | Ca_kabuli_chr02 | 22482091                | AA                              | GG                | 1945906012               |
| SNP_P3_20856_22482112 | NC_021161.1    | Ca_kabuli_chr02 | 22482112                | AA                              | GG                | 1945906013               |
| SNP_P3_20857_22482461 | NC_021161.1    | Ca_kabuli_chr02 | 22482461                | TT                              | GG                | 1945906015               |
| SNP_P3_20858_22482510 | NC_021161.1    | Ca_kabuli_chr02 | 22482510                | TT                              | CC                | 1945906017               |
| SNP_P3_20859_22482511 | NC_021161.1    | Ca_kabuli_chr02 | 22482511                | GG                              | AA                | 1945906019               |
| SNP_P3_20860_22482541 | NC_021161.1    | Ca_kabuli_chr02 | 22482541                | TT                              | GG                | 1945906020               |
| SNP_P3_20861_22482559 | NC_021161.1    | Ca_kabuli_chr02 | 22482559                | CC                              | AA                | 1945906022               |
| SNP_P3_20862_22482563 | NC_021161.1    | Ca_kabuli_chr02 | 22482563                | TT                              | AA                | 1945906024               |
| SNP_P3_20863_22482569 | NC_021161.1    | Ca_kabuli_chr02 | 22482569                | TT                              | CC                | 1945906026               |
| SNP_P3_20864_22482573 | NC_021161.1    | Ca_kabuli_chr02 | 22482573                | GG                              | AA                | 1945906028               |
| SNP_P3_20865_22482592 | NC_021161.1    | Ca_kabuli_chr02 | 22482592                | TT                              | GG                | 1945906029               |
| SNP_P3_20866_22482844 | NC_021161.1    | Ca_kabuli_chr02 | 22482844                | AA                              | TT                | 1945906031               |
| SNP_P3_20867_22482884 | NC_021161.1    | Ca_kabuli_chr02 | 22482884                | TT                              | GG                | 1945906033               |
| SNP_P3_20868_22482889 | NC_021161.1    | Ca_kabuli_chr02 | 22482889                | TT                              | CC                | 1945906035               |
| SNP_P3_20869_22482932 | NC_021161.1    | Ca_kabuli_chr02 | 22482932                | AA                              | GG                | 1945906036               |
| SNP_P3_20873_22579438 | NC_021161.1    | Ca_kabuli_chr02 | 22579438                | TT                              | CC                | 1945906038               |
| SNP_P3_20874_22579529 | NC_021161.1    | Ca_kabuli_chr02 | 22579529                | TT                              | AA                | 1945906040               |
| SNP_P3_20876_22585041 | NC_021161.1    | Ca_kabuli_chr02 | 22585041                | CC                              | AA                | 1945906042               |
| SNP_P3_20877_22585057 | NC_021161.1    | Ca_kabuli_chr02 | 22585057                | TT                              | CC                | 1945906044               |
| SNP_P3_20878_22585356 | NC_021161.1    | Ca_kabuli_chr02 | 22585356                | AA                              | GG                | 1945906045               |
| SNP_P3_20879_22585358 | NC_021161.1    | Ca_kabuli_chr02 | 22585358                | AA                              | GG                | 1945906047               |
| SNP_P3_20880_22585363 | NC_021161.1    | Ca_kabuli_chr02 | 22585363                | TT                              | CC                | 1945906049               |



| SNPs IDs              | Chromosome IDs | Chromosomes     | Physical positions (bp) | CDC Frontier (Reference genome) | (Pusa 256 & HPNB) | NCBI SNPdb Accession IDs |
|-----------------------|----------------|-----------------|-------------------------|---------------------------------|-------------------|--------------------------|
| SNP_P3_20881_22585398 | NC_021161.1    | Ca_kabuli_chr02 | 22585398                | AA                              | GG                | 1945906051               |
| SNP_P3_20882_22588899 | NC_021161.1    | Ca_kabuli_chr02 | 22588899                | TT                              | CC                | 1945906052               |
| SNP_P3_20883_22590652 | NC_021161.1    | Ca_kabuli_chr02 | 22590652                | TT                              | CC                | 1945906054               |
| SNP_P3_20884_22602017 | NC_021161.1    | Ca_kabuli_chr02 | 22602017                | CC                              | TT                | 1945906056               |
| SNP_P3_20885_22602326 | NC_021161.1    | Ca_kabuli_chr02 | 22602326                | CC                              | TT                | 1945906058               |
| SNP_P3_20886_22602403 | NC_021161.1    | Ca_kabuli_chr02 | 22602403                | TT                              | AA                | 1945906060               |
| SNP_P3_20887_22626262 | NC_021161.1    | Ca_kabuli_chr02 | 22626262                | GG                              | AA                | 1945906061               |
| SNP_P3_20888_22637893 | NC_021161.1    | Ca_kabuli_chr02 | 22637893                | GG                              | CC                | 1945906063               |
| SNP_P3_20889_22643815 | NC_021161.1    | Ca_kabuli_chr02 | 22643815                | TT                              | AA                | 1945906065               |
| SNP_P3_20890_22643824 | NC_021161.1    | Ca_kabuli_chr02 | 22643824                | TT                              | AA                | 1945906067               |
| SNP_P3_20891_22643851 | NC_021161.1    | Ca_kabuli_chr02 | 22643851                | AA                              | GG                | 1945906068               |
| SNP_P3_20892_22643896 | NC_021161.1    | Ca_kabuli_chr02 | 22643896                | TT                              | CC                | 1945906070               |
| SNP_P3_20893_22643995 | NC_021161.1    | Ca_kabuli_chr02 | 22643995                | TT                              | CC                | 1945906072               |
| SNP_P3_20894_22643998 | NC_021161.1    | Ca_kabuli_chr02 | 22643998                | TT                              | CC                | 1945906074               |
| SNP_P3_20895_22644007 | NC_021161.1    | Ca_kabuli_chr02 | 22644007                | AA                              | TT                | 1945906076               |
| SNP_P3_20896_22644162 | NC_021161.1    | Ca_kabuli_chr02 | 22644162                | TT                              | AA                | 1945906077               |
| SNP_P3_20897_22644177 | NC_021161.1    | Ca_kabuli_chr02 | 22644177                | AA                              | GG                | 1945906079               |
| SNP_P3_20898_22644213 | NC_021161.1    | Ca_kabuli_chr02 | 22644213                | GG                              | TT                | 1945906081               |
| SNP_P3_20899_22644231 | NC_021161.1    | Ca_kabuli_chr02 | 22644231                | AA                              | GG                | 1945906083               |
| SNP_P3_20900_22644238 | NC_021161.1    | Ca_kabuli_chr02 | 22644238                | TT                              | GG                | 1945906085               |
| SNP_P3_20901_22644358 | NC_021161.1    | Ca_kabuli_chr02 | 22644358                | CC                              | TT                | 1945906086               |
| SNP_P3_20902_22644374 | NC_021161.1    | Ca_kabuli_chr02 | 22644374                | TT                              | CC                | 1945906088               |
| SNP_P3_20903_22644407 | NC_021161.1    | Ca_kabuli_chr02 | 22644407                | TT                              | AA                | 1945906090               |
| SNP_P3_20904_22644431 | NC_021161.1    | Ca_kabuli_chr02 | 22644431                | AA                              | GG                | 1945906092               |
| SNP_P3_20905_22646750 | NC_021161.1    | Ca_kabuli_chr02 | 22646750                | GG                              | AA                | 1945906093               |
| SNP_P3_20906_22646767 | NC_021161.1    | Ca_kabuli_chr02 | 22646767                | AA                              | GG                | 1945906095               |
| SNP_P3_20907_22646861 | NC_021161.1    | Ca_kabuli_chr02 | 22646861                | TT                              | CC                | 1945906097               |
| SNP_P3_20908_22646862 | NC_021161.1    | Ca_kabuli_chr02 | 22646862                | TT                              | GG                | 1945906099               |
| SNP_P3_20909_22650562 | NC_021161.1    | Ca_kabuli_chr02 | 22650562                | CC                              | TT                | 1945906101               |
| SNP_P3_20910_22650614 | NC_021161.1    | Ca_kabuli_chr02 | 22650614                | TT                              | AA                | 1945906102               |
| SNP_P3_20912_22650687 | NC_021161.1    | Ca_kabuli_chr02 | 22650687                | AA                              | GG                | 1945906104               |
| SNP_P3_20913_22650734 | NC_021161.1    | Ca_kabuli_chr02 | 22650734                | TT                              | CC                | 1945906106               |
| SNP_P3_20914_22650764 | NC_021161.1    | Ca_kabuli_chr02 | 22650764                | AA                              | GG                | 1945906108               |
| SNP_P3_20915_22650780 | NC_021161.1    | Ca_kabuli_chr02 | 22650780                | TT                              | GG                | 1945906109               |
| SNP_P3_20916_22650798 | NC_021161.1    | Ca_kabuli_chr02 | 22650798                | AA                              | GG                | 1945906111               |
| SNP_P3_20917_22650848 | NC_021161.1    | Ca_kabuli_chr02 | 22650848                | CC                              | TT                | 1945906113               |
| SNP_P3_20918_22651022 | NC_021161.1    | Ca_kabuli_chr02 | 22651022                | AA                              | TT                | 1945906115               |
| SNP_P3_20919_22651023 | NC_021161.1    | Ca_kabuli_chr02 | 22651023                | TT                              | GG                | 1945906117               |
| SNP_P3_20920_22651210 | NC_021161.1    | Ca_kabuli_chr02 | 22651210                | GG                              | TT                | 1945906118               |
| SNP_P3_20921_22651219 | NC_021161.1    | Ca_kabuli_chr02 | 22651219                | GG                              | AA                | 1945906120               |
| SNP_P3_20922_22651501 | NC_021161.1    | Ca_kabuli_chr02 | 22651501                | CC                              | AA                | 1945906122               |
| SNP_P3_20923_22651843 | NC_021161.1    | Ca_kabuli_chr02 | 22651843                | TT                              | CC                | 1945906124               |

| SNPs IDs              | Chromosome IDs | Chromosomes     | Physical positions (bp) | CDC Frontier (Reference genome) | (Pusa 256 & HPNB) | NCBI SNPdb Accession IDs |
|-----------------------|----------------|-----------------|-------------------------|---------------------------------|-------------------|--------------------------|
| SNP_P3_20924_22651968 | NC_021161.1    | Ca_kabuli_chr02 | 22651968                | TT                              | GG                | 1945906125               |
| SNP_P3_20925_22651977 | NC_021161.1    | Ca_kabuli_chr02 | 22651977                | AA                              | CC                | 1945906127               |
| SNP_P3_20926_22652010 | NC_021161.1    | Ca_kabuli_chr02 | 22652010                | CC                              | TT                | 1945906129               |
| SNP_P3_20927_22665819 | NC_021161.1    | Ca_kabuli_chr02 | 22665819                | CC                              | AA                | 1945906131               |
| SNP_P3_20928_22667319 | NC_021161.1    | Ca_kabuli_chr02 | 22667319                | TT                              | CC                | 1945906133               |
| SNP_P3_20930_22667431 | NC_021161.1    | Ca_kabuli_chr02 | 22667431                | CC                              | TT                | 1945906134               |
| SNP_P3_20931_22667693 | NC_021161.1    | Ca_kabuli_chr02 | 22667693                | TT                              | AA                | 1945906136               |
| SNP_P3_20932_22667696 | NC_021161.1    | Ca_kabuli_chr02 | 22667696                | TT                              | CC                | 1945906138               |
| SNP_P3_20933_22667707 | NC_021161.1    | Ca_kabuli_chr02 | 22667707                | GG                              | TT                | 1945906140               |
| SNP_P3_20934_22667718 | NC_021161.1    | Ca_kabuli_chr02 | 22667718                | GG                              | AA                | 1945906142               |
| SNP_P3_20935_22667743 | NC_021161.1    | Ca_kabuli_chr02 | 22667743                | AA                              | GG                | 1945906143               |
| SNP_P3_20936_22667756 | NC_021161.1    | Ca_kabuli_chr02 | 22667756                | TT                              | CC                | 1945906145               |
| SNP_P3_20937_22668068 | NC_021161.1    | Ca_kabuli_chr02 | 22668068                | TT                              | CC                | 1945906147               |
| SNP_P3_20938_22672163 | NC_021161.1    | Ca_kabuli_chr02 | 22672163                | AA                              | CC                | 1945906149               |
| SNP_P3_20939_22677291 | NC_021161.1    | Ca_kabuli_chr02 | 22677291                | AA                              | TT                | 1945906150               |
| SNP_P3_20941_22701920 | NC_021161.1    | Ca_kabuli_chr02 | 22701920                | AA                              | GG                | 1945906152               |
| SNP_P3_20942_22711416 | NC_021161.1    | Ca_kabuli_chr02 | 22711416                | GG                              | AA                | 1945906154               |
| SNP_P3_20943_22711771 | NC_021161.1    | Ca_kabuli_chr02 | 22711771                | AA                              | GG                | 1945906156               |
| SNP_P3_20944_22740403 | NC_021161.1    | Ca_kabuli_chr02 | 22740403                | CC                              | TT                | 1945906158               |
| SNP_P3_20945_22745315 | NC_021161.1    | Ca_kabuli_chr02 | 22745315                | CC                              | TT                | 1945906159               |
| SNP_P3_20946_22748952 | NC_021161.1    | Ca_kabuli_chr02 | 22748952                | GG                              | AA                | 1945906161               |
| SNP_P3_20947_22749317 | NC_021161.1    | Ca_kabuli_chr02 | 22749317                | GG                              | AA                | 1945906163               |
| SNP_P3_20948_22749340 | NC_021161.1    | Ca_kabuli_chr02 | 22749340                | GG                              | AA                | 1945906165               |
| SNP_P3_20949_22749381 | NC_021161.1    | Ca_kabuli_chr02 | 22749381                | AA                              | GG                | 1945906166               |
| SNP_P3_20950_22749410 | NC_021161.1    | Ca_kabuli_chr02 | 22749410                | TT                              | CC                | 1945906168               |
| SNP_P3_20951_22749428 | NC_021161.1    | Ca_kabuli_chr02 | 22749428                | GG                              | AA                | 1945906170               |
| SNP_P3_20952_22749453 | NC_021161.1    | Ca_kabuli_chr02 | 22749453                | TT                              | GG                | 1945906172               |
| SNP_P3_20953_22749469 | NC_021161.1    | Ca_kabuli_chr02 | 22749469                | TT                              | GG                | 1945906174               |
| SNP_P3_20954_22749513 | NC_021161.1    | Ca_kabuli_chr02 | 22749513                | GG                              | AA                | 1945906175               |
| SNP_P3_20955_22749528 | NC_021161.1    | Ca_kabuli_chr02 | 22749528                | GG                              | AA                | 1945906177               |
| SNP_P3_20956_22749566 | NC_021161.1    | Ca_kabuli_chr02 | 22749566                | TT                              | AA                | 1945906179               |
| SNP_P3_20957_22749568 | NC_021161.1    | Ca_kabuli_chr02 | 22749568                | GG                              | AA                | 1945906181               |
| SNP_P3_20958_22749590 | NC_021161.1    | Ca_kabuli_chr02 | 22749590                | GG                              | AA                | 1945906182               |
| SNP_P3_20959_22749984 | NC_021161.1    | Ca_kabuli_chr02 | 22749984                | AA                              | GG                | 1945906184               |
| SNP_P3_20960_22750092 | NC_021161.1    | Ca_kabuli_chr02 | 22750092                | AA                              | CC                | 1945906186               |
| SNP_P3_20961_22750197 | NC_021161.1    | Ca_kabuli_chr02 | 22750197                | TT                              | CC                | 1945906188               |
| SNP_P3_20962_22750344 | NC_021161.1    | Ca_kabuli_chr02 | 22750344                | GG                              | AA                | 1945906190               |
| SNP_P3_20963_22750367 | NC_021161.1    | Ca_kabuli_chr02 | 22750367                | CC                              | TT                | 1945906191               |
| SNP_P3_20964_22750462 | NC_021161.1    | Ca_kabuli_chr02 | 22750462                | AA                              | GG                | 1945906193               |
| SNP_P3_20965_22750493 | NC_021161.1    | Ca_kabuli_chr02 | 22750493                | AA                              | GG                | 1945906195               |
| SNP_P3_20966_22750542 | NC_021161.1    | Ca_kabuli_chr02 | 22750542                | TT                              | CC                | 1945906197               |
| SNP_P3_20967_22755943 | NC_021161.1    | Ca_kabuli_chr02 | 22755943                | TT                              | AA                | 1945906199               |

| SNPs IDs              | Chromosome IDs | Chromosomes     | Physical positions (bp) | CDC Frontier (Reference genome) | (Pusa 256 & HPNB) | NCBI SNPdb Accession IDs |
|-----------------------|----------------|-----------------|-------------------------|---------------------------------|-------------------|--------------------------|
| SNP_P3_20968_22756558 | NC_021161.1    | Ca_kabuli_chr02 | 22756558                | GG                              | CC                | 1945906200               |
| SNP_P3_20969_22756953 | NC_021161.1    | Ca_kabuli_chr02 | 22756953                | CC                              | TT                | 1945906202               |
| SNP_P3_20970_22778081 | NC_021161.1    | Ca_kabuli_chr02 | 22778081                | AA                              | GG                | 1945906204               |
| SNP_P3_20971_22778472 | NC_021161.1    | Ca_kabuli_chr02 | 22778472                | AA                              | GG                | 1945906206               |
| SNP_P3_20972_22779117 | NC_021161.1    | Ca_kabuli_chr02 | 22779117                | TT                              | GG                | 1945906207               |
| SNP_P3_20973_22779144 | NC_021161.1    | Ca_kabuli_chr02 | 22779144                | TT                              | AA                | 1945906209               |
| SNP_P3_20975_22779399 | NC_021161.1    | Ca_kabuli_chr02 | 22779399                | TT                              | CC                | 1945906211               |
| SNP_P3_20976_22779420 | NC_021161.1    | Ca_kabuli_chr02 | 22779420                | GG                              | AA                | 1945906213               |
| SNP_P3_20977_22779644 | NC_021161.1    | Ca_kabuli_chr02 | 22779644                | GG                              | AA                | 1945906215               |
| SNP_P3_20978_22779960 | NC_021161.1    | Ca_kabuli_chr02 | 22779960                | AA                              | TT                | 1945906216               |
| SNP_P3_20979_22782712 | NC_021161.1    | Ca_kabuli_chr02 | 22782712                | TT                              | AA                | 1945906218               |
| SNP_P3_20980_22782947 | NC_021161.1    | Ca_kabuli_chr02 | 22782947                | GG                              | AA                | 1945906220               |
| SNP_P3_20981_22782950 | NC_021161.1    | Ca_kabuli_chr02 | 22782950                | GG                              | AA                | 1945906222               |
| SNP_P3_20982_22782971 | NC_021161.1    | Ca_kabuli_chr02 | 22782971                | AA                              | GG                | 1945906223               |
| SNP_P3_20983_22782989 | NC_021161.1    | Ca_kabuli_chr02 | 22782989                | CC                              | AA                | 1945906225               |
| SNP_P3_20984_22782992 | NC_021161.1    | Ca_kabuli_chr02 | 22782992                | CC                              | TT                | 1945906227               |
| SNP_P3_20985_22782995 | NC_021161.1    | Ca_kabuli_chr02 | 22782995                | TT                              | CC                | 1945906229               |
| SNP_P3_20986_22783022 | NC_021161.1    | Ca_kabuli_chr02 | 22783022                | AA                              | TT                | 1945906231               |
| SNP_P3_20987_22791290 | NC_021161.1    | Ca_kabuli_chr02 | 22791290                | TT                              | CC                | 1945906232               |
| SNP_P3_20988_22802829 | NC_021161.1    | Ca_kabuli_chr02 | 22802829                | CC                              | TT                | 1945906234               |
| SNP_P3_20989_22811468 | NC_021161.1    | Ca_kabuli_chr02 | 22811468                | CC                              | TT                | 1945906236               |
| SNP_P3_20990_22812347 | NC_021161.1    | Ca_kabuli_chr02 | 22812347                | CC                              | AA                | 1945906238               |
| SNP_P3_20991_22812381 | NC_021161.1    | Ca_kabuli_chr02 | 22812381                | TT                              | CC                | 1945906239               |
| SNP_P3_20992_22812698 | NC_021161.1    | Ca_kabuli_chr02 | 22812698                | GG                              | AA                | 1945906241               |
| SNP_P3_20993_22812705 | NC_021161.1    | Ca_kabuli_chr02 | 22812705                | CC                              | AA                | 1945906243               |
| SNP_P3_20994_22812725 | NC_021161.1    | Ca_kabuli_chr02 | 22812725                | GG                              | TT                | 1945906245               |
| SNP_P3_20995_22812731 | NC_021161.1    | Ca_kabuli_chr02 | 22812731                | AA                              | GG                | 1945906247               |
| SNP_P3_20996_22812809 | NC_021161.1    | Ca_kabuli_chr02 | 22812809                | AA                              | GG                | 1945906248               |
| SNP_P3_20997_22828319 | NC_021161.1    | Ca_kabuli_chr02 | 22828319                | CC                              | TT                | 1945906250               |
| SNP_P3_20998_22850434 | NC_021161.1    | Ca_kabuli_chr02 | 22850434                | GG                              | TT                | 1945906252               |
| SNP_P3_20999_22899476 | NC_021161.1    | Ca_kabuli_chr02 | 22899476                | AA                              | GG                | 1945906254               |
| SNP_P3_21000_22929718 | NC_021161.1    | Ca_kabuli_chr02 | 22929718                | AA                              | GG                | 1945906255               |
| SNP_P3_21001_22959702 | NC_021161.1    | Ca_kabuli_chr02 | 22959702                | AA                              | GG                | 1945906257               |
| SNP_P3_21002_22972525 | NC_021161.1    | Ca_kabuli_chr02 | 22972525                | AA                              | GG                | 1945906259               |
| SNP_P3_21003_22985044 | NC_021161.1    | Ca_kabuli_chr02 | 22985044                | CC                              | TT                | 1945906261               |
| SNP_P3_21004_23006738 | NC_021161.1    | Ca_kabuli_chr02 | 23006738                | TT                              | GG                | 1945906263               |
| SNP_P3_21005_23015240 | NC_021161.1    | Ca_kabuli_chr02 | 23015240                | CC                              | TT                | 1945906264               |
| SNP_P3_21006_23016336 | NC_021161.1    | Ca_kabuli_chr02 | 23016336                | GG                              | TT                | 1945906266               |
| SNP_P3_21007_23041249 | NC_021161.1    | Ca_kabuli_chr02 | 23041249                | GG                              | AA                | 1945906268               |
| SNP_P3_21008_23041316 | NC_021161.1    | Ca_kabuli_chr02 | 23041316                | AA                              | TT                | 1945906270               |
| SNP_P3_21009_23041325 | NC_021161.1    | Ca_kabuli_chr02 | 23041325                | AA                              | GG                | 1945906272               |
| SNP_P3_21010_23041335 | NC_021161.1    | Ca_kabuli_chr02 | 23041335                | AA                              | GG                | 1945906273               |

| SNPs IDs              | Chromosome IDs | Chromosomes     | Physical positions (bp) | CDC Frontier (Reference genome) | (Pusa 256 & HPNB) | NCBI SNPdb Accession IDs |
|-----------------------|----------------|-----------------|-------------------------|---------------------------------|-------------------|--------------------------|
| SNP_P3_21011_23041337 | NC_021161.1    | Ca_kabuli_chr02 | 23041337                | CC                              | TT                | 1945906275               |
| SNP_P3_21012_23041356 | NC_021161.1    | Ca_kabuli_chr02 | 23041356                | CC                              | TT                | 1945906277               |
| SNP_P3_21013_23041466 | NC_021161.1    | Ca_kabuli_chr02 | 23041466                | GG                              | AA                | 1945906279               |
| SNP_P3_21014_23041703 | NC_021161.1    | Ca_kabuli_chr02 | 23041703                | GG                              | AA                | 1945906280               |
| SNP_P3_21015_23041893 | NC_021161.1    | Ca_kabuli_chr02 | 23041893                | CC                              | TT                | 1945906282               |
| SNP_P3_21016_23042634 | NC_021161.1    | Ca_kabuli_chr02 | 23042634                | GG                              | AA                | 1945906284               |
| SNP_P3_21019_23067648 | NC_021161.1    | Ca_kabuli_chr02 | 23067648                | AA                              | GG                | 1945906286               |
| SNP_P3_21020_23067652 | NC_021161.1    | Ca_kabuli_chr02 | 23067652                | CC                              | TT                | 1945906288               |
| SNP_P3_21021_23067699 | NC_021161.1    | Ca_kabuli_chr02 | 23067699                | CC                              | TT                | 1945906289               |
| SNP_P3_21022_23067708 | NC_021161.1    | Ca_kabuli_chr02 | 23067708                | AA                              | TT                | 1945906291               |
| SNP_P3_21023_23067795 | NC_021161.1    | Ca_kabuli_chr02 | 23067795                | TT                              | CC                | 1945906293               |
| SNP_P3_21024_23068006 | NC_021161.1    | Ca_kabuli_chr02 | 23068006                | TT                              | CC                | 1945906295               |
| SNP_P3_21025_23068080 | NC_021161.1    | Ca_kabuli_chr02 | 23068080                | CC                              | GG                | 1945906296               |
| SNP_P3_21026_23068102 | NC_021161.1    | Ca_kabuli_chr02 | 23068102                | AA                              | GG                | 1945906298               |
| SNP_P3_21027_23068141 | NC_021161.1    | Ca_kabuli_chr02 | 23068141                | CC                              | AA                | 1945906300               |
| SNP_P3_21028_23068150 | NC_021161.1    | Ca_kabuli_chr02 | 23068150                | TT                              | CC                | 1945906302               |
| SNP_P3_21029_23068151 | NC_021161.1    | Ca_kabuli_chr02 | 23068151                | CC                              | GG                | 1945906304               |
| SNP_P3_21030_23068336 | NC_021161.1    | Ca_kabuli_chr02 | 23068336                | GG                              | CC                | 1945906305               |
| SNP_P3_21031_23068360 | NC_021161.1    | Ca_kabuli_chr02 | 23068360                | GG                              | AA                | 1945906307               |
| SNP_P3_21032_23133399 | NC_021161.1    | Ca_kabuli_chr02 | 23133399                | TT                              | AA                | 1945906309               |
| SNP_P3_21033_23155532 | NC_021161.1    | Ca_kabuli_chr02 | 23155532                | AA                              | GG                | 1945906311               |
| SNP_P3_21034_23155564 | NC_021161.1    | Ca_kabuli_chr02 | 23155564                | GG                              | TT                | 1945906312               |
| SNP_P3_21035_23155573 | NC_021161.1    | Ca_kabuli_chr02 | 23155573                | AA                              | TT                | 1945906314               |
| SNP_P3_21036_23155919 | NC_021161.1    | Ca_kabuli_chr02 | 23155919                | CC                              | TT                | 1945906316               |
| SNP_P3_21037_23156016 | NC_021161.1    | Ca_kabuli_chr02 | 23156016                | CC                              | TT                | 1945906318               |
| SNP_P3_21038_23156070 | NC_021161.1    | Ca_kabuli_chr02 | 23156070                | AA                              | TT                | 1945906320               |
| SNP_P3_21039_23173094 | NC_021161.1    | Ca_kabuli_chr02 | 23173094                | CC                              | AA                | 1945906321               |
| SNP_P3_21041_23192851 | NC_021161.1    | Ca_kabuli_chr02 | 23192851                | TT                              | CC                | 1945906323               |
| SNP_P3_21042_23192858 | NC_021161.1    | Ca_kabuli_chr02 | 23192858                | TT                              | CC                | 1945906325               |
| SNP_P3_21043_23192976 | NC_021161.1    | Ca_kabuli_chr02 | 23192976                | AA                              | GG                | 1945906327               |
| SNP_P3_21044_23193015 | NC_021161.1    | Ca_kabuli_chr02 | 23193015                | AA                              | GG                | 1945906328               |
| SNP_P3_21045_23193053 | NC_021161.1    | Ca_kabuli_chr02 | 23193053                | TT                              | AA                | 1945906330               |
| SNP_P3_21046_23193061 | NC_021161.1    | Ca_kabuli_chr02 | 23193061                | AA                              | CC                | 1945906332               |
| SNP_P3_21047_23193078 | NC_021161.1    | Ca_kabuli_chr02 | 23193078                | TT                              | CC                | 1945906334               |
| SNP_P3_21048_23193120 | NC_021161.1    | Ca_kabuli_chr02 | 23193120                | CC                              | TT                | 1945906336               |
| SNP_P3_21050_23197441 | NC_021161.1    | Ca_kabuli_chr02 | 23197441                | CC                              | TT                | 1945906337               |
| SNP_P3_21051_23199868 | NC_021161.1    | Ca_kabuli_chr02 | 23199868                | GG                              | CC                | 1945906339               |
| SNP_P3_21052_23199928 | NC_021161.1    | Ca_kabuli_chr02 | 23199928                | CC                              | TT                | 1945906341               |
| SNP_P3_21053_23229983 | NC_021161.1    | Ca_kabuli_chr02 | 23229983                | TT                              | CC                | 1945906343               |
| SNP_P3_21054_23254004 | NC_021161.1    | Ca_kabuli_chr02 | 23254004                | CC                              | AA                | 1945906344               |
| SNP_P3_21055_23254019 | NC_021161.1    | Ca_kabuli_chr02 | 23254019                | GG                              | AA                | 1945906346               |
| SNP_P3_21056_23254030 | NC_021161.1    | Ca_kabuli_chr02 | 23254030                | CC                              | TT                | 1945906348               |

| SNPs IDs              | Chromosome IDs | Chromosomes     | Physical positions (bp) | CDC Frontier (Reference genome) | (Pusa 256 & HPNB) | NCBI SNPdb Accession IDs |
|-----------------------|----------------|-----------------|-------------------------|---------------------------------|-------------------|--------------------------|
| SNP_P3_21057_23255653 | NC_021161.1    | Ca_kabuli_chr02 | 23255653                | TT                              | CC                | 1945906350               |
| SNP_P3_21058_23256250 | NC_021161.1    | Ca_kabuli_chr02 | 23256250                | CC                              | TT                | 1945906352               |
| SNP_P3_21059_23256251 | NC_021161.1    | Ca_kabuli_chr02 | 23256251                | AA                              | GG                | 1945906353               |
| SNP_P3_21060_23256268 | NC_021161.1    | Ca_kabuli_chr02 | 23256268                | TT                              | CC                | 1945906355               |
| SNP_P3_21061_23276114 | NC_021161.1    | Ca_kabuli_chr02 | 23276114                | AA                              | CC                | 1945906357               |
| SNP_P3_21062_23295428 | NC_021161.1    | Ca_kabuli_chr02 | 23295428                | GG                              | AA                | 1945906359               |
| SNP_P3_21063_23316038 | NC_021161.1    | Ca_kabuli_chr02 | 23316038                | AA                              | TT                | 1945906360               |
| SNP_P3_21064_23362429 | NC_021161.1    | Ca_kabuli_chr02 | 23362429                | AA                              | GG                | 1945906362               |
| SNP_P3_21065_23362644 | NC_021161.1    | Ca_kabuli_chr02 | 23362644                | CC                              | GG                | 1945906364               |
| SNP_P3_21066_23368568 | NC_021161.1    | Ca_kabuli_chr02 | 23368568                | TT                              | GG                | 1945906366               |
| SNP_P3_21067_23371303 | NC_021161.1    | Ca_kabuli_chr02 | 23371303                | GG                              | CC                | 1945906368               |
| SNP_P3_21068_23371497 | NC_021161.1    | Ca_kabuli_chr02 | 23371497                | CC                              | AA                | 1945906369               |
| SNP_P3_21069_23387693 | NC_021161.1    | Ca_kabuli_chr02 | 23387693                | GG                              | AA                | 1945906371               |
| SNP_P3_21070_23388387 | NC_021161.1    | Ca_kabuli_chr02 | 23388387                | AA                              | GG                | 1945906373               |
| SNP_P3_21071_23393267 | NC_021161.1    | Ca_kabuli_chr02 | 23393267                | AA                              | GG                | 1945906375               |
| SNP_P3_21072_23400975 | NC_021161.1    | Ca_kabuli_chr02 | 23400975                | GG                              | AA                | 1945906377               |
| SNP_P3_21073_23406301 | NC_021161.1    | Ca_kabuli_chr02 | 23406301                | CC                              | TT                | 1945906378               |
| SNP_P3_21074_23406304 | NC_021161.1    | Ca_kabuli_chr02 | 23406304                | AA                              | GG                | 1945906380               |
| SNP_P3_21075_23409136 | NC_021161.1    | Ca_kabuli_chr02 | 23409136                | GG                              | AA                | 1945906382               |
| SNP_P3_21076_23417614 | NC_021161.1    | Ca_kabuli_chr02 | 23417614                | AA                              | GG                | 1945906384               |
| SNP_P3_21077_23420287 | NC_021161.1    | Ca_kabuli_chr02 | 23420287                | TT                              | CC                | 1945906385               |
| SNP_P3_21081_23539436 | NC_021161.1    | Ca_kabuli_chr02 | 23539436                | CC                              | TT                | 1945906387               |
| SNP_P3_21082_23544794 | NC_021161.1    | Ca_kabuli_chr02 | 23544794                | AA                              | GG                | 1945906389               |
| SNP_P3_21083_23544816 | NC_021161.1    | Ca_kabuli_chr02 | 23544816                | AA                              | GG                | 1945906391               |
| SNP_P3_21084_23544950 | NC_021161.1    | Ca_kabuli_chr02 | 23544950                | TT                              | CC                | 1945906393               |
| SNP_P3_21085_23545017 | NC_021161.1    | Ca_kabuli_chr02 | 23545017                | TT                              | CC                | 1945906394               |
| SNP_P3_21086_23545023 | NC_021161.1    | Ca_kabuli_chr02 | 23545023                | AA                              | GG                | 1945906396               |
| SNP_P3_21087_23545059 | NC_021161.1    | Ca_kabuli_chr02 | 23545059                | TT                              | AA                | 1945906398               |
| SNP_P3_21088_23545121 | NC_021161.1    | Ca_kabuli_chr02 | 23545121                | AA                              | CC                | 1945906400               |
| SNP_P3_21089_23545134 | NC_021161.1    | Ca_kabuli_chr02 | 23545134                | TT                              | CC                | 1945906401               |
| SNP_P3_21090_23545143 | NC_021161.1    | Ca_kabuli_chr02 | 23545143                | AA                              | CC                | 1945906403               |
| SNP_P3_21091_23545147 | NC_021161.1    | Ca_kabuli_chr02 | 23545147                | GG                              | AA                | 1945906405               |
| SNP_P3_21092_23547629 | NC_021161.1    | Ca_kabuli_chr02 | 23547629                | AA                              | TT                | 1945906407               |
| SNP_P3_21093_23565884 | NC_021161.1    | Ca_kabuli_chr02 | 23565884                | AA                              | CC                | 1945906409               |
| SNP_P3_21094_23565909 | NC_021161.1    | Ca_kabuli_chr02 | 23565909                | AA                              | GG                | 1945906410               |
| SNP_P3_21095_23573866 | NC_021161.1    | Ca_kabuli_chr02 | 23573866                | TT                              | CC                | 1945906412               |
| SNP_P3_21096_23574035 | NC_021161.1    | Ca_kabuli_chr02 | 23574035                | TT                              | CC                | 1945906414               |
| SNP_P3_21097_23574590 | NC_021161.1    | Ca_kabuli_chr02 | 23574590                | CC                              | TT                | 1945906416               |
| SNP_P3_21098_23624268 | NC_021161.1    | Ca_kabuli_chr02 | 23624268                | AA                              | GG                | 1945906418               |
| SNP_P3_21099_23624289 | NC_021161.1    | Ca_kabuli_chr02 | 23624289                | TT                              | CC                | 1945906419               |
| SNP_P3_21100_23624316 | NC_021161.1    | Ca_kabuli_chr02 | 23624316                | GG                              | AA                | 1945906421               |
| SNP_P3_21101_23624340 | NC_021161.1    | Ca_kabuli_chr02 | 23624340                | TT                              | AA                | 1945906423               |

| SNPs IDs              | Chromosome IDs | Chromosomes     | Physical positions (bp) | CDC Frontier (Reference genome) | (Pusa 256 & HPNB) | NCBI SNPdb Accession IDs |
|-----------------------|----------------|-----------------|-------------------------|---------------------------------|-------------------|--------------------------|
| SNP_P3_21102_23624347 | NC_021161.1    | Ca_kabuli_chr02 | 23624347                | GG                              | TT                | 1945906425               |
| SNP_P3_21103_23624352 | NC_021161.1    | Ca_kabuli_chr02 | 23624352                | CC                              | TT                | 1945906426               |
| SNP_P3_21104_23624369 | NC_021161.1    | Ca_kabuli_chr02 | 23624369                | TT                              | AA                | 1945906428               |
| SNP_P3_21105_23624373 | NC_021161.1    | Ca_kabuli_chr02 | 23624373                | TT                              | GG                | 1945906430               |
| SNP_P3_21106_23624376 | NC_021161.1    | Ca_kabuli_chr02 | 23624376                | AA                              | GG                | 1945906432               |
| SNP_P3_21107_23624385 | NC_021161.1    | Ca_kabuli_chr02 | 23624385                | AA                              | GG                | 1945906434               |
| SNP_P3_21108_23624388 | NC_021161.1    | Ca_kabuli_chr02 | 23624388                | GG                              | CC                | 1945906435               |
| SNP_P3_21109_23624393 | NC_021161.1    | Ca_kabuli_chr02 | 23624393                | AA                              | GG                | 1945906437               |
| SNP_P3_21110_23624400 | NC_021161.1    | Ca_kabuli_chr02 | 23624400                | TT                              | CC                | 1945906439               |
| SNP_P3_21111_23624409 | NC_021161.1    | Ca_kabuli_chr02 | 23624409                | AA                              | GG                | 1945906441               |
| SNP_P3_21112_23624519 | NC_021161.1    | Ca_kabuli_chr02 | 23624519                | AA                              | TT                | 1945906442               |
| SNP_P3_21113_23624536 | NC_021161.1    | Ca_kabuli_chr02 | 23624536                | CC                              | TT                | 1945906444               |
| SNP_P3_21114_23624561 | NC_021161.1    | Ca_kabuli_chr02 | 23624561                | CC                              | TT                | 1945906446               |
| SNP_P3_21115_23624564 | NC_021161.1    | Ca_kabuli_chr02 | 23624564                | TT                              | CC                | 1945906448               |
| SNP_P3_21116_23624570 | NC_021161.1    | Ca_kabuli_chr02 | 23624570                | GG                              | AA                | 1945906450               |
| SNP_P3_21117_23626099 | NC_021161.1    | Ca_kabuli_chr02 | 23626099                | TT                              | CC                | 1945906451               |
| SNP_P3_21118_23627204 | NC_021161.1    | Ca_kabuli_chr02 | 23627204                | TT                              | CC                | 1945906453               |
| SNP_P3_21119_23627241 | NC_021161.1    | Ca_kabuli_chr02 | 23627241                | AA                              | CC                | 1945906455               |
| SNP_P3_21120_23627358 | NC_021161.1    | Ca_kabuli_chr02 | 23627358                | TT                              | CC                | 1945906457               |
| SNP_P3_21121_23627538 | NC_021161.1    | Ca_kabuli_chr02 | 23627538                | AA                              | GG                | 1945906458               |
| SNP_P3_21122_23627539 | NC_021161.1    | Ca_kabuli_chr02 | 23627539                | CC                              | TT                | 1945906460               |
| SNP_P3_21123_23643140 | NC_021161.1    | Ca_kabuli_chr02 | 23643140                | CC                              | TT                | 1945906462               |
| SNP_P3_21124_23691920 | NC_021161.1    | Ca_kabuli_chr02 | 23691920                | TT                              | CC                | 1945906464               |
| SNP_P3_21125_23691956 | NC_021161.1    | Ca_kabuli_chr02 | 23691956                | TT                              | CC                | 1945906466               |
| SNP_P3_21126_23696149 | NC_021161.1    | Ca_kabuli_chr02 | 23696149                | GG                              | AA                | 1945906467               |
| SNP_P3_21127_23734440 | NC_021161.1    | Ca_kabuli_chr02 | 23734440                | TT                              | AA                | 1945906469               |
| SNP_P3_21128_23734442 | NC_021161.1    | Ca_kabuli_chr02 | 23734442                | TT                              | AA                | 1945906471               |
| SNP_P3_21129_23752740 | NC_021161.1    | Ca_kabuli_chr02 | 23752740                | TT                              | AA                | 1945906473               |
| SNP_P3_21130_23753103 | NC_021161.1    | Ca_kabuli_chr02 | 23753103                | CC                              | TT                | 1945906475               |
| SNP_P3_21131_23753178 | NC_021161.1    | Ca_kabuli_chr02 | 23753178                | GG                              | AA                | 1945906476               |
| SNP_P3_21132_23760728 | NC_021161.1    | Ca_kabuli_chr02 | 23760728                | AA                              | GG                | 1945906478               |
| SNP_P3_21133_23760738 | NC_021161.1    | Ca_kabuli_chr02 | 23760738                | CC                              | TT                | 1945906480               |
| SNP_P3_21134_23765935 | NC_021161.1    | Ca_kabuli_chr02 | 23765935                | CC                              | TT                | 1945906482               |
| SNP_P3_21135_23765980 | NC_021161.1    | Ca_kabuli_chr02 | 23765980                | GG                              | AA                | 1945906483               |
| SNP_P3_21136_23766083 | NC_021161.1    | Ca_kabuli_chr02 | 23766083                | CC                              | TT                | 1945906485               |
| SNP_P3_21137_23766120 | NC_021161.1    | Ca_kabuli_chr02 | 23766120                | AA                              | TT                | 1945906487               |
| SNP_P3_21138_23766130 | NC_021161.1    | Ca_kabuli_chr02 | 23766130                | AA                              | CC                | 1945906489               |
| SNP_P3_21139_23766199 | NC_021161.1    | Ca_kabuli_chr02 | 23766199                | CC                              | AA                | 1945906491               |
| SNP_P3_21140_23773404 | NC_021161.1    | Ca_kabuli_chr02 | 23773404                | TT                              | GG                | 1945906492               |
| SNP_P3_21141_23794020 | NC_021161.1    | Ca_kabuli_chr02 | 23794020                | CC                              | TT                | 1945906494               |
| SNP_P3_21142_23794190 | NC_021161.1    | Ca_kabuli_chr02 | 23794190                | TT                              | GG                | 1945906496               |
| SNP_P3_21143_23794199 | NC_021161.1    | Ca_kabuli_chr02 | 23794199                | CC                              | TT                | 1945906498               |

| SNPs IDs              | Chromosome IDs | Chromosomes     | Physical positions (bp) | CDC Frontier (Reference genome) | (Pusa 256 & HPNB) | NCBI SNPdb Accession IDs |
|-----------------------|----------------|-----------------|-------------------------|---------------------------------|-------------------|--------------------------|
| SNP_P3_21144_23794272 | NC_021161.1    | Ca_kabuli_chr02 | 23794272                | TT                              | CC                | 1945906499               |
| SNP_P3_21145_23794372 | NC_021161.1    | Ca_kabuli_chr02 | 23794372                | TT                              | GG                | 1945906501               |
| SNP_P3_21147_23825644 | NC_021161.1    | Ca_kabuli_chr02 | 23825644                | AA                              | GG                | 1945906503               |
| SNP_P3_21148_23825701 | NC_021161.1    | Ca_kabuli_chr02 | 23825701                | CC                              | TT                | 1945906505               |
| SNP_P3_21149_23838574 | NC_021161.1    | Ca_kabuli_chr02 | 23838574                | CC                              | TT                | 1945906507               |
| SNP_P3_21150_23845361 | NC_021161.1    | Ca_kabuli_chr02 | 23845361                | AA                              | CC                | 1945906508               |
| SNP_P3_21151_23845362 | NC_021161.1    | Ca_kabuli_chr02 | 23845362                | AA                              | GG                | 1945906510               |
| SNP_P3_21152_23845385 | NC_021161.1    | Ca_kabuli_chr02 | 23845385                | CC                              | TT                | 1945906512               |
| SNP_P3_21153_23845451 | NC_021161.1    | Ca_kabuli_chr02 | 23845451                | GG                              | TT                | 1945906514               |
| SNP_P3_21154_23894990 | NC_021161.1    | Ca_kabuli_chr02 | 23894990                | AA                              | GG                | 1945906515               |
| SNP_P3_21155_23910254 | NC_021161.1    | Ca_kabuli_chr02 | 23910254                | TT                              | CC                | 1945906517               |
| SNP_P3_21156_23910913 | NC_021161.1    | Ca_kabuli_chr02 | 23910913                | CC                              | AA                | 1945906519               |
| SNP_P3_21157_23911358 | NC_021161.1    | Ca_kabuli_chr02 | 23911358                | CC                              | TT                | 1945906521               |
| SNP_P3_21158_23911677 | NC_021161.1    | Ca_kabuli_chr02 | 23911677                | AA                              | TT                | 1945906523               |
| SNP_P3_21159_23911786 | NC_021161.1    | Ca_kabuli_chr02 | 23911786                | CC                              | AA                | 1945906524               |
| SNP_P3_21160_23912417 | NC_021161.1    | Ca_kabuli_chr02 | 23912417                | TT                              | CC                | 1945906526               |
| SNP_P3_21161_23912432 | NC_021161.1    | Ca_kabuli_chr02 | 23912432                | CC                              | TT                | 1945906528               |
| SNP_P3_21162_23912698 | NC_021161.1    | Ca_kabuli_chr02 | 23912698                | AA                              | TT                | 1945906530               |
| SNP_P3_21163_23925718 | NC_021161.1    | Ca_kabuli_chr02 | 23925718                | AA                              | CC                | 1945906531               |
| SNP_P3_21164_23925725 | NC_021161.1    | Ca_kabuli_chr02 | 23925725                | CC                              | TT                | 1945906533               |
| SNP_P3_21165_23926393 | NC_021161.1    | Ca_kabuli_chr02 | 23926393                | GG                              | AA                | 1945906535               |
| SNP_P3_21166_23926501 | NC_021161.1    | Ca_kabuli_chr02 | 23926501                | GG                              | CC                | 1945906537               |
| SNP_P3_21167_23926521 | NC_021161.1    | Ca_kabuli_chr02 | 23926521                | GG                              | AA                | 1945906539               |
| SNP_P3_21168_23926543 | NC_021161.1    | Ca_kabuli_chr02 | 23926543                | AA                              | TT                | 1945906540               |
| SNP_P3_21170_23926769 | NC_021161.1    | Ca_kabuli_chr02 | 23926769                | AA                              | GG                | 1945906542               |
| SNP_P3_21171_23926813 | NC_021161.1    | Ca_kabuli_chr02 | 23926813                | TT                              | GG                | 1945906544               |
| SNP_P3_21172_23926996 | NC_021161.1    | Ca_kabuli_chr02 | 23926996                | GG                              | CC                | 1945906546               |
| SNP_P3_21173_23927105 | NC_021161.1    | Ca_kabuli_chr02 | 23927105                | AA                              | GG                | 1945906547               |
| SNP_P3_21174_23927240 | NC_021161.1    | Ca_kabuli_chr02 | 23927240                | GG                              | AA                | 1945906549               |
| SNP_P3_21175_23931668 | NC_021161.1    | Ca_kabuli_chr02 | 23931668                | GG                              | AA                | 1945906551               |
| SNP_P3_21176_23931990 | NC_021161.1    | Ca_kabuli_chr02 | 23931990                | GG                              | AA                | 1945906553               |
| SNP_P3_21177_23932205 | NC_021161.1    | Ca_kabuli_chr02 | 23932205                | TT                              | GG                | 1945906555               |
| SNP_P3_21179_23933608 | NC_021161.1    | Ca_kabuli_chr02 | 23933608                | GG                              | CC                | 1945906556               |
| SNP_P3_21180_23934055 | NC_021161.1    | Ca_kabuli_chr02 | 23934055                | CC                              | GG                | 1945906558               |
| SNP_P3_21181_23934184 | NC_021161.1    | Ca_kabuli_chr02 | 23934184                | AA                              | GG                | 1945906560               |
| SNP_P3_21182_23934307 | NC_021161.1    | Ca_kabuli_chr02 | 23934307                | TT                              | CC                | 1945906562               |
| SNP_P3_21183_23934472 | NC_021161.1    | Ca_kabuli_chr02 | 23934472                | AA                              | GG                | 1945906564               |
| SNP_P3_21184_23969721 | NC_021161.1    | Ca_kabuli_chr02 | 23969721                | TT                              | CC                | 1945906565               |
| SNP_P3_21185_23975052 | NC_021161.1    | Ca_kabuli_chr02 | 23975052                | CC                              | TT                | 1945906567               |
| SNP_P3_21188_24009971 | NC_021161.1    | Ca_kabuli_chr02 | 24009971                | AA                              | CC                | 1945906569               |
| SNP_P3_21190_24047683 | NC_021161.1    | Ca_kabuli_chr02 | 24047683                | CC                              | AA                | 1945906571               |
| SNP_P3_21191_24055962 | NC_021161.1    | Ca_kabuli_chr02 | 24055962                | TT                              | CC                | 1945906572               |

| SNPs IDs              | Chromosome IDs | Chromosomes     | Physical positions (bp) | CDC Frontier (Reference genome) | (Pusa 256 & HPNB) | NCBI SNPdb Accession IDs |
|-----------------------|----------------|-----------------|-------------------------|---------------------------------|-------------------|--------------------------|
| SNP_P3_21193_24070928 | NC_021161.1    | Ca_kabuli_chr02 | 24070928                | GG                              | AA                | 1945906574               |
| SNP_P3_21195_24104241 | NC_021161.1    | Ca_kabuli_chr02 | 24104241                | AA                              | GG                | 1945906576               |
| SNP_P3_21196_24150698 | NC_021161.1    | Ca_kabuli_chr02 | 24150698                | TT                              | CC                | 1945906578               |
| SNP_P3_21197_24151165 | NC_021161.1    | Ca_kabuli_chr02 | 24151165                | TT                              | CC                | 1945906580               |
| SNP_P3_21198_24151209 | NC_021161.1    | Ca_kabuli_chr02 | 24151209                | CC                              | TT                | 1945906581               |
| SNP_P3_21199_24151257 | NC_021161.1    | Ca_kabuli_chr02 | 24151257                | GG                              | AA                | 1945906583               |
| SNP_P3_21200_24151519 | NC_021161.1    | Ca_kabuli_chr02 | 24151519                | TT                              | CC                | 1945906585               |
| SNP_P3_21201_24151673 | NC_021161.1    | Ca_kabuli_chr02 | 24151673                | AA                              | GG                | 1945906587               |
| SNP_P3_21202_24151956 | NC_021161.1    | Ca_kabuli_chr02 | 24151956                | CC                              | TT                | 1945906588               |
| SNP_P3_21203_24194995 | NC_021161.1    | Ca_kabuli_chr02 | 24194995                | TT                              | CC                | 1945906590               |
| SNP_P3_21204_24195336 | NC_021161.1    | Ca_kabuli_chr02 | 24195336                | AA                              | TT                | 1945906592               |
| SNP_P3_21205_24226892 | NC_021161.1    | Ca_kabuli_chr02 | 24226892                | CC                              | AA                | 1945906594               |
| SNP_P3_21206_24227457 | NC_021161.1    | Ca_kabuli_chr02 | 24227457                | CC                              | TT                | 1945906596               |
| SNP_P3_21207_24241577 | NC_021161.1    | Ca_kabuli_chr02 | 24241577                | GG                              | TT                | 1945906597               |
| SNP_P3_21208_24241593 | NC_021161.1    | Ca_kabuli_chr02 | 24241593                | AA                              | TT                | 1945906599               |
| SNP_P3_21209_24241872 | NC_021161.1    | Ca_kabuli_chr02 | 24241872                | GG                              | AA                | 1945906601               |
| SNP_P3_21210_24244773 | NC_021161.1    | Ca_kabuli_chr02 | 24244773                | GG                              | AA                | 1945906603               |
| SNP_P3_21213_24251902 | NC_021161.1    | Ca_kabuli_chr02 | 24251902                | AA                              | GG                | 1945906604               |
| SNP_P3_21214_24252119 | NC_021161.1    | Ca_kabuli_chr02 | 24252119                | TT                              | CC                | 1945906606               |
| SNP_P3_21216_24252154 | NC_021161.1    | Ca_kabuli_chr02 | 24252154                | CC                              | TT                | 1945906608               |
| SNP_P3_21217_24252157 | NC_021161.1    | Ca_kabuli_chr02 | 24252157                | TT                              | CC                | 1945906610               |
| SNP_P3_21218_24252159 | NC_021161.1    | Ca_kabuli_chr02 | 24252159                | AA                              | CC                | 1945906612               |
| SNP_P3_21219_24252193 | NC_021161.1    | Ca_kabuli_chr02 | 24252193                | TT                              | CC                | 1945906613               |
| SNP_P3_21220_24256894 | NC_021161.1    | Ca_kabuli_chr02 | 24256894                | TT                              | CC                | 1945906615               |
| SNP_P3_21221_24257034 | NC_021161.1    | Ca_kabuli_chr02 | 24257034                | TT                              | CC                | 1945906617               |
| SNP_P3_21222_24257042 | NC_021161.1    | Ca_kabuli_chr02 | 24257042                | TT                              | CC                | 1945906619               |
| SNP_P3_21223_24257234 | NC_021161.1    | Ca_kabuli_chr02 | 24257234                | TT                              | CC                | 1945906620               |
| SNP_P3_21224_24257278 | NC_021161.1    | Ca_kabuli_chr02 | 24257278                | AA                              | GG                | 1945906622               |
| SNP_P3_21225_24257329 | NC_021161.1    | Ca_kabuli_chr02 | 24257329                | AA                              | GG                | 1945906624               |
| SNP_P3_21226_24257401 | NC_021161.1    | Ca_kabuli_chr02 | 24257401                | TT                              | AA                | 1945906626               |
| SNP_P3_21227_24257412 | NC_021161.1    | Ca_kabuli_chr02 | 24257412                | AA                              | TT                | 1945906628               |
| SNP_P3_21228_24259679 | NC_021161.1    | Ca_kabuli_chr02 | 24259679                | AA                              | CC                | 1945906629               |
| SNP_P3_21229_24259686 | NC_021161.1    | Ca_kabuli_chr02 | 24259686                | TT                              | AA                | 1945906631               |
| SNP_P3_21230_24259697 | NC_021161.1    | Ca_kabuli_chr02 | 24259697                | TT                              | GG                | 1945906633               |
| SNP_P3_21231_24259766 | NC_021161.1    | Ca_kabuli_chr02 | 24259766                | TT                              | CC                | 1945906635               |
| SNP_P3_21232_24259775 | NC_021161.1    | Ca_kabuli_chr02 | 24259775                | AA                              | TT                | 1945906636               |
| SNP_P3_21233_24259802 | NC_021161.1    | Ca_kabuli_chr02 | 24259802                | GG                              | TT                | 1945906638               |
| SNP_P3_21234_24260045 | NC_021161.1    | Ca_kabuli_chr02 | 24260045                | AA                              | GG                | 1945906640               |
| SNP_P3_21235_24278359 | NC_021161.1    | Ca_kabuli_chr02 | 24278359                | TT                              | AA                | 1945906642               |
| SNP_P3_21236_24280060 | NC_021161.1    | Ca_kabuli_chr02 | 24280060                | GG                              | AA                | 1945906644               |
| SNP_P3_21237_24309592 | NC_021161.1    | Ca_kabuli_chr02 | 24309592                | CC                              | TT                | 1945906645               |
| SNP_P3_21238_24309690 | NC_021161.1    | Ca_kabuli_chr02 | 24309690                | GG                              | TT                | 1945906647               |



| SNPs IDs              | Chromosome IDs | Chromosomes     | Physical positions (bp) | CDC Frontier (Reference genome) | (Pusa 256 & HPNB) | NCBI SNPdb Accession IDs |
|-----------------------|----------------|-----------------|-------------------------|---------------------------------|-------------------|--------------------------|
| SNP_P3_21239_24309691 | NC_021161.1    | Ca_kabuli_chr02 | 24309691                | TT                              | CC                | 1945906649               |
| SNP_P3_21240_24309694 | NC_021161.1    | Ca_kabuli_chr02 | 24309694                | TT                              | CC                | 1945906651               |
| SNP_P3_21241_24309738 | NC_021161.1    | Ca_kabuli_chr02 | 24309738                | AA                              | GG                | 1945906652               |
| SNP_P3_21242_24309751 | NC_021161.1    | Ca_kabuli_chr02 | 24309751                | AA                              | CC                | 1945906654               |
| SNP_P3_21243_24309763 | NC_021161.1    | Ca_kabuli_chr02 | 24309763                | GG                              | AA                | 1945906656               |
| SNP_P3_21244_24309774 | NC_021161.1    | Ca_kabuli_chr02 | 24309774                | TT                              | GG                | 1945906658               |
| SNP_P3_21245_24309775 | NC_021161.1    | Ca_kabuli_chr02 | 24309775                | AA                              | CC                | 1945906660               |
| SNP_P3_21246_24309966 | NC_021161.1    | Ca_kabuli_chr02 | 24309966                | TT                              | CC                | 1945906661               |
| SNP_P3_21247_24310013 | NC_021161.1    | Ca_kabuli_chr02 | 24310013                | TT                              | CC                | 1945906663               |
| SNP_P3_21248_24310031 | NC_021161.1    | Ca_kabuli_chr02 | 24310031                | CC                              | AA                | 1945906665               |
| SNP_P3_21249_24310033 | NC_021161.1    | Ca_kabuli_chr02 | 24310033                | GG                              | CC                | 1945906667               |
| SNP_P3_21250_24310106 | NC_021161.1    | Ca_kabuli_chr02 | 24310106                | CC                              | AA                | 1945906669               |
| SNP_P3_21251_24310124 | NC_021161.1    | Ca_kabuli_chr02 | 24310124                | CC                              | AA                | 1945906670               |
| SNP_P3_21252_24310160 | NC_021161.1    | Ca_kabuli_chr02 | 24310160                | GG                              | AA                | 1945906672               |
| SNP_P3_21253_24310193 | NC_021161.1    | Ca_kabuli_chr02 | 24310193                | GG                              | AA                | 1945906674               |
| SNP_P3_21254_24310198 | NC_021161.1    | Ca_kabuli_chr02 | 24310198                | CC                              | TT                | 1945906676               |
| SNP_P3_21255_24310223 | NC_021161.1    | Ca_kabuli_chr02 | 24310223                | CC                              | TT                | 1945906677               |
| SNP_P3_21256_24310265 | NC_021161.1    | Ca_kabuli_chr02 | 24310265                | AA                              | CC                | 1945906679               |
| SNP_P3_21257_24310574 | NC_021161.1    | Ca_kabuli_chr02 | 24310574                | CC                              | TT                | 1945906681               |
| SNP_P3_21258_24310623 | NC_021161.1    | Ca_kabuli_chr02 | 24310623                | CC                              | TT                | 1945906683               |
| SNP_P3_21259_24317985 | NC_021161.1    | Ca_kabuli_chr02 | 24317985                | TT                              | CC                | 1945906685               |
| SNP_P3_21260_24318078 | NC_021161.1    | Ca_kabuli_chr02 | 24318078                | TT                              | AA                | 1945906686               |
| SNP_P3_21261_24318815 | NC_021161.1    | Ca_kabuli_chr02 | 24318815                | CC                              | TT                | 1945906688               |
| SNP_P3_21262_24378182 | NC_021161.1    | Ca_kabuli_chr02 | 24378182                | TT                              | CC                | 1945906690               |
| SNP_P3_21263_24378208 | NC_021161.1    | Ca_kabuli_chr02 | 24378208                | TT                              | AA                | 1945906692               |
| SNP_P3_21264_24381698 | NC_021161.1    | Ca_kabuli_chr02 | 24381698                | AA                              | TT                | 1945906693               |
| SNP_P3_21265_24392065 | NC_021161.1    | Ca_kabuli_chr02 | 24392065                | AA                              | GG                | 1945906695               |
| SNP_P3_21266_24392078 | NC_021161.1    | Ca_kabuli_chr02 | 24392078                | CC                              | TT                | 1945906697               |
| SNP_P3_21267_24392292 | NC_021161.1    | Ca_kabuli_chr02 | 24392292                | AA                              | GG                | 1945906699               |
| SNP_P3_21269_24393557 | NC_021161.1    | Ca_kabuli_chr02 | 24393557                | TT                              | AA                | 1945906701               |
| SNP_P3_21270_24426729 | NC_021161.1    | Ca_kabuli_chr02 | 24426729                | CC                              | TT                | 1945906702               |
| SNP_P3_21271_24426739 | NC_021161.1    | Ca_kabuli_chr02 | 24426739                | TT                              | CC                | 1945906704               |
| SNP_P3_21272_24433498 | NC_021161.1    | Ca_kabuli_chr02 | 24433498                | AA                              | GG                | 1945906706               |
| SNP_P3_21273_24433666 | NC_021161.1    | Ca_kabuli_chr02 | 24433666                | CC                              | AA                | 1945906708               |
| SNP_P3_21274_24433676 | NC_021161.1    | Ca_kabuli_chr02 | 24433676                | TT                              | AA                | 1945906709               |
| SNP_P3_21275_24433899 | NC_021161.1    | Ca_kabuli_chr02 | 24433899                | TT                              | AA                | 1945906711               |
| SNP_P3_21276_24433935 | NC_021161.1    | Ca_kabuli_chr02 | 24433935                | TT                              | CC                | 1945906713               |
| SNP_P3_21277_24433946 | NC_021161.1    | Ca_kabuli_chr02 | 24433946                | AA                              | GG                | 1945906715               |
| SNP_P3_21278_24434040 | NC_021161.1    | Ca_kabuli_chr02 | 24434040                | AA                              | GG                | 1945906717               |
| SNP_P3_21279_24434042 | NC_021161.1    | Ca_kabuli_chr02 | 24434042                | TT                              | GG                | 1945906718               |
| SNP_P3_21280_24434053 | NC_021161.1    | Ca_kabuli_chr02 | 24434053                | TT                              | GG                | 1945906720               |
| SNP_P3_21281_24441504 | NC_021161.1    | Ca_kabuli_chr02 | 24441504                | TT                              | AA                | 1945906722               |

| SNPs IDs              | Chromosome IDs | Chromosomes     | Physical positions (bp) | CDC Frontier (Reference genome) | (Pusa 256 & HPNB) | NCBI SNPdb Accession IDs |
|-----------------------|----------------|-----------------|-------------------------|---------------------------------|-------------------|--------------------------|
| SNP_P3_21282_24442184 | NC_021161.1    | Ca_kabuli_chr02 | 24442184                | TT                              | CC                | 1945906724               |
| SNP_P3_21283_24442525 | NC_021161.1    | Ca_kabuli_chr02 | 24442525                | TT                              | CC                | 1945906725               |
| SNP_P3_21284_24442593 | NC_021161.1    | Ca_kabuli_chr02 | 24442593                | AA                              | GG                | 1945906727               |
| SNP_P3_21285_24442737 | NC_021161.1    | Ca_kabuli_chr02 | 24442737                | AA                              | GG                | 1945906729               |
| SNP_P3_21286_24442747 | NC_021161.1    | Ca_kabuli_chr02 | 24442747                | CC                              | AA                | 1945906731               |
| SNP_P3_21287_24454906 | NC_021161.1    | Ca_kabuli_chr02 | 24454906                | GG                              | TT                | 1945906733               |
| SNP_P3_21288_24454965 | NC_021161.1    | Ca_kabuli_chr02 | 24454965                | AA                              | GG                | 1945906734               |
| SNP_P3_21289_24454976 | NC_021161.1    | Ca_kabuli_chr02 | 24454976                | CC                              | AA                | 1945906736               |
| SNP_P3_21290_24455243 | NC_021161.1    | Ca_kabuli_chr02 | 24455243                | CC                              | TT                | 1945906738               |
| SNP_P3_21291_24455255 | NC_021161.1    | Ca_kabuli_chr02 | 24455255                | AA                              | TT                | 1945906740               |
| SNP_P3_21292_24455258 | NC_021161.1    | Ca_kabuli_chr02 | 24455258                | TT                              | GG                | 1945906742               |
| SNP_P3_21293_24476908 | NC_021161.1    | Ca_kabuli_chr02 | 24476908                | GG                              | AA                | 1945906744               |
| SNP_P3_21294_24476920 | NC_021161.1    | Ca_kabuli_chr02 | 24476920                | GG                              | AA                | 1945906745               |
| SNP_P3_21295_24494884 | NC_021161.1    | Ca_kabuli_chr02 | 24494884                | AA                              | TT                | 1945906747               |
| SNP_P3_21296_24494897 | NC_021161.1    | Ca_kabuli_chr02 | 24494897                | CC                              | TT                | 1945906749               |
| SNP_P3_21297_24498249 | NC_021161.1    | Ca_kabuli_chr02 | 24498249                | AA                              | GG                | 1945906751               |
| SNP_P3_21298_24515122 | NC_021161.1    | Ca_kabuli_chr02 | 24515122                | GG                              | CC                | 1945906753               |
| SNP_P3_21299_24545785 | NC_021161.1    | Ca_kabuli_chr02 | 24545785                | TT                              | AA                | 1945906755               |
| SNP_P3_21300_24557188 | NC_021161.1    | Ca_kabuli_chr02 | 24557188                | AA                              | CC                | 1945906756               |
| SNP_P3_21301_24557191 | NC_021161.1    | Ca_kabuli_chr02 | 24557191                | CC                              | TT                | 1945906758               |
| SNP_P3_21302_24557233 | NC_021161.1    | Ca_kabuli_chr02 | 24557233                | AA                              | GG                | 1945906760               |
| SNP_P3_21303_24557332 | NC_021161.1    | Ca_kabuli_chr02 | 24557332                | TT                              | CC                | 1945906762               |
| SNP_P3_21304_24557723 | NC_021161.1    | Ca_kabuli_chr02 | 24557723                | TT                              | CC                | 1945906764               |
| SNP_P3_21305_24557750 | NC_021161.1    | Ca_kabuli_chr02 | 24557750                | TT                              | CC                | 1945906766               |
| SNP_P3_21306_24574708 | NC_021161.1    | Ca_kabuli_chr02 | 24574708                | TT                              | AA                | 1945906767               |
| SNP_P3_21307_24575107 | NC_021161.1    | Ca_kabuli_chr02 | 24575107                | GG                              | TT                | 1945906769               |
| SNP_P3_21308_24575371 | NC_021161.1    | Ca_kabuli_chr02 | 24575371                | TT                              | GG                | 1945906771               |
| SNP_P3_21309_24575383 | NC_021161.1    | Ca_kabuli_chr02 | 24575383                | TT                              | CC                | 1945906773               |
| SNP_P3_21310_24575399 | NC_021161.1    | Ca_kabuli_chr02 | 24575399                | AA                              | TT                | 1945906775               |
| SNP_P3_21311_24575648 | NC_021161.1    | Ca_kabuli_chr02 | 24575648                | CC                              | TT                | 1945906777               |
| SNP_P3_21312_24575656 | NC_021161.1    | Ca_kabuli_chr02 | 24575656                | GG                              | AA                | 1945906778               |
| SNP_P3_21313_24575682 | NC_021161.1    | Ca_kabuli_chr02 | 24575682                | GG                              | TT                | 1945906780               |
| SNP_P3_21314_24575705 | NC_021161.1    | Ca_kabuli_chr02 | 24575705                | TT                              | CC                | 1945906782               |
| SNP_P3_21315_24597768 | NC_021161.1    | Ca_kabuli_chr02 | 24597768                | GG                              | AA                | 1945906784               |
| SNP_P3_21316_24597825 | NC_021161.1    | Ca_kabuli_chr02 | 24597825                | GG                              | TT                | 1945906786               |
| SNP_P3_21317_24597940 | NC_021161.1    | Ca_kabuli_chr02 | 24597940                | GG                              | AA                | 1945906788               |
| SNP_P3_21318_24597954 | NC_021161.1    | Ca_kabuli_chr02 | 24597954                | AA                              | GG                | 1945906789               |
| SNP_P3_21319_24601205 | NC_021161.1    | Ca_kabuli_chr02 | 24601205                | TT                              | CC                | 1945906791               |
| SNP_P3_21320_24611472 | NC_021161.1    | Ca_kabuli_chr02 | 24611472                | TT                              | CC                | 1945906793               |
| SNP_P3_21321_24611532 | NC_021161.1    | Ca_kabuli_chr02 | 24611532                | TT                              | GG                | 1945906795               |
| SNP_P3_21322_24611892 | NC_021161.1    | Ca_kabuli_chr02 | 24611892                | TT                              | GG                | 1945906797               |
| SNP_P3_21323_24632235 | NC_021161.1    | Ca_kabuli_chr02 | 24632235                | GG                              | AA                | 1945906799               |

| SNPs IDs              | Chromosome IDs | Chromosomes     | Physical positions (bp) | CDC Frontier (Reference genome) | (Pusa 256 & HPNB) | NCBI SNPdb Accession IDs |
|-----------------------|----------------|-----------------|-------------------------|---------------------------------|-------------------|--------------------------|
| SNP_P3_21324_24632886 | NC_021161.1    | Ca_kabuli_chr02 | 24632886                | AA                              | GG                | 1945906800               |
| SNP_P3_21325_24632949 | NC_021161.1    | Ca_kabuli_chr02 | 24632949                | GG                              | AA                | 1945906802               |
| SNP_P3_21326_24633996 | NC_021161.1    | Ca_kabuli_chr02 | 24633996                | TT                              | AA                | 1945906804               |
| SNP_P3_21327_24634110 | NC_021161.1    | Ca_kabuli_chr02 | 24634110                | TT                              | CC                | 1945906806               |
| SNP_P3_21330_24702963 | NC_021161.1    | Ca_kabuli_chr02 | 24702963                | GG                              | AA                | 1945906808               |
| SNP_P3_21331_24720058 | NC_021161.1    | Ca_kabuli_chr02 | 24720058                | CC                              | AA                | 1945906809               |
| SNP_P3_21332_24753817 | NC_021161.1    | Ca_kabuli_chr02 | 24753817                | GG                              | AA                | 1945906811               |
| SNP_P3_21333_24818341 | NC_021161.1    | Ca_kabuli_chr02 | 24818341                | GG                              | AA                | 1945906813               |
| SNP_P3_21334_24818354 | NC_021161.1    | Ca_kabuli_chr02 | 24818354                | TT                              | GG                | 1945906815               |
| SNP_P3_21335_24837395 | NC_021161.1    | Ca_kabuli_chr02 | 24837395                | TT                              | CC                | 1945906817               |
| SNP_P3_21336_24856355 | NC_021161.1    | Ca_kabuli_chr02 | 24856355                | TT                              | CC                | 1945906819               |
| SNP_P3_21337_24882322 | NC_021161.1    | Ca_kabuli_chr02 | 24882322                | CC                              | GG                | 1945906821               |
| SNP_P3_21338_24893790 | NC_021161.1    | Ca_kabuli_chr02 | 24893790                | GG                              | AA                | 1945906822               |
| SNP_P3_21339_24893879 | NC_021161.1    | Ca_kabuli_chr02 | 24893879                | AA                              | GG                | 1945906824               |
| SNP_P3_21340_24893923 | NC_021161.1    | Ca_kabuli_chr02 | 24893923                | CC                              | AA                | 1945906826               |
| SNP_P3_21341_24893942 | NC_021161.1    | Ca_kabuli_chr02 | 24893942                | AA                              | GG                | 1945906828               |
| SNP_P3_21342_24893972 | NC_021161.1    | Ca_kabuli_chr02 | 24893972                | CC                              | TT                | 1945906830               |
| SNP_P3_21343_24893998 | NC_021161.1    | Ca_kabuli_chr02 | 24893998                | TT                              | CC                | 1945906832               |
| SNP_P3_21344_24894050 | NC_021161.1    | Ca_kabuli_chr02 | 24894050                | GG                              | AA                | 1945906833               |
| SNP_P3_21345_24894055 | NC_021161.1    | Ca_kabuli_chr02 | 24894055                | AA                              | GG                | 1945906835               |
| SNP_P3_21346_24894092 | NC_021161.1    | Ca_kabuli_chr02 | 24894092                | TT                              | AA                | 1945906837               |
| SNP_P3_21347_24894093 | NC_021161.1    | Ca_kabuli_chr02 | 24894093                | AA                              | GG                | 1945906839               |
| SNP_P3_21348_24894104 | NC_021161.1    | Ca_kabuli_chr02 | 24894104                | CC                              | GG                | 1945906841               |
| SNP_P3_21349_24894105 | NC_021161.1    | Ca_kabuli_chr02 | 24894105                | TT                              | AA                | 1945906843               |
| SNP_P3_21350_24894128 | NC_021161.1    | Ca_kabuli_chr02 | 24894128                | GG                              | AA                | 1945906844               |
| SNP_P3_21351_24894181 | NC_021161.1    | Ca_kabuli_chr02 | 24894181                | TT                              | CC                | 1945906846               |
| SNP_P3_21352_24902992 | NC_021161.1    | Ca_kabuli_chr02 | 24902992                | TT                              | CC                | 1945906848               |
| SNP_P3_21353_24940445 | NC_021161.1    | Ca_kabuli_chr02 | 24940445                | AA                              | TT                | 1945906850               |
| SNP_P3_21354_24940478 | NC_021161.1    | Ca_kabuli_chr02 | 24940478                | GG                              | TT                | 1945906852               |
| SNP_P3_21355_24940499 | NC_021161.1    | Ca_kabuli_chr02 | 24940499                | TT                              | GG                | 1945906854               |
| SNP_P3_21356_24940505 | NC_021161.1    | Ca_kabuli_chr02 | 24940505                | CC                              | TT                | 1945906855               |
| SNP_P3_21357_24940736 | NC_021161.1    | Ca_kabuli_chr02 | 24940736                | AA                              | GG                | 1945906857               |
| SNP_P3_21358_24943018 | NC_021161.1    | Ca_kabuli_chr02 | 24943018                | TT                              | GG                | 1945906859               |
| SNP_P3_21359_24943056 | NC_021161.1    | Ca_kabuli_chr02 | 24943056                | GG                              | TT                | 1945906861               |
| SNP_P3_21360_24943092 | NC_021161.1    | Ca_kabuli_chr02 | 24943092                | AA                              | GG                | 1945906863               |
| SNP_P3_21361_24943095 | NC_021161.1    | Ca_kabuli_chr02 | 24943095                | CC                              | TT                | 1945906865               |
| SNP_P3_21362_24943150 | NC_021161.1    | Ca_kabuli_chr02 | 24943150                | CC                              | GG                | 1945906866               |
| SNP_P3_21363_24943153 | NC_021161.1    | Ca_kabuli_chr02 | 24943153                | AA                              | GG                | 1945906868               |
| SNP_P3_21364_24943179 | NC_021161.1    | Ca_kabuli_chr02 | 24943179                | AA                              | GG                | 1945906870               |
| SNP_P3_21365_24943200 | NC_021161.1    | Ca_kabuli_chr02 | 24943200                | AA                              | GG                | 1945906872               |
| SNP_P3_21367_24943310 | NC_021161.1    | Ca_kabuli_chr02 | 24943310                | AA                              | GG                | 1945906874               |
| SNP_P3_21368_24943435 | NC_021161.1    | Ca_kabuli_chr02 | 24943435                | TT                              | CC                | 1945906876               |

| SNPs IDs              | Chromosome IDs | Chromosomes     | Physical positions (bp) | CDC Frontier (Reference genome) | (Pusa 256 & HPNB) | NCBI SNPdb Accession IDs |
|-----------------------|----------------|-----------------|-------------------------|---------------------------------|-------------------|--------------------------|
| SNP_P3_21369_24943497 | NC_021161.1    | Ca_kabuli_chr02 | 24943497                | AA                              | GG                | 1945906877               |
| SNP_P3_21370_24947810 | NC_021161.1    | Ca_kabuli_chr02 | 24947810                | CC                              | TT                | 1945906879               |
| SNP_P3_21371_24947830 | NC_021161.1    | Ca_kabuli_chr02 | 24947830                | CC                              | TT                | 1945906881               |
| SNP_P3_21372_24947831 | NC_021161.1    | Ca_kabuli_chr02 | 24947831                | TT                              | CC                | 1945906883               |
| SNP_P3_21373_24947843 | NC_021161.1    | Ca_kabuli_chr02 | 24947843                | TT                              | AA                | 1945906885               |
| SNP_P3_21374_24947844 | NC_021161.1    | Ca_kabuli_chr02 | 24947844                | GG                              | AA                | 1945906887               |
| SNP_P3_21375_24947849 | NC_021161.1    | Ca_kabuli_chr02 | 24947849                | GG                              | AA                | 1945906889               |
| SNP_P3_21376_24947888 | NC_021161.1    | Ca_kabuli_chr02 | 24947888                | TT                              | CC                | 1945906890               |
| SNP_P3_21377_24947934 | NC_021161.1    | Ca_kabuli_chr02 | 24947934                | GG                              | AA                | 1945906892               |
| SNP_P3_21378_24947977 | NC_021161.1    | Ca_kabuli_chr02 | 24947977                | CC                              | TT                | 1945906894               |
| SNP_P3_21379_24948010 | NC_021161.1    | Ca_kabuli_chr02 | 24948010                | AA                              | GG                | 1945906896               |
| SNP_P3_21380_24948150 | NC_021161.1    | Ca_kabuli_chr02 | 24948150                | AA                              | GG                | 1945906898               |
| SNP_P3_21382_24948227 | NC_021161.1    | Ca_kabuli_chr02 | 24948227                | GG                              | AA                | 1945906899               |
| SNP_P3_21384_24948285 | NC_021161.1    | Ca_kabuli_chr02 | 24948285                | TT                              | CC                | 1945906901               |
| SNP_P3_21385_24948319 | NC_021161.1    | Ca_kabuli_chr02 | 24948319                | CC                              | AA                | 1945906903               |
| SNP_P3_21386_24962453 | NC_021161.1    | Ca_kabuli_chr02 | 24962453                | GG                              | AA                | 1945906905               |
| SNP_P3_21387_24969006 | NC_021161.1    | Ca_kabuli_chr02 | 24969006                | CC                              | AA                | 1945906907               |
| SNP_P3_21388_24969018 | NC_021161.1    | Ca_kabuli_chr02 | 24969018                | AA                              | GG                | 1945906908               |
| SNP_P3_21389_24969062 | NC_021161.1    | Ca_kabuli_chr02 | 24969062                | TT                              | CC                | 1945906910               |
| SNP_P3_21390_24969076 | NC_021161.1    | Ca_kabuli_chr02 | 24969076                | TT                              | AA                | 1945906912               |
| SNP_P3_21391_24969080 | NC_021161.1    | Ca_kabuli_chr02 | 24969080                | AA                              | CC                | 1945906914               |
| SNP_P3_21392_24969409 | NC_021161.1    | Ca_kabuli_chr02 | 24969409                | AA                              | GG                | 1945906915               |
| SNP_P3_21393_24969413 | NC_021161.1    | Ca_kabuli_chr02 | 24969413                | GG                              | CC                | 1945906917               |
| SNP_P3_21394_24969422 | NC_021161.1    | Ca_kabuli_chr02 | 24969422                | GG                              | AA                | 1945906919               |
| SNP_P3_21395_24969617 | NC_021161.1    | Ca_kabuli_chr02 | 24969617                | GG                              | AA                | 1945906921               |
| SNP_P3_21396_25025016 | NC_021161.1    | Ca_kabuli_chr02 | 25025016                | CC                              | TT                | 1945906923               |
| SNP_P3_21397_25025121 | NC_021161.1    | Ca_kabuli_chr02 | 25025121                | CC                              | TT                | 1945906924               |
| SNP_P3_21398_25025190 | NC_021161.1    | Ca_kabuli_chr02 | 25025190                | CC                              | TT                | 1945906926               |
| SNP_P3_21399_25025200 | NC_021161.1    | Ca_kabuli_chr02 | 25025200                | CC                              | TT                | 1945906928               |
| SNP_P3_21401_25025240 | NC_021161.1    | Ca_kabuli_chr02 | 25025240                | GG                              | AA                | 1945906930               |
| SNP_P3_21402_25025294 | NC_021161.1    | Ca_kabuli_chr02 | 25025294                | CC                              | TT                | 1945906931               |
| SNP_P3_21403_25025358 | NC_021161.1    | Ca_kabuli_chr02 | 25025358                | GG                              | AA                | 1945906933               |
| SNP_P3_21406_25095840 | NC_021161.1    | Ca_kabuli_chr02 | 25095840                | TT                              | CC                | 1945906935               |
| SNP_P3_21407_25096205 | NC_021161.1    | Ca_kabuli_chr02 | 25096205                | TT                              | GG                | 1945906937               |
| SNP_P3_21408_25096244 | NC_021161.1    | Ca_kabuli_chr02 | 25096244                | TT                              | CC                | 1945906939               |
| SNP_P3_21409_25096256 | NC_021161.1    | Ca_kabuli_chr02 | 25096256                | AA                              | GG                | 1945906940               |
| SNP_P3_21410_25096259 | NC_021161.1    | Ca_kabuli_chr02 | 25096259                | TT                              | CC                | 1945906942               |
| SNP_P3_21412_25130461 | NC_021161.1    | Ca_kabuli_chr02 | 25130461                | TT                              | GG                | 1945906944               |
| SNP_P3_21414_25136116 | NC_021161.1    | Ca_kabuli_chr02 | 25136116                | CC                              | GG                | 1945906946               |
| SNP_P3_21415_25156681 | NC_021161.1    | Ca_kabuli_chr02 | 25156681                | TT                              | AA                | 1945906947               |
| SNP_P3_21416_25156685 | NC_021161.1    | Ca_kabuli_chr02 | 25156685                | GG                              | AA                | 1945906949               |
| SNP_P3_21417_25156711 | NC_021161.1    | Ca_kabuli_chr02 | 25156711                | TT                              | CC                | 1945906951               |

| SNPs IDs              | Chromosome IDs | Chromosomes     | Physical positions (bp) | CDC Frontier (Reference genome) | (Pusa 256 & HPNB) | NCBI SNPdb Accession IDs |
|-----------------------|----------------|-----------------|-------------------------|---------------------------------|-------------------|--------------------------|
| SNP_P3_21418_25157289 | NC_021161.1    | Ca_kabuli_chr02 | 25157289                | TT                              | CC                | 1945906953               |
| SNP_P3_21419_25157291 | NC_021161.1    | Ca_kabuli_chr02 | 25157291                | AA                              | CC                | 1945906955               |
| SNP_P3_21420_25179084 | NC_021161.1    | Ca_kabuli_chr02 | 25179084                | GG                              | AA                | 1945906956               |
| SNP_P3_21421_25179466 | NC_021161.1    | Ca_kabuli_chr02 | 25179466                | AA                              | TT                | 1945906958               |
| SNP_P3_21422_25179473 | NC_021161.1    | Ca_kabuli_chr02 | 25179473                | AA                              | TT                | 1945906960               |
| SNP_P3_21423_25179474 | NC_021161.1    | Ca_kabuli_chr02 | 25179474                | AA                              | TT                | 1945906962               |
| SNP_P3_21424_25188186 | NC_021161.1    | Ca_kabuli_chr02 | 25188186                | CC                              | TT                | 1945906963               |
| SNP_P3_21425_25205271 | NC_021161.1    | Ca_kabuli_chr02 | 25205271                | CC                              | GG                | 1945906965               |
| SNP_P3_21427_25224365 | NC_021161.1    | Ca_kabuli_chr02 | 25224365                | GG                              | AA                | 1945906967               |
| SNP_P3_21428_25224450 | NC_021161.1    | Ca_kabuli_chr02 | 25224450                | CC                              | TT                | 1945906969               |
| SNP_P3_21429_25224713 | NC_021161.1    | Ca_kabuli_chr02 | 25224713                | GG                              | AA                | 1945906971               |
| SNP_P3_21430_25224717 | NC_021161.1    | Ca_kabuli_chr02 | 25224717                | GG                              | AA                | 1945906972               |
| SNP_P3_21431_25224723 | NC_021161.1    | Ca_kabuli_chr02 | 25224723                | AA                              | GG                | 1945906974               |
| SNP_P3_21432_25224724 | NC_021161.1    | Ca_kabuli_chr02 | 25224724                | CC                              | TT                | 1945906976               |
| SNP_P3_21433_25224736 | NC_021161.1    | Ca_kabuli_chr02 | 25224736                | TT                              | CC                | 1945906978               |
| SNP_P3_21435_25341939 | NC_021161.1    | Ca_kabuli_chr02 | 25341939                | AA                              | GG                | 1945906979               |
| SNP_P3_21436_25342905 | NC_021161.1    | Ca_kabuli_chr02 | 25342905                | GG                              | AA                | 1945906981               |
| SNP_P3_21437_25435818 | NC_021161.1    | Ca_kabuli_chr02 | 25435818                | TT                              | CC                | 1945906983               |
| SNP_P3_21438_25444169 | NC_021161.1    | Ca_kabuli_chr02 | 25444169                | GG                              | AA                | 1945906985               |
| SNP_P3_21440_25444366 | NC_021161.1    | Ca_kabuli_chr02 | 25444366                | TT                              | CC                | 1945906987               |
| SNP_P3_21441_25448787 | NC_021161.1    | Ca_kabuli_chr02 | 25448787                | TT                              | CC                | 1945906988               |
| SNP_P3_21442_25450913 | NC_021161.1    | Ca_kabuli_chr02 | 25450913                | TT                              | CC                | 1945906990               |
| SNP_P3_21443_25450924 | NC_021161.1    | Ca_kabuli_chr02 | 25450924                | AA                              | CC                | 1945906992               |
| SNP_P3_21444_25450945 | NC_021161.1    | Ca_kabuli_chr02 | 25450945                | AA                              | CC                | 1945906994               |
| SNP_P3_21445_25450974 | NC_021161.1    | Ca_kabuli_chr02 | 25450974                | TT                              | GG                | 1945906996               |
| SNP_P3_21446_25450986 | NC_021161.1    | Ca_kabuli_chr02 | 25450986                | TT                              | CC                | 1945906997               |
| SNP_P3_21447_25451015 | NC_021161.1    | Ca_kabuli_chr02 | 25451015                | AA                              | GG                | 1945906999               |
| SNP_P3_21448_25451035 | NC_021161.1    | Ca_kabuli_chr02 | 25451035                | GG                              | AA                | 1945907001               |
| SNP_P3_21449_25451041 | NC_021161.1    | Ca_kabuli_chr02 | 25451041                | AA                              | GG                | 1945907003               |
| SNP_P3_21450_25451126 | NC_021161.1    | Ca_kabuli_chr02 | 25451126                | TT                              | CC                | 1945907004               |
| SNP_P3_21451_25451144 | NC_021161.1    | Ca_kabuli_chr02 | 25451144                | AA                              | TT                | 1945907006               |
| SNP_P3_21452_25451293 | NC_021161.1    | Ca_kabuli_chr02 | 25451293                | GG                              | TT                | 1945907008               |
| SNP_P3_21453_25451298 | NC_021161.1    | Ca_kabuli_chr02 | 25451298                | GG                              | AA                | 1945907010               |
| SNP_P3_21454_25453083 | NC_021161.1    | Ca_kabuli_chr02 | 25453083                | AA                              | TT                | 1945907012               |
| SNP_P3_21455_25453830 | NC_021161.1    | Ca_kabuli_chr02 | 25453830                | AA                              | GG                | 1945907013               |
| SNP_P3_21457_25528533 | NC_021161.1    | Ca_kabuli_chr02 | 25528533                | TT                              | CC                | 1945907015               |
| SNP_P3_21458_25528650 | NC_021161.1    | Ca_kabuli_chr02 | 25528650                | TT                              | CC                | 1945907017               |
| SNP_P3_21459_25528653 | NC_021161.1    | Ca_kabuli_chr02 | 25528653                | AA                              | GG                | 1945907019               |
| SNP_P3_21460_25528675 | NC_021161.1    | Ca_kabuli_chr02 | 25528675                | AA                              | GG                | 1945907020               |
| SNP_P3_21461_25528909 | NC_021161.1    | Ca_kabuli_chr02 | 25528909                | AA                              | GG                | 1945907022               |
| SNP_P3_21462_25528912 | NC_021161.1    | Ca_kabuli_chr02 | 25528912                | TT                              | GG                | 1945907024               |
| SNP_P3_21463_25528937 | NC_021161.1    | Ca_kabuli_chr02 | 25528937                | GG                              | CC                | 1945907026               |

| SNPs IDs              | Chromosome IDs | Chromosomes     | Physical positions (bp) | CDC Frontier (Reference genome) | (Pusa 256 & HPNB) | NCBI SNPdb Accession IDs |
|-----------------------|----------------|-----------------|-------------------------|---------------------------------|-------------------|--------------------------|
| SNP_P3_21464_25528945 | NC_021161.1    | Ca_kabuli_chr02 | 25528945                | TT                              | GG                | 1945907028               |
| SNP_P3_21465_25528955 | NC_021161.1    | Ca_kabuli_chr02 | 25528955                | CC                              | AA                | 1945907029               |
| SNP_P3_21466_25528977 | NC_021161.1    | Ca_kabuli_chr02 | 25528977                | CC                              | TT                | 1945907031               |
| SNP_P3_21467_25529031 | NC_021161.1    | Ca_kabuli_chr02 | 25529031                | TT                              | AA                | 1945907033               |
| SNP_P3_21468_25529039 | NC_021161.1    | Ca_kabuli_chr02 | 25529039                | AA                              | GG                | 1945907035               |
| SNP_P3_21469_25529052 | NC_021161.1    | Ca_kabuli_chr02 | 25529052                | TT                              | CC                | 1945907036               |
| SNP_P3_21470_25529093 | NC_021161.1    | Ca_kabuli_chr02 | 25529093                | TT                              | GG                | 1945907038               |
| SNP_P3_21471_25529094 | NC_021161.1    | Ca_kabuli_chr02 | 25529094                | CC                              | AA                | 1945907040               |
| SNP_P3_21472_25529104 | NC_021161.1    | Ca_kabuli_chr02 | 25529104                | AA                              | CC                | 1945907042               |
| SNP_P3_21473_25529130 | NC_021161.1    | Ca_kabuli_chr02 | 25529130                | TT                              | CC                | 1945907044               |
| SNP_P3_21474_25529148 | NC_021161.1    | Ca_kabuli_chr02 | 25529148                | TT                              | CC                | 1945907045               |
| SNP_P3_21475_25529153 | NC_021161.1    | Ca_kabuli_chr02 | 25529153                | CC                              | AA                | 1945907047               |
| SNP_P3_21476_25529234 | NC_021161.1    | Ca_kabuli_chr02 | 25529234                | AA                              | GG                | 1945907049               |
| SNP_P3_21477_25529403 | NC_021161.1    | Ca_kabuli_chr02 | 25529403                | CC                              | AA                | 1945907051               |
| SNP_P3_21478_25529422 | NC_021161.1    | Ca_kabuli_chr02 | 25529422                | AA                              | GG                | 1945907052               |
| SNP_P3_21479_25529480 | NC_021161.1    | Ca_kabuli_chr02 | 25529480                | AA                              | GG                | 1945907054               |
| SNP_P3_21480_25529527 | NC_021161.1    | Ca_kabuli_chr02 | 25529527                | AA                              | CC                | 1945907056               |
| SNP_P3_21481_25529546 | NC_021161.1    | Ca_kabuli_chr02 | 25529546                | AA                              | TT                | 1945907058               |
| SNP_P3_21482_25529552 | NC_021161.1    | Ca_kabuli_chr02 | 25529552                | GG                              | AA                | 1945907060               |
| SNP_P3_21483_25529641 | NC_021161.1    | Ca_kabuli_chr02 | 25529641                | TT                              | GG                | 1945907061               |
| SNP_P3_21484_25529643 | NC_021161.1    | Ca_kabuli_chr02 | 25529643                | TT                              | CC                | 1945907063               |
| SNP_P3_21485_25529816 | NC_021161.1    | Ca_kabuli_chr02 | 25529816                | CC                              | TT                | 1945907065               |
| SNP_P3_21486_25529824 | NC_021161.1    | Ca_kabuli_chr02 | 25529824                | CC                              | TT                | 1945907067               |
| SNP_P3_21487_25529836 | NC_021161.1    | Ca_kabuli_chr02 | 25529836                | CC                              | TT                | 1945907068               |
| SNP_P3_21489_25529914 | NC_021161.1    | Ca_kabuli_chr02 | 25529914                | AA                              | GG                | 1945907070               |
| SNP_P3_21490_25529920 | NC_021161.1    | Ca_kabuli_chr02 | 25529920                | TT                              | GG                | 1945907072               |
| SNP_P3_21491_25529937 | NC_021161.1    | Ca_kabuli_chr02 | 25529937                | TT                              | CC                | 1945907074               |
| SNP_P3_21492_25529979 | NC_021161.1    | Ca_kabuli_chr02 | 25529979                | CC                              | TT                | 1945907076               |
| SNP_P3_21494_25534719 | NC_021161.1    | Ca_kabuli_chr02 | 25534719                | TT                              | GG                | 1945907077               |
| SNP_P3_21495_25535002 | NC_021161.1    | Ca_kabuli_chr02 | 25535002                | AA                              | GG                | 1945907079               |
| SNP_P3_21497_25535135 | NC_021161.1    | Ca_kabuli_chr02 | 25535135                | TT                              | CC                | 1945907081               |
| SNP_P3_21498_25535151 | NC_021161.1    | Ca_kabuli_chr02 | 25535151                | TT                              | CC                | 1945907083               |
| SNP_P3_21499_25535154 | NC_021161.1    | Ca_kabuli_chr02 | 25535154                | TT                              | GG                | 1945907085               |
| SNP_P3_21500_25535166 | NC_021161.1    | Ca_kabuli_chr02 | 25535166                | TT                              | CC                | 1945907086               |
| SNP_P3_21501_25549663 | NC_021161.1    | Ca_kabuli_chr02 | 25549663                | AA                              | CC                | 1945907088               |
| SNP_P3_21502_25551951 | NC_021161.1    | Ca_kabuli_chr02 | 25551951                | GG                              | AA                | 1945907090               |
| SNP_P3_21504_25554591 | NC_021161.1    | Ca_kabuli_chr02 | 25554591                | GG                              | AA                | 1945907092               |
| SNP_P3_21506_25603355 | NC_021161.1    | Ca_kabuli_chr02 | 25603355                | TT                              | CC                | 1945907093               |
| SNP_P3_21508_25603558 | NC_021161.1    | Ca_kabuli_chr02 | 25603558                | TT                              | CC                | 1945907095               |
| SNP_P3_21509_25603616 | NC_021161.1    | Ca_kabuli_chr02 | 25603616                | TT                              | GG                | 1945907097               |
| SNP_P3_21510_25609623 | NC_021161.1    | Ca_kabuli_chr02 | 25609623                | CC                              | AA                | 1945907099               |
| SNP_P3_21511_25609914 | NC_021161.1    | Ca_kabuli_chr02 | 25609914                | GG                              | AA                | 1945907101               |

| SNPs IDs              | Chromosome IDs | Chromosomes     | Physical positions (bp) | CDC Frontier (Reference genome) | (Pusa 256 & HPNB) | NCBI SNPdb Accession IDs |
|-----------------------|----------------|-----------------|-------------------------|---------------------------------|-------------------|--------------------------|
| SNP_P3_21512_25609926 | NC_021161.1    | Ca_kabuli_chr02 | 25609926                | CC                              | AA                | 1945907102               |
| SNP_P3_21513_25609998 | NC_021161.1    | Ca_kabuli_chr02 | 25609998                | TT                              | CC                | 1945907104               |
| SNP_P3_21514_25610036 | NC_021161.1    | Ca_kabuli_chr02 | 25610036                | CC                              | TT                | 1945907106               |
| SNP_P3_21515_25615434 | NC_021161.1    | Ca_kabuli_chr02 | 25615434                | GG                              | AA                | 1945907108               |
| SNP_P3_21516_25680160 | NC_021161.1    | Ca_kabuli_chr02 | 25680160                | TT                              | CC                | 1945907109               |
| SNP_P3_21517_25680174 | NC_021161.1    | Ca_kabuli_chr02 | 25680174                | CC                              | TT                | 1945907111               |
| SNP_P3_21518_25680387 | NC_021161.1    | Ca_kabuli_chr02 | 25680387                | TT                              | GG                | 1945907113               |
| SNP_P3_21519_25680390 | NC_021161.1    | Ca_kabuli_chr02 | 25680390                | CC                              | TT                | 1945907115               |
| SNP_P3_21520_25680504 | NC_021161.1    | Ca_kabuli_chr02 | 25680504                | AA                              | TT                | 1945907117               |
| SNP_P3_21521_25680570 | NC_021161.1    | Ca_kabuli_chr02 | 25680570                | AA                              | GG                | 1945907118               |
| SNP_P3_21522_25680581 | NC_021161.1    | Ca_kabuli_chr02 | 25680581                | CC                              | TT                | 1945907120               |
| SNP_P3_21523_25680583 | NC_021161.1    | Ca_kabuli_chr02 | 25680583                | TT                              | CC                | 1945907122               |
| SNP_P3_21524_25680652 | NC_021161.1    | Ca_kabuli_chr02 | 25680652                | AA                              | TT                | 1945907124               |
| SNP_P3_21525_25680654 | NC_021161.1    | Ca_kabuli_chr02 | 25680654                | TT                              | AA                | 1945907125               |
| SNP_P3_21526_25680670 | NC_021161.1    | Ca_kabuli_chr02 | 25680670                | AA                              | GG                | 1945907127               |
| SNP_P3_21527_25683026 | NC_021161.1    | Ca_kabuli_chr02 | 25683026                | TT                              | CC                | 1945907129               |
| SNP_P3_21528_25683068 | NC_021161.1    | Ca_kabuli_chr02 | 25683068                | GG                              | TT                | 1945907131               |
| SNP_P3_21529_25683303 | NC_021161.1    | Ca_kabuli_chr02 | 25683303                | TT                              | CC                | 1945907133               |
| SNP_P3_21530_25683306 | NC_021161.1    | Ca_kabuli_chr02 | 25683306                | TT                              | CC                | 1945907134               |
| SNP_P3_21531_25684926 | NC_021161.1    | Ca_kabuli_chr02 | 25684926                | AA                              | CC                | 1945907136               |
| SNP_P3_21532_25698112 | NC_021161.1    | Ca_kabuli_chr02 | 25698112                | GG                              | AA                | 1945907138               |
| SNP_P3_21533_25708432 | NC_021161.1    | Ca_kabuli_chr02 | 25708432                | GG                              | TT                | 1945907140               |
| SNP_P3_21534_25708805 | NC_021161.1    | Ca_kabuli_chr02 | 25708805                | TT                              | CC                | 1945907141               |
| SNP_P3_21535_25708835 | NC_021161.1    | Ca_kabuli_chr02 | 25708835                | AA                              | GG                | 1945907143               |
| SNP_P3_21536_25708866 | NC_021161.1    | Ca_kabuli_chr02 | 25708866                | CC                              | TT                | 1945907145               |
| SNP_P3_21537_25708892 | NC_021161.1    | Ca_kabuli_chr02 | 25708892                | AA                              | GG                | 1945907147               |
| SNP_P3_21538_25708899 | NC_021161.1    | Ca_kabuli_chr02 | 25708899                | TT                              | GG                | 1945907149               |
| SNP_P3_21539_25712916 | NC_021161.1    | Ca_kabuli_chr02 | 25712916                | GG                              | CC                | 1945907150               |
| SNP_P3_21540_25712940 | NC_021161.1    | Ca_kabuli_chr02 | 25712940                | TT                              | CC                | 1945907152               |
| SNP_P3_21541_25712946 | NC_021161.1    | Ca_kabuli_chr02 | 25712946                | CC                              | AA                | 1945907154               |
| SNP_P3_21542_25712955 | NC_021161.1    | Ca_kabuli_chr02 | 25712955                | AA                              | CC                | 1945907156               |
| SNP_P3_21543_25713199 | NC_021161.1    | Ca_kabuli_chr02 | 25713199                | GG                              | TT                | 1945907157               |
| SNP_P3_21544_25713222 | NC_021161.1    | Ca_kabuli_chr02 | 25713222                | GG                              | AA                | 1945907159               |
| SNP_P3_21545_25713261 | NC_021161.1    | Ca_kabuli_chr02 | 25713261                | CC                              | GG                | 1945907161               |
| SNP_P3_21546_25713295 | NC_021161.1    | Ca_kabuli_chr02 | 25713295                | AA                              | TT                | 1945907163               |
| SNP_P3_21547_25725969 | NC_021161.1    | Ca_kabuli_chr02 | 25725969                | CC                              | TT                | 1945907165               |
| SNP_P3_21548_25725970 | NC_021161.1    | Ca_kabuli_chr02 | 25725970                | AA                              | GG                | 1945907166               |
| SNP_P3_21549_25725986 | NC_021161.1    | Ca_kabuli_chr02 | 25725986                | GG                              | AA                | 1945907168               |
| SNP_P3_21550_25728276 | NC_021161.1    | Ca_kabuli_chr02 | 25728276                | TT                              | CC                | 1945907170               |
| SNP_P3_21552_25732247 | NC_021161.1    | Ca_kabuli_chr02 | 25732247                | AA                              | CC                | 1945907172               |
| SNP_P3_21554_25733092 | NC_021161.1    | Ca_kabuli_chr02 | 25733092                | AA                              | GG                | 1945907173               |
| SNP_P3_21555_25733096 | NC_021161.1    | Ca_kabuli_chr02 | 25733096                | AA                              | GG                | 1945907175               |

| SNPs IDs              | Chromosome IDs | Chromosomes     | Physical positions (bp) | CDC Frontier (Reference genome) | (Pusa 256 & HPNB) | NCBI SNPdb Accession IDs |
|-----------------------|----------------|-----------------|-------------------------|---------------------------------|-------------------|--------------------------|
| SNP_P3_21556_25733108 | NC_021161.1    | Ca_kabuli_chr02 | 25733108                | CC                              | TT                | 1945907177               |
| SNP_P3_21557_25733141 | NC_021161.1    | Ca_kabuli_chr02 | 25733141                | AA                              | GG                | 1945907179               |
| SNP_P3_21558_25744056 | NC_021161.1    | Ca_kabuli_chr02 | 25744056                | GG                              | TT                | 1945907181               |
| SNP_P3_21559_25756967 | NC_021161.1    | Ca_kabuli_chr02 | 25756967                | GG                              | AA                | 1945907182               |
| SNP_P3_21561_25795239 | NC_021161.1    | Ca_kabuli_chr02 | 25795239                | AA                              | TT                | 1945907184               |
| SNP_P3_21562_25812624 | NC_021161.1    | Ca_kabuli_chr02 | 25812624                | GG                              | AA                | 1945907186               |
| SNP_P3_21563_25812634 | NC_021161.1    | Ca_kabuli_chr02 | 25812634                | AA                              | GG                | 1945907188               |
| SNP_P3_21565_25832168 | NC_021161.1    | Ca_kabuli_chr02 | 25832168                | CC                              | TT                | 1945907190               |
| SNP_P3_21566_25845920 | NC_021161.1    | Ca_kabuli_chr02 | 25845920                | AA                              | TT                | 1945907191               |
| SNP_P3_21568_25901111 | NC_021161.1    | Ca_kabuli_chr02 | 25901111                | CC                              | GG                | 1945907193               |
| SNP_P3_21569_25953217 | NC_021161.1    | Ca_kabuli_chr02 | 25953217                | TT                              | AA                | 1945907195               |
| SNP_P3_21570_26029275 | NC_021161.1    | Ca_kabuli_chr02 | 26029275                | AA                              | CC                | 1945907197               |
| SNP_P3_21571_26033930 | NC_021161.1    | Ca_kabuli_chr02 | 26033930                | TT                              | GG                | 1945907198               |
| SNP_P3_21573_26096928 | NC_021161.1    | Ca_kabuli_chr02 | 26096928                | CC                              | TT                | 1945907200               |
| SNP_P3_21574_26101734 | NC_021161.1    | Ca_kabuli_chr02 | 26101734                | TT                              | AA                | 1945907202               |
| SNP_P3_21575_26101924 | NC_021161.1    | Ca_kabuli_chr02 | 26101924                | AA                              | TT                | 1945907204               |
| SNP_P3_21578_26404043 | NC_021161.1    | Ca_kabuli_chr02 | 26404043                | CC                              | TT                | 1945907206               |
| SNP_P3_21579_26426016 | NC_021161.1    | Ca_kabuli_chr02 | 26426016                | CC                              | TT                | 1945907207               |
| SNP_P3_21580_26438718 | NC_021161.1    | Ca_kabuli_chr02 | 26438718                | TT                              | GG                | 1945907209               |
| SNP_P3_21581_26438837 | NC_021161.1    | Ca_kabuli_chr02 | 26438837                | GG                              | AA                | 1945907211               |
| SNP_P3_21582_26438856 | NC_021161.1    | Ca_kabuli_chr02 | 26438856                | AA                              | GG                | 1945907213               |
| SNP_P3_21583_26446488 | NC_021161.1    | Ca_kabuli_chr02 | 26446488                | CC                              | TT                | 1945907214               |
| SNP_P3_21584_26448592 | NC_021161.1    | Ca_kabuli_chr02 | 26448592                | AA                              | GG                | 1945907216               |
| SNP_P3_21585_26448599 | NC_021161.1    | Ca_kabuli_chr02 | 26448599                | AA                              | GG                | 1945907218               |
| SNP_P3_21586_26452106 | NC_021161.1    | Ca_kabuli_chr02 | 26452106                | GG                              | AA                | 1945907220               |
| SNP_P3_21587_26457480 | NC_021161.1    | Ca_kabuli_chr02 | 26457480                | AA                              | GG                | 1945907222               |
| SNP_P3_21588_26480427 | NC_021161.1    | Ca_kabuli_chr02 | 26480427                | GG                              | AA                | 1945907223               |
| SNP_P3_21589_26480444 | NC_021161.1    | Ca_kabuli_chr02 | 26480444                | TT                              | AA                | 1945907225               |
| SNP_P3_21591_26488098 | NC_021161.1    | Ca_kabuli_chr02 | 26488098                | AA                              | GG                | 1945907227               |
| SNP_P3_21592_26488103 | NC_021161.1    | Ca_kabuli_chr02 | 26488103                | GG                              | AA                | 1945907229               |
| SNP_P3_21593_26488165 | NC_021161.1    | Ca_kabuli_chr02 | 26488165                | AA                              | TT                | 1945907230               |
| SNP_P3_21594_26488177 | NC_021161.1    | Ca_kabuli_chr02 | 26488177                | AA                              | GG                | 1945907232               |
| SNP_P3_21595_26488211 | NC_021161.1    | Ca_kabuli_chr02 | 26488211                | CC                              | TT                | 1945907234               |
| SNP_P3_21596_26488224 | NC_021161.1    | Ca_kabuli_chr02 | 26488224                | GG                              | TT                | 1945907236               |
| SNP_P3_21597_26488307 | NC_021161.1    | Ca_kabuli_chr02 | 26488307                | CC                              | TT                | 1945907238               |
| SNP_P3_21598_26488330 | NC_021161.1    | Ca_kabuli_chr02 | 26488330                | GG                              | AA                | 1945907239               |
| SNP_P3_21600_26488361 | NC_021161.1    | Ca_kabuli_chr02 | 26488361                | AA                              | GG                | 1945907241               |
| SNP_P3_21601_26488372 | NC_021161.1    | Ca_kabuli_chr02 | 26488372                | AA                              | GG                | 1945907243               |
| SNP_P3_21602_26488397 | NC_021161.1    | Ca_kabuli_chr02 | 26488397                | AA                              | CC                | 1945907245               |
| SNP_P3_21603_26488443 | NC_021161.1    | Ca_kabuli_chr02 | 26488443                | AA                              | TT                | 1945907246               |
| SNP_P3_21604_26488445 | NC_021161.1    | Ca_kabuli_chr02 | 26488445                | AA                              | TT                | 1945907248               |
| SNP_P3_21605_26488465 | NC_021161.1    | Ca_kabuli_chr02 | 26488465                | CC                              | TT                | 1945907250               |



| SNPs IDs              | Chromosome IDs | Chromosomes     | Physical positions (bp) | CDC Frontier (Reference genome) | (Pusa 256 & HPNB) | NCBI SNPdb Accession IDs |
|-----------------------|----------------|-----------------|-------------------------|---------------------------------|-------------------|--------------------------|
| SNP_P3_21606_26504149 | NC_021161.1    | Ca_kabuli_chr02 | 26504149                | AA                              | GG                | 1945907252               |
| SNP_P3_21608_26504422 | NC_021161.1    | Ca_kabuli_chr02 | 26504422                | AA                              | GG                | 1945907254               |
| SNP_P3_21609_26504558 | NC_021161.1    | Ca_kabuli_chr02 | 26504558                | AA                              | GG                | 1945907255               |
| SNP_P3_21611_26520575 | NC_021161.1    | Ca_kabuli_chr02 | 26520575                | CC                              | TT                | 1945907257               |
| SNP_P3_21612_26539016 | NC_021161.1    | Ca_kabuli_chr02 | 26539016                | GG                              | TT                | 1945907259               |
| SNP_P3_21614_26589623 | NC_021161.1    | Ca_kabuli_chr02 | 26589623                | GG                              | AA                | 1945907261               |
| SNP_P3_21615_26603185 | NC_021161.1    | Ca_kabuli_chr02 | 26603185                | CC                              | TT                | 1945907263               |
| SNP_P3_21616_26612128 | NC_021161.1    | Ca_kabuli_chr02 | 26612128                | GG                              | AA                | 1945907264               |
| SNP_P3_21617_26635205 | NC_021161.1    | Ca_kabuli_chr02 | 26635205                | CC                              | GG                | 1945907266               |
| SNP_P3_21618_26660340 | NC_021161.1    | Ca_kabuli_chr02 | 26660340                | GG                              | TT                | 1945907268               |
| SNP_P3_21619_26661349 | NC_021161.1    | Ca_kabuli_chr02 | 26661349                | AA                              | TT                | 1945907270               |
| SNP_P3_21620_26705771 | NC_021161.1    | Ca_kabuli_chr02 | 26705771                | GG                              | AA                | 1945907271               |
| SNP_P3_21621_26710052 | NC_021161.1    | Ca_kabuli_chr02 | 26710052                | GG                              | AA                | 1945907273               |
| SNP_P3_21622_26710807 | NC_021161.1    | Ca_kabuli_chr02 | 26710807                | GG                              | AA                | 1945907275               |
| SNP_P3_21623_26716080 | NC_021161.1    | Ca_kabuli_chr02 | 26716080                | GG                              | AA                | 1945907277               |
| SNP_P3_21624_26716086 | NC_021161.1    | Ca_kabuli_chr02 | 26716086                | AA                              | TT                | 1945907279               |
| SNP_P3_21625_26716100 | NC_021161.1    | Ca_kabuli_chr02 | 26716100                | GG                              | CC                | 1945907280               |
| SNP_P3_21626_26716101 | NC_021161.1    | Ca_kabuli_chr02 | 26716101                | CC                              | TT                | 1945907282               |
| SNP_P3_21627_26735982 | NC_021161.1    | Ca_kabuli_chr02 | 26735982                | GG                              | AA                | 1945907284               |
| SNP_P3_21628_26735997 | NC_021161.1    | Ca_kabuli_chr02 | 26735997                | TT                              | AA                | 1945907286               |
| SNP_P3_21629_26735998 | NC_021161.1    | Ca_kabuli_chr02 | 26735998                | GG                              | AA                | 1945907288               |
| SNP_P3_21630_26736032 | NC_021161.1    | Ca_kabuli_chr02 | 26736032                | AA                              | GG                | 1945907289               |
| SNP_P3_21632_26842239 | NC_021161.1    | Ca_kabuli_chr02 | 26842239                | GG                              | AA                | 1945907291               |
| SNP_P3_21633_26901560 | NC_021161.1    | Ca_kabuli_chr02 | 26901560                | AA                              | TT                | 1945907293               |
| SNP_P3_21634_26909279 | NC_021161.1    | Ca_kabuli_chr02 | 26909279                | GG                              | TT                | 1945907295               |
| SNP_P3_21635_26909527 | NC_021161.1    | Ca_kabuli_chr02 | 26909527                | TT                              | CC                | 1945907296               |
| SNP_P3_21636_26909733 | NC_021161.1    | Ca_kabuli_chr02 | 26909733                | AA                              | GG                | 1945907298               |
| SNP_P3_21637_26909837 | NC_021161.1    | Ca_kabuli_chr02 | 26909837                | AA                              | GG                | 1945907300               |
| SNP_P3_21638_26909867 | NC_021161.1    | Ca_kabuli_chr02 | 26909867                | AA                              | GG                | 1945907302               |
| SNP_P3_21639_26909876 | NC_021161.1    | Ca_kabuli_chr02 | 26909876                | TT                              | CC                | 1945907304               |
| SNP_P3_21640_26909886 | NC_021161.1    | Ca_kabuli_chr02 | 26909886                | AA                              | GG                | 1945907305               |
| SNP_P3_21641_26910130 | NC_021161.1    | Ca_kabuli_chr02 | 26910130                | AA                              | GG                | 1945907307               |
| SNP_P3_21642_26910131 | NC_021161.1    | Ca_kabuli_chr02 | 26910131                | AA                              | TT                | 1945907309               |
| SNP_P3_21643_26910244 | NC_021161.1    | Ca_kabuli_chr02 | 26910244                | AA                              | GG                | 1945907311               |
| SNP_P3_21644_26910274 | NC_021161.1    | Ca_kabuli_chr02 | 26910274                | AA                              | CC                | 1945907312               |
| SNP_P3_21645_26913677 | NC_021161.1    | Ca_kabuli_chr02 | 26913677                | AA                              | GG                | 1945907314               |
| SNP_P3_21646_26918306 | NC_021161.1    | Ca_kabuli_chr02 | 26918306                | TT                              | CC                | 1945907316               |
| SNP_P3_21647_26925591 | NC_021161.1    | Ca_kabuli_chr02 | 26925591                | CC                              | TT                | 1945907318               |
| SNP_P3_21648_26940527 | NC_021161.1    | Ca_kabuli_chr02 | 26940527                | CC                              | TT                | 1945907320               |
| SNP_P3_21649_26998067 | NC_021161.1    | Ca_kabuli_chr02 | 26998067                | CC                              | TT                | 1945907321               |
| SNP_P3_21650_27054335 | NC_021161.1    | Ca_kabuli_chr02 | 27054335                | AA                              | TT                | 1945907323               |
| SNP_P3_21651_27059555 | NC_021161.1    | Ca_kabuli_chr02 | 27059555                | CC                              | AA                | 1945907325               |

| SNPs IDs              | Chromosome IDs | Chromosomes     | Physical positions (bp) | CDC Frontier (Reference genome) | (Pusa 256 & HPNB) | NCBI SNPdb Accession IDs |
|-----------------------|----------------|-----------------|-------------------------|---------------------------------|-------------------|--------------------------|
| SNP_P3_21652_27094811 | NC_021161.1    | Ca_kabuli_chr02 | 27094811                | AA                              | GG                | 1945907327               |
| SNP_P3_21653_27135190 | NC_021161.1    | Ca_kabuli_chr02 | 27135190                | TT                              | CC                | 1945907329               |
| SNP_P3_21654_27137088 | NC_021161.1    | Ca_kabuli_chr02 | 27137088                | GG                              | AA                | 1945907330               |
| SNP_P3_21655_27137386 | NC_021161.1    | Ca_kabuli_chr02 | 27137386                | GG                              | AA                | 1945907332               |
| SNP_P3_21656_27140068 | NC_021161.1    | Ca_kabuli_chr02 | 27140068                | CC                              | TT                | 1945907334               |
| SNP_P3_21657_27141371 | NC_021161.1    | Ca_kabuli_chr02 | 27141371                | CC                              | TT                | 1945907336               |
| SNP_P3_21658_27141395 | NC_021161.1    | Ca_kabuli_chr02 | 27141395                | AA                              | GG                | 1945907337               |
| SNP_P3_21659_27156524 | NC_021161.1    | Ca_kabuli_chr02 | 27156524                | TT                              | CC                | 1945907339               |
| SNP_P3_21660_27190180 | NC_021161.1    | Ca_kabuli_chr02 | 27190180                | GG                              | TT                | 1945907341               |
| SNP_P3_21661_27192778 | NC_021161.1    | Ca_kabuli_chr02 | 27192778                | AA                              | TT                | 1945907343               |
| SNP_P3_21662_27192807 | NC_021161.1    | Ca_kabuli_chr02 | 27192807                | AA                              | CC                | 1945907345               |
| SNP_P3_21663_27192808 | NC_021161.1    | Ca_kabuli_chr02 | 27192808                | GG                              | AA                | 1945907346               |
| SNP_P3_21664_27192809 | NC_021161.1    | Ca_kabuli_chr02 | 27192809                | CC                              | TT                | 1945907348               |
| SNP_P3_21665_27192812 | NC_021161.1    | Ca_kabuli_chr02 | 27192812                | CC                              | TT                | 1945907350               |
| SNP_P3_21666_27192952 | NC_021161.1    | Ca_kabuli_chr02 | 27192952                | CC                              | GG                | 1945907352               |
| SNP_P3_21667_27193142 | NC_021161.1    | Ca_kabuli_chr02 | 27193142                | AA                              | TT                | 1945907353               |
| SNP_P3_21668_27194429 | NC_021161.1    | Ca_kabuli_chr02 | 27194429                | CC                              | TT                | 1945907355               |
| SNP_P3_21669_27194430 | NC_021161.1    | Ca_kabuli_chr02 | 27194430                | GG                              | AA                | 1945907357               |
| SNP_P3_21670_27194507 | NC_021161.1    | Ca_kabuli_chr02 | 27194507                | CC                              | TT                | 1945907359               |
| SNP_P3_21671_27194541 | NC_021161.1    | Ca_kabuli_chr02 | 27194541                | AA                              | GG                | 1945907361               |
| SNP_P3_21672_27210089 | NC_021161.1    | Ca_kabuli_chr02 | 27210089                | TT                              | AA                | 1945907362               |
| SNP_P3_21674_27250168 | NC_021161.1    | Ca_kabuli_chr02 | 27250168                | CC                              | TT                | 1945907364               |
| SNP_P3_21675_27254094 | NC_021161.1    | Ca_kabuli_chr02 | 27254094                | AA                              | TT                | 1945907366               |
| SNP_P3_21676_27254223 | NC_021161.1    | Ca_kabuli_chr02 | 27254223                | AA                              | GG                | 1945907368               |
| SNP_P3_21677_27254232 | NC_021161.1    | Ca_kabuli_chr02 | 27254232                | AA                              | GG                | 1945907369               |
| SNP_P3_21678_27254252 | NC_021161.1    | Ca_kabuli_chr02 | 27254252                | TT                              | CC                | 1945907371               |
| SNP_P3_21679_27254309 | NC_021161.1    | Ca_kabuli_chr02 | 27254309                | CC                              | TT                | 1945907373               |
| SNP_P3_21680_27254319 | NC_021161.1    | Ca_kabuli_chr02 | 27254319                | CC                              | TT                | 1945907375               |
| SNP_P3_21681_27254339 | NC_021161.1    | Ca_kabuli_chr02 | 27254339                | AA                              | GG                | 1945907377               |
| SNP_P3_21682_27261621 | NC_021161.1    | Ca_kabuli_chr02 | 27261621                | TT                              | GG                | 1945907378               |
| SNP_P3_21683_27261637 | NC_021161.1    | Ca_kabuli_chr02 | 27261637                | AA                              | TT                | 1945907380               |
| SNP_P3_21684_27261691 | NC_021161.1    | Ca_kabuli_chr02 | 27261691                | TT                              | GG                | 1945907382               |
| SNP_P3_21685_27278091 | NC_021161.1    | Ca_kabuli_chr02 | 27278091                | CC                              | TT                | 1945907384               |
| SNP_P3_21686_27280144 | NC_021161.1    | Ca_kabuli_chr02 | 27280144                | AA                              | TT                | 1945907386               |
| SNP_P3_21687_27325927 | NC_021161.1    | Ca_kabuli_chr02 | 27325927                | CC                              | TT                | 1945907387               |
| SNP_P3_21688_27325945 | NC_021161.1    | Ca_kabuli_chr02 | 27325945                | AA                              | GG                | 1945907389               |
| SNP_P3_21689_27325953 | NC_021161.1    | Ca_kabuli_chr02 | 27325953                | GG                              | CC                | 1945907391               |
| SNP_P3_21690_27325957 | NC_021161.1    | Ca_kabuli_chr02 | 27325957                | GG                              | AA                | 1945907393               |
| SNP_P3_21691_27325958 | NC_021161.1    | Ca_kabuli_chr02 | 27325958                | TT                              | CC                | 1945907394               |
| SNP_P3_21692_27325960 | NC_021161.1    | Ca_kabuli_chr02 | 27325960                | GG                              | TT                | 1945907396               |
| SNP_P3_21693_27325968 | NC_021161.1    | Ca_kabuli_chr02 | 27325968                | CC                              | AA                | 1945907398               |
| SNP_P3_21694_27325982 | NC_021161.1    | Ca_kabuli_chr02 | 27325982                | TT                              | CC                | 1945907400               |

| SNPs IDs              | Chromosome IDs | Chromosomes     | Physical positions (bp) | CDC Frontier (Reference genome) | (Pusa 256 & HPNB) | NCBI SNPdb Accession IDs |
|-----------------------|----------------|-----------------|-------------------------|---------------------------------|-------------------|--------------------------|
| SNP_P3_21695_27342878 | NC_021161.1    | Ca_kabuli_chr02 | 27342878                | CC                              | TT                | 1945907402               |
| SNP_P3_21696_27348121 | NC_021161.1    | Ca_kabuli_chr02 | 27348121                | TT                              | CC                | 1945907403               |
| SNP_P3_21697_27350822 | NC_021161.1    | Ca_kabuli_chr02 | 27350822                | GG                              | CC                | 1945907405               |
| SNP_P3_21698_27387320 | NC_021161.1    | Ca_kabuli_chr02 | 27387320                | AA                              | GG                | 1945907407               |
| SNP_P3_21699_27388821 | NC_021161.1    | Ca_kabuli_chr02 | 27388821                | AA                              | GG                | 1945907409               |
| SNP_P3_21700_27389806 | NC_021161.1    | Ca_kabuli_chr02 | 27389806                | TT                              | GG                | 1945907410               |
| SNP_P3_21701_27411076 | NC_021161.1    | Ca_kabuli_chr02 | 27411076                | TT                              | AA                | 1945907412               |
| SNP_P3_21702_27414706 | NC_021161.1    | Ca_kabuli_chr02 | 27414706                | GG                              | AA                | 1945907414               |
| SNP_P3_21703_27419378 | NC_021161.1    | Ca_kabuli_chr02 | 27419378                | TT                              | CC                | 1945907416               |
| SNP_P3_21704_27419735 | NC_021161.1    | Ca_kabuli_chr02 | 27419735                | CC                              | TT                | 1945907418               |
| SNP_P3_21706_27423601 | NC_021161.1    | Ca_kabuli_chr02 | 27423601                | AA                              | TT                | 1945907419               |
| SNP_P3_21707_27423602 | NC_021161.1    | Ca_kabuli_chr02 | 27423602                | AA                              | TT                | 1945907421               |
| SNP_P3_21708_27426868 | NC_021161.1    | Ca_kabuli_chr02 | 27426868                | TT                              | CC                | 1945907423               |
| SNP_P3_21709_27432142 | NC_021161.1    | Ca_kabuli_chr02 | 27432142                | TT                              | AA                | 1945907425               |
| SNP_P3_21710_27491393 | NC_021161.1    | Ca_kabuli_chr02 | 27491393                | TT                              | CC                | 1945907427               |
| SNP_P3_21711_27491677 | NC_021161.1    | Ca_kabuli_chr02 | 27491677                | TT                              | CC                | 1945907428               |
| SNP_P3_21712_27491694 | NC_021161.1    | Ca_kabuli_chr02 | 27491694                | AA                              | GG                | 1945907430               |
| SNP_P3_21713_27491695 | NC_021161.1    | Ca_kabuli_chr02 | 27491695                | AA                              | GG                | 1945907432               |
| SNP_P3_21714_27491742 | NC_021161.1    | Ca_kabuli_chr02 | 27491742                | AA                              | TT                | 1945907434               |
| SNP_P3_21715_27491771 | NC_021161.1    | Ca_kabuli_chr02 | 27491771                | AA                              | TT                | 1945907435               |
| SNP_P3_21716_27491774 | NC_021161.1    | Ca_kabuli_chr02 | 27491774                | CC                              | TT                | 1945907437               |
| SNP_P3_21717_27491776 | NC_021161.1    | Ca_kabuli_chr02 | 27491776                | AA                              | CC                | 1945907439               |
| SNP_P3_21718_27503419 | NC_021161.1    | Ca_kabuli_chr02 | 27503419                | AA                              | GG                | 1945907441               |
| SNP_P3_21719_27509627 | NC_021161.1    | Ca_kabuli_chr02 | 27509627                | CC                              | TT                | 1945907443               |
| SNP_P3_21720_27509671 | NC_021161.1    | Ca_kabuli_chr02 | 27509671                | GG                              | TT                | 1945907444               |
| SNP_P3_21721_27511127 | NC_021161.1    | Ca_kabuli_chr02 | 27511127                | GG                              | TT                | 1945907446               |
| SNP_P3_21722_27511212 | NC_021161.1    | Ca_kabuli_chr02 | 27511212                | TT                              | GG                | 1945907448               |
| SNP_P3_21723_27511213 | NC_021161.1    | Ca_kabuli_chr02 | 27511213                | CC                              | AA                | 1945907450               |
| SNP_P3_21724_27511253 | NC_021161.1    | Ca_kabuli_chr02 | 27511253                | CC                              | AA                | 1945907451               |
| SNP_P3_21725_27511254 | NC_021161.1    | Ca_kabuli_chr02 | 27511254                | AA                              | TT                | 1945907453               |
| SNP_P3_21726_27525855 | NC_021161.1    | Ca_kabuli_chr02 | 27525855                | GG                              | AA                | 1945907455               |
| SNP_P3_21728_27528183 | NC_021161.1    | Ca_kabuli_chr02 | 27528183                | AA                              | GG                | 1945907457               |
| SNP_P3_21729_27528290 | NC_021161.1    | Ca_kabuli_chr02 | 27528290                | AA                              | CC                | 1945907459               |
| SNP_P3_21730_27528298 | NC_021161.1    | Ca_kabuli_chr02 | 27528298                | AA                              | GG                | 1945907460               |
| SNP_P3_21731_27528421 | NC_021161.1    | Ca_kabuli_chr02 | 27528421                | TT                              | AA                | 1945907462               |
| SNP_P3_21732_27528453 | NC_021161.1    | Ca_kabuli_chr02 | 27528453                | TT                              | AA                | 1945907464               |
| SNP_P3_21733_27528463 | NC_021161.1    | Ca_kabuli_chr02 | 27528463                | TT                              | CC                | 1945907466               |
| SNP_P3_21734_27528474 | NC_021161.1    | Ca_kabuli_chr02 | 27528474                | AA                              | GG                | 1945907468               |
| SNP_P3_21735_27528479 | NC_021161.1    | Ca_kabuli_chr02 | 27528479                | TT                              | CC                | 1945907469               |
| SNP_P3_21736_27528525 | NC_021161.1    | Ca_kabuli_chr02 | 27528525                | CC                              | AA                | 1945907471               |
| SNP_P3_21737_27528562 | NC_021161.1    | Ca_kabuli_chr02 | 27528562                | TT                              | CC                | 1945907473               |
| SNP_P3_21738_27528563 | NC_021161.1    | Ca_kabuli_chr02 | 27528563                | AA                              | GG                | 1945907475               |

| SNPs IDs              | Chromosome IDs | Chromosomes     | Physical positions (bp) | CDC Frontier (Reference genome) | (Pusa 256 & HPNB) | NCBI SNPdb Accession IDs |
|-----------------------|----------------|-----------------|-------------------------|---------------------------------|-------------------|--------------------------|
| SNP_P3_21739_27528579 | NC_021161.1    | Ca_kabuli_chr02 | 27528579                | TT                              | AA                | 1945907476               |
| SNP_P3_21740_27532447 | NC_021161.1    | Ca_kabuli_chr02 | 27532447                | CC                              | TT                | 1945907478               |
| SNP_P3_21741_27532782 | NC_021161.1    | Ca_kabuli_chr02 | 27532782                | CC                              | TT                | 1945907480               |
| SNP_P3_21742_27539342 | NC_021161.1    | Ca_kabuli_chr02 | 27539342                | TT                              | AA                | 1945907482               |
| SNP_P3_21743_27539447 | NC_021161.1    | Ca_kabuli_chr02 | 27539447                | AA                              | TT                | 1945907484               |
| SNP_P3_21744_27539605 | NC_021161.1    | Ca_kabuli_chr02 | 27539605                | TT                              | CC                | 1945907485               |
| SNP_P3_21745_27539640 | NC_021161.1    | Ca_kabuli_chr02 | 27539640                | AA                              | GG                | 1945907487               |
| SNP_P3_21746_27539976 | NC_021161.1    | Ca_kabuli_chr02 | 27539976                | TT                              | CC                | 1945907489               |
| SNP_P3_21747_27551148 | NC_021161.1    | Ca_kabuli_chr02 | 27551148                | AA                              | GG                | 1945907491               |
| SNP_P3_21748_27611172 | NC_021161.1    | Ca_kabuli_chr02 | 27611172                | TT                              | CC                | 1945907493               |
| SNP_P3_21749_27611782 | NC_021161.1    | Ca_kabuli_chr02 | 27611782                | GG                              | CC                | 1945907494               |
| SNP_P3_21751_27628778 | NC_021161.1    | Ca_kabuli_chr02 | 27628778                | GG                              | AA                | 1945907496               |
| SNP_P3_21752_27639506 | NC_021161.1    | Ca_kabuli_chr02 | 27639506                | AA                              | GG                | 1945907498               |
| SNP_P3_21753_27647823 | NC_021161.1    | Ca_kabuli_chr02 | 27647823                | AA                              | GG                | 1945907500               |
| SNP_P3_21754_27647856 | NC_021161.1    | Ca_kabuli_chr02 | 27647856                | TT                              | CC                | 1945907501               |
| SNP_P3_21755_27647868 | NC_021161.1    | Ca_kabuli_chr02 | 27647868                | CC                              | TT                | 1945907503               |
| SNP_P3_21756_27647936 | NC_021161.1    | Ca_kabuli_chr02 | 27647936                | TT                              | CC                | 1945907505               |
| SNP_P3_21760_27730523 | NC_021161.1    | Ca_kabuli_chr02 | 27730523                | CC                              | TT                | 1945907507               |
| SNP_P3_21761_27742973 | NC_021161.1    | Ca_kabuli_chr02 | 27742973                | TT                              | GG                | 1945907509               |
| SNP_P3_21765_27858078 | NC_021161.1    | Ca_kabuli_chr02 | 27858078                | GG                              | TT                | 1945907510               |
| SNP_P3_21766_27887836 | NC_021161.1    | Ca_kabuli_chr02 | 27887836                | TT                              | CC                | 1945907512               |
| SNP_P3_21767_27887887 | NC_021161.1    | Ca_kabuli_chr02 | 27887887                | TT                              | CC                | 1945907514               |
| SNP_P3_21768_27888325 | NC_021161.1    | Ca_kabuli_chr02 | 27888325                | TT                              | CC                | 1945907516               |
| SNP_P3_21769_27888404 | NC_021161.1    | Ca_kabuli_chr02 | 27888404                | AA                              | CC                | 1945907517               |
| SNP_P3_21770_27888412 | NC_021161.1    | Ca_kabuli_chr02 | 27888412                | AA                              | CC                | 1945907519               |
| SNP_P3_21771_27930038 | NC_021161.1    | Ca_kabuli_chr02 | 27930038                | TT                              | AA                | 1945907521               |
| SNP_P3_21772_27949231 | NC_021161.1    | Ca_kabuli_chr02 | 27949231                | AA                              | GG                | 1945907523               |
| SNP_P3_21773_27964957 | NC_021161.1    | Ca_kabuli_chr02 | 27964957                | AA                              | GG                | 1945907525               |
| SNP_P3_21774_27965149 | NC_021161.1    | Ca_kabuli_chr02 | 27965149                | GG                              | CC                | 1945907526               |
| SNP_P3_21775_27965204 | NC_021161.1    | Ca_kabuli_chr02 | 27965204                | GG                              | AA                | 1945907528               |
| SNP_P3_21776_27965255 | NC_021161.1    | Ca_kabuli_chr02 | 27965255                | GG                              | TT                | 1945907530               |
| SNP_P3_21777_27965264 | NC_021161.1    | Ca_kabuli_chr02 | 27965264                | AA                              | GG                | 1945907532               |
| SNP_P3_21778_27965291 | NC_021161.1    | Ca_kabuli_chr02 | 27965291                | TT                              | CC                | 1945907534               |
| SNP_P3_21779_27965332 | NC_021161.1    | Ca_kabuli_chr02 | 27965332                | AA                              | CC                | 1945907535               |
| SNP_P3_21780_27965344 | NC_021161.1    | Ca_kabuli_chr02 | 27965344                | CC                              | TT                | 1945907537               |
| SNP_P3_21781_27965347 | NC_021161.1    | Ca_kabuli_chr02 | 27965347                | GG                              | AA                | 1945907539               |
| SNP_P3_21782_27965363 | NC_021161.1    | Ca_kabuli_chr02 | 27965363                | TT                              | CC                | 1945907541               |
| SNP_P3_21783_27965530 | NC_021161.1    | Ca_kabuli_chr02 | 27965530                | CC                              | TT                | 1945907542               |
| SNP_P3_21784_27965794 | NC_021161.1    | Ca_kabuli_chr02 | 27965794                | GG                              | TT                | 1945907544               |
| SNP_P3_21785_28006973 | NC_021161.1    | Ca_kabuli_chr02 | 28006973                | GG                              | AA                | 1945907546               |
| SNP_P3_21786_28006984 | NC_021161.1    | Ca_kabuli_chr02 | 28006984                | CC                              | TT                | 1945907548               |
| SNP_P3_21787_28009662 | NC_021161.1    | Ca_kabuli_chr02 | 28009662                | GG                              | TT                | 1945907550               |

| SNPs IDs              | Chromosome IDs | Chromosomes     | Physical positions (bp) | CDC Frontier (Reference genome) | (Pusa 256 & HPNB) | NCBI SNPdb Accession IDs |
|-----------------------|----------------|-----------------|-------------------------|---------------------------------|-------------------|--------------------------|
| SNP_P3_21790_28070274 | NC_021161.1    | Ca_kabuli_chr02 | 28070274                | TT                              | CC                | 1945907551               |
| SNP_P3_21792_28112683 | NC_021161.1    | Ca_kabuli_chr02 | 28112683                | TT                              | CC                | 1945907553               |
| SNP_P3_21793_28143350 | NC_021161.1    | Ca_kabuli_chr02 | 28143350                | CC                              | TT                | 1945907555               |
| SNP_P3_21794_28143366 | NC_021161.1    | Ca_kabuli_chr02 | 28143366                | AA                              | TT                | 1945907557               |
| SNP_P3_21795_28143723 | NC_021161.1    | Ca_kabuli_chr02 | 28143723                | CC                              | TT                | 1945907559               |
| SNP_P3_21796_28148586 | NC_021161.1    | Ca_kabuli_chr02 | 28148586                | CC                              | TT                | 1945907560               |
| SNP_P3_21797_28151522 | NC_021161.1    | Ca_kabuli_chr02 | 28151522                | TT                              | CC                | 1945907562               |
| SNP_P3_21798_28171975 | NC_021161.1    | Ca_kabuli_chr02 | 28171975                | TT                              | GG                | 1945907564               |
| SNP_P3_21799_28178104 | NC_021161.1    | Ca_kabuli_chr02 | 28178104                | TT                              | CC                | 1945907566               |
| SNP_P3_21800_28186380 | NC_021161.1    | Ca_kabuli_chr02 | 28186380                | GG                              | TT                | 1945907567               |
| SNP_P3_21803_28224044 | NC_021161.1    | Ca_kabuli_chr02 | 28224044                | GG                              | AA                | 1945907569               |
| SNP_P3_21804_28240061 | NC_021161.1    | Ca_kabuli_chr02 | 28240061                | TT                              | GG                | 1945907571               |
| SNP_P3_21805_28240429 | NC_021161.1    | Ca_kabuli_chr02 | 28240429                | CC                              | AA                | 1945907573               |
| SNP_P3_21806_28252190 | NC_021161.1    | Ca_kabuli_chr02 | 28252190                | CC                              | TT                | 1945907575               |
| SNP_P3_21807_28252192 | NC_021161.1    | Ca_kabuli_chr02 | 28252192                | CC                              | AA                | 1945907576               |
| SNP_P3_21808_28252213 | NC_021161.1    | Ca_kabuli_chr02 | 28252213                | CC                              | GG                | 1945907578               |
| SNP_P3_21809_28252263 | NC_021161.1    | Ca_kabuli_chr02 | 28252263                | AA                              | GG                | 1945907580               |
| SNP_P3_21810_28252267 | NC_021161.1    | Ca_kabuli_chr02 | 28252267                | AA                              | TT                | 1945907582               |
| SNP_P3_21811_28252269 | NC_021161.1    | Ca_kabuli_chr02 | 28252269                | TT                              | CC                | 1945907583               |
| SNP_P3_21812_28252488 | NC_021161.1    | Ca_kabuli_chr02 | 28252488                | GG                              | AA                | 1945907585               |
| SNP_P3_21813_28252499 | NC_021161.1    | Ca_kabuli_chr02 | 28252499                | CC                              | TT                | 1945907587               |
| SNP_P3_21814_28252511 | NC_021161.1    | Ca_kabuli_chr02 | 28252511                | GG                              | AA                | 1945907589               |
| SNP_P3_21815_28252512 | NC_021161.1    | Ca_kabuli_chr02 | 28252512                | AA                              | CC                | 1945907591               |
| SNP_P3_21816_28252514 | NC_021161.1    | Ca_kabuli_chr02 | 28252514                | AA                              | TT                | 1945907592               |
| SNP_P3_21817_28252519 | NC_021161.1    | Ca_kabuli_chr02 | 28252519                | AA                              | GG                | 1945907594               |
| SNP_P3_21818_28252520 | NC_021161.1    | Ca_kabuli_chr02 | 28252520                | GG                              | AA                | 1945907596               |
| SNP_P3_21819_28252537 | NC_021161.1    | Ca_kabuli_chr02 | 28252537                | GG                              | AA                | 1945907598               |
| SNP_P3_21820_28252574 | NC_021161.1    | Ca_kabuli_chr02 | 28252574                | TT                              | GG                | 1945907599               |
| SNP_P3_21821_28252608 | NC_021161.1    | Ca_kabuli_chr02 | 28252608                | CC                              | TT                | 1945907601               |
| SNP_P3_21822_28252622 | NC_021161.1    | Ca_kabuli_chr02 | 28252622                | CC                              | TT                | 1945907603               |
| SNP_P3_21823_28252635 | NC_021161.1    | Ca_kabuli_chr02 | 28252635                | GG                              | AA                | 1945907605               |
| SNP_P3_21824_28252662 | NC_021161.1    | Ca_kabuli_chr02 | 28252662                | AA                              | TT                | 1945907607               |
| SNP_P3_21825_28252782 | NC_021161.1    | Ca_kabuli_chr02 | 28252782                | TT                              | AA                | 1945907608               |
| SNP_P3_21826_28253781 | NC_021161.1    | Ca_kabuli_chr02 | 28253781                | CC                              | TT                | 1945907610               |
| SNP_P3_21827_28255397 | NC_021161.1    | Ca_kabuli_chr02 | 28255397                | CC                              | TT                | 1945907612               |
| SNP_P3_21828_28255405 | NC_021161.1    | Ca_kabuli_chr02 | 28255405                | TT                              | CC                | 1945907614               |
| SNP_P3_21829_28259681 | NC_021161.1    | Ca_kabuli_chr02 | 28259681                | GG                              | CC                | 1945907615               |
| SNP_P3_21830_28259766 | NC_021161.1    | Ca_kabuli_chr02 | 28259766                | CC                              | AA                | 1945907617               |
| SNP_P3_21832_28262541 | NC_021161.1    | Ca_kabuli_chr02 | 28262541                | CC                              | TT                | 1945907619               |
| SNP_P3_21833_28262543 | NC_021161.1    | Ca_kabuli_chr02 | 28262543                | AA                              | CC                | 1945907621               |
| SNP_P3_21834_28262677 | NC_021161.1    | Ca_kabuli_chr02 | 28262677                | GG                              | TT                | 1945907623               |
| SNP_P3_21835_28262687 | NC_021161.1    | Ca_kabuli_chr02 | 28262687                | GG                              | TT                | 1945907624               |

| SNPs IDs              | Chromosome IDs | Chromosomes     | Physical positions (bp) | CDC Frontier (Reference genome) | (Pusa 256 & HPNB) | NCBI SNPdb Accession IDs |
|-----------------------|----------------|-----------------|-------------------------|---------------------------------|-------------------|--------------------------|
| SNP_P3_21836_28262741 | NC_021161.1    | Ca_kabuli_chr02 | 28262741                | CC                              | AA                | 1945907626               |
| SNP_P3_21837_28262742 | NC_021161.1    | Ca_kabuli_chr02 | 28262742                | TT                              | CC                | 1945907628               |
| SNP_P3_21838_28262743 | NC_021161.1    | Ca_kabuli_chr02 | 28262743                | GG                              | AA                | 1945907630               |
| SNP_P3_21839_28262908 | NC_021161.1    | Ca_kabuli_chr02 | 28262908                | CC                              | AA                | 1945907631               |
| SNP_P3_21840_28262956 | NC_021161.1    | Ca_kabuli_chr02 | 28262956                | TT                              | GG                | 1945907633               |
| SNP_P3_21841_28262999 | NC_021161.1    | Ca_kabuli_chr02 | 28262999                | TT                              | GG                | 1945907635               |
| SNP_P3_21842_28263061 | NC_021161.1    | Ca_kabuli_chr02 | 28263061                | AA                              | GG                | 1945907637               |
| SNP_P3_21843_28263068 | NC_021161.1    | Ca_kabuli_chr02 | 28263068                | TT                              | GG                | 1945907639               |
| SNP_P3_21844_28263130 | NC_021161.1    | Ca_kabuli_chr02 | 28263130                | GG                              | AA                | 1945907640               |
| SNP_P3_21845_28263142 | NC_021161.1    | Ca_kabuli_chr02 | 28263142                | TT                              | CC                | 1945907642               |
| SNP_P3_21846_28263153 | NC_021161.1    | Ca_kabuli_chr02 | 28263153                | TT                              | CC                | 1945907644               |
| SNP_P3_21847_28265300 | NC_021161.1    | Ca_kabuli_chr02 | 28265300                | TT                              | CC                | 1945907646               |
| SNP_P3_21848_28265491 | NC_021161.1    | Ca_kabuli_chr02 | 28265491                | AA                              | GG                | 1945907647               |
| SNP_P3_21849_28284395 | NC_021161.1    | Ca_kabuli_chr02 | 28284395                | GG                              | TT                | 1945907649               |
| SNP_P3_21850_28284398 | NC_021161.1    | Ca_kabuli_chr02 | 28284398                | AA                              | GG                | 1945907651               |
| SNP_P3_21851_28284447 | NC_021161.1    | Ca_kabuli_chr02 | 28284447                | AA                              | GG                | 1945907653               |
| SNP_P3_21852_28351406 | NC_021161.1    | Ca_kabuli_chr02 | 28351406                | GG                              | AA                | 1945907655               |
| SNP_P3_21854_28372116 | NC_021161.1    | Ca_kabuli_chr02 | 28372116                | AA                              | TT                | 1945907656               |
| SNP_P3_21855_28388267 | NC_021161.1    | Ca_kabuli_chr02 | 28388267                | TT                              | CC                | 1945907658               |
| SNP_P3_21856_28388662 | NC_021161.1    | Ca_kabuli_chr02 | 28388662                | CC                              | TT                | 1945907660               |
| SNP_P3_21857_28392605 | NC_021161.1    | Ca_kabuli_chr02 | 28392605                | TT                              | CC                | 1945907662               |
| SNP_P3_21858_28395901 | NC_021161.1    | Ca_kabuli_chr02 | 28395901                | AA                              | TT                | 1945907664               |
| SNP_P3_21859_28396018 | NC_021161.1    | Ca_kabuli_chr02 | 28396018                | CC                              | GG                | 1945907665               |
| SNP_P3_21860_28396088 | NC_021161.1    | Ca_kabuli_chr02 | 28396088                | GG                              | AA                | 1945907667               |
| SNP_P3_21861_28396172 | NC_021161.1    | Ca_kabuli_chr02 | 28396172                | GG                              | AA                | 1945907669               |
| SNP_P3_21862_28396288 | NC_021161.1    | Ca_kabuli_chr02 | 28396288                | AA                              | TT                | 1945907671               |
| SNP_P3_21863_28396386 | NC_021161.1    | Ca_kabuli_chr02 | 28396386                | GG                              | CC                | 1945907672               |
| SNP_P3_21864_28396403 | NC_021161.1    | Ca_kabuli_chr02 | 28396403                | CC                              | TT                | 1945907674               |
| SNP_P3_21865_28411917 | NC_021161.1    | Ca_kabuli_chr02 | 28411917                | AA                              | GG                | 1945907676               |
| SNP_P3_21869_28465215 | NC_021161.1    | Ca_kabuli_chr02 | 28465215                | TT                              | GG                | 1945907678               |
| SNP_P3_21871_28465280 | NC_021161.1    | Ca_kabuli_chr02 | 28465280                | AA                              | CC                | 1945907680               |
| SNP_P3_21872_28465321 | NC_021161.1    | Ca_kabuli_chr02 | 28465321                | AA                              | GG                | 1945907681               |
| SNP_P3_21873_28465329 | NC_021161.1    | Ca_kabuli_chr02 | 28465329                | AA                              | TT                | 1945907683               |
| SNP_P3_21874_28465338 | NC_021161.1    | Ca_kabuli_chr02 | 28465338                | TT                              | AA                | 1945907685               |
| SNP_P3_21876_28465501 | NC_021161.1    | Ca_kabuli_chr02 | 28465501                | TT                              | GG                | 1945907687               |
| SNP_P3_21877_28465525 | NC_021161.1    | Ca_kabuli_chr02 | 28465525                | AA                              | GG                | 1945907688               |
| SNP_P3_21878_28465594 | NC_021161.1    | Ca_kabuli_chr02 | 28465594                | CC                              | AA                | 1945907690               |
| SNP_P3_21880_28465638 | NC_021161.1    | Ca_kabuli_chr02 | 28465638                | GG                              | AA                | 1945907692               |
| SNP_P3_21881_28465761 | NC_021161.1    | Ca_kabuli_chr02 | 28465761                | CC                              | AA                | 1945907694               |
| SNP_P3_21882_28471105 | NC_021161.1    | Ca_kabuli_chr02 | 28471105                | GG                              | AA                | 1945907696               |
| SNP_P3_21883_28480677 | NC_021161.1    | Ca_kabuli_chr02 | 28480677                | TT                              | GG                | 1945907697               |
| SNP_P3_21884_28485969 | NC_021161.1    | Ca_kabuli_chr02 | 28485969                | TT                              | CC                | 1945907699               |

| SNPs IDs              | Chromosome IDs | Chromosomes     | Physical positions (bp) | CDC Frontier (Reference genome) | (Pusa 256 & HPNB) | NCBI SNPdb Accession IDs |
|-----------------------|----------------|-----------------|-------------------------|---------------------------------|-------------------|--------------------------|
| SNP_P3_21885_28498024 | NC_021161.1    | Ca_kabuli_chr02 | 28498024                | TT                              | CC                | 1945907701               |
| SNP_P3_21886_28498125 | NC_021161.1    | Ca_kabuli_chr02 | 28498125                | GG                              | AA                | 1945907703               |
| SNP_P3_21887_28498136 | NC_021161.1    | Ca_kabuli_chr02 | 28498136                | AA                              | GG                | 1945907704               |
| SNP_P3_21888_28498143 | NC_021161.1    | Ca_kabuli_chr02 | 28498143                | TT                              | AA                | 1945907706               |
| SNP_P3_21889_28498478 | NC_021161.1    | Ca_kabuli_chr02 | 28498478                | TT                              | CC                | 1945907708               |
| SNP_P3_21890_28501064 | NC_021161.1    | Ca_kabuli_chr02 | 28501064                | AA                              | CC                | 1945907710               |
| SNP_P3_21891_28501085 | NC_021161.1    | Ca_kabuli_chr02 | 28501085                | TT                              | CC                | 1945907712               |
| SNP_P3_21892_28501122 | NC_021161.1    | Ca_kabuli_chr02 | 28501122                | TT                              | CC                | 1945907713               |
| SNP_P3_21893_28501257 | NC_021161.1    | Ca_kabuli_chr02 | 28501257                | AA                              | GG                | 1945907715               |
| SNP_P3_21894_28501410 | NC_021161.1    | Ca_kabuli_chr02 | 28501410                | AA                              | CC                | 1945907717               |
| SNP_P3_21895_28501412 | NC_021161.1    | Ca_kabuli_chr02 | 28501412                | GG                              | AA                | 1945907719               |
| SNP_P3_21896_28501588 | NC_021161.1    | Ca_kabuli_chr02 | 28501588                | TT                              | CC                | 1945907720               |
| SNP_P3_21897_28519899 | NC_021161.1    | Ca_kabuli_chr02 | 28519899                | TT                              | GG                | 1945907722               |
| SNP_P3_21898_28519900 | NC_021161.1    | Ca_kabuli_chr02 | 28519900                | GG                              | AA                | 1945907724               |
| SNP_P3_21899_28522465 | NC_021161.1    | Ca_kabuli_chr02 | 28522465                | GG                              | AA                | 1945907726               |
| SNP_P3_21900_28525470 | NC_021161.1    | Ca_kabuli_chr02 | 28525470                | GG                              | AA                | 1945907728               |
| SNP_P3_21901_28544325 | NC_021161.1    | Ca_kabuli_chr02 | 28544325                | GG                              | AA                | 1945907729               |
| SNP_P3_21902_28544339 | NC_021161.1    | Ca_kabuli_chr02 | 28544339                | GG                              | TT                | 1945907731               |
| SNP_P3_21903_28565275 | NC_021161.1    | Ca_kabuli_chr02 | 28565275                | TT                              | CC                | 1945907733               |
| SNP_P3_21904_28567560 | NC_021161.1    | Ca_kabuli_chr02 | 28567560                | CC                              | AA                | 1945907735               |
| SNP_P3_21905_28567571 | NC_021161.1    | Ca_kabuli_chr02 | 28567571                | AA                              | GG                | 1945907736               |
| SNP_P3_21906_28567584 | NC_021161.1    | Ca_kabuli_chr02 | 28567584                | AA                              | GG                | 1945907738               |
| SNP_P3_21907_28567602 | NC_021161.1    | Ca_kabuli_chr02 | 28567602                | TT                              | CC                | 1945907740               |
| SNP_P3_21908_28567605 | NC_021161.1    | Ca_kabuli_chr02 | 28567605                | AA                              | GG                | 1945907742               |
| SNP_P3_21909_28567614 | NC_021161.1    | Ca_kabuli_chr02 | 28567614                | AA                              | TT                | 1945907744               |
| SNP_P3_21910_28567617 | NC_021161.1    | Ca_kabuli_chr02 | 28567617                | AA                              | CC                | 1945907745               |
| SNP_P3_21911_28567623 | NC_021161.1    | Ca_kabuli_chr02 | 28567623                | CC                              | TT                | 1945907747               |
| SNP_P3_21912_28567812 | NC_021161.1    | Ca_kabuli_chr02 | 28567812                | TT                              | AA                | 1945907749               |
| SNP_P3_21913_28574044 | NC_021161.1    | Ca_kabuli_chr02 | 28574044                | TT                              | AA                | 1945907751               |
| SNP_P3_21914_28583114 | NC_021161.1    | Ca_kabuli_chr02 | 28583114                | GG                              | AA                | 1945907752               |
| SNP_P3_21915_28583283 | NC_021161.1    | Ca_kabuli_chr02 | 28583283                | CC                              | TT                | 1945907754               |
| SNP_P3_21916_28583303 | NC_021161.1    | Ca_kabuli_chr02 | 28583303                | GG                              | AA                | 1945907756               |
| SNP_P3_21917_28583316 | NC_021161.1    | Ca_kabuli_chr02 | 28583316                | TT                              | CC                | 1945907758               |
| SNP_P3_21918_28583326 | NC_021161.1    | Ca_kabuli_chr02 | 28583326                | CC                              | TT                | 1945907760               |
| SNP_P3_21919_28583363 | NC_021161.1    | Ca_kabuli_chr02 | 28583363                | GG                              | AA                | 1945907761               |
| SNP_P3_21920_28583376 | NC_021161.1    | Ca_kabuli_chr02 | 28583376                | GG                              | TT                | 1945907763               |
| SNP_P3_21921_28583409 | NC_021161.1    | Ca_kabuli_chr02 | 28583409                | TT                              | CC                | 1945907765               |
| SNP_P3_21924_28623169 | NC_021161.1    | Ca_kabuli_chr02 | 28623169                | CC                              | TT                | 1945907767               |
| SNP_P3_21925_28625021 | NC_021161.1    | Ca_kabuli_chr02 | 28625021                | GG                              | AA                | 1945907769               |
| SNP_P3_21926_28631740 | NC_021161.1    | Ca_kabuli_chr02 | 28631740                | AA                              | GG                | 1945907770               |
| SNP_P3_21927_28631758 | NC_021161.1    | Ca_kabuli_chr02 | 28631758                | TT                              | CC                | 1945907772               |
| SNP_P3_21928_28631794 | NC_021161.1    | Ca_kabuli_chr02 | 28631794                | TT                              | AA                | 1945907774               |

| SNPs IDs              | Chromosome IDs | Chromosomes     | Physical positions (bp) | CDC Frontier (Reference genome) | (Pusa 256 & HPNB) | NCBI SNPdb Accession IDs |
|-----------------------|----------------|-----------------|-------------------------|---------------------------------|-------------------|--------------------------|
| SNP_P3_21929_28631821 | NC_021161.1    | Ca_kabuli_chr02 | 28631821                | GG                              | AA                | 1945907776               |
| SNP_P3_21930_28632092 | NC_021161.1    | Ca_kabuli_chr02 | 28632092                | AA                              | TT                | 1945907777               |
| SNP_P3_21931_28632168 | NC_021161.1    | Ca_kabuli_chr02 | 28632168                | CC                              | GG                | 1945907779               |
| SNP_P3_21932_28632202 | NC_021161.1    | Ca_kabuli_chr02 | 28632202                | TT                              | CC                | 1945907781               |
| SNP_P3_21933_28632239 | NC_021161.1    | Ca_kabuli_chr02 | 28632239                | GG                              | AA                | 1945907783               |
| SNP_P3_21934_28633155 | NC_021161.1    | Ca_kabuli_chr02 | 28633155                | CC                              | GG                | 1945907785               |
| SNP_P3_21935_28654058 | NC_021161.1    | Ca_kabuli_chr02 | 28654058                | CC                              | TT                | 1945907786               |
| SNP_P3_21936_28656416 | NC_021161.1    | Ca_kabuli_chr02 | 28656416                | CC                              | TT                | 1945907788               |
| SNP_P3_21937_28662269 | NC_021161.1    | Ca_kabuli_chr02 | 28662269                | AA                              | CC                | 1945907790               |
| SNP_P3_21938_28662631 | NC_021161.1    | Ca_kabuli_chr02 | 28662631                | AA                              | GG                | 1945907792               |
| SNP_P3_21939_28667725 | NC_021161.1    | Ca_kabuli_chr02 | 28667725                | GG                              | AA                | 1945907793               |
| SNP_P3_21940_28669585 | NC_021161.1    | Ca_kabuli_chr02 | 28669585                | TT                              | CC                | 1945907795               |
| SNP_P3_21941_28669813 | NC_021161.1    | Ca_kabuli_chr02 | 28669813                | TT                              | AA                | 1945907797               |
| SNP_P3_21942_28669972 | NC_021161.1    | Ca_kabuli_chr02 | 28669972                | GG                              | TT                | 1945907799               |
| SNP_P3_21943_28669973 | NC_021161.1    | Ca_kabuli_chr02 | 28669973                | AA                              | GG                | 1945907801               |
| SNP_P3_21944_28670325 | NC_021161.1    | Ca_kabuli_chr02 | 28670325                | GG                              | AA                | 1945907802               |
| SNP_P3_21946_28678881 | NC_021161.1    | Ca_kabuli_chr02 | 28678881                | TT                              | GG                | 1945907804               |
| SNP_P3_21947_28723066 | NC_021161.1    | Ca_kabuli_chr02 | 28723066                | GG                              | CC                | 1945907806               |
| SNP_P3_21948_28723705 | NC_021161.1    | Ca_kabuli_chr02 | 28723705                | GG                              | TT                | 1945907808               |
| SNP_P3_21950_28736389 | NC_021161.1    | Ca_kabuli_chr02 | 28736389                | TT                              | CC                | 1945907809               |
| SNP_P3_21951_28758579 | NC_021161.1    | Ca_kabuli_chr02 | 28758579                | CC                              | AA                | 1945907811               |
| SNP_P3_21952_28811493 | NC_021161.1    | Ca_kabuli_chr02 | 28811493                | AA                              | TT                | 1945907813               |
| SNP_P3_21953_28817327 | NC_021161.1    | Ca_kabuli_chr02 | 28817327                | CC                              | GG                | 1945907815               |
| SNP_P3_21954_28818123 | NC_021161.1    | Ca_kabuli_chr02 | 28818123                | TT                              | GG                | 1945907817               |
| SNP_P3_21955_28832285 | NC_021161.1    | Ca_kabuli_chr02 | 28832285                | TT                              | CC                | 1945907818               |
| SNP_P3_21956_28834128 | NC_021161.1    | Ca_kabuli_chr02 | 28834128                | TT                              | CC                | 1945907820               |
| SNP_P3_21958_28888139 | NC_021161.1    | Ca_kabuli_chr02 | 28888139                | CC                              | GG                | 1945907822               |
| SNP_P3_21959_28889070 | NC_021161.1    | Ca_kabuli_chr02 | 28889070                | CC                              | GG                | 1945907824               |
| SNP_P3_21960_28889127 | NC_021161.1    | Ca_kabuli_chr02 | 28889127                | AA                              | CC                | 1945907825               |
| SNP_P3_21961_28889148 | NC_021161.1    | Ca_kabuli_chr02 | 28889148                | CC                              | GG                | 1945907827               |
| SNP_P3_21962_28889331 | NC_021161.1    | Ca_kabuli_chr02 | 28889331                | CC                              | TT                | 1945907829               |
| SNP_P3_21963_28889341 | NC_021161.1    | Ca_kabuli_chr02 | 28889341                | AA                              | GG                | 1945907831               |
| SNP_P3_21964_28889354 | NC_021161.1    | Ca_kabuli_chr02 | 28889354                | TT                              | CC                | 1945907833               |
| SNP_P3_21965_28889400 | NC_021161.1    | Ca_kabuli_chr02 | 28889400                | AA                              | GG                | 1945907834               |
| SNP_P3_21966_28889456 | NC_021161.1    | Ca_kabuli_chr02 | 28889456                | TT                              | CC                | 1945907836               |
| SNP_P3_21967_28889475 | NC_021161.1    | Ca_kabuli_chr02 | 28889475                | TT                              | CC                | 1945907838               |
| SNP_P3_21968_28889479 | NC_021161.1    | Ca_kabuli_chr02 | 28889479                | AA                              | GG                | 1945907840               |
| SNP_P3_21969_28889515 | NC_021161.1    | Ca_kabuli_chr02 | 28889515                | GG                              | TT                | 1945907841               |
| SNP_P3_21970_28889522 | NC_021161.1    | Ca_kabuli_chr02 | 28889522                | AA                              | GG                | 1945907843               |
| SNP_P3_21971_28889542 | NC_021161.1    | Ca_kabuli_chr02 | 28889542                | AA                              | GG                | 1945907845               |
| SNP_P3_21972_28889566 | NC_021161.1    | Ca_kabuli_chr02 | 28889566                | AA                              | GG                | 1945907847               |
| SNP_P3_21973_28889590 | NC_021161.1    | Ca_kabuli_chr02 | 28889590                | AA                              | GG                | 1945907849               |



| SNPs IDs              | Chromosome IDs | Chromosomes     | Physical positions (bp) | CDC Frontier (Reference genome) | (Pusa 256 & HPNB) | NCBI SNPdb Accession IDs |
|-----------------------|----------------|-----------------|-------------------------|---------------------------------|-------------------|--------------------------|
| SNP_P3_21974_28889615 | NC_021161.1    | Ca_kabuli_chr02 | 28889615                | AA                              | GG                | 1945907850               |
| SNP_P3_21975_28890143 | NC_021161.1    | Ca_kabuli_chr02 | 28890143                | CC                              | TT                | 1945907852               |
| SNP_P3_21976_28891746 | NC_021161.1    | Ca_kabuli_chr02 | 28891746                | AA                              | CC                | 1945907854               |
| SNP_P3_21977_28927260 | NC_021161.1    | Ca_kabuli_chr02 | 28927260                | CC                              | TT                | 1945907856               |
| SNP_P3_21979_28954760 | NC_021161.1    | Ca_kabuli_chr02 | 28954760                | GG                              | AA                | 1945907858               |
| SNP_P3_21980_28962805 | NC_021161.1    | Ca_kabuli_chr02 | 28962805                | CC                              | TT                | 1945907859               |
| SNP_P3_21981_28962938 | NC_021161.1    | Ca_kabuli_chr02 | 28962938                | AA                              | GG                | 1945907861               |
| SNP_P3_21984_28998614 | NC_021161.1    | Ca_kabuli_chr02 | 28998614                | TT                              | AA                | 1945907863               |
| SNP_P3_21985_29039056 | NC_021161.1    | Ca_kabuli_chr02 | 29039056                | AA                              | CC                | 1945907865               |
| SNP_P3_21986_29053676 | NC_021161.1    | Ca_kabuli_chr02 | 29053676                | GG                              | AA                | 1945907866               |
| SNP_P3_21987_29059730 | NC_021161.1    | Ca_kabuli_chr02 | 29059730                | CC                              | TT                | 1945907868               |
| SNP_P3_21988_29059815 | NC_021161.1    | Ca_kabuli_chr02 | 29059815                | TT                              | AA                | 1945907870               |
| SNP_P3_21989_29059831 | NC_021161.1    | Ca_kabuli_chr02 | 29059831                | AA                              | GG                | 1945907872               |
| SNP_P3_21990_29059832 | NC_021161.1    | Ca_kabuli_chr02 | 29059832                | TT                              | CC                | 1945907874               |
| SNP_P3_21991_29059876 | NC_021161.1    | Ca_kabuli_chr02 | 29059876                | AA                              | TT                | 1945907875               |
| SNP_P3_21992_29060081 | NC_021161.1    | Ca_kabuli_chr02 | 29060081                | AA                              | TT                | 1945907877               |
| SNP_P3_21993_29060099 | NC_021161.1    | Ca_kabuli_chr02 | 29060099                | AA                              | TT                | 1945907879               |
| SNP_P3_21994_29060149 | NC_021161.1    | Ca_kabuli_chr02 | 29060149                | GG                              | CC                | 1945907881               |
| SNP_P3_21995_29060168 | NC_021161.1    | Ca_kabuli_chr02 | 29060168                | CC                              | TT                | 1945907882               |
| SNP_P3_21996_29060172 | NC_021161.1    | Ca_kabuli_chr02 | 29060172                | TT                              | GG                | 1945907884               |
| SNP_P3_21997_29060284 | NC_021161.1    | Ca_kabuli_chr02 | 29060284                | TT                              | GG                | 1945907886               |
| SNP_P3_21998_29060325 | NC_021161.1    | Ca_kabuli_chr02 | 29060325                | GG                              | TT                | 1945907888               |
| SNP_P3_21999_29060339 | NC_021161.1    | Ca_kabuli_chr02 | 29060339                | TT                              | AA                | 1945907890               |
| SNP_P3_22000_29060396 | NC_021161.1    | Ca_kabuli_chr02 | 29060396                | CC                              | TT                | 1945907891               |
| SNP_P3_22001_29060407 | NC_021161.1    | Ca_kabuli_chr02 | 29060407                | AA                              | TT                | 1945907893               |
| SNP_P3_22002_29070934 | NC_021161.1    | Ca_kabuli_chr02 | 29070934                | GG                              | AA                | 1945907895               |
| SNP_P3_22003_29071105 | NC_021161.1    | Ca_kabuli_chr02 | 29071105                | TT                              | CC                | 1945907897               |
| SNP_P3_22004_29071270 | NC_021161.1    | Ca_kabuli_chr02 | 29071270                | TT                              | CC                | 1945907899               |
| SNP_P3_22005_29071303 | NC_021161.1    | Ca_kabuli_chr02 | 29071303                | GG                              | CC                | 1945907900               |
| SNP_P3_22006_29071501 | NC_021161.1    | Ca_kabuli_chr02 | 29071501                | TT                              | GG                | 1945907902               |
| SNP_P3_22007_29071573 | NC_021161.1    | Ca_kabuli_chr02 | 29071573                | TT                              | CC                | 1945907904               |
| SNP_P3_22008_29071803 | NC_021161.1    | Ca_kabuli_chr02 | 29071803                | TT                              | CC                | 1945907906               |
| SNP_P3_22011_29076668 | NC_021161.1    | Ca_kabuli_chr02 | 29076668                | GG                              | AA                | 1945907907               |
| SNP_P3_22012_29128863 | NC_021161.1    | Ca_kabuli_chr02 | 29128863                | CC                              | TT                | 1945907909               |
| SNP_P3_22013_29129366 | NC_021161.1    | Ca_kabuli_chr02 | 29129366                | AA                              | GG                | 1945907911               |
| SNP_P3_22014_29129398 | NC_021161.1    | Ca_kabuli_chr02 | 29129398                | AA                              | TT                | 1945907913               |
| SNP_P3_22015_29129407 | NC_021161.1    | Ca_kabuli_chr02 | 29129407                | AA                              | GG                | 1945907915               |
| SNP_P3_22016_29129421 | NC_021161.1    | Ca_kabuli_chr02 | 29129421                | TT                              | AA                | 1945907916               |
| SNP_P3_22017_29129441 | NC_021161.1    | Ca_kabuli_chr02 | 29129441                | CC                              | GG                | 1945907918               |
| SNP_P3_22018_29129442 | NC_021161.1    | Ca_kabuli_chr02 | 29129442                | TT                              | AA                | 1945907920               |
| SNP_P3_22019_29129774 | NC_021161.1    | Ca_kabuli_chr02 | 29129774                | GG                              | CC                | 1945907922               |
| SNP_P3_22020_29142679 | NC_021161.1    | Ca_kabuli_chr02 | 29142679                | CC                              | GG                | 1945907923               |

| SNPs IDs              | Chromosome IDs | Chromosomes     | Physical positions (bp) | CDC Frontier (Reference genome) | (Pusa 256 & HPNB) | NCBI SNPdb Accession IDs |
|-----------------------|----------------|-----------------|-------------------------|---------------------------------|-------------------|--------------------------|
| SNP_P3_22021_29148374 | NC_021161.1    | Ca_kabuli_chr02 | 29148374                | GG                              | TT                | 1945907925               |
| SNP_P3_22022_29170217 | NC_021161.1    | Ca_kabuli_chr02 | 29170217                | TT                              | AA                | 1945907927               |
| SNP_P3_22024_29181246 | NC_021161.1    | Ca_kabuli_chr02 | 29181246                | AA                              | GG                | 1945907929               |
| SNP_P3_22027_29196288 | NC_021161.1    | Ca_kabuli_chr02 | 29196288                | AA                              | TT                | 1945907931               |
| SNP_P3_22028_29215239 | NC_021161.1    | Ca_kabuli_chr02 | 29215239                | TT                              | CC                | 1945907932               |
| SNP_P3_22029_29215379 | NC_021161.1    | Ca_kabuli_chr02 | 29215379                | CC                              | TT                | 1945907934               |
| SNP_P3_22031_29215729 | NC_021161.1    | Ca_kabuli_chr02 | 29215729                | CC                              | TT                | 1945907936               |
| SNP_P3_22032_29215730 | NC_021161.1    | Ca_kabuli_chr02 | 29215730                | CC                              | TT                | 1945907938               |
| SNP_P3_22033_29215736 | NC_021161.1    | Ca_kabuli_chr02 | 29215736                | AA                              | GG                | 1945907939               |
| SNP_P3_22034_29215751 | NC_021161.1    | Ca_kabuli_chr02 | 29215751                | CC                              | GG                | 1945907941               |
| SNP_P3_22036_29238542 | NC_021161.1    | Ca_kabuli_chr02 | 29238542                | TT                              | CC                | 1945907943               |
| SNP_P3_22037_29238615 | NC_021161.1    | Ca_kabuli_chr02 | 29238615                | CC                              | TT                | 1945907945               |
| SNP_P3_22038_29238681 | NC_021161.1    | Ca_kabuli_chr02 | 29238681                | CC                              | TT                | 1945907947               |
| SNP_P3_22039_29238699 | NC_021161.1    | Ca_kabuli_chr02 | 29238699                | CC                              | GG                | 1945907948               |
| SNP_P3_22040_29238721 | NC_021161.1    | Ca_kabuli_chr02 | 29238721                | AA                              | TT                | 1945907950               |
| SNP_P3_22041_29238778 | NC_021161.1    | Ca_kabuli_chr02 | 29238778                | AA                              | GG                | 1945907952               |
| SNP_P3_22042_29238899 | NC_021161.1    | Ca_kabuli_chr02 | 29238899                | AA                              | GG                | 1945907954               |
| SNP_P3_22043_29239142 | NC_021161.1    | Ca_kabuli_chr02 | 29239142                | GG                              | TT                | 1945907955               |
| SNP_P3_22044_29239175 | NC_021161.1    | Ca_kabuli_chr02 | 29239175                | AA                              | GG                | 1945907957               |
| SNP_P3_22045_29239219 | NC_021161.1    | Ca_kabuli_chr02 | 29239219                | TT                              | CC                | 1945907959               |
| SNP_P3_22046_29239294 | NC_021161.1    | Ca_kabuli_chr02 | 29239294                | AA                              | CC                | 1945907961               |
| SNP_P3_22047_29239467 | NC_021161.1    | Ca_kabuli_chr02 | 29239467                | GG                              | AA                | 1945907963               |
| SNP_P3_22048_29239557 | NC_021161.1    | Ca_kabuli_chr02 | 29239557                | GG                              | AA                | 1945907964               |
| SNP_P3_22049_29239560 | NC_021161.1    | Ca_kabuli_chr02 | 29239560                | GG                              | AA                | 1945907966               |
| SNP_P3_22050_29239612 | NC_021161.1    | Ca_kabuli_chr02 | 29239612                | GG                              | AA                | 1945907968               |
| SNP_P3_22051_29239722 | NC_021161.1    | Ca_kabuli_chr02 | 29239722                | CC                              | TT                | 1945907970               |
| SNP_P3_22052_29239727 | NC_021161.1    | Ca_kabuli_chr02 | 29239727                | AA                              | GG                | 1945907972               |
| SNP_P3_22053_29239857 | NC_021161.1    | Ca_kabuli_chr02 | 29239857                | TT                              | CC                | 1945907973               |
| SNP_P3_22054_29239904 | NC_021161.1    | Ca_kabuli_chr02 | 29239904                | GG                              | AA                | 1945907975               |
| SNP_P3_22055_29239937 | NC_021161.1    | Ca_kabuli_chr02 | 29239937                | AA                              | GG                | 1945907977               |
| SNP_P3_22058_29240164 | NC_021161.1    | Ca_kabuli_chr02 | 29240164                | TT                              | CC                | 1945907979               |
| SNP_P3_22059_29240168 | NC_021161.1    | Ca_kabuli_chr02 | 29240168                | TT                              | GG                | 1945907980               |
| SNP_P3_22060_29240179 | NC_021161.1    | Ca_kabuli_chr02 | 29240179                | GG                              | AA                | 1945907982               |
| SNP_P3_22062_29240394 | NC_021161.1    | Ca_kabuli_chr02 | 29240394                | CC                              | TT                | 1945907984               |
| SNP_P3_22063_29240513 | NC_021161.1    | Ca_kabuli_chr02 | 29240513                | TT                              | CC                | 1945907986               |
| SNP_P3_22064_29240527 | NC_021161.1    | Ca_kabuli_chr02 | 29240527                | AA                              | GG                | 1945907988               |
| SNP_P3_22065_29240641 | NC_021161.1    | Ca_kabuli_chr02 | 29240641                | GG                              | TT                | 1945907989               |
| SNP_P3_22066_29240647 | NC_021161.1    | Ca_kabuli_chr02 | 29240647                | GG                              | AA                | 1945907991               |
| SNP_P3_22067_29240660 | NC_021161.1    | Ca_kabuli_chr02 | 29240660                | AA                              | GG                | 1945907993               |
| SNP_P3_22068_29240674 | NC_021161.1    | Ca_kabuli_chr02 | 29240674                | GG                              | AA                | 1945907995               |
| SNP_P3_22069_29240808 | NC_021161.1    | Ca_kabuli_chr02 | 29240808                | AA                              | TT                | 1945907996               |
| SNP_P3_22070_29241002 | NC_021161.1    | Ca_kabuli_chr02 | 29241002                | TT                              | AA                | 1945907998               |

| SNPs IDs              | Chromosome IDs | Chromosomes     | Physical positions (bp) | CDC Frontier (Reference genome) | (Pusa 256 & HPNB) | NCBI SNPdb Accession IDs |
|-----------------------|----------------|-----------------|-------------------------|---------------------------------|-------------------|--------------------------|
| SNP_P3_22071_29241003 | NC_021161.1    | Ca_kabuli_chr02 | 29241003                | GG                              | TT                | 1945908000               |
| SNP_P3_22072_29241353 | NC_021161.1    | Ca_kabuli_chr02 | 29241353                | TT                              | CC                | 1945908002               |
| SNP_P3_22073_29241354 | NC_021161.1    | Ca_kabuli_chr02 | 29241354                | CC                              | TT                | 1945908004               |
| SNP_P3_22075_29253002 | NC_021161.1    | Ca_kabuli_chr02 | 29253002                | GG                              | AA                | 1945908005               |
| SNP_P3_22076_29253430 | NC_021161.1    | Ca_kabuli_chr02 | 29253430                | CC                              | AA                | 1945908007               |
| SNP_P3_22077_29253440 | NC_021161.1    | Ca_kabuli_chr02 | 29253440                | TT                              | GG                | 1945908009               |
| SNP_P3_22078_29253450 | NC_021161.1    | Ca_kabuli_chr02 | 29253450                | AA                              | GG                | 1945908011               |
| SNP_P3_22079_29272333 | NC_021161.1    | Ca_kabuli_chr02 | 29272333                | CC                              | TT                | 1945908012               |
| SNP_P3_22080_29272334 | NC_021161.1    | Ca_kabuli_chr02 | 29272334                | AA                              | GG                | 1945908014               |
| SNP_P3_22081_29272628 | NC_021161.1    | Ca_kabuli_chr02 | 29272628                | TT                              | CC                | 1945908016               |
| SNP_P3_22082_29272680 | NC_021161.1    | Ca_kabuli_chr02 | 29272680                | GG                              | TT                | 1945908018               |
| SNP_P3_22083_29278577 | NC_021161.1    | Ca_kabuli_chr02 | 29278577                | GG                              | TT                | 1945908020               |
| SNP_P3_22084_29278615 | NC_021161.1    | Ca_kabuli_chr02 | 29278615                | CC                              | AA                | 1945908021               |
| SNP_P3_22085_29278625 | NC_021161.1    | Ca_kabuli_chr02 | 29278625                | GG                              | AA                | 1945908023               |
| SNP_P3_22086_29278669 | NC_021161.1    | Ca_kabuli_chr02 | 29278669                | TT                              | CC                | 1945908025               |
| SNP_P3_22087_29278681 | NC_021161.1    | Ca_kabuli_chr02 | 29278681                | GG                              | AA                | 1945908027               |
| SNP_P3_22088_29278699 | NC_021161.1    | Ca_kabuli_chr02 | 29278699                | GG                              | AA                | 1945908028               |
| SNP_P3_22089_29278940 | NC_021161.1    | Ca_kabuli_chr02 | 29278940                | TT                              | AA                | 1945908030               |
| SNP_P3_22090_29289176 | NC_021161.1    | Ca_kabuli_chr02 | 29289176                | AA                              | GG                | 1945908032               |
| SNP_P3_22091_29289265 | NC_021161.1    | Ca_kabuli_chr02 | 29289265                | TT                              | CC                | 1945908034               |
| SNP_P3_22092_29289300 | NC_021161.1    | Ca_kabuli_chr02 | 29289300                | TT                              | CC                | 1945908036               |
| SNP_P3_22093_29289547 | NC_021161.1    | Ca_kabuli_chr02 | 29289547                | AA                              | GG                | 1945908037               |
| SNP_P3_22094_29289590 | NC_021161.1    | Ca_kabuli_chr02 | 29289590                | AA                              | GG                | 1945908039               |
| SNP_P3_22095_29303802 | NC_021161.1    | Ca_kabuli_chr02 | 29303802                | CC                              | AA                | 1945908041               |
| SNP_P3_22096_29318954 | NC_021161.1    | Ca_kabuli_chr02 | 29318954                | AA                              | CC                | 1945908043               |
| SNP_P3_22097_29353749 | NC_021161.1    | Ca_kabuli_chr02 | 29353749                | CC                              | TT                | 1945908045               |
| SNP_P3_22099_29380319 | NC_021161.1    | Ca_kabuli_chr02 | 29380319                | AA                              | TT                | 1945908046               |
| SNP_P3_22100_29408963 | NC_021161.1    | Ca_kabuli_chr02 | 29408963                | AA                              | GG                | 1945908048               |
| SNP_P3_22101_29408985 | NC_021161.1    | Ca_kabuli_chr02 | 29408985                | TT                              | CC                | 1945908050               |
| SNP_P3_22102_29411795 | NC_021161.1    | Ca_kabuli_chr02 | 29411795                | AA                              | TT                | 1945908052               |
| SNP_P3_22103_29412093 | NC_021161.1    | Ca_kabuli_chr02 | 29412093                | AA                              | GG                | 1945908053               |
| SNP_P3_22105_29416805 | NC_021161.1    | Ca_kabuli_chr02 | 29416805                | AA                              | TT                | 1945908055               |
| SNP_P3_22106_29416838 | NC_021161.1    | Ca_kabuli_chr02 | 29416838                | AA                              | GG                | 1945908057               |
| SNP_P3_22107_29417235 | NC_021161.1    | Ca_kabuli_chr02 | 29417235                | GG                              | TT                | 1945908059               |
| SNP_P3_22109_29417344 | NC_021161.1    | Ca_kabuli_chr02 | 29417344                | GG                              | AA                | 1945908061               |
| SNP_P3_22111_29427567 | NC_021161.1    | Ca_kabuli_chr02 | 29427567                | CC                              | TT                | 1945908062               |
| SNP_P3_22112_29430864 | NC_021161.1    | Ca_kabuli_chr02 | 29430864                | AA                              | TT                | 1945908064               |
| SNP_P3_22113_29431412 | NC_021161.1    | Ca_kabuli_chr02 | 29431412                | TT                              | AA                | 1945908066               |
| SNP_P3_22114_29443702 | NC_021161.1    | Ca_kabuli_chr02 | 29443702                | TT                              | GG                | 1945908068               |
| SNP_P3_22115_29444196 | NC_021161.1    | Ca_kabuli_chr02 | 29444196                | AA                              | GG                | 1945908069               |
| SNP_P3_22116_29444200 | NC_021161.1    | Ca_kabuli_chr02 | 29444200                | GG                              | TT                | 1945908071               |
| SNP_P3_22118_29445605 | NC_021161.1    | Ca_kabuli_chr02 | 29445605                | GG                              | CC                | 1945908073               |

| SNPs IDs              | Chromosome IDs | Chromosomes     | Physical positions (bp) | CDC Frontier (Reference genome) | (Pusa 256 & HPNB) | NCBI SNPdb Accession IDs |
|-----------------------|----------------|-----------------|-------------------------|---------------------------------|-------------------|--------------------------|
| SNP_P3_22119_29445618 | NC_021161.1    | Ca_kabuli_chr02 | 29445618                | GG                              | CC                | 1945908075               |
| SNP_P3_22120_29445624 | NC_021161.1    | Ca_kabuli_chr02 | 29445624                | AA                              | CC                | 1945908077               |
| SNP_P3_22121_29445770 | NC_021161.1    | Ca_kabuli_chr02 | 29445770                | AA                              | GG                | 1945908078               |
| SNP_P3_22124_29446081 | NC_021161.1    | Ca_kabuli_chr02 | 29446081                | AA                              | GG                | 1945908080               |
| SNP_P3_22125_29446159 | NC_021161.1    | Ca_kabuli_chr02 | 29446159                | GG                              | TT                | 1945908082               |
| SNP_P3_22126_29446260 | NC_021161.1    | Ca_kabuli_chr02 | 29446260                | TT                              | CC                | 1945908084               |
| SNP_P3_22127_29446261 | NC_021161.1    | Ca_kabuli_chr02 | 29446261                | GG                              | TT                | 1945908085               |
| SNP_P3_22128_29446272 | NC_021161.1    | Ca_kabuli_chr02 | 29446272                | CC                              | AA                | 1945908087               |
| SNP_P3_22129_29447633 | NC_021161.1    | Ca_kabuli_chr02 | 29447633                | CC                              | TT                | 1945908089               |
| SNP_P3_22131_29480168 | NC_021161.1    | Ca_kabuli_chr02 | 29480168                | AA                              | GG                | 1945908091               |
| SNP_P3_22132_29484436 | NC_021161.1    | Ca_kabuli_chr02 | 29484436                | AA                              | TT                | 1945908093               |
| SNP_P3_22133_29497835 | NC_021161.1    | Ca_kabuli_chr02 | 29497835                | GG                              | AA                | 1945908094               |
| SNP_P3_22134_29504285 | NC_021161.1    | Ca_kabuli_chr02 | 29504285                | TT                              | AA                | 1945908096               |
| SNP_P3_22135_29504310 | NC_021161.1    | Ca_kabuli_chr02 | 29504310                | AA                              | TT                | 1945908098               |
| SNP_P3_22136_29504345 | NC_021161.1    | Ca_kabuli_chr02 | 29504345                | AA                              | GG                | 1945908100               |
| SNP_P3_22137_29504350 | NC_021161.1    | Ca_kabuli_chr02 | 29504350                | AA                              | CC                | 1945908101               |
| SNP_P3_22138_29504380 | NC_021161.1    | Ca_kabuli_chr02 | 29504380                | TT                              | GG                | 1945908103               |
| SNP_P3_22139_29504547 | NC_021161.1    | Ca_kabuli_chr02 | 29504547                | GG                              | AA                | 1945908105               |
| SNP_P3_22140_29504578 | NC_021161.1    | Ca_kabuli_chr02 | 29504578                | TT                              | CC                | 1945908107               |
| SNP_P3_22141_29509591 | NC_021161.1    | Ca_kabuli_chr02 | 29509591                | GG                              | AA                | 1945908109               |
| SNP_P3_22142_29509593 | NC_021161.1    | Ca_kabuli_chr02 | 29509593                | AA                              | TT                | 1945908110               |
| SNP_P3_22143_29510493 | NC_021161.1    | Ca_kabuli_chr02 | 29510493                | AA                              | CC                | 1945908112               |
| SNP_P3_22144_29514621 | NC_021161.1    | Ca_kabuli_chr02 | 29514621                | TT                              | CC                | 1945908114               |
| SNP_P3_22145_29514626 | NC_021161.1    | Ca_kabuli_chr02 | 29514626                | GG                              | AA                | 1945908116               |
| SNP_P3_22146_29514629 | NC_021161.1    | Ca_kabuli_chr02 | 29514629                | CC                              | TT                | 1945908117               |
| SNP_P3_22147_29563414 | NC_021161.1    | Ca_kabuli_chr02 | 29563414                | AA                              | TT                | 1945908119               |
| SNP_P3_22148_29593958 | NC_021161.1    | Ca_kabuli_chr02 | 29593958                | AA                              | TT                | 1945908121               |
| SNP_P3_22150_29609575 | NC_021161.1    | Ca_kabuli_chr02 | 29609575                | GG                              | CC                | 1945908123               |
| SNP_P3_22151_29618464 | NC_021161.1    | Ca_kabuli_chr02 | 29618464                | TT                              | GG                | 1945908125               |
| SNP_P3_22152_29644848 | NC_021161.1    | Ca_kabuli_chr02 | 29644848                | AA                              | TT                | 1945908126               |
| SNP_P3_22153_29644870 | NC_021161.1    | Ca_kabuli_chr02 | 29644870                | CC                              | AA                | 1945908128               |
| SNP_P3_22154_29644871 | NC_021161.1    | Ca_kabuli_chr02 | 29644871                | TT                              | CC                | 1945908130               |
| SNP_P3_22155_29644872 | NC_021161.1    | Ca_kabuli_chr02 | 29644872                | AA                              | TT                | 1945908132               |
| SNP_P3_22156_29644885 | NC_021161.1    | Ca_kabuli_chr02 | 29644885                | TT                              | AA                | 1945908134               |
| SNP_P3_22157_29644900 | NC_021161.1    | Ca_kabuli_chr02 | 29644900                | AA                              | CC                | 1945908135               |
| SNP_P3_22158_29645089 | NC_021161.1    | Ca_kabuli_chr02 | 29645089                | AA                              | CC                | 1945908137               |
| SNP_P3_22159_29646731 | NC_021161.1    | Ca_kabuli_chr02 | 29646731                | CC                              | TT                | 1945908139               |
| SNP_P3_22161_29647492 | NC_021161.1    | Ca_kabuli_chr02 | 29647492                | AA                              | CC                | 1945908141               |
| SNP_P3_22162_29647507 | NC_021161.1    | Ca_kabuli_chr02 | 29647507                | AA                              | CC                | 1945908142               |
| SNP_P3_22163_29653667 | NC_021161.1    | Ca_kabuli_chr02 | 29653667                | CC                              | TT                | 1945908144               |
| SNP_P3_22164_29653731 | NC_021161.1    | Ca_kabuli_chr02 | 29653731                | AA                              | CC                | 1945908146               |
| SNP_P3_22166_29662889 | NC_021161.1    | Ca_kabuli_chr02 | 29662889                | CC                              | AA                | 1945908148               |

| SNPs IDs              | Chromosome IDs | Chromosomes     | Physical positions (bp) | CDC Frontier (Reference genome) | (Pusa 256 & HPNB) | NCBI SNPdb Accession IDs |
|-----------------------|----------------|-----------------|-------------------------|---------------------------------|-------------------|--------------------------|
| SNP_P3_22167_29684429 | NC_021161.1    | Ca_kabuli_chr02 | 29684429                | GG                              | AA                | 1945908150               |
| SNP_P3_22168_29722284 | NC_021161.1    | Ca_kabuli_chr02 | 29722284                | TT                              | CC                | 1945908151               |
| SNP_P3_22169_29727856 | NC_021161.1    | Ca_kabuli_chr02 | 29727856                | GG                              | AA                | 1945908153               |
| SNP_P3_22170_29732566 | NC_021161.1    | Ca_kabuli_chr02 | 29732566                | TT                              | GG                | 1945908155               |
| SNP_P3_22171_29733115 | NC_021161.1    | Ca_kabuli_chr02 | 29733115                | AA                              | GG                | 1945908157               |
| SNP_P3_22172_29737499 | NC_021161.1    | Ca_kabuli_chr02 | 29737499                | GG                              | AA                | 1945908158               |
| SNP_P3_22173_29737528 | NC_021161.1    | Ca_kabuli_chr02 | 29737528                | CC                              | GG                | 1945908160               |
| SNP_P3_22174_29737529 | NC_021161.1    | Ca_kabuli_chr02 | 29737529                | GG                              | AA                | 1945908162               |
| SNP_P3_22175_29737657 | NC_021161.1    | Ca_kabuli_chr02 | 29737657                | CC                              | TT                | 1945908164               |
| SNP_P3_22176_29737689 | NC_021161.1    | Ca_kabuli_chr02 | 29737689                | TT                              | CC                | 1945908166               |
| SNP_P3_22177_29737749 | NC_021161.1    | Ca_kabuli_chr02 | 29737749                | CC                              | TT                | 1945908167               |
| SNP_P3_22178_29737750 | NC_021161.1    | Ca_kabuli_chr02 | 29737750                | TT                              | CC                | 1945908169               |
| SNP_P3_22179_29737889 | NC_021161.1    | Ca_kabuli_chr02 | 29737889                | CC                              | TT                | 1945908171               |
| SNP_P3_22180_29738013 | NC_021161.1    | Ca_kabuli_chr02 | 29738013                | AA                              | CC                | 1945908173               |
| SNP_P3_22181_29738028 | NC_021161.1    | Ca_kabuli_chr02 | 29738028                | AA                              | GG                | 1945908174               |
| SNP_P3_22182_29738092 | NC_021161.1    | Ca_kabuli_chr02 | 29738092                | TT                              | CC                | 1945908176               |
| SNP_P3_22183_29738100 | NC_021161.1    | Ca_kabuli_chr02 | 29738100                | CC                              | TT                | 1945908178               |
| SNP_P3_22184_29738109 | NC_021161.1    | Ca_kabuli_chr02 | 29738109                | CC                              | AA                | 1945908180               |
| SNP_P3_22185_29738141 | NC_021161.1    | Ca_kabuli_chr02 | 29738141                | TT                              | CC                | 1945908182               |
| SNP_P3_22186_29738208 | NC_021161.1    | Ca_kabuli_chr02 | 29738208                | GG                              | TT                | 1945908183               |
| SNP_P3_22187_29738656 | NC_021161.1    | Ca_kabuli_chr02 | 29738656                | GG                              | AA                | 1945908185               |
| SNP_P3_22188_29738837 | NC_021161.1    | Ca_kabuli_chr02 | 29738837                | CC                              | AA                | 1945908187               |
| SNP_P3_22189_29739071 | NC_021161.1    | Ca_kabuli_chr02 | 29739071                | AA                              | GG                | 1945908189               |
| SNP_P3_22190_29739092 | NC_021161.1    | Ca_kabuli_chr02 | 29739092                | TT                              | CC                | 1945908190               |
| SNP_P3_22191_29739170 | NC_021161.1    | Ca_kabuli_chr02 | 29739170                | GG                              | AA                | 1945908192               |
| SNP_P3_22192_29739203 | NC_021161.1    | Ca_kabuli_chr02 | 29739203                | GG                              | AA                | 1945908194               |
| SNP_P3_22193_29739240 | NC_021161.1    | Ca_kabuli_chr02 | 29739240                | GG                              | AA                | 1945908196               |
| SNP_P3_22194_29742485 | NC_021161.1    | Ca_kabuli_chr02 | 29742485                | AA                              | CC                | 1945908198               |
| SNP_P3_22195_29742564 | NC_021161.1    | Ca_kabuli_chr02 | 29742564                | GG                              | AA                | 1945908199               |
| SNP_P3_22196_29775578 | NC_021161.1    | Ca_kabuli_chr02 | 29775578                | AA                              | GG                | 1945908201               |
| SNP_P3_22197_29775579 | NC_021161.1    | Ca_kabuli_chr02 | 29775579                | TT                              | AA                | 1945908203               |
| SNP_P3_22198_29828212 | NC_021161.1    | Ca_kabuli_chr02 | 29828212                | CC                              | AA                | 1945908205               |
| SNP_P3_22199_29829777 | NC_021161.1    | Ca_kabuli_chr02 | 29829777                | TT                              | CC                | 1945908207               |
| SNP_P3_22200_29829779 | NC_021161.1    | Ca_kabuli_chr02 | 29829779                | TT                              | CC                | 1945908208               |
| SNP_P3_22201_29829800 | NC_021161.1    | Ca_kabuli_chr02 | 29829800                | TT                              | AA                | 1945908210               |
| SNP_P3_22204_29834675 | NC_021161.1    | Ca_kabuli_chr02 | 29834675                | AA                              | GG                | 1945908212               |
| SNP_P3_22206_29868394 | NC_021161.1    | Ca_kabuli_chr02 | 29868394                | TT                              | AA                | 1945908214               |
| SNP_P3_22207_29868400 | NC_021161.1    | Ca_kabuli_chr02 | 29868400                | CC                              | GG                | 1945908215               |
| SNP_P3_22208_29870069 | NC_021161.1    | Ca_kabuli_chr02 | 29870069                | GG                              | TT                | 1945908217               |
| SNP_P3_22210_29895317 | NC_021161.1    | Ca_kabuli_chr02 | 29895317                | AA                              | GG                | 1945908219               |
| SNP_P3_22211_29912209 | NC_021161.1    | Ca_kabuli_chr02 | 29912209                | CC                              | GG                | 1945908221               |
| SNP_P3_22212_29942971 | NC_021161.1    | Ca_kabuli_chr02 | 29942971                | AA                              | CC                | 1945908223               |

| SNPs IDs              | Chromosome IDs | Chromosomes     | Physical positions (bp) | CDC Frontier (Reference genome) | (Pusa 256 & HPNB) | NCBI SNPdb Accession IDs |
|-----------------------|----------------|-----------------|-------------------------|---------------------------------|-------------------|--------------------------|
| SNP_P3_22214_29962159 | NC_021161.1    | Ca_kabuli_chr02 | 29962159                | AA                              | GG                | 1945908224               |
| SNP_P3_22215_29962365 | NC_021161.1    | Ca_kabuli_chr02 | 29962365                | CC                              | AA                | 1945908226               |
| SNP_P3_22217_29963162 | NC_021161.1    | Ca_kabuli_chr02 | 29963162                | GG                              | AA                | 1945908228               |
| SNP_P3_22218_29964135 | NC_021161.1    | Ca_kabuli_chr02 | 29964135                | CC                              | AA                | 1945908230               |
| SNP_P3_22219_29964711 | NC_021161.1    | Ca_kabuli_chr02 | 29964711                | TT                              | AA                | 1945908231               |
| SNP_P3_22220_29971896 | NC_021161.1    | Ca_kabuli_chr02 | 29971896                | TT                              | CC                | 1945908233               |
| SNP_P3_22223_30004577 | NC_021161.1    | Ca_kabuli_chr02 | 30004577                | CC                              | TT                | 1945908235               |
| SNP_P3_22224_30040970 | NC_021161.1    | Ca_kabuli_chr02 | 30040970                | TT                              | GG                | 1945908237               |
| SNP_P3_22226_30058185 | NC_021161.1    | Ca_kabuli_chr02 | 30058185                | AA                              | TT                | 1945908239               |
| SNP_P3_22227_30058200 | NC_021161.1    | Ca_kabuli_chr02 | 30058200                | GG                              | AA                | 1945908240               |
| SNP_P3_22228_30058206 | NC_021161.1    | Ca_kabuli_chr02 | 30058206                | GG                              | AA                | 1945908242               |
| SNP_P3_22229_30058565 | NC_021161.1    | Ca_kabuli_chr02 | 30058565                | GG                              | AA                | 1945908244               |
| SNP_P3_22230_30059726 | NC_021161.1    | Ca_kabuli_chr02 | 30059726                | TT                              | GG                | 1945908246               |
| SNP_P3_22231_30075834 | NC_021161.1    | Ca_kabuli_chr02 | 30075834                | TT                              | CC                | 1945908247               |
| SNP_P3_22232_30091835 | NC_021161.1    | Ca_kabuli_chr02 | 30091835                | AA                              | GG                | 1945908249               |
| SNP_P3_22233_30092077 | NC_021161.1    | Ca_kabuli_chr02 | 30092077                | GG                              | AA                | 1945908251               |
| SNP_P3_22234_30092875 | NC_021161.1    | Ca_kabuli_chr02 | 30092875                | AA                              | CC                | 1945908253               |
| SNP_P3_22235_30094028 | NC_021161.1    | Ca_kabuli_chr02 | 30094028                | GG                              | CC                | 1945908255               |
| SNP_P3_22236_30094248 | NC_021161.1    | Ca_kabuli_chr02 | 30094248                | GG                              | AA                | 1945908256               |
| SNP_P3_22237_30094917 | NC_021161.1    | Ca_kabuli_chr02 | 30094917                | AA                              | TT                | 1945908258               |
| SNP_P3_22238_30095148 | NC_021161.1    | Ca_kabuli_chr02 | 30095148                | TT                              | AA                | 1945908260               |
| SNP_P3_22239_30095150 | NC_021161.1    | Ca_kabuli_chr02 | 30095150                | TT                              | CC                | 1945908262               |
| SNP_P3_22240_30095622 | NC_021161.1    | Ca_kabuli_chr02 | 30095622                | AA                              | GG                | 1945908263               |
| SNP_P3_22241_30095787 | NC_021161.1    | Ca_kabuli_chr02 | 30095787                | AA                              | TT                | 1945908265               |
| SNP_P3_22246_30097122 | NC_021161.1    | Ca_kabuli_chr02 | 30097122                | GG                              | AA                | 1945908267               |
| SNP_P3_22247_30097775 | NC_021161.1    | Ca_kabuli_chr02 | 30097775                | TT                              | CC                | 1945908269               |
| SNP_P3_22248_30112419 | NC_021161.1    | Ca_kabuli_chr02 | 30112419                | GG                              | AA                | 1945908271               |
| SNP_P3_22249_30112435 | NC_021161.1    | Ca_kabuli_chr02 | 30112435                | CC                              | GG                | 1945908272               |
| SNP_P3_22251_30112621 | NC_021161.1    | Ca_kabuli_chr02 | 30112621                | GG                              | AA                | 1945908274               |
| SNP_P3_22252_30112661 | NC_021161.1    | Ca_kabuli_chr02 | 30112661                | TT                              | GG                | 1945908276               |
| SNP_P3_22253_30126390 | NC_021161.1    | Ca_kabuli_chr02 | 30126390                | TT                              | CC                | 1945908278               |
| SNP_P3_22254_30126409 | NC_021161.1    | Ca_kabuli_chr02 | 30126409                | TT                              | CC                | 1945908279               |
| SNP_P3_22255_30126787 | NC_021161.1    | Ca_kabuli_chr02 | 30126787                | TT                              | AA                | 1945908281               |
| SNP_P3_22256_30127869 | NC_021161.1    | Ca_kabuli_chr02 | 30127869                | TT                              | AA                | 1945908283               |
| SNP_P3_22257_30144442 | NC_021161.1    | Ca_kabuli_chr02 | 30144442                | GG                              | AA                | 1945908285               |
| SNP_P3_22258_30144493 | NC_021161.1    | Ca_kabuli_chr02 | 30144493                | CC                              | AA                | 1945908287               |
| SNP_P3_22259_30144998 | NC_021161.1    | Ca_kabuli_chr02 | 30144998                | TT                              | AA                | 1945908288               |
| SNP_P3_22260_30145231 | NC_021161.1    | Ca_kabuli_chr02 | 30145231                | CC                              | GG                | 1945908290               |
| SNP_P3_22261_30145319 | NC_021161.1    | Ca_kabuli_chr02 | 30145319                | CC                              | TT                | 1945908292               |
| SNP_P3_22262_30145357 | NC_021161.1    | Ca_kabuli_chr02 | 30145357                | CC                              | TT                | 1945908294               |
| SNP_P3_22263_30145549 | NC_021161.1    | Ca_kabuli_chr02 | 30145549                | GG                              | CC                | 1945908296               |
| SNP_P3_22264_30146187 | NC_021161.1    | Ca_kabuli_chr02 | 30146187                | GG                              | AA                | 1945908297               |

| SNPs IDs              | Chromosome IDs | Chromosomes     | Physical positions (bp) | CDC Frontier (Reference genome) | (Pusa 256 & HPNB) | NCBI SNPdb Accession IDs |
|-----------------------|----------------|-----------------|-------------------------|---------------------------------|-------------------|--------------------------|
| SNP_P3_22265_30146287 | NC_021161.1    | Ca_kabuli_chr02 | 30146287                | CC                              | TT                | 1945908299               |
| SNP_P3_22266_30146362 | NC_021161.1    | Ca_kabuli_chr02 | 30146362                | CC                              | AA                | 1945908301               |
| SNP_P3_22267_30146363 | NC_021161.1    | Ca_kabuli_chr02 | 30146363                | CC                              | AA                | 1945908303               |
| SNP_P3_22268_30146370 | NC_021161.1    | Ca_kabuli_chr02 | 30146370                | TT                              | CC                | 1945908304               |
| SNP_P3_22269_30146409 | NC_021161.1    | Ca_kabuli_chr02 | 30146409                | CC                              | TT                | 1945908306               |
| SNP_P3_22270_30146418 | NC_021161.1    | Ca_kabuli_chr02 | 30146418                | CC                              | TT                | 1945908308               |
| SNP_P3_22271_30146538 | NC_021161.1    | Ca_kabuli_chr02 | 30146538                | AA                              | TT                | 1945908310               |
| SNP_P3_22272_30147134 | NC_021161.1    | Ca_kabuli_chr02 | 30147134                | CC                              | TT                | 1945908312               |
| SNP_P3_22273_30147137 | NC_021161.1    | Ca_kabuli_chr02 | 30147137                | CC                              | TT                | 1945908313               |
| SNP_P3_22274_30147165 | NC_021161.1    | Ca_kabuli_chr02 | 30147165                | GG                              | CC                | 1945908315               |
| SNP_P3_22275_30147382 | NC_021161.1    | Ca_kabuli_chr02 | 30147382                | GG                              | AA                | 1945908317               |
| SNP_P3_22276_30147445 | NC_021161.1    | Ca_kabuli_chr02 | 30147445                | TT                              | CC                | 1945908319               |
| SNP_P3_22277_30147482 | NC_021161.1    | Ca_kabuli_chr02 | 30147482                | TT                              | AA                | 1945908320               |
| SNP_P3_22278_30165086 | NC_021161.1    | Ca_kabuli_chr02 | 30165086                | TT                              | AA                | 1945908322               |
| SNP_P3_22279_30172866 | NC_021161.1    | Ca_kabuli_chr02 | 30172866                | GG                              | CC                | 1945908324               |
| SNP_P3_22280_30172924 | NC_021161.1    | Ca_kabuli_chr02 | 30172924                | TT                              | CC                | 1945908326               |
| SNP_P3_22281_30173691 | NC_021161.1    | Ca_kabuli_chr02 | 30173691                | GG                              | AA                | 1945908328               |
| SNP_P3_22282_30173984 | NC_021161.1    | Ca_kabuli_chr02 | 30173984                | GG                              | AA                | 1945908329               |
| SNP_P3_22283_30174484 | NC_021161.1    | Ca_kabuli_chr02 | 30174484                | CC                              | GG                | 1945908331               |
| SNP_P3_22285_30214102 | NC_021161.1    | Ca_kabuli_chr02 | 30214102                | AA                              | GG                | 1945908333               |
| SNP_P3_22286_30215692 | NC_021161.1    | Ca_kabuli_chr02 | 30215692                | TT                              | CC                | 1945908335               |
| SNP_P3_22287_30219712 | NC_021161.1    | Ca_kabuli_chr02 | 30219712                | AA                              | GG                | 1945908336               |
| SNP_P3_22288_30220109 | NC_021161.1    | Ca_kabuli_chr02 | 30220109                | AA                              | GG                | 1945908338               |
| SNP_P3_22289_30220135 | NC_021161.1    | Ca_kabuli_chr02 | 30220135                | CC                              | GG                | 1945908340               |
| SNP_P3_22290_30220140 | NC_021161.1    | Ca_kabuli_chr02 | 30220140                | TT                              | CC                | 1945908342               |
| SNP_P3_22292_30298255 | NC_021161.1    | Ca_kabuli_chr02 | 30298255                | AA                              | GG                | 1945908344               |
| SNP_P3_22293_30308703 | NC_021161.1    | Ca_kabuli_chr02 | 30308703                | CC                              | TT                | 1945908345               |
| SNP_P3_22294_30313860 | NC_021161.1    | Ca_kabuli_chr02 | 30313860                | GG                              | AA                | 1945908347               |
| SNP_P3_22295_30314523 | NC_021161.1    | Ca_kabuli_chr02 | 30314523                | TT                              | AA                | 1945908349               |
| SNP_P3_22296_30314548 | NC_021161.1    | Ca_kabuli_chr02 | 30314548                | CC                              | TT                | 1945908351               |
| SNP_P3_22297_30314594 | NC_021161.1    | Ca_kabuli_chr02 | 30314594                | CC                              | TT                | 1945908353               |
| SNP_P3_22298_30335068 | NC_021161.1    | Ca_kabuli_chr02 | 30335068                | GG                              | AA                | 1945908354               |
| SNP_P3_22299_30335072 | NC_021161.1    | Ca_kabuli_chr02 | 30335072                | GG                              | TT                | 1945908356               |
| SNP_P3_22300_30336700 | NC_021161.1    | Ca_kabuli_chr02 | 30336700                | CC                              | TT                | 1945908358               |
| SNP_P3_22301_30337032 | NC_021161.1    | Ca_kabuli_chr02 | 30337032                | AA                              | TT                | 1945908360               |
| SNP_P3_22302_30337268 | NC_021161.1    | Ca_kabuli_chr02 | 30337268                | TT                              | CC                | 1945908361               |
| SNP_P3_22303_30337599 | NC_021161.1    | Ca_kabuli_chr02 | 30337599                | TT                              | GG                | 1945908363               |
| SNP_P3_22304_30337624 | NC_021161.1    | Ca_kabuli_chr02 | 30337624                | CC                              | TT                | 1945908365               |
| SNP_P3_22305_30337655 | NC_021161.1    | Ca_kabuli_chr02 | 30337655                | AA                              | TT                | 1945908367               |
| SNP_P3_22306_30337750 | NC_021161.1    | Ca_kabuli_chr02 | 30337750                | GG                              | AA                | 1945908369               |
| SNP_P3_22307_30337759 | NC_021161.1    | Ca_kabuli_chr02 | 30337759                | GG                              | CC                | 1945908370               |
| SNP_P3_22308_30338896 | NC_021161.1    | Ca_kabuli_chr02 | 30338896                | GG                              | CC                | 1945908372               |

| SNPs IDs              | Chromosome IDs | Chromosomes     | Physical positions (bp) | CDC Frontier (Reference genome) | (Pusa 256 & HPNB) | NCBI SNPdb Accession IDs |
|-----------------------|----------------|-----------------|-------------------------|---------------------------------|-------------------|--------------------------|
| SNP_P3_22309_30338897 | NC_021161.1    | Ca_kabuli_chr02 | 30338897                | AA                              | GG                | 1945908374               |
| SNP_P3_22310_30339203 | NC_021161.1    | Ca_kabuli_chr02 | 30339203                | AA                              | GG                | 1945908376               |
| SNP_P3_22311_30340005 | NC_021161.1    | Ca_kabuli_chr02 | 30340005                | AA                              | TT                | 1945908377               |
| SNP_P3_22312_30340022 | NC_021161.1    | Ca_kabuli_chr02 | 30340022                | CC                              | TT                | 1945908379               |
| SNP_P3_22313_30340029 | NC_021161.1    | Ca_kabuli_chr02 | 30340029                | AA                              | GG                | 1945908381               |
| SNP_P3_22314_30340397 | NC_021161.1    | Ca_kabuli_chr02 | 30340397                | GG                              | AA                | 1945908383               |
| SNP_P3_22315_30340403 | NC_021161.1    | Ca_kabuli_chr02 | 30340403                | TT                              | AA                | 1945908385               |
| SNP_P3_22316_30340656 | NC_021161.1    | Ca_kabuli_chr02 | 30340656                | GG                              | AA                | 1945908386               |
| SNP_P3_22318_30340934 | NC_021161.1    | Ca_kabuli_chr02 | 30340934                | GG                              | CC                | 1945908388               |
| SNP_P3_22319_30340953 | NC_021161.1    | Ca_kabuli_chr02 | 30340953                | AA                              | TT                | 1945908390               |
| SNP_P3_22321_30341279 | NC_021161.1    | Ca_kabuli_chr02 | 30341279                | CC                              | TT                | 1945908392               |
| SNP_P3_22323_30342712 | NC_021161.1    | Ca_kabuli_chr02 | 30342712                | CC                              | GG                | 1945908393               |
| SNP_P3_22324_30344414 | NC_021161.1    | Ca_kabuli_chr02 | 30344414                | AA                              | TT                | 1945908395               |
| SNP_P3_22325_30344432 | NC_021161.1    | Ca_kabuli_chr02 | 30344432                | GG                              | AA                | 1945908397               |
| SNP_P3_22326_30344789 | NC_021161.1    | Ca_kabuli_chr02 | 30344789                | GG                              | TT                | 1945908399               |
| SNP_P3_22329_30346607 | NC_021161.1    | Ca_kabuli_chr02 | 30346607                | GG                              | AA                | 1945908401               |
| SNP_P3_22330_30347074 | NC_021161.1    | Ca_kabuli_chr02 | 30347074                | TT                              | AA                | 1945908402               |
| SNP_P3_22331_30347088 | NC_021161.1    | Ca_kabuli_chr02 | 30347088                | CC                              | AA                | 1945908404               |
| SNP_P3_22332_30347308 | NC_021161.1    | Ca_kabuli_chr02 | 30347308                | TT                              | CC                | 1945908406               |
| SNP_P3_22334_30347378 | NC_021161.1    | Ca_kabuli_chr02 | 30347378                | GG                              | AA                | 1945908408               |
| SNP_P3_22335_30347392 | NC_021161.1    | Ca_kabuli_chr02 | 30347392                | TT                              | CC                | 1945908410               |
| SNP_P3_22337_30347566 | NC_021161.1    | Ca_kabuli_chr02 | 30347566                | CC                              | TT                | 1945908411               |
| SNP_P3_22338_30347582 | NC_021161.1    | Ca_kabuli_chr02 | 30347582                | CC                              | TT                | 1945908413               |
| SNP_P3_22339_30348176 | NC_021161.1    | Ca_kabuli_chr02 | 30348176                | TT                              | CC                | 1945908415               |
| SNP_P3_22340_30348215 | NC_021161.1    | Ca_kabuli_chr02 | 30348215                | AA                              | GG                | 1945908417               |
| SNP_P3_22341_30348342 | NC_021161.1    | Ca_kabuli_chr02 | 30348342                | CC                              | TT                | 1945908418               |
| SNP_P3_22342_30348421 | NC_021161.1    | Ca_kabuli_chr02 | 30348421                | CC                              | TT                | 1945908420               |
| SNP_P3_22343_30348615 | NC_021161.1    | Ca_kabuli_chr02 | 30348615                | GG                              | AA                | 1945908422               |
| SNP_P3_22344_30351317 | NC_021161.1    | Ca_kabuli_chr02 | 30351317                | TT                              | CC                | 1945908424               |
| SNP_P3_22345_30351559 | NC_021161.1    | Ca_kabuli_chr02 | 30351559                | GG                              | TT                | 1945908426               |
| SNP_P3_22346_30351607 | NC_021161.1    | Ca_kabuli_chr02 | 30351607                | TT                              | CC                | 1945908427               |
| SNP_P3_22347_30352212 | NC_021161.1    | Ca_kabuli_chr02 | 30352212                | TT                              | AA                | 1945908429               |
| SNP_P3_22349_30352580 | NC_021161.1    | Ca_kabuli_chr02 | 30352580                | TT                              | AA                | 1945908431               |
| SNP_P3_22350_30352618 | NC_021161.1    | Ca_kabuli_chr02 | 30352618                | CC                              | TT                | 1945908433               |
| SNP_P3_22351_30352660 | NC_021161.1    | Ca_kabuli_chr02 | 30352660                | CC                              | GG                | 1945908434               |
| SNP_P3_22352_30352662 | NC_021161.1    | Ca_kabuli_chr02 | 30352662                | TT                              | CC                | 1945908436               |
| SNP_P3_22353_30352698 | NC_021161.1    | Ca_kabuli_chr02 | 30352698                | AA                              | GG                | 1945908438               |
| SNP_P3_22355_30355143 | NC_021161.1    | Ca_kabuli_chr02 | 30355143                | AA                              | TT                | 1945908440               |
| SNP_P3_22356_30355275 | NC_021161.1    | Ca_kabuli_chr02 | 30355275                | GG                              | AA                | 1945908442               |
| SNP_P3_22358_30355364 | NC_021161.1    | Ca_kabuli_chr02 | 30355364                | GG                              | AA                | 1945908443               |
| SNP_P3_22359_30355368 | NC_021161.1    | Ca_kabuli_chr02 | 30355368                | TT                              | AA                | 1945908445               |
| SNP_P3_22360_30355373 | NC_021161.1    | Ca_kabuli_chr02 | 30355373                | AA                              | GG                | 1945908447               |



| SNPs IDs              | Chromosome IDs | Chromosomes     | Physical positions (bp) | CDC Frontier (Reference genome) | (Pusa 256 & HPNB) | NCBI SNPdb Accession IDs |
|-----------------------|----------------|-----------------|-------------------------|---------------------------------|-------------------|--------------------------|
| SNP_P3_22361_30355628 | NC_021161.1    | Ca_kabuli_chr02 | 30355628                | GG                              | AA                | 1945908449               |
| SNP_P3_22362_30355687 | NC_021161.1    | Ca_kabuli_chr02 | 30355687                | AA                              | GG                | 1945908450               |
| SNP_P3_22363_30356049 | NC_021161.1    | Ca_kabuli_chr02 | 30356049                | TT                              | CC                | 1945908452               |
| SNP_P3_22364_30356555 | NC_021161.1    | Ca_kabuli_chr02 | 30356555                | CC                              | TT                | 1945908454               |
| SNP_P3_22365_30357124 | NC_021161.1    | Ca_kabuli_chr02 | 30357124                | CC                              | AA                | 1945908456               |
| SNP_P3_22366_30357172 | NC_021161.1    | Ca_kabuli_chr02 | 30357172                | CC                              | AA                | 1945908458               |
| SNP_P3_22367_30357896 | NC_021161.1    | Ca_kabuli_chr02 | 30357896                | TT                              | CC                | 1945908459               |
| SNP_P3_22368_30357920 | NC_021161.1    | Ca_kabuli_chr02 | 30357920                | GG                              | AA                | 1945908461               |
| SNP_P3_22369_30358173 | NC_021161.1    | Ca_kabuli_chr02 | 30358173                | CC                              | AA                | 1945908463               |
| SNP_P3_22370_30358185 | NC_021161.1    | Ca_kabuli_chr02 | 30358185                | TT                              | GG                | 1945908465               |
| SNP_P3_22371_30358789 | NC_021161.1    | Ca_kabuli_chr02 | 30358789                | CC                              | TT                | 1945908467               |
| SNP_P3_22372_30358799 | NC_021161.1    | Ca_kabuli_chr02 | 30358799                | AA                              | GG                | 1945908468               |
| SNP_P3_22373_30358808 | NC_021161.1    | Ca_kabuli_chr02 | 30358808                | AA                              | GG                | 1945908470               |
| SNP_P3_22374_30358813 | NC_021161.1    | Ca_kabuli_chr02 | 30358813                | CC                              | AA                | 1945908472               |
| SNP_P3_22375_30358840 | NC_021161.1    | Ca_kabuli_chr02 | 30358840                | TT                              | AA                | 1945908474               |
| SNP_P3_22376_30360175 | NC_021161.1    | Ca_kabuli_chr02 | 30360175                | AA                              | CC                | 1945908475               |
| SNP_P3_22377_30363995 | NC_021161.1    | Ca_kabuli_chr02 | 30363995                | TT                              | AA                | 1945908477               |
| SNP_P3_22378_30364025 | NC_021161.1    | Ca_kabuli_chr02 | 30364025                | CC                              | TT                | 1945908479               |
| SNP_P3_22379_30364042 | NC_021161.1    | Ca_kabuli_chr02 | 30364042                | GG                              | AA                | 1945908481               |
| SNP_P3_22380_30364520 | NC_021161.1    | Ca_kabuli_chr02 | 30364520                | TT                              | CC                | 1945908483               |
| SNP_P3_22381_30364636 | NC_021161.1    | Ca_kabuli_chr02 | 30364636                | CC                              | AA                | 1945908484               |
| SNP_P3_22382_30364751 | NC_021161.1    | Ca_kabuli_chr02 | 30364751                | AA                              | TT                | 1945908486               |
| SNP_P3_22383_30364838 | NC_021161.1    | Ca_kabuli_chr02 | 30364838                | TT                              | CC                | 1945908488               |
| SNP_P3_22384_30364839 | NC_021161.1    | Ca_kabuli_chr02 | 30364839                | AA                              | GG                | 1945908490               |
| SNP_P3_22385_30364850 | NC_021161.1    | Ca_kabuli_chr02 | 30364850                | AA                              | GG                | 1945908491               |
| SNP_P3_22386_30364894 | NC_021161.1    | Ca_kabuli_chr02 | 30364894                | GG                              | TT                | 1945908493               |
| SNP_P3_22387_30364902 | NC_021161.1    | Ca_kabuli_chr02 | 30364902                | TT                              | AA                | 1945908495               |
| SNP_P3_22389_30367730 | NC_021161.1    | Ca_kabuli_chr02 | 30367730                | CC                              | TT                | 1945908497               |
| SNP_P3_22390_30367734 | NC_021161.1    | Ca_kabuli_chr02 | 30367734                | CC                              | TT                | 1945908499               |
| SNP_P3_22392_30367910 | NC_021161.1    | Ca_kabuli_chr02 | 30367910                | GG                              | AA                | 1945908500               |
| SNP_P3_22393_30368015 | NC_021161.1    | Ca_kabuli_chr02 | 30368015                | TT                              | CC                | 1945908502               |
| SNP_P3_22394_30369088 | NC_021161.1    | Ca_kabuli_chr02 | 30369088                | AA                              | GG                | 1945908504               |
| SNP_P3_22395_30369220 | NC_021161.1    | Ca_kabuli_chr02 | 30369220                | AA                              | TT                | 1945908506               |
| SNP_P3_22397_30370326 | NC_021161.1    | Ca_kabuli_chr02 | 30370326                | TT                              | GG                | 1945908507               |
| SNP_P3_22398_30370528 | NC_021161.1    | Ca_kabuli_chr02 | 30370528                | AA                              | TT                | 1945908509               |
| SNP_P3_22399_30375157 | NC_021161.1    | Ca_kabuli_chr02 | 30375157                | TT                              | CC                | 1945908511               |
| SNP_P3_22401_30376727 | NC_021161.1    | Ca_kabuli_chr02 | 30376727                | TT                              | GG                | 1945908513               |
| SNP_P3_22402_30382968 | NC_021161.1    | Ca_kabuli_chr02 | 30382968                | TT                              | CC                | 1945908515               |
| SNP_P3_22403_30382973 | NC_021161.1    | Ca_kabuli_chr02 | 30382973                | AA                              | CC                | 1945908516               |
| SNP_P3_22404_30383237 | NC_021161.1    | Ca_kabuli_chr02 | 30383237                | TT                              | AA                | 1945908518               |
| SNP_P3_22405_30383262 | NC_021161.1    | Ca_kabuli_chr02 | 30383262                | GG                              | AA                | 1945908520               |
| SNP_P3_22406_30383298 | NC_021161.1    | Ca_kabuli_chr02 | 30383298                | AA                              | GG                | 1945908522               |

| SNPs IDs              | Chromosome IDs | Chromosomes     | Physical positions (bp) | CDC Frontier (Reference genome) | (Pusa 256 & HPNB) | NCBI SNPdb Accession IDs |
|-----------------------|----------------|-----------------|-------------------------|---------------------------------|-------------------|--------------------------|
| SNP_P3_22407_30383302 | NC_021161.1    | Ca_kabuli_chr02 | 30383302                | TT                              | GG                | 1945908524               |
| SNP_P3_22408_30384257 | NC_021161.1    | Ca_kabuli_chr02 | 30384257                | GG                              | CC                | 1945908525               |
| SNP_P3_22409_30384264 | NC_021161.1    | Ca_kabuli_chr02 | 30384264                | TT                              | CC                | 1945908527               |
| SNP_P3_22410_30384268 | NC_021161.1    | Ca_kabuli_chr02 | 30384268                | CC                              | TT                | 1945908529               |
| SNP_P3_22411_30384729 | NC_021161.1    | Ca_kabuli_chr02 | 30384729                | AA                              | GG                | 1945908531               |
| SNP_P3_22412_30384757 | NC_021161.1    | Ca_kabuli_chr02 | 30384757                | AA                              | GG                | 1945908532               |
| SNP_P3_22413_30384960 | NC_021161.1    | Ca_kabuli_chr02 | 30384960                | CC                              | TT                | 1945908534               |
| SNP_P3_22414_30385324 | NC_021161.1    | Ca_kabuli_chr02 | 30385324                | AA                              | GG                | 1945908536               |
| SNP_P3_22415_30385385 | NC_021161.1    | Ca_kabuli_chr02 | 30385385                | CC                              | AA                | 1945908538               |
| SNP_P3_22417_30385849 | NC_021161.1    | Ca_kabuli_chr02 | 30385849                | GG                              | AA                | 1945908540               |
| SNP_P3_22418_30385853 | NC_021161.1    | Ca_kabuli_chr02 | 30385853                | GG                              | AA                | 1945908541               |
| SNP_P3_22419_30385945 | NC_021161.1    | Ca_kabuli_chr02 | 30385945                | CC                              | TT                | 1945908543               |
| SNP_P3_22420_30385996 | NC_021161.1    | Ca_kabuli_chr02 | 30385996                | AA                              | GG                | 1945908545               |
| SNP_P3_22421_30389515 | NC_021161.1    | Ca_kabuli_chr02 | 30389515                | AA                              | TT                | 1945908547               |
| SNP_P3_22422_30389653 | NC_021161.1    | Ca_kabuli_chr02 | 30389653                | AA                              | TT                | 1945908548               |
| SNP_P3_22423_30389678 | NC_021161.1    | Ca_kabuli_chr02 | 30389678                | GG                              | AA                | 1945908550               |
| SNP_P3_22424_30390607 | NC_021161.1    | Ca_kabuli_chr02 | 30390607                | GG                              | AA                | 1945908552               |
| SNP_P3_22425_30390628 | NC_021161.1    | Ca_kabuli_chr02 | 30390628                | AA                              | GG                | 1945908554               |
| SNP_P3_22426_30391318 | NC_021161.1    | Ca_kabuli_chr02 | 30391318                | GG                              | AA                | 1945908556               |
| SNP_P3_22427_30391339 | NC_021161.1    | Ca_kabuli_chr02 | 30391339                | TT                              | CC                | 1945908557               |
| SNP_P3_22428_30391444 | NC_021161.1    | Ca_kabuli_chr02 | 30391444                | CC                              | AA                | 1945908559               |
| SNP_P3_22429_30393046 | NC_021161.1    | Ca_kabuli_chr02 | 30393046                | AA                              | TT                | 1945908561               |
| SNP_P3_22430_30393068 | NC_021161.1    | Ca_kabuli_chr02 | 30393068                | AA                              | TT                | 1945908563               |
| SNP_P3_22431_30393086 | NC_021161.1    | Ca_kabuli_chr02 | 30393086                | TT                              | AA                | 1945908564               |
| SNP_P3_22432_30393098 | NC_021161.1    | Ca_kabuli_chr02 | 30393098                | TT                              | CC                | 1945908566               |
| SNP_P3_22433_30393360 | NC_021161.1    | Ca_kabuli_chr02 | 30393360                | CC                              | GG                | 1945908568               |
| SNP_P3_22434_30393397 | NC_021161.1    | Ca_kabuli_chr02 | 30393397                | AA                              | CC                | 1945908570               |
| SNP_P3_22435_30393434 | NC_021161.1    | Ca_kabuli_chr02 | 30393434                | AA                              | GG                | 1945908572               |
| SNP_P3_22436_30393749 | NC_021161.1    | Ca_kabuli_chr02 | 30393749                | CC                              | AA                | 1945908573               |
| SNP_P3_22437_30393788 | NC_021161.1    | Ca_kabuli_chr02 | 30393788                | CC                              | TT                | 1945908575               |
| SNP_P3_22438_30393790 | NC_021161.1    | Ca_kabuli_chr02 | 30393790                | GG                              | AA                | 1945908577               |
| SNP_P3_22439_30394004 | NC_021161.1    | Ca_kabuli_chr02 | 30394004                | TT                              | GG                | 1945908579               |
| SNP_P3_22440_30394661 | NC_021161.1    | Ca_kabuli_chr02 | 30394661                | AA                              | GG                | 1945908581               |
| SNP_P3_22445_30398886 | NC_021161.1    | Ca_kabuli_chr02 | 30398886                | CC                              | TT                | 1945908582               |
| SNP_P3_22449_30401943 | NC_021161.1    | Ca_kabuli_chr02 | 30401943                | AA                              | TT                | 1945908584               |
| SNP_P3_22450_30402186 | NC_021161.1    | Ca_kabuli_chr02 | 30402186                | AA                              | TT                | 1945908586               |
| SNP_P3_22451_30402905 | NC_021161.1    | Ca_kabuli_chr02 | 30402905                | GG                              | TT                | 1945908588               |
| SNP_P3_22453_30403138 | NC_021161.1    | Ca_kabuli_chr02 | 30403138                | AA                              | CC                | 1945908589               |
| SNP_P3_22454_30403156 | NC_021161.1    | Ca_kabuli_chr02 | 30403156                | CC                              | GG                | 1945908591               |
| SNP_P3_22457_30404662 | NC_021161.1    | Ca_kabuli_chr02 | 30404662                | GG                              | TT                | 1945908593               |
| SNP_P3_22458_30406222 | NC_021161.1    | Ca_kabuli_chr02 | 30406222                | AA                              | CC                | 1945908595               |
| SNP_P3_22459_30406856 | NC_021161.1    | Ca_kabuli_chr02 | 30406856                | CC                              | GG                | 1945908597               |

| SNPs IDs              | Chromosome IDs | Chromosomes     | Physical positions (bp) | CDC Frontier (Reference genome) | (Pusa 256 & HPNB) | NCBI SNPdb Accession IDs |
|-----------------------|----------------|-----------------|-------------------------|---------------------------------|-------------------|--------------------------|
| SNP_P3_22460_30406887 | NC_021161.1    | Ca_kabuli_chr02 | 30406887                | GG                              | AA                | 1945908598               |
| SNP_P3_22461_30408392 | NC_021161.1    | Ca_kabuli_chr02 | 30408392                | AA                              | GG                | 1945908600               |
| SNP_P3_22462_30408622 | NC_021161.1    | Ca_kabuli_chr02 | 30408622                | AA                              | GG                | 1945908602               |
| SNP_P3_22463_30409027 | NC_021161.1    | Ca_kabuli_chr02 | 30409027                | TT                              | CC                | 1945908604               |
| SNP_P3_22464_30409725 | NC_021161.1    | Ca_kabuli_chr02 | 30409725                | CC                              | TT                | 1945908605               |
| SNP_P3_22465_30410235 | NC_021161.1    | Ca_kabuli_chr02 | 30410235                | CC                              | TT                | 1945908607               |
| SNP_P3_22467_30410490 | NC_021161.1    | Ca_kabuli_chr02 | 30410490                | GG                              | CC                | 1945908609               |
| SNP_P3_22468_30410492 | NC_021161.1    | Ca_kabuli_chr02 | 30410492                | CC                              | TT                | 1945908611               |
| SNP_P3_22470_30410624 | NC_021161.1    | Ca_kabuli_chr02 | 30410624                | GG                              | CC                | 1945908613               |
| SNP_P3_22471_30410703 | NC_021161.1    | Ca_kabuli_chr02 | 30410703                | CC                              | TT                | 1945908614               |
| SNP_P3_22472_30410776 | NC_021161.1    | Ca_kabuli_chr02 | 30410776                | CC                              | GG                | 1945908616               |
| SNP_P3_22473_30410962 | NC_021161.1    | Ca_kabuli_chr02 | 30410962                | TT                              | CC                | 1945908618               |
| SNP_P3_22474_30414121 | NC_021161.1    | Ca_kabuli_chr02 | 30414121                | TT                              | GG                | 1945908620               |
| SNP_P3_22475_30414409 | NC_021161.1    | Ca_kabuli_chr02 | 30414409                | CC                              | TT                | 1945908621               |
| SNP_P3_22477_30415603 | NC_021161.1    | Ca_kabuli_chr02 | 30415603                | CC                              | TT                | 1945908623               |
| SNP_P3_22479_30416622 | NC_021161.1    | Ca_kabuli_chr02 | 30416622                | GG                              | AA                | 1945908625               |
| SNP_P3_22480_30419055 | NC_021161.1    | Ca_kabuli_chr02 | 30419055                | CC                              | TT                | 1945908627               |
| SNP_P3_22481_30419286 | NC_021161.1    | Ca_kabuli_chr02 | 30419286                | AA                              | GG                | 1945908629               |
| SNP_P3_22483_30421355 | NC_021161.1    | Ca_kabuli_chr02 | 30421355                | CC                              | TT                | 1945908630               |
| SNP_P3_22484_30421377 | NC_021161.1    | Ca_kabuli_chr02 | 30421377                | CC                              | GG                | 1945908632               |
| SNP_P3_22485_30422731 | NC_021161.1    | Ca_kabuli_chr02 | 30422731                | GG                              | CC                | 1945908634               |
| SNP_P3_22487_30423815 | NC_021161.1    | Ca_kabuli_chr02 | 30423815                | CC                              | TT                | 1945908636               |
| SNP_P3_22488_30426994 | NC_021161.1    | Ca_kabuli_chr02 | 30426994                | GG                              | AA                | 1945908638               |
| SNP_P3_22489_30427009 | NC_021161.1    | Ca_kabuli_chr02 | 30427009                | CC                              | TT                | 1945908639               |
| SNP_P3_22490_30429516 | NC_021161.1    | Ca_kabuli_chr02 | 30429516                | TT                              | AA                | 1945908641               |
| SNP_P3_22491_30432465 | NC_021161.1    | Ca_kabuli_chr02 | 30432465                | GG                              | AA                | 1945908643               |
| SNP_P3_22492_30432653 | NC_021161.1    | Ca_kabuli_chr02 | 30432653                | GG                              | AA                | 1945908645               |
| SNP_P3_22495_30435214 | NC_021161.1    | Ca_kabuli_chr02 | 30435214                | AA                              | CC                | 1945908646               |
| SNP_P3_22496_30435276 | NC_021161.1    | Ca_kabuli_chr02 | 30435276                | CC                              | GG                | 1945908648               |
| SNP_P3_22497_30435491 | NC_021161.1    | Ca_kabuli_chr02 | 30435491                | AA                              | TT                | 1945908650               |
| SNP_P3_22498_30435540 | NC_021161.1    | Ca_kabuli_chr02 | 30435540                | AA                              | TT                | 1945908652               |
| SNP_P3_22499_30435541 | NC_021161.1    | Ca_kabuli_chr02 | 30435541                | CC                              | TT                | 1945908654               |
| SNP_P3_22500_30435551 | NC_021161.1    | Ca_kabuli_chr02 | 30435551                | CC                              | TT                | 1945908655               |
| SNP_P3_22501_30435593 | NC_021161.1    | Ca_kabuli_chr02 | 30435593                | TT                              | CC                | 1945908657               |
| SNP_P3_22502_30435622 | NC_021161.1    | Ca_kabuli_chr02 | 30435622                | AA                              | TT                | 1945908659               |
| SNP_P3_22503_30437950 | NC_021161.1    | Ca_kabuli_chr02 | 30437950                | GG                              | CC                | 1945908661               |
| SNP_P3_22504_30439043 | NC_021161.1    | Ca_kabuli_chr02 | 30439043                | TT                              | CC                | 1945908662               |
| SNP_P3_22505_30441736 | NC_021161.1    | Ca_kabuli_chr02 | 30441736                | GG                              | AA                | 1945908664               |
| SNP_P3_22506_30441841 | NC_021161.1    | Ca_kabuli_chr02 | 30441841                | AA                              | TT                | 1945908666               |
| SNP_P3_22507_30443952 | NC_021161.1    | Ca_kabuli_chr02 | 30443952                | TT                              | CC                | 1945908668               |
| SNP_P3_22508_30444025 | NC_021161.1    | Ca_kabuli_chr02 | 30444025                | TT                              | AA                | 1945908670               |
| SNP_P3_22509_30445632 | NC_021161.1    | Ca_kabuli_chr02 | 30445632                | AA                              | TT                | 1945908671               |

| SNPs IDs              | Chromosome IDs | Chromosomes     | Physical positions (bp) | CDC Frontier (Reference genome) | (Pusa 256 & HPNB) | NCBI SNPdb Accession IDs |
|-----------------------|----------------|-----------------|-------------------------|---------------------------------|-------------------|--------------------------|
| SNP_P3_22510_30445669 | NC_021161.1    | Ca_kabuli_chr02 | 30445669                | GG                              | AA                | 1945908673               |
| SNP_P3_22511_30445676 | NC_021161.1    | Ca_kabuli_chr02 | 30445676                | TT                              | AA                | 1945908675               |
| SNP_P3_22512_30445688 | NC_021161.1    | Ca_kabuli_chr02 | 30445688                | AA                              | TT                | 1945908677               |
| SNP_P3_22513_30445699 | NC_021161.1    | Ca_kabuli_chr02 | 30445699                | TT                              | CC                | 1945908679               |
| SNP_P3_22514_30445703 | NC_021161.1    | Ca_kabuli_chr02 | 30445703                | CC                              | AA                | 1945908680               |
| SNP_P3_22515_30445709 | NC_021161.1    | Ca_kabuli_chr02 | 30445709                | CC                              | TT                | 1945908682               |
| SNP_P3_22516_30445751 | NC_021161.1    | Ca_kabuli_chr02 | 30445751                | GG                              | TT                | 1945908684               |
| SNP_P3_22517_30445766 | NC_021161.1    | Ca_kabuli_chr02 | 30445766                | AA                              | CC                | 1945908686               |
| SNP_P3_22518_30445774 | NC_021161.1    | Ca_kabuli_chr02 | 30445774                | CC                              | TT                | 1945908687               |
| SNP_P3_22519_30445788 | NC_021161.1    | Ca_kabuli_chr02 | 30445788                | AA                              | GG                | 1945908689               |
| SNP_P3_22520_30445878 | NC_021161.1    | Ca_kabuli_chr02 | 30445878                | GG                              | CC                | 1945908691               |
| SNP_P3_22522_30446144 | NC_021161.1    | Ca_kabuli_chr02 | 30446144                | TT                              | AA                | 1945908693               |
| SNP_P3_22523_30447045 | NC_021161.1    | Ca_kabuli_chr02 | 30447045                | GG                              | TT                | 1945908695               |
| SNP_P3_22528_30448655 | NC_021161.1    | Ca_kabuli_chr02 | 30448655                | CC                              | GG                | 1945908696               |
| SNP_P3_22529_30449096 | NC_021161.1    | Ca_kabuli_chr02 | 30449096                | GG                              | AA                | 1945908698               |
| SNP_P3_22530_30449144 | NC_021161.1    | Ca_kabuli_chr02 | 30449144                | CC                              | TT                | 1945908700               |
| SNP_P3_22532_30449745 | NC_021161.1    | Ca_kabuli_chr02 | 30449745                | GG                              | AA                | 1945908702               |
| SNP_P3_22533_30450072 | NC_021161.1    | Ca_kabuli_chr02 | 30450072                | GG                              | AA                | 1945908703               |
| SNP_P3_22534_30450135 | NC_021161.1    | Ca_kabuli_chr02 | 30450135                | AA                              | GG                | 1945908705               |
| SNP_P3_22535_30450139 | NC_021161.1    | Ca_kabuli_chr02 | 30450139                | TT                              | CC                | 1945908707               |
| SNP_P3_22536_30450156 | NC_021161.1    | Ca_kabuli_chr02 | 30450156                | GG                              | CC                | 1945908709               |
| SNP_P3_22537_30450168 | NC_021161.1    | Ca_kabuli_chr02 | 30450168                | AA                              | GG                | 1945908711               |
| SNP_P3_22538_30450437 | NC_021161.1    | Ca_kabuli_chr02 | 30450437                | TT                              | AA                | 1945908712               |
| SNP_P3_22539_30456056 | NC_021161.1    | Ca_kabuli_chr02 | 30456056                | AA                              | GG                | 1945908714               |
| SNP_P3_22540_30456697 | NC_021161.1    | Ca_kabuli_chr02 | 30456697                | AA                              | TT                | 1945908716               |
| SNP_P3_22542_30457201 | NC_021161.1    | Ca_kabuli_chr02 | 30457201                | GG                              | AA                | 1945908718               |
| SNP_P3_22544_30457248 | NC_021161.1    | Ca_kabuli_chr02 | 30457248                | TT                              | CC                | 1945908719               |
| SNP_P3_22545_30457263 | NC_021161.1    | Ca_kabuli_chr02 | 30457263                | AA                              | GG                | 1945908721               |
| SNP_P3_22546_30457296 | NC_021161.1    | Ca_kabuli_chr02 | 30457296                | AA                              | GG                | 1945908723               |
| SNP_P3_22548_30457322 | NC_021161.1    | Ca_kabuli_chr02 | 30457322                | CC                              | TT                | 1945908725               |
| SNP_P3_22549_30457384 | NC_021161.1    | Ca_kabuli_chr02 | 30457384                | CC                              | TT                | 1945908727               |
| SNP_P3_22550_30457497 | NC_021161.1    | Ca_kabuli_chr02 | 30457497                | CC                              | TT                | 1945908728               |
| SNP_P3_22551_30457498 | NC_021161.1    | Ca_kabuli_chr02 | 30457498                | CC                              | GG                | 1945908730               |
| SNP_P3_22552_30457530 | NC_021161.1    | Ca_kabuli_chr02 | 30457530                | GG                              | AA                | 1945908732               |
| SNP_P3_22553_30457999 | NC_021161.1    | Ca_kabuli_chr02 | 30457999                | CC                              | TT                | 1945908734               |
| SNP_P3_22554_30458063 | NC_021161.1    | Ca_kabuli_chr02 | 30458063                | AA                              | CC                | 1945908735               |
| SNP_P3_22555_30458064 | NC_021161.1    | Ca_kabuli_chr02 | 30458064                | GG                              | TT                | 1945908737               |
| SNP_P3_22556_30458072 | NC_021161.1    | Ca_kabuli_chr02 | 30458072                | GG                              | AA                | 1945908739               |
| SNP_P3_22557_30458077 | NC_021161.1    | Ca_kabuli_chr02 | 30458077                | AA                              | GG                | 1945908741               |
| SNP_P3_22558_30458079 | NC_021161.1    | Ca_kabuli_chr02 | 30458079                | CC                              | TT                | 1945908743               |
| SNP_P3_22559_30458084 | NC_021161.1    | Ca_kabuli_chr02 | 30458084                | AA                              | GG                | 1945908744               |
| SNP_P3_22560_30458135 | NC_021161.1    | Ca_kabuli_chr02 | 30458135                | CC                              | TT                | 1945908746               |

| SNPs IDs              | Chromosome IDs | Chromosomes     | Physical positions (bp) | CDC Frontier (Reference genome) | (Pusa 256 & HPNB) | NCBI SNPdb Accession IDs |
|-----------------------|----------------|-----------------|-------------------------|---------------------------------|-------------------|--------------------------|
| SNP_P3_22561_30458155 | NC_021161.1    | Ca_kabuli_chr02 | 30458155                | CC                              | GG                | 1945908748               |
| SNP_P3_22562_30458172 | NC_021161.1    | Ca_kabuli_chr02 | 30458172                | AA                              | GG                | 1945908750               |
| SNP_P3_22563_30458176 | NC_021161.1    | Ca_kabuli_chr02 | 30458176                | TT                              | CC                | 1945908752               |
| SNP_P3_22564_30458187 | NC_021161.1    | Ca_kabuli_chr02 | 30458187                | AA                              | CC                | 1945908753               |
| SNP_P3_22565_30458209 | NC_021161.1    | Ca_kabuli_chr02 | 30458209                | AA                              | GG                | 1945908755               |
| SNP_P3_22567_30463061 | NC_021161.1    | Ca_kabuli_chr02 | 30463061                | CC                              | TT                | 1945908757               |
| SNP_P3_22568_30463320 | NC_021161.1    | Ca_kabuli_chr02 | 30463320                | GG                              | AA                | 1945908759               |
| SNP_P3_22571_30464084 | NC_021161.1    | Ca_kabuli_chr02 | 30464084                | TT                              | CC                | 1945908760               |
| SNP_P3_22574_30464384 | NC_021161.1    | Ca_kabuli_chr02 | 30464384                | AA                              | GG                | 1945908762               |
| SNP_P3_22575_30465710 | NC_021161.1    | Ca_kabuli_chr02 | 30465710                | GG                              | AA                | 1945908764               |
| SNP_P3_22576_30465757 | NC_021161.1    | Ca_kabuli_chr02 | 30465757                | GG                              | AA                | 1945908766               |
| SNP_P3_22577_30465879 | NC_021161.1    | Ca_kabuli_chr02 | 30465879                | AA                              | GG                | 1945908768               |
| SNP_P3_22578_30465882 | NC_021161.1    | Ca_kabuli_chr02 | 30465882                | CC                              | GG                | 1945908769               |
| SNP_P3_22579_30466819 | NC_021161.1    | Ca_kabuli_chr02 | 30466819                | CC                              | AA                | 1945908771               |
| SNP_P3_22580_30467052 | NC_021161.1    | Ca_kabuli_chr02 | 30467052                | CC                              | TT                | 1945908773               |
| SNP_P3_22581_30467551 | NC_021161.1    | Ca_kabuli_chr02 | 30467551                | TT                              | AA                | 1945908775               |
| SNP_P3_22582_30467624 | NC_021161.1    | Ca_kabuli_chr02 | 30467624                | GG                              | AA                | 1945908776               |
| SNP_P3_22583_30469087 | NC_021161.1    | Ca_kabuli_chr02 | 30469087                | TT                              | AA                | 1945908778               |
| SNP_P3_22584_30469211 | NC_021161.1    | Ca_kabuli_chr02 | 30469211                | AA                              | GG                | 1945908780               |
| SNP_P3_22585_30473141 | NC_021161.1    | Ca_kabuli_chr02 | 30473141                | TT                              | CC                | 1945908782               |
| SNP_P3_22586_30473207 | NC_021161.1    | Ca_kabuli_chr02 | 30473207                | CC                              | TT                | 1945908784               |
| SNP_P3_22587_30473216 | NC_021161.1    | Ca_kabuli_chr02 | 30473216                | AA                              | TT                | 1945908785               |
| SNP_P3_22588_30473268 | NC_021161.1    | Ca_kabuli_chr02 | 30473268                | TT                              | AA                | 1945908787               |
| SNP_P3_22589_30473269 | NC_021161.1    | Ca_kabuli_chr02 | 30473269                | TT                              | AA                | 1945908789               |
| SNP_P3_22590_30473271 | NC_021161.1    | Ca_kabuli_chr02 | 30473271                | TT                              | CC                | 1945908791               |
| SNP_P3_22591_30473326 | NC_021161.1    | Ca_kabuli_chr02 | 30473326                | GG                              | CC                | 1945908792               |
| SNP_P3_22595_30477611 | NC_021161.1    | Ca_kabuli_chr02 | 30477611                | CC                              | TT                | 1945908794               |
| SNP_P3_22596_30477637 | NC_021161.1    | Ca_kabuli_chr02 | 30477637                | AA                              | GG                | 1945908796               |
| SNP_P3_22597_30477890 | NC_021161.1    | Ca_kabuli_chr02 | 30477890                | TT                              | CC                | 1945908798               |
| SNP_P3_22598_30477892 | NC_021161.1    | Ca_kabuli_chr02 | 30477892                | CC                              | TT                | 1945908800               |
| SNP_P3_22600_30478180 | NC_021161.1    | Ca_kabuli_chr02 | 30478180                | CC                              | GG                | 1945908801               |
| SNP_P3_22601_30478769 | NC_021161.1    | Ca_kabuli_chr02 | 30478769                | AA                              | TT                | 1945908803               |
| SNP_P3_22602_30478777 | NC_021161.1    | Ca_kabuli_chr02 | 30478777                | AA                              | GG                | 1945908805               |
| SNP_P3_22603_30478822 | NC_021161.1    | Ca_kabuli_chr02 | 30478822                | CC                              | GG                | 1945908807               |
| SNP_P3_22604_30478833 | NC_021161.1    | Ca_kabuli_chr02 | 30478833                | GG                              | AA                | 1945908809               |
| SNP_P3_22605_30481340 | NC_021161.1    | Ca_kabuli_chr02 | 30481340                | GG                              | CC                | 1945908810               |
| SNP_P3_22606_30481845 | NC_021161.1    | Ca_kabuli_chr02 | 30481845                | AA                              | TT                | 1945908812               |
| SNP_P3_22607_30481887 | NC_021161.1    | Ca_kabuli_chr02 | 30481887                | TT                              | CC                | 1945908814               |
| SNP_P3_22610_30482455 | NC_021161.1    | Ca_kabuli_chr02 | 30482455                | AA                              | TT                | 1945908816               |
| SNP_P3_22611_30482457 | NC_021161.1    | Ca_kabuli_chr02 | 30482457                | TT                              | AA                | 1945908817               |
| SNP_P3_22612_30482469 | NC_021161.1    | Ca_kabuli_chr02 | 30482469                | CC                              | AA                | 1945908819               |
| SNP_P3_22613_30484306 | NC_021161.1    | Ca_kabuli_chr02 | 30484306                | TT                              | GG                | 1945908821               |

| SNPs IDs              | Chromosome IDs | Chromosomes     | Physical positions (bp) | CDC Frontier (Reference genome) | (Pusa 256 & HPNB) | NCBI SNPdb Accession IDs |
|-----------------------|----------------|-----------------|-------------------------|---------------------------------|-------------------|--------------------------|
| SNP_P3_22614_30484318 | NC_021161.1    | Ca_kabuli_chr02 | 30484318                | GG                              | AA                | 1945908823               |
| SNP_P3_22615_30484338 | NC_021161.1    | Ca_kabuli_chr02 | 30484338                | TT                              | CC                | 1945908825               |
| SNP_P3_22617_30484658 | NC_021161.1    | Ca_kabuli_chr02 | 30484658                | GG                              | CC                | 1945908826               |
| SNP_P3_22618_30484659 | NC_021161.1    | Ca_kabuli_chr02 | 30484659                | TT                              | GG                | 1945908828               |
| SNP_P3_22620_30485028 | NC_021161.1    | Ca_kabuli_chr02 | 30485028                | CC                              | TT                | 1945908830               |
| SNP_P3_22621_30489176 | NC_021161.1    | Ca_kabuli_chr02 | 30489176                | TT                              | CC                | 1945908832               |
| SNP_P3_22623_30489742 | NC_021161.1    | Ca_kabuli_chr02 | 30489742                | CC                              | TT                | 1945908833               |
| SNP_P3_22624_30489751 | NC_021161.1    | Ca_kabuli_chr02 | 30489751                | GG                              | AA                | 1945908835               |
| SNP_P3_22625_30489763 | NC_021161.1    | Ca_kabuli_chr02 | 30489763                | TT                              | CC                | 1945908837               |
| SNP_P3_22626_30489764 | NC_021161.1    | Ca_kabuli_chr02 | 30489764                | AA                              | TT                | 1945908839               |
| SNP_P3_22628_30489838 | NC_021161.1    | Ca_kabuli_chr02 | 30489838                | GG                              | AA                | 1945908841               |
| SNP_P3_22629_30489843 | NC_021161.1    | Ca_kabuli_chr02 | 30489843                | TT                              | CC                | 1945908842               |
| SNP_P3_22630_30489869 | NC_021161.1    | Ca_kabuli_chr02 | 30489869                | CC                              | TT                | 1945908844               |
| SNP_P3_22632_30490958 | NC_021161.1    | Ca_kabuli_chr02 | 30490958                | CC                              | GG                | 1945908846               |
| SNP_P3_22634_30491027 | NC_021161.1    | Ca_kabuli_chr02 | 30491027                | AA                              | CC                | 1945908848               |
| SNP_P3_22635_30491248 | NC_021161.1    | Ca_kabuli_chr02 | 30491248                | TT                              | CC                | 1945908849               |
| SNP_P3_22636_30491285 | NC_021161.1    | Ca_kabuli_chr02 | 30491285                | CC                              | TT                | 1945908851               |
| SNP_P3_22637_30491317 | NC_021161.1    | Ca_kabuli_chr02 | 30491317                | CC                              | TT                | 1945908853               |
| SNP_P3_22638_30494553 | NC_021161.1    | Ca_kabuli_chr02 | 30494553                | GG                              | AA                | 1945908855               |
| SNP_P3_22639_30494805 | NC_021161.1    | Ca_kabuli_chr02 | 30494805                | CC                              | AA                | 1945908857               |
| SNP_P3_22643_30500305 | NC_021161.1    | Ca_kabuli_chr02 | 30500305                | TT                              | AA                | 1945908858               |
| SNP_P3_22644_30500318 | NC_021161.1    | Ca_kabuli_chr02 | 30500318                | TT                              | AA                | 1945908860               |
| SNP_P3_22645_30500387 | NC_021161.1    | Ca_kabuli_chr02 | 30500387                | GG                              | AA                | 1945908862               |
| SNP_P3_22646_30500423 | NC_021161.1    | Ca_kabuli_chr02 | 30500423                | TT                              | CC                | 1945908864               |
| SNP_P3_22647_30500540 | NC_021161.1    | Ca_kabuli_chr02 | 30500540                | TT                              | CC                | 1945908866               |
| SNP_P3_22648_30500623 | NC_021161.1    | Ca_kabuli_chr02 | 30500623                | AA                              | GG                | 1945908867               |
| SNP_P3_22650_30504221 | NC_021161.1    | Ca_kabuli_chr02 | 30504221                | GG                              | AA                | 1945908869               |
| SNP_P3_22651_30504259 | NC_021161.1    | Ca_kabuli_chr02 | 30504259                | TT                              | CC                | 1945908871               |
| SNP_P3_22652_30504267 | NC_021161.1    | Ca_kabuli_chr02 | 30504267                | TT                              | CC                | 1945908873               |
| SNP_P3_22653_30504293 | NC_021161.1    | Ca_kabuli_chr02 | 30504293                | CC                              | AA                | 1945908874               |
| SNP_P3_22655_30506388 | NC_021161.1    | Ca_kabuli_chr02 | 30506388                | AA                              | TT                | 1945908876               |
| SNP_P3_22657_30506618 | NC_021161.1    | Ca_kabuli_chr02 | 30506618                | GG                              | AA                | 1945908878               |
| SNP_P3_22658_30506898 | NC_021161.1    | Ca_kabuli_chr02 | 30506898                | CC                              | GG                | 1945908880               |
| SNP_P3_22659_30507312 | NC_021161.1    | Ca_kabuli_chr02 | 30507312                | GG                              | AA                | 1945908882               |
| SNP_P3_22661_30507992 | NC_021161.1    | Ca_kabuli_chr02 | 30507992                | GG                              | TT                | 1945908883               |
| SNP_P3_22662_30508454 | NC_021161.1    | Ca_kabuli_chr02 | 30508454                | CC                              | TT                | 1945908885               |
| SNP_P3_22664_30509791 | NC_021161.1    | Ca_kabuli_chr02 | 30509791                | AA                              | GG                | 1945908887               |
| SNP_P3_22665_30510062 | NC_021161.1    | Ca_kabuli_chr02 | 30510062                | TT                              | AA                | 1945908889               |
| SNP_P3_22666_30510100 | NC_021161.1    | Ca_kabuli_chr02 | 30510100                | TT                              | CC                | 1945908890               |
| SNP_P3_22668_30510498 | NC_021161.1    | Ca_kabuli_chr02 | 30510498                | GG                              | AA                | 1945908892               |
| SNP_P3_22669_30510791 | NC_021161.1    | Ca_kabuli_chr02 | 30510791                | GG                              | AA                | 1945908894               |
| SNP_P3_22670_30510819 | NC_021161.1    | Ca_kabuli_chr02 | 30510819                | TT                              | CC                | 1945908896               |

| SNPs IDs              | Chromosome IDs | Chromosomes     | Physical positions (bp) | CDC Frontier (Reference genome) | (Pusa 256 & HPNB) | NCBI SNPdb Accession IDs |
|-----------------------|----------------|-----------------|-------------------------|---------------------------------|-------------------|--------------------------|
| SNP_P3_22671_30510892 | NC_021161.1    | Ca_kabuli_chr02 | 30510892                | GG                              | AA                | 1945908898               |
| SNP_P3_22672_30511804 | NC_021161.1    | Ca_kabuli_chr02 | 30511804                | TT                              | GG                | 1945908899               |
| SNP_P3_22673_30512082 | NC_021161.1    | Ca_kabuli_chr02 | 30512082                | CC                              | TT                | 1945908901               |
| SNP_P3_22674_30512103 | NC_021161.1    | Ca_kabuli_chr02 | 30512103                | GG                              | TT                | 1945908903               |
| SNP_P3_22675_30512111 | NC_021161.1    | Ca_kabuli_chr02 | 30512111                | TT                              | AA                | 1945908905               |
| SNP_P3_22676_30512126 | NC_021161.1    | Ca_kabuli_chr02 | 30512126                | CC                              | TT                | 1945908906               |
| SNP_P3_22677_30512406 | NC_021161.1    | Ca_kabuli_chr02 | 30512406                | AA                              | GG                | 1945908908               |
| SNP_P3_22678_30512450 | NC_021161.1    | Ca_kabuli_chr02 | 30512450                | CC                              | AA                | 1945908910               |
| SNP_P3_22680_30514566 | NC_021161.1    | Ca_kabuli_chr02 | 30514566                | CC                              | TT                | 1945908912               |
| SNP_P3_22681_30517251 | NC_021161.1    | Ca_kabuli_chr02 | 30517251                | AA                              | GG                | 1945908914               |
| SNP_P3_22682_30517281 | NC_021161.1    | Ca_kabuli_chr02 | 30517281                | AA                              | GG                | 1945908915               |
| SNP_P3_22683_30517317 | NC_021161.1    | Ca_kabuli_chr02 | 30517317                | GG                              | AA                | 1945908917               |
| SNP_P3_22684_30517700 | NC_021161.1    | Ca_kabuli_chr02 | 30517700                | CC                              | AA                | 1945908919               |
| SNP_P3_22685_30517702 | NC_021161.1    | Ca_kabuli_chr02 | 30517702                | GG                              | TT                | 1945908921               |
| SNP_P3_22687_30521253 | NC_021161.1    | Ca_kabuli_chr02 | 30521253                | TT                              | GG                | 1945908922               |
| SNP_P3_22690_30524968 | NC_021161.1    | Ca_kabuli_chr02 | 30524968                | AA                              | TT                | 1945908924               |
| SNP_P3_22691_30525098 | NC_021161.1    | Ca_kabuli_chr02 | 30525098                | CC                              | AA                | 1945908926               |
| SNP_P3_22692_30525668 | NC_021161.1    | Ca_kabuli_chr02 | 30525668                | CC                              | TT                | 1945908928               |
| SNP_P3_22693_30525676 | NC_021161.1    | Ca_kabuli_chr02 | 30525676                | GG                              | TT                | 1945908930               |
| SNP_P3_22694_30526029 | NC_021161.1    | Ca_kabuli_chr02 | 30526029                | CC                              | TT                | 1945908931               |
| SNP_P3_22695_30526059 | NC_021161.1    | Ca_kabuli_chr02 | 30526059                | AA                              | GG                | 1945908933               |
| SNP_P3_22696_30526943 | NC_021161.1    | Ca_kabuli_chr02 | 30526943                | TT                              | AA                | 1945908935               |
| SNP_P3_22697_30526953 | NC_021161.1    | Ca_kabuli_chr02 | 30526953                | TT                              | GG                | 1945908937               |
| SNP_P3_22699_30527254 | NC_021161.1    | Ca_kabuli_chr02 | 30527254                | GG                              | TT                | 1945908939               |
| SNP_P3_22700_30527262 | NC_021161.1    | Ca_kabuli_chr02 | 30527262                | GG                              | AA                | 1945908940               |
| SNP_P3_22701_30527273 | NC_021161.1    | Ca_kabuli_chr02 | 30527273                | TT                              | AA                | 1945908942               |
| SNP_P3_22702_30527434 | NC_021161.1    | Ca_kabuli_chr02 | 30527434                | AA                              | GG                | 1945908944               |
| SNP_P3_22703_30527720 | NC_021161.1    | Ca_kabuli_chr02 | 30527720                | GG                              | TT                | 1945908946               |
| SNP_P3_22705_30531675 | NC_021161.1    | Ca_kabuli_chr02 | 30531675                | TT                              | AA                | 1945908947               |
| SNP_P3_22707_30533065 | NC_021161.1    | Ca_kabuli_chr02 | 30533065                | CC                              | GG                | 1945908949               |
| SNP_P3_22708_30533075 | NC_021161.1    | Ca_kabuli_chr02 | 30533075                | TT                              | CC                | 1945908951               |
| SNP_P3_22709_30533816 | NC_021161.1    | Ca_kabuli_chr02 | 30533816                | CC                              | AA                | 1945908953               |
| SNP_P3_22710_30537150 | NC_021161.1    | Ca_kabuli_chr02 | 30537150                | GG                              | AA                | 1945908955               |
| SNP_P3_22711_30537397 | NC_021161.1    | Ca_kabuli_chr02 | 30537397                | AA                              | TT                | 1945908956               |
| SNP_P3_22712_30537408 | NC_021161.1    | Ca_kabuli_chr02 | 30537408                | CC                              | GG                | 1945908958               |
| SNP_P3_22713_30537412 | NC_021161.1    | Ca_kabuli_chr02 | 30537412                | GG                              | CC                | 1945908960               |
| SNP_P3_22715_30538406 | NC_021161.1    | Ca_kabuli_chr02 | 30538406                | CC                              | AA                | 1945908962               |
| SNP_P3_22716_30538679 | NC_021161.1    | Ca_kabuli_chr02 | 30538679                | CC                              | AA                | 1945908963               |
| SNP_P3_22717_30538681 | NC_021161.1    | Ca_kabuli_chr02 | 30538681                | CC                              | GG                | 1945908965               |
| SNP_P3_22718_30538954 | NC_021161.1    | Ca_kabuli_chr02 | 30538954                | CC                              | AA                | 1945908967               |
| SNP_P3_22719_30539042 | NC_021161.1    | Ca_kabuli_chr02 | 30539042                | GG                              | TT                | 1945908969               |
| SNP_P3_22720_30539227 | NC_021161.1    | Ca_kabuli_chr02 | 30539227                | AA                              | CC                | 1945908971               |

| SNPs IDs              | Chromosome IDs | Chromosomes     | Physical positions (bp) | CDC Frontier (Reference genome) | (Pusa 256 & HPNB) | NCBI SNPdb Accession IDs |
|-----------------------|----------------|-----------------|-------------------------|---------------------------------|-------------------|--------------------------|
| SNP_P3_22721_30539335 | NC_021161.1    | Ca_kabuli_chr02 | 30539335                | CC                              | AA                | 1945908972               |
| SNP_P3_22722_30539367 | NC_021161.1    | Ca_kabuli_chr02 | 30539367                | CC                              | TT                | 1945908974               |
| SNP_P3_22723_30539372 | NC_021161.1    | Ca_kabuli_chr02 | 30539372                | TT                              | CC                | 1945908976               |
| SNP_P3_22724_30540735 | NC_021161.1    | Ca_kabuli_chr02 | 30540735                | CC                              | TT                | 1945908978               |
| SNP_P3_22726_30547419 | NC_021161.1    | Ca_kabuli_chr02 | 30547419                | CC                              | TT                | 1945908979               |
| SNP_P3_22727_30547436 | NC_021161.1    | Ca_kabuli_chr02 | 30547436                | TT                              | CC                | 1945908981               |
| SNP_P3_22728_30547453 | NC_021161.1    | Ca_kabuli_chr02 | 30547453                | TT                              | CC                | 1945908983               |
| SNP_P3_22729_30547459 | NC_021161.1    | Ca_kabuli_chr02 | 30547459                | TT                              | AA                | 1945908985               |
| SNP_P3_22730_30547488 | NC_021161.1    | Ca_kabuli_chr02 | 30547488                | CC                              | TT                | 1945908987               |
| SNP_P3_22731_30547559 | NC_021161.1    | Ca_kabuli_chr02 | 30547559                | AA                              | GG                | 1945908988               |
| SNP_P3_22732_30547763 | NC_021161.1    | Ca_kabuli_chr02 | 30547763                | AA                              | GG                | 1945908990               |
| SNP_P3_22733_30547769 | NC_021161.1    | Ca_kabuli_chr02 | 30547769                | AA                              | GG                | 1945908992               |
| SNP_P3_22734_30547770 | NC_021161.1    | Ca_kabuli_chr02 | 30547770                | GG                              | AA                | 1945908994               |
| SNP_P3_22735_30547818 | NC_021161.1    | Ca_kabuli_chr02 | 30547818                | CC                              | TT                | 1945908996               |
| SNP_P3_22736_30549017 | NC_021161.1    | Ca_kabuli_chr02 | 30549017                | AA                              | GG                | 1945908997               |
| SNP_P3_22737_30549060 | NC_021161.1    | Ca_kabuli_chr02 | 30549060                | CC                              | TT                | 1945908999               |
| SNP_P3_22738_30549076 | NC_021161.1    | Ca_kabuli_chr02 | 30549076                | GG                              | AA                | 1945909001               |
| SNP_P3_22739_30549088 | NC_021161.1    | Ca_kabuli_chr02 | 30549088                | GG                              | AA                | 1945909003               |
| SNP_P3_22740_30550096 | NC_021161.1    | Ca_kabuli_chr02 | 30550096                | GG                              | AA                | 1945909004               |
| SNP_P3_22741_30550209 | NC_021161.1    | Ca_kabuli_chr02 | 30550209                | CC                              | TT                | 1945909006               |
| SNP_P3_22742_30550210 | NC_021161.1    | Ca_kabuli_chr02 | 30550210                | CC                              | GG                | 1945909008               |
| SNP_P3_22744_30550831 | NC_021161.1    | Ca_kabuli_chr02 | 30550831                | CC                              | TT                | 1945909010               |
| SNP_P3_22745_30551643 | NC_021161.1    | Ca_kabuli_chr02 | 30551643                | TT                              | AA                | 1945909012               |
| SNP_P3_22747_30553403 | NC_021161.1    | Ca_kabuli_chr02 | 30553403                | CC                              | GG                | 1945909013               |
| SNP_P3_22748_30553439 | NC_021161.1    | Ca_kabuli_chr02 | 30553439                | CC                              | AA                | 1945909015               |
| SNP_P3_22749_30553442 | NC_021161.1    | Ca_kabuli_chr02 | 30553442                | GG                              | CC                | 1945909017               |
| SNP_P3_22750_30553568 | NC_021161.1    | Ca_kabuli_chr02 | 30553568                | CC                              | GG                | 1945909019               |
| SNP_P3_22752_30553736 | NC_021161.1    | Ca_kabuli_chr02 | 30553736                | GG                              | AA                | 1945909020               |
| SNP_P3_22754_30556045 | NC_021161.1    | Ca_kabuli_chr02 | 30556045                | AA                              | CC                | 1945909022               |
| SNP_P3_22756_30556686 | NC_021161.1    | Ca_kabuli_chr02 | 30556686                | AA                              | GG                | 1945909024               |
| SNP_P3_22757_30556697 | NC_021161.1    | Ca_kabuli_chr02 | 30556697                | CC                              | TT                | 1945909026               |
| SNP_P3_22758_30556700 | NC_021161.1    | Ca_kabuli_chr02 | 30556700                | AA                              | GG                | 1945909028               |
| SNP_P3_22759_30556988 | NC_021161.1    | Ca_kabuli_chr02 | 30556988                | TT                              | CC                | 1945909029               |
| SNP_P3_22760_30556989 | NC_021161.1    | Ca_kabuli_chr02 | 30556989                | AA                              | CC                | 1945909031               |
| SNP_P3_22761_30557024 | NC_021161.1    | Ca_kabuli_chr02 | 30557024                | GG                              | AA                | 1945909033               |
| SNP_P3_22762_30557033 | NC_021161.1    | Ca_kabuli_chr02 | 30557033                | TT                              | CC                | 1945909035               |
| SNP_P3_22765_30558220 | NC_021161.1    | Ca_kabuli_chr02 | 30558220                | GG                              | AA                | 1945909036               |
| SNP_P3_22767_30558837 | NC_021161.1    | Ca_kabuli_chr02 | 30558837                | TT                              | CC                | 1945909038               |
| SNP_P3_22769_30563222 | NC_021161.1    | Ca_kabuli_chr02 | 30563222                | TT                              | CC                | 1945909040               |
| SNP_P3_22770_30563506 | NC_021161.1    | Ca_kabuli_chr02 | 30563506                | AA                              | GG                | 1945909042               |
| SNP_P3_22771_30563792 | NC_021161.1    | Ca_kabuli_chr02 | 30563792                | TT                              | AA                | 1945909044               |
| SNP_P3_22772_30563793 | NC_021161.1    | Ca_kabuli_chr02 | 30563793                | AA                              | GG                | 1945909045               |



| SNPs IDs              | Chromosome IDs | Chromosomes     | Physical positions (bp) | CDC Frontier (Reference genome) | (Pusa 256 & HPNB) | NCBI SNPdb Accession IDs |
|-----------------------|----------------|-----------------|-------------------------|---------------------------------|-------------------|--------------------------|
| SNP_P3_22773_30564579 | NC_021161.1    | Ca_kabuli_chr02 | 30564579                | CC                              | TT                | 1945909047               |
| SNP_P3_22775_30565751 | NC_021161.1    | Ca_kabuli_chr02 | 30565751                | TT                              | CC                | 1945909049               |
| SNP_P3_22776_30566013 | NC_021161.1    | Ca_kabuli_chr02 | 30566013                | TT                              | GG                | 1945909051               |
| SNP_P3_22778_30566144 | NC_021161.1    | Ca_kabuli_chr02 | 30566144                | CC                              | TT                | 1945909052               |
| SNP_P3_22779_30566184 | NC_021161.1    | Ca_kabuli_chr02 | 30566184                | AA                              | GG                | 1945909054               |
| SNP_P3_22781_30568919 | NC_021161.1    | Ca_kabuli_chr02 | 30568919                | TT                              | AA                | 1945909056               |
| SNP_P3_22782_30568947 | NC_021161.1    | Ca_kabuli_chr02 | 30568947                | AA                              | CC                | 1945909058               |
| SNP_P3_22785_30569249 | NC_021161.1    | Ca_kabuli_chr02 | 30569249                | AA                              | CC                | 1945909060               |
| SNP_P3_22786_30569452 | NC_021161.1    | Ca_kabuli_chr02 | 30569452                | CC                              | AA                | 1945909061               |
| SNP_P3_22787_30569770 | NC_021161.1    | Ca_kabuli_chr02 | 30569770                | CC                              | TT                | 1945909063               |
| SNP_P3_22788_30571071 | NC_021161.1    | Ca_kabuli_chr02 | 30571071                | CC                              | TT                | 1945909065               |
| SNP_P3_22790_30571501 | NC_021161.1    | Ca_kabuli_chr02 | 30571501                | TT                              | GG                | 1945909067               |
| SNP_P3_22791_30574147 | NC_021161.1    | Ca_kabuli_chr02 | 30574147                | AA                              | GG                | 1945909069               |
| SNP_P3_22793_30574550 | NC_021161.1    | Ca_kabuli_chr02 | 30574550                | CC                              | AA                | 1945909070               |
| SNP_P3_22796_30579222 | NC_021161.1    | Ca_kabuli_chr02 | 30579222                | AA                              | GG                | 1945909072               |
| SNP_P3_22797_30580894 | NC_021161.1    | Ca_kabuli_chr02 | 30580894                | TT                              | AA                | 1945909074               |
| SNP_P3_22798_30581192 | NC_021161.1    | Ca_kabuli_chr02 | 30581192                | CC                              | TT                | 1945909076               |
| SNP_P3_22799_30581695 | NC_021161.1    | Ca_kabuli_chr02 | 30581695                | TT                              | GG                | 1945909077               |
| SNP_P3_22800_30582181 | NC_021161.1    | Ca_kabuli_chr02 | 30582181                | CC                              | AA                | 1945909079               |
| SNP_P3_22801_30582183 | NC_021161.1    | Ca_kabuli_chr02 | 30582183                | TT                              | CC                | 1945909081               |
| SNP_P3_22802_30582730 | NC_021161.1    | Ca_kabuli_chr02 | 30582730                | AA                              | GG                | 1945909083               |
| SNP_P3_22803_30584656 | NC_021161.1    | Ca_kabuli_chr02 | 30584656                | GG                              | AA                | 1945909085               |
| SNP_P3_22804_30585096 | NC_021161.1    | Ca_kabuli_chr02 | 30585096                | TT                              | CC                | 1945909086               |
| SNP_P3_22805_30585144 | NC_021161.1    | Ca_kabuli_chr02 | 30585144                | CC                              | GG                | 1945909088               |
| SNP_P3_22806_30585147 | NC_021161.1    | Ca_kabuli_chr02 | 30585147                | TT                              | CC                | 1945909090               |
| SNP_P3_22807_30585152 | NC_021161.1    | Ca_kabuli_chr02 | 30585152                | AA                              | GG                | 1945909092               |
| SNP_P3_22809_30585978 | NC_021161.1    | Ca_kabuli_chr02 | 30585978                | CC                              | TT                | 1945909093               |
| SNP_P3_22811_30586283 | NC_021161.1    | Ca_kabuli_chr02 | 30586283                | GG                              | AA                | 1945909095               |
| SNP_P3_22812_30586296 | NC_021161.1    | Ca_kabuli_chr02 | 30586296                | TT                              | AA                | 1945909097               |
| SNP_P3_22813_30586300 | NC_021161.1    | Ca_kabuli_chr02 | 30586300                | TT                              | AA                | 1945909099               |
| SNP_P3_22814_30587199 | NC_021161.1    | Ca_kabuli_chr02 | 30587199                | AA                              | GG                | 1945909101               |
| SNP_P3_22815_30588253 | NC_021161.1    | Ca_kabuli_chr02 | 30588253                | CC                              | GG                | 1945909102               |
| SNP_P3_22816_30588980 | NC_021161.1    | Ca_kabuli_chr02 | 30588980                | AA                              | TT                | 1945909104               |
| SNP_P3_22817_30589233 | NC_021161.1    | Ca_kabuli_chr02 | 30589233                | GG                              | CC                | 1945909106               |
| SNP_P3_22818_30592864 | NC_021161.1    | Ca_kabuli_chr02 | 30592864                | CC                              | TT                | 1945909108               |
| SNP_P3_22819_30614753 | NC_021161.1    | Ca_kabuli_chr02 | 30614753                | CC                              | TT                | 1945909109               |
| SNP_P3_22821_30617165 | NC_021161.1    | Ca_kabuli_chr02 | 30617165                | AA                              | GG                | 1945909111               |
| SNP_P3_22822_30617175 | NC_021161.1    | Ca_kabuli_chr02 | 30617175                | AA                              | CC                | 1945909113               |
| SNP_P3_22823_30617203 | NC_021161.1    | Ca_kabuli_chr02 | 30617203                | CC                              | AA                | 1945909115               |
| SNP_P3_22824_30617950 | NC_021161.1    | Ca_kabuli_chr02 | 30617950                | GG                              | AA                | 1945909117               |
| SNP_P3_22825_30617983 | NC_021161.1    | Ca_kabuli_chr02 | 30617983                | AA                              | GG                | 1945909118               |
| SNP_P3_22826_30618263 | NC_021161.1    | Ca_kabuli_chr02 | 30618263                | TT                              | CC                | 1945909120               |

| SNPs IDs              | Chromosome IDs | Chromosomes     | Physical positions (bp) | CDC Frontier (Reference genome) | (Pusa 256 & HPNB) | NCBI SNPdb Accession IDs |
|-----------------------|----------------|-----------------|-------------------------|---------------------------------|-------------------|--------------------------|
| SNP_P3_22827_30618625 | NC_021161.1    | Ca_kabuli_chr02 | 30618625                | AA                              | TT                | 1945909122               |
| SNP_P3_22828_30619039 | NC_021161.1    | Ca_kabuli_chr02 | 30619039                | CC                              | TT                | 1945909124               |
| SNP_P3_22829_30620532 | NC_021161.1    | Ca_kabuli_chr02 | 30620532                | CC                              | TT                | 1945909125               |
| SNP_P3_22830_30620900 | NC_021161.1    | Ca_kabuli_chr02 | 30620900                | CC                              | AA                | 1945909127               |
| SNP_P3_22831_30620914 | NC_021161.1    | Ca_kabuli_chr02 | 30620914                | GG                              | AA                | 1945909129               |
| SNP_P3_22832_30620943 | NC_021161.1    | Ca_kabuli_chr02 | 30620943                | CC                              | TT                | 1945909131               |
| SNP_P3_22833_30620951 | NC_021161.1    | Ca_kabuli_chr02 | 30620951                | AA                              | GG                | 1945909133               |
| SNP_P3_22834_30621035 | NC_021161.1    | Ca_kabuli_chr02 | 30621035                | AA                              | GG                | 1945909134               |
| SNP_P3_22835_30621227 | NC_021161.1    | Ca_kabuli_chr02 | 30621227                | GG                              | TT                | 1945909136               |
| SNP_P3_22836_30621306 | NC_021161.1    | Ca_kabuli_chr02 | 30621306                | AA                              | GG                | 1945909138               |
| SNP_P3_22837_30621337 | NC_021161.1    | Ca_kabuli_chr02 | 30621337                | CC                              | TT                | 1945909140               |
| SNP_P3_22838_30621802 | NC_021161.1    | Ca_kabuli_chr02 | 30621802                | CC                              | TT                | 1945909141               |
| SNP_P3_22839_30621818 | NC_021161.1    | Ca_kabuli_chr02 | 30621818                | TT                              | CC                | 1945909143               |
| SNP_P3_22841_30622740 | NC_021161.1    | Ca_kabuli_chr02 | 30622740                | AA                              | TT                | 1945909145               |
| SNP_P3_22844_30624602 | NC_021161.1    | Ca_kabuli_chr02 | 30624602                | GG                              | AA                | 1945909147               |
| SNP_P3_22845_30624604 | NC_021161.1    | Ca_kabuli_chr02 | 30624604                | GG                              | AA                | 1945909149               |
| SNP_P3_22847_30631805 | NC_021161.1    | Ca_kabuli_chr02 | 30631805                | AA                              | TT                | 1945909150               |
| SNP_P3_22848_30632708 | NC_021161.1    | Ca_kabuli_chr02 | 30632708                | GG                              | CC                | 1945909152               |
| SNP_P3_22849_30632728 | NC_021161.1    | Ca_kabuli_chr02 | 30632728                | CC                              | TT                | 1945909154               |
| SNP_P3_22851_30633409 | NC_021161.1    | Ca_kabuli_chr02 | 30633409                | AA                              | GG                | 1945909156               |
| SNP_P3_22852_30635977 | NC_021161.1    | Ca_kabuli_chr02 | 30635977                | CC                              | AA                | 1945909158               |
| SNP_P3_22854_30637624 | NC_021161.1    | Ca_kabuli_chr02 | 30637624                | CC                              | TT                | 1945909159               |
| SNP_P3_22856_30639724 | NC_021161.1    | Ca_kabuli_chr02 | 30639724                | AA                              | GG                | 1945909161               |
| SNP_P3_22857_30639751 | NC_021161.1    | Ca_kabuli_chr02 | 30639751                | GG                              | CC                | 1945909163               |
| SNP_P3_22859_30639809 | NC_021161.1    | Ca_kabuli_chr02 | 30639809                | AA                              | GG                | 1945909165               |
| SNP_P3_22860_30641679 | NC_021161.1    | Ca_kabuli_chr02 | 30641679                | AA                              | TT                | 1945909166               |
| SNP_P3_22861_30642658 | NC_021161.1    | Ca_kabuli_chr02 | 30642658                | AA                              | TT                | 1945909168               |
| SNP_P3_22863_30643071 | NC_021161.1    | Ca_kabuli_chr02 | 30643071                | TT                              | GG                | 1945909170               |
| SNP_P3_22864_30643091 | NC_021161.1    | Ca_kabuli_chr02 | 30643091                | TT                              | AA                | 1945909172               |
| SNP_P3_22865_30643098 | NC_021161.1    | Ca_kabuli_chr02 | 30643098                | GG                              | CC                | 1945909174               |
| SNP_P3_22866_30643129 | NC_021161.1    | Ca_kabuli_chr02 | 30643129                | AA                              | GG                | 1945909175               |
| SNP_P3_22867_30643134 | NC_021161.1    | Ca_kabuli_chr02 | 30643134                | GG                              | AA                | 1945909177               |
| SNP_P3_22868_30644193 | NC_021161.1    | Ca_kabuli_chr02 | 30644193                | GG                              | AA                | 1945909179               |
| SNP_P3_22869_30645191 | NC_021161.1    | Ca_kabuli_chr02 | 30645191                | AA                              | GG                | 1945909181               |
| SNP_P3_22870_30645212 | NC_021161.1    | Ca_kabuli_chr02 | 30645212                | TT                              | CC                | 1945909182               |
| SNP_P3_22871_30646404 | NC_021161.1    | Ca_kabuli_chr02 | 30646404                | AA                              | GG                | 1945909184               |
| SNP_P3_22872_30648536 | NC_021161.1    | Ca_kabuli_chr02 | 30648536                | TT                              | CC                | 1945909186               |
| SNP_P3_22873_30648539 | NC_021161.1    | Ca_kabuli_chr02 | 30648539                | TT                              | GG                | 1945909188               |
| SNP_P3_22874_30648566 | NC_021161.1    | Ca_kabuli_chr02 | 30648566                | AA                              | CC                | 1945909190               |
| SNP_P3_22875_30648707 | NC_021161.1    | Ca_kabuli_chr02 | 30648707                | AA                              | GG                | 1945909191               |
| SNP_P3_22876_30649226 | NC_021161.1    | Ca_kabuli_chr02 | 30649226                | CC                              | TT                | 1945909193               |
| SNP_P3_22877_30650260 | NC_021161.1    | Ca_kabuli_chr02 | 30650260                | TT                              | CC                | 1945909195               |

| SNPs IDs              | Chromosome IDs | Chromosomes     | Physical positions (bp) | CDC Frontier (Reference genome) | (Pusa 256 & HPNB) | NCBI SNPdb Accession IDs |
|-----------------------|----------------|-----------------|-------------------------|---------------------------------|-------------------|--------------------------|
| SNP_P3_22878_30651160 | NC_021161.1    | Ca_kabuli_chr02 | 30651160                | CC                              | AA                | 1945909197               |
| SNP_P3_22879_30651226 | NC_021161.1    | Ca_kabuli_chr02 | 30651226                | CC                              | AA                | 1945909199               |
| SNP_P3_22880_30651262 | NC_021161.1    | Ca_kabuli_chr02 | 30651262                | CC                              | TT                | 1945909200               |
| SNP_P3_22882_30653151 | NC_021161.1    | Ca_kabuli_chr02 | 30653151                | GG                              | TT                | 1945909202               |
| SNP_P3_22883_30657357 | NC_021161.1    | Ca_kabuli_chr02 | 30657357                | AA                              | GG                | 1945909204               |
| SNP_P3_22884_30658591 | NC_021161.1    | Ca_kabuli_chr02 | 30658591                | AA                              | GG                | 1945909206               |
| SNP_P3_22885_30665394 | NC_021161.1    | Ca_kabuli_chr02 | 30665394                | AA                              | GG                | 1945909207               |
| SNP_P3_22886_30665436 | NC_021161.1    | Ca_kabuli_chr02 | 30665436                | CC                              | GG                | 1945909209               |
| SNP_P3_22888_30665686 | NC_021161.1    | Ca_kabuli_chr02 | 30665686                | AA                              | CC                | 1945909211               |
| SNP_P3_22890_30667477 | NC_021161.1    | Ca_kabuli_chr02 | 30667477                | TT                              | CC                | 1945909213               |
| SNP_P3_22891_30667498 | NC_021161.1    | Ca_kabuli_chr02 | 30667498                | TT                              | CC                | 1945909215               |
| SNP_P3_22892_30668107 | NC_021161.1    | Ca_kabuli_chr02 | 30668107                | CC                              | TT                | 1945909216               |
| SNP_P3_22893_30668114 | NC_021161.1    | Ca_kabuli_chr02 | 30668114                | AA                              | TT                | 1945909218               |
| SNP_P3_22894_30670035 | NC_021161.1    | Ca_kabuli_chr02 | 30670035                | AA                              | TT                | 1945909220               |
| SNP_P3_22895_30670720 | NC_021161.1    | Ca_kabuli_chr02 | 30670720                | TT                              | CC                | 1945909222               |
| SNP_P3_22896_30670727 | NC_021161.1    | Ca_kabuli_chr02 | 30670727                | AA                              | CC                | 1945909223               |
| SNP_P3_22898_30671044 | NC_021161.1    | Ca_kabuli_chr02 | 30671044                | AA                              | GG                | 1945909225               |
| SNP_P3_22899_30671101 | NC_021161.1    | Ca_kabuli_chr02 | 30671101                | AA                              | GG                | 1945909227               |
| SNP_P3_22900_30671272 | NC_021161.1    | Ca_kabuli_chr02 | 30671272                | AA                              | GG                | 1945909229               |
| SNP_P3_22902_30671578 | NC_021161.1    | Ca_kabuli_chr02 | 30671578                | AA                              | GG                | 1945909231               |
| SNP_P3_22904_30672195 | NC_021161.1    | Ca_kabuli_chr02 | 30672195                | CC                              | TT                | 1945909232               |
| SNP_P3_22905_30672232 | NC_021161.1    | Ca_kabuli_chr02 | 30672232                | AA                              | GG                | 1945909234               |
| SNP_P3_22907_30673951 | NC_021161.1    | Ca_kabuli_chr02 | 30673951                | GG                              | TT                | 1945909236               |
| SNP_P3_22908_30674106 | NC_021161.1    | Ca_kabuli_chr02 | 30674106                | GG                              | AA                | 1945909238               |
| SNP_P3_22909_30674219 | NC_021161.1    | Ca_kabuli_chr02 | 30674219                | TT                              | CC                | 1945909239               |
| SNP_P3_22910_30675938 | NC_021161.1    | Ca_kabuli_chr02 | 30675938                | GG                              | AA                | 1945909241               |
| SNP_P3_22911_30676246 | NC_021161.1    | Ca_kabuli_chr02 | 30676246                | GG                              | AA                | 1945909243               |
| SNP_P3_22912_30676250 | NC_021161.1    | Ca_kabuli_chr02 | 30676250                | CC                              | TT                | 1945909245               |
| SNP_P3_22914_30676717 | NC_021161.1    | Ca_kabuli_chr02 | 30676717                | AA                              | GG                | 1945909247               |
| SNP_P3_22916_30676791 | NC_021161.1    | Ca_kabuli_chr02 | 30676791                | GG                              | AA                | 1945909248               |
| SNP_P3_22917_30676793 | NC_021161.1    | Ca_kabuli_chr02 | 30676793                | TT                              | GG                | 1945909250               |
| SNP_P3_22918_30676796 | NC_021161.1    | Ca_kabuli_chr02 | 30676796                | CC                              | TT                | 1945909252               |
| SNP_P3_22919_30677784 | NC_021161.1    | Ca_kabuli_chr02 | 30677784                | GG                              | TT                | 1945909254               |
| SNP_P3_22920_30677797 | NC_021161.1    | Ca_kabuli_chr02 | 30677797                | AA                              | GG                | 1945909255               |
| SNP_P3_22921_30677832 | NC_021161.1    | Ca_kabuli_chr02 | 30677832                | TT                              | CC                | 1945909257               |
| SNP_P3_22923_30679331 | NC_021161.1    | Ca_kabuli_chr02 | 30679331                | AA                              | CC                | 1945909259               |
| SNP_P3_22924_30679654 | NC_021161.1    | Ca_kabuli_chr02 | 30679654                | AA                              | CC                | 1945909261               |
| SNP_P3_22925_30680908 | NC_021161.1    | Ca_kabuli_chr02 | 30680908                | AA                              | GG                | 1945909263               |
| SNP_P3_22926_30681192 | NC_021161.1    | Ca_kabuli_chr02 | 30681192                | CC                              | TT                | 1945909264               |
| SNP_P3_22927_30681838 | NC_021161.1    | Ca_kabuli_chr02 | 30681838                | CC                              | TT                | 1945909266               |
| SNP_P3_22928_30681843 | NC_021161.1    | Ca_kabuli_chr02 | 30681843                | AA                              | CC                | 1945909268               |
| SNP_P3_22929_30682014 | NC_021161.1    | Ca_kabuli_chr02 | 30682014                | TT                              | AA                | 1945909270               |

| SNPs IDs              | Chromosome IDs | Chromosomes     | Physical positions (bp) | CDC Frontier (Reference genome) | (Pusa 256 & HPNB) | NCBI SNPdb Accession IDs |
|-----------------------|----------------|-----------------|-------------------------|---------------------------------|-------------------|--------------------------|
| SNP_P3_22930_30682029 | NC_021161.1    | Ca_kabuli_chr02 | 30682029                | AA                              | TT                | 1945909272               |
| SNP_P3_22931_30682049 | NC_021161.1    | Ca_kabuli_chr02 | 30682049                | CC                              | AA                | 1945909273               |
| SNP_P3_22932_30682089 | NC_021161.1    | Ca_kabuli_chr02 | 30682089                | GG                              | TT                | 1945909275               |
| SNP_P3_22933_30682144 | NC_021161.1    | Ca_kabuli_chr02 | 30682144                | AA                              | TT                | 1945909277               |
| SNP_P3_22934_30682159 | NC_021161.1    | Ca_kabuli_chr02 | 30682159                | GG                              | TT                | 1945909279               |
| SNP_P3_22935_30682167 | NC_021161.1    | Ca_kabuli_chr02 | 30682167                | GG                              | AA                | 1945909280               |
| SNP_P3_22936_30682878 | NC_021161.1    | Ca_kabuli_chr02 | 30682878                | TT                              | CC                | 1945909282               |
| SNP_P3_22937_30682901 | NC_021161.1    | Ca_kabuli_chr02 | 30682901                | GG                              | AA                | 1945909284               |
| SNP_P3_22938_30682923 | NC_021161.1    | Ca_kabuli_chr02 | 30682923                | AA                              | TT                | 1945909286               |
| SNP_P3_22939_30684774 | NC_021161.1    | Ca_kabuli_chr02 | 30684774                | TT                              | GG                | 1945909288               |
| SNP_P3_22940_30685441 | NC_021161.1    | Ca_kabuli_chr02 | 30685441                | TT                              | CC                | 1945909289               |
| SNP_P3_22941_30685462 | NC_021161.1    | Ca_kabuli_chr02 | 30685462                | GG                              | AA                | 1945909291               |
| SNP_P3_22942_30686331 | NC_021161.1    | Ca_kabuli_chr02 | 30686331                | GG                              | AA                | 1945909293               |
| SNP_P3_22943_30687083 | NC_021161.1    | Ca_kabuli_chr02 | 30687083                | AA                              | GG                | 1945909295               |
| SNP_P3_22944_30687099 | NC_021161.1    | Ca_kabuli_chr02 | 30687099                | GG                              | AA                | 1945909296               |
| SNP_P3_22945_30687220 | NC_021161.1    | Ca_kabuli_chr02 | 30687220                | GG                              | AA                | 1945909298               |
| SNP_P3_22946_30687223 | NC_021161.1    | Ca_kabuli_chr02 | 30687223                | TT                              | CC                | 1945909300               |
| SNP_P3_22947_30687225 | NC_021161.1    | Ca_kabuli_chr02 | 30687225                | AA                              | GG                | 1945909302               |
| SNP_P3_22948_30687263 | NC_021161.1    | Ca_kabuli_chr02 | 30687263                | CC                              | TT                | 1945909304               |
| SNP_P3_22950_30690436 | NC_021161.1    | Ca_kabuli_chr02 | 30690436                | CC                              | TT                | 1945909305               |
| SNP_P3_22951_30690448 | NC_021161.1    | Ca_kabuli_chr02 | 30690448                | GG                              | AA                | 1945909307               |
| SNP_P3_22953_30690609 | NC_021161.1    | Ca_kabuli_chr02 | 30690609                | CC                              | AA                | 1945909309               |
| SNP_P3_22954_30690634 | NC_021161.1    | Ca_kabuli_chr02 | 30690634                | AA                              | GG                | 1945909311               |
| SNP_P3_22955_30690659 | NC_021161.1    | Ca_kabuli_chr02 | 30690659                | AA                              | CC                | 1945909313               |
| SNP_P3_22956_30690684 | NC_021161.1    | Ca_kabuli_chr02 | 30690684                | GG                              | AA                | 1945909314               |
| SNP_P3_22957_30692014 | NC_021161.1    | Ca_kabuli_chr02 | 30692014                | AA                              | GG                | 1945909316               |
| SNP_P3_22958_30692344 | NC_021161.1    | Ca_kabuli_chr02 | 30692344                | TT                              | CC                | 1945909318               |
| SNP_P3_22959_30694865 | NC_021161.1    | Ca_kabuli_chr02 | 30694865                | CC                              | TT                | 1945909320               |
| SNP_P3_22961_30695656 | NC_021161.1    | Ca_kabuli_chr02 | 30695656                | GG                              | AA                | 1945909321               |
| SNP_P3_22962_30695661 | NC_021161.1    | Ca_kabuli_chr02 | 30695661                | AA                              | GG                | 1945909323               |
| SNP_P3_22964_30696081 | NC_021161.1    | Ca_kabuli_chr02 | 30696081                | TT                              | CC                | 1945909325               |
| SNP_P3_22965_30696785 | NC_021161.1    | Ca_kabuli_chr02 | 30696785                | GG                              | AA                | 1945909327               |
| SNP_P3_22966_30697058 | NC_021161.1    | Ca_kabuli_chr02 | 30697058                | AA                              | CC                | 1945909329               |
| SNP_P3_22967_30697982 | NC_021161.1    | Ca_kabuli_chr02 | 30697982                | AA                              | TT                | 1945909330               |
| SNP_P3_22968_30698817 | NC_021161.1    | Ca_kabuli_chr02 | 30698817                | AA                              | CC                | 1945909332               |
| SNP_P3_22971_30701514 | NC_021161.1    | Ca_kabuli_chr02 | 30701514                | AA                              | GG                | 1945909334               |
| SNP_P3_22973_30703327 | NC_021161.1    | Ca_kabuli_chr02 | 30703327                | AA                              | GG                | 1945909336               |
| SNP_P3_22974_30703328 | NC_021161.1    | Ca_kabuli_chr02 | 30703328                | GG                              | CC                | 1945909338               |
| SNP_P3_22975_30703705 | NC_021161.1    | Ca_kabuli_chr02 | 30703705                | GG                              | TT                | 1945909339               |
| SNP_P3_22977_30704018 | NC_021161.1    | Ca_kabuli_chr02 | 30704018                | TT                              | AA                | 1945909341               |
| SNP_P3_22978_30704589 | NC_021161.1    | Ca_kabuli_chr02 | 30704589                | GG                              | AA                | 1945909343               |
| SNP_P3_22979_30704627 | NC_021161.1    | Ca_kabuli_chr02 | 30704627                | CC                              | TT                | 1945909345               |

| SNPs IDs              | Chromosome IDs | Chromosomes     | Physical positions (bp) | CDC Frontier (Reference genome) | (Pusa 256 & HPNB) | NCBI SNPdb Accession IDs |
|-----------------------|----------------|-----------------|-------------------------|---------------------------------|-------------------|--------------------------|
| SNP_P3_22981_30704685 | NC_021161.1    | Ca_kabuli_chr02 | 30704685                | CC                              | GG                | 1945909347               |
| SNP_P3_22982_30706884 | NC_021161.1    | Ca_kabuli_chr02 | 30706884                | GG                              | AA                | 1945909348               |
| SNP_P3_22983_30707178 | NC_021161.1    | Ca_kabuli_chr02 | 30707178                | AA                              | GG                | 1945909350               |
| SNP_P3_22984_30708727 | NC_021161.1    | Ca_kabuli_chr02 | 30708727                | TT                              | AA                | 1945909352               |
| SNP_P3_22985_30709392 | NC_021161.1    | Ca_kabuli_chr02 | 30709392                | GG                              | TT                | 1945909354               |
| SNP_P3_22986_30710170 | NC_021161.1    | Ca_kabuli_chr02 | 30710170                | GG                              | AA                | 1945909356               |
| SNP_P3_22988_30711122 | NC_021161.1    | Ca_kabuli_chr02 | 30711122                | AA                              | GG                | 1945909357               |
| SNP_P3_22989_30711123 | NC_021161.1    | Ca_kabuli_chr02 | 30711123                | GG                              | AA                | 1945909359               |
| SNP_P3_22990_30711132 | NC_021161.1    | Ca_kabuli_chr02 | 30711132                | CC                              | AA                | 1945909361               |
| SNP_P3_22991_30712184 | NC_021161.1    | Ca_kabuli_chr02 | 30712184                | CC                              | TT                | 1945909363               |
| SNP_P3_22992_30712473 | NC_021161.1    | Ca_kabuli_chr02 | 30712473                | CC                              | TT                | 1945909364               |
| SNP_P3_22993_30713797 | NC_021161.1    | Ca_kabuli_chr02 | 30713797                | GG                              | AA                | 1945909366               |
| SNP_P3_22994_30713875 | NC_021161.1    | Ca_kabuli_chr02 | 30713875                | AA                              | CC                | 1945909368               |
| SNP_P3_22995_30716266 | NC_021161.1    | Ca_kabuli_chr02 | 30716266                | TT                              | CC                | 1945909370               |
| SNP_P3_22996_30719324 | NC_021161.1    | Ca_kabuli_chr02 | 30719324                | TT                              | GG                | 1945909372               |
| SNP_P3_22997_30719344 | NC_021161.1    | Ca_kabuli_chr02 | 30719344                | AA                              | GG                | 1945909373               |
| SNP_P3_22999_30719590 | NC_021161.1    | Ca_kabuli_chr02 | 30719590                | AA                              | GG                | 1945909375               |
| SNP_P3_23001_30719909 | NC_021161.1    | Ca_kabuli_chr02 | 30719909                | CC                              | TT                | 1945909377               |
| SNP_P3_23002_30720144 | NC_021161.1    | Ca_kabuli_chr02 | 30720144                | GG                              | CC                | 1945909379               |
| SNP_P3_23004_30732467 | NC_021161.1    | Ca_kabuli_chr02 | 30732467                | CC                              | AA                | 1945909381               |
| SNP_P3_23005_30732679 | NC_021161.1    | Ca_kabuli_chr02 | 30732679                | AA                              | TT                | 1945909382               |
| SNP_P3_23006_30734436 | NC_021161.1    | Ca_kabuli_chr02 | 30734436                | AA                              | GG                | 1945909384               |
| SNP_P3_23007_30735457 | NC_021161.1    | Ca_kabuli_chr02 | 30735457                | GG                              | AA                | 1945909386               |
| SNP_P3_23010_30737344 | NC_021161.1    | Ca_kabuli_chr02 | 30737344                | GG                              | AA                | 1945909388               |
| SNP_P3_23013_30738187 | NC_021161.1    | Ca_kabuli_chr02 | 30738187                | GG                              | AA                | 1945909389               |
| SNP_P3_23015_30738524 | NC_021161.1    | Ca_kabuli_chr02 | 30738524                | TT                              | AA                | 1945909391               |
| SNP_P3_23016_30738959 | NC_021161.1    | Ca_kabuli_chr02 | 30738959                | CC                              | GG                | 1945909393               |
| SNP_P3_23017_30739835 | NC_021161.1    | Ca_kabuli_chr02 | 30739835                | AA                              | TT                | 1945909395               |
| SNP_P3_23018_30741438 | NC_021161.1    | Ca_kabuli_chr02 | 30741438                | GG                              | AA                | 1945909397               |
| SNP_P3_23021_30743388 | NC_021161.1    | Ca_kabuli_chr02 | 30743388                | AA                              | GG                | 1945909398               |
| SNP_P3_23022_30756068 | NC_021161.1    | Ca_kabuli_chr02 | 30756068                | AA                              | GG                | 1945909400               |
| SNP_P3_23023_30756091 | NC_021161.1    | Ca_kabuli_chr02 | 30756091                | TT                              | CC                | 1945909402               |
| SNP_P3_23024_30765498 | NC_021161.1    | Ca_kabuli_chr02 | 30765498                | TT                              | CC                | 1945909404               |
| SNP_P3_23025_30765898 | NC_021161.1    | Ca_kabuli_chr02 | 30765898                | AA                              | GG                | 1945909405               |
| SNP_P3_23026_30766033 | NC_021161.1    | Ca_kabuli_chr02 | 30766033                | TT                              | AA                | 1945909407               |
| SNP_P3_23027_30766038 | NC_021161.1    | Ca_kabuli_chr02 | 30766038                | GG                              | AA                | 1945909409               |
| SNP_P3_23029_30768620 | NC_021161.1    | Ca_kabuli_chr02 | 30768620                | AA                              | TT                | 1945909411               |
| SNP_P3_23030_30769482 | NC_021161.1    | Ca_kabuli_chr02 | 30769482                | TT                              | AA                | 1945909413               |
| SNP_P3_23032_30772363 | NC_021161.1    | Ca_kabuli_chr02 | 30772363                | GG                              | TT                | 1945909414               |
| SNP_P3_23033_30772368 | NC_021161.1    | Ca_kabuli_chr02 | 30772368                | TT                              | AA                | 1945909416               |
| SNP_P3_23034_30772434 | NC_021161.1    | Ca_kabuli_chr02 | 30772434                | GG                              | AA                | 1945909418               |
| SNP_P3_23035_30772445 | NC_021161.1    | Ca_kabuli_chr02 | 30772445                | CC                              | TT                | 1945909420               |

| SNPs IDs              | Chromosome IDs | Chromosomes     | Physical positions (bp) | CDC Frontier (Reference genome) | (Pusa 256 & HPNB) | NCBI SNPdb Accession IDs |
|-----------------------|----------------|-----------------|-------------------------|---------------------------------|-------------------|--------------------------|
| SNP_P3_23036_30772769 | NC_021161.1    | Ca_kabuli_chr02 | 30772769                | AA                              | TT                | 1945909421               |
| SNP_P3_23037_30773098 | NC_021161.1    | Ca_kabuli_chr02 | 30773098                | CC                              | TT                | 1945909423               |
| SNP_P3_23038_30773664 | NC_021161.1    | Ca_kabuli_chr02 | 30773664                | AA                              | CC                | 1945909425               |
| SNP_P3_23039_30775592 | NC_021161.1    | Ca_kabuli_chr02 | 30775592                | AA                              | GG                | 1945909427               |
| SNP_P3_23040_30775595 | NC_021161.1    | Ca_kabuli_chr02 | 30775595                | GG                              | AA                | 1945909429               |
| SNP_P3_23041_30776091 | NC_021161.1    | Ca_kabuli_chr02 | 30776091                | AA                              | GG                | 1945909430               |
| SNP_P3_23042_30776114 | NC_021161.1    | Ca_kabuli_chr02 | 30776114                | TT                              | AA                | 1945909432               |
| SNP_P3_23043_30776589 | NC_021161.1    | Ca_kabuli_chr02 | 30776589                | TT                              | CC                | 1945909434               |
| SNP_P3_23045_30778843 | NC_021161.1    | Ca_kabuli_chr02 | 30778843                | TT                              | AA                | 1945909436               |
| SNP_P3_23046_30779121 | NC_021161.1    | Ca_kabuli_chr02 | 30779121                | CC                              | AA                | 1945909438               |
| SNP_P3_23047_30783700 | NC_021161.1    | Ca_kabuli_chr02 | 30783700                | TT                              | CC                | 1945909439               |
| SNP_P3_23048_30783867 | NC_021161.1    | Ca_kabuli_chr02 | 30783867                | GG                              | AA                | 1945909441               |
| SNP_P3_23049_30785598 | NC_021161.1    | Ca_kabuli_chr02 | 30785598                | TT                              | AA                | 1945909443               |
| SNP_P3_23050_30785615 | NC_021161.1    | Ca_kabuli_chr02 | 30785615                | AA                              | GG                | 1945909445               |
| SNP_P3_23051_30785616 | NC_021161.1    | Ca_kabuli_chr02 | 30785616                | GG                              | AA                | 1945909446               |
| SNP_P3_23052_30785631 | NC_021161.1    | Ca_kabuli_chr02 | 30785631                | AA                              | GG                | 1945909448               |
| SNP_P3_23053_30785696 | NC_021161.1    | Ca_kabuli_chr02 | 30785696                | CC                              | TT                | 1945909450               |
| SNP_P3_23054_30785765 | NC_021161.1    | Ca_kabuli_chr02 | 30785765                | AA                              | GG                | 1945909452               |
| SNP_P3_23055_30785805 | NC_021161.1    | Ca_kabuli_chr02 | 30785805                | GG                              | AA                | 1945909454               |
| SNP_P3_23056_30785811 | NC_021161.1    | Ca_kabuli_chr02 | 30785811                | CC                              | TT                | 1945909455               |
| SNP_P3_23057_30785865 | NC_021161.1    | Ca_kabuli_chr02 | 30785865                | AA                              | TT                | 1945909457               |
| SNP_P3_23058_30785902 | NC_021161.1    | Ca_kabuli_chr02 | 30785902                | TT                              | AA                | 1945909459               |
| SNP_P3_23059_30788942 | NC_021161.1    | Ca_kabuli_chr02 | 30788942                | TT                              | CC                | 1945909461               |
| SNP_P3_23060_30788948 | NC_021161.1    | Ca_kabuli_chr02 | 30788948                | TT                              | CC                | 1945909462               |
| SNP_P3_23061_30789749 | NC_021161.1    | Ca_kabuli_chr02 | 30789749                | TT                              | AA                | 1945909464               |
| SNP_P3_23062_30790561 | NC_021161.1    | Ca_kabuli_chr02 | 30790561                | GG                              | TT                | 1945909466               |
| SNP_P3_23064_30791106 | NC_021161.1    | Ca_kabuli_chr02 | 30791106                | AA                              | CC                | 1945909468               |
| SNP_P3_23065_30791302 | NC_021161.1    | Ca_kabuli_chr02 | 30791302                | AA                              | CC                | 1945909470               |
| SNP_P3_23066_30791345 | NC_021161.1    | Ca_kabuli_chr02 | 30791345                | TT                              | CC                | 1945909471               |
| SNP_P3_23067_30791686 | NC_021161.1    | Ca_kabuli_chr02 | 30791686                | CC                              | TT                | 1945909473               |
| SNP_P3_23068_30791919 | NC_021161.1    | Ca_kabuli_chr02 | 30791919                | CC                              | GG                | 1945909475               |
| SNP_P3_23069_30791939 | NC_021161.1    | Ca_kabuli_chr02 | 30791939                | CC                              | AA                | 1945909477               |
| SNP_P3_23070_30792206 | NC_021161.1    | Ca_kabuli_chr02 | 30792206                | TT                              | CC                | 1945909478               |
| SNP_P3_23072_30792606 | NC_021161.1    | Ca_kabuli_chr02 | 30792606                | GG                              | AA                | 1945909480               |
| SNP_P3_23073_30792633 | NC_021161.1    | Ca_kabuli_chr02 | 30792633                | AA                              | GG                | 1945909482               |
| SNP_P3_23074_30793932 | NC_021161.1    | Ca_kabuli_chr02 | 30793932                | AA                              | GG                | 1945909484               |
| SNP_P3_23075_30793933 | NC_021161.1    | Ca_kabuli_chr02 | 30793933                | TT                              | CC                | 1945909486               |
| SNP_P3_23076_30794380 | NC_021161.1    | Ca_kabuli_chr02 | 30794380                | TT                              | AA                | 1945909488               |
| SNP_P3_23078_30795247 | NC_021161.1    | Ca_kabuli_chr02 | 30795247                | TT                              | CC                | 1945909489               |
| SNP_P3_23079_30795266 | NC_021161.1    | Ca_kabuli_chr02 | 30795266                | AA                              | GG                | 1945909491               |
| SNP_P3_23080_30795313 | NC_021161.1    | Ca_kabuli_chr02 | 30795313                | CC                              | AA                | 1945909493               |
| SNP_P3_23081_30795340 | NC_021161.1    | Ca_kabuli_chr02 | 30795340                | GG                              | AA                | 1945909495               |

| SNPs IDs              | Chromosome IDs | Chromosomes     | Physical positions (bp) | CDC Frontier (Reference genome) | (Pusa 256 & HPNB) | NCBI SNPdb Accession IDs |
|-----------------------|----------------|-----------------|-------------------------|---------------------------------|-------------------|--------------------------|
| SNP_P3_23082_30795705 | NC_021161.1    | Ca_kabuli_chr02 | 30795705                | GG                              | AA                | 1945909497               |
| SNP_P3_23084_30798232 | NC_021161.1    | Ca_kabuli_chr02 | 30798232                | CC                              | AA                | 1945909498               |
| SNP_P3_23085_30798242 | NC_021161.1    | Ca_kabuli_chr02 | 30798242                | GG                              | AA                | 1945909500               |
| SNP_P3_23086_30798248 | NC_021161.1    | Ca_kabuli_chr02 | 30798248                | GG                              | CC                | 1945909502               |
| SNP_P3_23087_30798262 | NC_021161.1    | Ca_kabuli_chr02 | 30798262                | GG                              | AA                | 1945909504               |
| SNP_P3_23088_30798510 | NC_021161.1    | Ca_kabuli_chr02 | 30798510                | GG                              | CC                | 1945909505               |
| SNP_P3_23089_30798540 | NC_021161.1    | Ca_kabuli_chr02 | 30798540                | TT                              | CC                | 1945909507               |
| SNP_P3_23090_30798569 | NC_021161.1    | Ca_kabuli_chr02 | 30798569                | AA                              | TT                | 1945909509               |
| SNP_P3_23091_30798574 | NC_021161.1    | Ca_kabuli_chr02 | 30798574                | CC                              | TT                | 1945909511               |
| SNP_P3_23092_30798610 | NC_021161.1    | Ca_kabuli_chr02 | 30798610                | GG                              | AA                | 1945909513               |
| SNP_P3_23093_30798627 | NC_021161.1    | Ca_kabuli_chr02 | 30798627                | AA                              | GG                | 1945909514               |
| SNP_P3_23094_30799893 | NC_021161.1    | Ca_kabuli_chr02 | 30799893                | TT                              | CC                | 1945909516               |
| SNP_P3_23095_30801217 | NC_021161.1    | Ca_kabuli_chr02 | 30801217                | TT                              | AA                | 1945909518               |
| SNP_P3_23096_30803915 | NC_021161.1    | Ca_kabuli_chr02 | 30803915                | GG                              | AA                | 1945909520               |
| SNP_P3_23097_30804375 | NC_021161.1    | Ca_kabuli_chr02 | 30804375                | CC                              | GG                | 1945909521               |
| SNP_P3_23099_30805042 | NC_021161.1    | Ca_kabuli_chr02 | 30805042                | AA                              | TT                | 1945909523               |
| SNP_P3_23100_30805064 | NC_021161.1    | Ca_kabuli_chr02 | 30805064                | CC                              | TT                | 1945909525               |
| SNP_P3_23102_30806855 | NC_021161.1    | Ca_kabuli_chr02 | 30806855                | TT                              | AA                | 1945909527               |
| SNP_P3_23103_30806866 | NC_021161.1    | Ca_kabuli_chr02 | 30806866                | TT                              | GG                | 1945909529               |
| SNP_P3_23104_30808681 | NC_021161.1    | Ca_kabuli_chr02 | 30808681                | TT                              | CC                | 1945909530               |
| SNP_P3_23105_30808767 | NC_021161.1    | Ca_kabuli_chr02 | 30808767                | AA                              | CC                | 1945909532               |
| SNP_P3_23106_30809153 | NC_021161.1    | Ca_kabuli_chr02 | 30809153                | AA                              | TT                | 1945909534               |
| SNP_P3_23108_30810396 | NC_021161.1    | Ca_kabuli_chr02 | 30810396                | AA                              | CC                | 1945909536               |
| SNP_P3_23109_30810402 | NC_021161.1    | Ca_kabuli_chr02 | 30810402                | CC                              | TT                | 1945909537               |
| SNP_P3_23110_30810411 | NC_021161.1    | Ca_kabuli_chr02 | 30810411                | GG                              | AA                | 1945909539               |
| SNP_P3_23111_30810416 | NC_021161.1    | Ca_kabuli_chr02 | 30810416                | CC                              | TT                | 1945909541               |
| SNP_P3_23112_30810435 | NC_021161.1    | Ca_kabuli_chr02 | 30810435                | GG                              | TT                | 1945909543               |
| SNP_P3_23113_30819224 | NC_021161.1    | Ca_kabuli_chr02 | 30819224                | CC                              | TT                | 1945909545               |
| SNP_P3_23114_30819999 | NC_021161.1    | Ca_kabuli_chr02 | 30819999                | CC                              | TT                | 1945909546               |
| SNP_P3_23115_30820057 | NC_021161.1    | Ca_kabuli_chr02 | 30820057                | TT                              | GG                | 1945909548               |
| SNP_P3_23116_30820072 | NC_021161.1    | Ca_kabuli_chr02 | 30820072                | CC                              | AA                | 1945909550               |
| SNP_P3_23117_30820101 | NC_021161.1    | Ca_kabuli_chr02 | 30820101                | GG                              | AA                | 1945909552               |
| SNP_P3_23118_30820130 | NC_021161.1    | Ca_kabuli_chr02 | 30820130                | CC                              | AA                | 1945909554               |
| SNP_P3_23119_30820156 | NC_021161.1    | Ca_kabuli_chr02 | 30820156                | CC                              | TT                | 1945909555               |
| SNP_P3_23120_30820159 | NC_021161.1    | Ca_kabuli_chr02 | 30820159                | TT                              | GG                | 1945909557               |
| SNP_P3_23121_30820168 | NC_021161.1    | Ca_kabuli_chr02 | 30820168                | TT                              | AA                | 1945909559               |
| SNP_P3_23122_30820182 | NC_021161.1    | Ca_kabuli_chr02 | 30820182                | AA                              | CC                | 1945909561               |
| SNP_P3_23123_30820198 | NC_021161.1    | Ca_kabuli_chr02 | 30820198                | AA                              | CC                | 1945909562               |
| SNP_P3_23124_30820202 | NC_021161.1    | Ca_kabuli_chr02 | 30820202                | TT                              | CC                | 1945909564               |
| SNP_P3_23125_30820237 | NC_021161.1    | Ca_kabuli_chr02 | 30820237                | GG                              | TT                | 1945909566               |
| SNP_P3_23126_30820324 | NC_021161.1    | Ca_kabuli_chr02 | 30820324                | AA                              | GG                | 1945909568               |
| SNP_P3_23127_30820435 | NC_021161.1    | Ca_kabuli_chr02 | 30820435                | CC                              | TT                | 1945909570               |

| SNPs IDs              | Chromosome IDs | Chromosomes     | Physical positions (bp) | CDC Frontier (Reference genome) | (Pusa 256 & HPNB) | NCBI SNPdb Accession IDs |
|-----------------------|----------------|-----------------|-------------------------|---------------------------------|-------------------|--------------------------|
| SNP_P3_23128_30820479 | NC_021161.1    | Ca_kabuli_chr02 | 30820479                | AA                              | GG                | 1945909571               |
| SNP_P3_23129_30820884 | NC_021161.1    | Ca_kabuli_chr02 | 30820884                | AA                              | GG                | 1945909573               |
| SNP_P3_23130_30820891 | NC_021161.1    | Ca_kabuli_chr02 | 30820891                | TT                              | CC                | 1945909575               |
| SNP_P3_23131_30821309 | NC_021161.1    | Ca_kabuli_chr02 | 30821309                | AA                              | CC                | 1945909577               |
| SNP_P3_23132_30822374 | NC_021161.1    | Ca_kabuli_chr02 | 30822374                | CC                              | TT                | 1945909578               |
| SNP_P3_23133_30822644 | NC_021161.1    | Ca_kabuli_chr02 | 30822644                | TT                              | CC                | 1945909580               |
| SNP_P3_23134_30826659 | NC_021161.1    | Ca_kabuli_chr02 | 30826659                | TT                              | CC                | 1945909582               |
| SNP_P3_23135_30831569 | NC_021161.1    | Ca_kabuli_chr02 | 30831569                | GG                              | AA                | 1945909584               |
| SNP_P3_23136_30831594 | NC_021161.1    | Ca_kabuli_chr02 | 30831594                | AA                              | CC                | 1945909586               |
| SNP_P3_23137_30831625 | NC_021161.1    | Ca_kabuli_chr02 | 30831625                | CC                              | AA                | 1945909587               |
| SNP_P3_23138_30831628 | NC_021161.1    | Ca_kabuli_chr02 | 30831628                | GG                              | AA                | 1945909589               |
| SNP_P3_23139_30831770 | NC_021161.1    | Ca_kabuli_chr02 | 30831770                | GG                              | AA                | 1945909591               |
| SNP_P3_23140_30831843 | NC_021161.1    | Ca_kabuli_chr02 | 30831843                | CC                              | TT                | 1945909593               |
| SNP_P3_23141_30831974 | NC_021161.1    | Ca_kabuli_chr02 | 30831974                | GG                              | AA                | 1945909595               |
| SNP_P3_23142_30834695 | NC_021161.1    | Ca_kabuli_chr02 | 30834695                | GG                              | AA                | 1945909596               |
| SNP_P3_23143_30834752 | NC_021161.1    | Ca_kabuli_chr02 | 30834752                | TT                              | CC                | 1945909598               |
| SNP_P3_23144_30834766 | NC_021161.1    | Ca_kabuli_chr02 | 30834766                | AA                              | CC                | 1945909600               |
| SNP_P3_23145_30834880 | NC_021161.1    | Ca_kabuli_chr02 | 30834880                | TT                              | CC                | 1945909602               |
| SNP_P3_23146_30834889 | NC_021161.1    | Ca_kabuli_chr02 | 30834889                | AA                              | TT                | 1945909603               |
| SNP_P3_23147_30834922 | NC_021161.1    | Ca_kabuli_chr02 | 30834922                | AA                              | GG                | 1945909605               |
| SNP_P3_23148_30834945 | NC_021161.1    | Ca_kabuli_chr02 | 30834945                | CC                              | TT                | 1945909607               |
| SNP_P3_23150_30836851 | NC_021161.1    | Ca_kabuli_chr02 | 30836851                | AA                              | GG                | 1945909609               |
| SNP_P3_23151_30836899 | NC_021161.1    | Ca_kabuli_chr02 | 30836899                | CC                              | TT                | 1945909611               |
| SNP_P3_23152_30836912 | NC_021161.1    | Ca_kabuli_chr02 | 30836912                | AA                              | GG                | 1945909612               |
| SNP_P3_23153_30836955 | NC_021161.1    | Ca_kabuli_chr02 | 30836955                | CC                              | TT                | 1945909614               |
| SNP_P3_23154_30837083 | NC_021161.1    | Ca_kabuli_chr02 | 30837083                | TT                              | AA                | 1945909616               |
| SNP_P3_23155_30837108 | NC_021161.1    | Ca_kabuli_chr02 | 30837108                | CC                              | TT                | 1945909618               |
| SNP_P3_23156_30837165 | NC_021161.1    | Ca_kabuli_chr02 | 30837165                | CC                              | TT                | 1945909619               |
| SNP_P3_23157_30837993 | NC_021161.1    | Ca_kabuli_chr02 | 30837993                | TT                              | CC                | 1945909621               |
| SNP_P3_23159_30839720 | NC_021161.1    | Ca_kabuli_chr02 | 30839720                | CC                              | GG                | 1945909623               |
| SNP_P3_23160_30839733 | NC_021161.1    | Ca_kabuli_chr02 | 30839733                | TT                              | CC                | 1945909625               |
| SNP_P3_23161_30839798 | NC_021161.1    | Ca_kabuli_chr02 | 30839798                | TT                              | CC                | 1945909627               |
| SNP_P3_23162_30839922 | NC_021161.1    | Ca_kabuli_chr02 | 30839922                | TT                              | CC                | 1945909628               |
| SNP_P3_23163_30840338 | NC_021161.1    | Ca_kabuli_chr02 | 30840338                | TT                              | AA                | 1945909630               |
| SNP_P3_23166_30840906 | NC_021161.1    | Ca_kabuli_chr02 | 30840906                | AA                              | TT                | 1945909632               |
| SNP_P3_23167_30840908 | NC_021161.1    | Ca_kabuli_chr02 | 30840908                | CC                              | AA                | 1945909634               |
| SNP_P3_23168_30840927 | NC_021161.1    | Ca_kabuli_chr02 | 30840927                | GG                              | AA                | 1945909636               |
| SNP_P3_23170_30842788 | NC_021161.1    | Ca_kabuli_chr02 | 30842788                | GG                              | AA                | 1945909637               |
| SNP_P3_23171_30842845 | NC_021161.1    | Ca_kabuli_chr02 | 30842845                | GG                              | CC                | 1945909639               |
| SNP_P3_23173_30843814 | NC_021161.1    | Ca_kabuli_chr02 | 30843814                | AA                              | CC                | 1945909641               |
| SNP_P3_23174_30843823 | NC_021161.1    | Ca_kabuli_chr02 | 30843823                | AA                              | CC                | 1945909643               |
| SNP_P3_23176_30844344 | NC_021161.1    | Ca_kabuli_chr02 | 30844344                | TT                              | CC                | 1945909644               |



| SNPs IDs              | Chromosome IDs | Chromosomes     | Physical positions (bp) | CDC Frontier (Reference genome) | (Pusa 256 & HPNB) | NCBI SNPdb Accession IDs |
|-----------------------|----------------|-----------------|-------------------------|---------------------------------|-------------------|--------------------------|
| SNP_P3_23177_30845225 | NC_021161.1    | Ca_kabuli_chr02 | 30845225                | TT                              | GG                | 1945909646               |
| SNP_P3_23179_30848630 | NC_021161.1    | Ca_kabuli_chr02 | 30848630                | GG                              | AA                | 1945909648               |
| SNP_P3_23181_30849783 | NC_021161.1    | Ca_kabuli_chr02 | 30849783                | CC                              | GG                | 1945909650               |
| SNP_P3_23182_30854386 | NC_021161.1    | Ca_kabuli_chr02 | 30854386                | TT                              | CC                | 1945909652               |
| SNP_P3_23184_30861538 | NC_021161.1    | Ca_kabuli_chr02 | 30861538                | GG                              | TT                | 1945909653               |
| SNP_P3_23186_30861859 | NC_021161.1    | Ca_kabuli_chr02 | 30861859                | CC                              | AA                | 1945909655               |
| SNP_P3_23188_30861882 | NC_021161.1    | Ca_kabuli_chr02 | 30861882                | AA                              | TT                | 1945909657               |
| SNP_P3_23190_30862070 | NC_021161.1    | Ca_kabuli_chr02 | 30862070                | GG                              | AA                | 1945909659               |
| SNP_P3_23193_30864798 | NC_021161.1    | Ca_kabuli_chr02 | 30864798                | CC                              | GG                | 1945909660               |
| SNP_P3_23194_30864892 | NC_021161.1    | Ca_kabuli_chr02 | 30864892                | AA                              | CC                | 1945909662               |
| SNP_P3_23195_30864896 | NC_021161.1    | Ca_kabuli_chr02 | 30864896                | GG                              | TT                | 1945909664               |
| SNP_P3_23196_30865064 | NC_021161.1    | Ca_kabuli_chr02 | 30865064                | AA                              | TT                | 1945909666               |
| SNP_P3_23198_30865235 | NC_021161.1    | Ca_kabuli_chr02 | 30865235                | AA                              | GG                | 1945909668               |
| SNP_P3_23199_30865251 | NC_021161.1    | Ca_kabuli_chr02 | 30865251                | GG                              | AA                | 1945909669               |
| SNP_P3_23200_30870068 | NC_021161.1    | Ca_kabuli_chr02 | 30870068                | AA                              | CC                | 1945909671               |
| SNP_P3_23201_30870069 | NC_021161.1    | Ca_kabuli_chr02 | 30870069                | TT                              | CC                | 1945909673               |
| SNP_P3_23202_30870455 | NC_021161.1    | Ca_kabuli_chr02 | 30870455                | TT                              | GG                | 1945909675               |
| SNP_P3_23203_30870505 | NC_021161.1    | Ca_kabuli_chr02 | 30870505                | AA                              | TT                | 1945909676               |
| SNP_P3_23204_30870944 | NC_021161.1    | Ca_kabuli_chr02 | 30870944                | CC                              | TT                | 1945909678               |
| SNP_P3_23205_30870963 | NC_021161.1    | Ca_kabuli_chr02 | 30870963                | GG                              | AA                | 1945909680               |
| SNP_P3_23206_30871036 | NC_021161.1    | Ca_kabuli_chr02 | 30871036                | TT                              | GG                | 1945909682               |
| SNP_P3_23207_30871313 | NC_021161.1    | Ca_kabuli_chr02 | 30871313                | AA                              | CC                | 1945909684               |
| SNP_P3_23208_30873120 | NC_021161.1    | Ca_kabuli_chr02 | 30873120                | CC                              | TT                | 1945909685               |
| SNP_P3_23209_30873378 | NC_021161.1    | Ca_kabuli_chr02 | 30873378                | GG                              | AA                | 1945909687               |
| SNP_P3_23210_30874017 | NC_021161.1    | Ca_kabuli_chr02 | 30874017                | CC                              | TT                | 1945909689               |
| SNP_P3_23211_30874043 | NC_021161.1    | Ca_kabuli_chr02 | 30874043                | TT                              | AA                | 1945909691               |
| SNP_P3_23212_30874479 | NC_021161.1    | Ca_kabuli_chr02 | 30874479                | TT                              | CC                | 1945909693               |
| SNP_P3_23213_30874713 | NC_021161.1    | Ca_kabuli_chr02 | 30874713                | CC                              | TT                | 1945909694               |
| SNP_P3_23214_30875436 | NC_021161.1    | Ca_kabuli_chr02 | 30875436                | TT                              | CC                | 1945909696               |
| SNP_P3_23215_30875730 | NC_021161.1    | Ca_kabuli_chr02 | 30875730                | TT                              | CC                | 1945909698               |
| SNP_P3_23217_30876212 | NC_021161.1    | Ca_kabuli_chr02 | 30876212                | GG                              | AA                | 1945909700               |
| SNP_P3_23219_30876608 | NC_021161.1    | Ca_kabuli_chr02 | 30876608                | AA                              | GG                | 1945909701               |
| SNP_P3_23220_30876709 | NC_021161.1    | Ca_kabuli_chr02 | 30876709                | CC                              | TT                | 1945909703               |
| SNP_P3_23221_30876761 | NC_021161.1    | Ca_kabuli_chr02 | 30876761                | CC                              | TT                | 1945909705               |
| SNP_P3_23223_30877516 | NC_021161.1    | Ca_kabuli_chr02 | 30877516                | GG                              | AA                | 1945909707               |
| SNP_P3_23224_30877534 | NC_021161.1    | Ca_kabuli_chr02 | 30877534                | TT                              | AA                | 1945909709               |
| SNP_P3_23225_30877537 | NC_021161.1    | Ca_kabuli_chr02 | 30877537                | GG                              | CC                | 1945909710               |
| SNP_P3_23226_30878670 | NC_021161.1    | Ca_kabuli_chr02 | 30878670                | AA                              | CC                | 1945909712               |
| SNP_P3_23227_30878702 | NC_021161.1    | Ca_kabuli_chr02 | 30878702                | CC                              | TT                | 1945909714               |
| SNP_P3_23228_30878743 | NC_021161.1    | Ca_kabuli_chr02 | 30878743                | AA                              | CC                | 1945909716               |
| SNP_P3_23230_30880438 | NC_021161.1    | Ca_kabuli_chr02 | 30880438                | TT                              | CC                | 1945909718               |
| SNP_P3_23231_30880452 | NC_021161.1    | Ca_kabuli_chr02 | 30880452                | TT                              | CC                | 1945909719               |

| SNPs IDs              | Chromosome IDs | Chromosomes     | Physical positions (bp) | CDC Frontier (Reference genome) | (Pusa 256 & HPNB) | NCBI SNPdb Accession IDs |
|-----------------------|----------------|-----------------|-------------------------|---------------------------------|-------------------|--------------------------|
| SNP_P3_23232_30881580 | NC_021161.1    | Ca_kabuli_chr02 | 30881580                | CC                              | AA                | 1945909721               |
| SNP_P3_23233_30881585 | NC_021161.1    | Ca_kabuli_chr02 | 30881585                | AA                              | CC                | 1945909723               |
| SNP_P3_23234_30881593 | NC_021161.1    | Ca_kabuli_chr02 | 30881593                | CC                              | TT                | 1945909725               |
| SNP_P3_23235_30881616 | NC_021161.1    | Ca_kabuli_chr02 | 30881616                | TT                              | AA                | 1945909726               |
| SNP_P3_23236_30881642 | NC_021161.1    | Ca_kabuli_chr02 | 30881642                | TT                              | GG                | 1945909728               |
| SNP_P3_23237_30881891 | NC_021161.1    | Ca_kabuli_chr02 | 30881891                | AA                              | GG                | 1945909730               |
| SNP_P3_23238_30881919 | NC_021161.1    | Ca_kabuli_chr02 | 30881919                | TT                              | CC                | 1945909732               |
| SNP_P3_23239_30882151 | NC_021161.1    | Ca_kabuli_chr02 | 30882151                | GG                              | AA                | 1945909734               |
| SNP_P3_23240_30882195 | NC_021161.1    | Ca_kabuli_chr02 | 30882195                | GG                              | AA                | 1945909735               |
| SNP_P3_23241_30882524 | NC_021161.1    | Ca_kabuli_chr02 | 30882524                | TT                              | CC                | 1945909737               |
| SNP_P3_23242_30882526 | NC_021161.1    | Ca_kabuli_chr02 | 30882526                | CC                              | AA                | 1945909739               |
| SNP_P3_23243_30882541 | NC_021161.1    | Ca_kabuli_chr02 | 30882541                | GG                              | AA                | 1945909741               |
| SNP_P3_23244_30882863 | NC_021161.1    | Ca_kabuli_chr02 | 30882863                | AA                              | GG                | 1945909743               |
| SNP_P3_23245_30886122 | NC_021161.1    | Ca_kabuli_chr02 | 30886122                | AA                              | GG                | 1945909744               |
| SNP_P3_23246_30886241 | NC_021161.1    | Ca_kabuli_chr02 | 30886241                | CC                              | AA                | 1945909746               |
| SNP_P3_23248_30887452 | NC_021161.1    | Ca_kabuli_chr02 | 30887452                | TT                              | CC                | 1945909748               |
| SNP_P3_23249_30887575 | NC_021161.1    | Ca_kabuli_chr02 | 30887575                | CC                              | TT                | 1945909750               |
| SNP_P3_23250_30887917 | NC_021161.1    | Ca_kabuli_chr02 | 30887917                | AA                              | TT                | 1945909751               |
| SNP_P3_23251_30887938 | NC_021161.1    | Ca_kabuli_chr02 | 30887938                | AA                              | TT                | 1945909753               |
| SNP_P3_23252_30887942 | NC_021161.1    | Ca_kabuli_chr02 | 30887942                | TT                              | AA                | 1945909755               |
| SNP_P3_23253_30887944 | NC_021161.1    | Ca_kabuli_chr02 | 30887944                | AA                              | CC                | 1945909757               |
| SNP_P3_23254_30887989 | NC_021161.1    | Ca_kabuli_chr02 | 30887989                | TT                              | CC                | 1945909759               |
| SNP_P3_23255_30889336 | NC_021161.1    | Ca_kabuli_chr02 | 30889336                | GG                              | AA                | 1945909760               |
| SNP_P3_23256_30889341 | NC_021161.1    | Ca_kabuli_chr02 | 30889341                | CC                              | GG                | 1945909762               |
| SNP_P3_23257_30889345 | NC_021161.1    | Ca_kabuli_chr02 | 30889345                | GG                              | AA                | 1945909764               |
| SNP_P3_23258_30889354 | NC_021161.1    | Ca_kabuli_chr02 | 30889354                | AA                              | GG                | 1945909766               |
| SNP_P3_23259_30889371 | NC_021161.1    | Ca_kabuli_chr02 | 30889371                | GG                              | AA                | 1945909767               |
| SNP_P3_23260_30889376 | NC_021161.1    | Ca_kabuli_chr02 | 30889376                | CC                              | TT                | 1945909769               |
| SNP_P3_23261_30889415 | NC_021161.1    | Ca_kabuli_chr02 | 30889415                | GG                              | AA                | 1945909771               |
| SNP_P3_23262_30889575 | NC_021161.1    | Ca_kabuli_chr02 | 30889575                | TT                              | CC                | 1945909773               |
| SNP_P3_23263_30889578 | NC_021161.1    | Ca_kabuli_chr02 | 30889578                | AA                              | CC                | 1945909775               |
| SNP_P3_23264_30889603 | NC_021161.1    | Ca_kabuli_chr02 | 30889603                | AA                              | GG                | 1945909776               |
| SNP_P3_23265_30889608 | NC_021161.1    | Ca_kabuli_chr02 | 30889608                | GG                              | AA                | 1945909778               |
| SNP_P3_23266_30889642 | NC_021161.1    | Ca_kabuli_chr02 | 30889642                | GG                              | AA                | 1945909780               |
| SNP_P3_23267_30889753 | NC_021161.1    | Ca_kabuli_chr02 | 30889753                | CC                              | AA                | 1945909782               |
| SNP_P3_23268_30889815 | NC_021161.1    | Ca_kabuli_chr02 | 30889815                | CC                              | TT                | 1945909784               |
| SNP_P3_23269_30889816 | NC_021161.1    | Ca_kabuli_chr02 | 30889816                | AA                              | GG                | 1945909785               |
| SNP_P3_23270_30889929 | NC_021161.1    | Ca_kabuli_chr02 | 30889929                | AA                              | TT                | 1945909787               |
| SNP_P3_23271_30889944 | NC_021161.1    | Ca_kabuli_chr02 | 30889944                | CC                              | GG                | 1945909789               |
| SNP_P3_23273_30890017 | NC_021161.1    | Ca_kabuli_chr02 | 30890017                | GG                              | CC                | 1945909791               |
| SNP_P3_23274_30890021 | NC_021161.1    | Ca_kabuli_chr02 | 30890021                | AA                              | TT                | 1945909792               |
| SNP_P3_23275_30890035 | NC_021161.1    | Ca_kabuli_chr02 | 30890035                | TT                              | CC                | 1945909794               |

| SNPs IDs              | Chromosome IDs | Chromosomes     | Physical positions (bp) | CDC Frontier (Reference genome) | (Pusa 256 & HPNB) | NCBI SNPdb Accession IDs |
|-----------------------|----------------|-----------------|-------------------------|---------------------------------|-------------------|--------------------------|
| SNP_P3_23276_30890061 | NC_021161.1    | Ca_kabuli_chr02 | 30890061                | AA                              | CC                | 1945909796               |
| SNP_P3_23277_30890096 | NC_021161.1    | Ca_kabuli_chr02 | 30890096                | CC                              | GG                | 1945909798               |
| SNP_P3_23278_30890113 | NC_021161.1    | Ca_kabuli_chr02 | 30890113                | AA                              | TT                | 1945909800               |
| SNP_P3_23280_30890174 | NC_021161.1    | Ca_kabuli_chr02 | 30890174                | CC                              | TT                | 1945909801               |
| SNP_P3_23282_30890510 | NC_021161.1    | Ca_kabuli_chr02 | 30890510                | CC                              | AA                | 1945909803               |
| SNP_P3_23284_30892359 | NC_021161.1    | Ca_kabuli_chr02 | 30892359                | GG                              | TT                | 1945909805               |
| SNP_P3_23285_30892716 | NC_021161.1    | Ca_kabuli_chr02 | 30892716                | TT                              | CC                | 1945909807               |
| SNP_P3_23286_30894575 | NC_021161.1    | Ca_kabuli_chr02 | 30894575                | TT                              | CC                | 1945909808               |
| SNP_P3_23287_30894795 | NC_021161.1    | Ca_kabuli_chr02 | 30894795                | TT                              | GG                | 1945909810               |
| SNP_P3_23288_30895862 | NC_021161.1    | Ca_kabuli_chr02 | 30895862                | CC                              | TT                | 1945909812               |
| SNP_P3_23289_30895867 | NC_021161.1    | Ca_kabuli_chr02 | 30895867                | GG                              | CC                | 1945909814               |
| SNP_P3_23293_30897229 | NC_021161.1    | Ca_kabuli_chr02 | 30897229                | CC                              | GG                | 1945909816               |
| SNP_P3_23295_30897982 | NC_021161.1    | Ca_kabuli_chr02 | 30897982                | GG                              | AA                | 1945909817               |
| SNP_P3_23296_30897993 | NC_021161.1    | Ca_kabuli_chr02 | 30897993                | AA                              | CC                | 1945909819               |
| SNP_P3_23297_30898015 | NC_021161.1    | Ca_kabuli_chr02 | 30898015                | TT                              | AA                | 1945909821               |
| SNP_P3_23298_30898026 | NC_021161.1    | Ca_kabuli_chr02 | 30898026                | TT                              | AA                | 1945909823               |
| SNP_P3_23300_30900223 | NC_021161.1    | Ca_kabuli_chr02 | 30900223                | AA                              | TT                | 1945909824               |
| SNP_P3_23305_30901761 | NC_021161.1    | Ca_kabuli_chr02 | 30901761                | TT                              | GG                | 1945909826               |
| SNP_P3_23306_30901762 | NC_021161.1    | Ca_kabuli_chr02 | 30901762                | AA                              | TT                | 1945909828               |
| SNP_P3_23307_30902000 | NC_021161.1    | Ca_kabuli_chr02 | 30902000                | CC                              | TT                | 1945909830               |
| SNP_P3_23308_30902037 | NC_021161.1    | Ca_kabuli_chr02 | 30902037                | AA                              | GG                | 1945909832               |
| SNP_P3_23309_30902153 | NC_021161.1    | Ca_kabuli_chr02 | 30902153                | GG                              | AA                | 1945909833               |
| SNP_P3_23310_30902291 | NC_021161.1    | Ca_kabuli_chr02 | 30902291                | GG                              | CC                | 1945909835               |
| SNP_P3_23312_30903768 | NC_021161.1    | Ca_kabuli_chr02 | 30903768                | TT                              | CC                | 1945909837               |
| SNP_P3_23313_30904167 | NC_021161.1    | Ca_kabuli_chr02 | 30904167                | CC                              | AA                | 1945909839               |
| SNP_P3_23314_30905292 | NC_021161.1    | Ca_kabuli_chr02 | 30905292                | CC                              | TT                | 1945909841               |
| SNP_P3_23315_30905341 | NC_021161.1    | Ca_kabuli_chr02 | 30905341                | GG                              | TT                | 1945909842               |
| SNP_P3_23316_30905612 | NC_021161.1    | Ca_kabuli_chr02 | 30905612                | GG                              | AA                | 1945909844               |
| SNP_P3_23317_30906051 | NC_021161.1    | Ca_kabuli_chr02 | 30906051                | GG                              | TT                | 1945909846               |
| SNP_P3_23318_30907382 | NC_021161.1    | Ca_kabuli_chr02 | 30907382                | GG                              | AA                | 1945909848               |
| SNP_P3_23319_30909745 | NC_021161.1    | Ca_kabuli_chr02 | 30909745                | CC                              | AA                | 1945909850               |
| SNP_P3_23320_30912211 | NC_021161.1    | Ca_kabuli_chr02 | 30912211                | GG                              | AA                | 1945909851               |
| SNP_P3_23321_30912471 | NC_021161.1    | Ca_kabuli_chr02 | 30912471                | AA                              | TT                | 1945909853               |
| SNP_P3_23322_30912678 | NC_021161.1    | Ca_kabuli_chr02 | 30912678                | AA                              | GG                | 1945909855               |
| SNP_P3_23323_30912722 | NC_021161.1    | Ca_kabuli_chr02 | 30912722                | CC                              | AA                | 1945909857               |
| SNP_P3_23324_30912798 | NC_021161.1    | Ca_kabuli_chr02 | 30912798                | TT                              | CC                | 1945909858               |
| SNP_P3_23325_30912967 | NC_021161.1    | Ca_kabuli_chr02 | 30912967                | AA                              | GG                | 1945909860               |
| SNP_P3_23326_30913854 | NC_021161.1    | Ca_kabuli_chr02 | 30913854                | GG                              | AA                | 1945909862               |
| SNP_P3_23327_30913906 | NC_021161.1    | Ca_kabuli_chr02 | 30913906                | AA                              | GG                | 1945909864               |
| SNP_P3_23328_30914518 | NC_021161.1    | Ca_kabuli_chr02 | 30914518                | AA                              | TT                | 1945909866               |
| SNP_P3_23330_30915590 | NC_021161.1    | Ca_kabuli_chr02 | 30915590                | TT                              | CC                | 1945909867               |
| SNP_P3_23331_30915603 | NC_021161.1    | Ca_kabuli_chr02 | 30915603                | TT                              | CC                | 1945909869               |

| SNPs IDs              | Chromosome IDs | Chromosomes     | Physical positions (bp) | CDC Frontier (Reference genome) | (Pusa 256 & HPNB) | NCBI SNPdb Accession IDs |
|-----------------------|----------------|-----------------|-------------------------|---------------------------------|-------------------|--------------------------|
| SNP_P3_23333_30918734 | NC_021161.1    | Ca_kabuli_chr02 | 30918734                | CC                              | GG                | 1945909871               |
| SNP_P3_23334_30919973 | NC_021161.1    | Ca_kabuli_chr02 | 30919973                | CC                              | TT                | 1945909873               |
| SNP_P3_23335_30920631 | NC_021161.1    | Ca_kabuli_chr02 | 30920631                | TT                              | CC                | 1945909875               |
| SNP_P3_23336_30921092 | NC_021161.1    | Ca_kabuli_chr02 | 30921092                | AA                              | CC                | 1945909876               |
| SNP_P3_23337_30921381 | NC_021161.1    | Ca_kabuli_chr02 | 30921381                | CC                              | TT                | 1945909878               |
| SNP_P3_23338_30921383 | NC_021161.1    | Ca_kabuli_chr02 | 30921383                | TT                              | CC                | 1945909880               |
| SNP_P3_23339_30921602 | NC_021161.1    | Ca_kabuli_chr02 | 30921602                | CC                              | TT                | 1945909882               |
| SNP_P3_23340_30921629 | NC_021161.1    | Ca_kabuli_chr02 | 30921629                | CC                              | AA                | 1945909883               |
| SNP_P3_23341_30921645 | NC_021161.1    | Ca_kabuli_chr02 | 30921645                | CC                              | AA                | 1945909885               |
| SNP_P3_23342_30922393 | NC_021161.1    | Ca_kabuli_chr02 | 30922393                | GG                              | AA                | 1945909887               |
| SNP_P3_23343_30922468 | NC_021161.1    | Ca_kabuli_chr02 | 30922468                | CC                              | TT                | 1945909889               |
| SNP_P3_23344_30922582 | NC_021161.1    | Ca_kabuli_chr02 | 30922582                | CC                              | GG                | 1945909891               |
| SNP_P3_23345_30922601 | NC_021161.1    | Ca_kabuli_chr02 | 30922601                | GG                              | AA                | 1945909892               |
| SNP_P3_23346_30922708 | NC_021161.1    | Ca_kabuli_chr02 | 30922708                | TT                              | CC                | 1945909894               |
| SNP_P3_23347_30922958 | NC_021161.1    | Ca_kabuli_chr02 | 30922958                | CC                              | TT                | 1945909896               |
| SNP_P3_23348_30924509 | NC_021161.1    | Ca_kabuli_chr02 | 30924509                | GG                              | AA                | 1945909898               |
| SNP_P3_23349_30925497 | NC_021161.1    | Ca_kabuli_chr02 | 30925497                | GG                              | AA                | 1945909899               |
| SNP_P3_23350_30925537 | NC_021161.1    | Ca_kabuli_chr02 | 30925537                | GG                              | AA                | 1945909901               |
| SNP_P3_23352_30926147 | NC_021161.1    | Ca_kabuli_chr02 | 30926147                | CC                              | AA                | 1945909903               |
| SNP_P3_23353_30926400 | NC_021161.1    | Ca_kabuli_chr02 | 30926400                | TT                              | CC                | 1945909905               |
| SNP_P3_23354_30927640 | NC_021161.1    | Ca_kabuli_chr02 | 30927640                | GG                              | TT                | 1945909907               |
| SNP_P3_23356_30927735 | NC_021161.1    | Ca_kabuli_chr02 | 30927735                | TT                              | CC                | 1945909908               |
| SNP_P3_23357_30927750 | NC_021161.1    | Ca_kabuli_chr02 | 30927750                | AA                              | GG                | 1945909910               |
| SNP_P3_23358_30927757 | NC_021161.1    | Ca_kabuli_chr02 | 30927757                | GG                              | TT                | 1945909912               |
| SNP_P3_23359_30928305 | NC_021161.1    | Ca_kabuli_chr02 | 30928305                | AA                              | CC                | 1945909914               |
| SNP_P3_23360_30928725 | NC_021161.1    | Ca_kabuli_chr02 | 30928725                | GG                              | AA                | 1945909916               |
| SNP_P3_23361_30928889 | NC_021161.1    | Ca_kabuli_chr02 | 30928889                | CC                              | AA                | 1945909917               |
| SNP_P3_23362_30929141 | NC_021161.1    | Ca_kabuli_chr02 | 30929141                | GG                              | AA                | 1945909919               |
| SNP_P3_23363_30929176 | NC_021161.1    | Ca_kabuli_chr02 | 30929176                | AA                              | GG                | 1945909921               |
| SNP_P3_23364_30929207 | NC_021161.1    | Ca_kabuli_chr02 | 30929207                | AA                              | GG                | 1945909923               |
| SNP_P3_23365_30929916 | NC_021161.1    | Ca_kabuli_chr02 | 30929916                | GG                              | AA                | 1945909924               |
| SNP_P3_23366_30929939 | NC_021161.1    | Ca_kabuli_chr02 | 30929939                | GG                              | AA                | 1945909926               |
| SNP_P3_23367_30929975 | NC_021161.1    | Ca_kabuli_chr02 | 30929975                | GG                              | AA                | 1945909928               |
| SNP_P3_23368_30930318 | NC_021161.1    | Ca_kabuli_chr02 | 30930318                | AA                              | GG                | 1945909930               |
| SNP_P3_23369_30930455 | NC_021161.1    | Ca_kabuli_chr02 | 30930455                | TT                              | CC                | 1945909932               |
| SNP_P3_23370_30930537 | NC_021161.1    | Ca_kabuli_chr02 | 30930537                | AA                              | GG                | 1945909933               |
| SNP_P3_23372_30932012 | NC_021161.1    | Ca_kabuli_chr02 | 30932012                | TT                              | AA                | 1945909935               |
| SNP_P3_23373_30932412 | NC_021161.1    | Ca_kabuli_chr02 | 30932412                | AA                              | GG                | 1945909937               |
| SNP_P3_23374_30933581 | NC_021161.1    | Ca_kabuli_chr02 | 30933581                | GG                              | TT                | 1945909939               |
| SNP_P3_23375_30933605 | NC_021161.1    | Ca_kabuli_chr02 | 30933605                | GG                              | AA                | 1945909940               |
| SNP_P3_23376_30933736 | NC_021161.1    | Ca_kabuli_chr02 | 30933736                | TT                              | CC                | 1945909942               |
| SNP_P3_23379_30936216 | NC_021161.1    | Ca_kabuli_chr02 | 30936216                | TT                              | CC                | 1945909944               |

| SNPs IDs              | Chromosome IDs | Chromosomes     | Physical positions (bp) | CDC Frontier (Reference genome) | (Pusa 256 & HPNB) | NCBI SNPdb Accession IDs |
|-----------------------|----------------|-----------------|-------------------------|---------------------------------|-------------------|--------------------------|
| SNP_P3_23381_30936920 | NC_021161.1    | Ca_kabuli_chr02 | 30936920                | TT                              | CC                | 1945909946               |
| SNP_P3_23382_30937524 | NC_021161.1    | Ca_kabuli_chr02 | 30937524                | CC                              | TT                | 1945909948               |
| SNP_P3_23383_30938101 | NC_021161.1    | Ca_kabuli_chr02 | 30938101                | AA                              | CC                | 1945909949               |
| SNP_P3_23384_30938110 | NC_021161.1    | Ca_kabuli_chr02 | 30938110                | CC                              | GG                | 1945909951               |
| SNP_P3_23385_30938623 | NC_021161.1    | Ca_kabuli_chr02 | 30938623                | GG                              | AA                | 1945909953               |
| SNP_P3_23386_30938857 | NC_021161.1    | Ca_kabuli_chr02 | 30938857                | TT                              | CC                | 1945909955               |
| SNP_P3_23388_30941212 | NC_021161.1    | Ca_kabuli_chr02 | 30941212                | TT                              | CC                | 1945909956               |
| SNP_P3_23389_30941273 | NC_021161.1    | Ca_kabuli_chr02 | 30941273                | AA                              | GG                | 1945909958               |
| SNP_P3_23391_30943783 | NC_021161.1    | Ca_kabuli_chr02 | 30943783                | GG                              | AA                | 1945909960               |
| SNP_P3_23392_30945106 | NC_021161.1    | Ca_kabuli_chr02 | 30945106                | GG                              | AA                | 1945909962               |
| SNP_P3_23393_30945415 | NC_021161.1    | Ca_kabuli_chr02 | 30945415                | TT                              | CC                | 1945909964               |
| SNP_P3_23394_30945655 | NC_021161.1    | Ca_kabuli_chr02 | 30945655                | TT                              | GG                | 1945909965               |
| SNP_P3_23395_30945719 | NC_021161.1    | Ca_kabuli_chr02 | 30945719                | GG                              | CC                | 1945909967               |
| SNP_P3_23396_30946885 | NC_021161.1    | Ca_kabuli_chr02 | 30946885                | AA                              | TT                | 1945909969               |
| SNP_P3_23397_30946994 | NC_021161.1    | Ca_kabuli_chr02 | 30946994                | GG                              | AA                | 1945909971               |
| SNP_P3_23398_30947034 | NC_021161.1    | Ca_kabuli_chr02 | 30947034                | AA                              | GG                | 1945909973               |
| SNP_P3_23399_30947253 | NC_021161.1    | Ca_kabuli_chr02 | 30947253                | CC                              | TT                | 1945909974               |
| SNP_P3_23401_30948069 | NC_021161.1    | Ca_kabuli_chr02 | 30948069                | GG                              | AA                | 1945909976               |
| SNP_P3_23402_30948396 | NC_021161.1    | Ca_kabuli_chr02 | 30948396                | CC                              | TT                | 1945909978               |
| SNP_P3_23403_30949078 | NC_021161.1    | Ca_kabuli_chr02 | 30949078                | TT                              | CC                | 1945909980               |
| SNP_P3_23404_30949148 | NC_021161.1    | Ca_kabuli_chr02 | 30949148                | AA                              | GG                | 1945909981               |
| SNP_P3_23405_30951211 | NC_021161.1    | Ca_kabuli_chr02 | 30951211                | TT                              | GG                | 1945909983               |
| SNP_P3_23406_30951694 | NC_021161.1    | Ca_kabuli_chr02 | 30951694                | CC                              | TT                | 1945909985               |
| SNP_P3_23407_30951724 | NC_021161.1    | Ca_kabuli_chr02 | 30951724                | AA                              | TT                | 1945909987               |
| SNP_P3_23409_30951922 | NC_021161.1    | Ca_kabuli_chr02 | 30951922                | GG                              | CC                | 1945909989               |
| SNP_P3_23410_30954351 | NC_021161.1    | Ca_kabuli_chr02 | 30954351                | TT                              | AA                | 1945909990               |
| SNP_P3_23411_30954959 | NC_021161.1    | Ca_kabuli_chr02 | 30954959                | AA                              | GG                | 1945909992               |
| SNP_P3_23412_30955582 | NC_021161.1    | Ca_kabuli_chr02 | 30955582                | CC                              | TT                | 1945909994               |
| SNP_P3_23414_30957588 | NC_021161.1    | Ca_kabuli_chr02 | 30957588                | TT                              | AA                | 1945909996               |
| SNP_P3_23415_30957589 | NC_021161.1    | Ca_kabuli_chr02 | 30957589                | TT                              | AA                | 1945909998               |
| SNP_P3_23416_30957590 | NC_021161.1    | Ca_kabuli_chr02 | 30957590                | TT                              | AA                | 1945909999               |
| SNP_P3_23417_30958001 | NC_021161.1    | Ca_kabuli_chr02 | 30958001                | AA                              | GG                | 1945910001               |
| SNP_P3_23418_30958066 | NC_021161.1    | Ca_kabuli_chr02 | 30958066                | CC                              | AA                | 1945910003               |
| SNP_P3_23419_30958680 | NC_021161.1    | Ca_kabuli_chr02 | 30958680                | AA                              | CC                | 1945910005               |
| SNP_P3_23420_30958778 | NC_021161.1    | Ca_kabuli_chr02 | 30958778                | CC                              | TT                | 1945910006               |
| SNP_P3_23422_30962010 | NC_021161.1    | Ca_kabuli_chr02 | 30962010                | CC                              | TT                | 1945910008               |
| SNP_P3_23423_30962038 | NC_021161.1    | Ca_kabuli_chr02 | 30962038                | TT                              | CC                | 1945910010               |
| SNP_P3_23424_30962144 | NC_021161.1    | Ca_kabuli_chr02 | 30962144                | TT                              | AA                | 1945910012               |
| SNP_P3_23425_30962150 | NC_021161.1    | Ca_kabuli_chr02 | 30962150                | TT                              | CC                | 1945910014               |
| SNP_P3_23426_30962157 | NC_021161.1    | Ca_kabuli_chr02 | 30962157                | TT                              | CC                | 1945910015               |
| SNP_P3_23428_30962383 | NC_021161.1    | Ca_kabuli_chr02 | 30962383                | AA                              | CC                | 1945910017               |
| SNP_P3_23429_30962415 | NC_021161.1    | Ca_kabuli_chr02 | 30962415                | AA                              | GG                | 1945910019               |

| SNPs IDs              | Chromosome IDs | Chromosomes     | Physical positions (bp) | CDC Frontier (Reference genome) | (Pusa 256 & HPNB) | NCBI SNPdb Accession IDs |
|-----------------------|----------------|-----------------|-------------------------|---------------------------------|-------------------|--------------------------|
| SNP_P3_23430_30962449 | NC_021161.1    | Ca_kabuli_chr02 | 30962449                | CC                              | TT                | 1945910021               |
| SNP_P3_23431_30962475 | NC_021161.1    | Ca_kabuli_chr02 | 30962475                | AA                              | TT                | 1945910022               |
| SNP_P3_23432_30962482 | NC_021161.1    | Ca_kabuli_chr02 | 30962482                | AA                              | TT                | 1945910024               |
| SNP_P3_23433_30962498 | NC_021161.1    | Ca_kabuli_chr02 | 30962498                | AA                              | GG                | 1945910026               |
| SNP_P3_23434_30962645 | NC_021161.1    | Ca_kabuli_chr02 | 30962645                | CC                              | AA                | 1945910028               |
| SNP_P3_23435_30962727 | NC_021161.1    | Ca_kabuli_chr02 | 30962727                | GG                              | AA                | 1945910030               |
| SNP_P3_23436_30962760 | NC_021161.1    | Ca_kabuli_chr02 | 30962760                | GG                              | AA                | 1945910031               |
| SNP_P3_23437_30962761 | NC_021161.1    | Ca_kabuli_chr02 | 30962761                | TT                              | GG                | 1945910033               |
| SNP_P3_23438_30962862 | NC_021161.1    | Ca_kabuli_chr02 | 30962862                | TT                              | CC                | 1945910035               |
| SNP_P3_23440_30963191 | NC_021161.1    | Ca_kabuli_chr02 | 30963191                | GG                              | TT                | 1945910037               |
| SNP_P3_23441_30963199 | NC_021161.1    | Ca_kabuli_chr02 | 30963199                | CC                              | TT                | 1945910038               |
| SNP_P3_23442_30963208 | NC_021161.1    | Ca_kabuli_chr02 | 30963208                | CC                              | TT                | 1945910040               |
| SNP_P3_23443_30963218 | NC_021161.1    | Ca_kabuli_chr02 | 30963218                | TT                              | GG                | 1945910042               |
| SNP_P3_23444_30963252 | NC_021161.1    | Ca_kabuli_chr02 | 30963252                | CC                              | GG                | 1945910044               |
| SNP_P3_23445_30963433 | NC_021161.1    | Ca_kabuli_chr02 | 30963433                | TT                              | CC                | 1945910046               |
| SNP_P3_23446_30963461 | NC_021161.1    | Ca_kabuli_chr02 | 30963461                | TT                              | CC                | 1945910047               |
| SNP_P3_23447_30966427 | NC_021161.1    | Ca_kabuli_chr02 | 30966427                | CC                              | TT                | 1945910049               |
| SNP_P3_23448_30966646 | NC_021161.1    | Ca_kabuli_chr02 | 30966646                | TT                              | CC                | 1945910051               |
| SNP_P3_23449_30966651 | NC_021161.1    | Ca_kabuli_chr02 | 30966651                | GG                              | AA                | 1945910053               |
| SNP_P3_23450_30966661 | NC_021161.1    | Ca_kabuli_chr02 | 30966661                | AA                              | GG                | 1945910054               |
| SNP_P3_23451_30968026 | NC_021161.1    | Ca_kabuli_chr02 | 30968026                | AA                              | GG                | 1945910056               |
| SNP_P3_23453_30968055 | NC_021161.1    | Ca_kabuli_chr02 | 30968055                | GG                              | AA                | 1945910058               |
| SNP_P3_23454_30968059 | NC_021161.1    | Ca_kabuli_chr02 | 30968059                | AA                              | CC                | 1945910060               |
| SNP_P3_23456_30968584 | NC_021161.1    | Ca_kabuli_chr02 | 30968584                | CC                              | AA                | 1945910062               |
| SNP_P3_23458_30978573 | NC_021161.1    | Ca_kabuli_chr02 | 30978573                | AA                              | TT                | 1945910063               |
| SNP_P3_23459_30978633 | NC_021161.1    | Ca_kabuli_chr02 | 30978633                | TT                              | CC                | 1945910065               |
| SNP_P3_23460_30979632 | NC_021161.1    | Ca_kabuli_chr02 | 30979632                | TT                              | GG                | 1945910067               |
| SNP_P3_23462_30983099 | NC_021161.1    | Ca_kabuli_chr02 | 30983099                | TT                              | GG                | 1945910069               |
| SNP_P3_23463_30983105 | NC_021161.1    | Ca_kabuli_chr02 | 30983105                | GG                              | AA                | 1945910071               |
| SNP_P3_23464_30983218 | NC_021161.1    | Ca_kabuli_chr02 | 30983218                | GG                              | AA                | 1945910072               |
| SNP_P3_23465_30983920 | NC_021161.1    | Ca_kabuli_chr02 | 30983920                | CC                              | TT                | 1945910074               |
| SNP_P3_23466_30983925 | NC_021161.1    | Ca_kabuli_chr02 | 30983925                | CC                              | TT                | 1945910076               |
| SNP_P3_23467_30983932 | NC_021161.1    | Ca_kabuli_chr02 | 30983932                | AA                              | GG                | 1945910078               |
| SNP_P3_23468_30991705 | NC_021161.1    | Ca_kabuli_chr02 | 30991705                | TT                              | CC                | 1945910079               |
| SNP_P3_23469_30991717 | NC_021161.1    | Ca_kabuli_chr02 | 30991717                | TT                              | AA                | 1945910081               |
| SNP_P3_23470_30991938 | NC_021161.1    | Ca_kabuli_chr02 | 30991938                | GG                              | AA                | 1945910083               |
| SNP_P3_23472_30997769 | NC_021161.1    | Ca_kabuli_chr02 | 30997769                | AA                              | TT                | 1945910085               |
| SNP_P3_23473_30997780 | NC_021161.1    | Ca_kabuli_chr02 | 30997780                | CC                              | AA                | 1945910087               |
| SNP_P3_23474_30997784 | NC_021161.1    | Ca_kabuli_chr02 | 30997784                | AA                              | TT                | 1945910088               |
| SNP_P3_23476_31005845 | NC_021161.1    | Ca_kabuli_chr02 | 31005845                | TT                              | CC                | 1945910090               |
| SNP_P3_23477_31005847 | NC_021161.1    | Ca_kabuli_chr02 | 31005847                | GG                              | TT                | 1945910092               |
| SNP_P3_23479_31006093 | NC_021161.1    | Ca_kabuli_chr02 | 31006093                | CC                              | GG                | 1945910094               |

| SNPs IDs              | Chromosome IDs | Chromosomes     | Physical positions (bp) | CDC Frontier (Reference genome) | (Pusa 256 & HPNB) | NCBI SNPdb Accession IDs |
|-----------------------|----------------|-----------------|-------------------------|---------------------------------|-------------------|--------------------------|
| SNP_P3_23480_31006114 | NC_021161.1    | Ca_kabuli_chr02 | 31006114                | CC                              | GG                | 1945910095               |
| SNP_P3_23481_31006155 | NC_021161.1    | Ca_kabuli_chr02 | 31006155                | TT                              | GG                | 1945910097               |
| SNP_P3_23482_31007359 | NC_021161.1    | Ca_kabuli_chr02 | 31007359                | GG                              | AA                | 1945910099               |
| SNP_P3_23483_31013550 | NC_021161.1    | Ca_kabuli_chr02 | 31013550                | AA                              | CC                | 1945910101               |
| SNP_P3_23484_31036185 | NC_021161.1    | Ca_kabuli_chr02 | 31036185                | TT                              | GG                | 1945910103               |
| SNP_P3_23485_31037075 | NC_021161.1    | Ca_kabuli_chr02 | 31037075                | AA                              | GG                | 1945910104               |
| SNP_P3_23486_31037157 | NC_021161.1    | Ca_kabuli_chr02 | 31037157                | AA                              | GG                | 1945910106               |
| SNP_P3_23487_31044272 | NC_021161.1    | Ca_kabuli_chr02 | 31044272                | CC                              | TT                | 1945910108               |
| SNP_P3_23489_31080029 | NC_021161.1    | Ca_kabuli_chr02 | 31080029                | AA                              | GG                | 1945910110               |
| SNP_P3_23490_31080534 | NC_021161.1    | Ca_kabuli_chr02 | 31080534                | AA                              | GG                | 1945910111               |
| SNP_P3_23493_31125887 | NC_021161.1    | Ca_kabuli_chr02 | 31125887                | TT                              | AA                | 1945910113               |
| SNP_P3_23494_31126716 | NC_021161.1    | Ca_kabuli_chr02 | 31126716                | AA                              | CC                | 1945910115               |
| SNP_P3_23496_31153298 | NC_021161.1    | Ca_kabuli_chr02 | 31153298                | GG                              | CC                | 1945910117               |
| SNP_P3_23497_31217194 | NC_021161.1    | Ca_kabuli_chr02 | 31217194                | AA                              | GG                | 1945910119               |
| SNP_P3_23498_31217220 | NC_021161.1    | Ca_kabuli_chr02 | 31217220                | TT                              | CC                | 1945910120               |
| SNP_P3_23499_31218629 | NC_021161.1    | Ca_kabuli_chr02 | 31218629                | TT                              | CC                | 1945910122               |
| SNP_P3_23500_31225418 | NC_021161.1    | Ca_kabuli_chr02 | 31225418                | AA                              | GG                | 1945910124               |
| SNP_P3_23501_31225440 | NC_021161.1    | Ca_kabuli_chr02 | 31225440                | AA                              | CC                | 1945910126               |
| SNP_P3_23502_31225740 | NC_021161.1    | Ca_kabuli_chr02 | 31225740                | AA                              | GG                | 1945910128               |
| SNP_P3_23503_31225779 | NC_021161.1    | Ca_kabuli_chr02 | 31225779                | AA                              | GG                | 1945910129               |
| SNP_P3_23504_31225801 | NC_021161.1    | Ca_kabuli_chr02 | 31225801                | TT                              | GG                | 1945910131               |
| SNP_P3_23505_31226052 | NC_021161.1    | Ca_kabuli_chr02 | 31226052                | GG                              | AA                | 1945910133               |
| SNP_P3_23506_31226057 | NC_021161.1    | Ca_kabuli_chr02 | 31226057                | GG                              | TT                | 1945910135               |
| SNP_P3_23507_31226090 | NC_021161.1    | Ca_kabuli_chr02 | 31226090                | GG                              | AA                | 1945910136               |
| SNP_P3_23508_31226433 | NC_021161.1    | Ca_kabuli_chr02 | 31226433                | AA                              | GG                | 1945910138               |
| SNP_P3_23509_31237394 | NC_021161.1    | Ca_kabuli_chr02 | 31237394                | AA                              | TT                | 1945910140               |
| SNP_P3_23510_31238560 | NC_021161.1    | Ca_kabuli_chr02 | 31238560                | TT                              | CC                | 1945910142               |
| SNP_P3_23511_31238578 | NC_021161.1    | Ca_kabuli_chr02 | 31238578                | TT                              | CC                | 1945910144               |
| SNP_P3_23512_31238603 | NC_021161.1    | Ca_kabuli_chr02 | 31238603                | GG                              | AA                | 1945910145               |
| SNP_P3_23513_31238625 | NC_021161.1    | Ca_kabuli_chr02 | 31238625                | AA                              | GG                | 1945910147               |
| SNP_P3_23514_31238630 | NC_021161.1    | Ca_kabuli_chr02 | 31238630                | CC                              | TT                | 1945910149               |
| SNP_P3_23515_31238638 | NC_021161.1    | Ca_kabuli_chr02 | 31238638                | TT                              | CC                | 1945910151               |
| SNP_P3_23516_31238689 | NC_021161.1    | Ca_kabuli_chr02 | 31238689                | AA                              | GG                | 1945910152               |
| SNP_P3_23517_31238695 | NC_021161.1    | Ca_kabuli_chr02 | 31238695                | CC                              | AA                | 1945910154               |
| SNP_P3_23518_31238743 | NC_021161.1    | Ca_kabuli_chr02 | 31238743                | AA                              | GG                | 1945910156               |
| SNP_P3_23519_31238879 | NC_021161.1    | Ca_kabuli_chr02 | 31238879                | CC                              | AA                | 1945910158               |
| SNP_P3_23520_31238881 | NC_021161.1    | Ca_kabuli_chr02 | 31238881                | TT                              | CC                | 1945910160               |
| SNP_P3_23521_31238887 | NC_021161.1    | Ca_kabuli_chr02 | 31238887                | AA                              | TT                | 1945910161               |
| SNP_P3_23522_31238888 | NC_021161.1    | Ca_kabuli_chr02 | 31238888                | AA                              | CC                | 1945910163               |
| SNP_P3_23523_31239102 | NC_021161.1    | Ca_kabuli_chr02 | 31239102                | AA                              | TT                | 1945910165               |
| SNP_P3_23524_31239948 | NC_021161.1    | Ca_kabuli_chr02 | 31239948                | GG                              | AA                | 1945910167               |
| SNP_P3_23526_31261133 | NC_021161.1    | Ca_kabuli_chr02 | 31261133                | GG                              | AA                | 1945910168               |

| SNPs IDs              | Chromosome IDs | Chromosomes     | Physical positions (bp) | CDC Frontier (Reference genome) | (Pusa 256 & HPNB) | NCBI SNPdb Accession IDs |
|-----------------------|----------------|-----------------|-------------------------|---------------------------------|-------------------|--------------------------|
| SNP_P3_23527_31261233 | NC_021161.1    | Ca_kabuli_chr02 | 31261233                | AA                              | GG                | 1945910170               |
| SNP_P3_23528_31261304 | NC_021161.1    | Ca_kabuli_chr02 | 31261304                | TT                              | CC                | 1945910172               |
| SNP_P3_23529_31261329 | NC_021161.1    | Ca_kabuli_chr02 | 31261329                | AA                              | GG                | 1945910174               |
| SNP_P3_23530_31261389 | NC_021161.1    | Ca_kabuli_chr02 | 31261389                | TT                              | CC                | 1945910176               |
| SNP_P3_23531_31263194 | NC_021161.1    | Ca_kabuli_chr02 | 31263194                | CC                              | GG                | 1945910177               |
| SNP_P3_23532_31263251 | NC_021161.1    | Ca_kabuli_chr02 | 31263251                | CC                              | TT                | 1945910179               |
| SNP_P3_23533_31263330 | NC_021161.1    | Ca_kabuli_chr02 | 31263330                | AA                              | GG                | 1945910181               |
| SNP_P3_23534_31268494 | NC_021161.1    | Ca_kabuli_chr02 | 31268494                | CC                              | TT                | 1945910183               |
| SNP_P3_23535_31270624 | NC_021161.1    | Ca_kabuli_chr02 | 31270624                | CC                              | TT                | 1945910184               |
| SNP_P3_23536_31270709 | NC_021161.1    | Ca_kabuli_chr02 | 31270709                | AA                              | GG                | 1945910186               |
| SNP_P3_23537_31271116 | NC_021161.1    | Ca_kabuli_chr02 | 31271116                | TT                              | AA                | 1945910188               |
| SNP_P3_23538_31278335 | NC_021161.1    | Ca_kabuli_chr02 | 31278335                | CC                              | AA                | 1945910190               |
| SNP_P3_23539_31278381 | NC_021161.1    | Ca_kabuli_chr02 | 31278381                | TT                              | CC                | 1945910192               |
| SNP_P3_23541_31286857 | NC_021161.1    | Ca_kabuli_chr02 | 31286857                | TT                              | CC                | 1945910193               |
| SNP_P3_23542_31288740 | NC_021161.1    | Ca_kabuli_chr02 | 31288740                | AA                              | CC                | 1945910195               |
| SNP_P3_23543_31289984 | NC_021161.1    | Ca_kabuli_chr02 | 31289984                | AA                              | CC                | 1945910197               |
| SNP_P3_23544_31289992 | NC_021161.1    | Ca_kabuli_chr02 | 31289992                | CC                              | GG                | 1945910199               |
| SNP_P3_23545_31290012 | NC_021161.1    | Ca_kabuli_chr02 | 31290012                | TT                              | CC                | 1945910200               |
| SNP_P3_23546_31290584 | NC_021161.1    | Ca_kabuli_chr02 | 31290584                | TT                              | CC                | 1945910202               |
| SNP_P3_23547_31290828 | NC_021161.1    | Ca_kabuli_chr02 | 31290828                | AA                              | TT                | 1945910204               |
| SNP_P3_23548_31293844 | NC_021161.1    | Ca_kabuli_chr02 | 31293844                | AA                              | TT                | 1945910206               |
| SNP_P3_23550_31295471 | NC_021161.1    | Ca_kabuli_chr02 | 31295471                | AA                              | TT                | 1945910208               |
| SNP_P3_23552_31383986 | NC_021161.1    | Ca_kabuli_chr02 | 31383986                | CC                              | TT                | 1945910209               |
| SNP_P3_23553_31386647 | NC_021161.1    | Ca_kabuli_chr02 | 31386647                | TT                              | CC                | 1945910211               |
| SNP_P3_23555_31433367 | NC_021161.1    | Ca_kabuli_chr02 | 31433367                | AA                              | GG                | 1945910213               |
| SNP_P3_23556_31438025 | NC_021161.1    | Ca_kabuli_chr02 | 31438025                | CC                              | TT                | 1945910215               |
| SNP_P3_23557_31438288 | NC_021161.1    | Ca_kabuli_chr02 | 31438288                | TT                              | GG                | 1945910217               |
| SNP_P3_23558_31438291 | NC_021161.1    | Ca_kabuli_chr02 | 31438291                | AA                              | GG                | 1945910218               |
| SNP_P3_23559_31444716 | NC_021161.1    | Ca_kabuli_chr02 | 31444716                | GG                              | AA                | 1945910220               |
| SNP_P3_23560_31450217 | NC_021161.1    | Ca_kabuli_chr02 | 31450217                | AA                              | TT                | 1945910222               |
| SNP_P3_23561_31450508 | NC_021161.1    | Ca_kabuli_chr02 | 31450508                | AA                              | GG                | 1945910224               |
| SNP_P3_23562_31450675 | NC_021161.1    | Ca_kabuli_chr02 | 31450675                | AA                              | GG                | 1945910225               |
| SNP_P3_23563_31451618 | NC_021161.1    | Ca_kabuli_chr02 | 31451618                | AA                              | TT                | 1945910227               |
| SNP_P3_23564_31451641 | NC_021161.1    | Ca_kabuli_chr02 | 31451641                | TT                              | CC                | 1945910229               |
| SNP_P3_23565_31451653 | NC_021161.1    | Ca_kabuli_chr02 | 31451653                | TT                              | CC                | 1945910231               |
| SNP_P3_23566_31451949 | NC_021161.1    | Ca_kabuli_chr02 | 31451949                | AA                              | CC                | 1945910233               |
| SNP_P3_23567_31451963 | NC_021161.1    | Ca_kabuli_chr02 | 31451963                | TT                              | CC                | 1945910234               |
| SNP_P3_23568_31451973 | NC_021161.1    | Ca_kabuli_chr02 | 31451973                | TT                              | CC                | 1945910236               |
| SNP_P3_23569_31453038 | NC_021161.1    | Ca_kabuli_chr02 | 31453038                | GG                              | AA                | 1945910238               |
| SNP_P3_23570_31453065 | NC_021161.1    | Ca_kabuli_chr02 | 31453065                | AA                              | GG                | 1945910240               |
| SNP_P3_23571_31457360 | NC_021161.1    | Ca_kabuli_chr02 | 31457360                | CC                              | TT                | 1945910241               |
| SNP_P3_23572_31482964 | NC_021161.1    | Ca_kabuli_chr02 | 31482964                | AA                              | GG                | 1945910243               |



| SNPs IDs              | Chromosome IDs | Chromosomes     | Physical positions (bp) | CDC Frontier (Reference genome) | (Pusa 256 & HPNB) | NCBI SNPdb Accession IDs |
|-----------------------|----------------|-----------------|-------------------------|---------------------------------|-------------------|--------------------------|
| SNP_P3_23573_31482994 | NC_021161.1    | Ca_kabuli_chr02 | 31482994                | AA                              | GG                | 1945910245               |
| SNP_P3_23574_31483239 | NC_021161.1    | Ca_kabuli_chr02 | 31483239                | AA                              | TT                | 1945910247               |
| SNP_P3_23575_31483240 | NC_021161.1    | Ca_kabuli_chr02 | 31483240                | AA                              | CC                | 1945910249               |
| SNP_P3_23576_31483242 | NC_021161.1    | Ca_kabuli_chr02 | 31483242                | AA                              | GG                | 1945910250               |
| SNP_P3_23577_31483260 | NC_021161.1    | Ca_kabuli_chr02 | 31483260                | TT                              | GG                | 1945910252               |
| SNP_P3_23578_31483319 | NC_021161.1    | Ca_kabuli_chr02 | 31483319                | TT                              | AA                | 1945910254               |
| SNP_P3_23579_31483327 | NC_021161.1    | Ca_kabuli_chr02 | 31483327                | AA                              | GG                | 1945910256               |
| SNP_P3_23580_31483345 | NC_021161.1    | Ca_kabuli_chr02 | 31483345                | GG                              | CC                | 1945910257               |
| SNP_P3_23581_31483347 | NC_021161.1    | Ca_kabuli_chr02 | 31483347                | CC                              | GG                | 1945910259               |
| SNP_P3_23582_31483367 | NC_021161.1    | Ca_kabuli_chr02 | 31483367                | TT                              | GG                | 1945910261               |
| SNP_P3_23583_31491516 | NC_021161.1    | Ca_kabuli_chr02 | 31491516                | AA                              | TT                | 1945910263               |
| SNP_P3_23584_31534100 | NC_021161.1    | Ca_kabuli_chr02 | 31534100                | CC                              | TT                | 1945910265               |
| SNP_P3_23585_31534190 | NC_021161.1    | Ca_kabuli_chr02 | 31534190                | AA                              | TT                | 1945910266               |
| SNP_P3_23587_31534385 | NC_021161.1    | Ca_kabuli_chr02 | 31534385                | CC                              | AA                | 1945910268               |
| SNP_P3_23588_31534502 | NC_021161.1    | Ca_kabuli_chr02 | 31534502                | AA                              | TT                | 1945910270               |
| SNP_P3_23589_31534623 | NC_021161.1    | Ca_kabuli_chr02 | 31534623                | AA                              | TT                | 1945910272               |
| SNP_P3_23590_31534642 | NC_021161.1    | Ca_kabuli_chr02 | 31534642                | TT                              | AA                | 1945910273               |
| SNP_P3_23591_31534720 | NC_021161.1    | Ca_kabuli_chr02 | 31534720                | TT                              | CC                | 1945910275               |
| SNP_P3_23592_31534749 | NC_021161.1    | Ca_kabuli_chr02 | 31534749                | AA                              | TT                | 1945910277               |
| SNP_P3_23593_31534777 | NC_021161.1    | Ca_kabuli_chr02 | 31534777                | CC                              | TT                | 1945910279               |
| SNP_P3_23594_31534784 | NC_021161.1    | Ca_kabuli_chr02 | 31534784                | GG                              | TT                | 1945910281               |
| SNP_P3_23595_31534820 | NC_021161.1    | Ca_kabuli_chr02 | 31534820                | AA                              | CC                | 1945910282               |
| SNP_P3_23597_31551415 | NC_021161.1    | Ca_kabuli_chr02 | 31551415                | AA                              | GG                | 1945910284               |
| SNP_P3_23598_31551825 | NC_021161.1    | Ca_kabuli_chr02 | 31551825                | AA                              | GG                | 1945910286               |
| SNP_P3_23599_31551828 | NC_021161.1    | Ca_kabuli_chr02 | 31551828                | AA                              | CC                | 1945910288               |
| SNP_P3_23600_31551866 | NC_021161.1    | Ca_kabuli_chr02 | 31551866                | GG                              | AA                | 1945910290               |
| SNP_P3_23602_31552168 | NC_021161.1    | Ca_kabuli_chr02 | 31552168                | CC                              | TT                | 1945910291               |
| SNP_P3_23603_31552257 | NC_021161.1    | Ca_kabuli_chr02 | 31552257                | CC                              | TT                | 1945910293               |
| SNP_P3_23604_31552828 | NC_021161.1    | Ca_kabuli_chr02 | 31552828                | CC                              | TT                | 1945910295               |
| SNP_P3_23605_31559333 | NC_021161.1    | Ca_kabuli_chr02 | 31559333                | TT                              | CC                | 1945910297               |
| SNP_P3_23606_31559349 | NC_021161.1    | Ca_kabuli_chr02 | 31559349                | TT                              | CC                | 1945910298               |
| SNP_P3_23607_31560496 | NC_021161.1    | Ca_kabuli_chr02 | 31560496                | AA                              | GG                | 1945910300               |
| SNP_P3_23608_31577282 | NC_021161.1    | Ca_kabuli_chr02 | 31577282                | CC                              | AA                | 1945910302               |
| SNP_P3_23610_31605222 | NC_021161.1    | Ca_kabuli_chr02 | 31605222                | GG                              | TT                | 1945910304               |
| SNP_P3_23611_31605351 | NC_021161.1    | Ca_kabuli_chr02 | 31605351                | GG                              | AA                | 1945910306               |
| SNP_P3_23612_31605458 | NC_021161.1    | Ca_kabuli_chr02 | 31605458                | TT                              | CC                | 1945910307               |
| SNP_P3_23613_31605479 | NC_021161.1    | Ca_kabuli_chr02 | 31605479                | AA                              | GG                | 1945910309               |
| SNP_P3_23614_31605488 | NC_021161.1    | Ca_kabuli_chr02 | 31605488                | CC                              | TT                | 1945910311               |
| SNP_P3_23615_31605499 | NC_021161.1    | Ca_kabuli_chr02 | 31605499                | AA                              | CC                | 1945910313               |
| SNP_P3_23616_31605511 | NC_021161.1    | Ca_kabuli_chr02 | 31605511                | AA                              | GG                | 1945910314               |
| SNP_P3_23617_31605534 | NC_021161.1    | Ca_kabuli_chr02 | 31605534                | CC                              | GG                | 1945910316               |
| SNP_P3_23618_31605568 | NC_021161.1    | Ca_kabuli_chr02 | 31605568                | CC                              | AA                | 1945910318               |

| SNPs IDs              | Chromosome IDs | Chromosomes     | Physical positions (bp) | CDC Frontier (Reference genome) | (Pusa 256 & HPNB) | NCBI SNPdb Accession IDs |
|-----------------------|----------------|-----------------|-------------------------|---------------------------------|-------------------|--------------------------|
| SNP_P3_23619_31605591 | NC_021161.1    | Ca_kabuli_chr02 | 31605591                | TT                              | GG                | 1945910320               |
| SNP_P3_23620_31605659 | NC_021161.1    | Ca_kabuli_chr02 | 31605659                | TT                              | CC                | 1945910322               |
| SNP_P3_23621_31612650 | NC_021161.1    | Ca_kabuli_chr02 | 31612650                | CC                              | AA                | 1945910323               |
| SNP_P3_23622_31628010 | NC_021161.1    | Ca_kabuli_chr02 | 31628010                | CC                              | TT                | 1945910325               |
| SNP_P3_23623_31631647 | NC_021161.1    | Ca_kabuli_chr02 | 31631647                | CC                              | TT                | 1945910327               |
| SNP_P3_23624_31631838 | NC_021161.1    | Ca_kabuli_chr02 | 31631838                | CC                              | TT                | 1945910329               |
| SNP_P3_23625_31631852 | NC_021161.1    | Ca_kabuli_chr02 | 31631852                | CC                              | TT                | 1945910330               |
| SNP_P3_23626_31635583 | NC_021161.1    | Ca_kabuli_chr02 | 31635583                | AA                              | TT                | 1945910332               |
| SNP_P3_23627_31646492 | NC_021161.1    | Ca_kabuli_chr02 | 31646492                | AA                              | GG                | 1945910334               |
| SNP_P3_23628_31646956 | NC_021161.1    | Ca_kabuli_chr02 | 31646956                | GG                              | TT                | 1945910336               |
| SNP_P3_23630_31648055 | NC_021161.1    | Ca_kabuli_chr02 | 31648055                | TT                              | GG                | 1945910338               |
| SNP_P3_23631_31676167 | NC_021161.1    | Ca_kabuli_chr02 | 31676167                | GG                              | AA                | 1945910339               |
| SNP_P3_23632_31677949 | NC_021161.1    | Ca_kabuli_chr02 | 31677949                | CC                              | TT                | 1945910341               |
| SNP_P3_23633_31703425 | NC_021161.1    | Ca_kabuli_chr02 | 31703425                | CC                              | TT                | 1945910343               |
| SNP_P3_23634_31703482 | NC_021161.1    | Ca_kabuli_chr02 | 31703482                | CC                              | TT                | 1945910345               |
| SNP_P3_23635_31719002 | NC_021161.1    | Ca_kabuli_chr02 | 31719002                | AA                              | GG                | 1945910347               |
| SNP_P3_23637_31735561 | NC_021161.1    | Ca_kabuli_chr02 | 31735561                | CC                              | TT                | 1945910348               |
| SNP_P3_23638_31762631 | NC_021161.1    | Ca_kabuli_chr02 | 31762631                | CC                              | TT                | 1945910350               |
| SNP_P3_23639_31775542 | NC_021161.1    | Ca_kabuli_chr02 | 31775542                | CC                              | AA                | 1945910352               |
| SNP_P3_23640_31775700 | NC_021161.1    | Ca_kabuli_chr02 | 31775700                | GG                              | AA                | 1945910354               |
| SNP_P3_23641_31775723 | NC_021161.1    | Ca_kabuli_chr02 | 31775723                | CC                              | TT                | 1945910355               |
| SNP_P3_23642_31775734 | NC_021161.1    | Ca_kabuli_chr02 | 31775734                | CC                              | AA                | 1945910357               |
| SNP_P3_23643_31775745 | NC_021161.1    | Ca_kabuli_chr02 | 31775745                | GG                              | AA                | 1945910359               |
| SNP_P3_23644_31796514 | NC_021161.1    | Ca_kabuli_chr02 | 31796514                | CC                              | TT                | 1945910361               |
| SNP_P3_23645_31810326 | NC_021161.1    | Ca_kabuli_chr02 | 31810326                | TT                              | CC                | 1945910363               |
| SNP_P3_23646_31816692 | NC_021161.1    | Ca_kabuli_chr02 | 31816692                | CC                              | TT                | 1945910364               |
| SNP_P3_23649_31855967 | NC_021161.1    | Ca_kabuli_chr02 | 31855967                | CC                              | TT                | 1945910366               |
| SNP_P3_23651_31857398 | NC_021161.1    | Ca_kabuli_chr02 | 31857398                | TT                              | AA                | 1945910368               |
| SNP_P3_23652_31857460 | NC_021161.1    | Ca_kabuli_chr02 | 31857460                | CC                              | TT                | 1945910370               |
| SNP_P3_23653_31857470 | NC_021161.1    | Ca_kabuli_chr02 | 31857470                | AA                              | GG                | 1945910371               |
| SNP_P3_23654_31857613 | NC_021161.1    | Ca_kabuli_chr02 | 31857613                | AA                              | GG                | 1945910373               |
| SNP_P3_23655_31857623 | NC_021161.1    | Ca_kabuli_chr02 | 31857623                | TT                              | CC                | 1945910375               |
| SNP_P3_23656_31857696 | NC_021161.1    | Ca_kabuli_chr02 | 31857696                | TT                              | AA                | 1945910377               |
| SNP_P3_23658_31857768 | NC_021161.1    | Ca_kabuli_chr02 | 31857768                | CC                              | TT                | 1945910379               |
| SNP_P3_23659_31857818 | NC_021161.1    | Ca_kabuli_chr02 | 31857818                | GG                              | TT                | 1945910380               |
| SNP_P3_23660_31857841 | NC_021161.1    | Ca_kabuli_chr02 | 31857841                | AA                              | GG                | 1945910382               |
| SNP_P3_23661_31857860 | NC_021161.1    | Ca_kabuli_chr02 | 31857860                | TT                              | CC                | 1945910384               |
| SNP_P3_23662_31858124 | NC_021161.1    | Ca_kabuli_chr02 | 31858124                | TT                              | CC                | 1945910386               |
| SNP_P3_23664_31864556 | NC_021161.1    | Ca_kabuli_chr02 | 31864556                | GG                              | AA                | 1945910387               |
| SNP_P3_23665_31864688 | NC_021161.1    | Ca_kabuli_chr02 | 31864688                | GG                              | AA                | 1945910389               |
| SNP_P3_23666_31869176 | NC_021161.1    | Ca_kabuli_chr02 | 31869176                | CC                              | TT                | 1945910391               |
| SNP_P3_23667_31869185 | NC_021161.1    | Ca_kabuli_chr02 | 31869185                | TT                              | CC                | 1945910393               |

| SNPs IDs              | Chromosome IDs | Chromosomes     | Physical positions (bp) | CDC Frontier (Reference genome) | (Pusa 256 & HPNB) | NCBI SNPdb Accession IDs |
|-----------------------|----------------|-----------------|-------------------------|---------------------------------|-------------------|--------------------------|
| SNP_P3_23668_31869268 | NC_021161.1    | Ca_kabuli_chr02 | 31869268                | TT                              | AA                | 1945910395               |
| SNP_P3_23669_31869952 | NC_021161.1    | Ca_kabuli_chr02 | 31869952                | GG                              | CC                | 1945910396               |
| SNP_P3_23670_31870180 | NC_021161.1    | Ca_kabuli_chr02 | 31870180                | CC                              | GG                | 1945910398               |
| SNP_P3_23671_31871915 | NC_021161.1    | Ca_kabuli_chr02 | 31871915                | CC                              | TT                | 1945910400               |
| SNP_P3_23672_31871946 | NC_021161.1    | Ca_kabuli_chr02 | 31871946                | GG                              | AA                | 1945910402               |
| SNP_P3_23673_31872251 | NC_021161.1    | Ca_kabuli_chr02 | 31872251                | AA                              | GG                | 1945910404               |
| SNP_P3_23674_31881488 | NC_021161.1    | Ca_kabuli_chr02 | 31881488                | AA                              | GG                | 1945910405               |
| SNP_P3_23675_31882685 | NC_021161.1    | Ca_kabuli_chr02 | 31882685                | TT                              | CC                | 1945910407               |
| SNP_P3_23676_31882696 | NC_021161.1    | Ca_kabuli_chr02 | 31882696                | GG                              | AA                | 1945910409               |
| SNP_P3_23677_31882704 | NC_021161.1    | Ca_kabuli_chr02 | 31882704                | CC                              | TT                | 1945910411               |
| SNP_P3_23678_31882707 | NC_021161.1    | Ca_kabuli_chr02 | 31882707                | GG                              | AA                | 1945910412               |
| SNP_P3_23679_31882830 | NC_021161.1    | Ca_kabuli_chr02 | 31882830                | GG                              | AA                | 1945910414               |
| SNP_P3_23680_31882840 | NC_021161.1    | Ca_kabuli_chr02 | 31882840                | TT                              | CC                | 1945910416               |
| SNP_P3_23681_31882845 | NC_021161.1    | Ca_kabuli_chr02 | 31882845                | GG                              | AA                | 1945910418               |
| SNP_P3_23682_31882872 | NC_021161.1    | Ca_kabuli_chr02 | 31882872                | TT                              | CC                | 1945910420               |
| SNP_P3_23683_31882924 | NC_021161.1    | Ca_kabuli_chr02 | 31882924                | AA                              | CC                | 1945910421               |
| SNP_P3_23685_31882982 | NC_021161.1    | Ca_kabuli_chr02 | 31882982                | TT                              | CC                | 1945910423               |
| SNP_P3_23686_31882992 | NC_021161.1    | Ca_kabuli_chr02 | 31882992                | AA                              | CC                | 1945910425               |
| SNP_P3_23688_31883040 | NC_021161.1    | Ca_kabuli_chr02 | 31883040                | AA                              | CC                | 1945910427               |
| SNP_P3_23689_31883240 | NC_021161.1    | Ca_kabuli_chr02 | 31883240                | CC                              | GG                | 1945910428               |
| SNP_P3_23690_31883310 | NC_021161.1    | Ca_kabuli_chr02 | 31883310                | AA                              | GG                | 1945910430               |
| SNP_P3_23691_31883399 | NC_021161.1    | Ca_kabuli_chr02 | 31883399                | TT                              | CC                | 1945910432               |
| SNP_P3_23692_31883516 | NC_021161.1    | Ca_kabuli_chr02 | 31883516                | TT                              | CC                | 1945910434               |
| SNP_P3_23693_31883583 | NC_021161.1    | Ca_kabuli_chr02 | 31883583                | GG                              | TT                | 1945910436               |
| SNP_P3_23695_31883738 | NC_021161.1    | Ca_kabuli_chr02 | 31883738                | CC                              | TT                | 1945910437               |
| SNP_P3_23696_31884454 | NC_021161.1    | Ca_kabuli_chr02 | 31884454                | GG                              | AA                | 1945910439               |
| SNP_P3_23697_31884471 | NC_021161.1    | Ca_kabuli_chr02 | 31884471                | GG                              | AA                | 1945910441               |
| SNP_P3_23698_31884500 | NC_021161.1    | Ca_kabuli_chr02 | 31884500                | GG                              | CC                | 1945910443               |
| SNP_P3_23699_31884549 | NC_021161.1    | Ca_kabuli_chr02 | 31884549                | AA                              | GG                | 1945910444               |
| SNP_P3_23700_31886208 | NC_021161.1    | Ca_kabuli_chr02 | 31886208                | TT                              | AA                | 1945910446               |
| SNP_P3_23701_31886340 | NC_021161.1    | Ca_kabuli_chr02 | 31886340                | AA                              | TT                | 1945910448               |
| SNP_P3_23702_31895590 | NC_021161.1    | Ca_kabuli_chr02 | 31895590                | TT                              | AA                | 1945910450               |
| SNP_P3_23703_31895602 | NC_021161.1    | Ca_kabuli_chr02 | 31895602                | GG                              | AA                | 1945910452               |
| SNP_P3_23704_31896478 | NC_021161.1    | Ca_kabuli_chr02 | 31896478                | TT                              | AA                | 1945910453               |
| SNP_P3_23705_31897073 | NC_021161.1    | Ca_kabuli_chr02 | 31897073                | CC                              | TT                | 1945910455               |
| SNP_P3_23706_31897130 | NC_021161.1    | Ca_kabuli_chr02 | 31897130                | GG                              | AA                | 1945910457               |
| SNP_P3_23707_31897330 | NC_021161.1    | Ca_kabuli_chr02 | 31897330                | AA                              | TT                | 1945910459               |
| SNP_P3_23709_31898338 | NC_021161.1    | Ca_kabuli_chr02 | 31898338                | TT                              | AA                | 1945910460               |
| SNP_P3_23710_31898708 | NC_021161.1    | Ca_kabuli_chr02 | 31898708                | GG                              | TT                | 1945910462               |
| SNP_P3_23711_31898711 | NC_021161.1    | Ca_kabuli_chr02 | 31898711                | GG                              | TT                | 1945910464               |
| SNP_P3_23712_31899301 | NC_021161.1    | Ca_kabuli_chr02 | 31899301                | GG                              | TT                | 1945910466               |
| SNP_P3_23713_31899476 | NC_021161.1    | Ca_kabuli_chr02 | 31899476                | AA                              | TT                | 1945910468               |

| SNPs IDs              | Chromosome IDs | Chromosomes     | Physical positions (bp) | CDC Frontier (Reference genome) | (Pusa 256 & HPNB) | NCBI SNPdb Accession IDs |
|-----------------------|----------------|-----------------|-------------------------|---------------------------------|-------------------|--------------------------|
| SNP_P3_23714_31899483 | NC_021161.1    | Ca_kabuli_chr02 | 31899483                | AA                              | GG                | 1945910469               |
| SNP_P3_23715_31899531 | NC_021161.1    | Ca_kabuli_chr02 | 31899531                | CC                              | TT                | 1945910471               |
| SNP_P3_23716_31899651 | NC_021161.1    | Ca_kabuli_chr02 | 31899651                | AA                              | GG                | 1945910473               |
| SNP_P3_23717_31900364 | NC_021161.1    | Ca_kabuli_chr02 | 31900364                | GG                              | AA                | 1945910475               |
| SNP_P3_23718_31903288 | NC_021161.1    | Ca_kabuli_chr02 | 31903288                | TT                              | CC                | 1945910477               |
| SNP_P3_23719_31904452 | NC_021161.1    | Ca_kabuli_chr02 | 31904452                | CC                              | TT                | 1945910478               |
| SNP_P3_23720_31905036 | NC_021161.1    | Ca_kabuli_chr02 | 31905036                | GG                              | TT                | 1945910480               |
| SNP_P3_23721_31905048 | NC_021161.1    | Ca_kabuli_chr02 | 31905048                | CC                              | TT                | 1945910482               |
| SNP_P3_23722_31905066 | NC_021161.1    | Ca_kabuli_chr02 | 31905066                | CC                              | AA                | 1945910484               |
| SNP_P3_23724_31906248 | NC_021161.1    | Ca_kabuli_chr02 | 31906248                | AA                              | TT                | 1945910485               |
| SNP_P3_23725_31906568 | NC_021161.1    | Ca_kabuli_chr02 | 31906568                | GG                              | AA                | 1945910487               |
| SNP_P3_23726_31907942 | NC_021161.1    | Ca_kabuli_chr02 | 31907942                | CC                              | TT                | 1945910489               |
| SNP_P3_23727_31911365 | NC_021161.1    | Ca_kabuli_chr02 | 31911365                | GG                              | AA                | 1945910491               |
| SNP_P3_23728_31914223 | NC_021161.1    | Ca_kabuli_chr02 | 31914223                | AA                              | GG                | 1945910493               |
| SNP_P3_23729_31914457 | NC_021161.1    | Ca_kabuli_chr02 | 31914457                | AA                              | TT                | 1945910494               |
| SNP_P3_23730_31914593 | NC_021161.1    | Ca_kabuli_chr02 | 31914593                | AA                              | CC                | 1945910496               |
| SNP_P3_23731_31914720 | NC_021161.1    | Ca_kabuli_chr02 | 31914720                | TT                              | GG                | 1945910498               |
| SNP_P3_23732_31914833 | NC_021161.1    | Ca_kabuli_chr02 | 31914833                | GG                              | AA                | 1945910500               |
| SNP_P3_23733_31915663 | NC_021161.1    | Ca_kabuli_chr02 | 31915663                | AA                              | CC                | 1945910501               |
| SNP_P3_23734_31915837 | NC_021161.1    | Ca_kabuli_chr02 | 31915837                | AA                              | CC                | 1945910503               |
| SNP_P3_23735_31916225 | NC_021161.1    | Ca_kabuli_chr02 | 31916225                | CC                              | TT                | 1945910505               |
| SNP_P3_23736_31916472 | NC_021161.1    | Ca_kabuli_chr02 | 31916472                | GG                              | TT                | 1945910507               |
| SNP_P3_23737_31916539 | NC_021161.1    | Ca_kabuli_chr02 | 31916539                | AA                              | GG                | 1945910509               |
| SNP_P3_23738_31916802 | NC_021161.1    | Ca_kabuli_chr02 | 31916802                | TT                              | AA                | 1945910510               |
| SNP_P3_23739_31916907 | NC_021161.1    | Ca_kabuli_chr02 | 31916907                | AA                              | GG                | 1945910512               |
| SNP_P3_23740_31917104 | NC_021161.1    | Ca_kabuli_chr02 | 31917104                | AA                              | GG                | 1945910514               |
| SNP_P3_23741_31917372 | NC_021161.1    | Ca_kabuli_chr02 | 31917372                | TT                              | CC                | 1945910516               |
| SNP_P3_23742_31917956 | NC_021161.1    | Ca_kabuli_chr02 | 31917956                | GG                              | AA                | 1945910517               |
| SNP_P3_23743_31917958 | NC_021161.1    | Ca_kabuli_chr02 | 31917958                | GG                              | AA                | 1945910519               |
| SNP_P3_23744_31919747 | NC_021161.1    | Ca_kabuli_chr02 | 31919747                | CC                              | TT                | 1945910521               |
| SNP_P3_23745_31921905 | NC_021161.1    | Ca_kabuli_chr02 | 31921905                | GG                              | AA                | 1945910523               |
| SNP_P3_23746_31921961 | NC_021161.1    | Ca_kabuli_chr02 | 31921961                | CC                              | TT                | 1945910525               |
| SNP_P3_23747_31921962 | NC_021161.1    | Ca_kabuli_chr02 | 31921962                | GG                              | AA                | 1945910526               |
| SNP_P3_23748_31921973 | NC_021161.1    | Ca_kabuli_chr02 | 31921973                | TT                              | GG                | 1945910528               |
| SNP_P3_23749_31922890 | NC_021161.1    | Ca_kabuli_chr02 | 31922890                | CC                              | TT                | 1945910530               |
| SNP_P3_23751_31922945 | NC_021161.1    | Ca_kabuli_chr02 | 31922945                | AA                              | TT                | 1945910532               |
| SNP_P3_23752_31923387 | NC_021161.1    | Ca_kabuli_chr02 | 31923387                | CC                              | AA                | 1945910533               |
| SNP_P3_23753_31923720 | NC_021161.1    | Ca_kabuli_chr02 | 31923720                | TT                              | CC                | 1945910535               |
| SNP_P3_23754_31924416 | NC_021161.1    | Ca_kabuli_chr02 | 31924416                | GG                              | TT                | 1945910537               |
| SNP_P3_23755_31924712 | NC_021161.1    | Ca_kabuli_chr02 | 31924712                | AA                              | GG                | 1945910539               |
| SNP_P3_23756_31924720 | NC_021161.1    | Ca_kabuli_chr02 | 31924720                | CC                              | TT                | 1945910541               |
| SNP_P3_23757_31924814 | NC_021161.1    | Ca_kabuli_chr02 | 31924814                | AA                              | TT                | 1945910542               |

| SNPs IDs              | Chromosome IDs | Chromosomes     | Physical positions (bp) | CDC Frontier (Reference genome) | (Pusa 256 & HPNB) | NCBI SNPdb Accession IDs |
|-----------------------|----------------|-----------------|-------------------------|---------------------------------|-------------------|--------------------------|
| SNP_P3_23758_31924851 | NC_021161.1    | Ca_kabuli_chr02 | 31924851                | GG                              | AA                | 1945910544               |
| SNP_P3_23759_31924853 | NC_021161.1    | Ca_kabuli_chr02 | 31924853                | GG                              | AA                | 1945910546               |
| SNP_P3_23760_31925258 | NC_021161.1    | Ca_kabuli_chr02 | 31925258                | CC                              | GG                | 1945910548               |
| SNP_P3_23761_31925366 | NC_021161.1    | Ca_kabuli_chr02 | 31925366                | TT                              | CC                | 1945910550               |
| SNP_P3_23762_31925384 | NC_021161.1    | Ca_kabuli_chr02 | 31925384                | GG                              | TT                | 1945910551               |
| SNP_P3_23763_31925425 | NC_021161.1    | Ca_kabuli_chr02 | 31925425                | CC                              | AA                | 1945910553               |
| SNP_P3_23764_31926520 | NC_021161.1    | Ca_kabuli_chr02 | 31926520                | AA                              | GG                | 1945910555               |
| SNP_P3_23766_31926950 | NC_021161.1    | Ca_kabuli_chr02 | 31926950                | CC                              | TT                | 1945910557               |
| SNP_P3_23767_31927009 | NC_021161.1    | Ca_kabuli_chr02 | 31927009                | AA                              | GG                | 1945910558               |
| SNP_P3_23768_31927319 | NC_021161.1    | Ca_kabuli_chr02 | 31927319                | AA                              | CC                | 1945910560               |
| SNP_P3_23769_31927701 | NC_021161.1    | Ca_kabuli_chr02 | 31927701                | CC                              | TT                | 1945910562               |
| SNP_P3_23770_31928777 | NC_021161.1    | Ca_kabuli_chr02 | 31928777                | GG                              | CC                | 1945910564               |
| SNP_P3_23771_31928911 | NC_021161.1    | Ca_kabuli_chr02 | 31928911                | CC                              | GG                | 1945910566               |
| SNP_P3_23772_31928936 | NC_021161.1    | Ca_kabuli_chr02 | 31928936                | TT                              | AA                | 1945910567               |
| SNP_P3_23773_31929189 | NC_021161.1    | Ca_kabuli_chr02 | 31929189                | CC                              | AA                | 1945910569               |
| SNP_P3_23774_31929242 | NC_021161.1    | Ca_kabuli_chr02 | 31929242                | TT                              | CC                | 1945910571               |
| SNP_P3_23775_31929249 | NC_021161.1    | Ca_kabuli_chr02 | 31929249                | TT                              | AA                | 1945910573               |
| SNP_P3_23776_31929291 | NC_021161.1    | Ca_kabuli_chr02 | 31929291                | TT                              | AA                | 1945910574               |
| SNP_P3_23777_31929295 | NC_021161.1    | Ca_kabuli_chr02 | 31929295                | TT                              | AA                | 1945910576               |
| SNP_P3_23778_31929311 | NC_021161.1    | Ca_kabuli_chr02 | 31929311                | CC                              | TT                | 1945910578               |
| SNP_P3_23779_31929346 | NC_021161.1    | Ca_kabuli_chr02 | 31929346                | AA                              | GG                | 1945910580               |
| SNP_P3_23780_31929516 | NC_021161.1    | Ca_kabuli_chr02 | 31929516                | GG                              | AA                | 1945910582               |
| SNP_P3_23781_31929882 | NC_021161.1    | Ca_kabuli_chr02 | 31929882                | AA                              | GG                | 1945910583               |
| SNP_P3_23782_31931487 | NC_021161.1    | Ca_kabuli_chr02 | 31931487                | AA                              | TT                | 1945910585               |
| SNP_P3_23785_31936799 | NC_021161.1    | Ca_kabuli_chr02 | 31936799                | TT                              | CC                | 1945910587               |
| SNP_P3_23786_31936814 | NC_021161.1    | Ca_kabuli_chr02 | 31936814                | AA                              | GG                | 1945910589               |
| SNP_P3_23787_31936818 | NC_021161.1    | Ca_kabuli_chr02 | 31936818                | TT                              | CC                | 1945910591               |
| SNP_P3_23788_31936823 | NC_021161.1    | Ca_kabuli_chr02 | 31936823                | TT                              | GG                | 1945910592               |
| SNP_P3_23789_31936827 | NC_021161.1    | Ca_kabuli_chr02 | 31936827                | CC                              | TT                | 1945910594               |
| SNP_P3_23790_31939262 | NC_021161.1    | Ca_kabuli_chr02 | 31939262                | AA                              | TT                | 1945910596               |
| SNP_P3_23791_31939475 | NC_021161.1    | Ca_kabuli_chr02 | 31939475                | CC                              | TT                | 1945910598               |
| SNP_P3_23794_31940216 | NC_021161.1    | Ca_kabuli_chr02 | 31940216                | AA                              | CC                | 1945910599               |
| SNP_P3_23797_31946173 | NC_021161.1    | Ca_kabuli_chr02 | 31946173                | TT                              | CC                | 1945910601               |
| SNP_P3_23798_31946185 | NC_021161.1    | Ca_kabuli_chr02 | 31946185                | TT                              | CC                | 1945910603               |
| SNP_P3_23799_31947009 | NC_021161.1    | Ca_kabuli_chr02 | 31947009                | GG                              | TT                | 1945910605               |
| SNP_P3_23800_31947041 | NC_021161.1    | Ca_kabuli_chr02 | 31947041                | CC                              | TT                | 1945910607               |
| SNP_P3_23801_31947583 | NC_021161.1    | Ca_kabuli_chr02 | 31947583                | CC                              | TT                | 1945910608               |
| SNP_P3_23802_31947590 | NC_021161.1    | Ca_kabuli_chr02 | 31947590                | AA                              | CC                | 1945910610               |
| SNP_P3_23803_31947778 | NC_021161.1    | Ca_kabuli_chr02 | 31947778                | CC                              | TT                | 1945910612               |
| SNP_P3_23804_31947795 | NC_021161.1    | Ca_kabuli_chr02 | 31947795                | TT                              | CC                | 1945910614               |
| SNP_P3_23805_31947834 | NC_021161.1    | Ca_kabuli_chr02 | 31947834                | AA                              | GG                | 1945910615               |
| SNP_P3_23806_31948860 | NC_021161.1    | Ca_kabuli_chr02 | 31948860                | CC                              | TT                | 1945910617               |

| SNPs IDs              | Chromosome IDs | Chromosomes     | Physical positions (bp) | CDC Frontier (Reference genome) | (Pusa 256 & HPNB) | NCBI SNPdb Accession IDs |
|-----------------------|----------------|-----------------|-------------------------|---------------------------------|-------------------|--------------------------|
| SNP_P3_23807_31949034 | NC_021161.1    | Ca_kabuli_chr02 | 31949034                | AA                              | GG                | 1945910619               |
| SNP_P3_23808_31949181 | NC_021161.1    | Ca_kabuli_chr02 | 31949181                | CC                              | TT                | 1945910621               |
| SNP_P3_23809_31949211 | NC_021161.1    | Ca_kabuli_chr02 | 31949211                | TT                              | AA                | 1945910623               |
| SNP_P3_23810_31949226 | NC_021161.1    | Ca_kabuli_chr02 | 31949226                | CC                              | TT                | 1945910624               |
| SNP_P3_23811_31949358 | NC_021161.1    | Ca_kabuli_chr02 | 31949358                | TT                              | GG                | 1945910626               |
| SNP_P3_23812_31949373 | NC_021161.1    | Ca_kabuli_chr02 | 31949373                | TT                              | AA                | 1945910628               |
| SNP_P3_23813_31949374 | NC_021161.1    | Ca_kabuli_chr02 | 31949374                | TT                              | AA                | 1945910630               |
| SNP_P3_23814_31949473 | NC_021161.1    | Ca_kabuli_chr02 | 31949473                | AA                              | CC                | 1945910632               |
| SNP_P3_23815_31950273 | NC_021161.1    | Ca_kabuli_chr02 | 31950273                | GG                              | AA                | 1945910633               |
| SNP_P3_23816_31950338 | NC_021161.1    | Ca_kabuli_chr02 | 31950338                | GG                              | TT                | 1945910635               |
| SNP_P3_23817_31952333 | NC_021161.1    | Ca_kabuli_chr02 | 31952333                | TT                              | AA                | 1945910637               |
| SNP_P3_23818_31953236 | NC_021161.1    | Ca_kabuli_chr02 | 31953236                | CC                              | TT                | 1945910639               |
| SNP_P3_23819_31953364 | NC_021161.1    | Ca_kabuli_chr02 | 31953364                | TT                              | CC                | 1945910640               |
| SNP_P3_23820_31954766 | NC_021161.1    | Ca_kabuli_chr02 | 31954766                | AA                              | GG                | 1945910642               |
| SNP_P3_23821_31954813 | NC_021161.1    | Ca_kabuli_chr02 | 31954813                | CC                              | TT                | 1945910644               |
| SNP_P3_23822_31954849 | NC_021161.1    | Ca_kabuli_chr02 | 31954849                | GG                              | AA                | 1945910646               |
| SNP_P3_23823_31955126 | NC_021161.1    | Ca_kabuli_chr02 | 31955126                | CC                              | TT                | 1945910648               |
| SNP_P3_23824_31955217 | NC_021161.1    | Ca_kabuli_chr02 | 31955217                | TT                              | AA                | 1945910649               |
| SNP_P3_23825_31955463 | NC_021161.1    | Ca_kabuli_chr02 | 31955463                | CC                              | TT                | 1945910651               |
| SNP_P3_23826_31955526 | NC_021161.1    | Ca_kabuli_chr02 | 31955526                | CC                              | AA                | 1945910653               |
| SNP_P3_23827_31956328 | NC_021161.1    | Ca_kabuli_chr02 | 31956328                | TT                              | AA                | 1945910655               |
| SNP_P3_23828_31958080 | NC_021161.1    | Ca_kabuli_chr02 | 31958080                | AA                              | GG                | 1945910656               |
| SNP_P3_23829_31958120 | NC_021161.1    | Ca_kabuli_chr02 | 31958120                | GG                              | AA                | 1945910658               |
| SNP_P3_23830_31958213 | NC_021161.1    | Ca_kabuli_chr02 | 31958213                | AA                              | GG                | 1945910660               |
| SNP_P3_23831_31958227 | NC_021161.1    | Ca_kabuli_chr02 | 31958227                | TT                              | CC                | 1945910662               |
| SNP_P3_23832_31958313 | NC_021161.1    | Ca_kabuli_chr02 | 31958313                | GG                              | AA                | 1945910664               |
| SNP_P3_23833_31958357 | NC_021161.1    | Ca_kabuli_chr02 | 31958357                | CC                              | TT                | 1945910665               |
| SNP_P3_23834_31958372 | NC_021161.1    | Ca_kabuli_chr02 | 31958372                | TT                              | CC                | 1945910667               |
| SNP_P3_23835_31958390 | NC_021161.1    | Ca_kabuli_chr02 | 31958390                | GG                              | AA                | 1945910669               |
| SNP_P3_23836_31958409 | NC_021161.1    | Ca_kabuli_chr02 | 31958409                | AA                              | GG                | 1945910671               |
| SNP_P3_23837_31958471 | NC_021161.1    | Ca_kabuli_chr02 | 31958471                | CC                              | TT                | 1945910672               |
| SNP_P3_23839_31963846 | NC_021161.1    | Ca_kabuli_chr02 | 31963846                | CC                              | TT                | 1945910674               |
| SNP_P3_23840_31963860 | NC_021161.1    | Ca_kabuli_chr02 | 31963860                | AA                              | CC                | 1945910676               |
| SNP_P3_23841_31963893 | NC_021161.1    | Ca_kabuli_chr02 | 31963893                | TT                              | CC                | 1945910678               |
| SNP_P3_23845_31964345 | NC_021161.1    | Ca_kabuli_chr02 | 31964345                | GG                              | CC                | 1945910680               |
| SNP_P3_23846_31964485 | NC_021161.1    | Ca_kabuli_chr02 | 31964485                | TT                              | CC                | 1945910681               |
| SNP_P3_23849_31965274 | NC_021161.1    | Ca_kabuli_chr02 | 31965274                | TT                              | CC                | 1945910683               |
| SNP_P3_23850_31969667 | NC_021161.1    | Ca_kabuli_chr02 | 31969667                | AA                              | CC                | 1945910685               |
| SNP_P3_23851_31976622 | NC_021161.1    | Ca_kabuli_chr02 | 31976622                | TT                              | GG                | 1945910687               |
| SNP_P3_23852_31976662 | NC_021161.1    | Ca_kabuli_chr02 | 31976662                | GG                              | AA                | 1945910688               |
| SNP_P3_23854_31980284 | NC_021161.1    | Ca_kabuli_chr02 | 31980284                | AA                              | GG                | 1945910690               |
| SNP_P3_23855_31980913 | NC_021161.1    | Ca_kabuli_chr02 | 31980913                | TT                              | CC                | 1945910692               |

| SNPs IDs              | Chromosome IDs | Chromosomes     | Physical positions (bp) | CDC Frontier (Reference genome) | (Pusa 256 & HPNB) | NCBI SNPdb Accession IDs |
|-----------------------|----------------|-----------------|-------------------------|---------------------------------|-------------------|--------------------------|
| SNP_P3_23856_31981070 | NC_021161.1    | Ca_kabuli_chr02 | 31981070                | GG                              | AA                | 1945910694               |
| SNP_P3_23858_31981456 | NC_021161.1    | Ca_kabuli_chr02 | 31981456                | GG                              | AA                | 1945910696               |
| SNP_P3_23859_31981576 | NC_021161.1    | Ca_kabuli_chr02 | 31981576                | AA                              | TT                | 1945910697               |
| SNP_P3_23860_31981581 | NC_021161.1    | Ca_kabuli_chr02 | 31981581                | AA                              | TT                | 1945910699               |
| SNP_P3_23861_31981626 | NC_021161.1    | Ca_kabuli_chr02 | 31981626                | TT                              | CC                | 1945910701               |
| SNP_P3_23863_31982147 | NC_021161.1    | Ca_kabuli_chr02 | 31982147                | CC                              | TT                | 1945910703               |
| SNP_P3_23864_31982149 | NC_021161.1    | Ca_kabuli_chr02 | 31982149                | CC                              | TT                | 1945910704               |
| SNP_P3_23865_31982167 | NC_021161.1    | Ca_kabuli_chr02 | 31982167                | CC                              | AA                | 1945910706               |
| SNP_P3_23866_31982392 | NC_021161.1    | Ca_kabuli_chr02 | 31982392                | AA                              | GG                | 1945910708               |
| SNP_P3_23867_31982393 | NC_021161.1    | Ca_kabuli_chr02 | 31982393                | CC                              | TT                | 1945910710               |
| SNP_P3_23868_31982407 | NC_021161.1    | Ca_kabuli_chr02 | 31982407                | AA                              | GG                | 1945910712               |
| SNP_P3_23869_31982744 | NC_021161.1    | Ca_kabuli_chr02 | 31982744                | CC                              | GG                | 1945910713               |
| SNP_P3_23872_31985157 | NC_021161.1    | Ca_kabuli_chr02 | 31985157                | CC                              | TT                | 1945910715               |
| SNP_P3_23873_31987190 | NC_021161.1    | Ca_kabuli_chr02 | 31987190                | AA                              | TT                | 1945910717               |
| SNP_P3_23874_31989168 | NC_021161.1    | Ca_kabuli_chr02 | 31989168                | TT                              | AA                | 1945910719               |
| SNP_P3_23875_31989446 | NC_021161.1    | Ca_kabuli_chr02 | 31989446                | AA                              | GG                | 1945910720               |
| SNP_P3_23876_31989480 | NC_021161.1    | Ca_kabuli_chr02 | 31989480                | CC                              | TT                | 1945910722               |
| SNP_P3_23877_31989502 | NC_021161.1    | Ca_kabuli_chr02 | 31989502                | GG                              | AA                | 1945910724               |
| SNP_P3_23878_31990522 | NC_021161.1    | Ca_kabuli_chr02 | 31990522                | GG                              | AA                | 1945910726               |
| SNP_P3_23880_31990706 | NC_021161.1    | Ca_kabuli_chr02 | 31990706                | AA                              | GG                | 1945910728               |
| SNP_P3_23881_31992321 | NC_021161.1    | Ca_kabuli_chr02 | 31992321                | AA                              | GG                | 1945910729               |
| SNP_P3_23882_31992424 | NC_021161.1    | Ca_kabuli_chr02 | 31992424                | GG                              | AA                | 1945910731               |
| SNP_P3_23883_31992710 | NC_021161.1    | Ca_kabuli_chr02 | 31992710                | TT                              | CC                | 1945910733               |
| SNP_P3_23884_31992789 | NC_021161.1    | Ca_kabuli_chr02 | 31992789                | AA                              | GG                | 1945910735               |
| SNP_P3_23885_32001027 | NC_021161.1    | Ca_kabuli_chr02 | 32001027                | TT                              | GG                | 1945910736               |
| SNP_P3_23886_32001038 | NC_021161.1    | Ca_kabuli_chr02 | 32001038                | CC                              | TT                | 1945910738               |
| SNP_P3_23887_32001058 | NC_021161.1    | Ca_kabuli_chr02 | 32001058                | TT                              | CC                | 1945910740               |
| SNP_P3_23888_32001352 | NC_021161.1    | Ca_kabuli_chr02 | 32001352                | TT                              | CC                | 1945910742               |
| SNP_P3_23889_32001364 | NC_021161.1    | Ca_kabuli_chr02 | 32001364                | TT                              | AA                | 1945910744               |
| SNP_P3_23890_32001390 | NC_021161.1    | Ca_kabuli_chr02 | 32001390                | CC                              | TT                | 1945910745               |
| SNP_P3_23891_32003411 | NC_021161.1    | Ca_kabuli_chr02 | 32003411                | TT                              | CC                | 1945910747               |
| SNP_P3_23893_32003721 | NC_021161.1    | Ca_kabuli_chr02 | 32003721                | AA                              | CC                | 1945910749               |
| SNP_P3_23894_32003735 | NC_021161.1    | Ca_kabuli_chr02 | 32003735                | TT                              | CC                | 1945910751               |
| SNP_P3_23895_32004392 | NC_021161.1    | Ca_kabuli_chr02 | 32004392                | GG                              | AA                | 1945910752               |
| SNP_P3_23896_32004739 | NC_021161.1    | Ca_kabuli_chr02 | 32004739                | GG                              | TT                | 1945910754               |
| SNP_P3_23898_32004792 | NC_021161.1    | Ca_kabuli_chr02 | 32004792                | CC                              | TT                | 1945910756               |
| SNP_P3_23899_32006896 | NC_021161.1    | Ca_kabuli_chr02 | 32006896                | TT                              | CC                | 1945910758               |
| SNP_P3_23900_32007088 | NC_021161.1    | Ca_kabuli_chr02 | 32007088                | CC                              | TT                | 1945910760               |
| SNP_P3_23901_32008336 | NC_021161.1    | Ca_kabuli_chr02 | 32008336                | TT                              | CC                | 1945910761               |
| SNP_P3_23902_32008369 | NC_021161.1    | Ca_kabuli_chr02 | 32008369                | CC                              | TT                | 1945910763               |
| SNP_P3_23903_32012921 | NC_021161.1    | Ca_kabuli_chr02 | 32012921                | GG                              | TT                | 1945910765               |
| SNP_P3_23904_32012972 | NC_021161.1    | Ca_kabuli_chr02 | 32012972                | AA                              | GG                | 1945910767               |

| SNPs IDs              | Chromosome IDs | Chromosomes     | Physical positions (bp) | CDC Frontier (Reference genome) | (Pusa 256 & HPNB) | NCBI SNPdb Accession IDs |
|-----------------------|----------------|-----------------|-------------------------|---------------------------------|-------------------|--------------------------|
| SNP_P3_23905_32012984 | NC_021161.1    | Ca_kabuli_chr02 | 32012984                | GG                              | AA                | 1945910768               |
| SNP_P3_23906_32014621 | NC_021161.1    | Ca_kabuli_chr02 | 32014621                | GG                              | AA                | 1945910770               |
| SNP_P3_23907_32014622 | NC_021161.1    | Ca_kabuli_chr02 | 32014622                | GG                              | AA                | 1945910772               |
| SNP_P3_23909_32016137 | NC_021161.1    | Ca_kabuli_chr02 | 32016137                | TT                              | CC                | 1945910774               |
| SNP_P3_23910_32016399 | NC_021161.1    | Ca_kabuli_chr02 | 32016399                | AA                              | GG                | 1945910775               |
| SNP_P3_23911_32016456 | NC_021161.1    | Ca_kabuli_chr02 | 32016456                | GG                              | AA                | 1945910777               |
| SNP_P3_23912_32016457 | NC_021161.1    | Ca_kabuli_chr02 | 32016457                | GG                              | TT                | 1945910779               |
| SNP_P3_23913_32017769 | NC_021161.1    | Ca_kabuli_chr02 | 32017769                | TT                              | CC                | 1945910781               |
| SNP_P3_23914_32017770 | NC_021161.1    | Ca_kabuli_chr02 | 32017770                | CC                              | AA                | 1945910783               |
| SNP_P3_23915_32017806 | NC_021161.1    | Ca_kabuli_chr02 | 32017806                | TT                              | GG                | 1945910784               |
| SNP_P3_23916_32019133 | NC_021161.1    | Ca_kabuli_chr02 | 32019133                | CC                              | TT                | 1945910786               |
| SNP_P3_23917_32022188 | NC_021161.1    | Ca_kabuli_chr02 | 32022188                | GG                              | AA                | 1945910788               |
| SNP_P3_23918_32022436 | NC_021161.1    | Ca_kabuli_chr02 | 32022436                | TT                              | CC                | 1945910790               |
| SNP_P3_23919_32023038 | NC_021161.1    | Ca_kabuli_chr02 | 32023038                | CC                              | TT                | 1945910791               |
| SNP_P3_23920_32023078 | NC_021161.1    | Ca_kabuli_chr02 | 32023078                | GG                              | AA                | 1945910793               |
| SNP_P3_23921_32024091 | NC_021161.1    | Ca_kabuli_chr02 | 32024091                | GG                              | AA                | 1945910795               |
| SNP_P3_23922_32024342 | NC_021161.1    | Ca_kabuli_chr02 | 32024342                | GG                              | AA                | 1945910797               |
| SNP_P3_23923_32025214 | NC_021161.1    | Ca_kabuli_chr02 | 32025214                | TT                              | CC                | 1945910799               |
| SNP_P3_23924_32025226 | NC_021161.1    | Ca_kabuli_chr02 | 32025226                | GG                              | TT                | 1945910800               |
| SNP_P3_23925_32025266 | NC_021161.1    | Ca_kabuli_chr02 | 32025266                | CC                              | TT                | 1945910802               |
| SNP_P3_23926_32026350 | NC_021161.1    | Ca_kabuli_chr02 | 32026350                | TT                              | AA                | 1945910804               |
| SNP_P3_23927_32030832 | NC_021161.1    | Ca_kabuli_chr02 | 32030832                | AA                              | GG                | 1945910806               |
| SNP_P3_23928_32031873 | NC_021161.1    | Ca_kabuli_chr02 | 32031873                | TT                              | AA                | 1945910807               |
| SNP_P3_23929_32032061 | NC_021161.1    | Ca_kabuli_chr02 | 32032061                | AA                              | CC                | 1945910809               |
| SNP_P3_23931_32032911 | NC_021161.1    | Ca_kabuli_chr02 | 32032911                | AA                              | TT                | 1945910811               |
| SNP_P3_23932_32032920 | NC_021161.1    | Ca_kabuli_chr02 | 32032920                | GG                              | AA                | 1945910813               |
| SNP_P3_23933_32032940 | NC_021161.1    | Ca_kabuli_chr02 | 32032940                | CC                              | GG                | 1945910815               |
| SNP_P3_23934_32033020 | NC_021161.1    | Ca_kabuli_chr02 | 32033020                | GG                              | AA                | 1945910816               |
| SNP_P3_23935_32033024 | NC_021161.1    | Ca_kabuli_chr02 | 32033024                | AA                              | GG                | 1945910818               |
| SNP_P3_23936_32033290 | NC_021161.1    | Ca_kabuli_chr02 | 32033290                | GG                              | AA                | 1945910820               |
| SNP_P3_23937_32033313 | NC_021161.1    | Ca_kabuli_chr02 | 32033313                | GG                              | AA                | 1945910822               |
| SNP_P3_23938_32033395 | NC_021161.1    | Ca_kabuli_chr02 | 32033395                | AA                              | GG                | 1945910823               |
| SNP_P3_23940_32036581 | NC_021161.1    | Ca_kabuli_chr02 | 32036581                | GG                              | AA                | 1945910825               |
| SNP_P3_23941_32036646 | NC_021161.1    | Ca_kabuli_chr02 | 32036646                | AA                              | GG                | 1945910827               |
| SNP_P3_23943_32039062 | NC_021161.1    | Ca_kabuli_chr02 | 32039062                | AA                              | GG                | 1945910829               |
| SNP_P3_23944_32039080 | NC_021161.1    | Ca_kabuli_chr02 | 32039080                | CC                              | TT                | 1945910831               |
| SNP_P3_23945_32046038 | NC_021161.1    | Ca_kabuli_chr02 | 32046038                | AA                              | CC                | 1945910832               |
| SNP_P3_23946_32046069 | NC_021161.1    | Ca_kabuli_chr02 | 32046069                | AA                              | GG                | 1945910834               |
| SNP_P3_23947_32046098 | NC_021161.1    | Ca_kabuli_chr02 | 32046098                | AA                              | TT                | 1945910836               |
| SNP_P3_23948_32046103 | NC_021161.1    | Ca_kabuli_chr02 | 32046103                | AA                              | GG                | 1945910838               |
| SNP_P3_23949_32046110 | NC_021161.1    | Ca_kabuli_chr02 | 32046110                | TT                              | CC                | 1945910839               |
| SNP_P3_23950_32046118 | NC_021161.1    | Ca_kabuli_chr02 | 32046118                | GG                              | AA                | 1945910841               |



| SNPs IDs              | Chromosome IDs | Chromosomes     | Physical positions (bp) | CDC Frontier (Reference genome) | (Pusa 256 & HPNB) | NCBI SNPdb Accession IDs |
|-----------------------|----------------|-----------------|-------------------------|---------------------------------|-------------------|--------------------------|
| SNP_P3_23951_32046137 | NC_021161.1    | Ca_kabuli_chr02 | 32046137                | AA                              | CC                | 1945910843               |
| SNP_P3_23952_32046140 | NC_021161.1    | Ca_kabuli_chr02 | 32046140                | CC                              | AA                | 1945910845               |
| SNP_P3_23953_32046154 | NC_021161.1    | Ca_kabuli_chr02 | 32046154                | AA                              | GG                | 1945910847               |
| SNP_P3_23954_32048211 | NC_021161.1    | Ca_kabuli_chr02 | 32048211                | TT                              | AA                | 1945910848               |
| SNP_P3_23955_32048281 | NC_021161.1    | Ca_kabuli_chr02 | 32048281                | CC                              | TT                | 1945910850               |
| SNP_P3_23958_32055442 | NC_021161.1    | Ca_kabuli_chr02 | 32055442                | CC                              | TT                | 1945910852               |
| SNP_P3_23959_32056464 | NC_021161.1    | Ca_kabuli_chr02 | 32056464                | AA                              | TT                | 1945910854               |
| SNP_P3_23961_32057834 | NC_021161.1    | Ca_kabuli_chr02 | 32057834                | GG                              | AA                | 1945910855               |
| SNP_P3_23962_32060134 | NC_021161.1    | Ca_kabuli_chr02 | 32060134                | CC                              | TT                | 1945910857               |
| SNP_P3_23963_32060303 | NC_021161.1    | Ca_kabuli_chr02 | 32060303                | CC                              | TT                | 1945910859               |
| SNP_P3_23964_32060309 | NC_021161.1    | Ca_kabuli_chr02 | 32060309                | AA                              | GG                | 1945910861               |
| SNP_P3_23965_32060889 | NC_021161.1    | Ca_kabuli_chr02 | 32060889                | GG                              | CC                | 1945910863               |
| SNP_P3_23966_32060908 | NC_021161.1    | Ca_kabuli_chr02 | 32060908                | CC                              | GG                | 1945910864               |
| SNP_P3_23967_32060918 | NC_021161.1    | Ca_kabuli_chr02 | 32060918                | GG                              | AA                | 1945910866               |
| SNP_P3_23968_32061542 | NC_021161.1    | Ca_kabuli_chr02 | 32061542                | AA                              | GG                | 1945910868               |
| SNP_P3_23969_32062565 | NC_021161.1    | Ca_kabuli_chr02 | 32062565                | CC                              | GG                | 1945910870               |
| SNP_P3_23970_32064686 | NC_021161.1    | Ca_kabuli_chr02 | 32064686                | TT                              | GG                | 1945910871               |
| SNP_P3_23971_32064687 | NC_021161.1    | Ca_kabuli_chr02 | 32064687                | GG                              | AA                | 1945910873               |
| SNP_P3_23972_32064688 | NC_021161.1    | Ca_kabuli_chr02 | 32064688                | AA                              | TT                | 1945910875               |
| SNP_P3_23973_32064692 | NC_021161.1    | Ca_kabuli_chr02 | 32064692                | AA                              | GG                | 1945910877               |
| SNP_P3_23974_32065322 | NC_021161.1    | Ca_kabuli_chr02 | 32065322                | GG                              | CC                | 1945910878               |
| SNP_P3_23975_32065369 | NC_021161.1    | Ca_kabuli_chr02 | 32065369                | GG                              | AA                | 1945910880               |
| SNP_P3_23976_32066181 | NC_021161.1    | Ca_kabuli_chr02 | 32066181                | CC                              | TT                | 1945910882               |
| SNP_P3_23980_32073472 | NC_021161.1    | Ca_kabuli_chr02 | 32073472                | TT                              | CC                | 1945910884               |
| SNP_P3_23981_32076554 | NC_021161.1    | Ca_kabuli_chr02 | 32076554                | CC                              | AA                | 1945910886               |
| SNP_P3_23982_32077448 | NC_021161.1    | Ca_kabuli_chr02 | 32077448                | AA                              | GG                | 1945910887               |
| SNP_P3_23983_32077563 | NC_021161.1    | Ca_kabuli_chr02 | 32077563                | CC                              | GG                | 1945910889               |
| SNP_P3_23984_32077576 | NC_021161.1    | Ca_kabuli_chr02 | 32077576                | TT                              | AA                | 1945910891               |
| SNP_P3_23985_32077608 | NC_021161.1    | Ca_kabuli_chr02 | 32077608                | AA                              | TT                | 1945910893               |
| SNP_P3_23987_32079919 | NC_021161.1    | Ca_kabuli_chr02 | 32079919                | CC                              | TT                | 1945910894               |
| SNP_P3_23988_32080022 | NC_021161.1    | Ca_kabuli_chr02 | 32080022                | AA                              | CC                | 1945910896               |
| SNP_P3_23989_32080037 | NC_021161.1    | Ca_kabuli_chr02 | 32080037                | GG                              | AA                | 1945910898               |
| SNP_P3_23990_32080071 | NC_021161.1    | Ca_kabuli_chr02 | 32080071                | TT                              | CC                | 1945910900               |
| SNP_P3_23991_32080094 | NC_021161.1    | Ca_kabuli_chr02 | 32080094                | CC                              | GG                | 1945910902               |
| SNP_P3_23992_32080132 | NC_021161.1    | Ca_kabuli_chr02 | 32080132                | AA                              | GG                | 1945910903               |
| SNP_P3_23993_32080180 | NC_021161.1    | Ca_kabuli_chr02 | 32080180                | GG                              | CC                | 1945910905               |
| SNP_P3_23995_32081506 | NC_021161.1    | Ca_kabuli_chr02 | 32081506                | TT                              | CC                | 1945910907               |
| SNP_P3_23996_32081539 | NC_021161.1    | Ca_kabuli_chr02 | 32081539                | TT                              | AA                | 1945910909               |
| SNP_P3_23997_32081572 | NC_021161.1    | Ca_kabuli_chr02 | 32081572                | CC                              | TT                | 1945910910               |
| SNP_P3_23998_32089074 | NC_021161.1    | Ca_kabuli_chr02 | 32089074                | AA                              | GG                | 1945910912               |
| SNP_P3_23999_32089198 | NC_021161.1    | Ca_kabuli_chr02 | 32089198                | TT                              | GG                | 1945910914               |
| SNP_P3_24000_32089449 | NC_021161.1    | Ca_kabuli_chr02 | 32089449                | CC                              | TT                | 1945910916               |

| SNPs IDs              | Chromosome IDs | Chromosomes     | Physical positions (bp) | CDC Frontier (Reference genome) | (Pusa 256 & HPNB) | NCBI SNPdb Accession IDs |
|-----------------------|----------------|-----------------|-------------------------|---------------------------------|-------------------|--------------------------|
| SNP_P3_24001_32089657 | NC_021161.1    | Ca_kabuli_chr02 | 32089657                | TT                              | CC                | 1945910918               |
| SNP_P3_24002_32094265 | NC_021161.1    | Ca_kabuli_chr02 | 32094265                | AA                              | GG                | 1945910919               |
| SNP_P3_24005_32095780 | NC_021161.1    | Ca_kabuli_chr02 | 32095780                | AA                              | TT                | 1945910921               |
| SNP_P3_24007_32095855 | NC_021161.1    | Ca_kabuli_chr02 | 32095855                | TT                              | AA                | 1945910923               |
| SNP_P3_24008_32096248 | NC_021161.1    | Ca_kabuli_chr02 | 32096248                | TT                              | AA                | 1945910925               |
| SNP_P3_24009_32096249 | NC_021161.1    | Ca_kabuli_chr02 | 32096249                | CC                              | GG                | 1945910926               |
| SNP_P3_24010_32098845 | NC_021161.1    | Ca_kabuli_chr02 | 32098845                | GG                              | AA                | 1945910928               |
| SNP_P3_24011_32099153 | NC_021161.1    | Ca_kabuli_chr02 | 32099153                | TT                              | CC                | 1945910930               |
| SNP_P3_24012_32099757 | NC_021161.1    | Ca_kabuli_chr02 | 32099757                | TT                              | CC                | 1945910932               |
| SNP_P3_24013_32104372 | NC_021161.1    | Ca_kabuli_chr02 | 32104372                | TT                              | CC                | 1945910934               |
| SNP_P3_24014_32104377 | NC_021161.1    | Ca_kabuli_chr02 | 32104377                | CC                              | TT                | 1945910935               |
| SNP_P3_24016_32104567 | NC_021161.1    | Ca_kabuli_chr02 | 32104567                | AA                              | TT                | 1945910937               |
| SNP_P3_24017_32109708 | NC_021161.1    | Ca_kabuli_chr02 | 32109708                | CC                              | AA                | 1945910939               |
| SNP_P3_24018_32109723 | NC_021161.1    | Ca_kabuli_chr02 | 32109723                | AA                              | GG                | 1945910941               |
| SNP_P3_24019_32109892 | NC_021161.1    | Ca_kabuli_chr02 | 32109892                | AA                              | TT                | 1945910942               |
| SNP_P3_24020_32109895 | NC_021161.1    | Ca_kabuli_chr02 | 32109895                | GG                              | AA                | 1945910944               |
| SNP_P3_24021_32109904 | NC_021161.1    | Ca_kabuli_chr02 | 32109904                | AA                              | TT                | 1945910946               |
| SNP_P3_24022_32109931 | NC_021161.1    | Ca_kabuli_chr02 | 32109931                | CC                              | TT                | 1945910948               |
| SNP_P3_24023_32109940 | NC_021161.1    | Ca_kabuli_chr02 | 32109940                | GG                              | AA                | 1945910949               |
| SNP_P3_24024_32110165 | NC_021161.1    | Ca_kabuli_chr02 | 32110165                | AA                              | GG                | 1945910951               |
| SNP_P3_24026_32110254 | NC_021161.1    | Ca_kabuli_chr02 | 32110254                | AA                              | GG                | 1945910953               |
| SNP_P3_24027_32110255 | NC_021161.1    | Ca_kabuli_chr02 | 32110255                | CC                              | TT                | 1945910955               |
| SNP_P3_24028_32110393 | NC_021161.1    | Ca_kabuli_chr02 | 32110393                | GG                              | AA                | 1945910957               |
| SNP_P3_24030_32112422 | NC_021161.1    | Ca_kabuli_chr02 | 32112422                | GG                              | AA                | 1945910958               |
| SNP_P3_24031_32112452 | NC_021161.1    | Ca_kabuli_chr02 | 32112452                | AA                              | GG                | 1945910960               |
| SNP_P3_24032_32112952 | NC_021161.1    | Ca_kabuli_chr02 | 32112952                | AA                              | GG                | 1945910962               |
| SNP_P3_24033_32113131 | NC_021161.1    | Ca_kabuli_chr02 | 32113131                | AA                              | GG                | 1945910964               |
| SNP_P3_24034_32113308 | NC_021161.1    | Ca_kabuli_chr02 | 32113308                | GG                              | AA                | 1945910965               |
| SNP_P3_24035_32113525 | NC_021161.1    | Ca_kabuli_chr02 | 32113525                | TT                              | GG                | 1945910967               |
| SNP_P3_24036_32113526 | NC_021161.1    | Ca_kabuli_chr02 | 32113526                | GG                              | AA                | 1945910969               |
| SNP_P3_24037_32116098 | NC_021161.1    | Ca_kabuli_chr02 | 32116098                | TT                              | GG                | 1945910971               |
| SNP_P3_24038_32116169 | NC_021161.1    | Ca_kabuli_chr02 | 32116169                | GG                              | AA                | 1945910973               |
| SNP_P3_24039_32117058 | NC_021161.1    | Ca_kabuli_chr02 | 32117058                | CC                              | TT                | 1945910974               |
| SNP_P3_24040_32118171 | NC_021161.1    | Ca_kabuli_chr02 | 32118171                | CC                              | TT                | 1945910976               |
| SNP_P3_24041_32118337 | NC_021161.1    | Ca_kabuli_chr02 | 32118337                | GG                              | CC                | 1945910978               |
| SNP_P3_24042_32118348 | NC_021161.1    | Ca_kabuli_chr02 | 32118348                | CC                              | TT                | 1945910980               |
| SNP_P3_24043_32118351 | NC_021161.1    | Ca_kabuli_chr02 | 32118351                | GG                              | AA                | 1945910981               |
| SNP_P3_24044_32118499 | NC_021161.1    | Ca_kabuli_chr02 | 32118499                | GG                              | CC                | 1945910983               |
| SNP_P3_24045_32118502 | NC_021161.1    | Ca_kabuli_chr02 | 32118502                | TT                              | CC                | 1945910985               |
| SNP_P3_24046_32118839 | NC_021161.1    | Ca_kabuli_chr02 | 32118839                | CC                              | TT                | 1945910987               |
| SNP_P3_24047_32118876 | NC_021161.1    | Ca_kabuli_chr02 | 32118876                | AA                              | CC                | 1945910989               |
| SNP_P3_24048_32118888 | NC_021161.1    | Ca_kabuli_chr02 | 32118888                | TT                              | GG                | 1945910990               |

| SNPs IDs              | Chromosome IDs | Chromosomes     | Physical positions (bp) | CDC Frontier (Reference genome) | (Pusa 256 & HPNB) | NCBI SNPdb Accession IDs |
|-----------------------|----------------|-----------------|-------------------------|---------------------------------|-------------------|--------------------------|
| SNP_P3_24049_32119331 | NC_021161.1    | Ca_kabuli_chr02 | 32119331                | AA                              | TT                | 1945910992               |
| SNP_P3_24050_32120144 | NC_021161.1    | Ca_kabuli_chr02 | 32120144                | TT                              | CC                | 1945910994               |
| SNP_P3_24051_32120195 | NC_021161.1    | Ca_kabuli_chr02 | 32120195                | CC                              | AA                | 1945910996               |
| SNP_P3_24052_32120204 | NC_021161.1    | Ca_kabuli_chr02 | 32120204                | AA                              | GG                | 1945910997               |
| SNP_P3_24053_32120207 | NC_021161.1    | Ca_kabuli_chr02 | 32120207                | TT                              | AA                | 1945910999               |
| SNP_P3_24054_32120230 | NC_021161.1    | Ca_kabuli_chr02 | 32120230                | TT                              | CC                | 1945911001               |
| SNP_P3_24055_32122015 | NC_021161.1    | Ca_kabuli_chr02 | 32122015                | AA                              | CC                | 1945911003               |
| SNP_P3_24056_32122338 | NC_021161.1    | Ca_kabuli_chr02 | 32122338                | GG                              | AA                | 1945911005               |
| SNP_P3_24057_32122340 | NC_021161.1    | Ca_kabuli_chr02 | 32122340                | AA                              | GG                | 1945911006               |
| SNP_P3_24059_32125896 | NC_021161.1    | Ca_kabuli_chr02 | 32125896                | TT                              | CC                | 1945911008               |
| SNP_P3_24060_32126301 | NC_021161.1    | Ca_kabuli_chr02 | 32126301                | TT                              | AA                | 1945911010               |
| SNP_P3_24062_32126590 | NC_021161.1    | Ca_kabuli_chr02 | 32126590                | TT                              | CC                | 1945911012               |
| SNP_P3_24063_32126778 | NC_021161.1    | Ca_kabuli_chr02 | 32126778                | TT                              | AA                | 1945911013               |
| SNP_P3_24064_32126814 | NC_021161.1    | Ca_kabuli_chr02 | 32126814                | GG                              | TT                | 1945911015               |
| SNP_P3_24066_32127045 | NC_021161.1    | Ca_kabuli_chr02 | 32127045                | GG                              | TT                | 1945911017               |
| SNP_P3_24067_32127055 | NC_021161.1    | Ca_kabuli_chr02 | 32127055                | TT                              | AA                | 1945911019               |
| SNP_P3_24068_32127483 | NC_021161.1    | Ca_kabuli_chr02 | 32127483                | AA                              | TT                | 1945911020               |
| SNP_P3_24069_32128629 | NC_021161.1    | Ca_kabuli_chr02 | 32128629                | CC                              | AA                | 1945911022               |
| SNP_P3_24070_32128821 | NC_021161.1    | Ca_kabuli_chr02 | 32128821                | TT                              | GG                | 1945911024               |
| SNP_P3_24071_32128825 | NC_021161.1    | Ca_kabuli_chr02 | 32128825                | AA                              | CC                | 1945911026               |
| SNP_P3_24072_32129909 | NC_021161.1    | Ca_kabuli_chr02 | 32129909                | GG                              | CC                | 1945911028               |
| SNP_P3_24075_32130256 | NC_021161.1    | Ca_kabuli_chr02 | 32130256                | TT                              | CC                | 1945911029               |
| SNP_P3_24076_32131394 | NC_021161.1    | Ca_kabuli_chr02 | 32131394                | CC                              | TT                | 1945911031               |
| SNP_P3_24077_32134514 | NC_021161.1    | Ca_kabuli_chr02 | 32134514                | AA                              | GG                | 1945911033               |
| SNP_P3_24079_32136110 | NC_021161.1    | Ca_kabuli_chr02 | 32136110                | AA                              | CC                | 1945911035               |
| SNP_P3_24080_32138784 | NC_021161.1    | Ca_kabuli_chr02 | 32138784                | TT                              | AA                | 1945911036               |
| SNP_P3_24081_32139311 | NC_021161.1    | Ca_kabuli_chr02 | 32139311                | AA                              | TT                | 1945911038               |
| SNP_P3_24082_32139448 | NC_021161.1    | Ca_kabuli_chr02 | 32139448                | CC                              | TT                | 1945911040               |
| SNP_P3_24083_32141888 | NC_021161.1    | Ca_kabuli_chr02 | 32141888                | AA                              | TT                | 1945911042               |
| SNP_P3_24084_32141909 | NC_021161.1    | Ca_kabuli_chr02 | 32141909                | CC                              | TT                | 1945911044               |
| SNP_P3_24085_32142017 | NC_021161.1    | Ca_kabuli_chr02 | 32142017                | GG                              | AA                | 1945911045               |
| SNP_P3_24088_32146004 | NC_021161.1    | Ca_kabuli_chr02 | 32146004                | GG                              | AA                | 1945911047               |
| SNP_P3_24089_32146868 | NC_021161.1    | Ca_kabuli_chr02 | 32146868                | GG                              | AA                | 1945911049               |
| SNP_P3_24090_32146874 | NC_021161.1    | Ca_kabuli_chr02 | 32146874                | GG                              | AA                | 1945911051               |
| SNP_P3_24091_32146876 | NC_021161.1    | Ca_kabuli_chr02 | 32146876                | GG                              | AA                | 1945911052               |
| SNP_P3_24092_32147117 | NC_021161.1    | Ca_kabuli_chr02 | 32147117                | GG                              | CC                | 1945911054               |
| SNP_P3_24093_32147121 | NC_021161.1    | Ca_kabuli_chr02 | 32147121                | TT                              | CC                | 1945911056               |
| SNP_P3_24094_32147167 | NC_021161.1    | Ca_kabuli_chr02 | 32147167                | AA                              | GG                | 1945911058               |
| SNP_P3_24095_32147193 | NC_021161.1    | Ca_kabuli_chr02 | 32147193                | TT                              | GG                | 1945911060               |
| SNP_P3_24097_32150503 | NC_021161.1    | Ca_kabuli_chr02 | 32150503                | GG                              | TT                | 1945911061               |
| SNP_P3_24098_32150876 | NC_021161.1    | Ca_kabuli_chr02 | 32150876                | TT                              | AA                | 1945911063               |
| SNP_P3_24099_32152325 | NC_021161.1    | Ca_kabuli_chr02 | 32152325                | AA                              | CC                | 1945911065               |

| SNPs IDs              | Chromosome IDs | Chromosomes     | Physical positions (bp) | CDC Frontier (Reference genome) | (Pusa 256 & HPNB) | NCBI SNPdb Accession IDs |
|-----------------------|----------------|-----------------|-------------------------|---------------------------------|-------------------|--------------------------|
| SNP_P3_24100_32152403 | NC_021161.1    | Ca_kabuli_chr02 | 32152403                | CC                              | TT                | 1945911067               |
| SNP_P3_24101_32152434 | NC_021161.1    | Ca_kabuli_chr02 | 32152434                | CC                              | GG                | 1945911068               |
| SNP_P3_24102_32152460 | NC_021161.1    | Ca_kabuli_chr02 | 32152460                | CC                              | TT                | 1945911070               |
| SNP_P3_24104_32153054 | NC_021161.1    | Ca_kabuli_chr02 | 32153054                | GG                              | AA                | 1945911072               |
| SNP_P3_24105_32153423 | NC_021161.1    | Ca_kabuli_chr02 | 32153423                | GG                              | AA                | 1945911074               |
| SNP_P3_24106_32153595 | NC_021161.1    | Ca_kabuli_chr02 | 32153595                | CC                              | TT                | 1945911076               |
| SNP_P3_24107_32153624 | NC_021161.1    | Ca_kabuli_chr02 | 32153624                | TT                              | AA                | 1945911077               |
| SNP_P3_24108_32153656 | NC_021161.1    | Ca_kabuli_chr02 | 32153656                | TT                              | AA                | 1945911079               |
| SNP_P3_24109_32153718 | NC_021161.1    | Ca_kabuli_chr02 | 32153718                | CC                              | TT                | 1945911081               |
| SNP_P3_24110_32155334 | NC_021161.1    | Ca_kabuli_chr02 | 32155334                | CC                              | TT                | 1945911083               |
| SNP_P3_24111_32155515 | NC_021161.1    | Ca_kabuli_chr02 | 32155515                | CC                              | GG                | 1945911084               |
| SNP_P3_24112_32155601 | NC_021161.1    | Ca_kabuli_chr02 | 32155601                | AA                              | TT                | 1945911086               |
| SNP_P3_24113_32156105 | NC_021161.1    | Ca_kabuli_chr02 | 32156105                | TT                              | GG                | 1945911088               |
| SNP_P3_24114_32158375 | NC_021161.1    | Ca_kabuli_chr02 | 32158375                | TT                              | CC                | 1945911090               |
| SNP_P3_24115_32158414 | NC_021161.1    | Ca_kabuli_chr02 | 32158414                | TT                              | AA                | 1945911091               |
| SNP_P3_24116_32158459 | NC_021161.1    | Ca_kabuli_chr02 | 32158459                | AA                              | TT                | 1945911093               |
| SNP_P3_24117_32158471 | NC_021161.1    | Ca_kabuli_chr02 | 32158471                | AA                              | TT                | 1945911095               |
| SNP_P3_24118_32158497 | NC_021161.1    | Ca_kabuli_chr02 | 32158497                | CC                              | TT                | 1945911097               |
| SNP_P3_24119_32158500 | NC_021161.1    | Ca_kabuli_chr02 | 32158500                | CC                              | TT                | 1945911099               |
| SNP_P3_24120_32158698 | NC_021161.1    | Ca_kabuli_chr02 | 32158698                | AA                              | TT                | 1945911100               |
| SNP_P3_24121_32158981 | NC_021161.1    | Ca_kabuli_chr02 | 32158981                | AA                              | GG                | 1945911102               |
| SNP_P3_24122_32159737 | NC_021161.1    | Ca_kabuli_chr02 | 32159737                | GG                              | AA                | 1945911104               |
| SNP_P3_24123_32160685 | NC_021161.1    | Ca_kabuli_chr02 | 32160685                | GG                              | AA                | 1945911106               |
| SNP_P3_24124_32160694 | NC_021161.1    | Ca_kabuli_chr02 | 32160694                | TT                              | AA                | 1945911107               |
| SNP_P3_24125_32161644 | NC_021161.1    | Ca_kabuli_chr02 | 32161644                | CC                              | AA                | 1945911109               |
| SNP_P3_24126_32161649 | NC_021161.1    | Ca_kabuli_chr02 | 32161649                | AA                              | CC                | 1945911111               |
| SNP_P3_24127_32161691 | NC_021161.1    | Ca_kabuli_chr02 | 32161691                | CC                              | TT                | 1945911113               |
| SNP_P3_24130_32162223 | NC_021161.1    | Ca_kabuli_chr02 | 32162223                | AA                              | GG                | 1945911115               |
| SNP_P3_24131_32162274 | NC_021161.1    | Ca_kabuli_chr02 | 32162274                | GG                              | TT                | 1945911116               |
| SNP_P3_24132_32162502 | NC_021161.1    | Ca_kabuli_chr02 | 32162502                | AA                              | TT                | 1945911118               |
| SNP_P3_24133_32162804 | NC_021161.1    | Ca_kabuli_chr02 | 32162804                | CC                              | TT                | 1945911120               |
| SNP_P3_24134_32162828 | NC_021161.1    | Ca_kabuli_chr02 | 32162828                | GG                              | AA                | 1945911122               |
| SNP_P3_24136_32164895 | NC_021161.1    | Ca_kabuli_chr02 | 32164895                | CC                              | TT                | 1945911123               |
| SNP_P3_24137_32165828 | NC_021161.1    | Ca_kabuli_chr02 | 32165828                | CC                              | TT                | 1945911125               |
| SNP_P3_24138_32165830 | NC_021161.1    | Ca_kabuli_chr02 | 32165830                | TT                              | GG                | 1945911127               |
| SNP_P3_24139_32166452 | NC_021161.1    | Ca_kabuli_chr02 | 32166452                | TT                              | CC                | 1945911129               |
| SNP_P3_24140_32166719 | NC_021161.1    | Ca_kabuli_chr02 | 32166719                | CC                              | TT                | 1945911131               |
| SNP_P3_24141_32166753 | NC_021161.1    | Ca_kabuli_chr02 | 32166753                | AA                              | CC                | 1945911132               |
| SNP_P3_24142_32166765 | NC_021161.1    | Ca_kabuli_chr02 | 32166765                | TT                              | AA                | 1945911134               |
| SNP_P3_24143_32167004 | NC_021161.1    | Ca_kabuli_chr02 | 32167004                | TT                              | GG                | 1945911136               |
| SNP_P3_24144_32170632 | NC_021161.1    | Ca_kabuli_chr02 | 32170632                | AA                              | TT                | 1945911138               |
| SNP_P3_24145_32170851 | NC_021161.1    | Ca_kabuli_chr02 | 32170851                | AA                              | CC                | 1945911139               |

| SNPs IDs              | Chromosome IDs | Chromosomes     | Physical positions (bp) | CDC Frontier (Reference genome) | (Pusa 256 & HPNB) | NCBI SNPdb Accession IDs |
|-----------------------|----------------|-----------------|-------------------------|---------------------------------|-------------------|--------------------------|
| SNP_P3_24146_32170857 | NC_021161.1    | Ca_kabuli_chr02 | 32170857                | TT                              | CC                | 1945911141               |
| SNP_P3_24147_32170860 | NC_021161.1    | Ca_kabuli_chr02 | 32170860                | GG                              | AA                | 1945911143               |
| SNP_P3_24148_32170899 | NC_021161.1    | Ca_kabuli_chr02 | 32170899                | TT                              | GG                | 1945911145               |
| SNP_P3_24149_32170908 | NC_021161.1    | Ca_kabuli_chr02 | 32170908                | AA                              | GG                | 1945911147               |
| SNP_P3_24150_32170919 | NC_021161.1    | Ca_kabuli_chr02 | 32170919                | GG                              | AA                | 1945911148               |
| SNP_P3_24151_32170942 | NC_021161.1    | Ca_kabuli_chr02 | 32170942                | AA                              | TT                | 1945911150               |
| SNP_P3_24152_32170955 | NC_021161.1    | Ca_kabuli_chr02 | 32170955                | GG                              | CC                | 1945911152               |
| SNP_P3_24153_32170974 | NC_021161.1    | Ca_kabuli_chr02 | 32170974                | TT                              | GG                | 1945911154               |
| SNP_P3_24154_32170977 | NC_021161.1    | Ca_kabuli_chr02 | 32170977                | TT                              | CC                | 1945911155               |
| SNP_P3_24155_32170994 | NC_021161.1    | Ca_kabuli_chr02 | 32170994                | AA                              | GG                | 1945911157               |
| SNP_P3_24156_32172638 | NC_021161.1    | Ca_kabuli_chr02 | 32172638                | CC                              | TT                | 1945911159               |
| SNP_P3_24158_32175811 | NC_021161.1    | Ca_kabuli_chr02 | 32175811                | TT                              | CC                | 1945911161               |
| SNP_P3_24159_32175825 | NC_021161.1    | Ca_kabuli_chr02 | 32175825                | CC                              | TT                | 1945911162               |
| SNP_P3_24161_32176053 | NC_021161.1    | Ca_kabuli_chr02 | 32176053                | GG                              | AA                | 1945911164               |
| SNP_P3_24162_32179103 | NC_021161.1    | Ca_kabuli_chr02 | 32179103                | AA                              | CC                | 1945911166               |
| SNP_P3_24163_32179412 | NC_021161.1    | Ca_kabuli_chr02 | 32179412                | AA                              | GG                | 1945911168               |
| SNP_P3_24164_32199294 | NC_021161.1    | Ca_kabuli_chr02 | 32199294                | TT                              | AA                | 1945911170               |
| SNP_P3_24165_32199553 | NC_021161.1    | Ca_kabuli_chr02 | 32199553                | TT                              | CC                | 1945911171               |
| SNP_P3_24166_32199597 | NC_021161.1    | Ca_kabuli_chr02 | 32199597                | CC                              | GG                | 1945911173               |
| SNP_P3_24167_32199599 | NC_021161.1    | Ca_kabuli_chr02 | 32199599                | GG                              | AA                | 1945911175               |
| SNP_P3_24168_32199687 | NC_021161.1    | Ca_kabuli_chr02 | 32199687                | TT                              | GG                | 1945911177               |
| SNP_P3_24169_32199875 | NC_021161.1    | Ca_kabuli_chr02 | 32199875                | TT                              | GG                | 1945911178               |
| SNP_P3_24170_32199884 | NC_021161.1    | Ca_kabuli_chr02 | 32199884                | CC                              | TT                | 1945911180               |
| SNP_P3_24171_32200085 | NC_021161.1    | Ca_kabuli_chr02 | 32200085                | GG                              | AA                | 1945911182               |
| SNP_P3_24172_32203368 | NC_021161.1    | Ca_kabuli_chr02 | 32203368                | CC                              | TT                | 1945911184               |
| SNP_P3_24174_32203822 | NC_021161.1    | Ca_kabuli_chr02 | 32203822                | TT                              | GG                | 1945911186               |
| SNP_P3_24175_32203866 | NC_021161.1    | Ca_kabuli_chr02 | 32203866                | GG                              | CC                | 1945911187               |
| SNP_P3_24176_32204169 | NC_021161.1    | Ca_kabuli_chr02 | 32204169                | AA                              | GG                | 1945911189               |
| SNP_P3_24177_32208817 | NC_021161.1    | Ca_kabuli_chr02 | 32208817                | TT                              | CC                | 1945911191               |
| SNP_P3_24178_32208824 | NC_021161.1    | Ca_kabuli_chr02 | 32208824                | AA                              | TT                | 1945911193               |
| SNP_P3_24179_32208852 | NC_021161.1    | Ca_kabuli_chr02 | 32208852                | AA                              | GG                | 1945911194               |
| SNP_P3_24180_32208937 | NC_021161.1    | Ca_kabuli_chr02 | 32208937                | TT                              | CC                | 1945911196               |
| SNP_P3_24181_32208965 | NC_021161.1    | Ca_kabuli_chr02 | 32208965                | TT                              | CC                | 1945911198               |
| SNP_P3_24182_32209005 | NC_021161.1    | Ca_kabuli_chr02 | 32209005                | TT                              | AA                | 1945911200               |
| SNP_P3_24183_32209035 | NC_021161.1    | Ca_kabuli_chr02 | 32209035                | TT                              | AA                | 1945911202               |
| SNP_P3_24185_32209145 | NC_021161.1    | Ca_kabuli_chr02 | 32209145                | GG                              | TT                | 1945911203               |
| SNP_P3_24186_32209158 | NC_021161.1    | Ca_kabuli_chr02 | 32209158                | CC                              | TT                | 1945911205               |
| SNP_P3_24187_32209171 | NC_021161.1    | Ca_kabuli_chr02 | 32209171                | AA                              | CC                | 1945911207               |
| SNP_P3_24188_32209179 | NC_021161.1    | Ca_kabuli_chr02 | 32209179                | GG                              | AA                | 1945911209               |
| SNP_P3_24189_32209201 | NC_021161.1    | Ca_kabuli_chr02 | 32209201                | AA                              | CC                | 1945911210               |
| SNP_P3_24190_32209208 | NC_021161.1    | Ca_kabuli_chr02 | 32209208                | CC                              | TT                | 1945911212               |
| SNP_P3_24191_32209291 | NC_021161.1    | Ca_kabuli_chr02 | 32209291                | GG                              | CC                | 1945911214               |

| SNPs IDs              | Chromosome IDs | Chromosomes     | Physical positions (bp) | CDC Frontier (Reference genome) | (Pusa 256 & HPNB) | NCBI SNPdb Accession IDs |
|-----------------------|----------------|-----------------|-------------------------|---------------------------------|-------------------|--------------------------|
| SNP_P3_24192_32209319 | NC_021161.1    | Ca_kabuli_chr02 | 32209319                | CC                              | AA                | 1945911216               |
| SNP_P3_24194_32209368 | NC_021161.1    | Ca_kabuli_chr02 | 32209368                | TT                              | CC                | 1945911218               |
| SNP_P3_24195_32209427 | NC_021161.1    | Ca_kabuli_chr02 | 32209427                | AA                              | CC                | 1945911219               |
| SNP_P3_24196_32209429 | NC_021161.1    | Ca_kabuli_chr02 | 32209429                | AA                              | TT                | 1945911221               |
| SNP_P3_24197_32209435 | NC_021161.1    | Ca_kabuli_chr02 | 32209435                | GG                              | AA                | 1945911223               |
| SNP_P3_24198_32209468 | NC_021161.1    | Ca_kabuli_chr02 | 32209468                | TT                              | AA                | 1945911225               |
| SNP_P3_24199_32209479 | NC_021161.1    | Ca_kabuli_chr02 | 32209479                | CC                              | TT                | 1945911226               |
| SNP_P3_24200_32209606 | NC_021161.1    | Ca_kabuli_chr02 | 32209606                | GG                              | AA                | 1945911228               |
| SNP_P3_24201_32209621 | NC_021161.1    | Ca_kabuli_chr02 | 32209621                | TT                              | CC                | 1945911230               |
| SNP_P3_24202_32209631 | NC_021161.1    | Ca_kabuli_chr02 | 32209631                | GG                              | TT                | 1945911232               |
| SNP_P3_24203_32209648 | NC_021161.1    | Ca_kabuli_chr02 | 32209648                | CC                              | GG                | 1945911234               |
| SNP_P3_24204_32209663 | NC_021161.1    | Ca_kabuli_chr02 | 32209663                | AA                              | CC                | 1945911235               |
| SNP_P3_24206_32209729 | NC_021161.1    | Ca_kabuli_chr02 | 32209729                | TT                              | AA                | 1945911237               |
| SNP_P3_24207_32209742 | NC_021161.1    | Ca_kabuli_chr02 | 32209742                | AA                              | CC                | 1945911239               |
| SNP_P3_24208_32209766 | NC_021161.1    | Ca_kabuli_chr02 | 32209766                | AA                              | GG                | 1945911241               |
| SNP_P3_24209_32209793 | NC_021161.1    | Ca_kabuli_chr02 | 32209793                | AA                              | CC                | 1945911242               |
| SNP_P3_24210_32209845 | NC_021161.1    | Ca_kabuli_chr02 | 32209845                | GG                              | AA                | 1945911244               |
| SNP_P3_24211_32209871 | NC_021161.1    | Ca_kabuli_chr02 | 32209871                | GG                              | CC                | 1945911246               |
| SNP_P3_24212_32209910 | NC_021161.1    | Ca_kabuli_chr02 | 32209910                | TT                              | GG                | 1945911248               |
| SNP_P3_24213_32209927 | NC_021161.1    | Ca_kabuli_chr02 | 32209927                | CC                              | GG                | 1945911249               |
| SNP_P3_24214_32209990 | NC_021161.1    | Ca_kabuli_chr02 | 32209990                | CC                              | TT                | 1945911251               |
| SNP_P3_24215_32210010 | NC_021161.1    | Ca_kabuli_chr02 | 32210010                | AA                              | CC                | 1945911253               |
| SNP_P3_24216_32210049 | NC_021161.1    | Ca_kabuli_chr02 | 32210049                | AA                              | GG                | 1945911255               |
| SNP_P3_24218_32210189 | NC_021161.1    | Ca_kabuli_chr02 | 32210189                | AA                              | TT                | 1945911257               |
| SNP_P3_24220_32210302 | NC_021161.1    | Ca_kabuli_chr02 | 32210302                | GG                              | AA                | 1945911258               |
| SNP_P3_24221_32210824 | NC_021161.1    | Ca_kabuli_chr02 | 32210824                | AA                              | TT                | 1945911260               |
| SNP_P3_24222_32211546 | NC_021161.1    | Ca_kabuli_chr02 | 32211546                | CC                              | AA                | 1945911262               |
| SNP_P3_24223_32211592 | NC_021161.1    | Ca_kabuli_chr02 | 32211592                | GG                              | TT                | 1945911264               |
| SNP_P3_24224_32211738 | NC_021161.1    | Ca_kabuli_chr02 | 32211738                | AA                              | GG                | 1945911265               |
| SNP_P3_24226_32211870 | NC_021161.1    | Ca_kabuli_chr02 | 32211870                | AA                              | TT                | 1945911267               |
| SNP_P3_24227_32211898 | NC_021161.1    | Ca_kabuli_chr02 | 32211898                | TT                              | GG                | 1945911269               |
| SNP_P3_24228_32212178 | NC_021161.1    | Ca_kabuli_chr02 | 32212178                | CC                              | AA                | 1945911271               |
| SNP_P3_24229_32212180 | NC_021161.1    | Ca_kabuli_chr02 | 32212180                | TT                              | CC                | 1945911273               |
| SNP_P3_24230_32212260 | NC_021161.1    | Ca_kabuli_chr02 | 32212260                | CC                              | TT                | 1945911274               |
| SNP_P3_24231_32212483 | NC_021161.1    | Ca_kabuli_chr02 | 32212483                | GG                              | AA                | 1945911276               |
| SNP_P3_24232_32212491 | NC_021161.1    | Ca_kabuli_chr02 | 32212491                | CC                              | TT                | 1945911278               |
| SNP_P3_24233_32212504 | NC_021161.1    | Ca_kabuli_chr02 | 32212504                | AA                              | GG                | 1945911280               |
| SNP_P3_24234_32212519 | NC_021161.1    | Ca_kabuli_chr02 | 32212519                | GG                              | AA                | 1945911281               |
| SNP_P3_24235_32212607 | NC_021161.1    | Ca_kabuli_chr02 | 32212607                | TT                              | AA                | 1945911283               |
| SNP_P3_24236_32212622 | NC_021161.1    | Ca_kabuli_chr02 | 32212622                | TT                              | AA                | 1945911285               |
| SNP_P3_24237_32212681 | NC_021161.1    | Ca_kabuli_chr02 | 32212681                | GG                              | TT                | 1945911287               |
| SNP_P3_24239_32213346 | NC_021161.1    | Ca_kabuli_chr02 | 32213346                | CC                              | TT                | 1945911289               |

| SNPs IDs              | Chromosome IDs | Chromosomes     | Physical positions (bp) | CDC Frontier (Reference genome) | (Pusa 256 & HPNB) | NCBI SNPdb Accession IDs |
|-----------------------|----------------|-----------------|-------------------------|---------------------------------|-------------------|--------------------------|
| SNP_P3_24240_32213351 | NC_021161.1    | Ca_kabuli_chr02 | 32213351                | CC                              | TT                | 1945911290               |
| SNP_P3_24241_32213382 | NC_021161.1    | Ca_kabuli_chr02 | 32213382                | TT                              | AA                | 1945911292               |
| SNP_P3_24242_32213420 | NC_021161.1    | Ca_kabuli_chr02 | 32213420                | GG                              | AA                | 1945911294               |
| SNP_P3_24244_32213793 | NC_021161.1    | Ca_kabuli_chr02 | 32213793                | CC                              | TT                | 1945911296               |
| SNP_P3_24245_32213807 | NC_021161.1    | Ca_kabuli_chr02 | 32213807                | CC                              | TT                | 1945911297               |
| SNP_P3_24246_32213929 | NC_021161.1    | Ca_kabuli_chr02 | 32213929                | AA                              | CC                | 1945911299               |
| SNP_P3_24247_32213967 | NC_021161.1    | Ca_kabuli_chr02 | 32213967                | CC                              | TT                | 1945911301               |
| SNP_P3_24248_32216465 | NC_021161.1    | Ca_kabuli_chr02 | 32216465                | CC                              | TT                | 1945911303               |
| SNP_P3_24249_32216698 | NC_021161.1    | Ca_kabuli_chr02 | 32216698                | AA                              | GG                | 1945911305               |
| SNP_P3_24250_32216917 | NC_021161.1    | Ca_kabuli_chr02 | 32216917                | CC                              | GG                | 1945911306               |
| SNP_P3_24251_32218029 | NC_021161.1    | Ca_kabuli_chr02 | 32218029                | TT                              | GG                | 1945911308               |
| SNP_P3_24252_32218109 | NC_021161.1    | Ca_kabuli_chr02 | 32218109                | GG                              | AA                | 1945911310               |
| SNP_P3_24253_32218143 | NC_021161.1    | Ca_kabuli_chr02 | 32218143                | GG                              | AA                | 1945911312               |
| SNP_P3_24256_32218774 | NC_021161.1    | Ca_kabuli_chr02 | 32218774                | CC                              | TT                | 1945911313               |
| SNP_P3_24257_32219945 | NC_021161.1    | Ca_kabuli_chr02 | 32219945                | GG                              | AA                | 1945911315               |
| SNP_P3_24258_32220952 | NC_021161.1    | Ca_kabuli_chr02 | 32220952                | TT                              | CC                | 1945911317               |
| SNP_P3_24260_32221268 | NC_021161.1    | Ca_kabuli_chr02 | 32221268                | TT                              | AA                | 1945911319               |
| SNP_P3_24262_32222665 | NC_021161.1    | Ca_kabuli_chr02 | 32222665                | GG                              | AA                | 1945911321               |
| SNP_P3_24263_32222927 | NC_021161.1    | Ca_kabuli_chr02 | 32222927                | AA                              | GG                | 1945911322               |
| SNP_P3_24264_32222940 | NC_021161.1    | Ca_kabuli_chr02 | 32222940                | CC                              | GG                | 1945911324               |
| SNP_P3_24265_32222942 | NC_021161.1    | Ca_kabuli_chr02 | 32222942                | TT                              | CC                | 1945911326               |
| SNP_P3_24266_32222975 | NC_021161.1    | Ca_kabuli_chr02 | 32222975                | CC                              | TT                | 1945911328               |
| SNP_P3_24267_32222985 | NC_021161.1    | Ca_kabuli_chr02 | 32222985                | CC                              | AA                | 1945911329               |
| SNP_P3_24268_32223019 | NC_021161.1    | Ca_kabuli_chr02 | 32223019                | AA                              | GG                | 1945911331               |
| SNP_P3_24269_32224017 | NC_021161.1    | Ca_kabuli_chr02 | 32224017                | AA                              | CC                | 1945911333               |
| SNP_P3_24270_32224233 | NC_021161.1    | Ca_kabuli_chr02 | 32224233                | GG                              | AA                | 1945911335               |
| SNP_P3_24271_32231812 | NC_021161.1    | Ca_kabuli_chr02 | 32231812                | CC                              | TT                | 1945911336               |
| SNP_P3_24274_32235022 | NC_021161.1    | Ca_kabuli_chr02 | 32235022                | GG                              | AA                | 1945911338               |
| SNP_P3_24275_32235661 | NC_021161.1    | Ca_kabuli_chr02 | 32235661                | CC                              | TT                | 1945911340               |
| SNP_P3_24276_32235665 | NC_021161.1    | Ca_kabuli_chr02 | 32235665                | TT                              | CC                | 1945911342               |
| SNP_P3_24277_32235666 | NC_021161.1    | Ca_kabuli_chr02 | 32235666                | CC                              | TT                | 1945911344               |
| SNP_P3_24278_32235668 | NC_021161.1    | Ca_kabuli_chr02 | 32235668                | TT                              | AA                | 1945911345               |
| SNP_P3_24279_32235683 | NC_021161.1    | Ca_kabuli_chr02 | 32235683                | GG                              | TT                | 1945911347               |
| SNP_P3_24280_32235987 | NC_021161.1    | Ca_kabuli_chr02 | 32235987                | AA                              | CC                | 1945911349               |
| SNP_P3_24281_32236038 | NC_021161.1    | Ca_kabuli_chr02 | 32236038                | CC                              | TT                | 1945911351               |
| SNP_P3_24282_32237576 | NC_021161.1    | Ca_kabuli_chr02 | 32237576                | TT                              | CC                | 1945911352               |
| SNP_P3_24283_32237635 | NC_021161.1    | Ca_kabuli_chr02 | 32237635                | GG                              | AA                | 1945911354               |
| SNP_P3_24284_32237930 | NC_021161.1    | Ca_kabuli_chr02 | 32237930                | GG                              | AA                | 1945911356               |
| SNP_P3_24285_32237948 | NC_021161.1    | Ca_kabuli_chr02 | 32237948                | GG                              | AA                | 1945911358               |
| SNP_P3_24286_32239761 | NC_021161.1    | Ca_kabuli_chr02 | 32239761                | GG                              | TT                | 1945911360               |
| SNP_P3_24287_32241225 | NC_021161.1    | Ca_kabuli_chr02 | 32241225                | GG                              | AA                | 1945911361               |
| SNP_P3_24288_32241275 | NC_021161.1    | Ca_kabuli_chr02 | 32241275                | TT                              | AA                | 1945911363               |

| SNPs IDs              | Chromosome IDs | Chromosomes     | Physical positions (bp) | CDC Frontier (Reference genome) | (Pusa 256 & HPNB) | NCBI SNPdb Accession IDs |
|-----------------------|----------------|-----------------|-------------------------|---------------------------------|-------------------|--------------------------|
| SNP_P3_24289_32242169 | NC_021161.1    | Ca_kabuli_chr02 | 32242169                | TT                              | CC                | 1945911365               |
| SNP_P3_24290_32242202 | NC_021161.1    | Ca_kabuli_chr02 | 32242202                | GG                              | CC                | 1945911367               |
| SNP_P3_24291_32244048 | NC_021161.1    | Ca_kabuli_chr02 | 32244048                | CC                              | AA                | 1945911368               |
| SNP_P3_24292_32244057 | NC_021161.1    | Ca_kabuli_chr02 | 32244057                | GG                              | AA                | 1945911370               |
| SNP_P3_24293_32244493 | NC_021161.1    | Ca_kabuli_chr02 | 32244493                | CC                              | TT                | 1945911372               |
| SNP_P3_24294_32244603 | NC_021161.1    | Ca_kabuli_chr02 | 32244603                | TT                              | CC                | 1945911374               |
| SNP_P3_24295_32244615 | NC_021161.1    | Ca_kabuli_chr02 | 32244615                | TT                              | AA                | 1945911375               |
| SNP_P3_24296_32244665 | NC_021161.1    | Ca_kabuli_chr02 | 32244665                | TT                              | AA                | 1945911377               |
| SNP_P3_24297_32245422 | NC_021161.1    | Ca_kabuli_chr02 | 32245422                | AA                              | GG                | 1945911379               |
| SNP_P3_24298_32245641 | NC_021161.1    | Ca_kabuli_chr02 | 32245641                | GG                              | AA                | 1945911381               |
| SNP_P3_24300_32245678 | NC_021161.1    | Ca_kabuli_chr02 | 32245678                | TT                              | CC                | 1945911383               |
| SNP_P3_24301_32245866 | NC_021161.1    | Ca_kabuli_chr02 | 32245866                | TT                              | GG                | 1945911384               |
| SNP_P3_24302_32245890 | NC_021161.1    | Ca_kabuli_chr02 | 32245890                | TT                              | CC                | 1945911386               |
| SNP_P3_24304_32245988 | NC_021161.1    | Ca_kabuli_chr02 | 32245988                | CC                              | TT                | 1945911388               |
| SNP_P3_24305_32246073 | NC_021161.1    | Ca_kabuli_chr02 | 32246073                | GG                              | AA                | 1945911390               |
| SNP_P3_24306_32246083 | NC_021161.1    | Ca_kabuli_chr02 | 32246083                | CC                              | TT                | 1945911391               |
| SNP_P3_24307_32246131 | NC_021161.1    | Ca_kabuli_chr02 | 32246131                | GG                              | AA                | 1945911393               |
| SNP_P3_24308_32246155 | NC_021161.1    | Ca_kabuli_chr02 | 32246155                | GG                              | AA                | 1945911395               |
| SNP_P3_24309_32247144 | NC_021161.1    | Ca_kabuli_chr02 | 32247144                | AA                              | TT                | 1945911397               |
| SNP_P3_24310_32247200 | NC_021161.1    | Ca_kabuli_chr02 | 32247200                | TT                              | CC                | 1945911399               |
| SNP_P3_24311_32247330 | NC_021161.1    | Ca_kabuli_chr02 | 32247330                | AA                              | GG                | 1945911400               |
| SNP_P3_24312_32247753 | NC_021161.1    | Ca_kabuli_chr02 | 32247753                | CC                              | TT                | 1945911402               |
| SNP_P3_24313_32247814 | NC_021161.1    | Ca_kabuli_chr02 | 32247814                | AA                              | GG                | 1945911404               |
| SNP_P3_24314_32248689 | NC_021161.1    | Ca_kabuli_chr02 | 32248689                | GG                              | AA                | 1945911406               |
| SNP_P3_24315_32248714 | NC_021161.1    | Ca_kabuli_chr02 | 32248714                | GG                              | AA                | 1945911407               |
| SNP_P3_24316_32248732 | NC_021161.1    | Ca_kabuli_chr02 | 32248732                | CC                              | TT                | 1945911409               |
| SNP_P3_24317_32248738 | NC_021161.1    | Ca_kabuli_chr02 | 32248738                | TT                              | AA                | 1945911411               |
| SNP_P3_24318_32251355 | NC_021161.1    | Ca_kabuli_chr02 | 32251355                | GG                              | TT                | 1945911413               |
| SNP_P3_24319_32251377 | NC_021161.1    | Ca_kabuli_chr02 | 32251377                | GG                              | AA                | 1945911415               |
| SNP_P3_24320_32252390 | NC_021161.1    | Ca_kabuli_chr02 | 32252390                | CC                              | GG                | 1945911416               |
| SNP_P3_24321_32253026 | NC_021161.1    | Ca_kabuli_chr02 | 32253026                | AA                              | TT                | 1945911418               |
| SNP_P3_24323_32255625 | NC_021161.1    | Ca_kabuli_chr02 | 32255625                | GG                              | CC                | 1945911420               |
| SNP_P3_24324_32256775 | NC_021161.1    | Ca_kabuli_chr02 | 32256775                | GG                              | AA                | 1945911422               |
| SNP_P3_24325_32256779 | NC_021161.1    | Ca_kabuli_chr02 | 32256779                | GG                              | AA                | 1945911423               |
| SNP_P3_24326_32257177 | NC_021161.1    | Ca_kabuli_chr02 | 32257177                | TT                              | AA                | 1945911425               |
| SNP_P3_24327_32257976 | NC_021161.1    | Ca_kabuli_chr02 | 32257976                | GG                              | AA                | 1945911427               |
| SNP_P3_24328_32258021 | NC_021161.1    | Ca_kabuli_chr02 | 32258021                | TT                              | GG                | 1945911429               |
| SNP_P3_24329_32258027 | NC_021161.1    | Ca_kabuli_chr02 | 32258027                | AA                              | GG                | 1945911431               |
| SNP_P3_24330_32258938 | NC_021161.1    | Ca_kabuli_chr02 | 32258938                | CC                              | GG                | 1945911432               |
| SNP_P3_24332_32259713 | NC_021161.1    | Ca_kabuli_chr02 | 32259713                | CC                              | GG                | 1945911434               |
| SNP_P3_24333_32259808 | NC_021161.1    | Ca_kabuli_chr02 | 32259808                | AA                              | CC                | 1945911436               |
| SNP_P3_24334_32259982 | NC_021161.1    | Ca_kabuli_chr02 | 32259982                | GG                              | TT                | 1945911438               |



| SNPs IDs              | Chromosome IDs | Chromosomes     | Physical positions (bp) | CDC Frontier (Reference genome) | (Pusa 256 & HPNB) | NCBI SNPdb Accession IDs |
|-----------------------|----------------|-----------------|-------------------------|---------------------------------|-------------------|--------------------------|
| SNP_P3_24335_32259984 | NC_021161.1    | Ca_kabuli_chr02 | 32259984                | AA                              | TT                | 1945911439               |
| SNP_P3_24338_32261069 | NC_021161.1    | Ca_kabuli_chr02 | 32261069                | AA                              | GG                | 1945911441               |
| SNP_P3_24339_32261573 | NC_021161.1    | Ca_kabuli_chr02 | 32261573                | CC                              | TT                | 1945911443               |
| SNP_P3_24340_32261631 | NC_021161.1    | Ca_kabuli_chr02 | 32261631                | CC                              | AA                | 1945911445               |
| SNP_P3_24341_32261727 | NC_021161.1    | Ca_kabuli_chr02 | 32261727                | CC                              | TT                | 1945911446               |
| SNP_P3_24342_32261732 | NC_021161.1    | Ca_kabuli_chr02 | 32261732                | CC                              | TT                | 1945911448               |
| SNP_P3_24343_32261758 | NC_021161.1    | Ca_kabuli_chr02 | 32261758                | CC                              | AA                | 1945911450               |
| SNP_P3_24345_32261856 | NC_021161.1    | Ca_kabuli_chr02 | 32261856                | CC                              | TT                | 1945911452               |
| SNP_P3_24346_32261882 | NC_021161.1    | Ca_kabuli_chr02 | 32261882                | GG                              | AA                | 1945911454               |
| SNP_P3_24347_32261930 | NC_021161.1    | Ca_kabuli_chr02 | 32261930                | AA                              | GG                | 1945911455               |
| SNP_P3_24349_32262049 | NC_021161.1    | Ca_kabuli_chr02 | 32262049                | AA                              | GG                | 1945911457               |
| SNP_P3_24350_32262135 | NC_021161.1    | Ca_kabuli_chr02 | 32262135                | TT                              | CC                | 1945911459               |
| SNP_P3_24352_32262390 | NC_021161.1    | Ca_kabuli_chr02 | 32262390                | AA                              | TT                | 1945911461               |
| SNP_P3_24353_32262503 | NC_021161.1    | Ca_kabuli_chr02 | 32262503                | CC                              | AA                | 1945911462               |
| SNP_P3_24356_32262821 | NC_021161.1    | Ca_kabuli_chr02 | 32262821                | CC                              | GG                | 1945911464               |
| SNP_P3_24357_32262840 | NC_021161.1    | Ca_kabuli_chr02 | 32262840                | TT                              | AA                | 1945911466               |
| SNP_P3_24359_32262979 | NC_021161.1    | Ca_kabuli_chr02 | 32262979                | AA                              | TT                | 1945911468               |
| SNP_P3_24361_32263499 | NC_021161.1    | Ca_kabuli_chr02 | 32263499                | GG                              | CC                | 1945911470               |
| SNP_P3_24362_32264733 | NC_021161.1    | Ca_kabuli_chr02 | 32264733                | TT                              | GG                | 1945911471               |
| SNP_P3_24363_32264779 | NC_021161.1    | Ca_kabuli_chr02 | 32264779                | GG                              | AA                | 1945911473               |
| SNP_P3_24364_32265171 | NC_021161.1    | Ca_kabuli_chr02 | 32265171                | AA                              | CC                | 1945911475               |
| SNP_P3_24365_32265172 | NC_021161.1    | Ca_kabuli_chr02 | 32265172                | TT                              | CC                | 1945911477               |
| SNP_P3_24366_32265216 | NC_021161.1    | Ca_kabuli_chr02 | 32265216                | TT                              | CC                | 1945911478               |
| SNP_P3_24367_32265253 | NC_021161.1    | Ca_kabuli_chr02 | 32265253                | AA                              | GG                | 1945911480               |
| SNP_P3_24368_32265255 | NC_021161.1    | Ca_kabuli_chr02 | 32265255                | AA                              | CC                | 1945911482               |
| SNP_P3_24369_32265256 | NC_021161.1    | Ca_kabuli_chr02 | 32265256                | CC                              | TT                | 1945911484               |
| SNP_P3_24370_32267376 | NC_021161.1    | Ca_kabuli_chr02 | 32267376                | GG                              | AA                | 1945911486               |
| SNP_P3_24371_32269913 | NC_021161.1    | Ca_kabuli_chr02 | 32269913                | AA                              | GG                | 1945911487               |
| SNP_P3_24372_32269975 | NC_021161.1    | Ca_kabuli_chr02 | 32269975                | CC                              | TT                | 1945911489               |
| SNP_P3_24373_32269981 | NC_021161.1    | Ca_kabuli_chr02 | 32269981                | CC                              | GG                | 1945911491               |
| SNP_P3_24374_32270077 | NC_021161.1    | Ca_kabuli_chr02 | 32270077                | TT                              | CC                | 1945911493               |
| SNP_P3_24375_32270182 | NC_021161.1    | Ca_kabuli_chr02 | 32270182                | TT                              | CC                | 1945911494               |
| SNP_P3_24376_32270188 | NC_021161.1    | Ca_kabuli_chr02 | 32270188                | AA                              | GG                | 1945911496               |
| SNP_P3_24377_32270594 | NC_021161.1    | Ca_kabuli_chr02 | 32270594                | AA                              | GG                | 1945911498               |
| SNP_P3_24378_32270966 | NC_021161.1    | Ca_kabuli_chr02 | 32270966                | GG                              | CC                | 1945911500               |
| SNP_P3_24379_32271331 | NC_021161.1    | Ca_kabuli_chr02 | 32271331                | AA                              | TT                | 1945911502               |
| SNP_P3_24380_32271334 | NC_021161.1    | Ca_kabuli_chr02 | 32271334                | AA                              | TT                | 1945911503               |
| SNP_P3_24381_32271462 | NC_021161.1    | Ca_kabuli_chr02 | 32271462                | TT                              | AA                | 1945911505               |
| SNP_P3_24382_32271472 | NC_021161.1    | Ca_kabuli_chr02 | 32271472                | AA                              | CC                | 1945911507               |
| SNP_P3_24383_32271487 | NC_021161.1    | Ca_kabuli_chr02 | 32271487                | CC                              | AA                | 1945911509               |
| SNP_P3_24384_32271857 | NC_021161.1    | Ca_kabuli_chr02 | 32271857                | GG                              | AA                | 1945911510               |
| SNP_P3_24385_32271862 | NC_021161.1    | Ca_kabuli_chr02 | 32271862                | CC                              | AA                | 1945911512               |

| SNPs IDs              | Chromosome IDs | Chromosomes     | Physical positions (bp) | CDC Frontier (Reference genome) | (Pusa 256 & HPNB) | NCBI SNPdb Accession IDs |
|-----------------------|----------------|-----------------|-------------------------|---------------------------------|-------------------|--------------------------|
| SNP_P3_24386_32271884 | NC_021161.1    | Ca_kabuli_chr02 | 32271884                | AA                              | TT                | 1945911514               |
| SNP_P3_24387_32271965 | NC_021161.1    | Ca_kabuli_chr02 | 32271965                | AA                              | GG                | 1945911516               |
| SNP_P3_24388_32272000 | NC_021161.1    | Ca_kabuli_chr02 | 32272000                | TT                              | GG                | 1945911517               |
| SNP_P3_24389_32272059 | NC_021161.1    | Ca_kabuli_chr02 | 32272059                | AA                              | TT                | 1945911519               |
| SNP_P3_24390_32272061 | NC_021161.1    | Ca_kabuli_chr02 | 32272061                | CC                              | TT                | 1945911521               |
| SNP_P3_24391_32272110 | NC_021161.1    | Ca_kabuli_chr02 | 32272110                | GG                              | AA                | 1945911523               |
| SNP_P3_24392_32272128 | NC_021161.1    | Ca_kabuli_chr02 | 32272128                | GG                              | AA                | 1945911525               |
| SNP_P3_24393_32272131 | NC_021161.1    | Ca_kabuli_chr02 | 32272131                | AA                              | TT                | 1945911526               |
| SNP_P3_24394_32272237 | NC_021161.1    | Ca_kabuli_chr02 | 32272237                | TT                              | GG                | 1945911528               |
| SNP_P3_24395_32272368 | NC_021161.1    | Ca_kabuli_chr02 | 32272368                | AA                              | GG                | 1945911530               |
| SNP_P3_24396_32272435 | NC_021161.1    | Ca_kabuli_chr02 | 32272435                | AA                              | GG                | 1945911532               |
| SNP_P3_24397_32272771 | NC_021161.1    | Ca_kabuli_chr02 | 32272771                | CC                              | AA                | 1945911533               |
| SNP_P3_24398_32272784 | NC_021161.1    | Ca_kabuli_chr02 | 32272784                | CC                              | AA                | 1945911535               |
| SNP_P3_24399_32274005 | NC_021161.1    | Ca_kabuli_chr02 | 32274005                | AA                              | GG                | 1945911537               |
| SNP_P3_24400_32280300 | NC_021161.1    | Ca_kabuli_chr02 | 32280300                | TT                              | CC                | 1945911539               |
| SNP_P3_24401_32282030 | NC_021161.1    | Ca_kabuli_chr02 | 32282030                | GG                              | CC                | 1945911541               |
| SNP_P3_24403_32285872 | NC_021161.1    | Ca_kabuli_chr02 | 32285872                | TT                              | AA                | 1945911542               |
| SNP_P3_24404_32288475 | NC_021161.1    | Ca_kabuli_chr02 | 32288475                | CC                              | AA                | 1945911544               |
| SNP_P3_24405_32289390 | NC_021161.1    | Ca_kabuli_chr02 | 32289390                | TT                              | CC                | 1945911546               |
| SNP_P3_24406_32289412 | NC_021161.1    | Ca_kabuli_chr02 | 32289412                | GG                              | AA                | 1945911548               |
| SNP_P3_24407_32289979 | NC_021161.1    | Ca_kabuli_chr02 | 32289979                | GG                              | TT                | 1945911549               |
| SNP_P3_24411_32290445 | NC_021161.1    | Ca_kabuli_chr02 | 32290445                | CC                              | TT                | 1945911551               |
| SNP_P3_24412_32290479 | NC_021161.1    | Ca_kabuli_chr02 | 32290479                | CC                              | TT                | 1945911553               |
| SNP_P3_24413_32290503 | NC_021161.1    | Ca_kabuli_chr02 | 32290503                | TT                              | GG                | 1945911555               |
| SNP_P3_24414_32290508 | NC_021161.1    | Ca_kabuli_chr02 | 32290508                | TT                              | CC                | 1945911556               |
| SNP_P3_24415_32290521 | NC_021161.1    | Ca_kabuli_chr02 | 32290521                | TT                              | GG                | 1945911558               |
| SNP_P3_24416_32290568 | NC_021161.1    | Ca_kabuli_chr02 | 32290568                | CC                              | TT                | 1945911560               |
| SNP_P3_24417_32290611 | NC_021161.1    | Ca_kabuli_chr02 | 32290611                | CC                              | TT                | 1945911562               |
| SNP_P3_24418_32291751 | NC_021161.1    | Ca_kabuli_chr02 | 32291751                | CC                              | TT                | 1945911564               |
| SNP_P3_24419_32291794 | NC_021161.1    | Ca_kabuli_chr02 | 32291794                | CC                              | TT                | 1945911565               |
| SNP_P3_24420_32291861 | NC_021161.1    | Ca_kabuli_chr02 | 32291861                | CC                              | TT                | 1945911567               |
| SNP_P3_24421_32291894 | NC_021161.1    | Ca_kabuli_chr02 | 32291894                | AA                              | CC                | 1945911569               |
| SNP_P3_24422_32292240 | NC_021161.1    | Ca_kabuli_chr02 | 32292240                | CC                              | TT                | 1945911571               |
| SNP_P3_24423_32292248 | NC_021161.1    | Ca_kabuli_chr02 | 32292248                | TT                              | GG                | 1945911572               |
| SNP_P3_24424_32292381 | NC_021161.1    | Ca_kabuli_chr02 | 32292381                | TT                              | GG                | 1945911574               |
| SNP_P3_24425_32292420 | NC_021161.1    | Ca_kabuli_chr02 | 32292420                | GG                              | AA                | 1945911576               |
| SNP_P3_24426_32293554 | NC_021161.1    | Ca_kabuli_chr02 | 32293554                | CC                              | TT                | 1945911578               |
| SNP_P3_24428_32294394 | NC_021161.1    | Ca_kabuli_chr02 | 32294394                | AA                              | GG                | 1945911580               |
| SNP_P3_24429_32294480 | NC_021161.1    | Ca_kabuli_chr02 | 32294480                | GG                              | AA                | 1945911581               |
| SNP_P3_24430_32294542 | NC_021161.1    | Ca_kabuli_chr02 | 32294542                | TT                              | CC                | 1945911583               |
| SNP_P3_24431_32294598 | NC_021161.1    | Ca_kabuli_chr02 | 32294598                | CC                              | TT                | 1945911585               |
| SNP_P3_24432_32294640 | NC_021161.1    | Ca_kabuli_chr02 | 32294640                | AA                              | GG                | 1945911587               |

| SNPs IDs              | Chromosome IDs | Chromosomes     | Physical positions (bp) | CDC Frontier (Reference genome) | (Pusa 256 & HPNB) | NCBI SNPdb Accession IDs |
|-----------------------|----------------|-----------------|-------------------------|---------------------------------|-------------------|--------------------------|
| SNP_P3_24433_32294691 | NC_021161.1    | Ca_kabuli_chr02 | 32294691                | AA                              | TT                | 1945911588               |
| SNP_P3_24434_32295291 | NC_021161.1    | Ca_kabuli_chr02 | 32295291                | GG                              | AA                | 1945911590               |
| SNP_P3_24435_32295319 | NC_021161.1    | Ca_kabuli_chr02 | 32295319                | GG                              | CC                | 1945911592               |
| SNP_P3_24436_32296407 | NC_021161.1    | Ca_kabuli_chr02 | 32296407                | TT                              | CC                | 1945911594               |
| SNP_P3_24437_32296459 | NC_021161.1    | Ca_kabuli_chr02 | 32296459                | AA                              | GG                | 1945911596               |
| SNP_P3_24438_32296544 | NC_021161.1    | Ca_kabuli_chr02 | 32296544                | TT                              | CC                | 1945911597               |
| SNP_P3_24439_32299258 | NC_021161.1    | Ca_kabuli_chr02 | 32299258                | CC                              | AA                | 1945911599               |
| SNP_P3_24440_32316601 | NC_021161.1    | Ca_kabuli_chr02 | 32316601                | GG                              | AA                | 1945911601               |
| SNP_P3_24441_32316602 | NC_021161.1    | Ca_kabuli_chr02 | 32316602                | CC                              | TT                | 1945911603               |
| SNP_P3_24442_32316618 | NC_021161.1    | Ca_kabuli_chr02 | 32316618                | CC                              | TT                | 1945911604               |
| SNP_P3_24443_32317305 | NC_021161.1    | Ca_kabuli_chr02 | 32317305                | GG                              | AA                | 1945911606               |
| SNP_P3_24444_32321545 | NC_021161.1    | Ca_kabuli_chr02 | 32321545                | CC                              | GG                | 1945911608               |
| SNP_P3_24445_32321942 | NC_021161.1    | Ca_kabuli_chr02 | 32321942                | AA                              | CC                | 1945911610               |
| SNP_P3_24446_32321970 | NC_021161.1    | Ca_kabuli_chr02 | 32321970                | AA                              | GG                | 1945911611               |
| SNP_P3_24447_32326402 | NC_021161.1    | Ca_kabuli_chr02 | 32326402                | TT                              | CC                | 1945911613               |
| SNP_P3_24449_32326903 | NC_021161.1    | Ca_kabuli_chr02 | 32326903                | AA                              | GG                | 1945911615               |
| SNP_P3_24450_32326916 | NC_021161.1    | Ca_kabuli_chr02 | 32326916                | GG                              | AA                | 1945911617               |
| SNP_P3_24452_32328939 | NC_021161.1    | Ca_kabuli_chr02 | 32328939                | CC                              | TT                | 1945911619               |
| SNP_P3_24453_32330822 | NC_021161.1    | Ca_kabuli_chr02 | 32330822                | CC                              | TT                | 1945911620               |
| SNP_P3_24454_32334218 | NC_021161.1    | Ca_kabuli_chr02 | 32334218                | CC                              | AA                | 1945911622               |
| SNP_P3_24455_32338194 | NC_021161.1    | Ca_kabuli_chr02 | 32338194                | AA                              | GG                | 1945911624               |
| SNP_P3_24456_32338208 | NC_021161.1    | Ca_kabuli_chr02 | 32338208                | TT                              | AA                | 1945911626               |
| SNP_P3_24457_32338227 | NC_021161.1    | Ca_kabuli_chr02 | 32338227                | AA                              | TT                | 1945911627               |
| SNP_P3_24458_32339140 | NC_021161.1    | Ca_kabuli_chr02 | 32339140                | TT                              | AA                | 1945911629               |
| SNP_P3_24459_32339176 | NC_021161.1    | Ca_kabuli_chr02 | 32339176                | TT                              | CC                | 1945911631               |
| SNP_P3_24461_32339308 | NC_021161.1    | Ca_kabuli_chr02 | 32339308                | TT                              | GG                | 1945911633               |
| SNP_P3_24462_32339738 | NC_021161.1    | Ca_kabuli_chr02 | 32339738                | TT                              | CC                | 1945911635               |
| SNP_P3_24463_32339964 | NC_021161.1    | Ca_kabuli_chr02 | 32339964                | TT                              | CC                | 1945911636               |
| SNP_P3_24464_32339966 | NC_021161.1    | Ca_kabuli_chr02 | 32339966                | GG                              | AA                | 1945911638               |
| SNP_P3_24465_32340108 | NC_021161.1    | Ca_kabuli_chr02 | 32340108                | TT                              | CC                | 1945911640               |
| SNP_P3_24467_32344766 | NC_021161.1    | Ca_kabuli_chr02 | 32344766                | GG                              | AA                | 1945911642               |
| SNP_P3_24468_32347329 | NC_021161.1    | Ca_kabuli_chr02 | 32347329                | AA                              | TT                | 1945911643               |
| SNP_P3_24469_32347331 | NC_021161.1    | Ca_kabuli_chr02 | 32347331                | GG                              | AA                | 1945911645               |
| SNP_P3_24470_32347421 | NC_021161.1    | Ca_kabuli_chr02 | 32347421                | TT                              | CC                | 1945911647               |
| SNP_P3_24471_32347424 | NC_021161.1    | Ca_kabuli_chr02 | 32347424                | GG                              | AA                | 1945911649               |
| SNP_P3_24472_32347448 | NC_021161.1    | Ca_kabuli_chr02 | 32347448                | TT                              | GG                | 1945911651               |
| SNP_P3_24474_32347679 | NC_021161.1    | Ca_kabuli_chr02 | 32347679                | CC                              | TT                | 1945911652               |
| SNP_P3_24475_32347697 | NC_021161.1    | Ca_kabuli_chr02 | 32347697                | AA                              | GG                | 1945911654               |
| SNP_P3_24476_32348054 | NC_021161.1    | Ca_kabuli_chr02 | 32348054                | AA                              | TT                | 1945911656               |
| SNP_P3_24477_32348539 | NC_021161.1    | Ca_kabuli_chr02 | 32348539                | AA                              | GG                | 1945911658               |
| SNP_P3_24478_32348590 | NC_021161.1    | Ca_kabuli_chr02 | 32348590                | AA                              | GG                | 1945911659               |
| SNP_P3_24480_32348891 | NC_021161.1    | Ca_kabuli_chr02 | 32348891                | TT                              | AA                | 1945911661               |

| SNPs IDs              | Chromosome IDs | Chromosomes     | Physical positions (bp) | CDC Frontier (Reference genome) | (Pusa 256 & HPNB) | NCBI SNPdb Accession IDs |
|-----------------------|----------------|-----------------|-------------------------|---------------------------------|-------------------|--------------------------|
| SNP_P3_24481_32348933 | NC_021161.1    | Ca_kabuli_chr02 | 32348933                | GG                              | AA                | 1945911663               |
| SNP_P3_24482_32349865 | NC_021161.1    | Ca_kabuli_chr02 | 32349865                | AA                              | CC                | 1945911665               |
| SNP_P3_24485_32349961 | NC_021161.1    | Ca_kabuli_chr02 | 32349961                | TT                              | AA                | 1945911666               |
| SNP_P3_24486_32350247 | NC_021161.1    | Ca_kabuli_chr02 | 32350247                | AA                              | GG                | 1945911668               |
| SNP_P3_24487_32350263 | NC_021161.1    | Ca_kabuli_chr02 | 32350263                | GG                              | AA                | 1945911670               |
| SNP_P3_24488_32350265 | NC_021161.1    | Ca_kabuli_chr02 | 32350265                | GG                              | AA                | 1945911672               |
| SNP_P3_24489_32350332 | NC_021161.1    | Ca_kabuli_chr02 | 32350332                | GG                              | TT                | 1945911674               |
| SNP_P3_24490_32350737 | NC_021161.1    | Ca_kabuli_chr02 | 32350737                | CC                              | TT                | 1945911675               |
| SNP_P3_24491_32351155 | NC_021161.1    | Ca_kabuli_chr02 | 32351155                | TT                              | CC                | 1945911677               |
| SNP_P3_24492_32351202 | NC_021161.1    | Ca_kabuli_chr02 | 32351202                | GG                              | AA                | 1945911679               |
| SNP_P3_24493_32351741 | NC_021161.1    | Ca_kabuli_chr02 | 32351741                | AA                              | GG                | 1945911681               |
| SNP_P3_24494_32353222 | NC_021161.1    | Ca_kabuli_chr02 | 32353222                | TT                              | CC                | 1945911682               |
| SNP_P3_24495_32353252 | NC_021161.1    | Ca_kabuli_chr02 | 32353252                | GG                              | AA                | 1945911684               |
| SNP_P3_24496_32353255 | NC_021161.1    | Ca_kabuli_chr02 | 32353255                | GG                              | AA                | 1945911686               |
| SNP_P3_24497_32353381 | NC_021161.1    | Ca_kabuli_chr02 | 32353381                | TT                              | AA                | 1945911688               |
| SNP_P3_24499_32353486 | NC_021161.1    | Ca_kabuli_chr02 | 32353486                | AA                              | CC                | 1945911690               |
| SNP_P3_24500_32353489 | NC_021161.1    | Ca_kabuli_chr02 | 32353489                | TT                              | CC                | 1945911691               |
| SNP_P3_24501_32353540 | NC_021161.1    | Ca_kabuli_chr02 | 32353540                | AA                              | TT                | 1945911693               |
| SNP_P3_24502_32353719 | NC_021161.1    | Ca_kabuli_chr02 | 32353719                | AA                              | GG                | 1945911695               |
| SNP_P3_24503_32353760 | NC_021161.1    | Ca_kabuli_chr02 | 32353760                | AA                              | TT                | 1945911697               |
| SNP_P3_24504_32353935 | NC_021161.1    | Ca_kabuli_chr02 | 32353935                | AA                              | GG                | 1945911698               |
| SNP_P3_24505_32354257 | NC_021161.1    | Ca_kabuli_chr02 | 32354257                | TT                              | GG                | 1945911700               |
| SNP_P3_24506_32354291 | NC_021161.1    | Ca_kabuli_chr02 | 32354291                | CC                              | TT                | 1945911702               |
| SNP_P3_24509_32356334 | NC_021161.1    | Ca_kabuli_chr02 | 32356334                | CC                              | TT                | 1945911704               |
| SNP_P3_24510_32357963 | NC_021161.1    | Ca_kabuli_chr02 | 32357963                | GG                              | CC                | 1945911706               |
| SNP_P3_24511_32357965 | NC_021161.1    | Ca_kabuli_chr02 | 32357965                | CC                              | TT                | 1945911707               |
| SNP_P3_24512_32357995 | NC_021161.1    | Ca_kabuli_chr02 | 32357995                | CC                              | TT                | 1945911709               |
| SNP_P3_24513_32358428 | NC_021161.1    | Ca_kabuli_chr02 | 32358428                | AA                              | TT                | 1945911711               |
| SNP_P3_24514_32358583 | NC_021161.1    | Ca_kabuli_chr02 | 32358583                | GG                              | AA                | 1945911713               |
| SNP_P3_24515_32358898 | NC_021161.1    | Ca_kabuli_chr02 | 32358898                | CC                              | TT                | 1945911714               |
| SNP_P3_24518_32361282 | NC_021161.1    | Ca_kabuli_chr02 | 32361282                | TT                              | CC                | 1945911716               |
| SNP_P3_24519_32361335 | NC_021161.1    | Ca_kabuli_chr02 | 32361335                | AA                              | GG                | 1945911718               |
| SNP_P3_24520_32361358 | NC_021161.1    | Ca_kabuli_chr02 | 32361358                | GG                              | AA                | 1945911720               |
| SNP_P3_24521_32361592 | NC_021161.1    | Ca_kabuli_chr02 | 32361592                | TT                              | AA                | 1945911721               |
| SNP_P3_24522_32361660 | NC_021161.1    | Ca_kabuli_chr02 | 32361660                | TT                              | GG                | 1945911723               |
| SNP_P3_24523_32362240 | NC_021161.1    | Ca_kabuli_chr02 | 32362240                | TT                              | CC                | 1945911725               |
| SNP_P3_24524_32362420 | NC_021161.1    | Ca_kabuli_chr02 | 32362420                | TT                              | GG                | 1945911727               |
| SNP_P3_24525_32363642 | NC_021161.1    | Ca_kabuli_chr02 | 32363642                | CC                              | TT                | 1945911729               |
| SNP_P3_24526_32364021 | NC_021161.1    | Ca_kabuli_chr02 | 32364021                | GG                              | AA                | 1945911730               |
| SNP_P3_24527_32365927 | NC_021161.1    | Ca_kabuli_chr02 | 32365927                | TT                              | AA                | 1945911732               |
| SNP_P3_24528_32366214 | NC_021161.1    | Ca_kabuli_chr02 | 32366214                | CC                              | TT                | 1945911734               |
| SNP_P3_24529_32366331 | NC_021161.1    | Ca_kabuli_chr02 | 32366331                | GG                              | AA                | 1945911736               |

| SNPs IDs              | Chromosome IDs | Chromosomes     | Physical positions (bp) | CDC Frontier (Reference genome) | (Pusa 256 & HPNB) | NCBI SNPdb Accession IDs |
|-----------------------|----------------|-----------------|-------------------------|---------------------------------|-------------------|--------------------------|
| SNP_P3_24530_32366365 | NC_021161.1    | Ca_kabuli_chr02 | 32366365                | CC                              | TT                | 1945911737               |
| SNP_P3_24532_32367279 | NC_021161.1    | Ca_kabuli_chr02 | 32367279                | CC                              | TT                | 1945911739               |
| SNP_P3_24533_32367650 | NC_021161.1    | Ca_kabuli_chr02 | 32367650                | CC                              | TT                | 1945911741               |
| SNP_P3_24534_32367882 | NC_021161.1    | Ca_kabuli_chr02 | 32367882                | CC                              | TT                | 1945911743               |
| SNP_P3_24535_32368400 | NC_021161.1    | Ca_kabuli_chr02 | 32368400                | TT                              | CC                | 1945911745               |
| SNP_P3_24536_32368420 | NC_021161.1    | Ca_kabuli_chr02 | 32368420                | GG                              | TT                | 1945911746               |
| SNP_P3_24537_32368692 | NC_021161.1    | Ca_kabuli_chr02 | 32368692                | AA                              | CC                | 1945911748               |
| SNP_P3_24538_32368733 | NC_021161.1    | Ca_kabuli_chr02 | 32368733                | GG                              | AA                | 1945911750               |
| SNP_P3_24539_32369698 | NC_021161.1    | Ca_kabuli_chr02 | 32369698                | AA                              | CC                | 1945911752               |
| SNP_P3_24540_32369699 | NC_021161.1    | Ca_kabuli_chr02 | 32369699                | AA                              | CC                | 1945911753               |
| SNP_P3_24541_32370088 | NC_021161.1    | Ca_kabuli_chr02 | 32370088                | AA                              | CC                | 1945911755               |
| SNP_P3_24542_32370111 | NC_021161.1    | Ca_kabuli_chr02 | 32370111                | GG                              | AA                | 1945911757               |
| SNP_P3_24544_32371156 | NC_021161.1    | Ca_kabuli_chr02 | 32371156                | AA                              | GG                | 1945911759               |
| SNP_P3_24545_32371538 | NC_021161.1    | Ca_kabuli_chr02 | 32371538                | AA                              | TT                | 1945911761               |
| SNP_P3_24546_32372016 | NC_021161.1    | Ca_kabuli_chr02 | 32372016                | CC                              | AA                | 1945911762               |
| SNP_P3_24547_32372155 | NC_021161.1    | Ca_kabuli_chr02 | 32372155                | CC                              | TT                | 1945911764               |
| SNP_P3_24548_32372172 | NC_021161.1    | Ca_kabuli_chr02 | 32372172                | CC                              | AA                | 1945911766               |
| SNP_P3_24549_32372441 | NC_021161.1    | Ca_kabuli_chr02 | 32372441                | AA                              | TT                | 1945911768               |
| SNP_P3_24550_32372442 | NC_021161.1    | Ca_kabuli_chr02 | 32372442                | CC                              | TT                | 1945911769               |
| SNP_P3_24551_32374161 | NC_021161.1    | Ca_kabuli_chr02 | 32374161                | TT                              | CC                | 1945911771               |
| SNP_P3_24552_32374212 | NC_021161.1    | Ca_kabuli_chr02 | 32374212                | GG                              | AA                | 1945911773               |
| SNP_P3_24554_32377249 | NC_021161.1    | Ca_kabuli_chr02 | 32377249                | GG                              | AA                | 1945911775               |
| SNP_P3_24555_32378422 | NC_021161.1    | Ca_kabuli_chr02 | 32378422                | CC                              | AA                | 1945911777               |
| SNP_P3_24557_32378927 | NC_021161.1    | Ca_kabuli_chr02 | 32378927                | AA                              | GG                | 1945911778               |
| SNP_P3_24558_32378934 | NC_021161.1    | Ca_kabuli_chr02 | 32378934                | AA                              | TT                | 1945911780               |
| SNP_P3_24559_32379178 | NC_021161.1    | Ca_kabuli_chr02 | 32379178                | AA                              | TT                | 1945911782               |
| SNP_P3_24560_32379545 | NC_021161.1    | Ca_kabuli_chr02 | 32379545                | GG                              | AA                | 1945911784               |
| SNP_P3_24562_32379636 | NC_021161.1    | Ca_kabuli_chr02 | 32379636                | AA                              | GG                | 1945911785               |
| SNP_P3_24563_32387545 | NC_021161.1    | Ca_kabuli_chr02 | 32387545                | GG                              | AA                | 1945911787               |
| SNP_P3_24564_32388942 | NC_021161.1    | Ca_kabuli_chr02 | 32388942                | CC                              | TT                | 1945911789               |
| SNP_P3_24565_32389199 | NC_021161.1    | Ca_kabuli_chr02 | 32389199                | CC                              | TT                | 1945911791               |
| SNP_P3_24566_32390348 | NC_021161.1    | Ca_kabuli_chr02 | 32390348                | CC                              | TT                | 1945911792               |
| SNP_P3_24567_32390392 | NC_021161.1    | Ca_kabuli_chr02 | 32390392                | GG                              | AA                | 1945911794               |
| SNP_P3_24568_32392502 | NC_021161.1    | Ca_kabuli_chr02 | 32392502                | CC                              | TT                | 1945911796               |
| SNP_P3_24569_32392520 | NC_021161.1    | Ca_kabuli_chr02 | 32392520                | CC                              | AA                | 1945911798               |
| SNP_P3_24570_32392558 | NC_021161.1    | Ca_kabuli_chr02 | 32392558                | AA                              | TT                | 1945911800               |
| SNP_P3_24571_32392593 | NC_021161.1    | Ca_kabuli_chr02 | 32392593                | GG                              | CC                | 1945911801               |
| SNP_P3_24572_32392633 | NC_021161.1    | Ca_kabuli_chr02 | 32392633                | GG                              | CC                | 1945911803               |
| SNP_P3_24573_32392640 | NC_021161.1    | Ca_kabuli_chr02 | 32392640                | GG                              | CC                | 1945911805               |
| SNP_P3_24574_32392654 | NC_021161.1    | Ca_kabuli_chr02 | 32392654                | CC                              | TT                | 1945911807               |
| SNP_P3_24575_32392684 | NC_021161.1    | Ca_kabuli_chr02 | 32392684                | AA                              | TT                | 1945911808               |
| SNP_P3_24576_32392693 | NC_021161.1    | Ca_kabuli_chr02 | 32392693                | TT                              | GG                | 1945911810               |

| SNPs IDs              | Chromosome IDs | Chromosomes     | Physical positions (bp) | CDC Frontier (Reference genome) | (Pusa 256 & HPNB) | NCBI SNPdb Accession IDs |
|-----------------------|----------------|-----------------|-------------------------|---------------------------------|-------------------|--------------------------|
| SNP_P3_24577_32392696 | NC_021161.1    | Ca_kabuli_chr02 | 32392696                | GG                              | CC                | 1945911812               |
| SNP_P3_24578_32392749 | NC_021161.1    | Ca_kabuli_chr02 | 32392749                | CC                              | TT                | 1945911814               |
| SNP_P3_24579_32392758 | NC_021161.1    | Ca_kabuli_chr02 | 32392758                | GG                              | AA                | 1945911816               |
| SNP_P3_24580_32392781 | NC_021161.1    | Ca_kabuli_chr02 | 32392781                | GG                              | AA                | 1945911817               |
| SNP_P3_24581_32392791 | NC_021161.1    | Ca_kabuli_chr02 | 32392791                | CC                              | TT                | 1945911819               |
| SNP_P3_24582_32392801 | NC_021161.1    | Ca_kabuli_chr02 | 32392801                | TT                              | CC                | 1945911821               |
| SNP_P3_24583_32392809 | NC_021161.1    | Ca_kabuli_chr02 | 32392809                | AA                              | TT                | 1945911823               |
| SNP_P3_24584_32392830 | NC_021161.1    | Ca_kabuli_chr02 | 32392830                | GG                              | AA                | 1945911824               |
| SNP_P3_24585_32392841 | NC_021161.1    | Ca_kabuli_chr02 | 32392841                | TT                              | CC                | 1945911826               |
| SNP_P3_24586_32392846 | NC_021161.1    | Ca_kabuli_chr02 | 32392846                | TT                              | CC                | 1945911828               |
| SNP_P3_24587_32392868 | NC_021161.1    | Ca_kabuli_chr02 | 32392868                | CC                              | TT                | 1945911830               |
| SNP_P3_24588_32392871 | NC_021161.1    | Ca_kabuli_chr02 | 32392871                | TT                              | GG                | 1945911832               |
| SNP_P3_24589_32392893 | NC_021161.1    | Ca_kabuli_chr02 | 32392893                | CC                              | AA                | 1945911833               |
| SNP_P3_24590_32392943 | NC_021161.1    | Ca_kabuli_chr02 | 32392943                | AA                              | GG                | 1945911835               |
| SNP_P3_24591_32392945 | NC_021161.1    | Ca_kabuli_chr02 | 32392945                | TT                              | CC                | 1945911837               |
| SNP_P3_24592_32392948 | NC_021161.1    | Ca_kabuli_chr02 | 32392948                | TT                              | GG                | 1945911839               |
| SNP_P3_24593_32392986 | NC_021161.1    | Ca_kabuli_chr02 | 32392986                | CC                              | TT                | 1945911840               |
| SNP_P3_24594_32393014 | NC_021161.1    | Ca_kabuli_chr02 | 32393014                | CC                              | TT                | 1945911842               |
| SNP_P3_24595_32393015 | NC_021161.1    | Ca_kabuli_chr02 | 32393015                | GG                              | TT                | 1945911844               |
| SNP_P3_24596_32393020 | NC_021161.1    | Ca_kabuli_chr02 | 32393020                | GG                              | AA                | 1945911846               |
| SNP_P3_24597_32393035 | NC_021161.1    | Ca_kabuli_chr02 | 32393035                | GG                              | AA                | 1945911848               |
| SNP_P3_24599_32393071 | NC_021161.1    | Ca_kabuli_chr02 | 32393071                | TT                              | AA                | 1945911849               |
| SNP_P3_24602_32393135 | NC_021161.1    | Ca_kabuli_chr02 | 32393135                | AA                              | CC                | 1945911851               |
| SNP_P3_24604_32393196 | NC_021161.1    | Ca_kabuli_chr02 | 32393196                | TT                              | AA                | 1945911853               |
| SNP_P3_24605_32393289 | NC_021161.1    | Ca_kabuli_chr02 | 32393289                | GG                              | AA                | 1945911855               |
| SNP_P3_24606_32393364 | NC_021161.1    | Ca_kabuli_chr02 | 32393364                | GG                              | TT                | 1945911856               |
| SNP_P3_24607_32393429 | NC_021161.1    | Ca_kabuli_chr02 | 32393429                | GG                              | AA                | 1945911858               |
| SNP_P3_24609_32393490 | NC_021161.1    | Ca_kabuli_chr02 | 32393490                | TT                              | CC                | 1945911860               |
| SNP_P3_24610_32393509 | NC_021161.1    | Ca_kabuli_chr02 | 32393509                | GG                              | AA                | 1945911862               |
| SNP_P3_24611_32393535 | NC_021161.1    | Ca_kabuli_chr02 | 32393535                | TT                              | AA                | 1945911864               |
| SNP_P3_24612_32393539 | NC_021161.1    | Ca_kabuli_chr02 | 32393539                | AA                              | GG                | 1945911865               |
| SNP_P3_24613_32393574 | NC_021161.1    | Ca_kabuli_chr02 | 32393574                | GG                              | TT                | 1945911867               |
| SNP_P3_24614_32393596 | NC_021161.1    | Ca_kabuli_chr02 | 32393596                | GG                              | AA                | 1945911869               |
| SNP_P3_24615_32393606 | NC_021161.1    | Ca_kabuli_chr02 | 32393606                | AA                              | GG                | 1945911871               |
| SNP_P3_24616_32393626 | NC_021161.1    | Ca_kabuli_chr02 | 32393626                | AA                              | GG                | 1945911872               |
| SNP_P3_24619_32393826 | NC_021161.1    | Ca_kabuli_chr02 | 32393826                | AA                              | GG                | 1945911874               |
| SNP_P3_24620_32394083 | NC_021161.1    | Ca_kabuli_chr02 | 32394083                | AA                              | TT                | 1945911876               |
| SNP_P3_24621_32394113 | NC_021161.1    | Ca_kabuli_chr02 | 32394113                | AA                              | CC                | 1945911878               |
| SNP_P3_24622_32394436 | NC_021161.1    | Ca_kabuli_chr02 | 32394436                | TT                              | CC                | 1945911880               |
| SNP_P3_24623_32394614 | NC_021161.1    | Ca_kabuli_chr02 | 32394614                | AA                              | GG                | 1945911881               |
| SNP_P3_24624_32394653 | NC_021161.1    | Ca_kabuli_chr02 | 32394653                | AA                              | GG                | 1945911883               |
| SNP_P3_24625_32394708 | NC_021161.1    | Ca_kabuli_chr02 | 32394708                | AA                              | GG                | 1945911885               |

| SNPs IDs              | Chromosome IDs | Chromosomes     | Physical positions (bp) | CDC Frontier (Reference genome) | (Pusa 256 & HPNB) | NCBI SNPdb Accession IDs |
|-----------------------|----------------|-----------------|-------------------------|---------------------------------|-------------------|--------------------------|
| SNP_P3_24626_32394715 | NC_021161.1    | Ca_kabuli_chr02 | 32394715                | AA                              | TT                | 1945911887               |
| SNP_P3_24628_32396904 | NC_021161.1    | Ca_kabuli_chr02 | 32396904                | GG                              | AA                | 1945911888               |
| SNP_P3_24629_32398201 | NC_021161.1    | Ca_kabuli_chr02 | 32398201                | CC                              | TT                | 1945911890               |
| SNP_P3_24631_32399964 | NC_021161.1    | Ca_kabuli_chr02 | 32399964                | AA                              | TT                | 1945911892               |
| SNP_P3_24632_32399978 | NC_021161.1    | Ca_kabuli_chr02 | 32399978                | AA                              | TT                | 1945911894               |
| SNP_P3_24633_32402054 | NC_021161.1    | Ca_kabuli_chr02 | 32402054                | TT                              | GG                | 1945911896               |
| SNP_P3_24634_32402410 | NC_021161.1    | Ca_kabuli_chr02 | 32402410                | CC                              | AA                | 1945911897               |
| SNP_P3_24635_32402515 | NC_021161.1    | Ca_kabuli_chr02 | 32402515                | CC                              | AA                | 1945911899               |
| SNP_P3_24636_32402940 | NC_021161.1    | Ca_kabuli_chr02 | 32402940                | TT                              | GG                | 1945911901               |
| SNP_P3_24637_32406351 | NC_021161.1    | Ca_kabuli_chr02 | 32406351                | CC                              | TT                | 1945911903               |
| SNP_P3_24638_32406546 | NC_021161.1    | Ca_kabuli_chr02 | 32406546                | AA                              | GG                | 1945911904               |
| SNP_P3_24639_32406564 | NC_021161.1    | Ca_kabuli_chr02 | 32406564                | GG                              | TT                | 1945911906               |
| SNP_P3_24640_32407184 | NC_021161.1    | Ca_kabuli_chr02 | 32407184                | AA                              | CC                | 1945911908               |
| SNP_P3_24642_32408344 | NC_021161.1    | Ca_kabuli_chr02 | 32408344                | TT                              | CC                | 1945911910               |
| SNP_P3_24643_32408349 | NC_021161.1    | Ca_kabuli_chr02 | 32408349                | TT                              | CC                | 1945911911               |
| SNP_P3_24644_32409765 | NC_021161.1    | Ca_kabuli_chr02 | 32409765                | GG                              | CC                | 1945911913               |
| SNP_P3_24646_32409967 | NC_021161.1    | Ca_kabuli_chr02 | 32409967                | CC                              | AA                | 1945911915               |
| SNP_P3_24647_32410183 | NC_021161.1    | Ca_kabuli_chr02 | 32410183                | GG                              | AA                | 1945911917               |
| SNP_P3_24648_32411738 | NC_021161.1    | Ca_kabuli_chr02 | 32411738                | AA                              | CC                | 1945911919               |
| SNP_P3_24649_32411946 | NC_021161.1    | Ca_kabuli_chr02 | 32411946                | GG                              | TT                | 1945911920               |
| SNP_P3_24650_32411986 | NC_021161.1    | Ca_kabuli_chr02 | 32411986                | TT                              | GG                | 1945911922               |
| SNP_P3_24651_32411994 | NC_021161.1    | Ca_kabuli_chr02 | 32411994                | GG                              | TT                | 1945911924               |
| SNP_P3_24652_32412000 | NC_021161.1    | Ca_kabuli_chr02 | 32412000                | TT                              | GG                | 1945911926               |
| SNP_P3_24653_32412032 | NC_021161.1    | Ca_kabuli_chr02 | 32412032                | GG                              | AA                | 1945911927               |
| SNP_P3_24654_32412039 | NC_021161.1    | Ca_kabuli_chr02 | 32412039                | CC                              | AA                | 1945911929               |
| SNP_P3_24655_32412088 | NC_021161.1    | Ca_kabuli_chr02 | 32412088                | AA                              | TT                | 1945911931               |
| SNP_P3_24656_32412632 | NC_021161.1    | Ca_kabuli_chr02 | 32412632                | CC                              | AA                | 1945911933               |
| SNP_P3_24657_32412815 | NC_021161.1    | Ca_kabuli_chr02 | 32412815                | CC                              | AA                | 1945911935               |
| SNP_P3_24658_32412897 | NC_021161.1    | Ca_kabuli_chr02 | 32412897                | GG                              | AA                | 1945911936               |
| SNP_P3_24659_32412948 | NC_021161.1    | Ca_kabuli_chr02 | 32412948                | TT                              | CC                | 1945911938               |
| SNP_P3_24660_32413233 | NC_021161.1    | Ca_kabuli_chr02 | 32413233                | TT                              | GG                | 1945911940               |
| SNP_P3_24661_32415118 | NC_021161.1    | Ca_kabuli_chr02 | 32415118                | GG                              | AA                | 1945911942               |
| SNP_P3_24662_32415510 | NC_021161.1    | Ca_kabuli_chr02 | 32415510                | TT                              | AA                | 1945911943               |
| SNP_P3_24664_32416418 | NC_021161.1    | Ca_kabuli_chr02 | 32416418                | CC                              | AA                | 1945911945               |
| SNP_P3_24665_32417804 | NC_021161.1    | Ca_kabuli_chr02 | 32417804                | CC                              | AA                | 1945911947               |
| SNP_P3_24667_32417961 | NC_021161.1    | Ca_kabuli_chr02 | 32417961                | AA                              | GG                | 1945911949               |
| SNP_P3_24668_32418036 | NC_021161.1    | Ca_kabuli_chr02 | 32418036                | CC                              | TT                | 1945911950               |
| SNP_P3_24669_32419750 | NC_021161.1    | Ca_kabuli_chr02 | 32419750                | GG                              | AA                | 1945911952               |
| SNP_P3_24670_32420046 | NC_021161.1    | Ca_kabuli_chr02 | 32420046                | AA                              | GG                | 1945911954               |
| SNP_P3_24671_32420769 | NC_021161.1    | Ca_kabuli_chr02 | 32420769                | GG                              | AA                | 1945911956               |
| SNP_P3_24672_32420854 | NC_021161.1    | Ca_kabuli_chr02 | 32420854                | TT                              | AA                | 1945911958               |
| SNP_P3_24673_32422076 | NC_021161.1    | Ca_kabuli_chr02 | 32422076                | AA                              | TT                | 1945911959               |

| SNPs IDs              | Chromosome IDs | Chromosomes     | Physical positions (bp) | CDC Frontier (Reference genome) | (Pusa 256 & HPNB) | NCBI SNPdb Accession IDs |
|-----------------------|----------------|-----------------|-------------------------|---------------------------------|-------------------|--------------------------|
| SNP_P3_24675_32422517 | NC_021161.1    | Ca_kabuli_chr02 | 32422517                | TT                              | AA                | 1945911961               |
| SNP_P3_24676_32423327 | NC_021161.1    | Ca_kabuli_chr02 | 32423327                | AA                              | CC                | 1945911963               |
| SNP_P3_24677_32423725 | NC_021161.1    | Ca_kabuli_chr02 | 32423725                | AA                              | TT                | 1945911965               |
| SNP_P3_24678_32423762 | NC_021161.1    | Ca_kabuli_chr02 | 32423762                | TT                              | GG                | 1945911966               |
| SNP_P3_24679_32423848 | NC_021161.1    | Ca_kabuli_chr02 | 32423848                | TT                              | CC                | 1945911968               |
| SNP_P3_24680_32424109 | NC_021161.1    | Ca_kabuli_chr02 | 32424109                | TT                              | AA                | 1945911970               |
| SNP_P3_24681_32430363 | NC_021161.1    | Ca_kabuli_chr02 | 32430363                | GG                              | TT                | 1945911972               |
| SNP_P3_24682_32430378 | NC_021161.1    | Ca_kabuli_chr02 | 32430378                | CC                              | TT                | 1945911974               |
| SNP_P3_24683_32430407 | NC_021161.1    | Ca_kabuli_chr02 | 32430407                | AA                              | CC                | 1945911975               |
| SNP_P3_24684_32430460 | NC_021161.1    | Ca_kabuli_chr02 | 32430460                | TT                              | GG                | 1945911977               |
| SNP_P3_24685_32430503 | NC_021161.1    | Ca_kabuli_chr02 | 32430503                | AA                              | CC                | 1945911979               |
| SNP_P3_24686_32430509 | NC_021161.1    | Ca_kabuli_chr02 | 32430509                | AA                              | TT                | 1945911981               |
| SNP_P3_24687_32430522 | NC_021161.1    | Ca_kabuli_chr02 | 32430522                | TT                              | CC                | 1945911982               |
| SNP_P3_24688_32432394 | NC_021161.1    | Ca_kabuli_chr02 | 32432394                | CC                              | TT                | 1945911984               |
| SNP_P3_24689_32432423 | NC_021161.1    | Ca_kabuli_chr02 | 32432423                | TT                              | CC                | 1945911986               |
| SNP_P3_24690_32432937 | NC_021161.1    | Ca_kabuli_chr02 | 32432937                | AA                              | GG                | 1945911988               |
| SNP_P3_24691_32433646 | NC_021161.1    | Ca_kabuli_chr02 | 32433646                | TT                              | CC                | 1945911990               |
| SNP_P3_24692_32436395 | NC_021161.1    | Ca_kabuli_chr02 | 32436395                | TT                              | CC                | 1945911991               |
| SNP_P3_24694_32436644 | NC_021161.1    | Ca_kabuli_chr02 | 32436644                | TT                              | CC                | 1945911993               |
| SNP_P3_24695_32436683 | NC_021161.1    | Ca_kabuli_chr02 | 32436683                | AA                              | TT                | 1945911995               |
| SNP_P3_24696_32436684 | NC_021161.1    | Ca_kabuli_chr02 | 32436684                | AA                              | TT                | 1945911997               |
| SNP_P3_24697_32436693 | NC_021161.1    | Ca_kabuli_chr02 | 32436693                | CC                              | TT                | 1945911998               |
| SNP_P3_24699_32436922 | NC_021161.1    | Ca_kabuli_chr02 | 32436922                | TT                              | CC                | 1945912000               |
| SNP_P3_24700_32436953 | NC_021161.1    | Ca_kabuli_chr02 | 32436953                | AA                              | GG                | 1945912002               |
| SNP_P3_24701_32436961 | NC_021161.1    | Ca_kabuli_chr02 | 32436961                | CC                              | TT                | 1945912004               |
| SNP_P3_24702_32437189 | NC_021161.1    | Ca_kabuli_chr02 | 32437189                | AA                              | TT                | 1945912006               |
| SNP_P3_24703_32437232 | NC_021161.1    | Ca_kabuli_chr02 | 32437232                | AA                              | GG                | 1945912007               |
| SNP_P3_24704_32437275 | NC_021161.1    | Ca_kabuli_chr02 | 32437275                | CC                              | TT                | 1945912009               |
| SNP_P3_24705_32437290 | NC_021161.1    | Ca_kabuli_chr02 | 32437290                | GG                              | TT                | 1945912011               |
| SNP_P3_24707_32437570 | NC_021161.1    | Ca_kabuli_chr02 | 32437570                | GG                              | AA                | 1945912013               |
| SNP_P3_24708_32437589 | NC_021161.1    | Ca_kabuli_chr02 | 32437589                | AA                              | GG                | 1945912014               |
| SNP_P3_24710_32437742 | NC_021161.1    | Ca_kabuli_chr02 | 32437742                | GG                              | AA                | 1945912016               |
| SNP_P3_24711_32437796 | NC_021161.1    | Ca_kabuli_chr02 | 32437796                | CC                              | TT                | 1945912018               |
| SNP_P3_24712_32437818 | NC_021161.1    | Ca_kabuli_chr02 | 32437818                | GG                              | TT                | 1945912020               |
| SNP_P3_24713_32437837 | NC_021161.1    | Ca_kabuli_chr02 | 32437837                | TT                              | AA                | 1945912021               |
| SNP_P3_24714_32438193 | NC_021161.1    | Ca_kabuli_chr02 | 32438193                | GG                              | TT                | 1945912023               |
| SNP_P3_24715_32438194 | NC_021161.1    | Ca_kabuli_chr02 | 32438194                | AA                              | CC                | 1945912025               |
| SNP_P3_24716_32439298 | NC_021161.1    | Ca_kabuli_chr02 | 32439298                | AA                              | TT                | 1945912027               |
| SNP_P3_24717_32439581 | NC_021161.1    | Ca_kabuli_chr02 | 32439581                | GG                              | CC                | 1945912029               |
| SNP_P3_24718_32439822 | NC_021161.1    | Ca_kabuli_chr02 | 32439822                | GG                              | AA                | 1945912030               |
| SNP_P3_24719_32452902 | NC_021161.1    | Ca_kabuli_chr02 | 32452902                | CC                              | TT                | 1945912032               |
| SNP_P3_24721_32453136 | NC_021161.1    | Ca_kabuli_chr02 | 32453136                | TT                              | GG                | 1945912034               |



| SNPs IDs              | Chromosome IDs | Chromosomes     | Physical positions (bp) | CDC Frontier (Reference genome) | (Pusa 256 & HPNB) | NCBI SNPdb Accession IDs |
|-----------------------|----------------|-----------------|-------------------------|---------------------------------|-------------------|--------------------------|
| SNP_P3_24722_32475294 | NC_021161.1    | Ca_kabuli_chr02 | 32475294                | GG                              | TT                | 1945912036               |
| SNP_P3_24723_32475295 | NC_021161.1    | Ca_kabuli_chr02 | 32475295                | GG                              | AA                | 1945912037               |
| SNP_P3_24724_32475317 | NC_021161.1    | Ca_kabuli_chr02 | 32475317                | AA                              | GG                | 1945912039               |
| SNP_P3_24725_32475327 | NC_021161.1    | Ca_kabuli_chr02 | 32475327                | CC                              | TT                | 1945912041               |
| SNP_P3_24726_32475751 | NC_021161.1    | Ca_kabuli_chr02 | 32475751                | AA                              | CC                | 1945912043               |
| SNP_P3_24727_32475902 | NC_021161.1    | Ca_kabuli_chr02 | 32475902                | GG                              | TT                | 1945912045               |
| SNP_P3_24728_32476861 | NC_021161.1    | Ca_kabuli_chr02 | 32476861                | TT                              | CC                | 1945912046               |
| SNP_P3_24730_32478173 | NC_021161.1    | Ca_kabuli_chr02 | 32478173                | GG                              | CC                | 1945912048               |
| SNP_P3_24731_32478928 | NC_021161.1    | Ca_kabuli_chr02 | 32478928                | AA                              | CC                | 1945912050               |
| SNP_P3_24732_32479073 | NC_021161.1    | Ca_kabuli_chr02 | 32479073                | GG                              | AA                | 1945912052               |
| SNP_P3_24733_32479294 | NC_021161.1    | Ca_kabuli_chr02 | 32479294                | TT                              | CC                | 1945912053               |
| SNP_P3_24734_32479296 | NC_021161.1    | Ca_kabuli_chr02 | 32479296                | TT                              | CC                | 1945912055               |
| SNP_P3_24735_32479308 | NC_021161.1    | Ca_kabuli_chr02 | 32479308                | CC                              | TT                | 1945912057               |
| SNP_P3_24736_32479626 | NC_021161.1    | Ca_kabuli_chr02 | 32479626                | GG                              | CC                | 1945912059               |
| SNP_P3_24737_32479831 | NC_021161.1    | Ca_kabuli_chr02 | 32479831                | TT                              | CC                | 1945912061               |
| SNP_P3_24738_32479840 | NC_021161.1    | Ca_kabuli_chr02 | 32479840                | GG                              | AA                | 1945912062               |
| SNP_P3_24740_32481902 | NC_021161.1    | Ca_kabuli_chr02 | 32481902                | AA                              | TT                | 1945912064               |
| SNP_P3_24741_32485089 | NC_021161.1    | Ca_kabuli_chr02 | 32485089                | GG                              | AA                | 1945912066               |
| SNP_P3_24742_32487684 | NC_021161.1    | Ca_kabuli_chr02 | 32487684                | TT                              | GG                | 1945912068               |
| SNP_P3_24743_32488021 | NC_021161.1    | Ca_kabuli_chr02 | 32488021                | TT                              | CC                | 1945912069               |
| SNP_P3_24744_32488146 | NC_021161.1    | Ca_kabuli_chr02 | 32488146                | CC                              | TT                | 1945912071               |
| SNP_P3_24745_32492022 | NC_021161.1    | Ca_kabuli_chr02 | 32492022                | GG                              | AA                | 1945912073               |
| SNP_P3_24746_32492448 | NC_021161.1    | Ca_kabuli_chr02 | 32492448                | CC                              | TT                | 1945912075               |
| SNP_P3_24749_32540871 | NC_021161.1    | Ca_kabuli_chr02 | 32540871                | GG                              | AA                | 1945912077               |
| SNP_P3_24750_32541116 | NC_021161.1    | Ca_kabuli_chr02 | 32541116                | CC                              | TT                | 1945912078               |
| SNP_P3_24751_32553967 | NC_021161.1    | Ca_kabuli_chr02 | 32553967                | AA                              | TT                | 1945912080               |
| SNP_P3_24752_32583889 | NC_021161.1    | Ca_kabuli_chr02 | 32583889                | GG                              | AA                | 1945912082               |
| SNP_P3_24753_32665399 | NC_021161.1    | Ca_kabuli_chr02 | 32665399                | CC                              | GG                | 1945912084               |
| SNP_P3_24755_32713621 | NC_021161.1    | Ca_kabuli_chr02 | 32713621                | CC                              | TT                | 1945912085               |
| SNP_P3_24758_32802058 | NC_021161.1    | Ca_kabuli_chr02 | 32802058                | GG                              | AA                | 1945912087               |
| SNP_P3_24759_32805557 | NC_021161.1    | Ca_kabuli_chr02 | 32805557                | TT                              | CC                | 1945912089               |
| SNP_P3_24761_32915145 | NC_021161.1    | Ca_kabuli_chr02 | 32915145                | AA                              | TT                | 1945912091               |
| SNP_P3_24762_32925682 | NC_021161.1    | Ca_kabuli_chr02 | 32925682                | AA                              | CC                | 1945912093               |
| SNP_P3_24763_32925683 | NC_021161.1    | Ca_kabuli_chr02 | 32925683                | AA                              | GG                | 1945912094               |
| SNP_P3_24765_32935101 | NC_021161.1    | Ca_kabuli_chr02 | 32935101                | CC                              | TT                | 1945912096               |
| SNP_P3_24768_32985398 | NC_021161.1    | Ca_kabuli_chr02 | 32985398                | TT                              | GG                | 1945912098               |
| SNP_P3_24769_33016816 | NC_021161.1    | Ca_kabuli_chr02 | 33016816                | GG                              | TT                | 1945912100               |
| SNP_P3_24772_33084528 | NC_021161.1    | Ca_kabuli_chr02 | 33084528                | GG                              | AA                | 1945912101               |
| SNP_P3_24773_33094349 | NC_021161.1    | Ca_kabuli_chr02 | 33094349                | AA                              | GG                | 1945912103               |
| SNP_P3_24774_33151940 | NC_021161.1    | Ca_kabuli_chr02 | 33151940                | TT                              | GG                | 1945912105               |
| SNP_P3_24775_33151950 | NC_021161.1    | Ca_kabuli_chr02 | 33151950                | GG                              | TT                | 1945912107               |
| SNP_P3_24776_33152001 | NC_021161.1    | Ca_kabuli_chr02 | 33152001                | CC                              | AA                | 1945912108               |

| SNPs IDs              | Chromosome IDs | Chromosomes     | Physical positions (bp) | CDC Frontier (Reference genome) | (Pusa 256 & HPNB) | NCBI SNPdb Accession IDs |
|-----------------------|----------------|-----------------|-------------------------|---------------------------------|-------------------|--------------------------|
| SNP_P3_24777_33152077 | NC_021161.1    | Ca_kabuli_chr02 | 33152077                | GG                              | TT                | 1945912110               |
| SNP_P3_24778_33152162 | NC_021161.1    | Ca_kabuli_chr02 | 33152162                | AA                              | GG                | 1945912112               |
| SNP_P3_24779_33166160 | NC_021161.1    | Ca_kabuli_chr02 | 33166160                | TT                              | CC                | 1945912114               |
| SNP_P3_24780_33166192 | NC_021161.1    | Ca_kabuli_chr02 | 33166192                | GG                              | AA                | 1945912116               |
| SNP_P3_24781_33166240 | NC_021161.1    | Ca_kabuli_chr02 | 33166240                | AA                              | GG                | 1945912117               |
| SNP_P3_24782_33166434 | NC_021161.1    | Ca_kabuli_chr02 | 33166434                | TT                              | CC                | 1945912119               |
| SNP_P3_24783_33166485 | NC_021161.1    | Ca_kabuli_chr02 | 33166485                | GG                              | TT                | 1945912121               |
| SNP_P3_24784_33166525 | NC_021161.1    | Ca_kabuli_chr02 | 33166525                | GG                              | AA                | 1945912123               |
| SNP_P3_24785_33166535 | NC_021161.1    | Ca_kabuli_chr02 | 33166535                | CC                              | GG                | 1945912124               |
| SNP_P3_24786_33166561 | NC_021161.1    | Ca_kabuli_chr02 | 33166561                | CC                              | TT                | 1945912126               |
| SNP_P3_24787_33166563 | NC_021161.1    | Ca_kabuli_chr02 | 33166563                | AA                              | CC                | 1945912128               |
| SNP_P3_24788_33166570 | NC_021161.1    | Ca_kabuli_chr02 | 33166570                | GG                              | AA                | 1945912130               |
| SNP_P3_24789_33166582 | NC_021161.1    | Ca_kabuli_chr02 | 33166582                | CC                              | AA                | 1945912132               |
| SNP_P3_24790_33166665 | NC_021161.1    | Ca_kabuli_chr02 | 33166665                | AA                              | GG                | 1945912133               |
| SNP_P3_24791_33166704 | NC_021161.1    | Ca_kabuli_chr02 | 33166704                | CC                              | TT                | 1945912135               |
| SNP_P3_24792_33166741 | NC_021161.1    | Ca_kabuli_chr02 | 33166741                | AA                              | GG                | 1945912137               |
| SNP_P3_24793_33167008 | NC_021161.1    | Ca_kabuli_chr02 | 33167008                | AA                              | GG                | 1945912139               |
| SNP_P3_24794_33167107 | NC_021161.1    | Ca_kabuli_chr02 | 33167107                | AA                              | CC                | 1945912140               |
| SNP_P3_24795_33167116 | NC_021161.1    | Ca_kabuli_chr02 | 33167116                | AA                              | GG                | 1945912142               |
| SNP_P3_24796_33208408 | NC_021161.1    | Ca_kabuli_chr02 | 33208408                | AA                              | TT                | 1945912144               |
| SNP_P3_24797_33240055 | NC_021161.1    | Ca_kabuli_chr02 | 33240055                | CC                              | TT                | 1945912146               |
| SNP_P3_24798_33242071 | NC_021161.1    | Ca_kabuli_chr02 | 33242071                | AA                              | GG                | 1945912148               |
| SNP_P3_24800_33258019 | NC_021161.1    | Ca_kabuli_chr02 | 33258019                | AA                              | TT                | 1945912149               |
| SNP_P3_24801_33258167 | NC_021161.1    | Ca_kabuli_chr02 | 33258167                | GG                              | AA                | 1945912151               |
| SNP_P3_24802_33269290 | NC_021161.1    | Ca_kabuli_chr02 | 33269290                | TT                              | CC                | 1945912153               |
| SNP_P3_24803_33269320 | NC_021161.1    | Ca_kabuli_chr02 | 33269320                | CC                              | TT                | 1945912155               |
| SNP_P3_24804_33269338 | NC_021161.1    | Ca_kabuli_chr02 | 33269338                | GG                              | TT                | 1945912156               |
| SNP_P3_24805_33269410 | NC_021161.1    | Ca_kabuli_chr02 | 33269410                | AA                              | GG                | 1945912158               |
| SNP_P3_24807_33296232 | NC_021161.1    | Ca_kabuli_chr02 | 33296232                | AA                              | TT                | 1945912160               |
| SNP_P3_24809_33306734 | NC_021161.1    | Ca_kabuli_chr02 | 33306734                | CC                              | TT                | 1945912162               |
| SNP_P3_24810_33345575 | NC_021161.1    | Ca_kabuli_chr02 | 33345575                | AA                              | GG                | 1945912163               |
| SNP_P3_24811_33345581 | NC_021161.1    | Ca_kabuli_chr02 | 33345581                | GG                              | AA                | 1945912165               |
| SNP_P3_24812_33345764 | NC_021161.1    | Ca_kabuli_chr02 | 33345764                | GG                              | AA                | 1945912167               |
| SNP_P3_24813_33345775 | NC_021161.1    | Ca_kabuli_chr02 | 33345775                | GG                              | TT                | 1945912169               |
| SNP_P3_24814_33346229 | NC_021161.1    | Ca_kabuli_chr02 | 33346229                | AA                              | GG                | 1945912171               |
| SNP_P3_24815_33346444 | NC_021161.1    | Ca_kabuli_chr02 | 33346444                | AA                              | GG                | 1945912172               |
| SNP_P3_24816_33346452 | NC_021161.1    | Ca_kabuli_chr02 | 33346452                | GG                              | AA                | 1945912174               |
| SNP_P3_24817_33346681 | NC_021161.1    | Ca_kabuli_chr02 | 33346681                | TT                              | CC                | 1945912176               |
| SNP_P3_24818_33346720 | NC_021161.1    | Ca_kabuli_chr02 | 33346720                | TT                              | CC                | 1945912178               |
| SNP_P3_24819_33346742 | NC_021161.1    | Ca_kabuli_chr02 | 33346742                | TT                              | CC                | 1945912179               |
| SNP_P3_24820_33346949 | NC_021161.1    | Ca_kabuli_chr02 | 33346949                | GG                              | AA                | 1945912181               |
| SNP_P3_24821_33397240 | NC_021161.1    | Ca_kabuli_chr02 | 33397240                | CC                              | TT                | 1945912183               |

| SNPs IDs              | Chromosome IDs | Chromosomes     | Physical positions (bp) | CDC Frontier (Reference genome) | (Pusa 256 & HPNB) | NCBI SNPdb Accession IDs |
|-----------------------|----------------|-----------------|-------------------------|---------------------------------|-------------------|--------------------------|
| SNP_P3_24822_33397276 | NC_021161.1    | Ca_kabuli_chr02 | 33397276                | GG                              | AA                | 1945912185               |
| SNP_P3_24823_33397517 | NC_021161.1    | Ca_kabuli_chr02 | 33397517                | CC                              | TT                | 1945912187               |
| SNP_P3_24824_33397552 | NC_021161.1    | Ca_kabuli_chr02 | 33397552                | GG                              | AA                | 1945912188               |
| SNP_P3_24825_33398292 | NC_021161.1    | Ca_kabuli_chr02 | 33398292                | CC                              | TT                | 1945912190               |
| SNP_P3_24826_33398310 | NC_021161.1    | Ca_kabuli_chr02 | 33398310                | CC                              | AA                | 1945912192               |
| SNP_P3_24828_33398527 | NC_021161.1    | Ca_kabuli_chr02 | 33398527                | GG                              | TT                | 1945912194               |
| SNP_P3_24829_33398549 | NC_021161.1    | Ca_kabuli_chr02 | 33398549                | CC                              | TT                | 1945912195               |
| SNP_P3_24830_33398550 | NC_021161.1    | Ca_kabuli_chr02 | 33398550                | AA                              | GG                | 1945912197               |
| SNP_P3_24831_33398814 | NC_021161.1    | Ca_kabuli_chr02 | 33398814                | TT                              | AA                | 1945912199               |
| SNP_P3_24832_33400969 | NC_021161.1    | Ca_kabuli_chr02 | 33400969                | AA                              | TT                | 1945912201               |
| SNP_P3_24833_33401099 | NC_021161.1    | Ca_kabuli_chr02 | 33401099                | AA                              | CC                | 1945912203               |
| SNP_P3_24834_33404202 | NC_021161.1    | Ca_kabuli_chr02 | 33404202                | AA                              | CC                | 1945912204               |
| SNP_P3_24836_33405265 | NC_021161.1    | Ca_kabuli_chr02 | 33405265                | GG                              | AA                | 1945912206               |
| SNP_P3_24837_33405304 | NC_021161.1    | Ca_kabuli_chr02 | 33405304                | AA                              | GG                | 1945912208               |
| SNP_P3_24838_33418452 | NC_021161.1    | Ca_kabuli_chr02 | 33418452                | GG                              | AA                | 1945912210               |
| SNP_P3_24839_33440046 | NC_021161.1    | Ca_kabuli_chr02 | 33440046                | AA                              | GG                | 1945912211               |
| SNP_P3_24841_33454039 | NC_021161.1    | Ca_kabuli_chr02 | 33454039                | GG                              | CC                | 1945912213               |
| SNP_P3_24842_33462805 | NC_021161.1    | Ca_kabuli_chr02 | 33462805                | AA                              | GG                | 1945912215               |
| SNP_P3_24843_33462911 | NC_021161.1    | Ca_kabuli_chr02 | 33462911                | GG                              | TT                | 1945912217               |
| SNP_P3_24844_33462953 | NC_021161.1    | Ca_kabuli_chr02 | 33462953                | CC                              | AA                | 1945912219               |
| SNP_P3_24845_33463060 | NC_021161.1    | Ca_kabuli_chr02 | 33463060                | CC                              | GG                | 1945912220               |
| SNP_P3_24846_33465922 | NC_021161.1    | Ca_kabuli_chr02 | 33465922                | TT                              | GG                | 1945912222               |
| SNP_P3_24847_33487798 | NC_021161.1    | Ca_kabuli_chr02 | 33487798                | TT                              | CC                | 1945912224               |
| SNP_P3_24849_33560615 | NC_021161.1    | Ca_kabuli_chr02 | 33560615                | TT                              | CC                | 1945912226               |
| SNP_P3_24852_33568316 | NC_021161.1    | Ca_kabuli_chr02 | 33568316                | GG                              | AA                | 1945912227               |
| SNP_P3_24853_33581959 | NC_021161.1    | Ca_kabuli_chr02 | 33581959                | TT                              | CC                | 1945912229               |
| SNP_P3_24854_33582304 | NC_021161.1    | Ca_kabuli_chr02 | 33582304                | TT                              | GG                | 1945912231               |
| SNP_P3_24855_33582702 | NC_021161.1    | Ca_kabuli_chr02 | 33582702                | AA                              | GG                | 1945912233               |
| SNP_P3_24856_33599992 | NC_021161.1    | Ca_kabuli_chr02 | 33599992                | TT                              | AA                | 1945912235               |
| SNP_P3_24857_33625384 | NC_021161.1    | Ca_kabuli_chr02 | 33625384                | CC                              | TT                | 1945912236               |
| SNP_P3_24859_33691485 | NC_021161.1    | Ca_kabuli_chr02 | 33691485                | CC                              | TT                | 1945912238               |
| SNP_P3_24860_33713018 | NC_021161.1    | Ca_kabuli_chr02 | 33713018                | GG                              | AA                | 1945912240               |
| SNP_P3_24861_33738049 | NC_021161.1    | Ca_kabuli_chr02 | 33738049                | AA                              | GG                | 1945912242               |
| SNP_P3_24862_33761577 | NC_021161.1    | Ca_kabuli_chr02 | 33761577                | GG                              | AA                | 1945912243               |
| SNP_P3_24863_33777993 | NC_021161.1    | Ca_kabuli_chr02 | 33777993                | CC                              | TT                | 1945912245               |
| SNP_P3_24864_33796778 | NC_021161.1    | Ca_kabuli_chr02 | 33796778                | AA                              | GG                | 1945912247               |
| SNP_P3_24866_33835477 | NC_021161.1    | Ca_kabuli_chr02 | 33835477                | GG                              | AA                | 1945912249               |
| SNP_P3_24867_33854266 | NC_021161.1    | Ca_kabuli_chr02 | 33854266                | CC                              | TT                | 1945912250               |
| SNP_P3_24868_33854438 | NC_021161.1    | Ca_kabuli_chr02 | 33854438                | AA                              | CC                | 1945912252               |
| SNP_P3_24869_33857989 | NC_021161.1    | Ca_kabuli_chr02 | 33857989                | TT                              | CC                | 1945912254               |
| SNP_P3_24870_33874319 | NC_021161.1    | Ca_kabuli_chr02 | 33874319                | CC                              | AA                | 1945912256               |
| SNP_P3_24872_33912699 | NC_021161.1    | Ca_kabuli_chr02 | 33912699                | CC                              | AA                | 1945912258               |

| SNPs IDs              | Chromosome IDs | Chromosomes     | Physical positions (bp) | CDC Frontier (Reference genome) | (Pusa 256 & HPNB) | NCBI SNPdb Accession IDs |
|-----------------------|----------------|-----------------|-------------------------|---------------------------------|-------------------|--------------------------|
| SNP_P3_24873_33921352 | NC_021161.1    | Ca_kabuli_chr02 | 33921352                | GG                              | CC                | 1945912259               |
| SNP_P3_24875_33955175 | NC_021161.1    | Ca_kabuli_chr02 | 33955175                | TT                              | GG                | 1945912261               |
| SNP_P3_24877_33955534 | NC_021161.1    | Ca_kabuli_chr02 | 33955534                | TT                              | CC                | 1945912263               |
| SNP_P3_24878_33955620 | NC_021161.1    | Ca_kabuli_chr02 | 33955620                | AA                              | GG                | 1945912265               |
| SNP_P3_24880_33959548 | NC_021161.1    | Ca_kabuli_chr02 | 33959548                | CC                              | TT                | 1945912266               |
| SNP_P3_24881_33959615 | NC_021161.1    | Ca_kabuli_chr02 | 33959615                | AA                              | TT                | 1945912268               |
| SNP_P3_24882_33959755 | NC_021161.1    | Ca_kabuli_chr02 | 33959755                | GG                              | TT                | 1945912270               |
| SNP_P3_24883_33959804 | NC_021161.1    | Ca_kabuli_chr02 | 33959804                | TT                              | CC                | 1945912272               |
| SNP_P3_24884_33959859 | NC_021161.1    | Ca_kabuli_chr02 | 33959859                | CC                              | TT                | 1945912274               |
| SNP_P3_24885_33959891 | NC_021161.1    | Ca_kabuli_chr02 | 33959891                | GG                              | AA                | 1945912275               |
| SNP_P3_24886_33959917 | NC_021161.1    | Ca_kabuli_chr02 | 33959917                | CC                              | TT                | 1945912277               |
| SNP_P3_24887_33959952 | NC_021161.1    | Ca_kabuli_chr02 | 33959952                | CC                              | TT                | 1945912279               |
| SNP_P3_24889_33984158 | NC_021161.1    | Ca_kabuli_chr02 | 33984158                | GG                              | TT                | 1945912281               |
| SNP_P3_24890_33984200 | NC_021161.1    | Ca_kabuli_chr02 | 33984200                | TT                              | AA                | 1945912282               |
| SNP_P3_24891_33984237 | NC_021161.1    | Ca_kabuli_chr02 | 33984237                | CC                              | TT                | 1945912284               |
| SNP_P3_24892_33984260 | NC_021161.1    | Ca_kabuli_chr02 | 33984260                | AA                              | GG                | 1945912286               |
| SNP_P3_24894_33984453 | NC_021161.1    | Ca_kabuli_chr02 | 33984453                | TT                              | CC                | 1945912288               |
| SNP_P3_24895_33984502 | NC_021161.1    | Ca_kabuli_chr02 | 33984502                | GG                              | AA                | 1945912290               |
| SNP_P3_24896_33984568 | NC_021161.1    | Ca_kabuli_chr02 | 33984568                | TT                              | GG                | 1945912291               |
| SNP_P3_24897_33984576 | NC_021161.1    | Ca_kabuli_chr02 | 33984576                | TT                              | GG                | 1945912293               |
| SNP_P3_24898_33984580 | NC_021161.1    | Ca_kabuli_chr02 | 33984580                | AA                              | TT                | 1945912295               |
| SNP_P3_24899_33984585 | NC_021161.1    | Ca_kabuli_chr02 | 33984585                | TT                              | GG                | 1945912297               |
| SNP_P3_24900_33984598 | NC_021161.1    | Ca_kabuli_chr02 | 33984598                | AA                              | CC                | 1945912298               |
| SNP_P3_24901_33984614 | NC_021161.1    | Ca_kabuli_chr02 | 33984614                | AA                              | TT                | 1945912300               |
| SNP_P3_24903_33984681 | NC_021161.1    | Ca_kabuli_chr02 | 33984681                | AA                              | TT                | 1945912302               |
| SNP_P3_24904_33985185 | NC_021161.1    | Ca_kabuli_chr02 | 33985185                | TT                              | CC                | 1945912304               |
| SNP_P3_24905_33985714 | NC_021161.1    | Ca_kabuli_chr02 | 33985714                | AA                              | CC                | 1945912306               |
| SNP_P3_24906_33986236 | NC_021161.1    | Ca_kabuli_chr02 | 33986236                | AA                              | CC                | 1945912307               |
| SNP_P3_24908_33986315 | NC_021161.1    | Ca_kabuli_chr02 | 33986315                | TT                              | GG                | 1945912309               |
| SNP_P3_24909_33986317 | NC_021161.1    | Ca_kabuli_chr02 | 33986317                | TT                              | CC                | 1945912311               |
| SNP_P3_24910_33986335 | NC_021161.1    | Ca_kabuli_chr02 | 33986335                | TT                              | CC                | 1945912313               |
| SNP_P3_24911_33986566 | NC_021161.1    | Ca_kabuli_chr02 | 33986566                | AA                              | GG                | 1945912314               |
| SNP_P3_24913_33986629 | NC_021161.1    | Ca_kabuli_chr02 | 33986629                | AA                              | TT                | 1945912316               |
| SNP_P3_24914_33986683 | NC_021161.1    | Ca_kabuli_chr02 | 33986683                | CC                              | TT                | 1945912318               |
| SNP_P3_24915_33986714 | NC_021161.1    | Ca_kabuli_chr02 | 33986714                | AA                              | TT                | 1945912320               |
| SNP_P3_24916_33986740 | NC_021161.1    | Ca_kabuli_chr02 | 33986740                | CC                              | TT                | 1945912322               |
| SNP_P3_24917_33986766 | NC_021161.1    | Ca_kabuli_chr02 | 33986766                | CC                              | TT                | 1945912323               |
| SNP_P3_24918_33986772 | NC_021161.1    | Ca_kabuli_chr02 | 33986772                | TT                              | CC                | 1945912325               |
| SNP_P3_24919_33986819 | NC_021161.1    | Ca_kabuli_chr02 | 33986819                | AA                              | TT                | 1945912327               |
| SNP_P3_24920_33986828 | NC_021161.1    | Ca_kabuli_chr02 | 33986828                | AA                              | GG                | 1945912329               |
| SNP_P3_24921_33986838 | NC_021161.1    | Ca_kabuli_chr02 | 33986838                | GG                              | AA                | 1945912330               |
| SNP_P3_24922_33986840 | NC_021161.1    | Ca_kabuli_chr02 | 33986840                | AA                              | TT                | 1945912332               |

| SNPs IDs              | Chromosome IDs | Chromosomes     | Physical positions (bp) | CDC Frontier (Reference genome) | (Pusa 256 & HPNB) | NCBI SNPdb Accession IDs |
|-----------------------|----------------|-----------------|-------------------------|---------------------------------|-------------------|--------------------------|
| SNP_P3_24923_33986841 | NC_021161.1    | Ca_kabuli_chr02 | 33986841                | CC                              | TT                | 1945912334               |
| SNP_P3_24924_33986845 | NC_021161.1    | Ca_kabuli_chr02 | 33986845                | TT                              | GG                | 1945912336               |
| SNP_P3_24925_33986861 | NC_021161.1    | Ca_kabuli_chr02 | 33986861                | AA                              | TT                | 1945912338               |
| SNP_P3_24926_33986923 | NC_021161.1    | Ca_kabuli_chr02 | 33986923                | AA                              | TT                | 1945912339               |
| SNP_P3_24927_33986946 | NC_021161.1    | Ca_kabuli_chr02 | 33986946                | GG                              | TT                | 1945912341               |
| SNP_P3_24928_33993670 | NC_021161.1    | Ca_kabuli_chr02 | 33993670                | GG                              | AA                | 1945912343               |
| SNP_P3_24930_33993681 | NC_021161.1    | Ca_kabuli_chr02 | 33993681                | TT                              | CC                | 1945912345               |
| SNP_P3_24931_33994128 | NC_021161.1    | Ca_kabuli_chr02 | 33994128                | AA                              | CC                | 1945912346               |
| SNP_P3_24932_34021889 | NC_021161.1    | Ca_kabuli_chr02 | 34021889                | TT                              | AA                | 1945912348               |
| SNP_P3_24933_34021976 | NC_021161.1    | Ca_kabuli_chr02 | 34021976                | AA                              | CC                | 1945912350               |
| SNP_P3_24934_34022549 | NC_021161.1    | Ca_kabuli_chr02 | 34022549                | AA                              | CC                | 1945912352               |
| SNP_P3_24935_34024589 | NC_021161.1    | Ca_kabuli_chr02 | 34024589                | AA                              | TT                | 1945912354               |
| SNP_P3_24936_34024608 | NC_021161.1    | Ca_kabuli_chr02 | 34024608                | TT                              | CC                | 1945912355               |
| SNP_P3_24937_34024835 | NC_021161.1    | Ca_kabuli_chr02 | 34024835                | AA                              | CC                | 1945912357               |
| SNP_P3_24938_34025069 | NC_021161.1    | Ca_kabuli_chr02 | 34025069                | AA                              | CC                | 1945912359               |
| SNP_P3_24939_34025111 | NC_021161.1    | Ca_kabuli_chr02 | 34025111                | GG                              | AA                | 1945912361               |
| SNP_P3_24940_34025270 | NC_021161.1    | Ca_kabuli_chr02 | 34025270                | TT                              | CC                | 1945912362               |
| SNP_P3_24941_34025286 | NC_021161.1    | Ca_kabuli_chr02 | 34025286                | TT                              | CC                | 1945912364               |
| SNP_P3_24942_34025292 | NC_021161.1    | Ca_kabuli_chr02 | 34025292                | GG                              | TT                | 1945912366               |
| SNP_P3_24943_34025330 | NC_021161.1    | Ca_kabuli_chr02 | 34025330                | AA                              | TT                | 1945912368               |
| SNP_P3_24944_34025456 | NC_021161.1    | Ca_kabuli_chr02 | 34025456                | CC                              | TT                | 1945912370               |
| SNP_P3_24945_34025521 | NC_021161.1    | Ca_kabuli_chr02 | 34025521                | CC                              | TT                | 1945912371               |
| SNP_P3_24946_34025625 | NC_021161.1    | Ca_kabuli_chr02 | 34025625                | AA                              | TT                | 1945912373               |
| SNP_P3_24947_34025637 | NC_021161.1    | Ca_kabuli_chr02 | 34025637                | TT                              | CC                | 1945912375               |
| SNP_P3_24948_34025653 | NC_021161.1    | Ca_kabuli_chr02 | 34025653                | TT                              | CC                | 1945912377               |
| SNP_P3_24949_34027286 | NC_021161.1    | Ca_kabuli_chr02 | 34027286                | CC                              | TT                | 1945912378               |
| SNP_P3_24950_34028460 | NC_021161.1    | Ca_kabuli_chr02 | 34028460                | AA                              | CC                | 1945912380               |
| SNP_P3_24951_34028465 | NC_021161.1    | Ca_kabuli_chr02 | 34028465                | AA                              | TT                | 1945912382               |
| SNP_P3_24952_34028491 | NC_021161.1    | Ca_kabuli_chr02 | 34028491                | TT                              | GG                | 1945912384               |
| SNP_P3_24953_34028525 | NC_021161.1    | Ca_kabuli_chr02 | 34028525                | AA                              | TT                | 1945912386               |
| SNP_P3_24954_34028549 | NC_021161.1    | Ca_kabuli_chr02 | 34028549                | CC                              | AA                | 1945912387               |
| SNP_P3_24955_34028572 | NC_021161.1    | Ca_kabuli_chr02 | 34028572                | AA                              | TT                | 1945912389               |
| SNP_P3_24956_34028821 | NC_021161.1    | Ca_kabuli_chr02 | 34028821                | TT                              | CC                | 1945912391               |
| SNP_P3_24957_34028828 | NC_021161.1    | Ca_kabuli_chr02 | 34028828                | AA                              | GG                | 1945912393               |
| SNP_P3_24959_34028908 | NC_021161.1    | Ca_kabuli_chr02 | 34028908                | TT                              | CC                | 1945912394               |
| SNP_P3_24960_34037681 | NC_021161.1    | Ca_kabuli_chr02 | 34037681                | TT                              | CC                | 1945912396               |
| SNP_P3_24961_34037694 | NC_021161.1    | Ca_kabuli_chr02 | 34037694                | GG                              | AA                | 1945912398               |
| SNP_P3_24962_34037724 | NC_021161.1    | Ca_kabuli_chr02 | 34037724                | TT                              | GG                | 1945912400               |
| SNP_P3_24963_34037739 | NC_021161.1    | Ca_kabuli_chr02 | 34037739                | AA                              | TT                | 1945912402               |
| SNP_P3_24964_34038155 | NC_021161.1    | Ca_kabuli_chr02 | 34038155                | TT                              | CC                | 1945912403               |
| SNP_P3_24965_34038158 | NC_021161.1    | Ca_kabuli_chr02 | 34038158                | TT                              | CC                | 1945912405               |
| SNP_P3_24966_34038241 | NC_021161.1    | Ca_kabuli_chr02 | 34038241                | TT                              | GG                | 1945912407               |

| SNPs IDs              | Chromosome IDs | Chromosomes     | Physical positions (bp) | CDC Frontier (Reference genome) | (Pusa 256 & HPNB) | NCBI SNPdb Accession IDs |
|-----------------------|----------------|-----------------|-------------------------|---------------------------------|-------------------|--------------------------|
| SNP_P3_24967_34038281 | NC_021161.1    | Ca_kabuli_chr02 | 34038281                | AA                              | GG                | 1945912409               |
| SNP_P3_24968_34054646 | NC_021161.1    | Ca_kabuli_chr02 | 34054646                | GG                              | AA                | 1945912410               |
| SNP_P3_24969_34054902 | NC_021161.1    | Ca_kabuli_chr02 | 34054902                | GG                              | AA                | 1945912412               |
| SNP_P3_24970_34054932 | NC_021161.1    | Ca_kabuli_chr02 | 34054932                | AA                              | TT                | 1945912414               |
| SNP_P3_24971_34076549 | NC_021161.1    | Ca_kabuli_chr02 | 34076549                | GG                              | TT                | 1945912416               |
| SNP_P3_24972_34076571 | NC_021161.1    | Ca_kabuli_chr02 | 34076571                | CC                              | TT                | 1945912417               |
| SNP_P3_24973_34076858 | NC_021161.1    | Ca_kabuli_chr02 | 34076858                | AA                              | GG                | 1945912419               |
| SNP_P3_24974_34085738 | NC_021161.1    | Ca_kabuli_chr02 | 34085738                | GG                              | AA                | 1945912421               |
| SNP_P3_24975_34086029 | NC_021161.1    | Ca_kabuli_chr02 | 34086029                | CC                              | TT                | 1945912423               |
| SNP_P3_24976_34086035 | NC_021161.1    | Ca_kabuli_chr02 | 34086035                | CC                              | GG                | 1945912425               |
| SNP_P3_24977_34086050 | NC_021161.1    | Ca_kabuli_chr02 | 34086050                | GG                              | AA                | 1945912426               |
| SNP_P3_24978_34086119 | NC_021161.1    | Ca_kabuli_chr02 | 34086119                | AA                              | GG                | 1945912428               |
| SNP_P3_24979_34086122 | NC_021161.1    | Ca_kabuli_chr02 | 34086122                | CC                              | TT                | 1945912430               |
| SNP_P3_24980_34086155 | NC_021161.1    | Ca_kabuli_chr02 | 34086155                | GG                              | AA                | 1945912432               |
| SNP_P3_24981_34086188 | NC_021161.1    | Ca_kabuli_chr02 | 34086188                | GG                              | AA                | 1945912433               |
| SNP_P3_24982_34086198 | NC_021161.1    | Ca_kabuli_chr02 | 34086198                | TT                              | CC                | 1945912435               |
| SNP_P3_24983_34086465 | NC_021161.1    | Ca_kabuli_chr02 | 34086465                | TT                              | CC                | 1945912437               |
| SNP_P3_24984_34086534 | NC_021161.1    | Ca_kabuli_chr02 | 34086534                | TT                              | CC                | 1945912439               |
| SNP_P3_24985_34087085 | NC_021161.1    | Ca_kabuli_chr02 | 34087085                | TT                              | CC                | 1945912441               |
| SNP_P3_24986_34087389 | NC_021161.1    | Ca_kabuli_chr02 | 34087389                | TT                              | GG                | 1945912442               |
| SNP_P3_24987_34087397 | NC_021161.1    | Ca_kabuli_chr02 | 34087397                | AA                              | TT                | 1945912444               |
| SNP_P3_24990_34114312 | NC_021161.1    | Ca_kabuli_chr02 | 34114312                | TT                              | AA                | 1945912446               |
| SNP_P3_24991_34142919 | NC_021161.1    | Ca_kabuli_chr02 | 34142919                | TT                              | CC                | 1945912448               |
| SNP_P3_24992_34143305 | NC_021161.1    | Ca_kabuli_chr02 | 34143305                | CC                              | AA                | 1945912449               |
| SNP_P3_24993_34165036 | NC_021161.1    | Ca_kabuli_chr02 | 34165036                | GG                              | AA                | 1945912451               |
| SNP_P3_24994_34195481 | NC_021161.1    | Ca_kabuli_chr02 | 34195481                | AA                              | TT                | 1945912453               |
| SNP_P3_24995_34201436 | NC_021161.1    | Ca_kabuli_chr02 | 34201436                | AA                              | CC                | 1945912455               |
| SNP_P3_24999_34243981 | NC_021161.1    | Ca_kabuli_chr02 | 34243981                | CC                              | TT                | 1945912457               |
| SNP_P3_25000_34253738 | NC_021161.1    | Ca_kabuli_chr02 | 34253738                | CC                              | GG                | 1945912458               |
| SNP_P3_25001_34264390 | NC_021161.1    | Ca_kabuli_chr02 | 34264390                | GG                              | AA                | 1945912460               |
| SNP_P3_25003_34272155 | NC_021161.1    | Ca_kabuli_chr02 | 34272155                | TT                              | GG                | 1945912462               |
| SNP_P3_25004_34272158 | NC_021161.1    | Ca_kabuli_chr02 | 34272158                | AA                              | GG                | 1945912464               |
| SNP_P3_25005_34283996 | NC_021161.1    | Ca_kabuli_chr02 | 34283996                | AA                              | TT                | 1945912465               |
| SNP_P3_25006_34297883 | NC_021161.1    | Ca_kabuli_chr02 | 34297883                | AA                              | TT                | 1945912467               |
| SNP_P3_25007_34320634 | NC_021161.1    | Ca_kabuli_chr02 | 34320634                | CC                              | TT                | 1945912469               |
| SNP_P3_25008_34329600 | NC_021161.1    | Ca_kabuli_chr02 | 34329600                | CC                              | AA                | 1945912471               |
| SNP_P3_25009_34330306 | NC_021161.1    | Ca_kabuli_chr02 | 34330306                | CC                              | GG                | 1945912473               |
| SNP_P3_25010_34331059 | NC_021161.1    | Ca_kabuli_chr02 | 34331059                | GG                              | TT                | 1945912474               |
| SNP_P3_25012_34331110 | NC_021161.1    | Ca_kabuli_chr02 | 34331110                | GG                              | CC                | 1945912476               |
| SNP_P3_25013_34333106 | NC_021161.1    | Ca_kabuli_chr02 | 34333106                | CC                              | GG                | 1945912478               |
| SNP_P3_25014_34333111 | NC_021161.1    | Ca_kabuli_chr02 | 34333111                | AA                              | TT                | 1945912480               |
| SNP_P3_25015_34334816 | NC_021161.1    | Ca_kabuli_chr02 | 34334816                | AA                              | TT                | 1945912481               |

| SNPs IDs              | Chromosome IDs | Chromosomes     | Physical positions (bp) | CDC Frontier (Reference genome) | (Pusa 256 & HPNB) | NCBI SNPdb Accession IDs |
|-----------------------|----------------|-----------------|-------------------------|---------------------------------|-------------------|--------------------------|
| SNP_P3_25016_34334817 | NC_021161.1    | Ca_kabuli_chr02 | 34334817                | AA                              | TT                | 1945912483               |
| SNP_P3_25017_34336915 | NC_021161.1    | Ca_kabuli_chr02 | 34336915                | AA                              | GG                | 1945912485               |
| SNP_P3_25018_34337001 | NC_021161.1    | Ca_kabuli_chr02 | 34337001                | TT                              | CC                | 1945912487               |
| SNP_P3_25019_34337040 | NC_021161.1    | Ca_kabuli_chr02 | 34337040                | GG                              | AA                | 1945912489               |
| SNP_P3_25020_34337060 | NC_021161.1    | Ca_kabuli_chr02 | 34337060                | GG                              | CC                | 1945912490               |
| SNP_P3_25021_34337241 | NC_021161.1    | Ca_kabuli_chr02 | 34337241                | CC                              | TT                | 1945912492               |
| SNP_P3_25022_34337304 | NC_021161.1    | Ca_kabuli_chr02 | 34337304                | GG                              | AA                | 1945912494               |
| SNP_P3_25023_34337458 | NC_021161.1    | Ca_kabuli_chr02 | 34337458                | TT                              | GG                | 1945912496               |
| SNP_P3_25024_34337459 | NC_021161.1    | Ca_kabuli_chr02 | 34337459                | GG                              | AA                | 1945912497               |
| SNP_P3_25025_34337841 | NC_021161.1    | Ca_kabuli_chr02 | 34337841                | AA                              | TT                | 1945912499               |
| SNP_P3_25026_34338311 | NC_021161.1    | Ca_kabuli_chr02 | 34338311                | GG                              | AA                | 1945912501               |
| SNP_P3_25027_34338325 | NC_021161.1    | Ca_kabuli_chr02 | 34338325                | AA                              | TT                | 1945912503               |
| SNP_P3_25028_34339296 | NC_021161.1    | Ca_kabuli_chr02 | 34339296                | CC                              | GG                | 1945912505               |
| SNP_P3_25029_34339304 | NC_021161.1    | Ca_kabuli_chr02 | 34339304                | GG                              | AA                | 1945912506               |
| SNP_P3_25030_34340718 | NC_021161.1    | Ca_kabuli_chr02 | 34340718                | AA                              | GG                | 1945912508               |
| SNP_P3_25031_34340725 | NC_021161.1    | Ca_kabuli_chr02 | 34340725                | GG                              | AA                | 1945912510               |
| SNP_P3_25032_34340776 | NC_021161.1    | Ca_kabuli_chr02 | 34340776                | AA                              | CC                | 1945912512               |
| SNP_P3_25033_34340777 | NC_021161.1    | Ca_kabuli_chr02 | 34340777                | CC                              | AA                | 1945912513               |
| SNP_P3_25034_34340817 | NC_021161.1    | Ca_kabuli_chr02 | 34340817                | GG                              | AA                | 1945912515               |
| SNP_P3_25035_34340829 | NC_021161.1    | Ca_kabuli_chr02 | 34340829                | GG                              | TT                | 1945912517               |
| SNP_P3_25036_34340868 | NC_021161.1    | Ca_kabuli_chr02 | 34340868                | AA                              | GG                | 1945912519               |
| SNP_P3_25037_34340879 | NC_021161.1    | Ca_kabuli_chr02 | 34340879                | TT                              | CC                | 1945912521               |
| SNP_P3_25038_34340885 | NC_021161.1    | Ca_kabuli_chr02 | 34340885                | GG                              | AA                | 1945912522               |
| SNP_P3_25039_34340991 | NC_021161.1    | Ca_kabuli_chr02 | 34340991                | TT                              | CC                | 1945912524               |
| SNP_P3_25040_34341236 | NC_021161.1    | Ca_kabuli_chr02 | 34341236                | GG                              | AA                | 1945912526               |
| SNP_P3_25041_34341265 | NC_021161.1    | Ca_kabuli_chr02 | 34341265                | CC                              | TT                | 1945912528               |
| SNP_P3_25042_34341481 | NC_021161.1    | Ca_kabuli_chr02 | 34341481                | CC                              | TT                | 1945912529               |
| SNP_P3_25043_34341518 | NC_021161.1    | Ca_kabuli_chr02 | 34341518                | AA                              | GG                | 1945912531               |
| SNP_P3_25044_34341567 | NC_021161.1    | Ca_kabuli_chr02 | 34341567                | GG                              | AA                | 1945912533               |
| SNP_P3_25045_34341586 | NC_021161.1    | Ca_kabuli_chr02 | 34341586                | CC                              | GG                | 1945912535               |
| SNP_P3_25046_34341600 | NC_021161.1    | Ca_kabuli_chr02 | 34341600                | CC                              | TT                | 1945912536               |
| SNP_P3_25047_34341614 | NC_021161.1    | Ca_kabuli_chr02 | 34341614                | AA                              | GG                | 1945912538               |
| SNP_P3_25049_34344469 | NC_021161.1    | Ca_kabuli_chr02 | 34344469                | TT                              | CC                | 1945912540               |
| SNP_P3_25050_34346881 | NC_021161.1    | Ca_kabuli_chr02 | 34346881                | AA                              | GG                | 1945912542               |
| SNP_P3_25051_34348414 | NC_021161.1    | Ca_kabuli_chr02 | 34348414                | AA                              | TT                | 1945912544               |
| SNP_P3_25054_34354082 | NC_021161.1    | Ca_kabuli_chr02 | 34354082                | TT                              | CC                | 1945912545               |
| SNP_P3_25055_34354372 | NC_021161.1    | Ca_kabuli_chr02 | 34354372                | GG                              | TT                | 1945912547               |
| SNP_P3_25056_34354616 | NC_021161.1    | Ca_kabuli_chr02 | 34354616                | GG                              | AA                | 1945912549               |
| SNP_P3_25057_34354632 | NC_021161.1    | Ca_kabuli_chr02 | 34354632                | AA                              | TT                | 1945912551               |
| SNP_P3_25058_34355149 | NC_021161.1    | Ca_kabuli_chr02 | 34355149                | GG                              | CC                | 1945912552               |
| SNP_P3_25061_34355499 | NC_021161.1    | Ca_kabuli_chr02 | 34355499                | TT                              | AA                | 1945912554               |
| SNP_P3_25062_34355549 | NC_021161.1    | Ca_kabuli_chr02 | 34355549                | AA                              | TT                | 1945912556               |

| SNPs IDs              | Chromosome IDs | Chromosomes     | Physical positions (bp) | CDC Frontier (Reference genome) | (Pusa 256 & HPNB) | NCBI SNPdb Accession IDs |
|-----------------------|----------------|-----------------|-------------------------|---------------------------------|-------------------|--------------------------|
| SNP_P3_25063_34355603 | NC_021161.1    | Ca_kabuli_chr02 | 34355603                | AA                              | GG                | 1945912558               |
| SNP_P3_25064_34355723 | NC_021161.1    | Ca_kabuli_chr02 | 34355723                | CC                              | TT                | 1945912560               |
| SNP_P3_25066_34357798 | NC_021161.1    | Ca_kabuli_chr02 | 34357798                | TT                              | GG                | 1945912561               |
| SNP_P3_25067_34357881 | NC_021161.1    | Ca_kabuli_chr02 | 34357881                | AA                              | TT                | 1945912563               |
| SNP_P3_25068_34421562 | NC_021161.1    | Ca_kabuli_chr02 | 34421562                | TT                              | CC                | 1945912565               |
| SNP_P3_25069_34421563 | NC_021161.1    | Ca_kabuli_chr02 | 34421563                | CC                              | AA                | 1945912567               |
| SNP_P3_25071_34491777 | NC_021161.1    | Ca_kabuli_chr02 | 34491777                | CC                              | TT                | 1945912568               |
| SNP_P3_25072_34496487 | NC_021161.1    | Ca_kabuli_chr02 | 34496487                | TT                              | GG                | 1945912570               |
| SNP_P3_25074_34527938 | NC_021161.1    | Ca_kabuli_chr02 | 34527938                | CC                              | AA                | 1945912572               |
| SNP_P3_25075_34530405 | NC_021161.1    | Ca_kabuli_chr02 | 34530405                | CC                              | TT                | 1945912574               |
| SNP_P3_25078_34566542 | NC_021161.1    | Ca_kabuli_chr02 | 34566542                | AA                              | CC                | 1945912576               |
| SNP_P3_25079_34566561 | NC_021161.1    | Ca_kabuli_chr02 | 34566561                | AA                              | TT                | 1945912577               |
| SNP_P3_25080_34566908 | NC_021161.1    | Ca_kabuli_chr02 | 34566908                | CC                              | TT                | 1945912579               |
| SNP_P3_25081_34566945 | NC_021161.1    | Ca_kabuli_chr02 | 34566945                | TT                              | CC                | 1945912581               |
| SNP_P3_25082_34592210 | NC_021161.1    | Ca_kabuli_chr02 | 34592210                | GG                              | TT                | 1945912583               |
| SNP_P3_25083_34592663 | NC_021161.1    | Ca_kabuli_chr02 | 34592663                | TT                              | CC                | 1945912584               |
| SNP_P3_25084_34652571 | NC_021161.1    | Ca_kabuli_chr02 | 34652571                | CC                              | TT                | 1945912586               |
| SNP_P3_25086_34683522 | NC_021161.1    | Ca_kabuli_chr02 | 34683522                | TT                              | AA                | 1945912588               |
| SNP_P3_25087_34683539 | NC_021161.1    | Ca_kabuli_chr02 | 34683539                | CC                              | TT                | 1945912590               |
| SNP_P3_25088_34683576 | NC_021161.1    | Ca_kabuli_chr02 | 34683576                | CC                              | TT                | 1945912591               |
| SNP_P3_25089_34683672 | NC_021161.1    | Ca_kabuli_chr02 | 34683672                | TT                              | GG                | 1945912593               |
| SNP_P3_25090_34683739 | NC_021161.1    | Ca_kabuli_chr02 | 34683739                | AA                              | CC                | 1945912595               |
| SNP_P3_25092_34683876 | NC_021161.1    | Ca_kabuli_chr02 | 34683876                | AA                              | GG                | 1945912597               |
| SNP_P3_25093_34683889 | NC_021161.1    | Ca_kabuli_chr02 | 34683889                | AA                              | TT                | 1945912599               |
| SNP_P3_25094_34683928 | NC_021161.1    | Ca_kabuli_chr02 | 34683928                | TT                              | AA                | 1945912600               |
| SNP_P3_25095_34683949 | NC_021161.1    | Ca_kabuli_chr02 | 34683949                | CC                              | AA                | 1945912602               |
| SNP_P3_25096_34684026 | NC_021161.1    | Ca_kabuli_chr02 | 34684026                | TT                              | CC                | 1945912604               |
| SNP_P3_25097_34684138 | NC_021161.1    | Ca_kabuli_chr02 | 34684138                | GG                              | AA                | 1945912606               |
| SNP_P3_25098_34684183 | NC_021161.1    | Ca_kabuli_chr02 | 34684183                | AA                              | GG                | 1945912607               |
| SNP_P3_25099_34684216 | NC_021161.1    | Ca_kabuli_chr02 | 34684216                | AA                              | GG                | 1945912609               |
| SNP_P3_25100_34684222 | NC_021161.1    | Ca_kabuli_chr02 | 34684222                | GG                              | AA                | 1945912611               |
| SNP_P3_25101_34684251 | NC_021161.1    | Ca_kabuli_chr02 | 34684251                | GG                              | TT                | 1945912613               |
| SNP_P3_25102_34684271 | NC_021161.1    | Ca_kabuli_chr02 | 34684271                | AA                              | TT                | 1945912615               |
| SNP_P3_25103_34684276 | NC_021161.1    | Ca_kabuli_chr02 | 34684276                | AA                              | GG                | 1945912616               |
| SNP_P3_25104_34684296 | NC_021161.1    | Ca_kabuli_chr02 | 34684296                | AA                              | GG                | 1945912618               |
| SNP_P3_25105_34684314 | NC_021161.1    | Ca_kabuli_chr02 | 34684314                | GG                              | CC                | 1945912620               |
| SNP_P3_25106_34684322 | NC_021161.1    | Ca_kabuli_chr02 | 34684322                | GG                              | CC                | 1945912622               |
| SNP_P3_25107_34684327 | NC_021161.1    | Ca_kabuli_chr02 | 34684327                | AA                              | GG                | 1945912623               |
| SNP_P3_25108_34684342 | NC_021161.1    | Ca_kabuli_chr02 | 34684342                | TT                              | GG                | 1945912625               |
| SNP_P3_25109_34684354 | NC_021161.1    | Ca_kabuli_chr02 | 34684354                | TT                              | CC                | 1945912627               |
| SNP_P3_25111_34684403 | NC_021161.1    | Ca_kabuli_chr02 | 34684403                | GG                              | AA                | 1945912629               |
| SNP_P3_25112_34684428 | NC_021161.1    | Ca_kabuli_chr02 | 34684428                | GG                              | CC                | 1945912631               |



| SNPs IDs              | Chromosome IDs | Chromosomes     | Physical positions (bp) | CDC Frontier (Reference genome) | (Pusa 256 & HPNB) | NCBI SNPdb Accession IDs |
|-----------------------|----------------|-----------------|-------------------------|---------------------------------|-------------------|--------------------------|
| SNP_P3_25113_34684448 | NC_021161.1    | Ca_kabuli_chr02 | 34684448                | CC                              | TT                | 1945912632               |
| SNP_P3_25114_34684509 | NC_021161.1    | Ca_kabuli_chr02 | 34684509                | TT                              | GG                | 1945912634               |
| SNP_P3_25116_34684646 | NC_021161.1    | Ca_kabuli_chr02 | 34684646                | GG                              | AA                | 1945912636               |
| SNP_P3_25118_34684732 | NC_021161.1    | Ca_kabuli_chr02 | 34684732                | AA                              | GG                | 1945912638               |
| SNP_P3_25119_34684742 | NC_021161.1    | Ca_kabuli_chr02 | 34684742                | GG                              | AA                | 1945912639               |
| SNP_P3_25120_34684754 | NC_021161.1    | Ca_kabuli_chr02 | 34684754                | GG                              | TT                | 1945912641               |
| SNP_P3_25121_34684833 | NC_021161.1    | Ca_kabuli_chr02 | 34684833                | GG                              | AA                | 1945912643               |
| SNP_P3_25122_34684850 | NC_021161.1    | Ca_kabuli_chr02 | 34684850                | TT                              | CC                | 1945912645               |
| SNP_P3_25125_34685009 | NC_021161.1    | Ca_kabuli_chr02 | 34685009                | CC                              | AA                | 1945912647               |
| SNP_P3_25126_34685048 | NC_021161.1    | Ca_kabuli_chr02 | 34685048                | CC                              | TT                | 1945912648               |
| SNP_P3_25127_34685085 | NC_021161.1    | Ca_kabuli_chr02 | 34685085                | CC                              | TT                | 1945912650               |
| SNP_P3_25128_34685101 | NC_021161.1    | Ca_kabuli_chr02 | 34685101                | CC                              | TT                | 1945912652               |
| SNP_P3_25129_34685116 | NC_021161.1    | Ca_kabuli_chr02 | 34685116                | TT                              | GG                | 1945912654               |
| SNP_P3_25130_34685148 | NC_021161.1    | Ca_kabuli_chr02 | 34685148                | GG                              | TT                | 1945912655               |
| SNP_P3_25131_34685180 | NC_021161.1    | Ca_kabuli_chr02 | 34685180                | CC                              | TT                | 1945912657               |
| SNP_P3_25132_34685339 | NC_021161.1    | Ca_kabuli_chr02 | 34685339                | TT                              | GG                | 1945912659               |
| SNP_P3_25133_34685620 | NC_021161.1    | Ca_kabuli_chr02 | 34685620                | GG                              | TT                | 1945912661               |
| SNP_P3_25134_34685691 | NC_021161.1    | Ca_kabuli_chr02 | 34685691                | TT                              | AA                | 1945912662               |
| SNP_P3_25136_34685736 | NC_021161.1    | Ca_kabuli_chr02 | 34685736                | CC                              | TT                | 1945912664               |
| SNP_P3_25137_34685913 | NC_021161.1    | Ca_kabuli_chr02 | 34685913                | AA                              | CC                | 1945912666               |
| SNP_P3_25140_34719975 | NC_021161.1    | Ca_kabuli_chr02 | 34719975                | CC                              | AA                | 1945912668               |
| SNP_P3_25141_34739253 | NC_021161.1    | Ca_kabuli_chr02 | 34739253                | AA                              | GG                | 1945912670               |
| SNP_P3_25142_34785127 | NC_021161.1    | Ca_kabuli_chr02 | 34785127                | CC                              | TT                | 1945912671               |
| SNP_P3_25143_34807547 | NC_021161.1    | Ca_kabuli_chr02 | 34807547                | GG                              | AA                | 1945912673               |
| SNP_P3_25144_34809592 | NC_021161.1    | Ca_kabuli_chr02 | 34809592                | GG                              | AA                | 1945912675               |
| SNP_P3_25145_34830714 | NC_021161.1    | Ca_kabuli_chr02 | 34830714                | CC                              | TT                | 1945912677               |
| SNP_P3_25146_34830733 | NC_021161.1    | Ca_kabuli_chr02 | 34830733                | CC                              | GG                | 1945912678               |
| SNP_P3_25147_34830827 | NC_021161.1    | Ca_kabuli_chr02 | 34830827                | CC                              | TT                | 1945912680               |
| SNP_P3_25148_34830967 | NC_021161.1    | Ca_kabuli_chr02 | 34830967                | GG                              | AA                | 1945912682               |
| SNP_P3_25149_34830995 | NC_021161.1    | Ca_kabuli_chr02 | 34830995                | AA                              | GG                | 1945912684               |
| SNP_P3_25150_34831021 | NC_021161.1    | Ca_kabuli_chr02 | 34831021                | CC                              | TT                | 1945912686               |
| SNP_P3_25151_34831161 | NC_021161.1    | Ca_kabuli_chr02 | 34831161                | TT                              | CC                | 1945912687               |
| SNP_P3_25152_34854561 | NC_021161.1    | Ca_kabuli_chr02 | 34854561                | AA                              | TT                | 1945912689               |
| SNP_P3_25154_34957084 | NC_021161.1    | Ca_kabuli_chr02 | 34957084                | GG                              | AA                | 1945912691               |
| SNP_P3_25155_34957108 | NC_021161.1    | Ca_kabuli_chr02 | 34957108                | CC                              | TT                | 1945912693               |
| SNP_P3_25156_34983159 | NC_021161.1    | Ca_kabuli_chr02 | 34983159                | CC                              | TT                | 1945912694               |
| SNP_P3_25157_34983186 | NC_021161.1    | Ca_kabuli_chr02 | 34983186                | TT                              | CC                | 1945912696               |
| SNP_P3_25158_34983297 | NC_021161.1    | Ca_kabuli_chr02 | 34983297                | TT                              | CC                | 1945912698               |
| SNP_P3_25160_34984408 | NC_021161.1    | Ca_kabuli_chr02 | 34984408                | CC                              | AA                | 1945912700               |
| SNP_P3_25161_35002115 | NC_021161.1    | Ca_kabuli_chr02 | 35002115                | AA                              | GG                | 1945912702               |
| SNP_P3_25162_35031064 | NC_021161.1    | Ca_kabuli_chr02 | 35031064                | TT                              | GG                | 1945912703               |
| SNP_P3_25164_35074460 | NC_021161.1    | Ca_kabuli_chr02 | 35074460                | TT                              | AA                | 1945912705               |

| SNPs IDs              | Chromosome IDs | Chromosomes     | Physical positions (bp) | CDC Frontier (Reference genome) | (Pusa 256 & HPNB) | NCBI SNPdb Accession IDs |
|-----------------------|----------------|-----------------|-------------------------|---------------------------------|-------------------|--------------------------|
| SNP_P3_25165_35074798 | NC_021161.1    | Ca_kabuli_chr02 | 35074798                | GG                              | AA                | 1945912707               |
| SNP_P3_25166_35166467 | NC_021161.1    | Ca_kabuli_chr02 | 35166467                | GG                              | AA                | 1945912709               |
| SNP_P3_25167_35168735 | NC_021161.1    | Ca_kabuli_chr02 | 35168735                | AA                              | CC                | 1945912710               |
| SNP_P3_25168_35168737 | NC_021161.1    | Ca_kabuli_chr02 | 35168737                | AA                              | CC                | 1945912712               |
| SNP_P3_25169_35177393 | NC_021161.1    | Ca_kabuli_chr02 | 35177393                | TT                              | AA                | 1945912714               |
| SNP_P3_25170_35179770 | NC_021161.1    | Ca_kabuli_chr02 | 35179770                | AA                              | GG                | 1945912716               |
| SNP_P3_25172_35258079 | NC_021161.1    | Ca_kabuli_chr02 | 35258079                | CC                              | TT                | 1945912718               |
| SNP_P3_25173_35258090 | NC_021161.1    | Ca_kabuli_chr02 | 35258090                | AA                              | GG                | 1945912719               |
| SNP_P3_25174_35258094 | NC_021161.1    | Ca_kabuli_chr02 | 35258094                | TT                              | CC                | 1945912721               |
| SNP_P3_25175_35258242 | NC_021161.1    | Ca_kabuli_chr02 | 35258242                | GG                              | AA                | 1945912723               |
| SNP_P3_25176_35258326 | NC_021161.1    | Ca_kabuli_chr02 | 35258326                | CC                              | TT                | 1945912725               |
| SNP_P3_25177_35258337 | NC_021161.1    | Ca_kabuli_chr02 | 35258337                | TT                              | AA                | 1945912726               |
| SNP_P3_25178_35258397 | NC_021161.1    | Ca_kabuli_chr02 | 35258397                | TT                              | CC                | 1945912728               |
| SNP_P3_25180_35260917 | NC_021161.1    | Ca_kabuli_chr02 | 35260917                | CC                              | TT                | 1945912730               |
| SNP_P3_25182_35287787 | NC_021161.1    | Ca_kabuli_chr02 | 35287787                | CC                              | TT                | 1945912732               |
| SNP_P3_25183_35287791 | NC_021161.1    | Ca_kabuli_chr02 | 35287791                | TT                              | GG                | 1945912734               |
| SNP_P3_25184_35287799 | NC_021161.1    | Ca_kabuli_chr02 | 35287799                | AA                              | GG                | 1945912735               |
| SNP_P3_25185_35287874 | NC_021161.1    | Ca_kabuli_chr02 | 35287874                | TT                              | CC                | 1945912737               |
| SNP_P3_25186_35287962 | NC_021161.1    | Ca_kabuli_chr02 | 35287962                | GG                              | CC                | 1945912739               |
| SNP_P3_25187_35288028 | NC_021161.1    | Ca_kabuli_chr02 | 35288028                | TT                              | AA                | 1945912741               |
| SNP_P3_25188_35288039 | NC_021161.1    | Ca_kabuli_chr02 | 35288039                | AA                              | GG                | 1945912742               |
| SNP_P3_25189_35288097 | NC_021161.1    | Ca_kabuli_chr02 | 35288097                | TT                              | CC                | 1945912744               |
| SNP_P3_25191_35288190 | NC_021161.1    | Ca_kabuli_chr02 | 35288190                | AA                              | GG                | 1945912746               |
| SNP_P3_25192_35288203 | NC_021161.1    | Ca_kabuli_chr02 | 35288203                | AA                              | GG                | 1945912748               |
| SNP_P3_25193_35288205 | NC_021161.1    | Ca_kabuli_chr02 | 35288205                | GG                              | TT                | 1945912750               |
| SNP_P3_25194_35288260 | NC_021161.1    | Ca_kabuli_chr02 | 35288260                | AA                              | GG                | 1945912751               |
| SNP_P3_25195_35288350 | NC_021161.1    | Ca_kabuli_chr02 | 35288350                | TT                              | CC                | 1945912753               |
| SNP_P3_25196_35288351 | NC_021161.1    | Ca_kabuli_chr02 | 35288351                | TT                              | CC                | 1945912755               |
| SNP_P3_25197_35288379 | NC_021161.1    | Ca_kabuli_chr02 | 35288379                | AA                              | CC                | 1945912757               |
| SNP_P3_25198_35288412 | NC_021161.1    | Ca_kabuli_chr02 | 35288412                | GG                              | TT                | 1945912758               |
| SNP_P3_25199_35288433 | NC_021161.1    | Ca_kabuli_chr02 | 35288433                | CC                              | TT                | 1945912760               |
| SNP_P3_25201_35288529 | NC_021161.1    | Ca_kabuli_chr02 | 35288529                | AA                              | TT                | 1945912762               |
| SNP_P3_25202_35288530 | NC_021161.1    | Ca_kabuli_chr02 | 35288530                | CC                              | TT                | 1945912764               |
| SNP_P3_25203_35288540 | NC_021161.1    | Ca_kabuli_chr02 | 35288540                | TT                              | AA                | 1945912765               |
| SNP_P3_25204_35288578 | NC_021161.1    | Ca_kabuli_chr02 | 35288578                | GG                              | TT                | 1945912767               |
| SNP_P3_25205_35288581 | NC_021161.1    | Ca_kabuli_chr02 | 35288581                | GG                              | AA                | 1945912769               |
| SNP_P3_25206_35288703 | NC_021161.1    | Ca_kabuli_chr02 | 35288703                | TT                              | CC                | 1945912771               |
| SNP_P3_25207_35288746 | NC_021161.1    | Ca_kabuli_chr02 | 35288746                | AA                              | TT                | 1945912773               |
| SNP_P3_25208_35288859 | NC_021161.1    | Ca_kabuli_chr02 | 35288859                | TT                              | GG                | 1945912774               |
| SNP_P3_25209_35288863 | NC_021161.1    | Ca_kabuli_chr02 | 35288863                | GG                              | TT                | 1945912776               |
| SNP_P3_25210_35288962 | NC_021161.1    | Ca_kabuli_chr02 | 35288962                | CC                              | AA                | 1945912778               |
| SNP_P3_25211_35288966 | NC_021161.1    | Ca_kabuli_chr02 | 35288966                | TT                              | CC                | 1945912780               |

| SNPs IDs              | Chromosome IDs | Chromosomes     | Physical positions (bp) | CDC Frontier (Reference genome) | (Pusa 256 & HPNB) | NCBI SNPdb Accession IDs |
|-----------------------|----------------|-----------------|-------------------------|---------------------------------|-------------------|--------------------------|
| SNP_P3_25212_35288967 | NC_021161.1    | Ca_kabuli_chr02 | 35288967                | TT                              | AA                | 1945912781               |
| SNP_P3_25213_35289047 | NC_021161.1    | Ca_kabuli_chr02 | 35289047                | TT                              | CC                | 1945912783               |
| SNP_P3_25214_35289099 | NC_021161.1    | Ca_kabuli_chr02 | 35289099                | TT                              | GG                | 1945912785               |
| SNP_P3_25215_35289103 | NC_021161.1    | Ca_kabuli_chr02 | 35289103                | GG                              | CC                | 1945912787               |
| SNP_P3_25216_35289282 | NC_021161.1    | Ca_kabuli_chr02 | 35289282                | AA                              | CC                | 1945912789               |
| SNP_P3_25217_35289300 | NC_021161.1    | Ca_kabuli_chr02 | 35289300                | AA                              | CC                | 1945912790               |
| SNP_P3_25218_35289310 | NC_021161.1    | Ca_kabuli_chr02 | 35289310                | TT                              | AA                | 1945912792               |
| SNP_P3_25219_35291901 | NC_021161.1    | Ca_kabuli_chr02 | 35291901                | GG                              | TT                | 1945912794               |
| SNP_P3_25220_35291940 | NC_021161.1    | Ca_kabuli_chr02 | 35291940                | AA                              | GG                | 1945912796               |
| SNP_P3_25222_35297846 | NC_021161.1    | Ca_kabuli_chr02 | 35297846                | TT                              | CC                | 1945912797               |
| SNP_P3_25223_35297860 | NC_021161.1    | Ca_kabuli_chr02 | 35297860                | CC                              | AA                | 1945912799               |
| SNP_P3_25225_35298528 | NC_021161.1    | Ca_kabuli_chr02 | 35298528                | GG                              | AA                | 1945912801               |
| SNP_P3_25226_35298533 | NC_021161.1    | Ca_kabuli_chr02 | 35298533                | AA                              | CC                | 1945912803               |
| SNP_P3_25227_35298553 | NC_021161.1    | Ca_kabuli_chr02 | 35298553                | CC                              | GG                | 1945912805               |
| SNP_P3_25228_35298784 | NC_021161.1    | Ca_kabuli_chr02 | 35298784                | TT                              | AA                | 1945912806               |
| SNP_P3_25229_35298857 | NC_021161.1    | Ca_kabuli_chr02 | 35298857                | GG                              | AA                | 1945912808               |
| SNP_P3_25230_35299116 | NC_021161.1    | Ca_kabuli_chr02 | 35299116                | GG                              | AA                | 1945912810               |
| SNP_P3_25231_35299117 | NC_021161.1    | Ca_kabuli_chr02 | 35299117                | AA                              | CC                | 1945912812               |
| SNP_P3_25232_35299129 | NC_021161.1    | Ca_kabuli_chr02 | 35299129                | GG                              | AA                | 1945912813               |
| SNP_P3_25233_35299161 | NC_021161.1    | Ca_kabuli_chr02 | 35299161                | CC                              | GG                | 1945912815               |
| SNP_P3_25234_35299163 | NC_021161.1    | Ca_kabuli_chr02 | 35299163                | AA                              | GG                | 1945912817               |
| SNP_P3_25235_35299597 | NC_021161.1    | Ca_kabuli_chr02 | 35299597                | TT                              | CC                | 1945912819               |
| SNP_P3_25236_35299825 | NC_021161.1    | Ca_kabuli_chr02 | 35299825                | GG                              | AA                | 1945912821               |
| SNP_P3_25237_35300219 | NC_021161.1    | Ca_kabuli_chr02 | 35300219                | GG                              | AA                | 1945912822               |
| SNP_P3_25238_35302844 | NC_021161.1    | Ca_kabuli_chr02 | 35302844                | GG                              | AA                | 1945912824               |
| SNP_P3_25239_35302916 | NC_021161.1    | Ca_kabuli_chr02 | 35302916                | GG                              | AA                | 1945912826               |
| SNP_P3_25240_35302992 | NC_021161.1    | Ca_kabuli_chr02 | 35302992                | GG                              | AA                | 1945912828               |
| SNP_P3_25241_35303184 | NC_021161.1    | Ca_kabuli_chr02 | 35303184                | GG                              | AA                | 1945912829               |
| SNP_P3_25242_35303231 | NC_021161.1    | Ca_kabuli_chr02 | 35303231                | CC                              | TT                | 1945912831               |
| SNP_P3_25243_35303281 | NC_021161.1    | Ca_kabuli_chr02 | 35303281                | TT                              | AA                | 1945912833               |
| SNP_P3_25244_35303295 | NC_021161.1    | Ca_kabuli_chr02 | 35303295                | GG                              | AA                | 1945912835               |
| SNP_P3_25245_35303397 | NC_021161.1    | Ca_kabuli_chr02 | 35303397                | GG                              | AA                | 1945912837               |
| SNP_P3_25247_35303511 | NC_021161.1    | Ca_kabuli_chr02 | 35303511                | GG                              | AA                | 1945912838               |
| SNP_P3_25248_35303589 | NC_021161.1    | Ca_kabuli_chr02 | 35303589                | AA                              | GG                | 1945912840               |
| SNP_P3_25249_35303595 | NC_021161.1    | Ca_kabuli_chr02 | 35303595                | TT                              | GG                | 1945912842               |
| SNP_P3_25250_35303614 | NC_021161.1    | Ca_kabuli_chr02 | 35303614                | TT                              | CC                | 1945912844               |
| SNP_P3_25251_35303671 | NC_021161.1    | Ca_kabuli_chr02 | 35303671                | CC                              | AA                | 1945912845               |
| SNP_P3_25252_35303711 | NC_021161.1    | Ca_kabuli_chr02 | 35303711                | GG                              | AA                | 1945912847               |
| SNP_P3_25253_35303778 | NC_021161.1    | Ca_kabuli_chr02 | 35303778                | AA                              | GG                | 1945912849               |
| SNP_P3_25254_35303836 | NC_021161.1    | Ca_kabuli_chr02 | 35303836                | GG                              | AA                | 1945912851               |
| SNP_P3_25255_35303932 | NC_021161.1    | Ca_kabuli_chr02 | 35303932                | TT                              | CC                | 1945912853               |
| SNP_P3_25256_35303957 | NC_021161.1    | Ca_kabuli_chr02 | 35303957                | TT                              | CC                | 1945912854               |

| SNPs IDs              | Chromosome IDs | Chromosomes     | Physical positions (bp) | CDC Frontier (Reference genome) | (Pusa 256 & HPNB) | NCBI SNPdb Accession IDs |
|-----------------------|----------------|-----------------|-------------------------|---------------------------------|-------------------|--------------------------|
| SNP_P3_25257_35303978 | NC_021161.1    | Ca_kabuli_chr02 | 35303978                | TT                              | GG                | 1945912856               |
| SNP_P3_25258_35304015 | NC_021161.1    | Ca_kabuli_chr02 | 35304015                | GG                              | CC                | 1945912858               |
| SNP_P3_25259_35304021 | NC_021161.1    | Ca_kabuli_chr02 | 35304021                | TT                              | CC                | 1945912860               |
| SNP_P3_25260_35304053 | NC_021161.1    | Ca_kabuli_chr02 | 35304053                | GG                              | TT                | 1945912861               |
| SNP_P3_25261_35304105 | NC_021161.1    | Ca_kabuli_chr02 | 35304105                | TT                              | CC                | 1945912863               |
| SNP_P3_25262_35304132 | NC_021161.1    | Ca_kabuli_chr02 | 35304132                | CC                              | TT                | 1945912865               |
| SNP_P3_25263_35304189 | NC_021161.1    | Ca_kabuli_chr02 | 35304189                | AA                              | GG                | 1945912867               |
| SNP_P3_25264_35304207 | NC_021161.1    | Ca_kabuli_chr02 | 35304207                | GG                              | AA                | 1945912869               |
| SNP_P3_25265_35304311 | NC_021161.1    | Ca_kabuli_chr02 | 35304311                | GG                              | AA                | 1945912870               |
| SNP_P3_25266_35304442 | NC_021161.1    | Ca_kabuli_chr02 | 35304442                | CC                              | AA                | 1945912872               |
| SNP_P3_25268_35304719 | NC_021161.1    | Ca_kabuli_chr02 | 35304719                | TT                              | CC                | 1945912874               |
| SNP_P3_25269_35304722 | NC_021161.1    | Ca_kabuli_chr02 | 35304722                | TT                              | CC                | 1945912876               |
| SNP_P3_25270_35304764 | NC_021161.1    | Ca_kabuli_chr02 | 35304764                | TT                              | CC                | 1945912877               |
| SNP_P3_25271_35304962 | NC_021161.1    | Ca_kabuli_chr02 | 35304962                | GG                              | TT                | 1945912879               |
| SNP_P3_25272_35305138 | NC_021161.1    | Ca_kabuli_chr02 | 35305138                | AA                              | GG                | 1945912881               |
| SNP_P3_25273_35305210 | NC_021161.1    | Ca_kabuli_chr02 | 35305210                | GG                              | AA                | 1945912883               |
| SNP_P3_25274_35305584 | NC_021161.1    | Ca_kabuli_chr02 | 35305584                | AA                              | GG                | 1945912884               |
| SNP_P3_25275_35305647 | NC_021161.1    | Ca_kabuli_chr02 | 35305647                | CC                              | TT                | 1945912886               |
| SNP_P3_25276_35306056 | NC_021161.1    | Ca_kabuli_chr02 | 35306056                | GG                              | TT                | 1945912888               |
| SNP_P3_25277_35306353 | NC_021161.1    | Ca_kabuli_chr02 | 35306353                | GG                              | AA                | 1945912890               |
| SNP_P3_25278_35306374 | NC_021161.1    | Ca_kabuli_chr02 | 35306374                | TT                              | CC                | 1945912892               |
| SNP_P3_25279_35313126 | NC_021161.1    | Ca_kabuli_chr02 | 35313126                | GG                              | TT                | 1945912893               |
| SNP_P3_25280_35313171 | NC_021161.1    | Ca_kabuli_chr02 | 35313171                | CC                              | TT                | 1945912895               |
| SNP_P3_25281_35313198 | NC_021161.1    | Ca_kabuli_chr02 | 35313198                | TT                              | GG                | 1945912897               |
| SNP_P3_25282_35313225 | NC_021161.1    | Ca_kabuli_chr02 | 35313225                | TT                              | GG                | 1945912899               |
| SNP_P3_25284_35329363 | NC_021161.1    | Ca_kabuli_chr02 | 35329363                | TT                              | AA                | 1945912900               |
| SNP_P3_25285_35329364 | NC_021161.1    | Ca_kabuli_chr02 | 35329364                | AA                              | GG                | 1945912902               |
| SNP_P3_25287_35353824 | NC_021161.1    | Ca_kabuli_chr02 | 35353824                | TT                              | AA                | 1945912904               |
| SNP_P3_25288_35353827 | NC_021161.1    | Ca_kabuli_chr02 | 35353827                | AA                              | CC                | 1945912906               |
| SNP_P3_25289_35406578 | NC_021161.1    | Ca_kabuli_chr02 | 35406578                | CC                              | TT                | 1945912908               |
| SNP_P3_25292_35428229 | NC_021161.1    | Ca_kabuli_chr02 | 35428229                | AA                              | GG                | 1945912909               |
| SNP_P3_25295_35519873 | NC_021161.1    | Ca_kabuli_chr02 | 35519873                | CC                              | TT                | 1945912911               |
| SNP_P3_25296_35556094 | NC_021161.1    | Ca_kabuli_chr02 | 35556094                | TT                              | CC                | 1945912913               |
| SNP_P3_25297_35556097 | NC_021161.1    | Ca_kabuli_chr02 | 35556097                | GG                              | CC                | 1945912915               |
| SNP_P3_25299_35559080 | NC_021161.1    | Ca_kabuli_chr02 | 35559080                | TT                              | CC                | 1945912916               |
| SNP_P3_25300_35578464 | NC_021161.1    | Ca_kabuli_chr02 | 35578464                | AA                              | TT                | 1945912918               |
| SNP_P3_25301_35580628 | NC_021161.1    | Ca_kabuli_chr02 | 35580628                | AA                              | TT                | 1945912920               |
| SNP_P3_25302_35580704 | NC_021161.1    | Ca_kabuli_chr02 | 35580704                | CC                              | AA                | 1945912922               |
| SNP_P3_25304_35582497 | NC_021161.1    | Ca_kabuli_chr02 | 35582497                | AA                              | CC                | 1945912923               |
| SNP_P3_25308_35788873 | NC_021161.1    | Ca_kabuli_chr02 | 35788873                | TT                              | CC                | 1945912925               |
| SNP_P3_25311_35821513 | NC_021161.1    | Ca_kabuli_chr02 | 35821513                | TT                              | CC                | 1945912927               |
| SNP_P3_25313_35846235 | NC_021161.1    | Ca_kabuli_chr02 | 35846235                | TT                              | AA                | 1945912929               |

| SNPs IDs              | Chromosome IDs | Chromosomes     | Physical positions (bp) | CDC Frontier (Reference genome) | (Pusa 256 & HPNB) | NCBI SNPdb Accession IDs |
|-----------------------|----------------|-----------------|-------------------------|---------------------------------|-------------------|--------------------------|
| SNP_P3_25314_35846342 | NC_021161.1    | Ca_kabuli_chr02 | 35846342                | GG                              | AA                | 1945912931               |
| SNP_P3_25316_35846590 | NC_021161.1    | Ca_kabuli_chr02 | 35846590                | GG                              | AA                | 1945912932               |
| SNP_P3_25317_35846656 | NC_021161.1    | Ca_kabuli_chr02 | 35846656                | TT                              | CC                | 1945912934               |
| SNP_P3_25318_35847107 | NC_021161.1    | Ca_kabuli_chr02 | 35847107                | AA                              | CC                | 1945912936               |
| SNP_P3_25319_35847289 | NC_021161.1    | Ca_kabuli_chr02 | 35847289                | AA                              | GG                | 1945912938               |
| SNP_P3_25320_35848476 | NC_021161.1    | Ca_kabuli_chr02 | 35848476                | CC                              | AA                | 1945912939               |
| SNP_P3_25321_35848622 | NC_021161.1    | Ca_kabuli_chr02 | 35848622                | GG                              | CC                | 1945912941               |
| SNP_P3_25323_35848740 | NC_021161.1    | Ca_kabuli_chr02 | 35848740                | AA                              | GG                | 1945912943               |
| SNP_P3_25325_35848990 | NC_021161.1    | Ca_kabuli_chr02 | 35848990                | AA                              | GG                | 1945912945               |
| SNP_P3_25326_35849951 | NC_021161.1    | Ca_kabuli_chr02 | 35849951                | CC                              | TT                | 1945912947               |
| SNP_P3_25327_35852656 | NC_021161.1    | Ca_kabuli_chr02 | 35852656                | AA                              | GG                | 1945912948               |
| SNP_P3_25328_35852662 | NC_021161.1    | Ca_kabuli_chr02 | 35852662                | AA                              | GG                | 1945912950               |
| SNP_P3_25329_35852689 | NC_021161.1    | Ca_kabuli_chr02 | 35852689                | CC                              | AA                | 1945912952               |
| SNP_P3_25331_35853383 | NC_021161.1    | Ca_kabuli_chr02 | 35853383                | CC                              | GG                | 1945912954               |
| SNP_P3_25332_35853636 | NC_021161.1    | Ca_kabuli_chr02 | 35853636                | CC                              | TT                | 1945912955               |
| SNP_P3_25334_35853717 | NC_021161.1    | Ca_kabuli_chr02 | 35853717                | AA                              | GG                | 1945912957               |
| SNP_P3_25336_35854922 | NC_021161.1    | Ca_kabuli_chr02 | 35854922                | CC                              | TT                | 1945912959               |
| SNP_P3_25337_35855085 | NC_021161.1    | Ca_kabuli_chr02 | 35855085                | CC                              | GG                | 1945912961               |
| SNP_P3_25339_35855737 | NC_021161.1    | Ca_kabuli_chr02 | 35855737                | GG                              | AA                | 1945912963               |
| SNP_P3_25340_35855819 | NC_021161.1    | Ca_kabuli_chr02 | 35855819                | AA                              | GG                | 1945912964               |
| SNP_P3_25341_35855840 | NC_021161.1    | Ca_kabuli_chr02 | 35855840                | AA                              | GG                | 1945912966               |
| SNP_P3_25343_35856189 | NC_021161.1    | Ca_kabuli_chr02 | 35856189                | TT                              | GG                | 1945912968               |
| SNP_P3_25344_35856834 | NC_021161.1    | Ca_kabuli_chr02 | 35856834                | CC                              | TT                | 1945912970               |
| SNP_P3_25345_35857883 | NC_021161.1    | Ca_kabuli_chr02 | 35857883                | GG                              | AA                | 1945912971               |
| SNP_P3_25346_35859086 | NC_021161.1    | Ca_kabuli_chr02 | 35859086                | AA                              | GG                | 1945912973               |
| SNP_P3_25348_35860429 | NC_021161.1    | Ca_kabuli_chr02 | 35860429                | CC                              | TT                | 1945912975               |
| SNP_P3_25349_35860817 | NC_021161.1    | Ca_kabuli_chr02 | 35860817                | GG                              | AA                | 1945912977               |
| SNP_P3_25351_35861103 | NC_021161.1    | Ca_kabuli_chr02 | 35861103                | CC                              | AA                | 1945912978               |
| SNP_P3_25352_35862457 | NC_021161.1    | Ca_kabuli_chr02 | 35862457                | TT                              | CC                | 1945912980               |
| SNP_P3_25353_35863752 | NC_021161.1    | Ca_kabuli_chr02 | 35863752                | AA                              | GG                | 1945912982               |
| SNP_P3_25354_35865381 | NC_021161.1    | Ca_kabuli_chr02 | 35865381                | TT                              | GG                | 1945912984               |
| SNP_P3_25355_35865416 | NC_021161.1    | Ca_kabuli_chr02 | 35865416                | CC                              | TT                | 1945912986               |
| SNP_P3_25356_35865484 | NC_021161.1    | Ca_kabuli_chr02 | 35865484                | TT                              | CC                | 1945912987               |
| SNP_P3_25357_35865501 | NC_021161.1    | Ca_kabuli_chr02 | 35865501                | TT                              | GG                | 1945912989               |
| SNP_P3_25358_35865961 | NC_021161.1    | Ca_kabuli_chr02 | 35865961                | AA                              | GG                | 1945912991               |
| SNP_P3_25359_35866046 | NC_021161.1    | Ca_kabuli_chr02 | 35866046                | GG                              | AA                | 1945912993               |
| SNP_P3_25360_35866801 | NC_021161.1    | Ca_kabuli_chr02 | 35866801                | GG                              | AA                | 1945912994               |
| SNP_P3_25362_35867123 | NC_021161.1    | Ca_kabuli_chr02 | 35867123                | CC                              | TT                | 1945912996               |
| SNP_P3_25363_35867126 | NC_021161.1    | Ca_kabuli_chr02 | 35867126                | CC                              | TT                | 1945912998               |
| SNP_P3_25364_35867127 | NC_021161.1    | Ca_kabuli_chr02 | 35867127                | AA                              | CC                | 1945913000               |
| SNP_P3_25365_35867227 | NC_021161.1    | Ca_kabuli_chr02 | 35867227                | TT                              | CC                | 1945913002               |
| SNP_P3_25366_35867234 | NC_021161.1    | Ca_kabuli_chr02 | 35867234                | GG                              | AA                | 1945913003               |

| SNPs IDs              | Chromosome IDs | Chromosomes     | Physical positions (bp) | CDC Frontier (Reference genome) | (Pusa 256 & HPNB) | NCBI SNPdb Accession IDs |
|-----------------------|----------------|-----------------|-------------------------|---------------------------------|-------------------|--------------------------|
| SNP_P3_25367_35867235 | NC_021161.1    | Ca_kabuli_chr02 | 35867235                | TT                              | CC                | 1945913005               |
| SNP_P3_25368_35867257 | NC_021161.1    | Ca_kabuli_chr02 | 35867257                | CC                              | TT                | 1945913007               |
| SNP_P3_25369_35868404 | NC_021161.1    | Ca_kabuli_chr02 | 35868404                | GG                              | AA                | 1945913009               |
| SNP_P3_25370_35869063 | NC_021161.1    | Ca_kabuli_chr02 | 35869063                | TT                              | GG                | 1945913010               |
| SNP_P3_25371_35870889 | NC_021161.1    | Ca_kabuli_chr02 | 35870889                | AA                              | CC                | 1945913012               |
| SNP_P3_25372_35872078 | NC_021161.1    | Ca_kabuli_chr02 | 35872078                | GG                              | CC                | 1945913014               |
| SNP_P3_25373_35872125 | NC_021161.1    | Ca_kabuli_chr02 | 35872125                | TT                              | CC                | 1945913016               |
| SNP_P3_25374_35872420 | NC_021161.1    | Ca_kabuli_chr02 | 35872420                | GG                              | AA                | 1945913018               |
| SNP_P3_25375_35878088 | NC_021161.1    | Ca_kabuli_chr02 | 35878088                | GG                              | AA                | 1945913019               |
| SNP_P3_25376_35878257 | NC_021161.1    | Ca_kabuli_chr02 | 35878257                | TT                              | CC                | 1945913021               |
| SNP_P3_25377_35878302 | NC_021161.1    | Ca_kabuli_chr02 | 35878302                | CC                              | TT                | 1945913023               |
| SNP_P3_25378_35878342 | NC_021161.1    | Ca_kabuli_chr02 | 35878342                | TT                              | GG                | 1945913025               |
| SNP_P3_25379_35878427 | NC_021161.1    | Ca_kabuli_chr02 | 35878427                | CC                              | TT                | 1945913026               |
| SNP_P3_25380_35878458 | NC_021161.1    | Ca_kabuli_chr02 | 35878458                | TT                              | AA                | 1945913028               |
| SNP_P3_25381_35878527 | NC_021161.1    | Ca_kabuli_chr02 | 35878527                | TT                              | AA                | 1945913030               |
| SNP_P3_25382_35878691 | NC_021161.1    | Ca_kabuli_chr02 | 35878691                | AA                              | CC                | 1945913032               |
| SNP_P3_25383_35879037 | NC_021161.1    | Ca_kabuli_chr02 | 35879037                | AA                              | TT                | 1945913034               |
| SNP_P3_25384_35883782 | NC_021161.1    | Ca_kabuli_chr02 | 35883782                | CC                              | TT                | 1945913035               |
| SNP_P3_25385_35884662 | NC_021161.1    | Ca_kabuli_chr02 | 35884662                | AA                              | GG                | 1945913037               |
| SNP_P3_25386_35885031 | NC_021161.1    | Ca_kabuli_chr02 | 35885031                | AA                              | CC                | 1945913039               |
| SNP_P3_25387_35886634 | NC_021161.1    | Ca_kabuli_chr02 | 35886634                | CC                              | AA                | 1945913041               |
| SNP_P3_25388_35888341 | NC_021161.1    | Ca_kabuli_chr02 | 35888341                | AA                              | GG                | 1945913042               |
| SNP_P3_25389_35888908 | NC_021161.1    | Ca_kabuli_chr02 | 35888908                | CC                              | TT                | 1945913044               |
| SNP_P3_25390_35889247 | NC_021161.1    | Ca_kabuli_chr02 | 35889247                | TT                              | CC                | 1945913046               |
| SNP_P3_25391_35889461 | NC_021161.1    | Ca_kabuli_chr02 | 35889461                | CC                              | TT                | 1945913048               |
| SNP_P3_25392_35889796 | NC_021161.1    | Ca_kabuli_chr02 | 35889796                | TT                              | CC                | 1945913050               |
| SNP_P3_25393_35889889 | NC_021161.1    | Ca_kabuli_chr02 | 35889889                | GG                              | AA                | 1945913051               |
| SNP_P3_25394_35890289 | NC_021161.1    | Ca_kabuli_chr02 | 35890289                | GG                              | TT                | 1945913053               |
| SNP_P3_25395_35891688 | NC_021161.1    | Ca_kabuli_chr02 | 35891688                | CC                              | TT                | 1945913055               |
| SNP_P3_25396_35892892 | NC_021161.1    | Ca_kabuli_chr02 | 35892892                | AA                              | GG                | 1945913057               |
| SNP_P3_25399_35893608 | NC_021161.1    | Ca_kabuli_chr02 | 35893608                | AA                              | TT                | 1945913058               |
| SNP_P3_25401_35893772 | NC_021161.1    | Ca_kabuli_chr02 | 35893772                | GG                              | AA                | 1945913060               |
| SNP_P3_25403_35894926 | NC_021161.1    | Ca_kabuli_chr02 | 35894926                | CC                              | TT                | 1945913062               |
| SNP_P3_25404_35895071 | NC_021161.1    | Ca_kabuli_chr02 | 35895071                | GG                              | TT                | 1945913064               |
| SNP_P3_25405_35895361 | NC_021161.1    | Ca_kabuli_chr02 | 35895361                | GG                              | AA                | 1945913066               |
| SNP_P3_25407_35895587 | NC_021161.1    | Ca_kabuli_chr02 | 35895587                | AA                              | CC                | 1945913067               |
| SNP_P3_25409_35897134 | NC_021161.1    | Ca_kabuli_chr02 | 35897134                | TT                              | CC                | 1945913069               |
| SNP_P3_25410_35897166 | NC_021161.1    | Ca_kabuli_chr02 | 35897166                | AA                              | GG                | 1945913071               |
| SNP_P3_25411_35897266 | NC_021161.1    | Ca_kabuli_chr02 | 35897266                | CC                              | TT                | 1945913073               |
| SNP_P3_25412_35897290 | NC_021161.1    | Ca_kabuli_chr02 | 35897290                | GG                              | AA                | 1945913074               |
| SNP_P3_25414_35897472 | NC_021161.1    | Ca_kabuli_chr02 | 35897472                | AA                              | CC                | 1945913076               |
| SNP_P3_25415_35897473 | NC_021161.1    | Ca_kabuli_chr02 | 35897473                | GG                              | AA                | 1945913078               |

| SNPs IDs              | Chromosome IDs | Chromosomes     | Physical positions (bp) | CDC Frontier (Reference genome) | (Pusa 256 & HPNB) | NCBI SNPdb Accession IDs |
|-----------------------|----------------|-----------------|-------------------------|---------------------------------|-------------------|--------------------------|
| SNP_P3_25416_35897483 | NC_021161.1    | Ca_kabuli_chr02 | 35897483                | GG                              | AA                | 1945913080               |
| SNP_P3_25417_35897849 | NC_021161.1    | Ca_kabuli_chr02 | 35897849                | TT                              | CC                | 1945913081               |
| SNP_P3_25418_35898856 | NC_021161.1    | Ca_kabuli_chr02 | 35898856                | CC                              | AA                | 1945913083               |
| SNP_P3_25419_35898876 | NC_021161.1    | Ca_kabuli_chr02 | 35898876                | TT                              | CC                | 1945913085               |
| SNP_P3_25421_35899892 | NC_021161.1    | Ca_kabuli_chr02 | 35899892                | AA                              | TT                | 1945913087               |
| SNP_P3_25422_35899921 | NC_021161.1    | Ca_kabuli_chr02 | 35899921                | CC                              | TT                | 1945913089               |
| SNP_P3_25424_35901119 | NC_021161.1    | Ca_kabuli_chr02 | 35901119                | TT                              | CC                | 1945913090               |
| SNP_P3_25425_35901124 | NC_021161.1    | Ca_kabuli_chr02 | 35901124                | TT                              | AA                | 1945913092               |
| SNP_P3_25426_35901182 | NC_021161.1    | Ca_kabuli_chr02 | 35901182                | TT                              | AA                | 1945913094               |
| SNP_P3_25427_35901298 | NC_021161.1    | Ca_kabuli_chr02 | 35901298                | TT                              | AA                | 1945913096               |
| SNP_P3_25428_35901429 | NC_021161.1    | Ca_kabuli_chr02 | 35901429                | AA                              | CC                | 1945913097               |
| SNP_P3_25429_35901442 | NC_021161.1    | Ca_kabuli_chr02 | 35901442                | TT                              | CC                | 1945913099               |
| SNP_P3_25430_35901754 | NC_021161.1    | Ca_kabuli_chr02 | 35901754                | CC                              | TT                | 1945913101               |
| SNP_P3_25432_35906179 | NC_021161.1    | Ca_kabuli_chr02 | 35906179                | CC                              | GG                | 1945913103               |
| SNP_P3_25433_35908363 | NC_021161.1    | Ca_kabuli_chr02 | 35908363                | AA                              | TT                | 1945913105               |
| SNP_P3_25434_35908399 | NC_021161.1    | Ca_kabuli_chr02 | 35908399                | AA                              | GG                | 1945913106               |
| SNP_P3_25435_35908649 | NC_021161.1    | Ca_kabuli_chr02 | 35908649                | CC                              | TT                | 1945913108               |
| SNP_P3_25436_35910045 | NC_021161.1    | Ca_kabuli_chr02 | 35910045                | CC                              | TT                | 1945913110               |
| SNP_P3_25437_35910047 | NC_021161.1    | Ca_kabuli_chr02 | 35910047                | GG                              | AA                | 1945913112               |
| SNP_P3_25438_35910184 | NC_021161.1    | Ca_kabuli_chr02 | 35910184                | TT                              | GG                | 1945913113               |
| SNP_P3_25439_35910185 | NC_021161.1    | Ca_kabuli_chr02 | 35910185                | GG                              | TT                | 1945913115               |
| SNP_P3_25440_35910202 | NC_021161.1    | Ca_kabuli_chr02 | 35910202                | AA                              | GG                | 1945913117               |
| SNP_P3_25441_35910205 | NC_021161.1    | Ca_kabuli_chr02 | 35910205                | AA                              | TT                | 1945913119               |
| SNP_P3_25442_35910209 | NC_021161.1    | Ca_kabuli_chr02 | 35910209                | CC                              | TT                | 1945913121               |
| SNP_P3_25443_35911565 | NC_021161.1    | Ca_kabuli_chr02 | 35911565                | GG                              | AA                | 1945913122               |
| SNP_P3_25444_35913472 | NC_021161.1    | Ca_kabuli_chr02 | 35913472                | AA                              | TT                | 1945913124               |
| SNP_P3_25445_35913474 | NC_021161.1    | Ca_kabuli_chr02 | 35913474                | CC                              | GG                | 1945913126               |
| SNP_P3_25446_35913479 | NC_021161.1    | Ca_kabuli_chr02 | 35913479                | CC                              | TT                | 1945913128               |
| SNP_P3_25447_35913486 | NC_021161.1    | Ca_kabuli_chr02 | 35913486                | AA                              | TT                | 1945913129               |
| SNP_P3_25448_35913488 | NC_021161.1    | Ca_kabuli_chr02 | 35913488                | TT                              | GG                | 1945913131               |
| SNP_P3_25451_35915747 | NC_021161.1    | Ca_kabuli_chr02 | 35915747                | GG                              | AA                | 1945913133               |
| SNP_P3_25452_35917628 | NC_021161.1    | Ca_kabuli_chr02 | 35917628                | CC                              | TT                | 1945913135               |
| SNP_P3_25454_35918592 | NC_021161.1    | Ca_kabuli_chr02 | 35918592                | GG                              | AA                | 1945913137               |
| SNP_P3_25455_35918650 | NC_021161.1    | Ca_kabuli_chr02 | 35918650                | GG                              | AA                | 1945913138               |
| SNP_P3_25456_35918697 | NC_021161.1    | Ca_kabuli_chr02 | 35918697                | TT                              | AA                | 1945913140               |
| SNP_P3_25457_35919018 | NC_021161.1    | Ca_kabuli_chr02 | 35919018                | CC                              | AA                | 1945913142               |
| SNP_P3_25458_35919032 | NC_021161.1    | Ca_kabuli_chr02 | 35919032                | AA                              | GG                | 1945913144               |
| SNP_P3_25459_35919036 | NC_021161.1    | Ca_kabuli_chr02 | 35919036                | AA                              | TT                | 1945913145               |
| SNP_P3_25460_35919084 | NC_021161.1    | Ca_kabuli_chr02 | 35919084                | TT                              | CC                | 1945913147               |
| SNP_P3_25461_35919102 | NC_021161.1    | Ca_kabuli_chr02 | 35919102                | TT                              | GG                | 1945913149               |
| SNP_P3_25462_35921184 | NC_021161.1    | Ca_kabuli_chr02 | 35921184                | CC                              | TT                | 1945913151               |
| SNP_P3_25463_35921883 | NC_021161.1    | Ca_kabuli_chr02 | 35921883                | AA                              | GG                | 1945913153               |

| SNPs IDs              | Chromosome IDs | Chromosomes     | Physical positions (bp) | CDC Frontier (Reference genome) | (Pusa 256 & HPNB) | NCBI SNPdb Accession IDs |
|-----------------------|----------------|-----------------|-------------------------|---------------------------------|-------------------|--------------------------|
| SNP_P3_25464_35921897 | NC_021161.1    | Ca_kabuli_chr02 | 35921897                | CC                              | TT                | 1945913154               |
| SNP_P3_25465_35922155 | NC_021161.1    | Ca_kabuli_chr02 | 35922155                | GG                              | AA                | 1945913156               |
| SNP_P3_25466_35922389 | NC_021161.1    | Ca_kabuli_chr02 | 35922389                | GG                              | AA                | 1945913158               |
| SNP_P3_25467_35923276 | NC_021161.1    | Ca_kabuli_chr02 | 35923276                | TT                              | GG                | 1945913160               |
| SNP_P3_25468_35923283 | NC_021161.1    | Ca_kabuli_chr02 | 35923283                | AA                              | GG                | 1945913161               |
| SNP_P3_25469_35923299 | NC_021161.1    | Ca_kabuli_chr02 | 35923299                | TT                              | CC                | 1945913163               |
| SNP_P3_25470_35923493 | NC_021161.1    | Ca_kabuli_chr02 | 35923493                | TT                              | CC                | 1945913165               |
| SNP_P3_25471_35923495 | NC_021161.1    | Ca_kabuli_chr02 | 35923495                | AA                              | GG                | 1945913167               |
| SNP_P3_25472_35923529 | NC_021161.1    | Ca_kabuli_chr02 | 35923529                | TT                              | CC                | 1945913169               |
| SNP_P3_25473_35923531 | NC_021161.1    | Ca_kabuli_chr02 | 35923531                | GG                              | AA                | 1945913170               |
| SNP_P3_25474_35923691 | NC_021161.1    | Ca_kabuli_chr02 | 35923691                | GG                              | AA                | 1945913172               |
| SNP_P3_25475_35923706 | NC_021161.1    | Ca_kabuli_chr02 | 35923706                | AA                              | CC                | 1945913174               |
| SNP_P3_25476_35923716 | NC_021161.1    | Ca_kabuli_chr02 | 35923716                | CC                              | TT                | 1945913176               |
| SNP_P3_25477_35923743 | NC_021161.1    | Ca_kabuli_chr02 | 35923743                | AA                              | CC                | 1945913177               |
| SNP_P3_25478_35923744 | NC_021161.1    | Ca_kabuli_chr02 | 35923744                | GG                              | AA                | 1945913179               |
| SNP_P3_25479_35923753 | NC_021161.1    | Ca_kabuli_chr02 | 35923753                | TT                              | CC                | 1945913181               |
| SNP_P3_25480_35923780 | NC_021161.1    | Ca_kabuli_chr02 | 35923780                | GG                              | AA                | 1945913183               |
| SNP_P3_25482_35924165 | NC_021161.1    | Ca_kabuli_chr02 | 35924165                | TT                              | CC                | 1945913184               |
| SNP_P3_25483_35925605 | NC_021161.1    | Ca_kabuli_chr02 | 35925605                | GG                              | AA                | 1945913186               |
| SNP_P3_25484_35925612 | NC_021161.1    | Ca_kabuli_chr02 | 35925612                | GG                              | AA                | 1945913188               |
| SNP_P3_25486_35925652 | NC_021161.1    | Ca_kabuli_chr02 | 35925652                | CC                              | AA                | 1945913190               |
| SNP_P3_25487_35925696 | NC_021161.1    | Ca_kabuli_chr02 | 35925696                | GG                              | TT                | 1945913192               |
| SNP_P3_25488_35925701 | NC_021161.1    | Ca_kabuli_chr02 | 35925701                | AA                              | GG                | 1945913193               |
| SNP_P3_25489_35925884 | NC_021161.1    | Ca_kabuli_chr02 | 35925884                | CC                              | TT                | 1945913195               |
| SNP_P3_25491_35929427 | NC_021161.1    | Ca_kabuli_chr02 | 35929427                | AA                              | GG                | 1945913197               |
| SNP_P3_25492_35929429 | NC_021161.1    | Ca_kabuli_chr02 | 35929429                | AA                              | GG                | 1945913199               |
| SNP_P3_25493_35929443 | NC_021161.1    | Ca_kabuli_chr02 | 35929443                | GG                              | TT                | 1945913201               |
| SNP_P3_25494_35929467 | NC_021161.1    | Ca_kabuli_chr02 | 35929467                | GG                              | AA                | 1945913202               |
| SNP_P3_25495_35929501 | NC_021161.1    | Ca_kabuli_chr02 | 35929501                | AA                              | TT                | 1945913204               |
| SNP_P3_25496_35929502 | NC_021161.1    | Ca_kabuli_chr02 | 35929502                | AA                              | TT                | 1945913206               |
| SNP_P3_25497_35929506 | NC_021161.1    | Ca_kabuli_chr02 | 35929506                | AA                              | TT                | 1945913208               |
| SNP_P3_25498_35934996 | NC_021161.1    | Ca_kabuli_chr02 | 35934996                | CC                              | AA                | 1945913209               |
| SNP_P3_25499_35935634 | NC_021161.1    | Ca_kabuli_chr02 | 35935634                | AA                              | CC                | 1945913211               |
| SNP_P3_25500_35935635 | NC_021161.1    | Ca_kabuli_chr02 | 35935635                | AA                              | TT                | 1945913213               |
| SNP_P3_25506_35940046 | NC_021161.1    | Ca_kabuli_chr02 | 35940046                | CC                              | AA                | 1945913215               |
| SNP_P3_25507_35940055 | NC_021161.1    | Ca_kabuli_chr02 | 35940055                | AA                              | GG                | 1945913217               |
| SNP_P3_25508_35940056 | NC_021161.1    | Ca_kabuli_chr02 | 35940056                | CC                              | TT                | 1945913218               |
| SNP_P3_25510_35940196 | NC_021161.1    | Ca_kabuli_chr02 | 35940196                | GG                              | AA                | 1945913220               |
| SNP_P3_25511_35940208 | NC_021161.1    | Ca_kabuli_chr02 | 35940208                | CC                              | TT                | 1945913222               |
| SNP_P3_25512_35940302 | NC_021161.1    | Ca_kabuli_chr02 | 35940302                | TT                              | AA                | 1945913224               |
| SNP_P3_25513_35940503 | NC_021161.1    | Ca_kabuli_chr02 | 35940503                | AA                              | CC                | 1945913225               |
| SNP_P3_25514_35940527 | NC_021161.1    | Ca_kabuli_chr02 | 35940527                | CC                              | TT                | 1945913227               |



| SNPs IDs              | Chromosome IDs | Chromosomes     | Physical positions (bp) | CDC Frontier (Reference genome) | (Pusa 256 & HPNB) | NCBI SNPdb Accession IDs |
|-----------------------|----------------|-----------------|-------------------------|---------------------------------|-------------------|--------------------------|
| SNP_P3_25515_35940530 | NC_021161.1    | Ca_kabuli_chr02 | 35940530                | CC                              | AA                | 1945913229               |
| SNP_P3_25516_35941110 | NC_021161.1    | Ca_kabuli_chr02 | 35941110                | TT                              | CC                | 1945913231               |
| SNP_P3_25517_35941123 | NC_021161.1    | Ca_kabuli_chr02 | 35941123                | AA                              | TT                | 1945913232               |
| SNP_P3_25518_35941185 | NC_021161.1    | Ca_kabuli_chr02 | 35941185                | AA                              | TT                | 1945913234               |
| SNP_P3_25519_35941925 | NC_021161.1    | Ca_kabuli_chr02 | 35941925                | GG                              | AA                | 1945913236               |
| SNP_P3_25520_35941928 | NC_021161.1    | Ca_kabuli_chr02 | 35941928                | AA                              | GG                | 1945913238               |
| SNP_P3_25522_35942155 | NC_021161.1    | Ca_kabuli_chr02 | 35942155                | TT                              | CC                | 1945913240               |
| SNP_P3_25523_35942165 | NC_021161.1    | Ca_kabuli_chr02 | 35942165                | AA                              | GG                | 1945913241               |
| SNP_P3_25526_35942561 | NC_021161.1    | Ca_kabuli_chr02 | 35942561                | CC                              | TT                | 1945913243               |
| SNP_P3_25528_35943521 | NC_021161.1    | Ca_kabuli_chr02 | 35943521                | TT                              | AA                | 1945913245               |
| SNP_P3_25529_35943542 | NC_021161.1    | Ca_kabuli_chr02 | 35943542                | TT                              | CC                | 1945913247               |
| SNP_P3_25530_35943597 | NC_021161.1    | Ca_kabuli_chr02 | 35943597                | TT                              | CC                | 1945913248               |
| SNP_P3_25531_35943598 | NC_021161.1    | Ca_kabuli_chr02 | 35943598                | GG                              | AA                | 1945913250               |
| SNP_P3_25532_35943604 | NC_021161.1    | Ca_kabuli_chr02 | 35943604                | TT                              | AA                | 1945913252               |
| SNP_P3_25533_35943613 | NC_021161.1    | Ca_kabuli_chr02 | 35943613                | AA                              | CC                | 1945913254               |
| SNP_P3_25534_35943615 | NC_021161.1    | Ca_kabuli_chr02 | 35943615                | AA                              | GG                | 1945913256               |
| SNP_P3_25535_35943966 | NC_021161.1    | Ca_kabuli_chr02 | 35943966                | GG                              | CC                | 1945913257               |
| SNP_P3_25536_35943969 | NC_021161.1    | Ca_kabuli_chr02 | 35943969                | AA                              | GG                | 1945913259               |
| SNP_P3_25537_35943980 | NC_021161.1    | Ca_kabuli_chr02 | 35943980                | TT                              | AA                | 1945913261               |
| SNP_P3_25538_35943984 | NC_021161.1    | Ca_kabuli_chr02 | 35943984                | GG                              | AA                | 1945913263               |
| SNP_P3_25539_35943996 | NC_021161.1    | Ca_kabuli_chr02 | 35943996                | CC                              | TT                | 1945913264               |
| SNP_P3_25540_35944008 | NC_021161.1    | Ca_kabuli_chr02 | 35944008                | TT                              | AA                | 1945913266               |
| SNP_P3_25541_35944212 | NC_021161.1    | Ca_kabuli_chr02 | 35944212                | CC                              | GG                | 1945913268               |
| SNP_P3_25542_35944225 | NC_021161.1    | Ca_kabuli_chr02 | 35944225                | TT                              | AA                | 1945913270               |
| SNP_P3_25543_35944243 | NC_021161.1    | Ca_kabuli_chr02 | 35944243                | AA                              | GG                | 1945913272               |
| SNP_P3_25545_35944299 | NC_021161.1    | Ca_kabuli_chr02 | 35944299                | TT                              | CC                | 1945913273               |
| SNP_P3_25546_35944781 | NC_021161.1    | Ca_kabuli_chr02 | 35944781                | CC                              | TT                | 1945913275               |
| SNP_P3_25547_35944799 | NC_021161.1    | Ca_kabuli_chr02 | 35944799                | GG                              | AA                | 1945913277               |
| SNP_P3_25548_35944816 | NC_021161.1    | Ca_kabuli_chr02 | 35944816                | AA                              | CC                | 1945913279               |
| SNP_P3_25549_35944831 | NC_021161.1    | Ca_kabuli_chr02 | 35944831                | CC                              | TT                | 1945913280               |
| SNP_P3_25550_35944834 | NC_021161.1    | Ca_kabuli_chr02 | 35944834                | CC                              | TT                | 1945913282               |
| SNP_P3_25551_35944855 | NC_021161.1    | Ca_kabuli_chr02 | 35944855                | CC                              | TT                | 1945913284               |
| SNP_P3_25552_35944897 | NC_021161.1    | Ca_kabuli_chr02 | 35944897                | TT                              | AA                | 1945913286               |
| SNP_P3_25553_35944958 | NC_021161.1    | Ca_kabuli_chr02 | 35944958                | TT                              | CC                | 1945913288               |
| SNP_P3_25555_35945012 | NC_021161.1    | Ca_kabuli_chr02 | 35945012                | AA                              | GG                | 1945913289               |
| SNP_P3_25556_35945028 | NC_021161.1    | Ca_kabuli_chr02 | 35945028                | TT                              | AA                | 1945913291               |
| SNP_P3_25557_35945048 | NC_021161.1    | Ca_kabuli_chr02 | 35945048                | CC                              | GG                | 1945913293               |
| SNP_P3_25558_35945051 | NC_021161.1    | Ca_kabuli_chr02 | 35945051                | CC                              | AA                | 1945913295               |
| SNP_P3_25559_35945086 | NC_021161.1    | Ca_kabuli_chr02 | 35945086                | AA                              | TT                | 1945913296               |
| SNP_P3_25560_35945091 | NC_021161.1    | Ca_kabuli_chr02 | 35945091                | CC                              | AA                | 1945913298               |
| SNP_P3_25561_35945161 | NC_021161.1    | Ca_kabuli_chr02 | 35945161                | AA                              | TT                | 1945913300               |
| SNP_P3_25562_35945206 | NC_021161.1    | Ca_kabuli_chr02 | 35945206                | AA                              | TT                | 1945913302               |

| SNPs IDs              | Chromosome IDs | Chromosomes     | Physical positions (bp) | CDC Frontier (Reference genome) | (Pusa 256 & HPNB) | NCBI SNPdb Accession IDs |
|-----------------------|----------------|-----------------|-------------------------|---------------------------------|-------------------|--------------------------|
| SNP_P3_25563_35945220 | NC_021161.1    | Ca_kabuli_chr02 | 35945220                | AA                              | CC                | 1945913304               |
| SNP_P3_25564_35945284 | NC_021161.1    | Ca_kabuli_chr02 | 35945284                | AA                              | GG                | 1945913305               |
| SNP_P3_25565_35945287 | NC_021161.1    | Ca_kabuli_chr02 | 35945287                | AA                              | GG                | 1945913307               |
| SNP_P3_25566_35945293 | NC_021161.1    | Ca_kabuli_chr02 | 35945293                | AA                              | GG                | 1945913309               |
| SNP_P3_25568_35945359 | NC_021161.1    | Ca_kabuli_chr02 | 35945359                | AA                              | CC                | 1945913311               |
| SNP_P3_25569_35945370 | NC_021161.1    | Ca_kabuli_chr02 | 35945370                | GG                              | CC                | 1945913312               |
| SNP_P3_25570_35945396 | NC_021161.1    | Ca_kabuli_chr02 | 35945396                | AA                              | CC                | 1945913314               |
| SNP_P3_25571_35945658 | NC_021161.1    | Ca_kabuli_chr02 | 35945658                | AA                              | GG                | 1945913316               |
| SNP_P3_25573_35945899 | NC_021161.1    | Ca_kabuli_chr02 | 35945899                | TT                              | GG                | 1945913318               |
| SNP_P3_25574_35953747 | NC_021161.1    | Ca_kabuli_chr02 | 35953747                | TT                              | GG                | 1945913320               |
| SNP_P3_25576_35955690 | NC_021161.1    | Ca_kabuli_chr02 | 35955690                | AA                              | GG                | 1945913321               |
| SNP_P3_25577_35955695 | NC_021161.1    | Ca_kabuli_chr02 | 35955695                | GG                              | AA                | 1945913323               |
| SNP_P3_25578_35955716 | NC_021161.1    | Ca_kabuli_chr02 | 35955716                | AA                              | TT                | 1945913325               |
| SNP_P3_25579_35955741 | NC_021161.1    | Ca_kabuli_chr02 | 35955741                | TT                              | AA                | 1945913327               |
| SNP_P3_25581_35956286 | NC_021161.1    | Ca_kabuli_chr02 | 35956286                | TT                              | AA                | 1945913328               |
| SNP_P3_25582_35956365 | NC_021161.1    | Ca_kabuli_chr02 | 35956365                | CC                              | AA                | 1945913330               |
| SNP_P3_25583_35957404 | NC_021161.1    | Ca_kabuli_chr02 | 35957404                | CC                              | TT                | 1945913332               |
| SNP_P3_25584_35957457 | NC_021161.1    | Ca_kabuli_chr02 | 35957457                | GG                              | TT                | 1945913334               |
| SNP_P3_25585_35958967 | NC_021161.1    | Ca_kabuli_chr02 | 35958967                | CC                              | TT                | 1945913336               |
| SNP_P3_25586_35959040 | NC_021161.1    | Ca_kabuli_chr02 | 35959040                | TT                              | CC                | 1945913337               |
| SNP_P3_25587_35960195 | NC_021161.1    | Ca_kabuli_chr02 | 35960195                | TT                              | AA                | 1945913339               |
| SNP_P3_25589_35960431 | NC_021161.1    | Ca_kabuli_chr02 | 35960431                | AA                              | CC                | 1945913341               |
| SNP_P3_25590_35960436 | NC_021161.1    | Ca_kabuli_chr02 | 35960436                | CC                              | AA                | 1945913343               |
| SNP_P3_25591_35960451 | NC_021161.1    | Ca_kabuli_chr02 | 35960451                | CC                              | TT                | 1945913344               |
| SNP_P3_25592_35960457 | NC_021161.1    | Ca_kabuli_chr02 | 35960457                | CC                              | TT                | 1945913346               |
| SNP_P3_25593_35960481 | NC_021161.1    | Ca_kabuli_chr02 | 35960481                | CC                              | TT                | 1945913348               |
| SNP_P3_25594_35960491 | NC_021161.1    | Ca_kabuli_chr02 | 35960491                | CC                              | GG                | 1945913350               |
| SNP_P3_25596_35960533 | NC_021161.1    | Ca_kabuli_chr02 | 35960533                | TT                              | CC                | 1945913351               |
| SNP_P3_25597_35960812 | NC_021161.1    | Ca_kabuli_chr02 | 35960812                | TT                              | CC                | 1945913353               |
| SNP_P3_25599_35961900 | NC_021161.1    | Ca_kabuli_chr02 | 35961900                | CC                              | TT                | 1945913355               |
| SNP_P3_25601_35961978 | NC_021161.1    | Ca_kabuli_chr02 | 35961978                | GG                              | AA                | 1945913357               |
| SNP_P3_25602_35962207 | NC_021161.1    | Ca_kabuli_chr02 | 35962207                | TT                              | CC                | 1945913359               |
| SNP_P3_25603_35962230 | NC_021161.1    | Ca_kabuli_chr02 | 35962230                | AA                              | GG                | 1945913360               |
| SNP_P3_25604_35962336 | NC_021161.1    | Ca_kabuli_chr02 | 35962336                | GG                              | AA                | 1945913362               |
| SNP_P3_25605_35962426 | NC_021161.1    | Ca_kabuli_chr02 | 35962426                | TT                              | CC                | 1945913364               |
| SNP_P3_25606_35962438 | NC_021161.1    | Ca_kabuli_chr02 | 35962438                | AA                              | GG                | 1945913366               |
| SNP_P3_25607_35962462 | NC_021161.1    | Ca_kabuli_chr02 | 35962462                | TT                              | CC                | 1945913367               |
| SNP_P3_25608_35962464 | NC_021161.1    | Ca_kabuli_chr02 | 35962464                | CC                              | AA                | 1945913369               |
| SNP_P3_25611_35962749 | NC_021161.1    | Ca_kabuli_chr02 | 35962749                | TT                              | AA                | 1945913371               |
| SNP_P3_25612_35962752 | NC_021161.1    | Ca_kabuli_chr02 | 35962752                | TT                              | AA                | 1945913373               |
| SNP_P3_25613_35962754 | NC_021161.1    | Ca_kabuli_chr02 | 35962754                | GG                              | TT                | 1945913375               |
| SNP_P3_25614_35962789 | NC_021161.1    | Ca_kabuli_chr02 | 35962789                | TT                              | AA                | 1945913376               |

| SNPs IDs              | Chromosome IDs | Chromosomes     | Physical positions (bp) | CDC Frontier (Reference genome) | (Pusa 256 & HPNB) | NCBI SNPdb Accession IDs |
|-----------------------|----------------|-----------------|-------------------------|---------------------------------|-------------------|--------------------------|
| SNP_P3_25615_35962804 | NC_021161.1    | Ca_kabuli_chr02 | 35962804                | GG                              | TT                | 1945913378               |
| SNP_P3_25616_35962806 | NC_021161.1    | Ca_kabuli_chr02 | 35962806                | AA                              | TT                | 1945913380               |
| SNP_P3_25617_35963031 | NC_021161.1    | Ca_kabuli_chr02 | 35963031                | CC                              | GG                | 1945913382               |
| SNP_P3_25618_35963039 | NC_021161.1    | Ca_kabuli_chr02 | 35963039                | AA                              | GG                | 1945913383               |
| SNP_P3_25619_35963041 | NC_021161.1    | Ca_kabuli_chr02 | 35963041                | TT                              | CC                | 1945913385               |
| SNP_P3_25620_35963074 | NC_021161.1    | Ca_kabuli_chr02 | 35963074                | GG                              | CC                | 1945913387               |
| SNP_P3_25621_35963501 | NC_021161.1    | Ca_kabuli_chr02 | 35963501                | TT                              | CC                | 1945913389               |
| SNP_P3_25622_35963625 | NC_021161.1    | Ca_kabuli_chr02 | 35963625                | GG                              | AA                | 1945913391               |
| SNP_P3_25623_35963857 | NC_021161.1    | Ca_kabuli_chr02 | 35963857                | AA                              | CC                | 1945913392               |
| SNP_P3_25625_35964569 | NC_021161.1    | Ca_kabuli_chr02 | 35964569                | AA                              | TT                | 1945913394               |
| SNP_P3_25626_35964587 | NC_021161.1    | Ca_kabuli_chr02 | 35964587                | TT                              | GG                | 1945913396               |
| SNP_P3_25629_35966091 | NC_021161.1    | Ca_kabuli_chr02 | 35966091                | CC                              | AA                | 1945913398               |
| SNP_P3_25631_35966125 | NC_021161.1    | Ca_kabuli_chr02 | 35966125                | TT                              | AA                | 1945913399               |
| SNP_P3_25632_35966805 | NC_021161.1    | Ca_kabuli_chr02 | 35966805                | CC                              | AA                | 1945913401               |
| SNP_P3_25633_35966830 | NC_021161.1    | Ca_kabuli_chr02 | 35966830                | TT                              | AA                | 1945913403               |
| SNP_P3_25634_35966837 | NC_021161.1    | Ca_kabuli_chr02 | 35966837                | GG                              | TT                | 1945913405               |
| SNP_P3_25636_35967185 | NC_021161.1    | Ca_kabuli_chr02 | 35967185                | CC                              | GG                | 1945913407               |
| SNP_P3_25638_35967229 | NC_021161.1    | Ca_kabuli_chr02 | 35967229                | GG                              | CC                | 1945913408               |
| SNP_P3_25639_35967461 | NC_021161.1    | Ca_kabuli_chr02 | 35967461                | AA                              | GG                | 1945913410               |
| SNP_P3_25640_35970260 | NC_021161.1    | Ca_kabuli_chr02 | 35970260                | TT                              | CC                | 1945913412               |
| SNP_P3_25641_35970428 | NC_021161.1    | Ca_kabuli_chr02 | 35970428                | TT                              | CC                | 1945913414               |
| SNP_P3_25642_35970446 | NC_021161.1    | Ca_kabuli_chr02 | 35970446                | CC                              | TT                | 1945913415               |
| SNP_P3_25643_35970461 | NC_021161.1    | Ca_kabuli_chr02 | 35970461                | TT                              | CC                | 1945913417               |
| SNP_P3_25644_35970463 | NC_021161.1    | Ca_kabuli_chr02 | 35970463                | CC                              | TT                | 1945913419               |
| SNP_P3_25645_35970838 | NC_021161.1    | Ca_kabuli_chr02 | 35970838                | CC                              | GG                | 1945913421               |
| SNP_P3_25646_35970898 | NC_021161.1    | Ca_kabuli_chr02 | 35970898                | GG                              | AA                | 1945913423               |
| SNP_P3_25647_35970900 | NC_021161.1    | Ca_kabuli_chr02 | 35970900                | GG                              | TT                | 1945913424               |
| SNP_P3_25648_35970940 | NC_021161.1    | Ca_kabuli_chr02 | 35970940                | TT                              | GG                | 1945913426               |
| SNP_P3_25649_35971120 | NC_021161.1    | Ca_kabuli_chr02 | 35971120                | CC                              | AA                | 1945913428               |
| SNP_P3_25650_35971182 | NC_021161.1    | Ca_kabuli_chr02 | 35971182                | AA                              | GG                | 1945913430               |
| SNP_P3_25652_35972717 | NC_021161.1    | Ca_kabuli_chr02 | 35972717                | GG                              | CC                | 1945913431               |
| SNP_P3_25653_35972720 | NC_021161.1    | Ca_kabuli_chr02 | 35972720                | GG                              | TT                | 1945913433               |
| SNP_P3_25654_35973745 | NC_021161.1    | Ca_kabuli_chr02 | 35973745                | GG                              | CC                | 1945913435               |
| SNP_P3_25655_35974073 | NC_021161.1    | Ca_kabuli_chr02 | 35974073                | TT                              | CC                | 1945913437               |
| SNP_P3_25656_35974130 | NC_021161.1    | Ca_kabuli_chr02 | 35974130                | TT                              | CC                | 1945913439               |
| SNP_P3_25657_35974602 | NC_021161.1    | Ca_kabuli_chr02 | 35974602                | AA                              | GG                | 1945913440               |
| SNP_P3_25658_35975499 | NC_021161.1    | Ca_kabuli_chr02 | 35975499                | GG                              | CC                | 1945913442               |
| SNP_P3_25659_35983180 | NC_021161.1    | Ca_kabuli_chr02 | 35983180                | TT                              | GG                | 1945913444               |
| SNP_P3_25660_35983528 | NC_021161.1    | Ca_kabuli_chr02 | 35983528                | TT                              | CC                | 1945913446               |
| SNP_P3_25661_35983700 | NC_021161.1    | Ca_kabuli_chr02 | 35983700                | TT                              | AA                | 1945913447               |
| SNP_P3_25662_35983754 | NC_021161.1    | Ca_kabuli_chr02 | 35983754                | GG                              | AA                | 1945913449               |
| SNP_P3_25663_35983817 | NC_021161.1    | Ca_kabuli_chr02 | 35983817                | AA                              | GG                | 1945913451               |

| SNPs IDs              | Chromosome IDs | Chromosomes     | Physical positions (bp) | CDC Frontier (Reference genome) | (Pusa 256 & HPNB) | NCBI SNPdb Accession IDs |
|-----------------------|----------------|-----------------|-------------------------|---------------------------------|-------------------|--------------------------|
| SNP_P3_25664_35983885 | NC_021161.1    | Ca_kabuli_chr02 | 35983885                | GG                              | AA                | 1945913453               |
| SNP_P3_25665_35983903 | NC_021161.1    | Ca_kabuli_chr02 | 35983903                | TT                              | CC                | 1945913454               |
| SNP_P3_25666_35983927 | NC_021161.1    | Ca_kabuli_chr02 | 35983927                | AA                              | CC                | 1945913456               |
| SNP_P3_25667_35984090 | NC_021161.1    | Ca_kabuli_chr02 | 35984090                | AA                              | CC                | 1945913458               |
| SNP_P3_25668_35985451 | NC_021161.1    | Ca_kabuli_chr02 | 35985451                | CC                              | TT                | 1945913460               |
| SNP_P3_25669_35986432 | NC_021161.1    | Ca_kabuli_chr02 | 35986432                | CC                              | GG                | 1945913462               |
| SNP_P3_25670_35986739 | NC_021161.1    | Ca_kabuli_chr02 | 35986739                | AA                              | GG                | 1945913463               |
| SNP_P3_25671_35986927 | NC_021161.1    | Ca_kabuli_chr02 | 35986927                | AA                              | TT                | 1945913465               |
| SNP_P3_25672_35986931 | NC_021161.1    | Ca_kabuli_chr02 | 35986931                | GG                              | TT                | 1945913467               |
| SNP_P3_25674_35987871 | NC_021161.1    | Ca_kabuli_chr02 | 35987871                | CC                              | TT                | 1945913469               |
| SNP_P3_25675_35987920 | NC_021161.1    | Ca_kabuli_chr02 | 35987920                | CC                              | AA                | 1945913470               |
| SNP_P3_25677_35988275 | NC_021161.1    | Ca_kabuli_chr02 | 35988275                | GG                              | CC                | 1945913472               |
| SNP_P3_25678_35988578 | NC_021161.1    | Ca_kabuli_chr02 | 35988578                | AA                              | GG                | 1945913474               |
| SNP_P3_25679_35990987 | NC_021161.1    | Ca_kabuli_chr02 | 35990987                | GG                              | AA                | 1945913476               |
| SNP_P3_25680_35991517 | NC_021161.1    | Ca_kabuli_chr02 | 35991517                | AA                              | TT                | 1945913478               |
| SNP_P3_25681_35992815 | NC_021161.1    | Ca_kabuli_chr02 | 35992815                | CC                              | GG                | 1945913479               |
| SNP_P3_25682_35994332 | NC_021161.1    | Ca_kabuli_chr02 | 35994332                | CC                              | TT                | 1945913481               |
| SNP_P3_25683_35994702 | NC_021161.1    | Ca_kabuli_chr02 | 35994702                | CC                              | TT                | 1945913483               |
| SNP_P3_25684_35995266 | NC_021161.1    | Ca_kabuli_chr02 | 35995266                | CC                              | TT                | 1945913485               |
| SNP_P3_25688_35996300 | NC_021161.1    | Ca_kabuli_chr02 | 35996300                | CC                              | TT                | 1945913486               |
| SNP_P3_25689_35996304 | NC_021161.1    | Ca_kabuli_chr02 | 35996304                | GG                              | TT                | 1945913488               |
| SNP_P3_25690_35996341 | NC_021161.1    | Ca_kabuli_chr02 | 35996341                | GG                              | CC                | 1945913490               |
| SNP_P3_25691_35996346 | NC_021161.1    | Ca_kabuli_chr02 | 35996346                | CC                              | TT                | 1945913492               |
| SNP_P3_25692_35996387 | NC_021161.1    | Ca_kabuli_chr02 | 35996387                | TT                              | CC                | 1945913494               |
| SNP_P3_25693_35996400 | NC_021161.1    | Ca_kabuli_chr02 | 35996400                | TT                              | CC                | 1945913495               |
| SNP_P3_25694_35996433 | NC_021161.1    | Ca_kabuli_chr02 | 35996433                | TT                              | CC                | 1945913497               |
| SNP_P3_25695_35996441 | NC_021161.1    | Ca_kabuli_chr02 | 35996441                | AA                              | TT                | 1945913499               |
| SNP_P3_25696_35996442 | NC_021161.1    | Ca_kabuli_chr02 | 35996442                | AA                              | TT                | 1945913501               |
| SNP_P3_25697_35996462 | NC_021161.1    | Ca_kabuli_chr02 | 35996462                | GG                              | AA                | 1945913502               |
| SNP_P3_25698_35996778 | NC_021161.1    | Ca_kabuli_chr02 | 35996778                | AA                              | CC                | 1945913504               |
| SNP_P3_25699_35996787 | NC_021161.1    | Ca_kabuli_chr02 | 35996787                | CC                              | AA                | 1945913506               |
| SNP_P3_25700_35997107 | NC_021161.1    | Ca_kabuli_chr02 | 35997107                | TT                              | GG                | 1945913508               |
| SNP_P3_25701_35997258 | NC_021161.1    | Ca_kabuli_chr02 | 35997258                | AA                              | GG                | 1945913510               |
| SNP_P3_25702_35997272 | NC_021161.1    | Ca_kabuli_chr02 | 35997272                | CC                              | TT                | 1945913511               |
| SNP_P3_25703_35997273 | NC_021161.1    | Ca_kabuli_chr02 | 35997273                | TT                              | CC                | 1945913513               |
| SNP_P3_25704_35997279 | NC_021161.1    | Ca_kabuli_chr02 | 35997279                | TT                              | CC                | 1945913515               |
| SNP_P3_25705_35997288 | NC_021161.1    | Ca_kabuli_chr02 | 35997288                | CC                              | TT                | 1945913517               |
| SNP_P3_25706_35997291 | NC_021161.1    | Ca_kabuli_chr02 | 35997291                | CC                              | TT                | 1945913518               |
| SNP_P3_25707_35997297 | NC_021161.1    | Ca_kabuli_chr02 | 35997297                | TT                              | CC                | 1945913520               |
| SNP_P3_25708_35997380 | NC_021161.1    | Ca_kabuli_chr02 | 35997380                | CC                              | TT                | 1945913522               |
| SNP_P3_25709_35997665 | NC_021161.1    | Ca_kabuli_chr02 | 35997665                | CC                              | TT                | 1945913524               |
| SNP_P3_25710_35997722 | NC_021161.1    | Ca_kabuli_chr02 | 35997722                | AA                              | GG                | 1945913526               |

| SNPs IDs              | Chromosome IDs | Chromosomes     | Physical positions (bp) | CDC Frontier (Reference genome) | (Pusa 256 & HPNB) | NCBI SNPdb Accession IDs |
|-----------------------|----------------|-----------------|-------------------------|---------------------------------|-------------------|--------------------------|
| SNP_P3_25711_35999218 | NC_021161.1    | Ca_kabuli_chr02 | 35999218                | AA                              | GG                | 1945913527               |
| SNP_P3_25712_35999353 | NC_021161.1    | Ca_kabuli_chr02 | 35999353                | AA                              | GG                | 1945913529               |
| SNP_P3_25713_35999363 | NC_021161.1    | Ca_kabuli_chr02 | 35999363                | CC                              | TT                | 1945913531               |
| SNP_P3_25714_35999875 | NC_021161.1    | Ca_kabuli_chr02 | 35999875                | TT                              | AA                | 1945913533               |
| SNP_P3_25716_36000046 | NC_021161.1    | Ca_kabuli_chr02 | 36000046                | TT                              | CC                | 1945913534               |
| SNP_P3_25718_36000867 | NC_021161.1    | Ca_kabuli_chr02 | 36000867                | TT                              | CC                | 1945913536               |
| SNP_P3_25719_36001077 | NC_021161.1    | Ca_kabuli_chr02 | 36001077                | AA                              | TT                | 1945913538               |
| SNP_P3_25720_36001108 | NC_021161.1    | Ca_kabuli_chr02 | 36001108                | AA                              | TT                | 1945913540               |
| SNP_P3_25721_36001397 | NC_021161.1    | Ca_kabuli_chr02 | 36001397                | AA                              | TT                | 1945913542               |
| SNP_P3_25722_36001400 | NC_021161.1    | Ca_kabuli_chr02 | 36001400                | TT                              | GG                | 1945913543               |
| SNP_P3_25723_36001432 | NC_021161.1    | Ca_kabuli_chr02 | 36001432                | AA                              | GG                | 1945913545               |
| SNP_P3_25724_36006985 | NC_021161.1    | Ca_kabuli_chr02 | 36006985                | CC                              | TT                | 1945913547               |
| SNP_P3_25725_36008074 | NC_021161.1    | Ca_kabuli_chr02 | 36008074                | GG                              | TT                | 1945913549               |
| SNP_P3_25726_36009182 | NC_021161.1    | Ca_kabuli_chr02 | 36009182                | AA                              | GG                | 1945913550               |
| SNP_P3_25727_36010076 | NC_021161.1    | Ca_kabuli_chr02 | 36010076                | CC                              | TT                | 1945913552               |
| SNP_P3_25728_36010728 | NC_021161.1    | Ca_kabuli_chr02 | 36010728                | GG                              | AA                | 1945913554               |
| SNP_P3_25729_36011599 | NC_021161.1    | Ca_kabuli_chr02 | 36011599                | CC                              | TT                | 1945913556               |
| SNP_P3_25730_36011842 | NC_021161.1    | Ca_kabuli_chr02 | 36011842                | CC                              | TT                | 1945913557               |
| SNP_P3_25731_36012130 | NC_021161.1    | Ca_kabuli_chr02 | 36012130                | TT                              | AA                | 1945913559               |
| SNP_P3_25732_36014922 | NC_021161.1    | Ca_kabuli_chr02 | 36014922                | AA                              | TT                | 1945913561               |
| SNP_P3_25733_36015127 | NC_021161.1    | Ca_kabuli_chr02 | 36015127                | CC                              | TT                | 1945913563               |
| SNP_P3_25734_36016362 | NC_021161.1    | Ca_kabuli_chr02 | 36016362                | GG                              | AA                | 1945913565               |
| SNP_P3_25735_36017015 | NC_021161.1    | Ca_kabuli_chr02 | 36017015                | GG                              | AA                | 1945913566               |
| SNP_P3_25736_36017663 | NC_021161.1    | Ca_kabuli_chr02 | 36017663                | CC                              | AA                | 1945913568               |
| SNP_P3_25737_36019168 | NC_021161.1    | Ca_kabuli_chr02 | 36019168                | CC                              | TT                | 1945913570               |
| SNP_P3_25738_36022490 | NC_021161.1    | Ca_kabuli_chr02 | 36022490                | TT                              | AA                | 1945913572               |
| SNP_P3_25739_36022578 | NC_021161.1    | Ca_kabuli_chr02 | 36022578                | AA                              | GG                | 1945913573               |
| SNP_P3_25740_36025200 | NC_021161.1    | Ca_kabuli_chr02 | 36025200                | TT                              | CC                | 1945913575               |
| SNP_P3_25741_36025435 | NC_021161.1    | Ca_kabuli_chr02 | 36025435                | AA                              | CC                | 1945913577               |
| SNP_P3_25742_36025477 | NC_021161.1    | Ca_kabuli_chr02 | 36025477                | CC                              | TT                | 1945913579               |
| SNP_P3_25743_36025503 | NC_021161.1    | Ca_kabuli_chr02 | 36025503                | GG                              | CC                | 1945913581               |
| SNP_P3_25744_36025887 | NC_021161.1    | Ca_kabuli_chr02 | 36025887                | GG                              | CC                | 1945913582               |
| SNP_P3_25745_36027317 | NC_021161.1    | Ca_kabuli_chr02 | 36027317                | GG                              | AA                | 1945913584               |
| SNP_P3_25747_36028123 | NC_021161.1    | Ca_kabuli_chr02 | 36028123                | TT                              | CC                | 1945913586               |
| SNP_P3_25748_36028465 | NC_021161.1    | Ca_kabuli_chr02 | 36028465                | TT                              | CC                | 1945913588               |
| SNP_P3_25749_36028472 | NC_021161.1    | Ca_kabuli_chr02 | 36028472                | GG                              | TT                | 1945913589               |
| SNP_P3_25750_36028503 | NC_021161.1    | Ca_kabuli_chr02 | 36028503                | TT                              | GG                | 1945913591               |
| SNP_P3_25751_36028513 | NC_021161.1    | Ca_kabuli_chr02 | 36028513                | AA                              | GG                | 1945913593               |
| SNP_P3_25753_36029025 | NC_021161.1    | Ca_kabuli_chr02 | 36029025                | GG                              | TT                | 1945913595               |
| SNP_P3_25757_36032263 | NC_021161.1    | Ca_kabuli_chr02 | 36032263                | CC                              | TT                | 1945913597               |
| SNP_P3_25758_36033234 | NC_021161.1    | Ca_kabuli_chr02 | 36033234                | AA                              | CC                | 1945913598               |
| SNP_P3_25759_36036238 | NC_021161.1    | Ca_kabuli_chr02 | 36036238                | TT                              | CC                | 1945913600               |

| SNPs IDs              | Chromosome IDs | Chromosomes     | Physical positions (bp) | CDC Frontier (Reference genome) | (Pusa 256 & HPNB) | NCBI SNPdb Accession IDs |
|-----------------------|----------------|-----------------|-------------------------|---------------------------------|-------------------|--------------------------|
| SNP_P3_25761_36038471 | NC_021161.1    | Ca_kabuli_chr02 | 36038471                | CC                              | TT                | 1945913602               |
| SNP_P3_25762_36038545 | NC_021161.1    | Ca_kabuli_chr02 | 36038545                | GG                              | AA                | 1945913604               |
| SNP_P3_25763_36038614 | NC_021161.1    | Ca_kabuli_chr02 | 36038614                | CC                              | AA                | 1945913605               |
| SNP_P3_25764_36038855 | NC_021161.1    | Ca_kabuli_chr02 | 36038855                | CC                              | AA                | 1945913607               |
| SNP_P3_25765_36038865 | NC_021161.1    | Ca_kabuli_chr02 | 36038865                | CC                              | TT                | 1945913609               |
| SNP_P3_25766_36038980 | NC_021161.1    | Ca_kabuli_chr02 | 36038980                | GG                              | TT                | 1945913611               |
| SNP_P3_25767_36039125 | NC_021161.1    | Ca_kabuli_chr02 | 36039125                | GG                              | AA                | 1945913613               |
| SNP_P3_25768_36041374 | NC_021161.1    | Ca_kabuli_chr02 | 36041374                | CC                              | GG                | 1945913614               |
| SNP_P3_25769_36042473 | NC_021161.1    | Ca_kabuli_chr02 | 36042473                | GG                              | AA                | 1945913616               |
| SNP_P3_25770_36042500 | NC_021161.1    | Ca_kabuli_chr02 | 36042500                | TT                              | CC                | 1945913618               |
| SNP_P3_25771_36045367 | NC_021161.1    | Ca_kabuli_chr02 | 36045367                | TT                              | AA                | 1945913620               |
| SNP_P3_25773_36045591 | NC_021161.1    | Ca_kabuli_chr02 | 36045591                | TT                              | AA                | 1945913621               |
| SNP_P3_25774_36051175 | NC_021161.1    | Ca_kabuli_chr02 | 36051175                | GG                              | TT                | 1945913623               |
| SNP_P3_25775_36051932 | NC_021161.1    | Ca_kabuli_chr02 | 36051932                | GG                              | CC                | 1945913625               |
| SNP_P3_25777_36052417 | NC_021161.1    | Ca_kabuli_chr02 | 36052417                | GG                              | AA                | 1945913627               |
| SNP_P3_25778_36052418 | NC_021161.1    | Ca_kabuli_chr02 | 36052418                | AA                              | TT                | 1945913629               |
| SNP_P3_25779_36053486 | NC_021161.1    | Ca_kabuli_chr02 | 36053486                | AA                              | GG                | 1945913630               |
| SNP_P3_25781_36053845 | NC_021161.1    | Ca_kabuli_chr02 | 36053845                | GG                              | AA                | 1945913632               |
| SNP_P3_25782_36054509 | NC_021161.1    | Ca_kabuli_chr02 | 36054509                | AA                              | TT                | 1945913634               |
| SNP_P3_25783_36054551 | NC_021161.1    | Ca_kabuli_chr02 | 36054551                | TT                              | AA                | 1945913636               |
| SNP_P3_25785_36058135 | NC_021161.1    | Ca_kabuli_chr02 | 36058135                | TT                              | CC                | 1945913637               |
| SNP_P3_25786_36059009 | NC_021161.1    | Ca_kabuli_chr02 | 36059009                | CC                              | AA                | 1945913639               |
| SNP_P3_25788_36059089 | NC_021161.1    | Ca_kabuli_chr02 | 36059089                | GG                              | AA                | 1945913641               |
| SNP_P3_25789_36060144 | NC_021161.1    | Ca_kabuli_chr02 | 36060144                | TT                              | CC                | 1945913643               |
| SNP_P3_25790_36060151 | NC_021161.1    | Ca_kabuli_chr02 | 36060151                | GG                              | TT                | 1945913645               |
| SNP_P3_25791_36060155 | NC_021161.1    | Ca_kabuli_chr02 | 36060155                | CC                              | TT                | 1945913646               |
| SNP_P3_25792_36060596 | NC_021161.1    | Ca_kabuli_chr02 | 36060596                | AA                              | TT                | 1945913648               |
| SNP_P3_25794_36061663 | NC_021161.1    | Ca_kabuli_chr02 | 36061663                | AA                              | GG                | 1945913650               |
| SNP_P3_25795_36062178 | NC_021161.1    | Ca_kabuli_chr02 | 36062178                | AA                              | GG                | 1945913652               |
| SNP_P3_25796_36062582 | NC_021161.1    | Ca_kabuli_chr02 | 36062582                | GG                              | AA                | 1945913653               |
| SNP_P3_25797_36063058 | NC_021161.1    | Ca_kabuli_chr02 | 36063058                | GG                              | TT                | 1945913655               |
| SNP_P3_25798_36063118 | NC_021161.1    | Ca_kabuli_chr02 | 36063118                | TT                              | CC                | 1945913657               |
| SNP_P3_25799_36063138 | NC_021161.1    | Ca_kabuli_chr02 | 36063138                | GG                              | TT                | 1945913659               |
| SNP_P3_25800_36063140 | NC_021161.1    | Ca_kabuli_chr02 | 36063140                | AA                              | GG                | 1945913661               |
| SNP_P3_25801_36063425 | NC_021161.1    | Ca_kabuli_chr02 | 36063425                | TT                              | CC                | 1945913662               |
| SNP_P3_25802_36063501 | NC_021161.1    | Ca_kabuli_chr02 | 36063501                | GG                              | TT                | 1945913664               |
| SNP_P3_25806_36066023 | NC_021161.1    | Ca_kabuli_chr02 | 36066023                | TT                              | GG                | 1945913666               |
| SNP_P3_25807_36066538 | NC_021161.1    | Ca_kabuli_chr02 | 36066538                | CC                              | TT                | 1945913668               |
| SNP_P3_25808_36066638 | NC_021161.1    | Ca_kabuli_chr02 | 36066638                | TT                              | AA                | 1945913669               |
| SNP_P3_25809_36066643 | NC_021161.1    | Ca_kabuli_chr02 | 36066643                | TT                              | AA                | 1945913671               |
| SNP_P3_25810_36068289 | NC_021161.1    | Ca_kabuli_chr02 | 36068289                | GG                              | TT                | 1945913673               |
| SNP_P3_25811_36068519 | NC_021161.1    | Ca_kabuli_chr02 | 36068519                | GG                              | CC                | 1945913675               |

| SNPs IDs              | Chromosome IDs | Chromosomes     | Physical positions (bp) | CDC Frontier (Reference genome) | (Pusa 256 & HPNB) | NCBI SNPdb Accession IDs |
|-----------------------|----------------|-----------------|-------------------------|---------------------------------|-------------------|--------------------------|
| SNP_P3_25812_36069106 | NC_021161.1    | Ca_kabuli_chr02 | 36069106                | TT                              | CC                | 1945913677               |
| SNP_P3_25813_36069831 | NC_021161.1    | Ca_kabuli_chr02 | 36069831                | AA                              | CC                | 1945913678               |
| SNP_P3_25814_36069846 | NC_021161.1    | Ca_kabuli_chr02 | 36069846                | CC                              | TT                | 1945913680               |
| SNP_P3_25815_36072864 | NC_021161.1    | Ca_kabuli_chr02 | 36072864                | AA                              | GG                | 1945913682               |
| SNP_P3_25816_36073453 | NC_021161.1    | Ca_kabuli_chr02 | 36073453                | AA                              | TT                | 1945913684               |
| SNP_P3_25817_36074438 | NC_021161.1    | Ca_kabuli_chr02 | 36074438                | GG                              | TT                | 1945913685               |
| SNP_P3_25818_36074629 | NC_021161.1    | Ca_kabuli_chr02 | 36074629                | TT                              | CC                | 1945913687               |
| SNP_P3_25819_36074630 | NC_021161.1    | Ca_kabuli_chr02 | 36074630                | GG                              | AA                | 1945913689               |
| SNP_P3_25820_36074703 | NC_021161.1    | Ca_kabuli_chr02 | 36074703                | AA                              | GG                | 1945913691               |
| SNP_P3_25821_36078127 | NC_021161.1    | Ca_kabuli_chr02 | 36078127                | AA                              | TT                | 1945913693               |
| SNP_P3_25822_36079380 | NC_021161.1    | Ca_kabuli_chr02 | 36079380                | CC                              | TT                | 1945913694               |
| SNP_P3_25823_36079404 | NC_021161.1    | Ca_kabuli_chr02 | 36079404                | TT                              | CC                | 1945913696               |
| SNP_P3_25824_36079414 | NC_021161.1    | Ca_kabuli_chr02 | 36079414                | CC                              | AA                | 1945913698               |
| SNP_P3_25825_36079425 | NC_021161.1    | Ca_kabuli_chr02 | 36079425                | CC                              | TT                | 1945913700               |
| SNP_P3_25826_36079587 | NC_021161.1    | Ca_kabuli_chr02 | 36079587                | CC                              | GG                | 1945913701               |
| SNP_P3_25827_36079644 | NC_021161.1    | Ca_kabuli_chr02 | 36079644                | CC                              | TT                | 1945913703               |
| SNP_P3_25828_36079662 | NC_021161.1    | Ca_kabuli_chr02 | 36079662                | TT                              | CC                | 1945913705               |
| SNP_P3_25829_36079667 | NC_021161.1    | Ca_kabuli_chr02 | 36079667                | CC                              | AA                | 1945913707               |
| SNP_P3_25830_36079734 | NC_021161.1    | Ca_kabuli_chr02 | 36079734                | AA                              | GG                | 1945913708               |
| SNP_P3_25831_36081832 | NC_021161.1    | Ca_kabuli_chr02 | 36081832                | AA                              | TT                | 1945913710               |
| SNP_P3_25832_36081908 | NC_021161.1    | Ca_kabuli_chr02 | 36081908                | AA                              | GG                | 1945913712               |
| SNP_P3_25833_36081929 | NC_021161.1    | Ca_kabuli_chr02 | 36081929                | GG                              | TT                | 1945913714               |
| SNP_P3_25834_36082691 | NC_021161.1    | Ca_kabuli_chr02 | 36082691                | CC                              | TT                | 1945913716               |
| SNP_P3_25835_36083540 | NC_021161.1    | Ca_kabuli_chr02 | 36083540                | AA                              | CC                | 1945913717               |
| SNP_P3_25836_36083565 | NC_021161.1    | Ca_kabuli_chr02 | 36083565                | CC                              | TT                | 1945913719               |
| SNP_P3_25837_36083826 | NC_021161.1    | Ca_kabuli_chr02 | 36083826                | TT                              | GG                | 1945913721               |
| SNP_P3_25838_36084257 | NC_021161.1    | Ca_kabuli_chr02 | 36084257                | AA                              | GG                | 1945913723               |
| SNP_P3_25839_36088676 | NC_021161.1    | Ca_kabuli_chr02 | 36088676                | CC                              | TT                | 1945913724               |
| SNP_P3_25840_36089104 | NC_021161.1    | Ca_kabuli_chr02 | 36089104                | CC                              | TT                | 1945913726               |
| SNP_P3_25842_36090287 | NC_021161.1    | Ca_kabuli_chr02 | 36090287                | CC                              | TT                | 1945913728               |
| SNP_P3_25844_36092359 | NC_021161.1    | Ca_kabuli_chr02 | 36092359                | AA                              | TT                | 1945913730               |
| SNP_P3_25845_36092798 | NC_021161.1    | Ca_kabuli_chr02 | 36092798                | GG                              | AA                | 1945913732               |
| SNP_P3_25846_36093236 | NC_021161.1    | Ca_kabuli_chr02 | 36093236                | AA                              | GG                | 1945913733               |
| SNP_P3_25847_36099354 | NC_021161.1    | Ca_kabuli_chr02 | 36099354                | AA                              | TT                | 1945913735               |
| SNP_P3_25848_36101358 | NC_021161.1    | Ca_kabuli_chr02 | 36101358                | GG                              | AA                | 1945913737               |
| SNP_P3_25849_36101379 | NC_021161.1    | Ca_kabuli_chr02 | 36101379                | GG                              | AA                | 1945913739               |
| SNP_P3_25850_36101490 | NC_021161.1    | Ca_kabuli_chr02 | 36101490                | CC                              | TT                | 1945913741               |
| SNP_P3_25851_36101514 | NC_021161.1    | Ca_kabuli_chr02 | 36101514                | AA                              | GG                | 1945913742               |
| SNP_P3_25852_36101532 | NC_021161.1    | Ca_kabuli_chr02 | 36101532                | CC                              | TT                | 1945913744               |
| SNP_P3_25853_36101870 | NC_021161.1    | Ca_kabuli_chr02 | 36101870                | CC                              | TT                | 1945913746               |
| SNP_P3_25854_36102060 | NC_021161.1    | Ca_kabuli_chr02 | 36102060                | TT                              | CC                | 1945913748               |
| SNP_P3_25855_36102117 | NC_021161.1    | Ca_kabuli_chr02 | 36102117                | TT                              | AA                | 1945913750               |

| SNPs IDs              | Chromosome IDs | Chromosomes     | Physical positions (bp) | CDC Frontier (Reference genome) | (Pusa 256 & HPNB) | NCBI SNPdb Accession IDs |
|-----------------------|----------------|-----------------|-------------------------|---------------------------------|-------------------|--------------------------|
| SNP_P3_25856_36102363 | NC_021161.1    | Ca_kabuli_chr02 | 36102363                | AA                              | GG                | 1945913751               |
| SNP_P3_25857_36102446 | NC_021161.1    | Ca_kabuli_chr02 | 36102446                | CC                              | TT                | 1945913753               |
| SNP_P3_25858_36104779 | NC_021161.1    | Ca_kabuli_chr02 | 36104779                | AA                              | GG                | 1945913755               |
| SNP_P3_25859_36104887 | NC_021161.1    | Ca_kabuli_chr02 | 36104887                | AA                              | CC                | 1945913757               |
| SNP_P3_25861_36105026 | NC_021161.1    | Ca_kabuli_chr02 | 36105026                | CC                              | GG                | 1945913758               |
| SNP_P3_25862_36105657 | NC_021161.1    | Ca_kabuli_chr02 | 36105657                | AA                              | GG                | 1945913760               |
| SNP_P3_25864_36108180 | NC_021161.1    | Ca_kabuli_chr02 | 36108180                | AA                              | CC                | 1945913762               |
| SNP_P3_25865_36108437 | NC_021161.1    | Ca_kabuli_chr02 | 36108437                | GG                              | AA                | 1945913764               |
| SNP_P3_25866_36108445 | NC_021161.1    | Ca_kabuli_chr02 | 36108445                | TT                              | CC                | 1945913765               |
| SNP_P3_25867_36108468 | NC_021161.1    | Ca_kabuli_chr02 | 36108468                | CC                              | TT                | 1945913767               |
| SNP_P3_25868_36108501 | NC_021161.1    | Ca_kabuli_chr02 | 36108501                | GG                              | AA                | 1945913769               |
| SNP_P3_25869_36110737 | NC_021161.1    | Ca_kabuli_chr02 | 36110737                | CC                              | TT                | 1945913771               |
| SNP_P3_25870_36110747 | NC_021161.1    | Ca_kabuli_chr02 | 36110747                | TT                              | CC                | 1945913773               |
| SNP_P3_25871_36110761 | NC_021161.1    | Ca_kabuli_chr02 | 36110761                | CC                              | TT                | 1945913774               |
| SNP_P3_25873_36112481 | NC_021161.1    | Ca_kabuli_chr02 | 36112481                | GG                              | CC                | 1945913776               |
| SNP_P3_25874_36112484 | NC_021161.1    | Ca_kabuli_chr02 | 36112484                | TT                              | CC                | 1945913778               |
| SNP_P3_25876_36113978 | NC_021161.1    | Ca_kabuli_chr02 | 36113978                | TT                              | AA                | 1945913780               |
| SNP_P3_25877_36114384 | NC_021161.1    | Ca_kabuli_chr02 | 36114384                | CC                              | TT                | 1945913781               |
| SNP_P3_25878_36114420 | NC_021161.1    | Ca_kabuli_chr02 | 36114420                | AA                              | TT                | 1945913783               |
| SNP_P3_25879_36114448 | NC_021161.1    | Ca_kabuli_chr02 | 36114448                | CC                              | TT                | 1945913785               |
| SNP_P3_25880_36114479 | NC_021161.1    | Ca_kabuli_chr02 | 36114479                | AA                              | CC                | 1945913787               |
| SNP_P3_25881_36114687 | NC_021161.1    | Ca_kabuli_chr02 | 36114687                | CC                              | TT                | 1945913789               |
| SNP_P3_25883_36116682 | NC_021161.1    | Ca_kabuli_chr02 | 36116682                | CC                              | TT                | 1945913790               |
| SNP_P3_25884_36118004 | NC_021161.1    | Ca_kabuli_chr02 | 36118004                | AA                              | CC                | 1945913792               |
| SNP_P3_25885_36118409 | NC_021161.1    | Ca_kabuli_chr02 | 36118409                | TT                              | AA                | 1945913794               |
| SNP_P3_25886_36118657 | NC_021161.1    | Ca_kabuli_chr02 | 36118657                | GG                              | CC                | 1945913796               |
| SNP_P3_25887_36118774 | NC_021161.1    | Ca_kabuli_chr02 | 36118774                | TT                              | AA                | 1945913797               |
| SNP_P3_25888_36120803 | NC_021161.1    | Ca_kabuli_chr02 | 36120803                | GG                              | TT                | 1945913799               |
| SNP_P3_25889_36120826 | NC_021161.1    | Ca_kabuli_chr02 | 36120826                | AA                              | TT                | 1945913801               |
| SNP_P3_25890_36120858 | NC_021161.1    | Ca_kabuli_chr02 | 36120858                | TT                              | GG                | 1945913803               |
| SNP_P3_25891_36122309 | NC_021161.1    | Ca_kabuli_chr02 | 36122309                | CC                              | AA                | 1945913805               |
| SNP_P3_25892_36122999 | NC_021161.1    | Ca_kabuli_chr02 | 36122999                | TT                              | CC                | 1945913806               |
| SNP_P3_25893_36124613 | NC_021161.1    | Ca_kabuli_chr02 | 36124613                | GG                              | AA                | 1945913808               |
| SNP_P3_25894_36125421 | NC_021161.1    | Ca_kabuli_chr02 | 36125421                | TT                              | AA                | 1945913810               |
| SNP_P3_25895_36125429 | NC_021161.1    | Ca_kabuli_chr02 | 36125429                | GG                              | TT                | 1945913812               |
| SNP_P3_25896_36125469 | NC_021161.1    | Ca_kabuli_chr02 | 36125469                | GG                              | TT                | 1945913813               |
| SNP_P3_25897_36125683 | NC_021161.1    | Ca_kabuli_chr02 | 36125683                | TT                              | GG                | 1945913815               |
| SNP_P3_25898_36128821 | NC_021161.1    | Ca_kabuli_chr02 | 36128821                | CC                              | TT                | 1945913817               |
| SNP_P3_25900_36130284 | NC_021161.1    | Ca_kabuli_chr02 | 36130284                | AA                              | GG                | 1945913819               |
| SNP_P3_25901_36130308 | NC_021161.1    | Ca_kabuli_chr02 | 36130308                | CC                              | GG                | 1945913821               |
| SNP_P3_25902_36138702 | NC_021161.1    | Ca_kabuli_chr02 | 36138702                | AA                              | TT                | 1945913822               |
| SNP_P3_25904_36146719 | NC_021161.1    | Ca_kabuli_chr02 | 36146719                | TT                              | CC                | 1945913824               |



| SNPs IDs              | Chromosome IDs | Chromosomes     | Physical positions (bp) | CDC Frontier (Reference genome) | (Pusa 256 & HPNB) | NCBI SNPdb Accession IDs |
|-----------------------|----------------|-----------------|-------------------------|---------------------------------|-------------------|--------------------------|
| SNP_P3_25905_36146853 | NC_021161.1    | Ca_kabuli_chr02 | 36146853                | CC                              | TT                | 1945913826               |
| SNP_P3_25907_36149024 | NC_021161.1    | Ca_kabuli_chr02 | 36149024                | GG                              | AA                | 1945913828               |
| SNP_P3_25908_36151080 | NC_021161.1    | Ca_kabuli_chr02 | 36151080                | AA                              | GG                | 1945913829               |
| SNP_P3_25909_36151417 | NC_021161.1    | Ca_kabuli_chr02 | 36151417                | AA                              | GG                | 1945913831               |
| SNP_P3_25910_36151642 | NC_021161.1    | Ca_kabuli_chr02 | 36151642                | TT                              | GG                | 1945913833               |
| SNP_P3_25911_36151966 | NC_021161.1    | Ca_kabuli_chr02 | 36151966                | GG                              | TT                | 1945913835               |
| SNP_P3_25912_36151989 | NC_021161.1    | Ca_kabuli_chr02 | 36151989                | TT                              | AA                | 1945913836               |
| SNP_P3_25913_36152017 | NC_021161.1    | Ca_kabuli_chr02 | 36152017                | TT                              | GG                | 1945913838               |
| SNP_P3_25914_36152192 | NC_021161.1    | Ca_kabuli_chr02 | 36152192                | AA                              | CC                | 1945913840               |
| SNP_P3_25916_36153514 | NC_021161.1    | Ca_kabuli_chr02 | 36153514                | GG                              | AA                | 1945913842               |
| SNP_P3_25917_36156222 | NC_021161.1    | Ca_kabuli_chr02 | 36156222                | GG                              | AA                | 1945913844               |
| SNP_P3_25918_36164399 | NC_021161.1    | Ca_kabuli_chr02 | 36164399                | AA                              | GG                | 1945913845               |
| SNP_P3_25919_36164452 | NC_021161.1    | Ca_kabuli_chr02 | 36164452                | AA                              | GG                | 1945913847               |
| SNP_P3_25921_36179247 | NC_021161.1    | Ca_kabuli_chr02 | 36179247                | TT                              | CC                | 1945913849               |
| SNP_P3_25922_36188613 | NC_021161.1    | Ca_kabuli_chr02 | 36188613                | CC                              | TT                | 1945913851               |
| SNP_P3_25923_36191072 | NC_021161.1    | Ca_kabuli_chr02 | 36191072                | CC                              | TT                | 1945913852               |
| SNP_P3_25924_36194439 | NC_021161.1    | Ca_kabuli_chr02 | 36194439                | CC                              | TT                | 1945913854               |
| SNP_P3_25925_36194474 | NC_021161.1    | Ca_kabuli_chr02 | 36194474                | AA                              | GG                | 1945913856               |
| SNP_P3_25926_36197968 | NC_021161.1    | Ca_kabuli_chr02 | 36197968                | GG                              | AA                | 1945913858               |
| SNP_P3_25927_36207684 | NC_021161.1    | Ca_kabuli_chr02 | 36207684                | AA                              | GG                | 1945913860               |
| SNP_P3_25928_36219612 | NC_021161.1    | Ca_kabuli_chr02 | 36219612                | TT                              | AA                | 1945913861               |
| SNP_P3_25929_36221406 | NC_021161.1    | Ca_kabuli_chr02 | 36221406                | TT                              | CC                | 1945913863               |
| SNP_P3_25932_36281214 | NC_021161.1    | Ca_kabuli_chr02 | 36281214                | AA                              | GG                | 1945913865               |
| SNP_P3_25933_36282593 | NC_021161.1    | Ca_kabuli_chr02 | 36282593                | AA                              | GG                | 1945913867               |
| SNP_P3_25934_36290463 | NC_021161.1    | Ca_kabuli_chr02 | 36290463                | GG                              | AA                | 1945913868               |
| SNP_P3_25935_36307923 | NC_021161.1    | Ca_kabuli_chr02 | 36307923                | TT                              | GG                | 1945913870               |
| SNP_P3_25936_36309717 | NC_021161.1    | Ca_kabuli_chr02 | 36309717                | TT                              | GG                | 1945913872               |
| SNP_P3_25937_36310674 | NC_021161.1    | Ca_kabuli_chr02 | 36310674                | AA                              | TT                | 1945913874               |
| SNP_P3_25938_36311168 | NC_021161.1    | Ca_kabuli_chr02 | 36311168                | TT                              | CC                | 1945913876               |
| SNP_P3_25939_36314712 | NC_021161.1    | Ca_kabuli_chr02 | 36314712                | TT                              | CC                | 1945913877               |
| SNP_P3_25940_36314713 | NC_021161.1    | Ca_kabuli_chr02 | 36314713                | CC                              | AA                | 1945913879               |
| SNP_P3_25941_36314739 | NC_021161.1    | Ca_kabuli_chr02 | 36314739                | AA                              | GG                | 1945913881               |
| SNP_P3_25942_36314744 | NC_021161.1    | Ca_kabuli_chr02 | 36314744                | TT                              | CC                | 1945913883               |
| SNP_P3_25943_36314768 | NC_021161.1    | Ca_kabuli_chr02 | 36314768                | AA                              | GG                | 1945913884               |
| SNP_P3_25944_36321367 | NC_021161.1    | Ca_kabuli_chr02 | 36321367                | AA                              | CC                | 1945913886               |
| SNP_P3_25945_36321382 | NC_021161.1    | Ca_kabuli_chr02 | 36321382                | AA                              | TT                | 1945913888               |
| SNP_P3_25947_36383140 | NC_021161.1    | Ca_kabuli_chr02 | 36383140                | AA                              | CC                | 1945913890               |
| SNP_P3_25949_36413312 | NC_021161.1    | Ca_kabuli_chr02 | 36413312                | AA                              | TT                | 1945913892               |
| SNP_P3_25950_36421759 | NC_021161.1    | Ca_kabuli_chr02 | 36421759                | CC                              | TT                | 1945913893               |
| SNP_P3_25952_36436615 | NC_021161.1    | Ca_kabuli_chr02 | 36436615                | AA                              | GG                | 1945913895               |
| SNP_P3_25954_36460745 | NC_021161.1    | Ca_kabuli_chr02 | 36460745                | GG                              | TT                | 1945913897               |
| SNP_P3_25956_36513667 | NC_021161.1    | Ca_kabuli_chr02 | 36513667                | AA                              | CC                | 1945913899               |

| SNPs IDs              | Chromosome IDs | Chromosomes     | Physical positions (bp) | CDC Frontier (Reference genome) | (Pusa 256 & HPNB) | NCBI SNPdb Accession IDs |
|-----------------------|----------------|-----------------|-------------------------|---------------------------------|-------------------|--------------------------|
| SNP_P3_25957_36521618 | NC_021161.1    | Ca_kabuli_chr02 | 36521618                | CC                              | TT                | 1945913900               |
| SNP_P3_25958_36548926 | NC_021161.1    | Ca_kabuli_chr02 | 36548926                | CC                              | TT                | 1945913902               |
| SNP_P3_25959_36548931 | NC_021161.1    | Ca_kabuli_chr02 | 36548931                | GG                              | AA                | 1945913904               |
| SNP_P3_25962_36580619 | NC_021161.1    | Ca_kabuli_chr02 | 36580619                | TT                              | AA                | 1945913906               |
| SNP_P3_25963_36580624 | NC_021161.1    | Ca_kabuli_chr02 | 36580624                | TT                              | CC                | 1945913908               |
| SNP_P3_25964_36580633 | NC_021161.1    | Ca_kabuli_chr02 | 36580633                | AA                              | TT                | 1945913909               |
| SNP_P3_25965_36580635 | NC_021161.1    | Ca_kabuli_chr02 | 36580635                | TT                              | AA                | 1945913911               |
| SNP_P3_25966_36594781 | NC_021161.1    | Ca_kabuli_chr02 | 36594781                | GG                              | AA                | 1945913913               |
| SNP_P3_25967_36597476 | NC_021161.1    | Ca_kabuli_chr02 | 36597476                | AA                              | CC                | 1945913915               |
| SNP_P3_25968_36597548 | NC_021161.1    | Ca_kabuli_chr02 | 36597548                | CC                              | TT                | 1945913916               |
| SNP_P3_25969_36597550 | NC_021161.1    | Ca_kabuli_chr02 | 36597550                | TT                              | CC                | 1945913918               |
| SNP_P3_25970_36597882 | NC_021161.1    | Ca_kabuli_chr02 | 36597882                | AA                              | GG                | 1945913920               |
| SNP_P3_25971_36598285 | NC_021161.1    | Ca_kabuli_chr02 | 36598285                | TT                              | AA                | 1945913922               |
| SNP_P3_25972_36598313 | NC_021161.1    | Ca_kabuli_chr02 | 36598313                | AA                              | GG                | 1945913923               |
| SNP_P3_25974_36601904 | NC_021161.1    | Ca_kabuli_chr02 | 36601904                | TT                              | CC                | 1945913925               |
| SNP_P3_25975_36607632 | NC_021161.1    | Ca_kabuli_chr02 | 36607632                | TT                              | CC                | 1945913927               |
| SNP_P3_25976_36607800 | NC_021161.1    | Ca_kabuli_chr02 | 36607800                | CC                              | TT                | 1945913929               |
| SNP_P3_25977_36607840 | NC_021161.1    | Ca_kabuli_chr02 | 36607840                | CC                              | AA                | 1945913931               |
| SNP_P3_25978_36624181 | NC_021161.1    | Ca_kabuli_chr02 | 36624181                | GG                              | TT                | 1945913932               |
| SNP_P3_25979_36624182 | NC_021161.1    | Ca_kabuli_chr02 | 36624182                | TT                              | AA                | 1945913934               |
| SNP_P3_25980_36624256 | NC_021161.1    | Ca_kabuli_chr02 | 36624256                | TT                              | CC                | 1945913936               |
| SNP_P3_25981_36624276 | NC_021161.1    | Ca_kabuli_chr02 | 36624276                | AA                              | GG                | 1945913938               |
| SNP_P3_25982_36624397 | NC_021161.1    | Ca_kabuli_chr02 | 36624397                | AA                              | GG                | 1945913939               |
| SNP_P3_25983_36624408 | NC_021161.1    | Ca_kabuli_chr02 | 36624408                | TT                              | GG                | 1945913941               |
| SNP_P3_25984_36624497 | NC_021161.1    | Ca_kabuli_chr02 | 36624497                | TT                              | CC                | 1945913943               |
| SNP_P3_25985_36626332 | NC_021161.1    | Ca_kabuli_chr02 | 36626332                | GG                              | CC                | 1945913945               |
| SNP_P3_25986_36626353 | NC_021161.1    | Ca_kabuli_chr02 | 36626353                | TT                              | GG                | 1945913947               |
| SNP_P3_25987_36626378 | NC_021161.1    | Ca_kabuli_chr02 | 36626378                | AA                              | GG                | 1945913948               |
| SNP_P3_25988_36626386 | NC_021161.1    | Ca_kabuli_chr02 | 36626386                | TT                              | CC                | 1945913950               |
| SNP_P3_25989_36626392 | NC_021161.1    | Ca_kabuli_chr02 | 36626392                | AA                              | GG                | 1945913952               |
| SNP_P3_25990_36627078 | NC_021161.1    | Ca_kabuli_chr02 | 36627078                | CC                              | TT                | 1945913954               |
| SNP_P3_25991_36627460 | NC_021161.1    | Ca_kabuli_chr02 | 36627460                | CC                              | GG                | 1945913955               |
| SNP_P3_25992_36628463 | NC_021161.1    | Ca_kabuli_chr02 | 36628463                | AA                              | CC                | 1945913957               |
| SNP_P3_25994_36633213 | NC_021161.1    | Ca_kabuli_chr02 | 36633213                | CC                              | AA                | 1945913959               |
| SNP_P3_25995_36634802 | NC_021161.1    | Ca_kabuli_chr02 | 36634802                | AA                              | GG                | 1945913961               |
| SNP_P3_25996_4730     | NC_021162.1    | Ca_kabuli_chr03 | 4730                    | TT                              | AA                | 1945913963               |
| SNP_P3_25997_5598     | NC_021162.1    | Ca_kabuli_chr03 | 5598                    | CC                              | TT                | 1945913964               |
| SNP_P3_25998_19515    | NC_021162.1    | Ca_kabuli_chr03 | 19515                   | GG                              | AA                | 1945913966               |
| SNP_P3_25999_33250    | NC_021162.1    | Ca_kabuli_chr03 | 33250                   | GG                              | AA                | 1945913968               |
| SNP_P3_26000_40641    | NC_021162.1    | Ca_kabuli_chr03 | 40641                   | GG                              | AA                | 1945913970               |
| SNP_P3_26001_51121    | NC_021162.1    | Ca_kabuli_chr03 | 51121                   | AA                              | GG                | 1945913971               |
| SNP_P3_26002_51122    | NC_021162.1    | Ca_kabuli_chr03 | 51122                   | TT                              | AA                | 1945913973               |

| SNPs IDs            | Chromosome IDs | Chromosomes     | Physical positions (bp) | CDC Frontier (Reference genome) | (Pusa 256 & HPNB) | NCBI SNPdb Accession IDs |
|---------------------|----------------|-----------------|-------------------------|---------------------------------|-------------------|--------------------------|
| SNP_P3_26003_72355  | NC_021162.1    | Ca_kabuli_chr03 | 72355                   | CC                              | AA                | 1945913975               |
| SNP_P3_26004_72356  | NC_021162.1    | Ca_kabuli_chr03 | 72356                   | CC                              | AA                | 1945913977               |
| SNP_P3_26005_81343  | NC_021162.1    | Ca_kabuli_chr03 | 81343                   | TT                              | AA                | 1945913979               |
| SNP_P3_26006_84169  | NC_021162.1    | Ca_kabuli_chr03 | 84169                   | AA                              | GG                | 1945913980               |
| SNP_P3_26007_86095  | NC_021162.1    | Ca_kabuli_chr03 | 86095                   | TT                              | CC                | 1945913982               |
| SNP_P3_26009_97168  | NC_021162.1    | Ca_kabuli_chr03 | 97168                   | AA                              | GG                | 1945913984               |
| SNP_P3_26010_109292 | NC_021162.1    | Ca_kabuli_chr03 | 109292                  | TT                              | GG                | 1945913986               |
| SNP_P3_26011_109694 | NC_021162.1    | Ca_kabuli_chr03 | 109694                  | TT                              | CC                | 1945913987               |
| SNP_P3_26012_123913 | NC_021162.1    | Ca_kabuli_chr03 | 123913                  | TT                              | CC                | 1945913989               |
| SNP_P3_26015_173818 | NC_021162.1    | Ca_kabuli_chr03 | 173818                  | TT                              | AA                | 1945913991               |
| SNP_P3_26016_174064 | NC_021162.1    | Ca_kabuli_chr03 | 174064                  | TT                              | CC                | 1945913993               |
| SNP_P3_26017_189842 | NC_021162.1    | Ca_kabuli_chr03 | 189842                  | AA                              | CC                | 1945913995               |
| SNP_P3_26018_189869 | NC_021162.1    | Ca_kabuli_chr03 | 189869                  | CC                              | TT                | 1945913996               |
| SNP_P3_26019_189870 | NC_021162.1    | Ca_kabuli_chr03 | 189870                  | TT                              | CC                | 1945913998               |
| SNP_P3_26020_189902 | NC_021162.1    | Ca_kabuli_chr03 | 189902                  | CC                              | AA                | 1945914000               |
| SNP_P3_26021_189916 | NC_021162.1    | Ca_kabuli_chr03 | 189916                  | AA                              | GG                | 1945914002               |
| SNP_P3_26022_189928 | NC_021162.1    | Ca_kabuli_chr03 | 189928                  | AA                              | CC                | 1945914003               |
| SNP_P3_26023_189929 | NC_021162.1    | Ca_kabuli_chr03 | 189929                  | AA                              | TT                | 1945914005               |
| SNP_P3_26024_189932 | NC_021162.1    | Ca_kabuli_chr03 | 189932                  | GG                              | AA                | 1945914007               |
| SNP_P3_26025_189938 | NC_021162.1    | Ca_kabuli_chr03 | 189938                  | AA                              | GG                | 1945914009               |
| SNP_P3_26026_214008 | NC_021162.1    | Ca_kabuli_chr03 | 214008                  | TT                              | CC                | 1945914011               |
| SNP_P3_26029_238222 | NC_021162.1    | Ca_kabuli_chr03 | 238222                  | TT                              | AA                | 1945914012               |
| SNP_P3_26030_247679 | NC_021162.1    | Ca_kabuli_chr03 | 247679                  | GG                              | AA                | 1945914014               |
| SNP_P3_26031_251369 | NC_021162.1    | Ca_kabuli_chr03 | 251369                  | AA                              | GG                | 1945914016               |
| SNP_P3_26032_274849 | NC_021162.1    | Ca_kabuli_chr03 | 274849                  | TT                              | AA                | 1945914018               |
| SNP_P3_26033_274865 | NC_021162.1    | Ca_kabuli_chr03 | 274865                  | AA                              | TT                | 1945914019               |
| SNP_P3_26034_275241 | NC_021162.1    | Ca_kabuli_chr03 | 275241                  | TT                              | GG                | 1945914021               |
| SNP_P3_26035_275260 | NC_021162.1    | Ca_kabuli_chr03 | 275260                  | AA                              | CC                | 1945914023               |
| SNP_P3_26036_277453 | NC_021162.1    | Ca_kabuli_chr03 | 277453                  | TT                              | GG                | 1945914025               |
| SNP_P3_26037_277656 | NC_021162.1    | Ca_kabuli_chr03 | 277656                  | AA                              | GG                | 1945914027               |
| SNP_P3_26038_277670 | NC_021162.1    | Ca_kabuli_chr03 | 277670                  | CC                              | TT                | 1945914028               |
| SNP_P3_26039_277697 | NC_021162.1    | Ca_kabuli_chr03 | 277697                  | AA                              | GG                | 1945914030               |
| SNP_P3_26040_335993 | NC_021162.1    | Ca_kabuli_chr03 | 335993                  | GG                              | TT                | 1945914032               |
| SNP_P3_26041_336071 | NC_021162.1    | Ca_kabuli_chr03 | 336071                  | GG                              | AA                | 1945914034               |
| SNP_P3_26042_337301 | NC_021162.1    | Ca_kabuli_chr03 | 337301                  | GG                              | AA                | 1945914035               |
| SNP_P3_26043_337381 | NC_021162.1    | Ca_kabuli_chr03 | 337381                  | TT                              | CC                | 1945914037               |
| SNP_P3_26044_337422 | NC_021162.1    | Ca_kabuli_chr03 | 337422                  | AA                              | CC                | 1945914039               |
| SNP_P3_26045_337564 | NC_021162.1    | Ca_kabuli_chr03 | 337564                  | AA                              | GG                | 1945914041               |
| SNP_P3_26046_337670 | NC_021162.1    | Ca_kabuli_chr03 | 337670                  | TT                              | AA                | 1945914043               |
| SNP_P3_26047_348044 | NC_021162.1    | Ca_kabuli_chr03 | 348044                  | AA                              | TT                | 1945914044               |
| SNP_P3_26048_348431 | NC_021162.1    | Ca_kabuli_chr03 | 348431                  | AA                              | CC                | 1945914046               |
| SNP_P3_26049_348443 | NC_021162.1    | Ca_kabuli_chr03 | 348443                  | GG                              | AA                | 1945914048               |

| SNPs IDs            | Chromosome IDs | Chromosomes     | Physical positions (bp) | CDC Frontier (Reference genome) | (Pusa 256 & HPNB) | NCBI SNPdb Accession IDs |
|---------------------|----------------|-----------------|-------------------------|---------------------------------|-------------------|--------------------------|
| SNP_P3_26050_348445 | NC_021162.1    | Ca_kabuli_chr03 | 348445                  | TT                              | CC                | 1945914050               |
| SNP_P3_26051_370832 | NC_021162.1    | Ca_kabuli_chr03 | 370832                  | TT                              | AA                | 1945914051               |
| SNP_P3_26052_371708 | NC_021162.1    | Ca_kabuli_chr03 | 371708                  | AA                              | CC                | 1945914053               |
| SNP_P3_26053_381858 | NC_021162.1    | Ca_kabuli_chr03 | 381858                  | GG                              | AA                | 1945914055               |
| SNP_P3_26054_384009 | NC_021162.1    | Ca_kabuli_chr03 | 384009                  | TT                              | AA                | 1945914057               |
| SNP_P3_26055_384029 | NC_021162.1    | Ca_kabuli_chr03 | 384029                  | AA                              | TT                | 1945914059               |
| SNP_P3_26057_415051 | NC_021162.1    | Ca_kabuli_chr03 | 415051                  | AA                              | GG                | 1945914060               |
| SNP_P3_26058_415078 | NC_021162.1    | Ca_kabuli_chr03 | 415078                  | GG                              | AA                | 1945914062               |
| SNP_P3_26059_415084 | NC_021162.1    | Ca_kabuli_chr03 | 415084                  | CC                              | GG                | 1945914064               |
| SNP_P3_26060_449899 | NC_021162.1    | Ca_kabuli_chr03 | 449899                  | TT                              | CC                | 1945914066               |
| SNP_P3_26061_450062 | NC_021162.1    | Ca_kabuli_chr03 | 450062                  | GG                              | AA                | 1945914068               |
| SNP_P3_26062_450073 | NC_021162.1    | Ca_kabuli_chr03 | 450073                  | GG                              | TT                | 1945914069               |
| SNP_P3_26063_451700 | NC_021162.1    | Ca_kabuli_chr03 | 451700                  | GG                              | AA                | 1945914071               |
| SNP_P3_26064_451809 | NC_021162.1    | Ca_kabuli_chr03 | 451809                  | AA                              | GG                | 1945914073               |
| SNP_P3_26065_451980 | NC_021162.1    | Ca_kabuli_chr03 | 451980                  | CC                              | AA                | 1945914075               |
| SNP_P3_26066_452090 | NC_021162.1    | Ca_kabuli_chr03 | 452090                  | TT                              | AA                | 1945914076               |
| SNP_P3_26067_452114 | NC_021162.1    | Ca_kabuli_chr03 | 452114                  | CC                              | TT                | 1945914078               |
| SNP_P3_26068_452933 | NC_021162.1    | Ca_kabuli_chr03 | 452933                  | TT                              | CC                | 1945914080               |
| SNP_P3_26071_454727 | NC_021162.1    | Ca_kabuli_chr03 | 454727                  | CC                              | TT                | 1945914082               |
| SNP_P3_26072_454738 | NC_021162.1    | Ca_kabuli_chr03 | 454738                  | TT                              | CC                | 1945914084               |
| SNP_P3_26073_454851 | NC_021162.1    | Ca_kabuli_chr03 | 454851                  | GG                              | AA                | 1945914085               |
| SNP_P3_26074_454862 | NC_021162.1    | Ca_kabuli_chr03 | 454862                  | AA                              | GG                | 1945914087               |
| SNP_P3_26075_457860 | NC_021162.1    | Ca_kabuli_chr03 | 457860                  | GG                              | TT                | 1945914089               |
| SNP_P3_26076_462188 | NC_021162.1    | Ca_kabuli_chr03 | 462188                  | TT                              | CC                | 1945914091               |
| SNP_P3_26077_473881 | NC_021162.1    | Ca_kabuli_chr03 | 473881                  | GG                              | AA                | 1945914092               |
| SNP_P3_26078_498626 | NC_021162.1    | Ca_kabuli_chr03 | 498626                  | TT                              | CC                | 1945914094               |
| SNP_P3_26079_531225 | NC_021162.1    | Ca_kabuli_chr03 | 531225                  | AA                              | TT                | 1945914096               |
| SNP_P3_26080_531261 | NC_021162.1    | Ca_kabuli_chr03 | 531261                  | AA                              | GG                | 1945914098               |
| SNP_P3_26081_566314 | NC_021162.1    | Ca_kabuli_chr03 | 566314                  | AA                              | CC                | 1945914100               |
| SNP_P3_26083_647432 | NC_021162.1    | Ca_kabuli_chr03 | 647432                  | CC                              | TT                | 1945914101               |
| SNP_P3_26084_647437 | NC_021162.1    | Ca_kabuli_chr03 | 647437                  | GG                              | AA                | 1945914103               |
| SNP_P3_26085_647492 | NC_021162.1    | Ca_kabuli_chr03 | 647492                  | CC                              | AA                | 1945914105               |
| SNP_P3_26087_661198 | NC_021162.1    | Ca_kabuli_chr03 | 661198                  | TT                              | AA                | 1945914107               |
| SNP_P3_26088_671243 | NC_021162.1    | Ca_kabuli_chr03 | 671243                  | CC                              | TT                | 1945914109               |
| SNP_P3_26089_671284 | NC_021162.1    | Ca_kabuli_chr03 | 671284                  | TT                              | CC                | 1945914110               |
| SNP_P3_26090_671321 | NC_021162.1    | Ca_kabuli_chr03 | 671321                  | GG                              | AA                | 1945914112               |
| SNP_P3_26091_671376 | NC_021162.1    | Ca_kabuli_chr03 | 671376                  | TT                              | CC                | 1945914114               |
| SNP_P3_26092_671389 | NC_021162.1    | Ca_kabuli_chr03 | 671389                  | GG                              | AA                | 1945914116               |
| SNP_P3_26093_671392 | NC_021162.1    | Ca_kabuli_chr03 | 671392                  | TT                              | GG                | 1945914118               |
| SNP_P3_26094_671399 | NC_021162.1    | Ca_kabuli_chr03 | 671399                  | GG                              | CC                | 1945914119               |
| SNP_P3_26095_671412 | NC_021162.1    | Ca_kabuli_chr03 | 671412                  | TT                              | AA                | 1945914121               |
| SNP_P3_26096_671451 | NC_021162.1    | Ca_kabuli_chr03 | 671451                  | AA                              | GG                | 1945914123               |

| SNPs IDs            | Chromosome IDs | Chromosomes     | Physical positions (bp) | CDC Frontier (Reference genome) | (Pusa 256 & HPNB) | NCBI SNPdb Accession IDs |
|---------------------|----------------|-----------------|-------------------------|---------------------------------|-------------------|--------------------------|
| SNP_P3_26097_671478 | NC_021162.1    | Ca_kabuli_chr03 | 671478                  | AA                              | GG                | 1945914125               |
| SNP_P3_26098_671549 | NC_021162.1    | Ca_kabuli_chr03 | 671549                  | TT                              | CC                | 1945914127               |
| SNP_P3_26099_671633 | NC_021162.1    | Ca_kabuli_chr03 | 671633                  | TT                              | CC                | 1945914128               |
| SNP_P3_26100_671764 | NC_021162.1    | Ca_kabuli_chr03 | 671764                  | AA                              | GG                | 1945914130               |
| SNP_P3_26101_694492 | NC_021162.1    | Ca_kabuli_chr03 | 694492                  | CC                              | GG                | 1945914132               |
| SNP_P3_26102_738347 | NC_021162.1    | Ca_kabuli_chr03 | 738347                  | GG                              | TT                | 1945914134               |
| SNP_P3_26103_753641 | NC_021162.1    | Ca_kabuli_chr03 | 753641                  | CC                              | TT                | 1945914135               |
| SNP_P3_26105_812822 | NC_021162.1    | Ca_kabuli_chr03 | 812822                  | CC                              | TT                | 1945914137               |
| SNP_P3_26106_814681 | NC_021162.1    | Ca_kabuli_chr03 | 814681                  | AA                              | GG                | 1945914139               |
| SNP_P3_26107_831335 | NC_021162.1    | Ca_kabuli_chr03 | 831335                  | AA                              | TT                | 1945914141               |
| SNP_P3_26108_831388 | NC_021162.1    | Ca_kabuli_chr03 | 831388                  | TT                              | AA                | 1945914143               |
| SNP_P3_26109_831490 | NC_021162.1    | Ca_kabuli_chr03 | 831490                  | TT                              | CC                | 1945914144               |
| SNP_P3_26110_831491 | NC_021162.1    | Ca_kabuli_chr03 | 831491                  | CC                              | GG                | 1945914146               |
| SNP_P3_26111_831628 | NC_021162.1    | Ca_kabuli_chr03 | 831628                  | TT                              | CC                | 1945914148               |
| SNP_P3_26112_831697 | NC_021162.1    | Ca_kabuli_chr03 | 831697                  | GG                              | AA                | 1945914150               |
| SNP_P3_26113_873633 | NC_021162.1    | Ca_kabuli_chr03 | 873633                  | TT                              | CC                | 1945914151               |
| SNP_P3_26114_878269 | NC_021162.1    | Ca_kabuli_chr03 | 878269                  | CC                              | TT                | 1945914153               |
| SNP_P3_26115_888998 | NC_021162.1    | Ca_kabuli_chr03 | 888998                  | AA                              | TT                | 1945914155               |
| SNP_P3_26116_893903 | NC_021162.1    | Ca_kabuli_chr03 | 893903                  | AA                              | GG                | 1945914157               |
| SNP_P3_26117_899597 | NC_021162.1    | Ca_kabuli_chr03 | 899597                  | CC                              | AA                | 1945914159               |
| SNP_P3_26118_907493 | NC_021162.1    | Ca_kabuli_chr03 | 907493                  | CC                              | AA                | 1945914160               |
| SNP_P3_26119_907514 | NC_021162.1    | Ca_kabuli_chr03 | 907514                  | GG                              | TT                | 1945914162               |
| SNP_P3_26120_907567 | NC_021162.1    | Ca_kabuli_chr03 | 907567                  | CC                              | TT                | 1945914164               |
| SNP_P3_26121_908689 | NC_021162.1    | Ca_kabuli_chr03 | 908689                  | TT                              | AA                | 1945914166               |
| SNP_P3_26122_922516 | NC_021162.1    | Ca_kabuli_chr03 | 922516                  | TT                              | CC                | 1945914168               |
| SNP_P3_26123_922553 | NC_021162.1    | Ca_kabuli_chr03 | 922553                  | AA                              | GG                | 1945914169               |
| SNP_P3_26124_922557 | NC_021162.1    | Ca_kabuli_chr03 | 922557                  | AA                              | TT                | 1945914171               |
| SNP_P3_26125_922599 | NC_021162.1    | Ca_kabuli_chr03 | 922599                  | TT                              | CC                | 1945914173               |
| SNP_P3_26126_922645 | NC_021162.1    | Ca_kabuli_chr03 | 922645                  | TT                              | CC                | 1945914175               |
| SNP_P3_26127_922680 | NC_021162.1    | Ca_kabuli_chr03 | 922680                  | TT                              | GG                | 1945914176               |
| SNP_P3_26128_923493 | NC_021162.1    | Ca_kabuli_chr03 | 923493                  | GG                              | AA                | 1945914178               |
| SNP_P3_26129_924715 | NC_021162.1    | Ca_kabuli_chr03 | 924715                  | GG                              | CC                | 1945914180               |
| SNP_P3_26130_924803 | NC_021162.1    | Ca_kabuli_chr03 | 924803                  | AA                              | GG                | 1945914182               |
| SNP_P3_26131_924808 | NC_021162.1    | Ca_kabuli_chr03 | 924808                  | CC                              | TT                | 1945914183               |
| SNP_P3_26132_924839 | NC_021162.1    | Ca_kabuli_chr03 | 924839                  | AA                              | GG                | 1945914185               |
| SNP_P3_26133_925256 | NC_021162.1    | Ca_kabuli_chr03 | 925256                  | GG                              | AA                | 1945914187               |
| SNP_P3_26134_925384 | NC_021162.1    | Ca_kabuli_chr03 | 925384                  | AA                              | GG                | 1945914189               |
| SNP_P3_26135_925481 | NC_021162.1    | Ca_kabuli_chr03 | 925481                  | CC                              | GG                | 1945914191               |
| SNP_P3_26136_926331 | NC_021162.1    | Ca_kabuli_chr03 | 926331                  | TT                              | AA                | 1945914192               |
| SNP_P3_26137_938903 | NC_021162.1    | Ca_kabuli_chr03 | 938903                  | TT                              | AA                | 1945914194               |
| SNP_P3_26138_938951 | NC_021162.1    | Ca_kabuli_chr03 | 938951                  | AA                              | GG                | 1945914196               |
| SNP_P3_26140_939100 | NC_021162.1    | Ca_kabuli_chr03 | 939100                  | AA                              | GG                | 1945914198               |

| SNPs IDs             | Chromosome IDs | Chromosomes     | Physical positions (bp) | CDC Frontier (Reference genome) | (Pusa 256 & HPNB) | NCBI SNPdb Accession IDs |
|----------------------|----------------|-----------------|-------------------------|---------------------------------|-------------------|--------------------------|
| SNP_P3_26141_939166  | NC_021162.1    | Ca_kabuli_chr03 | 939166                  | GG                              | TT                | 1945914200               |
| SNP_P3_26142_939396  | NC_021162.1    | Ca_kabuli_chr03 | 939396                  | GG                              | AA                | 1945914201               |
| SNP_P3_26143_954415  | NC_021162.1    | Ca_kabuli_chr03 | 954415                  | CC                              | AA                | 1945914203               |
| SNP_P3_26144_958879  | NC_021162.1    | Ca_kabuli_chr03 | 958879                  | TT                              | CC                | 1945914205               |
| SNP_P3_26145_958880  | NC_021162.1    | Ca_kabuli_chr03 | 958880                  | AA                              | GG                | 1945914207               |
| SNP_P3_26146_958881  | NC_021162.1    | Ca_kabuli_chr03 | 958881                  | GG                              | AA                | 1945914208               |
| SNP_P3_26147_958906  | NC_021162.1    | Ca_kabuli_chr03 | 958906                  | AA                              | CC                | 1945914210               |
| SNP_P3_26148_959118  | NC_021162.1    | Ca_kabuli_chr03 | 959118                  | TT                              | GG                | 1945914212               |
| SNP_P3_26149_959400  | NC_021162.1    | Ca_kabuli_chr03 | 959400                  | TT                              | CC                | 1945914214               |
| SNP_P3_26150_961741  | NC_021162.1    | Ca_kabuli_chr03 | 961741                  | AA                              | CC                | 1945914216               |
| SNP_P3_26151_962309  | NC_021162.1    | Ca_kabuli_chr03 | 962309                  | TT                              | AA                | 1945914217               |
| SNP_P3_26152_962482  | NC_021162.1    | Ca_kabuli_chr03 | 962482                  | TT                              | CC                | 1945914219               |
| SNP_P3_26153_962517  | NC_021162.1    | Ca_kabuli_chr03 | 962517                  | GG                              | AA                | 1945914221               |
| SNP_P3_26154_962645  | NC_021162.1    | Ca_kabuli_chr03 | 962645                  | TT                              | AA                | 1945914223               |
| SNP_P3_26155_962951  | NC_021162.1    | Ca_kabuli_chr03 | 962951                  | GG                              | AA                | 1945914224               |
| SNP_P3_26156_964059  | NC_021162.1    | Ca_kabuli_chr03 | 964059                  | AA                              | CC                | 1945914226               |
| SNP_P3_26157_964241  | NC_021162.1    | Ca_kabuli_chr03 | 964241                  | GG                              | AA                | 1945914228               |
| SNP_P3_26158_964568  | NC_021162.1    | Ca_kabuli_chr03 | 964568                  | CC                              | TT                | 1945914230               |
| SNP_P3_26159_986761  | NC_021162.1    | Ca_kabuli_chr03 | 986761                  | TT                              | AA                | 1945914232               |
| SNP_P3_26160_986959  | NC_021162.1    | Ca_kabuli_chr03 | 986959                  | GG                              | AA                | 1945914233               |
| SNP_P3_26161_987912  | NC_021162.1    | Ca_kabuli_chr03 | 987912                  | AA                              | GG                | 1945914235               |
| SNP_P3_26162_993659  | NC_021162.1    | Ca_kabuli_chr03 | 993659                  | TT                              | CC                | 1945914237               |
| SNP_P3_26163_995720  | NC_021162.1    | Ca_kabuli_chr03 | 995720                  | AA                              | GG                | 1945914239               |
| SNP_P3_26164_1005009 | NC_021162.1    | Ca_kabuli_chr03 | 1005009                 | GG                              | AA                | 1945914240               |
| SNP_P3_26165_1005340 | NC_021162.1    | Ca_kabuli_chr03 | 1005340                 | CC                              | AA                | 1945914242               |
| SNP_P3_26166_1005376 | NC_021162.1    | Ca_kabuli_chr03 | 1005376                 | AA                              | GG                | 1945914244               |
| SNP_P3_26167_1005389 | NC_021162.1    | Ca_kabuli_chr03 | 1005389                 | AA                              | GG                | 1945914246               |
| SNP_P3_26168_1005431 | NC_021162.1    | Ca_kabuli_chr03 | 1005431                 | AA                              | GG                | 1945914248               |
| SNP_P3_26169_1005588 | NC_021162.1    | Ca_kabuli_chr03 | 1005588                 | AA                              | CC                | 1945914249               |
| SNP_P3_26170_1037870 | NC_021162.1    | Ca_kabuli_chr03 | 1037870                 | TT                              | GG                | 1945914251               |
| SNP_P3_26172_1038101 | NC_021162.1    | Ca_kabuli_chr03 | 1038101                 | AA                              | GG                | 1945914253               |
| SNP_P3_26173_1038139 | NC_021162.1    | Ca_kabuli_chr03 | 1038139                 | CC                              | TT                | 1945914255               |
| SNP_P3_26174_1038194 | NC_021162.1    | Ca_kabuli_chr03 | 1038194                 | AA                              | GG                | 1945914256               |
| SNP_P3_26175_1038213 | NC_021162.1    | Ca_kabuli_chr03 | 1038213                 | TT                              | CC                | 1945914258               |
| SNP_P3_26176_1054054 | NC_021162.1    | Ca_kabuli_chr03 | 1054054                 | CC                              | AA                | 1945914260               |
| SNP_P3_26177_1062334 | NC_021162.1    | Ca_kabuli_chr03 | 1062334                 | CC                              | TT                | 1945914262               |
| SNP_P3_26178_1062591 | NC_021162.1    | Ca_kabuli_chr03 | 1062591                 | GG                              | AA                | 1945914264               |
| SNP_P3_26179_1062623 | NC_021162.1    | Ca_kabuli_chr03 | 1062623                 | AA                              | CC                | 1945914265               |
| SNP_P3_26180_1062632 | NC_021162.1    | Ca_kabuli_chr03 | 1062632                 | TT                              | CC                | 1945914267               |
| SNP_P3_26181_1062946 | NC_021162.1    | Ca_kabuli_chr03 | 1062946                 | CC                              | TT                | 1945914269               |
| SNP_P3_26182_1063112 | NC_021162.1    | Ca_kabuli_chr03 | 1063112                 | CC                              | TT                | 1945914271               |
| SNP_P3_26183_1063148 | NC_021162.1    | Ca_kabuli_chr03 | 1063148                 | TT                              | CC                | 1945914272               |

| SNPs IDs             | Chromosome IDs | Chromosomes     | Physical positions (bp) | CDC Frontier (Reference genome) | (Pusa 256 & HPNB) | NCBI SNPdb Accession IDs |
|----------------------|----------------|-----------------|-------------------------|---------------------------------|-------------------|--------------------------|
| SNP_P3_26184_1086228 | NC_021162.1    | Ca_kabuli_chr03 | 1086228                 | TT                              | CC                | 1945914274               |
| SNP_P3_26186_1109960 | NC_021162.1    | Ca_kabuli_chr03 | 1109960                 | CC                              | TT                | 1945914276               |
| SNP_P3_26187_1119346 | NC_021162.1    | Ca_kabuli_chr03 | 1119346                 | AA                              | TT                | 1945914278               |
| SNP_P3_26189_1159563 | NC_021162.1    | Ca_kabuli_chr03 | 1159563                 | CC                              | AA                | 1945914280               |
| SNP_P3_26190_1175163 | NC_021162.1    | Ca_kabuli_chr03 | 1175163                 | TT                              | AA                | 1945914281               |
| SNP_P3_26191_1175415 | NC_021162.1    | Ca_kabuli_chr03 | 1175415                 | TT                              | GG                | 1945914283               |
| SNP_P3_26192_1175443 | NC_021162.1    | Ca_kabuli_chr03 | 1175443                 | AA                              | CC                | 1945914285               |
| SNP_P3_26193_1175453 | NC_021162.1    | Ca_kabuli_chr03 | 1175453                 | TT                              | GG                | 1945914287               |
| SNP_P3_26194_1175485 | NC_021162.1    | Ca_kabuli_chr03 | 1175485                 | TT                              | CC                | 1945914288               |
| SNP_P3_26195_1175486 | NC_021162.1    | Ca_kabuli_chr03 | 1175486                 | AA                              | TT                | 1945914290               |
| SNP_P3_26196_1175761 | NC_021162.1    | Ca_kabuli_chr03 | 1175761                 | AA                              | GG                | 1945914292               |
| SNP_P3_26197_1175791 | NC_021162.1    | Ca_kabuli_chr03 | 1175791                 | AA                              | TT                | 1945914294               |
| SNP_P3_26198_1175822 | NC_021162.1    | Ca_kabuli_chr03 | 1175822                 | GG                              | AA                | 1945914296               |
| SNP_P3_26199_1175911 | NC_021162.1    | Ca_kabuli_chr03 | 1175911                 | AA                              | GG                | 1945914297               |
| SNP_P3_26200_1175945 | NC_021162.1    | Ca_kabuli_chr03 | 1175945                 | GG                              | AA                | 1945914299               |
| SNP_P3_26201_1185428 | NC_021162.1    | Ca_kabuli_chr03 | 1185428                 | CC                              | TT                | 1945914301               |
| SNP_P3_26202_1185584 | NC_021162.1    | Ca_kabuli_chr03 | 1185584                 | TT                              | CC                | 1945914303               |
| SNP_P3_26203_1185787 | NC_021162.1    | Ca_kabuli_chr03 | 1185787                 | TT                              | AA                | 1945914304               |
| SNP_P3_26204_1185832 | NC_021162.1    | Ca_kabuli_chr03 | 1185832                 | TT                              | CC                | 1945914306               |
| SNP_P3_26205_1185894 | NC_021162.1    | Ca_kabuli_chr03 | 1185894                 | GG                              | AA                | 1945914308               |
| SNP_P3_26206_1185903 | NC_021162.1    | Ca_kabuli_chr03 | 1185903                 | GG                              | TT                | 1945914310               |
| SNP_P3_26207_1185904 | NC_021162.1    | Ca_kabuli_chr03 | 1185904                 | GG                              | AA                | 1945914312               |
| SNP_P3_26208_1185933 | NC_021162.1    | Ca_kabuli_chr03 | 1185933                 | TT                              | CC                | 1945914313               |
| SNP_P3_26209_1186219 | NC_021162.1    | Ca_kabuli_chr03 | 1186219                 | TT                              | AA                | 1945914315               |
| SNP_P3_26210_1186225 | NC_021162.1    | Ca_kabuli_chr03 | 1186225                 | TT                              | AA                | 1945914317               |
| SNP_P3_26211_1188178 | NC_021162.1    | Ca_kabuli_chr03 | 1188178                 | TT                              | AA                | 1945914319               |
| SNP_P3_26212_1188676 | NC_021162.1    | Ca_kabuli_chr03 | 1188676                 | TT                              | AA                | 1945914320               |
| SNP_P3_26213_1188683 | NC_021162.1    | Ca_kabuli_chr03 | 1188683                 | CC                              | TT                | 1945914322               |
| SNP_P3_26214_1188728 | NC_021162.1    | Ca_kabuli_chr03 | 1188728                 | GG                              | AA                | 1945914324               |
| SNP_P3_26215_1189479 | NC_021162.1    | Ca_kabuli_chr03 | 1189479                 | AA                              | CC                | 1945914326               |
| SNP_P3_26217_1203410 | NC_021162.1    | Ca_kabuli_chr03 | 1203410                 | CC                              | TT                | 1945914328               |
| SNP_P3_26219_1244516 | NC_021162.1    | Ca_kabuli_chr03 | 1244516                 | GG                              | AA                | 1945914329               |
| SNP_P3_26220_1266823 | NC_021162.1    | Ca_kabuli_chr03 | 1266823                 | CC                              | GG                | 1945914331               |
| SNP_P3_26222_1273313 | NC_021162.1    | Ca_kabuli_chr03 | 1273313                 | AA                              | GG                | 1945914333               |
| SNP_P3_26223_1273643 | NC_021162.1    | Ca_kabuli_chr03 | 1273643                 | CC                              | GG                | 1945914335               |
| SNP_P3_26225_1321903 | NC_021162.1    | Ca_kabuli_chr03 | 1321903                 | AA                              | CC                | 1945914336               |
| SNP_P3_26227_1388846 | NC_021162.1    | Ca_kabuli_chr03 | 1388846                 | GG                              | AA                | 1945914338               |
| SNP_P3_26228_1394775 | NC_021162.1    | Ca_kabuli_chr03 | 1394775                 | TT                              | GG                | 1945914340               |
| SNP_P3_26229_1395094 | NC_021162.1    | Ca_kabuli_chr03 | 1395094                 | TT                              | AA                | 1945914342               |
| SNP_P3_26230_1395096 | NC_021162.1    | Ca_kabuli_chr03 | 1395096                 | TT                              | AA                | 1945914344               |
| SNP_P3_26231_1395109 | NC_021162.1    | Ca_kabuli_chr03 | 1395109                 | AA                              | GG                | 1945914345               |
| SNP_P3_26232_1395110 | NC_021162.1    | Ca_kabuli_chr03 | 1395110                 | TT                              | AA                | 1945914347               |

| SNPs IDs             | Chromosome IDs | Chromosomes     | Physical positions (bp) | CDC Frontier (Reference genome) | (Pusa 256 & HPNB) | NCBI SNPdb Accession IDs |
|----------------------|----------------|-----------------|-------------------------|---------------------------------|-------------------|--------------------------|
| SNP_P3_26233_1395121 | NC_021162.1    | Ca_kabuli_chr03 | 1395121                 | AA                              | GG                | 1945914349               |
| SNP_P3_26234_1395135 | NC_021162.1    | Ca_kabuli_chr03 | 1395135                 | CC                              | TT                | 1945914351               |
| SNP_P3_26235_1395392 | NC_021162.1    | Ca_kabuli_chr03 | 1395392                 | CC                              | AA                | 1945914352               |
| SNP_P3_26236_1395397 | NC_021162.1    | Ca_kabuli_chr03 | 1395397                 | TT                              | AA                | 1945914354               |
| SNP_P3_26237_1395398 | NC_021162.1    | Ca_kabuli_chr03 | 1395398                 | AA                              | CC                | 1945914356               |
| SNP_P3_26238_1395399 | NC_021162.1    | Ca_kabuli_chr03 | 1395399                 | TT                              | AA                | 1945914358               |
| SNP_P3_26239_1395400 | NC_021162.1    | Ca_kabuli_chr03 | 1395400                 | GG                              | TT                | 1945914360               |
| SNP_P3_26240_1395407 | NC_021162.1    | Ca_kabuli_chr03 | 1395407                 | GG                              | TT                | 1945914361               |
| SNP_P3_26241_1395482 | NC_021162.1    | Ca_kabuli_chr03 | 1395482                 | CC                              | TT                | 1945914363               |
| SNP_P3_26242_1395580 | NC_021162.1    | Ca_kabuli_chr03 | 1395580                 | GG                              | TT                | 1945914365               |
| SNP_P3_26243_1395805 | NC_021162.1    | Ca_kabuli_chr03 | 1395805                 | AA                              | CC                | 1945914367               |
| SNP_P3_26244_1395826 | NC_021162.1    | Ca_kabuli_chr03 | 1395826                 | TT                              | GG                | 1945914368               |
| SNP_P3_26245_1396142 | NC_021162.1    | Ca_kabuli_chr03 | 1396142                 | AA                              | GG                | 1945914370               |
| SNP_P3_26246_1396167 | NC_021162.1    | Ca_kabuli_chr03 | 1396167                 | TT                              | GG                | 1945914372               |
| SNP_P3_26247_1396177 | NC_021162.1    | Ca_kabuli_chr03 | 1396177                 | TT                              | GG                | 1945914374               |
| SNP_P3_26248_1396182 | NC_021162.1    | Ca_kabuli_chr03 | 1396182                 | AA                              | GG                | 1945914376               |
| SNP_P3_26249_1396194 | NC_021162.1    | Ca_kabuli_chr03 | 1396194                 | TT                              | GG                | 1945914377               |
| SNP_P3_26250_1396580 | NC_021162.1    | Ca_kabuli_chr03 | 1396580                 | CC                              | TT                | 1945914379               |
| SNP_P3_26251_1396607 | NC_021162.1    | Ca_kabuli_chr03 | 1396607                 | GG                              | AA                | 1945914381               |
| SNP_P3_26252_1396966 | NC_021162.1    | Ca_kabuli_chr03 | 1396966                 | AA                              | TT                | 1945914383               |
| SNP_P3_26253_1396994 | NC_021162.1    | Ca_kabuli_chr03 | 1396994                 | AA                              | GG                | 1945914384               |
| SNP_P3_26254_1397023 | NC_021162.1    | Ca_kabuli_chr03 | 1397023                 | AA                              | GG                | 1945914386               |
| SNP_P3_26255_1408041 | NC_021162.1    | Ca_kabuli_chr03 | 1408041                 | TT                              | AA                | 1945914388               |
| SNP_P3_26256_1450685 | NC_021162.1    | Ca_kabuli_chr03 | 1450685                 | GG                              | TT                | 1945914390               |
| SNP_P3_26257_1450898 | NC_021162.1    | Ca_kabuli_chr03 | 1450898                 | CC                              | TT                | 1945914392               |
| SNP_P3_26258_1450984 | NC_021162.1    | Ca_kabuli_chr03 | 1450984                 | AA                              | GG                | 1945914393               |
| SNP_P3_26259_1452268 | NC_021162.1    | Ca_kabuli_chr03 | 1452268                 | TT                              | AA                | 1945914395               |
| SNP_P3_26260_1452269 | NC_021162.1    | Ca_kabuli_chr03 | 1452269                 | CC                              | AA                | 1945914397               |
| SNP_P3_26261_1454878 | NC_021162.1    | Ca_kabuli_chr03 | 1454878                 | AA                              | GG                | 1945914399               |
| SNP_P3_26262_1458366 | NC_021162.1    | Ca_kabuli_chr03 | 1458366                 | GG                              | AA                | 1945914400               |
| SNP_P3_26263_1464172 | NC_021162.1    | Ca_kabuli_chr03 | 1464172                 | AA                              | GG                | 1945914402               |
| SNP_P3_26264_1468205 | NC_021162.1    | Ca_kabuli_chr03 | 1468205                 | GG                              | CC                | 1945914404               |
| SNP_P3_26265_1473611 | NC_021162.1    | Ca_kabuli_chr03 | 1473611                 | AA                              | GG                | 1945914406               |
| SNP_P3_26266_1476372 | NC_021162.1    | Ca_kabuli_chr03 | 1476372                 | AA                              | GG                | 1945914408               |
| SNP_P3_26267_1477916 | NC_021162.1    | Ca_kabuli_chr03 | 1477916                 | AA                              | TT                | 1945914409               |
| SNP_P3_26268_1479127 | NC_021162.1    | Ca_kabuli_chr03 | 1479127                 | AA                              | GG                | 1945914411               |
| SNP_P3_26272_1492921 | NC_021162.1    | Ca_kabuli_chr03 | 1492921                 | CC                              | TT                | 1945914413               |
| SNP_P3_26273_1506092 | NC_021162.1    | Ca_kabuli_chr03 | 1506092                 | GG                              | AA                | 1945914415               |
| SNP_P3_26274_1511250 | NC_021162.1    | Ca_kabuli_chr03 | 1511250                 | AA                              | GG                | 1945914416               |
| SNP_P3_26275_1511279 | NC_021162.1    | Ca_kabuli_chr03 | 1511279                 | TT                              | CC                | 1945914418               |
| SNP_P3_26276_1511650 | NC_021162.1    | Ca_kabuli_chr03 | 1511650                 | CC                              | TT                | 1945914420               |
| SNP_P3_26277_1511707 | NC_021162.1    | Ca_kabuli_chr03 | 1511707                 | AA                              | GG                | 1945914422               |



| SNPs IDs             | Chromosome IDs | Chromosomes     | Physical positions (bp) | CDC Frontier (Reference genome) | (Pusa 256 & HPNB) | NCBI SNPdb Accession IDs |
|----------------------|----------------|-----------------|-------------------------|---------------------------------|-------------------|--------------------------|
| SNP_P3_26278_1511782 | NC_021162.1    | Ca_kabuli_chr03 | 1511782                 | CC                              | AA                | 1945914423               |
| SNP_P3_26279_1512045 | NC_021162.1    | Ca_kabuli_chr03 | 1512045                 | TT                              | CC                | 1945914425               |
| SNP_P3_26280_1532706 | NC_021162.1    | Ca_kabuli_chr03 | 1532706                 | TT                              | CC                | 1945914427               |
| SNP_P3_26281_1532707 | NC_021162.1    | Ca_kabuli_chr03 | 1532707                 | GG                              | TT                | 1945914429               |
| SNP_P3_26282_1532734 | NC_021162.1    | Ca_kabuli_chr03 | 1532734                 | TT                              | AA                | 1945914431               |
| SNP_P3_26283_1532808 | NC_021162.1    | Ca_kabuli_chr03 | 1532808                 | AA                              | CC                | 1945914432               |
| SNP_P3_26284_1532809 | NC_021162.1    | Ca_kabuli_chr03 | 1532809                 | GG                              | AA                | 1945914434               |
| SNP_P3_26285_1532866 | NC_021162.1    | Ca_kabuli_chr03 | 1532866                 | AA                              | CC                | 1945914436               |
| SNP_P3_26286_1532918 | NC_021162.1    | Ca_kabuli_chr03 | 1532918                 | CC                              | AA                | 1945914438               |
| SNP_P3_26287_1533019 | NC_021162.1    | Ca_kabuli_chr03 | 1533019                 | GG                              | AA                | 1945914439               |
| SNP_P3_26288_1533039 | NC_021162.1    | Ca_kabuli_chr03 | 1533039                 | AA                              | GG                | 1945914441               |
| SNP_P3_26289_1533044 | NC_021162.1    | Ca_kabuli_chr03 | 1533044                 | AA                              | GG                | 1945914443               |
| SNP_P3_26290_1533063 | NC_021162.1    | Ca_kabuli_chr03 | 1533063                 | TT                              | GG                | 1945914445               |
| SNP_P3_26291_1533090 | NC_021162.1    | Ca_kabuli_chr03 | 1533090                 | CC                              | TT                | 1945914447               |
| SNP_P3_26292_1533220 | NC_021162.1    | Ca_kabuli_chr03 | 1533220                 | CC                              | TT                | 1945914448               |
| SNP_P3_26293_1533228 | NC_021162.1    | Ca_kabuli_chr03 | 1533228                 | AA                              | CC                | 1945914450               |
| SNP_P3_26294_1533230 | NC_021162.1    | Ca_kabuli_chr03 | 1533230                 | TT                              | AA                | 1945914452               |
| SNP_P3_26295_1533266 | NC_021162.1    | Ca_kabuli_chr03 | 1533266                 | GG                              | CC                | 1945914454               |
| SNP_P3_26296_1533317 | NC_021162.1    | Ca_kabuli_chr03 | 1533317                 | CC                              | AA                | 1945914456               |
| SNP_P3_26297_1533319 | NC_021162.1    | Ca_kabuli_chr03 | 1533319                 | AA                              | GG                | 1945914457               |
| SNP_P3_26298_1533341 | NC_021162.1    | Ca_kabuli_chr03 | 1533341                 | CC                              | TT                | 1945914459               |
| SNP_P3_26300_1533410 | NC_021162.1    | Ca_kabuli_chr03 | 1533410                 | GG                              | AA                | 1945914461               |
| SNP_P3_26301_1533560 | NC_021162.1    | Ca_kabuli_chr03 | 1533560                 | TT                              | CC                | 1945914463               |
| SNP_P3_26302_1533706 | NC_021162.1    | Ca_kabuli_chr03 | 1533706                 | CC                              | GG                | 1945914464               |
| SNP_P3_26303_1533711 | NC_021162.1    | Ca_kabuli_chr03 | 1533711                 | TT                              | CC                | 1945914466               |
| SNP_P3_26304_1533885 | NC_021162.1    | Ca_kabuli_chr03 | 1533885                 | TT                              | CC                | 1945914468               |
| SNP_P3_26305_1533947 | NC_021162.1    | Ca_kabuli_chr03 | 1533947                 | CC                              | TT                | 1945914470               |
| SNP_P3_26306_1533974 | NC_021162.1    | Ca_kabuli_chr03 | 1533974                 | GG                              | AA                | 1945914472               |
| SNP_P3_26307_1533975 | NC_021162.1    | Ca_kabuli_chr03 | 1533975                 | AA                              | GG                | 1945914473               |
| SNP_P3_26309_1534140 | NC_021162.1    | Ca_kabuli_chr03 | 1534140                 | AA                              | GG                | 1945914475               |
| SNP_P3_26310_1534278 | NC_021162.1    | Ca_kabuli_chr03 | 1534278                 | AA                              | CC                | 1945914477               |
| SNP_P3_26311_1534371 | NC_021162.1    | Ca_kabuli_chr03 | 1534371                 | TT                              | AA                | 1945914479               |
| SNP_P3_26312_1534392 | NC_021162.1    | Ca_kabuli_chr03 | 1534392                 | GG                              | AA                | 1945914480               |
| SNP_P3_26313_1534419 | NC_021162.1    | Ca_kabuli_chr03 | 1534419                 | CC                              | TT                | 1945914482               |
| SNP_P3_26314_1534459 | NC_021162.1    | Ca_kabuli_chr03 | 1534459                 | TT                              | AA                | 1945914484               |
| SNP_P3_26315_1534509 | NC_021162.1    | Ca_kabuli_chr03 | 1534509                 | GG                              | AA                | 1945914486               |
| SNP_P3_26316_1534631 | NC_021162.1    | Ca_kabuli_chr03 | 1534631                 | AA                              | CC                | 1945914488               |
| SNP_P3_26317_1534651 | NC_021162.1    | Ca_kabuli_chr03 | 1534651                 | CC                              | TT                | 1945914489               |
| SNP_P3_26318_1534678 | NC_021162.1    | Ca_kabuli_chr03 | 1534678                 | AA                              | GG                | 1945914491               |
| SNP_P3_26319_1534763 | NC_021162.1    | Ca_kabuli_chr03 | 1534763                 | CC                              | TT                | 1945914493               |
| SNP_P3_26320_1534806 | NC_021162.1    | Ca_kabuli_chr03 | 1534806                 | GG                              | AA                | 1945914495               |
| SNP_P3_26321_1535082 | NC_021162.1    | Ca_kabuli_chr03 | 1535082                 | AA                              | GG                | 1945914496               |

| SNPs IDs             | Chromosome IDs | Chromosomes     | Physical positions (bp) | CDC Frontier (Reference genome) | (Pusa 256 & HPNB) | NCBI SNPdb Accession IDs |
|----------------------|----------------|-----------------|-------------------------|---------------------------------|-------------------|--------------------------|
| SNP_P3_26322_1549454 | NC_021162.1    | Ca_kabuli_chr03 | 1549454                 | AA                              | TT                | 1945914498               |
| SNP_P3_26323_1570142 | NC_021162.1    | Ca_kabuli_chr03 | 1570142                 | CC                              | AA                | 1945914500               |
| SNP_P3_26324_1599082 | NC_021162.1    | Ca_kabuli_chr03 | 1599082                 | GG                              | AA                | 1945914502               |
| SNP_P3_26325_1708576 | NC_021162.1    | Ca_kabuli_chr03 | 1708576                 | AA                              | TT                | 1945914504               |
| SNP_P3_26326_1709723 | NC_021162.1    | Ca_kabuli_chr03 | 1709723                 | AA                              | GG                | 1945914505               |
| SNP_P3_26327_1718235 | NC_021162.1    | Ca_kabuli_chr03 | 1718235                 | GG                              | TT                | 1945914507               |
| SNP_P3_26329_1755478 | NC_021162.1    | Ca_kabuli_chr03 | 1755478                 | TT                              | CC                | 1945914509               |
| SNP_P3_26330_1774946 | NC_021162.1    | Ca_kabuli_chr03 | 1774946                 | AA                              | GG                | 1945914511               |
| SNP_P3_26331_1796233 | NC_021162.1    | Ca_kabuli_chr03 | 1796233                 | CC                              | TT                | 1945914512               |
| SNP_P3_26332_1796238 | NC_021162.1    | Ca_kabuli_chr03 | 1796238                 | TT                              | CC                | 1945914514               |
| SNP_P3_26333_1796242 | NC_021162.1    | Ca_kabuli_chr03 | 1796242                 | CC                              | TT                | 1945914516               |
| SNP_P3_26334_1796251 | NC_021162.1    | Ca_kabuli_chr03 | 1796251                 | AA                              | GG                | 1945914518               |
| SNP_P3_26335_1796272 | NC_021162.1    | Ca_kabuli_chr03 | 1796272                 | CC                              | TT                | 1945914520               |
| SNP_P3_26336_1796370 | NC_021162.1    | Ca_kabuli_chr03 | 1796370                 | AA                              | CC                | 1945914521               |
| SNP_P3_26337_1796373 | NC_021162.1    | Ca_kabuli_chr03 | 1796373                 | GG                              | AA                | 1945914523               |
| SNP_P3_26338_1796380 | NC_021162.1    | Ca_kabuli_chr03 | 1796380                 | CC                              | TT                | 1945914525               |
| SNP_P3_26339_1796425 | NC_021162.1    | Ca_kabuli_chr03 | 1796425                 | CC                              | TT                | 1945914527               |
| SNP_P3_26340_1796514 | NC_021162.1    | Ca_kabuli_chr03 | 1796514                 | TT                              | GG                | 1945914529               |
| SNP_P3_26341_1796699 | NC_021162.1    | Ca_kabuli_chr03 | 1796699                 | TT                              | CC                | 1945914530               |
| SNP_P3_26342_1796717 | NC_021162.1    | Ca_kabuli_chr03 | 1796717                 | AA                              | GG                | 1945914532               |
| SNP_P3_26343_1819919 | NC_021162.1    | Ca_kabuli_chr03 | 1819919                 | TT                              | CC                | 1945914534               |
| SNP_P3_26344_1824967 | NC_021162.1    | Ca_kabuli_chr03 | 1824967                 | TT                              | CC                | 1945914536               |
| SNP_P3_26345_1828968 | NC_021162.1    | Ca_kabuli_chr03 | 1828968                 | AA                              | GG                | 1945914537               |
| SNP_P3_26346_1848658 | NC_021162.1    | Ca_kabuli_chr03 | 1848658                 | GG                              | AA                | 1945914539               |
| SNP_P3_26347_1848668 | NC_021162.1    | Ca_kabuli_chr03 | 1848668                 | GG                              | TT                | 1945914541               |
| SNP_P3_26348_1849013 | NC_021162.1    | Ca_kabuli_chr03 | 1849013                 | AA                              | GG                | 1945914543               |
| SNP_P3_26349_1849023 | NC_021162.1    | Ca_kabuli_chr03 | 1849023                 | TT                              | AA                | 1945914545               |
| SNP_P3_26350_1924159 | NC_021162.1    | Ca_kabuli_chr03 | 1924159                 | AA                              | GG                | 1945914546               |
| SNP_P3_26351_1924160 | NC_021162.1    | Ca_kabuli_chr03 | 1924160                 | AA                              | GG                | 1945914548               |
| SNP_P3_26352_1950475 | NC_021162.1    | Ca_kabuli_chr03 | 1950475                 | GG                              | AA                | 1945914550               |
| SNP_P3_26354_1956229 | NC_021162.1    | Ca_kabuli_chr03 | 1956229                 | GG                              | AA                | 1945914552               |
| SNP_P3_26357_1966084 | NC_021162.1    | Ca_kabuli_chr03 | 1966084                 | CC                              | AA                | 1945914553               |
| SNP_P3_26358_2043789 | NC_021162.1    | Ca_kabuli_chr03 | 2043789                 | AA                              | CC                | 1945914555               |
| SNP_P3_26359_2044263 | NC_021162.1    | Ca_kabuli_chr03 | 2044263                 | CC                              | TT                | 1945914557               |
| SNP_P3_26360_2052932 | NC_021162.1    | Ca_kabuli_chr03 | 2052932                 | GG                              | AA                | 1945914559               |
| SNP_P3_26361_2058883 | NC_021162.1    | Ca_kabuli_chr03 | 2058883                 | AA                              | TT                | 1945914561               |
| SNP_P3_26362_2122350 | NC_021162.1    | Ca_kabuli_chr03 | 2122350                 | CC                              | TT                | 1945914562               |
| SNP_P3_26363_2137756 | NC_021162.1    | Ca_kabuli_chr03 | 2137756                 | AA                              | TT                | 1945914564               |
| SNP_P3_26364_2138412 | NC_021162.1    | Ca_kabuli_chr03 | 2138412                 | AA                              | CC                | 1945914566               |
| SNP_P3_26365_2138484 | NC_021162.1    | Ca_kabuli_chr03 | 2138484                 | CC                              | TT                | 1945914568               |
| SNP_P3_26366_2150569 | NC_021162.1    | Ca_kabuli_chr03 | 2150569                 | GG                              | AA                | 1945914569               |
| SNP_P3_26367_2182313 | NC_021162.1    | Ca_kabuli_chr03 | 2182313                 | AA                              | GG                | 1945914571               |

| SNPs IDs             | Chromosome IDs | Chromosomes     | Physical positions (bp) | CDC Frontier (Reference genome) | (Pusa 256 & HPNB) | NCBI SNPdb Accession IDs |
|----------------------|----------------|-----------------|-------------------------|---------------------------------|-------------------|--------------------------|
| SNP_P3_26368_2194217 | NC_021162.1    | Ca_kabuli_chr03 | 2194217                 | GG                              | TT                | 1945914573               |
| SNP_P3_26369_2194670 | NC_021162.1    | Ca_kabuli_chr03 | 2194670                 | TT                              | CC                | 1945914575               |
| SNP_P3_26370_2194692 | NC_021162.1    | Ca_kabuli_chr03 | 2194692                 | GG                              | TT                | 1945914577               |
| SNP_P3_26371_2194715 | NC_021162.1    | Ca_kabuli_chr03 | 2194715                 | TT                              | AA                | 1945914578               |
| SNP_P3_26372_2194716 | NC_021162.1    | Ca_kabuli_chr03 | 2194716                 | TT                              | GG                | 1945914580               |
| SNP_P3_26373_2194738 | NC_021162.1    | Ca_kabuli_chr03 | 2194738                 | TT                              | CC                | 1945914582               |
| SNP_P3_26374_2194834 | NC_021162.1    | Ca_kabuli_chr03 | 2194834                 | TT                              | CC                | 1945914584               |
| SNP_P3_26375_2194962 | NC_021162.1    | Ca_kabuli_chr03 | 2194962                 | AA                              | CC                | 1945914585               |
| SNP_P3_26376_2210514 | NC_021162.1    | Ca_kabuli_chr03 | 2210514                 | TT                              | GG                | 1945914587               |
| SNP_P3_26377_2210541 | NC_021162.1    | Ca_kabuli_chr03 | 2210541                 | TT                              | CC                | 1945914589               |
| SNP_P3_26378_2235231 | NC_021162.1    | Ca_kabuli_chr03 | 2235231                 | TT                              | AA                | 1945914591               |
| SNP_P3_26379_2282127 | NC_021162.1    | Ca_kabuli_chr03 | 2282127                 | TT                              | AA                | 1945914593               |
| SNP_P3_26380_2382525 | NC_021162.1    | Ca_kabuli_chr03 | 2382525                 | CC                              | AA                | 1945914594               |
| SNP_P3_26381_2382528 | NC_021162.1    | Ca_kabuli_chr03 | 2382528                 | TT                              | CC                | 1945914596               |
| SNP_P3_26382_2382590 | NC_021162.1    | Ca_kabuli_chr03 | 2382590                 | AA                              | CC                | 1945914598               |
| SNP_P3_26383_2382609 | NC_021162.1    | Ca_kabuli_chr03 | 2382609                 | GG                              | TT                | 1945914600               |
| SNP_P3_26384_2382636 | NC_021162.1    | Ca_kabuli_chr03 | 2382636                 | TT                              | AA                | 1945914601               |
| SNP_P3_26385_2382659 | NC_021162.1    | Ca_kabuli_chr03 | 2382659                 | TT                              | AA                | 1945914603               |
| SNP_P3_26386_2431480 | NC_021162.1    | Ca_kabuli_chr03 | 2431480                 | GG                              | AA                | 1945914605               |
| SNP_P3_26387_2473219 | NC_021162.1    | Ca_kabuli_chr03 | 2473219                 | AA                              | GG                | 1945914607               |
| SNP_P3_26388_2485616 | NC_021162.1    | Ca_kabuli_chr03 | 2485616                 | AA                              | GG                | 1945914609               |
| SNP_P3_26389_2489901 | NC_021162.1    | Ca_kabuli_chr03 | 2489901                 | CC                              | TT                | 1945914610               |
| SNP_P3_26390_2495540 | NC_021162.1    | Ca_kabuli_chr03 | 2495540                 | TT                              | CC                | 1945914612               |
| SNP_P3_26391_2496315 | NC_021162.1    | Ca_kabuli_chr03 | 2496315                 | TT                              | AA                | 1945914614               |
| SNP_P3_26392_2496354 | NC_021162.1    | Ca_kabuli_chr03 | 2496354                 | GG                              | AA                | 1945914616               |
| SNP_P3_26393_2496420 | NC_021162.1    | Ca_kabuli_chr03 | 2496420                 | TT                              | AA                | 1945914617               |
| SNP_P3_26394_2496426 | NC_021162.1    | Ca_kabuli_chr03 | 2496426                 | TT                              | AA                | 1945914619               |
| SNP_P3_26395_2496563 | NC_021162.1    | Ca_kabuli_chr03 | 2496563                 | GG                              | CC                | 1945914621               |
| SNP_P3_26396_2496581 | NC_021162.1    | Ca_kabuli_chr03 | 2496581                 | GG                              | CC                | 1945914623               |
| SNP_P3_26397_2496621 | NC_021162.1    | Ca_kabuli_chr03 | 2496621                 | CC                              | TT                | 1945914625               |
| SNP_P3_26398_2522535 | NC_021162.1    | Ca_kabuli_chr03 | 2522535                 | CC                              | GG                | 1945914626               |
| SNP_P3_26399_2527313 | NC_021162.1    | Ca_kabuli_chr03 | 2527313                 | AA                              | CC                | 1945914628               |
| SNP_P3_26400_2529197 | NC_021162.1    | Ca_kabuli_chr03 | 2529197                 | GG                              | CC                | 1945914630               |
| SNP_P3_26401_2530286 | NC_021162.1    | Ca_kabuli_chr03 | 2530286                 | TT                              | GG                | 1945914632               |
| SNP_P3_26402_2564082 | NC_021162.1    | Ca_kabuli_chr03 | 2564082                 | CC                              | TT                | 1945914634               |
| SNP_P3_26403_2565918 | NC_021162.1    | Ca_kabuli_chr03 | 2565918                 | TT                              | GG                | 1945914635               |
| SNP_P3_26404_2571166 | NC_021162.1    | Ca_kabuli_chr03 | 2571166                 | AA                              | TT                | 1945914637               |
| SNP_P3_26405_2571335 | NC_021162.1    | Ca_kabuli_chr03 | 2571335                 | AA                              | GG                | 1945914639               |
| SNP_P3_26406_2571339 | NC_021162.1    | Ca_kabuli_chr03 | 2571339                 | CC                              | TT                | 1945914641               |
| SNP_P3_26407_2571487 | NC_021162.1    | Ca_kabuli_chr03 | 2571487                 | AA                              | TT                | 1945914642               |
| SNP_P3_26408_2571517 | NC_021162.1    | Ca_kabuli_chr03 | 2571517                 | AA                              | CC                | 1945914644               |
| SNP_P3_26409_2571572 | NC_021162.1    | Ca_kabuli_chr03 | 2571572                 | CC                              | TT                | 1945914646               |

| SNPs IDs             | Chromosome IDs | Chromosomes     | Physical positions (bp) | CDC Frontier (Reference genome) | (Pusa 256 & HPNB) | NCBI SNPdb Accession IDs |
|----------------------|----------------|-----------------|-------------------------|---------------------------------|-------------------|--------------------------|
| SNP_P3_26410_2573682 | NC_021162.1    | Ca_kabuli_chr03 | 2573682                 | TT                              | AA                | 1945914648               |
| SNP_P3_26411_2573694 | NC_021162.1    | Ca_kabuli_chr03 | 2573694                 | AA                              | CC                | 1945914650               |
| SNP_P3_26412_2573705 | NC_021162.1    | Ca_kabuli_chr03 | 2573705                 | GG                              | AA                | 1945914651               |
| SNP_P3_26413_2573707 | NC_021162.1    | Ca_kabuli_chr03 | 2573707                 | GG                              | AA                | 1945914653               |
| SNP_P3_26414_2573753 | NC_021162.1    | Ca_kabuli_chr03 | 2573753                 | CC                              | GG                | 1945914655               |
| SNP_P3_26415_2573763 | NC_021162.1    | Ca_kabuli_chr03 | 2573763                 | TT                              | GG                | 1945914657               |
| SNP_P3_26417_2631149 | NC_021162.1    | Ca_kabuli_chr03 | 2631149                 | TT                              | CC                | 1945914658               |
| SNP_P3_26418_2631150 | NC_021162.1    | Ca_kabuli_chr03 | 2631150                 | AA                              | GG                | 1945914660               |
| SNP_P3_26419_2631164 | NC_021162.1    | Ca_kabuli_chr03 | 2631164                 | GG                              | AA                | 1945914662               |
| SNP_P3_26420_2631188 | NC_021162.1    | Ca_kabuli_chr03 | 2631188                 | GG                              | AA                | 1945914664               |
| SNP_P3_26421_2631205 | NC_021162.1    | Ca_kabuli_chr03 | 2631205                 | AA                              | GG                | 1945914666               |
| SNP_P3_26422_2631222 | NC_021162.1    | Ca_kabuli_chr03 | 2631222                 | GG                              | AA                | 1945914667               |
| SNP_P3_26423_2631237 | NC_021162.1    | Ca_kabuli_chr03 | 2631237                 | GG                              | TT                | 1945914669               |
| SNP_P3_26424_2631241 | NC_021162.1    | Ca_kabuli_chr03 | 2631241                 | CC                              | GG                | 1945914671               |
| SNP_P3_26425_2631250 | NC_021162.1    | Ca_kabuli_chr03 | 2631250                 | CC                              | TT                | 1945914673               |
| SNP_P3_26426_2631466 | NC_021162.1    | Ca_kabuli_chr03 | 2631466                 | TT                              | CC                | 1945914674               |
| SNP_P3_26427_2631514 | NC_021162.1    | Ca_kabuli_chr03 | 2631514                 | CC                              | TT                | 1945914676               |
| SNP_P3_26428_2631553 | NC_021162.1    | Ca_kabuli_chr03 | 2631553                 | GG                              | AA                | 1945914678               |
| SNP_P3_26429_2631569 | NC_021162.1    | Ca_kabuli_chr03 | 2631569                 | AA                              | GG                | 1945914680               |
| SNP_P3_26430_2631582 | NC_021162.1    | Ca_kabuli_chr03 | 2631582                 | TT                              | GG                | 1945914682               |
| SNP_P3_26431_2631589 | NC_021162.1    | Ca_kabuli_chr03 | 2631589                 | GG                              | AA                | 1945914683               |
| SNP_P3_26432_2631593 | NC_021162.1    | Ca_kabuli_chr03 | 2631593                 | TT                              | CC                | 1945914685               |
| SNP_P3_26433_2648940 | NC_021162.1    | Ca_kabuli_chr03 | 2648940                 | TT                              | CC                | 1945914687               |
| SNP_P3_26434_2648942 | NC_021162.1    | Ca_kabuli_chr03 | 2648942                 | GG                              | AA                | 1945914689               |
| SNP_P3_26435_2686345 | NC_021162.1    | Ca_kabuli_chr03 | 2686345                 | GG                              | AA                | 1945914691               |
| SNP_P3_26436_2700701 | NC_021162.1    | Ca_kabuli_chr03 | 2700701                 | GG                              | AA                | 1945914692               |
| SNP_P3_26437_2717285 | NC_021162.1    | Ca_kabuli_chr03 | 2717285                 | GG                              | TT                | 1945914694               |
| SNP_P3_26438_2717674 | NC_021162.1    | Ca_kabuli_chr03 | 2717674                 | GG                              | AA                | 1945914696               |
| SNP_P3_26439_2717687 | NC_021162.1    | Ca_kabuli_chr03 | 2717687                 | AA                              | GG                | 1945914698               |
| SNP_P3_26440_2732539 | NC_021162.1    | Ca_kabuli_chr03 | 2732539                 | CC                              | TT                | 1945914699               |
| SNP_P3_26441_2736617 | NC_021162.1    | Ca_kabuli_chr03 | 2736617                 | AA                              | GG                | 1945914701               |
| SNP_P3_26442_2736640 | NC_021162.1    | Ca_kabuli_chr03 | 2736640                 | TT                              | CC                | 1945914703               |
| SNP_P3_26443_2740232 | NC_021162.1    | Ca_kabuli_chr03 | 2740232                 | AA                              | GG                | 1945914705               |
| SNP_P3_26444_2751845 | NC_021162.1    | Ca_kabuli_chr03 | 2751845                 | AA                              | TT                | 1945914707               |
| SNP_P3_26445_2756933 | NC_021162.1    | Ca_kabuli_chr03 | 2756933                 | TT                              | AA                | 1945914708               |
| SNP_P3_26446_2762293 | NC_021162.1    | Ca_kabuli_chr03 | 2762293                 | TT                              | AA                | 1945914710               |
| SNP_P3_26447_2767457 | NC_021162.1    | Ca_kabuli_chr03 | 2767457                 | CC                              | TT                | 1945914712               |
| SNP_P3_26448_2767481 | NC_021162.1    | Ca_kabuli_chr03 | 2767481                 | TT                              | GG                | 1945914714               |
| SNP_P3_26449_2767594 | NC_021162.1    | Ca_kabuli_chr03 | 2767594                 | CC                              | TT                | 1945914715               |
| SNP_P3_26450_2767595 | NC_021162.1    | Ca_kabuli_chr03 | 2767595                 | GG                              | AA                | 1945914717               |
| SNP_P3_26451_2767612 | NC_021162.1    | Ca_kabuli_chr03 | 2767612                 | TT                              | CC                | 1945914719               |
| SNP_P3_26452_2767616 | NC_021162.1    | Ca_kabuli_chr03 | 2767616                 | CC                              | TT                | 1945914721               |

| SNPs IDs             | Chromosome IDs | Chromosomes     | Physical positions (bp) | CDC Frontier (Reference genome) | (Pusa 256 & HPNB) | NCBI SNPdb Accession IDs |
|----------------------|----------------|-----------------|-------------------------|---------------------------------|-------------------|--------------------------|
| SNP_P3_26453_2767747 | NC_021162.1    | Ca_kabuli_chr03 | 2767747                 | CC                              | TT                | 1945914723               |
| SNP_P3_26454_2767763 | NC_021162.1    | Ca_kabuli_chr03 | 2767763                 | GG                              | AA                | 1945914724               |
| SNP_P3_26455_2777212 | NC_021162.1    | Ca_kabuli_chr03 | 2777212                 | GG                              | AA                | 1945914726               |
| SNP_P3_26456_2777291 | NC_021162.1    | Ca_kabuli_chr03 | 2777291                 | TT                              | CC                | 1945914728               |
| SNP_P3_26457_2792381 | NC_021162.1    | Ca_kabuli_chr03 | 2792381                 | CC                              | TT                | 1945914730               |
| SNP_P3_26458_2795090 | NC_021162.1    | Ca_kabuli_chr03 | 2795090                 | TT                              | AA                | 1945914731               |
| SNP_P3_26460_2814666 | NC_021162.1    | Ca_kabuli_chr03 | 2814666                 | TT                              | GG                | 1945914733               |
| SNP_P3_26461_2815979 | NC_021162.1    | Ca_kabuli_chr03 | 2815979                 | TT                              | AA                | 1945914735               |
| SNP_P3_26462_2816925 | NC_021162.1    | Ca_kabuli_chr03 | 2816925                 | CC                              | AA                | 1945914737               |
| SNP_P3_26464_2854997 | NC_021162.1    | Ca_kabuli_chr03 | 2854997                 | AA                              | GG                | 1945914739               |
| SNP_P3_26465_2855217 | NC_021162.1    | Ca_kabuli_chr03 | 2855217                 | GG                              | AA                | 1945914740               |
| SNP_P3_26466_2855225 | NC_021162.1    | Ca_kabuli_chr03 | 2855225                 | CC                              | TT                | 1945914742               |
| SNP_P3_26467_2855246 | NC_021162.1    | Ca_kabuli_chr03 | 2855246                 | GG                              | CC                | 1945914744               |
| SNP_P3_26468_2855268 | NC_021162.1    | Ca_kabuli_chr03 | 2855268                 | CC                              | TT                | 1945914746               |
| SNP_P3_26469_2855322 | NC_021162.1    | Ca_kabuli_chr03 | 2855322                 | TT                              | CC                | 1945914747               |
| SNP_P3_26470_2855344 | NC_021162.1    | Ca_kabuli_chr03 | 2855344                 | AA                              | GG                | 1945914749               |
| SNP_P3_26471_2855360 | NC_021162.1    | Ca_kabuli_chr03 | 2855360                 | CC                              | TT                | 1945914751               |
| SNP_P3_26472_2855379 | NC_021162.1    | Ca_kabuli_chr03 | 2855379                 | TT                              | GG                | 1945914753               |
| SNP_P3_26473_2855383 | NC_021162.1    | Ca_kabuli_chr03 | 2855383                 | AA                              | TT                | 1945914755               |
| SNP_P3_26474_2855408 | NC_021162.1    | Ca_kabuli_chr03 | 2855408                 | AA                              | GG                | 1945914756               |
| SNP_P3_26475_2855431 | NC_021162.1    | Ca_kabuli_chr03 | 2855431                 | AA                              | GG                | 1945914758               |
| SNP_P3_26476_2855441 | NC_021162.1    | Ca_kabuli_chr03 | 2855441                 | AA                              | GG                | 1945914760               |
| SNP_P3_26477_2855486 | NC_021162.1    | Ca_kabuli_chr03 | 2855486                 | TT                              | GG                | 1945914762               |
| SNP_P3_26478_2855488 | NC_021162.1    | Ca_kabuli_chr03 | 2855488                 | AA                              | GG                | 1945914763               |
| SNP_P3_26479_2855512 | NC_021162.1    | Ca_kabuli_chr03 | 2855512                 | AA                              | TT                | 1945914765               |
| SNP_P3_26480_2855532 | NC_021162.1    | Ca_kabuli_chr03 | 2855532                 | AA                              | GG                | 1945914767               |
| SNP_P3_26481_2855540 | NC_021162.1    | Ca_kabuli_chr03 | 2855540                 | AA                              | TT                | 1945914769               |
| SNP_P3_26482_2855542 | NC_021162.1    | Ca_kabuli_chr03 | 2855542                 | CC                              | TT                | 1945914771               |
| SNP_P3_26483_2855550 | NC_021162.1    | Ca_kabuli_chr03 | 2855550                 | TT                              | CC                | 1945914772               |
| SNP_P3_26484_2855573 | NC_021162.1    | Ca_kabuli_chr03 | 2855573                 | AA                              | GG                | 1945914774               |
| SNP_P3_26485_2855584 | NC_021162.1    | Ca_kabuli_chr03 | 2855584                 | TT                              | CC                | 1945914776               |
| SNP_P3_26486_2855608 | NC_021162.1    | Ca_kabuli_chr03 | 2855608                 | CC                              | TT                | 1945914778               |
| SNP_P3_26487_2855611 | NC_021162.1    | Ca_kabuli_chr03 | 2855611                 | CC                              | TT                | 1945914779               |
| SNP_P3_26488_2855612 | NC_021162.1    | Ca_kabuli_chr03 | 2855612                 | CC                              | AA                | 1945914781               |
| SNP_P3_26489_2855676 | NC_021162.1    | Ca_kabuli_chr03 | 2855676                 | GG                              | TT                | 1945914783               |
| SNP_P3_26490_2855741 | NC_021162.1    | Ca_kabuli_chr03 | 2855741                 | CC                              | GG                | 1945914785               |
| SNP_P3_26491_2855776 | NC_021162.1    | Ca_kabuli_chr03 | 2855776                 | AA                              | GG                | 1945914787               |
| SNP_P3_26492_2855803 | NC_021162.1    | Ca_kabuli_chr03 | 2855803                 | AA                              | CC                | 1945914788               |
| SNP_P3_26493_2855812 | NC_021162.1    | Ca_kabuli_chr03 | 2855812                 | TT                              | CC                | 1945914790               |
| SNP_P3_26494_2855848 | NC_021162.1    | Ca_kabuli_chr03 | 2855848                 | CC                              | AA                | 1945914792               |
| SNP_P3_26495_2855858 | NC_021162.1    | Ca_kabuli_chr03 | 2855858                 | GG                              | TT                | 1945914794               |
| SNP_P3_26496_2855949 | NC_021162.1    | Ca_kabuli_chr03 | 2855949                 | GG                              | AA                | 1945914795               |

| SNPs IDs             | Chromosome IDs | Chromosomes     | Physical positions (bp) | CDC Frontier (Reference genome) | (Pusa 256 & HPNB) | NCBI SNPdb Accession IDs |
|----------------------|----------------|-----------------|-------------------------|---------------------------------|-------------------|--------------------------|
| SNP_P3_26497_2855965 | NC_021162.1    | Ca_kabuli_chr03 | 2855965                 | CC                              | GG                | 1945914797               |
| SNP_P3_26499_2856020 | NC_021162.1    | Ca_kabuli_chr03 | 2856020                 | CC                              | GG                | 1945914799               |
| SNP_P3_26500_2856038 | NC_021162.1    | Ca_kabuli_chr03 | 2856038                 | TT                              | CC                | 1945914801               |
| SNP_P3_26501_2856050 | NC_021162.1    | Ca_kabuli_chr03 | 2856050                 | AA                              | GG                | 1945914803               |
| SNP_P3_26502_2856064 | NC_021162.1    | Ca_kabuli_chr03 | 2856064                 | GG                              | TT                | 1945914804               |
| SNP_P3_26503_2856181 | NC_021162.1    | Ca_kabuli_chr03 | 2856181                 | CC                              | TT                | 1945914806               |
| SNP_P3_26504_2856194 | NC_021162.1    | Ca_kabuli_chr03 | 2856194                 | CC                              | TT                | 1945914808               |
| SNP_P3_26505_2856233 | NC_021162.1    | Ca_kabuli_chr03 | 2856233                 | CC                              | TT                | 1945914810               |
| SNP_P3_26506_2856311 | NC_021162.1    | Ca_kabuli_chr03 | 2856311                 | CC                              | GG                | 1945914811               |
| SNP_P3_26507_2856321 | NC_021162.1    | Ca_kabuli_chr03 | 2856321                 | AA                              | CC                | 1945914813               |
| SNP_P3_26508_2856361 | NC_021162.1    | Ca_kabuli_chr03 | 2856361                 | CC                              | TT                | 1945914815               |
| SNP_P3_26509_2856380 | NC_021162.1    | Ca_kabuli_chr03 | 2856380                 | AA                              | GG                | 1945914817               |
| SNP_P3_26510_2856390 | NC_021162.1    | Ca_kabuli_chr03 | 2856390                 | TT                              | CC                | 1945914819               |
| SNP_P3_26511_2856406 | NC_021162.1    | Ca_kabuli_chr03 | 2856406                 | GG                              | AA                | 1945914820               |
| SNP_P3_26512_2856436 | NC_021162.1    | Ca_kabuli_chr03 | 2856436                 | AA                              | CC                | 1945914822               |
| SNP_P3_26513_2856468 | NC_021162.1    | Ca_kabuli_chr03 | 2856468                 | AA                              | GG                | 1945914824               |
| SNP_P3_26514_2856497 | NC_021162.1    | Ca_kabuli_chr03 | 2856497                 | GG                              | TT                | 1945914826               |
| SNP_P3_26515_2856521 | NC_021162.1    | Ca_kabuli_chr03 | 2856521                 | TT                              | AA                | 1945914828               |
| SNP_P3_26516_2856523 | NC_021162.1    | Ca_kabuli_chr03 | 2856523                 | CC                              | TT                | 1945914829               |
| SNP_P3_26517_2856696 | NC_021162.1    | Ca_kabuli_chr03 | 2856696                 | TT                              | GG                | 1945914831               |
| SNP_P3_26518_2858239 | NC_021162.1    | Ca_kabuli_chr03 | 2858239                 | CC                              | GG                | 1945914833               |
| SNP_P3_26519_2858256 | NC_021162.1    | Ca_kabuli_chr03 | 2858256                 | TT                              | GG                | 1945914835               |
| SNP_P3_26520_2858257 | NC_021162.1    | Ca_kabuli_chr03 | 2858257                 | CC                              | GG                | 1945914836               |
| SNP_P3_26521_2858288 | NC_021162.1    | Ca_kabuli_chr03 | 2858288                 | CC                              | TT                | 1945914838               |
| SNP_P3_26522_2858319 | NC_021162.1    | Ca_kabuli_chr03 | 2858319                 | CC                              | GG                | 1945914840               |
| SNP_P3_26523_2858322 | NC_021162.1    | Ca_kabuli_chr03 | 2858322                 | TT                              | CC                | 1945914842               |
| SNP_P3_26524_2858426 | NC_021162.1    | Ca_kabuli_chr03 | 2858426                 | GG                              | AA                | 1945914844               |
| SNP_P3_26525_2858428 | NC_021162.1    | Ca_kabuli_chr03 | 2858428                 | AA                              | GG                | 1945914845               |
| SNP_P3_26526_2858551 | NC_021162.1    | Ca_kabuli_chr03 | 2858551                 | CC                              | TT                | 1945914847               |
| SNP_P3_26527_2858569 | NC_021162.1    | Ca_kabuli_chr03 | 2858569                 | GG                              | AA                | 1945914849               |
| SNP_P3_26528_2858718 | NC_021162.1    | Ca_kabuli_chr03 | 2858718                 | GG                              | TT                | 1945914851               |
| SNP_P3_26529_2858726 | NC_021162.1    | Ca_kabuli_chr03 | 2858726                 | CC                              | TT                | 1945914853               |
| SNP_P3_26530_2885132 | NC_021162.1    | Ca_kabuli_chr03 | 2885132                 | AA                              | GG                | 1945914854               |
| SNP_P3_26531_2886088 | NC_021162.1    | Ca_kabuli_chr03 | 2886088                 | TT                              | GG                | 1945914856               |
| SNP_P3_26532_2886090 | NC_021162.1    | Ca_kabuli_chr03 | 2886090                 | AA                              | CC                | 1945914858               |
| SNP_P3_26534_2887154 | NC_021162.1    | Ca_kabuli_chr03 | 2887154                 | AA                              | GG                | 1945914860               |
| SNP_P3_26535_2906741 | NC_021162.1    | Ca_kabuli_chr03 | 2906741                 | GG                              | AA                | 1945914861               |
| SNP_P3_26537_2954165 | NC_021162.1    | Ca_kabuli_chr03 | 2954165                 | AA                              | GG                | 1945914863               |
| SNP_P3_26538_2954902 | NC_021162.1    | Ca_kabuli_chr03 | 2954902                 | TT                              | CC                | 1945914865               |
| SNP_P3_26539_2954910 | NC_021162.1    | Ca_kabuli_chr03 | 2954910                 | GG                              | AA                | 1945914867               |
| SNP_P3_26540_2962475 | NC_021162.1    | Ca_kabuli_chr03 | 2962475                 | GG                              | AA                | 1945914869               |
| SNP_P3_26541_2970200 | NC_021162.1    | Ca_kabuli_chr03 | 2970200                 | AA                              | GG                | 1945914870               |

| SNPs IDs             | Chromosome IDs | Chromosomes     | Physical positions (bp) | CDC Frontier (Reference genome) | (Pusa 256 & HPNB) | NCBI SNPdb Accession IDs |
|----------------------|----------------|-----------------|-------------------------|---------------------------------|-------------------|--------------------------|
| SNP_P3_26542_2989574 | NC_021162.1    | Ca_kabuli_chr03 | 2989574                 | AA                              | GG                | 1945914872               |
| SNP_P3_26543_3015507 | NC_021162.1    | Ca_kabuli_chr03 | 3015507                 | TT                              | GG                | 1945914874               |
| SNP_P3_26544_3015508 | NC_021162.1    | Ca_kabuli_chr03 | 3015508                 | TT                              | CC                | 1945914876               |
| SNP_P3_26545_3063834 | NC_021162.1    | Ca_kabuli_chr03 | 3063834                 | TT                              | CC                | 1945914878               |
| SNP_P3_26547_3096761 | NC_021162.1    | Ca_kabuli_chr03 | 3096761                 | TT                              | AA                | 1945914879               |
| SNP_P3_26548_3097235 | NC_021162.1    | Ca_kabuli_chr03 | 3097235                 | AA                              | GG                | 1945914881               |
| SNP_P3_26549_3117652 | NC_021162.1    | Ca_kabuli_chr03 | 3117652                 | CC                              | TT                | 1945914883               |
| SNP_P3_26550_3117661 | NC_021162.1    | Ca_kabuli_chr03 | 3117661                 | GG                              | TT                | 1945914885               |
| SNP_P3_26551_3117702 | NC_021162.1    | Ca_kabuli_chr03 | 3117702                 | AA                              | TT                | 1945914887               |
| SNP_P3_26552_3120486 | NC_021162.1    | Ca_kabuli_chr03 | 3120486                 | CC                              | TT                | 1945914889               |
| SNP_P3_26554_3125507 | NC_021162.1    | Ca_kabuli_chr03 | 3125507                 | TT                              | CC                | 1945914890               |
| SNP_P3_26555_3128050 | NC_021162.1    | Ca_kabuli_chr03 | 3128050                 | CC                              | AA                | 1945914892               |
| SNP_P3_26556_3128054 | NC_021162.1    | Ca_kabuli_chr03 | 3128054                 | TT                              | CC                | 1945914894               |
| SNP_P3_26557_3129049 | NC_021162.1    | Ca_kabuli_chr03 | 3129049                 | TT                              | GG                | 1945914896               |
| SNP_P3_26558_3129547 | NC_021162.1    | Ca_kabuli_chr03 | 3129547                 | CC                              | TT                | 1945914898               |
| SNP_P3_26559_3148597 | NC_021162.1    | Ca_kabuli_chr03 | 3148597                 | GG                              | AA                | 1945914900               |
| SNP_P3_26560_3149732 | NC_021162.1    | Ca_kabuli_chr03 | 3149732                 | TT                              | CC                | 1945914901               |
| SNP_P3_26561_3149733 | NC_021162.1    | Ca_kabuli_chr03 | 3149733                 | AA                              | GG                | 1945914903               |
| SNP_P3_26562_3150006 | NC_021162.1    | Ca_kabuli_chr03 | 3150006                 | TT                              | CC                | 1945914905               |
| SNP_P3_26563_3150065 | NC_021162.1    | Ca_kabuli_chr03 | 3150065                 | GG                              | AA                | 1945914907               |
| SNP_P3_26564_3150097 | NC_021162.1    | Ca_kabuli_chr03 | 3150097                 | TT                              | CC                | 1945914909               |
| SNP_P3_26565_3152335 | NC_021162.1    | Ca_kabuli_chr03 | 3152335                 | GG                              | AA                | 1945914910               |
| SNP_P3_26566_3155747 | NC_021162.1    | Ca_kabuli_chr03 | 3155747                 | GG                              | AA                | 1945914912               |
| SNP_P3_26567_3164992 | NC_021162.1    | Ca_kabuli_chr03 | 3164992                 | GG                              | AA                | 1945914914               |
| SNP_P3_26568_3165049 | NC_021162.1    | Ca_kabuli_chr03 | 3165049                 | TT                              | GG                | 1945914916               |
| SNP_P3_26569_3169208 | NC_021162.1    | Ca_kabuli_chr03 | 3169208                 | TT                              | GG                | 1945914918               |
| SNP_P3_26570_3170206 | NC_021162.1    | Ca_kabuli_chr03 | 3170206                 | AA                              | GG                | 1945914920               |
| SNP_P3_26571_3170342 | NC_021162.1    | Ca_kabuli_chr03 | 3170342                 | CC                              | TT                | 1945914921               |
| SNP_P3_26572_3170887 | NC_021162.1    | Ca_kabuli_chr03 | 3170887                 | CC                              | TT                | 1945914923               |
| SNP_P3_26573_3170936 | NC_021162.1    | Ca_kabuli_chr03 | 3170936                 | GG                              | AA                | 1945914925               |
| SNP_P3_26574_3183613 | NC_021162.1    | Ca_kabuli_chr03 | 3183613                 | GG                              | AA                | 1945914927               |
| SNP_P3_26575_3184419 | NC_021162.1    | Ca_kabuli_chr03 | 3184419                 | TT                              | CC                | 1945914929               |
| SNP_P3_26579_3234990 | NC_021162.1    | Ca_kabuli_chr03 | 3234990                 | TT                              | CC                | 1945914930               |
| SNP_P3_26580_3235163 | NC_021162.1    | Ca_kabuli_chr03 | 3235163                 | GG                              | CC                | 1945914932               |
| SNP_P3_26582_3235371 | NC_021162.1    | Ca_kabuli_chr03 | 3235371                 | TT                              | CC                | 1945914934               |
| SNP_P3_26583_3235442 | NC_021162.1    | Ca_kabuli_chr03 | 3235442                 | AA                              | GG                | 1945914936               |
| SNP_P3_26585_3235487 | NC_021162.1    | Ca_kabuli_chr03 | 3235487                 | TT                              | GG                | 1945914938               |
| SNP_P3_26586_3235491 | NC_021162.1    | Ca_kabuli_chr03 | 3235491                 | CC                              | TT                | 1945914940               |
| SNP_P3_26587_3235536 | NC_021162.1    | Ca_kabuli_chr03 | 3235536                 | AA                              | GG                | 1945914941               |
| SNP_P3_26588_3235751 | NC_021162.1    | Ca_kabuli_chr03 | 3235751                 | TT                              | CC                | 1945914943               |
| SNP_P3_26589_3235789 | NC_021162.1    | Ca_kabuli_chr03 | 3235789                 | CC                              | AA                | 1945914945               |
| SNP_P3_26590_3235799 | NC_021162.1    | Ca_kabuli_chr03 | 3235799                 | CC                              | AA                | 1945914947               |

| SNPs IDs             | Chromosome IDs | Chromosomes     | Physical positions (bp) | CDC Frontier (Reference genome) | (Pusa 256 & HPNB) | NCBI SNPdb Accession IDs |
|----------------------|----------------|-----------------|-------------------------|---------------------------------|-------------------|--------------------------|
| SNP_P3_26591_3235814 | NC_021162.1    | Ca_kabuli_chr03 | 3235814                 | GG                              | CC                | 1945914949               |
| SNP_P3_26592_3235845 | NC_021162.1    | Ca_kabuli_chr03 | 3235845                 | AA                              | GG                | 1945914950               |
| SNP_P3_26593_3235887 | NC_021162.1    | Ca_kabuli_chr03 | 3235887                 | GG                              | TT                | 1945914952               |
| SNP_P3_26594_3252121 | NC_021162.1    | Ca_kabuli_chr03 | 3252121                 | CC                              | TT                | 1945914954               |
| SNP_P3_26595_3253634 | NC_021162.1    | Ca_kabuli_chr03 | 3253634                 | CC                              | TT                | 1945914956               |
| SNP_P3_26596_3267134 | NC_021162.1    | Ca_kabuli_chr03 | 3267134                 | TT                              | GG                | 1945914958               |
| SNP_P3_26597_3269231 | NC_021162.1    | Ca_kabuli_chr03 | 3269231                 | CC                              | AA                | 1945914960               |
| SNP_P3_26598_3277262 | NC_021162.1    | Ca_kabuli_chr03 | 3277262                 | AA                              | GG                | 1945914961               |
| SNP_P3_26599_3289590 | NC_021162.1    | Ca_kabuli_chr03 | 3289590                 | TT                              | GG                | 1945914963               |
| SNP_P3_26600_3289860 | NC_021162.1    | Ca_kabuli_chr03 | 3289860                 | AA                              | GG                | 1945914965               |
| SNP_P3_26601_3289890 | NC_021162.1    | Ca_kabuli_chr03 | 3289890                 | TT                              | CC                | 1945914967               |
| SNP_P3_26602_3289913 | NC_021162.1    | Ca_kabuli_chr03 | 3289913                 | AA                              | TT                | 1945914969               |
| SNP_P3_26603_3289952 | NC_021162.1    | Ca_kabuli_chr03 | 3289952                 | TT                              | CC                | 1945914970               |
| SNP_P3_26604_3291346 | NC_021162.1    | Ca_kabuli_chr03 | 3291346                 | AA                              | GG                | 1945914972               |
| SNP_P3_26605_3291424 | NC_021162.1    | Ca_kabuli_chr03 | 3291424                 | GG                              | AA                | 1945914974               |
| SNP_P3_26606_3291641 | NC_021162.1    | Ca_kabuli_chr03 | 3291641                 | AA                              | GG                | 1945914976               |
| SNP_P3_26607_3291656 | NC_021162.1    | Ca_kabuli_chr03 | 3291656                 | GG                              | TT                | 1945914978               |
| SNP_P3_26608_3291688 | NC_021162.1    | Ca_kabuli_chr03 | 3291688                 | GG                              | AA                | 1945914979               |
| SNP_P3_26609_3291697 | NC_021162.1    | Ca_kabuli_chr03 | 3291697                 | AA                              | GG                | 1945914981               |
| SNP_P3_26610_3291742 | NC_021162.1    | Ca_kabuli_chr03 | 3291742                 | GG                              | AA                | 1945914983               |
| SNP_P3_26611_3291746 | NC_021162.1    | Ca_kabuli_chr03 | 3291746                 | CC                              | TT                | 1945914985               |
| SNP_P3_26613_3299563 | NC_021162.1    | Ca_kabuli_chr03 | 3299563                 | TT                              | GG                | 1945914987               |
| SNP_P3_26614_3306059 | NC_021162.1    | Ca_kabuli_chr03 | 3306059                 | TT                              | CC                | 1945914989               |
| SNP_P3_26615_3306450 | NC_021162.1    | Ca_kabuli_chr03 | 3306450                 | AA                              | GG                | 1945914990               |
| SNP_P3_26616_3306471 | NC_021162.1    | Ca_kabuli_chr03 | 3306471                 | AA                              | GG                | 1945914992               |
| SNP_P3_26617_3306541 | NC_021162.1    | Ca_kabuli_chr03 | 3306541                 | TT                              | CC                | 1945914994               |
| SNP_P3_26618_3306567 | NC_021162.1    | Ca_kabuli_chr03 | 3306567                 | AA                              | GG                | 1945914996               |
| SNP_P3_26619_3333919 | NC_021162.1    | Ca_kabuli_chr03 | 3333919                 | AA                              | GG                | 1945914998               |
| SNP_P3_26620_3339551 | NC_021162.1    | Ca_kabuli_chr03 | 3339551                 | GG                              | AA                | 1945914999               |
| SNP_P3_26621_3339625 | NC_021162.1    | Ca_kabuli_chr03 | 3339625                 | GG                              | AA                | 1945915001               |
| SNP_P3_26622_3341158 | NC_021162.1    | Ca_kabuli_chr03 | 3341158                 | AA                              | GG                | 1945915003               |
| SNP_P3_26623_3356806 | NC_021162.1    | Ca_kabuli_chr03 | 3356806                 | CC                              | TT                | 1945915005               |
| SNP_P3_26624_3356810 | NC_021162.1    | Ca_kabuli_chr03 | 3356810                 | GG                              | AA                | 1945915007               |
| SNP_P3_26625_3358468 | NC_021162.1    | Ca_kabuli_chr03 | 3358468                 | CC                              | GG                | 1945915009               |
| SNP_P3_26626_3371952 | NC_021162.1    | Ca_kabuli_chr03 | 3371952                 | AA                              | GG                | 1945915010               |
| SNP_P3_26627_3372078 | NC_021162.1    | Ca_kabuli_chr03 | 3372078                 | AA                              | GG                | 1945915012               |
| SNP_P3_26628_3377498 | NC_021162.1    | Ca_kabuli_chr03 | 3377498                 | CC                              | TT                | 1945915014               |
| SNP_P3_26629_3383723 | NC_021162.1    | Ca_kabuli_chr03 | 3383723                 | AA                              | CC                | 1945915016               |
| SNP_P3_26630_3392065 | NC_021162.1    | Ca_kabuli_chr03 | 3392065                 | AA                              | TT                | 1945915018               |
| SNP_P3_26633_3409027 | NC_021162.1    | Ca_kabuli_chr03 | 3409027                 | TT                              | AA                | 1945915020               |
| SNP_P3_26634_3414017 | NC_021162.1    | Ca_kabuli_chr03 | 3414017                 | AA                              | GG                | 1945915021               |
| SNP_P3_26635_3449815 | NC_021162.1    | Ca_kabuli_chr03 | 3449815                 | AA                              | TT                | 1945915023               |



| SNPs IDs             | Chromosome IDs | Chromosomes     | Physical positions (bp) | CDC Frontier (Reference genome) | (Pusa 256 & HPNB) | NCBI SNPdb Accession IDs |
|----------------------|----------------|-----------------|-------------------------|---------------------------------|-------------------|--------------------------|
| SNP_P3_26636_3450705 | NC_021162.1    | Ca_kabuli_chr03 | 3450705                 | CC                              | AA                | 1945915025               |
| SNP_P3_26637_3455063 | NC_021162.1    | Ca_kabuli_chr03 | 3455063                 | GG                              | AA                | 1945915027               |
| SNP_P3_26638_3484532 | NC_021162.1    | Ca_kabuli_chr03 | 3484532                 | CC                              | TT                | 1945915029               |
| SNP_P3_26639_3484562 | NC_021162.1    | Ca_kabuli_chr03 | 3484562                 | GG                              | AA                | 1945915030               |
| SNP_P3_26640_3489816 | NC_021162.1    | Ca_kabuli_chr03 | 3489816                 | TT                              | CC                | 1945915032               |
| SNP_P3_26641_3493859 | NC_021162.1    | Ca_kabuli_chr03 | 3493859                 | GG                              | AA                | 1945915034               |
| SNP_P3_26642_3498053 | NC_021162.1    | Ca_kabuli_chr03 | 3498053                 | CC                              | GG                | 1945915036               |
| SNP_P3_26643_3498117 | NC_021162.1    | Ca_kabuli_chr03 | 3498117                 | TT                              | CC                | 1945915038               |
| SNP_P3_26644_3498161 | NC_021162.1    | Ca_kabuli_chr03 | 3498161                 | TT                              | AA                | 1945915039               |
| SNP_P3_26645_3498484 | NC_021162.1    | Ca_kabuli_chr03 | 3498484                 | AA                              | GG                | 1945915041               |
| SNP_P3_26646_3498487 | NC_021162.1    | Ca_kabuli_chr03 | 3498487                 | TT                              | CC                | 1945915043               |
| SNP_P3_26647_3498490 | NC_021162.1    | Ca_kabuli_chr03 | 3498490                 | CC                              | AA                | 1945915045               |
| SNP_P3_26648_3498562 | NC_021162.1    | Ca_kabuli_chr03 | 3498562                 | GG                              | AA                | 1945915046               |
| SNP_P3_26649_3498572 | NC_021162.1    | Ca_kabuli_chr03 | 3498572                 | AA                              | GG                | 1945915048               |
| SNP_P3_26651_3500409 | NC_021162.1    | Ca_kabuli_chr03 | 3500409                 | AA                              | GG                | 1945915050               |
| SNP_P3_26652_3500417 | NC_021162.1    | Ca_kabuli_chr03 | 3500417                 | CC                              | TT                | 1945915052               |
| SNP_P3_26653_3503311 | NC_021162.1    | Ca_kabuli_chr03 | 3503311                 | GG                              | AA                | 1945915054               |
| SNP_P3_26654_3503313 | NC_021162.1    | Ca_kabuli_chr03 | 3503313                 | AA                              | TT                | 1945915055               |
| SNP_P3_26655_3503317 | NC_021162.1    | Ca_kabuli_chr03 | 3503317                 | GG                              | CC                | 1945915057               |
| SNP_P3_26656_3503322 | NC_021162.1    | Ca_kabuli_chr03 | 3503322                 | GG                              | AA                | 1945915059               |
| SNP_P3_26657_3503630 | NC_021162.1    | Ca_kabuli_chr03 | 3503630                 | TT                              | CC                | 1945915061               |
| SNP_P3_26658_3503812 | NC_021162.1    | Ca_kabuli_chr03 | 3503812                 | AA                              | TT                | 1945915062               |
| SNP_P3_26659_3517501 | NC_021162.1    | Ca_kabuli_chr03 | 3517501                 | GG                              | AA                | 1945915064               |
| SNP_P3_26660_3517583 | NC_021162.1    | Ca_kabuli_chr03 | 3517583                 | CC                              | TT                | 1945915066               |
| SNP_P3_26661_3517966 | NC_021162.1    | Ca_kabuli_chr03 | 3517966                 | GG                              | TT                | 1945915068               |
| SNP_P3_26662_3517967 | NC_021162.1    | Ca_kabuli_chr03 | 3517967                 | GG                              | CC                | 1945915070               |
| SNP_P3_26665_3524068 | NC_021162.1    | Ca_kabuli_chr03 | 3524068                 | CC                              | TT                | 1945915071               |
| SNP_P3_26666_3524363 | NC_021162.1    | Ca_kabuli_chr03 | 3524363                 | CC                              | TT                | 1945915073               |
| SNP_P3_26667_3524402 | NC_021162.1    | Ca_kabuli_chr03 | 3524402                 | TT                              | GG                | 1945915075               |
| SNP_P3_26668_3524424 | NC_021162.1    | Ca_kabuli_chr03 | 3524424                 | TT                              | CC                | 1945915077               |
| SNP_P3_26669_3524461 | NC_021162.1    | Ca_kabuli_chr03 | 3524461                 | TT                              | CC                | 1945915078               |
| SNP_P3_26670_3531706 | NC_021162.1    | Ca_kabuli_chr03 | 3531706                 | GG                              | AA                | 1945915080               |
| SNP_P3_26671_3531985 | NC_021162.1    | Ca_kabuli_chr03 | 3531985                 | AA                              | GG                | 1945915082               |
| SNP_P3_26672_3531996 | NC_021162.1    | Ca_kabuli_chr03 | 3531996                 | AA                              | TT                | 1945915084               |
| SNP_P3_26673_3535079 | NC_021162.1    | Ca_kabuli_chr03 | 3535079                 | CC                              | TT                | 1945915086               |
| SNP_P3_26674_3535646 | NC_021162.1    | Ca_kabuli_chr03 | 3535646                 | GG                              | CC                | 1945915087               |
| SNP_P3_26675_3537147 | NC_021162.1    | Ca_kabuli_chr03 | 3537147                 | GG                              | CC                | 1945915089               |
| SNP_P3_26676_3537176 | NC_021162.1    | Ca_kabuli_chr03 | 3537176                 | AA                              | GG                | 1945915091               |
| SNP_P3_26677_3537584 | NC_021162.1    | Ca_kabuli_chr03 | 3537584                 | TT                              | CC                | 1945915093               |
| SNP_P3_26678_3537585 | NC_021162.1    | Ca_kabuli_chr03 | 3537585                 | TT                              | CC                | 1945915094               |
| SNP_P3_26679_3537621 | NC_021162.1    | Ca_kabuli_chr03 | 3537621                 | AA                              | GG                | 1945915096               |
| SNP_P3_26680_3542266 | NC_021162.1    | Ca_kabuli_chr03 | 3542266                 | CC                              | GG                | 1945915098               |

| SNPs IDs             | Chromosome IDs | Chromosomes     | Physical positions (bp) | CDC Frontier (Reference genome) | (Pusa 256 & HPNB) | NCBI SNPdb Accession IDs |
|----------------------|----------------|-----------------|-------------------------|---------------------------------|-------------------|--------------------------|
| SNP_P3_26681_3542315 | NC_021162.1    | Ca_kabuli_chr03 | 3542315                 | TT                              | GG                | 1945915100               |
| SNP_P3_26682_3542328 | NC_021162.1    | Ca_kabuli_chr03 | 3542328                 | CC                              | TT                | 1945915102               |
| SNP_P3_26683_3548425 | NC_021162.1    | Ca_kabuli_chr03 | 3548425                 | TT                              | GG                | 1945915103               |
| SNP_P3_26684_3549849 | NC_021162.1    | Ca_kabuli_chr03 | 3549849                 | AA                              | GG                | 1945915105               |
| SNP_P3_26686_3555092 | NC_021162.1    | Ca_kabuli_chr03 | 3555092                 | TT                              | CC                | 1945915107               |
| SNP_P3_26687_3575212 | NC_021162.1    | Ca_kabuli_chr03 | 3575212                 | CC                              | TT                | 1945915109               |
| SNP_P3_26688_3579643 | NC_021162.1    | Ca_kabuli_chr03 | 3579643                 | GG                              | AA                | 1945915110               |
| SNP_P3_26689_3580599 | NC_021162.1    | Ca_kabuli_chr03 | 3580599                 | GG                              | AA                | 1945915112               |
| SNP_P3_26690_3580684 | NC_021162.1    | Ca_kabuli_chr03 | 3580684                 | TT                              | CC                | 1945915114               |
| SNP_P3_26692_3639380 | NC_021162.1    | Ca_kabuli_chr03 | 3639380                 | TT                              | AA                | 1945915116               |
| SNP_P3_26693_3649873 | NC_021162.1    | Ca_kabuli_chr03 | 3649873                 | TT                              | GG                | 1945915118               |
| SNP_P3_26696_3694549 | NC_021162.1    | Ca_kabuli_chr03 | 3694549                 | TT                              | CC                | 1945915119               |
| SNP_P3_26697_3705433 | NC_021162.1    | Ca_kabuli_chr03 | 3705433                 | AA                              | GG                | 1945915121               |
| SNP_P3_26699_3729922 | NC_021162.1    | Ca_kabuli_chr03 | 3729922                 | CC                              | GG                | 1945915123               |
| SNP_P3_26700_3730171 | NC_021162.1    | Ca_kabuli_chr03 | 3730171                 | CC                              | AA                | 1945915125               |
| SNP_P3_26701_3731127 | NC_021162.1    | Ca_kabuli_chr03 | 3731127                 | AA                              | CC                | 1945915126               |
| SNP_P3_26702_3731403 | NC_021162.1    | Ca_kabuli_chr03 | 3731403                 | GG                              | AA                | 1945915128               |
| SNP_P3_26703_3731404 | NC_021162.1    | Ca_kabuli_chr03 | 3731404                 | AA                              | CC                | 1945915130               |
| SNP_P3_26704_3731452 | NC_021162.1    | Ca_kabuli_chr03 | 3731452                 | AA                              | GG                | 1945915132               |
| SNP_P3_26705_3731466 | NC_021162.1    | Ca_kabuli_chr03 | 3731466                 | TT                              | AA                | 1945915134               |
| SNP_P3_26706_3731482 | NC_021162.1    | Ca_kabuli_chr03 | 3731482                 | CC                              | GG                | 1945915135               |
| SNP_P3_26707_3733459 | NC_021162.1    | Ca_kabuli_chr03 | 3733459                 | GG                              | AA                | 1945915137               |
| SNP_P3_26708_3733769 | NC_021162.1    | Ca_kabuli_chr03 | 3733769                 | AA                              | CC                | 1945915139               |
| SNP_P3_26709_3733827 | NC_021162.1    | Ca_kabuli_chr03 | 3733827                 | CC                              | TT                | 1945915141               |
| SNP_P3_26710_3734857 | NC_021162.1    | Ca_kabuli_chr03 | 3734857                 | TT                              | CC                | 1945915142               |
| SNP_P3_26711_3734973 | NC_021162.1    | Ca_kabuli_chr03 | 3734973                 | AA                              | CC                | 1945915144               |
| SNP_P3_26712_3735853 | NC_021162.1    | Ca_kabuli_chr03 | 3735853                 | CC                              | AA                | 1945915146               |
| SNP_P3_26713_3739145 | NC_021162.1    | Ca_kabuli_chr03 | 3739145                 | GG                              | AA                | 1945915148               |
| SNP_P3_26714_3755717 | NC_021162.1    | Ca_kabuli_chr03 | 3755717                 | TT                              | AA                | 1945915150               |
| SNP_P3_26715_3777635 | NC_021162.1    | Ca_kabuli_chr03 | 3777635                 | TT                              | GG                | 1945915151               |
| SNP_P3_26716_3777636 | NC_021162.1    | Ca_kabuli_chr03 | 3777636                 | CC                              | TT                | 1945915153               |
| SNP_P3_26717_3787362 | NC_021162.1    | Ca_kabuli_chr03 | 3787362                 | CC                              | AA                | 1945915155               |
| SNP_P3_26718_3787571 | NC_021162.1    | Ca_kabuli_chr03 | 3787571                 | TT                              | CC                | 1945915157               |
| SNP_P3_26719_3787575 | NC_021162.1    | Ca_kabuli_chr03 | 3787575                 | AA                              | GG                | 1945915158               |
| SNP_P3_26720_3788990 | NC_021162.1    | Ca_kabuli_chr03 | 3788990                 | AA                              | TT                | 1945915160               |
| SNP_P3_26721_3788991 | NC_021162.1    | Ca_kabuli_chr03 | 3788991                 | GG                              | AA                | 1945915162               |
| SNP_P3_26722_3789150 | NC_021162.1    | Ca_kabuli_chr03 | 3789150                 | CC                              | TT                | 1945915164               |
| SNP_P3_26723_3789174 | NC_021162.1    | Ca_kabuli_chr03 | 3789174                 | TT                              | CC                | 1945915166               |
| SNP_P3_26724_3795745 | NC_021162.1    | Ca_kabuli_chr03 | 3795745                 | GG                              | AA                | 1945915167               |
| SNP_P3_26725_3795753 | NC_021162.1    | Ca_kabuli_chr03 | 3795753                 | GG                              | AA                | 1945915169               |
| SNP_P3_26726_3797029 | NC_021162.1    | Ca_kabuli_chr03 | 3797029                 | GG                              | AA                | 1945915171               |
| SNP_P3_26727_3797159 | NC_021162.1    | Ca_kabuli_chr03 | 3797159                 | GG                              | AA                | 1945915173               |

| SNPs IDs             | Chromosome IDs | Chromosomes     | Physical positions (bp) | CDC Frontier (Reference genome) | (Pusa 256 & HPNB) | NCBI SNPdb Accession IDs |
|----------------------|----------------|-----------------|-------------------------|---------------------------------|-------------------|--------------------------|
| SNP_P3_26728_3798620 | NC_021162.1    | Ca_kabuli_chr03 | 3798620                 | AA                              | CC                | 1945915174               |
| SNP_P3_26729_3802894 | NC_021162.1    | Ca_kabuli_chr03 | 3802894                 | GG                              | AA                | 1945915176               |
| SNP_P3_26730_3804458 | NC_021162.1    | Ca_kabuli_chr03 | 3804458                 | TT                              | CC                | 1945915178               |
| SNP_P3_26731_3804516 | NC_021162.1    | Ca_kabuli_chr03 | 3804516                 | CC                              | TT                | 1945915180               |
| SNP_P3_26732_3804523 | NC_021162.1    | Ca_kabuli_chr03 | 3804523                 | TT                              | CC                | 1945915182               |
| SNP_P3_26733_3804555 | NC_021162.1    | Ca_kabuli_chr03 | 3804555                 | AA                              | GG                | 1945915183               |
| SNP_P3_26735_3804627 | NC_021162.1    | Ca_kabuli_chr03 | 3804627                 | GG                              | AA                | 1945915185               |
| SNP_P3_26736_3806579 | NC_021162.1    | Ca_kabuli_chr03 | 3806579                 | CC                              | TT                | 1945915187               |
| SNP_P3_26737_3806600 | NC_021162.1    | Ca_kabuli_chr03 | 3806600                 | GG                              | AA                | 1945915189               |
| SNP_P3_26738_3814248 | NC_021162.1    | Ca_kabuli_chr03 | 3814248                 | AA                              | GG                | 1945915190               |
| SNP_P3_26740_3818085 | NC_021162.1    | Ca_kabuli_chr03 | 3818085                 | AA                              | GG                | 1945915192               |
| SNP_P3_26741_3825133 | NC_021162.1    | Ca_kabuli_chr03 | 3825133                 | GG                              | AA                | 1945915194               |
| SNP_P3_26742_3825153 | NC_021162.1    | Ca_kabuli_chr03 | 3825153                 | TT                              | CC                | 1945915196               |
| SNP_P3_26744_3825743 | NC_021162.1    | Ca_kabuli_chr03 | 3825743                 | CC                              | TT                | 1945915198               |
| SNP_P3_26745_3825775 | NC_021162.1    | Ca_kabuli_chr03 | 3825775                 | AA                              | GG                | 1945915199               |
| SNP_P3_26746_3839123 | NC_021162.1    | Ca_kabuli_chr03 | 3839123                 | CC                              | AA                | 1945915201               |
| SNP_P3_26747_3841610 | NC_021162.1    | Ca_kabuli_chr03 | 3841610                 | CC                              | TT                | 1945915203               |
| SNP_P3_26748_3842230 | NC_021162.1    | Ca_kabuli_chr03 | 3842230                 | TT                              | CC                | 1945915205               |
| SNP_P3_26749_3842231 | NC_021162.1    | Ca_kabuli_chr03 | 3842231                 | GG                              | TT                | 1945915206               |
| SNP_P3_26750_3842283 | NC_021162.1    | Ca_kabuli_chr03 | 3842283                 | TT                              | CC                | 1945915208               |
| SNP_P3_26751_3842297 | NC_021162.1    | Ca_kabuli_chr03 | 3842297                 | GG                              | AA                | 1945915210               |
| SNP_P3_26752_3842313 | NC_021162.1    | Ca_kabuli_chr03 | 3842313                 | GG                              | TT                | 1945915212               |
| SNP_P3_26753_3847280 | NC_021162.1    | Ca_kabuli_chr03 | 3847280                 | CC                              | AA                | 1945915214               |
| SNP_P3_26755_3857043 | NC_021162.1    | Ca_kabuli_chr03 | 3857043                 | GG                              | CC                | 1945915215               |
| SNP_P3_26756_3866325 | NC_021162.1    | Ca_kabuli_chr03 | 3866325                 | TT                              | CC                | 1945915217               |
| SNP_P3_26757_3866326 | NC_021162.1    | Ca_kabuli_chr03 | 3866326                 | AA                              | GG                | 1945915219               |
| SNP_P3_26758_3866345 | NC_021162.1    | Ca_kabuli_chr03 | 3866345                 | CC                              | AA                | 1945915221               |
| SNP_P3_26760_3874638 | NC_021162.1    | Ca_kabuli_chr03 | 3874638                 | CC                              | TT                | 1945915222               |
| SNP_P3_26762_3881572 | NC_021162.1    | Ca_kabuli_chr03 | 3881572                 | GG                              | TT                | 1945915224               |
| SNP_P3_26766_3924273 | NC_021162.1    | Ca_kabuli_chr03 | 3924273                 | GG                              | AA                | 1945915226               |
| SNP_P3_26767_3951763 | NC_021162.1    | Ca_kabuli_chr03 | 3951763                 | TT                              | GG                | 1945915228               |
| SNP_P3_26768_3962903 | NC_021162.1    | Ca_kabuli_chr03 | 3962903                 | TT                              | CC                | 1945915230               |
| SNP_P3_26769_3963192 | NC_021162.1    | Ca_kabuli_chr03 | 3963192                 | CC                              | TT                | 1945915231               |
| SNP_P3_26770_3963202 | NC_021162.1    | Ca_kabuli_chr03 | 3963202                 | AA                              | GG                | 1945915233               |
| SNP_P3_26771_3963208 | NC_021162.1    | Ca_kabuli_chr03 | 3963208                 | AA                              | TT                | 1945915235               |
| SNP_P3_26772_3963213 | NC_021162.1    | Ca_kabuli_chr03 | 3963213                 | GG                              | AA                | 1945915237               |
| SNP_P3_26773_3963227 | NC_021162.1    | Ca_kabuli_chr03 | 3963227                 | GG                              | CC                | 1945915238               |
| SNP_P3_26774_3963246 | NC_021162.1    | Ca_kabuli_chr03 | 3963246                 | CC                              | TT                | 1945915240               |
| SNP_P3_26776_3963429 | NC_021162.1    | Ca_kabuli_chr03 | 3963429                 | AA                              | GG                | 1945915242               |
| SNP_P3_26777_3963432 | NC_021162.1    | Ca_kabuli_chr03 | 3963432                 | TT                              | GG                | 1945915244               |
| SNP_P3_26778_3963457 | NC_021162.1    | Ca_kabuli_chr03 | 3963457                 | CC                              | GG                | 1945915246               |
| SNP_P3_26779_3964840 | NC_021162.1    | Ca_kabuli_chr03 | 3964840                 | AA                              | GG                | 1945915247               |

| SNPs IDs             | Chromosome IDs | Chromosomes     | Physical positions (bp) | CDC Frontier (Reference genome) | (Pusa 256 & HPNB) | NCBI SNPdb Accession IDs |
|----------------------|----------------|-----------------|-------------------------|---------------------------------|-------------------|--------------------------|
| SNP_P3_26780_3964850 | NC_021162.1    | Ca_kabuli_chr03 | 3964850                 | TT                              | AA                | 1945915249               |
| SNP_P3_26781_3965812 | NC_021162.1    | Ca_kabuli_chr03 | 3965812                 | CC                              | TT                | 1945915251               |
| SNP_P3_26782_3966350 | NC_021162.1    | Ca_kabuli_chr03 | 3966350                 | AA                              | TT                | 1945915253               |
| SNP_P3_26783_3966358 | NC_021162.1    | Ca_kabuli_chr03 | 3966358                 | AA                              | GG                | 1945915254               |
| SNP_P3_26784_3966374 | NC_021162.1    | Ca_kabuli_chr03 | 3966374                 | GG                              | AA                | 1945915256               |
| SNP_P3_26785_3990331 | NC_021162.1    | Ca_kabuli_chr03 | 3990331                 | CC                              | TT                | 1945915258               |
| SNP_P3_26786_4004438 | NC_021162.1    | Ca_kabuli_chr03 | 4004438                 | TT                              | CC                | 1945915260               |
| SNP_P3_26787_4004444 | NC_021162.1    | Ca_kabuli_chr03 | 4004444                 | AA                              | TT                | 1945915262               |
| SNP_P3_26788_4004445 | NC_021162.1    | Ca_kabuli_chr03 | 4004445                 | TT                              | CC                | 1945915263               |
| SNP_P3_26790_4006385 | NC_021162.1    | Ca_kabuli_chr03 | 4006385                 | TT                              | CC                | 1945915265               |
| SNP_P3_26791_4006386 | NC_021162.1    | Ca_kabuli_chr03 | 4006386                 | TT                              | GG                | 1945915267               |
| SNP_P3_26792_4017088 | NC_021162.1    | Ca_kabuli_chr03 | 4017088                 | CC                              | TT                | 1945915269               |
| SNP_P3_26793_4017297 | NC_021162.1    | Ca_kabuli_chr03 | 4017297                 | TT                              | AA                | 1945915270               |
| SNP_P3_26795_4017698 | NC_021162.1    | Ca_kabuli_chr03 | 4017698                 | TT                              | CC                | 1945915272               |
| SNP_P3_26796_4017759 | NC_021162.1    | Ca_kabuli_chr03 | 4017759                 | TT                              | CC                | 1945915274               |
| SNP_P3_26797_4024927 | NC_021162.1    | Ca_kabuli_chr03 | 4024927                 | AA                              | GG                | 1945915276               |
| SNP_P3_26798_4027315 | NC_021162.1    | Ca_kabuli_chr03 | 4027315                 | CC                              | TT                | 1945915278               |
| SNP_P3_26799_4027330 | NC_021162.1    | Ca_kabuli_chr03 | 4027330                 | TT                              | CC                | 1945915279               |
| SNP_P3_26800_4032321 | NC_021162.1    | Ca_kabuli_chr03 | 4032321                 | TT                              | CC                | 1945915281               |
| SNP_P3_26801_4033200 | NC_021162.1    | Ca_kabuli_chr03 | 4033200                 | CC                              | TT                | 1945915283               |
| SNP_P3_26802_4033254 | NC_021162.1    | Ca_kabuli_chr03 | 4033254                 | CC                              | TT                | 1945915285               |
| SNP_P3_26803_4035964 | NC_021162.1    | Ca_kabuli_chr03 | 4035964                 | AA                              | GG                | 1945915286               |
| SNP_P3_26804_4035966 | NC_021162.1    | Ca_kabuli_chr03 | 4035966                 | TT                              | GG                | 1945915288               |
| SNP_P3_26805_4036016 | NC_021162.1    | Ca_kabuli_chr03 | 4036016                 | CC                              | AA                | 1945915290               |
| SNP_P3_26806_4036026 | NC_021162.1    | Ca_kabuli_chr03 | 4036026                 | AA                              | GG                | 1945915292               |
| SNP_P3_26807_4036069 | NC_021162.1    | Ca_kabuli_chr03 | 4036069                 | AA                              | CC                | 1945915294               |
| SNP_P3_26808_4036360 | NC_021162.1    | Ca_kabuli_chr03 | 4036360                 | GG                              | AA                | 1945915295               |
| SNP_P3_26809_4041806 | NC_021162.1    | Ca_kabuli_chr03 | 4041806                 | TT                              | CC                | 1945915297               |
| SNP_P3_26811_4051672 | NC_021162.1    | Ca_kabuli_chr03 | 4051672                 | AA                              | GG                | 1945915299               |
| SNP_P3_26812_4051681 | NC_021162.1    | Ca_kabuli_chr03 | 4051681                 | AA                              | GG                | 1945915301               |
| SNP_P3_26813_4052120 | NC_021162.1    | Ca_kabuli_chr03 | 4052120                 | TT                              | GG                | 1945915302               |
| SNP_P3_26814_4052124 | NC_021162.1    | Ca_kabuli_chr03 | 4052124                 | CC                              | TT                | 1945915304               |
| SNP_P3_26815_4055997 | NC_021162.1    | Ca_kabuli_chr03 | 4055997                 | GG                              | AA                | 1945915306               |
| SNP_P3_26816_4056392 | NC_021162.1    | Ca_kabuli_chr03 | 4056392                 | GG                              | AA                | 1945915308               |
| SNP_P3_26817_4056452 | NC_021162.1    | Ca_kabuli_chr03 | 4056452                 | CC                              | AA                | 1945915310               |
| SNP_P3_26818_4056533 | NC_021162.1    | Ca_kabuli_chr03 | 4056533                 | AA                              | GG                | 1945915311               |
| SNP_P3_26819_4073322 | NC_021162.1    | Ca_kabuli_chr03 | 4073322                 | TT                              | GG                | 1945915313               |
| SNP_P3_26820_4073324 | NC_021162.1    | Ca_kabuli_chr03 | 4073324                 | GG                              | AA                | 1945915315               |
| SNP_P3_26822_4076183 | NC_021162.1    | Ca_kabuli_chr03 | 4076183                 | TT                              | AA                | 1945915317               |
| SNP_P3_26823_4076400 | NC_021162.1    | Ca_kabuli_chr03 | 4076400                 | GG                              | AA                | 1945915318               |
| SNP_P3_26824_4076513 | NC_021162.1    | Ca_kabuli_chr03 | 4076513                 | TT                              | AA                | 1945915320               |
| SNP_P3_26825_4076534 | NC_021162.1    | Ca_kabuli_chr03 | 4076534                 | AA                              | TT                | 1945915322               |

| SNPs IDs             | Chromosome IDs | Chromosomes     | Physical positions (bp) | CDC Frontier (Reference genome) | (Pusa 256 & HPNB) | NCBI SNPdb Accession IDs |
|----------------------|----------------|-----------------|-------------------------|---------------------------------|-------------------|--------------------------|
| SNP_P3_26826_4076541 | NC_021162.1    | Ca_kabuli_chr03 | 4076541                 | AA                              | TT                | 1945915324               |
| SNP_P3_26827_4098871 | NC_021162.1    | Ca_kabuli_chr03 | 4098871                 | GG                              | TT                | 1945915325               |
| SNP_P3_26828_4098876 | NC_021162.1    | Ca_kabuli_chr03 | 4098876                 | GG                              | AA                | 1945915327               |
| SNP_P3_26829_4098910 | NC_021162.1    | Ca_kabuli_chr03 | 4098910                 | TT                              | AA                | 1945915329               |
| SNP_P3_26830_4112338 | NC_021162.1    | Ca_kabuli_chr03 | 4112338                 | GG                              | AA                | 1945915331               |
| SNP_P3_26831_4112891 | NC_021162.1    | Ca_kabuli_chr03 | 4112891                 | AA                              | GG                | 1945915333               |
| SNP_P3_26832_4132176 | NC_021162.1    | Ca_kabuli_chr03 | 4132176                 | CC                              | AA                | 1945915334               |
| SNP_P3_26835_4132476 | NC_021162.1    | Ca_kabuli_chr03 | 4132476                 | CC                              | TT                | 1945915336               |
| SNP_P3_26836_4132486 | NC_021162.1    | Ca_kabuli_chr03 | 4132486                 | AA                              | GG                | 1945915338               |
| SNP_P3_26837_4132498 | NC_021162.1    | Ca_kabuli_chr03 | 4132498                 | TT                              | CC                | 1945915340               |
| SNP_P3_26840_4175158 | NC_021162.1    | Ca_kabuli_chr03 | 4175158                 | TT                              | CC                | 1945915341               |
| SNP_P3_26841_4189784 | NC_021162.1    | Ca_kabuli_chr03 | 4189784                 | AA                              | GG                | 1945915343               |
| SNP_P3_26842_4189805 | NC_021162.1    | Ca_kabuli_chr03 | 4189805                 | TT                              | GG                | 1945915345               |
| SNP_P3_26843_4231808 | NC_021162.1    | Ca_kabuli_chr03 | 4231808                 | AA                              | GG                | 1945915347               |
| SNP_P3_26844_4236148 | NC_021162.1    | Ca_kabuli_chr03 | 4236148                 | GG                              | AA                | 1945915349               |
| SNP_P3_26845_4248737 | NC_021162.1    | Ca_kabuli_chr03 | 4248737                 | TT                              | CC                | 1945915350               |
| SNP_P3_26846_4270915 | NC_021162.1    | Ca_kabuli_chr03 | 4270915                 | GG                              | AA                | 1945915352               |
| SNP_P3_26847_4270981 | NC_021162.1    | Ca_kabuli_chr03 | 4270981                 | TT                              | GG                | 1945915354               |
| SNP_P3_26848_4271012 | NC_021162.1    | Ca_kabuli_chr03 | 4271012                 | CC                              | AA                | 1945915356               |
| SNP_P3_26849_4271316 | NC_021162.1    | Ca_kabuli_chr03 | 4271316                 | TT                              | CC                | 1945915357               |
| SNP_P3_26850_4271320 | NC_021162.1    | Ca_kabuli_chr03 | 4271320                 | AA                              | GG                | 1945915359               |
| SNP_P3_26851_4276049 | NC_021162.1    | Ca_kabuli_chr03 | 4276049                 | GG                              | AA                | 1945915361               |
| SNP_P3_26852_4295865 | NC_021162.1    | Ca_kabuli_chr03 | 4295865                 | AA                              | GG                | 1945915363               |
| SNP_P3_26853_4307807 | NC_021162.1    | Ca_kabuli_chr03 | 4307807                 | CC                              | GG                | 1945915365               |
| SNP_P3_26854_4307880 | NC_021162.1    | Ca_kabuli_chr03 | 4307880                 | TT                              | CC                | 1945915366               |
| SNP_P3_26855_4316016 | NC_021162.1    | Ca_kabuli_chr03 | 4316016                 | GG                              | AA                | 1945915368               |
| SNP_P3_26856_4366125 | NC_021162.1    | Ca_kabuli_chr03 | 4366125                 | TT                              | CC                | 1945915370               |
| SNP_P3_26857_4366126 | NC_021162.1    | Ca_kabuli_chr03 | 4366126                 | TT                              | CC                | 1945915372               |
| SNP_P3_26859_4383132 | NC_021162.1    | Ca_kabuli_chr03 | 4383132                 | CC                              | GG                | 1945915373               |
| SNP_P3_26860_4383188 | NC_021162.1    | Ca_kabuli_chr03 | 4383188                 | AA                              | GG                | 1945915375               |
| SNP_P3_26861_4383400 | NC_021162.1    | Ca_kabuli_chr03 | 4383400                 | GG                              | AA                | 1945915377               |
| SNP_P3_26862_4385009 | NC_021162.1    | Ca_kabuli_chr03 | 4385009                 | TT                              | CC                | 1945915379               |
| SNP_P3_26863_4385359 | NC_021162.1    | Ca_kabuli_chr03 | 4385359                 | AA                              | GG                | 1945915380               |
| SNP_P3_26864_4385381 | NC_021162.1    | Ca_kabuli_chr03 | 4385381                 | CC                              | TT                | 1945915382               |
| SNP_P3_26865_4385436 | NC_021162.1    | Ca_kabuli_chr03 | 4385436                 | TT                              | CC                | 1945915384               |
| SNP_P3_26866_4389377 | NC_021162.1    | Ca_kabuli_chr03 | 4389377                 | CC                              | TT                | 1945915386               |
| SNP_P3_26867_4411031 | NC_021162.1    | Ca_kabuli_chr03 | 4411031                 | GG                              | AA                | 1945915388               |
| SNP_P3_26868_4430975 | NC_021162.1    | Ca_kabuli_chr03 | 4430975                 | GG                              | AA                | 1945915389               |
| SNP_P3_26869_4487956 | NC_021162.1    | Ca_kabuli_chr03 | 4487956                 | GG                              | TT                | 1945915391               |
| SNP_P3_26870_4517531 | NC_021162.1    | Ca_kabuli_chr03 | 4517531                 | CC                              | TT                | 1945915393               |
| SNP_P3_26872_4529488 | NC_021162.1    | Ca_kabuli_chr03 | 4529488                 | TT                              | CC                | 1945915395               |
| SNP_P3_26873_4536671 | NC_021162.1    | Ca_kabuli_chr03 | 4536671                 | CC                              | TT                | 1945915396               |

| SNPs IDs             | Chromosome IDs | Chromosomes     | Physical positions (bp) | CDC Frontier (Reference genome) | (Pusa 256 & HPNB) | NCBI SNPdb Accession IDs |
|----------------------|----------------|-----------------|-------------------------|---------------------------------|-------------------|--------------------------|
| SNP_P3_26874_4536761 | NC_021162.1    | Ca_kabuli_chr03 | 4536761                 | AA                              | TT                | 1945915398               |
| SNP_P3_26875_4536771 | NC_021162.1    | Ca_kabuli_chr03 | 4536771                 | AA                              | TT                | 1945915400               |
| SNP_P3_26876_4536776 | NC_021162.1    | Ca_kabuli_chr03 | 4536776                 | AA                              | CC                | 1945915402               |
| SNP_P3_26877_4562892 | NC_021162.1    | Ca_kabuli_chr03 | 4562892                 | AA                              | GG                | 1945915404               |
| SNP_P3_26878_4568403 | NC_021162.1    | Ca_kabuli_chr03 | 4568403                 | AA                              | CC                | 1945915405               |
| SNP_P3_26879_4568406 | NC_021162.1    | Ca_kabuli_chr03 | 4568406                 | CC                              | TT                | 1945915407               |
| SNP_P3_26880_4568410 | NC_021162.1    | Ca_kabuli_chr03 | 4568410                 | CC                              | TT                | 1945915409               |
| SNP_P3_26881_4568423 | NC_021162.1    | Ca_kabuli_chr03 | 4568423                 | TT                              | AA                | 1945915411               |
| SNP_P3_26882_4568450 | NC_021162.1    | Ca_kabuli_chr03 | 4568450                 | GG                              | AA                | 1945915412               |
| SNP_P3_26883_4589302 | NC_021162.1    | Ca_kabuli_chr03 | 4589302                 | AA                              | GG                | 1945915414               |
| SNP_P3_26884_4589310 | NC_021162.1    | Ca_kabuli_chr03 | 4589310                 | TT                              | CC                | 1945915416               |
| SNP_P3_26886_4611065 | NC_021162.1    | Ca_kabuli_chr03 | 4611065                 | AA                              | CC                | 1945915418               |
| SNP_P3_26887_4611069 | NC_021162.1    | Ca_kabuli_chr03 | 4611069                 | TT                              | CC                | 1945915419               |
| SNP_P3_26888_4619343 | NC_021162.1    | Ca_kabuli_chr03 | 4619343                 | CC                              | TT                | 1945915421               |
| SNP_P3_26889_4619492 | NC_021162.1    | Ca_kabuli_chr03 | 4619492                 | TT                              | CC                | 1945915423               |
| SNP_P3_26890_4619677 | NC_021162.1    | Ca_kabuli_chr03 | 4619677                 | CC                              | TT                | 1945915425               |
| SNP_P3_26891_4619695 | NC_021162.1    | Ca_kabuli_chr03 | 4619695                 | TT                              | CC                | 1945915427               |
| SNP_P3_26892_4653616 | NC_021162.1    | Ca_kabuli_chr03 | 4653616                 | AA                              | GG                | 1945915428               |
| SNP_P3_26893_4667201 | NC_021162.1    | Ca_kabuli_chr03 | 4667201                 | AA                              | CC                | 1945915430               |
| SNP_P3_26894_4671246 | NC_021162.1    | Ca_kabuli_chr03 | 4671246                 | TT                              | CC                | 1945915432               |
| SNP_P3_26895_4688258 | NC_021162.1    | Ca_kabuli_chr03 | 4688258                 | AA                              | GG                | 1945915434               |
| SNP_P3_26896_4688269 | NC_021162.1    | Ca_kabuli_chr03 | 4688269                 | CC                              | TT                | 1945915435               |
| SNP_P3_26897_4688383 | NC_021162.1    | Ca_kabuli_chr03 | 4688383                 | TT                              | CC                | 1945915437               |
| SNP_P3_26898_4688500 | NC_021162.1    | Ca_kabuli_chr03 | 4688500                 | GG                              | AA                | 1945915439               |
| SNP_P3_26899_4688552 | NC_021162.1    | Ca_kabuli_chr03 | 4688552                 | CC                              | AA                | 1945915441               |
| SNP_P3_26900_4688556 | NC_021162.1    | Ca_kabuli_chr03 | 4688556                 | AA                              | GG                | 1945915443               |
| SNP_P3_26901_4688709 | NC_021162.1    | Ca_kabuli_chr03 | 4688709                 | GG                              | TT                | 1945915444               |
| SNP_P3_26902_4688799 | NC_021162.1    | Ca_kabuli_chr03 | 4688799                 | AA                              | TT                | 1945915446               |
| SNP_P3_26903_4688866 | NC_021162.1    | Ca_kabuli_chr03 | 4688866                 | AA                              | TT                | 1945915448               |
| SNP_P3_26904_4688867 | NC_021162.1    | Ca_kabuli_chr03 | 4688867                 | TT                              | AA                | 1945915450               |
| SNP_P3_26905_4688868 | NC_021162.1    | Ca_kabuli_chr03 | 4688868                 | TT                              | AA                | 1945915451               |
| SNP_P3_26906_4688885 | NC_021162.1    | Ca_kabuli_chr03 | 4688885                 | AA                              | GG                | 1945915453               |
| SNP_P3_26907_4688901 | NC_021162.1    | Ca_kabuli_chr03 | 4688901                 | AA                              | CC                | 1945915455               |
| SNP_P3_26908_4689021 | NC_021162.1    | Ca_kabuli_chr03 | 4689021                 | CC                              | TT                | 1945915457               |
| SNP_P3_26909_4689029 | NC_021162.1    | Ca_kabuli_chr03 | 4689029                 | GG                              | AA                | 1945915459               |
| SNP_P3_26910_4689053 | NC_021162.1    | Ca_kabuli_chr03 | 4689053                 | GG                              | CC                | 1945915460               |
| SNP_P3_26911_4689098 | NC_021162.1    | Ca_kabuli_chr03 | 4689098                 | GG                              | AA                | 1945915462               |
| SNP_P3_26913_4720312 | NC_021162.1    | Ca_kabuli_chr03 | 4720312                 | GG                              | AA                | 1945915464               |
| SNP_P3_26914_4720317 | NC_021162.1    | Ca_kabuli_chr03 | 4720317                 | TT                              | GG                | 1945915466               |
| SNP_P3_26915_4720319 | NC_021162.1    | Ca_kabuli_chr03 | 4720319                 | AA                              | TT                | 1945915467               |
| SNP_P3_26916_4720392 | NC_021162.1    | Ca_kabuli_chr03 | 4720392                 | TT                              | CC                | 1945915469               |
| SNP_P3_26917_4720557 | NC_021162.1    | Ca_kabuli_chr03 | 4720557                 | CC                              | AA                | 1945915471               |

| SNPs IDs             | Chromosome IDs | Chromosomes     | Physical positions (bp) | CDC Frontier (Reference genome) | (Pusa 256 & HPNB) | NCBI SNPdb Accession IDs |
|----------------------|----------------|-----------------|-------------------------|---------------------------------|-------------------|--------------------------|
| SNP_P3_26918_4720572 | NC_021162.1    | Ca_kabuli_chr03 | 4720572                 | AA                              | GG                | 1945915473               |
| SNP_P3_26920_4783877 | NC_021162.1    | Ca_kabuli_chr03 | 4783877                 | CC                              | TT                | 1945915474               |
| SNP_P3_26922_4787227 | NC_021162.1    | Ca_kabuli_chr03 | 4787227                 | CC                              | TT                | 1945915476               |
| SNP_P3_26923_4787230 | NC_021162.1    | Ca_kabuli_chr03 | 4787230                 | AA                              | CC                | 1945915478               |
| SNP_P3_26924_4787283 | NC_021162.1    | Ca_kabuli_chr03 | 4787283                 | CC                              | TT                | 1945915480               |
| SNP_P3_26925_4787573 | NC_021162.1    | Ca_kabuli_chr03 | 4787573                 | AA                              | GG                | 1945915482               |
| SNP_P3_26926_4787576 | NC_021162.1    | Ca_kabuli_chr03 | 4787576                 | AA                              | GG                | 1945915483               |
| SNP_P3_26927_4787661 | NC_021162.1    | Ca_kabuli_chr03 | 4787661                 | GG                              | AA                | 1945915485               |
| SNP_P3_26928_4789191 | NC_021162.1    | Ca_kabuli_chr03 | 4789191                 | AA                              | GG                | 1945915487               |
| SNP_P3_26929_4789424 | NC_021162.1    | Ca_kabuli_chr03 | 4789424                 | AA                              | TT                | 1945915489               |
| SNP_P3_26930_4789569 | NC_021162.1    | Ca_kabuli_chr03 | 4789569                 | AA                              | CC                | 1945915490               |
| SNP_P3_26931_4821443 | NC_021162.1    | Ca_kabuli_chr03 | 4821443                 | AA                              | CC                | 1945915492               |
| SNP_P3_26933_4845876 | NC_021162.1    | Ca_kabuli_chr03 | 4845876                 | GG                              | AA                | 1945915494               |
| SNP_P3_26934_4846998 | NC_021162.1    | Ca_kabuli_chr03 | 4846998                 | AA                              | GG                | 1945915496               |
| SNP_P3_26935_4866682 | NC_021162.1    | Ca_kabuli_chr03 | 4866682                 | TT                              | CC                | 1945915498               |
| SNP_P3_26936_4866726 | NC_021162.1    | Ca_kabuli_chr03 | 4866726                 | TT                              | CC                | 1945915499               |
| SNP_P3_26939_4944628 | NC_021162.1    | Ca_kabuli_chr03 | 4944628                 | GG                              | CC                | 1945915501               |
| SNP_P3_26940_4944948 | NC_021162.1    | Ca_kabuli_chr03 | 4944948                 | AA                              | GG                | 1945915503               |
| SNP_P3_26941_4945677 | NC_021162.1    | Ca_kabuli_chr03 | 4945677                 | CC                              | AA                | 1945915505               |
| SNP_P3_26942_4945865 | NC_021162.1    | Ca_kabuli_chr03 | 4945865                 | TT                              | CC                | 1945915506               |
| SNP_P3_26943_4952174 | NC_021162.1    | Ca_kabuli_chr03 | 4952174                 | AA                              | CC                | 1945915508               |
| SNP_P3_26944_4952379 | NC_021162.1    | Ca_kabuli_chr03 | 4952379                 | AA                              | GG                | 1945915510               |
| SNP_P3_26945_4954284 | NC_021162.1    | Ca_kabuli_chr03 | 4954284                 | CC                              | TT                | 1945915512               |
| SNP_P3_26946_4954429 | NC_021162.1    | Ca_kabuli_chr03 | 4954429                 | CC                              | TT                | 1945915514               |
| SNP_P3_26947_4954698 | NC_021162.1    | Ca_kabuli_chr03 | 4954698                 | CC                              | TT                | 1945915515               |
| SNP_P3_26948_4954719 | NC_021162.1    | Ca_kabuli_chr03 | 4954719                 | CC                              | TT                | 1945915517               |
| SNP_P3_26949_4955350 | NC_021162.1    | Ca_kabuli_chr03 | 4955350                 | AA                              | GG                | 1945915519               |
| SNP_P3_26950_4955387 | NC_021162.1    | Ca_kabuli_chr03 | 4955387                 | AA                              | GG                | 1945915521               |
| SNP_P3_26951_4955404 | NC_021162.1    | Ca_kabuli_chr03 | 4955404                 | CC                              | TT                | 1945915522               |
| SNP_P3_26952_4955684 | NC_021162.1    | Ca_kabuli_chr03 | 4955684                 | CC                              | TT                | 1945915524               |
| SNP_P3_26953_4957784 | NC_021162.1    | Ca_kabuli_chr03 | 4957784                 | GG                              | TT                | 1945915526               |
| SNP_P3_26954_4958655 | NC_021162.1    | Ca_kabuli_chr03 | 4958655                 | CC                              | TT                | 1945915528               |
| SNP_P3_26955_4958853 | NC_021162.1    | Ca_kabuli_chr03 | 4958853                 | TT                              | CC                | 1945915530               |
| SNP_P3_26956_4958885 | NC_021162.1    | Ca_kabuli_chr03 | 4958885                 | CC                              | TT                | 1945915531               |
| SNP_P3_26957_4962907 | NC_021162.1    | Ca_kabuli_chr03 | 4962907                 | AA                              | TT                | 1945915533               |
| SNP_P3_26958_4962915 | NC_021162.1    | Ca_kabuli_chr03 | 4962915                 | TT                              | GG                | 1945915535               |
| SNP_P3_26959_4962971 | NC_021162.1    | Ca_kabuli_chr03 | 4962971                 | AA                              | GG                | 1945915537               |
| SNP_P3_26960_4962973 | NC_021162.1    | Ca_kabuli_chr03 | 4962973                 | AA                              | GG                | 1945915538               |
| SNP_P3_26961_4963053 | NC_021162.1    | Ca_kabuli_chr03 | 4963053                 | AA                              | GG                | 1945915540               |
| SNP_P3_26962_4963182 | NC_021162.1    | Ca_kabuli_chr03 | 4963182                 | CC                              | TT                | 1945915542               |
| SNP_P3_26963_4963276 | NC_021162.1    | Ca_kabuli_chr03 | 4963276                 | TT                              | GG                | 1945915544               |
| SNP_P3_26964_4964707 | NC_021162.1    | Ca_kabuli_chr03 | 4964707                 | TT                              | CC                | 1945915545               |

| SNPs IDs             | Chromosome IDs | Chromosomes     | Physical positions (bp) | CDC Frontier (Reference genome) | (Pusa 256 & HPNB) | NCBI SNPdb Accession IDs |
|----------------------|----------------|-----------------|-------------------------|---------------------------------|-------------------|--------------------------|
| SNP_P3_26965_4965187 | NC_021162.1    | Ca_kabuli_chr03 | 4965187                 | AA                              | CC                | 1945915547               |
| SNP_P3_26966_4965188 | NC_021162.1    | Ca_kabuli_chr03 | 4965188                 | CC                              | AA                | 1945915549               |
| SNP_P3_26967_4965190 | NC_021162.1    | Ca_kabuli_chr03 | 4965190                 | TT                              | AA                | 1945915551               |
| SNP_P3_26968_4965364 | NC_021162.1    | Ca_kabuli_chr03 | 4965364                 | GG                              | AA                | 1945915553               |
| SNP_P3_26969_4965506 | NC_021162.1    | Ca_kabuli_chr03 | 4965506                 | GG                              | AA                | 1945915554               |
| SNP_P3_26972_4965643 | NC_021162.1    | Ca_kabuli_chr03 | 4965643                 | AA                              | TT                | 1945915556               |
| SNP_P3_26973_4965646 | NC_021162.1    | Ca_kabuli_chr03 | 4965646                 | AA                              | TT                | 1945915558               |
| SNP_P3_26975_4965669 | NC_021162.1    | Ca_kabuli_chr03 | 4965669                 | AA                              | GG                | 1945915560               |
| SNP_P3_26976_4965678 | NC_021162.1    | Ca_kabuli_chr03 | 4965678                 | TT                              | AA                | 1945915561               |
| SNP_P3_26977_4965689 | NC_021162.1    | Ca_kabuli_chr03 | 4965689                 | TT                              | CC                | 1945915563               |
| SNP_P3_26978_4965744 | NC_021162.1    | Ca_kabuli_chr03 | 4965744                 | GG                              | CC                | 1945915565               |
| SNP_P3_26979_4965750 | NC_021162.1    | Ca_kabuli_chr03 | 4965750                 | AA                              | GG                | 1945915567               |
| SNP_P3_26980_4965771 | NC_021162.1    | Ca_kabuli_chr03 | 4965771                 | CC                              | AA                | 1945915569               |
| SNP_P3_26981_4965813 | NC_021162.1    | Ca_kabuli_chr03 | 4965813                 | TT                              | AA                | 1945915570               |
| SNP_P3_26982_4965915 | NC_021162.1    | Ca_kabuli_chr03 | 4965915                 | CC                              | TT                | 1945915572               |
| SNP_P3_26983_4965982 | NC_021162.1    | Ca_kabuli_chr03 | 4965982                 | CC                              | TT                | 1945915574               |
| SNP_P3_26984_4966049 | NC_021162.1    | Ca_kabuli_chr03 | 4966049                 | CC                              | TT                | 1945915576               |
| SNP_P3_26985_4966058 | NC_021162.1    | Ca_kabuli_chr03 | 4966058                 | AA                              | CC                | 1945915577               |
| SNP_P3_26987_4966188 | NC_021162.1    | Ca_kabuli_chr03 | 4966188                 | CC                              | TT                | 1945915579               |
| SNP_P3_26988_4966354 | NC_021162.1    | Ca_kabuli_chr03 | 4966354                 | TT                              | AA                | 1945915581               |
| SNP_P3_26989_4966473 | NC_021162.1    | Ca_kabuli_chr03 | 4966473                 | TT                              | AA                | 1945915583               |
| SNP_P3_26990_4966809 | NC_021162.1    | Ca_kabuli_chr03 | 4966809                 | AA                              | CC                | 1945915584               |
| SNP_P3_26991_4966856 | NC_021162.1    | Ca_kabuli_chr03 | 4966856                 | GG                              | AA                | 1945915586               |
| SNP_P3_26992_4966928 | NC_021162.1    | Ca_kabuli_chr03 | 4966928                 | TT                              | CC                | 1945915588               |
| SNP_P3_26993_4967093 | NC_021162.1    | Ca_kabuli_chr03 | 4967093                 | CC                              | TT                | 1945915590               |
| SNP_P3_26995_4975115 | NC_021162.1    | Ca_kabuli_chr03 | 4975115                 | GG                              | AA                | 1945915592               |
| SNP_P3_26996_4975123 | NC_021162.1    | Ca_kabuli_chr03 | 4975123                 | TT                              | GG                | 1945915593               |
| SNP_P3_26997_4975162 | NC_021162.1    | Ca_kabuli_chr03 | 4975162                 | AA                              | TT                | 1945915595               |
| SNP_P3_26999_4975317 | NC_021162.1    | Ca_kabuli_chr03 | 4975317                 | TT                              | CC                | 1945915597               |
| SNP_P3_27000_4976629 | NC_021162.1    | Ca_kabuli_chr03 | 4976629                 | TT                              | CC                | 1945915599               |
| SNP_P3_27001_4976978 | NC_021162.1    | Ca_kabuli_chr03 | 4976978                 | AA                              | GG                | 1945915600               |
| SNP_P3_27002_4989159 | NC_021162.1    | Ca_kabuli_chr03 | 4989159                 | CC                              | TT                | 1945915602               |
| SNP_P3_27003_5082257 | NC_021162.1    | Ca_kabuli_chr03 | 5082257                 | CC                              | TT                | 1945915604               |
| SNP_P3_27005_5096427 | NC_021162.1    | Ca_kabuli_chr03 | 5096427                 | TT                              | CC                | 1945915606               |
| SNP_P3_27006_5096443 | NC_021162.1    | Ca_kabuli_chr03 | 5096443                 | TT                              | GG                | 1945915608               |
| SNP_P3_27007_5097747 | NC_021162.1    | Ca_kabuli_chr03 | 5097747                 | GG                              | AA                | 1945915609               |
| SNP_P3_27008_5164829 | NC_021162.1    | Ca_kabuli_chr03 | 5164829                 | CC                              | TT                | 1945915611               |
| SNP_P3_27010_5229745 | NC_021162.1    | Ca_kabuli_chr03 | 5229745                 | GG                              | AA                | 1945915613               |
| SNP_P3_27011_5247626 | NC_021162.1    | Ca_kabuli_chr03 | 5247626                 | AA                              | TT                | 1945915615               |
| SNP_P3_27012_5247628 | NC_021162.1    | Ca_kabuli_chr03 | 5247628                 | TT                              | AA                | 1945915616               |
| SNP_P3_27013_5269898 | NC_021162.1    | Ca_kabuli_chr03 | 5269898                 | CC                              | AA                | 1945915618               |
| SNP_P3_27015_5269991 | NC_021162.1    | Ca_kabuli_chr03 | 5269991                 | AA                              | TT                | 1945915620               |



| SNPs IDs             | Chromosome IDs | Chromosomes     | Physical positions (bp) | CDC Frontier (Reference genome) | (Pusa 256 & HPNB) | NCBI SNPdb Accession IDs |
|----------------------|----------------|-----------------|-------------------------|---------------------------------|-------------------|--------------------------|
| SNP_P3_27016_5269993 | NC_021162.1    | Ca_kabuli_chr03 | 5269993                 | TT                              | AA                | 1945915622               |
| SNP_P3_27017_5270062 | NC_021162.1    | Ca_kabuli_chr03 | 5270062                 | AA                              | TT                | 1945915624               |
| SNP_P3_27018_5270108 | NC_021162.1    | Ca_kabuli_chr03 | 5270108                 | AA                              | GG                | 1945915625               |
| SNP_P3_27020_5270131 | NC_021162.1    | Ca_kabuli_chr03 | 5270131                 | TT                              | CC                | 1945915627               |
| SNP_P3_27021_5270398 | NC_021162.1    | Ca_kabuli_chr03 | 5270398                 | TT                              | AA                | 1945915629               |
| SNP_P3_27022_5270405 | NC_021162.1    | Ca_kabuli_chr03 | 5270405                 | AA                              | TT                | 1945915631               |
| SNP_P3_27023_5270439 | NC_021162.1    | Ca_kabuli_chr03 | 5270439                 | CC                              | TT                | 1945915632               |
| SNP_P3_27025_5270705 | NC_021162.1    | Ca_kabuli_chr03 | 5270705                 | TT                              | AA                | 1945915634               |
| SNP_P3_27026_5270718 | NC_021162.1    | Ca_kabuli_chr03 | 5270718                 | GG                              | AA                | 1945915636               |
| SNP_P3_27027_5273772 | NC_021162.1    | Ca_kabuli_chr03 | 5273772                 | TT                              | CC                | 1945915638               |
| SNP_P3_27028_5273784 | NC_021162.1    | Ca_kabuli_chr03 | 5273784                 | TT                              | AA                | 1945915639               |
| SNP_P3_27029_5273785 | NC_021162.1    | Ca_kabuli_chr03 | 5273785                 | GG                              | TT                | 1945915641               |
| SNP_P3_27030_5273792 | NC_021162.1    | Ca_kabuli_chr03 | 5273792                 | CC                              | TT                | 1945915643               |
| SNP_P3_27031_5273794 | NC_021162.1    | Ca_kabuli_chr03 | 5273794                 | AA                              | GG                | 1945915645               |
| SNP_P3_27032_5273820 | NC_021162.1    | Ca_kabuli_chr03 | 5273820                 | AA                              | GG                | 1945915647               |
| SNP_P3_27033_5273834 | NC_021162.1    | Ca_kabuli_chr03 | 5273834                 | GG                              | AA                | 1945915648               |
| SNP_P3_27034_5273835 | NC_021162.1    | Ca_kabuli_chr03 | 5273835                 | AA                              | GG                | 1945915650               |
| SNP_P3_27035_5273919 | NC_021162.1    | Ca_kabuli_chr03 | 5273919                 | CC                              | TT                | 1945915652               |
| SNP_P3_27036_5273973 | NC_021162.1    | Ca_kabuli_chr03 | 5273973                 | TT                              | GG                | 1945915654               |
| SNP_P3_27037_5274027 | NC_021162.1    | Ca_kabuli_chr03 | 5274027                 | GG                              | AA                | 1945915655               |
| SNP_P3_27038_5274147 | NC_021162.1    | Ca_kabuli_chr03 | 5274147                 | TT                              | CC                | 1945915657               |
| SNP_P3_27039_5274156 | NC_021162.1    | Ca_kabuli_chr03 | 5274156                 | AA                              | GG                | 1945915659               |
| SNP_P3_27040_5274168 | NC_021162.1    | Ca_kabuli_chr03 | 5274168                 | TT                              | AA                | 1945915661               |
| SNP_P3_27041_5274178 | NC_021162.1    | Ca_kabuli_chr03 | 5274178                 | TT                              | CC                | 1945915663               |
| SNP_P3_27042_5274198 | NC_021162.1    | Ca_kabuli_chr03 | 5274198                 | AA                              | GG                | 1945915664               |
| SNP_P3_27043_5274204 | NC_021162.1    | Ca_kabuli_chr03 | 5274204                 | TT                              | CC                | 1945915666               |
| SNP_P3_27044_5274210 | NC_021162.1    | Ca_kabuli_chr03 | 5274210                 | TT                              | AA                | 1945915668               |
| SNP_P3_27045_5274216 | NC_021162.1    | Ca_kabuli_chr03 | 5274216                 | AA                              | CC                | 1945915670               |
| SNP_P3_27046_5274249 | NC_021162.1    | Ca_kabuli_chr03 | 5274249                 | AA                              | GG                | 1945915671               |
| SNP_P3_27047_5274267 | NC_021162.1    | Ca_kabuli_chr03 | 5274267                 | TT                              | AA                | 1945915673               |
| SNP_P3_27048_5274273 | NC_021162.1    | Ca_kabuli_chr03 | 5274273                 | TT                              | AA                | 1945915675               |
| SNP_P3_27049_5274291 | NC_021162.1    | Ca_kabuli_chr03 | 5274291                 | TT                              | GG                | 1945915677               |
| SNP_P3_27050_5274303 | NC_021162.1    | Ca_kabuli_chr03 | 5274303                 | TT                              | AA                | 1945915679               |
| SNP_P3_27051_5274318 | NC_021162.1    | Ca_kabuli_chr03 | 5274318                 | TT                              | AA                | 1945915680               |
| SNP_P3_27052_5274330 | NC_021162.1    | Ca_kabuli_chr03 | 5274330                 | TT                              | CC                | 1945915682               |
| SNP_P3_27053_5274342 | NC_021162.1    | Ca_kabuli_chr03 | 5274342                 | GG                              | AA                | 1945915684               |
| SNP_P3_27054_5274366 | NC_021162.1    | Ca_kabuli_chr03 | 5274366                 | AA                              | GG                | 1945915686               |
| SNP_P3_27055_5274404 | NC_021162.1    | Ca_kabuli_chr03 | 5274404                 | AA                              | CC                | 1945915687               |
| SNP_P3_27056_5274411 | NC_021162.1    | Ca_kabuli_chr03 | 5274411                 | TT                              | CC                | 1945915689               |
| SNP_P3_27057_5274423 | NC_021162.1    | Ca_kabuli_chr03 | 5274423                 | CC                              | TT                | 1945915691               |
| SNP_P3_27058_5274428 | NC_021162.1    | Ca_kabuli_chr03 | 5274428                 | TT                              | CC                | 1945915693               |
| SNP_P3_27059_5274429 | NC_021162.1    | Ca_kabuli_chr03 | 5274429                 | AA                              | TT                | 1945915695               |

| SNPs IDs             | Chromosome IDs | Chromosomes     | Physical positions (bp) | CDC Frontier (Reference genome) | (Pusa 256 & HPNB) | NCBI SNPdb Accession IDs |
|----------------------|----------------|-----------------|-------------------------|---------------------------------|-------------------|--------------------------|
| SNP_P3_27060_5274444 | NC_021162.1    | Ca_kabuli_chr03 | 5274444                 | CC                              | TT                | 1945915696               |
| SNP_P3_27061_5274450 | NC_021162.1    | Ca_kabuli_chr03 | 5274450                 | CC                              | AA                | 1945915698               |
| SNP_P3_27062_5274453 | NC_021162.1    | Ca_kabuli_chr03 | 5274453                 | TT                              | CC                | 1945915700               |
| SNP_P3_27063_5274456 | NC_021162.1    | Ca_kabuli_chr03 | 5274456                 | CC                              | TT                | 1945915702               |
| SNP_P3_27064_5276575 | NC_021162.1    | Ca_kabuli_chr03 | 5276575                 | GG                              | AA                | 1945915703               |
| SNP_P3_27065_5276621 | NC_021162.1    | Ca_kabuli_chr03 | 5276621                 | TT                              | CC                | 1945915705               |
| SNP_P3_27066_5276626 | NC_021162.1    | Ca_kabuli_chr03 | 5276626                 | AA                              | CC                | 1945915707               |
| SNP_P3_27067_5276632 | NC_021162.1    | Ca_kabuli_chr03 | 5276632                 | AA                              | TT                | 1945915709               |
| SNP_P3_27068_5276645 | NC_021162.1    | Ca_kabuli_chr03 | 5276645                 | AA                              | GG                | 1945915711               |
| SNP_P3_27069_5276647 | NC_021162.1    | Ca_kabuli_chr03 | 5276647                 | TT                              | CC                | 1945915712               |
| SNP_P3_27070_5276656 | NC_021162.1    | Ca_kabuli_chr03 | 5276656                 | CC                              | TT                | 1945915714               |
| SNP_P3_27071_5276665 | NC_021162.1    | Ca_kabuli_chr03 | 5276665                 | TT                              | GG                | 1945915716               |
| SNP_P3_27073_5276686 | NC_021162.1    | Ca_kabuli_chr03 | 5276686                 | AA                              | GG                | 1945915718               |
| SNP_P3_27074_5278333 | NC_021162.1    | Ca_kabuli_chr03 | 5278333                 | GG                              | AA                | 1945915719               |
| SNP_P3_27076_5281618 | NC_021162.1    | Ca_kabuli_chr03 | 5281618                 | CC                              | TT                | 1945915721               |
| SNP_P3_27077_5281619 | NC_021162.1    | Ca_kabuli_chr03 | 5281619                 | AA                              | CC                | 1945915723               |
| SNP_P3_27078_5281632 | NC_021162.1    | Ca_kabuli_chr03 | 5281632                 | CC                              | AA                | 1945915725               |
| SNP_P3_27079_5282265 | NC_021162.1    | Ca_kabuli_chr03 | 5282265                 | CC                              | TT                | 1945915727               |
| SNP_P3_27080_5282266 | NC_021162.1    | Ca_kabuli_chr03 | 5282266                 | GG                              | TT                | 1945915728               |
| SNP_P3_27081_5285617 | NC_021162.1    | Ca_kabuli_chr03 | 5285617                 | CC                              | TT                | 1945915730               |
| SNP_P3_27082_5285637 | NC_021162.1    | Ca_kabuli_chr03 | 5285637                 | GG                              | AA                | 1945915732               |
| SNP_P3_27083_5285640 | NC_021162.1    | Ca_kabuli_chr03 | 5285640                 | TT                              | CC                | 1945915734               |
| SNP_P3_27084_5285791 | NC_021162.1    | Ca_kabuli_chr03 | 5285791                 | TT                              | CC                | 1945915735               |
| SNP_P3_27085_5285793 | NC_021162.1    | Ca_kabuli_chr03 | 5285793                 | TT                              | CC                | 1945915737               |
| SNP_P3_27086_5285804 | NC_021162.1    | Ca_kabuli_chr03 | 5285804                 | GG                              | CC                | 1945915739               |
| SNP_P3_27087_5285820 | NC_021162.1    | Ca_kabuli_chr03 | 5285820                 | GG                              | CC                | 1945915741               |
| SNP_P3_27088_5285854 | NC_021162.1    | Ca_kabuli_chr03 | 5285854                 | AA                              | GG                | 1945915743               |
| SNP_P3_27089_5285873 | NC_021162.1    | Ca_kabuli_chr03 | 5285873                 | TT                              | AA                | 1945915744               |
| SNP_P3_27090_5285931 | NC_021162.1    | Ca_kabuli_chr03 | 5285931                 | AA                              | TT                | 1945915746               |
| SNP_P3_27091_5285933 | NC_021162.1    | Ca_kabuli_chr03 | 5285933                 | CC                              | AA                | 1945915748               |
| SNP_P3_27092_5285947 | NC_021162.1    | Ca_kabuli_chr03 | 5285947                 | AA                              | CC                | 1945915750               |
| SNP_P3_27093_5286108 | NC_021162.1    | Ca_kabuli_chr03 | 5286108                 | TT                              | CC                | 1945915751               |
| SNP_P3_27094_5286136 | NC_021162.1    | Ca_kabuli_chr03 | 5286136                 | AA                              | GG                | 1945915753               |
| SNP_P3_27096_5287450 | NC_021162.1    | Ca_kabuli_chr03 | 5287450                 | CC                              | TT                | 1945915755               |
| SNP_P3_27097_5287529 | NC_021162.1    | Ca_kabuli_chr03 | 5287529                 | AA                              | GG                | 1945915757               |
| SNP_P3_27098_5287544 | NC_021162.1    | Ca_kabuli_chr03 | 5287544                 | CC                              | GG                | 1945915759               |
| SNP_P3_27099_5287658 | NC_021162.1    | Ca_kabuli_chr03 | 5287658                 | GG                              | AA                | 1945915760               |
| SNP_P3_27100_5287688 | NC_021162.1    | Ca_kabuli_chr03 | 5287688                 | CC                              | TT                | 1945915762               |
| SNP_P3_27101_5287691 | NC_021162.1    | Ca_kabuli_chr03 | 5287691                 | AA                              | GG                | 1945915764               |
| SNP_P3_27102_5287699 | NC_021162.1    | Ca_kabuli_chr03 | 5287699                 | CC                              | TT                | 1945915766               |
| SNP_P3_27104_5288445 | NC_021162.1    | Ca_kabuli_chr03 | 5288445                 | GG                              | AA                | 1945915768               |
| SNP_P3_27105_5288448 | NC_021162.1    | Ca_kabuli_chr03 | 5288448                 | AA                              | CC                | 1945915769               |

| SNPs IDs             | Chromosome IDs | Chromosomes     | Physical positions (bp) | CDC Frontier (Reference genome) | (Pusa 256 & HPNB) | NCBI SNPdb Accession IDs |
|----------------------|----------------|-----------------|-------------------------|---------------------------------|-------------------|--------------------------|
| SNP_P3_27106_5288453 | NC_021162.1    | Ca_kabuli_chr03 | 5288453                 | AA                              | TT                | 1945915771               |
| SNP_P3_27107_5288461 | NC_021162.1    | Ca_kabuli_chr03 | 5288461                 | CC                              | GG                | 1945915773               |
| SNP_P3_27108_5288462 | NC_021162.1    | Ca_kabuli_chr03 | 5288462                 | CC                              | AA                | 1945915775               |
| SNP_P3_27109_5288474 | NC_021162.1    | Ca_kabuli_chr03 | 5288474                 | AA                              | GG                | 1945915776               |
| SNP_P3_27110_5288498 | NC_021162.1    | Ca_kabuli_chr03 | 5288498                 | GG                              | AA                | 1945915778               |
| SNP_P3_27111_5288508 | NC_021162.1    | Ca_kabuli_chr03 | 5288508                 | CC                              | GG                | 1945915780               |
| SNP_P3_27112_5292269 | NC_021162.1    | Ca_kabuli_chr03 | 5292269                 | AA                              | GG                | 1945915782               |
| SNP_P3_27113_5292280 | NC_021162.1    | Ca_kabuli_chr03 | 5292280                 | GG                              | AA                | 1945915784               |
| SNP_P3_27114_5298942 | NC_021162.1    | Ca_kabuli_chr03 | 5298942                 | CC                              | TT                | 1945915785               |
| SNP_P3_27115_5321051 | NC_021162.1    | Ca_kabuli_chr03 | 5321051                 | AA                              | GG                | 1945915787               |
| SNP_P3_27116_5321069 | NC_021162.1    | Ca_kabuli_chr03 | 5321069                 | GG                              | AA                | 1945915789               |
| SNP_P3_27117_5321100 | NC_021162.1    | Ca_kabuli_chr03 | 5321100                 | GG                              | AA                | 1945915791               |
| SNP_P3_27118_5338674 | NC_021162.1    | Ca_kabuli_chr03 | 5338674                 | CC                              | TT                | 1945915792               |
| SNP_P3_27119_5338687 | NC_021162.1    | Ca_kabuli_chr03 | 5338687                 | CC                              | TT                | 1945915794               |
| SNP_P3_27120_5340504 | NC_021162.1    | Ca_kabuli_chr03 | 5340504                 | AA                              | GG                | 1945915796               |
| SNP_P3_27121_5340671 | NC_021162.1    | Ca_kabuli_chr03 | 5340671                 | CC                              | AA                | 1945915798               |
| SNP_P3_27122_5340847 | NC_021162.1    | Ca_kabuli_chr03 | 5340847                 | TT                              | CC                | 1945915800               |
| SNP_P3_27123_5340876 | NC_021162.1    | Ca_kabuli_chr03 | 5340876                 | AA                              | GG                | 1945915801               |
| SNP_P3_27124_5340893 | NC_021162.1    | Ca_kabuli_chr03 | 5340893                 | CC                              | TT                | 1945915803               |
| SNP_P3_27125_5340951 | NC_021162.1    | Ca_kabuli_chr03 | 5340951                 | TT                              | GG                | 1945915805               |
| SNP_P3_27126_5340976 | NC_021162.1    | Ca_kabuli_chr03 | 5340976                 | AA                              | CC                | 1945915807               |
| SNP_P3_27127_5341040 | NC_021162.1    | Ca_kabuli_chr03 | 5341040                 | TT                              | CC                | 1945915808               |
| SNP_P3_27128_5344680 | NC_021162.1    | Ca_kabuli_chr03 | 5344680                 | GG                              | AA                | 1945915810               |
| SNP_P3_27133_5501930 | NC_021162.1    | Ca_kabuli_chr03 | 5501930                 | TT                              | GG                | 1945915812               |
| SNP_P3_27134_5501949 | NC_021162.1    | Ca_kabuli_chr03 | 5501949                 | GG                              | AA                | 1945915814               |
| SNP_P3_27135_5501951 | NC_021162.1    | Ca_kabuli_chr03 | 5501951                 | AA                              | TT                | 1945915816               |
| SNP_P3_27136_5501952 | NC_021162.1    | Ca_kabuli_chr03 | 5501952                 | GG                              | CC                | 1945915817               |
| SNP_P3_27137_5502027 | NC_021162.1    | Ca_kabuli_chr03 | 5502027                 | AA                              | CC                | 1945915819               |
| SNP_P3_27138_5502152 | NC_021162.1    | Ca_kabuli_chr03 | 5502152                 | TT                              | AA                | 1945915821               |
| SNP_P3_27139_5502184 | NC_021162.1    | Ca_kabuli_chr03 | 5502184                 | GG                              | AA                | 1945915823               |
| SNP_P3_27143_5507659 | NC_021162.1    | Ca_kabuli_chr03 | 5507659                 | CC                              | TT                | 1945915824               |
| SNP_P3_27145_5507850 | NC_021162.1    | Ca_kabuli_chr03 | 5507850                 | AA                              | GG                | 1945915826               |
| SNP_P3_27146_5507946 | NC_021162.1    | Ca_kabuli_chr03 | 5507946                 | AA                              | CC                | 1945915828               |
| SNP_P3_27147_5508035 | NC_021162.1    | Ca_kabuli_chr03 | 5508035                 | GG                              | TT                | 1945915830               |
| SNP_P3_27148_5508532 | NC_021162.1    | Ca_kabuli_chr03 | 5508532                 | TT                              | AA                | 1945915832               |
| SNP_P3_27149_5508876 | NC_021162.1    | Ca_kabuli_chr03 | 5508876                 | AA                              | GG                | 1945915833               |
| SNP_P3_27150_5509233 | NC_021162.1    | Ca_kabuli_chr03 | 5509233                 | AA                              | CC                | 1945915835               |
| SNP_P3_27151_5509903 | NC_021162.1    | Ca_kabuli_chr03 | 5509903                 | GG                              | AA                | 1945915837               |
| SNP_P3_27152_5509907 | NC_021162.1    | Ca_kabuli_chr03 | 5509907                 | AA                              | GG                | 1945915839               |
| SNP_P3_27153_5509909 | NC_021162.1    | Ca_kabuli_chr03 | 5509909                 | GG                              | TT                | 1945915840               |
| SNP_P3_27154_5509936 | NC_021162.1    | Ca_kabuli_chr03 | 5509936                 | AA                              | GG                | 1945915842               |
| SNP_P3_27155_5510130 | NC_021162.1    | Ca_kabuli_chr03 | 5510130                 | GG                              | AA                | 1945915844               |

| SNPs IDs             | Chromosome IDs | Chromosomes     | Physical positions (bp) | CDC Frontier (Reference genome) | (Pusa 256 & HPNB) | NCBI SNPdb Accession IDs |
|----------------------|----------------|-----------------|-------------------------|---------------------------------|-------------------|--------------------------|
| SNP_P3_27156_5510138 | NC_021162.1    | Ca_kabuli_chr03 | 5510138                 | AA                              | GG                | 1945915846               |
| SNP_P3_27157_5510172 | NC_021162.1    | Ca_kabuli_chr03 | 5510172                 | TT                              | GG                | 1945915848               |
| SNP_P3_27158_5510189 | NC_021162.1    | Ca_kabuli_chr03 | 5510189                 | GG                              | AA                | 1945915849               |
| SNP_P3_27159_5510205 | NC_021162.1    | Ca_kabuli_chr03 | 5510205                 | GG                              | TT                | 1945915851               |
| SNP_P3_27160_5510238 | NC_021162.1    | Ca_kabuli_chr03 | 5510238                 | TT                              | CC                | 1945915853               |
| SNP_P3_27161_5515297 | NC_021162.1    | Ca_kabuli_chr03 | 5515297                 | AA                              | TT                | 1945915855               |
| SNP_P3_27162_5516329 | NC_021162.1    | Ca_kabuli_chr03 | 5516329                 | TT                              | AA                | 1945915856               |
| SNP_P3_27163_5516331 | NC_021162.1    | Ca_kabuli_chr03 | 5516331                 | GG                              | TT                | 1945915858               |
| SNP_P3_27164_5516350 | NC_021162.1    | Ca_kabuli_chr03 | 5516350                 | GG                              | AA                | 1945915860               |
| SNP_P3_27165_5516392 | NC_021162.1    | Ca_kabuli_chr03 | 5516392                 | AA                              | GG                | 1945915862               |
| SNP_P3_27166_5516394 | NC_021162.1    | Ca_kabuli_chr03 | 5516394                 | CC                              | TT                | 1945915864               |
| SNP_P3_27167_5516739 | NC_021162.1    | Ca_kabuli_chr03 | 5516739                 | TT                              | CC                | 1945915865               |
| SNP_P3_27168_5516741 | NC_021162.1    | Ca_kabuli_chr03 | 5516741                 | TT                              | CC                | 1945915867               |
| SNP_P3_27169_5516785 | NC_021162.1    | Ca_kabuli_chr03 | 5516785                 | AA                              | GG                | 1945915869               |
| SNP_P3_27171_5546595 | NC_021162.1    | Ca_kabuli_chr03 | 5546595                 | CC                              | TT                | 1945915871               |
| SNP_P3_27173_5588724 | NC_021162.1    | Ca_kabuli_chr03 | 5588724                 | GG                              | TT                | 1945915872               |
| SNP_P3_27174_5588889 | NC_021162.1    | Ca_kabuli_chr03 | 5588889                 | AA                              | CC                | 1945915874               |
| SNP_P3_27175_5588900 | NC_021162.1    | Ca_kabuli_chr03 | 5588900                 | GG                              | TT                | 1945915876               |
| SNP_P3_27176_5588902 | NC_021162.1    | Ca_kabuli_chr03 | 5588902                 | AA                              | GG                | 1945915878               |
| SNP_P3_27177_5588905 | NC_021162.1    | Ca_kabuli_chr03 | 5588905                 | AA                              | TT                | 1945915880               |
| SNP_P3_27178_5633013 | NC_021162.1    | Ca_kabuli_chr03 | 5633013                 | TT                              | AA                | 1945915881               |
| SNP_P3_27179_5633964 | NC_021162.1    | Ca_kabuli_chr03 | 5633964                 | AA                              | TT                | 1945915883               |
| SNP_P3_27180_5637345 | NC_021162.1    | Ca_kabuli_chr03 | 5637345                 | AA                              | GG                | 1945915885               |
| SNP_P3_27181_5637473 | NC_021162.1    | Ca_kabuli_chr03 | 5637473                 | AA                              | TT                | 1945915887               |
| SNP_P3_27182_5645055 | NC_021162.1    | Ca_kabuli_chr03 | 5645055                 | AA                              | GG                | 1945915888               |
| SNP_P3_27183_5645058 | NC_021162.1    | Ca_kabuli_chr03 | 5645058                 | AA                              | GG                | 1945915890               |
| SNP_P3_27184_5645232 | NC_021162.1    | Ca_kabuli_chr03 | 5645232                 | TT                              | CC                | 1945915892               |
| SNP_P3_27185_5645237 | NC_021162.1    | Ca_kabuli_chr03 | 5645237                 | CC                              | TT                | 1945915894               |
| SNP_P3_27187_5659612 | NC_021162.1    | Ca_kabuli_chr03 | 5659612                 | TT                              | CC                | 1945915896               |
| SNP_P3_27189_5678295 | NC_021162.1    | Ca_kabuli_chr03 | 5678295                 | AA                              | GG                | 1945915897               |
| SNP_P3_27190_5685748 | NC_021162.1    | Ca_kabuli_chr03 | 5685748                 | TT                              | GG                | 1945915899               |
| SNP_P3_27191_5685749 | NC_021162.1    | Ca_kabuli_chr03 | 5685749                 | AA                              | CC                | 1945915901               |
| SNP_P3_27192_5689031 | NC_021162.1    | Ca_kabuli_chr03 | 5689031                 | TT                              | CC                | 1945915903               |
| SNP_P3_27193_5689050 | NC_021162.1    | Ca_kabuli_chr03 | 5689050                 | CC                              | TT                | 1945915904               |
| SNP_P3_27195_5689357 | NC_021162.1    | Ca_kabuli_chr03 | 5689357                 | TT                              | CC                | 1945915906               |
| SNP_P3_27196_5689359 | NC_021162.1    | Ca_kabuli_chr03 | 5689359                 | AA                              | GG                | 1945915908               |
| SNP_P3_27197_5692263 | NC_021162.1    | Ca_kabuli_chr03 | 5692263                 | TT                              | CC                | 1945915910               |
| SNP_P3_27198_5692267 | NC_021162.1    | Ca_kabuli_chr03 | 5692267                 | TT                              | CC                | 1945915912               |
| SNP_P3_27199_5692283 | NC_021162.1    | Ca_kabuli_chr03 | 5692283                 | GG                              | AA                | 1945915913               |
| SNP_P3_27200_5692466 | NC_021162.1    | Ca_kabuli_chr03 | 5692466                 | TT                              | CC                | 1945915915               |
| SNP_P3_27201_5692468 | NC_021162.1    | Ca_kabuli_chr03 | 5692468                 | GG                              | AA                | 1945915917               |
| SNP_P3_27203_5709465 | NC_021162.1    | Ca_kabuli_chr03 | 5709465                 | TT                              | CC                | 1945915919               |

| SNPs IDs             | Chromosome IDs | Chromosomes     | Physical positions (bp) | CDC Frontier (Reference genome) | (Pusa 256 & HPNB) | NCBI SNPdb Accession IDs |
|----------------------|----------------|-----------------|-------------------------|---------------------------------|-------------------|--------------------------|
| SNP_P3_27204_5716270 | NC_021162.1    | Ca_kabuli_chr03 | 5716270                 | AA                              | GG                | 1945915920               |
| SNP_P3_27205_5716287 | NC_021162.1    | Ca_kabuli_chr03 | 5716287                 | AA                              | TT                | 1945915922               |
| SNP_P3_27206_5716301 | NC_021162.1    | Ca_kabuli_chr03 | 5716301                 | GG                              | TT                | 1945915924               |
| SNP_P3_27207_5716306 | NC_021162.1    | Ca_kabuli_chr03 | 5716306                 | AA                              | TT                | 1945915926               |
| SNP_P3_27208_5716315 | NC_021162.1    | Ca_kabuli_chr03 | 5716315                 | AA                              | CC                | 1945915928               |
| SNP_P3_27209_5717226 | NC_021162.1    | Ca_kabuli_chr03 | 5717226                 | GG                              | AA                | 1945915929               |
| SNP_P3_27210_5717925 | NC_021162.1    | Ca_kabuli_chr03 | 5717925                 | AA                              | GG                | 1945915931               |
| SNP_P3_27211_5717960 | NC_021162.1    | Ca_kabuli_chr03 | 5717960                 | TT                              | CC                | 1945915933               |
| SNP_P3_27214_5769482 | NC_021162.1    | Ca_kabuli_chr03 | 5769482                 | CC                              | GG                | 1945915935               |
| SNP_P3_27215_5769483 | NC_021162.1    | Ca_kabuli_chr03 | 5769483                 | AA                              | TT                | 1945915936               |
| SNP_P3_27216_5786188 | NC_021162.1    | Ca_kabuli_chr03 | 5786188                 | AA                              | GG                | 1945915938               |
| SNP_P3_27217_5797299 | NC_021162.1    | Ca_kabuli_chr03 | 5797299                 | GG                              | AA                | 1945915940               |
| SNP_P3_27218_5805133 | NC_021162.1    | Ca_kabuli_chr03 | 5805133                 | AA                              | TT                | 1945915942               |
| SNP_P3_27219_5805214 | NC_021162.1    | Ca_kabuli_chr03 | 5805214                 | CC                              | TT                | 1945915944               |
| SNP_P3_27221_5805565 | NC_021162.1    | Ca_kabuli_chr03 | 5805565                 | AA                              | GG                | 1945915945               |
| SNP_P3_27223_5838813 | NC_021162.1    | Ca_kabuli_chr03 | 5838813                 | AA                              | CC                | 1945915947               |
| SNP_P3_27224_5838859 | NC_021162.1    | Ca_kabuli_chr03 | 5838859                 | GG                              | TT                | 1945915949               |
| SNP_P3_27225_5839015 | NC_021162.1    | Ca_kabuli_chr03 | 5839015                 | AA                              | GG                | 1945915951               |
| SNP_P3_27226_5839060 | NC_021162.1    | Ca_kabuli_chr03 | 5839060                 | TT                              | CC                | 1945915952               |
| SNP_P3_27227_5839085 | NC_021162.1    | Ca_kabuli_chr03 | 5839085                 | TT                              | CC                | 1945915954               |
| SNP_P3_27228_5839815 | NC_021162.1    | Ca_kabuli_chr03 | 5839815                 | GG                              | TT                | 1945915956               |
| SNP_P3_27229_5840829 | NC_021162.1    | Ca_kabuli_chr03 | 5840829                 | AA                              | GG                | 1945915958               |
| SNP_P3_27230_5840858 | NC_021162.1    | Ca_kabuli_chr03 | 5840858                 | TT                              | GG                | 1945915960               |
| SNP_P3_27231_5840860 | NC_021162.1    | Ca_kabuli_chr03 | 5840860                 | AA                              | GG                | 1945915961               |
| SNP_P3_27232_5840888 | NC_021162.1    | Ca_kabuli_chr03 | 5840888                 | GG                              | TT                | 1945915963               |
| SNP_P3_27233_5840904 | NC_021162.1    | Ca_kabuli_chr03 | 5840904                 | CC                              | TT                | 1945915965               |
| SNP_P3_27234_5840927 | NC_021162.1    | Ca_kabuli_chr03 | 5840927                 | AA                              | GG                | 1945915967               |
| SNP_P3_27235_5840934 | NC_021162.1    | Ca_kabuli_chr03 | 5840934                 | TT                              | AA                | 1945915968               |
| SNP_P3_27236_5841031 | NC_021162.1    | Ca_kabuli_chr03 | 5841031                 | AA                              | GG                | 1945915970               |
| SNP_P3_27237_5841413 | NC_021162.1    | Ca_kabuli_chr03 | 5841413                 | AA                              | GG                | 1945915972               |
| SNP_P3_27238_5871358 | NC_021162.1    | Ca_kabuli_chr03 | 5871358                 | TT                              | CC                | 1945915974               |
| SNP_P3_27239_5888199 | NC_021162.1    | Ca_kabuli_chr03 | 5888199                 | AA                              | GG                | 1945915976               |
| SNP_P3_27240_5888237 | NC_021162.1    | Ca_kabuli_chr03 | 5888237                 | AA                              | CC                | 1945915977               |
| SNP_P3_27241_5888240 | NC_021162.1    | Ca_kabuli_chr03 | 5888240                 | TT                              | GG                | 1945915979               |
| SNP_P3_27242_5894066 | NC_021162.1    | Ca_kabuli_chr03 | 5894066                 | CC                              | GG                | 1945915981               |
| SNP_P3_27243_5914795 | NC_021162.1    | Ca_kabuli_chr03 | 5914795                 | CC                              | AA                | 1945915983               |
| SNP_P3_27244_5916180 | NC_021162.1    | Ca_kabuli_chr03 | 5916180                 | AA                              | GG                | 1945915984               |
| SNP_P3_27245_5916185 | NC_021162.1    | Ca_kabuli_chr03 | 5916185                 | TT                              | CC                | 1945915986               |
| SNP_P3_27246_5917674 | NC_021162.1    | Ca_kabuli_chr03 | 5917674                 | GG                              | AA                | 1945915988               |
| SNP_P3_27247_5922057 | NC_021162.1    | Ca_kabuli_chr03 | 5922057                 | AA                              | TT                | 1945915990               |
| SNP_P3_27248_5922087 | NC_021162.1    | Ca_kabuli_chr03 | 5922087                 | CC                              | GG                | 1945915992               |
| SNP_P3_27249_5922096 | NC_021162.1    | Ca_kabuli_chr03 | 5922096                 | CC                              | TT                | 1945915993               |

| SNPs IDs             | Chromosome IDs | Chromosomes     | Physical positions (bp) | CDC Frontier (Reference genome) | (Pusa 256 & HPNB) | NCBI SNPdb Accession IDs |
|----------------------|----------------|-----------------|-------------------------|---------------------------------|-------------------|--------------------------|
| SNP_P3_27250_5922517 | NC_021162.1    | Ca_kabuli_chr03 | 5922517                 | AA                              | GG                | 1945915995               |
| SNP_P3_27251_5922705 | NC_021162.1    | Ca_kabuli_chr03 | 5922705                 | TT                              | GG                | 1945915997               |
| SNP_P3_27252_5922757 | NC_021162.1    | Ca_kabuli_chr03 | 5922757                 | AA                              | GG                | 1945915999               |
| SNP_P3_27253_5923068 | NC_021162.1    | Ca_kabuli_chr03 | 5923068                 | AA                              | GG                | 1945916000               |
| SNP_P3_27254_5923101 | NC_021162.1    | Ca_kabuli_chr03 | 5923101                 | GG                              | TT                | 1945916002               |
| SNP_P3_27255_5936213 | NC_021162.1    | Ca_kabuli_chr03 | 5936213                 | TT                              | CC                | 1945916004               |
| SNP_P3_27256_5936267 | NC_021162.1    | Ca_kabuli_chr03 | 5936267                 | CC                              | TT                | 1945916006               |
| SNP_P3_27257_5936343 | NC_021162.1    | Ca_kabuli_chr03 | 5936343                 | TT                              | CC                | 1945916008               |
| SNP_P3_27258_5936579 | NC_021162.1    | Ca_kabuli_chr03 | 5936579                 | CC                              | TT                | 1945916009               |
| SNP_P3_27259_5936608 | NC_021162.1    | Ca_kabuli_chr03 | 5936608                 | TT                              | AA                | 1945916011               |
| SNP_P3_27260_5936665 | NC_021162.1    | Ca_kabuli_chr03 | 5936665                 | CC                              | TT                | 1945916013               |
| SNP_P3_27261_5936666 | NC_021162.1    | Ca_kabuli_chr03 | 5936666                 | AA                              | GG                | 1945916015               |
| SNP_P3_27262_5936668 | NC_021162.1    | Ca_kabuli_chr03 | 5936668                 | GG                              | AA                | 1945916016               |
| SNP_P3_27263_5936764 | NC_021162.1    | Ca_kabuli_chr03 | 5936764                 | TT                              | AA                | 1945916018               |
| SNP_P3_27264_5936906 | NC_021162.1    | Ca_kabuli_chr03 | 5936906                 | CC                              | TT                | 1945916020               |
| SNP_P3_27265_5943814 | NC_021162.1    | Ca_kabuli_chr03 | 5943814                 | GG                              | CC                | 1945916022               |
| SNP_P3_27266_5945208 | NC_021162.1    | Ca_kabuli_chr03 | 5945208                 | CC                              | AA                | 1945916024               |
| SNP_P3_27267_5945222 | NC_021162.1    | Ca_kabuli_chr03 | 5945222                 | AA                              | CC                | 1945916025               |
| SNP_P3_27268_5945269 | NC_021162.1    | Ca_kabuli_chr03 | 5945269                 | CC                              | AA                | 1945916027               |
| SNP_P3_27269_5945493 | NC_021162.1    | Ca_kabuli_chr03 | 5945493                 | CC                              | AA                | 1945916029               |
| SNP_P3_27270_5945500 | NC_021162.1    | Ca_kabuli_chr03 | 5945500                 | AA                              | TT                | 1945916031               |
| SNP_P3_27271_5945531 | NC_021162.1    | Ca_kabuli_chr03 | 5945531                 | CC                              | TT                | 1945916032               |
| SNP_P3_27272_5957718 | NC_021162.1    | Ca_kabuli_chr03 | 5957718                 | AA                              | CC                | 1945916034               |
| SNP_P3_27273_5958643 | NC_021162.1    | Ca_kabuli_chr03 | 5958643                 | GG                              | TT                | 1945916036               |
| SNP_P3_27274_5959132 | NC_021162.1    | Ca_kabuli_chr03 | 5959132                 | TT                              | CC                | 1945916038               |
| SNP_P3_27275_5967019 | NC_021162.1    | Ca_kabuli_chr03 | 5967019                 | GG                              | CC                | 1945916040               |
| SNP_P3_27276_5970699 | NC_021162.1    | Ca_kabuli_chr03 | 5970699                 | AA                              | TT                | 1945916041               |
| SNP_P3_27277_5975447 | NC_021162.1    | Ca_kabuli_chr03 | 5975447                 | AA                              | CC                | 1945916043               |
| SNP_P3_27278_5978448 | NC_021162.1    | Ca_kabuli_chr03 | 5978448                 | CC                              | AA                | 1945916045               |
| SNP_P3_27279_5978479 | NC_021162.1    | Ca_kabuli_chr03 | 5978479                 | CC                              | TT                | 1945916047               |
| SNP_P3_27280_5982921 | NC_021162.1    | Ca_kabuli_chr03 | 5982921                 | TT                              | CC                | 1945916048               |
| SNP_P3_27281_5983731 | NC_021162.1    | Ca_kabuli_chr03 | 5983731                 | TT                              | CC                | 1945916050               |
| SNP_P3_27282_5984876 | NC_021162.1    | Ca_kabuli_chr03 | 5984876                 | GG                              | TT                | 1945916052               |
| SNP_P3_27283_5984879 | NC_021162.1    | Ca_kabuli_chr03 | 5984879                 | TT                              | AA                | 1945916054               |
| SNP_P3_27284_5993794 | NC_021162.1    | Ca_kabuli_chr03 | 5993794                 | AA                              | CC                | 1945916056               |
| SNP_P3_27285_5993805 | NC_021162.1    | Ca_kabuli_chr03 | 5993805                 | TT                              | CC                | 1945916057               |
| SNP_P3_27286_5993822 | NC_021162.1    | Ca_kabuli_chr03 | 5993822                 | CC                              | TT                | 1945916059               |
| SNP_P3_27287_5993823 | NC_021162.1    | Ca_kabuli_chr03 | 5993823                 | AA                              | GG                | 1945916061               |
| SNP_P3_27288_5993830 | NC_021162.1    | Ca_kabuli_chr03 | 5993830                 | TT                              | GG                | 1945916063               |
| SNP_P3_27289_5993841 | NC_021162.1    | Ca_kabuli_chr03 | 5993841                 | TT                              | AA                | 1945916064               |
| SNP_P3_27291_5994233 | NC_021162.1    | Ca_kabuli_chr03 | 5994233                 | AA                              | TT                | 1945916066               |
| SNP_P3_27292_5994269 | NC_021162.1    | Ca_kabuli_chr03 | 5994269                 | AA                              | CC                | 1945916068               |

| SNPs IDs             | Chromosome IDs | Chromosomes     | Physical positions (bp) | CDC Frontier (Reference genome) | (Pusa 256 & HPNB) | NCBI SNPdb Accession IDs |
|----------------------|----------------|-----------------|-------------------------|---------------------------------|-------------------|--------------------------|
| SNP_P3_27293_5994298 | NC_021162.1    | Ca_kabuli_chr03 | 5994298                 | TT                              | AA                | 1945916070               |
| SNP_P3_27294_6004312 | NC_021162.1    | Ca_kabuli_chr03 | 6004312                 | AA                              | GG                | 1945916072               |
| SNP_P3_27295_6004732 | NC_021162.1    | Ca_kabuli_chr03 | 6004732                 | AA                              | GG                | 1945916073               |
| SNP_P3_27296_6004797 | NC_021162.1    | Ca_kabuli_chr03 | 6004797                 | AA                              | GG                | 1945916075               |
| SNP_P3_27297_6004850 | NC_021162.1    | Ca_kabuli_chr03 | 6004850                 | AA                              | GG                | 1945916077               |
| SNP_P3_27298_6021674 | NC_021162.1    | Ca_kabuli_chr03 | 6021674                 | CC                              | GG                | 1945916079               |
| SNP_P3_27299_6021698 | NC_021162.1    | Ca_kabuli_chr03 | 6021698                 | GG                              | CC                | 1945916080               |
| SNP_P3_27300_6021701 | NC_021162.1    | Ca_kabuli_chr03 | 6021701                 | GG                              | AA                | 1945916082               |
| SNP_P3_27301_6021721 | NC_021162.1    | Ca_kabuli_chr03 | 6021721                 | CC                              | TT                | 1945916084               |
| SNP_P3_27302_6030819 | NC_021162.1    | Ca_kabuli_chr03 | 6030819                 | AA                              | GG                | 1945916086               |
| SNP_P3_27303_6030821 | NC_021162.1    | Ca_kabuli_chr03 | 6030821                 | GG                              | TT                | 1945916088               |
| SNP_P3_27304_6030829 | NC_021162.1    | Ca_kabuli_chr03 | 6030829                 | TT                              | CC                | 1945916089               |
| SNP_P3_27305_6030871 | NC_021162.1    | Ca_kabuli_chr03 | 6030871                 | TT                              | GG                | 1945916091               |
| SNP_P3_27306_6031035 | NC_021162.1    | Ca_kabuli_chr03 | 6031035                 | GG                              | AA                | 1945916093               |
| SNP_P3_27307_6031191 | NC_021162.1    | Ca_kabuli_chr03 | 6031191                 | GG                              | CC                | 1945916095               |
| SNP_P3_27308_6031215 | NC_021162.1    | Ca_kabuli_chr03 | 6031215                 | TT                              | CC                | 1945916096               |
| SNP_P3_27309_6031225 | NC_021162.1    | Ca_kabuli_chr03 | 6031225                 | AA                              | CC                | 1945916098               |
| SNP_P3_27310_6031307 | NC_021162.1    | Ca_kabuli_chr03 | 6031307                 | AA                              | TT                | 1945916100               |
| SNP_P3_27311_6031427 | NC_021162.1    | Ca_kabuli_chr03 | 6031427                 | TT                              | CC                | 1945916102               |
| SNP_P3_27312_6031433 | NC_021162.1    | Ca_kabuli_chr03 | 6031433                 | GG                              | AA                | 1945916104               |
| SNP_P3_27313_6031451 | NC_021162.1    | Ca_kabuli_chr03 | 6031451                 | TT                              | CC                | 1945916105               |
| SNP_P3_27314_6031463 | NC_021162.1    | Ca_kabuli_chr03 | 6031463                 | GG                              | AA                | 1945916107               |
| SNP_P3_27315_6031466 | NC_021162.1    | Ca_kabuli_chr03 | 6031466                 | CC                              | TT                | 1945916109               |
| SNP_P3_27316_6034385 | NC_021162.1    | Ca_kabuli_chr03 | 6034385                 | AA                              | GG                | 1945916111               |
| SNP_P3_27317_6035912 | NC_021162.1    | Ca_kabuli_chr03 | 6035912                 | AA                              | CC                | 1945916112               |
| SNP_P3_27318_6037644 | NC_021162.1    | Ca_kabuli_chr03 | 6037644                 | TT                              | CC                | 1945916114               |
| SNP_P3_27319_6037715 | NC_021162.1    | Ca_kabuli_chr03 | 6037715                 | AA                              | GG                | 1945916116               |
| SNP_P3_27321_6088030 | NC_021162.1    | Ca_kabuli_chr03 | 6088030                 | GG                              | AA                | 1945916118               |
| SNP_P3_27323_6088319 | NC_021162.1    | Ca_kabuli_chr03 | 6088319                 | AA                              | TT                | 1945916120               |
| SNP_P3_27324_6088320 | NC_021162.1    | Ca_kabuli_chr03 | 6088320                 | AA                              | TT                | 1945916121               |
| SNP_P3_27325_6104777 | NC_021162.1    | Ca_kabuli_chr03 | 6104777                 | CC                              | GG                | 1945916123               |
| SNP_P3_27326_6104864 | NC_021162.1    | Ca_kabuli_chr03 | 6104864                 | AA                              | GG                | 1945916125               |
| SNP_P3_27328_6159075 | NC_021162.1    | Ca_kabuli_chr03 | 6159075                 | GG                              | AA                | 1945916127               |
| SNP_P3_27329_6159085 | NC_021162.1    | Ca_kabuli_chr03 | 6159085                 | TT                              | AA                | 1945916128               |
| SNP_P3_27330_6159100 | NC_021162.1    | Ca_kabuli_chr03 | 6159100                 | CC                              | AA                | 1945916130               |
| SNP_P3_27331_6193396 | NC_021162.1    | Ca_kabuli_chr03 | 6193396                 | GG                              | TT                | 1945916132               |
| SNP_P3_27332_6214628 | NC_021162.1    | Ca_kabuli_chr03 | 6214628                 | TT                              | AA                | 1945916134               |
| SNP_P3_27333_6214629 | NC_021162.1    | Ca_kabuli_chr03 | 6214629                 | AA                              | TT                | 1945916136               |
| SNP_P3_27334_6219407 | NC_021162.1    | Ca_kabuli_chr03 | 6219407                 | GG                              | AA                | 1945916137               |
| SNP_P3_27335_6243880 | NC_021162.1    | Ca_kabuli_chr03 | 6243880                 | AA                              | GG                | 1945916139               |
| SNP_P3_27336_6243889 | NC_021162.1    | Ca_kabuli_chr03 | 6243889                 | CC                              | TT                | 1945916141               |
| SNP_P3_27338_6243979 | NC_021162.1    | Ca_kabuli_chr03 | 6243979                 | GG                              | AA                | 1945916143               |

| SNPs IDs             | Chromosome IDs | Chromosomes     | Physical positions (bp) | CDC Frontier (Reference genome) | (Pusa 256 & HPNB) | NCBI SNPdb Accession IDs |
|----------------------|----------------|-----------------|-------------------------|---------------------------------|-------------------|--------------------------|
| SNP_P3_27339_6248278 | NC_021162.1    | Ca_kabuli_chr03 | 6248278                 | GG                              | AA                | 1945916144               |
| SNP_P3_27340_6252910 | NC_021162.1    | Ca_kabuli_chr03 | 6252910                 | AA                              | GG                | 1945916146               |
| SNP_P3_27341_6252951 | NC_021162.1    | Ca_kabuli_chr03 | 6252951                 | TT                              | CC                | 1945916148               |
| SNP_P3_27342_6257967 | NC_021162.1    | Ca_kabuli_chr03 | 6257967                 | AA                              | GG                | 1945916150               |
| SNP_P3_27343_6259684 | NC_021162.1    | Ca_kabuli_chr03 | 6259684                 | GG                              | AA                | 1945916152               |
| SNP_P3_27344_6293742 | NC_021162.1    | Ca_kabuli_chr03 | 6293742                 | TT                              | GG                | 1945916153               |
| SNP_P3_27345_6297142 | NC_021162.1    | Ca_kabuli_chr03 | 6297142                 | GG                              | AA                | 1945916155               |
| SNP_P3_27347_6301920 | NC_021162.1    | Ca_kabuli_chr03 | 6301920                 | CC                              | TT                | 1945916157               |
| SNP_P3_27348_6302492 | NC_021162.1    | Ca_kabuli_chr03 | 6302492                 | AA                              | CC                | 1945916159               |
| SNP_P3_27349_6302512 | NC_021162.1    | Ca_kabuli_chr03 | 6302512                 | AA                              | GG                | 1945916160               |
| SNP_P3_27350_6302565 | NC_021162.1    | Ca_kabuli_chr03 | 6302565                 | CC                              | TT                | 1945916162               |
| SNP_P3_27351_6302899 | NC_021162.1    | Ca_kabuli_chr03 | 6302899                 | AA                              | GG                | 1945916164               |
| SNP_P3_27352_6302939 | NC_021162.1    | Ca_kabuli_chr03 | 6302939                 | CC                              | TT                | 1945916166               |
| SNP_P3_27353_6325707 | NC_021162.1    | Ca_kabuli_chr03 | 6325707                 | GG                              | AA                | 1945916168               |
| SNP_P3_27354_6328804 | NC_021162.1    | Ca_kabuli_chr03 | 6328804                 | TT                              | GG                | 1945916169               |
| SNP_P3_27355_6333759 | NC_021162.1    | Ca_kabuli_chr03 | 6333759                 | AA                              | TT                | 1945916171               |
| SNP_P3_27356_6333827 | NC_021162.1    | Ca_kabuli_chr03 | 6333827                 | AA                              | GG                | 1945916173               |
| SNP_P3_27361_6363417 | NC_021162.1    | Ca_kabuli_chr03 | 6363417                 | GG                              | CC                | 1945916175               |
| SNP_P3_27362_6371941 | NC_021162.1    | Ca_kabuli_chr03 | 6371941                 | CC                              | TT                | 1945916176               |
| SNP_P3_27363_6371988 | NC_021162.1    | Ca_kabuli_chr03 | 6371988                 | GG                              | AA                | 1945916178               |
| SNP_P3_27364_6372002 | NC_021162.1    | Ca_kabuli_chr03 | 6372002                 | TT                              | AA                | 1945916180               |
| SNP_P3_27365_6372004 | NC_021162.1    | Ca_kabuli_chr03 | 6372004                 | AA                              | GG                | 1945916182               |
| SNP_P3_27367_6372228 | NC_021162.1    | Ca_kabuli_chr03 | 6372228                 | AA                              | TT                | 1945916184               |
| SNP_P3_27368_6372262 | NC_021162.1    | Ca_kabuli_chr03 | 6372262                 | AA                              | CC                | 1945916185               |
| SNP_P3_27369_6372264 | NC_021162.1    | Ca_kabuli_chr03 | 6372264                 | AA                              | TT                | 1945916187               |
| SNP_P3_27371_6376519 | NC_021162.1    | Ca_kabuli_chr03 | 6376519                 | AA                              | TT                | 1945916189               |
| SNP_P3_27372_6386716 | NC_021162.1    | Ca_kabuli_chr03 | 6386716                 | TT                              | GG                | 1945916191               |
| SNP_P3_27373_6386717 | NC_021162.1    | Ca_kabuli_chr03 | 6386717                 | CC                              | GG                | 1945916192               |
| SNP_P3_27374_6386864 | NC_021162.1    | Ca_kabuli_chr03 | 6386864                 | TT                              | CC                | 1945916194               |
| SNP_P3_27375_6386896 | NC_021162.1    | Ca_kabuli_chr03 | 6386896                 | CC                              | TT                | 1945916196               |
| SNP_P3_27376_6386928 | NC_021162.1    | Ca_kabuli_chr03 | 6386928                 | TT                              | CC                | 1945916198               |
| SNP_P3_27378_6386943 | NC_021162.1    | Ca_kabuli_chr03 | 6386943                 | GG                              | AA                | 1945916200               |
| SNP_P3_27379_6397122 | NC_021162.1    | Ca_kabuli_chr03 | 6397122                 | GG                              | AA                | 1945916201               |
| SNP_P3_27380_6397131 | NC_021162.1    | Ca_kabuli_chr03 | 6397131                 | TT                              | GG                | 1945916203               |
| SNP_P3_27381_6428253 | NC_021162.1    | Ca_kabuli_chr03 | 6428253                 | TT                              | AA                | 1945916205               |
| SNP_P3_27382_6430983 | NC_021162.1    | Ca_kabuli_chr03 | 6430983                 | AA                              | GG                | 1945916207               |
| SNP_P3_27383_6430987 | NC_021162.1    | Ca_kabuli_chr03 | 6430987                 | GG                              | CC                | 1945916208               |
| SNP_P3_27384_6431027 | NC_021162.1    | Ca_kabuli_chr03 | 6431027                 | GG                              | AA                | 1945916210               |
| SNP_P3_27385_6431363 | NC_021162.1    | Ca_kabuli_chr03 | 6431363                 | AA                              | GG                | 1945916212               |
| SNP_P3_27386_6453760 | NC_021162.1    | Ca_kabuli_chr03 | 6453760                 | TT                              | CC                | 1945916214               |
| SNP_P3_27387_6474374 | NC_021162.1    | Ca_kabuli_chr03 | 6474374                 | AA                              | TT                | 1945916216               |
| SNP_P3_27388_6519841 | NC_021162.1    | Ca_kabuli_chr03 | 6519841                 | AA                              | GG                | 1945916217               |



| SNPs IDs             | Chromosome IDs | Chromosomes     | Physical positions (bp) | CDC Frontier (Reference genome) | (Pusa 256 & HPNB) | NCBI SNPdb Accession IDs |
|----------------------|----------------|-----------------|-------------------------|---------------------------------|-------------------|--------------------------|
| SNP_P3_27389_6520131 | NC_021162.1    | Ca_kabuli_chr03 | 6520131                 | AA                              | GG                | 1945916219               |
| SNP_P3_27390_6520144 | NC_021162.1    | Ca_kabuli_chr03 | 6520144                 | CC                              | AA                | 1945916221               |
| SNP_P3_27391_6520284 | NC_021162.1    | Ca_kabuli_chr03 | 6520284                 | AA                              | GG                | 1945916223               |
| SNP_P3_27392_6520291 | NC_021162.1    | Ca_kabuli_chr03 | 6520291                 | CC                              | TT                | 1945916225               |
| SNP_P3_27393_6547312 | NC_021162.1    | Ca_kabuli_chr03 | 6547312                 | TT                              | AA                | 1945916226               |
| SNP_P3_27395_6569728 | NC_021162.1    | Ca_kabuli_chr03 | 6569728                 | CC                              | TT                | 1945916228               |
| SNP_P3_27396_6581942 | NC_021162.1    | Ca_kabuli_chr03 | 6581942                 | GG                              | AA                | 1945916230               |
| SNP_P3_27397_6582270 | NC_021162.1    | Ca_kabuli_chr03 | 6582270                 | TT                              | CC                | 1945916232               |
| SNP_P3_27398_6583701 | NC_021162.1    | Ca_kabuli_chr03 | 6583701                 | CC                              | GG                | 1945916233               |
| SNP_P3_27400_6587860 | NC_021162.1    | Ca_kabuli_chr03 | 6587860                 | AA                              | GG                | 1945916235               |
| SNP_P3_27401_6588348 | NC_021162.1    | Ca_kabuli_chr03 | 6588348                 | TT                              | AA                | 1945916237               |
| SNP_P3_27402_6588638 | NC_021162.1    | Ca_kabuli_chr03 | 6588638                 | CC                              | TT                | 1945916239               |
| SNP_P3_27403_6588778 | NC_021162.1    | Ca_kabuli_chr03 | 6588778                 | TT                              | GG                | 1945916241               |
| SNP_P3_27404_6588920 | NC_021162.1    | Ca_kabuli_chr03 | 6588920                 | GG                              | AA                | 1945916242               |
| SNP_P3_27405_6589283 | NC_021162.1    | Ca_kabuli_chr03 | 6589283                 | CC                              | AA                | 1945916244               |
| SNP_P3_27406_6589692 | NC_021162.1    | Ca_kabuli_chr03 | 6589692                 | TT                              | CC                | 1945916246               |
| SNP_P3_27407_6590181 | NC_021162.1    | Ca_kabuli_chr03 | 6590181                 | CC                              | TT                | 1945916248               |
| SNP_P3_27408_6590380 | NC_021162.1    | Ca_kabuli_chr03 | 6590380                 | GG                              | AA                | 1945916249               |
| SNP_P3_27409_6590452 | NC_021162.1    | Ca_kabuli_chr03 | 6590452                 | CC                              | AA                | 1945916251               |
| SNP_P3_27410_6591729 | NC_021162.1    | Ca_kabuli_chr03 | 6591729                 | TT                              | GG                | 1945916253               |
| SNP_P3_27411_6592074 | NC_021162.1    | Ca_kabuli_chr03 | 6592074                 | CC                              | TT                | 1945916255               |
| SNP_P3_27412_6597997 | NC_021162.1    | Ca_kabuli_chr03 | 6597997                 | CC                              | AA                | 1945916257               |
| SNP_P3_27413_6599039 | NC_021162.1    | Ca_kabuli_chr03 | 6599039                 | TT                              | CC                | 1945916258               |
| SNP_P3_27414_6599058 | NC_021162.1    | Ca_kabuli_chr03 | 6599058                 | AA                              | CC                | 1945916260               |
| SNP_P3_27415_6599070 | NC_021162.1    | Ca_kabuli_chr03 | 6599070                 | TT                              | CC                | 1945916262               |
| SNP_P3_27416_6599081 | NC_021162.1    | Ca_kabuli_chr03 | 6599081                 | CC                              | TT                | 1945916264               |
| SNP_P3_27417_6599095 | NC_021162.1    | Ca_kabuli_chr03 | 6599095                 | GG                              | CC                | 1945916265               |
| SNP_P3_27418_6599098 | NC_021162.1    | Ca_kabuli_chr03 | 6599098                 | TT                              | AA                | 1945916267               |
| SNP_P3_27419_6599124 | NC_021162.1    | Ca_kabuli_chr03 | 6599124                 | TT                              | AA                | 1945916269               |
| SNP_P3_27420_6599143 | NC_021162.1    | Ca_kabuli_chr03 | 6599143                 | TT                              | CC                | 1945916271               |
| SNP_P3_27421_6599149 | NC_021162.1    | Ca_kabuli_chr03 | 6599149                 | TT                              | CC                | 1945916273               |
| SNP_P3_27422_6599174 | NC_021162.1    | Ca_kabuli_chr03 | 6599174                 | AA                              | TT                | 1945916274               |
| SNP_P3_27423_6599175 | NC_021162.1    | Ca_kabuli_chr03 | 6599175                 | TT                              | AA                | 1945916276               |
| SNP_P3_27424_6599208 | NC_021162.1    | Ca_kabuli_chr03 | 6599208                 | AA                              | GG                | 1945916278               |
| SNP_P3_27425_6599217 | NC_021162.1    | Ca_kabuli_chr03 | 6599217                 | TT                              | AA                | 1945916280               |
| SNP_P3_27426_6599310 | NC_021162.1    | Ca_kabuli_chr03 | 6599310                 | AA                              | GG                | 1945916281               |
| SNP_P3_27427_6599482 | NC_021162.1    | Ca_kabuli_chr03 | 6599482                 | GG                              | AA                | 1945916283               |
| SNP_P3_27428_6599878 | NC_021162.1    | Ca_kabuli_chr03 | 6599878                 | CC                              | GG                | 1945916285               |
| SNP_P3_27429_6599942 | NC_021162.1    | Ca_kabuli_chr03 | 6599942                 | TT                              | AA                | 1945916287               |
| SNP_P3_27430_6600484 | NC_021162.1    | Ca_kabuli_chr03 | 6600484                 | AA                              | GG                | 1945916289               |
| SNP_P3_27431_6600839 | NC_021162.1    | Ca_kabuli_chr03 | 6600839                 | CC                              | AA                | 1945916290               |
| SNP_P3_27432_6607166 | NC_021162.1    | Ca_kabuli_chr03 | 6607166                 | TT                              | AA                | 1945916292               |

| SNPs IDs             | Chromosome IDs | Chromosomes     | Physical positions (bp) | CDC Frontier (Reference genome) | (Pusa 256 & HPNB) | NCBI SNPdb Accession IDs |
|----------------------|----------------|-----------------|-------------------------|---------------------------------|-------------------|--------------------------|
| SNP_P3_27433_6607332 | NC_021162.1    | Ca_kabuli_chr03 | 6607332                 | AA                              | TT                | 1945916294               |
| SNP_P3_27434_6607348 | NC_021162.1    | Ca_kabuli_chr03 | 6607348                 | TT                              | CC                | 1945916296               |
| SNP_P3_27435_6608192 | NC_021162.1    | Ca_kabuli_chr03 | 6608192                 | TT                              | CC                | 1945916297               |
| SNP_P3_27436_6608197 | NC_021162.1    | Ca_kabuli_chr03 | 6608197                 | AA                              | GG                | 1945916299               |
| SNP_P3_27437_6608449 | NC_021162.1    | Ca_kabuli_chr03 | 6608449                 | GG                              | TT                | 1945916301               |
| SNP_P3_27438_6608861 | NC_021162.1    | Ca_kabuli_chr03 | 6608861                 | TT                              | AA                | 1945916303               |
| SNP_P3_27439_6618154 | NC_021162.1    | Ca_kabuli_chr03 | 6618154                 | TT                              | AA                | 1945916305               |
| SNP_P3_27443_6675431 | NC_021162.1    | Ca_kabuli_chr03 | 6675431                 | AA                              | GG                | 1945916306               |
| SNP_P3_27444_6675470 | NC_021162.1    | Ca_kabuli_chr03 | 6675470                 | GG                              | TT                | 1945916308               |
| SNP_P3_27445_6675544 | NC_021162.1    | Ca_kabuli_chr03 | 6675544                 | TT                              | CC                | 1945916310               |
| SNP_P3_27446_6675562 | NC_021162.1    | Ca_kabuli_chr03 | 6675562                 | AA                              | GG                | 1945916312               |
| SNP_P3_27447_6675633 | NC_021162.1    | Ca_kabuli_chr03 | 6675633                 | TT                              | GG                | 1945916313               |
| SNP_P3_27448_6675956 | NC_021162.1    | Ca_kabuli_chr03 | 6675956                 | TT                              | AA                | 1945916315               |
| SNP_P3_27449_6675959 | NC_021162.1    | Ca_kabuli_chr03 | 6675959                 | GG                              | TT                | 1945916317               |
| SNP_P3_27450_6675964 | NC_021162.1    | Ca_kabuli_chr03 | 6675964                 | GG                              | AA                | 1945916319               |
| SNP_P3_27451_6675966 | NC_021162.1    | Ca_kabuli_chr03 | 6675966                 | GG                              | TT                | 1945916321               |
| SNP_P3_27454_6694940 | NC_021162.1    | Ca_kabuli_chr03 | 6694940                 | CC                              | TT                | 1945916322               |
| SNP_P3_27455_6698037 | NC_021162.1    | Ca_kabuli_chr03 | 6698037                 | AA                              | GG                | 1945916324               |
| SNP_P3_27456_6719268 | NC_021162.1    | Ca_kabuli_chr03 | 6719268                 | CC                              | AA                | 1945916326               |
| SNP_P3_27458_6724076 | NC_021162.1    | Ca_kabuli_chr03 | 6724076                 | AA                              | GG                | 1945916328               |
| SNP_P3_27459_6724288 | NC_021162.1    | Ca_kabuli_chr03 | 6724288                 | TT                              | CC                | 1945916329               |
| SNP_P3_27460_6724711 | NC_021162.1    | Ca_kabuli_chr03 | 6724711                 | TT                              | CC                | 1945916331               |
| SNP_P3_27461_6724712 | NC_021162.1    | Ca_kabuli_chr03 | 6724712                 | TT                              | CC                | 1945916333               |
| SNP_P3_27462_6728901 | NC_021162.1    | Ca_kabuli_chr03 | 6728901                 | AA                              | GG                | 1945916335               |
| SNP_P3_27463_6734840 | NC_021162.1    | Ca_kabuli_chr03 | 6734840                 | GG                              | AA                | 1945916337               |
| SNP_P3_27464_6734844 | NC_021162.1    | Ca_kabuli_chr03 | 6734844                 | CC                              | TT                | 1945916338               |
| SNP_P3_27465_6734870 | NC_021162.1    | Ca_kabuli_chr03 | 6734870                 | CC                              | TT                | 1945916340               |
| SNP_P3_27466_6734880 | NC_021162.1    | Ca_kabuli_chr03 | 6734880                 | CC                              | TT                | 1945916342               |
| SNP_P3_27467_6734881 | NC_021162.1    | Ca_kabuli_chr03 | 6734881                 | CC                              | TT                | 1945916344               |
| SNP_P3_27468_6734901 | NC_021162.1    | Ca_kabuli_chr03 | 6734901                 | GG                              | TT                | 1945916345               |
| SNP_P3_27469_6735548 | NC_021162.1    | Ca_kabuli_chr03 | 6735548                 | CC                              | AA                | 1945916347               |
| SNP_P3_27470_6739764 | NC_021162.1    | Ca_kabuli_chr03 | 6739764                 | GG                              | AA                | 1945916349               |
| SNP_P3_27471_6739882 | NC_021162.1    | Ca_kabuli_chr03 | 6739882                 | AA                              | GG                | 1945916351               |
| SNP_P3_27472_6740213 | NC_021162.1    | Ca_kabuli_chr03 | 6740213                 | AA                              | GG                | 1945916353               |
| SNP_P3_27473_6740247 | NC_021162.1    | Ca_kabuli_chr03 | 6740247                 | TT                              | CC                | 1945916354               |
| SNP_P3_27474_6740260 | NC_021162.1    | Ca_kabuli_chr03 | 6740260                 | CC                              | TT                | 1945916356               |
| SNP_P3_27475_6770926 | NC_021162.1    | Ca_kabuli_chr03 | 6770926                 | AA                              | CC                | 1945916358               |
| SNP_P3_27476_6770934 | NC_021162.1    | Ca_kabuli_chr03 | 6770934                 | AA                              | GG                | 1945916360               |
| SNP_P3_27477_6772485 | NC_021162.1    | Ca_kabuli_chr03 | 6772485                 | TT                              | CC                | 1945916361               |
| SNP_P3_27478_6772524 | NC_021162.1    | Ca_kabuli_chr03 | 6772524                 | TT                              | CC                | 1945916363               |
| SNP_P3_27479_6772552 | NC_021162.1    | Ca_kabuli_chr03 | 6772552                 | CC                              | TT                | 1945916365               |
| SNP_P3_27480_6772870 | NC_021162.1    | Ca_kabuli_chr03 | 6772870                 | TT                              | CC                | 1945916367               |

| SNPs IDs             | Chromosome IDs | Chromosomes     | Physical positions (bp) | CDC Frontier (Reference genome) | (Pusa 256 & HPNB) | NCBI SNPdb Accession IDs |
|----------------------|----------------|-----------------|-------------------------|---------------------------------|-------------------|--------------------------|
| SNP_P3_27482_6773169 | NC_021162.1    | Ca_kabuli_chr03 | 6773169                 | GG                              | AA                | 1945916369               |
| SNP_P3_27483_6773171 | NC_021162.1    | Ca_kabuli_chr03 | 6773171                 | AA                              | GG                | 1945916370               |
| SNP_P3_27484_6773439 | NC_021162.1    | Ca_kabuli_chr03 | 6773439                 | TT                              | CC                | 1945916372               |
| SNP_P3_27485_6773443 | NC_021162.1    | Ca_kabuli_chr03 | 6773443                 | TT                              | CC                | 1945916374               |
| SNP_P3_27486_6773447 | NC_021162.1    | Ca_kabuli_chr03 | 6773447                 | GG                              | AA                | 1945916376               |
| SNP_P3_27487_6773481 | NC_021162.1    | Ca_kabuli_chr03 | 6773481                 | TT                              | CC                | 1945916377               |
| SNP_P3_27488_6774057 | NC_021162.1    | Ca_kabuli_chr03 | 6774057                 | CC                              | TT                | 1945916379               |
| SNP_P3_27490_6774146 | NC_021162.1    | Ca_kabuli_chr03 | 6774146                 | GG                              | AA                | 1945916381               |
| SNP_P3_27491_6774235 | NC_021162.1    | Ca_kabuli_chr03 | 6774235                 | CC                              | AA                | 1945916383               |
| SNP_P3_27492_6774373 | NC_021162.1    | Ca_kabuli_chr03 | 6774373                 | TT                              | AA                | 1945916385               |
| SNP_P3_27493_6774379 | NC_021162.1    | Ca_kabuli_chr03 | 6774379                 | AA                              | GG                | 1945916386               |
| SNP_P3_27494_6780284 | NC_021162.1    | Ca_kabuli_chr03 | 6780284                 | AA                              | GG                | 1945916388               |
| SNP_P3_27495_6780322 | NC_021162.1    | Ca_kabuli_chr03 | 6780322                 | CC                              | TT                | 1945916390               |
| SNP_P3_27497_6780560 | NC_021162.1    | Ca_kabuli_chr03 | 6780560                 | GG                              | AA                | 1945916392               |
| SNP_P3_27498_6780651 | NC_021162.1    | Ca_kabuli_chr03 | 6780651                 | TT                              | AA                | 1945916393               |
| SNP_P3_27499_6780692 | NC_021162.1    | Ca_kabuli_chr03 | 6780692                 | TT                              | AA                | 1945916395               |
| SNP_P3_27500_6780764 | NC_021162.1    | Ca_kabuli_chr03 | 6780764                 | TT                              | CC                | 1945916397               |
| SNP_P3_27501_6780894 | NC_021162.1    | Ca_kabuli_chr03 | 6780894                 | GG                              | AA                | 1945916399               |
| SNP_P3_27502_6781028 | NC_021162.1    | Ca_kabuli_chr03 | 6781028                 | CC                              | TT                | 1945916401               |
| SNP_P3_27503_6781062 | NC_021162.1    | Ca_kabuli_chr03 | 6781062                 | TT                              | GG                | 1945916402               |
| SNP_P3_27504_6781078 | NC_021162.1    | Ca_kabuli_chr03 | 6781078                 | CC                              | AA                | 1945916404               |
| SNP_P3_27505_6781311 | NC_021162.1    | Ca_kabuli_chr03 | 6781311                 | CC                              | TT                | 1945916406               |
| SNP_P3_27506_6781368 | NC_021162.1    | Ca_kabuli_chr03 | 6781368                 | CC                              | TT                | 1945916408               |
| SNP_P3_27507_6790084 | NC_021162.1    | Ca_kabuli_chr03 | 6790084                 | GG                              | AA                | 1945916409               |
| SNP_P3_27508_6790188 | NC_021162.1    | Ca_kabuli_chr03 | 6790188                 | CC                              | TT                | 1945916411               |
| SNP_P3_27509_6790218 | NC_021162.1    | Ca_kabuli_chr03 | 6790218                 | TT                              | AA                | 1945916413               |
| SNP_P3_27510_6790293 | NC_021162.1    | Ca_kabuli_chr03 | 6790293                 | GG                              | AA                | 1945916415               |
| SNP_P3_27511_6790356 | NC_021162.1    | Ca_kabuli_chr03 | 6790356                 | CC                              | TT                | 1945916417               |
| SNP_P3_27512_6790446 | NC_021162.1    | Ca_kabuli_chr03 | 6790446                 | CC                              | TT                | 1945916418               |
| SNP_P3_27514_6815969 | NC_021162.1    | Ca_kabuli_chr03 | 6815969                 | AA                              | GG                | 1945916420               |
| SNP_P3_27516_6821915 | NC_021162.1    | Ca_kabuli_chr03 | 6821915                 | CC                              | TT                | 1945916422               |
| SNP_P3_27517_6821934 | NC_021162.1    | Ca_kabuli_chr03 | 6821934                 | TT                              | CC                | 1945916424               |
| SNP_P3_27519_6822080 | NC_021162.1    | Ca_kabuli_chr03 | 6822080                 | GG                              | AA                | 1945916425               |
| SNP_P3_27520_6822100 | NC_021162.1    | Ca_kabuli_chr03 | 6822100                 | GG                              | TT                | 1945916427               |
| SNP_P3_27521_6822158 | NC_021162.1    | Ca_kabuli_chr03 | 6822158                 | AA                              | GG                | 1945916429               |
| SNP_P3_27522_6823640 | NC_021162.1    | Ca_kabuli_chr03 | 6823640                 | TT                              | CC                | 1945916431               |
| SNP_P3_27523_6825995 | NC_021162.1    | Ca_kabuli_chr03 | 6825995                 | AA                              | CC                | 1945916433               |
| SNP_P3_27524_6826002 | NC_021162.1    | Ca_kabuli_chr03 | 6826002                 | CC                              | AA                | 1945916434               |
| SNP_P3_27525_6826017 | NC_021162.1    | Ca_kabuli_chr03 | 6826017                 | GG                              | AA                | 1945916436               |
| SNP_P3_27526_6826099 | NC_021162.1    | Ca_kabuli_chr03 | 6826099                 | TT                              | CC                | 1945916438               |
| SNP_P3_27527_6826252 | NC_021162.1    | Ca_kabuli_chr03 | 6826252                 | TT                              | AA                | 1945916440               |
| SNP_P3_27528_6826257 | NC_021162.1    | Ca_kabuli_chr03 | 6826257                 | AA                              | TT                | 1945916441               |

| SNPs IDs             | Chromosome IDs | Chromosomes     | Physical positions (bp) | CDC Frontier (Reference genome) | (Pusa 256 & HPNB) | NCBI SNPdb Accession IDs |
|----------------------|----------------|-----------------|-------------------------|---------------------------------|-------------------|--------------------------|
| SNP_P3_27529_6826292 | NC_021162.1    | Ca_kabuli_chr03 | 6826292                 | GG                              | AA                | 1945916443               |
| SNP_P3_27530_6826297 | NC_021162.1    | Ca_kabuli_chr03 | 6826297                 | TT                              | CC                | 1945916445               |
| SNP_P3_27531_6826313 | NC_021162.1    | Ca_kabuli_chr03 | 6826313                 | CC                              | TT                | 1945916447               |
| SNP_P3_27532_6826326 | NC_021162.1    | Ca_kabuli_chr03 | 6826326                 | CC                              | AA                | 1945916449               |
| SNP_P3_27533_6826361 | NC_021162.1    | Ca_kabuli_chr03 | 6826361                 | GG                              | AA                | 1945916450               |
| SNP_P3_27534_6828355 | NC_021162.1    | Ca_kabuli_chr03 | 6828355                 | GG                              | AA                | 1945916452               |
| SNP_P3_27535_6828379 | NC_021162.1    | Ca_kabuli_chr03 | 6828379                 | CC                              | AA                | 1945916454               |
| SNP_P3_27536_6828385 | NC_021162.1    | Ca_kabuli_chr03 | 6828385                 | TT                              | CC                | 1945916456               |
| SNP_P3_27537_6838166 | NC_021162.1    | Ca_kabuli_chr03 | 6838166                 | GG                              | AA                | 1945916457               |
| SNP_P3_27538_6838416 | NC_021162.1    | Ca_kabuli_chr03 | 6838416                 | AA                              | TT                | 1945916459               |
| SNP_P3_27539_6838581 | NC_021162.1    | Ca_kabuli_chr03 | 6838581                 | CC                              | AA                | 1945916461               |
| SNP_P3_27541_6842435 | NC_021162.1    | Ca_kabuli_chr03 | 6842435                 | GG                              | AA                | 1945916463               |
| SNP_P3_27542_6859411 | NC_021162.1    | Ca_kabuli_chr03 | 6859411                 | GG                              | TT                | 1945916465               |
| SNP_P3_27543_6859424 | NC_021162.1    | Ca_kabuli_chr03 | 6859424                 | CC                              | TT                | 1945916466               |
| SNP_P3_27544_6859432 | NC_021162.1    | Ca_kabuli_chr03 | 6859432                 | CC                              | AA                | 1945916468               |
| SNP_P3_27545_6859470 | NC_021162.1    | Ca_kabuli_chr03 | 6859470                 | CC                              | AA                | 1945916470               |
| SNP_P3_27546_6859498 | NC_021162.1    | Ca_kabuli_chr03 | 6859498                 | TT                              | CC                | 1945916472               |
| SNP_P3_27547_6859508 | NC_021162.1    | Ca_kabuli_chr03 | 6859508                 | CC                              | TT                | 1945916473               |
| SNP_P3_27548_6859517 | NC_021162.1    | Ca_kabuli_chr03 | 6859517                 | AA                              | TT                | 1945916475               |
| SNP_P3_27549_6859520 | NC_021162.1    | Ca_kabuli_chr03 | 6859520                 | GG                              | TT                | 1945916477               |
| SNP_P3_27550_6859524 | NC_021162.1    | Ca_kabuli_chr03 | 6859524                 | TT                              | AA                | 1945916479               |
| SNP_P3_27551_6859545 | NC_021162.1    | Ca_kabuli_chr03 | 6859545                 | TT                              | CC                | 1945916481               |
| SNP_P3_27552_6859668 | NC_021162.1    | Ca_kabuli_chr03 | 6859668                 | GG                              | AA                | 1945916482               |
| SNP_P3_27553_6859702 | NC_021162.1    | Ca_kabuli_chr03 | 6859702                 | CC                              | TT                | 1945916484               |
| SNP_P3_27554_6859716 | NC_021162.1    | Ca_kabuli_chr03 | 6859716                 | GG                              | AA                | 1945916486               |
| SNP_P3_27555_6859762 | NC_021162.1    | Ca_kabuli_chr03 | 6859762                 | TT                              | CC                | 1945916488               |
| SNP_P3_27556_6859889 | NC_021162.1    | Ca_kabuli_chr03 | 6859889                 | GG                              | AA                | 1945916489               |
| SNP_P3_27557_6859890 | NC_021162.1    | Ca_kabuli_chr03 | 6859890                 | TT                              | CC                | 1945916491               |
| SNP_P3_27558_6867772 | NC_021162.1    | Ca_kabuli_chr03 | 6867772                 | AA                              | TT                | 1945916493               |
| SNP_P3_27559_6873999 | NC_021162.1    | Ca_kabuli_chr03 | 6873999                 | TT                              | CC                | 1945916495               |
| SNP_P3_27560_6893205 | NC_021162.1    | Ca_kabuli_chr03 | 6893205                 | AA                              | GG                | 1945916497               |
| SNP_P3_27561_6906187 | NC_021162.1    | Ca_kabuli_chr03 | 6906187                 | AA                              | GG                | 1945916498               |
| SNP_P3_27562_6906547 | NC_021162.1    | Ca_kabuli_chr03 | 6906547                 | TT                              | GG                | 1945916500               |
| SNP_P3_27563_6906571 | NC_021162.1    | Ca_kabuli_chr03 | 6906571                 | TT                              | CC                | 1945916502               |
| SNP_P3_27564_6947337 | NC_021162.1    | Ca_kabuli_chr03 | 6947337                 | AA                              | GG                | 1945916504               |
| SNP_P3_27565_6951792 | NC_021162.1    | Ca_kabuli_chr03 | 6951792                 | GG                              | AA                | 1945916505               |
| SNP_P3_27567_6966467 | NC_021162.1    | Ca_kabuli_chr03 | 6966467                 | GG                              | CC                | 1945916507               |
| SNP_P3_27568_6978019 | NC_021162.1    | Ca_kabuli_chr03 | 6978019                 | AA                              | GG                | 1945916509               |
| SNP_P3_27569_6983430 | NC_021162.1    | Ca_kabuli_chr03 | 6983430                 | AA                              | CC                | 1945916511               |
| SNP_P3_27570_6991204 | NC_021162.1    | Ca_kabuli_chr03 | 6991204                 | GG                              | AA                | 1945916513               |
| SNP_P3_27571_6992948 | NC_021162.1    | Ca_kabuli_chr03 | 6992948                 | TT                              | CC                | 1945916514               |
| SNP_P3_27572_7056308 | NC_021162.1    | Ca_kabuli_chr03 | 7056308                 | GG                              | AA                | 1945916516               |

| SNPs IDs             | Chromosome IDs | Chromosomes     | Physical positions (bp) | CDC Frontier (Reference genome) | (Pusa 256 & HPNB) | NCBI SNPdb Accession IDs |
|----------------------|----------------|-----------------|-------------------------|---------------------------------|-------------------|--------------------------|
| SNP_P3_27573_7060685 | NC_021162.1    | Ca_kabuli_chr03 | 7060685                 | CC                              | TT                | 1945916518               |
| SNP_P3_27575_7065576 | NC_021162.1    | Ca_kabuli_chr03 | 7065576                 | CC                              | AA                | 1945916520               |
| SNP_P3_27576_7065580 | NC_021162.1    | Ca_kabuli_chr03 | 7065580                 | AA                              | GG                | 1945916521               |
| SNP_P3_27577_7065625 | NC_021162.1    | Ca_kabuli_chr03 | 7065625                 | CC                              | TT                | 1945916523               |
| SNP_P3_27578_7065728 | NC_021162.1    | Ca_kabuli_chr03 | 7065728                 | AA                              | CC                | 1945916525               |
| SNP_P3_27579_7065738 | NC_021162.1    | Ca_kabuli_chr03 | 7065738                 | CC                              | TT                | 1945916527               |
| SNP_P3_27580_7065902 | NC_021162.1    | Ca_kabuli_chr03 | 7065902                 | AA                              | CC                | 1945916529               |
| SNP_P3_27581_7066041 | NC_021162.1    | Ca_kabuli_chr03 | 7066041                 | GG                              | AA                | 1945916530               |
| SNP_P3_27583_7080062 | NC_021162.1    | Ca_kabuli_chr03 | 7080062                 | GG                              | AA                | 1945916532               |
| SNP_P3_27584_7103295 | NC_021162.1    | Ca_kabuli_chr03 | 7103295                 | CC                              | GG                | 1945916534               |
| SNP_P3_27585_7103661 | NC_021162.1    | Ca_kabuli_chr03 | 7103661                 | AA                              | GG                | 1945916536               |
| SNP_P3_27587_7120148 | NC_021162.1    | Ca_kabuli_chr03 | 7120148                 | GG                              | AA                | 1945916537               |
| SNP_P3_27588_7120370 | NC_021162.1    | Ca_kabuli_chr03 | 7120370                 | GG                              | AA                | 1945916539               |
| SNP_P3_27589_7120390 | NC_021162.1    | Ca_kabuli_chr03 | 7120390                 | CC                              | AA                | 1945916541               |
| SNP_P3_27590_7120392 | NC_021162.1    | Ca_kabuli_chr03 | 7120392                 | AA                              | GG                | 1945916543               |
| SNP_P3_27591_7120457 | NC_021162.1    | Ca_kabuli_chr03 | 7120457                 | GG                              | CC                | 1945916545               |
| SNP_P3_27592_7120476 | NC_021162.1    | Ca_kabuli_chr03 | 7120476                 | CC                              | GG                | 1945916546               |
| SNP_P3_27593_7120566 | NC_021162.1    | Ca_kabuli_chr03 | 7120566                 | TT                              | GG                | 1945916548               |
| SNP_P3_27594_7120627 | NC_021162.1    | Ca_kabuli_chr03 | 7120627                 | AA                              | GG                | 1945916550               |
| SNP_P3_27595_7120638 | NC_021162.1    | Ca_kabuli_chr03 | 7120638                 | AA                              | GG                | 1945916552               |
| SNP_P3_27596_7120639 | NC_021162.1    | Ca_kabuli_chr03 | 7120639                 | AA                              | GG                | 1945916553               |
| SNP_P3_27597_7120777 | NC_021162.1    | Ca_kabuli_chr03 | 7120777                 | CC                              | TT                | 1945916555               |
| SNP_P3_27598_7120795 | NC_021162.1    | Ca_kabuli_chr03 | 7120795                 | CC                              | TT                | 1945916557               |
| SNP_P3_27600_7222818 | NC_021162.1    | Ca_kabuli_chr03 | 7222818                 | TT                              | CC                | 1945916559               |
| SNP_P3_27602_7255457 | NC_021162.1    | Ca_kabuli_chr03 | 7255457                 | GG                              | AA                | 1945916561               |
| SNP_P3_27603_7276652 | NC_021162.1    | Ca_kabuli_chr03 | 7276652                 | GG                              | AA                | 1945916562               |
| SNP_P3_27604_7284640 | NC_021162.1    | Ca_kabuli_chr03 | 7284640                 | CC                              | TT                | 1945916564               |
| SNP_P3_27605_7290095 | NC_021162.1    | Ca_kabuli_chr03 | 7290095                 | TT                              | CC                | 1945916566               |
| SNP_P3_27607_7340229 | NC_021162.1    | Ca_kabuli_chr03 | 7340229                 | TT                              | CC                | 1945916568               |
| SNP_P3_27608_7340236 | NC_021162.1    | Ca_kabuli_chr03 | 7340236                 | AA                              | GG                | 1945916569               |
| SNP_P3_27609_7368089 | NC_021162.1    | Ca_kabuli_chr03 | 7368089                 | CC                              | TT                | 1945916571               |
| SNP_P3_27611_7430628 | NC_021162.1    | Ca_kabuli_chr03 | 7430628                 | CC                              | AA                | 1945916573               |
| SNP_P3_27612_7430775 | NC_021162.1    | Ca_kabuli_chr03 | 7430775                 | AA                              | CC                | 1945916575               |
| SNP_P3_27613_7431200 | NC_021162.1    | Ca_kabuli_chr03 | 7431200                 | CC                              | TT                | 1945916577               |
| SNP_P3_27614_7431205 | NC_021162.1    | Ca_kabuli_chr03 | 7431205                 | AA                              | GG                | 1945916578               |
| SNP_P3_27615_7441819 | NC_021162.1    | Ca_kabuli_chr03 | 7441819                 | GG                              | AA                | 1945916580               |
| SNP_P3_27616_7470707 | NC_021162.1    | Ca_kabuli_chr03 | 7470707                 | CC                              | GG                | 1945916582               |
| SNP_P3_27618_7492584 | NC_021162.1    | Ca_kabuli_chr03 | 7492584                 | TT                              | CC                | 1945916584               |
| SNP_P3_27619_7504212 | NC_021162.1    | Ca_kabuli_chr03 | 7504212                 | CC                              | TT                | 1945916585               |
| SNP_P3_27620_7558470 | NC_021162.1    | Ca_kabuli_chr03 | 7558470                 | AA                              | TT                | 1945916587               |
| SNP_P3_27621_7563977 | NC_021162.1    | Ca_kabuli_chr03 | 7563977                 | TT                              | CC                | 1945916589               |
| SNP_P3_27622_7564345 | NC_021162.1    | Ca_kabuli_chr03 | 7564345                 | CC                              | TT                | 1945916591               |

| SNPs IDs             | Chromosome IDs | Chromosomes     | Physical positions (bp) | CDC Frontier (Reference genome) | (Pusa 256 & HPNB) | NCBI SNPdb Accession IDs |
|----------------------|----------------|-----------------|-------------------------|---------------------------------|-------------------|--------------------------|
| SNP_P3_27624_7638292 | NC_021162.1    | Ca_kabuli_chr03 | 7638292                 | GG                              | AA                | 1945916593               |
| SNP_P3_27625_7638541 | NC_021162.1    | Ca_kabuli_chr03 | 7638541                 | AA                              | GG                | 1945916594               |
| SNP_P3_27626_7650735 | NC_021162.1    | Ca_kabuli_chr03 | 7650735                 | GG                              | AA                | 1945916596               |
| SNP_P3_27627_7681873 | NC_021162.1    | Ca_kabuli_chr03 | 7681873                 | TT                              | CC                | 1945916598               |
| SNP_P3_27628_7681877 | NC_021162.1    | Ca_kabuli_chr03 | 7681877                 | AA                              | TT                | 1945916600               |
| SNP_P3_27629_7686896 | NC_021162.1    | Ca_kabuli_chr03 | 7686896                 | CC                              | TT                | 1945916601               |
| SNP_P3_27630_7689393 | NC_021162.1    | Ca_kabuli_chr03 | 7689393                 | TT                              | GG                | 1945916603               |
| SNP_P3_27631_7697391 | NC_021162.1    | Ca_kabuli_chr03 | 7697391                 | CC                              | TT                | 1945916605               |
| SNP_P3_27632_7732117 | NC_021162.1    | Ca_kabuli_chr03 | 7732117                 | GG                              | TT                | 1945916607               |
| SNP_P3_27633_7739339 | NC_021162.1    | Ca_kabuli_chr03 | 7739339                 | AA                              | CC                | 1945916609               |
| SNP_P3_27634_7739350 | NC_021162.1    | Ca_kabuli_chr03 | 7739350                 | AA                              | CC                | 1945916610               |
| SNP_P3_27635_7753386 | NC_021162.1    | Ca_kabuli_chr03 | 7753386                 | AA                              | CC                | 1945916612               |
| SNP_P3_27636_7754175 | NC_021162.1    | Ca_kabuli_chr03 | 7754175                 | AA                              | GG                | 1945916614               |
| SNP_P3_27637_7772984 | NC_021162.1    | Ca_kabuli_chr03 | 7772984                 | GG                              | AA                | 1945916616               |
| SNP_P3_27638_7772986 | NC_021162.1    | Ca_kabuli_chr03 | 7772986                 | GG                              | AA                | 1945916617               |
| SNP_P3_27639_7773013 | NC_021162.1    | Ca_kabuli_chr03 | 7773013                 | TT                              | CC                | 1945916619               |
| SNP_P3_27641_7801363 | NC_021162.1    | Ca_kabuli_chr03 | 7801363                 | GG                              | CC                | 1945916621               |
| SNP_P3_27642_7801457 | NC_021162.1    | Ca_kabuli_chr03 | 7801457                 | AA                              | GG                | 1945916623               |
| SNP_P3_27643_7804153 | NC_021162.1    | Ca_kabuli_chr03 | 7804153                 | CC                              | TT                | 1945916625               |
| SNP_P3_27644_7804178 | NC_021162.1    | Ca_kabuli_chr03 | 7804178                 | CC                              | AA                | 1945916626               |
| SNP_P3_27645_7804266 | NC_021162.1    | Ca_kabuli_chr03 | 7804266                 | AA                              | GG                | 1945916628               |
| SNP_P3_27646_7804323 | NC_021162.1    | Ca_kabuli_chr03 | 7804323                 | TT                              | GG                | 1945916630               |
| SNP_P3_27647_7804423 | NC_021162.1    | Ca_kabuli_chr03 | 7804423                 | TT                              | GG                | 1945916632               |
| SNP_P3_27648_7804559 | NC_021162.1    | Ca_kabuli_chr03 | 7804559                 | TT                              | GG                | 1945916633               |
| SNP_P3_27649_7804924 | NC_021162.1    | Ca_kabuli_chr03 | 7804924                 | TT                              | GG                | 1945916635               |
| SNP_P3_27650_7804934 | NC_021162.1    | Ca_kabuli_chr03 | 7804934                 | AA                              | GG                | 1945916637               |
| SNP_P3_27651_7804988 | NC_021162.1    | Ca_kabuli_chr03 | 7804988                 | TT                              | GG                | 1945916639               |
| SNP_P3_27652_7805034 | NC_021162.1    | Ca_kabuli_chr03 | 7805034                 | GG                              | CC                | 1945916641               |
| SNP_P3_27653_7805155 | NC_021162.1    | Ca_kabuli_chr03 | 7805155                 | CC                              | TT                | 1945916642               |
| SNP_P3_27654_7835244 | NC_021162.1    | Ca_kabuli_chr03 | 7835244                 | GG                              | AA                | 1945916644               |
| SNP_P3_27655_7835275 | NC_021162.1    | Ca_kabuli_chr03 | 7835275                 | GG                              | AA                | 1945916646               |
| SNP_P3_27656_7839274 | NC_021162.1    | Ca_kabuli_chr03 | 7839274                 | TT                              | AA                | 1945916648               |
| SNP_P3_27657_7884018 | NC_021162.1    | Ca_kabuli_chr03 | 7884018                 | AA                              | TT                | 1945916649               |
| SNP_P3_27658_7915268 | NC_021162.1    | Ca_kabuli_chr03 | 7915268                 | GG                              | CC                | 1945916651               |
| SNP_P3_27659_7915273 | NC_021162.1    | Ca_kabuli_chr03 | 7915273                 | TT                              | CC                | 1945916653               |
| SNP_P3_27660_7919150 | NC_021162.1    | Ca_kabuli_chr03 | 7919150                 | AA                              | GG                | 1945916655               |
| SNP_P3_27662_7922629 | NC_021162.1    | Ca_kabuli_chr03 | 7922629                 | CC                              | AA                | 1945916657               |
| SNP_P3_27663_7959420 | NC_021162.1    | Ca_kabuli_chr03 | 7959420                 | AA                              | CC                | 1945916658               |
| SNP_P3_27664_7959450 | NC_021162.1    | Ca_kabuli_chr03 | 7959450                 | TT                              | CC                | 1945916660               |
| SNP_P3_27665_7959455 | NC_021162.1    | Ca_kabuli_chr03 | 7959455                 | CC                              | TT                | 1945916662               |
| SNP_P3_27666_7959601 | NC_021162.1    | Ca_kabuli_chr03 | 7959601                 | AA                              | CC                | 1945916664               |
| SNP_P3_27667_7959715 | NC_021162.1    | Ca_kabuli_chr03 | 7959715                 | GG                              | AA                | 1945916665               |

| SNPs IDs             | Chromosome IDs | Chromosomes     | Physical positions (bp) | CDC Frontier (Reference genome) | (Pusa 256 & HPNB) | NCBI SNPdb Accession IDs |
|----------------------|----------------|-----------------|-------------------------|---------------------------------|-------------------|--------------------------|
| SNP_P3_27668_7959718 | NC_021162.1    | Ca_kabuli_chr03 | 7959718                 | AA                              | TT                | 1945916667               |
| SNP_P3_27669_7959744 | NC_021162.1    | Ca_kabuli_chr03 | 7959744                 | AA                              | GG                | 1945916669               |
| SNP_P3_27671_7959882 | NC_021162.1    | Ca_kabuli_chr03 | 7959882                 | CC                              | TT                | 1945916671               |
| SNP_P3_27672_7959912 | NC_021162.1    | Ca_kabuli_chr03 | 7959912                 | CC                              | TT                | 1945916673               |
| SNP_P3_27673_7959918 | NC_021162.1    | Ca_kabuli_chr03 | 7959918                 | GG                              | AA                | 1945916674               |
| SNP_P3_27674_7959928 | NC_021162.1    | Ca_kabuli_chr03 | 7959928                 | TT                              | GG                | 1945916676               |
| SNP_P3_27675_7959948 | NC_021162.1    | Ca_kabuli_chr03 | 7959948                 | CC                              | TT                | 1945916678               |
| SNP_P3_27676_7963472 | NC_021162.1    | Ca_kabuli_chr03 | 7963472                 | AA                              | GG                | 1945916680               |
| SNP_P3_27677_7963568 | NC_021162.1    | Ca_kabuli_chr03 | 7963568                 | TT                              | CC                | 1945916681               |
| SNP_P3_27678_7963571 | NC_021162.1    | Ca_kabuli_chr03 | 7963571                 | TT                              | AA                | 1945916683               |
| SNP_P3_27679_7972863 | NC_021162.1    | Ca_kabuli_chr03 | 7972863                 | CC                              | TT                | 1945916685               |
| SNP_P3_27680_7972876 | NC_021162.1    | Ca_kabuli_chr03 | 7972876                 | GG                              | AA                | 1945916687               |
| SNP_P3_27681_7979687 | NC_021162.1    | Ca_kabuli_chr03 | 7979687                 | CC                              | GG                | 1945916689               |
| SNP_P3_27682_7979705 | NC_021162.1    | Ca_kabuli_chr03 | 7979705                 | TT                              | AA                | 1945916690               |
| SNP_P3_27683_7979711 | NC_021162.1    | Ca_kabuli_chr03 | 7979711                 | GG                              | TT                | 1945916692               |
| SNP_P3_27684_8062003 | NC_021162.1    | Ca_kabuli_chr03 | 8062003                 | GG                              | AA                | 1945916694               |
| SNP_P3_27685_8062018 | NC_021162.1    | Ca_kabuli_chr03 | 8062018                 | AA                              | GG                | 1945916696               |
| SNP_P3_27686_8062078 | NC_021162.1    | Ca_kabuli_chr03 | 8062078                 | CC                              | TT                | 1945916697               |
| SNP_P3_27687_8062098 | NC_021162.1    | Ca_kabuli_chr03 | 8062098                 | TT                              | CC                | 1945916699               |
| SNP_P3_27688_8062113 | NC_021162.1    | Ca_kabuli_chr03 | 8062113                 | TT                              | CC                | 1945916701               |
| SNP_P3_27689_8062124 | NC_021162.1    | Ca_kabuli_chr03 | 8062124                 | AA                              | CC                | 1945916703               |
| SNP_P3_27690_8062127 | NC_021162.1    | Ca_kabuli_chr03 | 8062127                 | AA                              | CC                | 1945916705               |
| SNP_P3_27691_8062156 | NC_021162.1    | Ca_kabuli_chr03 | 8062156                 | AA                              | GG                | 1945916706               |
| SNP_P3_27692_8062216 | NC_021162.1    | Ca_kabuli_chr03 | 8062216                 | GG                              | TT                | 1945916708               |
| SNP_P3_27693_8062348 | NC_021162.1    | Ca_kabuli_chr03 | 8062348                 | GG                              | AA                | 1945916710               |
| SNP_P3_27694_8062386 | NC_021162.1    | Ca_kabuli_chr03 | 8062386                 | CC                              | TT                | 1945916712               |
| SNP_P3_27695_8062389 | NC_021162.1    | Ca_kabuli_chr03 | 8062389                 | CC                              | AA                | 1945916713               |
| SNP_P3_27696_8062451 | NC_021162.1    | Ca_kabuli_chr03 | 8062451                 | AA                              | CC                | 1945916715               |
| SNP_P3_27697_8062506 | NC_021162.1    | Ca_kabuli_chr03 | 8062506                 | AA                              | GG                | 1945916717               |
| SNP_P3_27698_8087910 | NC_021162.1    | Ca_kabuli_chr03 | 8087910                 | AA                              | CC                | 1945916719               |
| SNP_P3_27699_8087929 | NC_021162.1    | Ca_kabuli_chr03 | 8087929                 | AA                              | GG                | 1945916721               |
| SNP_P3_27700_8088131 | NC_021162.1    | Ca_kabuli_chr03 | 8088131                 | GG                              | CC                | 1945916722               |
| SNP_P3_27701_8088149 | NC_021162.1    | Ca_kabuli_chr03 | 8088149                 | CC                              | AA                | 1945916724               |
| SNP_P3_27702_8088257 | NC_021162.1    | Ca_kabuli_chr03 | 8088257                 | AA                              | CC                | 1945916726               |
| SNP_P3_27703_8088358 | NC_021162.1    | Ca_kabuli_chr03 | 8088358                 | TT                              | CC                | 1945916728               |
| SNP_P3_27704_8088387 | NC_021162.1    | Ca_kabuli_chr03 | 8088387                 | TT                              | CC                | 1945916730               |
| SNP_P3_27705_8088394 | NC_021162.1    | Ca_kabuli_chr03 | 8088394                 | TT                              | CC                | 1945916731               |
| SNP_P3_27706_8088419 | NC_021162.1    | Ca_kabuli_chr03 | 8088419                 | AA                              | CC                | 1945916733               |
| SNP_P3_27707_8088433 | NC_021162.1    | Ca_kabuli_chr03 | 8088433                 | CC                              | AA                | 1945916735               |
| SNP_P3_27708_8088447 | NC_021162.1    | Ca_kabuli_chr03 | 8088447                 | GG                              | AA                | 1945916737               |
| SNP_P3_27709_8088452 | NC_021162.1    | Ca_kabuli_chr03 | 8088452                 | GG                              | AA                | 1945916738               |
| SNP_P3_27710_8088479 | NC_021162.1    | Ca_kabuli_chr03 | 8088479                 | AA                              | TT                | 1945916740               |

| SNPs IDs             | Chromosome IDs | Chromosomes     | Physical positions (bp) | CDC Frontier (Reference genome) | (Pusa 256 & HPNB) | NCBI SNPdb Accession IDs |
|----------------------|----------------|-----------------|-------------------------|---------------------------------|-------------------|--------------------------|
| SNP_P3_27711_8088480 | NC_021162.1    | Ca_kabuli_chr03 | 8088480                 | TT                              | CC                | 1945916742               |
| SNP_P3_27712_8088534 | NC_021162.1    | Ca_kabuli_chr03 | 8088534                 | AA                              | CC                | 1945916744               |
| SNP_P3_27713_8088586 | NC_021162.1    | Ca_kabuli_chr03 | 8088586                 | TT                              | CC                | 1945916746               |
| SNP_P3_27714_8089354 | NC_021162.1    | Ca_kabuli_chr03 | 8089354                 | AA                              | GG                | 1945916747               |
| SNP_P3_27715_8117447 | NC_021162.1    | Ca_kabuli_chr03 | 8117447                 | TT                              | CC                | 1945916749               |
| SNP_P3_27716_8132239 | NC_021162.1    | Ca_kabuli_chr03 | 8132239                 | TT                              | CC                | 1945916751               |
| SNP_P3_27717_8145866 | NC_021162.1    | Ca_kabuli_chr03 | 8145866                 | GG                              | AA                | 1945916753               |
| SNP_P3_27718_8157458 | NC_021162.1    | Ca_kabuli_chr03 | 8157458                 | TT                              | CC                | 1945916754               |
| SNP_P3_27719_8157606 | NC_021162.1    | Ca_kabuli_chr03 | 8157606                 | TT                              | GG                | 1945916756               |
| SNP_P3_27720_8178651 | NC_021162.1    | Ca_kabuli_chr03 | 8178651                 | TT                              | CC                | 1945916758               |
| SNP_P3_27721_8178690 | NC_021162.1    | Ca_kabuli_chr03 | 8178690                 | AA                              | CC                | 1945916760               |
| SNP_P3_27722_8178961 | NC_021162.1    | Ca_kabuli_chr03 | 8178961                 | CC                              | AA                | 1945916762               |
| SNP_P3_27723_8178979 | NC_021162.1    | Ca_kabuli_chr03 | 8178979                 | AA                              | GG                | 1945916763               |
| SNP_P3_27724_8213762 | NC_021162.1    | Ca_kabuli_chr03 | 8213762                 | TT                              | CC                | 1945916765               |
| SNP_P3_27725_8213928 | NC_021162.1    | Ca_kabuli_chr03 | 8213928                 | CC                              | TT                | 1945916767               |
| SNP_P3_27726_8218308 | NC_021162.1    | Ca_kabuli_chr03 | 8218308                 | TT                              | AA                | 1945916769               |
| SNP_P3_27727_8218350 | NC_021162.1    | Ca_kabuli_chr03 | 8218350                 | AA                              | TT                | 1945916770               |
| SNP_P3_27728_8218663 | NC_021162.1    | Ca_kabuli_chr03 | 8218663                 | CC                              | TT                | 1945916772               |
| SNP_P3_27729_8221970 | NC_021162.1    | Ca_kabuli_chr03 | 8221970                 | CC                              | AA                | 1945916774               |
| SNP_P3_27730_8221971 | NC_021162.1    | Ca_kabuli_chr03 | 8221971                 | AA                              | TT                | 1945916776               |
| SNP_P3_27731_8226093 | NC_021162.1    | Ca_kabuli_chr03 | 8226093                 | AA                              | GG                | 1945916778               |
| SNP_P3_27732_8234620 | NC_021162.1    | Ca_kabuli_chr03 | 8234620                 | AA                              | TT                | 1945916779               |
| SNP_P3_27733_8234632 | NC_021162.1    | Ca_kabuli_chr03 | 8234632                 | GG                              | AA                | 1945916781               |
| SNP_P3_27734_8234697 | NC_021162.1    | Ca_kabuli_chr03 | 8234697                 | CC                              | TT                | 1945916783               |
| SNP_P3_27735_8234900 | NC_021162.1    | Ca_kabuli_chr03 | 8234900                 | GG                              | TT                | 1945916785               |
| SNP_P3_27736_8234984 | NC_021162.1    | Ca_kabuli_chr03 | 8234984                 | CC                              | TT                | 1945916786               |
| SNP_P3_27737_8241073 | NC_021162.1    | Ca_kabuli_chr03 | 8241073                 | AA                              | GG                | 1945916788               |
| SNP_P3_27738_8241086 | NC_021162.1    | Ca_kabuli_chr03 | 8241086                 | CC                              | TT                | 1945916790               |
| SNP_P3_27739_8241160 | NC_021162.1    | Ca_kabuli_chr03 | 8241160                 | CC                              | TT                | 1945916792               |
| SNP_P3_27740_8241409 | NC_021162.1    | Ca_kabuli_chr03 | 8241409                 | TT                              | CC                | 1945916794               |
| SNP_P3_27741_8241427 | NC_021162.1    | Ca_kabuli_chr03 | 8241427                 | GG                              | AA                | 1945916795               |
| SNP_P3_27742_8241449 | NC_021162.1    | Ca_kabuli_chr03 | 8241449                 | AA                              | GG                | 1945916797               |
| SNP_P3_27743_8241456 | NC_021162.1    | Ca_kabuli_chr03 | 8241456                 | TT                              | GG                | 1945916799               |
| SNP_P3_27744_8241694 | NC_021162.1    | Ca_kabuli_chr03 | 8241694                 | TT                              | CC                | 1945916801               |
| SNP_P3_27745_8241839 | NC_021162.1    | Ca_kabuli_chr03 | 8241839                 | CC                              | TT                | 1945916802               |
| SNP_P3_27746_8241858 | NC_021162.1    | Ca_kabuli_chr03 | 8241858                 | TT                              | CC                | 1945916804               |
| SNP_P3_27747_8241880 | NC_021162.1    | Ca_kabuli_chr03 | 8241880                 | AA                              | GG                | 1945916806               |
| SNP_P3_27748_8242129 | NC_021162.1    | Ca_kabuli_chr03 | 8242129                 | TT                              | CC                | 1945916808               |
| SNP_P3_27749_8244320 | NC_021162.1    | Ca_kabuli_chr03 | 8244320                 | TT                              | CC                | 1945916810               |
| SNP_P3_27751_8245671 | NC_021162.1    | Ca_kabuli_chr03 | 8245671                 | AA                              | CC                | 1945916811               |
| SNP_P3_27752_8245948 | NC_021162.1    | Ca_kabuli_chr03 | 8245948                 | AA                              | GG                | 1945916813               |
| SNP_P3_27753_8275652 | NC_021162.1    | Ca_kabuli_chr03 | 8275652                 | AA                              | GG                | 1945916815               |



| SNPs IDs             | Chromosome IDs | Chromosomes     | Physical positions (bp) | CDC Frontier (Reference genome) | (Pusa 256 & HPNB) | NCBI SNPdb Accession IDs |
|----------------------|----------------|-----------------|-------------------------|---------------------------------|-------------------|--------------------------|
| SNP_P3_27754_8275660 | NC_021162.1    | Ca_kabuli_chr03 | 8275660                 | AA                              | TT                | 1945916817               |
| SNP_P3_27755_8275673 | NC_021162.1    | Ca_kabuli_chr03 | 8275673                 | TT                              | AA                | 1945916818               |
| SNP_P3_27756_8275676 | NC_021162.1    | Ca_kabuli_chr03 | 8275676                 | AA                              | CC                | 1945916820               |
| SNP_P3_27757_8275746 | NC_021162.1    | Ca_kabuli_chr03 | 8275746                 | CC                              | AA                | 1945916822               |
| SNP_P3_27758_8277187 | NC_021162.1    | Ca_kabuli_chr03 | 8277187                 | TT                              | CC                | 1945916824               |
| SNP_P3_27759_8277188 | NC_021162.1    | Ca_kabuli_chr03 | 8277188                 | CC                              | TT                | 1945916826               |
| SNP_P3_27760_8277711 | NC_021162.1    | Ca_kabuli_chr03 | 8277711                 | CC                              | TT                | 1945916827               |
| SNP_P3_27761_8279412 | NC_021162.1    | Ca_kabuli_chr03 | 8279412                 | CC                              | TT                | 1945916829               |
| SNP_P3_27762_8290560 | NC_021162.1    | Ca_kabuli_chr03 | 8290560                 | TT                              | AA                | 1945916831               |
| SNP_P3_27763_8304837 | NC_021162.1    | Ca_kabuli_chr03 | 8304837                 | TT                              | CC                | 1945916833               |
| SNP_P3_27764_8304850 | NC_021162.1    | Ca_kabuli_chr03 | 8304850                 | TT                              | CC                | 1945916834               |
| SNP_P3_27765_8306740 | NC_021162.1    | Ca_kabuli_chr03 | 8306740                 | TT                              | CC                | 1945916836               |
| SNP_P3_27766_8306785 | NC_021162.1    | Ca_kabuli_chr03 | 8306785                 | GG                              | AA                | 1945916838               |
| SNP_P3_27767_8306821 | NC_021162.1    | Ca_kabuli_chr03 | 8306821                 | CC                              | TT                | 1945916840               |
| SNP_P3_27768_8306845 | NC_021162.1    | Ca_kabuli_chr03 | 8306845                 | AA                              | GG                | 1945916842               |
| SNP_P3_27769_8325330 | NC_021162.1    | Ca_kabuli_chr03 | 8325330                 | GG                              | TT                | 1945916843               |
| SNP_P3_27771_8325511 | NC_021162.1    | Ca_kabuli_chr03 | 8325511                 | AA                              | GG                | 1945916845               |
| SNP_P3_27772_8337563 | NC_021162.1    | Ca_kabuli_chr03 | 8337563                 | CC                              | TT                | 1945916847               |
| SNP_P3_27773_8339465 | NC_021162.1    | Ca_kabuli_chr03 | 8339465                 | AA                              | GG                | 1945916849               |
| SNP_P3_27774_8339473 | NC_021162.1    | Ca_kabuli_chr03 | 8339473                 | TT                              | CC                | 1945916850               |
| SNP_P3_27775_8352342 | NC_021162.1    | Ca_kabuli_chr03 | 8352342                 | GG                              | CC                | 1945916852               |
| SNP_P3_27776_8359073 | NC_021162.1    | Ca_kabuli_chr03 | 8359073                 | CC                              | AA                | 1945916854               |
| SNP_P3_27777_8360473 | NC_021162.1    | Ca_kabuli_chr03 | 8360473                 | AA                              | GG                | 1945916856               |
| SNP_P3_27778_8360509 | NC_021162.1    | Ca_kabuli_chr03 | 8360509                 | GG                              | AA                | 1945916858               |
| SNP_P3_27779_8360854 | NC_021162.1    | Ca_kabuli_chr03 | 8360854                 | GG                              | AA                | 1945916859               |
| SNP_P3_27780_8360889 | NC_021162.1    | Ca_kabuli_chr03 | 8360889                 | TT                              | AA                | 1945916861               |
| SNP_P3_27781_8371370 | NC_021162.1    | Ca_kabuli_chr03 | 8371370                 | CC                              | TT                | 1945916863               |
| SNP_P3_27782_8371387 | NC_021162.1    | Ca_kabuli_chr03 | 8371387                 | CC                              | TT                | 1945916865               |
| SNP_P3_27783_8383998 | NC_021162.1    | Ca_kabuli_chr03 | 8383998                 | GG                              | AA                | 1945916866               |
| SNP_P3_27784_8384075 | NC_021162.1    | Ca_kabuli_chr03 | 8384075                 | AA                              | CC                | 1945916868               |
| SNP_P3_27785_8384120 | NC_021162.1    | Ca_kabuli_chr03 | 8384120                 | AA                              | TT                | 1945916870               |
| SNP_P3_27786_8384901 | NC_021162.1    | Ca_kabuli_chr03 | 8384901                 | CC                              | TT                | 1945916872               |
| SNP_P3_27787_8393133 | NC_021162.1    | Ca_kabuli_chr03 | 8393133                 | AA                              | CC                | 1945916874               |
| SNP_P3_27789_8413114 | NC_021162.1    | Ca_kabuli_chr03 | 8413114                 | AA                              | GG                | 1945916875               |
| SNP_P3_27790_8413489 | NC_021162.1    | Ca_kabuli_chr03 | 8413489                 | TT                              | AA                | 1945916877               |
| SNP_P3_27791_8431048 | NC_021162.1    | Ca_kabuli_chr03 | 8431048                 | CC                              | TT                | 1945916879               |
| SNP_P3_27792_8431050 | NC_021162.1    | Ca_kabuli_chr03 | 8431050                 | CC                              | TT                | 1945916881               |
| SNP_P3_27793_8436767 | NC_021162.1    | Ca_kabuli_chr03 | 8436767                 | TT                              | CC                | 1945916882               |
| SNP_P3_27795_8476023 | NC_021162.1    | Ca_kabuli_chr03 | 8476023                 | AA                              | CC                | 1945916884               |
| SNP_P3_27796_8476025 | NC_021162.1    | Ca_kabuli_chr03 | 8476025                 | AA                              | GG                | 1945916886               |
| SNP_P3_27797_8501119 | NC_021162.1    | Ca_kabuli_chr03 | 8501119                 | CC                              | GG                | 1945916888               |
| SNP_P3_27798_8501416 | NC_021162.1    | Ca_kabuli_chr03 | 8501416                 | AA                              | CC                | 1945916890               |

| SNPs IDs             | Chromosome IDs | Chromosomes     | Physical positions (bp) | CDC Frontier (Reference genome) | (Pusa 256 & HPNB) | NCBI SNPdb Accession IDs |
|----------------------|----------------|-----------------|-------------------------|---------------------------------|-------------------|--------------------------|
| SNP_P3_27799_8501451 | NC_021162.1    | Ca_kabuli_chr03 | 8501451                 | AA                              | GG                | 1945916891               |
| SNP_P3_27800_8501456 | NC_021162.1    | Ca_kabuli_chr03 | 8501456                 | CC                              | TT                | 1945916893               |
| SNP_P3_27801_8501466 | NC_021162.1    | Ca_kabuli_chr03 | 8501466                 | AA                              | GG                | 1945916895               |
| SNP_P3_27802_8501496 | NC_021162.1    | Ca_kabuli_chr03 | 8501496                 | TT                              | CC                | 1945916897               |
| SNP_P3_27803_8501515 | NC_021162.1    | Ca_kabuli_chr03 | 8501515                 | CC                              | GG                | 1945916898               |
| SNP_P3_27805_8527233 | NC_021162.1    | Ca_kabuli_chr03 | 8527233                 | GG                              | AA                | 1945916900               |
| SNP_P3_27806_8527266 | NC_021162.1    | Ca_kabuli_chr03 | 8527266                 | AA                              | GG                | 1945916902               |
| SNP_P3_27807_8527485 | NC_021162.1    | Ca_kabuli_chr03 | 8527485                 | TT                              | GG                | 1945916904               |
| SNP_P3_27808_8527501 | NC_021162.1    | Ca_kabuli_chr03 | 8527501                 | TT                              | GG                | 1945916906               |
| SNP_P3_27809_8527527 | NC_021162.1    | Ca_kabuli_chr03 | 8527527                 | AA                              | GG                | 1945916907               |
| SNP_P3_27810_8527618 | NC_021162.1    | Ca_kabuli_chr03 | 8527618                 | GG                              | AA                | 1945916909               |
| SNP_P3_27811_8527761 | NC_021162.1    | Ca_kabuli_chr03 | 8527761                 | TT                              | CC                | 1945916911               |
| SNP_P3_27812_8531820 | NC_021162.1    | Ca_kabuli_chr03 | 8531820                 | CC                              | GG                | 1945916913               |
| SNP_P3_27813_8534596 | NC_021162.1    | Ca_kabuli_chr03 | 8534596                 | GG                              | TT                | 1945916914               |
| SNP_P3_27814_8534716 | NC_021162.1    | Ca_kabuli_chr03 | 8534716                 | GG                              | TT                | 1945916916               |
| SNP_P3_27815_8535045 | NC_021162.1    | Ca_kabuli_chr03 | 8535045                 | CC                              | TT                | 1945916918               |
| SNP_P3_27817_8535179 | NC_021162.1    | Ca_kabuli_chr03 | 8535179                 | CC                              | TT                | 1945916920               |
| SNP_P3_27818_8535228 | NC_021162.1    | Ca_kabuli_chr03 | 8535228                 | GG                              | TT                | 1945916922               |
| SNP_P3_27819_8535241 | NC_021162.1    | Ca_kabuli_chr03 | 8535241                 | AA                              | CC                | 1945916923               |
| SNP_P3_27820_8535291 | NC_021162.1    | Ca_kabuli_chr03 | 8535291                 | TT                              | CC                | 1945916925               |
| SNP_P3_27821_8535364 | NC_021162.1    | Ca_kabuli_chr03 | 8535364                 | TT                              | CC                | 1945916927               |
| SNP_P3_27822_8535369 | NC_021162.1    | Ca_kabuli_chr03 | 8535369                 | TT                              | CC                | 1945916929               |
| SNP_P3_27823_8535464 | NC_021162.1    | Ca_kabuli_chr03 | 8535464                 | AA                              | CC                | 1945916930               |
| SNP_P3_27824_8535487 | NC_021162.1    | Ca_kabuli_chr03 | 8535487                 | GG                              | TT                | 1945916932               |
| SNP_P3_27825_8535507 | NC_021162.1    | Ca_kabuli_chr03 | 8535507                 | CC                              | TT                | 1945916934               |
| SNP_P3_27826_8535510 | NC_021162.1    | Ca_kabuli_chr03 | 8535510                 | GG                              | CC                | 1945916936               |
| SNP_P3_27827_8535523 | NC_021162.1    | Ca_kabuli_chr03 | 8535523                 | AA                              | GG                | 1945916938               |
| SNP_P3_27828_8535607 | NC_021162.1    | Ca_kabuli_chr03 | 8535607                 | TT                              | AA                | 1945916939               |
| SNP_P3_27830_8535749 | NC_021162.1    | Ca_kabuli_chr03 | 8535749                 | AA                              | CC                | 1945916941               |
| SNP_P3_27831_8535779 | NC_021162.1    | Ca_kabuli_chr03 | 8535779                 | CC                              | TT                | 1945916943               |
| SNP_P3_27832_8535940 | NC_021162.1    | Ca_kabuli_chr03 | 8535940                 | AA                              | CC                | 1945916945               |
| SNP_P3_27833_8536213 | NC_021162.1    | Ca_kabuli_chr03 | 8536213                 | TT                              | CC                | 1945916946               |
| SNP_P3_27834_8536275 | NC_021162.1    | Ca_kabuli_chr03 | 8536275                 | CC                              | TT                | 1945916948               |
| SNP_P3_27835_8536568 | NC_021162.1    | Ca_kabuli_chr03 | 8536568                 | TT                              | CC                | 1945916950               |
| SNP_P3_27836_8545888 | NC_021162.1    | Ca_kabuli_chr03 | 8545888                 | GG                              | AA                | 1945916952               |
| SNP_P3_27837_8545898 | NC_021162.1    | Ca_kabuli_chr03 | 8545898                 | TT                              | CC                | 1945916954               |
| SNP_P3_27838_8545906 | NC_021162.1    | Ca_kabuli_chr03 | 8545906                 | AA                              | TT                | 1945916955               |
| SNP_P3_27839_8546011 | NC_021162.1    | Ca_kabuli_chr03 | 8546011                 | TT                              | CC                | 1945916957               |
| SNP_P3_27840_8546013 | NC_021162.1    | Ca_kabuli_chr03 | 8546013                 | TT                              | CC                | 1945916959               |
| SNP_P3_27841_8547245 | NC_021162.1    | Ca_kabuli_chr03 | 8547245                 | AA                              | GG                | 1945916961               |
| SNP_P3_27842_8552217 | NC_021162.1    | Ca_kabuli_chr03 | 8552217                 | AA                              | GG                | 1945916962               |
| SNP_P3_27843_8560425 | NC_021162.1    | Ca_kabuli_chr03 | 8560425                 | AA                              | GG                | 1945916964               |

| SNPs IDs             | Chromosome IDs | Chromosomes     | Physical positions (bp) | CDC Frontier (Reference genome) | (Pusa 256 & HPNB) | NCBI SNPdb Accession IDs |
|----------------------|----------------|-----------------|-------------------------|---------------------------------|-------------------|--------------------------|
| SNP_P3_27845_8585682 | NC_021162.1    | Ca_kabuli_chr03 | 8585682                 | TT                              | CC                | 1945916966               |
| SNP_P3_27847_8609910 | NC_021162.1    | Ca_kabuli_chr03 | 8609910                 | TT                              | CC                | 1945916968               |
| SNP_P3_27848_8611698 | NC_021162.1    | Ca_kabuli_chr03 | 8611698                 | GG                              | AA                | 1945916970               |
| SNP_P3_27849_8624718 | NC_021162.1    | Ca_kabuli_chr03 | 8624718                 | CC                              | TT                | 1945916971               |
| SNP_P3_27850_8624748 | NC_021162.1    | Ca_kabuli_chr03 | 8624748                 | TT                              | GG                | 1945916973               |
| SNP_P3_27851_8651659 | NC_021162.1    | Ca_kabuli_chr03 | 8651659                 | CC                              | TT                | 1945916975               |
| SNP_P3_27852_8651674 | NC_021162.1    | Ca_kabuli_chr03 | 8651674                 | AA                              | GG                | 1945916977               |
| SNP_P3_27853_8651691 | NC_021162.1    | Ca_kabuli_chr03 | 8651691                 | TT                              | GG                | 1945916978               |
| SNP_P3_27854_8651707 | NC_021162.1    | Ca_kabuli_chr03 | 8651707                 | CC                              | TT                | 1945916980               |
| SNP_P3_27855_8651717 | NC_021162.1    | Ca_kabuli_chr03 | 8651717                 | TT                              | GG                | 1945916982               |
| SNP_P3_27856_8651744 | NC_021162.1    | Ca_kabuli_chr03 | 8651744                 | GG                              | AA                | 1945916984               |
| SNP_P3_27857_8651749 | NC_021162.1    | Ca_kabuli_chr03 | 8651749                 | TT                              | CC                | 1945916986               |
| SNP_P3_27858_8651767 | NC_021162.1    | Ca_kabuli_chr03 | 8651767                 | GG                              | AA                | 1945916987               |
| SNP_P3_27859_8651789 | NC_021162.1    | Ca_kabuli_chr03 | 8651789                 | TT                              | GG                | 1945916989               |
| SNP_P3_27860_8652071 | NC_021162.1    | Ca_kabuli_chr03 | 8652071                 | AA                              | CC                | 1945916991               |
| SNP_P3_27861_8652077 | NC_021162.1    | Ca_kabuli_chr03 | 8652077                 | GG                              | AA                | 1945916993               |
| SNP_P3_27862_8652078 | NC_021162.1    | Ca_kabuli_chr03 | 8652078                 | TT                              | GG                | 1945916994               |
| SNP_P3_27863_8653127 | NC_021162.1    | Ca_kabuli_chr03 | 8653127                 | AA                              | GG                | 1945916996               |
| SNP_P3_27864_8653154 | NC_021162.1    | Ca_kabuli_chr03 | 8653154                 | CC                              | TT                | 1945916998               |
| SNP_P3_27865_8656688 | NC_021162.1    | Ca_kabuli_chr03 | 8656688                 | GG                              | TT                | 1945917000               |
| SNP_P3_27866_8684165 | NC_021162.1    | Ca_kabuli_chr03 | 8684165                 | TT                              | CC                | 1945917002               |
| SNP_P3_27867_8687003 | NC_021162.1    | Ca_kabuli_chr03 | 8687003                 | CC                              | TT                | 1945917003               |
| SNP_P3_27868_8688069 | NC_021162.1    | Ca_kabuli_chr03 | 8688069                 | AA                              | TT                | 1945917005               |
| SNP_P3_27870_8718643 | NC_021162.1    | Ca_kabuli_chr03 | 8718643                 | GG                              | AA                | 1945917007               |
| SNP_P3_27871_8729727 | NC_021162.1    | Ca_kabuli_chr03 | 8729727                 | CC                              | TT                | 1945917009               |
| SNP_P3_27872_8737612 | NC_021162.1    | Ca_kabuli_chr03 | 8737612                 | AA                              | CC                | 1945917010               |
| SNP_P3_27873_8738536 | NC_021162.1    | Ca_kabuli_chr03 | 8738536                 | TT                              | CC                | 1945917012               |
| SNP_P3_27874_8756399 | NC_021162.1    | Ca_kabuli_chr03 | 8756399                 | CC                              | TT                | 1945917014               |
| SNP_P3_27875_8756582 | NC_021162.1    | Ca_kabuli_chr03 | 8756582                 | TT                              | CC                | 1945917016               |
| SNP_P3_27877_8756629 | NC_021162.1    | Ca_kabuli_chr03 | 8756629                 | GG                              | AA                | 1945917018               |
| SNP_P3_27878_8756665 | NC_021162.1    | Ca_kabuli_chr03 | 8756665                 | GG                              | AA                | 1945917019               |
| SNP_P3_27879_8758481 | NC_021162.1    | Ca_kabuli_chr03 | 8758481                 | AA                              | GG                | 1945917021               |
| SNP_P3_27880_8773391 | NC_021162.1    | Ca_kabuli_chr03 | 8773391                 | GG                              | AA                | 1945917023               |
| SNP_P3_27882_8776093 | NC_021162.1    | Ca_kabuli_chr03 | 8776093                 | AA                              | TT                | 1945917025               |
| SNP_P3_27883_8781540 | NC_021162.1    | Ca_kabuli_chr03 | 8781540                 | CC                              | GG                | 1945917026               |
| SNP_P3_27884_8781548 | NC_021162.1    | Ca_kabuli_chr03 | 8781548                 | TT                              | GG                | 1945917028               |
| SNP_P3_27885_8795909 | NC_021162.1    | Ca_kabuli_chr03 | 8795909                 | GG                              | AA                | 1945917030               |
| SNP_P3_27886_8800934 | NC_021162.1    | Ca_kabuli_chr03 | 8800934                 | TT                              | AA                | 1945917032               |
| SNP_P3_27887_8800937 | NC_021162.1    | Ca_kabuli_chr03 | 8800937                 | TT                              | GG                | 1945917034               |
| SNP_P3_27888_8800981 | NC_021162.1    | Ca_kabuli_chr03 | 8800981                 | GG                              | AA                | 1945917035               |
| SNP_P3_27889_8823707 | NC_021162.1    | Ca_kabuli_chr03 | 8823707                 | AA                              | CC                | 1945917037               |
| SNP_P3_27891_8836823 | NC_021162.1    | Ca_kabuli_chr03 | 8836823                 | TT                              | CC                | 1945917039               |

| SNPs IDs             | Chromosome IDs | Chromosomes     | Physical positions (bp) | CDC Frontier (Reference genome) | (Pusa 256 & HPNB) | NCBI SNPdb Accession IDs |
|----------------------|----------------|-----------------|-------------------------|---------------------------------|-------------------|--------------------------|
| SNP_P3_27892_8836868 | NC_021162.1    | Ca_kabuli_chr03 | 8836868                 | TT                              | CC                | 1945917041               |
| SNP_P3_27893_8860740 | NC_021162.1    | Ca_kabuli_chr03 | 8860740                 | AA                              | CC                | 1945917042               |
| SNP_P3_27894_8922423 | NC_021162.1    | Ca_kabuli_chr03 | 8922423                 | TT                              | AA                | 1945917044               |
| SNP_P3_27895_8922435 | NC_021162.1    | Ca_kabuli_chr03 | 8922435                 | TT                              | CC                | 1945917046               |
| SNP_P3_27896_8926355 | NC_021162.1    | Ca_kabuli_chr03 | 8926355                 | CC                              | TT                | 1945917048               |
| SNP_P3_27897_8932451 | NC_021162.1    | Ca_kabuli_chr03 | 8932451                 | TT                              | CC                | 1945917050               |
| SNP_P3_27898_8932480 | NC_021162.1    | Ca_kabuli_chr03 | 8932480                 | GG                              | TT                | 1945917051               |
| SNP_P3_27899_8933528 | NC_021162.1    | Ca_kabuli_chr03 | 8933528                 | TT                              | AA                | 1945917053               |
| SNP_P3_27900_8934112 | NC_021162.1    | Ca_kabuli_chr03 | 8934112                 | AA                              | GG                | 1945917055               |
| SNP_P3_27901_8941873 | NC_021162.1    | Ca_kabuli_chr03 | 8941873                 | AA                              | CC                | 1945917057               |
| SNP_P3_27902_8941919 | NC_021162.1    | Ca_kabuli_chr03 | 8941919                 | GG                              | CC                | 1945917058               |
| SNP_P3_27904_8965994 | NC_021162.1    | Ca_kabuli_chr03 | 8965994                 | AA                              | GG                | 1945917060               |
| SNP_P3_27905_8977205 | NC_021162.1    | Ca_kabuli_chr03 | 8977205                 | CC                              | TT                | 1945917062               |
| SNP_P3_27906_8977207 | NC_021162.1    | Ca_kabuli_chr03 | 8977207                 | GG                              | AA                | 1945917064               |
| SNP_P3_27907_9012017 | NC_021162.1    | Ca_kabuli_chr03 | 9012017                 | AA                              | TT                | 1945917066               |
| SNP_P3_27908_9041531 | NC_021162.1    | Ca_kabuli_chr03 | 9041531                 | GG                              | AA                | 1945917067               |
| SNP_P3_27909_9041660 | NC_021162.1    | Ca_kabuli_chr03 | 9041660                 | TT                              | CC                | 1945917069               |
| SNP_P3_27910_9041758 | NC_021162.1    | Ca_kabuli_chr03 | 9041758                 | GG                              | AA                | 1945917071               |
| SNP_P3_27911_9042199 | NC_021162.1    | Ca_kabuli_chr03 | 9042199                 | TT                              | AA                | 1945917073               |
| SNP_P3_27912_9059206 | NC_021162.1    | Ca_kabuli_chr03 | 9059206                 | AA                              | GG                | 1945917074               |
| SNP_P3_27913_9060398 | NC_021162.1    | Ca_kabuli_chr03 | 9060398                 | TT                              | CC                | 1945917076               |
| SNP_P3_27914_9060444 | NC_021162.1    | Ca_kabuli_chr03 | 9060444                 | TT                              | CC                | 1945917078               |
| SNP_P3_27915_9060445 | NC_021162.1    | Ca_kabuli_chr03 | 9060445                 | AA                              | GG                | 1945917080               |
| SNP_P3_27916_9060506 | NC_021162.1    | Ca_kabuli_chr03 | 9060506                 | AA                              | TT                | 1945917082               |
| SNP_P3_27917_9060688 | NC_021162.1    | Ca_kabuli_chr03 | 9060688                 | CC                              | TT                | 1945917083               |
| SNP_P3_27918_9060937 | NC_021162.1    | Ca_kabuli_chr03 | 9060937                 | GG                              | AA                | 1945917085               |
| SNP_P3_27919_9063842 | NC_021162.1    | Ca_kabuli_chr03 | 9063842                 | GG                              | AA                | 1945917087               |
| SNP_P3_27920_9063882 | NC_021162.1    | Ca_kabuli_chr03 | 9063882                 | CC                              | TT                | 1945917089               |
| SNP_P3_27921_9063884 | NC_021162.1    | Ca_kabuli_chr03 | 9063884                 | AA                              | GG                | 1945917090               |
| SNP_P3_27922_9063902 | NC_021162.1    | Ca_kabuli_chr03 | 9063902                 | CC                              | TT                | 1945917092               |
| SNP_P3_27923_9063911 | NC_021162.1    | Ca_kabuli_chr03 | 9063911                 | GG                              | AA                | 1945917094               |
| SNP_P3_27924_9063914 | NC_021162.1    | Ca_kabuli_chr03 | 9063914                 | CC                              | TT                | 1945917096               |
| SNP_P3_27925_9063938 | NC_021162.1    | Ca_kabuli_chr03 | 9063938                 | AA                              | GG                | 1945917098               |
| SNP_P3_27926_9063941 | NC_021162.1    | Ca_kabuli_chr03 | 9063941                 | TT                              | GG                | 1945917099               |
| SNP_P3_27927_9063944 | NC_021162.1    | Ca_kabuli_chr03 | 9063944                 | AA                              | GG                | 1945917101               |
| SNP_P3_27928_9063962 | NC_021162.1    | Ca_kabuli_chr03 | 9063962                 | AA                              | GG                | 1945917103               |
| SNP_P3_27929_9063965 | NC_021162.1    | Ca_kabuli_chr03 | 9063965                 | GG                              | AA                | 1945917105               |
| SNP_P3_27930_9063974 | NC_021162.1    | Ca_kabuli_chr03 | 9063974                 | AA                              | GG                | 1945917107               |
| SNP_P3_27931_9063977 | NC_021162.1    | Ca_kabuli_chr03 | 9063977                 | TT                              | CC                | 1945917108               |
| SNP_P3_27932_9063994 | NC_021162.1    | Ca_kabuli_chr03 | 9063994                 | GG                              | TT                | 1945917110               |
| SNP_P3_27933_9064024 | NC_021162.1    | Ca_kabuli_chr03 | 9064024                 | AA                              | GG                | 1945917112               |
| SNP_P3_27934_9064026 | NC_021162.1    | Ca_kabuli_chr03 | 9064026                 | AA                              | GG                | 1945917114               |

| SNPs IDs             | Chromosome IDs | Chromosomes     | Physical positions (bp) | CDC Frontier (Reference genome) | (Pusa 256 & HPNB) | NCBI SNPdb Accession IDs |
|----------------------|----------------|-----------------|-------------------------|---------------------------------|-------------------|--------------------------|
| SNP_P3_27935_9064027 | NC_021162.1    | Ca_kabuli_chr03 | 9064027                 | TT                              | CC                | 1945917115               |
| SNP_P3_27936_9064064 | NC_021162.1    | Ca_kabuli_chr03 | 9064064                 | CC                              | TT                | 1945917117               |
| SNP_P3_27937_9064081 | NC_021162.1    | Ca_kabuli_chr03 | 9064081                 | GG                              | AA                | 1945917119               |
| SNP_P3_27938_9064103 | NC_021162.1    | Ca_kabuli_chr03 | 9064103                 | TT                              | CC                | 1945917121               |
| SNP_P3_27939_9064313 | NC_021162.1    | Ca_kabuli_chr03 | 9064313                 | GG                              | AA                | 1945917123               |
| SNP_P3_27940_9066866 | NC_021162.1    | Ca_kabuli_chr03 | 9066866                 | GG                              | AA                | 1945917124               |
| SNP_P3_27941_9067019 | NC_021162.1    | Ca_kabuli_chr03 | 9067019                 | AA                              | GG                | 1945917126               |
| SNP_P3_27942_9067061 | NC_021162.1    | Ca_kabuli_chr03 | 9067061                 | CC                              | TT                | 1945917128               |
| SNP_P3_27943_9067330 | NC_021162.1    | Ca_kabuli_chr03 | 9067330                 | AA                              | GG                | 1945917130               |
| SNP_P3_27944_9067342 | NC_021162.1    | Ca_kabuli_chr03 | 9067342                 | GG                              | CC                | 1945917131               |
| SNP_P3_27945_9067373 | NC_021162.1    | Ca_kabuli_chr03 | 9067373                 | AA                              | GG                | 1945917133               |
| SNP_P3_27946_9067400 | NC_021162.1    | Ca_kabuli_chr03 | 9067400                 | AA                              | GG                | 1945917135               |
| SNP_P3_27947_9067414 | NC_021162.1    | Ca_kabuli_chr03 | 9067414                 | CC                              | TT                | 1945917137               |
| SNP_P3_27948_9067425 | NC_021162.1    | Ca_kabuli_chr03 | 9067425                 | AA                              | GG                | 1945917139               |
| SNP_P3_27949_9069048 | NC_021162.1    | Ca_kabuli_chr03 | 9069048                 | TT                              | CC                | 1945917140               |
| SNP_P3_27950_9069190 | NC_021162.1    | Ca_kabuli_chr03 | 9069190                 | GG                              | AA                | 1945917142               |
| SNP_P3_27951_9079210 | NC_021162.1    | Ca_kabuli_chr03 | 9079210                 | GG                              | AA                | 1945917144               |
| SNP_P3_27953_9129338 | NC_021162.1    | Ca_kabuli_chr03 | 9129338                 | TT                              | GG                | 1945917146               |
| SNP_P3_27954_9144617 | NC_021162.1    | Ca_kabuli_chr03 | 9144617                 | AA                              | GG                | 1945917148               |
| SNP_P3_27955_9144640 | NC_021162.1    | Ca_kabuli_chr03 | 9144640                 | GG                              | CC                | 1945917149               |
| SNP_P3_27956_9185409 | NC_021162.1    | Ca_kabuli_chr03 | 9185409                 | AA                              | GG                | 1945917151               |
| SNP_P3_27958_9193474 | NC_021162.1    | Ca_kabuli_chr03 | 9193474                 | AA                              | GG                | 1945917153               |
| SNP_P3_27959_9195617 | NC_021162.1    | Ca_kabuli_chr03 | 9195617                 | CC                              | TT                | 1945917155               |
| SNP_P3_27960_9195641 | NC_021162.1    | Ca_kabuli_chr03 | 9195641                 | TT                              | GG                | 1945917156               |
| SNP_P3_27961_9196013 | NC_021162.1    | Ca_kabuli_chr03 | 9196013                 | AA                              | GG                | 1945917158               |
| SNP_P3_27962_9196325 | NC_021162.1    | Ca_kabuli_chr03 | 9196325                 | TT                              | CC                | 1945917160               |
| SNP_P3_27963_9196332 | NC_021162.1    | Ca_kabuli_chr03 | 9196332                 | GG                              | AA                | 1945917162               |
| SNP_P3_27964_9196377 | NC_021162.1    | Ca_kabuli_chr03 | 9196377                 | GG                              | AA                | 1945917164               |
| SNP_P3_27965_9196394 | NC_021162.1    | Ca_kabuli_chr03 | 9196394                 | CC                              | AA                | 1945917165               |
| SNP_P3_27966_9206523 | NC_021162.1    | Ca_kabuli_chr03 | 9206523                 | GG                              | AA                | 1945917167               |
| SNP_P3_27967_9229271 | NC_021162.1    | Ca_kabuli_chr03 | 9229271                 | AA                              | CC                | 1945917169               |
| SNP_P3_27968_9229866 | NC_021162.1    | Ca_kabuli_chr03 | 9229866                 | TT                              | CC                | 1945917171               |
| SNP_P3_27969_9236240 | NC_021162.1    | Ca_kabuli_chr03 | 9236240                 | GG                              | AA                | 1945917172               |
| SNP_P3_27971_9289289 | NC_021162.1    | Ca_kabuli_chr03 | 9289289                 | TT                              | AA                | 1945917174               |
| SNP_P3_27973_9290195 | NC_021162.1    | Ca_kabuli_chr03 | 9290195                 | CC                              | TT                | 1945917176               |
| SNP_P3_27975_9305229 | NC_021162.1    | Ca_kabuli_chr03 | 9305229                 | TT                              | GG                | 1945917178               |
| SNP_P3_27976_9305235 | NC_021162.1    | Ca_kabuli_chr03 | 9305235                 | TT                              | CC                | 1945917180               |
| SNP_P3_27977_9340950 | NC_021162.1    | Ca_kabuli_chr03 | 9340950                 | GG                              | AA                | 1945917181               |
| SNP_P3_27978_9374977 | NC_021162.1    | Ca_kabuli_chr03 | 9374977                 | GG                              | TT                | 1945917183               |
| SNP_P3_27981_9399930 | NC_021162.1    | Ca_kabuli_chr03 | 9399930                 | TT                              | AA                | 1945917185               |
| SNP_P3_27982_9405463 | NC_021162.1    | Ca_kabuli_chr03 | 9405463                 | TT                              | AA                | 1945917187               |
| SNP_P3_27984_9416331 | NC_021162.1    | Ca_kabuli_chr03 | 9416331                 | AA                              | GG                | 1945917188               |

| SNPs IDs             | Chromosome IDs | Chromosomes     | Physical positions (bp) | CDC Frontier (Reference genome) | (Pusa 256 & HPNB) | NCBI SNPdb Accession IDs |
|----------------------|----------------|-----------------|-------------------------|---------------------------------|-------------------|--------------------------|
| SNP_P3_27985_9416333 | NC_021162.1    | Ca_kabuli_chr03 | 9416333                 | TT                              | AA                | 1945917190               |
| SNP_P3_27986_9416426 | NC_021162.1    | Ca_kabuli_chr03 | 9416426                 | AA                              | GG                | 1945917192               |
| SNP_P3_27987_9416427 | NC_021162.1    | Ca_kabuli_chr03 | 9416427                 | AA                              | CC                | 1945917194               |
| SNP_P3_27988_9426928 | NC_021162.1    | Ca_kabuli_chr03 | 9426928                 | GG                              | CC                | 1945917196               |
| SNP_P3_27990_9429335 | NC_021162.1    | Ca_kabuli_chr03 | 9429335                 | GG                              | TT                | 1945917197               |
| SNP_P3_27991_9429464 | NC_021162.1    | Ca_kabuli_chr03 | 9429464                 | TT                              | AA                | 1945917199               |
| SNP_P3_27992_9429651 | NC_021162.1    | Ca_kabuli_chr03 | 9429651                 | AA                              | GG                | 1945917201               |
| SNP_P3_27993_9429673 | NC_021162.1    | Ca_kabuli_chr03 | 9429673                 | AA                              | GG                | 1945917203               |
| SNP_P3_27994_9429684 | NC_021162.1    | Ca_kabuli_chr03 | 9429684                 | CC                              | TT                | 1945917204               |
| SNP_P3_27995_9429779 | NC_021162.1    | Ca_kabuli_chr03 | 9429779                 | TT                              | CC                | 1945917206               |
| SNP_P3_27996_9463604 | NC_021162.1    | Ca_kabuli_chr03 | 9463604                 | AA                              | CC                | 1945917208               |
| SNP_P3_27997_9465401 | NC_021162.1    | Ca_kabuli_chr03 | 9465401                 | CC                              | TT                | 1945917210               |
| SNP_P3_27998_9495205 | NC_021162.1    | Ca_kabuli_chr03 | 9495205                 | AA                              | GG                | 1945917212               |
| SNP_P3_27999_9496430 | NC_021162.1    | Ca_kabuli_chr03 | 9496430                 | TT                              | CC                | 1945917213               |
| SNP_P3_28000_9496431 | NC_021162.1    | Ca_kabuli_chr03 | 9496431                 | TT                              | AA                | 1945917215               |
| SNP_P3_28002_9501682 | NC_021162.1    | Ca_kabuli_chr03 | 9501682                 | AA                              | CC                | 1945917217               |
| SNP_P3_28003_9501698 | NC_021162.1    | Ca_kabuli_chr03 | 9501698                 | AA                              | CC                | 1945917219               |
| SNP_P3_28004_9506305 | NC_021162.1    | Ca_kabuli_chr03 | 9506305                 | AA                              | GG                | 1945917220               |
| SNP_P3_28005_9506316 | NC_021162.1    | Ca_kabuli_chr03 | 9506316                 | TT                              | CC                | 1945917222               |
| SNP_P3_28006_9506328 | NC_021162.1    | Ca_kabuli_chr03 | 9506328                 | CC                              | TT                | 1945917224               |
| SNP_P3_28007_9510370 | NC_021162.1    | Ca_kabuli_chr03 | 9510370                 | GG                              | AA                | 1945917226               |
| SNP_P3_28008_9540575 | NC_021162.1    | Ca_kabuli_chr03 | 9540575                 | TT                              | GG                | 1945917228               |
| SNP_P3_28009_9540710 | NC_021162.1    | Ca_kabuli_chr03 | 9540710                 | CC                              | TT                | 1945917229               |
| SNP_P3_28010_9540836 | NC_021162.1    | Ca_kabuli_chr03 | 9540836                 | CC                              | TT                | 1945917231               |
| SNP_P3_28011_9540905 | NC_021162.1    | Ca_kabuli_chr03 | 9540905                 | CC                              | TT                | 1945917233               |
| SNP_P3_28012_9541171 | NC_021162.1    | Ca_kabuli_chr03 | 9541171                 | AA                              | TT                | 1945917235               |
| SNP_P3_28013_9541205 | NC_021162.1    | Ca_kabuli_chr03 | 9541205                 | GG                              | AA                | 1945917236               |
| SNP_P3_28014_9541256 | NC_021162.1    | Ca_kabuli_chr03 | 9541256                 | AA                              | TT                | 1945917238               |
| SNP_P3_28015_9542023 | NC_021162.1    | Ca_kabuli_chr03 | 9542023                 | GG                              | AA                | 1945917240               |
| SNP_P3_28016_9542032 | NC_021162.1    | Ca_kabuli_chr03 | 9542032                 | GG                              | CC                | 1945917242               |
| SNP_P3_28017_9542398 | NC_021162.1    | Ca_kabuli_chr03 | 9542398                 | GG                              | AA                | 1945917244               |
| SNP_P3_28018_9543235 | NC_021162.1    | Ca_kabuli_chr03 | 9543235                 | TT                              | AA                | 1945917245               |
| SNP_P3_28019_9543238 | NC_021162.1    | Ca_kabuli_chr03 | 9543238                 | AA                              | GG                | 1945917247               |
| SNP_P3_28020_9543240 | NC_021162.1    | Ca_kabuli_chr03 | 9543240                 | GG                              | AA                | 1945917249               |
| SNP_P3_28021_9544618 | NC_021162.1    | Ca_kabuli_chr03 | 9544618                 | TT                              | AA                | 1945917251               |
| SNP_P3_28022_9544623 | NC_021162.1    | Ca_kabuli_chr03 | 9544623                 | CC                              | TT                | 1945917252               |
| SNP_P3_28025_9577875 | NC_021162.1    | Ca_kabuli_chr03 | 9577875                 | AA                              | GG                | 1945917254               |
| SNP_P3_28026_9577902 | NC_021162.1    | Ca_kabuli_chr03 | 9577902                 | CC                              | GG                | 1945917256               |
| SNP_P3_28027_9578032 | NC_021162.1    | Ca_kabuli_chr03 | 9578032                 | TT                              | CC                | 1945917258               |
| SNP_P3_28028_9578264 | NC_021162.1    | Ca_kabuli_chr03 | 9578264                 | TT                              | CC                | 1945917260               |
| SNP_P3_28029_9578341 | NC_021162.1    | Ca_kabuli_chr03 | 9578341                 | TT                              | GG                | 1945917261               |
| SNP_P3_28030_9578346 | NC_021162.1    | Ca_kabuli_chr03 | 9578346                 | TT                              | CC                | 1945917263               |

| SNPs IDs             | Chromosome IDs | Chromosomes     | Physical positions (bp) | CDC Frontier (Reference genome) | (Pusa 256 & HPNB) | NCBI SNPdb Accession IDs |
|----------------------|----------------|-----------------|-------------------------|---------------------------------|-------------------|--------------------------|
| SNP_P3_28031_9578412 | NC_021162.1    | Ca_kabuli_chr03 | 9578412                 | TT                              | GG                | 1945917265               |
| SNP_P3_28032_9578688 | NC_021162.1    | Ca_kabuli_chr03 | 9578688                 | AA                              | GG                | 1945917267               |
| SNP_P3_28033_9578703 | NC_021162.1    | Ca_kabuli_chr03 | 9578703                 | GG                              | TT                | 1945917268               |
| SNP_P3_28034_9578841 | NC_021162.1    | Ca_kabuli_chr03 | 9578841                 | CC                              | TT                | 1945917270               |
| SNP_P3_28035_9583029 | NC_021162.1    | Ca_kabuli_chr03 | 9583029                 | GG                              | CC                | 1945917272               |
| SNP_P3_28036_9583045 | NC_021162.1    | Ca_kabuli_chr03 | 9583045                 | AA                              | GG                | 1945917274               |
| SNP_P3_28037_9583060 | NC_021162.1    | Ca_kabuli_chr03 | 9583060                 | AA                              | CC                | 1945917276               |
| SNP_P3_28038_9583064 | NC_021162.1    | Ca_kabuli_chr03 | 9583064                 | TT                              | CC                | 1945917277               |
| SNP_P3_28039_9583374 | NC_021162.1    | Ca_kabuli_chr03 | 9583374                 | TT                              | CC                | 1945917279               |
| SNP_P3_28040_9583436 | NC_021162.1    | Ca_kabuli_chr03 | 9583436                 | AA                              | GG                | 1945917281               |
| SNP_P3_28041_9584412 | NC_021162.1    | Ca_kabuli_chr03 | 9584412                 | GG                              | AA                | 1945917283               |
| SNP_P3_28042_9584535 | NC_021162.1    | Ca_kabuli_chr03 | 9584535                 | CC                              | AA                | 1945917284               |
| SNP_P3_28043_9584554 | NC_021162.1    | Ca_kabuli_chr03 | 9584554                 | AA                              | TT                | 1945917286               |
| SNP_P3_28044_9584556 | NC_021162.1    | Ca_kabuli_chr03 | 9584556                 | TT                              | AA                | 1945917288               |
| SNP_P3_28045_9584557 | NC_021162.1    | Ca_kabuli_chr03 | 9584557                 | CC                              | AA                | 1945917290               |
| SNP_P3_28046_9584677 | NC_021162.1    | Ca_kabuli_chr03 | 9584677                 | AA                              | GG                | 1945917292               |
| SNP_P3_28047_9584678 | NC_021162.1    | Ca_kabuli_chr03 | 9584678                 | CC                              | AA                | 1945917293               |
| SNP_P3_28048_9649959 | NC_021162.1    | Ca_kabuli_chr03 | 9649959                 | TT                              | CC                | 1945917295               |
| SNP_P3_28049_9650559 | NC_021162.1    | Ca_kabuli_chr03 | 9650559                 | GG                              | AA                | 1945917297               |
| SNP_P3_28050_9650583 | NC_021162.1    | Ca_kabuli_chr03 | 9650583                 | TT                              | CC                | 1945917299               |
| SNP_P3_28051_9650674 | NC_021162.1    | Ca_kabuli_chr03 | 9650674                 | TT                              | CC                | 1945917300               |
| SNP_P3_28053_9720727 | NC_021162.1    | Ca_kabuli_chr03 | 9720727                 | TT                              | AA                | 1945917302               |
| SNP_P3_28054_9720759 | NC_021162.1    | Ca_kabuli_chr03 | 9720759                 | GG                              | AA                | 1945917304               |
| SNP_P3_28055_9785165 | NC_021162.1    | Ca_kabuli_chr03 | 9785165                 | TT                              | CC                | 1945917306               |
| SNP_P3_28056_9785182 | NC_021162.1    | Ca_kabuli_chr03 | 9785182                 | AA                              | TT                | 1945917308               |
| SNP_P3_28057_9806126 | NC_021162.1    | Ca_kabuli_chr03 | 9806126                 | CC                              | GG                | 1945917309               |
| SNP_P3_28059_9822426 | NC_021162.1    | Ca_kabuli_chr03 | 9822426                 | CC                              | AA                | 1945917311               |
| SNP_P3_28060_9869248 | NC_021162.1    | Ca_kabuli_chr03 | 9869248                 | TT                              | AA                | 1945917313               |
| SNP_P3_28061_9870182 | NC_021162.1    | Ca_kabuli_chr03 | 9870182                 | CC                              | TT                | 1945917315               |
| SNP_P3_28062_9870764 | NC_021162.1    | Ca_kabuli_chr03 | 9870764                 | TT                              | CC                | 1945917316               |
| SNP_P3_28063_9922032 | NC_021162.1    | Ca_kabuli_chr03 | 9922032                 | AA                              | TT                | 1945917318               |
| SNP_P3_28064_9938625 | NC_021162.1    | Ca_kabuli_chr03 | 9938625                 | AA                              | TT                | 1945917320               |
| SNP_P3_28065_9938904 | NC_021162.1    | Ca_kabuli_chr03 | 9938904                 | AA                              | CC                | 1945917322               |
| SNP_P3_28066_9940409 | NC_021162.1    | Ca_kabuli_chr03 | 9940409                 | TT                              | CC                | 1945917324               |
| SNP_P3_28067_9940684 | NC_021162.1    | Ca_kabuli_chr03 | 9940684                 | AA                              | GG                | 1945917325               |
| SNP_P3_28069_9953150 | NC_021162.1    | Ca_kabuli_chr03 | 9953150                 | TT                              | CC                | 1945917327               |
| SNP_P3_28071_9954656 | NC_021162.1    | Ca_kabuli_chr03 | 9954656                 | AA                              | GG                | 1945917329               |
| SNP_P3_28072_9967423 | NC_021162.1    | Ca_kabuli_chr03 | 9967423                 | AA                              | CC                | 1945917331               |
| SNP_P3_28073_9967426 | NC_021162.1    | Ca_kabuli_chr03 | 9967426                 | GG                              | TT                | 1945917332               |
| SNP_P3_28074_9967716 | NC_021162.1    | Ca_kabuli_chr03 | 9967716                 | AA                              | GG                | 1945917334               |
| SNP_P3_28075_9967749 | NC_021162.1    | Ca_kabuli_chr03 | 9967749                 | TT                              | CC                | 1945917336               |
| SNP_P3_28076_9967750 | NC_021162.1    | Ca_kabuli_chr03 | 9967750                 | AA                              | TT                | 1945917338               |

| SNPs IDs              | Chromosome IDs | Chromosomes     | Physical positions (bp) | CDC Frontier (Reference genome) | (Pusa 256 & HPNB) | NCBI SNPdb Accession IDs |
|-----------------------|----------------|-----------------|-------------------------|---------------------------------|-------------------|--------------------------|
| SNP_P3_28077_9967786  | NC_021162.1    | Ca_kabuli_chr03 | 9967786                 | AA                              | CC                | 1945917340               |
| SNP_P3_28078_9968623  | NC_021162.1    | Ca_kabuli_chr03 | 9968623                 | GG                              | AA                | 1945917341               |
| SNP_P3_28079_9968653  | NC_021162.1    | Ca_kabuli_chr03 | 9968653                 | CC                              | GG                | 1945917343               |
| SNP_P3_28080_10013132 | NC_021162.1    | Ca_kabuli_chr03 | 10013132                | TT                              | GG                | 1945917345               |
| SNP_P3_28081_10026394 | NC_021162.1    | Ca_kabuli_chr03 | 10026394                | TT                              | AA                | 1945917347               |
| SNP_P3_28082_10026450 | NC_021162.1    | Ca_kabuli_chr03 | 10026450                | CC                              | AA                | 1945917348               |
| SNP_P3_28083_10026674 | NC_021162.1    | Ca_kabuli_chr03 | 10026674                | CC                              | TT                | 1945917350               |
| SNP_P3_28084_10026736 | NC_021162.1    | Ca_kabuli_chr03 | 10026736                | GG                              | AA                | 1945917352               |
| SNP_P3_28085_10052114 | NC_021162.1    | Ca_kabuli_chr03 | 10052114                | GG                              | AA                | 1945917354               |
| SNP_P3_28086_10079782 | NC_021162.1    | Ca_kabuli_chr03 | 10079782                | CC                              | TT                | 1945917356               |
| SNP_P3_28087_10079811 | NC_021162.1    | Ca_kabuli_chr03 | 10079811                | TT                              | GG                | 1945917357               |
| SNP_P3_28088_10079833 | NC_021162.1    | Ca_kabuli_chr03 | 10079833                | TT                              | CC                | 1945917359               |
| SNP_P3_28089_10093148 | NC_021162.1    | Ca_kabuli_chr03 | 10093148                | TT                              | CC                | 1945917361               |
| SNP_P3_28090_10094653 | NC_021162.1    | Ca_kabuli_chr03 | 10094653                | CC                              | TT                | 1945917363               |
| SNP_P3_28091_10094657 | NC_021162.1    | Ca_kabuli_chr03 | 10094657                | AA                              | GG                | 1945917365               |
| SNP_P3_28092_10094862 | NC_021162.1    | Ca_kabuli_chr03 | 10094862                | AA                              | GG                | 1945917366               |
| SNP_P3_28093_10095161 | NC_021162.1    | Ca_kabuli_chr03 | 10095161                | GG                              | TT                | 1945917368               |
| SNP_P3_28094_10128062 | NC_021162.1    | Ca_kabuli_chr03 | 10128062                | TT                              | AA                | 1945917370               |
| SNP_P3_28095_10159074 | NC_021162.1    | Ca_kabuli_chr03 | 10159074                | AA                              | GG                | 1945917372               |
| SNP_P3_28096_10159272 | NC_021162.1    | Ca_kabuli_chr03 | 10159272                | CC                              | TT                | 1945917373               |
| SNP_P3_28097_10159277 | NC_021162.1    | Ca_kabuli_chr03 | 10159277                | CC                              | TT                | 1945917375               |
| SNP_P3_28099_10159583 | NC_021162.1    | Ca_kabuli_chr03 | 10159583                | TT                              | CC                | 1945917377               |
| SNP_P3_28100_10159584 | NC_021162.1    | Ca_kabuli_chr03 | 10159584                | AA                              | GG                | 1945917379               |
| SNP_P3_28101_10159607 | NC_021162.1    | Ca_kabuli_chr03 | 10159607                | AA                              | GG                | 1945917381               |
| SNP_P3_28102_10159630 | NC_021162.1    | Ca_kabuli_chr03 | 10159630                | TT                              | CC                | 1945917382               |
| SNP_P3_28103_10159639 | NC_021162.1    | Ca_kabuli_chr03 | 10159639                | TT                              | CC                | 1945917384               |
| SNP_P3_28104_10159665 | NC_021162.1    | Ca_kabuli_chr03 | 10159665                | GG                              | AA                | 1945917386               |
| SNP_P3_28106_10159709 | NC_021162.1    | Ca_kabuli_chr03 | 10159709                | AA                              | CC                | 1945917388               |
| SNP_P3_28107_10159710 | NC_021162.1    | Ca_kabuli_chr03 | 10159710                | TT                              | CC                | 1945917389               |
| SNP_P3_28108_10159714 | NC_021162.1    | Ca_kabuli_chr03 | 10159714                | TT                              | CC                | 1945917391               |
| SNP_P3_28109_10159787 | NC_021162.1    | Ca_kabuli_chr03 | 10159787                | AA                              | CC                | 1945917393               |
| SNP_P3_28110_10159795 | NC_021162.1    | Ca_kabuli_chr03 | 10159795                | TT                              | GG                | 1945917395               |
| SNP_P3_28111_10159811 | NC_021162.1    | Ca_kabuli_chr03 | 10159811                | TT                              | CC                | 1945917397               |
| SNP_P3_28112_10159812 | NC_021162.1    | Ca_kabuli_chr03 | 10159812                | AA                              | GG                | 1945917398               |
| SNP_P3_28113_10159815 | NC_021162.1    | Ca_kabuli_chr03 | 10159815                | TT                              | CC                | 1945917400               |
| SNP_P3_28114_10159818 | NC_021162.1    | Ca_kabuli_chr03 | 10159818                | TT                              | CC                | 1945917402               |
| SNP_P3_28115_10159822 | NC_021162.1    | Ca_kabuli_chr03 | 10159822                | TT                              | CC                | 1945917404               |
| SNP_P3_28116_10169165 | NC_021162.1    | Ca_kabuli_chr03 | 10169165                | GG                              | AA                | 1945917405               |
| SNP_P3_28117_10169196 | NC_021162.1    | Ca_kabuli_chr03 | 10169196                | GG                              | AA                | 1945917407               |
| SNP_P3_28118_10169224 | NC_021162.1    | Ca_kabuli_chr03 | 10169224                | AA                              | GG                | 1945917409               |
| SNP_P3_28119_10169335 | NC_021162.1    | Ca_kabuli_chr03 | 10169335                | TT                              | CC                | 1945917411               |
| SNP_P3_28120_10169512 | NC_021162.1    | Ca_kabuli_chr03 | 10169512                | AA                              | GG                | 1945917413               |



| SNPs IDs              | Chromosome IDs | Chromosomes     | Physical positions (bp) | CDC Frontier (Reference genome) | (Pusa 256 & HPNB) | NCBI SNPdb Accession IDs |
|-----------------------|----------------|-----------------|-------------------------|---------------------------------|-------------------|--------------------------|
| SNP_P3_28121_10169553 | NC_021162.1    | Ca_kabuli_chr03 | 10169553                | AA                              | CC                | 1945917414               |
| SNP_P3_28122_10169594 | NC_021162.1    | Ca_kabuli_chr03 | 10169594                | TT                              | CC                | 1945917416               |
| SNP_P3_28123_10169615 | NC_021162.1    | Ca_kabuli_chr03 | 10169615                | AA                              | GG                | 1945917418               |
| SNP_P3_28124_10169627 | NC_021162.1    | Ca_kabuli_chr03 | 10169627                | TT                              | CC                | 1945917420               |
| SNP_P3_28125_10169685 | NC_021162.1    | Ca_kabuli_chr03 | 10169685                | GG                              | CC                | 1945917421               |
| SNP_P3_28126_10180372 | NC_021162.1    | Ca_kabuli_chr03 | 10180372                | GG                              | TT                | 1945917423               |
| SNP_P3_28127_10184259 | NC_021162.1    | Ca_kabuli_chr03 | 10184259                | AA                              | GG                | 1945917425               |
| SNP_P3_28128_10184268 | NC_021162.1    | Ca_kabuli_chr03 | 10184268                | TT                              | CC                | 1945917427               |
| SNP_P3_28129_10184514 | NC_021162.1    | Ca_kabuli_chr03 | 10184514                | TT                              | CC                | 1945917429               |
| SNP_P3_28130_10184519 | NC_021162.1    | Ca_kabuli_chr03 | 10184519                | AA                              | TT                | 1945917430               |
| SNP_P3_28131_10184523 | NC_021162.1    | Ca_kabuli_chr03 | 10184523                | TT                              | CC                | 1945917432               |
| SNP_P3_28132_10184548 | NC_021162.1    | Ca_kabuli_chr03 | 10184548                | AA                              | CC                | 1945917434               |
| SNP_P3_28133_10184968 | NC_021162.1    | Ca_kabuli_chr03 | 10184968                | AA                              | GG                | 1945917436               |
| SNP_P3_28134_10188627 | NC_021162.1    | Ca_kabuli_chr03 | 10188627                | GG                              | TT                | 1945917437               |
| SNP_P3_28135_10188632 | NC_021162.1    | Ca_kabuli_chr03 | 10188632                | GG                              | CC                | 1945917439               |
| SNP_P3_28136_10188638 | NC_021162.1    | Ca_kabuli_chr03 | 10188638                | TT                              | AA                | 1945917441               |
| SNP_P3_28137_10255048 | NC_021162.1    | Ca_kabuli_chr03 | 10255048                | TT                              | AA                | 1945917443               |
| SNP_P3_28138_10255053 | NC_021162.1    | Ca_kabuli_chr03 | 10255053                | GG                              | AA                | 1945917445               |
| SNP_P3_28139_10255060 | NC_021162.1    | Ca_kabuli_chr03 | 10255060                | GG                              | TT                | 1945917446               |
| SNP_P3_28140_10255193 | NC_021162.1    | Ca_kabuli_chr03 | 10255193                | TT                              | CC                | 1945917448               |
| SNP_P3_28141_10255230 | NC_021162.1    | Ca_kabuli_chr03 | 10255230                | AA                              | GG                | 1945917450               |
| SNP_P3_28142_10255319 | NC_021162.1    | Ca_kabuli_chr03 | 10255319                | AA                              | GG                | 1945917452               |
| SNP_P3_28143_10255377 | NC_021162.1    | Ca_kabuli_chr03 | 10255377                | AA                              | GG                | 1945917453               |
| SNP_P3_28144_10255381 | NC_021162.1    | Ca_kabuli_chr03 | 10255381                | TT                              | CC                | 1945917455               |
| SNP_P3_28145_10255392 | NC_021162.1    | Ca_kabuli_chr03 | 10255392                | TT                              | CC                | 1945917457               |
| SNP_P3_28146_10255395 | NC_021162.1    | Ca_kabuli_chr03 | 10255395                | TT                              | CC                | 1945917459               |
| SNP_P3_28147_10255405 | NC_021162.1    | Ca_kabuli_chr03 | 10255405                | AA                              | GG                | 1945917461               |
| SNP_P3_28148_10342271 | NC_021162.1    | Ca_kabuli_chr03 | 10342271                | AA                              | GG                | 1945917462               |
| SNP_P3_28149_10342292 | NC_021162.1    | Ca_kabuli_chr03 | 10342292                | GG                              | AA                | 1945917464               |
| SNP_P3_28150_10342294 | NC_021162.1    | Ca_kabuli_chr03 | 10342294                | CC                              | TT                | 1945917466               |
| SNP_P3_28151_10342694 | NC_021162.1    | Ca_kabuli_chr03 | 10342694                | AA                              | CC                | 1945917468               |
| SNP_P3_28152_10349618 | NC_021162.1    | Ca_kabuli_chr03 | 10349618                | TT                              | AA                | 1945917469               |
| SNP_P3_28153_10349627 | NC_021162.1    | Ca_kabuli_chr03 | 10349627                | TT                              | AA                | 1945917471               |
| SNP_P3_28154_10349649 | NC_021162.1    | Ca_kabuli_chr03 | 10349649                | TT                              | GG                | 1945917473               |
| SNP_P3_28156_10371220 | NC_021162.1    | Ca_kabuli_chr03 | 10371220                | CC                              | TT                | 1945917475               |
| SNP_P3_28157_10389490 | NC_021162.1    | Ca_kabuli_chr03 | 10389490                | TT                              | GG                | 1945917477               |
| SNP_P3_28158_10392798 | NC_021162.1    | Ca_kabuli_chr03 | 10392798                | TT                              | AA                | 1945917478               |
| SNP_P3_28160_10404263 | NC_021162.1    | Ca_kabuli_chr03 | 10404263                | CC                              | TT                | 1945917480               |
| SNP_P3_28161_10404643 | NC_021162.1    | Ca_kabuli_chr03 | 10404643                | TT                              | GG                | 1945917482               |
| SNP_P3_28162_10404647 | NC_021162.1    | Ca_kabuli_chr03 | 10404647                | AA                              | GG                | 1945917484               |
| SNP_P3_28163_10498584 | NC_021162.1    | Ca_kabuli_chr03 | 10498584                | TT                              | AA                | 1945917485               |
| SNP_P3_28164_10504701 | NC_021162.1    | Ca_kabuli_chr03 | 10504701                | TT                              | AA                | 1945917487               |

| SNPs IDs              | Chromosome IDs | Chromosomes     | Physical positions (bp) | CDC Frontier (Reference genome) | (Pusa 256 & HPNB) | NCBI SNPdb Accession IDs |
|-----------------------|----------------|-----------------|-------------------------|---------------------------------|-------------------|--------------------------|
| SNP_P3_28165_10505142 | NC_021162.1    | Ca_kabuli_chr03 | 10505142                | AA                              | CC                | 1945917489               |
| SNP_P3_28166_10514950 | NC_021162.1    | Ca_kabuli_chr03 | 10514950                | AA                              | CC                | 1945917491               |
| SNP_P3_28167_10514958 | NC_021162.1    | Ca_kabuli_chr03 | 10514958                | AA                              | CC                | 1945917493               |
| SNP_P3_28168_10514976 | NC_021162.1    | Ca_kabuli_chr03 | 10514976                | CC                              | GG                | 1945917494               |
| SNP_P3_28169_10525515 | NC_021162.1    | Ca_kabuli_chr03 | 10525515                | AA                              | TT                | 1945917496               |
| SNP_P3_28170_10525524 | NC_021162.1    | Ca_kabuli_chr03 | 10525524                | GG                              | TT                | 1945917498               |
| SNP_P3_28173_10594859 | NC_021162.1    | Ca_kabuli_chr03 | 10594859                | CC                              | AA                | 1945917500               |
| SNP_P3_28174_10594902 | NC_021162.1    | Ca_kabuli_chr03 | 10594902                | CC                              | TT                | 1945917501               |
| SNP_P3_28175_10595213 | NC_021162.1    | Ca_kabuli_chr03 | 10595213                | TT                              | CC                | 1945917503               |
| SNP_P3_28176_10603074 | NC_021162.1    | Ca_kabuli_chr03 | 10603074                | AA                              | GG                | 1945917505               |
| SNP_P3_28177_10603091 | NC_021162.1    | Ca_kabuli_chr03 | 10603091                | CC                              | TT                | 1945917507               |
| SNP_P3_28178_10603132 | NC_021162.1    | Ca_kabuli_chr03 | 10603132                | AA                              | GG                | 1945917509               |
| SNP_P3_28179_10608739 | NC_021162.1    | Ca_kabuli_chr03 | 10608739                | AA                              | GG                | 1945917510               |
| SNP_P3_28180_10610099 | NC_021162.1    | Ca_kabuli_chr03 | 10610099                | GG                              | TT                | 1945917512               |
| SNP_P3_28181_10640977 | NC_021162.1    | Ca_kabuli_chr03 | 10640977                | TT                              | CC                | 1945917514               |
| SNP_P3_28182_10653804 | NC_021162.1    | Ca_kabuli_chr03 | 10653804                | CC                              | AA                | 1945917516               |
| SNP_P3_28183_10663701 | NC_021162.1    | Ca_kabuli_chr03 | 10663701                | TT                              | AA                | 1945917517               |
| SNP_P3_28184_10670459 | NC_021162.1    | Ca_kabuli_chr03 | 10670459                | TT                              | AA                | 1945917519               |
| SNP_P3_28185_10670635 | NC_021162.1    | Ca_kabuli_chr03 | 10670635                | AA                              | GG                | 1945917521               |
| SNP_P3_28186_10670750 | NC_021162.1    | Ca_kabuli_chr03 | 10670750                | CC                              | AA                | 1945917523               |
| SNP_P3_28187_10670905 | NC_021162.1    | Ca_kabuli_chr03 | 10670905                | TT                              | CC                | 1945917525               |
| SNP_P3_28188_10745720 | NC_021162.1    | Ca_kabuli_chr03 | 10745720                | GG                              | AA                | 1945917526               |
| SNP_P3_28189_10805531 | NC_021162.1    | Ca_kabuli_chr03 | 10805531                | TT                              | GG                | 1945917528               |
| SNP_P3_28190_10828337 | NC_021162.1    | Ca_kabuli_chr03 | 10828337                | TT                              | CC                | 1945917530               |
| SNP_P3_28192_10851531 | NC_021162.1    | Ca_kabuli_chr03 | 10851531                | AA                              | GG                | 1945917532               |
| SNP_P3_28193_10851541 | NC_021162.1    | Ca_kabuli_chr03 | 10851541                | AA                              | GG                | 1945917533               |
| SNP_P3_28194_10851542 | NC_021162.1    | Ca_kabuli_chr03 | 10851542                | TT                              | GG                | 1945917535               |
| SNP_P3_28195_10851590 | NC_021162.1    | Ca_kabuli_chr03 | 10851590                | TT                              | CC                | 1945917537               |
| SNP_P3_28196_10851610 | NC_021162.1    | Ca_kabuli_chr03 | 10851610                | AA                              | GG                | 1945917539               |
| SNP_P3_28197_10851683 | NC_021162.1    | Ca_kabuli_chr03 | 10851683                | GG                              | AA                | 1945917541               |
| SNP_P3_28198_10851733 | NC_021162.1    | Ca_kabuli_chr03 | 10851733                | AA                              | TT                | 1945917542               |
| SNP_P3_28199_10851895 | NC_021162.1    | Ca_kabuli_chr03 | 10851895                | AA                              | GG                | 1945917544               |
| SNP_P3_28200_10851958 | NC_021162.1    | Ca_kabuli_chr03 | 10851958                | AA                              | GG                | 1945917546               |
| SNP_P3_28201_10851994 | NC_021162.1    | Ca_kabuli_chr03 | 10851994                | AA                              | GG                | 1945917548               |
| SNP_P3_28202_10852009 | NC_021162.1    | Ca_kabuli_chr03 | 10852009                | AA                              | GG                | 1945917549               |
| SNP_P3_28203_10858320 | NC_021162.1    | Ca_kabuli_chr03 | 10858320                | TT                              | CC                | 1945917551               |
| SNP_P3_28204_10858765 | NC_021162.1    | Ca_kabuli_chr03 | 10858765                | TT                              | GG                | 1945917553               |
| SNP_P3_28205_10858767 | NC_021162.1    | Ca_kabuli_chr03 | 10858767                | TT                              | AA                | 1945917555               |
| SNP_P3_28207_10919080 | NC_021162.1    | Ca_kabuli_chr03 | 10919080                | GG                              | AA                | 1945917557               |
| SNP_P3_28208_10919897 | NC_021162.1    | Ca_kabuli_chr03 | 10919897                | TT                              | CC                | 1945917558               |
| SNP_P3_28209_10920036 | NC_021162.1    | Ca_kabuli_chr03 | 10920036                | AA                              | TT                | 1945917560               |
| SNP_P3_28210_10922128 | NC_021162.1    | Ca_kabuli_chr03 | 10922128                | AA                              | GG                | 1945917562               |

| SNPs IDs              | Chromosome IDs | Chromosomes     | Physical positions (bp) | CDC Frontier (Reference genome) | (Pusa 256 & HPNB) | NCBI SNPdb Accession IDs |
|-----------------------|----------------|-----------------|-------------------------|---------------------------------|-------------------|--------------------------|
| SNP_P3_28211_10922288 | NC_021162.1    | Ca_kabuli_chr03 | 10922288                | AA                              | GG                | 1945917564               |
| SNP_P3_28212_10922915 | NC_021162.1    | Ca_kabuli_chr03 | 10922915                | TT                              | GG                | 1945917565               |
| SNP_P3_28213_10923019 | NC_021162.1    | Ca_kabuli_chr03 | 10923019                | TT                              | AA                | 1945917567               |
| SNP_P3_28214_10923031 | NC_021162.1    | Ca_kabuli_chr03 | 10923031                | AA                              | GG                | 1945917569               |
| SNP_P3_28215_10923111 | NC_021162.1    | Ca_kabuli_chr03 | 10923111                | AA                              | GG                | 1945917571               |
| SNP_P3_28216_10923130 | NC_021162.1    | Ca_kabuli_chr03 | 10923130                | TT                              | AA                | 1945917573               |
| SNP_P3_28217_10923148 | NC_021162.1    | Ca_kabuli_chr03 | 10923148                | AA                              | GG                | 1945917574               |
| SNP_P3_28220_10923181 | NC_021162.1    | Ca_kabuli_chr03 | 10923181                | GG                              | AA                | 1945917576               |
| SNP_P3_28221_10923184 | NC_021162.1    | Ca_kabuli_chr03 | 10923184                | AA                              | GG                | 1945917578               |
| SNP_P3_28223_10923400 | NC_021162.1    | Ca_kabuli_chr03 | 10923400                | AA                              | TT                | 1945917580               |
| SNP_P3_28224_10923478 | NC_021162.1    | Ca_kabuli_chr03 | 10923478                | AA                              | GG                | 1945917581               |
| SNP_P3_28226_10938423 | NC_021162.1    | Ca_kabuli_chr03 | 10938423                | AA                              | GG                | 1945917583               |
| SNP_P3_28227_10949993 | NC_021162.1    | Ca_kabuli_chr03 | 10949993                | AA                              | GG                | 1945917585               |
| SNP_P3_28228_10950885 | NC_021162.1    | Ca_kabuli_chr03 | 10950885                | GG                              | AA                | 1945917587               |
| SNP_P3_28229_10950886 | NC_021162.1    | Ca_kabuli_chr03 | 10950886                | CC                              | AA                | 1945917589               |
| SNP_P3_28230_10950889 | NC_021162.1    | Ca_kabuli_chr03 | 10950889                | TT                              | AA                | 1945917590               |
| SNP_P3_28231_10950910 | NC_021162.1    | Ca_kabuli_chr03 | 10950910                | GG                              | TT                | 1945917592               |
| SNP_P3_28232_10954227 | NC_021162.1    | Ca_kabuli_chr03 | 10954227                | TT                              | CC                | 1945917594               |
| SNP_P3_28233_10954463 | NC_021162.1    | Ca_kabuli_chr03 | 10954463                | GG                              | TT                | 1945917596               |
| SNP_P3_28234_10954473 | NC_021162.1    | Ca_kabuli_chr03 | 10954473                | AA                              | GG                | 1945917597               |
| SNP_P3_28235_10954524 | NC_021162.1    | Ca_kabuli_chr03 | 10954524                | CC                              | TT                | 1945917599               |
| SNP_P3_28236_10954615 | NC_021162.1    | Ca_kabuli_chr03 | 10954615                | CC                              | TT                | 1945917601               |
| SNP_P3_28237_10988572 | NC_021162.1    | Ca_kabuli_chr03 | 10988572                | AA                              | GG                | 1945917603               |
| SNP_P3_28238_10995811 | NC_021162.1    | Ca_kabuli_chr03 | 10995811                | CC                              | TT                | 1945917605               |
| SNP_P3_28239_10995829 | NC_021162.1    | Ca_kabuli_chr03 | 10995829                | CC                              | GG                | 1945917606               |
| SNP_P3_28240_10995838 | NC_021162.1    | Ca_kabuli_chr03 | 10995838                | GG                              | AA                | 1945917608               |
| SNP_P3_28241_10995841 | NC_021162.1    | Ca_kabuli_chr03 | 10995841                | CC                              | TT                | 1945917610               |
| SNP_P3_28242_10995850 | NC_021162.1    | Ca_kabuli_chr03 | 10995850                | AA                              | GG                | 1945917612               |
| SNP_P3_28243_10995852 | NC_021162.1    | Ca_kabuli_chr03 | 10995852                | CC                              | TT                | 1945917613               |
| SNP_P3_28244_10995853 | NC_021162.1    | Ca_kabuli_chr03 | 10995853                | TT                              | CC                | 1945917615               |
| SNP_P3_28245_10995870 | NC_021162.1    | Ca_kabuli_chr03 | 10995870                | AA                              | CC                | 1945917617               |
| SNP_P3_28246_10995886 | NC_021162.1    | Ca_kabuli_chr03 | 10995886                | GG                              | AA                | 1945917619               |
| SNP_P3_28247_10995891 | NC_021162.1    | Ca_kabuli_chr03 | 10995891                | CC                              | TT                | 1945917621               |
| SNP_P3_28248_11080124 | NC_021162.1    | Ca_kabuli_chr03 | 11080124                | AA                              | CC                | 1945917622               |
| SNP_P3_28249_11116542 | NC_021162.1    | Ca_kabuli_chr03 | 11116542                | AA                              | TT                | 1945917624               |
| SNP_P3_28250_11142866 | NC_021162.1    | Ca_kabuli_chr03 | 11142866                | AA                              | CC                | 1945917626               |
| SNP_P3_28251_11142872 | NC_021162.1    | Ca_kabuli_chr03 | 11142872                | TT                              | CC                | 1945917628               |
| SNP_P3_28252_11142907 | NC_021162.1    | Ca_kabuli_chr03 | 11142907                | AA                              | CC                | 1945917629               |
| SNP_P3_28253_11142945 | NC_021162.1    | Ca_kabuli_chr03 | 11142945                | TT                              | CC                | 1945917631               |
| SNP_P3_28254_11146381 | NC_021162.1    | Ca_kabuli_chr03 | 11146381                | TT                              | GG                | 1945917633               |
| SNP_P3_28255_11146403 | NC_021162.1    | Ca_kabuli_chr03 | 11146403                | GG                              | CC                | 1945917635               |
| SNP_P3_28256_11146412 | NC_021162.1    | Ca_kabuli_chr03 | 11146412                | GG                              | TT                | 1945917637               |

| SNPs IDs              | Chromosome IDs | Chromosomes     | Physical positions (bp) | CDC Frontier (Reference genome) | (Pusa 256 & HPNB) | NCBI SNPdb Accession IDs |
|-----------------------|----------------|-----------------|-------------------------|---------------------------------|-------------------|--------------------------|
| SNP_P3_28257_11146484 | NC_021162.1    | Ca_kabuli_chr03 | 11146484                | CC                              | GG                | 1945917638               |
| SNP_P3_28258_11146629 | NC_021162.1    | Ca_kabuli_chr03 | 11146629                | CC                              | TT                | 1945917640               |
| SNP_P3_28259_11147057 | NC_021162.1    | Ca_kabuli_chr03 | 11147057                | AA                              | CC                | 1945917642               |
| SNP_P3_28260_11147063 | NC_021162.1    | Ca_kabuli_chr03 | 11147063                | TT                              | GG                | 1945917644               |
| SNP_P3_28261_11147268 | NC_021162.1    | Ca_kabuli_chr03 | 11147268                | GG                              | TT                | 1945917645               |
| SNP_P3_28263_11252272 | NC_021162.1    | Ca_kabuli_chr03 | 11252272                | AA                              | GG                | 1945917647               |
| SNP_P3_28264_11252282 | NC_021162.1    | Ca_kabuli_chr03 | 11252282                | AA                              | GG                | 1945917649               |
| SNP_P3_28265_11252582 | NC_021162.1    | Ca_kabuli_chr03 | 11252582                | GG                              | TT                | 1945917651               |
| SNP_P3_28266_11252627 | NC_021162.1    | Ca_kabuli_chr03 | 11252627                | AA                              | TT                | 1945917653               |
| SNP_P3_28267_11262298 | NC_021162.1    | Ca_kabuli_chr03 | 11262298                | AA                              | CC                | 1945917654               |
| SNP_P3_28268_11262813 | NC_021162.1    | Ca_kabuli_chr03 | 11262813                | TT                              | GG                | 1945917656               |
| SNP_P3_28269_11262818 | NC_021162.1    | Ca_kabuli_chr03 | 11262818                | AA                              | TT                | 1945917658               |
| SNP_P3_28270_11262847 | NC_021162.1    | Ca_kabuli_chr03 | 11262847                | GG                              | AA                | 1945917660               |
| SNP_P3_28271_11262877 | NC_021162.1    | Ca_kabuli_chr03 | 11262877                | AA                              | GG                | 1945917661               |
| SNP_P3_28272_11262930 | NC_021162.1    | Ca_kabuli_chr03 | 11262930                | TT                              | AA                | 1945917663               |
| SNP_P3_28274_11263152 | NC_021162.1    | Ca_kabuli_chr03 | 11263152                | CC                              | TT                | 1945917665               |
| SNP_P3_28276_11282078 | NC_021162.1    | Ca_kabuli_chr03 | 11282078                | TT                              | AA                | 1945917667               |
| SNP_P3_28277_11282458 | NC_021162.1    | Ca_kabuli_chr03 | 11282458                | AA                              | GG                | 1945917669               |
| SNP_P3_28279_11306847 | NC_021162.1    | Ca_kabuli_chr03 | 11306847                | TT                              | GG                | 1945917670               |
| SNP_P3_28280_11322621 | NC_021162.1    | Ca_kabuli_chr03 | 11322621                | GG                              | AA                | 1945917672               |
| SNP_P3_28282_11326762 | NC_021162.1    | Ca_kabuli_chr03 | 11326762                | TT                              | CC                | 1945917674               |
| SNP_P3_28283_11326798 | NC_021162.1    | Ca_kabuli_chr03 | 11326798                | AA                              | GG                | 1945917676               |
| SNP_P3_28284_11326815 | NC_021162.1    | Ca_kabuli_chr03 | 11326815                | TT                              | CC                | 1945917678               |
| SNP_P3_28285_11326818 | NC_021162.1    | Ca_kabuli_chr03 | 11326818                | GG                              | AA                | 1945917679               |
| SNP_P3_28286_11326819 | NC_021162.1    | Ca_kabuli_chr03 | 11326819                | AA                              | TT                | 1945917681               |
| SNP_P3_28287_11328481 | NC_021162.1    | Ca_kabuli_chr03 | 11328481                | AA                              | TT                | 1945917683               |
| SNP_P3_28288_11328515 | NC_021162.1    | Ca_kabuli_chr03 | 11328515                | CC                              | TT                | 1945917685               |
| SNP_P3_28289_11368395 | NC_021162.1    | Ca_kabuli_chr03 | 11368395                | AA                              | GG                | 1945917686               |
| SNP_P3_28290_11402374 | NC_021162.1    | Ca_kabuli_chr03 | 11402374                | AA                              | TT                | 1945917688               |
| SNP_P3_28291_11403328 | NC_021162.1    | Ca_kabuli_chr03 | 11403328                | TT                              | CC                | 1945917690               |
| SNP_P3_28292_11403344 | NC_021162.1    | Ca_kabuli_chr03 | 11403344                | CC                              | TT                | 1945917692               |
| SNP_P3_28293_11438586 | NC_021162.1    | Ca_kabuli_chr03 | 11438586                | TT                              | CC                | 1945917694               |
| SNP_P3_28294_11443131 | NC_021162.1    | Ca_kabuli_chr03 | 11443131                | GG                              | AA                | 1945917695               |
| SNP_P3_28295_11447632 | NC_021162.1    | Ca_kabuli_chr03 | 11447632                | TT                              | CC                | 1945917697               |
| SNP_P3_28296_11452565 | NC_021162.1    | Ca_kabuli_chr03 | 11452565                | CC                              | GG                | 1945917699               |
| SNP_P3_28297_11452567 | NC_021162.1    | Ca_kabuli_chr03 | 11452567                | TT                              | GG                | 1945917701               |
| SNP_P3_28298_11452584 | NC_021162.1    | Ca_kabuli_chr03 | 11452584                | CC                              | AA                | 1945917702               |
| SNP_P3_28300_11464640 | NC_021162.1    | Ca_kabuli_chr03 | 11464640                | GG                              | TT                | 1945917704               |
| SNP_P3_28301_11464824 | NC_021162.1    | Ca_kabuli_chr03 | 11464824                | TT                              | GG                | 1945917706               |
| SNP_P3_28302_11464913 | NC_021162.1    | Ca_kabuli_chr03 | 11464913                | GG                              | TT                | 1945917708               |
| SNP_P3_28303_11465059 | NC_021162.1    | Ca_kabuli_chr03 | 11465059                | AA                              | GG                | 1945917710               |
| SNP_P3_28304_11465093 | NC_021162.1    | Ca_kabuli_chr03 | 11465093                | AA                              | TT                | 1945917711               |

| SNPs IDs              | Chromosome IDs | Chromosomes     | Physical positions (bp) | CDC Frontier (Reference genome) | (Pusa 256 & HPNB) | NCBI SNPdb Accession IDs |
|-----------------------|----------------|-----------------|-------------------------|---------------------------------|-------------------|--------------------------|
| SNP_P3_28305_11465368 | NC_021162.1    | Ca_kabuli_chr03 | 11465368                | CC                              | TT                | 1945917713               |
| SNP_P3_28306_11497407 | NC_021162.1    | Ca_kabuli_chr03 | 11497407                | TT                              | GG                | 1945917715               |
| SNP_P3_28308_11497804 | NC_021162.1    | Ca_kabuli_chr03 | 11497804                | TT                              | GG                | 1945917717               |
| SNP_P3_28309_11497950 | NC_021162.1    | Ca_kabuli_chr03 | 11497950                | GG                              | AA                | 1945917718               |
| SNP_P3_28310_11497986 | NC_021162.1    | Ca_kabuli_chr03 | 11497986                | CC                              | TT                | 1945917720               |
| SNP_P3_28311_11498020 | NC_021162.1    | Ca_kabuli_chr03 | 11498020                | AA                              | TT                | 1945917722               |
| SNP_P3_28312_11498203 | NC_021162.1    | Ca_kabuli_chr03 | 11498203                | TT                              | AA                | 1945917724               |
| SNP_P3_28313_11498205 | NC_021162.1    | Ca_kabuli_chr03 | 11498205                | CC                              | TT                | 1945917726               |
| SNP_P3_28314_11498214 | NC_021162.1    | Ca_kabuli_chr03 | 11498214                | AA                              | GG                | 1945917727               |
| SNP_P3_28315_11498215 | NC_021162.1    | Ca_kabuli_chr03 | 11498215                | TT                              | GG                | 1945917729               |
| SNP_P3_28316_11498275 | NC_021162.1    | Ca_kabuli_chr03 | 11498275                | TT                              | CC                | 1945917731               |
| SNP_P3_28317_11498292 | NC_021162.1    | Ca_kabuli_chr03 | 11498292                | TT                              | CC                | 1945917733               |
| SNP_P3_28318_11498307 | NC_021162.1    | Ca_kabuli_chr03 | 11498307                | TT                              | CC                | 1945917734               |
| SNP_P3_28319_11498315 | NC_021162.1    | Ca_kabuli_chr03 | 11498315                | GG                              | AA                | 1945917736               |
| SNP_P3_28320_11498329 | NC_021162.1    | Ca_kabuli_chr03 | 11498329                | CC                              | TT                | 1945917738               |
| SNP_P3_28322_11501251 | NC_021162.1    | Ca_kabuli_chr03 | 11501251                | CC                              | TT                | 1945917740               |
| SNP_P3_28323_11501252 | NC_021162.1    | Ca_kabuli_chr03 | 11501252                | TT                              | CC                | 1945917742               |
| SNP_P3_28324_11501253 | NC_021162.1    | Ca_kabuli_chr03 | 11501253                | CC                              | AA                | 1945917743               |
| SNP_P3_28327_11520310 | NC_021162.1    | Ca_kabuli_chr03 | 11520310                | TT                              | CC                | 1945917745               |
| SNP_P3_28328_11521345 | NC_021162.1    | Ca_kabuli_chr03 | 11521345                | TT                              | CC                | 1945917747               |
| SNP_P3_28329_11527391 | NC_021162.1    | Ca_kabuli_chr03 | 11527391                | AA                              | GG                | 1945917749               |
| SNP_P3_28330_11527460 | NC_021162.1    | Ca_kabuli_chr03 | 11527460                | GG                              | AA                | 1945917750               |
| SNP_P3_28331_11527466 | NC_021162.1    | Ca_kabuli_chr03 | 11527466                | TT                              | CC                | 1945917752               |
| SNP_P3_28332_11527509 | NC_021162.1    | Ca_kabuli_chr03 | 11527509                | AA                              | TT                | 1945917754               |
| SNP_P3_28333_11527511 | NC_021162.1    | Ca_kabuli_chr03 | 11527511                | AA                              | GG                | 1945917756               |
| SNP_P3_28334_11527535 | NC_021162.1    | Ca_kabuli_chr03 | 11527535                | AA                              | GG                | 1945917758               |
| SNP_P3_28335_11527576 | NC_021162.1    | Ca_kabuli_chr03 | 11527576                | AA                              | GG                | 1945917759               |
| SNP_P3_28336_11527577 | NC_021162.1    | Ca_kabuli_chr03 | 11527577                | CC                              | TT                | 1945917761               |
| SNP_P3_28337_11527752 | NC_021162.1    | Ca_kabuli_chr03 | 11527752                | AA                              | CC                | 1945917763               |
| SNP_P3_28338_11527832 | NC_021162.1    | Ca_kabuli_chr03 | 11527832                | AA                              | GG                | 1945917765               |
| SNP_P3_28339_11527905 | NC_021162.1    | Ca_kabuli_chr03 | 11527905                | AA                              | GG                | 1945917766               |
| SNP_P3_28340_11527927 | NC_021162.1    | Ca_kabuli_chr03 | 11527927                | AA                              | GG                | 1945917768               |
| SNP_P3_28341_11528043 | NC_021162.1    | Ca_kabuli_chr03 | 11528043                | AA                              | GG                | 1945917770               |
| SNP_P3_28342_11530512 | NC_021162.1    | Ca_kabuli_chr03 | 11530512                | GG                              | AA                | 1945917772               |
| SNP_P3_28344_11532092 | NC_021162.1    | Ca_kabuli_chr03 | 11532092                | GG                              | TT                | 1945917774               |
| SNP_P3_28345_11536928 | NC_021162.1    | Ca_kabuli_chr03 | 11536928                | AA                              | GG                | 1945917775               |
| SNP_P3_28347_11585835 | NC_021162.1    | Ca_kabuli_chr03 | 11585835                | GG                              | CC                | 1945917777               |
| SNP_P3_28348_11586551 | NC_021162.1    | Ca_kabuli_chr03 | 11586551                | GG                              | AA                | 1945917779               |
| SNP_P3_28349_11586578 | NC_021162.1    | Ca_kabuli_chr03 | 11586578                | TT                              | CC                | 1945917781               |
| SNP_P3_28350_11588299 | NC_021162.1    | Ca_kabuli_chr03 | 11588299                | AA                              | GG                | 1945917783               |
| SNP_P3_28351_11592330 | NC_021162.1    | Ca_kabuli_chr03 | 11592330                | TT                              | CC                | 1945917784               |
| SNP_P3_28352_11608356 | NC_021162.1    | Ca_kabuli_chr03 | 11608356                | CC                              | TT                | 1945917786               |

| SNPs IDs              | Chromosome IDs | Chromosomes     | Physical positions (bp) | CDC Frontier (Reference genome) | (Pusa 256 & HPNB) | NCBI SNPdb Accession IDs |
|-----------------------|----------------|-----------------|-------------------------|---------------------------------|-------------------|--------------------------|
| SNP_P3_28353_11608396 | NC_021162.1    | Ca_kabuli_chr03 | 11608396                | AA                              | GG                | 1945917788               |
| SNP_P3_28354_11653927 | NC_021162.1    | Ca_kabuli_chr03 | 11653927                | CC                              | GG                | 1945917790               |
| SNP_P3_28355_11677445 | NC_021162.1    | Ca_kabuli_chr03 | 11677445                | GG                              | CC                | 1945917791               |
| SNP_P3_28356_11680573 | NC_021162.1    | Ca_kabuli_chr03 | 11680573                | GG                              | AA                | 1945917793               |
| SNP_P3_28357_11690276 | NC_021162.1    | Ca_kabuli_chr03 | 11690276                | CC                              | TT                | 1945917795               |
| SNP_P3_28358_11714815 | NC_021162.1    | Ca_kabuli_chr03 | 11714815                | CC                              | TT                | 1945917797               |
| SNP_P3_28360_11732469 | NC_021162.1    | Ca_kabuli_chr03 | 11732469                | AA                              | GG                | 1945917799               |
| SNP_P3_28362_11757939 | NC_021162.1    | Ca_kabuli_chr03 | 11757939                | GG                              | TT                | 1945917800               |
| SNP_P3_28363_11765018 | NC_021162.1    | Ca_kabuli_chr03 | 11765018                | GG                              | TT                | 1945917802               |
| SNP_P3_28364_11765187 | NC_021162.1    | Ca_kabuli_chr03 | 11765187                | CC                              | GG                | 1945917804               |
| SNP_P3_28365_11765226 | NC_021162.1    | Ca_kabuli_chr03 | 11765226                | AA                              | TT                | 1945917806               |
| SNP_P3_28367_11765479 | NC_021162.1    | Ca_kabuli_chr03 | 11765479                | TT                              | AA                | 1945917807               |
| SNP_P3_28368_11765515 | NC_021162.1    | Ca_kabuli_chr03 | 11765515                | CC                              | TT                | 1945917809               |
| SNP_P3_28369_11765522 | NC_021162.1    | Ca_kabuli_chr03 | 11765522                | TT                              | CC                | 1945917811               |
| SNP_P3_28370_11773670 | NC_021162.1    | Ca_kabuli_chr03 | 11773670                | GG                              | AA                | 1945917813               |
| SNP_P3_28371_11774111 | NC_021162.1    | Ca_kabuli_chr03 | 11774111                | AA                              | TT                | 1945917815               |
| SNP_P3_28372_11774194 | NC_021162.1    | Ca_kabuli_chr03 | 11774194                | AA                              | CC                | 1945917816               |
| SNP_P3_28373_11774207 | NC_021162.1    | Ca_kabuli_chr03 | 11774207                | TT                              | GG                | 1945917818               |
| SNP_P3_28374_11774222 | NC_021162.1    | Ca_kabuli_chr03 | 11774222                | TT                              | AA                | 1945917820               |
| SNP_P3_28375_11774230 | NC_021162.1    | Ca_kabuli_chr03 | 11774230                | CC                              | AA                | 1945917822               |
| SNP_P3_28376_11774261 | NC_021162.1    | Ca_kabuli_chr03 | 11774261                | GG                              | AA                | 1945917823               |
| SNP_P3_28377_11774312 | NC_021162.1    | Ca_kabuli_chr03 | 11774312                | AA                              | GG                | 1945917825               |
| SNP_P3_28378_11774315 | NC_021162.1    | Ca_kabuli_chr03 | 11774315                | TT                              | CC                | 1945917827               |
| SNP_P3_28379_11776193 | NC_021162.1    | Ca_kabuli_chr03 | 11776193                | AA                              | GG                | 1945917829               |
| SNP_P3_28380_11776225 | NC_021162.1    | Ca_kabuli_chr03 | 11776225                | AA                              | GG                | 1945917831               |
| SNP_P3_28381_11784740 | NC_021162.1    | Ca_kabuli_chr03 | 11784740                | CC                              | TT                | 1945917832               |
| SNP_P3_28382_11784741 | NC_021162.1    | Ca_kabuli_chr03 | 11784741                | AA                              | GG                | 1945917834               |
| SNP_P3_28383_11784968 | NC_021162.1    | Ca_kabuli_chr03 | 11784968                | AA                              | GG                | 1945917836               |
| SNP_P3_28384_11795596 | NC_021162.1    | Ca_kabuli_chr03 | 11795596                | GG                              | AA                | 1945917838               |
| SNP_P3_28385_11795598 | NC_021162.1    | Ca_kabuli_chr03 | 11795598                | AA                              | TT                | 1945917839               |
| SNP_P3_28386_11805035 | NC_021162.1    | Ca_kabuli_chr03 | 11805035                | AA                              | GG                | 1945917841               |
| SNP_P3_28387_11805351 | NC_021162.1    | Ca_kabuli_chr03 | 11805351                | AA                              | TT                | 1945917843               |
| SNP_P3_28388_11806397 | NC_021162.1    | Ca_kabuli_chr03 | 11806397                | GG                              | AA                | 1945917845               |
| SNP_P3_28389_11830355 | NC_021162.1    | Ca_kabuli_chr03 | 11830355                | CC                              | TT                | 1945917847               |
| SNP_P3_28390_11830671 | NC_021162.1    | Ca_kabuli_chr03 | 11830671                | TT                              | AA                | 1945917848               |
| SNP_P3_28391_11830855 | NC_021162.1    | Ca_kabuli_chr03 | 11830855                | TT                              | CC                | 1945917850               |
| SNP_P3_28392_11888175 | NC_021162.1    | Ca_kabuli_chr03 | 11888175                | GG                              | CC                | 1945917852               |
| SNP_P3_28394_11905022 | NC_021162.1    | Ca_kabuli_chr03 | 11905022                | GG                              | AA                | 1945917854               |
| SNP_P3_28395_11906650 | NC_021162.1    | Ca_kabuli_chr03 | 11906650                | AA                              | GG                | 1945917855               |
| SNP_P3_28396_11906920 | NC_021162.1    | Ca_kabuli_chr03 | 11906920                | CC                              | TT                | 1945917857               |
| SNP_P3_28397_11906924 | NC_021162.1    | Ca_kabuli_chr03 | 11906924                | GG                              | AA                | 1945917859               |
| SNP_P3_28399_11925411 | NC_021162.1    | Ca_kabuli_chr03 | 11925411                | TT                              | CC                | 1945917861               |

| SNPs IDs              | Chromosome IDs | Chromosomes     | Physical positions (bp) | CDC Frontier (Reference genome) | (Pusa 256 & HPNB) | NCBI SNPdb Accession IDs |
|-----------------------|----------------|-----------------|-------------------------|---------------------------------|-------------------|--------------------------|
| SNP_P3_28400_11950220 | NC_021162.1    | Ca_kabuli_chr03 | 11950220                | TT                              | CC                | 1945917863               |
| SNP_P3_28401_11950231 | NC_021162.1    | Ca_kabuli_chr03 | 11950231                | CC                              | AA                | 1945917864               |
| SNP_P3_28402_11950263 | NC_021162.1    | Ca_kabuli_chr03 | 11950263                | CC                              | TT                | 1945917866               |
| SNP_P3_28403_11950495 | NC_021162.1    | Ca_kabuli_chr03 | 11950495                | CC                              | TT                | 1945917868               |
| SNP_P3_28404_11951977 | NC_021162.1    | Ca_kabuli_chr03 | 11951977                | GG                              | AA                | 1945917870               |
| SNP_P3_28405_11956719 | NC_021162.1    | Ca_kabuli_chr03 | 11956719                | AA                              | GG                | 1945917871               |
| SNP_P3_28406_11956720 | NC_021162.1    | Ca_kabuli_chr03 | 11956720                | AA                              | TT                | 1945917873               |
| SNP_P3_28407_11957635 | NC_021162.1    | Ca_kabuli_chr03 | 11957635                | CC                              | TT                | 1945917875               |
| SNP_P3_28408_11958468 | NC_021162.1    | Ca_kabuli_chr03 | 11958468                | GG                              | TT                | 1945917877               |
| SNP_P3_28410_12002724 | NC_021162.1    | Ca_kabuli_chr03 | 12002724                | GG                              | AA                | 1945917879               |
| SNP_P3_28411_12027024 | NC_021162.1    | Ca_kabuli_chr03 | 12027024                | TT                              | GG                | 1945917880               |
| SNP_P3_28412_12031547 | NC_021162.1    | Ca_kabuli_chr03 | 12031547                | TT                              | GG                | 1945917882               |
| SNP_P3_28413_12031549 | NC_021162.1    | Ca_kabuli_chr03 | 12031549                | GG                              | TT                | 1945917884               |
| SNP_P3_28414_12031571 | NC_021162.1    | Ca_kabuli_chr03 | 12031571                | GG                              | AA                | 1945917886               |
| SNP_P3_28415_12031572 | NC_021162.1    | Ca_kabuli_chr03 | 12031572                | GG                              | CC                | 1945917887               |
| SNP_P3_28416_12032069 | NC_021162.1    | Ca_kabuli_chr03 | 12032069                | CC                              | AA                | 1945917889               |
| SNP_P3_28417_12032125 | NC_021162.1    | Ca_kabuli_chr03 | 12032125                | AA                              | TT                | 1945917891               |
| SNP_P3_28418_12032164 | NC_021162.1    | Ca_kabuli_chr03 | 12032164                | CC                              | AA                | 1945917893               |
| SNP_P3_28419_12032216 | NC_021162.1    | Ca_kabuli_chr03 | 12032216                | GG                              | AA                | 1945917895               |
| SNP_P3_28420_12032224 | NC_021162.1    | Ca_kabuli_chr03 | 12032224                | TT                              | GG                | 1945917896               |
| SNP_P3_28421_12032365 | NC_021162.1    | Ca_kabuli_chr03 | 12032365                | GG                              | AA                | 1945917898               |
| SNP_P3_28422_12032397 | NC_021162.1    | Ca_kabuli_chr03 | 12032397                | AA                              | CC                | 1945917900               |
| SNP_P3_28423_12032401 | NC_021162.1    | Ca_kabuli_chr03 | 12032401                | TT                              | CC                | 1945917902               |
| SNP_P3_28424_12032407 | NC_021162.1    | Ca_kabuli_chr03 | 12032407                | AA                              | TT                | 1945917904               |
| SNP_P3_28425_12032462 | NC_021162.1    | Ca_kabuli_chr03 | 12032462                | AA                              | GG                | 1945917905               |
| SNP_P3_28426_12032519 | NC_021162.1    | Ca_kabuli_chr03 | 12032519                | TT                              | CC                | 1945917907               |
| SNP_P3_28427_12034162 | NC_021162.1    | Ca_kabuli_chr03 | 12034162                | TT                              | CC                | 1945917909               |
| SNP_P3_28428_12034202 | NC_021162.1    | Ca_kabuli_chr03 | 12034202                | CC                              | AA                | 1945917911               |
| SNP_P3_28429_12080826 | NC_021162.1    | Ca_kabuli_chr03 | 12080826                | AA                              | CC                | 1945917912               |
| SNP_P3_28430_12081071 | NC_021162.1    | Ca_kabuli_chr03 | 12081071                | CC                              | AA                | 1945917914               |
| SNP_P3_28431_12111477 | NC_021162.1    | Ca_kabuli_chr03 | 12111477                | CC                              | TT                | 1945917916               |
| SNP_P3_28432_12111541 | NC_021162.1    | Ca_kabuli_chr03 | 12111541                | TT                              | CC                | 1945917918               |
| SNP_P3_28433_12111545 | NC_021162.1    | Ca_kabuli_chr03 | 12111545                | CC                              | TT                | 1945917920               |
| SNP_P3_28434_12111753 | NC_021162.1    | Ca_kabuli_chr03 | 12111753                | AA                              | TT                | 1945917921               |
| SNP_P3_28435_12111758 | NC_021162.1    | Ca_kabuli_chr03 | 12111758                | TT                              | AA                | 1945917923               |
| SNP_P3_28436_12111759 | NC_021162.1    | Ca_kabuli_chr03 | 12111759                | TT                              | CC                | 1945917925               |
| SNP_P3_28437_12111760 | NC_021162.1    | Ca_kabuli_chr03 | 12111760                | TT                              | AA                | 1945917927               |
| SNP_P3_28438_12111795 | NC_021162.1    | Ca_kabuli_chr03 | 12111795                | CC                              | AA                | 1945917928               |
| SNP_P3_28439_12127557 | NC_021162.1    | Ca_kabuli_chr03 | 12127557                | CC                              | TT                | 1945917930               |
| SNP_P3_28440_12144386 | NC_021162.1    | Ca_kabuli_chr03 | 12144386                | GG                              | TT                | 1945917932               |
| SNP_P3_28441_12148470 | NC_021162.1    | Ca_kabuli_chr03 | 12148470                | TT                              | CC                | 1945917934               |
| SNP_P3_28442_12164098 | NC_021162.1    | Ca_kabuli_chr03 | 12164098                | GG                              | CC                | 1945917936               |

| SNPs IDs              | Chromosome IDs | Chromosomes     | Physical positions (bp) | CDC Frontier (Reference genome) | (Pusa 256 & HPNB) | NCBI SNPdb Accession IDs |
|-----------------------|----------------|-----------------|-------------------------|---------------------------------|-------------------|--------------------------|
| SNP_P3_28443_12164136 | NC_021162.1    | Ca_kabuli_chr03 | 12164136                | AA                              | GG                | 1945917937               |
| SNP_P3_28444_12167759 | NC_021162.1    | Ca_kabuli_chr03 | 12167759                | GG                              | TT                | 1945917939               |
| SNP_P3_28445_12197360 | NC_021162.1    | Ca_kabuli_chr03 | 12197360                | TT                              | AA                | 1945917941               |
| SNP_P3_28446_12203460 | NC_021162.1    | Ca_kabuli_chr03 | 12203460                | GG                              | AA                | 1945917943               |
| SNP_P3_28447_12208945 | NC_021162.1    | Ca_kabuli_chr03 | 12208945                | AA                              | GG                | 1945917944               |
| SNP_P3_28449_12239571 | NC_021162.1    | Ca_kabuli_chr03 | 12239571                | CC                              | AA                | 1945917946               |
| SNP_P3_28451_12345910 | NC_021162.1    | Ca_kabuli_chr03 | 12345910                | CC                              | AA                | 1945917948               |
| SNP_P3_28452_12345921 | NC_021162.1    | Ca_kabuli_chr03 | 12345921                | CC                              | AA                | 1945917950               |
| SNP_P3_28453_12345927 | NC_021162.1    | Ca_kabuli_chr03 | 12345927                | CC                              | TT                | 1945917952               |
| SNP_P3_28454_12345942 | NC_021162.1    | Ca_kabuli_chr03 | 12345942                | GG                              | AA                | 1945917953               |
| SNP_P3_28455_12348432 | NC_021162.1    | Ca_kabuli_chr03 | 12348432                | AA                              | TT                | 1945917955               |
| SNP_P3_28456_12375762 | NC_021162.1    | Ca_kabuli_chr03 | 12375762                | TT                              | AA                | 1945917957               |
| SNP_P3_28457_12387488 | NC_021162.1    | Ca_kabuli_chr03 | 12387488                | TT                              | CC                | 1945917959               |
| SNP_P3_28458_12387519 | NC_021162.1    | Ca_kabuli_chr03 | 12387519                | GG                              | AA                | 1945917960               |
| SNP_P3_28459_12387558 | NC_021162.1    | Ca_kabuli_chr03 | 12387558                | GG                              | AA                | 1945917962               |
| SNP_P3_28460_12387588 | NC_021162.1    | Ca_kabuli_chr03 | 12387588                | AA                              | GG                | 1945917964               |
| SNP_P3_28461_12387619 | NC_021162.1    | Ca_kabuli_chr03 | 12387619                | GG                              | TT                | 1945917966               |
| SNP_P3_28462_12387668 | NC_021162.1    | Ca_kabuli_chr03 | 12387668                | TT                              | CC                | 1945917968               |
| SNP_P3_28463_12387670 | NC_021162.1    | Ca_kabuli_chr03 | 12387670                | TT                              | CC                | 1945917969               |
| SNP_P3_28464_12387698 | NC_021162.1    | Ca_kabuli_chr03 | 12387698                | TT                              | CC                | 1945917971               |
| SNP_P3_28465_12387752 | NC_021162.1    | Ca_kabuli_chr03 | 12387752                | TT                              | CC                | 1945917973               |
| SNP_P3_28467_12415430 | NC_021162.1    | Ca_kabuli_chr03 | 12415430                | GG                              | CC                | 1945917975               |
| SNP_P3_28468_12423576 | NC_021162.1    | Ca_kabuli_chr03 | 12423576                | CC                              | TT                | 1945917976               |
| SNP_P3_28469_12432493 | NC_021162.1    | Ca_kabuli_chr03 | 12432493                | TT                              | CC                | 1945917978               |
| SNP_P3_28470_12432588 | NC_021162.1    | Ca_kabuli_chr03 | 12432588                | GG                              | AA                | 1945917980               |
| SNP_P3_28471_12432818 | NC_021162.1    | Ca_kabuli_chr03 | 12432818                | CC                              | GG                | 1945917982               |
| SNP_P3_28472_12432832 | NC_021162.1    | Ca_kabuli_chr03 | 12432832                | TT                              | CC                | 1945917984               |
| SNP_P3_28473_12438400 | NC_021162.1    | Ca_kabuli_chr03 | 12438400                | TT                              | CC                | 1945917985               |
| SNP_P3_28474_12452752 | NC_021162.1    | Ca_kabuli_chr03 | 12452752                | TT                              | AA                | 1945917987               |
| SNP_P3_28475_12452760 | NC_021162.1    | Ca_kabuli_chr03 | 12452760                | CC                              | TT                | 1945917989               |
| SNP_P3_28476_12456431 | NC_021162.1    | Ca_kabuli_chr03 | 12456431                | GG                              | AA                | 1945917991               |
| SNP_P3_28477_12549704 | NC_021162.1    | Ca_kabuli_chr03 | 12549704                | CC                              | GG                | 1945917992               |
| SNP_P3_28478_12558980 | NC_021162.1    | Ca_kabuli_chr03 | 12558980                | GG                              | AA                | 1945917994               |
| SNP_P3_28479_12560207 | NC_021162.1    | Ca_kabuli_chr03 | 12560207                | CC                              | TT                | 1945917996               |
| SNP_P3_28480_12560862 | NC_021162.1    | Ca_kabuli_chr03 | 12560862                | CC                              | GG                | 1945917998               |
| SNP_P3_28481_12563636 | NC_021162.1    | Ca_kabuli_chr03 | 12563636                | GG                              | AA                | 1945918000               |
| SNP_P3_28482_12566658 | NC_021162.1    | Ca_kabuli_chr03 | 12566658                | CC                              | GG                | 1945918001               |
| SNP_P3_28483_12566835 | NC_021162.1    | Ca_kabuli_chr03 | 12566835                | CC                              | TT                | 1945918003               |
| SNP_P3_28484_12581204 | NC_021162.1    | Ca_kabuli_chr03 | 12581204                | GG                              | TT                | 1945918005               |
| SNP_P3_28485_12581217 | NC_021162.1    | Ca_kabuli_chr03 | 12581217                | GG                              | AA                | 1945918007               |
| SNP_P3_28486_12581367 | NC_021162.1    | Ca_kabuli_chr03 | 12581367                | GG                              | AA                | 1945918008               |
| SNP_P3_28487_12581437 | NC_021162.1    | Ca_kabuli_chr03 | 12581437                | TT                              | CC                | 1945918010               |



| SNPs IDs              | Chromosome IDs | Chromosomes     | Physical positions (bp) | CDC Frontier (Reference genome) | (Pusa 256 & HPNB) | NCBI SNPdb Accession IDs |
|-----------------------|----------------|-----------------|-------------------------|---------------------------------|-------------------|--------------------------|
| SNP_P3_28488_12581643 | NC_021162.1    | Ca_kabuli_chr03 | 12581643                | AA                              | GG                | 1945918012               |
| SNP_P3_28489_12581704 | NC_021162.1    | Ca_kabuli_chr03 | 12581704                | CC                              | TT                | 1945918014               |
| SNP_P3_28490_12582006 | NC_021162.1    | Ca_kabuli_chr03 | 12582006                | AA                              | TT                | 1945918016               |
| SNP_P3_28491_12582123 | NC_021162.1    | Ca_kabuli_chr03 | 12582123                | GG                              | AA                | 1945918017               |
| SNP_P3_28493_12603691 | NC_021162.1    | Ca_kabuli_chr03 | 12603691                | TT                              | GG                | 1945918019               |
| SNP_P3_28494_12606325 | NC_021162.1    | Ca_kabuli_chr03 | 12606325                | GG                              | AA                | 1945918021               |
| SNP_P3_28495_12606366 | NC_021162.1    | Ca_kabuli_chr03 | 12606366                | CC                              | TT                | 1945918023               |
| SNP_P3_28496_12639098 | NC_021162.1    | Ca_kabuli_chr03 | 12639098                | GG                              | AA                | 1945918024               |
| SNP_P3_28498_12660292 | NC_021162.1    | Ca_kabuli_chr03 | 12660292                | TT                              | AA                | 1945918026               |
| SNP_P3_28499_12660797 | NC_021162.1    | Ca_kabuli_chr03 | 12660797                | GG                              | AA                | 1945918028               |
| SNP_P3_28500_12661013 | NC_021162.1    | Ca_kabuli_chr03 | 12661013                | CC                              | TT                | 1945918030               |
| SNP_P3_28501_12661014 | NC_021162.1    | Ca_kabuli_chr03 | 12661014                | AA                              | GG                | 1945918032               |
| SNP_P3_28502_12661019 | NC_021162.1    | Ca_kabuli_chr03 | 12661019                | AA                              | GG                | 1945918033               |
| SNP_P3_28503_12668373 | NC_021162.1    | Ca_kabuli_chr03 | 12668373                | GG                              | AA                | 1945918035               |
| SNP_P3_28504_12675672 | NC_021162.1    | Ca_kabuli_chr03 | 12675672                | AA                              | TT                | 1945918037               |
| SNP_P3_28505_12676974 | NC_021162.1    | Ca_kabuli_chr03 | 12676974                | CC                              | TT                | 1945918039               |
| SNP_P3_28506_12683926 | NC_021162.1    | Ca_kabuli_chr03 | 12683926                | CC                              | TT                | 1945918040               |
| SNP_P3_28507_12683930 | NC_021162.1    | Ca_kabuli_chr03 | 12683930                | GG                              | AA                | 1945918042               |
| SNP_P3_28508_12684039 | NC_021162.1    | Ca_kabuli_chr03 | 12684039                | TT                              | CC                | 1945918044               |
| SNP_P3_28509_12699638 | NC_021162.1    | Ca_kabuli_chr03 | 12699638                | GG                              | AA                | 1945918046               |
| SNP_P3_28510_12699656 | NC_021162.1    | Ca_kabuli_chr03 | 12699656                | AA                              | CC                | 1945918048               |
| SNP_P3_28511_12714184 | NC_021162.1    | Ca_kabuli_chr03 | 12714184                | GG                              | TT                | 1945918049               |
| SNP_P3_28512_12714191 | NC_021162.1    | Ca_kabuli_chr03 | 12714191                | CC                              | TT                | 1945918051               |
| SNP_P3_28513_12714249 | NC_021162.1    | Ca_kabuli_chr03 | 12714249                | TT                              | CC                | 1945918053               |
| SNP_P3_28514_12714262 | NC_021162.1    | Ca_kabuli_chr03 | 12714262                | AA                              | CC                | 1945918055               |
| SNP_P3_28515_12714346 | NC_021162.1    | Ca_kabuli_chr03 | 12714346                | TT                              | GG                | 1945918056               |
| SNP_P3_28517_12723177 | NC_021162.1    | Ca_kabuli_chr03 | 12723177                | AA                              | CC                | 1945918058               |
| SNP_P3_28518_12737744 | NC_021162.1    | Ca_kabuli_chr03 | 12737744                | AA                              | GG                | 1945918060               |
| SNP_P3_28519_12739850 | NC_021162.1    | Ca_kabuli_chr03 | 12739850                | GG                              | CC                | 1945918062               |
| SNP_P3_28520_12739882 | NC_021162.1    | Ca_kabuli_chr03 | 12739882                | AA                              | GG                | 1945918064               |
| SNP_P3_28521_12740124 | NC_021162.1    | Ca_kabuli_chr03 | 12740124                | AA                              | GG                | 1945918065               |
| SNP_P3_28522_12740130 | NC_021162.1    | Ca_kabuli_chr03 | 12740130                | GG                              | AA                | 1945918067               |
| SNP_P3_28523_12740149 | NC_021162.1    | Ca_kabuli_chr03 | 12740149                | GG                              | AA                | 1945918069               |
| SNP_P3_28524_12740154 | NC_021162.1    | Ca_kabuli_chr03 | 12740154                | AA                              | GG                | 1945918071               |
| SNP_P3_28525_12740160 | NC_021162.1    | Ca_kabuli_chr03 | 12740160                | CC                              | TT                | 1945918073               |
| SNP_P3_28526_12740161 | NC_021162.1    | Ca_kabuli_chr03 | 12740161                | TT                              | CC                | 1945918074               |
| SNP_P3_28527_12741085 | NC_021162.1    | Ca_kabuli_chr03 | 12741085                | GG                              | AA                | 1945918076               |
| SNP_P3_28528_12763733 | NC_021162.1    | Ca_kabuli_chr03 | 12763733                | GG                              | CC                | 1945918078               |
| SNP_P3_28529_12763739 | NC_021162.1    | Ca_kabuli_chr03 | 12763739                | TT                              | GG                | 1945918080               |
| SNP_P3_28530_12763788 | NC_021162.1    | Ca_kabuli_chr03 | 12763788                | TT                              | CC                | 1945918081               |
| SNP_P3_28531_12779120 | NC_021162.1    | Ca_kabuli_chr03 | 12779120                | AA                              | GG                | 1945918083               |
| SNP_P3_28532_12779127 | NC_021162.1    | Ca_kabuli_chr03 | 12779127                | CC                              | GG                | 1945918085               |

| SNPs IDs              | Chromosome IDs | Chromosomes     | Physical positions (bp) | CDC Frontier (Reference genome) | (Pusa 256 & HPNB) | NCBI SNPdb Accession IDs |
|-----------------------|----------------|-----------------|-------------------------|---------------------------------|-------------------|--------------------------|
| SNP_P3_28533_12779140 | NC_021162.1    | Ca_kabuli_chr03 | 12779140                | TT                              | CC                | 1945918087               |
| SNP_P3_28534_12779176 | NC_021162.1    | Ca_kabuli_chr03 | 12779176                | TT                              | CC                | 1945918089               |
| SNP_P3_28535_12779393 | NC_021162.1    | Ca_kabuli_chr03 | 12779393                | AA                              | GG                | 1945918090               |
| SNP_P3_28536_12779404 | NC_021162.1    | Ca_kabuli_chr03 | 12779404                | GG                              | AA                | 1945918092               |
| SNP_P3_28537_12779454 | NC_021162.1    | Ca_kabuli_chr03 | 12779454                | GG                              | TT                | 1945918094               |
| SNP_P3_28538_12779471 | NC_021162.1    | Ca_kabuli_chr03 | 12779471                | CC                              | AA                | 1945918096               |
| SNP_P3_28539_12785957 | NC_021162.1    | Ca_kabuli_chr03 | 12785957                | CC                              | TT                | 1945918097               |
| SNP_P3_28540_12786823 | NC_021162.1    | Ca_kabuli_chr03 | 12786823                | AA                              | GG                | 1945918099               |
| SNP_P3_28541_12801956 | NC_021162.1    | Ca_kabuli_chr03 | 12801956                | CC                              | AA                | 1945918101               |
| SNP_P3_28542_12801999 | NC_021162.1    | Ca_kabuli_chr03 | 12801999                | AA                              | GG                | 1945918103               |
| SNP_P3_28543_12808886 | NC_021162.1    | Ca_kabuli_chr03 | 12808886                | CC                              | TT                | 1945918105               |
| SNP_P3_28544_12808902 | NC_021162.1    | Ca_kabuli_chr03 | 12808902                | GG                              | AA                | 1945918106               |
| SNP_P3_28545_12809058 | NC_021162.1    | Ca_kabuli_chr03 | 12809058                | TT                              | GG                | 1945918108               |
| SNP_P3_28546_12809104 | NC_021162.1    | Ca_kabuli_chr03 | 12809104                | AA                              | GG                | 1945918110               |
| SNP_P3_28547_12809136 | NC_021162.1    | Ca_kabuli_chr03 | 12809136                | CC                              | TT                | 1945918112               |
| SNP_P3_28548_12809140 | NC_021162.1    | Ca_kabuli_chr03 | 12809140                | TT                              | CC                | 1945918113               |
| SNP_P3_28549_12809148 | NC_021162.1    | Ca_kabuli_chr03 | 12809148                | CC                              | TT                | 1945918115               |
| SNP_P3_28550_12809159 | NC_021162.1    | Ca_kabuli_chr03 | 12809159                | CC                              | TT                | 1945918117               |
| SNP_P3_28551_12809177 | NC_021162.1    | Ca_kabuli_chr03 | 12809177                | TT                              | CC                | 1945918119               |
| SNP_P3_28552_12809178 | NC_021162.1    | Ca_kabuli_chr03 | 12809178                | AA                              | GG                | 1945918121               |
| SNP_P3_28553_12809182 | NC_021162.1    | Ca_kabuli_chr03 | 12809182                | AA                              | GG                | 1945918122               |
| SNP_P3_28554_12809467 | NC_021162.1    | Ca_kabuli_chr03 | 12809467                | CC                              | TT                | 1945918124               |
| SNP_P3_28555_12809568 | NC_021162.1    | Ca_kabuli_chr03 | 12809568                | TT                              | GG                | 1945918126               |
| SNP_P3_28556_12814456 | NC_021162.1    | Ca_kabuli_chr03 | 12814456                | GG                              | AA                | 1945918128               |
| SNP_P3_28557_12814471 | NC_021162.1    | Ca_kabuli_chr03 | 12814471                | GG                              | CC                | 1945918129               |
| SNP_P3_28559_12823624 | NC_021162.1    | Ca_kabuli_chr03 | 12823624                | TT                              | CC                | 1945918131               |
| SNP_P3_28560_12823998 | NC_021162.1    | Ca_kabuli_chr03 | 12823998                | AA                              | GG                | 1945918133               |
| SNP_P3_28561_12829739 | NC_021162.1    | Ca_kabuli_chr03 | 12829739                | CC                              | TT                | 1945918135               |
| SNP_P3_28562_12867768 | NC_021162.1    | Ca_kabuli_chr03 | 12867768                | AA                              | GG                | 1945918137               |
| SNP_P3_28563_12922226 | NC_021162.1    | Ca_kabuli_chr03 | 12922226                | CC                              | TT                | 1945918138               |
| SNP_P3_28564_12922276 | NC_021162.1    | Ca_kabuli_chr03 | 12922276                | TT                              | GG                | 1945918140               |
| SNP_P3_28566_12922410 | NC_021162.1    | Ca_kabuli_chr03 | 12922410                | GG                              | AA                | 1945918142               |
| SNP_P3_28567_12922667 | NC_021162.1    | Ca_kabuli_chr03 | 12922667                | AA                              | CC                | 1945918144               |
| SNP_P3_28568_12922713 | NC_021162.1    | Ca_kabuli_chr03 | 12922713                | GG                              | AA                | 1945918145               |
| SNP_P3_28569_12922720 | NC_021162.1    | Ca_kabuli_chr03 | 12922720                | CC                              | TT                | 1945918147               |
| SNP_P3_28570_12922732 | NC_021162.1    | Ca_kabuli_chr03 | 12922732                | TT                              | CC                | 1945918149               |
| SNP_P3_28571_12922752 | NC_021162.1    | Ca_kabuli_chr03 | 12922752                | CC                              | TT                | 1945918151               |
| SNP_P3_28572_12925202 | NC_021162.1    | Ca_kabuli_chr03 | 12925202                | TT                              | CC                | 1945918153               |
| SNP_P3_28573_12969802 | NC_021162.1    | Ca_kabuli_chr03 | 12969802                | TT                              | AA                | 1945918154               |
| SNP_P3_28575_12983352 | NC_021162.1    | Ca_kabuli_chr03 | 12983352                | TT                              | CC                | 1945918156               |
| SNP_P3_28576_12993773 | NC_021162.1    | Ca_kabuli_chr03 | 12993773                | CC                              | TT                | 1945918158               |
| SNP_P3_28577_12993777 | NC_021162.1    | Ca_kabuli_chr03 | 12993777                | TT                              | CC                | 1945918160               |

| SNPs IDs              | Chromosome IDs | Chromosomes     | Physical positions (bp) | CDC Frontier (Reference genome) | (Pusa 256 & HPNB) | NCBI SNPdb Accession IDs |
|-----------------------|----------------|-----------------|-------------------------|---------------------------------|-------------------|--------------------------|
| SNP_P3_28578_12993827 | NC_021162.1    | Ca_kabuli_chr03 | 12993827                | AA                              | GG                | 1945918161               |
| SNP_P3_28579_12993915 | NC_021162.1    | Ca_kabuli_chr03 | 12993915                | AA                              | GG                | 1945918163               |
| SNP_P3_28580_12994119 | NC_021162.1    | Ca_kabuli_chr03 | 12994119                | AA                              | GG                | 1945918165               |
| SNP_P3_28581_12994145 | NC_021162.1    | Ca_kabuli_chr03 | 12994145                | TT                              | CC                | 1945918167               |
| SNP_P3_28582_12994177 | NC_021162.1    | Ca_kabuli_chr03 | 12994177                | GG                              | TT                | 1945918169               |
| SNP_P3_28583_12994183 | NC_021162.1    | Ca_kabuli_chr03 | 12994183                | AA                              | CC                | 1945918170               |
| SNP_P3_28584_12994188 | NC_021162.1    | Ca_kabuli_chr03 | 12994188                | TT                              | CC                | 1945918172               |
| SNP_P3_28585_12994235 | NC_021162.1    | Ca_kabuli_chr03 | 12994235                | AA                              | GG                | 1945918174               |
| SNP_P3_28586_12994245 | NC_021162.1    | Ca_kabuli_chr03 | 12994245                | TT                              | CC                | 1945918176               |
| SNP_P3_28587_12994253 | NC_021162.1    | Ca_kabuli_chr03 | 12994253                | TT                              | CC                | 1945918178               |
| SNP_P3_28588_12994269 | NC_021162.1    | Ca_kabuli_chr03 | 12994269                | AA                              | CC                | 1945918179               |
| SNP_P3_28589_12994305 | NC_021162.1    | Ca_kabuli_chr03 | 12994305                | TT                              | CC                | 1945918181               |
| SNP_P3_28590_12994318 | NC_021162.1    | Ca_kabuli_chr03 | 12994318                | AA                              | GG                | 1945918183               |
| SNP_P3_28591_12994572 | NC_021162.1    | Ca_kabuli_chr03 | 12994572                | TT                              | CC                | 1945918185               |
| SNP_P3_28592_12997396 | NC_021162.1    | Ca_kabuli_chr03 | 12997396                | GG                              | CC                | 1945918186               |
| SNP_P3_28593_12997405 | NC_021162.1    | Ca_kabuli_chr03 | 12997405                | CC                              | AA                | 1945918188               |
| SNP_P3_28595_13006634 | NC_021162.1    | Ca_kabuli_chr03 | 13006634                | AA                              | GG                | 1945918190               |
| SNP_P3_28596_13033798 | NC_021162.1    | Ca_kabuli_chr03 | 13033798                | AA                              | CC                | 1945918192               |
| SNP_P3_28597_13036479 | NC_021162.1    | Ca_kabuli_chr03 | 13036479                | AA                              | GG                | 1945918194               |
| SNP_P3_28598_13036484 | NC_021162.1    | Ca_kabuli_chr03 | 13036484                | AA                              | GG                | 1945918195               |
| SNP_P3_28599_13040946 | NC_021162.1    | Ca_kabuli_chr03 | 13040946                | AA                              | TT                | 1945918197               |
| SNP_P3_28600_13040983 | NC_021162.1    | Ca_kabuli_chr03 | 13040983                | TT                              | CC                | 1945918199               |
| SNP_P3_28601_13041005 | NC_021162.1    | Ca_kabuli_chr03 | 13041005                | GG                              | AA                | 1945918201               |
| SNP_P3_28602_13041039 | NC_021162.1    | Ca_kabuli_chr03 | 13041039                | AA                              | GG                | 1945918202               |
| SNP_P3_28603_13041042 | NC_021162.1    | Ca_kabuli_chr03 | 13041042                | TT                              | CC                | 1945918204               |
| SNP_P3_28604_13041068 | NC_021162.1    | Ca_kabuli_chr03 | 13041068                | CC                              | TT                | 1945918206               |
| SNP_P3_28605_13041075 | NC_021162.1    | Ca_kabuli_chr03 | 13041075                | CC                              | AA                | 1945918208               |
| SNP_P3_28606_13041122 | NC_021162.1    | Ca_kabuli_chr03 | 13041122                | GG                              | AA                | 1945918210               |
| SNP_P3_28607_13041422 | NC_021162.1    | Ca_kabuli_chr03 | 13041422                | CC                              | TT                | 1945918211               |
| SNP_P3_28608_13041468 | NC_021162.1    | Ca_kabuli_chr03 | 13041468                | CC                              | TT                | 1945918213               |
| SNP_P3_28609_13041503 | NC_021162.1    | Ca_kabuli_chr03 | 13041503                | TT                              | CC                | 1945918215               |
| SNP_P3_28610_13041533 | NC_021162.1    | Ca_kabuli_chr03 | 13041533                | AA                              | GG                | 1945918217               |
| SNP_P3_28611_13041578 | NC_021162.1    | Ca_kabuli_chr03 | 13041578                | AA                              | GG                | 1945918218               |
| SNP_P3_28612_13041598 | NC_021162.1    | Ca_kabuli_chr03 | 13041598                | AA                              | GG                | 1945918220               |
| SNP_P3_28613_13041638 | NC_021162.1    | Ca_kabuli_chr03 | 13041638                | TT                              | CC                | 1945918222               |
| SNP_P3_28614_13042102 | NC_021162.1    | Ca_kabuli_chr03 | 13042102                | AA                              | CC                | 1945918224               |
| SNP_P3_28615_13042121 | NC_021162.1    | Ca_kabuli_chr03 | 13042121                | AA                              | TT                | 1945918226               |
| SNP_P3_28616_13042123 | NC_021162.1    | Ca_kabuli_chr03 | 13042123                | GG                              | AA                | 1945918227               |
| SNP_P3_28617_13047747 | NC_021162.1    | Ca_kabuli_chr03 | 13047747                | GG                              | AA                | 1945918229               |
| SNP_P3_28618_13050309 | NC_021162.1    | Ca_kabuli_chr03 | 13050309                | TT                              | AA                | 1945918231               |
| SNP_P3_28619_13050654 | NC_021162.1    | Ca_kabuli_chr03 | 13050654                | TT                              | CC                | 1945918233               |
| SNP_P3_28620_13050667 | NC_021162.1    | Ca_kabuli_chr03 | 13050667                | GG                              | AA                | 1945918234               |

| SNPs IDs              | Chromosome IDs | Chromosomes     | Physical positions (bp) | CDC Frontier (Reference genome) | (Pusa 256 & HPNB) | NCBI SNPdb Accession IDs |
|-----------------------|----------------|-----------------|-------------------------|---------------------------------|-------------------|--------------------------|
| SNP_P3_28621_13050707 | NC_021162.1    | Ca_kabuli_chr03 | 13050707                | TT                              | CC                | 1945918236               |
| SNP_P3_28622_13050719 | NC_021162.1    | Ca_kabuli_chr03 | 13050719                | AA                              | GG                | 1945918238               |
| SNP_P3_28624_13068603 | NC_021162.1    | Ca_kabuli_chr03 | 13068603                | AA                              | GG                | 1945918240               |
| SNP_P3_28625_13068635 | NC_021162.1    | Ca_kabuli_chr03 | 13068635                | AA                              | GG                | 1945918242               |
| SNP_P3_28626_13068994 | NC_021162.1    | Ca_kabuli_chr03 | 13068994                | TT                              | CC                | 1945918243               |
| SNP_P3_28627_13070102 | NC_021162.1    | Ca_kabuli_chr03 | 13070102                | TT                              | GG                | 1945918245               |
| SNP_P3_28628_13070122 | NC_021162.1    | Ca_kabuli_chr03 | 13070122                | GG                              | TT                | 1945918247               |
| SNP_P3_28630_13072569 | NC_021162.1    | Ca_kabuli_chr03 | 13072569                | TT                              | CC                | 1945918249               |
| SNP_P3_28631_13079213 | NC_021162.1    | Ca_kabuli_chr03 | 13079213                | AA                              | TT                | 1945918251               |
| SNP_P3_28632_13079422 | NC_021162.1    | Ca_kabuli_chr03 | 13079422                | TT                              | CC                | 1945918252               |
| SNP_P3_28633_13096562 | NC_021162.1    | Ca_kabuli_chr03 | 13096562                | TT                              | CC                | 1945918254               |
| SNP_P3_28634_13096566 | NC_021162.1    | Ca_kabuli_chr03 | 13096566                | AA                              | CC                | 1945918256               |
| SNP_P3_28635_13096590 | NC_021162.1    | Ca_kabuli_chr03 | 13096590                | AA                              | CC                | 1945918258               |
| SNP_P3_28636_13096654 | NC_021162.1    | Ca_kabuli_chr03 | 13096654                | TT                              | CC                | 1945918259               |
| SNP_P3_28637_13096763 | NC_021162.1    | Ca_kabuli_chr03 | 13096763                | AA                              | CC                | 1945918261               |
| SNP_P3_28638_13096799 | NC_021162.1    | Ca_kabuli_chr03 | 13096799                | TT                              | GG                | 1945918263               |
| SNP_P3_28639_13096813 | NC_021162.1    | Ca_kabuli_chr03 | 13096813                | GG                              | AA                | 1945918265               |
| SNP_P3_28640_13096814 | NC_021162.1    | Ca_kabuli_chr03 | 13096814                | GG                              | TT                | 1945918267               |
| SNP_P3_28641_13096869 | NC_021162.1    | Ca_kabuli_chr03 | 13096869                | TT                              | CC                | 1945918268               |
| SNP_P3_28642_13096884 | NC_021162.1    | Ca_kabuli_chr03 | 13096884                | TT                              | CC                | 1945918270               |
| SNP_P3_28646_13097106 | NC_021162.1    | Ca_kabuli_chr03 | 13097106                | TT                              | CC                | 1945918272               |
| SNP_P3_28647_13097110 | NC_021162.1    | Ca_kabuli_chr03 | 13097110                | CC                              | TT                | 1945918274               |
| SNP_P3_28648_13097189 | NC_021162.1    | Ca_kabuli_chr03 | 13097189                | AA                              | GG                | 1945918275               |
| SNP_P3_28650_13107590 | NC_021162.1    | Ca_kabuli_chr03 | 13107590                | CC                              | GG                | 1945918277               |
| SNP_P3_28651_13107601 | NC_021162.1    | Ca_kabuli_chr03 | 13107601                | AA                              | GG                | 1945918279               |
| SNP_P3_28652_13107617 | NC_021162.1    | Ca_kabuli_chr03 | 13107617                | AA                              | GG                | 1945918281               |
| SNP_P3_28653_13129295 | NC_021162.1    | Ca_kabuli_chr03 | 13129295                | AA                              | TT                | 1945918283               |
| SNP_P3_28654_13135626 | NC_021162.1    | Ca_kabuli_chr03 | 13135626                | TT                              | AA                | 1945918284               |
| SNP_P3_28658_13172370 | NC_021162.1    | Ca_kabuli_chr03 | 13172370                | GG                              | CC                | 1945918286               |
| SNP_P3_28659_13180035 | NC_021162.1    | Ca_kabuli_chr03 | 13180035                | CC                              | TT                | 1945918288               |
| SNP_P3_28660_13180039 | NC_021162.1    | Ca_kabuli_chr03 | 13180039                | TT                              | GG                | 1945918290               |
| SNP_P3_28661_13180052 | NC_021162.1    | Ca_kabuli_chr03 | 13180052                | TT                              | CC                | 1945918291               |
| SNP_P3_28662_13184587 | NC_021162.1    | Ca_kabuli_chr03 | 13184587                | CC                              | AA                | 1945918293               |
| SNP_P3_28663_13185101 | NC_021162.1    | Ca_kabuli_chr03 | 13185101                | TT                              | CC                | 1945918295               |
| SNP_P3_28664_13185114 | NC_021162.1    | Ca_kabuli_chr03 | 13185114                | TT                              | CC                | 1945918297               |
| SNP_P3_28665_13185136 | NC_021162.1    | Ca_kabuli_chr03 | 13185136                | GG                              | TT                | 1945918299               |
| SNP_P3_28666_13185138 | NC_021162.1    | Ca_kabuli_chr03 | 13185138                | GG                              | TT                | 1945918300               |
| SNP_P3_28667_13185163 | NC_021162.1    | Ca_kabuli_chr03 | 13185163                | GG                              | CC                | 1945918302               |
| SNP_P3_28668_13185164 | NC_021162.1    | Ca_kabuli_chr03 | 13185164                | AA                              | CC                | 1945918304               |
| SNP_P3_28669_13185210 | NC_021162.1    | Ca_kabuli_chr03 | 13185210                | GG                              | AA                | 1945918306               |
| SNP_P3_28670_13185297 | NC_021162.1    | Ca_kabuli_chr03 | 13185297                | CC                              | AA                | 1945918307               |
| SNP_P3_28671_13185329 | NC_021162.1    | Ca_kabuli_chr03 | 13185329                | GG                              | AA                | 1945918309               |

| SNPs IDs              | Chromosome IDs | Chromosomes     | Physical positions (bp) | CDC Frontier (Reference genome) | (Pusa 256 & HPNB) | NCBI SNPdb Accession IDs |
|-----------------------|----------------|-----------------|-------------------------|---------------------------------|-------------------|--------------------------|
| SNP_P3_28672_13185350 | NC_021162.1    | Ca_kabuli_chr03 | 13185350                | GG                              | AA                | 1945918311               |
| SNP_P3_28673_13185376 | NC_021162.1    | Ca_kabuli_chr03 | 13185376                | TT                              | AA                | 1945918313               |
| SNP_P3_28674_13185385 | NC_021162.1    | Ca_kabuli_chr03 | 13185385                | GG                              | TT                | 1945918315               |
| SNP_P3_28675_13185408 | NC_021162.1    | Ca_kabuli_chr03 | 13185408                | CC                              | TT                | 1945918316               |
| SNP_P3_28677_13185472 | NC_021162.1    | Ca_kabuli_chr03 | 13185472                | AA                              | CC                | 1945918318               |
| SNP_P3_28678_13185558 | NC_021162.1    | Ca_kabuli_chr03 | 13185558                | GG                              | CC                | 1945918320               |
| SNP_P3_28679_13185559 | NC_021162.1    | Ca_kabuli_chr03 | 13185559                | GG                              | AA                | 1945918322               |
| SNP_P3_28680_13185568 | NC_021162.1    | Ca_kabuli_chr03 | 13185568                | GG                              | AA                | 1945918323               |
| SNP_P3_28681_13185569 | NC_021162.1    | Ca_kabuli_chr03 | 13185569                | AA                              | GG                | 1945918325               |
| SNP_P3_28682_13185579 | NC_021162.1    | Ca_kabuli_chr03 | 13185579                | TT                              | CC                | 1945918327               |
| SNP_P3_28683_13185767 | NC_021162.1    | Ca_kabuli_chr03 | 13185767                | CC                              | GG                | 1945918329               |
| SNP_P3_28684_13213191 | NC_021162.1    | Ca_kabuli_chr03 | 13213191                | AA                              | GG                | 1945918331               |
| SNP_P3_28685_13238621 | NC_021162.1    | Ca_kabuli_chr03 | 13238621                | AA                              | CC                | 1945918332               |
| SNP_P3_28686_13243529 | NC_021162.1    | Ca_kabuli_chr03 | 13243529                | TT                              | GG                | 1945918334               |
| SNP_P3_28687_13243530 | NC_021162.1    | Ca_kabuli_chr03 | 13243530                | AA                              | GG                | 1945918336               |
| SNP_P3_28688_13243543 | NC_021162.1    | Ca_kabuli_chr03 | 13243543                | AA                              | CC                | 1945918338               |
| SNP_P3_28689_13243554 | NC_021162.1    | Ca_kabuli_chr03 | 13243554                | AA                              | GG                | 1945918340               |
| SNP_P3_28690_13243556 | NC_021162.1    | Ca_kabuli_chr03 | 13243556                | CC                              | GG                | 1945918341               |
| SNP_P3_28691_13243568 | NC_021162.1    | Ca_kabuli_chr03 | 13243568                | TT                              | CC                | 1945918343               |
| SNP_P3_28692_13243597 | NC_021162.1    | Ca_kabuli_chr03 | 13243597                | GG                              | CC                | 1945918345               |
| SNP_P3_28693_13243753 | NC_021162.1    | Ca_kabuli_chr03 | 13243753                | GG                              | AA                | 1945918347               |
| SNP_P3_28694_13243754 | NC_021162.1    | Ca_kabuli_chr03 | 13243754                | GG                              | CC                | 1945918348               |
| SNP_P3_28695_13244178 | NC_021162.1    | Ca_kabuli_chr03 | 13244178                | GG                              | AA                | 1945918350               |
| SNP_P3_28696_13267980 | NC_021162.1    | Ca_kabuli_chr03 | 13267980                | CC                              | GG                | 1945918352               |
| SNP_P3_28697_13285211 | NC_021162.1    | Ca_kabuli_chr03 | 13285211                | AA                              | GG                | 1945918354               |
| SNP_P3_28698_13285214 | NC_021162.1    | Ca_kabuli_chr03 | 13285214                | AA                              | GG                | 1945918356               |
| SNP_P3_28699_13285217 | NC_021162.1    | Ca_kabuli_chr03 | 13285217                | AA                              | GG                | 1945918357               |
| SNP_P3_28700_13291899 | NC_021162.1    | Ca_kabuli_chr03 | 13291899                | AA                              | GG                | 1945918359               |
| SNP_P3_28701_13291932 | NC_021162.1    | Ca_kabuli_chr03 | 13291932                | AA                              | GG                | 1945918361               |
| SNP_P3_28703_13292187 | NC_021162.1    | Ca_kabuli_chr03 | 13292187                | AA                              | GG                | 1945918363               |
| SNP_P3_28705_13325512 | NC_021162.1    | Ca_kabuli_chr03 | 13325512                | AA                              | GG                | 1945918364               |
| SNP_P3_28706_13338618 | NC_021162.1    | Ca_kabuli_chr03 | 13338618                | GG                              | AA                | 1945918366               |
| SNP_P3_28707_13346261 | NC_021162.1    | Ca_kabuli_chr03 | 13346261                | GG                              | AA                | 1945918368               |
| SNP_P3_28709_13363240 | NC_021162.1    | Ca_kabuli_chr03 | 13363240                | AA                              | GG                | 1945918370               |
| SNP_P3_28710_13363334 | NC_021162.1    | Ca_kabuli_chr03 | 13363334                | AA                              | GG                | 1945918372               |
| SNP_P3_28711_13363395 | NC_021162.1    | Ca_kabuli_chr03 | 13363395                | CC                              | AA                | 1945918373               |
| SNP_P3_28712_13363401 | NC_021162.1    | Ca_kabuli_chr03 | 13363401                | AA                              | GG                | 1945918375               |
| SNP_P3_28713_13364307 | NC_021162.1    | Ca_kabuli_chr03 | 13364307                | GG                              | AA                | 1945918377               |
| SNP_P3_28714_13364372 | NC_021162.1    | Ca_kabuli_chr03 | 13364372                | GG                              | AA                | 1945918379               |
| SNP_P3_28715_13364387 | NC_021162.1    | Ca_kabuli_chr03 | 13364387                | GG                              | AA                | 1945918380               |
| SNP_P3_28716_13364426 | NC_021162.1    | Ca_kabuli_chr03 | 13364426                | GG                              | AA                | 1945918382               |
| SNP_P3_28717_13364428 | NC_021162.1    | Ca_kabuli_chr03 | 13364428                | AA                              | GG                | 1945918384               |

| SNPs IDs              | Chromosome IDs | Chromosomes     | Physical positions (bp) | CDC Frontier (Reference genome) | (Pusa 256 & HPNB) | NCBI SNPdb Accession IDs |
|-----------------------|----------------|-----------------|-------------------------|---------------------------------|-------------------|--------------------------|
| SNP_P3_28718_13364596 | NC_021162.1    | Ca_kabuli_chr03 | 13364596                | CC                              | AA                | 1945918386               |
| SNP_P3_28719_13364771 | NC_021162.1    | Ca_kabuli_chr03 | 13364771                | CC                              | GG                | 1945918388               |
| SNP_P3_28720_13412911 | NC_021162.1    | Ca_kabuli_chr03 | 13412911                | CC                              | AA                | 1945918389               |
| SNP_P3_28721_13415370 | NC_021162.1    | Ca_kabuli_chr03 | 13415370                | CC                              | TT                | 1945918391               |
| SNP_P3_28723_13450999 | NC_021162.1    | Ca_kabuli_chr03 | 13450999                | AA                              | CC                | 1945918393               |
| SNP_P3_28724_13451009 | NC_021162.1    | Ca_kabuli_chr03 | 13451009                | GG                              | TT                | 1945918395               |
| SNP_P3_28725_13451073 | NC_021162.1    | Ca_kabuli_chr03 | 13451073                | AA                              | TT                | 1945918396               |
| SNP_P3_28726_13451074 | NC_021162.1    | Ca_kabuli_chr03 | 13451074                | AA                              | CC                | 1945918398               |
| SNP_P3_28727_13451076 | NC_021162.1    | Ca_kabuli_chr03 | 13451076                | AA                              | GG                | 1945918400               |
| SNP_P3_28728_13451077 | NC_021162.1    | Ca_kabuli_chr03 | 13451077                | TT                              | CC                | 1945918402               |
| SNP_P3_28729_13451093 | NC_021162.1    | Ca_kabuli_chr03 | 13451093                | TT                              | CC                | 1945918404               |
| SNP_P3_28730_13451106 | NC_021162.1    | Ca_kabuli_chr03 | 13451106                | AA                              | TT                | 1945918405               |
| SNP_P3_28731_13451138 | NC_021162.1    | Ca_kabuli_chr03 | 13451138                | AA                              | CC                | 1945918407               |
| SNP_P3_28732_13451362 | NC_021162.1    | Ca_kabuli_chr03 | 13451362                | AA                              | GG                | 1945918409               |
| SNP_P3_28733_13458453 | NC_021162.1    | Ca_kabuli_chr03 | 13458453                | TT                              | CC                | 1945918411               |
| SNP_P3_28734_13459432 | NC_021162.1    | Ca_kabuli_chr03 | 13459432                | CC                              | TT                | 1945918412               |
| SNP_P3_28735_13459814 | NC_021162.1    | Ca_kabuli_chr03 | 13459814                | TT                              | CC                | 1945918414               |
| SNP_P3_28736_13462232 | NC_021162.1    | Ca_kabuli_chr03 | 13462232                | GG                              | AA                | 1945918416               |
| SNP_P3_28738_13465239 | NC_021162.1    | Ca_kabuli_chr03 | 13465239                | TT                              | CC                | 1945918418               |
| SNP_P3_28739_13465244 | NC_021162.1    | Ca_kabuli_chr03 | 13465244                | TT                              | CC                | 1945918420               |
| SNP_P3_28740_13465251 | NC_021162.1    | Ca_kabuli_chr03 | 13465251                | CC                              | TT                | 1945918421               |
| SNP_P3_28741_13465281 | NC_021162.1    | Ca_kabuli_chr03 | 13465281                | GG                              | TT                | 1945918423               |
| SNP_P3_28742_13469684 | NC_021162.1    | Ca_kabuli_chr03 | 13469684                | GG                              | AA                | 1945918425               |
| SNP_P3_28743_13480016 | NC_021162.1    | Ca_kabuli_chr03 | 13480016                | TT                              | CC                | 1945918427               |
| SNP_P3_28744_13487957 | NC_021162.1    | Ca_kabuli_chr03 | 13487957                | AA                              | GG                | 1945918428               |
| SNP_P3_28745_13487963 | NC_021162.1    | Ca_kabuli_chr03 | 13487963                | GG                              | AA                | 1945918430               |
| SNP_P3_28746_13488023 | NC_021162.1    | Ca_kabuli_chr03 | 13488023                | GG                              | AA                | 1945918432               |
| SNP_P3_28747_13488375 | NC_021162.1    | Ca_kabuli_chr03 | 13488375                | AA                              | GG                | 1945918434               |
| SNP_P3_28748_13488414 | NC_021162.1    | Ca_kabuli_chr03 | 13488414                | AA                              | GG                | 1945918436               |
| SNP_P3_28749_13488476 | NC_021162.1    | Ca_kabuli_chr03 | 13488476                | TT                              | CC                | 1945918437               |
| SNP_P3_28750_13513790 | NC_021162.1    | Ca_kabuli_chr03 | 13513790                | CC                              | TT                | 1945918439               |
| SNP_P3_28751_13521791 | NC_021162.1    | Ca_kabuli_chr03 | 13521791                | AA                              | TT                | 1945918441               |
| SNP_P3_28752_13521792 | NC_021162.1    | Ca_kabuli_chr03 | 13521792                | AA                              | TT                | 1945918443               |
| SNP_P3_28753_13525682 | NC_021162.1    | Ca_kabuli_chr03 | 13525682                | GG                              | AA                | 1945918444               |
| SNP_P3_28754_13556723 | NC_021162.1    | Ca_kabuli_chr03 | 13556723                | TT                              | AA                | 1945918446               |
| SNP_P3_28755_13556831 | NC_021162.1    | Ca_kabuli_chr03 | 13556831                | TT                              | AA                | 1945918448               |
| SNP_P3_28756_13561482 | NC_021162.1    | Ca_kabuli_chr03 | 13561482                | AA                              | CC                | 1945918450               |
| SNP_P3_28757_13566206 | NC_021162.1    | Ca_kabuli_chr03 | 13566206                | TT                              | AA                | 1945918452               |
| SNP_P3_28758_13591721 | NC_021162.1    | Ca_kabuli_chr03 | 13591721                | GG                              | AA                | 1945918453               |
| SNP_P3_28759_13591919 | NC_021162.1    | Ca_kabuli_chr03 | 13591919                | CC                              | TT                | 1945918455               |
| SNP_P3_28760_13596997 | NC_021162.1    | Ca_kabuli_chr03 | 13596997                | GG                              | AA                | 1945918457               |
| SNP_P3_28761_13597050 | NC_021162.1    | Ca_kabuli_chr03 | 13597050                | AA                              | GG                | 1945918459               |

| SNPs IDs              | Chromosome IDs | Chromosomes     | Physical positions (bp) | CDC Frontier (Reference genome) | (Pusa 256 & HPNB) | NCBI SNPdb Accession IDs |
|-----------------------|----------------|-----------------|-------------------------|---------------------------------|-------------------|--------------------------|
| SNP_P3_28762_13597075 | NC_021162.1    | Ca_kabuli_chr03 | 13597075                | CC                              | TT                | 1945918461               |
| SNP_P3_28764_13736733 | NC_021162.1    | Ca_kabuli_chr03 | 13736733                | GG                              | TT                | 1945918462               |
| SNP_P3_28765_13788757 | NC_021162.1    | Ca_kabuli_chr03 | 13788757                | GG                              | AA                | 1945918464               |
| SNP_P3_28766_13829589 | NC_021162.1    | Ca_kabuli_chr03 | 13829589                | AA                              | TT                | 1945918466               |
| SNP_P3_28767_13844828 | NC_021162.1    | Ca_kabuli_chr03 | 13844828                | TT                              | AA                | 1945918468               |
| SNP_P3_28768_13862255 | NC_021162.1    | Ca_kabuli_chr03 | 13862255                | GG                              | AA                | 1945918469               |
| SNP_P3_28770_13865170 | NC_021162.1    | Ca_kabuli_chr03 | 13865170                | AA                              | GG                | 1945918471               |
| SNP_P3_28771_13865174 | NC_021162.1    | Ca_kabuli_chr03 | 13865174                | AA                              | GG                | 1945918473               |
| SNP_P3_28772_13868339 | NC_021162.1    | Ca_kabuli_chr03 | 13868339                | AA                              | GG                | 1945918475               |
| SNP_P3_28773_13868409 | NC_021162.1    | Ca_kabuli_chr03 | 13868409                | GG                              | AA                | 1945918477               |
| SNP_P3_28774_13868412 | NC_021162.1    | Ca_kabuli_chr03 | 13868412                | CC                              | TT                | 1945918478               |
| SNP_P3_28775_13868478 | NC_021162.1    | Ca_kabuli_chr03 | 13868478                | AA                              | GG                | 1945918480               |
| SNP_P3_28776_13868536 | NC_021162.1    | Ca_kabuli_chr03 | 13868536                | AA                              | GG                | 1945918482               |
| SNP_P3_28777_13868683 | NC_021162.1    | Ca_kabuli_chr03 | 13868683                | TT                              | CC                | 1945918484               |
| SNP_P3_28778_13868703 | NC_021162.1    | Ca_kabuli_chr03 | 13868703                | AA                              | CC                | 1945918485               |
| SNP_P3_28779_13868720 | NC_021162.1    | Ca_kabuli_chr03 | 13868720                | GG                              | AA                | 1945918487               |
| SNP_P3_28780_13868750 | NC_021162.1    | Ca_kabuli_chr03 | 13868750                | AA                              | GG                | 1945918489               |
| SNP_P3_28781_13868801 | NC_021162.1    | Ca_kabuli_chr03 | 13868801                | AA                              | CC                | 1945918491               |
| SNP_P3_28782_13868803 | NC_021162.1    | Ca_kabuli_chr03 | 13868803                | TT                              | GG                | 1945918493               |
| SNP_P3_28783_13868811 | NC_021162.1    | Ca_kabuli_chr03 | 13868811                | TT                              | CC                | 1945918494               |
| SNP_P3_28784_13868818 | NC_021162.1    | Ca_kabuli_chr03 | 13868818                | TT                              | GG                | 1945918496               |
| SNP_P3_28785_13868820 | NC_021162.1    | Ca_kabuli_chr03 | 13868820                | CC                              | TT                | 1945918498               |
| SNP_P3_28786_13868900 | NC_021162.1    | Ca_kabuli_chr03 | 13868900                | GG                              | TT                | 1945918500               |
| SNP_P3_28787_13886392 | NC_021162.1    | Ca_kabuli_chr03 | 13886392                | GG                              | TT                | 1945918501               |
| SNP_P3_28788_13886851 | NC_021162.1    | Ca_kabuli_chr03 | 13886851                | AA                              | GG                | 1945918503               |
| SNP_P3_28789_13886862 | NC_021162.1    | Ca_kabuli_chr03 | 13886862                | TT                              | GG                | 1945918505               |
| SNP_P3_28790_13886878 | NC_021162.1    | Ca_kabuli_chr03 | 13886878                | CC                              | AA                | 1945918507               |
| SNP_P3_28791_13935043 | NC_021162.1    | Ca_kabuli_chr03 | 13935043                | GG                              | TT                | 1945918509               |
| SNP_P3_28792_13935059 | NC_021162.1    | Ca_kabuli_chr03 | 13935059                | AA                              | TT                | 1945918510               |
| SNP_P3_28793_13935523 | NC_021162.1    | Ca_kabuli_chr03 | 13935523                | GG                              | TT                | 1945918512               |
| SNP_P3_28795_13935971 | NC_021162.1    | Ca_kabuli_chr03 | 13935971                | CC                              | AA                | 1945918514               |
| SNP_P3_28796_13935983 | NC_021162.1    | Ca_kabuli_chr03 | 13935983                | CC                              | TT                | 1945918516               |
| SNP_P3_28797_13936280 | NC_021162.1    | Ca_kabuli_chr03 | 13936280                | AA                              | GG                | 1945918517               |
| SNP_P3_28798_13950230 | NC_021162.1    | Ca_kabuli_chr03 | 13950230                | CC                              | TT                | 1945918519               |
| SNP_P3_28799_13957669 | NC_021162.1    | Ca_kabuli_chr03 | 13957669                | AA                              | CC                | 1945918521               |
| SNP_P3_28800_13970449 | NC_021162.1    | Ca_kabuli_chr03 | 13970449                | AA                              | GG                | 1945918523               |
| SNP_P3_28801_13986742 | NC_021162.1    | Ca_kabuli_chr03 | 13986742                | GG                              | AA                | 1945918525               |
| SNP_P3_28802_13992562 | NC_021162.1    | Ca_kabuli_chr03 | 13992562                | TT                              | AA                | 1945918526               |
| SNP_P3_28803_13992579 | NC_021162.1    | Ca_kabuli_chr03 | 13992579                | CC                              | TT                | 1945918528               |
| SNP_P3_28804_14014515 | NC_021162.1    | Ca_kabuli_chr03 | 14014515                | AA                              | GG                | 1945918530               |
| SNP_P3_28805_14102341 | NC_021162.1    | Ca_kabuli_chr03 | 14102341                | CC                              | AA                | 1945918532               |
| SNP_P3_28806_14102705 | NC_021162.1    | Ca_kabuli_chr03 | 14102705                | CC                              | TT                | 1945918533               |

| SNPs IDs              | Chromosome IDs | Chromosomes     | Physical positions (bp) | CDC Frontier (Reference genome) | (Pusa 256 & HPNB) | NCBI SNPdb Accession IDs |
|-----------------------|----------------|-----------------|-------------------------|---------------------------------|-------------------|--------------------------|
| SNP_P3_28807_14136754 | NC_021162.1    | Ca_kabuli_chr03 | 14136754                | GG                              | AA                | 1945918535               |
| SNP_P3_28808_14144407 | NC_021162.1    | Ca_kabuli_chr03 | 14144407                | AA                              | CC                | 1945918537               |
| SNP_P3_28809_14144432 | NC_021162.1    | Ca_kabuli_chr03 | 14144432                | TT                              | GG                | 1945918539               |
| SNP_P3_28810_14144962 | NC_021162.1    | Ca_kabuli_chr03 | 14144962                | TT                              | CC                | 1945918541               |
| SNP_P3_28811_14147309 | NC_021162.1    | Ca_kabuli_chr03 | 14147309                | CC                              | TT                | 1945918542               |
| SNP_P3_28812_14147517 | NC_021162.1    | Ca_kabuli_chr03 | 14147517                | TT                              | GG                | 1945918544               |
| SNP_P3_28813_14148449 | NC_021162.1    | Ca_kabuli_chr03 | 14148449                | AA                              | GG                | 1945918546               |
| SNP_P3_28814_14192084 | NC_021162.1    | Ca_kabuli_chr03 | 14192084                | GG                              | AA                | 1945918548               |
| SNP_P3_28816_14227494 | NC_021162.1    | Ca_kabuli_chr03 | 14227494                | TT                              | AA                | 1945918549               |
| SNP_P3_28817_14227512 | NC_021162.1    | Ca_kabuli_chr03 | 14227512                | TT                              | AA                | 1945918551               |
| SNP_P3_28818_14227531 | NC_021162.1    | Ca_kabuli_chr03 | 14227531                | AA                              | CC                | 1945918553               |
| SNP_P3_28819_14227534 | NC_021162.1    | Ca_kabuli_chr03 | 14227534                | TT                              | AA                | 1945918555               |
| SNP_P3_28820_14227550 | NC_021162.1    | Ca_kabuli_chr03 | 14227550                | AA                              | CC                | 1945918557               |
| SNP_P3_28821_14227552 | NC_021162.1    | Ca_kabuli_chr03 | 14227552                | CC                              | GG                | 1945918558               |
| SNP_P3_28822_14243761 | NC_021162.1    | Ca_kabuli_chr03 | 14243761                | TT                              | CC                | 1945918560               |
| SNP_P3_28823_14245528 | NC_021162.1    | Ca_kabuli_chr03 | 14245528                | TT                              | AA                | 1945918562               |
| SNP_P3_28824_14245585 | NC_021162.1    | Ca_kabuli_chr03 | 14245585                | AA                              | GG                | 1945918564               |
| SNP_P3_28825_14245793 | NC_021162.1    | Ca_kabuli_chr03 | 14245793                | CC                              | TT                | 1945918565               |
| SNP_P3_28826_14245813 | NC_021162.1    | Ca_kabuli_chr03 | 14245813                | TT                              | AA                | 1945918567               |
| SNP_P3_28827_14245820 | NC_021162.1    | Ca_kabuli_chr03 | 14245820                | AA                              | GG                | 1945918569               |
| SNP_P3_28828_14246702 | NC_021162.1    | Ca_kabuli_chr03 | 14246702                | GG                              | AA                | 1945918571               |
| SNP_P3_28829_14246705 | NC_021162.1    | Ca_kabuli_chr03 | 14246705                | CC                              | GG                | 1945918573               |
| SNP_P3_28830_14246791 | NC_021162.1    | Ca_kabuli_chr03 | 14246791                | AA                              | GG                | 1945918574               |
| SNP_P3_28831_14246798 | NC_021162.1    | Ca_kabuli_chr03 | 14246798                | CC                              | TT                | 1945918576               |
| SNP_P3_28832_14246859 | NC_021162.1    | Ca_kabuli_chr03 | 14246859                | CC                              | TT                | 1945918578               |
| SNP_P3_28833_14246886 | NC_021162.1    | Ca_kabuli_chr03 | 14246886                | AA                              | CC                | 1945918580               |
| SNP_P3_28834_14247091 | NC_021162.1    | Ca_kabuli_chr03 | 14247091                | AA                              | GG                | 1945918581               |
| SNP_P3_28835_14247092 | NC_021162.1    | Ca_kabuli_chr03 | 14247092                | TT                              | CC                | 1945918583               |
| SNP_P3_28836_14247132 | NC_021162.1    | Ca_kabuli_chr03 | 14247132                | AA                              | GG                | 1945918585               |
| SNP_P3_28837_14247194 | NC_021162.1    | Ca_kabuli_chr03 | 14247194                | AA                              | GG                | 1945918587               |
| SNP_P3_28838_14247209 | NC_021162.1    | Ca_kabuli_chr03 | 14247209                | AA                              | GG                | 1945918589               |
| SNP_P3_28839_14247421 | NC_021162.1    | Ca_kabuli_chr03 | 14247421                | TT                              | GG                | 1945918590               |
| SNP_P3_28840_14247491 | NC_021162.1    | Ca_kabuli_chr03 | 14247491                | GG                              | AA                | 1945918592               |
| SNP_P3_28841_14247628 | NC_021162.1    | Ca_kabuli_chr03 | 14247628                | GG                              | AA                | 1945918594               |
| SNP_P3_28842_14247724 | NC_021162.1    | Ca_kabuli_chr03 | 14247724                | CC                              | TT                | 1945918596               |
| SNP_P3_28843_14247789 | NC_021162.1    | Ca_kabuli_chr03 | 14247789                | GG                              | TT                | 1945918598               |
| SNP_P3_28844_14247953 | NC_021162.1    | Ca_kabuli_chr03 | 14247953                | CC                              | TT                | 1945918599               |
| SNP_P3_28845_14248011 | NC_021162.1    | Ca_kabuli_chr03 | 14248011                | GG                              | TT                | 1945918601               |
| SNP_P3_28846_14248014 | NC_021162.1    | Ca_kabuli_chr03 | 14248014                | AA                              | CC                | 1945918603               |
| SNP_P3_28847_14248095 | NC_021162.1    | Ca_kabuli_chr03 | 14248095                | TT                              | GG                | 1945918605               |
| SNP_P3_28848_14248098 | NC_021162.1    | Ca_kabuli_chr03 | 14248098                | TT                              | AA                | 1945918606               |
| SNP_P3_28849_14248157 | NC_021162.1    | Ca_kabuli_chr03 | 14248157                | AA                              | GG                | 1945918608               |



| SNPs IDs              | Chromosome IDs | Chromosomes     | Physical positions (bp) | CDC Frontier (Reference genome) | (Pusa 256 & HPNB) | NCBI SNPdb Accession IDs |
|-----------------------|----------------|-----------------|-------------------------|---------------------------------|-------------------|--------------------------|
| SNP_P3_28850_14248309 | NC_021162.1    | Ca_kabuli_chr03 | 14248309                | TT                              | CC                | 1945918610               |
| SNP_P3_28851_14248339 | NC_021162.1    | Ca_kabuli_chr03 | 14248339                | TT                              | CC                | 1945918612               |
| SNP_P3_28852_14248404 | NC_021162.1    | Ca_kabuli_chr03 | 14248404                | TT                              | AA                | 1945918614               |
| SNP_P3_28853_14248410 | NC_021162.1    | Ca_kabuli_chr03 | 14248410                | TT                              | CC                | 1945918615               |
| SNP_P3_28854_14248435 | NC_021162.1    | Ca_kabuli_chr03 | 14248435                | TT                              | AA                | 1945918617               |
| SNP_P3_28855_14248446 | NC_021162.1    | Ca_kabuli_chr03 | 14248446                | CC                              | AA                | 1945918619               |
| SNP_P3_28856_14248576 | NC_021162.1    | Ca_kabuli_chr03 | 14248576                | TT                              | CC                | 1945918621               |
| SNP_P3_28857_14248827 | NC_021162.1    | Ca_kabuli_chr03 | 14248827                | AA                              | GG                | 1945918622               |
| SNP_P3_28858_14248933 | NC_021162.1    | Ca_kabuli_chr03 | 14248933                | GG                              | AA                | 1945918624               |
| SNP_P3_28859_14249125 | NC_021162.1    | Ca_kabuli_chr03 | 14249125                | TT                              | CC                | 1945918626               |
| SNP_P3_28860_14249133 | NC_021162.1    | Ca_kabuli_chr03 | 14249133                | AA                              | GG                | 1945918628               |
| SNP_P3_28861_14249147 | NC_021162.1    | Ca_kabuli_chr03 | 14249147                | AA                              | GG                | 1945918630               |
| SNP_P3_28862_14249148 | NC_021162.1    | Ca_kabuli_chr03 | 14249148                | AA                              | TT                | 1945918631               |
| SNP_P3_28863_14249156 | NC_021162.1    | Ca_kabuli_chr03 | 14249156                | CC                              | TT                | 1945918633               |
| SNP_P3_28864_14249242 | NC_021162.1    | Ca_kabuli_chr03 | 14249242                | TT                              | AA                | 1945918635               |
| SNP_P3_28865_14249248 | NC_021162.1    | Ca_kabuli_chr03 | 14249248                | AA                              | GG                | 1945918637               |
| SNP_P3_28866_14249439 | NC_021162.1    | Ca_kabuli_chr03 | 14249439                | CC                              | TT                | 1945918638               |
| SNP_P3_28867_14249493 | NC_021162.1    | Ca_kabuli_chr03 | 14249493                | AA                              | GG                | 1945918640               |
| SNP_P3_28868_14249497 | NC_021162.1    | Ca_kabuli_chr03 | 14249497                | CC                              | TT                | 1945918642               |
| SNP_P3_28869_14430957 | NC_021162.1    | Ca_kabuli_chr03 | 14430957                | AA                              | GG                | 1945918644               |
| SNP_P3_28870_14430962 | NC_021162.1    | Ca_kabuli_chr03 | 14430962                | CC                              | TT                | 1945918646               |
| SNP_P3_28871_14441210 | NC_021162.1    | Ca_kabuli_chr03 | 14441210                | AA                              | GG                | 1945918647               |
| SNP_P3_28872_14448814 | NC_021162.1    | Ca_kabuli_chr03 | 14448814                | CC                              | TT                | 1945918649               |
| SNP_P3_28874_14464089 | NC_021162.1    | Ca_kabuli_chr03 | 14464089                | TT                              | CC                | 1945918651               |
| SNP_P3_28875_14473924 | NC_021162.1    | Ca_kabuli_chr03 | 14473924                | TT                              | CC                | 1945918653               |
| SNP_P3_28876_14492048 | NC_021162.1    | Ca_kabuli_chr03 | 14492048                | CC                              | AA                | 1945918654               |
| SNP_P3_28879_14495131 | NC_021162.1    | Ca_kabuli_chr03 | 14495131                | AA                              | GG                | 1945918656               |
| SNP_P3_28880_14495154 | NC_021162.1    | Ca_kabuli_chr03 | 14495154                | CC                              | TT                | 1945918658               |
| SNP_P3_28881_14495170 | NC_021162.1    | Ca_kabuli_chr03 | 14495170                | AA                              | CC                | 1945918660               |
| SNP_P3_28882_14495185 | NC_021162.1    | Ca_kabuli_chr03 | 14495185                | TT                              | CC                | 1945918662               |
| SNP_P3_28883_14495205 | NC_021162.1    | Ca_kabuli_chr03 | 14495205                | GG                              | AA                | 1945918663               |
| SNP_P3_28884_14495412 | NC_021162.1    | Ca_kabuli_chr03 | 14495412                | CC                              | AA                | 1945918665               |
| SNP_P3_28885_14495501 | NC_021162.1    | Ca_kabuli_chr03 | 14495501                | TT                              | CC                | 1945918667               |
| SNP_P3_28889_14505146 | NC_021162.1    | Ca_kabuli_chr03 | 14505146                | CC                              | TT                | 1945918669               |
| SNP_P3_28891_14531834 | NC_021162.1    | Ca_kabuli_chr03 | 14531834                | CC                              | TT                | 1945918670               |
| SNP_P3_28892_14540732 | NC_021162.1    | Ca_kabuli_chr03 | 14540732                | GG                              | AA                | 1945918672               |
| SNP_P3_28893_14543000 | NC_021162.1    | Ca_kabuli_chr03 | 14543000                | CC                              | AA                | 1945918674               |
| SNP_P3_28894_14543008 | NC_021162.1    | Ca_kabuli_chr03 | 14543008                | TT                              | GG                | 1945918676               |
| SNP_P3_28895_14543010 | NC_021162.1    | Ca_kabuli_chr03 | 14543010                | AA                              | TT                | 1945918678               |
| SNP_P3_28896_14543020 | NC_021162.1    | Ca_kabuli_chr03 | 14543020                | TT                              | CC                | 1945918679               |
| SNP_P3_28897_14543365 | NC_021162.1    | Ca_kabuli_chr03 | 14543365                | CC                              | GG                | 1945918681               |
| SNP_P3_28898_14543443 | NC_021162.1    | Ca_kabuli_chr03 | 14543443                | TT                              | GG                | 1945918683               |

| SNPs IDs              | Chromosome IDs | Chromosomes     | Physical positions (bp) | CDC Frontier (Reference genome) | (Pusa 256 & HPNB) | NCBI SNPdb Accession IDs |
|-----------------------|----------------|-----------------|-------------------------|---------------------------------|-------------------|--------------------------|
| SNP_P3_28899_14543457 | NC_021162.1    | Ca_kabuli_chr03 | 14543457                | AA                              | GG                | 1945918685               |
| SNP_P3_28900_14543462 | NC_021162.1    | Ca_kabuli_chr03 | 14543462                | CC                              | TT                | 1945918686               |
| SNP_P3_28901_14543534 | NC_021162.1    | Ca_kabuli_chr03 | 14543534                | TT                              | CC                | 1945918688               |
| SNP_P3_28902_14543550 | NC_021162.1    | Ca_kabuli_chr03 | 14543550                | CC                              | AA                | 1945918690               |
| SNP_P3_28903_14543553 | NC_021162.1    | Ca_kabuli_chr03 | 14543553                | TT                              | CC                | 1945918692               |
| SNP_P3_28904_14543557 | NC_021162.1    | Ca_kabuli_chr03 | 14543557                | AA                              | CC                | 1945918694               |
| SNP_P3_28905_14547615 | NC_021162.1    | Ca_kabuli_chr03 | 14547615                | AA                              | CC                | 1945918695               |
| SNP_P3_28906_14547791 | NC_021162.1    | Ca_kabuli_chr03 | 14547791                | GG                              | AA                | 1945918697               |
| SNP_P3_28907_14556386 | NC_021162.1    | Ca_kabuli_chr03 | 14556386                | AA                              | GG                | 1945918699               |
| SNP_P3_28908_14575325 | NC_021162.1    | Ca_kabuli_chr03 | 14575325                | GG                              | AA                | 1945918701               |
| SNP_P3_28912_14653365 | NC_021162.1    | Ca_kabuli_chr03 | 14653365                | AA                              | GG                | 1945918702               |
| SNP_P3_28913_14653384 | NC_021162.1    | Ca_kabuli_chr03 | 14653384                | CC                              | GG                | 1945918704               |
| SNP_P3_28914_14685880 | NC_021162.1    | Ca_kabuli_chr03 | 14685880                | GG                              | AA                | 1945918706               |
| SNP_P3_28915_14696998 | NC_021162.1    | Ca_kabuli_chr03 | 14696998                | AA                              | GG                | 1945918708               |
| SNP_P3_28916_14697026 | NC_021162.1    | Ca_kabuli_chr03 | 14697026                | AA                              | GG                | 1945918710               |
| SNP_P3_28917_14697043 | NC_021162.1    | Ca_kabuli_chr03 | 14697043                | AA                              | CC                | 1945918711               |
| SNP_P3_28918_14697343 | NC_021162.1    | Ca_kabuli_chr03 | 14697343                | AA                              | GG                | 1945918713               |
| SNP_P3_28919_14704175 | NC_021162.1    | Ca_kabuli_chr03 | 14704175                | GG                              | CC                | 1945918715               |
| SNP_P3_28920_14706603 | NC_021162.1    | Ca_kabuli_chr03 | 14706603                | AA                              | CC                | 1945918717               |
| SNP_P3_28921_14710977 | NC_021162.1    | Ca_kabuli_chr03 | 14710977                | TT                              | GG                | 1945918718               |
| SNP_P3_28922_14780176 | NC_021162.1    | Ca_kabuli_chr03 | 14780176                | CC                              | TT                | 1945918720               |
| SNP_P3_28923_14780247 | NC_021162.1    | Ca_kabuli_chr03 | 14780247                | AA                              | GG                | 1945918722               |
| SNP_P3_28924_14780282 | NC_021162.1    | Ca_kabuli_chr03 | 14780282                | AA                              | GG                | 1945918724               |
| SNP_P3_28925_14790349 | NC_021162.1    | Ca_kabuli_chr03 | 14790349                | CC                              | AA                | 1945918726               |
| SNP_P3_28926_14795717 | NC_021162.1    | Ca_kabuli_chr03 | 14795717                | GG                              | AA                | 1945918727               |
| SNP_P3_28927_14795996 | NC_021162.1    | Ca_kabuli_chr03 | 14795996                | AA                              | TT                | 1945918729               |
| SNP_P3_28928_14796042 | NC_021162.1    | Ca_kabuli_chr03 | 14796042                | GG                              | TT                | 1945918731               |
| SNP_P3_28929_14797148 | NC_021162.1    | Ca_kabuli_chr03 | 14797148                | AA                              | GG                | 1945918733               |
| SNP_P3_28931_14801632 | NC_021162.1    | Ca_kabuli_chr03 | 14801632                | TT                              | CC                | 1945918734               |
| SNP_P3_28932_14814676 | NC_021162.1    | Ca_kabuli_chr03 | 14814676                | CC                              | TT                | 1945918736               |
| SNP_P3_28933_14815740 | NC_021162.1    | Ca_kabuli_chr03 | 14815740                | TT                              | CC                | 1945918738               |
| SNP_P3_28934_14815947 | NC_021162.1    | Ca_kabuli_chr03 | 14815947                | GG                              | AA                | 1945918740               |
| SNP_P3_28935_14816120 | NC_021162.1    | Ca_kabuli_chr03 | 14816120                | AA                              | TT                | 1945918742               |
| SNP_P3_28936_14816164 | NC_021162.1    | Ca_kabuli_chr03 | 14816164                | GG                              | AA                | 1945918743               |
| SNP_P3_28937_14816180 | NC_021162.1    | Ca_kabuli_chr03 | 14816180                | TT                              | CC                | 1945918745               |
| SNP_P3_28938_14816185 | NC_021162.1    | Ca_kabuli_chr03 | 14816185                | AA                              | GG                | 1945918747               |
| SNP_P3_28939_14816216 | NC_021162.1    | Ca_kabuli_chr03 | 14816216                | GG                              | AA                | 1945918749               |
| SNP_P3_28940_14820048 | NC_021162.1    | Ca_kabuli_chr03 | 14820048                | CC                              | TT                | 1945918751               |
| SNP_P3_28941_14835338 | NC_021162.1    | Ca_kabuli_chr03 | 14835338                | AA                              | CC                | 1945918752               |
| SNP_P3_28943_14845603 | NC_021162.1    | Ca_kabuli_chr03 | 14845603                | CC                              | TT                | 1945918754               |
| SNP_P3_28944_14845795 | NC_021162.1    | Ca_kabuli_chr03 | 14845795                | TT                              | AA                | 1945918756               |
| SNP_P3_28945_14845796 | NC_021162.1    | Ca_kabuli_chr03 | 14845796                | GG                              | AA                | 1945918758               |

| SNPs IDs              | Chromosome IDs | Chromosomes     | Physical positions (bp) | CDC Frontier (Reference genome) | (Pusa 256 & HPNB) | NCBI SNPdb Accession IDs |
|-----------------------|----------------|-----------------|-------------------------|---------------------------------|-------------------|--------------------------|
| SNP_P3_28946_14848682 | NC_021162.1    | Ca_kabuli_chr03 | 14848682                | CC                              | GG                | 1945918759               |
| SNP_P3_28947_14853660 | NC_021162.1    | Ca_kabuli_chr03 | 14853660                | TT                              | CC                | 1945918761               |
| SNP_P3_28948_14853947 | NC_021162.1    | Ca_kabuli_chr03 | 14853947                | TT                              | GG                | 1945918763               |
| SNP_P3_28949_14853979 | NC_021162.1    | Ca_kabuli_chr03 | 14853979                | AA                              | GG                | 1945918765               |
| SNP_P3_28950_14854067 | NC_021162.1    | Ca_kabuli_chr03 | 14854067                | AA                              | GG                | 1945918767               |
| SNP_P3_28951_14854204 | NC_021162.1    | Ca_kabuli_chr03 | 14854204                | CC                              | GG                | 1945918768               |
| SNP_P3_28952_14858487 | NC_021162.1    | Ca_kabuli_chr03 | 14858487                | AA                              | TT                | 1945918770               |
| SNP_P3_28953_14858491 | NC_021162.1    | Ca_kabuli_chr03 | 14858491                | TT                              | GG                | 1945918772               |
| SNP_P3_28954_14858495 | NC_021162.1    | Ca_kabuli_chr03 | 14858495                | AA                              | GG                | 1945918774               |
| SNP_P3_28955_14858499 | NC_021162.1    | Ca_kabuli_chr03 | 14858499                | AA                              | GG                | 1945918775               |
| SNP_P3_28956_14858766 | NC_021162.1    | Ca_kabuli_chr03 | 14858766                | CC                              | AA                | 1945918777               |
| SNP_P3_28957_14859923 | NC_021162.1    | Ca_kabuli_chr03 | 14859923                | AA                              | GG                | 1945918779               |
| SNP_P3_28958_14859955 | NC_021162.1    | Ca_kabuli_chr03 | 14859955                | GG                              | AA                | 1945918781               |
| SNP_P3_28959_14860007 | NC_021162.1    | Ca_kabuli_chr03 | 14860007                | CC                              | TT                | 1945918783               |
| SNP_P3_28960_14862985 | NC_021162.1    | Ca_kabuli_chr03 | 14862985                | GG                              | TT                | 1945918784               |
| SNP_P3_28961_14862988 | NC_021162.1    | Ca_kabuli_chr03 | 14862988                | AA                              | TT                | 1945918786               |
| SNP_P3_28962_14867226 | NC_021162.1    | Ca_kabuli_chr03 | 14867226                | AA                              | CC                | 1945918788               |
| SNP_P3_28963_14867508 | NC_021162.1    | Ca_kabuli_chr03 | 14867508                | TT                              | GG                | 1945918790               |
| SNP_P3_28964_14867608 | NC_021162.1    | Ca_kabuli_chr03 | 14867608                | CC                              | GG                | 1945918791               |
| SNP_P3_28965_14867621 | NC_021162.1    | Ca_kabuli_chr03 | 14867621                | AA                              | GG                | 1945918793               |
| SNP_P3_28966_14867716 | NC_021162.1    | Ca_kabuli_chr03 | 14867716                | GG                              | AA                | 1945918795               |
| SNP_P3_28967_14867718 | NC_021162.1    | Ca_kabuli_chr03 | 14867718                | AA                              | GG                | 1945918797               |
| SNP_P3_28968_14867748 | NC_021162.1    | Ca_kabuli_chr03 | 14867748                | TT                              | GG                | 1945918799               |
| SNP_P3_28969_14867789 | NC_021162.1    | Ca_kabuli_chr03 | 14867789                | AA                              | GG                | 1945918800               |
| SNP_P3_28970_14868671 | NC_021162.1    | Ca_kabuli_chr03 | 14868671                | TT                              | CC                | 1945918802               |
| SNP_P3_28971_14868742 | NC_021162.1    | Ca_kabuli_chr03 | 14868742                | GG                              | AA                | 1945918804               |
| SNP_P3_28972_14868759 | NC_021162.1    | Ca_kabuli_chr03 | 14868759                | CC                              | TT                | 1945918806               |
| SNP_P3_28973_14868767 | NC_021162.1    | Ca_kabuli_chr03 | 14868767                | CC                              | AA                | 1945918807               |
| SNP_P3_28974_14868840 | NC_021162.1    | Ca_kabuli_chr03 | 14868840                | AA                              | GG                | 1945918809               |
| SNP_P3_28976_14868871 | NC_021162.1    | Ca_kabuli_chr03 | 14868871                | AA                              | GG                | 1945918811               |
| SNP_P3_28977_14868877 | NC_021162.1    | Ca_kabuli_chr03 | 14868877                | TT                              | CC                | 1945918813               |
| SNP_P3_28978_14868975 | NC_021162.1    | Ca_kabuli_chr03 | 14868975                | AA                              | TT                | 1945918815               |
| SNP_P3_28979_14872349 | NC_021162.1    | Ca_kabuli_chr03 | 14872349                | GG                              | CC                | 1945918816               |
| SNP_P3_28980_14872430 | NC_021162.1    | Ca_kabuli_chr03 | 14872430                | TT                              | AA                | 1945918818               |
| SNP_P3_28981_14872435 | NC_021162.1    | Ca_kabuli_chr03 | 14872435                | AA                              | GG                | 1945918820               |
| SNP_P3_28983_14872437 | NC_021162.1    | Ca_kabuli_chr03 | 14872437                | CC                              | AA                | 1945918822               |
| SNP_P3_28984_14872442 | NC_021162.1    | Ca_kabuli_chr03 | 14872442                | CC                              | AA                | 1945918823               |
| SNP_P3_28986_14875224 | NC_021162.1    | Ca_kabuli_chr03 | 14875224                | TT                              | AA                | 1945918825               |
| SNP_P3_28987_14875967 | NC_021162.1    | Ca_kabuli_chr03 | 14875967                | AA                              | GG                | 1945918827               |
| SNP_P3_28989_14878043 | NC_021162.1    | Ca_kabuli_chr03 | 14878043                | TT                              | GG                | 1945918829               |
| SNP_P3_28990_14878047 | NC_021162.1    | Ca_kabuli_chr03 | 14878047                | GG                              | TT                | 1945918831               |
| SNP_P3_28991_14878068 | NC_021162.1    | Ca_kabuli_chr03 | 14878068                | CC                              | TT                | 1945918832               |

| SNPs IDs              | Chromosome IDs | Chromosomes     | Physical positions (bp) | CDC Frontier (Reference genome) | (Pusa 256 & HPNB) | NCBI SNPdb Accession IDs |
|-----------------------|----------------|-----------------|-------------------------|---------------------------------|-------------------|--------------------------|
| SNP_P3_28992_14878070 | NC_021162.1    | Ca_kabuli_chr03 | 14878070                | AA                              | TT                | 1945918834               |
| SNP_P3_28993_14878071 | NC_021162.1    | Ca_kabuli_chr03 | 14878071                | CC                              | TT                | 1945918836               |
| SNP_P3_28994_14878396 | NC_021162.1    | Ca_kabuli_chr03 | 14878396                | AA                              | TT                | 1945918838               |
| SNP_P3_28995_14878402 | NC_021162.1    | Ca_kabuli_chr03 | 14878402                | GG                              | AA                | 1945918839               |
| SNP_P3_28996_14878598 | NC_021162.1    | Ca_kabuli_chr03 | 14878598                | CC                              | TT                | 1945918841               |
| SNP_P3_28997_14878768 | NC_021162.1    | Ca_kabuli_chr03 | 14878768                | CC                              | TT                | 1945918843               |
| SNP_P3_28998_14878902 | NC_021162.1    | Ca_kabuli_chr03 | 14878902                | CC                              | AA                | 1945918845               |
| SNP_P3_28999_14878909 | NC_021162.1    | Ca_kabuli_chr03 | 14878909                | GG                              | TT                | 1945918847               |
| SNP_P3_29000_14878912 | NC_021162.1    | Ca_kabuli_chr03 | 14878912                | TT                              | CC                | 1945918848               |
| SNP_P3_29001_14878947 | NC_021162.1    | Ca_kabuli_chr03 | 14878947                | GG                              | CC                | 1945918850               |
| SNP_P3_29002_14878970 | NC_021162.1    | Ca_kabuli_chr03 | 14878970                | TT                              | AA                | 1945918852               |
| SNP_P3_29003_14879155 | NC_021162.1    | Ca_kabuli_chr03 | 14879155                | AA                              | GG                | 1945918854               |
| SNP_P3_29004_14879188 | NC_021162.1    | Ca_kabuli_chr03 | 14879188                | TT                              | GG                | 1945918855               |
| SNP_P3_29005_14879339 | NC_021162.1    | Ca_kabuli_chr03 | 14879339                | GG                              | AA                | 1945918857               |
| SNP_P3_29006_14879340 | NC_021162.1    | Ca_kabuli_chr03 | 14879340                | GG                              | TT                | 1945918859               |
| SNP_P3_29007_14880478 | NC_021162.1    | Ca_kabuli_chr03 | 14880478                | CC                              | AA                | 1945918861               |
| SNP_P3_29008_14880501 | NC_021162.1    | Ca_kabuli_chr03 | 14880501                | TT                              | AA                | 1945918863               |
| SNP_P3_29009_14880515 | NC_021162.1    | Ca_kabuli_chr03 | 14880515                | AA                              | GG                | 1945918864               |
| SNP_P3_29010_14880541 | NC_021162.1    | Ca_kabuli_chr03 | 14880541                | CC                              | AA                | 1945918866               |
| SNP_P3_29011_14880663 | NC_021162.1    | Ca_kabuli_chr03 | 14880663                | AA                              | GG                | 1945918868               |
| SNP_P3_29013_14880876 | NC_021162.1    | Ca_kabuli_chr03 | 14880876                | TT                              | GG                | 1945918870               |
| SNP_P3_29014_14880889 | NC_021162.1    | Ca_kabuli_chr03 | 14880889                | CC                              | GG                | 1945918872               |
| SNP_P3_29015_14880891 | NC_021162.1    | Ca_kabuli_chr03 | 14880891                | GG                              | AA                | 1945918873               |
| SNP_P3_29016_14880942 | NC_021162.1    | Ca_kabuli_chr03 | 14880942                | CC                              | AA                | 1945918875               |
| SNP_P3_29017_14880943 | NC_021162.1    | Ca_kabuli_chr03 | 14880943                | TT                              | CC                | 1945918877               |
| SNP_P3_29018_14880955 | NC_021162.1    | Ca_kabuli_chr03 | 14880955                | CC                              | AA                | 1945918879               |
| SNP_P3_29019_14880978 | NC_021162.1    | Ca_kabuli_chr03 | 14880978                | AA                              | GG                | 1945918880               |
| SNP_P3_29020_14881069 | NC_021162.1    | Ca_kabuli_chr03 | 14881069                | GG                              | AA                | 1945918882               |
| SNP_P3_29021_14881143 | NC_021162.1    | Ca_kabuli_chr03 | 14881143                | GG                              | AA                | 1945918884               |
| SNP_P3_29022_14881381 | NC_021162.1    | Ca_kabuli_chr03 | 14881381                | GG                              | AA                | 1945918886               |
| SNP_P3_29023_14881397 | NC_021162.1    | Ca_kabuli_chr03 | 14881397                | TT                              | GG                | 1945918888               |
| SNP_P3_29024_14881406 | NC_021162.1    | Ca_kabuli_chr03 | 14881406                | TT                              | AA                | 1945918889               |
| SNP_P3_29025_14881412 | NC_021162.1    | Ca_kabuli_chr03 | 14881412                | AA                              | GG                | 1945918891               |
| SNP_P3_29026_14881434 | NC_021162.1    | Ca_kabuli_chr03 | 14881434                | CC                              | TT                | 1945918893               |
| SNP_P3_29027_14889048 | NC_021162.1    | Ca_kabuli_chr03 | 14889048                | AA                              | TT                | 1945918895               |
| SNP_P3_29028_14889195 | NC_021162.1    | Ca_kabuli_chr03 | 14889195                | GG                              | CC                | 1945918896               |
| SNP_P3_29029_14889240 | NC_021162.1    | Ca_kabuli_chr03 | 14889240                | AA                              | GG                | 1945918898               |
| SNP_P3_29030_14889463 | NC_021162.1    | Ca_kabuli_chr03 | 14889463                | TT                              | AA                | 1945918900               |
| SNP_P3_29031_14889568 | NC_021162.1    | Ca_kabuli_chr03 | 14889568                | AA                              | TT                | 1945918902               |
| SNP_P3_29032_14889664 | NC_021162.1    | Ca_kabuli_chr03 | 14889664                | CC                              | TT                | 1945918904               |
| SNP_P3_29033_14889805 | NC_021162.1    | Ca_kabuli_chr03 | 14889805                | TT                              | CC                | 1945918905               |
| SNP_P3_29034_14889891 | NC_021162.1    | Ca_kabuli_chr03 | 14889891                | TT                              | AA                | 1945918907               |

| SNPs IDs              | Chromosome IDs | Chromosomes     | Physical positions (bp) | CDC Frontier (Reference genome) | (Pusa 256 & HPNB) | NCBI SNPdb Accession IDs |
|-----------------------|----------------|-----------------|-------------------------|---------------------------------|-------------------|--------------------------|
| SNP_P3_29035_14890176 | NC_021162.1    | Ca_kabuli_chr03 | 14890176                | TT                              | CC                | 1945918909               |
| SNP_P3_29036_14890847 | NC_021162.1    | Ca_kabuli_chr03 | 14890847                | GG                              | AA                | 1945918911               |
| SNP_P3_29037_14891174 | NC_021162.1    | Ca_kabuli_chr03 | 14891174                | GG                              | CC                | 1945918912               |
| SNP_P3_29038_14892758 | NC_021162.1    | Ca_kabuli_chr03 | 14892758                | TT                              | CC                | 1945918914               |
| SNP_P3_29039_14892786 | NC_021162.1    | Ca_kabuli_chr03 | 14892786                | AA                              | CC                | 1945918916               |
| SNP_P3_29040_14892787 | NC_021162.1    | Ca_kabuli_chr03 | 14892787                | CC                              | AA                | 1945918918               |
| SNP_P3_29041_14892951 | NC_021162.1    | Ca_kabuli_chr03 | 14892951                | CC                              | TT                | 1945918920               |
| SNP_P3_29042_14893042 | NC_021162.1    | Ca_kabuli_chr03 | 14893042                | CC                              | TT                | 1945918921               |
| SNP_P3_29043_14893123 | NC_021162.1    | Ca_kabuli_chr03 | 14893123                | AA                              | TT                | 1945918923               |
| SNP_P3_29044_14893246 | NC_021162.1    | Ca_kabuli_chr03 | 14893246                | CC                              | TT                | 1945918925               |
| SNP_P3_29045_14893290 | NC_021162.1    | Ca_kabuli_chr03 | 14893290                | GG                              | CC                | 1945918927               |
| SNP_P3_29046_14893438 | NC_021162.1    | Ca_kabuli_chr03 | 14893438                | TT                              | CC                | 1945918928               |
| SNP_P3_29047_14893486 | NC_021162.1    | Ca_kabuli_chr03 | 14893486                | CC                              | GG                | 1945918930               |
| SNP_P3_29048_14893498 | NC_021162.1    | Ca_kabuli_chr03 | 14893498                | AA                              | TT                | 1945918932               |
| SNP_P3_29049_14893537 | NC_021162.1    | Ca_kabuli_chr03 | 14893537                | AA                              | CC                | 1945918934               |
| SNP_P3_29050_14893646 | NC_021162.1    | Ca_kabuli_chr03 | 14893646                | TT                              | CC                | 1945918936               |
| SNP_P3_29051_14893667 | NC_021162.1    | Ca_kabuli_chr03 | 14893667                | AA                              | TT                | 1945918937               |
| SNP_P3_29052_14893682 | NC_021162.1    | Ca_kabuli_chr03 | 14893682                | GG                              | AA                | 1945918939               |
| SNP_P3_29053_14894352 | NC_021162.1    | Ca_kabuli_chr03 | 14894352                | AA                              | GG                | 1945918941               |
| SNP_P3_29054_14895810 | NC_021162.1    | Ca_kabuli_chr03 | 14895810                | AA                              | TT                | 1945918943               |
| SNP_P3_29055_14899590 | NC_021162.1    | Ca_kabuli_chr03 | 14899590                | GG                              | TT                | 1945918944               |
| SNP_P3_29056_14900918 | NC_021162.1    | Ca_kabuli_chr03 | 14900918                | AA                              | GG                | 1945918946               |
| SNP_P3_29057_14900921 | NC_021162.1    | Ca_kabuli_chr03 | 14900921                | CC                              | TT                | 1945918948               |
| SNP_P3_29058_14900924 | NC_021162.1    | Ca_kabuli_chr03 | 14900924                | GG                              | TT                | 1945918950               |
| SNP_P3_29059_14901025 | NC_021162.1    | Ca_kabuli_chr03 | 14901025                | AA                              | GG                | 1945918952               |
| SNP_P3_29060_14901030 | NC_021162.1    | Ca_kabuli_chr03 | 14901030                | CC                              | GG                | 1945918953               |
| SNP_P3_29061_14901035 | NC_021162.1    | Ca_kabuli_chr03 | 14901035                | CC                              | GG                | 1945918955               |
| SNP_P3_29062_14901048 | NC_021162.1    | Ca_kabuli_chr03 | 14901048                | CC                              | TT                | 1945918957               |
| SNP_P3_29063_14901056 | NC_021162.1    | Ca_kabuli_chr03 | 14901056                | TT                              | GG                | 1945918959               |
| SNP_P3_29064_14901057 | NC_021162.1    | Ca_kabuli_chr03 | 14901057                | CC                              | AA                | 1945918960               |
| SNP_P3_29065_14901473 | NC_021162.1    | Ca_kabuli_chr03 | 14901473                | AA                              | TT                | 1945918962               |
| SNP_P3_29066_14902800 | NC_021162.1    | Ca_kabuli_chr03 | 14902800                | TT                              | GG                | 1945918964               |
| SNP_P3_29068_14904456 | NC_021162.1    | Ca_kabuli_chr03 | 14904456                | TT                              | CC                | 1945918966               |
| SNP_P3_29069_14904901 | NC_021162.1    | Ca_kabuli_chr03 | 14904901                | CC                              | TT                | 1945918968               |
| SNP_P3_29070_14904909 | NC_021162.1    | Ca_kabuli_chr03 | 14904909                | AA                              | GG                | 1945918969               |
| SNP_P3_29072_14908015 | NC_021162.1    | Ca_kabuli_chr03 | 14908015                | AA                              | TT                | 1945918971               |
| SNP_P3_29073_14919159 | NC_021162.1    | Ca_kabuli_chr03 | 14919159                | GG                              | TT                | 1945918973               |
| SNP_P3_29075_14919308 | NC_021162.1    | Ca_kabuli_chr03 | 14919308                | GG                              | AA                | 1945918975               |
| SNP_P3_29076_14919508 | NC_021162.1    | Ca_kabuli_chr03 | 14919508                | GG                              | TT                | 1945918976               |
| SNP_P3_29077_14919521 | NC_021162.1    | Ca_kabuli_chr03 | 14919521                | GG                              | CC                | 1945918978               |
| SNP_P3_29078_14919530 | NC_021162.1    | Ca_kabuli_chr03 | 14919530                | AA                              | GG                | 1945918980               |
| SNP_P3_29079_14935253 | NC_021162.1    | Ca_kabuli_chr03 | 14935253                | GG                              | TT                | 1945918982               |

| SNPs IDs              | Chromosome IDs | Chromosomes     | Physical positions (bp) | CDC Frontier (Reference genome) | (Pusa 256 & HPNB) | NCBI SNPdb Accession IDs |
|-----------------------|----------------|-----------------|-------------------------|---------------------------------|-------------------|--------------------------|
| SNP_P3_29080_14935255 | NC_021162.1    | Ca_kabuli_chr03 | 14935255                | AA                              | GG                | 1945918984               |
| SNP_P3_29082_14945508 | NC_021162.1    | Ca_kabuli_chr03 | 14945508                | AA                              | GG                | 1945918985               |
| SNP_P3_29083_14946908 | NC_021162.1    | Ca_kabuli_chr03 | 14946908                | CC                              | TT                | 1945918987               |
| SNP_P3_29084_14952152 | NC_021162.1    | Ca_kabuli_chr03 | 14952152                | AA                              | GG                | 1945918989               |
| SNP_P3_29085_14952189 | NC_021162.1    | Ca_kabuli_chr03 | 14952189                | TT                              | GG                | 1945918991               |
| SNP_P3_29086_14952213 | NC_021162.1    | Ca_kabuli_chr03 | 14952213                | CC                              | GG                | 1945918992               |
| SNP_P3_29087_14952277 | NC_021162.1    | Ca_kabuli_chr03 | 14952277                | TT                              | CC                | 1945918994               |
| SNP_P3_29088_14952285 | NC_021162.1    | Ca_kabuli_chr03 | 14952285                | TT                              | GG                | 1945918996               |
| SNP_P3_29089_14952313 | NC_021162.1    | Ca_kabuli_chr03 | 14952313                | TT                              | GG                | 1945918998               |
| SNP_P3_29090_14953625 | NC_021162.1    | Ca_kabuli_chr03 | 14953625                | TT                              | CC                | 1945919000               |
| SNP_P3_29091_14955797 | NC_021162.1    | Ca_kabuli_chr03 | 14955797                | TT                              | GG                | 1945919001               |
| SNP_P3_29092_14960827 | NC_021162.1    | Ca_kabuli_chr03 | 14960827                | TT                              | AA                | 1945919003               |
| SNP_P3_29093_14960843 | NC_021162.1    | Ca_kabuli_chr03 | 14960843                | AA                              | TT                | 1945919005               |
| SNP_P3_29094_14963684 | NC_021162.1    | Ca_kabuli_chr03 | 14963684                | CC                              | TT                | 1945919007               |
| SNP_P3_29095_14987248 | NC_021162.1    | Ca_kabuli_chr03 | 14987248                | GG                              | AA                | 1945919009               |
| SNP_P3_29096_15037862 | NC_021162.1    | Ca_kabuli_chr03 | 15037862                | CC                              | TT                | 1945919010               |
| SNP_P3_29097_15038518 | NC_021162.1    | Ca_kabuli_chr03 | 15038518                | CC                              | TT                | 1945919012               |
| SNP_P3_29098_15038531 | NC_021162.1    | Ca_kabuli_chr03 | 15038531                | TT                              | CC                | 1945919014               |
| SNP_P3_29099_15038792 | NC_021162.1    | Ca_kabuli_chr03 | 15038792                | AA                              | CC                | 1945919016               |
| SNP_P3_29100_15038910 | NC_021162.1    | Ca_kabuli_chr03 | 15038910                | CC                              | AA                | 1945919017               |
| SNP_P3_29101_15038989 | NC_021162.1    | Ca_kabuli_chr03 | 15038989                | TT                              | CC                | 1945919019               |
| SNP_P3_29102_15039040 | NC_021162.1    | Ca_kabuli_chr03 | 15039040                | GG                              | AA                | 1945919021               |
| SNP_P3_29103_15039218 | NC_021162.1    | Ca_kabuli_chr03 | 15039218                | CC                              | AA                | 1945919023               |
| SNP_P3_29106_15039509 | NC_021162.1    | Ca_kabuli_chr03 | 15039509                | GG                              | AA                | 1945919025               |
| SNP_P3_29107_15042477 | NC_021162.1    | Ca_kabuli_chr03 | 15042477                | CC                              | TT                | 1945919026               |
| SNP_P3_29108_15047593 | NC_021162.1    | Ca_kabuli_chr03 | 15047593                | AA                              | GG                | 1945919028               |
| SNP_P3_29109_15047616 | NC_021162.1    | Ca_kabuli_chr03 | 15047616                | CC                              | TT                | 1945919030               |
| SNP_P3_29110_15047652 | NC_021162.1    | Ca_kabuli_chr03 | 15047652                | TT                              | CC                | 1945919032               |
| SNP_P3_29112_15047692 | NC_021162.1    | Ca_kabuli_chr03 | 15047692                | GG                              | TT                | 1945919033               |
| SNP_P3_29113_15052848 | NC_021162.1    | Ca_kabuli_chr03 | 15052848                | CC                              | AA                | 1945919035               |
| SNP_P3_29114_15052885 | NC_021162.1    | Ca_kabuli_chr03 | 15052885                | TT                              | CC                | 1945919037               |
| SNP_P3_29115_15052898 | NC_021162.1    | Ca_kabuli_chr03 | 15052898                | CC                              | GG                | 1945919039               |
| SNP_P3_29116_15052899 | NC_021162.1    | Ca_kabuli_chr03 | 15052899                | TT                              | AA                | 1945919041               |
| SNP_P3_29117_15053002 | NC_021162.1    | Ca_kabuli_chr03 | 15053002                | GG                              | AA                | 1945919042               |
| SNP_P3_29118_15053080 | NC_021162.1    | Ca_kabuli_chr03 | 15053080                | GG                              | AA                | 1945919044               |
| SNP_P3_29119_15053102 | NC_021162.1    | Ca_kabuli_chr03 | 15053102                | TT                              | CC                | 1945919046               |
| SNP_P3_29121_15072295 | NC_021162.1    | Ca_kabuli_chr03 | 15072295                | GG                              | AA                | 1945919048               |
| SNP_P3_29122_15072494 | NC_021162.1    | Ca_kabuli_chr03 | 15072494                | GG                              | TT                | 1945919049               |
| SNP_P3_29123_15072506 | NC_021162.1    | Ca_kabuli_chr03 | 15072506                | AA                              | CC                | 1945919051               |
| SNP_P3_29124_15072516 | NC_021162.1    | Ca_kabuli_chr03 | 15072516                | TT                              | CC                | 1945919053               |
| SNP_P3_29126_15102810 | NC_021162.1    | Ca_kabuli_chr03 | 15102810                | TT                              | CC                | 1945919055               |
| SNP_P3_29127_15212417 | NC_021162.1    | Ca_kabuli_chr03 | 15212417                | CC                              | AA                | 1945919057               |

| SNPs IDs              | Chromosome IDs | Chromosomes     | Physical positions (bp) | CDC Frontier (Reference genome) | (Pusa 256 & HPNB) | NCBI SNPdb Accession IDs |
|-----------------------|----------------|-----------------|-------------------------|---------------------------------|-------------------|--------------------------|
| SNP_P3_29128_15212423 | NC_021162.1    | Ca_kabuli_chr03 | 15212423                | GG                              | AA                | 1945919058               |
| SNP_P3_29129_15212440 | NC_021162.1    | Ca_kabuli_chr03 | 15212440                | TT                              | CC                | 1945919060               |
| SNP_P3_29130_15212540 | NC_021162.1    | Ca_kabuli_chr03 | 15212540                | GG                              | AA                | 1945919062               |
| SNP_P3_29131_15216309 | NC_021162.1    | Ca_kabuli_chr03 | 15216309                | AA                              | GG                | 1945919064               |
| SNP_P3_29133_15231840 | NC_021162.1    | Ca_kabuli_chr03 | 15231840                | GG                              | AA                | 1945919065               |
| SNP_P3_29134_15232252 | NC_021162.1    | Ca_kabuli_chr03 | 15232252                | AA                              | GG                | 1945919067               |
| SNP_P3_29135_15271826 | NC_021162.1    | Ca_kabuli_chr03 | 15271826                | AA                              | GG                | 1945919069               |
| SNP_P3_29136_15271833 | NC_021162.1    | Ca_kabuli_chr03 | 15271833                | TT                              | CC                | 1945919071               |
| SNP_P3_29137_15271861 | NC_021162.1    | Ca_kabuli_chr03 | 15271861                | GG                              | AA                | 1945919073               |
| SNP_P3_29138_15271867 | NC_021162.1    | Ca_kabuli_chr03 | 15271867                | GG                              | AA                | 1945919074               |
| SNP_P3_29139_15272204 | NC_021162.1    | Ca_kabuli_chr03 | 15272204                | AA                              | GG                | 1945919076               |
| SNP_P3_29140_15273589 | NC_021162.1    | Ca_kabuli_chr03 | 15273589                | TT                              | GG                | 1945919078               |
| SNP_P3_29141_15273640 | NC_021162.1    | Ca_kabuli_chr03 | 15273640                | AA                              | GG                | 1945919080               |
| SNP_P3_29142_15273655 | NC_021162.1    | Ca_kabuli_chr03 | 15273655                | GG                              | CC                | 1945919081               |
| SNP_P3_29143_15290605 | NC_021162.1    | Ca_kabuli_chr03 | 15290605                | AA                              | GG                | 1945919083               |
| SNP_P3_29144_15297047 | NC_021162.1    | Ca_kabuli_chr03 | 15297047                | AA                              | GG                | 1945919085               |
| SNP_P3_29145_15309571 | NC_021162.1    | Ca_kabuli_chr03 | 15309571                | TT                              | CC                | 1945919087               |
| SNP_P3_29146_15309631 | NC_021162.1    | Ca_kabuli_chr03 | 15309631                | TT                              | CC                | 1945919089               |
| SNP_P3_29147_15309941 | NC_021162.1    | Ca_kabuli_chr03 | 15309941                | AA                              | GG                | 1945919090               |
| SNP_P3_29148_15309960 | NC_021162.1    | Ca_kabuli_chr03 | 15309960                | TT                              | CC                | 1945919092               |
| SNP_P3_29149_15314098 | NC_021162.1    | Ca_kabuli_chr03 | 15314098                | AA                              | TT                | 1945919094               |
| SNP_P3_29150_15314117 | NC_021162.1    | Ca_kabuli_chr03 | 15314117                | GG                              | AA                | 1945919096               |
| SNP_P3_29151_15314175 | NC_021162.1    | Ca_kabuli_chr03 | 15314175                | AA                              | GG                | 1945919097               |
| SNP_P3_29152_15314199 | NC_021162.1    | Ca_kabuli_chr03 | 15314199                | GG                              | AA                | 1945919099               |
| SNP_P3_29153_15314229 | NC_021162.1    | Ca_kabuli_chr03 | 15314229                | GG                              | AA                | 1945919101               |
| SNP_P3_29154_15314488 | NC_021162.1    | Ca_kabuli_chr03 | 15314488                | TT                              | CC                | 1945919103               |
| SNP_P3_29156_15332236 | NC_021162.1    | Ca_kabuli_chr03 | 15332236                | AA                              | CC                | 1945919105               |
| SNP_P3_29157_15338159 | NC_021162.1    | Ca_kabuli_chr03 | 15338159                | GG                              | AA                | 1945919106               |
| SNP_P3_29158_15375055 | NC_021162.1    | Ca_kabuli_chr03 | 15375055                | GG                              | AA                | 1945919108               |
| SNP_P3_29159_15383332 | NC_021162.1    | Ca_kabuli_chr03 | 15383332                | AA                              | CC                | 1945919110               |
| SNP_P3_29160_15387937 | NC_021162.1    | Ca_kabuli_chr03 | 15387937                | AA                              | GG                | 1945919112               |
| SNP_P3_29162_15411564 | NC_021162.1    | Ca_kabuli_chr03 | 15411564                | TT                              | CC                | 1945919113               |
| SNP_P3_29163_15420912 | NC_021162.1    | Ca_kabuli_chr03 | 15420912                | AA                              | GG                | 1945919115               |
| SNP_P3_29164_15420936 | NC_021162.1    | Ca_kabuli_chr03 | 15420936                | AA                              | GG                | 1945919117               |
| SNP_P3_29167_15514807 | NC_021162.1    | Ca_kabuli_chr03 | 15514807                | GG                              | TT                | 1945919119               |
| SNP_P3_29168_15514808 | NC_021162.1    | Ca_kabuli_chr03 | 15514808                | TT                              | CC                | 1945919121               |
| SNP_P3_29169_15514811 | NC_021162.1    | Ca_kabuli_chr03 | 15514811                | CC                              | TT                | 1945919122               |
| SNP_P3_29170_15514828 | NC_021162.1    | Ca_kabuli_chr03 | 15514828                | TT                              | CC                | 1945919124               |
| SNP_P3_29172_15547929 | NC_021162.1    | Ca_kabuli_chr03 | 15547929                | AA                              | TT                | 1945919126               |
| SNP_P3_29173_15562043 | NC_021162.1    | Ca_kabuli_chr03 | 15562043                | CC                              | TT                | 1945919128               |
| SNP_P3_29174_15588363 | NC_021162.1    | Ca_kabuli_chr03 | 15588363                | TT                              | CC                | 1945919130               |
| SNP_P3_29175_15588589 | NC_021162.1    | Ca_kabuli_chr03 | 15588589                | AA                              | GG                | 1945919131               |

| SNPs IDs              | Chromosome IDs | Chromosomes     | Physical positions (bp) | CDC Frontier (Reference genome) | (Pusa 256 & HPNB) | NCBI SNPdb Accession IDs |
|-----------------------|----------------|-----------------|-------------------------|---------------------------------|-------------------|--------------------------|
| SNP_P3_29176_15588649 | NC_021162.1    | Ca_kabuli_chr03 | 15588649                | AA                              | GG                | 1945919133               |
| SNP_P3_29177_15588665 | NC_021162.1    | Ca_kabuli_chr03 | 15588665                | GG                              | AA                | 1945919135               |
| SNP_P3_29178_15588672 | NC_021162.1    | Ca_kabuli_chr03 | 15588672                | CC                              | TT                | 1945919137               |
| SNP_P3_29179_15588738 | NC_021162.1    | Ca_kabuli_chr03 | 15588738                | AA                              | CC                | 1945919138               |
| SNP_P3_29180_15588788 | NC_021162.1    | Ca_kabuli_chr03 | 15588788                | GG                              | TT                | 1945919140               |
| SNP_P3_29181_15588926 | NC_021162.1    | Ca_kabuli_chr03 | 15588926                | AA                              | TT                | 1945919142               |
| SNP_P3_29182_15588932 | NC_021162.1    | Ca_kabuli_chr03 | 15588932                | GG                              | AA                | 1945919144               |
| SNP_P3_29183_15589407 | NC_021162.1    | Ca_kabuli_chr03 | 15589407                | AA                              | GG                | 1945919146               |
| SNP_P3_29184_15610993 | NC_021162.1    | Ca_kabuli_chr03 | 15610993                | AA                              | GG                | 1945919147               |
| SNP_P3_29186_15649640 | NC_021162.1    | Ca_kabuli_chr03 | 15649640                | CC                              | TT                | 1945919149               |
| SNP_P3_29187_15657620 | NC_021162.1    | Ca_kabuli_chr03 | 15657620                | AA                              | GG                | 1945919151               |
| SNP_P3_29188_15657677 | NC_021162.1    | Ca_kabuli_chr03 | 15657677                | AA                              | GG                | 1945919153               |
| SNP_P3_29189_15657720 | NC_021162.1    | Ca_kabuli_chr03 | 15657720                | GG                              | AA                | 1945919154               |
| SNP_P3_29190_15657745 | NC_021162.1    | Ca_kabuli_chr03 | 15657745                | AA                              | GG                | 1945919156               |
| SNP_P3_29191_15657755 | NC_021162.1    | Ca_kabuli_chr03 | 15657755                | TT                              | CC                | 1945919158               |
| SNP_P3_29192_15657768 | NC_021162.1    | Ca_kabuli_chr03 | 15657768                | AA                              | GG                | 1945919160               |
| SNP_P3_29193_15657779 | NC_021162.1    | Ca_kabuli_chr03 | 15657779                | AA                              | GG                | 1945919162               |
| SNP_P3_29194_15657886 | NC_021162.1    | Ca_kabuli_chr03 | 15657886                | GG                              | AA                | 1945919163               |
| SNP_P3_29195_15657907 | NC_021162.1    | Ca_kabuli_chr03 | 15657907                | CC                              | GG                | 1945919165               |
| SNP_P3_29196_15657913 | NC_021162.1    | Ca_kabuli_chr03 | 15657913                | TT                              | CC                | 1945919167               |
| SNP_P3_29197_15657931 | NC_021162.1    | Ca_kabuli_chr03 | 15657931                | AA                              | GG                | 1945919169               |
| SNP_P3_29198_15657942 | NC_021162.1    | Ca_kabuli_chr03 | 15657942                | CC                              | TT                | 1945919170               |
| SNP_P3_29199_15657944 | NC_021162.1    | Ca_kabuli_chr03 | 15657944                | AA                              | CC                | 1945919172               |
| SNP_P3_29200_15657955 | NC_021162.1    | Ca_kabuli_chr03 | 15657955                | TT                              | CC                | 1945919174               |
| SNP_P3_29201_15657968 | NC_021162.1    | Ca_kabuli_chr03 | 15657968                | CC                              | AA                | 1945919176               |
| SNP_P3_29202_15657972 | NC_021162.1    | Ca_kabuli_chr03 | 15657972                | AA                              | CC                | 1945919178               |
| SNP_P3_29203_15657977 | NC_021162.1    | Ca_kabuli_chr03 | 15657977                | TT                              | CC                | 1945919179               |
| SNP_P3_29204_15658021 | NC_021162.1    | Ca_kabuli_chr03 | 15658021                | TT                              | CC                | 1945919181               |
| SNP_P3_29205_15658063 | NC_021162.1    | Ca_kabuli_chr03 | 15658063                | CC                              | GG                | 1945919183               |
| SNP_P3_29206_15658105 | NC_021162.1    | Ca_kabuli_chr03 | 15658105                | TT                              | GG                | 1945919185               |
| SNP_P3_29207_15658106 | NC_021162.1    | Ca_kabuli_chr03 | 15658106                | GG                              | AA                | 1945919186               |
| SNP_P3_29208_15658198 | NC_021162.1    | Ca_kabuli_chr03 | 15658198                | TT                              | GG                | 1945919188               |
| SNP_P3_29209_15658199 | NC_021162.1    | Ca_kabuli_chr03 | 15658199                | GG                              | AA                | 1945919190               |
| SNP_P3_29210_15658210 | NC_021162.1    | Ca_kabuli_chr03 | 15658210                | TT                              | CC                | 1945919192               |
| SNP_P3_29211_15658437 | NC_021162.1    | Ca_kabuli_chr03 | 15658437                | TT                              | AA                | 1945919194               |
| SNP_P3_29212_15658469 | NC_021162.1    | Ca_kabuli_chr03 | 15658469                | GG                              | AA                | 1945919195               |
| SNP_P3_29214_15658509 | NC_021162.1    | Ca_kabuli_chr03 | 15658509                | CC                              | GG                | 1945919197               |
| SNP_P3_29215_15658510 | NC_021162.1    | Ca_kabuli_chr03 | 15658510                | AA                              | GG                | 1945919199               |
| SNP_P3_29217_15658530 | NC_021162.1    | Ca_kabuli_chr03 | 15658530                | AA                              | CC                | 1945919201               |
| SNP_P3_29218_15658537 | NC_021162.1    | Ca_kabuli_chr03 | 15658537                | TT                              | CC                | 1945919202               |
| SNP_P3_29219_15658598 | NC_021162.1    | Ca_kabuli_chr03 | 15658598                | GG                              | TT                | 1945919204               |
| SNP_P3_29220_15658686 | NC_021162.1    | Ca_kabuli_chr03 | 15658686                | TT                              | GG                | 1945919206               |



| SNPs IDs              | Chromosome IDs | Chromosomes     | Physical positions (bp) | CDC Frontier (Reference genome) | (Pusa 256 & HPNB) | NCBI SNPdb Accession IDs |
|-----------------------|----------------|-----------------|-------------------------|---------------------------------|-------------------|--------------------------|
| SNP_P3_29221_15658714 | NC_021162.1    | Ca_kabuli_chr03 | 15658714                | TT                              | GG                | 1945919208               |
| SNP_P3_29222_15658736 | NC_021162.1    | Ca_kabuli_chr03 | 15658736                | TT                              | CC                | 1945919210               |
| SNP_P3_29223_15658803 | NC_021162.1    | Ca_kabuli_chr03 | 15658803                | AA                              | CC                | 1945919211               |
| SNP_P3_29224_15658805 | NC_021162.1    | Ca_kabuli_chr03 | 15658805                | GG                              | CC                | 1945919213               |
| SNP_P3_29225_15658815 | NC_021162.1    | Ca_kabuli_chr03 | 15658815                | TT                              | CC                | 1945919215               |
| SNP_P3_29226_15658819 | NC_021162.1    | Ca_kabuli_chr03 | 15658819                | GG                              | AA                | 1945919217               |
| SNP_P3_29227_15658867 | NC_021162.1    | Ca_kabuli_chr03 | 15658867                | TT                              | CC                | 1945919218               |
| SNP_P3_29228_15658923 | NC_021162.1    | Ca_kabuli_chr03 | 15658923                | AA                              | GG                | 1945919220               |
| SNP_P3_29229_15658928 | NC_021162.1    | Ca_kabuli_chr03 | 15658928                | TT                              | CC                | 1945919222               |
| SNP_P3_29230_15658971 | NC_021162.1    | Ca_kabuli_chr03 | 15658971                | TT                              | CC                | 1945919224               |
| SNP_P3_29231_15658984 | NC_021162.1    | Ca_kabuli_chr03 | 15658984                | TT                              | CC                | 1945919226               |
| SNP_P3_29232_15659061 | NC_021162.1    | Ca_kabuli_chr03 | 15659061                | AA                              | CC                | 1945919227               |
| SNP_P3_29233_15659075 | NC_021162.1    | Ca_kabuli_chr03 | 15659075                | AA                              | CC                | 1945919229               |
| SNP_P3_29234_15659081 | NC_021162.1    | Ca_kabuli_chr03 | 15659081                | CC                              | TT                | 1945919231               |
| SNP_P3_29235_15659125 | NC_021162.1    | Ca_kabuli_chr03 | 15659125                | TT                              | CC                | 1945919233               |
| SNP_P3_29236_15659138 | NC_021162.1    | Ca_kabuli_chr03 | 15659138                | GG                              | TT                | 1945919235               |
| SNP_P3_29237_15659140 | NC_021162.1    | Ca_kabuli_chr03 | 15659140                | AA                              | GG                | 1945919236               |
| SNP_P3_29238_15659151 | NC_021162.1    | Ca_kabuli_chr03 | 15659151                | CC                              | AA                | 1945919238               |
| SNP_P3_29239_15659162 | NC_021162.1    | Ca_kabuli_chr03 | 15659162                | TT                              | CC                | 1945919240               |
| SNP_P3_29240_15659213 | NC_021162.1    | Ca_kabuli_chr03 | 15659213                | AA                              | CC                | 1945919242               |
| SNP_P3_29241_15659257 | NC_021162.1    | Ca_kabuli_chr03 | 15659257                | CC                              | TT                | 1945919243               |
| SNP_P3_29242_15659263 | NC_021162.1    | Ca_kabuli_chr03 | 15659263                | TT                              | CC                | 1945919245               |
| SNP_P3_29243_15659306 | NC_021162.1    | Ca_kabuli_chr03 | 15659306                | TT                              | GG                | 1945919247               |
| SNP_P3_29244_15659311 | NC_021162.1    | Ca_kabuli_chr03 | 15659311                | TT                              | CC                | 1945919249               |
| SNP_P3_29245_15659319 | NC_021162.1    | Ca_kabuli_chr03 | 15659319                | GG                              | TT                | 1945919251               |
| SNP_P3_29246_15659334 | NC_021162.1    | Ca_kabuli_chr03 | 15659334                | CC                              | AA                | 1945919252               |
| SNP_P3_29247_15659354 | NC_021162.1    | Ca_kabuli_chr03 | 15659354                | AA                              | GG                | 1945919254               |
| SNP_P3_29248_15659363 | NC_021162.1    | Ca_kabuli_chr03 | 15659363                | AA                              | CC                | 1945919256               |
| SNP_P3_29249_15659387 | NC_021162.1    | Ca_kabuli_chr03 | 15659387                | GG                              | AA                | 1945919258               |
| SNP_P3_29250_15659400 | NC_021162.1    | Ca_kabuli_chr03 | 15659400                | TT                              | CC                | 1945919259               |
| SNP_P3_29251_15659420 | NC_021162.1    | Ca_kabuli_chr03 | 15659420                | TT                              | CC                | 1945919261               |
| SNP_P3_29252_15659459 | NC_021162.1    | Ca_kabuli_chr03 | 15659459                | AA                              | TT                | 1945919263               |
| SNP_P3_29253_15659474 | NC_021162.1    | Ca_kabuli_chr03 | 15659474                | AA                              | GG                | 1945919265               |
| SNP_P3_29254_15659508 | NC_021162.1    | Ca_kabuli_chr03 | 15659508                | TT                              | AA                | 1945919267               |
| SNP_P3_29255_15659513 | NC_021162.1    | Ca_kabuli_chr03 | 15659513                | AA                              | GG                | 1945919268               |
| SNP_P3_29256_15659556 | NC_021162.1    | Ca_kabuli_chr03 | 15659556                | AA                              | CC                | 1945919270               |
| SNP_P3_29257_15659582 | NC_021162.1    | Ca_kabuli_chr03 | 15659582                | GG                              | TT                | 1945919272               |
| SNP_P3_29258_15659590 | NC_021162.1    | Ca_kabuli_chr03 | 15659590                | TT                              | AA                | 1945919274               |
| SNP_P3_29259_15659597 | NC_021162.1    | Ca_kabuli_chr03 | 15659597                | AA                              | TT                | 1945919275               |
| SNP_P3_29260_15659616 | NC_021162.1    | Ca_kabuli_chr03 | 15659616                | AA                              | CC                | 1945919277               |
| SNP_P3_29261_15659651 | NC_021162.1    | Ca_kabuli_chr03 | 15659651                | AA                              | GG                | 1945919279               |
| SNP_P3_29262_15659653 | NC_021162.1    | Ca_kabuli_chr03 | 15659653                | AA                              | GG                | 1945919281               |

| SNPs IDs              | Chromosome IDs | Chromosomes     | Physical positions (bp) | CDC Frontier (Reference genome) | (Pusa 256 & HPNB) | NCBI SNPdb Accession IDs |
|-----------------------|----------------|-----------------|-------------------------|---------------------------------|-------------------|--------------------------|
| SNP_P3_29263_15659667 | NC_021162.1    | Ca_kabuli_chr03 | 15659667                | TT                              | CC                | 1945919283               |
| SNP_P3_29264_15659694 | NC_021162.1    | Ca_kabuli_chr03 | 15659694                | TT                              | CC                | 1945919284               |
| SNP_P3_29265_15659712 | NC_021162.1    | Ca_kabuli_chr03 | 15659712                | TT                              | CC                | 1945919286               |
| SNP_P3_29266_15659749 | NC_021162.1    | Ca_kabuli_chr03 | 15659749                | GG                              | CC                | 1945919288               |
| SNP_P3_29267_15659774 | NC_021162.1    | Ca_kabuli_chr03 | 15659774                | AA                              | CC                | 1945919290               |
| SNP_P3_29268_15659806 | NC_021162.1    | Ca_kabuli_chr03 | 15659806                | AA                              | GG                | 1945919291               |
| SNP_P3_29269_15659811 | NC_021162.1    | Ca_kabuli_chr03 | 15659811                | TT                              | CC                | 1945919293               |
| SNP_P3_29270_15659867 | NC_021162.1    | Ca_kabuli_chr03 | 15659867                | AA                              | GG                | 1945919295               |
| SNP_P3_29271_15659957 | NC_021162.1    | Ca_kabuli_chr03 | 15659957                | TT                              | CC                | 1945919297               |
| SNP_P3_29272_15659997 | NC_021162.1    | Ca_kabuli_chr03 | 15659997                | AA                              | GG                | 1945919299               |
| SNP_P3_29273_15660047 | NC_021162.1    | Ca_kabuli_chr03 | 15660047                | TT                              | CC                | 1945919300               |
| SNP_P3_29274_15660063 | NC_021162.1    | Ca_kabuli_chr03 | 15660063                | TT                              | CC                | 1945919302               |
| SNP_P3_29275_15660076 | NC_021162.1    | Ca_kabuli_chr03 | 15660076                | AA                              | GG                | 1945919304               |
| SNP_P3_29276_15660096 | NC_021162.1    | Ca_kabuli_chr03 | 15660096                | AA                              | GG                | 1945919306               |
| SNP_P3_29277_15660116 | NC_021162.1    | Ca_kabuli_chr03 | 15660116                | TT                              | CC                | 1945919307               |
| SNP_P3_29278_15660128 | NC_021162.1    | Ca_kabuli_chr03 | 15660128                | AA                              | GG                | 1945919309               |
| SNP_P3_29279_15660163 | NC_021162.1    | Ca_kabuli_chr03 | 15660163                | GG                              | AA                | 1945919311               |
| SNP_P3_29280_15660341 | NC_021162.1    | Ca_kabuli_chr03 | 15660341                | TT                              | CC                | 1945919313               |
| SNP_P3_29281_15660348 | NC_021162.1    | Ca_kabuli_chr03 | 15660348                | AA                              | GG                | 1945919315               |
| SNP_P3_29282_15660352 | NC_021162.1    | Ca_kabuli_chr03 | 15660352                | AA                              | GG                | 1945919316               |
| SNP_P3_29283_15660358 | NC_021162.1    | Ca_kabuli_chr03 | 15660358                | AA                              | GG                | 1945919318               |
| SNP_P3_29284_15660389 | NC_021162.1    | Ca_kabuli_chr03 | 15660389                | AA                              | CC                | 1945919320               |
| SNP_P3_29285_15660414 | NC_021162.1    | Ca_kabuli_chr03 | 15660414                | TT                              | CC                | 1945919322               |
| SNP_P3_29286_15660438 | NC_021162.1    | Ca_kabuli_chr03 | 15660438                | CC                              | GG                | 1945919323               |
| SNP_P3_29287_15660466 | NC_021162.1    | Ca_kabuli_chr03 | 15660466                | TT                              | CC                | 1945919325               |
| SNP_P3_29288_15660467 | NC_021162.1    | Ca_kabuli_chr03 | 15660467                | AA                              | GG                | 1945919327               |
| SNP_P3_29290_15660579 | NC_021162.1    | Ca_kabuli_chr03 | 15660579                | CC                              | TT                | 1945919329               |
| SNP_P3_29291_15660622 | NC_021162.1    | Ca_kabuli_chr03 | 15660622                | AA                              | CC                | 1945919331               |
| SNP_P3_29292_15660636 | NC_021162.1    | Ca_kabuli_chr03 | 15660636                | AA                              | GG                | 1945919332               |
| SNP_P3_29293_15660684 | NC_021162.1    | Ca_kabuli_chr03 | 15660684                | AA                              | GG                | 1945919334               |
| SNP_P3_29294_15689297 | NC_021162.1    | Ca_kabuli_chr03 | 15689297                | GG                              | AA                | 1945919336               |
| SNP_P3_29295_15689688 | NC_021162.1    | Ca_kabuli_chr03 | 15689688                | AA                              | CC                | 1945919338               |
| SNP_P3_29297_15732582 | NC_021162.1    | Ca_kabuli_chr03 | 15732582                | AA                              | GG                | 1945919339               |
| SNP_P3_29298_15752535 | NC_021162.1    | Ca_kabuli_chr03 | 15752535                | TT                              | CC                | 1945919341               |
| SNP_P3_29299_15758736 | NC_021162.1    | Ca_kabuli_chr03 | 15758736                | AA                              | TT                | 1945919343               |
| SNP_P3_29300_15772600 | NC_021162.1    | Ca_kabuli_chr03 | 15772600                | CC                              | TT                | 1945919345               |
| SNP_P3_29301_15784720 | NC_021162.1    | Ca_kabuli_chr03 | 15784720                | CC                              | GG                | 1945919347               |
| SNP_P3_29302_15806617 | NC_021162.1    | Ca_kabuli_chr03 | 15806617                | CC                              | GG                | 1945919348               |
| SNP_P3_29304_15810339 | NC_021162.1    | Ca_kabuli_chr03 | 15810339                | TT                              | AA                | 1945919350               |
| SNP_P3_29305_15810348 | NC_021162.1    | Ca_kabuli_chr03 | 15810348                | CC                              | TT                | 1945919352               |
| SNP_P3_29306_15810350 | NC_021162.1    | Ca_kabuli_chr03 | 15810350                | CC                              | AA                | 1945919354               |
| SNP_P3_29307_15814053 | NC_021162.1    | Ca_kabuli_chr03 | 15814053                | CC                              | TT                | 1945919356               |

| SNPs IDs              | Chromosome IDs | Chromosomes     | Physical positions (bp) | CDC Frontier (Reference genome) | (Pusa 256 & HPNB) | NCBI SNPdb Accession IDs |
|-----------------------|----------------|-----------------|-------------------------|---------------------------------|-------------------|--------------------------|
| SNP_P3_29309_15844602 | NC_021162.1    | Ca_kabuli_chr03 | 15844602                | AA                              | CC                | 1945919357               |
| SNP_P3_29311_15868565 | NC_021162.1    | Ca_kabuli_chr03 | 15868565                | AA                              | GG                | 1945919359               |
| SNP_P3_29312_15868567 | NC_021162.1    | Ca_kabuli_chr03 | 15868567                | AA                              | GG                | 1945919361               |
| SNP_P3_29314_15912241 | NC_021162.1    | Ca_kabuli_chr03 | 15912241                | AA                              | GG                | 1945919363               |
| SNP_P3_29315_15912245 | NC_021162.1    | Ca_kabuli_chr03 | 15912245                | AA                              | GG                | 1945919364               |
| SNP_P3_29316_15956721 | NC_021162.1    | Ca_kabuli_chr03 | 15956721                | TT                              | AA                | 1945919366               |
| SNP_P3_29317_15956725 | NC_021162.1    | Ca_kabuli_chr03 | 15956725                | TT                              | GG                | 1945919368               |
| SNP_P3_29318_15961796 | NC_021162.1    | Ca_kabuli_chr03 | 15961796                | CC                              | TT                | 1945919370               |
| SNP_P3_29319_15961799 | NC_021162.1    | Ca_kabuli_chr03 | 15961799                | CC                              | TT                | 1945919372               |
| SNP_P3_29320_15969716 | NC_021162.1    | Ca_kabuli_chr03 | 15969716                | GG                              | TT                | 1945919373               |
| SNP_P3_29321_15969725 | NC_021162.1    | Ca_kabuli_chr03 | 15969725                | GG                              | TT                | 1945919375               |
| SNP_P3_29322_15978190 | NC_021162.1    | Ca_kabuli_chr03 | 15978190                | CC                              | TT                | 1945919377               |
| SNP_P3_29323_16068728 | NC_021162.1    | Ca_kabuli_chr03 | 16068728                | GG                              | TT                | 1945919379               |
| SNP_P3_29324_16087743 | NC_021162.1    | Ca_kabuli_chr03 | 16087743                | GG                              | AA                | 1945919380               |
| SNP_P3_29325_16088811 | NC_021162.1    | Ca_kabuli_chr03 | 16088811                | TT                              | CC                | 1945919382               |
| SNP_P3_29327_16106863 | NC_021162.1    | Ca_kabuli_chr03 | 16106863                | GG                              | CC                | 1945919384               |
| SNP_P3_29328_16106945 | NC_021162.1    | Ca_kabuli_chr03 | 16106945                | AA                              | GG                | 1945919386               |
| SNP_P3_29329_16106983 | NC_021162.1    | Ca_kabuli_chr03 | 16106983                | TT                              | CC                | 1945919388               |
| SNP_P3_29331_16107228 | NC_021162.1    | Ca_kabuli_chr03 | 16107228                | AA                              | GG                | 1945919389               |
| SNP_P3_29332_16107242 | NC_021162.1    | Ca_kabuli_chr03 | 16107242                | CC                              | TT                | 1945919391               |
| SNP_P3_29333_16107263 | NC_021162.1    | Ca_kabuli_chr03 | 16107263                | AA                              | GG                | 1945919393               |
| SNP_P3_29334_16107292 | NC_021162.1    | Ca_kabuli_chr03 | 16107292                | AA                              | GG                | 1945919395               |
| SNP_P3_29335_16107345 | NC_021162.1    | Ca_kabuli_chr03 | 16107345                | CC                              | TT                | 1945919396               |
| SNP_P3_29337_16108387 | NC_021162.1    | Ca_kabuli_chr03 | 16108387                | TT                              | CC                | 1945919398               |
| SNP_P3_29338_16108401 | NC_021162.1    | Ca_kabuli_chr03 | 16108401                | TT                              | CC                | 1945919400               |
| SNP_P3_29339_16108420 | NC_021162.1    | Ca_kabuli_chr03 | 16108420                | TT                              | CC                | 1945919402               |
| SNP_P3_29340_16108429 | NC_021162.1    | Ca_kabuli_chr03 | 16108429                | GG                              | AA                | 1945919404               |
| SNP_P3_29341_16115088 | NC_021162.1    | Ca_kabuli_chr03 | 16115088                | AA                              | GG                | 1945919405               |
| SNP_P3_29342_16115201 | NC_021162.1    | Ca_kabuli_chr03 | 16115201                | GG                              | AA                | 1945919407               |
| SNP_P3_29343_16115209 | NC_021162.1    | Ca_kabuli_chr03 | 16115209                | CC                              | AA                | 1945919409               |
| SNP_P3_29344_16116723 | NC_021162.1    | Ca_kabuli_chr03 | 16116723                | TT                              | AA                | 1945919411               |
| SNP_P3_29345_16117458 | NC_021162.1    | Ca_kabuli_chr03 | 16117458                | CC                              | TT                | 1945919412               |
| SNP_P3_29346_16117549 | NC_021162.1    | Ca_kabuli_chr03 | 16117549                | GG                              | AA                | 1945919414               |
| SNP_P3_29347_16117587 | NC_021162.1    | Ca_kabuli_chr03 | 16117587                | CC                              | AA                | 1945919416               |
| SNP_P3_29348_16125786 | NC_021162.1    | Ca_kabuli_chr03 | 16125786                | TT                              | AA                | 1945919418               |
| SNP_P3_29350_16133223 | NC_021162.1    | Ca_kabuli_chr03 | 16133223                | TT                              | CC                | 1945919420               |
| SNP_P3_29352_16133445 | NC_021162.1    | Ca_kabuli_chr03 | 16133445                | CC                              | GG                | 1945919421               |
| SNP_P3_29354_16133506 | NC_021162.1    | Ca_kabuli_chr03 | 16133506                | TT                              | AA                | 1945919423               |
| SNP_P3_29355_16133508 | NC_021162.1    | Ca_kabuli_chr03 | 16133508                | TT                              | AA                | 1945919425               |
| SNP_P3_29356_16133528 | NC_021162.1    | Ca_kabuli_chr03 | 16133528                | CC                              | TT                | 1945919427               |
| SNP_P3_29357_16134501 | NC_021162.1    | Ca_kabuli_chr03 | 16134501                | AA                              | GG                | 1945919428               |
| SNP_P3_29358_16136420 | NC_021162.1    | Ca_kabuli_chr03 | 16136420                | GG                              | AA                | 1945919430               |

| SNPs IDs              | Chromosome IDs | Chromosomes     | Physical positions (bp) | CDC Frontier (Reference genome) | (Pusa 256 & HPNB) | NCBI SNPdb Accession IDs |
|-----------------------|----------------|-----------------|-------------------------|---------------------------------|-------------------|--------------------------|
| SNP_P3_29360_16144988 | NC_021162.1    | Ca_kabuli_chr03 | 16144988                | CC                              | TT                | 1945919432               |
| SNP_P3_29361_16154293 | NC_021162.1    | Ca_kabuli_chr03 | 16154293                | TT                              | CC                | 1945919434               |
| SNP_P3_29362_16160472 | NC_021162.1    | Ca_kabuli_chr03 | 16160472                | TT                              | CC                | 1945919436               |
| SNP_P3_29363_16160682 | NC_021162.1    | Ca_kabuli_chr03 | 16160682                | GG                              | AA                | 1945919437               |
| SNP_P3_29364_16160921 | NC_021162.1    | Ca_kabuli_chr03 | 16160921                | AA                              | GG                | 1945919439               |
| SNP_P3_29365_16160922 | NC_021162.1    | Ca_kabuli_chr03 | 16160922                | TT                              | CC                | 1945919441               |
| SNP_P3_29366_16160936 | NC_021162.1    | Ca_kabuli_chr03 | 16160936                | TT                              | AA                | 1945919443               |
| SNP_P3_29367_16160989 | NC_021162.1    | Ca_kabuli_chr03 | 16160989                | AA                              | GG                | 1945919445               |
| SNP_P3_29369_16164198 | NC_021162.1    | Ca_kabuli_chr03 | 16164198                | AA                              | GG                | 1945919446               |
| SNP_P3_29370_16164283 | NC_021162.1    | Ca_kabuli_chr03 | 16164283                | AA                              | GG                | 1945919448               |
| SNP_P3_29371_16164292 | NC_021162.1    | Ca_kabuli_chr03 | 16164292                | CC                              | GG                | 1945919450               |
| SNP_P3_29372_16164308 | NC_021162.1    | Ca_kabuli_chr03 | 16164308                | CC                              | TT                | 1945919452               |
| SNP_P3_29373_16164327 | NC_021162.1    | Ca_kabuli_chr03 | 16164327                | TT                              | AA                | 1945919453               |
| SNP_P3_29374_16164336 | NC_021162.1    | Ca_kabuli_chr03 | 16164336                | GG                              | AA                | 1945919455               |
| SNP_P3_29375_16166482 | NC_021162.1    | Ca_kabuli_chr03 | 16166482                | TT                              | AA                | 1945919457               |
| SNP_P3_29377_16166862 | NC_021162.1    | Ca_kabuli_chr03 | 16166862                | AA                              | TT                | 1945919459               |
| SNP_P3_29378_16166938 | NC_021162.1    | Ca_kabuli_chr03 | 16166938                | GG                              | AA                | 1945919461               |
| SNP_P3_29379_16167055 | NC_021162.1    | Ca_kabuli_chr03 | 16167055                | TT                              | CC                | 1945919462               |
| SNP_P3_29380_16167092 | NC_021162.1    | Ca_kabuli_chr03 | 16167092                | AA                              | GG                | 1945919464               |
| SNP_P3_29381_16167100 | NC_021162.1    | Ca_kabuli_chr03 | 16167100                | GG                              | TT                | 1945919466               |
| SNP_P3_29382_16167116 | NC_021162.1    | Ca_kabuli_chr03 | 16167116                | CC                              | TT                | 1945919468               |
| SNP_P3_29383_16167247 | NC_021162.1    | Ca_kabuli_chr03 | 16167247                | AA                              | GG                | 1945919469               |
| SNP_P3_29384_16167294 | NC_021162.1    | Ca_kabuli_chr03 | 16167294                | AA                              | CC                | 1945919471               |
| SNP_P3_29385_16168929 | NC_021162.1    | Ca_kabuli_chr03 | 16168929                | CC                              | GG                | 1945919473               |
| SNP_P3_29386_16168936 | NC_021162.1    | Ca_kabuli_chr03 | 16168936                | CC                              | TT                | 1945919475               |
| SNP_P3_29387_16168969 | NC_021162.1    | Ca_kabuli_chr03 | 16168969                | GG                              | AA                | 1945919477               |
| SNP_P3_29388_16168982 | NC_021162.1    | Ca_kabuli_chr03 | 16168982                | CC                              | TT                | 1945919478               |
| SNP_P3_29389_16169169 | NC_021162.1    | Ca_kabuli_chr03 | 16169169                | AA                              | GG                | 1945919480               |
| SNP_P3_29390_16169209 | NC_021162.1    | Ca_kabuli_chr03 | 16169209                | CC                              | TT                | 1945919482               |
| SNP_P3_29391_16169245 | NC_021162.1    | Ca_kabuli_chr03 | 16169245                | GG                              | AA                | 1945919484               |
| SNP_P3_29392_16170792 | NC_021162.1    | Ca_kabuli_chr03 | 16170792                | AA                              | GG                | 1945919485               |
| SNP_P3_29393_16170975 | NC_021162.1    | Ca_kabuli_chr03 | 16170975                | CC                              | TT                | 1945919487               |
| SNP_P3_29394_16170997 | NC_021162.1    | Ca_kabuli_chr03 | 16170997                | TT                              | CC                | 1945919489               |
| SNP_P3_29395_16170998 | NC_021162.1    | Ca_kabuli_chr03 | 16170998                | CC                              | AA                | 1945919491               |
| SNP_P3_29396_16171007 | NC_021162.1    | Ca_kabuli_chr03 | 16171007                | GG                              | AA                | 1945919493               |
| SNP_P3_29397_16171028 | NC_021162.1    | Ca_kabuli_chr03 | 16171028                | CC                              | TT                | 1945919494               |
| SNP_P3_29398_16171051 | NC_021162.1    | Ca_kabuli_chr03 | 16171051                | TT                              | CC                | 1945919496               |
| SNP_P3_29400_16171366 | NC_021162.1    | Ca_kabuli_chr03 | 16171366                | CC                              | TT                | 1945919498               |
| SNP_P3_29401_16171409 | NC_021162.1    | Ca_kabuli_chr03 | 16171409                | TT                              | GG                | 1945919500               |
| SNP_P3_29402_16171811 | NC_021162.1    | Ca_kabuli_chr03 | 16171811                | TT                              | CC                | 1945919501               |
| SNP_P3_29403_16175511 | NC_021162.1    | Ca_kabuli_chr03 | 16175511                | GG                              | AA                | 1945919503               |
| SNP_P3_29404_16181478 | NC_021162.1    | Ca_kabuli_chr03 | 16181478                | AA                              | TT                | 1945919505               |

| SNPs IDs              | Chromosome IDs | Chromosomes     | Physical positions (bp) | CDC Frontier (Reference genome) | (Pusa 256 & HPNB) | NCBI SNPdb Accession IDs |
|-----------------------|----------------|-----------------|-------------------------|---------------------------------|-------------------|--------------------------|
| SNP_P3_29405_16181971 | NC_021162.1    | Ca_kabuli_chr03 | 16181971                | CC                              | TT                | 1945919507               |
| SNP_P3_29406_16182007 | NC_021162.1    | Ca_kabuli_chr03 | 16182007                | CC                              | TT                | 1945919509               |
| SNP_P3_29407_16182402 | NC_021162.1    | Ca_kabuli_chr03 | 16182402                | AA                              | CC                | 1945919510               |
| SNP_P3_29408_16182646 | NC_021162.1    | Ca_kabuli_chr03 | 16182646                | TT                              | CC                | 1945919512               |
| SNP_P3_29409_16182674 | NC_021162.1    | Ca_kabuli_chr03 | 16182674                | GG                              | AA                | 1945919514               |
| SNP_P3_29412_16182938 | NC_021162.1    | Ca_kabuli_chr03 | 16182938                | GG                              | AA                | 1945919516               |
| SNP_P3_29413_16183118 | NC_021162.1    | Ca_kabuli_chr03 | 16183118                | CC                              | TT                | 1945919517               |
| SNP_P3_29414_16183187 | NC_021162.1    | Ca_kabuli_chr03 | 16183187                | CC                              | TT                | 1945919519               |
| SNP_P3_29415_16183207 | NC_021162.1    | Ca_kabuli_chr03 | 16183207                | GG                              | AA                | 1945919521               |
| SNP_P3_29416_16183257 | NC_021162.1    | Ca_kabuli_chr03 | 16183257                | TT                              | CC                | 1945919523               |
| SNP_P3_29417_16183364 | NC_021162.1    | Ca_kabuli_chr03 | 16183364                | AA                              | CC                | 1945919525               |
| SNP_P3_29418_16186433 | NC_021162.1    | Ca_kabuli_chr03 | 16186433                | TT                              | AA                | 1945919526               |
| SNP_P3_29419_16186436 | NC_021162.1    | Ca_kabuli_chr03 | 16186436                | TT                              | AA                | 1945919528               |
| SNP_P3_29420_16190276 | NC_021162.1    | Ca_kabuli_chr03 | 16190276                | GG                              | TT                | 1945919530               |
| SNP_P3_29421_16190500 | NC_021162.1    | Ca_kabuli_chr03 | 16190500                | TT                              | CC                | 1945919532               |
| SNP_P3_29422_16190693 | NC_021162.1    | Ca_kabuli_chr03 | 16190693                | AA                              | GG                | 1945919534               |
| SNP_P3_29423_16190727 | NC_021162.1    | Ca_kabuli_chr03 | 16190727                | CC                              | TT                | 1945919535               |
| SNP_P3_29424_16190766 | NC_021162.1    | Ca_kabuli_chr03 | 16190766                | TT                              | AA                | 1945919537               |
| SNP_P3_29426_16195021 | NC_021162.1    | Ca_kabuli_chr03 | 16195021                | CC                              | TT                | 1945919539               |
| SNP_P3_29427_16195099 | NC_021162.1    | Ca_kabuli_chr03 | 16195099                | GG                              | AA                | 1945919541               |
| SNP_P3_29429_16195223 | NC_021162.1    | Ca_kabuli_chr03 | 16195223                | AA                              | GG                | 1945919542               |
| SNP_P3_29431_16195418 | NC_021162.1    | Ca_kabuli_chr03 | 16195418                | TT                              | CC                | 1945919544               |
| SNP_P3_29433_16195743 | NC_021162.1    | Ca_kabuli_chr03 | 16195743                | AA                              | GG                | 1945919546               |
| SNP_P3_29434_16195752 | NC_021162.1    | Ca_kabuli_chr03 | 16195752                | AA                              | TT                | 1945919548               |
| SNP_P3_29435_16195770 | NC_021162.1    | Ca_kabuli_chr03 | 16195770                | CC                              | TT                | 1945919550               |
| SNP_P3_29436_16195781 | NC_021162.1    | Ca_kabuli_chr03 | 16195781                | GG                              | CC                | 1945919551               |
| SNP_P3_29437_16195806 | NC_021162.1    | Ca_kabuli_chr03 | 16195806                | AA                              | TT                | 1945919553               |
| SNP_P3_29438_16195811 | NC_021162.1    | Ca_kabuli_chr03 | 16195811                | CC                              | AA                | 1945919555               |
| SNP_P3_29439_16195828 | NC_021162.1    | Ca_kabuli_chr03 | 16195828                | CC                              | GG                | 1945919557               |
| SNP_P3_29440_16195883 | NC_021162.1    | Ca_kabuli_chr03 | 16195883                | GG                              | AA                | 1945919558               |
| SNP_P3_29441_16195914 | NC_021162.1    | Ca_kabuli_chr03 | 16195914                | AA                              | GG                | 1945919560               |
| SNP_P3_29442_16195933 | NC_021162.1    | Ca_kabuli_chr03 | 16195933                | CC                              | GG                | 1945919562               |
| SNP_P3_29443_16196052 | NC_021162.1    | Ca_kabuli_chr03 | 16196052                | TT                              | CC                | 1945919564               |
| SNP_P3_29444_16196098 | NC_021162.1    | Ca_kabuli_chr03 | 16196098                | CC                              | TT                | 1945919566               |
| SNP_P3_29445_16196649 | NC_021162.1    | Ca_kabuli_chr03 | 16196649                | TT                              | AA                | 1945919567               |
| SNP_P3_29446_16196718 | NC_021162.1    | Ca_kabuli_chr03 | 16196718                | AA                              | TT                | 1945919569               |
| SNP_P3_29447_16196841 | NC_021162.1    | Ca_kabuli_chr03 | 16196841                | TT                              | AA                | 1945919571               |
| SNP_P3_29448_16196885 | NC_021162.1    | Ca_kabuli_chr03 | 16196885                | TT                              | AA                | 1945919573               |
| SNP_P3_29450_16197370 | NC_021162.1    | Ca_kabuli_chr03 | 16197370                | AA                              | GG                | 1945919574               |
| SNP_P3_29451_16197539 | NC_021162.1    | Ca_kabuli_chr03 | 16197539                | GG                              | TT                | 1945919576               |
| SNP_P3_29452_16197582 | NC_021162.1    | Ca_kabuli_chr03 | 16197582                | CC                              | AA                | 1945919578               |
| SNP_P3_29453_16197638 | NC_021162.1    | Ca_kabuli_chr03 | 16197638                | AA                              | GG                | 1945919580               |

| SNPs IDs              | Chromosome IDs | Chromosomes     | Physical positions (bp) | CDC Frontier (Reference genome) | (Pusa 256 & HPNB) | NCBI SNPdb Accession IDs |
|-----------------------|----------------|-----------------|-------------------------|---------------------------------|-------------------|--------------------------|
| SNP_P3_29454_16197653 | NC_021162.1    | Ca_kabuli_chr03 | 16197653                | CC                              | TT                | 1945919582               |
| SNP_P3_29455_16197689 | NC_021162.1    | Ca_kabuli_chr03 | 16197689                | AA                              | GG                | 1945919583               |
| SNP_P3_29456_16197703 | NC_021162.1    | Ca_kabuli_chr03 | 16197703                | GG                              | AA                | 1945919585               |
| SNP_P3_29457_16197731 | NC_021162.1    | Ca_kabuli_chr03 | 16197731                | GG                              | AA                | 1945919587               |
| SNP_P3_29458_16197733 | NC_021162.1    | Ca_kabuli_chr03 | 16197733                | CC                              | TT                | 1945919589               |
| SNP_P3_29459_16210577 | NC_021162.1    | Ca_kabuli_chr03 | 16210577                | CC                              | GG                | 1945919590               |
| SNP_P3_29460_16211999 | NC_021162.1    | Ca_kabuli_chr03 | 16211999                | TT                              | AA                | 1945919592               |
| SNP_P3_29461_16212025 | NC_021162.1    | Ca_kabuli_chr03 | 16212025                | TT                              | AA                | 1945919594               |
| SNP_P3_29462_16212049 | NC_021162.1    | Ca_kabuli_chr03 | 16212049                | TT                              | CC                | 1945919596               |
| SNP_P3_29464_16212123 | NC_021162.1    | Ca_kabuli_chr03 | 16212123                | CC                              | AA                | 1945919598               |
| SNP_P3_29465_16212159 | NC_021162.1    | Ca_kabuli_chr03 | 16212159                | GG                              | AA                | 1945919599               |
| SNP_P3_29466_16212198 | NC_021162.1    | Ca_kabuli_chr03 | 16212198                | GG                              | TT                | 1945919601               |
| SNP_P3_29467_16212226 | NC_021162.1    | Ca_kabuli_chr03 | 16212226                | GG                              | AA                | 1945919603               |
| SNP_P3_29468_16212275 | NC_021162.1    | Ca_kabuli_chr03 | 16212275                | TT                              | CC                | 1945919605               |
| SNP_P3_29469_16212331 | NC_021162.1    | Ca_kabuli_chr03 | 16212331                | GG                              | TT                | 1945919606               |
| SNP_P3_29470_16212362 | NC_021162.1    | Ca_kabuli_chr03 | 16212362                | AA                              | GG                | 1945919608               |
| SNP_P3_29472_16212401 | NC_021162.1    | Ca_kabuli_chr03 | 16212401                | TT                              | CC                | 1945919610               |
| SNP_P3_29473_16212413 | NC_021162.1    | Ca_kabuli_chr03 | 16212413                | CC                              | GG                | 1945919612               |
| SNP_P3_29474_16212438 | NC_021162.1    | Ca_kabuli_chr03 | 16212438                | TT                              | CC                | 1945919614               |
| SNP_P3_29475_16212485 | NC_021162.1    | Ca_kabuli_chr03 | 16212485                | CC                              | GG                | 1945919615               |
| SNP_P3_29476_16212488 | NC_021162.1    | Ca_kabuli_chr03 | 16212488                | TT                              | CC                | 1945919617               |
| SNP_P3_29477_16212495 | NC_021162.1    | Ca_kabuli_chr03 | 16212495                | AA                              | GG                | 1945919619               |
| SNP_P3_29478_16212521 | NC_021162.1    | Ca_kabuli_chr03 | 16212521                | GG                              | AA                | 1945919621               |
| SNP_P3_29479_16212526 | NC_021162.1    | Ca_kabuli_chr03 | 16212526                | GG                              | AA                | 1945919622               |
| SNP_P3_29480_16212531 | NC_021162.1    | Ca_kabuli_chr03 | 16212531                | GG                              | AA                | 1945919624               |
| SNP_P3_29482_16235191 | NC_021162.1    | Ca_kabuli_chr03 | 16235191                | GG                              | AA                | 1945919626               |
| SNP_P3_29483_16235197 | NC_021162.1    | Ca_kabuli_chr03 | 16235197                | AA                              | GG                | 1945919628               |
| SNP_P3_29484_16237507 | NC_021162.1    | Ca_kabuli_chr03 | 16237507                | AA                              | GG                | 1945919630               |
| SNP_P3_29485_16237530 | NC_021162.1    | Ca_kabuli_chr03 | 16237530                | TT                              | CC                | 1945919631               |
| SNP_P3_29486_16239203 | NC_021162.1    | Ca_kabuli_chr03 | 16239203                | TT                              | GG                | 1945919633               |
| SNP_P3_29487_16244871 | NC_021162.1    | Ca_kabuli_chr03 | 16244871                | CC                              | TT                | 1945919635               |
| SNP_P3_29488_16245336 | NC_021162.1    | Ca_kabuli_chr03 | 16245336                | GG                              | CC                | 1945919637               |
| SNP_P3_29489_16245342 | NC_021162.1    | Ca_kabuli_chr03 | 16245342                | AA                              | GG                | 1945919639               |
| SNP_P3_29490_16245382 | NC_021162.1    | Ca_kabuli_chr03 | 16245382                | TT                              | GG                | 1945919640               |
| SNP_P3_29491_16252228 | NC_021162.1    | Ca_kabuli_chr03 | 16252228                | AA                              | GG                | 1945919642               |
| SNP_P3_29492_16283986 | NC_021162.1    | Ca_kabuli_chr03 | 16283986                | GG                              | AA                | 1945919644               |
| SNP_P3_29493_16284046 | NC_021162.1    | Ca_kabuli_chr03 | 16284046                | TT                              | CC                | 1945919646               |
| SNP_P3_29494_16297964 | NC_021162.1    | Ca_kabuli_chr03 | 16297964                | CC                              | TT                | 1945919647               |
| SNP_P3_29495_16309753 | NC_021162.1    | Ca_kabuli_chr03 | 16309753                | AA                              | TT                | 1945919649               |
| SNP_P3_29496_16331630 | NC_021162.1    | Ca_kabuli_chr03 | 16331630                | AA                              | CC                | 1945919651               |
| SNP_P3_29497_16331654 | NC_021162.1    | Ca_kabuli_chr03 | 16331654                | GG                              | TT                | 1945919653               |
| SNP_P3_29499_16331822 | NC_021162.1    | Ca_kabuli_chr03 | 16331822                | AA                              | CC                | 1945919655               |

| SNPs IDs              | Chromosome IDs | Chromosomes     | Physical positions (bp) | CDC Frontier (Reference genome) | (Pusa 256 & HPNB) | NCBI SNPdb Accession IDs |
|-----------------------|----------------|-----------------|-------------------------|---------------------------------|-------------------|--------------------------|
| SNP_P3_29500_16331838 | NC_021162.1    | Ca_kabuli_chr03 | 16331838                | TT                              | AA                | 1945919656               |
| SNP_P3_29501_16331935 | NC_021162.1    | Ca_kabuli_chr03 | 16331935                | GG                              | AA                | 1945919658               |
| SNP_P3_29503_16331974 | NC_021162.1    | Ca_kabuli_chr03 | 16331974                | AA                              | CC                | 1945919660               |
| SNP_P3_29504_16335501 | NC_021162.1    | Ca_kabuli_chr03 | 16335501                | AA                              | GG                | 1945919662               |
| SNP_P3_29505_16347192 | NC_021162.1    | Ca_kabuli_chr03 | 16347192                | TT                              | CC                | 1945919663               |
| SNP_P3_29506_16347274 | NC_021162.1    | Ca_kabuli_chr03 | 16347274                | CC                              | TT                | 1945919665               |
| SNP_P3_29509_16382550 | NC_021162.1    | Ca_kabuli_chr03 | 16382550                | CC                              | AA                | 1945919667               |
| SNP_P3_29510_16382552 | NC_021162.1    | Ca_kabuli_chr03 | 16382552                | TT                              | GG                | 1945919669               |
| SNP_P3_29511_16382971 | NC_021162.1    | Ca_kabuli_chr03 | 16382971                | GG                              | AA                | 1945919671               |
| SNP_P3_29512_16392209 | NC_021162.1    | Ca_kabuli_chr03 | 16392209                | TT                              | CC                | 1945919672               |
| SNP_P3_29513_16413350 | NC_021162.1    | Ca_kabuli_chr03 | 16413350                | GG                              | AA                | 1945919674               |
| SNP_P3_29514_16413366 | NC_021162.1    | Ca_kabuli_chr03 | 16413366                | GG                              | TT                | 1945919676               |
| SNP_P3_29515_16413395 | NC_021162.1    | Ca_kabuli_chr03 | 16413395                | AA                              | GG                | 1945919678               |
| SNP_P3_29516_16413491 | NC_021162.1    | Ca_kabuli_chr03 | 16413491                | TT                              | GG                | 1945919679               |
| SNP_P3_29517_16413569 | NC_021162.1    | Ca_kabuli_chr03 | 16413569                | TT                              | CC                | 1945919681               |
| SNP_P3_29518_16413573 | NC_021162.1    | Ca_kabuli_chr03 | 16413573                | TT                              | CC                | 1945919683               |
| SNP_P3_29519_16413587 | NC_021162.1    | Ca_kabuli_chr03 | 16413587                | GG                              | AA                | 1945919685               |
| SNP_P3_29520_16413639 | NC_021162.1    | Ca_kabuli_chr03 | 16413639                | AA                              | GG                | 1945919687               |
| SNP_P3_29521_16413642 | NC_021162.1    | Ca_kabuli_chr03 | 16413642                | GG                              | AA                | 1945919688               |
| SNP_P3_29522_16413648 | NC_021162.1    | Ca_kabuli_chr03 | 16413648                | GG                              | AA                | 1945919690               |
| SNP_P3_29523_16413662 | NC_021162.1    | Ca_kabuli_chr03 | 16413662                | CC                              | TT                | 1945919692               |
| SNP_P3_29524_16413666 | NC_021162.1    | Ca_kabuli_chr03 | 16413666                | AA                              | GG                | 1945919694               |
| SNP_P3_29525_16413954 | NC_021162.1    | Ca_kabuli_chr03 | 16413954                | TT                              | CC                | 1945919696               |
| SNP_P3_29526_16414054 | NC_021162.1    | Ca_kabuli_chr03 | 16414054                | AA                              | CC                | 1945919697               |
| SNP_P3_29527_16414066 | NC_021162.1    | Ca_kabuli_chr03 | 16414066                | GG                              | AA                | 1945919699               |
| SNP_P3_29528_16433339 | NC_021162.1    | Ca_kabuli_chr03 | 16433339                | CC                              | TT                | 1945919701               |
| SNP_P3_29529_16441419 | NC_021162.1    | Ca_kabuli_chr03 | 16441419                | TT                              | AA                | 1945919703               |
| SNP_P3_29530_16441444 | NC_021162.1    | Ca_kabuli_chr03 | 16441444                | TT                              | CC                | 1945919704               |
| SNP_P3_29531_16441500 | NC_021162.1    | Ca_kabuli_chr03 | 16441500                | TT                              | CC                | 1945919706               |
| SNP_P3_29532_16441514 | NC_021162.1    | Ca_kabuli_chr03 | 16441514                | CC                              | AA                | 1945919708               |
| SNP_P3_29533_16441516 | NC_021162.1    | Ca_kabuli_chr03 | 16441516                | AA                              | TT                | 1945919710               |
| SNP_P3_29534_16441550 | NC_021162.1    | Ca_kabuli_chr03 | 16441550                | GG                              | AA                | 1945919712               |
| SNP_P3_29535_16441589 | NC_021162.1    | Ca_kabuli_chr03 | 16441589                | GG                              | CC                | 1945919713               |
| SNP_P3_29536_16441687 | NC_021162.1    | Ca_kabuli_chr03 | 16441687                | TT                              | GG                | 1945919715               |
| SNP_P3_29537_16455145 | NC_021162.1    | Ca_kabuli_chr03 | 16455145                | TT                              | CC                | 1945919717               |
| SNP_P3_29538_16467050 | NC_021162.1    | Ca_kabuli_chr03 | 16467050                | TT                              | CC                | 1945919719               |
| SNP_P3_29539_16467098 | NC_021162.1    | Ca_kabuli_chr03 | 16467098                | AA                              | CC                | 1945919720               |
| SNP_P3_29540_16467106 | NC_021162.1    | Ca_kabuli_chr03 | 16467106                | CC                              | TT                | 1945919722               |
| SNP_P3_29541_16470088 | NC_021162.1    | Ca_kabuli_chr03 | 16470088                | TT                              | CC                | 1945919724               |
| SNP_P3_29542_16471630 | NC_021162.1    | Ca_kabuli_chr03 | 16471630                | TT                              | GG                | 1945919726               |
| SNP_P3_29543_16471637 | NC_021162.1    | Ca_kabuli_chr03 | 16471637                | AA                              | TT                | 1945919728               |
| SNP_P3_29545_16471943 | NC_021162.1    | Ca_kabuli_chr03 | 16471943                | TT                              | GG                | 1945919729               |

| SNPs IDs              | Chromosome IDs | Chromosomes     | Physical positions (bp) | CDC Frontier (Reference genome) | (Pusa 256 & HPNB) | NCBI SNPdb Accession IDs |
|-----------------------|----------------|-----------------|-------------------------|---------------------------------|-------------------|--------------------------|
| SNP_P3_29546_16472095 | NC_021162.1    | Ca_kabuli_chr03 | 16472095                | TT                              | GG                | 1945919731               |
| SNP_P3_29547_16472098 | NC_021162.1    | Ca_kabuli_chr03 | 16472098                | AA                              | CC                | 1945919733               |
| SNP_P3_29548_16473376 | NC_021162.1    | Ca_kabuli_chr03 | 16473376                | CC                              | TT                | 1945919735               |
| SNP_P3_29550_16485572 | NC_021162.1    | Ca_kabuli_chr03 | 16485572                | CC                              | TT                | 1945919736               |
| SNP_P3_29551_16494873 | NC_021162.1    | Ca_kabuli_chr03 | 16494873                | TT                              | GG                | 1945919738               |
| SNP_P3_29552_16502844 | NC_021162.1    | Ca_kabuli_chr03 | 16502844                | AA                              | TT                | 1945919740               |
| SNP_P3_29553_16502851 | NC_021162.1    | Ca_kabuli_chr03 | 16502851                | TT                              | GG                | 1945919742               |
| SNP_P3_29554_16504050 | NC_021162.1    | Ca_kabuli_chr03 | 16504050                | CC                              | TT                | 1945919744               |
| SNP_P3_29555_16504144 | NC_021162.1    | Ca_kabuli_chr03 | 16504144                | TT                              | GG                | 1945919745               |
| SNP_P3_29556_16504960 | NC_021162.1    | Ca_kabuli_chr03 | 16504960                | TT                              | AA                | 1945919747               |
| SNP_P3_29557_16509420 | NC_021162.1    | Ca_kabuli_chr03 | 16509420                | TT                              | GG                | 1945919749               |
| SNP_P3_29558_16529818 | NC_021162.1    | Ca_kabuli_chr03 | 16529818                | TT                              | GG                | 1945919751               |
| SNP_P3_29559_16530781 | NC_021162.1    | Ca_kabuli_chr03 | 16530781                | AA                              | TT                | 1945919752               |
| SNP_P3_29561_16550014 | NC_021162.1    | Ca_kabuli_chr03 | 16550014                | AA                              | CC                | 1945919754               |
| SNP_P3_29562_16556014 | NC_021162.1    | Ca_kabuli_chr03 | 16556014                | GG                              | AA                | 1945919756               |
| SNP_P3_29563_16556023 | NC_021162.1    | Ca_kabuli_chr03 | 16556023                | AA                              | TT                | 1945919758               |
| SNP_P3_29564_16556043 | NC_021162.1    | Ca_kabuli_chr03 | 16556043                | CC                              | TT                | 1945919760               |
| SNP_P3_29565_16556374 | NC_021162.1    | Ca_kabuli_chr03 | 16556374                | TT                              | CC                | 1945919761               |
| SNP_P3_29566_16556381 | NC_021162.1    | Ca_kabuli_chr03 | 16556381                | CC                              | TT                | 1945919763               |
| SNP_P3_29567_16578684 | NC_021162.1    | Ca_kabuli_chr03 | 16578684                | GG                              | AA                | 1945919765               |
| SNP_P3_29568_16580339 | NC_021162.1    | Ca_kabuli_chr03 | 16580339                | CC                              | TT                | 1945919767               |
| SNP_P3_29569_16625399 | NC_021162.1    | Ca_kabuli_chr03 | 16625399                | TT                              | GG                | 1945919768               |
| SNP_P3_29570_16633818 | NC_021162.1    | Ca_kabuli_chr03 | 16633818                | TT                              | CC                | 1945919770               |
| SNP_P3_29571_16652183 | NC_021162.1    | Ca_kabuli_chr03 | 16652183                | AA                              | TT                | 1945919772               |
| SNP_P3_29572_16652187 | NC_021162.1    | Ca_kabuli_chr03 | 16652187                | AA                              | GG                | 1945919774               |
| SNP_P3_29573_16662023 | NC_021162.1    | Ca_kabuli_chr03 | 16662023                | TT                              | AA                | 1945919776               |
| SNP_P3_29574_16668476 | NC_021162.1    | Ca_kabuli_chr03 | 16668476                | TT                              | CC                | 1945919777               |
| SNP_P3_29575_16673999 | NC_021162.1    | Ca_kabuli_chr03 | 16673999                | TT                              | AA                | 1945919779               |
| SNP_P3_29576_16679136 | NC_021162.1    | Ca_kabuli_chr03 | 16679136                | GG                              | AA                | 1945919781               |
| SNP_P3_29577_16747265 | NC_021162.1    | Ca_kabuli_chr03 | 16747265                | GG                              | AA                | 1945919783               |
| SNP_P3_29578_16747267 | NC_021162.1    | Ca_kabuli_chr03 | 16747267                | GG                              | AA                | 1945919785               |
| SNP_P3_29579_16747278 | NC_021162.1    | Ca_kabuli_chr03 | 16747278                | AA                              | GG                | 1945919786               |
| SNP_P3_29580_16747320 | NC_021162.1    | Ca_kabuli_chr03 | 16747320                | TT                              | CC                | 1945919788               |
| SNP_P3_29581_16747356 | NC_021162.1    | Ca_kabuli_chr03 | 16747356                | TT                              | CC                | 1945919790               |
| SNP_P3_29582_16747373 | NC_021162.1    | Ca_kabuli_chr03 | 16747373                | AA                              | GG                | 1945919792               |
| SNP_P3_29583_16747396 | NC_021162.1    | Ca_kabuli_chr03 | 16747396                | TT                              | CC                | 1945919793               |
| SNP_P3_29584_16784985 | NC_021162.1    | Ca_kabuli_chr03 | 16784985                | CC                              | AA                | 1945919795               |
| SNP_P3_29586_16803899 | NC_021162.1    | Ca_kabuli_chr03 | 16803899                | CC                              | TT                | 1945919797               |
| SNP_P3_29587_16804666 | NC_021162.1    | Ca_kabuli_chr03 | 16804666                | CC                              | AA                | 1945919799               |
| SNP_P3_29588_16820942 | NC_021162.1    | Ca_kabuli_chr03 | 16820942                | TT                              | CC                | 1945919801               |
| SNP_P3_29589_16824241 | NC_021162.1    | Ca_kabuli_chr03 | 16824241                | AA                              | GG                | 1945919802               |
| SNP_P3_29590_16855210 | NC_021162.1    | Ca_kabuli_chr03 | 16855210                | CC                              | AA                | 1945919804               |



| SNPs IDs              | Chromosome IDs | Chromosomes     | Physical positions (bp) | CDC Frontier (Reference genome) | (Pusa 256 & HPNB) | NCBI SNPdb Accession IDs |
|-----------------------|----------------|-----------------|-------------------------|---------------------------------|-------------------|--------------------------|
| SNP_P3_29591_16869677 | NC_021162.1    | Ca_kabuli_chr03 | 16869677                | TT                              | CC                | 1945919806               |
| SNP_P3_29592_16872529 | NC_021162.1    | Ca_kabuli_chr03 | 16872529                | CC                              | TT                | 1945919808               |
| SNP_P3_29593_16877642 | NC_021162.1    | Ca_kabuli_chr03 | 16877642                | AA                              | GG                | 1945919809               |
| SNP_P3_29594_16879399 | NC_021162.1    | Ca_kabuli_chr03 | 16879399                | TT                              | CC                | 1945919811               |
| SNP_P3_29595_16879430 | NC_021162.1    | Ca_kabuli_chr03 | 16879430                | TT                              | GG                | 1945919813               |
| SNP_P3_29596_16879572 | NC_021162.1    | Ca_kabuli_chr03 | 16879572                | CC                              | TT                | 1945919815               |
| SNP_P3_29597_16879573 | NC_021162.1    | Ca_kabuli_chr03 | 16879573                | TT                              | CC                | 1945919817               |
| SNP_P3_29598_16879721 | NC_021162.1    | Ca_kabuli_chr03 | 16879721                | GG                              | AA                | 1945919818               |
| SNP_P3_29599_16879972 | NC_021162.1    | Ca_kabuli_chr03 | 16879972                | CC                              | TT                | 1945919820               |
| SNP_P3_29600_16884273 | NC_021162.1    | Ca_kabuli_chr03 | 16884273                | GG                              | TT                | 1945919822               |
| SNP_P3_29602_16887095 | NC_021162.1    | Ca_kabuli_chr03 | 16887095                | TT                              | CC                | 1945919824               |
| SNP_P3_29603_16894468 | NC_021162.1    | Ca_kabuli_chr03 | 16894468                | TT                              | GG                | 1945919825               |
| SNP_P3_29604_16894800 | NC_021162.1    | Ca_kabuli_chr03 | 16894800                | TT                              | GG                | 1945919827               |
| SNP_P3_29605_16913369 | NC_021162.1    | Ca_kabuli_chr03 | 16913369                | TT                              | GG                | 1945919829               |
| SNP_P3_29606_16932254 | NC_021162.1    | Ca_kabuli_chr03 | 16932254                | TT                              | AA                | 1945919831               |
| SNP_P3_29607_16933958 | NC_021162.1    | Ca_kabuli_chr03 | 16933958                | CC                              | TT                | 1945919833               |
| SNP_P3_29608_16941757 | NC_021162.1    | Ca_kabuli_chr03 | 16941757                | TT                              | GG                | 1945919834               |
| SNP_P3_29610_16975249 | NC_021162.1    | Ca_kabuli_chr03 | 16975249                | TT                              | CC                | 1945919836               |
| SNP_P3_29611_16992126 | NC_021162.1    | Ca_kabuli_chr03 | 16992126                | GG                              | AA                | 1945919838               |
| SNP_P3_29612_16997840 | NC_021162.1    | Ca_kabuli_chr03 | 16997840                | CC                              | TT                | 1945919840               |
| SNP_P3_29613_17015613 | NC_021162.1    | Ca_kabuli_chr03 | 17015613                | AA                              | GG                | 1945919842               |
| SNP_P3_29614_17030915 | NC_021162.1    | Ca_kabuli_chr03 | 17030915                | TT                              | AA                | 1945919843               |
| SNP_P3_29615_17031033 | NC_021162.1    | Ca_kabuli_chr03 | 17031033                | CC                              | TT                | 1945919845               |
| SNP_P3_29616_17031342 | NC_021162.1    | Ca_kabuli_chr03 | 17031342                | AA                              | GG                | 1945919847               |
| SNP_P3_29617_17031413 | NC_021162.1    | Ca_kabuli_chr03 | 17031413                | TT                              | GG                | 1945919849               |
| SNP_P3_29618_17031515 | NC_021162.1    | Ca_kabuli_chr03 | 17031515                | AA                              | TT                | 1945919850               |
| SNP_P3_29619_17031539 | NC_021162.1    | Ca_kabuli_chr03 | 17031539                | TT                              | GG                | 1945919852               |
| SNP_P3_29620_17031886 | NC_021162.1    | Ca_kabuli_chr03 | 17031886                | AA                              | CC                | 1945919854               |
| SNP_P3_29621_17034515 | NC_021162.1    | Ca_kabuli_chr03 | 17034515                | AA                              | GG                | 1945919856               |
| SNP_P3_29622_17035050 | NC_021162.1    | Ca_kabuli_chr03 | 17035050                | AA                              | GG                | 1945919858               |
| SNP_P3_29623_17035357 | NC_021162.1    | Ca_kabuli_chr03 | 17035357                | TT                              | GG                | 1945919859               |
| SNP_P3_29624_17035389 | NC_021162.1    | Ca_kabuli_chr03 | 17035389                | GG                              | TT                | 1945919861               |
| SNP_P3_29625_17038966 | NC_021162.1    | Ca_kabuli_chr03 | 17038966                | TT                              | GG                | 1945919863               |
| SNP_P3_29626_17039093 | NC_021162.1    | Ca_kabuli_chr03 | 17039093                | AA                              | GG                | 1945919865               |
| SNP_P3_29627_17039154 | NC_021162.1    | Ca_kabuli_chr03 | 17039154                | TT                              | AA                | 1945919866               |
| SNP_P3_29628_17039230 | NC_021162.1    | Ca_kabuli_chr03 | 17039230                | TT                              | CC                | 1945919868               |
| SNP_P3_29630_17039333 | NC_021162.1    | Ca_kabuli_chr03 | 17039333                | AA                              | GG                | 1945919870               |
| SNP_P3_29631_17039363 | NC_021162.1    | Ca_kabuli_chr03 | 17039363                | AA                              | CC                | 1945919872               |
| SNP_P3_29632_17039364 | NC_021162.1    | Ca_kabuli_chr03 | 17039364                | CC                              | TT                | 1945919874               |
| SNP_P3_29633_17039388 | NC_021162.1    | Ca_kabuli_chr03 | 17039388                | TT                              | CC                | 1945919875               |
| SNP_P3_29634_17039463 | NC_021162.1    | Ca_kabuli_chr03 | 17039463                | AA                              | TT                | 1945919877               |
| SNP_P3_29636_17068094 | NC_021162.1    | Ca_kabuli_chr03 | 17068094                | CC                              | TT                | 1945919879               |

| SNPs IDs              | Chromosome IDs | Chromosomes     | Physical positions (bp) | CDC Frontier (Reference genome) | (Pusa 256 & HPNB) | NCBI SNPdb Accession IDs |
|-----------------------|----------------|-----------------|-------------------------|---------------------------------|-------------------|--------------------------|
| SNP_P3_29637_17124865 | NC_021162.1    | Ca_kabuli_chr03 | 17124865                | CC                              | TT                | 1945919881               |
| SNP_P3_29638_17132440 | NC_021162.1    | Ca_kabuli_chr03 | 17132440                | GG                              | AA                | 1945919882               |
| SNP_P3_29640_17138055 | NC_021162.1    | Ca_kabuli_chr03 | 17138055                | CC                              | TT                | 1945919884               |
| SNP_P3_29641_17168176 | NC_021162.1    | Ca_kabuli_chr03 | 17168176                | TT                              | CC                | 1945919886               |
| SNP_P3_29642_17169294 | NC_021162.1    | Ca_kabuli_chr03 | 17169294                | GG                              | CC                | 1945919888               |
| SNP_P3_29643_17171528 | NC_021162.1    | Ca_kabuli_chr03 | 17171528                | GG                              | AA                | 1945919890               |
| SNP_P3_29645_17187821 | NC_021162.1    | Ca_kabuli_chr03 | 17187821                | CC                              | GG                | 1945919891               |
| SNP_P3_29646_17187826 | NC_021162.1    | Ca_kabuli_chr03 | 17187826                | GG                              | AA                | 1945919893               |
| SNP_P3_29648_17202574 | NC_021162.1    | Ca_kabuli_chr03 | 17202574                | GG                              | AA                | 1945919895               |
| SNP_P3_29649_17217668 | NC_021162.1    | Ca_kabuli_chr03 | 17217668                | CC                              | AA                | 1945919897               |
| SNP_P3_29650_17217978 | NC_021162.1    | Ca_kabuli_chr03 | 17217978                | AA                              | GG                | 1945919899               |
| SNP_P3_29651_17222018 | NC_021162.1    | Ca_kabuli_chr03 | 17222018                | GG                              | TT                | 1945919900               |
| SNP_P3_29652_17222424 | NC_021162.1    | Ca_kabuli_chr03 | 17222424                | TT                              | AA                | 1945919902               |
| SNP_P3_29653_17225465 | NC_021162.1    | Ca_kabuli_chr03 | 17225465                | AA                              | GG                | 1945919904               |
| SNP_P3_29654_17225519 | NC_021162.1    | Ca_kabuli_chr03 | 17225519                | GG                              | TT                | 1945919906               |
| SNP_P3_29656_17277490 | NC_021162.1    | Ca_kabuli_chr03 | 17277490                | CC                              | GG                | 1945919907               |
| SNP_P3_29657_17277491 | NC_021162.1    | Ca_kabuli_chr03 | 17277491                | AA                              | TT                | 1945919909               |
| SNP_P3_29659_17311848 | NC_021162.1    | Ca_kabuli_chr03 | 17311848                | TT                              | AA                | 1945919911               |
| SNP_P3_29660_17353994 | NC_021162.1    | Ca_kabuli_chr03 | 17353994                | TT                              | AA                | 1945919913               |
| SNP_P3_29661_17374301 | NC_021162.1    | Ca_kabuli_chr03 | 17374301                | TT                              | AA                | 1945919915               |
| SNP_P3_29662_17374391 | NC_021162.1    | Ca_kabuli_chr03 | 17374391                | AA                              | GG                | 1945919916               |
| SNP_P3_29663_17374401 | NC_021162.1    | Ca_kabuli_chr03 | 17374401                | CC                              | TT                | 1945919918               |
| SNP_P3_29664_17375341 | NC_021162.1    | Ca_kabuli_chr03 | 17375341                | CC                              | AA                | 1945919920               |
| SNP_P3_29665_17396954 | NC_021162.1    | Ca_kabuli_chr03 | 17396954                | CC                              | TT                | 1945919922               |
| SNP_P3_29666_17440696 | NC_021162.1    | Ca_kabuli_chr03 | 17440696                | CC                              | TT                | 1945919923               |
| SNP_P3_29667_17440709 | NC_021162.1    | Ca_kabuli_chr03 | 17440709                | GG                              | AA                | 1945919925               |
| SNP_P3_29668_17440744 | NC_021162.1    | Ca_kabuli_chr03 | 17440744                | GG                              | AA                | 1945919927               |
| SNP_P3_29670_17486420 | NC_021162.1    | Ca_kabuli_chr03 | 17486420                | TT                              | CC                | 1945919929               |
| SNP_P3_29671_17489927 | NC_021162.1    | Ca_kabuli_chr03 | 17489927                | AA                              | GG                | 1945919931               |
| SNP_P3_29674_17491928 | NC_021162.1    | Ca_kabuli_chr03 | 17491928                | AA                              | GG                | 1945919932               |
| SNP_P3_29675_17492106 | NC_021162.1    | Ca_kabuli_chr03 | 17492106                | TT                              | CC                | 1945919934               |
| SNP_P3_29676_17492210 | NC_021162.1    | Ca_kabuli_chr03 | 17492210                | TT                              | AA                | 1945919936               |
| SNP_P3_29677_17492211 | NC_021162.1    | Ca_kabuli_chr03 | 17492211                | CC                              | TT                | 1945919938               |
| SNP_P3_29678_17499157 | NC_021162.1    | Ca_kabuli_chr03 | 17499157                | TT                              | GG                | 1945919940               |
| SNP_P3_29679_17499390 | NC_021162.1    | Ca_kabuli_chr03 | 17499390                | CC                              | TT                | 1945919941               |
| SNP_P3_29680_17506140 | NC_021162.1    | Ca_kabuli_chr03 | 17506140                | TT                              | CC                | 1945919943               |
| SNP_P3_29681_17506519 | NC_021162.1    | Ca_kabuli_chr03 | 17506519                | GG                              | CC                | 1945919945               |
| SNP_P3_29682_17506523 | NC_021162.1    | Ca_kabuli_chr03 | 17506523                | CC                              | TT                | 1945919947               |
| SNP_P3_29683_17506775 | NC_021162.1    | Ca_kabuli_chr03 | 17506775                | CC                              | AA                | 1945919948               |
| SNP_P3_29684_17506908 | NC_021162.1    | Ca_kabuli_chr03 | 17506908                | TT                              | CC                | 1945919950               |
| SNP_P3_29685_17506937 | NC_021162.1    | Ca_kabuli_chr03 | 17506937                | CC                              | TT                | 1945919952               |
| SNP_P3_29686_17506990 | NC_021162.1    | Ca_kabuli_chr03 | 17506990                | AA                              | GG                | 1945919954               |

| SNPs IDs              | Chromosome IDs | Chromosomes     | Physical positions (bp) | CDC Frontier (Reference genome) | (Pusa 256 & HPNB) | NCBI SNPdb Accession IDs |
|-----------------------|----------------|-----------------|-------------------------|---------------------------------|-------------------|--------------------------|
| SNP_P3_29687_17506993 | NC_021162.1    | Ca_kabuli_chr03 | 17506993                | CC                              | TT                | 1945919956               |
| SNP_P3_29688_17507203 | NC_021162.1    | Ca_kabuli_chr03 | 17507203                | CC                              | TT                | 1945919957               |
| SNP_P3_29689_17508913 | NC_021162.1    | Ca_kabuli_chr03 | 17508913                | CC                              | AA                | 1945919959               |
| SNP_P3_29690_17550693 | NC_021162.1    | Ca_kabuli_chr03 | 17550693                | TT                              | CC                | 1945919961               |
| SNP_P3_29693_17580757 | NC_021162.1    | Ca_kabuli_chr03 | 17580757                | GG                              | AA                | 1945919963               |
| SNP_P3_29694_17582750 | NC_021162.1    | Ca_kabuli_chr03 | 17582750                | AA                              | TT                | 1945919964               |
| SNP_P3_29695_17585282 | NC_021162.1    | Ca_kabuli_chr03 | 17585282                | TT                              | AA                | 1945919966               |
| SNP_P3_29696_17585285 | NC_021162.1    | Ca_kabuli_chr03 | 17585285                | AA                              | TT                | 1945919968               |
| SNP_P3_29697_17600697 | NC_021162.1    | Ca_kabuli_chr03 | 17600697                | CC                              | AA                | 1945919970               |
| SNP_P3_29698_17601003 | NC_021162.1    | Ca_kabuli_chr03 | 17601003                | GG                              | TT                | 1945919972               |
| SNP_P3_29699_17601044 | NC_021162.1    | Ca_kabuli_chr03 | 17601044                | TT                              | CC                | 1945919973               |
| SNP_P3_29700_17601058 | NC_021162.1    | Ca_kabuli_chr03 | 17601058                | AA                              | GG                | 1945919975               |
| SNP_P3_29701_17601110 | NC_021162.1    | Ca_kabuli_chr03 | 17601110                | TT                              | CC                | 1945919977               |
| SNP_P3_29702_17601180 | NC_021162.1    | Ca_kabuli_chr03 | 17601180                | AA                              | GG                | 1945919979               |
| SNP_P3_29703_17601370 | NC_021162.1    | Ca_kabuli_chr03 | 17601370                | TT                              | CC                | 1945919980               |
| SNP_P3_29704_17678808 | NC_021162.1    | Ca_kabuli_chr03 | 17678808                | AA                              | CC                | 1945919982               |
| SNP_P3_29705_17679196 | NC_021162.1    | Ca_kabuli_chr03 | 17679196                | CC                              | AA                | 1945919984               |
| SNP_P3_29706_17679205 | NC_021162.1    | Ca_kabuli_chr03 | 17679205                | TT                              | GG                | 1945919986               |
| SNP_P3_29707_17679228 | NC_021162.1    | Ca_kabuli_chr03 | 17679228                | AA                              | GG                | 1945919988               |
| SNP_P3_29710_17752987 | NC_021162.1    | Ca_kabuli_chr03 | 17752987                | AA                              | GG                | 1945919989               |
| SNP_P3_29711_17753271 | NC_021162.1    | Ca_kabuli_chr03 | 17753271                | TT                              | CC                | 1945919991               |
| SNP_P3_29712_17753272 | NC_021162.1    | Ca_kabuli_chr03 | 17753272                | TT                              | CC                | 1945919993               |
| SNP_P3_29713_17756027 | NC_021162.1    | Ca_kabuli_chr03 | 17756027                | TT                              | CC                | 1945919995               |
| SNP_P3_29714_17756132 | NC_021162.1    | Ca_kabuli_chr03 | 17756132                | GG                              | AA                | 1945919997               |
| SNP_P3_29715_17756149 | NC_021162.1    | Ca_kabuli_chr03 | 17756149                | GG                              | AA                | 1945919998               |
| SNP_P3_29716_17756200 | NC_021162.1    | Ca_kabuli_chr03 | 17756200                | CC                              | TT                | 1945920000               |
| SNP_P3_29717_17756242 | NC_021162.1    | Ca_kabuli_chr03 | 17756242                | TT                              | CC                | 1945920002               |
| SNP_P3_29718_17756254 | NC_021162.1    | Ca_kabuli_chr03 | 17756254                | CC                              | TT                | 1945920004               |
| SNP_P3_29719_17756258 | NC_021162.1    | Ca_kabuli_chr03 | 17756258                | AA                              | GG                | 1945920005               |
| SNP_P3_29720_17756262 | NC_021162.1    | Ca_kabuli_chr03 | 17756262                | CC                              | TT                | 1945920007               |
| SNP_P3_29721_17756292 | NC_021162.1    | Ca_kabuli_chr03 | 17756292                | TT                              | CC                | 1945920009               |
| SNP_P3_29722_17756301 | NC_021162.1    | Ca_kabuli_chr03 | 17756301                | TT                              | CC                | 1945920011               |
| SNP_P3_29723_17756312 | NC_021162.1    | Ca_kabuli_chr03 | 17756312                | CC                              | TT                | 1945920013               |
| SNP_P3_29724_17756346 | NC_021162.1    | Ca_kabuli_chr03 | 17756346                | CC                              | TT                | 1945920014               |
| SNP_P3_29725_17756423 | NC_021162.1    | Ca_kabuli_chr03 | 17756423                | CC                              | TT                | 1945920016               |
| SNP_P3_29726_17756440 | NC_021162.1    | Ca_kabuli_chr03 | 17756440                | AA                              | GG                | 1945920018               |
| SNP_P3_29727_17756470 | NC_021162.1    | Ca_kabuli_chr03 | 17756470                | CC                              | TT                | 1945920020               |
| SNP_P3_29728_17756522 | NC_021162.1    | Ca_kabuli_chr03 | 17756522                | GG                              | TT                | 1945920021               |
| SNP_P3_29729_17756574 | NC_021162.1    | Ca_kabuli_chr03 | 17756574                | AA                              | GG                | 1945920023               |
| SNP_P3_29730_17756717 | NC_021162.1    | Ca_kabuli_chr03 | 17756717                | TT                              | CC                | 1945920025               |
| SNP_P3_29731_17757593 | NC_021162.1    | Ca_kabuli_chr03 | 17757593                | GG                              | AA                | 1945920027               |
| SNP_P3_29732_17759348 | NC_021162.1    | Ca_kabuli_chr03 | 17759348                | AA                              | GG                | 1945920029               |

| SNPs IDs              | Chromosome IDs | Chromosomes     | Physical positions (bp) | CDC Frontier (Reference genome) | (Pusa 256 & HPNB) | NCBI SNPdb Accession IDs |
|-----------------------|----------------|-----------------|-------------------------|---------------------------------|-------------------|--------------------------|
| SNP_P3_29733_17759355 | NC_021162.1    | Ca_kabuli_chr03 | 17759355                | TT                              | GG                | 1945920030               |
| SNP_P3_29734_17759375 | NC_021162.1    | Ca_kabuli_chr03 | 17759375                | CC                              | TT                | 1945920032               |
| SNP_P3_29735_17759424 | NC_021162.1    | Ca_kabuli_chr03 | 17759424                | GG                              | AA                | 1945920034               |
| SNP_P3_29736_17761126 | NC_021162.1    | Ca_kabuli_chr03 | 17761126                | AA                              | TT                | 1945920036               |
| SNP_P3_29737_17804674 | NC_021162.1    | Ca_kabuli_chr03 | 17804674                | CC                              | TT                | 1945920037               |
| SNP_P3_29738_17805415 | NC_021162.1    | Ca_kabuli_chr03 | 17805415                | AA                              | GG                | 1945920039               |
| SNP_P3_29739_17807822 | NC_021162.1    | Ca_kabuli_chr03 | 17807822                | CC                              | TT                | 1945920041               |
| SNP_P3_29740_17838330 | NC_021162.1    | Ca_kabuli_chr03 | 17838330                | CC                              | TT                | 1945920043               |
| SNP_P3_29741_17838333 | NC_021162.1    | Ca_kabuli_chr03 | 17838333                | AA                              | GG                | 1945920045               |
| SNP_P3_29742_17838340 | NC_021162.1    | Ca_kabuli_chr03 | 17838340                | AA                              | GG                | 1945920046               |
| SNP_P3_29743_17874816 | NC_021162.1    | Ca_kabuli_chr03 | 17874816                | GG                              | TT                | 1945920048               |
| SNP_P3_29744_17874825 | NC_021162.1    | Ca_kabuli_chr03 | 17874825                | CC                              | AA                | 1945920050               |
| SNP_P3_29745_17896720 | NC_021162.1    | Ca_kabuli_chr03 | 17896720                | GG                              | AA                | 1945920052               |
| SNP_P3_29747_17941602 | NC_021162.1    | Ca_kabuli_chr03 | 17941602                | CC                              | TT                | 1945920054               |
| SNP_P3_29748_17989339 | NC_021162.1    | Ca_kabuli_chr03 | 17989339                | TT                              | GG                | 1945920055               |
| SNP_P3_29749_17989707 | NC_021162.1    | Ca_kabuli_chr03 | 17989707                | TT                              | AA                | 1945920057               |
| SNP_P3_29750_18009605 | NC_021162.1    | Ca_kabuli_chr03 | 18009605                | TT                              | CC                | 1945920059               |
| SNP_P3_29751_18019089 | NC_021162.1    | Ca_kabuli_chr03 | 18019089                | AA                              | CC                | 1945920061               |
| SNP_P3_29752_18019101 | NC_021162.1    | Ca_kabuli_chr03 | 18019101                | AA                              | GG                | 1945920062               |
| SNP_P3_29753_18019102 | NC_021162.1    | Ca_kabuli_chr03 | 18019102                | TT                              | CC                | 1945920064               |
| SNP_P3_29754_18019146 | NC_021162.1    | Ca_kabuli_chr03 | 18019146                | AA                              | GG                | 1945920066               |
| SNP_P3_29755_18019162 | NC_021162.1    | Ca_kabuli_chr03 | 18019162                | CC                              | TT                | 1945920068               |
| SNP_P3_29756_18019436 | NC_021162.1    | Ca_kabuli_chr03 | 18019436                | GG                              | AA                | 1945920070               |
| SNP_P3_29757_18060637 | NC_021162.1    | Ca_kabuli_chr03 | 18060637                | GG                              | AA                | 1945920071               |
| SNP_P3_29758_18060660 | NC_021162.1    | Ca_kabuli_chr03 | 18060660                | GG                              | AA                | 1945920073               |
| SNP_P3_29759_18062070 | NC_021162.1    | Ca_kabuli_chr03 | 18062070                | AA                              | GG                | 1945920075               |
| SNP_P3_29760_18062393 | NC_021162.1    | Ca_kabuli_chr03 | 18062393                | GG                              | AA                | 1945920077               |
| SNP_P3_29761_18093339 | NC_021162.1    | Ca_kabuli_chr03 | 18093339                | CC                              | GG                | 1945920078               |
| SNP_P3_29762_18122125 | NC_021162.1    | Ca_kabuli_chr03 | 18122125                | TT                              | AA                | 1945920080               |
| SNP_P3_29763_18128904 | NC_021162.1    | Ca_kabuli_chr03 | 18128904                | TT                              | CC                | 1945920082               |
| SNP_P3_29764_18128912 | NC_021162.1    | Ca_kabuli_chr03 | 18128912                | GG                              | AA                | 1945920084               |
| SNP_P3_29765_18128918 | NC_021162.1    | Ca_kabuli_chr03 | 18128918                | AA                              | GG                | 1945920086               |
| SNP_P3_29766_18133205 | NC_021162.1    | Ca_kabuli_chr03 | 18133205                | GG                              | AA                | 1945920087               |
| SNP_P3_29767_18133220 | NC_021162.1    | Ca_kabuli_chr03 | 18133220                | GG                              | AA                | 1945920089               |
| SNP_P3_29768_18133243 | NC_021162.1    | Ca_kabuli_chr03 | 18133243                | GG                              | AA                | 1945920091               |
| SNP_P3_29769_18133287 | NC_021162.1    | Ca_kabuli_chr03 | 18133287                | GG                              | AA                | 1945920093               |
| SNP_P3_29770_18157998 | NC_021162.1    | Ca_kabuli_chr03 | 18157998                | TT                              | AA                | 1945920095               |
| SNP_P3_29771_18165490 | NC_021162.1    | Ca_kabuli_chr03 | 18165490                | TT                              | AA                | 1945920096               |
| SNP_P3_29772_18165504 | NC_021162.1    | Ca_kabuli_chr03 | 18165504                | GG                              | AA                | 1945920098               |
| SNP_P3_29773_18170444 | NC_021162.1    | Ca_kabuli_chr03 | 18170444                | CC                              | AA                | 1945920100               |
| SNP_P3_29774_18170535 | NC_021162.1    | Ca_kabuli_chr03 | 18170535                | CC                              | AA                | 1945920102               |
| SNP_P3_29775_18170540 | NC_021162.1    | Ca_kabuli_chr03 | 18170540                | TT                              | CC                | 1945920103               |

| SNPs IDs              | Chromosome IDs | Chromosomes     | Physical positions (bp) | CDC Frontier (Reference genome) | (Pusa 256 & HPNB) | NCBI SNPdb Accession IDs |
|-----------------------|----------------|-----------------|-------------------------|---------------------------------|-------------------|--------------------------|
| SNP_P3_29776_18170547 | NC_021162.1    | Ca_kabuli_chr03 | 18170547                | AA                              | GG                | 1945920105               |
| SNP_P3_29777_18170562 | NC_021162.1    | Ca_kabuli_chr03 | 18170562                | TT                              | CC                | 1945920107               |
| SNP_P3_29778_18170570 | NC_021162.1    | Ca_kabuli_chr03 | 18170570                | CC                              | TT                | 1945920109               |
| SNP_P3_29779_18170596 | NC_021162.1    | Ca_kabuli_chr03 | 18170596                | TT                              | CC                | 1945920111               |
| SNP_P3_29780_18170630 | NC_021162.1    | Ca_kabuli_chr03 | 18170630                | TT                              | CC                | 1945920112               |
| SNP_P3_29781_18170749 | NC_021162.1    | Ca_kabuli_chr03 | 18170749                | GG                              | CC                | 1945920114               |
| SNP_P3_29782_18170756 | NC_021162.1    | Ca_kabuli_chr03 | 18170756                | GG                              | CC                | 1945920116               |
| SNP_P3_29783_18170780 | NC_021162.1    | Ca_kabuli_chr03 | 18170780                | AA                              | GG                | 1945920118               |
| SNP_P3_29784_18170859 | NC_021162.1    | Ca_kabuli_chr03 | 18170859                | AA                              | TT                | 1945920119               |
| SNP_P3_29785_18170860 | NC_021162.1    | Ca_kabuli_chr03 | 18170860                | AA                              | TT                | 1945920121               |
| SNP_P3_29786_18173347 | NC_021162.1    | Ca_kabuli_chr03 | 18173347                | AA                              | GG                | 1945920123               |
| SNP_P3_29787_18173353 | NC_021162.1    | Ca_kabuli_chr03 | 18173353                | TT                              | CC                | 1945920125               |
| SNP_P3_29788_18173571 | NC_021162.1    | Ca_kabuli_chr03 | 18173571                | AA                              | CC                | 1945920127               |
| SNP_P3_29789_18173609 | NC_021162.1    | Ca_kabuli_chr03 | 18173609                | AA                              | GG                | 1945920128               |
| SNP_P3_29790_18173640 | NC_021162.1    | Ca_kabuli_chr03 | 18173640                | TT                              | CC                | 1945920130               |
| SNP_P3_29791_18173875 | NC_021162.1    | Ca_kabuli_chr03 | 18173875                | CC                              | TT                | 1945920132               |
| SNP_P3_29792_18178713 | NC_021162.1    | Ca_kabuli_chr03 | 18178713                | CC                              | TT                | 1945920134               |
| SNP_P3_29793_18178781 | NC_021162.1    | Ca_kabuli_chr03 | 18178781                | TT                              | CC                | 1945920135               |
| SNP_P3_29794_18178797 | NC_021162.1    | Ca_kabuli_chr03 | 18178797                | GG                              | AA                | 1945920137               |
| SNP_P3_29795_18178799 | NC_021162.1    | Ca_kabuli_chr03 | 18178799                | TT                              | CC                | 1945920139               |
| SNP_P3_29796_18179312 | NC_021162.1    | Ca_kabuli_chr03 | 18179312                | CC                              | AA                | 1945920141               |
| SNP_P3_29797_18182191 | NC_021162.1    | Ca_kabuli_chr03 | 18182191                | AA                              | CC                | 1945920143               |
| SNP_P3_29798_18183240 | NC_021162.1    | Ca_kabuli_chr03 | 18183240                | CC                              | TT                | 1945920144               |
| SNP_P3_29799_18187695 | NC_021162.1    | Ca_kabuli_chr03 | 18187695                | GG                              | AA                | 1945920146               |
| SNP_P3_29800_18190147 | NC_021162.1    | Ca_kabuli_chr03 | 18190147                | CC                              | TT                | 1945920148               |
| SNP_P3_29801_18190169 | NC_021162.1    | Ca_kabuli_chr03 | 18190169                | TT                              | CC                | 1945920150               |
| SNP_P3_29802_18190286 | NC_021162.1    | Ca_kabuli_chr03 | 18190286                | GG                              | AA                | 1945920151               |
| SNP_P3_29803_18190333 | NC_021162.1    | Ca_kabuli_chr03 | 18190333                | TT                              | GG                | 1945920153               |
| SNP_P3_29804_18190624 | NC_021162.1    | Ca_kabuli_chr03 | 18190624                | TT                              | AA                | 1945920155               |
| SNP_P3_29805_18190635 | NC_021162.1    | Ca_kabuli_chr03 | 18190635                | AA                              | CC                | 1945920157               |
| SNP_P3_29806_18191026 | NC_021162.1    | Ca_kabuli_chr03 | 18191026                | GG                              | AA                | 1945920159               |
| SNP_P3_29808_18191058 | NC_021162.1    | Ca_kabuli_chr03 | 18191058                | AA                              | GG                | 1945920160               |
| SNP_P3_29809_18191090 | NC_021162.1    | Ca_kabuli_chr03 | 18191090                | AA                              | TT                | 1945920162               |
| SNP_P3_29810_18191095 | NC_021162.1    | Ca_kabuli_chr03 | 18191095                | TT                              | AA                | 1945920164               |
| SNP_P3_29811_18191101 | NC_021162.1    | Ca_kabuli_chr03 | 18191101                | CC                              | TT                | 1945920166               |
| SNP_P3_29813_18191128 | NC_021162.1    | Ca_kabuli_chr03 | 18191128                | CC                              | TT                | 1945920168               |
| SNP_P3_29814_18191136 | NC_021162.1    | Ca_kabuli_chr03 | 18191136                | CC                              | TT                | 1945920169               |
| SNP_P3_29815_18191409 | NC_021162.1    | Ca_kabuli_chr03 | 18191409                | AA                              | GG                | 1945920171               |
| SNP_P3_29816_18191433 | NC_021162.1    | Ca_kabuli_chr03 | 18191433                | AA                              | GG                | 1945920173               |
| SNP_P3_29817_18191538 | NC_021162.1    | Ca_kabuli_chr03 | 18191538                | AA                              | TT                | 1945920175               |
| SNP_P3_29818_18191547 | NC_021162.1    | Ca_kabuli_chr03 | 18191547                | GG                              | TT                | 1945920176               |
| SNP_P3_29819_18191685 | NC_021162.1    | Ca_kabuli_chr03 | 18191685                | AA                              | GG                | 1945920178               |

| SNPs IDs              | Chromosome IDs | Chromosomes     | Physical positions (bp) | CDC Frontier (Reference genome) | (Pusa 256 & HPNB) | NCBI SNPdb Accession IDs |
|-----------------------|----------------|-----------------|-------------------------|---------------------------------|-------------------|--------------------------|
| SNP_P3_29820_18191689 | NC_021162.1    | Ca_kabuli_chr03 | 18191689                | TT                              | CC                | 1945920180               |
| SNP_P3_29821_18192399 | NC_021162.1    | Ca_kabuli_chr03 | 18192399                | TT                              | GG                | 1945920182               |
| SNP_P3_29822_18196771 | NC_021162.1    | Ca_kabuli_chr03 | 18196771                | TT                              | GG                | 1945920184               |
| SNP_P3_29823_18196792 | NC_021162.1    | Ca_kabuli_chr03 | 18196792                | TT                              | CC                | 1945920185               |
| SNP_P3_29824_18196992 | NC_021162.1    | Ca_kabuli_chr03 | 18196992                | AA                              | GG                | 1945920187               |
| SNP_P3_29825_18197007 | NC_021162.1    | Ca_kabuli_chr03 | 18197007                | AA                              | GG                | 1945920189               |
| SNP_P3_29826_18197026 | NC_021162.1    | Ca_kabuli_chr03 | 18197026                | CC                              | TT                | 1945920191               |
| SNP_P3_29827_18197111 | NC_021162.1    | Ca_kabuli_chr03 | 18197111                | CC                              | TT                | 1945920192               |
| SNP_P3_29828_18197121 | NC_021162.1    | Ca_kabuli_chr03 | 18197121                | TT                              | CC                | 1945920194               |
| SNP_P3_29829_18229244 | NC_021162.1    | Ca_kabuli_chr03 | 18229244                | GG                              | AA                | 1945920196               |
| SNP_P3_29830_18239050 | NC_021162.1    | Ca_kabuli_chr03 | 18239050                | TT                              | AA                | 1945920198               |
| SNP_P3_29831_18239064 | NC_021162.1    | Ca_kabuli_chr03 | 18239064                | CC                              | AA                | 1945920200               |
| SNP_P3_29832_18239100 | NC_021162.1    | Ca_kabuli_chr03 | 18239100                | AA                              | GG                | 1945920201               |
| SNP_P3_29834_18249302 | NC_021162.1    | Ca_kabuli_chr03 | 18249302                | CC                              | TT                | 1945920203               |
| SNP_P3_29835_18253227 | NC_021162.1    | Ca_kabuli_chr03 | 18253227                | AA                              | GG                | 1945920205               |
| SNP_P3_29836_18253280 | NC_021162.1    | Ca_kabuli_chr03 | 18253280                | CC                              | TT                | 1945920207               |
| SNP_P3_29837_18253331 | NC_021162.1    | Ca_kabuli_chr03 | 18253331                | CC                              | TT                | 1945920208               |
| SNP_P3_29838_18253352 | NC_021162.1    | Ca_kabuli_chr03 | 18253352                | AA                              | CC                | 1945920210               |
| SNP_P3_29839_18253366 | NC_021162.1    | Ca_kabuli_chr03 | 18253366                | TT                              | AA                | 1945920212               |
| SNP_P3_29840_18253369 | NC_021162.1    | Ca_kabuli_chr03 | 18253369                | AA                              | GG                | 1945920214               |
| SNP_P3_29841_18253490 | NC_021162.1    | Ca_kabuli_chr03 | 18253490                | GG                              | AA                | 1945920216               |
| SNP_P3_29842_18253591 | NC_021162.1    | Ca_kabuli_chr03 | 18253591                | AA                              | GG                | 1945920217               |
| SNP_P3_29843_18257164 | NC_021162.1    | Ca_kabuli_chr03 | 18257164                | CC                              | TT                | 1945920219               |
| SNP_P3_29844_18272689 | NC_021162.1    | Ca_kabuli_chr03 | 18272689                | AA                              | CC                | 1945920221               |
| SNP_P3_29846_18272752 | NC_021162.1    | Ca_kabuli_chr03 | 18272752                | CC                              | TT                | 1945920223               |
| SNP_P3_29847_18272767 | NC_021162.1    | Ca_kabuli_chr03 | 18272767                | TT                              | CC                | 1945920225               |
| SNP_P3_29848_18272780 | NC_021162.1    | Ca_kabuli_chr03 | 18272780                | TT                              | CC                | 1945920226               |
| SNP_P3_29849_18274773 | NC_021162.1    | Ca_kabuli_chr03 | 18274773                | TT                              | GG                | 1945920228               |
| SNP_P3_29850_18274788 | NC_021162.1    | Ca_kabuli_chr03 | 18274788                | TT                              | CC                | 1945920230               |
| SNP_P3_29851_18294689 | NC_021162.1    | Ca_kabuli_chr03 | 18294689                | GG                              | AA                | 1945920232               |
| SNP_P3_29852_18294698 | NC_021162.1    | Ca_kabuli_chr03 | 18294698                | TT                              | CC                | 1945920233               |
| SNP_P3_29853_18294711 | NC_021162.1    | Ca_kabuli_chr03 | 18294711                | AA                              | GG                | 1945920235               |
| SNP_P3_29854_18294733 | NC_021162.1    | Ca_kabuli_chr03 | 18294733                | TT                              | CC                | 1945920237               |
| SNP_P3_29855_18295051 | NC_021162.1    | Ca_kabuli_chr03 | 18295051                | CC                              | TT                | 1945920239               |
| SNP_P3_29856_18295091 | NC_021162.1    | Ca_kabuli_chr03 | 18295091                | GG                              | AA                | 1945920241               |
| SNP_P3_29857_18295113 | NC_021162.1    | Ca_kabuli_chr03 | 18295113                | AA                              | GG                | 1945920242               |
| SNP_P3_29858_18302987 | NC_021162.1    | Ca_kabuli_chr03 | 18302987                | TT                              | CC                | 1945920244               |
| SNP_P3_29859_18303016 | NC_021162.1    | Ca_kabuli_chr03 | 18303016                | AA                              | CC                | 1945920246               |
| SNP_P3_29860_18303044 | NC_021162.1    | Ca_kabuli_chr03 | 18303044                | TT                              | CC                | 1945920248               |
| SNP_P3_29861_18303054 | NC_021162.1    | Ca_kabuli_chr03 | 18303054                | GG                              | AA                | 1945920249               |
| SNP_P3_29862_18303115 | NC_021162.1    | Ca_kabuli_chr03 | 18303115                | AA                              | GG                | 1945920251               |
| SNP_P3_29863_18303404 | NC_021162.1    | Ca_kabuli_chr03 | 18303404                | AA                              | TT                | 1945920253               |

| SNPs IDs              | Chromosome IDs | Chromosomes     | Physical positions (bp) | CDC Frontier (Reference genome) | (Pusa 256 & HPNB) | NCBI SNPdb Accession IDs |
|-----------------------|----------------|-----------------|-------------------------|---------------------------------|-------------------|--------------------------|
| SNP_P3_29864_18303447 | NC_021162.1    | Ca_kabuli_chr03 | 18303447                | TT                              | CC                | 1945920255               |
| SNP_P3_29865_18341099 | NC_021162.1    | Ca_kabuli_chr03 | 18341099                | CC                              | GG                | 1945920257               |
| SNP_P3_29866_18362087 | NC_021162.1    | Ca_kabuli_chr03 | 18362087                | AA                              | TT                | 1945920258               |
| SNP_P3_29867_18370435 | NC_021162.1    | Ca_kabuli_chr03 | 18370435                | TT                              | CC                | 1945920260               |
| SNP_P3_29868_18378453 | NC_021162.1    | Ca_kabuli_chr03 | 18378453                | CC                              | GG                | 1945920262               |
| SNP_P3_29869_18434851 | NC_021162.1    | Ca_kabuli_chr03 | 18434851                | AA                              | GG                | 1945920264               |
| SNP_P3_29870_18435022 | NC_021162.1    | Ca_kabuli_chr03 | 18435022                | TT                              | GG                | 1945920266               |
| SNP_P3_29871_18435073 | NC_021162.1    | Ca_kabuli_chr03 | 18435073                | TT                              | GG                | 1945920267               |
| SNP_P3_29872_18435087 | NC_021162.1    | Ca_kabuli_chr03 | 18435087                | GG                              | TT                | 1945920269               |
| SNP_P3_29873_18435095 | NC_021162.1    | Ca_kabuli_chr03 | 18435095                | TT                              | CC                | 1945920271               |
| SNP_P3_29874_18435129 | NC_021162.1    | Ca_kabuli_chr03 | 18435129                | GG                              | AA                | 1945920273               |
| SNP_P3_29875_18435140 | NC_021162.1    | Ca_kabuli_chr03 | 18435140                | AA                              | GG                | 1945920274               |
| SNP_P3_29876_18435159 | NC_021162.1    | Ca_kabuli_chr03 | 18435159                | GG                              | AA                | 1945920276               |
| SNP_P3_29877_18435179 | NC_021162.1    | Ca_kabuli_chr03 | 18435179                | TT                              | AA                | 1945920278               |
| SNP_P3_29878_18435196 | NC_021162.1    | Ca_kabuli_chr03 | 18435196                | TT                              | GG                | 1945920280               |
| SNP_P3_29879_18435210 | NC_021162.1    | Ca_kabuli_chr03 | 18435210                | TT                              | CC                | 1945920282               |
| SNP_P3_29880_18435240 | NC_021162.1    | Ca_kabuli_chr03 | 18435240                | TT                              | CC                | 1945920283               |
| SNP_P3_29881_18440644 | NC_021162.1    | Ca_kabuli_chr03 | 18440644                | TT                              | GG                | 1945920285               |
| SNP_P3_29882_18480512 | NC_021162.1    | Ca_kabuli_chr03 | 18480512                | AA                              | TT                | 1945920287               |
| SNP_P3_29884_18491181 | NC_021162.1    | Ca_kabuli_chr03 | 18491181                | TT                              | GG                | 1945920289               |
| SNP_P3_29885_18491187 | NC_021162.1    | Ca_kabuli_chr03 | 18491187                | TT                              | GG                | 1945920290               |
| SNP_P3_29886_18574549 | NC_021162.1    | Ca_kabuli_chr03 | 18574549                | GG                              | AA                | 1945920292               |
| SNP_P3_29887_18577033 | NC_021162.1    | Ca_kabuli_chr03 | 18577033                | TT                              | CC                | 1945920294               |
| SNP_P3_29888_18577034 | NC_021162.1    | Ca_kabuli_chr03 | 18577034                | CC                              | TT                | 1945920296               |
| SNP_P3_29889_18579214 | NC_021162.1    | Ca_kabuli_chr03 | 18579214                | TT                              | AA                | 1945920298               |
| SNP_P3_29890_18589983 | NC_021162.1    | Ca_kabuli_chr03 | 18589983                | GG                              | AA                | 1945920299               |
| SNP_P3_29891_18608843 | NC_021162.1    | Ca_kabuli_chr03 | 18608843                | AA                              | CC                | 1945920301               |
| SNP_P3_29892_18608878 | NC_021162.1    | Ca_kabuli_chr03 | 18608878                | AA                              | CC                | 1945920303               |
| SNP_P3_29893_18608918 | NC_021162.1    | Ca_kabuli_chr03 | 18608918                | TT                              | GG                | 1945920305               |
| SNP_P3_29894_18609225 | NC_021162.1    | Ca_kabuli_chr03 | 18609225                | GG                              | AA                | 1945920307               |
| SNP_P3_29895_18609239 | NC_021162.1    | Ca_kabuli_chr03 | 18609239                | TT                              | CC                | 1945920308               |
| SNP_P3_29896_18670191 | NC_021162.1    | Ca_kabuli_chr03 | 18670191                | AA                              | GG                | 1945920310               |
| SNP_P3_29897_18670211 | NC_021162.1    | Ca_kabuli_chr03 | 18670211                | AA                              | GG                | 1945920312               |
| SNP_P3_29898_18670230 | NC_021162.1    | Ca_kabuli_chr03 | 18670230                | TT                              | GG                | 1945920314               |
| SNP_P3_29899_18670279 | NC_021162.1    | Ca_kabuli_chr03 | 18670279                | CC                              | TT                | 1945920315               |
| SNP_P3_29900_18670290 | NC_021162.1    | Ca_kabuli_chr03 | 18670290                | CC                              | TT                | 1945920317               |
| SNP_P3_29901_18670324 | NC_021162.1    | Ca_kabuli_chr03 | 18670324                | TT                              | AA                | 1945920319               |
| SNP_P3_29902_18670462 | NC_021162.1    | Ca_kabuli_chr03 | 18670462                | CC                              | AA                | 1945920321               |
| SNP_P3_29903_18670519 | NC_021162.1    | Ca_kabuli_chr03 | 18670519                | TT                              | GG                | 1945920323               |
| SNP_P3_29904_18670826 | NC_021162.1    | Ca_kabuli_chr03 | 18670826                | CC                              | TT                | 1945920324               |
| SNP_P3_29907_18742246 | NC_021162.1    | Ca_kabuli_chr03 | 18742246                | GG                              | CC                | 1945920326               |
| SNP_P3_29908_18747348 | NC_021162.1    | Ca_kabuli_chr03 | 18747348                | TT                              | CC                | 1945920328               |

| SNPs IDs              | Chromosome IDs | Chromosomes     | Physical positions (bp) | CDC Frontier (Reference genome) | (Pusa 256 & HPNB) | NCBI SNPdb Accession IDs |
|-----------------------|----------------|-----------------|-------------------------|---------------------------------|-------------------|--------------------------|
| SNP_P3_29910_18750935 | NC_021162.1    | Ca_kabuli_chr03 | 18750935                | CC                              | AA                | 1945920330               |
| SNP_P3_29911_18755322 | NC_021162.1    | Ca_kabuli_chr03 | 18755322                | AA                              | TT                | 1945920331               |
| SNP_P3_29912_18791376 | NC_021162.1    | Ca_kabuli_chr03 | 18791376                | TT                              | CC                | 1945920333               |
| SNP_P3_29913_18792396 | NC_021162.1    | Ca_kabuli_chr03 | 18792396                | AA                              | GG                | 1945920335               |
| SNP_P3_29914_18794551 | NC_021162.1    | Ca_kabuli_chr03 | 18794551                | TT                              | GG                | 1945920337               |
| SNP_P3_29915_18853718 | NC_021162.1    | Ca_kabuli_chr03 | 18853718                | AA                              | GG                | 1945920339               |
| SNP_P3_29916_18853720 | NC_021162.1    | Ca_kabuli_chr03 | 18853720                | TT                              | CC                | 1945920340               |
| SNP_P3_29917_18864050 | NC_021162.1    | Ca_kabuli_chr03 | 18864050                | TT                              | AA                | 1945920342               |
| SNP_P3_29918_18866421 | NC_021162.1    | Ca_kabuli_chr03 | 18866421                | AA                              | CC                | 1945920344               |
| SNP_P3_29919_18915019 | NC_021162.1    | Ca_kabuli_chr03 | 18915019                | CC                              | TT                | 1945920346               |
| SNP_P3_29920_18922545 | NC_021162.1    | Ca_kabuli_chr03 | 18922545                | GG                              | AA                | 1945920347               |
| SNP_P3_29921_18934894 | NC_021162.1    | Ca_kabuli_chr03 | 18934894                | AA                              | CC                | 1945920349               |
| SNP_P3_29922_18938740 | NC_021162.1    | Ca_kabuli_chr03 | 18938740                | CC                              | AA                | 1945920351               |
| SNP_P3_29924_18956640 | NC_021162.1    | Ca_kabuli_chr03 | 18956640                | AA                              | GG                | 1945920353               |
| SNP_P3_29925_18972547 | NC_021162.1    | Ca_kabuli_chr03 | 18972547                | CC                              | TT                | 1945920355               |
| SNP_P3_29926_18972596 | NC_021162.1    | Ca_kabuli_chr03 | 18972596                | AA                              | GG                | 1945920356               |
| SNP_P3_29927_19007538 | NC_021162.1    | Ca_kabuli_chr03 | 19007538                | AA                              | GG                | 1945920358               |
| SNP_P3_29928_19007555 | NC_021162.1    | Ca_kabuli_chr03 | 19007555                | CC                              | TT                | 1945920360               |
| SNP_P3_29929_19007617 | NC_021162.1    | Ca_kabuli_chr03 | 19007617                | TT                              | GG                | 1945920362               |
| SNP_P3_29930_19008740 | NC_021162.1    | Ca_kabuli_chr03 | 19008740                | TT                              | AA                | 1945920364               |
| SNP_P3_29931_19008742 | NC_021162.1    | Ca_kabuli_chr03 | 19008742                | AA                              | TT                | 1945920365               |
| SNP_P3_29932_19008772 | NC_021162.1    | Ca_kabuli_chr03 | 19008772                | CC                              | TT                | 1945920367               |
| SNP_P3_29933_19008774 | NC_021162.1    | Ca_kabuli_chr03 | 19008774                | CC                              | AA                | 1945920369               |
| SNP_P3_29934_19008775 | NC_021162.1    | Ca_kabuli_chr03 | 19008775                | AA                              | CC                | 1945920371               |
| SNP_P3_29935_19008779 | NC_021162.1    | Ca_kabuli_chr03 | 19008779                | TT                              | GG                | 1945920372               |
| SNP_P3_29936_19008784 | NC_021162.1    | Ca_kabuli_chr03 | 19008784                | TT                              | CC                | 1945920374               |
| SNP_P3_29937_19036579 | NC_021162.1    | Ca_kabuli_chr03 | 19036579                | GG                              | TT                | 1945920376               |
| SNP_P3_29938_19060137 | NC_021162.1    | Ca_kabuli_chr03 | 19060137                | AA                              | TT                | 1945920378               |
| SNP_P3_29939_19087139 | NC_021162.1    | Ca_kabuli_chr03 | 19087139                | CC                              | TT                | 1945920380               |
| SNP_P3_29942_19089386 | NC_021162.1    | Ca_kabuli_chr03 | 19089386                | CC                              | TT                | 1945920381               |
| SNP_P3_29943_19089417 | NC_021162.1    | Ca_kabuli_chr03 | 19089417                | TT                              | CC                | 1945920383               |
| SNP_P3_29944_19089456 | NC_021162.1    | Ca_kabuli_chr03 | 19089456                | TT                              | GG                | 1945920385               |
| SNP_P3_29945_19089483 | NC_021162.1    | Ca_kabuli_chr03 | 19089483                | AA                              | GG                | 1945920387               |
| SNP_P3_29946_19089496 | NC_021162.1    | Ca_kabuli_chr03 | 19089496                | TT                              | CC                | 1945920388               |
| SNP_P3_29947_19089515 | NC_021162.1    | Ca_kabuli_chr03 | 19089515                | GG                              | AA                | 1945920390               |
| SNP_P3_29948_19089518 | NC_021162.1    | Ca_kabuli_chr03 | 19089518                | AA                              | GG                | 1945920392               |
| SNP_P3_29949_19089738 | NC_021162.1    | Ca_kabuli_chr03 | 19089738                | AA                              | GG                | 1945920394               |
| SNP_P3_29950_19089740 | NC_021162.1    | Ca_kabuli_chr03 | 19089740                | CC                              | AA                | 1945920396               |
| SNP_P3_29952_19135205 | NC_021162.1    | Ca_kabuli_chr03 | 19135205                | TT                              | CC                | 1945920397               |
| SNP_P3_29953_19135246 | NC_021162.1    | Ca_kabuli_chr03 | 19135246                | AA                              | GG                | 1945920399               |
| SNP_P3_29954_19135268 | NC_021162.1    | Ca_kabuli_chr03 | 19135268                | AA                              | GG                | 1945920401               |
| SNP_P3_29955_19135269 | NC_021162.1    | Ca_kabuli_chr03 | 19135269                | TT                              | GG                | 1945920403               |



| SNPs IDs              | Chromosome IDs | Chromosomes     | Physical positions (bp) | CDC Frontier (Reference genome) | (Pusa 256 & HPNB) | NCBI SNPdb Accession IDs |
|-----------------------|----------------|-----------------|-------------------------|---------------------------------|-------------------|--------------------------|
| SNP_P3_29957_19196406 | NC_021162.1    | Ca_kabuli_chr03 | 19196406                | CC                              | TT                | 1945920405               |
| SNP_P3_29959_19196511 | NC_021162.1    | Ca_kabuli_chr03 | 19196511                | AA                              | TT                | 1945920406               |
| SNP_P3_29960_19196834 | NC_021162.1    | Ca_kabuli_chr03 | 19196834                | AA                              | CC                | 1945920408               |
| SNP_P3_29961_19198407 | NC_021162.1    | Ca_kabuli_chr03 | 19198407                | CC                              | GG                | 1945920410               |
| SNP_P3_29962_19198551 | NC_021162.1    | Ca_kabuli_chr03 | 19198551                | GG                              | AA                | 1945920412               |
| SNP_P3_29963_19198639 | NC_021162.1    | Ca_kabuli_chr03 | 19198639                | TT                              | GG                | 1945920413               |
| SNP_P3_29964_19198654 | NC_021162.1    | Ca_kabuli_chr03 | 19198654                | TT                              | CC                | 1945920415               |
| SNP_P3_29965_19198771 | NC_021162.1    | Ca_kabuli_chr03 | 19198771                | TT                              | CC                | 1945920417               |
| SNP_P3_29966_19198864 | NC_021162.1    | Ca_kabuli_chr03 | 19198864                | TT                              | CC                | 1945920419               |
| SNP_P3_29967_19198896 | NC_021162.1    | Ca_kabuli_chr03 | 19198896                | TT                              | CC                | 1945920421               |
| SNP_P3_29968_19198953 | NC_021162.1    | Ca_kabuli_chr03 | 19198953                | TT                              | CC                | 1945920422               |
| SNP_P3_29969_19198990 | NC_021162.1    | Ca_kabuli_chr03 | 19198990                | TT                              | GG                | 1945920424               |
| SNP_P3_29970_19199019 | NC_021162.1    | Ca_kabuli_chr03 | 19199019                | AA                              | CC                | 1945920426               |
| SNP_P3_29971_19199730 | NC_021162.1    | Ca_kabuli_chr03 | 19199730                | TT                              | GG                | 1945920428               |
| SNP_P3_29972_19206096 | NC_021162.1    | Ca_kabuli_chr03 | 19206096                | AA                              | TT                | 1945920429               |
| SNP_P3_29973_19230723 | NC_021162.1    | Ca_kabuli_chr03 | 19230723                | AA                              | GG                | 1945920431               |
| SNP_P3_29974_19347444 | NC_021162.1    | Ca_kabuli_chr03 | 19347444                | CC                              | TT                | 1945920433               |
| SNP_P3_29975_19356444 | NC_021162.1    | Ca_kabuli_chr03 | 19356444                | AA                              | GG                | 1945920435               |
| SNP_P3_29976_19356488 | NC_021162.1    | Ca_kabuli_chr03 | 19356488                | AA                              | GG                | 1945920437               |
| SNP_P3_29977_19356504 | NC_021162.1    | Ca_kabuli_chr03 | 19356504                | CC                              | AA                | 1945920438               |
| SNP_P3_29978_19357223 | NC_021162.1    | Ca_kabuli_chr03 | 19357223                | CC                              | GG                | 1945920440               |
| SNP_P3_29979_19357461 | NC_021162.1    | Ca_kabuli_chr03 | 19357461                | AA                              | CC                | 1945920442               |
| SNP_P3_29980_19357487 | NC_021162.1    | Ca_kabuli_chr03 | 19357487                | CC                              | AA                | 1945920444               |
| SNP_P3_29981_19357721 | NC_021162.1    | Ca_kabuli_chr03 | 19357721                | CC                              | AA                | 1945920446               |
| SNP_P3_29982_19357783 | NC_021162.1    | Ca_kabuli_chr03 | 19357783                | TT                              | AA                | 1945920447               |
| SNP_P3_29983_19357788 | NC_021162.1    | Ca_kabuli_chr03 | 19357788                | CC                              | TT                | 1945920449               |
| SNP_P3_29984_19357930 | NC_021162.1    | Ca_kabuli_chr03 | 19357930                | CC                              | TT                | 1945920451               |
| SNP_P3_29985_19357972 | NC_021162.1    | Ca_kabuli_chr03 | 19357972                | TT                              | CC                | 1945920453               |
| SNP_P3_29986_19358021 | NC_021162.1    | Ca_kabuli_chr03 | 19358021                | CC                              | TT                | 1945920454               |
| SNP_P3_29987_19358108 | NC_021162.1    | Ca_kabuli_chr03 | 19358108                | AA                              | GG                | 1945920456               |
| SNP_P3_29988_19358186 | NC_021162.1    | Ca_kabuli_chr03 | 19358186                | AA                              | GG                | 1945920458               |
| SNP_P3_29989_19358343 | NC_021162.1    | Ca_kabuli_chr03 | 19358343                | CC                              | TT                | 1945920460               |
| SNP_P3_29990_19358347 | NC_021162.1    | Ca_kabuli_chr03 | 19358347                | TT                              | CC                | 1945920462               |
| SNP_P3_29991_19358380 | NC_021162.1    | Ca_kabuli_chr03 | 19358380                | CC                              | AA                | 1945920463               |
| SNP_P3_29993_19358678 | NC_021162.1    | Ca_kabuli_chr03 | 19358678                | GG                              | AA                | 1945920465               |
| SNP_P3_29994_19358710 | NC_021162.1    | Ca_kabuli_chr03 | 19358710                | CC                              | TT                | 1945920467               |
| SNP_P3_29995_19358718 | NC_021162.1    | Ca_kabuli_chr03 | 19358718                | GG                              | AA                | 1945920469               |
| SNP_P3_29996_19358734 | NC_021162.1    | Ca_kabuli_chr03 | 19358734                | CC                              | TT                | 1945920470               |
| SNP_P3_29997_19358745 | NC_021162.1    | Ca_kabuli_chr03 | 19358745                | CC                              | TT                | 1945920472               |
| SNP_P3_29998_19358834 | NC_021162.1    | Ca_kabuli_chr03 | 19358834                | CC                              | AA                | 1945920474               |
| SNP_P3_29999_19358877 | NC_021162.1    | Ca_kabuli_chr03 | 19358877                | CC                              | GG                | 1945920476               |
| SNP_P3_30000_19358880 | NC_021162.1    | Ca_kabuli_chr03 | 19358880                | TT                              | CC                | 1945920478               |

| SNPs IDs              | Chromosome IDs | Chromosomes     | Physical positions (bp) | CDC Frontier (Reference genome) | (Pusa 256 & HPNB) | NCBI SNPdb Accession IDs |
|-----------------------|----------------|-----------------|-------------------------|---------------------------------|-------------------|--------------------------|
| SNP_P3_30001_19358954 | NC_021162.1    | Ca_kabuli_chr03 | 19358954                | AA                              | TT                | 1945920479               |
| SNP_P3_30002_19358967 | NC_021162.1    | Ca_kabuli_chr03 | 19358967                | GG                              | AA                | 1945920481               |
| SNP_P3_30003_19358993 | NC_021162.1    | Ca_kabuli_chr03 | 19358993                | AA                              | GG                | 1945920483               |
| SNP_P3_30005_19359053 | NC_021162.1    | Ca_kabuli_chr03 | 19359053                | GG                              | AA                | 1945920485               |
| SNP_P3_30006_19359059 | NC_021162.1    | Ca_kabuli_chr03 | 19359059                | TT                              | GG                | 1945920487               |
| SNP_P3_30007_19359111 | NC_021162.1    | Ca_kabuli_chr03 | 19359111                | CC                              | TT                | 1945920488               |
| SNP_P3_30008_19359147 | NC_021162.1    | Ca_kabuli_chr03 | 19359147                | GG                              | CC                | 1945920490               |
| SNP_P3_30009_19359151 | NC_021162.1    | Ca_kabuli_chr03 | 19359151                | GG                              | CC                | 1945920492               |
| SNP_P3_30010_19359153 | NC_021162.1    | Ca_kabuli_chr03 | 19359153                | GG                              | TT                | 1945920494               |
| SNP_P3_30011_19359188 | NC_021162.1    | Ca_kabuli_chr03 | 19359188                | CC                              | TT                | 1945920495               |
| SNP_P3_30012_19359189 | NC_021162.1    | Ca_kabuli_chr03 | 19359189                | TT                              | GG                | 1945920497               |
| SNP_P3_30013_19359254 | NC_021162.1    | Ca_kabuli_chr03 | 19359254                | AA                              | GG                | 1945920499               |
| SNP_P3_30014_19359309 | NC_021162.1    | Ca_kabuli_chr03 | 19359309                | AA                              | TT                | 1945920501               |
| SNP_P3_30015_19359310 | NC_021162.1    | Ca_kabuli_chr03 | 19359310                | GG                              | CC                | 1945920503               |
| SNP_P3_30017_19359455 | NC_021162.1    | Ca_kabuli_chr03 | 19359455                | AA                              | TT                | 1945920504               |
| SNP_P3_30018_19359494 | NC_021162.1    | Ca_kabuli_chr03 | 19359494                | CC                              | TT                | 1945920506               |
| SNP_P3_30019_19359510 | NC_021162.1    | Ca_kabuli_chr03 | 19359510                | AA                              | GG                | 1945920508               |
| SNP_P3_30020_19359522 | NC_021162.1    | Ca_kabuli_chr03 | 19359522                | CC                              | TT                | 1945920510               |
| SNP_P3_30021_19359528 | NC_021162.1    | Ca_kabuli_chr03 | 19359528                | TT                              | CC                | 1945920511               |
| SNP_P3_30022_19359557 | NC_021162.1    | Ca_kabuli_chr03 | 19359557                | CC                              | TT                | 1945920513               |
| SNP_P3_30023_19359562 | NC_021162.1    | Ca_kabuli_chr03 | 19359562                | TT                              | CC                | 1945920515               |
| SNP_P3_30024_19359576 | NC_021162.1    | Ca_kabuli_chr03 | 19359576                | TT                              | GG                | 1945920517               |
| SNP_P3_30025_19359580 | NC_021162.1    | Ca_kabuli_chr03 | 19359580                | CC                              | TT                | 1945920519               |
| SNP_P3_30026_19359641 | NC_021162.1    | Ca_kabuli_chr03 | 19359641                | GG                              | AA                | 1945920520               |
| SNP_P3_30027_19359749 | NC_021162.1    | Ca_kabuli_chr03 | 19359749                | TT                              | CC                | 1945920522               |
| SNP_P3_30028_19359834 | NC_021162.1    | Ca_kabuli_chr03 | 19359834                | TT                              | GG                | 1945920524               |
| SNP_P3_30029_19359992 | NC_021162.1    | Ca_kabuli_chr03 | 19359992                | CC                              | TT                | 1945920526               |
| SNP_P3_30030_19360078 | NC_021162.1    | Ca_kabuli_chr03 | 19360078                | AA                              | GG                | 1945920528               |
| SNP_P3_30031_19360153 | NC_021162.1    | Ca_kabuli_chr03 | 19360153                | GG                              | TT                | 1945920529               |
| SNP_P3_30032_19360198 | NC_021162.1    | Ca_kabuli_chr03 | 19360198                | AA                              | CC                | 1945920531               |
| SNP_P3_30033_19360261 | NC_021162.1    | Ca_kabuli_chr03 | 19360261                | AA                              | CC                | 1945920533               |
| SNP_P3_30034_19360459 | NC_021162.1    | Ca_kabuli_chr03 | 19360459                | GG                              | AA                | 1945920535               |
| SNP_P3_30035_19360479 | NC_021162.1    | Ca_kabuli_chr03 | 19360479                | AA                              | GG                | 1945920536               |
| SNP_P3_30036_19360670 | NC_021162.1    | Ca_kabuli_chr03 | 19360670                | AA                              | GG                | 1945920538               |
| SNP_P3_30037_19360674 | NC_021162.1    | Ca_kabuli_chr03 | 19360674                | AA                              | GG                | 1945920540               |
| SNP_P3_30038_19360680 | NC_021162.1    | Ca_kabuli_chr03 | 19360680                | CC                              | GG                | 1945920542               |
| SNP_P3_30039_19360710 | NC_021162.1    | Ca_kabuli_chr03 | 19360710                | GG                              | AA                | 1945920544               |
| SNP_P3_30040_19360816 | NC_021162.1    | Ca_kabuli_chr03 | 19360816                | AA                              | GG                | 1945920545               |
| SNP_P3_30041_19361040 | NC_021162.1    | Ca_kabuli_chr03 | 19361040                | GG                              | TT                | 1945920547               |
| SNP_P3_30042_19361143 | NC_021162.1    | Ca_kabuli_chr03 | 19361143                | CC                              | TT                | 1945920549               |
| SNP_P3_30043_19361153 | NC_021162.1    | Ca_kabuli_chr03 | 19361153                | TT                              | AA                | 1945920551               |
| SNP_P3_30044_19361274 | NC_021162.1    | Ca_kabuli_chr03 | 19361274                | CC                              | TT                | 1945920552               |

| SNPs IDs              | Chromosome IDs | Chromosomes     | Physical positions (bp) | CDC Frontier (Reference genome) | (Pusa 256 & HPNB) | NCBI SNPdb Accession IDs |
|-----------------------|----------------|-----------------|-------------------------|---------------------------------|-------------------|--------------------------|
| SNP_P3_30045_19361640 | NC_021162.1    | Ca_kabuli_chr03 | 19361640                | AA                              | GG                | 1945920554               |
| SNP_P3_30046_19361653 | NC_021162.1    | Ca_kabuli_chr03 | 19361653                | AA                              | GG                | 1945920556               |
| SNP_P3_30047_19361968 | NC_021162.1    | Ca_kabuli_chr03 | 19361968                | TT                              | AA                | 1945920558               |
| SNP_P3_30048_19362033 | NC_021162.1    | Ca_kabuli_chr03 | 19362033                | TT                              | AA                | 1945920560               |
| SNP_P3_30049_19362034 | NC_021162.1    | Ca_kabuli_chr03 | 19362034                | GG                              | AA                | 1945920561               |
| SNP_P3_30050_19362035 | NC_021162.1    | Ca_kabuli_chr03 | 19362035                | CC                              | AA                | 1945920563               |
| SNP_P3_30051_19362043 | NC_021162.1    | Ca_kabuli_chr03 | 19362043                | AA                              | TT                | 1945920565               |
| SNP_P3_30052_19362069 | NC_021162.1    | Ca_kabuli_chr03 | 19362069                | TT                              | CC                | 1945920567               |
| SNP_P3_30053_19362113 | NC_021162.1    | Ca_kabuli_chr03 | 19362113                | CC                              | TT                | 1945920568               |
| SNP_P3_30055_19366628 | NC_021162.1    | Ca_kabuli_chr03 | 19366628                | TT                              | CC                | 1945920570               |
| SNP_P3_30057_19367244 | NC_021162.1    | Ca_kabuli_chr03 | 19367244                | CC                              | TT                | 1945920572               |
| SNP_P3_30058_19367265 | NC_021162.1    | Ca_kabuli_chr03 | 19367265                | GG                              | AA                | 1945920574               |
| SNP_P3_30059_19367432 | NC_021162.1    | Ca_kabuli_chr03 | 19367432                | GG                              | AA                | 1945920576               |
| SNP_P3_30060_19367540 | NC_021162.1    | Ca_kabuli_chr03 | 19367540                | AA                              | TT                | 1945920577               |
| SNP_P3_30061_19367596 | NC_021162.1    | Ca_kabuli_chr03 | 19367596                | AA                              | TT                | 1945920579               |
| SNP_P3_30062_19367688 | NC_021162.1    | Ca_kabuli_chr03 | 19367688                | AA                              | TT                | 1945920581               |
| SNP_P3_30063_19367815 | NC_021162.1    | Ca_kabuli_chr03 | 19367815                | CC                              | AA                | 1945920583               |
| SNP_P3_30065_19367883 | NC_021162.1    | Ca_kabuli_chr03 | 19367883                | AA                              | CC                | 1945920585               |
| SNP_P3_30066_19367891 | NC_021162.1    | Ca_kabuli_chr03 | 19367891                | TT                              | CC                | 1945920586               |
| SNP_P3_30067_19367904 | NC_021162.1    | Ca_kabuli_chr03 | 19367904                | CC                              | AA                | 1945920588               |
| SNP_P3_30068_19367941 | NC_021162.1    | Ca_kabuli_chr03 | 19367941                | CC                              | TT                | 1945920590               |
| SNP_P3_30069_19368046 | NC_021162.1    | Ca_kabuli_chr03 | 19368046                | AA                              | CC                | 1945920592               |
| SNP_P3_30070_19368421 | NC_021162.1    | Ca_kabuli_chr03 | 19368421                | AA                              | GG                | 1945920593               |
| SNP_P3_30071_19368460 | NC_021162.1    | Ca_kabuli_chr03 | 19368460                | CC                              | AA                | 1945920595               |
| SNP_P3_30072_19368514 | NC_021162.1    | Ca_kabuli_chr03 | 19368514                | AA                              | TT                | 1945920597               |
| SNP_P3_30073_19368543 | NC_021162.1    | Ca_kabuli_chr03 | 19368543                | TT                              | AA                | 1945920599               |
| SNP_P3_30075_19368598 | NC_021162.1    | Ca_kabuli_chr03 | 19368598                | AA                              | GG                | 1945920601               |
| SNP_P3_30076_19368881 | NC_021162.1    | Ca_kabuli_chr03 | 19368881                | TT                              | AA                | 1945920602               |
| SNP_P3_30078_19369150 | NC_021162.1    | Ca_kabuli_chr03 | 19369150                | TT                              | GG                | 1945920604               |
| SNP_P3_30079_19369196 | NC_021162.1    | Ca_kabuli_chr03 | 19369196                | GG                              | AA                | 1945920606               |
| SNP_P3_30080_19369257 | NC_021162.1    | Ca_kabuli_chr03 | 19369257                | GG                              | CC                | 1945920608               |
| SNP_P3_30081_19369312 | NC_021162.1    | Ca_kabuli_chr03 | 19369312                | AA                              | TT                | 1945920609               |
| SNP_P3_30082_19369587 | NC_021162.1    | Ca_kabuli_chr03 | 19369587                | CC                              | TT                | 1945920611               |
| SNP_P3_30083_19369590 | NC_021162.1    | Ca_kabuli_chr03 | 19369590                | AA                              | CC                | 1945920613               |
| SNP_P3_30084_19369627 | NC_021162.1    | Ca_kabuli_chr03 | 19369627                | AA                              | GG                | 1945920615               |
| SNP_P3_30085_19370429 | NC_021162.1    | Ca_kabuli_chr03 | 19370429                | AA                              | CC                | 1945920617               |
| SNP_P3_30086_19370503 | NC_021162.1    | Ca_kabuli_chr03 | 19370503                | TT                              | AA                | 1945920618               |
| SNP_P3_30087_19370827 | NC_021162.1    | Ca_kabuli_chr03 | 19370827                | GG                              | AA                | 1945920620               |
| SNP_P3_30088_19370857 | NC_021162.1    | Ca_kabuli_chr03 | 19370857                | GG                              | TT                | 1945920622               |
| SNP_P3_30089_19370919 | NC_021162.1    | Ca_kabuli_chr03 | 19370919                | TT                              | GG                | 1945920624               |
| SNP_P3_30091_19373237 | NC_021162.1    | Ca_kabuli_chr03 | 19373237                | AA                              | TT                | 1945920626               |
| SNP_P3_30092_19373371 | NC_021162.1    | Ca_kabuli_chr03 | 19373371                | TT                              | AA                | 1945920627               |

| SNPs IDs              | Chromosome IDs | Chromosomes     | Physical positions (bp) | CDC Frontier (Reference genome) | (Pusa 256 & HPNB) | NCBI SNPdb Accession IDs |
|-----------------------|----------------|-----------------|-------------------------|---------------------------------|-------------------|--------------------------|
| SNP_P3_30093_19373419 | NC_021162.1    | Ca_kabuli_chr03 | 19373419                | TT                              | CC                | 1945920629               |
| SNP_P3_30094_19373446 | NC_021162.1    | Ca_kabuli_chr03 | 19373446                | CC                              | GG                | 1945920631               |
| SNP_P3_30095_19373527 | NC_021162.1    | Ca_kabuli_chr03 | 19373527                | AA                              | TT                | 1945920633               |
| SNP_P3_30096_19373558 | NC_021162.1    | Ca_kabuli_chr03 | 19373558                | GG                              | AA                | 1945920634               |
| SNP_P3_30097_19373579 | NC_021162.1    | Ca_kabuli_chr03 | 19373579                | CC                              | TT                | 1945920636               |
| SNP_P3_30098_19373625 | NC_021162.1    | Ca_kabuli_chr03 | 19373625                | CC                              | AA                | 1945920638               |
| SNP_P3_30099_19373629 | NC_021162.1    | Ca_kabuli_chr03 | 19373629                | TT                              | CC                | 1945920640               |
| SNP_P3_30101_19373968 | NC_021162.1    | Ca_kabuli_chr03 | 19373968                | AA                              | GG                | 1945920642               |
| SNP_P3_30102_19374000 | NC_021162.1    | Ca_kabuli_chr03 | 19374000                | AA                              | TT                | 1945920643               |
| SNP_P3_30103_19374012 | NC_021162.1    | Ca_kabuli_chr03 | 19374012                | TT                              | CC                | 1945920645               |
| SNP_P3_30104_19374013 | NC_021162.1    | Ca_kabuli_chr03 | 19374013                | TT                              | CC                | 1945920647               |
| SNP_P3_30105_19374024 | NC_021162.1    | Ca_kabuli_chr03 | 19374024                | GG                              | TT                | 1945920649               |
| SNP_P3_30106_19374038 | NC_021162.1    | Ca_kabuli_chr03 | 19374038                | AA                              | CC                | 1945920650               |
| SNP_P3_30107_19374046 | NC_021162.1    | Ca_kabuli_chr03 | 19374046                | AA                              | TT                | 1945920652               |
| SNP_P3_30108_19374051 | NC_021162.1    | Ca_kabuli_chr03 | 19374051                | CC                              | TT                | 1945920654               |
| SNP_P3_30109_19374066 | NC_021162.1    | Ca_kabuli_chr03 | 19374066                | GG                              | AA                | 1945920656               |
| SNP_P3_30110_19374102 | NC_021162.1    | Ca_kabuli_chr03 | 19374102                | TT                              | AA                | 1945920658               |
| SNP_P3_30111_19374150 | NC_021162.1    | Ca_kabuli_chr03 | 19374150                | TT                              | CC                | 1945920659               |
| SNP_P3_30112_19374352 | NC_021162.1    | Ca_kabuli_chr03 | 19374352                | GG                              | TT                | 1945920661               |
| SNP_P3_30113_19374538 | NC_021162.1    | Ca_kabuli_chr03 | 19374538                | CC                              | AA                | 1945920663               |
| SNP_P3_30114_19374558 | NC_021162.1    | Ca_kabuli_chr03 | 19374558                | CC                              | TT                | 1945920665               |
| SNP_P3_30115_19374606 | NC_021162.1    | Ca_kabuli_chr03 | 19374606                | CC                              | TT                | 1945920666               |
| SNP_P3_30116_19374611 | NC_021162.1    | Ca_kabuli_chr03 | 19374611                | TT                              | GG                | 1945920668               |
| SNP_P3_30117_19374638 | NC_021162.1    | Ca_kabuli_chr03 | 19374638                | TT                              | GG                | 1945920670               |
| SNP_P3_30118_19374732 | NC_021162.1    | Ca_kabuli_chr03 | 19374732                | CC                              | GG                | 1945920672               |
| SNP_P3_30119_19375012 | NC_021162.1    | Ca_kabuli_chr03 | 19375012                | TT                              | AA                | 1945920674               |
| SNP_P3_30120_19375020 | NC_021162.1    | Ca_kabuli_chr03 | 19375020                | AA                              | GG                | 1945920675               |
| SNP_P3_30121_19375031 | NC_021162.1    | Ca_kabuli_chr03 | 19375031                | AA                              | GG                | 1945920677               |
| SNP_P3_30124_19375138 | NC_021162.1    | Ca_kabuli_chr03 | 19375138                | GG                              | AA                | 1945920679               |
| SNP_P3_30125_19375145 | NC_021162.1    | Ca_kabuli_chr03 | 19375145                | AA                              | GG                | 1945920681               |
| SNP_P3_30126_19375191 | NC_021162.1    | Ca_kabuli_chr03 | 19375191                | AA                              | CC                | 1945920683               |
| SNP_P3_30127_19375219 | NC_021162.1    | Ca_kabuli_chr03 | 19375219                | TT                              | AA                | 1945920684               |
| SNP_P3_30128_19375236 | NC_021162.1    | Ca_kabuli_chr03 | 19375236                | GG                              | AA                | 1945920686               |
| SNP_P3_30129_19375292 | NC_021162.1    | Ca_kabuli_chr03 | 19375292                | CC                              | TT                | 1945920688               |
| SNP_P3_30130_19375438 | NC_021162.1    | Ca_kabuli_chr03 | 19375438                | TT                              | GG                | 1945920690               |
| SNP_P3_30131_19375505 | NC_021162.1    | Ca_kabuli_chr03 | 19375505                | TT                              | GG                | 1945920691               |
| SNP_P3_30132_19375539 | NC_021162.1    | Ca_kabuli_chr03 | 19375539                | AA                              | GG                | 1945920693               |
| SNP_P3_30134_19376104 | NC_021162.1    | Ca_kabuli_chr03 | 19376104                | CC                              | AA                | 1945920695               |
| SNP_P3_30135_19376201 | NC_021162.1    | Ca_kabuli_chr03 | 19376201                | CC                              | TT                | 1945920697               |
| SNP_P3_30136_19376255 | NC_021162.1    | Ca_kabuli_chr03 | 19376255                | CC                              | TT                | 1945920699               |
| SNP_P3_30137_19376296 | NC_021162.1    | Ca_kabuli_chr03 | 19376296                | GG                              | AA                | 1945920700               |
| SNP_P3_30138_19376356 | NC_021162.1    | Ca_kabuli_chr03 | 19376356                | CC                              | TT                | 1945920702               |

| SNPs IDs              | Chromosome IDs | Chromosomes     | Physical positions (bp) | CDC Frontier (Reference genome) | (Pusa 256 & HPNB) | NCBI SNPdb Accession IDs |
|-----------------------|----------------|-----------------|-------------------------|---------------------------------|-------------------|--------------------------|
| SNP_P3_30139_19376443 | NC_021162.1    | Ca_kabuli_chr03 | 19376443                | GG                              | TT                | 1945920704               |
| SNP_P3_30140_19376495 | NC_021162.1    | Ca_kabuli_chr03 | 19376495                | TT                              | CC                | 1945920706               |
| SNP_P3_30141_19376528 | NC_021162.1    | Ca_kabuli_chr03 | 19376528                | TT                              | CC                | 1945920707               |
| SNP_P3_30142_19376562 | NC_021162.1    | Ca_kabuli_chr03 | 19376562                | AA                              | GG                | 1945920709               |
| SNP_P3_30143_19376579 | NC_021162.1    | Ca_kabuli_chr03 | 19376579                | AA                              | GG                | 1945920711               |
| SNP_P3_30144_19376603 | NC_021162.1    | Ca_kabuli_chr03 | 19376603                | TT                              | AA                | 1945920713               |
| SNP_P3_30145_19376838 | NC_021162.1    | Ca_kabuli_chr03 | 19376838                | GG                              | AA                | 1945920715               |
| SNP_P3_30146_19380292 | NC_021162.1    | Ca_kabuli_chr03 | 19380292                | CC                              | TT                | 1945920716               |
| SNP_P3_30147_19380371 | NC_021162.1    | Ca_kabuli_chr03 | 19380371                | CC                              | TT                | 1945920718               |
| SNP_P3_30148_19380434 | NC_021162.1    | Ca_kabuli_chr03 | 19380434                | TT                              | GG                | 1945920720               |
| SNP_P3_30149_19380490 | NC_021162.1    | Ca_kabuli_chr03 | 19380490                | GG                              | AA                | 1945920722               |
| SNP_P3_30150_19380514 | NC_021162.1    | Ca_kabuli_chr03 | 19380514                | CC                              | TT                | 1945920724               |
| SNP_P3_30151_19380519 | NC_021162.1    | Ca_kabuli_chr03 | 19380519                | TT                              | CC                | 1945920725               |
| SNP_P3_30152_19380582 | NC_021162.1    | Ca_kabuli_chr03 | 19380582                | TT                              | CC                | 1945920727               |
| SNP_P3_30153_19380625 | NC_021162.1    | Ca_kabuli_chr03 | 19380625                | GG                              | AA                | 1945920729               |
| SNP_P3_30154_19380659 | NC_021162.1    | Ca_kabuli_chr03 | 19380659                | TT                              | CC                | 1945920731               |
| SNP_P3_30155_19380721 | NC_021162.1    | Ca_kabuli_chr03 | 19380721                | TT                              | CC                | 1945920732               |
| SNP_P3_30156_19380769 | NC_021162.1    | Ca_kabuli_chr03 | 19380769                | TT                              | CC                | 1945920734               |
| SNP_P3_30157_19380799 | NC_021162.1    | Ca_kabuli_chr03 | 19380799                | TT                              | CC                | 1945920736               |
| SNP_P3_30158_19380962 | NC_021162.1    | Ca_kabuli_chr03 | 19380962                | GG                              | TT                | 1945920738               |
| SNP_P3_30159_19380966 | NC_021162.1    | Ca_kabuli_chr03 | 19380966                | TT                              | CC                | 1945920740               |
| SNP_P3_30160_19381019 | NC_021162.1    | Ca_kabuli_chr03 | 19381019                | GG                              | AA                | 1945920741               |
| SNP_P3_30161_19381034 | NC_021162.1    | Ca_kabuli_chr03 | 19381034                | TT                              | AA                | 1945920743               |
| SNP_P3_30162_19381107 | NC_021162.1    | Ca_kabuli_chr03 | 19381107                | GG                              | AA                | 1945920745               |
| SNP_P3_30163_19381306 | NC_021162.1    | Ca_kabuli_chr03 | 19381306                | CC                              | TT                | 1945920747               |
| SNP_P3_30164_19381428 | NC_021162.1    | Ca_kabuli_chr03 | 19381428                | CC                              | TT                | 1945920748               |
| SNP_P3_30165_19381453 | NC_021162.1    | Ca_kabuli_chr03 | 19381453                | TT                              | GG                | 1945920750               |
| SNP_P3_30167_19381591 | NC_021162.1    | Ca_kabuli_chr03 | 19381591                | AA                              | CC                | 1945920752               |
| SNP_P3_30168_19381592 | NC_021162.1    | Ca_kabuli_chr03 | 19381592                | TT                              | AA                | 1945920754               |
| SNP_P3_30169_19381634 | NC_021162.1    | Ca_kabuli_chr03 | 19381634                | CC                              | AA                | 1945920756               |
| SNP_P3_30170_19381656 | NC_021162.1    | Ca_kabuli_chr03 | 19381656                | AA                              | GG                | 1945920757               |
| SNP_P3_30171_19381665 | NC_021162.1    | Ca_kabuli_chr03 | 19381665                | AA                              | GG                | 1945920759               |
| SNP_P3_30172_19381787 | NC_021162.1    | Ca_kabuli_chr03 | 19381787                | GG                              | AA                | 1945920761               |
| SNP_P3_30173_19381804 | NC_021162.1    | Ca_kabuli_chr03 | 19381804                | TT                              | CC                | 1945920763               |
| SNP_P3_30174_19381839 | NC_021162.1    | Ca_kabuli_chr03 | 19381839                | CC                              | AA                | 1945920764               |
| SNP_P3_30175_19381894 | NC_021162.1    | Ca_kabuli_chr03 | 19381894                | AA                              | CC                | 1945920766               |
| SNP_P3_30176_19381919 | NC_021162.1    | Ca_kabuli_chr03 | 19381919                | CC                              | TT                | 1945920768               |
| SNP_P3_30177_19382193 | NC_021162.1    | Ca_kabuli_chr03 | 19382193                | TT                              | CC                | 1945920770               |
| SNP_P3_30178_19382254 | NC_021162.1    | Ca_kabuli_chr03 | 19382254                | GG                              | AA                | 1945920772               |
| SNP_P3_30179_19382269 | NC_021162.1    | Ca_kabuli_chr03 | 19382269                | GG                              | AA                | 1945920773               |
| SNP_P3_30180_19382500 | NC_021162.1    | Ca_kabuli_chr03 | 19382500                | TT                              | GG                | 1945920775               |
| SNP_P3_30181_19382531 | NC_021162.1    | Ca_kabuli_chr03 | 19382531                | CC                              | GG                | 1945920777               |

| SNPs IDs              | Chromosome IDs | Chromosomes     | Physical positions (bp) | CDC Frontier (Reference genome) | (Pusa 256 & HPNB) | NCBI SNPdb Accession IDs |
|-----------------------|----------------|-----------------|-------------------------|---------------------------------|-------------------|--------------------------|
| SNP_P3_30182_19382538 | NC_021162.1    | Ca_kabuli_chr03 | 19382538                | TT                              | CC                | 1945920779               |
| SNP_P3_30183_19382556 | NC_021162.1    | Ca_kabuli_chr03 | 19382556                | AA                              | TT                | 1945920781               |
| SNP_P3_30184_19382558 | NC_021162.1    | Ca_kabuli_chr03 | 19382558                | GG                              | CC                | 1945920782               |
| SNP_P3_30185_19382559 | NC_021162.1    | Ca_kabuli_chr03 | 19382559                | GG                              | TT                | 1945920784               |
| SNP_P3_30186_19382563 | NC_021162.1    | Ca_kabuli_chr03 | 19382563                | GG                              | AA                | 1945920786               |
| SNP_P3_30187_19382751 | NC_021162.1    | Ca_kabuli_chr03 | 19382751                | CC                              | TT                | 1945920788               |
| SNP_P3_30189_19382876 | NC_021162.1    | Ca_kabuli_chr03 | 19382876                | GG                              | TT                | 1945920789               |
| SNP_P3_30190_19383542 | NC_021162.1    | Ca_kabuli_chr03 | 19383542                | AA                              | GG                | 1945920791               |
| SNP_P3_30191_19383555 | NC_021162.1    | Ca_kabuli_chr03 | 19383555                | CC                              | TT                | 1945920793               |
| SNP_P3_30192_19383714 | NC_021162.1    | Ca_kabuli_chr03 | 19383714                | GG                              | AA                | 1945920795               |
| SNP_P3_30193_19383772 | NC_021162.1    | Ca_kabuli_chr03 | 19383772                | CC                              | TT                | 1945920797               |
| SNP_P3_30195_19384022 | NC_021162.1    | Ca_kabuli_chr03 | 19384022                | GG                              | AA                | 1945920798               |
| SNP_P3_30196_19384055 | NC_021162.1    | Ca_kabuli_chr03 | 19384055                | AA                              | GG                | 1945920800               |
| SNP_P3_30197_19384089 | NC_021162.1    | Ca_kabuli_chr03 | 19384089                | AA                              | GG                | 1945920802               |
| SNP_P3_30198_19384093 | NC_021162.1    | Ca_kabuli_chr03 | 19384093                | CC                              | TT                | 1945920804               |
| SNP_P3_30199_19384108 | NC_021162.1    | Ca_kabuli_chr03 | 19384108                | AA                              | CC                | 1945920805               |
| SNP_P3_30200_19384125 | NC_021162.1    | Ca_kabuli_chr03 | 19384125                | GG                              | AA                | 1945920807               |
| SNP_P3_30201_19384126 | NC_021162.1    | Ca_kabuli_chr03 | 19384126                | GG                              | AA                | 1945920809               |
| SNP_P3_30202_19385025 | NC_021162.1    | Ca_kabuli_chr03 | 19385025                | GG                              | AA                | 1945920811               |
| SNP_P3_30203_19385079 | NC_021162.1    | Ca_kabuli_chr03 | 19385079                | AA                              | GG                | 1945920813               |
| SNP_P3_30204_19385144 | NC_021162.1    | Ca_kabuli_chr03 | 19385144                | CC                              | AA                | 1945920814               |
| SNP_P3_30205_19385147 | NC_021162.1    | Ca_kabuli_chr03 | 19385147                | CC                              | TT                | 1945920816               |
| SNP_P3_30206_19385179 | NC_021162.1    | Ca_kabuli_chr03 | 19385179                | AA                              | GG                | 1945920818               |
| SNP_P3_30207_19385271 | NC_021162.1    | Ca_kabuli_chr03 | 19385271                | TT                              | CC                | 1945920820               |
| SNP_P3_30208_19385318 | NC_021162.1    | Ca_kabuli_chr03 | 19385318                | AA                              | GG                | 1945920821               |
| SNP_P3_30209_19385371 | NC_021162.1    | Ca_kabuli_chr03 | 19385371                | GG                              | AA                | 1945920823               |
| SNP_P3_30210_19385519 | NC_021162.1    | Ca_kabuli_chr03 | 19385519                | TT                              | CC                | 1945920825               |
| SNP_P3_30211_19385526 | NC_021162.1    | Ca_kabuli_chr03 | 19385526                | CC                              | TT                | 1945920827               |
| SNP_P3_30212_19385570 | NC_021162.1    | Ca_kabuli_chr03 | 19385570                | AA                              | TT                | 1945920829               |
| SNP_P3_30213_19385609 | NC_021162.1    | Ca_kabuli_chr03 | 19385609                | TT                              | CC                | 1945920830               |
| SNP_P3_30214_19385618 | NC_021162.1    | Ca_kabuli_chr03 | 19385618                | TT                              | AA                | 1945920832               |
| SNP_P3_30215_19385645 | NC_021162.1    | Ca_kabuli_chr03 | 19385645                | AA                              | GG                | 1945920834               |
| SNP_P3_30216_19385650 | NC_021162.1    | Ca_kabuli_chr03 | 19385650                | AA                              | GG                | 1945920836               |
| SNP_P3_30217_19385655 | NC_021162.1    | Ca_kabuli_chr03 | 19385655                | CC                              | TT                | 1945920838               |
| SNP_P3_30218_19385753 | NC_021162.1    | Ca_kabuli_chr03 | 19385753                | TT                              | CC                | 1945920839               |
| SNP_P3_30219_19385808 | NC_021162.1    | Ca_kabuli_chr03 | 19385808                | GG                              | CC                | 1945920841               |
| SNP_P3_30220_19385972 | NC_021162.1    | Ca_kabuli_chr03 | 19385972                | GG                              | AA                | 1945920843               |
| SNP_P3_30221_19385976 | NC_021162.1    | Ca_kabuli_chr03 | 19385976                | GG                              | AA                | 1945920845               |
| SNP_P3_30222_19385982 | NC_021162.1    | Ca_kabuli_chr03 | 19385982                | AA                              | GG                | 1945920846               |
| SNP_P3_30223_19386037 | NC_021162.1    | Ca_kabuli_chr03 | 19386037                | AA                              | GG                | 1945920848               |
| SNP_P3_30224_19386044 | NC_021162.1    | Ca_kabuli_chr03 | 19386044                | TT                              | CC                | 1945920850               |
| SNP_P3_30225_19386061 | NC_021162.1    | Ca_kabuli_chr03 | 19386061                | AA                              | GG                | 1945920852               |

| SNPs IDs              | Chromosome IDs | Chromosomes     | Physical positions (bp) | CDC Frontier (Reference genome) | (Pusa 256 & HPNB) | NCBI SNPdb Accession IDs |
|-----------------------|----------------|-----------------|-------------------------|---------------------------------|-------------------|--------------------------|
| SNP_P3_30226_19386096 | NC_021162.1    | Ca_kabuli_chr03 | 19386096                | GG                              | AA                | 1945920854               |
| SNP_P3_30227_19386105 | NC_021162.1    | Ca_kabuli_chr03 | 19386105                | GG                              | CC                | 1945920855               |
| SNP_P3_30228_19386142 | NC_021162.1    | Ca_kabuli_chr03 | 19386142                | AA                              | GG                | 1945920857               |
| SNP_P3_30230_19387008 | NC_021162.1    | Ca_kabuli_chr03 | 19387008                | AA                              | GG                | 1945920859               |
| SNP_P3_30234_19402926 | NC_021162.1    | Ca_kabuli_chr03 | 19402926                | TT                              | CC                | 1945920861               |
| SNP_P3_30235_19402946 | NC_021162.1    | Ca_kabuli_chr03 | 19402946                | AA                              | CC                | 1945920862               |
| SNP_P3_30236_19402952 | NC_021162.1    | Ca_kabuli_chr03 | 19402952                | TT                              | CC                | 1945920864               |
| SNP_P3_30237_19402975 | NC_021162.1    | Ca_kabuli_chr03 | 19402975                | AA                              | GG                | 1945920866               |
| SNP_P3_30238_19402981 | NC_021162.1    | Ca_kabuli_chr03 | 19402981                | AA                              | GG                | 1945920868               |
| SNP_P3_30240_19435378 | NC_021162.1    | Ca_kabuli_chr03 | 19435378                | CC                              | TT                | 1945920870               |
| SNP_P3_30241_19452875 | NC_021162.1    | Ca_kabuli_chr03 | 19452875                | TT                              | CC                | 1945920871               |
| SNP_P3_30242_19452892 | NC_021162.1    | Ca_kabuli_chr03 | 19452892                | TT                              | CC                | 1945920873               |
| SNP_P3_30243_19452934 | NC_021162.1    | Ca_kabuli_chr03 | 19452934                | CC                              | GG                | 1945920875               |
| SNP_P3_30244_19452981 | NC_021162.1    | Ca_kabuli_chr03 | 19452981                | AA                              | CC                | 1945920877               |
| SNP_P3_30245_19452985 | NC_021162.1    | Ca_kabuli_chr03 | 19452985                | GG                              | TT                | 1945920879               |
| SNP_P3_30246_19453036 | NC_021162.1    | Ca_kabuli_chr03 | 19453036                | GG                              | AA                | 1945920880               |
| SNP_P3_30247_19453319 | NC_021162.1    | Ca_kabuli_chr03 | 19453319                | AA                              | GG                | 1945920882               |
| SNP_P3_30248_19481413 | NC_021162.1    | Ca_kabuli_chr03 | 19481413                | TT                              | GG                | 1945920884               |
| SNP_P3_30249_19483684 | NC_021162.1    | Ca_kabuli_chr03 | 19483684                | AA                              | TT                | 1945920886               |
| SNP_P3_30250_19485970 | NC_021162.1    | Ca_kabuli_chr03 | 19485970                | TT                              | AA                | 1945920887               |
| SNP_P3_30251_19494405 | NC_021162.1    | Ca_kabuli_chr03 | 19494405                | AA                              | CC                | 1945920889               |
| SNP_P3_30252_19499398 | NC_021162.1    | Ca_kabuli_chr03 | 19499398                | AA                              | GG                | 1945920891               |
| SNP_P3_30253_19545659 | NC_021162.1    | Ca_kabuli_chr03 | 19545659                | CC                              | TT                | 1945920893               |
| SNP_P3_30254_19545796 | NC_021162.1    | Ca_kabuli_chr03 | 19545796                | AA                              | TT                | 1945920895               |
| SNP_P3_30255_19545847 | NC_021162.1    | Ca_kabuli_chr03 | 19545847                | AA                              | CC                | 1945920896               |
| SNP_P3_30256_19545898 | NC_021162.1    | Ca_kabuli_chr03 | 19545898                | TT                              | AA                | 1945920898               |
| SNP_P3_30257_19548937 | NC_021162.1    | Ca_kabuli_chr03 | 19548937                | CC                              | TT                | 1945920900               |
| SNP_P3_30258_19548953 | NC_021162.1    | Ca_kabuli_chr03 | 19548953                | AA                              | GG                | 1945920902               |
| SNP_P3_30259_19555432 | NC_021162.1    | Ca_kabuli_chr03 | 19555432                | TT                              | GG                | 1945920903               |
| SNP_P3_30260_19555475 | NC_021162.1    | Ca_kabuli_chr03 | 19555475                | CC                              | TT                | 1945920905               |
| SNP_P3_30261_19555815 | NC_021162.1    | Ca_kabuli_chr03 | 19555815                | AA                              | GG                | 1945920907               |
| SNP_P3_30262_19555856 | NC_021162.1    | Ca_kabuli_chr03 | 19555856                | CC                              | TT                | 1945920909               |
| SNP_P3_30263_19556555 | NC_021162.1    | Ca_kabuli_chr03 | 19556555                | GG                              | AA                | 1945920911               |
| SNP_P3_30264_19556558 | NC_021162.1    | Ca_kabuli_chr03 | 19556558                | TT                              | AA                | 1945920912               |
| SNP_P3_30265_19556582 | NC_021162.1    | Ca_kabuli_chr03 | 19556582                | CC                              | TT                | 1945920914               |
| SNP_P3_30266_19556597 | NC_021162.1    | Ca_kabuli_chr03 | 19556597                | TT                              | CC                | 1945920916               |
| SNP_P3_30267_19556609 | NC_021162.1    | Ca_kabuli_chr03 | 19556609                | GG                              | AA                | 1945920918               |
| SNP_P3_30268_19556657 | NC_021162.1    | Ca_kabuli_chr03 | 19556657                | AA                              | GG                | 1945920920               |
| SNP_P3_30269_19556840 | NC_021162.1    | Ca_kabuli_chr03 | 19556840                | AA                              | GG                | 1945920921               |
| SNP_P3_30270_19564711 | NC_021162.1    | Ca_kabuli_chr03 | 19564711                | TT                              | AA                | 1945920923               |
| SNP_P3_30271_19581715 | NC_021162.1    | Ca_kabuli_chr03 | 19581715                | GG                              | AA                | 1945920925               |
| SNP_P3_30272_19589427 | NC_021162.1    | Ca_kabuli_chr03 | 19589427                | TT                              | GG                | 1945920927               |

| SNPs IDs              | Chromosome IDs | Chromosomes     | Physical positions (bp) | CDC Frontier (Reference genome) | (Pusa 256 & HPNB) | NCBI SNPdb Accession IDs |
|-----------------------|----------------|-----------------|-------------------------|---------------------------------|-------------------|--------------------------|
| SNP_P3_30273_19589428 | NC_021162.1    | Ca_kabuli_chr03 | 19589428                | TT                              | CC                | 1945920928               |
| SNP_P3_30274_19595104 | NC_021162.1    | Ca_kabuli_chr03 | 19595104                | AA                              | GG                | 1945920930               |
| SNP_P3_30275_19598723 | NC_021162.1    | Ca_kabuli_chr03 | 19598723                | GG                              | AA                | 1945920932               |
| SNP_P3_30276_19634320 | NC_021162.1    | Ca_kabuli_chr03 | 19634320                | TT                              | CC                | 1945920934               |
| SNP_P3_30277_19634322 | NC_021162.1    | Ca_kabuli_chr03 | 19634322                | AA                              | GG                | 1945920936               |
| SNP_P3_30278_19634370 | NC_021162.1    | Ca_kabuli_chr03 | 19634370                | CC                              | TT                | 1945920937               |
| SNP_P3_30279_19634380 | NC_021162.1    | Ca_kabuli_chr03 | 19634380                | GG                              | AA                | 1945920939               |
| SNP_P3_30280_19636503 | NC_021162.1    | Ca_kabuli_chr03 | 19636503                | CC                              | GG                | 1945920941               |
| SNP_P3_30281_19636538 | NC_021162.1    | Ca_kabuli_chr03 | 19636538                | AA                              | GG                | 1945920943               |
| SNP_P3_30282_19639561 | NC_021162.1    | Ca_kabuli_chr03 | 19639561                | TT                              | CC                | 1945920944               |
| SNP_P3_30283_19639668 | NC_021162.1    | Ca_kabuli_chr03 | 19639668                | GG                              | AA                | 1945920946               |
| SNP_P3_30284_19639939 | NC_021162.1    | Ca_kabuli_chr03 | 19639939                | GG                              | AA                | 1945920948               |
| SNP_P3_30285_19639973 | NC_021162.1    | Ca_kabuli_chr03 | 19639973                | TT                              | AA                | 1945920950               |
| SNP_P3_30286_19639989 | NC_021162.1    | Ca_kabuli_chr03 | 19639989                | TT                              | GG                | 1945920952               |
| SNP_P3_30287_19639992 | NC_021162.1    | Ca_kabuli_chr03 | 19639992                | AA                              | TT                | 1945920953               |
| SNP_P3_30288_19640018 | NC_021162.1    | Ca_kabuli_chr03 | 19640018                | GG                              | CC                | 1945920955               |
| SNP_P3_30289_19640041 | NC_021162.1    | Ca_kabuli_chr03 | 19640041                | CC                              | TT                | 1945920957               |
| SNP_P3_30290_19643050 | NC_021162.1    | Ca_kabuli_chr03 | 19643050                | GG                              | CC                | 1945920959               |
| SNP_P3_30291_19646572 | NC_021162.1    | Ca_kabuli_chr03 | 19646572                | AA                              | GG                | 1945920961               |
| SNP_P3_30292_19646976 | NC_021162.1    | Ca_kabuli_chr03 | 19646976                | GG                              | AA                | 1945920962               |
| SNP_P3_30293_19646992 | NC_021162.1    | Ca_kabuli_chr03 | 19646992                | TT                              | CC                | 1945920964               |
| SNP_P3_30294_19646994 | NC_021162.1    | Ca_kabuli_chr03 | 19646994                | AA                              | TT                | 1945920966               |
| SNP_P3_30295_19647015 | NC_021162.1    | Ca_kabuli_chr03 | 19647015                | CC                              | TT                | 1945920968               |
| SNP_P3_30296_19651710 | NC_021162.1    | Ca_kabuli_chr03 | 19651710                | AA                              | GG                | 1945920969               |
| SNP_P3_30297_19656248 | NC_021162.1    | Ca_kabuli_chr03 | 19656248                | TT                              | AA                | 1945920971               |
| SNP_P3_30298_19656296 | NC_021162.1    | Ca_kabuli_chr03 | 19656296                | GG                              | CC                | 1945920973               |
| SNP_P3_30299_19656312 | NC_021162.1    | Ca_kabuli_chr03 | 19656312                | TT                              | GG                | 1945920975               |
| SNP_P3_30300_19674596 | NC_021162.1    | Ca_kabuli_chr03 | 19674596                | GG                              | AA                | 1945920977               |
| SNP_P3_30301_19686876 | NC_021162.1    | Ca_kabuli_chr03 | 19686876                | CC                              | TT                | 1945920978               |
| SNP_P3_30302_19688198 | NC_021162.1    | Ca_kabuli_chr03 | 19688198                | GG                              | CC                | 1945920980               |
| SNP_P3_30303_19688207 | NC_021162.1    | Ca_kabuli_chr03 | 19688207                | TT                              | CC                | 1945920982               |
| SNP_P3_30304_19688210 | NC_021162.1    | Ca_kabuli_chr03 | 19688210                | AA                              | TT                | 1945920984               |
| SNP_P3_30305_19688212 | NC_021162.1    | Ca_kabuli_chr03 | 19688212                | GG                              | TT                | 1945920985               |
| SNP_P3_30306_19688226 | NC_021162.1    | Ca_kabuli_chr03 | 19688226                | AA                              | CC                | 1945920987               |
| SNP_P3_30307_19688645 | NC_021162.1    | Ca_kabuli_chr03 | 19688645                | CC                              | TT                | 1945920989               |
| SNP_P3_30308_19688647 | NC_021162.1    | Ca_kabuli_chr03 | 19688647                | AA                              | GG                | 1945920991               |
| SNP_P3_30309_19688719 | NC_021162.1    | Ca_kabuli_chr03 | 19688719                | GG                              | AA                | 1945920993               |
| SNP_P3_30310_19688733 | NC_021162.1    | Ca_kabuli_chr03 | 19688733                | CC                              | TT                | 1945920994               |
| SNP_P3_30311_19688748 | NC_021162.1    | Ca_kabuli_chr03 | 19688748                | GG                              | AA                | 1945920996               |
| SNP_P3_30312_19696460 | NC_021162.1    | Ca_kabuli_chr03 | 19696460                | GG                              | AA                | 1945920998               |
| SNP_P3_30313_19696474 | NC_021162.1    | Ca_kabuli_chr03 | 19696474                | GG                              | AA                | 1945921000               |
| SNP_P3_30314_19696484 | NC_021162.1    | Ca_kabuli_chr03 | 19696484                | TT                              | CC                | 1945921001               |



| SNPs IDs              | Chromosome IDs | Chromosomes     | Physical positions (bp) | CDC Frontier (Reference genome) | (Pusa 256 & HPNB) | NCBI SNPdb Accession IDs |
|-----------------------|----------------|-----------------|-------------------------|---------------------------------|-------------------|--------------------------|
| SNP_P3_30315_19702398 | NC_021162.1    | Ca_kabuli_chr03 | 19702398                | AA                              | TT                | 1945921003               |
| SNP_P3_30316_19702417 | NC_021162.1    | Ca_kabuli_chr03 | 19702417                | GG                              | TT                | 1945921005               |
| SNP_P3_30317_19706038 | NC_021162.1    | Ca_kabuli_chr03 | 19706038                | TT                              | CC                | 1945921007               |
| SNP_P3_30318_19709053 | NC_021162.1    | Ca_kabuli_chr03 | 19709053                | AA                              | TT                | 1945921009               |
| SNP_P3_30319_19724448 | NC_021162.1    | Ca_kabuli_chr03 | 19724448                | AA                              | CC                | 1945921010               |
| SNP_P3_30320_19735115 | NC_021162.1    | Ca_kabuli_chr03 | 19735115                | CC                              | AA                | 1945921012               |
| SNP_P3_30321_19740917 | NC_021162.1    | Ca_kabuli_chr03 | 19740917                | CC                              | AA                | 1945921014               |
| SNP_P3_30322_19742599 | NC_021162.1    | Ca_kabuli_chr03 | 19742599                | TT                              | AA                | 1945921016               |
| SNP_P3_30323_19742796 | NC_021162.1    | Ca_kabuli_chr03 | 19742796                | GG                              | AA                | 1945921018               |
| SNP_P3_30325_19771899 | NC_021162.1    | Ca_kabuli_chr03 | 19771899                | TT                              | CC                | 1945921019               |
| SNP_P3_30326_19835536 | NC_021162.1    | Ca_kabuli_chr03 | 19835536                | AA                              | GG                | 1945921021               |
| SNP_P3_30328_19894531 | NC_021162.1    | Ca_kabuli_chr03 | 19894531                | TT                              | CC                | 1945921023               |
| SNP_P3_30329_19894799 | NC_021162.1    | Ca_kabuli_chr03 | 19894799                | AA                              | GG                | 1945921025               |
| SNP_P3_30330_19894841 | NC_021162.1    | Ca_kabuli_chr03 | 19894841                | CC                              | TT                | 1945921026               |
| SNP_P3_30331_19894844 | NC_021162.1    | Ca_kabuli_chr03 | 19894844                | GG                              | CC                | 1945921028               |
| SNP_P3_30332_19897180 | NC_021162.1    | Ca_kabuli_chr03 | 19897180                | CC                              | TT                | 1945921030               |
| SNP_P3_30333_19897205 | NC_021162.1    | Ca_kabuli_chr03 | 19897205                | CC                              | TT                | 1945921032               |
| SNP_P3_30334_19897251 | NC_021162.1    | Ca_kabuli_chr03 | 19897251                | TT                              | GG                | 1945921034               |
| SNP_P3_30335_19897252 | NC_021162.1    | Ca_kabuli_chr03 | 19897252                | CC                              | GG                | 1945921035               |
| SNP_P3_30336_19897276 | NC_021162.1    | Ca_kabuli_chr03 | 19897276                | AA                              | GG                | 1945921037               |
| SNP_P3_30337_19897277 | NC_021162.1    | Ca_kabuli_chr03 | 19897277                | CC                              | AA                | 1945921039               |
| SNP_P3_30338_19897279 | NC_021162.1    | Ca_kabuli_chr03 | 19897279                | CC                              | AA                | 1945921041               |
| SNP_P3_30339_19897301 | NC_021162.1    | Ca_kabuli_chr03 | 19897301                | AA                              | GG                | 1945921042               |
| SNP_P3_30340_19897308 | NC_021162.1    | Ca_kabuli_chr03 | 19897308                | AA                              | TT                | 1945921044               |
| SNP_P3_30341_19897511 | NC_021162.1    | Ca_kabuli_chr03 | 19897511                | TT                              | CC                | 1945921046               |
| SNP_P3_30342_19897524 | NC_021162.1    | Ca_kabuli_chr03 | 19897524                | GG                              | AA                | 1945921048               |
| SNP_P3_30343_19901997 | NC_021162.1    | Ca_kabuli_chr03 | 19901997                | AA                              | GG                | 1945921050               |
| SNP_P3_30344_19908670 | NC_021162.1    | Ca_kabuli_chr03 | 19908670                | AA                              | TT                | 1945921051               |
| SNP_P3_30345_19920306 | NC_021162.1    | Ca_kabuli_chr03 | 19920306                | GG                              | AA                | 1945921053               |
| SNP_P3_30346_19934155 | NC_021162.1    | Ca_kabuli_chr03 | 19934155                | AA                              | TT                | 1945921055               |
| SNP_P3_30347_19944849 | NC_021162.1    | Ca_kabuli_chr03 | 19944849                | TT                              | CC                | 1945921057               |
| SNP_P3_30348_19959224 | NC_021162.1    | Ca_kabuli_chr03 | 19959224                | GG                              | AA                | 1945921059               |
| SNP_P3_30349_19960101 | NC_021162.1    | Ca_kabuli_chr03 | 19960101                | AA                              | GG                | 1945921060               |
| SNP_P3_30350_19960175 | NC_021162.1    | Ca_kabuli_chr03 | 19960175                | GG                              | AA                | 1945921062               |
| SNP_P3_30351_19960239 | NC_021162.1    | Ca_kabuli_chr03 | 19960239                | AA                              | CC                | 1945921064               |
| SNP_P3_30354_19961010 | NC_021162.1    | Ca_kabuli_chr03 | 19961010                | CC                              | TT                | 1945921066               |
| SNP_P3_30355_19961016 | NC_021162.1    | Ca_kabuli_chr03 | 19961016                | AA                              | CC                | 1945921067               |
| SNP_P3_30356_19964961 | NC_021162.1    | Ca_kabuli_chr03 | 19964961                | GG                              | AA                | 1945921069               |
| SNP_P3_30357_19965047 | NC_021162.1    | Ca_kabuli_chr03 | 19965047                | CC                              | TT                | 1945921071               |
| SNP_P3_30358_19965123 | NC_021162.1    | Ca_kabuli_chr03 | 19965123                | AA                              | GG                | 1945921073               |
| SNP_P3_30359_19965226 | NC_021162.1    | Ca_kabuli_chr03 | 19965226                | AA                              | GG                | 1945921075               |
| SNP_P3_30360_19965279 | NC_021162.1    | Ca_kabuli_chr03 | 19965279                | AA                              | CC                | 1945921076               |

| SNPs IDs              | Chromosome IDs | Chromosomes     | Physical positions (bp) | CDC Frontier (Reference genome) | (Pusa 256 & HPNB) | NCBI SNPdb Accession IDs |
|-----------------------|----------------|-----------------|-------------------------|---------------------------------|-------------------|--------------------------|
| SNP_P3_30361_19965308 | NC_021162.1    | Ca_kabuli_chr03 | 19965308                | GG                              | CC                | 1945921078               |
| SNP_P3_30362_19965313 | NC_021162.1    | Ca_kabuli_chr03 | 19965313                | GG                              | AA                | 1945921080               |
| SNP_P3_30363_19965323 | NC_021162.1    | Ca_kabuli_chr03 | 19965323                | GG                              | AA                | 1945921082               |
| SNP_P3_30364_19965325 | NC_021162.1    | Ca_kabuli_chr03 | 19965325                | GG                              | AA                | 1945921083               |
| SNP_P3_30365_19967565 | NC_021162.1    | Ca_kabuli_chr03 | 19967565                | AA                              | GG                | 1945921085               |
| SNP_P3_30366_19967624 | NC_021162.1    | Ca_kabuli_chr03 | 19967624                | CC                              | TT                | 1945921087               |
| SNP_P3_30367_19967630 | NC_021162.1    | Ca_kabuli_chr03 | 19967630                | AA                              | CC                | 1945921089               |
| SNP_P3_30368_19967771 | NC_021162.1    | Ca_kabuli_chr03 | 19967771                | TT                              | CC                | 1945921091               |
| SNP_P3_30369_19967773 | NC_021162.1    | Ca_kabuli_chr03 | 19967773                | AA                              | GG                | 1945921092               |
| SNP_P3_30370_19967843 | NC_021162.1    | Ca_kabuli_chr03 | 19967843                | TT                              | CC                | 1945921094               |
| SNP_P3_30372_19968170 | NC_021162.1    | Ca_kabuli_chr03 | 19968170                | CC                              | TT                | 1945921096               |
| SNP_P3_30373_19968197 | NC_021162.1    | Ca_kabuli_chr03 | 19968197                | AA                              | GG                | 1945921098               |
| SNP_P3_30374_19970892 | NC_021162.1    | Ca_kabuli_chr03 | 19970892                | TT                              | AA                | 1945921100               |
| SNP_P3_30375_19976985 | NC_021162.1    | Ca_kabuli_chr03 | 19976985                | CC                              | AA                | 1945921101               |
| SNP_P3_30376_19984768 | NC_021162.1    | Ca_kabuli_chr03 | 19984768                | AA                              | TT                | 1945921103               |
| SNP_P3_30378_19993771 | NC_021162.1    | Ca_kabuli_chr03 | 19993771                | GG                              | AA                | 1945921105               |
| SNP_P3_30379_19993794 | NC_021162.1    | Ca_kabuli_chr03 | 19993794                | GG                              | AA                | 1945921107               |
| SNP_P3_30380_19994048 | NC_021162.1    | Ca_kabuli_chr03 | 19994048                | GG                              | CC                | 1945921108               |
| SNP_P3_30381_19994126 | NC_021162.1    | Ca_kabuli_chr03 | 19994126                | AA                              | GG                | 1945921110               |
| SNP_P3_30382_19994168 | NC_021162.1    | Ca_kabuli_chr03 | 19994168                | CC                              | AA                | 1945921112               |
| SNP_P3_30383_19994170 | NC_021162.1    | Ca_kabuli_chr03 | 19994170                | AA                              | GG                | 1945921114               |
| SNP_P3_30384_19994297 | NC_021162.1    | Ca_kabuli_chr03 | 19994297                | CC                              | TT                | 1945921116               |
| SNP_P3_30385_19994301 | NC_021162.1    | Ca_kabuli_chr03 | 19994301                | CC                              | TT                | 1945921117               |
| SNP_P3_30386_20000257 | NC_021162.1    | Ca_kabuli_chr03 | 20000257                | TT                              | AA                | 1945921119               |
| SNP_P3_30389_20011615 | NC_021162.1    | Ca_kabuli_chr03 | 20011615                | GG                              | AA                | 1945921121               |
| SNP_P3_30390_20011676 | NC_021162.1    | Ca_kabuli_chr03 | 20011676                | GG                              | TT                | 1945921123               |
| SNP_P3_30391_20011718 | NC_021162.1    | Ca_kabuli_chr03 | 20011718                | GG                              | AA                | 1945921124               |
| SNP_P3_30392_20011742 | NC_021162.1    | Ca_kabuli_chr03 | 20011742                | CC                              | TT                | 1945921126               |
| SNP_P3_30393_20011905 | NC_021162.1    | Ca_kabuli_chr03 | 20011905                | GG                              | CC                | 1945921128               |
| SNP_P3_30394_20011933 | NC_021162.1    | Ca_kabuli_chr03 | 20011933                | CC                              | TT                | 1945921130               |
| SNP_P3_30395_20012040 | NC_021162.1    | Ca_kabuli_chr03 | 20012040                | CC                              | TT                | 1945921132               |
| SNP_P3_30396_20012067 | NC_021162.1    | Ca_kabuli_chr03 | 20012067                | CC                              | TT                | 1945921133               |
| SNP_P3_30397_20012109 | NC_021162.1    | Ca_kabuli_chr03 | 20012109                | GG                              | AA                | 1945921135               |
| SNP_P3_30398_20012171 | NC_021162.1    | Ca_kabuli_chr03 | 20012171                | GG                              | AA                | 1945921137               |
| SNP_P3_30399_20012191 | NC_021162.1    | Ca_kabuli_chr03 | 20012191                | TT                              | CC                | 1945921139               |
| SNP_P3_30400_20012193 | NC_021162.1    | Ca_kabuli_chr03 | 20012193                | GG                              | AA                | 1945921141               |
| SNP_P3_30401_20012233 | NC_021162.1    | Ca_kabuli_chr03 | 20012233                | GG                              | AA                | 1945921142               |
| SNP_P3_30402_20015830 | NC_021162.1    | Ca_kabuli_chr03 | 20015830                | GG                              | AA                | 1945921144               |
| SNP_P3_30404_20075274 | NC_021162.1    | Ca_kabuli_chr03 | 20075274                | AA                              | GG                | 1945921146               |
| SNP_P3_30405_20075277 | NC_021162.1    | Ca_kabuli_chr03 | 20075277                | AA                              | GG                | 1945921148               |
| SNP_P3_30406_20081473 | NC_021162.1    | Ca_kabuli_chr03 | 20081473                | GG                              | AA                | 1945921149               |
| SNP_P3_30407_20113524 | NC_021162.1    | Ca_kabuli_chr03 | 20113524                | TT                              | CC                | 1945921151               |

| SNPs IDs              | Chromosome IDs | Chromosomes     | Physical positions (bp) | CDC Frontier (Reference genome) | (Pusa 256 & HPNB) | NCBI SNPdb Accession IDs |
|-----------------------|----------------|-----------------|-------------------------|---------------------------------|-------------------|--------------------------|
| SNP_P3_30408_20115819 | NC_021162.1    | Ca_kabuli_chr03 | 20115819                | TT                              | CC                | 1945921153               |
| SNP_P3_30409_20119236 | NC_021162.1    | Ca_kabuli_chr03 | 20119236                | CC                              | AA                | 1945921155               |
| SNP_P3_30410_20122707 | NC_021162.1    | Ca_kabuli_chr03 | 20122707                | TT                              | CC                | 1945921157               |
| SNP_P3_30412_20195780 | NC_021162.1    | Ca_kabuli_chr03 | 20195780                | CC                              | TT                | 1945921158               |
| SNP_P3_30414_20222547 | NC_021162.1    | Ca_kabuli_chr03 | 20222547                | AA                              | GG                | 1945921160               |
| SNP_P3_30415_20228419 | NC_021162.1    | Ca_kabuli_chr03 | 20228419                | AA                              | CC                | 1945921162               |
| SNP_P3_30416_20228425 | NC_021162.1    | Ca_kabuli_chr03 | 20228425                | TT                              | AA                | 1945921164               |
| SNP_P3_30417_20232380 | NC_021162.1    | Ca_kabuli_chr03 | 20232380                | TT                              | AA                | 1945921165               |
| SNP_P3_30418_20233059 | NC_021162.1    | Ca_kabuli_chr03 | 20233059                | GG                              | TT                | 1945921167               |
| SNP_P3_30419_20256047 | NC_021162.1    | Ca_kabuli_chr03 | 20256047                | GG                              | AA                | 1945921169               |
| SNP_P3_30420_20256090 | NC_021162.1    | Ca_kabuli_chr03 | 20256090                | TT                              | AA                | 1945921171               |
| SNP_P3_30421_20256109 | NC_021162.1    | Ca_kabuli_chr03 | 20256109                | AA                              | CC                | 1945921173               |
| SNP_P3_30422_20256153 | NC_021162.1    | Ca_kabuli_chr03 | 20256153                | CC                              | TT                | 1945921174               |
| SNP_P3_30423_20256207 | NC_021162.1    | Ca_kabuli_chr03 | 20256207                | GG                              | CC                | 1945921176               |
| SNP_P3_30424_20258154 | NC_021162.1    | Ca_kabuli_chr03 | 20258154                | TT                              | AA                | 1945921178               |
| SNP_P3_30425_20258270 | NC_021162.1    | Ca_kabuli_chr03 | 20258270                | TT                              | CC                | 1945921180               |
| SNP_P3_30426_20258298 | NC_021162.1    | Ca_kabuli_chr03 | 20258298                | CC                              | TT                | 1945921182               |
| SNP_P3_30427_20258317 | NC_021162.1    | Ca_kabuli_chr03 | 20258317                | AA                              | GG                | 1945921183               |
| SNP_P3_30428_20258357 | NC_021162.1    | Ca_kabuli_chr03 | 20258357                | TT                              | CC                | 1945921185               |
| SNP_P3_30429_20258551 | NC_021162.1    | Ca_kabuli_chr03 | 20258551                | TT                              | GG                | 1945921187               |
| SNP_P3_30430_20258573 | NC_021162.1    | Ca_kabuli_chr03 | 20258573                | AA                              | CC                | 1945921189               |
| SNP_P3_30431_20258600 | NC_021162.1    | Ca_kabuli_chr03 | 20258600                | GG                              | AA                | 1945921190               |
| SNP_P3_30433_20319266 | NC_021162.1    | Ca_kabuli_chr03 | 20319266                | AA                              | TT                | 1945921192               |
| SNP_P3_30435_20323809 | NC_021162.1    | Ca_kabuli_chr03 | 20323809                | CC                              | GG                | 1945921194               |
| SNP_P3_30436_20323846 | NC_021162.1    | Ca_kabuli_chr03 | 20323846                | GG                              | AA                | 1945921196               |
| SNP_P3_30437_20323960 | NC_021162.1    | Ca_kabuli_chr03 | 20323960                | TT                              | AA                | 1945921198               |
| SNP_P3_30438_20323993 | NC_021162.1    | Ca_kabuli_chr03 | 20323993                | AA                              | GG                | 1945921199               |
| SNP_P3_30439_20324152 | NC_021162.1    | Ca_kabuli_chr03 | 20324152                | CC                              | AA                | 1945921201               |
| SNP_P3_30440_20324219 | NC_021162.1    | Ca_kabuli_chr03 | 20324219                | AA                              | CC                | 1945921203               |
| SNP_P3_30441_20324232 | NC_021162.1    | Ca_kabuli_chr03 | 20324232                | TT                              | CC                | 1945921205               |
| SNP_P3_30442_20324276 | NC_021162.1    | Ca_kabuli_chr03 | 20324276                | AA                              | CC                | 1945921206               |
| SNP_P3_30443_20337567 | NC_021162.1    | Ca_kabuli_chr03 | 20337567                | CC                              | TT                | 1945921208               |
| SNP_P3_30444_20337573 | NC_021162.1    | Ca_kabuli_chr03 | 20337573                | GG                              | AA                | 1945921210               |
| SNP_P3_30445_20337575 | NC_021162.1    | Ca_kabuli_chr03 | 20337575                | TT                              | CC                | 1945921212               |
| SNP_P3_30446_20339344 | NC_021162.1    | Ca_kabuli_chr03 | 20339344                | AA                              | CC                | 1945921214               |
| SNP_P3_30447_20339414 | NC_021162.1    | Ca_kabuli_chr03 | 20339414                | AA                              | GG                | 1945921215               |
| SNP_P3_30449_20339579 | NC_021162.1    | Ca_kabuli_chr03 | 20339579                | AA                              | TT                | 1945921217               |
| SNP_P3_30450_20339580 | NC_021162.1    | Ca_kabuli_chr03 | 20339580                | TT                              | AA                | 1945921219               |
| SNP_P3_30451_20339615 | NC_021162.1    | Ca_kabuli_chr03 | 20339615                | AA                              | TT                | 1945921221               |
| SNP_P3_30452_20339667 | NC_021162.1    | Ca_kabuli_chr03 | 20339667                | CC                              | TT                | 1945921223               |
| SNP_P3_30453_20351473 | NC_021162.1    | Ca_kabuli_chr03 | 20351473                | GG                              | TT                | 1945921224               |
| SNP_P3_30454_20361905 | NC_021162.1    | Ca_kabuli_chr03 | 20361905                | GG                              | CC                | 1945921226               |

| SNPs IDs              | Chromosome IDs | Chromosomes     | Physical positions (bp) | CDC Frontier (Reference genome) | (Pusa 256 & HPNB) | NCBI SNPdb Accession IDs |
|-----------------------|----------------|-----------------|-------------------------|---------------------------------|-------------------|--------------------------|
| SNP_P3_30455_20394847 | NC_021162.1    | Ca_kabuli_chr03 | 20394847                | GG                              | CC                | 1945921228               |
| SNP_P3_30456_20398302 | NC_021162.1    | Ca_kabuli_chr03 | 20398302                | CC                              | TT                | 1945921230               |
| SNP_P3_30458_20429182 | NC_021162.1    | Ca_kabuli_chr03 | 20429182                | TT                              | AA                | 1945921231               |
| SNP_P3_30459_20436687 | NC_021162.1    | Ca_kabuli_chr03 | 20436687                | CC                              | TT                | 1945921233               |
| SNP_P3_30460_20436728 | NC_021162.1    | Ca_kabuli_chr03 | 20436728                | TT                              | CC                | 1945921235               |
| SNP_P3_30461_20438634 | NC_021162.1    | Ca_kabuli_chr03 | 20438634                | TT                              | CC                | 1945921237               |
| SNP_P3_30462_20438635 | NC_021162.1    | Ca_kabuli_chr03 | 20438635                | GG                              | AA                | 1945921239               |
| SNP_P3_30463_20438698 | NC_021162.1    | Ca_kabuli_chr03 | 20438698                | CC                              | TT                | 1945921240               |
| SNP_P3_30464_20438708 | NC_021162.1    | Ca_kabuli_chr03 | 20438708                | CC                              | AA                | 1945921242               |
| SNP_P3_30465_20438777 | NC_021162.1    | Ca_kabuli_chr03 | 20438777                | TT                              | CC                | 1945921244               |
| SNP_P3_30466_20438787 | NC_021162.1    | Ca_kabuli_chr03 | 20438787                | AA                              | CC                | 1945921246               |
| SNP_P3_30467_20439004 | NC_021162.1    | Ca_kabuli_chr03 | 20439004                | GG                              | TT                | 1945921247               |
| SNP_P3_30468_20439013 | NC_021162.1    | Ca_kabuli_chr03 | 20439013                | AA                              | TT                | 1945921249               |
| SNP_P3_30469_20439066 | NC_021162.1    | Ca_kabuli_chr03 | 20439066                | GG                              | AA                | 1945921251               |
| SNP_P3_30470_20439091 | NC_021162.1    | Ca_kabuli_chr03 | 20439091                | AA                              | CC                | 1945921253               |
| SNP_P3_30471_20487826 | NC_021162.1    | Ca_kabuli_chr03 | 20487826                | TT                              | CC                | 1945921255               |
| SNP_P3_30472_20488175 | NC_021162.1    | Ca_kabuli_chr03 | 20488175                | AA                              | GG                | 1945921256               |
| SNP_P3_30474_20519103 | NC_021162.1    | Ca_kabuli_chr03 | 20519103                | CC                              | TT                | 1945921258               |
| SNP_P3_30475_20548200 | NC_021162.1    | Ca_kabuli_chr03 | 20548200                | CC                              | AA                | 1945921260               |
| SNP_P3_30476_20602832 | NC_021162.1    | Ca_kabuli_chr03 | 20602832                | GG                              | AA                | 1945921262               |
| SNP_P3_30478_20621269 | NC_021162.1    | Ca_kabuli_chr03 | 20621269                | GG                              | CC                | 1945921264               |
| SNP_P3_30479_20627220 | NC_021162.1    | Ca_kabuli_chr03 | 20627220                | CC                              | TT                | 1945921265               |
| SNP_P3_30480_20661161 | NC_021162.1    | Ca_kabuli_chr03 | 20661161                | AA                              | CC                | 1945921267               |
| SNP_P3_30481_20698888 | NC_021162.1    | Ca_kabuli_chr03 | 20698888                | AA                              | TT                | 1945921269               |
| SNP_P3_30482_20698903 | NC_021162.1    | Ca_kabuli_chr03 | 20698903                | GG                              | AA                | 1945921271               |
| SNP_P3_30483_20698911 | NC_021162.1    | Ca_kabuli_chr03 | 20698911                | AA                              | GG                | 1945921272               |
| SNP_P3_30484_20699533 | NC_021162.1    | Ca_kabuli_chr03 | 20699533                | GG                              | CC                | 1945921274               |
| SNP_P3_30485_20699584 | NC_021162.1    | Ca_kabuli_chr03 | 20699584                | GG                              | AA                | 1945921276               |
| SNP_P3_30486_20706815 | NC_021162.1    | Ca_kabuli_chr03 | 20706815                | GG                              | CC                | 1945921278               |
| SNP_P3_30487_20722870 | NC_021162.1    | Ca_kabuli_chr03 | 20722870                | TT                              | CC                | 1945921280               |
| SNP_P3_30488_20724295 | NC_021162.1    | Ca_kabuli_chr03 | 20724295                | CC                              | TT                | 1945921281               |
| SNP_P3_30489_20728260 | NC_021162.1    | Ca_kabuli_chr03 | 20728260                | CC                              | TT                | 1945921283               |
| SNP_P3_30490_20728620 | NC_021162.1    | Ca_kabuli_chr03 | 20728620                | AA                              | GG                | 1945921285               |
| SNP_P3_30491_20728705 | NC_021162.1    | Ca_kabuli_chr03 | 20728705                | AA                              | CC                | 1945921287               |
| SNP_P3_30492_20728706 | NC_021162.1    | Ca_kabuli_chr03 | 20728706                | TT                              | AA                | 1945921288               |
| SNP_P3_30493_20728852 | NC_021162.1    | Ca_kabuli_chr03 | 20728852                | TT                              | CC                | 1945921290               |
| SNP_P3_30494_20730663 | NC_021162.1    | Ca_kabuli_chr03 | 20730663                | CC                              | TT                | 1945921292               |
| SNP_P3_30495_20730674 | NC_021162.1    | Ca_kabuli_chr03 | 20730674                | AA                              | CC                | 1945921294               |
| SNP_P3_30496_20730679 | NC_021162.1    | Ca_kabuli_chr03 | 20730679                | GG                              | AA                | 1945921296               |
| SNP_P3_30497_20730721 | NC_021162.1    | Ca_kabuli_chr03 | 20730721                | GG                              | TT                | 1945921297               |
| SNP_P3_30498_20730724 | NC_021162.1    | Ca_kabuli_chr03 | 20730724                | TT                              | GG                | 1945921299               |
| SNP_P3_30499_20731135 | NC_021162.1    | Ca_kabuli_chr03 | 20731135                | GG                              | AA                | 1945921301               |

| SNPs IDs              | Chromosome IDs | Chromosomes     | Physical positions (bp) | CDC Frontier (Reference genome) | (Pusa 256 & HPNB) | NCBI SNPdb Accession IDs |
|-----------------------|----------------|-----------------|-------------------------|---------------------------------|-------------------|--------------------------|
| SNP_P3_30500_20738438 | NC_021162.1    | Ca_kabuli_chr03 | 20738438                | GG                              | AA                | 1945921303               |
| SNP_P3_30501_20738493 | NC_021162.1    | Ca_kabuli_chr03 | 20738493                | CC                              | TT                | 1945921305               |
| SNP_P3_30502_20738510 | NC_021162.1    | Ca_kabuli_chr03 | 20738510                | AA                              | CC                | 1945921306               |
| SNP_P3_30503_20738578 | NC_021162.1    | Ca_kabuli_chr03 | 20738578                | TT                              | CC                | 1945921308               |
| SNP_P3_30504_20738789 | NC_021162.1    | Ca_kabuli_chr03 | 20738789                | CC                              | TT                | 1945921310               |
| SNP_P3_30505_20738795 | NC_021162.1    | Ca_kabuli_chr03 | 20738795                | AA                              | GG                | 1945921312               |
| SNP_P3_30506_20738820 | NC_021162.1    | Ca_kabuli_chr03 | 20738820                | CC                              | TT                | 1945921313               |
| SNP_P3_30507_20739053 | NC_021162.1    | Ca_kabuli_chr03 | 20739053                | GG                              | TT                | 1945921315               |
| SNP_P3_30508_20739072 | NC_021162.1    | Ca_kabuli_chr03 | 20739072                | GG                              | AA                | 1945921317               |
| SNP_P3_30509_20744226 | NC_021162.1    | Ca_kabuli_chr03 | 20744226                | AA                              | GG                | 1945921319               |
| SNP_P3_30510_20744246 | NC_021162.1    | Ca_kabuli_chr03 | 20744246                | GG                              | AA                | 1945921321               |
| SNP_P3_30511_20744322 | NC_021162.1    | Ca_kabuli_chr03 | 20744322                | GG                              | TT                | 1945921322               |
| SNP_P3_30512_20744326 | NC_021162.1    | Ca_kabuli_chr03 | 20744326                | TT                              | GG                | 1945921324               |
| SNP_P3_30513_20744412 | NC_021162.1    | Ca_kabuli_chr03 | 20744412                | AA                              | TT                | 1945921326               |
| SNP_P3_30514_20744414 | NC_021162.1    | Ca_kabuli_chr03 | 20744414                | TT                              | CC                | 1945921328               |
| SNP_P3_30515_20744433 | NC_021162.1    | Ca_kabuli_chr03 | 20744433                | AA                              | GG                | 1945921329               |
| SNP_P3_30516_20744474 | NC_021162.1    | Ca_kabuli_chr03 | 20744474                | TT                              | GG                | 1945921331               |
| SNP_P3_30517_20744491 | NC_021162.1    | Ca_kabuli_chr03 | 20744491                | GG                              | TT                | 1945921333               |
| SNP_P3_30518_20744515 | NC_021162.1    | Ca_kabuli_chr03 | 20744515                | AA                              | TT                | 1945921335               |
| SNP_P3_30519_20744525 | NC_021162.1    | Ca_kabuli_chr03 | 20744525                | GG                              | AA                | 1945921337               |
| SNP_P3_30520_20744550 | NC_021162.1    | Ca_kabuli_chr03 | 20744550                | GG                              | CC                | 1945921338               |
| SNP_P3_30521_20744564 | NC_021162.1    | Ca_kabuli_chr03 | 20744564                | CC                              | TT                | 1945921340               |
| SNP_P3_30522_20746140 | NC_021162.1    | Ca_kabuli_chr03 | 20746140                | CC                              | GG                | 1945921342               |
| SNP_P3_30524_20773721 | NC_021162.1    | Ca_kabuli_chr03 | 20773721                | AA                              | GG                | 1945921344               |
| SNP_P3_30526_20860226 | NC_021162.1    | Ca_kabuli_chr03 | 20860226                | CC                              | TT                | 1945921345               |
| SNP_P3_30527_20887793 | NC_021162.1    | Ca_kabuli_chr03 | 20887793                | CC                              | TT                | 1945921347               |
| SNP_P3_30528_20896548 | NC_021162.1    | Ca_kabuli_chr03 | 20896548                | AA                              | CC                | 1945921349               |
| SNP_P3_30529_20896563 | NC_021162.1    | Ca_kabuli_chr03 | 20896563                | AA                              | GG                | 1945921351               |
| SNP_P3_30530_20896581 | NC_021162.1    | Ca_kabuli_chr03 | 20896581                | GG                              | AA                | 1945921353               |
| SNP_P3_30531_20896604 | NC_021162.1    | Ca_kabuli_chr03 | 20896604                | AA                              | TT                | 1945921354               |
| SNP_P3_30532_20896610 | NC_021162.1    | Ca_kabuli_chr03 | 20896610                | TT                              | AA                | 1945921356               |
| SNP_P3_30533_20896776 | NC_021162.1    | Ca_kabuli_chr03 | 20896776                | TT                              | CC                | 1945921358               |
| SNP_P3_30534_20899410 | NC_021162.1    | Ca_kabuli_chr03 | 20899410                | AA                              | GG                | 1945921360               |
| SNP_P3_30535_20899436 | NC_021162.1    | Ca_kabuli_chr03 | 20899436                | TT                              | CC                | 1945921361               |
| SNP_P3_30536_20902283 | NC_021162.1    | Ca_kabuli_chr03 | 20902283                | TT                              | CC                | 1945921363               |
| SNP_P3_30537_20902338 | NC_021162.1    | Ca_kabuli_chr03 | 20902338                | CC                              | TT                | 1945921365               |
| SNP_P3_30538_20902371 | NC_021162.1    | Ca_kabuli_chr03 | 20902371                | TT                              | CC                | 1945921367               |
| SNP_P3_30539_20902376 | NC_021162.1    | Ca_kabuli_chr03 | 20902376                | TT                              | CC                | 1945921369               |
| SNP_P3_30540_20903121 | NC_021162.1    | Ca_kabuli_chr03 | 20903121                | CC                              | TT                | 1945921370               |
| SNP_P3_30541_20912856 | NC_021162.1    | Ca_kabuli_chr03 | 20912856                | AA                              | GG                | 1945921372               |
| SNP_P3_30542_20913600 | NC_021162.1    | Ca_kabuli_chr03 | 20913600                | CC                              | TT                | 1945921374               |
| SNP_P3_30543_20913615 | NC_021162.1    | Ca_kabuli_chr03 | 20913615                | CC                              | TT                | 1945921376               |

| SNPs IDs              | Chromosome IDs | Chromosomes     | Physical positions (bp) | CDC Frontier (Reference genome) | (Pusa 256 & HPNB) | NCBI SNPdb Accession IDs |
|-----------------------|----------------|-----------------|-------------------------|---------------------------------|-------------------|--------------------------|
| SNP_P3_30544_20933472 | NC_021162.1    | Ca_kabuli_chr03 | 20933472                | AA                              | CC                | 1945921377               |
| SNP_P3_30545_20933482 | NC_021162.1    | Ca_kabuli_chr03 | 20933482                | AA                              | GG                | 1945921379               |
| SNP_P3_30546_20933493 | NC_021162.1    | Ca_kabuli_chr03 | 20933493                | TT                              | AA                | 1945921381               |
| SNP_P3_30547_20933563 | NC_021162.1    | Ca_kabuli_chr03 | 20933563                | AA                              | GG                | 1945921383               |
| SNP_P3_30548_20933572 | NC_021162.1    | Ca_kabuli_chr03 | 20933572                | CC                              | GG                | 1945921384               |
| SNP_P3_30549_20940587 | NC_021162.1    | Ca_kabuli_chr03 | 20940587                | CC                              | TT                | 1945921386               |
| SNP_P3_30550_20944439 | NC_021162.1    | Ca_kabuli_chr03 | 20944439                | GG                              | AA                | 1945921388               |
| SNP_P3_30551_20944443 | NC_021162.1    | Ca_kabuli_chr03 | 20944443                | TT                              | GG                | 1945921390               |
| SNP_P3_30552_20945436 | NC_021162.1    | Ca_kabuli_chr03 | 20945436                | AA                              | GG                | 1945921392               |
| SNP_P3_30555_20970480 | NC_021162.1    | Ca_kabuli_chr03 | 20970480                | CC                              | GG                | 1945921393               |
| SNP_P3_30556_20970483 | NC_021162.1    | Ca_kabuli_chr03 | 20970483                | AA                              | TT                | 1945921395               |
| SNP_P3_30557_20988627 | NC_021162.1    | Ca_kabuli_chr03 | 20988627                | GG                              | AA                | 1945921397               |
| SNP_P3_30559_21004873 | NC_021162.1    | Ca_kabuli_chr03 | 21004873                | AA                              | GG                | 1945921399               |
| SNP_P3_30560_21010514 | NC_021162.1    | Ca_kabuli_chr03 | 21010514                | AA                              | GG                | 1945921400               |
| SNP_P3_30561_21010520 | NC_021162.1    | Ca_kabuli_chr03 | 21010520                | TT                              | CC                | 1945921402               |
| SNP_P3_30562_21012514 | NC_021162.1    | Ca_kabuli_chr03 | 21012514                | CC                              | TT                | 1945921404               |
| SNP_P3_30563_21012898 | NC_021162.1    | Ca_kabuli_chr03 | 21012898                | TT                              | CC                | 1945921406               |
| SNP_P3_30564_21012925 | NC_021162.1    | Ca_kabuli_chr03 | 21012925                | GG                              | AA                | 1945921407               |
| SNP_P3_30565_21012937 | NC_021162.1    | Ca_kabuli_chr03 | 21012937                | AA                              | CC                | 1945921409               |
| SNP_P3_30566_21063203 | NC_021162.1    | Ca_kabuli_chr03 | 21063203                | CC                              | TT                | 1945921411               |
| SNP_P3_30567_21066521 | NC_021162.1    | Ca_kabuli_chr03 | 21066521                | AA                              | CC                | 1945921413               |
| SNP_P3_30568_21066535 | NC_021162.1    | Ca_kabuli_chr03 | 21066535                | AA                              | GG                | 1945921415               |
| SNP_P3_30569_21066541 | NC_021162.1    | Ca_kabuli_chr03 | 21066541                | AA                              | GG                | 1945921416               |
| SNP_P3_30570_21066549 | NC_021162.1    | Ca_kabuli_chr03 | 21066549                | CC                              | AA                | 1945921418               |
| SNP_P3_30571_21067143 | NC_021162.1    | Ca_kabuli_chr03 | 21067143                | CC                              | TT                | 1945921420               |
| SNP_P3_30572_21068715 | NC_021162.1    | Ca_kabuli_chr03 | 21068715                | CC                              | TT                | 1945921422               |
| SNP_P3_30573_21068733 | NC_021162.1    | Ca_kabuli_chr03 | 21068733                | TT                              | AA                | 1945921423               |
| SNP_P3_30574_21068761 | NC_021162.1    | Ca_kabuli_chr03 | 21068761                | CC                              | TT                | 1945921425               |
| SNP_P3_30575_21068777 | NC_021162.1    | Ca_kabuli_chr03 | 21068777                | CC                              | AA                | 1945921427               |
| SNP_P3_30577_21068831 | NC_021162.1    | Ca_kabuli_chr03 | 21068831                | AA                              | GG                | 1945921429               |
| SNP_P3_30578_21068834 | NC_021162.1    | Ca_kabuli_chr03 | 21068834                | AA                              | GG                | 1945921431               |
| SNP_P3_30579_21068846 | NC_021162.1    | Ca_kabuli_chr03 | 21068846                | GG                              | CC                | 1945921432               |
| SNP_P3_30580_21069019 | NC_021162.1    | Ca_kabuli_chr03 | 21069019                | TT                              | AA                | 1945921434               |
| SNP_P3_30581_21069041 | NC_021162.1    | Ca_kabuli_chr03 | 21069041                | TT                              | CC                | 1945921436               |
| SNP_P3_30582_21069111 | NC_021162.1    | Ca_kabuli_chr03 | 21069111                | CC                              | AA                | 1945921438               |
| SNP_P3_30583_21069148 | NC_021162.1    | Ca_kabuli_chr03 | 21069148                | CC                              | TT                | 1945921439               |
| SNP_P3_30584_21086854 | NC_021162.1    | Ca_kabuli_chr03 | 21086854                | TT                              | CC                | 1945921441               |
| SNP_P3_30586_21112515 | NC_021162.1    | Ca_kabuli_chr03 | 21112515                | GG                              | AA                | 1945921443               |
| SNP_P3_30587_21135091 | NC_021162.1    | Ca_kabuli_chr03 | 21135091                | GG                              | AA                | 1945921445               |
| SNP_P3_30588_21163928 | NC_021162.1    | Ca_kabuli_chr03 | 21163928                | AA                              | GG                | 1945921446               |
| SNP_P3_30589_21186380 | NC_021162.1    | Ca_kabuli_chr03 | 21186380                | AA                              | TT                | 1945921448               |
| SNP_P3_30590_21186394 | NC_021162.1    | Ca_kabuli_chr03 | 21186394                | GG                              | AA                | 1945921450               |

| SNPs IDs              | Chromosome IDs | Chromosomes     | Physical positions (bp) | CDC Frontier (Reference genome) | (Pusa 256 & HPNB) | NCBI SNPdb Accession IDs |
|-----------------------|----------------|-----------------|-------------------------|---------------------------------|-------------------|--------------------------|
| SNP_P3_30591_21186422 | NC_021162.1    | Ca_kabuli_chr03 | 21186422                | TT                              | AA                | 1945921452               |
| SNP_P3_30592_21186782 | NC_021162.1    | Ca_kabuli_chr03 | 21186782                | TT                              | GG                | 1945921454               |
| SNP_P3_30593_21189131 | NC_021162.1    | Ca_kabuli_chr03 | 21189131                | CC                              | TT                | 1945921455               |
| SNP_P3_30595_21200971 | NC_021162.1    | Ca_kabuli_chr03 | 21200971                | TT                              | CC                | 1945921457               |
| SNP_P3_30598_21215465 | NC_021162.1    | Ca_kabuli_chr03 | 21215465                | AA                              | TT                | 1945921459               |
| SNP_P3_30599_21215948 | NC_021162.1    | Ca_kabuli_chr03 | 21215948                | AA                              | GG                | 1945921461               |
| SNP_P3_30600_21243762 | NC_021162.1    | Ca_kabuli_chr03 | 21243762                | CC                              | TT                | 1945921462               |
| SNP_P3_30601_21243788 | NC_021162.1    | Ca_kabuli_chr03 | 21243788                | TT                              | CC                | 1945921464               |
| SNP_P3_30602_21243791 | NC_021162.1    | Ca_kabuli_chr03 | 21243791                | TT                              | CC                | 1945921466               |
| SNP_P3_30603_21243906 | NC_021162.1    | Ca_kabuli_chr03 | 21243906                | TT                              | CC                | 1945921468               |
| SNP_P3_30604_21243912 | NC_021162.1    | Ca_kabuli_chr03 | 21243912                | TT                              | CC                | 1945921470               |
| SNP_P3_30605_21243940 | NC_021162.1    | Ca_kabuli_chr03 | 21243940                | TT                              | CC                | 1945921471               |
| SNP_P3_30606_21243941 | NC_021162.1    | Ca_kabuli_chr03 | 21243941                | AA                              | GG                | 1945921473               |
| SNP_P3_30607_21243942 | NC_021162.1    | Ca_kabuli_chr03 | 21243942                | CC                              | AA                | 1945921475               |
| SNP_P3_30608_21243946 | NC_021162.1    | Ca_kabuli_chr03 | 21243946                | AA                              | CC                | 1945921477               |
| SNP_P3_30609_21243999 | NC_021162.1    | Ca_kabuli_chr03 | 21243999                | TT                              | CC                | 1945921478               |
| SNP_P3_30610_21244002 | NC_021162.1    | Ca_kabuli_chr03 | 21244002                | GG                              | TT                | 1945921480               |
| SNP_P3_30611_21244007 | NC_021162.1    | Ca_kabuli_chr03 | 21244007                | TT                              | CC                | 1945921482               |
| SNP_P3_30612_21244043 | NC_021162.1    | Ca_kabuli_chr03 | 21244043                | CC                              | TT                | 1945921484               |
| SNP_P3_30613_21248817 | NC_021162.1    | Ca_kabuli_chr03 | 21248817                | AA                              | GG                | 1945921485               |
| SNP_P3_30616_21303410 | NC_021162.1    | Ca_kabuli_chr03 | 21303410                | GG                              | AA                | 1945921487               |
| SNP_P3_30618_21322354 | NC_021162.1    | Ca_kabuli_chr03 | 21322354                | CC                              | TT                | 1945921489               |
| SNP_P3_30619_21331434 | NC_021162.1    | Ca_kabuli_chr03 | 21331434                | CC                              | TT                | 1945921491               |
| SNP_P3_30620_21331822 | NC_021162.1    | Ca_kabuli_chr03 | 21331822                | AA                              | GG                | 1945921493               |
| SNP_P3_30621_21331835 | NC_021162.1    | Ca_kabuli_chr03 | 21331835                | AA                              | CC                | 1945921494               |
| SNP_P3_30622_21331850 | NC_021162.1    | Ca_kabuli_chr03 | 21331850                | AA                              | CC                | 1945921496               |
| SNP_P3_30623_21331872 | NC_021162.1    | Ca_kabuli_chr03 | 21331872                | AA                              | TT                | 1945921498               |
| SNP_P3_30624_21356265 | NC_021162.1    | Ca_kabuli_chr03 | 21356265                | GG                              | AA                | 1945921500               |
| SNP_P3_30625_21356341 | NC_021162.1    | Ca_kabuli_chr03 | 21356341                | AA                              | GG                | 1945921501               |
| SNP_P3_30626_21357474 | NC_021162.1    | Ca_kabuli_chr03 | 21357474                | AA                              | TT                | 1945921503               |
| SNP_P3_30627_21357492 | NC_021162.1    | Ca_kabuli_chr03 | 21357492                | TT                              | CC                | 1945921505               |
| SNP_P3_30628_21362167 | NC_021162.1    | Ca_kabuli_chr03 | 21362167                | CC                              | GG                | 1945921507               |
| SNP_P3_30629_21362192 | NC_021162.1    | Ca_kabuli_chr03 | 21362192                | TT                              | CC                | 1945921508               |
| SNP_P3_30630_21419129 | NC_021162.1    | Ca_kabuli_chr03 | 21419129                | TT                              | AA                | 1945921510               |
| SNP_P3_30631_21419152 | NC_021162.1    | Ca_kabuli_chr03 | 21419152                | GG                              | TT                | 1945921512               |
| SNP_P3_30633_21419465 | NC_021162.1    | Ca_kabuli_chr03 | 21419465                | GG                              | AA                | 1945921514               |
| SNP_P3_30634_21420355 | NC_021162.1    | Ca_kabuli_chr03 | 21420355                | AA                              | CC                | 1945921516               |
| SNP_P3_30635_21422167 | NC_021162.1    | Ca_kabuli_chr03 | 21422167                | TT                              | GG                | 1945921517               |
| SNP_P3_30636_21422190 | NC_021162.1    | Ca_kabuli_chr03 | 21422190                | TT                              | CC                | 1945921519               |
| SNP_P3_30637_21430425 | NC_021162.1    | Ca_kabuli_chr03 | 21430425                | GG                              | CC                | 1945921521               |
| SNP_P3_30638_21482040 | NC_021162.1    | Ca_kabuli_chr03 | 21482040                | TT                              | CC                | 1945921523               |
| SNP_P3_30639_21489653 | NC_021162.1    | Ca_kabuli_chr03 | 21489653                | TT                              | CC                | 1945921524               |

| SNPs IDs              | Chromosome IDs | Chromosomes     | Physical positions (bp) | CDC Frontier (Reference genome) | (Pusa 256 & HPNB) | NCBI SNPdb Accession IDs |
|-----------------------|----------------|-----------------|-------------------------|---------------------------------|-------------------|--------------------------|
| SNP_P3_30640_21506877 | NC_021162.1    | Ca_kabuli_chr03 | 21506877                | GG                              | AA                | 1945921526               |
| SNP_P3_30641_21523214 | NC_021162.1    | Ca_kabuli_chr03 | 21523214                | TT                              | CC                | 1945921528               |
| SNP_P3_30642_21524379 | NC_021162.1    | Ca_kabuli_chr03 | 21524379                | GG                              | AA                | 1945921530               |
| SNP_P3_30643_21524397 | NC_021162.1    | Ca_kabuli_chr03 | 21524397                | CC                              | TT                | 1945921531               |
| SNP_P3_30644_21583604 | NC_021162.1    | Ca_kabuli_chr03 | 21583604                | AA                              | TT                | 1945921533               |
| SNP_P3_30645_21583609 | NC_021162.1    | Ca_kabuli_chr03 | 21583609                | TT                              | AA                | 1945921535               |
| SNP_P3_30646_21583610 | NC_021162.1    | Ca_kabuli_chr03 | 21583610                | GG                              | AA                | 1945921537               |
| SNP_P3_30647_21583629 | NC_021162.1    | Ca_kabuli_chr03 | 21583629                | AA                              | TT                | 1945921539               |
| SNP_P3_30649_21589894 | NC_021162.1    | Ca_kabuli_chr03 | 21589894                | GG                              | AA                | 1945921540               |
| SNP_P3_30652_21635312 | NC_021162.1    | Ca_kabuli_chr03 | 21635312                | AA                              | TT                | 1945921542               |
| SNP_P3_30654_21635388 | NC_021162.1    | Ca_kabuli_chr03 | 21635388                | AA                              | TT                | 1945921544               |
| SNP_P3_30655_21635390 | NC_021162.1    | Ca_kabuli_chr03 | 21635390                | AA                              | GG                | 1945921546               |
| SNP_P3_30656_21635417 | NC_021162.1    | Ca_kabuli_chr03 | 21635417                | GG                              | TT                | 1945921547               |
| SNP_P3_30657_21635466 | NC_021162.1    | Ca_kabuli_chr03 | 21635466                | AA                              | GG                | 1945921549               |
| SNP_P3_30659_21635661 | NC_021162.1    | Ca_kabuli_chr03 | 21635661                | GG                              | TT                | 1945921551               |
| SNP_P3_30660_21635673 | NC_021162.1    | Ca_kabuli_chr03 | 21635673                | AA                              | TT                | 1945921553               |
| SNP_P3_30661_21635675 | NC_021162.1    | Ca_kabuli_chr03 | 21635675                | GG                              | AA                | 1945921555               |
| SNP_P3_30662_21635688 | NC_021162.1    | Ca_kabuli_chr03 | 21635688                | AA                              | GG                | 1945921556               |
| SNP_P3_30663_21635766 | NC_021162.1    | Ca_kabuli_chr03 | 21635766                | TT                              | CC                | 1945921558               |
| SNP_P3_30664_21635852 | NC_021162.1    | Ca_kabuli_chr03 | 21635852                | GG                              | TT                | 1945921560               |
| SNP_P3_30665_21635859 | NC_021162.1    | Ca_kabuli_chr03 | 21635859                | GG                              | TT                | 1945921562               |
| SNP_P3_30666_21635875 | NC_021162.1    | Ca_kabuli_chr03 | 21635875                | GG                              | AA                | 1945921563               |
| SNP_P3_30667_21636945 | NC_021162.1    | Ca_kabuli_chr03 | 21636945                | CC                              | TT                | 1945921565               |
| SNP_P3_30668_21674619 | NC_021162.1    | Ca_kabuli_chr03 | 21674619                | GG                              | AA                | 1945921567               |
| SNP_P3_30669_21679855 | NC_021162.1    | Ca_kabuli_chr03 | 21679855                | CC                              | TT                | 1945921569               |
| SNP_P3_30670_21688532 | NC_021162.1    | Ca_kabuli_chr03 | 21688532                | AA                              | GG                | 1945921570               |
| SNP_P3_30672_21766936 | NC_021162.1    | Ca_kabuli_chr03 | 21766936                | CC                              | AA                | 1945921572               |
| SNP_P3_30673_21771344 | NC_021162.1    | Ca_kabuli_chr03 | 21771344                | CC                              | TT                | 1945921574               |
| SNP_P3_30674_21771347 | NC_021162.1    | Ca_kabuli_chr03 | 21771347                | TT                              | GG                | 1945921576               |
| SNP_P3_30675_21806958 | NC_021162.1    | Ca_kabuli_chr03 | 21806958                | CC                              | TT                | 1945921578               |
| SNP_P3_30676_21818936 | NC_021162.1    | Ca_kabuli_chr03 | 21818936                | CC                              | TT                | 1945921579               |
| SNP_P3_30677_21833412 | NC_021162.1    | Ca_kabuli_chr03 | 21833412                | CC                              | TT                | 1945921581               |
| SNP_P3_30678_21881295 | NC_021162.1    | Ca_kabuli_chr03 | 21881295                | AA                              | GG                | 1945921583               |
| SNP_P3_30679_21882109 | NC_021162.1    | Ca_kabuli_chr03 | 21882109                | GG                              | CC                | 1945921585               |
| SNP_P3_30680_21883020 | NC_021162.1    | Ca_kabuli_chr03 | 21883020                | GG                              | AA                | 1945921586               |
| SNP_P3_30682_21885772 | NC_021162.1    | Ca_kabuli_chr03 | 21885772                | AA                              | CC                | 1945921588               |
| SNP_P3_30683_21885775 | NC_021162.1    | Ca_kabuli_chr03 | 21885775                | AA                              | GG                | 1945921590               |
| SNP_P3_30684_21886198 | NC_021162.1    | Ca_kabuli_chr03 | 21886198                | GG                              | AA                | 1945921592               |
| SNP_P3_30685_21887559 | NC_021162.1    | Ca_kabuli_chr03 | 21887559                | GG                              | AA                | 1945921593               |
| SNP_P3_30686_21887578 | NC_021162.1    | Ca_kabuli_chr03 | 21887578                | GG                              | AA                | 1945921595               |
| SNP_P3_30687_21887585 | NC_021162.1    | Ca_kabuli_chr03 | 21887585                | CC                              | TT                | 1945921597               |
| SNP_P3_30688_21887588 | NC_021162.1    | Ca_kabuli_chr03 | 21887588                | AA                              | TT                | 1945921599               |



| SNPs IDs              | Chromosome IDs | Chromosomes     | Physical positions (bp) | CDC Frontier (Reference genome) | (Pusa 256 & HPNB) | NCBI SNPdb Accession IDs |
|-----------------------|----------------|-----------------|-------------------------|---------------------------------|-------------------|--------------------------|
| SNP_P3_30689_21887592 | NC_021162.1    | Ca_kabuli_chr03 | 21887592                | TT                              | CC                | 1945921601               |
| SNP_P3_30690_21887593 | NC_021162.1    | Ca_kabuli_chr03 | 21887593                | TT                              | CC                | 1945921602               |
| SNP_P3_30691_21887705 | NC_021162.1    | Ca_kabuli_chr03 | 21887705                | GG                              | AA                | 1945921604               |
| SNP_P3_30692_21890831 | NC_021162.1    | Ca_kabuli_chr03 | 21890831                | TT                              | CC                | 1945921606               |
| SNP_P3_30693_21891642 | NC_021162.1    | Ca_kabuli_chr03 | 21891642                | TT                              | CC                | 1945921608               |
| SNP_P3_30694_21891697 | NC_021162.1    | Ca_kabuli_chr03 | 21891697                | AA                              | CC                | 1945921609               |
| SNP_P3_30695_21891798 | NC_021162.1    | Ca_kabuli_chr03 | 21891798                | GG                              | TT                | 1945921611               |
| SNP_P3_30696_21892123 | NC_021162.1    | Ca_kabuli_chr03 | 21892123                | AA                              | TT                | 1945921613               |
| SNP_P3_30697_21892130 | NC_021162.1    | Ca_kabuli_chr03 | 21892130                | TT                              | CC                | 1945921615               |
| SNP_P3_30698_21892171 | NC_021162.1    | Ca_kabuli_chr03 | 21892171                | CC                              | TT                | 1945921616               |
| SNP_P3_30699_21892950 | NC_021162.1    | Ca_kabuli_chr03 | 21892950                | AA                              | GG                | 1945921618               |
| SNP_P3_30700_21893100 | NC_021162.1    | Ca_kabuli_chr03 | 21893100                | GG                              | TT                | 1945921620               |
| SNP_P3_30701_21893398 | NC_021162.1    | Ca_kabuli_chr03 | 21893398                | AA                              | GG                | 1945921622               |
| SNP_P3_30702_21895333 | NC_021162.1    | Ca_kabuli_chr03 | 21895333                | CC                              | AA                | 1945921624               |
| SNP_P3_30703_21895537 | NC_021162.1    | Ca_kabuli_chr03 | 21895537                | GG                              | AA                | 1945921625               |
| SNP_P3_30704_21895626 | NC_021162.1    | Ca_kabuli_chr03 | 21895626                | CC                              | AA                | 1945921627               |
| SNP_P3_30705_21895702 | NC_021162.1    | Ca_kabuli_chr03 | 21895702                | CC                              | TT                | 1945921629               |
| SNP_P3_30706_21895883 | NC_021162.1    | Ca_kabuli_chr03 | 21895883                | AA                              | TT                | 1945921631               |
| SNP_P3_30707_21895884 | NC_021162.1    | Ca_kabuli_chr03 | 21895884                | AA                              | TT                | 1945921632               |
| SNP_P3_30708_21895963 | NC_021162.1    | Ca_kabuli_chr03 | 21895963                | AA                              | TT                | 1945921634               |
| SNP_P3_30709_21895964 | NC_021162.1    | Ca_kabuli_chr03 | 21895964                | AA                              | TT                | 1945921636               |
| SNP_P3_30710_21897359 | NC_021162.1    | Ca_kabuli_chr03 | 21897359                | AA                              | CC                | 1945921638               |
| SNP_P3_30711_21897504 | NC_021162.1    | Ca_kabuli_chr03 | 21897504                | AA                              | GG                | 1945921640               |
| SNP_P3_30712_21897526 | NC_021162.1    | Ca_kabuli_chr03 | 21897526                | AA                              | GG                | 1945921641               |
| SNP_P3_30713_21897746 | NC_021162.1    | Ca_kabuli_chr03 | 21897746                | GG                              | AA                | 1945921643               |
| SNP_P3_30715_21898771 | NC_021162.1    | Ca_kabuli_chr03 | 21898771                | AA                              | CC                | 1945921645               |
| SNP_P3_30716_21899661 | NC_021162.1    | Ca_kabuli_chr03 | 21899661                | GG                              | AA                | 1945921647               |
| SNP_P3_30717_21900017 | NC_021162.1    | Ca_kabuli_chr03 | 21900017                | CC                              | AA                | 1945921648               |
| SNP_P3_30718_21904319 | NC_021162.1    | Ca_kabuli_chr03 | 21904319                | AA                              | GG                | 1945921650               |
| SNP_P3_30719_21904374 | NC_021162.1    | Ca_kabuli_chr03 | 21904374                | AA                              | CC                | 1945921652               |
| SNP_P3_30721_21994535 | NC_021162.1    | Ca_kabuli_chr03 | 21994535                | GG                              | AA                | 1945921654               |
| SNP_P3_30722_22006917 | NC_021162.1    | Ca_kabuli_chr03 | 22006917                | TT                              | CC                | 1945921655               |
| SNP_P3_30723_22010912 | NC_021162.1    | Ca_kabuli_chr03 | 22010912                | GG                              | AA                | 1945921657               |
| SNP_P3_30725_22041477 | NC_021162.1    | Ca_kabuli_chr03 | 22041477                | CC                              | TT                | 1945921659               |
| SNP_P3_30726_22070334 | NC_021162.1    | Ca_kabuli_chr03 | 22070334                | TT                              | GG                | 1945921661               |
| SNP_P3_30727_22070342 | NC_021162.1    | Ca_kabuli_chr03 | 22070342                | GG                              | CC                | 1945921663               |
| SNP_P3_30728_22070451 | NC_021162.1    | Ca_kabuli_chr03 | 22070451                | TT                              | GG                | 1945921664               |
| SNP_P3_30729_22070475 | NC_021162.1    | Ca_kabuli_chr03 | 22070475                | AA                              | TT                | 1945921666               |
| SNP_P3_30730_22070902 | NC_021162.1    | Ca_kabuli_chr03 | 22070902                | GG                              | AA                | 1945921668               |
| SNP_P3_30732_22125375 | NC_021162.1    | Ca_kabuli_chr03 | 22125375                | AA                              | TT                | 1945921670               |
| SNP_P3_30733_22125420 | NC_021162.1    | Ca_kabuli_chr03 | 22125420                | CC                              | TT                | 1945921671               |
| SNP_P3_30734_22125681 | NC_021162.1    | Ca_kabuli_chr03 | 22125681                | CC                              | AA                | 1945921673               |

| SNPs IDs              | Chromosome IDs | Chromosomes     | Physical positions (bp) | CDC Frontier (Reference genome) | (Pusa 256 & HPNB) | NCBI SNPdb Accession IDs |
|-----------------------|----------------|-----------------|-------------------------|---------------------------------|-------------------|--------------------------|
| SNP_P3_30735_22125735 | NC_021162.1    | Ca_kabuli_chr03 | 22125735                | CC                              | AA                | 1945921675               |
| SNP_P3_30736_22130171 | NC_021162.1    | Ca_kabuli_chr03 | 22130171                | GG                              | AA                | 1945921677               |
| SNP_P3_30737_22130178 | NC_021162.1    | Ca_kabuli_chr03 | 22130178                | AA                              | GG                | 1945921679               |
| SNP_P3_30738_22130250 | NC_021162.1    | Ca_kabuli_chr03 | 22130250                | AA                              | GG                | 1945921680               |
| SNP_P3_30739_22130312 | NC_021162.1    | Ca_kabuli_chr03 | 22130312                | CC                              | TT                | 1945921682               |
| SNP_P3_30740_22130333 | NC_021162.1    | Ca_kabuli_chr03 | 22130333                | AA                              | GG                | 1945921684               |
| SNP_P3_30741_22130334 | NC_021162.1    | Ca_kabuli_chr03 | 22130334                | AA                              | GG                | 1945921686               |
| SNP_P3_30742_22130343 | NC_021162.1    | Ca_kabuli_chr03 | 22130343                | GG                              | TT                | 1945921687               |
| SNP_P3_30743_22130356 | NC_021162.1    | Ca_kabuli_chr03 | 22130356                | AA                              | TT                | 1945921689               |
| SNP_P3_30744_22130466 | NC_021162.1    | Ca_kabuli_chr03 | 22130466                | GG                              | AA                | 1945921691               |
| SNP_P3_30745_22130481 | NC_021162.1    | Ca_kabuli_chr03 | 22130481                | TT                              | CC                | 1945921693               |
| SNP_P3_30746_22130508 | NC_021162.1    | Ca_kabuli_chr03 | 22130508                | CC                              | TT                | 1945921695               |
| SNP_P3_30747_22130661 | NC_021162.1    | Ca_kabuli_chr03 | 22130661                | GG                              | AA                | 1945921696               |
| SNP_P3_30748_22130682 | NC_021162.1    | Ca_kabuli_chr03 | 22130682                | CC                              | AA                | 1945921698               |
| SNP_P3_30749_22130697 | NC_021162.1    | Ca_kabuli_chr03 | 22130697                | AA                              | GG                | 1945921700               |
| SNP_P3_30750_22130712 | NC_021162.1    | Ca_kabuli_chr03 | 22130712                | AA                              | GG                | 1945921702               |
| SNP_P3_30752_22168145 | NC_021162.1    | Ca_kabuli_chr03 | 22168145                | AA                              | GG                | 1945921703               |
| SNP_P3_30753_22180448 | NC_021162.1    | Ca_kabuli_chr03 | 22180448                | GG                              | AA                | 1945921705               |
| SNP_P3_30754_22205686 | NC_021162.1    | Ca_kabuli_chr03 | 22205686                | GG                              | CC                | 1945921707               |
| SNP_P3_30755_22241781 | NC_021162.1    | Ca_kabuli_chr03 | 22241781                | TT                              | CC                | 1945921709               |
| SNP_P3_30756_22285874 | NC_021162.1    | Ca_kabuli_chr03 | 22285874                | AA                              | GG                | 1945921711               |
| SNP_P3_30757_22324020 | NC_021162.1    | Ca_kabuli_chr03 | 22324020                | AA                              | TT                | 1945921712               |
| SNP_P3_30758_22336945 | NC_021162.1    | Ca_kabuli_chr03 | 22336945                | AA                              | GG                | 1945921714               |
| SNP_P3_30759_22343847 | NC_021162.1    | Ca_kabuli_chr03 | 22343847                | AA                              | CC                | 1945921716               |
| SNP_P3_30761_22377521 | NC_021162.1    | Ca_kabuli_chr03 | 22377521                | TT                              | AA                | 1945921718               |
| SNP_P3_30763_22407119 | NC_021162.1    | Ca_kabuli_chr03 | 22407119                | TT                              | CC                | 1945921719               |
| SNP_P3_30764_22413535 | NC_021162.1    | Ca_kabuli_chr03 | 22413535                | AA                              | GG                | 1945921721               |
| SNP_P3_30766_22439155 | NC_021162.1    | Ca_kabuli_chr03 | 22439155                | GG                              | AA                | 1945921723               |
| SNP_P3_30767_22460133 | NC_021162.1    | Ca_kabuli_chr03 | 22460133                | CC                              | TT                | 1945921725               |
| SNP_P3_30769_22482800 | NC_021162.1    | Ca_kabuli_chr03 | 22482800                | CC                              | TT                | 1945921726               |
| SNP_P3_30770_22482848 | NC_021162.1    | Ca_kabuli_chr03 | 22482848                | GG                              | AA                | 1945921728               |
| SNP_P3_30771_22482870 | NC_021162.1    | Ca_kabuli_chr03 | 22482870                | TT                              | CC                | 1945921730               |
| SNP_P3_30772_22482883 | NC_021162.1    | Ca_kabuli_chr03 | 22482883                | TT                              | GG                | 1945921732               |
| SNP_P3_30773_22482884 | NC_021162.1    | Ca_kabuli_chr03 | 22482884                | TT                              | CC                | 1945921734               |
| SNP_P3_30774_22484270 | NC_021162.1    | Ca_kabuli_chr03 | 22484270                | CC                              | TT                | 1945921735               |
| SNP_P3_30776_22494909 | NC_021162.1    | Ca_kabuli_chr03 | 22494909                | CC                              | TT                | 1945921737               |
| SNP_P3_30777_22495312 | NC_021162.1    | Ca_kabuli_chr03 | 22495312                | AA                              | GG                | 1945921739               |
| SNP_P3_30779_22513928 | NC_021162.1    | Ca_kabuli_chr03 | 22513928                | GG                              | TT                | 1945921741               |
| SNP_P3_30780_22535574 | NC_021162.1    | Ca_kabuli_chr03 | 22535574                | AA                              | GG                | 1945921742               |
| SNP_P3_30781_22549903 | NC_021162.1    | Ca_kabuli_chr03 | 22549903                | GG                              | TT                | 1945921744               |
| SNP_P3_30782_22551164 | NC_021162.1    | Ca_kabuli_chr03 | 22551164                | GG                              | AA                | 1945921746               |
| SNP_P3_30783_22571725 | NC_021162.1    | Ca_kabuli_chr03 | 22571725                | GG                              | AA                | 1945921748               |

| SNPs IDs              | Chromosome IDs | Chromosomes     | Physical positions (bp) | CDC Frontier (Reference genome) | (Pusa 256 & HPNB) | NCBI SNPdb Accession IDs |
|-----------------------|----------------|-----------------|-------------------------|---------------------------------|-------------------|--------------------------|
| SNP_P3_30784_22600257 | NC_021162.1    | Ca_kabuli_chr03 | 22600257                | TT                              | CC                | 1945921750               |
| SNP_P3_30785_22620559 | NC_021162.1    | Ca_kabuli_chr03 | 22620559                | AA                              | GG                | 1945921751               |
| SNP_P3_30786_22628121 | NC_021162.1    | Ca_kabuli_chr03 | 22628121                | AA                              | TT                | 1945921753               |
| SNP_P3_30787_22649231 | NC_021162.1    | Ca_kabuli_chr03 | 22649231                | GG                              | AA                | 1945921755               |
| SNP_P3_30788_22679724 | NC_021162.1    | Ca_kabuli_chr03 | 22679724                | TT                              | AA                | 1945921757               |
| SNP_P3_30789_22709081 | NC_021162.1    | Ca_kabuli_chr03 | 22709081                | GG                              | AA                | 1945921758               |
| SNP_P3_30790_22711096 | NC_021162.1    | Ca_kabuli_chr03 | 22711096                | TT                              | CC                | 1945921760               |
| SNP_P3_30791_22715510 | NC_021162.1    | Ca_kabuli_chr03 | 22715510                | TT                              | CC                | 1945921762               |
| SNP_P3_30792_22732591 | NC_021162.1    | Ca_kabuli_chr03 | 22732591                | CC                              | TT                | 1945921764               |
| SNP_P3_30793_22743150 | NC_021162.1    | Ca_kabuli_chr03 | 22743150                | GG                              | AA                | 1945921766               |
| SNP_P3_30794_22757960 | NC_021162.1    | Ca_kabuli_chr03 | 22757960                | TT                              | CC                | 1945921767               |
| SNP_P3_30795_22770207 | NC_021162.1    | Ca_kabuli_chr03 | 22770207                | GG                              | AA                | 1945921769               |
| SNP_P3_30796_22795809 | NC_021162.1    | Ca_kabuli_chr03 | 22795809                | CC                              | TT                | 1945921771               |
| SNP_P3_30797_22809355 | NC_021162.1    | Ca_kabuli_chr03 | 22809355                | AA                              | TT                | 1945921773               |
| SNP_P3_30798_22824229 | NC_021162.1    | Ca_kabuli_chr03 | 22824229                | CC                              | AA                | 1945921774               |
| SNP_P3_30799_22827948 | NC_021162.1    | Ca_kabuli_chr03 | 22827948                | CC                              | TT                | 1945921776               |
| SNP_P3_30800_22839108 | NC_021162.1    | Ca_kabuli_chr03 | 22839108                | TT                              | CC                | 1945921778               |
| SNP_P3_30801_22850433 | NC_021162.1    | Ca_kabuli_chr03 | 22850433                | AA                              | TT                | 1945921780               |
| SNP_P3_30802_22876511 | NC_021162.1    | Ca_kabuli_chr03 | 22876511                | AA                              | GG                | 1945921782               |
| SNP_P3_30803_22892280 | NC_021162.1    | Ca_kabuli_chr03 | 22892280                | GG                              | AA                | 1945921783               |
| SNP_P3_30805_22924649 | NC_021162.1    | Ca_kabuli_chr03 | 22924649                | TT                              | AA                | 1945921785               |
| SNP_P3_30806_22935147 | NC_021162.1    | Ca_kabuli_chr03 | 22935147                | TT                              | GG                | 1945921787               |
| SNP_P3_30807_22935154 | NC_021162.1    | Ca_kabuli_chr03 | 22935154                | GG                              | AA                | 1945921789               |
| SNP_P3_30808_22944106 | NC_021162.1    | Ca_kabuli_chr03 | 22944106                | TT                              | AA                | 1945921790               |
| SNP_P3_30810_22964420 | NC_021162.1    | Ca_kabuli_chr03 | 22964420                | AA                              | TT                | 1945921792               |
| SNP_P3_30811_23000022 | NC_021162.1    | Ca_kabuli_chr03 | 23000022                | AA                              | CC                | 1945921794               |
| SNP_P3_30812_23001059 | NC_021162.1    | Ca_kabuli_chr03 | 23001059                | GG                              | CC                | 1945921796               |
| SNP_P3_30813_23012928 | NC_021162.1    | Ca_kabuli_chr03 | 23012928                | TT                              | GG                | 1945921798               |
| SNP_P3_30814_23013246 | NC_021162.1    | Ca_kabuli_chr03 | 23013246                | AA                              | TT                | 1945921799               |
| SNP_P3_30815_23013920 | NC_021162.1    | Ca_kabuli_chr03 | 23013920                | GG                              | AA                | 1945921801               |
| SNP_P3_30817_23014133 | NC_021162.1    | Ca_kabuli_chr03 | 23014133                | AA                              | GG                | 1945921803               |
| SNP_P3_30818_23014136 | NC_021162.1    | Ca_kabuli_chr03 | 23014136                | GG                              | TT                | 1945921805               |
| SNP_P3_30819_23014149 | NC_021162.1    | Ca_kabuli_chr03 | 23014149                | TT                              | GG                | 1945921806               |
| SNP_P3_30820_23014151 | NC_021162.1    | Ca_kabuli_chr03 | 23014151                | TT                              | CC                | 1945921808               |
| SNP_P3_30821_23014152 | NC_021162.1    | Ca_kabuli_chr03 | 23014152                | GG                              | AA                | 1945921810               |
| SNP_P3_30822_23014178 | NC_021162.1    | Ca_kabuli_chr03 | 23014178                | TT                              | AA                | 1945921812               |
| SNP_P3_30823_23014183 | NC_021162.1    | Ca_kabuli_chr03 | 23014183                | GG                              | CC                | 1945921814               |
| SNP_P3_30824_23014193 | NC_021162.1    | Ca_kabuli_chr03 | 23014193                | GG                              | AA                | 1945921815               |
| SNP_P3_30825_23014194 | NC_021162.1    | Ca_kabuli_chr03 | 23014194                | GG                              | AA                | 1945921817               |
| SNP_P3_30827_23016959 | NC_021162.1    | Ca_kabuli_chr03 | 23016959                | CC                              | TT                | 1945921819               |
| SNP_P3_30828_23018703 | NC_021162.1    | Ca_kabuli_chr03 | 23018703                | CC                              | AA                | 1945921821               |
| SNP_P3_30829_23019096 | NC_021162.1    | Ca_kabuli_chr03 | 23019096                | CC                              | TT                | 1945921822               |

| SNPs IDs              | Chromosome IDs | Chromosomes     | Physical positions (bp) | CDC Frontier (Reference genome) | (Pusa 256 & HPNB) | NCBI SNPdb Accession IDs |
|-----------------------|----------------|-----------------|-------------------------|---------------------------------|-------------------|--------------------------|
| SNP_P3_30830_23019162 | NC_021162.1    | Ca_kabuli_chr03 | 23019162                | AA                              | TT                | 1945921824               |
| SNP_P3_30831_23019184 | NC_021162.1    | Ca_kabuli_chr03 | 23019184                | GG                              | AA                | 1945921826               |
| SNP_P3_30832_23045312 | NC_021162.1    | Ca_kabuli_chr03 | 23045312                | CC                              | TT                | 1945921828               |
| SNP_P3_30833_23045313 | NC_021162.1    | Ca_kabuli_chr03 | 23045313                | CC                              | TT                | 1945921830               |
| SNP_P3_30834_23047845 | NC_021162.1    | Ca_kabuli_chr03 | 23047845                | TT                              | AA                | 1945921831               |
| SNP_P3_30835_23048130 | NC_021162.1    | Ca_kabuli_chr03 | 23048130                | TT                              | CC                | 1945921833               |
| SNP_P3_30836_23053789 | NC_021162.1    | Ca_kabuli_chr03 | 23053789                | TT                              | GG                | 1945921835               |
| SNP_P3_30837_23054021 | NC_021162.1    | Ca_kabuli_chr03 | 23054021                | TT                              | CC                | 1945921837               |
| SNP_P3_30839_23101860 | NC_021162.1    | Ca_kabuli_chr03 | 23101860                | AA                              | CC                | 1945921838               |
| SNP_P3_30840_23101864 | NC_021162.1    | Ca_kabuli_chr03 | 23101864                | TT                              | CC                | 1945921840               |
| SNP_P3_30841_23113915 | NC_021162.1    | Ca_kabuli_chr03 | 23113915                | GG                              | CC                | 1945921842               |
| SNP_P3_30842_23114608 | NC_021162.1    | Ca_kabuli_chr03 | 23114608                | GG                              | AA                | 1945921844               |
| SNP_P3_30843_23130460 | NC_021162.1    | Ca_kabuli_chr03 | 23130460                | AA                              | GG                | 1945921846               |
| SNP_P3_30844_23131583 | NC_021162.1    | Ca_kabuli_chr03 | 23131583                | TT                              | CC                | 1945921847               |
| SNP_P3_30845_23132419 | NC_021162.1    | Ca_kabuli_chr03 | 23132419                | GG                              | AA                | 1945921849               |
| SNP_P3_30846_23135272 | NC_021162.1    | Ca_kabuli_chr03 | 23135272                | TT                              | AA                | 1945921851               |
| SNP_P3_30848_23197859 | NC_021162.1    | Ca_kabuli_chr03 | 23197859                | AA                              | GG                | 1945921853               |
| SNP_P3_30849_23214135 | NC_021162.1    | Ca_kabuli_chr03 | 23214135                | GG                              | CC                | 1945921854               |
| SNP_P3_30850_23240395 | NC_021162.1    | Ca_kabuli_chr03 | 23240395                | GG                              | CC                | 1945921856               |
| SNP_P3_30851_23240463 | NC_021162.1    | Ca_kabuli_chr03 | 23240463                | AA                              | CC                | 1945921858               |
| SNP_P3_30853_23287438 | NC_021162.1    | Ca_kabuli_chr03 | 23287438                | AA                              | TT                | 1945921860               |
| SNP_P3_30854_23288548 | NC_021162.1    | Ca_kabuli_chr03 | 23288548                | CC                              | TT                | 1945921862               |
| SNP_P3_30855_23296872 | NC_021162.1    | Ca_kabuli_chr03 | 23296872                | GG                              | AA                | 1945921863               |
| SNP_P3_30856_23296921 | NC_021162.1    | Ca_kabuli_chr03 | 23296921                | GG                              | AA                | 1945921865               |
| SNP_P3_30858_23297021 | NC_021162.1    | Ca_kabuli_chr03 | 23297021                | GG                              | AA                | 1945921867               |
| SNP_P3_30859_23297124 | NC_021162.1    | Ca_kabuli_chr03 | 23297124                | AA                              | GG                | 1945921869               |
| SNP_P3_30860_23297795 | NC_021162.1    | Ca_kabuli_chr03 | 23297795                | AA                              | GG                | 1945921870               |
| SNP_P3_30861_23321167 | NC_021162.1    | Ca_kabuli_chr03 | 23321167                | TT                              | CC                | 1945921872               |
| SNP_P3_30862_23321184 | NC_021162.1    | Ca_kabuli_chr03 | 23321184                | TT                              | CC                | 1945921874               |
| SNP_P3_30863_23325582 | NC_021162.1    | Ca_kabuli_chr03 | 23325582                | AA                              | GG                | 1945921876               |
| SNP_P3_30864_23327595 | NC_021162.1    | Ca_kabuli_chr03 | 23327595                | CC                              | TT                | 1945921877               |
| SNP_P3_30865_23329914 | NC_021162.1    | Ca_kabuli_chr03 | 23329914                | GG                              | AA                | 1945921879               |
| SNP_P3_30866_23389557 | NC_021162.1    | Ca_kabuli_chr03 | 23389557                | CC                              | GG                | 1945921881               |
| SNP_P3_30867_23424409 | NC_021162.1    | Ca_kabuli_chr03 | 23424409                | TT                              | GG                | 1945921883               |
| SNP_P3_30868_23433119 | NC_021162.1    | Ca_kabuli_chr03 | 23433119                | CC                              | AA                | 1945921885               |
| SNP_P3_30869_23496729 | NC_021162.1    | Ca_kabuli_chr03 | 23496729                | TT                              | CC                | 1945921886               |
| SNP_P3_30870_23496865 | NC_021162.1    | Ca_kabuli_chr03 | 23496865                | GG                              | AA                | 1945921888               |
| SNP_P3_30871_23497485 | NC_021162.1    | Ca_kabuli_chr03 | 23497485                | TT                              | CC                | 1945921890               |
| SNP_P3_30872_23526146 | NC_021162.1    | Ca_kabuli_chr03 | 23526146                | CC                              | TT                | 1945921892               |
| SNP_P3_30873_23547379 | NC_021162.1    | Ca_kabuli_chr03 | 23547379                | TT                              | GG                | 1945921893               |
| SNP_P3_30874_23550668 | NC_021162.1    | Ca_kabuli_chr03 | 23550668                | AA                              | GG                | 1945921895               |
| SNP_P3_30875_23550766 | NC_021162.1    | Ca_kabuli_chr03 | 23550766                | CC                              | AA                | 1945921897               |

| SNPs IDs              | Chromosome IDs | Chromosomes     | Physical positions (bp) | CDC Frontier (Reference genome) | (Pusa 256 & HPNB) | NCBI SNPdb Accession IDs |
|-----------------------|----------------|-----------------|-------------------------|---------------------------------|-------------------|--------------------------|
| SNP_P3_30877_23558527 | NC_021162.1    | Ca_kabuli_chr03 | 23558527                | CC                              | GG                | 1945921899               |
| SNP_P3_30878_23558545 | NC_021162.1    | Ca_kabuli_chr03 | 23558545                | TT                              | GG                | 1945921901               |
| SNP_P3_30879_23558551 | NC_021162.1    | Ca_kabuli_chr03 | 23558551                | AA                              | TT                | 1945921902               |
| SNP_P3_30880_23593166 | NC_021162.1    | Ca_kabuli_chr03 | 23593166                | CC                              | TT                | 1945921904               |
| SNP_P3_30881_23606300 | NC_021162.1    | Ca_kabuli_chr03 | 23606300                | AA                              | GG                | 1945921906               |
| SNP_P3_30882_23609280 | NC_021162.1    | Ca_kabuli_chr03 | 23609280                | AA                              | TT                | 1945921908               |
| SNP_P3_30883_23609763 | NC_021162.1    | Ca_kabuli_chr03 | 23609763                | AA                              | TT                | 1945921909               |
| SNP_P3_30885_23652896 | NC_021162.1    | Ca_kabuli_chr03 | 23652896                | GG                              | AA                | 1945921911               |
| SNP_P3_30886_23682072 | NC_021162.1    | Ca_kabuli_chr03 | 23682072                | CC                              | TT                | 1945921913               |
| SNP_P3_30887_23686357 | NC_021162.1    | Ca_kabuli_chr03 | 23686357                | AA                              | GG                | 1945921915               |
| SNP_P3_30888_23689641 | NC_021162.1    | Ca_kabuli_chr03 | 23689641                | TT                              | CC                | 1945921917               |
| SNP_P3_30890_23736062 | NC_021162.1    | Ca_kabuli_chr03 | 23736062                | AA                              | GG                | 1945921918               |
| SNP_P3_30891_23736501 | NC_021162.1    | Ca_kabuli_chr03 | 23736501                | CC                              | AA                | 1945921920               |
| SNP_P3_30892_23758637 | NC_021162.1    | Ca_kabuli_chr03 | 23758637                | CC                              | AA                | 1945921922               |
| SNP_P3_30895_23762873 | NC_021162.1    | Ca_kabuli_chr03 | 23762873                | AA                              | GG                | 1945921924               |
| SNP_P3_30896_23762876 | NC_021162.1    | Ca_kabuli_chr03 | 23762876                | TT                              | CC                | 1945921925               |
| SNP_P3_30897_23763310 | NC_021162.1    | Ca_kabuli_chr03 | 23763310                | AA                              | GG                | 1945921927               |
| SNP_P3_30899_23857333 | NC_021162.1    | Ca_kabuli_chr03 | 23857333                | GG                              | TT                | 1945921929               |
| SNP_P3_30900_23863491 | NC_021162.1    | Ca_kabuli_chr03 | 23863491                | TT                              | GG                | 1945921931               |
| SNP_P3_30901_23863816 | NC_021162.1    | Ca_kabuli_chr03 | 23863816                | CC                              | AA                | 1945921933               |
| SNP_P3_30903_23876306 | NC_021162.1    | Ca_kabuli_chr03 | 23876306                | CC                              | TT                | 1945921934               |
| SNP_P3_30906_23881381 | NC_021162.1    | Ca_kabuli_chr03 | 23881381                | TT                              | GG                | 1945921936               |
| SNP_P3_30908_23910357 | NC_021162.1    | Ca_kabuli_chr03 | 23910357                | GG                              | TT                | 1945921938               |
| SNP_P3_30909_23912427 | NC_021162.1    | Ca_kabuli_chr03 | 23912427                | AA                              | GG                | 1945921940               |
| SNP_P3_30910_23945749 | NC_021162.1    | Ca_kabuli_chr03 | 23945749                | AA                              | GG                | 1945921941               |
| SNP_P3_30911_23945798 | NC_021162.1    | Ca_kabuli_chr03 | 23945798                | TT                              | CC                | 1945921943               |
| SNP_P3_30912_23945906 | NC_021162.1    | Ca_kabuli_chr03 | 23945906                | AA                              | GG                | 1945921945               |
| SNP_P3_30913_23945912 | NC_021162.1    | Ca_kabuli_chr03 | 23945912                | AA                              | GG                | 1945921947               |
| SNP_P3_30914_23945919 | NC_021162.1    | Ca_kabuli_chr03 | 23945919                | TT                              | GG                | 1945921949               |
| SNP_P3_30915_23945931 | NC_021162.1    | Ca_kabuli_chr03 | 23945931                | AA                              | GG                | 1945921950               |
| SNP_P3_30916_23945963 | NC_021162.1    | Ca_kabuli_chr03 | 23945963                | AA                              | GG                | 1945921952               |
| SNP_P3_30917_23946006 | NC_021162.1    | Ca_kabuli_chr03 | 23946006                | AA                              | GG                | 1945921954               |
| SNP_P3_30918_23946041 | NC_021162.1    | Ca_kabuli_chr03 | 23946041                | TT                              | AA                | 1945921956               |
| SNP_P3_30919_23946157 | NC_021162.1    | Ca_kabuli_chr03 | 23946157                | TT                              | GG                | 1945921957               |
| SNP_P3_30920_23946300 | NC_021162.1    | Ca_kabuli_chr03 | 23946300                | TT                              | CC                | 1945921959               |
| SNP_P3_30921_23946301 | NC_021162.1    | Ca_kabuli_chr03 | 23946301                | TT                              | CC                | 1945921961               |
| SNP_P3_30922_23946309 | NC_021162.1    | Ca_kabuli_chr03 | 23946309                | TT                              | GG                | 1945921963               |
| SNP_P3_30923_23946416 | NC_021162.1    | Ca_kabuli_chr03 | 23946416                | TT                              | CC                | 1945921965               |
| SNP_P3_30924_23948970 | NC_021162.1    | Ca_kabuli_chr03 | 23948970                | AA                              | CC                | 1945921966               |
| SNP_P3_30925_23948977 | NC_021162.1    | Ca_kabuli_chr03 | 23948977                | TT                              | GG                | 1945921968               |
| SNP_P3_30926_23949003 | NC_021162.1    | Ca_kabuli_chr03 | 23949003                | TT                              | CC                | 1945921970               |
| SNP_P3_30927_23949010 | NC_021162.1    | Ca_kabuli_chr03 | 23949010                | GG                              | AA                | 1945921972               |

| SNPs IDs              | Chromosome IDs | Chromosomes     | Physical positions (bp) | CDC Frontier (Reference genome) | (Pusa 256 & HPNB) | NCBI SNPdb Accession IDs |
|-----------------------|----------------|-----------------|-------------------------|---------------------------------|-------------------|--------------------------|
| SNP_P3_30928_23949012 | NC_021162.1    | Ca_kabuli_chr03 | 23949012                | TT                              | CC                | 1945921973               |
| SNP_P3_30929_23949080 | NC_021162.1    | Ca_kabuli_chr03 | 23949080                | AA                              | GG                | 1945921975               |
| SNP_P3_30930_23949336 | NC_021162.1    | Ca_kabuli_chr03 | 23949336                | AA                              | CC                | 1945921977               |
| SNP_P3_30931_23949353 | NC_021162.1    | Ca_kabuli_chr03 | 23949353                | AA                              | GG                | 1945921979               |
| SNP_P3_30932_23949364 | NC_021162.1    | Ca_kabuli_chr03 | 23949364                | AA                              | GG                | 1945921981               |
| SNP_P3_30933_23949501 | NC_021162.1    | Ca_kabuli_chr03 | 23949501                | TT                              | CC                | 1945921982               |
| SNP_P3_30934_23949503 | NC_021162.1    | Ca_kabuli_chr03 | 23949503                | TT                              | CC                | 1945921984               |
| SNP_P3_30935_23949510 | NC_021162.1    | Ca_kabuli_chr03 | 23949510                | TT                              | CC                | 1945921986               |
| SNP_P3_30936_23949517 | NC_021162.1    | Ca_kabuli_chr03 | 23949517                | GG                              | AA                | 1945921988               |
| SNP_P3_30937_23949543 | NC_021162.1    | Ca_kabuli_chr03 | 23949543                | AA                              | CC                | 1945921989               |
| SNP_P3_30938_23949558 | NC_021162.1    | Ca_kabuli_chr03 | 23949558                | AA                              | GG                | 1945921991               |
| SNP_P3_30939_23949589 | NC_021162.1    | Ca_kabuli_chr03 | 23949589                | GG                              | AA                | 1945921993               |
| SNP_P3_30940_23949813 | NC_021162.1    | Ca_kabuli_chr03 | 23949813                | CC                              | TT                | 1945921995               |
| SNP_P3_30941_23965441 | NC_021162.1    | Ca_kabuli_chr03 | 23965441                | TT                              | AA                | 1945921997               |
| SNP_P3_30942_23992612 | NC_021162.1    | Ca_kabuli_chr03 | 23992612                | AA                              | GG                | 1945921998               |
| SNP_P3_30943_24010837 | NC_021162.1    | Ca_kabuli_chr03 | 24010837                | TT                              | AA                | 1945922000               |
| SNP_P3_30945_24013204 | NC_021162.1    | Ca_kabuli_chr03 | 24013204                | GG                              | AA                | 1945922002               |
| SNP_P3_30946_24020521 | NC_021162.1    | Ca_kabuli_chr03 | 24020521                | AA                              | GG                | 1945922004               |
| SNP_P3_30947_24082411 | NC_021162.1    | Ca_kabuli_chr03 | 24082411                | TT                              | CC                | 1945922005               |
| SNP_P3_30948_24097055 | NC_021162.1    | Ca_kabuli_chr03 | 24097055                | CC                              | TT                | 1945922007               |
| SNP_P3_30949_24112327 | NC_021162.1    | Ca_kabuli_chr03 | 24112327                | CC                              | TT                | 1945922009               |
| SNP_P3_30950_24112679 | NC_021162.1    | Ca_kabuli_chr03 | 24112679                | TT                              | CC                | 1945922011               |
| SNP_P3_30951_24112686 | NC_021162.1    | Ca_kabuli_chr03 | 24112686                | TT                              | AA                | 1945922013               |
| SNP_P3_30952_24151582 | NC_021162.1    | Ca_kabuli_chr03 | 24151582                | GG                              | AA                | 1945922014               |
| SNP_P3_30953_24154842 | NC_021162.1    | Ca_kabuli_chr03 | 24154842                | TT                              | CC                | 1945922016               |
| SNP_P3_30954_24168024 | NC_021162.1    | Ca_kabuli_chr03 | 24168024                | GG                              | TT                | 1945922018               |
| SNP_P3_30955_24168068 | NC_021162.1    | Ca_kabuli_chr03 | 24168068                | CC                              | GG                | 1945922020               |
| SNP_P3_30956_24168070 | NC_021162.1    | Ca_kabuli_chr03 | 24168070                | GG                              | AA                | 1945922021               |
| SNP_P3_30958_24174652 | NC_021162.1    | Ca_kabuli_chr03 | 24174652                | TT                              | CC                | 1945922023               |
| SNP_P3_30959_24175258 | NC_021162.1    | Ca_kabuli_chr03 | 24175258                | TT                              | CC                | 1945922025               |
| SNP_P3_30960_24175270 | NC_021162.1    | Ca_kabuli_chr03 | 24175270                | CC                              | TT                | 1945922027               |
| SNP_P3_30961_24175288 | NC_021162.1    | Ca_kabuli_chr03 | 24175288                | GG                              | AA                | 1945922029               |
| SNP_P3_30962_24175300 | NC_021162.1    | Ca_kabuli_chr03 | 24175300                | GG                              | AA                | 1945922030               |
| SNP_P3_30963_24177255 | NC_021162.1    | Ca_kabuli_chr03 | 24177255                | CC                              | TT                | 1945922032               |
| SNP_P3_30964_24177428 | NC_021162.1    | Ca_kabuli_chr03 | 24177428                | GG                              | AA                | 1945922034               |
| SNP_P3_30965_24177730 | NC_021162.1    | Ca_kabuli_chr03 | 24177730                | TT                              | CC                | 1945922036               |
| SNP_P3_30966_24183978 | NC_021162.1    | Ca_kabuli_chr03 | 24183978                | AA                              | CC                | 1945922037               |
| SNP_P3_30967_24186964 | NC_021162.1    | Ca_kabuli_chr03 | 24186964                | TT                              | AA                | 1945922039               |
| SNP_P3_30968_24186970 | NC_021162.1    | Ca_kabuli_chr03 | 24186970                | AA                              | GG                | 1945922041               |
| SNP_P3_30969_24186975 | NC_021162.1    | Ca_kabuli_chr03 | 24186975                | TT                              | CC                | 1945922043               |
| SNP_P3_30970_24187116 | NC_021162.1    | Ca_kabuli_chr03 | 24187116                | CC                              | GG                | 1945922045               |
| SNP_P3_30971_24187129 | NC_021162.1    | Ca_kabuli_chr03 | 24187129                | CC                              | AA                | 1945922046               |

| SNPs IDs              | Chromosome IDs | Chromosomes     | Physical positions (bp) | CDC Frontier (Reference genome) | (Pusa 256 & HPNB) | NCBI SNPdb Accession IDs |
|-----------------------|----------------|-----------------|-------------------------|---------------------------------|-------------------|--------------------------|
| SNP_P3_30972_24187352 | NC_021162.1    | Ca_kabuli_chr03 | 24187352                | CC                              | AA                | 1945922048               |
| SNP_P3_30973_24187382 | NC_021162.1    | Ca_kabuli_chr03 | 24187382                | GG                              | AA                | 1945922050               |
| SNP_P3_30974_24187421 | NC_021162.1    | Ca_kabuli_chr03 | 24187421                | GG                              | AA                | 1945922052               |
| SNP_P3_30975_24187437 | NC_021162.1    | Ca_kabuli_chr03 | 24187437                | TT                              | CC                | 1945922053               |
| SNP_P3_30976_24187451 | NC_021162.1    | Ca_kabuli_chr03 | 24187451                | AA                              | TT                | 1945922055               |
| SNP_P3_30977_24187453 | NC_021162.1    | Ca_kabuli_chr03 | 24187453                | AA                              | TT                | 1945922057               |
| SNP_P3_30978_24187457 | NC_021162.1    | Ca_kabuli_chr03 | 24187457                | CC                              | AA                | 1945922059               |
| SNP_P3_30979_24187508 | NC_021162.1    | Ca_kabuli_chr03 | 24187508                | CC                              | AA                | 1945922061               |
| SNP_P3_30980_24187519 | NC_021162.1    | Ca_kabuli_chr03 | 24187519                | GG                              | AA                | 1945922062               |
| SNP_P3_30981_24187520 | NC_021162.1    | Ca_kabuli_chr03 | 24187520                | AA                              | GG                | 1945922064               |
| SNP_P3_30982_24187535 | NC_021162.1    | Ca_kabuli_chr03 | 24187535                | GG                              | AA                | 1945922066               |
| SNP_P3_30983_24187540 | NC_021162.1    | Ca_kabuli_chr03 | 24187540                | TT                              | CC                | 1945922068               |
| SNP_P3_30984_24187558 | NC_021162.1    | Ca_kabuli_chr03 | 24187558                | AA                              | CC                | 1945922069               |
| SNP_P3_30985_24187568 | NC_021162.1    | Ca_kabuli_chr03 | 24187568                | GG                              | AA                | 1945922071               |
| SNP_P3_30986_24187577 | NC_021162.1    | Ca_kabuli_chr03 | 24187577                | TT                              | AA                | 1945922073               |
| SNP_P3_30987_24187595 | NC_021162.1    | Ca_kabuli_chr03 | 24187595                | AA                              | GG                | 1945922075               |
| SNP_P3_30988_24187721 | NC_021162.1    | Ca_kabuli_chr03 | 24187721                | CC                              | AA                | 1945922076               |
| SNP_P3_30989_24187722 | NC_021162.1    | Ca_kabuli_chr03 | 24187722                | AA                              | GG                | 1945922078               |
| SNP_P3_30990_24187734 | NC_021162.1    | Ca_kabuli_chr03 | 24187734                | TT                              | AA                | 1945922080               |
| SNP_P3_30991_24187746 | NC_021162.1    | Ca_kabuli_chr03 | 24187746                | AA                              | CC                | 1945922082               |
| SNP_P3_30992_24187774 | NC_021162.1    | Ca_kabuli_chr03 | 24187774                | AA                              | TT                | 1945922084               |
| SNP_P3_30993_24187819 | NC_021162.1    | Ca_kabuli_chr03 | 24187819                | TT                              | GG                | 1945922085               |
| SNP_P3_30994_24187821 | NC_021162.1    | Ca_kabuli_chr03 | 24187821                | GG                              | AA                | 1945922087               |
| SNP_P3_30995_24187823 | NC_021162.1    | Ca_kabuli_chr03 | 24187823                | AA                              | GG                | 1945922089               |
| SNP_P3_30996_24187850 | NC_021162.1    | Ca_kabuli_chr03 | 24187850                | AA                              | GG                | 1945922091               |
| SNP_P3_30997_24187853 | NC_021162.1    | Ca_kabuli_chr03 | 24187853                | CC                              | TT                | 1945922092               |
| SNP_P3_30998_24187863 | NC_021162.1    | Ca_kabuli_chr03 | 24187863                | CC                              | TT                | 1945922094               |
| SNP_P3_30999_24187914 | NC_021162.1    | Ca_kabuli_chr03 | 24187914                | AA                              | TT                | 1945922096               |
| SNP_P3_31000_24187915 | NC_021162.1    | Ca_kabuli_chr03 | 24187915                | AA                              | CC                | 1945922098               |
| SNP_P3_31001_24187955 | NC_021162.1    | Ca_kabuli_chr03 | 24187955                | TT                              | CC                | 1945922100               |
| SNP_P3_31002_24187970 | NC_021162.1    | Ca_kabuli_chr03 | 24187970                | AA                              | GG                | 1945922101               |
| SNP_P3_31003_24187973 | NC_021162.1    | Ca_kabuli_chr03 | 24187973                | CC                              | TT                | 1945922103               |
| SNP_P3_31004_24187988 | NC_021162.1    | Ca_kabuli_chr03 | 24187988                | TT                              | CC                | 1945922105               |
| SNP_P3_31005_24187995 | NC_021162.1    | Ca_kabuli_chr03 | 24187995                | GG                              | AA                | 1945922107               |
| SNP_P3_31006_24188025 | NC_021162.1    | Ca_kabuli_chr03 | 24188025                | CC                              | TT                | 1945922108               |
| SNP_P3_31007_24188913 | NC_021162.1    | Ca_kabuli_chr03 | 24188913                | CC                              | TT                | 1945922110               |
| SNP_P3_31008_24188972 | NC_021162.1    | Ca_kabuli_chr03 | 24188972                | AA                              | GG                | 1945922112               |
| SNP_P3_31009_24188973 | NC_021162.1    | Ca_kabuli_chr03 | 24188973                | GG                              | AA                | 1945922114               |
| SNP_P3_31011_24240398 | NC_021162.1    | Ca_kabuli_chr03 | 24240398                | AA                              | GG                | 1945922116               |
| SNP_P3_31012_24255147 | NC_021162.1    | Ca_kabuli_chr03 | 24255147                | CC                              | GG                | 1945922117               |
| SNP_P3_31013_24270461 | NC_021162.1    | Ca_kabuli_chr03 | 24270461                | TT                              | AA                | 1945922119               |
| SNP_P3_31014_24270467 | NC_021162.1    | Ca_kabuli_chr03 | 24270467                | GG                              | TT                | 1945922121               |

| SNPs IDs              | Chromosome IDs | Chromosomes     | Physical positions (bp) | CDC Frontier (Reference genome) | (Pusa 256 & HPNB) | NCBI SNPdb Accession IDs |
|-----------------------|----------------|-----------------|-------------------------|---------------------------------|-------------------|--------------------------|
| SNP_P3_31015_24270612 | NC_021162.1    | Ca_kabuli_chr03 | 24270612                | CC                              | TT                | 1945922123               |
| SNP_P3_31016_24270669 | NC_021162.1    | Ca_kabuli_chr03 | 24270669                | CC                              | GG                | 1945922124               |
| SNP_P3_31017_24272955 | NC_021162.1    | Ca_kabuli_chr03 | 24272955                | CC                              | AA                | 1945922126               |
| SNP_P3_31019_24272991 | NC_021162.1    | Ca_kabuli_chr03 | 24272991                | AA                              | CC                | 1945922128               |
| SNP_P3_31020_24273004 | NC_021162.1    | Ca_kabuli_chr03 | 24273004                | TT                              | CC                | 1945922130               |
| SNP_P3_31021_24320298 | NC_021162.1    | Ca_kabuli_chr03 | 24320298                | GG                              | AA                | 1945922132               |
| SNP_P3_31022_24388166 | NC_021162.1    | Ca_kabuli_chr03 | 24388166                | GG                              | AA                | 1945922133               |
| SNP_P3_31023_24388171 | NC_021162.1    | Ca_kabuli_chr03 | 24388171                | AA                              | GG                | 1945922135               |
| SNP_P3_31024_24388180 | NC_021162.1    | Ca_kabuli_chr03 | 24388180                | AA                              | GG                | 1945922137               |
| SNP_P3_31026_24410950 | NC_021162.1    | Ca_kabuli_chr03 | 24410950                | GG                              | TT                | 1945922139               |
| SNP_P3_31028_24439326 | NC_021162.1    | Ca_kabuli_chr03 | 24439326                | CC                              | TT                | 1945922140               |
| SNP_P3_31030_24468874 | NC_021162.1    | Ca_kabuli_chr03 | 24468874                | TT                              | CC                | 1945922142               |
| SNP_P3_31032_24509844 | NC_021162.1    | Ca_kabuli_chr03 | 24509844                | TT                              | GG                | 1945922144               |
| SNP_P3_31033_24509845 | NC_021162.1    | Ca_kabuli_chr03 | 24509845                | TT                              | GG                | 1945922146               |
| SNP_P3_31034_24512151 | NC_021162.1    | Ca_kabuli_chr03 | 24512151                | AA                              | GG                | 1945922148               |
| SNP_P3_31035_24521396 | NC_021162.1    | Ca_kabuli_chr03 | 24521396                | CC                              | TT                | 1945922149               |
| SNP_P3_31036_24534212 | NC_021162.1    | Ca_kabuli_chr03 | 24534212                | GG                              | AA                | 1945922151               |
| SNP_P3_31039_24559528 | NC_021162.1    | Ca_kabuli_chr03 | 24559528                | AA                              | GG                | 1945922153               |
| SNP_P3_31040_24561743 | NC_021162.1    | Ca_kabuli_chr03 | 24561743                | AA                              | TT                | 1945922155               |
| SNP_P3_31041_24595719 | NC_021162.1    | Ca_kabuli_chr03 | 24595719                | AA                              | GG                | 1945922156               |
| SNP_P3_31042_24609796 | NC_021162.1    | Ca_kabuli_chr03 | 24609796                | TT                              | CC                | 1945922158               |
| SNP_P3_31043_24611612 | NC_021162.1    | Ca_kabuli_chr03 | 24611612                | CC                              | TT                | 1945922160               |
| SNP_P3_31044_24613411 | NC_021162.1    | Ca_kabuli_chr03 | 24613411                | GG                              | AA                | 1945922162               |
| SNP_P3_31045_24613524 | NC_021162.1    | Ca_kabuli_chr03 | 24613524                | TT                              | CC                | 1945922163               |
| SNP_P3_31046_24649653 | NC_021162.1    | Ca_kabuli_chr03 | 24649653                | GG                              | AA                | 1945922165               |
| SNP_P3_31047_24660598 | NC_021162.1    | Ca_kabuli_chr03 | 24660598                | AA                              | GG                | 1945922167               |
| SNP_P3_31048_24681174 | NC_021162.1    | Ca_kabuli_chr03 | 24681174                | GG                              | AA                | 1945922169               |
| SNP_P3_31049_24689042 | NC_021162.1    | Ca_kabuli_chr03 | 24689042                | GG                              | AA                | 1945922171               |
| SNP_P3_31050_24703638 | NC_021162.1    | Ca_kabuli_chr03 | 24703638                | CC                              | TT                | 1945922172               |
| SNP_P3_31052_24737073 | NC_021162.1    | Ca_kabuli_chr03 | 24737073                | TT                              | CC                | 1945922174               |
| SNP_P3_31053_24738295 | NC_021162.1    | Ca_kabuli_chr03 | 24738295                | TT                              | CC                | 1945922176               |
| SNP_P3_31054_24744506 | NC_021162.1    | Ca_kabuli_chr03 | 24744506                | AA                              | TT                | 1945922178               |
| SNP_P3_31055_24791035 | NC_021162.1    | Ca_kabuli_chr03 | 24791035                | GG                              | CC                | 1945922179               |
| SNP_P3_31057_24796161 | NC_021162.1    | Ca_kabuli_chr03 | 24796161                | CC                              | GG                | 1945922181               |
| SNP_P3_31058_24796162 | NC_021162.1    | Ca_kabuli_chr03 | 24796162                | GG                              | AA                | 1945922183               |
| SNP_P3_31059_24796217 | NC_021162.1    | Ca_kabuli_chr03 | 24796217                | CC                              | TT                | 1945922185               |
| SNP_P3_31060_24796317 | NC_021162.1    | Ca_kabuli_chr03 | 24796317                | AA                              | GG                | 1945922187               |
| SNP_P3_31061_24796328 | NC_021162.1    | Ca_kabuli_chr03 | 24796328                | AA                              | TT                | 1945922188               |
| SNP_P3_31062_24796347 | NC_021162.1    | Ca_kabuli_chr03 | 24796347                | AA                              | CC                | 1945922190               |
| SNP_P3_31063_24796349 | NC_021162.1    | Ca_kabuli_chr03 | 24796349                | TT                              | CC                | 1945922192               |
| SNP_P3_31064_24796400 | NC_021162.1    | Ca_kabuli_chr03 | 24796400                | TT                              | CC                | 1945922194               |
| SNP_P3_31065_24796446 | NC_021162.1    | Ca_kabuli_chr03 | 24796446                | TT                              | GG                | 1945922195               |



| SNPs IDs              | Chromosome IDs | Chromosomes     | Physical positions (bp) | CDC Frontier (Reference genome) | (Pusa 256 & HPNB) | NCBI SNPdb Accession IDs |
|-----------------------|----------------|-----------------|-------------------------|---------------------------------|-------------------|--------------------------|
| SNP_P3_31066_24796488 | NC_021162.1    | Ca_kabuli_chr03 | 24796488                | CC                              | AA                | 1945922197               |
| SNP_P3_31067_24796528 | NC_021162.1    | Ca_kabuli_chr03 | 24796528                | CC                              | TT                | 1945922199               |
| SNP_P3_31068_24796535 | NC_021162.1    | Ca_kabuli_chr03 | 24796535                | AA                              | TT                | 1945922201               |
| SNP_P3_31069_24796575 | NC_021162.1    | Ca_kabuli_chr03 | 24796575                | CC                              | TT                | 1945922203               |
| SNP_P3_31070_24796615 | NC_021162.1    | Ca_kabuli_chr03 | 24796615                | AA                              | CC                | 1945922204               |
| SNP_P3_31071_24796617 | NC_021162.1    | Ca_kabuli_chr03 | 24796617                | GG                              | CC                | 1945922206               |
| SNP_P3_31072_24796655 | NC_021162.1    | Ca_kabuli_chr03 | 24796655                | CC                              | AA                | 1945922208               |
| SNP_P3_31073_24796712 | NC_021162.1    | Ca_kabuli_chr03 | 24796712                | AA                              | TT                | 1945922210               |
| SNP_P3_31074_24796715 | NC_021162.1    | Ca_kabuli_chr03 | 24796715                | CC                              | TT                | 1945922211               |
| SNP_P3_31075_24796783 | NC_021162.1    | Ca_kabuli_chr03 | 24796783                | TT                              | AA                | 1945922213               |
| SNP_P3_31076_24796836 | NC_021162.1    | Ca_kabuli_chr03 | 24796836                | CC                              | AA                | 1945922215               |
| SNP_P3_31078_24815316 | NC_021162.1    | Ca_kabuli_chr03 | 24815316                | TT                              | AA                | 1945922217               |
| SNP_P3_31079_24832314 | NC_021162.1    | Ca_kabuli_chr03 | 24832314                | TT                              | GG                | 1945922219               |
| SNP_P3_31080_24835613 | NC_021162.1    | Ca_kabuli_chr03 | 24835613                | GG                              | AA                | 1945922220               |
| SNP_P3_31081_24835626 | NC_021162.1    | Ca_kabuli_chr03 | 24835626                | TT                              | GG                | 1945922222               |
| SNP_P3_31082_24835645 | NC_021162.1    | Ca_kabuli_chr03 | 24835645                | TT                              | GG                | 1945922224               |
| SNP_P3_31084_24865556 | NC_021162.1    | Ca_kabuli_chr03 | 24865556                | AA                              | GG                | 1945922226               |
| SNP_P3_31086_24925315 | NC_021162.1    | Ca_kabuli_chr03 | 24925315                | GG                              | AA                | 1945922227               |
| SNP_P3_31089_24967322 | NC_021162.1    | Ca_kabuli_chr03 | 24967322                | AA                              | GG                | 1945922229               |
| SNP_P3_31090_24967323 | NC_021162.1    | Ca_kabuli_chr03 | 24967323                | TT                              | AA                | 1945922231               |
| SNP_P3_31092_24973104 | NC_021162.1    | Ca_kabuli_chr03 | 24973104                | CC                              | TT                | 1945922233               |
| SNP_P3_31094_25023166 | NC_021162.1    | Ca_kabuli_chr03 | 25023166                | TT                              | CC                | 1945922235               |
| SNP_P3_31095_25030814 | NC_021162.1    | Ca_kabuli_chr03 | 25030814                | CC                              | TT                | 1945922236               |
| SNP_P3_31096_25040615 | NC_021162.1    | Ca_kabuli_chr03 | 25040615                | AA                              | GG                | 1945922238               |
| SNP_P3_31097_25040663 | NC_021162.1    | Ca_kabuli_chr03 | 25040663                | GG                              | AA                | 1945922240               |
| SNP_P3_31098_25040673 | NC_021162.1    | Ca_kabuli_chr03 | 25040673                | GG                              | TT                | 1945922242               |
| SNP_P3_31099_25040718 | NC_021162.1    | Ca_kabuli_chr03 | 25040718                | TT                              | CC                | 1945922243               |
| SNP_P3_31100_25040730 | NC_021162.1    | Ca_kabuli_chr03 | 25040730                | AA                              | GG                | 1945922245               |
| SNP_P3_31101_25040745 | NC_021162.1    | Ca_kabuli_chr03 | 25040745                | AA                              | GG                | 1945922247               |
| SNP_P3_31102_25040798 | NC_021162.1    | Ca_kabuli_chr03 | 25040798                | AA                              | GG                | 1945922249               |
| SNP_P3_31103_25040800 | NC_021162.1    | Ca_kabuli_chr03 | 25040800                | AA                              | GG                | 1945922251               |
| SNP_P3_31104_25040827 | NC_021162.1    | Ca_kabuli_chr03 | 25040827                | AA                              | GG                | 1945922252               |
| SNP_P3_31105_25040835 | NC_021162.1    | Ca_kabuli_chr03 | 25040835                | AA                              | TT                | 1945922254               |
| SNP_P3_31106_25040838 | NC_021162.1    | Ca_kabuli_chr03 | 25040838                | TT                              | CC                | 1945922256               |
| SNP_P3_31107_25040844 | NC_021162.1    | Ca_kabuli_chr03 | 25040844                | TT                              | CC                | 1945922258               |
| SNP_P3_31108_25044802 | NC_021162.1    | Ca_kabuli_chr03 | 25044802                | TT                              | AA                | 1945922259               |
| SNP_P3_31109_25057350 | NC_021162.1    | Ca_kabuli_chr03 | 25057350                | AA                              | CC                | 1945922261               |
| SNP_P3_31110_25074054 | NC_021162.1    | Ca_kabuli_chr03 | 25074054                | GG                              | AA                | 1945922263               |
| SNP_P3_31111_25077813 | NC_021162.1    | Ca_kabuli_chr03 | 25077813                | TT                              | AA                | 1945922265               |
| SNP_P3_31113_25114594 | NC_021162.1    | Ca_kabuli_chr03 | 25114594                | AA                              | GG                | 1945922267               |
| SNP_P3_31114_25115048 | NC_021162.1    | Ca_kabuli_chr03 | 25115048                | TT                              | GG                | 1945922268               |
| SNP_P3_31115_25115728 | NC_021162.1    | Ca_kabuli_chr03 | 25115728                | AA                              | TT                | 1945922270               |

| SNPs IDs              | Chromosome IDs | Chromosomes     | Physical positions (bp) | CDC Frontier (Reference genome) | (Pusa 256 & HPNB) | NCBI SNPdb Accession IDs |
|-----------------------|----------------|-----------------|-------------------------|---------------------------------|-------------------|--------------------------|
| SNP_P3_31116_25132617 | NC_021162.1    | Ca_kabuli_chr03 | 25132617                | GG                              | AA                | 1945922272               |
| SNP_P3_31117_25145247 | NC_021162.1    | Ca_kabuli_chr03 | 25145247                | TT                              | CC                | 1945922274               |
| SNP_P3_31118_25155625 | NC_021162.1    | Ca_kabuli_chr03 | 25155625                | AA                              | GG                | 1945922275               |
| SNP_P3_31122_25257039 | NC_021162.1    | Ca_kabuli_chr03 | 25257039                | CC                              | TT                | 1945922277               |
| SNP_P3_31123_25261641 | NC_021162.1    | Ca_kabuli_chr03 | 25261641                | GG                              | AA                | 1945922279               |
| SNP_P3_31124_25288047 | NC_021162.1    | Ca_kabuli_chr03 | 25288047                | GG                              | AA                | 1945922281               |
| SNP_P3_31126_25325785 | NC_021162.1    | Ca_kabuli_chr03 | 25325785                | AA                              | GG                | 1945922283               |
| SNP_P3_31127_25326695 | NC_021162.1    | Ca_kabuli_chr03 | 25326695                | CC                              | TT                | 1945922284               |
| SNP_P3_31128_25351320 | NC_021162.1    | Ca_kabuli_chr03 | 25351320                | TT                              | AA                | 1945922286               |
| SNP_P3_31129_25363195 | NC_021162.1    | Ca_kabuli_chr03 | 25363195                | TT                              | GG                | 1945922288               |
| SNP_P3_31130_25372830 | NC_021162.1    | Ca_kabuli_chr03 | 25372830                | AA                              | CC                | 1945922290               |
| SNP_P3_31131_25405529 | NC_021162.1    | Ca_kabuli_chr03 | 25405529                | TT                              | AA                | 1945922291               |
| SNP_P3_31133_25425283 | NC_021162.1    | Ca_kabuli_chr03 | 25425283                | AA                              | TT                | 1945922293               |
| SNP_P3_31136_25450697 | NC_021162.1    | Ca_kabuli_chr03 | 25450697                | AA                              | GG                | 1945922295               |
| SNP_P3_31138_25490685 | NC_021162.1    | Ca_kabuli_chr03 | 25490685                | TT                              | GG                | 1945922297               |
| SNP_P3_31139_25490686 | NC_021162.1    | Ca_kabuli_chr03 | 25490686                | TT                              | AA                | 1945922299               |
| SNP_P3_31142_25529888 | NC_021162.1    | Ca_kabuli_chr03 | 25529888                | AA                              | CC                | 1945922300               |
| SNP_P3_31143_25546017 | NC_021162.1    | Ca_kabuli_chr03 | 25546017                | AA                              | TT                | 1945922302               |
| SNP_P3_31144_25557642 | NC_021162.1    | Ca_kabuli_chr03 | 25557642                | GG                              | TT                | 1945922304               |
| SNP_P3_31147_25602793 | NC_021162.1    | Ca_kabuli_chr03 | 25602793                | TT                              | CC                | 1945922306               |
| SNP_P3_31148_25625867 | NC_021162.1    | Ca_kabuli_chr03 | 25625867                | AA                              | GG                | 1945922307               |
| SNP_P3_31149_25625873 | NC_021162.1    | Ca_kabuli_chr03 | 25625873                | AA                              | GG                | 1945922309               |
| SNP_P3_31150_25625959 | NC_021162.1    | Ca_kabuli_chr03 | 25625959                | AA                              | CC                | 1945922311               |
| SNP_P3_31151_25626102 | NC_021162.1    | Ca_kabuli_chr03 | 25626102                | CC                              | AA                | 1945922313               |
| SNP_P3_31152_25626129 | NC_021162.1    | Ca_kabuli_chr03 | 25626129                | AA                              | GG                | 1945922315               |
| SNP_P3_31153_25632732 | NC_021162.1    | Ca_kabuli_chr03 | 25632732                | AA                              | TT                | 1945922316               |
| SNP_P3_31154_25641447 | NC_021162.1    | Ca_kabuli_chr03 | 25641447                | TT                              | GG                | 1945922318               |
| SNP_P3_31155_25641456 | NC_021162.1    | Ca_kabuli_chr03 | 25641456                | CC                              | TT                | 1945922320               |
| SNP_P3_31157_25720624 | NC_021162.1    | Ca_kabuli_chr03 | 25720624                | TT                              | GG                | 1945922322               |
| SNP_P3_31159_25811231 | NC_021162.1    | Ca_kabuli_chr03 | 25811231                | AA                              | GG                | 1945922323               |
| SNP_P3_31160_25811239 | NC_021162.1    | Ca_kabuli_chr03 | 25811239                | GG                              | AA                | 1945922325               |
| SNP_P3_31161_25811242 | NC_021162.1    | Ca_kabuli_chr03 | 25811242                | TT                              | GG                | 1945922327               |
| SNP_P3_31162_25811254 | NC_021162.1    | Ca_kabuli_chr03 | 25811254                | CC                              | TT                | 1945922329               |
| SNP_P3_31163_25827863 | NC_021162.1    | Ca_kabuli_chr03 | 25827863                | GG                              | TT                | 1945922331               |
| SNP_P3_31165_25867152 | NC_021162.1    | Ca_kabuli_chr03 | 25867152                | CC                              | TT                | 1945922332               |
| SNP_P3_31166_25870344 | NC_021162.1    | Ca_kabuli_chr03 | 25870344                | AA                              | GG                | 1945922334               |
| SNP_P3_31167_25872806 | NC_021162.1    | Ca_kabuli_chr03 | 25872806                | AA                              | CC                | 1945922336               |
| SNP_P3_31168_25872828 | NC_021162.1    | Ca_kabuli_chr03 | 25872828                | AA                              | GG                | 1945922338               |
| SNP_P3_31169_25872829 | NC_021162.1    | Ca_kabuli_chr03 | 25872829                | GG                              | AA                | 1945922339               |
| SNP_P3_31171_25872988 | NC_021162.1    | Ca_kabuli_chr03 | 25872988                | GG                              | AA                | 1945922341               |
| SNP_P3_31172_25885789 | NC_021162.1    | Ca_kabuli_chr03 | 25885789                | TT                              | CC                | 1945922343               |
| SNP_P3_31173_25885798 | NC_021162.1    | Ca_kabuli_chr03 | 25885798                | AA                              | GG                | 1945922345               |

| SNPs IDs              | Chromosome IDs | Chromosomes     | Physical positions (bp) | CDC Frontier (Reference genome) | (Pusa 256 & HPNB) | NCBI SNPdb Accession IDs |
|-----------------------|----------------|-----------------|-------------------------|---------------------------------|-------------------|--------------------------|
| SNP_P3_31174_25886071 | NC_021162.1    | Ca_kabuli_chr03 | 25886071                | AA                              | TT                | 1945922346               |
| SNP_P3_31175_25886077 | NC_021162.1    | Ca_kabuli_chr03 | 25886077                | AA                              | TT                | 1945922348               |
| SNP_P3_31176_25886087 | NC_021162.1    | Ca_kabuli_chr03 | 25886087                | TT                              | AA                | 1945922350               |
| SNP_P3_31177_25886088 | NC_021162.1    | Ca_kabuli_chr03 | 25886088                | AA                              | TT                | 1945922352               |
| SNP_P3_31178_25886132 | NC_021162.1    | Ca_kabuli_chr03 | 25886132                | CC                              | TT                | 1945922354               |
| SNP_P3_31179_25886163 | NC_021162.1    | Ca_kabuli_chr03 | 25886163                | AA                              | TT                | 1945922355               |
| SNP_P3_31180_25886164 | NC_021162.1    | Ca_kabuli_chr03 | 25886164                | TT                              | AA                | 1945922357               |
| SNP_P3_31181_25886183 | NC_021162.1    | Ca_kabuli_chr03 | 25886183                | CC                              | GG                | 1945922359               |
| SNP_P3_31182_25886194 | NC_021162.1    | Ca_kabuli_chr03 | 25886194                | AA                              | GG                | 1945922361               |
| SNP_P3_31183_25886220 | NC_021162.1    | Ca_kabuli_chr03 | 25886220                | CC                              | AA                | 1945922363               |
| SNP_P3_31184_25886242 | NC_021162.1    | Ca_kabuli_chr03 | 25886242                | GG                              | AA                | 1945922364               |
| SNP_P3_31185_25886296 | NC_021162.1    | Ca_kabuli_chr03 | 25886296                | CC                              | TT                | 1945922366               |
| SNP_P3_31186_25886382 | NC_021162.1    | Ca_kabuli_chr03 | 25886382                | GG                              | AA                | 1945922368               |
| SNP_P3_31187_25888108 | NC_021162.1    | Ca_kabuli_chr03 | 25888108                | CC                              | GG                | 1945922370               |
| SNP_P3_31188_25888172 | NC_021162.1    | Ca_kabuli_chr03 | 25888172                | TT                              | AA                | 1945922371               |
| SNP_P3_31189_25888215 | NC_021162.1    | Ca_kabuli_chr03 | 25888215                | CC                              | TT                | 1945922373               |
| SNP_P3_31190_25888226 | NC_021162.1    | Ca_kabuli_chr03 | 25888226                | TT                              | CC                | 1945922375               |
| SNP_P3_31191_25888289 | NC_021162.1    | Ca_kabuli_chr03 | 25888289                | TT                              | AA                | 1945922377               |
| SNP_P3_31192_25888497 | NC_021162.1    | Ca_kabuli_chr03 | 25888497                | GG                              | AA                | 1945922378               |
| SNP_P3_31193_25888499 | NC_021162.1    | Ca_kabuli_chr03 | 25888499                | AA                              | CC                | 1945922380               |
| SNP_P3_31194_25888504 | NC_021162.1    | Ca_kabuli_chr03 | 25888504                | AA                              | GG                | 1945922382               |
| SNP_P3_31195_25888512 | NC_021162.1    | Ca_kabuli_chr03 | 25888512                | TT                              | CC                | 1945922384               |
| SNP_P3_31198_25888573 | NC_021162.1    | Ca_kabuli_chr03 | 25888573                | AA                              | GG                | 1945922386               |
| SNP_P3_31199_25888585 | NC_021162.1    | Ca_kabuli_chr03 | 25888585                | AA                              | GG                | 1945922387               |
| SNP_P3_31200_25888659 | NC_021162.1    | Ca_kabuli_chr03 | 25888659                | TT                              | AA                | 1945922389               |
| SNP_P3_31201_25888665 | NC_021162.1    | Ca_kabuli_chr03 | 25888665                | AA                              | TT                | 1945922391               |
| SNP_P3_31202_25888698 | NC_021162.1    | Ca_kabuli_chr03 | 25888698                | AA                              | TT                | 1945922393               |
| SNP_P3_31203_25888753 | NC_021162.1    | Ca_kabuli_chr03 | 25888753                | TT                              | GG                | 1945922394               |
| SNP_P3_31205_25888961 | NC_021162.1    | Ca_kabuli_chr03 | 25888961                | TT                              | CC                | 1945922396               |
| SNP_P3_31206_25888970 | NC_021162.1    | Ca_kabuli_chr03 | 25888970                | AA                              | TT                | 1945922398               |
| SNP_P3_31207_25888971 | NC_021162.1    | Ca_kabuli_chr03 | 25888971                | CC                              | AA                | 1945922400               |
| SNP_P3_31208_25888986 | NC_021162.1    | Ca_kabuli_chr03 | 25888986                | GG                              | AA                | 1945922402               |
| SNP_P3_31209_25889053 | NC_021162.1    | Ca_kabuli_chr03 | 25889053                | TT                              | CC                | 1945922403               |
| SNP_P3_31210_25889085 | NC_021162.1    | Ca_kabuli_chr03 | 25889085                | AA                              | GG                | 1945922405               |
| SNP_P3_31212_25889157 | NC_021162.1    | Ca_kabuli_chr03 | 25889157                | CC                              | TT                | 1945922407               |
| SNP_P3_31213_25889158 | NC_021162.1    | Ca_kabuli_chr03 | 25889158                | AA                              | TT                | 1945922409               |
| SNP_P3_31214_25889389 | NC_021162.1    | Ca_kabuli_chr03 | 25889389                | CC                              | TT                | 1945922410               |
| SNP_P3_31215_25889398 | NC_021162.1    | Ca_kabuli_chr03 | 25889398                | AA                              | TT                | 1945922412               |
| SNP_P3_31216_25889405 | NC_021162.1    | Ca_kabuli_chr03 | 25889405                | CC                              | AA                | 1945922414               |
| SNP_P3_31217_25889416 | NC_021162.1    | Ca_kabuli_chr03 | 25889416                | TT                              | GG                | 1945922416               |
| SNP_P3_31218_25889604 | NC_021162.1    | Ca_kabuli_chr03 | 25889604                | AA                              | TT                | 1945922418               |
| SNP_P3_31219_25889605 | NC_021162.1    | Ca_kabuli_chr03 | 25889605                | TT                              | AA                | 1945922419               |

| SNPs IDs              | Chromosome IDs | Chromosomes     | Physical positions (bp) | CDC Frontier (Reference genome) | (Pusa 256 & HPNB) | NCBI SNPdb Accession IDs |
|-----------------------|----------------|-----------------|-------------------------|---------------------------------|-------------------|--------------------------|
| SNP_P3_31221_25889650 | NC_021162.1    | Ca_kabuli_chr03 | 25889650                | GG                              | AA                | 1945922421               |
| SNP_P3_31222_25889680 | NC_021162.1    | Ca_kabuli_chr03 | 25889680                | AA                              | CC                | 1945922423               |
| SNP_P3_31223_25890789 | NC_021162.1    | Ca_kabuli_chr03 | 25890789                | AA                              | TT                | 1945922425               |
| SNP_P3_31224_25891218 | NC_021162.1    | Ca_kabuli_chr03 | 25891218                | AA                              | TT                | 1945922426               |
| SNP_P3_31225_25891463 | NC_021162.1    | Ca_kabuli_chr03 | 25891463                | AA                              | CC                | 1945922428               |
| SNP_P3_31226_25891464 | NC_021162.1    | Ca_kabuli_chr03 | 25891464                | TT                              | GG                | 1945922430               |
| SNP_P3_31227_25891471 | NC_021162.1    | Ca_kabuli_chr03 | 25891471                | TT                              | AA                | 1945922432               |
| SNP_P3_31228_25891746 | NC_021162.1    | Ca_kabuli_chr03 | 25891746                | GG                              | AA                | 1945922434               |
| SNP_P3_31230_25892027 | NC_021162.1    | Ca_kabuli_chr03 | 25892027                | TT                              | CC                | 1945922435               |
| SNP_P3_31231_25908993 | NC_021162.1    | Ca_kabuli_chr03 | 25908993                | GG                              | AA                | 1945922437               |
| SNP_P3_31234_25971833 | NC_021162.1    | Ca_kabuli_chr03 | 25971833                | AA                              | GG                | 1945922439               |
| SNP_P3_31235_25971852 | NC_021162.1    | Ca_kabuli_chr03 | 25971852                | TT                              | CC                | 1945922441               |
| SNP_P3_31236_25971861 | NC_021162.1    | Ca_kabuli_chr03 | 25971861                | AA                              | GG                | 1945922442               |
| SNP_P3_31237_25971878 | NC_021162.1    | Ca_kabuli_chr03 | 25971878                | TT                              | AA                | 1945922444               |
| SNP_P3_31238_25971933 | NC_021162.1    | Ca_kabuli_chr03 | 25971933                | AA                              | CC                | 1945922446               |
| SNP_P3_31239_25972042 | NC_021162.1    | Ca_kabuli_chr03 | 25972042                | TT                              | CC                | 1945922448               |
| SNP_P3_31240_25972178 | NC_021162.1    | Ca_kabuli_chr03 | 25972178                | AA                              | GG                | 1945922450               |
| SNP_P3_31241_25972211 | NC_021162.1    | Ca_kabuli_chr03 | 25972211                | TT                              | CC                | 1945922451               |
| SNP_P3_31242_25972233 | NC_021162.1    | Ca_kabuli_chr03 | 25972233                | AA                              | CC                | 1945922453               |
| SNP_P3_31243_25972250 | NC_021162.1    | Ca_kabuli_chr03 | 25972250                | TT                              | GG                | 1945922455               |
| SNP_P3_31244_25972368 | NC_021162.1    | Ca_kabuli_chr03 | 25972368                | AA                              | GG                | 1945922457               |
| SNP_P3_31245_25972377 | NC_021162.1    | Ca_kabuli_chr03 | 25972377                | TT                              | CC                | 1945922458               |
| SNP_P3_31246_25972426 | NC_021162.1    | Ca_kabuli_chr03 | 25972426                | AA                              | GG                | 1945922460               |
| SNP_P3_31247_25972441 | NC_021162.1    | Ca_kabuli_chr03 | 25972441                | AA                              | GG                | 1945922462               |
| SNP_P3_31248_25972442 | NC_021162.1    | Ca_kabuli_chr03 | 25972442                | TT                              | GG                | 1945922464               |
| SNP_P3_31249_25972449 | NC_021162.1    | Ca_kabuli_chr03 | 25972449                | TT                              | CC                | 1945922466               |
| SNP_P3_31250_25972452 | NC_021162.1    | Ca_kabuli_chr03 | 25972452                | TT                              | GG                | 1945922467               |
| SNP_P3_31251_25979070 | NC_021162.1    | Ca_kabuli_chr03 | 25979070                | CC                              | AA                | 1945922469               |
| SNP_P3_31252_26014078 | NC_021162.1    | Ca_kabuli_chr03 | 26014078                | AA                              | GG                | 1945922471               |
| SNP_P3_31254_26014355 | NC_021162.1    | Ca_kabuli_chr03 | 26014355                | GG                              | AA                | 1945922473               |
| SNP_P3_31255_26015155 | NC_021162.1    | Ca_kabuli_chr03 | 26015155                | TT                              | CC                | 1945922474               |
| SNP_P3_31256_26042054 | NC_021162.1    | Ca_kabuli_chr03 | 26042054                | TT                              | CC                | 1945922476               |
| SNP_P3_31257_26042067 | NC_021162.1    | Ca_kabuli_chr03 | 26042067                | CC                              | AA                | 1945922478               |
| SNP_P3_31258_26051741 | NC_021162.1    | Ca_kabuli_chr03 | 26051741                | TT                              | CC                | 1945922480               |
| SNP_P3_31259_26061936 | NC_021162.1    | Ca_kabuli_chr03 | 26061936                | TT                              | CC                | 1945922482               |
| SNP_P3_31260_26070526 | NC_021162.1    | Ca_kabuli_chr03 | 26070526                | AA                              | GG                | 1945922483               |
| SNP_P3_31261_26070575 | NC_021162.1    | Ca_kabuli_chr03 | 26070575                | AA                              | GG                | 1945922485               |
| SNP_P3_31262_26070813 | NC_021162.1    | Ca_kabuli_chr03 | 26070813                | AA                              | TT                | 1945922487               |
| SNP_P3_31263_26071315 | NC_021162.1    | Ca_kabuli_chr03 | 26071315                | GG                              | AA                | 1945922489               |
| SNP_P3_31264_26071332 | NC_021162.1    | Ca_kabuli_chr03 | 26071332                | TT                              | AA                | 1945922490               |
| SNP_P3_31266_26071683 | NC_021162.1    | Ca_kabuli_chr03 | 26071683                | GG                              | AA                | 1945922492               |
| SNP_P3_31267_26071763 | NC_021162.1    | Ca_kabuli_chr03 | 26071763                | GG                              | CC                | 1945922494               |

| SNPs IDs              | Chromosome IDs | Chromosomes     | Physical positions (bp) | CDC Frontier (Reference genome) | (Pusa 256 & HPNB) | NCBI SNPdb Accession IDs |
|-----------------------|----------------|-----------------|-------------------------|---------------------------------|-------------------|--------------------------|
| SNP_P3_31268_26071805 | NC_021162.1    | Ca_kabuli_chr03 | 26071805                | GG                              | AA                | 1945922496               |
| SNP_P3_31270_26071907 | NC_021162.1    | Ca_kabuli_chr03 | 26071907                | GG                              | AA                | 1945922498               |
| SNP_P3_31272_26074489 | NC_021162.1    | Ca_kabuli_chr03 | 26074489                | CC                              | AA                | 1945922499               |
| SNP_P3_31273_26076407 | NC_021162.1    | Ca_kabuli_chr03 | 26076407                | GG                              | AA                | 1945922501               |
| SNP_P3_31274_26095480 | NC_021162.1    | Ca_kabuli_chr03 | 26095480                | CC                              | AA                | 1945922503               |
| SNP_P3_31275_26096127 | NC_021162.1    | Ca_kabuli_chr03 | 26096127                | TT                              | AA                | 1945922505               |
| SNP_P3_31276_26098057 | NC_021162.1    | Ca_kabuli_chr03 | 26098057                | AA                              | TT                | 1945922506               |
| SNP_P3_31277_26101073 | NC_021162.1    | Ca_kabuli_chr03 | 26101073                | TT                              | CC                | 1945922508               |
| SNP_P3_31278_26101092 | NC_021162.1    | Ca_kabuli_chr03 | 26101092                | CC                              | TT                | 1945922510               |
| SNP_P3_31279_26101098 | NC_021162.1    | Ca_kabuli_chr03 | 26101098                | AA                              | TT                | 1945922512               |
| SNP_P3_31280_26101105 | NC_021162.1    | Ca_kabuli_chr03 | 26101105                | AA                              | GG                | 1945922514               |
| SNP_P3_31281_26101111 | NC_021162.1    | Ca_kabuli_chr03 | 26101111                | AA                              | CC                | 1945922515               |
| SNP_P3_31282_26101405 | NC_021162.1    | Ca_kabuli_chr03 | 26101405                | AA                              | CC                | 1945922517               |
| SNP_P3_31283_26101426 | NC_021162.1    | Ca_kabuli_chr03 | 26101426                | AA                              | GG                | 1945922519               |
| SNP_P3_31284_26101707 | NC_021162.1    | Ca_kabuli_chr03 | 26101707                | AA                              | GG                | 1945922521               |
| SNP_P3_31285_26101929 | NC_021162.1    | Ca_kabuli_chr03 | 26101929                | CC                              | TT                | 1945922522               |
| SNP_P3_31286_26101965 | NC_021162.1    | Ca_kabuli_chr03 | 26101965                | CC                              | TT                | 1945922524               |
| SNP_P3_31287_26101968 | NC_021162.1    | Ca_kabuli_chr03 | 26101968                | GG                              | TT                | 1945922526               |
| SNP_P3_31288_26101976 | NC_021162.1    | Ca_kabuli_chr03 | 26101976                | AA                              | TT                | 1945922528               |
| SNP_P3_31289_26101995 | NC_021162.1    | Ca_kabuli_chr03 | 26101995                | TT                              | CC                | 1945922529               |
| SNP_P3_31290_26102048 | NC_021162.1    | Ca_kabuli_chr03 | 26102048                | CC                              | TT                | 1945922531               |
| SNP_P3_31291_26108111 | NC_021162.1    | Ca_kabuli_chr03 | 26108111                | AA                              | GG                | 1945922533               |
| SNP_P3_31292_26108160 | NC_021162.1    | Ca_kabuli_chr03 | 26108160                | AA                              | TT                | 1945922535               |
| SNP_P3_31294_26114176 | NC_021162.1    | Ca_kabuli_chr03 | 26114176                | AA                              | TT                | 1945922537               |
| SNP_P3_31296_26114539 | NC_021162.1    | Ca_kabuli_chr03 | 26114539                | CC                              | GG                | 1945922538               |
| SNP_P3_31297_26114734 | NC_021162.1    | Ca_kabuli_chr03 | 26114734                | TT                              | CC                | 1945922540               |
| SNP_P3_31298_26114742 | NC_021162.1    | Ca_kabuli_chr03 | 26114742                | CC                              | TT                | 1945922542               |
| SNP_P3_31299_26114743 | NC_021162.1    | Ca_kabuli_chr03 | 26114743                | GG                              | AA                | 1945922544               |
| SNP_P3_31300_26114858 | NC_021162.1    | Ca_kabuli_chr03 | 26114858                | CC                              | TT                | 1945922545               |
| SNP_P3_31302_26114967 | NC_021162.1    | Ca_kabuli_chr03 | 26114967                | CC                              | TT                | 1945922547               |
| SNP_P3_31303_26114972 | NC_021162.1    | Ca_kabuli_chr03 | 26114972                | AA                              | TT                | 1945922549               |
| SNP_P3_31305_26115036 | NC_021162.1    | Ca_kabuli_chr03 | 26115036                | AA                              | GG                | 1945922551               |
| SNP_P3_31306_26115051 | NC_021162.1    | Ca_kabuli_chr03 | 26115051                | GG                              | CC                | 1945922553               |
| SNP_P3_31307_26115162 | NC_021162.1    | Ca_kabuli_chr03 | 26115162                | AA                              | TT                | 1945922554               |
| SNP_P3_31308_26115199 | NC_021162.1    | Ca_kabuli_chr03 | 26115199                | TT                              | AA                | 1945922556               |
| SNP_P3_31309_26115202 | NC_021162.1    | Ca_kabuli_chr03 | 26115202                | CC                              | GG                | 1945922558               |
| SNP_P3_31310_26115226 | NC_021162.1    | Ca_kabuli_chr03 | 26115226                | AA                              | TT                | 1945922560               |
| SNP_P3_31311_26115322 | NC_021162.1    | Ca_kabuli_chr03 | 26115322                | TT                              | AA                | 1945922561               |
| SNP_P3_31312_26115384 | NC_021162.1    | Ca_kabuli_chr03 | 26115384                | AA                              | TT                | 1945922563               |
| SNP_P3_31313_26115435 | NC_021162.1    | Ca_kabuli_chr03 | 26115435                | TT                              | GG                | 1945922565               |
| SNP_P3_31314_26115491 | NC_021162.1    | Ca_kabuli_chr03 | 26115491                | AA                              | GG                | 1945922567               |
| SNP_P3_31315_26115543 | NC_021162.1    | Ca_kabuli_chr03 | 26115543                | GG                              | AA                | 1945922569               |

| SNPs IDs              | Chromosome IDs | Chromosomes     | Physical positions (bp) | CDC Frontier (Reference genome) | (Pusa 256 & HPNB) | NCBI SNPdb Accession IDs |
|-----------------------|----------------|-----------------|-------------------------|---------------------------------|-------------------|--------------------------|
| SNP_P3_31316_26115748 | NC_021162.1    | Ca_kabuli_chr03 | 26115748                | AA                              | TT                | 1945922570               |
| SNP_P3_31317_26116385 | NC_021162.1    | Ca_kabuli_chr03 | 26116385                | CC                              | TT                | 1945922572               |
| SNP_P3_31318_26116392 | NC_021162.1    | Ca_kabuli_chr03 | 26116392                | CC                              | GG                | 1945922574               |
| SNP_P3_31319_26116396 | NC_021162.1    | Ca_kabuli_chr03 | 26116396                | TT                              | CC                | 1945922576               |
| SNP_P3_31320_26116399 | NC_021162.1    | Ca_kabuli_chr03 | 26116399                | TT                              | CC                | 1945922577               |
| SNP_P3_31322_26166283 | NC_021162.1    | Ca_kabuli_chr03 | 26166283                | TT                              | AA                | 1945922579               |
| SNP_P3_31323_26166287 | NC_021162.1    | Ca_kabuli_chr03 | 26166287                | AA                              | TT                | 1945922581               |
| SNP_P3_31324_26174976 | NC_021162.1    | Ca_kabuli_chr03 | 26174976                | TT                              | CC                | 1945922583               |
| SNP_P3_31325_26179921 | NC_021162.1    | Ca_kabuli_chr03 | 26179921                | TT                              | AA                | 1945922585               |
| SNP_P3_31326_26179972 | NC_021162.1    | Ca_kabuli_chr03 | 26179972                | TT                              | CC                | 1945922586               |
| SNP_P3_31327_26181545 | NC_021162.1    | Ca_kabuli_chr03 | 26181545                | GG                              | AA                | 1945922588               |
| SNP_P3_31329_26266788 | NC_021162.1    | Ca_kabuli_chr03 | 26266788                | AA                              | TT                | 1945922590               |
| SNP_P3_31330_26287910 | NC_021162.1    | Ca_kabuli_chr03 | 26287910                | AA                              | GG                | 1945922592               |
| SNP_P3_31333_26350505 | NC_021162.1    | Ca_kabuli_chr03 | 26350505                | GG                              | TT                | 1945922593               |
| SNP_P3_31334_26396126 | NC_021162.1    | Ca_kabuli_chr03 | 26396126                | TT                              | GG                | 1945922595               |
| SNP_P3_31336_26411747 | NC_021162.1    | Ca_kabuli_chr03 | 26411747                | TT                              | CC                | 1945922597               |
| SNP_P3_31337_26411988 | NC_021162.1    | Ca_kabuli_chr03 | 26411988                | CC                              | TT                | 1945922599               |
| SNP_P3_31338_26412178 | NC_021162.1    | Ca_kabuli_chr03 | 26412178                | TT                              | GG                | 1945922601               |
| SNP_P3_31339_26483862 | NC_021162.1    | Ca_kabuli_chr03 | 26483862                | CC                              | TT                | 1945922602               |
| SNP_P3_31340_26484165 | NC_021162.1    | Ca_kabuli_chr03 | 26484165                | CC                              | TT                | 1945922604               |
| SNP_P3_31341_26484213 | NC_021162.1    | Ca_kabuli_chr03 | 26484213                | AA                              | GG                | 1945922606               |
| SNP_P3_31342_26484228 | NC_021162.1    | Ca_kabuli_chr03 | 26484228                | CC                              | TT                | 1945922608               |
| SNP_P3_31343_26486837 | NC_021162.1    | Ca_kabuli_chr03 | 26486837                | CC                              | AA                | 1945922609               |
| SNP_P3_31344_26495307 | NC_021162.1    | Ca_kabuli_chr03 | 26495307                | CC                              | TT                | 1945922611               |
| SNP_P3_31345_26495353 | NC_021162.1    | Ca_kabuli_chr03 | 26495353                | TT                              | CC                | 1945922613               |
| SNP_P3_31346_26495361 | NC_021162.1    | Ca_kabuli_chr03 | 26495361                | TT                              | CC                | 1945922615               |
| SNP_P3_31347_26495556 | NC_021162.1    | Ca_kabuli_chr03 | 26495556                | GG                              | AA                | 1945922617               |
| SNP_P3_31348_26495558 | NC_021162.1    | Ca_kabuli_chr03 | 26495558                | GG                              | AA                | 1945922618               |
| SNP_P3_31349_26495591 | NC_021162.1    | Ca_kabuli_chr03 | 26495591                | AA                              | GG                | 1945922620               |
| SNP_P3_31350_26495666 | NC_021162.1    | Ca_kabuli_chr03 | 26495666                | CC                              | TT                | 1945922622               |
| SNP_P3_31351_26495683 | NC_021162.1    | Ca_kabuli_chr03 | 26495683                | TT                              | CC                | 1945922624               |
| SNP_P3_31352_26495685 | NC_021162.1    | Ca_kabuli_chr03 | 26495685                | TT                              | CC                | 1945922625               |
| SNP_P3_31353_26495689 | NC_021162.1    | Ca_kabuli_chr03 | 26495689                | AA                              | TT                | 1945922627               |
| SNP_P3_31354_26495714 | NC_021162.1    | Ca_kabuli_chr03 | 26495714                | TT                              | AA                | 1945922629               |
| SNP_P3_31355_26495755 | NC_021162.1    | Ca_kabuli_chr03 | 26495755                | AA                              | TT                | 1945922631               |
| SNP_P3_31356_26495766 | NC_021162.1    | Ca_kabuli_chr03 | 26495766                | AA                              | TT                | 1945922633               |
| SNP_P3_31357_26495815 | NC_021162.1    | Ca_kabuli_chr03 | 26495815                | GG                              | AA                | 1945922634               |
| SNP_P3_31358_26495956 | NC_021162.1    | Ca_kabuli_chr03 | 26495956                | CC                              | TT                | 1945922636               |
| SNP_P3_31359_26496003 | NC_021162.1    | Ca_kabuli_chr03 | 26496003                | AA                              | CC                | 1945922638               |
| SNP_P3_31360_26496005 | NC_021162.1    | Ca_kabuli_chr03 | 26496005                | AA                              | TT                | 1945922640               |
| SNP_P3_31361_26496135 | NC_021162.1    | Ca_kabuli_chr03 | 26496135                | AA                              | GG                | 1945922641               |
| SNP_P3_31362_26496154 | NC_021162.1    | Ca_kabuli_chr03 | 26496154                | AA                              | GG                | 1945922643               |

| SNPs IDs              | Chromosome IDs | Chromosomes     | Physical positions (bp) | CDC Frontier (Reference genome) | (Pusa 256 & HPNB) | NCBI SNPdb Accession IDs |
|-----------------------|----------------|-----------------|-------------------------|---------------------------------|-------------------|--------------------------|
| SNP_P3_31363_26505810 | NC_021162.1    | Ca_kabuli_chr03 | 26505810                | GG                              | TT                | 1945922645               |
| SNP_P3_31367_26648608 | NC_021162.1    | Ca_kabuli_chr03 | 26648608                | GG                              | AA                | 1945922647               |
| SNP_P3_31369_26686647 | NC_021162.1    | Ca_kabuli_chr03 | 26686647                | TT                              | GG                | 1945922649               |
| SNP_P3_31370_26686950 | NC_021162.1    | Ca_kabuli_chr03 | 26686950                | CC                              | TT                | 1945922650               |
| SNP_P3_31371_26707690 | NC_021162.1    | Ca_kabuli_chr03 | 26707690                | TT                              | CC                | 1945922652               |
| SNP_P3_31372_26708035 | NC_021162.1    | Ca_kabuli_chr03 | 26708035                | GG                              | TT                | 1945922654               |
| SNP_P3_31373_26708036 | NC_021162.1    | Ca_kabuli_chr03 | 26708036                | TT                              | AA                | 1945922656               |
| SNP_P3_31374_26708037 | NC_021162.1    | Ca_kabuli_chr03 | 26708037                | CC                              | AA                | 1945922657               |
| SNP_P3_31375_26708068 | NC_021162.1    | Ca_kabuli_chr03 | 26708068                | TT                              | CC                | 1945922659               |
| SNP_P3_31377_26776049 | NC_021162.1    | Ca_kabuli_chr03 | 26776049                | CC                              | TT                | 1945922661               |
| SNP_P3_31379_26897312 | NC_021162.1    | Ca_kabuli_chr03 | 26897312                | CC                              | TT                | 1945922663               |
| SNP_P3_31380_26897934 | NC_021162.1    | Ca_kabuli_chr03 | 26897934                | GG                              | AA                | 1945922665               |
| SNP_P3_31381_26901395 | NC_021162.1    | Ca_kabuli_chr03 | 26901395                | CC                              | TT                | 1945922666               |
| SNP_P3_31382_26907170 | NC_021162.1    | Ca_kabuli_chr03 | 26907170                | TT                              | AA                | 1945922668               |
| SNP_P3_31385_27072775 | NC_021162.1    | Ca_kabuli_chr03 | 27072775                | GG                              | CC                | 1945922670               |
| SNP_P3_31386_27073468 | NC_021162.1    | Ca_kabuli_chr03 | 27073468                | AA                              | GG                | 1945922672               |
| SNP_P3_31388_27073585 | NC_021162.1    | Ca_kabuli_chr03 | 27073585                | GG                              | TT                | 1945922673               |
| SNP_P3_31389_27073619 | NC_021162.1    | Ca_kabuli_chr03 | 27073619                | TT                              | GG                | 1945922675               |
| SNP_P3_31390_27073658 | NC_021162.1    | Ca_kabuli_chr03 | 27073658                | TT                              | AA                | 1945922677               |
| SNP_P3_31391_27098925 | NC_021162.1    | Ca_kabuli_chr03 | 27098925                | AA                              | GG                | 1945922679               |
| SNP_P3_31392_27120100 | NC_021162.1    | Ca_kabuli_chr03 | 27120100                | GG                              | AA                | 1945922681               |
| SNP_P3_31393_27130410 | NC_021162.1    | Ca_kabuli_chr03 | 27130410                | TT                              | GG                | 1945922682               |
| SNP_P3_31395_27178144 | NC_021162.1    | Ca_kabuli_chr03 | 27178144                | AA                              | TT                | 1945922684               |
| SNP_P3_31396_27178145 | NC_021162.1    | Ca_kabuli_chr03 | 27178145                | AA                              | CC                | 1945922686               |
| SNP_P3_31397_27215902 | NC_021162.1    | Ca_kabuli_chr03 | 27215902                | CC                              | TT                | 1945922688               |
| SNP_P3_31399_27228356 | NC_021162.1    | Ca_kabuli_chr03 | 27228356                | AA                              | GG                | 1945922689               |
| SNP_P3_31400_27228445 | NC_021162.1    | Ca_kabuli_chr03 | 27228445                | GG                              | TT                | 1945922691               |
| SNP_P3_31401_27236865 | NC_021162.1    | Ca_kabuli_chr03 | 27236865                | AA                              | TT                | 1945922693               |
| SNP_P3_31402_27238032 | NC_021162.1    | Ca_kabuli_chr03 | 27238032                | TT                              | GG                | 1945922695               |
| SNP_P3_31403_27238879 | NC_021162.1    | Ca_kabuli_chr03 | 27238879                | AA                              | GG                | 1945922697               |
| SNP_P3_31404_27240617 | NC_021162.1    | Ca_kabuli_chr03 | 27240617                | TT                              | CC                | 1945922698               |
| SNP_P3_31405_27240695 | NC_021162.1    | Ca_kabuli_chr03 | 27240695                | GG                              | AA                | 1945922700               |
| SNP_P3_31406_27240708 | NC_021162.1    | Ca_kabuli_chr03 | 27240708                | TT                              | CC                | 1945922702               |
| SNP_P3_31407_27240762 | NC_021162.1    | Ca_kabuli_chr03 | 27240762                | CC                              | GG                | 1945922704               |
| SNP_P3_31408_27240763 | NC_021162.1    | Ca_kabuli_chr03 | 27240763                | AA                              | CC                | 1945922705               |
| SNP_P3_31409_27244911 | NC_021162.1    | Ca_kabuli_chr03 | 27244911                | GG                              | CC                | 1945922707               |
| SNP_P3_31410_27245484 | NC_021162.1    | Ca_kabuli_chr03 | 27245484                | GG                              | AA                | 1945922709               |
| SNP_P3_31411_27246249 | NC_021162.1    | Ca_kabuli_chr03 | 27246249                | CC                              | TT                | 1945922711               |
| SNP_P3_31415_27282766 | NC_021162.1    | Ca_kabuli_chr03 | 27282766                | GG                              | AA                | 1945922713               |
| SNP_P3_31418_27306870 | NC_021162.1    | Ca_kabuli_chr03 | 27306870                | AA                              | GG                | 1945922714               |
| SNP_P3_31419_27309208 | NC_021162.1    | Ca_kabuli_chr03 | 27309208                | CC                              | GG                | 1945922716               |
| SNP_P3_31421_27321372 | NC_021162.1    | Ca_kabuli_chr03 | 27321372                | TT                              | AA                | 1945922718               |

| SNPs IDs              | Chromosome IDs | Chromosomes     | Physical positions (bp) | CDC Frontier (Reference genome) | (Pusa 256 & HPNB) | NCBI SNPdb Accession IDs |
|-----------------------|----------------|-----------------|-------------------------|---------------------------------|-------------------|--------------------------|
| SNP_P3_31423_27345010 | NC_021162.1    | Ca_kabuli_chr03 | 27345010                | TT                              | CC                | 1945922720               |
| SNP_P3_31424_27345014 | NC_021162.1    | Ca_kabuli_chr03 | 27345014                | AA                              | CC                | 1945922721               |
| SNP_P3_31425_27356423 | NC_021162.1    | Ca_kabuli_chr03 | 27356423                | GG                              | AA                | 1945922723               |
| SNP_P3_31429_27406518 | NC_021162.1    | Ca_kabuli_chr03 | 27406518                | CC                              | TT                | 1945922725               |
| SNP_P3_31431_27442019 | NC_021162.1    | Ca_kabuli_chr03 | 27442019                | GG                              | TT                | 1945922727               |
| SNP_P3_31433_27570150 | NC_021162.1    | Ca_kabuli_chr03 | 27570150                | CC                              | TT                | 1945922729               |
| SNP_P3_31434_27582610 | NC_021162.1    | Ca_kabuli_chr03 | 27582610                | CC                              | GG                | 1945922730               |
| SNP_P3_31435_27601869 | NC_021162.1    | Ca_kabuli_chr03 | 27601869                | TT                              | AA                | 1945922732               |
| SNP_P3_31436_27603174 | NC_021162.1    | Ca_kabuli_chr03 | 27603174                | AA                              | GG                | 1945922734               |
| SNP_P3_31437_27617967 | NC_021162.1    | Ca_kabuli_chr03 | 27617967                | AA                              | GG                | 1945922736               |
| SNP_P3_31438_27629059 | NC_021162.1    | Ca_kabuli_chr03 | 27629059                | CC                              | TT                | 1945922737               |
| SNP_P3_31439_27640663 | NC_021162.1    | Ca_kabuli_chr03 | 27640663                | GG                              | AA                | 1945922739               |
| SNP_P3_31440_27648605 | NC_021162.1    | Ca_kabuli_chr03 | 27648605                | TT                              | CC                | 1945922741               |
| SNP_P3_31441_27648608 | NC_021162.1    | Ca_kabuli_chr03 | 27648608                | AA                              | CC                | 1945922743               |
| SNP_P3_31442_27658533 | NC_021162.1    | Ca_kabuli_chr03 | 27658533                | TT                              | AA                | 1945922745               |
| SNP_P3_31443_27679549 | NC_021162.1    | Ca_kabuli_chr03 | 27679549                | TT                              | GG                | 1945922746               |
| SNP_P3_31444_27679551 | NC_021162.1    | Ca_kabuli_chr03 | 27679551                | TT                              | GG                | 1945922748               |
| SNP_P3_31445_27682272 | NC_021162.1    | Ca_kabuli_chr03 | 27682272                | CC                              | TT                | 1945922750               |
| SNP_P3_31446_27687090 | NC_021162.1    | Ca_kabuli_chr03 | 27687090                | AA                              | CC                | 1945922752               |
| SNP_P3_31448_27692283 | NC_021162.1    | Ca_kabuli_chr03 | 27692283                | CC                              | TT                | 1945922753               |
| SNP_P3_31449_27699567 | NC_021162.1    | Ca_kabuli_chr03 | 27699567                | CC                              | AA                | 1945922755               |
| SNP_P3_31450_27699623 | NC_021162.1    | Ca_kabuli_chr03 | 27699623                | CC                              | GG                | 1945922757               |
| SNP_P3_31451_27699625 | NC_021162.1    | Ca_kabuli_chr03 | 27699625                | GG                              | CC                | 1945922759               |
| SNP_P3_31452_27720096 | NC_021162.1    | Ca_kabuli_chr03 | 27720096                | GG                              | AA                | 1945922761               |
| SNP_P3_31453_27775206 | NC_021162.1    | Ca_kabuli_chr03 | 27775206                | CC                              | TT                | 1945922762               |
| SNP_P3_31454_27775207 | NC_021162.1    | Ca_kabuli_chr03 | 27775207                | AA                              | CC                | 1945922764               |
| SNP_P3_31455_27775212 | NC_021162.1    | Ca_kabuli_chr03 | 27775212                | TT                              | AA                | 1945922766               |
| SNP_P3_31456_27794465 | NC_021162.1    | Ca_kabuli_chr03 | 27794465                | GG                              | AA                | 1945922768               |
| SNP_P3_31457_27846763 | NC_021162.1    | Ca_kabuli_chr03 | 27846763                | TT                              | CC                | 1945922769               |
| SNP_P3_31458_27849884 | NC_021162.1    | Ca_kabuli_chr03 | 27849884                | TT                              | AA                | 1945922771               |
| SNP_P3_31459_27853044 | NC_021162.1    | Ca_kabuli_chr03 | 27853044                | AA                              | TT                | 1945922773               |
| SNP_P3_31460_27853050 | NC_021162.1    | Ca_kabuli_chr03 | 27853050                | AA                              | TT                | 1945922775               |
| SNP_P3_31461_27853054 | NC_021162.1    | Ca_kabuli_chr03 | 27853054                | GG                              | AA                | 1945922777               |
| SNP_P3_31462_27853063 | NC_021162.1    | Ca_kabuli_chr03 | 27853063                | AA                              | GG                | 1945922778               |
| SNP_P3_31463_27853083 | NC_021162.1    | Ca_kabuli_chr03 | 27853083                | GG                              | AA                | 1945922780               |
| SNP_P3_31464_27853598 | NC_021162.1    | Ca_kabuli_chr03 | 27853598                | CC                              | AA                | 1945922782               |
| SNP_P3_31465_27853957 | NC_021162.1    | Ca_kabuli_chr03 | 27853957                | CC                              | TT                | 1945922784               |
| SNP_P3_31467_27854215 | NC_021162.1    | Ca_kabuli_chr03 | 27854215                | GG                              | AA                | 1945922785               |
| SNP_P3_31468_27854224 | NC_021162.1    | Ca_kabuli_chr03 | 27854224                | GG                              | AA                | 1945922787               |
| SNP_P3_31469_27854306 | NC_021162.1    | Ca_kabuli_chr03 | 27854306                | GG                              | AA                | 1945922789               |
| SNP_P3_31470_27854352 | NC_021162.1    | Ca_kabuli_chr03 | 27854352                | TT                              | CC                | 1945922791               |
| SNP_P3_31471_27854355 | NC_021162.1    | Ca_kabuli_chr03 | 27854355                | GG                              | AA                | 1945922793               |



| SNPs IDs              | Chromosome IDs | Chromosomes     | Physical positions (bp) | CDC Frontier (Reference genome) | (Pusa 256 & HPNB) | NCBI SNPdb Accession IDs |
|-----------------------|----------------|-----------------|-------------------------|---------------------------------|-------------------|--------------------------|
| SNP_P3_31472_27854555 | NC_021162.1    | Ca_kabuli_chr03 | 27854555                | GG                              | AA                | 1945922794               |
| SNP_P3_31473_27854694 | NC_021162.1    | Ca_kabuli_chr03 | 27854694                | AA                              | GG                | 1945922796               |
| SNP_P3_31474_27854695 | NC_021162.1    | Ca_kabuli_chr03 | 27854695                | AA                              | GG                | 1945922798               |
| SNP_P3_31475_27854731 | NC_021162.1    | Ca_kabuli_chr03 | 27854731                | AA                              | GG                | 1945922800               |
| SNP_P3_31476_27854735 | NC_021162.1    | Ca_kabuli_chr03 | 27854735                | AA                              | GG                | 1945922801               |
| SNP_P3_31477_27854744 | NC_021162.1    | Ca_kabuli_chr03 | 27854744                | GG                              | TT                | 1945922803               |
| SNP_P3_31479_27854816 | NC_021162.1    | Ca_kabuli_chr03 | 27854816                | GG                              | TT                | 1945922805               |
| SNP_P3_31480_27855139 | NC_021162.1    | Ca_kabuli_chr03 | 27855139                | AA                              | CC                | 1945922807               |
| SNP_P3_31481_27856730 | NC_021162.1    | Ca_kabuli_chr03 | 27856730                | GG                              | AA                | 1945922808               |
| SNP_P3_31483_27861236 | NC_021162.1    | Ca_kabuli_chr03 | 27861236                | AA                              | GG                | 1945922810               |
| SNP_P3_31484_27866542 | NC_021162.1    | Ca_kabuli_chr03 | 27866542                | AA                              | GG                | 1945922812               |
| SNP_P3_31485_27866897 | NC_021162.1    | Ca_kabuli_chr03 | 27866897                | AA                              | CC                | 1945922814               |
| SNP_P3_31486_27866904 | NC_021162.1    | Ca_kabuli_chr03 | 27866904                | TT                              | CC                | 1945922816               |
| SNP_P3_31487_27866950 | NC_021162.1    | Ca_kabuli_chr03 | 27866950                | AA                              | GG                | 1945922817               |
| SNP_P3_31488_27869836 | NC_021162.1    | Ca_kabuli_chr03 | 27869836                | TT                              | GG                | 1945922819               |
| SNP_P3_31489_27875897 | NC_021162.1    | Ca_kabuli_chr03 | 27875897                | GG                              | AA                | 1945922821               |
| SNP_P3_31491_27919487 | NC_021162.1    | Ca_kabuli_chr03 | 27919487                | AA                              | TT                | 1945922823               |
| SNP_P3_31493_27954109 | NC_021162.1    | Ca_kabuli_chr03 | 27954109                | GG                              | AA                | 1945922824               |
| SNP_P3_31494_27979060 | NC_021162.1    | Ca_kabuli_chr03 | 27979060                | CC                              | TT                | 1945922826               |
| SNP_P3_31496_28014298 | NC_021162.1    | Ca_kabuli_chr03 | 28014298                | TT                              | AA                | 1945922828               |
| SNP_P3_31498_28026724 | NC_021162.1    | Ca_kabuli_chr03 | 28026724                | TT                              | CC                | 1945922830               |
| SNP_P3_31499_28026728 | NC_021162.1    | Ca_kabuli_chr03 | 28026728                | AA                              | CC                | 1945922832               |
| SNP_P3_31500_28052656 | NC_021162.1    | Ca_kabuli_chr03 | 28052656                | GG                              | AA                | 1945922833               |
| SNP_P3_31502_28052822 | NC_021162.1    | Ca_kabuli_chr03 | 28052822                | CC                              | GG                | 1945922835               |
| SNP_P3_31504_28109511 | NC_021162.1    | Ca_kabuli_chr03 | 28109511                | CC                              | AA                | 1945922837               |
| SNP_P3_31505_28109606 | NC_021162.1    | Ca_kabuli_chr03 | 28109606                | TT                              | CC                | 1945922839               |
| SNP_P3_31506_28109613 | NC_021162.1    | Ca_kabuli_chr03 | 28109613                | GG                              | AA                | 1945922840               |
| SNP_P3_31507_28109653 | NC_021162.1    | Ca_kabuli_chr03 | 28109653                | CC                              | TT                | 1945922842               |
| SNP_P3_31508_28109758 | NC_021162.1    | Ca_kabuli_chr03 | 28109758                | AA                              | GG                | 1945922844               |
| SNP_P3_31510_28138128 | NC_021162.1    | Ca_kabuli_chr03 | 28138128                | TT                              | AA                | 1945922846               |
| SNP_P3_31511_28138130 | NC_021162.1    | Ca_kabuli_chr03 | 28138130                | CC                              | TT                | 1945922848               |
| SNP_P3_31512_28138145 | NC_021162.1    | Ca_kabuli_chr03 | 28138145                | TT                              | CC                | 1945922849               |
| SNP_P3_31513_28150628 | NC_021162.1    | Ca_kabuli_chr03 | 28150628                | AA                              | CC                | 1945922851               |
| SNP_P3_31514_28188148 | NC_021162.1    | Ca_kabuli_chr03 | 28188148                | CC                              | AA                | 1945922853               |
| SNP_P3_31515_28188262 | NC_021162.1    | Ca_kabuli_chr03 | 28188262                | CC                              | TT                | 1945922855               |
| SNP_P3_31517_28188337 | NC_021162.1    | Ca_kabuli_chr03 | 28188337                | GG                              | TT                | 1945922856               |
| SNP_P3_31518_28188406 | NC_021162.1    | Ca_kabuli_chr03 | 28188406                | AA                              | TT                | 1945922858               |
| SNP_P3_31519_28188412 | NC_021162.1    | Ca_kabuli_chr03 | 28188412                | GG                              | AA                | 1945922860               |
| SNP_P3_31521_28188447 | NC_021162.1    | Ca_kabuli_chr03 | 28188447                | TT                              | AA                | 1945922862               |
| SNP_P3_31522_28188528 | NC_021162.1    | Ca_kabuli_chr03 | 28188528                | CC                              | TT                | 1945922864               |
| SNP_P3_31523_28188765 | NC_021162.1    | Ca_kabuli_chr03 | 28188765                | AA                              | TT                | 1945922865               |
| SNP_P3_31524_28188779 | NC_021162.1    | Ca_kabuli_chr03 | 28188779                | TT                              | CC                | 1945922867               |

| SNPs IDs              | Chromosome IDs | Chromosomes     | Physical positions (bp) | CDC Frontier (Reference genome) | (Pusa 256 & HPNB) | NCBI SNPdb Accession IDs |
|-----------------------|----------------|-----------------|-------------------------|---------------------------------|-------------------|--------------------------|
| SNP_P3_31526_28192938 | NC_021162.1    | Ca_kabuli_chr03 | 28192938                | TT                              | CC                | 1945922869               |
| SNP_P3_31527_28193234 | NC_021162.1    | Ca_kabuli_chr03 | 28193234                | GG                              | AA                | 1945922871               |
| SNP_P3_31528_28193238 | NC_021162.1    | Ca_kabuli_chr03 | 28193238                | GG                              | AA                | 1945922872               |
| SNP_P3_31529_28193301 | NC_021162.1    | Ca_kabuli_chr03 | 28193301                | CC                              | TT                | 1945922874               |
| SNP_P3_31530_28196047 | NC_021162.1    | Ca_kabuli_chr03 | 28196047                | TT                              | CC                | 1945922876               |
| SNP_P3_31531_28196304 | NC_021162.1    | Ca_kabuli_chr03 | 28196304                | GG                              | CC                | 1945922878               |
| SNP_P3_31532_28196324 | NC_021162.1    | Ca_kabuli_chr03 | 28196324                | GG                              | AA                | 1945922879               |
| SNP_P3_31533_28196370 | NC_021162.1    | Ca_kabuli_chr03 | 28196370                | AA                              | GG                | 1945922881               |
| SNP_P3_31534_28198115 | NC_021162.1    | Ca_kabuli_chr03 | 28198115                | AA                              | GG                | 1945922883               |
| SNP_P3_31535_28198303 | NC_021162.1    | Ca_kabuli_chr03 | 28198303                | TT                              | AA                | 1945922885               |
| SNP_P3_31537_28198336 | NC_021162.1    | Ca_kabuli_chr03 | 28198336                | TT                              | CC                | 1945922887               |
| SNP_P3_31539_28198392 | NC_021162.1    | Ca_kabuli_chr03 | 28198392                | AA                              | GG                | 1945922888               |
| SNP_P3_31540_28221570 | NC_021162.1    | Ca_kabuli_chr03 | 28221570                | CC                              | AA                | 1945922890               |
| SNP_P3_31541_28221571 | NC_021162.1    | Ca_kabuli_chr03 | 28221571                | GG                              | TT                | 1945922892               |
| SNP_P3_31542_28225053 | NC_021162.1    | Ca_kabuli_chr03 | 28225053                | GG                              | AA                | 1945922894               |
| SNP_P3_31543_28226516 | NC_021162.1    | Ca_kabuli_chr03 | 28226516                | CC                              | TT                | 1945922895               |
| SNP_P3_31544_28262373 | NC_021162.1    | Ca_kabuli_chr03 | 28262373                | TT                              | GG                | 1945922897               |
| SNP_P3_31546_28262592 | NC_021162.1    | Ca_kabuli_chr03 | 28262592                | CC                              | GG                | 1945922899               |
| SNP_P3_31547_28262781 | NC_021162.1    | Ca_kabuli_chr03 | 28262781                | GG                              | TT                | 1945922901               |
| SNP_P3_31548_28274804 | NC_021162.1    | Ca_kabuli_chr03 | 28274804                | AA                              | GG                | 1945922903               |
| SNP_P3_31549_28293654 | NC_021162.1    | Ca_kabuli_chr03 | 28293654                | AA                              | TT                | 1945922904               |
| SNP_P3_31550_28356476 | NC_021162.1    | Ca_kabuli_chr03 | 28356476                | TT                              | CC                | 1945922906               |
| SNP_P3_31552_28361316 | NC_021162.1    | Ca_kabuli_chr03 | 28361316                | AA                              | GG                | 1945922908               |
| SNP_P3_31553_28384184 | NC_021162.1    | Ca_kabuli_chr03 | 28384184                | AA                              | TT                | 1945922910               |
| SNP_P3_31554_28398908 | NC_021162.1    | Ca_kabuli_chr03 | 28398908                | TT                              | GG                | 1945922911               |
| SNP_P3_31555_28398909 | NC_021162.1    | Ca_kabuli_chr03 | 28398909                | TT                              | CC                | 1945922913               |
| SNP_P3_31556_28407763 | NC_021162.1    | Ca_kabuli_chr03 | 28407763                | CC                              | TT                | 1945922915               |
| SNP_P3_31557_28407798 | NC_021162.1    | Ca_kabuli_chr03 | 28407798                | TT                              | CC                | 1945922917               |
| SNP_P3_31558_28407926 | NC_021162.1    | Ca_kabuli_chr03 | 28407926                | TT                              | AA                | 1945922919               |
| SNP_P3_31559_28421658 | NC_021162.1    | Ca_kabuli_chr03 | 28421658                | GG                              | AA                | 1945922920               |
| SNP_P3_31560_28445495 | NC_021162.1    | Ca_kabuli_chr03 | 28445495                | CC                              | AA                | 1945922922               |
| SNP_P3_31562_28461458 | NC_021162.1    | Ca_kabuli_chr03 | 28461458                | TT                              | CC                | 1945922924               |
| SNP_P3_31563_28461459 | NC_021162.1    | Ca_kabuli_chr03 | 28461459                | CC                              | TT                | 1945922926               |
| SNP_P3_31565_28513622 | NC_021162.1    | Ca_kabuli_chr03 | 28513622                | AA                              | TT                | 1945922927               |
| SNP_P3_31567_28558968 | NC_021162.1    | Ca_kabuli_chr03 | 28558968                | CC                              | TT                | 1945922929               |
| SNP_P3_31568_28625170 | NC_021162.1    | Ca_kabuli_chr03 | 28625170                | AA                              | TT                | 1945922931               |
| SNP_P3_31569_28680364 | NC_021162.1    | Ca_kabuli_chr03 | 28680364                | AA                              | GG                | 1945922933               |
| SNP_P3_31570_28680365 | NC_021162.1    | Ca_kabuli_chr03 | 28680365                | AA                              | GG                | 1945922935               |
| SNP_P3_31572_28687648 | NC_021162.1    | Ca_kabuli_chr03 | 28687648                | AA                              | TT                | 1945922936               |
| SNP_P3_31573_28687649 | NC_021162.1    | Ca_kabuli_chr03 | 28687649                | AA                              | TT                | 1945922938               |
| SNP_P3_31574_28743722 | NC_021162.1    | Ca_kabuli_chr03 | 28743722                | TT                              | GG                | 1945922940               |
| SNP_P3_31577_28797835 | NC_021162.1    | Ca_kabuli_chr03 | 28797835                | GG                              | CC                | 1945922942               |

| SNPs IDs              | Chromosome IDs | Chromosomes     | Physical positions (bp) | CDC Frontier (Reference genome) | (Pusa 256 & HPNB) | NCBI SNPdb Accession IDs |
|-----------------------|----------------|-----------------|-------------------------|---------------------------------|-------------------|--------------------------|
| SNP_P3_31578_28799300 | NC_021162.1    | Ca_kabuli_chr03 | 28799300                | GG                              | AA                | 1945922943               |
| SNP_P3_31579_28799332 | NC_021162.1    | Ca_kabuli_chr03 | 28799332                | AA                              | TT                | 1945922945               |
| SNP_P3_31580_28799366 | NC_021162.1    | Ca_kabuli_chr03 | 28799366                | CC                              | TT                | 1945922947               |
| SNP_P3_31581_28799374 | NC_021162.1    | Ca_kabuli_chr03 | 28799374                | TT                              | AA                | 1945922949               |
| SNP_P3_31582_28799381 | NC_021162.1    | Ca_kabuli_chr03 | 28799381                | TT                              | AA                | 1945922951               |
| SNP_P3_31584_28799558 | NC_021162.1    | Ca_kabuli_chr03 | 28799558                | AA                              | CC                | 1945922952               |
| SNP_P3_31586_28799600 | NC_021162.1    | Ca_kabuli_chr03 | 28799600                | GG                              | AA                | 1945922954               |
| SNP_P3_31587_28799626 | NC_021162.1    | Ca_kabuli_chr03 | 28799626                | GG                              | AA                | 1945922956               |
| SNP_P3_31588_28799633 | NC_021162.1    | Ca_kabuli_chr03 | 28799633                | TT                              | CC                | 1945922958               |
| SNP_P3_31589_28799692 | NC_021162.1    | Ca_kabuli_chr03 | 28799692                | TT                              | CC                | 1945922959               |
| SNP_P3_31590_28799696 | NC_021162.1    | Ca_kabuli_chr03 | 28799696                | AA                              | CC                | 1945922961               |
| SNP_P3_31591_28799697 | NC_021162.1    | Ca_kabuli_chr03 | 28799697                | AA                              | CC                | 1945922963               |
| SNP_P3_31592_28799751 | NC_021162.1    | Ca_kabuli_chr03 | 28799751                | CC                              | TT                | 1945922965               |
| SNP_P3_31593_28799779 | NC_021162.1    | Ca_kabuli_chr03 | 28799779                | TT                              | CC                | 1945922967               |
| SNP_P3_31594_28799803 | NC_021162.1    | Ca_kabuli_chr03 | 28799803                | CC                              | AA                | 1945922968               |
| SNP_P3_31595_28799805 | NC_021162.1    | Ca_kabuli_chr03 | 28799805                | GG                              | TT                | 1945922970               |
| SNP_P3_31596_28799930 | NC_021162.1    | Ca_kabuli_chr03 | 28799930                | GG                              | AA                | 1945922972               |
| SNP_P3_31598_28800011 | NC_021162.1    | Ca_kabuli_chr03 | 28800011                | TT                              | AA                | 1945922974               |
| SNP_P3_31599_28800018 | NC_021162.1    | Ca_kabuli_chr03 | 28800018                | AA                              | TT                | 1945922975               |
| SNP_P3_31600_28800020 | NC_021162.1    | Ca_kabuli_chr03 | 28800020                | AA                              | GG                | 1945922977               |
| SNP_P3_31602_28800320 | NC_021162.1    | Ca_kabuli_chr03 | 28800320                | AA                              | GG                | 1945922979               |
| SNP_P3_31603_28870353 | NC_021162.1    | Ca_kabuli_chr03 | 28870353                | GG                              | AA                | 1945922981               |
| SNP_P3_31604_28902055 | NC_021162.1    | Ca_kabuli_chr03 | 28902055                | CC                              | TT                | 1945922982               |
| SNP_P3_31605_28902122 | NC_021162.1    | Ca_kabuli_chr03 | 28902122                | AA                              | GG                | 1945922984               |
| SNP_P3_31606_28902124 | NC_021162.1    | Ca_kabuli_chr03 | 28902124                | TT                              | CC                | 1945922986               |
| SNP_P3_31607_28902233 | NC_021162.1    | Ca_kabuli_chr03 | 28902233                | AA                              | TT                | 1945922988               |
| SNP_P3_31608_28916816 | NC_021162.1    | Ca_kabuli_chr03 | 28916816                | AA                              | GG                | 1945922990               |
| SNP_P3_31609_28918996 | NC_021162.1    | Ca_kabuli_chr03 | 28918996                | CC                              | TT                | 1945922991               |
| SNP_P3_31612_28984710 | NC_021162.1    | Ca_kabuli_chr03 | 28984710                | GG                              | TT                | 1945922993               |
| SNP_P3_31613_28984910 | NC_021162.1    | Ca_kabuli_chr03 | 28984910                | CC                              | TT                | 1945922995               |
| SNP_P3_31615_28994904 | NC_021162.1    | Ca_kabuli_chr03 | 28994904                | TT                              | GG                | 1945922997               |
| SNP_P3_31616_28994916 | NC_021162.1    | Ca_kabuli_chr03 | 28994916                | AA                              | GG                | 1945922998               |
| SNP_P3_31617_28994917 | NC_021162.1    | Ca_kabuli_chr03 | 28994917                | TT                              | CC                | 1945923000               |
| SNP_P3_31619_28995047 | NC_021162.1    | Ca_kabuli_chr03 | 28995047                | CC                              | TT                | 1945923002               |
| SNP_P3_31620_28995098 | NC_021162.1    | Ca_kabuli_chr03 | 28995098                | AA                              | GG                | 1945923004               |
| SNP_P3_31621_28995112 | NC_021162.1    | Ca_kabuli_chr03 | 28995112                | CC                              | AA                | 1945923006               |
| SNP_P3_31623_28995158 | NC_021162.1    | Ca_kabuli_chr03 | 28995158                | TT                              | CC                | 1945923007               |
| SNP_P3_31624_28995293 | NC_021162.1    | Ca_kabuli_chr03 | 28995293                | GG                              | CC                | 1945923009               |
| SNP_P3_31625_28995321 | NC_021162.1    | Ca_kabuli_chr03 | 28995321                | AA                              | CC                | 1945923011               |
| SNP_P3_31626_28995379 | NC_021162.1    | Ca_kabuli_chr03 | 28995379                | AA                              | GG                | 1945923013               |
| SNP_P3_31627_28995407 | NC_021162.1    | Ca_kabuli_chr03 | 28995407                | AA                              | GG                | 1945923014               |
| SNP_P3_31628_28995492 | NC_021162.1    | Ca_kabuli_chr03 | 28995492                | AA                              | GG                | 1945923016               |

| SNPs IDs              | Chromosome IDs | Chromosomes     | Physical positions (bp) | CDC Frontier (Reference genome) | (Pusa 256 & HPNB) | NCBI SNPdb Accession IDs |
|-----------------------|----------------|-----------------|-------------------------|---------------------------------|-------------------|--------------------------|
| SNP_P3_31629_28995566 | NC_021162.1    | Ca_kabuli_chr03 | 28995566                | TT                              | AA                | 1945923018               |
| SNP_P3_31630_28995571 | NC_021162.1    | Ca_kabuli_chr03 | 28995571                | CC                              | TT                | 1945923020               |
| SNP_P3_31631_28995576 | NC_021162.1    | Ca_kabuli_chr03 | 28995576                | TT                              | GG                | 1945923022               |
| SNP_P3_31632_28995586 | NC_021162.1    | Ca_kabuli_chr03 | 28995586                | GG                              | AA                | 1945923023               |
| SNP_P3_31633_28996528 | NC_021162.1    | Ca_kabuli_chr03 | 28996528                | TT                              | CC                | 1945923025               |
| SNP_P3_31634_28996566 | NC_021162.1    | Ca_kabuli_chr03 | 28996566                | CC                              | TT                | 1945923027               |
| SNP_P3_31635_28996573 | NC_021162.1    | Ca_kabuli_chr03 | 28996573                | TT                              | CC                | 1945923029               |
| SNP_P3_31636_28996584 | NC_021162.1    | Ca_kabuli_chr03 | 28996584                | CC                              | TT                | 1945923030               |
| SNP_P3_31637_28996585 | NC_021162.1    | Ca_kabuli_chr03 | 28996585                | AA                              | GG                | 1945923032               |
| SNP_P3_31638_28996587 | NC_021162.1    | Ca_kabuli_chr03 | 28996587                | TT                              | AA                | 1945923034               |
| SNP_P3_31639_28996624 | NC_021162.1    | Ca_kabuli_chr03 | 28996624                | GG                              | TT                | 1945923036               |
| SNP_P3_31641_28996681 | NC_021162.1    | Ca_kabuli_chr03 | 28996681                | TT                              | CC                | 1945923038               |
| SNP_P3_31642_28996874 | NC_021162.1    | Ca_kabuli_chr03 | 28996874                | AA                              | CC                | 1945923039               |
| SNP_P3_31643_28996928 | NC_021162.1    | Ca_kabuli_chr03 | 28996928                | AA                              | GG                | 1945923041               |
| SNP_P3_31644_28996931 | NC_021162.1    | Ca_kabuli_chr03 | 28996931                | AA                              | GG                | 1945923043               |
| SNP_P3_31645_28996935 | NC_021162.1    | Ca_kabuli_chr03 | 28996935                | AA                              | GG                | 1945923045               |
| SNP_P3_31646_28996971 | NC_021162.1    | Ca_kabuli_chr03 | 28996971                | TT                              | AA                | 1945923046               |
| SNP_P3_31647_28996977 | NC_021162.1    | Ca_kabuli_chr03 | 28996977                | TT                              | CC                | 1945923048               |
| SNP_P3_31648_28997022 | NC_021162.1    | Ca_kabuli_chr03 | 28997022                | CC                              | TT                | 1945923050               |
| SNP_P3_31649_28997027 | NC_021162.1    | Ca_kabuli_chr03 | 28997027                | AA                              | CC                | 1945923052               |
| SNP_P3_31650_28997337 | NC_021162.1    | Ca_kabuli_chr03 | 28997337                | CC                              | TT                | 1945923054               |
| SNP_P3_31651_28997338 | NC_021162.1    | Ca_kabuli_chr03 | 28997338                | AA                              | GG                | 1945923055               |
| SNP_P3_31652_28997389 | NC_021162.1    | Ca_kabuli_chr03 | 28997389                | AA                              | CC                | 1945923057               |
| SNP_P3_31653_28997427 | NC_021162.1    | Ca_kabuli_chr03 | 28997427                | CC                              | TT                | 1945923059               |
| SNP_P3_31654_28999521 | NC_021162.1    | Ca_kabuli_chr03 | 28999521                | CC                              | TT                | 1945923061               |
| SNP_P3_31655_28999544 | NC_021162.1    | Ca_kabuli_chr03 | 28999544                | TT                              | AA                | 1945923062               |
| SNP_P3_31656_28999585 | NC_021162.1    | Ca_kabuli_chr03 | 28999585                | GG                              | AA                | 1945923064               |
| SNP_P3_31657_28999587 | NC_021162.1    | Ca_kabuli_chr03 | 28999587                | CC                              | GG                | 1945923066               |
| SNP_P3_31658_28999620 | NC_021162.1    | Ca_kabuli_chr03 | 28999620                | AA                              | GG                | 1945923068               |
| SNP_P3_31660_28999780 | NC_021162.1    | Ca_kabuli_chr03 | 28999780                | AA                              | CC                | 1945923069               |
| SNP_P3_31661_28999785 | NC_021162.1    | Ca_kabuli_chr03 | 28999785                | CC                              | GG                | 1945923071               |
| SNP_P3_31662_28999798 | NC_021162.1    | Ca_kabuli_chr03 | 28999798                | CC                              | TT                | 1945923073               |
| SNP_P3_31663_28999814 | NC_021162.1    | Ca_kabuli_chr03 | 28999814                | AA                              | TT                | 1945923075               |
| SNP_P3_31664_28999841 | NC_021162.1    | Ca_kabuli_chr03 | 28999841                | AA                              | GG                | 1945923077               |
| SNP_P3_31665_28999900 | NC_021162.1    | Ca_kabuli_chr03 | 28999900                | CC                              | TT                | 1945923078               |
| SNP_P3_31666_28999916 | NC_021162.1    | Ca_kabuli_chr03 | 28999916                | TT                              | AA                | 1945923080               |
| SNP_P3_31667_28999921 | NC_021162.1    | Ca_kabuli_chr03 | 28999921                | AA                              | TT                | 1945923082               |
| SNP_P3_31668_29000035 | NC_021162.1    | Ca_kabuli_chr03 | 29000035                | TT                              | GG                | 1945923084               |
| SNP_P3_31669_29000040 | NC_021162.1    | Ca_kabuli_chr03 | 29000040                | CC                              | GG                | 1945923085               |
| SNP_P3_31670_29000093 | NC_021162.1    | Ca_kabuli_chr03 | 29000093                | AA                              | GG                | 1945923087               |
| SNP_P3_31671_29000161 | NC_021162.1    | Ca_kabuli_chr03 | 29000161                | TT                              | GG                | 1945923089               |
| SNP_P3_31672_29000220 | NC_021162.1    | Ca_kabuli_chr03 | 29000220                | GG                              | AA                | 1945923091               |

| SNPs IDs              | Chromosome IDs | Chromosomes     | Physical positions (bp) | CDC Frontier (Reference genome) | (Pusa 256 & HPNB) | NCBI SNPdb Accession IDs |
|-----------------------|----------------|-----------------|-------------------------|---------------------------------|-------------------|--------------------------|
| SNP_P3_31673_29000223 | NC_021162.1    | Ca_kabuli_chr03 | 29000223                | GG                              | AA                | 1945923093               |
| SNP_P3_31674_29000240 | NC_021162.1    | Ca_kabuli_chr03 | 29000240                | GG                              | AA                | 1945923094               |
| SNP_P3_31675_29000268 | NC_021162.1    | Ca_kabuli_chr03 | 29000268                | GG                              | AA                | 1945923096               |
| SNP_P3_31676_29000321 | NC_021162.1    | Ca_kabuli_chr03 | 29000321                | TT                              | CC                | 1945923098               |
| SNP_P3_31677_29000667 | NC_021162.1    | Ca_kabuli_chr03 | 29000667                | CC                              | AA                | 1945923100               |
| SNP_P3_31678_29000693 | NC_021162.1    | Ca_kabuli_chr03 | 29000693                | AA                              | GG                | 1945923101               |
| SNP_P3_31679_29000720 | NC_021162.1    | Ca_kabuli_chr03 | 29000720                | GG                              | CC                | 1945923103               |
| SNP_P3_31680_29000723 | NC_021162.1    | Ca_kabuli_chr03 | 29000723                | TT                              | AA                | 1945923105               |
| SNP_P3_31681_29000745 | NC_021162.1    | Ca_kabuli_chr03 | 29000745                | GG                              | AA                | 1945923107               |
| SNP_P3_31682_29000758 | NC_021162.1    | Ca_kabuli_chr03 | 29000758                | GG                              | TT                | 1945923109               |
| SNP_P3_31683_29000770 | NC_021162.1    | Ca_kabuli_chr03 | 29000770                | AA                              | GG                | 1945923110               |
| SNP_P3_31684_29000771 | NC_021162.1    | Ca_kabuli_chr03 | 29000771                | CC                              | TT                | 1945923112               |
| SNP_P3_31685_29000775 | NC_021162.1    | Ca_kabuli_chr03 | 29000775                | AA                              | TT                | 1945923114               |
| SNP_P3_31686_29000790 | NC_021162.1    | Ca_kabuli_chr03 | 29000790                | CC                              | TT                | 1945923116               |
| SNP_P3_31687_29000810 | NC_021162.1    | Ca_kabuli_chr03 | 29000810                | CC                              | TT                | 1945923117               |
| SNP_P3_31689_29000834 | NC_021162.1    | Ca_kabuli_chr03 | 29000834                | CC                              | AA                | 1945923119               |
| SNP_P3_31690_29000839 | NC_021162.1    | Ca_kabuli_chr03 | 29000839                | AA                              | GG                | 1945923121               |
| SNP_P3_31691_29000965 | NC_021162.1    | Ca_kabuli_chr03 | 29000965                | GG                              | TT                | 1945923123               |
| SNP_P3_31692_29000970 | NC_021162.1    | Ca_kabuli_chr03 | 29000970                | AA                              | TT                | 1945923124               |
| SNP_P3_31693_29000975 | NC_021162.1    | Ca_kabuli_chr03 | 29000975                | AA                              | CC                | 1945923126               |
| SNP_P3_31694_29000981 | NC_021162.1    | Ca_kabuli_chr03 | 29000981                | CC                              | TT                | 1945923128               |
| SNP_P3_31695_29001038 | NC_021162.1    | Ca_kabuli_chr03 | 29001038                | TT                              | CC                | 1945923130               |
| SNP_P3_31696_29001043 | NC_021162.1    | Ca_kabuli_chr03 | 29001043                | AA                              | GG                | 1945923132               |
| SNP_P3_31697_29001068 | NC_021162.1    | Ca_kabuli_chr03 | 29001068                | GG                              | AA                | 1945923133               |
| SNP_P3_31698_29001074 | NC_021162.1    | Ca_kabuli_chr03 | 29001074                | TT                              | CC                | 1945923135               |
| SNP_P3_31699_29001082 | NC_021162.1    | Ca_kabuli_chr03 | 29001082                | TT                              | AA                | 1945923137               |
| SNP_P3_31700_29001178 | NC_021162.1    | Ca_kabuli_chr03 | 29001178                | CC                              | TT                | 1945923139               |
| SNP_P3_31701_29001180 | NC_021162.1    | Ca_kabuli_chr03 | 29001180                | GG                              | AA                | 1945923140               |
| SNP_P3_31702_29007554 | NC_021162.1    | Ca_kabuli_chr03 | 29007554                | TT                              | AA                | 1945923142               |
| SNP_P3_31703_29007874 | NC_021162.1    | Ca_kabuli_chr03 | 29007874                | AA                              | GG                | 1945923144               |
| SNP_P3_31704_29007922 | NC_021162.1    | Ca_kabuli_chr03 | 29007922                | GG                              | TT                | 1945923146               |
| SNP_P3_31705_29041905 | NC_021162.1    | Ca_kabuli_chr03 | 29041905                | TT                              | CC                | 1945923148               |
| SNP_P3_31706_29047739 | NC_021162.1    | Ca_kabuli_chr03 | 29047739                | CC                              | TT                | 1945923149               |
| SNP_P3_31707_29072946 | NC_021162.1    | Ca_kabuli_chr03 | 29072946                | CC                              | TT                | 1945923151               |
| SNP_P3_31708_29073856 | NC_021162.1    | Ca_kabuli_chr03 | 29073856                | AA                              | CC                | 1945923153               |
| SNP_P3_31709_29085313 | NC_021162.1    | Ca_kabuli_chr03 | 29085313                | AA                              | GG                | 1945923155               |
| SNP_P3_31710_29087596 | NC_021162.1    | Ca_kabuli_chr03 | 29087596                | TT                              | AA                | 1945923156               |
| SNP_P3_31713_29105109 | NC_021162.1    | Ca_kabuli_chr03 | 29105109                | AA                              | GG                | 1945923158               |
| SNP_P3_31714_29132058 | NC_021162.1    | Ca_kabuli_chr03 | 29132058                | TT                              | CC                | 1945923160               |
| SNP_P3_31715_29149081 | NC_021162.1    | Ca_kabuli_chr03 | 29149081                | AA                              | TT                | 1945923162               |
| SNP_P3_31716_29161048 | NC_021162.1    | Ca_kabuli_chr03 | 29161048                | TT                              | AA                | 1945923164               |
| SNP_P3_31717_29161985 | NC_021162.1    | Ca_kabuli_chr03 | 29161985                | AA                              | TT                | 1945923165               |

| SNPs IDs              | Chromosome IDs | Chromosomes     | Physical positions (bp) | CDC Frontier (Reference genome) | (Pusa 256 & HPNB) | NCBI SNPdb Accession IDs |
|-----------------------|----------------|-----------------|-------------------------|---------------------------------|-------------------|--------------------------|
| SNP_P3_31719_29194623 | NC_021162.1    | Ca_kabuli_chr03 | 29194623                | TT                              | CC                | 1945923167               |
| SNP_P3_31720_29214525 | NC_021162.1    | Ca_kabuli_chr03 | 29214525                | CC                              | TT                | 1945923169               |
| SNP_P3_31721_29221154 | NC_021162.1    | Ca_kabuli_chr03 | 29221154                | AA                              | GG                | 1945923171               |
| SNP_P3_31722_29226853 | NC_021162.1    | Ca_kabuli_chr03 | 29226853                | CC                              | AA                | 1945923172               |
| SNP_P3_31723_29247995 | NC_021162.1    | Ca_kabuli_chr03 | 29247995                | GG                              | AA                | 1945923174               |
| SNP_P3_31724_29248176 | NC_021162.1    | Ca_kabuli_chr03 | 29248176                | TT                              | GG                | 1945923176               |
| SNP_P3_31725_29248366 | NC_021162.1    | Ca_kabuli_chr03 | 29248366                | TT                              | CC                | 1945923178               |
| SNP_P3_31726_29248530 | NC_021162.1    | Ca_kabuli_chr03 | 29248530                | CC                              | TT                | 1945923180               |
| SNP_P3_31727_29248563 | NC_021162.1    | Ca_kabuli_chr03 | 29248563                | TT                              | CC                | 1945923181               |
| SNP_P3_31728_29249434 | NC_021162.1    | Ca_kabuli_chr03 | 29249434                | CC                              | TT                | 1945923183               |
| SNP_P3_31729_29249462 | NC_021162.1    | Ca_kabuli_chr03 | 29249462                | TT                              | GG                | 1945923185               |
| SNP_P3_31730_29249503 | NC_021162.1    | Ca_kabuli_chr03 | 29249503                | AA                              | GG                | 1945923187               |
| SNP_P3_31731_29249508 | NC_021162.1    | Ca_kabuli_chr03 | 29249508                | TT                              | GG                | 1945923188               |
| SNP_P3_31733_29249535 | NC_021162.1    | Ca_kabuli_chr03 | 29249535                | GG                              | AA                | 1945923190               |
| SNP_P3_31734_29249553 | NC_021162.1    | Ca_kabuli_chr03 | 29249553                | AA                              | GG                | 1945923192               |
| SNP_P3_31735_29249614 | NC_021162.1    | Ca_kabuli_chr03 | 29249614                | AA                              | GG                | 1945923194               |
| SNP_P3_31736_29249681 | NC_021162.1    | Ca_kabuli_chr03 | 29249681                | AA                              | CC                | 1945923196               |
| SNP_P3_31737_29249702 | NC_021162.1    | Ca_kabuli_chr03 | 29249702                | AA                              | GG                | 1945923197               |
| SNP_P3_31738_29249734 | NC_021162.1    | Ca_kabuli_chr03 | 29249734                | AA                              | GG                | 1945923199               |
| SNP_P3_31739_29249942 | NC_021162.1    | Ca_kabuli_chr03 | 29249942                | TT                              | CC                | 1945923201               |
| SNP_P3_31740_29249965 | NC_021162.1    | Ca_kabuli_chr03 | 29249965                | AA                              | GG                | 1945923203               |
| SNP_P3_31741_29250029 | NC_021162.1    | Ca_kabuli_chr03 | 29250029                | GG                              | AA                | 1945923204               |
| SNP_P3_31742_29250060 | NC_021162.1    | Ca_kabuli_chr03 | 29250060                | GG                              | AA                | 1945923206               |
| SNP_P3_31743_29251598 | NC_021162.1    | Ca_kabuli_chr03 | 29251598                | AA                              | GG                | 1945923208               |
| SNP_P3_31746_29297776 | NC_021162.1    | Ca_kabuli_chr03 | 29297776                | TT                              | AA                | 1945923210               |
| SNP_P3_31747_29318929 | NC_021162.1    | Ca_kabuli_chr03 | 29318929                | GG                              | AA                | 1945923211               |
| SNP_P3_31748_29341065 | NC_021162.1    | Ca_kabuli_chr03 | 29341065                | GG                              | AA                | 1945923213               |
| SNP_P3_31749_29382973 | NC_021162.1    | Ca_kabuli_chr03 | 29382973                | GG                              | AA                | 1945923215               |
| SNP_P3_31751_29485067 | NC_021162.1    | Ca_kabuli_chr03 | 29485067                | AA                              | GG                | 1945923217               |
| SNP_P3_31753_29506963 | NC_021162.1    | Ca_kabuli_chr03 | 29506963                | TT                              | GG                | 1945923219               |
| SNP_P3_31755_29535227 | NC_021162.1    | Ca_kabuli_chr03 | 29535227                | GG                              | AA                | 1945923220               |
| SNP_P3_31756_29541829 | NC_021162.1    | Ca_kabuli_chr03 | 29541829                | TT                              | CC                | 1945923222               |
| SNP_P3_31757_29553757 | NC_021162.1    | Ca_kabuli_chr03 | 29553757                | TT                              | AA                | 1945923224               |
| SNP_P3_31758_29553761 | NC_021162.1    | Ca_kabuli_chr03 | 29553761                | TT                              | GG                | 1945923226               |
| SNP_P3_31759_29553762 | NC_021162.1    | Ca_kabuli_chr03 | 29553762                | GG                              | AA                | 1945923227               |
| SNP_P3_31760_29556418 | NC_021162.1    | Ca_kabuli_chr03 | 29556418                | TT                              | CC                | 1945923229               |
| SNP_P3_31761_29560425 | NC_021162.1    | Ca_kabuli_chr03 | 29560425                | AA                              | GG                | 1945923231               |
| SNP_P3_31762_29560743 | NC_021162.1    | Ca_kabuli_chr03 | 29560743                | AA                              | GG                | 1945923233               |
| SNP_P3_31763_29560745 | NC_021162.1    | Ca_kabuli_chr03 | 29560745                | AA                              | CC                | 1945923235               |
| SNP_P3_31764_29564352 | NC_021162.1    | Ca_kabuli_chr03 | 29564352                | GG                              | AA                | 1945923236               |
| SNP_P3_31765_29594447 | NC_021162.1    | Ca_kabuli_chr03 | 29594447                | CC                              | TT                | 1945923238               |
| SNP_P3_31766_29613176 | NC_021162.1    | Ca_kabuli_chr03 | 29613176                | CC                              | TT                | 1945923240               |

| SNPs IDs              | Chromosome IDs | Chromosomes     | Physical positions (bp) | CDC Frontier (Reference genome) | (Pusa 256 & HPNB) | NCBI SNPdb Accession IDs |
|-----------------------|----------------|-----------------|-------------------------|---------------------------------|-------------------|--------------------------|
| SNP_P3_31768_29623650 | NC_021162.1    | Ca_kabuli_chr03 | 29623650                | CC                              | TT                | 1945923242               |
| SNP_P3_31769_29647476 | NC_021162.1    | Ca_kabuli_chr03 | 29647476                | TT                              | AA                | 1945923243               |
| SNP_P3_31771_29665954 | NC_021162.1    | Ca_kabuli_chr03 | 29665954                | AA                              | TT                | 1945923245               |
| SNP_P3_31772_29680107 | NC_021162.1    | Ca_kabuli_chr03 | 29680107                | AA                              | GG                | 1945923247               |
| SNP_P3_31773_29691890 | NC_021162.1    | Ca_kabuli_chr03 | 29691890                | TT                              | AA                | 1945923249               |
| SNP_P3_31775_29718934 | NC_021162.1    | Ca_kabuli_chr03 | 29718934                | CC                              | TT                | 1945923251               |
| SNP_P3_31776_29732065 | NC_021162.1    | Ca_kabuli_chr03 | 29732065                | AA                              | GG                | 1945923252               |
| SNP_P3_31779_29759665 | NC_021162.1    | Ca_kabuli_chr03 | 29759665                | TT                              | AA                | 1945923254               |
| SNP_P3_31780_29761912 | NC_021162.1    | Ca_kabuli_chr03 | 29761912                | AA                              | GG                | 1945923256               |
| SNP_P3_31781_29762004 | NC_021162.1    | Ca_kabuli_chr03 | 29762004                | AA                              | TT                | 1945923258               |
| SNP_P3_31784_29775047 | NC_021162.1    | Ca_kabuli_chr03 | 29775047                | AA                              | TT                | 1945923259               |
| SNP_P3_31785_29780273 | NC_021162.1    | Ca_kabuli_chr03 | 29780273                | TT                              | AA                | 1945923261               |
| SNP_P3_31788_29846617 | NC_021162.1    | Ca_kabuli_chr03 | 29846617                | TT                              | AA                | 1945923263               |
| SNP_P3_31791_29858723 | NC_021162.1    | Ca_kabuli_chr03 | 29858723                | AA                              | TT                | 1945923265               |
| SNP_P3_31792_29858724 | NC_021162.1    | Ca_kabuli_chr03 | 29858724                | TT                              | CC                | 1945923266               |
| SNP_P3_31793_29867328 | NC_021162.1    | Ca_kabuli_chr03 | 29867328                | GG                              | TT                | 1945923268               |
| SNP_P3_31794_29877241 | NC_021162.1    | Ca_kabuli_chr03 | 29877241                | TT                              | AA                | 1945923270               |
| SNP_P3_31795_29886215 | NC_021162.1    | Ca_kabuli_chr03 | 29886215                | TT                              | CC                | 1945923272               |
| SNP_P3_31796_29900611 | NC_021162.1    | Ca_kabuli_chr03 | 29900611                | AA                              | GG                | 1945923274               |
| SNP_P3_31797_29902610 | NC_021162.1    | Ca_kabuli_chr03 | 29902610                | GG                              | AA                | 1945923275               |
| SNP_P3_31798_29904044 | NC_021162.1    | Ca_kabuli_chr03 | 29904044                | GG                              | AA                | 1945923277               |
| SNP_P3_31799_29921379 | NC_021162.1    | Ca_kabuli_chr03 | 29921379                | CC                              | TT                | 1945923279               |
| SNP_P3_31800_29924851 | NC_021162.1    | Ca_kabuli_chr03 | 29924851                | GG                              | CC                | 1945923281               |
| SNP_P3_31801_29934810 | NC_021162.1    | Ca_kabuli_chr03 | 29934810                | AA                              | GG                | 1945923282               |
| SNP_P3_31802_29936503 | NC_021162.1    | Ca_kabuli_chr03 | 29936503                | TT                              | CC                | 1945923284               |
| SNP_P3_31803_29937161 | NC_021162.1    | Ca_kabuli_chr03 | 29937161                | AA                              | GG                | 1945923286               |
| SNP_P3_31804_29938093 | NC_021162.1    | Ca_kabuli_chr03 | 29938093                | AA                              | TT                | 1945923288               |
| SNP_P3_31806_29950693 | NC_021162.1    | Ca_kabuli_chr03 | 29950693                | CC                              | TT                | 1945923290               |
| SNP_P3_31807_29957135 | NC_021162.1    | Ca_kabuli_chr03 | 29957135                | CC                              | GG                | 1945923291               |
| SNP_P3_31808_29987634 | NC_021162.1    | Ca_kabuli_chr03 | 29987634                | TT                              | GG                | 1945923293               |
| SNP_P3_31809_29987635 | NC_021162.1    | Ca_kabuli_chr03 | 29987635                | TT                              | GG                | 1945923295               |
| SNP_P3_31810_29994022 | NC_021162.1    | Ca_kabuli_chr03 | 29994022                | AA                              | TT                | 1945923297               |
| SNP_P3_31811_29998955 | NC_021162.1    | Ca_kabuli_chr03 | 29998955                | AA                              | GG                | 1945923298               |
| SNP_P3_31812_30004484 | NC_021162.1    | Ca_kabuli_chr03 | 30004484                | TT                              | AA                | 1945923300               |
| SNP_P3_31813_30009254 | NC_021162.1    | Ca_kabuli_chr03 | 30009254                | TT                              | CC                | 1945923302               |
| SNP_P3_31814_30031090 | NC_021162.1    | Ca_kabuli_chr03 | 30031090                | CC                              | TT                | 1945923304               |
| SNP_P3_31815_30032577 | NC_021162.1    | Ca_kabuli_chr03 | 30032577                | GG                              | AA                | 1945923306               |
| SNP_P3_31816_30032680 | NC_021162.1    | Ca_kabuli_chr03 | 30032680                | CC                              | TT                | 1945923307               |
| SNP_P3_31817_30033954 | NC_021162.1    | Ca_kabuli_chr03 | 30033954                | CC                              | AA                | 1945923309               |
| SNP_P3_31819_30040332 | NC_021162.1    | Ca_kabuli_chr03 | 30040332                | TT                              | CC                | 1945923311               |
| SNP_P3_31821_30053897 | NC_021162.1    | Ca_kabuli_chr03 | 30053897                | CC                              | TT                | 1945923313               |
| SNP_P3_31822_30070777 | NC_021162.1    | Ca_kabuli_chr03 | 30070777                | GG                              | AA                | 1945923314               |

| SNPs IDs              | Chromosome IDs | Chromosomes     | Physical positions (bp) | CDC Frontier (Reference genome) | (Pusa 256 & HPNB) | NCBI SNPdb Accession IDs |
|-----------------------|----------------|-----------------|-------------------------|---------------------------------|-------------------|--------------------------|
| SNP_P3_31824_30095022 | NC_021162.1    | Ca_kabuli_chr03 | 30095022                | TT                              | CC                | 1945923316               |
| SNP_P3_31826_30148952 | NC_021162.1    | Ca_kabuli_chr03 | 30148952                | GG                              | TT                | 1945923318               |
| SNP_P3_31827_30151830 | NC_021162.1    | Ca_kabuli_chr03 | 30151830                | AA                              | GG                | 1945923320               |
| SNP_P3_31828_30153441 | NC_021162.1    | Ca_kabuli_chr03 | 30153441                | CC                              | TT                | 1945923322               |
| SNP_P3_31829_30159607 | NC_021162.1    | Ca_kabuli_chr03 | 30159607                | CC                              | TT                | 1945923323               |
| SNP_P3_31830_30188163 | NC_021162.1    | Ca_kabuli_chr03 | 30188163                | TT                              | AA                | 1945923325               |
| SNP_P3_31832_30236665 | NC_021162.1    | Ca_kabuli_chr03 | 30236665                | CC                              | AA                | 1945923327               |
| SNP_P3_31833_30236669 | NC_021162.1    | Ca_kabuli_chr03 | 30236669                | AA                              | CC                | 1945923329               |
| SNP_P3_31834_30245873 | NC_021162.1    | Ca_kabuli_chr03 | 30245873                | AA                              | TT                | 1945923330               |
| SNP_P3_31835_30260469 | NC_021162.1    | Ca_kabuli_chr03 | 30260469                | CC                              | TT                | 1945923332               |
| SNP_P3_31836_30273395 | NC_021162.1    | Ca_kabuli_chr03 | 30273395                | AA                              | GG                | 1945923334               |
| SNP_P3_31837_30284443 | NC_021162.1    | Ca_kabuli_chr03 | 30284443                | GG                              | TT                | 1945923336               |
| SNP_P3_31838_30293456 | NC_021162.1    | Ca_kabuli_chr03 | 30293456                | GG                              | TT                | 1945923338               |
| SNP_P3_31839_30293591 | NC_021162.1    | Ca_kabuli_chr03 | 30293591                | CC                              | TT                | 1945923339               |
| SNP_P3_31840_30306741 | NC_021162.1    | Ca_kabuli_chr03 | 30306741                | TT                              | CC                | 1945923341               |
| SNP_P3_31841_30332535 | NC_021162.1    | Ca_kabuli_chr03 | 30332535                | TT                              | AA                | 1945923343               |
| SNP_P3_31842_30396895 | NC_021162.1    | Ca_kabuli_chr03 | 30396895                | TT                              | CC                | 1945923345               |
| SNP_P3_31843_30403727 | NC_021162.1    | Ca_kabuli_chr03 | 30403727                | GG                              | AA                | 1945923346               |
| SNP_P3_31844_30412995 | NC_021162.1    | Ca_kabuli_chr03 | 30412995                | GG                              | AA                | 1945923348               |
| SNP_P3_31847_30438938 | NC_021162.1    | Ca_kabuli_chr03 | 30438938                | TT                              | AA                | 1945923350               |
| SNP_P3_31848_30464356 | NC_021162.1    | Ca_kabuli_chr03 | 30464356                | GG                              | AA                | 1945923352               |
| SNP_P3_31850_30497743 | NC_021162.1    | Ca_kabuli_chr03 | 30497743                | AA                              | GG                | 1945923354               |
| SNP_P3_31851_30497746 | NC_021162.1    | Ca_kabuli_chr03 | 30497746                | AA                              | TT                | 1945923355               |
| SNP_P3_31852_30497900 | NC_021162.1    | Ca_kabuli_chr03 | 30497900                | AA                              | TT                | 1945923357               |
| SNP_P3_31854_30607460 | NC_021162.1    | Ca_kabuli_chr03 | 30607460                | AA                              | CC                | 1945923359               |
| SNP_P3_31855_30612096 | NC_021162.1    | Ca_kabuli_chr03 | 30612096                | GG                              | AA                | 1945923361               |
| SNP_P3_31856_30626462 | NC_021162.1    | Ca_kabuli_chr03 | 30626462                | TT                              | CC                | 1945923362               |
| SNP_P3_31857_30628965 | NC_021162.1    | Ca_kabuli_chr03 | 30628965                | TT                              | CC                | 1945923364               |
| SNP_P3_31858_30646900 | NC_021162.1    | Ca_kabuli_chr03 | 30646900                | GG                              | AA                | 1945923366               |
| SNP_P3_31859_30682116 | NC_021162.1    | Ca_kabuli_chr03 | 30682116                | CC                              | TT                | 1945923368               |
| SNP_P3_31861_30726148 | NC_021162.1    | Ca_kabuli_chr03 | 30726148                | TT                              | CC                | 1945923370               |
| SNP_P3_31862_30755273 | NC_021162.1    | Ca_kabuli_chr03 | 30755273                | GG                              | AA                | 1945923371               |
| SNP_P3_31863_30771296 | NC_021162.1    | Ca_kabuli_chr03 | 30771296                | AA                              | TT                | 1945923373               |
| SNP_P3_31864_30803796 | NC_021162.1    | Ca_kabuli_chr03 | 30803796                | CC                              | TT                | 1945923375               |
| SNP_P3_31865_30815376 | NC_021162.1    | Ca_kabuli_chr03 | 30815376                | GG                              | AA                | 1945923377               |
| SNP_P3_31866_30819831 | NC_021162.1    | Ca_kabuli_chr03 | 30819831                | TT                              | CC                | 1945923378               |
| SNP_P3_31867_30820127 | NC_021162.1    | Ca_kabuli_chr03 | 30820127                | TT                              | CC                | 1945923380               |
| SNP_P3_31868_30820134 | NC_021162.1    | Ca_kabuli_chr03 | 30820134                | GG                              | AA                | 1945923382               |
| SNP_P3_31869_30820142 | NC_021162.1    | Ca_kabuli_chr03 | 30820142                | AA                              | GG                | 1945923384               |
| SNP_P3_31870_30820175 | NC_021162.1    | Ca_kabuli_chr03 | 30820175                | TT                              | GG                | 1945923386               |
| SNP_P3_31871_30820176 | NC_021162.1    | Ca_kabuli_chr03 | 30820176                | TT                              | CC                | 1945923387               |
| SNP_P3_31872_30820186 | NC_021162.1    | Ca_kabuli_chr03 | 30820186                | GG                              | AA                | 1945923389               |



| SNPs IDs              | Chromosome IDs | Chromosomes     | Physical positions (bp) | CDC Frontier (Reference genome) | (Pusa 256 & HPNB) | NCBI SNPdb Accession IDs |
|-----------------------|----------------|-----------------|-------------------------|---------------------------------|-------------------|--------------------------|
| SNP_P3_31873_30820208 | NC_021162.1    | Ca_kabuli_chr03 | 30820208                | AA                              | GG                | 1945923391               |
| SNP_P3_31875_30837284 | NC_021162.1    | Ca_kabuli_chr03 | 30837284                | CC                              | TT                | 1945923393               |
| SNP_P3_31876_30846276 | NC_021162.1    | Ca_kabuli_chr03 | 30846276                | TT                              | GG                | 1945923394               |
| SNP_P3_31877_30846290 | NC_021162.1    | Ca_kabuli_chr03 | 30846290                | TT                              | GG                | 1945923396               |
| SNP_P3_31878_30846301 | NC_021162.1    | Ca_kabuli_chr03 | 30846301                | GG                              | AA                | 1945923398               |
| SNP_P3_31879_30846315 | NC_021162.1    | Ca_kabuli_chr03 | 30846315                | GG                              | AA                | 1945923400               |
| SNP_P3_31880_30846355 | NC_021162.1    | Ca_kabuli_chr03 | 30846355                | CC                              | AA                | 1945923401               |
| SNP_P3_31881_30846404 | NC_021162.1    | Ca_kabuli_chr03 | 30846404                | AA                              | GG                | 1945923403               |
| SNP_P3_31882_30846471 | NC_021162.1    | Ca_kabuli_chr03 | 30846471                | TT                              | AA                | 1945923405               |
| SNP_P3_31883_30846773 | NC_021162.1    | Ca_kabuli_chr03 | 30846773                | AA                              | GG                | 1945923407               |
| SNP_P3_31884_30846791 | NC_021162.1    | Ca_kabuli_chr03 | 30846791                | TT                              | CC                | 1945923409               |
| SNP_P3_31885_30846815 | NC_021162.1    | Ca_kabuli_chr03 | 30846815                | AA                              | TT                | 1945923410               |
| SNP_P3_31886_30886326 | NC_021162.1    | Ca_kabuli_chr03 | 30886326                | CC                              | TT                | 1945923412               |
| SNP_P3_31887_30886351 | NC_021162.1    | Ca_kabuli_chr03 | 30886351                | TT                              | CC                | 1945923414               |
| SNP_P3_31892_30930645 | NC_021162.1    | Ca_kabuli_chr03 | 30930645                | TT                              | CC                | 1945923416               |
| SNP_P3_31893_30940282 | NC_021162.1    | Ca_kabuli_chr03 | 30940282                | GG                              | AA                | 1945923418               |
| SNP_P3_31896_30991823 | NC_021162.1    | Ca_kabuli_chr03 | 30991823                | AA                              | TT                | 1945923419               |
| SNP_P3_31897_31028521 | NC_021162.1    | Ca_kabuli_chr03 | 31028521                | AA                              | GG                | 1945923421               |
| SNP_P3_31899_31037138 | NC_021162.1    | Ca_kabuli_chr03 | 31037138                | CC                              | TT                | 1945923423               |
| SNP_P3_31900_31037169 | NC_021162.1    | Ca_kabuli_chr03 | 31037169                | TT                              | AA                | 1945923425               |
| SNP_P3_31901_31055122 | NC_021162.1    | Ca_kabuli_chr03 | 31055122                | CC                              | GG                | 1945923426               |
| SNP_P3_31902_31067424 | NC_021162.1    | Ca_kabuli_chr03 | 31067424                | GG                              | AA                | 1945923428               |
| SNP_P3_31903_31072665 | NC_021162.1    | Ca_kabuli_chr03 | 31072665                | TT                              | CC                | 1945923430               |
| SNP_P3_31905_31108227 | NC_021162.1    | Ca_kabuli_chr03 | 31108227                | TT                              | CC                | 1945923432               |
| SNP_P3_31906_31140288 | NC_021162.1    | Ca_kabuli_chr03 | 31140288                | TT                              | CC                | 1945923434               |
| SNP_P3_31907_31165509 | NC_021162.1    | Ca_kabuli_chr03 | 31165509                | TT                              | AA                | 1945923435               |
| SNP_P3_31908_31177456 | NC_021162.1    | Ca_kabuli_chr03 | 31177456                | AA                              | GG                | 1945923437               |
| SNP_P3_31910_31214385 | NC_021162.1    | Ca_kabuli_chr03 | 31214385                | GG                              | AA                | 1945923439               |
| SNP_P3_31911_31222105 | NC_021162.1    | Ca_kabuli_chr03 | 31222105                | TT                              | CC                | 1945923441               |
| SNP_P3_31912_31222108 | NC_021162.1    | Ca_kabuli_chr03 | 31222108                | AA                              | GG                | 1945923442               |
| SNP_P3_31913_31232521 | NC_021162.1    | Ca_kabuli_chr03 | 31232521                | GG                              | AA                | 1945923444               |
| SNP_P3_31914_31241440 | NC_021162.1    | Ca_kabuli_chr03 | 31241440                | GG                              | TT                | 1945923446               |
| SNP_P3_31915_31263100 | NC_021162.1    | Ca_kabuli_chr03 | 31263100                | AA                              | TT                | 1945923448               |
| SNP_P3_31916_31263216 | NC_021162.1    | Ca_kabuli_chr03 | 31263216                | AA                              | GG                | 1945923450               |
| SNP_P3_31917_31263806 | NC_021162.1    | Ca_kabuli_chr03 | 31263806                | CC                              | TT                | 1945923451               |
| SNP_P3_31918_31263813 | NC_021162.1    | Ca_kabuli_chr03 | 31263813                | TT                              | AA                | 1945923453               |
| SNP_P3_31919_31263816 | NC_021162.1    | Ca_kabuli_chr03 | 31263816                | CC                              | TT                | 1945923455               |
| SNP_P3_31920_31263857 | NC_021162.1    | Ca_kabuli_chr03 | 31263857                | TT                              | CC                | 1945923457               |
| SNP_P3_31921_31263870 | NC_021162.1    | Ca_kabuli_chr03 | 31263870                | GG                              | CC                | 1945923458               |
| SNP_P3_31922_31263874 | NC_021162.1    | Ca_kabuli_chr03 | 31263874                | GG                              | AA                | 1945923460               |
| SNP_P3_31923_31263892 | NC_021162.1    | Ca_kabuli_chr03 | 31263892                | GG                              | AA                | 1945923462               |
| SNP_P3_31924_31263925 | NC_021162.1    | Ca_kabuli_chr03 | 31263925                | TT                              | CC                | 1945923464               |

| SNPs IDs              | Chromosome IDs | Chromosomes     | Physical positions (bp) | CDC Frontier (Reference genome) | (Pusa 256 & HPNB) | NCBI SNPdb Accession IDs |
|-----------------------|----------------|-----------------|-------------------------|---------------------------------|-------------------|--------------------------|
| SNP_P3_31925_31264165 | NC_021162.1    | Ca_kabuli_chr03 | 31264165                | GG                              | AA                | 1945923466               |
| SNP_P3_31926_31264167 | NC_021162.1    | Ca_kabuli_chr03 | 31264167                | CC                              | TT                | 1945923467               |
| SNP_P3_31927_31264169 | NC_021162.1    | Ca_kabuli_chr03 | 31264169                | GG                              | AA                | 1945923469               |
| SNP_P3_31928_31264213 | NC_021162.1    | Ca_kabuli_chr03 | 31264213                | GG                              | AA                | 1945923471               |
| SNP_P3_31929_31265418 | NC_021162.1    | Ca_kabuli_chr03 | 31265418                | TT                              | AA                | 1945923473               |
| SNP_P3_31930_31265678 | NC_021162.1    | Ca_kabuli_chr03 | 31265678                | AA                              | GG                | 1945923474               |
| SNP_P3_31931_31265693 | NC_021162.1    | Ca_kabuli_chr03 | 31265693                | AA                              | GG                | 1945923476               |
| SNP_P3_31932_31265700 | NC_021162.1    | Ca_kabuli_chr03 | 31265700                | AA                              | GG                | 1945923478               |
| SNP_P3_31933_31265716 | NC_021162.1    | Ca_kabuli_chr03 | 31265716                | CC                              | AA                | 1945923480               |
| SNP_P3_31934_31265741 | NC_021162.1    | Ca_kabuli_chr03 | 31265741                | GG                              | AA                | 1945923482               |
| SNP_P3_31935_31265757 | NC_021162.1    | Ca_kabuli_chr03 | 31265757                | CC                              | TT                | 1945923483               |
| SNP_P3_31937_31266128 | NC_021162.1    | Ca_kabuli_chr03 | 31266128                | TT                              | CC                | 1945923485               |
| SNP_P3_31938_31266854 | NC_021162.1    | Ca_kabuli_chr03 | 31266854                | GG                              | AA                | 1945923487               |
| SNP_P3_31939_31266863 | NC_021162.1    | Ca_kabuli_chr03 | 31266863                | TT                              | AA                | 1945923489               |
| SNP_P3_31941_31266959 | NC_021162.1    | Ca_kabuli_chr03 | 31266959                | CC                              | AA                | 1945923490               |
| SNP_P3_31942_31266963 | NC_021162.1    | Ca_kabuli_chr03 | 31266963                | AA                              | GG                | 1945923492               |
| SNP_P3_31943_31266998 | NC_021162.1    | Ca_kabuli_chr03 | 31266998                | GG                              | AA                | 1945923494               |
| SNP_P3_31944_31267137 | NC_021162.1    | Ca_kabuli_chr03 | 31267137                | AA                              | GG                | 1945923496               |
| SNP_P3_31945_31268324 | NC_021162.1    | Ca_kabuli_chr03 | 31268324                | TT                              | CC                | 1945923498               |
| SNP_P3_31946_31268389 | NC_021162.1    | Ca_kabuli_chr03 | 31268389                | TT                              | CC                | 1945923499               |
| SNP_P3_31947_31273102 | NC_021162.1    | Ca_kabuli_chr03 | 31273102                | AA                              | GG                | 1945923501               |
| SNP_P3_31948_31273155 | NC_021162.1    | Ca_kabuli_chr03 | 31273155                | TT                              | AA                | 1945923503               |
| SNP_P3_31949_31273316 | NC_021162.1    | Ca_kabuli_chr03 | 31273316                | TT                              | AA                | 1945923505               |
| SNP_P3_31950_31273340 | NC_021162.1    | Ca_kabuli_chr03 | 31273340                | AA                              | GG                | 1945923506               |
| SNP_P3_31951_31273341 | NC_021162.1    | Ca_kabuli_chr03 | 31273341                | AA                              | TT                | 1945923508               |
| SNP_P3_31952_31273342 | NC_021162.1    | Ca_kabuli_chr03 | 31273342                | AA                              | TT                | 1945923510               |
| SNP_P3_31953_31273343 | NC_021162.1    | Ca_kabuli_chr03 | 31273343                | AA                              | TT                | 1945923512               |
| SNP_P3_31954_31274153 | NC_021162.1    | Ca_kabuli_chr03 | 31274153                | TT                              | AA                | 1945923514               |
| SNP_P3_31955_31278526 | NC_021162.1    | Ca_kabuli_chr03 | 31278526                | TT                              | CC                | 1945923515               |
| SNP_P3_31956_31278527 | NC_021162.1    | Ca_kabuli_chr03 | 31278527                | CC                              | AA                | 1945923517               |
| SNP_P3_31957_31278571 | NC_021162.1    | Ca_kabuli_chr03 | 31278571                | GG                              | AA                | 1945923519               |
| SNP_P3_31958_31279111 | NC_021162.1    | Ca_kabuli_chr03 | 31279111                | CC                              | TT                | 1945923521               |
| SNP_P3_31959_31280061 | NC_021162.1    | Ca_kabuli_chr03 | 31280061                | AA                              | TT                | 1945923522               |
| SNP_P3_31960_31280171 | NC_021162.1    | Ca_kabuli_chr03 | 31280171                | TT                              | AA                | 1945923524               |
| SNP_P3_31961_31280326 | NC_021162.1    | Ca_kabuli_chr03 | 31280326                | AA                              | GG                | 1945923526               |
| SNP_P3_31962_31280364 | NC_021162.1    | Ca_kabuli_chr03 | 31280364                | CC                              | TT                | 1945923528               |
| SNP_P3_31963_31280414 | NC_021162.1    | Ca_kabuli_chr03 | 31280414                | GG                              | TT                | 1945923530               |
| SNP_P3_31964_31280462 | NC_021162.1    | Ca_kabuli_chr03 | 31280462                | CC                              | AA                | 1945923531               |
| SNP_P3_31965_31280649 | NC_021162.1    | Ca_kabuli_chr03 | 31280649                | CC                              | TT                | 1945923533               |
| SNP_P3_31966_31281854 | NC_021162.1    | Ca_kabuli_chr03 | 31281854                | AA                              | GG                | 1945923535               |
| SNP_P3_31967_31282372 | NC_021162.1    | Ca_kabuli_chr03 | 31282372                | GG                              | TT                | 1945923537               |
| SNP_P3_31968_31282389 | NC_021162.1    | Ca_kabuli_chr03 | 31282389                | CC                              | TT                | 1945923538               |

| SNPs IDs              | Chromosome IDs | Chromosomes     | Physical positions (bp) | CDC Frontier (Reference genome) | (Pusa 256 & HPNB) | NCBI SNPdb Accession IDs |
|-----------------------|----------------|-----------------|-------------------------|---------------------------------|-------------------|--------------------------|
| SNP_P3_31969_31283862 | NC_021162.1    | Ca_kabuli_chr03 | 31283862                | GG                              | AA                | 1945923540               |
| SNP_P3_31970_31283899 | NC_021162.1    | Ca_kabuli_chr03 | 31283899                | TT                              | GG                | 1945923542               |
| SNP_P3_31972_31284630 | NC_021162.1    | Ca_kabuli_chr03 | 31284630                | CC                              | TT                | 1945923544               |
| SNP_P3_31973_31284694 | NC_021162.1    | Ca_kabuli_chr03 | 31284694                | TT                              | CC                | 1945923546               |
| SNP_P3_31974_31284702 | NC_021162.1    | Ca_kabuli_chr03 | 31284702                | AA                              | GG                | 1945923547               |
| SNP_P3_31975_31284710 | NC_021162.1    | Ca_kabuli_chr03 | 31284710                | AA                              | TT                | 1945923549               |
| SNP_P3_31976_31284736 | NC_021162.1    | Ca_kabuli_chr03 | 31284736                | GG                              | CC                | 1945923551               |
| SNP_P3_31977_31284745 | NC_021162.1    | Ca_kabuli_chr03 | 31284745                | GG                              | AA                | 1945923553               |
| SNP_P3_31980_31285078 | NC_021162.1    | Ca_kabuli_chr03 | 31285078                | CC                              | AA                | 1945923554               |
| SNP_P3_31982_31286288 | NC_021162.1    | Ca_kabuli_chr03 | 31286288                | GG                              | AA                | 1945923556               |
| SNP_P3_31983_31286306 | NC_021162.1    | Ca_kabuli_chr03 | 31286306                | CC                              | TT                | 1945923558               |
| SNP_P3_31984_31287085 | NC_021162.1    | Ca_kabuli_chr03 | 31287085                | GG                              | AA                | 1945923560               |
| SNP_P3_31985_31287172 | NC_021162.1    | Ca_kabuli_chr03 | 31287172                | TT                              | GG                | 1945923562               |
| SNP_P3_31986_31287215 | NC_021162.1    | Ca_kabuli_chr03 | 31287215                | GG                              | TT                | 1945923563               |
| SNP_P3_31987_31287684 | NC_021162.1    | Ca_kabuli_chr03 | 31287684                | TT                              | CC                | 1945923565               |
| SNP_P3_31988_31289479 | NC_021162.1    | Ca_kabuli_chr03 | 31289479                | CC                              | AA                | 1945923567               |
| SNP_P3_31989_31289700 | NC_021162.1    | Ca_kabuli_chr03 | 31289700                | TT                              | AA                | 1945923569               |
| SNP_P3_31990_31289701 | NC_021162.1    | Ca_kabuli_chr03 | 31289701                | CC                              | AA                | 1945923570               |
| SNP_P3_31992_31290054 | NC_021162.1    | Ca_kabuli_chr03 | 31290054                | GG                              | AA                | 1945923572               |
| SNP_P3_31993_31290145 | NC_021162.1    | Ca_kabuli_chr03 | 31290145                | TT                              | CC                | 1945923574               |
| SNP_P3_31995_31291706 | NC_021162.1    | Ca_kabuli_chr03 | 31291706                | GG                              | AA                | 1945923576               |
| SNP_P3_31997_31292114 | NC_021162.1    | Ca_kabuli_chr03 | 31292114                | TT                              | AA                | 1945923578               |
| SNP_P3_31998_31292417 | NC_021162.1    | Ca_kabuli_chr03 | 31292417                | TT                              | CC                | 1945923579               |
| SNP_P3_31999_31294721 | NC_021162.1    | Ca_kabuli_chr03 | 31294721                | GG                              | AA                | 1945923581               |
| SNP_P3_32000_31294749 | NC_021162.1    | Ca_kabuli_chr03 | 31294749                | GG                              | TT                | 1945923583               |
| SNP_P3_32001_31294818 | NC_021162.1    | Ca_kabuli_chr03 | 31294818                | AA                              | GG                | 1945923585               |
| SNP_P3_32002_31294832 | NC_021162.1    | Ca_kabuli_chr03 | 31294832                | AA                              | CC                | 1945923586               |
| SNP_P3_32003_31294938 | NC_021162.1    | Ca_kabuli_chr03 | 31294938                | CC                              | TT                | 1945923588               |
| SNP_P3_32004_31294950 | NC_021162.1    | Ca_kabuli_chr03 | 31294950                | TT                              | CC                | 1945923590               |
| SNP_P3_32005_31295012 | NC_021162.1    | Ca_kabuli_chr03 | 31295012                | CC                              | GG                | 1945923592               |
| SNP_P3_32006_31295035 | NC_021162.1    | Ca_kabuli_chr03 | 31295035                | GG                              | AA                | 1945923594               |
| SNP_P3_32007_31295071 | NC_021162.1    | Ca_kabuli_chr03 | 31295071                | GG                              | AA                | 1945923595               |
| SNP_P3_32008_31295110 | NC_021162.1    | Ca_kabuli_chr03 | 31295110                | AA                              | CC                | 1945923597               |
| SNP_P3_32009_31295138 | NC_021162.1    | Ca_kabuli_chr03 | 31295138                | AA                              | GG                | 1945923599               |
| SNP_P3_32010_31296426 | NC_021162.1    | Ca_kabuli_chr03 | 31296426                | TT                              | CC                | 1945923601               |
| SNP_P3_32011_31296677 | NC_021162.1    | Ca_kabuli_chr03 | 31296677                | AA                              | GG                | 1945923602               |
| SNP_P3_32013_31297149 | NC_021162.1    | Ca_kabuli_chr03 | 31297149                | TT                              | AA                | 1945923604               |
| SNP_P3_32014_31297228 | NC_021162.1    | Ca_kabuli_chr03 | 31297228                | TT                              | CC                | 1945923606               |
| SNP_P3_32015_31297508 | NC_021162.1    | Ca_kabuli_chr03 | 31297508                | AA                              | CC                | 1945923608               |
| SNP_P3_32016_31297955 | NC_021162.1    | Ca_kabuli_chr03 | 31297955                | GG                              | AA                | 1945923610               |
| SNP_P3_32017_31299949 | NC_021162.1    | Ca_kabuli_chr03 | 31299949                | TT                              | CC                | 1945923611               |
| SNP_P3_32018_31299968 | NC_021162.1    | Ca_kabuli_chr03 | 31299968                | GG                              | TT                | 1945923613               |

| SNPs IDs              | Chromosome IDs | Chromosomes     | Physical positions (bp) | CDC Frontier (Reference genome) | (Pusa 256 & HPNB) | NCBI SNPdb Accession IDs |
|-----------------------|----------------|-----------------|-------------------------|---------------------------------|-------------------|--------------------------|
| SNP_P3_32019_31299973 | NC_021162.1    | Ca_kabuli_chr03 | 31299973                | CC                              | TT                | 1945923615               |
| SNP_P3_32020_31299982 | NC_021162.1    | Ca_kabuli_chr03 | 31299982                | CC                              | TT                | 1945923617               |
| SNP_P3_32021_31301544 | NC_021162.1    | Ca_kabuli_chr03 | 31301544                | CC                              | GG                | 1945923618               |
| SNP_P3_32022_31302329 | NC_021162.1    | Ca_kabuli_chr03 | 31302329                | TT                              | AA                | 1945923620               |
| SNP_P3_32023_31302625 | NC_021162.1    | Ca_kabuli_chr03 | 31302625                | CC                              | TT                | 1945923622               |
| SNP_P3_32024_31303607 | NC_021162.1    | Ca_kabuli_chr03 | 31303607                | AA                              | CC                | 1945923624               |
| SNP_P3_32025_31303618 | NC_021162.1    | Ca_kabuli_chr03 | 31303618                | TT                              | CC                | 1945923626               |
| SNP_P3_32027_31304130 | NC_021162.1    | Ca_kabuli_chr03 | 31304130                | CC                              | GG                | 1945923627               |
| SNP_P3_32030_31307637 | NC_021162.1    | Ca_kabuli_chr03 | 31307637                | CC                              | TT                | 1945923629               |
| SNP_P3_32031_31310371 | NC_021162.1    | Ca_kabuli_chr03 | 31310371                | CC                              | AA                | 1945923631               |
| SNP_P3_32032_31310398 | NC_021162.1    | Ca_kabuli_chr03 | 31310398                | AA                              | GG                | 1945923633               |
| SNP_P3_32033_31310411 | NC_021162.1    | Ca_kabuli_chr03 | 31310411                | AA                              | TT                | 1945923634               |
| SNP_P3_32035_31310453 | NC_021162.1    | Ca_kabuli_chr03 | 31310453                | CC                              | AA                | 1945923636               |
| SNP_P3_32038_31314015 | NC_021162.1    | Ca_kabuli_chr03 | 31314015                | AA                              | CC                | 1945923638               |
| SNP_P3_32039_31314435 | NC_021162.1    | Ca_kabuli_chr03 | 31314435                | GG                              | CC                | 1945923640               |
| SNP_P3_32040_31314787 | NC_021162.1    | Ca_kabuli_chr03 | 31314787                | TT                              | GG                | 1945923642               |
| SNP_P3_32041_31315087 | NC_021162.1    | Ca_kabuli_chr03 | 31315087                | TT                              | AA                | 1945923643               |
| SNP_P3_32042_31317431 | NC_021162.1    | Ca_kabuli_chr03 | 31317431                | CC                              | TT                | 1945923645               |
| SNP_P3_32043_31319937 | NC_021162.1    | Ca_kabuli_chr03 | 31319937                | TT                              | GG                | 1945923647               |
| SNP_P3_32044_31319969 | NC_021162.1    | Ca_kabuli_chr03 | 31319969                | AA                              | CC                | 1945923649               |
| SNP_P3_32045_31320016 | NC_021162.1    | Ca_kabuli_chr03 | 31320016                | CC                              | TT                | 1945923650               |
| SNP_P3_32048_31320132 | NC_021162.1    | Ca_kabuli_chr03 | 31320132                | CC                              | TT                | 1945923652               |
| SNP_P3_32049_31321517 | NC_021162.1    | Ca_kabuli_chr03 | 31321517                | TT                              | AA                | 1945923654               |
| SNP_P3_32050_31321778 | NC_021162.1    | Ca_kabuli_chr03 | 31321778                | GG                              | AA                | 1945923656               |
| SNP_P3_32051_31321850 | NC_021162.1    | Ca_kabuli_chr03 | 31321850                | AA                              | GG                | 1945923657               |
| SNP_P3_32052_31321877 | NC_021162.1    | Ca_kabuli_chr03 | 31321877                | GG                              | AA                | 1945923659               |
| SNP_P3_32053_31322012 | NC_021162.1    | Ca_kabuli_chr03 | 31322012                | AA                              | GG                | 1945923661               |
| SNP_P3_32054_31322014 | NC_021162.1    | Ca_kabuli_chr03 | 31322014                | CC                              | TT                | 1945923663               |
| SNP_P3_32055_31322077 | NC_021162.1    | Ca_kabuli_chr03 | 31322077                | AA                              | TT                | 1945923665               |
| SNP_P3_32057_31322336 | NC_021162.1    | Ca_kabuli_chr03 | 31322336                | CC                              | TT                | 1945923666               |
| SNP_P3_32058_31322404 | NC_021162.1    | Ca_kabuli_chr03 | 31322404                | TT                              | CC                | 1945923668               |
| SNP_P3_32060_31323516 | NC_021162.1    | Ca_kabuli_chr03 | 31323516                | CC                              | AA                | 1945923670               |
| SNP_P3_32061_31323568 | NC_021162.1    | Ca_kabuli_chr03 | 31323568                | AA                              | GG                | 1945923672               |
| SNP_P3_32062_31323685 | NC_021162.1    | Ca_kabuli_chr03 | 31323685                | TT                              | AA                | 1945923673               |
| SNP_P3_32063_31323867 | NC_021162.1    | Ca_kabuli_chr03 | 31323867                | CC                              | GG                | 1945923675               |
| SNP_P3_32064_31324302 | NC_021162.1    | Ca_kabuli_chr03 | 31324302                | GG                              | AA                | 1945923677               |
| SNP_P3_32066_31324699 | NC_021162.1    | Ca_kabuli_chr03 | 31324699                | AA                              | CC                | 1945923679               |
| SNP_P3_32068_31325757 | NC_021162.1    | Ca_kabuli_chr03 | 31325757                | TT                              | CC                | 1945923681               |
| SNP_P3_32069_31325771 | NC_021162.1    | Ca_kabuli_chr03 | 31325771                | TT                              | GG                | 1945923682               |
| SNP_P3_32070_31326080 | NC_021162.1    | Ca_kabuli_chr03 | 31326080                | GG                              | TT                | 1945923684               |
| SNP_P3_32071_31326671 | NC_021162.1    | Ca_kabuli_chr03 | 31326671                | GG                              | TT                | 1945923686               |
| SNP_P3_32073_31327243 | NC_021162.1    | Ca_kabuli_chr03 | 31327243                | AA                              | GG                | 1945923688               |

| SNPs IDs              | Chromosome IDs | Chromosomes     | Physical positions (bp) | CDC Frontier (Reference genome) | (Pusa 256 & HPNB) | NCBI SNPdb Accession IDs |
|-----------------------|----------------|-----------------|-------------------------|---------------------------------|-------------------|--------------------------|
| SNP_P3_32074_31327363 | NC_021162.1    | Ca_kabuli_chr03 | 31327363                | GG                              | CC                | 1945923689               |
| SNP_P3_32075_31327377 | NC_021162.1    | Ca_kabuli_chr03 | 31327377                | CC                              | TT                | 1945923691               |
| SNP_P3_32076_31327388 | NC_021162.1    | Ca_kabuli_chr03 | 31327388                | AA                              | GG                | 1945923693               |
| SNP_P3_32077_31327428 | NC_021162.1    | Ca_kabuli_chr03 | 31327428                | GG                              | AA                | 1945923695               |
| SNP_P3_32078_31327436 | NC_021162.1    | Ca_kabuli_chr03 | 31327436                | GG                              | TT                | 1945923697               |
| SNP_P3_32079_31327765 | NC_021162.1    | Ca_kabuli_chr03 | 31327765                | CC                              | TT                | 1945923698               |
| SNP_P3_32081_31328393 | NC_021162.1    | Ca_kabuli_chr03 | 31328393                | GG                              | AA                | 1945923700               |
| SNP_P3_32082_31328422 | NC_021162.1    | Ca_kabuli_chr03 | 31328422                | TT                              | CC                | 1945923702               |
| SNP_P3_32083_31328687 | NC_021162.1    | Ca_kabuli_chr03 | 31328687                | GG                              | AA                | 1945923704               |
| SNP_P3_32084_31328701 | NC_021162.1    | Ca_kabuli_chr03 | 31328701                | TT                              | CC                | 1945923705               |
| SNP_P3_32085_31328805 | NC_021162.1    | Ca_kabuli_chr03 | 31328805                | GG                              | AA                | 1945923707               |
| SNP_P3_32086_31330271 | NC_021162.1    | Ca_kabuli_chr03 | 31330271                | AA                              | GG                | 1945923709               |
| SNP_P3_32087_31330293 | NC_021162.1    | Ca_kabuli_chr03 | 31330293                | TT                              | CC                | 1945923711               |
| SNP_P3_32088_31330308 | NC_021162.1    | Ca_kabuli_chr03 | 31330308                | CC                              | TT                | 1945923713               |
| SNP_P3_32089_31330311 | NC_021162.1    | Ca_kabuli_chr03 | 31330311                | AA                              | CC                | 1945923714               |
| SNP_P3_32090_31330722 | NC_021162.1    | Ca_kabuli_chr03 | 31330722                | CC                              | GG                | 1945923716               |
| SNP_P3_32091_31330725 | NC_021162.1    | Ca_kabuli_chr03 | 31330725                | AA                              | GG                | 1945923718               |
| SNP_P3_32092_31331006 | NC_021162.1    | Ca_kabuli_chr03 | 31331006                | GG                              | AA                | 1945923720               |
| SNP_P3_32093_31331046 | NC_021162.1    | Ca_kabuli_chr03 | 31331046                | AA                              | GG                | 1945923721               |
| SNP_P3_32094_31331075 | NC_021162.1    | Ca_kabuli_chr03 | 31331075                | GG                              | AA                | 1945923723               |
| SNP_P3_32095_31331318 | NC_021162.1    | Ca_kabuli_chr03 | 31331318                | TT                              | AA                | 1945923725               |
| SNP_P3_32096_31331402 | NC_021162.1    | Ca_kabuli_chr03 | 31331402                | AA                              | TT                | 1945923727               |
| SNP_P3_32097_31331585 | NC_021162.1    | Ca_kabuli_chr03 | 31331585                | CC                              | TT                | 1945923729               |
| SNP_P3_32098_31333132 | NC_021162.1    | Ca_kabuli_chr03 | 31333132                | CC                              | TT                | 1945923730               |
| SNP_P3_32099_31333432 | NC_021162.1    | Ca_kabuli_chr03 | 31333432                | CC                              | AA                | 1945923732               |
| SNP_P3_32100_31333461 | NC_021162.1    | Ca_kabuli_chr03 | 31333461                | CC                              | TT                | 1945923734               |
| SNP_P3_32101_31334118 | NC_021162.1    | Ca_kabuli_chr03 | 31334118                | CC                              | GG                | 1945923736               |
| SNP_P3_32102_31334249 | NC_021162.1    | Ca_kabuli_chr03 | 31334249                | GG                              | TT                | 1945923737               |
| SNP_P3_32103_31334261 | NC_021162.1    | Ca_kabuli_chr03 | 31334261                | AA                              | GG                | 1945923739               |
| SNP_P3_32104_31334285 | NC_021162.1    | Ca_kabuli_chr03 | 31334285                | TT                              | GG                | 1945923741               |
| SNP_P3_32105_31334731 | NC_021162.1    | Ca_kabuli_chr03 | 31334731                | GG                              | CC                | 1945923743               |
| SNP_P3_32107_31336940 | NC_021162.1    | Ca_kabuli_chr03 | 31336940                | AA                              | TT                | 1945923745               |
| SNP_P3_32108_31337842 | NC_021162.1    | Ca_kabuli_chr03 | 31337842                | AA                              | CC                | 1945923746               |
| SNP_P3_32110_31338641 | NC_021162.1    | Ca_kabuli_chr03 | 31338641                | CC                              | TT                | 1945923748               |
| SNP_P3_32111_31338780 | NC_021162.1    | Ca_kabuli_chr03 | 31338780                | CC                              | GG                | 1945923750               |
| SNP_P3_32113_31339375 | NC_021162.1    | Ca_kabuli_chr03 | 31339375                | AA                              | TT                | 1945923752               |
| SNP_P3_32114_31339388 | NC_021162.1    | Ca_kabuli_chr03 | 31339388                | TT                              | GG                | 1945923753               |
| SNP_P3_32115_31339616 | NC_021162.1    | Ca_kabuli_chr03 | 31339616                | CC                              | TT                | 1945923755               |
| SNP_P3_32116_31341577 | NC_021162.1    | Ca_kabuli_chr03 | 31341577                | AA                              | CC                | 1945923757               |
| SNP_P3_32117_31341580 | NC_021162.1    | Ca_kabuli_chr03 | 31341580                | GG                              | CC                | 1945923759               |
| SNP_P3_32119_31343480 | NC_021162.1    | Ca_kabuli_chr03 | 31343480                | CC                              | TT                | 1945923761               |
| SNP_P3_32120_31343527 | NC_021162.1    | Ca_kabuli_chr03 | 31343527                | AA                              | GG                | 1945923762               |

| SNPs IDs              | Chromosome IDs | Chromosomes     | Physical positions (bp) | CDC Frontier (Reference genome) | (Pusa 256 & HPNB) | NCBI SNPdb Accession IDs |
|-----------------------|----------------|-----------------|-------------------------|---------------------------------|-------------------|--------------------------|
| SNP_P3_32121_31343546 | NC_021162.1    | Ca_kabuli_chr03 | 31343546                | TT                              | CC                | 1945923764               |
| SNP_P3_32122_31343724 | NC_021162.1    | Ca_kabuli_chr03 | 31343724                | GG                              | AA                | 1945923766               |
| SNP_P3_32125_31347812 | NC_021162.1    | Ca_kabuli_chr03 | 31347812                | TT                              | GG                | 1945923768               |
| SNP_P3_32126_31347843 | NC_021162.1    | Ca_kabuli_chr03 | 31347843                | CC                              | AA                | 1945923769               |
| SNP_P3_32127_31347964 | NC_021162.1    | Ca_kabuli_chr03 | 31347964                | TT                              | AA                | 1945923771               |
| SNP_P3_32128_31347965 | NC_021162.1    | Ca_kabuli_chr03 | 31347965                | TT                              | CC                | 1945923773               |
| SNP_P3_32129_31348245 | NC_021162.1    | Ca_kabuli_chr03 | 31348245                | TT                              | GG                | 1945923775               |
| SNP_P3_32130_31348304 | NC_021162.1    | Ca_kabuli_chr03 | 31348304                | GG                              | TT                | 1945923777               |
| SNP_P3_32131_31348628 | NC_021162.1    | Ca_kabuli_chr03 | 31348628                | CC                              | AA                | 1945923778               |
| SNP_P3_32132_31348672 | NC_021162.1    | Ca_kabuli_chr03 | 31348672                | GG                              | AA                | 1945923780               |
| SNP_P3_32133_31348677 | NC_021162.1    | Ca_kabuli_chr03 | 31348677                | TT                              | CC                | 1945923782               |
| SNP_P3_32134_31348687 | NC_021162.1    | Ca_kabuli_chr03 | 31348687                | CC                              | TT                | 1945923784               |
| SNP_P3_32135_31348699 | NC_021162.1    | Ca_kabuli_chr03 | 31348699                | AA                              | GG                | 1945923785               |
| SNP_P3_32136_31348709 | NC_021162.1    | Ca_kabuli_chr03 | 31348709                | GG                              | AA                | 1945923787               |
| SNP_P3_32138_31350327 | NC_021162.1    | Ca_kabuli_chr03 | 31350327                | AA                              | TT                | 1945923789               |
| SNP_P3_32139_31350620 | NC_021162.1    | Ca_kabuli_chr03 | 31350620                | TT                              | CC                | 1945923791               |
| SNP_P3_32140_31350635 | NC_021162.1    | Ca_kabuli_chr03 | 31350635                | CC                              | TT                | 1945923793               |
| SNP_P3_32143_31350742 | NC_021162.1    | Ca_kabuli_chr03 | 31350742                | CC                              | GG                | 1945923794               |
| SNP_P3_32146_31353028 | NC_021162.1    | Ca_kabuli_chr03 | 31353028                | TT                              | CC                | 1945923796               |
| SNP_P3_32147_31353355 | NC_021162.1    | Ca_kabuli_chr03 | 31353355                | CC                              | AA                | 1945923798               |
| SNP_P3_32148_31353442 | NC_021162.1    | Ca_kabuli_chr03 | 31353442                | GG                              | AA                | 1945923800               |
| SNP_P3_32149_31353558 | NC_021162.1    | Ca_kabuli_chr03 | 31353558                | GG                              | AA                | 1945923801               |
| SNP_P3_32150_31353786 | NC_021162.1    | Ca_kabuli_chr03 | 31353786                | TT                              | CC                | 1945923803               |
| SNP_P3_32151_31357162 | NC_021162.1    | Ca_kabuli_chr03 | 31357162                | CC                              | GG                | 1945923805               |
| SNP_P3_32152_31357212 | NC_021162.1    | Ca_kabuli_chr03 | 31357212                | GG                              | AA                | 1945923807               |
| SNP_P3_32153_31359013 | NC_021162.1    | Ca_kabuli_chr03 | 31359013                | CC                              | TT                | 1945923808               |
| SNP_P3_32154_31359077 | NC_021162.1    | Ca_kabuli_chr03 | 31359077                | AA                              | CC                | 1945923810               |
| SNP_P3_32155_31359081 | NC_021162.1    | Ca_kabuli_chr03 | 31359081                | TT                              | CC                | 1945923812               |
| SNP_P3_32156_31359087 | NC_021162.1    | Ca_kabuli_chr03 | 31359087                | GG                              | AA                | 1945923814               |
| SNP_P3_32157_31359842 | NC_021162.1    | Ca_kabuli_chr03 | 31359842                | CC                              | TT                | 1945923816               |
| SNP_P3_32158_31359843 | NC_021162.1    | Ca_kabuli_chr03 | 31359843                | GG                              | TT                | 1945923817               |
| SNP_P3_32159_31359849 | NC_021162.1    | Ca_kabuli_chr03 | 31359849                | CC                              | GG                | 1945923819               |
| SNP_P3_32160_31361238 | NC_021162.1    | Ca_kabuli_chr03 | 31361238                | AA                              | TT                | 1945923821               |
| SNP_P3_32161_31361244 | NC_021162.1    | Ca_kabuli_chr03 | 31361244                | GG                              | TT                | 1945923823               |
| SNP_P3_32162_31361269 | NC_021162.1    | Ca_kabuli_chr03 | 31361269                | CC                              | TT                | 1945923824               |
| SNP_P3_32163_31364014 | NC_021162.1    | Ca_kabuli_chr03 | 31364014                | GG                              | AA                | 1945923826               |
| SNP_P3_32164_31364090 | NC_021162.1    | Ca_kabuli_chr03 | 31364090                | GG                              | AA                | 1945923828               |
| SNP_P3_32165_31364094 | NC_021162.1    | Ca_kabuli_chr03 | 31364094                | TT                              | CC                | 1945923830               |
| SNP_P3_32166_31364644 | NC_021162.1    | Ca_kabuli_chr03 | 31364644                | CC                              | TT                | 1945923832               |
| SNP_P3_32167_31364701 | NC_021162.1    | Ca_kabuli_chr03 | 31364701                | GG                              | AA                | 1945923833               |
| SNP_P3_32168_31366985 | NC_021162.1    | Ca_kabuli_chr03 | 31366985                | CC                              | AA                | 1945923835               |
| SNP_P3_32169_31369457 | NC_021162.1    | Ca_kabuli_chr03 | 31369457                | CC                              | GG                | 1945923837               |

| SNPs IDs              | Chromosome IDs | Chromosomes     | Physical positions (bp) | CDC Frontier (Reference genome) | (Pusa 256 & HPNB) | NCBI SNPdb Accession IDs |
|-----------------------|----------------|-----------------|-------------------------|---------------------------------|-------------------|--------------------------|
| SNP_P3_32171_31370393 | NC_021162.1    | Ca_kabuli_chr03 | 31370393                | GG                              | TT                | 1945923839               |
| SNP_P3_32172_31370497 | NC_021162.1    | Ca_kabuli_chr03 | 31370497                | CC                              | TT                | 1945923840               |
| SNP_P3_32173_31370630 | NC_021162.1    | Ca_kabuli_chr03 | 31370630                | TT                              | GG                | 1945923842               |
| SNP_P3_32174_31370765 | NC_021162.1    | Ca_kabuli_chr03 | 31370765                | GG                              | AA                | 1945923844               |
| SNP_P3_32175_31370795 | NC_021162.1    | Ca_kabuli_chr03 | 31370795                | GG                              | AA                | 1945923846               |
| SNP_P3_32176_31370956 | NC_021162.1    | Ca_kabuli_chr03 | 31370956                | AA                              | GG                | 1945923848               |
| SNP_P3_32177_31371009 | NC_021162.1    | Ca_kabuli_chr03 | 31371009                | CC                              | TT                | 1945923849               |
| SNP_P3_32178_31371021 | NC_021162.1    | Ca_kabuli_chr03 | 31371021                | CC                              | TT                | 1945923851               |
| SNP_P3_32179_31371288 | NC_021162.1    | Ca_kabuli_chr03 | 31371288                | TT                              | AA                | 1945923853               |
| SNP_P3_32180_31371558 | NC_021162.1    | Ca_kabuli_chr03 | 31371558                | TT                              | CC                | 1945923855               |
| SNP_P3_32181_31372629 | NC_021162.1    | Ca_kabuli_chr03 | 31372629                | AA                              | TT                | 1945923856               |
| SNP_P3_32182_31374999 | NC_021162.1    | Ca_kabuli_chr03 | 31374999                | CC                              | TT                | 1945923858               |
| SNP_P3_32184_31376026 | NC_021162.1    | Ca_kabuli_chr03 | 31376026                | AA                              | TT                | 1945923860               |
| SNP_P3_32185_31376438 | NC_021162.1    | Ca_kabuli_chr03 | 31376438                | CC                              | TT                | 1945923862               |
| SNP_P3_32186_31376453 | NC_021162.1    | Ca_kabuli_chr03 | 31376453                | CC                              | AA                | 1945923864               |
| SNP_P3_32187_31376480 | NC_021162.1    | Ca_kabuli_chr03 | 31376480                | GG                              | CC                | 1945923865               |
| SNP_P3_32188_31378013 | NC_021162.1    | Ca_kabuli_chr03 | 31378013                | CC                              | AA                | 1945923867               |
| SNP_P3_32189_31378318 | NC_021162.1    | Ca_kabuli_chr03 | 31378318                | GG                              | CC                | 1945923869               |
| SNP_P3_32190_31378351 | NC_021162.1    | Ca_kabuli_chr03 | 31378351                | TT                              | CC                | 1945923871               |
| SNP_P3_32191_31379040 | NC_021162.1    | Ca_kabuli_chr03 | 31379040                | GG                              | TT                | 1945923872               |
| SNP_P3_32192_31379099 | NC_021162.1    | Ca_kabuli_chr03 | 31379099                | AA                              | TT                | 1945923874               |
| SNP_P3_32193_31379105 | NC_021162.1    | Ca_kabuli_chr03 | 31379105                | TT                              | AA                | 1945923876               |
| SNP_P3_32194_31379795 | NC_021162.1    | Ca_kabuli_chr03 | 31379795                | TT                              | CC                | 1945923878               |
| SNP_P3_32195_31380038 | NC_021162.1    | Ca_kabuli_chr03 | 31380038                | TT                              | GG                | 1945923880               |
| SNP_P3_32196_31380088 | NC_021162.1    | Ca_kabuli_chr03 | 31380088                | CC                              | TT                | 1945923881               |
| SNP_P3_32197_31380091 | NC_021162.1    | Ca_kabuli_chr03 | 31380091                | AA                              | CC                | 1945923883               |
| SNP_P3_32198_31380116 | NC_021162.1    | Ca_kabuli_chr03 | 31380116                | TT                              | CC                | 1945923885               |
| SNP_P3_32199_31380119 | NC_021162.1    | Ca_kabuli_chr03 | 31380119                | CC                              | TT                | 1945923887               |
| SNP_P3_32200_31381445 | NC_021162.1    | Ca_kabuli_chr03 | 31381445                | TT                              | AA                | 1945923888               |
| SNP_P3_32202_31381621 | NC_021162.1    | Ca_kabuli_chr03 | 31381621                | AA                              | GG                | 1945923890               |
| SNP_P3_32205_31383356 | NC_021162.1    | Ca_kabuli_chr03 | 31383356                | CC                              | AA                | 1945923892               |
| SNP_P3_32206_31383586 | NC_021162.1    | Ca_kabuli_chr03 | 31383586                | CC                              | TT                | 1945923894               |
| SNP_P3_32207_31385165 | NC_021162.1    | Ca_kabuli_chr03 | 31385165                | GG                              | AA                | 1945923896               |
| SNP_P3_32208_31385188 | NC_021162.1    | Ca_kabuli_chr03 | 31385188                | CC                              | TT                | 1945923897               |
| SNP_P3_32209_31385235 | NC_021162.1    | Ca_kabuli_chr03 | 31385235                | AA                              | GG                | 1945923899               |
| SNP_P3_32210_31385269 | NC_021162.1    | Ca_kabuli_chr03 | 31385269                | TT                              | CC                | 1945923901               |
| SNP_P3_32212_31386986 | NC_021162.1    | Ca_kabuli_chr03 | 31386986                | TT                              | CC                | 1945923903               |
| SNP_P3_32213_31387042 | NC_021162.1    | Ca_kabuli_chr03 | 31387042                | GG                              | AA                | 1945923904               |
| SNP_P3_32214_31389449 | NC_021162.1    | Ca_kabuli_chr03 | 31389449                | TT                              | CC                | 1945923906               |
| SNP_P3_32215_31390666 | NC_021162.1    | Ca_kabuli_chr03 | 31390666                | TT                              | AA                | 1945923908               |
| SNP_P3_32216_31391834 | NC_021162.1    | Ca_kabuli_chr03 | 31391834                | GG                              | AA                | 1945923910               |
| SNP_P3_32217_31392225 | NC_021162.1    | Ca_kabuli_chr03 | 31392225                | GG                              | AA                | 1945923912               |

| SNPs IDs              | Chromosome IDs | Chromosomes     | Physical positions (bp) | CDC Frontier (Reference genome) | (Pusa 256 & HPNB) | NCBI SNPdb Accession IDs |
|-----------------------|----------------|-----------------|-------------------------|---------------------------------|-------------------|--------------------------|
| SNP_P3_32218_31393160 | NC_021162.1    | Ca_kabuli_chr03 | 31393160                | CC                              | TT                | 1945923913               |
| SNP_P3_32219_31393791 | NC_021162.1    | Ca_kabuli_chr03 | 31393791                | GG                              | AA                | 1945923915               |
| SNP_P3_32220_31394097 | NC_021162.1    | Ca_kabuli_chr03 | 31394097                | TT                              | AA                | 1945923917               |
| SNP_P3_32221_31394362 | NC_021162.1    | Ca_kabuli_chr03 | 31394362                | CC                              | GG                | 1945923919               |
| SNP_P3_32222_31395178 | NC_021162.1    | Ca_kabuli_chr03 | 31395178                | TT                              | CC                | 1945923920               |
| SNP_P3_32223_31395189 | NC_021162.1    | Ca_kabuli_chr03 | 31395189                | TT                              | CC                | 1945923922               |
| SNP_P3_32224_31395209 | NC_021162.1    | Ca_kabuli_chr03 | 31395209                | AA                              | GG                | 1945923924               |
| SNP_P3_32225_31395210 | NC_021162.1    | Ca_kabuli_chr03 | 31395210                | AA                              | GG                | 1945923926               |
| SNP_P3_32226_31396001 | NC_021162.1    | Ca_kabuli_chr03 | 31396001                | TT                              | GG                | 1945923928               |
| SNP_P3_32227_31396002 | NC_021162.1    | Ca_kabuli_chr03 | 31396002                | CC                              | AA                | 1945923929               |
| SNP_P3_32228_31396003 | NC_021162.1    | Ca_kabuli_chr03 | 31396003                | AA                              | GG                | 1945923931               |
| SNP_P3_32229_31396157 | NC_021162.1    | Ca_kabuli_chr03 | 31396157                | GG                              | TT                | 1945923933               |
| SNP_P3_32230_31396174 | NC_021162.1    | Ca_kabuli_chr03 | 31396174                | CC                              | TT                | 1945923935               |
| SNP_P3_32232_31396560 | NC_021162.1    | Ca_kabuli_chr03 | 31396560                | TT                              | CC                | 1945923936               |
| SNP_P3_32233_31396724 | NC_021162.1    | Ca_kabuli_chr03 | 31396724                | GG                              | AA                | 1945923938               |
| SNP_P3_32234_31396729 | NC_021162.1    | Ca_kabuli_chr03 | 31396729                | GG                              | TT                | 1945923940               |
| SNP_P3_32235_31396744 | NC_021162.1    | Ca_kabuli_chr03 | 31396744                | CC                              | GG                | 1945923942               |
| SNP_P3_32236_31403047 | NC_021162.1    | Ca_kabuli_chr03 | 31403047                | AA                              | GG                | 1945923944               |
| SNP_P3_32237_31405081 | NC_021162.1    | Ca_kabuli_chr03 | 31405081                | CC                              | GG                | 1945923945               |
| SNP_P3_32239_31411720 | NC_021162.1    | Ca_kabuli_chr03 | 31411720                | AA                              | GG                | 1945923947               |
| SNP_P3_32240_31412407 | NC_021162.1    | Ca_kabuli_chr03 | 31412407                | GG                              | AA                | 1945923949               |
| SNP_P3_32241_31412918 | NC_021162.1    | Ca_kabuli_chr03 | 31412918                | TT                              | CC                | 1945923951               |
| SNP_P3_32242_31414195 | NC_021162.1    | Ca_kabuli_chr03 | 31414195                | TT                              | GG                | 1945923952               |
| SNP_P3_32243_31414294 | NC_021162.1    | Ca_kabuli_chr03 | 31414294                | TT                              | CC                | 1945923954               |
| SNP_P3_32245_31416395 | NC_021162.1    | Ca_kabuli_chr03 | 31416395                | CC                              | TT                | 1945923956               |
| SNP_P3_32246_31419698 | NC_021162.1    | Ca_kabuli_chr03 | 31419698                | TT                              | CC                | 1945923958               |
| SNP_P3_32247_31420899 | NC_021162.1    | Ca_kabuli_chr03 | 31420899                | CC                              | TT                | 1945923960               |
| SNP_P3_32248_31421645 | NC_021162.1    | Ca_kabuli_chr03 | 31421645                | GG                              | TT                | 1945923961               |
| SNP_P3_32249_31426602 | NC_021162.1    | Ca_kabuli_chr03 | 31426602                | CC                              | TT                | 1945923963               |
| SNP_P3_32250_31427024 | NC_021162.1    | Ca_kabuli_chr03 | 31427024                | AA                              | GG                | 1945923965               |
| SNP_P3_32251_31427102 | NC_021162.1    | Ca_kabuli_chr03 | 31427102                | CC                              | TT                | 1945923967               |
| SNP_P3_32252_31439756 | NC_021162.1    | Ca_kabuli_chr03 | 31439756                | AA                              | CC                | 1945923968               |
| SNP_P3_32253_31439829 | NC_021162.1    | Ca_kabuli_chr03 | 31439829                | CC                              | TT                | 1945923970               |
| SNP_P3_32254_31439934 | NC_021162.1    | Ca_kabuli_chr03 | 31439934                | AA                              | CC                | 1945923972               |
| SNP_P3_32255_31440127 | NC_021162.1    | Ca_kabuli_chr03 | 31440127                | GG                              | AA                | 1945923974               |
| SNP_P3_32256_31440203 | NC_021162.1    | Ca_kabuli_chr03 | 31440203                | TT                              | GG                | 1945923975               |
| SNP_P3_32258_31440560 | NC_021162.1    | Ca_kabuli_chr03 | 31440560                | GG                              | AA                | 1945923977               |
| SNP_P3_32260_31441789 | NC_021162.1    | Ca_kabuli_chr03 | 31441789                | AA                              | GG                | 1945923979               |
| SNP_P3_32261_31441800 | NC_021162.1    | Ca_kabuli_chr03 | 31441800                | TT                              | CC                | 1945923981               |
| SNP_P3_32262_31442940 | NC_021162.1    | Ca_kabuli_chr03 | 31442940                | AA                              | TT                | 1945923983               |
| SNP_P3_32266_31443341 | NC_021162.1    | Ca_kabuli_chr03 | 31443341                | AA                              | GG                | 1945923984               |
| SNP_P3_32267_31443631 | NC_021162.1    | Ca_kabuli_chr03 | 31443631                | CC                              | TT                | 1945923986               |



| SNPs IDs              | Chromosome IDs | Chromosomes     | Physical positions (bp) | CDC Frontier (Reference genome) | (Pusa 256 & HPNB) | NCBI SNPdb Accession IDs |
|-----------------------|----------------|-----------------|-------------------------|---------------------------------|-------------------|--------------------------|
| SNP_P3_32268_31443983 | NC_021162.1    | Ca_kabuli_chr03 | 31443983                | TT                              | CC                | 1945923988               |
| SNP_P3_32269_31444532 | NC_021162.1    | Ca_kabuli_chr03 | 31444532                | TT                              | CC                | 1945923990               |
| SNP_P3_32271_31445311 | NC_021162.1    | Ca_kabuli_chr03 | 31445311                | GG                              | AA                | 1945923991               |
| SNP_P3_32272_31445338 | NC_021162.1    | Ca_kabuli_chr03 | 31445338                | AA                              | GG                | 1945923993               |
| SNP_P3_32275_31445635 | NC_021162.1    | Ca_kabuli_chr03 | 31445635                | AA                              | TT                | 1945923995               |
| SNP_P3_32276_31445678 | NC_021162.1    | Ca_kabuli_chr03 | 31445678                | GG                              | AA                | 1945923997               |
| SNP_P3_32277_31446565 | NC_021162.1    | Ca_kabuli_chr03 | 31446565                | AA                              | TT                | 1945923999               |
| SNP_P3_32278_31446797 | NC_021162.1    | Ca_kabuli_chr03 | 31446797                | CC                              | GG                | 1945924000               |
| SNP_P3_32279_31446833 | NC_021162.1    | Ca_kabuli_chr03 | 31446833                | AA                              | GG                | 1945924002               |
| SNP_P3_32280_31446847 | NC_021162.1    | Ca_kabuli_chr03 | 31446847                | GG                              | TT                | 1945924004               |
| SNP_P3_32281_31446866 | NC_021162.1    | Ca_kabuli_chr03 | 31446866                | CC                              | TT                | 1945924006               |
| SNP_P3_32282_31446874 | NC_021162.1    | Ca_kabuli_chr03 | 31446874                | AA                              | TT                | 1945924007               |
| SNP_P3_32284_31449011 | NC_021162.1    | Ca_kabuli_chr03 | 31449011                | AA                              | CC                | 1945924009               |
| SNP_P3_32285_31449151 | NC_021162.1    | Ca_kabuli_chr03 | 31449151                | AA                              | GG                | 1945924011               |
| SNP_P3_32287_31451376 | NC_021162.1    | Ca_kabuli_chr03 | 31451376                | GG                              | AA                | 1945924013               |
| SNP_P3_32288_31451409 | NC_021162.1    | Ca_kabuli_chr03 | 31451409                | GG                              | AA                | 1945924015               |
| SNP_P3_32289_31452772 | NC_021162.1    | Ca_kabuli_chr03 | 31452772                | GG                              | AA                | 1945924016               |
| SNP_P3_32290_31455806 | NC_021162.1    | Ca_kabuli_chr03 | 31455806                | AA                              | CC                | 1945924018               |
| SNP_P3_32291_31456247 | NC_021162.1    | Ca_kabuli_chr03 | 31456247                | GG                              | CC                | 1945924020               |
| SNP_P3_32292_31457897 | NC_021162.1    | Ca_kabuli_chr03 | 31457897                | TT                              | AA                | 1945924022               |
| SNP_P3_32293_31457919 | NC_021162.1    | Ca_kabuli_chr03 | 31457919                | CC                              | TT                | 1945924023               |
| SNP_P3_32294_31459203 | NC_021162.1    | Ca_kabuli_chr03 | 31459203                | TT                              | CC                | 1945924025               |
| SNP_P3_32295_31459224 | NC_021162.1    | Ca_kabuli_chr03 | 31459224                | AA                              | TT                | 1945924027               |
| SNP_P3_32296_31459988 | NC_021162.1    | Ca_kabuli_chr03 | 31459988                | GG                              | AA                | 1945924029               |
| SNP_P3_32297_31460018 | NC_021162.1    | Ca_kabuli_chr03 | 31460018                | AA                              | TT                | 1945924031               |
| SNP_P3_32298_31461015 | NC_021162.1    | Ca_kabuli_chr03 | 31461015                | AA                              | GG                | 1945924032               |
| SNP_P3_32299_31461260 | NC_021162.1    | Ca_kabuli_chr03 | 31461260                | GG                              | AA                | 1945924034               |
| SNP_P3_32300_31462780 | NC_021162.1    | Ca_kabuli_chr03 | 31462780                | CC                              | GG                | 1945924036               |
| SNP_P3_32301_31464715 | NC_021162.1    | Ca_kabuli_chr03 | 31464715                | GG                              | CC                | 1945924038               |
| SNP_P3_32302_31464772 | NC_021162.1    | Ca_kabuli_chr03 | 31464772                | AA                              | GG                | 1945924040               |
| SNP_P3_32303_31464849 | NC_021162.1    | Ca_kabuli_chr03 | 31464849                | GG                              | TT                | 1945924041               |
| SNP_P3_32304_31464857 | NC_021162.1    | Ca_kabuli_chr03 | 31464857                | GG                              | TT                | 1945924043               |
| SNP_P3_32305_31464862 | NC_021162.1    | Ca_kabuli_chr03 | 31464862                | TT                              | GG                | 1945924045               |
| SNP_P3_32306_31464867 | NC_021162.1    | Ca_kabuli_chr03 | 31464867                | CC                              | AA                | 1945924047               |
| SNP_P3_32308_31465143 | NC_021162.1    | Ca_kabuli_chr03 | 31465143                | CC                              | TT                | 1945924048               |
| SNP_P3_32309_31465168 | NC_021162.1    | Ca_kabuli_chr03 | 31465168                | CC                              | TT                | 1945924050               |
| SNP_P3_32310_31465188 | NC_021162.1    | Ca_kabuli_chr03 | 31465188                | TT                              | CC                | 1945924052               |
| SNP_P3_32311_31465216 | NC_021162.1    | Ca_kabuli_chr03 | 31465216                | AA                              | GG                | 1945924054               |
| SNP_P3_32312_31466068 | NC_021162.1    | Ca_kabuli_chr03 | 31466068                | CC                              | TT                | 1945924056               |
| SNP_P3_32313_31466085 | NC_021162.1    | Ca_kabuli_chr03 | 31466085                | GG                              | CC                | 1945924057               |
| SNP_P3_32314_31466100 | NC_021162.1    | Ca_kabuli_chr03 | 31466100                | TT                              | CC                | 1945924059               |
| SNP_P3_32315_31466279 | NC_021162.1    | Ca_kabuli_chr03 | 31466279                | AA                              | GG                | 1945924061               |

| SNPs IDs              | Chromosome IDs | Chromosomes     | Physical positions (bp) | CDC Frontier (Reference genome) | (Pusa 256 & HPNB) | NCBI SNPdb Accession IDs |
|-----------------------|----------------|-----------------|-------------------------|---------------------------------|-------------------|--------------------------|
| SNP_P3_32316_31466283 | NC_021162.1    | Ca_kabuli_chr03 | 31466283                | TT                              | CC                | 1945924063               |
| SNP_P3_32317_31466306 | NC_021162.1    | Ca_kabuli_chr03 | 31466306                | GG                              | CC                | 1945924064               |
| SNP_P3_32318_31466946 | NC_021162.1    | Ca_kabuli_chr03 | 31466946                | AA                              | GG                | 1945924066               |
| SNP_P3_32319_31466987 | NC_021162.1    | Ca_kabuli_chr03 | 31466987                | GG                              | AA                | 1945924068               |
| SNP_P3_32321_31471729 | NC_021162.1    | Ca_kabuli_chr03 | 31471729                | GG                              | AA                | 1945924070               |
| SNP_P3_32322_31473279 | NC_021162.1    | Ca_kabuli_chr03 | 31473279                | TT                              | CC                | 1945924072               |
| SNP_P3_32323_31473282 | NC_021162.1    | Ca_kabuli_chr03 | 31473282                | AA                              | GG                | 1945924073               |
| SNP_P3_32324_31473348 | NC_021162.1    | Ca_kabuli_chr03 | 31473348                | CC                              | GG                | 1945924075               |
| SNP_P3_32325_31473606 | NC_021162.1    | Ca_kabuli_chr03 | 31473606                | AA                              | GG                | 1945924077               |
| SNP_P3_32326_31473633 | NC_021162.1    | Ca_kabuli_chr03 | 31473633                | AA                              | GG                | 1945924079               |
| SNP_P3_32327_31475404 | NC_021162.1    | Ca_kabuli_chr03 | 31475404                | TT                              | CC                | 1945924080               |
| SNP_P3_32328_31475459 | NC_021162.1    | Ca_kabuli_chr03 | 31475459                | AA                              | GG                | 1945924082               |
| SNP_P3_32329_31475495 | NC_021162.1    | Ca_kabuli_chr03 | 31475495                | GG                              | AA                | 1945924084               |
| SNP_P3_32330_31475500 | NC_021162.1    | Ca_kabuli_chr03 | 31475500                | GG                              | TT                | 1945924086               |
| SNP_P3_32332_31475828 | NC_021162.1    | Ca_kabuli_chr03 | 31475828                | CC                              | AA                | 1945924087               |
| SNP_P3_32334_31475955 | NC_021162.1    | Ca_kabuli_chr03 | 31475955                | TT                              | CC                | 1945924089               |
| SNP_P3_32336_31476599 | NC_021162.1    | Ca_kabuli_chr03 | 31476599                | TT                              | CC                | 1945924091               |
| SNP_P3_32339_31477352 | NC_021162.1    | Ca_kabuli_chr03 | 31477352                | CC                              | AA                | 1945924093               |
| SNP_P3_32340_31481132 | NC_021162.1    | Ca_kabuli_chr03 | 31481132                | AA                              | CC                | 1945924095               |
| SNP_P3_32341_31482845 | NC_021162.1    | Ca_kabuli_chr03 | 31482845                | GG                              | CC                | 1945924096               |
| SNP_P3_32343_31482943 | NC_021162.1    | Ca_kabuli_chr03 | 31482943                | CC                              | TT                | 1945924098               |
| SNP_P3_32344_31482955 | NC_021162.1    | Ca_kabuli_chr03 | 31482955                | GG                              | AA                | 1945924100               |
| SNP_P3_32345_31483116 | NC_021162.1    | Ca_kabuli_chr03 | 31483116                | GG                              | AA                | 1945924102               |
| SNP_P3_32346_31483129 | NC_021162.1    | Ca_kabuli_chr03 | 31483129                | TT                              | AA                | 1945924103               |
| SNP_P3_32347_31484951 | NC_021162.1    | Ca_kabuli_chr03 | 31484951                | GG                              | CC                | 1945924105               |
| SNP_P3_32348_31484959 | NC_021162.1    | Ca_kabuli_chr03 | 31484959                | AA                              | GG                | 1945924107               |
| SNP_P3_32349_31485005 | NC_021162.1    | Ca_kabuli_chr03 | 31485005                | CC                              | TT                | 1945924109               |
| SNP_P3_32350_31487210 | NC_021162.1    | Ca_kabuli_chr03 | 31487210                | TT                              | CC                | 1945924111               |
| SNP_P3_32351_31487246 | NC_021162.1    | Ca_kabuli_chr03 | 31487246                | AA                              | GG                | 1945924112               |
| SNP_P3_32352_31487435 | NC_021162.1    | Ca_kabuli_chr03 | 31487435                | CC                              | TT                | 1945924114               |
| SNP_P3_32353_31487486 | NC_021162.1    | Ca_kabuli_chr03 | 31487486                | GG                              | TT                | 1945924116               |
| SNP_P3_32354_31488241 | NC_021162.1    | Ca_kabuli_chr03 | 31488241                | GG                              | TT                | 1945924118               |
| SNP_P3_32357_31489491 | NC_021162.1    | Ca_kabuli_chr03 | 31489491                | TT                              | CC                | 1945924119               |
| SNP_P3_32358_31489654 | NC_021162.1    | Ca_kabuli_chr03 | 31489654                | GG                              | AA                | 1945924121               |
| SNP_P3_32359_31489922 | NC_021162.1    | Ca_kabuli_chr03 | 31489922                | CC                              | TT                | 1945924123               |
| SNP_P3_32361_31491462 | NC_021162.1    | Ca_kabuli_chr03 | 31491462                | TT                              | AA                | 1945924125               |
| SNP_P3_32362_31493454 | NC_021162.1    | Ca_kabuli_chr03 | 31493454                | CC                              | TT                | 1945924127               |
| SNP_P3_32363_31493633 | NC_021162.1    | Ca_kabuli_chr03 | 31493633                | TT                              | CC                | 1945924128               |
| SNP_P3_32364_31493823 | NC_021162.1    | Ca_kabuli_chr03 | 31493823                | AA                              | GG                | 1945924130               |
| SNP_P3_32365_31494761 | NC_021162.1    | Ca_kabuli_chr03 | 31494761                | CC                              | TT                | 1945924132               |
| SNP_P3_32366_31494763 | NC_021162.1    | Ca_kabuli_chr03 | 31494763                | TT                              | CC                | 1945924134               |
| SNP_P3_32367_31494784 | NC_021162.1    | Ca_kabuli_chr03 | 31494784                | GG                              | AA                | 1945924135               |

| SNPs IDs              | Chromosome IDs | Chromosomes     | Physical positions (bp) | CDC Frontier (Reference genome) | (Pusa 256 & HPNB) | NCBI SNPdb Accession IDs |
|-----------------------|----------------|-----------------|-------------------------|---------------------------------|-------------------|--------------------------|
| SNP_P3_32368_31494791 | NC_021162.1    | Ca_kabuli_chr03 | 31494791                | AA                              | GG                | 1945924137               |
| SNP_P3_32369_31495281 | NC_021162.1    | Ca_kabuli_chr03 | 31495281                | TT                              | GG                | 1945924139               |
| SNP_P3_32370_31495288 | NC_021162.1    | Ca_kabuli_chr03 | 31495288                | TT                              | GG                | 1945924141               |
| SNP_P3_32371_31495801 | NC_021162.1    | Ca_kabuli_chr03 | 31495801                | CC                              | GG                | 1945924143               |
| SNP_P3_32372_31496070 | NC_021162.1    | Ca_kabuli_chr03 | 31496070                | TT                              | AA                | 1945924144               |
| SNP_P3_32373_31496075 | NC_021162.1    | Ca_kabuli_chr03 | 31496075                | TT                              | GG                | 1945924146               |
| SNP_P3_32374_31496704 | NC_021162.1    | Ca_kabuli_chr03 | 31496704                | CC                              | TT                | 1945924148               |
| SNP_P3_32375_31496712 | NC_021162.1    | Ca_kabuli_chr03 | 31496712                | GG                              | AA                | 1945924150               |
| SNP_P3_32376_31496937 | NC_021162.1    | Ca_kabuli_chr03 | 31496937                | TT                              | CC                | 1945924151               |
| SNP_P3_32377_31497984 | NC_021162.1    | Ca_kabuli_chr03 | 31497984                | AA                              | GG                | 1945924153               |
| SNP_P3_32378_31498284 | NC_021162.1    | Ca_kabuli_chr03 | 31498284                | GG                              | AA                | 1945924155               |
| SNP_P3_32380_31499046 | NC_021162.1    | Ca_kabuli_chr03 | 31499046                | CC                              | TT                | 1945924157               |
| SNP_P3_32381_31499055 | NC_021162.1    | Ca_kabuli_chr03 | 31499055                | TT                              | CC                | 1945924159               |
| SNP_P3_32382_31499550 | NC_021162.1    | Ca_kabuli_chr03 | 31499550                | CC                              | TT                | 1945924160               |
| SNP_P3_32383_31499771 | NC_021162.1    | Ca_kabuli_chr03 | 31499771                | AA                              | CC                | 1945924162               |
| SNP_P3_32384_31499798 | NC_021162.1    | Ca_kabuli_chr03 | 31499798                | GG                              | TT                | 1945924164               |
| SNP_P3_32386_31500201 | NC_021162.1    | Ca_kabuli_chr03 | 31500201                | AA                              | GG                | 1945924166               |
| SNP_P3_32387_31500207 | NC_021162.1    | Ca_kabuli_chr03 | 31500207                | GG                              | TT                | 1945924167               |
| SNP_P3_32388_31500308 | NC_021162.1    | Ca_kabuli_chr03 | 31500308                | AA                              | GG                | 1945924169               |
| SNP_P3_32389_31500504 | NC_021162.1    | Ca_kabuli_chr03 | 31500504                | AA                              | GG                | 1945924171               |
| SNP_P3_32390_31503411 | NC_021162.1    | Ca_kabuli_chr03 | 31503411                | AA                              | CC                | 1945924173               |
| SNP_P3_32391_31504757 | NC_021162.1    | Ca_kabuli_chr03 | 31504757                | TT                              | CC                | 1945924175               |
| SNP_P3_32392_31504857 | NC_021162.1    | Ca_kabuli_chr03 | 31504857                | AA                              | GG                | 1945924176               |
| SNP_P3_32393_31505537 | NC_021162.1    | Ca_kabuli_chr03 | 31505537                | GG                              | AA                | 1945924178               |
| SNP_P3_32394_31506364 | NC_021162.1    | Ca_kabuli_chr03 | 31506364                | CC                              | AA                | 1945924180               |
| SNP_P3_32395_31508634 | NC_021162.1    | Ca_kabuli_chr03 | 31508634                | AA                              | GG                | 1945924182               |
| SNP_P3_32397_31509082 | NC_021162.1    | Ca_kabuli_chr03 | 31509082                | AA                              | GG                | 1945924183               |
| SNP_P3_32398_31509516 | NC_021162.1    | Ca_kabuli_chr03 | 31509516                | AA                              | CC                | 1945924185               |
| SNP_P3_32399_31512242 | NC_021162.1    | Ca_kabuli_chr03 | 31512242                | TT                              | GG                | 1945924187               |
| SNP_P3_32400_31514859 | NC_021162.1    | Ca_kabuli_chr03 | 31514859                | TT                              | CC                | 1945924189               |
| SNP_P3_32401_31516341 | NC_021162.1    | Ca_kabuli_chr03 | 31516341                | AA                              | GG                | 1945924191               |
| SNP_P3_32402_31516662 | NC_021162.1    | Ca_kabuli_chr03 | 31516662                | GG                              | TT                | 1945924192               |
| SNP_P3_32403_31516766 | NC_021162.1    | Ca_kabuli_chr03 | 31516766                | TT                              | CC                | 1945924194               |
| SNP_P3_32404_31517136 | NC_021162.1    | Ca_kabuli_chr03 | 31517136                | GG                              | AA                | 1945924196               |
| SNP_P3_32405_31517201 | NC_021162.1    | Ca_kabuli_chr03 | 31517201                | AA                              | GG                | 1945924198               |
| SNP_P3_32406_31518989 | NC_021162.1    | Ca_kabuli_chr03 | 31518989                | TT                              | AA                | 1945924199               |
| SNP_P3_32409_31519979 | NC_021162.1    | Ca_kabuli_chr03 | 31519979                | GG                              | AA                | 1945924201               |
| SNP_P3_32411_31527751 | NC_021162.1    | Ca_kabuli_chr03 | 31527751                | AA                              | GG                | 1945924203               |
| SNP_P3_32412_31527846 | NC_021162.1    | Ca_kabuli_chr03 | 31527846                | AA                              | GG                | 1945924205               |
| SNP_P3_32413_31528726 | NC_021162.1    | Ca_kabuli_chr03 | 31528726                | TT                              | CC                | 1945924207               |
| SNP_P3_32414_31528742 | NC_021162.1    | Ca_kabuli_chr03 | 31528742                | CC                              | TT                | 1945924208               |
| SNP_P3_32415_31529203 | NC_021162.1    | Ca_kabuli_chr03 | 31529203                | AA                              | GG                | 1945924210               |

| SNPs IDs              | Chromosome IDs | Chromosomes     | Physical positions (bp) | CDC Frontier (Reference genome) | (Pusa 256 & HPNB) | NCBI SNPdb Accession IDs |
|-----------------------|----------------|-----------------|-------------------------|---------------------------------|-------------------|--------------------------|
| SNP_P3_32416_31529948 | NC_021162.1    | Ca_kabuli_chr03 | 31529948                | CC                              | TT                | 1945924212               |
| SNP_P3_32417_31529968 | NC_021162.1    | Ca_kabuli_chr03 | 31529968                | TT                              | CC                | 1945924214               |
| SNP_P3_32418_31530242 | NC_021162.1    | Ca_kabuli_chr03 | 31530242                | GG                              | TT                | 1945924215               |
| SNP_P3_32420_31530410 | NC_021162.1    | Ca_kabuli_chr03 | 31530410                | TT                              | AA                | 1945924217               |
| SNP_P3_32422_31530525 | NC_021162.1    | Ca_kabuli_chr03 | 31530525                | CC                              | TT                | 1945924219               |
| SNP_P3_32424_31530709 | NC_021162.1    | Ca_kabuli_chr03 | 31530709                | GG                              | AA                | 1945924221               |
| SNP_P3_32425_31530724 | NC_021162.1    | Ca_kabuli_chr03 | 31530724                | CC                              | AA                | 1945924223               |
| SNP_P3_32426_31530926 | NC_021162.1    | Ca_kabuli_chr03 | 31530926                | AA                              | GG                | 1945924224               |
| SNP_P3_32427_31530993 | NC_021162.1    | Ca_kabuli_chr03 | 31530993                | CC                              | TT                | 1945924226               |
| SNP_P3_32428_31531123 | NC_021162.1    | Ca_kabuli_chr03 | 31531123                | AA                              | CC                | 1945924228               |
| SNP_P3_32429_31531130 | NC_021162.1    | Ca_kabuli_chr03 | 31531130                | AA                              | GG                | 1945924230               |
| SNP_P3_32430_31531190 | NC_021162.1    | Ca_kabuli_chr03 | 31531190                | CC                              | AA                | 1945924231               |
| SNP_P3_32431_31531305 | NC_021162.1    | Ca_kabuli_chr03 | 31531305                | AA                              | GG                | 1945924233               |
| SNP_P3_32432_31531332 | NC_021162.1    | Ca_kabuli_chr03 | 31531332                | TT                              | CC                | 1945924235               |
| SNP_P3_32434_31531382 | NC_021162.1    | Ca_kabuli_chr03 | 31531382                | GG                              | AA                | 1945924237               |
| SNP_P3_32435_31532622 | NC_021162.1    | Ca_kabuli_chr03 | 31532622                | TT                              | CC                | 1945924238               |
| SNP_P3_32436_31532701 | NC_021162.1    | Ca_kabuli_chr03 | 31532701                | CC                              | TT                | 1945924240               |
| SNP_P3_32437_31532967 | NC_021162.1    | Ca_kabuli_chr03 | 31532967                | GG                              | AA                | 1945924242               |
| SNP_P3_32438_31533141 | NC_021162.1    | Ca_kabuli_chr03 | 31533141                | AA                              | GG                | 1945924244               |
| SNP_P3_32439_31533490 | NC_021162.1    | Ca_kabuli_chr03 | 31533490                | TT                              | AA                | 1945924246               |
| SNP_P3_32440_31535164 | NC_021162.1    | Ca_kabuli_chr03 | 31535164                | TT                              | CC                | 1945924247               |
| SNP_P3_32441_31535240 | NC_021162.1    | Ca_kabuli_chr03 | 31535240                | TT                              | GG                | 1945924249               |
| SNP_P3_32442_31535280 | NC_021162.1    | Ca_kabuli_chr03 | 31535280                | CC                              | TT                | 1945924251               |
| SNP_P3_32443_31535551 | NC_021162.1    | Ca_kabuli_chr03 | 31535551                | GG                              | TT                | 1945924253               |
| SNP_P3_32444_31535793 | NC_021162.1    | Ca_kabuli_chr03 | 31535793                | AA                              | GG                | 1945924254               |
| SNP_P3_32445_31536241 | NC_021162.1    | Ca_kabuli_chr03 | 31536241                | AA                              | TT                | 1945924256               |
| SNP_P3_32446_31536782 | NC_021162.1    | Ca_kabuli_chr03 | 31536782                | GG                              | AA                | 1945924258               |
| SNP_P3_32447_31537289 | NC_021162.1    | Ca_kabuli_chr03 | 31537289                | CC                              | TT                | 1945924260               |
| SNP_P3_32448_31537454 | NC_021162.1    | Ca_kabuli_chr03 | 31537454                | GG                              | AA                | 1945924262               |
| SNP_P3_32449_31537719 | NC_021162.1    | Ca_kabuli_chr03 | 31537719                | CC                              | TT                | 1945924263               |
| SNP_P3_32450_31539212 | NC_021162.1    | Ca_kabuli_chr03 | 31539212                | TT                              | CC                | 1945924265               |
| SNP_P3_32451_31539257 | NC_021162.1    | Ca_kabuli_chr03 | 31539257                | TT                              | CC                | 1945924267               |
| SNP_P3_32452_31539709 | NC_021162.1    | Ca_kabuli_chr03 | 31539709                | AA                              | GG                | 1945924269               |
| SNP_P3_32453_31540467 | NC_021162.1    | Ca_kabuli_chr03 | 31540467                | TT                              | AA                | 1945924270               |
| SNP_P3_32454_31540856 | NC_021162.1    | Ca_kabuli_chr03 | 31540856                | GG                              | AA                | 1945924272               |
| SNP_P3_32455_31542798 | NC_021162.1    | Ca_kabuli_chr03 | 31542798                | CC                              | AA                | 1945924274               |
| SNP_P3_32456_31542903 | NC_021162.1    | Ca_kabuli_chr03 | 31542903                | CC                              | TT                | 1945924276               |
| SNP_P3_32457_31542985 | NC_021162.1    | Ca_kabuli_chr03 | 31542985                | CC                              | TT                | 1945924278               |
| SNP_P3_32458_31544060 | NC_021162.1    | Ca_kabuli_chr03 | 31544060                | GG                              | AA                | 1945924279               |
| SNP_P3_32459_31544114 | NC_021162.1    | Ca_kabuli_chr03 | 31544114                | TT                              | CC                | 1945924281               |
| SNP_P3_32460_31544631 | NC_021162.1    | Ca_kabuli_chr03 | 31544631                | GG                              | CC                | 1945924283               |
| SNP_P3_32461_31560623 | NC_021162.1    | Ca_kabuli_chr03 | 31560623                | GG                              | AA                | 1945924285               |

| SNPs IDs              | Chromosome IDs | Chromosomes     | Physical positions (bp) | CDC Frontier (Reference genome) | (Pusa 256 & HPNB) | NCBI SNPdb Accession IDs |
|-----------------------|----------------|-----------------|-------------------------|---------------------------------|-------------------|--------------------------|
| SNP_P3_32462_31560698 | NC_021162.1    | Ca_kabuli_chr03 | 31560698                | TT                              | CC                | 1945924286               |
| SNP_P3_32463_31560700 | NC_021162.1    | Ca_kabuli_chr03 | 31560700                | TT                              | AA                | 1945924288               |
| SNP_P3_32464_31560701 | NC_021162.1    | Ca_kabuli_chr03 | 31560701                | TT                              | CC                | 1945924290               |
| SNP_P3_32466_31560710 | NC_021162.1    | Ca_kabuli_chr03 | 31560710                | AA                              | GG                | 1945924292               |
| SNP_P3_32467_31562604 | NC_021162.1    | Ca_kabuli_chr03 | 31562604                | CC                              | AA                | 1945924294               |
| SNP_P3_32468_31562850 | NC_021162.1    | Ca_kabuli_chr03 | 31562850                | GG                              | AA                | 1945924295               |
| SNP_P3_32469_31562854 | NC_021162.1    | Ca_kabuli_chr03 | 31562854                | TT                              | GG                | 1945924297               |
| SNP_P3_32470_31562985 | NC_021162.1    | Ca_kabuli_chr03 | 31562985                | GG                              | AA                | 1945924299               |
| SNP_P3_32472_31563479 | NC_021162.1    | Ca_kabuli_chr03 | 31563479                | TT                              | CC                | 1945924301               |
| SNP_P3_32473_31563494 | NC_021162.1    | Ca_kabuli_chr03 | 31563494                | CC                              | TT                | 1945924302               |
| SNP_P3_32476_31564003 | NC_021162.1    | Ca_kabuli_chr03 | 31564003                | AA                              | GG                | 1945924304               |
| SNP_P3_32477_31564251 | NC_021162.1    | Ca_kabuli_chr03 | 31564251                | CC                              | TT                | 1945924306               |
| SNP_P3_32478_31564393 | NC_021162.1    | Ca_kabuli_chr03 | 31564393                | CC                              | TT                | 1945924308               |
| SNP_P3_32480_31565346 | NC_021162.1    | Ca_kabuli_chr03 | 31565346                | CC                              | GG                | 1945924310               |
| SNP_P3_32481_31565398 | NC_021162.1    | Ca_kabuli_chr03 | 31565398                | TT                              | GG                | 1945924311               |
| SNP_P3_32482_31565399 | NC_021162.1    | Ca_kabuli_chr03 | 31565399                | GG                              | AA                | 1945924313               |
| SNP_P3_32483_31565411 | NC_021162.1    | Ca_kabuli_chr03 | 31565411                | TT                              | GG                | 1945924315               |
| SNP_P3_32485_31565624 | NC_021162.1    | Ca_kabuli_chr03 | 31565624                | TT                              | CC                | 1945924317               |
| SNP_P3_32486_31565626 | NC_021162.1    | Ca_kabuli_chr03 | 31565626                | CC                              | AA                | 1945924318               |
| SNP_P3_32487_31565657 | NC_021162.1    | Ca_kabuli_chr03 | 31565657                | CC                              | TT                | 1945924320               |
| SNP_P3_32488_31565674 | NC_021162.1    | Ca_kabuli_chr03 | 31565674                | GG                              | CC                | 1945924322               |
| SNP_P3_32489_31565676 | NC_021162.1    | Ca_kabuli_chr03 | 31565676                | AA                              | GG                | 1945924324               |
| SNP_P3_32490_31565696 | NC_021162.1    | Ca_kabuli_chr03 | 31565696                | CC                              | AA                | 1945924326               |
| SNP_P3_32491_31565774 | NC_021162.1    | Ca_kabuli_chr03 | 31565774                | TT                              | GG                | 1945924327               |
| SNP_P3_32492_31566094 | NC_021162.1    | Ca_kabuli_chr03 | 31566094                | GG                              | AA                | 1945924329               |
| SNP_P3_32495_31566857 | NC_021162.1    | Ca_kabuli_chr03 | 31566857                | CC                              | TT                | 1945924331               |
| SNP_P3_32496_31566968 | NC_021162.1    | Ca_kabuli_chr03 | 31566968                | AA                              | GG                | 1945924333               |
| SNP_P3_32498_31567825 | NC_021162.1    | Ca_kabuli_chr03 | 31567825                | CC                              | AA                | 1945924334               |
| SNP_P3_32499_31569246 | NC_021162.1    | Ca_kabuli_chr03 | 31569246                | AA                              | GG                | 1945924336               |
| SNP_P3_32500_31569454 | NC_021162.1    | Ca_kabuli_chr03 | 31569454                | CC                              | TT                | 1945924338               |
| SNP_P3_32502_31569714 | NC_021162.1    | Ca_kabuli_chr03 | 31569714                | AA                              | TT                | 1945924340               |
| SNP_P3_32503_31570491 | NC_021162.1    | Ca_kabuli_chr03 | 31570491                | AA                              | CC                | 1945924342               |
| SNP_P3_32504_31572298 | NC_021162.1    | Ca_kabuli_chr03 | 31572298                | TT                              | AA                | 1945924343               |
| SNP_P3_32505_31572911 | NC_021162.1    | Ca_kabuli_chr03 | 31572911                | TT                              | CC                | 1945924345               |
| SNP_P3_32507_31574612 | NC_021162.1    | Ca_kabuli_chr03 | 31574612                | AA                              | GG                | 1945924347               |
| SNP_P3_32508_31576326 | NC_021162.1    | Ca_kabuli_chr03 | 31576326                | TT                              | AA                | 1945924349               |
| SNP_P3_32509_31576647 | NC_021162.1    | Ca_kabuli_chr03 | 31576647                | AA                              | CC                | 1945924350               |
| SNP_P3_32511_31577975 | NC_021162.1    | Ca_kabuli_chr03 | 31577975                | GG                              | AA                | 1945924352               |
| SNP_P3_32512_31577984 | NC_021162.1    | Ca_kabuli_chr03 | 31577984                | TT                              | GG                | 1945924354               |
| SNP_P3_32513_31578008 | NC_021162.1    | Ca_kabuli_chr03 | 31578008                | GG                              | AA                | 1945924356               |
| SNP_P3_32514_31578521 | NC_021162.1    | Ca_kabuli_chr03 | 31578521                | TT                              | GG                | 1945924358               |
| SNP_P3_32515_31578677 | NC_021162.1    | Ca_kabuli_chr03 | 31578677                | CC                              | AA                | 1945924359               |

| SNPs IDs              | Chromosome IDs | Chromosomes     | Physical positions (bp) | CDC Frontier (Reference genome) | (Pusa 256 & HPNB) | NCBI SNPdb Accession IDs |
|-----------------------|----------------|-----------------|-------------------------|---------------------------------|-------------------|--------------------------|
| SNP_P3_32518_31582297 | NC_021162.1    | Ca_kabuli_chr03 | 31582297                | CC                              | TT                | 1945924361               |
| SNP_P3_32520_31583215 | NC_021162.1    | Ca_kabuli_chr03 | 31583215                | CC                              | GG                | 1945924363               |
| SNP_P3_32522_31584369 | NC_021162.1    | Ca_kabuli_chr03 | 31584369                | TT                              | CC                | 1945924365               |
| SNP_P3_32523_31585635 | NC_021162.1    | Ca_kabuli_chr03 | 31585635                | CC                              | TT                | 1945924366               |
| SNP_P3_32524_31585786 | NC_021162.1    | Ca_kabuli_chr03 | 31585786                | GG                              | AA                | 1945924368               |
| SNP_P3_32525_31585802 | NC_021162.1    | Ca_kabuli_chr03 | 31585802                | AA                              | CC                | 1945924370               |
| SNP_P3_32526_31585948 | NC_021162.1    | Ca_kabuli_chr03 | 31585948                | AA                              | GG                | 1945924372               |
| SNP_P3_32527_31585951 | NC_021162.1    | Ca_kabuli_chr03 | 31585951                | CC                              | GG                | 1945924374               |
| SNP_P3_32528_31587620 | NC_021162.1    | Ca_kabuli_chr03 | 31587620                | CC                              | TT                | 1945924375               |
| SNP_P3_32529_31587665 | NC_021162.1    | Ca_kabuli_chr03 | 31587665                | AA                              | CC                | 1945924377               |
| SNP_P3_32530_31588251 | NC_021162.1    | Ca_kabuli_chr03 | 31588251                | CC                              | TT                | 1945924379               |
| SNP_P3_32533_31591158 | NC_021162.1    | Ca_kabuli_chr03 | 31591158                | CC                              | AA                | 1945924381               |
| SNP_P3_32534_31591180 | NC_021162.1    | Ca_kabuli_chr03 | 31591180                | TT                              | CC                | 1945924382               |
| SNP_P3_32535_31591931 | NC_021162.1    | Ca_kabuli_chr03 | 31591931                | AA                              | GG                | 1945924384               |
| SNP_P3_32536_31592318 | NC_021162.1    | Ca_kabuli_chr03 | 31592318                | GG                              | TT                | 1945924386               |
| SNP_P3_32538_31594668 | NC_021162.1    | Ca_kabuli_chr03 | 31594668                | TT                              | AA                | 1945924388               |
| SNP_P3_32539_31594709 | NC_021162.1    | Ca_kabuli_chr03 | 31594709                | TT                              | AA                | 1945924390               |
| SNP_P3_32540_31594711 | NC_021162.1    | Ca_kabuli_chr03 | 31594711                | TT                              | GG                | 1945924391               |
| SNP_P3_32541_31601907 | NC_021162.1    | Ca_kabuli_chr03 | 31601907                | GG                              | AA                | 1945924393               |
| SNP_P3_32542_31602167 | NC_021162.1    | Ca_kabuli_chr03 | 31602167                | CC                              | TT                | 1945924395               |
| SNP_P3_32543_31602194 | NC_021162.1    | Ca_kabuli_chr03 | 31602194                | TT                              | CC                | 1945924397               |
| SNP_P3_32544_31602644 | NC_021162.1    | Ca_kabuli_chr03 | 31602644                | GG                              | AA                | 1945924398               |
| SNP_P3_32546_31602668 | NC_021162.1    | Ca_kabuli_chr03 | 31602668                | CC                              | TT                | 1945924400               |
| SNP_P3_32547_31602853 | NC_021162.1    | Ca_kabuli_chr03 | 31602853                | TT                              | CC                | 1945924402               |
| SNP_P3_32548_31602861 | NC_021162.1    | Ca_kabuli_chr03 | 31602861                | TT                              | AA                | 1945924404               |
| SNP_P3_32549_31602903 | NC_021162.1    | Ca_kabuli_chr03 | 31602903                | TT                              | GG                | 1945924405               |
| SNP_P3_32551_31603099 | NC_021162.1    | Ca_kabuli_chr03 | 31603099                | GG                              | AA                | 1945924407               |
| SNP_P3_32552_31603121 | NC_021162.1    | Ca_kabuli_chr03 | 31603121                | TT                              | AA                | 1945924409               |
| SNP_P3_32553_31603198 | NC_021162.1    | Ca_kabuli_chr03 | 31603198                | CC                              | AA                | 1945924411               |
| SNP_P3_32555_31603348 | NC_021162.1    | Ca_kabuli_chr03 | 31603348                | GG                              | CC                | 1945924413               |
| SNP_P3_32556_31603502 | NC_021162.1    | Ca_kabuli_chr03 | 31603502                | CC                              | GG                | 1945924414               |
| SNP_P3_32557_31603573 | NC_021162.1    | Ca_kabuli_chr03 | 31603573                | TT                              | CC                | 1945924416               |
| SNP_P3_32558_31603802 | NC_021162.1    | Ca_kabuli_chr03 | 31603802                | CC                              | AA                | 1945924418               |
| SNP_P3_32561_31604416 | NC_021162.1    | Ca_kabuli_chr03 | 31604416                | CC                              | TT                | 1945924420               |
| SNP_P3_32562_31604424 | NC_021162.1    | Ca_kabuli_chr03 | 31604424                | TT                              | AA                | 1945924421               |
| SNP_P3_32563_31605724 | NC_021162.1    | Ca_kabuli_chr03 | 31605724                | AA                              | GG                | 1945924423               |
| SNP_P3_32565_31605895 | NC_021162.1    | Ca_kabuli_chr03 | 31605895                | TT                              | GG                | 1945924425               |
| SNP_P3_32568_31606936 | NC_021162.1    | Ca_kabuli_chr03 | 31606936                | AA                              | CC                | 1945924427               |
| SNP_P3_32569_31606956 | NC_021162.1    | Ca_kabuli_chr03 | 31606956                | CC                              | TT                | 1945924429               |
| SNP_P3_32571_31607450 | NC_021162.1    | Ca_kabuli_chr03 | 31607450                | GG                              | TT                | 1945924430               |
| SNP_P3_32572_31607530 | NC_021162.1    | Ca_kabuli_chr03 | 31607530                | TT                              | AA                | 1945924432               |
| SNP_P3_32573_31608411 | NC_021162.1    | Ca_kabuli_chr03 | 31608411                | TT                              | CC                | 1945924434               |

| SNPs IDs              | Chromosome IDs | Chromosomes     | Physical positions (bp) | CDC Frontier (Reference genome) | (Pusa 256 & HPNB) | NCBI SNPdb Accession IDs |
|-----------------------|----------------|-----------------|-------------------------|---------------------------------|-------------------|--------------------------|
| SNP_P3_32574_31608463 | NC_021162.1    | Ca_kabuli_chr03 | 31608463                | CC                              | AA                | 1945924436               |
| SNP_P3_32575_31610113 | NC_021162.1    | Ca_kabuli_chr03 | 31610113                | GG                              | AA                | 1945924437               |
| SNP_P3_32577_31610580 | NC_021162.1    | Ca_kabuli_chr03 | 31610580                | TT                              | CC                | 1945924439               |
| SNP_P3_32578_31610616 | NC_021162.1    | Ca_kabuli_chr03 | 31610616                | TT                              | CC                | 1945924441               |
| SNP_P3_32579_31610710 | NC_021162.1    | Ca_kabuli_chr03 | 31610710                | CC                              | TT                | 1945924443               |
| SNP_P3_32580_31610758 | NC_021162.1    | Ca_kabuli_chr03 | 31610758                | AA                              | GG                | 1945924445               |
| SNP_P3_32581_31610956 | NC_021162.1    | Ca_kabuli_chr03 | 31610956                | AA                              | CC                | 1945924446               |
| SNP_P3_32582_31610980 | NC_021162.1    | Ca_kabuli_chr03 | 31610980                | GG                              | CC                | 1945924448               |
| SNP_P3_32583_31612393 | NC_021162.1    | Ca_kabuli_chr03 | 31612393                | AA                              | GG                | 1945924450               |
| SNP_P3_32584_31612419 | NC_021162.1    | Ca_kabuli_chr03 | 31612419                | CC                              | TT                | 1945924452               |
| SNP_P3_32585_31612620 | NC_021162.1    | Ca_kabuli_chr03 | 31612620                | GG                              | AA                | 1945924453               |
| SNP_P3_32586_31612639 | NC_021162.1    | Ca_kabuli_chr03 | 31612639                | TT                              | GG                | 1945924455               |
| SNP_P3_32587_31613424 | NC_021162.1    | Ca_kabuli_chr03 | 31613424                | CC                              | GG                | 1945924457               |
| SNP_P3_32588_31613431 | NC_021162.1    | Ca_kabuli_chr03 | 31613431                | AA                              | GG                | 1945924459               |
| SNP_P3_32589_31613702 | NC_021162.1    | Ca_kabuli_chr03 | 31613702                | AA                              | GG                | 1945924461               |
| SNP_P3_32590_31613982 | NC_021162.1    | Ca_kabuli_chr03 | 31613982                | CC                              | TT                | 1945924462               |
| SNP_P3_32591_31614049 | NC_021162.1    | Ca_kabuli_chr03 | 31614049                | TT                              | CC                | 1945924464               |
| SNP_P3_32592_31614060 | NC_021162.1    | Ca_kabuli_chr03 | 31614060                | CC                              | TT                | 1945924466               |
| SNP_P3_32593_31614070 | NC_021162.1    | Ca_kabuli_chr03 | 31614070                | CC                              | TT                | 1945924468               |
| SNP_P3_32594_31614080 | NC_021162.1    | Ca_kabuli_chr03 | 31614080                | CC                              | GG                | 1945924469               |
| SNP_P3_32595_31614295 | NC_021162.1    | Ca_kabuli_chr03 | 31614295                | AA                              | GG                | 1945924471               |
| SNP_P3_32596_31614305 | NC_021162.1    | Ca_kabuli_chr03 | 31614305                | AA                              | GG                | 1945924473               |
| SNP_P3_32597_31614310 | NC_021162.1    | Ca_kabuli_chr03 | 31614310                | CC                              | TT                | 1945924475               |
| SNP_P3_32598_31616030 | NC_021162.1    | Ca_kabuli_chr03 | 31616030                | CC                              | TT                | 1945924477               |
| SNP_P3_32599_31619157 | NC_021162.1    | Ca_kabuli_chr03 | 31619157                | TT                              | CC                | 1945924478               |
| SNP_P3_32600_31624134 | NC_021162.1    | Ca_kabuli_chr03 | 31624134                | TT                              | GG                | 1945924480               |
| SNP_P3_32601_31626318 | NC_021162.1    | Ca_kabuli_chr03 | 31626318                | TT                              | GG                | 1945924482               |
| SNP_P3_32602_31627871 | NC_021162.1    | Ca_kabuli_chr03 | 31627871                | TT                              | CC                | 1945924484               |
| SNP_P3_32603_31627901 | NC_021162.1    | Ca_kabuli_chr03 | 31627901                | AA                              | GG                | 1945924485               |
| SNP_P3_32604_31628056 | NC_021162.1    | Ca_kabuli_chr03 | 31628056                | GG                              | AA                | 1945924487               |
| SNP_P3_32605_31628061 | NC_021162.1    | Ca_kabuli_chr03 | 31628061                | AA                              | GG                | 1945924489               |
| SNP_P3_32606_31629482 | NC_021162.1    | Ca_kabuli_chr03 | 31629482                | AA                              | TT                | 1945924491               |
| SNP_P3_32607_31629623 | NC_021162.1    | Ca_kabuli_chr03 | 31629623                | GG                              | AA                | 1945924493               |
| SNP_P3_32609_31632006 | NC_021162.1    | Ca_kabuli_chr03 | 31632006                | GG                              | AA                | 1945924494               |
| SNP_P3_32610_31632190 | NC_021162.1    | Ca_kabuli_chr03 | 31632190                | GG                              | AA                | 1945924496               |
| SNP_P3_32611_31632197 | NC_021162.1    | Ca_kabuli_chr03 | 31632197                | AA                              | GG                | 1945924498               |
| SNP_P3_32612_31632305 | NC_021162.1    | Ca_kabuli_chr03 | 31632305                | TT                              | AA                | 1945924500               |
| SNP_P3_32613_31632307 | NC_021162.1    | Ca_kabuli_chr03 | 31632307                | AA                              | GG                | 1945924501               |
| SNP_P3_32614_31632308 | NC_021162.1    | Ca_kabuli_chr03 | 31632308                | AA                              | GG                | 1945924503               |
| SNP_P3_32615_31632310 | NC_021162.1    | Ca_kabuli_chr03 | 31632310                | GG                              | TT                | 1945924505               |
| SNP_P3_32616_31632311 | NC_021162.1    | Ca_kabuli_chr03 | 31632311                | TT                              | AA                | 1945924507               |
| SNP_P3_32617_31632313 | NC_021162.1    | Ca_kabuli_chr03 | 31632313                | AA                              | TT                | 1945924509               |

| SNPs IDs              | Chromosome IDs | Chromosomes     | Physical positions (bp) | CDC Frontier (Reference genome) | (Pusa 256 & HPNB) | NCBI SNPdb Accession IDs |
|-----------------------|----------------|-----------------|-------------------------|---------------------------------|-------------------|--------------------------|
| SNP_P3_32619_31632598 | NC_021162.1    | Ca_kabuli_chr03 | 31632598                | AA                              | GG                | 1945924510               |
| SNP_P3_32620_31632642 | NC_021162.1    | Ca_kabuli_chr03 | 31632642                | AA                              | TT                | 1945924512               |
| SNP_P3_32621_31632771 | NC_021162.1    | Ca_kabuli_chr03 | 31632771                | CC                              | TT                | 1945924514               |
| SNP_P3_32623_31633542 | NC_021162.1    | Ca_kabuli_chr03 | 31633542                | CC                              | GG                | 1945924516               |
| SNP_P3_32624_31633862 | NC_021162.1    | Ca_kabuli_chr03 | 31633862                | GG                              | TT                | 1945924517               |
| SNP_P3_32625_31633870 | NC_021162.1    | Ca_kabuli_chr03 | 31633870                | CC                              | TT                | 1945924519               |
| SNP_P3_32626_31634818 | NC_021162.1    | Ca_kabuli_chr03 | 31634818                | TT                              | CC                | 1945924521               |
| SNP_P3_32627_31635367 | NC_021162.1    | Ca_kabuli_chr03 | 31635367                | AA                              | GG                | 1945924523               |
| SNP_P3_32628_31635416 | NC_021162.1    | Ca_kabuli_chr03 | 31635416                | TT                              | CC                | 1945924524               |
| SNP_P3_32629_31637009 | NC_021162.1    | Ca_kabuli_chr03 | 31637009                | GG                              | AA                | 1945924526               |
| SNP_P3_32631_31637675 | NC_021162.1    | Ca_kabuli_chr03 | 31637675                | CC                              | TT                | 1945924528               |
| SNP_P3_32632_31637681 | NC_021162.1    | Ca_kabuli_chr03 | 31637681                | TT                              | CC                | 1945924530               |
| SNP_P3_32633_31637704 | NC_021162.1    | Ca_kabuli_chr03 | 31637704                | TT                              | GG                | 1945924532               |
| SNP_P3_32634_31638047 | NC_021162.1    | Ca_kabuli_chr03 | 31638047                | AA                              | GG                | 1945924533               |
| SNP_P3_32636_31641927 | NC_021162.1    | Ca_kabuli_chr03 | 31641927                | GG                              | TT                | 1945924535               |
| SNP_P3_32637_31642109 | NC_021162.1    | Ca_kabuli_chr03 | 31642109                | CC                              | GG                | 1945924537               |
| SNP_P3_32638_31642147 | NC_021162.1    | Ca_kabuli_chr03 | 31642147                | AA                              | CC                | 1945924539               |
| SNP_P3_32639_31643499 | NC_021162.1    | Ca_kabuli_chr03 | 31643499                | CC                              | TT                | 1945924540               |
| SNP_P3_32640_31645713 | NC_021162.1    | Ca_kabuli_chr03 | 31645713                | CC                              | AA                | 1945924542               |
| SNP_P3_32641_31656226 | NC_021162.1    | Ca_kabuli_chr03 | 31656226                | CC                              | TT                | 1945924544               |
| SNP_P3_32642_31662857 | NC_021162.1    | Ca_kabuli_chr03 | 31662857                | CC                              | TT                | 1945924546               |
| SNP_P3_32643_31682319 | NC_021162.1    | Ca_kabuli_chr03 | 31682319                | TT                              | AA                | 1945924548               |
| SNP_P3_32644_31682538 | NC_021162.1    | Ca_kabuli_chr03 | 31682538                | CC                              | GG                | 1945924549               |
| SNP_P3_32645_31692643 | NC_021162.1    | Ca_kabuli_chr03 | 31692643                | AA                              | GG                | 1945924551               |
| SNP_P3_32646_31709925 | NC_021162.1    | Ca_kabuli_chr03 | 31709925                | AA                              | CC                | 1945924553               |
| SNP_P3_32647_31811588 | NC_021162.1    | Ca_kabuli_chr03 | 31811588                | AA                              | CC                | 1945924555               |
| SNP_P3_32649_31845687 | NC_021162.1    | Ca_kabuli_chr03 | 31845687                | AA                              | TT                | 1945924556               |
| SNP_P3_32651_31893468 | NC_021162.1    | Ca_kabuli_chr03 | 31893468                | GG                              | AA                | 1945924558               |
| SNP_P3_32653_31902349 | NC_021162.1    | Ca_kabuli_chr03 | 31902349                | AA                              | GG                | 1945924560               |
| SNP_P3_32654_31903578 | NC_021162.1    | Ca_kabuli_chr03 | 31903578                | GG                              | AA                | 1945924562               |
| SNP_P3_32656_31938171 | NC_021162.1    | Ca_kabuli_chr03 | 31938171                | CC                              | TT                | 1945924564               |
| SNP_P3_32658_31939916 | NC_021162.1    | Ca_kabuli_chr03 | 31939916                | CC                              | TT                | 1945924565               |
| SNP_P3_32659_31940187 | NC_021162.1    | Ca_kabuli_chr03 | 31940187                | CC                              | TT                | 1945924567               |
| SNP_P3_32660_31940381 | NC_021162.1    | Ca_kabuli_chr03 | 31940381                | TT                              | GG                | 1945924569               |
| SNP_P3_32661_31940438 | NC_021162.1    | Ca_kabuli_chr03 | 31940438                | CC                              | GG                | 1945924571               |
| SNP_P3_32662_31940484 | NC_021162.1    | Ca_kabuli_chr03 | 31940484                | GG                              | CC                | 1945924572               |
| SNP_P3_32663_31940508 | NC_021162.1    | Ca_kabuli_chr03 | 31940508                | CC                              | TT                | 1945924574               |
| SNP_P3_32664_31940682 | NC_021162.1    | Ca_kabuli_chr03 | 31940682                | GG                              | AA                | 1945924576               |
| SNP_P3_32665_31940714 | NC_021162.1    | Ca_kabuli_chr03 | 31940714                | AA                              | GG                | 1945924578               |
| SNP_P3_32666_31940744 | NC_021162.1    | Ca_kabuli_chr03 | 31940744                | TT                              | CC                | 1945924580               |
| SNP_P3_32667_31940766 | NC_021162.1    | Ca_kabuli_chr03 | 31940766                | CC                              | TT                | 1945924581               |
| SNP_P3_32668_31942794 | NC_021162.1    | Ca_kabuli_chr03 | 31942794                | CC                              | TT                | 1945924583               |



| SNPs IDs              | Chromosome IDs | Chromosomes     | Physical positions (bp) | CDC Frontier (Reference genome) | (Pusa 256 & HPNB) | NCBI SNPdb Accession IDs |
|-----------------------|----------------|-----------------|-------------------------|---------------------------------|-------------------|--------------------------|
| SNP_P3_32669_31966807 | NC_021162.1    | Ca_kabuli_chr03 | 31966807                | GG                              | AA                | 1945924585               |
| SNP_P3_32670_32334940 | NC_021162.1    | Ca_kabuli_chr03 | 32334940                | AA                              | CC                | 1945924587               |
| SNP_P3_32671_32334949 | NC_021162.1    | Ca_kabuli_chr03 | 32334949                | TT                              | CC                | 1945924588               |
| SNP_P3_32672_32334985 | NC_021162.1    | Ca_kabuli_chr03 | 32334985                | TT                              | GG                | 1945924590               |
| SNP_P3_32673_32347697 | NC_021162.1    | Ca_kabuli_chr03 | 32347697                | GG                              | AA                | 1945924592               |
| SNP_P3_32675_32360952 | NC_021162.1    | Ca_kabuli_chr03 | 32360952                | GG                              | AA                | 1945924594               |
| SNP_P3_32676_32362741 | NC_021162.1    | Ca_kabuli_chr03 | 32362741                | AA                              | GG                | 1945924596               |
| SNP_P3_32679_32409785 | NC_021162.1    | Ca_kabuli_chr03 | 32409785                | AA                              | GG                | 1945924597               |
| SNP_P3_32680_32409793 | NC_021162.1    | Ca_kabuli_chr03 | 32409793                | TT                              | CC                | 1945924599               |
| SNP_P3_32681_32413071 | NC_021162.1    | Ca_kabuli_chr03 | 32413071                | CC                              | GG                | 1945924601               |
| SNP_P3_32682_32413106 | NC_021162.1    | Ca_kabuli_chr03 | 32413106                | CC                              | TT                | 1945924603               |
| SNP_P3_32683_32414346 | NC_021162.1    | Ca_kabuli_chr03 | 32414346                | AA                              | GG                | 1945924604               |
| SNP_P3_32684_32414372 | NC_021162.1    | Ca_kabuli_chr03 | 32414372                | TT                              | CC                | 1945924606               |
| SNP_P3_32685_32414401 | NC_021162.1    | Ca_kabuli_chr03 | 32414401                | TT                              | CC                | 1945924608               |
| SNP_P3_32686_32414411 | NC_021162.1    | Ca_kabuli_chr03 | 32414411                | CC                              | TT                | 1945924610               |
| SNP_P3_32687_32414493 | NC_021162.1    | Ca_kabuli_chr03 | 32414493                | AA                              | GG                | 1945924612               |
| SNP_P3_32688_32414497 | NC_021162.1    | Ca_kabuli_chr03 | 32414497                | TT                              | GG                | 1945924613               |
| SNP_P3_32689_32414554 | NC_021162.1    | Ca_kabuli_chr03 | 32414554                | AA                              | CC                | 1945924615               |
| SNP_P3_32690_32414708 | NC_021162.1    | Ca_kabuli_chr03 | 32414708                | TT                              | CC                | 1945924617               |
| SNP_P3_32691_32414834 | NC_021162.1    | Ca_kabuli_chr03 | 32414834                | TT                              | CC                | 1945924619               |
| SNP_P3_32692_32414897 | NC_021162.1    | Ca_kabuli_chr03 | 32414897                | AA                              | GG                | 1945924620               |
| SNP_P3_32693_32414898 | NC_021162.1    | Ca_kabuli_chr03 | 32414898                | GG                              | AA                | 1945924622               |
| SNP_P3_32694_32414942 | NC_021162.1    | Ca_kabuli_chr03 | 32414942                | AA                              | GG                | 1945924624               |
| SNP_P3_32695_32417324 | NC_021162.1    | Ca_kabuli_chr03 | 32417324                | CC                              | TT                | 1945924626               |
| SNP_P3_32696_32418659 | NC_021162.1    | Ca_kabuli_chr03 | 32418659                | CC                              | TT                | 1945924628               |
| SNP_P3_32697_32451219 | NC_021162.1    | Ca_kabuli_chr03 | 32451219                | GG                              | AA                | 1945924629               |
| SNP_P3_32698_32453086 | NC_021162.1    | Ca_kabuli_chr03 | 32453086                | AA                              | TT                | 1945924631               |
| SNP_P3_32699_32457393 | NC_021162.1    | Ca_kabuli_chr03 | 32457393                | TT                              | CC                | 1945924633               |
| SNP_P3_32700_32457406 | NC_021162.1    | Ca_kabuli_chr03 | 32457406                | AA                              | GG                | 1945924635               |
| SNP_P3_32701_32457426 | NC_021162.1    | Ca_kabuli_chr03 | 32457426                | CC                              | TT                | 1945924636               |
| SNP_P3_32702_32457747 | NC_021162.1    | Ca_kabuli_chr03 | 32457747                | GG                              | AA                | 1945924638               |
| SNP_P3_32703_32457924 | NC_021162.1    | Ca_kabuli_chr03 | 32457924                | CC                              | AA                | 1945924640               |
| SNP_P3_32704_32458016 | NC_021162.1    | Ca_kabuli_chr03 | 32458016                | CC                              | AA                | 1945924642               |
| SNP_P3_32705_32458230 | NC_021162.1    | Ca_kabuli_chr03 | 32458230                | CC                              | TT                | 1945924644               |
| SNP_P3_32706_32458251 | NC_021162.1    | Ca_kabuli_chr03 | 32458251                | TT                              | AA                | 1945924645               |
| SNP_P3_32708_32481809 | NC_021162.1    | Ca_kabuli_chr03 | 32481809                | GG                              | AA                | 1945924647               |
| SNP_P3_32709_32485805 | NC_021162.1    | Ca_kabuli_chr03 | 32485805                | TT                              | CC                | 1945924649               |
| SNP_P3_32711_32498221 | NC_021162.1    | Ca_kabuli_chr03 | 32498221                | TT                              | CC                | 1945924651               |
| SNP_P3_32712_32508634 | NC_021162.1    | Ca_kabuli_chr03 | 32508634                | CC                              | TT                | 1945924652               |
| SNP_P3_32713_32508656 | NC_021162.1    | Ca_kabuli_chr03 | 32508656                | AA                              | TT                | 1945924654               |
| SNP_P3_32714_32517341 | NC_021162.1    | Ca_kabuli_chr03 | 32517341                | AA                              | TT                | 1945924656               |
| SNP_P3_32715_32541648 | NC_021162.1    | Ca_kabuli_chr03 | 32541648                | CC                              | TT                | 1945924658               |

| SNPs IDs              | Chromosome IDs | Chromosomes     | Physical positions (bp) | CDC Frontier (Reference genome) | (Pusa 256 & HPNB) | NCBI SNPdb Accession IDs |
|-----------------------|----------------|-----------------|-------------------------|---------------------------------|-------------------|--------------------------|
| SNP_P3_32719_32581602 | NC_021162.1    | Ca_kabuli_chr03 | 32581602                | TT                              | CC                | 1945924660               |
| SNP_P3_32720_32589963 | NC_021162.1    | Ca_kabuli_chr03 | 32589963                | CC                              | TT                | 1945924661               |
| SNP_P3_32721_32590005 | NC_021162.1    | Ca_kabuli_chr03 | 32590005                | GG                              | AA                | 1945924663               |
| SNP_P3_32722_32591971 | NC_021162.1    | Ca_kabuli_chr03 | 32591971                | TT                              | CC                | 1945924665               |
| SNP_P3_32723_32591972 | NC_021162.1    | Ca_kabuli_chr03 | 32591972                | AA                              | GG                | 1945924667               |
| SNP_P3_32724_32592925 | NC_021162.1    | Ca_kabuli_chr03 | 32592925                | CC                              | TT                | 1945924668               |
| SNP_P3_32726_32625227 | NC_021162.1    | Ca_kabuli_chr03 | 32625227                | AA                              | TT                | 1945924670               |
| SNP_P3_32727_32625231 | NC_021162.1    | Ca_kabuli_chr03 | 32625231                | TT                              | CC                | 1945924672               |
| SNP_P3_32728_32663718 | NC_021162.1    | Ca_kabuli_chr03 | 32663718                | CC                              | GG                | 1945924674               |
| SNP_P3_32730_32679335 | NC_021162.1    | Ca_kabuli_chr03 | 32679335                | TT                              | AA                | 1945924676               |
| SNP_P3_32731_32729960 | NC_021162.1    | Ca_kabuli_chr03 | 32729960                | TT                              | GG                | 1945924677               |
| SNP_P3_32732_32732903 | NC_021162.1    | Ca_kabuli_chr03 | 32732903                | GG                              | CC                | 1945924679               |
| SNP_P3_32733_32760444 | NC_021162.1    | Ca_kabuli_chr03 | 32760444                | TT                              | CC                | 1945924681               |
| SNP_P3_32734_32770538 | NC_021162.1    | Ca_kabuli_chr03 | 32770538                | GG                              | AA                | 1945924683               |
| SNP_P3_32735_32778698 | NC_021162.1    | Ca_kabuli_chr03 | 32778698                | CC                              | TT                | 1945924684               |
| SNP_P3_32736_32781308 | NC_021162.1    | Ca_kabuli_chr03 | 32781308                | AA                              | CC                | 1945924686               |
| SNP_P3_32737_32784592 | NC_021162.1    | Ca_kabuli_chr03 | 32784592                | GG                              | AA                | 1945924688               |
| SNP_P3_32738_32787280 | NC_021162.1    | Ca_kabuli_chr03 | 32787280                | CC                              | AA                | 1945924690               |
| SNP_P3_32739_32788533 | NC_021162.1    | Ca_kabuli_chr03 | 32788533                | AA                              | GG                | 1945924692               |
| SNP_P3_32740_32788535 | NC_021162.1    | Ca_kabuli_chr03 | 32788535                | AA                              | CC                | 1945924693               |
| SNP_P3_32741_32791120 | NC_021162.1    | Ca_kabuli_chr03 | 32791120                | GG                              | AA                | 1945924695               |
| SNP_P3_32744_32824050 | NC_021162.1    | Ca_kabuli_chr03 | 32824050                | CC                              | TT                | 1945924697               |
| SNP_P3_32745_32824136 | NC_021162.1    | Ca_kabuli_chr03 | 32824136                | TT                              | CC                | 1945924699               |
| SNP_P3_32746_32824378 | NC_021162.1    | Ca_kabuli_chr03 | 32824378                | AA                              | GG                | 1945924700               |
| SNP_P3_32747_32832264 | NC_021162.1    | Ca_kabuli_chr03 | 32832264                | GG                              | AA                | 1945924702               |
| SNP_P3_32748_32832955 | NC_021162.1    | Ca_kabuli_chr03 | 32832955                | TT                              | AA                | 1945924704               |
| SNP_P3_32749_32840886 | NC_021162.1    | Ca_kabuli_chr03 | 32840886                | AA                              | TT                | 1945924706               |
| SNP_P3_32751_32849933 | NC_021162.1    | Ca_kabuli_chr03 | 32849933                | TT                              | CC                | 1945924707               |
| SNP_P3_32752_32851370 | NC_021162.1    | Ca_kabuli_chr03 | 32851370                | TT                              | GG                | 1945924709               |
| SNP_P3_32753_32852048 | NC_021162.1    | Ca_kabuli_chr03 | 32852048                | AA                              | GG                | 1945924711               |
| SNP_P3_32758_32913488 | NC_021162.1    | Ca_kabuli_chr03 | 32913488                | GG                              | AA                | 1945924713               |
| SNP_P3_32759_32915669 | NC_021162.1    | Ca_kabuli_chr03 | 32915669                | CC                              | TT                | 1945924715               |
| SNP_P3_32760_32925335 | NC_021162.1    | Ca_kabuli_chr03 | 32925335                | AA                              | TT                | 1945924716               |
| SNP_P3_32761_32942276 | NC_021162.1    | Ca_kabuli_chr03 | 32942276                | CC                              | AA                | 1945924718               |
| SNP_P3_32763_32963186 | NC_021162.1    | Ca_kabuli_chr03 | 32963186                | GG                              | TT                | 1945924720               |
| SNP_P3_32764_32982680 | NC_021162.1    | Ca_kabuli_chr03 | 32982680                | CC                              | TT                | 1945924722               |
| SNP_P3_32765_32989201 | NC_021162.1    | Ca_kabuli_chr03 | 32989201                | TT                              | CC                | 1945924723               |
| SNP_P3_32767_33014049 | NC_021162.1    | Ca_kabuli_chr03 | 33014049                | AA                              | CC                | 1945924725               |
| SNP_P3_32768_33040424 | NC_021162.1    | Ca_kabuli_chr03 | 33040424                | GG                              | TT                | 1945924727               |
| SNP_P3_32770_33046473 | NC_021162.1    | Ca_kabuli_chr03 | 33046473                | TT                              | CC                | 1945924729               |
| SNP_P3_32771_33050833 | NC_021162.1    | Ca_kabuli_chr03 | 33050833                | CC                              | AA                | 1945924731               |
| SNP_P3_32772_33053678 | NC_021162.1    | Ca_kabuli_chr03 | 33053678                | GG                              | AA                | 1945924732               |

| SNPs IDs              | Chromosome IDs | Chromosomes     | Physical positions (bp) | CDC Frontier (Reference genome) | (Pusa 256 & HPNB) | NCBI SNPdb Accession IDs |
|-----------------------|----------------|-----------------|-------------------------|---------------------------------|-------------------|--------------------------|
| SNP_P3_32773_33056642 | NC_021162.1    | Ca_kabuli_chr03 | 33056642                | CC                              | AA                | 1945924734               |
| SNP_P3_32774_33065985 | NC_021162.1    | Ca_kabuli_chr03 | 33065985                | AA                              | GG                | 1945924736               |
| SNP_P3_32776_33102482 | NC_021162.1    | Ca_kabuli_chr03 | 33102482                | CC                              | GG                | 1945924738               |
| SNP_P3_32777_33121835 | NC_021162.1    | Ca_kabuli_chr03 | 33121835                | TT                              | GG                | 1945924739               |
| SNP_P3_32778_33122650 | NC_021162.1    | Ca_kabuli_chr03 | 33122650                | AA                              | GG                | 1945924741               |
| SNP_P3_32780_33145201 | NC_021162.1    | Ca_kabuli_chr03 | 33145201                | TT                              | AA                | 1945924743               |
| SNP_P3_32781_33145381 | NC_021162.1    | Ca_kabuli_chr03 | 33145381                | AA                              | GG                | 1945924745               |
| SNP_P3_32782_33145384 | NC_021162.1    | Ca_kabuli_chr03 | 33145384                | AA                              | GG                | 1945924747               |
| SNP_P3_32783_33162890 | NC_021162.1    | Ca_kabuli_chr03 | 33162890                | AA                              | GG                | 1945924748               |
| SNP_P3_32784_33169725 | NC_021162.1    | Ca_kabuli_chr03 | 33169725                | GG                              | AA                | 1945924750               |
| SNP_P3_32785_33192900 | NC_021162.1    | Ca_kabuli_chr03 | 33192900                | GG                              | AA                | 1945924752               |
| SNP_P3_32787_33228442 | NC_021162.1    | Ca_kabuli_chr03 | 33228442                | GG                              | AA                | 1945924754               |
| SNP_P3_32789_33277176 | NC_021162.1    | Ca_kabuli_chr03 | 33277176                | AA                              | GG                | 1945924755               |
| SNP_P3_32790_33277180 | NC_021162.1    | Ca_kabuli_chr03 | 33277180                | TT                              | CC                | 1945924757               |
| SNP_P3_32791_33290623 | NC_021162.1    | Ca_kabuli_chr03 | 33290623                | CC                              | AA                | 1945924759               |
| SNP_P3_32792_33290734 | NC_021162.1    | Ca_kabuli_chr03 | 33290734                | TT                              | CC                | 1945924761               |
| SNP_P3_32793_33290922 | NC_021162.1    | Ca_kabuli_chr03 | 33290922                | CC                              | TT                | 1945924763               |
| SNP_P3_32794_33333343 | NC_021162.1    | Ca_kabuli_chr03 | 33333343                | AA                              | CC                | 1945924764               |
| SNP_P3_32796_33357451 | NC_021162.1    | Ca_kabuli_chr03 | 33357451                | CC                              | TT                | 1945924766               |
| SNP_P3_32797_33357589 | NC_021162.1    | Ca_kabuli_chr03 | 33357589                | CC                              | TT                | 1945924768               |
| SNP_P3_32799_33392944 | NC_021162.1    | Ca_kabuli_chr03 | 33392944                | GG                              | TT                | 1945924770               |
| SNP_P3_32800_33392991 | NC_021162.1    | Ca_kabuli_chr03 | 33392991                | CC                              | TT                | 1945924771               |
| SNP_P3_32801_33392999 | NC_021162.1    | Ca_kabuli_chr03 | 33392999                | AA                              | GG                | 1945924773               |
| SNP_P3_32802_33393316 | NC_021162.1    | Ca_kabuli_chr03 | 33393316                | GG                              | AA                | 1945924775               |
| SNP_P3_32803_33393588 | NC_021162.1    | Ca_kabuli_chr03 | 33393588                | TT                              | CC                | 1945924777               |
| SNP_P3_32804_33393591 | NC_021162.1    | Ca_kabuli_chr03 | 33393591                | TT                              | CC                | 1945924779               |
| SNP_P3_32805_33393599 | NC_021162.1    | Ca_kabuli_chr03 | 33393599                | TT                              | CC                | 1945924780               |
| SNP_P3_32807_33447035 | NC_021162.1    | Ca_kabuli_chr03 | 33447035                | GG                              | AA                | 1945924782               |
| SNP_P3_32808_33460398 | NC_021162.1    | Ca_kabuli_chr03 | 33460398                | TT                              | CC                | 1945924784               |
| SNP_P3_32809_33460436 | NC_021162.1    | Ca_kabuli_chr03 | 33460436                | GG                              | AA                | 1945924786               |
| SNP_P3_32810_33460458 | NC_021162.1    | Ca_kabuli_chr03 | 33460458                | TT                              | CC                | 1945924787               |
| SNP_P3_32811_33492518 | NC_021162.1    | Ca_kabuli_chr03 | 33492518                | CC                              | TT                | 1945924789               |
| SNP_P3_32812_33522974 | NC_021162.1    | Ca_kabuli_chr03 | 33522974                | AA                              | GG                | 1945924791               |
| SNP_P3_32813_33524508 | NC_021162.1    | Ca_kabuli_chr03 | 33524508                | TT                              | AA                | 1945924793               |
| SNP_P3_32814_33524646 | NC_021162.1    | Ca_kabuli_chr03 | 33524646                | AA                              | GG                | 1945924795               |
| SNP_P3_32815_33524660 | NC_021162.1    | Ca_kabuli_chr03 | 33524660                | TT                              | CC                | 1945924796               |
| SNP_P3_32816_33524960 | NC_021162.1    | Ca_kabuli_chr03 | 33524960                | AA                              | GG                | 1945924798               |
| SNP_P3_32817_33538032 | NC_021162.1    | Ca_kabuli_chr03 | 33538032                | GG                              | AA                | 1945924800               |
| SNP_P3_32818_33540265 | NC_021162.1    | Ca_kabuli_chr03 | 33540265                | AA                              | GG                | 1945924802               |
| SNP_P3_32819_33540276 | NC_021162.1    | Ca_kabuli_chr03 | 33540276                | AA                              | GG                | 1945924803               |
| SNP_P3_32821_33558581 | NC_021162.1    | Ca_kabuli_chr03 | 33558581                | CC                              | TT                | 1945924805               |
| SNP_P3_32822_33560276 | NC_021162.1    | Ca_kabuli_chr03 | 33560276                | GG                              | AA                | 1945924807               |

| SNPs IDs              | Chromosome IDs | Chromosomes     | Physical positions (bp) | CDC Frontier (Reference genome) | (Pusa 256 & HPNB) | NCBI SNPdb Accession IDs |
|-----------------------|----------------|-----------------|-------------------------|---------------------------------|-------------------|--------------------------|
| SNP_P3_32823_33561162 | NC_021162.1    | Ca_kabuli_chr03 | 33561162                | AA                              | GG                | 1945924809               |
| SNP_P3_32824_33561571 | NC_021162.1    | Ca_kabuli_chr03 | 33561571                | CC                              | TT                | 1945924811               |
| SNP_P3_32825_33568255 | NC_021162.1    | Ca_kabuli_chr03 | 33568255                | GG                              | TT                | 1945924812               |
| SNP_P3_32826_33568279 | NC_021162.1    | Ca_kabuli_chr03 | 33568279                | TT                              | CC                | 1945924814               |
| SNP_P3_32827_33578857 | NC_021162.1    | Ca_kabuli_chr03 | 33578857                | GG                              | TT                | 1945924816               |
| SNP_P3_32828_33579127 | NC_021162.1    | Ca_kabuli_chr03 | 33579127                | TT                              | GG                | 1945924818               |
| SNP_P3_32831_33587349 | NC_021162.1    | Ca_kabuli_chr03 | 33587349                | CC                              | TT                | 1945924819               |
| SNP_P3_32832_33588455 | NC_021162.1    | Ca_kabuli_chr03 | 33588455                | CC                              | TT                | 1945924821               |
| SNP_P3_32833_33589328 | NC_021162.1    | Ca_kabuli_chr03 | 33589328                | CC                              | TT                | 1945924823               |
| SNP_P3_32834_33599246 | NC_021162.1    | Ca_kabuli_chr03 | 33599246                | CC                              | TT                | 1945924825               |
| SNP_P3_32835_33599743 | NC_021162.1    | Ca_kabuli_chr03 | 33599743                | CC                              | TT                | 1945924827               |
| SNP_P3_32836_33599897 | NC_021162.1    | Ca_kabuli_chr03 | 33599897                | GG                              | AA                | 1945924828               |
| SNP_P3_32837_33618891 | NC_021162.1    | Ca_kabuli_chr03 | 33618891                | GG                              | TT                | 1945924830               |
| SNP_P3_32838_33624738 | NC_021162.1    | Ca_kabuli_chr03 | 33624738                | CC                              | TT                | 1945924832               |
| SNP_P3_32839_33625939 | NC_021162.1    | Ca_kabuli_chr03 | 33625939                | CC                              | AA                | 1945924834               |
| SNP_P3_32840_33629825 | NC_021162.1    | Ca_kabuli_chr03 | 33629825                | GG                              | TT                | 1945924835               |
| SNP_P3_32841_33629856 | NC_021162.1    | Ca_kabuli_chr03 | 33629856                | CC                              | TT                | 1945924837               |
| SNP_P3_32842_33630022 | NC_021162.1    | Ca_kabuli_chr03 | 33630022                | GG                              | AA                | 1945924839               |
| SNP_P3_32843_33630398 | NC_021162.1    | Ca_kabuli_chr03 | 33630398                | AA                              | GG                | 1945924841               |
| SNP_P3_32845_33662368 | NC_021162.1    | Ca_kabuli_chr03 | 33662368                | CC                              | TT                | 1945924843               |
| SNP_P3_32846_33662374 | NC_021162.1    | Ca_kabuli_chr03 | 33662374                | TT                              | GG                | 1945924844               |
| SNP_P3_32847_33680645 | NC_021162.1    | Ca_kabuli_chr03 | 33680645                | TT                              | AA                | 1945924846               |
| SNP_P3_32849_33710890 | NC_021162.1    | Ca_kabuli_chr03 | 33710890                | TT                              | AA                | 1945924848               |
| SNP_P3_32850_33712529 | NC_021162.1    | Ca_kabuli_chr03 | 33712529                | CC                              | GG                | 1945924850               |
| SNP_P3_32851_33720681 | NC_021162.1    | Ca_kabuli_chr03 | 33720681                | AA                              | GG                | 1945924851               |
| SNP_P3_32852_33730113 | NC_021162.1    | Ca_kabuli_chr03 | 33730113                | GG                              | CC                | 1945924853               |
| SNP_P3_32853_33755114 | NC_021162.1    | Ca_kabuli_chr03 | 33755114                | GG                              | AA                | 1945924855               |
| SNP_P3_32854_33765733 | NC_021162.1    | Ca_kabuli_chr03 | 33765733                | TT                              | AA                | 1945924857               |
| SNP_P3_32855_33766554 | NC_021162.1    | Ca_kabuli_chr03 | 33766554                | AA                              | GG                | 1945924859               |
| SNP_P3_32856_33773030 | NC_021162.1    | Ca_kabuli_chr03 | 33773030                | AA                              | GG                | 1945924860               |
| SNP_P3_32857_33777681 | NC_021162.1    | Ca_kabuli_chr03 | 33777681                | AA                              | CC                | 1945924862               |
| SNP_P3_32858_33778419 | NC_021162.1    | Ca_kabuli_chr03 | 33778419                | TT                              | CC                | 1945924864               |
| SNP_P3_32859_33778522 | NC_021162.1    | Ca_kabuli_chr03 | 33778522                | GG                              | AA                | 1945924866               |
| SNP_P3_32860_33791762 | NC_021162.1    | Ca_kabuli_chr03 | 33791762                | AA                              | GG                | 1945924867               |
| SNP_P3_32861_33792119 | NC_021162.1    | Ca_kabuli_chr03 | 33792119                | TT                              | AA                | 1945924869               |
| SNP_P3_32862_33794702 | NC_021162.1    | Ca_kabuli_chr03 | 33794702                | AA                              | GG                | 1945924871               |
| SNP_P3_32863_33794836 | NC_021162.1    | Ca_kabuli_chr03 | 33794836                | AA                              | CC                | 1945924873               |
| SNP_P3_32864_33794898 | NC_021162.1    | Ca_kabuli_chr03 | 33794898                | AA                              | CC                | 1945924875               |
| SNP_P3_32865_33794901 | NC_021162.1    | Ca_kabuli_chr03 | 33794901                | TT                              | CC                | 1945924876               |
| SNP_P3_32866_33795129 | NC_021162.1    | Ca_kabuli_chr03 | 33795129                | AA                              | CC                | 1945924878               |
| SNP_P3_32867_33795186 | NC_021162.1    | Ca_kabuli_chr03 | 33795186                | CC                              | TT                | 1945924880               |
| SNP_P3_32868_33795248 | NC_021162.1    | Ca_kabuli_chr03 | 33795248                | AA                              | GG                | 1945924882               |

| SNPs IDs              | Chromosome IDs | Chromosomes     | Physical positions (bp) | CDC Frontier (Reference genome) | (Pusa 256 & HPNB) | NCBI SNPdb Accession IDs |
|-----------------------|----------------|-----------------|-------------------------|---------------------------------|-------------------|--------------------------|
| SNP_P3_32870_33829644 | NC_021162.1    | Ca_kabuli_chr03 | 33829644                | GG                              | CC                | 1945924883               |
| SNP_P3_32871_33848879 | NC_021162.1    | Ca_kabuli_chr03 | 33848879                | CC                              | TT                | 1945924885               |
| SNP_P3_32874_33878031 | NC_021162.1    | Ca_kabuli_chr03 | 33878031                | CC                              | TT                | 1945924887               |
| SNP_P3_32875_33883524 | NC_021162.1    | Ca_kabuli_chr03 | 33883524                | CC                              | AA                | 1945924889               |
| SNP_P3_32876_33883758 | NC_021162.1    | Ca_kabuli_chr03 | 33883758                | AA                              | GG                | 1945924891               |
| SNP_P3_32877_33914071 | NC_021162.1    | Ca_kabuli_chr03 | 33914071                | TT                              | GG                | 1945924892               |
| SNP_P3_32878_33930943 | NC_021162.1    | Ca_kabuli_chr03 | 33930943                | GG                              | AA                | 1945924894               |
| SNP_P3_32879_33930954 | NC_021162.1    | Ca_kabuli_chr03 | 33930954                | CC                              | GG                | 1945924896               |
| SNP_P3_32880_33933104 | NC_021162.1    | Ca_kabuli_chr03 | 33933104                | GG                              | AA                | 1945924898               |
| SNP_P3_32881_33939058 | NC_021162.1    | Ca_kabuli_chr03 | 33939058                | TT                              | AA                | 1945924899               |
| SNP_P3_32882_33940795 | NC_021162.1    | Ca_kabuli_chr03 | 33940795                | TT                              | CC                | 1945924901               |
| SNP_P3_32886_33968486 | NC_021162.1    | Ca_kabuli_chr03 | 33968486                | AA                              | GG                | 1945924903               |
| SNP_P3_32889_33990236 | NC_021162.1    | Ca_kabuli_chr03 | 33990236                | AA                              | CC                | 1945924905               |
| SNP_P3_32890_33996460 | NC_021162.1    | Ca_kabuli_chr03 | 33996460                | TT                              | GG                | 1945924907               |
| SNP_P3_32891_33996462 | NC_021162.1    | Ca_kabuli_chr03 | 33996462                | TT                              | CC                | 1945924908               |
| SNP_P3_32892_34021009 | NC_021162.1    | Ca_kabuli_chr03 | 34021009                | CC                              | TT                | 1945924910               |
| SNP_P3_32893_34032702 | NC_021162.1    | Ca_kabuli_chr03 | 34032702                | TT                              | AA                | 1945924912               |
| SNP_P3_32894_34032732 | NC_021162.1    | Ca_kabuli_chr03 | 34032732                | CC                              | TT                | 1945924914               |
| SNP_P3_32895_34032814 | NC_021162.1    | Ca_kabuli_chr03 | 34032814                | CC                              | TT                | 1945924915               |
| SNP_P3_32896_34062681 | NC_021162.1    | Ca_kabuli_chr03 | 34062681                | GG                              | TT                | 1945924917               |
| SNP_P3_32897_34065648 | NC_021162.1    | Ca_kabuli_chr03 | 34065648                | CC                              | TT                | 1945924919               |
| SNP_P3_32898_34065679 | NC_021162.1    | Ca_kabuli_chr03 | 34065679                | AA                              | GG                | 1945924921               |
| SNP_P3_32899_34065848 | NC_021162.1    | Ca_kabuli_chr03 | 34065848                | TT                              | CC                | 1945924923               |
| SNP_P3_32900_34065861 | NC_021162.1    | Ca_kabuli_chr03 | 34065861                | TT                              | AA                | 1945924924               |
| SNP_P3_32901_34065891 | NC_021162.1    | Ca_kabuli_chr03 | 34065891                | TT                              | GG                | 1945924926               |
| SNP_P3_32902_34066033 | NC_021162.1    | Ca_kabuli_chr03 | 34066033                | TT                              | CC                | 1945924928               |
| SNP_P3_32903_34066040 | NC_021162.1    | Ca_kabuli_chr03 | 34066040                | TT                              | GG                | 1945924930               |
| SNP_P3_32904_34069902 | NC_021162.1    | Ca_kabuli_chr03 | 34069902                | GG                              | CC                | 1945924931               |
| SNP_P3_32905_34075881 | NC_021162.1    | Ca_kabuli_chr03 | 34075881                | GG                              | AA                | 1945924933               |
| SNP_P3_32906_34076089 | NC_021162.1    | Ca_kabuli_chr03 | 34076089                | AA                              | GG                | 1945924935               |
| SNP_P3_32907_34087294 | NC_021162.1    | Ca_kabuli_chr03 | 34087294                | GG                              | AA                | 1945924937               |
| SNP_P3_32908_34089123 | NC_021162.1    | Ca_kabuli_chr03 | 34089123                | GG                              | AA                | 1945924939               |
| SNP_P3_32909_34089280 | NC_021162.1    | Ca_kabuli_chr03 | 34089280                | CC                              | TT                | 1945924940               |
| SNP_P3_32910_34107358 | NC_021162.1    | Ca_kabuli_chr03 | 34107358                | CC                              | TT                | 1945924942               |
| SNP_P3_32911_34108565 | NC_021162.1    | Ca_kabuli_chr03 | 34108565                | CC                              | TT                | 1945924944               |
| SNP_P3_32912_34127595 | NC_021162.1    | Ca_kabuli_chr03 | 34127595                | CC                              | TT                | 1945924946               |
| SNP_P3_32913_34128505 | NC_021162.1    | Ca_kabuli_chr03 | 34128505                | TT                              | CC                | 1945924947               |
| SNP_P3_32915_34130784 | NC_021162.1    | Ca_kabuli_chr03 | 34130784                | TT                              | AA                | 1945924949               |
| SNP_P3_32916_34142796 | NC_021162.1    | Ca_kabuli_chr03 | 34142796                | CC                              | TT                | 1945924951               |
| SNP_P3_32917_34142981 | NC_021162.1    | Ca_kabuli_chr03 | 34142981                | TT                              | CC                | 1945924953               |
| SNP_P3_32918_34151392 | NC_021162.1    | Ca_kabuli_chr03 | 34151392                | CC                              | AA                | 1945924955               |
| SNP_P3_32919_34159631 | NC_021162.1    | Ca_kabuli_chr03 | 34159631                | GG                              | AA                | 1945924956               |

| SNPs IDs              | Chromosome IDs | Chromosomes     | Physical positions (bp) | CDC Frontier (Reference genome) | (Pusa 256 & HPNB) | NCBI SNPdb Accession IDs |
|-----------------------|----------------|-----------------|-------------------------|---------------------------------|-------------------|--------------------------|
| SNP_P3_32920_34162770 | NC_021162.1    | Ca_kabuli_chr03 | 34162770                | AA                              | GG                | 1945924958               |
| SNP_P3_32921_34169411 | NC_021162.1    | Ca_kabuli_chr03 | 34169411                | GG                              | AA                | 1945924960               |
| SNP_P3_32922_34169430 | NC_021162.1    | Ca_kabuli_chr03 | 34169430                | AA                              | GG                | 1945924962               |
| SNP_P3_32923_34169457 | NC_021162.1    | Ca_kabuli_chr03 | 34169457                | AA                              | GG                | 1945924963               |
| SNP_P3_32924_34169484 | NC_021162.1    | Ca_kabuli_chr03 | 34169484                | TT                              | CC                | 1945924965               |
| SNP_P3_32925_34169621 | NC_021162.1    | Ca_kabuli_chr03 | 34169621                | AA                              | GG                | 1945924967               |
| SNP_P3_32926_34170826 | NC_021162.1    | Ca_kabuli_chr03 | 34170826                | GG                              | AA                | 1945924969               |
| SNP_P3_32927_34189501 | NC_021162.1    | Ca_kabuli_chr03 | 34189501                | AA                              | CC                | 1945924971               |
| SNP_P3_32928_34219241 | NC_021162.1    | Ca_kabuli_chr03 | 34219241                | AA                              | TT                | 1945924972               |
| SNP_P3_32929_34222000 | NC_021162.1    | Ca_kabuli_chr03 | 34222000                | GG                              | AA                | 1945924974               |
| SNP_P3_32930_34227429 | NC_021162.1    | Ca_kabuli_chr03 | 34227429                | CC                              | AA                | 1945924976               |
| SNP_P3_32932_34284596 | NC_021162.1    | Ca_kabuli_chr03 | 34284596                | GG                              | CC                | 1945924978               |
| SNP_P3_32934_34302947 | NC_021162.1    | Ca_kabuli_chr03 | 34302947                | TT                              | AA                | 1945924979               |
| SNP_P3_32935_34304115 | NC_021162.1    | Ca_kabuli_chr03 | 34304115                | AA                              | GG                | 1945924981               |
| SNP_P3_32937_34324397 | NC_021162.1    | Ca_kabuli_chr03 | 34324397                | CC                              | TT                | 1945924983               |
| SNP_P3_32938_34325359 | NC_021162.1    | Ca_kabuli_chr03 | 34325359                | GG                              | AA                | 1945924985               |
| SNP_P3_32939_34361314 | NC_021162.1    | Ca_kabuli_chr03 | 34361314                | GG                              | AA                | 1945924987               |
| SNP_P3_32940_34365203 | NC_021162.1    | Ca_kabuli_chr03 | 34365203                | GG                              | TT                | 1945924988               |
| SNP_P3_32941_34365265 | NC_021162.1    | Ca_kabuli_chr03 | 34365265                | TT                              | GG                | 1945924990               |
| SNP_P3_32942_34365312 | NC_021162.1    | Ca_kabuli_chr03 | 34365312                | CC                              | TT                | 1945924992               |
| SNP_P3_32943_34365316 | NC_021162.1    | Ca_kabuli_chr03 | 34365316                | AA                              | TT                | 1945924994               |
| SNP_P3_32944_34365320 | NC_021162.1    | Ca_kabuli_chr03 | 34365320                | CC                              | TT                | 1945924995               |
| SNP_P3_32945_34367367 | NC_021162.1    | Ca_kabuli_chr03 | 34367367                | AA                              | TT                | 1945924997               |
| SNP_P3_32946_34369479 | NC_021162.1    | Ca_kabuli_chr03 | 34369479                | GG                              | AA                | 1945924999               |
| SNP_P3_32947_34391829 | NC_021162.1    | Ca_kabuli_chr03 | 34391829                | TT                              | CC                | 1945925001               |
| SNP_P3_32948_34391888 | NC_021162.1    | Ca_kabuli_chr03 | 34391888                | GG                              | AA                | 1945925003               |
| SNP_P3_32949_34410183 | NC_021162.1    | Ca_kabuli_chr03 | 34410183                | AA                              | TT                | 1945925004               |
| SNP_P3_32951_34465490 | NC_021162.1    | Ca_kabuli_chr03 | 34465490                | GG                              | AA                | 1945925006               |
| SNP_P3_32952_34465513 | NC_021162.1    | Ca_kabuli_chr03 | 34465513                | CC                              | TT                | 1945925008               |
| SNP_P3_32954_34476874 | NC_021162.1    | Ca_kabuli_chr03 | 34476874                | GG                              | AA                | 1945925010               |
| SNP_P3_32955_34478435 | NC_021162.1    | Ca_kabuli_chr03 | 34478435                | AA                              | GG                | 1945925011               |
| SNP_P3_32956_34483842 | NC_021162.1    | Ca_kabuli_chr03 | 34483842                | GG                              | AA                | 1945925013               |
| SNP_P3_32957_34483881 | NC_021162.1    | Ca_kabuli_chr03 | 34483881                | AA                              | CC                | 1945925015               |
| SNP_P3_32958_34483925 | NC_021162.1    | Ca_kabuli_chr03 | 34483925                | TT                              | GG                | 1945925017               |
| SNP_P3_32959_34484188 | NC_021162.1    | Ca_kabuli_chr03 | 34484188                | TT                              | CC                | 1945925019               |
| SNP_P3_32960_34484199 | NC_021162.1    | Ca_kabuli_chr03 | 34484199                | TT                              | AA                | 1945925020               |
| SNP_P3_32961_34484215 | NC_021162.1    | Ca_kabuli_chr03 | 34484215                | AA                              | CC                | 1945925022               |
| SNP_P3_32962_34485525 | NC_021162.1    | Ca_kabuli_chr03 | 34485525                | GG                              | AA                | 1945925024               |
| SNP_P3_32963_34490538 | NC_021162.1    | Ca_kabuli_chr03 | 34490538                | CC                              | TT                | 1945925026               |
| SNP_P3_32964_34538818 | NC_021162.1    | Ca_kabuli_chr03 | 34538818                | AA                              | CC                | 1945925027               |
| SNP_P3_32965_34538819 | NC_021162.1    | Ca_kabuli_chr03 | 34538819                | CC                              | AA                | 1945925029               |
| SNP_P3_32966_34538841 | NC_021162.1    | Ca_kabuli_chr03 | 34538841                | TT                              | AA                | 1945925031               |

| SNPs IDs              | Chromosome IDs | Chromosomes     | Physical positions (bp) | CDC Frontier (Reference genome) | (Pusa 256 & HPNB) | NCBI SNPdb Accession IDs |
|-----------------------|----------------|-----------------|-------------------------|---------------------------------|-------------------|--------------------------|
| SNP_P3_32967_34538864 | NC_021162.1    | Ca_kabuli_chr03 | 34538864                | CC                              | TT                | 1945925033               |
| SNP_P3_32968_34538865 | NC_021162.1    | Ca_kabuli_chr03 | 34538865                | AA                              | CC                | 1945925034               |
| SNP_P3_32969_34538891 | NC_021162.1    | Ca_kabuli_chr03 | 34538891                | CC                              | TT                | 1945925036               |
| SNP_P3_32970_34540602 | NC_021162.1    | Ca_kabuli_chr03 | 34540602                | GG                              | TT                | 1945925038               |
| SNP_P3_32972_34578005 | NC_021162.1    | Ca_kabuli_chr03 | 34578005                | CC                              | TT                | 1945925040               |
| SNP_P3_32974_34592182 | NC_021162.1    | Ca_kabuli_chr03 | 34592182                | AA                              | CC                | 1945925042               |
| SNP_P3_32975_34595013 | NC_021162.1    | Ca_kabuli_chr03 | 34595013                | TT                              | CC                | 1945925043               |
| SNP_P3_32976_34595034 | NC_021162.1    | Ca_kabuli_chr03 | 34595034                | GG                              | AA                | 1945925045               |
| SNP_P3_32978_34667161 | NC_021162.1    | Ca_kabuli_chr03 | 34667161                | AA                              | GG                | 1945925047               |
| SNP_P3_32979_34688323 | NC_021162.1    | Ca_kabuli_chr03 | 34688323                | TT                              | CC                | 1945925049               |
| SNP_P3_32980_34716436 | NC_021162.1    | Ca_kabuli_chr03 | 34716436                | CC                              | TT                | 1945925050               |
| SNP_P3_32981_34729035 | NC_021162.1    | Ca_kabuli_chr03 | 34729035                | GG                              | TT                | 1945925052               |
| SNP_P3_32982_34745453 | NC_021162.1    | Ca_kabuli_chr03 | 34745453                | AA                              | GG                | 1945925054               |
| SNP_P3_32983_34748303 | NC_021162.1    | Ca_kabuli_chr03 | 34748303                | AA                              | TT                | 1945925056               |
| SNP_P3_32984_34768533 | NC_021162.1    | Ca_kabuli_chr03 | 34768533                | TT                              | CC                | 1945925058               |
| SNP_P3_32985_34788220 | NC_021162.1    | Ca_kabuli_chr03 | 34788220                | GG                              | TT                | 1945925059               |
| SNP_P3_32988_34820079 | NC_021162.1    | Ca_kabuli_chr03 | 34820079                | TT                              | AA                | 1945925061               |
| SNP_P3_32989_34846408 | NC_021162.1    | Ca_kabuli_chr03 | 34846408                | GG                              | TT                | 1945925063               |
| SNP_P3_32990_34869899 | NC_021162.1    | Ca_kabuli_chr03 | 34869899                | TT                              | AA                | 1945925065               |
| SNP_P3_32992_34881778 | NC_021162.1    | Ca_kabuli_chr03 | 34881778                | TT                              | CC                | 1945925066               |
| SNP_P3_32993_34902403 | NC_021162.1    | Ca_kabuli_chr03 | 34902403                | CC                              | TT                | 1945925068               |
| SNP_P3_32994_34920141 | NC_021162.1    | Ca_kabuli_chr03 | 34920141                | TT                              | CC                | 1945925070               |
| SNP_P3_32996_35004001 | NC_021162.1    | Ca_kabuli_chr03 | 35004001                | CC                              | GG                | 1945925072               |
| SNP_P3_32997_35009222 | NC_021162.1    | Ca_kabuli_chr03 | 35009222                | TT                              | CC                | 1945925074               |
| SNP_P3_32998_35009318 | NC_021162.1    | Ca_kabuli_chr03 | 35009318                | CC                              | AA                | 1945925075               |
| SNP_P3_32999_35009326 | NC_021162.1    | Ca_kabuli_chr03 | 35009326                | TT                              | CC                | 1945925077               |
| SNP_P3_33000_35009340 | NC_021162.1    | Ca_kabuli_chr03 | 35009340                | TT                              | CC                | 1945925079               |
| SNP_P3_33004_35063117 | NC_021162.1    | Ca_kabuli_chr03 | 35063117                | TT                              | CC                | 1945925081               |
| SNP_P3_33005_35075804 | NC_021162.1    | Ca_kabuli_chr03 | 35075804                | TT                              | CC                | 1945925082               |
| SNP_P3_33007_35130503 | NC_021162.1    | Ca_kabuli_chr03 | 35130503                | CC                              | TT                | 1945925084               |
| SNP_P3_33008_35153792 | NC_021162.1    | Ca_kabuli_chr03 | 35153792                | CC                              | TT                | 1945925086               |
| SNP_P3_33009_35173327 | NC_021162.1    | Ca_kabuli_chr03 | 35173327                | AA                              | GG                | 1945925088               |
| SNP_P3_33010_35175709 | NC_021162.1    | Ca_kabuli_chr03 | 35175709                | TT                              | CC                | 1945925090               |
| SNP_P3_33011_35177218 | NC_021162.1    | Ca_kabuli_chr03 | 35177218                | AA                              | GG                | 1945925091               |
| SNP_P3_33012_35190531 | NC_021162.1    | Ca_kabuli_chr03 | 35190531                | CC                              | GG                | 1945925093               |
| SNP_P3_33013_35192862 | NC_021162.1    | Ca_kabuli_chr03 | 35192862                | TT                              | AA                | 1945925095               |
| SNP_P3_33014_35203964 | NC_021162.1    | Ca_kabuli_chr03 | 35203964                | CC                              | TT                | 1945925097               |
| SNP_P3_33016_35214237 | NC_021162.1    | Ca_kabuli_chr03 | 35214237                | CC                              | TT                | 1945925098               |
| SNP_P3_33017_35229665 | NC_021162.1    | Ca_kabuli_chr03 | 35229665                | GG                              | AA                | 1945925100               |
| SNP_P3_33024_35301868 | NC_021162.1    | Ca_kabuli_chr03 | 35301868                | AA                              | TT                | 1945925102               |
| SNP_P3_33025_35347882 | NC_021162.1    | Ca_kabuli_chr03 | 35347882                | CC                              | TT                | 1945925104               |
| SNP_P3_33026_35359962 | NC_021162.1    | Ca_kabuli_chr03 | 35359962                | GG                              | AA                | 1945925106               |

| SNPs IDs              | Chromosome IDs | Chromosomes     | Physical positions (bp) | CDC Frontier (Reference genome) | (Pusa 256 & HPNB) | NCBI SNPdb Accession IDs |
|-----------------------|----------------|-----------------|-------------------------|---------------------------------|-------------------|--------------------------|
| SNP_P3_33027_35362181 | NC_021162.1    | Ca_kabuli_chr03 | 35362181                | AA                              | TT                | 1945925107               |
| SNP_P3_33028_35399495 | NC_021162.1    | Ca_kabuli_chr03 | 35399495                | GG                              | AA                | 1945925109               |
| SNP_P3_33029_35423673 | NC_021162.1    | Ca_kabuli_chr03 | 35423673                | CC                              | GG                | 1945925111               |
| SNP_P3_33031_35472999 | NC_021162.1    | Ca_kabuli_chr03 | 35472999                | CC                              | TT                | 1945925113               |
| SNP_P3_33032_35497174 | NC_021162.1    | Ca_kabuli_chr03 | 35497174                | TT                              | AA                | 1945925114               |
| SNP_P3_33033_35514219 | NC_021162.1    | Ca_kabuli_chr03 | 35514219                | GG                              | AA                | 1945925116               |
| SNP_P3_33034_35534159 | NC_021162.1    | Ca_kabuli_chr03 | 35534159                | CC                              | TT                | 1945925118               |
| SNP_P3_33035_35536949 | NC_021162.1    | Ca_kabuli_chr03 | 35536949                | TT                              | CC                | 1945925120               |
| SNP_P3_33036_35597722 | NC_021162.1    | Ca_kabuli_chr03 | 35597722                | GG                              | CC                | 1945925122               |
| SNP_P3_33037_35640615 | NC_021162.1    | Ca_kabuli_chr03 | 35640615                | CC                              | AA                | 1945925123               |
| SNP_P3_33038_35652556 | NC_021162.1    | Ca_kabuli_chr03 | 35652556                | AA                              | GG                | 1945925125               |
| SNP_P3_33039_35653816 | NC_021162.1    | Ca_kabuli_chr03 | 35653816                | GG                              | TT                | 1945925127               |
| SNP_P3_33040_35656110 | NC_021162.1    | Ca_kabuli_chr03 | 35656110                | TT                              | CC                | 1945925129               |
| SNP_P3_33041_35670381 | NC_021162.1    | Ca_kabuli_chr03 | 35670381                | CC                              | TT                | 1945925130               |
| SNP_P3_33043_35684261 | NC_021162.1    | Ca_kabuli_chr03 | 35684261                | TT                              | AA                | 1945925132               |
| SNP_P3_33045_35688212 | NC_021162.1    | Ca_kabuli_chr03 | 35688212                | CC                              | TT                | 1945925134               |
| SNP_P3_33046_35697652 | NC_021162.1    | Ca_kabuli_chr03 | 35697652                | TT                              | AA                | 1945925136               |
| SNP_P3_33047_35697965 | NC_021162.1    | Ca_kabuli_chr03 | 35697965                | GG                              | AA                | 1945925138               |
| SNP_P3_33048_35702671 | NC_021162.1    | Ca_kabuli_chr03 | 35702671                | TT                              | CC                | 1945925139               |
| SNP_P3_33051_35721195 | NC_021162.1    | Ca_kabuli_chr03 | 35721195                | GG                              | AA                | 1945925141               |
| SNP_P3_33052_35733263 | NC_021162.1    | Ca_kabuli_chr03 | 35733263                | TT                              | AA                | 1945925143               |
| SNP_P3_33053_35756024 | NC_021162.1    | Ca_kabuli_chr03 | 35756024                | AA                              | GG                | 1945925145               |
| SNP_P3_33055_35788365 | NC_021162.1    | Ca_kabuli_chr03 | 35788365                | AA                              | GG                | 1945925146               |
| SNP_P3_33057_35799040 | NC_021162.1    | Ca_kabuli_chr03 | 35799040                | CC                              | TT                | 1945925148               |
| SNP_P3_33058_35801014 | NC_021162.1    | Ca_kabuli_chr03 | 35801014                | TT                              | CC                | 1945925150               |
| SNP_P3_33060_35816675 | NC_021162.1    | Ca_kabuli_chr03 | 35816675                | AA                              | TT                | 1945925152               |
| SNP_P3_33061_35816676 | NC_021162.1    | Ca_kabuli_chr03 | 35816676                | CC                              | TT                | 1945925154               |
| SNP_P3_33063_35829747 | NC_021162.1    | Ca_kabuli_chr03 | 35829747                | CC                              | TT                | 1945925155               |
| SNP_P3_33068_35879083 | NC_021162.1    | Ca_kabuli_chr03 | 35879083                | AA                              | GG                | 1945925157               |
| SNP_P3_33069_35880776 | NC_021162.1    | Ca_kabuli_chr03 | 35880776                | CC                              | AA                | 1945925159               |
| SNP_P3_33071_35892436 | NC_021162.1    | Ca_kabuli_chr03 | 35892436                | TT                              | AA                | 1945925161               |
| SNP_P3_33072_35897330 | NC_021162.1    | Ca_kabuli_chr03 | 35897330                | GG                              | AA                | 1945925162               |
| SNP_P3_33074_35913702 | NC_021162.1    | Ca_kabuli_chr03 | 35913702                | AA                              | GG                | 1945925164               |
| SNP_P3_33075_35943462 | NC_021162.1    | Ca_kabuli_chr03 | 35943462                | TT                              | CC                | 1945925166               |
| SNP_P3_33078_35951429 | NC_021162.1    | Ca_kabuli_chr03 | 35951429                | TT                              | CC                | 1945925168               |
| SNP_P3_33080_35952856 | NC_021162.1    | Ca_kabuli_chr03 | 35952856                | AA                              | CC                | 1945925170               |
| SNP_P3_33081_35952935 | NC_021162.1    | Ca_kabuli_chr03 | 35952935                | CC                              | GG                | 1945925171               |
| SNP_P3_33084_35953390 | NC_021162.1    | Ca_kabuli_chr03 | 35953390                | CC                              | AA                | 1945925173               |
| SNP_P3_33086_35953636 | NC_021162.1    | Ca_kabuli_chr03 | 35953636                | CC                              | AA                | 1945925175               |
| SNP_P3_33087_35953641 | NC_021162.1    | Ca_kabuli_chr03 | 35953641                | TT                              | CC                | 1945925177               |
| SNP_P3_33088_35953667 | NC_021162.1    | Ca_kabuli_chr03 | 35953667                | GG                              | CC                | 1945925178               |
| SNP_P3_33089_35953673 | NC_021162.1    | Ca_kabuli_chr03 | 35953673                | AA                              | GG                | 1945925180               |



| SNPs IDs              | Chromosome IDs | Chromosomes     | Physical positions (bp) | CDC Frontier (Reference genome) | (Pusa 256 & HPNB) | NCBI SNPdb Accession IDs |
|-----------------------|----------------|-----------------|-------------------------|---------------------------------|-------------------|--------------------------|
| SNP_P3_33090_35953698 | NC_021162.1    | Ca_kabuli_chr03 | 35953698                | CC                              | TT                | 1945925182               |
| SNP_P3_33092_35953998 | NC_021162.1    | Ca_kabuli_chr03 | 35953998                | AA                              | GG                | 1945925184               |
| SNP_P3_33093_35954035 | NC_021162.1    | Ca_kabuli_chr03 | 35954035                | AA                              | GG                | 1945925186               |
| SNP_P3_33094_35954077 | NC_021162.1    | Ca_kabuli_chr03 | 35954077                | CC                              | TT                | 1945925187               |
| SNP_P3_33095_35954092 | NC_021162.1    | Ca_kabuli_chr03 | 35954092                | CC                              | TT                | 1945925189               |
| SNP_P3_33096_35954113 | NC_021162.1    | Ca_kabuli_chr03 | 35954113                | TT                              | CC                | 1945925191               |
| SNP_P3_33097_35954141 | NC_021162.1    | Ca_kabuli_chr03 | 35954141                | GG                              | CC                | 1945925193               |
| SNP_P3_33098_35954174 | NC_021162.1    | Ca_kabuli_chr03 | 35954174                | AA                              | GG                | 1945925194               |
| SNP_P3_33099_35954545 | NC_021162.1    | Ca_kabuli_chr03 | 35954545                | TT                              | CC                | 1945925196               |
| SNP_P3_33100_35954546 | NC_021162.1    | Ca_kabuli_chr03 | 35954546                | CC                              | TT                | 1945925198               |
| SNP_P3_33101_35954563 | NC_021162.1    | Ca_kabuli_chr03 | 35954563                | TT                              | CC                | 1945925200               |
| SNP_P3_33102_35954570 | NC_021162.1    | Ca_kabuli_chr03 | 35954570                | GG                              | AA                | 1945925202               |
| SNP_P3_33103_35955545 | NC_021162.1    | Ca_kabuli_chr03 | 35955545                | AA                              | GG                | 1945925203               |
| SNP_P3_33104_35956040 | NC_021162.1    | Ca_kabuli_chr03 | 35956040                | TT                              | AA                | 1945925205               |
| SNP_P3_33105_35958405 | NC_021162.1    | Ca_kabuli_chr03 | 35958405                | CC                              | GG                | 1945925207               |
| SNP_P3_33106_35958424 | NC_021162.1    | Ca_kabuli_chr03 | 35958424                | TT                              | GG                | 1945925209               |
| SNP_P3_33107_35958448 | NC_021162.1    | Ca_kabuli_chr03 | 35958448                | AA                              | GG                | 1945925210               |
| SNP_P3_33109_35959668 | NC_021162.1    | Ca_kabuli_chr03 | 35959668                | TT                              | AA                | 1945925212               |
| SNP_P3_33110_35959672 | NC_021162.1    | Ca_kabuli_chr03 | 35959672                | GG                              | TT                | 1945925214               |
| SNP_P3_33111_35959907 | NC_021162.1    | Ca_kabuli_chr03 | 35959907                | GG                              | AA                | 1945925216               |
| SNP_P3_33116_35962930 | NC_021162.1    | Ca_kabuli_chr03 | 35962930                | TT                              | CC                | 1945925218               |
| SNP_P3_33117_35962931 | NC_021162.1    | Ca_kabuli_chr03 | 35962931                | GG                              | AA                | 1945925219               |
| SNP_P3_33118_35962956 | NC_021162.1    | Ca_kabuli_chr03 | 35962956                | AA                              | GG                | 1945925221               |
| SNP_P3_33121_35963793 | NC_021162.1    | Ca_kabuli_chr03 | 35963793                | AA                              | GG                | 1945925223               |
| SNP_P3_33122_35965476 | NC_021162.1    | Ca_kabuli_chr03 | 35965476                | AA                              | GG                | 1945925225               |
| SNP_P3_33123_35966273 | NC_021162.1    | Ca_kabuli_chr03 | 35966273                | TT                              | CC                | 1945925226               |
| SNP_P3_33124_35966531 | NC_021162.1    | Ca_kabuli_chr03 | 35966531                | CC                              | AA                | 1945925228               |
| SNP_P3_33125_35966542 | NC_021162.1    | Ca_kabuli_chr03 | 35966542                | CC                              | TT                | 1945925230               |
| SNP_P3_33126_35966564 | NC_021162.1    | Ca_kabuli_chr03 | 35966564                | AA                              | TT                | 1945925232               |
| SNP_P3_33127_35968176 | NC_021162.1    | Ca_kabuli_chr03 | 35968176                | AA                              | TT                | 1945925234               |
| SNP_P3_33128_35968217 | NC_021162.1    | Ca_kabuli_chr03 | 35968217                | CC                              | AA                | 1945925235               |
| SNP_P3_33129_35968235 | NC_021162.1    | Ca_kabuli_chr03 | 35968235                | AA                              | TT                | 1945925237               |
| SNP_P3_33130_35971921 | NC_021162.1    | Ca_kabuli_chr03 | 35971921                | CC                              | AA                | 1945925239               |
| SNP_P3_33131_35971999 | NC_021162.1    | Ca_kabuli_chr03 | 35971999                | GG                              | TT                | 1945925241               |
| SNP_P3_33132_35972029 | NC_021162.1    | Ca_kabuli_chr03 | 35972029                | AA                              | GG                | 1945925242               |
| SNP_P3_33133_35972459 | NC_021162.1    | Ca_kabuli_chr03 | 35972459                | TT                              | AA                | 1945925244               |
| SNP_P3_33134_35976903 | NC_021162.1    | Ca_kabuli_chr03 | 35976903                | AA                              | CC                | 1945925246               |
| SNP_P3_33135_35978651 | NC_021162.1    | Ca_kabuli_chr03 | 35978651                | AA                              | TT                | 1945925248               |
| SNP_P3_33136_35978997 | NC_021162.1    | Ca_kabuli_chr03 | 35978997                | AA                              | GG                | 1945925250               |
| SNP_P3_33137_35979023 | NC_021162.1    | Ca_kabuli_chr03 | 35979023                | GG                              | TT                | 1945925251               |
| SNP_P3_33138_35979094 | NC_021162.1    | Ca_kabuli_chr03 | 35979094                | GG                              | AA                | 1945925253               |
| SNP_P3_33139_35979121 | NC_021162.1    | Ca_kabuli_chr03 | 35979121                | GG                              | AA                | 1945925255               |

| SNPs IDs              | Chromosome IDs | Chromosomes     | Physical positions (bp) | CDC Frontier (Reference genome) | (Pusa 256 & HPNB) | NCBI SNPdb Accession IDs |
|-----------------------|----------------|-----------------|-------------------------|---------------------------------|-------------------|--------------------------|
| SNP_P3_33140_35979490 | NC_021162.1    | Ca_kabuli_chr03 | 35979490                | CC                              | TT                | 1945925257               |
| SNP_P3_33141_35979806 | NC_021162.1    | Ca_kabuli_chr03 | 35979806                | CC                              | TT                | 1945925258               |
| SNP_P3_33143_35982756 | NC_021162.1    | Ca_kabuli_chr03 | 35982756                | GG                              | CC                | 1945925260               |
| SNP_P3_33144_35983735 | NC_021162.1    | Ca_kabuli_chr03 | 35983735                | CC                              | TT                | 1945925262               |
| SNP_P3_33146_35986669 | NC_021162.1    | Ca_kabuli_chr03 | 35986669                | CC                              | TT                | 1945925264               |
| SNP_P3_33147_35986828 | NC_021162.1    | Ca_kabuli_chr03 | 35986828                | AA                              | GG                | 1945925266               |
| SNP_P3_33148_35991785 | NC_021162.1    | Ca_kabuli_chr03 | 35991785                | CC                              | TT                | 1945925267               |
| SNP_P3_33149_35992742 | NC_021162.1    | Ca_kabuli_chr03 | 35992742                | GG                              | AA                | 1945925269               |
| SNP_P3_33151_35992994 | NC_021162.1    | Ca_kabuli_chr03 | 35992994                | AA                              | GG                | 1945925271               |
| SNP_P3_33152_35993243 | NC_021162.1    | Ca_kabuli_chr03 | 35993243                | TT                              | GG                | 1945925273               |
| SNP_P3_33154_35993504 | NC_021162.1    | Ca_kabuli_chr03 | 35993504                | CC                              | AA                | 1945925274               |
| SNP_P3_33155_35993630 | NC_021162.1    | Ca_kabuli_chr03 | 35993630                | CC                              | AA                | 1945925276               |
| SNP_P3_33156_35993663 | NC_021162.1    | Ca_kabuli_chr03 | 35993663                | CC                              | TT                | 1945925278               |
| SNP_P3_33157_35993700 | NC_021162.1    | Ca_kabuli_chr03 | 35993700                | CC                              | AA                | 1945925280               |
| SNP_P3_33158_35993857 | NC_021162.1    | Ca_kabuli_chr03 | 35993857                | TT                              | AA                | 1945925282               |
| SNP_P3_33159_35993887 | NC_021162.1    | Ca_kabuli_chr03 | 35993887                | GG                              | AA                | 1945925283               |
| SNP_P3_33161_35994108 | NC_021162.1    | Ca_kabuli_chr03 | 35994108                | AA                              | GG                | 1945925285               |
| SNP_P3_33162_35994127 | NC_021162.1    | Ca_kabuli_chr03 | 35994127                | CC                              | TT                | 1945925287               |
| SNP_P3_33163_35994154 | NC_021162.1    | Ca_kabuli_chr03 | 35994154                | AA                              | GG                | 1945925289               |
| SNP_P3_33166_35994537 | NC_021162.1    | Ca_kabuli_chr03 | 35994537                | AA                              | GG                | 1945925290               |
| SNP_P3_33169_35997081 | NC_021162.1    | Ca_kabuli_chr03 | 35997081                | GG                              | CC                | 1945925292               |
| SNP_P3_33170_35998275 | NC_021162.1    | Ca_kabuli_chr03 | 35998275                | TT                              | GG                | 1945925294               |
| SNP_P3_33172_36000210 | NC_021162.1    | Ca_kabuli_chr03 | 36000210                | TT                              | CC                | 1945925296               |
| SNP_P3_33173_36000214 | NC_021162.1    | Ca_kabuli_chr03 | 36000214                | GG                              | AA                | 1945925298               |
| SNP_P3_33174_36000439 | NC_021162.1    | Ca_kabuli_chr03 | 36000439                | AA                              | GG                | 1945925299               |
| SNP_P3_33175_36002257 | NC_021162.1    | Ca_kabuli_chr03 | 36002257                | CC                              | TT                | 1945925301               |
| SNP_P3_33176_36002463 | NC_021162.1    | Ca_kabuli_chr03 | 36002463                | GG                              | AA                | 1945925303               |
| SNP_P3_33177_36002796 | NC_021162.1    | Ca_kabuli_chr03 | 36002796                | TT                              | CC                | 1945925305               |
| SNP_P3_33178_36002931 | NC_021162.1    | Ca_kabuli_chr03 | 36002931                | TT                              | CC                | 1945925306               |
| SNP_P3_33179_36005405 | NC_021162.1    | Ca_kabuli_chr03 | 36005405                | CC                              | TT                | 1945925308               |
| SNP_P3_33180_36006334 | NC_021162.1    | Ca_kabuli_chr03 | 36006334                | CC                              | TT                | 1945925310               |
| SNP_P3_33181_36006552 | NC_021162.1    | Ca_kabuli_chr03 | 36006552                | CC                              | AA                | 1945925312               |
| SNP_P3_33182_36009878 | NC_021162.1    | Ca_kabuli_chr03 | 36009878                | TT                              | CC                | 1945925314               |
| SNP_P3_33184_36013158 | NC_021162.1    | Ca_kabuli_chr03 | 36013158                | AA                              | TT                | 1945925315               |
| SNP_P3_33185_36013347 | NC_021162.1    | Ca_kabuli_chr03 | 36013347                | CC                              | AA                | 1945925317               |
| SNP_P3_33186_36013668 | NC_021162.1    | Ca_kabuli_chr03 | 36013668                | AA                              | TT                | 1945925319               |
| SNP_P3_33187_36013673 | NC_021162.1    | Ca_kabuli_chr03 | 36013673                | AA                              | TT                | 1945925321               |
| SNP_P3_33188_36013713 | NC_021162.1    | Ca_kabuli_chr03 | 36013713                | AA                              | GG                | 1945925322               |
| SNP_P3_33189_36013716 | NC_021162.1    | Ca_kabuli_chr03 | 36013716                | AA                              | GG                | 1945925324               |
| SNP_P3_33190_36013746 | NC_021162.1    | Ca_kabuli_chr03 | 36013746                | TT                              | AA                | 1945925326               |
| SNP_P3_33191_36013761 | NC_021162.1    | Ca_kabuli_chr03 | 36013761                | AA                              | GG                | 1945925328               |
| SNP_P3_33192_36015292 | NC_021162.1    | Ca_kabuli_chr03 | 36015292                | CC                              | GG                | 1945925330               |

| SNPs IDs              | Chromosome IDs | Chromosomes     | Physical positions (bp) | CDC Frontier (Reference genome) | (Pusa 256 & HPNB) | NCBI SNPdb Accession IDs |
|-----------------------|----------------|-----------------|-------------------------|---------------------------------|-------------------|--------------------------|
| SNP_P3_33193_36015383 | NC_021162.1    | Ca_kabuli_chr03 | 36015383                | CC                              | TT                | 1945925331               |
| SNP_P3_33194_36015701 | NC_021162.1    | Ca_kabuli_chr03 | 36015701                | AA                              | GG                | 1945925333               |
| SNP_P3_33195_36015712 | NC_021162.1    | Ca_kabuli_chr03 | 36015712                | TT                              | GG                | 1945925335               |
| SNP_P3_33196_36016694 | NC_021162.1    | Ca_kabuli_chr03 | 36016694                | GG                              | TT                | 1945925337               |
| SNP_P3_33199_36017202 | NC_021162.1    | Ca_kabuli_chr03 | 36017202                | TT                              | GG                | 1945925338               |
| SNP_P3_33200_36017310 | NC_021162.1    | Ca_kabuli_chr03 | 36017310                | GG                              | AA                | 1945925340               |
| SNP_P3_33201_36017381 | NC_021162.1    | Ca_kabuli_chr03 | 36017381                | TT                              | CC                | 1945925342               |
| SNP_P3_33202_36017614 | NC_021162.1    | Ca_kabuli_chr03 | 36017614                | GG                              | AA                | 1945925344               |
| SNP_P3_33203_36017629 | NC_021162.1    | Ca_kabuli_chr03 | 36017629                | AA                              | CC                | 1945925346               |
| SNP_P3_33204_36017637 | NC_021162.1    | Ca_kabuli_chr03 | 36017637                | AA                              | TT                | 1945925347               |
| SNP_P3_33206_36017665 | NC_021162.1    | Ca_kabuli_chr03 | 36017665                | AA                              | GG                | 1945925349               |
| SNP_P3_33208_36017972 | NC_021162.1    | Ca_kabuli_chr03 | 36017972                | GG                              | AA                | 1945925351               |
| SNP_P3_33209_36018140 | NC_021162.1    | Ca_kabuli_chr03 | 36018140                | GG                              | CC                | 1945925353               |
| SNP_P3_33210_36018152 | NC_021162.1    | Ca_kabuli_chr03 | 36018152                | AA                              | CC                | 1945925354               |
| SNP_P3_33211_36018822 | NC_021162.1    | Ca_kabuli_chr03 | 36018822                | TT                              | CC                | 1945925356               |
| SNP_P3_33214_36020155 | NC_021162.1    | Ca_kabuli_chr03 | 36020155                | TT                              | AA                | 1945925358               |
| SNP_P3_33216_36021433 | NC_021162.1    | Ca_kabuli_chr03 | 36021433                | TT                              | AA                | 1945925360               |
| SNP_P3_33217_36021723 | NC_021162.1    | Ca_kabuli_chr03 | 36021723                | TT                              | CC                | 1945925362               |
| SNP_P3_33218_36021789 | NC_021162.1    | Ca_kabuli_chr03 | 36021789                | GG                              | AA                | 1945925363               |
| SNP_P3_33219_36021999 | NC_021162.1    | Ca_kabuli_chr03 | 36021999                | AA                              | GG                | 1945925365               |
| SNP_P3_33220_36022004 | NC_021162.1    | Ca_kabuli_chr03 | 36022004                | GG                              | AA                | 1945925367               |
| SNP_P3_33221_36022015 | NC_021162.1    | Ca_kabuli_chr03 | 36022015                | TT                              | GG                | 1945925369               |
| SNP_P3_33222_36022022 | NC_021162.1    | Ca_kabuli_chr03 | 36022022                | AA                              | GG                | 1945925370               |
| SNP_P3_33223_36022029 | NC_021162.1    | Ca_kabuli_chr03 | 36022029                | CC                              | TT                | 1945925372               |
| SNP_P3_33224_36022030 | NC_021162.1    | Ca_kabuli_chr03 | 36022030                | TT                              | CC                | 1945925374               |
| SNP_P3_33226_36022083 | NC_021162.1    | Ca_kabuli_chr03 | 36022083                | CC                              | TT                | 1945925376               |
| SNP_P3_33227_36022092 | NC_021162.1    | Ca_kabuli_chr03 | 36022092                | AA                              | GG                | 1945925378               |
| SNP_P3_33232_36025680 | NC_021162.1    | Ca_kabuli_chr03 | 36025680                | AA                              | GG                | 1945925379               |
| SNP_P3_33233_36025714 | NC_021162.1    | Ca_kabuli_chr03 | 36025714                | AA                              | TT                | 1945925381               |
| SNP_P3_33234_36025756 | NC_021162.1    | Ca_kabuli_chr03 | 36025756                | GG                              | AA                | 1945925383               |
| SNP_P3_33235_36025769 | NC_021162.1    | Ca_kabuli_chr03 | 36025769                | AA                              | GG                | 1945925385               |
| SNP_P3_33236_36025902 | NC_021162.1    | Ca_kabuli_chr03 | 36025902                | GG                              | AA                | 1945925386               |
| SNP_P3_33237_36025912 | NC_021162.1    | Ca_kabuli_chr03 | 36025912                | CC                              | TT                | 1945925388               |
| SNP_P3_33239_36025964 | NC_021162.1    | Ca_kabuli_chr03 | 36025964                | TT                              | CC                | 1945925390               |
| SNP_P3_33240_36026929 | NC_021162.1    | Ca_kabuli_chr03 | 36026929                | AA                              | CC                | 1945925392               |
| SNP_P3_33241_36026985 | NC_021162.1    | Ca_kabuli_chr03 | 36026985                | TT                              | GG                | 1945925394               |
| SNP_P3_33242_36027150 | NC_021162.1    | Ca_kabuli_chr03 | 36027150                | CC                              | GG                | 1945925395               |
| SNP_P3_33243_36029870 | NC_021162.1    | Ca_kabuli_chr03 | 36029870                | GG                              | AA                | 1945925397               |
| SNP_P3_33244_36031559 | NC_021162.1    | Ca_kabuli_chr03 | 36031559                | AA                              | GG                | 1945925399               |
| SNP_P3_33245_36031952 | NC_021162.1    | Ca_kabuli_chr03 | 36031952                | GG                              | TT                | 1945925401               |
| SNP_P3_33246_36031967 | NC_021162.1    | Ca_kabuli_chr03 | 36031967                | GG                              | AA                | 1945925402               |
| SNP_P3_33248_36032493 | NC_021162.1    | Ca_kabuli_chr03 | 36032493                | GG                              | AA                | 1945925404               |

| SNPs IDs              | Chromosome IDs | Chromosomes     | Physical positions (bp) | CDC Frontier (Reference genome) | (Pusa 256 & HPNB) | NCBI SNPdb Accession IDs |
|-----------------------|----------------|-----------------|-------------------------|---------------------------------|-------------------|--------------------------|
| SNP_P3_33249_36032566 | NC_021162.1    | Ca_kabuli_chr03 | 36032566                | CC                              | TT                | 1945925406               |
| SNP_P3_33251_36032974 | NC_021162.1    | Ca_kabuli_chr03 | 36032974                | TT                              | AA                | 1945925408               |
| SNP_P3_33252_36033137 | NC_021162.1    | Ca_kabuli_chr03 | 36033137                | CC                              | TT                | 1945925409               |
| SNP_P3_33253_36033142 | NC_021162.1    | Ca_kabuli_chr03 | 36033142                | GG                              | TT                | 1945925411               |
| SNP_P3_33254_36033148 | NC_021162.1    | Ca_kabuli_chr03 | 36033148                | CC                              | TT                | 1945925413               |
| SNP_P3_33255_36033176 | NC_021162.1    | Ca_kabuli_chr03 | 36033176                | CC                              | TT                | 1945925415               |
| SNP_P3_33257_36035459 | NC_021162.1    | Ca_kabuli_chr03 | 36035459                | AA                              | TT                | 1945925417               |
| SNP_P3_33259_36035859 | NC_021162.1    | Ca_kabuli_chr03 | 36035859                | TT                              | CC                | 1945925418               |
| SNP_P3_33260_36035925 | NC_021162.1    | Ca_kabuli_chr03 | 36035925                | CC                              | TT                | 1945925420               |
| SNP_P3_33261_36036333 | NC_021162.1    | Ca_kabuli_chr03 | 36036333                | CC                              | GG                | 1945925422               |
| SNP_P3_33262_36036341 | NC_021162.1    | Ca_kabuli_chr03 | 36036341                | AA                              | TT                | 1945925424               |
| SNP_P3_33263_36036353 | NC_021162.1    | Ca_kabuli_chr03 | 36036353                | AA                              | GG                | 1945925425               |
| SNP_P3_33264_36039029 | NC_021162.1    | Ca_kabuli_chr03 | 36039029                | TT                              | CC                | 1945925427               |
| SNP_P3_33266_36039906 | NC_021162.1    | Ca_kabuli_chr03 | 36039906                | TT                              | CC                | 1945925429               |
| SNP_P3_33267_36039908 | NC_021162.1    | Ca_kabuli_chr03 | 36039908                | GG                              | AA                | 1945925431               |
| SNP_P3_33268_36039930 | NC_021162.1    | Ca_kabuli_chr03 | 36039930                | CC                              | TT                | 1945925433               |
| SNP_P3_33271_36040360 | NC_021162.1    | Ca_kabuli_chr03 | 36040360                | GG                              | AA                | 1945925434               |
| SNP_P3_33273_36041210 | NC_021162.1    | Ca_kabuli_chr03 | 36041210                | TT                              | CC                | 1945925436               |
| SNP_P3_33274_36041235 | NC_021162.1    | Ca_kabuli_chr03 | 36041235                | TT                              | AA                | 1945925438               |
| SNP_P3_33275_36041292 | NC_021162.1    | Ca_kabuli_chr03 | 36041292                | CC                              | TT                | 1945925440               |
| SNP_P3_33276_36041363 | NC_021162.1    | Ca_kabuli_chr03 | 36041363                | AA                              | GG                | 1945925441               |
| SNP_P3_33277_36041475 | NC_021162.1    | Ca_kabuli_chr03 | 36041475                | TT                              | CC                | 1945925443               |
| SNP_P3_33278_36041503 | NC_021162.1    | Ca_kabuli_chr03 | 36041503                | AA                              | GG                | 1945925445               |
| SNP_P3_33279_36041549 | NC_021162.1    | Ca_kabuli_chr03 | 36041549                | TT                              | CC                | 1945925447               |
| SNP_P3_33282_36042611 | NC_021162.1    | Ca_kabuli_chr03 | 36042611                | AA                              | GG                | 1945925449               |
| SNP_P3_33283_36042613 | NC_021162.1    | Ca_kabuli_chr03 | 36042613                | GG                              | CC                | 1945925450               |
| SNP_P3_33284_36042798 | NC_021162.1    | Ca_kabuli_chr03 | 36042798                | TT                              | GG                | 1945925452               |
| SNP_P3_33285_36042931 | NC_021162.1    | Ca_kabuli_chr03 | 36042931                | AA                              | GG                | 1945925454               |
| SNP_P3_33286_36042945 | NC_021162.1    | Ca_kabuli_chr03 | 36042945                | CC                              | TT                | 1945925456               |
| SNP_P3_33287_36043058 | NC_021162.1    | Ca_kabuli_chr03 | 36043058                | CC                              | GG                | 1945925457               |
| SNP_P3_33289_36043125 | NC_021162.1    | Ca_kabuli_chr03 | 36043125                | GG                              | AA                | 1945925459               |
| SNP_P3_33290_36043161 | NC_021162.1    | Ca_kabuli_chr03 | 36043161                | AA                              | GG                | 1945925461               |
| SNP_P3_33291_36043271 | NC_021162.1    | Ca_kabuli_chr03 | 36043271                | CC                              | TT                | 1945925463               |
| SNP_P3_33292_36043369 | NC_021162.1    | Ca_kabuli_chr03 | 36043369                | TT                              | AA                | 1945925465               |
| SNP_P3_33293_36043410 | NC_021162.1    | Ca_kabuli_chr03 | 36043410                | CC                              | TT                | 1945925466               |
| SNP_P3_33294_36043481 | NC_021162.1    | Ca_kabuli_chr03 | 36043481                | TT                              | CC                | 1945925468               |
| SNP_P3_33295_36043667 | NC_021162.1    | Ca_kabuli_chr03 | 36043667                | GG                              | AA                | 1945925470               |
| SNP_P3_33296_36043716 | NC_021162.1    | Ca_kabuli_chr03 | 36043716                | CC                              | TT                | 1945925472               |
| SNP_P3_33297_36043756 | NC_021162.1    | Ca_kabuli_chr03 | 36043756                | TT                              | CC                | 1945925473               |
| SNP_P3_33298_36043938 | NC_021162.1    | Ca_kabuli_chr03 | 36043938                | TT                              | CC                | 1945925475               |
| SNP_P3_33299_36044031 | NC_021162.1    | Ca_kabuli_chr03 | 36044031                | AA                              | GG                | 1945925477               |
| SNP_P3_33300_36044063 | NC_021162.1    | Ca_kabuli_chr03 | 36044063                | GG                              | AA                | 1945925479               |

| SNPs IDs              | Chromosome IDs | Chromosomes     | Physical positions (bp) | CDC Frontier (Reference genome) | (Pusa 256 & HPNB) | NCBI SNPdb Accession IDs |
|-----------------------|----------------|-----------------|-------------------------|---------------------------------|-------------------|--------------------------|
| SNP_P3_33301_36044235 | NC_021162.1    | Ca_kabuli_chr03 | 36044235                | GG                              | AA                | 1945925481               |
| SNP_P3_33302_36044244 | NC_021162.1    | Ca_kabuli_chr03 | 36044244                | AA                              | GG                | 1945925482               |
| SNP_P3_33303_36044529 | NC_021162.1    | Ca_kabuli_chr03 | 36044529                | CC                              | TT                | 1945925484               |
| SNP_P3_33304_36044563 | NC_021162.1    | Ca_kabuli_chr03 | 36044563                | GG                              | TT                | 1945925486               |
| SNP_P3_33305_36044975 | NC_021162.1    | Ca_kabuli_chr03 | 36044975                | GG                              | AA                | 1945925488               |
| SNP_P3_33306_36044976 | NC_021162.1    | Ca_kabuli_chr03 | 36044976                | CC                              | GG                | 1945925489               |
| SNP_P3_33307_36045553 | NC_021162.1    | Ca_kabuli_chr03 | 36045553                | TT                              | CC                | 1945925491               |
| SNP_P3_33308_36045594 | NC_021162.1    | Ca_kabuli_chr03 | 36045594                | GG                              | AA                | 1945925493               |
| SNP_P3_33309_36045609 | NC_021162.1    | Ca_kabuli_chr03 | 36045609                | AA                              | GG                | 1945925495               |
| SNP_P3_33311_36046091 | NC_021162.1    | Ca_kabuli_chr03 | 36046091                | TT                              | AA                | 1945925497               |
| SNP_P3_33312_36046495 | NC_021162.1    | Ca_kabuli_chr03 | 36046495                | AA                              | TT                | 1945925498               |
| SNP_P3_33313_36048188 | NC_021162.1    | Ca_kabuli_chr03 | 36048188                | AA                              | GG                | 1945925500               |
| SNP_P3_33315_36048363 | NC_021162.1    | Ca_kabuli_chr03 | 36048363                | CC                              | GG                | 1945925502               |
| SNP_P3_33316_36050860 | NC_021162.1    | Ca_kabuli_chr03 | 36050860                | CC                              | TT                | 1945925504               |
| SNP_P3_33317_36052289 | NC_021162.1    | Ca_kabuli_chr03 | 36052289                | AA                              | GG                | 1945925505               |
| SNP_P3_33318_36052306 | NC_021162.1    | Ca_kabuli_chr03 | 36052306                | GG                              | CC                | 1945925507               |
| SNP_P3_33319_36052606 | NC_021162.1    | Ca_kabuli_chr03 | 36052606                | CC                              | TT                | 1945925509               |
| SNP_P3_33321_36052813 | NC_021162.1    | Ca_kabuli_chr03 | 36052813                | AA                              | GG                | 1945925511               |
| SNP_P3_33322_36052900 | NC_021162.1    | Ca_kabuli_chr03 | 36052900                | GG                              | AA                | 1945925513               |
| SNP_P3_33323_36052952 | NC_021162.1    | Ca_kabuli_chr03 | 36052952                | TT                              | CC                | 1945925514               |
| SNP_P3_33324_36053382 | NC_021162.1    | Ca_kabuli_chr03 | 36053382                | CC                              | TT                | 1945925516               |
| SNP_P3_33325_36053825 | NC_021162.1    | Ca_kabuli_chr03 | 36053825                | CC                              | GG                | 1945925518               |
| SNP_P3_33326_36056464 | NC_021162.1    | Ca_kabuli_chr03 | 36056464                | TT                              | AA                | 1945925520               |
| SNP_P3_33327_36056486 | NC_021162.1    | Ca_kabuli_chr03 | 36056486                | TT                              | CC                | 1945925521               |
| SNP_P3_33328_36056525 | NC_021162.1    | Ca_kabuli_chr03 | 36056525                | TT                              | CC                | 1945925523               |
| SNP_P3_33329_36056526 | NC_021162.1    | Ca_kabuli_chr03 | 36056526                | CC                              | TT                | 1945925525               |
| SNP_P3_33330_36056919 | NC_021162.1    | Ca_kabuli_chr03 | 36056919                | AA                              | CC                | 1945925527               |
| SNP_P3_33331_36057801 | NC_021162.1    | Ca_kabuli_chr03 | 36057801                | CC                              | TT                | 1945925529               |
| SNP_P3_33332_36060694 | NC_021162.1    | Ca_kabuli_chr03 | 36060694                | AA                              | GG                | 1945925530               |
| SNP_P3_33333_36065752 | NC_021162.1    | Ca_kabuli_chr03 | 36065752                | AA                              | GG                | 1945925532               |
| SNP_P3_33334_36066511 | NC_021162.1    | Ca_kabuli_chr03 | 36066511                | GG                              | TT                | 1945925534               |
| SNP_P3_33335_36066583 | NC_021162.1    | Ca_kabuli_chr03 | 36066583                | CC                              | TT                | 1945925536               |
| SNP_P3_33336_36066881 | NC_021162.1    | Ca_kabuli_chr03 | 36066881                | GG                              | AA                | 1945925537               |
| SNP_P3_33337_36067151 | NC_021162.1    | Ca_kabuli_chr03 | 36067151                | AA                              | GG                | 1945925539               |
| SNP_P3_33338_36067831 | NC_021162.1    | Ca_kabuli_chr03 | 36067831                | AA                              | GG                | 1945925541               |
| SNP_P3_33339_36067850 | NC_021162.1    | Ca_kabuli_chr03 | 36067850                | TT                              | AA                | 1945925543               |
| SNP_P3_33340_36068063 | NC_021162.1    | Ca_kabuli_chr03 | 36068063                | TT                              | CC                | 1945925545               |
| SNP_P3_33341_36068081 | NC_021162.1    | Ca_kabuli_chr03 | 36068081                | CC                              | AA                | 1945925546               |
| SNP_P3_33343_36068726 | NC_021162.1    | Ca_kabuli_chr03 | 36068726                | GG                              | AA                | 1945925548               |
| SNP_P3_33344_36068797 | NC_021162.1    | Ca_kabuli_chr03 | 36068797                | CC                              | TT                | 1945925550               |
| SNP_P3_33345_36072701 | NC_021162.1    | Ca_kabuli_chr03 | 36072701                | TT                              | AA                | 1945925552               |
| SNP_P3_33346_36074170 | NC_021162.1    | Ca_kabuli_chr03 | 36074170                | AA                              | GG                | 1945925553               |

| SNPs IDs              | Chromosome IDs | Chromosomes     | Physical positions (bp) | CDC Frontier (Reference genome) | (Pusa 256 & HPNB) | NCBI SNPdb Accession IDs |
|-----------------------|----------------|-----------------|-------------------------|---------------------------------|-------------------|--------------------------|
| SNP_P3_33347_36075285 | NC_021162.1    | Ca_kabuli_chr03 | 36075285                | AA                              | GG                | 1945925555               |
| SNP_P3_33348_36075740 | NC_021162.1    | Ca_kabuli_chr03 | 36075740                | GG                              | TT                | 1945925557               |
| SNP_P3_33349_36075781 | NC_021162.1    | Ca_kabuli_chr03 | 36075781                | GG                              | AA                | 1945925559               |
| SNP_P3_33350_36075785 | NC_021162.1    | Ca_kabuli_chr03 | 36075785                | CC                              | TT                | 1945925561               |
| SNP_P3_33351_36076102 | NC_021162.1    | Ca_kabuli_chr03 | 36076102                | TT                              | CC                | 1945925562               |
| SNP_P3_33352_36076359 | NC_021162.1    | Ca_kabuli_chr03 | 36076359                | TT                              | AA                | 1945925564               |
| SNP_P3_33353_36076367 | NC_021162.1    | Ca_kabuli_chr03 | 36076367                | CC                              | AA                | 1945925566               |
| SNP_P3_33354_36076475 | NC_021162.1    | Ca_kabuli_chr03 | 36076475                | TT                              | GG                | 1945925568               |
| SNP_P3_33356_36076560 | NC_021162.1    | Ca_kabuli_chr03 | 36076560                | TT                              | AA                | 1945925569               |
| SNP_P3_33357_36076831 | NC_021162.1    | Ca_kabuli_chr03 | 36076831                | CC                              | TT                | 1945925571               |
| SNP_P3_33358_36076844 | NC_021162.1    | Ca_kabuli_chr03 | 36076844                | GG                              | CC                | 1945925573               |
| SNP_P3_33359_36078121 | NC_021162.1    | Ca_kabuli_chr03 | 36078121                | TT                              | GG                | 1945925575               |
| SNP_P3_33360_36078430 | NC_021162.1    | Ca_kabuli_chr03 | 36078430                | CC                              | TT                | 1945925577               |
| SNP_P3_33361_36078561 | NC_021162.1    | Ca_kabuli_chr03 | 36078561                | TT                              | CC                | 1945925578               |
| SNP_P3_33362_36079128 | NC_021162.1    | Ca_kabuli_chr03 | 36079128                | AA                              | TT                | 1945925580               |
| SNP_P3_33363_36079134 | NC_021162.1    | Ca_kabuli_chr03 | 36079134                | CC                              | TT                | 1945925582               |
| SNP_P3_33364_36079237 | NC_021162.1    | Ca_kabuli_chr03 | 36079237                | TT                              | GG                | 1945925584               |
| SNP_P3_33365_36085446 | NC_021162.1    | Ca_kabuli_chr03 | 36085446                | GG                              | AA                | 1945925585               |
| SNP_P3_33366_36085483 | NC_021162.1    | Ca_kabuli_chr03 | 36085483                | AA                              | GG                | 1945925587               |
| SNP_P3_33367_36085517 | NC_021162.1    | Ca_kabuli_chr03 | 36085517                | AA                              | GG                | 1945925589               |
| SNP_P3_33368_36085550 | NC_021162.1    | Ca_kabuli_chr03 | 36085550                | CC                              | TT                | 1945925591               |
| SNP_P3_33369_36085791 | NC_021162.1    | Ca_kabuli_chr03 | 36085791                | GG                              | AA                | 1945925593               |
| SNP_P3_33370_36085793 | NC_021162.1    | Ca_kabuli_chr03 | 36085793                | CC                              | GG                | 1945925594               |
| SNP_P3_33372_36087009 | NC_021162.1    | Ca_kabuli_chr03 | 36087009                | AA                              | GG                | 1945925596               |
| SNP_P3_33374_36087416 | NC_021162.1    | Ca_kabuli_chr03 | 36087416                | AA                              | GG                | 1945925598               |
| SNP_P3_33375_36087574 | NC_021162.1    | Ca_kabuli_chr03 | 36087574                | GG                              | AA                | 1945925600               |
| SNP_P3_33379_36088981 | NC_021162.1    | Ca_kabuli_chr03 | 36088981                | CC                              | TT                | 1945925601               |
| SNP_P3_33380_36088982 | NC_021162.1    | Ca_kabuli_chr03 | 36088982                | CC                              | TT                | 1945925603               |
| SNP_P3_33381_36089027 | NC_021162.1    | Ca_kabuli_chr03 | 36089027                | GG                              | AA                | 1945925605               |
| SNP_P3_33383_36089853 | NC_021162.1    | Ca_kabuli_chr03 | 36089853                | GG                              | AA                | 1945925607               |
| SNP_P3_33385_36090228 | NC_021162.1    | Ca_kabuli_chr03 | 36090228                | TT                              | CC                | 1945925609               |
| SNP_P3_33386_36090581 | NC_021162.1    | Ca_kabuli_chr03 | 36090581                | CC                              | GG                | 1945925610               |
| SNP_P3_33388_36090629 | NC_021162.1    | Ca_kabuli_chr03 | 36090629                | CC                              | AA                | 1945925612               |
| SNP_P3_33389_36090661 | NC_021162.1    | Ca_kabuli_chr03 | 36090661                | GG                              | AA                | 1945925614               |
| SNP_P3_33390_36090669 | NC_021162.1    | Ca_kabuli_chr03 | 36090669                | TT                              | CC                | 1945925616               |
| SNP_P3_33391_36091865 | NC_021162.1    | Ca_kabuli_chr03 | 36091865                | CC                              | TT                | 1945925617               |
| SNP_P3_33392_36092090 | NC_021162.1    | Ca_kabuli_chr03 | 36092090                | TT                              | AA                | 1945925619               |
| SNP_P3_33393_36092145 | NC_021162.1    | Ca_kabuli_chr03 | 36092145                | AA                              | GG                | 1945925621               |
| SNP_P3_33395_36092747 | NC_021162.1    | Ca_kabuli_chr03 | 36092747                | AA                              | TT                | 1945925623               |
| SNP_P3_33396_36092967 | NC_021162.1    | Ca_kabuli_chr03 | 36092967                | GG                              | TT                | 1945925625               |
| SNP_P3_33397_36093038 | NC_021162.1    | Ca_kabuli_chr03 | 36093038                | CC                              | TT                | 1945925626               |
| SNP_P3_33398_36093043 | NC_021162.1    | Ca_kabuli_chr03 | 36093043                | GG                              | TT                | 1945925628               |

| SNPs IDs              | Chromosome IDs | Chromosomes     | Physical positions (bp) | CDC Frontier (Reference genome) | (Pusa 256 & HPNB) | NCBI SNPdb Accession IDs |
|-----------------------|----------------|-----------------|-------------------------|---------------------------------|-------------------|--------------------------|
| SNP_P3_33399_36093052 | NC_021162.1    | Ca_kabuli_chr03 | 36093052                | TT                              | CC                | 1945925630               |
| SNP_P3_33400_36093345 | NC_021162.1    | Ca_kabuli_chr03 | 36093345                | AA                              | CC                | 1945925632               |
| SNP_P3_33401_36093369 | NC_021162.1    | Ca_kabuli_chr03 | 36093369                | AA                              | TT                | 1945925633               |
| SNP_P3_33402_36093836 | NC_021162.1    | Ca_kabuli_chr03 | 36093836                | CC                              | TT                | 1945925635               |
| SNP_P3_33403_36094207 | NC_021162.1    | Ca_kabuli_chr03 | 36094207                | TT                              | CC                | 1945925637               |
| SNP_P3_33404_36094647 | NC_021162.1    | Ca_kabuli_chr03 | 36094647                | TT                              | CC                | 1945925639               |
| SNP_P3_33405_36094907 | NC_021162.1    | Ca_kabuli_chr03 | 36094907                | AA                              | GG                | 1945925641               |
| SNP_P3_33406_36094924 | NC_021162.1    | Ca_kabuli_chr03 | 36094924                | CC                              | GG                | 1945925642               |
| SNP_P3_33408_36095130 | NC_021162.1    | Ca_kabuli_chr03 | 36095130                | AA                              | TT                | 1945925644               |
| SNP_P3_33409_36095139 | NC_021162.1    | Ca_kabuli_chr03 | 36095139                | AA                              | GG                | 1945925646               |
| SNP_P3_33410_36095151 | NC_021162.1    | Ca_kabuli_chr03 | 36095151                | AA                              | CC                | 1945925648               |
| SNP_P3_33411_36095172 | NC_021162.1    | Ca_kabuli_chr03 | 36095172                | GG                              | AA                | 1945925649               |
| SNP_P3_33412_36095292 | NC_021162.1    | Ca_kabuli_chr03 | 36095292                | GG                              | AA                | 1945925651               |
| SNP_P3_33413_36096458 | NC_021162.1    | Ca_kabuli_chr03 | 36096458                | TT                              | GG                | 1945925653               |
| SNP_P3_33414_36096615 | NC_021162.1    | Ca_kabuli_chr03 | 36096615                | TT                              | CC                | 1945925655               |
| SNP_P3_33415_36096648 | NC_021162.1    | Ca_kabuli_chr03 | 36096648                | TT                              | CC                | 1945925656               |
| SNP_P3_33416_36096675 | NC_021162.1    | Ca_kabuli_chr03 | 36096675                | CC                              | GG                | 1945925658               |
| SNP_P3_33417_36096719 | NC_021162.1    | Ca_kabuli_chr03 | 36096719                | GG                              | CC                | 1945925660               |
| SNP_P3_33419_36098854 | NC_021162.1    | Ca_kabuli_chr03 | 36098854                | CC                              | AA                | 1945925662               |
| SNP_P3_33421_36100259 | NC_021162.1    | Ca_kabuli_chr03 | 36100259                | CC                              | TT                | 1945925664               |
| SNP_P3_33422_36100567 | NC_021162.1    | Ca_kabuli_chr03 | 36100567                | CC                              | AA                | 1945925665               |
| SNP_P3_33423_36100837 | NC_021162.1    | Ca_kabuli_chr03 | 36100837                | TT                              | AA                | 1945925667               |
| SNP_P3_33424_36101081 | NC_021162.1    | Ca_kabuli_chr03 | 36101081                | AA                              | CC                | 1945925669               |
| SNP_P3_33425_36101113 | NC_021162.1    | Ca_kabuli_chr03 | 36101113                | GG                              | AA                | 1945925671               |
| SNP_P3_33426_36101971 | NC_021162.1    | Ca_kabuli_chr03 | 36101971                | CC                              | GG                | 1945925673               |
| SNP_P3_33427_36102322 | NC_021162.1    | Ca_kabuli_chr03 | 36102322                | CC                              | GG                | 1945925674               |
| SNP_P3_33429_36102492 | NC_021162.1    | Ca_kabuli_chr03 | 36102492                | AA                              | TT                | 1945925676               |
| SNP_P3_33430_36104393 | NC_021162.1    | Ca_kabuli_chr03 | 36104393                | CC                              | GG                | 1945925678               |
| SNP_P3_33431_36104569 | NC_021162.1    | Ca_kabuli_chr03 | 36104569                | CC                              | TT                | 1945925680               |
| SNP_P3_33433_36105384 | NC_021162.1    | Ca_kabuli_chr03 | 36105384                | TT                              | AA                | 1945925681               |
| SNP_P3_33434_36105390 | NC_021162.1    | Ca_kabuli_chr03 | 36105390                | GG                              | TT                | 1945925683               |
| SNP_P3_33435_36105714 | NC_021162.1    | Ca_kabuli_chr03 | 36105714                | GG                              | AA                | 1945925685               |
| SNP_P3_33437_36105753 | NC_021162.1    | Ca_kabuli_chr03 | 36105753                | GG                              | AA                | 1945925687               |
| SNP_P3_33438_36106826 | NC_021162.1    | Ca_kabuli_chr03 | 36106826                | TT                              | CC                | 1945925688               |
| SNP_P3_33439_36106831 | NC_021162.1    | Ca_kabuli_chr03 | 36106831                | TT                              | CC                | 1945925690               |
| SNP_P3_33441_36112008 | NC_021162.1    | Ca_kabuli_chr03 | 36112008                | TT                              | CC                | 1945925692               |
| SNP_P3_33444_36113527 | NC_021162.1    | Ca_kabuli_chr03 | 36113527                | AA                              | CC                | 1945925694               |
| SNP_P3_33445_36115474 | NC_021162.1    | Ca_kabuli_chr03 | 36115474                | AA                              | CC                | 1945925696               |
| SNP_P3_33446_36115521 | NC_021162.1    | Ca_kabuli_chr03 | 36115521                | AA                              | CC                | 1945925697               |
| SNP_P3_33447_36116405 | NC_021162.1    | Ca_kabuli_chr03 | 36116405                | AA                              | CC                | 1945925699               |
| SNP_P3_33450_36116864 | NC_021162.1    | Ca_kabuli_chr03 | 36116864                | AA                              | CC                | 1945925701               |
| SNP_P3_33451_36117130 | NC_021162.1    | Ca_kabuli_chr03 | 36117130                | AA                              | GG                | 1945925703               |

| SNPs IDs              | Chromosome IDs | Chromosomes     | Physical positions (bp) | CDC Frontier (Reference genome) | (Pusa 256 & HPNB) | NCBI SNPdb Accession IDs |
|-----------------------|----------------|-----------------|-------------------------|---------------------------------|-------------------|--------------------------|
| SNP_P3_33452_36117423 | NC_021162.1    | Ca_kabuli_chr03 | 36117423                | AA                              | TT                | 1945925704               |
| SNP_P3_33453_36117734 | NC_021162.1    | Ca_kabuli_chr03 | 36117734                | TT                              | CC                | 1945925706               |
| SNP_P3_33454_36118120 | NC_021162.1    | Ca_kabuli_chr03 | 36118120                | TT                              | CC                | 1945925708               |
| SNP_P3_33457_36121123 | NC_021162.1    | Ca_kabuli_chr03 | 36121123                | TT                              | CC                | 1945925710               |
| SNP_P3_33458_36121509 | NC_021162.1    | Ca_kabuli_chr03 | 36121509                | GG                              | TT                | 1945925712               |
| SNP_P3_33459_36121557 | NC_021162.1    | Ca_kabuli_chr03 | 36121557                | AA                              | GG                | 1945925713               |
| SNP_P3_33460_36122112 | NC_021162.1    | Ca_kabuli_chr03 | 36122112                | CC                              | TT                | 1945925715               |
| SNP_P3_33461_36122263 | NC_021162.1    | Ca_kabuli_chr03 | 36122263                | CC                              | AA                | 1945925717               |
| SNP_P3_33462_36122388 | NC_021162.1    | Ca_kabuli_chr03 | 36122388                | TT                              | CC                | 1945925719               |
| SNP_P3_33463_36122408 | NC_021162.1    | Ca_kabuli_chr03 | 36122408                | GG                              | AA                | 1945925720               |
| SNP_P3_33464_36122467 | NC_021162.1    | Ca_kabuli_chr03 | 36122467                | TT                              | AA                | 1945925722               |
| SNP_P3_33465_36122498 | NC_021162.1    | Ca_kabuli_chr03 | 36122498                | AA                              | CC                | 1945925724               |
| SNP_P3_33466_36122574 | NC_021162.1    | Ca_kabuli_chr03 | 36122574                | CC                              | GG                | 1945925726               |
| SNP_P3_33468_36123240 | NC_021162.1    | Ca_kabuli_chr03 | 36123240                | AA                              | GG                | 1945925728               |
| SNP_P3_33470_36123400 | NC_021162.1    | Ca_kabuli_chr03 | 36123400                | AA                              | CC                | 1945925729               |
| SNP_P3_33471_36123581 | NC_021162.1    | Ca_kabuli_chr03 | 36123581                | GG                              | AA                | 1945925731               |
| SNP_P3_33472_36123600 | NC_021162.1    | Ca_kabuli_chr03 | 36123600                | CC                              | TT                | 1945925733               |
| SNP_P3_33473_36123626 | NC_021162.1    | Ca_kabuli_chr03 | 36123626                | GG                              | AA                | 1945925735               |
| SNP_P3_33474_36123761 | NC_021162.1    | Ca_kabuli_chr03 | 36123761                | AA                              | GG                | 1945925736               |
| SNP_P3_33475_36123811 | NC_021162.1    | Ca_kabuli_chr03 | 36123811                | GG                              | AA                | 1945925738               |
| SNP_P3_33476_36124798 | NC_021162.1    | Ca_kabuli_chr03 | 36124798                | TT                              | CC                | 1945925740               |
| SNP_P3_33477_36125468 | NC_021162.1    | Ca_kabuli_chr03 | 36125468                | TT                              | CC                | 1945925742               |
| SNP_P3_33478_36126154 | NC_021162.1    | Ca_kabuli_chr03 | 36126154                | CC                              | GG                | 1945925744               |
| SNP_P3_33479_36126327 | NC_021162.1    | Ca_kabuli_chr03 | 36126327                | TT                              | CC                | 1945925745               |
| SNP_P3_33480_36126658 | NC_021162.1    | Ca_kabuli_chr03 | 36126658                | TT                              | CC                | 1945925747               |
| SNP_P3_33481_36127148 | NC_021162.1    | Ca_kabuli_chr03 | 36127148                | AA                              | GG                | 1945925749               |
| SNP_P3_33482_36127174 | NC_021162.1    | Ca_kabuli_chr03 | 36127174                | TT                              | CC                | 1945925751               |
| SNP_P3_33483_36127559 | NC_021162.1    | Ca_kabuli_chr03 | 36127559                | CC                              | TT                | 1945925752               |
| SNP_P3_33484_36128303 | NC_021162.1    | Ca_kabuli_chr03 | 36128303                | GG                              | AA                | 1945925754               |
| SNP_P3_33485_36128313 | NC_021162.1    | Ca_kabuli_chr03 | 36128313                | AA                              | GG                | 1945925756               |
| SNP_P3_33486_36128520 | NC_021162.1    | Ca_kabuli_chr03 | 36128520                | TT                              | GG                | 1945925758               |
| SNP_P3_33487_36128521 | NC_021162.1    | Ca_kabuli_chr03 | 36128521                | CC                              | TT                | 1945925760               |
| SNP_P3_33489_36128932 | NC_021162.1    | Ca_kabuli_chr03 | 36128932                | AA                              | GG                | 1945925761               |
| SNP_P3_33490_36129004 | NC_021162.1    | Ca_kabuli_chr03 | 36129004                | TT                              | CC                | 1945925763               |
| SNP_P3_33491_36129128 | NC_021162.1    | Ca_kabuli_chr03 | 36129128                | GG                              | AA                | 1945925765               |
| SNP_P3_33493_36129403 | NC_021162.1    | Ca_kabuli_chr03 | 36129403                | GG                              | AA                | 1945925767               |
| SNP_P3_33495_36129429 | NC_021162.1    | Ca_kabuli_chr03 | 36129429                | CC                              | TT                | 1945925768               |
| SNP_P3_33496_36129555 | NC_021162.1    | Ca_kabuli_chr03 | 36129555                | TT                              | CC                | 1945925770               |
| SNP_P3_33497_36129592 | NC_021162.1    | Ca_kabuli_chr03 | 36129592                | TT                              | AA                | 1945925772               |
| SNP_P3_33498_36129692 | NC_021162.1    | Ca_kabuli_chr03 | 36129692                | CC                              | TT                | 1945925774               |
| SNP_P3_33499_36131201 | NC_021162.1    | Ca_kabuli_chr03 | 36131201                | TT                              | CC                | 1945925776               |
| SNP_P3_33500_36131741 | NC_021162.1    | Ca_kabuli_chr03 | 36131741                | TT                              | GG                | 1945925777               |



| SNPs IDs              | Chromosome IDs | Chromosomes     | Physical positions (bp) | CDC Frontier (Reference genome) | (Pusa 256 & HPNB) | NCBI SNPdb Accession IDs |
|-----------------------|----------------|-----------------|-------------------------|---------------------------------|-------------------|--------------------------|
| SNP_P3_33501_36131950 | NC_021162.1    | Ca_kabuli_chr03 | 36131950                | CC                              | TT                | 1945925779               |
| SNP_P3_33502_36131967 | NC_021162.1    | Ca_kabuli_chr03 | 36131967                | CC                              | TT                | 1945925781               |
| SNP_P3_33503_36132052 | NC_021162.1    | Ca_kabuli_chr03 | 36132052                | CC                              | TT                | 1945925783               |
| SNP_P3_33504_36132071 | NC_021162.1    | Ca_kabuli_chr03 | 36132071                | AA                              | GG                | 1945925784               |
| SNP_P3_33505_36132172 | NC_021162.1    | Ca_kabuli_chr03 | 36132172                | AA                              | CC                | 1945925786               |
| SNP_P3_33506_36132277 | NC_021162.1    | Ca_kabuli_chr03 | 36132277                | CC                              | AA                | 1945925788               |
| SNP_P3_33507_36132554 | NC_021162.1    | Ca_kabuli_chr03 | 36132554                | AA                              | TT                | 1945925790               |
| SNP_P3_33509_36133521 | NC_021162.1    | Ca_kabuli_chr03 | 36133521                | GG                              | AA                | 1945925792               |
| SNP_P3_33510_36134932 | NC_021162.1    | Ca_kabuli_chr03 | 36134932                | TT                              | GG                | 1945925793               |
| SNP_P3_33511_36135118 | NC_021162.1    | Ca_kabuli_chr03 | 36135118                | CC                              | GG                | 1945925795               |
| SNP_P3_33512_36135143 | NC_021162.1    | Ca_kabuli_chr03 | 36135143                | CC                              | AA                | 1945925797               |
| SNP_P3_33513_36135231 | NC_021162.1    | Ca_kabuli_chr03 | 36135231                | TT                              | AA                | 1945925799               |
| SNP_P3_33514_36135257 | NC_021162.1    | Ca_kabuli_chr03 | 36135257                | CC                              | AA                | 1945925800               |
| SNP_P3_33515_36135296 | NC_021162.1    | Ca_kabuli_chr03 | 36135296                | GG                              | AA                | 1945925802               |
| SNP_P3_33516_36135308 | NC_021162.1    | Ca_kabuli_chr03 | 36135308                | TT                              | AA                | 1945925804               |
| SNP_P3_33517_36135383 | NC_021162.1    | Ca_kabuli_chr03 | 36135383                | CC                              | AA                | 1945925806               |
| SNP_P3_33518_36135407 | NC_021162.1    | Ca_kabuli_chr03 | 36135407                | TT                              | GG                | 1945925808               |
| SNP_P3_33519_36135702 | NC_021162.1    | Ca_kabuli_chr03 | 36135702                | CC                              | GG                | 1945925809               |
| SNP_P3_33520_36138065 | NC_021162.1    | Ca_kabuli_chr03 | 36138065                | TT                              | CC                | 1945925811               |
| SNP_P3_33521_36138077 | NC_021162.1    | Ca_kabuli_chr03 | 36138077                | GG                              | AA                | 1945925813               |
| SNP_P3_33522_36138544 | NC_021162.1    | Ca_kabuli_chr03 | 36138544                | TT                              | GG                | 1945925815               |
| SNP_P3_33524_36138856 | NC_021162.1    | Ca_kabuli_chr03 | 36138856                | GG                              | AA                | 1945925816               |
| SNP_P3_33525_36139543 | NC_021162.1    | Ca_kabuli_chr03 | 36139543                | AA                              | GG                | 1945925818               |
| SNP_P3_33526_36139552 | NC_021162.1    | Ca_kabuli_chr03 | 36139552                | TT                              | AA                | 1945925820               |
| SNP_P3_33527_36139557 | NC_021162.1    | Ca_kabuli_chr03 | 36139557                | CC                              | TT                | 1945925822               |
| SNP_P3_33529_36139608 | NC_021162.1    | Ca_kabuli_chr03 | 36139608                | GG                              | CC                | 1945925824               |
| SNP_P3_33531_36140375 | NC_021162.1    | Ca_kabuli_chr03 | 36140375                | AA                              | TT                | 1945925825               |
| SNP_P3_33532_36140856 | NC_021162.1    | Ca_kabuli_chr03 | 36140856                | AA                              | CC                | 1945925827               |
| SNP_P3_33533_36144601 | NC_021162.1    | Ca_kabuli_chr03 | 36144601                | GG                              | AA                | 1945925829               |
| SNP_P3_33534_36145259 | NC_021162.1    | Ca_kabuli_chr03 | 36145259                | AA                              | GG                | 1945925831               |
| SNP_P3_33535_36145429 | NC_021162.1    | Ca_kabuli_chr03 | 36145429                | GG                              | AA                | 1945925832               |
| SNP_P3_33536_36145459 | NC_021162.1    | Ca_kabuli_chr03 | 36145459                | AA                              | GG                | 1945925834               |
| SNP_P3_33537_36146677 | NC_021162.1    | Ca_kabuli_chr03 | 36146677                | GG                              | AA                | 1945925836               |
| SNP_P3_33538_36146862 | NC_021162.1    | Ca_kabuli_chr03 | 36146862                | AA                              | CC                | 1945925838               |
| SNP_P3_33539_36146873 | NC_021162.1    | Ca_kabuli_chr03 | 36146873                | TT                              | CC                | 1945925839               |
| SNP_P3_33540_36148402 | NC_021162.1    | Ca_kabuli_chr03 | 36148402                | CC                              | TT                | 1945925841               |
| SNP_P3_33541_36148442 | NC_021162.1    | Ca_kabuli_chr03 | 36148442                | CC                              | TT                | 1945925843               |
| SNP_P3_33542_36149082 | NC_021162.1    | Ca_kabuli_chr03 | 36149082                | TT                              | CC                | 1945925845               |
| SNP_P3_33543_36149101 | NC_021162.1    | Ca_kabuli_chr03 | 36149101                | GG                              | TT                | 1945925847               |
| SNP_P3_33544_36149147 | NC_021162.1    | Ca_kabuli_chr03 | 36149147                | AA                              | TT                | 1945925848               |
| SNP_P3_33545_36149928 | NC_021162.1    | Ca_kabuli_chr03 | 36149928                | AA                              | CC                | 1945925850               |
| SNP_P3_33546_36150251 | NC_021162.1    | Ca_kabuli_chr03 | 36150251                | CC                              | TT                | 1945925852               |

| SNPs IDs              | Chromosome IDs | Chromosomes     | Physical positions (bp) | CDC Frontier (Reference genome) | (Pusa 256 & HPNB) | NCBI SNPdb Accession IDs |
|-----------------------|----------------|-----------------|-------------------------|---------------------------------|-------------------|--------------------------|
| SNP_P3_33547_36150280 | NC_021162.1    | Ca_kabuli_chr03 | 36150280                | TT                              | GG                | 1945925854               |
| SNP_P3_33548_36153261 | NC_021162.1    | Ca_kabuli_chr03 | 36153261                | TT                              | CC                | 1945925855               |
| SNP_P3_33549_36153377 | NC_021162.1    | Ca_kabuli_chr03 | 36153377                | TT                              | AA                | 1945925857               |
| SNP_P3_33552_36156453 | NC_021162.1    | Ca_kabuli_chr03 | 36156453                | CC                              | TT                | 1945925859               |
| SNP_P3_33553_36156498 | NC_021162.1    | Ca_kabuli_chr03 | 36156498                | TT                              | CC                | 1945925861               |
| SNP_P3_33555_36157004 | NC_021162.1    | Ca_kabuli_chr03 | 36157004                | GG                              | AA                | 1945925863               |
| SNP_P3_33557_36158227 | NC_021162.1    | Ca_kabuli_chr03 | 36158227                | TT                              | AA                | 1945925864               |
| SNP_P3_33558_36159556 | NC_021162.1    | Ca_kabuli_chr03 | 36159556                | CC                              | TT                | 1945925866               |
| SNP_P3_33560_36164390 | NC_021162.1    | Ca_kabuli_chr03 | 36164390                | TT                              | GG                | 1945925868               |
| SNP_P3_33561_36166886 | NC_021162.1    | Ca_kabuli_chr03 | 36166886                | GG                              | AA                | 1945925870               |
| SNP_P3_33562_36177333 | NC_021162.1    | Ca_kabuli_chr03 | 36177333                | GG                              | TT                | 1945925871               |
| SNP_P3_33563_36180299 | NC_021162.1    | Ca_kabuli_chr03 | 36180299                | AA                              | GG                | 1945925873               |
| SNP_P3_33565_36180676 | NC_021162.1    | Ca_kabuli_chr03 | 36180676                | AA                              | GG                | 1945925875               |
| SNP_P3_33566_36182946 | NC_021162.1    | Ca_kabuli_chr03 | 36182946                | GG                              | TT                | 1945925877               |
| SNP_P3_33567_36182980 | NC_021162.1    | Ca_kabuli_chr03 | 36182980                | AA                              | TT                | 1945925879               |
| SNP_P3_33568_36183178 | NC_021162.1    | Ca_kabuli_chr03 | 36183178                | AA                              | GG                | 1945925880               |
| SNP_P3_33569_36183184 | NC_021162.1    | Ca_kabuli_chr03 | 36183184                | TT                              | CC                | 1945925882               |
| SNP_P3_33570_36183189 | NC_021162.1    | Ca_kabuli_chr03 | 36183189                | TT                              | CC                | 1945925884               |
| SNP_P3_33571_36184620 | NC_021162.1    | Ca_kabuli_chr03 | 36184620                | CC                              | AA                | 1945925886               |
| SNP_P3_33572_36184674 | NC_021162.1    | Ca_kabuli_chr03 | 36184674                | GG                              | TT                | 1945925887               |
| SNP_P3_33573_36187504 | NC_021162.1    | Ca_kabuli_chr03 | 36187504                | GG                              | AA                | 1945925889               |
| SNP_P3_33575_36188059 | NC_021162.1    | Ca_kabuli_chr03 | 36188059                | AA                              | TT                | 1945925891               |
| SNP_P3_33576_36188093 | NC_021162.1    | Ca_kabuli_chr03 | 36188093                | GG                              | AA                | 1945925893               |
| SNP_P3_33577_36188100 | NC_021162.1    | Ca_kabuli_chr03 | 36188100                | AA                              | GG                | 1945925895               |
| SNP_P3_33578_36188367 | NC_021162.1    | Ca_kabuli_chr03 | 36188367                | TT                              | CC                | 1945925896               |
| SNP_P3_33579_36188384 | NC_021162.1    | Ca_kabuli_chr03 | 36188384                | GG                              | TT                | 1945925898               |
| SNP_P3_33580_36188387 | NC_021162.1    | Ca_kabuli_chr03 | 36188387                | CC                              | TT                | 1945925900               |
| SNP_P3_33581_36188400 | NC_021162.1    | Ca_kabuli_chr03 | 36188400                | AA                              | TT                | 1945925902               |
| SNP_P3_33582_36188402 | NC_021162.1    | Ca_kabuli_chr03 | 36188402                | TT                              | AA                | 1945925903               |
| SNP_P3_33584_36192320 | NC_021162.1    | Ca_kabuli_chr03 | 36192320                | CC                              | AA                | 1945925905               |
| SNP_P3_33585_36192485 | NC_021162.1    | Ca_kabuli_chr03 | 36192485                | GG                              | AA                | 1945925907               |
| SNP_P3_33586_36192488 | NC_021162.1    | Ca_kabuli_chr03 | 36192488                | GG                              | AA                | 1945925909               |
| SNP_P3_33588_36193133 | NC_021162.1    | Ca_kabuli_chr03 | 36193133                | AA                              | GG                | 1945925911               |
| SNP_P3_33589_36194086 | NC_021162.1    | Ca_kabuli_chr03 | 36194086                | CC                              | GG                | 1945925912               |
| SNP_P3_33590_36194563 | NC_021162.1    | Ca_kabuli_chr03 | 36194563                | GG                              | AA                | 1945925914               |
| SNP_P3_33591_36194641 | NC_021162.1    | Ca_kabuli_chr03 | 36194641                | TT                              | CC                | 1945925916               |
| SNP_P3_33592_36194902 | NC_021162.1    | Ca_kabuli_chr03 | 36194902                | AA                              | GG                | 1945925918               |
| SNP_P3_33593_36194929 | NC_021162.1    | Ca_kabuli_chr03 | 36194929                | AA                              | TT                | 1945925919               |
| SNP_P3_33594_36194955 | NC_021162.1    | Ca_kabuli_chr03 | 36194955                | AA                              | TT                | 1945925921               |
| SNP_P3_33595_36196271 | NC_021162.1    | Ca_kabuli_chr03 | 36196271                | CC                              | AA                | 1945925923               |
| SNP_P3_33596_36196279 | NC_021162.1    | Ca_kabuli_chr03 | 36196279                | TT                              | CC                | 1945925925               |
| SNP_P3_33597_36196814 | NC_021162.1    | Ca_kabuli_chr03 | 36196814                | GG                              | TT                | 1945925927               |

| SNPs IDs              | Chromosome IDs | Chromosomes     | Physical positions (bp) | CDC Frontier (Reference genome) | (Pusa 256 & HPNB) | NCBI SNPdb Accession IDs |
|-----------------------|----------------|-----------------|-------------------------|---------------------------------|-------------------|--------------------------|
| SNP_P3_33598_36196964 | NC_021162.1    | Ca_kabuli_chr03 | 36196964                | TT                              | CC                | 1945925928               |
| SNP_P3_33599_36196971 | NC_021162.1    | Ca_kabuli_chr03 | 36196971                | AA                              | GG                | 1945925930               |
| SNP_P3_33600_36196975 | NC_021162.1    | Ca_kabuli_chr03 | 36196975                | AA                              | TT                | 1945925932               |
| SNP_P3_33602_36197078 | NC_021162.1    | Ca_kabuli_chr03 | 36197078                | AA                              | CC                | 1945925934               |
| SNP_P3_33603_36197096 | NC_021162.1    | Ca_kabuli_chr03 | 36197096                | GG                              | AA                | 1945925935               |
| SNP_P3_33604_36197137 | NC_021162.1    | Ca_kabuli_chr03 | 36197137                | GG                              | AA                | 1945925937               |
| SNP_P3_33605_36197160 | NC_021162.1    | Ca_kabuli_chr03 | 36197160                | AA                              | TT                | 1945925939               |
| SNP_P3_33606_36197175 | NC_021162.1    | Ca_kabuli_chr03 | 36197175                | TT                              | CC                | 1945925941               |
| SNP_P3_33608_36197485 | NC_021162.1    | Ca_kabuli_chr03 | 36197485                | CC                              | TT                | 1945925943               |
| SNP_P3_33610_36198271 | NC_021162.1    | Ca_kabuli_chr03 | 36198271                | AA                              | TT                | 1945925944               |
| SNP_P3_33611_36198275 | NC_021162.1    | Ca_kabuli_chr03 | 36198275                | AA                              | CC                | 1945925946               |
| SNP_P3_33613_36199561 | NC_021162.1    | Ca_kabuli_chr03 | 36199561                | TT                              | AA                | 1945925948               |
| SNP_P3_33614_36200686 | NC_021162.1    | Ca_kabuli_chr03 | 36200686                | CC                              | TT                | 1945925950               |
| SNP_P3_33615_36201114 | NC_021162.1    | Ca_kabuli_chr03 | 36201114                | GG                              | AA                | 1945925951               |
| SNP_P3_33616_36201459 | NC_021162.1    | Ca_kabuli_chr03 | 36201459                | CC                              | TT                | 1945925953               |
| SNP_P3_33617_36201479 | NC_021162.1    | Ca_kabuli_chr03 | 36201479                | CC                              | AA                | 1945925955               |
| SNP_P3_33618_36201669 | NC_021162.1    | Ca_kabuli_chr03 | 36201669                | CC                              | TT                | 1945925957               |
| SNP_P3_33619_36201670 | NC_021162.1    | Ca_kabuli_chr03 | 36201670                | CC                              | GG                | 1945925959               |
| SNP_P3_33620_36201696 | NC_021162.1    | Ca_kabuli_chr03 | 36201696                | GG                              | AA                | 1945925960               |
| SNP_P3_33621_36201885 | NC_021162.1    | Ca_kabuli_chr03 | 36201885                | AA                              | GG                | 1945925962               |
| SNP_P3_33622_36202222 | NC_021162.1    | Ca_kabuli_chr03 | 36202222                | TT                              | CC                | 1945925964               |
| SNP_P3_33623_36202225 | NC_021162.1    | Ca_kabuli_chr03 | 36202225                | AA                              | CC                | 1945925966               |
| SNP_P3_33624_36202249 | NC_021162.1    | Ca_kabuli_chr03 | 36202249                | GG                              | AA                | 1945925967               |
| SNP_P3_33625_36202502 | NC_021162.1    | Ca_kabuli_chr03 | 36202502                | TT                              | CC                | 1945925969               |
| SNP_P3_33626_36202607 | NC_021162.1    | Ca_kabuli_chr03 | 36202607                | AA                              | CC                | 1945925971               |
| SNP_P3_33627_36202648 | NC_021162.1    | Ca_kabuli_chr03 | 36202648                | TT                              | CC                | 1945925973               |
| SNP_P3_33628_36202944 | NC_021162.1    | Ca_kabuli_chr03 | 36202944                | AA                              | TT                | 1945925975               |
| SNP_P3_33629_36203026 | NC_021162.1    | Ca_kabuli_chr03 | 36203026                | AA                              | TT                | 1945925976               |
| SNP_P3_33630_36203410 | NC_021162.1    | Ca_kabuli_chr03 | 36203410                | TT                              | AA                | 1945925978               |
| SNP_P3_33635_36205508 | NC_021162.1    | Ca_kabuli_chr03 | 36205508                | TT                              | AA                | 1945925980               |
| SNP_P3_33636_36205943 | NC_021162.1    | Ca_kabuli_chr03 | 36205943                | AA                              | GG                | 1945925982               |
| SNP_P3_33637_36205957 | NC_021162.1    | Ca_kabuli_chr03 | 36205957                | TT                              | GG                | 1945925983               |
| SNP_P3_33639_36207178 | NC_021162.1    | Ca_kabuli_chr03 | 36207178                | AA                              | TT                | 1945925985               |
| SNP_P3_33641_36208506 | NC_021162.1    | Ca_kabuli_chr03 | 36208506                | AA                              | CC                | 1945925987               |
| SNP_P3_33642_36210436 | NC_021162.1    | Ca_kabuli_chr03 | 36210436                | GG                              | TT                | 1945925989               |
| SNP_P3_33644_36211482 | NC_021162.1    | Ca_kabuli_chr03 | 36211482                | CC                              | AA                | 1945925990               |
| SNP_P3_33645_36211500 | NC_021162.1    | Ca_kabuli_chr03 | 36211500                | CC                              | TT                | 1945925992               |
| SNP_P3_33646_36211513 | NC_021162.1    | Ca_kabuli_chr03 | 36211513                | CC                              | AA                | 1945925994               |
| SNP_P3_33647_36212007 | NC_021162.1    | Ca_kabuli_chr03 | 36212007                | CC                              | GG                | 1945925996               |
| SNP_P3_33649_36212100 | NC_021162.1    | Ca_kabuli_chr03 | 36212100                | AA                              | TT                | 1945925998               |
| SNP_P3_33650_36212363 | NC_021162.1    | Ca_kabuli_chr03 | 36212363                | GG                              | TT                | 1945925999               |
| SNP_P3_33651_36212376 | NC_021162.1    | Ca_kabuli_chr03 | 36212376                | CC                              | GG                | 1945926001               |

| SNPs IDs              | Chromosome IDs | Chromosomes     | Physical positions (bp) | CDC Frontier (Reference genome) | (Pusa 256 & HPNB) | NCBI SNPdb Accession IDs |
|-----------------------|----------------|-----------------|-------------------------|---------------------------------|-------------------|--------------------------|
| SNP_P3_33653_36212657 | NC_021162.1    | Ca_kabuli_chr03 | 36212657                | TT                              | GG                | 1945926003               |
| SNP_P3_33654_36212843 | NC_021162.1    | Ca_kabuli_chr03 | 36212843                | TT                              | AA                | 1945926005               |
| SNP_P3_33655_36213135 | NC_021162.1    | Ca_kabuli_chr03 | 36213135                | TT                              | CC                | 1945926006               |
| SNP_P3_33656_36213144 | NC_021162.1    | Ca_kabuli_chr03 | 36213144                | AA                              | GG                | 1945926008               |
| SNP_P3_33657_36213155 | NC_021162.1    | Ca_kabuli_chr03 | 36213155                | AA                              | GG                | 1945926010               |
| SNP_P3_33658_36213198 | NC_021162.1    | Ca_kabuli_chr03 | 36213198                | AA                              | GG                | 1945926012               |
| SNP_P3_33660_36213601 | NC_021162.1    | Ca_kabuli_chr03 | 36213601                | AA                              | GG                | 1945926014               |
| SNP_P3_33661_36213606 | NC_021162.1    | Ca_kabuli_chr03 | 36213606                | AA                              | CC                | 1945926015               |
| SNP_P3_33662_36213809 | NC_021162.1    | Ca_kabuli_chr03 | 36213809                | CC                              | TT                | 1945926017               |
| SNP_P3_33663_36213812 | NC_021162.1    | Ca_kabuli_chr03 | 36213812                | TT                              | CC                | 1945926019               |
| SNP_P3_33664_36213997 | NC_021162.1    | Ca_kabuli_chr03 | 36213997                | AA                              | GG                | 1945926021               |
| SNP_P3_33665_36214067 | NC_021162.1    | Ca_kabuli_chr03 | 36214067                | GG                              | AA                | 1945926022               |
| SNP_P3_33666_36214554 | NC_021162.1    | Ca_kabuli_chr03 | 36214554                | TT                              | CC                | 1945926024               |
| SNP_P3_33667_36215472 | NC_021162.1    | Ca_kabuli_chr03 | 36215472                | TT                              | AA                | 1945926026               |
| SNP_P3_33670_36215851 | NC_021162.1    | Ca_kabuli_chr03 | 36215851                | AA                              | GG                | 1945926028               |
| SNP_P3_33671_36215852 | NC_021162.1    | Ca_kabuli_chr03 | 36215852                | CC                              | TT                | 1945926030               |
| SNP_P3_33673_36216947 | NC_021162.1    | Ca_kabuli_chr03 | 36216947                | AA                              | CC                | 1945926031               |
| SNP_P3_33674_36217105 | NC_021162.1    | Ca_kabuli_chr03 | 36217105                | TT                              | CC                | 1945926033               |
| SNP_P3_33675_36217438 | NC_021162.1    | Ca_kabuli_chr03 | 36217438                | CC                              | TT                | 1945926035               |
| SNP_P3_33676_36217686 | NC_021162.1    | Ca_kabuli_chr03 | 36217686                | GG                              | AA                | 1945926037               |
| SNP_P3_33677_36217731 | NC_021162.1    | Ca_kabuli_chr03 | 36217731                | CC                              | AA                | 1945926038               |
| SNP_P3_33678_36218034 | NC_021162.1    | Ca_kabuli_chr03 | 36218034                | TT                              | CC                | 1945926040               |
| SNP_P3_33679_36218687 | NC_021162.1    | Ca_kabuli_chr03 | 36218687                | AA                              | CC                | 1945926042               |
| SNP_P3_33680_36219157 | NC_021162.1    | Ca_kabuli_chr03 | 36219157                | GG                              | TT                | 1945926044               |
| SNP_P3_33681_36219354 | NC_021162.1    | Ca_kabuli_chr03 | 36219354                | AA                              | GG                | 1945926046               |
| SNP_P3_33682_36219497 | NC_021162.1    | Ca_kabuli_chr03 | 36219497                | GG                              | AA                | 1945926047               |
| SNP_P3_33683_36219507 | NC_021162.1    | Ca_kabuli_chr03 | 36219507                | TT                              | GG                | 1945926049               |
| SNP_P3_33684_36219618 | NC_021162.1    | Ca_kabuli_chr03 | 36219618                | AA                              | GG                | 1945926051               |
| SNP_P3_33686_36219850 | NC_021162.1    | Ca_kabuli_chr03 | 36219850                | AA                              | GG                | 1945926053               |
| SNP_P3_33689_36220762 | NC_021162.1    | Ca_kabuli_chr03 | 36220762                | AA                              | CC                | 1945926054               |
| SNP_P3_33690_36221026 | NC_021162.1    | Ca_kabuli_chr03 | 36221026                | TT                              | GG                | 1945926056               |
| SNP_P3_33691_36221562 | NC_021162.1    | Ca_kabuli_chr03 | 36221562                | TT                              | AA                | 1945926058               |
| SNP_P3_33692_36221951 | NC_021162.1    | Ca_kabuli_chr03 | 36221951                | AA                              | CC                | 1945926060               |
| SNP_P3_33693_36221952 | NC_021162.1    | Ca_kabuli_chr03 | 36221952                | AA                              | GG                | 1945926062               |
| SNP_P3_33694_36222052 | NC_021162.1    | Ca_kabuli_chr03 | 36222052                | AA                              | CC                | 1945926063               |
| SNP_P3_33695_36222115 | NC_021162.1    | Ca_kabuli_chr03 | 36222115                | TT                              | CC                | 1945926065               |
| SNP_P3_33696_36222117 | NC_021162.1    | Ca_kabuli_chr03 | 36222117                | AA                              | GG                | 1945926067               |
| SNP_P3_33697_36222139 | NC_021162.1    | Ca_kabuli_chr03 | 36222139                | TT                              | CC                | 1945926069               |
| SNP_P3_33698_36222143 | NC_021162.1    | Ca_kabuli_chr03 | 36222143                | TT                              | GG                | 1945926070               |
| SNP_P3_33699_36222189 | NC_021162.1    | Ca_kabuli_chr03 | 36222189                | AA                              | GG                | 1945926072               |
| SNP_P3_33700_36222286 | NC_021162.1    | Ca_kabuli_chr03 | 36222286                | GG                              | TT                | 1945926074               |
| SNP_P3_33701_36222305 | NC_021162.1    | Ca_kabuli_chr03 | 36222305                | CC                              | TT                | 1945926076               |

| SNPs IDs              | Chromosome IDs | Chromosomes     | Physical positions (bp) | CDC Frontier (Reference genome) | (Pusa 256 & HPNB) | NCBI SNPdb Accession IDs |
|-----------------------|----------------|-----------------|-------------------------|---------------------------------|-------------------|--------------------------|
| SNP_P3_33702_36222329 | NC_021162.1    | Ca_kabuli_chr03 | 36222329                | GG                              | AA                | 1945926078               |
| SNP_P3_33703_36223350 | NC_021162.1    | Ca_kabuli_chr03 | 36223350                | AA                              | GG                | 1945926079               |
| SNP_P3_33705_36225173 | NC_021162.1    | Ca_kabuli_chr03 | 36225173                | AA                              | GG                | 1945926081               |
| SNP_P3_33706_36227458 | NC_021162.1    | Ca_kabuli_chr03 | 36227458                | CC                              | TT                | 1945926083               |
| SNP_P3_33707_36228932 | NC_021162.1    | Ca_kabuli_chr03 | 36228932                | CC                              | TT                | 1945926085               |
| SNP_P3_33708_36228933 | NC_021162.1    | Ca_kabuli_chr03 | 36228933                | AA                              | GG                | 1945926086               |
| SNP_P3_33709_36229031 | NC_021162.1    | Ca_kabuli_chr03 | 36229031                | GG                              | AA                | 1945926088               |
| SNP_P3_33710_36229961 | NC_021162.1    | Ca_kabuli_chr03 | 36229961                | AA                              | TT                | 1945926090               |
| SNP_P3_33711_36229993 | NC_021162.1    | Ca_kabuli_chr03 | 36229993                | AA                              | TT                | 1945926092               |
| SNP_P3_33712_36229994 | NC_021162.1    | Ca_kabuli_chr03 | 36229994                | GG                              | AA                | 1945926094               |
| SNP_P3_33713_36230023 | NC_021162.1    | Ca_kabuli_chr03 | 36230023                | TT                              | GG                | 1945926095               |
| SNP_P3_33714_36230362 | NC_021162.1    | Ca_kabuli_chr03 | 36230362                | TT                              | AA                | 1945926097               |
| SNP_P3_33715_36230422 | NC_021162.1    | Ca_kabuli_chr03 | 36230422                | GG                              | TT                | 1945926099               |
| SNP_P3_33716_36230451 | NC_021162.1    | Ca_kabuli_chr03 | 36230451                | GG                              | AA                | 1945926101               |
| SNP_P3_33717_36230452 | NC_021162.1    | Ca_kabuli_chr03 | 36230452                | TT                              | AA                | 1945926102               |
| SNP_P3_33720_36233790 | NC_021162.1    | Ca_kabuli_chr03 | 36233790                | CC                              | GG                | 1945926104               |
| SNP_P3_33721_36233872 | NC_021162.1    | Ca_kabuli_chr03 | 36233872                | AA                              | GG                | 1945926106               |
| SNP_P3_33722_36233892 | NC_021162.1    | Ca_kabuli_chr03 | 36233892                | AA                              | GG                | 1945926108               |
| SNP_P3_33723_36234180 | NC_021162.1    | Ca_kabuli_chr03 | 36234180                | TT                              | CC                | 1945926110               |
| SNP_P3_33724_36234192 | NC_021162.1    | Ca_kabuli_chr03 | 36234192                | CC                              | TT                | 1945926111               |
| SNP_P3_33725_36234961 | NC_021162.1    | Ca_kabuli_chr03 | 36234961                | AA                              | TT                | 1945926113               |
| SNP_P3_33726_36236496 | NC_021162.1    | Ca_kabuli_chr03 | 36236496                | CC                              | GG                | 1945926115               |
| SNP_P3_33727_36236945 | NC_021162.1    | Ca_kabuli_chr03 | 36236945                | TT                              | CC                | 1945926117               |
| SNP_P3_33728_36237216 | NC_021162.1    | Ca_kabuli_chr03 | 36237216                | CC                              | TT                | 1945926118               |
| SNP_P3_33730_36238138 | NC_021162.1    | Ca_kabuli_chr03 | 36238138                | AA                              | TT                | 1945926120               |
| SNP_P3_33731_36238629 | NC_021162.1    | Ca_kabuli_chr03 | 36238629                | TT                              | AA                | 1945926122               |
| SNP_P3_33732_36238632 | NC_021162.1    | Ca_kabuli_chr03 | 36238632                | TT                              | CC                | 1945926124               |
| SNP_P3_33733_36240348 | NC_021162.1    | Ca_kabuli_chr03 | 36240348                | AA                              | GG                | 1945926126               |
| SNP_P3_33734_36240379 | NC_021162.1    | Ca_kabuli_chr03 | 36240379                | AA                              | GG                | 1945926127               |
| SNP_P3_33735_36240392 | NC_021162.1    | Ca_kabuli_chr03 | 36240392                | GG                              | AA                | 1945926129               |
| SNP_P3_33737_36240530 | NC_021162.1    | Ca_kabuli_chr03 | 36240530                | TT                              | CC                | 1945926131               |
| SNP_P3_33738_36240531 | NC_021162.1    | Ca_kabuli_chr03 | 36240531                | TT                              | CC                | 1945926133               |
| SNP_P3_33739_36240532 | NC_021162.1    | Ca_kabuli_chr03 | 36240532                | GG                              | AA                | 1945926134               |
| SNP_P3_33740_36240533 | NC_021162.1    | Ca_kabuli_chr03 | 36240533                | AA                              | GG                | 1945926136               |
| SNP_P3_33741_36240668 | NC_021162.1    | Ca_kabuli_chr03 | 36240668                | GG                              | AA                | 1945926138               |
| SNP_P3_33742_36240707 | NC_021162.1    | Ca_kabuli_chr03 | 36240707                | TT                              | CC                | 1945926140               |
| SNP_P3_33743_36240728 | NC_021162.1    | Ca_kabuli_chr03 | 36240728                | TT                              | AA                | 1945926142               |
| SNP_P3_33744_36240729 | NC_021162.1    | Ca_kabuli_chr03 | 36240729                | TT                              | AA                | 1945926143               |
| SNP_P3_33745_36240730 | NC_021162.1    | Ca_kabuli_chr03 | 36240730                | TT                              | AA                | 1945926145               |
| SNP_P3_33746_36240734 | NC_021162.1    | Ca_kabuli_chr03 | 36240734                | TT                              | CC                | 1945926147               |
| SNP_P3_33747_36240740 | NC_021162.1    | Ca_kabuli_chr03 | 36240740                | AA                              | TT                | 1945926149               |
| SNP_P3_33748_36240751 | NC_021162.1    | Ca_kabuli_chr03 | 36240751                | AA                              | GG                | 1945926150               |

| SNPs IDs              | Chromosome IDs | Chromosomes     | Physical positions (bp) | CDC Frontier (Reference genome) | (Pusa 256 & HPNB) | NCBI SNPdb Accession IDs |
|-----------------------|----------------|-----------------|-------------------------|---------------------------------|-------------------|--------------------------|
| SNP_P3_33749_36240755 | NC_021162.1    | Ca_kabuli_chr03 | 36240755                | TT                              | CC                | 1945926152               |
| SNP_P3_33750_36240765 | NC_021162.1    | Ca_kabuli_chr03 | 36240765                | AA                              | GG                | 1945926154               |
| SNP_P3_33751_36240766 | NC_021162.1    | Ca_kabuli_chr03 | 36240766                | GG                              | AA                | 1945926156               |
| SNP_P3_33752_36240767 | NC_021162.1    | Ca_kabuli_chr03 | 36240767                | AA                              | GG                | 1945926158               |
| SNP_P3_33753_36241663 | NC_021162.1    | Ca_kabuli_chr03 | 36241663                | GG                              | TT                | 1945926159               |
| SNP_P3_33754_36242480 | NC_021162.1    | Ca_kabuli_chr03 | 36242480                | CC                              | GG                | 1945926161               |
| SNP_P3_33757_36243176 | NC_021162.1    | Ca_kabuli_chr03 | 36243176                | CC                              | TT                | 1945926163               |
| SNP_P3_33758_36243218 | NC_021162.1    | Ca_kabuli_chr03 | 36243218                | TT                              | AA                | 1945926165               |
| SNP_P3_33759_36244186 | NC_021162.1    | Ca_kabuli_chr03 | 36244186                | GG                              | CC                | 1945926166               |
| SNP_P3_33760_36244567 | NC_021162.1    | Ca_kabuli_chr03 | 36244567                | AA                              | GG                | 1945926168               |
| SNP_P3_33761_36245164 | NC_021162.1    | Ca_kabuli_chr03 | 36245164                | GG                              | TT                | 1945926170               |
| SNP_P3_33762_36246359 | NC_021162.1    | Ca_kabuli_chr03 | 36246359                | CC                              | TT                | 1945926172               |
| SNP_P3_33763_36249150 | NC_021162.1    | Ca_kabuli_chr03 | 36249150                | TT                              | AA                | 1945926174               |
| SNP_P3_33764_36249318 | NC_021162.1    | Ca_kabuli_chr03 | 36249318                | CC                              | TT                | 1945926175               |
| SNP_P3_33765_36249414 | NC_021162.1    | Ca_kabuli_chr03 | 36249414                | CC                              | TT                | 1945926177               |
| SNP_P3_33766_36249456 | NC_021162.1    | Ca_kabuli_chr03 | 36249456                | AA                              | TT                | 1945926179               |
| SNP_P3_33767_36249533 | NC_021162.1    | Ca_kabuli_chr03 | 36249533                | AA                              | TT                | 1945926181               |
| SNP_P3_33768_36249549 | NC_021162.1    | Ca_kabuli_chr03 | 36249549                | TT                              | AA                | 1945926182               |
| SNP_P3_33769_36249595 | NC_021162.1    | Ca_kabuli_chr03 | 36249595                | CC                              | TT                | 1945926184               |
| SNP_P3_33770_36249654 | NC_021162.1    | Ca_kabuli_chr03 | 36249654                | TT                              | AA                | 1945926186               |
| SNP_P3_33771_36251007 | NC_021162.1    | Ca_kabuli_chr03 | 36251007                | AA                              | TT                | 1945926188               |
| SNP_P3_33773_36252255 | NC_021162.1    | Ca_kabuli_chr03 | 36252255                | AA                              | TT                | 1945926190               |
| SNP_P3_33774_36252256 | NC_021162.1    | Ca_kabuli_chr03 | 36252256                | AA                              | CC                | 1945926191               |
| SNP_P3_33775_36253952 | NC_021162.1    | Ca_kabuli_chr03 | 36253952                | CC                              | TT                | 1945926193               |
| SNP_P3_33777_36255662 | NC_021162.1    | Ca_kabuli_chr03 | 36255662                | TT                              | CC                | 1945926195               |
| SNP_P3_33778_36255887 | NC_021162.1    | Ca_kabuli_chr03 | 36255887                | AA                              | CC                | 1945926197               |
| SNP_P3_33780_36256081 | NC_021162.1    | Ca_kabuli_chr03 | 36256081                | CC                              | TT                | 1945926198               |
| SNP_P3_33781_36256146 | NC_021162.1    | Ca_kabuli_chr03 | 36256146                | CC                              | TT                | 1945926200               |
| SNP_P3_33783_36257027 | NC_021162.1    | Ca_kabuli_chr03 | 36257027                | CC                              | TT                | 1945926202               |
| SNP_P3_33784_36257053 | NC_021162.1    | Ca_kabuli_chr03 | 36257053                | GG                              | TT                | 1945926204               |
| SNP_P3_33786_36258640 | NC_021162.1    | Ca_kabuli_chr03 | 36258640                | TT                              | CC                | 1945926206               |
| SNP_P3_33787_36259442 | NC_021162.1    | Ca_kabuli_chr03 | 36259442                | TT                              | CC                | 1945926207               |
| SNP_P3_33789_36262817 | NC_021162.1    | Ca_kabuli_chr03 | 36262817                | CC                              | AA                | 1945926209               |
| SNP_P3_33791_36263224 | NC_021162.1    | Ca_kabuli_chr03 | 36263224                | GG                              | AA                | 1945926211               |
| SNP_P3_33792_36263255 | NC_021162.1    | Ca_kabuli_chr03 | 36263255                | GG                              | AA                | 1945926213               |
| SNP_P3_33794_36263519 | NC_021162.1    | Ca_kabuli_chr03 | 36263519                | CC                              | TT                | 1945926215               |
| SNP_P3_33795_36263556 | NC_021162.1    | Ca_kabuli_chr03 | 36263556                | TT                              | CC                | 1945926216               |
| SNP_P3_33796_36263651 | NC_021162.1    | Ca_kabuli_chr03 | 36263651                | GG                              | TT                | 1945926218               |
| SNP_P3_33797_36264657 | NC_021162.1    | Ca_kabuli_chr03 | 36264657                | AA                              | CC                | 1945926220               |
| SNP_P3_33800_36268954 | NC_021162.1    | Ca_kabuli_chr03 | 36268954                | AA                              | TT                | 1945926222               |
| SNP_P3_33801_36268975 | NC_021162.1    | Ca_kabuli_chr03 | 36268975                | CC                              | GG                | 1945926223               |
| SNP_P3_33802_36269029 | NC_021162.1    | Ca_kabuli_chr03 | 36269029                | CC                              | TT                | 1945926225               |

| SNPs IDs              | Chromosome IDs | Chromosomes     | Physical positions (bp) | CDC Frontier (Reference genome) | (Pusa 256 & HPNB) | NCBI SNPdb Accession IDs |
|-----------------------|----------------|-----------------|-------------------------|---------------------------------|-------------------|--------------------------|
| SNP_P3_33803_36269103 | NC_021162.1    | Ca_kabuli_chr03 | 36269103                | CC                              | AA                | 1945926227               |
| SNP_P3_33804_36269405 | NC_021162.1    | Ca_kabuli_chr03 | 36269405                | TT                              | GG                | 1945926229               |
| SNP_P3_33806_36269552 | NC_021162.1    | Ca_kabuli_chr03 | 36269552                | TT                              | CC                | 1945926230               |
| SNP_P3_33807_36270527 | NC_021162.1    | Ca_kabuli_chr03 | 36270527                | AA                              | GG                | 1945926232               |
| SNP_P3_33808_36270564 | NC_021162.1    | Ca_kabuli_chr03 | 36270564                | AA                              | GG                | 1945926234               |
| SNP_P3_33810_36270580 | NC_021162.1    | Ca_kabuli_chr03 | 36270580                | TT                              | CC                | 1945926236               |
| SNP_P3_33811_36270654 | NC_021162.1    | Ca_kabuli_chr03 | 36270654                | CC                              | TT                | 1945926238               |
| SNP_P3_33812_36271407 | NC_021162.1    | Ca_kabuli_chr03 | 36271407                | GG                              | AA                | 1945926239               |
| SNP_P3_33813_36271662 | NC_021162.1    | Ca_kabuli_chr03 | 36271662                | GG                              | TT                | 1945926241               |
| SNP_P3_33814_36271669 | NC_021162.1    | Ca_kabuli_chr03 | 36271669                | TT                              | CC                | 1945926243               |
| SNP_P3_33815_36271702 | NC_021162.1    | Ca_kabuli_chr03 | 36271702                | AA                              | GG                | 1945926245               |
| SNP_P3_33816_36271709 | NC_021162.1    | Ca_kabuli_chr03 | 36271709                | GG                              | TT                | 1945926246               |
| SNP_P3_33817_36271711 | NC_021162.1    | Ca_kabuli_chr03 | 36271711                | GG                              | TT                | 1945926248               |
| SNP_P3_33818_36271972 | NC_021162.1    | Ca_kabuli_chr03 | 36271972                | CC                              | TT                | 1945926250               |
| SNP_P3_33819_36274572 | NC_021162.1    | Ca_kabuli_chr03 | 36274572                | AA                              | GG                | 1945926252               |
| SNP_P3_33820_36274580 | NC_021162.1    | Ca_kabuli_chr03 | 36274580                | AA                              | TT                | 1945926254               |
| SNP_P3_33821_36274654 | NC_021162.1    | Ca_kabuli_chr03 | 36274654                | CC                              | GG                | 1945926255               |
| SNP_P3_33823_36275133 | NC_021162.1    | Ca_kabuli_chr03 | 36275133                | TT                              | GG                | 1945926257               |
| SNP_P3_33825_36275220 | NC_021162.1    | Ca_kabuli_chr03 | 36275220                | GG                              | AA                | 1945926259               |
| SNP_P3_33826_36275223 | NC_021162.1    | Ca_kabuli_chr03 | 36275223                | AA                              | TT                | 1945926261               |
| SNP_P3_33827_36276533 | NC_021162.1    | Ca_kabuli_chr03 | 36276533                | TT                              | AA                | 1945926262               |
| SNP_P3_33828_36276534 | NC_021162.1    | Ca_kabuli_chr03 | 36276534                | GG                              | TT                | 1945926264               |
| SNP_P3_33829_36276695 | NC_021162.1    | Ca_kabuli_chr03 | 36276695                | CC                              | GG                | 1945926266               |
| SNP_P3_33830_36276717 | NC_021162.1    | Ca_kabuli_chr03 | 36276717                | TT                              | CC                | 1945926268               |
| SNP_P3_33831_36276724 | NC_021162.1    | Ca_kabuli_chr03 | 36276724                | GG                              | AA                | 1945926270               |
| SNP_P3_33832_36276857 | NC_021162.1    | Ca_kabuli_chr03 | 36276857                | GG                              | AA                | 1945926271               |
| SNP_P3_33833_36277115 | NC_021162.1    | Ca_kabuli_chr03 | 36277115                | CC                              | TT                | 1945926273               |
| SNP_P3_33834_36277364 | NC_021162.1    | Ca_kabuli_chr03 | 36277364                | CC                              | TT                | 1945926275               |
| SNP_P3_33837_36278886 | NC_021162.1    | Ca_kabuli_chr03 | 36278886                | AA                              | GG                | 1945926277               |
| SNP_P3_33838_36279802 | NC_021162.1    | Ca_kabuli_chr03 | 36279802                | TT                              | GG                | 1945926278               |
| SNP_P3_33839_36281877 | NC_021162.1    | Ca_kabuli_chr03 | 36281877                | CC                              | TT                | 1945926280               |
| SNP_P3_33840_36281944 | NC_021162.1    | Ca_kabuli_chr03 | 36281944                | TT                              | CC                | 1945926282               |
| SNP_P3_33841_36284477 | NC_021162.1    | Ca_kabuli_chr03 | 36284477                | GG                              | AA                | 1945926284               |
| SNP_P3_33843_36286165 | NC_021162.1    | Ca_kabuli_chr03 | 36286165                | AA                              | GG                | 1945926286               |
| SNP_P3_33844_36286358 | NC_021162.1    | Ca_kabuli_chr03 | 36286358                | GG                              | AA                | 1945926287               |
| SNP_P3_33845_36286372 | NC_021162.1    | Ca_kabuli_chr03 | 36286372                | CC                              | TT                | 1945926289               |
| SNP_P3_33846_36287403 | NC_021162.1    | Ca_kabuli_chr03 | 36287403                | GG                              | AA                | 1945926291               |
| SNP_P3_33847_36287437 | NC_021162.1    | Ca_kabuli_chr03 | 36287437                | GG                              | AA                | 1945926293               |
| SNP_P3_33848_36287467 | NC_021162.1    | Ca_kabuli_chr03 | 36287467                | CC                              | TT                | 1945926294               |
| SNP_P3_33849_36287670 | NC_021162.1    | Ca_kabuli_chr03 | 36287670                | GG                              | AA                | 1945926296               |
| SNP_P3_33850_36287712 | NC_021162.1    | Ca_kabuli_chr03 | 36287712                | CC                              | TT                | 1945926298               |
| SNP_P3_33851_36287714 | NC_021162.1    | Ca_kabuli_chr03 | 36287714                | CC                              | TT                | 1945926300               |

| SNPs IDs              | Chromosome IDs | Chromosomes     | Physical positions (bp) | CDC Frontier (Reference genome) | (Pusa 256 & HPNB) | NCBI SNPdb Accession IDs |
|-----------------------|----------------|-----------------|-------------------------|---------------------------------|-------------------|--------------------------|
| SNP_P3_33852_36287722 | NC_021162.1    | Ca_kabuli_chr03 | 36287722                | AA                              | GG                | 1945926302               |
| SNP_P3_33853_36287742 | NC_021162.1    | Ca_kabuli_chr03 | 36287742                | GG                              | AA                | 1945926303               |
| SNP_P3_33854_36287748 | NC_021162.1    | Ca_kabuli_chr03 | 36287748                | AA                              | GG                | 1945926305               |
| SNP_P3_33855_36287751 | NC_021162.1    | Ca_kabuli_chr03 | 36287751                | AA                              | CC                | 1945926307               |
| SNP_P3_33856_36287769 | NC_021162.1    | Ca_kabuli_chr03 | 36287769                | TT                              | CC                | 1945926309               |
| SNP_P3_33857_36289697 | NC_021162.1    | Ca_kabuli_chr03 | 36289697                | TT                              | GG                | 1945926310               |
| SNP_P3_33858_36289706 | NC_021162.1    | Ca_kabuli_chr03 | 36289706                | TT                              | CC                | 1945926312               |
| SNP_P3_33859_36290619 | NC_021162.1    | Ca_kabuli_chr03 | 36290619                | TT                              | AA                | 1945926314               |
| SNP_P3_33860_36290621 | NC_021162.1    | Ca_kabuli_chr03 | 36290621                | TT                              | AA                | 1945926316               |
| SNP_P3_33861_36290696 | NC_021162.1    | Ca_kabuli_chr03 | 36290696                | CC                              | TT                | 1945926318               |
| SNP_P3_33862_36290704 | NC_021162.1    | Ca_kabuli_chr03 | 36290704                | AA                              | GG                | 1945926319               |
| SNP_P3_33863_36290709 | NC_021162.1    | Ca_kabuli_chr03 | 36290709                | TT                              | CC                | 1945926321               |
| SNP_P3_33864_36290760 | NC_021162.1    | Ca_kabuli_chr03 | 36290760                | CC                              | TT                | 1945926323               |
| SNP_P3_33865_36290853 | NC_021162.1    | Ca_kabuli_chr03 | 36290853                | AA                              | CC                | 1945926325               |
| SNP_P3_33866_36290859 | NC_021162.1    | Ca_kabuli_chr03 | 36290859                | GG                              | AA                | 1945926326               |
| SNP_P3_33867_36290882 | NC_021162.1    | Ca_kabuli_chr03 | 36290882                | TT                              | CC                | 1945926328               |
| SNP_P3_33868_36290887 | NC_021162.1    | Ca_kabuli_chr03 | 36290887                | GG                              | CC                | 1945926330               |
| SNP_P3_33869_36290924 | NC_021162.1    | Ca_kabuli_chr03 | 36290924                | TT                              | GG                | 1945926332               |
| SNP_P3_33870_36290927 | NC_021162.1    | Ca_kabuli_chr03 | 36290927                | TT                              | AA                | 1945926334               |
| SNP_P3_33871_36290928 | NC_021162.1    | Ca_kabuli_chr03 | 36290928                | CC                              | TT                | 1945926335               |
| SNP_P3_33872_36291051 | NC_021162.1    | Ca_kabuli_chr03 | 36291051                | CC                              | TT                | 1945926337               |
| SNP_P3_33874_36291201 | NC_021162.1    | Ca_kabuli_chr03 | 36291201                | TT                              | CC                | 1945926339               |
| SNP_P3_33876_36303055 | NC_021162.1    | Ca_kabuli_chr03 | 36303055                | CC                              | TT                | 1945926341               |
| SNP_P3_33877_36303093 | NC_021162.1    | Ca_kabuli_chr03 | 36303093                | TT                              | CC                | 1945926342               |
| SNP_P3_33878_36304309 | NC_021162.1    | Ca_kabuli_chr03 | 36304309                | AA                              | GG                | 1945926344               |
| SNP_P3_33879_36304567 | NC_021162.1    | Ca_kabuli_chr03 | 36304567                | CC                              | TT                | 1945926346               |
| SNP_P3_33880_36304592 | NC_021162.1    | Ca_kabuli_chr03 | 36304592                | GG                              | AA                | 1945926348               |
| SNP_P3_33881_36304679 | NC_021162.1    | Ca_kabuli_chr03 | 36304679                | AA                              | GG                | 1945926350               |
| SNP_P3_33883_36308398 | NC_021162.1    | Ca_kabuli_chr03 | 36308398                | AA                              | GG                | 1945926351               |
| SNP_P3_33885_36308470 | NC_021162.1    | Ca_kabuli_chr03 | 36308470                | CC                              | TT                | 1945926353               |
| SNP_P3_33886_36308840 | NC_021162.1    | Ca_kabuli_chr03 | 36308840                | TT                              | GG                | 1945926355               |
| SNP_P3_33887_36309895 | NC_021162.1    | Ca_kabuli_chr03 | 36309895                | TT                              | CC                | 1945926357               |
| SNP_P3_33888_36312300 | NC_021162.1    | Ca_kabuli_chr03 | 36312300                | GG                              | TT                | 1945926358               |
| SNP_P3_33889_36313050 | NC_021162.1    | Ca_kabuli_chr03 | 36313050                | GG                              | CC                | 1945926360               |
| SNP_P3_33891_36320300 | NC_021162.1    | Ca_kabuli_chr03 | 36320300                | GG                              | AA                | 1945926362               |
| SNP_P3_33892_36321537 | NC_021162.1    | Ca_kabuli_chr03 | 36321537                | CC                              | AA                | 1945926364               |
| SNP_P3_33893_36321551 | NC_021162.1    | Ca_kabuli_chr03 | 36321551                | CC                              | TT                | 1945926366               |
| SNP_P3_33894_36324057 | NC_021162.1    | Ca_kabuli_chr03 | 36324057                | AA                              | TT                | 1945926367               |
| SNP_P3_33895_36324074 | NC_021162.1    | Ca_kabuli_chr03 | 36324074                | TT                              | GG                | 1945926369               |
| SNP_P3_33896_36324805 | NC_021162.1    | Ca_kabuli_chr03 | 36324805                | AA                              | TT                | 1945926371               |
| SNP_P3_33898_36324833 | NC_021162.1    | Ca_kabuli_chr03 | 36324833                | CC                              | TT                | 1945926373               |
| SNP_P3_33899_36324894 | NC_021162.1    | Ca_kabuli_chr03 | 36324894                | AA                              | CC                | 1945926374               |



| SNPs IDs              | Chromosome IDs | Chromosomes     | Physical positions (bp) | CDC Frontier (Reference genome) | (Pusa 256 & HPNB) | NCBI SNPdb Accession IDs |
|-----------------------|----------------|-----------------|-------------------------|---------------------------------|-------------------|--------------------------|
| SNP_P3_33900_36326762 | NC_021162.1    | Ca_kabuli_chr03 | 36326762                | TT                              | CC                | 1945926376               |
| SNP_P3_33901_36326788 | NC_021162.1    | Ca_kabuli_chr03 | 36326788                | AA                              | GG                | 1945926378               |
| SNP_P3_33902_36326972 | NC_021162.1    | Ca_kabuli_chr03 | 36326972                | AA                              | GG                | 1945926380               |
| SNP_P3_33904_36327134 | NC_021162.1    | Ca_kabuli_chr03 | 36327134                | CC                              | GG                | 1945926382               |
| SNP_P3_33905_36327149 | NC_021162.1    | Ca_kabuli_chr03 | 36327149                | CC                              | TT                | 1945926383               |
| SNP_P3_33907_36331358 | NC_021162.1    | Ca_kabuli_chr03 | 36331358                | AA                              | TT                | 1945926385               |
| SNP_P3_33908_36331375 | NC_021162.1    | Ca_kabuli_chr03 | 36331375                | TT                              | GG                | 1945926387               |
| SNP_P3_33910_36332125 | NC_021162.1    | Ca_kabuli_chr03 | 36332125                | CC                              | TT                | 1945926389               |
| SNP_P3_33911_36332614 | NC_021162.1    | Ca_kabuli_chr03 | 36332614                | TT                              | CC                | 1945926390               |
| SNP_P3_33912_36333331 | NC_021162.1    | Ca_kabuli_chr03 | 36333331                | AA                              | TT                | 1945926392               |
| SNP_P3_33914_36334653 | NC_021162.1    | Ca_kabuli_chr03 | 36334653                | AA                              | GG                | 1945926394               |
| SNP_P3_33915_36334745 | NC_021162.1    | Ca_kabuli_chr03 | 36334745                | CC                              | TT                | 1945926396               |
| SNP_P3_33917_36334782 | NC_021162.1    | Ca_kabuli_chr03 | 36334782                | GG                              | AA                | 1945926398               |
| SNP_P3_33918_36334930 | NC_021162.1    | Ca_kabuli_chr03 | 36334930                | AA                              | GG                | 1945926399               |
| SNP_P3_33919_36335032 | NC_021162.1    | Ca_kabuli_chr03 | 36335032                | GG                              | TT                | 1945926401               |
| SNP_P3_33920_36336618 | NC_021162.1    | Ca_kabuli_chr03 | 36336618                | TT                              | AA                | 1945926403               |
| SNP_P3_33921_36336644 | NC_021162.1    | Ca_kabuli_chr03 | 36336644                | AA                              | TT                | 1945926405               |
| SNP_P3_33922_36336707 | NC_021162.1    | Ca_kabuli_chr03 | 36336707                | GG                              | CC                | 1945926407               |
| SNP_P3_33924_36338688 | NC_021162.1    | Ca_kabuli_chr03 | 36338688                | AA                              | TT                | 1945926408               |
| SNP_P3_33925_36339400 | NC_021162.1    | Ca_kabuli_chr03 | 36339400                | GG                              | AA                | 1945926410               |
| SNP_P3_33926_36340093 | NC_021162.1    | Ca_kabuli_chr03 | 36340093                | TT                              | AA                | 1945926412               |
| SNP_P3_33928_36341458 | NC_021162.1    | Ca_kabuli_chr03 | 36341458                | TT                              | AA                | 1945926414               |
| SNP_P3_33929_36342037 | NC_021162.1    | Ca_kabuli_chr03 | 36342037                | TT                              | GG                | 1945926415               |
| SNP_P3_33931_36342254 | NC_021162.1    | Ca_kabuli_chr03 | 36342254                | TT                              | CC                | 1945926417               |
| SNP_P3_33932_36342276 | NC_021162.1    | Ca_kabuli_chr03 | 36342276                | GG                              | AA                | 1945926419               |
| SNP_P3_33933_36342323 | NC_021162.1    | Ca_kabuli_chr03 | 36342323                | GG                              | AA                | 1945926421               |
| SNP_P3_33934_36342325 | NC_021162.1    | Ca_kabuli_chr03 | 36342325                | AA                              | CC                | 1945926422               |
| SNP_P3_33935_36342397 | NC_021162.1    | Ca_kabuli_chr03 | 36342397                | TT                              | CC                | 1945926424               |
| SNP_P3_33937_36342446 | NC_021162.1    | Ca_kabuli_chr03 | 36342446                | CC                              | GG                | 1945926426               |
| SNP_P3_33938_36342587 | NC_021162.1    | Ca_kabuli_chr03 | 36342587                | TT                              | GG                | 1945926428               |
| SNP_P3_33939_36342815 | NC_021162.1    | Ca_kabuli_chr03 | 36342815                | TT                              | CC                | 1945926430               |
| SNP_P3_33940_36343337 | NC_021162.1    | Ca_kabuli_chr03 | 36343337                | TT                              | AA                | 1945926431               |
| SNP_P3_33941_36343579 | NC_021162.1    | Ca_kabuli_chr03 | 36343579                | CC                              | TT                | 1945926433               |
| SNP_P3_33942_36343888 | NC_021162.1    | Ca_kabuli_chr03 | 36343888                | GG                              | AA                | 1945926435               |
| SNP_P3_33944_36345983 | NC_021162.1    | Ca_kabuli_chr03 | 36345983                | CC                              | TT                | 1945926437               |
| SNP_P3_33945_36345985 | NC_021162.1    | Ca_kabuli_chr03 | 36345985                | CC                              | TT                | 1945926438               |
| SNP_P3_33946_36347925 | NC_021162.1    | Ca_kabuli_chr03 | 36347925                | CC                              | TT                | 1945926440               |
| SNP_P3_33947_36348085 | NC_021162.1    | Ca_kabuli_chr03 | 36348085                | TT                              | CC                | 1945926442               |
| SNP_P3_33948_36348089 | NC_021162.1    | Ca_kabuli_chr03 | 36348089                | GG                              | AA                | 1945926444               |
| SNP_P3_33949_36348092 | NC_021162.1    | Ca_kabuli_chr03 | 36348092                | CC                              | TT                | 1945926446               |
| SNP_P3_33950_36348093 | NC_021162.1    | Ca_kabuli_chr03 | 36348093                | AA                              | GG                | 1945926447               |
| SNP_P3_33951_36349045 | NC_021162.1    | Ca_kabuli_chr03 | 36349045                | TT                              | CC                | 1945926449               |

| SNPs IDs              | Chromosome IDs | Chromosomes     | Physical positions (bp) | CDC Frontier (Reference genome) | (Pusa 256 & HPNB) | NCBI SNPdb Accession IDs |
|-----------------------|----------------|-----------------|-------------------------|---------------------------------|-------------------|--------------------------|
| SNP_P3_33952_36349087 | NC_021162.1    | Ca_kabuli_chr03 | 36349087                | AA                              | TT                | 1945926451               |
| SNP_P3_33953_36349116 | NC_021162.1    | Ca_kabuli_chr03 | 36349116                | CC                              | GG                | 1945926453               |
| SNP_P3_33954_36349173 | NC_021162.1    | Ca_kabuli_chr03 | 36349173                | CC                              | TT                | 1945926454               |
| SNP_P3_33955_36349174 | NC_021162.1    | Ca_kabuli_chr03 | 36349174                | AA                              | CC                | 1945926456               |
| SNP_P3_33956_36349182 | NC_021162.1    | Ca_kabuli_chr03 | 36349182                | AA                              | GG                | 1945926458               |
| SNP_P3_33957_36349187 | NC_021162.1    | Ca_kabuli_chr03 | 36349187                | TT                              | CC                | 1945926460               |
| SNP_P3_33958_36349233 | NC_021162.1    | Ca_kabuli_chr03 | 36349233                | CC                              | TT                | 1945926462               |
| SNP_P3_33959_36349282 | NC_021162.1    | Ca_kabuli_chr03 | 36349282                | TT                              | CC                | 1945926463               |
| SNP_P3_33961_36349346 | NC_021162.1    | Ca_kabuli_chr03 | 36349346                | TT                              | CC                | 1945926465               |
| SNP_P3_33962_36349442 | NC_021162.1    | Ca_kabuli_chr03 | 36349442                | AA                              | TT                | 1945926467               |
| SNP_P3_33963_36349658 | NC_021162.1    | Ca_kabuli_chr03 | 36349658                | CC                              | AA                | 1945926469               |
| SNP_P3_33964_36350559 | NC_021162.1    | Ca_kabuli_chr03 | 36350559                | CC                              | GG                | 1945926470               |
| SNP_P3_33965_36351769 | NC_021162.1    | Ca_kabuli_chr03 | 36351769                | CC                              | TT                | 1945926472               |
| SNP_P3_33966_36351775 | NC_021162.1    | Ca_kabuli_chr03 | 36351775                | TT                              | AA                | 1945926474               |
| SNP_P3_33967_36351780 | NC_021162.1    | Ca_kabuli_chr03 | 36351780                | GG                              | TT                | 1945926476               |
| SNP_P3_33968_36351797 | NC_021162.1    | Ca_kabuli_chr03 | 36351797                | CC                              | TT                | 1945926478               |
| SNP_P3_33969_36351801 | NC_021162.1    | Ca_kabuli_chr03 | 36351801                | GG                              | AA                | 1945926479               |
| SNP_P3_33970_36351802 | NC_021162.1    | Ca_kabuli_chr03 | 36351802                | AA                              | GG                | 1945926481               |
| SNP_P3_33971_36351865 | NC_021162.1    | Ca_kabuli_chr03 | 36351865                | TT                              | CC                | 1945926483               |
| SNP_P3_33972_36353065 | NC_021162.1    | Ca_kabuli_chr03 | 36353065                | AA                              | TT                | 1945926485               |
| SNP_P3_33973_36353359 | NC_021162.1    | Ca_kabuli_chr03 | 36353359                | TT                              | CC                | 1945926486               |
| SNP_P3_33975_36353555 | NC_021162.1    | Ca_kabuli_chr03 | 36353555                | CC                              | AA                | 1945926488               |
| SNP_P3_33976_36353564 | NC_021162.1    | Ca_kabuli_chr03 | 36353564                | TT                              | AA                | 1945926490               |
| SNP_P3_33977_36353662 | NC_021162.1    | Ca_kabuli_chr03 | 36353662                | CC                              | GG                | 1945926492               |
| SNP_P3_33978_36353664 | NC_021162.1    | Ca_kabuli_chr03 | 36353664                | CC                              | GG                | 1945926494               |
| SNP_P3_33979_36354328 | NC_021162.1    | Ca_kabuli_chr03 | 36354328                | GG                              | AA                | 1945926495               |
| SNP_P3_33980_36360457 | NC_021162.1    | Ca_kabuli_chr03 | 36360457                | AA                              | TT                | 1945926497               |
| SNP_P3_33981_36361540 | NC_021162.1    | Ca_kabuli_chr03 | 36361540                | AA                              | GG                | 1945926499               |
| SNP_P3_33983_36361604 | NC_021162.1    | Ca_kabuli_chr03 | 36361604                | CC                              | TT                | 1945926501               |
| SNP_P3_33985_36361902 | NC_021162.1    | Ca_kabuli_chr03 | 36361902                | GG                              | CC                | 1945926502               |
| SNP_P3_33986_36362352 | NC_021162.1    | Ca_kabuli_chr03 | 36362352                | CC                              | GG                | 1945926504               |
| SNP_P3_33987_36363273 | NC_021162.1    | Ca_kabuli_chr03 | 36363273                | AA                              | CC                | 1945926506               |
| SNP_P3_33989_36367049 | NC_021162.1    | Ca_kabuli_chr03 | 36367049                | AA                              | GG                | 1945926508               |
| SNP_P3_33990_36367411 | NC_021162.1    | Ca_kabuli_chr03 | 36367411                | AA                              | GG                | 1945926510               |
| SNP_P3_33991_36367659 | NC_021162.1    | Ca_kabuli_chr03 | 36367659                | TT                              | AA                | 1945926511               |
| SNP_P3_33992_36369774 | NC_021162.1    | Ca_kabuli_chr03 | 36369774                | TT                              | AA                | 1945926513               |
| SNP_P3_33993_36369816 | NC_021162.1    | Ca_kabuli_chr03 | 36369816                | GG                              | CC                | 1945926515               |
| SNP_P3_33994_36371332 | NC_021162.1    | Ca_kabuli_chr03 | 36371332                | GG                              | AA                | 1945926517               |
| SNP_P3_33995_36371373 | NC_021162.1    | Ca_kabuli_chr03 | 36371373                | CC                              | AA                | 1945926518               |
| SNP_P3_33996_36371515 | NC_021162.1    | Ca_kabuli_chr03 | 36371515                | TT                              | AA                | 1945926520               |
| SNP_P3_33997_36371539 | NC_021162.1    | Ca_kabuli_chr03 | 36371539                | TT                              | CC                | 1945926522               |
| SNP_P3_33999_36371645 | NC_021162.1    | Ca_kabuli_chr03 | 36371645                | TT                              | GG                | 1945926524               |

| SNPs IDs              | Chromosome IDs | Chromosomes     | Physical positions (bp) | CDC Frontier (Reference genome) | (Pusa 256 & HPNB) | NCBI SNPdb Accession IDs |
|-----------------------|----------------|-----------------|-------------------------|---------------------------------|-------------------|--------------------------|
| SNP_P3_34000_36371661 | NC_021162.1    | Ca_kabuli_chr03 | 36371661                | GG                              | CC                | 1945926526               |
| SNP_P3_34002_36371887 | NC_021162.1    | Ca_kabuli_chr03 | 36371887                | TT                              | CC                | 1945926527               |
| SNP_P3_34003_36372074 | NC_021162.1    | Ca_kabuli_chr03 | 36372074                | TT                              | CC                | 1945926529               |
| SNP_P3_34004_36372479 | NC_021162.1    | Ca_kabuli_chr03 | 36372479                | AA                              | TT                | 1945926531               |
| SNP_P3_34005_36372714 | NC_021162.1    | Ca_kabuli_chr03 | 36372714                | GG                              | AA                | 1945926533               |
| SNP_P3_34006_36374837 | NC_021162.1    | Ca_kabuli_chr03 | 36374837                | TT                              | CC                | 1945926534               |
| SNP_P3_34007_36374864 | NC_021162.1    | Ca_kabuli_chr03 | 36374864                | TT                              | CC                | 1945926536               |
| SNP_P3_34008_36375069 | NC_021162.1    | Ca_kabuli_chr03 | 36375069                | AA                              | CC                | 1945926538               |
| SNP_P3_34009_36376206 | NC_021162.1    | Ca_kabuli_chr03 | 36376206                | CC                              | GG                | 1945926540               |
| SNP_P3_34011_36377262 | NC_021162.1    | Ca_kabuli_chr03 | 36377262                | GG                              | TT                | 1945926542               |
| SNP_P3_34012_36377809 | NC_021162.1    | Ca_kabuli_chr03 | 36377809                | GG                              | AA                | 1945926543               |
| SNP_P3_34013_36377837 | NC_021162.1    | Ca_kabuli_chr03 | 36377837                | CC                              | AA                | 1945926545               |
| SNP_P3_34014_36377857 | NC_021162.1    | Ca_kabuli_chr03 | 36377857                | TT                              | CC                | 1945926547               |
| SNP_P3_34015_36378078 | NC_021162.1    | Ca_kabuli_chr03 | 36378078                | AA                              | GG                | 1945926549               |
| SNP_P3_34016_36378678 | NC_021162.1    | Ca_kabuli_chr03 | 36378678                | TT                              | AA                | 1945926550               |
| SNP_P3_34017_36378872 | NC_021162.1    | Ca_kabuli_chr03 | 36378872                | GG                              | AA                | 1945926552               |
| SNP_P3_34018_36379672 | NC_021162.1    | Ca_kabuli_chr03 | 36379672                | CC                              | TT                | 1945926554               |
| SNP_P3_34020_36381331 | NC_021162.1    | Ca_kabuli_chr03 | 36381331                | CC                              | AA                | 1945926556               |
| SNP_P3_34021_36381395 | NC_021162.1    | Ca_kabuli_chr03 | 36381395                | TT                              | GG                | 1945926558               |
| SNP_P3_34022_36381571 | NC_021162.1    | Ca_kabuli_chr03 | 36381571                | CC                              | TT                | 1945926559               |
| SNP_P3_34023_36381808 | NC_021162.1    | Ca_kabuli_chr03 | 36381808                | AA                              | GG                | 1945926561               |
| SNP_P3_34024_36381823 | NC_021162.1    | Ca_kabuli_chr03 | 36381823                | CC                              | TT                | 1945926563               |
| SNP_P3_34025_36381826 | NC_021162.1    | Ca_kabuli_chr03 | 36381826                | AA                              | GG                | 1945926565               |
| SNP_P3_34026_36381892 | NC_021162.1    | Ca_kabuli_chr03 | 36381892                | AA                              | GG                | 1945926566               |
| SNP_P3_34027_36381912 | NC_021162.1    | Ca_kabuli_chr03 | 36381912                | CC                              | GG                | 1945926568               |
| SNP_P3_34028_36382216 | NC_021162.1    | Ca_kabuli_chr03 | 36382216                | AA                              | GG                | 1945926570               |
| SNP_P3_34029_36382573 | NC_021162.1    | Ca_kabuli_chr03 | 36382573                | AA                              | GG                | 1945926572               |
| SNP_P3_34030_36382584 | NC_021162.1    | Ca_kabuli_chr03 | 36382584                | AA                              | GG                | 1945926574               |
| SNP_P3_34031_36382752 | NC_021162.1    | Ca_kabuli_chr03 | 36382752                | GG                              | AA                | 1945926575               |
| SNP_P3_34032_36382992 | NC_021162.1    | Ca_kabuli_chr03 | 36382992                | TT                              | CC                | 1945926577               |
| SNP_P3_34033_36383024 | NC_021162.1    | Ca_kabuli_chr03 | 36383024                | AA                              | CC                | 1945926579               |
| SNP_P3_34035_36383687 | NC_021162.1    | Ca_kabuli_chr03 | 36383687                | GG                              | AA                | 1945926581               |
| SNP_P3_34036_36383808 | NC_021162.1    | Ca_kabuli_chr03 | 36383808                | TT                              | AA                | 1945926582               |
| SNP_P3_34038_36384252 | NC_021162.1    | Ca_kabuli_chr03 | 36384252                | GG                              | AA                | 1945926584               |
| SNP_P3_34039_36384840 | NC_021162.1    | Ca_kabuli_chr03 | 36384840                | AA                              | GG                | 1945926586               |
| SNP_P3_34040_36384909 | NC_021162.1    | Ca_kabuli_chr03 | 36384909                | GG                              | AA                | 1945926588               |
| SNP_P3_34041_36384929 | NC_021162.1    | Ca_kabuli_chr03 | 36384929                | AA                              | GG                | 1945926590               |
| SNP_P3_34042_36385318 | NC_021162.1    | Ca_kabuli_chr03 | 36385318                | TT                              | GG                | 1945926591               |
| SNP_P3_34043_36385325 | NC_021162.1    | Ca_kabuli_chr03 | 36385325                | TT                              | GG                | 1945926593               |
| SNP_P3_34044_36386074 | NC_021162.1    | Ca_kabuli_chr03 | 36386074                | GG                              | AA                | 1945926595               |
| SNP_P3_34045_36387908 | NC_021162.1    | Ca_kabuli_chr03 | 36387908                | TT                              | CC                | 1945926597               |
| SNP_P3_34046_36389601 | NC_021162.1    | Ca_kabuli_chr03 | 36389601                | CC                              | AA                | 1945926598               |

| SNPs IDs              | Chromosome IDs | Chromosomes     | Physical positions (bp) | CDC Frontier (Reference genome) | (Pusa 256 & HPNB) | NCBI SNPdb Accession IDs |
|-----------------------|----------------|-----------------|-------------------------|---------------------------------|-------------------|--------------------------|
| SNP_P3_34048_36392070 | NC_021162.1    | Ca_kabuli_chr03 | 36392070                | TT                              | CC                | 1945926600               |
| SNP_P3_34049_36392074 | NC_021162.1    | Ca_kabuli_chr03 | 36392074                | GG                              | TT                | 1945926602               |
| SNP_P3_34051_36398461 | NC_021162.1    | Ca_kabuli_chr03 | 36398461                | TT                              | CC                | 1945926604               |
| SNP_P3_34052_36398695 | NC_021162.1    | Ca_kabuli_chr03 | 36398695                | AA                              | GG                | 1945926606               |
| SNP_P3_34053_36398696 | NC_021162.1    | Ca_kabuli_chr03 | 36398696                | TT                              | GG                | 1945926607               |
| SNP_P3_34054_36399415 | NC_021162.1    | Ca_kabuli_chr03 | 36399415                | TT                              | CC                | 1945926609               |
| SNP_P3_34055_36399707 | NC_021162.1    | Ca_kabuli_chr03 | 36399707                | CC                              | TT                | 1945926611               |
| SNP_P3_34056_36399765 | NC_021162.1    | Ca_kabuli_chr03 | 36399765                | TT                              | CC                | 1945926613               |
| SNP_P3_34057_36401758 | NC_021162.1    | Ca_kabuli_chr03 | 36401758                | TT                              | CC                | 1945926614               |
| SNP_P3_34059_36402821 | NC_021162.1    | Ca_kabuli_chr03 | 36402821                | AA                              | GG                | 1945926616               |
| SNP_P3_34060_36403086 | NC_021162.1    | Ca_kabuli_chr03 | 36403086                | TT                              | GG                | 1945926618               |
| SNP_P3_34061_36403147 | NC_021162.1    | Ca_kabuli_chr03 | 36403147                | CC                              | GG                | 1945926620               |
| SNP_P3_34063_36403551 | NC_021162.1    | Ca_kabuli_chr03 | 36403551                | AA                              | GG                | 1945926622               |
| SNP_P3_34065_36403586 | NC_021162.1    | Ca_kabuli_chr03 | 36403586                | AA                              | GG                | 1945926623               |
| SNP_P3_34066_36403726 | NC_021162.1    | Ca_kabuli_chr03 | 36403726                | TT                              | GG                | 1945926625               |
| SNP_P3_34067_36405456 | NC_021162.1    | Ca_kabuli_chr03 | 36405456                | CC                              | TT                | 1945926627               |
| SNP_P3_34068_36406251 | NC_021162.1    | Ca_kabuli_chr03 | 36406251                | CC                              | TT                | 1945926629               |
| SNP_P3_34069_36408142 | NC_021162.1    | Ca_kabuli_chr03 | 36408142                | AA                              | CC                | 1945926630               |
| SNP_P3_34070_36409162 | NC_021162.1    | Ca_kabuli_chr03 | 36409162                | GG                              | AA                | 1945926632               |
| SNP_P3_34071_36409627 | NC_021162.1    | Ca_kabuli_chr03 | 36409627                | GG                              | TT                | 1945926634               |
| SNP_P3_34072_36410067 | NC_021162.1    | Ca_kabuli_chr03 | 36410067                | CC                              | TT                | 1945926636               |
| SNP_P3_34073_36411969 | NC_021162.1    | Ca_kabuli_chr03 | 36411969                | TT                              | CC                | 1945926638               |
| SNP_P3_34074_36413350 | NC_021162.1    | Ca_kabuli_chr03 | 36413350                | CC                              | AA                | 1945926639               |
| SNP_P3_34076_36413575 | NC_021162.1    | Ca_kabuli_chr03 | 36413575                | AA                              | CC                | 1945926641               |
| SNP_P3_34077_36413801 | NC_021162.1    | Ca_kabuli_chr03 | 36413801                | TT                              | CC                | 1945926643               |
| SNP_P3_34078_36414017 | NC_021162.1    | Ca_kabuli_chr03 | 36414017                | GG                              | AA                | 1945926645               |
| SNP_P3_34081_36416710 | NC_021162.1    | Ca_kabuli_chr03 | 36416710                | AA                              | GG                | 1945926646               |
| SNP_P3_34082_36417921 | NC_021162.1    | Ca_kabuli_chr03 | 36417921                | GG                              | AA                | 1945926648               |
| SNP_P3_34083_36419675 | NC_021162.1    | Ca_kabuli_chr03 | 36419675                | CC                              | TT                | 1945926650               |
| SNP_P3_34084_36419716 | NC_021162.1    | Ca_kabuli_chr03 | 36419716                | CC                              | TT                | 1945926652               |
| SNP_P3_34085_36420051 | NC_021162.1    | Ca_kabuli_chr03 | 36420051                | TT                              | CC                | 1945926653               |
| SNP_P3_34086_36420128 | NC_021162.1    | Ca_kabuli_chr03 | 36420128                | AA                              | TT                | 1945926655               |
| SNP_P3_34088_36421014 | NC_021162.1    | Ca_kabuli_chr03 | 36421014                | TT                              | CC                | 1945926657               |
| SNP_P3_34089_36422053 | NC_021162.1    | Ca_kabuli_chr03 | 36422053                | CC                              | AA                | 1945926659               |
| SNP_P3_34091_36429176 | NC_021162.1    | Ca_kabuli_chr03 | 36429176                | TT                              | GG                | 1945926661               |
| SNP_P3_34093_36430053 | NC_021162.1    | Ca_kabuli_chr03 | 36430053                | AA                              | TT                | 1945926662               |
| SNP_P3_34094_36431188 | NC_021162.1    | Ca_kabuli_chr03 | 36431188                | CC                              | TT                | 1945926664               |
| SNP_P3_34096_36431664 | NC_021162.1    | Ca_kabuli_chr03 | 36431664                | TT                              | CC                | 1945926666               |
| SNP_P3_34097_36431892 | NC_021162.1    | Ca_kabuli_chr03 | 36431892                | CC                              | TT                | 1945926668               |
| SNP_P3_34098_36431901 | NC_021162.1    | Ca_kabuli_chr03 | 36431901                | TT                              | CC                | 1945926670               |
| SNP_P3_34100_36432970 | NC_021162.1    | Ca_kabuli_chr03 | 36432970                | AA                              | CC                | 1945926671               |
| SNP_P3_34101_36433217 | NC_021162.1    | Ca_kabuli_chr03 | 36433217                | TT                              | CC                | 1945926673               |

| SNPs IDs              | Chromosome IDs | Chromosomes     | Physical positions (bp) | CDC Frontier (Reference genome) | (Pusa 256 & HPNB) | NCBI SNPdb Accession IDs |
|-----------------------|----------------|-----------------|-------------------------|---------------------------------|-------------------|--------------------------|
| SNP_P3_34102_36433264 | NC_021162.1    | Ca_kabuli_chr03 | 36433264                | GG                              | AA                | 1945926675               |
| SNP_P3_34103_36433816 | NC_021162.1    | Ca_kabuli_chr03 | 36433816                | AA                              | TT                | 1945926677               |
| SNP_P3_34105_36434867 | NC_021162.1    | Ca_kabuli_chr03 | 36434867                | AA                              | GG                | 1945926678               |
| SNP_P3_34106_36437046 | NC_021162.1    | Ca_kabuli_chr03 | 36437046                | GG                              | TT                | 1945926680               |
| SNP_P3_34107_36437078 | NC_021162.1    | Ca_kabuli_chr03 | 36437078                | AA                              | GG                | 1945926682               |
| SNP_P3_34108_36437338 | NC_021162.1    | Ca_kabuli_chr03 | 36437338                | GG                              | AA                | 1945926684               |
| SNP_P3_34109_36437426 | NC_021162.1    | Ca_kabuli_chr03 | 36437426                | AA                              | TT                | 1945926685               |
| SNP_P3_34110_36437630 | NC_021162.1    | Ca_kabuli_chr03 | 36437630                | GG                              | TT                | 1945926687               |
| SNP_P3_34111_36439280 | NC_021162.1    | Ca_kabuli_chr03 | 36439280                | AA                              | CC                | 1945926689               |
| SNP_P3_34112_36439645 | NC_021162.1    | Ca_kabuli_chr03 | 36439645                | TT                              | CC                | 1945926691               |
| SNP_P3_34113_36439704 | NC_021162.1    | Ca_kabuli_chr03 | 36439704                | AA                              | GG                | 1945926693               |
| SNP_P3_34114_36440451 | NC_021162.1    | Ca_kabuli_chr03 | 36440451                | GG                              | AA                | 1945926694               |
| SNP_P3_34115_36440715 | NC_021162.1    | Ca_kabuli_chr03 | 36440715                | AA                              | GG                | 1945926696               |
| SNP_P3_34116_36441956 | NC_021162.1    | Ca_kabuli_chr03 | 36441956                | AA                              | GG                | 1945926698               |
| SNP_P3_34117_36441977 | NC_021162.1    | Ca_kabuli_chr03 | 36441977                | TT                              | CC                | 1945926700               |
| SNP_P3_34118_36442276 | NC_021162.1    | Ca_kabuli_chr03 | 36442276                | AA                              | GG                | 1945926701               |
| SNP_P3_34119_36442332 | NC_021162.1    | Ca_kabuli_chr03 | 36442332                | AA                              | GG                | 1945926703               |
| SNP_P3_34120_36442468 | NC_021162.1    | Ca_kabuli_chr03 | 36442468                | AA                              | GG                | 1945926705               |
| SNP_P3_34121_36442907 | NC_021162.1    | Ca_kabuli_chr03 | 36442907                | AA                              | GG                | 1945926707               |
| SNP_P3_34122_36443012 | NC_021162.1    | Ca_kabuli_chr03 | 36443012                | CC                              | TT                | 1945926709               |
| SNP_P3_34124_36443278 | NC_021162.1    | Ca_kabuli_chr03 | 36443278                | CC                              | TT                | 1945926710               |
| SNP_P3_34125_36443609 | NC_021162.1    | Ca_kabuli_chr03 | 36443609                | TT                              | CC                | 1945926712               |
| SNP_P3_34126_36445231 | NC_021162.1    | Ca_kabuli_chr03 | 36445231                | CC                              | GG                | 1945926714               |
| SNP_P3_34127_36446102 | NC_021162.1    | Ca_kabuli_chr03 | 36446102                | AA                              | TT                | 1945926716               |
| SNP_P3_34128_36446106 | NC_021162.1    | Ca_kabuli_chr03 | 36446106                | TT                              | AA                | 1945926717               |
| SNP_P3_34129_36446112 | NC_021162.1    | Ca_kabuli_chr03 | 36446112                | AA                              | TT                | 1945926719               |
| SNP_P3_34130_36446117 | NC_021162.1    | Ca_kabuli_chr03 | 36446117                | AA                              | GG                | 1945926721               |
| SNP_P3_34131_36446387 | NC_021162.1    | Ca_kabuli_chr03 | 36446387                | TT                              | GG                | 1945926723               |
| SNP_P3_34132_36446685 | NC_021162.1    | Ca_kabuli_chr03 | 36446685                | AA                              | TT                | 1945926725               |
| SNP_P3_34133_36446696 | NC_021162.1    | Ca_kabuli_chr03 | 36446696                | AA                              | GG                | 1945926726               |
| SNP_P3_34134_36447129 | NC_021162.1    | Ca_kabuli_chr03 | 36447129                | CC                              | TT                | 1945926728               |
| SNP_P3_34136_36447364 | NC_021162.1    | Ca_kabuli_chr03 | 36447364                | TT                              | AA                | 1945926730               |
| SNP_P3_34138_36447434 | NC_021162.1    | Ca_kabuli_chr03 | 36447434                | AA                              | GG                | 1945926732               |
| SNP_P3_34141_36448792 | NC_021162.1    | Ca_kabuli_chr03 | 36448792                | GG                              | CC                | 1945926733               |
| SNP_P3_34142_36449000 | NC_021162.1    | Ca_kabuli_chr03 | 36449000                | AA                              | GG                | 1945926735               |
| SNP_P3_34143_36449513 | NC_021162.1    | Ca_kabuli_chr03 | 36449513                | CC                              | TT                | 1945926737               |
| SNP_P3_34144_36449522 | NC_021162.1    | Ca_kabuli_chr03 | 36449522                | CC                              | AA                | 1945926739               |
| SNP_P3_34145_36456323 | NC_021162.1    | Ca_kabuli_chr03 | 36456323                | TT                              | AA                | 1945926741               |
| SNP_P3_34146_36468763 | NC_021162.1    | Ca_kabuli_chr03 | 36468763                | CC                              | TT                | 1945926742               |
| SNP_P3_34147_36468765 | NC_021162.1    | Ca_kabuli_chr03 | 36468765                | AA                              | GG                | 1945926744               |
| SNP_P3_34148_36468773 | NC_021162.1    | Ca_kabuli_chr03 | 36468773                | TT                              | CC                | 1945926746               |
| SNP_P3_34149_36468788 | NC_021162.1    | Ca_kabuli_chr03 | 36468788                | CC                              | AA                | 1945926748               |

| SNPs IDs              | Chromosome IDs | Chromosomes     | Physical positions (bp) | CDC Frontier (Reference genome) | (Pusa 256 & HPNB) | NCBI SNPdb Accession IDs |
|-----------------------|----------------|-----------------|-------------------------|---------------------------------|-------------------|--------------------------|
| SNP_P3_34150_36469006 | NC_021162.1    | Ca_kabuli_chr03 | 36469006                | AA                              | CC                | 1945926749               |
| SNP_P3_34151_36475811 | NC_021162.1    | Ca_kabuli_chr03 | 36475811                | AA                              | CC                | 1945926751               |
| SNP_P3_34152_36475872 | NC_021162.1    | Ca_kabuli_chr03 | 36475872                | TT                              | CC                | 1945926753               |
| SNP_P3_34154_36476349 | NC_021162.1    | Ca_kabuli_chr03 | 36476349                | CC                              | TT                | 1945926755               |
| SNP_P3_34155_36476366 | NC_021162.1    | Ca_kabuli_chr03 | 36476366                | TT                              | AA                | 1945926757               |
| SNP_P3_34156_36476370 | NC_021162.1    | Ca_kabuli_chr03 | 36476370                | AA                              | GG                | 1945926758               |
| SNP_P3_34157_36476413 | NC_021162.1    | Ca_kabuli_chr03 | 36476413                | TT                              | GG                | 1945926760               |
| SNP_P3_34159_36483110 | NC_021162.1    | Ca_kabuli_chr03 | 36483110                | TT                              | CC                | 1945926762               |
| SNP_P3_34160_36521271 | NC_021162.1    | Ca_kabuli_chr03 | 36521271                | CC                              | GG                | 1945926764               |
| SNP_P3_34162_36538534 | NC_021162.1    | Ca_kabuli_chr03 | 36538534                | CC                              | TT                | 1945926765               |
| SNP_P3_34165_36563355 | NC_021162.1    | Ca_kabuli_chr03 | 36563355                | CC                              | TT                | 1945926767               |
| SNP_P3_34166_36565195 | NC_021162.1    | Ca_kabuli_chr03 | 36565195                | GG                              | AA                | 1945926769               |
| SNP_P3_34167_36566857 | NC_021162.1    | Ca_kabuli_chr03 | 36566857                | CC                              | AA                | 1945926771               |
| SNP_P3_34168_36576255 | NC_021162.1    | Ca_kabuli_chr03 | 36576255                | AA                              | TT                | 1945926773               |
| SNP_P3_34169_36580553 | NC_021162.1    | Ca_kabuli_chr03 | 36580553                | AA                              | GG                | 1945926774               |
| SNP_P3_34171_36613808 | NC_021162.1    | Ca_kabuli_chr03 | 36613808                | TT                              | GG                | 1945926776               |
| SNP_P3_34172_36645568 | NC_021162.1    | Ca_kabuli_chr03 | 36645568                | TT                              | CC                | 1945926778               |
| SNP_P3_34173_36654529 | NC_021162.1    | Ca_kabuli_chr03 | 36654529                | CC                              | AA                | 1945926780               |
| SNP_P3_34175_36714043 | NC_021162.1    | Ca_kabuli_chr03 | 36714043                | AA                              | GG                | 1945926781               |
| SNP_P3_34176_36714604 | NC_021162.1    | Ca_kabuli_chr03 | 36714604                | TT                              | AA                | 1945926783               |
| SNP_P3_34177_36727157 | NC_021162.1    | Ca_kabuli_chr03 | 36727157                | TT                              | CC                | 1945926785               |
| SNP_P3_34178_36727381 | NC_021162.1    | Ca_kabuli_chr03 | 36727381                | CC                              | TT                | 1945926787               |
| SNP_P3_34179_36729461 | NC_021162.1    | Ca_kabuli_chr03 | 36729461                | AA                              | GG                | 1945926789               |
| SNP_P3_34180_36762398 | NC_021162.1    | Ca_kabuli_chr03 | 36762398                | CC                              | TT                | 1945926790               |
| SNP_P3_34181_36762722 | NC_021162.1    | Ca_kabuli_chr03 | 36762722                | TT                              | AA                | 1945926792               |
| SNP_P3_34182_36762737 | NC_021162.1    | Ca_kabuli_chr03 | 36762737                | AA                              | GG                | 1945926794               |
| SNP_P3_34183_36762754 | NC_021162.1    | Ca_kabuli_chr03 | 36762754                | GG                              | AA                | 1945926796               |
| SNP_P3_34184_36771191 | NC_021162.1    | Ca_kabuli_chr03 | 36771191                | CC                              | TT                | 1945926797               |
| SNP_P3_34186_36818074 | NC_021162.1    | Ca_kabuli_chr03 | 36818074                | CC                              | TT                | 1945926799               |
| SNP_P3_34189_36834182 | NC_021162.1    | Ca_kabuli_chr03 | 36834182                | TT                              | CC                | 1945926801               |
| SNP_P3_34191_36841811 | NC_021162.1    | Ca_kabuli_chr03 | 36841811                | CC                              | TT                | 1945926803               |
| SNP_P3_34192_36864086 | NC_021162.1    | Ca_kabuli_chr03 | 36864086                | TT                              | CC                | 1945926805               |
| SNP_P3_34193_36869387 | NC_021162.1    | Ca_kabuli_chr03 | 36869387                | TT                              | CC                | 1945926806               |
| SNP_P3_34194_36878977 | NC_021162.1    | Ca_kabuli_chr03 | 36878977                | CC                              | TT                | 1945926808               |
| SNP_P3_34195_36898002 | NC_021162.1    | Ca_kabuli_chr03 | 36898002                | GG                              | TT                | 1945926810               |
| SNP_P3_34196_36907066 | NC_021162.1    | Ca_kabuli_chr03 | 36907066                | AA                              | GG                | 1945926812               |
| SNP_P3_34197_36927174 | NC_021162.1    | Ca_kabuli_chr03 | 36927174                | TT                              | CC                | 1945926813               |
| SNP_P3_34198_36942005 | NC_021162.1    | Ca_kabuli_chr03 | 36942005                | CC                              | AA                | 1945926815               |
| SNP_P3_34199_36942006 | NC_021162.1    | Ca_kabuli_chr03 | 36942006                | AA                              | TT                | 1945926817               |
| SNP_P3_34200_36946767 | NC_021162.1    | Ca_kabuli_chr03 | 36946767                | AA                              | GG                | 1945926819               |
| SNP_P3_34201_36962202 | NC_021162.1    | Ca_kabuli_chr03 | 36962202                | AA                              | TT                | 1945926821               |
| SNP_P3_34202_36967269 | NC_021162.1    | Ca_kabuli_chr03 | 36967269                | CC                              | GG                | 1945926822               |

| SNPs IDs              | Chromosome IDs | Chromosomes     | Physical positions (bp) | CDC Frontier (Reference genome) | (Pusa 256 & HPNB) | NCBI SNPdb Accession IDs |
|-----------------------|----------------|-----------------|-------------------------|---------------------------------|-------------------|--------------------------|
| SNP_P3_34203_36968988 | NC_021162.1    | Ca_kabuli_chr03 | 36968988                | GG                              | AA                | 1945926824               |
| SNP_P3_34204_36978848 | NC_021162.1    | Ca_kabuli_chr03 | 36978848                | TT                              | GG                | 1945926826               |
| SNP_P3_34207_37014682 | NC_021162.1    | Ca_kabuli_chr03 | 37014682                | AA                              | GG                | 1945926828               |
| SNP_P3_34209_37026533 | NC_021162.1    | Ca_kabuli_chr03 | 37026533                | CC                              | TT                | 1945926829               |
| SNP_P3_34210_37026538 | NC_021162.1    | Ca_kabuli_chr03 | 37026538                | TT                              | AA                | 1945926831               |
| SNP_P3_34216_37090540 | NC_021162.1    | Ca_kabuli_chr03 | 37090540                | TT                              | CC                | 1945926833               |
| SNP_P3_34217_37104221 | NC_021162.1    | Ca_kabuli_chr03 | 37104221                | AA                              | TT                | 1945926835               |
| SNP_P3_34218_37106199 | NC_021162.1    | Ca_kabuli_chr03 | 37106199                | TT                              | CC                | 1945926837               |
| SNP_P3_34220_37149694 | NC_021162.1    | Ca_kabuli_chr03 | 37149694                | TT                              | CC                | 1945926838               |
| SNP_P3_34223_37182310 | NC_021162.1    | Ca_kabuli_chr03 | 37182310                | TT                              | AA                | 1945926840               |
| SNP_P3_34227_37220142 | NC_021162.1    | Ca_kabuli_chr03 | 37220142                | CC                              | AA                | 1945926842               |
| SNP_P3_34228_37245624 | NC_021162.1    | Ca_kabuli_chr03 | 37245624                | AA                              | TT                | 1945926844               |
| SNP_P3_34230_37248638 | NC_021162.1    | Ca_kabuli_chr03 | 37248638                | GG                              | AA                | 1945926845               |
| SNP_P3_34231_37248730 | NC_021162.1    | Ca_kabuli_chr03 | 37248730                | TT                              | CC                | 1945926847               |
| SNP_P3_34232_37296893 | NC_021162.1    | Ca_kabuli_chr03 | 37296893                | AA                              | CC                | 1945926849               |
| SNP_P3_34233_37319153 | NC_021162.1    | Ca_kabuli_chr03 | 37319153                | GG                              | AA                | 1945926851               |
| SNP_P3_34234_37340954 | NC_021162.1    | Ca_kabuli_chr03 | 37340954                | AA                              | TT                | 1945926853               |
| SNP_P3_34235_37341210 | NC_021162.1    | Ca_kabuli_chr03 | 37341210                | CC                              | TT                | 1945926854               |
| SNP_P3_34237_37366065 | NC_021162.1    | Ca_kabuli_chr03 | 37366065                | TT                              | GG                | 1945926856               |
| SNP_P3_34239_37409331 | NC_021162.1    | Ca_kabuli_chr03 | 37409331                | CC                              | TT                | 1945926858               |
| SNP_P3_34240_37418385 | NC_021162.1    | Ca_kabuli_chr03 | 37418385                | CC                              | AA                | 1945926860               |
| SNP_P3_34241_37454259 | NC_021162.1    | Ca_kabuli_chr03 | 37454259                | AA                              | CC                | 1945926861               |
| SNP_P3_34242_37454456 | NC_021162.1    | Ca_kabuli_chr03 | 37454456                | TT                              | AA                | 1945926863               |
| SNP_P3_34244_37502257 | NC_021162.1    | Ca_kabuli_chr03 | 37502257                | CC                              | TT                | 1945926865               |
| SNP_P3_34245_37519659 | NC_021162.1    | Ca_kabuli_chr03 | 37519659                | AA                              | TT                | 1945926867               |
| SNP_P3_34246_37519660 | NC_021162.1    | Ca_kabuli_chr03 | 37519660                | AA                              | TT                | 1945926869               |
| SNP_P3_34247_37521151 | NC_021162.1    | Ca_kabuli_chr03 | 37521151                | GG                              | AA                | 1945926870               |
| SNP_P3_34248_37641677 | NC_021162.1    | Ca_kabuli_chr03 | 37641677                | GG                              | TT                | 1945926872               |
| SNP_P3_34249_37704613 | NC_021162.1    | Ca_kabuli_chr03 | 37704613                | AA                              | GG                | 1945926874               |
| SNP_P3_34250_37718792 | NC_021162.1    | Ca_kabuli_chr03 | 37718792                | TT                              | CC                | 1945926876               |
| SNP_P3_34251_37718844 | NC_021162.1    | Ca_kabuli_chr03 | 37718844                | AA                              | GG                | 1945926877               |
| SNP_P3_34252_37718862 | NC_021162.1    | Ca_kabuli_chr03 | 37718862                | GG                              | AA                | 1945926879               |
| SNP_P3_34253_37718900 | NC_021162.1    | Ca_kabuli_chr03 | 37718900                | GG                              | AA                | 1945926881               |
| SNP_P3_34255_37718909 | NC_021162.1    | Ca_kabuli_chr03 | 37718909                | TT                              | AA                | 1945926883               |
| SNP_P3_34257_37719635 | NC_021162.1    | Ca_kabuli_chr03 | 37719635                | TT                              | AA                | 1945926885               |
| SNP_P3_34258_37719653 | NC_021162.1    | Ca_kabuli_chr03 | 37719653                | TT                              | CC                | 1945926886               |
| SNP_P3_34259_37719695 | NC_021162.1    | Ca_kabuli_chr03 | 37719695                | AA                              | GG                | 1945926888               |
| SNP_P3_34260_37719739 | NC_021162.1    | Ca_kabuli_chr03 | 37719739                | TT                              | AA                | 1945926890               |
| SNP_P3_34261_37727230 | NC_021162.1    | Ca_kabuli_chr03 | 37727230                | TT                              | GG                | 1945926892               |
| SNP_P3_34263_37730582 | NC_021162.1    | Ca_kabuli_chr03 | 37730582                | TT                              | CC                | 1945926893               |
| SNP_P3_34264_37732805 | NC_021162.1    | Ca_kabuli_chr03 | 37732805                | AA                              | CC                | 1945926895               |
| SNP_P3_34265_37741378 | NC_021162.1    | Ca_kabuli_chr03 | 37741378                | TT                              | AA                | 1945926897               |

| SNPs IDs              | Chromosome IDs | Chromosomes     | Physical positions (bp) | CDC Frontier (Reference genome) | (Pusa 256 & HPNB) | NCBI SNPdb Accession IDs |
|-----------------------|----------------|-----------------|-------------------------|---------------------------------|-------------------|--------------------------|
| SNP_P3_34266_37746146 | NC_021162.1    | Ca_kabuli_chr03 | 37746146                | AA                              | TT                | 1945926899               |
| SNP_P3_34267_37750839 | NC_021162.1    | Ca_kabuli_chr03 | 37750839                | AA                              | GG                | 1945926901               |
| SNP_P3_34269_37757563 | NC_021162.1    | Ca_kabuli_chr03 | 37757563                | TT                              | AA                | 1945926902               |
| SNP_P3_34270_37757566 | NC_021162.1    | Ca_kabuli_chr03 | 37757566                | TT                              | GG                | 1945926904               |
| SNP_P3_34271_37764081 | NC_021162.1    | Ca_kabuli_chr03 | 37764081                | AA                              | CC                | 1945926906               |
| SNP_P3_34272_37764353 | NC_021162.1    | Ca_kabuli_chr03 | 37764353                | TT                              | CC                | 1945926908               |
| SNP_P3_34273_37764448 | NC_021162.1    | Ca_kabuli_chr03 | 37764448                | AA                              | GG                | 1945926909               |
| SNP_P3_34274_37764508 | NC_021162.1    | Ca_kabuli_chr03 | 37764508                | GG                              | AA                | 1945926911               |
| SNP_P3_34275_37764569 | NC_021162.1    | Ca_kabuli_chr03 | 37764569                | TT                              | CC                | 1945926913               |
| SNP_P3_34276_37765265 | NC_021162.1    | Ca_kabuli_chr03 | 37765265                | AA                              | GG                | 1945926915               |
| SNP_P3_34277_37765269 | NC_021162.1    | Ca_kabuli_chr03 | 37765269                | TT                              | CC                | 1945926917               |
| SNP_P3_34278_37765415 | NC_021162.1    | Ca_kabuli_chr03 | 37765415                | AA                              | CC                | 1945926918               |
| SNP_P3_34279_37768893 | NC_021162.1    | Ca_kabuli_chr03 | 37768893                | TT                              | CC                | 1945926920               |
| SNP_P3_34280_37769383 | NC_021162.1    | Ca_kabuli_chr03 | 37769383                | TT                              | GG                | 1945926922               |
| SNP_P3_34281_37799779 | NC_021162.1    | Ca_kabuli_chr03 | 37799779                | AA                              | CC                | 1945926924               |
| SNP_P3_34282_37808276 | NC_021162.1    | Ca_kabuli_chr03 | 37808276                | TT                              | AA                | 1945926925               |
| SNP_P3_34283_37808282 | NC_021162.1    | Ca_kabuli_chr03 | 37808282                | AA                              | TT                | 1945926927               |
| SNP_P3_34284_37808284 | NC_021162.1    | Ca_kabuli_chr03 | 37808284                | CC                              | TT                | 1945926929               |
| SNP_P3_34285_37813057 | NC_021162.1    | Ca_kabuli_chr03 | 37813057                | CC                              | AA                | 1945926931               |
| SNP_P3_34288_37853449 | NC_021162.1    | Ca_kabuli_chr03 | 37853449                | AA                              | GG                | 1945926933               |
| SNP_P3_34290_37898795 | NC_021162.1    | Ca_kabuli_chr03 | 37898795                | AA                              | GG                | 1945926934               |
| SNP_P3_34291_37900347 | NC_021162.1    | Ca_kabuli_chr03 | 37900347                | GG                              | AA                | 1945926936               |
| SNP_P3_34292_37916495 | NC_021162.1    | Ca_kabuli_chr03 | 37916495                | GG                              | AA                | 1945926938               |
| SNP_P3_34293_37924631 | NC_021162.1    | Ca_kabuli_chr03 | 37924631                | AA                              | GG                | 1945926940               |
| SNP_P3_34294_37936565 | NC_021162.1    | Ca_kabuli_chr03 | 37936565                | CC                              | TT                | 1945926941               |
| SNP_P3_34295_37943258 | NC_021162.1    | Ca_kabuli_chr03 | 37943258                | GG                              | TT                | 1945926943               |
| SNP_P3_34296_37949111 | NC_021162.1    | Ca_kabuli_chr03 | 37949111                | GG                              | AA                | 1945926945               |
| SNP_P3_34297_37955060 | NC_021162.1    | Ca_kabuli_chr03 | 37955060                | AA                              | GG                | 1945926947               |
| SNP_P3_34298_37955301 | NC_021162.1    | Ca_kabuli_chr03 | 37955301                | AA                              | GG                | 1945926949               |
| SNP_P3_34299_37968318 | NC_021162.1    | Ca_kabuli_chr03 | 37968318                | CC                              | TT                | 1945926950               |
| SNP_P3_34301_37979303 | NC_021162.1    | Ca_kabuli_chr03 | 37979303                | AA                              | CC                | 1945926952               |
| SNP_P3_34304_38009349 | NC_021162.1    | Ca_kabuli_chr03 | 38009349                | AA                              | GG                | 1945926954               |
| SNP_P3_34305_38009624 | NC_021162.1    | Ca_kabuli_chr03 | 38009624                | AA                              | TT                | 1945926956               |
| SNP_P3_34306_38016694 | NC_021162.1    | Ca_kabuli_chr03 | 38016694                | TT                              | CC                | 1945926957               |
| SNP_P3_34307_38022118 | NC_021162.1    | Ca_kabuli_chr03 | 38022118                | GG                              | TT                | 1945926959               |
| SNP_P3_34309_38029712 | NC_021162.1    | Ca_kabuli_chr03 | 38029712                | GG                              | TT                | 1945926961               |
| SNP_P3_34310_38063734 | NC_021162.1    | Ca_kabuli_chr03 | 38063734                | GG                              | AA                | 1945926963               |
| SNP_P3_34314_38092175 | NC_021162.1    | Ca_kabuli_chr03 | 38092175                | TT                              | AA                | 1945926965               |
| SNP_P3_34316_38127401 | NC_021162.1    | Ca_kabuli_chr03 | 38127401                | TT                              | CC                | 1945926966               |
| SNP_P3_34317_38130334 | NC_021162.1    | Ca_kabuli_chr03 | 38130334                | AA                              | TT                | 1945926968               |
| SNP_P3_34319_38137627 | NC_021162.1    | Ca_kabuli_chr03 | 38137627                | TT                              | GG                | 1945926970               |
| SNP_P3_34320_38137708 | NC_021162.1    | Ca_kabuli_chr03 | 38137708                | CC                              | TT                | 1945926972               |



| SNPs IDs              | Chromosome IDs | Chromosomes     | Physical positions (bp) | CDC Frontier (Reference genome) | (Pusa 256 & HPNB) | NCBI SNPdb Accession IDs |
|-----------------------|----------------|-----------------|-------------------------|---------------------------------|-------------------|--------------------------|
| SNP_P3_34321_38137913 | NC_021162.1    | Ca_kabuli_chr03 | 38137913                | AA                              | TT                | 1945926973               |
| SNP_P3_34322_38137988 | NC_021162.1    | Ca_kabuli_chr03 | 38137988                | TT                              | CC                | 1945926975               |
| SNP_P3_34323_38138317 | NC_021162.1    | Ca_kabuli_chr03 | 38138317                | TT                              | AA                | 1945926977               |
| SNP_P3_34324_38141471 | NC_021162.1    | Ca_kabuli_chr03 | 38141471                | AA                              | GG                | 1945926979               |
| SNP_P3_34325_38141943 | NC_021162.1    | Ca_kabuli_chr03 | 38141943                | CC                              | TT                | 1945926981               |
| SNP_P3_34326_38141971 | NC_021162.1    | Ca_kabuli_chr03 | 38141971                | AA                              | GG                | 1945926982               |
| SNP_P3_34327_38141982 | NC_021162.1    | Ca_kabuli_chr03 | 38141982                | TT                              | CC                | 1945926984               |
| SNP_P3_34328_38142275 | NC_021162.1    | Ca_kabuli_chr03 | 38142275                | TT                              | CC                | 1945926986               |
| SNP_P3_34329_38142308 | NC_021162.1    | Ca_kabuli_chr03 | 38142308                | GG                              | TT                | 1945926988               |
| SNP_P3_34330_38142383 | NC_021162.1    | Ca_kabuli_chr03 | 38142383                | TT                              | GG                | 1945926989               |
| SNP_P3_34331_38142420 | NC_021162.1    | Ca_kabuli_chr03 | 38142420                | GG                              | AA                | 1945926991               |
| SNP_P3_34332_38142463 | NC_021162.1    | Ca_kabuli_chr03 | 38142463                | AA                              | CC                | 1945926993               |
| SNP_P3_34333_38142498 | NC_021162.1    | Ca_kabuli_chr03 | 38142498                | AA                              | GG                | 1945926995               |
| SNP_P3_34334_38142535 | NC_021162.1    | Ca_kabuli_chr03 | 38142535                | AA                              | GG                | 1945926997               |
| SNP_P3_34335_38142550 | NC_021162.1    | Ca_kabuli_chr03 | 38142550                | GG                              | AA                | 1945926998               |
| SNP_P3_34336_38142829 | NC_021162.1    | Ca_kabuli_chr03 | 38142829                | CC                              | TT                | 1945927000               |
| SNP_P3_34338_38145808 | NC_021162.1    | Ca_kabuli_chr03 | 38145808                | GG                              | AA                | 1945927002               |
| SNP_P3_34340_38146214 | NC_021162.1    | Ca_kabuli_chr03 | 38146214                | TT                              | CC                | 1945927004               |
| SNP_P3_34341_38146231 | NC_021162.1    | Ca_kabuli_chr03 | 38146231                | AA                              | GG                | 1945927005               |
| SNP_P3_34342_38146665 | NC_021162.1    | Ca_kabuli_chr03 | 38146665                | CC                              | TT                | 1945927007               |
| SNP_P3_34343_38146666 | NC_021162.1    | Ca_kabuli_chr03 | 38146666                | TT                              | GG                | 1945927009               |
| SNP_P3_34344_38148959 | NC_021162.1    | Ca_kabuli_chr03 | 38148959                | CC                              | AA                | 1945927011               |
| SNP_P3_34346_38149544 | NC_021162.1    | Ca_kabuli_chr03 | 38149544                | CC                              | TT                | 1945927013               |
| SNP_P3_34347_38154120 | NC_021162.1    | Ca_kabuli_chr03 | 38154120                | GG                              | AA                | 1945927014               |
| SNP_P3_34348_38154122 | NC_021162.1    | Ca_kabuli_chr03 | 38154122                | GG                              | AA                | 1945927016               |
| SNP_P3_34349_38155882 | NC_021162.1    | Ca_kabuli_chr03 | 38155882                | CC                              | TT                | 1945927018               |
| SNP_P3_34350_38155926 | NC_021162.1    | Ca_kabuli_chr03 | 38155926                | TT                              | CC                | 1945927020               |
| SNP_P3_34351_38156048 | NC_021162.1    | Ca_kabuli_chr03 | 38156048                | AA                              | GG                | 1945927021               |
| SNP_P3_34354_38156987 | NC_021162.1    | Ca_kabuli_chr03 | 38156987                | TT                              | CC                | 1945927023               |
| SNP_P3_34355_38158864 | NC_021162.1    | Ca_kabuli_chr03 | 38158864                | AA                              | GG                | 1945927025               |
| SNP_P3_34356_38159402 | NC_021162.1    | Ca_kabuli_chr03 | 38159402                | GG                              | AA                | 1945927027               |
| SNP_P3_34357_38159632 | NC_021162.1    | Ca_kabuli_chr03 | 38159632                | GG                              | AA                | 1945927029               |
| SNP_P3_34358_38162318 | NC_021162.1    | Ca_kabuli_chr03 | 38162318                | GG                              | TT                | 1945927030               |
| SNP_P3_34359_38165684 | NC_021162.1    | Ca_kabuli_chr03 | 38165684                | AA                              | GG                | 1945927032               |
| SNP_P3_34360_38168137 | NC_021162.1    | Ca_kabuli_chr03 | 38168137                | CC                              | GG                | 1945927034               |
| SNP_P3_34362_38170409 | NC_021162.1    | Ca_kabuli_chr03 | 38170409                | AA                              | CC                | 1945927036               |
| SNP_P3_34363_38170553 | NC_021162.1    | Ca_kabuli_chr03 | 38170553                | GG                              | AA                | 1945927037               |
| SNP_P3_34364_38170634 | NC_021162.1    | Ca_kabuli_chr03 | 38170634                | GG                              | AA                | 1945927039               |
| SNP_P3_34365_38170639 | NC_021162.1    | Ca_kabuli_chr03 | 38170639                | AA                              | GG                | 1945927041               |
| SNP_P3_34366_38170656 | NC_021162.1    | Ca_kabuli_chr03 | 38170656                | TT                              | CC                | 1945927043               |
| SNP_P3_34367_38170673 | NC_021162.1    | Ca_kabuli_chr03 | 38170673                | CC                              | TT                | 1945927045               |
| SNP_P3_34368_38170709 | NC_021162.1    | Ca_kabuli_chr03 | 38170709                | TT                              | CC                | 1945927046               |

| SNPs IDs              | Chromosome IDs | Chromosomes     | Physical positions (bp) | CDC Frontier (Reference genome) | (Pusa 256 & HPNB) | NCBI SNPdb Accession IDs |
|-----------------------|----------------|-----------------|-------------------------|---------------------------------|-------------------|--------------------------|
| SNP_P3_34370_38171153 | NC_021162.1    | Ca_kabuli_chr03 | 38171153                | CC                              | TT                | 1945927048               |
| SNP_P3_34371_38172276 | NC_021162.1    | Ca_kabuli_chr03 | 38172276                | GG                              | AA                | 1945927050               |
| SNP_P3_34372_38173649 | NC_021162.1    | Ca_kabuli_chr03 | 38173649                | AA                              | GG                | 1945927052               |
| SNP_P3_34373_38173932 | NC_021162.1    | Ca_kabuli_chr03 | 38173932                | TT                              | CC                | 1945927053               |
| SNP_P3_34374_38174079 | NC_021162.1    | Ca_kabuli_chr03 | 38174079                | CC                              | TT                | 1945927055               |
| SNP_P3_34376_38174265 | NC_021162.1    | Ca_kabuli_chr03 | 38174265                | CC                              | AA                | 1945927057               |
| SNP_P3_34377_38174282 | NC_021162.1    | Ca_kabuli_chr03 | 38174282                | AA                              | GG                | 1945927059               |
| SNP_P3_34378_38174287 | NC_021162.1    | Ca_kabuli_chr03 | 38174287                | CC                              | GG                | 1945927061               |
| SNP_P3_34379_38174322 | NC_021162.1    | Ca_kabuli_chr03 | 38174322                | AA                              | CC                | 1945927062               |
| SNP_P3_34381_38174455 | NC_021162.1    | Ca_kabuli_chr03 | 38174455                | AA                              | TT                | 1945927064               |
| SNP_P3_34382_38176160 | NC_021162.1    | Ca_kabuli_chr03 | 38176160                | CC                              | TT                | 1945927066               |
| SNP_P3_34383_38177210 | NC_021162.1    | Ca_kabuli_chr03 | 38177210                | AA                              | GG                | 1945927068               |
| SNP_P3_34384_38177281 | NC_021162.1    | Ca_kabuli_chr03 | 38177281                | GG                              | CC                | 1945927069               |
| SNP_P3_34385_38177406 | NC_021162.1    | Ca_kabuli_chr03 | 38177406                | GG                              | AA                | 1945927071               |
| SNP_P3_34386_38177611 | NC_021162.1    | Ca_kabuli_chr03 | 38177611                | GG                              | TT                | 1945927073               |
| SNP_P3_34387_38177641 | NC_021162.1    | Ca_kabuli_chr03 | 38177641                | GG                              | CC                | 1945927075               |
| SNP_P3_34388_38177708 | NC_021162.1    | Ca_kabuli_chr03 | 38177708                | TT                              | AA                | 1945927077               |
| SNP_P3_34389_38177756 | NC_021162.1    | Ca_kabuli_chr03 | 38177756                | TT                              | CC                | 1945927078               |
| SNP_P3_34390_38177996 | NC_021162.1    | Ca_kabuli_chr03 | 38177996                | AA                              | TT                | 1945927080               |
| SNP_P3_34391_38180619 | NC_021162.1    | Ca_kabuli_chr03 | 38180619                | GG                              | AA                | 1945927082               |
| SNP_P3_34392_38180820 | NC_021162.1    | Ca_kabuli_chr03 | 38180820                | TT                              | AA                | 1945927084               |
| SNP_P3_34393_38181200 | NC_021162.1    | Ca_kabuli_chr03 | 38181200                | GG                              | TT                | 1945927085               |
| SNP_P3_34394_38181225 | NC_021162.1    | Ca_kabuli_chr03 | 38181225                | TT                              | CC                | 1945927087               |
| SNP_P3_34395_38181245 | NC_021162.1    | Ca_kabuli_chr03 | 38181245                | AA                              | GG                | 1945927089               |
| SNP_P3_34397_38181462 | NC_021162.1    | Ca_kabuli_chr03 | 38181462                | AA                              | TT                | 1945927091               |
| SNP_P3_34399_38183089 | NC_021162.1    | Ca_kabuli_chr03 | 38183089                | AA                              | GG                | 1945927093               |
| SNP_P3_34400_38183251 | NC_021162.1    | Ca_kabuli_chr03 | 38183251                | TT                              | CC                | 1945927094               |
| SNP_P3_34401_38183258 | NC_021162.1    | Ca_kabuli_chr03 | 38183258                | CC                              | AA                | 1945927096               |
| SNP_P3_34402_38183409 | NC_021162.1    | Ca_kabuli_chr03 | 38183409                | AA                              | TT                | 1945927098               |
| SNP_P3_34403_38183665 | NC_021162.1    | Ca_kabuli_chr03 | 38183665                | TT                              | CC                | 1945927100               |
| SNP_P3_34405_38184255 | NC_021162.1    | Ca_kabuli_chr03 | 38184255                | GG                              | AA                | 1945927101               |
| SNP_P3_34406_38186009 | NC_021162.1    | Ca_kabuli_chr03 | 38186009                | TT                              | CC                | 1945927103               |
| SNP_P3_34407_38186641 | NC_021162.1    | Ca_kabuli_chr03 | 38186641                | GG                              | CC                | 1945927105               |
| SNP_P3_34408_38186689 | NC_021162.1    | Ca_kabuli_chr03 | 38186689                | GG                              | CC                | 1945927107               |
| SNP_P3_34409_38186915 | NC_021162.1    | Ca_kabuli_chr03 | 38186915                | GG                              | AA                | 1945927109               |
| SNP_P3_34410_38186925 | NC_021162.1    | Ca_kabuli_chr03 | 38186925                | AA                              | CC                | 1945927110               |
| SNP_P3_34411_38188764 | NC_021162.1    | Ca_kabuli_chr03 | 38188764                | TT                              | GG                | 1945927112               |
| SNP_P3_34412_38190370 | NC_021162.1    | Ca_kabuli_chr03 | 38190370                | GG                              | AA                | 1945927114               |
| SNP_P3_34413_38190610 | NC_021162.1    | Ca_kabuli_chr03 | 38190610                | CC                              | AA                | 1945927116               |
| SNP_P3_34414_38194022 | NC_021162.1    | Ca_kabuli_chr03 | 38194022                | GG                              | AA                | 1945927117               |
| SNP_P3_34415_38194497 | NC_021162.1    | Ca_kabuli_chr03 | 38194497                | AA                              | GG                | 1945927119               |
| SNP_P3_34416_38201164 | NC_021162.1    | Ca_kabuli_chr03 | 38201164                | GG                              | AA                | 1945927121               |

| SNPs IDs              | Chromosome IDs | Chromosomes     | Physical positions (bp) | CDC Frontier (Reference genome) | (Pusa 256 & HPNB) | NCBI SNPdb Accession IDs |
|-----------------------|----------------|-----------------|-------------------------|---------------------------------|-------------------|--------------------------|
| SNP_P3_34417_38201629 | NC_021162.1    | Ca_kabuli_chr03 | 38201629                | CC                              | GG                | 1945927123               |
| SNP_P3_34418_38201957 | NC_021162.1    | Ca_kabuli_chr03 | 38201957                | GG                              | TT                | 1945927125               |
| SNP_P3_34419_38202024 | NC_021162.1    | Ca_kabuli_chr03 | 38202024                | TT                              | AA                | 1945927126               |
| SNP_P3_34420_38203052 | NC_021162.1    | Ca_kabuli_chr03 | 38203052                | TT                              | CC                | 1945927128               |
| SNP_P3_34421_38203325 | NC_021162.1    | Ca_kabuli_chr03 | 38203325                | AA                              | GG                | 1945927130               |
| SNP_P3_34422_38203343 | NC_021162.1    | Ca_kabuli_chr03 | 38203343                | TT                              | GG                | 1945927132               |
| SNP_P3_34423_38203356 | NC_021162.1    | Ca_kabuli_chr03 | 38203356                | TT                              | CC                | 1945927133               |
| SNP_P3_34424_38203396 | NC_021162.1    | Ca_kabuli_chr03 | 38203396                | TT                              | CC                | 1945927135               |
| SNP_P3_34425_38203767 | NC_021162.1    | Ca_kabuli_chr03 | 38203767                | TT                              | CC                | 1945927137               |
| SNP_P3_34426_38203791 | NC_021162.1    | Ca_kabuli_chr03 | 38203791                | CC                              | TT                | 1945927139               |
| SNP_P3_34427_38203821 | NC_021162.1    | Ca_kabuli_chr03 | 38203821                | GG                              | TT                | 1945927141               |
| SNP_P3_34429_38203884 | NC_021162.1    | Ca_kabuli_chr03 | 38203884                | CC                              | AA                | 1945927142               |
| SNP_P3_34430_38203918 | NC_021162.1    | Ca_kabuli_chr03 | 38203918                | TT                              | CC                | 1945927144               |
| SNP_P3_34431_38204037 | NC_021162.1    | Ca_kabuli_chr03 | 38204037                | AA                              | TT                | 1945927146               |
| SNP_P3_34432_38204806 | NC_021162.1    | Ca_kabuli_chr03 | 38204806                | CC                              | TT                | 1945927148               |
| SNP_P3_34433_38204993 | NC_021162.1    | Ca_kabuli_chr03 | 38204993                | GG                              | AA                | 1945927149               |
| SNP_P3_34434_38205116 | NC_021162.1    | Ca_kabuli_chr03 | 38205116                | TT                              | CC                | 1945927151               |
| SNP_P3_34435_38205117 | NC_021162.1    | Ca_kabuli_chr03 | 38205117                | TT                              | CC                | 1945927153               |
| SNP_P3_34436_38205154 | NC_021162.1    | Ca_kabuli_chr03 | 38205154                | CC                              | TT                | 1945927155               |
| SNP_P3_34437_38205171 | NC_021162.1    | Ca_kabuli_chr03 | 38205171                | AA                              | GG                | 1945927157               |
| SNP_P3_34438_38205525 | NC_021162.1    | Ca_kabuli_chr03 | 38205525                | GG                              | AA                | 1945927158               |
| SNP_P3_34439_38205936 | NC_021162.1    | Ca_kabuli_chr03 | 38205936                | CC                              | GG                | 1945927160               |
| SNP_P3_34442_38208535 | NC_021162.1    | Ca_kabuli_chr03 | 38208535                | CC                              | GG                | 1945927162               |
| SNP_P3_34443_38208615 | NC_021162.1    | Ca_kabuli_chr03 | 38208615                | TT                              | GG                | 1945927164               |
| SNP_P3_34446_38208908 | NC_021162.1    | Ca_kabuli_chr03 | 38208908                | TT                              | AA                | 1945927165               |
| SNP_P3_34447_38208909 | NC_021162.1    | Ca_kabuli_chr03 | 38208909                | AA                              | GG                | 1945927167               |
| SNP_P3_34448_38209361 | NC_021162.1    | Ca_kabuli_chr03 | 38209361                | GG                              | AA                | 1945927169               |
| SNP_P3_34449_38209362 | NC_021162.1    | Ca_kabuli_chr03 | 38209362                | TT                              | GG                | 1945927171               |
| SNP_P3_34450_38210917 | NC_021162.1    | Ca_kabuli_chr03 | 38210917                | AA                              | GG                | 1945927173               |
| SNP_P3_34451_38212139 | NC_021162.1    | Ca_kabuli_chr03 | 38212139                | CC                              | AA                | 1945927174               |
| SNP_P3_34452_38212216 | NC_021162.1    | Ca_kabuli_chr03 | 38212216                | TT                              | CC                | 1945927176               |
| SNP_P3_34453_38212327 | NC_021162.1    | Ca_kabuli_chr03 | 38212327                | TT                              | GG                | 1945927178               |
| SNP_P3_34454_38212369 | NC_021162.1    | Ca_kabuli_chr03 | 38212369                | AA                              | GG                | 1945927180               |
| SNP_P3_34457_38215792 | NC_021162.1    | Ca_kabuli_chr03 | 38215792                | AA                              | GG                | 1945927181               |
| SNP_P3_34459_38215904 | NC_021162.1    | Ca_kabuli_chr03 | 38215904                | GG                              | TT                | 1945927183               |
| SNP_P3_34460_38216604 | NC_021162.1    | Ca_kabuli_chr03 | 38216604                | CC                              | TT                | 1945927185               |
| SNP_P3_34461_38218826 | NC_021162.1    | Ca_kabuli_chr03 | 38218826                | TT                              | CC                | 1945927187               |
| SNP_P3_34465_38219261 | NC_021162.1    | Ca_kabuli_chr03 | 38219261                | TT                              | AA                | 1945927189               |
| SNP_P3_34466_38219270 | NC_021162.1    | Ca_kabuli_chr03 | 38219270                | GG                              | AA                | 1945927190               |
| SNP_P3_34467_38219502 | NC_021162.1    | Ca_kabuli_chr03 | 38219502                | AA                              | GG                | 1945927192               |
| SNP_P3_34468_38219572 | NC_021162.1    | Ca_kabuli_chr03 | 38219572                | CC                              | AA                | 1945927194               |
| SNP_P3_34469_38219589 | NC_021162.1    | Ca_kabuli_chr03 | 38219589                | AA                              | GG                | 1945927196               |

| SNPs IDs              | Chromosome IDs | Chromosomes     | Physical positions (bp) | CDC Frontier (Reference genome) | (Pusa 256 & HPNB) | NCBI SNPdb Accession IDs |
|-----------------------|----------------|-----------------|-------------------------|---------------------------------|-------------------|--------------------------|
| SNP_P3_34470_38219599 | NC_021162.1    | Ca_kabuli_chr03 | 38219599                | CC                              | AA                | 1945927197               |
| SNP_P3_34471_38219800 | NC_021162.1    | Ca_kabuli_chr03 | 38219800                | AA                              | GG                | 1945927199               |
| SNP_P3_34472_38219815 | NC_021162.1    | Ca_kabuli_chr03 | 38219815                | AA                              | GG                | 1945927201               |
| SNP_P3_34473_38219821 | NC_021162.1    | Ca_kabuli_chr03 | 38219821                | GG                              | AA                | 1945927203               |
| SNP_P3_34474_38219862 | NC_021162.1    | Ca_kabuli_chr03 | 38219862                | TT                              | CC                | 1945927205               |
| SNP_P3_34476_38219943 | NC_021162.1    | Ca_kabuli_chr03 | 38219943                | AA                              | GG                | 1945927206               |
| SNP_P3_34477_38220958 | NC_021162.1    | Ca_kabuli_chr03 | 38220958                | GG                              | AA                | 1945927208               |
| SNP_P3_34479_38224014 | NC_021162.1    | Ca_kabuli_chr03 | 38224014                | AA                              | GG                | 1945927210               |
| SNP_P3_34481_38224700 | NC_021162.1    | Ca_kabuli_chr03 | 38224700                | AA                              | GG                | 1945927212               |
| SNP_P3_34482_38224772 | NC_021162.1    | Ca_kabuli_chr03 | 38224772                | TT                              | CC                | 1945927213               |
| SNP_P3_34483_38224994 | NC_021162.1    | Ca_kabuli_chr03 | 38224994                | GG                              | CC                | 1945927215               |
| SNP_P3_34484_38225093 | NC_021162.1    | Ca_kabuli_chr03 | 38225093                | AA                              | TT                | 1945927217               |
| SNP_P3_34486_38225789 | NC_021162.1    | Ca_kabuli_chr03 | 38225789                | CC                              | TT                | 1945927219               |
| SNP_P3_34489_38226396 | NC_021162.1    | Ca_kabuli_chr03 | 38226396                | TT                              | CC                | 1945927221               |
| SNP_P3_34490_38226534 | NC_021162.1    | Ca_kabuli_chr03 | 38226534                | GG                              | TT                | 1945927222               |
| SNP_P3_34491_38227354 | NC_021162.1    | Ca_kabuli_chr03 | 38227354                | CC                              | TT                | 1945927224               |
| SNP_P3_34492_38228728 | NC_021162.1    | Ca_kabuli_chr03 | 38228728                | AA                              | CC                | 1945927226               |
| SNP_P3_34493_38229365 | NC_021162.1    | Ca_kabuli_chr03 | 38229365                | TT                              | CC                | 1945927228               |
| SNP_P3_34494_38229410 | NC_021162.1    | Ca_kabuli_chr03 | 38229410                | CC                              | TT                | 1945927229               |
| SNP_P3_34495_38231757 | NC_021162.1    | Ca_kabuli_chr03 | 38231757                | CC                              | TT                | 1945927231               |
| SNP_P3_34496_38231945 | NC_021162.1    | Ca_kabuli_chr03 | 38231945                | GG                              | AA                | 1945927233               |
| SNP_P3_34498_38232348 | NC_021162.1    | Ca_kabuli_chr03 | 38232348                | GG                              | AA                | 1945927235               |
| SNP_P3_34499_38232382 | NC_021162.1    | Ca_kabuli_chr03 | 38232382                | GG                              | AA                | 1945927237               |
| SNP_P3_34500_38232399 | NC_021162.1    | Ca_kabuli_chr03 | 38232399                | AA                              | GG                | 1945927238               |
| SNP_P3_34501_38232402 | NC_021162.1    | Ca_kabuli_chr03 | 38232402                | GG                              | CC                | 1945927240               |
| SNP_P3_34502_38232403 | NC_021162.1    | Ca_kabuli_chr03 | 38232403                | GG                              | TT                | 1945927242               |
| SNP_P3_34503_38232412 | NC_021162.1    | Ca_kabuli_chr03 | 38232412                | AA                              | GG                | 1945927244               |
| SNP_P3_34504_38232531 | NC_021162.1    | Ca_kabuli_chr03 | 38232531                | TT                              | CC                | 1945927245               |
| SNP_P3_34505_38232536 | NC_021162.1    | Ca_kabuli_chr03 | 38232536                | TT                              | AA                | 1945927247               |
| SNP_P3_34506_38232558 | NC_021162.1    | Ca_kabuli_chr03 | 38232558                | GG                              | AA                | 1945927249               |
| SNP_P3_34507_38232793 | NC_021162.1    | Ca_kabuli_chr03 | 38232793                | CC                              | GG                | 1945927251               |
| SNP_P3_34509_38233955 | NC_021162.1    | Ca_kabuli_chr03 | 38233955                | TT                              | CC                | 1945927253               |
| SNP_P3_34510_38234113 | NC_021162.1    | Ca_kabuli_chr03 | 38234113                | TT                              | AA                | 1945927254               |
| SNP_P3_34511_38234903 | NC_021162.1    | Ca_kabuli_chr03 | 38234903                | CC                              | TT                | 1945927256               |
| SNP_P3_34512_38235141 | NC_021162.1    | Ca_kabuli_chr03 | 38235141                | AA                              | TT                | 1945927258               |
| SNP_P3_34513_38235256 | NC_021162.1    | Ca_kabuli_chr03 | 38235256                | GG                              | AA                | 1945927260               |
| SNP_P3_34514_38236160 | NC_021162.1    | Ca_kabuli_chr03 | 38236160                | GG                              | AA                | 1945927261               |
| SNP_P3_34515_38236243 | NC_021162.1    | Ca_kabuli_chr03 | 38236243                | CC                              | TT                | 1945927263               |
| SNP_P3_34516_38236627 | NC_021162.1    | Ca_kabuli_chr03 | 38236627                | AA                              | GG                | 1945927265               |
| SNP_P3_34517_38236792 | NC_021162.1    | Ca_kabuli_chr03 | 38236792                | CC                              | AA                | 1945927267               |
| SNP_P3_34518_38238012 | NC_021162.1    | Ca_kabuli_chr03 | 38238012                | AA                              | GG                | 1945927269               |
| SNP_P3_34519_38238323 | NC_021162.1    | Ca_kabuli_chr03 | 38238323                | AA                              | GG                | 1945927270               |

| SNPs IDs              | Chromosome IDs | Chromosomes     | Physical positions (bp) | CDC Frontier (Reference genome) | (Pusa 256 & HPNB) | NCBI SNPdb Accession IDs |
|-----------------------|----------------|-----------------|-------------------------|---------------------------------|-------------------|--------------------------|
| SNP_P3_34520_38239731 | NC_021162.1    | Ca_kabuli_chr03 | 38239731                | AA                              | TT                | 1945927272               |
| SNP_P3_34521_38241187 | NC_021162.1    | Ca_kabuli_chr03 | 38241187                | CC                              | TT                | 1945927274               |
| SNP_P3_34522_38241374 | NC_021162.1    | Ca_kabuli_chr03 | 38241374                | GG                              | AA                | 1945927276               |
| SNP_P3_34523_38267766 | NC_021162.1    | Ca_kabuli_chr03 | 38267766                | AA                              | GG                | 1945927277               |
| SNP_P3_34524_38284496 | NC_021162.1    | Ca_kabuli_chr03 | 38284496                | GG                              | AA                | 1945927279               |
| SNP_P3_34526_38300466 | NC_021162.1    | Ca_kabuli_chr03 | 38300466                | AA                              | GG                | 1945927281               |
| SNP_P3_34528_38344978 | NC_021162.1    | Ca_kabuli_chr03 | 38344978                | CC                              | TT                | 1945927283               |
| SNP_P3_34529_38347501 | NC_021162.1    | Ca_kabuli_chr03 | 38347501                | GG                              | AA                | 1945927285               |
| SNP_P3_34530_38353156 | NC_021162.1    | Ca_kabuli_chr03 | 38353156                | TT                              | CC                | 1945927286               |
| SNP_P3_34531_38353157 | NC_021162.1    | Ca_kabuli_chr03 | 38353157                | TT                              | GG                | 1945927288               |
| SNP_P3_34532_38366448 | NC_021162.1    | Ca_kabuli_chr03 | 38366448                | TT                              | GG                | 1945927290               |
| SNP_P3_34533_38406481 | NC_021162.1    | Ca_kabuli_chr03 | 38406481                | TT                              | CC                | 1945927292               |
| SNP_P3_34534_38422812 | NC_021162.1    | Ca_kabuli_chr03 | 38422812                | GG                              | CC                | 1945927293               |
| SNP_P3_34535_38423530 | NC_021162.1    | Ca_kabuli_chr03 | 38423530                | GG                              | AA                | 1945927295               |
| SNP_P3_34536_38423531 | NC_021162.1    | Ca_kabuli_chr03 | 38423531                | GG                              | AA                | 1945927297               |
| SNP_P3_34537_38492304 | NC_021162.1    | Ca_kabuli_chr03 | 38492304                | CC                              | AA                | 1945927299               |
| SNP_P3_34538_38583645 | NC_021162.1    | Ca_kabuli_chr03 | 38583645                | AA                              | GG                | 1945927301               |
| SNP_P3_34539_38617361 | NC_021162.1    | Ca_kabuli_chr03 | 38617361                | CC                              | TT                | 1945927302               |
| SNP_P3_34540_38618162 | NC_021162.1    | Ca_kabuli_chr03 | 38618162                | TT                              | AA                | 1945927304               |
| SNP_P3_34542_38622880 | NC_021162.1    | Ca_kabuli_chr03 | 38622880                | AA                              | CC                | 1945927306               |
| SNP_P3_34543_38623626 | NC_021162.1    | Ca_kabuli_chr03 | 38623626                | CC                              | TT                | 1945927308               |
| SNP_P3_34544_38623937 | NC_021162.1    | Ca_kabuli_chr03 | 38623937                | TT                              | CC                | 1945927309               |
| SNP_P3_34546_38632457 | NC_021162.1    | Ca_kabuli_chr03 | 38632457                | TT                              | CC                | 1945927311               |
| SNP_P3_34547_38634916 | NC_021162.1    | Ca_kabuli_chr03 | 38634916                | GG                              | CC                | 1945927313               |
| SNP_P3_34551_38690610 | NC_021162.1    | Ca_kabuli_chr03 | 38690610                | GG                              | AA                | 1945927315               |
| SNP_P3_34552_38690611 | NC_021162.1    | Ca_kabuli_chr03 | 38690611                | TT                              | CC                | 1945927317               |
| SNP_P3_34553_38690638 | NC_021162.1    | Ca_kabuli_chr03 | 38690638                | GG                              | AA                | 1945927318               |
| SNP_P3_34554_38690651 | NC_021162.1    | Ca_kabuli_chr03 | 38690651                | AA                              | TT                | 1945927320               |
| SNP_P3_34555_38690747 | NC_021162.1    | Ca_kabuli_chr03 | 38690747                | AA                              | TT                | 1945927322               |
| SNP_P3_34556_38690862 | NC_021162.1    | Ca_kabuli_chr03 | 38690862                | CC                              | AA                | 1945927324               |
| SNP_P3_34558_38691177 | NC_021162.1    | Ca_kabuli_chr03 | 38691177                | AA                              | GG                | 1945927325               |
| SNP_P3_34559_38698007 | NC_021162.1    | Ca_kabuli_chr03 | 38698007                | GG                              | AA                | 1945927327               |
| SNP_P3_34561_38733571 | NC_021162.1    | Ca_kabuli_chr03 | 38733571                | TT                              | AA                | 1945927329               |
| SNP_P3_34563_38735609 | NC_021162.1    | Ca_kabuli_chr03 | 38735609                | AA                              | GG                | 1945927331               |
| SNP_P3_34564_38735613 | NC_021162.1    | Ca_kabuli_chr03 | 38735613                | TT                              | AA                | 1945927333               |
| SNP_P3_34565_38736001 | NC_021162.1    | Ca_kabuli_chr03 | 38736001                | AA                              | GG                | 1945927334               |
| SNP_P3_34566_38736003 | NC_021162.1    | Ca_kabuli_chr03 | 38736003                | AA                              | TT                | 1945927336               |
| SNP_P3_34567_38738387 | NC_021162.1    | Ca_kabuli_chr03 | 38738387                | TT                              | AA                | 1945927338               |
| SNP_P3_34568_38754856 | NC_021162.1    | Ca_kabuli_chr03 | 38754856                | GG                              | AA                | 1945927340               |
| SNP_P3_34569_38767119 | NC_021162.1    | Ca_kabuli_chr03 | 38767119                | CC                              | TT                | 1945927341               |
| SNP_P3_34570_38800056 | NC_021162.1    | Ca_kabuli_chr03 | 38800056                | GG                              | AA                | 1945927343               |
| SNP_P3_34571_38812441 | NC_021162.1    | Ca_kabuli_chr03 | 38812441                | TT                              | GG                | 1945927345               |

| SNPs IDs              | Chromosome IDs | Chromosomes     | Physical positions (bp) | CDC Frontier (Reference genome) | (Pusa 256 & HPNB) | NCBI SNPdb Accession IDs |
|-----------------------|----------------|-----------------|-------------------------|---------------------------------|-------------------|--------------------------|
| SNP_P3_34572_38856891 | NC_021162.1    | Ca_kabuli_chr03 | 38856891                | CC                              | GG                | 1945927347               |
| SNP_P3_34573_38867772 | NC_021162.1    | Ca_kabuli_chr03 | 38867772                | TT                              | CC                | 1945927349               |
| SNP_P3_34574_38870491 | NC_021162.1    | Ca_kabuli_chr03 | 38870491                | AA                              | TT                | 1945927350               |
| SNP_P3_34575_38870525 | NC_021162.1    | Ca_kabuli_chr03 | 38870525                | AA                              | CC                | 1945927352               |
| SNP_P3_34576_38870527 | NC_021162.1    | Ca_kabuli_chr03 | 38870527                | GG                              | AA                | 1945927354               |
| SNP_P3_34578_38900328 | NC_021162.1    | Ca_kabuli_chr03 | 38900328                | AA                              | TT                | 1945927356               |
| SNP_P3_34579_38900329 | NC_021162.1    | Ca_kabuli_chr03 | 38900329                | AA                              | TT                | 1945927357               |
| SNP_P3_34580_38900545 | NC_021162.1    | Ca_kabuli_chr03 | 38900545                | TT                              | CC                | 1945927359               |
| SNP_P3_34581_38900554 | NC_021162.1    | Ca_kabuli_chr03 | 38900554                | GG                              | AA                | 1945927361               |
| SNP_P3_34582_38900814 | NC_021162.1    | Ca_kabuli_chr03 | 38900814                | AA                              | GG                | 1945927363               |
| SNP_P3_34583_38900826 | NC_021162.1    | Ca_kabuli_chr03 | 38900826                | CC                              | TT                | 1945927365               |
| SNP_P3_34584_38900877 | NC_021162.1    | Ca_kabuli_chr03 | 38900877                | TT                              | CC                | 1945927366               |
| SNP_P3_34585_38900879 | NC_021162.1    | Ca_kabuli_chr03 | 38900879                | GG                              | AA                | 1945927368               |
| SNP_P3_34586_38901082 | NC_021162.1    | Ca_kabuli_chr03 | 38901082                | TT                              | CC                | 1945927370               |
| SNP_P3_34588_38901395 | NC_021162.1    | Ca_kabuli_chr03 | 38901395                | AA                              | GG                | 1945927372               |
| SNP_P3_34589_38902606 | NC_021162.1    | Ca_kabuli_chr03 | 38902606                | AA                              | GG                | 1945927373               |
| SNP_P3_34590_38902671 | NC_021162.1    | Ca_kabuli_chr03 | 38902671                | TT                              | GG                | 1945927375               |
| SNP_P3_34591_38902996 | NC_021162.1    | Ca_kabuli_chr03 | 38902996                | AA                              | GG                | 1945927377               |
| SNP_P3_34592_38903012 | NC_021162.1    | Ca_kabuli_chr03 | 38903012                | AA                              | GG                | 1945927379               |
| SNP_P3_34593_38907418 | NC_021162.1    | Ca_kabuli_chr03 | 38907418                | TT                              | GG                | 1945927381               |
| SNP_P3_34594_38908772 | NC_021162.1    | Ca_kabuli_chr03 | 38908772                | CC                              | GG                | 1945927382               |
| SNP_P3_34595_38908787 | NC_021162.1    | Ca_kabuli_chr03 | 38908787                | CC                              | TT                | 1945927384               |
| SNP_P3_34596_38942376 | NC_021162.1    | Ca_kabuli_chr03 | 38942376                | TT                              | AA                | 1945927386               |
| SNP_P3_34597_38946909 | NC_021162.1    | Ca_kabuli_chr03 | 38946909                | GG                              | TT                | 1945927388               |
| SNP_P3_34598_38955778 | NC_021162.1    | Ca_kabuli_chr03 | 38955778                | GG                              | AA                | 1945927389               |
| SNP_P3_34599_38955916 | NC_021162.1    | Ca_kabuli_chr03 | 38955916                | TT                              | GG                | 1945927391               |
| SNP_P3_34600_38958262 | NC_021162.1    | Ca_kabuli_chr03 | 38958262                | TT                              | CC                | 1945927393               |
| SNP_P3_34601_38958319 | NC_021162.1    | Ca_kabuli_chr03 | 38958319                | CC                              | AA                | 1945927395               |
| SNP_P3_34602_38960769 | NC_021162.1    | Ca_kabuli_chr03 | 38960769                | CC                              | TT                | 1945927397               |
| SNP_P3_34604_38976211 | NC_021162.1    | Ca_kabuli_chr03 | 38976211                | AA                              | GG                | 1945927398               |
| SNP_P3_34606_39053394 | NC_021162.1    | Ca_kabuli_chr03 | 39053394                | AA                              | GG                | 1945927400               |
| SNP_P3_34607_39053916 | NC_021162.1    | Ca_kabuli_chr03 | 39053916                | TT                              | CC                | 1945927402               |
| SNP_P3_34608_39067165 | NC_021162.1    | Ca_kabuli_chr03 | 39067165                | GG                              | AA                | 1945927404               |
| SNP_P3_34609_39068653 | NC_021162.1    | Ca_kabuli_chr03 | 39068653                | CC                              | TT                | 1945927405               |
| SNP_P3_34610_39087580 | NC_021162.1    | Ca_kabuli_chr03 | 39087580                | CC                              | TT                | 1945927407               |
| SNP_P3_34611_39108022 | NC_021162.1    | Ca_kabuli_chr03 | 39108022                | AA                              | GG                | 1945927409               |
| SNP_P3_34613_39156091 | NC_021162.1    | Ca_kabuli_chr03 | 39156091                | CC                              | GG                | 1945927411               |
| SNP_P3_34614_39183999 | NC_021162.1    | Ca_kabuli_chr03 | 39183999                | GG                              | AA                | 1945927413               |
| SNP_P3_34615_39184047 | NC_021162.1    | Ca_kabuli_chr03 | 39184047                | CC                              | TT                | 1945927414               |
| SNP_P3_34616_39190615 | NC_021162.1    | Ca_kabuli_chr03 | 39190615                | AA                              | GG                | 1945927416               |
| SNP_P3_34617_39226952 | NC_021162.1    | Ca_kabuli_chr03 | 39226952                | GG                              | TT                | 1945927418               |
| SNP_P3_34618_39245204 | NC_021162.1    | Ca_kabuli_chr03 | 39245204                | GG                              | AA                | 1945927420               |

| SNPs IDs              | Chromosome IDs | Chromosomes     | Physical positions (bp) | CDC Frontier (Reference genome) | (Pusa 256 & HPNB) | NCBI SNPdb Accession IDs |
|-----------------------|----------------|-----------------|-------------------------|---------------------------------|-------------------|--------------------------|
| SNP_P3_34619_39271343 | NC_021162.1    | Ca_kabuli_chr03 | 39271343                | GG                              | AA                | 1945927421               |
| SNP_P3_34620_39293057 | NC_021162.1    | Ca_kabuli_chr03 | 39293057                | TT                              | AA                | 1945927423               |
| SNP_P3_34621_39293058 | NC_021162.1    | Ca_kabuli_chr03 | 39293058                | TT                              | AA                | 1945927425               |
| SNP_P3_34624_39319738 | NC_021162.1    | Ca_kabuli_chr03 | 39319738                | TT                              | CC                | 1945927427               |
| SNP_P3_34625_39329900 | NC_021162.1    | Ca_kabuli_chr03 | 39329900                | GG                              | AA                | 1945927429               |
| SNP_P3_34626_39347797 | NC_021162.1    | Ca_kabuli_chr03 | 39347797                | GG                              | TT                | 1945927430               |
| SNP_P3_34628_39373546 | NC_021162.1    | Ca_kabuli_chr03 | 39373546                | TT                              | CC                | 1945927432               |
| SNP_P3_34629_39388844 | NC_021162.1    | Ca_kabuli_chr03 | 39388844                | CC                              | TT                | 1945927434               |
| SNP_P3_34630_39390380 | NC_021162.1    | Ca_kabuli_chr03 | 39390380                | GG                              | AA                | 1945927436               |
| SNP_P3_34631_39396669 | NC_021162.1    | Ca_kabuli_chr03 | 39396669                | AA                              | CC                | 1945927437               |
| SNP_P3_34633_39415298 | NC_021162.1    | Ca_kabuli_chr03 | 39415298                | GG                              | AA                | 1945927439               |
| SNP_P3_34634_39418715 | NC_021162.1    | Ca_kabuli_chr03 | 39418715                | TT                              | CC                | 1945927441               |
| SNP_P3_34635_39418728 | NC_021162.1    | Ca_kabuli_chr03 | 39418728                | GG                              | AA                | 1945927443               |
| SNP_P3_34636_39418741 | NC_021162.1    | Ca_kabuli_chr03 | 39418741                | TT                              | CC                | 1945927445               |
| SNP_P3_34637_39418756 | NC_021162.1    | Ca_kabuli_chr03 | 39418756                | GG                              | AA                | 1945927446               |
| SNP_P3_34638_39418759 | NC_021162.1    | Ca_kabuli_chr03 | 39418759                | CC                              | GG                | 1945927448               |
| SNP_P3_34639_39419631 | NC_021162.1    | Ca_kabuli_chr03 | 39419631                | GG                              | AA                | 1945927450               |
| SNP_P3_34640_39419727 | NC_021162.1    | Ca_kabuli_chr03 | 39419727                | CC                              | TT                | 1945927452               |
| SNP_P3_34643_39543586 | NC_021162.1    | Ca_kabuli_chr03 | 39543586                | GG                              | AA                | 1945927453               |
| SNP_P3_34644_39545478 | NC_021162.1    | Ca_kabuli_chr03 | 39545478                | CC                              | AA                | 1945927455               |
| SNP_P3_34647_39578578 | NC_021162.1    | Ca_kabuli_chr03 | 39578578                | GG                              | AA                | 1945927457               |
| SNP_P3_34648_39581648 | NC_021162.1    | Ca_kabuli_chr03 | 39581648                | TT                              | AA                | 1945927459               |
| SNP_P3_34649_39597116 | NC_021162.1    | Ca_kabuli_chr03 | 39597116                | CC                              | AA                | 1945927461               |
| SNP_P3_34650_39603602 | NC_021162.1    | Ca_kabuli_chr03 | 39603602                | TT                              | AA                | 1945927462               |
| SNP_P3_34651_39610904 | NC_021162.1    | Ca_kabuli_chr03 | 39610904                | AA                              | GG                | 1945927464               |
| SNP_P3_34652_39610905 | NC_021162.1    | Ca_kabuli_chr03 | 39610905                | GG                              | AA                | 1945927466               |
| SNP_P3_34653_39610913 | NC_021162.1    | Ca_kabuli_chr03 | 39610913                | GG                              | AA                | 1945927468               |
| SNP_P3_34654_39610934 | NC_021162.1    | Ca_kabuli_chr03 | 39610934                | TT                              | AA                | 1945927469               |
| SNP_P3_34655_39610958 | NC_021162.1    | Ca_kabuli_chr03 | 39610958                | CC                              | TT                | 1945927471               |
| SNP_P3_34656_39610995 | NC_021162.1    | Ca_kabuli_chr03 | 39610995                | TT                              | AA                | 1945927473               |
| SNP_P3_34657_39611014 | NC_021162.1    | Ca_kabuli_chr03 | 39611014                | AA                              | TT                | 1945927475               |
| SNP_P3_34658_39611027 | NC_021162.1    | Ca_kabuli_chr03 | 39611027                | TT                              | CC                | 1945927476               |
| SNP_P3_34659_39611159 | NC_021162.1    | Ca_kabuli_chr03 | 39611159                | GG                              | AA                | 1945927478               |
| SNP_P3_34660_39611170 | NC_021162.1    | Ca_kabuli_chr03 | 39611170                | TT                              | AA                | 1945927480               |
| SNP_P3_34661_39611320 | NC_021162.1    | Ca_kabuli_chr03 | 39611320                | AA                              | GG                | 1945927482               |
| SNP_P3_34663_39611386 | NC_021162.1    | Ca_kabuli_chr03 | 39611386                | TT                              | GG                | 1945927484               |
| SNP_P3_34664_39611410 | NC_021162.1    | Ca_kabuli_chr03 | 39611410                | TT                              | CC                | 1945927485               |
| SNP_P3_34665_39611444 | NC_021162.1    | Ca_kabuli_chr03 | 39611444                | GG                              | AA                | 1945927487               |
| SNP_P3_34666_39611446 | NC_021162.1    | Ca_kabuli_chr03 | 39611446                | AA                              | TT                | 1945927489               |
| SNP_P3_34667_39611461 | NC_021162.1    | Ca_kabuli_chr03 | 39611461                | GG                              | AA                | 1945927491               |
| SNP_P3_34668_39611490 | NC_021162.1    | Ca_kabuli_chr03 | 39611490                | CC                              | TT                | 1945927493               |
| SNP_P3_34669_39611687 | NC_021162.1    | Ca_kabuli_chr03 | 39611687                | GG                              | AA                | 1945927494               |

| SNPs IDs              | Chromosome IDs | Chromosomes     | Physical positions (bp) | CDC Frontier (Reference genome) | (Pusa 256 & HPNB) | NCBI SNPdb Accession IDs |
|-----------------------|----------------|-----------------|-------------------------|---------------------------------|-------------------|--------------------------|
| SNP_P3_34670_39611688 | NC_021162.1    | Ca_kabuli_chr03 | 39611688                | CC                              | TT                | 1945927496               |
| SNP_P3_34671_39611699 | NC_021162.1    | Ca_kabuli_chr03 | 39611699                | TT                              | CC                | 1945927498               |
| SNP_P3_34672_39611718 | NC_021162.1    | Ca_kabuli_chr03 | 39611718                | GG                              | AA                | 1945927500               |
| SNP_P3_34673_39611737 | NC_021162.1    | Ca_kabuli_chr03 | 39611737                | AA                              | GG                | 1945927501               |
| SNP_P3_34674_39612534 | NC_021162.1    | Ca_kabuli_chr03 | 39612534                | TT                              | CC                | 1945927503               |
| SNP_P3_34675_39612558 | NC_021162.1    | Ca_kabuli_chr03 | 39612558                | AA                              | TT                | 1945927505               |
| SNP_P3_34676_39612568 | NC_021162.1    | Ca_kabuli_chr03 | 39612568                | AA                              | TT                | 1945927507               |
| SNP_P3_34679_39629985 | NC_021162.1    | Ca_kabuli_chr03 | 39629985                | GG                              | AA                | 1945927508               |
| SNP_P3_34681_39702771 | NC_021162.1    | Ca_kabuli_chr03 | 39702771                | GG                              | TT                | 1945927510               |
| SNP_P3_34684_39717287 | NC_021162.1    | Ca_kabuli_chr03 | 39717287                | CC                              | TT                | 1945927512               |
| SNP_P3_34685_39732153 | NC_021162.1    | Ca_kabuli_chr03 | 39732153                | CC                              | TT                | 1945927514               |
| SNP_P3_34686_39755236 | NC_021162.1    | Ca_kabuli_chr03 | 39755236                | CC                              | TT                | 1945927516               |
| SNP_P3_34687_39765722 | NC_021162.1    | Ca_kabuli_chr03 | 39765722                | TT                              | CC                | 1945927517               |
| SNP_P3_34688_39803312 | NC_021162.1    | Ca_kabuli_chr03 | 39803312                | TT                              | CC                | 1945927519               |
| SNP_P3_34689_39835718 | NC_021162.1    | Ca_kabuli_chr03 | 39835718                | GG                              | AA                | 1945927521               |
| SNP_P3_34691_39836908 | NC_021162.1    | Ca_kabuli_chr03 | 39836908                | AA                              | GG                | 1945927523               |
| SNP_P3_34692_39846523 | NC_021162.1    | Ca_kabuli_chr03 | 39846523                | CC                              | TT                | 1945927524               |
| SNP_P3_34693_39856769 | NC_021162.1    | Ca_kabuli_chr03 | 39856769                | GG                              | CC                | 1945927526               |
| SNP_P3_34694_39864815 | NC_021162.1    | Ca_kabuli_chr03 | 39864815                | GG                              | CC                | 1945927528               |
| SNP_P3_34695_39865286 | NC_021162.1    | Ca_kabuli_chr03 | 39865286                | AA                              | TT                | 1945927530               |
| SNP_P3_34696_39865460 | NC_021162.1    | Ca_kabuli_chr03 | 39865460                | AA                              | CC                | 1945927532               |
| SNP_P3_34697_39865465 | NC_021162.1    | Ca_kabuli_chr03 | 39865465                | AA                              | TT                | 1945927533               |
| SNP_P3_34698_39866503 | NC_021162.1    | Ca_kabuli_chr03 | 39866503                | GG                              | AA                | 1945927535               |
| SNP_P3_34701_39873091 | NC_021162.1    | Ca_kabuli_chr03 | 39873091                | AA                              | GG                | 1945927537               |
| SNP_P3_34702_39874630 | NC_021162.1    | Ca_kabuli_chr03 | 39874630                | TT                              | CC                | 1945927539               |
| SNP_P3_34703_39874634 | NC_021162.1    | Ca_kabuli_chr03 | 39874634                | TT                              | AA                | 1945927540               |
| SNP_P3_34704_39885397 | NC_021162.1    | Ca_kabuli_chr03 | 39885397                | GG                              | AA                | 1945927542               |
| SNP_P3_34705_39903314 | NC_021162.1    | Ca_kabuli_chr03 | 39903314                | TT                              | GG                | 1945927544               |
| SNP_P3_34706_39906819 | NC_021162.1    | Ca_kabuli_chr03 | 39906819                | AA                              | CC                | 1945927546               |
| SNP_P3_34708_39933731 | NC_021162.1    | Ca_kabuli_chr03 | 39933731                | CC                              | TT                | 1945927548               |
| SNP_P3_34709_39934083 | NC_021162.1    | Ca_kabuli_chr03 | 39934083                | CC                              | TT                | 1945927549               |
| SNP_P3_34710_39934096 | NC_021162.1    | Ca_kabuli_chr03 | 39934096                | CC                              | TT                | 1945927551               |
| SNP_P3_34711_39938101 | NC_021162.1    | Ca_kabuli_chr03 | 39938101                | AA                              | GG                | 1945927553               |
| SNP_P3_34712_39946923 | NC_021162.1    | Ca_kabuli_chr03 | 39946923                | TT                              | CC                | 1945927555               |
| SNP_P3_34713_39955262 | NC_021162.1    | Ca_kabuli_chr03 | 39955262                | TT                              | CC                | 1945927556               |
| SNP_P3_34714_39955735 | NC_021162.1    | Ca_kabuli_chr03 | 39955735                | AA                              | GG                | 1945927558               |
| SNP_P3_34716_39964840 | NC_021162.1    | Ca_kabuli_chr03 | 39964840                | TT                              | GG                | 1945927560               |
| SNP_P3_34717_39978056 | NC_021162.1    | Ca_kabuli_chr03 | 39978056                | TT                              | CC                | 1945927562               |
| SNP_P3_34718_39978229 | NC_021162.1    | Ca_kabuli_chr03 | 39978229                | CC                              | AA                | 1945927564               |
| SNP_P3_34719_39978361 | NC_021162.1    | Ca_kabuli_chr03 | 39978361                | CC                              | AA                | 1945927565               |
| SNP_P3_34720_39978378 | NC_021162.1    | Ca_kabuli_chr03 | 39978378                | GG                              | AA                | 1945927567               |
| SNP_P3_34721_39978389 | NC_021162.1    | Ca_kabuli_chr03 | 39978389                | AA                              | GG                | 1945927569               |



| SNPs IDs              | Chromosome IDs | Chromosomes     | Physical positions (bp) | CDC Frontier (Reference genome) | (Pusa 256 & HPNB) | NCBI SNPdb Accession IDs |
|-----------------------|----------------|-----------------|-------------------------|---------------------------------|-------------------|--------------------------|
| SNP_P3_34722_39978422 | NC_021162.1    | Ca_kabuli_chr03 | 39978422                | AA                              | GG                | 1945927571               |
| SNP_P3_34723_39978427 | NC_021162.1    | Ca_kabuli_chr03 | 39978427                | AA                              | GG                | 1945927573               |
| SNP_P3_34724_39978952 | NC_021162.1    | Ca_kabuli_chr03 | 39978952                | CC                              | AA                | 1945927574               |
| SNP_P3_34725_39979079 | NC_021162.1    | Ca_kabuli_chr03 | 39979079                | TT                              | GG                | 1945927576               |
| SNP_P3_34726_39979104 | NC_021162.1    | Ca_kabuli_chr03 | 39979104                | TT                              | CC                | 1945927578               |
| SNP_P3_34727_39979119 | NC_021162.1    | Ca_kabuli_chr03 | 39979119                | AA                              | GG                | 1945927580               |
| SNP_P3_34728_39979173 | NC_021162.1    | Ca_kabuli_chr03 | 39979173                | GG                              | CC                | 1945927581               |
| SNP_P3_34729_39979504 | NC_021162.1    | Ca_kabuli_chr03 | 39979504                | TT                              | AA                | 1945927583               |
| SNP_P3_34730_39981442 | NC_021162.1    | Ca_kabuli_chr03 | 39981442                | AA                              | TT                | 1945927585               |
| SNP_P3_34731_39981443 | NC_021162.1    | Ca_kabuli_chr03 | 39981443                | TT                              | GG                | 1945927587               |
| SNP_P3_34732_39981648 | NC_021162.1    | Ca_kabuli_chr03 | 39981648                | GG                              | CC                | 1945927589               |
| SNP_P3_34733_39981885 | NC_021162.1    | Ca_kabuli_chr03 | 39981885                | AA                              | GG                | 1945927590               |
| SNP_P3_34734_39981974 | NC_021162.1    | Ca_kabuli_chr03 | 39981974                | AA                              | GG                | 1945927592               |
| SNP_P3_34735_39988165 | NC_021162.1    | Ca_kabuli_chr03 | 39988165                | GG                              | CC                | 1945927594               |
| SNP_P3_34736_39988204 | NC_021162.1    | Ca_kabuli_chr03 | 39988204                | AA                              | CC                | 1945927596               |
| SNP_P3_34737_25238    | NC_021163.1    | Ca_kabuli_chr04 | 25238                   | AA                              | TT                | 1945927597               |
| SNP_P3_34738_30623    | NC_021163.1    | Ca_kabuli_chr04 | 30623                   | GG                              | AA                | 1945927599               |
| SNP_P3_34740_64669    | NC_021163.1    | Ca_kabuli_chr04 | 64669                   | TT                              | AA                | 1945927601               |
| SNP_P3_34741_79769    | NC_021163.1    | Ca_kabuli_chr04 | 79769                   | GG                              | AA                | 1945927603               |
| SNP_P3_34743_80152    | NC_021163.1    | Ca_kabuli_chr04 | 80152                   | CC                              | AA                | 1945927604               |
| SNP_P3_34744_80166    | NC_021163.1    | Ca_kabuli_chr04 | 80166                   | AA                              | GG                | 1945927606               |
| SNP_P3_34745_80169    | NC_021163.1    | Ca_kabuli_chr04 | 80169                   | TT                              | CC                | 1945927608               |
| SNP_P3_34746_80250    | NC_021163.1    | Ca_kabuli_chr04 | 80250                   | AA                              | GG                | 1945927610               |
| SNP_P3_34747_80289    | NC_021163.1    | Ca_kabuli_chr04 | 80289                   | AA                              | GG                | 1945927612               |
| SNP_P3_34748_80323    | NC_021163.1    | Ca_kabuli_chr04 | 80323                   | GG                              | AA                | 1945927613               |
| SNP_P3_34749_80330    | NC_021163.1    | Ca_kabuli_chr04 | 80330                   | TT                              | CC                | 1945927615               |
| SNP_P3_34750_80343    | NC_021163.1    | Ca_kabuli_chr04 | 80343                   | TT                              | GG                | 1945927617               |
| SNP_P3_34751_84994    | NC_021163.1    | Ca_kabuli_chr04 | 84994                   | TT                              | CC                | 1945927619               |
| SNP_P3_34752_85411    | NC_021163.1    | Ca_kabuli_chr04 | 85411                   | AA                              | GG                | 1945927620               |
| SNP_P3_34753_85468    | NC_021163.1    | Ca_kabuli_chr04 | 85468                   | CC                              | TT                | 1945927622               |
| SNP_P3_34754_85513    | NC_021163.1    | Ca_kabuli_chr04 | 85513                   | TT                              | CC                | 1945927624               |
| SNP_P3_34755_85556    | NC_021163.1    | Ca_kabuli_chr04 | 85556                   | TT                              | GG                | 1945927626               |
| SNP_P3_34756_85592    | NC_021163.1    | Ca_kabuli_chr04 | 85592                   | GG                              | CC                | 1945927628               |
| SNP_P3_34757_85714    | NC_021163.1    | Ca_kabuli_chr04 | 85714                   | TT                              | CC                | 1945927629               |
| SNP_P3_34758_85721    | NC_021163.1    | Ca_kabuli_chr04 | 85721                   | CC                              | TT                | 1945927631               |
| SNP_P3_34759_85761    | NC_021163.1    | Ca_kabuli_chr04 | 85761                   | AA                              | TT                | 1945927633               |
| SNP_P3_34760_85768    | NC_021163.1    | Ca_kabuli_chr04 | 85768                   | AA                              | GG                | 1945927635               |
| SNP_P3_34761_85945    | NC_021163.1    | Ca_kabuli_chr04 | 85945                   | TT                              | CC                | 1945927636               |
| SNP_P3_34762_86019    | NC_021163.1    | Ca_kabuli_chr04 | 86019                   | TT                              | GG                | 1945927638               |
| SNP_P3_34763_89519    | NC_021163.1    | Ca_kabuli_chr04 | 89519                   | AA                              | CC                | 1945927640               |
| SNP_P3_34765_89808    | NC_021163.1    | Ca_kabuli_chr04 | 89808                   | GG                              | AA                | 1945927642               |
| SNP_P3_34766_89837    | NC_021163.1    | Ca_kabuli_chr04 | 89837                   | TT                              | AA                | 1945927644               |

| SNPs IDs            | Chromosome IDs | Chromosomes     | Physical positions (bp) | CDC Frontier (Reference genome) | (Pusa 256 & HPNB) | NCBI SNPdb Accession IDs |
|---------------------|----------------|-----------------|-------------------------|---------------------------------|-------------------|--------------------------|
| SNP_P3_34767_89884  | NC_021163.1    | Ca_kabuli_chr04 | 89884                   | AA                              | GG                | 1945927645               |
| SNP_P3_34768_89985  | NC_021163.1    | Ca_kabuli_chr04 | 89985                   | CC                              | TT                | 1945927647               |
| SNP_P3_34769_90171  | NC_021163.1    | Ca_kabuli_chr04 | 90171                   | GG                              | TT                | 1945927649               |
| SNP_P3_34770_94609  | NC_021163.1    | Ca_kabuli_chr04 | 94609                   | CC                              | TT                | 1945927651               |
| SNP_P3_34771_104388 | NC_021163.1    | Ca_kabuli_chr04 | 104388                  | GG                              | TT                | 1945927652               |
| SNP_P3_34772_104774 | NC_021163.1    | Ca_kabuli_chr04 | 104774                  | AA                              | GG                | 1945927654               |
| SNP_P3_34773_104789 | NC_021163.1    | Ca_kabuli_chr04 | 104789                  | GG                              | TT                | 1945927656               |
| SNP_P3_34774_113325 | NC_021163.1    | Ca_kabuli_chr04 | 113325                  | GG                              | AA                | 1945927658               |
| SNP_P3_34775_113528 | NC_021163.1    | Ca_kabuli_chr04 | 113528                  | CC                              | AA                | 1945927660               |
| SNP_P3_34776_130718 | NC_021163.1    | Ca_kabuli_chr04 | 130718                  | TT                              | GG                | 1945927661               |
| SNP_P3_34777_130733 | NC_021163.1    | Ca_kabuli_chr04 | 130733                  | CC                              | TT                | 1945927663               |
| SNP_P3_34778_130759 | NC_021163.1    | Ca_kabuli_chr04 | 130759                  | AA                              | GG                | 1945927665               |
| SNP_P3_34779_130789 | NC_021163.1    | Ca_kabuli_chr04 | 130789                  | TT                              | CC                | 1945927667               |
| SNP_P3_34780_130827 | NC_021163.1    | Ca_kabuli_chr04 | 130827                  | AA                              | GG                | 1945927668               |
| SNP_P3_34781_130850 | NC_021163.1    | Ca_kabuli_chr04 | 130850                  | TT                              | CC                | 1945927670               |
| SNP_P3_34782_130860 | NC_021163.1    | Ca_kabuli_chr04 | 130860                  | AA                              | GG                | 1945927672               |
| SNP_P3_34783_130974 | NC_021163.1    | Ca_kabuli_chr04 | 130974                  | AA                              | GG                | 1945927674               |
| SNP_P3_34784_130983 | NC_021163.1    | Ca_kabuli_chr04 | 130983                  | AA                              | GG                | 1945927676               |
| SNP_P3_34785_131016 | NC_021163.1    | Ca_kabuli_chr04 | 131016                  | AA                              | GG                | 1945927677               |
| SNP_P3_34786_131032 | NC_021163.1    | Ca_kabuli_chr04 | 131032                  | CC                              | TT                | 1945927679               |
| SNP_P3_34787_131052 | NC_021163.1    | Ca_kabuli_chr04 | 131052                  | AA                              | GG                | 1945927681               |
| SNP_P3_34788_131064 | NC_021163.1    | Ca_kabuli_chr04 | 131064                  | CC                              | AA                | 1945927683               |
| SNP_P3_34789_131091 | NC_021163.1    | Ca_kabuli_chr04 | 131091                  | GG                              | AA                | 1945927684               |
| SNP_P3_34790_131166 | NC_021163.1    | Ca_kabuli_chr04 | 131166                  | AA                              | GG                | 1945927686               |
| SNP_P3_34792_141798 | NC_021163.1    | Ca_kabuli_chr04 | 141798                  | AA                              | GG                | 1945927688               |
| SNP_P3_34793_174257 | NC_021163.1    | Ca_kabuli_chr04 | 174257                  | CC                              | TT                | 1945927690               |
| SNP_P3_34794_176846 | NC_021163.1    | Ca_kabuli_chr04 | 176846                  | AA                              | CC                | 1945927692               |
| SNP_P3_34795_186669 | NC_021163.1    | Ca_kabuli_chr04 | 186669                  | CC                              | TT                | 1945927693               |
| SNP_P3_34796_189633 | NC_021163.1    | Ca_kabuli_chr04 | 189633                  | TT                              | GG                | 1945927695               |
| SNP_P3_34797_189635 | NC_021163.1    | Ca_kabuli_chr04 | 189635                  | AA                              | CC                | 1945927697               |
| SNP_P3_34798_192710 | NC_021163.1    | Ca_kabuli_chr04 | 192710                  | GG                              | TT                | 1945927699               |
| SNP_P3_34799_209343 | NC_021163.1    | Ca_kabuli_chr04 | 209343                  | TT                              | CC                | 1945927700               |
| SNP_P3_34800_242893 | NC_021163.1    | Ca_kabuli_chr04 | 242893                  | TT                              | AA                | 1945927702               |
| SNP_P3_34801_276141 | NC_021163.1    | Ca_kabuli_chr04 | 276141                  | GG                              | AA                | 1945927704               |
| SNP_P3_34802_276152 | NC_021163.1    | Ca_kabuli_chr04 | 276152                  | AA                              | TT                | 1945927706               |
| SNP_P3_34803_319888 | NC_021163.1    | Ca_kabuli_chr04 | 319888                  | CC                              | AA                | 1945927708               |
| SNP_P3_34804_319889 | NC_021163.1    | Ca_kabuli_chr04 | 319889                  | AA                              | CC                | 1945927709               |
| SNP_P3_34806_339281 | NC_021163.1    | Ca_kabuli_chr04 | 339281                  | AA                              | GG                | 1945927711               |
| SNP_P3_34807_357396 | NC_021163.1    | Ca_kabuli_chr04 | 357396                  | TT                              | CC                | 1945927713               |
| SNP_P3_34808_357397 | NC_021163.1    | Ca_kabuli_chr04 | 357397                  | TT                              | AA                | 1945927715               |
| SNP_P3_34809_357520 | NC_021163.1    | Ca_kabuli_chr04 | 357520                  | TT                              | GG                | 1945927716               |
| SNP_P3_34810_357527 | NC_021163.1    | Ca_kabuli_chr04 | 357527                  | CC                              | TT                | 1945927718               |

| SNPs IDs            | Chromosome IDs | Chromosomes     | Physical positions (bp) | CDC Frontier (Reference genome) | (Pusa 256 & HPNB) | NCBI SNPdb Accession IDs |
|---------------------|----------------|-----------------|-------------------------|---------------------------------|-------------------|--------------------------|
| SNP_P3_34811_357529 | NC_021163.1    | Ca_kabuli_chr04 | 357529                  | CC                              | TT                | 1945927720               |
| SNP_P3_34812_357562 | NC_021163.1    | Ca_kabuli_chr04 | 357562                  | TT                              | CC                | 1945927722               |
| SNP_P3_34813_357582 | NC_021163.1    | Ca_kabuli_chr04 | 357582                  | TT                              | GG                | 1945927724               |
| SNP_P3_34814_357637 | NC_021163.1    | Ca_kabuli_chr04 | 357637                  | AA                              | CC                | 1945927725               |
| SNP_P3_34815_357650 | NC_021163.1    | Ca_kabuli_chr04 | 357650                  | GG                              | AA                | 1945927727               |
| SNP_P3_34816_357853 | NC_021163.1    | Ca_kabuli_chr04 | 357853                  | AA                              | GG                | 1945927729               |
| SNP_P3_34817_357887 | NC_021163.1    | Ca_kabuli_chr04 | 357887                  | AA                              | GG                | 1945927731               |
| SNP_P3_34819_417882 | NC_021163.1    | Ca_kabuli_chr04 | 417882                  | AA                              | GG                | 1945927732               |
| SNP_P3_34820_417895 | NC_021163.1    | Ca_kabuli_chr04 | 417895                  | CC                              | TT                | 1945927734               |
| SNP_P3_34821_417904 | NC_021163.1    | Ca_kabuli_chr04 | 417904                  | GG                              | AA                | 1945927736               |
| SNP_P3_34822_417951 | NC_021163.1    | Ca_kabuli_chr04 | 417951                  | AA                              | GG                | 1945927738               |
| SNP_P3_34823_418082 | NC_021163.1    | Ca_kabuli_chr04 | 418082                  | CC                              | TT                | 1945927740               |
| SNP_P3_34825_418186 | NC_021163.1    | Ca_kabuli_chr04 | 418186                  | AA                              | GG                | 1945927741               |
| SNP_P3_34826_428569 | NC_021163.1    | Ca_kabuli_chr04 | 428569                  | TT                              | CC                | 1945927743               |
| SNP_P3_34827_451188 | NC_021163.1    | Ca_kabuli_chr04 | 451188                  | GG                              | AA                | 1945927745               |
| SNP_P3_34828_461501 | NC_021163.1    | Ca_kabuli_chr04 | 461501                  | CC                              | AA                | 1945927747               |
| SNP_P3_34829_464510 | NC_021163.1    | Ca_kabuli_chr04 | 464510                  | CC                              | TT                | 1945927748               |
| SNP_P3_34830_471800 | NC_021163.1    | Ca_kabuli_chr04 | 471800                  | CC                              | TT                | 1945927750               |
| SNP_P3_34831_478439 | NC_021163.1    | Ca_kabuli_chr04 | 478439                  | TT                              | CC                | 1945927752               |
| SNP_P3_34832_498870 | NC_021163.1    | Ca_kabuli_chr04 | 498870                  | AA                              | GG                | 1945927754               |
| SNP_P3_34833_513886 | NC_021163.1    | Ca_kabuli_chr04 | 513886                  | AA                              | GG                | 1945927756               |
| SNP_P3_34835_528371 | NC_021163.1    | Ca_kabuli_chr04 | 528371                  | AA                              | GG                | 1945927757               |
| SNP_P3_34836_528372 | NC_021163.1    | Ca_kabuli_chr04 | 528372                  | AA                              | TT                | 1945927759               |
| SNP_P3_34837_540470 | NC_021163.1    | Ca_kabuli_chr04 | 540470                  | GG                              | TT                | 1945927761               |
| SNP_P3_34838_559126 | NC_021163.1    | Ca_kabuli_chr04 | 559126                  | TT                              | CC                | 1945927763               |
| SNP_P3_34839_559134 | NC_021163.1    | Ca_kabuli_chr04 | 559134                  | TT                              | AA                | 1945927764               |
| SNP_P3_34840_559534 | NC_021163.1    | Ca_kabuli_chr04 | 559534                  | CC                              | TT                | 1945927766               |
| SNP_P3_34841_568247 | NC_021163.1    | Ca_kabuli_chr04 | 568247                  | CC                              | AA                | 1945927768               |
| SNP_P3_34843_584089 | NC_021163.1    | Ca_kabuli_chr04 | 584089                  | CC                              | TT                | 1945927770               |
| SNP_P3_34844_584090 | NC_021163.1    | Ca_kabuli_chr04 | 584090                  | CC                              | AA                | 1945927772               |
| SNP_P3_34845_584099 | NC_021163.1    | Ca_kabuli_chr04 | 584099                  | GG                              | AA                | 1945927773               |
| SNP_P3_34847_728689 | NC_021163.1    | Ca_kabuli_chr04 | 728689                  | CC                              | TT                | 1945927775               |
| SNP_P3_34850_773945 | NC_021163.1    | Ca_kabuli_chr04 | 773945                  | GG                              | AA                | 1945927777               |
| SNP_P3_34851_780349 | NC_021163.1    | Ca_kabuli_chr04 | 780349                  | TT                              | CC                | 1945927779               |
| SNP_P3_34852_808314 | NC_021163.1    | Ca_kabuli_chr04 | 808314                  | CC                              | TT                | 1945927780               |
| SNP_P3_34854_818568 | NC_021163.1    | Ca_kabuli_chr04 | 818568                  | GG                              | AA                | 1945927782               |
| SNP_P3_34855_823929 | NC_021163.1    | Ca_kabuli_chr04 | 823929                  | CC                              | AA                | 1945927784               |
| SNP_P3_34856_823931 | NC_021163.1    | Ca_kabuli_chr04 | 823931                  | TT                              | CC                | 1945927786               |
| SNP_P3_34857_823946 | NC_021163.1    | Ca_kabuli_chr04 | 823946                  | AA                              | GG                | 1945927788               |
| SNP_P3_34858_823967 | NC_021163.1    | Ca_kabuli_chr04 | 823967                  | AA                              | CC                | 1945927789               |
| SNP_P3_34859_823970 | NC_021163.1    | Ca_kabuli_chr04 | 823970                  | TT                              | CC                | 1945927791               |
| SNP_P3_34860_837624 | NC_021163.1    | Ca_kabuli_chr04 | 837624                  | CC                              | TT                | 1945927793               |

| SNPs IDs             | Chromosome IDs | Chromosomes     | Physical positions (bp) | CDC Frontier (Reference genome) | (Pusa 256 & HPNB) | NCBI SNPdb Accession IDs |
|----------------------|----------------|-----------------|-------------------------|---------------------------------|-------------------|--------------------------|
| SNP_P3_34861_860792  | NC_021163.1    | Ca_kabuli_chr04 | 860792                  | TT                              | AA                | 1945927795               |
| SNP_P3_34863_941434  | NC_021163.1    | Ca_kabuli_chr04 | 941434                  | GG                              | AA                | 1945927796               |
| SNP_P3_34864_945822  | NC_021163.1    | Ca_kabuli_chr04 | 945822                  | TT                              | AA                | 1945927798               |
| SNP_P3_34866_982276  | NC_021163.1    | Ca_kabuli_chr04 | 982276                  | AA                              | GG                | 1945927800               |
| SNP_P3_34867_1043221 | NC_021163.1    | Ca_kabuli_chr04 | 1043221                 | TT                              | CC                | 1945927802               |
| SNP_P3_34868_1044032 | NC_021163.1    | Ca_kabuli_chr04 | 1044032                 | AA                              | GG                | 1945927804               |
| SNP_P3_34869_1089346 | NC_021163.1    | Ca_kabuli_chr04 | 1089346                 | TT                              | CC                | 1945927805               |
| SNP_P3_34870_1116786 | NC_021163.1    | Ca_kabuli_chr04 | 1116786                 | TT                              | GG                | 1945927807               |
| SNP_P3_34871_1146305 | NC_021163.1    | Ca_kabuli_chr04 | 1146305                 | GG                              | AA                | 1945927809               |
| SNP_P3_34873_1172883 | NC_021163.1    | Ca_kabuli_chr04 | 1172883                 | TT                              | GG                | 1945927811               |
| SNP_P3_34875_1273383 | NC_021163.1    | Ca_kabuli_chr04 | 1273383                 | AA                              | GG                | 1945927812               |
| SNP_P3_34876_1309137 | NC_021163.1    | Ca_kabuli_chr04 | 1309137                 | CC                              | TT                | 1945927814               |
| SNP_P3_34877_1329853 | NC_021163.1    | Ca_kabuli_chr04 | 1329853                 | GG                              | AA                | 1945927816               |
| SNP_P3_34879_1406084 | NC_021163.1    | Ca_kabuli_chr04 | 1406084                 | GG                              | AA                | 1945927818               |
| SNP_P3_34881_1440675 | NC_021163.1    | Ca_kabuli_chr04 | 1440675                 | TT                              | CC                | 1945927820               |
| SNP_P3_34882_1452089 | NC_021163.1    | Ca_kabuli_chr04 | 1452089                 | AA                              | TT                | 1945927821               |
| SNP_P3_34883_1464772 | NC_021163.1    | Ca_kabuli_chr04 | 1464772                 | TT                              | CC                | 1945927823               |
| SNP_P3_34885_1499677 | NC_021163.1    | Ca_kabuli_chr04 | 1499677                 | GG                              | TT                | 1945927825               |
| SNP_P3_34886_1514147 | NC_021163.1    | Ca_kabuli_chr04 | 1514147                 | AA                              | GG                | 1945927827               |
| SNP_P3_34887_1536655 | NC_021163.1    | Ca_kabuli_chr04 | 1536655                 | TT                              | CC                | 1945927828               |
| SNP_P3_34888_1536859 | NC_021163.1    | Ca_kabuli_chr04 | 1536859                 | TT                              | CC                | 1945927830               |
| SNP_P3_34889_1542978 | NC_021163.1    | Ca_kabuli_chr04 | 1542978                 | CC                              | AA                | 1945927832               |
| SNP_P3_34890_1553749 | NC_021163.1    | Ca_kabuli_chr04 | 1553749                 | GG                              | TT                | 1945927834               |
| SNP_P3_34892_1607865 | NC_021163.1    | Ca_kabuli_chr04 | 1607865                 | GG                              | TT                | 1945927836               |
| SNP_P3_34894_1623978 | NC_021163.1    | Ca_kabuli_chr04 | 1623978                 | AA                              | CC                | 1945927837               |
| SNP_P3_34895_1677022 | NC_021163.1    | Ca_kabuli_chr04 | 1677022                 | GG                              | AA                | 1945927839               |
| SNP_P3_34896_1677042 | NC_021163.1    | Ca_kabuli_chr04 | 1677042                 | AA                              | CC                | 1945927841               |
| SNP_P3_34897_1677101 | NC_021163.1    | Ca_kabuli_chr04 | 1677101                 | TT                              | AA                | 1945927843               |
| SNP_P3_34898_1677111 | NC_021163.1    | Ca_kabuli_chr04 | 1677111                 | TT                              | GG                | 1945927844               |
| SNP_P3_34899_1677197 | NC_021163.1    | Ca_kabuli_chr04 | 1677197                 | GG                              | AA                | 1945927846               |
| SNP_P3_34900_1677209 | NC_021163.1    | Ca_kabuli_chr04 | 1677209                 | TT                              | AA                | 1945927848               |
| SNP_P3_34901_1677215 | NC_021163.1    | Ca_kabuli_chr04 | 1677215                 | GG                              | CC                | 1945927850               |
| SNP_P3_34902_1677219 | NC_021163.1    | Ca_kabuli_chr04 | 1677219                 | TT                              | GG                | 1945927852               |
| SNP_P3_34903_1677233 | NC_021163.1    | Ca_kabuli_chr04 | 1677233                 | TT                              | CC                | 1945927853               |
| SNP_P3_34904_1677241 | NC_021163.1    | Ca_kabuli_chr04 | 1677241                 | TT                              | CC                | 1945927855               |
| SNP_P3_34905_1677242 | NC_021163.1    | Ca_kabuli_chr04 | 1677242                 | GG                              | AA                | 1945927857               |
| SNP_P3_34907_1677466 | NC_021163.1    | Ca_kabuli_chr04 | 1677466                 | CC                              | TT                | 1945927859               |
| SNP_P3_34908_1681504 | NC_021163.1    | Ca_kabuli_chr04 | 1681504                 | TT                              | CC                | 1945927860               |
| SNP_P3_34909_1697293 | NC_021163.1    | Ca_kabuli_chr04 | 1697293                 | TT                              | CC                | 1945927862               |
| SNP_P3_34910_1719734 | NC_021163.1    | Ca_kabuli_chr04 | 1719734                 | GG                              | AA                | 1945927864               |
| SNP_P3_34912_1755518 | NC_021163.1    | Ca_kabuli_chr04 | 1755518                 | AA                              | TT                | 1945927866               |
| SNP_P3_34913_1757219 | NC_021163.1    | Ca_kabuli_chr04 | 1757219                 | AA                              | TT                | 1945927868               |

| SNPs IDs             | Chromosome IDs | Chromosomes     | Physical positions (bp) | CDC Frontier (Reference genome) | (Pusa 256 & HPNB) | NCBI SNPdb Accession IDs |
|----------------------|----------------|-----------------|-------------------------|---------------------------------|-------------------|--------------------------|
| SNP_P3_34914_1763025 | NC_021163.1    | Ca_kabuli_chr04 | 1763025                 | AA                              | TT                | 1945927869               |
| SNP_P3_34920_1765354 | NC_021163.1    | Ca_kabuli_chr04 | 1765354                 | CC                              | TT                | 1945927871               |
| SNP_P3_34921_1765370 | NC_021163.1    | Ca_kabuli_chr04 | 1765370                 | TT                              | CC                | 1945927873               |
| SNP_P3_34922_1766023 | NC_021163.1    | Ca_kabuli_chr04 | 1766023                 | GG                              | AA                | 1945927875               |
| SNP_P3_34923_1766075 | NC_021163.1    | Ca_kabuli_chr04 | 1766075                 | GG                              | AA                | 1945927876               |
| SNP_P3_34924_1766094 | NC_021163.1    | Ca_kabuli_chr04 | 1766094                 | CC                              | TT                | 1945927878               |
| SNP_P3_34925_1766105 | NC_021163.1    | Ca_kabuli_chr04 | 1766105                 | TT                              | GG                | 1945927880               |
| SNP_P3_34928_1774508 | NC_021163.1    | Ca_kabuli_chr04 | 1774508                 | AA                              | GG                | 1945927882               |
| SNP_P3_34929_1774545 | NC_021163.1    | Ca_kabuli_chr04 | 1774545                 | AA                              | GG                | 1945927884               |
| SNP_P3_34930_1774856 | NC_021163.1    | Ca_kabuli_chr04 | 1774856                 | CC                              | AA                | 1945927885               |
| SNP_P3_34931_1775159 | NC_021163.1    | Ca_kabuli_chr04 | 1775159                 | GG                              | AA                | 1945927887               |
| SNP_P3_34932_1775227 | NC_021163.1    | Ca_kabuli_chr04 | 1775227                 | GG                              | AA                | 1945927889               |
| SNP_P3_34933_1775230 | NC_021163.1    | Ca_kabuli_chr04 | 1775230                 | GG                              | CC                | 1945927891               |
| SNP_P3_34934_1775243 | NC_021163.1    | Ca_kabuli_chr04 | 1775243                 | CC                              | TT                | 1945927892               |
| SNP_P3_34936_1775892 | NC_021163.1    | Ca_kabuli_chr04 | 1775892                 | GG                              | AA                | 1945927894               |
| SNP_P3_34937_1775935 | NC_021163.1    | Ca_kabuli_chr04 | 1775935                 | AA                              | CC                | 1945927896               |
| SNP_P3_34938_1775941 | NC_021163.1    | Ca_kabuli_chr04 | 1775941                 | CC                              | TT                | 1945927898               |
| SNP_P3_34939_1776419 | NC_021163.1    | Ca_kabuli_chr04 | 1776419                 | GG                              | AA                | 1945927900               |
| SNP_P3_34940_1776426 | NC_021163.1    | Ca_kabuli_chr04 | 1776426                 | TT                              | CC                | 1945927901               |
| SNP_P3_34942_1778025 | NC_021163.1    | Ca_kabuli_chr04 | 1778025                 | TT                              | CC                | 1945927903               |
| SNP_P3_34943_1778575 | NC_021163.1    | Ca_kabuli_chr04 | 1778575                 | GG                              | AA                | 1945927905               |
| SNP_P3_34944_1778763 | NC_021163.1    | Ca_kabuli_chr04 | 1778763                 | TT                              | CC                | 1945927907               |
| SNP_P3_34945_1778914 | NC_021163.1    | Ca_kabuli_chr04 | 1778914                 | AA                              | TT                | 1945927908               |
| SNP_P3_34946_1779114 | NC_021163.1    | Ca_kabuli_chr04 | 1779114                 | TT                              | GG                | 1945927910               |
| SNP_P3_34947_1779363 | NC_021163.1    | Ca_kabuli_chr04 | 1779363                 | CC                              | GG                | 1945927912               |
| SNP_P3_34949_1779927 | NC_021163.1    | Ca_kabuli_chr04 | 1779927                 | AA                              | GG                | 1945927914               |
| SNP_P3_34950_1779940 | NC_021163.1    | Ca_kabuli_chr04 | 1779940                 | CC                              | TT                | 1945927916               |
| SNP_P3_34951_1780000 | NC_021163.1    | Ca_kabuli_chr04 | 1780000                 | GG                              | AA                | 1945927917               |
| SNP_P3_34952_1780018 | NC_021163.1    | Ca_kabuli_chr04 | 1780018                 | GG                              | AA                | 1945927919               |
| SNP_P3_34953_1780034 | NC_021163.1    | Ca_kabuli_chr04 | 1780034                 | GG                              | AA                | 1945927921               |
| SNP_P3_34954_1780403 | NC_021163.1    | Ca_kabuli_chr04 | 1780403                 | AA                              | GG                | 1945927923               |
| SNP_P3_34955_1780413 | NC_021163.1    | Ca_kabuli_chr04 | 1780413                 | TT                              | GG                | 1945927924               |
| SNP_P3_34956_1780841 | NC_021163.1    | Ca_kabuli_chr04 | 1780841                 | TT                              | AA                | 1945927926               |
| SNP_P3_34957_1780844 | NC_021163.1    | Ca_kabuli_chr04 | 1780844                 | GG                              | AA                | 1945927928               |
| SNP_P3_34958_1780857 | NC_021163.1    | Ca_kabuli_chr04 | 1780857                 | AA                              | TT                | 1945927930               |
| SNP_P3_34959_1780888 | NC_021163.1    | Ca_kabuli_chr04 | 1780888                 | CC                              | GG                | 1945927932               |
| SNP_P3_34960_1783150 | NC_021163.1    | Ca_kabuli_chr04 | 1783150                 | GG                              | AA                | 1945927933               |
| SNP_P3_34961_1783613 | NC_021163.1    | Ca_kabuli_chr04 | 1783613                 | TT                              | AA                | 1945927935               |
| SNP_P3_34962_1783808 | NC_021163.1    | Ca_kabuli_chr04 | 1783808                 | TT                              | CC                | 1945927937               |
| SNP_P3_34964_1786417 | NC_021163.1    | Ca_kabuli_chr04 | 1786417                 | CC                              | GG                | 1945927939               |
| SNP_P3_34965_1786430 | NC_021163.1    | Ca_kabuli_chr04 | 1786430                 | CC                              | TT                | 1945927940               |
| SNP_P3_34966_1786498 | NC_021163.1    | Ca_kabuli_chr04 | 1786498                 | AA                              | CC                | 1945927942               |

| SNPs IDs             | Chromosome IDs | Chromosomes     | Physical positions (bp) | CDC Frontier (Reference genome) | (Pusa 256 & HPNB) | NCBI SNPdb Accession IDs |
|----------------------|----------------|-----------------|-------------------------|---------------------------------|-------------------|--------------------------|
| SNP_P3_34968_1786596 | NC_021163.1    | Ca_kabuli_chr04 | 1786596                 | GG                              | TT                | 1945927944               |
| SNP_P3_34969_1786735 | NC_021163.1    | Ca_kabuli_chr04 | 1786735                 | GG                              | AA                | 1945927946               |
| SNP_P3_34970_1786768 | NC_021163.1    | Ca_kabuli_chr04 | 1786768                 | TT                              | GG                | 1945927948               |
| SNP_P3_34971_1786827 | NC_021163.1    | Ca_kabuli_chr04 | 1786827                 | AA                              | GG                | 1945927949               |
| SNP_P3_34972_1787958 | NC_021163.1    | Ca_kabuli_chr04 | 1787958                 | TT                              | GG                | 1945927951               |
| SNP_P3_34973_1789357 | NC_021163.1    | Ca_kabuli_chr04 | 1789357                 | GG                              | AA                | 1945927953               |
| SNP_P3_34974_1789390 | NC_021163.1    | Ca_kabuli_chr04 | 1789390                 | TT                              | CC                | 1945927955               |
| SNP_P3_34975_1789434 | NC_021163.1    | Ca_kabuli_chr04 | 1789434                 | CC                              | AA                | 1945927956               |
| SNP_P3_34976_1789448 | NC_021163.1    | Ca_kabuli_chr04 | 1789448                 | TT                              | CC                | 1945927958               |
| SNP_P3_34978_1789590 | NC_021163.1    | Ca_kabuli_chr04 | 1789590                 | TT                              | GG                | 1945927960               |
| SNP_P3_34979_1789648 | NC_021163.1    | Ca_kabuli_chr04 | 1789648                 | TT                              | GG                | 1945927962               |
| SNP_P3_34981_1791871 | NC_021163.1    | Ca_kabuli_chr04 | 1791871                 | AA                              | GG                | 1945927964               |
| SNP_P3_34982_1791990 | NC_021163.1    | Ca_kabuli_chr04 | 1791990                 | AA                              | GG                | 1945927965               |
| SNP_P3_34983_1792114 | NC_021163.1    | Ca_kabuli_chr04 | 1792114                 | GG                              | AA                | 1945927967               |
| SNP_P3_34984_1792582 | NC_021163.1    | Ca_kabuli_chr04 | 1792582                 | TT                              | CC                | 1945927969               |
| SNP_P3_34986_1794183 | NC_021163.1    | Ca_kabuli_chr04 | 1794183                 | GG                              | AA                | 1945927971               |
| SNP_P3_34987_1794406 | NC_021163.1    | Ca_kabuli_chr04 | 1794406                 | TT                              | CC                | 1945927972               |
| SNP_P3_34988_1794779 | NC_021163.1    | Ca_kabuli_chr04 | 1794779                 | TT                              | CC                | 1945927974               |
| SNP_P3_34990_1795323 | NC_021163.1    | Ca_kabuli_chr04 | 1795323                 | GG                              | TT                | 1945927976               |
| SNP_P3_34991_1795380 | NC_021163.1    | Ca_kabuli_chr04 | 1795380                 | GG                              | AA                | 1945927978               |
| SNP_P3_34992_1796273 | NC_021163.1    | Ca_kabuli_chr04 | 1796273                 | TT                              | GG                | 1945927980               |
| SNP_P3_34994_1798100 | NC_021163.1    | Ca_kabuli_chr04 | 1798100                 | AA                              | GG                | 1945927981               |
| SNP_P3_34995_1798332 | NC_021163.1    | Ca_kabuli_chr04 | 1798332                 | TT                              | AA                | 1945927983               |
| SNP_P3_34996_1800269 | NC_021163.1    | Ca_kabuli_chr04 | 1800269                 | AA                              | GG                | 1945927985               |
| SNP_P3_34997_1800964 | NC_021163.1    | Ca_kabuli_chr04 | 1800964                 | AA                              | TT                | 1945927987               |
| SNP_P3_34998_1801631 | NC_021163.1    | Ca_kabuli_chr04 | 1801631                 | TT                              | CC                | 1945927988               |
| SNP_P3_34999_1801852 | NC_021163.1    | Ca_kabuli_chr04 | 1801852                 | GG                              | TT                | 1945927990               |
| SNP_P3_35000_1801878 | NC_021163.1    | Ca_kabuli_chr04 | 1801878                 | TT                              | CC                | 1945927992               |
| SNP_P3_35002_1803567 | NC_021163.1    | Ca_kabuli_chr04 | 1803567                 | CC                              | AA                | 1945927994               |
| SNP_P3_35003_1803569 | NC_021163.1    | Ca_kabuli_chr04 | 1803569                 | GG                              | CC                | 1945927996               |
| SNP_P3_35004_1804749 | NC_021163.1    | Ca_kabuli_chr04 | 1804749                 | TT                              | CC                | 1945927997               |
| SNP_P3_35005_1805555 | NC_021163.1    | Ca_kabuli_chr04 | 1805555                 | AA                              | CC                | 1945927999               |
| SNP_P3_35006_1806361 | NC_021163.1    | Ca_kabuli_chr04 | 1806361                 | CC                              | TT                | 1945928001               |
| SNP_P3_35007_1807096 | NC_021163.1    | Ca_kabuli_chr04 | 1807096                 | GG                              | AA                | 1945928003               |
| SNP_P3_35008_1809748 | NC_021163.1    | Ca_kabuli_chr04 | 1809748                 | CC                              | AA                | 1945928004               |
| SNP_P3_35009_1810753 | NC_021163.1    | Ca_kabuli_chr04 | 1810753                 | AA                              | GG                | 1945928006               |
| SNP_P3_35010_1811136 | NC_021163.1    | Ca_kabuli_chr04 | 1811136                 | TT                              | GG                | 1945928008               |
| SNP_P3_35011_1811419 | NC_021163.1    | Ca_kabuli_chr04 | 1811419                 | AA                              | CC                | 1945928010               |
| SNP_P3_35012_1812751 | NC_021163.1    | Ca_kabuli_chr04 | 1812751                 | AA                              | GG                | 1945928012               |
| SNP_P3_35013_1812891 | NC_021163.1    | Ca_kabuli_chr04 | 1812891                 | AA                              | GG                | 1945928013               |
| SNP_P3_35014_1813211 | NC_021163.1    | Ca_kabuli_chr04 | 1813211                 | TT                              | AA                | 1945928015               |
| SNP_P3_35015_1813759 | NC_021163.1    | Ca_kabuli_chr04 | 1813759                 | AA                              | TT                | 1945928017               |

| SNPs IDs             | Chromosome IDs | Chromosomes     | Physical positions (bp) | CDC Frontier (Reference genome) | (Pusa 256 & HPNB) | NCBI SNPdb Accession IDs |
|----------------------|----------------|-----------------|-------------------------|---------------------------------|-------------------|--------------------------|
| SNP_P3_35016_1814127 | NC_021163.1    | Ca_kabuli_chr04 | 1814127                 | AA                              | TT                | 1945928019               |
| SNP_P3_35017_1814157 | NC_021163.1    | Ca_kabuli_chr04 | 1814157                 | GG                              | CC                | 1945928020               |
| SNP_P3_35018_1814210 | NC_021163.1    | Ca_kabuli_chr04 | 1814210                 | CC                              | AA                | 1945928022               |
| SNP_P3_35019_1814782 | NC_021163.1    | Ca_kabuli_chr04 | 1814782                 | GG                              | AA                | 1945928024               |
| SNP_P3_35020_1815484 | NC_021163.1    | Ca_kabuli_chr04 | 1815484                 | AA                              | GG                | 1945928026               |
| SNP_P3_35021_1818177 | NC_021163.1    | Ca_kabuli_chr04 | 1818177                 | TT                              | AA                | 1945928028               |
| SNP_P3_35023_1818738 | NC_021163.1    | Ca_kabuli_chr04 | 1818738                 | GG                              | AA                | 1945928029               |
| SNP_P3_35024_1818840 | NC_021163.1    | Ca_kabuli_chr04 | 1818840                 | AA                              | CC                | 1945928031               |
| SNP_P3_35025_1820545 | NC_021163.1    | Ca_kabuli_chr04 | 1820545                 | CC                              | GG                | 1945928033               |
| SNP_P3_35026_1820586 | NC_021163.1    | Ca_kabuli_chr04 | 1820586                 | GG                              | TT                | 1945928035               |
| SNP_P3_35027_1820601 | NC_021163.1    | Ca_kabuli_chr04 | 1820601                 | CC                              | AA                | 1945928036               |
| SNP_P3_35028_1820626 | NC_021163.1    | Ca_kabuli_chr04 | 1820626                 | GG                              | AA                | 1945928038               |
| SNP_P3_35029_1820637 | NC_021163.1    | Ca_kabuli_chr04 | 1820637                 | GG                              | AA                | 1945928040               |
| SNP_P3_35030_1821027 | NC_021163.1    | Ca_kabuli_chr04 | 1821027                 | AA                              | TT                | 1945928042               |
| SNP_P3_35031_1821709 | NC_021163.1    | Ca_kabuli_chr04 | 1821709                 | AA                              | GG                | 1945928044               |
| SNP_P3_35032_1821714 | NC_021163.1    | Ca_kabuli_chr04 | 1821714                 | AA                              | GG                | 1945928045               |
| SNP_P3_35033_1822070 | NC_021163.1    | Ca_kabuli_chr04 | 1822070                 | GG                              | AA                | 1945928047               |
| SNP_P3_35034_1822606 | NC_021163.1    | Ca_kabuli_chr04 | 1822606                 | CC                              | TT                | 1945928049               |
| SNP_P3_35036_1823315 | NC_021163.1    | Ca_kabuli_chr04 | 1823315                 | GG                              | AA                | 1945928051               |
| SNP_P3_35037_1823332 | NC_021163.1    | Ca_kabuli_chr04 | 1823332                 | TT                              | CC                | 1945928052               |
| SNP_P3_35038_1823845 | NC_021163.1    | Ca_kabuli_chr04 | 1823845                 | AA                              | CC                | 1945928054               |
| SNP_P3_35040_1823903 | NC_021163.1    | Ca_kabuli_chr04 | 1823903                 | TT                              | CC                | 1945928056               |
| SNP_P3_35041_1824042 | NC_021163.1    | Ca_kabuli_chr04 | 1824042                 | GG                              | AA                | 1945928058               |
| SNP_P3_35042_1824240 | NC_021163.1    | Ca_kabuli_chr04 | 1824240                 | AA                              | TT                | 1945928059               |
| SNP_P3_35043_1824242 | NC_021163.1    | Ca_kabuli_chr04 | 1824242                 | GG                              | TT                | 1945928061               |
| SNP_P3_35044_1824268 | NC_021163.1    | Ca_kabuli_chr04 | 1824268                 | CC                              | TT                | 1945928063               |
| SNP_P3_35045_1824479 | NC_021163.1    | Ca_kabuli_chr04 | 1824479                 | GG                              | AA                | 1945928065               |
| SNP_P3_35047_1826486 | NC_021163.1    | Ca_kabuli_chr04 | 1826486                 | AA                              | GG                | 1945928067               |
| SNP_P3_35048_1826533 | NC_021163.1    | Ca_kabuli_chr04 | 1826533                 | GG                              | AA                | 1945928068               |
| SNP_P3_35049_1826574 | NC_021163.1    | Ca_kabuli_chr04 | 1826574                 | GG                              | AA                | 1945928070               |
| SNP_P3_35050_1826678 | NC_021163.1    | Ca_kabuli_chr04 | 1826678                 | AA                              | GG                | 1945928072               |
| SNP_P3_35051_1826727 | NC_021163.1    | Ca_kabuli_chr04 | 1826727                 | CC                              | TT                | 1945928074               |
| SNP_P3_35052_1826748 | NC_021163.1    | Ca_kabuli_chr04 | 1826748                 | AA                              | GG                | 1945928075               |
| SNP_P3_35053_1827631 | NC_021163.1    | Ca_kabuli_chr04 | 1827631                 | GG                              | AA                | 1945928077               |
| SNP_P3_35054_1827793 | NC_021163.1    | Ca_kabuli_chr04 | 1827793                 | AA                              | GG                | 1945928079               |
| SNP_P3_35055_1828730 | NC_021163.1    | Ca_kabuli_chr04 | 1828730                 | CC                              | TT                | 1945928081               |
| SNP_P3_35057_1831026 | NC_021163.1    | Ca_kabuli_chr04 | 1831026                 | AA                              | CC                | 1945928083               |
| SNP_P3_35058_1831028 | NC_021163.1    | Ca_kabuli_chr04 | 1831028                 | AA                              | GG                | 1945928084               |
| SNP_P3_35059_1831035 | NC_021163.1    | Ca_kabuli_chr04 | 1831035                 | GG                              | AA                | 1945928086               |
| SNP_P3_35060_1831056 | NC_021163.1    | Ca_kabuli_chr04 | 1831056                 | TT                              | CC                | 1945928088               |
| SNP_P3_35061_1831066 | NC_021163.1    | Ca_kabuli_chr04 | 1831066                 | GG                              | AA                | 1945928090               |
| SNP_P3_35062_1831079 | NC_021163.1    | Ca_kabuli_chr04 | 1831079                 | GG                              | CC                | 1945928091               |

| SNPs IDs             | Chromosome IDs | Chromosomes     | Physical positions (bp) | CDC Frontier (Reference genome) | (Pusa 256 & HPNB) | NCBI SNPdb Accession IDs |
|----------------------|----------------|-----------------|-------------------------|---------------------------------|-------------------|--------------------------|
| SNP_P3_35063_1831187 | NC_021163.1    | Ca_kabuli_chr04 | 1831187                 | CC                              | AA                | 1945928093               |
| SNP_P3_35064_1831237 | NC_021163.1    | Ca_kabuli_chr04 | 1831237                 | AA                              | GG                | 1945928095               |
| SNP_P3_35065_1832795 | NC_021163.1    | Ca_kabuli_chr04 | 1832795                 | TT                              | CC                | 1945928097               |
| SNP_P3_35066_1835511 | NC_021163.1    | Ca_kabuli_chr04 | 1835511                 | AA                              | TT                | 1945928099               |
| SNP_P3_35067_1835822 | NC_021163.1    | Ca_kabuli_chr04 | 1835822                 | GG                              | AA                | 1945928100               |
| SNP_P3_35068_1836457 | NC_021163.1    | Ca_kabuli_chr04 | 1836457                 | GG                              | TT                | 1945928102               |
| SNP_P3_35069_1839161 | NC_021163.1    | Ca_kabuli_chr04 | 1839161                 | CC                              | TT                | 1945928104               |
| SNP_P3_35070_1839307 | NC_021163.1    | Ca_kabuli_chr04 | 1839307                 | AA                              | GG                | 1945928106               |
| SNP_P3_35071_1840074 | NC_021163.1    | Ca_kabuli_chr04 | 1840074                 | TT                              | CC                | 1945928107               |
| SNP_P3_35072_1840866 | NC_021163.1    | Ca_kabuli_chr04 | 1840866                 | AA                              | GG                | 1945928109               |
| SNP_P3_35075_1841446 | NC_021163.1    | Ca_kabuli_chr04 | 1841446                 | TT                              | AA                | 1945928111               |
| SNP_P3_35076_1844719 | NC_021163.1    | Ca_kabuli_chr04 | 1844719                 | AA                              | GG                | 1945928113               |
| SNP_P3_35077_1845012 | NC_021163.1    | Ca_kabuli_chr04 | 1845012                 | TT                              | CC                | 1945928115               |
| SNP_P3_35078_1848594 | NC_021163.1    | Ca_kabuli_chr04 | 1848594                 | CC                              | TT                | 1945928116               |
| SNP_P3_35079_1848608 | NC_021163.1    | Ca_kabuli_chr04 | 1848608                 | CC                              | GG                | 1945928118               |
| SNP_P3_35080_1848610 | NC_021163.1    | Ca_kabuli_chr04 | 1848610                 | TT                              | CC                | 1945928120               |
| SNP_P3_35081_1848643 | NC_021163.1    | Ca_kabuli_chr04 | 1848643                 | AA                              | GG                | 1945928122               |
| SNP_P3_35082_1848897 | NC_021163.1    | Ca_kabuli_chr04 | 1848897                 | AA                              | TT                | 1945928123               |
| SNP_P3_35083_1849076 | NC_021163.1    | Ca_kabuli_chr04 | 1849076                 | AA                              | GG                | 1945928125               |
| SNP_P3_35084_1849098 | NC_021163.1    | Ca_kabuli_chr04 | 1849098                 | TT                              | CC                | 1945928127               |
| SNP_P3_35085_1849253 | NC_021163.1    | Ca_kabuli_chr04 | 1849253                 | AA                              | CC                | 1945928129               |
| SNP_P3_35086_1849382 | NC_021163.1    | Ca_kabuli_chr04 | 1849382                 | TT                              | CC                | 1945928131               |
| SNP_P3_35089_1849499 | NC_021163.1    | Ca_kabuli_chr04 | 1849499                 | AA                              | CC                | 1945928132               |
| SNP_P3_35091_1849625 | NC_021163.1    | Ca_kabuli_chr04 | 1849625                 | GG                              | AA                | 1945928134               |
| SNP_P3_35092_1849634 | NC_021163.1    | Ca_kabuli_chr04 | 1849634                 | AA                              | GG                | 1945928136               |
| SNP_P3_35094_1855038 | NC_021163.1    | Ca_kabuli_chr04 | 1855038                 | TT                              | AA                | 1945928138               |
| SNP_P3_35096_1856238 | NC_021163.1    | Ca_kabuli_chr04 | 1856238                 | GG                              | TT                | 1945928139               |
| SNP_P3_35097_1858022 | NC_021163.1    | Ca_kabuli_chr04 | 1858022                 | GG                              | CC                | 1945928141               |
| SNP_P3_35098_1859127 | NC_021163.1    | Ca_kabuli_chr04 | 1859127                 | TT                              | CC                | 1945928143               |
| SNP_P3_35099_1859165 | NC_021163.1    | Ca_kabuli_chr04 | 1859165                 | AA                              | GG                | 1945928145               |
| SNP_P3_35100_1859394 | NC_021163.1    | Ca_kabuli_chr04 | 1859394                 | GG                              | AA                | 1945928147               |
| SNP_P3_35101_1859401 | NC_021163.1    | Ca_kabuli_chr04 | 1859401                 | TT                              | CC                | 1945928148               |
| SNP_P3_35102_1859432 | NC_021163.1    | Ca_kabuli_chr04 | 1859432                 | GG                              | AA                | 1945928150               |
| SNP_P3_35103_1859652 | NC_021163.1    | Ca_kabuli_chr04 | 1859652                 | TT                              | CC                | 1945928152               |
| SNP_P3_35104_1859695 | NC_021163.1    | Ca_kabuli_chr04 | 1859695                 | CC                              | TT                | 1945928154               |
| SNP_P3_35105_1859703 | NC_021163.1    | Ca_kabuli_chr04 | 1859703                 | CC                              | TT                | 1945928155               |
| SNP_P3_35106_1859723 | NC_021163.1    | Ca_kabuli_chr04 | 1859723                 | AA                              | GG                | 1945928157               |
| SNP_P3_35107_1859734 | NC_021163.1    | Ca_kabuli_chr04 | 1859734                 | CC                              | AA                | 1945928159               |
| SNP_P3_35109_1860457 | NC_021163.1    | Ca_kabuli_chr04 | 1860457                 | TT                              | GG                | 1945928161               |
| SNP_P3_35110_1860458 | NC_021163.1    | Ca_kabuli_chr04 | 1860458                 | AA                              | GG                | 1945928163               |
| SNP_P3_35113_1865082 | NC_021163.1    | Ca_kabuli_chr04 | 1865082                 | CC                              | TT                | 1945928164               |
| SNP_P3_35114_1865442 | NC_021163.1    | Ca_kabuli_chr04 | 1865442                 | CC                              | TT                | 1945928166               |



| SNPs IDs             | Chromosome IDs | Chromosomes     | Physical positions (bp) | CDC Frontier (Reference genome) | (Pusa 256 & HPNB) | NCBI SNPdb Accession IDs |
|----------------------|----------------|-----------------|-------------------------|---------------------------------|-------------------|--------------------------|
| SNP_P3_35115_1866090 | NC_021163.1    | Ca_kabuli_chr04 | 1866090                 | AA                              | GG                | 1945928168               |
| SNP_P3_35116_1866103 | NC_021163.1    | Ca_kabuli_chr04 | 1866103                 | AA                              | GG                | 1945928170               |
| SNP_P3_35117_1866357 | NC_021163.1    | Ca_kabuli_chr04 | 1866357                 | TT                              | CC                | 1945928171               |
| SNP_P3_35118_1866558 | NC_021163.1    | Ca_kabuli_chr04 | 1866558                 | GG                              | AA                | 1945928173               |
| SNP_P3_35119_1867095 | NC_021163.1    | Ca_kabuli_chr04 | 1867095                 | CC                              | TT                | 1945928175               |
| SNP_P3_35120_1867176 | NC_021163.1    | Ca_kabuli_chr04 | 1867176                 | AA                              | GG                | 1945928177               |
| SNP_P3_35121_1867228 | NC_021163.1    | Ca_kabuli_chr04 | 1867228                 | GG                              | AA                | 1945928179               |
| SNP_P3_35122_1870240 | NC_021163.1    | Ca_kabuli_chr04 | 1870240                 | GG                              | AA                | 1945928180               |
| SNP_P3_35123_1870317 | NC_021163.1    | Ca_kabuli_chr04 | 1870317                 | CC                              | TT                | 1945928182               |
| SNP_P3_35124_1871064 | NC_021163.1    | Ca_kabuli_chr04 | 1871064                 | TT                              | CC                | 1945928184               |
| SNP_P3_35125_1871098 | NC_021163.1    | Ca_kabuli_chr04 | 1871098                 | TT                              | AA                | 1945928186               |
| SNP_P3_35126_1871798 | NC_021163.1    | Ca_kabuli_chr04 | 1871798                 | TT                              | CC                | 1945928187               |
| SNP_P3_35127_1871801 | NC_021163.1    | Ca_kabuli_chr04 | 1871801                 | AA                              | CC                | 1945928189               |
| SNP_P3_35128_1872465 | NC_021163.1    | Ca_kabuli_chr04 | 1872465                 | CC                              | TT                | 1945928191               |
| SNP_P3_35129_1872747 | NC_021163.1    | Ca_kabuli_chr04 | 1872747                 | GG                              | CC                | 1945928193               |
| SNP_P3_35130_1872749 | NC_021163.1    | Ca_kabuli_chr04 | 1872749                 | CC                              | GG                | 1945928194               |
| SNP_P3_35131_1872768 | NC_021163.1    | Ca_kabuli_chr04 | 1872768                 | AA                              | TT                | 1945928196               |
| SNP_P3_35132_1872773 | NC_021163.1    | Ca_kabuli_chr04 | 1872773                 | GG                              | AA                | 1945928198               |
| SNP_P3_35135_1892810 | NC_021163.1    | Ca_kabuli_chr04 | 1892810                 | CC                              | AA                | 1945928200               |
| SNP_P3_35136_1892814 | NC_021163.1    | Ca_kabuli_chr04 | 1892814                 | AA                              | CC                | 1945928202               |
| SNP_P3_35137_1899792 | NC_021163.1    | Ca_kabuli_chr04 | 1899792                 | AA                              | GG                | 1945928203               |
| SNP_P3_35138_1903884 | NC_021163.1    | Ca_kabuli_chr04 | 1903884                 | CC                              | TT                | 1945928205               |
| SNP_P3_35141_1938613 | NC_021163.1    | Ca_kabuli_chr04 | 1938613                 | AA                              | GG                | 1945928207               |
| SNP_P3_35143_1975709 | NC_021163.1    | Ca_kabuli_chr04 | 1975709                 | TT                              | CC                | 1945928209               |
| SNP_P3_35144_1980818 | NC_021163.1    | Ca_kabuli_chr04 | 1980818                 | AA                              | GG                | 1945928210               |
| SNP_P3_35146_2024040 | NC_021163.1    | Ca_kabuli_chr04 | 2024040                 | AA                              | GG                | 1945928212               |
| SNP_P3_35147_2024095 | NC_021163.1    | Ca_kabuli_chr04 | 2024095                 | GG                              | AA                | 1945928214               |
| SNP_P3_35148_2024108 | NC_021163.1    | Ca_kabuli_chr04 | 2024108                 | AA                              | GG                | 1945928216               |
| SNP_P3_35149_2024112 | NC_021163.1    | Ca_kabuli_chr04 | 2024112                 | GG                              | AA                | 1945928218               |
| SNP_P3_35150_2024132 | NC_021163.1    | Ca_kabuli_chr04 | 2024132                 | GG                              | CC                | 1945928219               |
| SNP_P3_35151_2024142 | NC_021163.1    | Ca_kabuli_chr04 | 2024142                 | GG                              | CC                | 1945928221               |
| SNP_P3_35152_2024144 | NC_021163.1    | Ca_kabuli_chr04 | 2024144                 | CC                              | AA                | 1945928223               |
| SNP_P3_35153_2024313 | NC_021163.1    | Ca_kabuli_chr04 | 2024313                 | AA                              | GG                | 1945928225               |
| SNP_P3_35154_2024376 | NC_021163.1    | Ca_kabuli_chr04 | 2024376                 | AA                              | TT                | 1945928226               |
| SNP_P3_35155_2024379 | NC_021163.1    | Ca_kabuli_chr04 | 2024379                 | AA                              | GG                | 1945928228               |
| SNP_P3_35157_2032147 | NC_021163.1    | Ca_kabuli_chr04 | 2032147                 | AA                              | GG                | 1945928230               |
| SNP_P3_35159_2032225 | NC_021163.1    | Ca_kabuli_chr04 | 2032225                 | CC                              | TT                | 1945928232               |
| SNP_P3_35160_2032243 | NC_021163.1    | Ca_kabuli_chr04 | 2032243                 | TT                              | CC                | 1945928234               |
| SNP_P3_35161_2032252 | NC_021163.1    | Ca_kabuli_chr04 | 2032252                 | TT                              | GG                | 1945928235               |
| SNP_P3_35162_2032329 | NC_021163.1    | Ca_kabuli_chr04 | 2032329                 | CC                              | TT                | 1945928237               |
| SNP_P3_35163_2032374 | NC_021163.1    | Ca_kabuli_chr04 | 2032374                 | GG                              | AA                | 1945928239               |
| SNP_P3_35164_2032396 | NC_021163.1    | Ca_kabuli_chr04 | 2032396                 | GG                              | CC                | 1945928241               |

| SNPs IDs             | Chromosome IDs | Chromosomes     | Physical positions (bp) | CDC Frontier (Reference genome) | (Pusa 256 & HPNB) | NCBI SNPdb Accession IDs |
|----------------------|----------------|-----------------|-------------------------|---------------------------------|-------------------|--------------------------|
| SNP_P3_35165_2032416 | NC_021163.1    | Ca_kabuli_chr04 | 2032416                 | CC                              | GG                | 1945928242               |
| SNP_P3_35166_2032427 | NC_021163.1    | Ca_kabuli_chr04 | 2032427                 | GG                              | AA                | 1945928244               |
| SNP_P3_35167_2032449 | NC_021163.1    | Ca_kabuli_chr04 | 2032449                 | AA                              | GG                | 1945928246               |
| SNP_P3_35168_2032480 | NC_021163.1    | Ca_kabuli_chr04 | 2032480                 | TT                              | CC                | 1945928248               |
| SNP_P3_35169_2032481 | NC_021163.1    | Ca_kabuli_chr04 | 2032481                 | GG                              | TT                | 1945928250               |
| SNP_P3_35170_2032510 | NC_021163.1    | Ca_kabuli_chr04 | 2032510                 | AA                              | TT                | 1945928251               |
| SNP_P3_35171_2032529 | NC_021163.1    | Ca_kabuli_chr04 | 2032529                 | GG                              | AA                | 1945928253               |
| SNP_P3_35173_2032567 | NC_021163.1    | Ca_kabuli_chr04 | 2032567                 | TT                              | CC                | 1945928255               |
| SNP_P3_35174_2032582 | NC_021163.1    | Ca_kabuli_chr04 | 2032582                 | CC                              | TT                | 1945928257               |
| SNP_P3_35175_2032636 | NC_021163.1    | Ca_kabuli_chr04 | 2032636                 | AA                              | GG                | 1945928258               |
| SNP_P3_35176_2032638 | NC_021163.1    | Ca_kabuli_chr04 | 2032638                 | TT                              | AA                | 1945928260               |
| SNP_P3_35177_2032720 | NC_021163.1    | Ca_kabuli_chr04 | 2032720                 | CC                              | AA                | 1945928262               |
| SNP_P3_35178_2032723 | NC_021163.1    | Ca_kabuli_chr04 | 2032723                 | CC                              | AA                | 1945928264               |
| SNP_P3_35179_2032724 | NC_021163.1    | Ca_kabuli_chr04 | 2032724                 | AA                              | CC                | 1945928266               |
| SNP_P3_35181_2032773 | NC_021163.1    | Ca_kabuli_chr04 | 2032773                 | AA                              | TT                | 1945928267               |
| SNP_P3_35182_2032846 | NC_021163.1    | Ca_kabuli_chr04 | 2032846                 | AA                              | GG                | 1945928269               |
| SNP_P3_35183_2032858 | NC_021163.1    | Ca_kabuli_chr04 | 2032858                 | AA                              | GG                | 1945928271               |
| SNP_P3_35184_2032904 | NC_021163.1    | Ca_kabuli_chr04 | 2032904                 | GG                              | AA                | 1945928273               |
| SNP_P3_35185_2032911 | NC_021163.1    | Ca_kabuli_chr04 | 2032911                 | TT                              | CC                | 1945928274               |
| SNP_P3_35186_2032912 | NC_021163.1    | Ca_kabuli_chr04 | 2032912                 | GG                              | CC                | 1945928276               |
| SNP_P3_35187_2034107 | NC_021163.1    | Ca_kabuli_chr04 | 2034107                 | GG                              | TT                | 1945928278               |
| SNP_P3_35188_2034132 | NC_021163.1    | Ca_kabuli_chr04 | 2034132                 | GG                              | AA                | 1945928280               |
| SNP_P3_35189_2034149 | NC_021163.1    | Ca_kabuli_chr04 | 2034149                 | TT                              | CC                | 1945928282               |
| SNP_P3_35190_2034152 | NC_021163.1    | Ca_kabuli_chr04 | 2034152                 | TT                              | CC                | 1945928283               |
| SNP_P3_35191_2034169 | NC_021163.1    | Ca_kabuli_chr04 | 2034169                 | TT                              | CC                | 1945928285               |
| SNP_P3_35192_2034304 | NC_021163.1    | Ca_kabuli_chr04 | 2034304                 | GG                              | AA                | 1945928287               |
| SNP_P3_35193_2034340 | NC_021163.1    | Ca_kabuli_chr04 | 2034340                 | AA                              | CC                | 1945928289               |
| SNP_P3_35194_2034385 | NC_021163.1    | Ca_kabuli_chr04 | 2034385                 | CC                              | AA                | 1945928290               |
| SNP_P3_35195_2034396 | NC_021163.1    | Ca_kabuli_chr04 | 2034396                 | GG                              | AA                | 1945928292               |
| SNP_P3_35196_2034398 | NC_021163.1    | Ca_kabuli_chr04 | 2034398                 | TT                              | CC                | 1945928294               |
| SNP_P3_35198_2034505 | NC_021163.1    | Ca_kabuli_chr04 | 2034505                 | GG                              | AA                | 1945928296               |
| SNP_P3_35199_2034547 | NC_021163.1    | Ca_kabuli_chr04 | 2034547                 | GG                              | AA                | 1945928298               |
| SNP_P3_35200_2034548 | NC_021163.1    | Ca_kabuli_chr04 | 2034548                 | TT                              | CC                | 1945928299               |
| SNP_P3_35201_2034556 | NC_021163.1    | Ca_kabuli_chr04 | 2034556                 | GG                              | AA                | 1945928301               |
| SNP_P3_35203_2034717 | NC_021163.1    | Ca_kabuli_chr04 | 2034717                 | GG                              | CC                | 1945928303               |
| SNP_P3_35204_2034721 | NC_021163.1    | Ca_kabuli_chr04 | 2034721                 | GG                              | AA                | 1945928305               |
| SNP_P3_35205_2034756 | NC_021163.1    | Ca_kabuli_chr04 | 2034756                 | AA                              | GG                | 1945928306               |
| SNP_P3_35206_2034757 | NC_021163.1    | Ca_kabuli_chr04 | 2034757                 | AA                              | CC                | 1945928308               |
| SNP_P3_35207_2034768 | NC_021163.1    | Ca_kabuli_chr04 | 2034768                 | GG                              | AA                | 1945928310               |
| SNP_P3_35208_2034789 | NC_021163.1    | Ca_kabuli_chr04 | 2034789                 | CC                              | TT                | 1945928312               |
| SNP_P3_35209_2034790 | NC_021163.1    | Ca_kabuli_chr04 | 2034790                 | TT                              | GG                | 1945928314               |
| SNP_P3_35210_2034835 | NC_021163.1    | Ca_kabuli_chr04 | 2034835                 | GG                              | CC                | 1945928315               |

| SNPs IDs             | Chromosome IDs | Chromosomes     | Physical positions (bp) | CDC Frontier (Reference genome) | (Pusa 256 & HPNB) | NCBI SNPdb Accession IDs |
|----------------------|----------------|-----------------|-------------------------|---------------------------------|-------------------|--------------------------|
| SNP_P3_35211_2034850 | NC_021163.1    | Ca_kabuli_chr04 | 2034850                 | TT                              | CC                | 1945928317               |
| SNP_P3_35212_2034894 | NC_021163.1    | Ca_kabuli_chr04 | 2034894                 | TT                              | CC                | 1945928319               |
| SNP_P3_35213_2034900 | NC_021163.1    | Ca_kabuli_chr04 | 2034900                 | AA                              | TT                | 1945928321               |
| SNP_P3_35214_2034952 | NC_021163.1    | Ca_kabuli_chr04 | 2034952                 | AA                              | GG                | 1945928322               |
| SNP_P3_35215_2034974 | NC_021163.1    | Ca_kabuli_chr04 | 2034974                 | GG                              | TT                | 1945928324               |
| SNP_P3_35216_2035015 | NC_021163.1    | Ca_kabuli_chr04 | 2035015                 | GG                              | TT                | 1945928326               |
| SNP_P3_35217_2035016 | NC_021163.1    | Ca_kabuli_chr04 | 2035016                 | TT                              | AA                | 1945928328               |
| SNP_P3_35218_2035035 | NC_021163.1    | Ca_kabuli_chr04 | 2035035                 | GG                              | CC                | 1945928329               |
| SNP_P3_35219_2035047 | NC_021163.1    | Ca_kabuli_chr04 | 2035047                 | AA                              | TT                | 1945928331               |
| SNP_P3_35220_2035090 | NC_021163.1    | Ca_kabuli_chr04 | 2035090                 | TT                              | CC                | 1945928333               |
| SNP_P3_35221_2035166 | NC_021163.1    | Ca_kabuli_chr04 | 2035166                 | AA                              | GG                | 1945928335               |
| SNP_P3_35222_2035174 | NC_021163.1    | Ca_kabuli_chr04 | 2035174                 | CC                              | TT                | 1945928337               |
| SNP_P3_35223_2035187 | NC_021163.1    | Ca_kabuli_chr04 | 2035187                 | TT                              | CC                | 1945928338               |
| SNP_P3_35224_2035188 | NC_021163.1    | Ca_kabuli_chr04 | 2035188                 | GG                              | AA                | 1945928340               |
| SNP_P3_35225_2035191 | NC_021163.1    | Ca_kabuli_chr04 | 2035191                 | AA                              | CC                | 1945928342               |
| SNP_P3_35226_2035192 | NC_021163.1    | Ca_kabuli_chr04 | 2035192                 | CC                              | AA                | 1945928344               |
| SNP_P3_35228_2035329 | NC_021163.1    | Ca_kabuli_chr04 | 2035329                 | AA                              | CC                | 1945928345               |
| SNP_P3_35229_2035330 | NC_021163.1    | Ca_kabuli_chr04 | 2035330                 | GG                              | CC                | 1945928347               |
| SNP_P3_35230_2035400 | NC_021163.1    | Ca_kabuli_chr04 | 2035400                 | AA                              | GG                | 1945928349               |
| SNP_P3_35231_2035405 | NC_021163.1    | Ca_kabuli_chr04 | 2035405                 | GG                              | AA                | 1945928351               |
| SNP_P3_35232_2035415 | NC_021163.1    | Ca_kabuli_chr04 | 2035415                 | CC                              | TT                | 1945928353               |
| SNP_P3_35233_2035525 | NC_021163.1    | Ca_kabuli_chr04 | 2035525                 | AA                              | GG                | 1945928354               |
| SNP_P3_35234_2035526 | NC_021163.1    | Ca_kabuli_chr04 | 2035526                 | GG                              | AA                | 1945928356               |
| SNP_P3_35235_2035530 | NC_021163.1    | Ca_kabuli_chr04 | 2035530                 | CC                              | TT                | 1945928358               |
| SNP_P3_35236_2035543 | NC_021163.1    | Ca_kabuli_chr04 | 2035543                 | GG                              | TT                | 1945928360               |
| SNP_P3_35237_2035561 | NC_021163.1    | Ca_kabuli_chr04 | 2035561                 | TT                              | GG                | 1945928361               |
| SNP_P3_35238_2035584 | NC_021163.1    | Ca_kabuli_chr04 | 2035584                 | GG                              | AA                | 1945928363               |
| SNP_P3_35239_2035678 | NC_021163.1    | Ca_kabuli_chr04 | 2035678                 | TT                              | CC                | 1945928365               |
| SNP_P3_35240_2035692 | NC_021163.1    | Ca_kabuli_chr04 | 2035692                 | AA                              | CC                | 1945928367               |
| SNP_P3_35242_2035720 | NC_021163.1    | Ca_kabuli_chr04 | 2035720                 | TT                              | CC                | 1945928369               |
| SNP_P3_35243_2035757 | NC_021163.1    | Ca_kabuli_chr04 | 2035757                 | CC                              | TT                | 1945928370               |
| SNP_P3_35245_2035841 | NC_021163.1    | Ca_kabuli_chr04 | 2035841                 | TT                              | CC                | 1945928372               |
| SNP_P3_35246_2035894 | NC_021163.1    | Ca_kabuli_chr04 | 2035894                 | AA                              | CC                | 1945928374               |
| SNP_P3_35247_2035921 | NC_021163.1    | Ca_kabuli_chr04 | 2035921                 | AA                              | TT                | 1945928376               |
| SNP_P3_35248_2035923 | NC_021163.1    | Ca_kabuli_chr04 | 2035923                 | GG                              | AA                | 1945928377               |
| SNP_P3_35249_2035930 | NC_021163.1    | Ca_kabuli_chr04 | 2035930                 | AA                              | TT                | 1945928379               |
| SNP_P3_35250_2035955 | NC_021163.1    | Ca_kabuli_chr04 | 2035955                 | CC                              | AA                | 1945928381               |
| SNP_P3_35251_2035979 | NC_021163.1    | Ca_kabuli_chr04 | 2035979                 | GG                              | AA                | 1945928383               |
| SNP_P3_35252_2036101 | NC_021163.1    | Ca_kabuli_chr04 | 2036101                 | TT                              | AA                | 1945928385               |
| SNP_P3_35253_2050327 | NC_021163.1    | Ca_kabuli_chr04 | 2050327                 | TT                              | CC                | 1945928386               |
| SNP_P3_35254_2053074 | NC_021163.1    | Ca_kabuli_chr04 | 2053074                 | GG                              | CC                | 1945928388               |
| SNP_P3_35256_2122859 | NC_021163.1    | Ca_kabuli_chr04 | 2122859                 | TT                              | GG                | 1945928390               |

| SNPs IDs             | Chromosome IDs | Chromosomes     | Physical positions (bp) | CDC Frontier (Reference genome) | (Pusa 256 & HPNB) | NCBI SNPdb Accession IDs |
|----------------------|----------------|-----------------|-------------------------|---------------------------------|-------------------|--------------------------|
| SNP_P3_35257_2122860 | NC_021163.1    | Ca_kabuli_chr04 | 2122860                 | TT                              | AA                | 1945928392               |
| SNP_P3_35258_2130281 | NC_021163.1    | Ca_kabuli_chr04 | 2130281                 | AA                              | GG                | 1945928393               |
| SNP_P3_35259_2161466 | NC_021163.1    | Ca_kabuli_chr04 | 2161466                 | CC                              | TT                | 1945928395               |
| SNP_P3_35260_2165156 | NC_021163.1    | Ca_kabuli_chr04 | 2165156                 | CC                              | TT                | 1945928397               |
| SNP_P3_35261_2177920 | NC_021163.1    | Ca_kabuli_chr04 | 2177920                 | CC                              | GG                | 1945928399               |
| SNP_P3_35262_2181849 | NC_021163.1    | Ca_kabuli_chr04 | 2181849                 | TT                              | CC                | 1945928401               |
| SNP_P3_35263_2208617 | NC_021163.1    | Ca_kabuli_chr04 | 2208617                 | AA                              | TT                | 1945928402               |
| SNP_P3_35264_2208625 | NC_021163.1    | Ca_kabuli_chr04 | 2208625                 | AA                              | GG                | 1945928404               |
| SNP_P3_35265_2211561 | NC_021163.1    | Ca_kabuli_chr04 | 2211561                 | TT                              | CC                | 1945928406               |
| SNP_P3_35267_2233917 | NC_021163.1    | Ca_kabuli_chr04 | 2233917                 | CC                              | GG                | 1945928408               |
| SNP_P3_35268_2274276 | NC_021163.1    | Ca_kabuli_chr04 | 2274276                 | TT                              | GG                | 1945928409               |
| SNP_P3_35269_2285115 | NC_021163.1    | Ca_kabuli_chr04 | 2285115                 | GG                              | AA                | 1945928411               |
| SNP_P3_35271_2289441 | NC_021163.1    | Ca_kabuli_chr04 | 2289441                 | AA                              | CC                | 1945928413               |
| SNP_P3_35272_2292280 | NC_021163.1    | Ca_kabuli_chr04 | 2292280                 | CC                              | TT                | 1945928415               |
| SNP_P3_35273_2323431 | NC_021163.1    | Ca_kabuli_chr04 | 2323431                 | TT                              | CC                | 1945928417               |
| SNP_P3_35274_2344297 | NC_021163.1    | Ca_kabuli_chr04 | 2344297                 | GG                              | AA                | 1945928418               |
| SNP_P3_35275_2371850 | NC_021163.1    | Ca_kabuli_chr04 | 2371850                 | TT                              | CC                | 1945928420               |
| SNP_P3_35276_2373628 | NC_021163.1    | Ca_kabuli_chr04 | 2373628                 | GG                              | AA                | 1945928422               |
| SNP_P3_35277_2390544 | NC_021163.1    | Ca_kabuli_chr04 | 2390544                 | AA                              | GG                | 1945928424               |
| SNP_P3_35278_2401220 | NC_021163.1    | Ca_kabuli_chr04 | 2401220                 | CC                              | AA                | 1945928425               |
| SNP_P3_35279_2418794 | NC_021163.1    | Ca_kabuli_chr04 | 2418794                 | AA                              | GG                | 1945928427               |
| SNP_P3_35281_2449197 | NC_021163.1    | Ca_kabuli_chr04 | 2449197                 | TT                              | GG                | 1945928429               |
| SNP_P3_35282_2449947 | NC_021163.1    | Ca_kabuli_chr04 | 2449947                 | TT                              | CC                | 1945928431               |
| SNP_P3_35283_2471868 | NC_021163.1    | Ca_kabuli_chr04 | 2471868                 | TT                              | CC                | 1945928433               |
| SNP_P3_35284_2487345 | NC_021163.1    | Ca_kabuli_chr04 | 2487345                 | CC                              | TT                | 1945928434               |
| SNP_P3_35285_2495295 | NC_021163.1    | Ca_kabuli_chr04 | 2495295                 | CC                              | TT                | 1945928436               |
| SNP_P3_35288_2563223 | NC_021163.1    | Ca_kabuli_chr04 | 2563223                 | TT                              | GG                | 1945928438               |
| SNP_P3_35292_2688220 | NC_021163.1    | Ca_kabuli_chr04 | 2688220                 | GG                              | AA                | 1945928440               |
| SNP_P3_35293_2688270 | NC_021163.1    | Ca_kabuli_chr04 | 2688270                 | AA                              | GG                | 1945928441               |
| SNP_P3_35294_2743187 | NC_021163.1    | Ca_kabuli_chr04 | 2743187                 | AA                              | TT                | 1945928443               |
| SNP_P3_35295_2757348 | NC_021163.1    | Ca_kabuli_chr04 | 2757348                 | TT                              | CC                | 1945928445               |
| SNP_P3_35296_2799405 | NC_021163.1    | Ca_kabuli_chr04 | 2799405                 | CC                              | TT                | 1945928447               |
| SNP_P3_35297_2855258 | NC_021163.1    | Ca_kabuli_chr04 | 2855258                 | AA                              | GG                | 1945928449               |
| SNP_P3_35298_2858187 | NC_021163.1    | Ca_kabuli_chr04 | 2858187                 | TT                              | CC                | 1945928450               |
| SNP_P3_35299_2924620 | NC_021163.1    | Ca_kabuli_chr04 | 2924620                 | AA                              | CC                | 1945928452               |
| SNP_P3_35300_2970302 | NC_021163.1    | Ca_kabuli_chr04 | 2970302                 | GG                              | AA                | 1945928454               |
| SNP_P3_35301_2973525 | NC_021163.1    | Ca_kabuli_chr04 | 2973525                 | AA                              | CC                | 1945928456               |
| SNP_P3_35302_2987298 | NC_021163.1    | Ca_kabuli_chr04 | 2987298                 | AA                              | TT                | 1945928457               |
| SNP_P3_35305_3029425 | NC_021163.1    | Ca_kabuli_chr04 | 3029425                 | GG                              | AA                | 1945928459               |
| SNP_P3_35306_3039430 | NC_021163.1    | Ca_kabuli_chr04 | 3039430                 | TT                              | CC                | 1945928461               |
| SNP_P3_35307_3039431 | NC_021163.1    | Ca_kabuli_chr04 | 3039431                 | AA                              | TT                | 1945928463               |
| SNP_P3_35308_3039438 | NC_021163.1    | Ca_kabuli_chr04 | 3039438                 | TT                              | GG                | 1945928465               |

| SNPs IDs             | Chromosome IDs | Chromosomes     | Physical positions (bp) | CDC Frontier (Reference genome) | (Pusa 256 & HPNB) | NCBI SNPdb Accession IDs |
|----------------------|----------------|-----------------|-------------------------|---------------------------------|-------------------|--------------------------|
| SNP_P3_35309_3039439 | NC_021163.1    | Ca_kabuli_chr04 | 3039439                 | TT                              | AA                | 1945928466               |
| SNP_P3_35311_3081239 | NC_021163.1    | Ca_kabuli_chr04 | 3081239                 | AA                              | TT                | 1945928468               |
| SNP_P3_35312_3082096 | NC_021163.1    | Ca_kabuli_chr04 | 3082096                 | TT                              | GG                | 1945928470               |
| SNP_P3_35313_3092216 | NC_021163.1    | Ca_kabuli_chr04 | 3092216                 | AA                              | CC                | 1945928472               |
| SNP_P3_35314_3122921 | NC_021163.1    | Ca_kabuli_chr04 | 3122921                 | GG                              | CC                | 1945928473               |
| SNP_P3_35316_3167549 | NC_021163.1    | Ca_kabuli_chr04 | 3167549                 | GG                              | AA                | 1945928475               |
| SNP_P3_35317_3167568 | NC_021163.1    | Ca_kabuli_chr04 | 3167568                 | AA                              | GG                | 1945928477               |
| SNP_P3_35320_3266921 | NC_021163.1    | Ca_kabuli_chr04 | 3266921                 | AA                              | GG                | 1945928479               |
| SNP_P3_35321_3299286 | NC_021163.1    | Ca_kabuli_chr04 | 3299286                 | AA                              | CC                | 1945928481               |
| SNP_P3_35323_3344433 | NC_021163.1    | Ca_kabuli_chr04 | 3344433                 | TT                              | CC                | 1945928482               |
| SNP_P3_35324_3355608 | NC_021163.1    | Ca_kabuli_chr04 | 3355608                 | CC                              | TT                | 1945928484               |
| SNP_P3_35325_3355798 | NC_021163.1    | Ca_kabuli_chr04 | 3355798                 | AA                              | CC                | 1945928486               |
| SNP_P3_35327_3355854 | NC_021163.1    | Ca_kabuli_chr04 | 3355854                 | AA                              | GG                | 1945928488               |
| SNP_P3_35328_3355865 | NC_021163.1    | Ca_kabuli_chr04 | 3355865                 | GG                              | CC                | 1945928489               |
| SNP_P3_35329_3355909 | NC_021163.1    | Ca_kabuli_chr04 | 3355909                 | GG                              | CC                | 1945928491               |
| SNP_P3_35330_3355921 | NC_021163.1    | Ca_kabuli_chr04 | 3355921                 | AA                              | CC                | 1945928493               |
| SNP_P3_35332_3375538 | NC_021163.1    | Ca_kabuli_chr04 | 3375538                 | AA                              | GG                | 1945928495               |
| SNP_P3_35333_3392394 | NC_021163.1    | Ca_kabuli_chr04 | 3392394                 | TT                              | AA                | 1945928497               |
| SNP_P3_35334_3435757 | NC_021163.1    | Ca_kabuli_chr04 | 3435757                 | CC                              | TT                | 1945928498               |
| SNP_P3_35335_3460484 | NC_021163.1    | Ca_kabuli_chr04 | 3460484                 | CC                              | AA                | 1945928500               |
| SNP_P3_35337_3495187 | NC_021163.1    | Ca_kabuli_chr04 | 3495187                 | GG                              | AA                | 1945928502               |
| SNP_P3_35338_3525796 | NC_021163.1    | Ca_kabuli_chr04 | 3525796                 | TT                              | GG                | 1945928504               |
| SNP_P3_35340_3543346 | NC_021163.1    | Ca_kabuli_chr04 | 3543346                 | CC                              | TT                | 1945928505               |
| SNP_P3_35341_3547248 | NC_021163.1    | Ca_kabuli_chr04 | 3547248                 | AA                              | CC                | 1945928507               |
| SNP_P3_35343_3569412 | NC_021163.1    | Ca_kabuli_chr04 | 3569412                 | AA                              | TT                | 1945928509               |
| SNP_P3_35345_3587747 | NC_021163.1    | Ca_kabuli_chr04 | 3587747                 | TT                              | CC                | 1945928511               |
| SNP_P3_35346_3597153 | NC_021163.1    | Ca_kabuli_chr04 | 3597153                 | CC                              | TT                | 1945928512               |
| SNP_P3_35348_3634385 | NC_021163.1    | Ca_kabuli_chr04 | 3634385                 | AA                              | GG                | 1945928514               |
| SNP_P3_35349_3634387 | NC_021163.1    | Ca_kabuli_chr04 | 3634387                 | GG                              | AA                | 1945928516               |
| SNP_P3_35351_3682557 | NC_021163.1    | Ca_kabuli_chr04 | 3682557                 | GG                              | AA                | 1945928518               |
| SNP_P3_35353_3751067 | NC_021163.1    | Ca_kabuli_chr04 | 3751067                 | TT                              | CC                | 1945928520               |
| SNP_P3_35354_3780569 | NC_021163.1    | Ca_kabuli_chr04 | 3780569                 | GG                              | AA                | 1945928521               |
| SNP_P3_35356_3782695 | NC_021163.1    | Ca_kabuli_chr04 | 3782695                 | TT                              | AA                | 1945928523               |
| SNP_P3_35357_3794622 | NC_021163.1    | Ca_kabuli_chr04 | 3794622                 | TT                              | CC                | 1945928525               |
| SNP_P3_35358_3833261 | NC_021163.1    | Ca_kabuli_chr04 | 3833261                 | AA                              | TT                | 1945928527               |
| SNP_P3_35359_3833279 | NC_021163.1    | Ca_kabuli_chr04 | 3833279                 | CC                              | TT                | 1945928528               |
| SNP_P3_35360_3833283 | NC_021163.1    | Ca_kabuli_chr04 | 3833283                 | CC                              | TT                | 1945928530               |
| SNP_P3_35361_3833300 | NC_021163.1    | Ca_kabuli_chr04 | 3833300                 | AA                              | TT                | 1945928532               |
| SNP_P3_35362_3833365 | NC_021163.1    | Ca_kabuli_chr04 | 3833365                 | TT                              | CC                | 1945928534               |
| SNP_P3_35363_3833433 | NC_021163.1    | Ca_kabuli_chr04 | 3833433                 | TT                              | AA                | 1945928536               |
| SNP_P3_35365_3833637 | NC_021163.1    | Ca_kabuli_chr04 | 3833637                 | AA                              | GG                | 1945928537               |
| SNP_P3_35366_3846941 | NC_021163.1    | Ca_kabuli_chr04 | 3846941                 | GG                              | AA                | 1945928539               |

| SNPs IDs             | Chromosome IDs | Chromosomes     | Physical positions (bp) | CDC Frontier (Reference genome) | (Pusa 256 & HPNB) | NCBI SNPdb Accession IDs |
|----------------------|----------------|-----------------|-------------------------|---------------------------------|-------------------|--------------------------|
| SNP_P3_35367_3855719 | NC_021163.1    | Ca_kabuli_chr04 | 3855719                 | CC                              | AA                | 1945928541               |
| SNP_P3_35368_3857512 | NC_021163.1    | Ca_kabuli_chr04 | 3857512                 | AA                              | GG                | 1945928543               |
| SNP_P3_35369_3860480 | NC_021163.1    | Ca_kabuli_chr04 | 3860480                 | TT                              | GG                | 1945928544               |
| SNP_P3_35370_3868479 | NC_021163.1    | Ca_kabuli_chr04 | 3868479                 | GG                              | AA                | 1945928546               |
| SNP_P3_35371_3869621 | NC_021163.1    | Ca_kabuli_chr04 | 3869621                 | AA                              | CC                | 1945928548               |
| SNP_P3_35372_3869993 | NC_021163.1    | Ca_kabuli_chr04 | 3869993                 | AA                              | TT                | 1945928550               |
| SNP_P3_35373_3870683 | NC_021163.1    | Ca_kabuli_chr04 | 3870683                 | CC                              | AA                | 1945928552               |
| SNP_P3_35374_3871941 | NC_021163.1    | Ca_kabuli_chr04 | 3871941                 | CC                              | AA                | 1945928553               |
| SNP_P3_35375_3871942 | NC_021163.1    | Ca_kabuli_chr04 | 3871942                 | AA                              | TT                | 1945928555               |
| SNP_P3_35376_3872059 | NC_021163.1    | Ca_kabuli_chr04 | 3872059                 | TT                              | GG                | 1945928557               |
| SNP_P3_35377_3872267 | NC_021163.1    | Ca_kabuli_chr04 | 3872267                 | TT                              | AA                | 1945928559               |
| SNP_P3_35378_3872325 | NC_021163.1    | Ca_kabuli_chr04 | 3872325                 | TT                              | CC                | 1945928560               |
| SNP_P3_35379_3872366 | NC_021163.1    | Ca_kabuli_chr04 | 3872366                 | AA                              | GG                | 1945928562               |
| SNP_P3_35380_3872378 | NC_021163.1    | Ca_kabuli_chr04 | 3872378                 | GG                              | AA                | 1945928564               |
| SNP_P3_35381_3872555 | NC_021163.1    | Ca_kabuli_chr04 | 3872555                 | TT                              | CC                | 1945928566               |
| SNP_P3_35382_3872571 | NC_021163.1    | Ca_kabuli_chr04 | 3872571                 | TT                              | AA                | 1945928568               |
| SNP_P3_35383_3872654 | NC_021163.1    | Ca_kabuli_chr04 | 3872654                 | TT                              | CC                | 1945928569               |
| SNP_P3_35384_3873484 | NC_021163.1    | Ca_kabuli_chr04 | 3873484                 | TT                              | AA                | 1945928571               |
| SNP_P3_35387_3980890 | NC_021163.1    | Ca_kabuli_chr04 | 3980890                 | CC                              | GG                | 1945928573               |
| SNP_P3_35388_3981193 | NC_021163.1    | Ca_kabuli_chr04 | 3981193                 | TT                              | GG                | 1945928575               |
| SNP_P3_35391_3992101 | NC_021163.1    | Ca_kabuli_chr04 | 3992101                 | CC                              | TT                | 1945928576               |
| SNP_P3_35393_3993149 | NC_021163.1    | Ca_kabuli_chr04 | 3993149                 | CC                              | TT                | 1945928578               |
| SNP_P3_35394_3993248 | NC_021163.1    | Ca_kabuli_chr04 | 3993248                 | TT                              | CC                | 1945928580               |
| SNP_P3_35395_3994807 | NC_021163.1    | Ca_kabuli_chr04 | 3994807                 | CC                              | TT                | 1945928582               |
| SNP_P3_35396_3994818 | NC_021163.1    | Ca_kabuli_chr04 | 3994818                 | CC                              | GG                | 1945928584               |
| SNP_P3_35397_3994838 | NC_021163.1    | Ca_kabuli_chr04 | 3994838                 | TT                              | CC                | 1945928585               |
| SNP_P3_35398_3994846 | NC_021163.1    | Ca_kabuli_chr04 | 3994846                 | AA                              | GG                | 1945928587               |
| SNP_P3_35400_3997076 | NC_021163.1    | Ca_kabuli_chr04 | 3997076                 | GG                              | AA                | 1945928589               |
| SNP_P3_35401_3997446 | NC_021163.1    | Ca_kabuli_chr04 | 3997446                 | TT                              | CC                | 1945928591               |
| SNP_P3_35402_3998336 | NC_021163.1    | Ca_kabuli_chr04 | 3998336                 | CC                              | TT                | 1945928592               |
| SNP_P3_35403_3998347 | NC_021163.1    | Ca_kabuli_chr04 | 3998347                 | AA                              | GG                | 1945928594               |
| SNP_P3_35404_3998358 | NC_021163.1    | Ca_kabuli_chr04 | 3998358                 | AA                              | GG                | 1945928596               |
| SNP_P3_35405_3998639 | NC_021163.1    | Ca_kabuli_chr04 | 3998639                 | TT                              | GG                | 1945928598               |
| SNP_P3_35406_3998674 | NC_021163.1    | Ca_kabuli_chr04 | 3998674                 | TT                              | AA                | 1945928600               |
| SNP_P3_35407_3999749 | NC_021163.1    | Ca_kabuli_chr04 | 3999749                 | TT                              | GG                | 1945928601               |
| SNP_P3_35408_4000028 | NC_021163.1    | Ca_kabuli_chr04 | 4000028                 | GG                              | TT                | 1945928603               |
| SNP_P3_35409_4000048 | NC_021163.1    | Ca_kabuli_chr04 | 4000048                 | GG                              | AA                | 1945928605               |
| SNP_P3_35410_4000773 | NC_021163.1    | Ca_kabuli_chr04 | 4000773                 | AA                              | CC                | 1945928607               |
| SNP_P3_35411_4001908 | NC_021163.1    | Ca_kabuli_chr04 | 4001908                 | AA                              | CC                | 1945928608               |
| SNP_P3_35412_4007975 | NC_021163.1    | Ca_kabuli_chr04 | 4007975                 | CC                              | AA                | 1945928610               |
| SNP_P3_35413_4008179 | NC_021163.1    | Ca_kabuli_chr04 | 4008179                 | TT                              | CC                | 1945928612               |
| SNP_P3_35416_4008302 | NC_021163.1    | Ca_kabuli_chr04 | 4008302                 | AA                              | GG                | 1945928614               |

| SNPs IDs             | Chromosome IDs | Chromosomes     | Physical positions (bp) | CDC Frontier (Reference genome) | (Pusa 256 & HPNB) | NCBI SNPdb Accession IDs |
|----------------------|----------------|-----------------|-------------------------|---------------------------------|-------------------|--------------------------|
| SNP_P3_35417_4008325 | NC_021163.1    | Ca_kabuli_chr04 | 4008325                 | TT                              | AA                | 1945928616               |
| SNP_P3_35418_4008539 | NC_021163.1    | Ca_kabuli_chr04 | 4008539                 | AA                              | GG                | 1945928617               |
| SNP_P3_35419_4009165 | NC_021163.1    | Ca_kabuli_chr04 | 4009165                 | GG                              | TT                | 1945928619               |
| SNP_P3_35420_4009170 | NC_021163.1    | Ca_kabuli_chr04 | 4009170                 | GG                              | AA                | 1945928621               |
| SNP_P3_35421_4011302 | NC_021163.1    | Ca_kabuli_chr04 | 4011302                 | GG                              | AA                | 1945928623               |
| SNP_P3_35423_4012694 | NC_021163.1    | Ca_kabuli_chr04 | 4012694                 | CC                              | GG                | 1945928624               |
| SNP_P3_35425_4013542 | NC_021163.1    | Ca_kabuli_chr04 | 4013542                 | GG                              | AA                | 1945928626               |
| SNP_P3_35426_4013680 | NC_021163.1    | Ca_kabuli_chr04 | 4013680                 | CC                              | TT                | 1945928628               |
| SNP_P3_35427_4013698 | NC_021163.1    | Ca_kabuli_chr04 | 4013698                 | TT                              | AA                | 1945928630               |
| SNP_P3_35428_4013699 | NC_021163.1    | Ca_kabuli_chr04 | 4013699                 | CC                              | AA                | 1945928632               |
| SNP_P3_35429_4016460 | NC_021163.1    | Ca_kabuli_chr04 | 4016460                 | TT                              | CC                | 1945928633               |
| SNP_P3_35430_4016579 | NC_021163.1    | Ca_kabuli_chr04 | 4016579                 | AA                              | GG                | 1945928635               |
| SNP_P3_35431_4016585 | NC_021163.1    | Ca_kabuli_chr04 | 4016585                 | CC                              | TT                | 1945928637               |
| SNP_P3_35432_4017446 | NC_021163.1    | Ca_kabuli_chr04 | 4017446                 | CC                              | TT                | 1945928639               |
| SNP_P3_35433_4017727 | NC_021163.1    | Ca_kabuli_chr04 | 4017727                 | AA                              | GG                | 1945928640               |
| SNP_P3_35434_4017945 | NC_021163.1    | Ca_kabuli_chr04 | 4017945                 | TT                              | CC                | 1945928642               |
| SNP_P3_35435_4019874 | NC_021163.1    | Ca_kabuli_chr04 | 4019874                 | GG                              | CC                | 1945928644               |
| SNP_P3_35436_4022919 | NC_021163.1    | Ca_kabuli_chr04 | 4022919                 | TT                              | AA                | 1945928646               |
| SNP_P3_35438_4023577 | NC_021163.1    | Ca_kabuli_chr04 | 4023577                 | CC                              | TT                | 1945928648               |
| SNP_P3_35439_4023605 | NC_021163.1    | Ca_kabuli_chr04 | 4023605                 | TT                              | AA                | 1945928649               |
| SNP_P3_35440_4023608 | NC_021163.1    | Ca_kabuli_chr04 | 4023608                 | TT                              | GG                | 1945928651               |
| SNP_P3_35441_4023685 | NC_021163.1    | Ca_kabuli_chr04 | 4023685                 | GG                              | TT                | 1945928653               |
| SNP_P3_35442_4023692 | NC_021163.1    | Ca_kabuli_chr04 | 4023692                 | TT                              | GG                | 1945928655               |
| SNP_P3_35443_4023762 | NC_021163.1    | Ca_kabuli_chr04 | 4023762                 | TT                              | GG                | 1945928656               |
| SNP_P3_35444_4023904 | NC_021163.1    | Ca_kabuli_chr04 | 4023904                 | CC                              | TT                | 1945928658               |
| SNP_P3_35445_4023965 | NC_021163.1    | Ca_kabuli_chr04 | 4023965                 | CC                              | TT                | 1945928660               |
| SNP_P3_35446_4024409 | NC_021163.1    | Ca_kabuli_chr04 | 4024409                 | AA                              | TT                | 1945928662               |
| SNP_P3_35447_4024412 | NC_021163.1    | Ca_kabuli_chr04 | 4024412                 | TT                              | CC                | 1945928664               |
| SNP_P3_35448_4024476 | NC_021163.1    | Ca_kabuli_chr04 | 4024476                 | TT                              | CC                | 1945928665               |
| SNP_P3_35449_4024669 | NC_021163.1    | Ca_kabuli_chr04 | 4024669                 | TT                              | AA                | 1945928667               |
| SNP_P3_35450_4024713 | NC_021163.1    | Ca_kabuli_chr04 | 4024713                 | CC                              | GG                | 1945928669               |
| SNP_P3_35451_4024714 | NC_021163.1    | Ca_kabuli_chr04 | 4024714                 | CC                              | TT                | 1945928671               |
| SNP_P3_35452_4024717 | NC_021163.1    | Ca_kabuli_chr04 | 4024717                 | TT                              | CC                | 1945928672               |
| SNP_P3_35454_4024996 | NC_021163.1    | Ca_kabuli_chr04 | 4024996                 | TT                              | AA                | 1945928674               |
| SNP_P3_35455_4025295 | NC_021163.1    | Ca_kabuli_chr04 | 4025295                 | TT                              | CC                | 1945928676               |
| SNP_P3_35458_4030260 | NC_021163.1    | Ca_kabuli_chr04 | 4030260                 | TT                              | AA                | 1945928678               |
| SNP_P3_35459_4030338 | NC_021163.1    | Ca_kabuli_chr04 | 4030338                 | CC                              | TT                | 1945928680               |
| SNP_P3_35460_4030730 | NC_021163.1    | Ca_kabuli_chr04 | 4030730                 | GG                              | AA                | 1945928681               |
| SNP_P3_35461_4030761 | NC_021163.1    | Ca_kabuli_chr04 | 4030761                 | GG                              | AA                | 1945928683               |
| SNP_P3_35462_4030766 | NC_021163.1    | Ca_kabuli_chr04 | 4030766                 | AA                              | TT                | 1945928685               |
| SNP_P3_35463_4032200 | NC_021163.1    | Ca_kabuli_chr04 | 4032200                 | AA                              | GG                | 1945928687               |
| SNP_P3_35466_4033074 | NC_021163.1    | Ca_kabuli_chr04 | 4033074                 | CC                              | GG                | 1945928688               |

| SNPs IDs             | Chromosome IDs | Chromosomes     | Physical positions (bp) | CDC Frontier (Reference genome) | (Pusa 256 & HPNB) | NCBI SNPdb Accession IDs |
|----------------------|----------------|-----------------|-------------------------|---------------------------------|-------------------|--------------------------|
| SNP_P3_35467_4033077 | NC_021163.1    | Ca_kabuli_chr04 | 4033077                 | CC                              | AA                | 1945928690               |
| SNP_P3_35468_4034211 | NC_021163.1    | Ca_kabuli_chr04 | 4034211                 | GG                              | TT                | 1945928692               |
| SNP_P3_35469_4034212 | NC_021163.1    | Ca_kabuli_chr04 | 4034212                 | CC                              | GG                | 1945928694               |
| SNP_P3_35470_4034213 | NC_021163.1    | Ca_kabuli_chr04 | 4034213                 | GG                              | AA                | 1945928696               |
| SNP_P3_35471_4034219 | NC_021163.1    | Ca_kabuli_chr04 | 4034219                 | AA                              | CC                | 1945928697               |
| SNP_P3_35472_4036121 | NC_021163.1    | Ca_kabuli_chr04 | 4036121                 | TT                              | AA                | 1945928699               |
| SNP_P3_35475_4038758 | NC_021163.1    | Ca_kabuli_chr04 | 4038758                 | TT                              | GG                | 1945928701               |
| SNP_P3_35476_4038906 | NC_021163.1    | Ca_kabuli_chr04 | 4038906                 | AA                              | GG                | 1945928703               |
| SNP_P3_35477_4038970 | NC_021163.1    | Ca_kabuli_chr04 | 4038970                 | AA                              | CC                | 1945928704               |
| SNP_P3_35478_4041171 | NC_021163.1    | Ca_kabuli_chr04 | 4041171                 | AA                              | GG                | 1945928706               |
| SNP_P3_35479_4041192 | NC_021163.1    | Ca_kabuli_chr04 | 4041192                 | CC                              | TT                | 1945928708               |
| SNP_P3_35480_4041226 | NC_021163.1    | Ca_kabuli_chr04 | 4041226                 | AA                              | GG                | 1945928710               |
| SNP_P3_35481_4041237 | NC_021163.1    | Ca_kabuli_chr04 | 4041237                 | TT                              | CC                | 1945928712               |
| SNP_P3_35482_4041238 | NC_021163.1    | Ca_kabuli_chr04 | 4041238                 | TT                              | GG                | 1945928713               |
| SNP_P3_35484_4041769 | NC_021163.1    | Ca_kabuli_chr04 | 4041769                 | GG                              | AA                | 1945928715               |
| SNP_P3_35485_4042705 | NC_021163.1    | Ca_kabuli_chr04 | 4042705                 | CC                              | TT                | 1945928717               |
| SNP_P3_35486_4043451 | NC_021163.1    | Ca_kabuli_chr04 | 4043451                 | GG                              | AA                | 1945928719               |
| SNP_P3_35487_4043454 | NC_021163.1    | Ca_kabuli_chr04 | 4043454                 | GG                              | CC                | 1945928720               |
| SNP_P3_35488_4043481 | NC_021163.1    | Ca_kabuli_chr04 | 4043481                 | GG                              | AA                | 1945928722               |
| SNP_P3_35489_4043777 | NC_021163.1    | Ca_kabuli_chr04 | 4043777                 | CC                              | AA                | 1945928724               |
| SNP_P3_35490_4043808 | NC_021163.1    | Ca_kabuli_chr04 | 4043808                 | TT                              | CC                | 1945928726               |
| SNP_P3_35491_4043822 | NC_021163.1    | Ca_kabuli_chr04 | 4043822                 | TT                              | AA                | 1945928728               |
| SNP_P3_35492_4044032 | NC_021163.1    | Ca_kabuli_chr04 | 4044032                 | CC                              | TT                | 1945928729               |
| SNP_P3_35493_4044055 | NC_021163.1    | Ca_kabuli_chr04 | 4044055                 | AA                              | TT                | 1945928731               |
| SNP_P3_35496_4045385 | NC_021163.1    | Ca_kabuli_chr04 | 4045385                 | AA                              | TT                | 1945928733               |
| SNP_P3_35497_4045423 | NC_021163.1    | Ca_kabuli_chr04 | 4045423                 | AA                              | CC                | 1945928735               |
| SNP_P3_35498_4045451 | NC_021163.1    | Ca_kabuli_chr04 | 4045451                 | TT                              | CC                | 1945928736               |
| SNP_P3_35500_4046100 | NC_021163.1    | Ca_kabuli_chr04 | 4046100                 | TT                              | CC                | 1945928738               |
| SNP_P3_35501_4046338 | NC_021163.1    | Ca_kabuli_chr04 | 4046338                 | CC                              | TT                | 1945928740               |
| SNP_P3_35503_4046449 | NC_021163.1    | Ca_kabuli_chr04 | 4046449                 | CC                              | TT                | 1945928742               |
| SNP_P3_35504_4046651 | NC_021163.1    | Ca_kabuli_chr04 | 4046651                 | CC                              | TT                | 1945928743               |
| SNP_P3_35505_4048947 | NC_021163.1    | Ca_kabuli_chr04 | 4048947                 | CC                              | AA                | 1945928745               |
| SNP_P3_35507_4051415 | NC_021163.1    | Ca_kabuli_chr04 | 4051415                 | GG                              | AA                | 1945928747               |
| SNP_P3_35508_4051824 | NC_021163.1    | Ca_kabuli_chr04 | 4051824                 | TT                              | CC                | 1945928749               |
| SNP_P3_35509_4052772 | NC_021163.1    | Ca_kabuli_chr04 | 4052772                 | CC                              | AA                | 1945928751               |
| SNP_P3_35510_4052784 | NC_021163.1    | Ca_kabuli_chr04 | 4052784                 | AA                              | GG                | 1945928752               |
| SNP_P3_35511_4053029 | NC_021163.1    | Ca_kabuli_chr04 | 4053029                 | GG                              | TT                | 1945928754               |
| SNP_P3_35512_4053030 | NC_021163.1    | Ca_kabuli_chr04 | 4053030                 | TT                              | GG                | 1945928756               |
| SNP_P3_35513_4053031 | NC_021163.1    | Ca_kabuli_chr04 | 4053031                 | GG                              | AA                | 1945928758               |
| SNP_P3_35514_4053032 | NC_021163.1    | Ca_kabuli_chr04 | 4053032                 | GG                              | TT                | 1945928759               |
| SNP_P3_35515_4053033 | NC_021163.1    | Ca_kabuli_chr04 | 4053033                 | GG                              | TT                | 1945928761               |
| SNP_P3_35516_4053035 | NC_021163.1    | Ca_kabuli_chr04 | 4053035                 | CC                              | GG                | 1945928763               |



| SNPs IDs             | Chromosome IDs | Chromosomes     | Physical positions (bp) | CDC Frontier (Reference genome) | (Pusa 256 & HPNB) | NCBI SNPdb Accession IDs |
|----------------------|----------------|-----------------|-------------------------|---------------------------------|-------------------|--------------------------|
| SNP_P3_35517_4053947 | NC_021163.1    | Ca_kabuli_chr04 | 4053947                 | TT                              | CC                | 1945928765               |
| SNP_P3_35518_4054007 | NC_021163.1    | Ca_kabuli_chr04 | 4054007                 | TT                              | CC                | 1945928767               |
| SNP_P3_35519_4054841 | NC_021163.1    | Ca_kabuli_chr04 | 4054841                 | TT                              | AA                | 1945928768               |
| SNP_P3_35520_4054842 | NC_021163.1    | Ca_kabuli_chr04 | 4054842                 | GG                              | CC                | 1945928770               |
| SNP_P3_35521_4054870 | NC_021163.1    | Ca_kabuli_chr04 | 4054870                 | TT                              | CC                | 1945928772               |
| SNP_P3_35522_4054919 | NC_021163.1    | Ca_kabuli_chr04 | 4054919                 | AA                              | TT                | 1945928774               |
| SNP_P3_35524_4055027 | NC_021163.1    | Ca_kabuli_chr04 | 4055027                 | AA                              | TT                | 1945928775               |
| SNP_P3_35525_4055170 | NC_021163.1    | Ca_kabuli_chr04 | 4055170                 | GG                              | AA                | 1945928777               |
| SNP_P3_35526_4055348 | NC_021163.1    | Ca_kabuli_chr04 | 4055348                 | GG                              | AA                | 1945928779               |
| SNP_P3_35527_4055353 | NC_021163.1    | Ca_kabuli_chr04 | 4055353                 | GG                              | AA                | 1945928781               |
| SNP_P3_35528_4055544 | NC_021163.1    | Ca_kabuli_chr04 | 4055544                 | GG                              | AA                | 1945928783               |
| SNP_P3_35529_4055941 | NC_021163.1    | Ca_kabuli_chr04 | 4055941                 | AA                              | TT                | 1945928784               |
| SNP_P3_35530_4056522 | NC_021163.1    | Ca_kabuli_chr04 | 4056522                 | CC                              | TT                | 1945928786               |
| SNP_P3_35531_4059054 | NC_021163.1    | Ca_kabuli_chr04 | 4059054                 | GG                              | CC                | 1945928788               |
| SNP_P3_35532_4059132 | NC_021163.1    | Ca_kabuli_chr04 | 4059132                 | GG                              | CC                | 1945928790               |
| SNP_P3_35534_4061129 | NC_021163.1    | Ca_kabuli_chr04 | 4061129                 | GG                              | AA                | 1945928791               |
| SNP_P3_35535_4067100 | NC_021163.1    | Ca_kabuli_chr04 | 4067100                 | GG                              | AA                | 1945928793               |
| SNP_P3_35538_4068885 | NC_021163.1    | Ca_kabuli_chr04 | 4068885                 | AA                              | GG                | 1945928795               |
| SNP_P3_35539_4070551 | NC_021163.1    | Ca_kabuli_chr04 | 4070551                 | GG                              | CC                | 1945928797               |
| SNP_P3_35540_4074175 | NC_021163.1    | Ca_kabuli_chr04 | 4074175                 | GG                              | TT                | 1945928799               |
| SNP_P3_35541_4074184 | NC_021163.1    | Ca_kabuli_chr04 | 4074184                 | AA                              | TT                | 1945928800               |
| SNP_P3_35542_4076492 | NC_021163.1    | Ca_kabuli_chr04 | 4076492                 | CC                              | TT                | 1945928802               |
| SNP_P3_35543_4077910 | NC_021163.1    | Ca_kabuli_chr04 | 4077910                 | GG                              | TT                | 1945928804               |
| SNP_P3_35544_4079929 | NC_021163.1    | Ca_kabuli_chr04 | 4079929                 | TT                              | CC                | 1945928806               |
| SNP_P3_35545_4080869 | NC_021163.1    | Ca_kabuli_chr04 | 4080869                 | TT                              | GG                | 1945928807               |
| SNP_P3_35546_4081132 | NC_021163.1    | Ca_kabuli_chr04 | 4081132                 | CC                              | TT                | 1945928809               |
| SNP_P3_35547_4081152 | NC_021163.1    | Ca_kabuli_chr04 | 4081152                 | AA                              | GG                | 1945928811               |
| SNP_P3_35548_4081509 | NC_021163.1    | Ca_kabuli_chr04 | 4081509                 | CC                              | AA                | 1945928813               |
| SNP_P3_35550_4084194 | NC_021163.1    | Ca_kabuli_chr04 | 4084194                 | AA                              | TT                | 1945928815               |
| SNP_P3_35551_4084435 | NC_021163.1    | Ca_kabuli_chr04 | 4084435                 | AA                              | GG                | 1945928816               |
| SNP_P3_35552_4084501 | NC_021163.1    | Ca_kabuli_chr04 | 4084501                 | TT                              | CC                | 1945928818               |
| SNP_P3_35553_4084539 | NC_021163.1    | Ca_kabuli_chr04 | 4084539                 | GG                              | AA                | 1945928820               |
| SNP_P3_35554_4084844 | NC_021163.1    | Ca_kabuli_chr04 | 4084844                 | GG                              | TT                | 1945928822               |
| SNP_P3_35555_4084847 | NC_021163.1    | Ca_kabuli_chr04 | 4084847                 | CC                              | TT                | 1945928823               |
| SNP_P3_35556_4084885 | NC_021163.1    | Ca_kabuli_chr04 | 4084885                 | GG                              | AA                | 1945928825               |
| SNP_P3_35557_4084900 | NC_021163.1    | Ca_kabuli_chr04 | 4084900                 | CC                              | TT                | 1945928827               |
| SNP_P3_35558_4085160 | NC_021163.1    | Ca_kabuli_chr04 | 4085160                 | TT                              | AA                | 1945928829               |
| SNP_P3_35559_4085172 | NC_021163.1    | Ca_kabuli_chr04 | 4085172                 | AA                              | GG                | 1945928831               |
| SNP_P3_35560_4085362 | NC_021163.1    | Ca_kabuli_chr04 | 4085362                 | TT                              | CC                | 1945928832               |
| SNP_P3_35561_4085444 | NC_021163.1    | Ca_kabuli_chr04 | 4085444                 | AA                              | GG                | 1945928834               |
| SNP_P3_35562_4085473 | NC_021163.1    | Ca_kabuli_chr04 | 4085473                 | GG                              | AA                | 1945928836               |
| SNP_P3_35563_4085496 | NC_021163.1    | Ca_kabuli_chr04 | 4085496                 | GG                              | AA                | 1945928838               |

| SNPs IDs             | Chromosome IDs | Chromosomes     | Physical positions (bp) | CDC Frontier (Reference genome) | (Pusa 256 & HPNB) | NCBI SNPdb Accession IDs |
|----------------------|----------------|-----------------|-------------------------|---------------------------------|-------------------|--------------------------|
| SNP_P3_35564_4085502 | NC_021163.1    | Ca_kabuli_chr04 | 4085502                 | TT                              | CC                | 1945928839               |
| SNP_P3_35565_4085802 | NC_021163.1    | Ca_kabuli_chr04 | 4085802                 | CC                              | AA                | 1945928841               |
| SNP_P3_35566_4085825 | NC_021163.1    | Ca_kabuli_chr04 | 4085825                 | GG                              | CC                | 1945928843               |
| SNP_P3_35567_4086248 | NC_021163.1    | Ca_kabuli_chr04 | 4086248                 | GG                              | AA                | 1945928845               |
| SNP_P3_35569_4086566 | NC_021163.1    | Ca_kabuli_chr04 | 4086566                 | GG                              | AA                | 1945928847               |
| SNP_P3_35570_4092250 | NC_021163.1    | Ca_kabuli_chr04 | 4092250                 | CC                              | TT                | 1945928848               |
| SNP_P3_35572_4092562 | NC_021163.1    | Ca_kabuli_chr04 | 4092562                 | AA                              | CC                | 1945928850               |
| SNP_P3_35573_4093080 | NC_021163.1    | Ca_kabuli_chr04 | 4093080                 | AA                              | CC                | 1945928852               |
| SNP_P3_35574_4093101 | NC_021163.1    | Ca_kabuli_chr04 | 4093101                 | GG                              | TT                | 1945928854               |
| SNP_P3_35575_4093173 | NC_021163.1    | Ca_kabuli_chr04 | 4093173                 | CC                              | TT                | 1945928855               |
| SNP_P3_35576_4093174 | NC_021163.1    | Ca_kabuli_chr04 | 4093174                 | CC                              | TT                | 1945928857               |
| SNP_P3_35577_4093184 | NC_021163.1    | Ca_kabuli_chr04 | 4093184                 | CC                              | TT                | 1945928859               |
| SNP_P3_35579_4093533 | NC_021163.1    | Ca_kabuli_chr04 | 4093533                 | GG                              | AA                | 1945928861               |
| SNP_P3_35580_4094184 | NC_021163.1    | Ca_kabuli_chr04 | 4094184                 | CC                              | TT                | 1945928863               |
| SNP_P3_35581_4096157 | NC_021163.1    | Ca_kabuli_chr04 | 4096157                 | AA                              | GG                | 1945928864               |
| SNP_P3_35582_4096180 | NC_021163.1    | Ca_kabuli_chr04 | 4096180                 | TT                              | CC                | 1945928866               |
| SNP_P3_35583_4096801 | NC_021163.1    | Ca_kabuli_chr04 | 4096801                 | GG                              | TT                | 1945928868               |
| SNP_P3_35584_4096817 | NC_021163.1    | Ca_kabuli_chr04 | 4096817                 | AA                              | GG                | 1945928870               |
| SNP_P3_35585_4096929 | NC_021163.1    | Ca_kabuli_chr04 | 4096929                 | CC                              | GG                | 1945928871               |
| SNP_P3_35586_4097295 | NC_021163.1    | Ca_kabuli_chr04 | 4097295                 | CC                              | TT                | 1945928873               |
| SNP_P3_35587_4098977 | NC_021163.1    | Ca_kabuli_chr04 | 4098977                 | AA                              | GG                | 1945928875               |
| SNP_P3_35588_4099161 | NC_021163.1    | Ca_kabuli_chr04 | 4099161                 | GG                              | AA                | 1945928877               |
| SNP_P3_35589_4100179 | NC_021163.1    | Ca_kabuli_chr04 | 4100179                 | GG                              | CC                | 1945928878               |
| SNP_P3_35590_4100320 | NC_021163.1    | Ca_kabuli_chr04 | 4100320                 | CC                              | TT                | 1945928880               |
| SNP_P3_35591_4100322 | NC_021163.1    | Ca_kabuli_chr04 | 4100322                 | AA                              | TT                | 1945928882               |
| SNP_P3_35592_4100327 | NC_021163.1    | Ca_kabuli_chr04 | 4100327                 | GG                              | AA                | 1945928884               |
| SNP_P3_35593_4100390 | NC_021163.1    | Ca_kabuli_chr04 | 4100390                 | GG                              | AA                | 1945928886               |
| SNP_P3_35594_4100393 | NC_021163.1    | Ca_kabuli_chr04 | 4100393                 | AA                              | GG                | 1945928887               |
| SNP_P3_35595_4100395 | NC_021163.1    | Ca_kabuli_chr04 | 4100395                 | GG                              | AA                | 1945928889               |
| SNP_P3_35596_4100421 | NC_021163.1    | Ca_kabuli_chr04 | 4100421                 | GG                              | AA                | 1945928891               |
| SNP_P3_35597_4100425 | NC_021163.1    | Ca_kabuli_chr04 | 4100425                 | CC                              | GG                | 1945928893               |
| SNP_P3_35598_4100429 | NC_021163.1    | Ca_kabuli_chr04 | 4100429                 | GG                              | TT                | 1945928894               |
| SNP_P3_35599_4101295 | NC_021163.1    | Ca_kabuli_chr04 | 4101295                 | TT                              | CC                | 1945928896               |
| SNP_P3_35600_4101299 | NC_021163.1    | Ca_kabuli_chr04 | 4101299                 | CC                              | GG                | 1945928898               |
| SNP_P3_35601_4101464 | NC_021163.1    | Ca_kabuli_chr04 | 4101464                 | GG                              | AA                | 1945928900               |
| SNP_P3_35602_4101494 | NC_021163.1    | Ca_kabuli_chr04 | 4101494                 | AA                              | GG                | 1945928902               |
| SNP_P3_35603_4102216 | NC_021163.1    | Ca_kabuli_chr04 | 4102216                 | CC                              | TT                | 1945928903               |
| SNP_P3_35604_4102349 | NC_021163.1    | Ca_kabuli_chr04 | 4102349                 | AA                              | TT                | 1945928905               |
| SNP_P3_35605_4102630 | NC_021163.1    | Ca_kabuli_chr04 | 4102630                 | AA                              | CC                | 1945928907               |
| SNP_P3_35606_4102743 | NC_021163.1    | Ca_kabuli_chr04 | 4102743                 | GG                              | TT                | 1945928909               |
| SNP_P3_35607_4102744 | NC_021163.1    | Ca_kabuli_chr04 | 4102744                 | TT                              | CC                | 1945928910               |
| SNP_P3_35608_4102786 | NC_021163.1    | Ca_kabuli_chr04 | 4102786                 | GG                              | AA                | 1945928912               |

| SNPs IDs             | Chromosome IDs | Chromosomes     | Physical positions (bp) | CDC Frontier (Reference genome) | (Pusa 256 & HPNB) | NCBI SNPdb Accession IDs |
|----------------------|----------------|-----------------|-------------------------|---------------------------------|-------------------|--------------------------|
| SNP_P3_35609_4102810 | NC_021163.1    | Ca_kabuli_chr04 | 4102810                 | AA                              | GG                | 1945928914               |
| SNP_P3_35611_4104118 | NC_021163.1    | Ca_kabuli_chr04 | 4104118                 | CC                              | TT                | 1945928916               |
| SNP_P3_35612_4104182 | NC_021163.1    | Ca_kabuli_chr04 | 4104182                 | TT                              | AA                | 1945928918               |
| SNP_P3_35613_4104225 | NC_021163.1    | Ca_kabuli_chr04 | 4104225                 | TT                              | CC                | 1945928919               |
| SNP_P3_35615_4104408 | NC_021163.1    | Ca_kabuli_chr04 | 4104408                 | AA                              | GG                | 1945928921               |
| SNP_P3_35616_4104438 | NC_021163.1    | Ca_kabuli_chr04 | 4104438                 | GG                              | AA                | 1945928923               |
| SNP_P3_35617_4104467 | NC_021163.1    | Ca_kabuli_chr04 | 4104467                 | CC                              | AA                | 1945928925               |
| SNP_P3_35618_4109224 | NC_021163.1    | Ca_kabuli_chr04 | 4109224                 | TT                              | GG                | 1945928926               |
| SNP_P3_35619_4109257 | NC_021163.1    | Ca_kabuli_chr04 | 4109257                 | TT                              | AA                | 1945928928               |
| SNP_P3_35620_4111246 | NC_021163.1    | Ca_kabuli_chr04 | 4111246                 | TT                              | CC                | 1945928930               |
| SNP_P3_35621_4112958 | NC_021163.1    | Ca_kabuli_chr04 | 4112958                 | AA                              | CC                | 1945928932               |
| SNP_P3_35622_4113011 | NC_021163.1    | Ca_kabuli_chr04 | 4113011                 | CC                              | GG                | 1945928934               |
| SNP_P3_35623_4115127 | NC_021163.1    | Ca_kabuli_chr04 | 4115127                 | GG                              | CC                | 1945928935               |
| SNP_P3_35625_4116031 | NC_021163.1    | Ca_kabuli_chr04 | 4116031                 | AA                              | TT                | 1945928937               |
| SNP_P3_35627_4118258 | NC_021163.1    | Ca_kabuli_chr04 | 4118258                 | AA                              | GG                | 1945928939               |
| SNP_P3_35628_4118267 | NC_021163.1    | Ca_kabuli_chr04 | 4118267                 | AA                              | TT                | 1945928941               |
| SNP_P3_35630_4118605 | NC_021163.1    | Ca_kabuli_chr04 | 4118605                 | GG                              | AA                | 1945928942               |
| SNP_P3_35632_4121232 | NC_021163.1    | Ca_kabuli_chr04 | 4121232                 | CC                              | GG                | 1945928944               |
| SNP_P3_35633_4122026 | NC_021163.1    | Ca_kabuli_chr04 | 4122026                 | CC                              | TT                | 1945928946               |
| SNP_P3_35634_4122032 | NC_021163.1    | Ca_kabuli_chr04 | 4122032                 | GG                              | TT                | 1945928948               |
| SNP_P3_35635_4122282 | NC_021163.1    | Ca_kabuli_chr04 | 4122282                 | GG                              | CC                | 1945928950               |
| SNP_P3_35636_4123662 | NC_021163.1    | Ca_kabuli_chr04 | 4123662                 | GG                              | AA                | 1945928951               |
| SNP_P3_35637_4123698 | NC_021163.1    | Ca_kabuli_chr04 | 4123698                 | CC                              | AA                | 1945928953               |
| SNP_P3_35638_4123704 | NC_021163.1    | Ca_kabuli_chr04 | 4123704                 | GG                              | TT                | 1945928955               |
| SNP_P3_35639_4123867 | NC_021163.1    | Ca_kabuli_chr04 | 4123867                 | AA                              | GG                | 1945928957               |
| SNP_P3_35640_4123931 | NC_021163.1    | Ca_kabuli_chr04 | 4123931                 | AA                              | TT                | 1945928958               |
| SNP_P3_35641_4124631 | NC_021163.1    | Ca_kabuli_chr04 | 4124631                 | AA                              | TT                | 1945928960               |
| SNP_P3_35642_4124632 | NC_021163.1    | Ca_kabuli_chr04 | 4124632                 | AA                              | TT                | 1945928962               |
| SNP_P3_35643_4124634 | NC_021163.1    | Ca_kabuli_chr04 | 4124634                 | AA                              | TT                | 1945928964               |
| SNP_P3_35644_4124885 | NC_021163.1    | Ca_kabuli_chr04 | 4124885                 | TT                              | CC                | 1945928966               |
| SNP_P3_35645_4124956 | NC_021163.1    | Ca_kabuli_chr04 | 4124956                 | AA                              | GG                | 1945928967               |
| SNP_P3_35646_4125210 | NC_021163.1    | Ca_kabuli_chr04 | 4125210                 | CC                              | AA                | 1945928969               |
| SNP_P3_35647_4125402 | NC_021163.1    | Ca_kabuli_chr04 | 4125402                 | TT                              | AA                | 1945928971               |
| SNP_P3_35648_4125407 | NC_021163.1    | Ca_kabuli_chr04 | 4125407                 | CC                              | GG                | 1945928973               |
| SNP_P3_35649_4125431 | NC_021163.1    | Ca_kabuli_chr04 | 4125431                 | AA                              | GG                | 1945928974               |
| SNP_P3_35650_4125468 | NC_021163.1    | Ca_kabuli_chr04 | 4125468                 | AA                              | GG                | 1945928976               |
| SNP_P3_35651_4125766 | NC_021163.1    | Ca_kabuli_chr04 | 4125766                 | GG                              | AA                | 1945928978               |
| SNP_P3_35652_4125767 | NC_021163.1    | Ca_kabuli_chr04 | 4125767                 | GG                              | TT                | 1945928980               |
| SNP_P3_35653_4125769 | NC_021163.1    | Ca_kabuli_chr04 | 4125769                 | AA                              | CC                | 1945928982               |
| SNP_P3_35655_4126402 | NC_021163.1    | Ca_kabuli_chr04 | 4126402                 | AA                              | GG                | 1945928983               |
| SNP_P3_35656_4126410 | NC_021163.1    | Ca_kabuli_chr04 | 4126410                 | TT                              | GG                | 1945928985               |
| SNP_P3_35657_4126578 | NC_021163.1    | Ca_kabuli_chr04 | 4126578                 | GG                              | AA                | 1945928987               |

| SNPs IDs             | Chromosome IDs | Chromosomes     | Physical positions (bp) | CDC Frontier (Reference genome) | (Pusa 256 & HPNB) | NCBI SNPdb Accession IDs |
|----------------------|----------------|-----------------|-------------------------|---------------------------------|-------------------|--------------------------|
| SNP_P3_35658_4128205 | NC_021163.1    | Ca_kabuli_chr04 | 4128205                 | GG                              | AA                | 1945928989               |
| SNP_P3_35659_4128440 | NC_021163.1    | Ca_kabuli_chr04 | 4128440                 | AA                              | TT                | 1945928990               |
| SNP_P3_35660_4129046 | NC_021163.1    | Ca_kabuli_chr04 | 4129046                 | TT                              | CC                | 1945928992               |
| SNP_P3_35661_4129597 | NC_021163.1    | Ca_kabuli_chr04 | 4129597                 | AA                              | GG                | 1945928994               |
| SNP_P3_35663_4129623 | NC_021163.1    | Ca_kabuli_chr04 | 4129623                 | CC                              | TT                | 1945928996               |
| SNP_P3_35664_4130585 | NC_021163.1    | Ca_kabuli_chr04 | 4130585                 | CC                              | TT                | 1945928998               |
| SNP_P3_35666_4132051 | NC_021163.1    | Ca_kabuli_chr04 | 4132051                 | GG                              | AA                | 1945928999               |
| SNP_P3_35667_4132063 | NC_021163.1    | Ca_kabuli_chr04 | 4132063                 | TT                              | AA                | 1945929001               |
| SNP_P3_35668_4132083 | NC_021163.1    | Ca_kabuli_chr04 | 4132083                 | CC                              | TT                | 1945929003               |
| SNP_P3_35669_4132123 | NC_021163.1    | Ca_kabuli_chr04 | 4132123                 | TT                              | CC                | 1945929005               |
| SNP_P3_35670_4132311 | NC_021163.1    | Ca_kabuli_chr04 | 4132311                 | TT                              | GG                | 1945929006               |
| SNP_P3_35672_4134773 | NC_021163.1    | Ca_kabuli_chr04 | 4134773                 | TT                              | CC                | 1945929008               |
| SNP_P3_35673_4136403 | NC_021163.1    | Ca_kabuli_chr04 | 4136403                 | CC                              | TT                | 1945929010               |
| SNP_P3_35674_4136569 | NC_021163.1    | Ca_kabuli_chr04 | 4136569                 | AA                              | GG                | 1945929012               |
| SNP_P3_35675_4136579 | NC_021163.1    | Ca_kabuli_chr04 | 4136579                 | CC                              | TT                | 1945929014               |
| SNP_P3_35677_4136649 | NC_021163.1    | Ca_kabuli_chr04 | 4136649                 | AA                              | GG                | 1945929015               |
| SNP_P3_35678_4136651 | NC_021163.1    | Ca_kabuli_chr04 | 4136651                 | CC                              | TT                | 1945929017               |
| SNP_P3_35679_4136897 | NC_021163.1    | Ca_kabuli_chr04 | 4136897                 | GG                              | TT                | 1945929019               |
| SNP_P3_35680_4136906 | NC_021163.1    | Ca_kabuli_chr04 | 4136906                 | AA                              | GG                | 1945929021               |
| SNP_P3_35681_4137035 | NC_021163.1    | Ca_kabuli_chr04 | 4137035                 | GG                              | AA                | 1945929022               |
| SNP_P3_35682_4137079 | NC_021163.1    | Ca_kabuli_chr04 | 4137079                 | AA                              | GG                | 1945929024               |
| SNP_P3_35683_4137253 | NC_021163.1    | Ca_kabuli_chr04 | 4137253                 | TT                              | CC                | 1945929026               |
| SNP_P3_35684_4137301 | NC_021163.1    | Ca_kabuli_chr04 | 4137301                 | CC                              | TT                | 1945929028               |
| SNP_P3_35685_4137302 | NC_021163.1    | Ca_kabuli_chr04 | 4137302                 | TT                              | CC                | 1945929030               |
| SNP_P3_35686_4137311 | NC_021163.1    | Ca_kabuli_chr04 | 4137311                 | AA                              | GG                | 1945929031               |
| SNP_P3_35687_4137373 | NC_021163.1    | Ca_kabuli_chr04 | 4137373                 | GG                              | AA                | 1945929033               |
| SNP_P3_35688_4139984 | NC_021163.1    | Ca_kabuli_chr04 | 4139984                 | TT                              | GG                | 1945929035               |
| SNP_P3_35689_4139986 | NC_021163.1    | Ca_kabuli_chr04 | 4139986                 | TT                              | CC                | 1945929037               |
| SNP_P3_35691_4144367 | NC_021163.1    | Ca_kabuli_chr04 | 4144367                 | AA                              | GG                | 1945929038               |
| SNP_P3_35692_4144370 | NC_021163.1    | Ca_kabuli_chr04 | 4144370                 | AA                              | GG                | 1945929040               |
| SNP_P3_35693_4146832 | NC_021163.1    | Ca_kabuli_chr04 | 4146832                 | AA                              | GG                | 1945929042               |
| SNP_P3_35694_4147215 | NC_021163.1    | Ca_kabuli_chr04 | 4147215                 | GG                              | AA                | 1945929044               |
| SNP_P3_35696_4150051 | NC_021163.1    | Ca_kabuli_chr04 | 4150051                 | GG                              | AA                | 1945929045               |
| SNP_P3_35697_4150155 | NC_021163.1    | Ca_kabuli_chr04 | 4150155                 | GG                              | AA                | 1945929047               |
| SNP_P3_35699_4154295 | NC_021163.1    | Ca_kabuli_chr04 | 4154295                 | GG                              | TT                | 1945929049               |
| SNP_P3_35700_4154507 | NC_021163.1    | Ca_kabuli_chr04 | 4154507                 | GG                              | TT                | 1945929051               |
| SNP_P3_35703_4157905 | NC_021163.1    | Ca_kabuli_chr04 | 4157905                 | CC                              | AA                | 1945929053               |
| SNP_P3_35704_4157907 | NC_021163.1    | Ca_kabuli_chr04 | 4157907                 | CC                              | TT                | 1945929054               |
| SNP_P3_35705_4159709 | NC_021163.1    | Ca_kabuli_chr04 | 4159709                 | CC                              | TT                | 1945929056               |
| SNP_P3_35708_4162273 | NC_021163.1    | Ca_kabuli_chr04 | 4162273                 | GG                              | AA                | 1945929058               |
| SNP_P3_35709_4162616 | NC_021163.1    | Ca_kabuli_chr04 | 4162616                 | CC                              | TT                | 1945929060               |
| SNP_P3_35710_4162638 | NC_021163.1    | Ca_kabuli_chr04 | 4162638                 | AA                              | TT                | 1945929061               |

| SNPs IDs             | Chromosome IDs | Chromosomes     | Physical positions (bp) | CDC Frontier (Reference genome) | (Pusa 256 & HPNB) | NCBI SNPdb Accession IDs |
|----------------------|----------------|-----------------|-------------------------|---------------------------------|-------------------|--------------------------|
| SNP_P3_35712_4165676 | NC_021163.1    | Ca_kabuli_chr04 | 4165676                 | GG                              | AA                | 1945929063               |
| SNP_P3_35713_4165947 | NC_021163.1    | Ca_kabuli_chr04 | 4165947                 | AA                              | GG                | 1945929065               |
| SNP_P3_35714_4165963 | NC_021163.1    | Ca_kabuli_chr04 | 4165963                 | CC                              | TT                | 1945929067               |
| SNP_P3_35715_4167704 | NC_021163.1    | Ca_kabuli_chr04 | 4167704                 | CC                              | AA                | 1945929069               |
| SNP_P3_35716_4168348 | NC_021163.1    | Ca_kabuli_chr04 | 4168348                 | CC                              | GG                | 1945929070               |
| SNP_P3_35717_4168689 | NC_021163.1    | Ca_kabuli_chr04 | 4168689                 | GG                              | CC                | 1945929072               |
| SNP_P3_35718_4168921 | NC_021163.1    | Ca_kabuli_chr04 | 4168921                 | TT                              | CC                | 1945929074               |
| SNP_P3_35719_4169378 | NC_021163.1    | Ca_kabuli_chr04 | 4169378                 | CC                              | TT                | 1945929076               |
| SNP_P3_35720_4170247 | NC_021163.1    | Ca_kabuli_chr04 | 4170247                 | AA                              | TT                | 1945929077               |
| SNP_P3_35721_4170277 | NC_021163.1    | Ca_kabuli_chr04 | 4170277                 | TT                              | AA                | 1945929079               |
| SNP_P3_35723_4172108 | NC_021163.1    | Ca_kabuli_chr04 | 4172108                 | CC                              | TT                | 1945929081               |
| SNP_P3_35724_4172901 | NC_021163.1    | Ca_kabuli_chr04 | 4172901                 | TT                              | AA                | 1945929083               |
| SNP_P3_35726_4173086 | NC_021163.1    | Ca_kabuli_chr04 | 4173086                 | GG                              | CC                | 1945929085               |
| SNP_P3_35728_4173468 | NC_021163.1    | Ca_kabuli_chr04 | 4173468                 | GG                              | CC                | 1945929086               |
| SNP_P3_35729_4173503 | NC_021163.1    | Ca_kabuli_chr04 | 4173503                 | CC                              | GG                | 1945929088               |
| SNP_P3_35731_4173941 | NC_021163.1    | Ca_kabuli_chr04 | 4173941                 | GG                              | AA                | 1945929090               |
| SNP_P3_35732_4174091 | NC_021163.1    | Ca_kabuli_chr04 | 4174091                 | AA                              | CC                | 1945929092               |
| SNP_P3_35733_4174115 | NC_021163.1    | Ca_kabuli_chr04 | 4174115                 | AA                              | GG                | 1945929093               |
| SNP_P3_35734_4174235 | NC_021163.1    | Ca_kabuli_chr04 | 4174235                 | CC                              | AA                | 1945929095               |
| SNP_P3_35736_4174413 | NC_021163.1    | Ca_kabuli_chr04 | 4174413                 | AA                              | TT                | 1945929097               |
| SNP_P3_35737_4174425 | NC_021163.1    | Ca_kabuli_chr04 | 4174425                 | TT                              | AA                | 1945929099               |
| SNP_P3_35738_4174427 | NC_021163.1    | Ca_kabuli_chr04 | 4174427                 | AA                              | TT                | 1945929101               |
| SNP_P3_35740_4174894 | NC_021163.1    | Ca_kabuli_chr04 | 4174894                 | CC                              | TT                | 1945929102               |
| SNP_P3_35741_4175690 | NC_021163.1    | Ca_kabuli_chr04 | 4175690                 | AA                              | TT                | 1945929104               |
| SNP_P3_35742_4175906 | NC_021163.1    | Ca_kabuli_chr04 | 4175906                 | TT                              | CC                | 1945929106               |
| SNP_P3_35743_4175915 | NC_021163.1    | Ca_kabuli_chr04 | 4175915                 | GG                              | AA                | 1945929108               |
| SNP_P3_35744_4175922 | NC_021163.1    | Ca_kabuli_chr04 | 4175922                 | CC                              | TT                | 1945929109               |
| SNP_P3_35745_4175968 | NC_021163.1    | Ca_kabuli_chr04 | 4175968                 | TT                              | CC                | 1945929111               |
| SNP_P3_35746_4175997 | NC_021163.1    | Ca_kabuli_chr04 | 4175997                 | CC                              | TT                | 1945929113               |
| SNP_P3_35747_4176149 | NC_021163.1    | Ca_kabuli_chr04 | 4176149                 | AA                              | GG                | 1945929115               |
| SNP_P3_35748_4176150 | NC_021163.1    | Ca_kabuli_chr04 | 4176150                 | TT                              | AA                | 1945929117               |
| SNP_P3_35750_4176688 | NC_021163.1    | Ca_kabuli_chr04 | 4176688                 | TT                              | CC                | 1945929118               |
| SNP_P3_35751_4176708 | NC_021163.1    | Ca_kabuli_chr04 | 4176708                 | GG                              | AA                | 1945929120               |
| SNP_P3_35752_4176709 | NC_021163.1    | Ca_kabuli_chr04 | 4176709                 | AA                              | GG                | 1945929122               |
| SNP_P3_35754_4179627 | NC_021163.1    | Ca_kabuli_chr04 | 4179627                 | CC                              | TT                | 1945929124               |
| SNP_P3_35755_4179665 | NC_021163.1    | Ca_kabuli_chr04 | 4179665                 | GG                              | TT                | 1945929125               |
| SNP_P3_35756_4179672 | NC_021163.1    | Ca_kabuli_chr04 | 4179672                 | CC                              | TT                | 1945929127               |
| SNP_P3_35757_4179961 | NC_021163.1    | Ca_kabuli_chr04 | 4179961                 | AA                              | GG                | 1945929129               |
| SNP_P3_35758_4179992 | NC_021163.1    | Ca_kabuli_chr04 | 4179992                 | AA                              | CC                | 1945929131               |
| SNP_P3_35759_4187365 | NC_021163.1    | Ca_kabuli_chr04 | 4187365                 | CC                              | TT                | 1945929133               |
| SNP_P3_35760_4187738 | NC_021163.1    | Ca_kabuli_chr04 | 4187738                 | TT                              | GG                | 1945929134               |
| SNP_P3_35761_4187791 | NC_021163.1    | Ca_kabuli_chr04 | 4187791                 | AA                              | GG                | 1945929136               |

| SNPs IDs             | Chromosome IDs | Chromosomes     | Physical positions (bp) | CDC Frontier (Reference genome) | (Pusa 256 & HPNB) | NCBI SNPdb Accession IDs |
|----------------------|----------------|-----------------|-------------------------|---------------------------------|-------------------|--------------------------|
| SNP_P3_35762_4187795 | NC_021163.1    | Ca_kabuli_chr04 | 4187795                 | TT                              | CC                | 1945929138               |
| SNP_P3_35763_4187798 | NC_021163.1    | Ca_kabuli_chr04 | 4187798                 | AA                              | TT                | 1945929140               |
| SNP_P3_35764_4187838 | NC_021163.1    | Ca_kabuli_chr04 | 4187838                 | TT                              | GG                | 1945929141               |
| SNP_P3_35765_4188432 | NC_021163.1    | Ca_kabuli_chr04 | 4188432                 | CC                              | AA                | 1945929143               |
| SNP_P3_35766_4189386 | NC_021163.1    | Ca_kabuli_chr04 | 4189386                 | CC                              | TT                | 1945929145               |
| SNP_P3_35767_4189623 | NC_021163.1    | Ca_kabuli_chr04 | 4189623                 | TT                              | CC                | 1945929147               |
| SNP_P3_35768_4189628 | NC_021163.1    | Ca_kabuli_chr04 | 4189628                 | GG                              | TT                | 1945929149               |
| SNP_P3_35769_4191493 | NC_021163.1    | Ca_kabuli_chr04 | 4191493                 | CC                              | TT                | 1945929150               |
| SNP_P3_35770_4191533 | NC_021163.1    | Ca_kabuli_chr04 | 4191533                 | TT                              | GG                | 1945929152               |
| SNP_P3_35772_4194562 | NC_021163.1    | Ca_kabuli_chr04 | 4194562                 | GG                              | CC                | 1945929154               |
| SNP_P3_35773_4194647 | NC_021163.1    | Ca_kabuli_chr04 | 4194647                 | CC                              | GG                | 1945929156               |
| SNP_P3_35774_4196237 | NC_021163.1    | Ca_kabuli_chr04 | 4196237                 | CC                              | TT                | 1945929157               |
| SNP_P3_35777_4196611 | NC_021163.1    | Ca_kabuli_chr04 | 4196611                 | AA                              | CC                | 1945929159               |
| SNP_P3_35778_4197146 | NC_021163.1    | Ca_kabuli_chr04 | 4197146                 | AA                              | TT                | 1945929161               |
| SNP_P3_35779_4197482 | NC_021163.1    | Ca_kabuli_chr04 | 4197482                 | CC                              | TT                | 1945929163               |
| SNP_P3_35780_4199531 | NC_021163.1    | Ca_kabuli_chr04 | 4199531                 | AA                              | GG                | 1945929165               |
| SNP_P3_35781_4202519 | NC_021163.1    | Ca_kabuli_chr04 | 4202519                 | CC                              | TT                | 1945929166               |
| SNP_P3_35783_4241674 | NC_021163.1    | Ca_kabuli_chr04 | 4241674                 | TT                              | GG                | 1945929168               |
| SNP_P3_35784_4241908 | NC_021163.1    | Ca_kabuli_chr04 | 4241908                 | GG                              | AA                | 1945929170               |
| SNP_P3_35789_4283781 | NC_021163.1    | Ca_kabuli_chr04 | 4283781                 | AA                              | GG                | 1945929172               |
| SNP_P3_35790_4299200 | NC_021163.1    | Ca_kabuli_chr04 | 4299200                 | AA                              | GG                | 1945929173               |
| SNP_P3_35791_4301884 | NC_021163.1    | Ca_kabuli_chr04 | 4301884                 | TT                              | CC                | 1945929175               |
| SNP_P3_35792_4312360 | NC_021163.1    | Ca_kabuli_chr04 | 4312360                 | TT                              | GG                | 1945929177               |
| SNP_P3_35793_4316549 | NC_021163.1    | Ca_kabuli_chr04 | 4316549                 | TT                              | CC                | 1945929179               |
| SNP_P3_35795_4371519 | NC_021163.1    | Ca_kabuli_chr04 | 4371519                 | CC                              | TT                | 1945929181               |
| SNP_P3_35796_4371579 | NC_021163.1    | Ca_kabuli_chr04 | 4371579                 | TT                              | AA                | 1945929182               |
| SNP_P3_35798_4380074 | NC_021163.1    | Ca_kabuli_chr04 | 4380074                 | AA                              | GG                | 1945929184               |
| SNP_P3_35799_4380203 | NC_021163.1    | Ca_kabuli_chr04 | 4380203                 | CC                              | TT                | 1945929186               |
| SNP_P3_35800_4383138 | NC_021163.1    | Ca_kabuli_chr04 | 4383138                 | AA                              | GG                | 1945929188               |
| SNP_P3_35801_4383266 | NC_021163.1    | Ca_kabuli_chr04 | 4383266                 | AA                              | GG                | 1945929189               |
| SNP_P3_35802_4383288 | NC_021163.1    | Ca_kabuli_chr04 | 4383288                 | AA                              | GG                | 1945929191               |
| SNP_P3_35803_4383330 | NC_021163.1    | Ca_kabuli_chr04 | 4383330                 | GG                              | AA                | 1945929193               |
| SNP_P3_35804_4383621 | NC_021163.1    | Ca_kabuli_chr04 | 4383621                 | GG                              | AA                | 1945929195               |
| SNP_P3_35805_4383826 | NC_021163.1    | Ca_kabuli_chr04 | 4383826                 | CC                              | AA                | 1945929197               |
| SNP_P3_35806_4383880 | NC_021163.1    | Ca_kabuli_chr04 | 4383880                 | GG                              | AA                | 1945929198               |
| SNP_P3_35807_4390633 | NC_021163.1    | Ca_kabuli_chr04 | 4390633                 | GG                              | AA                | 1945929200               |
| SNP_P3_35808_4399287 | NC_021163.1    | Ca_kabuli_chr04 | 4399287                 | GG                              | TT                | 1945929202               |
| SNP_P3_35811_4409547 | NC_021163.1    | Ca_kabuli_chr04 | 4409547                 | GG                              | AA                | 1945929204               |
| SNP_P3_35812_4422462 | NC_021163.1    | Ca_kabuli_chr04 | 4422462                 | GG                              | AA                | 1945929205               |
| SNP_P3_35813_4429522 | NC_021163.1    | Ca_kabuli_chr04 | 4429522                 | TT                              | CC                | 1945929207               |
| SNP_P3_35814_4432420 | NC_021163.1    | Ca_kabuli_chr04 | 4432420                 | AA                              | TT                | 1945929209               |
| SNP_P3_35815_4432421 | NC_021163.1    | Ca_kabuli_chr04 | 4432421                 | AA                              | GG                | 1945929211               |

| SNPs IDs             | Chromosome IDs | Chromosomes     | Physical positions (bp) | CDC Frontier (Reference genome) | (Pusa 256 & HPNB) | NCBI SNPdb Accession IDs |
|----------------------|----------------|-----------------|-------------------------|---------------------------------|-------------------|--------------------------|
| SNP_P3_35816_4432617 | NC_021163.1    | Ca_kabuli_chr04 | 4432617                 | GG                              | CC                | 1945929213               |
| SNP_P3_35817_4447139 | NC_021163.1    | Ca_kabuli_chr04 | 4447139                 | TT                              | CC                | 1945929214               |
| SNP_P3_35819_4450113 | NC_021163.1    | Ca_kabuli_chr04 | 4450113                 | TT                              | AA                | 1945929216               |
| SNP_P3_35820_4450400 | NC_021163.1    | Ca_kabuli_chr04 | 4450400                 | TT                              | CC                | 1945929218               |
| SNP_P3_35821_4451247 | NC_021163.1    | Ca_kabuli_chr04 | 4451247                 | AA                              | GG                | 1945929220               |
| SNP_P3_35822_4454142 | NC_021163.1    | Ca_kabuli_chr04 | 4454142                 | CC                              | TT                | 1945929221               |
| SNP_P3_35824_4461238 | NC_021163.1    | Ca_kabuli_chr04 | 4461238                 | AA                              | GG                | 1945929223               |
| SNP_P3_35825_4461483 | NC_021163.1    | Ca_kabuli_chr04 | 4461483                 | CC                              | GG                | 1945929225               |
| SNP_P3_35826_4463110 | NC_021163.1    | Ca_kabuli_chr04 | 4463110                 | GG                              | AA                | 1945929227               |
| SNP_P3_35827_4463840 | NC_021163.1    | Ca_kabuli_chr04 | 4463840                 | GG                              | AA                | 1945929228               |
| SNP_P3_35828_4463893 | NC_021163.1    | Ca_kabuli_chr04 | 4463893                 | TT                              | AA                | 1945929230               |
| SNP_P3_35829_4463894 | NC_021163.1    | Ca_kabuli_chr04 | 4463894                 | TT                              | AA                | 1945929232               |
| SNP_P3_35830_4464047 | NC_021163.1    | Ca_kabuli_chr04 | 4464047                 | AA                              | GG                | 1945929234               |
| SNP_P3_35831_4464070 | NC_021163.1    | Ca_kabuli_chr04 | 4464070                 | TT                              | AA                | 1945929236               |
| SNP_P3_35832_4464122 | NC_021163.1    | Ca_kabuli_chr04 | 4464122                 | AA                              | GG                | 1945929237               |
| SNP_P3_35833_4465225 | NC_021163.1    | Ca_kabuli_chr04 | 4465225                 | AA                              | TT                | 1945929239               |
| SNP_P3_35834_4465282 | NC_021163.1    | Ca_kabuli_chr04 | 4465282                 | AA                              | GG                | 1945929241               |
| SNP_P3_35835_4465288 | NC_021163.1    | Ca_kabuli_chr04 | 4465288                 | CC                              | TT                | 1945929243               |
| SNP_P3_35836_4466411 | NC_021163.1    | Ca_kabuli_chr04 | 4466411                 | CC                              | TT                | 1945929244               |
| SNP_P3_35837_4468394 | NC_021163.1    | Ca_kabuli_chr04 | 4468394                 | CC                              | TT                | 1945929246               |
| SNP_P3_35838_4468826 | NC_021163.1    | Ca_kabuli_chr04 | 4468826                 | AA                              | GG                | 1945929248               |
| SNP_P3_35839_4468861 | NC_021163.1    | Ca_kabuli_chr04 | 4468861                 | CC                              | AA                | 1945929250               |
| SNP_P3_35841_4471565 | NC_021163.1    | Ca_kabuli_chr04 | 4471565                 | AA                              | GG                | 1945929252               |
| SNP_P3_35843_4477415 | NC_021163.1    | Ca_kabuli_chr04 | 4477415                 | GG                              | AA                | 1945929253               |
| SNP_P3_35845_4480252 | NC_021163.1    | Ca_kabuli_chr04 | 4480252                 | TT                              | AA                | 1945929255               |
| SNP_P3_35846_4480267 | NC_021163.1    | Ca_kabuli_chr04 | 4480267                 | AA                              | GG                | 1945929257               |
| SNP_P3_35848_4480394 | NC_021163.1    | Ca_kabuli_chr04 | 4480394                 | GG                              | TT                | 1945929259               |
| SNP_P3_35849_4481170 | NC_021163.1    | Ca_kabuli_chr04 | 4481170                 | TT                              | AA                | 1945929260               |
| SNP_P3_35851_4481736 | NC_021163.1    | Ca_kabuli_chr04 | 4481736                 | CC                              | TT                | 1945929262               |
| SNP_P3_35852_4481759 | NC_021163.1    | Ca_kabuli_chr04 | 4481759                 | GG                              | TT                | 1945929264               |
| SNP_P3_35853_4481995 | NC_021163.1    | Ca_kabuli_chr04 | 4481995                 | TT                              | GG                | 1945929266               |
| SNP_P3_35855_4482952 | NC_021163.1    | Ca_kabuli_chr04 | 4482952                 | CC                              | AA                | 1945929268               |
| SNP_P3_35856_4483070 | NC_021163.1    | Ca_kabuli_chr04 | 4483070                 | TT                              | CC                | 1945929269               |
| SNP_P3_35857_4483071 | NC_021163.1    | Ca_kabuli_chr04 | 4483071                 | GG                              | TT                | 1945929271               |
| SNP_P3_35858_4483075 | NC_021163.1    | Ca_kabuli_chr04 | 4483075                 | AA                              | TT                | 1945929273               |
| SNP_P3_35859_4484356 | NC_021163.1    | Ca_kabuli_chr04 | 4484356                 | GG                              | AA                | 1945929275               |
| SNP_P3_35862_4487474 | NC_021163.1    | Ca_kabuli_chr04 | 4487474                 | TT                              | AA                | 1945929276               |
| SNP_P3_35863_4488203 | NC_021163.1    | Ca_kabuli_chr04 | 4488203                 | AA                              | TT                | 1945929278               |
| SNP_P3_35865_4491183 | NC_021163.1    | Ca_kabuli_chr04 | 4491183                 | GG                              | AA                | 1945929280               |
| SNP_P3_35866_4491409 | NC_021163.1    | Ca_kabuli_chr04 | 4491409                 | GG                              | TT                | 1945929282               |
| SNP_P3_35867_4498190 | NC_021163.1    | Ca_kabuli_chr04 | 4498190                 | CC                              | TT                | 1945929283               |
| SNP_P3_35868_4498199 | NC_021163.1    | Ca_kabuli_chr04 | 4498199                 | GG                              | AA                | 1945929285               |

| SNPs IDs             | Chromosome IDs | Chromosomes     | Physical positions (bp) | CDC Frontier (Reference genome) | (Pusa 256 & HPNB) | NCBI SNPdb Accession IDs |
|----------------------|----------------|-----------------|-------------------------|---------------------------------|-------------------|--------------------------|
| SNP_P3_35869_4499561 | NC_021163.1    | Ca_kabuli_chr04 | 4499561                 | TT                              | AA                | 1945929287               |
| SNP_P3_35870_4499589 | NC_021163.1    | Ca_kabuli_chr04 | 4499589                 | AA                              | CC                | 1945929289               |
| SNP_P3_35872_4499929 | NC_021163.1    | Ca_kabuli_chr04 | 4499929                 | TT                              | CC                | 1945929291               |
| SNP_P3_35873_4500456 | NC_021163.1    | Ca_kabuli_chr04 | 4500456                 | GG                              | AA                | 1945929292               |
| SNP_P3_35874_4500469 | NC_021163.1    | Ca_kabuli_chr04 | 4500469                 | TT                              | GG                | 1945929294               |
| SNP_P3_35875_4500486 | NC_021163.1    | Ca_kabuli_chr04 | 4500486                 | CC                              | TT                | 1945929296               |
| SNP_P3_35876_4500513 | NC_021163.1    | Ca_kabuli_chr04 | 4500513                 | TT                              | CC                | 1945929298               |
| SNP_P3_35877_4500536 | NC_021163.1    | Ca_kabuli_chr04 | 4500536                 | CC                              | TT                | 1945929299               |
| SNP_P3_35878_4500541 | NC_021163.1    | Ca_kabuli_chr04 | 4500541                 | CC                              | GG                | 1945929301               |
| SNP_P3_35879_4501445 | NC_021163.1    | Ca_kabuli_chr04 | 4501445                 | GG                              | TT                | 1945929303               |
| SNP_P3_35880_4501839 | NC_021163.1    | Ca_kabuli_chr04 | 4501839                 | TT                              | GG                | 1945929305               |
| SNP_P3_35881_4503891 | NC_021163.1    | Ca_kabuli_chr04 | 4503891                 | TT                              | CC                | 1945929306               |
| SNP_P3_35882_4506399 | NC_021163.1    | Ca_kabuli_chr04 | 4506399                 | CC                              | TT                | 1945929308               |
| SNP_P3_35883_4506437 | NC_021163.1    | Ca_kabuli_chr04 | 4506437                 | GG                              | AA                | 1945929310               |
| SNP_P3_35884_4506443 | NC_021163.1    | Ca_kabuli_chr04 | 4506443                 | CC                              | AA                | 1945929312               |
| SNP_P3_35885_4506444 | NC_021163.1    | Ca_kabuli_chr04 | 4506444                 | AA                              | GG                | 1945929314               |
| SNP_P3_35886_4506674 | NC_021163.1    | Ca_kabuli_chr04 | 4506674                 | CC                              | GG                | 1945929315               |
| SNP_P3_35887_4506698 | NC_021163.1    | Ca_kabuli_chr04 | 4506698                 | CC                              | AA                | 1945929317               |
| SNP_P3_35888_4506746 | NC_021163.1    | Ca_kabuli_chr04 | 4506746                 | AA                              | TT                | 1945929319               |
| SNP_P3_35889_4506780 | NC_021163.1    | Ca_kabuli_chr04 | 4506780                 | TT                              | CC                | 1945929321               |
| SNP_P3_35893_4507759 | NC_021163.1    | Ca_kabuli_chr04 | 4507759                 | TT                              | CC                | 1945929322               |
| SNP_P3_35894_4508056 | NC_021163.1    | Ca_kabuli_chr04 | 4508056                 | TT                              | CC                | 1945929324               |
| SNP_P3_35895_4508075 | NC_021163.1    | Ca_kabuli_chr04 | 4508075                 | CC                              | GG                | 1945929326               |
| SNP_P3_35896_4508094 | NC_021163.1    | Ca_kabuli_chr04 | 4508094                 | CC                              | TT                | 1945929328               |
| SNP_P3_35897_4508185 | NC_021163.1    | Ca_kabuli_chr04 | 4508185                 | CC                              | TT                | 1945929329               |
| SNP_P3_35898_4510827 | NC_021163.1    | Ca_kabuli_chr04 | 4510827                 | AA                              | GG                | 1945929331               |
| SNP_P3_35899_4516766 | NC_021163.1    | Ca_kabuli_chr04 | 4516766                 | AA                              | GG                | 1945929333               |
| SNP_P3_35900_4516777 | NC_021163.1    | Ca_kabuli_chr04 | 4516777                 | AA                              | GG                | 1945929335               |
| SNP_P3_35901_4516781 | NC_021163.1    | Ca_kabuli_chr04 | 4516781                 | AA                              | GG                | 1945929337               |
| SNP_P3_35902_4516796 | NC_021163.1    | Ca_kabuli_chr04 | 4516796                 | TT                              | CC                | 1945929338               |
| SNP_P3_35903_4516797 | NC_021163.1    | Ca_kabuli_chr04 | 4516797                 | CC                              | AA                | 1945929340               |
| SNP_P3_35904_4516801 | NC_021163.1    | Ca_kabuli_chr04 | 4516801                 | GG                              | AA                | 1945929342               |
| SNP_P3_35905_4516813 | NC_021163.1    | Ca_kabuli_chr04 | 4516813                 | GG                              | TT                | 1945929344               |
| SNP_P3_35906_4516850 | NC_021163.1    | Ca_kabuli_chr04 | 4516850                 | TT                              | CC                | 1945929345               |
| SNP_P3_35913_4521130 | NC_021163.1    | Ca_kabuli_chr04 | 4521130                 | CC                              | TT                | 1945929347               |
| SNP_P3_35914_4521700 | NC_021163.1    | Ca_kabuli_chr04 | 4521700                 | CC                              | TT                | 1945929349               |
| SNP_P3_35916_4522418 | NC_021163.1    | Ca_kabuli_chr04 | 4522418                 | GG                              | AA                | 1945929351               |
| SNP_P3_35917_4522430 | NC_021163.1    | Ca_kabuli_chr04 | 4522430                 | GG                              | TT                | 1945929352               |
| SNP_P3_35918_4523241 | NC_021163.1    | Ca_kabuli_chr04 | 4523241                 | GG                              | TT                | 1945929354               |
| SNP_P3_35920_4523321 | NC_021163.1    | Ca_kabuli_chr04 | 4523321                 | GG                              | AA                | 1945929356               |
| SNP_P3_35922_4524883 | NC_021163.1    | Ca_kabuli_chr04 | 4524883                 | CC                              | TT                | 1945929358               |
| SNP_P3_35923_4524912 | NC_021163.1    | Ca_kabuli_chr04 | 4524912                 | TT                              | CC                | 1945929360               |



| SNPs IDs             | Chromosome IDs | Chromosomes     | Physical positions (bp) | CDC Frontier (Reference genome) | (Pusa 256 & HPNB) | NCBI SNPdb Accession IDs |
|----------------------|----------------|-----------------|-------------------------|---------------------------------|-------------------|--------------------------|
| SNP_P3_35924_4524927 | NC_021163.1    | Ca_kabuli_chr04 | 4524927                 | AA                              | CC                | 1945929361               |
| SNP_P3_35925_4525330 | NC_021163.1    | Ca_kabuli_chr04 | 4525330                 | TT                              | CC                | 1945929363               |
| SNP_P3_35926_4525379 | NC_021163.1    | Ca_kabuli_chr04 | 4525379                 | CC                              | TT                | 1945929365               |
| SNP_P3_35927_4525401 | NC_021163.1    | Ca_kabuli_chr04 | 4525401                 | GG                              | AA                | 1945929367               |
| SNP_P3_35928_4525404 | NC_021163.1    | Ca_kabuli_chr04 | 4525404                 | CC                              | TT                | 1945929368               |
| SNP_P3_35929_4527391 | NC_021163.1    | Ca_kabuli_chr04 | 4527391                 | AA                              | TT                | 1945929370               |
| SNP_P3_35931_4527876 | NC_021163.1    | Ca_kabuli_chr04 | 4527876                 | AA                              | GG                | 1945929372               |
| SNP_P3_35933_4528639 | NC_021163.1    | Ca_kabuli_chr04 | 4528639                 | TT                              | GG                | 1945929374               |
| SNP_P3_35936_4532677 | NC_021163.1    | Ca_kabuli_chr04 | 4532677                 | GG                              | AA                | 1945929375               |
| SNP_P3_35937_4532693 | NC_021163.1    | Ca_kabuli_chr04 | 4532693                 | CC                              | TT                | 1945929377               |
| SNP_P3_35938_4533051 | NC_021163.1    | Ca_kabuli_chr04 | 4533051                 | CC                              | TT                | 1945929379               |
| SNP_P3_35939_4533268 | NC_021163.1    | Ca_kabuli_chr04 | 4533268                 | CC                              | GG                | 1945929381               |
| SNP_P3_35940_4537198 | NC_021163.1    | Ca_kabuli_chr04 | 4537198                 | TT                              | GG                | 1945929383               |
| SNP_P3_35942_4537740 | NC_021163.1    | Ca_kabuli_chr04 | 4537740                 | TT                              | CC                | 1945929384               |
| SNP_P3_35943_4537906 | NC_021163.1    | Ca_kabuli_chr04 | 4537906                 | CC                              | GG                | 1945929386               |
| SNP_P3_35944_4537970 | NC_021163.1    | Ca_kabuli_chr04 | 4537970                 | AA                              | GG                | 1945929388               |
| SNP_P3_35945_4538002 | NC_021163.1    | Ca_kabuli_chr04 | 4538002                 | GG                              | TT                | 1945929390               |
| SNP_P3_35946_4538131 | NC_021163.1    | Ca_kabuli_chr04 | 4538131                 | CC                              | TT                | 1945929391               |
| SNP_P3_35947_4538162 | NC_021163.1    | Ca_kabuli_chr04 | 4538162                 | CC                              | GG                | 1945929393               |
| SNP_P3_35948_4538198 | NC_021163.1    | Ca_kabuli_chr04 | 4538198                 | AA                              | CC                | 1945929395               |
| SNP_P3_35949_4538216 | NC_021163.1    | Ca_kabuli_chr04 | 4538216                 | CC                              | TT                | 1945929397               |
| SNP_P3_35950_4538255 | NC_021163.1    | Ca_kabuli_chr04 | 4538255                 | GG                              | AA                | 1945929398               |
| SNP_P3_35951_4538270 | NC_021163.1    | Ca_kabuli_chr04 | 4538270                 | TT                              | CC                | 1945929400               |
| SNP_P3_35952_4538274 | NC_021163.1    | Ca_kabuli_chr04 | 4538274                 | CC                              | TT                | 1945929402               |
| SNP_P3_35954_4538558 | NC_021163.1    | Ca_kabuli_chr04 | 4538558                 | TT                              | CC                | 1945929404               |
| SNP_P3_35955_4538562 | NC_021163.1    | Ca_kabuli_chr04 | 4538562                 | CC                              | AA                | 1945929406               |
| SNP_P3_35956_4538920 | NC_021163.1    | Ca_kabuli_chr04 | 4538920                 | AA                              | GG                | 1945929407               |
| SNP_P3_35957_4540658 | NC_021163.1    | Ca_kabuli_chr04 | 4540658                 | CC                              | AA                | 1945929409               |
| SNP_P3_35958_4540719 | NC_021163.1    | Ca_kabuli_chr04 | 4540719                 | GG                              | TT                | 1945929411               |
| SNP_P3_35959_4541812 | NC_021163.1    | Ca_kabuli_chr04 | 4541812                 | CC                              | AA                | 1945929413               |
| SNP_P3_35960_4541853 | NC_021163.1    | Ca_kabuli_chr04 | 4541853                 | AA                              | TT                | 1945929414               |
| SNP_P3_35961_4542507 | NC_021163.1    | Ca_kabuli_chr04 | 4542507                 | AA                              | GG                | 1945929416               |
| SNP_P3_35962_4543172 | NC_021163.1    | Ca_kabuli_chr04 | 4543172                 | AA                              | CC                | 1945929418               |
| SNP_P3_35963_4545150 | NC_021163.1    | Ca_kabuli_chr04 | 4545150                 | CC                              | TT                | 1945929420               |
| SNP_P3_35964_4545160 | NC_021163.1    | Ca_kabuli_chr04 | 4545160                 | GG                              | CC                | 1945929421               |
| SNP_P3_35965_4545220 | NC_021163.1    | Ca_kabuli_chr04 | 4545220                 | TT                              | CC                | 1945929423               |
| SNP_P3_35967_4547872 | NC_021163.1    | Ca_kabuli_chr04 | 4547872                 | TT                              | CC                | 1945929425               |
| SNP_P3_35968_4548188 | NC_021163.1    | Ca_kabuli_chr04 | 4548188                 | TT                              | CC                | 1945929427               |
| SNP_P3_35970_4549954 | NC_021163.1    | Ca_kabuli_chr04 | 4549954                 | AA                              | CC                | 1945929429               |
| SNP_P3_35971_4549958 | NC_021163.1    | Ca_kabuli_chr04 | 4549958                 | CC                              | TT                | 1945929430               |
| SNP_P3_35972_4560363 | NC_021163.1    | Ca_kabuli_chr04 | 4560363                 | GG                              | AA                | 1945929432               |
| SNP_P3_35973_4560397 | NC_021163.1    | Ca_kabuli_chr04 | 4560397                 | TT                              | CC                | 1945929434               |

| SNPs IDs             | Chromosome IDs | Chromosomes     | Physical positions (bp) | CDC Frontier (Reference genome) | (Pusa 256 & HPNB) | NCBI SNPdb Accession IDs |
|----------------------|----------------|-----------------|-------------------------|---------------------------------|-------------------|--------------------------|
| SNP_P3_35975_4561631 | NC_021163.1    | Ca_kabuli_chr04 | 4561631                 | TT                              | GG                | 1945929436               |
| SNP_P3_35976_4561836 | NC_021163.1    | Ca_kabuli_chr04 | 4561836                 | TT                              | AA                | 1945929437               |
| SNP_P3_35977_4562597 | NC_021163.1    | Ca_kabuli_chr04 | 4562597                 | TT                              | GG                | 1945929439               |
| SNP_P3_35978_4562600 | NC_021163.1    | Ca_kabuli_chr04 | 4562600                 | TT                              | CC                | 1945929441               |
| SNP_P3_35979_4563977 | NC_021163.1    | Ca_kabuli_chr04 | 4563977                 | CC                              | TT                | 1945929443               |
| SNP_P3_35980_4564219 | NC_021163.1    | Ca_kabuli_chr04 | 4564219                 | TT                              | CC                | 1945929444               |
| SNP_P3_35981_4567922 | NC_021163.1    | Ca_kabuli_chr04 | 4567922                 | CC                              | TT                | 1945929446               |
| SNP_P3_35982_4567936 | NC_021163.1    | Ca_kabuli_chr04 | 4567936                 | AA                              | GG                | 1945929448               |
| SNP_P3_35983_4570298 | NC_021163.1    | Ca_kabuli_chr04 | 4570298                 | TT                              | CC                | 1945929450               |
| SNP_P3_35985_4570858 | NC_021163.1    | Ca_kabuli_chr04 | 4570858                 | TT                              | AA                | 1945929452               |
| SNP_P3_35986_4575034 | NC_021163.1    | Ca_kabuli_chr04 | 4575034                 | GG                              | CC                | 1945929453               |
| SNP_P3_35987_4575253 | NC_021163.1    | Ca_kabuli_chr04 | 4575253                 | AA                              | GG                | 1945929455               |
| SNP_P3_35988_4575500 | NC_021163.1    | Ca_kabuli_chr04 | 4575500                 | TT                              | CC                | 1945929457               |
| SNP_P3_35989_4579588 | NC_021163.1    | Ca_kabuli_chr04 | 4579588                 | AA                              | GG                | 1945929459               |
| SNP_P3_35990_4580082 | NC_021163.1    | Ca_kabuli_chr04 | 4580082                 | TT                              | AA                | 1945929460               |
| SNP_P3_35991_4582378 | NC_021163.1    | Ca_kabuli_chr04 | 4582378                 | CC                              | GG                | 1945929462               |
| SNP_P3_35993_4582941 | NC_021163.1    | Ca_kabuli_chr04 | 4582941                 | TT                              | CC                | 1945929464               |
| SNP_P3_35994_4584939 | NC_021163.1    | Ca_kabuli_chr04 | 4584939                 | CC                              | AA                | 1945929466               |
| SNP_P3_35995_4585284 | NC_021163.1    | Ca_kabuli_chr04 | 4585284                 | AA                              | GG                | 1945929467               |
| SNP_P3_35996_4585388 | NC_021163.1    | Ca_kabuli_chr04 | 4585388                 | CC                              | TT                | 1945929469               |
| SNP_P3_35997_4586320 | NC_021163.1    | Ca_kabuli_chr04 | 4586320                 | GG                              | TT                | 1945929471               |
| SNP_P3_35998_4586512 | NC_021163.1    | Ca_kabuli_chr04 | 4586512                 | TT                              | AA                | 1945929473               |
| SNP_P3_35999_4586563 | NC_021163.1    | Ca_kabuli_chr04 | 4586563                 | CC                              | TT                | 1945929475               |
| SNP_P3_36000_4586661 | NC_021163.1    | Ca_kabuli_chr04 | 4586661                 | AA                              | GG                | 1945929476               |
| SNP_P3_36001_4587900 | NC_021163.1    | Ca_kabuli_chr04 | 4587900                 | TT                              | GG                | 1945929478               |
| SNP_P3_36002_4588010 | NC_021163.1    | Ca_kabuli_chr04 | 4588010                 | GG                              | AA                | 1945929480               |
| SNP_P3_36003_4588070 | NC_021163.1    | Ca_kabuli_chr04 | 4588070                 | GG                              | AA                | 1945929482               |
| SNP_P3_36005_4588721 | NC_021163.1    | Ca_kabuli_chr04 | 4588721                 | GG                              | AA                | 1945929483               |
| SNP_P3_36007_4589375 | NC_021163.1    | Ca_kabuli_chr04 | 4589375                 | AA                              | GG                | 1945929485               |
| SNP_P3_36011_4590130 | NC_021163.1    | Ca_kabuli_chr04 | 4590130                 | TT                              | CC                | 1945929487               |
| SNP_P3_36012_4592726 | NC_021163.1    | Ca_kabuli_chr04 | 4592726                 | AA                              | GG                | 1945929489               |
| SNP_P3_36013_4592740 | NC_021163.1    | Ca_kabuli_chr04 | 4592740                 | AA                              | GG                | 1945929491               |
| SNP_P3_36014_4593010 | NC_021163.1    | Ca_kabuli_chr04 | 4593010                 | TT                              | CC                | 1945929492               |
| SNP_P3_36015_4593289 | NC_021163.1    | Ca_kabuli_chr04 | 4593289                 | CC                              | TT                | 1945929494               |
| SNP_P3_36017_4593340 | NC_021163.1    | Ca_kabuli_chr04 | 4593340                 | AA                              | TT                | 1945929496               |
| SNP_P3_36019_4593702 | NC_021163.1    | Ca_kabuli_chr04 | 4593702                 | CC                              | TT                | 1945929498               |
| SNP_P3_36020_4594765 | NC_021163.1    | Ca_kabuli_chr04 | 4594765                 | CC                              | TT                | 1945929499               |
| SNP_P3_36022_4602558 | NC_021163.1    | Ca_kabuli_chr04 | 4602558                 | GG                              | AA                | 1945929501               |
| SNP_P3_36023_4631588 | NC_021163.1    | Ca_kabuli_chr04 | 4631588                 | AA                              | TT                | 1945929503               |
| SNP_P3_36024_4649729 | NC_021163.1    | Ca_kabuli_chr04 | 4649729                 | TT                              | AA                | 1945929505               |
| SNP_P3_36025_4654170 | NC_021163.1    | Ca_kabuli_chr04 | 4654170                 | AA                              | TT                | 1945929506               |
| SNP_P3_36027_4720476 | NC_021163.1    | Ca_kabuli_chr04 | 4720476                 | GG                              | AA                | 1945929508               |

| SNPs IDs             | Chromosome IDs | Chromosomes     | Physical positions (bp) | CDC Frontier (Reference genome) | (Pusa 256 & HPNB) | NCBI SNPdb Accession IDs |
|----------------------|----------------|-----------------|-------------------------|---------------------------------|-------------------|--------------------------|
| SNP_P3_36030_4813776 | NC_021163.1    | Ca_kabuli_chr04 | 4813776                 | GG                              | TT                | 1945929510               |
| SNP_P3_36031_4815011 | NC_021163.1    | Ca_kabuli_chr04 | 4815011                 | TT                              | GG                | 1945929512               |
| SNP_P3_36033_4817399 | NC_021163.1    | Ca_kabuli_chr04 | 4817399                 | TT                              | AA                | 1945929514               |
| SNP_P3_36034_4823996 | NC_021163.1    | Ca_kabuli_chr04 | 4823996                 | CC                              | TT                | 1945929515               |
| SNP_P3_36035_4825370 | NC_021163.1    | Ca_kabuli_chr04 | 4825370                 | CC                              | TT                | 1945929517               |
| SNP_P3_36036_4825783 | NC_021163.1    | Ca_kabuli_chr04 | 4825783                 | AA                              | CC                | 1945929519               |
| SNP_P3_36037_4830011 | NC_021163.1    | Ca_kabuli_chr04 | 4830011                 | GG                              | TT                | 1945929521               |
| SNP_P3_36038_4830050 | NC_021163.1    | Ca_kabuli_chr04 | 4830050                 | GG                              | AA                | 1945929522               |
| SNP_P3_36040_4830330 | NC_021163.1    | Ca_kabuli_chr04 | 4830330                 | GG                              | AA                | 1945929524               |
| SNP_P3_36041_4831092 | NC_021163.1    | Ca_kabuli_chr04 | 4831092                 | TT                              | CC                | 1945929526               |
| SNP_P3_36042_4831107 | NC_021163.1    | Ca_kabuli_chr04 | 4831107                 | GG                              | AA                | 1945929528               |
| SNP_P3_36043_4831154 | NC_021163.1    | Ca_kabuli_chr04 | 4831154                 | CC                              | TT                | 1945929529               |
| SNP_P3_36044_4839572 | NC_021163.1    | Ca_kabuli_chr04 | 4839572                 | TT                              | AA                | 1945929531               |
| SNP_P3_36045_4839575 | NC_021163.1    | Ca_kabuli_chr04 | 4839575                 | TT                              | AA                | 1945929533               |
| SNP_P3_36046_4839576 | NC_021163.1    | Ca_kabuli_chr04 | 4839576                 | AA                              | TT                | 1945929535               |
| SNP_P3_36047_4839709 | NC_021163.1    | Ca_kabuli_chr04 | 4839709                 | CC                              | TT                | 1945929537               |
| SNP_P3_36049_4839797 | NC_021163.1    | Ca_kabuli_chr04 | 4839797                 | GG                              | TT                | 1945929538               |
| SNP_P3_36050_4839799 | NC_021163.1    | Ca_kabuli_chr04 | 4839799                 | GG                              | CC                | 1945929540               |
| SNP_P3_36052_4841373 | NC_021163.1    | Ca_kabuli_chr04 | 4841373                 | TT                              | AA                | 1945929542               |
| SNP_P3_36053_4842379 | NC_021163.1    | Ca_kabuli_chr04 | 4842379                 | GG                              | CC                | 1945929544               |
| SNP_P3_36054_4847642 | NC_021163.1    | Ca_kabuli_chr04 | 4847642                 | CC                              | TT                | 1945929545               |
| SNP_P3_36055_4847751 | NC_021163.1    | Ca_kabuli_chr04 | 4847751                 | AA                              | GG                | 1945929547               |
| SNP_P3_36056_4847752 | NC_021163.1    | Ca_kabuli_chr04 | 4847752                 | AA                              | GG                | 1945929549               |
| SNP_P3_36057_4847753 | NC_021163.1    | Ca_kabuli_chr04 | 4847753                 | TT                              | CC                | 1945929551               |
| SNP_P3_36058_4847754 | NC_021163.1    | Ca_kabuli_chr04 | 4847754                 | CC                              | TT                | 1945929552               |
| SNP_P3_36059_4847766 | NC_021163.1    | Ca_kabuli_chr04 | 4847766                 | CC                              | TT                | 1945929554               |
| SNP_P3_36060_4847812 | NC_021163.1    | Ca_kabuli_chr04 | 4847812                 | GG                              | TT                | 1945929556               |
| SNP_P3_36061_4847944 | NC_021163.1    | Ca_kabuli_chr04 | 4847944                 | TT                              | CC                | 1945929558               |
| SNP_P3_36062_4849747 | NC_021163.1    | Ca_kabuli_chr04 | 4849747                 | CC                              | TT                | 1945929560               |
| SNP_P3_36063_4849751 | NC_021163.1    | Ca_kabuli_chr04 | 4849751                 | AA                              | CC                | 1945929561               |
| SNP_P3_36064_4850216 | NC_021163.1    | Ca_kabuli_chr04 | 4850216                 | CC                              | AA                | 1945929563               |
| SNP_P3_36065_4850244 | NC_021163.1    | Ca_kabuli_chr04 | 4850244                 | AA                              | CC                | 1945929565               |
| SNP_P3_36066_4850477 | NC_021163.1    | Ca_kabuli_chr04 | 4850477                 | AA                              | GG                | 1945929567               |
| SNP_P3_36067_4850500 | NC_021163.1    | Ca_kabuli_chr04 | 4850500                 | GG                              | TT                | 1945929568               |
| SNP_P3_36068_4850503 | NC_021163.1    | Ca_kabuli_chr04 | 4850503                 | TT                              | CC                | 1945929570               |
| SNP_P3_36069_4850519 | NC_021163.1    | Ca_kabuli_chr04 | 4850519                 | CC                              | TT                | 1945929572               |
| SNP_P3_36070_4850527 | NC_021163.1    | Ca_kabuli_chr04 | 4850527                 | CC                              | TT                | 1945929574               |
| SNP_P3_36071_4850818 | NC_021163.1    | Ca_kabuli_chr04 | 4850818                 | CC                              | AA                | 1945929575               |
| SNP_P3_36073_4851546 | NC_021163.1    | Ca_kabuli_chr04 | 4851546                 | TT                              | AA                | 1945929577               |
| SNP_P3_36075_4852133 | NC_021163.1    | Ca_kabuli_chr04 | 4852133                 | AA                              | TT                | 1945929579               |
| SNP_P3_36077_4854841 | NC_021163.1    | Ca_kabuli_chr04 | 4854841                 | AA                              | GG                | 1945929581               |
| SNP_P3_36078_4858205 | NC_021163.1    | Ca_kabuli_chr04 | 4858205                 | AA                              | GG                | 1945929583               |

| SNPs IDs             | Chromosome IDs | Chromosomes     | Physical positions (bp) | CDC Frontier (Reference genome) | (Pusa 256 & HPNB) | NCBI SNPdb Accession IDs |
|----------------------|----------------|-----------------|-------------------------|---------------------------------|-------------------|--------------------------|
| SNP_P3_36079_4858710 | NC_021163.1    | Ca_kabuli_chr04 | 4858710                 | AA                              | GG                | 1945929584               |
| SNP_P3_36080_4858829 | NC_021163.1    | Ca_kabuli_chr04 | 4858829                 | AA                              | GG                | 1945929586               |
| SNP_P3_36082_4859175 | NC_021163.1    | Ca_kabuli_chr04 | 4859175                 | GG                              | TT                | 1945929588               |
| SNP_P3_36085_4859292 | NC_021163.1    | Ca_kabuli_chr04 | 4859292                 | CC                              | GG                | 1945929590               |
| SNP_P3_36086_4860048 | NC_021163.1    | Ca_kabuli_chr04 | 4860048                 | CC                              | AA                | 1945929591               |
| SNP_P3_36087_4860050 | NC_021163.1    | Ca_kabuli_chr04 | 4860050                 | GG                              | AA                | 1945929593               |
| SNP_P3_36088_4860096 | NC_021163.1    | Ca_kabuli_chr04 | 4860096                 | AA                              | GG                | 1945929595               |
| SNP_P3_36089_4867004 | NC_021163.1    | Ca_kabuli_chr04 | 4867004                 | CC                              | TT                | 1945929597               |
| SNP_P3_36090_4867163 | NC_021163.1    | Ca_kabuli_chr04 | 4867163                 | AA                              | GG                | 1945929598               |
| SNP_P3_36091_4867223 | NC_021163.1    | Ca_kabuli_chr04 | 4867223                 | CC                              | TT                | 1945929600               |
| SNP_P3_36092_4867563 | NC_021163.1    | Ca_kabuli_chr04 | 4867563                 | GG                              | TT                | 1945929602               |
| SNP_P3_36093_4868057 | NC_021163.1    | Ca_kabuli_chr04 | 4868057                 | CC                              | TT                | 1945929604               |
| SNP_P3_36094_4871871 | NC_021163.1    | Ca_kabuli_chr04 | 4871871                 | AA                              | CC                | 1945929606               |
| SNP_P3_36095_4872092 | NC_021163.1    | Ca_kabuli_chr04 | 4872092                 | TT                              | AA                | 1945929607               |
| SNP_P3_36096_4872102 | NC_021163.1    | Ca_kabuli_chr04 | 4872102                 | GG                              | TT                | 1945929609               |
| SNP_P3_36097_4873223 | NC_021163.1    | Ca_kabuli_chr04 | 4873223                 | GG                              | CC                | 1945929611               |
| SNP_P3_36099_4873639 | NC_021163.1    | Ca_kabuli_chr04 | 4873639                 | GG                              | AA                | 1945929613               |
| SNP_P3_36100_4873943 | NC_021163.1    | Ca_kabuli_chr04 | 4873943                 | CC                              | AA                | 1945929614               |
| SNP_P3_36101_4881840 | NC_021163.1    | Ca_kabuli_chr04 | 4881840                 | TT                              | AA                | 1945929616               |
| SNP_P3_36102_4883817 | NC_021163.1    | Ca_kabuli_chr04 | 4883817                 | AA                              | GG                | 1945929618               |
| SNP_P3_36103_4884358 | NC_021163.1    | Ca_kabuli_chr04 | 4884358                 | GG                              | TT                | 1945929620               |
| SNP_P3_36104_4884396 | NC_021163.1    | Ca_kabuli_chr04 | 4884396                 | CC                              | TT                | 1945929621               |
| SNP_P3_36106_4884551 | NC_021163.1    | Ca_kabuli_chr04 | 4884551                 | TT                              | CC                | 1945929623               |
| SNP_P3_36107_4886081 | NC_021163.1    | Ca_kabuli_chr04 | 4886081                 | CC                              | AA                | 1945929625               |
| SNP_P3_36108_4886165 | NC_021163.1    | Ca_kabuli_chr04 | 4886165                 | GG                              | AA                | 1945929627               |
| SNP_P3_36109_4886440 | NC_021163.1    | Ca_kabuli_chr04 | 4886440                 | CC                              | TT                | 1945929629               |
| SNP_P3_36110_4886962 | NC_021163.1    | Ca_kabuli_chr04 | 4886962                 | GG                              | AA                | 1945929630               |
| SNP_P3_36112_4888215 | NC_021163.1    | Ca_kabuli_chr04 | 4888215                 | AA                              | GG                | 1945929632               |
| SNP_P3_36113_4888336 | NC_021163.1    | Ca_kabuli_chr04 | 4888336                 | AA                              | GG                | 1945929634               |
| SNP_P3_36114_4889299 | NC_021163.1    | Ca_kabuli_chr04 | 4889299                 | CC                              | TT                | 1945929636               |
| SNP_P3_36118_4892461 | NC_021163.1    | Ca_kabuli_chr04 | 4892461                 | TT                              | AA                | 1945929637               |
| SNP_P3_36119_4893230 | NC_021163.1    | Ca_kabuli_chr04 | 4893230                 | CC                              | GG                | 1945929639               |
| SNP_P3_36121_4894126 | NC_021163.1    | Ca_kabuli_chr04 | 4894126                 | TT                              | AA                | 1945929641               |
| SNP_P3_36122_4895708 | NC_021163.1    | Ca_kabuli_chr04 | 4895708                 | GG                              | CC                | 1945929643               |
| SNP_P3_36123_4896874 | NC_021163.1    | Ca_kabuli_chr04 | 4896874                 | TT                              | CC                | 1945929644               |
| SNP_P3_36124_4896970 | NC_021163.1    | Ca_kabuli_chr04 | 4896970                 | AA                              | GG                | 1945929646               |
| SNP_P3_36126_4898269 | NC_021163.1    | Ca_kabuli_chr04 | 4898269                 | CC                              | GG                | 1945929648               |
| SNP_P3_36127_4898493 | NC_021163.1    | Ca_kabuli_chr04 | 4898493                 | AA                              | TT                | 1945929650               |
| SNP_P3_36128_4899671 | NC_021163.1    | Ca_kabuli_chr04 | 4899671                 | AA                              | CC                | 1945929652               |
| SNP_P3_36129_4900597 | NC_021163.1    | Ca_kabuli_chr04 | 4900597                 | CC                              | TT                | 1945929653               |
| SNP_P3_36130_4900741 | NC_021163.1    | Ca_kabuli_chr04 | 4900741                 | AA                              | GG                | 1945929655               |
| SNP_P3_36132_4901047 | NC_021163.1    | Ca_kabuli_chr04 | 4901047                 | TT                              | AA                | 1945929657               |

| SNPs IDs             | Chromosome IDs | Chromosomes     | Physical positions (bp) | CDC Frontier (Reference genome) | (Pusa 256 & HPNB) | NCBI SNPdb Accession IDs |
|----------------------|----------------|-----------------|-------------------------|---------------------------------|-------------------|--------------------------|
| SNP_P3_36133_4901484 | NC_021163.1    | Ca_kabuli_chr04 | 4901484                 | GG                              | AA                | 1945929659               |
| SNP_P3_36134_4902126 | NC_021163.1    | Ca_kabuli_chr04 | 4902126                 | AA                              | GG                | 1945929660               |
| SNP_P3_36135_4902479 | NC_021163.1    | Ca_kabuli_chr04 | 4902479                 | AA                              | GG                | 1945929662               |
| SNP_P3_36136_4902757 | NC_021163.1    | Ca_kabuli_chr04 | 4902757                 | TT                              | CC                | 1945929664               |
| SNP_P3_36137_4902849 | NC_021163.1    | Ca_kabuli_chr04 | 4902849                 | TT                              | GG                | 1945929666               |
| SNP_P3_36139_4903546 | NC_021163.1    | Ca_kabuli_chr04 | 4903546                 | CC                              | GG                | 1945929667               |
| SNP_P3_36140_4903605 | NC_021163.1    | Ca_kabuli_chr04 | 4903605                 | AA                              | TT                | 1945929669               |
| SNP_P3_36141_4904585 | NC_021163.1    | Ca_kabuli_chr04 | 4904585                 | CC                              | TT                | 1945929671               |
| SNP_P3_36142_4906171 | NC_021163.1    | Ca_kabuli_chr04 | 4906171                 | GG                              | AA                | 1945929673               |
| SNP_P3_36143_4906250 | NC_021163.1    | Ca_kabuli_chr04 | 4906250                 | TT                              | CC                | 1945929675               |
| SNP_P3_36144_4906325 | NC_021163.1    | Ca_kabuli_chr04 | 4906325                 | CC                              | AA                | 1945929676               |
| SNP_P3_36146_4909007 | NC_021163.1    | Ca_kabuli_chr04 | 4909007                 | AA                              | GG                | 1945929678               |
| SNP_P3_36147_4909094 | NC_021163.1    | Ca_kabuli_chr04 | 4909094                 | GG                              | AA                | 1945929680               |
| SNP_P3_36148_4909115 | NC_021163.1    | Ca_kabuli_chr04 | 4909115                 | GG                              | AA                | 1945929682               |
| SNP_P3_36149_4909163 | NC_021163.1    | Ca_kabuli_chr04 | 4909163                 | CC                              | TT                | 1945929683               |
| SNP_P3_36150_4909359 | NC_021163.1    | Ca_kabuli_chr04 | 4909359                 | CC                              | TT                | 1945929685               |
| SNP_P3_36151_4909523 | NC_021163.1    | Ca_kabuli_chr04 | 4909523                 | GG                              | AA                | 1945929687               |
| SNP_P3_36152_4910749 | NC_021163.1    | Ca_kabuli_chr04 | 4910749                 | AA                              | GG                | 1945929689               |
| SNP_P3_36153_4910767 | NC_021163.1    | Ca_kabuli_chr04 | 4910767                 | AA                              | CC                | 1945929690               |
| SNP_P3_36154_4910817 | NC_021163.1    | Ca_kabuli_chr04 | 4910817                 | AA                              | TT                | 1945929692               |
| SNP_P3_36155_4911393 | NC_021163.1    | Ca_kabuli_chr04 | 4911393                 | TT                              | CC                | 1945929694               |
| SNP_P3_36156_4911456 | NC_021163.1    | Ca_kabuli_chr04 | 4911456                 | CC                              | TT                | 1945929696               |
| SNP_P3_36157_4911701 | NC_021163.1    | Ca_kabuli_chr04 | 4911701                 | AA                              | GG                | 1945929698               |
| SNP_P3_36158_4912176 | NC_021163.1    | Ca_kabuli_chr04 | 4912176                 | AA                              | TT                | 1945929699               |
| SNP_P3_36159_4912241 | NC_021163.1    | Ca_kabuli_chr04 | 4912241                 | TT                              | CC                | 1945929701               |
| SNP_P3_36160_4912285 | NC_021163.1    | Ca_kabuli_chr04 | 4912285                 | AA                              | GG                | 1945929703               |
| SNP_P3_36161_4913038 | NC_021163.1    | Ca_kabuli_chr04 | 4913038                 | AA                              | GG                | 1945929705               |
| SNP_P3_36162_4913108 | NC_021163.1    | Ca_kabuli_chr04 | 4913108                 | CC                              | TT                | 1945929706               |
| SNP_P3_36163_4913128 | NC_021163.1    | Ca_kabuli_chr04 | 4913128                 | AA                              | GG                | 1945929708               |
| SNP_P3_36164_4913215 | NC_021163.1    | Ca_kabuli_chr04 | 4913215                 | CC                              | TT                | 1945929710               |
| SNP_P3_36165_4913466 | NC_021163.1    | Ca_kabuli_chr04 | 4913466                 | TT                              | GG                | 1945929712               |
| SNP_P3_36166_4914451 | NC_021163.1    | Ca_kabuli_chr04 | 4914451                 | AA                              | GG                | 1945929713               |
| SNP_P3_36167_4914750 | NC_021163.1    | Ca_kabuli_chr04 | 4914750                 | GG                              | AA                | 1945929715               |
| SNP_P3_36168_4915113 | NC_021163.1    | Ca_kabuli_chr04 | 4915113                 | TT                              | AA                | 1945929717               |
| SNP_P3_36169_4915114 | NC_021163.1    | Ca_kabuli_chr04 | 4915114                 | TT                              | AA                | 1945929719               |
| SNP_P3_36170_4915173 | NC_021163.1    | Ca_kabuli_chr04 | 4915173                 | AA                              | CC                | 1945929721               |
| SNP_P3_36171_4917767 | NC_021163.1    | Ca_kabuli_chr04 | 4917767                 | CC                              | TT                | 1945929722               |
| SNP_P3_36173_4917882 | NC_021163.1    | Ca_kabuli_chr04 | 4917882                 | GG                              | AA                | 1945929724               |
| SNP_P3_36174_4917892 | NC_021163.1    | Ca_kabuli_chr04 | 4917892                 | TT                              | AA                | 1945929726               |
| SNP_P3_36175_4917920 | NC_021163.1    | Ca_kabuli_chr04 | 4917920                 | GG                              | AA                | 1945929728               |
| SNP_P3_36176_4917965 | NC_021163.1    | Ca_kabuli_chr04 | 4917965                 | CC                              | TT                | 1945929729               |
| SNP_P3_36177_4917972 | NC_021163.1    | Ca_kabuli_chr04 | 4917972                 | AA                              | GG                | 1945929731               |

| SNPs IDs             | Chromosome IDs | Chromosomes     | Physical positions (bp) | CDC Frontier (Reference genome) | (Pusa 256 & HPNB) | NCBI SNPdb Accession IDs |
|----------------------|----------------|-----------------|-------------------------|---------------------------------|-------------------|--------------------------|
| SNP_P3_36178_4917977 | NC_021163.1    | Ca_kabuli_chr04 | 4917977                 | GG                              | AA                | 1945929733               |
| SNP_P3_36179_4918016 | NC_021163.1    | Ca_kabuli_chr04 | 4918016                 | CC                              | TT                | 1945929735               |
| SNP_P3_36180_4918017 | NC_021163.1    | Ca_kabuli_chr04 | 4918017                 | AA                              | TT                | 1945929736               |
| SNP_P3_36181_4918019 | NC_021163.1    | Ca_kabuli_chr04 | 4918019                 | TT                              | GG                | 1945929738               |
| SNP_P3_36182_4918704 | NC_021163.1    | Ca_kabuli_chr04 | 4918704                 | CC                              | TT                | 1945929740               |
| SNP_P3_36183_4918949 | NC_021163.1    | Ca_kabuli_chr04 | 4918949                 | CC                              | TT                | 1945929742               |
| SNP_P3_36184_4918950 | NC_021163.1    | Ca_kabuli_chr04 | 4918950                 | GG                              | AA                | 1945929744               |
| SNP_P3_36185_4921203 | NC_021163.1    | Ca_kabuli_chr04 | 4921203                 | GG                              | AA                | 1945929745               |
| SNP_P3_36186_4923801 | NC_021163.1    | Ca_kabuli_chr04 | 4923801                 | TT                              | CC                | 1945929747               |
| SNP_P3_36188_4924052 | NC_021163.1    | Ca_kabuli_chr04 | 4924052                 | TT                              | GG                | 1945929749               |
| SNP_P3_36189_4924113 | NC_021163.1    | Ca_kabuli_chr04 | 4924113                 | AA                              | GG                | 1945929751               |
| SNP_P3_36190_4924118 | NC_021163.1    | Ca_kabuli_chr04 | 4924118                 | CC                              | TT                | 1945929752               |
| SNP_P3_36191_4924486 | NC_021163.1    | Ca_kabuli_chr04 | 4924486                 | AA                              | GG                | 1945929754               |
| SNP_P3_36192_4924489 | NC_021163.1    | Ca_kabuli_chr04 | 4924489                 | AA                              | TT                | 1945929756               |
| SNP_P3_36193_4924568 | NC_021163.1    | Ca_kabuli_chr04 | 4924568                 | AA                              | GG                | 1945929758               |
| SNP_P3_36194_4924764 | NC_021163.1    | Ca_kabuli_chr04 | 4924764                 | TT                              | CC                | 1945929759               |
| SNP_P3_36195_4924834 | NC_021163.1    | Ca_kabuli_chr04 | 4924834                 | AA                              | TT                | 1945929761               |
| SNP_P3_36196_4924969 | NC_021163.1    | Ca_kabuli_chr04 | 4924969                 | TT                              | CC                | 1945929763               |
| SNP_P3_36197_4925061 | NC_021163.1    | Ca_kabuli_chr04 | 4925061                 | TT                              | AA                | 1945929765               |
| SNP_P3_36198_4925109 | NC_021163.1    | Ca_kabuli_chr04 | 4925109                 | TT                              | AA                | 1945929767               |
| SNP_P3_36199_4925153 | NC_021163.1    | Ca_kabuli_chr04 | 4925153                 | AA                              | TT                | 1945929768               |
| SNP_P3_36200_4925161 | NC_021163.1    | Ca_kabuli_chr04 | 4925161                 | TT                              | CC                | 1945929770               |
| SNP_P3_36201_4925276 | NC_021163.1    | Ca_kabuli_chr04 | 4925276                 | AA                              | GG                | 1945929772               |
| SNP_P3_36202_4925301 | NC_021163.1    | Ca_kabuli_chr04 | 4925301                 | CC                              | TT                | 1945929774               |
| SNP_P3_36203_4925367 | NC_021163.1    | Ca_kabuli_chr04 | 4925367                 | AA                              | TT                | 1945929775               |
| SNP_P3_36204_4925396 | NC_021163.1    | Ca_kabuli_chr04 | 4925396                 | GG                              | CC                | 1945929777               |
| SNP_P3_36205_4925413 | NC_021163.1    | Ca_kabuli_chr04 | 4925413                 | GG                              | CC                | 1945929779               |
| SNP_P3_36207_4929579 | NC_021163.1    | Ca_kabuli_chr04 | 4929579                 | CC                              | AA                | 1945929781               |
| SNP_P3_36208_4933687 | NC_021163.1    | Ca_kabuli_chr04 | 4933687                 | AA                              | TT                | 1945929782               |
| SNP_P3_36209_4933707 | NC_021163.1    | Ca_kabuli_chr04 | 4933707                 | GG                              | AA                | 1945929784               |
| SNP_P3_36211_4946730 | NC_021163.1    | Ca_kabuli_chr04 | 4946730                 | GG                              | CC                | 1945929786               |
| SNP_P3_36212_4955931 | NC_021163.1    | Ca_kabuli_chr04 | 4955931                 | GG                              | AA                | 1945929788               |
| SNP_P3_36213_4956385 | NC_021163.1    | Ca_kabuli_chr04 | 4956385                 | TT                              | CC                | 1945929790               |
| SNP_P3_36214_4967579 | NC_021163.1    | Ca_kabuli_chr04 | 4967579                 | AA                              | GG                | 1945929791               |
| SNP_P3_36215_4969231 | NC_021163.1    | Ca_kabuli_chr04 | 4969231                 | AA                              | GG                | 1945929793               |
| SNP_P3_36216_4993922 | NC_021163.1    | Ca_kabuli_chr04 | 4993922                 | GG                              | TT                | 1945929795               |
| SNP_P3_36217_5003659 | NC_021163.1    | Ca_kabuli_chr04 | 5003659                 | AA                              | CC                | 1945929797               |
| SNP_P3_36219_5045789 | NC_021163.1    | Ca_kabuli_chr04 | 5045789                 | AA                              | GG                | 1945929798               |
| SNP_P3_36220_5067185 | NC_021163.1    | Ca_kabuli_chr04 | 5067185                 | TT                              | CC                | 1945929800               |
| SNP_P3_36221_5073317 | NC_021163.1    | Ca_kabuli_chr04 | 5073317                 | AA                              | TT                | 1945929802               |
| SNP_P3_36222_5073318 | NC_021163.1    | Ca_kabuli_chr04 | 5073318                 | CC                              | AA                | 1945929804               |
| SNP_P3_36223_5109358 | NC_021163.1    | Ca_kabuli_chr04 | 5109358                 | AA                              | CC                | 1945929805               |

| SNPs IDs             | Chromosome IDs | Chromosomes     | Physical positions (bp) | CDC Frontier (Reference genome) | (Pusa 256 & HPNB) | NCBI SNPdb Accession IDs |
|----------------------|----------------|-----------------|-------------------------|---------------------------------|-------------------|--------------------------|
| SNP_P3_36224_5123267 | NC_021163.1    | Ca_kabuli_chr04 | 5123267                 | TT                              | CC                | 1945929807               |
| SNP_P3_36225_5142011 | NC_021163.1    | Ca_kabuli_chr04 | 5142011                 | CC                              | TT                | 1945929809               |
| SNP_P3_36226_5143649 | NC_021163.1    | Ca_kabuli_chr04 | 5143649                 | GG                              | AA                | 1945929811               |
| SNP_P3_36227_5177103 | NC_021163.1    | Ca_kabuli_chr04 | 5177103                 | GG                              | AA                | 1945929813               |
| SNP_P3_36228_5180851 | NC_021163.1    | Ca_kabuli_chr04 | 5180851                 | TT                              | GG                | 1945929814               |
| SNP_P3_36230_5242397 | NC_021163.1    | Ca_kabuli_chr04 | 5242397                 | AA                              | TT                | 1945929816               |
| SNP_P3_36231_5245775 | NC_021163.1    | Ca_kabuli_chr04 | 5245775                 | TT                              | AA                | 1945929818               |
| SNP_P3_36232_5248366 | NC_021163.1    | Ca_kabuli_chr04 | 5248366                 | CC                              | TT                | 1945929820               |
| SNP_P3_36233_5294157 | NC_021163.1    | Ca_kabuli_chr04 | 5294157                 | TT                              | CC                | 1945929821               |
| SNP_P3_36235_5369207 | NC_021163.1    | Ca_kabuli_chr04 | 5369207                 | TT                              | CC                | 1945929823               |
| SNP_P3_36236_5380747 | NC_021163.1    | Ca_kabuli_chr04 | 5380747                 | GG                              | AA                | 1945929825               |
| SNP_P3_36237_5381563 | NC_021163.1    | Ca_kabuli_chr04 | 5381563                 | GG                              | AA                | 1945929827               |
| SNP_P3_36238_5381566 | NC_021163.1    | Ca_kabuli_chr04 | 5381566                 | AA                              | TT                | 1945929829               |
| SNP_P3_36239_5418266 | NC_021163.1    | Ca_kabuli_chr04 | 5418266                 | AA                              | TT                | 1945929830               |
| SNP_P3_36240_5445321 | NC_021163.1    | Ca_kabuli_chr04 | 5445321                 | TT                              | CC                | 1945929832               |
| SNP_P3_36241_5465717 | NC_021163.1    | Ca_kabuli_chr04 | 5465717                 | GG                              | AA                | 1945929834               |
| SNP_P3_36243_5477012 | NC_021163.1    | Ca_kabuli_chr04 | 5477012                 | AA                              | GG                | 1945929836               |
| SNP_P3_36244_5483470 | NC_021163.1    | Ca_kabuli_chr04 | 5483470                 | CC                              | AA                | 1945929837               |
| SNP_P3_36245_5483473 | NC_021163.1    | Ca_kabuli_chr04 | 5483473                 | CC                              | TT                | 1945929839               |
| SNP_P3_36246_5483534 | NC_021163.1    | Ca_kabuli_chr04 | 5483534                 | TT                              | AA                | 1945929841               |
| SNP_P3_36247_5483700 | NC_021163.1    | Ca_kabuli_chr04 | 5483700                 | TT                              | CC                | 1945929843               |
| SNP_P3_36248_5483811 | NC_021163.1    | Ca_kabuli_chr04 | 5483811                 | AA                              | GG                | 1945929844               |
| SNP_P3_36249_5483845 | NC_021163.1    | Ca_kabuli_chr04 | 5483845                 | AA                              | GG                | 1945929846               |
| SNP_P3_36250_5483863 | NC_021163.1    | Ca_kabuli_chr04 | 5483863                 | TT                              | AA                | 1945929848               |
| SNP_P3_36251_5484014 | NC_021163.1    | Ca_kabuli_chr04 | 5484014                 | GG                              | CC                | 1945929850               |
| SNP_P3_36252_5484956 | NC_021163.1    | Ca_kabuli_chr04 | 5484956                 | AA                              | GG                | 1945929852               |
| SNP_P3_36253_5485013 | NC_021163.1    | Ca_kabuli_chr04 | 5485013                 | AA                              | GG                | 1945929853               |
| SNP_P3_36254_5496094 | NC_021163.1    | Ca_kabuli_chr04 | 5496094                 | AA                              | TT                | 1945929855               |
| SNP_P3_36255_5496095 | NC_021163.1    | Ca_kabuli_chr04 | 5496095                 | TT                              | GG                | 1945929857               |
| SNP_P3_36256_5497226 | NC_021163.1    | Ca_kabuli_chr04 | 5497226                 | TT                              | CC                | 1945929859               |
| SNP_P3_36257_5515905 | NC_021163.1    | Ca_kabuli_chr04 | 5515905                 | AA                              | GG                | 1945929860               |
| SNP_P3_36258_5515911 | NC_021163.1    | Ca_kabuli_chr04 | 5515911                 | GG                              | AA                | 1945929862               |
| SNP_P3_36259_5515917 | NC_021163.1    | Ca_kabuli_chr04 | 5515917                 | GG                              | AA                | 1945929864               |
| SNP_P3_36260_5515923 | NC_021163.1    | Ca_kabuli_chr04 | 5515923                 | GG                              | AA                | 1945929866               |
| SNP_P3_36261_5520227 | NC_021163.1    | Ca_kabuli_chr04 | 5520227                 | CC                              | TT                | 1945929867               |
| SNP_P3_36262_5562602 | NC_021163.1    | Ca_kabuli_chr04 | 5562602                 | CC                              | TT                | 1945929869               |
| SNP_P3_36263_5568776 | NC_021163.1    | Ca_kabuli_chr04 | 5568776                 | GG                              | AA                | 1945929871               |
| SNP_P3_36264_5570752 | NC_021163.1    | Ca_kabuli_chr04 | 5570752                 | CC                              | TT                | 1945929873               |
| SNP_P3_36265_5587043 | NC_021163.1    | Ca_kabuli_chr04 | 5587043                 | GG                              | AA                | 1945929875               |
| SNP_P3_36266_5601238 | NC_021163.1    | Ca_kabuli_chr04 | 5601238                 | GG                              | CC                | 1945929876               |
| SNP_P3_36267_5615968 | NC_021163.1    | Ca_kabuli_chr04 | 5615968                 | AA                              | TT                | 1945929878               |
| SNP_P3_36268_5616944 | NC_021163.1    | Ca_kabuli_chr04 | 5616944                 | CC                              | AA                | 1945929880               |

| SNPs IDs             | Chromosome IDs | Chromosomes     | Physical positions (bp) | CDC Frontier (Reference genome) | (Pusa 256 & HPNB) | NCBI SNPdb Accession IDs |
|----------------------|----------------|-----------------|-------------------------|---------------------------------|-------------------|--------------------------|
| SNP_P3_36270_5619309 | NC_021163.1    | Ca_kabuli_chr04 | 5619309                 | TT                              | GG                | 1945929882               |
| SNP_P3_36272_5641834 | NC_021163.1    | Ca_kabuli_chr04 | 5641834                 | AA                              | TT                | 1945929883               |
| SNP_P3_36274_5658761 | NC_021163.1    | Ca_kabuli_chr04 | 5658761                 | TT                              | CC                | 1945929885               |
| SNP_P3_36276_5701205 | NC_021163.1    | Ca_kabuli_chr04 | 5701205                 | GG                              | AA                | 1945929887               |
| SNP_P3_36278_5719660 | NC_021163.1    | Ca_kabuli_chr04 | 5719660                 | TT                              | CC                | 1945929889               |
| SNP_P3_36279_5726826 | NC_021163.1    | Ca_kabuli_chr04 | 5726826                 | CC                              | AA                | 1945929890               |
| SNP_P3_36281_5828635 | NC_021163.1    | Ca_kabuli_chr04 | 5828635                 | TT                              | AA                | 1945929892               |
| SNP_P3_36282_5836671 | NC_021163.1    | Ca_kabuli_chr04 | 5836671                 | AA                              | CC                | 1945929894               |
| SNP_P3_36283_5849232 | NC_021163.1    | Ca_kabuli_chr04 | 5849232                 | GG                              | AA                | 1945929896               |
| SNP_P3_36284_5858167 | NC_021163.1    | Ca_kabuli_chr04 | 5858167                 | GG                              | AA                | 1945929898               |
| SNP_P3_36285_5870221 | NC_021163.1    | Ca_kabuli_chr04 | 5870221                 | AA                              | GG                | 1945929899               |
| SNP_P3_36286_5912546 | NC_021163.1    | Ca_kabuli_chr04 | 5912546                 | CC                              | AA                | 1945929901               |
| SNP_P3_36287_5925667 | NC_021163.1    | Ca_kabuli_chr04 | 5925667                 | GG                              | TT                | 1945929903               |
| SNP_P3_36289_5941209 | NC_021163.1    | Ca_kabuli_chr04 | 5941209                 | CC                              | TT                | 1945929905               |
| SNP_P3_36290_5951563 | NC_021163.1    | Ca_kabuli_chr04 | 5951563                 | TT                              | CC                | 1945929906               |
| SNP_P3_36291_5952652 | NC_021163.1    | Ca_kabuli_chr04 | 5952652                 | AA                              | GG                | 1945929908               |
| SNP_P3_36292_6013383 | NC_021163.1    | Ca_kabuli_chr04 | 6013383                 | TT                              | CC                | 1945929910               |
| SNP_P3_36293_6017529 | NC_021163.1    | Ca_kabuli_chr04 | 6017529                 | GG                              | AA                | 1945929912               |
| SNP_P3_36294_6017658 | NC_021163.1    | Ca_kabuli_chr04 | 6017658                 | CC                              | TT                | 1945929913               |
| SNP_P3_36295_6023513 | NC_021163.1    | Ca_kabuli_chr04 | 6023513                 | AA                              | TT                | 1945929915               |
| SNP_P3_36296_6028077 | NC_021163.1    | Ca_kabuli_chr04 | 6028077                 | TT                              | CC                | 1945929917               |
| SNP_P3_36297_6050243 | NC_021163.1    | Ca_kabuli_chr04 | 6050243                 | CC                              | TT                | 1945929919               |
| SNP_P3_36298_6050270 | NC_021163.1    | Ca_kabuli_chr04 | 6050270                 | TT                              | CC                | 1945929921               |
| SNP_P3_36299_6050273 | NC_021163.1    | Ca_kabuli_chr04 | 6050273                 | AA                              | TT                | 1945929922               |
| SNP_P3_36300_6050283 | NC_021163.1    | Ca_kabuli_chr04 | 6050283                 | TT                              | GG                | 1945929924               |
| SNP_P3_36301_6050682 | NC_021163.1    | Ca_kabuli_chr04 | 6050682                 | GG                              | AA                | 1945929926               |
| SNP_P3_36302_6059314 | NC_021163.1    | Ca_kabuli_chr04 | 6059314                 | AA                              | GG                | 1945929928               |
| SNP_P3_36303_6096003 | NC_021163.1    | Ca_kabuli_chr04 | 6096003                 | AA                              | GG                | 1945929929               |
| SNP_P3_36305_6123584 | NC_021163.1    | Ca_kabuli_chr04 | 6123584                 | GG                              | AA                | 1945929931               |
| SNP_P3_36306_6129167 | NC_021163.1    | Ca_kabuli_chr04 | 6129167                 | TT                              | AA                | 1945929933               |
| SNP_P3_36307_6140258 | NC_021163.1    | Ca_kabuli_chr04 | 6140258                 | CC                              | AA                | 1945929935               |
| SNP_P3_36308_6145007 | NC_021163.1    | Ca_kabuli_chr04 | 6145007                 | TT                              | AA                | 1945929936               |
| SNP_P3_36310_6198586 | NC_021163.1    | Ca_kabuli_chr04 | 6198586                 | TT                              | CC                | 1945929938               |
| SNP_P3_36311_6207398 | NC_021163.1    | Ca_kabuli_chr04 | 6207398                 | AA                              | GG                | 1945929940               |
| SNP_P3_36313_6209346 | NC_021163.1    | Ca_kabuli_chr04 | 6209346                 | TT                              | GG                | 1945929942               |
| SNP_P3_36314_6212288 | NC_021163.1    | Ca_kabuli_chr04 | 6212288                 | TT                              | CC                | 1945929944               |
| SNP_P3_36315_6212294 | NC_021163.1    | Ca_kabuli_chr04 | 6212294                 | CC                              | AA                | 1945929945               |
| SNP_P3_36316_6212321 | NC_021163.1    | Ca_kabuli_chr04 | 6212321                 | AA                              | TT                | 1945929947               |
| SNP_P3_36317_6212338 | NC_021163.1    | Ca_kabuli_chr04 | 6212338                 | GG                              | TT                | 1945929949               |
| SNP_P3_36318_6213616 | NC_021163.1    | Ca_kabuli_chr04 | 6213616                 | CC                              | TT                | 1945929951               |
| SNP_P3_36319_6219492 | NC_021163.1    | Ca_kabuli_chr04 | 6219492                 | TT                              | CC                | 1945929952               |
| SNP_P3_36320_6225000 | NC_021163.1    | Ca_kabuli_chr04 | 6225000                 | TT                              | AA                | 1945929954               |



| SNPs IDs             | Chromosome IDs | Chromosomes     | Physical positions (bp) | CDC Frontier (Reference genome) | (Pusa 256 & HPNB) | NCBI SNPdb Accession IDs |
|----------------------|----------------|-----------------|-------------------------|---------------------------------|-------------------|--------------------------|
| SNP_P3_36321_6225019 | NC_021163.1    | Ca_kabuli_chr04 | 6225019                 | CC                              | AA                | 1945929956               |
| SNP_P3_36322_6225022 | NC_021163.1    | Ca_kabuli_chr04 | 6225022                 | AA                              | TT                | 1945929958               |
| SNP_P3_36323_6225541 | NC_021163.1    | Ca_kabuli_chr04 | 6225541                 | TT                              | CC                | 1945929959               |
| SNP_P3_36324_6260741 | NC_021163.1    | Ca_kabuli_chr04 | 6260741                 | GG                              | AA                | 1945929961               |
| SNP_P3_36325_6265384 | NC_021163.1    | Ca_kabuli_chr04 | 6265384                 | TT                              | CC                | 1945929963               |
| SNP_P3_36327_6313722 | NC_021163.1    | Ca_kabuli_chr04 | 6313722                 | CC                              | TT                | 1945929965               |
| SNP_P3_36328_6322195 | NC_021163.1    | Ca_kabuli_chr04 | 6322195                 | TT                              | CC                | 1945929967               |
| SNP_P3_36329_6322346 | NC_021163.1    | Ca_kabuli_chr04 | 6322346                 | GG                              | AA                | 1945929968               |
| SNP_P3_36331_6344836 | NC_021163.1    | Ca_kabuli_chr04 | 6344836                 | CC                              | TT                | 1945929970               |
| SNP_P3_36332_6359997 | NC_021163.1    | Ca_kabuli_chr04 | 6359997                 | GG                              | AA                | 1945929972               |
| SNP_P3_36333_6381732 | NC_021163.1    | Ca_kabuli_chr04 | 6381732                 | AA                              | CC                | 1945929974               |
| SNP_P3_36334_6406569 | NC_021163.1    | Ca_kabuli_chr04 | 6406569                 | AA                              | GG                | 1945929975               |
| SNP_P3_36335_6406578 | NC_021163.1    | Ca_kabuli_chr04 | 6406578                 | AA                              | GG                | 1945929977               |
| SNP_P3_36336_6406592 | NC_021163.1    | Ca_kabuli_chr04 | 6406592                 | AA                              | TT                | 1945929979               |
| SNP_P3_36337_6418115 | NC_021163.1    | Ca_kabuli_chr04 | 6418115                 | CC                              | TT                | 1945929981               |
| SNP_P3_36338_6455795 | NC_021163.1    | Ca_kabuli_chr04 | 6455795                 | GG                              | AA                | 1945929982               |
| SNP_P3_36339_6459969 | NC_021163.1    | Ca_kabuli_chr04 | 6459969                 | CC                              | TT                | 1945929984               |
| SNP_P3_36340_6480208 | NC_021163.1    | Ca_kabuli_chr04 | 6480208                 | TT                              | GG                | 1945929986               |
| SNP_P3_36341_6480209 | NC_021163.1    | Ca_kabuli_chr04 | 6480209                 | TT                              | AA                | 1945929988               |
| SNP_P3_36342_6494543 | NC_021163.1    | Ca_kabuli_chr04 | 6494543                 | TT                              | AA                | 1945929990               |
| SNP_P3_36343_6494549 | NC_021163.1    | Ca_kabuli_chr04 | 6494549                 | AA                              | TT                | 1945929991               |
| SNP_P3_36346_6536871 | NC_021163.1    | Ca_kabuli_chr04 | 6536871                 | TT                              | AA                | 1945929993               |
| SNP_P3_36349_6588380 | NC_021163.1    | Ca_kabuli_chr04 | 6588380                 | TT                              | CC                | 1945929995               |
| SNP_P3_36352_6620114 | NC_021163.1    | Ca_kabuli_chr04 | 6620114                 | TT                              | CC                | 1945929997               |
| SNP_P3_36355_6795373 | NC_021163.1    | Ca_kabuli_chr04 | 6795373                 | AA                              | TT                | 1945929998               |
| SNP_P3_36356_6816952 | NC_021163.1    | Ca_kabuli_chr04 | 6816952                 | CC                              | TT                | 1945930000               |
| SNP_P3_36357_6822700 | NC_021163.1    | Ca_kabuli_chr04 | 6822700                 | TT                              | AA                | 1945930002               |
| SNP_P3_36358_6861555 | NC_021163.1    | Ca_kabuli_chr04 | 6861555                 | GG                              | AA                | 1945930004               |
| SNP_P3_36359_6863627 | NC_021163.1    | Ca_kabuli_chr04 | 6863627                 | CC                              | TT                | 1945930005               |
| SNP_P3_36360_6864146 | NC_021163.1    | Ca_kabuli_chr04 | 6864146                 | CC                              | AA                | 1945930007               |
| SNP_P3_36361_6864188 | NC_021163.1    | Ca_kabuli_chr04 | 6864188                 | AA                              | GG                | 1945930009               |
| SNP_P3_36362_6881221 | NC_021163.1    | Ca_kabuli_chr04 | 6881221                 | AA                              | TT                | 1945930011               |
| SNP_P3_36363_6901597 | NC_021163.1    | Ca_kabuli_chr04 | 6901597                 | TT                              | CC                | 1945930013               |
| SNP_P3_36365_6907263 | NC_021163.1    | Ca_kabuli_chr04 | 6907263                 | AA                              | TT                | 1945930014               |
| SNP_P3_36366_6907267 | NC_021163.1    | Ca_kabuli_chr04 | 6907267                 | CC                              | TT                | 1945930016               |
| SNP_P3_36367_6907299 | NC_021163.1    | Ca_kabuli_chr04 | 6907299                 | AA                              | GG                | 1945930018               |
| SNP_P3_36368_6907648 | NC_021163.1    | Ca_kabuli_chr04 | 6907648                 | TT                              | AA                | 1945930020               |
| SNP_P3_36369_6913088 | NC_021163.1    | Ca_kabuli_chr04 | 6913088                 | TT                              | AA                | 1945930021               |
| SNP_P3_36370_6921988 | NC_021163.1    | Ca_kabuli_chr04 | 6921988                 | AA                              | CC                | 1945930023               |
| SNP_P3_36372_6950523 | NC_021163.1    | Ca_kabuli_chr04 | 6950523                 | AA                              | GG                | 1945930025               |
| SNP_P3_36375_6975779 | NC_021163.1    | Ca_kabuli_chr04 | 6975779                 | CC                              | AA                | 1945930027               |
| SNP_P3_36376_6981919 | NC_021163.1    | Ca_kabuli_chr04 | 6981919                 | AA                              | GG                | 1945930028               |

| SNPs IDs             | Chromosome IDs | Chromosomes     | Physical positions (bp) | CDC Frontier (Reference genome) | (Pusa 256 & HPNB) | NCBI SNPdb Accession IDs |
|----------------------|----------------|-----------------|-------------------------|---------------------------------|-------------------|--------------------------|
| SNP_P3_36378_7029322 | NC_021163.1    | Ca_kabuli_chr04 | 7029322                 | CC                              | TT                | 1945930030               |
| SNP_P3_36379_7054984 | NC_021163.1    | Ca_kabuli_chr04 | 7054984                 | AA                              | CC                | 1945930032               |
| SNP_P3_36380_7061136 | NC_021163.1    | Ca_kabuli_chr04 | 7061136                 | GG                              | TT                | 1945930034               |
| SNP_P3_36382_7102147 | NC_021163.1    | Ca_kabuli_chr04 | 7102147                 | GG                              | AA                | 1945930036               |
| SNP_P3_36384_7106487 | NC_021163.1    | Ca_kabuli_chr04 | 7106487                 | TT                              | GG                | 1945930037               |
| SNP_P3_36385_7108099 | NC_021163.1    | Ca_kabuli_chr04 | 7108099                 | TT                              | GG                | 1945930039               |
| SNP_P3_36387_7110486 | NC_021163.1    | Ca_kabuli_chr04 | 7110486                 | GG                              | AA                | 1945930041               |
| SNP_P3_36388_7117272 | NC_021163.1    | Ca_kabuli_chr04 | 7117272                 | GG                              | CC                | 1945930043               |
| SNP_P3_36389_7128635 | NC_021163.1    | Ca_kabuli_chr04 | 7128635                 | GG                              | AA                | 1945930044               |
| SNP_P3_36390_7128962 | NC_021163.1    | Ca_kabuli_chr04 | 7128962                 | AA                              | CC                | 1945930046               |
| SNP_P3_36392_7179984 | NC_021163.1    | Ca_kabuli_chr04 | 7179984                 | AA                              | GG                | 1945930048               |
| SNP_P3_36395_7215695 | NC_021163.1    | Ca_kabuli_chr04 | 7215695                 | TT                              | CC                | 1945930050               |
| SNP_P3_36396_7218173 | NC_021163.1    | Ca_kabuli_chr04 | 7218173                 | TT                              | CC                | 1945930051               |
| SNP_P3_36398_7272521 | NC_021163.1    | Ca_kabuli_chr04 | 7272521                 | TT                              | CC                | 1945930053               |
| SNP_P3_36400_7287153 | NC_021163.1    | Ca_kabuli_chr04 | 7287153                 | GG                              | AA                | 1945930055               |
| SNP_P3_36401_7292955 | NC_021163.1    | Ca_kabuli_chr04 | 7292955                 | GG                              | AA                | 1945930057               |
| SNP_P3_36402_7323477 | NC_021163.1    | Ca_kabuli_chr04 | 7323477                 | CC                              | TT                | 1945930058               |
| SNP_P3_36403_7359150 | NC_021163.1    | Ca_kabuli_chr04 | 7359150                 | AA                              | GG                | 1945930060               |
| SNP_P3_36404_7359173 | NC_021163.1    | Ca_kabuli_chr04 | 7359173                 | AA                              | TT                | 1945930062               |
| SNP_P3_36408_7405163 | NC_021163.1    | Ca_kabuli_chr04 | 7405163                 | AA                              | GG                | 1945930064               |
| SNP_P3_36409_7434801 | NC_021163.1    | Ca_kabuli_chr04 | 7434801                 | GG                              | AA                | 1945930066               |
| SNP_P3_36410_7440765 | NC_021163.1    | Ca_kabuli_chr04 | 7440765                 | GG                              | AA                | 1945930067               |
| SNP_P3_36411_7443350 | NC_021163.1    | Ca_kabuli_chr04 | 7443350                 | GG                              | TT                | 1945930069               |
| SNP_P3_36412_7464315 | NC_021163.1    | Ca_kabuli_chr04 | 7464315                 | TT                              | GG                | 1945930071               |
| SNP_P3_36413_7464337 | NC_021163.1    | Ca_kabuli_chr04 | 7464337                 | GG                              | CC                | 1945930073               |
| SNP_P3_36414_7464338 | NC_021163.1    | Ca_kabuli_chr04 | 7464338                 | CC                              | AA                | 1945930074               |
| SNP_P3_36415_7464339 | NC_021163.1    | Ca_kabuli_chr04 | 7464339                 | AA                              | TT                | 1945930076               |
| SNP_P3_36416_7480526 | NC_021163.1    | Ca_kabuli_chr04 | 7480526                 | GG                              | TT                | 1945930078               |
| SNP_P3_36417_7519601 | NC_021163.1    | Ca_kabuli_chr04 | 7519601                 | TT                              | CC                | 1945930080               |
| SNP_P3_36418_7540591 | NC_021163.1    | Ca_kabuli_chr04 | 7540591                 | AA                              | CC                | 1945930081               |
| SNP_P3_36419_7579920 | NC_021163.1    | Ca_kabuli_chr04 | 7579920                 | GG                              | AA                | 1945930083               |
| SNP_P3_36421_7591937 | NC_021163.1    | Ca_kabuli_chr04 | 7591937                 | TT                              | AA                | 1945930085               |
| SNP_P3_36422_7593496 | NC_021163.1    | Ca_kabuli_chr04 | 7593496                 | GG                              | AA                | 1945930087               |
| SNP_P3_36423_7602555 | NC_021163.1    | Ca_kabuli_chr04 | 7602555                 | AA                              | TT                | 1945930089               |
| SNP_P3_36424_7602556 | NC_021163.1    | Ca_kabuli_chr04 | 7602556                 | AA                              | TT                | 1945930090               |
| SNP_P3_36425_7637887 | NC_021163.1    | Ca_kabuli_chr04 | 7637887                 | AA                              | GG                | 1945930092               |
| SNP_P3_36426_7637891 | NC_021163.1    | Ca_kabuli_chr04 | 7637891                 | AA                              | GG                | 1945930094               |
| SNP_P3_36427_7637894 | NC_021163.1    | Ca_kabuli_chr04 | 7637894                 | GG                              | AA                | 1945930096               |
| SNP_P3_36428_7638088 | NC_021163.1    | Ca_kabuli_chr04 | 7638088                 | CC                              | AA                | 1945930097               |
| SNP_P3_36429_7638091 | NC_021163.1    | Ca_kabuli_chr04 | 7638091                 | CC                              | AA                | 1945930099               |
| SNP_P3_36430_7638100 | NC_021163.1    | Ca_kabuli_chr04 | 7638100                 | AA                              | GG                | 1945930101               |
| SNP_P3_36431_7638110 | NC_021163.1    | Ca_kabuli_chr04 | 7638110                 | GG                              | AA                | 1945930103               |

| SNPs IDs             | Chromosome IDs | Chromosomes     | Physical positions (bp) | CDC Frontier (Reference genome) | (Pusa 256 & HPNB) | NCBI SNPdb Accession IDs |
|----------------------|----------------|-----------------|-------------------------|---------------------------------|-------------------|--------------------------|
| SNP_P3_36432_7638134 | NC_021163.1    | Ca_kabuli_chr04 | 7638134                 | CC                              | TT                | 1945930104               |
| SNP_P3_36433_7638308 | NC_021163.1    | Ca_kabuli_chr04 | 7638308                 | GG                              | TT                | 1945930106               |
| SNP_P3_36434_7673284 | NC_021163.1    | Ca_kabuli_chr04 | 7673284                 | CC                              | TT                | 1945930108               |
| SNP_P3_36435_7673719 | NC_021163.1    | Ca_kabuli_chr04 | 7673719                 | CC                              | GG                | 1945930110               |
| SNP_P3_36436_7684588 | NC_021163.1    | Ca_kabuli_chr04 | 7684588                 | GG                              | TT                | 1945930112               |
| SNP_P3_36437_7703753 | NC_021163.1    | Ca_kabuli_chr04 | 7703753                 | TT                              | GG                | 1945930113               |
| SNP_P3_36438_7703764 | NC_021163.1    | Ca_kabuli_chr04 | 7703764                 | AA                              | TT                | 1945930115               |
| SNP_P3_36440_7713594 | NC_021163.1    | Ca_kabuli_chr04 | 7713594                 | AA                              | GG                | 1945930117               |
| SNP_P3_36441_7713818 | NC_021163.1    | Ca_kabuli_chr04 | 7713818                 | GG                              | AA                | 1945930119               |
| SNP_P3_36442_7727449 | NC_021163.1    | Ca_kabuli_chr04 | 7727449                 | TT                              | GG                | 1945930120               |
| SNP_P3_36443_7733801 | NC_021163.1    | Ca_kabuli_chr04 | 7733801                 | CC                              | TT                | 1945930122               |
| SNP_P3_36444_7738250 | NC_021163.1    | Ca_kabuli_chr04 | 7738250                 | CC                              | AA                | 1945930124               |
| SNP_P3_36445_7746286 | NC_021163.1    | Ca_kabuli_chr04 | 7746286                 | CC                              | TT                | 1945930126               |
| SNP_P3_36449_7811446 | NC_021163.1    | Ca_kabuli_chr04 | 7811446                 | TT                              | AA                | 1945930127               |
| SNP_P3_36450_7820516 | NC_021163.1    | Ca_kabuli_chr04 | 7820516                 | AA                              | TT                | 1945930129               |
| SNP_P3_36452_7826813 | NC_021163.1    | Ca_kabuli_chr04 | 7826813                 | CC                              | TT                | 1945930131               |
| SNP_P3_36454_7838307 | NC_021163.1    | Ca_kabuli_chr04 | 7838307                 | AA                              | GG                | 1945930133               |
| SNP_P3_36455_7850253 | NC_021163.1    | Ca_kabuli_chr04 | 7850253                 | GG                              | AA                | 1945930135               |
| SNP_P3_36456_7876015 | NC_021163.1    | Ca_kabuli_chr04 | 7876015                 | GG                              | AA                | 1945930136               |
| SNP_P3_36457_7906273 | NC_021163.1    | Ca_kabuli_chr04 | 7906273                 | GG                              | AA                | 1945930138               |
| SNP_P3_36458_7927555 | NC_021163.1    | Ca_kabuli_chr04 | 7927555                 | TT                              | AA                | 1945930140               |
| SNP_P3_36459_7930071 | NC_021163.1    | Ca_kabuli_chr04 | 7930071                 | AA                              | GG                | 1945930142               |
| SNP_P3_36461_7946722 | NC_021163.1    | Ca_kabuli_chr04 | 7946722                 | CC                              | TT                | 1945930143               |
| SNP_P3_36462_7969575 | NC_021163.1    | Ca_kabuli_chr04 | 7969575                 | CC                              | TT                | 1945930145               |
| SNP_P3_36464_7978333 | NC_021163.1    | Ca_kabuli_chr04 | 7978333                 | CC                              | TT                | 1945930147               |
| SNP_P3_36466_8008918 | NC_021163.1    | Ca_kabuli_chr04 | 8008918                 | GG                              | AA                | 1945930149               |
| SNP_P3_36467_8029195 | NC_021163.1    | Ca_kabuli_chr04 | 8029195                 | TT                              | AA                | 1945930150               |
| SNP_P3_36468_8035132 | NC_021163.1    | Ca_kabuli_chr04 | 8035132                 | CC                              | GG                | 1945930152               |
| SNP_P3_36472_8109633 | NC_021163.1    | Ca_kabuli_chr04 | 8109633                 | GG                              | AA                | 1945930154               |
| SNP_P3_36473_8159094 | NC_021163.1    | Ca_kabuli_chr04 | 8159094                 | TT                              | CC                | 1945930156               |
| SNP_P3_36475_8167215 | NC_021163.1    | Ca_kabuli_chr04 | 8167215                 | CC                              | AA                | 1945930158               |
| SNP_P3_36477_8167279 | NC_021163.1    | Ca_kabuli_chr04 | 8167279                 | TT                              | GG                | 1945930159               |
| SNP_P3_36479_8167643 | NC_021163.1    | Ca_kabuli_chr04 | 8167643                 | TT                              | CC                | 1945930161               |
| SNP_P3_36480_8168511 | NC_021163.1    | Ca_kabuli_chr04 | 8168511                 | GG                              | AA                | 1945930163               |
| SNP_P3_36481_8168521 | NC_021163.1    | Ca_kabuli_chr04 | 8168521                 | GG                              | AA                | 1945930165               |
| SNP_P3_36482_8168537 | NC_021163.1    | Ca_kabuli_chr04 | 8168537                 | GG                              | AA                | 1945930166               |
| SNP_P3_36483_8168541 | NC_021163.1    | Ca_kabuli_chr04 | 8168541                 | GG                              | TT                | 1945930168               |
| SNP_P3_36484_8169328 | NC_021163.1    | Ca_kabuli_chr04 | 8169328                 | AA                              | TT                | 1945930170               |
| SNP_P3_36485_8169329 | NC_021163.1    | Ca_kabuli_chr04 | 8169329                 | CC                              | AA                | 1945930172               |
| SNP_P3_36486_8169537 | NC_021163.1    | Ca_kabuli_chr04 | 8169537                 | AA                              | GG                | 1945930173               |
| SNP_P3_36487_8169541 | NC_021163.1    | Ca_kabuli_chr04 | 8169541                 | AA                              | GG                | 1945930175               |
| SNP_P3_36488_8169547 | NC_021163.1    | Ca_kabuli_chr04 | 8169547                 | TT                              | CC                | 1945930177               |

| SNPs IDs             | Chromosome IDs | Chromosomes     | Physical positions (bp) | CDC Frontier (Reference genome) | (Pusa 256 & HPNB) | NCBI SNPdb Accession IDs |
|----------------------|----------------|-----------------|-------------------------|---------------------------------|-------------------|--------------------------|
| SNP_P3_36489_8169561 | NC_021163.1    | Ca_kabuli_chr04 | 8169561                 | GG                              | CC                | 1945930179               |
| SNP_P3_36491_8169777 | NC_021163.1    | Ca_kabuli_chr04 | 8169777                 | GG                              | AA                | 1945930181               |
| SNP_P3_36492_8170050 | NC_021163.1    | Ca_kabuli_chr04 | 8170050                 | TT                              | AA                | 1945930182               |
| SNP_P3_36493_8170105 | NC_021163.1    | Ca_kabuli_chr04 | 8170105                 | TT                              | CC                | 1945930184               |
| SNP_P3_36494_8170391 | NC_021163.1    | Ca_kabuli_chr04 | 8170391                 | CC                              | TT                | 1945930186               |
| SNP_P3_36495_8170400 | NC_021163.1    | Ca_kabuli_chr04 | 8170400                 | TT                              | CC                | 1945930188               |
| SNP_P3_36497_8170695 | NC_021163.1    | Ca_kabuli_chr04 | 8170695                 | CC                              | GG                | 1945930189               |
| SNP_P3_36498_8170794 | NC_021163.1    | Ca_kabuli_chr04 | 8170794                 | CC                              | TT                | 1945930191               |
| SNP_P3_36499_8170799 | NC_021163.1    | Ca_kabuli_chr04 | 8170799                 | TT                              | AA                | 1945930193               |
| SNP_P3_36500_8171166 | NC_021163.1    | Ca_kabuli_chr04 | 8171166                 | AA                              | GG                | 1945930195               |
| SNP_P3_36502_8171526 | NC_021163.1    | Ca_kabuli_chr04 | 8171526                 | TT                              | GG                | 1945930196               |
| SNP_P3_36503_8171538 | NC_021163.1    | Ca_kabuli_chr04 | 8171538                 | CC                              | TT                | 1945930198               |
| SNP_P3_36504_8171620 | NC_021163.1    | Ca_kabuli_chr04 | 8171620                 | TT                              | AA                | 1945930200               |
| SNP_P3_36507_8173166 | NC_021163.1    | Ca_kabuli_chr04 | 8173166                 | CC                              | TT                | 1945930202               |
| SNP_P3_36509_8173317 | NC_021163.1    | Ca_kabuli_chr04 | 8173317                 | AA                              | GG                | 1945930203               |
| SNP_P3_36511_8173409 | NC_021163.1    | Ca_kabuli_chr04 | 8173409                 | CC                              | TT                | 1945930205               |
| SNP_P3_36512_8173426 | NC_021163.1    | Ca_kabuli_chr04 | 8173426                 | CC                              | GG                | 1945930207               |
| SNP_P3_36513_8173480 | NC_021163.1    | Ca_kabuli_chr04 | 8173480                 | GG                              | CC                | 1945930209               |
| SNP_P3_36514_8173497 | NC_021163.1    | Ca_kabuli_chr04 | 8173497                 | CC                              | TT                | 1945930211               |
| SNP_P3_36517_8175858 | NC_021163.1    | Ca_kabuli_chr04 | 8175858                 | GG                              | AA                | 1945930212               |
| SNP_P3_36518_8175872 | NC_021163.1    | Ca_kabuli_chr04 | 8175872                 | TT                              | CC                | 1945930214               |
| SNP_P3_36519_8176091 | NC_021163.1    | Ca_kabuli_chr04 | 8176091                 | GG                              | CC                | 1945930216               |
| SNP_P3_36520_8176092 | NC_021163.1    | Ca_kabuli_chr04 | 8176092                 | GG                              | CC                | 1945930218               |
| SNP_P3_36521_8176308 | NC_021163.1    | Ca_kabuli_chr04 | 8176308                 | TT                              | CC                | 1945930219               |
| SNP_P3_36522_8176459 | NC_021163.1    | Ca_kabuli_chr04 | 8176459                 | CC                              | TT                | 1945930221               |
| SNP_P3_36523_8176501 | NC_021163.1    | Ca_kabuli_chr04 | 8176501                 | GG                              | AA                | 1945930223               |
| SNP_P3_36524_8176518 | NC_021163.1    | Ca_kabuli_chr04 | 8176518                 | TT                              | CC                | 1945930225               |
| SNP_P3_36525_8177624 | NC_021163.1    | Ca_kabuli_chr04 | 8177624                 | AA                              | GG                | 1945930226               |
| SNP_P3_36526_8178043 | NC_021163.1    | Ca_kabuli_chr04 | 8178043                 | AA                              | GG                | 1945930228               |
| SNP_P3_36527_8178235 | NC_021163.1    | Ca_kabuli_chr04 | 8178235                 | GG                              | TT                | 1945930230               |
| SNP_P3_36528_8178490 | NC_021163.1    | Ca_kabuli_chr04 | 8178490                 | AA                              | TT                | 1945930232               |
| SNP_P3_36530_8178989 | NC_021163.1    | Ca_kabuli_chr04 | 8178989                 | GG                              | AA                | 1945930234               |
| SNP_P3_36531_8179905 | NC_021163.1    | Ca_kabuli_chr04 | 8179905                 | TT                              | CC                | 1945930235               |
| SNP_P3_36532_8180055 | NC_021163.1    | Ca_kabuli_chr04 | 8180055                 | CC                              | AA                | 1945930237               |
| SNP_P3_36533_8180373 | NC_021163.1    | Ca_kabuli_chr04 | 8180373                 | CC                              | AA                | 1945930239               |
| SNP_P3_36534_8182707 | NC_021163.1    | Ca_kabuli_chr04 | 8182707                 | CC                              | TT                | 1945930241               |
| SNP_P3_36535_8182916 | NC_021163.1    | Ca_kabuli_chr04 | 8182916                 | CC                              | TT                | 1945930242               |
| SNP_P3_36538_8185146 | NC_021163.1    | Ca_kabuli_chr04 | 8185146                 | CC                              | TT                | 1945930244               |
| SNP_P3_36540_8185206 | NC_021163.1    | Ca_kabuli_chr04 | 8185206                 | AA                              | TT                | 1945930246               |
| SNP_P3_36541_8185853 | NC_021163.1    | Ca_kabuli_chr04 | 8185853                 | GG                              | AA                | 1945930248               |
| SNP_P3_36542_8186102 | NC_021163.1    | Ca_kabuli_chr04 | 8186102                 | GG                              | AA                | 1945930249               |
| SNP_P3_36543_8186224 | NC_021163.1    | Ca_kabuli_chr04 | 8186224                 | AA                              | GG                | 1945930251               |

| SNPs IDs             | Chromosome IDs | Chromosomes     | Physical positions (bp) | CDC Frontier (Reference genome) | (Pusa 256 & HPNB) | NCBI SNPdb Accession IDs |
|----------------------|----------------|-----------------|-------------------------|---------------------------------|-------------------|--------------------------|
| SNP_P3_36544_8186279 | NC_021163.1    | Ca_kabuli_chr04 | 8186279                 | GG                              | AA                | 1945930253               |
| SNP_P3_36546_8186559 | NC_021163.1    | Ca_kabuli_chr04 | 8186559                 | GG                              | AA                | 1945930255               |
| SNP_P3_36547_8186969 | NC_021163.1    | Ca_kabuli_chr04 | 8186969                 | CC                              | AA                | 1945930257               |
| SNP_P3_36548_8187623 | NC_021163.1    | Ca_kabuli_chr04 | 8187623                 | CC                              | TT                | 1945930258               |
| SNP_P3_36549_8189384 | NC_021163.1    | Ca_kabuli_chr04 | 8189384                 | TT                              | AA                | 1945930260               |
| SNP_P3_36550_8189395 | NC_021163.1    | Ca_kabuli_chr04 | 8189395                 | AA                              | CC                | 1945930262               |
| SNP_P3_36551_8189416 | NC_021163.1    | Ca_kabuli_chr04 | 8189416                 | TT                              | CC                | 1945930264               |
| SNP_P3_36552_8191224 | NC_021163.1    | Ca_kabuli_chr04 | 8191224                 | GG                              | AA                | 1945930265               |
| SNP_P3_36553_8191771 | NC_021163.1    | Ca_kabuli_chr04 | 8191771                 | AA                              | CC                | 1945930267               |
| SNP_P3_36556_8195455 | NC_021163.1    | Ca_kabuli_chr04 | 8195455                 | AA                              | GG                | 1945930269               |
| SNP_P3_36557_8195755 | NC_021163.1    | Ca_kabuli_chr04 | 8195755                 | TT                              | CC                | 1945930271               |
| SNP_P3_36558_8195761 | NC_021163.1    | Ca_kabuli_chr04 | 8195761                 | TT                              | CC                | 1945930272               |
| SNP_P3_36559_8196145 | NC_021163.1    | Ca_kabuli_chr04 | 8196145                 | GG                              | AA                | 1945930274               |
| SNP_P3_36560_8196148 | NC_021163.1    | Ca_kabuli_chr04 | 8196148                 | CC                              | AA                | 1945930276               |
| SNP_P3_36561_8196403 | NC_021163.1    | Ca_kabuli_chr04 | 8196403                 | TT                              | CC                | 1945930278               |
| SNP_P3_36562_8198670 | NC_021163.1    | Ca_kabuli_chr04 | 8198670                 | CC                              | AA                | 1945930279               |
| SNP_P3_36563_8199784 | NC_021163.1    | Ca_kabuli_chr04 | 8199784                 | TT                              | CC                | 1945930281               |
| SNP_P3_36564_8200027 | NC_021163.1    | Ca_kabuli_chr04 | 8200027                 | GG                              | AA                | 1945930283               |
| SNP_P3_36565_8200053 | NC_021163.1    | Ca_kabuli_chr04 | 8200053                 | CC                              | TT                | 1945930285               |
| SNP_P3_36566_8200067 | NC_021163.1    | Ca_kabuli_chr04 | 8200067                 | CC                              | TT                | 1945930287               |
| SNP_P3_36567_8200094 | NC_021163.1    | Ca_kabuli_chr04 | 8200094                 | AA                              | TT                | 1945930288               |
| SNP_P3_36568_8202738 | NC_021163.1    | Ca_kabuli_chr04 | 8202738                 | AA                              | GG                | 1945930290               |
| SNP_P3_36569_8202775 | NC_021163.1    | Ca_kabuli_chr04 | 8202775                 | AA                              | CC                | 1945930292               |
| SNP_P3_36570_8202782 | NC_021163.1    | Ca_kabuli_chr04 | 8202782                 | AA                              | TT                | 1945930294               |
| SNP_P3_36571_8202796 | NC_021163.1    | Ca_kabuli_chr04 | 8202796                 | AA                              | GG                | 1945930295               |
| SNP_P3_36572_8202804 | NC_021163.1    | Ca_kabuli_chr04 | 8202804                 | CC                              | TT                | 1945930297               |
| SNP_P3_36573_8202812 | NC_021163.1    | Ca_kabuli_chr04 | 8202812                 | CC                              | TT                | 1945930299               |
| SNP_P3_36574_8202816 | NC_021163.1    | Ca_kabuli_chr04 | 8202816                 | CC                              | TT                | 1945930301               |
| SNP_P3_36575_8202830 | NC_021163.1    | Ca_kabuli_chr04 | 8202830                 | GG                              | TT                | 1945930302               |
| SNP_P3_36576_8203010 | NC_021163.1    | Ca_kabuli_chr04 | 8203010                 | GG                              | TT                | 1945930304               |
| SNP_P3_36577_8203848 | NC_021163.1    | Ca_kabuli_chr04 | 8203848                 | AA                              | GG                | 1945930306               |
| SNP_P3_36580_8204485 | NC_021163.1    | Ca_kabuli_chr04 | 8204485                 | TT                              | AA                | 1945930308               |
| SNP_P3_36581_8204505 | NC_021163.1    | Ca_kabuli_chr04 | 8204505                 | AA                              | TT                | 1945930310               |
| SNP_P3_36582_8204553 | NC_021163.1    | Ca_kabuli_chr04 | 8204553                 | AA                              | GG                | 1945930311               |
| SNP_P3_36583_8204583 | NC_021163.1    | Ca_kabuli_chr04 | 8204583                 | GG                              | TT                | 1945930313               |
| SNP_P3_36584_8205253 | NC_021163.1    | Ca_kabuli_chr04 | 8205253                 | CC                              | AA                | 1945930315               |
| SNP_P3_36585_8205254 | NC_021163.1    | Ca_kabuli_chr04 | 8205254                 | GG                              | TT                | 1945930317               |
| SNP_P3_36588_8206388 | NC_021163.1    | Ca_kabuli_chr04 | 8206388                 | TT                              | AA                | 1945930318               |
| SNP_P3_36589_8206770 | NC_021163.1    | Ca_kabuli_chr04 | 8206770                 | GG                              | AA                | 1945930320               |
| SNP_P3_36590_8206910 | NC_021163.1    | Ca_kabuli_chr04 | 8206910                 | CC                              | GG                | 1945930322               |
| SNP_P3_36592_8207586 | NC_021163.1    | Ca_kabuli_chr04 | 8207586                 | GG                              | AA                | 1945930324               |
| SNP_P3_36593_8207841 | NC_021163.1    | Ca_kabuli_chr04 | 8207841                 | CC                              | AA                | 1945930325               |

| SNPs IDs             | Chromosome IDs | Chromosomes     | Physical positions (bp) | CDC Frontier (Reference genome) | (Pusa 256 & HPNB) | NCBI SNPdb Accession IDs |
|----------------------|----------------|-----------------|-------------------------|---------------------------------|-------------------|--------------------------|
| SNP_P3_36595_8208534 | NC_021163.1    | Ca_kabuli_chr04 | 8208534                 | CC                              | TT                | 1945930327               |
| SNP_P3_36596_8208822 | NC_021163.1    | Ca_kabuli_chr04 | 8208822                 | GG                              | AA                | 1945930329               |
| SNP_P3_36597_8208837 | NC_021163.1    | Ca_kabuli_chr04 | 8208837                 | GG                              | AA                | 1945930331               |
| SNP_P3_36598_8208889 | NC_021163.1    | Ca_kabuli_chr04 | 8208889                 | TT                              | CC                | 1945930333               |
| SNP_P3_36599_8208891 | NC_021163.1    | Ca_kabuli_chr04 | 8208891                 | CC                              | GG                | 1945930334               |
| SNP_P3_36600_8208898 | NC_021163.1    | Ca_kabuli_chr04 | 8208898                 | GG                              | AA                | 1945930336               |
| SNP_P3_36601_8208974 | NC_021163.1    | Ca_kabuli_chr04 | 8208974                 | AA                              | GG                | 1945930338               |
| SNP_P3_36602_8209184 | NC_021163.1    | Ca_kabuli_chr04 | 8209184                 | CC                              | GG                | 1945930340               |
| SNP_P3_36603_8209202 | NC_021163.1    | Ca_kabuli_chr04 | 8209202                 | TT                              | CC                | 1945930341               |
| SNP_P3_36604_8209315 | NC_021163.1    | Ca_kabuli_chr04 | 8209315                 | AA                              | TT                | 1945930343               |
| SNP_P3_36605_8209327 | NC_021163.1    | Ca_kabuli_chr04 | 8209327                 | GG                              | CC                | 1945930345               |
| SNP_P3_36606_8209391 | NC_021163.1    | Ca_kabuli_chr04 | 8209391                 | AA                              | CC                | 1945930347               |
| SNP_P3_36607_8209594 | NC_021163.1    | Ca_kabuli_chr04 | 8209594                 | GG                              | AA                | 1945930348               |
| SNP_P3_36608_8209669 | NC_021163.1    | Ca_kabuli_chr04 | 8209669                 | CC                              | TT                | 1945930350               |
| SNP_P3_36609_8210262 | NC_021163.1    | Ca_kabuli_chr04 | 8210262                 | AA                              | TT                | 1945930352               |
| SNP_P3_36610_8210279 | NC_021163.1    | Ca_kabuli_chr04 | 8210279                 | AA                              | GG                | 1945930354               |
| SNP_P3_36611_8210443 | NC_021163.1    | Ca_kabuli_chr04 | 8210443                 | TT                              | GG                | 1945930356               |
| SNP_P3_36613_8210604 | NC_021163.1    | Ca_kabuli_chr04 | 8210604                 | CC                              | TT                | 1945930357               |
| SNP_P3_36615_8210744 | NC_021163.1    | Ca_kabuli_chr04 | 8210744                 | TT                              | CC                | 1945930359               |
| SNP_P3_36616_8210985 | NC_021163.1    | Ca_kabuli_chr04 | 8210985                 | GG                              | TT                | 1945930361               |
| SNP_P3_36617_8211191 | NC_021163.1    | Ca_kabuli_chr04 | 8211191                 | CC                              | TT                | 1945930363               |
| SNP_P3_36618_8211279 | NC_021163.1    | Ca_kabuli_chr04 | 8211279                 | AA                              | GG                | 1945930364               |
| SNP_P3_36620_8211812 | NC_021163.1    | Ca_kabuli_chr04 | 8211812                 | GG                              | AA                | 1945930366               |
| SNP_P3_36621_8211955 | NC_021163.1    | Ca_kabuli_chr04 | 8211955                 | AA                              | TT                | 1945930368               |
| SNP_P3_36622_8212296 | NC_021163.1    | Ca_kabuli_chr04 | 8212296                 | GG                              | TT                | 1945930370               |
| SNP_P3_36623_8212312 | NC_021163.1    | Ca_kabuli_chr04 | 8212312                 | TT                              | AA                | 1945930371               |
| SNP_P3_36624_8212326 | NC_021163.1    | Ca_kabuli_chr04 | 8212326                 | AA                              | GG                | 1945930373               |
| SNP_P3_36625_8214727 | NC_021163.1    | Ca_kabuli_chr04 | 8214727                 | AA                              | GG                | 1945930375               |
| SNP_P3_36626_8214742 | NC_021163.1    | Ca_kabuli_chr04 | 8214742                 | AA                              | CC                | 1945930377               |
| SNP_P3_36627_8214770 | NC_021163.1    | Ca_kabuli_chr04 | 8214770                 | CC                              | AA                | 1945930379               |
| SNP_P3_36628_8214778 | NC_021163.1    | Ca_kabuli_chr04 | 8214778                 | CC                              | TT                | 1945930380               |
| SNP_P3_36629_8214848 | NC_021163.1    | Ca_kabuli_chr04 | 8214848                 | TT                              | GG                | 1945930382               |
| SNP_P3_36630_8215045 | NC_021163.1    | Ca_kabuli_chr04 | 8215045                 | AA                              | TT                | 1945930384               |
| SNP_P3_36631_8215075 | NC_021163.1    | Ca_kabuli_chr04 | 8215075                 | TT                              | AA                | 1945930386               |
| SNP_P3_36632_8215082 | NC_021163.1    | Ca_kabuli_chr04 | 8215082                 | AA                              | TT                | 1945930387               |
| SNP_P3_36633_8215083 | NC_021163.1    | Ca_kabuli_chr04 | 8215083                 | AA                              | TT                | 1945930389               |
| SNP_P3_36634_8215530 | NC_021163.1    | Ca_kabuli_chr04 | 8215530                 | CC                              | TT                | 1945930391               |
| SNP_P3_36636_8216105 | NC_021163.1    | Ca_kabuli_chr04 | 8216105                 | AA                              | GG                | 1945930393               |
| SNP_P3_36638_8216388 | NC_021163.1    | Ca_kabuli_chr04 | 8216388                 | AA                              | CC                | 1945930394               |
| SNP_P3_36640_8217181 | NC_021163.1    | Ca_kabuli_chr04 | 8217181                 | CC                              | TT                | 1945930396               |
| SNP_P3_36642_8217565 | NC_021163.1    | Ca_kabuli_chr04 | 8217565                 | CC                              | GG                | 1945930398               |
| SNP_P3_36643_8218843 | NC_021163.1    | Ca_kabuli_chr04 | 8218843                 | AA                              | CC                | 1945930400               |

| SNPs IDs             | Chromosome IDs | Chromosomes     | Physical positions (bp) | CDC Frontier (Reference genome) | (Pusa 256 & HPNB) | NCBI SNPdb Accession IDs |
|----------------------|----------------|-----------------|-------------------------|---------------------------------|-------------------|--------------------------|
| SNP_P3_36644_8219704 | NC_021163.1    | Ca_kabuli_chr04 | 8219704                 | AA                              | TT                | 1945930401               |
| SNP_P3_36645_8219731 | NC_021163.1    | Ca_kabuli_chr04 | 8219731                 | GG                              | AA                | 1945930403               |
| SNP_P3_36647_8220483 | NC_021163.1    | Ca_kabuli_chr04 | 8220483                 | AA                              | TT                | 1945930405               |
| SNP_P3_36648_8220517 | NC_021163.1    | Ca_kabuli_chr04 | 8220517                 | AA                              | GG                | 1945930407               |
| SNP_P3_36649_8220527 | NC_021163.1    | Ca_kabuli_chr04 | 8220527                 | AA                              | GG                | 1945930409               |
| SNP_P3_36650_8220543 | NC_021163.1    | Ca_kabuli_chr04 | 8220543                 | GG                              | CC                | 1945930410               |
| SNP_P3_36651_8220552 | NC_021163.1    | Ca_kabuli_chr04 | 8220552                 | TT                              | AA                | 1945930412               |
| SNP_P3_36653_8221347 | NC_021163.1    | Ca_kabuli_chr04 | 8221347                 | TT                              | CC                | 1945930414               |
| SNP_P3_36654_8221510 | NC_021163.1    | Ca_kabuli_chr04 | 8221510                 | TT                              | AA                | 1945930416               |
| SNP_P3_36655_8221628 | NC_021163.1    | Ca_kabuli_chr04 | 8221628                 | GG                              | AA                | 1945930417               |
| SNP_P3_36656_8221654 | NC_021163.1    | Ca_kabuli_chr04 | 8221654                 | AA                              | GG                | 1945930419               |
| SNP_P3_36657_8223339 | NC_021163.1    | Ca_kabuli_chr04 | 8223339                 | TT                              | CC                | 1945930421               |
| SNP_P3_36658_8223686 | NC_021163.1    | Ca_kabuli_chr04 | 8223686                 | GG                              | TT                | 1945930423               |
| SNP_P3_36659_8223771 | NC_021163.1    | Ca_kabuli_chr04 | 8223771                 | CC                              | TT                | 1945930424               |
| SNP_P3_36660_8223992 | NC_021163.1    | Ca_kabuli_chr04 | 8223992                 | GG                              | AA                | 1945930426               |
| SNP_P3_36661_8223996 | NC_021163.1    | Ca_kabuli_chr04 | 8223996                 | CC                              | GG                | 1945930428               |
| SNP_P3_36662_8225391 | NC_021163.1    | Ca_kabuli_chr04 | 8225391                 | GG                              | AA                | 1945930430               |
| SNP_P3_36664_8226051 | NC_021163.1    | Ca_kabuli_chr04 | 8226051                 | CC                              | GG                | 1945930432               |
| SNP_P3_36666_8226369 | NC_021163.1    | Ca_kabuli_chr04 | 8226369                 | TT                              | GG                | 1945930433               |
| SNP_P3_36667_8226435 | NC_021163.1    | Ca_kabuli_chr04 | 8226435                 | GG                              | CC                | 1945930435               |
| SNP_P3_36668_8226743 | NC_021163.1    | Ca_kabuli_chr04 | 8226743                 | CC                              | AA                | 1945930437               |
| SNP_P3_36669_8226833 | NC_021163.1    | Ca_kabuli_chr04 | 8226833                 | CC                              | TT                | 1945930439               |
| SNP_P3_36671_8227306 | NC_021163.1    | Ca_kabuli_chr04 | 8227306                 | GG                              | AA                | 1945930440               |
| SNP_P3_36672_8227310 | NC_021163.1    | Ca_kabuli_chr04 | 8227310                 | AA                              | GG                | 1945930442               |
| SNP_P3_36673_8227330 | NC_021163.1    | Ca_kabuli_chr04 | 8227330                 | AA                              | GG                | 1945930444               |
| SNP_P3_36674_8227337 | NC_021163.1    | Ca_kabuli_chr04 | 8227337                 | AA                              | GG                | 1945930446               |
| SNP_P3_36675_8227436 | NC_021163.1    | Ca_kabuli_chr04 | 8227436                 | TT                              | CC                | 1945930447               |
| SNP_P3_36676_8228815 | NC_021163.1    | Ca_kabuli_chr04 | 8228815                 | AA                              | GG                | 1945930449               |
| SNP_P3_36677_8229033 | NC_021163.1    | Ca_kabuli_chr04 | 8229033                 | CC                              | TT                | 1945930451               |
| SNP_P3_36678_8229143 | NC_021163.1    | Ca_kabuli_chr04 | 8229143                 | AA                              | GG                | 1945930453               |
| SNP_P3_36679_8230374 | NC_021163.1    | Ca_kabuli_chr04 | 8230374                 | AA                              | GG                | 1945930455               |
| SNP_P3_36680_8230508 | NC_021163.1    | Ca_kabuli_chr04 | 8230508                 | CC                              | TT                | 1945930456               |
| SNP_P3_36681_8230515 | NC_021163.1    | Ca_kabuli_chr04 | 8230515                 | TT                              | CC                | 1945930458               |
| SNP_P3_36682_8230551 | NC_021163.1    | Ca_kabuli_chr04 | 8230551                 | TT                              | CC                | 1945930460               |
| SNP_P3_36683_8230557 | NC_021163.1    | Ca_kabuli_chr04 | 8230557                 | CC                              | TT                | 1945930462               |
| SNP_P3_36684_8230607 | NC_021163.1    | Ca_kabuli_chr04 | 8230607                 | CC                              | TT                | 1945930463               |
| SNP_P3_36685_8230611 | NC_021163.1    | Ca_kabuli_chr04 | 8230611                 | AA                              | GG                | 1945930465               |
| SNP_P3_36686_8230632 | NC_021163.1    | Ca_kabuli_chr04 | 8230632                 | TT                              | GG                | 1945930467               |
| SNP_P3_36687_8230637 | NC_021163.1    | Ca_kabuli_chr04 | 8230637                 | TT                              | CC                | 1945930469               |
| SNP_P3_36688_8230760 | NC_021163.1    | Ca_kabuli_chr04 | 8230760                 | TT                              | CC                | 1945930470               |
| SNP_P3_36689_8231973 | NC_021163.1    | Ca_kabuli_chr04 | 8231973                 | AA                              | TT                | 1945930472               |
| SNP_P3_36690_8232338 | NC_021163.1    | Ca_kabuli_chr04 | 8232338                 | GG                              | AA                | 1945930474               |

| SNPs IDs             | Chromosome IDs | Chromosomes     | Physical positions (bp) | CDC Frontier (Reference genome) | (Pusa 256 & HPNB) | NCBI SNPdb Accession IDs |
|----------------------|----------------|-----------------|-------------------------|---------------------------------|-------------------|--------------------------|
| SNP_P3_36692_8235080 | NC_021163.1    | Ca_kabuli_chr04 | 8235080                 | GG                              | TT                | 1945930476               |
| SNP_P3_36693_8235095 | NC_021163.1    | Ca_kabuli_chr04 | 8235095                 | GG                              | AA                | 1945930477               |
| SNP_P3_36694_8235509 | NC_021163.1    | Ca_kabuli_chr04 | 8235509                 | AA                              | TT                | 1945930479               |
| SNP_P3_36695_8235555 | NC_021163.1    | Ca_kabuli_chr04 | 8235555                 | TT                              | CC                | 1945930481               |
| SNP_P3_36697_8238842 | NC_021163.1    | Ca_kabuli_chr04 | 8238842                 | TT                              | CC                | 1945930483               |
| SNP_P3_36699_8239918 | NC_021163.1    | Ca_kabuli_chr04 | 8239918                 | CC                              | TT                | 1945930485               |
| SNP_P3_36700_8240938 | NC_021163.1    | Ca_kabuli_chr04 | 8240938                 | CC                              | TT                | 1945930486               |
| SNP_P3_36701_8241149 | NC_021163.1    | Ca_kabuli_chr04 | 8241149                 | TT                              | AA                | 1945930488               |
| SNP_P3_36702_8241170 | NC_021163.1    | Ca_kabuli_chr04 | 8241170                 | AA                              | GG                | 1945930490               |
| SNP_P3_36703_8241172 | NC_021163.1    | Ca_kabuli_chr04 | 8241172                 | AA                              | GG                | 1945930492               |
| SNP_P3_36704_8241184 | NC_021163.1    | Ca_kabuli_chr04 | 8241184                 | CC                              | TT                | 1945930493               |
| SNP_P3_36705_8241187 | NC_021163.1    | Ca_kabuli_chr04 | 8241187                 | GG                              | AA                | 1945930495               |
| SNP_P3_36706_8241189 | NC_021163.1    | Ca_kabuli_chr04 | 8241189                 | AA                              | GG                | 1945930497               |
| SNP_P3_36707_8241192 | NC_021163.1    | Ca_kabuli_chr04 | 8241192                 | TT                              | AA                | 1945930499               |
| SNP_P3_36708_8241202 | NC_021163.1    | Ca_kabuli_chr04 | 8241202                 | TT                              | AA                | 1945930500               |
| SNP_P3_36709_8241210 | NC_021163.1    | Ca_kabuli_chr04 | 8241210                 | GG                              | AA                | 1945930502               |
| SNP_P3_36710_8241232 | NC_021163.1    | Ca_kabuli_chr04 | 8241232                 | CC                              | TT                | 1945930504               |
| SNP_P3_36711_8241267 | NC_021163.1    | Ca_kabuli_chr04 | 8241267                 | AA                              | GG                | 1945930506               |
| SNP_P3_36712_8241401 | NC_021163.1    | Ca_kabuli_chr04 | 8241401                 | TT                              | AA                | 1945930508               |
| SNP_P3_36713_8241417 | NC_021163.1    | Ca_kabuli_chr04 | 8241417                 | GG                              | AA                | 1945930509               |
| SNP_P3_36714_8248038 | NC_021163.1    | Ca_kabuli_chr04 | 8248038                 | GG                              | AA                | 1945930511               |
| SNP_P3_36715_8248288 | NC_021163.1    | Ca_kabuli_chr04 | 8248288                 | TT                              | CC                | 1945930513               |
| SNP_P3_36716_8249381 | NC_021163.1    | Ca_kabuli_chr04 | 8249381                 | TT                              | CC                | 1945930515               |
| SNP_P3_36717_8252620 | NC_021163.1    | Ca_kabuli_chr04 | 8252620                 | CC                              | TT                | 1945930516               |
| SNP_P3_36718_8255943 | NC_021163.1    | Ca_kabuli_chr04 | 8255943                 | AA                              | TT                | 1945930518               |
| SNP_P3_36719_8256356 | NC_021163.1    | Ca_kabuli_chr04 | 8256356                 | GG                              | TT                | 1945930520               |
| SNP_P3_36720_8256539 | NC_021163.1    | Ca_kabuli_chr04 | 8256539                 | CC                              | TT                | 1945930522               |
| SNP_P3_36721_8256679 | NC_021163.1    | Ca_kabuli_chr04 | 8256679                 | CC                              | AA                | 1945930523               |
| SNP_P3_36722_8256806 | NC_021163.1    | Ca_kabuli_chr04 | 8256806                 | AA                              | GG                | 1945930525               |
| SNP_P3_36723_8256855 | NC_021163.1    | Ca_kabuli_chr04 | 8256855                 | CC                              | TT                | 1945930527               |
| SNP_P3_36724_8257096 | NC_021163.1    | Ca_kabuli_chr04 | 8257096                 | AA                              | TT                | 1945930529               |
| SNP_P3_36725_8257982 | NC_021163.1    | Ca_kabuli_chr04 | 8257982                 | CC                              | TT                | 1945930531               |
| SNP_P3_36726_8264674 | NC_021163.1    | Ca_kabuli_chr04 | 8264674                 | TT                              | AA                | 1945930532               |
| SNP_P3_36727_8264881 | NC_021163.1    | Ca_kabuli_chr04 | 8264881                 | AA                              | GG                | 1945930534               |
| SNP_P3_36728_8264922 | NC_021163.1    | Ca_kabuli_chr04 | 8264922                 | AA                              | GG                | 1945930536               |
| SNP_P3_36729_8264935 | NC_021163.1    | Ca_kabuli_chr04 | 8264935                 | GG                              | AA                | 1945930538               |
| SNP_P3_36730_8267452 | NC_021163.1    | Ca_kabuli_chr04 | 8267452                 | GG                              | AA                | 1945930539               |
| SNP_P3_36731_8267764 | NC_021163.1    | Ca_kabuli_chr04 | 8267764                 | CC                              | GG                | 1945930541               |
| SNP_P3_36732_8267780 | NC_021163.1    | Ca_kabuli_chr04 | 8267780                 | GG                              | AA                | 1945930543               |
| SNP_P3_36733_8268217 | NC_021163.1    | Ca_kabuli_chr04 | 8268217                 | AA                              | GG                | 1945930545               |
| SNP_P3_36734_8268349 | NC_021163.1    | Ca_kabuli_chr04 | 8268349                 | GG                              | AA                | 1945930546               |
| SNP_P3_36735_8268498 | NC_021163.1    | Ca_kabuli_chr04 | 8268498                 | CC                              | TT                | 1945930548               |



| SNPs IDs             | Chromosome IDs | Chromosomes     | Physical positions (bp) | CDC Frontier (Reference genome) | (Pusa 256 & HPNB) | NCBI SNPdb Accession IDs |
|----------------------|----------------|-----------------|-------------------------|---------------------------------|-------------------|--------------------------|
| SNP_P3_36736_8269767 | NC_021163.1    | Ca_kabuli_chr04 | 8269767                 | GG                              | AA                | 1945930550               |
| SNP_P3_36737_8272285 | NC_021163.1    | Ca_kabuli_chr04 | 8272285                 | GG                              | TT                | 1945930552               |
| SNP_P3_36738_8272305 | NC_021163.1    | Ca_kabuli_chr04 | 8272305                 | CC                              | TT                | 1945930554               |
| SNP_P3_36739_8272645 | NC_021163.1    | Ca_kabuli_chr04 | 8272645                 | CC                              | TT                | 1945930555               |
| SNP_P3_36740_8273193 | NC_021163.1    | Ca_kabuli_chr04 | 8273193                 | CC                              | TT                | 1945930557               |
| SNP_P3_36741_8275233 | NC_021163.1    | Ca_kabuli_chr04 | 8275233                 | AA                              | TT                | 1945930559               |
| SNP_P3_36742_8276298 | NC_021163.1    | Ca_kabuli_chr04 | 8276298                 | AA                              | CC                | 1945930561               |
| SNP_P3_36743_8277565 | NC_021163.1    | Ca_kabuli_chr04 | 8277565                 | AA                              | TT                | 1945930562               |
| SNP_P3_36744_8279258 | NC_021163.1    | Ca_kabuli_chr04 | 8279258                 | AA                              | CC                | 1945930564               |
| SNP_P3_36745_8280621 | NC_021163.1    | Ca_kabuli_chr04 | 8280621                 | GG                              | AA                | 1945930566               |
| SNP_P3_36746_8280769 | NC_021163.1    | Ca_kabuli_chr04 | 8280769                 | AA                              | GG                | 1945930568               |
| SNP_P3_36747_8281158 | NC_021163.1    | Ca_kabuli_chr04 | 8281158                 | TT                              | AA                | 1945930569               |
| SNP_P3_36748_8281166 | NC_021163.1    | Ca_kabuli_chr04 | 8281166                 | TT                              | GG                | 1945930571               |
| SNP_P3_36750_8282916 | NC_021163.1    | Ca_kabuli_chr04 | 8282916                 | TT                              | CC                | 1945930573               |
| SNP_P3_36751_8282925 | NC_021163.1    | Ca_kabuli_chr04 | 8282925                 | GG                              | TT                | 1945930575               |
| SNP_P3_36753_8283190 | NC_021163.1    | Ca_kabuli_chr04 | 8283190                 | AA                              | GG                | 1945930577               |
| SNP_P3_36754_8284513 | NC_021163.1    | Ca_kabuli_chr04 | 8284513                 | GG                              | AA                | 1945930578               |
| SNP_P3_36755_8284526 | NC_021163.1    | Ca_kabuli_chr04 | 8284526                 | CC                              | TT                | 1945930580               |
| SNP_P3_36756_8287134 | NC_021163.1    | Ca_kabuli_chr04 | 8287134                 | CC                              | AA                | 1945930582               |
| SNP_P3_36757_8288983 | NC_021163.1    | Ca_kabuli_chr04 | 8288983                 | TT                              | CC                | 1945930584               |
| SNP_P3_36758_8289018 | NC_021163.1    | Ca_kabuli_chr04 | 8289018                 | CC                              | TT                | 1945930585               |
| SNP_P3_36759_8289096 | NC_021163.1    | Ca_kabuli_chr04 | 8289096                 | GG                              | AA                | 1945930587               |
| SNP_P3_36760_8289302 | NC_021163.1    | Ca_kabuli_chr04 | 8289302                 | GG                              | AA                | 1945930589               |
| SNP_P3_36761_8290520 | NC_021163.1    | Ca_kabuli_chr04 | 8290520                 | TT                              | AA                | 1945930591               |
| SNP_P3_36762_8291441 | NC_021163.1    | Ca_kabuli_chr04 | 8291441                 | GG                              | AA                | 1945930592               |
| SNP_P3_36763_8291790 | NC_021163.1    | Ca_kabuli_chr04 | 8291790                 | AA                              | GG                | 1945930594               |
| SNP_P3_36764_8291920 | NC_021163.1    | Ca_kabuli_chr04 | 8291920                 | AA                              | GG                | 1945930596               |
| SNP_P3_36765_8292193 | NC_021163.1    | Ca_kabuli_chr04 | 8292193                 | TT                              | CC                | 1945930598               |
| SNP_P3_36766_8292522 | NC_021163.1    | Ca_kabuli_chr04 | 8292522                 | GG                              | AA                | 1945930599               |
| SNP_P3_36767_8293321 | NC_021163.1    | Ca_kabuli_chr04 | 8293321                 | GG                              | TT                | 1945930601               |
| SNP_P3_36769_8293453 | NC_021163.1    | Ca_kabuli_chr04 | 8293453                 | CC                              | TT                | 1945930603               |
| SNP_P3_36770_8293465 | NC_021163.1    | Ca_kabuli_chr04 | 8293465                 | AA                              | GG                | 1945930605               |
| SNP_P3_36771_8293487 | NC_021163.1    | Ca_kabuli_chr04 | 8293487                 | TT                              | CC                | 1945930607               |
| SNP_P3_36772_8293646 | NC_021163.1    | Ca_kabuli_chr04 | 8293646                 | CC                              | TT                | 1945930608               |
| SNP_P3_36773_8293809 | NC_021163.1    | Ca_kabuli_chr04 | 8293809                 | AA                              | GG                | 1945930610               |
| SNP_P3_36774_8293814 | NC_021163.1    | Ca_kabuli_chr04 | 8293814                 | CC                              | TT                | 1945930612               |
| SNP_P3_36776_8294836 | NC_021163.1    | Ca_kabuli_chr04 | 8294836                 | TT                              | CC                | 1945930614               |
| SNP_P3_36777_8294865 | NC_021163.1    | Ca_kabuli_chr04 | 8294865                 | AA                              | GG                | 1945930615               |
| SNP_P3_36778_8295529 | NC_021163.1    | Ca_kabuli_chr04 | 8295529                 | GG                              | AA                | 1945930617               |
| SNP_P3_36779_8295532 | NC_021163.1    | Ca_kabuli_chr04 | 8295532                 | AA                              | GG                | 1945930619               |
| SNP_P3_36780_8295564 | NC_021163.1    | Ca_kabuli_chr04 | 8295564                 | AA                              | GG                | 1945930621               |
| SNP_P3_36781_8295586 | NC_021163.1    | Ca_kabuli_chr04 | 8295586                 | GG                              | AA                | 1945930622               |

| SNPs IDs             | Chromosome IDs | Chromosomes     | Physical positions (bp) | CDC Frontier (Reference genome) | (Pusa 256 & HPNB) | NCBI SNPdb Accession IDs |
|----------------------|----------------|-----------------|-------------------------|---------------------------------|-------------------|--------------------------|
| SNP_P3_36784_8296062 | NC_021163.1    | Ca_kabuli_chr04 | 8296062                 | CC                              | TT                | 1945930624               |
| SNP_P3_36785_8296077 | NC_021163.1    | Ca_kabuli_chr04 | 8296077                 | AA                              | TT                | 1945930626               |
| SNP_P3_36786_8296848 | NC_021163.1    | Ca_kabuli_chr04 | 8296848                 | TT                              | CC                | 1945930628               |
| SNP_P3_36787_8296892 | NC_021163.1    | Ca_kabuli_chr04 | 8296892                 | AA                              | TT                | 1945930630               |
| SNP_P3_36788_8296920 | NC_021163.1    | Ca_kabuli_chr04 | 8296920                 | GG                              | CC                | 1945930631               |
| SNP_P3_36789_8297112 | NC_021163.1    | Ca_kabuli_chr04 | 8297112                 | TT                              | AA                | 1945930633               |
| SNP_P3_36790_8297126 | NC_021163.1    | Ca_kabuli_chr04 | 8297126                 | TT                              | AA                | 1945930635               |
| SNP_P3_36791_8297206 | NC_021163.1    | Ca_kabuli_chr04 | 8297206                 | AA                              | GG                | 1945930637               |
| SNP_P3_36793_8297270 | NC_021163.1    | Ca_kabuli_chr04 | 8297270                 | AA                              | GG                | 1945930638               |
| SNP_P3_36794_8297274 | NC_021163.1    | Ca_kabuli_chr04 | 8297274                 | AA                              | TT                | 1945930640               |
| SNP_P3_36795_8297549 | NC_021163.1    | Ca_kabuli_chr04 | 8297549                 | GG                              | TT                | 1945930642               |
| SNP_P3_36796_8297565 | NC_021163.1    | Ca_kabuli_chr04 | 8297565                 | TT                              | CC                | 1945930644               |
| SNP_P3_36797_8298224 | NC_021163.1    | Ca_kabuli_chr04 | 8298224                 | GG                              | CC                | 1945930645               |
| SNP_P3_36798_8299288 | NC_021163.1    | Ca_kabuli_chr04 | 8299288                 | AA                              | TT                | 1945930647               |
| SNP_P3_36799_8299325 | NC_021163.1    | Ca_kabuli_chr04 | 8299325                 | GG                              | AA                | 1945930649               |
| SNP_P3_36800_8300157 | NC_021163.1    | Ca_kabuli_chr04 | 8300157                 | AA                              | GG                | 1945930651               |
| SNP_P3_36801_8300165 | NC_021163.1    | Ca_kabuli_chr04 | 8300165                 | AA                              | GG                | 1945930652               |
| SNP_P3_36803_8300314 | NC_021163.1    | Ca_kabuli_chr04 | 8300314                 | GG                              | TT                | 1945930654               |
| SNP_P3_36804_8300554 | NC_021163.1    | Ca_kabuli_chr04 | 8300554                 | TT                              | CC                | 1945930656               |
| SNP_P3_36805_8301184 | NC_021163.1    | Ca_kabuli_chr04 | 8301184                 | TT                              | GG                | 1945930658               |
| SNP_P3_36806_8303873 | NC_021163.1    | Ca_kabuli_chr04 | 8303873                 | AA                              | TT                | 1945930660               |
| SNP_P3_36807_8305356 | NC_021163.1    | Ca_kabuli_chr04 | 8305356                 | CC                              | TT                | 1945930661               |
| SNP_P3_36808_8305366 | NC_021163.1    | Ca_kabuli_chr04 | 8305366                 | AA                              | GG                | 1945930663               |
| SNP_P3_36809_8306595 | NC_021163.1    | Ca_kabuli_chr04 | 8306595                 | CC                              | AA                | 1945930665               |
| SNP_P3_36810_8307763 | NC_021163.1    | Ca_kabuli_chr04 | 8307763                 | TT                              | AA                | 1945930667               |
| SNP_P3_36812_8308861 | NC_021163.1    | Ca_kabuli_chr04 | 8308861                 | AA                              | TT                | 1945930668               |
| SNP_P3_36813_8308913 | NC_021163.1    | Ca_kabuli_chr04 | 8308913                 | GG                              | AA                | 1945930670               |
| SNP_P3_36814_8309060 | NC_021163.1    | Ca_kabuli_chr04 | 8309060                 | AA                              | TT                | 1945930672               |
| SNP_P3_36815_8309149 | NC_021163.1    | Ca_kabuli_chr04 | 8309149                 | AA                              | GG                | 1945930674               |
| SNP_P3_36817_8309253 | NC_021163.1    | Ca_kabuli_chr04 | 8309253                 | CC                              | TT                | 1945930675               |
| SNP_P3_36820_8309576 | NC_021163.1    | Ca_kabuli_chr04 | 8309576                 | AA                              | GG                | 1945930677               |
| SNP_P3_36821_8310609 | NC_021163.1    | Ca_kabuli_chr04 | 8310609                 | CC                              | GG                | 1945930679               |
| SNP_P3_36823_8311857 | NC_021163.1    | Ca_kabuli_chr04 | 8311857                 | CC                              | TT                | 1945930681               |
| SNP_P3_36825_8312459 | NC_021163.1    | Ca_kabuli_chr04 | 8312459                 | CC                              | TT                | 1945930682               |
| SNP_P3_36826_8312608 | NC_021163.1    | Ca_kabuli_chr04 | 8312608                 | GG                              | AA                | 1945930684               |
| SNP_P3_36827_8312825 | NC_021163.1    | Ca_kabuli_chr04 | 8312825                 | TT                              | AA                | 1945930686               |
| SNP_P3_36829_8313919 | NC_021163.1    | Ca_kabuli_chr04 | 8313919                 | AA                              | GG                | 1945930688               |
| SNP_P3_36830_8313926 | NC_021163.1    | Ca_kabuli_chr04 | 8313926                 | CC                              | TT                | 1945930690               |
| SNP_P3_36831_8313934 | NC_021163.1    | Ca_kabuli_chr04 | 8313934                 | GG                              | AA                | 1945930691               |
| SNP_P3_36832_8314410 | NC_021163.1    | Ca_kabuli_chr04 | 8314410                 | CC                              | TT                | 1945930693               |
| SNP_P3_36833_8314547 | NC_021163.1    | Ca_kabuli_chr04 | 8314547                 | CC                              | TT                | 1945930695               |
| SNP_P3_36839_8316475 | NC_021163.1    | Ca_kabuli_chr04 | 8316475                 | TT                              | CC                | 1945930697               |

| SNPs IDs             | Chromosome IDs | Chromosomes     | Physical positions (bp) | CDC Frontier (Reference genome) | (Pusa 256 & HPNB) | NCBI SNPdb Accession IDs |
|----------------------|----------------|-----------------|-------------------------|---------------------------------|-------------------|--------------------------|
| SNP_P3_36840_8316649 | NC_021163.1    | Ca_kabuli_chr04 | 8316649                 | AA                              | TT                | 1945930698               |
| SNP_P3_36841_8316654 | NC_021163.1    | Ca_kabuli_chr04 | 8316654                 | TT                              | CC                | 1945930700               |
| SNP_P3_36843_8316745 | NC_021163.1    | Ca_kabuli_chr04 | 8316745                 | AA                              | GG                | 1945930702               |
| SNP_P3_36844_8316775 | NC_021163.1    | Ca_kabuli_chr04 | 8316775                 | AA                              | CC                | 1945930704               |
| SNP_P3_36845_8317074 | NC_021163.1    | Ca_kabuli_chr04 | 8317074                 | AA                              | GG                | 1945930705               |
| SNP_P3_36846_8317145 | NC_021163.1    | Ca_kabuli_chr04 | 8317145                 | AA                              | TT                | 1945930707               |
| SNP_P3_36847_8319892 | NC_021163.1    | Ca_kabuli_chr04 | 8319892                 | AA                              | GG                | 1945930709               |
| SNP_P3_36848_8319939 | NC_021163.1    | Ca_kabuli_chr04 | 8319939                 | GG                              | AA                | 1945930711               |
| SNP_P3_36849_8319995 | NC_021163.1    | Ca_kabuli_chr04 | 8319995                 | TT                              | CC                | 1945930712               |
| SNP_P3_36850_8320039 | NC_021163.1    | Ca_kabuli_chr04 | 8320039                 | AA                              | TT                | 1945930714               |
| SNP_P3_36852_8320283 | NC_021163.1    | Ca_kabuli_chr04 | 8320283                 | AA                              | GG                | 1945930716               |
| SNP_P3_36853_8320323 | NC_021163.1    | Ca_kabuli_chr04 | 8320323                 | AA                              | GG                | 1945930718               |
| SNP_P3_36854_8320331 | NC_021163.1    | Ca_kabuli_chr04 | 8320331                 | CC                              | TT                | 1945930720               |
| SNP_P3_36855_8320378 | NC_021163.1    | Ca_kabuli_chr04 | 8320378                 | CC                              | GG                | 1945930721               |
| SNP_P3_36857_8320543 | NC_021163.1    | Ca_kabuli_chr04 | 8320543                 | AA                              | CC                | 1945930723               |
| SNP_P3_36858_8321284 | NC_021163.1    | Ca_kabuli_chr04 | 8321284                 | GG                              | AA                | 1945930725               |
| SNP_P3_36859_8321316 | NC_021163.1    | Ca_kabuli_chr04 | 8321316                 | GG                              | AA                | 1945930727               |
| SNP_P3_36860_8321332 | NC_021163.1    | Ca_kabuli_chr04 | 8321332                 | GG                              | TT                | 1945930728               |
| SNP_P3_36861_8321350 | NC_021163.1    | Ca_kabuli_chr04 | 8321350                 | CC                              | TT                | 1945930730               |
| SNP_P3_36862_8321378 | NC_021163.1    | Ca_kabuli_chr04 | 8321378                 | AA                              | GG                | 1945930732               |
| SNP_P3_36863_8321635 | NC_021163.1    | Ca_kabuli_chr04 | 8321635                 | AA                              | GG                | 1945930734               |
| SNP_P3_36865_8321651 | NC_021163.1    | Ca_kabuli_chr04 | 8321651                 | GG                              | AA                | 1945930735               |
| SNP_P3_36866_8321714 | NC_021163.1    | Ca_kabuli_chr04 | 8321714                 | GG                              | AA                | 1945930737               |
| SNP_P3_36867_8321721 | NC_021163.1    | Ca_kabuli_chr04 | 8321721                 | GG                              | AA                | 1945930739               |
| SNP_P3_36868_8325253 | NC_021163.1    | Ca_kabuli_chr04 | 8325253                 | TT                              | GG                | 1945930741               |
| SNP_P3_36870_8325860 | NC_021163.1    | Ca_kabuli_chr04 | 8325860                 | GG                              | AA                | 1945930743               |
| SNP_P3_36871_8325896 | NC_021163.1    | Ca_kabuli_chr04 | 8325896                 | CC                              | TT                | 1945930744               |
| SNP_P3_36872_8325909 | NC_021163.1    | Ca_kabuli_chr04 | 8325909                 | TT                              | CC                | 1945930746               |
| SNP_P3_36873_8325925 | NC_021163.1    | Ca_kabuli_chr04 | 8325925                 | TT                              | CC                | 1945930748               |
| SNP_P3_36874_8325930 | NC_021163.1    | Ca_kabuli_chr04 | 8325930                 | TT                              | AA                | 1945930750               |
| SNP_P3_36875_8325951 | NC_021163.1    | Ca_kabuli_chr04 | 8325951                 | GG                              | AA                | 1945930751               |
| SNP_P3_36876_8325952 | NC_021163.1    | Ca_kabuli_chr04 | 8325952                 | AA                              | GG                | 1945930753               |
| SNP_P3_36877_8330143 | NC_021163.1    | Ca_kabuli_chr04 | 8330143                 | GG                              | AA                | 1945930755               |
| SNP_P3_36878_8330596 | NC_021163.1    | Ca_kabuli_chr04 | 8330596                 | AA                              | TT                | 1945930757               |
| SNP_P3_36879_8330735 | NC_021163.1    | Ca_kabuli_chr04 | 8330735                 | GG                              | CC                | 1945930758               |
| SNP_P3_36880_8330934 | NC_021163.1    | Ca_kabuli_chr04 | 8330934                 | TT                              | GG                | 1945930760               |
| SNP_P3_36881_8330996 | NC_021163.1    | Ca_kabuli_chr04 | 8330996                 | GG                              | AA                | 1945930762               |
| SNP_P3_36882_8331244 | NC_021163.1    | Ca_kabuli_chr04 | 8331244                 | CC                              | TT                | 1945930764               |
| SNP_P3_36883_8331317 | NC_021163.1    | Ca_kabuli_chr04 | 8331317                 | TT                              | GG                | 1945930765               |
| SNP_P3_36885_8333280 | NC_021163.1    | Ca_kabuli_chr04 | 8333280                 | GG                              | TT                | 1945930767               |
| SNP_P3_36886_8333281 | NC_021163.1    | Ca_kabuli_chr04 | 8333281                 | TT                              | GG                | 1945930769               |
| SNP_P3_36887_8333316 | NC_021163.1    | Ca_kabuli_chr04 | 8333316                 | TT                              | AA                | 1945930771               |

| SNPs IDs             | Chromosome IDs | Chromosomes     | Physical positions (bp) | CDC Frontier (Reference genome) | (Pusa 256 & HPNB) | NCBI SNPdb Accession IDs |
|----------------------|----------------|-----------------|-------------------------|---------------------------------|-------------------|--------------------------|
| SNP_P3_36889_8333777 | NC_021163.1    | Ca_kabuli_chr04 | 8333777                 | AA                              | GG                | 1945930773               |
| SNP_P3_36891_8333869 | NC_021163.1    | Ca_kabuli_chr04 | 8333869                 | GG                              | AA                | 1945930774               |
| SNP_P3_36892_8334028 | NC_021163.1    | Ca_kabuli_chr04 | 8334028                 | TT                              | CC                | 1945930776               |
| SNP_P3_36893_8334196 | NC_021163.1    | Ca_kabuli_chr04 | 8334196                 | TT                              | CC                | 1945930778               |
| SNP_P3_36894_8334201 | NC_021163.1    | Ca_kabuli_chr04 | 8334201                 | TT                              | CC                | 1945930780               |
| SNP_P3_36895_8334302 | NC_021163.1    | Ca_kabuli_chr04 | 8334302                 | AA                              | CC                | 1945930781               |
| SNP_P3_36897_8334447 | NC_021163.1    | Ca_kabuli_chr04 | 8334447                 | TT                              | CC                | 1945930783               |
| SNP_P3_36898_8334772 | NC_021163.1    | Ca_kabuli_chr04 | 8334772                 | GG                              | AA                | 1945930785               |
| SNP_P3_36899_8338824 | NC_021163.1    | Ca_kabuli_chr04 | 8338824                 | TT                              | CC                | 1945930787               |
| SNP_P3_36900_8338996 | NC_021163.1    | Ca_kabuli_chr04 | 8338996                 | TT                              | CC                | 1945930788               |
| SNP_P3_36901_8339045 | NC_021163.1    | Ca_kabuli_chr04 | 8339045                 | CC                              | TT                | 1945930790               |
| SNP_P3_36902_8339083 | NC_021163.1    | Ca_kabuli_chr04 | 8339083                 | CC                              | AA                | 1945930792               |
| SNP_P3_36903_8339110 | NC_021163.1    | Ca_kabuli_chr04 | 8339110                 | CC                              | TT                | 1945930794               |
| SNP_P3_36904_8341552 | NC_021163.1    | Ca_kabuli_chr04 | 8341552                 | CC                              | GG                | 1945930795               |
| SNP_P3_36905_8341828 | NC_021163.1    | Ca_kabuli_chr04 | 8341828                 | GG                              | AA                | 1945930797               |
| SNP_P3_36907_8343936 | NC_021163.1    | Ca_kabuli_chr04 | 8343936                 | GG                              | CC                | 1945930799               |
| SNP_P3_36908_8344076 | NC_021163.1    | Ca_kabuli_chr04 | 8344076                 | CC                              | TT                | 1945930801               |
| SNP_P3_36909_8344078 | NC_021163.1    | Ca_kabuli_chr04 | 8344078                 | GG                              | AA                | 1945930803               |
| SNP_P3_36910_8344807 | NC_021163.1    | Ca_kabuli_chr04 | 8344807                 | AA                              | GG                | 1945930804               |
| SNP_P3_36912_8345982 | NC_021163.1    | Ca_kabuli_chr04 | 8345982                 | CC                              | TT                | 1945930806               |
| SNP_P3_36913_8346101 | NC_021163.1    | Ca_kabuli_chr04 | 8346101                 | CC                              | TT                | 1945930808               |
| SNP_P3_36914_8346456 | NC_021163.1    | Ca_kabuli_chr04 | 8346456                 | TT                              | CC                | 1945930810               |
| SNP_P3_36915_8346980 | NC_021163.1    | Ca_kabuli_chr04 | 8346980                 | TT                              | CC                | 1945930811               |
| SNP_P3_36917_8348823 | NC_021163.1    | Ca_kabuli_chr04 | 8348823                 | CC                              | GG                | 1945930813               |
| SNP_P3_36918_8348938 | NC_021163.1    | Ca_kabuli_chr04 | 8348938                 | TT                              | CC                | 1945930815               |
| SNP_P3_36919_8349069 | NC_021163.1    | Ca_kabuli_chr04 | 8349069                 | GG                              | CC                | 1945930817               |
| SNP_P3_36920_8349125 | NC_021163.1    | Ca_kabuli_chr04 | 8349125                 | AA                              | GG                | 1945930818               |
| SNP_P3_36921_8349539 | NC_021163.1    | Ca_kabuli_chr04 | 8349539                 | TT                              | AA                | 1945930820               |
| SNP_P3_36922_8350573 | NC_021163.1    | Ca_kabuli_chr04 | 8350573                 | GG                              | TT                | 1945930822               |
| SNP_P3_36923_8350889 | NC_021163.1    | Ca_kabuli_chr04 | 8350889                 | GG                              | TT                | 1945930824               |
| SNP_P3_36924_8350993 | NC_021163.1    | Ca_kabuli_chr04 | 8350993                 | CC                              | TT                | 1945930825               |
| SNP_P3_36925_8351064 | NC_021163.1    | Ca_kabuli_chr04 | 8351064                 | TT                              | CC                | 1945930827               |
| SNP_P3_36926_8353089 | NC_021163.1    | Ca_kabuli_chr04 | 8353089                 | TT                              | CC                | 1945930829               |
| SNP_P3_36927_8353090 | NC_021163.1    | Ca_kabuli_chr04 | 8353090                 | GG                              | AA                | 1945930831               |
| SNP_P3_36928_8353437 | NC_021163.1    | Ca_kabuli_chr04 | 8353437                 | CC                              | AA                | 1945930833               |
| SNP_P3_36929_8354683 | NC_021163.1    | Ca_kabuli_chr04 | 8354683                 | TT                              | GG                | 1945930834               |
| SNP_P3_36930_8354693 | NC_021163.1    | Ca_kabuli_chr04 | 8354693                 | TT                              | AA                | 1945930836               |
| SNP_P3_36931_8355764 | NC_021163.1    | Ca_kabuli_chr04 | 8355764                 | TT                              | CC                | 1945930838               |
| SNP_P3_36932_8355800 | NC_021163.1    | Ca_kabuli_chr04 | 8355800                 | CC                              | TT                | 1945930840               |
| SNP_P3_36933_8355806 | NC_021163.1    | Ca_kabuli_chr04 | 8355806                 | AA                              | GG                | 1945930841               |
| SNP_P3_36935_8357874 | NC_021163.1    | Ca_kabuli_chr04 | 8357874                 | AA                              | GG                | 1945930843               |
| SNP_P3_36936_8358850 | NC_021163.1    | Ca_kabuli_chr04 | 8358850                 | CC                              | TT                | 1945930845               |

| SNPs IDs             | Chromosome IDs | Chromosomes     | Physical positions (bp) | CDC Frontier (Reference genome) | (Pusa 256 & HPNB) | NCBI SNPdb Accession IDs |
|----------------------|----------------|-----------------|-------------------------|---------------------------------|-------------------|--------------------------|
| SNP_P3_36937_8359190 | NC_021163.1    | Ca_kabuli_chr04 | 8359190                 | AA                              | GG                | 1945930847               |
| SNP_P3_36938_8361616 | NC_021163.1    | Ca_kabuli_chr04 | 8361616                 | CC                              | TT                | 1945930848               |
| SNP_P3_36939_8361871 | NC_021163.1    | Ca_kabuli_chr04 | 8361871                 | AA                              | GG                | 1945930850               |
| SNP_P3_36940_8362958 | NC_021163.1    | Ca_kabuli_chr04 | 8362958                 | TT                              | CC                | 1945930852               |
| SNP_P3_36941_8362971 | NC_021163.1    | Ca_kabuli_chr04 | 8362971                 | TT                              | GG                | 1945930854               |
| SNP_P3_36942_8362972 | NC_021163.1    | Ca_kabuli_chr04 | 8362972                 | TT                              | GG                | 1945930855               |
| SNP_P3_36943_8363008 | NC_021163.1    | Ca_kabuli_chr04 | 8363008                 | GG                              | AA                | 1945930857               |
| SNP_P3_36944_8363097 | NC_021163.1    | Ca_kabuli_chr04 | 8363097                 | CC                              | TT                | 1945930859               |
| SNP_P3_36945_8363114 | NC_021163.1    | Ca_kabuli_chr04 | 8363114                 | TT                              | CC                | 1945930861               |
| SNP_P3_36946_8363116 | NC_021163.1    | Ca_kabuli_chr04 | 8363116                 | TT                              | CC                | 1945930863               |
| SNP_P3_36947_8363117 | NC_021163.1    | Ca_kabuli_chr04 | 8363117                 | TT                              | GG                | 1945930864               |
| SNP_P3_36948_8363131 | NC_021163.1    | Ca_kabuli_chr04 | 8363131                 | GG                              | AA                | 1945930866               |
| SNP_P3_36949_8363147 | NC_021163.1    | Ca_kabuli_chr04 | 8363147                 | CC                              | TT                | 1945930868               |
| SNP_P3_36950_8367094 | NC_021163.1    | Ca_kabuli_chr04 | 8367094                 | GG                              | AA                | 1945930870               |
| SNP_P3_36951_8367208 | NC_021163.1    | Ca_kabuli_chr04 | 8367208                 | TT                              | GG                | 1945930871               |
| SNP_P3_36952_8369050 | NC_021163.1    | Ca_kabuli_chr04 | 8369050                 | TT                              | CC                | 1945930873               |
| SNP_P3_36953_8370155 | NC_021163.1    | Ca_kabuli_chr04 | 8370155                 | TT                              | CC                | 1945930875               |
| SNP_P3_36954_8370798 | NC_021163.1    | Ca_kabuli_chr04 | 8370798                 | AA                              | CC                | 1945930877               |
| SNP_P3_36955_8371299 | NC_021163.1    | Ca_kabuli_chr04 | 8371299                 | CC                              | TT                | 1945930878               |
| SNP_P3_36956_8371677 | NC_021163.1    | Ca_kabuli_chr04 | 8371677                 | TT                              | CC                | 1945930880               |
| SNP_P3_36957_8372451 | NC_021163.1    | Ca_kabuli_chr04 | 8372451                 | CC                              | TT                | 1945930882               |
| SNP_P3_36958_8372453 | NC_021163.1    | Ca_kabuli_chr04 | 8372453                 | TT                              | CC                | 1945930884               |
| SNP_P3_36960_8373139 | NC_021163.1    | Ca_kabuli_chr04 | 8373139                 | GG                              | TT                | 1945930885               |
| SNP_P3_36961_8373155 | NC_021163.1    | Ca_kabuli_chr04 | 8373155                 | AA                              | GG                | 1945930887               |
| SNP_P3_36962_8373162 | NC_021163.1    | Ca_kabuli_chr04 | 8373162                 | AA                              | GG                | 1945930889               |
| SNP_P3_36964_8373653 | NC_021163.1    | Ca_kabuli_chr04 | 8373653                 | TT                              | AA                | 1945930891               |
| SNP_P3_36965_8373664 | NC_021163.1    | Ca_kabuli_chr04 | 8373664                 | GG                              | AA                | 1945930892               |
| SNP_P3_36967_8376497 | NC_021163.1    | Ca_kabuli_chr04 | 8376497                 | TT                              | AA                | 1945930894               |
| SNP_P3_36968_8376518 | NC_021163.1    | Ca_kabuli_chr04 | 8376518                 | AA                              | GG                | 1945930896               |
| SNP_P3_36969_8376575 | NC_021163.1    | Ca_kabuli_chr04 | 8376575                 | AA                              | GG                | 1945930898               |
| SNP_P3_36970_8376737 | NC_021163.1    | Ca_kabuli_chr04 | 8376737                 | AA                              | TT                | 1945930899               |
| SNP_P3_36971_8376774 | NC_021163.1    | Ca_kabuli_chr04 | 8376774                 | TT                              | CC                | 1945930901               |
| SNP_P3_36973_8377131 | NC_021163.1    | Ca_kabuli_chr04 | 8377131                 | GG                              | CC                | 1945930903               |
| SNP_P3_36974_8379089 | NC_021163.1    | Ca_kabuli_chr04 | 8379089                 | AA                              | GG                | 1945930905               |
| SNP_P3_36975_8379117 | NC_021163.1    | Ca_kabuli_chr04 | 8379117                 | GG                              | AA                | 1945930907               |
| SNP_P3_36976_8380973 | NC_021163.1    | Ca_kabuli_chr04 | 8380973                 | GG                              | AA                | 1945930908               |
| SNP_P3_36977_8380976 | NC_021163.1    | Ca_kabuli_chr04 | 8380976                 | TT                              | GG                | 1945930910               |
| SNP_P3_36978_8381023 | NC_021163.1    | Ca_kabuli_chr04 | 8381023                 | CC                              | AA                | 1945930912               |
| SNP_P3_36981_8382508 | NC_021163.1    | Ca_kabuli_chr04 | 8382508                 | CC                              | TT                | 1945930914               |
| SNP_P3_36983_8383411 | NC_021163.1    | Ca_kabuli_chr04 | 8383411                 | CC                              | AA                | 1945930915               |
| SNP_P3_36984_8383412 | NC_021163.1    | Ca_kabuli_chr04 | 8383412                 | AA                              | CC                | 1945930917               |
| SNP_P3_36985_8384595 | NC_021163.1    | Ca_kabuli_chr04 | 8384595                 | AA                              | GG                | 1945930919               |

| SNPs IDs             | Chromosome IDs | Chromosomes     | Physical positions (bp) | CDC Frontier (Reference genome) | (Pusa 256 & HPNB) | NCBI SNPdb Accession IDs |
|----------------------|----------------|-----------------|-------------------------|---------------------------------|-------------------|--------------------------|
| SNP_P3_36986_8387026 | NC_021163.1    | Ca_kabuli_chr04 | 8387026                 | TT                              | GG                | 1945930921               |
| SNP_P3_36987_8387960 | NC_021163.1    | Ca_kabuli_chr04 | 8387960                 | CC                              | TT                | 1945930922               |
| SNP_P3_36988_8388211 | NC_021163.1    | Ca_kabuli_chr04 | 8388211                 | TT                              | CC                | 1945930924               |
| SNP_P3_36989_8388301 | NC_021163.1    | Ca_kabuli_chr04 | 8388301                 | TT                              | AA                | 1945930926               |
| SNP_P3_36990_8388480 | NC_021163.1    | Ca_kabuli_chr04 | 8388480                 | GG                              | TT                | 1945930928               |
| SNP_P3_36991_8388755 | NC_021163.1    | Ca_kabuli_chr04 | 8388755                 | CC                              | TT                | 1945930929               |
| SNP_P3_36992_8389207 | NC_021163.1    | Ca_kabuli_chr04 | 8389207                 | AA                              | GG                | 1945930931               |
| SNP_P3_36994_8390540 | NC_021163.1    | Ca_kabuli_chr04 | 8390540                 | CC                              | GG                | 1945930933               |
| SNP_P3_36995_8390560 | NC_021163.1    | Ca_kabuli_chr04 | 8390560                 | AA                              | GG                | 1945930935               |
| SNP_P3_36997_8391707 | NC_021163.1    | Ca_kabuli_chr04 | 8391707                 | GG                              | AA                | 1945930936               |
| SNP_P3_36998_8395126 | NC_021163.1    | Ca_kabuli_chr04 | 8395126                 | AA                              | TT                | 1945930938               |
| SNP_P3_36999_8396632 | NC_021163.1    | Ca_kabuli_chr04 | 8396632                 | AA                              | GG                | 1945930940               |
| SNP_P3_37000_8396704 | NC_021163.1    | Ca_kabuli_chr04 | 8396704                 | GG                              | TT                | 1945930942               |
| SNP_P3_37001_8396957 | NC_021163.1    | Ca_kabuli_chr04 | 8396957                 | AA                              | GG                | 1945930944               |
| SNP_P3_37002_8399465 | NC_021163.1    | Ca_kabuli_chr04 | 8399465                 | AA                              | TT                | 1945930945               |
| SNP_P3_37003_8399493 | NC_021163.1    | Ca_kabuli_chr04 | 8399493                 | CC                              | TT                | 1945930947               |
| SNP_P3_37006_8401085 | NC_021163.1    | Ca_kabuli_chr04 | 8401085                 | CC                              | GG                | 1945930949               |
| SNP_P3_37007_8401109 | NC_021163.1    | Ca_kabuli_chr04 | 8401109                 | GG                              | AA                | 1945930951               |
| SNP_P3_37008_8401126 | NC_021163.1    | Ca_kabuli_chr04 | 8401126                 | TT                              | GG                | 1945930952               |
| SNP_P3_37009_8401143 | NC_021163.1    | Ca_kabuli_chr04 | 8401143                 | TT                              | AA                | 1945930954               |
| SNP_P3_37010_8401566 | NC_021163.1    | Ca_kabuli_chr04 | 8401566                 | TT                              | CC                | 1945930956               |
| SNP_P3_37011_8401571 | NC_021163.1    | Ca_kabuli_chr04 | 8401571                 | GG                              | TT                | 1945930958               |
| SNP_P3_37013_8402175 | NC_021163.1    | Ca_kabuli_chr04 | 8402175                 | TT                              | CC                | 1945930959               |
| SNP_P3_37014_8402434 | NC_021163.1    | Ca_kabuli_chr04 | 8402434                 | GG                              | CC                | 1945930961               |
| SNP_P3_37015_8402613 | NC_021163.1    | Ca_kabuli_chr04 | 8402613                 | AA                              | GG                | 1945930963               |
| SNP_P3_37016_8405817 | NC_021163.1    | Ca_kabuli_chr04 | 8405817                 | GG                              | CC                | 1945930965               |
| SNP_P3_37017_8406939 | NC_021163.1    | Ca_kabuli_chr04 | 8406939                 | CC                              | TT                | 1945930967               |
| SNP_P3_37019_8408179 | NC_021163.1    | Ca_kabuli_chr04 | 8408179                 | CC                              | TT                | 1945930968               |
| SNP_P3_37020_8408187 | NC_021163.1    | Ca_kabuli_chr04 | 8408187                 | TT                              | GG                | 1945930970               |
| SNP_P3_37021_8408301 | NC_021163.1    | Ca_kabuli_chr04 | 8408301                 | TT                              | CC                | 1945930972               |
| SNP_P3_37022_8408443 | NC_021163.1    | Ca_kabuli_chr04 | 8408443                 | CC                              | TT                | 1945930974               |
| SNP_P3_37024_8408649 | NC_021163.1    | Ca_kabuli_chr04 | 8408649                 | TT                              | AA                | 1945930975               |
| SNP_P3_37025_8408683 | NC_021163.1    | Ca_kabuli_chr04 | 8408683                 | TT                              | GG                | 1945930977               |
| SNP_P3_37026_8408864 | NC_021163.1    | Ca_kabuli_chr04 | 8408864                 | CC                              | GG                | 1945930979               |
| SNP_P3_37028_8408915 | NC_021163.1    | Ca_kabuli_chr04 | 8408915                 | CC                              | TT                | 1945930981               |
| SNP_P3_37029_8408933 | NC_021163.1    | Ca_kabuli_chr04 | 8408933                 | GG                              | AA                | 1945930982               |
| SNP_P3_37032_8409755 | NC_021163.1    | Ca_kabuli_chr04 | 8409755                 | CC                              | TT                | 1945930984               |
| SNP_P3_37033_8409787 | NC_021163.1    | Ca_kabuli_chr04 | 8409787                 | GG                              | AA                | 1945930986               |
| SNP_P3_37034_8409793 | NC_021163.1    | Ca_kabuli_chr04 | 8409793                 | CC                              | TT                | 1945930988               |
| SNP_P3_37035_8409841 | NC_021163.1    | Ca_kabuli_chr04 | 8409841                 | GG                              | AA                | 1945930990               |
| SNP_P3_37037_8410147 | NC_021163.1    | Ca_kabuli_chr04 | 8410147                 | TT                              | GG                | 1945930991               |
| SNP_P3_37038_8410742 | NC_021163.1    | Ca_kabuli_chr04 | 8410742                 | GG                              | AA                | 1945930993               |

| SNPs IDs             | Chromosome IDs | Chromosomes     | Physical positions (bp) | CDC Frontier (Reference genome) | (Pusa 256 & HPNB) | NCBI SNPdb Accession IDs |
|----------------------|----------------|-----------------|-------------------------|---------------------------------|-------------------|--------------------------|
| SNP_P3_37039_8410761 | NC_021163.1    | Ca_kabuli_chr04 | 8410761                 | GG                              | TT                | 1945930995               |
| SNP_P3_37040_8410948 | NC_021163.1    | Ca_kabuli_chr04 | 8410948                 | TT                              | AA                | 1945930997               |
| SNP_P3_37041_8411197 | NC_021163.1    | Ca_kabuli_chr04 | 8411197                 | AA                              | TT                | 1945930998               |
| SNP_P3_37042_8411203 | NC_021163.1    | Ca_kabuli_chr04 | 8411203                 | CC                              | TT                | 1945931000               |
| SNP_P3_37043_8411528 | NC_021163.1    | Ca_kabuli_chr04 | 8411528                 | CC                              | TT                | 1945931002               |
| SNP_P3_37044_8411537 | NC_021163.1    | Ca_kabuli_chr04 | 8411537                 | GG                              | AA                | 1945931004               |
| SNP_P3_37045_8411581 | NC_021163.1    | Ca_kabuli_chr04 | 8411581                 | GG                              | TT                | 1945931005               |
| SNP_P3_37046_8411768 | NC_021163.1    | Ca_kabuli_chr04 | 8411768                 | AA                              | GG                | 1945931007               |
| SNP_P3_37047_8411769 | NC_021163.1    | Ca_kabuli_chr04 | 8411769                 | GG                              | TT                | 1945931009               |
| SNP_P3_37048_8411778 | NC_021163.1    | Ca_kabuli_chr04 | 8411778                 | CC                              | TT                | 1945931011               |
| SNP_P3_37049_8411789 | NC_021163.1    | Ca_kabuli_chr04 | 8411789                 | TT                              | GG                | 1945931013               |
| SNP_P3_37050_8411798 | NC_021163.1    | Ca_kabuli_chr04 | 8411798                 | GG                              | AA                | 1945931014               |
| SNP_P3_37051_8412066 | NC_021163.1    | Ca_kabuli_chr04 | 8412066                 | CC                              | TT                | 1945931016               |
| SNP_P3_37052_8413835 | NC_021163.1    | Ca_kabuli_chr04 | 8413835                 | TT                              | CC                | 1945931018               |
| SNP_P3_37053_8414070 | NC_021163.1    | Ca_kabuli_chr04 | 8414070                 | CC                              | TT                | 1945931020               |
| SNP_P3_37054_8414085 | NC_021163.1    | Ca_kabuli_chr04 | 8414085                 | TT                              | CC                | 1945931021               |
| SNP_P3_37056_8414157 | NC_021163.1    | Ca_kabuli_chr04 | 8414157                 | TT                              | CC                | 1945931023               |
| SNP_P3_37057_8414160 | NC_021163.1    | Ca_kabuli_chr04 | 8414160                 | GG                              | AA                | 1945931025               |
| SNP_P3_37059_8415337 | NC_021163.1    | Ca_kabuli_chr04 | 8415337                 | AA                              | GG                | 1945931027               |
| SNP_P3_37060_8415508 | NC_021163.1    | Ca_kabuli_chr04 | 8415508                 | CC                              | AA                | 1945931028               |
| SNP_P3_37061_8416423 | NC_021163.1    | Ca_kabuli_chr04 | 8416423                 | GG                              | AA                | 1945931030               |
| SNP_P3_37062_8417459 | NC_021163.1    | Ca_kabuli_chr04 | 8417459                 | GG                              | CC                | 1945931032               |
| SNP_P3_37063_8417915 | NC_021163.1    | Ca_kabuli_chr04 | 8417915                 | TT                              | CC                | 1945931034               |
| SNP_P3_37064_8417953 | NC_021163.1    | Ca_kabuli_chr04 | 8417953                 | CC                              | TT                | 1945931035               |
| SNP_P3_37065_8422349 | NC_021163.1    | Ca_kabuli_chr04 | 8422349                 | GG                              | AA                | 1945931037               |
| SNP_P3_37066_8422370 | NC_021163.1    | Ca_kabuli_chr04 | 8422370                 | TT                              | AA                | 1945931039               |
| SNP_P3_37067_8422418 | NC_021163.1    | Ca_kabuli_chr04 | 8422418                 | AA                              | GG                | 1945931041               |
| SNP_P3_37068_8423868 | NC_021163.1    | Ca_kabuli_chr04 | 8423868                 | AA                              | GG                | 1945931043               |
| SNP_P3_37069_8424021 | NC_021163.1    | Ca_kabuli_chr04 | 8424021                 | AA                              | GG                | 1945931044               |
| SNP_P3_37070_8424034 | NC_021163.1    | Ca_kabuli_chr04 | 8424034                 | CC                              | AA                | 1945931046               |
| SNP_P3_37072_8424102 | NC_021163.1    | Ca_kabuli_chr04 | 8424102                 | GG                              | AA                | 1945931048               |
| SNP_P3_37073_8425075 | NC_021163.1    | Ca_kabuli_chr04 | 8425075                 | TT                              | CC                | 1945931050               |
| SNP_P3_37074_8425321 | NC_021163.1    | Ca_kabuli_chr04 | 8425321                 | GG                              | AA                | 1945931051               |
| SNP_P3_37075_8425322 | NC_021163.1    | Ca_kabuli_chr04 | 8425322                 | AA                              | TT                | 1945931053               |
| SNP_P3_37076_8425369 | NC_021163.1    | Ca_kabuli_chr04 | 8425369                 | TT                              | AA                | 1945931055               |
| SNP_P3_37077_8425393 | NC_021163.1    | Ca_kabuli_chr04 | 8425393                 | TT                              | CC                | 1945931057               |
| SNP_P3_37079_8428536 | NC_021163.1    | Ca_kabuli_chr04 | 8428536                 | CC                              | GG                | 1945931058               |
| SNP_P3_37080_8429431 | NC_021163.1    | Ca_kabuli_chr04 | 8429431                 | TT                              | CC                | 1945931060               |
| SNP_P3_37081_8437112 | NC_021163.1    | Ca_kabuli_chr04 | 8437112                 | CC                              | AA                | 1945931062               |
| SNP_P3_37082_8439522 | NC_021163.1    | Ca_kabuli_chr04 | 8439522                 | TT                              | CC                | 1945931064               |
| SNP_P3_37083_8440565 | NC_021163.1    | Ca_kabuli_chr04 | 8440565                 | GG                              | TT                | 1945931066               |
| SNP_P3_37084_8440993 | NC_021163.1    | Ca_kabuli_chr04 | 8440993                 | GG                              | TT                | 1945931067               |

| SNPs IDs             | Chromosome IDs | Chromosomes     | Physical positions (bp) | CDC Frontier (Reference genome) | (Pusa 256 & HPNB) | NCBI SNPdb Accession IDs |
|----------------------|----------------|-----------------|-------------------------|---------------------------------|-------------------|--------------------------|
| SNP_P3_37085_8441519 | NC_021163.1    | Ca_kabuli_chr04 | 8441519                 | AA                              | TT                | 1945931069               |
| SNP_P3_37087_8442678 | NC_021163.1    | Ca_kabuli_chr04 | 8442678                 | TT                              | CC                | 1945931071               |
| SNP_P3_37088_8443166 | NC_021163.1    | Ca_kabuli_chr04 | 8443166                 | TT                              | GG                | 1945931073               |
| SNP_P3_37090_8448294 | NC_021163.1    | Ca_kabuli_chr04 | 8448294                 | TT                              | CC                | 1945931074               |
| SNP_P3_37091_8448367 | NC_021163.1    | Ca_kabuli_chr04 | 8448367                 | TT                              | AA                | 1945931076               |
| SNP_P3_37092_8448386 | NC_021163.1    | Ca_kabuli_chr04 | 8448386                 | AA                              | GG                | 1945931078               |
| SNP_P3_37093_8448392 | NC_021163.1    | Ca_kabuli_chr04 | 8448392                 | AA                              | TT                | 1945931080               |
| SNP_P3_37094_8448482 | NC_021163.1    | Ca_kabuli_chr04 | 8448482                 | TT                              | CC                | 1945931081               |
| SNP_P3_37095_8448506 | NC_021163.1    | Ca_kabuli_chr04 | 8448506                 | CC                              | TT                | 1945931083               |
| SNP_P3_37096_8448544 | NC_021163.1    | Ca_kabuli_chr04 | 8448544                 | AA                              | TT                | 1945931085               |
| SNP_P3_37097_8448545 | NC_021163.1    | Ca_kabuli_chr04 | 8448545                 | AA                              | TT                | 1945931087               |
| SNP_P3_37098_8448593 | NC_021163.1    | Ca_kabuli_chr04 | 8448593                 | AA                              | GG                | 1945931089               |
| SNP_P3_37099_8448601 | NC_021163.1    | Ca_kabuli_chr04 | 8448601                 | TT                              | AA                | 1945931090               |
| SNP_P3_37100_8448627 | NC_021163.1    | Ca_kabuli_chr04 | 8448627                 | GG                              | AA                | 1945931092               |
| SNP_P3_37101_8448631 | NC_021163.1    | Ca_kabuli_chr04 | 8448631                 | CC                              | TT                | 1945931094               |
| SNP_P3_37102_8448645 | NC_021163.1    | Ca_kabuli_chr04 | 8448645                 | AA                              | TT                | 1945931096               |
| SNP_P3_37103_8448662 | NC_021163.1    | Ca_kabuli_chr04 | 8448662                 | GG                              | AA                | 1945931097               |
| SNP_P3_37104_8448899 | NC_021163.1    | Ca_kabuli_chr04 | 8448899                 | AA                              | TT                | 1945931099               |
| SNP_P3_37105_8448962 | NC_021163.1    | Ca_kabuli_chr04 | 8448962                 | TT                              | CC                | 1945931101               |
| SNP_P3_37106_8454042 | NC_021163.1    | Ca_kabuli_chr04 | 8454042                 | GG                              | AA                | 1945931103               |
| SNP_P3_37108_8454163 | NC_021163.1    | Ca_kabuli_chr04 | 8454163                 | CC                              | TT                | 1945931105               |
| SNP_P3_37109_8454184 | NC_021163.1    | Ca_kabuli_chr04 | 8454184                 | CC                              | GG                | 1945931106               |
| SNP_P3_37110_8454198 | NC_021163.1    | Ca_kabuli_chr04 | 8454198                 | TT                              | CC                | 1945931108               |
| SNP_P3_37111_8454218 | NC_021163.1    | Ca_kabuli_chr04 | 8454218                 | AA                              | GG                | 1945931110               |
| SNP_P3_37112_8454243 | NC_021163.1    | Ca_kabuli_chr04 | 8454243                 | GG                              | AA                | 1945931112               |
| SNP_P3_37113_8454276 | NC_021163.1    | Ca_kabuli_chr04 | 8454276                 | CC                              | AA                | 1945931113               |
| SNP_P3_37114_8456393 | NC_021163.1    | Ca_kabuli_chr04 | 8456393                 | GG                              | AA                | 1945931115               |
| SNP_P3_37115_8457947 | NC_021163.1    | Ca_kabuli_chr04 | 8457947                 | CC                              | GG                | 1945931117               |
| SNP_P3_37116_8458075 | NC_021163.1    | Ca_kabuli_chr04 | 8458075                 | AA                              | TT                | 1945931119               |
| SNP_P3_37117_8458284 | NC_021163.1    | Ca_kabuli_chr04 | 8458284                 | CC                              | TT                | 1945931120               |
| SNP_P3_37118_8458305 | NC_021163.1    | Ca_kabuli_chr04 | 8458305                 | GG                              | AA                | 1945931122               |
| SNP_P3_37120_8459084 | NC_021163.1    | Ca_kabuli_chr04 | 8459084                 | AA                              | CC                | 1945931124               |
| SNP_P3_37121_8459087 | NC_021163.1    | Ca_kabuli_chr04 | 8459087                 | GG                              | AA                | 1945931126               |
| SNP_P3_37122_8459117 | NC_021163.1    | Ca_kabuli_chr04 | 8459117                 | AA                              | GG                | 1945931128               |
| SNP_P3_37123_8459129 | NC_021163.1    | Ca_kabuli_chr04 | 8459129                 | AA                              | TT                | 1945931129               |
| SNP_P3_37124_8459131 | NC_021163.1    | Ca_kabuli_chr04 | 8459131                 | AA                              | TT                | 1945931131               |
| SNP_P3_37125_8459304 | NC_021163.1    | Ca_kabuli_chr04 | 8459304                 | CC                              | AA                | 1945931133               |
| SNP_P3_37127_8459357 | NC_021163.1    | Ca_kabuli_chr04 | 8459357                 | AA                              | TT                | 1945931135               |
| SNP_P3_37128_8459387 | NC_021163.1    | Ca_kabuli_chr04 | 8459387                 | CC                              | TT                | 1945931136               |
| SNP_P3_37130_8459840 | NC_021163.1    | Ca_kabuli_chr04 | 8459840                 | GG                              | TT                | 1945931138               |
| SNP_P3_37132_8461437 | NC_021163.1    | Ca_kabuli_chr04 | 8461437                 | AA                              | GG                | 1945931140               |
| SNP_P3_37134_8462357 | NC_021163.1    | Ca_kabuli_chr04 | 8462357                 | CC                              | TT                | 1945931142               |



| SNPs IDs             | Chromosome IDs | Chromosomes     | Physical positions (bp) | CDC Frontier (Reference genome) | (Pusa 256 & HPNB) | NCBI SNPdb Accession IDs |
|----------------------|----------------|-----------------|-------------------------|---------------------------------|-------------------|--------------------------|
| SNP_P3_37135_8462426 | NC_021163.1    | Ca_kabuli_chr04 | 8462426                 | CC                              | TT                | 1945931143               |
| SNP_P3_37136_8462691 | NC_021163.1    | Ca_kabuli_chr04 | 8462691                 | GG                              | AA                | 1945931145               |
| SNP_P3_37137_8463145 | NC_021163.1    | Ca_kabuli_chr04 | 8463145                 | CC                              | TT                | 1945931147               |
| SNP_P3_37138_8465126 | NC_021163.1    | Ca_kabuli_chr04 | 8465126                 | CC                              | TT                | 1945931149               |
| SNP_P3_37139_8465150 | NC_021163.1    | Ca_kabuli_chr04 | 8465150                 | GG                              | AA                | 1945931151               |
| SNP_P3_37141_8467633 | NC_021163.1    | Ca_kabuli_chr04 | 8467633                 | TT                              | AA                | 1945931152               |
| SNP_P3_37142_8468121 | NC_021163.1    | Ca_kabuli_chr04 | 8468121                 | AA                              | GG                | 1945931154               |
| SNP_P3_37143_8468126 | NC_021163.1    | Ca_kabuli_chr04 | 8468126                 | TT                              | AA                | 1945931156               |
| SNP_P3_37144_8468381 | NC_021163.1    | Ca_kabuli_chr04 | 8468381                 | CC                              | TT                | 1945931158               |
| SNP_P3_37145_8468413 | NC_021163.1    | Ca_kabuli_chr04 | 8468413                 | AA                              | GG                | 1945931159               |
| SNP_P3_37147_8468854 | NC_021163.1    | Ca_kabuli_chr04 | 8468854                 | AA                              | GG                | 1945931161               |
| SNP_P3_37148_8471029 | NC_021163.1    | Ca_kabuli_chr04 | 8471029                 | AA                              | GG                | 1945931163               |
| SNP_P3_37149_8471061 | NC_021163.1    | Ca_kabuli_chr04 | 8471061                 | GG                              | CC                | 1945931165               |
| SNP_P3_37150_8471685 | NC_021163.1    | Ca_kabuli_chr04 | 8471685                 | CC                              | TT                | 1945931167               |
| SNP_P3_37151_8471686 | NC_021163.1    | Ca_kabuli_chr04 | 8471686                 | CC                              | GG                | 1945931168               |
| SNP_P3_37152_8471877 | NC_021163.1    | Ca_kabuli_chr04 | 8471877                 | CC                              | TT                | 1945931170               |
| SNP_P3_37154_8473028 | NC_021163.1    | Ca_kabuli_chr04 | 8473028                 | AA                              | GG                | 1945931172               |
| SNP_P3_37155_8473120 | NC_021163.1    | Ca_kabuli_chr04 | 8473120                 | AA                              | GG                | 1945931174               |
| SNP_P3_37156_8473127 | NC_021163.1    | Ca_kabuli_chr04 | 8473127                 | AA                              | GG                | 1945931175               |
| SNP_P3_37158_8476033 | NC_021163.1    | Ca_kabuli_chr04 | 8476033                 | CC                              | TT                | 1945931177               |
| SNP_P3_37159_8476340 | NC_021163.1    | Ca_kabuli_chr04 | 8476340                 | TT                              | AA                | 1945931179               |
| SNP_P3_37162_8476618 | NC_021163.1    | Ca_kabuli_chr04 | 8476618                 | CC                              | TT                | 1945931181               |
| SNP_P3_37163_8476636 | NC_021163.1    | Ca_kabuli_chr04 | 8476636                 | GG                              | AA                | 1945931182               |
| SNP_P3_37164_8476993 | NC_021163.1    | Ca_kabuli_chr04 | 8476993                 | TT                              | GG                | 1945931184               |
| SNP_P3_37165_8477203 | NC_021163.1    | Ca_kabuli_chr04 | 8477203                 | GG                              | AA                | 1945931186               |
| SNP_P3_37166_8477210 | NC_021163.1    | Ca_kabuli_chr04 | 8477210                 | GG                              | CC                | 1945931188               |
| SNP_P3_37167_8477239 | NC_021163.1    | Ca_kabuli_chr04 | 8477239                 | CC                              | TT                | 1945931190               |
| SNP_P3_37168_8477461 | NC_021163.1    | Ca_kabuli_chr04 | 8477461                 | GG                              | AA                | 1945931191               |
| SNP_P3_37169_8478090 | NC_021163.1    | Ca_kabuli_chr04 | 8478090                 | TT                              | GG                | 1945931193               |
| SNP_P3_37170_8478132 | NC_021163.1    | Ca_kabuli_chr04 | 8478132                 | CC                              | TT                | 1945931195               |
| SNP_P3_37172_8479412 | NC_021163.1    | Ca_kabuli_chr04 | 8479412                 | CC                              | TT                | 1945931197               |
| SNP_P3_37173_8479413 | NC_021163.1    | Ca_kabuli_chr04 | 8479413                 | TT                              | CC                | 1945931198               |
| SNP_P3_37174_8480489 | NC_021163.1    | Ca_kabuli_chr04 | 8480489                 | CC                              | TT                | 1945931200               |
| SNP_P3_37175_8481158 | NC_021163.1    | Ca_kabuli_chr04 | 8481158                 | CC                              | AA                | 1945931202               |
| SNP_P3_37177_8481234 | NC_021163.1    | Ca_kabuli_chr04 | 8481234                 | AA                              | GG                | 1945931204               |
| SNP_P3_37178_8481292 | NC_021163.1    | Ca_kabuli_chr04 | 8481292                 | AA                              | TT                | 1945931205               |
| SNP_P3_37179_8481636 | NC_021163.1    | Ca_kabuli_chr04 | 8481636                 | AA                              | GG                | 1945931207               |
| SNP_P3_37181_8482549 | NC_021163.1    | Ca_kabuli_chr04 | 8482549                 | TT                              | CC                | 1945931209               |
| SNP_P3_37182_8482782 | NC_021163.1    | Ca_kabuli_chr04 | 8482782                 | GG                              | AA                | 1945931211               |
| SNP_P3_37184_8483162 | NC_021163.1    | Ca_kabuli_chr04 | 8483162                 | TT                              | CC                | 1945931213               |
| SNP_P3_37187_8490008 | NC_021163.1    | Ca_kabuli_chr04 | 8490008                 | CC                              | TT                | 1945931214               |
| SNP_P3_37190_8490725 | NC_021163.1    | Ca_kabuli_chr04 | 8490725                 | AA                              | GG                | 1945931216               |

| SNPs IDs             | Chromosome IDs | Chromosomes     | Physical positions (bp) | CDC Frontier (Reference genome) | (Pusa 256 & HPNB) | NCBI SNPdb Accession IDs |
|----------------------|----------------|-----------------|-------------------------|---------------------------------|-------------------|--------------------------|
| SNP_P3_37191_8490747 | NC_021163.1    | Ca_kabuli_chr04 | 8490747                 | GG                              | TT                | 1945931218               |
| SNP_P3_37193_8493090 | NC_021163.1    | Ca_kabuli_chr04 | 8493090                 | AA                              | GG                | 1945931220               |
| SNP_P3_37194_8493394 | NC_021163.1    | Ca_kabuli_chr04 | 8493394                 | CC                              | TT                | 1945931221               |
| SNP_P3_37195_8493814 | NC_021163.1    | Ca_kabuli_chr04 | 8493814                 | TT                              | CC                | 1945931223               |
| SNP_P3_37196_8494291 | NC_021163.1    | Ca_kabuli_chr04 | 8494291                 | GG                              | AA                | 1945931225               |
| SNP_P3_37197_8496853 | NC_021163.1    | Ca_kabuli_chr04 | 8496853                 | GG                              | AA                | 1945931227               |
| SNP_P3_37198_8497083 | NC_021163.1    | Ca_kabuli_chr04 | 8497083                 | CC                              | AA                | 1945931228               |
| SNP_P3_37200_8499090 | NC_021163.1    | Ca_kabuli_chr04 | 8499090                 | GG                              | TT                | 1945931230               |
| SNP_P3_37201_8502065 | NC_021163.1    | Ca_kabuli_chr04 | 8502065                 | TT                              | AA                | 1945931232               |
| SNP_P3_37202_8502109 | NC_021163.1    | Ca_kabuli_chr04 | 8502109                 | AA                              | TT                | 1945931234               |
| SNP_P3_37203_8503082 | NC_021163.1    | Ca_kabuli_chr04 | 8503082                 | CC                              | AA                | 1945931236               |
| SNP_P3_37204_8503812 | NC_021163.1    | Ca_kabuli_chr04 | 8503812                 | TT                              | AA                | 1945931237               |
| SNP_P3_37205_8503824 | NC_021163.1    | Ca_kabuli_chr04 | 8503824                 | TT                              | CC                | 1945931239               |
| SNP_P3_37207_8504058 | NC_021163.1    | Ca_kabuli_chr04 | 8504058                 | AA                              | CC                | 1945931241               |
| SNP_P3_37209_8505178 | NC_021163.1    | Ca_kabuli_chr04 | 8505178                 | AA                              | GG                | 1945931243               |
| SNP_P3_37210_8505573 | NC_021163.1    | Ca_kabuli_chr04 | 8505573                 | CC                              | GG                | 1945931244               |
| SNP_P3_37211_8507287 | NC_021163.1    | Ca_kabuli_chr04 | 8507287                 | GG                              | AA                | 1945931246               |
| SNP_P3_37212_8507356 | NC_021163.1    | Ca_kabuli_chr04 | 8507356                 | GG                              | TT                | 1945931248               |
| SNP_P3_37213_8508028 | NC_021163.1    | Ca_kabuli_chr04 | 8508028                 | CC                              | AA                | 1945931250               |
| SNP_P3_37214_8508301 | NC_021163.1    | Ca_kabuli_chr04 | 8508301                 | TT                              | CC                | 1945931251               |
| SNP_P3_37215_8508338 | NC_021163.1    | Ca_kabuli_chr04 | 8508338                 | TT                              | AA                | 1945931253               |
| SNP_P3_37216_8508878 | NC_021163.1    | Ca_kabuli_chr04 | 8508878                 | AA                              | GG                | 1945931255               |
| SNP_P3_37218_8509407 | NC_021163.1    | Ca_kabuli_chr04 | 8509407                 | AA                              | GG                | 1945931257               |
| SNP_P3_37219_8510789 | NC_021163.1    | Ca_kabuli_chr04 | 8510789                 | AA                              | CC                | 1945931259               |
| SNP_P3_37220_8510807 | NC_021163.1    | Ca_kabuli_chr04 | 8510807                 | CC                              | GG                | 1945931260               |
| SNP_P3_37221_8512441 | NC_021163.1    | Ca_kabuli_chr04 | 8512441                 | CC                              | TT                | 1945931262               |
| SNP_P3_37222_8513077 | NC_021163.1    | Ca_kabuli_chr04 | 8513077                 | CC                              | AA                | 1945931264               |
| SNP_P3_37224_8513216 | NC_021163.1    | Ca_kabuli_chr04 | 8513216                 | GG                              | AA                | 1945931266               |
| SNP_P3_37225_8514112 | NC_021163.1    | Ca_kabuli_chr04 | 8514112                 | TT                              | GG                | 1945931267               |
| SNP_P3_37228_8514560 | NC_021163.1    | Ca_kabuli_chr04 | 8514560                 | AA                              | CC                | 1945931269               |
| SNP_P3_37229_8514599 | NC_021163.1    | Ca_kabuli_chr04 | 8514599                 | TT                              | GG                | 1945931271               |
| SNP_P3_37230_8514600 | NC_021163.1    | Ca_kabuli_chr04 | 8514600                 | CC                              | AA                | 1945931273               |
| SNP_P3_37232_8514672 | NC_021163.1    | Ca_kabuli_chr04 | 8514672                 | AA                              | GG                | 1945931275               |
| SNP_P3_37233_8514719 | NC_021163.1    | Ca_kabuli_chr04 | 8514719                 | TT                              | CC                | 1945931276               |
| SNP_P3_37234_8514741 | NC_021163.1    | Ca_kabuli_chr04 | 8514741                 | CC                              | TT                | 1945931278               |
| SNP_P3_37235_8514746 | NC_021163.1    | Ca_kabuli_chr04 | 8514746                 | TT                              | CC                | 1945931280               |
| SNP_P3_37236_8514852 | NC_021163.1    | Ca_kabuli_chr04 | 8514852                 | AA                              | GG                | 1945931282               |
| SNP_P3_37237_8514902 | NC_021163.1    | Ca_kabuli_chr04 | 8514902                 | GG                              | AA                | 1945931283               |
| SNP_P3_37238_8514954 | NC_021163.1    | Ca_kabuli_chr04 | 8514954                 | GG                              | AA                | 1945931285               |
| SNP_P3_37239_8514961 | NC_021163.1    | Ca_kabuli_chr04 | 8514961                 | CC                              | TT                | 1945931287               |
| SNP_P3_37240_8514969 | NC_021163.1    | Ca_kabuli_chr04 | 8514969                 | GG                              | TT                | 1945931289               |
| SNP_P3_37242_8515043 | NC_021163.1    | Ca_kabuli_chr04 | 8515043                 | TT                              | CC                | 1945931290               |

| SNPs IDs             | Chromosome IDs | Chromosomes     | Physical positions (bp) | CDC Frontier (Reference genome) | (Pusa 256 & HPNB) | NCBI SNPdb Accession IDs |
|----------------------|----------------|-----------------|-------------------------|---------------------------------|-------------------|--------------------------|
| SNP_P3_37243_8515063 | NC_021163.1    | Ca_kabuli_chr04 | 8515063                 | GG                              | AA                | 1945931292               |
| SNP_P3_37244_8515304 | NC_021163.1    | Ca_kabuli_chr04 | 8515304                 | CC                              | TT                | 1945931294               |
| SNP_P3_37245_8515309 | NC_021163.1    | Ca_kabuli_chr04 | 8515309                 | TT                              | CC                | 1945931296               |
| SNP_P3_37246_8515353 | NC_021163.1    | Ca_kabuli_chr04 | 8515353                 | AA                              | GG                | 1945931298               |
| SNP_P3_37247_8515354 | NC_021163.1    | Ca_kabuli_chr04 | 8515354                 | AA                              | GG                | 1945931299               |
| SNP_P3_37248_8516230 | NC_021163.1    | Ca_kabuli_chr04 | 8516230                 | GG                              | AA                | 1945931301               |
| SNP_P3_37250_8516984 | NC_021163.1    | Ca_kabuli_chr04 | 8516984                 | GG                              | CC                | 1945931303               |
| SNP_P3_37251_8518262 | NC_021163.1    | Ca_kabuli_chr04 | 8518262                 | CC                              | TT                | 1945931305               |
| SNP_P3_37252_8518979 | NC_021163.1    | Ca_kabuli_chr04 | 8518979                 | AA                              | GG                | 1945931306               |
| SNP_P3_37253_8519200 | NC_021163.1    | Ca_kabuli_chr04 | 8519200                 | CC                              | AA                | 1945931308               |
| SNP_P3_37254_8520945 | NC_021163.1    | Ca_kabuli_chr04 | 8520945                 | GG                              | AA                | 1945931310               |
| SNP_P3_37255_8521206 | NC_021163.1    | Ca_kabuli_chr04 | 8521206                 | CC                              | AA                | 1945931312               |
| SNP_P3_37256_8521223 | NC_021163.1    | Ca_kabuli_chr04 | 8521223                 | CC                              | TT                | 1945931313               |
| SNP_P3_37257_8521620 | NC_021163.1    | Ca_kabuli_chr04 | 8521620                 | GG                              | AA                | 1945931315               |
| SNP_P3_37258_8521775 | NC_021163.1    | Ca_kabuli_chr04 | 8521775                 | AA                              | GG                | 1945931317               |
| SNP_P3_37260_8521866 | NC_021163.1    | Ca_kabuli_chr04 | 8521866                 | TT                              | GG                | 1945931319               |
| SNP_P3_37261_8521927 | NC_021163.1    | Ca_kabuli_chr04 | 8521927                 | AA                              | TT                | 1945931321               |
| SNP_P3_37262_8522087 | NC_021163.1    | Ca_kabuli_chr04 | 8522087                 | AA                              | CC                | 1945931322               |
| SNP_P3_37263_8522105 | NC_021163.1    | Ca_kabuli_chr04 | 8522105                 | CC                              | TT                | 1945931324               |
| SNP_P3_37264_8522144 | NC_021163.1    | Ca_kabuli_chr04 | 8522144                 | TT                              | CC                | 1945931326               |
| SNP_P3_37266_8522247 | NC_021163.1    | Ca_kabuli_chr04 | 8522247                 | AA                              | GG                | 1945931328               |
| SNP_P3_37267_8522268 | NC_021163.1    | Ca_kabuli_chr04 | 8522268                 | CC                              | TT                | 1945931329               |
| SNP_P3_37268_8522502 | NC_021163.1    | Ca_kabuli_chr04 | 8522502                 | AA                              | CC                | 1945931331               |
| SNP_P3_37269_8522645 | NC_021163.1    | Ca_kabuli_chr04 | 8522645                 | GG                              | TT                | 1945931333               |
| SNP_P3_37270_8522646 | NC_021163.1    | Ca_kabuli_chr04 | 8522646                 | TT                              | AA                | 1945931335               |
| SNP_P3_37271_8523341 | NC_021163.1    | Ca_kabuli_chr04 | 8523341                 | GG                              | AA                | 1945931336               |
| SNP_P3_37272_8532621 | NC_021163.1    | Ca_kabuli_chr04 | 8532621                 | GG                              | TT                | 1945931338               |
| SNP_P3_37273_8540270 | NC_021163.1    | Ca_kabuli_chr04 | 8540270                 | GG                              | TT                | 1945931340               |
| SNP_P3_37274_8573031 | NC_021163.1    | Ca_kabuli_chr04 | 8573031                 | AA                              | GG                | 1945931342               |
| SNP_P3_37275_8576692 | NC_021163.1    | Ca_kabuli_chr04 | 8576692                 | AA                              | GG                | 1945931344               |
| SNP_P3_37276_8610479 | NC_021163.1    | Ca_kabuli_chr04 | 8610479                 | GG                              | AA                | 1945931345               |
| SNP_P3_37277_8611352 | NC_021163.1    | Ca_kabuli_chr04 | 8611352                 | TT                              | CC                | 1945931347               |
| SNP_P3_37278_8611410 | NC_021163.1    | Ca_kabuli_chr04 | 8611410                 | AA                              | TT                | 1945931349               |
| SNP_P3_37279_8611794 | NC_021163.1    | Ca_kabuli_chr04 | 8611794                 | TT                              | CC                | 1945931351               |
| SNP_P3_37280_8611815 | NC_021163.1    | Ca_kabuli_chr04 | 8611815                 | GG                              | AA                | 1945931352               |
| SNP_P3_37281_8612977 | NC_021163.1    | Ca_kabuli_chr04 | 8612977                 | GG                              | TT                | 1945931354               |
| SNP_P3_37282_8613027 | NC_021163.1    | Ca_kabuli_chr04 | 8613027                 | AA                              | GG                | 1945931356               |
| SNP_P3_37283_8613285 | NC_021163.1    | Ca_kabuli_chr04 | 8613285                 | CC                              | TT                | 1945931358               |
| SNP_P3_37284_8613333 | NC_021163.1    | Ca_kabuli_chr04 | 8613333                 | AA                              | GG                | 1945931359               |
| SNP_P3_37285_8613496 | NC_021163.1    | Ca_kabuli_chr04 | 8613496                 | TT                              | CC                | 1945931361               |
| SNP_P3_37286_8613808 | NC_021163.1    | Ca_kabuli_chr04 | 8613808                 | AA                              | GG                | 1945931363               |
| SNP_P3_37287_8614053 | NC_021163.1    | Ca_kabuli_chr04 | 8614053                 | TT                              | AA                | 1945931365               |

| SNPs IDs             | Chromosome IDs | Chromosomes     | Physical positions (bp) | CDC Frontier (Reference genome) | (Pusa 256 & HPNB) | NCBI SNPdb Accession IDs |
|----------------------|----------------|-----------------|-------------------------|---------------------------------|-------------------|--------------------------|
| SNP_P3_37288_8614380 | NC_021163.1    | Ca_kabuli_chr04 | 8614380                 | CC                              | TT                | 1945931367               |
| SNP_P3_37290_8616202 | NC_021163.1    | Ca_kabuli_chr04 | 8616202                 | CC                              | AA                | 1945931368               |
| SNP_P3_37291_8616269 | NC_021163.1    | Ca_kabuli_chr04 | 8616269                 | CC                              | AA                | 1945931370               |
| SNP_P3_37293_8617423 | NC_021163.1    | Ca_kabuli_chr04 | 8617423                 | CC                              | GG                | 1945931372               |
| SNP_P3_37294_8617618 | NC_021163.1    | Ca_kabuli_chr04 | 8617618                 | TT                              | CC                | 1945931374               |
| SNP_P3_37296_8617707 | NC_021163.1    | Ca_kabuli_chr04 | 8617707                 | CC                              | GG                | 1945931375               |
| SNP_P3_37297_8619588 | NC_021163.1    | Ca_kabuli_chr04 | 8619588                 | AA                              | TT                | 1945931377               |
| SNP_P3_37298_8619920 | NC_021163.1    | Ca_kabuli_chr04 | 8619920                 | CC                              | TT                | 1945931379               |
| SNP_P3_37299_8622045 | NC_021163.1    | Ca_kabuli_chr04 | 8622045                 | AA                              | GG                | 1945931381               |
| SNP_P3_37300_8622754 | NC_021163.1    | Ca_kabuli_chr04 | 8622754                 | TT                              | GG                | 1945931382               |
| SNP_P3_37302_8623321 | NC_021163.1    | Ca_kabuli_chr04 | 8623321                 | AA                              | GG                | 1945931384               |
| SNP_P3_37303_8623331 | NC_021163.1    | Ca_kabuli_chr04 | 8623331                 | CC                              | TT                | 1945931386               |
| SNP_P3_37304_8623334 | NC_021163.1    | Ca_kabuli_chr04 | 8623334                 | GG                              | AA                | 1945931388               |
| SNP_P3_37306_8623999 | NC_021163.1    | Ca_kabuli_chr04 | 8623999                 | CC                              | TT                | 1945931390               |
| SNP_P3_37308_8626136 | NC_021163.1    | Ca_kabuli_chr04 | 8626136                 | TT                              | AA                | 1945931391               |
| SNP_P3_37310_8626444 | NC_021163.1    | Ca_kabuli_chr04 | 8626444                 | AA                              | TT                | 1945931393               |
| SNP_P3_37311_8626467 | NC_021163.1    | Ca_kabuli_chr04 | 8626467                 | CC                              | TT                | 1945931395               |
| SNP_P3_37313_8627372 | NC_021163.1    | Ca_kabuli_chr04 | 8627372                 | CC                              | TT                | 1945931397               |
| SNP_P3_37314_8627547 | NC_021163.1    | Ca_kabuli_chr04 | 8627547                 | AA                              | GG                | 1945931398               |
| SNP_P3_37315_8630513 | NC_021163.1    | Ca_kabuli_chr04 | 8630513                 | GG                              | TT                | 1945931400               |
| SNP_P3_37316_8630614 | NC_021163.1    | Ca_kabuli_chr04 | 8630614                 | AA                              | GG                | 1945931402               |
| SNP_P3_37317_8630630 | NC_021163.1    | Ca_kabuli_chr04 | 8630630                 | AA                              | CC                | 1945931404               |
| SNP_P3_37318_8630645 | NC_021163.1    | Ca_kabuli_chr04 | 8630645                 | CC                              | GG                | 1945931405               |
| SNP_P3_37319_8630671 | NC_021163.1    | Ca_kabuli_chr04 | 8630671                 | AA                              | GG                | 1945931407               |
| SNP_P3_37320_8630677 | NC_021163.1    | Ca_kabuli_chr04 | 8630677                 | AA                              | GG                | 1945931409               |
| SNP_P3_37321_8630692 | NC_021163.1    | Ca_kabuli_chr04 | 8630692                 | AA                              | TT                | 1945931411               |
| SNP_P3_37322_8630693 | NC_021163.1    | Ca_kabuli_chr04 | 8630693                 | CC                              | TT                | 1945931413               |
| SNP_P3_37323_8630697 | NC_021163.1    | Ca_kabuli_chr04 | 8630697                 | TT                              | GG                | 1945931414               |
| SNP_P3_37324_8630765 | NC_021163.1    | Ca_kabuli_chr04 | 8630765                 | GG                              | AA                | 1945931416               |
| SNP_P3_37325_8630799 | NC_021163.1    | Ca_kabuli_chr04 | 8630799                 | CC                              | TT                | 1945931418               |
| SNP_P3_37326_8631875 | NC_021163.1    | Ca_kabuli_chr04 | 8631875                 | CC                              | TT                | 1945931420               |
| SNP_P3_37327_8632546 | NC_021163.1    | Ca_kabuli_chr04 | 8632546                 | TT                              | CC                | 1945931421               |
| SNP_P3_37328_8632704 | NC_021163.1    | Ca_kabuli_chr04 | 8632704                 | TT                              | AA                | 1945931423               |
| SNP_P3_37329_8632747 | NC_021163.1    | Ca_kabuli_chr04 | 8632747                 | TT                              | AA                | 1945931425               |
| SNP_P3_37330_8632974 | NC_021163.1    | Ca_kabuli_chr04 | 8632974                 | CC                              | TT                | 1945931427               |
| SNP_P3_37331_8632985 | NC_021163.1    | Ca_kabuli_chr04 | 8632985                 | CC                              | TT                | 1945931428               |
| SNP_P3_37332_8632990 | NC_021163.1    | Ca_kabuli_chr04 | 8632990                 | GG                              | AA                | 1945931430               |
| SNP_P3_37333_8633950 | NC_021163.1    | Ca_kabuli_chr04 | 8633950                 | CC                              | TT                | 1945931432               |
| SNP_P3_37334_8634304 | NC_021163.1    | Ca_kabuli_chr04 | 8634304                 | GG                              | AA                | 1945931434               |
| SNP_P3_37335_8634306 | NC_021163.1    | Ca_kabuli_chr04 | 8634306                 | GG                              | AA                | 1945931436               |
| SNP_P3_37336_8635137 | NC_021163.1    | Ca_kabuli_chr04 | 8635137                 | TT                              | CC                | 1945931437               |
| SNP_P3_37337_8635185 | NC_021163.1    | Ca_kabuli_chr04 | 8635185                 | TT                              | CC                | 1945931439               |

| SNPs IDs             | Chromosome IDs | Chromosomes     | Physical positions (bp) | CDC Frontier (Reference genome) | (Pusa 256 & HPNB) | NCBI SNPdb Accession IDs |
|----------------------|----------------|-----------------|-------------------------|---------------------------------|-------------------|--------------------------|
| SNP_P3_37338_8635233 | NC_021163.1    | Ca_kabuli_chr04 | 8635233                 | CC                              | AA                | 1945931441               |
| SNP_P3_37339_8635236 | NC_021163.1    | Ca_kabuli_chr04 | 8635236                 | AA                              | TT                | 1945931443               |
| SNP_P3_37340_8635453 | NC_021163.1    | Ca_kabuli_chr04 | 8635453                 | CC                              | AA                | 1945931444               |
| SNP_P3_37341_8635454 | NC_021163.1    | Ca_kabuli_chr04 | 8635454                 | TT                              | CC                | 1945931446               |
| SNP_P3_37342_8635512 | NC_021163.1    | Ca_kabuli_chr04 | 8635512                 | TT                              | GG                | 1945931448               |
| SNP_P3_37343_8635515 | NC_021163.1    | Ca_kabuli_chr04 | 8635515                 | AA                              | CC                | 1945931450               |
| SNP_P3_37344_8635529 | NC_021163.1    | Ca_kabuli_chr04 | 8635529                 | TT                              | AA                | 1945931452               |
| SNP_P3_37345_8636191 | NC_021163.1    | Ca_kabuli_chr04 | 8636191                 | CC                              | TT                | 1945931453               |
| SNP_P3_37346_8636217 | NC_021163.1    | Ca_kabuli_chr04 | 8636217                 | CC                              | GG                | 1945931455               |
| SNP_P3_37348_8637013 | NC_021163.1    | Ca_kabuli_chr04 | 8637013                 | CC                              | TT                | 1945931457               |
| SNP_P3_37349_8637017 | NC_021163.1    | Ca_kabuli_chr04 | 8637017                 | AA                              | CC                | 1945931459               |
| SNP_P3_37350_8637184 | NC_021163.1    | Ca_kabuli_chr04 | 8637184                 | TT                              | AA                | 1945931460               |
| SNP_P3_37351_8637186 | NC_021163.1    | Ca_kabuli_chr04 | 8637186                 | GG                              | AA                | 1945931462               |
| SNP_P3_37352_8637196 | NC_021163.1    | Ca_kabuli_chr04 | 8637196                 | TT                              | CC                | 1945931464               |
| SNP_P3_37353_8637232 | NC_021163.1    | Ca_kabuli_chr04 | 8637232                 | GG                              | TT                | 1945931466               |
| SNP_P3_37355_8637275 | NC_021163.1    | Ca_kabuli_chr04 | 8637275                 | GG                              | AA                | 1945931467               |
| SNP_P3_37356_8637292 | NC_021163.1    | Ca_kabuli_chr04 | 8637292                 | CC                              | TT                | 1945931469               |
| SNP_P3_37357_8637947 | NC_021163.1    | Ca_kabuli_chr04 | 8637947                 | TT                              | CC                | 1945931471               |
| SNP_P3_37358_8638270 | NC_021163.1    | Ca_kabuli_chr04 | 8638270                 | CC                              | AA                | 1945931473               |
| SNP_P3_37359_8639647 | NC_021163.1    | Ca_kabuli_chr04 | 8639647                 | TT                              | CC                | 1945931475               |
| SNP_P3_37360_8639666 | NC_021163.1    | Ca_kabuli_chr04 | 8639666                 | TT                              | AA                | 1945931476               |
| SNP_P3_37361_8640040 | NC_021163.1    | Ca_kabuli_chr04 | 8640040                 | GG                              | AA                | 1945931478               |
| SNP_P3_37362_8640053 | NC_021163.1    | Ca_kabuli_chr04 | 8640053                 | CC                              | GG                | 1945931480               |
| SNP_P3_37363_8640061 | NC_021163.1    | Ca_kabuli_chr04 | 8640061                 | GG                              | TT                | 1945931482               |
| SNP_P3_37364_8640096 | NC_021163.1    | Ca_kabuli_chr04 | 8640096                 | GG                              | AA                | 1945931483               |
| SNP_P3_37366_8641844 | NC_021163.1    | Ca_kabuli_chr04 | 8641844                 | TT                              | CC                | 1945931485               |
| SNP_P3_37367_8641845 | NC_021163.1    | Ca_kabuli_chr04 | 8641845                 | AA                              | CC                | 1945931487               |
| SNP_P3_37368_8641883 | NC_021163.1    | Ca_kabuli_chr04 | 8641883                 | CC                              | TT                | 1945931489               |
| SNP_P3_37369_8641968 | NC_021163.1    | Ca_kabuli_chr04 | 8641968                 | AA                              | GG                | 1945931490               |
| SNP_P3_37370_8642039 | NC_021163.1    | Ca_kabuli_chr04 | 8642039                 | TT                              | CC                | 1945931492               |
| SNP_P3_37371_8642694 | NC_021163.1    | Ca_kabuli_chr04 | 8642694                 | TT                              | AA                | 1945931494               |
| SNP_P3_37372_8642756 | NC_021163.1    | Ca_kabuli_chr04 | 8642756                 | GG                              | CC                | 1945931496               |
| SNP_P3_37373_8645700 | NC_021163.1    | Ca_kabuli_chr04 | 8645700                 | CC                              | AA                | 1945931498               |
| SNP_P3_37374_8645947 | NC_021163.1    | Ca_kabuli_chr04 | 8645947                 | TT                              | CC                | 1945931499               |
| SNP_P3_37375_8645960 | NC_021163.1    | Ca_kabuli_chr04 | 8645960                 | TT                              | CC                | 1945931501               |
| SNP_P3_37376_8646152 | NC_021163.1    | Ca_kabuli_chr04 | 8646152                 | AA                              | CC                | 1945931503               |
| SNP_P3_37377_8646570 | NC_021163.1    | Ca_kabuli_chr04 | 8646570                 | AA                              | TT                | 1945931505               |
| SNP_P3_37378_8646585 | NC_021163.1    | Ca_kabuli_chr04 | 8646585                 | CC                              | TT                | 1945931506               |
| SNP_P3_37379_8646921 | NC_021163.1    | Ca_kabuli_chr04 | 8646921                 | GG                              | AA                | 1945931508               |
| SNP_P3_37380_8646975 | NC_021163.1    | Ca_kabuli_chr04 | 8646975                 | CC                              | TT                | 1945931510               |
| SNP_P3_37381_8647104 | NC_021163.1    | Ca_kabuli_chr04 | 8647104                 | CC                              | AA                | 1945931512               |
| SNP_P3_37382_8647107 | NC_021163.1    | Ca_kabuli_chr04 | 8647107                 | CC                              | GG                | 1945931513               |

| SNPs IDs             | Chromosome IDs | Chromosomes     | Physical positions (bp) | CDC Frontier (Reference genome) | (Pusa 256 & HPNB) | NCBI SNPdb Accession IDs |
|----------------------|----------------|-----------------|-------------------------|---------------------------------|-------------------|--------------------------|
| SNP_P3_37383_8647695 | NC_021163.1    | Ca_kabuli_chr04 | 8647695                 | CC                              | TT                | 1945931515               |
| SNP_P3_37384_8647703 | NC_021163.1    | Ca_kabuli_chr04 | 8647703                 | TT                              | AA                | 1945931517               |
| SNP_P3_37386_8648035 | NC_021163.1    | Ca_kabuli_chr04 | 8648035                 | TT                              | CC                | 1945931519               |
| SNP_P3_37387_8648043 | NC_021163.1    | Ca_kabuli_chr04 | 8648043                 | TT                              | AA                | 1945931521               |
| SNP_P3_37388_8648091 | NC_021163.1    | Ca_kabuli_chr04 | 8648091                 | TT                              | GG                | 1945931522               |
| SNP_P3_37389_8648636 | NC_021163.1    | Ca_kabuli_chr04 | 8648636                 | AA                              | GG                | 1945931524               |
| SNP_P3_37390_8648807 | NC_021163.1    | Ca_kabuli_chr04 | 8648807                 | TT                              | AA                | 1945931526               |
| SNP_P3_37391_8648900 | NC_021163.1    | Ca_kabuli_chr04 | 8648900                 | TT                              | CC                | 1945931528               |
| SNP_P3_37393_8651288 | NC_021163.1    | Ca_kabuli_chr04 | 8651288                 | GG                              | CC                | 1945931529               |
| SNP_P3_37394_8651317 | NC_021163.1    | Ca_kabuli_chr04 | 8651317                 | GG                              | CC                | 1945931531               |
| SNP_P3_37396_8652906 | NC_021163.1    | Ca_kabuli_chr04 | 8652906                 | GG                              | TT                | 1945931533               |
| SNP_P3_37397_8652922 | NC_021163.1    | Ca_kabuli_chr04 | 8652922                 | TT                              | CC                | 1945931535               |
| SNP_P3_37398_8652932 | NC_021163.1    | Ca_kabuli_chr04 | 8652932                 | CC                              | TT                | 1945931536               |
| SNP_P3_37399_8652947 | NC_021163.1    | Ca_kabuli_chr04 | 8652947                 | TT                              | GG                | 1945931538               |
| SNP_P3_37400_8653024 | NC_021163.1    | Ca_kabuli_chr04 | 8653024                 | TT                              | CC                | 1945931540               |
| SNP_P3_37401_8653087 | NC_021163.1    | Ca_kabuli_chr04 | 8653087                 | AA                              | GG                | 1945931542               |
| SNP_P3_37402_8653092 | NC_021163.1    | Ca_kabuli_chr04 | 8653092                 | GG                              | AA                | 1945931544               |
| SNP_P3_37403_8653215 | NC_021163.1    | Ca_kabuli_chr04 | 8653215                 | AA                              | GG                | 1945931545               |
| SNP_P3_37404_8653222 | NC_021163.1    | Ca_kabuli_chr04 | 8653222                 | AA                              | GG                | 1945931547               |
| SNP_P3_37405_8653248 | NC_021163.1    | Ca_kabuli_chr04 | 8653248                 | GG                              | AA                | 1945931549               |
| SNP_P3_37406_8653334 | NC_021163.1    | Ca_kabuli_chr04 | 8653334                 | TT                              | CC                | 1945931551               |
| SNP_P3_37407_8653381 | NC_021163.1    | Ca_kabuli_chr04 | 8653381                 | CC                              | TT                | 1945931552               |
| SNP_P3_37408_8655030 | NC_021163.1    | Ca_kabuli_chr04 | 8655030                 | AA                              | TT                | 1945931554               |
| SNP_P3_37409_8655576 | NC_021163.1    | Ca_kabuli_chr04 | 8655576                 | TT                              | CC                | 1945931556               |
| SNP_P3_37410_8655758 | NC_021163.1    | Ca_kabuli_chr04 | 8655758                 | AA                              | GG                | 1945931558               |
| SNP_P3_37411_8655768 | NC_021163.1    | Ca_kabuli_chr04 | 8655768                 | CC                              | TT                | 1945931559               |
| SNP_P3_37412_8655771 | NC_021163.1    | Ca_kabuli_chr04 | 8655771                 | CC                              | TT                | 1945931561               |
| SNP_P3_37413_8655993 | NC_021163.1    | Ca_kabuli_chr04 | 8655993                 | GG                              | TT                | 1945931563               |
| SNP_P3_37414_8656186 | NC_021163.1    | Ca_kabuli_chr04 | 8656186                 | AA                              | GG                | 1945931565               |
| SNP_P3_37415_8656230 | NC_021163.1    | Ca_kabuli_chr04 | 8656230                 | GG                              | TT                | 1945931567               |
| SNP_P3_37416_8657326 | NC_021163.1    | Ca_kabuli_chr04 | 8657326                 | CC                              | TT                | 1945931568               |
| SNP_P3_37417_8661189 | NC_021163.1    | Ca_kabuli_chr04 | 8661189                 | GG                              | AA                | 1945931570               |
| SNP_P3_37418_8662609 | NC_021163.1    | Ca_kabuli_chr04 | 8662609                 | AA                              | CC                | 1945931572               |
| SNP_P3_37419_8662718 | NC_021163.1    | Ca_kabuli_chr04 | 8662718                 | CC                              | GG                | 1945931574               |
| SNP_P3_37420_8663083 | NC_021163.1    | Ca_kabuli_chr04 | 8663083                 | GG                              | AA                | 1945931575               |
| SNP_P3_37421_8663451 | NC_021163.1    | Ca_kabuli_chr04 | 8663451                 | GG                              | CC                | 1945931577               |
| SNP_P3_37422_8663476 | NC_021163.1    | Ca_kabuli_chr04 | 8663476                 | CC                              | GG                | 1945931579               |
| SNP_P3_37423_8663479 | NC_021163.1    | Ca_kabuli_chr04 | 8663479                 | CC                              | TT                | 1945931581               |
| SNP_P3_37424_8663717 | NC_021163.1    | Ca_kabuli_chr04 | 8663717                 | GG                              | AA                | 1945931583               |
| SNP_P3_37425_8663724 | NC_021163.1    | Ca_kabuli_chr04 | 8663724                 | AA                              | CC                | 1945931584               |
| SNP_P3_37426_8663734 | NC_021163.1    | Ca_kabuli_chr04 | 8663734                 | TT                              | GG                | 1945931586               |
| SNP_P3_37427_8664639 | NC_021163.1    | Ca_kabuli_chr04 | 8664639                 | TT                              | CC                | 1945931588               |

| SNPs IDs             | Chromosome IDs | Chromosomes     | Physical positions (bp) | CDC Frontier (Reference genome) | (Pusa 256 & HPNB) | NCBI SNPdb Accession IDs |
|----------------------|----------------|-----------------|-------------------------|---------------------------------|-------------------|--------------------------|
| SNP_P3_37428_8664663 | NC_021163.1    | Ca_kabuli_chr04 | 8664663                 | GG                              | AA                | 1945931590               |
| SNP_P3_37429_8664668 | NC_021163.1    | Ca_kabuli_chr04 | 8664668                 | CC                              | TT                | 1945931591               |
| SNP_P3_37430_8664723 | NC_021163.1    | Ca_kabuli_chr04 | 8664723                 | AA                              | CC                | 1945931593               |
| SNP_P3_37431_8664950 | NC_021163.1    | Ca_kabuli_chr04 | 8664950                 | TT                              | AA                | 1945931595               |
| SNP_P3_37432_8665571 | NC_021163.1    | Ca_kabuli_chr04 | 8665571                 | GG                              | AA                | 1945931597               |
| SNP_P3_37433_8665768 | NC_021163.1    | Ca_kabuli_chr04 | 8665768                 | GG                              | TT                | 1945931598               |
| SNP_P3_37434_8665790 | NC_021163.1    | Ca_kabuli_chr04 | 8665790                 | TT                              | CC                | 1945931600               |
| SNP_P3_37435_8665791 | NC_021163.1    | Ca_kabuli_chr04 | 8665791                 | CC                              | GG                | 1945931602               |
| SNP_P3_37436_8665915 | NC_021163.1    | Ca_kabuli_chr04 | 8665915                 | GG                              | AA                | 1945931604               |
| SNP_P3_37437_8665978 | NC_021163.1    | Ca_kabuli_chr04 | 8665978                 | TT                              | CC                | 1945931606               |
| SNP_P3_37438_8666317 | NC_021163.1    | Ca_kabuli_chr04 | 8666317                 | GG                              | AA                | 1945931607               |
| SNP_P3_37439_8666356 | NC_021163.1    | Ca_kabuli_chr04 | 8666356                 | CC                              | TT                | 1945931609               |
| SNP_P3_37440_8666365 | NC_021163.1    | Ca_kabuli_chr04 | 8666365                 | CC                              | GG                | 1945931611               |
| SNP_P3_37441_8667970 | NC_021163.1    | Ca_kabuli_chr04 | 8667970                 | AA                              | GG                | 1945931613               |
| SNP_P3_37442_8668168 | NC_021163.1    | Ca_kabuli_chr04 | 8668168                 | TT                              | CC                | 1945931614               |
| SNP_P3_37443_8668492 | NC_021163.1    | Ca_kabuli_chr04 | 8668492                 | AA                              | CC                | 1945931616               |
| SNP_P3_37444_8668648 | NC_021163.1    | Ca_kabuli_chr04 | 8668648                 | GG                              | AA                | 1945931618               |
| SNP_P3_37445_8668753 | NC_021163.1    | Ca_kabuli_chr04 | 8668753                 | GG                              | AA                | 1945931620               |
| SNP_P3_37446_8670012 | NC_021163.1    | Ca_kabuli_chr04 | 8670012                 | TT                              | GG                | 1945931621               |
| SNP_P3_37447_8670092 | NC_021163.1    | Ca_kabuli_chr04 | 8670092                 | CC                              | AA                | 1945931623               |
| SNP_P3_37448_8670109 | NC_021163.1    | Ca_kabuli_chr04 | 8670109                 | TT                              | AA                | 1945931625               |
| SNP_P3_37449_8670133 | NC_021163.1    | Ca_kabuli_chr04 | 8670133                 | AA                              | GG                | 1945931627               |
| SNP_P3_37450_8670207 | NC_021163.1    | Ca_kabuli_chr04 | 8670207                 | GG                              | TT                | 1945931629               |
| SNP_P3_37451_8670215 | NC_021163.1    | Ca_kabuli_chr04 | 8670215                 | GG                              | AA                | 1945931630               |
| SNP_P3_37452_8670220 | NC_021163.1    | Ca_kabuli_chr04 | 8670220                 | GG                              | AA                | 1945931632               |
| SNP_P3_37453_8670370 | NC_021163.1    | Ca_kabuli_chr04 | 8670370                 | CC                              | TT                | 1945931634               |
| SNP_P3_37454_8670388 | NC_021163.1    | Ca_kabuli_chr04 | 8670388                 | TT                              | CC                | 1945931636               |
| SNP_P3_37455_8670390 | NC_021163.1    | Ca_kabuli_chr04 | 8670390                 | TT                              | GG                | 1945931637               |
| SNP_P3_37456_8677300 | NC_021163.1    | Ca_kabuli_chr04 | 8677300                 | TT                              | AA                | 1945931639               |
| SNP_P3_37457_8677513 | NC_021163.1    | Ca_kabuli_chr04 | 8677513                 | GG                              | AA                | 1945931641               |
| SNP_P3_37458_8677651 | NC_021163.1    | Ca_kabuli_chr04 | 8677651                 | GG                              | TT                | 1945931643               |
| SNP_P3_37459_8677674 | NC_021163.1    | Ca_kabuli_chr04 | 8677674                 | AA                              | GG                | 1945931644               |
| SNP_P3_37460_8677694 | NC_021163.1    | Ca_kabuli_chr04 | 8677694                 | CC                              | TT                | 1945931646               |
| SNP_P3_37461_8683053 | NC_021163.1    | Ca_kabuli_chr04 | 8683053                 | AA                              | GG                | 1945931648               |
| SNP_P3_37462_8683208 | NC_021163.1    | Ca_kabuli_chr04 | 8683208                 | AA                              | GG                | 1945931650               |
| SNP_P3_37463_8683231 | NC_021163.1    | Ca_kabuli_chr04 | 8683231                 | GG                              | TT                | 1945931652               |
| SNP_P3_37464_8683257 | NC_021163.1    | Ca_kabuli_chr04 | 8683257                 | AA                              | CC                | 1945931653               |
| SNP_P3_37465_8683274 | NC_021163.1    | Ca_kabuli_chr04 | 8683274                 | GG                              | AA                | 1945931655               |
| SNP_P3_37466_8683303 | NC_021163.1    | Ca_kabuli_chr04 | 8683303                 | AA                              | TT                | 1945931657               |
| SNP_P3_37467_8683308 | NC_021163.1    | Ca_kabuli_chr04 | 8683308                 | TT                              | CC                | 1945931659               |
| SNP_P3_37468_8683327 | NC_021163.1    | Ca_kabuli_chr04 | 8683327                 | TT                              | CC                | 1945931660               |
| SNP_P3_37469_8684184 | NC_021163.1    | Ca_kabuli_chr04 | 8684184                 | GG                              | AA                | 1945931662               |

| SNPs IDs             | Chromosome IDs | Chromosomes     | Physical positions (bp) | CDC Frontier (Reference genome) | (Pusa 256 & HPNB) | NCBI SNPdb Accession IDs |
|----------------------|----------------|-----------------|-------------------------|---------------------------------|-------------------|--------------------------|
| SNP_P3_37470_8684185 | NC_021163.1    | Ca_kabuli_chr04 | 8684185                 | GG                              | AA                | 1945931664               |
| SNP_P3_37471_8684220 | NC_021163.1    | Ca_kabuli_chr04 | 8684220                 | AA                              | GG                | 1945931666               |
| SNP_P3_37472_8684230 | NC_021163.1    | Ca_kabuli_chr04 | 8684230                 | TT                              | CC                | 1945931667               |
| SNP_P3_37473_8685067 | NC_021163.1    | Ca_kabuli_chr04 | 8685067                 | AA                              | GG                | 1945931669               |
| SNP_P3_37474_8685341 | NC_021163.1    | Ca_kabuli_chr04 | 8685341                 | GG                              | AA                | 1945931671               |
| SNP_P3_37475_8685364 | NC_021163.1    | Ca_kabuli_chr04 | 8685364                 | GG                              | AA                | 1945931673               |
| SNP_P3_37476_8687848 | NC_021163.1    | Ca_kabuli_chr04 | 8687848                 | CC                              | AA                | 1945931674               |
| SNP_P3_37477_8688161 | NC_021163.1    | Ca_kabuli_chr04 | 8688161                 | AA                              | GG                | 1945931676               |
| SNP_P3_37478_8688673 | NC_021163.1    | Ca_kabuli_chr04 | 8688673                 | TT                              | CC                | 1945931678               |
| SNP_P3_37479_8689200 | NC_021163.1    | Ca_kabuli_chr04 | 8689200                 | GG                              | TT                | 1945931680               |
| SNP_P3_37480_8689432 | NC_021163.1    | Ca_kabuli_chr04 | 8689432                 | AA                              | GG                | 1945931682               |
| SNP_P3_37481_8689438 | NC_021163.1    | Ca_kabuli_chr04 | 8689438                 | AA                              | GG                | 1945931683               |
| SNP_P3_37482_8689459 | NC_021163.1    | Ca_kabuli_chr04 | 8689459                 | TT                              | CC                | 1945931685               |
| SNP_P3_37483_8689604 | NC_021163.1    | Ca_kabuli_chr04 | 8689604                 | AA                              | GG                | 1945931687               |
| SNP_P3_37484_8689606 | NC_021163.1    | Ca_kabuli_chr04 | 8689606                 | AA                              | GG                | 1945931689               |
| SNP_P3_37486_8689707 | NC_021163.1    | Ca_kabuli_chr04 | 8689707                 | CC                              | AA                | 1945931690               |
| SNP_P3_37487_8689951 | NC_021163.1    | Ca_kabuli_chr04 | 8689951                 | CC                              | AA                | 1945931692               |
| SNP_P3_37488_8689967 | NC_021163.1    | Ca_kabuli_chr04 | 8689967                 | AA                              | GG                | 1945931694               |
| SNP_P3_37489_8689975 | NC_021163.1    | Ca_kabuli_chr04 | 8689975                 | TT                              | CC                | 1945931696               |
| SNP_P3_37490_8690043 | NC_021163.1    | Ca_kabuli_chr04 | 8690043                 | GG                              | AA                | 1945931697               |
| SNP_P3_37491_8690046 | NC_021163.1    | Ca_kabuli_chr04 | 8690046                 | TT                              | AA                | 1945931699               |
| SNP_P3_37492_8690133 | NC_021163.1    | Ca_kabuli_chr04 | 8690133                 | CC                              | TT                | 1945931701               |
| SNP_P3_37493_8690423 | NC_021163.1    | Ca_kabuli_chr04 | 8690423                 | AA                              | GG                | 1945931703               |
| SNP_P3_37494_8690435 | NC_021163.1    | Ca_kabuli_chr04 | 8690435                 | AA                              | CC                | 1945931704               |
| SNP_P3_37496_8690491 | NC_021163.1    | Ca_kabuli_chr04 | 8690491                 | AA                              | GG                | 1945931706               |
| SNP_P3_37499_8691161 | NC_021163.1    | Ca_kabuli_chr04 | 8691161                 | TT                              | CC                | 1945931708               |
| SNP_P3_37501_8691494 | NC_021163.1    | Ca_kabuli_chr04 | 8691494                 | CC                              | TT                | 1945931710               |
| SNP_P3_37503_8691982 | NC_021163.1    | Ca_kabuli_chr04 | 8691982                 | CC                              | GG                | 1945931711               |
| SNP_P3_37504_8693355 | NC_021163.1    | Ca_kabuli_chr04 | 8693355                 | GG                              | AA                | 1945931713               |
| SNP_P3_37506_8694207 | NC_021163.1    | Ca_kabuli_chr04 | 8694207                 | AA                              | CC                | 1945931715               |
| SNP_P3_37507_8694698 | NC_021163.1    | Ca_kabuli_chr04 | 8694698                 | GG                              | AA                | 1945931717               |
| SNP_P3_37508_8694816 | NC_021163.1    | Ca_kabuli_chr04 | 8694816                 | AA                              | TT                | 1945931719               |
| SNP_P3_37509_8695079 | NC_021163.1    | Ca_kabuli_chr04 | 8695079                 | CC                              | TT                | 1945931720               |
| SNP_P3_37510_8695111 | NC_021163.1    | Ca_kabuli_chr04 | 8695111                 | TT                              | GG                | 1945931722               |
| SNP_P3_37511_8695379 | NC_021163.1    | Ca_kabuli_chr04 | 8695379                 | TT                              | GG                | 1945931724               |
| SNP_P3_37512_8696395 | NC_021163.1    | Ca_kabuli_chr04 | 8696395                 | GG                              | CC                | 1945931726               |
| SNP_P3_37513_8696442 | NC_021163.1    | Ca_kabuli_chr04 | 8696442                 | AA                              | CC                | 1945931727               |
| SNP_P3_37514_8696943 | NC_021163.1    | Ca_kabuli_chr04 | 8696943                 | GG                              | AA                | 1945931729               |
| SNP_P3_37515_8697475 | NC_021163.1    | Ca_kabuli_chr04 | 8697475                 | TT                              | GG                | 1945931731               |
| SNP_P3_37517_8701460 | NC_021163.1    | Ca_kabuli_chr04 | 8701460                 | AA                              | GG                | 1945931733               |
| SNP_P3_37518_8702035 | NC_021163.1    | Ca_kabuli_chr04 | 8702035                 | TT                              | GG                | 1945931734               |
| SNP_P3_37519_8702368 | NC_021163.1    | Ca_kabuli_chr04 | 8702368                 | GG                              | AA                | 1945931736               |



| SNPs IDs             | Chromosome IDs | Chromosomes     | Physical positions (bp) | CDC Frontier (Reference genome) | (Pusa 256 & HPNB) | NCBI SNPdb Accession IDs |
|----------------------|----------------|-----------------|-------------------------|---------------------------------|-------------------|--------------------------|
| SNP_P3_37520_8702668 | NC_021163.1    | Ca_kabuli_chr04 | 8702668                 | CC                              | GG                | 1945931738               |
| SNP_P3_37521_8703373 | NC_021163.1    | Ca_kabuli_chr04 | 8703373                 | GG                              | CC                | 1945931740               |
| SNP_P3_37523_8704825 | NC_021163.1    | Ca_kabuli_chr04 | 8704825                 | AA                              | CC                | 1945931741               |
| SNP_P3_37524_8704829 | NC_021163.1    | Ca_kabuli_chr04 | 8704829                 | AA                              | GG                | 1945931743               |
| SNP_P3_37525_8704836 | NC_021163.1    | Ca_kabuli_chr04 | 8704836                 | GG                              | AA                | 1945931745               |
| SNP_P3_37526_8704840 | NC_021163.1    | Ca_kabuli_chr04 | 8704840                 | CC                              | AA                | 1945931747               |
| SNP_P3_37527_8704845 | NC_021163.1    | Ca_kabuli_chr04 | 8704845                 | CC                              | AA                | 1945931748               |
| SNP_P3_37528_8704915 | NC_021163.1    | Ca_kabuli_chr04 | 8704915                 | AA                              | TT                | 1945931750               |
| SNP_P3_37529_8704943 | NC_021163.1    | Ca_kabuli_chr04 | 8704943                 | GG                              | CC                | 1945931752               |
| SNP_P3_37530_8705007 | NC_021163.1    | Ca_kabuli_chr04 | 8705007                 | TT                              | CC                | 1945931754               |
| SNP_P3_37531_8706830 | NC_021163.1    | Ca_kabuli_chr04 | 8706830                 | GG                              | AA                | 1945931756               |
| SNP_P3_37533_8706882 | NC_021163.1    | Ca_kabuli_chr04 | 8706882                 | AA                              | GG                | 1945931757               |
| SNP_P3_37534_8706892 | NC_021163.1    | Ca_kabuli_chr04 | 8706892                 | TT                              | CC                | 1945931759               |
| SNP_P3_37535_8706908 | NC_021163.1    | Ca_kabuli_chr04 | 8706908                 | TT                              | CC                | 1945931761               |
| SNP_P3_37536_8707743 | NC_021163.1    | Ca_kabuli_chr04 | 8707743                 | TT                              | CC                | 1945931763               |
| SNP_P3_37537_8707995 | NC_021163.1    | Ca_kabuli_chr04 | 8707995                 | GG                              | AA                | 1945931764               |
| SNP_P3_37538_8708337 | NC_021163.1    | Ca_kabuli_chr04 | 8708337                 | AA                              | TT                | 1945931766               |
| SNP_P3_37539_8709072 | NC_021163.1    | Ca_kabuli_chr04 | 8709072                 | TT                              | CC                | 1945931768               |
| SNP_P3_37541_8710834 | NC_021163.1    | Ca_kabuli_chr04 | 8710834                 | AA                              | TT                | 1945931770               |
| SNP_P3_37542_8710883 | NC_021163.1    | Ca_kabuli_chr04 | 8710883                 | AA                              | TT                | 1945931771               |
| SNP_P3_37543_8711104 | NC_021163.1    | Ca_kabuli_chr04 | 8711104                 | TT                              | CC                | 1945931773               |
| SNP_P3_37544_8711148 | NC_021163.1    | Ca_kabuli_chr04 | 8711148                 | AA                              | GG                | 1945931775               |
| SNP_P3_37546_8711259 | NC_021163.1    | Ca_kabuli_chr04 | 8711259                 | AA                              | GG                | 1945931777               |
| SNP_P3_37547_8711335 | NC_021163.1    | Ca_kabuli_chr04 | 8711335                 | CC                              | TT                | 1945931778               |
| SNP_P3_37548_8711862 | NC_021163.1    | Ca_kabuli_chr04 | 8711862                 | CC                              | AA                | 1945931780               |
| SNP_P3_37551_8713849 | NC_021163.1    | Ca_kabuli_chr04 | 8713849                 | TT                              | CC                | 1945931782               |
| SNP_P3_37552_8713882 | NC_021163.1    | Ca_kabuli_chr04 | 8713882                 | GG                              | AA                | 1945931784               |
| SNP_P3_37553_8713889 | NC_021163.1    | Ca_kabuli_chr04 | 8713889                 | AA                              | TT                | 1945931786               |
| SNP_P3_37554_8715147 | NC_021163.1    | Ca_kabuli_chr04 | 8715147                 | TT                              | AA                | 1945931787               |
| SNP_P3_37555_8715351 | NC_021163.1    | Ca_kabuli_chr04 | 8715351                 | AA                              | CC                | 1945931789               |
| SNP_P3_37556_8716310 | NC_021163.1    | Ca_kabuli_chr04 | 8716310                 | AA                              | GG                | 1945931791               |
| SNP_P3_37557_8717090 | NC_021163.1    | Ca_kabuli_chr04 | 8717090                 | AA                              | GG                | 1945931793               |
| SNP_P3_37558_8717114 | NC_021163.1    | Ca_kabuli_chr04 | 8717114                 | TT                              | GG                | 1945931794               |
| SNP_P3_37559_8719020 | NC_021163.1    | Ca_kabuli_chr04 | 8719020                 | CC                              | AA                | 1945931796               |
| SNP_P3_37560_8719050 | NC_021163.1    | Ca_kabuli_chr04 | 8719050                 | CC                              | TT                | 1945931798               |
| SNP_P3_37561_8720331 | NC_021163.1    | Ca_kabuli_chr04 | 8720331                 | TT                              | CC                | 1945931800               |
| SNP_P3_37562_8720354 | NC_021163.1    | Ca_kabuli_chr04 | 8720354                 | AA                              | TT                | 1945931801               |
| SNP_P3_37563_8720406 | NC_021163.1    | Ca_kabuli_chr04 | 8720406                 | AA                              | CC                | 1945931803               |
| SNP_P3_37564_8720614 | NC_021163.1    | Ca_kabuli_chr04 | 8720614                 | AA                              | GG                | 1945931805               |
| SNP_P3_37565_8720658 | NC_021163.1    | Ca_kabuli_chr04 | 8720658                 | AA                              | TT                | 1945931807               |
| SNP_P3_37566_8720952 | NC_021163.1    | Ca_kabuli_chr04 | 8720952                 | CC                              | AA                | 1945931808               |
| SNP_P3_37567_8721220 | NC_021163.1    | Ca_kabuli_chr04 | 8721220                 | CC                              | TT                | 1945931810               |

| SNPs IDs             | Chromosome IDs | Chromosomes     | Physical positions (bp) | CDC Frontier (Reference genome) | (Pusa 256 & HPNB) | NCBI SNPdb Accession IDs |
|----------------------|----------------|-----------------|-------------------------|---------------------------------|-------------------|--------------------------|
| SNP_P3_37568_8721837 | NC_021163.1    | Ca_kabuli_chr04 | 8721837                 | AA                              | GG                | 1945931812               |
| SNP_P3_37569_8723173 | NC_021163.1    | Ca_kabuli_chr04 | 8723173                 | GG                              | AA                | 1945931814               |
| SNP_P3_37570_8724229 | NC_021163.1    | Ca_kabuli_chr04 | 8724229                 | AA                              | GG                | 1945931816               |
| SNP_P3_37571_8725428 | NC_021163.1    | Ca_kabuli_chr04 | 8725428                 | AA                              | CC                | 1945931817               |
| SNP_P3_37572_8725484 | NC_021163.1    | Ca_kabuli_chr04 | 8725484                 | GG                              | AA                | 1945931819               |
| SNP_P3_37573_8725491 | NC_021163.1    | Ca_kabuli_chr04 | 8725491                 | TT                              | GG                | 1945931821               |
| SNP_P3_37574_8725987 | NC_021163.1    | Ca_kabuli_chr04 | 8725987                 | AA                              | GG                | 1945931823               |
| SNP_P3_37575_8726006 | NC_021163.1    | Ca_kabuli_chr04 | 8726006                 | GG                              | AA                | 1945931824               |
| SNP_P3_37576_8726023 | NC_021163.1    | Ca_kabuli_chr04 | 8726023                 | GG                              | AA                | 1945931826               |
| SNP_P3_37577_8726314 | NC_021163.1    | Ca_kabuli_chr04 | 8726314                 | GG                              | AA                | 1945931828               |
| SNP_P3_37578_8726319 | NC_021163.1    | Ca_kabuli_chr04 | 8726319                 | CC                              | TT                | 1945931830               |
| SNP_P3_37579_8726486 | NC_021163.1    | Ca_kabuli_chr04 | 8726486                 | GG                              | AA                | 1945931831               |
| SNP_P3_37580_8727321 | NC_021163.1    | Ca_kabuli_chr04 | 8727321                 | GG                              | TT                | 1945931833               |
| SNP_P3_37582_8727597 | NC_021163.1    | Ca_kabuli_chr04 | 8727597                 | CC                              | AA                | 1945931835               |
| SNP_P3_37584_8727627 | NC_021163.1    | Ca_kabuli_chr04 | 8727627                 | AA                              | GG                | 1945931837               |
| SNP_P3_37585_8727722 | NC_021163.1    | Ca_kabuli_chr04 | 8727722                 | AA                              | TT                | 1945931838               |
| SNP_P3_37587_8728670 | NC_021163.1    | Ca_kabuli_chr04 | 8728670                 | GG                              | AA                | 1945931840               |
| SNP_P3_37588_8729951 | NC_021163.1    | Ca_kabuli_chr04 | 8729951                 | AA                              | GG                | 1945931842               |
| SNP_P3_37589_8729964 | NC_021163.1    | Ca_kabuli_chr04 | 8729964                 | CC                              | TT                | 1945931844               |
| SNP_P3_37590_8730403 | NC_021163.1    | Ca_kabuli_chr04 | 8730403                 | AA                              | GG                | 1945931846               |
| SNP_P3_37591_8730406 | NC_021163.1    | Ca_kabuli_chr04 | 8730406                 | CC                              | TT                | 1945931847               |
| SNP_P3_37592_8730431 | NC_021163.1    | Ca_kabuli_chr04 | 8730431                 | TT                              | CC                | 1945931849               |
| SNP_P3_37593_8730523 | NC_021163.1    | Ca_kabuli_chr04 | 8730523                 | CC                              | GG                | 1945931851               |
| SNP_P3_37594_8730650 | NC_021163.1    | Ca_kabuli_chr04 | 8730650                 | CC                              | TT                | 1945931853               |
| SNP_P3_37595_8730710 | NC_021163.1    | Ca_kabuli_chr04 | 8730710                 | TT                              | CC                | 1945931854               |
| SNP_P3_37598_8731485 | NC_021163.1    | Ca_kabuli_chr04 | 8731485                 | AA                              | CC                | 1945931856               |
| SNP_P3_37599_8732683 | NC_021163.1    | Ca_kabuli_chr04 | 8732683                 | AA                              | GG                | 1945931858               |
| SNP_P3_37600_8733001 | NC_021163.1    | Ca_kabuli_chr04 | 8733001                 | TT                              | CC                | 1945931860               |
| SNP_P3_37601_8733012 | NC_021163.1    | Ca_kabuli_chr04 | 8733012                 | AA                              | GG                | 1945931861               |
| SNP_P3_37603_8734404 | NC_021163.1    | Ca_kabuli_chr04 | 8734404                 | GG                              | AA                | 1945931863               |
| SNP_P3_37604_8734425 | NC_021163.1    | Ca_kabuli_chr04 | 8734425                 | CC                              | TT                | 1945931865               |
| SNP_P3_37605_8734484 | NC_021163.1    | Ca_kabuli_chr04 | 8734484                 | CC                              | TT                | 1945931867               |
| SNP_P3_37606_8734717 | NC_021163.1    | Ca_kabuli_chr04 | 8734717                 | AA                              | GG                | 1945931868               |
| SNP_P3_37607_8736143 | NC_021163.1    | Ca_kabuli_chr04 | 8736143                 | CC                              | TT                | 1945931870               |
| SNP_P3_37608_8736557 | NC_021163.1    | Ca_kabuli_chr04 | 8736557                 | AA                              | GG                | 1945931872               |
| SNP_P3_37609_8737135 | NC_021163.1    | Ca_kabuli_chr04 | 8737135                 | TT                              | AA                | 1945931874               |
| SNP_P3_37610_8737219 | NC_021163.1    | Ca_kabuli_chr04 | 8737219                 | AA                              | CC                | 1945931876               |
| SNP_P3_37611_8737225 | NC_021163.1    | Ca_kabuli_chr04 | 8737225                 | CC                              | TT                | 1945931877               |
| SNP_P3_37612_8737257 | NC_021163.1    | Ca_kabuli_chr04 | 8737257                 | TT                              | CC                | 1945931879               |
| SNP_P3_37613_8737590 | NC_021163.1    | Ca_kabuli_chr04 | 8737590                 | CC                              | TT                | 1945931881               |
| SNP_P3_37614_8737804 | NC_021163.1    | Ca_kabuli_chr04 | 8737804                 | TT                              | CC                | 1945931883               |
| SNP_P3_37615_8737857 | NC_021163.1    | Ca_kabuli_chr04 | 8737857                 | AA                              | GG                | 1945931884               |

| SNPs IDs             | Chromosome IDs | Chromosomes     | Physical positions (bp) | CDC Frontier (Reference genome) | (Pusa 256 & HPNB) | NCBI SNPdb Accession IDs |
|----------------------|----------------|-----------------|-------------------------|---------------------------------|-------------------|--------------------------|
| SNP_P3_37616_8737859 | NC_021163.1    | Ca_kabuli_chr04 | 8737859                 | CC                              | TT                | 1945931886               |
| SNP_P3_37617_8741454 | NC_021163.1    | Ca_kabuli_chr04 | 8741454                 | TT                              | AA                | 1945931888               |
| SNP_P3_37618_8741584 | NC_021163.1    | Ca_kabuli_chr04 | 8741584                 | CC                              | TT                | 1945931890               |
| SNP_P3_37620_8741631 | NC_021163.1    | Ca_kabuli_chr04 | 8741631                 | AA                              | GG                | 1945931891               |
| SNP_P3_37621_8741632 | NC_021163.1    | Ca_kabuli_chr04 | 8741632                 | GG                              | AA                | 1945931893               |
| SNP_P3_37622_8741701 | NC_021163.1    | Ca_kabuli_chr04 | 8741701                 | AA                              | GG                | 1945931895               |
| SNP_P3_37623_8741753 | NC_021163.1    | Ca_kabuli_chr04 | 8741753                 | TT                              | CC                | 1945931897               |
| SNP_P3_37626_8743288 | NC_021163.1    | Ca_kabuli_chr04 | 8743288                 | AA                              | TT                | 1945931898               |
| SNP_P3_37627_8745592 | NC_021163.1    | Ca_kabuli_chr04 | 8745592                 | GG                              | AA                | 1945931900               |
| SNP_P3_37628_8745638 | NC_021163.1    | Ca_kabuli_chr04 | 8745638                 | GG                              | AA                | 1945931902               |
| SNP_P3_37629_8745642 | NC_021163.1    | Ca_kabuli_chr04 | 8745642                 | CC                              | TT                | 1945931904               |
| SNP_P3_37630_8745657 | NC_021163.1    | Ca_kabuli_chr04 | 8745657                 | TT                              | CC                | 1945931906               |
| SNP_P3_37631_8745664 | NC_021163.1    | Ca_kabuli_chr04 | 8745664                 | GG                              | CC                | 1945931907               |
| SNP_P3_37632_8745665 | NC_021163.1    | Ca_kabuli_chr04 | 8745665                 | AA                              | GG                | 1945931909               |
| SNP_P3_37633_8745708 | NC_021163.1    | Ca_kabuli_chr04 | 8745708                 | CC                              | TT                | 1945931911               |
| SNP_P3_37634_8745712 | NC_021163.1    | Ca_kabuli_chr04 | 8745712                 | CC                              | TT                | 1945931913               |
| SNP_P3_37635_8747810 | NC_021163.1    | Ca_kabuli_chr04 | 8747810                 | TT                              | CC                | 1945931914               |
| SNP_P3_37636_8748287 | NC_021163.1    | Ca_kabuli_chr04 | 8748287                 | CC                              | TT                | 1945931916               |
| SNP_P3_37637_8748330 | NC_021163.1    | Ca_kabuli_chr04 | 8748330                 | AA                              | GG                | 1945931918               |
| SNP_P3_37638_8748521 | NC_021163.1    | Ca_kabuli_chr04 | 8748521                 | TT                              | CC                | 1945931920               |
| SNP_P3_37639_8749717 | NC_021163.1    | Ca_kabuli_chr04 | 8749717                 | GG                              | AA                | 1945931921               |
| SNP_P3_37640_8750627 | NC_021163.1    | Ca_kabuli_chr04 | 8750627                 | AA                              | GG                | 1945931923               |
| SNP_P3_37641_8750631 | NC_021163.1    | Ca_kabuli_chr04 | 8750631                 | TT                              | CC                | 1945931925               |
| SNP_P3_37643_8750939 | NC_021163.1    | Ca_kabuli_chr04 | 8750939                 | CC                              | TT                | 1945931927               |
| SNP_P3_37644_8751132 | NC_021163.1    | Ca_kabuli_chr04 | 8751132                 | AA                              | GG                | 1945931929               |
| SNP_P3_37645_8752086 | NC_021163.1    | Ca_kabuli_chr04 | 8752086                 | GG                              | TT                | 1945931930               |
| SNP_P3_37646_8753225 | NC_021163.1    | Ca_kabuli_chr04 | 8753225                 | AA                              | TT                | 1945931932               |
| SNP_P3_37648_8753611 | NC_021163.1    | Ca_kabuli_chr04 | 8753611                 | CC                              | TT                | 1945931934               |
| SNP_P3_37650_8754256 | NC_021163.1    | Ca_kabuli_chr04 | 8754256                 | TT                              | CC                | 1945931936               |
| SNP_P3_37651_8754317 | NC_021163.1    | Ca_kabuli_chr04 | 8754317                 | TT                              | CC                | 1945931937               |
| SNP_P3_37652_8754453 | NC_021163.1    | Ca_kabuli_chr04 | 8754453                 | CC                              | TT                | 1945931939               |
| SNP_P3_37653_8754798 | NC_021163.1    | Ca_kabuli_chr04 | 8754798                 | GG                              | TT                | 1945931941               |
| SNP_P3_37654_8754813 | NC_021163.1    | Ca_kabuli_chr04 | 8754813                 | GG                              | CC                | 1945931943               |
| SNP_P3_37655_8756193 | NC_021163.1    | Ca_kabuli_chr04 | 8756193                 | AA                              | TT                | 1945931944               |
| SNP_P3_37656_8756204 | NC_021163.1    | Ca_kabuli_chr04 | 8756204                 | AA                              | GG                | 1945931946               |
| SNP_P3_37657_8756228 | NC_021163.1    | Ca_kabuli_chr04 | 8756228                 | TT                              | CC                | 1945931948               |
| SNP_P3_37658_8756275 | NC_021163.1    | Ca_kabuli_chr04 | 8756275                 | AA                              | TT                | 1945931950               |
| SNP_P3_37659_8756585 | NC_021163.1    | Ca_kabuli_chr04 | 8756585                 | TT                              | GG                | 1945931952               |
| SNP_P3_37660_8756677 | NC_021163.1    | Ca_kabuli_chr04 | 8756677                 | CC                              | TT                | 1945931953               |
| SNP_P3_37662_8757134 | NC_021163.1    | Ca_kabuli_chr04 | 8757134                 | AA                              | GG                | 1945931955               |
| SNP_P3_37665_8757429 | NC_021163.1    | Ca_kabuli_chr04 | 8757429                 | TT                              | CC                | 1945931957               |
| SNP_P3_37666_8757457 | NC_021163.1    | Ca_kabuli_chr04 | 8757457                 | TT                              | GG                | 1945931959               |

| SNPs IDs             | Chromosome IDs | Chromosomes     | Physical positions (bp) | CDC Frontier (Reference genome) | (Pusa 256 & HPNB) | NCBI SNPdb Accession IDs |
|----------------------|----------------|-----------------|-------------------------|---------------------------------|-------------------|--------------------------|
| SNP_P3_37669_8758630 | NC_021163.1    | Ca_kabuli_chr04 | 8758630                 | AA                              | GG                | 1945931960               |
| SNP_P3_37670_8760479 | NC_021163.1    | Ca_kabuli_chr04 | 8760479                 | GG                              | AA                | 1945931962               |
| SNP_P3_37671_8760515 | NC_021163.1    | Ca_kabuli_chr04 | 8760515                 | AA                              | GG                | 1945931964               |
| SNP_P3_37672_8760944 | NC_021163.1    | Ca_kabuli_chr04 | 8760944                 | AA                              | TT                | 1945931966               |
| SNP_P3_37673_8761962 | NC_021163.1    | Ca_kabuli_chr04 | 8761962                 | TT                              | GG                | 1945931967               |
| SNP_P3_37674_8761972 | NC_021163.1    | Ca_kabuli_chr04 | 8761972                 | AA                              | GG                | 1945931969               |
| SNP_P3_37675_8761985 | NC_021163.1    | Ca_kabuli_chr04 | 8761985                 | TT                              | GG                | 1945931971               |
| SNP_P3_37676_8761987 | NC_021163.1    | Ca_kabuli_chr04 | 8761987                 | GG                              | TT                | 1945931973               |
| SNP_P3_37677_8762008 | NC_021163.1    | Ca_kabuli_chr04 | 8762008                 | AA                              | TT                | 1945931974               |
| SNP_P3_37679_8762240 | NC_021163.1    | Ca_kabuli_chr04 | 8762240                 | GG                              | CC                | 1945931976               |
| SNP_P3_37680_8762283 | NC_021163.1    | Ca_kabuli_chr04 | 8762283                 | GG                              | CC                | 1945931978               |
| SNP_P3_37682_8765043 | NC_021163.1    | Ca_kabuli_chr04 | 8765043                 | CC                              | AA                | 1945931980               |
| SNP_P3_37683_8765052 | NC_021163.1    | Ca_kabuli_chr04 | 8765052                 | AA                              | CC                | 1945931981               |
| SNP_P3_37684_8765206 | NC_021163.1    | Ca_kabuli_chr04 | 8765206                 | GG                              | AA                | 1945931983               |
| SNP_P3_37685_8765232 | NC_021163.1    | Ca_kabuli_chr04 | 8765232                 | AA                              | GG                | 1945931985               |
| SNP_P3_37686_8765262 | NC_021163.1    | Ca_kabuli_chr04 | 8765262                 | GG                              | AA                | 1945931987               |
| SNP_P3_37687_8768237 | NC_021163.1    | Ca_kabuli_chr04 | 8768237                 | CC                              | TT                | 1945931989               |
| SNP_P3_37688_8768246 | NC_021163.1    | Ca_kabuli_chr04 | 8768246                 | CC                              | TT                | 1945931990               |
| SNP_P3_37689_8768264 | NC_021163.1    | Ca_kabuli_chr04 | 8768264                 | CC                              | AA                | 1945931992               |
| SNP_P3_37690_8768294 | NC_021163.1    | Ca_kabuli_chr04 | 8768294                 | AA                              | CC                | 1945931994               |
| SNP_P3_37692_8768535 | NC_021163.1    | Ca_kabuli_chr04 | 8768535                 | TT                              | AA                | 1945931996               |
| SNP_P3_37694_8769760 | NC_021163.1    | Ca_kabuli_chr04 | 8769760                 | TT                              | CC                | 1945931997               |
| SNP_P3_37695_8769769 | NC_021163.1    | Ca_kabuli_chr04 | 8769769                 | AA                              | CC                | 1945931999               |
| SNP_P3_37696_8769779 | NC_021163.1    | Ca_kabuli_chr04 | 8769779                 | TT                              | CC                | 1945932001               |
| SNP_P3_37697_8769862 | NC_021163.1    | Ca_kabuli_chr04 | 8769862                 | CC                              | TT                | 1945932003               |
| SNP_P3_37698_8770911 | NC_021163.1    | Ca_kabuli_chr04 | 8770911                 | AA                              | TT                | 1945932004               |
| SNP_P3_37699_8773992 | NC_021163.1    | Ca_kabuli_chr04 | 8773992                 | CC                              | TT                | 1945932006               |
| SNP_P3_37700_8774103 | NC_021163.1    | Ca_kabuli_chr04 | 8774103                 | AA                              | GG                | 1945932008               |
| SNP_P3_37701_8774188 | NC_021163.1    | Ca_kabuli_chr04 | 8774188                 | AA                              | GG                | 1945932010               |
| SNP_P3_37702_8774189 | NC_021163.1    | Ca_kabuli_chr04 | 8774189                 | GG                              | AA                | 1945932011               |
| SNP_P3_37703_8774196 | NC_021163.1    | Ca_kabuli_chr04 | 8774196                 | AA                              | TT                | 1945932013               |
| SNP_P3_37704_8774248 | NC_021163.1    | Ca_kabuli_chr04 | 8774248                 | TT                              | CC                | 1945932015               |
| SNP_P3_37705_8774249 | NC_021163.1    | Ca_kabuli_chr04 | 8774249                 | CC                              | TT                | 1945932017               |
| SNP_P3_37706_8774310 | NC_021163.1    | Ca_kabuli_chr04 | 8774310                 | TT                              | CC                | 1945932019               |
| SNP_P3_37707_8774316 | NC_021163.1    | Ca_kabuli_chr04 | 8774316                 | GG                              | AA                | 1945932020               |
| SNP_P3_37710_8774747 | NC_021163.1    | Ca_kabuli_chr04 | 8774747                 | TT                              | AA                | 1945932022               |
| SNP_P3_37711_8774853 | NC_021163.1    | Ca_kabuli_chr04 | 8774853                 | TT                              | CC                | 1945932024               |
| SNP_P3_37712_8774891 | NC_021163.1    | Ca_kabuli_chr04 | 8774891                 | CC                              | AA                | 1945932026               |
| SNP_P3_37713_8775158 | NC_021163.1    | Ca_kabuli_chr04 | 8775158                 | GG                              | CC                | 1945932027               |
| SNP_P3_37715_8775981 | NC_021163.1    | Ca_kabuli_chr04 | 8775981                 | CC                              | TT                | 1945932029               |
| SNP_P3_37716_8775995 | NC_021163.1    | Ca_kabuli_chr04 | 8775995                 | GG                              | AA                | 1945932031               |
| SNP_P3_37717_8776325 | NC_021163.1    | Ca_kabuli_chr04 | 8776325                 | TT                              | CC                | 1945932033               |

| SNPs IDs             | Chromosome IDs | Chromosomes     | Physical positions (bp) | CDC Frontier (Reference genome) | (Pusa 256 & HPNB) | NCBI SNPdb Accession IDs |
|----------------------|----------------|-----------------|-------------------------|---------------------------------|-------------------|--------------------------|
| SNP_P3_37718_8777820 | NC_021163.1    | Ca_kabuli_chr04 | 8777820                 | GG                              | AA                | 1945932034               |
| SNP_P3_37719_8778302 | NC_021163.1    | Ca_kabuli_chr04 | 8778302                 | GG                              | AA                | 1945932036               |
| SNP_P3_37720_8778750 | NC_021163.1    | Ca_kabuli_chr04 | 8778750                 | AA                              | GG                | 1945932038               |
| SNP_P3_37721_8779376 | NC_021163.1    | Ca_kabuli_chr04 | 8779376                 | AA                              | CC                | 1945932040               |
| SNP_P3_37722_8779383 | NC_021163.1    | Ca_kabuli_chr04 | 8779383                 | CC                              | TT                | 1945932041               |
| SNP_P3_37723_8779396 | NC_021163.1    | Ca_kabuli_chr04 | 8779396                 | TT                              | GG                | 1945932043               |
| SNP_P3_37724_8779410 | NC_021163.1    | Ca_kabuli_chr04 | 8779410                 | CC                              | GG                | 1945932045               |
| SNP_P3_37725_8780379 | NC_021163.1    | Ca_kabuli_chr04 | 8780379                 | TT                              | GG                | 1945932047               |
| SNP_P3_37726_8780445 | NC_021163.1    | Ca_kabuli_chr04 | 8780445                 | AA                              | CC                | 1945932049               |
| SNP_P3_37727_8780457 | NC_021163.1    | Ca_kabuli_chr04 | 8780457                 | GG                              | AA                | 1945932050               |
| SNP_P3_37728_8780460 | NC_021163.1    | Ca_kabuli_chr04 | 8780460                 | TT                              | GG                | 1945932052               |
| SNP_P3_37729_8780666 | NC_021163.1    | Ca_kabuli_chr04 | 8780666                 | CC                              | TT                | 1945932054               |
| SNP_P3_37730_8783209 | NC_021163.1    | Ca_kabuli_chr04 | 8783209                 | GG                              | AA                | 1945932056               |
| SNP_P3_37731_8783887 | NC_021163.1    | Ca_kabuli_chr04 | 8783887                 | GG                              | AA                | 1945932057               |
| SNP_P3_37732_8783918 | NC_021163.1    | Ca_kabuli_chr04 | 8783918                 | CC                              | AA                | 1945932059               |
| SNP_P3_37733_8784354 | NC_021163.1    | Ca_kabuli_chr04 | 8784354                 | GG                              | CC                | 1945932061               |
| SNP_P3_37734_8785159 | NC_021163.1    | Ca_kabuli_chr04 | 8785159                 | AA                              | GG                | 1945932063               |
| SNP_P3_37736_8785676 | NC_021163.1    | Ca_kabuli_chr04 | 8785676                 | GG                              | AA                | 1945932064               |
| SNP_P3_37737_8788873 | NC_021163.1    | Ca_kabuli_chr04 | 8788873                 | CC                              | TT                | 1945932066               |
| SNP_P3_37738_8789155 | NC_021163.1    | Ca_kabuli_chr04 | 8789155                 | TT                              | AA                | 1945932068               |
| SNP_P3_37740_8789723 | NC_021163.1    | Ca_kabuli_chr04 | 8789723                 | GG                              | AA                | 1945932070               |
| SNP_P3_37741_8789748 | NC_021163.1    | Ca_kabuli_chr04 | 8789748                 | CC                              | TT                | 1945932072               |
| SNP_P3_37742_8791560 | NC_021163.1    | Ca_kabuli_chr04 | 8791560                 | AA                              | CC                | 1945932073               |
| SNP_P3_37743_8792290 | NC_021163.1    | Ca_kabuli_chr04 | 8792290                 | CC                              | TT                | 1945932075               |
| SNP_P3_37744_8792293 | NC_021163.1    | Ca_kabuli_chr04 | 8792293                 | GG                              | TT                | 1945932077               |
| SNP_P3_37745_8792299 | NC_021163.1    | Ca_kabuli_chr04 | 8792299                 | TT                              | CC                | 1945932079               |
| SNP_P3_37746_8792501 | NC_021163.1    | Ca_kabuli_chr04 | 8792501                 | TT                              | CC                | 1945932080               |
| SNP_P3_37747_8792636 | NC_021163.1    | Ca_kabuli_chr04 | 8792636                 | GG                              | AA                | 1945932082               |
| SNP_P3_37748_8792695 | NC_021163.1    | Ca_kabuli_chr04 | 8792695                 | TT                              | GG                | 1945932084               |
| SNP_P3_37749_8792698 | NC_021163.1    | Ca_kabuli_chr04 | 8792698                 | GG                              | AA                | 1945932086               |
| SNP_P3_37751_8795489 | NC_021163.1    | Ca_kabuli_chr04 | 8795489                 | TT                              | CC                | 1945932087               |
| SNP_P3_37752_8795770 | NC_021163.1    | Ca_kabuli_chr04 | 8795770                 | GG                              | CC                | 1945932089               |
| SNP_P3_37754_8796567 | NC_021163.1    | Ca_kabuli_chr04 | 8796567                 | CC                              | TT                | 1945932091               |
| SNP_P3_37755_8796801 | NC_021163.1    | Ca_kabuli_chr04 | 8796801                 | TT                              | AA                | 1945932093               |
| SNP_P3_37756_8796957 | NC_021163.1    | Ca_kabuli_chr04 | 8796957                 | CC                              | TT                | 1945932095               |
| SNP_P3_37757_8797188 | NC_021163.1    | Ca_kabuli_chr04 | 8797188                 | AA                              | GG                | 1945932096               |
| SNP_P3_37758_8797365 | NC_021163.1    | Ca_kabuli_chr04 | 8797365                 | TT                              | CC                | 1945932098               |
| SNP_P3_37759_8797366 | NC_021163.1    | Ca_kabuli_chr04 | 8797366                 | AA                              | GG                | 1945932100               |
| SNP_P3_37760_8799782 | NC_021163.1    | Ca_kabuli_chr04 | 8799782                 | AA                              | CC                | 1945932102               |
| SNP_P3_37761_8803083 | NC_021163.1    | Ca_kabuli_chr04 | 8803083                 | GG                              | AA                | 1945932103               |
| SNP_P3_37762_8803169 | NC_021163.1    | Ca_kabuli_chr04 | 8803169                 | AA                              | GG                | 1945932105               |
| SNP_P3_37763_8804382 | NC_021163.1    | Ca_kabuli_chr04 | 8804382                 | AA                              | GG                | 1945932107               |

| SNPs IDs             | Chromosome IDs | Chromosomes     | Physical positions (bp) | CDC Frontier (Reference genome) | (Pusa 256 & HPNB) | NCBI SNPdb Accession IDs |
|----------------------|----------------|-----------------|-------------------------|---------------------------------|-------------------|--------------------------|
| SNP_P3_37764_8804385 | NC_021163.1    | Ca_kabuli_chr04 | 8804385                 | GG                              | TT                | 1945932109               |
| SNP_P3_37765_8804876 | NC_021163.1    | Ca_kabuli_chr04 | 8804876                 | AA                              | GG                | 1945932110               |
| SNP_P3_37766_8805363 | NC_021163.1    | Ca_kabuli_chr04 | 8805363                 | GG                              | AA                | 1945932112               |
| SNP_P3_37767_8805667 | NC_021163.1    | Ca_kabuli_chr04 | 8805667                 | TT                              | CC                | 1945932114               |
| SNP_P3_37768_8806431 | NC_021163.1    | Ca_kabuli_chr04 | 8806431                 | TT                              | CC                | 1945932116               |
| SNP_P3_37769_8809985 | NC_021163.1    | Ca_kabuli_chr04 | 8809985                 | CC                              | TT                | 1945932118               |
| SNP_P3_37770_8810206 | NC_021163.1    | Ca_kabuli_chr04 | 8810206                 | CC                              | TT                | 1945932119               |
| SNP_P3_37771_8810232 | NC_021163.1    | Ca_kabuli_chr04 | 8810232                 | CC                              | TT                | 1945932121               |
| SNP_P3_37772_8810256 | NC_021163.1    | Ca_kabuli_chr04 | 8810256                 | CC                              | GG                | 1945932123               |
| SNP_P3_37773_8810294 | NC_021163.1    | Ca_kabuli_chr04 | 8810294                 | TT                              | AA                | 1945932125               |
| SNP_P3_37774_8810297 | NC_021163.1    | Ca_kabuli_chr04 | 8810297                 | TT                              | AA                | 1945932126               |
| SNP_P3_37775_8813910 | NC_021163.1    | Ca_kabuli_chr04 | 8813910                 | AA                              | CC                | 1945932128               |
| SNP_P3_37776_8816286 | NC_021163.1    | Ca_kabuli_chr04 | 8816286                 | TT                              | AA                | 1945932130               |
| SNP_P3_37777_8816320 | NC_021163.1    | Ca_kabuli_chr04 | 8816320                 | GG                              | CC                | 1945932132               |
| SNP_P3_37779_8816683 | NC_021163.1    | Ca_kabuli_chr04 | 8816683                 | GG                              | AA                | 1945932133               |
| SNP_P3_37780_8816808 | NC_021163.1    | Ca_kabuli_chr04 | 8816808                 | AA                              | GG                | 1945932135               |
| SNP_P3_37781_8816986 | NC_021163.1    | Ca_kabuli_chr04 | 8816986                 | AA                              | TT                | 1945932137               |
| SNP_P3_37782_8818049 | NC_021163.1    | Ca_kabuli_chr04 | 8818049                 | CC                              | AA                | 1945932139               |
| SNP_P3_37783_8818268 | NC_021163.1    | Ca_kabuli_chr04 | 8818268                 | TT                              | CC                | 1945932141               |
| SNP_P3_37784_8818751 | NC_021163.1    | Ca_kabuli_chr04 | 8818751                 | AA                              | CC                | 1945932142               |
| SNP_P3_37785_8818759 | NC_021163.1    | Ca_kabuli_chr04 | 8818759                 | AA                              | GG                | 1945932144               |
| SNP_P3_37786_8827197 | NC_021163.1    | Ca_kabuli_chr04 | 8827197                 | CC                              | TT                | 1945932146               |
| SNP_P3_37787_8827256 | NC_021163.1    | Ca_kabuli_chr04 | 8827256                 | GG                              | AA                | 1945932148               |
| SNP_P3_37788_8827396 | NC_021163.1    | Ca_kabuli_chr04 | 8827396                 | CC                              | GG                | 1945932149               |
| SNP_P3_37789_8827441 | NC_021163.1    | Ca_kabuli_chr04 | 8827441                 | TT                              | CC                | 1945932151               |
| SNP_P3_37790_8827469 | NC_021163.1    | Ca_kabuli_chr04 | 8827469                 | AA                              | GG                | 1945932153               |
| SNP_P3_37791_8827489 | NC_021163.1    | Ca_kabuli_chr04 | 8827489                 | AA                              | GG                | 1945932155               |
| SNP_P3_37792_8827749 | NC_021163.1    | Ca_kabuli_chr04 | 8827749                 | TT                              | AA                | 1945932156               |
| SNP_P3_37793_8827750 | NC_021163.1    | Ca_kabuli_chr04 | 8827750                 | CC                              | TT                | 1945932158               |
| SNP_P3_37794_8828361 | NC_021163.1    | Ca_kabuli_chr04 | 8828361                 | GG                              | TT                | 1945932160               |
| SNP_P3_37795_8828364 | NC_021163.1    | Ca_kabuli_chr04 | 8828364                 | TT                              | GG                | 1945932162               |
| SNP_P3_37796_8829367 | NC_021163.1    | Ca_kabuli_chr04 | 8829367                 | GG                              | AA                | 1945932164               |
| SNP_P3_37797_8829368 | NC_021163.1    | Ca_kabuli_chr04 | 8829368                 | TT                              | CC                | 1945932165               |
| SNP_P3_37798_8830408 | NC_021163.1    | Ca_kabuli_chr04 | 8830408                 | AA                              | GG                | 1945932167               |
| SNP_P3_37799_8830412 | NC_021163.1    | Ca_kabuli_chr04 | 8830412                 | GG                              | AA                | 1945932169               |
| SNP_P3_37800_8830444 | NC_021163.1    | Ca_kabuli_chr04 | 8830444                 | AA                              | GG                | 1945932171               |
| SNP_P3_37801_8830456 | NC_021163.1    | Ca_kabuli_chr04 | 8830456                 | GG                              | AA                | 1945932172               |
| SNP_P3_37802_8830529 | NC_021163.1    | Ca_kabuli_chr04 | 8830529                 | GG                              | AA                | 1945932174               |
| SNP_P3_37803_8830533 | NC_021163.1    | Ca_kabuli_chr04 | 8830533                 | TT                              | AA                | 1945932176               |
| SNP_P3_37804_8830552 | NC_021163.1    | Ca_kabuli_chr04 | 8830552                 | GG                              | AA                | 1945932178               |
| SNP_P3_37805_8830565 | NC_021163.1    | Ca_kabuli_chr04 | 8830565                 | TT                              | CC                | 1945932179               |
| SNP_P3_37806_8830578 | NC_021163.1    | Ca_kabuli_chr04 | 8830578                 | TT                              | CC                | 1945932181               |

| SNPs IDs             | Chromosome IDs | Chromosomes     | Physical positions (bp) | CDC Frontier (Reference genome) | (Pusa 256 & HPNB) | NCBI SNPdb Accession IDs |
|----------------------|----------------|-----------------|-------------------------|---------------------------------|-------------------|--------------------------|
| SNP_P3_37807_8830795 | NC_021163.1    | Ca_kabuli_chr04 | 8830795                 | CC                              | TT                | 1945932183               |
| SNP_P3_37808_8831763 | NC_021163.1    | Ca_kabuli_chr04 | 8831763                 | CC                              | TT                | 1945932185               |
| SNP_P3_37809_8832086 | NC_021163.1    | Ca_kabuli_chr04 | 8832086                 | TT                              | CC                | 1945932187               |
| SNP_P3_37810_8832290 | NC_021163.1    | Ca_kabuli_chr04 | 8832290                 | GG                              | AA                | 1945932188               |
| SNP_P3_37811_8832345 | NC_021163.1    | Ca_kabuli_chr04 | 8832345                 | TT                              | GG                | 1945932190               |
| SNP_P3_37812_8832401 | NC_021163.1    | Ca_kabuli_chr04 | 8832401                 | GG                              | AA                | 1945932192               |
| SNP_P3_37813_8832429 | NC_021163.1    | Ca_kabuli_chr04 | 8832429                 | GG                              | AA                | 1945932194               |
| SNP_P3_37814_8832440 | NC_021163.1    | Ca_kabuli_chr04 | 8832440                 | AA                              | CC                | 1945932195               |
| SNP_P3_37815_8832450 | NC_021163.1    | Ca_kabuli_chr04 | 8832450                 | AA                              | TT                | 1945932197               |
| SNP_P3_37816_8832456 | NC_021163.1    | Ca_kabuli_chr04 | 8832456                 | AA                              | GG                | 1945932199               |
| SNP_P3_37817_8832477 | NC_021163.1    | Ca_kabuli_chr04 | 8832477                 | GG                              | TT                | 1945932201               |
| SNP_P3_37818_8832517 | NC_021163.1    | Ca_kabuli_chr04 | 8832517                 | TT                              | CC                | 1945932202               |
| SNP_P3_37819_8832523 | NC_021163.1    | Ca_kabuli_chr04 | 8832523                 | AA                              | TT                | 1945932204               |
| SNP_P3_37820_8832989 | NC_021163.1    | Ca_kabuli_chr04 | 8832989                 | AA                              | GG                | 1945932206               |
| SNP_P3_37821_8836282 | NC_021163.1    | Ca_kabuli_chr04 | 8836282                 | TT                              | CC                | 1945932208               |
| SNP_P3_37823_8837442 | NC_021163.1    | Ca_kabuli_chr04 | 8837442                 | TT                              | AA                | 1945932209               |
| SNP_P3_37824_8837443 | NC_021163.1    | Ca_kabuli_chr04 | 8837443                 | CC                              | TT                | 1945932211               |
| SNP_P3_37825_8837690 | NC_021163.1    | Ca_kabuli_chr04 | 8837690                 | TT                              | CC                | 1945932213               |
| SNP_P3_37826_8837735 | NC_021163.1    | Ca_kabuli_chr04 | 8837735                 | GG                              | AA                | 1945932215               |
| SNP_P3_37827_8837756 | NC_021163.1    | Ca_kabuli_chr04 | 8837756                 | GG                              | AA                | 1945932216               |
| SNP_P3_37828_8839418 | NC_021163.1    | Ca_kabuli_chr04 | 8839418                 | AA                              | GG                | 1945932218               |
| SNP_P3_37829_8839710 | NC_021163.1    | Ca_kabuli_chr04 | 8839710                 | GG                              | AA                | 1945932220               |
| SNP_P3_37830_8839833 | NC_021163.1    | Ca_kabuli_chr04 | 8839833                 | CC                              | TT                | 1945932222               |
| SNP_P3_37832_8840195 | NC_021163.1    | Ca_kabuli_chr04 | 8840195                 | CC                              | TT                | 1945932223               |
| SNP_P3_37833_8840216 | NC_021163.1    | Ca_kabuli_chr04 | 8840216                 | CC                              | TT                | 1945932225               |
| SNP_P3_37834_8840260 | NC_021163.1    | Ca_kabuli_chr04 | 8840260                 | CC                              | TT                | 1945932227               |
| SNP_P3_37835_8840579 | NC_021163.1    | Ca_kabuli_chr04 | 8840579                 | TT                              | GG                | 1945932229               |
| SNP_P3_37836_8840605 | NC_021163.1    | Ca_kabuli_chr04 | 8840605                 | GG                              | AA                | 1945932231               |
| SNP_P3_37837_8841149 | NC_021163.1    | Ca_kabuli_chr04 | 8841149                 | TT                              | GG                | 1945932232               |
| SNP_P3_37838_8841224 | NC_021163.1    | Ca_kabuli_chr04 | 8841224                 | TT                              | CC                | 1945932234               |
| SNP_P3_37839_8841236 | NC_021163.1    | Ca_kabuli_chr04 | 8841236                 | TT                              | CC                | 1945932236               |
| SNP_P3_37840_8841313 | NC_021163.1    | Ca_kabuli_chr04 | 8841313                 | AA                              | GG                | 1945932238               |
| SNP_P3_37842_8842981 | NC_021163.1    | Ca_kabuli_chr04 | 8842981                 | CC                              | TT                | 1945932239               |
| SNP_P3_37843_8846689 | NC_021163.1    | Ca_kabuli_chr04 | 8846689                 | TT                              | CC                | 1945932241               |
| SNP_P3_37844_8847314 | NC_021163.1    | Ca_kabuli_chr04 | 8847314                 | GG                              | AA                | 1945932243               |
| SNP_P3_37845_8847384 | NC_021163.1    | Ca_kabuli_chr04 | 8847384                 | AA                              | TT                | 1945932245               |
| SNP_P3_37846_8848435 | NC_021163.1    | Ca_kabuli_chr04 | 8848435                 | CC                              | TT                | 1945932246               |
| SNP_P3_37847_8853229 | NC_021163.1    | Ca_kabuli_chr04 | 8853229                 | CC                              | TT                | 1945932248               |
| SNP_P3_37848_8855445 | NC_021163.1    | Ca_kabuli_chr04 | 8855445                 | TT                              | CC                | 1945932250               |
| SNP_P3_37850_8859087 | NC_021163.1    | Ca_kabuli_chr04 | 8859087                 | TT                              | CC                | 1945932252               |
| SNP_P3_37851_8859089 | NC_021163.1    | Ca_kabuli_chr04 | 8859089                 | AA                              | CC                | 1945932253               |
| SNP_P3_37852_8859431 | NC_021163.1    | Ca_kabuli_chr04 | 8859431                 | GG                              | AA                | 1945932255               |

| SNPs IDs             | Chromosome IDs | Chromosomes     | Physical positions (bp) | CDC Frontier (Reference genome) | (Pusa 256 & HPNB) | NCBI SNPdb Accession IDs |
|----------------------|----------------|-----------------|-------------------------|---------------------------------|-------------------|--------------------------|
| SNP_P3_37854_8859709 | NC_021163.1    | Ca_kabuli_chr04 | 8859709                 | AA                              | CC                | 1945932257               |
| SNP_P3_37855_8859936 | NC_021163.1    | Ca_kabuli_chr04 | 8859936                 | GG                              | AA                | 1945932259               |
| SNP_P3_37856_8859962 | NC_021163.1    | Ca_kabuli_chr04 | 8859962                 | GG                              | CC                | 1945932261               |
| SNP_P3_37857_8860131 | NC_021163.1    | Ca_kabuli_chr04 | 8860131                 | AA                              | CC                | 1945932262               |
| SNP_P3_37858_8860592 | NC_021163.1    | Ca_kabuli_chr04 | 8860592                 | CC                              | TT                | 1945932264               |
| SNP_P3_37859_8860594 | NC_021163.1    | Ca_kabuli_chr04 | 8860594                 | CC                              | TT                | 1945932266               |
| SNP_P3_37860_8860758 | NC_021163.1    | Ca_kabuli_chr04 | 8860758                 | GG                              | CC                | 1945932268               |
| SNP_P3_37861_8860796 | NC_021163.1    | Ca_kabuli_chr04 | 8860796                 | GG                              | AA                | 1945932269               |
| SNP_P3_37863_8861510 | NC_021163.1    | Ca_kabuli_chr04 | 8861510                 | GG                              | TT                | 1945932271               |
| SNP_P3_37864_8862323 | NC_021163.1    | Ca_kabuli_chr04 | 8862323                 | GG                              | AA                | 1945932273               |
| SNP_P3_37865_8862324 | NC_021163.1    | Ca_kabuli_chr04 | 8862324                 | CC                              | AA                | 1945932275               |
| SNP_P3_37866_8863079 | NC_021163.1    | Ca_kabuli_chr04 | 8863079                 | AA                              | TT                | 1945932276               |
| SNP_P3_37867_8863480 | NC_021163.1    | Ca_kabuli_chr04 | 8863480                 | TT                              | CC                | 1945932278               |
| SNP_P3_37868_8863813 | NC_021163.1    | Ca_kabuli_chr04 | 8863813                 | TT                              | CC                | 1945932280               |
| SNP_P3_37869_8863901 | NC_021163.1    | Ca_kabuli_chr04 | 8863901                 | AA                              | CC                | 1945932282               |
| SNP_P3_37870_8863912 | NC_021163.1    | Ca_kabuli_chr04 | 8863912                 | TT                              | CC                | 1945932284               |
| SNP_P3_37871_8863952 | NC_021163.1    | Ca_kabuli_chr04 | 8863952                 | CC                              | AA                | 1945932285               |
| SNP_P3_37872_8864222 | NC_021163.1    | Ca_kabuli_chr04 | 8864222                 | GG                              | AA                | 1945932287               |
| SNP_P3_37873_8864379 | NC_021163.1    | Ca_kabuli_chr04 | 8864379                 | AA                              | TT                | 1945932289               |
| SNP_P3_37874_8864386 | NC_021163.1    | Ca_kabuli_chr04 | 8864386                 | AA                              | CC                | 1945932291               |
| SNP_P3_37876_8864676 | NC_021163.1    | Ca_kabuli_chr04 | 8864676                 | GG                              | AA                | 1945932292               |
| SNP_P3_37878_8865128 | NC_021163.1    | Ca_kabuli_chr04 | 8865128                 | TT                              | GG                | 1945932294               |
| SNP_P3_37879_8866653 | NC_021163.1    | Ca_kabuli_chr04 | 8866653                 | TT                              | GG                | 1945932296               |
| SNP_P3_37881_8867952 | NC_021163.1    | Ca_kabuli_chr04 | 8867952                 | GG                              | AA                | 1945932298               |
| SNP_P3_37882_8868335 | NC_021163.1    | Ca_kabuli_chr04 | 8868335                 | CC                              | TT                | 1945932299               |
| SNP_P3_37883_8868397 | NC_021163.1    | Ca_kabuli_chr04 | 8868397                 | AA                              | TT                | 1945932301               |
| SNP_P3_37884_8869468 | NC_021163.1    | Ca_kabuli_chr04 | 8869468                 | TT                              | AA                | 1945932303               |
| SNP_P3_37887_8870947 | NC_021163.1    | Ca_kabuli_chr04 | 8870947                 | TT                              | GG                | 1945932305               |
| SNP_P3_37888_8870970 | NC_021163.1    | Ca_kabuli_chr04 | 8870970                 | CC                              | TT                | 1945932307               |
| SNP_P3_37890_8871341 | NC_021163.1    | Ca_kabuli_chr04 | 8871341                 | AA                              | CC                | 1945932308               |
| SNP_P3_37891_8871613 | NC_021163.1    | Ca_kabuli_chr04 | 8871613                 | AA                              | GG                | 1945932310               |
| SNP_P3_37892_8871887 | NC_021163.1    | Ca_kabuli_chr04 | 8871887                 | GG                              | CC                | 1945932312               |
| SNP_P3_37893_8871890 | NC_021163.1    | Ca_kabuli_chr04 | 8871890                 | AA                              | CC                | 1945932314               |
| SNP_P3_37894_8876559 | NC_021163.1    | Ca_kabuli_chr04 | 8876559                 | AA                              | CC                | 1945932315               |
| SNP_P3_37896_8877442 | NC_021163.1    | Ca_kabuli_chr04 | 8877442                 | GG                              | AA                | 1945932317               |
| SNP_P3_37897_8877768 | NC_021163.1    | Ca_kabuli_chr04 | 8877768                 | AA                              | CC                | 1945932319               |
| SNP_P3_37898_8877781 | NC_021163.1    | Ca_kabuli_chr04 | 8877781                 | TT                              | GG                | 1945932321               |
| SNP_P3_37899_8878019 | NC_021163.1    | Ca_kabuli_chr04 | 8878019                 | AA                              | GG                | 1945932322               |
| SNP_P3_37900_8878022 | NC_021163.1    | Ca_kabuli_chr04 | 8878022                 | CC                              | TT                | 1945932324               |
| SNP_P3_37901_8878030 | NC_021163.1    | Ca_kabuli_chr04 | 8878030                 | GG                              | AA                | 1945932326               |
| SNP_P3_37902_8878037 | NC_021163.1    | Ca_kabuli_chr04 | 8878037                 | TT                              | CC                | 1945932328               |
| SNP_P3_37903_8878052 | NC_021163.1    | Ca_kabuli_chr04 | 8878052                 | TT                              | CC                | 1945932330               |



| SNPs IDs             | Chromosome IDs | Chromosomes     | Physical positions (bp) | CDC Frontier (Reference genome) | (Pusa 256 & HPNB) | NCBI SNPdb Accession IDs |
|----------------------|----------------|-----------------|-------------------------|---------------------------------|-------------------|--------------------------|
| SNP_P3_37904_8878537 | NC_021163.1    | Ca_kabuli_chr04 | 8878537                 | AA                              | GG                | 1945932331               |
| SNP_P3_37905_8878586 | NC_021163.1    | Ca_kabuli_chr04 | 8878586                 | GG                              | AA                | 1945932333               |
| SNP_P3_37906_8880087 | NC_021163.1    | Ca_kabuli_chr04 | 8880087                 | TT                              | CC                | 1945932335               |
| SNP_P3_37907_8880104 | NC_021163.1    | Ca_kabuli_chr04 | 8880104                 | TT                              | CC                | 1945932337               |
| SNP_P3_37909_8880171 | NC_021163.1    | Ca_kabuli_chr04 | 8880171                 | TT                              | CC                | 1945932338               |
| SNP_P3_37910_8880176 | NC_021163.1    | Ca_kabuli_chr04 | 8880176                 | CC                              | TT                | 1945932340               |
| SNP_P3_37911_8880189 | NC_021163.1    | Ca_kabuli_chr04 | 8880189                 | TT                              | CC                | 1945932342               |
| SNP_P3_37913_8880315 | NC_021163.1    | Ca_kabuli_chr04 | 8880315                 | TT                              | AA                | 1945932344               |
| SNP_P3_37914_8881020 | NC_021163.1    | Ca_kabuli_chr04 | 8881020                 | CC                              | TT                | 1945932345               |
| SNP_P3_37915_8881034 | NC_021163.1    | Ca_kabuli_chr04 | 8881034                 | CC                              | TT                | 1945932347               |
| SNP_P3_37916_8881057 | NC_021163.1    | Ca_kabuli_chr04 | 8881057                 | GG                              | AA                | 1945932349               |
| SNP_P3_37917_8882184 | NC_021163.1    | Ca_kabuli_chr04 | 8882184                 | TT                              | AA                | 1945932351               |
| SNP_P3_37918_8882194 | NC_021163.1    | Ca_kabuli_chr04 | 8882194                 | TT                              | GG                | 1945932353               |
| SNP_P3_37920_8882834 | NC_021163.1    | Ca_kabuli_chr04 | 8882834                 | CC                              | TT                | 1945932354               |
| SNP_P3_37921_8884584 | NC_021163.1    | Ca_kabuli_chr04 | 8884584                 | CC                              | GG                | 1945932356               |
| SNP_P3_37922_8884585 | NC_021163.1    | Ca_kabuli_chr04 | 8884585                 | AA                              | GG                | 1945932358               |
| SNP_P3_37923_8884606 | NC_021163.1    | Ca_kabuli_chr04 | 8884606                 | TT                              | GG                | 1945932360               |
| SNP_P3_37925_8884798 | NC_021163.1    | Ca_kabuli_chr04 | 8884798                 | AA                              | TT                | 1945932361               |
| SNP_P3_37926_8884850 | NC_021163.1    | Ca_kabuli_chr04 | 8884850                 | GG                              | TT                | 1945932363               |
| SNP_P3_37927_8884871 | NC_021163.1    | Ca_kabuli_chr04 | 8884871                 | TT                              | CC                | 1945932365               |
| SNP_P3_37928_8884886 | NC_021163.1    | Ca_kabuli_chr04 | 8884886                 | GG                              | AA                | 1945932367               |
| SNP_P3_37929_8884965 | NC_021163.1    | Ca_kabuli_chr04 | 8884965                 | AA                              | CC                | 1945932368               |
| SNP_P3_37930_8884998 | NC_021163.1    | Ca_kabuli_chr04 | 8884998                 | CC                              | TT                | 1945932370               |
| SNP_P3_37931_8885076 | NC_021163.1    | Ca_kabuli_chr04 | 8885076                 | AA                              | GG                | 1945932372               |
| SNP_P3_37932_8887038 | NC_021163.1    | Ca_kabuli_chr04 | 8887038                 | TT                              | AA                | 1945932374               |
| SNP_P3_37933_8887772 | NC_021163.1    | Ca_kabuli_chr04 | 8887772                 | TT                              | AA                | 1945932376               |
| SNP_P3_37934_8887981 | NC_021163.1    | Ca_kabuli_chr04 | 8887981                 | GG                              | AA                | 1945932377               |
| SNP_P3_37935_8888948 | NC_021163.1    | Ca_kabuli_chr04 | 8888948                 | CC                              | TT                | 1945932379               |
| SNP_P3_37936_8889160 | NC_021163.1    | Ca_kabuli_chr04 | 8889160                 | TT                              | CC                | 1945932381               |
| SNP_P3_37937_8889175 | NC_021163.1    | Ca_kabuli_chr04 | 8889175                 | TT                              | GG                | 1945932383               |
| SNP_P3_37938_8889186 | NC_021163.1    | Ca_kabuli_chr04 | 8889186                 | CC                              | TT                | 1945932384               |
| SNP_P3_37939_8889226 | NC_021163.1    | Ca_kabuli_chr04 | 8889226                 | CC                              | TT                | 1945932386               |
| SNP_P3_37940_8890988 | NC_021163.1    | Ca_kabuli_chr04 | 8890988                 | GG                              | AA                | 1945932388               |
| SNP_P3_37941_8890989 | NC_021163.1    | Ca_kabuli_chr04 | 8890989                 | CC                              | GG                | 1945932390               |
| SNP_P3_37946_8894004 | NC_021163.1    | Ca_kabuli_chr04 | 8894004                 | CC                              | TT                | 1945932391               |
| SNP_P3_37947_8894031 | NC_021163.1    | Ca_kabuli_chr04 | 8894031                 | TT                              | CC                | 1945932393               |
| SNP_P3_37948_8894061 | NC_021163.1    | Ca_kabuli_chr04 | 8894061                 | GG                              | AA                | 1945932395               |
| SNP_P3_37949_8894064 | NC_021163.1    | Ca_kabuli_chr04 | 8894064                 | GG                              | AA                | 1945932397               |
| SNP_P3_37950_8894108 | NC_021163.1    | Ca_kabuli_chr04 | 8894108                 | AA                              | GG                | 1945932398               |
| SNP_P3_37951_8894121 | NC_021163.1    | Ca_kabuli_chr04 | 8894121                 | AA                              | GG                | 1945932400               |
| SNP_P3_37952_8894122 | NC_021163.1    | Ca_kabuli_chr04 | 8894122                 | GG                              | AA                | 1945932402               |
| SNP_P3_37954_8895047 | NC_021163.1    | Ca_kabuli_chr04 | 8895047                 | GG                              | CC                | 1945932404               |

| SNPs IDs             | Chromosome IDs | Chromosomes     | Physical positions (bp) | CDC Frontier (Reference genome) | (Pusa 256 & HPNB) | NCBI SNPdb Accession IDs |
|----------------------|----------------|-----------------|-------------------------|---------------------------------|-------------------|--------------------------|
| SNP_P3_37955_8895071 | NC_021163.1    | Ca_kabuli_chr04 | 8895071                 | GG                              | TT                | 1945932406               |
| SNP_P3_37956_8895411 | NC_021163.1    | Ca_kabuli_chr04 | 8895411                 | GG                              | TT                | 1945932407               |
| SNP_P3_37957_8895412 | NC_021163.1    | Ca_kabuli_chr04 | 8895412                 | AA                              | TT                | 1945932409               |
| SNP_P3_37958_8895419 | NC_021163.1    | Ca_kabuli_chr04 | 8895419                 | AA                              | CC                | 1945932411               |
| SNP_P3_37959_8895426 | NC_021163.1    | Ca_kabuli_chr04 | 8895426                 | AA                              | GG                | 1945932413               |
| SNP_P3_37960_8895436 | NC_021163.1    | Ca_kabuli_chr04 | 8895436                 | GG                              | AA                | 1945932414               |
| SNP_P3_37961_8895458 | NC_021163.1    | Ca_kabuli_chr04 | 8895458                 | CC                              | TT                | 1945932416               |
| SNP_P3_37963_8897204 | NC_021163.1    | Ca_kabuli_chr04 | 8897204                 | AA                              | TT                | 1945932418               |
| SNP_P3_37964_8897205 | NC_021163.1    | Ca_kabuli_chr04 | 8897205                 | TT                              | CC                | 1945932420               |
| SNP_P3_37966_8897539 | NC_021163.1    | Ca_kabuli_chr04 | 8897539                 | CC                              | TT                | 1945932421               |
| SNP_P3_37967_8897630 | NC_021163.1    | Ca_kabuli_chr04 | 8897630                 | TT                              | AA                | 1945932423               |
| SNP_P3_37968_8897890 | NC_021163.1    | Ca_kabuli_chr04 | 8897890                 | GG                              | AA                | 1945932425               |
| SNP_P3_37969_8897902 | NC_021163.1    | Ca_kabuli_chr04 | 8897902                 | CC                              | TT                | 1945932427               |
| SNP_P3_37970_8898818 | NC_021163.1    | Ca_kabuli_chr04 | 8898818                 | TT                              | AA                | 1945932428               |
| SNP_P3_37971_8900157 | NC_021163.1    | Ca_kabuli_chr04 | 8900157                 | CC                              | AA                | 1945932430               |
| SNP_P3_37972_8900165 | NC_021163.1    | Ca_kabuli_chr04 | 8900165                 | AA                              | GG                | 1945932432               |
| SNP_P3_37973_8900172 | NC_021163.1    | Ca_kabuli_chr04 | 8900172                 | CC                              | GG                | 1945932434               |
| SNP_P3_37974_8900196 | NC_021163.1    | Ca_kabuli_chr04 | 8900196                 | TT                              | AA                | 1945932436               |
| SNP_P3_37975_8900227 | NC_021163.1    | Ca_kabuli_chr04 | 8900227                 | AA                              | TT                | 1945932437               |
| SNP_P3_37976_8900267 | NC_021163.1    | Ca_kabuli_chr04 | 8900267                 | GG                              | AA                | 1945932439               |
| SNP_P3_37979_8901796 | NC_021163.1    | Ca_kabuli_chr04 | 8901796                 | TT                              | AA                | 1945932441               |
| SNP_P3_37980_8903047 | NC_021163.1    | Ca_kabuli_chr04 | 8903047                 | CC                              | TT                | 1945932443               |
| SNP_P3_37981_8904374 | NC_021163.1    | Ca_kabuli_chr04 | 8904374                 | CC                              | TT                | 1945932444               |
| SNP_P3_37982_8904375 | NC_021163.1    | Ca_kabuli_chr04 | 8904375                 | AA                              | CC                | 1945932446               |
| SNP_P3_37983_8904433 | NC_021163.1    | Ca_kabuli_chr04 | 8904433                 | TT                              | AA                | 1945932448               |
| SNP_P3_37985_8905781 | NC_021163.1    | Ca_kabuli_chr04 | 8905781                 | CC                              | TT                | 1945932450               |
| SNP_P3_37986_8905883 | NC_021163.1    | Ca_kabuli_chr04 | 8905883                 | GG                              | AA                | 1945932451               |
| SNP_P3_37987_8906014 | NC_021163.1    | Ca_kabuli_chr04 | 8906014                 | AA                              | GG                | 1945932453               |
| SNP_P3_37988_8906095 | NC_021163.1    | Ca_kabuli_chr04 | 8906095                 | AA                              | GG                | 1945932455               |
| SNP_P3_37989_8906235 | NC_021163.1    | Ca_kabuli_chr04 | 8906235                 | AA                              | TT                | 1945932457               |
| SNP_P3_37991_8911571 | NC_021163.1    | Ca_kabuli_chr04 | 8911571                 | TT                              | CC                | 1945932459               |
| SNP_P3_37993_9026969 | NC_021163.1    | Ca_kabuli_chr04 | 9026969                 | TT                              | CC                | 1945932460               |
| SNP_P3_37996_9030164 | NC_021163.1    | Ca_kabuli_chr04 | 9030164                 | GG                              | CC                | 1945932462               |
| SNP_P3_37997_9030441 | NC_021163.1    | Ca_kabuli_chr04 | 9030441                 | AA                              | TT                | 1945932464               |
| SNP_P3_37998_9037721 | NC_021163.1    | Ca_kabuli_chr04 | 9037721                 | TT                              | GG                | 1945932466               |
| SNP_P3_37999_9037754 | NC_021163.1    | Ca_kabuli_chr04 | 9037754                 | TT                              | CC                | 1945932467               |
| SNP_P3_38002_9065856 | NC_021163.1    | Ca_kabuli_chr04 | 9065856                 | TT                              | AA                | 1945932469               |
| SNP_P3_38003_9065920 | NC_021163.1    | Ca_kabuli_chr04 | 9065920                 | CC                              | TT                | 1945932471               |
| SNP_P3_38004_9066176 | NC_021163.1    | Ca_kabuli_chr04 | 9066176                 | TT                              | AA                | 1945932473               |
| SNP_P3_38005_9066214 | NC_021163.1    | Ca_kabuli_chr04 | 9066214                 | GG                              | TT                | 1945932474               |
| SNP_P3_38006_9066238 | NC_021163.1    | Ca_kabuli_chr04 | 9066238                 | GG                              | TT                | 1945932476               |
| SNP_P3_38007_9066255 | NC_021163.1    | Ca_kabuli_chr04 | 9066255                 | CC                              | TT                | 1945932478               |

| SNPs IDs             | Chromosome IDs | Chromosomes     | Physical positions (bp) | CDC Frontier (Reference genome) | (Pusa 256 & HPNB) | NCBI SNPdb Accession IDs |
|----------------------|----------------|-----------------|-------------------------|---------------------------------|-------------------|--------------------------|
| SNP_P3_38009_9066488 | NC_021163.1    | Ca_kabuli_chr04 | 9066488                 | TT                              | CC                | 1945932480               |
| SNP_P3_38010_9066935 | NC_021163.1    | Ca_kabuli_chr04 | 9066935                 | GG                              | CC                | 1945932481               |
| SNP_P3_38011_9071128 | NC_021163.1    | Ca_kabuli_chr04 | 9071128                 | TT                              | AA                | 1945932483               |
| SNP_P3_38012_9071191 | NC_021163.1    | Ca_kabuli_chr04 | 9071191                 | TT                              | GG                | 1945932485               |
| SNP_P3_38013_9071204 | NC_021163.1    | Ca_kabuli_chr04 | 9071204                 | AA                              | GG                | 1945932487               |
| SNP_P3_38014_9075389 | NC_021163.1    | Ca_kabuli_chr04 | 9075389                 | AA                              | TT                | 1945932489               |
| SNP_P3_38016_9083510 | NC_021163.1    | Ca_kabuli_chr04 | 9083510                 | AA                              | GG                | 1945932490               |
| SNP_P3_38017_9083688 | NC_021163.1    | Ca_kabuli_chr04 | 9083688                 | AA                              | TT                | 1945932492               |
| SNP_P3_38018_9083720 | NC_021163.1    | Ca_kabuli_chr04 | 9083720                 | CC                              | TT                | 1945932494               |
| SNP_P3_38019_9086650 | NC_021163.1    | Ca_kabuli_chr04 | 9086650                 | GG                              | AA                | 1945932496               |
| SNP_P3_38020_9104616 | NC_021163.1    | Ca_kabuli_chr04 | 9104616                 | GG                              | AA                | 1945932497               |
| SNP_P3_38021_9126710 | NC_021163.1    | Ca_kabuli_chr04 | 9126710                 | GG                              | AA                | 1945932499               |
| SNP_P3_38023_9147377 | NC_021163.1    | Ca_kabuli_chr04 | 9147377                 | TT                              | CC                | 1945932501               |
| SNP_P3_38024_9147380 | NC_021163.1    | Ca_kabuli_chr04 | 9147380                 | AA                              | GG                | 1945932503               |
| SNP_P3_38025_9159047 | NC_021163.1    | Ca_kabuli_chr04 | 9159047                 | CC                              | TT                | 1945932505               |
| SNP_P3_38026_9168500 | NC_021163.1    | Ca_kabuli_chr04 | 9168500                 | GG                              | AA                | 1945932506               |
| SNP_P3_38027_9176511 | NC_021163.1    | Ca_kabuli_chr04 | 9176511                 | TT                              | CC                | 1945932508               |
| SNP_P3_38028_9176593 | NC_021163.1    | Ca_kabuli_chr04 | 9176593                 | AA                              | GG                | 1945932510               |
| SNP_P3_38029_9179144 | NC_021163.1    | Ca_kabuli_chr04 | 9179144                 | GG                              | TT                | 1945932512               |
| SNP_P3_38030_9183506 | NC_021163.1    | Ca_kabuli_chr04 | 9183506                 | GG                              | TT                | 1945932513               |
| SNP_P3_38032_9229964 | NC_021163.1    | Ca_kabuli_chr04 | 9229964                 | TT                              | CC                | 1945932515               |
| SNP_P3_38033_9229976 | NC_021163.1    | Ca_kabuli_chr04 | 9229976                 | CC                              | TT                | 1945932517               |
| SNP_P3_38034_9230022 | NC_021163.1    | Ca_kabuli_chr04 | 9230022                 | TT                              | CC                | 1945932519               |
| SNP_P3_38035_9230158 | NC_021163.1    | Ca_kabuli_chr04 | 9230158                 | AA                              | CC                | 1945932520               |
| SNP_P3_38036_9233240 | NC_021163.1    | Ca_kabuli_chr04 | 9233240                 | AA                              | GG                | 1945932522               |
| SNP_P3_38037_9233342 | NC_021163.1    | Ca_kabuli_chr04 | 9233342                 | TT                              | AA                | 1945932524               |
| SNP_P3_38038_9233352 | NC_021163.1    | Ca_kabuli_chr04 | 9233352                 | TT                              | AA                | 1945932526               |
| SNP_P3_38039_9233438 | NC_021163.1    | Ca_kabuli_chr04 | 9233438                 | AA                              | GG                | 1945932528               |
| SNP_P3_38040_9233485 | NC_021163.1    | Ca_kabuli_chr04 | 9233485                 | GG                              | AA                | 1945932529               |
| SNP_P3_38041_9233490 | NC_021163.1    | Ca_kabuli_chr04 | 9233490                 | TT                              | GG                | 1945932531               |
| SNP_P3_38043_9292463 | NC_021163.1    | Ca_kabuli_chr04 | 9292463                 | AA                              | GG                | 1945932533               |
| SNP_P3_38044_9312774 | NC_021163.1    | Ca_kabuli_chr04 | 9312774                 | GG                              | TT                | 1945932535               |
| SNP_P3_38045_9320647 | NC_021163.1    | Ca_kabuli_chr04 | 9320647                 | CC                              | AA                | 1945932536               |
| SNP_P3_38047_9347286 | NC_021163.1    | Ca_kabuli_chr04 | 9347286                 | TT                              | AA                | 1945932538               |
| SNP_P3_38051_9387971 | NC_021163.1    | Ca_kabuli_chr04 | 9387971                 | TT                              | CC                | 1945932540               |
| SNP_P3_38052_9387977 | NC_021163.1    | Ca_kabuli_chr04 | 9387977                 | AA                              | CC                | 1945932542               |
| SNP_P3_38053_9388067 | NC_021163.1    | Ca_kabuli_chr04 | 9388067                 | GG                              | AA                | 1945932544               |
| SNP_P3_38054_9388158 | NC_021163.1    | Ca_kabuli_chr04 | 9388158                 | GG                              | AA                | 1945932545               |
| SNP_P3_38055_9388174 | NC_021163.1    | Ca_kabuli_chr04 | 9388174                 | GG                              | CC                | 1945932547               |
| SNP_P3_38056_9388180 | NC_021163.1    | Ca_kabuli_chr04 | 9388180                 | TT                              | AA                | 1945932549               |
| SNP_P3_38057_9388185 | NC_021163.1    | Ca_kabuli_chr04 | 9388185                 | AA                              | GG                | 1945932551               |
| SNP_P3_38058_9388226 | NC_021163.1    | Ca_kabuli_chr04 | 9388226                 | GG                              | AA                | 1945932552               |

| SNPs IDs             | Chromosome IDs | Chromosomes     | Physical positions (bp) | CDC Frontier (Reference genome) | (Pusa 256 & HPNB) | NCBI SNPdb Accession IDs |
|----------------------|----------------|-----------------|-------------------------|---------------------------------|-------------------|--------------------------|
| SNP_P3_38059_9388232 | NC_021163.1    | Ca_kabuli_chr04 | 9388232                 | GG                              | TT                | 1945932554               |
| SNP_P3_38060_9388233 | NC_021163.1    | Ca_kabuli_chr04 | 9388233                 | GG                              | AA                | 1945932556               |
| SNP_P3_38061_9388271 | NC_021163.1    | Ca_kabuli_chr04 | 9388271                 | GG                              | TT                | 1945932558               |
| SNP_P3_38062_9388273 | NC_021163.1    | Ca_kabuli_chr04 | 9388273                 | TT                              | CC                | 1945932559               |
| SNP_P3_38063_9389037 | NC_021163.1    | Ca_kabuli_chr04 | 9389037                 | AA                              | GG                | 1945932561               |
| SNP_P3_38064_9392277 | NC_021163.1    | Ca_kabuli_chr04 | 9392277                 | AA                              | TT                | 1945932563               |
| SNP_P3_38066_9456501 | NC_021163.1    | Ca_kabuli_chr04 | 9456501                 | GG                              | AA                | 1945932565               |
| SNP_P3_38067_9456993 | NC_021163.1    | Ca_kabuli_chr04 | 9456993                 | GG                              | TT                | 1945932566               |
| SNP_P3_38068_9506779 | NC_021163.1    | Ca_kabuli_chr04 | 9506779                 | GG                              | AA                | 1945932568               |
| SNP_P3_38069_9516071 | NC_021163.1    | Ca_kabuli_chr04 | 9516071                 | AA                              | GG                | 1945932570               |
| SNP_P3_38070_9540211 | NC_021163.1    | Ca_kabuli_chr04 | 9540211                 | TT                              | AA                | 1945932572               |
| SNP_P3_38072_9550003 | NC_021163.1    | Ca_kabuli_chr04 | 9550003                 | CC                              | GG                | 1945932574               |
| SNP_P3_38076_9627836 | NC_021163.1    | Ca_kabuli_chr04 | 9627836                 | AA                              | GG                | 1945932575               |
| SNP_P3_38077_9627880 | NC_021163.1    | Ca_kabuli_chr04 | 9627880                 | AA                              | CC                | 1945932577               |
| SNP_P3_38078_9627914 | NC_021163.1    | Ca_kabuli_chr04 | 9627914                 | TT                              | CC                | 1945932579               |
| SNP_P3_38079_9627972 | NC_021163.1    | Ca_kabuli_chr04 | 9627972                 | CC                              | AA                | 1945932581               |
| SNP_P3_38080_9628213 | NC_021163.1    | Ca_kabuli_chr04 | 9628213                 | AA                              | TT                | 1945932582               |
| SNP_P3_38081_9628234 | NC_021163.1    | Ca_kabuli_chr04 | 9628234                 | GG                              | AA                | 1945932584               |
| SNP_P3_38082_9628241 | NC_021163.1    | Ca_kabuli_chr04 | 9628241                 | AA                              | GG                | 1945932586               |
| SNP_P3_38083_9628456 | NC_021163.1    | Ca_kabuli_chr04 | 9628456                 | AA                              | GG                | 1945932588               |
| SNP_P3_38084_9628486 | NC_021163.1    | Ca_kabuli_chr04 | 9628486                 | AA                              | GG                | 1945932590               |
| SNP_P3_38085_9628531 | NC_021163.1    | Ca_kabuli_chr04 | 9628531                 | GG                              | AA                | 1945932591               |
| SNP_P3_38086_9628564 | NC_021163.1    | Ca_kabuli_chr04 | 9628564                 | AA                              | TT                | 1945932593               |
| SNP_P3_38087_9628577 | NC_021163.1    | Ca_kabuli_chr04 | 9628577                 | AA                              | GG                | 1945932595               |
| SNP_P3_38088_9628578 | NC_021163.1    | Ca_kabuli_chr04 | 9628578                 | AA                              | GG                | 1945932597               |
| SNP_P3_38089_9628591 | NC_021163.1    | Ca_kabuli_chr04 | 9628591                 | CC                              | TT                | 1945932598               |
| SNP_P3_38090_9628622 | NC_021163.1    | Ca_kabuli_chr04 | 9628622                 | GG                              | AA                | 1945932600               |
| SNP_P3_38091_9628730 | NC_021163.1    | Ca_kabuli_chr04 | 9628730                 | AA                              | GG                | 1945932602               |
| SNP_P3_38092_9628733 | NC_021163.1    | Ca_kabuli_chr04 | 9628733                 | TT                              | AA                | 1945932604               |
| SNP_P3_38093_9628779 | NC_021163.1    | Ca_kabuli_chr04 | 9628779                 | CC                              | TT                | 1945932605               |
| SNP_P3_38094_9628805 | NC_021163.1    | Ca_kabuli_chr04 | 9628805                 | AA                              | TT                | 1945932607               |
| SNP_P3_38095_9628818 | NC_021163.1    | Ca_kabuli_chr04 | 9628818                 | CC                              | TT                | 1945932609               |
| SNP_P3_38096_9628831 | NC_021163.1    | Ca_kabuli_chr04 | 9628831                 | AA                              | TT                | 1945932611               |
| SNP_P3_38097_9628871 | NC_021163.1    | Ca_kabuli_chr04 | 9628871                 | TT                              | GG                | 1945932613               |
| SNP_P3_38098_9628911 | NC_021163.1    | Ca_kabuli_chr04 | 9628911                 | CC                              | TT                | 1945932614               |
| SNP_P3_38099_9628913 | NC_021163.1    | Ca_kabuli_chr04 | 9628913                 | AA                              | GG                | 1945932616               |
| SNP_P3_38100_9628929 | NC_021163.1    | Ca_kabuli_chr04 | 9628929                 | CC                              | AA                | 1945932618               |
| SNP_P3_38101_9628972 | NC_021163.1    | Ca_kabuli_chr04 | 9628972                 | CC                              | AA                | 1945932620               |
| SNP_P3_38102_9629076 | NC_021163.1    | Ca_kabuli_chr04 | 9629076                 | TT                              | CC                | 1945932621               |
| SNP_P3_38103_9629079 | NC_021163.1    | Ca_kabuli_chr04 | 9629079                 | AA                              | TT                | 1945932623               |
| SNP_P3_38104_9629128 | NC_021163.1    | Ca_kabuli_chr04 | 9629128                 | GG                              | AA                | 1945932625               |
| SNP_P3_38105_9629129 | NC_021163.1    | Ca_kabuli_chr04 | 9629129                 | AA                              | GG                | 1945932627               |

| SNPs IDs             | Chromosome IDs | Chromosomes     | Physical positions (bp) | CDC Frontier (Reference genome) | (Pusa 256 & HPNB) | NCBI SNPdb Accession IDs |
|----------------------|----------------|-----------------|-------------------------|---------------------------------|-------------------|--------------------------|
| SNP_P3_38106_9629167 | NC_021163.1    | Ca_kabuli_chr04 | 9629167                 | TT                              | GG                | 1945932628               |
| SNP_P3_38107_9629168 | NC_021163.1    | Ca_kabuli_chr04 | 9629168                 | GG                              | TT                | 1945932630               |
| SNP_P3_38108_9629173 | NC_021163.1    | Ca_kabuli_chr04 | 9629173                 | GG                              | AA                | 1945932632               |
| SNP_P3_38109_9629181 | NC_021163.1    | Ca_kabuli_chr04 | 9629181                 | GG                              | TT                | 1945932634               |
| SNP_P3_38110_9629230 | NC_021163.1    | Ca_kabuli_chr04 | 9629230                 | GG                              | CC                | 1945932636               |
| SNP_P3_38111_9629237 | NC_021163.1    | Ca_kabuli_chr04 | 9629237                 | AA                              | TT                | 1945932637               |
| SNP_P3_38112_9629241 | NC_021163.1    | Ca_kabuli_chr04 | 9629241                 | GG                              | TT                | 1945932639               |
| SNP_P3_38113_9629263 | NC_021163.1    | Ca_kabuli_chr04 | 9629263                 | AA                              | GG                | 1945932641               |
| SNP_P3_38114_9629267 | NC_021163.1    | Ca_kabuli_chr04 | 9629267                 | CC                              | TT                | 1945932643               |
| SNP_P3_38115_9629354 | NC_021163.1    | Ca_kabuli_chr04 | 9629354                 | TT                              | AA                | 1945932644               |
| SNP_P3_38116_9629366 | NC_021163.1    | Ca_kabuli_chr04 | 9629366                 | TT                              | GG                | 1945932646               |
| SNP_P3_38117_9629402 | NC_021163.1    | Ca_kabuli_chr04 | 9629402                 | TT                              | CC                | 1945932648               |
| SNP_P3_38118_9629417 | NC_021163.1    | Ca_kabuli_chr04 | 9629417                 | TT                              | GG                | 1945932650               |
| SNP_P3_38119_9629477 | NC_021163.1    | Ca_kabuli_chr04 | 9629477                 | CC                              | TT                | 1945932651               |
| SNP_P3_38120_9629502 | NC_021163.1    | Ca_kabuli_chr04 | 9629502                 | AA                              | GG                | 1945932653               |
| SNP_P3_38121_9629549 | NC_021163.1    | Ca_kabuli_chr04 | 9629549                 | CC                              | TT                | 1945932655               |
| SNP_P3_38122_9629561 | NC_021163.1    | Ca_kabuli_chr04 | 9629561                 | CC                              | TT                | 1945932657               |
| SNP_P3_38123_9629562 | NC_021163.1    | Ca_kabuli_chr04 | 9629562                 | TT                              | CC                | 1945932659               |
| SNP_P3_38124_9629568 | NC_021163.1    | Ca_kabuli_chr04 | 9629568                 | GG                              | AA                | 1945932660               |
| SNP_P3_38125_9629632 | NC_021163.1    | Ca_kabuli_chr04 | 9629632                 | GG                              | AA                | 1945932662               |
| SNP_P3_38126_9629639 | NC_021163.1    | Ca_kabuli_chr04 | 9629639                 | CC                              | TT                | 1945932664               |
| SNP_P3_38127_9629683 | NC_021163.1    | Ca_kabuli_chr04 | 9629683                 | CC                              | AA                | 1945932666               |
| SNP_P3_38128_9629691 | NC_021163.1    | Ca_kabuli_chr04 | 9629691                 | TT                              | CC                | 1945932667               |
| SNP_P3_38129_9629749 | NC_021163.1    | Ca_kabuli_chr04 | 9629749                 | AA                              | GG                | 1945932669               |
| SNP_P3_38130_9629819 | NC_021163.1    | Ca_kabuli_chr04 | 9629819                 | CC                              | TT                | 1945932671               |
| SNP_P3_38131_9629825 | NC_021163.1    | Ca_kabuli_chr04 | 9629825                 | CC                              | GG                | 1945932673               |
| SNP_P3_38132_9629841 | NC_021163.1    | Ca_kabuli_chr04 | 9629841                 | TT                              | CC                | 1945932675               |
| SNP_P3_38133_9629855 | NC_021163.1    | Ca_kabuli_chr04 | 9629855                 | AA                              | TT                | 1945932676               |
| SNP_P3_38134_9629887 | NC_021163.1    | Ca_kabuli_chr04 | 9629887                 | GG                              | TT                | 1945932678               |
| SNP_P3_38135_9629924 | NC_021163.1    | Ca_kabuli_chr04 | 9629924                 | AA                              | GG                | 1945932680               |
| SNP_P3_38136_9629940 | NC_021163.1    | Ca_kabuli_chr04 | 9629940                 | CC                              | TT                | 1945932682               |
| SNP_P3_38137_9629971 | NC_021163.1    | Ca_kabuli_chr04 | 9629971                 | GG                              | AA                | 1945932683               |
| SNP_P3_38138_9629978 | NC_021163.1    | Ca_kabuli_chr04 | 9629978                 | TT                              | GG                | 1945932685               |
| SNP_P3_38139_9629995 | NC_021163.1    | Ca_kabuli_chr04 | 9629995                 | AA                              | CC                | 1945932687               |
| SNP_P3_38140_9630050 | NC_021163.1    | Ca_kabuli_chr04 | 9630050                 | AA                              | TT                | 1945932689               |
| SNP_P3_38141_9630065 | NC_021163.1    | Ca_kabuli_chr04 | 9630065                 | CC                              | TT                | 1945932690               |
| SNP_P3_38142_9630119 | NC_021163.1    | Ca_kabuli_chr04 | 9630119                 | AA                              | GG                | 1945932692               |
| SNP_P3_38144_9630161 | NC_021163.1    | Ca_kabuli_chr04 | 9630161                 | GG                              | AA                | 1945932694               |
| SNP_P3_38145_9630193 | NC_021163.1    | Ca_kabuli_chr04 | 9630193                 | CC                              | GG                | 1945932696               |
| SNP_P3_38146_9630199 | NC_021163.1    | Ca_kabuli_chr04 | 9630199                 | TT                              | GG                | 1945932698               |
| SNP_P3_38147_9630210 | NC_021163.1    | Ca_kabuli_chr04 | 9630210                 | GG                              | TT                | 1945932699               |
| SNP_P3_38148_9630214 | NC_021163.1    | Ca_kabuli_chr04 | 9630214                 | AA                              | GG                | 1945932701               |

| SNPs IDs             | Chromosome IDs | Chromosomes     | Physical positions (bp) | CDC Frontier (Reference genome) | (Pusa 256 & HPNB) | NCBI SNPdb Accession IDs |
|----------------------|----------------|-----------------|-------------------------|---------------------------------|-------------------|--------------------------|
| SNP_P3_38149_9630268 | NC_021163.1    | Ca_kabuli_chr04 | 9630268                 | CC                              | AA                | 1945932703               |
| SNP_P3_38150_9630282 | NC_021163.1    | Ca_kabuli_chr04 | 9630282                 | TT                              | CC                | 1945932705               |
| SNP_P3_38152_9630356 | NC_021163.1    | Ca_kabuli_chr04 | 9630356                 | GG                              | TT                | 1945932706               |
| SNP_P3_38153_9630406 | NC_021163.1    | Ca_kabuli_chr04 | 9630406                 | TT                              | AA                | 1945932708               |
| SNP_P3_38154_9630526 | NC_021163.1    | Ca_kabuli_chr04 | 9630526                 | AA                              | GG                | 1945932710               |
| SNP_P3_38155_9630530 | NC_021163.1    | Ca_kabuli_chr04 | 9630530                 | GG                              | TT                | 1945932712               |
| SNP_P3_38156_9630563 | NC_021163.1    | Ca_kabuli_chr04 | 9630563                 | CC                              | TT                | 1945932713               |
| SNP_P3_38157_9630587 | NC_021163.1    | Ca_kabuli_chr04 | 9630587                 | TT                              | GG                | 1945932715               |
| SNP_P3_38158_9630598 | NC_021163.1    | Ca_kabuli_chr04 | 9630598                 | GG                              | AA                | 1945932717               |
| SNP_P3_38159_9630602 | NC_021163.1    | Ca_kabuli_chr04 | 9630602                 | AA                              | GG                | 1945932719               |
| SNP_P3_38160_9630604 | NC_021163.1    | Ca_kabuli_chr04 | 9630604                 | TT                              | GG                | 1945932721               |
| SNP_P3_38161_9630650 | NC_021163.1    | Ca_kabuli_chr04 | 9630650                 | AA                              | CC                | 1945932722               |
| SNP_P3_38162_9630676 | NC_021163.1    | Ca_kabuli_chr04 | 9630676                 | TT                              | CC                | 1945932724               |
| SNP_P3_38163_9630679 | NC_021163.1    | Ca_kabuli_chr04 | 9630679                 | TT                              | CC                | 1945932726               |
| SNP_P3_38164_9630698 | NC_021163.1    | Ca_kabuli_chr04 | 9630698                 | AA                              | GG                | 1945932728               |
| SNP_P3_38165_9630739 | NC_021163.1    | Ca_kabuli_chr04 | 9630739                 | TT                              | CC                | 1945932729               |
| SNP_P3_38166_9630902 | NC_021163.1    | Ca_kabuli_chr04 | 9630902                 | AA                              | TT                | 1945932731               |
| SNP_P3_38167_9630920 | NC_021163.1    | Ca_kabuli_chr04 | 9630920                 | CC                              | TT                | 1945932733               |
| SNP_P3_38168_9631992 | NC_021163.1    | Ca_kabuli_chr04 | 9631992                 | TT                              | CC                | 1945932735               |
| SNP_P3_38169_9632646 | NC_021163.1    | Ca_kabuli_chr04 | 9632646                 | GG                              | AA                | 1945932736               |
| SNP_P3_38171_9632840 | NC_021163.1    | Ca_kabuli_chr04 | 9632840                 | TT                              | AA                | 1945932738               |
| SNP_P3_38172_9632892 | NC_021163.1    | Ca_kabuli_chr04 | 9632892                 | AA                              | CC                | 1945932740               |
| SNP_P3_38173_9632908 | NC_021163.1    | Ca_kabuli_chr04 | 9632908                 | TT                              | AA                | 1945932742               |
| SNP_P3_38174_9632955 | NC_021163.1    | Ca_kabuli_chr04 | 9632955                 | TT                              | AA                | 1945932743               |
| SNP_P3_38175_9633046 | NC_021163.1    | Ca_kabuli_chr04 | 9633046                 | GG                              | AA                | 1945932745               |
| SNP_P3_38176_9633055 | NC_021163.1    | Ca_kabuli_chr04 | 9633055                 | AA                              | GG                | 1945932747               |
| SNP_P3_38178_9633935 | NC_021163.1    | Ca_kabuli_chr04 | 9633935                 | TT                              | GG                | 1945932749               |
| SNP_P3_38179_9633954 | NC_021163.1    | Ca_kabuli_chr04 | 9633954                 | CC                              | AA                | 1945932750               |
| SNP_P3_38180_9633978 | NC_021163.1    | Ca_kabuli_chr04 | 9633978                 | GG                              | AA                | 1945932752               |
| SNP_P3_38181_9634018 | NC_021163.1    | Ca_kabuli_chr04 | 9634018                 | GG                              | AA                | 1945932754               |
| SNP_P3_38182_9634020 | NC_021163.1    | Ca_kabuli_chr04 | 9634020                 | TT                              | CC                | 1945932756               |
| SNP_P3_38183_9634021 | NC_021163.1    | Ca_kabuli_chr04 | 9634021                 | AA                              | GG                | 1945932758               |
| SNP_P3_38184_9634029 | NC_021163.1    | Ca_kabuli_chr04 | 9634029                 | CC                              | TT                | 1945932759               |
| SNP_P3_38185_9634041 | NC_021163.1    | Ca_kabuli_chr04 | 9634041                 | GG                              | CC                | 1945932761               |
| SNP_P3_38186_9634065 | NC_021163.1    | Ca_kabuli_chr04 | 9634065                 | TT                              | GG                | 1945932763               |
| SNP_P3_38187_9677312 | NC_021163.1    | Ca_kabuli_chr04 | 9677312                 | GG                              | TT                | 1945932765               |
| SNP_P3_38188_9685877 | NC_021163.1    | Ca_kabuli_chr04 | 9685877                 | AA                              | TT                | 1945932766               |
| SNP_P3_38189_9693394 | NC_021163.1    | Ca_kabuli_chr04 | 9693394                 | GG                              | AA                | 1945932768               |
| SNP_P3_38191_9708945 | NC_021163.1    | Ca_kabuli_chr04 | 9708945                 | TT                              | AA                | 1945932770               |
| SNP_P3_38193_9723082 | NC_021163.1    | Ca_kabuli_chr04 | 9723082                 | CC                              | TT                | 1945932772               |
| SNP_P3_38194_9726008 | NC_021163.1    | Ca_kabuli_chr04 | 9726008                 | AA                              | GG                | 1945932773               |
| SNP_P3_38195_9726199 | NC_021163.1    | Ca_kabuli_chr04 | 9726199                 | AA                              | GG                | 1945932775               |

| SNPs IDs              | Chromosome IDs | Chromosomes     | Physical positions (bp) | CDC Frontier (Reference genome) | (Pusa 256 & HPNB) | NCBI SNPdb Accession IDs |
|-----------------------|----------------|-----------------|-------------------------|---------------------------------|-------------------|--------------------------|
| SNP_P3_38196_9726237  | NC_021163.1    | Ca_kabuli_chr04 | 9726237                 | AA                              | CC                | 1945932777               |
| SNP_P3_38198_9726356  | NC_021163.1    | Ca_kabuli_chr04 | 9726356                 | CC                              | TT                | 1945932779               |
| SNP_P3_38199_9726364  | NC_021163.1    | Ca_kabuli_chr04 | 9726364                 | AA                              | GG                | 1945932781               |
| SNP_P3_38200_9726517  | NC_021163.1    | Ca_kabuli_chr04 | 9726517                 | CC                              | GG                | 1945932782               |
| SNP_P3_38201_9726681  | NC_021163.1    | Ca_kabuli_chr04 | 9726681                 | CC                              | TT                | 1945932784               |
| SNP_P3_38202_9726852  | NC_021163.1    | Ca_kabuli_chr04 | 9726852                 | GG                              | AA                | 1945932786               |
| SNP_P3_38203_9727350  | NC_021163.1    | Ca_kabuli_chr04 | 9727350                 | AA                              | GG                | 1945932788               |
| SNP_P3_38206_9792409  | NC_021163.1    | Ca_kabuli_chr04 | 9792409                 | CC                              | TT                | 1945932789               |
| SNP_P3_38207_9792414  | NC_021163.1    | Ca_kabuli_chr04 | 9792414                 | TT                              | GG                | 1945932791               |
| SNP_P3_38208_9792684  | NC_021163.1    | Ca_kabuli_chr04 | 9792684                 | AA                              | GG                | 1945932793               |
| SNP_P3_38210_9863644  | NC_021163.1    | Ca_kabuli_chr04 | 9863644                 | CC                              | TT                | 1945932795               |
| SNP_P3_38211_9866135  | NC_021163.1    | Ca_kabuli_chr04 | 9866135                 | AA                              | TT                | 1945932796               |
| SNP_P3_38212_9868037  | NC_021163.1    | Ca_kabuli_chr04 | 9868037                 | TT                              | AA                | 1945932798               |
| SNP_P3_38213_9878355  | NC_021163.1    | Ca_kabuli_chr04 | 9878355                 | GG                              | AA                | 1945932800               |
| SNP_P3_38215_9933697  | NC_021163.1    | Ca_kabuli_chr04 | 9933697                 | AA                              | CC                | 1945932802               |
| SNP_P3_38216_9966869  | NC_021163.1    | Ca_kabuli_chr04 | 9966869                 | GG                              | AA                | 1945932803               |
| SNP_P3_38219_10004601 | NC_021163.1    | Ca_kabuli_chr04 | 10004601                | CC                              | TT                | 1945932805               |
| SNP_P3_38220_10030902 | NC_021163.1    | Ca_kabuli_chr04 | 10030902                | GG                              | TT                | 1945932807               |
| SNP_P3_38222_10036376 | NC_021163.1    | Ca_kabuli_chr04 | 10036376                | TT                              | CC                | 1945932809               |
| SNP_P3_38223_10061484 | NC_021163.1    | Ca_kabuli_chr04 | 10061484                | TT                              | CC                | 1945932810               |
| SNP_P3_38224_10061487 | NC_021163.1    | Ca_kabuli_chr04 | 10061487                | TT                              | GG                | 1945932812               |
| SNP_P3_38225_10063728 | NC_021163.1    | Ca_kabuli_chr04 | 10063728                | AA                              | TT                | 1945932814               |
| SNP_P3_38226_10073518 | NC_021163.1    | Ca_kabuli_chr04 | 10073518                | GG                              | AA                | 1945932816               |
| SNP_P3_38227_10076031 | NC_021163.1    | Ca_kabuli_chr04 | 10076031                | AA                              | GG                | 1945932818               |
| SNP_P3_38228_10107258 | NC_021163.1    | Ca_kabuli_chr04 | 10107258                | CC                              | TT                | 1945932819               |
| SNP_P3_38230_10137700 | NC_021163.1    | Ca_kabuli_chr04 | 10137700                | CC                              | TT                | 1945932821               |
| SNP_P3_38231_10147699 | NC_021163.1    | Ca_kabuli_chr04 | 10147699                | CC                              | TT                | 1945932823               |
| SNP_P3_38233_10205947 | NC_021163.1    | Ca_kabuli_chr04 | 10205947                | AA                              | GG                | 1945932825               |
| SNP_P3_38235_10215165 | NC_021163.1    | Ca_kabuli_chr04 | 10215165                | TT                              | CC                | 1945932826               |
| SNP_P3_38237_10240756 | NC_021163.1    | Ca_kabuli_chr04 | 10240756                | GG                              | TT                | 1945932828               |
| SNP_P3_38241_10253310 | NC_021163.1    | Ca_kabuli_chr04 | 10253310                | TT                              | GG                | 1945932830               |
| SNP_P3_38242_10253324 | NC_021163.1    | Ca_kabuli_chr04 | 10253324                | CC                              | GG                | 1945932832               |
| SNP_P3_38243_10253342 | NC_021163.1    | Ca_kabuli_chr04 | 10253342                | GG                              | CC                | 1945932833               |
| SNP_P3_38244_10253349 | NC_021163.1    | Ca_kabuli_chr04 | 10253349                | CC                              | GG                | 1945932835               |
| SNP_P3_38245_10253369 | NC_021163.1    | Ca_kabuli_chr04 | 10253369                | TT                              | GG                | 1945932837               |
| SNP_P3_38246_10253370 | NC_021163.1    | Ca_kabuli_chr04 | 10253370                | CC                              | AA                | 1945932839               |
| SNP_P3_38247_10253410 | NC_021163.1    | Ca_kabuli_chr04 | 10253410                | AA                              | CC                | 1945932840               |
| SNP_P3_38248_10253569 | NC_021163.1    | Ca_kabuli_chr04 | 10253569                | AA                              | GG                | 1945932842               |
| SNP_P3_38250_10255449 | NC_021163.1    | Ca_kabuli_chr04 | 10255449                | CC                              | TT                | 1945932844               |
| SNP_P3_38251_10255857 | NC_021163.1    | Ca_kabuli_chr04 | 10255857                | AA                              | GG                | 1945932846               |
| SNP_P3_38253_10264783 | NC_021163.1    | Ca_kabuli_chr04 | 10264783                | TT                              | CC                | 1945932848               |
| SNP_P3_38255_10278083 | NC_021163.1    | Ca_kabuli_chr04 | 10278083                | TT                              | CC                | 1945932849               |

| SNPs IDs              | Chromosome IDs | Chromosomes     | Physical positions (bp) | CDC Frontier (Reference genome) | (Pusa 256 & HPNB) | NCBI SNPdb Accession IDs |
|-----------------------|----------------|-----------------|-------------------------|---------------------------------|-------------------|--------------------------|
| SNP_P3_38256_10278607 | NC_021163.1    | Ca_kabuli_chr04 | 10278607                | GG                              | AA                | 1945932851               |
| SNP_P3_38257_10278667 | NC_021163.1    | Ca_kabuli_chr04 | 10278667                | CC                              | TT                | 1945932853               |
| SNP_P3_38258_10303294 | NC_021163.1    | Ca_kabuli_chr04 | 10303294                | GG                              | AA                | 1945932855               |
| SNP_P3_38259_10330044 | NC_021163.1    | Ca_kabuli_chr04 | 10330044                | GG                              | TT                | 1945932856               |
| SNP_P3_38261_10336155 | NC_021163.1    | Ca_kabuli_chr04 | 10336155                | AA                              | TT                | 1945932858               |
| SNP_P3_38262_10369142 | NC_021163.1    | Ca_kabuli_chr04 | 10369142                | TT                              | AA                | 1945932860               |
| SNP_P3_38263_10374933 | NC_021163.1    | Ca_kabuli_chr04 | 10374933                | TT                              | CC                | 1945932862               |
| SNP_P3_38264_10378823 | NC_021163.1    | Ca_kabuli_chr04 | 10378823                | TT                              | CC                | 1945932863               |
| SNP_P3_38266_10445377 | NC_021163.1    | Ca_kabuli_chr04 | 10445377                | TT                              | GG                | 1945932865               |
| SNP_P3_38268_10460294 | NC_021163.1    | Ca_kabuli_chr04 | 10460294                | TT                              | AA                | 1945932867               |
| SNP_P3_38270_10508502 | NC_021163.1    | Ca_kabuli_chr04 | 10508502                | GG                              | AA                | 1945932869               |
| SNP_P3_38271_10515279 | NC_021163.1    | Ca_kabuli_chr04 | 10515279                | AA                              | TT                | 1945932870               |
| SNP_P3_38272_10570626 | NC_021163.1    | Ca_kabuli_chr04 | 10570626                | TT                              | GG                | 1945932872               |
| SNP_P3_38274_10650852 | NC_021163.1    | Ca_kabuli_chr04 | 10650852                | AA                              | GG                | 1945932874               |
| SNP_P3_38277_10666731 | NC_021163.1    | Ca_kabuli_chr04 | 10666731                | CC                              | AA                | 1945932876               |
| SNP_P3_38278_10666737 | NC_021163.1    | Ca_kabuli_chr04 | 10666737                | GG                              | AA                | 1945932878               |
| SNP_P3_38279_10674943 | NC_021163.1    | Ca_kabuli_chr04 | 10674943                | GG                              | AA                | 1945932879               |
| SNP_P3_38280_10693073 | NC_021163.1    | Ca_kabuli_chr04 | 10693073                | AA                              | TT                | 1945932881               |
| SNP_P3_38281_10693089 | NC_021163.1    | Ca_kabuli_chr04 | 10693089                | AA                              | CC                | 1945932883               |
| SNP_P3_38282_10752870 | NC_021163.1    | Ca_kabuli_chr04 | 10752870                | AA                              | TT                | 1945932885               |
| SNP_P3_38283_10753473 | NC_021163.1    | Ca_kabuli_chr04 | 10753473                | AA                              | GG                | 1945932886               |
| SNP_P3_38284_10757629 | NC_021163.1    | Ca_kabuli_chr04 | 10757629                | AA                              | CC                | 1945932888               |
| SNP_P3_38285_10757937 | NC_021163.1    | Ca_kabuli_chr04 | 10757937                | TT                              | GG                | 1945932890               |
| SNP_P3_38286_10757939 | NC_021163.1    | Ca_kabuli_chr04 | 10757939                | TT                              | GG                | 1945932892               |
| SNP_P3_38287_10769762 | NC_021163.1    | Ca_kabuli_chr04 | 10769762                | AA                              | CC                | 1945932893               |
| SNP_P3_38290_10822471 | NC_021163.1    | Ca_kabuli_chr04 | 10822471                | CC                              | GG                | 1945932895               |
| SNP_P3_38292_10831472 | NC_021163.1    | Ca_kabuli_chr04 | 10831472                | GG                              | CC                | 1945932897               |
| SNP_P3_38293_10841256 | NC_021163.1    | Ca_kabuli_chr04 | 10841256                | AA                              | TT                | 1945932899               |
| SNP_P3_38295_10879282 | NC_021163.1    | Ca_kabuli_chr04 | 10879282                | TT                              | CC                | 1945932901               |
| SNP_P3_38296_10880231 | NC_021163.1    | Ca_kabuli_chr04 | 10880231                | TT                              | AA                | 1945932902               |
| SNP_P3_38297_10880475 | NC_021163.1    | Ca_kabuli_chr04 | 10880475                | TT                              | AA                | 1945932904               |
| SNP_P3_38298_10880480 | NC_021163.1    | Ca_kabuli_chr04 | 10880480                | TT                              | CC                | 1945932906               |
| SNP_P3_38299_11002996 | NC_021163.1    | Ca_kabuli_chr04 | 11002996                | AA                              | GG                | 1945932908               |
| SNP_P3_38300_11003102 | NC_021163.1    | Ca_kabuli_chr04 | 11003102                | TT                              | CC                | 1945932909               |
| SNP_P3_38301_11003109 | NC_021163.1    | Ca_kabuli_chr04 | 11003109                | TT                              | CC                | 1945932911               |
| SNP_P3_38302_11003256 | NC_021163.1    | Ca_kabuli_chr04 | 11003256                | AA                              | GG                | 1945932913               |
| SNP_P3_38303_11003479 | NC_021163.1    | Ca_kabuli_chr04 | 11003479                | TT                              | CC                | 1945932915               |
| SNP_P3_38304_11003604 | NC_021163.1    | Ca_kabuli_chr04 | 11003604                | GG                              | TT                | 1945932916               |
| SNP_P3_38305_11003672 | NC_021163.1    | Ca_kabuli_chr04 | 11003672                | AA                              | GG                | 1945932918               |
| SNP_P3_38306_11026243 | NC_021163.1    | Ca_kabuli_chr04 | 11026243                | TT                              | CC                | 1945932920               |
| SNP_P3_38309_11158218 | NC_021163.1    | Ca_kabuli_chr04 | 11158218                | TT                              | GG                | 1945932922               |
| SNP_P3_38310_11182677 | NC_021163.1    | Ca_kabuli_chr04 | 11182677                | AA                              | TT                | 1945932924               |



| SNPs IDs              | Chromosome IDs | Chromosomes     | Physical positions (bp) | CDC Frontier (Reference genome) | (Pusa 256 & HPNB) | NCBI SNPdb Accession IDs |
|-----------------------|----------------|-----------------|-------------------------|---------------------------------|-------------------|--------------------------|
| SNP_P3_38311_11182679 | NC_021163.1    | Ca_kabuli_chr04 | 11182679                | AA                              | GG                | 1945932925               |
| SNP_P3_38314_11209560 | NC_021163.1    | Ca_kabuli_chr04 | 11209560                | TT                              | CC                | 1945932927               |
| SNP_P3_38315_11209593 | NC_021163.1    | Ca_kabuli_chr04 | 11209593                | AA                              | TT                | 1945932929               |
| SNP_P3_38317_11209971 | NC_021163.1    | Ca_kabuli_chr04 | 11209971                | CC                              | TT                | 1945932931               |
| SNP_P3_38319_11214334 | NC_021163.1    | Ca_kabuli_chr04 | 11214334                | AA                              | CC                | 1945932932               |
| SNP_P3_38320_11214337 | NC_021163.1    | Ca_kabuli_chr04 | 11214337                | AA                              | TT                | 1945932934               |
| SNP_P3_38321_11214469 | NC_021163.1    | Ca_kabuli_chr04 | 11214469                | GG                              | AA                | 1945932936               |
| SNP_P3_38322_11215373 | NC_021163.1    | Ca_kabuli_chr04 | 11215373                | TT                              | CC                | 1945932938               |
| SNP_P3_38323_11216025 | NC_021163.1    | Ca_kabuli_chr04 | 11216025                | TT                              | GG                | 1945932939               |
| SNP_P3_38324_11216045 | NC_021163.1    | Ca_kabuli_chr04 | 11216045                | GG                              | AA                | 1945932941               |
| SNP_P3_38326_11216179 | NC_021163.1    | Ca_kabuli_chr04 | 11216179                | CC                              | AA                | 1945932943               |
| SNP_P3_38328_11216294 | NC_021163.1    | Ca_kabuli_chr04 | 11216294                | CC                              | TT                | 1945932945               |
| SNP_P3_38329_11216341 | NC_021163.1    | Ca_kabuli_chr04 | 11216341                | AA                              | GG                | 1945932947               |
| SNP_P3_38331_11216908 | NC_021163.1    | Ca_kabuli_chr04 | 11216908                | GG                              | TT                | 1945932948               |
| SNP_P3_38332_11217093 | NC_021163.1    | Ca_kabuli_chr04 | 11217093                | CC                              | TT                | 1945932950               |
| SNP_P3_38333_11217195 | NC_021163.1    | Ca_kabuli_chr04 | 11217195                | TT                              | GG                | 1945932952               |
| SNP_P3_38334_11217883 | NC_021163.1    | Ca_kabuli_chr04 | 11217883                | AA                              | GG                | 1945932954               |
| SNP_P3_38335_11217884 | NC_021163.1    | Ca_kabuli_chr04 | 11217884                | AA                              | CC                | 1945932955               |
| SNP_P3_38336_11218248 | NC_021163.1    | Ca_kabuli_chr04 | 11218248                | AA                              | GG                | 1945932957               |
| SNP_P3_38337_11218249 | NC_021163.1    | Ca_kabuli_chr04 | 11218249                | CC                              | TT                | 1945932959               |
| SNP_P3_38338_11225408 | NC_021163.1    | Ca_kabuli_chr04 | 11225408                | AA                              | GG                | 1945932961               |
| SNP_P3_38339_11225536 | NC_021163.1    | Ca_kabuli_chr04 | 11225536                | TT                              | GG                | 1945932962               |
| SNP_P3_38340_11225569 | NC_021163.1    | Ca_kabuli_chr04 | 11225569                | CC                              | TT                | 1945932964               |
| SNP_P3_38341_11225571 | NC_021163.1    | Ca_kabuli_chr04 | 11225571                | CC                              | AA                | 1945932966               |
| SNP_P3_38342_11225583 | NC_021163.1    | Ca_kabuli_chr04 | 11225583                | TT                              | CC                | 1945932968               |
| SNP_P3_38343_11226687 | NC_021163.1    | Ca_kabuli_chr04 | 11226687                | GG                              | TT                | 1945932969               |
| SNP_P3_38344_11226771 | NC_021163.1    | Ca_kabuli_chr04 | 11226771                | GG                              | TT                | 1945932971               |
| SNP_P3_38345_11226772 | NC_021163.1    | Ca_kabuli_chr04 | 11226772                | AA                              | CC                | 1945932973               |
| SNP_P3_38346_11226774 | NC_021163.1    | Ca_kabuli_chr04 | 11226774                | CC                              | TT                | 1945932975               |
| SNP_P3_38347_11226778 | NC_021163.1    | Ca_kabuli_chr04 | 11226778                | GG                              | CC                | 1945932977               |
| SNP_P3_38348_11227984 | NC_021163.1    | Ca_kabuli_chr04 | 11227984                | AA                              | GG                | 1945932978               |
| SNP_P3_38349_11228098 | NC_021163.1    | Ca_kabuli_chr04 | 11228098                | GG                              | TT                | 1945932980               |
| SNP_P3_38350_11228100 | NC_021163.1    | Ca_kabuli_chr04 | 11228100                | AA                              | GG                | 1945932982               |
| SNP_P3_38351_11228278 | NC_021163.1    | Ca_kabuli_chr04 | 11228278                | CC                              | GG                | 1945932984               |
| SNP_P3_38352_11228320 | NC_021163.1    | Ca_kabuli_chr04 | 11228320                | TT                              | AA                | 1945932985               |
| SNP_P3_38353_11228387 | NC_021163.1    | Ca_kabuli_chr04 | 11228387                | GG                              | AA                | 1945932987               |
| SNP_P3_38355_11229156 | NC_021163.1    | Ca_kabuli_chr04 | 11229156                | AA                              | GG                | 1945932989               |
| SNP_P3_38356_11230003 | NC_021163.1    | Ca_kabuli_chr04 | 11230003                | GG                              | AA                | 1945932991               |
| SNP_P3_38357_11231438 | NC_021163.1    | Ca_kabuli_chr04 | 11231438                | TT                              | CC                | 1945932992               |
| SNP_P3_38358_11232562 | NC_021163.1    | Ca_kabuli_chr04 | 11232562                | AA                              | CC                | 1945932994               |
| SNP_P3_38359_11232595 | NC_021163.1    | Ca_kabuli_chr04 | 11232595                | AA                              | TT                | 1945932996               |
| SNP_P3_38360_11236674 | NC_021163.1    | Ca_kabuli_chr04 | 11236674                | AA                              | TT                | 1945932998               |

| SNPs IDs              | Chromosome IDs | Chromosomes     | Physical positions (bp) | CDC Frontier (Reference genome) | (Pusa 256 & HPNB) | NCBI SNPdb Accession IDs |
|-----------------------|----------------|-----------------|-------------------------|---------------------------------|-------------------|--------------------------|
| SNP_P3_38361_11237022 | NC_021163.1    | Ca_kabuli_chr04 | 11237022                | CC                              | TT                | 1945933000               |
| SNP_P3_38362_11237043 | NC_021163.1    | Ca_kabuli_chr04 | 11237043                | GG                              | AA                | 1945933001               |
| SNP_P3_38363_11237106 | NC_021163.1    | Ca_kabuli_chr04 | 11237106                | GG                              | AA                | 1945933003               |
| SNP_P3_38364_11237603 | NC_021163.1    | Ca_kabuli_chr04 | 11237603                | TT                              | CC                | 1945933005               |
| SNP_P3_38365_11237628 | NC_021163.1    | Ca_kabuli_chr04 | 11237628                | TT                              | CC                | 1945933007               |
| SNP_P3_38366_11237629 | NC_021163.1    | Ca_kabuli_chr04 | 11237629                | GG                              | CC                | 1945933008               |
| SNP_P3_38367_11237634 | NC_021163.1    | Ca_kabuli_chr04 | 11237634                | AA                              | GG                | 1945933010               |
| SNP_P3_38368_11237971 | NC_021163.1    | Ca_kabuli_chr04 | 11237971                | CC                              | TT                | 1945933012               |
| SNP_P3_38370_11238204 | NC_021163.1    | Ca_kabuli_chr04 | 11238204                | TT                              | AA                | 1945933014               |
| SNP_P3_38371_11238332 | NC_021163.1    | Ca_kabuli_chr04 | 11238332                | AA                              | GG                | 1945933015               |
| SNP_P3_38372_11238457 | NC_021163.1    | Ca_kabuli_chr04 | 11238457                | TT                              | AA                | 1945933017               |
| SNP_P3_38373_11238459 | NC_021163.1    | Ca_kabuli_chr04 | 11238459                | CC                              | AA                | 1945933019               |
| SNP_P3_38374_11238471 | NC_021163.1    | Ca_kabuli_chr04 | 11238471                | GG                              | AA                | 1945933021               |
| SNP_P3_38375_11239751 | NC_021163.1    | Ca_kabuli_chr04 | 11239751                | CC                              | TT                | 1945933022               |
| SNP_P3_38376_11240091 | NC_021163.1    | Ca_kabuli_chr04 | 11240091                | TT                              | AA                | 1945933024               |
| SNP_P3_38377_11240101 | NC_021163.1    | Ca_kabuli_chr04 | 11240101                | AA                              | CC                | 1945933026               |
| SNP_P3_38378_11240103 | NC_021163.1    | Ca_kabuli_chr04 | 11240103                | CC                              | TT                | 1945933028               |
| SNP_P3_38380_11240191 | NC_021163.1    | Ca_kabuli_chr04 | 11240191                | CC                              | TT                | 1945933030               |
| SNP_P3_38381_11240208 | NC_021163.1    | Ca_kabuli_chr04 | 11240208                | GG                              | AA                | 1945933031               |
| SNP_P3_38382_11240454 | NC_021163.1    | Ca_kabuli_chr04 | 11240454                | AA                              | TT                | 1945933033               |
| SNP_P3_38383_11240455 | NC_021163.1    | Ca_kabuli_chr04 | 11240455                | TT                              | GG                | 1945933035               |
| SNP_P3_38384_11240471 | NC_021163.1    | Ca_kabuli_chr04 | 11240471                | CC                              | AA                | 1945933037               |
| SNP_P3_38385_11240832 | NC_021163.1    | Ca_kabuli_chr04 | 11240832                | CC                              | AA                | 1945933038               |
| SNP_P3_38386_11240971 | NC_021163.1    | Ca_kabuli_chr04 | 11240971                | GG                              | AA                | 1945933040               |
| SNP_P3_38388_11241013 | NC_021163.1    | Ca_kabuli_chr04 | 11241013                | AA                              | GG                | 1945933042               |
| SNP_P3_38389_11241078 | NC_021163.1    | Ca_kabuli_chr04 | 11241078                | CC                              | TT                | 1945933044               |
| SNP_P3_38390_11241158 | NC_021163.1    | Ca_kabuli_chr04 | 11241158                | GG                              | AA                | 1945933045               |
| SNP_P3_38391_11241178 | NC_021163.1    | Ca_kabuli_chr04 | 11241178                | AA                              | TT                | 1945933047               |
| SNP_P3_38392_11241187 | NC_021163.1    | Ca_kabuli_chr04 | 11241187                | GG                              | TT                | 1945933049               |
| SNP_P3_38393_11241226 | NC_021163.1    | Ca_kabuli_chr04 | 11241226                | CC                              | TT                | 1945933051               |
| SNP_P3_38394_11242579 | NC_021163.1    | Ca_kabuli_chr04 | 11242579                | CC                              | TT                | 1945933052               |
| SNP_P3_38395_11243407 | NC_021163.1    | Ca_kabuli_chr04 | 11243407                | AA                              | CC                | 1945933054               |
| SNP_P3_38396_11243425 | NC_021163.1    | Ca_kabuli_chr04 | 11243425                | AA                              | GG                | 1945933056               |
| SNP_P3_38397_11243447 | NC_021163.1    | Ca_kabuli_chr04 | 11243447                | CC                              | GG                | 1945933058               |
| SNP_P3_38398_11243672 | NC_021163.1    | Ca_kabuli_chr04 | 11243672                | TT                              | CC                | 1945933060               |
| SNP_P3_38399_11243684 | NC_021163.1    | Ca_kabuli_chr04 | 11243684                | TT                              | CC                | 1945933061               |
| SNP_P3_38400_11243855 | NC_021163.1    | Ca_kabuli_chr04 | 11243855                | CC                              | TT                | 1945933063               |
| SNP_P3_38401_11248319 | NC_021163.1    | Ca_kabuli_chr04 | 11248319                | AA                              | TT                | 1945933065               |
| SNP_P3_38402_11250058 | NC_021163.1    | Ca_kabuli_chr04 | 11250058                | TT                              | CC                | 1945933067               |
| SNP_P3_38403_11250465 | NC_021163.1    | Ca_kabuli_chr04 | 11250465                | CC                              | TT                | 1945933068               |
| SNP_P3_38404_11250992 | NC_021163.1    | Ca_kabuli_chr04 | 11250992                | AA                              | CC                | 1945933070               |
| SNP_P3_38405_11251000 | NC_021163.1    | Ca_kabuli_chr04 | 11251000                | CC                              | TT                | 1945933072               |

| SNPs IDs              | Chromosome IDs | Chromosomes     | Physical positions (bp) | CDC Frontier (Reference genome) | (Pusa 256 & HPNB) | NCBI SNPdb Accession IDs |
|-----------------------|----------------|-----------------|-------------------------|---------------------------------|-------------------|--------------------------|
| SNP_P3_38406_11251040 | NC_021163.1    | Ca_kabuli_chr04 | 11251040                | AA                              | CC                | 1945933074               |
| SNP_P3_38407_11251596 | NC_021163.1    | Ca_kabuli_chr04 | 11251596                | CC                              | AA                | 1945933075               |
| SNP_P3_38409_11257370 | NC_021163.1    | Ca_kabuli_chr04 | 11257370                | AA                              | GG                | 1945933077               |
| SNP_P3_38410_11257398 | NC_021163.1    | Ca_kabuli_chr04 | 11257398                | GG                              | AA                | 1945933079               |
| SNP_P3_38411_11257450 | NC_021163.1    | Ca_kabuli_chr04 | 11257450                | GG                              | AA                | 1945933081               |
| SNP_P3_38412_11257760 | NC_021163.1    | Ca_kabuli_chr04 | 11257760                | CC                              | GG                | 1945933082               |
| SNP_P3_38413_11258045 | NC_021163.1    | Ca_kabuli_chr04 | 11258045                | GG                              | AA                | 1945933084               |
| SNP_P3_38415_11258186 | NC_021163.1    | Ca_kabuli_chr04 | 11258186                | CC                              | TT                | 1945933086               |
| SNP_P3_38416_11259144 | NC_021163.1    | Ca_kabuli_chr04 | 11259144                | CC                              | GG                | 1945933088               |
| SNP_P3_38417_11259378 | NC_021163.1    | Ca_kabuli_chr04 | 11259378                | TT                              | AA                | 1945933090               |
| SNP_P3_38418_11259750 | NC_021163.1    | Ca_kabuli_chr04 | 11259750                | CC                              | AA                | 1945933091               |
| SNP_P3_38419_11259807 | NC_021163.1    | Ca_kabuli_chr04 | 11259807                | GG                              | AA                | 1945933093               |
| SNP_P3_38420_11260088 | NC_021163.1    | Ca_kabuli_chr04 | 11260088                | TT                              | AA                | 1945933095               |
| SNP_P3_38421_11260161 | NC_021163.1    | Ca_kabuli_chr04 | 11260161                | AA                              | GG                | 1945933097               |
| SNP_P3_38422_11260162 | NC_021163.1    | Ca_kabuli_chr04 | 11260162                | GG                              | TT                | 1945933098               |
| SNP_P3_38423_11261439 | NC_021163.1    | Ca_kabuli_chr04 | 11261439                | CC                              | TT                | 1945933100               |
| SNP_P3_38424_11261470 | NC_021163.1    | Ca_kabuli_chr04 | 11261470                | CC                              | TT                | 1945933102               |
| SNP_P3_38425_11261686 | NC_021163.1    | Ca_kabuli_chr04 | 11261686                | TT                              | CC                | 1945933104               |
| SNP_P3_38427_11266188 | NC_021163.1    | Ca_kabuli_chr04 | 11266188                | CC                              | TT                | 1945933105               |
| SNP_P3_38428_11266464 | NC_021163.1    | Ca_kabuli_chr04 | 11266464                | AA                              | TT                | 1945933107               |
| SNP_P3_38430_11266850 | NC_021163.1    | Ca_kabuli_chr04 | 11266850                | AA                              | GG                | 1945933109               |
| SNP_P3_38431_11266878 | NC_021163.1    | Ca_kabuli_chr04 | 11266878                | GG                              | AA                | 1945933111               |
| SNP_P3_38432_11266896 | NC_021163.1    | Ca_kabuli_chr04 | 11266896                | CC                              | TT                | 1945933113               |
| SNP_P3_38433_11266908 | NC_021163.1    | Ca_kabuli_chr04 | 11266908                | TT                              | GG                | 1945933114               |
| SNP_P3_38434_11266912 | NC_021163.1    | Ca_kabuli_chr04 | 11266912                | TT                              | CC                | 1945933116               |
| SNP_P3_38435_11267037 | NC_021163.1    | Ca_kabuli_chr04 | 11267037                | TT                              | CC                | 1945933118               |
| SNP_P3_38436_11267185 | NC_021163.1    | Ca_kabuli_chr04 | 11267185                | AA                              | GG                | 1945933120               |
| SNP_P3_38437_11267279 | NC_021163.1    | Ca_kabuli_chr04 | 11267279                | GG                              | AA                | 1945933121               |
| SNP_P3_38438_11267307 | NC_021163.1    | Ca_kabuli_chr04 | 11267307                | AA                              | CC                | 1945933123               |
| SNP_P3_38439_11267552 | NC_021163.1    | Ca_kabuli_chr04 | 11267552                | TT                              | CC                | 1945933125               |
| SNP_P3_38440_11267951 | NC_021163.1    | Ca_kabuli_chr04 | 11267951                | GG                              | AA                | 1945933127               |
| SNP_P3_38441_11267975 | NC_021163.1    | Ca_kabuli_chr04 | 11267975                | AA                              | GG                | 1945933128               |
| SNP_P3_38443_11269875 | NC_021163.1    | Ca_kabuli_chr04 | 11269875                | CC                              | TT                | 1945933130               |
| SNP_P3_38444_11269887 | NC_021163.1    | Ca_kabuli_chr04 | 11269887                | GG                              | AA                | 1945933132               |
| SNP_P3_38445_11270245 | NC_021163.1    | Ca_kabuli_chr04 | 11270245                | CC                              | TT                | 1945933134               |
| SNP_P3_38447_11270649 | NC_021163.1    | Ca_kabuli_chr04 | 11270649                | CC                              | GG                | 1945933136               |
| SNP_P3_38448_11271477 | NC_021163.1    | Ca_kabuli_chr04 | 11271477                | TT                              | CC                | 1945933137               |
| SNP_P3_38449_11271658 | NC_021163.1    | Ca_kabuli_chr04 | 11271658                | CC                              | TT                | 1945933139               |
| SNP_P3_38450_11272888 | NC_021163.1    | Ca_kabuli_chr04 | 11272888                | TT                              | CC                | 1945933141               |
| SNP_P3_38451_11272904 | NC_021163.1    | Ca_kabuli_chr04 | 11272904                | AA                              | CC                | 1945933143               |
| SNP_P3_38452_11272962 | NC_021163.1    | Ca_kabuli_chr04 | 11272962                | CC                              | AA                | 1945933144               |
| SNP_P3_38455_11273267 | NC_021163.1    | Ca_kabuli_chr04 | 11273267                | TT                              | GG                | 1945933146               |

| SNPs IDs              | Chromosome IDs | Chromosomes     | Physical positions (bp) | CDC Frontier (Reference genome) | (Pusa 256 & HPNB) | NCBI SNPdb Accession IDs |
|-----------------------|----------------|-----------------|-------------------------|---------------------------------|-------------------|--------------------------|
| SNP_P3_38456_11273328 | NC_021163.1    | Ca_kabuli_chr04 | 11273328                | CC                              | TT                | 1945933148               |
| SNP_P3_38457_11276225 | NC_021163.1    | Ca_kabuli_chr04 | 11276225                | CC                              | TT                | 1945933150               |
| SNP_P3_38458_11276937 | NC_021163.1    | Ca_kabuli_chr04 | 11276937                | TT                              | CC                | 1945933151               |
| SNP_P3_38459_11278211 | NC_021163.1    | Ca_kabuli_chr04 | 11278211                | AA                              | TT                | 1945933153               |
| SNP_P3_38460_11278213 | NC_021163.1    | Ca_kabuli_chr04 | 11278213                | GG                              | TT                | 1945933155               |
| SNP_P3_38461_11279554 | NC_021163.1    | Ca_kabuli_chr04 | 11279554                | GG                              | AA                | 1945933157               |
| SNP_P3_38462_11279687 | NC_021163.1    | Ca_kabuli_chr04 | 11279687                | CC                              | GG                | 1945933159               |
| SNP_P3_38463_11280490 | NC_021163.1    | Ca_kabuli_chr04 | 11280490                | GG                              | AA                | 1945933160               |
| SNP_P3_38464_11281006 | NC_021163.1    | Ca_kabuli_chr04 | 11281006                | AA                              | GG                | 1945933162               |
| SNP_P3_38465_11281459 | NC_021163.1    | Ca_kabuli_chr04 | 11281459                | CC                              | AA                | 1945933164               |
| SNP_P3_38466_11281484 | NC_021163.1    | Ca_kabuli_chr04 | 11281484                | AA                              | TT                | 1945933166               |
| SNP_P3_38467_11281566 | NC_021163.1    | Ca_kabuli_chr04 | 11281566                | GG                              | AA                | 1945933167               |
| SNP_P3_38469_11281690 | NC_021163.1    | Ca_kabuli_chr04 | 11281690                | GG                              | AA                | 1945933169               |
| SNP_P3_38470_11281943 | NC_021163.1    | Ca_kabuli_chr04 | 11281943                | TT                              | CC                | 1945933171               |
| SNP_P3_38471_11281957 | NC_021163.1    | Ca_kabuli_chr04 | 11281957                | AA                              | GG                | 1945933173               |
| SNP_P3_38472_11281981 | NC_021163.1    | Ca_kabuli_chr04 | 11281981                | CC                              | TT                | 1945933174               |
| SNP_P3_38473_11282076 | NC_021163.1    | Ca_kabuli_chr04 | 11282076                | CC                              | TT                | 1945933176               |
| SNP_P3_38474_11282096 | NC_021163.1    | Ca_kabuli_chr04 | 11282096                | CC                              | TT                | 1945933178               |
| SNP_P3_38475_11282129 | NC_021163.1    | Ca_kabuli_chr04 | 11282129                | AA                              | CC                | 1945933180               |
| SNP_P3_38476_11282396 | NC_021163.1    | Ca_kabuli_chr04 | 11282396                | CC                              | GG                | 1945933182               |
| SNP_P3_38477_11282402 | NC_021163.1    | Ca_kabuli_chr04 | 11282402                | CC                              | TT                | 1945933183               |
| SNP_P3_38478_11282432 | NC_021163.1    | Ca_kabuli_chr04 | 11282432                | TT                              | AA                | 1945933185               |
| SNP_P3_38479_11282464 | NC_021163.1    | Ca_kabuli_chr04 | 11282464                | GG                              | AA                | 1945933187               |
| SNP_P3_38480_11283548 | NC_021163.1    | Ca_kabuli_chr04 | 11283548                | CC                              | TT                | 1945933189               |
| SNP_P3_38481_11283853 | NC_021163.1    | Ca_kabuli_chr04 | 11283853                | CC                              | TT                | 1945933190               |
| SNP_P3_38482_11287770 | NC_021163.1    | Ca_kabuli_chr04 | 11287770                | AA                              | TT                | 1945933192               |
| SNP_P3_38483_11288025 | NC_021163.1    | Ca_kabuli_chr04 | 11288025                | TT                              | CC                | 1945933194               |
| SNP_P3_38484_11289703 | NC_021163.1    | Ca_kabuli_chr04 | 11289703                | AA                              | TT                | 1945933196               |
| SNP_P3_38485_11290396 | NC_021163.1    | Ca_kabuli_chr04 | 11290396                | TT                              | AA                | 1945933197               |
| SNP_P3_38487_11292701 | NC_021163.1    | Ca_kabuli_chr04 | 11292701                | GG                              | TT                | 1945933199               |
| SNP_P3_38489_11297517 | NC_021163.1    | Ca_kabuli_chr04 | 11297517                | TT                              | CC                | 1945933201               |
| SNP_P3_38490_11297908 | NC_021163.1    | Ca_kabuli_chr04 | 11297908                | CC                              | GG                | 1945933203               |
| SNP_P3_38491_11297912 | NC_021163.1    | Ca_kabuli_chr04 | 11297912                | GG                              | AA                | 1945933205               |
| SNP_P3_38493_11300107 | NC_021163.1    | Ca_kabuli_chr04 | 11300107                | CC                              | TT                | 1945933206               |
| SNP_P3_38494_11300138 | NC_021163.1    | Ca_kabuli_chr04 | 11300138                | GG                              | AA                | 1945933208               |
| SNP_P3_38495_11300145 | NC_021163.1    | Ca_kabuli_chr04 | 11300145                | CC                              | TT                | 1945933210               |
| SNP_P3_38496_11300182 | NC_021163.1    | Ca_kabuli_chr04 | 11300182                | CC                              | GG                | 1945933212               |
| SNP_P3_38497_11300390 | NC_021163.1    | Ca_kabuli_chr04 | 11300390                | TT                              | AA                | 1945933213               |
| SNP_P3_38499_11300673 | NC_021163.1    | Ca_kabuli_chr04 | 11300673                | TT                              | GG                | 1945933215               |
| SNP_P3_38500_11301391 | NC_021163.1    | Ca_kabuli_chr04 | 11301391                | CC                              | AA                | 1945933217               |
| SNP_P3_38501_11301816 | NC_021163.1    | Ca_kabuli_chr04 | 11301816                | CC                              | GG                | 1945933219               |
| SNP_P3_38502_11304182 | NC_021163.1    | Ca_kabuli_chr04 | 11304182                | CC                              | TT                | 1945933220               |

| SNPs IDs              | Chromosome IDs | Chromosomes     | Physical positions (bp) | CDC Frontier (Reference genome) | (Pusa 256 & HPNB) | NCBI SNPdb Accession IDs |
|-----------------------|----------------|-----------------|-------------------------|---------------------------------|-------------------|--------------------------|
| SNP_P3_38503_11304410 | NC_021163.1    | Ca_kabuli_chr04 | 11304410                | CC                              | TT                | 1945933222               |
| SNP_P3_38504_11304462 | NC_021163.1    | Ca_kabuli_chr04 | 11304462                | GG                              | AA                | 1945933224               |
| SNP_P3_38505_11306327 | NC_021163.1    | Ca_kabuli_chr04 | 11306327                | AA                              | TT                | 1945933226               |
| SNP_P3_38507_11306656 | NC_021163.1    | Ca_kabuli_chr04 | 11306656                | AA                              | GG                | 1945933227               |
| SNP_P3_38508_11308404 | NC_021163.1    | Ca_kabuli_chr04 | 11308404                | GG                              | AA                | 1945933229               |
| SNP_P3_38509_11308407 | NC_021163.1    | Ca_kabuli_chr04 | 11308407                | GG                              | AA                | 1945933231               |
| SNP_P3_38510_11309800 | NC_021163.1    | Ca_kabuli_chr04 | 11309800                | GG                              | TT                | 1945933233               |
| SNP_P3_38511_11310049 | NC_021163.1    | Ca_kabuli_chr04 | 11310049                | CC                              | TT                | 1945933235               |
| SNP_P3_38512_11310133 | NC_021163.1    | Ca_kabuli_chr04 | 11310133                | GG                              | AA                | 1945933236               |
| SNP_P3_38513_11310196 | NC_021163.1    | Ca_kabuli_chr04 | 11310196                | TT                              | CC                | 1945933238               |
| SNP_P3_38514_11310229 | NC_021163.1    | Ca_kabuli_chr04 | 11310229                | GG                              | TT                | 1945933240               |
| SNP_P3_38515_11310294 | NC_021163.1    | Ca_kabuli_chr04 | 11310294                | TT                              | CC                | 1945933242               |
| SNP_P3_38516_11310515 | NC_021163.1    | Ca_kabuli_chr04 | 11310515                | GG                              | AA                | 1945933243               |
| SNP_P3_38517_11310905 | NC_021163.1    | Ca_kabuli_chr04 | 11310905                | TT                              | CC                | 1945933245               |
| SNP_P3_38518_11310906 | NC_021163.1    | Ca_kabuli_chr04 | 11310906                | GG                              | AA                | 1945933247               |
| SNP_P3_38521_11313012 | NC_021163.1    | Ca_kabuli_chr04 | 11313012                | GG                              | AA                | 1945933249               |
| SNP_P3_38522_11313081 | NC_021163.1    | Ca_kabuli_chr04 | 11313081                | TT                              | CC                | 1945933250               |
| SNP_P3_38523_11313094 | NC_021163.1    | Ca_kabuli_chr04 | 11313094                | TT                              | CC                | 1945933252               |
| SNP_P3_38524_11313119 | NC_021163.1    | Ca_kabuli_chr04 | 11313119                | TT                              | CC                | 1945933254               |
| SNP_P3_38525_11313121 | NC_021163.1    | Ca_kabuli_chr04 | 11313121                | GG                              | AA                | 1945933256               |
| SNP_P3_38526_11313131 | NC_021163.1    | Ca_kabuli_chr04 | 11313131                | TT                              | CC                | 1945933257               |
| SNP_P3_38527_11313136 | NC_021163.1    | Ca_kabuli_chr04 | 11313136                | CC                              | TT                | 1945933259               |
| SNP_P3_38528_11313142 | NC_021163.1    | Ca_kabuli_chr04 | 11313142                | CC                              | TT                | 1945933261               |
| SNP_P3_38529_11313151 | NC_021163.1    | Ca_kabuli_chr04 | 11313151                | AA                              | GG                | 1945933263               |
| SNP_P3_38530_11313337 | NC_021163.1    | Ca_kabuli_chr04 | 11313337                | GG                              | AA                | 1945933265               |
| SNP_P3_38531_11313875 | NC_021163.1    | Ca_kabuli_chr04 | 11313875                | TT                              | GG                | 1945933266               |
| SNP_P3_38532_11315374 | NC_021163.1    | Ca_kabuli_chr04 | 11315374                | AA                              | GG                | 1945933268               |
| SNP_P3_38533_11316859 | NC_021163.1    | Ca_kabuli_chr04 | 11316859                | CC                              | TT                | 1945933270               |
| SNP_P3_38535_11317776 | NC_021163.1    | Ca_kabuli_chr04 | 11317776                | TT                              | AA                | 1945933272               |
| SNP_P3_38537_11320496 | NC_021163.1    | Ca_kabuli_chr04 | 11320496                | AA                              | GG                | 1945933273               |
| SNP_P3_38538_11320744 | NC_021163.1    | Ca_kabuli_chr04 | 11320744                | GG                              | TT                | 1945933275               |
| SNP_P3_38539_11320753 | NC_021163.1    | Ca_kabuli_chr04 | 11320753                | GG                              | TT                | 1945933277               |
| SNP_P3_38540_11320767 | NC_021163.1    | Ca_kabuli_chr04 | 11320767                | GG                              | AA                | 1945933279               |
| SNP_P3_38541_11322212 | NC_021163.1    | Ca_kabuli_chr04 | 11322212                | CC                              | TT                | 1945933280               |
| SNP_P3_38542_11322905 | NC_021163.1    | Ca_kabuli_chr04 | 11322905                | AA                              | CC                | 1945933282               |
| SNP_P3_38544_11322957 | NC_021163.1    | Ca_kabuli_chr04 | 11322957                | AA                              | GG                | 1945933284               |
| SNP_P3_38545_11323142 | NC_021163.1    | Ca_kabuli_chr04 | 11323142                | TT                              | GG                | 1945933286               |
| SNP_P3_38546_11323274 | NC_021163.1    | Ca_kabuli_chr04 | 11323274                | CC                              | TT                | 1945933288               |
| SNP_P3_38547_11323429 | NC_021163.1    | Ca_kabuli_chr04 | 11323429                | CC                              | TT                | 1945933289               |
| SNP_P3_38548_11323447 | NC_021163.1    | Ca_kabuli_chr04 | 11323447                | TT                              | GG                | 1945933291               |
| SNP_P3_38550_11323937 | NC_021163.1    | Ca_kabuli_chr04 | 11323937                | TT                              | CC                | 1945933293               |
| SNP_P3_38551_11323946 | NC_021163.1    | Ca_kabuli_chr04 | 11323946                | AA                              | CC                | 1945933295               |

| SNPs IDs              | Chromosome IDs | Chromosomes     | Physical positions (bp) | CDC Frontier (Reference genome) | (Pusa 256 & HPNB) | NCBI SNPdb Accession IDs |
|-----------------------|----------------|-----------------|-------------------------|---------------------------------|-------------------|--------------------------|
| SNP_P3_38553_11324447 | NC_021163.1    | Ca_kabuli_chr04 | 11324447                | CC                              | TT                | 1945933296               |
| SNP_P3_38554_11325221 | NC_021163.1    | Ca_kabuli_chr04 | 11325221                | GG                              | AA                | 1945933298               |
| SNP_P3_38555_11325382 | NC_021163.1    | Ca_kabuli_chr04 | 11325382                | CC                              | AA                | 1945933300               |
| SNP_P3_38556_11325589 | NC_021163.1    | Ca_kabuli_chr04 | 11325589                | TT                              | CC                | 1945933302               |
| SNP_P3_38557_11325759 | NC_021163.1    | Ca_kabuli_chr04 | 11325759                | CC                              | GG                | 1945933303               |
| SNP_P3_38558_11325772 | NC_021163.1    | Ca_kabuli_chr04 | 11325772                | TT                              | CC                | 1945933305               |
| SNP_P3_38560_11327148 | NC_021163.1    | Ca_kabuli_chr04 | 11327148                | CC                              | TT                | 1945933307               |
| SNP_P3_38561_11327194 | NC_021163.1    | Ca_kabuli_chr04 | 11327194                | TT                              | CC                | 1945933309               |
| SNP_P3_38562_11327223 | NC_021163.1    | Ca_kabuli_chr04 | 11327223                | AA                              | TT                | 1945933310               |
| SNP_P3_38563_11328457 | NC_021163.1    | Ca_kabuli_chr04 | 11328457                | AA                              | TT                | 1945933312               |
| SNP_P3_38564_11329476 | NC_021163.1    | Ca_kabuli_chr04 | 11329476                | GG                              | TT                | 1945933314               |
| SNP_P3_38565_11330493 | NC_021163.1    | Ca_kabuli_chr04 | 11330493                | GG                              | AA                | 1945933316               |
| SNP_P3_38567_11332140 | NC_021163.1    | Ca_kabuli_chr04 | 11332140                | AA                              | GG                | 1945933318               |
| SNP_P3_38568_11332217 | NC_021163.1    | Ca_kabuli_chr04 | 11332217                | AA                              | CC                | 1945933319               |
| SNP_P3_38569_11332245 | NC_021163.1    | Ca_kabuli_chr04 | 11332245                | AA                              | TT                | 1945933321               |
| SNP_P3_38570_11332583 | NC_021163.1    | Ca_kabuli_chr04 | 11332583                | TT                              | AA                | 1945933323               |
| SNP_P3_38571_11333618 | NC_021163.1    | Ca_kabuli_chr04 | 11333618                | CC                              | GG                | 1945933325               |
| SNP_P3_38572_11334056 | NC_021163.1    | Ca_kabuli_chr04 | 11334056                | AA                              | GG                | 1945933326               |
| SNP_P3_38573_11334058 | NC_021163.1    | Ca_kabuli_chr04 | 11334058                | CC                              | GG                | 1945933328               |
| SNP_P3_38574_11335624 | NC_021163.1    | Ca_kabuli_chr04 | 11335624                | AA                              | TT                | 1945933330               |
| SNP_P3_38575_11335738 | NC_021163.1    | Ca_kabuli_chr04 | 11335738                | CC                              | AA                | 1945933332               |
| SNP_P3_38576_11337980 | NC_021163.1    | Ca_kabuli_chr04 | 11337980                | TT                              | AA                | 1945933333               |
| SNP_P3_38577_11338239 | NC_021163.1    | Ca_kabuli_chr04 | 11338239                | AA                              | CC                | 1945933335               |
| SNP_P3_38578_11338311 | NC_021163.1    | Ca_kabuli_chr04 | 11338311                | TT                              | GG                | 1945933337               |
| SNP_P3_38580_11339078 | NC_021163.1    | Ca_kabuli_chr04 | 11339078                | AA                              | GG                | 1945933339               |
| SNP_P3_38581_11339086 | NC_021163.1    | Ca_kabuli_chr04 | 11339086                | TT                              | CC                | 1945933340               |
| SNP_P3_38582_11339114 | NC_021163.1    | Ca_kabuli_chr04 | 11339114                | CC                              | TT                | 1945933342               |
| SNP_P3_38583_11339294 | NC_021163.1    | Ca_kabuli_chr04 | 11339294                | GG                              | AA                | 1945933344               |
| SNP_P3_38584_11339344 | NC_021163.1    | Ca_kabuli_chr04 | 11339344                | CC                              | TT                | 1945933346               |
| SNP_P3_38585_11339390 | NC_021163.1    | Ca_kabuli_chr04 | 11339390                | AA                              | GG                | 1945933348               |
| SNP_P3_38586_11339434 | NC_021163.1    | Ca_kabuli_chr04 | 11339434                | AA                              | GG                | 1945933349               |
| SNP_P3_38587_11339544 | NC_021163.1    | Ca_kabuli_chr04 | 11339544                | TT                              | AA                | 1945933351               |
| SNP_P3_38588_11340498 | NC_021163.1    | Ca_kabuli_chr04 | 11340498                | CC                              | TT                | 1945933353               |
| SNP_P3_38589_11342548 | NC_021163.1    | Ca_kabuli_chr04 | 11342548                | AA                              | GG                | 1945933355               |
| SNP_P3_38590_11342571 | NC_021163.1    | Ca_kabuli_chr04 | 11342571                | CC                              | TT                | 1945933356               |
| SNP_P3_38591_11342653 | NC_021163.1    | Ca_kabuli_chr04 | 11342653                | CC                              | TT                | 1945933358               |
| SNP_P3_38592_11342912 | NC_021163.1    | Ca_kabuli_chr04 | 11342912                | GG                              | AA                | 1945933360               |
| SNP_P3_38593_11343427 | NC_021163.1    | Ca_kabuli_chr04 | 11343427                | TT                              | CC                | 1945933362               |
| SNP_P3_38594_11344095 | NC_021163.1    | Ca_kabuli_chr04 | 11344095                | TT                              | GG                | 1945933363               |
| SNP_P3_38595_11344253 | NC_021163.1    | Ca_kabuli_chr04 | 11344253                | TT                              | CC                | 1945933365               |
| SNP_P3_38597_11346916 | NC_021163.1    | Ca_kabuli_chr04 | 11346916                | AA                              | GG                | 1945933367               |
| SNP_P3_38598_11347005 | NC_021163.1    | Ca_kabuli_chr04 | 11347005                | TT                              | GG                | 1945933369               |

| SNPs IDs              | Chromosome IDs | Chromosomes     | Physical positions (bp) | CDC Frontier (Reference genome) | (Pusa 256 & HPNB) | NCBI SNPdb Accession IDs |
|-----------------------|----------------|-----------------|-------------------------|---------------------------------|-------------------|--------------------------|
| SNP_P3_38599_11347049 | NC_021163.1    | Ca_kabuli_chr04 | 11347049                | CC                              | TT                | 1945933370               |
| SNP_P3_38600_11347072 | NC_021163.1    | Ca_kabuli_chr04 | 11347072                | CC                              | TT                | 1945933372               |
| SNP_P3_38601_11347512 | NC_021163.1    | Ca_kabuli_chr04 | 11347512                | AA                              | GG                | 1945933374               |
| SNP_P3_38602_11347560 | NC_021163.1    | Ca_kabuli_chr04 | 11347560                | GG                              | AA                | 1945933376               |
| SNP_P3_38603_11347841 | NC_021163.1    | Ca_kabuli_chr04 | 11347841                | GG                              | AA                | 1945933377               |
| SNP_P3_38604_11347852 | NC_021163.1    | Ca_kabuli_chr04 | 11347852                | CC                              | TT                | 1945933379               |
| SNP_P3_38605_11347864 | NC_021163.1    | Ca_kabuli_chr04 | 11347864                | TT                              | AA                | 1945933381               |
| SNP_P3_38606_11350193 | NC_021163.1    | Ca_kabuli_chr04 | 11350193                | CC                              | TT                | 1945933383               |
| SNP_P3_38607_11350439 | NC_021163.1    | Ca_kabuli_chr04 | 11350439                | AA                              | GG                | 1945933384               |
| SNP_P3_38608_11350502 | NC_021163.1    | Ca_kabuli_chr04 | 11350502                | GG                              | CC                | 1945933386               |
| SNP_P3_38609_11350587 | NC_021163.1    | Ca_kabuli_chr04 | 11350587                | AA                              | TT                | 1945933388               |
| SNP_P3_38610_11350814 | NC_021163.1    | Ca_kabuli_chr04 | 11350814                | CC                              | GG                | 1945933390               |
| SNP_P3_38611_11351092 | NC_021163.1    | Ca_kabuli_chr04 | 11351092                | AA                              | CC                | 1945933392               |
| SNP_P3_38612_11353871 | NC_021163.1    | Ca_kabuli_chr04 | 11353871                | AA                              | GG                | 1945933393               |
| SNP_P3_38613_11355528 | NC_021163.1    | Ca_kabuli_chr04 | 11355528                | CC                              | TT                | 1945933395               |
| SNP_P3_38614_11355597 | NC_021163.1    | Ca_kabuli_chr04 | 11355597                | TT                              | GG                | 1945933397               |
| SNP_P3_38615_11355625 | NC_021163.1    | Ca_kabuli_chr04 | 11355625                | TT                              | CC                | 1945933399               |
| SNP_P3_38616_11355637 | NC_021163.1    | Ca_kabuli_chr04 | 11355637                | GG                              | AA                | 1945933400               |
| SNP_P3_38617_11355882 | NC_021163.1    | Ca_kabuli_chr04 | 11355882                | GG                              | AA                | 1945933402               |
| SNP_P3_38618_11356110 | NC_021163.1    | Ca_kabuli_chr04 | 11356110                | GG                              | AA                | 1945933404               |
| SNP_P3_38619_11356121 | NC_021163.1    | Ca_kabuli_chr04 | 11356121                | CC                              | GG                | 1945933406               |
| SNP_P3_38620_11356335 | NC_021163.1    | Ca_kabuli_chr04 | 11356335                | GG                              | AA                | 1945933407               |
| SNP_P3_38621_11357628 | NC_021163.1    | Ca_kabuli_chr04 | 11357628                | AA                              | TT                | 1945933409               |
| SNP_P3_38622_11357925 | NC_021163.1    | Ca_kabuli_chr04 | 11357925                | AA                              | CC                | 1945933411               |
| SNP_P3_38623_11359625 | NC_021163.1    | Ca_kabuli_chr04 | 11359625                | AA                              | GG                | 1945933413               |
| SNP_P3_38624_11359736 | NC_021163.1    | Ca_kabuli_chr04 | 11359736                | GG                              | AA                | 1945933414               |
| SNP_P3_38626_11359854 | NC_021163.1    | Ca_kabuli_chr04 | 11359854                | TT                              | AA                | 1945933416               |
| SNP_P3_38627_11359855 | NC_021163.1    | Ca_kabuli_chr04 | 11359855                | TT                              | AA                | 1945933418               |
| SNP_P3_38628_11359918 | NC_021163.1    | Ca_kabuli_chr04 | 11359918                | TT                              | CC                | 1945933420               |
| SNP_P3_38629_11359965 | NC_021163.1    | Ca_kabuli_chr04 | 11359965                | GG                              | AA                | 1945933421               |
| SNP_P3_38631_11360216 | NC_021163.1    | Ca_kabuli_chr04 | 11360216                | GG                              | AA                | 1945933423               |
| SNP_P3_38632_11361411 | NC_021163.1    | Ca_kabuli_chr04 | 11361411                | AA                              | CC                | 1945933425               |
| SNP_P3_38633_11361417 | NC_021163.1    | Ca_kabuli_chr04 | 11361417                | CC                              | TT                | 1945933427               |
| SNP_P3_38634_11364212 | NC_021163.1    | Ca_kabuli_chr04 | 11364212                | CC                              | TT                | 1945933429               |
| SNP_P3_38635_11364937 | NC_021163.1    | Ca_kabuli_chr04 | 11364937                | AA                              | CC                | 1945933430               |
| SNP_P3_38636_11365135 | NC_021163.1    | Ca_kabuli_chr04 | 11365135                | CC                              | TT                | 1945933432               |
| SNP_P3_38637_11365147 | NC_021163.1    | Ca_kabuli_chr04 | 11365147                | GG                              | AA                | 1945933434               |
| SNP_P3_38638_11365261 | NC_021163.1    | Ca_kabuli_chr04 | 11365261                | TT                              | GG                | 1945933436               |
| SNP_P3_38639_11365698 | NC_021163.1    | Ca_kabuli_chr04 | 11365698                | TT                              | CC                | 1945933437               |
| SNP_P3_38640_11365921 | NC_021163.1    | Ca_kabuli_chr04 | 11365921                | GG                              | AA                | 1945933439               |
| SNP_P3_38641_11366604 | NC_021163.1    | Ca_kabuli_chr04 | 11366604                | TT                              | CC                | 1945933441               |
| SNP_P3_38642_11366616 | NC_021163.1    | Ca_kabuli_chr04 | 11366616                | CC                              | TT                | 1945933443               |

| SNPs IDs              | Chromosome IDs | Chromosomes     | Physical positions (bp) | CDC Frontier (Reference genome) | (Pusa 256 & HPNB) | NCBI SNPdb Accession IDs |
|-----------------------|----------------|-----------------|-------------------------|---------------------------------|-------------------|--------------------------|
| SNP_P3_38643_11366912 | NC_021163.1    | Ca_kabuli_chr04 | 11366912                | CC                              | TT                | 1945933444               |
| SNP_P3_38644_11366921 | NC_021163.1    | Ca_kabuli_chr04 | 11366921                | GG                              | AA                | 1945933446               |
| SNP_P3_38645_11368237 | NC_021163.1    | Ca_kabuli_chr04 | 11368237                | CC                              | GG                | 1945933448               |
| SNP_P3_38647_11369602 | NC_021163.1    | Ca_kabuli_chr04 | 11369602                | TT                              | GG                | 1945933450               |
| SNP_P3_38648_11370238 | NC_021163.1    | Ca_kabuli_chr04 | 11370238                | TT                              | AA                | 1945933452               |
| SNP_P3_38649_11370524 | NC_021163.1    | Ca_kabuli_chr04 | 11370524                | AA                              | GG                | 1945933453               |
| SNP_P3_38651_11370978 | NC_021163.1    | Ca_kabuli_chr04 | 11370978                | TT                              | AA                | 1945933455               |
| SNP_P3_38652_11370982 | NC_021163.1    | Ca_kabuli_chr04 | 11370982                | CC                              | AA                | 1945933457               |
| SNP_P3_38653_11371016 | NC_021163.1    | Ca_kabuli_chr04 | 11371016                | TT                              | AA                | 1945933459               |
| SNP_P3_38655_11372484 | NC_021163.1    | Ca_kabuli_chr04 | 11372484                | AA                              | TT                | 1945933460               |
| SNP_P3_38656_11373015 | NC_021163.1    | Ca_kabuli_chr04 | 11373015                | AA                              | CC                | 1945933462               |
| SNP_P3_38657_11373112 | NC_021163.1    | Ca_kabuli_chr04 | 11373112                | GG                              | TT                | 1945933464               |
| SNP_P3_38658_11373415 | NC_021163.1    | Ca_kabuli_chr04 | 11373415                | AA                              | GG                | 1945933466               |
| SNP_P3_38659_11374820 | NC_021163.1    | Ca_kabuli_chr04 | 11374820                | TT                              | CC                | 1945933467               |
| SNP_P3_38660_11374984 | NC_021163.1    | Ca_kabuli_chr04 | 11374984                | CC                              | AA                | 1945933469               |
| SNP_P3_38661_11375533 | NC_021163.1    | Ca_kabuli_chr04 | 11375533                | GG                              | TT                | 1945933471               |
| SNP_P3_38662_11375800 | NC_021163.1    | Ca_kabuli_chr04 | 11375800                | AA                              | TT                | 1945933473               |
| SNP_P3_38664_11376545 | NC_021163.1    | Ca_kabuli_chr04 | 11376545                | TT                              | GG                | 1945933475               |
| SNP_P3_38665_11382277 | NC_021163.1    | Ca_kabuli_chr04 | 11382277                | CC                              | TT                | 1945933476               |
| SNP_P3_38666_11383377 | NC_021163.1    | Ca_kabuli_chr04 | 11383377                | AA                              | TT                | 1945933478               |
| SNP_P3_38667_11386583 | NC_021163.1    | Ca_kabuli_chr04 | 11386583                | AA                              | GG                | 1945933480               |
| SNP_P3_38668_11386609 | NC_021163.1    | Ca_kabuli_chr04 | 11386609                | AA                              | TT                | 1945933482               |
| SNP_P3_38669_11387145 | NC_021163.1    | Ca_kabuli_chr04 | 11387145                | GG                              | TT                | 1945933483               |
| SNP_P3_38670_11390451 | NC_021163.1    | Ca_kabuli_chr04 | 11390451                | TT                              | AA                | 1945933485               |
| SNP_P3_38671_11390468 | NC_021163.1    | Ca_kabuli_chr04 | 11390468                | CC                              | TT                | 1945933487               |
| SNP_P3_38672_11395697 | NC_021163.1    | Ca_kabuli_chr04 | 11395697                | TT                              | AA                | 1945933489               |
| SNP_P3_38673_11395995 | NC_021163.1    | Ca_kabuli_chr04 | 11395995                | TT                              | CC                | 1945933490               |
| SNP_P3_38674_11399049 | NC_021163.1    | Ca_kabuli_chr04 | 11399049                | CC                              | TT                | 1945933492               |
| SNP_P3_38675_11399128 | NC_021163.1    | Ca_kabuli_chr04 | 11399128                | AA                              | GG                | 1945933494               |
| SNP_P3_38677_11399315 | NC_021163.1    | Ca_kabuli_chr04 | 11399315                | AA                              | GG                | 1945933496               |
| SNP_P3_38678_11399316 | NC_021163.1    | Ca_kabuli_chr04 | 11399316                | GG                              | TT                | 1945933498               |
| SNP_P3_38679_11399317 | NC_021163.1    | Ca_kabuli_chr04 | 11399317                | TT                              | AA                | 1945933499               |
| SNP_P3_38680_11399328 | NC_021163.1    | Ca_kabuli_chr04 | 11399328                | GG                              | AA                | 1945933501               |
| SNP_P3_38681_11399375 | NC_021163.1    | Ca_kabuli_chr04 | 11399375                | AA                              | GG                | 1945933503               |
| SNP_P3_38682_11399400 | NC_021163.1    | Ca_kabuli_chr04 | 11399400                | TT                              | AA                | 1945933505               |
| SNP_P3_38683_11400287 | NC_021163.1    | Ca_kabuli_chr04 | 11400287                | CC                              | AA                | 1945933506               |
| SNP_P3_38684_11400309 | NC_021163.1    | Ca_kabuli_chr04 | 11400309                | TT                              | GG                | 1945933508               |
| SNP_P3_38685_11400556 | NC_021163.1    | Ca_kabuli_chr04 | 11400556                | TT                              | AA                | 1945933510               |
| SNP_P3_38686_11400665 | NC_021163.1    | Ca_kabuli_chr04 | 11400665                | GG                              | TT                | 1945933512               |
| SNP_P3_38687_11400695 | NC_021163.1    | Ca_kabuli_chr04 | 11400695                | GG                              | TT                | 1945933513               |
| SNP_P3_38688_11400701 | NC_021163.1    | Ca_kabuli_chr04 | 11400701                | AA                              | GG                | 1945933515               |
| SNP_P3_38689_11402672 | NC_021163.1    | Ca_kabuli_chr04 | 11402672                | CC                              | TT                | 1945933517               |



| SNPs IDs              | Chromosome IDs | Chromosomes     | Physical positions (bp) | CDC Frontier (Reference genome) | (Pusa 256 & HPNB) | NCBI SNPdb Accession IDs |
|-----------------------|----------------|-----------------|-------------------------|---------------------------------|-------------------|--------------------------|
| SNP_P3_38690_11403703 | NC_021163.1    | Ca_kabuli_chr04 | 11403703                | CC                              | AA                | 1945933519               |
| SNP_P3_38691_11403765 | NC_021163.1    | Ca_kabuli_chr04 | 11403765                | TT                              | CC                | 1945933521               |
| SNP_P3_38692_11403817 | NC_021163.1    | Ca_kabuli_chr04 | 11403817                | TT                              | CC                | 1945933522               |
| SNP_P3_38693_11403911 | NC_021163.1    | Ca_kabuli_chr04 | 11403911                | GG                              | CC                | 1945933524               |
| SNP_P3_38694_11403941 | NC_021163.1    | Ca_kabuli_chr04 | 11403941                | TT                              | CC                | 1945933526               |
| SNP_P3_38695_11406139 | NC_021163.1    | Ca_kabuli_chr04 | 11406139                | AA                              | CC                | 1945933528               |
| SNP_P3_38696_11406144 | NC_021163.1    | Ca_kabuli_chr04 | 11406144                | AA                              | TT                | 1945933529               |
| SNP_P3_38697_11406943 | NC_021163.1    | Ca_kabuli_chr04 | 11406943                | AA                              | CC                | 1945933531               |
| SNP_P3_38698_11408652 | NC_021163.1    | Ca_kabuli_chr04 | 11408652                | GG                              | AA                | 1945933533               |
| SNP_P3_38700_11415005 | NC_021163.1    | Ca_kabuli_chr04 | 11415005                | GG                              | AA                | 1945933535               |
| SNP_P3_38702_11415142 | NC_021163.1    | Ca_kabuli_chr04 | 11415142                | GG                              | AA                | 1945933536               |
| SNP_P3_38703_11415190 | NC_021163.1    | Ca_kabuli_chr04 | 11415190                | TT                              | CC                | 1945933538               |
| SNP_P3_38704_11415266 | NC_021163.1    | Ca_kabuli_chr04 | 11415266                | TT                              | GG                | 1945933540               |
| SNP_P3_38705_11415316 | NC_021163.1    | Ca_kabuli_chr04 | 11415316                | GG                              | AA                | 1945933542               |
| SNP_P3_38706_11415705 | NC_021163.1    | Ca_kabuli_chr04 | 11415705                | TT                              | CC                | 1945933544               |
| SNP_P3_38707_11415776 | NC_021163.1    | Ca_kabuli_chr04 | 11415776                | CC                              | AA                | 1945933545               |
| SNP_P3_38708_11415801 | NC_021163.1    | Ca_kabuli_chr04 | 11415801                | TT                              | CC                | 1945933547               |
| SNP_P3_38709_11415874 | NC_021163.1    | Ca_kabuli_chr04 | 11415874                | CC                              | TT                | 1945933549               |
| SNP_P3_38710_11416024 | NC_021163.1    | Ca_kabuli_chr04 | 11416024                | CC                              | TT                | 1945933551               |
| SNP_P3_38711_11416057 | NC_021163.1    | Ca_kabuli_chr04 | 11416057                | GG                              | AA                | 1945933552               |
| SNP_P3_38713_11418008 | NC_021163.1    | Ca_kabuli_chr04 | 11418008                | CC                              | AA                | 1945933554               |
| SNP_P3_38714_11418066 | NC_021163.1    | Ca_kabuli_chr04 | 11418066                | CC                              | TT                | 1945933556               |
| SNP_P3_38715_11418082 | NC_021163.1    | Ca_kabuli_chr04 | 11418082                | GG                              | CC                | 1945933558               |
| SNP_P3_38716_11420878 | NC_021163.1    | Ca_kabuli_chr04 | 11420878                | TT                              | CC                | 1945933559               |
| SNP_P3_38718_11425006 | NC_021163.1    | Ca_kabuli_chr04 | 11425006                | AA                              | TT                | 1945933561               |
| SNP_P3_38719_11425009 | NC_021163.1    | Ca_kabuli_chr04 | 11425009                | AA                              | TT                | 1945933563               |
| SNP_P3_38720_11425038 | NC_021163.1    | Ca_kabuli_chr04 | 11425038                | TT                              | GG                | 1945933565               |
| SNP_P3_38721_11425538 | NC_021163.1    | Ca_kabuli_chr04 | 11425538                | TT                              | GG                | 1945933567               |
| SNP_P3_38722_11426175 | NC_021163.1    | Ca_kabuli_chr04 | 11426175                | TT                              | CC                | 1945933568               |
| SNP_P3_38723_11426473 | NC_021163.1    | Ca_kabuli_chr04 | 11426473                | CC                              | AA                | 1945933570               |
| SNP_P3_38724_11429944 | NC_021163.1    | Ca_kabuli_chr04 | 11429944                | GG                              | CC                | 1945933572               |
| SNP_P3_38725_11434088 | NC_021163.1    | Ca_kabuli_chr04 | 11434088                | TT                              | GG                | 1945933574               |
| SNP_P3_38726_11434119 | NC_021163.1    | Ca_kabuli_chr04 | 11434119                | GG                              | AA                | 1945933575               |
| SNP_P3_38727_11434169 | NC_021163.1    | Ca_kabuli_chr04 | 11434169                | AA                              | TT                | 1945933577               |
| SNP_P3_38729_11434967 | NC_021163.1    | Ca_kabuli_chr04 | 11434967                | TT                              | CC                | 1945933579               |
| SNP_P3_38730_11435076 | NC_021163.1    | Ca_kabuli_chr04 | 11435076                | GG                              | AA                | 1945933581               |
| SNP_P3_38731_11435101 | NC_021163.1    | Ca_kabuli_chr04 | 11435101                | TT                              | AA                | 1945933582               |
| SNP_P3_38732_11436407 | NC_021163.1    | Ca_kabuli_chr04 | 11436407                | CC                              | TT                | 1945933584               |
| SNP_P3_38733_11436408 | NC_021163.1    | Ca_kabuli_chr04 | 11436408                | AA                              | TT                | 1945933586               |
| SNP_P3_38734_11437977 | NC_021163.1    | Ca_kabuli_chr04 | 11437977                | GG                              | TT                | 1945933588               |
| SNP_P3_38735_11439539 | NC_021163.1    | Ca_kabuli_chr04 | 11439539                | AA                              | TT                | 1945933589               |
| SNP_P3_38736_11439540 | NC_021163.1    | Ca_kabuli_chr04 | 11439540                | AA                              | GG                | 1945933591               |

| SNPs IDs              | Chromosome IDs | Chromosomes     | Physical positions (bp) | CDC Frontier (Reference genome) | (Pusa 256 & HPNB) | NCBI SNPdb Accession IDs |
|-----------------------|----------------|-----------------|-------------------------|---------------------------------|-------------------|--------------------------|
| SNP_P3_38737_11440311 | NC_021163.1    | Ca_kabuli_chr04 | 11440311                | AA                              | CC                | 1945933593               |
| SNP_P3_38738_11441221 | NC_021163.1    | Ca_kabuli_chr04 | 11441221                | GG                              | AA                | 1945933595               |
| SNP_P3_38739_11441476 | NC_021163.1    | Ca_kabuli_chr04 | 11441476                | GG                              | AA                | 1945933596               |
| SNP_P3_38740_11442061 | NC_021163.1    | Ca_kabuli_chr04 | 11442061                | TT                              | CC                | 1945933598               |
| SNP_P3_38741_11442099 | NC_021163.1    | Ca_kabuli_chr04 | 11442099                | CC                              | TT                | 1945933600               |
| SNP_P3_38742_11442383 | NC_021163.1    | Ca_kabuli_chr04 | 11442383                | GG                              | CC                | 1945933602               |
| SNP_P3_38743_11443240 | NC_021163.1    | Ca_kabuli_chr04 | 11443240                | CC                              | TT                | 1945933604               |
| SNP_P3_38744_11444144 | NC_021163.1    | Ca_kabuli_chr04 | 11444144                | GG                              | AA                | 1945933605               |
| SNP_P3_38745_11444148 | NC_021163.1    | Ca_kabuli_chr04 | 11444148                | AA                              | GG                | 1945933607               |
| SNP_P3_38746_11444433 | NC_021163.1    | Ca_kabuli_chr04 | 11444433                | CC                              | TT                | 1945933609               |
| SNP_P3_38747_11444615 | NC_021163.1    | Ca_kabuli_chr04 | 11444615                | AA                              | TT                | 1945933611               |
| SNP_P3_38748_11444621 | NC_021163.1    | Ca_kabuli_chr04 | 11444621                | GG                              | AA                | 1945933612               |
| SNP_P3_38749_11444659 | NC_021163.1    | Ca_kabuli_chr04 | 11444659                | CC                              | AA                | 1945933614               |
| SNP_P3_38750_11444989 | NC_021163.1    | Ca_kabuli_chr04 | 11444989                | CC                              | TT                | 1945933616               |
| SNP_P3_38751_11445649 | NC_021163.1    | Ca_kabuli_chr04 | 11445649                | CC                              | TT                | 1945933618               |
| SNP_P3_38752_11445674 | NC_021163.1    | Ca_kabuli_chr04 | 11445674                | GG                              | AA                | 1945933619               |
| SNP_P3_38753_11447075 | NC_021163.1    | Ca_kabuli_chr04 | 11447075                | AA                              | TT                | 1945933621               |
| SNP_P3_38754_11447439 | NC_021163.1    | Ca_kabuli_chr04 | 11447439                | CC                              | TT                | 1945933623               |
| SNP_P3_38755_11449241 | NC_021163.1    | Ca_kabuli_chr04 | 11449241                | TT                              | GG                | 1945933625               |
| SNP_P3_38756_11449255 | NC_021163.1    | Ca_kabuli_chr04 | 11449255                | AA                              | GG                | 1945933626               |
| SNP_P3_38757_11449309 | NC_021163.1    | Ca_kabuli_chr04 | 11449309                | CC                              | TT                | 1945933628               |
| SNP_P3_38759_11450558 | NC_021163.1    | Ca_kabuli_chr04 | 11450558                | TT                              | AA                | 1945933630               |
| SNP_P3_38761_11451822 | NC_021163.1    | Ca_kabuli_chr04 | 11451822                | AA                              | TT                | 1945933632               |
| SNP_P3_38762_11451835 | NC_021163.1    | Ca_kabuli_chr04 | 11451835                | CC                              | GG                | 1945933634               |
| SNP_P3_38763_11451880 | NC_021163.1    | Ca_kabuli_chr04 | 11451880                | TT                              | GG                | 1945933635               |
| SNP_P3_38764_11451925 | NC_021163.1    | Ca_kabuli_chr04 | 11451925                | TT                              | GG                | 1945933637               |
| SNP_P3_38766_11452072 | NC_021163.1    | Ca_kabuli_chr04 | 11452072                | TT                              | CC                | 1945933639               |
| SNP_P3_38770_11454684 | NC_021163.1    | Ca_kabuli_chr04 | 11454684                | GG                              | AA                | 1945933641               |
| SNP_P3_38772_11457164 | NC_021163.1    | Ca_kabuli_chr04 | 11457164                | TT                              | AA                | 1945933642               |
| SNP_P3_38773_11457186 | NC_021163.1    | Ca_kabuli_chr04 | 11457186                | AA                              | GG                | 1945933644               |
| SNP_P3_38774_11457196 | NC_021163.1    | Ca_kabuli_chr04 | 11457196                | GG                              | AA                | 1945933646               |
| SNP_P3_38775_11457461 | NC_021163.1    | Ca_kabuli_chr04 | 11457461                | AA                              | TT                | 1945933648               |
| SNP_P3_38776_11457464 | NC_021163.1    | Ca_kabuli_chr04 | 11457464                | CC                              | TT                | 1945933649               |
| SNP_P3_38777_11457489 | NC_021163.1    | Ca_kabuli_chr04 | 11457489                | GG                              | TT                | 1945933651               |
| SNP_P3_38778_11461022 | NC_021163.1    | Ca_kabuli_chr04 | 11461022                | TT                              | CC                | 1945933653               |
| SNP_P3_38779_11461035 | NC_021163.1    | Ca_kabuli_chr04 | 11461035                | CC                              | TT                | 1945933655               |
| SNP_P3_38780_11461039 | NC_021163.1    | Ca_kabuli_chr04 | 11461039                | AA                              | CC                | 1945933657               |
| SNP_P3_38781_11461040 | NC_021163.1    | Ca_kabuli_chr04 | 11461040                | TT                              | GG                | 1945933658               |
| SNP_P3_38782_11461043 | NC_021163.1    | Ca_kabuli_chr04 | 11461043                | AA                              | GG                | 1945933660               |
| SNP_P3_38783_11461694 | NC_021163.1    | Ca_kabuli_chr04 | 11461694                | AA                              | TT                | 1945933662               |
| SNP_P3_38784_11463040 | NC_021163.1    | Ca_kabuli_chr04 | 11463040                | CC                              | AA                | 1945933664               |
| SNP_P3_38785_11463050 | NC_021163.1    | Ca_kabuli_chr04 | 11463050                | AA                              | GG                | 1945933665               |

| SNPs IDs              | Chromosome IDs | Chromosomes     | Physical positions (bp) | CDC Frontier (Reference genome) | (Pusa 256 & HPNB) | NCBI SNPdb Accession IDs |
|-----------------------|----------------|-----------------|-------------------------|---------------------------------|-------------------|--------------------------|
| SNP_P3_38786_11463057 | NC_021163.1    | Ca_kabuli_chr04 | 11463057                | GG                              | AA                | 1945933667               |
| SNP_P3_38787_11464697 | NC_021163.1    | Ca_kabuli_chr04 | 11464697                | GG                              | AA                | 1945933669               |
| SNP_P3_38788_11465992 | NC_021163.1    | Ca_kabuli_chr04 | 11465992                | GG                              | TT                | 1945933671               |
| SNP_P3_38789_11466893 | NC_021163.1    | Ca_kabuli_chr04 | 11466893                | GG                              | AA                | 1945933672               |
| SNP_P3_38790_11466938 | NC_021163.1    | Ca_kabuli_chr04 | 11466938                | AA                              | TT                | 1945933674               |
| SNP_P3_38791_11466952 | NC_021163.1    | Ca_kabuli_chr04 | 11466952                | TT                              | CC                | 1945933676               |
| SNP_P3_38792_11467014 | NC_021163.1    | Ca_kabuli_chr04 | 11467014                | CC                              | AA                | 1945933678               |
| SNP_P3_38793_11467017 | NC_021163.1    | Ca_kabuli_chr04 | 11467017                | GG                              | AA                | 1945933680               |
| SNP_P3_38794_11467020 | NC_021163.1    | Ca_kabuli_chr04 | 11467020                | TT                              | CC                | 1945933681               |
| SNP_P3_38795_11468305 | NC_021163.1    | Ca_kabuli_chr04 | 11468305                | TT                              | CC                | 1945933683               |
| SNP_P3_38796_11468769 | NC_021163.1    | Ca_kabuli_chr04 | 11468769                | AA                              | GG                | 1945933685               |
| SNP_P3_38797_11468777 | NC_021163.1    | Ca_kabuli_chr04 | 11468777                | CC                              | TT                | 1945933687               |
| SNP_P3_38798_11469095 | NC_021163.1    | Ca_kabuli_chr04 | 11469095                | AA                              | TT                | 1945933688               |
| SNP_P3_38799_11469103 | NC_021163.1    | Ca_kabuli_chr04 | 11469103                | GG                              | CC                | 1945933690               |
| SNP_P3_38800_11470018 | NC_021163.1    | Ca_kabuli_chr04 | 11470018                | GG                              | AA                | 1945933692               |
| SNP_P3_38801_11470166 | NC_021163.1    | Ca_kabuli_chr04 | 11470166                | AA                              | GG                | 1945933694               |
| SNP_P3_38802_11470422 | NC_021163.1    | Ca_kabuli_chr04 | 11470422                | TT                              | CC                | 1945933696               |
| SNP_P3_38803_11470486 | NC_021163.1    | Ca_kabuli_chr04 | 11470486                | GG                              | AA                | 1945933697               |
| SNP_P3_38805_11471347 | NC_021163.1    | Ca_kabuli_chr04 | 11471347                | TT                              | CC                | 1945933699               |
| SNP_P3_38806_11471556 | NC_021163.1    | Ca_kabuli_chr04 | 11471556                | AA                              | TT                | 1945933701               |
| SNP_P3_38807_11471568 | NC_021163.1    | Ca_kabuli_chr04 | 11471568                | CC                              | AA                | 1945933703               |
| SNP_P3_38808_11471596 | NC_021163.1    | Ca_kabuli_chr04 | 11471596                | TT                              | CC                | 1945933704               |
| SNP_P3_38809_11471641 | NC_021163.1    | Ca_kabuli_chr04 | 11471641                | AA                              | GG                | 1945933706               |
| SNP_P3_38810_11472055 | NC_021163.1    | Ca_kabuli_chr04 | 11472055                | AA                              | TT                | 1945933708               |
| SNP_P3_38811_11472084 | NC_021163.1    | Ca_kabuli_chr04 | 11472084                | TT                              | CC                | 1945933710               |
| SNP_P3_38812_11472134 | NC_021163.1    | Ca_kabuli_chr04 | 11472134                | AA                              | GG                | 1945933711               |
| SNP_P3_38813_11472525 | NC_021163.1    | Ca_kabuli_chr04 | 11472525                | GG                              | AA                | 1945933713               |
| SNP_P3_38814_11472557 | NC_021163.1    | Ca_kabuli_chr04 | 11472557                | TT                              | CC                | 1945933715               |
| SNP_P3_38816_11472797 | NC_021163.1    | Ca_kabuli_chr04 | 11472797                | CC                              | GG                | 1945933717               |
| SNP_P3_38817_11472819 | NC_021163.1    | Ca_kabuli_chr04 | 11472819                | TT                              | CC                | 1945933719               |
| SNP_P3_38818_11472847 | NC_021163.1    | Ca_kabuli_chr04 | 11472847                | AA                              | GG                | 1945933720               |
| SNP_P3_38819_11473092 | NC_021163.1    | Ca_kabuli_chr04 | 11473092                | TT                              | CC                | 1945933722               |
| SNP_P3_38821_11481297 | NC_021163.1    | Ca_kabuli_chr04 | 11481297                | CC                              | TT                | 1945933724               |
| SNP_P3_38822_11481701 | NC_021163.1    | Ca_kabuli_chr04 | 11481701                | AA                              | GG                | 1945933726               |
| SNP_P3_38823_11481705 | NC_021163.1    | Ca_kabuli_chr04 | 11481705                | CC                              | GG                | 1945933727               |
| SNP_P3_38824_11482001 | NC_021163.1    | Ca_kabuli_chr04 | 11482001                | CC                              | AA                | 1945933729               |
| SNP_P3_38825_11484683 | NC_021163.1    | Ca_kabuli_chr04 | 11484683                | AA                              | TT                | 1945933731               |
| SNP_P3_38826_11489077 | NC_021163.1    | Ca_kabuli_chr04 | 11489077                | TT                              | AA                | 1945933733               |
| SNP_P3_38827_11489639 | NC_021163.1    | Ca_kabuli_chr04 | 11489639                | CC                              | TT                | 1945933734               |
| SNP_P3_38828_11491378 | NC_021163.1    | Ca_kabuli_chr04 | 11491378                | GG                              | AA                | 1945933736               |
| SNP_P3_38829_11493013 | NC_021163.1    | Ca_kabuli_chr04 | 11493013                | CC                              | TT                | 1945933738               |
| SNP_P3_38830_11493785 | NC_021163.1    | Ca_kabuli_chr04 | 11493785                | TT                              | GG                | 1945933740               |

| SNPs IDs              | Chromosome IDs | Chromosomes     | Physical positions (bp) | CDC Frontier (Reference genome) | (Pusa 256 & HPNB) | NCBI SNPdb Accession IDs |
|-----------------------|----------------|-----------------|-------------------------|---------------------------------|-------------------|--------------------------|
| SNP_P3_38832_11494646 | NC_021163.1    | Ca_kabuli_chr04 | 11494646                | TT                              | AA                | 1945933742               |
| SNP_P3_38833_11506912 | NC_021163.1    | Ca_kabuli_chr04 | 11506912                | TT                              | AA                | 1945933743               |
| SNP_P3_38834_11506998 | NC_021163.1    | Ca_kabuli_chr04 | 11506998                | TT                              | CC                | 1945933745               |
| SNP_P3_38836_11507275 | NC_021163.1    | Ca_kabuli_chr04 | 11507275                | AA                              | GG                | 1945933747               |
| SNP_P3_38837_11507324 | NC_021163.1    | Ca_kabuli_chr04 | 11507324                | TT                              | CC                | 1945933749               |
| SNP_P3_38838_11512246 | NC_021163.1    | Ca_kabuli_chr04 | 11512246                | GG                              | AA                | 1945933750               |
| SNP_P3_38839_11512540 | NC_021163.1    | Ca_kabuli_chr04 | 11512540                | AA                              | TT                | 1945933752               |
| SNP_P3_38841_11512599 | NC_021163.1    | Ca_kabuli_chr04 | 11512599                | AA                              | TT                | 1945933754               |
| SNP_P3_38842_11512609 | NC_021163.1    | Ca_kabuli_chr04 | 11512609                | GG                              | TT                | 1945933756               |
| SNP_P3_38843_11512668 | NC_021163.1    | Ca_kabuli_chr04 | 11512668                | GG                              | AA                | 1945933757               |
| SNP_P3_38844_11512678 | NC_021163.1    | Ca_kabuli_chr04 | 11512678                | GG                              | CC                | 1945933759               |
| SNP_P3_38845_11512715 | NC_021163.1    | Ca_kabuli_chr04 | 11512715                | GG                              | AA                | 1945933761               |
| SNP_P3_38846_11512976 | NC_021163.1    | Ca_kabuli_chr04 | 11512976                | TT                              | CC                | 1945933763               |
| SNP_P3_38847_11512992 | NC_021163.1    | Ca_kabuli_chr04 | 11512992                | CC                              | TT                | 1945933765               |
| SNP_P3_38848_11513501 | NC_021163.1    | Ca_kabuli_chr04 | 11513501                | AA                              | CC                | 1945933766               |
| SNP_P3_38849_11513502 | NC_021163.1    | Ca_kabuli_chr04 | 11513502                | CC                              | TT                | 1945933768               |
| SNP_P3_38851_11514467 | NC_021163.1    | Ca_kabuli_chr04 | 11514467                | GG                              | AA                | 1945933770               |
| SNP_P3_38852_11514506 | NC_021163.1    | Ca_kabuli_chr04 | 11514506                | CC                              | TT                | 1945933772               |
| SNP_P3_38854_11514703 | NC_021163.1    | Ca_kabuli_chr04 | 11514703                | GG                              | AA                | 1945933773               |
| SNP_P3_38855_11514870 | NC_021163.1    | Ca_kabuli_chr04 | 11514870                | AA                              | CC                | 1945933775               |
| SNP_P3_38856_11515735 | NC_021163.1    | Ca_kabuli_chr04 | 11515735                | CC                              | TT                | 1945933777               |
| SNP_P3_38857_11515774 | NC_021163.1    | Ca_kabuli_chr04 | 11515774                | GG                              | TT                | 1945933779               |
| SNP_P3_38858_11516293 | NC_021163.1    | Ca_kabuli_chr04 | 11516293                | AA                              | GG                | 1945933781               |
| SNP_P3_38859_11516379 | NC_021163.1    | Ca_kabuli_chr04 | 11516379                | AA                              | GG                | 1945933782               |
| SNP_P3_38860_11516547 | NC_021163.1    | Ca_kabuli_chr04 | 11516547                | TT                              | CC                | 1945933784               |
| SNP_P3_38861_11517007 | NC_021163.1    | Ca_kabuli_chr04 | 11517007                | CC                              | AA                | 1945933786               |
| SNP_P3_38862_11517182 | NC_021163.1    | Ca_kabuli_chr04 | 11517182                | AA                              | TT                | 1945933788               |
| SNP_P3_38863_11517582 | NC_021163.1    | Ca_kabuli_chr04 | 11517582                | CC                              | TT                | 1945933789               |
| SNP_P3_38864_11517647 | NC_021163.1    | Ca_kabuli_chr04 | 11517647                | GG                              | CC                | 1945933791               |
| SNP_P3_38865_11518068 | NC_021163.1    | Ca_kabuli_chr04 | 11518068                | AA                              | GG                | 1945933793               |
| SNP_P3_38866_11518458 | NC_021163.1    | Ca_kabuli_chr04 | 11518458                | CC                              | GG                | 1945933795               |
| SNP_P3_38867_11518807 | NC_021163.1    | Ca_kabuli_chr04 | 11518807                | AA                              | GG                | 1945933796               |
| SNP_P3_38868_11519026 | NC_021163.1    | Ca_kabuli_chr04 | 11519026                | TT                              | GG                | 1945933798               |
| SNP_P3_38869_11519124 | NC_021163.1    | Ca_kabuli_chr04 | 11519124                | GG                              | AA                | 1945933800               |
| SNP_P3_38870_11519207 | NC_021163.1    | Ca_kabuli_chr04 | 11519207                | AA                              | GG                | 1945933802               |
| SNP_P3_38871_11519222 | NC_021163.1    | Ca_kabuli_chr04 | 11519222                | CC                              | TT                | 1945933804               |
| SNP_P3_38872_11519400 | NC_021163.1    | Ca_kabuli_chr04 | 11519400                | CC                              | TT                | 1945933805               |
| SNP_P3_38873_11519444 | NC_021163.1    | Ca_kabuli_chr04 | 11519444                | TT                              | CC                | 1945933807               |
| SNP_P3_38874_11519562 | NC_021163.1    | Ca_kabuli_chr04 | 11519562                | AA                              | GG                | 1945933809               |
| SNP_P3_38876_11519739 | NC_021163.1    | Ca_kabuli_chr04 | 11519739                | TT                              | CC                | 1945933811               |
| SNP_P3_38877_11519746 | NC_021163.1    | Ca_kabuli_chr04 | 11519746                | CC                              | TT                | 1945933812               |
| SNP_P3_38878_11520321 | NC_021163.1    | Ca_kabuli_chr04 | 11520321                | GG                              | AA                | 1945933814               |

| SNPs IDs              | Chromosome IDs | Chromosomes     | Physical positions (bp) | CDC Frontier (Reference genome) | (Pusa 256 & HPNB) | NCBI SNPdb Accession IDs |
|-----------------------|----------------|-----------------|-------------------------|---------------------------------|-------------------|--------------------------|
| SNP_P3_38879_11520464 | NC_021163.1    | Ca_kabuli_chr04 | 11520464                | GG                              | AA                | 1945933816               |
| SNP_P3_38880_11520644 | NC_021163.1    | Ca_kabuli_chr04 | 11520644                | AA                              | GG                | 1945933818               |
| SNP_P3_38881_11520939 | NC_021163.1    | Ca_kabuli_chr04 | 11520939                | GG                              | AA                | 1945933819               |
| SNP_P3_38882_11523957 | NC_021163.1    | Ca_kabuli_chr04 | 11523957                | TT                              | AA                | 1945933821               |
| SNP_P3_38883_11523972 | NC_021163.1    | Ca_kabuli_chr04 | 11523972                | GG                              | AA                | 1945933823               |
| SNP_P3_38884_11527265 | NC_021163.1    | Ca_kabuli_chr04 | 11527265                | CC                              | TT                | 1945933825               |
| SNP_P3_38885_11527539 | NC_021163.1    | Ca_kabuli_chr04 | 11527539                | AA                              | TT                | 1945933827               |
| SNP_P3_38886_11527693 | NC_021163.1    | Ca_kabuli_chr04 | 11527693                | AA                              | GG                | 1945933828               |
| SNP_P3_38887_11529821 | NC_021163.1    | Ca_kabuli_chr04 | 11529821                | GG                              | TT                | 1945933830               |
| SNP_P3_38889_11534976 | NC_021163.1    | Ca_kabuli_chr04 | 11534976                | AA                              | TT                | 1945933832               |
| SNP_P3_38890_11535053 | NC_021163.1    | Ca_kabuli_chr04 | 11535053                | CC                              | GG                | 1945933834               |
| SNP_P3_38891_11535139 | NC_021163.1    | Ca_kabuli_chr04 | 11535139                | CC                              | GG                | 1945933835               |
| SNP_P3_38892_11535170 | NC_021163.1    | Ca_kabuli_chr04 | 11535170                | GG                              | AA                | 1945933837               |
| SNP_P3_38893_11535179 | NC_021163.1    | Ca_kabuli_chr04 | 11535179                | CC                              | TT                | 1945933839               |
| SNP_P3_38894_11535372 | NC_021163.1    | Ca_kabuli_chr04 | 11535372                | CC                              | TT                | 1945933841               |
| SNP_P3_38895_11535422 | NC_021163.1    | Ca_kabuli_chr04 | 11535422                | GG                              | AA                | 1945933842               |
| SNP_P3_38896_11535443 | NC_021163.1    | Ca_kabuli_chr04 | 11535443                | AA                              | GG                | 1945933844               |
| SNP_P3_38897_11536718 | NC_021163.1    | Ca_kabuli_chr04 | 11536718                | CC                              | GG                | 1945933846               |
| SNP_P3_38898_11536796 | NC_021163.1    | Ca_kabuli_chr04 | 11536796                | TT                              | GG                | 1945933848               |
| SNP_P3_38900_11537131 | NC_021163.1    | Ca_kabuli_chr04 | 11537131                | AA                              | GG                | 1945933850               |
| SNP_P3_38902_11539400 | NC_021163.1    | Ca_kabuli_chr04 | 11539400                | CC                              | TT                | 1945933851               |
| SNP_P3_38903_11540744 | NC_021163.1    | Ca_kabuli_chr04 | 11540744                | AA                              | GG                | 1945933853               |
| SNP_P3_38904_11541200 | NC_021163.1    | Ca_kabuli_chr04 | 11541200                | CC                              | GG                | 1945933855               |
| SNP_P3_38905_11541207 | NC_021163.1    | Ca_kabuli_chr04 | 11541207                | AA                              | GG                | 1945933857               |
| SNP_P3_38906_11541230 | NC_021163.1    | Ca_kabuli_chr04 | 11541230                | TT                              | CC                | 1945933858               |
| SNP_P3_38907_11541352 | NC_021163.1    | Ca_kabuli_chr04 | 11541352                | GG                              | AA                | 1945933860               |
| SNP_P3_38908_11541376 | NC_021163.1    | Ca_kabuli_chr04 | 11541376                | GG                              | CC                | 1945933862               |
| SNP_P3_38909_11541377 | NC_021163.1    | Ca_kabuli_chr04 | 11541377                | GG                              | AA                | 1945933864               |
| SNP_P3_38910_11541492 | NC_021163.1    | Ca_kabuli_chr04 | 11541492                | AA                              | GG                | 1945933865               |
| SNP_P3_38911_11543239 | NC_021163.1    | Ca_kabuli_chr04 | 11543239                | AA                              | GG                | 1945933867               |
| SNP_P3_38912_11543244 | NC_021163.1    | Ca_kabuli_chr04 | 11543244                | GG                              | AA                | 1945933869               |
| SNP_P3_38913_11543414 | NC_021163.1    | Ca_kabuli_chr04 | 11543414                | TT                              | AA                | 1945933871               |
| SNP_P3_38915_11543928 | NC_021163.1    | Ca_kabuli_chr04 | 11543928                | AA                              | TT                | 1945933873               |
| SNP_P3_38916_11543930 | NC_021163.1    | Ca_kabuli_chr04 | 11543930                | TT                              | GG                | 1945933874               |
| SNP_P3_38918_11544688 | NC_021163.1    | Ca_kabuli_chr04 | 11544688                | TT                              | CC                | 1945933876               |
| SNP_P3_38919_11545596 | NC_021163.1    | Ca_kabuli_chr04 | 11545596                | TT                              | CC                | 1945933878               |
| SNP_P3_38920_11545607 | NC_021163.1    | Ca_kabuli_chr04 | 11545607                | GG                              | AA                | 1945933880               |
| SNP_P3_38921_11547059 | NC_021163.1    | Ca_kabuli_chr04 | 11547059                | TT                              | CC                | 1945933881               |
| SNP_P3_38924_11547620 | NC_021163.1    | Ca_kabuli_chr04 | 11547620                | TT                              | AA                | 1945933883               |
| SNP_P3_38925_11547754 | NC_021163.1    | Ca_kabuli_chr04 | 11547754                | AA                              | CC                | 1945933885               |
| SNP_P3_38926_11548952 | NC_021163.1    | Ca_kabuli_chr04 | 11548952                | TT                              | CC                | 1945933887               |
| SNP_P3_38929_11550598 | NC_021163.1    | Ca_kabuli_chr04 | 11550598                | CC                              | AA                | 1945933888               |

| SNPs IDs              | Chromosome IDs | Chromosomes     | Physical positions (bp) | CDC Frontier (Reference genome) | (Pusa 256 & HPNB) | NCBI SNPdb Accession IDs |
|-----------------------|----------------|-----------------|-------------------------|---------------------------------|-------------------|--------------------------|
| SNP_P3_38931_11551599 | NC_021163.1    | Ca_kabuli_chr04 | 11551599                | CC                              | TT                | 1945933890               |
| SNP_P3_38933_11553014 | NC_021163.1    | Ca_kabuli_chr04 | 11553014                | TT                              | AA                | 1945933892               |
| SNP_P3_38934_11554324 | NC_021163.1    | Ca_kabuli_chr04 | 11554324                | CC                              | TT                | 1945933894               |
| SNP_P3_38935_11554747 | NC_021163.1    | Ca_kabuli_chr04 | 11554747                | AA                              | TT                | 1945933896               |
| SNP_P3_38936_11554779 | NC_021163.1    | Ca_kabuli_chr04 | 11554779                | AA                              | GG                | 1945933897               |
| SNP_P3_38937_11554913 | NC_021163.1    | Ca_kabuli_chr04 | 11554913                | CC                              | TT                | 1945933899               |
| SNP_P3_38938_11555593 | NC_021163.1    | Ca_kabuli_chr04 | 11555593                | GG                              | AA                | 1945933901               |
| SNP_P3_38939_11555811 | NC_021163.1    | Ca_kabuli_chr04 | 11555811                | GG                              | AA                | 1945933903               |
| SNP_P3_38940_11555823 | NC_021163.1    | Ca_kabuli_chr04 | 11555823                | AA                              | CC                | 1945933904               |
| SNP_P3_38941_11555947 | NC_021163.1    | Ca_kabuli_chr04 | 11555947                | GG                              | AA                | 1945933906               |
| SNP_P3_38943_11559426 | NC_021163.1    | Ca_kabuli_chr04 | 11559426                | TT                              | CC                | 1945933908               |
| SNP_P3_38944_11564595 | NC_021163.1    | Ca_kabuli_chr04 | 11564595                | AA                              | GG                | 1945933910               |
| SNP_P3_38945_11564608 | NC_021163.1    | Ca_kabuli_chr04 | 11564608                | CC                              | TT                | 1945933911               |
| SNP_P3_38946_11565934 | NC_021163.1    | Ca_kabuli_chr04 | 11565934                | AA                              | GG                | 1945933913               |
| SNP_P3_38947_11568997 | NC_021163.1    | Ca_kabuli_chr04 | 11568997                | TT                              | AA                | 1945933915               |
| SNP_P3_38948_11570287 | NC_021163.1    | Ca_kabuli_chr04 | 11570287                | AA                              | CC                | 1945933917               |
| SNP_P3_38949_11570627 | NC_021163.1    | Ca_kabuli_chr04 | 11570627                | CC                              | TT                | 1945933919               |
| SNP_P3_38950_11570632 | NC_021163.1    | Ca_kabuli_chr04 | 11570632                | CC                              | TT                | 1945933920               |
| SNP_P3_38953_11655130 | NC_021163.1    | Ca_kabuli_chr04 | 11655130                | TT                              | AA                | 1945933922               |
| SNP_P3_38954_11657106 | NC_021163.1    | Ca_kabuli_chr04 | 11657106                | GG                              | CC                | 1945933924               |
| SNP_P3_38955_11707277 | NC_021163.1    | Ca_kabuli_chr04 | 11707277                | GG                              | AA                | 1945933926               |
| SNP_P3_38957_11726164 | NC_021163.1    | Ca_kabuli_chr04 | 11726164                | AA                              | TT                | 1945933927               |
| SNP_P3_38958_11739851 | NC_021163.1    | Ca_kabuli_chr04 | 11739851                | GG                              | AA                | 1945933929               |
| SNP_P3_38959_11754375 | NC_021163.1    | Ca_kabuli_chr04 | 11754375                | AA                              | GG                | 1945933931               |
| SNP_P3_38960_11757356 | NC_021163.1    | Ca_kabuli_chr04 | 11757356                | CC                              | TT                | 1945933933               |
| SNP_P3_38963_11788317 | NC_021163.1    | Ca_kabuli_chr04 | 11788317                | CC                              | GG                | 1945933934               |
| SNP_P3_38964_11793596 | NC_021163.1    | Ca_kabuli_chr04 | 11793596                | TT                              | CC                | 1945933936               |
| SNP_P3_38965_11793658 | NC_021163.1    | Ca_kabuli_chr04 | 11793658                | AA                              | GG                | 1945933938               |
| SNP_P3_38966_11795200 | NC_021163.1    | Ca_kabuli_chr04 | 11795200                | CC                              | AA                | 1945933940               |
| SNP_P3_38968_11812023 | NC_021163.1    | Ca_kabuli_chr04 | 11812023                | TT                              | CC                | 1945933942               |
| SNP_P3_38970_11877745 | NC_021163.1    | Ca_kabuli_chr04 | 11877745                | GG                              | AA                | 1945933943               |
| SNP_P3_38971_11898791 | NC_021163.1    | Ca_kabuli_chr04 | 11898791                | AA                              | GG                | 1945933945               |
| SNP_P3_38973_11913546 | NC_021163.1    | Ca_kabuli_chr04 | 11913546                | AA                              | GG                | 1945933947               |
| SNP_P3_38974_11913549 | NC_021163.1    | Ca_kabuli_chr04 | 11913549                | AA                              | TT                | 1945933949               |
| SNP_P3_38975_11913553 | NC_021163.1    | Ca_kabuli_chr04 | 11913553                | TT                              | AA                | 1945933950               |
| SNP_P3_38976_11926380 | NC_021163.1    | Ca_kabuli_chr04 | 11926380                | TT                              | AA                | 1945933952               |
| SNP_P3_38978_11934002 | NC_021163.1    | Ca_kabuli_chr04 | 11934002                | AA                              | TT                | 1945933954               |
| SNP_P3_38979_11943570 | NC_021163.1    | Ca_kabuli_chr04 | 11943570                | GG                              | AA                | 1945933956               |
| SNP_P3_38980_11971800 | NC_021163.1    | Ca_kabuli_chr04 | 11971800                | AA                              | GG                | 1945933958               |
| SNP_P3_38981_11974769 | NC_021163.1    | Ca_kabuli_chr04 | 11974769                | TT                              | AA                | 1945933959               |
| SNP_P3_38982_11996032 | NC_021163.1    | Ca_kabuli_chr04 | 11996032                | GG                              | AA                | 1945933961               |
| SNP_P3_38983_12032990 | NC_021163.1    | Ca_kabuli_chr04 | 12032990                | CC                              | TT                | 1945933963               |

| SNPs IDs              | Chromosome IDs | Chromosomes     | Physical positions (bp) | CDC Frontier (Reference genome) | (Pusa 256 & HPNB) | NCBI SNPdb Accession IDs |
|-----------------------|----------------|-----------------|-------------------------|---------------------------------|-------------------|--------------------------|
| SNP_P3_38984_12039582 | NC_021163.1    | Ca_kabuli_chr04 | 12039582                | AA                              | CC                | 1945933965               |
| SNP_P3_38985_12039588 | NC_021163.1    | Ca_kabuli_chr04 | 12039588                | TT                              | GG                | 1945933966               |
| SNP_P3_38987_12054391 | NC_021163.1    | Ca_kabuli_chr04 | 12054391                | GG                              | AA                | 1945933968               |
| SNP_P3_38988_12062897 | NC_021163.1    | Ca_kabuli_chr04 | 12062897                | AA                              | CC                | 1945933970               |
| SNP_P3_38989_12062911 | NC_021163.1    | Ca_kabuli_chr04 | 12062911                | CC                              | AA                | 1945933972               |
| SNP_P3_38990_12075322 | NC_021163.1    | Ca_kabuli_chr04 | 12075322                | GG                              | AA                | 1945933973               |
| SNP_P3_38993_12127747 | NC_021163.1    | Ca_kabuli_chr04 | 12127747                | AA                              | TT                | 1945933975               |
| SNP_P3_38994_12136808 | NC_021163.1    | Ca_kabuli_chr04 | 12136808                | TT                              | CC                | 1945933977               |
| SNP_P3_38996_12165004 | NC_021163.1    | Ca_kabuli_chr04 | 12165004                | AA                              | CC                | 1945933979               |
| SNP_P3_38997_12193675 | NC_021163.1    | Ca_kabuli_chr04 | 12193675                | GG                              | AA                | 1945933981               |
| SNP_P3_38998_12193677 | NC_021163.1    | Ca_kabuli_chr04 | 12193677                | TT                              | AA                | 1945933982               |
| SNP_P3_38999_12197754 | NC_021163.1    | Ca_kabuli_chr04 | 12197754                | TT                              | AA                | 1945933984               |
| SNP_P3_39000_12200489 | NC_021163.1    | Ca_kabuli_chr04 | 12200489                | TT                              | AA                | 1945933986               |
| SNP_P3_39001_12220253 | NC_021163.1    | Ca_kabuli_chr04 | 12220253                | CC                              | TT                | 1945933988               |
| SNP_P3_39004_12227457 | NC_021163.1    | Ca_kabuli_chr04 | 12227457                | AA                              | GG                | 1945933989               |
| SNP_P3_39005_12261130 | NC_021163.1    | Ca_kabuli_chr04 | 12261130                | AA                              | GG                | 1945933991               |
| SNP_P3_39008_12331116 | NC_021163.1    | Ca_kabuli_chr04 | 12331116                | AA                              | GG                | 1945933993               |
| SNP_P3_39009_12338538 | NC_021163.1    | Ca_kabuli_chr04 | 12338538                | GG                              | TT                | 1945933995               |
| SNP_P3_39010_12338541 | NC_021163.1    | Ca_kabuli_chr04 | 12338541                | TT                              | AA                | 1945933996               |
| SNP_P3_39011_12338543 | NC_021163.1    | Ca_kabuli_chr04 | 12338543                | CC                              | GG                | 1945933998               |
| SNP_P3_39012_12338700 | NC_021163.1    | Ca_kabuli_chr04 | 12338700                | TT                              | CC                | 1945934000               |
| SNP_P3_39013_12338757 | NC_021163.1    | Ca_kabuli_chr04 | 12338757                | AA                              | TT                | 1945934002               |
| SNP_P3_39014_12338791 | NC_021163.1    | Ca_kabuli_chr04 | 12338791                | TT                              | GG                | 1945934004               |
| SNP_P3_39015_12338916 | NC_021163.1    | Ca_kabuli_chr04 | 12338916                | AA                              | GG                | 1945934005               |
| SNP_P3_39016_12339312 | NC_021163.1    | Ca_kabuli_chr04 | 12339312                | CC                              | TT                | 1945934007               |
| SNP_P3_39017_12343735 | NC_021163.1    | Ca_kabuli_chr04 | 12343735                | TT                              | AA                | 1945934009               |
| SNP_P3_39018_12343848 | NC_021163.1    | Ca_kabuli_chr04 | 12343848                | TT                              | GG                | 1945934011               |
| SNP_P3_39019_12344402 | NC_021163.1    | Ca_kabuli_chr04 | 12344402                | CC                              | TT                | 1945934012               |
| SNP_P3_39020_12344795 | NC_021163.1    | Ca_kabuli_chr04 | 12344795                | AA                              | GG                | 1945934014               |
| SNP_P3_39021_12371574 | NC_021163.1    | Ca_kabuli_chr04 | 12371574                | AA                              | TT                | 1945934016               |
| SNP_P3_39022_12381928 | NC_021163.1    | Ca_kabuli_chr04 | 12381928                | TT                              | CC                | 1945934018               |
| SNP_P3_39023_12387057 | NC_021163.1    | Ca_kabuli_chr04 | 12387057                | TT                              | CC                | 1945934019               |
| SNP_P3_39025_12442512 | NC_021163.1    | Ca_kabuli_chr04 | 12442512                | GG                              | AA                | 1945934021               |
| SNP_P3_39026_12443288 | NC_021163.1    | Ca_kabuli_chr04 | 12443288                | TT                              | CC                | 1945934023               |
| SNP_P3_39027_12446195 | NC_021163.1    | Ca_kabuli_chr04 | 12446195                | AA                              | TT                | 1945934025               |
| SNP_P3_39028_12452482 | NC_021163.1    | Ca_kabuli_chr04 | 12452482                | GG                              | AA                | 1945934026               |
| SNP_P3_39029_12452527 | NC_021163.1    | Ca_kabuli_chr04 | 12452527                | AA                              | TT                | 1945934028               |
| SNP_P3_39030_12463487 | NC_021163.1    | Ca_kabuli_chr04 | 12463487                | GG                              | TT                | 1945934030               |
| SNP_P3_39031_12463612 | NC_021163.1    | Ca_kabuli_chr04 | 12463612                | AA                              | GG                | 1945934032               |
| SNP_P3_39032_12463629 | NC_021163.1    | Ca_kabuli_chr04 | 12463629                | CC                              | AA                | 1945934034               |
| SNP_P3_39033_12464906 | NC_021163.1    | Ca_kabuli_chr04 | 12464906                | TT                              | CC                | 1945934035               |
| SNP_P3_39034_12473816 | NC_021163.1    | Ca_kabuli_chr04 | 12473816                | GG                              | AA                | 1945934037               |

| SNPs IDs              | Chromosome IDs | Chromosomes     | Physical positions (bp) | CDC Frontier (Reference genome) | (Pusa 256 & HPNB) | NCBI SNPdb Accession IDs |
|-----------------------|----------------|-----------------|-------------------------|---------------------------------|-------------------|--------------------------|
| SNP_P3_39035_12475985 | NC_021163.1    | Ca_kabuli_chr04 | 12475985                | GG                              | CC                | 1945934039               |
| SNP_P3_39036_12477427 | NC_021163.1    | Ca_kabuli_chr04 | 12477427                | GG                              | AA                | 1945934041               |
| SNP_P3_39037_12477428 | NC_021163.1    | Ca_kabuli_chr04 | 12477428                | TT                              | CC                | 1945934042               |
| SNP_P3_39038_12477435 | NC_021163.1    | Ca_kabuli_chr04 | 12477435                | TT                              | CC                | 1945934044               |
| SNP_P3_39039_12477492 | NC_021163.1    | Ca_kabuli_chr04 | 12477492                | CC                              | GG                | 1945934046               |
| SNP_P3_39042_12479878 | NC_021163.1    | Ca_kabuli_chr04 | 12479878                | AA                              | GG                | 1945934048               |
| SNP_P3_39043_12481059 | NC_021163.1    | Ca_kabuli_chr04 | 12481059                | GG                              | AA                | 1945934049               |
| SNP_P3_39044_12481076 | NC_021163.1    | Ca_kabuli_chr04 | 12481076                | AA                              | GG                | 1945934051               |
| SNP_P3_39045_12481088 | NC_021163.1    | Ca_kabuli_chr04 | 12481088                | TT                              | GG                | 1945934053               |
| SNP_P3_39046_12481099 | NC_021163.1    | Ca_kabuli_chr04 | 12481099                | AA                              | GG                | 1945934055               |
| SNP_P3_39047_12481265 | NC_021163.1    | Ca_kabuli_chr04 | 12481265                | AA                              | TT                | 1945934057               |
| SNP_P3_39048_12481291 | NC_021163.1    | Ca_kabuli_chr04 | 12481291                | GG                              | AA                | 1945934058               |
| SNP_P3_39049_12481303 | NC_021163.1    | Ca_kabuli_chr04 | 12481303                | AA                              | CC                | 1945934060               |
| SNP_P3_39050_12481455 | NC_021163.1    | Ca_kabuli_chr04 | 12481455                | TT                              | CC                | 1945934062               |
| SNP_P3_39051_12481469 | NC_021163.1    | Ca_kabuli_chr04 | 12481469                | GG                              | TT                | 1945934064               |
| SNP_P3_39052_12481837 | NC_021163.1    | Ca_kabuli_chr04 | 12481837                | TT                              | CC                | 1945934065               |
| SNP_P3_39053_12482050 | NC_021163.1    | Ca_kabuli_chr04 | 12482050                | GG                              | AA                | 1945934067               |
| SNP_P3_39054_12482093 | NC_021163.1    | Ca_kabuli_chr04 | 12482093                | GG                              | AA                | 1945934069               |
| SNP_P3_39055_12482107 | NC_021163.1    | Ca_kabuli_chr04 | 12482107                | CC                              | TT                | 1945934071               |
| SNP_P3_39057_12482453 | NC_021163.1    | Ca_kabuli_chr04 | 12482453                | GG                              | AA                | 1945934072               |
| SNP_P3_39058_12483934 | NC_021163.1    | Ca_kabuli_chr04 | 12483934                | GG                              | AA                | 1945934074               |
| SNP_P3_39059_12485612 | NC_021163.1    | Ca_kabuli_chr04 | 12485612                | TT                              | AA                | 1945934076               |
| SNP_P3_39060_12485615 | NC_021163.1    | Ca_kabuli_chr04 | 12485615                | TT                              | CC                | 1945934078               |
| SNP_P3_39061_12485628 | NC_021163.1    | Ca_kabuli_chr04 | 12485628                | CC                              | AA                | 1945934080               |
| SNP_P3_39062_12485690 | NC_021163.1    | Ca_kabuli_chr04 | 12485690                | AA                              | GG                | 1945934081               |
| SNP_P3_39063_12488209 | NC_021163.1    | Ca_kabuli_chr04 | 12488209                | AA                              | TT                | 1945934083               |
| SNP_P3_39064_12489569 | NC_021163.1    | Ca_kabuli_chr04 | 12489569                | TT                              | AA                | 1945934085               |
| SNP_P3_39065_12489765 | NC_021163.1    | Ca_kabuli_chr04 | 12489765                | AA                              | GG                | 1945934087               |
| SNP_P3_39066_12489785 | NC_021163.1    | Ca_kabuli_chr04 | 12489785                | AA                              | TT                | 1945934088               |
| SNP_P3_39067_12490280 | NC_021163.1    | Ca_kabuli_chr04 | 12490280                | AA                              | GG                | 1945934090               |
| SNP_P3_39069_12492569 | NC_021163.1    | Ca_kabuli_chr04 | 12492569                | GG                              | AA                | 1945934092               |
| SNP_P3_39070_12493479 | NC_021163.1    | Ca_kabuli_chr04 | 12493479                | TT                              | GG                | 1945934094               |
| SNP_P3_39071_12493643 | NC_021163.1    | Ca_kabuli_chr04 | 12493643                | AA                              | GG                | 1945934095               |
| SNP_P3_39073_12493665 | NC_021163.1    | Ca_kabuli_chr04 | 12493665                | AA                              | GG                | 1945934097               |
| SNP_P3_39074_12493668 | NC_021163.1    | Ca_kabuli_chr04 | 12493668                | CC                              | TT                | 1945934099               |
| SNP_P3_39075_12497577 | NC_021163.1    | Ca_kabuli_chr04 | 12497577                | CC                              | GG                | 1945934101               |
| SNP_P3_39076_12498559 | NC_021163.1    | Ca_kabuli_chr04 | 12498559                | CC                              | TT                | 1945934103               |
| SNP_P3_39077_12498589 | NC_021163.1    | Ca_kabuli_chr04 | 12498589                | AA                              | TT                | 1945934104               |
| SNP_P3_39078_12499434 | NC_021163.1    | Ca_kabuli_chr04 | 12499434                | TT                              | CC                | 1945934106               |
| SNP_P3_39080_12507364 | NC_021163.1    | Ca_kabuli_chr04 | 12507364                | TT                              | AA                | 1945934108               |
| SNP_P3_39081_12507374 | NC_021163.1    | Ca_kabuli_chr04 | 12507374                | CC                              | GG                | 1945934110               |
| SNP_P3_39082_12507678 | NC_021163.1    | Ca_kabuli_chr04 | 12507678                | GG                              | AA                | 1945934111               |



| SNPs IDs              | Chromosome IDs | Chromosomes     | Physical positions (bp) | CDC Frontier (Reference genome) | (Pusa 256 & HPNB) | NCBI SNPdb Accession IDs |
|-----------------------|----------------|-----------------|-------------------------|---------------------------------|-------------------|--------------------------|
| SNP_P3_39083_12507685 | NC_021163.1    | Ca_kabuli_chr04 | 12507685                | CC                              | TT                | 1945934113               |
| SNP_P3_39084_12507686 | NC_021163.1    | Ca_kabuli_chr04 | 12507686                | GG                              | AA                | 1945934115               |
| SNP_P3_39085_12507701 | NC_021163.1    | Ca_kabuli_chr04 | 12507701                | TT                              | CC                | 1945934117               |
| SNP_P3_39086_12509318 | NC_021163.1    | Ca_kabuli_chr04 | 12509318                | GG                              | TT                | 1945934118               |
| SNP_P3_39087_12509333 | NC_021163.1    | Ca_kabuli_chr04 | 12509333                | GG                              | AA                | 1945934120               |
| SNP_P3_39088_12509656 | NC_021163.1    | Ca_kabuli_chr04 | 12509656                | GG                              | AA                | 1945934122               |
| SNP_P3_39090_12511107 | NC_021163.1    | Ca_kabuli_chr04 | 12511107                | GG                              | AA                | 1945934124               |
| SNP_P3_39091_12511371 | NC_021163.1    | Ca_kabuli_chr04 | 12511371                | AA                              | TT                | 1945934126               |
| SNP_P3_39092_12512005 | NC_021163.1    | Ca_kabuli_chr04 | 12512005                | GG                              | AA                | 1945934127               |
| SNP_P3_39093_12512074 | NC_021163.1    | Ca_kabuli_chr04 | 12512074                | TT                              | CC                | 1945934129               |
| SNP_P3_39094_12512475 | NC_021163.1    | Ca_kabuli_chr04 | 12512475                | GG                              | AA                | 1945934131               |
| SNP_P3_39095_12512490 | NC_021163.1    | Ca_kabuli_chr04 | 12512490                | AA                              | GG                | 1945934133               |
| SNP_P3_39096_12512495 | NC_021163.1    | Ca_kabuli_chr04 | 12512495                | GG                              | AA                | 1945934134               |
| SNP_P3_39097_12512503 | NC_021163.1    | Ca_kabuli_chr04 | 12512503                | AA                              | GG                | 1945934136               |
| SNP_P3_39098_12512504 | NC_021163.1    | Ca_kabuli_chr04 | 12512504                | GG                              | AA                | 1945934138               |
| SNP_P3_39099_12512706 | NC_021163.1    | Ca_kabuli_chr04 | 12512706                | TT                              | CC                | 1945934140               |
| SNP_P3_39100_12512957 | NC_021163.1    | Ca_kabuli_chr04 | 12512957                | GG                              | AA                | 1945934141               |
| SNP_P3_39101_12512974 | NC_021163.1    | Ca_kabuli_chr04 | 12512974                | TT                              | GG                | 1945934143               |
| SNP_P3_39103_12513256 | NC_021163.1    | Ca_kabuli_chr04 | 12513256                | AA                              | GG                | 1945934145               |
| SNP_P3_39104_12513269 | NC_021163.1    | Ca_kabuli_chr04 | 12513269                | CC                              | TT                | 1945934147               |
| SNP_P3_39105_12517423 | NC_021163.1    | Ca_kabuli_chr04 | 12517423                | GG                              | AA                | 1945934149               |
| SNP_P3_39106_12517437 | NC_021163.1    | Ca_kabuli_chr04 | 12517437                | TT                              | CC                | 1945934150               |
| SNP_P3_39107_12517478 | NC_021163.1    | Ca_kabuli_chr04 | 12517478                | AA                              | TT                | 1945934152               |
| SNP_P3_39108_12517571 | NC_021163.1    | Ca_kabuli_chr04 | 12517571                | AA                              | GG                | 1945934154               |
| SNP_P3_39109_12519896 | NC_021163.1    | Ca_kabuli_chr04 | 12519896                | CC                              | TT                | 1945934156               |
| SNP_P3_39110_12519918 | NC_021163.1    | Ca_kabuli_chr04 | 12519918                | TT                              | AA                | 1945934157               |
| SNP_P3_39111_12520282 | NC_021163.1    | Ca_kabuli_chr04 | 12520282                | TT                              | AA                | 1945934159               |
| SNP_P3_39113_12520637 | NC_021163.1    | Ca_kabuli_chr04 | 12520637                | GG                              | AA                | 1945934161               |
| SNP_P3_39114_12520655 | NC_021163.1    | Ca_kabuli_chr04 | 12520655                | GG                              | AA                | 1945934163               |
| SNP_P3_39115_12522804 | NC_021163.1    | Ca_kabuli_chr04 | 12522804                | GG                              | AA                | 1945934164               |
| SNP_P3_39116_12522933 | NC_021163.1    | Ca_kabuli_chr04 | 12522933                | TT                              | CC                | 1945934166               |
| SNP_P3_39117_12523321 | NC_021163.1    | Ca_kabuli_chr04 | 12523321                | TT                              | CC                | 1945934168               |
| SNP_P3_39118_12523474 | NC_021163.1    | Ca_kabuli_chr04 | 12523474                | GG                              | TT                | 1945934170               |
| SNP_P3_39119_12523537 | NC_021163.1    | Ca_kabuli_chr04 | 12523537                | GG                              | AA                | 1945934172               |
| SNP_P3_39120_12523543 | NC_021163.1    | Ca_kabuli_chr04 | 12523543                | CC                              | TT                | 1945934173               |
| SNP_P3_39121_12523672 | NC_021163.1    | Ca_kabuli_chr04 | 12523672                | GG                              | AA                | 1945934175               |
| SNP_P3_39122_12523829 | NC_021163.1    | Ca_kabuli_chr04 | 12523829                | AA                              | GG                | 1945934177               |
| SNP_P3_39123_12523934 | NC_021163.1    | Ca_kabuli_chr04 | 12523934                | GG                              | TT                | 1945934179               |
| SNP_P3_39124_12524032 | NC_021163.1    | Ca_kabuli_chr04 | 12524032                | TT                              | AA                | 1945934180               |
| SNP_P3_39125_12524770 | NC_021163.1    | Ca_kabuli_chr04 | 12524770                | CC                              | TT                | 1945934182               |
| SNP_P3_39126_12525934 | NC_021163.1    | Ca_kabuli_chr04 | 12525934                | GG                              | AA                | 1945934184               |
| SNP_P3_39127_12525942 | NC_021163.1    | Ca_kabuli_chr04 | 12525942                | AA                              | GG                | 1945934186               |

| SNPs IDs              | Chromosome IDs | Chromosomes     | Physical positions (bp) | CDC Frontier (Reference genome) | (Pusa 256 & HPNB) | NCBI SNPdb Accession IDs |
|-----------------------|----------------|-----------------|-------------------------|---------------------------------|-------------------|--------------------------|
| SNP_P3_39128_12526023 | NC_021163.1    | Ca_kabuli_chr04 | 12526023                | GG                              | TT                | 1945934188               |
| SNP_P3_39129_12527282 | NC_021163.1    | Ca_kabuli_chr04 | 12527282                | CC                              | TT                | 1945934189               |
| SNP_P3_39130_12527318 | NC_021163.1    | Ca_kabuli_chr04 | 12527318                | GG                              | AA                | 1945934191               |
| SNP_P3_39131_12527509 | NC_021163.1    | Ca_kabuli_chr04 | 12527509                | TT                              | GG                | 1945934193               |
| SNP_P3_39132_12528208 | NC_021163.1    | Ca_kabuli_chr04 | 12528208                | AA                              | GG                | 1945934195               |
| SNP_P3_39133_12528782 | NC_021163.1    | Ca_kabuli_chr04 | 12528782                | AA                              | CC                | 1945934196               |
| SNP_P3_39134_12528853 | NC_021163.1    | Ca_kabuli_chr04 | 12528853                | AA                              | GG                | 1945934198               |
| SNP_P3_39135_12528899 | NC_021163.1    | Ca_kabuli_chr04 | 12528899                | CC                              | TT                | 1945934200               |
| SNP_P3_39137_12529029 | NC_021163.1    | Ca_kabuli_chr04 | 12529029                | CC                              | TT                | 1945934202               |
| SNP_P3_39138_12529174 | NC_021163.1    | Ca_kabuli_chr04 | 12529174                | AA                              | GG                | 1945934203               |
| SNP_P3_39139_12529179 | NC_021163.1    | Ca_kabuli_chr04 | 12529179                | AA                              | TT                | 1945934205               |
| SNP_P3_39141_12529221 | NC_021163.1    | Ca_kabuli_chr04 | 12529221                | TT                              | CC                | 1945934207               |
| SNP_P3_39142_12529258 | NC_021163.1    | Ca_kabuli_chr04 | 12529258                | GG                              | AA                | 1945934209               |
| SNP_P3_39143_12529283 | NC_021163.1    | Ca_kabuli_chr04 | 12529283                | TT                              | CC                | 1945934211               |
| SNP_P3_39144_12529395 | NC_021163.1    | Ca_kabuli_chr04 | 12529395                | AA                              | GG                | 1945934212               |
| SNP_P3_39145_12529444 | NC_021163.1    | Ca_kabuli_chr04 | 12529444                | TT                              | CC                | 1945934214               |
| SNP_P3_39146_12529509 | NC_021163.1    | Ca_kabuli_chr04 | 12529509                | AA                              | GG                | 1945934216               |
| SNP_P3_39147_12529642 | NC_021163.1    | Ca_kabuli_chr04 | 12529642                | AA                              | TT                | 1945934218               |
| SNP_P3_39148_12529666 | NC_021163.1    | Ca_kabuli_chr04 | 12529666                | GG                              | TT                | 1945934219               |
| SNP_P3_39149_12529790 | NC_021163.1    | Ca_kabuli_chr04 | 12529790                | TT                              | AA                | 1945934221               |
| SNP_P3_39150_12530287 | NC_021163.1    | Ca_kabuli_chr04 | 12530287                | TT                              | CC                | 1945934223               |
| SNP_P3_39152_12531378 | NC_021163.1    | Ca_kabuli_chr04 | 12531378                | AA                              | CC                | 1945934225               |
| SNP_P3_39154_12531551 | NC_021163.1    | Ca_kabuli_chr04 | 12531551                | GG                              | CC                | 1945934226               |
| SNP_P3_39155_12531773 | NC_021163.1    | Ca_kabuli_chr04 | 12531773                | TT                              | CC                | 1945934228               |
| SNP_P3_39156_12532686 | NC_021163.1    | Ca_kabuli_chr04 | 12532686                | AA                              | GG                | 1945934230               |
| SNP_P3_39158_12534847 | NC_021163.1    | Ca_kabuli_chr04 | 12534847                | CC                              | TT                | 1945934232               |
| SNP_P3_39160_12537457 | NC_021163.1    | Ca_kabuli_chr04 | 12537457                | CC                              | TT                | 1945934234               |
| SNP_P3_39161_12537472 | NC_021163.1    | Ca_kabuli_chr04 | 12537472                | GG                              | AA                | 1945934235               |
| SNP_P3_39162_12540286 | NC_021163.1    | Ca_kabuli_chr04 | 12540286                | CC                              | AA                | 1945934237               |
| SNP_P3_39163_12542364 | NC_021163.1    | Ca_kabuli_chr04 | 12542364                | GG                              | AA                | 1945934239               |
| SNP_P3_39164_12542421 | NC_021163.1    | Ca_kabuli_chr04 | 12542421                | GG                              | AA                | 1945934241               |
| SNP_P3_39165_12544574 | NC_021163.1    | Ca_kabuli_chr04 | 12544574                | TT                              | AA                | 1945934242               |
| SNP_P3_39167_12546002 | NC_021163.1    | Ca_kabuli_chr04 | 12546002                | GG                              | AA                | 1945934244               |
| SNP_P3_39168_12546982 | NC_021163.1    | Ca_kabuli_chr04 | 12546982                | AA                              | GG                | 1945934246               |
| SNP_P3_39169_12547180 | NC_021163.1    | Ca_kabuli_chr04 | 12547180                | TT                              | CC                | 1945934248               |
| SNP_P3_39170_12547451 | NC_021163.1    | Ca_kabuli_chr04 | 12547451                | AA                              | GG                | 1945934249               |
| SNP_P3_39171_12547847 | NC_021163.1    | Ca_kabuli_chr04 | 12547847                | CC                              | TT                | 1945934251               |
| SNP_P3_39173_12548962 | NC_021163.1    | Ca_kabuli_chr04 | 12548962                | TT                              | GG                | 1945934253               |
| SNP_P3_39174_12548976 | NC_021163.1    | Ca_kabuli_chr04 | 12548976                | AA                              | GG                | 1945934255               |
| SNP_P3_39175_12550714 | NC_021163.1    | Ca_kabuli_chr04 | 12550714                | GG                              | CC                | 1945934257               |
| SNP_P3_39176_12550882 | NC_021163.1    | Ca_kabuli_chr04 | 12550882                | AA                              | CC                | 1945934258               |
| SNP_P3_39177_12550942 | NC_021163.1    | Ca_kabuli_chr04 | 12550942                | CC                              | TT                | 1945934260               |

| SNPs IDs              | Chromosome IDs | Chromosomes     | Physical positions (bp) | CDC Frontier (Reference genome) | (Pusa 256 & HPNB) | NCBI SNPdb Accession IDs |
|-----------------------|----------------|-----------------|-------------------------|---------------------------------|-------------------|--------------------------|
| SNP_P3_39178_12551202 | NC_021163.1    | Ca_kabuli_chr04 | 12551202                | GG                              | AA                | 1945934262               |
| SNP_P3_39179_12551551 | NC_021163.1    | Ca_kabuli_chr04 | 12551551                | CC                              | TT                | 1945934264               |
| SNP_P3_39180_12551554 | NC_021163.1    | Ca_kabuli_chr04 | 12551554                | GG                              | TT                | 1945934265               |
| SNP_P3_39182_12553504 | NC_021163.1    | Ca_kabuli_chr04 | 12553504                | GG                              | AA                | 1945934267               |
| SNP_P3_39183_12554488 | NC_021163.1    | Ca_kabuli_chr04 | 12554488                | GG                              | TT                | 1945934269               |
| SNP_P3_39184_12555232 | NC_021163.1    | Ca_kabuli_chr04 | 12555232                | CC                              | GG                | 1945934271               |
| SNP_P3_39185_12556048 | NC_021163.1    | Ca_kabuli_chr04 | 12556048                | AA                              | GG                | 1945934273               |
| SNP_P3_39186_12556174 | NC_021163.1    | Ca_kabuli_chr04 | 12556174                | GG                              | TT                | 1945934274               |
| SNP_P3_39187_12559070 | NC_021163.1    | Ca_kabuli_chr04 | 12559070                | GG                              | AA                | 1945934276               |
| SNP_P3_39188_12559440 | NC_021163.1    | Ca_kabuli_chr04 | 12559440                | AA                              | CC                | 1945934278               |
| SNP_P3_39189_12559442 | NC_021163.1    | Ca_kabuli_chr04 | 12559442                | GG                              | AA                | 1945934280               |
| SNP_P3_39190_12562098 | NC_021163.1    | Ca_kabuli_chr04 | 12562098                | GG                              | TT                | 1945934281               |
| SNP_P3_39191_12562103 | NC_021163.1    | Ca_kabuli_chr04 | 12562103                | GG                              | AA                | 1945934283               |
| SNP_P3_39192_12562285 | NC_021163.1    | Ca_kabuli_chr04 | 12562285                | CC                              | TT                | 1945934285               |
| SNP_P3_39193_12563092 | NC_021163.1    | Ca_kabuli_chr04 | 12563092                | GG                              | AA                | 1945934287               |
| SNP_P3_39194_12563110 | NC_021163.1    | Ca_kabuli_chr04 | 12563110                | GG                              | AA                | 1945934288               |
| SNP_P3_39195_12563442 | NC_021163.1    | Ca_kabuli_chr04 | 12563442                | GG                              | AA                | 1945934290               |
| SNP_P3_39196_12563670 | NC_021163.1    | Ca_kabuli_chr04 | 12563670                | GG                              | TT                | 1945934292               |
| SNP_P3_39197_12563697 | NC_021163.1    | Ca_kabuli_chr04 | 12563697                | GG                              | AA                | 1945934294               |
| SNP_P3_39198_12563859 | NC_021163.1    | Ca_kabuli_chr04 | 12563859                | GG                              | AA                | 1945934296               |
| SNP_P3_39199_12563860 | NC_021163.1    | Ca_kabuli_chr04 | 12563860                | CC                              | GG                | 1945934297               |
| SNP_P3_39200_12563895 | NC_021163.1    | Ca_kabuli_chr04 | 12563895                | TT                              | AA                | 1945934299               |
| SNP_P3_39201_12563950 | NC_021163.1    | Ca_kabuli_chr04 | 12563950                | AA                              | GG                | 1945934301               |
| SNP_P3_39202_12563954 | NC_021163.1    | Ca_kabuli_chr04 | 12563954                | CC                              | TT                | 1945934303               |
| SNP_P3_39203_12563967 | NC_021163.1    | Ca_kabuli_chr04 | 12563967                | GG                              | AA                | 1945934304               |
| SNP_P3_39204_12564156 | NC_021163.1    | Ca_kabuli_chr04 | 12564156                | TT                              | CC                | 1945934306               |
| SNP_P3_39205_12564160 | NC_021163.1    | Ca_kabuli_chr04 | 12564160                | CC                              | TT                | 1945934308               |
| SNP_P3_39206_12565567 | NC_021163.1    | Ca_kabuli_chr04 | 12565567                | CC                              | AA                | 1945934310               |
| SNP_P3_39207_12565581 | NC_021163.1    | Ca_kabuli_chr04 | 12565581                | AA                              | TT                | 1945934311               |
| SNP_P3_39208_12566032 | NC_021163.1    | Ca_kabuli_chr04 | 12566032                | GG                              | AA                | 1945934313               |
| SNP_P3_39209_12566056 | NC_021163.1    | Ca_kabuli_chr04 | 12566056                | TT                              | GG                | 1945934315               |
| SNP_P3_39210_12566090 | NC_021163.1    | Ca_kabuli_chr04 | 12566090                | AA                              | GG                | 1945934317               |
| SNP_P3_39211_12566319 | NC_021163.1    | Ca_kabuli_chr04 | 12566319                | TT                              | CC                | 1945934319               |
| SNP_P3_39212_12566324 | NC_021163.1    | Ca_kabuli_chr04 | 12566324                | CC                              | AA                | 1945934320               |
| SNP_P3_39213_12566325 | NC_021163.1    | Ca_kabuli_chr04 | 12566325                | GG                              | TT                | 1945934322               |
| SNP_P3_39214_12566762 | NC_021163.1    | Ca_kabuli_chr04 | 12566762                | TT                              | GG                | 1945934324               |
| SNP_P3_39215_12566786 | NC_021163.1    | Ca_kabuli_chr04 | 12566786                | GG                              | AA                | 1945934326               |
| SNP_P3_39216_12566801 | NC_021163.1    | Ca_kabuli_chr04 | 12566801                | GG                              | AA                | 1945934327               |
| SNP_P3_39217_12568458 | NC_021163.1    | Ca_kabuli_chr04 | 12568458                | TT                              | CC                | 1945934329               |
| SNP_P3_39218_12568476 | NC_021163.1    | Ca_kabuli_chr04 | 12568476                | CC                              | TT                | 1945934331               |
| SNP_P3_39219_12568599 | NC_021163.1    | Ca_kabuli_chr04 | 12568599                | GG                              | AA                | 1945934333               |
| SNP_P3_39220_12568602 | NC_021163.1    | Ca_kabuli_chr04 | 12568602                | TT                              | CC                | 1945934335               |

| SNPs IDs              | Chromosome IDs | Chromosomes     | Physical positions (bp) | CDC Frontier (Reference genome) | (Pusa 256 & HPNB) | NCBI SNPdb Accession IDs |
|-----------------------|----------------|-----------------|-------------------------|---------------------------------|-------------------|--------------------------|
| SNP_P3_39221_12568707 | NC_021163.1    | Ca_kabuli_chr04 | 12568707                | GG                              | AA                | 1945934336               |
| SNP_P3_39222_12568845 | NC_021163.1    | Ca_kabuli_chr04 | 12568845                | TT                              | GG                | 1945934338               |
| SNP_P3_39223_12569708 | NC_021163.1    | Ca_kabuli_chr04 | 12569708                | GG                              | CC                | 1945934340               |
| SNP_P3_39224_12570678 | NC_021163.1    | Ca_kabuli_chr04 | 12570678                | GG                              | TT                | 1945934342               |
| SNP_P3_39225_12570705 | NC_021163.1    | Ca_kabuli_chr04 | 12570705                | CC                              | TT                | 1945934343               |
| SNP_P3_39226_12570762 | NC_021163.1    | Ca_kabuli_chr04 | 12570762                | GG                              | AA                | 1945934345               |
| SNP_P3_39229_12571754 | NC_021163.1    | Ca_kabuli_chr04 | 12571754                | AA                              | GG                | 1945934347               |
| SNP_P3_39231_12572114 | NC_021163.1    | Ca_kabuli_chr04 | 12572114                | AA                              | GG                | 1945934349               |
| SNP_P3_39232_12572117 | NC_021163.1    | Ca_kabuli_chr04 | 12572117                | AA                              | TT                | 1945934350               |
| SNP_P3_39233_12572153 | NC_021163.1    | Ca_kabuli_chr04 | 12572153                | AA                              | GG                | 1945934352               |
| SNP_P3_39234_12572240 | NC_021163.1    | Ca_kabuli_chr04 | 12572240                | CC                              | TT                | 1945934354               |
| SNP_P3_39235_12572257 | NC_021163.1    | Ca_kabuli_chr04 | 12572257                | CC                              | TT                | 1945934356               |
| SNP_P3_39236_12572261 | NC_021163.1    | Ca_kabuli_chr04 | 12572261                | TT                              | GG                | 1945934358               |
| SNP_P3_39237_12572336 | NC_021163.1    | Ca_kabuli_chr04 | 12572336                | TT                              | GG                | 1945934359               |
| SNP_P3_39238_12572346 | NC_021163.1    | Ca_kabuli_chr04 | 12572346                | AA                              | GG                | 1945934361               |
| SNP_P3_39239_12572423 | NC_021163.1    | Ca_kabuli_chr04 | 12572423                | TT                              | AA                | 1945934363               |
| SNP_P3_39240_12572794 | NC_021163.1    | Ca_kabuli_chr04 | 12572794                | TT                              | CC                | 1945934365               |
| SNP_P3_39241_12572811 | NC_021163.1    | Ca_kabuli_chr04 | 12572811                | AA                              | GG                | 1945934366               |
| SNP_P3_39242_12572822 | NC_021163.1    | Ca_kabuli_chr04 | 12572822                | TT                              | CC                | 1945934368               |
| SNP_P3_39243_12572917 | NC_021163.1    | Ca_kabuli_chr04 | 12572917                | CC                              | TT                | 1945934370               |
| SNP_P3_39244_12572919 | NC_021163.1    | Ca_kabuli_chr04 | 12572919                | CC                              | TT                | 1945934372               |
| SNP_P3_39245_12572920 | NC_021163.1    | Ca_kabuli_chr04 | 12572920                | CC                              | TT                | 1945934373               |
| SNP_P3_39246_12572927 | NC_021163.1    | Ca_kabuli_chr04 | 12572927                | CC                              | TT                | 1945934375               |
| SNP_P3_39247_12573142 | NC_021163.1    | Ca_kabuli_chr04 | 12573142                | TT                              | CC                | 1945934377               |
| SNP_P3_39248_12573172 | NC_021163.1    | Ca_kabuli_chr04 | 12573172                | CC                              | TT                | 1945934379               |
| SNP_P3_39249_12573193 | NC_021163.1    | Ca_kabuli_chr04 | 12573193                | TT                              | GG                | 1945934381               |
| SNP_P3_39250_12575234 | NC_021163.1    | Ca_kabuli_chr04 | 12575234                | GG                              | TT                | 1945934382               |
| SNP_P3_39251_12575257 | NC_021163.1    | Ca_kabuli_chr04 | 12575257                | AA                              | GG                | 1945934384               |
| SNP_P3_39252_12575278 | NC_021163.1    | Ca_kabuli_chr04 | 12575278                | GG                              | AA                | 1945934386               |
| SNP_P3_39253_12576619 | NC_021163.1    | Ca_kabuli_chr04 | 12576619                | AA                              | GG                | 1945934388               |
| SNP_P3_39255_12577739 | NC_021163.1    | Ca_kabuli_chr04 | 12577739                | GG                              | CC                | 1945934389               |
| SNP_P3_39256_12577773 | NC_021163.1    | Ca_kabuli_chr04 | 12577773                | TT                              | AA                | 1945934391               |
| SNP_P3_39257_12577800 | NC_021163.1    | Ca_kabuli_chr04 | 12577800                | TT                              | AA                | 1945934393               |
| SNP_P3_39258_12577823 | NC_021163.1    | Ca_kabuli_chr04 | 12577823                | GG                              | CC                | 1945934395               |
| SNP_P3_39259_12578134 | NC_021163.1    | Ca_kabuli_chr04 | 12578134                | TT                              | CC                | 1945934396               |
| SNP_P3_39260_12578195 | NC_021163.1    | Ca_kabuli_chr04 | 12578195                | TT                              | GG                | 1945934398               |
| SNP_P3_39261_12578606 | NC_021163.1    | Ca_kabuli_chr04 | 12578606                | TT                              | AA                | 1945934400               |
| SNP_P3_39262_12578627 | NC_021163.1    | Ca_kabuli_chr04 | 12578627                | CC                              | TT                | 1945934402               |
| SNP_P3_39263_12578789 | NC_021163.1    | Ca_kabuli_chr04 | 12578789                | AA                              | GG                | 1945934403               |
| SNP_P3_39264_12578806 | NC_021163.1    | Ca_kabuli_chr04 | 12578806                | TT                              | CC                | 1945934405               |
| SNP_P3_39265_12579386 | NC_021163.1    | Ca_kabuli_chr04 | 12579386                | TT                              | CC                | 1945934407               |
| SNP_P3_39266_12579473 | NC_021163.1    | Ca_kabuli_chr04 | 12579473                | CC                              | TT                | 1945934409               |

| SNPs IDs              | Chromosome IDs | Chromosomes     | Physical positions (bp) | CDC Frontier (Reference genome) | (Pusa 256 & HPNB) | NCBI SNPdb Accession IDs |
|-----------------------|----------------|-----------------|-------------------------|---------------------------------|-------------------|--------------------------|
| SNP_P3_39267_12579528 | NC_021163.1    | Ca_kabuli_chr04 | 12579528                | CC                              | AA                | 1945934411               |
| SNP_P3_39268_12580189 | NC_021163.1    | Ca_kabuli_chr04 | 12580189                | GG                              | AA                | 1945934412               |
| SNP_P3_39269_12580200 | NC_021163.1    | Ca_kabuli_chr04 | 12580200                | AA                              | GG                | 1945934414               |
| SNP_P3_39270_12582787 | NC_021163.1    | Ca_kabuli_chr04 | 12582787                | AA                              | GG                | 1945934416               |
| SNP_P3_39271_12582935 | NC_021163.1    | Ca_kabuli_chr04 | 12582935                | GG                              | AA                | 1945934418               |
| SNP_P3_39273_12583349 | NC_021163.1    | Ca_kabuli_chr04 | 12583349                | AA                              | TT                | 1945934419               |
| SNP_P3_39274_12583366 | NC_021163.1    | Ca_kabuli_chr04 | 12583366                | CC                              | TT                | 1945934421               |
| SNP_P3_39276_12585023 | NC_021163.1    | Ca_kabuli_chr04 | 12585023                | CC                              | TT                | 1945934423               |
| SNP_P3_39277_12585236 | NC_021163.1    | Ca_kabuli_chr04 | 12585236                | TT                              | CC                | 1945934425               |
| SNP_P3_39278_12585241 | NC_021163.1    | Ca_kabuli_chr04 | 12585241                | AA                              | CC                | 1945934426               |
| SNP_P3_39279_12585246 | NC_021163.1    | Ca_kabuli_chr04 | 12585246                | CC                              | AA                | 1945934428               |
| SNP_P3_39280_12585275 | NC_021163.1    | Ca_kabuli_chr04 | 12585275                | TT                              | CC                | 1945934430               |
| SNP_P3_39281_12585287 | NC_021163.1    | Ca_kabuli_chr04 | 12585287                | TT                              | CC                | 1945934432               |
| SNP_P3_39282_12585314 | NC_021163.1    | Ca_kabuli_chr04 | 12585314                | TT                              | CC                | 1945934434               |
| SNP_P3_39283_12585351 | NC_021163.1    | Ca_kabuli_chr04 | 12585351                | TT                              | CC                | 1945934435               |
| SNP_P3_39284_12586768 | NC_021163.1    | Ca_kabuli_chr04 | 12586768                | CC                              | TT                | 1945934437               |
| SNP_P3_39285_12587507 | NC_021163.1    | Ca_kabuli_chr04 | 12587507                | TT                              | CC                | 1945934439               |
| SNP_P3_39286_12587523 | NC_021163.1    | Ca_kabuli_chr04 | 12587523                | GG                              | AA                | 1945934441               |
| SNP_P3_39287_12587527 | NC_021163.1    | Ca_kabuli_chr04 | 12587527                | CC                              | AA                | 1945934442               |
| SNP_P3_39288_12587715 | NC_021163.1    | Ca_kabuli_chr04 | 12587715                | GG                              | AA                | 1945934444               |
| SNP_P3_39289_12587731 | NC_021163.1    | Ca_kabuli_chr04 | 12587731                | CC                              | TT                | 1945934446               |
| SNP_P3_39290_12588150 | NC_021163.1    | Ca_kabuli_chr04 | 12588150                | TT                              | AA                | 1945934448               |
| SNP_P3_39291_12588180 | NC_021163.1    | Ca_kabuli_chr04 | 12588180                | AA                              | GG                | 1945934449               |
| SNP_P3_39293_12589390 | NC_021163.1    | Ca_kabuli_chr04 | 12589390                | CC                              | TT                | 1945934451               |
| SNP_P3_39294_12589402 | NC_021163.1    | Ca_kabuli_chr04 | 12589402                | GG                              | AA                | 1945934453               |
| SNP_P3_39295_12589434 | NC_021163.1    | Ca_kabuli_chr04 | 12589434                | CC                              | TT                | 1945934455               |
| SNP_P3_39296_12591553 | NC_021163.1    | Ca_kabuli_chr04 | 12591553                | GG                              | AA                | 1945934457               |
| SNP_P3_39297_12592014 | NC_021163.1    | Ca_kabuli_chr04 | 12592014                | CC                              | GG                | 1945934458               |
| SNP_P3_39298_12592493 | NC_021163.1    | Ca_kabuli_chr04 | 12592493                | GG                              | AA                | 1945934460               |
| SNP_P3_39299_12592697 | NC_021163.1    | Ca_kabuli_chr04 | 12592697                | CC                              | AA                | 1945934462               |
| SNP_P3_39300_12592698 | NC_021163.1    | Ca_kabuli_chr04 | 12592698                | AA                              | TT                | 1945934464               |
| SNP_P3_39301_12592973 | NC_021163.1    | Ca_kabuli_chr04 | 12592973                | CC                              | AA                | 1945934465               |
| SNP_P3_39302_12593212 | NC_021163.1    | Ca_kabuli_chr04 | 12593212                | CC                              | AA                | 1945934467               |
| SNP_P3_39303_12593349 | NC_021163.1    | Ca_kabuli_chr04 | 12593349                | AA                              | TT                | 1945934469               |
| SNP_P3_39304_12593611 | NC_021163.1    | Ca_kabuli_chr04 | 12593611                | CC                              | AA                | 1945934471               |
| SNP_P3_39306_12593961 | NC_021163.1    | Ca_kabuli_chr04 | 12593961                | GG                              | CC                | 1945934472               |
| SNP_P3_39307_12593986 | NC_021163.1    | Ca_kabuli_chr04 | 12593986                | TT                              | CC                | 1945934474               |
| SNP_P3_39308_12597123 | NC_021163.1    | Ca_kabuli_chr04 | 12597123                | GG                              | AA                | 1945934476               |
| SNP_P3_39309_12597748 | NC_021163.1    | Ca_kabuli_chr04 | 12597748                | AA                              | GG                | 1945934478               |
| SNP_P3_39310_12598758 | NC_021163.1    | Ca_kabuli_chr04 | 12598758                | GG                              | AA                | 1945934480               |
| SNP_P3_39311_12599221 | NC_021163.1    | Ca_kabuli_chr04 | 12599221                | TT                              | CC                | 1945934481               |
| SNP_P3_39312_12599315 | NC_021163.1    | Ca_kabuli_chr04 | 12599315                | GG                              | AA                | 1945934483               |

| SNPs IDs              | Chromosome IDs | Chromosomes     | Physical positions (bp) | CDC Frontier (Reference genome) | (Pusa 256 & HPNB) | NCBI SNPdb Accession IDs |
|-----------------------|----------------|-----------------|-------------------------|---------------------------------|-------------------|--------------------------|
| SNP_P3_39313_12599342 | NC_021163.1    | Ca_kabuli_chr04 | 12599342                | GG                              | AA                | 1945934485               |
| SNP_P3_39314_12599860 | NC_021163.1    | Ca_kabuli_chr04 | 12599860                | AA                              | GG                | 1945934487               |
| SNP_P3_39315_12599868 | NC_021163.1    | Ca_kabuli_chr04 | 12599868                | AA                              | GG                | 1945934488               |
| SNP_P3_39316_12600591 | NC_021163.1    | Ca_kabuli_chr04 | 12600591                | GG                              | AA                | 1945934490               |
| SNP_P3_39317_12600891 | NC_021163.1    | Ca_kabuli_chr04 | 12600891                | AA                              | GG                | 1945934492               |
| SNP_P3_39318_12601567 | NC_021163.1    | Ca_kabuli_chr04 | 12601567                | TT                              | GG                | 1945934494               |
| SNP_P3_39319_12603876 | NC_021163.1    | Ca_kabuli_chr04 | 12603876                | CC                              | AA                | 1945934495               |
| SNP_P3_39321_12604563 | NC_021163.1    | Ca_kabuli_chr04 | 12604563                | AA                              | GG                | 1945934497               |
| SNP_P3_39322_12604564 | NC_021163.1    | Ca_kabuli_chr04 | 12604564                | TT                              | GG                | 1945934499               |
| SNP_P3_39323_12604571 | NC_021163.1    | Ca_kabuli_chr04 | 12604571                | AA                              | CC                | 1945934501               |
| SNP_P3_39324_12604800 | NC_021163.1    | Ca_kabuli_chr04 | 12604800                | TT                              | CC                | 1945934503               |
| SNP_P3_39326_12605815 | NC_021163.1    | Ca_kabuli_chr04 | 12605815                | TT                              | AA                | 1945934504               |
| SNP_P3_39327_12606172 | NC_021163.1    | Ca_kabuli_chr04 | 12606172                | TT                              | CC                | 1945934506               |
| SNP_P3_39328_12606708 | NC_021163.1    | Ca_kabuli_chr04 | 12606708                | CC                              | TT                | 1945934508               |
| SNP_P3_39329_12607031 | NC_021163.1    | Ca_kabuli_chr04 | 12607031                | TT                              | CC                | 1945934510               |
| SNP_P3_39330_12607511 | NC_021163.1    | Ca_kabuli_chr04 | 12607511                | TT                              | CC                | 1945934511               |
| SNP_P3_39331_12607520 | NC_021163.1    | Ca_kabuli_chr04 | 12607520                | CC                              | TT                | 1945934513               |
| SNP_P3_39332_12607534 | NC_021163.1    | Ca_kabuli_chr04 | 12607534                | CC                              | AA                | 1945934515               |
| SNP_P3_39333_12607607 | NC_021163.1    | Ca_kabuli_chr04 | 12607607                | TT                              | CC                | 1945934517               |
| SNP_P3_39334_12607614 | NC_021163.1    | Ca_kabuli_chr04 | 12607614                | AA                              | CC                | 1945934518               |
| SNP_P3_39335_12607631 | NC_021163.1    | Ca_kabuli_chr04 | 12607631                | GG                              | AA                | 1945934520               |
| SNP_P3_39336_12607787 | NC_021163.1    | Ca_kabuli_chr04 | 12607787                | GG                              | CC                | 1945934522               |
| SNP_P3_39337_12607854 | NC_021163.1    | Ca_kabuli_chr04 | 12607854                | AA                              | GG                | 1945934524               |
| SNP_P3_39338_12607859 | NC_021163.1    | Ca_kabuli_chr04 | 12607859                | GG                              | CC                | 1945934526               |
| SNP_P3_39339_12607864 | NC_021163.1    | Ca_kabuli_chr04 | 12607864                | TT                              | AA                | 1945934527               |
| SNP_P3_39340_12607892 | NC_021163.1    | Ca_kabuli_chr04 | 12607892                | AA                              | TT                | 1945934529               |
| SNP_P3_39341_12607924 | NC_021163.1    | Ca_kabuli_chr04 | 12607924                | GG                              | TT                | 1945934531               |
| SNP_P3_39342_12608367 | NC_021163.1    | Ca_kabuli_chr04 | 12608367                | TT                              | CC                | 1945934533               |
| SNP_P3_39343_12608440 | NC_021163.1    | Ca_kabuli_chr04 | 12608440                | GG                              | AA                | 1945934534               |
| SNP_P3_39344_12612005 | NC_021163.1    | Ca_kabuli_chr04 | 12612005                | AA                              | GG                | 1945934536               |
| SNP_P3_39345_12622076 | NC_021163.1    | Ca_kabuli_chr04 | 12622076                | CC                              | TT                | 1945934538               |
| SNP_P3_39346_12627568 | NC_021163.1    | Ca_kabuli_chr04 | 12627568                | AA                              | GG                | 1945934540               |
| SNP_P3_39347_12628062 | NC_021163.1    | Ca_kabuli_chr04 | 12628062                | GG                              | TT                | 1945934541               |
| SNP_P3_39351_12676345 | NC_021163.1    | Ca_kabuli_chr04 | 12676345                | GG                              | AA                | 1945934543               |
| SNP_P3_39352_12676389 | NC_021163.1    | Ca_kabuli_chr04 | 12676389                | AA                              | GG                | 1945934545               |
| SNP_P3_39353_12676398 | NC_021163.1    | Ca_kabuli_chr04 | 12676398                | GG                              | AA                | 1945934547               |
| SNP_P3_39354_12676452 | NC_021163.1    | Ca_kabuli_chr04 | 12676452                | GG                              | AA                | 1945934549               |
| SNP_P3_39355_12676486 | NC_021163.1    | Ca_kabuli_chr04 | 12676486                | TT                              | CC                | 1945934550               |
| SNP_P3_39356_12676665 | NC_021163.1    | Ca_kabuli_chr04 | 12676665                | AA                              | GG                | 1945934552               |
| SNP_P3_39357_12676713 | NC_021163.1    | Ca_kabuli_chr04 | 12676713                | AA                              | GG                | 1945934554               |
| SNP_P3_39358_12676757 | NC_021163.1    | Ca_kabuli_chr04 | 12676757                | GG                              | AA                | 1945934556               |
| SNP_P3_39359_12676758 | NC_021163.1    | Ca_kabuli_chr04 | 12676758                | GG                              | CC                | 1945934557               |

| SNPs IDs              | Chromosome IDs | Chromosomes     | Physical positions (bp) | CDC Frontier (Reference genome) | (Pusa 256 & HPNB) | NCBI SNPdb Accession IDs |
|-----------------------|----------------|-----------------|-------------------------|---------------------------------|-------------------|--------------------------|
| SNP_P3_39360_12676766 | NC_021163.1    | Ca_kabuli_chr04 | 12676766                | AA                              | GG                | 1945934559               |
| SNP_P3_39361_12714210 | NC_021163.1    | Ca_kabuli_chr04 | 12714210                | AA                              | CC                | 1945934561               |
| SNP_P3_39362_12772311 | NC_021163.1    | Ca_kabuli_chr04 | 12772311                | GG                              | TT                | 1945934563               |
| SNP_P3_39363_12784650 | NC_021163.1    | Ca_kabuli_chr04 | 12784650                | AA                              | TT                | 1945934564               |
| SNP_P3_39364_12798952 | NC_021163.1    | Ca_kabuli_chr04 | 12798952                | AA                              | GG                | 1945934566               |
| SNP_P3_39366_12858001 | NC_021163.1    | Ca_kabuli_chr04 | 12858001                | CC                              | AA                | 1945934568               |
| SNP_P3_39367_12899247 | NC_021163.1    | Ca_kabuli_chr04 | 12899247                | CC                              | TT                | 1945934570               |
| SNP_P3_39368_12899567 | NC_021163.1    | Ca_kabuli_chr04 | 12899567                | AA                              | GG                | 1945934572               |
| SNP_P3_39369_12926479 | NC_021163.1    | Ca_kabuli_chr04 | 12926479                | CC                              | TT                | 1945934573               |
| SNP_P3_39370_12969201 | NC_021163.1    | Ca_kabuli_chr04 | 12969201                | TT                              | CC                | 1945934575               |
| SNP_P3_39371_12986909 | NC_021163.1    | Ca_kabuli_chr04 | 12986909                | TT                              | CC                | 1945934577               |
| SNP_P3_39372_13025651 | NC_021163.1    | Ca_kabuli_chr04 | 13025651                | AA                              | TT                | 1945934579               |
| SNP_P3_39373_13030319 | NC_021163.1    | Ca_kabuli_chr04 | 13030319                | AA                              | GG                | 1945934580               |
| SNP_P3_39374_13047552 | NC_021163.1    | Ca_kabuli_chr04 | 13047552                | AA                              | GG                | 1945934582               |
| SNP_P3_39375_13075493 | NC_021163.1    | Ca_kabuli_chr04 | 13075493                | TT                              | CC                | 1945934584               |
| SNP_P3_39376_13075497 | NC_021163.1    | Ca_kabuli_chr04 | 13075497                | TT                              | CC                | 1945934586               |
| SNP_P3_39377_13092972 | NC_021163.1    | Ca_kabuli_chr04 | 13092972                | CC                              | TT                | 1945934587               |
| SNP_P3_39378_13105735 | NC_021163.1    | Ca_kabuli_chr04 | 13105735                | GG                              | AA                | 1945934589               |
| SNP_P3_39379_13157023 | NC_021163.1    | Ca_kabuli_chr04 | 13157023                | CC                              | AA                | 1945934591               |
| SNP_P3_39381_13161136 | NC_021163.1    | Ca_kabuli_chr04 | 13161136                | TT                              | CC                | 1945934593               |
| SNP_P3_39382_13184656 | NC_021163.1    | Ca_kabuli_chr04 | 13184656                | TT                              | CC                | 1945934595               |
| SNP_P3_39383_13214301 | NC_021163.1    | Ca_kabuli_chr04 | 13214301                | GG                              | AA                | 1945934596               |
| SNP_P3_39384_13215821 | NC_021163.1    | Ca_kabuli_chr04 | 13215821                | AA                              | GG                | 1945934598               |
| SNP_P3_39385_13216058 | NC_021163.1    | Ca_kabuli_chr04 | 13216058                | TT                              | CC                | 1945934600               |
| SNP_P3_39386_13221840 | NC_021163.1    | Ca_kabuli_chr04 | 13221840                | TT                              | GG                | 1945934602               |
| SNP_P3_39387_13242649 | NC_021163.1    | Ca_kabuli_chr04 | 13242649                | GG                              | AA                | 1945934603               |
| SNP_P3_39388_13246619 | NC_021163.1    | Ca_kabuli_chr04 | 13246619                | AA                              | TT                | 1945934605               |
| SNP_P3_39390_13327480 | NC_021163.1    | Ca_kabuli_chr04 | 13327480                | AA                              | GG                | 1945934607               |
| SNP_P3_39391_13393754 | NC_021163.1    | Ca_kabuli_chr04 | 13393754                | AA                              | TT                | 1945934609               |
| SNP_P3_39394_13436788 | NC_021163.1    | Ca_kabuli_chr04 | 13436788                | AA                              | GG                | 1945934611               |
| SNP_P3_39395_13439304 | NC_021163.1    | Ca_kabuli_chr04 | 13439304                | GG                              | AA                | 1945934612               |
| SNP_P3_39396_13455213 | NC_021163.1    | Ca_kabuli_chr04 | 13455213                | AA                              | TT                | 1945934614               |
| SNP_P3_39397_13460906 | NC_021163.1    | Ca_kabuli_chr04 | 13460906                | AA                              | TT                | 1945934616               |
| SNP_P3_39398_13461044 | NC_021163.1    | Ca_kabuli_chr04 | 13461044                | CC                              | GG                | 1945934618               |
| SNP_P3_39402_13510544 | NC_021163.1    | Ca_kabuli_chr04 | 13510544                | GG                              | AA                | 1945934619               |
| SNP_P3_39403_13532411 | NC_021163.1    | Ca_kabuli_chr04 | 13532411                | GG                              | AA                | 1945934621               |
| SNP_P3_39405_13549638 | NC_021163.1    | Ca_kabuli_chr04 | 13549638                | AA                              | CC                | 1945934623               |
| SNP_P3_39407_13555410 | NC_021163.1    | Ca_kabuli_chr04 | 13555410                | GG                              | AA                | 1945934625               |
| SNP_P3_39408_13555506 | NC_021163.1    | Ca_kabuli_chr04 | 13555506                | CC                              | TT                | 1945934626               |
| SNP_P3_39409_13555515 | NC_021163.1    | Ca_kabuli_chr04 | 13555515                | CC                              | TT                | 1945934628               |
| SNP_P3_39410_13555518 | NC_021163.1    | Ca_kabuli_chr04 | 13555518                | CC                              | TT                | 1945934630               |
| SNP_P3_39411_13555547 | NC_021163.1    | Ca_kabuli_chr04 | 13555547                | GG                              | AA                | 1945934632               |

| SNPs IDs              | Chromosome IDs | Chromosomes     | Physical positions (bp) | CDC Frontier (Reference genome) | (Pusa 256 & HPNB) | NCBI SNPdb Accession IDs |
|-----------------------|----------------|-----------------|-------------------------|---------------------------------|-------------------|--------------------------|
| SNP_P3_39412_13555705 | NC_021163.1    | Ca_kabuli_chr04 | 13555705                | CC                              | TT                | 1945934634               |
| SNP_P3_39413_13555807 | NC_021163.1    | Ca_kabuli_chr04 | 13555807                | AA                              | GG                | 1945934635               |
| SNP_P3_39414_13555892 | NC_021163.1    | Ca_kabuli_chr04 | 13555892                | CC                              | TT                | 1945934637               |
| SNP_P3_39415_13556026 | NC_021163.1    | Ca_kabuli_chr04 | 13556026                | AA                              | GG                | 1945934639               |
| SNP_P3_39416_13556040 | NC_021163.1    | Ca_kabuli_chr04 | 13556040                | TT                              | CC                | 1945934641               |
| SNP_P3_39417_13556041 | NC_021163.1    | Ca_kabuli_chr04 | 13556041                | CC                              | TT                | 1945934642               |
| SNP_P3_39418_13556048 | NC_021163.1    | Ca_kabuli_chr04 | 13556048                | TT                              | CC                | 1945934644               |
| SNP_P3_39419_13557218 | NC_021163.1    | Ca_kabuli_chr04 | 13557218                | CC                              | AA                | 1945934646               |
| SNP_P3_39420_13557266 | NC_021163.1    | Ca_kabuli_chr04 | 13557266                | CC                              | TT                | 1945934648               |
| SNP_P3_39421_13559960 | NC_021163.1    | Ca_kabuli_chr04 | 13559960                | CC                              | TT                | 1945934650               |
| SNP_P3_39422_13559986 | NC_021163.1    | Ca_kabuli_chr04 | 13559986                | CC                              | GG                | 1945934651               |
| SNP_P3_39423_13559996 | NC_021163.1    | Ca_kabuli_chr04 | 13559996                | AA                              | CC                | 1945934653               |
| SNP_P3_39424_13560520 | NC_021163.1    | Ca_kabuli_chr04 | 13560520                | AA                              | GG                | 1945934655               |
| SNP_P3_39425_13578292 | NC_021163.1    | Ca_kabuli_chr04 | 13578292                | GG                              | CC                | 1945934657               |
| SNP_P3_39426_13578991 | NC_021163.1    | Ca_kabuli_chr04 | 13578991                | AA                              | GG                | 1945934658               |
| SNP_P3_39427_13579471 | NC_021163.1    | Ca_kabuli_chr04 | 13579471                | CC                              | TT                | 1945934660               |
| SNP_P3_39430_13579927 | NC_021163.1    | Ca_kabuli_chr04 | 13579927                | TT                              | AA                | 1945934662               |
| SNP_P3_39431_13579934 | NC_021163.1    | Ca_kabuli_chr04 | 13579934                | TT                              | AA                | 1945934664               |
| SNP_P3_39432_13580707 | NC_021163.1    | Ca_kabuli_chr04 | 13580707                | TT                              | CC                | 1945934665               |
| SNP_P3_39433_13581004 | NC_021163.1    | Ca_kabuli_chr04 | 13581004                | GG                              | AA                | 1945934667               |
| SNP_P3_39434_13581268 | NC_021163.1    | Ca_kabuli_chr04 | 13581268                | CC                              | TT                | 1945934669               |
| SNP_P3_39435_13581291 | NC_021163.1    | Ca_kabuli_chr04 | 13581291                | AA                              | GG                | 1945934671               |
| SNP_P3_39436_13581318 | NC_021163.1    | Ca_kabuli_chr04 | 13581318                | CC                              | TT                | 1945934673               |
| SNP_P3_39437_13582319 | NC_021163.1    | Ca_kabuli_chr04 | 13582319                | AA                              | GG                | 1945934674               |
| SNP_P3_39438_13582324 | NC_021163.1    | Ca_kabuli_chr04 | 13582324                | TT                              | CC                | 1945934676               |
| SNP_P3_39439_13582332 | NC_021163.1    | Ca_kabuli_chr04 | 13582332                | TT                              | CC                | 1945934678               |
| SNP_P3_39440_13582334 | NC_021163.1    | Ca_kabuli_chr04 | 13582334                | TT                              | CC                | 1945934680               |
| SNP_P3_39441_13582370 | NC_021163.1    | Ca_kabuli_chr04 | 13582370                | TT                              | CC                | 1945934681               |
| SNP_P3_39442_13585462 | NC_021163.1    | Ca_kabuli_chr04 | 13585462                | TT                              | AA                | 1945934683               |
| SNP_P3_39443_13585680 | NC_021163.1    | Ca_kabuli_chr04 | 13585680                | AA                              | GG                | 1945934685               |
| SNP_P3_39444_13586114 | NC_021163.1    | Ca_kabuli_chr04 | 13586114                | TT                              | CC                | 1945934687               |
| SNP_P3_39445_13586365 | NC_021163.1    | Ca_kabuli_chr04 | 13586365                | CC                              | AA                | 1945934688               |
| SNP_P3_39446_13587371 | NC_021163.1    | Ca_kabuli_chr04 | 13587371                | CC                              | TT                | 1945934690               |
| SNP_P3_39447_13587569 | NC_021163.1    | Ca_kabuli_chr04 | 13587569                | TT                              | AA                | 1945934692               |
| SNP_P3_39448_13587573 | NC_021163.1    | Ca_kabuli_chr04 | 13587573                | CC                              | TT                | 1945934694               |
| SNP_P3_39450_13588928 | NC_021163.1    | Ca_kabuli_chr04 | 13588928                | TT                              | CC                | 1945934696               |
| SNP_P3_39451_13589320 | NC_021163.1    | Ca_kabuli_chr04 | 13589320                | GG                              | TT                | 1945934697               |
| SNP_P3_39453_13592216 | NC_021163.1    | Ca_kabuli_chr04 | 13592216                | CC                              | TT                | 1945934699               |
| SNP_P3_39454_13592394 | NC_021163.1    | Ca_kabuli_chr04 | 13592394                | AA                              | GG                | 1945934701               |
| SNP_P3_39455_13603482 | NC_021163.1    | Ca_kabuli_chr04 | 13603482                | TT                              | CC                | 1945934703               |
| SNP_P3_39456_13603544 | NC_021163.1    | Ca_kabuli_chr04 | 13603544                | GG                              | TT                | 1945934704               |
| SNP_P3_39457_13603587 | NC_021163.1    | Ca_kabuli_chr04 | 13603587                | AA                              | GG                | 1945934706               |



| SNPs IDs              | Chromosome IDs | Chromosomes     | Physical positions (bp) | CDC Frontier (Reference genome) | (Pusa 256 & HPNB) | NCBI SNPdb Accession IDs |
|-----------------------|----------------|-----------------|-------------------------|---------------------------------|-------------------|--------------------------|
| SNP_P3_39458_13603592 | NC_021163.1    | Ca_kabuli_chr04 | 13603592                | TT                              | AA                | 1945934708               |
| SNP_P3_39460_13607214 | NC_021163.1    | Ca_kabuli_chr04 | 13607214                | AA                              | GG                | 1945934710               |
| SNP_P3_39461_13607224 | NC_021163.1    | Ca_kabuli_chr04 | 13607224                | AA                              | TT                | 1945934712               |
| SNP_P3_39462_13607225 | NC_021163.1    | Ca_kabuli_chr04 | 13607225                | AA                              | GG                | 1945934713               |
| SNP_P3_39463_13607229 | NC_021163.1    | Ca_kabuli_chr04 | 13607229                | GG                              | AA                | 1945934715               |
| SNP_P3_39464_13607235 | NC_021163.1    | Ca_kabuli_chr04 | 13607235                | GG                              | AA                | 1945934717               |
| SNP_P3_39465_13607265 | NC_021163.1    | Ca_kabuli_chr04 | 13607265                | TT                              | GG                | 1945934719               |
| SNP_P3_39466_13607979 | NC_021163.1    | Ca_kabuli_chr04 | 13607979                | CC                              | GG                | 1945934720               |
| SNP_P3_39468_13608348 | NC_021163.1    | Ca_kabuli_chr04 | 13608348                | AA                              | CC                | 1945934722               |
| SNP_P3_39469_13612307 | NC_021163.1    | Ca_kabuli_chr04 | 13612307                | AA                              | TT                | 1945934724               |
| SNP_P3_39470_13613448 | NC_021163.1    | Ca_kabuli_chr04 | 13613448                | TT                              | GG                | 1945934726               |
| SNP_P3_39471_13613455 | NC_021163.1    | Ca_kabuli_chr04 | 13613455                | GG                              | AA                | 1945934727               |
| SNP_P3_39472_13614104 | NC_021163.1    | Ca_kabuli_chr04 | 13614104                | GG                              | AA                | 1945934729               |
| SNP_P3_39474_13614320 | NC_021163.1    | Ca_kabuli_chr04 | 13614320                | GG                              | CC                | 1945934731               |
| SNP_P3_39475_13614323 | NC_021163.1    | Ca_kabuli_chr04 | 13614323                | GG                              | TT                | 1945934733               |
| SNP_P3_39476_13614346 | NC_021163.1    | Ca_kabuli_chr04 | 13614346                | TT                              | GG                | 1945934735               |
| SNP_P3_39477_13614348 | NC_021163.1    | Ca_kabuli_chr04 | 13614348                | AA                              | GG                | 1945934736               |
| SNP_P3_39478_13614600 | NC_021163.1    | Ca_kabuli_chr04 | 13614600                | CC                              | GG                | 1945934738               |
| SNP_P3_39479_13615412 | NC_021163.1    | Ca_kabuli_chr04 | 13615412                | AA                              | TT                | 1945934740               |
| SNP_P3_39480_13615413 | NC_021163.1    | Ca_kabuli_chr04 | 13615413                | TT                              | GG                | 1945934742               |
| SNP_P3_39481_13615634 | NC_021163.1    | Ca_kabuli_chr04 | 13615634                | GG                              | TT                | 1945934743               |
| SNP_P3_39483_13615761 | NC_021163.1    | Ca_kabuli_chr04 | 13615761                | AA                              | TT                | 1945934745               |
| SNP_P3_39484_13615992 | NC_021163.1    | Ca_kabuli_chr04 | 13615992                | AA                              | GG                | 1945934747               |
| SNP_P3_39485_13615994 | NC_021163.1    | Ca_kabuli_chr04 | 13615994                | TT                              | AA                | 1945934749               |
| SNP_P3_39486_13616000 | NC_021163.1    | Ca_kabuli_chr04 | 13616000                | AA                              | TT                | 1945934751               |
| SNP_P3_39487_13616001 | NC_021163.1    | Ca_kabuli_chr04 | 13616001                | AA                              | TT                | 1945934752               |
| SNP_P3_39488_13616008 | NC_021163.1    | Ca_kabuli_chr04 | 13616008                | AA                              | CC                | 1945934754               |
| SNP_P3_39490_13616773 | NC_021163.1    | Ca_kabuli_chr04 | 13616773                | TT                              | CC                | 1945934756               |
| SNP_P3_39492_13617139 | NC_021163.1    | Ca_kabuli_chr04 | 13617139                | CC                              | TT                | 1945934758               |
| SNP_P3_39494_13617625 | NC_021163.1    | Ca_kabuli_chr04 | 13617625                | GG                              | TT                | 1945934759               |
| SNP_P3_39495_13617712 | NC_021163.1    | Ca_kabuli_chr04 | 13617712                | TT                              | CC                | 1945934761               |
| SNP_P3_39496_13617804 | NC_021163.1    | Ca_kabuli_chr04 | 13617804                | CC                              | TT                | 1945934763               |
| SNP_P3_39497_13620114 | NC_021163.1    | Ca_kabuli_chr04 | 13620114                | AA                              | GG                | 1945934765               |
| SNP_P3_39498_13620118 | NC_021163.1    | Ca_kabuli_chr04 | 13620118                | TT                              | GG                | 1945934766               |
| SNP_P3_39499_13620167 | NC_021163.1    | Ca_kabuli_chr04 | 13620167                | AA                              | GG                | 1945934768               |
| SNP_P3_39500_13620184 | NC_021163.1    | Ca_kabuli_chr04 | 13620184                | GG                              | AA                | 1945934770               |
| SNP_P3_39501_13620193 | NC_021163.1    | Ca_kabuli_chr04 | 13620193                | GG                              | AA                | 1945934772               |
| SNP_P3_39502_13620205 | NC_021163.1    | Ca_kabuli_chr04 | 13620205                | CC                              | TT                | 1945934774               |
| SNP_P3_39503_13621927 | NC_021163.1    | Ca_kabuli_chr04 | 13621927                | TT                              | CC                | 1945934775               |
| SNP_P3_39504_13621981 | NC_021163.1    | Ca_kabuli_chr04 | 13621981                | AA                              | GG                | 1945934777               |
| SNP_P3_39505_13623468 | NC_021163.1    | Ca_kabuli_chr04 | 13623468                | AA                              | TT                | 1945934779               |
| SNP_P3_39506_13623697 | NC_021163.1    | Ca_kabuli_chr04 | 13623697                | GG                              | AA                | 1945934781               |

| SNPs IDs              | Chromosome IDs | Chromosomes     | Physical positions (bp) | CDC Frontier (Reference genome) | (Pusa 256 & HPNB) | NCBI SNPdb Accession IDs |
|-----------------------|----------------|-----------------|-------------------------|---------------------------------|-------------------|--------------------------|
| SNP_P3_39507_13624393 | NC_021163.1    | Ca_kabuli_chr04 | 13624393                | CC                              | TT                | 1945934782               |
| SNP_P3_39508_13624643 | NC_021163.1    | Ca_kabuli_chr04 | 13624643                | GG                              | AA                | 1945934784               |
| SNP_P3_39509_13624655 | NC_021163.1    | Ca_kabuli_chr04 | 13624655                | TT                              | CC                | 1945934786               |
| SNP_P3_39510_13624705 | NC_021163.1    | Ca_kabuli_chr04 | 13624705                | CC                              | AA                | 1945934788               |
| SNP_P3_39511_13624730 | NC_021163.1    | Ca_kabuli_chr04 | 13624730                | GG                              | AA                | 1945934790               |
| SNP_P3_39512_13625107 | NC_021163.1    | Ca_kabuli_chr04 | 13625107                | CC                              | TT                | 1945934791               |
| SNP_P3_39513_13625945 | NC_021163.1    | Ca_kabuli_chr04 | 13625945                | AA                              | GG                | 1945934793               |
| SNP_P3_39514_13625978 | NC_021163.1    | Ca_kabuli_chr04 | 13625978                | GG                              | TT                | 1945934795               |
| SNP_P3_39515_13626002 | NC_021163.1    | Ca_kabuli_chr04 | 13626002                | AA                              | TT                | 1945934797               |
| SNP_P3_39516_13626102 | NC_021163.1    | Ca_kabuli_chr04 | 13626102                | TT                              | CC                | 1945934798               |
| SNP_P3_39518_13626310 | NC_021163.1    | Ca_kabuli_chr04 | 13626310                | CC                              | AA                | 1945934800               |
| SNP_P3_39519_13626319 | NC_021163.1    | Ca_kabuli_chr04 | 13626319                | TT                              | GG                | 1945934802               |
| SNP_P3_39520_13626358 | NC_021163.1    | Ca_kabuli_chr04 | 13626358                | CC                              | TT                | 1945934804               |
| SNP_P3_39521_13626994 | NC_021163.1    | Ca_kabuli_chr04 | 13626994                | CC                              | GG                | 1945934805               |
| SNP_P3_39522_13627196 | NC_021163.1    | Ca_kabuli_chr04 | 13627196                | AA                              | GG                | 1945934807               |
| SNP_P3_39523_13627203 | NC_021163.1    | Ca_kabuli_chr04 | 13627203                | CC                              | TT                | 1945934809               |
| SNP_P3_39524_13627281 | NC_021163.1    | Ca_kabuli_chr04 | 13627281                | TT                              | AA                | 1945934811               |
| SNP_P3_39526_13627511 | NC_021163.1    | Ca_kabuli_chr04 | 13627511                | CC                              | TT                | 1945934813               |
| SNP_P3_39527_13627512 | NC_021163.1    | Ca_kabuli_chr04 | 13627512                | TT                              | CC                | 1945934814               |
| SNP_P3_39528_13627543 | NC_021163.1    | Ca_kabuli_chr04 | 13627543                | CC                              | TT                | 1945934816               |
| SNP_P3_39529_13627623 | NC_021163.1    | Ca_kabuli_chr04 | 13627623                | AA                              | CC                | 1945934818               |
| SNP_P3_39530_13629120 | NC_021163.1    | Ca_kabuli_chr04 | 13629120                | AA                              | CC                | 1945934820               |
| SNP_P3_39531_13629148 | NC_021163.1    | Ca_kabuli_chr04 | 13629148                | CC                              | TT                | 1945934821               |
| SNP_P3_39533_13629544 | NC_021163.1    | Ca_kabuli_chr04 | 13629544                | TT                              | AA                | 1945934823               |
| SNP_P3_39534_13629565 | NC_021163.1    | Ca_kabuli_chr04 | 13629565                | TT                              | CC                | 1945934825               |
| SNP_P3_39535_13629582 | NC_021163.1    | Ca_kabuli_chr04 | 13629582                | CC                              | TT                | 1945934827               |
| SNP_P3_39536_13629607 | NC_021163.1    | Ca_kabuli_chr04 | 13629607                | TT                              | CC                | 1945934829               |
| SNP_P3_39537_13629608 | NC_021163.1    | Ca_kabuli_chr04 | 13629608                | AA                              | GG                | 1945934830               |
| SNP_P3_39538_13629613 | NC_021163.1    | Ca_kabuli_chr04 | 13629613                | AA                              | GG                | 1945934832               |
| SNP_P3_39539_13629619 | NC_021163.1    | Ca_kabuli_chr04 | 13629619                | GG                              | AA                | 1945934834               |
| SNP_P3_39540_13629624 | NC_021163.1    | Ca_kabuli_chr04 | 13629624                | GG                              | AA                | 1945934836               |
| SNP_P3_39541_13629628 | NC_021163.1    | Ca_kabuli_chr04 | 13629628                | AA                              | CC                | 1945934837               |
| SNP_P3_39542_13629634 | NC_021163.1    | Ca_kabuli_chr04 | 13629634                | CC                              | TT                | 1945934839               |
| SNP_P3_39543_13629635 | NC_021163.1    | Ca_kabuli_chr04 | 13629635                | TT                              | CC                | 1945934841               |
| SNP_P3_39545_13630674 | NC_021163.1    | Ca_kabuli_chr04 | 13630674                | CC                              | AA                | 1945934843               |
| SNP_P3_39546_13630867 | NC_021163.1    | Ca_kabuli_chr04 | 13630867                | CC                              | GG                | 1945934844               |
| SNP_P3_39547_13631031 | NC_021163.1    | Ca_kabuli_chr04 | 13631031                | CC                              | TT                | 1945934846               |
| SNP_P3_39548_13631050 | NC_021163.1    | Ca_kabuli_chr04 | 13631050                | AA                              | CC                | 1945934848               |
| SNP_P3_39551_13631332 | NC_021163.1    | Ca_kabuli_chr04 | 13631332                | CC                              | TT                | 1945934850               |
| SNP_P3_39552_13632546 | NC_021163.1    | Ca_kabuli_chr04 | 13632546                | TT                              | CC                | 1945934852               |
| SNP_P3_39553_13632557 | NC_021163.1    | Ca_kabuli_chr04 | 13632557                | AA                              | GG                | 1945934853               |
| SNP_P3_39554_13632858 | NC_021163.1    | Ca_kabuli_chr04 | 13632858                | GG                              | AA                | 1945934855               |

| SNPs IDs              | Chromosome IDs | Chromosomes     | Physical positions (bp) | CDC Frontier (Reference genome) | (Pusa 256 & HPNB) | NCBI SNPdb Accession IDs |
|-----------------------|----------------|-----------------|-------------------------|---------------------------------|-------------------|--------------------------|
| SNP_P3_39555_13632902 | NC_021163.1    | Ca_kabuli_chr04 | 13632902                | CC                              | TT                | 1945934857               |
| SNP_P3_39556_13632911 | NC_021163.1    | Ca_kabuli_chr04 | 13632911                | CC                              | TT                | 1945934859               |
| SNP_P3_39557_13632956 | NC_021163.1    | Ca_kabuli_chr04 | 13632956                | GG                              | AA                | 1945934860               |
| SNP_P3_39558_13632975 | NC_021163.1    | Ca_kabuli_chr04 | 13632975                | CC                              | TT                | 1945934862               |
| SNP_P3_39559_13633795 | NC_021163.1    | Ca_kabuli_chr04 | 13633795                | TT                              | CC                | 1945934864               |
| SNP_P3_39560_13633804 | NC_021163.1    | Ca_kabuli_chr04 | 13633804                | GG                              | AA                | 1945934866               |
| SNP_P3_39561_13635753 | NC_021163.1    | Ca_kabuli_chr04 | 13635753                | CC                              | TT                | 1945934867               |
| SNP_P3_39563_13636598 | NC_021163.1    | Ca_kabuli_chr04 | 13636598                | TT                              | AA                | 1945934869               |
| SNP_P3_39564_13636931 | NC_021163.1    | Ca_kabuli_chr04 | 13636931                | GG                              | TT                | 1945934871               |
| SNP_P3_39566_13637032 | NC_021163.1    | Ca_kabuli_chr04 | 13637032                | GG                              | TT                | 1945934873               |
| SNP_P3_39567_13638562 | NC_021163.1    | Ca_kabuli_chr04 | 13638562                | AA                              | TT                | 1945934875               |
| SNP_P3_39568_13638744 | NC_021163.1    | Ca_kabuli_chr04 | 13638744                | TT                              | CC                | 1945934876               |
| SNP_P3_39569_13638757 | NC_021163.1    | Ca_kabuli_chr04 | 13638757                | AA                              | GG                | 1945934878               |
| SNP_P3_39570_13638859 | NC_021163.1    | Ca_kabuli_chr04 | 13638859                | TT                              | CC                | 1945934880               |
| SNP_P3_39571_13638860 | NC_021163.1    | Ca_kabuli_chr04 | 13638860                | GG                              | AA                | 1945934882               |
| SNP_P3_39573_13638882 | NC_021163.1    | Ca_kabuli_chr04 | 13638882                | AA                              | GG                | 1945934883               |
| SNP_P3_39574_13639481 | NC_021163.1    | Ca_kabuli_chr04 | 13639481                | AA                              | GG                | 1945934885               |
| SNP_P3_39575_13639484 | NC_021163.1    | Ca_kabuli_chr04 | 13639484                | AA                              | GG                | 1945934887               |
| SNP_P3_39576_13640213 | NC_021163.1    | Ca_kabuli_chr04 | 13640213                | TT                              | CC                | 1945934889               |
| SNP_P3_39577_13641407 | NC_021163.1    | Ca_kabuli_chr04 | 13641407                | AA                              | CC                | 1945934891               |
| SNP_P3_39580_13643806 | NC_021163.1    | Ca_kabuli_chr04 | 13643806                | AA                              | GG                | 1945934892               |
| SNP_P3_39582_13644625 | NC_021163.1    | Ca_kabuli_chr04 | 13644625                | GG                              | AA                | 1945934894               |
| SNP_P3_39583_13644648 | NC_021163.1    | Ca_kabuli_chr04 | 13644648                | AA                              | GG                | 1945934896               |
| SNP_P3_39584_13644698 | NC_021163.1    | Ca_kabuli_chr04 | 13644698                | GG                              | CC                | 1945934898               |
| SNP_P3_39585_13646220 | NC_021163.1    | Ca_kabuli_chr04 | 13646220                | TT                              | GG                | 1945934899               |
| SNP_P3_39586_13647029 | NC_021163.1    | Ca_kabuli_chr04 | 13647029                | CC                              | AA                | 1945934901               |
| SNP_P3_39587_13649503 | NC_021163.1    | Ca_kabuli_chr04 | 13649503                | TT                              | GG                | 1945934903               |
| SNP_P3_39588_13650062 | NC_021163.1    | Ca_kabuli_chr04 | 13650062                | GG                              | TT                | 1945934905               |
| SNP_P3_39589_13650065 | NC_021163.1    | Ca_kabuli_chr04 | 13650065                | TT                              | AA                | 1945934906               |
| SNP_P3_39590_13653780 | NC_021163.1    | Ca_kabuli_chr04 | 13653780                | AA                              | GG                | 1945934908               |
| SNP_P3_39591_13654556 | NC_021163.1    | Ca_kabuli_chr04 | 13654556                | AA                              | GG                | 1945934910               |
| SNP_P3_39592_13654564 | NC_021163.1    | Ca_kabuli_chr04 | 13654564                | TT                              | GG                | 1945934912               |
| SNP_P3_39593_13654567 | NC_021163.1    | Ca_kabuli_chr04 | 13654567                | AA                              | TT                | 1945934914               |
| SNP_P3_39594_13654593 | NC_021163.1    | Ca_kabuli_chr04 | 13654593                | TT                              | AA                | 1945934915               |
| SNP_P3_39595_13654599 | NC_021163.1    | Ca_kabuli_chr04 | 13654599                | AA                              | TT                | 1945934917               |
| SNP_P3_39596_13654880 | NC_021163.1    | Ca_kabuli_chr04 | 13654880                | GG                              | TT                | 1945934919               |
| SNP_P3_39598_13655305 | NC_021163.1    | Ca_kabuli_chr04 | 13655305                | TT                              | GG                | 1945934921               |
| SNP_P3_39599_13655316 | NC_021163.1    | Ca_kabuli_chr04 | 13655316                | AA                              | GG                | 1945934922               |
| SNP_P3_39600_13656182 | NC_021163.1    | Ca_kabuli_chr04 | 13656182                | TT                              | CC                | 1945934924               |
| SNP_P3_39601_13656186 | NC_021163.1    | Ca_kabuli_chr04 | 13656186                | CC                              | GG                | 1945934926               |
| SNP_P3_39602_13656249 | NC_021163.1    | Ca_kabuli_chr04 | 13656249                | GG                              | AA                | 1945934928               |
| SNP_P3_39603_13656285 | NC_021163.1    | Ca_kabuli_chr04 | 13656285                | AA                              | GG                | 1945934930               |

| SNPs IDs              | Chromosome IDs | Chromosomes     | Physical positions (bp) | CDC Frontier (Reference genome) | (Pusa 256 & HPNB) | NCBI SNPdb Accession IDs |
|-----------------------|----------------|-----------------|-------------------------|---------------------------------|-------------------|--------------------------|
| SNP_P3_39604_13656312 | NC_021163.1    | Ca_kabuli_chr04 | 13656312                | AA                              | GG                | 1945934931               |
| SNP_P3_39607_13658002 | NC_021163.1    | Ca_kabuli_chr04 | 13658002                | GG                              | CC                | 1945934933               |
| SNP_P3_39608_13658156 | NC_021163.1    | Ca_kabuli_chr04 | 13658156                | AA                              | TT                | 1945934935               |
| SNP_P3_39609_13658288 | NC_021163.1    | Ca_kabuli_chr04 | 13658288                | TT                              | AA                | 1945934937               |
| SNP_P3_39610_13658599 | NC_021163.1    | Ca_kabuli_chr04 | 13658599                | GG                              | AA                | 1945934938               |
| SNP_P3_39611_13660774 | NC_021163.1    | Ca_kabuli_chr04 | 13660774                | CC                              | GG                | 1945934940               |
| SNP_P3_39613_13663858 | NC_021163.1    | Ca_kabuli_chr04 | 13663858                | TT                              | CC                | 1945934942               |
| SNP_P3_39614_13663947 | NC_021163.1    | Ca_kabuli_chr04 | 13663947                | TT                              | AA                | 1945934944               |
| SNP_P3_39615_13663953 | NC_021163.1    | Ca_kabuli_chr04 | 13663953                | AA                              | TT                | 1945934945               |
| SNP_P3_39616_13663999 | NC_021163.1    | Ca_kabuli_chr04 | 13663999                | AA                              | CC                | 1945934947               |
| SNP_P3_39617_13664000 | NC_021163.1    | Ca_kabuli_chr04 | 13664000                | GG                              | AA                | 1945934949               |
| SNP_P3_39618_13664031 | NC_021163.1    | Ca_kabuli_chr04 | 13664031                | AA                              | GG                | 1945934951               |
| SNP_P3_39619_13664069 | NC_021163.1    | Ca_kabuli_chr04 | 13664069                | GG                              | AA                | 1945934953               |
| SNP_P3_39620_13664244 | NC_021163.1    | Ca_kabuli_chr04 | 13664244                | GG                              | TT                | 1945934954               |
| SNP_P3_39621_13665097 | NC_021163.1    | Ca_kabuli_chr04 | 13665097                | CC                              | GG                | 1945934956               |
| SNP_P3_39622_13665308 | NC_021163.1    | Ca_kabuli_chr04 | 13665308                | TT                              | AA                | 1945934958               |
| SNP_P3_39623_13665333 | NC_021163.1    | Ca_kabuli_chr04 | 13665333                | TT                              | CC                | 1945934960               |
| SNP_P3_39624_13665492 | NC_021163.1    | Ca_kabuli_chr04 | 13665492                | AA                              | CC                | 1945934961               |
| SNP_P3_39625_13665958 | NC_021163.1    | Ca_kabuli_chr04 | 13665958                | GG                              | AA                | 1945934963               |
| SNP_P3_39626_13665959 | NC_021163.1    | Ca_kabuli_chr04 | 13665959                | TT                              | CC                | 1945934965               |
| SNP_P3_39628_13666213 | NC_021163.1    | Ca_kabuli_chr04 | 13666213                | AA                              | TT                | 1945934967               |
| SNP_P3_39629_13666358 | NC_021163.1    | Ca_kabuli_chr04 | 13666358                | TT                              | CC                | 1945934969               |
| SNP_P3_39630_13667579 | NC_021163.1    | Ca_kabuli_chr04 | 13667579                | AA                              | TT                | 1945934970               |
| SNP_P3_39631_13667632 | NC_021163.1    | Ca_kabuli_chr04 | 13667632                | AA                              | TT                | 1945934972               |
| SNP_P3_39633_13670817 | NC_021163.1    | Ca_kabuli_chr04 | 13670817                | AA                              | GG                | 1945934974               |
| SNP_P3_39634_13670961 | NC_021163.1    | Ca_kabuli_chr04 | 13670961                | CC                              | TT                | 1945934976               |
| SNP_P3_39635_13671160 | NC_021163.1    | Ca_kabuli_chr04 | 13671160                | AA                              | GG                | 1945934977               |
| SNP_P3_39637_13671413 | NC_021163.1    | Ca_kabuli_chr04 | 13671413                | GG                              | AA                | 1945934979               |
| SNP_P3_39638_13671700 | NC_021163.1    | Ca_kabuli_chr04 | 13671700                | AA                              | CC                | 1945934981               |
| SNP_P3_39639_13671730 | NC_021163.1    | Ca_kabuli_chr04 | 13671730                | CC                              | TT                | 1945934983               |
| SNP_P3_39640_13671745 | NC_021163.1    | Ca_kabuli_chr04 | 13671745                | GG                              | AA                | 1945934984               |
| SNP_P3_39641_13671763 | NC_021163.1    | Ca_kabuli_chr04 | 13671763                | GG                              | CC                | 1945934986               |
| SNP_P3_39642_13672193 | NC_021163.1    | Ca_kabuli_chr04 | 13672193                | GG                              | AA                | 1945934988               |
| SNP_P3_39643_13672312 | NC_021163.1    | Ca_kabuli_chr04 | 13672312                | CC                              | TT                | 1945934990               |
| SNP_P3_39644_13673437 | NC_021163.1    | Ca_kabuli_chr04 | 13673437                | AA                              | CC                | 1945934992               |
| SNP_P3_39645_13674097 | NC_021163.1    | Ca_kabuli_chr04 | 13674097                | TT                              | GG                | 1945934993               |
| SNP_P3_39646_13674114 | NC_021163.1    | Ca_kabuli_chr04 | 13674114                | TT                              | CC                | 1945934995               |
| SNP_P3_39647_13674149 | NC_021163.1    | Ca_kabuli_chr04 | 13674149                | TT                              | AA                | 1945934997               |
| SNP_P3_39649_13674203 | NC_021163.1    | Ca_kabuli_chr04 | 13674203                | GG                              | AA                | 1945934999               |
| SNP_P3_39650_13674932 | NC_021163.1    | Ca_kabuli_chr04 | 13674932                | GG                              | AA                | 1945935000               |
| SNP_P3_39652_13675057 | NC_021163.1    | Ca_kabuli_chr04 | 13675057                | AA                              | GG                | 1945935002               |
| SNP_P3_39653_13675072 | NC_021163.1    | Ca_kabuli_chr04 | 13675072                | GG                              | AA                | 1945935004               |

| SNPs IDs              | Chromosome IDs | Chromosomes     | Physical positions (bp) | CDC Frontier (Reference genome) | (Pusa 256 & HPNB) | NCBI SNPdb Accession IDs |
|-----------------------|----------------|-----------------|-------------------------|---------------------------------|-------------------|--------------------------|
| SNP_P3_39654_13675263 | NC_021163.1    | Ca_kabuli_chr04 | 13675263                | TT                              | CC                | 1945935006               |
| SNP_P3_39655_13675275 | NC_021163.1    | Ca_kabuli_chr04 | 13675275                | TT                              | GG                | 1945935007               |
| SNP_P3_39656_13675277 | NC_021163.1    | Ca_kabuli_chr04 | 13675277                | GG                              | AA                | 1945935009               |
| SNP_P3_39657_13675287 | NC_021163.1    | Ca_kabuli_chr04 | 13675287                | AA                              | GG                | 1945935011               |
| SNP_P3_39658_13675501 | NC_021163.1    | Ca_kabuli_chr04 | 13675501                | TT                              | CC                | 1945935013               |
| SNP_P3_39659_13675506 | NC_021163.1    | Ca_kabuli_chr04 | 13675506                | CC                              | TT                | 1945935015               |
| SNP_P3_39660_13675590 | NC_021163.1    | Ca_kabuli_chr04 | 13675590                | CC                              | TT                | 1945935016               |
| SNP_P3_39661_13675591 | NC_021163.1    | Ca_kabuli_chr04 | 13675591                | GG                              | AA                | 1945935018               |
| SNP_P3_39662_13676174 | NC_021163.1    | Ca_kabuli_chr04 | 13676174                | AA                              | GG                | 1945935020               |
| SNP_P3_39664_13676753 | NC_021163.1    | Ca_kabuli_chr04 | 13676753                | TT                              | AA                | 1945935022               |
| SNP_P3_39665_13677405 | NC_021163.1    | Ca_kabuli_chr04 | 13677405                | CC                              | TT                | 1945935023               |
| SNP_P3_39666_13677451 | NC_021163.1    | Ca_kabuli_chr04 | 13677451                | TT                              | CC                | 1945935025               |
| SNP_P3_39667_13677718 | NC_021163.1    | Ca_kabuli_chr04 | 13677718                | TT                              | GG                | 1945935027               |
| SNP_P3_39668_13677885 | NC_021163.1    | Ca_kabuli_chr04 | 13677885                | AA                              | GG                | 1945935029               |
| SNP_P3_39669_13677920 | NC_021163.1    | Ca_kabuli_chr04 | 13677920                | GG                              | AA                | 1945935031               |
| SNP_P3_39670_13678056 | NC_021163.1    | Ca_kabuli_chr04 | 13678056                | TT                              | AA                | 1945935032               |
| SNP_P3_39673_13682389 | NC_021163.1    | Ca_kabuli_chr04 | 13682389                | TT                              | AA                | 1945935034               |
| SNP_P3_39674_13682393 | NC_021163.1    | Ca_kabuli_chr04 | 13682393                | AA                              | GG                | 1945935036               |
| SNP_P3_39675_13683132 | NC_021163.1    | Ca_kabuli_chr04 | 13683132                | GG                              | AA                | 1945935038               |
| SNP_P3_39676_13683145 | NC_021163.1    | Ca_kabuli_chr04 | 13683145                | AA                              | CC                | 1945935039               |
| SNP_P3_39677_13683157 | NC_021163.1    | Ca_kabuli_chr04 | 13683157                | CC                              | TT                | 1945935041               |
| SNP_P3_39678_13685569 | NC_021163.1    | Ca_kabuli_chr04 | 13685569                | CC                              | AA                | 1945935043               |
| SNP_P3_39679_13685618 | NC_021163.1    | Ca_kabuli_chr04 | 13685618                | GG                              | AA                | 1945935045               |
| SNP_P3_39681_13687728 | NC_021163.1    | Ca_kabuli_chr04 | 13687728                | CC                              | TT                | 1945935046               |
| SNP_P3_39682_13691182 | NC_021163.1    | Ca_kabuli_chr04 | 13691182                | TT                              | GG                | 1945935048               |
| SNP_P3_39683_13691491 | NC_021163.1    | Ca_kabuli_chr04 | 13691491                | AA                              | GG                | 1945935050               |
| SNP_P3_39684_13691820 | NC_021163.1    | Ca_kabuli_chr04 | 13691820                | GG                              | TT                | 1945935052               |
| SNP_P3_39685_13692111 | NC_021163.1    | Ca_kabuli_chr04 | 13692111                | TT                              | CC                | 1945935054               |
| SNP_P3_39688_13696228 | NC_021163.1    | Ca_kabuli_chr04 | 13696228                | AA                              | TT                | 1945935055               |
| SNP_P3_39689_13696909 | NC_021163.1    | Ca_kabuli_chr04 | 13696909                | CC                              | TT                | 1945935057               |
| SNP_P3_39690_13698231 | NC_021163.1    | Ca_kabuli_chr04 | 13698231                | CC                              | TT                | 1945935059               |
| SNP_P3_39691_13698500 | NC_021163.1    | Ca_kabuli_chr04 | 13698500                | TT                              | CC                | 1945935061               |
| SNP_P3_39692_13698702 | NC_021163.1    | Ca_kabuli_chr04 | 13698702                | GG                              | AA                | 1945935062               |
| SNP_P3_39693_13699195 | NC_021163.1    | Ca_kabuli_chr04 | 13699195                | TT                              | CC                | 1945935064               |
| SNP_P3_39694_13699400 | NC_021163.1    | Ca_kabuli_chr04 | 13699400                | GG                              | TT                | 1945935066               |
| SNP_P3_39695_13699663 | NC_021163.1    | Ca_kabuli_chr04 | 13699663                | GG                              | AA                | 1945935068               |
| SNP_P3_39696_13700136 | NC_021163.1    | Ca_kabuli_chr04 | 13700136                | AA                              | TT                | 1945935070               |
| SNP_P3_39700_13701413 | NC_021163.1    | Ca_kabuli_chr04 | 13701413                | GG                              | AA                | 1945935071               |
| SNP_P3_39701_13701476 | NC_021163.1    | Ca_kabuli_chr04 | 13701476                | GG                              | AA                | 1945935073               |
| SNP_P3_39702_13701523 | NC_021163.1    | Ca_kabuli_chr04 | 13701523                | AA                              | GG                | 1945935075               |
| SNP_P3_39703_13701580 | NC_021163.1    | Ca_kabuli_chr04 | 13701580                | TT                              | CC                | 1945935077               |
| SNP_P3_39704_13703269 | NC_021163.1    | Ca_kabuli_chr04 | 13703269                | GG                              | AA                | 1945935078               |

| SNPs IDs              | Chromosome IDs | Chromosomes     | Physical positions (bp) | CDC Frontier (Reference genome) | (Pusa 256 & HPNB) | NCBI SNPdb Accession IDs |
|-----------------------|----------------|-----------------|-------------------------|---------------------------------|-------------------|--------------------------|
| SNP_P3_39705_13703295 | NC_021163.1    | Ca_kabuli_chr04 | 13703295                | TT                              | AA                | 1945935080               |
| SNP_P3_39706_13704801 | NC_021163.1    | Ca_kabuli_chr04 | 13704801                | TT                              | CC                | 1945935082               |
| SNP_P3_39707_13704841 | NC_021163.1    | Ca_kabuli_chr04 | 13704841                | CC                              | TT                | 1945935084               |
| SNP_P3_39708_13705360 | NC_021163.1    | Ca_kabuli_chr04 | 13705360                | GG                              | TT                | 1945935085               |
| SNP_P3_39709_13705381 | NC_021163.1    | Ca_kabuli_chr04 | 13705381                | TT                              | CC                | 1945935087               |
| SNP_P3_39710_13705600 | NC_021163.1    | Ca_kabuli_chr04 | 13705600                | TT                              | AA                | 1945935089               |
| SNP_P3_39711_13706323 | NC_021163.1    | Ca_kabuli_chr04 | 13706323                | TT                              | CC                | 1945935091               |
| SNP_P3_39712_13706324 | NC_021163.1    | Ca_kabuli_chr04 | 13706324                | AA                              | CC                | 1945935093               |
| SNP_P3_39714_13706398 | NC_021163.1    | Ca_kabuli_chr04 | 13706398                | CC                              | TT                | 1945935094               |
| SNP_P3_39715_13706907 | NC_021163.1    | Ca_kabuli_chr04 | 13706907                | AA                              | CC                | 1945935096               |
| SNP_P3_39716_13706918 | NC_021163.1    | Ca_kabuli_chr04 | 13706918                | AA                              | TT                | 1945935098               |
| SNP_P3_39717_13707204 | NC_021163.1    | Ca_kabuli_chr04 | 13707204                | TT                              | GG                | 1945935100               |
| SNP_P3_39718_13708309 | NC_021163.1    | Ca_kabuli_chr04 | 13708309                | GG                              | AA                | 1945935101               |
| SNP_P3_39720_13709025 | NC_021163.1    | Ca_kabuli_chr04 | 13709025                | AA                              | GG                | 1945935103               |
| SNP_P3_39721_13710377 | NC_021163.1    | Ca_kabuli_chr04 | 13710377                | AA                              | GG                | 1945935105               |
| SNP_P3_39725_13717610 | NC_021163.1    | Ca_kabuli_chr04 | 13717610                | CC                              | TT                | 1945935107               |
| SNP_P3_39726_13717652 | NC_021163.1    | Ca_kabuli_chr04 | 13717652                | CC                              | TT                | 1945935109               |
| SNP_P3_39727_13718817 | NC_021163.1    | Ca_kabuli_chr04 | 13718817                | GG                              | AA                | 1945935110               |
| SNP_P3_39729_13722342 | NC_021163.1    | Ca_kabuli_chr04 | 13722342                | GG                              | CC                | 1945935112               |
| SNP_P3_39730_13722838 | NC_021163.1    | Ca_kabuli_chr04 | 13722838                | AA                              | GG                | 1945935114               |
| SNP_P3_39731_13723629 | NC_021163.1    | Ca_kabuli_chr04 | 13723629                | GG                              | TT                | 1945935116               |
| SNP_P3_39732_13723658 | NC_021163.1    | Ca_kabuli_chr04 | 13723658                | TT                              | CC                | 1945935117               |
| SNP_P3_39733_13724666 | NC_021163.1    | Ca_kabuli_chr04 | 13724666                | GG                              | CC                | 1945935119               |
| SNP_P3_39734_13726718 | NC_021163.1    | Ca_kabuli_chr04 | 13726718                | GG                              | TT                | 1945935121               |
| SNP_P3_39735_13727786 | NC_021163.1    | Ca_kabuli_chr04 | 13727786                | TT                              | CC                | 1945935123               |
| SNP_P3_39736_13730400 | NC_021163.1    | Ca_kabuli_chr04 | 13730400                | AA                              | GG                | 1945935124               |
| SNP_P3_39737_13732002 | NC_021163.1    | Ca_kabuli_chr04 | 13732002                | GG                              | CC                | 1945935126               |
| SNP_P3_39738_13732621 | NC_021163.1    | Ca_kabuli_chr04 | 13732621                | GG                              | CC                | 1945935128               |
| SNP_P3_39739_13734262 | NC_021163.1    | Ca_kabuli_chr04 | 13734262                | AA                              | GG                | 1945935130               |
| SNP_P3_39740_13734274 | NC_021163.1    | Ca_kabuli_chr04 | 13734274                | GG                              | AA                | 1945935132               |
| SNP_P3_39741_13734297 | NC_021163.1    | Ca_kabuli_chr04 | 13734297                | GG                              | AA                | 1945935133               |
| SNP_P3_39742_13735321 | NC_021163.1    | Ca_kabuli_chr04 | 13735321                | TT                              | CC                | 1945935135               |
| SNP_P3_39743_13735693 | NC_021163.1    | Ca_kabuli_chr04 | 13735693                | TT                              | CC                | 1945935137               |
| SNP_P3_39744_13736553 | NC_021163.1    | Ca_kabuli_chr04 | 13736553                | GG                              | AA                | 1945935139               |
| SNP_P3_39745_13736558 | NC_021163.1    | Ca_kabuli_chr04 | 13736558                | CC                              | AA                | 1945935140               |
| SNP_P3_39746_13736691 | NC_021163.1    | Ca_kabuli_chr04 | 13736691                | TT                              | CC                | 1945935142               |
| SNP_P3_39747_13736788 | NC_021163.1    | Ca_kabuli_chr04 | 13736788                | CC                              | AA                | 1945935144               |
| SNP_P3_39748_13736796 | NC_021163.1    | Ca_kabuli_chr04 | 13736796                | AA                              | CC                | 1945935146               |
| SNP_P3_39749_13736935 | NC_021163.1    | Ca_kabuli_chr04 | 13736935                | TT                              | CC                | 1945935148               |
| SNP_P3_39750_13737946 | NC_021163.1    | Ca_kabuli_chr04 | 13737946                | GG                              | AA                | 1945935149               |
| SNP_P3_39751_13738278 | NC_021163.1    | Ca_kabuli_chr04 | 13738278                | GG                              | AA                | 1945935151               |
| SNP_P3_39752_13738307 | NC_021163.1    | Ca_kabuli_chr04 | 13738307                | GG                              | AA                | 1945935153               |

| SNPs IDs              | Chromosome IDs | Chromosomes     | Physical positions (bp) | CDC Frontier (Reference genome) | (Pusa 256 & HPNB) | NCBI SNPdb Accession IDs |
|-----------------------|----------------|-----------------|-------------------------|---------------------------------|-------------------|--------------------------|
| SNP_P3_39753_13739835 | NC_021163.1    | Ca_kabuli_chr04 | 13739835                | GG                              | AA                | 1945935155               |
| SNP_P3_39754_13739854 | NC_021163.1    | Ca_kabuli_chr04 | 13739854                | GG                              | CC                | 1945935156               |
| SNP_P3_39755_13739916 | NC_021163.1    | Ca_kabuli_chr04 | 13739916                | AA                              | TT                | 1945935158               |
| SNP_P3_39756_13739918 | NC_021163.1    | Ca_kabuli_chr04 | 13739918                | TT                              | CC                | 1945935160               |
| SNP_P3_39757_13740709 | NC_021163.1    | Ca_kabuli_chr04 | 13740709                | CC                              | AA                | 1945935162               |
| SNP_P3_39758_13740933 | NC_021163.1    | Ca_kabuli_chr04 | 13740933                | CC                              | TT                | 1945935163               |
| SNP_P3_39760_13744768 | NC_021163.1    | Ca_kabuli_chr04 | 13744768                | AA                              | GG                | 1945935165               |
| SNP_P3_39761_13748062 | NC_021163.1    | Ca_kabuli_chr04 | 13748062                | AA                              | CC                | 1945935167               |
| SNP_P3_39762_13748583 | NC_021163.1    | Ca_kabuli_chr04 | 13748583                | AA                              | GG                | 1945935169               |
| SNP_P3_39763_13749000 | NC_021163.1    | Ca_kabuli_chr04 | 13749000                | GG                              | AA                | 1945935171               |
| SNP_P3_39764_13749353 | NC_021163.1    | Ca_kabuli_chr04 | 13749353                | AA                              | GG                | 1945935172               |
| SNP_P3_39766_13750897 | NC_021163.1    | Ca_kabuli_chr04 | 13750897                | CC                              | TT                | 1945935174               |
| SNP_P3_39767_13750912 | NC_021163.1    | Ca_kabuli_chr04 | 13750912                | GG                              | AA                | 1945935176               |
| SNP_P3_39768_13750924 | NC_021163.1    | Ca_kabuli_chr04 | 13750924                | CC                              | TT                | 1945935178               |
| SNP_P3_39770_13751227 | NC_021163.1    | Ca_kabuli_chr04 | 13751227                | AA                              | GG                | 1945935179               |
| SNP_P3_39772_13753564 | NC_021163.1    | Ca_kabuli_chr04 | 13753564                | CC                              | TT                | 1945935181               |
| SNP_P3_39773_13753621 | NC_021163.1    | Ca_kabuli_chr04 | 13753621                | GG                              | AA                | 1945935183               |
| SNP_P3_39774_13753801 | NC_021163.1    | Ca_kabuli_chr04 | 13753801                | TT                              | CC                | 1945935185               |
| SNP_P3_39775_13756679 | NC_021163.1    | Ca_kabuli_chr04 | 13756679                | CC                              | TT                | 1945935186               |
| SNP_P3_39776_13758029 | NC_021163.1    | Ca_kabuli_chr04 | 13758029                | AA                              | TT                | 1945935188               |
| SNP_P3_39777_13758909 | NC_021163.1    | Ca_kabuli_chr04 | 13758909                | AA                              | GG                | 1945935190               |
| SNP_P3_39779_13760326 | NC_021163.1    | Ca_kabuli_chr04 | 13760326                | CC                              | TT                | 1945935192               |
| SNP_P3_39780_13760350 | NC_021163.1    | Ca_kabuli_chr04 | 13760350                | TT                              | GG                | 1945935194               |
| SNP_P3_39781_13760698 | NC_021163.1    | Ca_kabuli_chr04 | 13760698                | AA                              | GG                | 1945935195               |
| SNP_P3_39782_13761831 | NC_021163.1    | Ca_kabuli_chr04 | 13761831                | AA                              | TT                | 1945935197               |
| SNP_P3_39783_13761934 | NC_021163.1    | Ca_kabuli_chr04 | 13761934                | AA                              | CC                | 1945935199               |
| SNP_P3_39784_13762000 | NC_021163.1    | Ca_kabuli_chr04 | 13762000                | CC                              | GG                | 1945935201               |
| SNP_P3_39785_13762436 | NC_021163.1    | Ca_kabuli_chr04 | 13762436                | TT                              | AA                | 1945935202               |
| SNP_P3_39786_13762499 | NC_021163.1    | Ca_kabuli_chr04 | 13762499                | CC                              | AA                | 1945935204               |
| SNP_P3_39787_13763974 | NC_021163.1    | Ca_kabuli_chr04 | 13763974                | GG                              | CC                | 1945935206               |
| SNP_P3_39788_13764288 | NC_021163.1    | Ca_kabuli_chr04 | 13764288                | CC                              | TT                | 1945935208               |
| SNP_P3_39789_13765373 | NC_021163.1    | Ca_kabuli_chr04 | 13765373                | AA                              | GG                | 1945935209               |
| SNP_P3_39790_13766508 | NC_021163.1    | Ca_kabuli_chr04 | 13766508                | CC                              | GG                | 1945935211               |
| SNP_P3_39791_13768790 | NC_021163.1    | Ca_kabuli_chr04 | 13768790                | AA                              | CC                | 1945935213               |
| SNP_P3_39792_13769005 | NC_021163.1    | Ca_kabuli_chr04 | 13769005                | TT                              | CC                | 1945935215               |
| SNP_P3_39793_13769052 | NC_021163.1    | Ca_kabuli_chr04 | 13769052                | TT                              | GG                | 1945935217               |
| SNP_P3_39794_13770000 | NC_021163.1    | Ca_kabuli_chr04 | 13770000                | GG                              | CC                | 1945935218               |
| SNP_P3_39795_13770030 | NC_021163.1    | Ca_kabuli_chr04 | 13770030                | AA                              | CC                | 1945935220               |
| SNP_P3_39796_13770039 | NC_021163.1    | Ca_kabuli_chr04 | 13770039                | CC                              | TT                | 1945935222               |
| SNP_P3_39797_13770336 | NC_021163.1    | Ca_kabuli_chr04 | 13770336                | CC                              | TT                | 1945935224               |
| SNP_P3_39798_13770337 | NC_021163.1    | Ca_kabuli_chr04 | 13770337                | GG                              | AA                | 1945935225               |
| SNP_P3_39799_13770561 | NC_021163.1    | Ca_kabuli_chr04 | 13770561                | CC                              | TT                | 1945935227               |

| SNPs IDs              | Chromosome IDs | Chromosomes     | Physical positions (bp) | CDC Frontier (Reference genome) | (Pusa 256 & HPNB) | NCBI SNPdb Accession IDs |
|-----------------------|----------------|-----------------|-------------------------|---------------------------------|-------------------|--------------------------|
| SNP_P3_39801_13770906 | NC_021163.1    | Ca_kabuli_chr04 | 13770906                | AA                              | TT                | 1945935229               |
| SNP_P3_39802_13770910 | NC_021163.1    | Ca_kabuli_chr04 | 13770910                | AA                              | GG                | 1945935231               |
| SNP_P3_39803_13770928 | NC_021163.1    | Ca_kabuli_chr04 | 13770928                | TT                              | AA                | 1945935233               |
| SNP_P3_39804_13770951 | NC_021163.1    | Ca_kabuli_chr04 | 13770951                | AA                              | GG                | 1945935234               |
| SNP_P3_39806_13770976 | NC_021163.1    | Ca_kabuli_chr04 | 13770976                | GG                              | AA                | 1945935236               |
| SNP_P3_39807_13771003 | NC_021163.1    | Ca_kabuli_chr04 | 13771003                | TT                              | GG                | 1945935238               |
| SNP_P3_39809_13771148 | NC_021163.1    | Ca_kabuli_chr04 | 13771148                | CC                              | TT                | 1945935240               |
| SNP_P3_39810_13772828 | NC_021163.1    | Ca_kabuli_chr04 | 13772828                | AA                              | TT                | 1945935241               |
| SNP_P3_39811_13772829 | NC_021163.1    | Ca_kabuli_chr04 | 13772829                | GG                              | AA                | 1945935243               |
| SNP_P3_39812_13772836 | NC_021163.1    | Ca_kabuli_chr04 | 13772836                | TT                              | CC                | 1945935245               |
| SNP_P3_39813_13773214 | NC_021163.1    | Ca_kabuli_chr04 | 13773214                | CC                              | GG                | 1945935247               |
| SNP_P3_39814_13774066 | NC_021163.1    | Ca_kabuli_chr04 | 13774066                | TT                              | CC                | 1945935248               |
| SNP_P3_39815_13774071 | NC_021163.1    | Ca_kabuli_chr04 | 13774071                | AA                              | GG                | 1945935250               |
| SNP_P3_39816_13774086 | NC_021163.1    | Ca_kabuli_chr04 | 13774086                | GG                              | AA                | 1945935252               |
| SNP_P3_39817_13774090 | NC_021163.1    | Ca_kabuli_chr04 | 13774090                | CC                              | TT                | 1945935254               |
| SNP_P3_39818_13774331 | NC_021163.1    | Ca_kabuli_chr04 | 13774331                | CC                              | TT                | 1945935256               |
| SNP_P3_39819_13774509 | NC_021163.1    | Ca_kabuli_chr04 | 13774509                | TT                              | CC                | 1945935257               |
| SNP_P3_39821_13776039 | NC_021163.1    | Ca_kabuli_chr04 | 13776039                | TT                              | AA                | 1945935259               |
| SNP_P3_39823_13776474 | NC_021163.1    | Ca_kabuli_chr04 | 13776474                | GG                              | AA                | 1945935261               |
| SNP_P3_39824_13776541 | NC_021163.1    | Ca_kabuli_chr04 | 13776541                | AA                              | CC                | 1945935263               |
| SNP_P3_39826_13777678 | NC_021163.1    | Ca_kabuli_chr04 | 13777678                | GG                              | CC                | 1945935264               |
| SNP_P3_39828_13777828 | NC_021163.1    | Ca_kabuli_chr04 | 13777828                | TT                              | AA                | 1945935266               |
| SNP_P3_39829_13779392 | NC_021163.1    | Ca_kabuli_chr04 | 13779392                | AA                              | TT                | 1945935268               |
| SNP_P3_39830_13779614 | NC_021163.1    | Ca_kabuli_chr04 | 13779614                | CC                              | TT                | 1945935270               |
| SNP_P3_39832_13780146 | NC_021163.1    | Ca_kabuli_chr04 | 13780146                | CC                              | GG                | 1945935271               |
| SNP_P3_39833_13784416 | NC_021163.1    | Ca_kabuli_chr04 | 13784416                | CC                              | GG                | 1945935273               |
| SNP_P3_39834_13784822 | NC_021163.1    | Ca_kabuli_chr04 | 13784822                | CC                              | AA                | 1945935275               |
| SNP_P3_39835_13785126 | NC_021163.1    | Ca_kabuli_chr04 | 13785126                | TT                              | AA                | 1945935277               |
| SNP_P3_39836_13786982 | NC_021163.1    | Ca_kabuli_chr04 | 13786982                | CC                              | GG                | 1945935279               |
| SNP_P3_39837_13788111 | NC_021163.1    | Ca_kabuli_chr04 | 13788111                | TT                              | CC                | 1945935280               |
| SNP_P3_39838_13788136 | NC_021163.1    | Ca_kabuli_chr04 | 13788136                | AA                              | TT                | 1945935282               |
| SNP_P3_39840_13792099 | NC_021163.1    | Ca_kabuli_chr04 | 13792099                | TT                              | GG                | 1945935284               |
| SNP_P3_39841_13792105 | NC_021163.1    | Ca_kabuli_chr04 | 13792105                | TT                              | CC                | 1945935286               |
| SNP_P3_39843_13792215 | NC_021163.1    | Ca_kabuli_chr04 | 13792215                | TT                              | AA                | 1945935287               |
| SNP_P3_39846_13792425 | NC_021163.1    | Ca_kabuli_chr04 | 13792425                | GG                              | AA                | 1945935289               |
| SNP_P3_39847_13792457 | NC_021163.1    | Ca_kabuli_chr04 | 13792457                | GG                              | AA                | 1945935291               |
| SNP_P3_39848_13793063 | NC_021163.1    | Ca_kabuli_chr04 | 13793063                | TT                              | AA                | 1945935293               |
| SNP_P3_39849_13793268 | NC_021163.1    | Ca_kabuli_chr04 | 13793268                | GG                              | CC                | 1945935295               |
| SNP_P3_39850_13793486 | NC_021163.1    | Ca_kabuli_chr04 | 13793486                | GG                              | TT                | 1945935296               |
| SNP_P3_39852_13794043 | NC_021163.1    | Ca_kabuli_chr04 | 13794043                | AA                              | CC                | 1945935298               |
| SNP_P3_39853_13796045 | NC_021163.1    | Ca_kabuli_chr04 | 13796045                | AA                              | CC                | 1945935300               |
| SNP_P3_39856_13799114 | NC_021163.1    | Ca_kabuli_chr04 | 13799114                | CC                              | AA                | 1945935302               |



| SNPs IDs              | Chromosome IDs | Chromosomes     | Physical positions (bp) | CDC Frontier (Reference genome) | (Pusa 256 & HPNB) | NCBI SNPdb Accession IDs |
|-----------------------|----------------|-----------------|-------------------------|---------------------------------|-------------------|--------------------------|
| SNP_P3_39857_13799886 | NC_021163.1    | Ca_kabuli_chr04 | 13799886                | AA                              | CC                | 1945935303               |
| SNP_P3_39858_13799918 | NC_021163.1    | Ca_kabuli_chr04 | 13799918                | TT                              | AA                | 1945935305               |
| SNP_P3_39859_13799977 | NC_021163.1    | Ca_kabuli_chr04 | 13799977                | CC                              | AA                | 1945935307               |
| SNP_P3_39860_13800461 | NC_021163.1    | Ca_kabuli_chr04 | 13800461                | TT                              | CC                | 1945935309               |
| SNP_P3_39861_13803896 | NC_021163.1    | Ca_kabuli_chr04 | 13803896                | GG                              | TT                | 1945935310               |
| SNP_P3_39862_13803955 | NC_021163.1    | Ca_kabuli_chr04 | 13803955                | GG                              | TT                | 1945935312               |
| SNP_P3_39863_13806386 | NC_021163.1    | Ca_kabuli_chr04 | 13806386                | CC                              | AA                | 1945935314               |
| SNP_P3_39864_13806387 | NC_021163.1    | Ca_kabuli_chr04 | 13806387                | CC                              | AA                | 1945935316               |
| SNP_P3_39865_13806402 | NC_021163.1    | Ca_kabuli_chr04 | 13806402                | CC                              | TT                | 1945935318               |
| SNP_P3_39869_13808436 | NC_021163.1    | Ca_kabuli_chr04 | 13808436                | AA                              | GG                | 1945935319               |
| SNP_P3_39871_13808823 | NC_021163.1    | Ca_kabuli_chr04 | 13808823                | CC                              | TT                | 1945935321               |
| SNP_P3_39872_13808840 | NC_021163.1    | Ca_kabuli_chr04 | 13808840                | CC                              | GG                | 1945935323               |
| SNP_P3_39873_13810632 | NC_021163.1    | Ca_kabuli_chr04 | 13810632                | CC                              | TT                | 1945935325               |
| SNP_P3_39874_13810880 | NC_021163.1    | Ca_kabuli_chr04 | 13810880                | AA                              | GG                | 1945935326               |
| SNP_P3_39876_13812920 | NC_021163.1    | Ca_kabuli_chr04 | 13812920                | GG                              | AA                | 1945935328               |
| SNP_P3_39877_13814204 | NC_021163.1    | Ca_kabuli_chr04 | 13814204                | CC                              | AA                | 1945935330               |
| SNP_P3_39878_13815413 | NC_021163.1    | Ca_kabuli_chr04 | 13815413                | TT                              | AA                | 1945935332               |
| SNP_P3_39879_13815420 | NC_021163.1    | Ca_kabuli_chr04 | 13815420                | TT                              | CC                | 1945935334               |
| SNP_P3_39880_13815467 | NC_021163.1    | Ca_kabuli_chr04 | 13815467                | CC                              | AA                | 1945935335               |
| SNP_P3_39881_13815654 | NC_021163.1    | Ca_kabuli_chr04 | 13815654                | TT                              | CC                | 1945935337               |
| SNP_P3_39882_13816479 | NC_021163.1    | Ca_kabuli_chr04 | 13816479                | AA                              | GG                | 1945935339               |
| SNP_P3_39883_13816483 | NC_021163.1    | Ca_kabuli_chr04 | 13816483                | TT                              | CC                | 1945935341               |
| SNP_P3_39884_13816771 | NC_021163.1    | Ca_kabuli_chr04 | 13816771                | AA                              | CC                | 1945935342               |
| SNP_P3_39885_13816772 | NC_021163.1    | Ca_kabuli_chr04 | 13816772                | TT                              | GG                | 1945935344               |
| SNP_P3_39886_13816882 | NC_021163.1    | Ca_kabuli_chr04 | 13816882                | TT                              | AA                | 1945935346               |
| SNP_P3_39887_13817102 | NC_021163.1    | Ca_kabuli_chr04 | 13817102                | CC                              | GG                | 1945935348               |
| SNP_P3_39888_13818996 | NC_021163.1    | Ca_kabuli_chr04 | 13818996                | CC                              | TT                | 1945935349               |
| SNP_P3_39889_13820104 | NC_021163.1    | Ca_kabuli_chr04 | 13820104                | TT                              | CC                | 1945935351               |
| SNP_P3_39890_13821063 | NC_021163.1    | Ca_kabuli_chr04 | 13821063                | GG                              | AA                | 1945935353               |
| SNP_P3_39891_13821436 | NC_021163.1    | Ca_kabuli_chr04 | 13821436                | GG                              | TT                | 1945935355               |
| SNP_P3_39892_13822628 | NC_021163.1    | Ca_kabuli_chr04 | 13822628                | AA                              | TT                | 1945935357               |
| SNP_P3_39893_13822995 | NC_021163.1    | Ca_kabuli_chr04 | 13822995                | AA                              | GG                | 1945935358               |
| SNP_P3_39894_13823266 | NC_021163.1    | Ca_kabuli_chr04 | 13823266                | GG                              | AA                | 1945935360               |
| SNP_P3_39895_13823268 | NC_021163.1    | Ca_kabuli_chr04 | 13823268                | GG                              | AA                | 1945935362               |
| SNP_P3_39896_13824711 | NC_021163.1    | Ca_kabuli_chr04 | 13824711                | GG                              | AA                | 1945935364               |
| SNP_P3_39897_13824867 | NC_021163.1    | Ca_kabuli_chr04 | 13824867                | AA                              | GG                | 1945935365               |
| SNP_P3_39898_13824888 | NC_021163.1    | Ca_kabuli_chr04 | 13824888                | TT                              | CC                | 1945935367               |
| SNP_P3_39899_13824891 | NC_021163.1    | Ca_kabuli_chr04 | 13824891                | GG                              | AA                | 1945935369               |
| SNP_P3_39900_13825423 | NC_021163.1    | Ca_kabuli_chr04 | 13825423                | CC                              | AA                | 1945935371               |
| SNP_P3_39901_13825451 | NC_021163.1    | Ca_kabuli_chr04 | 13825451                | GG                              | AA                | 1945935372               |
| SNP_P3_39903_13825706 | NC_021163.1    | Ca_kabuli_chr04 | 13825706                | TT                              | CC                | 1945935374               |
| SNP_P3_39904_13825763 | NC_021163.1    | Ca_kabuli_chr04 | 13825763                | TT                              | CC                | 1945935376               |

| SNPs IDs              | Chromosome IDs | Chromosomes     | Physical positions (bp) | CDC Frontier (Reference genome) | (Pusa 256 & HPNB) | NCBI SNPdb Accession IDs |
|-----------------------|----------------|-----------------|-------------------------|---------------------------------|-------------------|--------------------------|
| SNP_P3_39905_13825787 | NC_021163.1    | Ca_kabuli_chr04 | 13825787                | GG                              | AA                | 1945935378               |
| SNP_P3_39906_13826044 | NC_021163.1    | Ca_kabuli_chr04 | 13826044                | GG                              | AA                | 1945935380               |
| SNP_P3_39907_13826091 | NC_021163.1    | Ca_kabuli_chr04 | 13826091                | CC                              | TT                | 1945935381               |
| SNP_P3_39909_13826161 | NC_021163.1    | Ca_kabuli_chr04 | 13826161                | GG                              | AA                | 1945935383               |
| SNP_P3_39910_13826182 | NC_021163.1    | Ca_kabuli_chr04 | 13826182                | CC                              | TT                | 1945935385               |
| SNP_P3_39912_13827243 | NC_021163.1    | Ca_kabuli_chr04 | 13827243                | CC                              | TT                | 1945935387               |
| SNP_P3_39915_13828442 | NC_021163.1    | Ca_kabuli_chr04 | 13828442                | CC                              | TT                | 1945935388               |
| SNP_P3_39918_13829415 | NC_021163.1    | Ca_kabuli_chr04 | 13829415                | GG                              | TT                | 1945935390               |
| SNP_P3_39919_13829429 | NC_021163.1    | Ca_kabuli_chr04 | 13829429                | TT                              | AA                | 1945935392               |
| SNP_P3_39920_13829438 | NC_021163.1    | Ca_kabuli_chr04 | 13829438                | GG                              | AA                | 1945935394               |
| SNP_P3_39922_13829765 | NC_021163.1    | Ca_kabuli_chr04 | 13829765                | GG                              | TT                | 1945935396               |
| SNP_P3_39923_13829811 | NC_021163.1    | Ca_kabuli_chr04 | 13829811                | TT                              | GG                | 1945935397               |
| SNP_P3_39924_13829822 | NC_021163.1    | Ca_kabuli_chr04 | 13829822                | AA                              | GG                | 1945935399               |
| SNP_P3_39925_13830031 | NC_021163.1    | Ca_kabuli_chr04 | 13830031                | TT                              | CC                | 1945935401               |
| SNP_P3_39926_13830333 | NC_021163.1    | Ca_kabuli_chr04 | 13830333                | CC                              | TT                | 1945935403               |
| SNP_P3_39927_13830364 | NC_021163.1    | Ca_kabuli_chr04 | 13830364                | GG                              | AA                | 1945935404               |
| SNP_P3_39928_13830371 | NC_021163.1    | Ca_kabuli_chr04 | 13830371                | GG                              | CC                | 1945935406               |
| SNP_P3_39930_13830568 | NC_021163.1    | Ca_kabuli_chr04 | 13830568                | GG                              | AA                | 1945935408               |
| SNP_P3_39931_13830584 | NC_021163.1    | Ca_kabuli_chr04 | 13830584                | TT                              | CC                | 1945935410               |
| SNP_P3_39932_13830585 | NC_021163.1    | Ca_kabuli_chr04 | 13830585                | CC                              | TT                | 1945935411               |
| SNP_P3_39933_13830590 | NC_021163.1    | Ca_kabuli_chr04 | 13830590                | AA                              | GG                | 1945935413               |
| SNP_P3_39934_13830593 | NC_021163.1    | Ca_kabuli_chr04 | 13830593                | AA                              | GG                | 1945935415               |
| SNP_P3_39935_13830820 | NC_021163.1    | Ca_kabuli_chr04 | 13830820                | AA                              | CC                | 1945935417               |
| SNP_P3_39936_13831665 | NC_021163.1    | Ca_kabuli_chr04 | 13831665                | CC                              | TT                | 1945935419               |
| SNP_P3_39937_13831800 | NC_021163.1    | Ca_kabuli_chr04 | 13831800                | CC                              | TT                | 1945935420               |
| SNP_P3_39938_13831836 | NC_021163.1    | Ca_kabuli_chr04 | 13831836                | AA                              | TT                | 1945935422               |
| SNP_P3_39939_13831867 | NC_021163.1    | Ca_kabuli_chr04 | 13831867                | CC                              | AA                | 1945935424               |
| SNP_P3_39940_13831875 | NC_021163.1    | Ca_kabuli_chr04 | 13831875                | CC                              | AA                | 1945935426               |
| SNP_P3_39941_13831889 | NC_021163.1    | Ca_kabuli_chr04 | 13831889                | CC                              | AA                | 1945935427               |
| SNP_P3_39942_13831952 | NC_021163.1    | Ca_kabuli_chr04 | 13831952                | CC                              | GG                | 1945935429               |
| SNP_P3_39943_13831989 | NC_021163.1    | Ca_kabuli_chr04 | 13831989                | TT                              | CC                | 1945935431               |
| SNP_P3_39944_13832258 | NC_021163.1    | Ca_kabuli_chr04 | 13832258                | AA                              | TT                | 1945935433               |
| SNP_P3_39945_13832443 | NC_021163.1    | Ca_kabuli_chr04 | 13832443                | TT                              | CC                | 1945935434               |
| SNP_P3_39946_13832613 | NC_021163.1    | Ca_kabuli_chr04 | 13832613                | TT                              | CC                | 1945935436               |
| SNP_P3_39947_13833816 | NC_021163.1    | Ca_kabuli_chr04 | 13833816                | AA                              | GG                | 1945935438               |
| SNP_P3_39948_13835317 | NC_021163.1    | Ca_kabuli_chr04 | 13835317                | CC                              | AA                | 1945935440               |
| SNP_P3_39951_13837345 | NC_021163.1    | Ca_kabuli_chr04 | 13837345                | GG                              | AA                | 1945935442               |
| SNP_P3_39953_13840227 | NC_021163.1    | Ca_kabuli_chr04 | 13840227                | CC                              | AA                | 1945935443               |
| SNP_P3_39954_13840484 | NC_021163.1    | Ca_kabuli_chr04 | 13840484                | TT                              | CC                | 1945935445               |
| SNP_P3_39955_13841279 | NC_021163.1    | Ca_kabuli_chr04 | 13841279                | CC                              | AA                | 1945935447               |
| SNP_P3_39956_13843305 | NC_021163.1    | Ca_kabuli_chr04 | 13843305                | GG                              | TT                | 1945935449               |
| SNP_P3_39957_13845205 | NC_021163.1    | Ca_kabuli_chr04 | 13845205                | AA                              | CC                | 1945935450               |

| SNPs IDs              | Chromosome IDs | Chromosomes     | Physical positions (bp) | CDC Frontier (Reference genome) | (Pusa 256 & HPNB) | NCBI SNPdb Accession IDs |
|-----------------------|----------------|-----------------|-------------------------|---------------------------------|-------------------|--------------------------|
| SNP_P3_39958_13845581 | NC_021163.1    | Ca_kabuli_chr04 | 13845581                | AA                              | TT                | 1945935452               |
| SNP_P3_39959_13845639 | NC_021163.1    | Ca_kabuli_chr04 | 13845639                | AA                              | CC                | 1945935454               |
| SNP_P3_39960_13845675 | NC_021163.1    | Ca_kabuli_chr04 | 13845675                | TT                              | AA                | 1945935456               |
| SNP_P3_39961_13846929 | NC_021163.1    | Ca_kabuli_chr04 | 13846929                | AA                              | CC                | 1945935458               |
| SNP_P3_39962_13847234 | NC_021163.1    | Ca_kabuli_chr04 | 13847234                | CC                              | AA                | 1945935459               |
| SNP_P3_39963_13849389 | NC_021163.1    | Ca_kabuli_chr04 | 13849389                | CC                              | GG                | 1945935461               |
| SNP_P3_39964_13849604 | NC_021163.1    | Ca_kabuli_chr04 | 13849604                | TT                              | AA                | 1945935463               |
| SNP_P3_39965_13852471 | NC_021163.1    | Ca_kabuli_chr04 | 13852471                | CC                              | AA                | 1945935465               |
| SNP_P3_39966_13853747 | NC_021163.1    | Ca_kabuli_chr04 | 13853747                | CC                              | GG                | 1945935466               |
| SNP_P3_39967_13853831 | NC_021163.1    | Ca_kabuli_chr04 | 13853831                | GG                              | AA                | 1945935468               |
| SNP_P3_39969_13853954 | NC_021163.1    | Ca_kabuli_chr04 | 13853954                | CC                              | AA                | 1945935470               |
| SNP_P3_39970_13854044 | NC_021163.1    | Ca_kabuli_chr04 | 13854044                | AA                              | GG                | 1945935472               |
| SNP_P3_39972_13854187 | NC_021163.1    | Ca_kabuli_chr04 | 13854187                | CC                              | TT                | 1945935473               |
| SNP_P3_39973_13854194 | NC_021163.1    | Ca_kabuli_chr04 | 13854194                | AA                              | GG                | 1945935475               |
| SNP_P3_39974_13854207 | NC_021163.1    | Ca_kabuli_chr04 | 13854207                | CC                              | TT                | 1945935477               |
| SNP_P3_39975_13854219 | NC_021163.1    | Ca_kabuli_chr04 | 13854219                | AA                              | TT                | 1945935479               |
| SNP_P3_39976_13854221 | NC_021163.1    | Ca_kabuli_chr04 | 13854221                | GG                              | TT                | 1945935481               |
| SNP_P3_39977_13854366 | NC_021163.1    | Ca_kabuli_chr04 | 13854366                | AA                              | GG                | 1945935482               |
| SNP_P3_39978_13854431 | NC_021163.1    | Ca_kabuli_chr04 | 13854431                | GG                              | AA                | 1945935484               |
| SNP_P3_39979_13854455 | NC_021163.1    | Ca_kabuli_chr04 | 13854455                | TT                              | GG                | 1945935486               |
| SNP_P3_39980_13856347 | NC_021163.1    | Ca_kabuli_chr04 | 13856347                | GG                              | AA                | 1945935488               |
| SNP_P3_39981_13856425 | NC_021163.1    | Ca_kabuli_chr04 | 13856425                | GG                              | CC                | 1945935489               |
| SNP_P3_39982_13856579 | NC_021163.1    | Ca_kabuli_chr04 | 13856579                | TT                              | CC                | 1945935491               |
| SNP_P3_39983_13856600 | NC_021163.1    | Ca_kabuli_chr04 | 13856600                | AA                              | GG                | 1945935493               |
| SNP_P3_39984_13856625 | NC_021163.1    | Ca_kabuli_chr04 | 13856625                | CC                              | TT                | 1945935495               |
| SNP_P3_39990_13858203 | NC_021163.1    | Ca_kabuli_chr04 | 13858203                | CC                              | AA                | 1945935497               |
| SNP_P3_39991_13858972 | NC_021163.1    | Ca_kabuli_chr04 | 13858972                | AA                              | GG                | 1945935498               |
| SNP_P3_39992_13860236 | NC_021163.1    | Ca_kabuli_chr04 | 13860236                | TT                              | CC                | 1945935500               |
| SNP_P3_39993_13861006 | NC_021163.1    | Ca_kabuli_chr04 | 13861006                | GG                              | AA                | 1945935502               |
| SNP_P3_39995_13861060 | NC_021163.1    | Ca_kabuli_chr04 | 13861060                | AA                              | TT                | 1945935504               |
| SNP_P3_39996_13861069 | NC_021163.1    | Ca_kabuli_chr04 | 13861069                | AA                              | GG                | 1945935505               |
| SNP_P3_39997_13861070 | NC_021163.1    | Ca_kabuli_chr04 | 13861070                | TT                              | CC                | 1945935507               |
| SNP_P3_39998_13861131 | NC_021163.1    | Ca_kabuli_chr04 | 13861131                | TT                              | GG                | 1945935509               |
| SNP_P3_39999_13861136 | NC_021163.1    | Ca_kabuli_chr04 | 13861136                | GG                              | AA                | 1945935511               |
| SNP_P3_40000_13864629 | NC_021163.1    | Ca_kabuli_chr04 | 13864629                | CC                              | AA                | 1945935512               |
| SNP_P3_40001_13864883 | NC_021163.1    | Ca_kabuli_chr04 | 13864883                | TT                              | AA                | 1945935514               |
| SNP_P3_40002_13864963 | NC_021163.1    | Ca_kabuli_chr04 | 13864963                | TT                              | AA                | 1945935516               |
| SNP_P3_40004_13866165 | NC_021163.1    | Ca_kabuli_chr04 | 13866165                | CC                              | AA                | 1945935518               |
| SNP_P3_40005_13866933 | NC_021163.1    | Ca_kabuli_chr04 | 13866933                | GG                              | AA                | 1945935520               |
| SNP_P3_40006_13867064 | NC_021163.1    | Ca_kabuli_chr04 | 13867064                | AA                              | GG                | 1945935521               |
| SNP_P3_40009_13908262 | NC_021163.1    | Ca_kabuli_chr04 | 13908262                | GG                              | TT                | 1945935523               |
| SNP_P3_40011_13908685 | NC_021163.1    | Ca_kabuli_chr04 | 13908685                | GG                              | AA                | 1945935525               |

| SNPs IDs              | Chromosome IDs | Chromosomes     | Physical positions (bp) | CDC Frontier (Reference genome) | (Pusa 256 & HPNB) | NCBI SNPdb Accession IDs |
|-----------------------|----------------|-----------------|-------------------------|---------------------------------|-------------------|--------------------------|
| SNP_P3_40012_13908791 | NC_021163.1    | Ca_kabuli_chr04 | 13908791                | CC                              | AA                | 1945935527               |
| SNP_P3_40013_13908798 | NC_021163.1    | Ca_kabuli_chr04 | 13908798                | GG                              | AA                | 1945935528               |
| SNP_P3_40014_13908943 | NC_021163.1    | Ca_kabuli_chr04 | 13908943                | AA                              | GG                | 1945935530               |
| SNP_P3_40015_13909246 | NC_021163.1    | Ca_kabuli_chr04 | 13909246                | CC                              | TT                | 1945935532               |
| SNP_P3_40017_13911299 | NC_021163.1    | Ca_kabuli_chr04 | 13911299                | TT                              | CC                | 1945935534               |
| SNP_P3_40018_13917277 | NC_021163.1    | Ca_kabuli_chr04 | 13917277                | TT                              | GG                | 1945935535               |
| SNP_P3_40019_13917650 | NC_021163.1    | Ca_kabuli_chr04 | 13917650                | CC                              | TT                | 1945935537               |
| SNP_P3_40020_13962641 | NC_021163.1    | Ca_kabuli_chr04 | 13962641                | TT                              | GG                | 1945935539               |
| SNP_P3_40021_13962644 | NC_021163.1    | Ca_kabuli_chr04 | 13962644                | AA                              | GG                | 1945935541               |
| SNP_P3_40022_13968358 | NC_021163.1    | Ca_kabuli_chr04 | 13968358                | GG                              | AA                | 1945935543               |
| SNP_P3_40023_14000745 | NC_021163.1    | Ca_kabuli_chr04 | 14000745                | TT                              | AA                | 1945935544               |
| SNP_P3_40025_14000758 | NC_021163.1    | Ca_kabuli_chr04 | 14000758                | AA                              | TT                | 1945935546               |
| SNP_P3_40026_14052963 | NC_021163.1    | Ca_kabuli_chr04 | 14052963                | CC                              | TT                | 1945935548               |
| SNP_P3_40027_14085762 | NC_021163.1    | Ca_kabuli_chr04 | 14085762                | CC                              | TT                | 1945935550               |
| SNP_P3_40028_14154572 | NC_021163.1    | Ca_kabuli_chr04 | 14154572                | CC                              | TT                | 1945935551               |
| SNP_P3_40029_14188181 | NC_021163.1    | Ca_kabuli_chr04 | 14188181                | AA                              | GG                | 1945935553               |
| SNP_P3_40030_14194783 | NC_021163.1    | Ca_kabuli_chr04 | 14194783                | GG                              | TT                | 1945935555               |
| SNP_P3_40031_14204758 | NC_021163.1    | Ca_kabuli_chr04 | 14204758                | AA                              | TT                | 1945935557               |
| SNP_P3_40032_14204776 | NC_021163.1    | Ca_kabuli_chr04 | 14204776                | AA                              | GG                | 1945935559               |
| SNP_P3_40033_14204997 | NC_021163.1    | Ca_kabuli_chr04 | 14204997                | AA                              | TT                | 1945935560               |
| SNP_P3_40034_14205049 | NC_021163.1    | Ca_kabuli_chr04 | 14205049                | TT                              | AA                | 1945935562               |
| SNP_P3_40035_14211475 | NC_021163.1    | Ca_kabuli_chr04 | 14211475                | TT                              | CC                | 1945935564               |
| SNP_P3_40036_14231857 | NC_021163.1    | Ca_kabuli_chr04 | 14231857                | CC                              | TT                | 1945935566               |
| SNP_P3_40037_14235417 | NC_021163.1    | Ca_kabuli_chr04 | 14235417                | TT                              | CC                | 1945935567               |
| SNP_P3_40039_14264894 | NC_021163.1    | Ca_kabuli_chr04 | 14264894                | GG                              | TT                | 1945935569               |
| SNP_P3_40040_14264902 | NC_021163.1    | Ca_kabuli_chr04 | 14264902                | AA                              | CC                | 1945935571               |
| SNP_P3_40041_14271489 | NC_021163.1    | Ca_kabuli_chr04 | 14271489                | TT                              | AA                | 1945935573               |
| SNP_P3_40042_14271508 | NC_021163.1    | Ca_kabuli_chr04 | 14271508                | TT                              | GG                | 1945935574               |
| SNP_P3_40043_14271531 | NC_021163.1    | Ca_kabuli_chr04 | 14271531                | TT                              | CC                | 1945935576               |
| SNP_P3_40044_14271579 | NC_021163.1    | Ca_kabuli_chr04 | 14271579                | TT                              | CC                | 1945935578               |
| SNP_P3_40045_14271765 | NC_021163.1    | Ca_kabuli_chr04 | 14271765                | GG                              | AA                | 1945935580               |
| SNP_P3_40046_14271775 | NC_021163.1    | Ca_kabuli_chr04 | 14271775                | CC                              | TT                | 1945935582               |
| SNP_P3_40047_14271776 | NC_021163.1    | Ca_kabuli_chr04 | 14271776                | TT                              | CC                | 1945935583               |
| SNP_P3_40048_14271785 | NC_021163.1    | Ca_kabuli_chr04 | 14271785                | TT                              | CC                | 1945935585               |
| SNP_P3_40049_14271825 | NC_021163.1    | Ca_kabuli_chr04 | 14271825                | TT                              | AA                | 1945935587               |
| SNP_P3_40050_14271938 | NC_021163.1    | Ca_kabuli_chr04 | 14271938                | GG                              | AA                | 1945935589               |
| SNP_P3_40051_14271954 | NC_021163.1    | Ca_kabuli_chr04 | 14271954                | TT                              | CC                | 1945935590               |
| SNP_P3_40053_14297414 | NC_021163.1    | Ca_kabuli_chr04 | 14297414                | CC                              | TT                | 1945935592               |
| SNP_P3_40054_14308963 | NC_021163.1    | Ca_kabuli_chr04 | 14308963                | GG                              | AA                | 1945935594               |
| SNP_P3_40055_14329783 | NC_021163.1    | Ca_kabuli_chr04 | 14329783                | GG                              | AA                | 1945935596               |
| SNP_P3_40056_14329853 | NC_021163.1    | Ca_kabuli_chr04 | 14329853                | AA                              | GG                | 1945935597               |
| SNP_P3_40057_14329858 | NC_021163.1    | Ca_kabuli_chr04 | 14329858                | CC                              | GG                | 1945935599               |

| SNPs IDs              | Chromosome IDs | Chromosomes     | Physical positions (bp) | CDC Frontier (Reference genome) | (Pusa 256 & HPNB) | NCBI SNPdb Accession IDs |
|-----------------------|----------------|-----------------|-------------------------|---------------------------------|-------------------|--------------------------|
| SNP_P3_40058_14329863 | NC_021163.1    | Ca_kabuli_chr04 | 14329863                | TT                              | CC                | 1945935601               |
| SNP_P3_40059_14329884 | NC_021163.1    | Ca_kabuli_chr04 | 14329884                | AA                              | GG                | 1945935603               |
| SNP_P3_40060_14329941 | NC_021163.1    | Ca_kabuli_chr04 | 14329941                | TT                              | CC                | 1945935605               |
| SNP_P3_40061_14330178 | NC_021163.1    | Ca_kabuli_chr04 | 14330178                | TT                              | CC                | 1945935606               |
| SNP_P3_40062_14330220 | NC_021163.1    | Ca_kabuli_chr04 | 14330220                | AA                              | GG                | 1945935608               |
| SNP_P3_40063_14359088 | NC_021163.1    | Ca_kabuli_chr04 | 14359088                | TT                              | GG                | 1945935610               |
| SNP_P3_40064_14383885 | NC_021163.1    | Ca_kabuli_chr04 | 14383885                | AA                              | GG                | 1945935612               |
| SNP_P3_40065_14392425 | NC_021163.1    | Ca_kabuli_chr04 | 14392425                | GG                              | AA                | 1945935613               |
| SNP_P3_40066_14392510 | NC_021163.1    | Ca_kabuli_chr04 | 14392510                | GG                              | AA                | 1945935615               |
| SNP_P3_40067_14392527 | NC_021163.1    | Ca_kabuli_chr04 | 14392527                | AA                              | GG                | 1945935617               |
| SNP_P3_40068_14392703 | NC_021163.1    | Ca_kabuli_chr04 | 14392703                | AA                              | GG                | 1945935619               |
| SNP_P3_40069_14392721 | NC_021163.1    | Ca_kabuli_chr04 | 14392721                | TT                              | GG                | 1945935621               |
| SNP_P3_40070_14397103 | NC_021163.1    | Ca_kabuli_chr04 | 14397103                | AA                              | GG                | 1945935622               |
| SNP_P3_40071_14397207 | NC_021163.1    | Ca_kabuli_chr04 | 14397207                | TT                              | CC                | 1945935624               |
| SNP_P3_40072_14397224 | NC_021163.1    | Ca_kabuli_chr04 | 14397224                | GG                              | AA                | 1945935626               |
| SNP_P3_40073_14397279 | NC_021163.1    | Ca_kabuli_chr04 | 14397279                | AA                              | GG                | 1945935628               |
| SNP_P3_40074_14397281 | NC_021163.1    | Ca_kabuli_chr04 | 14397281                | AA                              | TT                | 1945935629               |
| SNP_P3_40076_14397378 | NC_021163.1    | Ca_kabuli_chr04 | 14397378                | TT                              | CC                | 1945935631               |
| SNP_P3_40077_14397425 | NC_021163.1    | Ca_kabuli_chr04 | 14397425                | AA                              | GG                | 1945935633               |
| SNP_P3_40078_14397507 | NC_021163.1    | Ca_kabuli_chr04 | 14397507                | AA                              | CC                | 1945935635               |
| SNP_P3_40079_14397591 | NC_021163.1    | Ca_kabuli_chr04 | 14397591                | CC                              | TT                | 1945935636               |
| SNP_P3_40080_14397670 | NC_021163.1    | Ca_kabuli_chr04 | 14397670                | TT                              | CC                | 1945935638               |
| SNP_P3_40081_14398049 | NC_021163.1    | Ca_kabuli_chr04 | 14398049                | TT                              | CC                | 1945935640               |
| SNP_P3_40082_14398780 | NC_021163.1    | Ca_kabuli_chr04 | 14398780                | GG                              | AA                | 1945935642               |
| SNP_P3_40083_14398807 | NC_021163.1    | Ca_kabuli_chr04 | 14398807                | AA                              | GG                | 1945935644               |
| SNP_P3_40084_14398855 | NC_021163.1    | Ca_kabuli_chr04 | 14398855                | TT                              | AA                | 1945935645               |
| SNP_P3_40086_14399086 | NC_021163.1    | Ca_kabuli_chr04 | 14399086                | TT                              | CC                | 1945935647               |
| SNP_P3_40087_14399137 | NC_021163.1    | Ca_kabuli_chr04 | 14399137                | AA                              | GG                | 1945935649               |
| SNP_P3_40088_14399150 | NC_021163.1    | Ca_kabuli_chr04 | 14399150                | TT                              | GG                | 1945935651               |
| SNP_P3_40089_14399173 | NC_021163.1    | Ca_kabuli_chr04 | 14399173                | TT                              | CC                | 1945935652               |
| SNP_P3_40090_14399444 | NC_021163.1    | Ca_kabuli_chr04 | 14399444                | TT                              | GG                | 1945935654               |
| SNP_P3_40091_14405470 | NC_021163.1    | Ca_kabuli_chr04 | 14405470                | TT                              | CC                | 1945935656               |
| SNP_P3_40092_14405471 | NC_021163.1    | Ca_kabuli_chr04 | 14405471                | TT                              | GG                | 1945935658               |
| SNP_P3_40093_14405509 | NC_021163.1    | Ca_kabuli_chr04 | 14405509                | CC                              | TT                | 1945935659               |
| SNP_P3_40094_14405514 | NC_021163.1    | Ca_kabuli_chr04 | 14405514                | TT                              | GG                | 1945935661               |
| SNP_P3_40095_14405577 | NC_021163.1    | Ca_kabuli_chr04 | 14405577                | AA                              | GG                | 1945935663               |
| SNP_P3_40096_14405593 | NC_021163.1    | Ca_kabuli_chr04 | 14405593                | GG                              | TT                | 1945935665               |
| SNP_P3_40097_14405603 | NC_021163.1    | Ca_kabuli_chr04 | 14405603                | AA                              | TT                | 1945935667               |
| SNP_P3_40099_14405699 | NC_021163.1    | Ca_kabuli_chr04 | 14405699                | GG                              | TT                | 1945935668               |
| SNP_P3_40100_14405707 | NC_021163.1    | Ca_kabuli_chr04 | 14405707                | CC                              | TT                | 1945935670               |
| SNP_P3_40101_14405722 | NC_021163.1    | Ca_kabuli_chr04 | 14405722                | GG                              | AA                | 1945935672               |
| SNP_P3_40103_14405819 | NC_021163.1    | Ca_kabuli_chr04 | 14405819                | AA                              | GG                | 1945935674               |

| SNPs IDs              | Chromosome IDs | Chromosomes     | Physical positions (bp) | CDC Frontier (Reference genome) | (Pusa 256 & HPNB) | NCBI SNPdb Accession IDs |
|-----------------------|----------------|-----------------|-------------------------|---------------------------------|-------------------|--------------------------|
| SNP_P3_40104_14405826 | NC_021163.1    | Ca_kabuli_chr04 | 14405826                | CC                              | TT                | 1945935675               |
| SNP_P3_40105_14405834 | NC_021163.1    | Ca_kabuli_chr04 | 14405834                | TT                              | CC                | 1945935677               |
| SNP_P3_40106_14405862 | NC_021163.1    | Ca_kabuli_chr04 | 14405862                | GG                              | AA                | 1945935679               |
| SNP_P3_40107_14405865 | NC_021163.1    | Ca_kabuli_chr04 | 14405865                | GG                              | CC                | 1945935681               |
| SNP_P3_40108_14406021 | NC_021163.1    | Ca_kabuli_chr04 | 14406021                | AA                              | TT                | 1945935682               |
| SNP_P3_40109_14406059 | NC_021163.1    | Ca_kabuli_chr04 | 14406059                | TT                              | AA                | 1945935684               |
| SNP_P3_40110_14406085 | NC_021163.1    | Ca_kabuli_chr04 | 14406085                | AA                              | TT                | 1945935686               |
| SNP_P3_40111_14406101 | NC_021163.1    | Ca_kabuli_chr04 | 14406101                | TT                              | CC                | 1945935688               |
| SNP_P3_40112_14406116 | NC_021163.1    | Ca_kabuli_chr04 | 14406116                | TT                              | CC                | 1945935690               |
| SNP_P3_40114_14406143 | NC_021163.1    | Ca_kabuli_chr04 | 14406143                | TT                              | GG                | 1945935691               |
| SNP_P3_40115_14406185 | NC_021163.1    | Ca_kabuli_chr04 | 14406185                | GG                              | AA                | 1945935693               |
| SNP_P3_40116_14406220 | NC_021163.1    | Ca_kabuli_chr04 | 14406220                | AA                              | TT                | 1945935695               |
| SNP_P3_40117_14406221 | NC_021163.1    | Ca_kabuli_chr04 | 14406221                | GG                              | AA                | 1945935697               |
| SNP_P3_40118_14406243 | NC_021163.1    | Ca_kabuli_chr04 | 14406243                | GG                              | AA                | 1945935698               |
| SNP_P3_40119_14406348 | NC_021163.1    | Ca_kabuli_chr04 | 14406348                | TT                              | GG                | 1945935700               |
| SNP_P3_40120_14406395 | NC_021163.1    | Ca_kabuli_chr04 | 14406395                | TT                              | AA                | 1945935702               |
| SNP_P3_40121_14407570 | NC_021163.1    | Ca_kabuli_chr04 | 14407570                | GG                              | TT                | 1945935704               |
| SNP_P3_40122_14421622 | NC_021163.1    | Ca_kabuli_chr04 | 14421622                | AA                              | TT                | 1945935705               |
| SNP_P3_40123_14421887 | NC_021163.1    | Ca_kabuli_chr04 | 14421887                | AA                              | GG                | 1945935707               |
| SNP_P3_40124_14422154 | NC_021163.1    | Ca_kabuli_chr04 | 14422154                | AA                              | TT                | 1945935709               |
| SNP_P3_40125_14422166 | NC_021163.1    | Ca_kabuli_chr04 | 14422166                | TT                              | CC                | 1945935711               |
| SNP_P3_40126_14422183 | NC_021163.1    | Ca_kabuli_chr04 | 14422183                | CC                              | GG                | 1945935713               |
| SNP_P3_40127_14422218 | NC_021163.1    | Ca_kabuli_chr04 | 14422218                | CC                              | TT                | 1945935714               |
| SNP_P3_40128_14423274 | NC_021163.1    | Ca_kabuli_chr04 | 14423274                | TT                              | AA                | 1945935716               |
| SNP_P3_40129_14423894 | NC_021163.1    | Ca_kabuli_chr04 | 14423894                | TT                              | GG                | 1945935718               |
| SNP_P3_40130_14449705 | NC_021163.1    | Ca_kabuli_chr04 | 14449705                | AA                              | GG                | 1945935720               |
| SNP_P3_40131_14449711 | NC_021163.1    | Ca_kabuli_chr04 | 14449711                | AA                              | CC                | 1945935721               |
| SNP_P3_40132_14450560 | NC_021163.1    | Ca_kabuli_chr04 | 14450560                | GG                              | AA                | 1945935723               |
| SNP_P3_40133_14451585 | NC_021163.1    | Ca_kabuli_chr04 | 14451585                | CC                              | TT                | 1945935725               |
| SNP_P3_40134_14491093 | NC_021163.1    | Ca_kabuli_chr04 | 14491093                | AA                              | CC                | 1945935727               |
| SNP_P3_40136_14556421 | NC_021163.1    | Ca_kabuli_chr04 | 14556421                | TT                              | GG                | 1945935728               |
| SNP_P3_40137_14556477 | NC_021163.1    | Ca_kabuli_chr04 | 14556477                | TT                              | CC                | 1945935730               |
| SNP_P3_40138_14556489 | NC_021163.1    | Ca_kabuli_chr04 | 14556489                | AA                              | GG                | 1945935732               |
| SNP_P3_40139_14556676 | NC_021163.1    | Ca_kabuli_chr04 | 14556676                | GG                              | AA                | 1945935734               |
| SNP_P3_40141_14598016 | NC_021163.1    | Ca_kabuli_chr04 | 14598016                | TT                              | GG                | 1945935736               |
| SNP_P3_40145_14729430 | NC_021163.1    | Ca_kabuli_chr04 | 14729430                | GG                              | AA                | 1945935737               |
| SNP_P3_40146_14742686 | NC_021163.1    | Ca_kabuli_chr04 | 14742686                | CC                              | TT                | 1945935739               |
| SNP_P3_40147_14772116 | NC_021163.1    | Ca_kabuli_chr04 | 14772116                | TT                              | AA                | 1945935741               |
| SNP_P3_40148_14772126 | NC_021163.1    | Ca_kabuli_chr04 | 14772126                | CC                              | TT                | 1945935743               |
| SNP_P3_40149_14772143 | NC_021163.1    | Ca_kabuli_chr04 | 14772143                | AA                              | GG                | 1945935744               |
| SNP_P3_40150_14772151 | NC_021163.1    | Ca_kabuli_chr04 | 14772151                | CC                              | AA                | 1945935746               |
| SNP_P3_40151_14772171 | NC_021163.1    | Ca_kabuli_chr04 | 14772171                | TT                              | CC                | 1945935748               |

| SNPs IDs              | Chromosome IDs | Chromosomes     | Physical positions (bp) | CDC Frontier (Reference genome) | (Pusa 256 & HPNB) | NCBI SNPdb Accession IDs |
|-----------------------|----------------|-----------------|-------------------------|---------------------------------|-------------------|--------------------------|
| SNP_P3_40152_14793944 | NC_021163.1    | Ca_kabuli_chr04 | 14793944                | GG                              | AA                | 1945935750               |
| SNP_P3_40153_14807354 | NC_021163.1    | Ca_kabuli_chr04 | 14807354                | TT                              | CC                | 1945935752               |
| SNP_P3_40154_14814071 | NC_021163.1    | Ca_kabuli_chr04 | 14814071                | AA                              | TT                | 1945935753               |
| SNP_P3_40156_14846175 | NC_021163.1    | Ca_kabuli_chr04 | 14846175                | TT                              | CC                | 1945935755               |
| SNP_P3_40157_14867245 | NC_021163.1    | Ca_kabuli_chr04 | 14867245                | TT                              | CC                | 1945935757               |
| SNP_P3_40158_14867416 | NC_021163.1    | Ca_kabuli_chr04 | 14867416                | TT                              | CC                | 1945935759               |
| SNP_P3_40159_14888299 | NC_021163.1    | Ca_kabuli_chr04 | 14888299                | CC                              | AA                | 1945935760               |
| SNP_P3_40160_14911647 | NC_021163.1    | Ca_kabuli_chr04 | 14911647                | GG                              | AA                | 1945935762               |
| SNP_P3_40161_14911691 | NC_021163.1    | Ca_kabuli_chr04 | 14911691                | GG                              | AA                | 1945935764               |
| SNP_P3_40162_14911692 | NC_021163.1    | Ca_kabuli_chr04 | 14911692                | AA                              | GG                | 1945935766               |
| SNP_P3_40163_14912372 | NC_021163.1    | Ca_kabuli_chr04 | 14912372                | TT                              | AA                | 1945935767               |
| SNP_P3_40165_14932690 | NC_021163.1    | Ca_kabuli_chr04 | 14932690                | AA                              | GG                | 1945935769               |
| SNP_P3_40166_14932838 | NC_021163.1    | Ca_kabuli_chr04 | 14932838                | CC                              | AA                | 1945935771               |
| SNP_P3_40167_14932858 | NC_021163.1    | Ca_kabuli_chr04 | 14932858                | GG                              | CC                | 1945935773               |
| SNP_P3_40169_14933063 | NC_021163.1    | Ca_kabuli_chr04 | 14933063                | AA                              | GG                | 1945935775               |
| SNP_P3_40170_14933118 | NC_021163.1    | Ca_kabuli_chr04 | 14933118                | GG                              | TT                | 1945935776               |
| SNP_P3_40171_14933179 | NC_021163.1    | Ca_kabuli_chr04 | 14933179                | CC                              | TT                | 1945935778               |
| SNP_P3_40172_14933187 | NC_021163.1    | Ca_kabuli_chr04 | 14933187                | TT                              | CC                | 1945935780               |
| SNP_P3_40173_14940221 | NC_021163.1    | Ca_kabuli_chr04 | 14940221                | TT                              | CC                | 1945935782               |
| SNP_P3_40175_14974978 | NC_021163.1    | Ca_kabuli_chr04 | 14974978                | GG                              | AA                | 1945935783               |
| SNP_P3_40176_14996914 | NC_021163.1    | Ca_kabuli_chr04 | 14996914                | CC                              | TT                | 1945935785               |
| SNP_P3_40178_14997168 | NC_021163.1    | Ca_kabuli_chr04 | 14997168                | CC                              | TT                | 1945935787               |
| SNP_P3_40179_14997210 | NC_021163.1    | Ca_kabuli_chr04 | 14997210                | GG                              | CC                | 1945935789               |
| SNP_P3_40180_14999788 | NC_021163.1    | Ca_kabuli_chr04 | 14999788                | CC                              | TT                | 1945935790               |
| SNP_P3_40181_14999871 | NC_021163.1    | Ca_kabuli_chr04 | 14999871                | GG                              | TT                | 1945935792               |
| SNP_P3_40182_14999877 | NC_021163.1    | Ca_kabuli_chr04 | 14999877                | GG                              | AA                | 1945935794               |
| SNP_P3_40183_14999899 | NC_021163.1    | Ca_kabuli_chr04 | 14999899                | TT                              | CC                | 1945935796               |
| SNP_P3_40184_14999984 | NC_021163.1    | Ca_kabuli_chr04 | 14999984                | CC                              | TT                | 1945935798               |
| SNP_P3_40185_14999994 | NC_021163.1    | Ca_kabuli_chr04 | 14999994                | TT                              | CC                | 1945935799               |
| SNP_P3_40186_15000054 | NC_021163.1    | Ca_kabuli_chr04 | 15000054                | TT                              | AA                | 1945935801               |
| SNP_P3_40187_15000059 | NC_021163.1    | Ca_kabuli_chr04 | 15000059                | AA                              | TT                | 1945935803               |
| SNP_P3_40188_15004610 | NC_021163.1    | Ca_kabuli_chr04 | 15004610                | TT                              | CC                | 1945935805               |
| SNP_P3_40189_15004759 | NC_021163.1    | Ca_kabuli_chr04 | 15004759                | TT                              | GG                | 1945935806               |
| SNP_P3_40190_15004763 | NC_021163.1    | Ca_kabuli_chr04 | 15004763                | GG                              | AA                | 1945935808               |
| SNP_P3_40191_15004797 | NC_021163.1    | Ca_kabuli_chr04 | 15004797                | TT                              | CC                | 1945935810               |
| SNP_P3_40192_15004920 | NC_021163.1    | Ca_kabuli_chr04 | 15004920                | AA                              | GG                | 1945935812               |
| SNP_P3_40193_15005007 | NC_021163.1    | Ca_kabuli_chr04 | 15005007                | CC                              | AA                | 1945935813               |
| SNP_P3_40194_15005022 | NC_021163.1    | Ca_kabuli_chr04 | 15005022                | AA                              | GG                | 1945935815               |
| SNP_P3_40195_15005027 | NC_021163.1    | Ca_kabuli_chr04 | 15005027                | TT                              | CC                | 1945935817               |
| SNP_P3_40196_15006257 | NC_021163.1    | Ca_kabuli_chr04 | 15006257                | AA                              | TT                | 1945935819               |
| SNP_P3_40200_15046083 | NC_021163.1    | Ca_kabuli_chr04 | 15046083                | AA                              | GG                | 1945935821               |
| SNP_P3_40201_15048106 | NC_021163.1    | Ca_kabuli_chr04 | 15048106                | TT                              | AA                | 1945935822               |

| SNPs IDs              | Chromosome IDs | Chromosomes     | Physical positions (bp) | CDC Frontier (Reference genome) | (Pusa 256 & HPNB) | NCBI SNPdb Accession IDs |
|-----------------------|----------------|-----------------|-------------------------|---------------------------------|-------------------|--------------------------|
| SNP_P3_40202_15048121 | NC_021163.1    | Ca_kabuli_chr04 | 15048121                | AA                              | CC                | 1945935824               |
| SNP_P3_40203_15048137 | NC_021163.1    | Ca_kabuli_chr04 | 15048137                | AA                              | TT                | 1945935826               |
| SNP_P3_40204_15048142 | NC_021163.1    | Ca_kabuli_chr04 | 15048142                | AA                              | CC                | 1945935828               |
| SNP_P3_40206_15048218 | NC_021163.1    | Ca_kabuli_chr04 | 15048218                | TT                              | AA                | 1945935829               |
| SNP_P3_40208_15081011 | NC_021163.1    | Ca_kabuli_chr04 | 15081011                | TT                              | CC                | 1945935831               |
| SNP_P3_40209_15081028 | NC_021163.1    | Ca_kabuli_chr04 | 15081028                | TT                              | CC                | 1945935833               |
| SNP_P3_40210_15081033 | NC_021163.1    | Ca_kabuli_chr04 | 15081033                | GG                              | AA                | 1945935835               |
| SNP_P3_40211_15081062 | NC_021163.1    | Ca_kabuli_chr04 | 15081062                | TT                              | AA                | 1945935836               |
| SNP_P3_40212_15081093 | NC_021163.1    | Ca_kabuli_chr04 | 15081093                | AA                              | GG                | 1945935838               |
| SNP_P3_40213_15081094 | NC_021163.1    | Ca_kabuli_chr04 | 15081094                | TT                              | GG                | 1945935840               |
| SNP_P3_40215_15118309 | NC_021163.1    | Ca_kabuli_chr04 | 15118309                | TT                              | GG                | 1945935842               |
| SNP_P3_40216_15118715 | NC_021163.1    | Ca_kabuli_chr04 | 15118715                | AA                              | GG                | 1945935844               |
| SNP_P3_40217_15118728 | NC_021163.1    | Ca_kabuli_chr04 | 15118728                | CC                              | TT                | 1945935845               |
| SNP_P3_40218_15118778 | NC_021163.1    | Ca_kabuli_chr04 | 15118778                | AA                              | TT                | 1945935847               |
| SNP_P3_40219_15133095 | NC_021163.1    | Ca_kabuli_chr04 | 15133095                | TT                              | AA                | 1945935849               |
| SNP_P3_40220_15163382 | NC_021163.1    | Ca_kabuli_chr04 | 15163382                | AA                              | GG                | 1945935851               |
| SNP_P3_40221_15170850 | NC_021163.1    | Ca_kabuli_chr04 | 15170850                | CC                              | TT                | 1945935852               |
| SNP_P3_40222_15174385 | NC_021163.1    | Ca_kabuli_chr04 | 15174385                | AA                              | CC                | 1945935854               |
| SNP_P3_40223_15174626 | NC_021163.1    | Ca_kabuli_chr04 | 15174626                | TT                              | CC                | 1945935856               |
| SNP_P3_40224_15181183 | NC_021163.1    | Ca_kabuli_chr04 | 15181183                | AA                              | GG                | 1945935858               |
| SNP_P3_40225_15208578 | NC_021163.1    | Ca_kabuli_chr04 | 15208578                | AA                              | TT                | 1945935859               |
| SNP_P3_40226_15208600 | NC_021163.1    | Ca_kabuli_chr04 | 15208600                | CC                              | GG                | 1945935861               |
| SNP_P3_40227_15222672 | NC_021163.1    | Ca_kabuli_chr04 | 15222672                | AA                              | TT                | 1945935863               |
| SNP_P3_40228_15230393 | NC_021163.1    | Ca_kabuli_chr04 | 15230393                | TT                              | AA                | 1945935865               |
| SNP_P3_40229_15292097 | NC_021163.1    | Ca_kabuli_chr04 | 15292097                | AA                              | GG                | 1945935867               |
| SNP_P3_40230_15293982 | NC_021163.1    | Ca_kabuli_chr04 | 15293982                | TT                              | GG                | 1945935868               |
| SNP_P3_40231_15294022 | NC_021163.1    | Ca_kabuli_chr04 | 15294022                | TT                              | CC                | 1945935870               |
| SNP_P3_40232_15333218 | NC_021163.1    | Ca_kabuli_chr04 | 15333218                | AA                              | GG                | 1945935872               |
| SNP_P3_40233_15333258 | NC_021163.1    | Ca_kabuli_chr04 | 15333258                | TT                              | CC                | 1945935874               |
| SNP_P3_40234_15333300 | NC_021163.1    | Ca_kabuli_chr04 | 15333300                | AA                              | GG                | 1945935875               |
| SNP_P3_40235_15333325 | NC_021163.1    | Ca_kabuli_chr04 | 15333325                | CC                              | TT                | 1945935877               |
| SNP_P3_40236_15333354 | NC_021163.1    | Ca_kabuli_chr04 | 15333354                | GG                              | AA                | 1945935879               |
| SNP_P3_40237_15333356 | NC_021163.1    | Ca_kabuli_chr04 | 15333356                | TT                              | CC                | 1945935881               |
| SNP_P3_40238_15333727 | NC_021163.1    | Ca_kabuli_chr04 | 15333727                | AA                              | CC                | 1945935883               |
| SNP_P3_40239_15343488 | NC_021163.1    | Ca_kabuli_chr04 | 15343488                | GG                              | AA                | 1945935884               |
| SNP_P3_40240_15347087 | NC_021163.1    | Ca_kabuli_chr04 | 15347087                | TT                              | CC                | 1945935886               |
| SNP_P3_40242_15401156 | NC_021163.1    | Ca_kabuli_chr04 | 15401156                | AA                              | CC                | 1945935888               |
| SNP_P3_40246_15465084 | NC_021163.1    | Ca_kabuli_chr04 | 15465084                | TT                              | AA                | 1945935890               |
| SNP_P3_40248_15523768 | NC_021163.1    | Ca_kabuli_chr04 | 15523768                | GG                              | AA                | 1945935891               |
| SNP_P3_40249_15527067 | NC_021163.1    | Ca_kabuli_chr04 | 15527067                | CC                              | TT                | 1945935893               |
| SNP_P3_40250_15573138 | NC_021163.1    | Ca_kabuli_chr04 | 15573138                | GG                              | AA                | 1945935895               |
| SNP_P3_40251_15573144 | NC_021163.1    | Ca_kabuli_chr04 | 15573144                | TT                              | AA                | 1945935897               |



| SNPs IDs              | Chromosome IDs | Chromosomes     | Physical positions (bp) | CDC Frontier (Reference genome) | (Pusa 256 & HPNB) | NCBI SNPdb Accession IDs |
|-----------------------|----------------|-----------------|-------------------------|---------------------------------|-------------------|--------------------------|
| SNP_P3_40252_15585095 | NC_021163.1    | Ca_kabuli_chr04 | 15585095                | AA                              | GG                | 1945935898               |
| SNP_P3_40253_15592863 | NC_021163.1    | Ca_kabuli_chr04 | 15592863                | AA                              | TT                | 1945935900               |
| SNP_P3_40254_15592864 | NC_021163.1    | Ca_kabuli_chr04 | 15592864                | AA                              | CC                | 1945935902               |
| SNP_P3_40255_15592865 | NC_021163.1    | Ca_kabuli_chr04 | 15592865                | AA                              | CC                | 1945935904               |
| SNP_P3_40256_15592924 | NC_021163.1    | Ca_kabuli_chr04 | 15592924                | GG                              | CC                | 1945935906               |
| SNP_P3_40257_15595736 | NC_021163.1    | Ca_kabuli_chr04 | 15595736                | TT                              | CC                | 1945935907               |
| SNP_P3_40258_15595799 | NC_021163.1    | Ca_kabuli_chr04 | 15595799                | AA                              | CC                | 1945935909               |
| SNP_P3_40260_15608255 | NC_021163.1    | Ca_kabuli_chr04 | 15608255                | AA                              | TT                | 1945935911               |
| SNP_P3_40261_15615853 | NC_021163.1    | Ca_kabuli_chr04 | 15615853                | TT                              | AA                | 1945935913               |
| SNP_P3_40262_15618716 | NC_021163.1    | Ca_kabuli_chr04 | 15618716                | TT                              | CC                | 1945935914               |
| SNP_P3_40263_15618717 | NC_021163.1    | Ca_kabuli_chr04 | 15618717                | TT                              | CC                | 1945935916               |
| SNP_P3_40264_15632684 | NC_021163.1    | Ca_kabuli_chr04 | 15632684                | TT                              | GG                | 1945935918               |
| SNP_P3_40265_15632697 | NC_021163.1    | Ca_kabuli_chr04 | 15632697                | TT                              | CC                | 1945935920               |
| SNP_P3_40266_15632699 | NC_021163.1    | Ca_kabuli_chr04 | 15632699                | GG                              | TT                | 1945935921               |
| SNP_P3_40268_15671062 | NC_021163.1    | Ca_kabuli_chr04 | 15671062                | GG                              | AA                | 1945935923               |
| SNP_P3_40269_15716532 | NC_021163.1    | Ca_kabuli_chr04 | 15716532                | GG                              | AA                | 1945935925               |
| SNP_P3_40270_15722159 | NC_021163.1    | Ca_kabuli_chr04 | 15722159                | TT                              | CC                | 1945935927               |
| SNP_P3_40271_15722177 | NC_021163.1    | Ca_kabuli_chr04 | 15722177                | TT                              | CC                | 1945935929               |
| SNP_P3_40272_15722268 | NC_021163.1    | Ca_kabuli_chr04 | 15722268                | TT                              | AA                | 1945935930               |
| SNP_P3_40273_15723210 | NC_021163.1    | Ca_kabuli_chr04 | 15723210                | TT                              | GG                | 1945935932               |
| SNP_P3_40274_15749262 | NC_021163.1    | Ca_kabuli_chr04 | 15749262                | CC                              | AA                | 1945935934               |
| SNP_P3_40277_15788330 | NC_021163.1    | Ca_kabuli_chr04 | 15788330                | AA                              | CC                | 1945935936               |
| SNP_P3_40278_15788354 | NC_021163.1    | Ca_kabuli_chr04 | 15788354                | AA                              | GG                | 1945935937               |
| SNP_P3_40279_15788398 | NC_021163.1    | Ca_kabuli_chr04 | 15788398                | GG                              | AA                | 1945935939               |
| SNP_P3_40280_15788479 | NC_021163.1    | Ca_kabuli_chr04 | 15788479                | TT                              | CC                | 1945935941               |
| SNP_P3_40281_15788493 | NC_021163.1    | Ca_kabuli_chr04 | 15788493                | GG                              | AA                | 1945935943               |
| SNP_P3_40282_15788495 | NC_021163.1    | Ca_kabuli_chr04 | 15788495                | GG                              | CC                | 1945935945               |
| SNP_P3_40283_15788519 | NC_021163.1    | Ca_kabuli_chr04 | 15788519                | TT                              | CC                | 1945935946               |
| SNP_P3_40284_15788546 | NC_021163.1    | Ca_kabuli_chr04 | 15788546                | TT                              | CC                | 1945935948               |
| SNP_P3_40285_15788555 | NC_021163.1    | Ca_kabuli_chr04 | 15788555                | AA                              | GG                | 1945935950               |
| SNP_P3_40286_15788564 | NC_021163.1    | Ca_kabuli_chr04 | 15788564                | GG                              | AA                | 1945935952               |
| SNP_P3_40287_15788718 | NC_021163.1    | Ca_kabuli_chr04 | 15788718                | GG                              | TT                | 1945935953               |
| SNP_P3_40288_15788721 | NC_021163.1    | Ca_kabuli_chr04 | 15788721                | TT                              | CC                | 1945935955               |
| SNP_P3_40289_15788754 | NC_021163.1    | Ca_kabuli_chr04 | 15788754                | GG                              | AA                | 1945935957               |
| SNP_P3_40290_15788830 | NC_021163.1    | Ca_kabuli_chr04 | 15788830                | TT                              | GG                | 1945935959               |
| SNP_P3_40291_15788849 | NC_021163.1    | Ca_kabuli_chr04 | 15788849                | CC                              | TT                | 1945935961               |
| SNP_P3_40292_15801277 | NC_021163.1    | Ca_kabuli_chr04 | 15801277                | TT                              | CC                | 1945935962               |
| SNP_P3_40293_15801308 | NC_021163.1    | Ca_kabuli_chr04 | 15801308                | CC                              | TT                | 1945935964               |
| SNP_P3_40294_15801376 | NC_021163.1    | Ca_kabuli_chr04 | 15801376                | AA                              | CC                | 1945935966               |
| SNP_P3_40295_15801379 | NC_021163.1    | Ca_kabuli_chr04 | 15801379                | TT                              | CC                | 1945935968               |
| SNP_P3_40296_15801386 | NC_021163.1    | Ca_kabuli_chr04 | 15801386                | AA                              | TT                | 1945935969               |
| SNP_P3_40297_15801397 | NC_021163.1    | Ca_kabuli_chr04 | 15801397                | AA                              | GG                | 1945935971               |

| SNPs IDs              | Chromosome IDs | Chromosomes     | Physical positions (bp) | CDC Frontier (Reference genome) | (Pusa 256 & HPNB) | NCBI SNPdb Accession IDs |
|-----------------------|----------------|-----------------|-------------------------|---------------------------------|-------------------|--------------------------|
| SNP_P3_40298_15815202 | NC_021163.1    | Ca_kabuli_chr04 | 15815202                | TT                              | CC                | 1945935973               |
| SNP_P3_40299_15815766 | NC_021163.1    | Ca_kabuli_chr04 | 15815766                | AA                              | GG                | 1945935975               |
| SNP_P3_40300_15826056 | NC_021163.1    | Ca_kabuli_chr04 | 15826056                | TT                              | AA                | 1945935976               |
| SNP_P3_40301_15839469 | NC_021163.1    | Ca_kabuli_chr04 | 15839469                | AA                              | TT                | 1945935978               |
| SNP_P3_40302_15860021 | NC_021163.1    | Ca_kabuli_chr04 | 15860021                | AA                              | TT                | 1945935980               |
| SNP_P3_40303_15878368 | NC_021163.1    | Ca_kabuli_chr04 | 15878368                | GG                              | TT                | 1945935982               |
| SNP_P3_40305_15885893 | NC_021163.1    | Ca_kabuli_chr04 | 15885893                | AA                              | GG                | 1945935984               |
| SNP_P3_40306_15904949 | NC_021163.1    | Ca_kabuli_chr04 | 15904949                | CC                              | GG                | 1945935985               |
| SNP_P3_40307_15908905 | NC_021163.1    | Ca_kabuli_chr04 | 15908905                | GG                              | AA                | 1945935987               |
| SNP_P3_40308_15917177 | NC_021163.1    | Ca_kabuli_chr04 | 15917177                | TT                              | GG                | 1945935989               |
| SNP_P3_40309_15917459 | NC_021163.1    | Ca_kabuli_chr04 | 15917459                | AA                              | GG                | 1945935991               |
| SNP_P3_40310_15918443 | NC_021163.1    | Ca_kabuli_chr04 | 15918443                | GG                              | AA                | 1945935992               |
| SNP_P3_40311_15918463 | NC_021163.1    | Ca_kabuli_chr04 | 15918463                | TT                              | AA                | 1945935994               |
| SNP_P3_40312_15925154 | NC_021163.1    | Ca_kabuli_chr04 | 15925154                | CC                              | TT                | 1945935996               |
| SNP_P3_40313_15926318 | NC_021163.1    | Ca_kabuli_chr04 | 15926318                | GG                              | AA                | 1945935998               |
| SNP_P3_40314_15927605 | NC_021163.1    | Ca_kabuli_chr04 | 15927605                | GG                              | TT                | 1945936000               |
| SNP_P3_40315_15930674 | NC_021163.1    | Ca_kabuli_chr04 | 15930674                | AA                              | TT                | 1945936001               |
| SNP_P3_40316_15931210 | NC_021163.1    | Ca_kabuli_chr04 | 15931210                | AA                              | TT                | 1945936003               |
| SNP_P3_40317_15932499 | NC_021163.1    | Ca_kabuli_chr04 | 15932499                | AA                              | GG                | 1945936005               |
| SNP_P3_40318_15932740 | NC_021163.1    | Ca_kabuli_chr04 | 15932740                | GG                              | AA                | 1945936007               |
| SNP_P3_40319_15932744 | NC_021163.1    | Ca_kabuli_chr04 | 15932744                | CC                              | TT                | 1945936008               |
| SNP_P3_40320_15935794 | NC_021163.1    | Ca_kabuli_chr04 | 15935794                | AA                              | GG                | 1945936010               |
| SNP_P3_40321_15935863 | NC_021163.1    | Ca_kabuli_chr04 | 15935863                | CC                              | GG                | 1945936012               |
| SNP_P3_40322_15936134 | NC_021163.1    | Ca_kabuli_chr04 | 15936134                | CC                              | TT                | 1945936014               |
| SNP_P3_40324_15936526 | NC_021163.1    | Ca_kabuli_chr04 | 15936526                | AA                              | GG                | 1945936015               |
| SNP_P3_40325_15936583 | NC_021163.1    | Ca_kabuli_chr04 | 15936583                | GG                              | AA                | 1945936017               |
| SNP_P3_40326_15937238 | NC_021163.1    | Ca_kabuli_chr04 | 15937238                | AA                              | CC                | 1945936019               |
| SNP_P3_40327_15938078 | NC_021163.1    | Ca_kabuli_chr04 | 15938078                | TT                              | CC                | 1945936021               |
| SNP_P3_40328_15938089 | NC_021163.1    | Ca_kabuli_chr04 | 15938089                | GG                              | AA                | 1945936023               |
| SNP_P3_40329_15938274 | NC_021163.1    | Ca_kabuli_chr04 | 15938274                | AA                              | GG                | 1945936024               |
| SNP_P3_40330_15938371 | NC_021163.1    | Ca_kabuli_chr04 | 15938371                | CC                              | GG                | 1945936026               |
| SNP_P3_40331_15938583 | NC_021163.1    | Ca_kabuli_chr04 | 15938583                | TT                              | CC                | 1945936028               |
| SNP_P3_40332_15938924 | NC_021163.1    | Ca_kabuli_chr04 | 15938924                | GG                              | AA                | 1945936030               |
| SNP_P3_40333_15939707 | NC_021163.1    | Ca_kabuli_chr04 | 15939707                | CC                              | TT                | 1945936031               |
| SNP_P3_40334_15940594 | NC_021163.1    | Ca_kabuli_chr04 | 15940594                | TT                              | CC                | 1945936033               |
| SNP_P3_40335_15941236 | NC_021163.1    | Ca_kabuli_chr04 | 15941236                | AA                              | TT                | 1945936035               |
| SNP_P3_40336_15943053 | NC_021163.1    | Ca_kabuli_chr04 | 15943053                | TT                              | GG                | 1945936037               |
| SNP_P3_40337_15943498 | NC_021163.1    | Ca_kabuli_chr04 | 15943498                | GG                              | CC                | 1945936038               |
| SNP_P3_40338_15943861 | NC_021163.1    | Ca_kabuli_chr04 | 15943861                | GG                              | CC                | 1945936040               |
| SNP_P3_40339_15949651 | NC_021163.1    | Ca_kabuli_chr04 | 15949651                | AA                              | GG                | 1945936042               |
| SNP_P3_40340_15951868 | NC_021163.1    | Ca_kabuli_chr04 | 15951868                | TT                              | CC                | 1945936044               |
| SNP_P3_40341_15951880 | NC_021163.1    | Ca_kabuli_chr04 | 15951880                | AA                              | TT                | 1945936046               |

| SNPs IDs              | Chromosome IDs | Chromosomes     | Physical positions (bp) | CDC Frontier (Reference genome) | (Pusa 256 & HPNB) | NCBI SNPdb Accession IDs |
|-----------------------|----------------|-----------------|-------------------------|---------------------------------|-------------------|--------------------------|
| SNP_P3_40342_15954373 | NC_021163.1    | Ca_kabuli_chr04 | 15954373                | AA                              | TT                | 1945936047               |
| SNP_P3_40343_15954398 | NC_021163.1    | Ca_kabuli_chr04 | 15954398                | GG                              | AA                | 1945936049               |
| SNP_P3_40344_15954403 | NC_021163.1    | Ca_kabuli_chr04 | 15954403                | TT                              | CC                | 1945936051               |
| SNP_P3_40345_15957521 | NC_021163.1    | Ca_kabuli_chr04 | 15957521                | TT                              | CC                | 1945936053               |
| SNP_P3_40346_15957554 | NC_021163.1    | Ca_kabuli_chr04 | 15957554                | CC                              | GG                | 1945936054               |
| SNP_P3_40347_15957571 | NC_021163.1    | Ca_kabuli_chr04 | 15957571                | CC                              | AA                | 1945936056               |
| SNP_P3_40348_15957598 | NC_021163.1    | Ca_kabuli_chr04 | 15957598                | TT                              | CC                | 1945936058               |
| SNP_P3_40349_15959491 | NC_021163.1    | Ca_kabuli_chr04 | 15959491                | GG                              | TT                | 1945936060               |
| SNP_P3_40350_15959499 | NC_021163.1    | Ca_kabuli_chr04 | 15959499                | TT                              | CC                | 1945936062               |
| SNP_P3_40351_15959516 | NC_021163.1    | Ca_kabuli_chr04 | 15959516                | CC                              | TT                | 1945936063               |
| SNP_P3_40352_15959729 | NC_021163.1    | Ca_kabuli_chr04 | 15959729                | TT                              | CC                | 1945936065               |
| SNP_P3_40353_15959936 | NC_021163.1    | Ca_kabuli_chr04 | 15959936                | CC                              | TT                | 1945936067               |
| SNP_P3_40354_15960964 | NC_021163.1    | Ca_kabuli_chr04 | 15960964                | TT                              | AA                | 1945936069               |
| SNP_P3_40355_15963332 | NC_021163.1    | Ca_kabuli_chr04 | 15963332                | TT                              | CC                | 1945936070               |
| SNP_P3_40356_15964348 | NC_021163.1    | Ca_kabuli_chr04 | 15964348                | GG                              | AA                | 1945936072               |
| SNP_P3_40357_15964388 | NC_021163.1    | Ca_kabuli_chr04 | 15964388                | AA                              | GG                | 1945936074               |
| SNP_P3_40358_15964391 | NC_021163.1    | Ca_kabuli_chr04 | 15964391                | TT                              | AA                | 1945936076               |
| SNP_P3_40359_15966550 | NC_021163.1    | Ca_kabuli_chr04 | 15966550                | GG                              | AA                | 1945936077               |
| SNP_P3_40360_15967628 | NC_021163.1    | Ca_kabuli_chr04 | 15967628                | TT                              | AA                | 1945936079               |
| SNP_P3_40361_15967629 | NC_021163.1    | Ca_kabuli_chr04 | 15967629                | AA                              | GG                | 1945936081               |
| SNP_P3_40362_15972941 | NC_021163.1    | Ca_kabuli_chr04 | 15972941                | TT                              | GG                | 1945936083               |
| SNP_P3_40363_15972976 | NC_021163.1    | Ca_kabuli_chr04 | 15972976                | AA                              | CC                | 1945936085               |
| SNP_P3_40364_15975869 | NC_021163.1    | Ca_kabuli_chr04 | 15975869                | TT                              | CC                | 1945936086               |
| SNP_P3_40365_15975886 | NC_021163.1    | Ca_kabuli_chr04 | 15975886                | GG                              | TT                | 1945936088               |
| SNP_P3_40366_15981417 | NC_021163.1    | Ca_kabuli_chr04 | 15981417                | TT                              | GG                | 1945936090               |
| SNP_P3_40367_15982086 | NC_021163.1    | Ca_kabuli_chr04 | 15982086                | GG                              | TT                | 1945936092               |
| SNP_P3_40368_15983274 | NC_021163.1    | Ca_kabuli_chr04 | 15983274                | AA                              | GG                | 1945936093               |
| SNP_P3_40369_15984228 | NC_021163.1    | Ca_kabuli_chr04 | 15984228                | TT                              | GG                | 1945936095               |
| SNP_P3_40370_15984755 | NC_021163.1    | Ca_kabuli_chr04 | 15984755                | AA                              | GG                | 1945936097               |
| SNP_P3_40371_15984941 | NC_021163.1    | Ca_kabuli_chr04 | 15984941                | TT                              | GG                | 1945936099               |
| SNP_P3_40372_15984995 | NC_021163.1    | Ca_kabuli_chr04 | 15984995                | CC                              | TT                | 1945936101               |
| SNP_P3_40373_15985045 | NC_021163.1    | Ca_kabuli_chr04 | 15985045                | TT                              | AA                | 1945936102               |
| SNP_P3_40374_15985167 | NC_021163.1    | Ca_kabuli_chr04 | 15985167                | TT                              | CC                | 1945936104               |
| SNP_P3_40375_15985271 | NC_021163.1    | Ca_kabuli_chr04 | 15985271                | CC                              | TT                | 1945936106               |
| SNP_P3_40376_15985283 | NC_021163.1    | Ca_kabuli_chr04 | 15985283                | TT                              | CC                | 1945936108               |
| SNP_P3_40377_15985466 | NC_021163.1    | Ca_kabuli_chr04 | 15985466                | CC                              | TT                | 1945936109               |
| SNP_P3_40379_15989361 | NC_021163.1    | Ca_kabuli_chr04 | 15989361                | CC                              | TT                | 1945936111               |
| SNP_P3_40380_15989868 | NC_021163.1    | Ca_kabuli_chr04 | 15989868                | AA                              | GG                | 1945936113               |
| SNP_P3_40382_15992454 | NC_021163.1    | Ca_kabuli_chr04 | 15992454                | AA                              | GG                | 1945936115               |
| SNP_P3_40383_15996386 | NC_021163.1    | Ca_kabuli_chr04 | 15996386                | AA                              | GG                | 1945936116               |
| SNP_P3_40384_15998140 | NC_021163.1    | Ca_kabuli_chr04 | 15998140                | GG                              | AA                | 1945936118               |
| SNP_P3_40385_15998147 | NC_021163.1    | Ca_kabuli_chr04 | 15998147                | AA                              | GG                | 1945936120               |

| SNPs IDs              | Chromosome IDs | Chromosomes     | Physical positions (bp) | CDC Frontier (Reference genome) | (Pusa 256 & HPNB) | NCBI SNPdb Accession IDs |
|-----------------------|----------------|-----------------|-------------------------|---------------------------------|-------------------|--------------------------|
| SNP_P3_40387_16010042 | NC_021163.1    | Ca_kabuli_chr04 | 16010042                | TT                              | CC                | 1945936122               |
| SNP_P3_40388_16012029 | NC_021163.1    | Ca_kabuli_chr04 | 16012029                | GG                              | AA                | 1945936124               |
| SNP_P3_40389_16012465 | NC_021163.1    | Ca_kabuli_chr04 | 16012465                | AA                              | GG                | 1945936125               |
| SNP_P3_40390_16023634 | NC_021163.1    | Ca_kabuli_chr04 | 16023634                | TT                              | GG                | 1945936127               |
| SNP_P3_40391_16025613 | NC_021163.1    | Ca_kabuli_chr04 | 16025613                | TT                              | CC                | 1945936129               |
| SNP_P3_40392_16025834 | NC_021163.1    | Ca_kabuli_chr04 | 16025834                | TT                              | CC                | 1945936131               |
| SNP_P3_40393_16025878 | NC_021163.1    | Ca_kabuli_chr04 | 16025878                | GG                              | CC                | 1945936132               |
| SNP_P3_40394_16025879 | NC_021163.1    | Ca_kabuli_chr04 | 16025879                | CC                              | TT                | 1945936134               |
| SNP_P3_40395_16025882 | NC_021163.1    | Ca_kabuli_chr04 | 16025882                | CC                              | AA                | 1945936136               |
| SNP_P3_40396_16026095 | NC_021163.1    | Ca_kabuli_chr04 | 16026095                | CC                              | AA                | 1945936138               |
| SNP_P3_40397_16026131 | NC_021163.1    | Ca_kabuli_chr04 | 16026131                | AA                              | GG                | 1945936140               |
| SNP_P3_40398_16026157 | NC_021163.1    | Ca_kabuli_chr04 | 16026157                | CC                              | TT                | 1945936141               |
| SNP_P3_40399_16026972 | NC_021163.1    | Ca_kabuli_chr04 | 16026972                | GG                              | CC                | 1945936143               |
| SNP_P3_40400_16026979 | NC_021163.1    | Ca_kabuli_chr04 | 16026979                | CC                              | TT                | 1945936145               |
| SNP_P3_40401_16027227 | NC_021163.1    | Ca_kabuli_chr04 | 16027227                | GG                              | AA                | 1945936147               |
| SNP_P3_40402_16027272 | NC_021163.1    | Ca_kabuli_chr04 | 16027272                | GG                              | AA                | 1945936148               |
| SNP_P3_40403_16027292 | NC_021163.1    | Ca_kabuli_chr04 | 16027292                | AA                              | CC                | 1945936150               |
| SNP_P3_40404_16027299 | NC_021163.1    | Ca_kabuli_chr04 | 16027299                | TT                              | AA                | 1945936152               |
| SNP_P3_40405_16028165 | NC_021163.1    | Ca_kabuli_chr04 | 16028165                | CC                              | TT                | 1945936154               |
| SNP_P3_40406_16028709 | NC_021163.1    | Ca_kabuli_chr04 | 16028709                | TT                              | GG                | 1945936155               |
| SNP_P3_40407_16028729 | NC_021163.1    | Ca_kabuli_chr04 | 16028729                | GG                              | TT                | 1945936157               |
| SNP_P3_40408_16030999 | NC_021163.1    | Ca_kabuli_chr04 | 16030999                | CC                              | GG                | 1945936159               |
| SNP_P3_40409_16031593 | NC_021163.1    | Ca_kabuli_chr04 | 16031593                | TT                              | GG                | 1945936161               |
| SNP_P3_40410_16042350 | NC_021163.1    | Ca_kabuli_chr04 | 16042350                | TT                              | CC                | 1945936163               |
| SNP_P3_40411_16042553 | NC_021163.1    | Ca_kabuli_chr04 | 16042553                | GG                              | TT                | 1945936164               |
| SNP_P3_40412_16042562 | NC_021163.1    | Ca_kabuli_chr04 | 16042562                | TT                              | CC                | 1945936166               |
| SNP_P3_40413_16042565 | NC_021163.1    | Ca_kabuli_chr04 | 16042565                | CC                              | TT                | 1945936168               |
| SNP_P3_40414_16044321 | NC_021163.1    | Ca_kabuli_chr04 | 16044321                | TT                              | CC                | 1945936170               |
| SNP_P3_40415_16044338 | NC_021163.1    | Ca_kabuli_chr04 | 16044338                | TT                              | CC                | 1945936171               |
| SNP_P3_40416_16047195 | NC_021163.1    | Ca_kabuli_chr04 | 16047195                | GG                              | AA                | 1945936173               |
| SNP_P3_40417_16049010 | NC_021163.1    | Ca_kabuli_chr04 | 16049010                | AA                              | GG                | 1945936175               |
| SNP_P3_40418_16049037 | NC_021163.1    | Ca_kabuli_chr04 | 16049037                | AA                              | GG                | 1945936177               |
| SNP_P3_40419_16049168 | NC_021163.1    | Ca_kabuli_chr04 | 16049168                | GG                              | CC                | 1945936178               |
| SNP_P3_40420_16049395 | NC_021163.1    | Ca_kabuli_chr04 | 16049395                | AA                              | GG                | 1945936180               |
| SNP_P3_40422_16051721 | NC_021163.1    | Ca_kabuli_chr04 | 16051721                | AA                              | GG                | 1945936182               |
| SNP_P3_40423_16053590 | NC_021163.1    | Ca_kabuli_chr04 | 16053590                | GG                              | TT                | 1945936184               |
| SNP_P3_40424_16053599 | NC_021163.1    | Ca_kabuli_chr04 | 16053599                | CC                              | GG                | 1945936186               |
| SNP_P3_40425_16055627 | NC_021163.1    | Ca_kabuli_chr04 | 16055627                | CC                              | AA                | 1945936187               |
| SNP_P3_40426_16055649 | NC_021163.1    | Ca_kabuli_chr04 | 16055649                | GG                              | CC                | 1945936189               |
| SNP_P3_40427_16055785 | NC_021163.1    | Ca_kabuli_chr04 | 16055785                | CC                              | TT                | 1945936191               |
| SNP_P3_40428_16061142 | NC_021163.1    | Ca_kabuli_chr04 | 16061142                | TT                              | AA                | 1945936193               |
| SNP_P3_40429_16061164 | NC_021163.1    | Ca_kabuli_chr04 | 16061164                | CC                              | AA                | 1945936194               |

| SNPs IDs              | Chromosome IDs | Chromosomes     | Physical positions (bp) | CDC Frontier (Reference genome) | (Pusa 256 & HPNB) | NCBI SNPdb Accession IDs |
|-----------------------|----------------|-----------------|-------------------------|---------------------------------|-------------------|--------------------------|
| SNP_P3_40430_16061165 | NC_021163.1    | Ca_kabuli_chr04 | 16061165                | AA                              | CC                | 1945936196               |
| SNP_P3_40431_16061511 | NC_021163.1    | Ca_kabuli_chr04 | 16061511                | TT                              | CC                | 1945936198               |
| SNP_P3_40432_16061898 | NC_021163.1    | Ca_kabuli_chr04 | 16061898                | CC                              | AA                | 1945936200               |
| SNP_P3_40433_16062197 | NC_021163.1    | Ca_kabuli_chr04 | 16062197                | TT                              | AA                | 1945936202               |
| SNP_P3_40436_16065737 | NC_021163.1    | Ca_kabuli_chr04 | 16065737                | GG                              | AA                | 1945936203               |
| SNP_P3_40437_16065784 | NC_021163.1    | Ca_kabuli_chr04 | 16065784                | AA                              | TT                | 1945936205               |
| SNP_P3_40438_16066011 | NC_021163.1    | Ca_kabuli_chr04 | 16066011                | GG                              | AA                | 1945936207               |
| SNP_P3_40439_16066167 | NC_021163.1    | Ca_kabuli_chr04 | 16066167                | CC                              | GG                | 1945936209               |
| SNP_P3_40441_16072589 | NC_021163.1    | Ca_kabuli_chr04 | 16072589                | TT                              | GG                | 1945936210               |
| SNP_P3_40442_16072597 | NC_021163.1    | Ca_kabuli_chr04 | 16072597                | AA                              | TT                | 1945936212               |
| SNP_P3_40444_16073768 | NC_021163.1    | Ca_kabuli_chr04 | 16073768                | CC                              | TT                | 1945936214               |
| SNP_P3_40445_16074072 | NC_021163.1    | Ca_kabuli_chr04 | 16074072                | CC                              | AA                | 1945936216               |
| SNP_P3_40446_16074836 | NC_021163.1    | Ca_kabuli_chr04 | 16074836                | TT                              | CC                | 1945936217               |
| SNP_P3_40447_16075296 | NC_021163.1    | Ca_kabuli_chr04 | 16075296                | AA                              | TT                | 1945936219               |
| SNP_P3_40448_16076166 | NC_021163.1    | Ca_kabuli_chr04 | 16076166                | TT                              | CC                | 1945936221               |
| SNP_P3_40449_16076177 | NC_021163.1    | Ca_kabuli_chr04 | 16076177                | CC                              | TT                | 1945936223               |
| SNP_P3_40450_16079762 | NC_021163.1    | Ca_kabuli_chr04 | 16079762                | AA                              | CC                | 1945936225               |
| SNP_P3_40452_16079838 | NC_021163.1    | Ca_kabuli_chr04 | 16079838                | TT                              | AA                | 1945936226               |
| SNP_P3_40453_16080199 | NC_021163.1    | Ca_kabuli_chr04 | 16080199                | AA                              | TT                | 1945936228               |
| SNP_P3_40454_16080208 | NC_021163.1    | Ca_kabuli_chr04 | 16080208                | CC                              | TT                | 1945936230               |
| SNP_P3_40456_16080595 | NC_021163.1    | Ca_kabuli_chr04 | 16080595                | GG                              | TT                | 1945936232               |
| SNP_P3_40457_16080617 | NC_021163.1    | Ca_kabuli_chr04 | 16080617                | GG                              | AA                | 1945936233               |
| SNP_P3_40458_16080620 | NC_021163.1    | Ca_kabuli_chr04 | 16080620                | TT                              | AA                | 1945936235               |
| SNP_P3_40459_16082469 | NC_021163.1    | Ca_kabuli_chr04 | 16082469                | TT                              | CC                | 1945936237               |
| SNP_P3_40460_16082813 | NC_021163.1    | Ca_kabuli_chr04 | 16082813                | CC                              | TT                | 1945936239               |
| SNP_P3_40461_16082874 | NC_021163.1    | Ca_kabuli_chr04 | 16082874                | TT                              | CC                | 1945936240               |
| SNP_P3_40462_16082884 | NC_021163.1    | Ca_kabuli_chr04 | 16082884                | CC                              | TT                | 1945936242               |
| SNP_P3_40464_16084630 | NC_021163.1    | Ca_kabuli_chr04 | 16084630                | TT                              | CC                | 1945936244               |
| SNP_P3_40465_16084641 | NC_021163.1    | Ca_kabuli_chr04 | 16084641                | GG                              | AA                | 1945936246               |
| SNP_P3_40466_16085164 | NC_021163.1    | Ca_kabuli_chr04 | 16085164                | AA                              | CC                | 1945936248               |
| SNP_P3_40468_16089682 | NC_021163.1    | Ca_kabuli_chr04 | 16089682                | GG                              | TT                | 1945936249               |
| SNP_P3_40469_16095029 | NC_021163.1    | Ca_kabuli_chr04 | 16095029                | CC                              | TT                | 1945936251               |
| SNP_P3_40470_16097934 | NC_021163.1    | Ca_kabuli_chr04 | 16097934                | CC                              | TT                | 1945936253               |
| SNP_P3_40471_16098269 | NC_021163.1    | Ca_kabuli_chr04 | 16098269                | TT                              | CC                | 1945936255               |
| SNP_P3_40472_16098284 | NC_021163.1    | Ca_kabuli_chr04 | 16098284                | GG                              | AA                | 1945936256               |
| SNP_P3_40473_16098287 | NC_021163.1    | Ca_kabuli_chr04 | 16098287                | AA                              | TT                | 1945936258               |
| SNP_P3_40474_16098294 | NC_021163.1    | Ca_kabuli_chr04 | 16098294                | CC                              | TT                | 1945936260               |
| SNP_P3_40475_16098495 | NC_021163.1    | Ca_kabuli_chr04 | 16098495                | TT                              | AA                | 1945936262               |
| SNP_P3_40476_16098514 | NC_021163.1    | Ca_kabuli_chr04 | 16098514                | CC                              | TT                | 1945936263               |
| SNP_P3_40477_16098774 | NC_021163.1    | Ca_kabuli_chr04 | 16098774                | GG                              | AA                | 1945936265               |
| SNP_P3_40478_16098853 | NC_021163.1    | Ca_kabuli_chr04 | 16098853                | CC                              | TT                | 1945936267               |
| SNP_P3_40479_16098897 | NC_021163.1    | Ca_kabuli_chr04 | 16098897                | GG                              | AA                | 1945936269               |

| SNPs IDs              | Chromosome IDs | Chromosomes     | Physical positions (bp) | CDC Frontier (Reference genome) | (Pusa 256 & HPNB) | NCBI SNPdb Accession IDs |
|-----------------------|----------------|-----------------|-------------------------|---------------------------------|-------------------|--------------------------|
| SNP_P3_40480_16098933 | NC_021163.1    | Ca_kabuli_chr04 | 16098933                | CC                              | TT                | 1945936271               |
| SNP_P3_40481_16098986 | NC_021163.1    | Ca_kabuli_chr04 | 16098986                | CC                              | TT                | 1945936272               |
| SNP_P3_40482_16098989 | NC_021163.1    | Ca_kabuli_chr04 | 16098989                | AA                              | GG                | 1945936274               |
| SNP_P3_40483_16098993 | NC_021163.1    | Ca_kabuli_chr04 | 16098993                | CC                              | TT                | 1945936276               |
| SNP_P3_40484_16098996 | NC_021163.1    | Ca_kabuli_chr04 | 16098996                | TT                              | AA                | 1945936278               |
| SNP_P3_40485_16099016 | NC_021163.1    | Ca_kabuli_chr04 | 16099016                | CC                              | TT                | 1945936279               |
| SNP_P3_40487_16100067 | NC_021163.1    | Ca_kabuli_chr04 | 16100067                | AA                              | CC                | 1945936281               |
| SNP_P3_40488_16109812 | NC_021163.1    | Ca_kabuli_chr04 | 16109812                | GG                              | AA                | 1945936283               |
| SNP_P3_40489_16115615 | NC_021163.1    | Ca_kabuli_chr04 | 16115615                | AA                              | GG                | 1945936285               |
| SNP_P3_40490_16130942 | NC_021163.1    | Ca_kabuli_chr04 | 16130942                | TT                              | AA                | 1945936287               |
| SNP_P3_40491_16131350 | NC_021163.1    | Ca_kabuli_chr04 | 16131350                | GG                              | AA                | 1945936288               |
| SNP_P3_40492_16146382 | NC_021163.1    | Ca_kabuli_chr04 | 16146382                | TT                              | AA                | 1945936290               |
| SNP_P3_40494_16146596 | NC_021163.1    | Ca_kabuli_chr04 | 16146596                | CC                              | TT                | 1945936292               |
| SNP_P3_40495_16146601 | NC_021163.1    | Ca_kabuli_chr04 | 16146601                | AA                              | GG                | 1945936294               |
| SNP_P3_40496_16172082 | NC_021163.1    | Ca_kabuli_chr04 | 16172082                | TT                              | CC                | 1945936295               |
| SNP_P3_40497_16180719 | NC_021163.1    | Ca_kabuli_chr04 | 16180719                | TT                              | CC                | 1945936297               |
| SNP_P3_40498_16181369 | NC_021163.1    | Ca_kabuli_chr04 | 16181369                | GG                              | AA                | 1945936299               |
| SNP_P3_40499_16186641 | NC_021163.1    | Ca_kabuli_chr04 | 16186641                | CC                              | TT                | 1945936301               |
| SNP_P3_40500_16203354 | NC_021163.1    | Ca_kabuli_chr04 | 16203354                | AA                              | GG                | 1945936302               |
| SNP_P3_40501_16205706 | NC_021163.1    | Ca_kabuli_chr04 | 16205706                | TT                              | CC                | 1945936304               |
| SNP_P3_40502_16207312 | NC_021163.1    | Ca_kabuli_chr04 | 16207312                | AA                              | GG                | 1945936306               |
| SNP_P3_40504_16230914 | NC_021163.1    | Ca_kabuli_chr04 | 16230914                | CC                              | TT                | 1945936308               |
| SNP_P3_40506_16250499 | NC_021163.1    | Ca_kabuli_chr04 | 16250499                | CC                              | TT                | 1945936310               |
| SNP_P3_40507_16262073 | NC_021163.1    | Ca_kabuli_chr04 | 16262073                | AA                              | GG                | 1945936311               |
| SNP_P3_40509_16295588 | NC_021163.1    | Ca_kabuli_chr04 | 16295588                | GG                              | AA                | 1945936313               |
| SNP_P3_40512_16309152 | NC_021163.1    | Ca_kabuli_chr04 | 16309152                | AA                              | GG                | 1945936315               |
| SNP_P3_40513_16337168 | NC_021163.1    | Ca_kabuli_chr04 | 16337168                | AA                              | GG                | 1945936317               |
| SNP_P3_40514_16353454 | NC_021163.1    | Ca_kabuli_chr04 | 16353454                | AA                              | TT                | 1945936318               |
| SNP_P3_40515_16355503 | NC_021163.1    | Ca_kabuli_chr04 | 16355503                | CC                              | TT                | 1945936320               |
| SNP_P3_40516_16357893 | NC_021163.1    | Ca_kabuli_chr04 | 16357893                | AA                              | GG                | 1945936322               |
| SNP_P3_40517_16380510 | NC_021163.1    | Ca_kabuli_chr04 | 16380510                | TT                              | CC                | 1945936324               |
| SNP_P3_40518_16404619 | NC_021163.1    | Ca_kabuli_chr04 | 16404619                | CC                              | TT                | 1945936325               |
| SNP_P3_40519_16404837 | NC_021163.1    | Ca_kabuli_chr04 | 16404837                | AA                              | TT                | 1945936327               |
| SNP_P3_40520_16405457 | NC_021163.1    | Ca_kabuli_chr04 | 16405457                | AA                              | GG                | 1945936329               |
| SNP_P3_40521_16411130 | NC_021163.1    | Ca_kabuli_chr04 | 16411130                | CC                              | GG                | 1945936331               |
| SNP_P3_40522_16420068 | NC_021163.1    | Ca_kabuli_chr04 | 16420068                | CC                              | TT                | 1945936333               |
| SNP_P3_40523_16420609 | NC_021163.1    | Ca_kabuli_chr04 | 16420609                | CC                              | GG                | 1945936334               |
| SNP_P3_40524_16420610 | NC_021163.1    | Ca_kabuli_chr04 | 16420610                | AA                              | TT                | 1945936336               |
| SNP_P3_40525_16456670 | NC_021163.1    | Ca_kabuli_chr04 | 16456670                | AA                              | GG                | 1945936338               |
| SNP_P3_40526_16475717 | NC_021163.1    | Ca_kabuli_chr04 | 16475717                | GG                              | AA                | 1945936340               |
| SNP_P3_40528_16483302 | NC_021163.1    | Ca_kabuli_chr04 | 16483302                | AA                              | GG                | 1945936341               |
| SNP_P3_40529_16494137 | NC_021163.1    | Ca_kabuli_chr04 | 16494137                | TT                              | AA                | 1945936343               |

| SNPs IDs              | Chromosome IDs | Chromosomes     | Physical positions (bp) | CDC Frontier (Reference genome) | (Pusa 256 & HPNB) | NCBI SNPdb Accession IDs |
|-----------------------|----------------|-----------------|-------------------------|---------------------------------|-------------------|--------------------------|
| SNP_P3_40530_16521594 | NC_021163.1    | Ca_kabuli_chr04 | 16521594                | TT                              | CC                | 1945936345               |
| SNP_P3_40531_16525546 | NC_021163.1    | Ca_kabuli_chr04 | 16525546                | GG                              | AA                | 1945936347               |
| SNP_P3_40533_16560757 | NC_021163.1    | Ca_kabuli_chr04 | 16560757                | AA                              | GG                | 1945936349               |
| SNP_P3_40534_16562166 | NC_021163.1    | Ca_kabuli_chr04 | 16562166                | AA                              | TT                | 1945936350               |
| SNP_P3_40535_16576426 | NC_021163.1    | Ca_kabuli_chr04 | 16576426                | CC                              | AA                | 1945936352               |
| SNP_P3_40536_16576470 | NC_021163.1    | Ca_kabuli_chr04 | 16576470                | GG                              | AA                | 1945936354               |
| SNP_P3_40537_16576486 | NC_021163.1    | Ca_kabuli_chr04 | 16576486                | GG                              | AA                | 1945936356               |
| SNP_P3_40538_16584169 | NC_021163.1    | Ca_kabuli_chr04 | 16584169                | TT                              | AA                | 1945936357               |
| SNP_P3_40539_16584739 | NC_021163.1    | Ca_kabuli_chr04 | 16584739                | CC                              | GG                | 1945936359               |
| SNP_P3_40540_16585801 | NC_021163.1    | Ca_kabuli_chr04 | 16585801                | CC                              | TT                | 1945936361               |
| SNP_P3_40541_16593865 | NC_021163.1    | Ca_kabuli_chr04 | 16593865                | CC                              | TT                | 1945936363               |
| SNP_P3_40542_16605926 | NC_021163.1    | Ca_kabuli_chr04 | 16605926                | CC                              | AA                | 1945936364               |
| SNP_P3_40544_16616188 | NC_021163.1    | Ca_kabuli_chr04 | 16616188                | GG                              | AA                | 1945936366               |
| SNP_P3_40545_16620399 | NC_021163.1    | Ca_kabuli_chr04 | 16620399                | TT                              | AA                | 1945936368               |
| SNP_P3_40546_16641001 | NC_021163.1    | Ca_kabuli_chr04 | 16641001                | GG                              | AA                | 1945936370               |
| SNP_P3_40547_16652809 | NC_021163.1    | Ca_kabuli_chr04 | 16652809                | CC                              | AA                | 1945936372               |
| SNP_P3_40548_16665879 | NC_021163.1    | Ca_kabuli_chr04 | 16665879                | CC                              | TT                | 1945936373               |
| SNP_P3_40549_16676753 | NC_021163.1    | Ca_kabuli_chr04 | 16676753                | CC                              | TT                | 1945936375               |
| SNP_P3_40550_16688460 | NC_021163.1    | Ca_kabuli_chr04 | 16688460                | GG                              | CC                | 1945936377               |
| SNP_P3_40551_16704147 | NC_021163.1    | Ca_kabuli_chr04 | 16704147                | CC                              | GG                | 1945936379               |
| SNP_P3_40552_16704800 | NC_021163.1    | Ca_kabuli_chr04 | 16704800                | GG                              | AA                | 1945936380               |
| SNP_P3_40553_16704809 | NC_021163.1    | Ca_kabuli_chr04 | 16704809                | GG                              | TT                | 1945936382               |
| SNP_P3_40556_16728707 | NC_021163.1    | Ca_kabuli_chr04 | 16728707                | CC                              | TT                | 1945936384               |
| SNP_P3_40557_16728768 | NC_021163.1    | Ca_kabuli_chr04 | 16728768                | GG                              | AA                | 1945936386               |
| SNP_P3_40559_16733718 | NC_021163.1    | Ca_kabuli_chr04 | 16733718                | TT                              | CC                | 1945936387               |
| SNP_P3_40560_16738619 | NC_021163.1    | Ca_kabuli_chr04 | 16738619                | AA                              | GG                | 1945936389               |
| SNP_P3_40561_16740611 | NC_021163.1    | Ca_kabuli_chr04 | 16740611                | GG                              | AA                | 1945936391               |
| SNP_P3_40562_16767039 | NC_021163.1    | Ca_kabuli_chr04 | 16767039                | AA                              | CC                | 1945936393               |
| SNP_P3_40565_16796826 | NC_021163.1    | Ca_kabuli_chr04 | 16796826                | CC                              | TT                | 1945936395               |
| SNP_P3_40566_16804549 | NC_021163.1    | Ca_kabuli_chr04 | 16804549                | AA                              | GG                | 1945936396               |
| SNP_P3_40567_16819105 | NC_021163.1    | Ca_kabuli_chr04 | 16819105                | AA                              | GG                | 1945936398               |
| SNP_P3_40572_16879014 | NC_021163.1    | Ca_kabuli_chr04 | 16879014                | CC                              | TT                | 1945936400               |
| SNP_P3_40573_16879410 | NC_021163.1    | Ca_kabuli_chr04 | 16879410                | AA                              | GG                | 1945936402               |
| SNP_P3_40574_16879411 | NC_021163.1    | Ca_kabuli_chr04 | 16879411                | AA                              | GG                | 1945936403               |
| SNP_P3_40575_16883439 | NC_021163.1    | Ca_kabuli_chr04 | 16883439                | CC                              | TT                | 1945936405               |
| SNP_P3_40576_16906791 | NC_021163.1    | Ca_kabuli_chr04 | 16906791                | GG                              | AA                | 1945936407               |
| SNP_P3_40577_16906801 | NC_021163.1    | Ca_kabuli_chr04 | 16906801                | CC                              | AA                | 1945936409               |
| SNP_P3_40578_16913891 | NC_021163.1    | Ca_kabuli_chr04 | 16913891                | CC                              | TT                | 1945936411               |
| SNP_P3_40580_16943134 | NC_021163.1    | Ca_kabuli_chr04 | 16943134                | TT                              | CC                | 1945936412               |
| SNP_P3_40582_16943240 | NC_021163.1    | Ca_kabuli_chr04 | 16943240                | GG                              | AA                | 1945936414               |
| SNP_P3_40583_16943246 | NC_021163.1    | Ca_kabuli_chr04 | 16943246                | CC                              | AA                | 1945936416               |
| SNP_P3_40584_16943286 | NC_021163.1    | Ca_kabuli_chr04 | 16943286                | GG                              | AA                | 1945936418               |

| SNPs IDs              | Chromosome IDs | Chromosomes     | Physical positions (bp) | CDC Frontier (Reference genome) | (Pusa 256 & HPNB) | NCBI SNPdb Accession IDs |
|-----------------------|----------------|-----------------|-------------------------|---------------------------------|-------------------|--------------------------|
| SNP_P3_40585_16957491 | NC_021163.1    | Ca_kabuli_chr04 | 16957491                | AA                              | GG                | 1945936419               |
| SNP_P3_40588_16987383 | NC_021163.1    | Ca_kabuli_chr04 | 16987383                | TT                              | CC                | 1945936421               |
| SNP_P3_40589_16990299 | NC_021163.1    | Ca_kabuli_chr04 | 16990299                | CC                              | AA                | 1945936423               |
| SNP_P3_40591_16990347 | NC_021163.1    | Ca_kabuli_chr04 | 16990347                | GG                              | TT                | 1945936425               |
| SNP_P3_40592_16990705 | NC_021163.1    | Ca_kabuli_chr04 | 16990705                | TT                              | CC                | 1945936426               |
| SNP_P3_40593_16990912 | NC_021163.1    | Ca_kabuli_chr04 | 16990912                | CC                              | AA                | 1945936428               |
| SNP_P3_40594_16993926 | NC_021163.1    | Ca_kabuli_chr04 | 16993926                | TT                              | CC                | 1945936430               |
| SNP_P3_40595_16994886 | NC_021163.1    | Ca_kabuli_chr04 | 16994886                | CC                              | TT                | 1945936432               |
| SNP_P3_40596_16994887 | NC_021163.1    | Ca_kabuli_chr04 | 16994887                | GG                              | AA                | 1945936434               |
| SNP_P3_40597_16998525 | NC_021163.1    | Ca_kabuli_chr04 | 16998525                | CC                              | TT                | 1945936435               |
| SNP_P3_40598_16998543 | NC_021163.1    | Ca_kabuli_chr04 | 16998543                | GG                              | TT                | 1945936437               |
| SNP_P3_40599_16998825 | NC_021163.1    | Ca_kabuli_chr04 | 16998825                | GG                              | AA                | 1945936439               |
| SNP_P3_40600_16999855 | NC_021163.1    | Ca_kabuli_chr04 | 16999855                | TT                              | AA                | 1945936441               |
| SNP_P3_40601_17001487 | NC_021163.1    | Ca_kabuli_chr04 | 17001487                | GG                              | CC                | 1945936442               |
| SNP_P3_40602_17003080 | NC_021163.1    | Ca_kabuli_chr04 | 17003080                | GG                              | AA                | 1945936444               |
| SNP_P3_40604_17003144 | NC_021163.1    | Ca_kabuli_chr04 | 17003144                | GG                              | AA                | 1945936446               |
| SNP_P3_40605_17003145 | NC_021163.1    | Ca_kabuli_chr04 | 17003145                | CC                              | GG                | 1945936448               |
| SNP_P3_40606_17003183 | NC_021163.1    | Ca_kabuli_chr04 | 17003183                | GG                              | CC                | 1945936449               |
| SNP_P3_40607_17003939 | NC_021163.1    | Ca_kabuli_chr04 | 17003939                | TT                              | CC                | 1945936451               |
| SNP_P3_40608_17003942 | NC_021163.1    | Ca_kabuli_chr04 | 17003942                | GG                              | AA                | 1945936453               |
| SNP_P3_40609_17003953 | NC_021163.1    | Ca_kabuli_chr04 | 17003953                | GG                              | AA                | 1945936455               |
| SNP_P3_40610_17004148 | NC_021163.1    | Ca_kabuli_chr04 | 17004148                | GG                              | AA                | 1945936457               |
| SNP_P3_40611_17006808 | NC_021163.1    | Ca_kabuli_chr04 | 17006808                | GG                              | AA                | 1945936458               |
| SNP_P3_40613_17007444 | NC_021163.1    | Ca_kabuli_chr04 | 17007444                | AA                              | CC                | 1945936460               |
| SNP_P3_40614_17007852 | NC_021163.1    | Ca_kabuli_chr04 | 17007852                | AA                              | CC                | 1945936462               |
| SNP_P3_40615_17008379 | NC_021163.1    | Ca_kabuli_chr04 | 17008379                | GG                              | AA                | 1945936464               |
| SNP_P3_40618_17010753 | NC_021163.1    | Ca_kabuli_chr04 | 17010753                | TT                              | CC                | 1945936465               |
| SNP_P3_40619_17010809 | NC_021163.1    | Ca_kabuli_chr04 | 17010809                | AA                              | TT                | 1945936467               |
| SNP_P3_40621_17012249 | NC_021163.1    | Ca_kabuli_chr04 | 17012249                | GG                              | AA                | 1945936469               |
| SNP_P3_40622_17013283 | NC_021163.1    | Ca_kabuli_chr04 | 17013283                | CC                              | TT                | 1945936471               |
| SNP_P3_40623_17014108 | NC_021163.1    | Ca_kabuli_chr04 | 17014108                | TT                              | GG                | 1945936473               |
| SNP_P3_40625_17015542 | NC_021163.1    | Ca_kabuli_chr04 | 17015542                | AA                              | TT                | 1945936474               |
| SNP_P3_40626_17015613 | NC_021163.1    | Ca_kabuli_chr04 | 17015613                | AA                              | GG                | 1945936476               |
| SNP_P3_40627_17015615 | NC_021163.1    | Ca_kabuli_chr04 | 17015615                | TT                              | CC                | 1945936478               |
| SNP_P3_40628_17015909 | NC_021163.1    | Ca_kabuli_chr04 | 17015909                | TT                              | GG                | 1945936480               |
| SNP_P3_40629_17018194 | NC_021163.1    | Ca_kabuli_chr04 | 17018194                | GG                              | AA                | 1945936481               |
| SNP_P3_40630_17018207 | NC_021163.1    | Ca_kabuli_chr04 | 17018207                | AA                              | TT                | 1945936483               |
| SNP_P3_40631_17022960 | NC_021163.1    | Ca_kabuli_chr04 | 17022960                | GG                              | AA                | 1945936485               |
| SNP_P3_40632_17023158 | NC_021163.1    | Ca_kabuli_chr04 | 17023158                | AA                              | TT                | 1945936487               |
| SNP_P3_40633_17023267 | NC_021163.1    | Ca_kabuli_chr04 | 17023267                | GG                              | AA                | 1945936488               |
| SNP_P3_40634_17024096 | NC_021163.1    | Ca_kabuli_chr04 | 17024096                | CC                              | TT                | 1945936490               |
| SNP_P3_40635_17024626 | NC_021163.1    | Ca_kabuli_chr04 | 17024626                | GG                              | TT                | 1945936492               |



| SNPs IDs              | Chromosome IDs | Chromosomes     | Physical positions (bp) | CDC Frontier (Reference genome) | (Pusa 256 & HPNB) | NCBI SNPdb Accession IDs |
|-----------------------|----------------|-----------------|-------------------------|---------------------------------|-------------------|--------------------------|
| SNP_P3_40637_17026924 | NC_021163.1    | Ca_kabuli_chr04 | 17026924                | CC                              | TT                | 1945936494               |
| SNP_P3_40639_17030566 | NC_021163.1    | Ca_kabuli_chr04 | 17030566                | GG                              | AA                | 1945936496               |
| SNP_P3_40640_17037485 | NC_021163.1    | Ca_kabuli_chr04 | 17037485                | TT                              | GG                | 1945936497               |
| SNP_P3_40641_17041279 | NC_021163.1    | Ca_kabuli_chr04 | 17041279                | GG                              | AA                | 1945936499               |
| SNP_P3_40642_17041348 | NC_021163.1    | Ca_kabuli_chr04 | 17041348                | TT                              | GG                | 1945936501               |
| SNP_P3_40644_17045970 | NC_021163.1    | Ca_kabuli_chr04 | 17045970                | TT                              | CC                | 1945936503               |
| SNP_P3_40646_17050627 | NC_021163.1    | Ca_kabuli_chr04 | 17050627                | TT                              | CC                | 1945936504               |
| SNP_P3_40647_17050850 | NC_021163.1    | Ca_kabuli_chr04 | 17050850                | TT                              | CC                | 1945936506               |
| SNP_P3_40648_17051808 | NC_021163.1    | Ca_kabuli_chr04 | 17051808                | TT                              | GG                | 1945936508               |
| SNP_P3_40649_17053909 | NC_021163.1    | Ca_kabuli_chr04 | 17053909                | GG                              | AA                | 1945936510               |
| SNP_P3_40650_17058743 | NC_021163.1    | Ca_kabuli_chr04 | 17058743                | AA                              | GG                | 1945936511               |
| SNP_P3_40651_17059327 | NC_021163.1    | Ca_kabuli_chr04 | 17059327                | GG                              | AA                | 1945936513               |
| SNP_P3_40652_17059519 | NC_021163.1    | Ca_kabuli_chr04 | 17059519                | TT                              | GG                | 1945936515               |
| SNP_P3_40653_17059585 | NC_021163.1    | Ca_kabuli_chr04 | 17059585                | AA                              | GG                | 1945936517               |
| SNP_P3_40654_17060398 | NC_021163.1    | Ca_kabuli_chr04 | 17060398                | CC                              | TT                | 1945936519               |
| SNP_P3_40655_17060418 | NC_021163.1    | Ca_kabuli_chr04 | 17060418                | TT                              | CC                | 1945936520               |
| SNP_P3_40656_17061486 | NC_021163.1    | Ca_kabuli_chr04 | 17061486                | CC                              | TT                | 1945936522               |
| SNP_P3_40658_17063625 | NC_021163.1    | Ca_kabuli_chr04 | 17063625                | GG                              | AA                | 1945936524               |
| SNP_P3_40659_17063734 | NC_021163.1    | Ca_kabuli_chr04 | 17063734                | AA                              | GG                | 1945936526               |
| SNP_P3_40660_17064832 | NC_021163.1    | Ca_kabuli_chr04 | 17064832                | GG                              | AA                | 1945936527               |
| SNP_P3_40662_17065090 | NC_021163.1    | Ca_kabuli_chr04 | 17065090                | AA                              | CC                | 1945936529               |
| SNP_P3_40663_17065216 | NC_021163.1    | Ca_kabuli_chr04 | 17065216                | GG                              | AA                | 1945936531               |
| SNP_P3_40667_17081211 | NC_021163.1    | Ca_kabuli_chr04 | 17081211                | TT                              | CC                | 1945936533               |
| SNP_P3_40668_17081458 | NC_021163.1    | Ca_kabuli_chr04 | 17081458                | GG                              | AA                | 1945936535               |
| SNP_P3_40669_17081489 | NC_021163.1    | Ca_kabuli_chr04 | 17081489                | TT                              | CC                | 1945936536               |
| SNP_P3_40670_17081510 | NC_021163.1    | Ca_kabuli_chr04 | 17081510                | AA                              | GG                | 1945936538               |
| SNP_P3_40671_17081524 | NC_021163.1    | Ca_kabuli_chr04 | 17081524                | GG                              | AA                | 1945936540               |
| SNP_P3_40672_17081546 | NC_021163.1    | Ca_kabuli_chr04 | 17081546                | CC                              | TT                | 1945936542               |
| SNP_P3_40673_17081588 | NC_021163.1    | Ca_kabuli_chr04 | 17081588                | GG                              | AA                | 1945936543               |
| SNP_P3_40674_17081628 | NC_021163.1    | Ca_kabuli_chr04 | 17081628                | AA                              | GG                | 1945936545               |
| SNP_P3_40675_17081639 | NC_021163.1    | Ca_kabuli_chr04 | 17081639                | AA                              | GG                | 1945936547               |
| SNP_P3_40676_17081694 | NC_021163.1    | Ca_kabuli_chr04 | 17081694                | TT                              | GG                | 1945936549               |
| SNP_P3_40678_17081945 | NC_021163.1    | Ca_kabuli_chr04 | 17081945                | AA                              | TT                | 1945936550               |
| SNP_P3_40679_17081985 | NC_021163.1    | Ca_kabuli_chr04 | 17081985                | AA                              | TT                | 1945936552               |
| SNP_P3_40681_17082019 | NC_021163.1    | Ca_kabuli_chr04 | 17082019                | AA                              | TT                | 1945936554               |
| SNP_P3_40682_17082346 | NC_021163.1    | Ca_kabuli_chr04 | 17082346                | TT                              | CC                | 1945936556               |
| SNP_P3_40683_17082605 | NC_021163.1    | Ca_kabuli_chr04 | 17082605                | CC                              | TT                | 1945936558               |
| SNP_P3_40684_17082710 | NC_021163.1    | Ca_kabuli_chr04 | 17082710                | GG                              | AA                | 1945936559               |
| SNP_P3_40685_17086425 | NC_021163.1    | Ca_kabuli_chr04 | 17086425                | CC                              | TT                | 1945936561               |
| SNP_P3_40686_17086904 | NC_021163.1    | Ca_kabuli_chr04 | 17086904                | GG                              | AA                | 1945936563               |
| SNP_P3_40687_17086966 | NC_021163.1    | Ca_kabuli_chr04 | 17086966                | TT                              | GG                | 1945936565               |
| SNP_P3_40688_17087031 | NC_021163.1    | Ca_kabuli_chr04 | 17087031                | GG                              | AA                | 1945936566               |

| SNPs IDs              | Chromosome IDs | Chromosomes     | Physical positions (bp) | CDC Frontier (Reference genome) | (Pusa 256 & HPNB) | NCBI SNPdb Accession IDs |
|-----------------------|----------------|-----------------|-------------------------|---------------------------------|-------------------|--------------------------|
| SNP_P3_40689_17087866 | NC_021163.1    | Ca_kabuli_chr04 | 17087866                | AA                              | GG                | 1945936568               |
| SNP_P3_40690_17087969 | NC_021163.1    | Ca_kabuli_chr04 | 17087969                | CC                              | TT                | 1945936570               |
| SNP_P3_40691_17088154 | NC_021163.1    | Ca_kabuli_chr04 | 17088154                | AA                              | CC                | 1945936572               |
| SNP_P3_40692_17088176 | NC_021163.1    | Ca_kabuli_chr04 | 17088176                | TT                              | AA                | 1945936573               |
| SNP_P3_40693_17088202 | NC_021163.1    | Ca_kabuli_chr04 | 17088202                | CC                              | TT                | 1945936575               |
| SNP_P3_40694_17088269 | NC_021163.1    | Ca_kabuli_chr04 | 17088269                | CC                              | TT                | 1945936577               |
| SNP_P3_40695_17088341 | NC_021163.1    | Ca_kabuli_chr04 | 17088341                | CC                              | TT                | 1945936579               |
| SNP_P3_40696_17089328 | NC_021163.1    | Ca_kabuli_chr04 | 17089328                | AA                              | CC                | 1945936581               |
| SNP_P3_40698_17089961 | NC_021163.1    | Ca_kabuli_chr04 | 17089961                | AA                              | TT                | 1945936582               |
| SNP_P3_40701_17095262 | NC_021163.1    | Ca_kabuli_chr04 | 17095262                | AA                              | GG                | 1945936584               |
| SNP_P3_40702_17096010 | NC_021163.1    | Ca_kabuli_chr04 | 17096010                | GG                              | AA                | 1945936586               |
| SNP_P3_40704_17096081 | NC_021163.1    | Ca_kabuli_chr04 | 17096081                | TT                              | CC                | 1945936588               |
| SNP_P3_40705_17096309 | NC_021163.1    | Ca_kabuli_chr04 | 17096309                | CC                              | TT                | 1945936589               |
| SNP_P3_40706_17096836 | NC_021163.1    | Ca_kabuli_chr04 | 17096836                | CC                              | TT                | 1945936591               |
| SNP_P3_40707_17096883 | NC_021163.1    | Ca_kabuli_chr04 | 17096883                | TT                              | GG                | 1945936593               |
| SNP_P3_40708_17097879 | NC_021163.1    | Ca_kabuli_chr04 | 17097879                | GG                              | AA                | 1945936595               |
| SNP_P3_40711_17099084 | NC_021163.1    | Ca_kabuli_chr04 | 17099084                | CC                              | AA                | 1945936597               |
| SNP_P3_40712_17099100 | NC_021163.1    | Ca_kabuli_chr04 | 17099100                | GG                              | TT                | 1945936598               |
| SNP_P3_40714_17101572 | NC_021163.1    | Ca_kabuli_chr04 | 17101572                | GG                              | AA                | 1945936600               |
| SNP_P3_40715_17101928 | NC_021163.1    | Ca_kabuli_chr04 | 17101928                | CC                              | TT                | 1945936602               |
| SNP_P3_40716_17101936 | NC_021163.1    | Ca_kabuli_chr04 | 17101936                | GG                              | AA                | 1945936604               |
| SNP_P3_40717_17101963 | NC_021163.1    | Ca_kabuli_chr04 | 17101963                | GG                              | AA                | 1945936605               |
| SNP_P3_40719_17102203 | NC_021163.1    | Ca_kabuli_chr04 | 17102203                | CC                              | TT                | 1945936607               |
| SNP_P3_40720_17104682 | NC_021163.1    | Ca_kabuli_chr04 | 17104682                | AA                              | TT                | 1945936609               |
| SNP_P3_40721_17104709 | NC_021163.1    | Ca_kabuli_chr04 | 17104709                | AA                              | GG                | 1945936611               |
| SNP_P3_40722_17104879 | NC_021163.1    | Ca_kabuli_chr04 | 17104879                | CC                              | GG                | 1945936612               |
| SNP_P3_40723_17105292 | NC_021163.1    | Ca_kabuli_chr04 | 17105292                | TT                              | CC                | 1945936614               |
| SNP_P3_40724_17106364 | NC_021163.1    | Ca_kabuli_chr04 | 17106364                | AA                              | TT                | 1945936616               |
| SNP_P3_40726_17114904 | NC_021163.1    | Ca_kabuli_chr04 | 17114904                | CC                              | GG                | 1945936618               |
| SNP_P3_40727_17115296 | NC_021163.1    | Ca_kabuli_chr04 | 17115296                | AA                              | GG                | 1945936620               |
| SNP_P3_40728_17115949 | NC_021163.1    | Ca_kabuli_chr04 | 17115949                | CC                              | TT                | 1945936621               |
| SNP_P3_40729_17116060 | NC_021163.1    | Ca_kabuli_chr04 | 17116060                | GG                              | TT                | 1945936623               |
| SNP_P3_40730_17116117 | NC_021163.1    | Ca_kabuli_chr04 | 17116117                | GG                              | TT                | 1945936625               |
| SNP_P3_40731_17116345 | NC_021163.1    | Ca_kabuli_chr04 | 17116345                | TT                              | AA                | 1945936627               |
| SNP_P3_40732_17116396 | NC_021163.1    | Ca_kabuli_chr04 | 17116396                | AA                              | TT                | 1945936628               |
| SNP_P3_40733_17116468 | NC_021163.1    | Ca_kabuli_chr04 | 17116468                | TT                              | CC                | 1945936630               |
| SNP_P3_40735_17131256 | NC_021163.1    | Ca_kabuli_chr04 | 17131256                | TT                              | GG                | 1945936632               |
| SNP_P3_40736_17131304 | NC_021163.1    | Ca_kabuli_chr04 | 17131304                | GG                              | AA                | 1945936634               |
| SNP_P3_40738_17131682 | NC_021163.1    | Ca_kabuli_chr04 | 17131682                | AA                              | CC                | 1945936635               |
| SNP_P3_40739_17131929 | NC_021163.1    | Ca_kabuli_chr04 | 17131929                | AA                              | GG                | 1945936637               |
| SNP_P3_40740_17131977 | NC_021163.1    | Ca_kabuli_chr04 | 17131977                | CC                              | TT                | 1945936639               |
| SNP_P3_40741_17133194 | NC_021163.1    | Ca_kabuli_chr04 | 17133194                | CC                              | TT                | 1945936641               |

| SNPs IDs              | Chromosome IDs | Chromosomes     | Physical positions (bp) | CDC Frontier (Reference genome) | (Pusa 256 & HPNB) | NCBI SNPdb Accession IDs |
|-----------------------|----------------|-----------------|-------------------------|---------------------------------|-------------------|--------------------------|
| SNP_P3_40742_17133253 | NC_021163.1    | Ca_kabuli_chr04 | 17133253                | AA                              | GG                | 1945936643               |
| SNP_P3_40744_17134673 | NC_021163.1    | Ca_kabuli_chr04 | 17134673                | TT                              | CC                | 1945936644               |
| SNP_P3_40745_17134699 | NC_021163.1    | Ca_kabuli_chr04 | 17134699                | TT                              | AA                | 1945936646               |
| SNP_P3_40746_17134711 | NC_021163.1    | Ca_kabuli_chr04 | 17134711                | CC                              | TT                | 1945936648               |
| SNP_P3_40747_17134713 | NC_021163.1    | Ca_kabuli_chr04 | 17134713                | AA                              | GG                | 1945936650               |
| SNP_P3_40748_17135872 | NC_021163.1    | Ca_kabuli_chr04 | 17135872                | TT                              | AA                | 1945936651               |
| SNP_P3_40749_17136532 | NC_021163.1    | Ca_kabuli_chr04 | 17136532                | TT                              | CC                | 1945936653               |
| SNP_P3_40750_17136837 | NC_021163.1    | Ca_kabuli_chr04 | 17136837                | AA                              | TT                | 1945936655               |
| SNP_P3_40751_17137067 | NC_021163.1    | Ca_kabuli_chr04 | 17137067                | CC                              | TT                | 1945936657               |
| SNP_P3_40752_17138650 | NC_021163.1    | Ca_kabuli_chr04 | 17138650                | GG                              | AA                | 1945936658               |
| SNP_P3_40753_17139245 | NC_021163.1    | Ca_kabuli_chr04 | 17139245                | TT                              | GG                | 1945936660               |
| SNP_P3_40754_17139395 | NC_021163.1    | Ca_kabuli_chr04 | 17139395                | CC                              | TT                | 1945936662               |
| SNP_P3_40755_17140399 | NC_021163.1    | Ca_kabuli_chr04 | 17140399                | AA                              | GG                | 1945936664               |
| SNP_P3_40759_17143178 | NC_021163.1    | Ca_kabuli_chr04 | 17143178                | GG                              | CC                | 1945936666               |
| SNP_P3_40760_17143209 | NC_021163.1    | Ca_kabuli_chr04 | 17143209                | GG                              | AA                | 1945936667               |
| SNP_P3_40761_17143221 | NC_021163.1    | Ca_kabuli_chr04 | 17143221                | GG                              | TT                | 1945936669               |
| SNP_P3_40762_17143245 | NC_021163.1    | Ca_kabuli_chr04 | 17143245                | TT                              | CC                | 1945936671               |
| SNP_P3_40763_17143279 | NC_021163.1    | Ca_kabuli_chr04 | 17143279                | AA                              | TT                | 1945936673               |
| SNP_P3_40764_17143295 | NC_021163.1    | Ca_kabuli_chr04 | 17143295                | GG                              | AA                | 1945936674               |
| SNP_P3_40765_17143316 | NC_021163.1    | Ca_kabuli_chr04 | 17143316                | GG                              | AA                | 1945936676               |
| SNP_P3_40766_17143326 | NC_021163.1    | Ca_kabuli_chr04 | 17143326                | GG                              | TT                | 1945936678               |
| SNP_P3_40767_17143336 | NC_021163.1    | Ca_kabuli_chr04 | 17143336                | CC                              | TT                | 1945936680               |
| SNP_P3_40768_17143483 | NC_021163.1    | Ca_kabuli_chr04 | 17143483                | GG                              | AA                | 1945936681               |
| SNP_P3_40769_17143497 | NC_021163.1    | Ca_kabuli_chr04 | 17143497                | GG                              | CC                | 1945936683               |
| SNP_P3_40770_17143533 | NC_021163.1    | Ca_kabuli_chr04 | 17143533                | CC                              | GG                | 1945936685               |
| SNP_P3_40771_17143551 | NC_021163.1    | Ca_kabuli_chr04 | 17143551                | AA                              | GG                | 1945936687               |
| SNP_P3_40772_17143559 | NC_021163.1    | Ca_kabuli_chr04 | 17143559                | AA                              | GG                | 1945936689               |
| SNP_P3_40773_17143561 | NC_021163.1    | Ca_kabuli_chr04 | 17143561                | GG                              | AA                | 1945936690               |
| SNP_P3_40775_17143825 | NC_021163.1    | Ca_kabuli_chr04 | 17143825                | GG                              | AA                | 1945936692               |
| SNP_P3_40776_17143834 | NC_021163.1    | Ca_kabuli_chr04 | 17143834                | CC                              | TT                | 1945936694               |
| SNP_P3_40777_17143843 | NC_021163.1    | Ca_kabuli_chr04 | 17143843                | GG                              | CC                | 1945936696               |
| SNP_P3_40778_17143855 | NC_021163.1    | Ca_kabuli_chr04 | 17143855                | TT                              | GG                | 1945936697               |
| SNP_P3_40779_17146214 | NC_021163.1    | Ca_kabuli_chr04 | 17146214                | AA                              | TT                | 1945936699               |
| SNP_P3_40781_17146565 | NC_021163.1    | Ca_kabuli_chr04 | 17146565                | TT                              | CC                | 1945936701               |
| SNP_P3_40782_17147024 | NC_021163.1    | Ca_kabuli_chr04 | 17147024                | GG                              | AA                | 1945936703               |
| SNP_P3_40784_17147537 | NC_021163.1    | Ca_kabuli_chr04 | 17147537                | CC                              | TT                | 1945936705               |
| SNP_P3_40785_17149074 | NC_021163.1    | Ca_kabuli_chr04 | 17149074                | AA                              | GG                | 1945936706               |
| SNP_P3_40786_17149111 | NC_021163.1    | Ca_kabuli_chr04 | 17149111                | GG                              | AA                | 1945936708               |
| SNP_P3_40787_17150722 | NC_021163.1    | Ca_kabuli_chr04 | 17150722                | GG                              | AA                | 1945936710               |
| SNP_P3_40788_17152612 | NC_021163.1    | Ca_kabuli_chr04 | 17152612                | AA                              | GG                | 1945936712               |
| SNP_P3_40789_17153677 | NC_021163.1    | Ca_kabuli_chr04 | 17153677                | AA                              | GG                | 1945936713               |
| SNP_P3_40790_17154033 | NC_021163.1    | Ca_kabuli_chr04 | 17154033                | AA                              | GG                | 1945936715               |

| SNPs IDs              | Chromosome IDs | Chromosomes     | Physical positions (bp) | CDC Frontier (Reference genome) | (Pusa 256 & HPNB) | NCBI SNPdb Accession IDs |
|-----------------------|----------------|-----------------|-------------------------|---------------------------------|-------------------|--------------------------|
| SNP_P3_40791_17154455 | NC_021163.1    | Ca_kabuli_chr04 | 17154455                | AA                              | GG                | 1945936717               |
| SNP_P3_40792_17154964 | NC_021163.1    | Ca_kabuli_chr04 | 17154964                | CC                              | AA                | 1945936719               |
| SNP_P3_40793_17156597 | NC_021163.1    | Ca_kabuli_chr04 | 17156597                | GG                              | CC                | 1945936720               |
| SNP_P3_40794_17157172 | NC_021163.1    | Ca_kabuli_chr04 | 17157172                | TT                              | CC                | 1945936722               |
| SNP_P3_40796_17157814 | NC_021163.1    | Ca_kabuli_chr04 | 17157814                | CC                              | TT                | 1945936724               |
| SNP_P3_40797_17158169 | NC_021163.1    | Ca_kabuli_chr04 | 17158169                | GG                              | TT                | 1945936726               |
| SNP_P3_40798_17158221 | NC_021163.1    | Ca_kabuli_chr04 | 17158221                | CC                              | AA                | 1945936728               |
| SNP_P3_40799_17158231 | NC_021163.1    | Ca_kabuli_chr04 | 17158231                | TT                              | CC                | 1945936729               |
| SNP_P3_40800_17158376 | NC_021163.1    | Ca_kabuli_chr04 | 17158376                | GG                              | CC                | 1945936731               |
| SNP_P3_40801_17158559 | NC_021163.1    | Ca_kabuli_chr04 | 17158559                | TT                              | AA                | 1945936733               |
| SNP_P3_40802_17158697 | NC_021163.1    | Ca_kabuli_chr04 | 17158697                | AA                              | GG                | 1945936735               |
| SNP_P3_40803_17158747 | NC_021163.1    | Ca_kabuli_chr04 | 17158747                | AA                              | GG                | 1945936736               |
| SNP_P3_40804_17158887 | NC_021163.1    | Ca_kabuli_chr04 | 17158887                | GG                              | CC                | 1945936738               |
| SNP_P3_40805_17159103 | NC_021163.1    | Ca_kabuli_chr04 | 17159103                | CC                              | TT                | 1945936740               |
| SNP_P3_40806_17164063 | NC_021163.1    | Ca_kabuli_chr04 | 17164063                | GG                              | AA                | 1945936742               |
| SNP_P3_40807_17164299 | NC_021163.1    | Ca_kabuli_chr04 | 17164299                | GG                              | TT                | 1945936743               |
| SNP_P3_40808_17164745 | NC_021163.1    | Ca_kabuli_chr04 | 17164745                | CC                              | TT                | 1945936745               |
| SNP_P3_40809_17166573 | NC_021163.1    | Ca_kabuli_chr04 | 17166573                | GG                              | AA                | 1945936747               |
| SNP_P3_40810_17166930 | NC_021163.1    | Ca_kabuli_chr04 | 17166930                | GG                              | TT                | 1945936749               |
| SNP_P3_40811_17167147 | NC_021163.1    | Ca_kabuli_chr04 | 17167147                | CC                              | TT                | 1945936751               |
| SNP_P3_40812_17167188 | NC_021163.1    | Ca_kabuli_chr04 | 17167188                | CC                              | AA                | 1945936752               |
| SNP_P3_40813_17167196 | NC_021163.1    | Ca_kabuli_chr04 | 17167196                | CC                              | TT                | 1945936754               |
| SNP_P3_40814_17167464 | NC_021163.1    | Ca_kabuli_chr04 | 17167464                | CC                              | TT                | 1945936756               |
| SNP_P3_40815_17167619 | NC_021163.1    | Ca_kabuli_chr04 | 17167619                | TT                              | CC                | 1945936758               |
| SNP_P3_40816_17167624 | NC_021163.1    | Ca_kabuli_chr04 | 17167624                | AA                              | GG                | 1945936759               |
| SNP_P3_40817_17167627 | NC_021163.1    | Ca_kabuli_chr04 | 17167627                | TT                              | GG                | 1945936761               |
| SNP_P3_40818_17167633 | NC_021163.1    | Ca_kabuli_chr04 | 17167633                | CC                              | AA                | 1945936763               |
| SNP_P3_40819_17167700 | NC_021163.1    | Ca_kabuli_chr04 | 17167700                | GG                              | AA                | 1945936765               |
| SNP_P3_40820_17167918 | NC_021163.1    | Ca_kabuli_chr04 | 17167918                | TT                              | GG                | 1945936767               |
| SNP_P3_40821_17167966 | NC_021163.1    | Ca_kabuli_chr04 | 17167966                | AA                              | GG                | 1945936768               |
| SNP_P3_40822_17167998 | NC_021163.1    | Ca_kabuli_chr04 | 17167998                | TT                              | AA                | 1945936770               |
| SNP_P3_40824_17168274 | NC_021163.1    | Ca_kabuli_chr04 | 17168274                | TT                              | CC                | 1945936772               |
| SNP_P3_40825_17168455 | NC_021163.1    | Ca_kabuli_chr04 | 17168455                | GG                              | AA                | 1945936774               |
| SNP_P3_40827_17168531 | NC_021163.1    | Ca_kabuli_chr04 | 17168531                | TT                              | GG                | 1945936775               |
| SNP_P3_40828_17168805 | NC_021163.1    | Ca_kabuli_chr04 | 17168805                | GG                              | AA                | 1945936777               |
| SNP_P3_40829_17169376 | NC_021163.1    | Ca_kabuli_chr04 | 17169376                | TT                              | CC                | 1945936779               |
| SNP_P3_40830_17169378 | NC_021163.1    | Ca_kabuli_chr04 | 17169378                | CC                              | TT                | 1945936781               |
| SNP_P3_40831_17170849 | NC_021163.1    | Ca_kabuli_chr04 | 17170849                | CC                              | TT                | 1945936782               |
| SNP_P3_40832_17170852 | NC_021163.1    | Ca_kabuli_chr04 | 17170852                | TT                              | CC                | 1945936784               |
| SNP_P3_40833_17170863 | NC_021163.1    | Ca_kabuli_chr04 | 17170863                | GG                              | AA                | 1945936786               |
| SNP_P3_40834_17170887 | NC_021163.1    | Ca_kabuli_chr04 | 17170887                | AA                              | GG                | 1945936788               |
| SNP_P3_40835_17170929 | NC_021163.1    | Ca_kabuli_chr04 | 17170929                | TT                              | GG                | 1945936790               |

| SNPs IDs              | Chromosome IDs | Chromosomes     | Physical positions (bp) | CDC Frontier (Reference genome) | (Pusa 256 & HPNB) | NCBI SNPdb Accession IDs |
|-----------------------|----------------|-----------------|-------------------------|---------------------------------|-------------------|--------------------------|
| SNP_P3_40836_17171191 | NC_021163.1    | Ca_kabuli_chr04 | 17171191                | AA                              | TT                | 1945936791               |
| SNP_P3_40837_17171217 | NC_021163.1    | Ca_kabuli_chr04 | 17171217                | CC                              | TT                | 1945936793               |
| SNP_P3_40839_17172356 | NC_021163.1    | Ca_kabuli_chr04 | 17172356                | CC                              | AA                | 1945936795               |
| SNP_P3_40840_17172777 | NC_021163.1    | Ca_kabuli_chr04 | 17172777                | GG                              | CC                | 1945936797               |
| SNP_P3_40841_17185648 | NC_021163.1    | Ca_kabuli_chr04 | 17185648                | TT                              | CC                | 1945936798               |
| SNP_P3_40842_17186518 | NC_021163.1    | Ca_kabuli_chr04 | 17186518                | AA                              | TT                | 1945936800               |
| SNP_P3_40843_17186721 | NC_021163.1    | Ca_kabuli_chr04 | 17186721                | GG                              | AA                | 1945936802               |
| SNP_P3_40844_17186742 | NC_021163.1    | Ca_kabuli_chr04 | 17186742                | AA                              | GG                | 1945936804               |
| SNP_P3_40845_17186888 | NC_021163.1    | Ca_kabuli_chr04 | 17186888                | GG                              | AA                | 1945936805               |
| SNP_P3_40846_17186901 | NC_021163.1    | Ca_kabuli_chr04 | 17186901                | GG                              | AA                | 1945936807               |
| SNP_P3_40847_17186903 | NC_021163.1    | Ca_kabuli_chr04 | 17186903                | TT                              | CC                | 1945936809               |
| SNP_P3_40848_17186910 | NC_021163.1    | Ca_kabuli_chr04 | 17186910                | AA                              | TT                | 1945936811               |
| SNP_P3_40849_17187222 | NC_021163.1    | Ca_kabuli_chr04 | 17187222                | TT                              | GG                | 1945936813               |
| SNP_P3_40850_17187248 | NC_021163.1    | Ca_kabuli_chr04 | 17187248                | AA                              | GG                | 1945936814               |
| SNP_P3_40851_17187251 | NC_021163.1    | Ca_kabuli_chr04 | 17187251                | CC                              | GG                | 1945936816               |
| SNP_P3_40852_17187560 | NC_021163.1    | Ca_kabuli_chr04 | 17187560                | GG                              | CC                | 1945936818               |
| SNP_P3_40853_17188232 | NC_021163.1    | Ca_kabuli_chr04 | 17188232                | TT                              | CC                | 1945936820               |
| SNP_P3_40854_17191853 | NC_021163.1    | Ca_kabuli_chr04 | 17191853                | CC                              | AA                | 1945936821               |
| SNP_P3_40855_17193106 | NC_021163.1    | Ca_kabuli_chr04 | 17193106                | TT                              | CC                | 1945936823               |
| SNP_P3_40856_17193804 | NC_021163.1    | Ca_kabuli_chr04 | 17193804                | GG                              | TT                | 1945936825               |
| SNP_P3_40857_17194051 | NC_021163.1    | Ca_kabuli_chr04 | 17194051                | CC                              | TT                | 1945936827               |
| SNP_P3_40858_17194655 | NC_021163.1    | Ca_kabuli_chr04 | 17194655                | GG                              | CC                | 1945936829               |
| SNP_P3_40859_17194669 | NC_021163.1    | Ca_kabuli_chr04 | 17194669                | AA                              | GG                | 1945936830               |
| SNP_P3_40861_17195405 | NC_021163.1    | Ca_kabuli_chr04 | 17195405                | AA                              | GG                | 1945936832               |
| SNP_P3_40863_17195418 | NC_021163.1    | Ca_kabuli_chr04 | 17195418                | TT                              | AA                | 1945936834               |
| SNP_P3_40864_17195423 | NC_021163.1    | Ca_kabuli_chr04 | 17195423                | TT                              | CC                | 1945936836               |
| SNP_P3_40865_17195431 | NC_021163.1    | Ca_kabuli_chr04 | 17195431                | TT                              | GG                | 1945936837               |
| SNP_P3_40866_17195635 | NC_021163.1    | Ca_kabuli_chr04 | 17195635                | AA                              | TT                | 1945936839               |
| SNP_P3_40867_17195836 | NC_021163.1    | Ca_kabuli_chr04 | 17195836                | GG                              | AA                | 1945936841               |
| SNP_P3_40868_17195975 | NC_021163.1    | Ca_kabuli_chr04 | 17195975                | AA                              | TT                | 1945936843               |
| SNP_P3_40870_17198053 | NC_021163.1    | Ca_kabuli_chr04 | 17198053                | GG                              | AA                | 1945936844               |
| SNP_P3_40871_17198333 | NC_021163.1    | Ca_kabuli_chr04 | 17198333                | TT                              | CC                | 1945936846               |
| SNP_P3_40872_17201283 | NC_021163.1    | Ca_kabuli_chr04 | 17201283                | TT                              | AA                | 1945936848               |
| SNP_P3_40873_17201336 | NC_021163.1    | Ca_kabuli_chr04 | 17201336                | GG                              | CC                | 1945936850               |
| SNP_P3_40874_17201343 | NC_021163.1    | Ca_kabuli_chr04 | 17201343                | CC                              | TT                | 1945936852               |
| SNP_P3_40875_17202770 | NC_021163.1    | Ca_kabuli_chr04 | 17202770                | GG                              | AA                | 1945936853               |
| SNP_P3_40876_17203037 | NC_021163.1    | Ca_kabuli_chr04 | 17203037                | AA                              | CC                | 1945936855               |
| SNP_P3_40877_17203059 | NC_021163.1    | Ca_kabuli_chr04 | 17203059                | TT                              | CC                | 1945936857               |
| SNP_P3_40878_17203096 | NC_021163.1    | Ca_kabuli_chr04 | 17203096                | TT                              | CC                | 1945936859               |
| SNP_P3_40879_17203141 | NC_021163.1    | Ca_kabuli_chr04 | 17203141                | TT                              | CC                | 1945936860               |
| SNP_P3_40880_17203144 | NC_021163.1    | Ca_kabuli_chr04 | 17203144                | GG                              | AA                | 1945936862               |
| SNP_P3_40881_17203145 | NC_021163.1    | Ca_kabuli_chr04 | 17203145                | AA                              | GG                | 1945936864               |

| SNPs IDs              | Chromosome IDs | Chromosomes     | Physical positions (bp) | CDC Frontier (Reference genome) | (Pusa 256 & HPNB) | NCBI SNPdb Accession IDs |
|-----------------------|----------------|-----------------|-------------------------|---------------------------------|-------------------|--------------------------|
| SNP_P3_40882_17204871 | NC_021163.1    | Ca_kabuli_chr04 | 17204871                | AA                              | CC                | 1945936866               |
| SNP_P3_40883_17204952 | NC_021163.1    | Ca_kabuli_chr04 | 17204952                | TT                              | AA                | 1945936868               |
| SNP_P3_40885_17207153 | NC_021163.1    | Ca_kabuli_chr04 | 17207153                | AA                              | TT                | 1945936869               |
| SNP_P3_40887_17208415 | NC_021163.1    | Ca_kabuli_chr04 | 17208415                | GG                              | TT                | 1945936871               |
| SNP_P3_40889_17208628 | NC_021163.1    | Ca_kabuli_chr04 | 17208628                | GG                              | AA                | 1945936873               |
| SNP_P3_40890_17208915 | NC_021163.1    | Ca_kabuli_chr04 | 17208915                | CC                              | TT                | 1945936875               |
| SNP_P3_40891_17209885 | NC_021163.1    | Ca_kabuli_chr04 | 17209885                | AA                              | CC                | 1945936876               |
| SNP_P3_40892_17209886 | NC_021163.1    | Ca_kabuli_chr04 | 17209886                | TT                              | CC                | 1945936878               |
| SNP_P3_40893_17210388 | NC_021163.1    | Ca_kabuli_chr04 | 17210388                | AA                              | GG                | 1945936880               |
| SNP_P3_40895_17211141 | NC_021163.1    | Ca_kabuli_chr04 | 17211141                | TT                              | CC                | 1945936882               |
| SNP_P3_40896_17211623 | NC_021163.1    | Ca_kabuli_chr04 | 17211623                | AA                              | GG                | 1945936883               |
| SNP_P3_40897_17211679 | NC_021163.1    | Ca_kabuli_chr04 | 17211679                | GG                              | AA                | 1945936885               |
| SNP_P3_40898_17211789 | NC_021163.1    | Ca_kabuli_chr04 | 17211789                | GG                              | AA                | 1945936887               |
| SNP_P3_40899_17212159 | NC_021163.1    | Ca_kabuli_chr04 | 17212159                | TT                              | CC                | 1945936889               |
| SNP_P3_40900_17213298 | NC_021163.1    | Ca_kabuli_chr04 | 17213298                | TT                              | CC                | 1945936891               |
| SNP_P3_40901_17213865 | NC_021163.1    | Ca_kabuli_chr04 | 17213865                | AA                              | CC                | 1945936892               |
| SNP_P3_40903_17214305 | NC_021163.1    | Ca_kabuli_chr04 | 17214305                | TT                              | GG                | 1945936894               |
| SNP_P3_40904_17214313 | NC_021163.1    | Ca_kabuli_chr04 | 17214313                | CC                              | AA                | 1945936896               |
| SNP_P3_40905_17214324 | NC_021163.1    | Ca_kabuli_chr04 | 17214324                | TT                              | CC                | 1945936898               |
| SNP_P3_40906_17214354 | NC_021163.1    | Ca_kabuli_chr04 | 17214354                | GG                              | AA                | 1945936899               |
| SNP_P3_40907_17214503 | NC_021163.1    | Ca_kabuli_chr04 | 17214503                | GG                              | AA                | 1945936901               |
| SNP_P3_40911_17219746 | NC_021163.1    | Ca_kabuli_chr04 | 17219746                | AA                              | GG                | 1945936903               |
| SNP_P3_40912_17219776 | NC_021163.1    | Ca_kabuli_chr04 | 17219776                | GG                              | AA                | 1945936905               |
| SNP_P3_40913_17223503 | NC_021163.1    | Ca_kabuli_chr04 | 17223503                | GG                              | CC                | 1945936907               |
| SNP_P3_40914_17223567 | NC_021163.1    | Ca_kabuli_chr04 | 17223567                | AA                              | GG                | 1945936908               |
| SNP_P3_40915_17223651 | NC_021163.1    | Ca_kabuli_chr04 | 17223651                | AA                              | CC                | 1945936910               |
| SNP_P3_40916_17223666 | NC_021163.1    | Ca_kabuli_chr04 | 17223666                | CC                              | TT                | 1945936912               |
| SNP_P3_40917_17223711 | NC_021163.1    | Ca_kabuli_chr04 | 17223711                | CC                              | GG                | 1945936914               |
| SNP_P3_40918_17223722 | NC_021163.1    | Ca_kabuli_chr04 | 17223722                | AA                              | GG                | 1945936915               |
| SNP_P3_40919_17223730 | NC_021163.1    | Ca_kabuli_chr04 | 17223730                | GG                              | TT                | 1945936917               |
| SNP_P3_40920_17223731 | NC_021163.1    | Ca_kabuli_chr04 | 17223731                | AA                              | TT                | 1945936919               |
| SNP_P3_40922_17223764 | NC_021163.1    | Ca_kabuli_chr04 | 17223764                | TT                              | CC                | 1945936921               |
| SNP_P3_40923_17223809 | NC_021163.1    | Ca_kabuli_chr04 | 17223809                | AA                              | GG                | 1945936922               |
| SNP_P3_40924_17223818 | NC_021163.1    | Ca_kabuli_chr04 | 17223818                | GG                              | AA                | 1945936924               |
| SNP_P3_40926_17223867 | NC_021163.1    | Ca_kabuli_chr04 | 17223867                | CC                              | GG                | 1945936926               |
| SNP_P3_40927_17223868 | NC_021163.1    | Ca_kabuli_chr04 | 17223868                | TT                              | AA                | 1945936928               |
| SNP_P3_40928_17224103 | NC_021163.1    | Ca_kabuli_chr04 | 17224103                | TT                              | CC                | 1945936930               |
| SNP_P3_40929_17224572 | NC_021163.1    | Ca_kabuli_chr04 | 17224572                | AA                              | TT                | 1945936931               |
| SNP_P3_40930_17225207 | NC_021163.1    | Ca_kabuli_chr04 | 17225207                | AA                              | GG                | 1945936933               |
| SNP_P3_40931_17225681 | NC_021163.1    | Ca_kabuli_chr04 | 17225681                | TT                              | AA                | 1945936935               |
| SNP_P3_40932_17227101 | NC_021163.1    | Ca_kabuli_chr04 | 17227101                | GG                              | CC                | 1945936937               |
| SNP_P3_40933_17227136 | NC_021163.1    | Ca_kabuli_chr04 | 17227136                | GG                              | CC                | 1945936938               |

| SNPs IDs              | Chromosome IDs | Chromosomes     | Physical positions (bp) | CDC Frontier (Reference genome) | (Pusa 256 & HPNB) | NCBI SNPdb Accession IDs |
|-----------------------|----------------|-----------------|-------------------------|---------------------------------|-------------------|--------------------------|
| SNP_P3_40935_17232504 | NC_021163.1    | Ca_kabuli_chr04 | 17232504                | TT                              | CC                | 1945936940               |
| SNP_P3_40936_17234673 | NC_021163.1    | Ca_kabuli_chr04 | 17234673                | TT                              | GG                | 1945936942               |
| SNP_P3_40938_17238328 | NC_021163.1    | Ca_kabuli_chr04 | 17238328                | AA                              | TT                | 1945936944               |
| SNP_P3_40940_17241010 | NC_021163.1    | Ca_kabuli_chr04 | 17241010                | GG                              | AA                | 1945936946               |
| SNP_P3_40941_17241577 | NC_021163.1    | Ca_kabuli_chr04 | 17241577                | AA                              | TT                | 1945936947               |
| SNP_P3_40942_17241611 | NC_021163.1    | Ca_kabuli_chr04 | 17241611                | GG                              | AA                | 1945936949               |
| SNP_P3_40943_17241622 | NC_021163.1    | Ca_kabuli_chr04 | 17241622                | GG                              | AA                | 1945936951               |
| SNP_P3_40944_17241630 | NC_021163.1    | Ca_kabuli_chr04 | 17241630                | TT                              | CC                | 1945936953               |
| SNP_P3_40945_17242022 | NC_021163.1    | Ca_kabuli_chr04 | 17242022                | TT                              | AA                | 1945936954               |
| SNP_P3_40946_17242104 | NC_021163.1    | Ca_kabuli_chr04 | 17242104                | TT                              | AA                | 1945936956               |
| SNP_P3_40947_17242291 | NC_021163.1    | Ca_kabuli_chr04 | 17242291                | TT                              | CC                | 1945936958               |
| SNP_P3_40948_17242469 | NC_021163.1    | Ca_kabuli_chr04 | 17242469                | AA                              | TT                | 1945936960               |
| SNP_P3_40950_17242518 | NC_021163.1    | Ca_kabuli_chr04 | 17242518                | TT                              | AA                | 1945936961               |
| SNP_P3_40952_17243181 | NC_021163.1    | Ca_kabuli_chr04 | 17243181                | AA                              | CC                | 1945936963               |
| SNP_P3_40954_17243645 | NC_021163.1    | Ca_kabuli_chr04 | 17243645                | TT                              | GG                | 1945936965               |
| SNP_P3_40955_17243650 | NC_021163.1    | Ca_kabuli_chr04 | 17243650                | GG                              | TT                | 1945936967               |
| SNP_P3_40956_17243677 | NC_021163.1    | Ca_kabuli_chr04 | 17243677                | AA                              | TT                | 1945936969               |
| SNP_P3_40957_17243711 | NC_021163.1    | Ca_kabuli_chr04 | 17243711                | CC                              | TT                | 1945936970               |
| SNP_P3_40958_17243863 | NC_021163.1    | Ca_kabuli_chr04 | 17243863                | GG                              | CC                | 1945936972               |
| SNP_P3_40959_17243942 | NC_021163.1    | Ca_kabuli_chr04 | 17243942                | GG                              | TT                | 1945936974               |
| SNP_P3_40960_17243943 | NC_021163.1    | Ca_kabuli_chr04 | 17243943                | AA                              | TT                | 1945936976               |
| SNP_P3_40962_17243965 | NC_021163.1    | Ca_kabuli_chr04 | 17243965                | CC                              | TT                | 1945936977               |
| SNP_P3_40963_17243966 | NC_021163.1    | Ca_kabuli_chr04 | 17243966                | CC                              | TT                | 1945936979               |
| SNP_P3_40964_17244542 | NC_021163.1    | Ca_kabuli_chr04 | 17244542                | CC                              | TT                | 1945936981               |
| SNP_P3_40965_17244912 | NC_021163.1    | Ca_kabuli_chr04 | 17244912                | CC                              | TT                | 1945936983               |
| SNP_P3_40966_17245175 | NC_021163.1    | Ca_kabuli_chr04 | 17245175                | AA                              | GG                | 1945936984               |
| SNP_P3_40967_17245236 | NC_021163.1    | Ca_kabuli_chr04 | 17245236                | AA                              | TT                | 1945936986               |
| SNP_P3_40968_17245266 | NC_021163.1    | Ca_kabuli_chr04 | 17245266                | CC                              | TT                | 1945936988               |
| SNP_P3_40969_17245271 | NC_021163.1    | Ca_kabuli_chr04 | 17245271                | CC                              | GG                | 1945936990               |
| SNP_P3_40970_17245291 | NC_021163.1    | Ca_kabuli_chr04 | 17245291                | AA                              | TT                | 1945936992               |
| SNP_P3_40971_17245304 | NC_021163.1    | Ca_kabuli_chr04 | 17245304                | TT                              | AA                | 1945936993               |
| SNP_P3_40972_17245339 | NC_021163.1    | Ca_kabuli_chr04 | 17245339                | AA                              | CC                | 1945936995               |
| SNP_P3_40973_17245343 | NC_021163.1    | Ca_kabuli_chr04 | 17245343                | TT                              | CC                | 1945936997               |
| SNP_P3_40974_17246540 | NC_021163.1    | Ca_kabuli_chr04 | 17246540                | GG                              | AA                | 1945936999               |
| SNP_P3_40975_17246555 | NC_021163.1    | Ca_kabuli_chr04 | 17246555                | TT                              | CC                | 1945937000               |
| SNP_P3_40976_17246574 | NC_021163.1    | Ca_kabuli_chr04 | 17246574                | AA                              | GG                | 1945937002               |
| SNP_P3_40977_17246905 | NC_021163.1    | Ca_kabuli_chr04 | 17246905                | GG                              | TT                | 1945937004               |
| SNP_P3_40978_17247359 | NC_021163.1    | Ca_kabuli_chr04 | 17247359                | AA                              | CC                | 1945937006               |
| SNP_P3_40981_17250278 | NC_021163.1    | Ca_kabuli_chr04 | 17250278                | CC                              | AA                | 1945937008               |
| SNP_P3_40982_17250294 | NC_021163.1    | Ca_kabuli_chr04 | 17250294                | AA                              | GG                | 1945937009               |
| SNP_P3_40983_17250300 | NC_021163.1    | Ca_kabuli_chr04 | 17250300                | GG                              | AA                | 1945937011               |
| SNP_P3_40984_17250352 | NC_021163.1    | Ca_kabuli_chr04 | 17250352                | CC                              | AA                | 1945937013               |

| SNPs IDs              | Chromosome IDs | Chromosomes     | Physical positions (bp) | CDC Frontier (Reference genome) | (Pusa 256 & HPNB) | NCBI SNPdb Accession IDs |
|-----------------------|----------------|-----------------|-------------------------|---------------------------------|-------------------|--------------------------|
| SNP_P3_40985_17251463 | NC_021163.1    | Ca_kabuli_chr04 | 17251463                | CC                              | TT                | 1945937015               |
| SNP_P3_40986_17251527 | NC_021163.1    | Ca_kabuli_chr04 | 17251527                | AA                              | CC                | 1945937016               |
| SNP_P3_40987_17251563 | NC_021163.1    | Ca_kabuli_chr04 | 17251563                | CC                              | AA                | 1945937018               |
| SNP_P3_40988_17252097 | NC_021163.1    | Ca_kabuli_chr04 | 17252097                | CC                              | TT                | 1945937020               |
| SNP_P3_40989_17252102 | NC_021163.1    | Ca_kabuli_chr04 | 17252102                | CC                              | GG                | 1945937022               |
| SNP_P3_40990_17252104 | NC_021163.1    | Ca_kabuli_chr04 | 17252104                | TT                              | CC                | 1945937023               |
| SNP_P3_40991_17252136 | NC_021163.1    | Ca_kabuli_chr04 | 17252136                | GG                              | AA                | 1945937025               |
| SNP_P3_40992_17252158 | NC_021163.1    | Ca_kabuli_chr04 | 17252158                | TT                              | CC                | 1945937027               |
| SNP_P3_40993_17253234 | NC_021163.1    | Ca_kabuli_chr04 | 17253234                | AA                              | GG                | 1945937029               |
| SNP_P3_40994_17253692 | NC_021163.1    | Ca_kabuli_chr04 | 17253692                | AA                              | CC                | 1945937031               |
| SNP_P3_40996_17254622 | NC_021163.1    | Ca_kabuli_chr04 | 17254622                | GG                              | AA                | 1945937032               |
| SNP_P3_40997_17254630 | NC_021163.1    | Ca_kabuli_chr04 | 17254630                | TT                              | CC                | 1945937034               |
| SNP_P3_40998_17255126 | NC_021163.1    | Ca_kabuli_chr04 | 17255126                | CC                              | TT                | 1945937036               |
| SNP_P3_41001_17257226 | NC_021163.1    | Ca_kabuli_chr04 | 17257226                | AA                              | GG                | 1945937038               |
| SNP_P3_41002_17257227 | NC_021163.1    | Ca_kabuli_chr04 | 17257227                | GG                              | AA                | 1945937039               |
| SNP_P3_41003_17257278 | NC_021163.1    | Ca_kabuli_chr04 | 17257278                | GG                              | AA                | 1945937041               |
| SNP_P3_41004_17257295 | NC_021163.1    | Ca_kabuli_chr04 | 17257295                | TT                              | CC                | 1945937043               |
| SNP_P3_41005_17257307 | NC_021163.1    | Ca_kabuli_chr04 | 17257307                | AA                              | GG                | 1945937045               |
| SNP_P3_41006_17257382 | NC_021163.1    | Ca_kabuli_chr04 | 17257382                | AA                              | CC                | 1945937047               |
| SNP_P3_41008_17259350 | NC_021163.1    | Ca_kabuli_chr04 | 17259350                | GG                              | AA                | 1945937048               |
| SNP_P3_41010_17259612 | NC_021163.1    | Ca_kabuli_chr04 | 17259612                | TT                              | CC                | 1945937050               |
| SNP_P3_41011_17259623 | NC_021163.1    | Ca_kabuli_chr04 | 17259623                | CC                              | TT                | 1945937052               |
| SNP_P3_41012_17259633 | NC_021163.1    | Ca_kabuli_chr04 | 17259633                | TT                              | CC                | 1945937054               |
| SNP_P3_41015_17260052 | NC_021163.1    | Ca_kabuli_chr04 | 17260052                | TT                              | CC                | 1945937055               |
| SNP_P3_41016_17260110 | NC_021163.1    | Ca_kabuli_chr04 | 17260110                | CC                              | TT                | 1945937057               |
| SNP_P3_41017_17260396 | NC_021163.1    | Ca_kabuli_chr04 | 17260396                | CC                              | TT                | 1945937059               |
| SNP_P3_41018_17260482 | NC_021163.1    | Ca_kabuli_chr04 | 17260482                | TT                              | GG                | 1945937061               |
| SNP_P3_41019_17261532 | NC_021163.1    | Ca_kabuli_chr04 | 17261532                | GG                              | AA                | 1945937062               |
| SNP_P3_41020_17261550 | NC_021163.1    | Ca_kabuli_chr04 | 17261550                | AA                              | CC                | 1945937064               |
| SNP_P3_41021_17261915 | NC_021163.1    | Ca_kabuli_chr04 | 17261915                | CC                              | GG                | 1945937066               |
| SNP_P3_41024_17264248 | NC_021163.1    | Ca_kabuli_chr04 | 17264248                | AA                              | CC                | 1945937068               |
| SNP_P3_41025_17264621 | NC_021163.1    | Ca_kabuli_chr04 | 17264621                | GG                              | CC                | 1945937070               |
| SNP_P3_41026_17265098 | NC_021163.1    | Ca_kabuli_chr04 | 17265098                | TT                              | CC                | 1945937071               |
| SNP_P3_41027_17266576 | NC_021163.1    | Ca_kabuli_chr04 | 17266576                | AA                              | GG                | 1945937073               |
| SNP_P3_41031_17270320 | NC_021163.1    | Ca_kabuli_chr04 | 17270320                | CC                              | TT                | 1945937075               |
| SNP_P3_41032_17270575 | NC_021163.1    | Ca_kabuli_chr04 | 17270575                | TT                              | CC                | 1945937077               |
| SNP_P3_41033_17270576 | NC_021163.1    | Ca_kabuli_chr04 | 17270576                | AA                              | CC                | 1945937078               |
| SNP_P3_41034_17270587 | NC_021163.1    | Ca_kabuli_chr04 | 17270587                | AA                              | TT                | 1945937080               |
| SNP_P3_41035_17270588 | NC_021163.1    | Ca_kabuli_chr04 | 17270588                | TT                              | CC                | 1945937082               |
| SNP_P3_41036_17271572 | NC_021163.1    | Ca_kabuli_chr04 | 17271572                | GG                              | AA                | 1945937084               |
| SNP_P3_41038_17275977 | NC_021163.1    | Ca_kabuli_chr04 | 17275977                | GG                              | AA                | 1945937085               |
| SNP_P3_41040_17281374 | NC_021163.1    | Ca_kabuli_chr04 | 17281374                | AA                              | GG                | 1945937087               |



| SNPs IDs              | Chromosome IDs | Chromosomes     | Physical positions (bp) | CDC Frontier (Reference genome) | (Pusa 256 & HPNB) | NCBI SNPdb Accession IDs |
|-----------------------|----------------|-----------------|-------------------------|---------------------------------|-------------------|--------------------------|
| SNP_P3_41041_17281704 | NC_021163.1    | Ca_kabuli_chr04 | 17281704                | TT                              | CC                | 1945937089               |
| SNP_P3_41042_17282148 | NC_021163.1    | Ca_kabuli_chr04 | 17282148                | CC                              | GG                | 1945937091               |
| SNP_P3_41043_17284845 | NC_021163.1    | Ca_kabuli_chr04 | 17284845                | CC                              | TT                | 1945937093               |
| SNP_P3_41045_17285059 | NC_021163.1    | Ca_kabuli_chr04 | 17285059                | TT                              | CC                | 1945937094               |
| SNP_P3_41046_17285076 | NC_021163.1    | Ca_kabuli_chr04 | 17285076                | GG                              | TT                | 1945937096               |
| SNP_P3_41047_17285100 | NC_021163.1    | Ca_kabuli_chr04 | 17285100                | AA                              | GG                | 1945937098               |
| SNP_P3_41049_17285206 | NC_021163.1    | Ca_kabuli_chr04 | 17285206                | TT                              | AA                | 1945937100               |
| SNP_P3_41050_17285269 | NC_021163.1    | Ca_kabuli_chr04 | 17285269                | TT                              | AA                | 1945937101               |
| SNP_P3_41051_17285279 | NC_021163.1    | Ca_kabuli_chr04 | 17285279                | TT                              | CC                | 1945937103               |
| SNP_P3_41052_17285282 | NC_021163.1    | Ca_kabuli_chr04 | 17285282                | GG                              | CC                | 1945937105               |
| SNP_P3_41053_17285291 | NC_021163.1    | Ca_kabuli_chr04 | 17285291                | TT                              | GG                | 1945937107               |
| SNP_P3_41054_17285365 | NC_021163.1    | Ca_kabuli_chr04 | 17285365                | CC                              | AA                | 1945937109               |
| SNP_P3_41056_17286517 | NC_021163.1    | Ca_kabuli_chr04 | 17286517                | TT                              | AA                | 1945937110               |
| SNP_P3_41058_17286542 | NC_021163.1    | Ca_kabuli_chr04 | 17286542                | GG                              | TT                | 1945937112               |
| SNP_P3_41059_17286647 | NC_021163.1    | Ca_kabuli_chr04 | 17286647                | CC                              | TT                | 1945937114               |
| SNP_P3_41061_17286717 | NC_021163.1    | Ca_kabuli_chr04 | 17286717                | CC                              | TT                | 1945937116               |
| SNP_P3_41062_17286722 | NC_021163.1    | Ca_kabuli_chr04 | 17286722                | AA                              | TT                | 1945937117               |
| SNP_P3_41063_17286843 | NC_021163.1    | Ca_kabuli_chr04 | 17286843                | GG                              | AA                | 1945937119               |
| SNP_P3_41064_17286857 | NC_021163.1    | Ca_kabuli_chr04 | 17286857                | TT                              | CC                | 1945937121               |
| SNP_P3_41066_17286921 | NC_021163.1    | Ca_kabuli_chr04 | 17286921                | TT                              | CC                | 1945937123               |
| SNP_P3_41067_17286974 | NC_021163.1    | Ca_kabuli_chr04 | 17286974                | CC                              | AA                | 1945937124               |
| SNP_P3_41068_17286975 | NC_021163.1    | Ca_kabuli_chr04 | 17286975                | AA                              | TT                | 1945937126               |
| SNP_P3_41069_17286976 | NC_021163.1    | Ca_kabuli_chr04 | 17286976                | AA                              | GG                | 1945937128               |
| SNP_P3_41070_17287847 | NC_021163.1    | Ca_kabuli_chr04 | 17287847                | AA                              | GG                | 1945937130               |
| SNP_P3_41071_17288932 | NC_021163.1    | Ca_kabuli_chr04 | 17288932                | GG                              | AA                | 1945937132               |
| SNP_P3_41072_17288961 | NC_021163.1    | Ca_kabuli_chr04 | 17288961                | GG                              | AA                | 1945937133               |
| SNP_P3_41073_17288970 | NC_021163.1    | Ca_kabuli_chr04 | 17288970                | AA                              | GG                | 1945937135               |
| SNP_P3_41074_17288993 | NC_021163.1    | Ca_kabuli_chr04 | 17288993                | CC                              | TT                | 1945937137               |
| SNP_P3_41075_17289203 | NC_021163.1    | Ca_kabuli_chr04 | 17289203                | CC                              | TT                | 1945937139               |
| SNP_P3_41076_17289312 | NC_021163.1    | Ca_kabuli_chr04 | 17289312                | GG                              | AA                | 1945937140               |
| SNP_P3_41077_17289320 | NC_021163.1    | Ca_kabuli_chr04 | 17289320                | AA                              | CC                | 1945937142               |
| SNP_P3_41078_17289327 | NC_021163.1    | Ca_kabuli_chr04 | 17289327                | AA                              | GG                | 1945937144               |
| SNP_P3_41079_17289845 | NC_021163.1    | Ca_kabuli_chr04 | 17289845                | CC                              | AA                | 1945937146               |
| SNP_P3_41080_17289883 | NC_021163.1    | Ca_kabuli_chr04 | 17289883                | GG                              | AA                | 1945937148               |
| SNP_P3_41081_17290860 | NC_021163.1    | Ca_kabuli_chr04 | 17290860                | CC                              | TT                | 1945937149               |
| SNP_P3_41082_17290861 | NC_021163.1    | Ca_kabuli_chr04 | 17290861                | CC                              | AA                | 1945937151               |
| SNP_P3_41084_17291028 | NC_021163.1    | Ca_kabuli_chr04 | 17291028                | GG                              | TT                | 1945937153               |
| SNP_P3_41085_17291149 | NC_021163.1    | Ca_kabuli_chr04 | 17291149                | TT                              | CC                | 1945937155               |
| SNP_P3_41086_17291181 | NC_021163.1    | Ca_kabuli_chr04 | 17291181                | AA                              | GG                | 1945937156               |
| SNP_P3_41087_17291183 | NC_021163.1    | Ca_kabuli_chr04 | 17291183                | AA                              | GG                | 1945937158               |
| SNP_P3_41088_17291626 | NC_021163.1    | Ca_kabuli_chr04 | 17291626                | GG                              | AA                | 1945937160               |
| SNP_P3_41089_17291657 | NC_021163.1    | Ca_kabuli_chr04 | 17291657                | TT                              | GG                | 1945937162               |

| SNPs IDs              | Chromosome IDs | Chromosomes     | Physical positions (bp) | CDC Frontier (Reference genome) | (Pusa 256 & HPNB) | NCBI SNPdb Accession IDs |
|-----------------------|----------------|-----------------|-------------------------|---------------------------------|-------------------|--------------------------|
| SNP_P3_41090_17291662 | NC_021163.1    | Ca_kabuli_chr04 | 17291662                | TT                              | CC                | 1945937163               |
| SNP_P3_41091_17291921 | NC_021163.1    | Ca_kabuli_chr04 | 17291921                | AA                              | TT                | 1945937165               |
| SNP_P3_41092_17291934 | NC_021163.1    | Ca_kabuli_chr04 | 17291934                | CC                              | TT                | 1945937167               |
| SNP_P3_41093_17292910 | NC_021163.1    | Ca_kabuli_chr04 | 17292910                | AA                              | TT                | 1945937169               |
| SNP_P3_41094_17293122 | NC_021163.1    | Ca_kabuli_chr04 | 17293122                | TT                              | CC                | 1945937171               |
| SNP_P3_41095_17293139 | NC_021163.1    | Ca_kabuli_chr04 | 17293139                | TT                              | CC                | 1945937172               |
| SNP_P3_41096_17293169 | NC_021163.1    | Ca_kabuli_chr04 | 17293169                | TT                              | CC                | 1945937174               |
| SNP_P3_41097_17293171 | NC_021163.1    | Ca_kabuli_chr04 | 17293171                | CC                              | TT                | 1945937176               |
| SNP_P3_41098_17293768 | NC_021163.1    | Ca_kabuli_chr04 | 17293768                | AA                              | GG                | 1945937178               |
| SNP_P3_41099_17293854 | NC_021163.1    | Ca_kabuli_chr04 | 17293854                | AA                              | CC                | 1945937179               |
| SNP_P3_41100_17294886 | NC_021163.1    | Ca_kabuli_chr04 | 17294886                | GG                              | AA                | 1945937181               |
| SNP_P3_41101_17295065 | NC_021163.1    | Ca_kabuli_chr04 | 17295065                | GG                              | AA                | 1945937183               |
| SNP_P3_41102_17295114 | NC_021163.1    | Ca_kabuli_chr04 | 17295114                | AA                              | TT                | 1945937185               |
| SNP_P3_41105_17296035 | NC_021163.1    | Ca_kabuli_chr04 | 17296035                | AA                              | CC                | 1945937187               |
| SNP_P3_41106_17296036 | NC_021163.1    | Ca_kabuli_chr04 | 17296036                | AA                              | GG                | 1945937188               |
| SNP_P3_41107_17296040 | NC_021163.1    | Ca_kabuli_chr04 | 17296040                | CC                              | TT                | 1945937190               |
| SNP_P3_41108_17296992 | NC_021163.1    | Ca_kabuli_chr04 | 17296992                | TT                              | AA                | 1945937192               |
| SNP_P3_41110_17300949 | NC_021163.1    | Ca_kabuli_chr04 | 17300949                | CC                              | TT                | 1945937194               |
| SNP_P3_41111_17307439 | NC_021163.1    | Ca_kabuli_chr04 | 17307439                | GG                              | TT                | 1945937195               |
| SNP_P3_41112_17309732 | NC_021163.1    | Ca_kabuli_chr04 | 17309732                | AA                              | CC                | 1945937197               |
| SNP_P3_41114_17313161 | NC_021163.1    | Ca_kabuli_chr04 | 17313161                | TT                              | CC                | 1945937199               |
| SNP_P3_41115_17313397 | NC_021163.1    | Ca_kabuli_chr04 | 17313397                | CC                              | TT                | 1945937201               |
| SNP_P3_41118_17313602 | NC_021163.1    | Ca_kabuli_chr04 | 17313602                | TT                              | AA                | 1945937202               |
| SNP_P3_41119_17313969 | NC_021163.1    | Ca_kabuli_chr04 | 17313969                | TT                              | GG                | 1945937204               |
| SNP_P3_41120_17314215 | NC_021163.1    | Ca_kabuli_chr04 | 17314215                | AA                              | GG                | 1945937206               |
| SNP_P3_41122_17314474 | NC_021163.1    | Ca_kabuli_chr04 | 17314474                | AA                              | GG                | 1945937208               |
| SNP_P3_41123_17314485 | NC_021163.1    | Ca_kabuli_chr04 | 17314485                | TT                              | CC                | 1945937210               |
| SNP_P3_41125_17314543 | NC_021163.1    | Ca_kabuli_chr04 | 17314543                | AA                              | TT                | 1945937211               |
| SNP_P3_41126_17314557 | NC_021163.1    | Ca_kabuli_chr04 | 17314557                | AA                              | GG                | 1945937213               |
| SNP_P3_41128_17314689 | NC_021163.1    | Ca_kabuli_chr04 | 17314689                | GG                              | AA                | 1945937215               |
| SNP_P3_41130_17314901 | NC_021163.1    | Ca_kabuli_chr04 | 17314901                | AA                              | GG                | 1945937217               |
| SNP_P3_41132_17315205 | NC_021163.1    | Ca_kabuli_chr04 | 17315205                | GG                              | AA                | 1945937218               |
| SNP_P3_41133_17315206 | NC_021163.1    | Ca_kabuli_chr04 | 17315206                | TT                              | CC                | 1945937220               |
| SNP_P3_41134_17315289 | NC_021163.1    | Ca_kabuli_chr04 | 17315289                | GG                              | AA                | 1945937222               |
| SNP_P3_41135_17315378 | NC_021163.1    | Ca_kabuli_chr04 | 17315378                | CC                              | TT                | 1945937224               |
| SNP_P3_41136_17315396 | NC_021163.1    | Ca_kabuli_chr04 | 17315396                | CC                              | TT                | 1945937226               |
| SNP_P3_41137_17315413 | NC_021163.1    | Ca_kabuli_chr04 | 17315413                | AA                              | GG                | 1945937227               |
| SNP_P3_41138_17315465 | NC_021163.1    | Ca_kabuli_chr04 | 17315465                | AA                              | TT                | 1945937229               |
| SNP_P3_41139_17315476 | NC_021163.1    | Ca_kabuli_chr04 | 17315476                | TT                              | AA                | 1945937231               |
| SNP_P3_41140_17315562 | NC_021163.1    | Ca_kabuli_chr04 | 17315562                | AA                              | TT                | 1945937233               |
| SNP_P3_41141_17315563 | NC_021163.1    | Ca_kabuli_chr04 | 17315563                | GG                              | TT                | 1945937234               |
| SNP_P3_41142_17315790 | NC_021163.1    | Ca_kabuli_chr04 | 17315790                | AA                              | GG                | 1945937236               |

| SNPs IDs              | Chromosome IDs | Chromosomes     | Physical positions (bp) | CDC Frontier (Reference genome) | (Pusa 256 & HPNB) | NCBI SNPdb Accession IDs |
|-----------------------|----------------|-----------------|-------------------------|---------------------------------|-------------------|--------------------------|
| SNP_P3_41143_17315824 | NC_021163.1    | Ca_kabuli_chr04 | 17315824                | TT                              | AA                | 1945937238               |
| SNP_P3_41145_17317838 | NC_021163.1    | Ca_kabuli_chr04 | 17317838                | TT                              | CC                | 1945937240               |
| SNP_P3_41148_17317985 | NC_021163.1    | Ca_kabuli_chr04 | 17317985                | GG                              | AA                | 1945937241               |
| SNP_P3_41149_17318000 | NC_021163.1    | Ca_kabuli_chr04 | 17318000                | GG                              | AA                | 1945937243               |
| SNP_P3_41152_17318145 | NC_021163.1    | Ca_kabuli_chr04 | 17318145                | TT                              | GG                | 1945937245               |
| SNP_P3_41154_17318201 | NC_021163.1    | Ca_kabuli_chr04 | 17318201                | AA                              | TT                | 1945937247               |
| SNP_P3_41155_17318280 | NC_021163.1    | Ca_kabuli_chr04 | 17318280                | TT                              | CC                | 1945937249               |
| SNP_P3_41156_17319725 | NC_021163.1    | Ca_kabuli_chr04 | 17319725                | CC                              | TT                | 1945937250               |
| SNP_P3_41157_17321925 | NC_021163.1    | Ca_kabuli_chr04 | 17321925                | TT                              | AA                | 1945937252               |
| SNP_P3_41159_17322164 | NC_021163.1    | Ca_kabuli_chr04 | 17322164                | TT                              | CC                | 1945937254               |
| SNP_P3_41160_17322236 | NC_021163.1    | Ca_kabuli_chr04 | 17322236                | AA                              | TT                | 1945937256               |
| SNP_P3_41162_17322330 | NC_021163.1    | Ca_kabuli_chr04 | 17322330                | AA                              | GG                | 1945937257               |
| SNP_P3_41163_17322493 | NC_021163.1    | Ca_kabuli_chr04 | 17322493                | CC                              | AA                | 1945937259               |
| SNP_P3_41164_17322528 | NC_021163.1    | Ca_kabuli_chr04 | 17322528                | GG                              | TT                | 1945937261               |
| SNP_P3_41165_17322553 | NC_021163.1    | Ca_kabuli_chr04 | 17322553                | GG                              | AA                | 1945937263               |
| SNP_P3_41166_17322606 | NC_021163.1    | Ca_kabuli_chr04 | 17322606                | AA                              | GG                | 1945937264               |
| SNP_P3_41167_17322697 | NC_021163.1    | Ca_kabuli_chr04 | 17322697                | AA                              | CC                | 1945937266               |
| SNP_P3_41168_17324177 | NC_021163.1    | Ca_kabuli_chr04 | 17324177                | GG                              | TT                | 1945937268               |
| SNP_P3_41169_17324285 | NC_021163.1    | Ca_kabuli_chr04 | 17324285                | AA                              | TT                | 1945937270               |
| SNP_P3_41170_17324324 | NC_021163.1    | Ca_kabuli_chr04 | 17324324                | GG                              | TT                | 1945937272               |
| SNP_P3_41172_17326772 | NC_021163.1    | Ca_kabuli_chr04 | 17326772                | AA                              | GG                | 1945937273               |
| SNP_P3_41173_17326884 | NC_021163.1    | Ca_kabuli_chr04 | 17326884                | CC                              | TT                | 1945937275               |
| SNP_P3_41174_17327335 | NC_021163.1    | Ca_kabuli_chr04 | 17327335                | AA                              | GG                | 1945937277               |
| SNP_P3_41175_17327379 | NC_021163.1    | Ca_kabuli_chr04 | 17327379                | GG                              | AA                | 1945937279               |
| SNP_P3_41177_17328519 | NC_021163.1    | Ca_kabuli_chr04 | 17328519                | TT                              | CC                | 1945937280               |
| SNP_P3_41178_17328524 | NC_021163.1    | Ca_kabuli_chr04 | 17328524                | TT                              | AA                | 1945937282               |
| SNP_P3_41179_17328537 | NC_021163.1    | Ca_kabuli_chr04 | 17328537                | AA                              | GG                | 1945937284               |
| SNP_P3_41180_17328539 | NC_021163.1    | Ca_kabuli_chr04 | 17328539                | GG                              | CC                | 1945937286               |
| SNP_P3_41181_17328544 | NC_021163.1    | Ca_kabuli_chr04 | 17328544                | TT                              | AA                | 1945937288               |
| SNP_P3_41182_17328562 | NC_021163.1    | Ca_kabuli_chr04 | 17328562                | GG                              | AA                | 1945937289               |
| SNP_P3_41185_17329282 | NC_021163.1    | Ca_kabuli_chr04 | 17329282                | AA                              | GG                | 1945937291               |
| SNP_P3_41186_17330831 | NC_021163.1    | Ca_kabuli_chr04 | 17330831                | TT                              | CC                | 1945937293               |
| SNP_P3_41187_17331101 | NC_021163.1    | Ca_kabuli_chr04 | 17331101                | CC                              | TT                | 1945937295               |
| SNP_P3_41188_17331132 | NC_021163.1    | Ca_kabuli_chr04 | 17331132                | GG                              | AA                | 1945937296               |
| SNP_P3_41189_17331492 | NC_021163.1    | Ca_kabuli_chr04 | 17331492                | TT                              | GG                | 1945937298               |
| SNP_P3_41190_17331599 | NC_021163.1    | Ca_kabuli_chr04 | 17331599                | CC                              | TT                | 1945937300               |
| SNP_P3_41191_17332275 | NC_021163.1    | Ca_kabuli_chr04 | 17332275                | CC                              | AA                | 1945937302               |
| SNP_P3_41192_17332381 | NC_021163.1    | Ca_kabuli_chr04 | 17332381                | AA                              | TT                | 1945937303               |
| SNP_P3_41193_17332488 | NC_021163.1    | Ca_kabuli_chr04 | 17332488                | TT                              | GG                | 1945937305               |
| SNP_P3_41194_17332679 | NC_021163.1    | Ca_kabuli_chr04 | 17332679                | GG                              | TT                | 1945937307               |
| SNP_P3_41195_17334093 | NC_021163.1    | Ca_kabuli_chr04 | 17334093                | GG                              | TT                | 1945937309               |
| SNP_P3_41196_17334204 | NC_021163.1    | Ca_kabuli_chr04 | 17334204                | GG                              | AA                | 1945937311               |

| SNPs IDs              | Chromosome IDs | Chromosomes     | Physical positions (bp) | CDC Frontier (Reference genome) | (Pusa 256 & HPNB) | NCBI SNPdb Accession IDs |
|-----------------------|----------------|-----------------|-------------------------|---------------------------------|-------------------|--------------------------|
| SNP_P3_41197_17334359 | NC_021163.1    | Ca_kabuli_chr04 | 17334359                | TT                              | AA                | 1945937312               |
| SNP_P3_41198_17334394 | NC_021163.1    | Ca_kabuli_chr04 | 17334394                | TT                              | GG                | 1945937314               |
| SNP_P3_41199_17334750 | NC_021163.1    | Ca_kabuli_chr04 | 17334750                | CC                              | TT                | 1945937316               |
| SNP_P3_41200_17334760 | NC_021163.1    | Ca_kabuli_chr04 | 17334760                | CC                              | TT                | 1945937318               |
| SNP_P3_41201_17337001 | NC_021163.1    | Ca_kabuli_chr04 | 17337001                | CC                              | AA                | 1945937319               |
| SNP_P3_41203_17337469 | NC_021163.1    | Ca_kabuli_chr04 | 17337469                | CC                              | GG                | 1945937321               |
| SNP_P3_41204_17337484 | NC_021163.1    | Ca_kabuli_chr04 | 17337484                | AA                              | CC                | 1945937323               |
| SNP_P3_41205_17338491 | NC_021163.1    | Ca_kabuli_chr04 | 17338491                | GG                              | AA                | 1945937325               |
| SNP_P3_41206_17338958 | NC_021163.1    | Ca_kabuli_chr04 | 17338958                | CC                              | TT                | 1945937327               |
| SNP_P3_41207_17339200 | NC_021163.1    | Ca_kabuli_chr04 | 17339200                | GG                              | AA                | 1945937328               |
| SNP_P3_41208_17339623 | NC_021163.1    | Ca_kabuli_chr04 | 17339623                | TT                              | CC                | 1945937330               |
| SNP_P3_41210_17343730 | NC_021163.1    | Ca_kabuli_chr04 | 17343730                | GG                              | AA                | 1945937332               |
| SNP_P3_41211_17344319 | NC_021163.1    | Ca_kabuli_chr04 | 17344319                | CC                              | TT                | 1945937334               |
| SNP_P3_41212_17345253 | NC_021163.1    | Ca_kabuli_chr04 | 17345253                | TT                              | AA                | 1945937335               |
| SNP_P3_41214_17347483 | NC_021163.1    | Ca_kabuli_chr04 | 17347483                | AA                              | CC                | 1945937337               |
| SNP_P3_41215_17347712 | NC_021163.1    | Ca_kabuli_chr04 | 17347712                | TT                              | GG                | 1945937339               |
| SNP_P3_41216_17348034 | NC_021163.1    | Ca_kabuli_chr04 | 17348034                | CC                              | GG                | 1945937341               |
| SNP_P3_41217_17349077 | NC_021163.1    | Ca_kabuli_chr04 | 17349077                | AA                              | TT                | 1945937342               |
| SNP_P3_41218_17349092 | NC_021163.1    | Ca_kabuli_chr04 | 17349092                | AA                              | TT                | 1945937344               |
| SNP_P3_41219_17349404 | NC_021163.1    | Ca_kabuli_chr04 | 17349404                | AA                              | TT                | 1945937346               |
| SNP_P3_41220_17353020 | NC_021163.1    | Ca_kabuli_chr04 | 17353020                | AA                              | GG                | 1945937348               |
| SNP_P3_41221_17353021 | NC_021163.1    | Ca_kabuli_chr04 | 17353021                | CC                              | AA                | 1945937350               |
| SNP_P3_41222_17353102 | NC_021163.1    | Ca_kabuli_chr04 | 17353102                | AA                              | TT                | 1945937351               |
| SNP_P3_41223_17353118 | NC_021163.1    | Ca_kabuli_chr04 | 17353118                | CC                              | TT                | 1945937353               |
| SNP_P3_41224_17353145 | NC_021163.1    | Ca_kabuli_chr04 | 17353145                | CC                              | TT                | 1945937355               |
| SNP_P3_41225_17353380 | NC_021163.1    | Ca_kabuli_chr04 | 17353380                | TT                              | CC                | 1945937357               |
| SNP_P3_41226_17354204 | NC_021163.1    | Ca_kabuli_chr04 | 17354204                | AA                              | TT                | 1945937358               |
| SNP_P3_41227_17355579 | NC_021163.1    | Ca_kabuli_chr04 | 17355579                | CC                              | AA                | 1945937360               |
| SNP_P3_41228_17355594 | NC_021163.1    | Ca_kabuli_chr04 | 17355594                | TT                              | CC                | 1945937362               |
| SNP_P3_41229_17356267 | NC_021163.1    | Ca_kabuli_chr04 | 17356267                | AA                              | GG                | 1945937364               |
| SNP_P3_41230_17356320 | NC_021163.1    | Ca_kabuli_chr04 | 17356320                | GG                              | CC                | 1945937366               |
| SNP_P3_41231_17356607 | NC_021163.1    | Ca_kabuli_chr04 | 17356607                | GG                              | AA                | 1945937367               |
| SNP_P3_41232_17356647 | NC_021163.1    | Ca_kabuli_chr04 | 17356647                | CC                              | TT                | 1945937369               |
| SNP_P3_41233_17356670 | NC_021163.1    | Ca_kabuli_chr04 | 17356670                | AA                              | TT                | 1945937371               |
| SNP_P3_41234_17356678 | NC_021163.1    | Ca_kabuli_chr04 | 17356678                | CC                              | TT                | 1945937373               |
| SNP_P3_41235_17356963 | NC_021163.1    | Ca_kabuli_chr04 | 17356963                | TT                              | CC                | 1945937374               |
| SNP_P3_41236_17357857 | NC_021163.1    | Ca_kabuli_chr04 | 17357857                | CC                              | AA                | 1945937376               |
| SNP_P3_41237_17358613 | NC_021163.1    | Ca_kabuli_chr04 | 17358613                | AA                              | GG                | 1945937378               |
| SNP_P3_41238_17358879 | NC_021163.1    | Ca_kabuli_chr04 | 17358879                | TT                              | AA                | 1945937380               |
| SNP_P3_41239_17360249 | NC_021163.1    | Ca_kabuli_chr04 | 17360249                | AA                              | TT                | 1945937381               |
| SNP_P3_41242_17364151 | NC_021163.1    | Ca_kabuli_chr04 | 17364151                | GG                              | CC                | 1945937383               |
| SNP_P3_41243_17366772 | NC_021163.1    | Ca_kabuli_chr04 | 17366772                | AA                              | CC                | 1945937385               |

| SNPs IDs              | Chromosome IDs | Chromosomes     | Physical positions (bp) | CDC Frontier (Reference genome) | (Pusa 256 & HPNB) | NCBI SNPdb Accession IDs |
|-----------------------|----------------|-----------------|-------------------------|---------------------------------|-------------------|--------------------------|
| SNP_P3_41244_17367052 | NC_021163.1    | Ca_kabuli_chr04 | 17367052                | TT                              | AA                | 1945937387               |
| SNP_P3_41245_17367056 | NC_021163.1    | Ca_kabuli_chr04 | 17367056                | TT                              | CC                | 1945937389               |
| SNP_P3_41247_17367173 | NC_021163.1    | Ca_kabuli_chr04 | 17367173                | CC                              | TT                | 1945937390               |
| SNP_P3_41248_17367249 | NC_021163.1    | Ca_kabuli_chr04 | 17367249                | GG                              | AA                | 1945937392               |
| SNP_P3_41249_17367542 | NC_021163.1    | Ca_kabuli_chr04 | 17367542                | GG                              | AA                | 1945937394               |
| SNP_P3_41250_17367567 | NC_021163.1    | Ca_kabuli_chr04 | 17367567                | AA                              | GG                | 1945937396               |
| SNP_P3_41251_17368103 | NC_021163.1    | Ca_kabuli_chr04 | 17368103                | AA                              | GG                | 1945937397               |
| SNP_P3_41252_17368762 | NC_021163.1    | Ca_kabuli_chr04 | 17368762                | TT                              | CC                | 1945937399               |
| SNP_P3_41253_17368797 | NC_021163.1    | Ca_kabuli_chr04 | 17368797                | CC                              | TT                | 1945937401               |
| SNP_P3_41254_17368804 | NC_021163.1    | Ca_kabuli_chr04 | 17368804                | CC                              | TT                | 1945937403               |
| SNP_P3_41255_17371527 | NC_021163.1    | Ca_kabuli_chr04 | 17371527                | GG                              | TT                | 1945937405               |
| SNP_P3_41256_17371597 | NC_021163.1    | Ca_kabuli_chr04 | 17371597                | AA                              | GG                | 1945937406               |
| SNP_P3_41257_17372946 | NC_021163.1    | Ca_kabuli_chr04 | 17372946                | TT                              | AA                | 1945937408               |
| SNP_P3_41258_17373612 | NC_021163.1    | Ca_kabuli_chr04 | 17373612                | GG                              | CC                | 1945937410               |
| SNP_P3_41261_17380419 | NC_021163.1    | Ca_kabuli_chr04 | 17380419                | GG                              | AA                | 1945937412               |
| SNP_P3_41262_17380437 | NC_021163.1    | Ca_kabuli_chr04 | 17380437                | TT                              | CC                | 1945937413               |
| SNP_P3_41265_17381209 | NC_021163.1    | Ca_kabuli_chr04 | 17381209                | CC                              | AA                | 1945937415               |
| SNP_P3_41266_17381225 | NC_021163.1    | Ca_kabuli_chr04 | 17381225                | AA                              | GG                | 1945937417               |
| SNP_P3_41267_17381453 | NC_021163.1    | Ca_kabuli_chr04 | 17381453                | TT                              | CC                | 1945937419               |
| SNP_P3_41268_17381473 | NC_021163.1    | Ca_kabuli_chr04 | 17381473                | CC                              | TT                | 1945937420               |
| SNP_P3_41269_17381489 | NC_021163.1    | Ca_kabuli_chr04 | 17381489                | CC                              | TT                | 1945937422               |
| SNP_P3_41270_17383687 | NC_021163.1    | Ca_kabuli_chr04 | 17383687                | AA                              | TT                | 1945937424               |
| SNP_P3_41271_17384181 | NC_021163.1    | Ca_kabuli_chr04 | 17384181                | CC                              | TT                | 1945937426               |
| SNP_P3_41272_17384186 | NC_021163.1    | Ca_kabuli_chr04 | 17384186                | CC                              | TT                | 1945937428               |
| SNP_P3_41273_17384188 | NC_021163.1    | Ca_kabuli_chr04 | 17384188                | GG                              | TT                | 1945937429               |
| SNP_P3_41274_17384219 | NC_021163.1    | Ca_kabuli_chr04 | 17384219                | TT                              | GG                | 1945937431               |
| SNP_P3_41275_17384228 | NC_021163.1    | Ca_kabuli_chr04 | 17384228                | CC                              | TT                | 1945937433               |
| SNP_P3_41276_17384238 | NC_021163.1    | Ca_kabuli_chr04 | 17384238                | AA                              | GG                | 1945937435               |
| SNP_P3_41277_17384541 | NC_021163.1    | Ca_kabuli_chr04 | 17384541                | CC                              | TT                | 1945937436               |
| SNP_P3_41278_17384752 | NC_021163.1    | Ca_kabuli_chr04 | 17384752                | AA                              | GG                | 1945937438               |
| SNP_P3_41279_17384760 | NC_021163.1    | Ca_kabuli_chr04 | 17384760                | TT                              | CC                | 1945937440               |
| SNP_P3_41280_17385098 | NC_021163.1    | Ca_kabuli_chr04 | 17385098                | CC                              | TT                | 1945937442               |
| SNP_P3_41281_17385104 | NC_021163.1    | Ca_kabuli_chr04 | 17385104                | GG                              | TT                | 1945937444               |
| SNP_P3_41282_17385198 | NC_021163.1    | Ca_kabuli_chr04 | 17385198                | GG                              | CC                | 1945937445               |
| SNP_P3_41283_17385200 | NC_021163.1    | Ca_kabuli_chr04 | 17385200                | CC                              | AA                | 1945937447               |
| SNP_P3_41284_17385211 | NC_021163.1    | Ca_kabuli_chr04 | 17385211                | CC                              | TT                | 1945937449               |
| SNP_P3_41285_17385212 | NC_021163.1    | Ca_kabuli_chr04 | 17385212                | AA                              | GG                | 1945937451               |
| SNP_P3_41286_17385786 | NC_021163.1    | Ca_kabuli_chr04 | 17385786                | TT                              | GG                | 1945937452               |
| SNP_P3_41287_17386205 | NC_021163.1    | Ca_kabuli_chr04 | 17386205                | AA                              | GG                | 1945937454               |
| SNP_P3_41289_17386739 | NC_021163.1    | Ca_kabuli_chr04 | 17386739                | CC                              | TT                | 1945937456               |
| SNP_P3_41290_17387026 | NC_021163.1    | Ca_kabuli_chr04 | 17387026                | AA                              | CC                | 1945937458               |
| SNP_P3_41291_17387030 | NC_021163.1    | Ca_kabuli_chr04 | 17387030                | AA                              | CC                | 1945937459               |

| SNPs IDs              | Chromosome IDs | Chromosomes     | Physical positions (bp) | CDC Frontier (Reference genome) | (Pusa 256 & HPNB) | NCBI SNPdb Accession IDs |
|-----------------------|----------------|-----------------|-------------------------|---------------------------------|-------------------|--------------------------|
| SNP_P3_41292_17387047 | NC_021163.1    | Ca_kabuli_chr04 | 17387047                | GG                              | AA                | 1945937461               |
| SNP_P3_41293_17388455 | NC_021163.1    | Ca_kabuli_chr04 | 17388455                | TT                              | CC                | 1945937463               |
| SNP_P3_41294_17388621 | NC_021163.1    | Ca_kabuli_chr04 | 17388621                | CC                              | AA                | 1945937465               |
| SNP_P3_41295_17388625 | NC_021163.1    | Ca_kabuli_chr04 | 17388625                | TT                              | CC                | 1945937467               |
| SNP_P3_41296_17388655 | NC_021163.1    | Ca_kabuli_chr04 | 17388655                | AA                              | GG                | 1945937468               |
| SNP_P3_41297_17388774 | NC_021163.1    | Ca_kabuli_chr04 | 17388774                | AA                              | TT                | 1945937470               |
| SNP_P3_41298_17388849 | NC_021163.1    | Ca_kabuli_chr04 | 17388849                | GG                              | TT                | 1945937472               |
| SNP_P3_41299_17388856 | NC_021163.1    | Ca_kabuli_chr04 | 17388856                | TT                              | GG                | 1945937474               |
| SNP_P3_41300_17388870 | NC_021163.1    | Ca_kabuli_chr04 | 17388870                | AA                              | GG                | 1945937475               |
| SNP_P3_41301_17389880 | NC_021163.1    | Ca_kabuli_chr04 | 17389880                | GG                              | AA                | 1945937477               |
| SNP_P3_41302_17391695 | NC_021163.1    | Ca_kabuli_chr04 | 17391695                | AA                              | CC                | 1945937479               |
| SNP_P3_41303_17392405 | NC_021163.1    | Ca_kabuli_chr04 | 17392405                | AA                              | GG                | 1945937481               |
| SNP_P3_41304_17393811 | NC_021163.1    | Ca_kabuli_chr04 | 17393811                | TT                              | CC                | 1945937482               |
| SNP_P3_41308_17398645 | NC_021163.1    | Ca_kabuli_chr04 | 17398645                | AA                              | GG                | 1945937484               |
| SNP_P3_41309_17399570 | NC_021163.1    | Ca_kabuli_chr04 | 17399570                | TT                              | CC                | 1945937486               |
| SNP_P3_41310_17403021 | NC_021163.1    | Ca_kabuli_chr04 | 17403021                | AA                              | GG                | 1945937488               |
| SNP_P3_41311_17403032 | NC_021163.1    | Ca_kabuli_chr04 | 17403032                | CC                              | AA                | 1945937490               |
| SNP_P3_41312_17403038 | NC_021163.1    | Ca_kabuli_chr04 | 17403038                | AA                              | GG                | 1945937491               |
| SNP_P3_41313_17403696 | NC_021163.1    | Ca_kabuli_chr04 | 17403696                | GG                              | AA                | 1945937493               |
| SNP_P3_41314_17404067 | NC_021163.1    | Ca_kabuli_chr04 | 17404067                | GG                              | AA                | 1945937495               |
| SNP_P3_41315_17404661 | NC_021163.1    | Ca_kabuli_chr04 | 17404661                | TT                              | CC                | 1945937497               |
| SNP_P3_41316_17405094 | NC_021163.1    | Ca_kabuli_chr04 | 17405094                | GG                              | TT                | 1945937498               |
| SNP_P3_41317_17406305 | NC_021163.1    | Ca_kabuli_chr04 | 17406305                | AA                              | GG                | 1945937500               |
| SNP_P3_41318_17406410 | NC_021163.1    | Ca_kabuli_chr04 | 17406410                | GG                              | AA                | 1945937502               |
| SNP_P3_41319_17406456 | NC_021163.1    | Ca_kabuli_chr04 | 17406456                | TT                              | CC                | 1945937504               |
| SNP_P3_41320_17407407 | NC_021163.1    | Ca_kabuli_chr04 | 17407407                | TT                              | CC                | 1945937506               |
| SNP_P3_41321_17407479 | NC_021163.1    | Ca_kabuli_chr04 | 17407479                | GG                              | TT                | 1945937507               |
| SNP_P3_41322_17407736 | NC_021163.1    | Ca_kabuli_chr04 | 17407736                | AA                              | GG                | 1945937509               |
| SNP_P3_41323_17408625 | NC_021163.1    | Ca_kabuli_chr04 | 17408625                | TT                              | CC                | 1945937511               |
| SNP_P3_41324_17408656 | NC_021163.1    | Ca_kabuli_chr04 | 17408656                | AA                              | TT                | 1945937513               |
| SNP_P3_41326_17409922 | NC_021163.1    | Ca_kabuli_chr04 | 17409922                | AA                              | GG                | 1945937514               |
| SNP_P3_41327_17409936 | NC_021163.1    | Ca_kabuli_chr04 | 17409936                | AA                              | GG                | 1945937516               |
| SNP_P3_41328_17409945 | NC_021163.1    | Ca_kabuli_chr04 | 17409945                | CC                              | TT                | 1945937518               |
| SNP_P3_41329_17409947 | NC_021163.1    | Ca_kabuli_chr04 | 17409947                | AA                              | GG                | 1945937520               |
| SNP_P3_41330_17409958 | NC_021163.1    | Ca_kabuli_chr04 | 17409958                | TT                              | CC                | 1945937521               |
| SNP_P3_41331_17410228 | NC_021163.1    | Ca_kabuli_chr04 | 17410228                | TT                              | AA                | 1945937523               |
| SNP_P3_41332_17411985 | NC_021163.1    | Ca_kabuli_chr04 | 17411985                | CC                              | TT                | 1945937525               |
| SNP_P3_41333_17411986 | NC_021163.1    | Ca_kabuli_chr04 | 17411986                | TT                              | CC                | 1945937527               |
| SNP_P3_41334_17415739 | NC_021163.1    | Ca_kabuli_chr04 | 17415739                | CC                              | AA                | 1945937529               |
| SNP_P3_41335_17415740 | NC_021163.1    | Ca_kabuli_chr04 | 17415740                | GG                              | TT                | 1945937530               |
| SNP_P3_41336_17415760 | NC_021163.1    | Ca_kabuli_chr04 | 17415760                | GG                              | TT                | 1945937532               |
| SNP_P3_41337_17415761 | NC_021163.1    | Ca_kabuli_chr04 | 17415761                | AA                              | GG                | 1945937534               |

| SNPs IDs              | Chromosome IDs | Chromosomes     | Physical positions (bp) | CDC Frontier (Reference genome) | (Pusa 256 & HPNB) | NCBI SNPdb Accession IDs |
|-----------------------|----------------|-----------------|-------------------------|---------------------------------|-------------------|--------------------------|
| SNP_P3_41338_17415766 | NC_021163.1    | Ca_kabuli_chr04 | 17415766                | GG                              | AA                | 1945937536               |
| SNP_P3_41339_17420216 | NC_021163.1    | Ca_kabuli_chr04 | 17420216                | AA                              | GG                | 1945937537               |
| SNP_P3_41340_17420272 | NC_021163.1    | Ca_kabuli_chr04 | 17420272                | CC                              | TT                | 1945937539               |
| SNP_P3_41341_17420273 | NC_021163.1    | Ca_kabuli_chr04 | 17420273                | TT                              | CC                | 1945937541               |
| SNP_P3_41342_17420277 | NC_021163.1    | Ca_kabuli_chr04 | 17420277                | TT                              | CC                | 1945937543               |
| SNP_P3_41343_17420304 | NC_021163.1    | Ca_kabuli_chr04 | 17420304                | AA                              | CC                | 1945937545               |
| SNP_P3_41344_17420307 | NC_021163.1    | Ca_kabuli_chr04 | 17420307                | CC                              | AA                | 1945937546               |
| SNP_P3_41345_17420425 | NC_021163.1    | Ca_kabuli_chr04 | 17420425                | CC                              | TT                | 1945937548               |
| SNP_P3_41346_17421428 | NC_021163.1    | Ca_kabuli_chr04 | 17421428                | CC                              | GG                | 1945937550               |
| SNP_P3_41347_17421434 | NC_021163.1    | Ca_kabuli_chr04 | 17421434                | AA                              | CC                | 1945937552               |
| SNP_P3_41348_17421788 | NC_021163.1    | Ca_kabuli_chr04 | 17421788                | GG                              | CC                | 1945937553               |
| SNP_P3_41349_17421792 | NC_021163.1    | Ca_kabuli_chr04 | 17421792                | AA                              | TT                | 1945937555               |
| SNP_P3_41350_17421818 | NC_021163.1    | Ca_kabuli_chr04 | 17421818                | CC                              | TT                | 1945937557               |
| SNP_P3_41351_17422021 | NC_021163.1    | Ca_kabuli_chr04 | 17422021                | AA                              | GG                | 1945937559               |
| SNP_P3_41353_17423091 | NC_021163.1    | Ca_kabuli_chr04 | 17423091                | TT                              | AA                | 1945937560               |
| SNP_P3_41355_17423647 | NC_021163.1    | Ca_kabuli_chr04 | 17423647                | TT                              | CC                | 1945937562               |
| SNP_P3_41356_17423648 | NC_021163.1    | Ca_kabuli_chr04 | 17423648                | AA                              | GG                | 1945937564               |
| SNP_P3_41357_17423701 | NC_021163.1    | Ca_kabuli_chr04 | 17423701                | CC                              | GG                | 1945937566               |
| SNP_P3_41358_17423703 | NC_021163.1    | Ca_kabuli_chr04 | 17423703                | AA                              | GG                | 1945937568               |
| SNP_P3_41359_17424666 | NC_021163.1    | Ca_kabuli_chr04 | 17424666                | GG                              | TT                | 1945937569               |
| SNP_P3_41360_17424719 | NC_021163.1    | Ca_kabuli_chr04 | 17424719                | CC                              | AA                | 1945937571               |
| SNP_P3_41361_17424722 | NC_021163.1    | Ca_kabuli_chr04 | 17424722                | TT                              | CC                | 1945937573               |
| SNP_P3_41362_17424916 | NC_021163.1    | Ca_kabuli_chr04 | 17424916                | GG                              | TT                | 1945937575               |
| SNP_P3_41363_17424919 | NC_021163.1    | Ca_kabuli_chr04 | 17424919                | AA                              | CC                | 1945937576               |
| SNP_P3_41364_17424929 | NC_021163.1    | Ca_kabuli_chr04 | 17424929                | GG                              | AA                | 1945937578               |
| SNP_P3_41365_17424955 | NC_021163.1    | Ca_kabuli_chr04 | 17424955                | GG                              | AA                | 1945937580               |
| SNP_P3_41366_17424966 | NC_021163.1    | Ca_kabuli_chr04 | 17424966                | GG                              | AA                | 1945937582               |
| SNP_P3_41367_17425002 | NC_021163.1    | Ca_kabuli_chr04 | 17425002                | TT                              | AA                | 1945937583               |
| SNP_P3_41368_17425186 | NC_021163.1    | Ca_kabuli_chr04 | 17425186                | TT                              | CC                | 1945937585               |
| SNP_P3_41369_17425527 | NC_021163.1    | Ca_kabuli_chr04 | 17425527                | CC                              | AA                | 1945937587               |
| SNP_P3_41371_17426175 | NC_021163.1    | Ca_kabuli_chr04 | 17426175                | CC                              | GG                | 1945937589               |
| SNP_P3_41372_17426204 | NC_021163.1    | Ca_kabuli_chr04 | 17426204                | CC                              | TT                | 1945937591               |
| SNP_P3_41373_17427309 | NC_021163.1    | Ca_kabuli_chr04 | 17427309                | AA                              | GG                | 1945937592               |
| SNP_P3_41374_17427310 | NC_021163.1    | Ca_kabuli_chr04 | 17427310                | TT                              | AA                | 1945937594               |
| SNP_P3_41375_17427362 | NC_021163.1    | Ca_kabuli_chr04 | 17427362                | CC                              | TT                | 1945937596               |
| SNP_P3_41376_17428757 | NC_021163.1    | Ca_kabuli_chr04 | 17428757                | GG                              | AA                | 1945937598               |
| SNP_P3_41377_17428758 | NC_021163.1    | Ca_kabuli_chr04 | 17428758                | CC                              | GG                | 1945937599               |
| SNP_P3_41378_17429041 | NC_021163.1    | Ca_kabuli_chr04 | 17429041                | GG                              | AA                | 1945937601               |
| SNP_P3_41379_17429165 | NC_021163.1    | Ca_kabuli_chr04 | 17429165                | TT                              | GG                | 1945937603               |
| SNP_P3_41380_17429456 | NC_021163.1    | Ca_kabuli_chr04 | 17429456                | TT                              | AA                | 1945937605               |
| SNP_P3_41381_17429457 | NC_021163.1    | Ca_kabuli_chr04 | 17429457                | TT                              | AA                | 1945937607               |
| SNP_P3_41382_17430042 | NC_021163.1    | Ca_kabuli_chr04 | 17430042                | AA                              | TT                | 1945937608               |

| SNPs IDs              | Chromosome IDs | Chromosomes     | Physical positions (bp) | CDC Frontier (Reference genome) | (Pusa 256 & HPNB) | NCBI SNPdb Accession IDs |
|-----------------------|----------------|-----------------|-------------------------|---------------------------------|-------------------|--------------------------|
| SNP_P3_41383_17430108 | NC_021163.1    | Ca_kabuli_chr04 | 17430108                | CC                              | TT                | 1945937610               |
| SNP_P3_41385_17430298 | NC_021163.1    | Ca_kabuli_chr04 | 17430298                | GG                              | CC                | 1945937612               |
| SNP_P3_41387_17430554 | NC_021163.1    | Ca_kabuli_chr04 | 17430554                | AA                              | CC                | 1945937614               |
| SNP_P3_41388_17430613 | NC_021163.1    | Ca_kabuli_chr04 | 17430613                | CC                              | AA                | 1945937615               |
| SNP_P3_41389_17430714 | NC_021163.1    | Ca_kabuli_chr04 | 17430714                | CC                              | TT                | 1945937617               |
| SNP_P3_41390_17431553 | NC_021163.1    | Ca_kabuli_chr04 | 17431553                | AA                              | GG                | 1945937619               |
| SNP_P3_41392_17431923 | NC_021163.1    | Ca_kabuli_chr04 | 17431923                | GG                              | AA                | 1945937621               |
| SNP_P3_41393_17434295 | NC_021163.1    | Ca_kabuli_chr04 | 17434295                | AA                              | TT                | 1945937622               |
| SNP_P3_41394_17434326 | NC_021163.1    | Ca_kabuli_chr04 | 17434326                | GG                              | TT                | 1945937624               |
| SNP_P3_41395_17435159 | NC_021163.1    | Ca_kabuli_chr04 | 17435159                | GG                              | TT                | 1945937626               |
| SNP_P3_41396_17435166 | NC_021163.1    | Ca_kabuli_chr04 | 17435166                | GG                              | AA                | 1945937628               |
| SNP_P3_41397_17435219 | NC_021163.1    | Ca_kabuli_chr04 | 17435219                | GG                              | AA                | 1945937630               |
| SNP_P3_41398_17435234 | NC_021163.1    | Ca_kabuli_chr04 | 17435234                | TT                              | CC                | 1945937631               |
| SNP_P3_41400_17435419 | NC_021163.1    | Ca_kabuli_chr04 | 17435419                | AA                              | GG                | 1945937633               |
| SNP_P3_41401_17435422 | NC_021163.1    | Ca_kabuli_chr04 | 17435422                | AA                              | GG                | 1945937635               |
| SNP_P3_41403_17435936 | NC_021163.1    | Ca_kabuli_chr04 | 17435936                | AA                              | GG                | 1945937637               |
| SNP_P3_41404_17435962 | NC_021163.1    | Ca_kabuli_chr04 | 17435962                | TT                              | CC                | 1945937638               |
| SNP_P3_41405_17436000 | NC_021163.1    | Ca_kabuli_chr04 | 17436000                | CC                              | TT                | 1945937640               |
| SNP_P3_41406_17436110 | NC_021163.1    | Ca_kabuli_chr04 | 17436110                | AA                              | TT                | 1945937642               |
| SNP_P3_41407_17436121 | NC_021163.1    | Ca_kabuli_chr04 | 17436121                | TT                              | AA                | 1945937644               |
| SNP_P3_41408_17436123 | NC_021163.1    | Ca_kabuli_chr04 | 17436123                | AA                              | GG                | 1945937645               |
| SNP_P3_41409_17436152 | NC_021163.1    | Ca_kabuli_chr04 | 17436152                | AA                              | GG                | 1945937647               |
| SNP_P3_41410_17436201 | NC_021163.1    | Ca_kabuli_chr04 | 17436201                | TT                              | GG                | 1945937649               |
| SNP_P3_41411_17436250 | NC_021163.1    | Ca_kabuli_chr04 | 17436250                | TT                              | AA                | 1945937651               |
| SNP_P3_41412_17436279 | NC_021163.1    | Ca_kabuli_chr04 | 17436279                | TT                              | GG                | 1945937653               |
| SNP_P3_41413_17436281 | NC_021163.1    | Ca_kabuli_chr04 | 17436281                | GG                              | TT                | 1945937654               |
| SNP_P3_41414_17436288 | NC_021163.1    | Ca_kabuli_chr04 | 17436288                | AA                              | GG                | 1945937656               |
| SNP_P3_41415_17436359 | NC_021163.1    | Ca_kabuli_chr04 | 17436359                | AA                              | GG                | 1945937658               |
| SNP_P3_41416_17436363 | NC_021163.1    | Ca_kabuli_chr04 | 17436363                | CC                              | TT                | 1945937660               |
| SNP_P3_41417_17436381 | NC_021163.1    | Ca_kabuli_chr04 | 17436381                | TT                              | GG                | 1945937661               |
| SNP_P3_41418_17436448 | NC_021163.1    | Ca_kabuli_chr04 | 17436448                | TT                              | CC                | 1945937663               |
| SNP_P3_41419_17436464 | NC_021163.1    | Ca_kabuli_chr04 | 17436464                | AA                              | GG                | 1945937665               |
| SNP_P3_41421_17436598 | NC_021163.1    | Ca_kabuli_chr04 | 17436598                | GG                              | AA                | 1945937667               |
| SNP_P3_41422_17436628 | NC_021163.1    | Ca_kabuli_chr04 | 17436628                | GG                              | CC                | 1945937669               |
| SNP_P3_41423_17436799 | NC_021163.1    | Ca_kabuli_chr04 | 17436799                | GG                              | AA                | 1945937670               |
| SNP_P3_41424_17436804 | NC_021163.1    | Ca_kabuli_chr04 | 17436804                | CC                              | TT                | 1945937672               |
| SNP_P3_41425_17437217 | NC_021163.1    | Ca_kabuli_chr04 | 17437217                | GG                              | AA                | 1945937674               |
| SNP_P3_41426_17437441 | NC_021163.1    | Ca_kabuli_chr04 | 17437441                | AA                              | TT                | 1945937676               |
| SNP_P3_41428_17438072 | NC_021163.1    | Ca_kabuli_chr04 | 17438072                | AA                              | CC                | 1945937677               |
| SNP_P3_41429_17438875 | NC_021163.1    | Ca_kabuli_chr04 | 17438875                | CC                              | AA                | 1945937679               |
| SNP_P3_41430_17439430 | NC_021163.1    | Ca_kabuli_chr04 | 17439430                | GG                              | CC                | 1945937681               |
| SNP_P3_41431_17439431 | NC_021163.1    | Ca_kabuli_chr04 | 17439431                | AA                              | TT                | 1945937683               |



| SNPs IDs              | Chromosome IDs | Chromosomes     | Physical positions (bp) | CDC Frontier (Reference genome) | (Pusa 256 & HPNB) | NCBI SNPdb Accession IDs |
|-----------------------|----------------|-----------------|-------------------------|---------------------------------|-------------------|--------------------------|
| SNP_P3_41432_17440039 | NC_021163.1    | Ca_kabuli_chr04 | 17440039                | AA                              | GG                | 1945937684               |
| SNP_P3_41433_17440178 | NC_021163.1    | Ca_kabuli_chr04 | 17440178                | AA                              | CC                | 1945937686               |
| SNP_P3_41434_17440198 | NC_021163.1    | Ca_kabuli_chr04 | 17440198                | CC                              | AA                | 1945937688               |
| SNP_P3_41435_17440259 | NC_021163.1    | Ca_kabuli_chr04 | 17440259                | GG                              | TT                | 1945937690               |
| SNP_P3_41436_17440292 | NC_021163.1    | Ca_kabuli_chr04 | 17440292                | TT                              | CC                | 1945937692               |
| SNP_P3_41437_17440300 | NC_021163.1    | Ca_kabuli_chr04 | 17440300                | GG                              | AA                | 1945937693               |
| SNP_P3_41438_17440332 | NC_021163.1    | Ca_kabuli_chr04 | 17440332                | TT                              | AA                | 1945937695               |
| SNP_P3_41439_17441044 | NC_021163.1    | Ca_kabuli_chr04 | 17441044                | GG                              | CC                | 1945937697               |
| SNP_P3_41440_17441061 | NC_021163.1    | Ca_kabuli_chr04 | 17441061                | TT                              | CC                | 1945937699               |
| SNP_P3_41441_17442336 | NC_021163.1    | Ca_kabuli_chr04 | 17442336                | AA                              | GG                | 1945937700               |
| SNP_P3_41442_17442413 | NC_021163.1    | Ca_kabuli_chr04 | 17442413                | GG                              | AA                | 1945937702               |
| SNP_P3_41443_17442460 | NC_021163.1    | Ca_kabuli_chr04 | 17442460                | TT                              | CC                | 1945937704               |
| SNP_P3_41444_17442488 | NC_021163.1    | Ca_kabuli_chr04 | 17442488                | AA                              | CC                | 1945937706               |
| SNP_P3_41445_17442621 | NC_021163.1    | Ca_kabuli_chr04 | 17442621                | TT                              | GG                | 1945937708               |
| SNP_P3_41446_17442664 | NC_021163.1    | Ca_kabuli_chr04 | 17442664                | CC                              | GG                | 1945937709               |
| SNP_P3_41447_17442845 | NC_021163.1    | Ca_kabuli_chr04 | 17442845                | GG                              | CC                | 1945937711               |
| SNP_P3_41448_17443056 | NC_021163.1    | Ca_kabuli_chr04 | 17443056                | AA                              | GG                | 1945937713               |
| SNP_P3_41450_17443506 | NC_021163.1    | Ca_kabuli_chr04 | 17443506                | AA                              | CC                | 1945937715               |
| SNP_P3_41452_17443662 | NC_021163.1    | Ca_kabuli_chr04 | 17443662                | GG                              | CC                | 1945937716               |
| SNP_P3_41453_17443687 | NC_021163.1    | Ca_kabuli_chr04 | 17443687                | CC                              | TT                | 1945937718               |
| SNP_P3_41454_17443689 | NC_021163.1    | Ca_kabuli_chr04 | 17443689                | TT                              | CC                | 1945937720               |
| SNP_P3_41455_17443704 | NC_021163.1    | Ca_kabuli_chr04 | 17443704                | GG                              | AA                | 1945937722               |
| SNP_P3_41456_17443715 | NC_021163.1    | Ca_kabuli_chr04 | 17443715                | CC                              | GG                | 1945937723               |
| SNP_P3_41457_17443871 | NC_021163.1    | Ca_kabuli_chr04 | 17443871                | CC                              | GG                | 1945937725               |
| SNP_P3_41458_17445030 | NC_021163.1    | Ca_kabuli_chr04 | 17445030                | AA                              | GG                | 1945937727               |
| SNP_P3_41459_17445166 | NC_021163.1    | Ca_kabuli_chr04 | 17445166                | CC                              | AA                | 1945937729               |
| SNP_P3_41460_17445190 | NC_021163.1    | Ca_kabuli_chr04 | 17445190                | CC                              | TT                | 1945937731               |
| SNP_P3_41462_17445455 | NC_021163.1    | Ca_kabuli_chr04 | 17445455                | GG                              | CC                | 1945937732               |
| SNP_P3_41463_17447127 | NC_021163.1    | Ca_kabuli_chr04 | 17447127                | TT                              | AA                | 1945937734               |
| SNP_P3_41464_17447133 | NC_021163.1    | Ca_kabuli_chr04 | 17447133                | TT                              | CC                | 1945937736               |
| SNP_P3_41466_17449691 | NC_021163.1    | Ca_kabuli_chr04 | 17449691                | AA                              | CC                | 1945937738               |
| SNP_P3_41467_17453185 | NC_021163.1    | Ca_kabuli_chr04 | 17453185                | AA                              | CC                | 1945937739               |
| SNP_P3_41468_17454196 | NC_021163.1    | Ca_kabuli_chr04 | 17454196                | GG                              | AA                | 1945937741               |
| SNP_P3_41469_17456362 | NC_021163.1    | Ca_kabuli_chr04 | 17456362                | GG                              | AA                | 1945937743               |
| SNP_P3_41470_17458318 | NC_021163.1    | Ca_kabuli_chr04 | 17458318                | TT                              | CC                | 1945937745               |
| SNP_P3_41471_17458322 | NC_021163.1    | Ca_kabuli_chr04 | 17458322                | AA                              | CC                | 1945937747               |
| SNP_P3_41472_17458331 | NC_021163.1    | Ca_kabuli_chr04 | 17458331                | AA                              | GG                | 1945937748               |
| SNP_P3_41473_17458374 | NC_021163.1    | Ca_kabuli_chr04 | 17458374                | CC                              | TT                | 1945937750               |
| SNP_P3_41474_17458396 | NC_021163.1    | Ca_kabuli_chr04 | 17458396                | GG                              | AA                | 1945937752               |
| SNP_P3_41475_17458589 | NC_021163.1    | Ca_kabuli_chr04 | 17458589                | TT                              | CC                | 1945937754               |
| SNP_P3_41477_17459709 | NC_021163.1    | Ca_kabuli_chr04 | 17459709                | TT                              | CC                | 1945937755               |
| SNP_P3_41478_17462227 | NC_021163.1    | Ca_kabuli_chr04 | 17462227                | AA                              | GG                | 1945937757               |

| SNPs IDs              | Chromosome IDs | Chromosomes     | Physical positions (bp) | CDC Frontier (Reference genome) | (Pusa 256 & HPNB) | NCBI SNPdb Accession IDs |
|-----------------------|----------------|-----------------|-------------------------|---------------------------------|-------------------|--------------------------|
| SNP_P3_41479_17462550 | NC_021163.1    | Ca_kabuli_chr04 | 17462550                | GG                              | TT                | 1945937759               |
| SNP_P3_41480_17462920 | NC_021163.1    | Ca_kabuli_chr04 | 17462920                | CC                              | TT                | 1945937761               |
| SNP_P3_41481_17462947 | NC_021163.1    | Ca_kabuli_chr04 | 17462947                | AA                              | GG                | 1945937762               |
| SNP_P3_41482_17462977 | NC_021163.1    | Ca_kabuli_chr04 | 17462977                | GG                              | AA                | 1945937764               |
| SNP_P3_41485_17464338 | NC_021163.1    | Ca_kabuli_chr04 | 17464338                | GG                              | AA                | 1945937766               |
| SNP_P3_41487_17465806 | NC_021163.1    | Ca_kabuli_chr04 | 17465806                | CC                              | TT                | 1945937768               |
| SNP_P3_41488_17466772 | NC_021163.1    | Ca_kabuli_chr04 | 17466772                | TT                              | CC                | 1945937770               |
| SNP_P3_41489_17467667 | NC_021163.1    | Ca_kabuli_chr04 | 17467667                | TT                              | AA                | 1945937771               |
| SNP_P3_41490_17467687 | NC_021163.1    | Ca_kabuli_chr04 | 17467687                | CC                              | TT                | 1945937773               |
| SNP_P3_41491_17468085 | NC_021163.1    | Ca_kabuli_chr04 | 17468085                | GG                              | AA                | 1945937775               |
| SNP_P3_41492_17468882 | NC_021163.1    | Ca_kabuli_chr04 | 17468882                | GG                              | AA                | 1945937777               |
| SNP_P3_41493_17469245 | NC_021163.1    | Ca_kabuli_chr04 | 17469245                | AA                              | TT                | 1945937778               |
| SNP_P3_41494_17469526 | NC_021163.1    | Ca_kabuli_chr04 | 17469526                | AA                              | TT                | 1945937780               |
| SNP_P3_41495_17469553 | NC_021163.1    | Ca_kabuli_chr04 | 17469553                | GG                              | AA                | 1945937782               |
| SNP_P3_41496_17469617 | NC_021163.1    | Ca_kabuli_chr04 | 17469617                | AA                              | GG                | 1945937784               |
| SNP_P3_41497_17469687 | NC_021163.1    | Ca_kabuli_chr04 | 17469687                | TT                              | AA                | 1945937785               |
| SNP_P3_41498_17469921 | NC_021163.1    | Ca_kabuli_chr04 | 17469921                | GG                              | AA                | 1945937787               |
| SNP_P3_41499_17469994 | NC_021163.1    | Ca_kabuli_chr04 | 17469994                | AA                              | GG                | 1945937789               |
| SNP_P3_41500_17471059 | NC_021163.1    | Ca_kabuli_chr04 | 17471059                | GG                              | AA                | 1945937791               |
| SNP_P3_41501_17474930 | NC_021163.1    | Ca_kabuli_chr04 | 17474930                | GG                              | AA                | 1945937793               |
| SNP_P3_41502_17475325 | NC_021163.1    | Ca_kabuli_chr04 | 17475325                | GG                              | AA                | 1945937794               |
| SNP_P3_41504_17477488 | NC_021163.1    | Ca_kabuli_chr04 | 17477488                | GG                              | CC                | 1945937796               |
| SNP_P3_41505_17478493 | NC_021163.1    | Ca_kabuli_chr04 | 17478493                | TT                              | AA                | 1945937798               |
| SNP_P3_41506_17479654 | NC_021163.1    | Ca_kabuli_chr04 | 17479654                | TT                              | CC                | 1945937800               |
| SNP_P3_41508_17480621 | NC_021163.1    | Ca_kabuli_chr04 | 17480621                | GG                              | AA                | 1945937801               |
| SNP_P3_41509_17481031 | NC_021163.1    | Ca_kabuli_chr04 | 17481031                | TT                              | CC                | 1945937803               |
| SNP_P3_41510_17483457 | NC_021163.1    | Ca_kabuli_chr04 | 17483457                | AA                              | GG                | 1945937805               |
| SNP_P3_41511_17483838 | NC_021163.1    | Ca_kabuli_chr04 | 17483838                | TT                              | CC                | 1945937807               |
| SNP_P3_41512_17483852 | NC_021163.1    | Ca_kabuli_chr04 | 17483852                | TT                              | CC                | 1945937809               |
| SNP_P3_41513_17485575 | NC_021163.1    | Ca_kabuli_chr04 | 17485575                | TT                              | CC                | 1945937810               |
| SNP_P3_41514_17485935 | NC_021163.1    | Ca_kabuli_chr04 | 17485935                | CC                              | TT                | 1945937812               |
| SNP_P3_41516_17489210 | NC_021163.1    | Ca_kabuli_chr04 | 17489210                | AA                              | GG                | 1945937814               |
| SNP_P3_41517_17489212 | NC_021163.1    | Ca_kabuli_chr04 | 17489212                | TT                              | GG                | 1945937816               |
| SNP_P3_41520_17489899 | NC_021163.1    | Ca_kabuli_chr04 | 17489899                | TT                              | CC                | 1945937817               |
| SNP_P3_41521_17491203 | NC_021163.1    | Ca_kabuli_chr04 | 17491203                | GG                              | AA                | 1945937819               |
| SNP_P3_41522_17491527 | NC_021163.1    | Ca_kabuli_chr04 | 17491527                | TT                              | AA                | 1945937821               |
| SNP_P3_41523_17491611 | NC_021163.1    | Ca_kabuli_chr04 | 17491611                | CC                              | TT                | 1945937823               |
| SNP_P3_41524_17492108 | NC_021163.1    | Ca_kabuli_chr04 | 17492108                | CC                              | TT                | 1945937825               |
| SNP_P3_41525_17492112 | NC_021163.1    | Ca_kabuli_chr04 | 17492112                | GG                              | AA                | 1945937826               |
| SNP_P3_41526_17492287 | NC_021163.1    | Ca_kabuli_chr04 | 17492287                | TT                              | GG                | 1945937828               |
| SNP_P3_41527_17492331 | NC_021163.1    | Ca_kabuli_chr04 | 17492331                | CC                              | AA                | 1945937830               |
| SNP_P3_41528_17492349 | NC_021163.1    | Ca_kabuli_chr04 | 17492349                | AA                              | CC                | 1945937832               |

| SNPs IDs              | Chromosome IDs | Chromosomes     | Physical positions (bp) | CDC Frontier (Reference genome) | (Pusa 256 & HPNB) | NCBI SNPdb Accession IDs |
|-----------------------|----------------|-----------------|-------------------------|---------------------------------|-------------------|--------------------------|
| SNP_P3_41529_17492413 | NC_021163.1    | Ca_kabuli_chr04 | 17492413                | AA                              | CC                | 1945937833               |
| SNP_P3_41530_17492435 | NC_021163.1    | Ca_kabuli_chr04 | 17492435                | CC                              | TT                | 1945937835               |
| SNP_P3_41531_17492491 | NC_021163.1    | Ca_kabuli_chr04 | 17492491                | TT                              | AA                | 1945937837               |
| SNP_P3_41532_17492779 | NC_021163.1    | Ca_kabuli_chr04 | 17492779                | GG                              | AA                | 1945937839               |
| SNP_P3_41533_17493422 | NC_021163.1    | Ca_kabuli_chr04 | 17493422                | GG                              | TT                | 1945937840               |
| SNP_P3_41534_17493687 | NC_021163.1    | Ca_kabuli_chr04 | 17493687                | TT                              | CC                | 1945937842               |
| SNP_P3_41536_17494326 | NC_021163.1    | Ca_kabuli_chr04 | 17494326                | AA                              | TT                | 1945937844               |
| SNP_P3_41537_17495176 | NC_021163.1    | Ca_kabuli_chr04 | 17495176                | GG                              | AA                | 1945937846               |
| SNP_P3_41538_17495211 | NC_021163.1    | Ca_kabuli_chr04 | 17495211                | GG                              | CC                | 1945937848               |
| SNP_P3_41539_17495227 | NC_021163.1    | Ca_kabuli_chr04 | 17495227                | GG                              | AA                | 1945937849               |
| SNP_P3_41540_17495586 | NC_021163.1    | Ca_kabuli_chr04 | 17495586                | CC                              | AA                | 1945937851               |
| SNP_P3_41541_17495587 | NC_021163.1    | Ca_kabuli_chr04 | 17495587                | GG                              | AA                | 1945937853               |
| SNP_P3_41542_17496919 | NC_021163.1    | Ca_kabuli_chr04 | 17496919                | TT                              | AA                | 1945937855               |
| SNP_P3_41543_17497758 | NC_021163.1    | Ca_kabuli_chr04 | 17497758                | TT                              | AA                | 1945937856               |
| SNP_P3_41544_17508992 | NC_021163.1    | Ca_kabuli_chr04 | 17508992                | GG                              | AA                | 1945937858               |
| SNP_P3_41545_17518807 | NC_021163.1    | Ca_kabuli_chr04 | 17518807                | CC                              | AA                | 1945937860               |
| SNP_P3_41546_17523832 | NC_021163.1    | Ca_kabuli_chr04 | 17523832                | CC                              | TT                | 1945937862               |
| SNP_P3_41547_17524659 | NC_021163.1    | Ca_kabuli_chr04 | 17524659                | TT                              | AA                | 1945937864               |
| SNP_P3_41548_17525410 | NC_021163.1    | Ca_kabuli_chr04 | 17525410                | GG                              | CC                | 1945937865               |
| SNP_P3_41549_17525582 | NC_021163.1    | Ca_kabuli_chr04 | 17525582                | CC                              | GG                | 1945937867               |
| SNP_P3_41550_17525616 | NC_021163.1    | Ca_kabuli_chr04 | 17525616                | GG                              | AA                | 1945937869               |
| SNP_P3_41551_17526087 | NC_021163.1    | Ca_kabuli_chr04 | 17526087                | GG                              | AA                | 1945937871               |
| SNP_P3_41552_17526167 | NC_021163.1    | Ca_kabuli_chr04 | 17526167                | AA                              | TT                | 1945937872               |
| SNP_P3_41553_17526564 | NC_021163.1    | Ca_kabuli_chr04 | 17526564                | AA                              | GG                | 1945937874               |
| SNP_P3_41554_17526610 | NC_021163.1    | Ca_kabuli_chr04 | 17526610                | GG                              | AA                | 1945937876               |
| SNP_P3_41555_17526907 | NC_021163.1    | Ca_kabuli_chr04 | 17526907                | TT                              | CC                | 1945937878               |
| SNP_P3_41559_17528270 | NC_021163.1    | Ca_kabuli_chr04 | 17528270                | AA                              | CC                | 1945937879               |
| SNP_P3_41562_17530458 | NC_021163.1    | Ca_kabuli_chr04 | 17530458                | GG                              | AA                | 1945937881               |
| SNP_P3_41563_17530874 | NC_021163.1    | Ca_kabuli_chr04 | 17530874                | AA                              | GG                | 1945937883               |
| SNP_P3_41564_17531834 | NC_021163.1    | Ca_kabuli_chr04 | 17531834                | GG                              | TT                | 1945937885               |
| SNP_P3_41565_17532501 | NC_021163.1    | Ca_kabuli_chr04 | 17532501                | CC                              | AA                | 1945937887               |
| SNP_P3_41566_17533015 | NC_021163.1    | Ca_kabuli_chr04 | 17533015                | CC                              | GG                | 1945937888               |
| SNP_P3_41568_17533675 | NC_021163.1    | Ca_kabuli_chr04 | 17533675                | AA                              | GG                | 1945937890               |
| SNP_P3_41570_17534738 | NC_021163.1    | Ca_kabuli_chr04 | 17534738                | TT                              | CC                | 1945937892               |
| SNP_P3_41571_17534921 | NC_021163.1    | Ca_kabuli_chr04 | 17534921                | AA                              | GG                | 1945937894               |
| SNP_P3_41572_17537857 | NC_021163.1    | Ca_kabuli_chr04 | 17537857                | CC                              | TT                | 1945937895               |
| SNP_P3_41573_17537862 | NC_021163.1    | Ca_kabuli_chr04 | 17537862                | CC                              | GG                | 1945937897               |
| SNP_P3_41574_17537869 | NC_021163.1    | Ca_kabuli_chr04 | 17537869                | CC                              | TT                | 1945937899               |
| SNP_P3_41575_17542809 | NC_021163.1    | Ca_kabuli_chr04 | 17542809                | TT                              | CC                | 1945937901               |
| SNP_P3_41576_17545016 | NC_021163.1    | Ca_kabuli_chr04 | 17545016                | TT                              | GG                | 1945937903               |
| SNP_P3_41578_17545746 | NC_021163.1    | Ca_kabuli_chr04 | 17545746                | TT                              | AA                | 1945937904               |
| SNP_P3_41580_17550828 | NC_021163.1    | Ca_kabuli_chr04 | 17550828                | CC                              | TT                | 1945937906               |

| SNPs IDs              | Chromosome IDs | Chromosomes     | Physical positions (bp) | CDC Frontier (Reference genome) | (Pusa 256 & HPNB) | NCBI SNPdb Accession IDs |
|-----------------------|----------------|-----------------|-------------------------|---------------------------------|-------------------|--------------------------|
| SNP_P3_41581_17552476 | NC_021163.1    | Ca_kabuli_chr04 | 17552476                | AA                              | GG                | 1945937908               |
| SNP_P3_41582_17553427 | NC_021163.1    | Ca_kabuli_chr04 | 17553427                | TT                              | CC                | 1945937910               |
| SNP_P3_41583_17554811 | NC_021163.1    | Ca_kabuli_chr04 | 17554811                | AA                              | TT                | 1945937911               |
| SNP_P3_41584_17555025 | NC_021163.1    | Ca_kabuli_chr04 | 17555025                | AA                              | GG                | 1945937913               |
| SNP_P3_41585_17555029 | NC_021163.1    | Ca_kabuli_chr04 | 17555029                | CC                              | TT                | 1945937915               |
| SNP_P3_41586_17555145 | NC_021163.1    | Ca_kabuli_chr04 | 17555145                | AA                              | GG                | 1945937917               |
| SNP_P3_41587_17555471 | NC_021163.1    | Ca_kabuli_chr04 | 17555471                | GG                              | AA                | 1945937918               |
| SNP_P3_41588_17556822 | NC_021163.1    | Ca_kabuli_chr04 | 17556822                | GG                              | AA                | 1945937920               |
| SNP_P3_41590_17558433 | NC_021163.1    | Ca_kabuli_chr04 | 17558433                | TT                              | CC                | 1945937922               |
| SNP_P3_41591_17558627 | NC_021163.1    | Ca_kabuli_chr04 | 17558627                | CC                              | AA                | 1945937924               |
| SNP_P3_41592_17558801 | NC_021163.1    | Ca_kabuli_chr04 | 17558801                | AA                              | GG                | 1945937926               |
| SNP_P3_41593_17559211 | NC_021163.1    | Ca_kabuli_chr04 | 17559211                | GG                              | TT                | 1945937927               |
| SNP_P3_41594_17561103 | NC_021163.1    | Ca_kabuli_chr04 | 17561103                | AA                              | CC                | 1945937929               |
| SNP_P3_41595_17561301 | NC_021163.1    | Ca_kabuli_chr04 | 17561301                | CC                              | TT                | 1945937931               |
| SNP_P3_41596_17562683 | NC_021163.1    | Ca_kabuli_chr04 | 17562683                | CC                              | TT                | 1945937933               |
| SNP_P3_41598_17564306 | NC_021163.1    | Ca_kabuli_chr04 | 17564306                | TT                              | CC                | 1945937934               |
| SNP_P3_41599_17564320 | NC_021163.1    | Ca_kabuli_chr04 | 17564320                | AA                              | CC                | 1945937936               |
| SNP_P3_41600_17566237 | NC_021163.1    | Ca_kabuli_chr04 | 17566237                | AA                              | CC                | 1945937938               |
| SNP_P3_41601_17566886 | NC_021163.1    | Ca_kabuli_chr04 | 17566886                | GG                              | AA                | 1945937940               |
| SNP_P3_41602_17567079 | NC_021163.1    | Ca_kabuli_chr04 | 17567079                | TT                              | CC                | 1945937942               |
| SNP_P3_41603_17567110 | NC_021163.1    | Ca_kabuli_chr04 | 17567110                | GG                              | CC                | 1945937943               |
| SNP_P3_41604_17568170 | NC_021163.1    | Ca_kabuli_chr04 | 17568170                | TT                              | GG                | 1945937945               |
| SNP_P3_41605_17568190 | NC_021163.1    | Ca_kabuli_chr04 | 17568190                | GG                              | AA                | 1945937947               |
| SNP_P3_41606_17568228 | NC_021163.1    | Ca_kabuli_chr04 | 17568228                | TT                              | AA                | 1945937949               |
| SNP_P3_41607_17573140 | NC_021163.1    | Ca_kabuli_chr04 | 17573140                | AA                              | GG                | 1945937950               |
| SNP_P3_41608_17573522 | NC_021163.1    | Ca_kabuli_chr04 | 17573522                | GG                              | AA                | 1945937952               |
| SNP_P3_41609_17577996 | NC_021163.1    | Ca_kabuli_chr04 | 17577996                | CC                              | TT                | 1945937954               |
| SNP_P3_41610_17580854 | NC_021163.1    | Ca_kabuli_chr04 | 17580854                | TT                              | GG                | 1945937956               |
| SNP_P3_41611_17580989 | NC_021163.1    | Ca_kabuli_chr04 | 17580989                | TT                              | CC                | 1945937957               |
| SNP_P3_41612_17581331 | NC_021163.1    | Ca_kabuli_chr04 | 17581331                | CC                              | TT                | 1945937959               |
| SNP_P3_41613_17581562 | NC_021163.1    | Ca_kabuli_chr04 | 17581562                | GG                              | AA                | 1945937961               |
| SNP_P3_41614_17581593 | NC_021163.1    | Ca_kabuli_chr04 | 17581593                | AA                              | GG                | 1945937963               |
| SNP_P3_41615_17581611 | NC_021163.1    | Ca_kabuli_chr04 | 17581611                | AA                              | TT                | 1945937965               |
| SNP_P3_41616_17581647 | NC_021163.1    | Ca_kabuli_chr04 | 17581647                | CC                              | TT                | 1945937966               |
| SNP_P3_41617_17581676 | NC_021163.1    | Ca_kabuli_chr04 | 17581676                | CC                              | GG                | 1945937968               |
| SNP_P3_41618_17581694 | NC_021163.1    | Ca_kabuli_chr04 | 17581694                | GG                              | AA                | 1945937970               |
| SNP_P3_41619_17582394 | NC_021163.1    | Ca_kabuli_chr04 | 17582394                | TT                              | GG                | 1945937972               |
| SNP_P3_41620_17583640 | NC_021163.1    | Ca_kabuli_chr04 | 17583640                | AA                              | GG                | 1945937973               |
| SNP_P3_41621_17583914 | NC_021163.1    | Ca_kabuli_chr04 | 17583914                | GG                              | AA                | 1945937975               |
| SNP_P3_41622_17583933 | NC_021163.1    | Ca_kabuli_chr04 | 17583933                | CC                              | AA                | 1945937977               |
| SNP_P3_41623_17587498 | NC_021163.1    | Ca_kabuli_chr04 | 17587498                | CC                              | TT                | 1945937979               |
| SNP_P3_41624_17589143 | NC_021163.1    | Ca_kabuli_chr04 | 17589143                | GG                              | AA                | 1945937981               |

| SNPs IDs              | Chromosome IDs | Chromosomes     | Physical positions (bp) | CDC Frontier (Reference genome) | (Pusa 256 & HPNB) | NCBI SNPdb Accession IDs |
|-----------------------|----------------|-----------------|-------------------------|---------------------------------|-------------------|--------------------------|
| SNP_P3_41625_17590404 | NC_021163.1    | Ca_kabuli_chr04 | 17590404                | CC                              | TT                | 1945937982               |
| SNP_P3_41626_17590932 | NC_021163.1    | Ca_kabuli_chr04 | 17590932                | CC                              | TT                | 1945937984               |
| SNP_P3_41627_17591297 | NC_021163.1    | Ca_kabuli_chr04 | 17591297                | AA                              | GG                | 1945937986               |
| SNP_P3_41628_17595392 | NC_021163.1    | Ca_kabuli_chr04 | 17595392                | CC                              | GG                | 1945937988               |
| SNP_P3_41629_17595546 | NC_021163.1    | Ca_kabuli_chr04 | 17595546                | CC                              | AA                | 1945937989               |
| SNP_P3_41630_17595763 | NC_021163.1    | Ca_kabuli_chr04 | 17595763                | TT                              | CC                | 1945937991               |
| SNP_P3_41631_17595864 | NC_021163.1    | Ca_kabuli_chr04 | 17595864                | TT                              | AA                | 1945937993               |
| SNP_P3_41632_17596054 | NC_021163.1    | Ca_kabuli_chr04 | 17596054                | GG                              | TT                | 1945937995               |
| SNP_P3_41633_17596360 | NC_021163.1    | Ca_kabuli_chr04 | 17596360                | AA                              | GG                | 1945937997               |
| SNP_P3_41634_17596515 | NC_021163.1    | Ca_kabuli_chr04 | 17596515                | GG                              | AA                | 1945937998               |
| SNP_P3_41635_17597982 | NC_021163.1    | Ca_kabuli_chr04 | 17597982                | TT                              | GG                | 1945938000               |
| SNP_P3_41636_17598531 | NC_021163.1    | Ca_kabuli_chr04 | 17598531                | AA                              | TT                | 1945938002               |
| SNP_P3_41637_17598712 | NC_021163.1    | Ca_kabuli_chr04 | 17598712                | AA                              | GG                | 1945938004               |
| SNP_P3_41638_17598790 | NC_021163.1    | Ca_kabuli_chr04 | 17598790                | TT                              | GG                | 1945938005               |
| SNP_P3_41639_17599183 | NC_021163.1    | Ca_kabuli_chr04 | 17599183                | AA                              | TT                | 1945938007               |
| SNP_P3_41640_17599307 | NC_021163.1    | Ca_kabuli_chr04 | 17599307                | AA                              | GG                | 1945938009               |
| SNP_P3_41641_17599438 | NC_021163.1    | Ca_kabuli_chr04 | 17599438                | GG                              | CC                | 1945938011               |
| SNP_P3_41642_17599439 | NC_021163.1    | Ca_kabuli_chr04 | 17599439                | AA                              | GG                | 1945938012               |
| SNP_P3_41643_17599483 | NC_021163.1    | Ca_kabuli_chr04 | 17599483                | AA                              | GG                | 1945938014               |
| SNP_P3_41644_17599488 | NC_021163.1    | Ca_kabuli_chr04 | 17599488                | AA                              | CC                | 1945938016               |
| SNP_P3_41645_17599929 | NC_021163.1    | Ca_kabuli_chr04 | 17599929                | AA                              | GG                | 1945938018               |
| SNP_P3_41647_17600039 | NC_021163.1    | Ca_kabuli_chr04 | 17600039                | TT                              | GG                | 1945938020               |
| SNP_P3_41648_17600041 | NC_021163.1    | Ca_kabuli_chr04 | 17600041                | TT                              | CC                | 1945938021               |
| SNP_P3_41649_17600176 | NC_021163.1    | Ca_kabuli_chr04 | 17600176                | GG                              | AA                | 1945938023               |
| SNP_P3_41650_17600187 | NC_021163.1    | Ca_kabuli_chr04 | 17600187                | GG                              | AA                | 1945938025               |
| SNP_P3_41651_17600188 | NC_021163.1    | Ca_kabuli_chr04 | 17600188                | AA                              | GG                | 1945938027               |
| SNP_P3_41652_17600259 | NC_021163.1    | Ca_kabuli_chr04 | 17600259                | GG                              | AA                | 1945938028               |
| SNP_P3_41653_17600264 | NC_021163.1    | Ca_kabuli_chr04 | 17600264                | AA                              | TT                | 1945938030               |
| SNP_P3_41654_17600292 | NC_021163.1    | Ca_kabuli_chr04 | 17600292                | CC                              | GG                | 1945938032               |
| SNP_P3_41655_17600298 | NC_021163.1    | Ca_kabuli_chr04 | 17600298                | TT                              | GG                | 1945938034               |
| SNP_P3_41656_17600324 | NC_021163.1    | Ca_kabuli_chr04 | 17600324                | TT                              | CC                | 1945938036               |
| SNP_P3_41657_17600388 | NC_021163.1    | Ca_kabuli_chr04 | 17600388                | TT                              | GG                | 1945938037               |
| SNP_P3_41658_17600429 | NC_021163.1    | Ca_kabuli_chr04 | 17600429                | AA                              | GG                | 1945938039               |
| SNP_P3_41659_17600467 | NC_021163.1    | Ca_kabuli_chr04 | 17600467                | AA                              | GG                | 1945938041               |
| SNP_P3_41660_17600562 | NC_021163.1    | Ca_kabuli_chr04 | 17600562                | TT                              | GG                | 1945938043               |
| SNP_P3_41661_17600618 | NC_021163.1    | Ca_kabuli_chr04 | 17600618                | CC                              | TT                | 1945938044               |
| SNP_P3_41662_17600744 | NC_021163.1    | Ca_kabuli_chr04 | 17600744                | GG                              | AA                | 1945938046               |
| SNP_P3_41663_17600774 | NC_021163.1    | Ca_kabuli_chr04 | 17600774                | GG                              | CC                | 1945938048               |
| SNP_P3_41666_17600936 | NC_021163.1    | Ca_kabuli_chr04 | 17600936                | AA                              | TT                | 1945938050               |
| SNP_P3_41667_17601012 | NC_021163.1    | Ca_kabuli_chr04 | 17601012                | TT                              | CC                | 1945938051               |
| SNP_P3_41668_17601081 | NC_021163.1    | Ca_kabuli_chr04 | 17601081                | TT                              | AA                | 1945938053               |
| SNP_P3_41669_17601144 | NC_021163.1    | Ca_kabuli_chr04 | 17601144                | TT                              | CC                | 1945938055               |

| SNPs IDs              | Chromosome IDs | Chromosomes     | Physical positions (bp) | CDC Frontier (Reference genome) | (Pusa 256 & HPNB) | NCBI SNPdb Accession IDs |
|-----------------------|----------------|-----------------|-------------------------|---------------------------------|-------------------|--------------------------|
| SNP_P3_41670_17601446 | NC_021163.1    | Ca_kabuli_chr04 | 17601446                | TT                              | CC                | 1945938057               |
| SNP_P3_41672_17601539 | NC_021163.1    | Ca_kabuli_chr04 | 17601539                | CC                              | TT                | 1945938059               |
| SNP_P3_41673_17601603 | NC_021163.1    | Ca_kabuli_chr04 | 17601603                | GG                              | AA                | 1945938060               |
| SNP_P3_41674_17601607 | NC_021163.1    | Ca_kabuli_chr04 | 17601607                | CC                              | AA                | 1945938062               |
| SNP_P3_41675_17601646 | NC_021163.1    | Ca_kabuli_chr04 | 17601646                | TT                              | AA                | 1945938064               |
| SNP_P3_41676_17601727 | NC_021163.1    | Ca_kabuli_chr04 | 17601727                | TT                              | CC                | 1945938066               |
| SNP_P3_41677_17601736 | NC_021163.1    | Ca_kabuli_chr04 | 17601736                | CC                              | TT                | 1945938067               |
| SNP_P3_41678_17601762 | NC_021163.1    | Ca_kabuli_chr04 | 17601762                | GG                              | AA                | 1945938069               |
| SNP_P3_41679_17601763 | NC_021163.1    | Ca_kabuli_chr04 | 17601763                | AA                              | GG                | 1945938071               |
| SNP_P3_41680_17601777 | NC_021163.1    | Ca_kabuli_chr04 | 17601777                | CC                              | AA                | 1945938073               |
| SNP_P3_41681_17601786 | NC_021163.1    | Ca_kabuli_chr04 | 17601786                | GG                              | AA                | 1945938075               |
| SNP_P3_41682_17601792 | NC_021163.1    | Ca_kabuli_chr04 | 17601792                | AA                              | GG                | 1945938076               |
| SNP_P3_41683_17601794 | NC_021163.1    | Ca_kabuli_chr04 | 17601794                | AA                              | GG                | 1945938078               |
| SNP_P3_41684_17601815 | NC_021163.1    | Ca_kabuli_chr04 | 17601815                | CC                              | TT                | 1945938080               |
| SNP_P3_41685_17601830 | NC_021163.1    | Ca_kabuli_chr04 | 17601830                | GG                              | AA                | 1945938082               |
| SNP_P3_41686_17601835 | NC_021163.1    | Ca_kabuli_chr04 | 17601835                | GG                              | AA                | 1945938083               |
| SNP_P3_41688_17601933 | NC_021163.1    | Ca_kabuli_chr04 | 17601933                | TT                              | GG                | 1945938085               |
| SNP_P3_41689_17602022 | NC_021163.1    | Ca_kabuli_chr04 | 17602022                | CC                              | TT                | 1945938087               |
| SNP_P3_41690_17602063 | NC_021163.1    | Ca_kabuli_chr04 | 17602063                | AA                              | TT                | 1945938089               |
| SNP_P3_41691_17602199 | NC_021163.1    | Ca_kabuli_chr04 | 17602199                | GG                              | AA                | 1945938091               |
| SNP_P3_41692_17602202 | NC_021163.1    | Ca_kabuli_chr04 | 17602202                | GG                              | AA                | 1945938092               |
| SNP_P3_41693_17602232 | NC_021163.1    | Ca_kabuli_chr04 | 17602232                | GG                              | AA                | 1945938094               |
| SNP_P3_41694_17602243 | NC_021163.1    | Ca_kabuli_chr04 | 17602243                | GG                              | AA                | 1945938096               |
| SNP_P3_41695_17602244 | NC_021163.1    | Ca_kabuli_chr04 | 17602244                | TT                              | GG                | 1945938098               |
| SNP_P3_41696_17602321 | NC_021163.1    | Ca_kabuli_chr04 | 17602321                | CC                              | TT                | 1945938099               |
| SNP_P3_41697_17602346 | NC_021163.1    | Ca_kabuli_chr04 | 17602346                | CC                              | TT                | 1945938101               |
| SNP_P3_41699_17602932 | NC_021163.1    | Ca_kabuli_chr04 | 17602932                | TT                              | CC                | 1945938103               |
| SNP_P3_41701_17606229 | NC_021163.1    | Ca_kabuli_chr04 | 17606229                | AA                              | GG                | 1945938105               |
| SNP_P3_41702_17607636 | NC_021163.1    | Ca_kabuli_chr04 | 17607636                | AA                              | GG                | 1945938106               |
| SNP_P3_41703_17607643 | NC_021163.1    | Ca_kabuli_chr04 | 17607643                | GG                              | CC                | 1945938108               |
| SNP_P3_41704_17607644 | NC_021163.1    | Ca_kabuli_chr04 | 17607644                | CC                              | TT                | 1945938110               |
| SNP_P3_41705_17610040 | NC_021163.1    | Ca_kabuli_chr04 | 17610040                | AA                              | TT                | 1945938112               |
| SNP_P3_41706_17613492 | NC_021163.1    | Ca_kabuli_chr04 | 17613492                | AA                              | GG                | 1945938114               |
| SNP_P3_41707_17614232 | NC_021163.1    | Ca_kabuli_chr04 | 17614232                | AA                              | GG                | 1945938115               |
| SNP_P3_41708_17615913 | NC_021163.1    | Ca_kabuli_chr04 | 17615913                | TT                              | CC                | 1945938117               |
| SNP_P3_41709_17616228 | NC_021163.1    | Ca_kabuli_chr04 | 17616228                | AA                              | TT                | 1945938119               |
| SNP_P3_41710_17616662 | NC_021163.1    | Ca_kabuli_chr04 | 17616662                | AA                              | GG                | 1945938121               |
| SNP_P3_41711_17617047 | NC_021163.1    | Ca_kabuli_chr04 | 17617047                | AA                              | TT                | 1945938122               |
| SNP_P3_41713_17617191 | NC_021163.1    | Ca_kabuli_chr04 | 17617191                | AA                              | GG                | 1945938124               |
| SNP_P3_41714_17617489 | NC_021163.1    | Ca_kabuli_chr04 | 17617489                | GG                              | TT                | 1945938126               |
| SNP_P3_41715_17618093 | NC_021163.1    | Ca_kabuli_chr04 | 17618093                | AA                              | TT                | 1945938128               |
| SNP_P3_41716_17618135 | NC_021163.1    | Ca_kabuli_chr04 | 17618135                | TT                              | AA                | 1945938130               |

| SNPs IDs              | Chromosome IDs | Chromosomes     | Physical positions (bp) | CDC Frontier (Reference genome) | (Pusa 256 & HPNB) | NCBI SNPdb Accession IDs |
|-----------------------|----------------|-----------------|-------------------------|---------------------------------|-------------------|--------------------------|
| SNP_P3_41717_17618136 | NC_021163.1    | Ca_kabuli_chr04 | 17618136                | TT                              | AA                | 1945938131               |
| SNP_P3_41718_17618146 | NC_021163.1    | Ca_kabuli_chr04 | 17618146                | CC                              | TT                | 1945938133               |
| SNP_P3_41720_17619062 | NC_021163.1    | Ca_kabuli_chr04 | 17619062                | TT                              | AA                | 1945938135               |
| SNP_P3_41721_17620495 | NC_021163.1    | Ca_kabuli_chr04 | 17620495                | TT                              | CC                | 1945938137               |
| SNP_P3_41723_17620524 | NC_021163.1    | Ca_kabuli_chr04 | 17620524                | TT                              | AA                | 1945938138               |
| SNP_P3_41724_17620557 | NC_021163.1    | Ca_kabuli_chr04 | 17620557                | GG                              | AA                | 1945938140               |
| SNP_P3_41725_17620590 | NC_021163.1    | Ca_kabuli_chr04 | 17620590                | CC                              | TT                | 1945938142               |
| SNP_P3_41726_17620596 | NC_021163.1    | Ca_kabuli_chr04 | 17620596                | AA                              | GG                | 1945938144               |
| SNP_P3_41727_17620871 | NC_021163.1    | Ca_kabuli_chr04 | 17620871                | AA                              | GG                | 1945938146               |
| SNP_P3_41728_17620966 | NC_021163.1    | Ca_kabuli_chr04 | 17620966                | GG                              | AA                | 1945938147               |
| SNP_P3_41729_17620973 | NC_021163.1    | Ca_kabuli_chr04 | 17620973                | GG                              | TT                | 1945938149               |
| SNP_P3_41730_17621035 | NC_021163.1    | Ca_kabuli_chr04 | 17621035                | TT                              | GG                | 1945938151               |
| SNP_P3_41731_17621380 | NC_021163.1    | Ca_kabuli_chr04 | 17621380                | TT                              | AA                | 1945938153               |
| SNP_P3_41732_17622316 | NC_021163.1    | Ca_kabuli_chr04 | 17622316                | TT                              | CC                | 1945938154               |
| SNP_P3_41733_17622335 | NC_021163.1    | Ca_kabuli_chr04 | 17622335                | GG                              | CC                | 1945938156               |
| SNP_P3_41734_17622418 | NC_021163.1    | Ca_kabuli_chr04 | 17622418                | AA                              | TT                | 1945938158               |
| SNP_P3_41735_17622423 | NC_021163.1    | Ca_kabuli_chr04 | 17622423                | AA                              | TT                | 1945938160               |
| SNP_P3_41736_17622438 | NC_021163.1    | Ca_kabuli_chr04 | 17622438                | AA                              | TT                | 1945938161               |
| SNP_P3_41737_17622471 | NC_021163.1    | Ca_kabuli_chr04 | 17622471                | CC                              | TT                | 1945938163               |
| SNP_P3_41738_17622652 | NC_021163.1    | Ca_kabuli_chr04 | 17622652                | TT                              | AA                | 1945938165               |
| SNP_P3_41740_17626374 | NC_021163.1    | Ca_kabuli_chr04 | 17626374                | CC                              | TT                | 1945938167               |
| SNP_P3_41742_17626651 | NC_021163.1    | Ca_kabuli_chr04 | 17626651                | TT                              | CC                | 1945938169               |
| SNP_P3_41743_17627325 | NC_021163.1    | Ca_kabuli_chr04 | 17627325                | CC                              | TT                | 1945938170               |
| SNP_P3_41744_17627605 | NC_021163.1    | Ca_kabuli_chr04 | 17627605                | GG                              | TT                | 1945938172               |
| SNP_P3_41746_17628436 | NC_021163.1    | Ca_kabuli_chr04 | 17628436                | TT                              | AA                | 1945938174               |
| SNP_P3_41747_17629116 | NC_021163.1    | Ca_kabuli_chr04 | 17629116                | TT                              | CC                | 1945938176               |
| SNP_P3_41748_17629117 | NC_021163.1    | Ca_kabuli_chr04 | 17629117                | GG                              | TT                | 1945938177               |
| SNP_P3_41749_17629137 | NC_021163.1    | Ca_kabuli_chr04 | 17629137                | CC                              | AA                | 1945938179               |
| SNP_P3_41750_17629138 | NC_021163.1    | Ca_kabuli_chr04 | 17629138                | GG                              | AA                | 1945938181               |
| SNP_P3_41751_17629415 | NC_021163.1    | Ca_kabuli_chr04 | 17629415                | TT                              | GG                | 1945938183               |
| SNP_P3_41752_17631084 | NC_021163.1    | Ca_kabuli_chr04 | 17631084                | TT                              | GG                | 1945938185               |
| SNP_P3_41753_17631123 | NC_021163.1    | Ca_kabuli_chr04 | 17631123                | CC                              | GG                | 1945938186               |
| SNP_P3_41754_17632085 | NC_021163.1    | Ca_kabuli_chr04 | 17632085                | TT                              | CC                | 1945938188               |
| SNP_P3_41756_17632470 | NC_021163.1    | Ca_kabuli_chr04 | 17632470                | TT                              | CC                | 1945938190               |
| SNP_P3_41757_17632802 | NC_021163.1    | Ca_kabuli_chr04 | 17632802                | GG                              | TT                | 1945938192               |
| SNP_P3_41758_17633606 | NC_021163.1    | Ca_kabuli_chr04 | 17633606                | TT                              | CC                | 1945938193               |
| SNP_P3_41759_17633666 | NC_021163.1    | Ca_kabuli_chr04 | 17633666                | TT                              | CC                | 1945938195               |
| SNP_P3_41760_17634221 | NC_021163.1    | Ca_kabuli_chr04 | 17634221                | GG                              | AA                | 1945938197               |
| SNP_P3_41761_17634786 | NC_021163.1    | Ca_kabuli_chr04 | 17634786                | AA                              | TT                | 1945938199               |
| SNP_P3_41762_17634865 | NC_021163.1    | Ca_kabuli_chr04 | 17634865                | GG                              | AA                | 1945938200               |
| SNP_P3_41763_17634986 | NC_021163.1    | Ca_kabuli_chr04 | 17634986                | GG                              | CC                | 1945938202               |
| SNP_P3_41764_17635156 | NC_021163.1    | Ca_kabuli_chr04 | 17635156                | TT                              | CC                | 1945938204               |

| SNPs IDs              | Chromosome IDs | Chromosomes     | Physical positions (bp) | CDC Frontier (Reference genome) | (Pusa 256 & HPNB) | NCBI SNPdb Accession IDs |
|-----------------------|----------------|-----------------|-------------------------|---------------------------------|-------------------|--------------------------|
| SNP_P3_41765_17635666 | NC_021163.1    | Ca_kabuli_chr04 | 17635666                | CC                              | TT                | 1945938206               |
| SNP_P3_41766_17636409 | NC_021163.1    | Ca_kabuli_chr04 | 17636409                | AA                              | CC                | 1945938208               |
| SNP_P3_41768_17637564 | NC_021163.1    | Ca_kabuli_chr04 | 17637564                | TT                              | CC                | 1945938209               |
| SNP_P3_41769_17638226 | NC_021163.1    | Ca_kabuli_chr04 | 17638226                | CC                              | AA                | 1945938211               |
| SNP_P3_41772_17640920 | NC_021163.1    | Ca_kabuli_chr04 | 17640920                | AA                              | GG                | 1945938213               |
| SNP_P3_41773_17641346 | NC_021163.1    | Ca_kabuli_chr04 | 17641346                | TT                              | AA                | 1945938215               |
| SNP_P3_41774_17641750 | NC_021163.1    | Ca_kabuli_chr04 | 17641750                | GG                              | AA                | 1945938216               |
| SNP_P3_41775_17642087 | NC_021163.1    | Ca_kabuli_chr04 | 17642087                | CC                              | TT                | 1945938218               |
| SNP_P3_41776_17645218 | NC_021163.1    | Ca_kabuli_chr04 | 17645218                | AA                              | TT                | 1945938220               |
| SNP_P3_41777_17645242 | NC_021163.1    | Ca_kabuli_chr04 | 17645242                | AA                              | TT                | 1945938222               |
| SNP_P3_41779_17645447 | NC_021163.1    | Ca_kabuli_chr04 | 17645447                | TT                              | CC                | 1945938224               |
| SNP_P3_41780_17645500 | NC_021163.1    | Ca_kabuli_chr04 | 17645500                | GG                              | TT                | 1945938225               |
| SNP_P3_41781_17645849 | NC_021163.1    | Ca_kabuli_chr04 | 17645849                | TT                              | CC                | 1945938227               |
| SNP_P3_41782_17645859 | NC_021163.1    | Ca_kabuli_chr04 | 17645859                | TT                              | CC                | 1945938229               |
| SNP_P3_41783_17645862 | NC_021163.1    | Ca_kabuli_chr04 | 17645862                | TT                              | GG                | 1945938231               |
| SNP_P3_41784_17646178 | NC_021163.1    | Ca_kabuli_chr04 | 17646178                | TT                              | CC                | 1945938232               |
| SNP_P3_41785_17646187 | NC_021163.1    | Ca_kabuli_chr04 | 17646187                | AA                              | GG                | 1945938234               |
| SNP_P3_41786_17648293 | NC_021163.1    | Ca_kabuli_chr04 | 17648293                | GG                              | CC                | 1945938236               |
| SNP_P3_41787_17648884 | NC_021163.1    | Ca_kabuli_chr04 | 17648884                | TT                              | AA                | 1945938238               |
| SNP_P3_41788_17648885 | NC_021163.1    | Ca_kabuli_chr04 | 17648885                | AA                              | TT                | 1945938239               |
| SNP_P3_41789_17648889 | NC_021163.1    | Ca_kabuli_chr04 | 17648889                | TT                              | AA                | 1945938241               |
| SNP_P3_41790_17649235 | NC_021163.1    | Ca_kabuli_chr04 | 17649235                | CC                              | TT                | 1945938243               |
| SNP_P3_41791_17649830 | NC_021163.1    | Ca_kabuli_chr04 | 17649830                | GG                              | AA                | 1945938245               |
| SNP_P3_41792_17649847 | NC_021163.1    | Ca_kabuli_chr04 | 17649847                | AA                              | GG                | 1945938247               |
| SNP_P3_41793_17649884 | NC_021163.1    | Ca_kabuli_chr04 | 17649884                | CC                              | TT                | 1945938248               |
| SNP_P3_41794_17649888 | NC_021163.1    | Ca_kabuli_chr04 | 17649888                | TT                              | CC                | 1945938250               |
| SNP_P3_41795_17650054 | NC_021163.1    | Ca_kabuli_chr04 | 17650054                | GG                              | AA                | 1945938252               |
| SNP_P3_41797_17652965 | NC_021163.1    | Ca_kabuli_chr04 | 17652965                | CC                              | TT                | 1945938254               |
| SNP_P3_41798_17654163 | NC_021163.1    | Ca_kabuli_chr04 | 17654163                | TT                              | AA                | 1945938255               |
| SNP_P3_41800_17654613 | NC_021163.1    | Ca_kabuli_chr04 | 17654613                | GG                              | TT                | 1945938257               |
| SNP_P3_41802_17654816 | NC_021163.1    | Ca_kabuli_chr04 | 17654816                | AA                              | GG                | 1945938259               |
| SNP_P3_41803_17656432 | NC_021163.1    | Ca_kabuli_chr04 | 17656432                | GG                              | AA                | 1945938261               |
| SNP_P3_41804_17656454 | NC_021163.1    | Ca_kabuli_chr04 | 17656454                | GG                              | TT                | 1945938263               |
| SNP_P3_41805_17656460 | NC_021163.1    | Ca_kabuli_chr04 | 17656460                | GG                              | AA                | 1945938264               |
| SNP_P3_41806_17656723 | NC_021163.1    | Ca_kabuli_chr04 | 17656723                | GG                              | TT                | 1945938266               |
| SNP_P3_41807_17656809 | NC_021163.1    | Ca_kabuli_chr04 | 17656809                | GG                              | AA                | 1945938268               |
| SNP_P3_41808_17656945 | NC_021163.1    | Ca_kabuli_chr04 | 17656945                | GG                              | AA                | 1945938270               |
| SNP_P3_41809_17657008 | NC_021163.1    | Ca_kabuli_chr04 | 17657008                | AA                              | CC                | 1945938271               |
| SNP_P3_41810_17657710 | NC_021163.1    | Ca_kabuli_chr04 | 17657710                | TT                              | AA                | 1945938273               |
| SNP_P3_41811_17658205 | NC_021163.1    | Ca_kabuli_chr04 | 17658205                | GG                              | CC                | 1945938275               |
| SNP_P3_41813_17659173 | NC_021163.1    | Ca_kabuli_chr04 | 17659173                | CC                              | TT                | 1945938277               |
| SNP_P3_41814_17659174 | NC_021163.1    | Ca_kabuli_chr04 | 17659174                | TT                              | CC                | 1945938279               |



| SNPs IDs              | Chromosome IDs | Chromosomes     | Physical positions (bp) | CDC Frontier (Reference genome) | (Pusa 256 & HPNB) | NCBI SNPdb Accession IDs |
|-----------------------|----------------|-----------------|-------------------------|---------------------------------|-------------------|--------------------------|
| SNP_P3_41815_17662333 | NC_021163.1    | Ca_kabuli_chr04 | 17662333                | CC                              | TT                | 1945938280               |
| SNP_P3_41816_17662335 | NC_021163.1    | Ca_kabuli_chr04 | 17662335                | TT                              | CC                | 1945938282               |
| SNP_P3_41817_17662360 | NC_021163.1    | Ca_kabuli_chr04 | 17662360                | TT                              | GG                | 1945938284               |
| SNP_P3_41818_17665256 | NC_021163.1    | Ca_kabuli_chr04 | 17665256                | GG                              | AA                | 1945938286               |
| SNP_P3_41819_17665344 | NC_021163.1    | Ca_kabuli_chr04 | 17665344                | GG                              | AA                | 1945938287               |
| SNP_P3_41820_17665599 | NC_021163.1    | Ca_kabuli_chr04 | 17665599                | CC                              | GG                | 1945938289               |
| SNP_P3_41821_17665757 | NC_021163.1    | Ca_kabuli_chr04 | 17665757                | CC                              | TT                | 1945938291               |
| SNP_P3_41822_17668402 | NC_021163.1    | Ca_kabuli_chr04 | 17668402                | TT                              | GG                | 1945938293               |
| SNP_P3_41823_17669969 | NC_021163.1    | Ca_kabuli_chr04 | 17669969                | AA                              | TT                | 1945938294               |
| SNP_P3_41824_17669970 | NC_021163.1    | Ca_kabuli_chr04 | 17669970                | CC                              | GG                | 1945938296               |
| SNP_P3_41826_17670973 | NC_021163.1    | Ca_kabuli_chr04 | 17670973                | TT                              | CC                | 1945938298               |
| SNP_P3_41827_17671028 | NC_021163.1    | Ca_kabuli_chr04 | 17671028                | CC                              | GG                | 1945938300               |
| SNP_P3_41828_17671327 | NC_021163.1    | Ca_kabuli_chr04 | 17671327                | CC                              | TT                | 1945938302               |
| SNP_P3_41829_17671328 | NC_021163.1    | Ca_kabuli_chr04 | 17671328                | AA                              | GG                | 1945938303               |
| SNP_P3_41830_17672351 | NC_021163.1    | Ca_kabuli_chr04 | 17672351                | GG                              | AA                | 1945938305               |
| SNP_P3_41831_17672361 | NC_021163.1    | Ca_kabuli_chr04 | 17672361                | AA                              | TT                | 1945938307               |
| SNP_P3_41832_17672647 | NC_021163.1    | Ca_kabuli_chr04 | 17672647                | AA                              | GG                | 1945938309               |
| SNP_P3_41834_17673032 | NC_021163.1    | Ca_kabuli_chr04 | 17673032                | TT                              | GG                | 1945938310               |
| SNP_P3_41835_17673255 | NC_021163.1    | Ca_kabuli_chr04 | 17673255                | TT                              | GG                | 1945938312               |
| SNP_P3_41836_17673827 | NC_021163.1    | Ca_kabuli_chr04 | 17673827                | CC                              | AA                | 1945938314               |
| SNP_P3_41837_17674151 | NC_021163.1    | Ca_kabuli_chr04 | 17674151                | GG                              | AA                | 1945938316               |
| SNP_P3_41838_17674638 | NC_021163.1    | Ca_kabuli_chr04 | 17674638                | GG                              | AA                | 1945938318               |
| SNP_P3_41839_17675387 | NC_021163.1    | Ca_kabuli_chr04 | 17675387                | TT                              | GG                | 1945938319               |
| SNP_P3_41840_17675863 | NC_021163.1    | Ca_kabuli_chr04 | 17675863                | GG                              | AA                | 1945938321               |
| SNP_P3_41841_17676213 | NC_021163.1    | Ca_kabuli_chr04 | 17676213                | AA                              | GG                | 1945938323               |
| SNP_P3_41842_17676228 | NC_021163.1    | Ca_kabuli_chr04 | 17676228                | AA                              | GG                | 1945938325               |
| SNP_P3_41843_17677076 | NC_021163.1    | Ca_kabuli_chr04 | 17677076                | TT                              | CC                | 1945938326               |
| SNP_P3_41844_17677474 | NC_021163.1    | Ca_kabuli_chr04 | 17677474                | GG                              | AA                | 1945938328               |
| SNP_P3_41845_17678295 | NC_021163.1    | Ca_kabuli_chr04 | 17678295                | TT                              | GG                | 1945938330               |
| SNP_P3_41846_17678319 | NC_021163.1    | Ca_kabuli_chr04 | 17678319                | CC                              | TT                | 1945938332               |
| SNP_P3_41847_17678321 | NC_021163.1    | Ca_kabuli_chr04 | 17678321                | AA                              | GG                | 1945938333               |
| SNP_P3_41848_17678341 | NC_021163.1    | Ca_kabuli_chr04 | 17678341                | AA                              | GG                | 1945938335               |
| SNP_P3_41850_17680961 | NC_021163.1    | Ca_kabuli_chr04 | 17680961                | AA                              | GG                | 1945938337               |
| SNP_P3_41852_17681288 | NC_021163.1    | Ca_kabuli_chr04 | 17681288                | CC                              | TT                | 1945938339               |
| SNP_P3_41853_17681310 | NC_021163.1    | Ca_kabuli_chr04 | 17681310                | AA                              | GG                | 1945938341               |
| SNP_P3_41854_17682245 | NC_021163.1    | Ca_kabuli_chr04 | 17682245                | AA                              | GG                | 1945938342               |
| SNP_P3_41855_17682337 | NC_021163.1    | Ca_kabuli_chr04 | 17682337                | CC                              | AA                | 1945938344               |
| SNP_P3_41856_17682349 | NC_021163.1    | Ca_kabuli_chr04 | 17682349                | TT                              | GG                | 1945938346               |
| SNP_P3_41857_17682640 | NC_021163.1    | Ca_kabuli_chr04 | 17682640                | CC                              | TT                | 1945938348               |
| SNP_P3_41858_17686095 | NC_021163.1    | Ca_kabuli_chr04 | 17686095                | CC                              | TT                | 1945938349               |
| SNP_P3_41859_17686111 | NC_021163.1    | Ca_kabuli_chr04 | 17686111                | TT                              | CC                | 1945938351               |
| SNP_P3_41860_17686234 | NC_021163.1    | Ca_kabuli_chr04 | 17686234                | CC                              | TT                | 1945938353               |

| SNPs IDs              | Chromosome IDs | Chromosomes     | Physical positions (bp) | CDC Frontier (Reference genome) | (Pusa 256 & HPNB) | NCBI SNPdb Accession IDs |
|-----------------------|----------------|-----------------|-------------------------|---------------------------------|-------------------|--------------------------|
| SNP_P3_41861_17686240 | NC_021163.1    | Ca_kabuli_chr04 | 17686240                | TT                              | CC                | 1945938355               |
| SNP_P3_41862_17686486 | NC_021163.1    | Ca_kabuli_chr04 | 17686486                | TT                              | GG                | 1945938357               |
| SNP_P3_41863_17686517 | NC_021163.1    | Ca_kabuli_chr04 | 17686517                | AA                              | CC                | 1945938358               |
| SNP_P3_41864_17690387 | NC_021163.1    | Ca_kabuli_chr04 | 17690387                | GG                              | TT                | 1945938360               |
| SNP_P3_41866_17691490 | NC_021163.1    | Ca_kabuli_chr04 | 17691490                | CC                              | TT                | 1945938362               |
| SNP_P3_41868_17696998 | NC_021163.1    | Ca_kabuli_chr04 | 17696998                | TT                              | GG                | 1945938364               |
| SNP_P3_41869_17698373 | NC_021163.1    | Ca_kabuli_chr04 | 17698373                | TT                              | CC                | 1945938365               |
| SNP_P3_41870_17698375 | NC_021163.1    | Ca_kabuli_chr04 | 17698375                | GG                              | AA                | 1945938367               |
| SNP_P3_41872_17699053 | NC_021163.1    | Ca_kabuli_chr04 | 17699053                | CC                              | TT                | 1945938369               |
| SNP_P3_41873_17699746 | NC_021163.1    | Ca_kabuli_chr04 | 17699746                | TT                              | AA                | 1945938371               |
| SNP_P3_41874_17700388 | NC_021163.1    | Ca_kabuli_chr04 | 17700388                | CC                              | TT                | 1945938373               |
| SNP_P3_41875_17701618 | NC_021163.1    | Ca_kabuli_chr04 | 17701618                | TT                              | GG                | 1945938374               |
| SNP_P3_41876_17702964 | NC_021163.1    | Ca_kabuli_chr04 | 17702964                | CC                              | AA                | 1945938376               |
| SNP_P3_41877_17703569 | NC_021163.1    | Ca_kabuli_chr04 | 17703569                | GG                              | AA                | 1945938378               |
| SNP_P3_41878_17703801 | NC_021163.1    | Ca_kabuli_chr04 | 17703801                | TT                              | CC                | 1945938380               |
| SNP_P3_41880_17712755 | NC_021163.1    | Ca_kabuli_chr04 | 17712755                | CC                              | TT                | 1945938381               |
| SNP_P3_41881_17712923 | NC_021163.1    | Ca_kabuli_chr04 | 17712923                | GG                              | AA                | 1945938383               |
| SNP_P3_41884_17715557 | NC_021163.1    | Ca_kabuli_chr04 | 17715557                | CC                              | TT                | 1945938385               |
| SNP_P3_41885_17715568 | NC_021163.1    | Ca_kabuli_chr04 | 17715568                | CC                              | TT                | 1945938387               |
| SNP_P3_41887_17715848 | NC_021163.1    | Ca_kabuli_chr04 | 17715848                | AA                              | GG                | 1945938388               |
| SNP_P3_41888_17717316 | NC_021163.1    | Ca_kabuli_chr04 | 17717316                | TT                              | GG                | 1945938390               |
| SNP_P3_41889_17717317 | NC_021163.1    | Ca_kabuli_chr04 | 17717317                | GG                              | TT                | 1945938392               |
| SNP_P3_41892_17722177 | NC_021163.1    | Ca_kabuli_chr04 | 17722177                | TT                              | GG                | 1945938394               |
| SNP_P3_41893_17723717 | NC_021163.1    | Ca_kabuli_chr04 | 17723717                | CC                              | TT                | 1945938396               |
| SNP_P3_41894_17724090 | NC_021163.1    | Ca_kabuli_chr04 | 17724090                | CC                              | AA                | 1945938397               |
| SNP_P3_41895_17724343 | NC_021163.1    | Ca_kabuli_chr04 | 17724343                | AA                              | GG                | 1945938399               |
| SNP_P3_41896_17724815 | NC_021163.1    | Ca_kabuli_chr04 | 17724815                | TT                              | GG                | 1945938401               |
| SNP_P3_41897_17724831 | NC_021163.1    | Ca_kabuli_chr04 | 17724831                | TT                              | GG                | 1945938403               |
| SNP_P3_41898_17726050 | NC_021163.1    | Ca_kabuli_chr04 | 17726050                | AA                              | TT                | 1945938404               |
| SNP_P3_41899_17726295 | NC_021163.1    | Ca_kabuli_chr04 | 17726295                | TT                              | CC                | 1945938406               |
| SNP_P3_41900_17728612 | NC_021163.1    | Ca_kabuli_chr04 | 17728612                | AA                              | CC                | 1945938408               |
| SNP_P3_41901_17728820 | NC_021163.1    | Ca_kabuli_chr04 | 17728820                | AA                              | GG                | 1945938410               |
| SNP_P3_41902_17728826 | NC_021163.1    | Ca_kabuli_chr04 | 17728826                | AA                              | TT                | 1945938411               |
| SNP_P3_41903_17728845 | NC_021163.1    | Ca_kabuli_chr04 | 17728845                | CC                              | AA                | 1945938413               |
| SNP_P3_41904_17730535 | NC_021163.1    | Ca_kabuli_chr04 | 17730535                | CC                              | TT                | 1945938415               |
| SNP_P3_41905_17730790 | NC_021163.1    | Ca_kabuli_chr04 | 17730790                | CC                              | TT                | 1945938417               |
| SNP_P3_41906_17730873 | NC_021163.1    | Ca_kabuli_chr04 | 17730873                | CC                              | TT                | 1945938419               |
| SNP_P3_41907_17731579 | NC_021163.1    | Ca_kabuli_chr04 | 17731579                | GG                              | AA                | 1945938420               |
| SNP_P3_41908_17731798 | NC_021163.1    | Ca_kabuli_chr04 | 17731798                | GG                              | AA                | 1945938422               |
| SNP_P3_41909_17732960 | NC_021163.1    | Ca_kabuli_chr04 | 17732960                | TT                              | AA                | 1945938424               |
| SNP_P3_41910_17733802 | NC_021163.1    | Ca_kabuli_chr04 | 17733802                | GG                              | AA                | 1945938426               |
| SNP_P3_41911_17734713 | NC_021163.1    | Ca_kabuli_chr04 | 17734713                | CC                              | TT                | 1945938427               |

| SNPs IDs              | Chromosome IDs | Chromosomes     | Physical positions (bp) | CDC Frontier (Reference genome) | (Pusa 256 & HPNB) | NCBI SNPdb Accession IDs |
|-----------------------|----------------|-----------------|-------------------------|---------------------------------|-------------------|--------------------------|
| SNP_P3_41912_17735618 | NC_021163.1    | Ca_kabuli_chr04 | 17735618                | TT                              | AA                | 1945938429               |
| SNP_P3_41913_17735627 | NC_021163.1    | Ca_kabuli_chr04 | 17735627                | TT                              | GG                | 1945938431               |
| SNP_P3_41914_17735639 | NC_021163.1    | Ca_kabuli_chr04 | 17735639                | GG                              | TT                | 1945938433               |
| SNP_P3_41915_17735648 | NC_021163.1    | Ca_kabuli_chr04 | 17735648                | CC                              | AA                | 1945938435               |
| SNP_P3_41916_17735668 | NC_021163.1    | Ca_kabuli_chr04 | 17735668                | CC                              | TT                | 1945938436               |
| SNP_P3_41917_17735692 | NC_021163.1    | Ca_kabuli_chr04 | 17735692                | CC                              | AA                | 1945938438               |
| SNP_P3_41918_17735737 | NC_021163.1    | Ca_kabuli_chr04 | 17735737                | TT                              | AA                | 1945938440               |
| SNP_P3_41919_17735913 | NC_021163.1    | Ca_kabuli_chr04 | 17735913                | AA                              | GG                | 1945938442               |
| SNP_P3_41920_17735916 | NC_021163.1    | Ca_kabuli_chr04 | 17735916                | GG                              | TT                | 1945938443               |
| SNP_P3_41921_17735926 | NC_021163.1    | Ca_kabuli_chr04 | 17735926                | CC                              | AA                | 1945938445               |
| SNP_P3_41922_17735934 | NC_021163.1    | Ca_kabuli_chr04 | 17735934                | GG                              | AA                | 1945938447               |
| SNP_P3_41923_17736116 | NC_021163.1    | Ca_kabuli_chr04 | 17736116                | GG                              | AA                | 1945938449               |
| SNP_P3_41925_17736463 | NC_021163.1    | Ca_kabuli_chr04 | 17736463                | CC                              | TT                | 1945938450               |
| SNP_P3_41926_17737131 | NC_021163.1    | Ca_kabuli_chr04 | 17737131                | AA                              | CC                | 1945938452               |
| SNP_P3_41927_17738552 | NC_021163.1    | Ca_kabuli_chr04 | 17738552                | CC                              | TT                | 1945938454               |
| SNP_P3_41928_17738584 | NC_021163.1    | Ca_kabuli_chr04 | 17738584                | AA                              | TT                | 1945938456               |
| SNP_P3_41929_17738585 | NC_021163.1    | Ca_kabuli_chr04 | 17738585                | AA                              | GG                | 1945938458               |
| SNP_P3_41930_17738788 | NC_021163.1    | Ca_kabuli_chr04 | 17738788                | AA                              | GG                | 1945938459               |
| SNP_P3_41932_17738850 | NC_021163.1    | Ca_kabuli_chr04 | 17738850                | CC                              | TT                | 1945938461               |
| SNP_P3_41934_17739114 | NC_021163.1    | Ca_kabuli_chr04 | 17739114                | GG                              | AA                | 1945938463               |
| SNP_P3_41935_17739480 | NC_021163.1    | Ca_kabuli_chr04 | 17739480                | AA                              | CC                | 1945938465               |
| SNP_P3_41936_17739772 | NC_021163.1    | Ca_kabuli_chr04 | 17739772                | TT                              | GG                | 1945938466               |
| SNP_P3_41937_17739798 | NC_021163.1    | Ca_kabuli_chr04 | 17739798                | TT                              | GG                | 1945938468               |
| SNP_P3_41938_17740872 | NC_021163.1    | Ca_kabuli_chr04 | 17740872                | AA                              | GG                | 1945938470               |
| SNP_P3_41939_17741299 | NC_021163.1    | Ca_kabuli_chr04 | 17741299                | GG                              | AA                | 1945938472               |
| SNP_P3_41940_17741543 | NC_021163.1    | Ca_kabuli_chr04 | 17741543                | TT                              | AA                | 1945938474               |
| SNP_P3_41941_17741553 | NC_021163.1    | Ca_kabuli_chr04 | 17741553                | AA                              | CC                | 1945938475               |
| SNP_P3_41942_17741759 | NC_021163.1    | Ca_kabuli_chr04 | 17741759                | TT                              | CC                | 1945938477               |
| SNP_P3_41943_17742489 | NC_021163.1    | Ca_kabuli_chr04 | 17742489                | AA                              | TT                | 1945938479               |
| SNP_P3_41944_17742497 | NC_021163.1    | Ca_kabuli_chr04 | 17742497                | CC                              | TT                | 1945938481               |
| SNP_P3_41945_17742556 | NC_021163.1    | Ca_kabuli_chr04 | 17742556                | AA                              | CC                | 1945938482               |
| SNP_P3_41946_17742557 | NC_021163.1    | Ca_kabuli_chr04 | 17742557                | AA                              | GG                | 1945938484               |
| SNP_P3_41947_17742826 | NC_021163.1    | Ca_kabuli_chr04 | 17742826                | AA                              | CC                | 1945938486               |
| SNP_P3_41948_17742845 | NC_021163.1    | Ca_kabuli_chr04 | 17742845                | GG                              | AA                | 1945938488               |
| SNP_P3_41949_17742850 | NC_021163.1    | Ca_kabuli_chr04 | 17742850                | CC                              | AA                | 1945938490               |
| SNP_P3_41950_17744465 | NC_021163.1    | Ca_kabuli_chr04 | 17744465                | TT                              | CC                | 1945938491               |
| SNP_P3_41951_17744478 | NC_021163.1    | Ca_kabuli_chr04 | 17744478                | AA                              | TT                | 1945938493               |
| SNP_P3_41952_17744534 | NC_021163.1    | Ca_kabuli_chr04 | 17744534                | GG                              | AA                | 1945938495               |
| SNP_P3_41953_17744811 | NC_021163.1    | Ca_kabuli_chr04 | 17744811                | TT                              | CC                | 1945938497               |
| SNP_P3_41954_17744815 | NC_021163.1    | Ca_kabuli_chr04 | 17744815                | AA                              | CC                | 1945938498               |
| SNP_P3_41956_17746882 | NC_021163.1    | Ca_kabuli_chr04 | 17746882                | AA                              | TT                | 1945938500               |
| SNP_P3_41957_17747186 | NC_021163.1    | Ca_kabuli_chr04 | 17747186                | TT                              | CC                | 1945938502               |

| SNPs IDs              | Chromosome IDs | Chromosomes     | Physical positions (bp) | CDC Frontier (Reference genome) | (Pusa 256 & HPNB) | NCBI SNPdb Accession IDs |
|-----------------------|----------------|-----------------|-------------------------|---------------------------------|-------------------|--------------------------|
| SNP_P3_41963_17749991 | NC_021163.1    | Ca_kabuli_chr04 | 17749991                | GG                              | AA                | 1945938504               |
| SNP_P3_41964_17754479 | NC_021163.1    | Ca_kabuli_chr04 | 17754479                | GG                              | AA                | 1945938505               |
| SNP_P3_41965_17756550 | NC_021163.1    | Ca_kabuli_chr04 | 17756550                | AA                              | GG                | 1945938507               |
| SNP_P3_41966_17756718 | NC_021163.1    | Ca_kabuli_chr04 | 17756718                | AA                              | GG                | 1945938509               |
| SNP_P3_41967_17756723 | NC_021163.1    | Ca_kabuli_chr04 | 17756723                | TT                              | CC                | 1945938511               |
| SNP_P3_41968_17756849 | NC_021163.1    | Ca_kabuli_chr04 | 17756849                | CC                              | TT                | 1945938513               |
| SNP_P3_41969_17756854 | NC_021163.1    | Ca_kabuli_chr04 | 17756854                | CC                              | AA                | 1945938514               |
| SNP_P3_41970_17756884 | NC_021163.1    | Ca_kabuli_chr04 | 17756884                | AA                              | CC                | 1945938516               |
| SNP_P3_41971_17757024 | NC_021163.1    | Ca_kabuli_chr04 | 17757024                | GG                              | AA                | 1945938518               |
| SNP_P3_41972_17757033 | NC_021163.1    | Ca_kabuli_chr04 | 17757033                | AA                              | CC                | 1945938520               |
| SNP_P3_41973_17757037 | NC_021163.1    | Ca_kabuli_chr04 | 17757037                | AA                              | GG                | 1945938521               |
| SNP_P3_41974_17757051 | NC_021163.1    | Ca_kabuli_chr04 | 17757051                | GG                              | TT                | 1945938523               |
| SNP_P3_41975_17757076 | NC_021163.1    | Ca_kabuli_chr04 | 17757076                | TT                              | CC                | 1945938525               |
| SNP_P3_41976_17757079 | NC_021163.1    | Ca_kabuli_chr04 | 17757079                | TT                              | CC                | 1945938527               |
| SNP_P3_41977_17757201 | NC_021163.1    | Ca_kabuli_chr04 | 17757201                | AA                              | TT                | 1945938529               |
| SNP_P3_41979_17757748 | NC_021163.1    | Ca_kabuli_chr04 | 17757748                | CC                              | TT                | 1945938530               |
| SNP_P3_41980_17757797 | NC_021163.1    | Ca_kabuli_chr04 | 17757797                | CC                              | AA                | 1945938532               |
| SNP_P3_41981_17757821 | NC_021163.1    | Ca_kabuli_chr04 | 17757821                | CC                              | TT                | 1945938534               |
| SNP_P3_41982_17757935 | NC_021163.1    | Ca_kabuli_chr04 | 17757935                | AA                              | CC                | 1945938536               |
| SNP_P3_41983_17764827 | NC_021163.1    | Ca_kabuli_chr04 | 17764827                | AA                              | CC                | 1945938537               |
| SNP_P3_41986_17766909 | NC_021163.1    | Ca_kabuli_chr04 | 17766909                | AA                              | TT                | 1945938539               |
| SNP_P3_41987_17768650 | NC_021163.1    | Ca_kabuli_chr04 | 17768650                | CC                              | TT                | 1945938541               |
| SNP_P3_41988_17769095 | NC_021163.1    | Ca_kabuli_chr04 | 17769095                | GG                              | AA                | 1945938543               |
| SNP_P3_41989_17769099 | NC_021163.1    | Ca_kabuli_chr04 | 17769099                | GG                              | CC                | 1945938544               |
| SNP_P3_41990_17774306 | NC_021163.1    | Ca_kabuli_chr04 | 17774306                | TT                              | AA                | 1945938546               |
| SNP_P3_41993_17775530 | NC_021163.1    | Ca_kabuli_chr04 | 17775530                | AA                              | GG                | 1945938548               |
| SNP_P3_41995_17775920 | NC_021163.1    | Ca_kabuli_chr04 | 17775920                | CC                              | TT                | 1945938550               |
| SNP_P3_41996_17775944 | NC_021163.1    | Ca_kabuli_chr04 | 17775944                | CC                              | TT                | 1945938552               |
| SNP_P3_41997_17776200 | NC_021163.1    | Ca_kabuli_chr04 | 17776200                | TT                              | GG                | 1945938553               |
| SNP_P3_41998_17776201 | NC_021163.1    | Ca_kabuli_chr04 | 17776201                | TT                              | AA                | 1945938555               |
| SNP_P3_42000_17777602 | NC_021163.1    | Ca_kabuli_chr04 | 17777602                | TT                              | GG                | 1945938557               |
| SNP_P3_42002_17779072 | NC_021163.1    | Ca_kabuli_chr04 | 17779072                | TT                              | CC                | 1945938559               |
| SNP_P3_42003_17779119 | NC_021163.1    | Ca_kabuli_chr04 | 17779119                | GG                              | TT                | 1945938560               |
| SNP_P3_42004_17779120 | NC_021163.1    | Ca_kabuli_chr04 | 17779120                | TT                              | GG                | 1945938562               |
| SNP_P3_42005_17779558 | NC_021163.1    | Ca_kabuli_chr04 | 17779558                | TT                              | AA                | 1945938564               |
| SNP_P3_42006_17780203 | NC_021163.1    | Ca_kabuli_chr04 | 17780203                | TT                              | CC                | 1945938566               |
| SNP_P3_42007_17780211 | NC_021163.1    | Ca_kabuli_chr04 | 17780211                | TT                              | CC                | 1945938568               |
| SNP_P3_42008_17780253 | NC_021163.1    | Ca_kabuli_chr04 | 17780253                | CC                              | TT                | 1945938569               |
| SNP_P3_42009_17780294 | NC_021163.1    | Ca_kabuli_chr04 | 17780294                | GG                              | AA                | 1945938571               |
| SNP_P3_42010_17780476 | NC_021163.1    | Ca_kabuli_chr04 | 17780476                | AA                              | CC                | 1945938573               |
| SNP_P3_42011_17780569 | NC_021163.1    | Ca_kabuli_chr04 | 17780569                | TT                              | CC                | 1945938575               |
| SNP_P3_42012_17782842 | NC_021163.1    | Ca_kabuli_chr04 | 17782842                | CC                              | TT                | 1945938576               |

| SNPs IDs              | Chromosome IDs | Chromosomes     | Physical positions (bp) | CDC Frontier (Reference genome) | (Pusa 256 & HPNB) | NCBI SNPdb Accession IDs |
|-----------------------|----------------|-----------------|-------------------------|---------------------------------|-------------------|--------------------------|
| SNP_P3_42013_17784563 | NC_021163.1    | Ca_kabuli_chr04 | 17784563                | GG                              | TT                | 1945938578               |
| SNP_P3_42014_17784578 | NC_021163.1    | Ca_kabuli_chr04 | 17784578                | CC                              | AA                | 1945938580               |
| SNP_P3_42015_17784654 | NC_021163.1    | Ca_kabuli_chr04 | 17784654                | TT                              | GG                | 1945938582               |
| SNP_P3_42016_17784792 | NC_021163.1    | Ca_kabuli_chr04 | 17784792                | AA                              | TT                | 1945938583               |
| SNP_P3_42018_17786701 | NC_021163.1    | Ca_kabuli_chr04 | 17786701                | GG                              | AA                | 1945938585               |
| SNP_P3_42019_17786787 | NC_021163.1    | Ca_kabuli_chr04 | 17786787                | GG                              | AA                | 1945938587               |
| SNP_P3_42020_17788013 | NC_021163.1    | Ca_kabuli_chr04 | 17788013                | CC                              | TT                | 1945938589               |
| SNP_P3_42021_17788376 | NC_021163.1    | Ca_kabuli_chr04 | 17788376                | AA                              | GG                | 1945938591               |
| SNP_P3_42022_17791794 | NC_021163.1    | Ca_kabuli_chr04 | 17791794                | AA                              | CC                | 1945938592               |
| SNP_P3_42023_17793179 | NC_021163.1    | Ca_kabuli_chr04 | 17793179                | TT                              | CC                | 1945938594               |
| SNP_P3_42024_17793223 | NC_021163.1    | Ca_kabuli_chr04 | 17793223                | GG                              | CC                | 1945938596               |
| SNP_P3_42025_17793722 | NC_021163.1    | Ca_kabuli_chr04 | 17793722                | TT                              | CC                | 1945938598               |
| SNP_P3_42026_17810892 | NC_021163.1    | Ca_kabuli_chr04 | 17810892                | AA                              | GG                | 1945938599               |
| SNP_P3_42027_17815962 | NC_021163.1    | Ca_kabuli_chr04 | 17815962                | GG                              | CC                | 1945938601               |
| SNP_P3_42028_17819541 | NC_021163.1    | Ca_kabuli_chr04 | 17819541                | AA                              | CC                | 1945938603               |
| SNP_P3_42029_17819619 | NC_021163.1    | Ca_kabuli_chr04 | 17819619                | TT                              | CC                | 1945938605               |
| SNP_P3_42030_17819696 | NC_021163.1    | Ca_kabuli_chr04 | 17819696                | TT                              | CC                | 1945938607               |
| SNP_P3_42031_17819888 | NC_021163.1    | Ca_kabuli_chr04 | 17819888                | TT                              | AA                | 1945938608               |
| SNP_P3_42032_17819900 | NC_021163.1    | Ca_kabuli_chr04 | 17819900                | AA                              | CC                | 1945938610               |
| SNP_P3_42033_17819937 | NC_021163.1    | Ca_kabuli_chr04 | 17819937                | CC                              | TT                | 1945938612               |
| SNP_P3_42034_17820248 | NC_021163.1    | Ca_kabuli_chr04 | 17820248                | AA                              | GG                | 1945938614               |
| SNP_P3_42035_17821911 | NC_021163.1    | Ca_kabuli_chr04 | 17821911                | CC                              | TT                | 1945938615               |
| SNP_P3_42036_17823392 | NC_021163.1    | Ca_kabuli_chr04 | 17823392                | GG                              | AA                | 1945938617               |
| SNP_P3_42037_17823417 | NC_021163.1    | Ca_kabuli_chr04 | 17823417                | GG                              | AA                | 1945938619               |
| SNP_P3_42039_17824178 | NC_021163.1    | Ca_kabuli_chr04 | 17824178                | AA                              | GG                | 1945938621               |
| SNP_P3_42041_17825402 | NC_021163.1    | Ca_kabuli_chr04 | 17825402                | AA                              | GG                | 1945938622               |
| SNP_P3_42043_17825605 | NC_021163.1    | Ca_kabuli_chr04 | 17825605                | CC                              | TT                | 1945938624               |
| SNP_P3_42044_17825607 | NC_021163.1    | Ca_kabuli_chr04 | 17825607                | CC                              | TT                | 1945938626               |
| SNP_P3_42045_17825619 | NC_021163.1    | Ca_kabuli_chr04 | 17825619                | CC                              | TT                | 1945938628               |
| SNP_P3_42046_17825626 | NC_021163.1    | Ca_kabuli_chr04 | 17825626                | CC                              | TT                | 1945938630               |
| SNP_P3_42047_17825650 | NC_021163.1    | Ca_kabuli_chr04 | 17825650                | CC                              | TT                | 1945938631               |
| SNP_P3_42048_17825685 | NC_021163.1    | Ca_kabuli_chr04 | 17825685                | GG                              | AA                | 1945938633               |
| SNP_P3_42049_17825707 | NC_021163.1    | Ca_kabuli_chr04 | 17825707                | CC                              | AA                | 1945938635               |
| SNP_P3_42050_17825748 | NC_021163.1    | Ca_kabuli_chr04 | 17825748                | GG                              | AA                | 1945938637               |
| SNP_P3_42051_17825753 | NC_021163.1    | Ca_kabuli_chr04 | 17825753                | CC                              | TT                | 1945938638               |
| SNP_P3_42052_17825773 | NC_021163.1    | Ca_kabuli_chr04 | 17825773                | GG                              | AA                | 1945938640               |
| SNP_P3_42053_17825804 | NC_021163.1    | Ca_kabuli_chr04 | 17825804                | CC                              | TT                | 1945938642               |
| SNP_P3_42054_17825828 | NC_021163.1    | Ca_kabuli_chr04 | 17825828                | GG                              | TT                | 1945938644               |
| SNP_P3_42055_17825874 | NC_021163.1    | Ca_kabuli_chr04 | 17825874                | TT                              | AA                | 1945938646               |
| SNP_P3_42057_17825956 | NC_021163.1    | Ca_kabuli_chr04 | 17825956                | TT                              | CC                | 1945938647               |
| SNP_P3_42058_17825974 | NC_021163.1    | Ca_kabuli_chr04 | 17825974                | TT                              | AA                | 1945938649               |
| SNP_P3_42060_17825999 | NC_021163.1    | Ca_kabuli_chr04 | 17825999                | TT                              | CC                | 1945938651               |

| SNPs IDs              | Chromosome IDs | Chromosomes     | Physical positions (bp) | CDC Frontier (Reference genome) | (Pusa 256 & HPNB) | NCBI SNPdb Accession IDs |
|-----------------------|----------------|-----------------|-------------------------|---------------------------------|-------------------|--------------------------|
| SNP_P3_42061_17826082 | NC_021163.1    | Ca_kabuli_chr04 | 17826082                | TT                              | CC                | 1945938653               |
| SNP_P3_42062_17826110 | NC_021163.1    | Ca_kabuli_chr04 | 17826110                | TT                              | CC                | 1945938654               |
| SNP_P3_42063_17826165 | NC_021163.1    | Ca_kabuli_chr04 | 17826165                | TT                              | CC                | 1945938656               |
| SNP_P3_42064_17826219 | NC_021163.1    | Ca_kabuli_chr04 | 17826219                | CC                              | TT                | 1945938658               |
| SNP_P3_42066_17828900 | NC_021163.1    | Ca_kabuli_chr04 | 17828900                | TT                              | AA                | 1945938660               |
| SNP_P3_42067_17828942 | NC_021163.1    | Ca_kabuli_chr04 | 17828942                | TT                              | CC                | 1945938661               |
| SNP_P3_42068_17828957 | NC_021163.1    | Ca_kabuli_chr04 | 17828957                | AA                              | GG                | 1945938663               |
| SNP_P3_42070_17829471 | NC_021163.1    | Ca_kabuli_chr04 | 17829471                | TT                              | AA                | 1945938665               |
| SNP_P3_42071_17829598 | NC_021163.1    | Ca_kabuli_chr04 | 17829598                | TT                              | GG                | 1945938667               |
| SNP_P3_42072_17829877 | NC_021163.1    | Ca_kabuli_chr04 | 17829877                | GG                              | AA                | 1945938669               |
| SNP_P3_42073_17830052 | NC_021163.1    | Ca_kabuli_chr04 | 17830052                | CC                              | TT                | 1945938670               |
| SNP_P3_42074_17830063 | NC_021163.1    | Ca_kabuli_chr04 | 17830063                | GG                              | AA                | 1945938672               |
| SNP_P3_42075_17830092 | NC_021163.1    | Ca_kabuli_chr04 | 17830092                | CC                              | TT                | 1945938674               |
| SNP_P3_42077_17830519 | NC_021163.1    | Ca_kabuli_chr04 | 17830519                | AA                              | CC                | 1945938676               |
| SNP_P3_42078_17830668 | NC_021163.1    | Ca_kabuli_chr04 | 17830668                | TT                              | CC                | 1945938677               |
| SNP_P3_42079_17830754 | NC_021163.1    | Ca_kabuli_chr04 | 17830754                | TT                              | CC                | 1945938679               |
| SNP_P3_42080_17831051 | NC_021163.1    | Ca_kabuli_chr04 | 17831051                | TT                              | CC                | 1945938681               |
| SNP_P3_42082_17831396 | NC_021163.1    | Ca_kabuli_chr04 | 17831396                | TT                              | GG                | 1945938683               |
| SNP_P3_42083_17831432 | NC_021163.1    | Ca_kabuli_chr04 | 17831432                | GG                              | AA                | 1945938685               |
| SNP_P3_42084_17831593 | NC_021163.1    | Ca_kabuli_chr04 | 17831593                | TT                              | CC                | 1945938686               |
| SNP_P3_42088_17844810 | NC_021163.1    | Ca_kabuli_chr04 | 17844810                | CC                              | GG                | 1945938688               |
| SNP_P3_42089_17845070 | NC_021163.1    | Ca_kabuli_chr04 | 17845070                | CC                              | TT                | 1945938690               |
| SNP_P3_42090_17845109 | NC_021163.1    | Ca_kabuli_chr04 | 17845109                | TT                              | CC                | 1945938692               |
| SNP_P3_42092_17845327 | NC_021163.1    | Ca_kabuli_chr04 | 17845327                | CC                              | TT                | 1945938693               |
| SNP_P3_42094_17846089 | NC_021163.1    | Ca_kabuli_chr04 | 17846089                | TT                              | CC                | 1945938695               |
| SNP_P3_42095_17846311 | NC_021163.1    | Ca_kabuli_chr04 | 17846311                | AA                              | GG                | 1945938697               |
| SNP_P3_42096_17846396 | NC_021163.1    | Ca_kabuli_chr04 | 17846396                | GG                              | CC                | 1945938699               |
| SNP_P3_42098_17849389 | NC_021163.1    | Ca_kabuli_chr04 | 17849389                | TT                              | CC                | 1945938700               |
| SNP_P3_42100_17851548 | NC_021163.1    | Ca_kabuli_chr04 | 17851548                | TT                              | AA                | 1945938702               |
| SNP_P3_42101_17851583 | NC_021163.1    | Ca_kabuli_chr04 | 17851583                | AA                              | TT                | 1945938704               |
| SNP_P3_42102_17851792 | NC_021163.1    | Ca_kabuli_chr04 | 17851792                | TT                              | AA                | 1945938706               |
| SNP_P3_42103_17853520 | NC_021163.1    | Ca_kabuli_chr04 | 17853520                | AA                              | CC                | 1945938708               |
| SNP_P3_42104_17854162 | NC_021163.1    | Ca_kabuli_chr04 | 17854162                | GG                              | AA                | 1945938709               |
| SNP_P3_42105_17856190 | NC_021163.1    | Ca_kabuli_chr04 | 17856190                | AA                              | GG                | 1945938711               |
| SNP_P3_42106_17856694 | NC_021163.1    | Ca_kabuli_chr04 | 17856694                | TT                              | CC                | 1945938713               |
| SNP_P3_42107_17858442 | NC_021163.1    | Ca_kabuli_chr04 | 17858442                | AA                              | TT                | 1945938715               |
| SNP_P3_42108_17858830 | NC_021163.1    | Ca_kabuli_chr04 | 17858830                | TT                              | AA                | 1945938716               |
| SNP_P3_42109_17859931 | NC_021163.1    | Ca_kabuli_chr04 | 17859931                | GG                              | TT                | 1945938718               |
| SNP_P3_42110_17863115 | NC_021163.1    | Ca_kabuli_chr04 | 17863115                | AA                              | GG                | 1945938720               |
| SNP_P3_42113_17865633 | NC_021163.1    | Ca_kabuli_chr04 | 17865633                | GG                              | AA                | 1945938722               |
| SNP_P3_42114_17865646 | NC_021163.1    | Ca_kabuli_chr04 | 17865646                | GG                              | CC                | 1945938724               |
| SNP_P3_42115_17865661 | NC_021163.1    | Ca_kabuli_chr04 | 17865661                | CC                              | TT                | 1945938725               |

| SNPs IDs              | Chromosome IDs | Chromosomes     | Physical positions (bp) | CDC Frontier (Reference genome) | (Pusa 256 & HPNB) | NCBI SNPdb Accession IDs |
|-----------------------|----------------|-----------------|-------------------------|---------------------------------|-------------------|--------------------------|
| SNP_P3_42116_17865669 | NC_021163.1    | Ca_kabuli_chr04 | 17865669                | TT                              | CC                | 1945938727               |
| SNP_P3_42117_17865918 | NC_021163.1    | Ca_kabuli_chr04 | 17865918                | TT                              | CC                | 1945938729               |
| SNP_P3_42118_17865922 | NC_021163.1    | Ca_kabuli_chr04 | 17865922                | GG                              | AA                | 1945938731               |
| SNP_P3_42119_17870845 | NC_021163.1    | Ca_kabuli_chr04 | 17870845                | GG                              | AA                | 1945938732               |
| SNP_P3_42121_17871397 | NC_021163.1    | Ca_kabuli_chr04 | 17871397                | CC                              | GG                | 1945938734               |
| SNP_P3_42122_17871763 | NC_021163.1    | Ca_kabuli_chr04 | 17871763                | CC                              | TT                | 1945938736               |
| SNP_P3_42123_17871804 | NC_021163.1    | Ca_kabuli_chr04 | 17871804                | CC                              | TT                | 1945938738               |
| SNP_P3_42124_17872539 | NC_021163.1    | Ca_kabuli_chr04 | 17872539                | GG                              | TT                | 1945938739               |
| SNP_P3_42128_17880491 | NC_021163.1    | Ca_kabuli_chr04 | 17880491                | GG                              | AA                | 1945938741               |
| SNP_P3_42129_17892550 | NC_021163.1    | Ca_kabuli_chr04 | 17892550                | AA                              | GG                | 1945938743               |
| SNP_P3_42130_17897009 | NC_021163.1    | Ca_kabuli_chr04 | 17897009                | AA                              | TT                | 1945938745               |
| SNP_P3_42131_17897032 | NC_021163.1    | Ca_kabuli_chr04 | 17897032                | CC                              | GG                | 1945938747               |
| SNP_P3_42132_17897041 | NC_021163.1    | Ca_kabuli_chr04 | 17897041                | CC                              | AA                | 1945938748               |
| SNP_P3_42133_17932701 | NC_021163.1    | Ca_kabuli_chr04 | 17932701                | CC                              | TT                | 1945938750               |
| SNP_P3_42135_17955592 | NC_021163.1    | Ca_kabuli_chr04 | 17955592                | TT                              | CC                | 1945938752               |
| SNP_P3_42138_18024832 | NC_021163.1    | Ca_kabuli_chr04 | 18024832                | AA                              | GG                | 1945938754               |
| SNP_P3_42139_18024863 | NC_021163.1    | Ca_kabuli_chr04 | 18024863                | AA                              | GG                | 1945938755               |
| SNP_P3_42140_18024908 | NC_021163.1    | Ca_kabuli_chr04 | 18024908                | AA                              | GG                | 1945938757               |
| SNP_P3_42141_18024913 | NC_021163.1    | Ca_kabuli_chr04 | 18024913                | TT                              | CC                | 1945938759               |
| SNP_P3_42142_18024922 | NC_021163.1    | Ca_kabuli_chr04 | 18024922                | TT                              | CC                | 1945938761               |
| SNP_P3_42143_18025240 | NC_021163.1    | Ca_kabuli_chr04 | 18025240                | AA                              | TT                | 1945938763               |
| SNP_P3_42144_18025242 | NC_021163.1    | Ca_kabuli_chr04 | 18025242                | TT                              | AA                | 1945938764               |
| SNP_P3_42145_18025244 | NC_021163.1    | Ca_kabuli_chr04 | 18025244                | GG                              | AA                | 1945938766               |
| SNP_P3_42146_18025340 | NC_021163.1    | Ca_kabuli_chr04 | 18025340                | AA                              | GG                | 1945938768               |
| SNP_P3_42147_18025382 | NC_021163.1    | Ca_kabuli_chr04 | 18025382                | CC                              | TT                | 1945938770               |
| SNP_P3_42148_18026330 | NC_021163.1    | Ca_kabuli_chr04 | 18026330                | CC                              | TT                | 1945938771               |
| SNP_P3_42149_18033495 | NC_021163.1    | Ca_kabuli_chr04 | 18033495                | GG                              | AA                | 1945938773               |
| SNP_P3_42150_18033669 | NC_021163.1    | Ca_kabuli_chr04 | 18033669                | TT                              | CC                | 1945938775               |
| SNP_P3_42151_18033859 | NC_021163.1    | Ca_kabuli_chr04 | 18033859                | TT                              | CC                | 1945938777               |
| SNP_P3_42155_18074986 | NC_021163.1    | Ca_kabuli_chr04 | 18074986                | TT                              | GG                | 1945938778               |
| SNP_P3_42156_18074987 | NC_021163.1    | Ca_kabuli_chr04 | 18074987                | TT                              | AA                | 1945938780               |
| SNP_P3_42157_18081472 | NC_021163.1    | Ca_kabuli_chr04 | 18081472                | CC                              | TT                | 1945938782               |
| SNP_P3_42159_18091877 | NC_021163.1    | Ca_kabuli_chr04 | 18091877                | AA                              | CC                | 1945938784               |
| SNP_P3_42162_18131236 | NC_021163.1    | Ca_kabuli_chr04 | 18131236                | CC                              | TT                | 1945938786               |
| SNP_P3_42163_18131269 | NC_021163.1    | Ca_kabuli_chr04 | 18131269                | CC                              | AA                | 1945938787               |
| SNP_P3_42164_18131296 | NC_021163.1    | Ca_kabuli_chr04 | 18131296                | TT                              | CC                | 1945938789               |
| SNP_P3_42165_18131633 | NC_021163.1    | Ca_kabuli_chr04 | 18131633                | TT                              | CC                | 1945938791               |
| SNP_P3_42166_18138091 | NC_021163.1    | Ca_kabuli_chr04 | 18138091                | CC                              | TT                | 1945938793               |
| SNP_P3_42167_18138108 | NC_021163.1    | Ca_kabuli_chr04 | 18138108                | TT                              | CC                | 1945938794               |
| SNP_P3_42168_18138248 | NC_021163.1    | Ca_kabuli_chr04 | 18138248                | CC                              | AA                | 1945938796               |
| SNP_P3_42169_18142121 | NC_021163.1    | Ca_kabuli_chr04 | 18142121                | AA                              | TT                | 1945938798               |
| SNP_P3_42170_18142127 | NC_021163.1    | Ca_kabuli_chr04 | 18142127                | GG                              | AA                | 1945938800               |

| SNPs IDs              | Chromosome IDs | Chromosomes     | Physical positions (bp) | CDC Frontier (Reference genome) | (Pusa 256 & HPNB) | NCBI SNPdb Accession IDs |
|-----------------------|----------------|-----------------|-------------------------|---------------------------------|-------------------|--------------------------|
| SNP_P3_42171_18142158 | NC_021163.1    | Ca_kabuli_chr04 | 18142158                | GG                              | AA                | 1945938802               |
| SNP_P3_42173_18197551 | NC_021163.1    | Ca_kabuli_chr04 | 18197551                | AA                              | TT                | 1945938803               |
| SNP_P3_42174_18201091 | NC_021163.1    | Ca_kabuli_chr04 | 18201091                | TT                              | GG                | 1945938805               |
| SNP_P3_42175_18201095 | NC_021163.1    | Ca_kabuli_chr04 | 18201095                | TT                              | CC                | 1945938807               |
| SNP_P3_42176_18201126 | NC_021163.1    | Ca_kabuli_chr04 | 18201126                | TT                              | CC                | 1945938809               |
| SNP_P3_42177_18262308 | NC_021163.1    | Ca_kabuli_chr04 | 18262308                | TT                              | AA                | 1945938810               |
| SNP_P3_42178_18262611 | NC_021163.1    | Ca_kabuli_chr04 | 18262611                | AA                              | GG                | 1945938812               |
| SNP_P3_42179_18262799 | NC_021163.1    | Ca_kabuli_chr04 | 18262799                | AA                              | GG                | 1945938814               |
| SNP_P3_42180_18263367 | NC_021163.1    | Ca_kabuli_chr04 | 18263367                | CC                              | TT                | 1945938816               |
| SNP_P3_42181_18263815 | NC_021163.1    | Ca_kabuli_chr04 | 18263815                | AA                              | GG                | 1945938817               |
| SNP_P3_42182_18263858 | NC_021163.1    | Ca_kabuli_chr04 | 18263858                | TT                              | CC                | 1945938819               |
| SNP_P3_42183_18264121 | NC_021163.1    | Ca_kabuli_chr04 | 18264121                | AA                              | GG                | 1945938821               |
| SNP_P3_42184_18264406 | NC_021163.1    | Ca_kabuli_chr04 | 18264406                | TT                              | CC                | 1945938823               |
| SNP_P3_42185_18264423 | NC_021163.1    | Ca_kabuli_chr04 | 18264423                | TT                              | AA                | 1945938825               |
| SNP_P3_42186_18264713 | NC_021163.1    | Ca_kabuli_chr04 | 18264713                | TT                              | AA                | 1945938826               |
| SNP_P3_42187_18264802 | NC_021163.1    | Ca_kabuli_chr04 | 18264802                | TT                              | CC                | 1945938828               |
| SNP_P3_42188_18266203 | NC_021163.1    | Ca_kabuli_chr04 | 18266203                | AA                              | CC                | 1945938830               |
| SNP_P3_42189_18295091 | NC_021163.1    | Ca_kabuli_chr04 | 18295091                | CC                              | AA                | 1945938832               |
| SNP_P3_42190_18295254 | NC_021163.1    | Ca_kabuli_chr04 | 18295254                | AA                              | GG                | 1945938833               |
| SNP_P3_42191_18295473 | NC_021163.1    | Ca_kabuli_chr04 | 18295473                | CC                              | TT                | 1945938835               |
| SNP_P3_42192_18295684 | NC_021163.1    | Ca_kabuli_chr04 | 18295684                | AA                              | TT                | 1945938837               |
| SNP_P3_42193_18295695 | NC_021163.1    | Ca_kabuli_chr04 | 18295695                | AA                              | GG                | 1945938839               |
| SNP_P3_42194_18296461 | NC_021163.1    | Ca_kabuli_chr04 | 18296461                | AA                              | CC                | 1945938840               |
| SNP_P3_42195_18296466 | NC_021163.1    | Ca_kabuli_chr04 | 18296466                | CC                              | TT                | 1945938842               |
| SNP_P3_42196_18296469 | NC_021163.1    | Ca_kabuli_chr04 | 18296469                | TT                              | CC                | 1945938844               |
| SNP_P3_42197_18296504 | NC_021163.1    | Ca_kabuli_chr04 | 18296504                | TT                              | GG                | 1945938846               |
| SNP_P3_42198_18296505 | NC_021163.1    | Ca_kabuli_chr04 | 18296505                | GG                              | TT                | 1945938848               |
| SNP_P3_42199_18296982 | NC_021163.1    | Ca_kabuli_chr04 | 18296982                | GG                              | TT                | 1945938849               |
| SNP_P3_42200_18310636 | NC_021163.1    | Ca_kabuli_chr04 | 18310636                | AA                              | TT                | 1945938851               |
| SNP_P3_42202_18317488 | NC_021163.1    | Ca_kabuli_chr04 | 18317488                | CC                              | TT                | 1945938853               |
| SNP_P3_42203_18323400 | NC_021163.1    | Ca_kabuli_chr04 | 18323400                | CC                              | AA                | 1945938855               |
| SNP_P3_42204_18343034 | NC_021163.1    | Ca_kabuli_chr04 | 18343034                | TT                              | AA                | 1945938856               |
| SNP_P3_42205_18345972 | NC_021163.1    | Ca_kabuli_chr04 | 18345972                | AA                              | TT                | 1945938858               |
| SNP_P3_42206_18369514 | NC_021163.1    | Ca_kabuli_chr04 | 18369514                | CC                              | AA                | 1945938860               |
| SNP_P3_42207_18388201 | NC_021163.1    | Ca_kabuli_chr04 | 18388201                | GG                              | AA                | 1945938862               |
| SNP_P3_42208_18388451 | NC_021163.1    | Ca_kabuli_chr04 | 18388451                | TT                              | CC                | 1945938864               |
| SNP_P3_42209_18388616 | NC_021163.1    | Ca_kabuli_chr04 | 18388616                | AA                              | TT                | 1945938865               |
| SNP_P3_42211_18445751 | NC_021163.1    | Ca_kabuli_chr04 | 18445751                | GG                              | AA                | 1945938867               |
| SNP_P3_42212_18445824 | NC_021163.1    | Ca_kabuli_chr04 | 18445824                | AA                              | CC                | 1945938869               |
| SNP_P3_42213_18445828 | NC_021163.1    | Ca_kabuli_chr04 | 18445828                | CC                              | TT                | 1945938871               |
| SNP_P3_42215_18512170 | NC_021163.1    | Ca_kabuli_chr04 | 18512170                | AA                              | GG                | 1945938872               |
| SNP_P3_42216_18515433 | NC_021163.1    | Ca_kabuli_chr04 | 18515433                | TT                              | AA                | 1945938874               |



| SNPs IDs              | Chromosome IDs | Chromosomes     | Physical positions (bp) | CDC Frontier (Reference genome) | (Pusa 256 & HPNB) | NCBI SNPdb Accession IDs |
|-----------------------|----------------|-----------------|-------------------------|---------------------------------|-------------------|--------------------------|
| SNP_P3_42217_18535884 | NC_021163.1    | Ca_kabuli_chr04 | 18535884                | CC                              | TT                | 1945938876               |
| SNP_P3_42218_18549509 | NC_021163.1    | Ca_kabuli_chr04 | 18549509                | GG                              | AA                | 1945938878               |
| SNP_P3_42219_18553182 | NC_021163.1    | Ca_kabuli_chr04 | 18553182                | AA                              | TT                | 1945938879               |
| SNP_P3_42221_18557853 | NC_021163.1    | Ca_kabuli_chr04 | 18557853                | CC                              | TT                | 1945938881               |
| SNP_P3_42222_18558588 | NC_021163.1    | Ca_kabuli_chr04 | 18558588                | GG                              | AA                | 1945938883               |
| SNP_P3_42224_18588637 | NC_021163.1    | Ca_kabuli_chr04 | 18588637                | AA                              | GG                | 1945938885               |
| SNP_P3_42225_18588843 | NC_021163.1    | Ca_kabuli_chr04 | 18588843                | CC                              | TT                | 1945938887               |
| SNP_P3_42226_18650473 | NC_021163.1    | Ca_kabuli_chr04 | 18650473                | CC                              | AA                | 1945938888               |
| SNP_P3_42227_18650781 | NC_021163.1    | Ca_kabuli_chr04 | 18650781                | AA                              | GG                | 1945938890               |
| SNP_P3_42228_18651195 | NC_021163.1    | Ca_kabuli_chr04 | 18651195                | TT                              | CC                | 1945938892               |
| SNP_P3_42229_18653012 | NC_021163.1    | Ca_kabuli_chr04 | 18653012                | CC                              | TT                | 1945938894               |
| SNP_P3_42230_18658152 | NC_021163.1    | Ca_kabuli_chr04 | 18658152                | GG                              | AA                | 1945938895               |
| SNP_P3_42231_18658509 | NC_021163.1    | Ca_kabuli_chr04 | 18658509                | GG                              | AA                | 1945938897               |
| SNP_P3_42232_18658511 | NC_021163.1    | Ca_kabuli_chr04 | 18658511                | AA                              | CC                | 1945938899               |
| SNP_P3_42233_18658626 | NC_021163.1    | Ca_kabuli_chr04 | 18658626                | CC                              | TT                | 1945938901               |
| SNP_P3_42236_18676211 | NC_021163.1    | Ca_kabuli_chr04 | 18676211                | AA                              | TT                | 1945938903               |
| SNP_P3_42237_18676212 | NC_021163.1    | Ca_kabuli_chr04 | 18676212                | AA                              | CC                | 1945938904               |
| SNP_P3_42238_18676428 | NC_021163.1    | Ca_kabuli_chr04 | 18676428                | TT                              | GG                | 1945938906               |
| SNP_P3_42239_18676838 | NC_021163.1    | Ca_kabuli_chr04 | 18676838                | TT                              | CC                | 1945938908               |
| SNP_P3_42240_18677131 | NC_021163.1    | Ca_kabuli_chr04 | 18677131                | TT                              | CC                | 1945938910               |
| SNP_P3_42241_18677169 | NC_021163.1    | Ca_kabuli_chr04 | 18677169                | TT                              | CC                | 1945938911               |
| SNP_P3_42242_18703967 | NC_021163.1    | Ca_kabuli_chr04 | 18703967                | TT                              | CC                | 1945938913               |
| SNP_P3_42244_18704126 | NC_021163.1    | Ca_kabuli_chr04 | 18704126                | GG                              | AA                | 1945938915               |
| SNP_P3_42245_18704377 | NC_021163.1    | Ca_kabuli_chr04 | 18704377                | AA                              | GG                | 1945938917               |
| SNP_P3_42246_18745932 | NC_021163.1    | Ca_kabuli_chr04 | 18745932                | AA                              | CC                | 1945938918               |
| SNP_P3_42247_18770235 | NC_021163.1    | Ca_kabuli_chr04 | 18770235                | CC                              | TT                | 1945938920               |
| SNP_P3_42248_18792382 | NC_021163.1    | Ca_kabuli_chr04 | 18792382                | GG                              | TT                | 1945938922               |
| SNP_P3_42249_18801138 | NC_021163.1    | Ca_kabuli_chr04 | 18801138                | TT                              | GG                | 1945938924               |
| SNP_P3_42250_18801957 | NC_021163.1    | Ca_kabuli_chr04 | 18801957                | TT                              | CC                | 1945938926               |
| SNP_P3_42251_18801999 | NC_021163.1    | Ca_kabuli_chr04 | 18801999                | GG                              | TT                | 1945938927               |
| SNP_P3_42252_18816392 | NC_021163.1    | Ca_kabuli_chr04 | 18816392                | GG                              | AA                | 1945938929               |
| SNP_P3_42253_18821166 | NC_021163.1    | Ca_kabuli_chr04 | 18821166                | AA                              | TT                | 1945938931               |
| SNP_P3_42254_18834163 | NC_021163.1    | Ca_kabuli_chr04 | 18834163                | TT                              | AA                | 1945938933               |
| SNP_P3_42255_18836722 | NC_021163.1    | Ca_kabuli_chr04 | 18836722                | CC                              | TT                | 1945938934               |
| SNP_P3_42257_18837011 | NC_021163.1    | Ca_kabuli_chr04 | 18837011                | AA                              | GG                | 1945938936               |
| SNP_P3_42258_18838035 | NC_021163.1    | Ca_kabuli_chr04 | 18838035                | AA                              | TT                | 1945938938               |
| SNP_P3_42259_18841092 | NC_021163.1    | Ca_kabuli_chr04 | 18841092                | CC                              | AA                | 1945938940               |
| SNP_P3_42260_18841096 | NC_021163.1    | Ca_kabuli_chr04 | 18841096                | GG                              | CC                | 1945938942               |
| SNP_P3_42261_18841105 | NC_021163.1    | Ca_kabuli_chr04 | 18841105                | TT                              | AA                | 1945938943               |
| SNP_P3_42262_18841106 | NC_021163.1    | Ca_kabuli_chr04 | 18841106                | CC                              | AA                | 1945938945               |
| SNP_P3_42263_18842166 | NC_021163.1    | Ca_kabuli_chr04 | 18842166                | TT                              | AA                | 1945938947               |
| SNP_P3_42265_18912844 | NC_021163.1    | Ca_kabuli_chr04 | 18912844                | TT                              | CC                | 1945938949               |

| SNPs IDs              | Chromosome IDs | Chromosomes     | Physical positions (bp) | CDC Frontier (Reference genome) | (Pusa 256 & HPNB) | NCBI SNPdb Accession IDs |
|-----------------------|----------------|-----------------|-------------------------|---------------------------------|-------------------|--------------------------|
| SNP_P3_42266_18934692 | NC_021163.1    | Ca_kabuli_chr04 | 18934692                | TT                              | AA                | 1945938950               |
| SNP_P3_42267_18957147 | NC_021163.1    | Ca_kabuli_chr04 | 18957147                | CC                              | AA                | 1945938952               |
| SNP_P3_42268_18969384 | NC_021163.1    | Ca_kabuli_chr04 | 18969384                | AA                              | GG                | 1945938954               |
| SNP_P3_42269_18974151 | NC_021163.1    | Ca_kabuli_chr04 | 18974151                | AA                              | TT                | 1945938956               |
| SNP_P3_42270_18977629 | NC_021163.1    | Ca_kabuli_chr04 | 18977629                | TT                              | GG                | 1945938957               |
| SNP_P3_42272_19046014 | NC_021163.1    | Ca_kabuli_chr04 | 19046014                | AA                              | TT                | 1945938959               |
| SNP_P3_42274_19046122 | NC_021163.1    | Ca_kabuli_chr04 | 19046122                | AA                              | CC                | 1945938961               |
| SNP_P3_42275_19046132 | NC_021163.1    | Ca_kabuli_chr04 | 19046132                | AA                              | CC                | 1945938963               |
| SNP_P3_42276_19047094 | NC_021163.1    | Ca_kabuli_chr04 | 19047094                | CC                              | AA                | 1945938965               |
| SNP_P3_42278_19082276 | NC_021163.1    | Ca_kabuli_chr04 | 19082276                | TT                              | CC                | 1945938966               |
| SNP_P3_42279_19082324 | NC_021163.1    | Ca_kabuli_chr04 | 19082324                | GG                              | AA                | 1945938968               |
| SNP_P3_42280_19082756 | NC_021163.1    | Ca_kabuli_chr04 | 19082756                | CC                              | TT                | 1945938970               |
| SNP_P3_42281_19084661 | NC_021163.1    | Ca_kabuli_chr04 | 19084661                | GG                              | AA                | 1945938972               |
| SNP_P3_42282_19084815 | NC_021163.1    | Ca_kabuli_chr04 | 19084815                | TT                              | GG                | 1945938973               |
| SNP_P3_42283_19085510 | NC_021163.1    | Ca_kabuli_chr04 | 19085510                | TT                              | GG                | 1945938975               |
| SNP_P3_42284_19103892 | NC_021163.1    | Ca_kabuli_chr04 | 19103892                | GG                              | CC                | 1945938977               |
| SNP_P3_42285_19115935 | NC_021163.1    | Ca_kabuli_chr04 | 19115935                | CC                              | GG                | 1945938979               |
| SNP_P3_42286_19163488 | NC_021163.1    | Ca_kabuli_chr04 | 19163488                | AA                              | GG                | 1945938981               |
| SNP_P3_42287_19163510 | NC_021163.1    | Ca_kabuli_chr04 | 19163510                | TT                              | CC                | 1945938982               |
| SNP_P3_42288_19164417 | NC_021163.1    | Ca_kabuli_chr04 | 19164417                | AA                              | TT                | 1945938984               |
| SNP_P3_42289_19181517 | NC_021163.1    | Ca_kabuli_chr04 | 19181517                | AA                              | CC                | 1945938986               |
| SNP_P3_42290_19181518 | NC_021163.1    | Ca_kabuli_chr04 | 19181518                | AA                              | CC                | 1945938988               |
| SNP_P3_42291_19203325 | NC_021163.1    | Ca_kabuli_chr04 | 19203325                | AA                              | GG                | 1945938989               |
| SNP_P3_42293_19265352 | NC_021163.1    | Ca_kabuli_chr04 | 19265352                | GG                              | AA                | 1945938991               |
| SNP_P3_42295_19296688 | NC_021163.1    | Ca_kabuli_chr04 | 19296688                | AA                              | TT                | 1945938993               |
| SNP_P3_42296_19296691 | NC_021163.1    | Ca_kabuli_chr04 | 19296691                | AA                              | CC                | 1945938995               |
| SNP_P3_42297_19337330 | NC_021163.1    | Ca_kabuli_chr04 | 19337330                | AA                              | TT                | 1945938996               |
| SNP_P3_42298_19337789 | NC_021163.1    | Ca_kabuli_chr04 | 19337789                | AA                              | GG                | 1945938998               |
| SNP_P3_42299_19341286 | NC_021163.1    | Ca_kabuli_chr04 | 19341286                | TT                              | CC                | 1945939000               |
| SNP_P3_42300_19341452 | NC_021163.1    | Ca_kabuli_chr04 | 19341452                | CC                              | TT                | 1945939002               |
| SNP_P3_42301_19341453 | NC_021163.1    | Ca_kabuli_chr04 | 19341453                | GG                              | AA                | 1945939004               |
| SNP_P3_42303_19342455 | NC_021163.1    | Ca_kabuli_chr04 | 19342455                | TT                              | CC                | 1945939005               |
| SNP_P3_42304_19342582 | NC_021163.1    | Ca_kabuli_chr04 | 19342582                | CC                              | TT                | 1945939007               |
| SNP_P3_42305_19350210 | NC_021163.1    | Ca_kabuli_chr04 | 19350210                | GG                              | TT                | 1945939009               |
| SNP_P3_42306_19350281 | NC_021163.1    | Ca_kabuli_chr04 | 19350281                | GG                              | TT                | 1945939011               |
| SNP_P3_42307_19350301 | NC_021163.1    | Ca_kabuli_chr04 | 19350301                | GG                              | TT                | 1945939012               |
| SNP_P3_42308_19350584 | NC_021163.1    | Ca_kabuli_chr04 | 19350584                | TT                              | AA                | 1945939014               |
| SNP_P3_42312_19396848 | NC_021163.1    | Ca_kabuli_chr04 | 19396848                | AA                              | GG                | 1945939016               |
| SNP_P3_42313_19396852 | NC_021163.1    | Ca_kabuli_chr04 | 19396852                | CC                              | TT                | 1945939018               |
| SNP_P3_42314_19397407 | NC_021163.1    | Ca_kabuli_chr04 | 19397407                | CC                              | TT                | 1945939020               |
| SNP_P3_42316_19400072 | NC_021163.1    | Ca_kabuli_chr04 | 19400072                | GG                              | AA                | 1945939021               |
| SNP_P3_42318_19408233 | NC_021163.1    | Ca_kabuli_chr04 | 19408233                | TT                              | GG                | 1945939023               |

| SNPs IDs              | Chromosome IDs | Chromosomes     | Physical positions (bp) | CDC Frontier (Reference genome) | (Pusa 256 & HPNB) | NCBI SNPdb Accession IDs |
|-----------------------|----------------|-----------------|-------------------------|---------------------------------|-------------------|--------------------------|
| SNP_P3_42320_19429795 | NC_021163.1    | Ca_kabuli_chr04 | 19429795                | CC                              | TT                | 1945939025               |
| SNP_P3_42321_19442449 | NC_021163.1    | Ca_kabuli_chr04 | 19442449                | AA                              | CC                | 1945939027               |
| SNP_P3_42322_19445761 | NC_021163.1    | Ca_kabuli_chr04 | 19445761                | AA                              | TT                | 1945939028               |
| SNP_P3_42323_19445972 | NC_021163.1    | Ca_kabuli_chr04 | 19445972                | TT                              | GG                | 1945939030               |
| SNP_P3_42324_19446025 | NC_021163.1    | Ca_kabuli_chr04 | 19446025                | AA                              | CC                | 1945939032               |
| SNP_P3_42325_19446052 | NC_021163.1    | Ca_kabuli_chr04 | 19446052                | AA                              | GG                | 1945939034               |
| SNP_P3_42326_19446063 | NC_021163.1    | Ca_kabuli_chr04 | 19446063                | GG                              | TT                | 1945939035               |
| SNP_P3_42327_19446068 | NC_021163.1    | Ca_kabuli_chr04 | 19446068                | CC                              | AA                | 1945939037               |
| SNP_P3_42328_19446108 | NC_021163.1    | Ca_kabuli_chr04 | 19446108                | AA                              | GG                | 1945939039               |
| SNP_P3_42329_19446272 | NC_021163.1    | Ca_kabuli_chr04 | 19446272                | AA                              | GG                | 1945939041               |
| SNP_P3_42330_19446307 | NC_021163.1    | Ca_kabuli_chr04 | 19446307                | TT                              | CC                | 1945939043               |
| SNP_P3_42331_19449689 | NC_021163.1    | Ca_kabuli_chr04 | 19449689                | TT                              | CC                | 1945939044               |
| SNP_P3_42332_19449698 | NC_021163.1    | Ca_kabuli_chr04 | 19449698                | AA                              | GG                | 1945939046               |
| SNP_P3_42333_19449728 | NC_021163.1    | Ca_kabuli_chr04 | 19449728                | AA                              | CC                | 1945939048               |
| SNP_P3_42334_19450794 | NC_021163.1    | Ca_kabuli_chr04 | 19450794                | GG                              | AA                | 1945939050               |
| SNP_P3_42335_19453679 | NC_021163.1    | Ca_kabuli_chr04 | 19453679                | TT                              | CC                | 1945939051               |
| SNP_P3_42336_19463579 | NC_021163.1    | Ca_kabuli_chr04 | 19463579                | AA                              | GG                | 1945939053               |
| SNP_P3_42337_19517367 | NC_021163.1    | Ca_kabuli_chr04 | 19517367                | TT                              | GG                | 1945939055               |
| SNP_P3_42338_19517423 | NC_021163.1    | Ca_kabuli_chr04 | 19517423                | TT                              | CC                | 1945939057               |
| SNP_P3_42339_19517709 | NC_021163.1    | Ca_kabuli_chr04 | 19517709                | GG                              | AA                | 1945939059               |
| SNP_P3_42340_19571627 | NC_021163.1    | Ca_kabuli_chr04 | 19571627                | GG                              | TT                | 1945939060               |
| SNP_P3_42341_19571635 | NC_021163.1    | Ca_kabuli_chr04 | 19571635                | CC                              | AA                | 1945939062               |
| SNP_P3_42342_19572092 | NC_021163.1    | Ca_kabuli_chr04 | 19572092                | GG                              | TT                | 1945939064               |
| SNP_P3_42343_19572097 | NC_021163.1    | Ca_kabuli_chr04 | 19572097                | TT                              | AA                | 1945939066               |
| SNP_P3_42345_19577135 | NC_021163.1    | Ca_kabuli_chr04 | 19577135                | CC                              | TT                | 1945939067               |
| SNP_P3_42346_19587718 | NC_021163.1    | Ca_kabuli_chr04 | 19587718                | CC                              | TT                | 1945939069               |
| SNP_P3_42347_19607593 | NC_021163.1    | Ca_kabuli_chr04 | 19607593                | AA                              | GG                | 1945939071               |
| SNP_P3_42348_19611705 | NC_021163.1    | Ca_kabuli_chr04 | 19611705                | AA                              | GG                | 1945939073               |
| SNP_P3_42349_19616107 | NC_021163.1    | Ca_kabuli_chr04 | 19616107                | GG                              | AA                | 1945939074               |
| SNP_P3_42350_19622119 | NC_021163.1    | Ca_kabuli_chr04 | 19622119                | GG                              | AA                | 1945939076               |
| SNP_P3_42351_19628231 | NC_021163.1    | Ca_kabuli_chr04 | 19628231                | CC                              | GG                | 1945939078               |
| SNP_P3_42352_19633104 | NC_021163.1    | Ca_kabuli_chr04 | 19633104                | TT                              | AA                | 1945939080               |
| SNP_P3_42354_19643734 | NC_021163.1    | Ca_kabuli_chr04 | 19643734                | AA                              | GG                | 1945939082               |
| SNP_P3_42355_19644129 | NC_021163.1    | Ca_kabuli_chr04 | 19644129                | AA                              | GG                | 1945939083               |
| SNP_P3_42356_19649039 | NC_021163.1    | Ca_kabuli_chr04 | 19649039                | GG                              | AA                | 1945939085               |
| SNP_P3_42357_19649302 | NC_021163.1    | Ca_kabuli_chr04 | 19649302                | TT                              | AA                | 1945939087               |
| SNP_P3_42358_19665662 | NC_021163.1    | Ca_kabuli_chr04 | 19665662                | CC                              | AA                | 1945939089               |
| SNP_P3_42359_19674562 | NC_021163.1    | Ca_kabuli_chr04 | 19674562                | GG                              | AA                | 1945939090               |
| SNP_P3_42360_19675788 | NC_021163.1    | Ca_kabuli_chr04 | 19675788                | CC                              | TT                | 1945939092               |
| SNP_P3_42362_19679044 | NC_021163.1    | Ca_kabuli_chr04 | 19679044                | CC                              | GG                | 1945939094               |
| SNP_P3_42363_19679048 | NC_021163.1    | Ca_kabuli_chr04 | 19679048                | CC                              | AA                | 1945939096               |
| SNP_P3_42364_19679107 | NC_021163.1    | Ca_kabuli_chr04 | 19679107                | CC                              | TT                | 1945939098               |

| SNPs IDs              | Chromosome IDs | Chromosomes     | Physical positions (bp) | CDC Frontier (Reference genome) | (Pusa 256 & HPNB) | NCBI SNPdb Accession IDs |
|-----------------------|----------------|-----------------|-------------------------|---------------------------------|-------------------|--------------------------|
| SNP_P3_42365_19679117 | NC_021163.1    | Ca_kabuli_chr04 | 19679117                | CC                              | TT                | 1945939099               |
| SNP_P3_42366_19679450 | NC_021163.1    | Ca_kabuli_chr04 | 19679450                | CC                              | TT                | 1945939101               |
| SNP_P3_42367_19691758 | NC_021163.1    | Ca_kabuli_chr04 | 19691758                | AA                              | GG                | 1945939103               |
| SNP_P3_42368_19709511 | NC_021163.1    | Ca_kabuli_chr04 | 19709511                | TT                              | AA                | 1945939105               |
| SNP_P3_42369_19730082 | NC_021163.1    | Ca_kabuli_chr04 | 19730082                | GG                              | AA                | 1945939106               |
| SNP_P3_42371_19783870 | NC_021163.1    | Ca_kabuli_chr04 | 19783870                | AA                              | GG                | 1945939108               |
| SNP_P3_42372_19783925 | NC_021163.1    | Ca_kabuli_chr04 | 19783925                | AA                              | GG                | 1945939110               |
| SNP_P3_42373_19783970 | NC_021163.1    | Ca_kabuli_chr04 | 19783970                | CC                              | TT                | 1945939112               |
| SNP_P3_42374_19784103 | NC_021163.1    | Ca_kabuli_chr04 | 19784103                | GG                              | AA                | 1945939113               |
| SNP_P3_42375_19784123 | NC_021163.1    | Ca_kabuli_chr04 | 19784123                | AA                              | GG                | 1945939115               |
| SNP_P3_42376_19784143 | NC_021163.1    | Ca_kabuli_chr04 | 19784143                | GG                              | TT                | 1945939117               |
| SNP_P3_42377_19784198 | NC_021163.1    | Ca_kabuli_chr04 | 19784198                | GG                              | AA                | 1945939119               |
| SNP_P3_42378_19784223 | NC_021163.1    | Ca_kabuli_chr04 | 19784223                | GG                              | AA                | 1945939121               |
| SNP_P3_42380_19789350 | NC_021163.1    | Ca_kabuli_chr04 | 19789350                | CC                              | TT                | 1945939122               |
| SNP_P3_42381_19790230 | NC_021163.1    | Ca_kabuli_chr04 | 19790230                | CC                              | AA                | 1945939124               |
| SNP_P3_42383_19852418 | NC_021163.1    | Ca_kabuli_chr04 | 19852418                | AA                              | GG                | 1945939126               |
| SNP_P3_42386_19946064 | NC_021163.1    | Ca_kabuli_chr04 | 19946064                | AA                              | GG                | 1945939128               |
| SNP_P3_42387_19948090 | NC_021163.1    | Ca_kabuli_chr04 | 19948090                | CC                              | TT                | 1945939129               |
| SNP_P3_42388_19953637 | NC_021163.1    | Ca_kabuli_chr04 | 19953637                | GG                              | AA                | 1945939131               |
| SNP_P3_42389_19953643 | NC_021163.1    | Ca_kabuli_chr04 | 19953643                | CC                              | TT                | 1945939133               |
| SNP_P3_42390_19959739 | NC_021163.1    | Ca_kabuli_chr04 | 19959739                | CC                              | TT                | 1945939135               |
| SNP_P3_42391_19960546 | NC_021163.1    | Ca_kabuli_chr04 | 19960546                | GG                              | AA                | 1945939137               |
| SNP_P3_42392_19968511 | NC_021163.1    | Ca_kabuli_chr04 | 19968511                | TT                              | CC                | 1945939138               |
| SNP_P3_42393_19968611 | NC_021163.1    | Ca_kabuli_chr04 | 19968611                | CC                              | TT                | 1945939140               |
| SNP_P3_42394_19968833 | NC_021163.1    | Ca_kabuli_chr04 | 19968833                | AA                              | CC                | 1945939142               |
| SNP_P3_42395_19968887 | NC_021163.1    | Ca_kabuli_chr04 | 19968887                | AA                              | CC                | 1945939144               |
| SNP_P3_42396_19968897 | NC_021163.1    | Ca_kabuli_chr04 | 19968897                | GG                              | AA                | 1945939145               |
| SNP_P3_42397_19968923 | NC_021163.1    | Ca_kabuli_chr04 | 19968923                | CC                              | TT                | 1945939147               |
| SNP_P3_42398_19968936 | NC_021163.1    | Ca_kabuli_chr04 | 19968936                | AA                              | GG                | 1945939149               |
| SNP_P3_42399_19968996 | NC_021163.1    | Ca_kabuli_chr04 | 19968996                | TT                              | CC                | 1945939151               |
| SNP_P3_42400_20012879 | NC_021163.1    | Ca_kabuli_chr04 | 20012879                | TT                              | CC                | 1945939152               |
| SNP_P3_42401_20015433 | NC_021163.1    | Ca_kabuli_chr04 | 20015433                | TT                              | CC                | 1945939154               |
| SNP_P3_42402_20016336 | NC_021163.1    | Ca_kabuli_chr04 | 20016336                | CC                              | TT                | 1945939156               |
| SNP_P3_42405_20072277 | NC_021163.1    | Ca_kabuli_chr04 | 20072277                | AA                              | GG                | 1945939158               |
| SNP_P3_42406_20075633 | NC_021163.1    | Ca_kabuli_chr04 | 20075633                | TT                              | CC                | 1945939160               |
| SNP_P3_42407_20097049 | NC_021163.1    | Ca_kabuli_chr04 | 20097049                | AA                              | GG                | 1945939161               |
| SNP_P3_42408_20097052 | NC_021163.1    | Ca_kabuli_chr04 | 20097052                | GG                              | TT                | 1945939163               |
| SNP_P3_42409_20097068 | NC_021163.1    | Ca_kabuli_chr04 | 20097068                | CC                              | AA                | 1945939165               |
| SNP_P3_42410_20097070 | NC_021163.1    | Ca_kabuli_chr04 | 20097070                | AA                              | GG                | 1945939167               |
| SNP_P3_42411_20097083 | NC_021163.1    | Ca_kabuli_chr04 | 20097083                | TT                              | CC                | 1945939168               |
| SNP_P3_42412_20097143 | NC_021163.1    | Ca_kabuli_chr04 | 20097143                | AA                              | GG                | 1945939170               |
| SNP_P3_42413_20097223 | NC_021163.1    | Ca_kabuli_chr04 | 20097223                | CC                              | TT                | 1945939172               |

| SNPs IDs              | Chromosome IDs | Chromosomes     | Physical positions (bp) | CDC Frontier (Reference genome) | (Pusa 256 & HPNB) | NCBI SNPdb Accession IDs |
|-----------------------|----------------|-----------------|-------------------------|---------------------------------|-------------------|--------------------------|
| SNP_P3_42414_20097455 | NC_021163.1    | Ca_kabuli_chr04 | 20097455                | AA                              | GG                | 1945939174               |
| SNP_P3_42415_20110471 | NC_021163.1    | Ca_kabuli_chr04 | 20110471                | AA                              | CC                | 1945939175               |
| SNP_P3_42416_20110525 | NC_021163.1    | Ca_kabuli_chr04 | 20110525                | CC                              | TT                | 1945939177               |
| SNP_P3_42417_20110860 | NC_021163.1    | Ca_kabuli_chr04 | 20110860                | AA                              | GG                | 1945939179               |
| SNP_P3_42418_20110882 | NC_021163.1    | Ca_kabuli_chr04 | 20110882                | TT                              | GG                | 1945939181               |
| SNP_P3_42419_20110904 | NC_021163.1    | Ca_kabuli_chr04 | 20110904                | TT                              | GG                | 1945939183               |
| SNP_P3_42420_20110928 | NC_021163.1    | Ca_kabuli_chr04 | 20110928                | AA                              | CC                | 1945939184               |
| SNP_P3_42421_20131214 | NC_021163.1    | Ca_kabuli_chr04 | 20131214                | TT                              | CC                | 1945939186               |
| SNP_P3_42422_20131216 | NC_021163.1    | Ca_kabuli_chr04 | 20131216                | AA                              | GG                | 1945939188               |
| SNP_P3_42423_20145788 | NC_021163.1    | Ca_kabuli_chr04 | 20145788                | TT                              | CC                | 1945939190               |
| SNP_P3_42424_20147541 | NC_021163.1    | Ca_kabuli_chr04 | 20147541                | AA                              | GG                | 1945939191               |
| SNP_P3_42425_20163463 | NC_021163.1    | Ca_kabuli_chr04 | 20163463                | AA                              | GG                | 1945939193               |
| SNP_P3_42426_20164678 | NC_021163.1    | Ca_kabuli_chr04 | 20164678                | TT                              | AA                | 1945939195               |
| SNP_P3_42427_20164679 | NC_021163.1    | Ca_kabuli_chr04 | 20164679                | TT                              | AA                | 1945939197               |
| SNP_P3_42428_20172916 | NC_021163.1    | Ca_kabuli_chr04 | 20172916                | GG                              | AA                | 1945939198               |
| SNP_P3_42429_20180488 | NC_021163.1    | Ca_kabuli_chr04 | 20180488                | CC                              | TT                | 1945939200               |
| SNP_P3_42431_20193995 | NC_021163.1    | Ca_kabuli_chr04 | 20193995                | TT                              | CC                | 1945939202               |
| SNP_P3_42432_20211093 | NC_021163.1    | Ca_kabuli_chr04 | 20211093                | TT                              | GG                | 1945939204               |
| SNP_P3_42433_20212198 | NC_021163.1    | Ca_kabuli_chr04 | 20212198                | GG                              | AA                | 1945939206               |
| SNP_P3_42434_20213398 | NC_021163.1    | Ca_kabuli_chr04 | 20213398                | AA                              | GG                | 1945939207               |
| SNP_P3_42435_20232889 | NC_021163.1    | Ca_kabuli_chr04 | 20232889                | TT                              | CC                | 1945939209               |
| SNP_P3_42437_20233667 | NC_021163.1    | Ca_kabuli_chr04 | 20233667                | TT                              | GG                | 1945939211               |
| SNP_P3_42439_20266393 | NC_021163.1    | Ca_kabuli_chr04 | 20266393                | AA                              | GG                | 1945939213               |
| SNP_P3_42440_20266404 | NC_021163.1    | Ca_kabuli_chr04 | 20266404                | AA                              | GG                | 1945939214               |
| SNP_P3_42441_20266411 | NC_021163.1    | Ca_kabuli_chr04 | 20266411                | AA                              | GG                | 1945939216               |
| SNP_P3_42442_20266414 | NC_021163.1    | Ca_kabuli_chr04 | 20266414                | CC                              | TT                | 1945939218               |
| SNP_P3_42444_20266495 | NC_021163.1    | Ca_kabuli_chr04 | 20266495                | AA                              | GG                | 1945939220               |
| SNP_P3_42445_20266508 | NC_021163.1    | Ca_kabuli_chr04 | 20266508                | AA                              | CC                | 1945939222               |
| SNP_P3_42446_20266540 | NC_021163.1    | Ca_kabuli_chr04 | 20266540                | CC                              | TT                | 1945939223               |
| SNP_P3_42447_20266651 | NC_021163.1    | Ca_kabuli_chr04 | 20266651                | GG                              | AA                | 1945939225               |
| SNP_P3_42448_20266670 | NC_021163.1    | Ca_kabuli_chr04 | 20266670                | TT                              | CC                | 1945939227               |
| SNP_P3_42449_20266684 | NC_021163.1    | Ca_kabuli_chr04 | 20266684                | CC                              | AA                | 1945939229               |
| SNP_P3_42450_20266805 | NC_021163.1    | Ca_kabuli_chr04 | 20266805                | TT                              | CC                | 1945939230               |
| SNP_P3_42451_20266807 | NC_021163.1    | Ca_kabuli_chr04 | 20266807                | TT                              | AA                | 1945939232               |
| SNP_P3_42452_20296627 | NC_021163.1    | Ca_kabuli_chr04 | 20296627                | AA                              | TT                | 1945939234               |
| SNP_P3_42453_20317928 | NC_021163.1    | Ca_kabuli_chr04 | 20317928                | TT                              | CC                | 1945939236               |
| SNP_P3_42454_20318527 | NC_021163.1    | Ca_kabuli_chr04 | 20318527                | GG                              | AA                | 1945939237               |
| SNP_P3_42455_20318856 | NC_021163.1    | Ca_kabuli_chr04 | 20318856                | TT                              | CC                | 1945939239               |
| SNP_P3_42456_20322457 | NC_021163.1    | Ca_kabuli_chr04 | 20322457                | AA                              | GG                | 1945939241               |
| SNP_P3_42457_20328342 | NC_021163.1    | Ca_kabuli_chr04 | 20328342                | GG                              | AA                | 1945939243               |
| SNP_P3_42458_20340525 | NC_021163.1    | Ca_kabuli_chr04 | 20340525                | TT                              | GG                | 1945939245               |
| SNP_P3_42459_20355733 | NC_021163.1    | Ca_kabuli_chr04 | 20355733                | GG                              | TT                | 1945939246               |

| SNPs IDs              | Chromosome IDs | Chromosomes     | Physical positions (bp) | CDC Frontier (Reference genome) | (Pusa 256 & HPNB) | NCBI SNPdb Accession IDs |
|-----------------------|----------------|-----------------|-------------------------|---------------------------------|-------------------|--------------------------|
| SNP_P3_42460_20397442 | NC_021163.1    | Ca_kabuli_chr04 | 20397442                | TT                              | AA                | 1945939248               |
| SNP_P3_42461_20403095 | NC_021163.1    | Ca_kabuli_chr04 | 20403095                | CC                              | TT                | 1945939250               |
| SNP_P3_42462_20532147 | NC_021163.1    | Ca_kabuli_chr04 | 20532147                | GG                              | AA                | 1945939252               |
| SNP_P3_42463_20540455 | NC_021163.1    | Ca_kabuli_chr04 | 20540455                | TT                              | CC                | 1945939253               |
| SNP_P3_42464_20573203 | NC_021163.1    | Ca_kabuli_chr04 | 20573203                | CC                              | TT                | 1945939255               |
| SNP_P3_42465_20594476 | NC_021163.1    | Ca_kabuli_chr04 | 20594476                | AA                              | TT                | 1945939257               |
| SNP_P3_42466_20604408 | NC_021163.1    | Ca_kabuli_chr04 | 20604408                | TT                              | GG                | 1945939259               |
| SNP_P3_42467_20608810 | NC_021163.1    | Ca_kabuli_chr04 | 20608810                | CC                              | AA                | 1945939261               |
| SNP_P3_42469_20633385 | NC_021163.1    | Ca_kabuli_chr04 | 20633385                | TT                              | CC                | 1945939262               |
| SNP_P3_42470_20636644 | NC_021163.1    | Ca_kabuli_chr04 | 20636644                | CC                              | TT                | 1945939264               |
| SNP_P3_42471_20648795 | NC_021163.1    | Ca_kabuli_chr04 | 20648795                | TT                              | CC                | 1945939266               |
| SNP_P3_42473_20680068 | NC_021163.1    | Ca_kabuli_chr04 | 20680068                | GG                              | AA                | 1945939268               |
| SNP_P3_42474_20681305 | NC_021163.1    | Ca_kabuli_chr04 | 20681305                | TT                              | AA                | 1945939269               |
| SNP_P3_42476_20721231 | NC_021163.1    | Ca_kabuli_chr04 | 20721231                | TT                              | CC                | 1945939271               |
| SNP_P3_42477_20728307 | NC_021163.1    | Ca_kabuli_chr04 | 20728307                | CC                              | TT                | 1945939273               |
| SNP_P3_42478_20733343 | NC_021163.1    | Ca_kabuli_chr04 | 20733343                | CC                              | GG                | 1945939275               |
| SNP_P3_42479_20738499 | NC_021163.1    | Ca_kabuli_chr04 | 20738499                | AA                              | GG                | 1945939276               |
| SNP_P3_42480_20738517 | NC_021163.1    | Ca_kabuli_chr04 | 20738517                | TT                              | GG                | 1945939278               |
| SNP_P3_42481_20738526 | NC_021163.1    | Ca_kabuli_chr04 | 20738526                | GG                              | AA                | 1945939280               |
| SNP_P3_42482_20758059 | NC_021163.1    | Ca_kabuli_chr04 | 20758059                | CC                              | AA                | 1945939282               |
| SNP_P3_42484_20774682 | NC_021163.1    | Ca_kabuli_chr04 | 20774682                | TT                              | CC                | 1945939284               |
| SNP_P3_42485_20798480 | NC_021163.1    | Ca_kabuli_chr04 | 20798480                | CC                              | GG                | 1945939285               |
| SNP_P3_42486_20798814 | NC_021163.1    | Ca_kabuli_chr04 | 20798814                | GG                              | TT                | 1945939287               |
| SNP_P3_42488_20798885 | NC_021163.1    | Ca_kabuli_chr04 | 20798885                | AA                              | TT                | 1945939289               |
| SNP_P3_42489_20798926 | NC_021163.1    | Ca_kabuli_chr04 | 20798926                | AA                              | CC                | 1945939291               |
| SNP_P3_42490_20798927 | NC_021163.1    | Ca_kabuli_chr04 | 20798927                | CC                              | TT                | 1945939292               |
| SNP_P3_42491_20819593 | NC_021163.1    | Ca_kabuli_chr04 | 20819593                | GG                              | CC                | 1945939294               |
| SNP_P3_42492_20819595 | NC_021163.1    | Ca_kabuli_chr04 | 20819595                | GG                              | AA                | 1945939296               |
| SNP_P3_42493_20819612 | NC_021163.1    | Ca_kabuli_chr04 | 20819612                | GG                              | CC                | 1945939298               |
| SNP_P3_42494_20819639 | NC_021163.1    | Ca_kabuli_chr04 | 20819639                | TT                              | GG                | 1945939300               |
| SNP_P3_42495_20819651 | NC_021163.1    | Ca_kabuli_chr04 | 20819651                | TT                              | AA                | 1945939301               |
| SNP_P3_42496_20819655 | NC_021163.1    | Ca_kabuli_chr04 | 20819655                | AA                              | GG                | 1945939303               |
| SNP_P3_42497_20819656 | NC_021163.1    | Ca_kabuli_chr04 | 20819656                | GG                              | AA                | 1945939305               |
| SNP_P3_42498_20819671 | NC_021163.1    | Ca_kabuli_chr04 | 20819671                | GG                              | AA                | 1945939307               |
| SNP_P3_42499_20819686 | NC_021163.1    | Ca_kabuli_chr04 | 20819686                | AA                              | GG                | 1945939308               |
| SNP_P3_42500_20819755 | NC_021163.1    | Ca_kabuli_chr04 | 20819755                | TT                              | CC                | 1945939310               |
| SNP_P3_42501_20819763 | NC_021163.1    | Ca_kabuli_chr04 | 20819763                | AA                              | GG                | 1945939312               |
| SNP_P3_42502_20819768 | NC_021163.1    | Ca_kabuli_chr04 | 20819768                | TT                              | AA                | 1945939314               |
| SNP_P3_42503_20819770 | NC_021163.1    | Ca_kabuli_chr04 | 20819770                | CC                              | GG                | 1945939315               |
| SNP_P3_42504_20819771 | NC_021163.1    | Ca_kabuli_chr04 | 20819771                | AA                              | CC                | 1945939317               |
| SNP_P3_42505_20819803 | NC_021163.1    | Ca_kabuli_chr04 | 20819803                | AA                              | CC                | 1945939319               |
| SNP_P3_42506_20819806 | NC_021163.1    | Ca_kabuli_chr04 | 20819806                | CC                              | TT                | 1945939321               |

| SNPs IDs              | Chromosome IDs | Chromosomes     | Physical positions (bp) | CDC Frontier (Reference genome) | (Pusa 256 & HPNB) | NCBI SNPdb Accession IDs |
|-----------------------|----------------|-----------------|-------------------------|---------------------------------|-------------------|--------------------------|
| SNP_P3_42507_20819839 | NC_021163.1    | Ca_kabuli_chr04 | 20819839                | AA                              | CC                | 1945939323               |
| SNP_P3_42508_20819910 | NC_021163.1    | Ca_kabuli_chr04 | 20819910                | TT                              | GG                | 1945939324               |
| SNP_P3_42509_20819925 | NC_021163.1    | Ca_kabuli_chr04 | 20819925                | AA                              | GG                | 1945939326               |
| SNP_P3_42510_20825872 | NC_021163.1    | Ca_kabuli_chr04 | 20825872                | AA                              | GG                | 1945939328               |
| SNP_P3_42511_20830163 | NC_021163.1    | Ca_kabuli_chr04 | 20830163                | TT                              | AA                | 1945939330               |
| SNP_P3_42512_20830228 | NC_021163.1    | Ca_kabuli_chr04 | 20830228                | GG                              | TT                | 1945939331               |
| SNP_P3_42513_20830263 | NC_021163.1    | Ca_kabuli_chr04 | 20830263                | TT                              | CC                | 1945939333               |
| SNP_P3_42514_20830458 | NC_021163.1    | Ca_kabuli_chr04 | 20830458                | TT                              | CC                | 1945939335               |
| SNP_P3_42515_20855104 | NC_021163.1    | Ca_kabuli_chr04 | 20855104                | GG                              | AA                | 1945939337               |
| SNP_P3_42516_20855122 | NC_021163.1    | Ca_kabuli_chr04 | 20855122                | CC                              | TT                | 1945939339               |
| SNP_P3_42517_20855123 | NC_021163.1    | Ca_kabuli_chr04 | 20855123                | AA                              | GG                | 1945939340               |
| SNP_P3_42518_20855391 | NC_021163.1    | Ca_kabuli_chr04 | 20855391                | AA                              | TT                | 1945939342               |
| SNP_P3_42519_20871173 | NC_021163.1    | Ca_kabuli_chr04 | 20871173                | TT                              | CC                | 1945939344               |
| SNP_P3_42521_20897087 | NC_021163.1    | Ca_kabuli_chr04 | 20897087                | TT                              | GG                | 1945939346               |
| SNP_P3_42522_20910864 | NC_021163.1    | Ca_kabuli_chr04 | 20910864                | CC                              | AA                | 1945939347               |
| SNP_P3_42523_20917821 | NC_021163.1    | Ca_kabuli_chr04 | 20917821                | TT                              | CC                | 1945939349               |
| SNP_P3_42524_20929404 | NC_021163.1    | Ca_kabuli_chr04 | 20929404                | TT                              | AA                | 1945939351               |
| SNP_P3_42528_20977818 | NC_021163.1    | Ca_kabuli_chr04 | 20977818                | AA                              | CC                | 1945939353               |
| SNP_P3_42529_20977822 | NC_021163.1    | Ca_kabuli_chr04 | 20977822                | GG                              | AA                | 1945939354               |
| SNP_P3_42530_20987362 | NC_021163.1    | Ca_kabuli_chr04 | 20987362                | TT                              | GG                | 1945939356               |
| SNP_P3_42531_20987364 | NC_021163.1    | Ca_kabuli_chr04 | 20987364                | TT                              | GG                | 1945939358               |
| SNP_P3_42532_20995667 | NC_021163.1    | Ca_kabuli_chr04 | 20995667                | GG                              | AA                | 1945939360               |
| SNP_P3_42533_20997946 | NC_021163.1    | Ca_kabuli_chr04 | 20997946                | CC                              | AA                | 1945939362               |
| SNP_P3_42534_20997961 | NC_021163.1    | Ca_kabuli_chr04 | 20997961                | CC                              | GG                | 1945939363               |
| SNP_P3_42535_20997965 | NC_021163.1    | Ca_kabuli_chr04 | 20997965                | TT                              | GG                | 1945939365               |
| SNP_P3_42536_20998007 | NC_021163.1    | Ca_kabuli_chr04 | 20998007                | TT                              | CC                | 1945939367               |
| SNP_P3_42537_21008450 | NC_021163.1    | Ca_kabuli_chr04 | 21008450                | GG                              | TT                | 1945939369               |
| SNP_P3_42538_21008514 | NC_021163.1    | Ca_kabuli_chr04 | 21008514                | TT                              | GG                | 1945939370               |
| SNP_P3_42539_21014278 | NC_021163.1    | Ca_kabuli_chr04 | 21014278                | GG                              | AA                | 1945939372               |
| SNP_P3_42540_21026517 | NC_021163.1    | Ca_kabuli_chr04 | 21026517                | TT                              | GG                | 1945939374               |
| SNP_P3_42541_21031561 | NC_021163.1    | Ca_kabuli_chr04 | 21031561                | GG                              | CC                | 1945939376               |
| SNP_P3_42542_21043607 | NC_021163.1    | Ca_kabuli_chr04 | 21043607                | AA                              | GG                | 1945939378               |
| SNP_P3_42543_21045473 | NC_021163.1    | Ca_kabuli_chr04 | 21045473                | CC                              | TT                | 1945939379               |
| SNP_P3_42544_21046587 | NC_021163.1    | Ca_kabuli_chr04 | 21046587                | TT                              | AA                | 1945939381               |
| SNP_P3_42545_21047711 | NC_021163.1    | Ca_kabuli_chr04 | 21047711                | AA                              | TT                | 1945939383               |
| SNP_P3_42547_21067488 | NC_021163.1    | Ca_kabuli_chr04 | 21067488                | TT                              | AA                | 1945939385               |
| SNP_P3_42548_21067553 | NC_021163.1    | Ca_kabuli_chr04 | 21067553                | TT                              | CC                | 1945939386               |
| SNP_P3_42549_21067888 | NC_021163.1    | Ca_kabuli_chr04 | 21067888                | AA                              | GG                | 1945939388               |
| SNP_P3_42550_21067914 | NC_021163.1    | Ca_kabuli_chr04 | 21067914                | TT                              | CC                | 1945939390               |
| SNP_P3_42551_21067936 | NC_021163.1    | Ca_kabuli_chr04 | 21067936                | TT                              | CC                | 1945939392               |
| SNP_P3_42552_21067940 | NC_021163.1    | Ca_kabuli_chr04 | 21067940                | TT                              | CC                | 1945939393               |
| SNP_P3_42553_21067941 | NC_021163.1    | Ca_kabuli_chr04 | 21067941                | TT                              | CC                | 1945939395               |

| SNPs IDs              | Chromosome IDs | Chromosomes     | Physical positions (bp) | CDC Frontier (Reference genome) | (Pusa 256 & HPNB) | NCBI SNPdb Accession IDs |
|-----------------------|----------------|-----------------|-------------------------|---------------------------------|-------------------|--------------------------|
| SNP_P3_42554_21067950 | NC_021163.1    | Ca_kabuli_chr04 | 21067950                | AA                              | GG                | 1945939397               |
| SNP_P3_42555_21067952 | NC_021163.1    | Ca_kabuli_chr04 | 21067952                | AA                              | TT                | 1945939399               |
| SNP_P3_42556_21067977 | NC_021163.1    | Ca_kabuli_chr04 | 21067977                | CC                              | TT                | 1945939401               |
| SNP_P3_42557_21067983 | NC_021163.1    | Ca_kabuli_chr04 | 21067983                | AA                              | CC                | 1945939402               |
| SNP_P3_42558_21071801 | NC_021163.1    | Ca_kabuli_chr04 | 21071801                | AA                              | TT                | 1945939404               |
| SNP_P3_42559_21071806 | NC_021163.1    | Ca_kabuli_chr04 | 21071806                | CC                              | TT                | 1945939406               |
| SNP_P3_42560_21071866 | NC_021163.1    | Ca_kabuli_chr04 | 21071866                | CC                              | GG                | 1945939408               |
| SNP_P3_42562_21071919 | NC_021163.1    | Ca_kabuli_chr04 | 21071919                | TT                              | CC                | 1945939409               |
| SNP_P3_42565_21085048 | NC_021163.1    | Ca_kabuli_chr04 | 21085048                | GG                              | AA                | 1945939411               |
| SNP_P3_42566_21089858 | NC_021163.1    | Ca_kabuli_chr04 | 21089858                | TT                              | CC                | 1945939413               |
| SNP_P3_42568_21138666 | NC_021163.1    | Ca_kabuli_chr04 | 21138666                | GG                              | CC                | 1945939415               |
| SNP_P3_42569_21155171 | NC_021163.1    | Ca_kabuli_chr04 | 21155171                | GG                              | AA                | 1945939417               |
| SNP_P3_42571_21160954 | NC_021163.1    | Ca_kabuli_chr04 | 21160954                | AA                              | GG                | 1945939418               |
| SNP_P3_42572_21160967 | NC_021163.1    | Ca_kabuli_chr04 | 21160967                | AA                              | GG                | 1945939420               |
| SNP_P3_42573_21161001 | NC_021163.1    | Ca_kabuli_chr04 | 21161001                | CC                              | TT                | 1945939422               |
| SNP_P3_42574_21162072 | NC_021163.1    | Ca_kabuli_chr04 | 21162072                | TT                              | GG                | 1945939424               |
| SNP_P3_42575_21162493 | NC_021163.1    | Ca_kabuli_chr04 | 21162493                | AA                              | CC                | 1945939425               |
| SNP_P3_42576_21174981 | NC_021163.1    | Ca_kabuli_chr04 | 21174981                | CC                              | TT                | 1945939427               |
| SNP_P3_42577_21175015 | NC_021163.1    | Ca_kabuli_chr04 | 21175015                | CC                              | AA                | 1945939429               |
| SNP_P3_42578_21175052 | NC_021163.1    | Ca_kabuli_chr04 | 21175052                | TT                              | CC                | 1945939431               |
| SNP_P3_42579_21175270 | NC_021163.1    | Ca_kabuli_chr04 | 21175270                | AA                              | GG                | 1945939432               |
| SNP_P3_42580_21175364 | NC_021163.1    | Ca_kabuli_chr04 | 21175364                | GG                              | AA                | 1945939434               |
| SNP_P3_42581_21180155 | NC_021163.1    | Ca_kabuli_chr04 | 21180155                | AA                              | CC                | 1945939436               |
| SNP_P3_42582_21183578 | NC_021163.1    | Ca_kabuli_chr04 | 21183578                | AA                              | CC                | 1945939438               |
| SNP_P3_42583_21183584 | NC_021163.1    | Ca_kabuli_chr04 | 21183584                | TT                              | AA                | 1945939440               |
| SNP_P3_42584_21185442 | NC_021163.1    | Ca_kabuli_chr04 | 21185442                | CC                              | TT                | 1945939441               |
| SNP_P3_42586_21229455 | NC_021163.1    | Ca_kabuli_chr04 | 21229455                | AA                              | TT                | 1945939443               |
| SNP_P3_42587_21229628 | NC_021163.1    | Ca_kabuli_chr04 | 21229628                | CC                              | AA                | 1945939445               |
| SNP_P3_42588_21229669 | NC_021163.1    | Ca_kabuli_chr04 | 21229669                | AA                              | TT                | 1945939447               |
| SNP_P3_42589_21229753 | NC_021163.1    | Ca_kabuli_chr04 | 21229753                | GG                              | CC                | 1945939448               |
| SNP_P3_42590_21229780 | NC_021163.1    | Ca_kabuli_chr04 | 21229780                | AA                              | GG                | 1945939450               |
| SNP_P3_42592_21231125 | NC_021163.1    | Ca_kabuli_chr04 | 21231125                | TT                              | GG                | 1945939452               |
| SNP_P3_42593_21231212 | NC_021163.1    | Ca_kabuli_chr04 | 21231212                | CC                              | AA                | 1945939454               |
| SNP_P3_42594_21231328 | NC_021163.1    | Ca_kabuli_chr04 | 21231328                | AA                              | GG                | 1945939455               |
| SNP_P3_42595_21231441 | NC_021163.1    | Ca_kabuli_chr04 | 21231441                | GG                              | CC                | 1945939457               |
| SNP_P3_42596_21231457 | NC_021163.1    | Ca_kabuli_chr04 | 21231457                | TT                              | CC                | 1945939459               |
| SNP_P3_42597_21231463 | NC_021163.1    | Ca_kabuli_chr04 | 21231463                | AA                              | TT                | 1945939461               |
| SNP_P3_42598_21231495 | NC_021163.1    | Ca_kabuli_chr04 | 21231495                | CC                              | TT                | 1945939463               |
| SNP_P3_42599_21231506 | NC_021163.1    | Ca_kabuli_chr04 | 21231506                | TT                              | CC                | 1945939464               |
| SNP_P3_42600_21231550 | NC_021163.1    | Ca_kabuli_chr04 | 21231550                | TT                              | GG                | 1945939466               |
| SNP_P3_42601_21239532 | NC_021163.1    | Ca_kabuli_chr04 | 21239532                | GG                              | AA                | 1945939468               |
| SNP_P3_42602_21239895 | NC_021163.1    | Ca_kabuli_chr04 | 21239895                | CC                              | TT                | 1945939470               |



| SNPs IDs              | Chromosome IDs | Chromosomes     | Physical positions (bp) | CDC Frontier (Reference genome) | (Pusa 256 & HPNB) | NCBI SNPdb Accession IDs |
|-----------------------|----------------|-----------------|-------------------------|---------------------------------|-------------------|--------------------------|
| SNP_P3_42603_21240167 | NC_021163.1    | Ca_kabuli_chr04 | 21240167                | AA                              | TT                | 1945939471               |
| SNP_P3_42604_21240207 | NC_021163.1    | Ca_kabuli_chr04 | 21240207                | TT                              | AA                | 1945939473               |
| SNP_P3_42605_21243203 | NC_021163.1    | Ca_kabuli_chr04 | 21243203                | AA                              | CC                | 1945939475               |
| SNP_P3_42606_21243734 | NC_021163.1    | Ca_kabuli_chr04 | 21243734                | GG                              | AA                | 1945939477               |
| SNP_P3_42607_21261668 | NC_021163.1    | Ca_kabuli_chr04 | 21261668                | TT                              | CC                | 1945939479               |
| SNP_P3_42610_21331084 | NC_021163.1    | Ca_kabuli_chr04 | 21331084                | TT                              | GG                | 1945939480               |
| SNP_P3_42611_21331108 | NC_021163.1    | Ca_kabuli_chr04 | 21331108                | TT                              | AA                | 1945939482               |
| SNP_P3_42612_21331112 | NC_021163.1    | Ca_kabuli_chr04 | 21331112                | TT                              | CC                | 1945939484               |
| SNP_P3_42613_21331119 | NC_021163.1    | Ca_kabuli_chr04 | 21331119                | TT                              | CC                | 1945939486               |
| SNP_P3_42614_21331164 | NC_021163.1    | Ca_kabuli_chr04 | 21331164                | AA                              | CC                | 1945939487               |
| SNP_P3_42615_21331437 | NC_021163.1    | Ca_kabuli_chr04 | 21331437                | AA                              | CC                | 1945939489               |
| SNP_P3_42616_21331469 | NC_021163.1    | Ca_kabuli_chr04 | 21331469                | TT                              | CC                | 1945939491               |
| SNP_P3_42617_21331505 | NC_021163.1    | Ca_kabuli_chr04 | 21331505                | AA                              | GG                | 1945939493               |
| SNP_P3_42618_21331512 | NC_021163.1    | Ca_kabuli_chr04 | 21331512                | TT                              | AA                | 1945939494               |
| SNP_P3_42619_21346316 | NC_021163.1    | Ca_kabuli_chr04 | 21346316                | AA                              | TT                | 1945939496               |
| SNP_P3_42620_21347515 | NC_021163.1    | Ca_kabuli_chr04 | 21347515                | TT                              | AA                | 1945939498               |
| SNP_P3_42621_21347809 | NC_021163.1    | Ca_kabuli_chr04 | 21347809                | AA                              | TT                | 1945939500               |
| SNP_P3_42622_21347905 | NC_021163.1    | Ca_kabuli_chr04 | 21347905                | CC                              | AA                | 1945939502               |
| SNP_P3_42623_21380030 | NC_021163.1    | Ca_kabuli_chr04 | 21380030                | GG                              | TT                | 1945939503               |
| SNP_P3_42624_21400088 | NC_021163.1    | Ca_kabuli_chr04 | 21400088                | AA                              | GG                | 1945939505               |
| SNP_P3_42625_21425707 | NC_021163.1    | Ca_kabuli_chr04 | 21425707                | GG                              | AA                | 1945939507               |
| SNP_P3_42627_21450711 | NC_021163.1    | Ca_kabuli_chr04 | 21450711                | AA                              | GG                | 1945939509               |
| SNP_P3_42628_21463462 | NC_021163.1    | Ca_kabuli_chr04 | 21463462                | TT                              | CC                | 1945939510               |
| SNP_P3_42629_21471604 | NC_021163.1    | Ca_kabuli_chr04 | 21471604                | AA                              | TT                | 1945939512               |
| SNP_P3_42630_21503454 | NC_021163.1    | Ca_kabuli_chr04 | 21503454                | CC                              | AA                | 1945939514               |
| SNP_P3_42631_21503790 | NC_021163.1    | Ca_kabuli_chr04 | 21503790                | GG                              | AA                | 1945939516               |
| SNP_P3_42632_21503831 | NC_021163.1    | Ca_kabuli_chr04 | 21503831                | AA                              | GG                | 1945939518               |
| SNP_P3_42633_21508192 | NC_021163.1    | Ca_kabuli_chr04 | 21508192                | GG                              | AA                | 1945939519               |
| SNP_P3_42634_21511779 | NC_021163.1    | Ca_kabuli_chr04 | 21511779                | TT                              | GG                | 1945939521               |
| SNP_P3_42635_21515304 | NC_021163.1    | Ca_kabuli_chr04 | 21515304                | GG                              | AA                | 1945939523               |
| SNP_P3_42636_21521169 | NC_021163.1    | Ca_kabuli_chr04 | 21521169                | GG                              | AA                | 1945939525               |
| SNP_P3_42637_21522017 | NC_021163.1    | Ca_kabuli_chr04 | 21522017                | AA                              | TT                | 1945939526               |
| SNP_P3_42638_21522018 | NC_021163.1    | Ca_kabuli_chr04 | 21522018                | GG                              | TT                | 1945939528               |
| SNP_P3_42639_21528944 | NC_021163.1    | Ca_kabuli_chr04 | 21528944                | AA                              | CC                | 1945939530               |
| SNP_P3_42640_21528970 | NC_021163.1    | Ca_kabuli_chr04 | 21528970                | CC                              | AA                | 1945939532               |
| SNP_P3_42641_21528972 | NC_021163.1    | Ca_kabuli_chr04 | 21528972                | TT                              | AA                | 1945939533               |
| SNP_P3_42642_21528973 | NC_021163.1    | Ca_kabuli_chr04 | 21528973                | AA                              | TT                | 1945939535               |
| SNP_P3_42643_21529154 | NC_021163.1    | Ca_kabuli_chr04 | 21529154                | CC                              | TT                | 1945939537               |
| SNP_P3_42645_21529200 | NC_021163.1    | Ca_kabuli_chr04 | 21529200                | GG                              | AA                | 1945939539               |
| SNP_P3_42647_21569919 | NC_021163.1    | Ca_kabuli_chr04 | 21569919                | TT                              | GG                | 1945939541               |
| SNP_P3_42648_21569925 | NC_021163.1    | Ca_kabuli_chr04 | 21569925                | TT                              | CC                | 1945939542               |
| SNP_P3_42649_21569945 | NC_021163.1    | Ca_kabuli_chr04 | 21569945                | TT                              | AA                | 1945939544               |

| SNPs IDs              | Chromosome IDs | Chromosomes     | Physical positions (bp) | CDC Frontier (Reference genome) | (Pusa 256 & HPNB) | NCBI SNPdb Accession IDs |
|-----------------------|----------------|-----------------|-------------------------|---------------------------------|-------------------|--------------------------|
| SNP_P3_42650_21570243 | NC_021163.1    | Ca_kabuli_chr04 | 21570243                | AA                              | GG                | 1945939546               |
| SNP_P3_42651_21570272 | NC_021163.1    | Ca_kabuli_chr04 | 21570272                | GG                              | TT                | 1945939548               |
| SNP_P3_42652_21570311 | NC_021163.1    | Ca_kabuli_chr04 | 21570311                | CC                              | TT                | 1945939549               |
| SNP_P3_42653_21571219 | NC_021163.1    | Ca_kabuli_chr04 | 21571219                | CC                              | AA                | 1945939551               |
| SNP_P3_42654_21589607 | NC_021163.1    | Ca_kabuli_chr04 | 21589607                | CC                              | TT                | 1945939553               |
| SNP_P3_42656_21601812 | NC_021163.1    | Ca_kabuli_chr04 | 21601812                | TT                              | AA                | 1945939555               |
| SNP_P3_42657_21601824 | NC_021163.1    | Ca_kabuli_chr04 | 21601824                | AA                              | TT                | 1945939557               |
| SNP_P3_42658_21601835 | NC_021163.1    | Ca_kabuli_chr04 | 21601835                | CC                              | TT                | 1945939558               |
| SNP_P3_42659_21601868 | NC_021163.1    | Ca_kabuli_chr04 | 21601868                | TT                              | CC                | 1945939560               |
| SNP_P3_42660_21601908 | NC_021163.1    | Ca_kabuli_chr04 | 21601908                | TT                              | AA                | 1945939562               |
| SNP_P3_42661_21601968 | NC_021163.1    | Ca_kabuli_chr04 | 21601968                | AA                              | CC                | 1945939564               |
| SNP_P3_42662_21601970 | NC_021163.1    | Ca_kabuli_chr04 | 21601970                | AA                              | TT                | 1945939565               |
| SNP_P3_42663_21601974 | NC_021163.1    | Ca_kabuli_chr04 | 21601974                | TT                              | AA                | 1945939567               |
| SNP_P3_42664_21607300 | NC_021163.1    | Ca_kabuli_chr04 | 21607300                | TT                              | CC                | 1945939569               |
| SNP_P3_42665_21607346 | NC_021163.1    | Ca_kabuli_chr04 | 21607346                | CC                              | TT                | 1945939571               |
| SNP_P3_42666_21607368 | NC_021163.1    | Ca_kabuli_chr04 | 21607368                | GG                              | TT                | 1945939573               |
| SNP_P3_42667_21607747 | NC_021163.1    | Ca_kabuli_chr04 | 21607747                | TT                              | CC                | 1945939574               |
| SNP_P3_42668_21607752 | NC_021163.1    | Ca_kabuli_chr04 | 21607752                | TT                              | CC                | 1945939576               |
| SNP_P3_42669_21607768 | NC_021163.1    | Ca_kabuli_chr04 | 21607768                | TT                              | GG                | 1945939578               |
| SNP_P3_42670_21607788 | NC_021163.1    | Ca_kabuli_chr04 | 21607788                | TT                              | CC                | 1945939580               |
| SNP_P3_42671_21607796 | NC_021163.1    | Ca_kabuli_chr04 | 21607796                | GG                              | TT                | 1945939581               |
| SNP_P3_42672_21607804 | NC_021163.1    | Ca_kabuli_chr04 | 21607804                | CC                              | TT                | 1945939583               |
| SNP_P3_42673_21607813 | NC_021163.1    | Ca_kabuli_chr04 | 21607813                | AA                              | CC                | 1945939585               |
| SNP_P3_42674_21607893 | NC_021163.1    | Ca_kabuli_chr04 | 21607893                | CC                              | TT                | 1945939587               |
| SNP_P3_42675_21607898 | NC_021163.1    | Ca_kabuli_chr04 | 21607898                | CC                              | TT                | 1945939588               |
| SNP_P3_42676_21607903 | NC_021163.1    | Ca_kabuli_chr04 | 21607903                | GG                              | AA                | 1945939590               |
| SNP_P3_42677_21609261 | NC_021163.1    | Ca_kabuli_chr04 | 21609261                | TT                              | AA                | 1945939592               |
| SNP_P3_42678_21609770 | NC_021163.1    | Ca_kabuli_chr04 | 21609770                | AA                              | GG                | 1945939594               |
| SNP_P3_42679_21609783 | NC_021163.1    | Ca_kabuli_chr04 | 21609783                | TT                              | CC                | 1945939596               |
| SNP_P3_42680_21609798 | NC_021163.1    | Ca_kabuli_chr04 | 21609798                | CC                              | TT                | 1945939597               |
| SNP_P3_42681_21615003 | NC_021163.1    | Ca_kabuli_chr04 | 21615003                | CC                              | TT                | 1945939599               |
| SNP_P3_42682_21622088 | NC_021163.1    | Ca_kabuli_chr04 | 21622088                | AA                              | GG                | 1945939601               |
| SNP_P3_42683_21622089 | NC_021163.1    | Ca_kabuli_chr04 | 21622089                | GG                              | AA                | 1945939603               |
| SNP_P3_42684_21622583 | NC_021163.1    | Ca_kabuli_chr04 | 21622583                | AA                              | CC                | 1945939604               |
| SNP_P3_42687_21622693 | NC_021163.1    | Ca_kabuli_chr04 | 21622693                | GG                              | AA                | 1945939606               |
| SNP_P3_42688_21622872 | NC_021163.1    | Ca_kabuli_chr04 | 21622872                | TT                              | CC                | 1945939608               |
| SNP_P3_42689_21623016 | NC_021163.1    | Ca_kabuli_chr04 | 21623016                | AA                              | GG                | 1945939610               |
| SNP_P3_42690_21625751 | NC_021163.1    | Ca_kabuli_chr04 | 21625751                | GG                              | AA                | 1945939612               |
| SNP_P3_42691_21637144 | NC_021163.1    | Ca_kabuli_chr04 | 21637144                | AA                              | GG                | 1945939613               |
| SNP_P3_42692_21643406 | NC_021163.1    | Ca_kabuli_chr04 | 21643406                | GG                              | AA                | 1945939615               |
| SNP_P3_42693_21645198 | NC_021163.1    | Ca_kabuli_chr04 | 21645198                | CC                              | TT                | 1945939617               |
| SNP_P3_42694_21645285 | NC_021163.1    | Ca_kabuli_chr04 | 21645285                | AA                              | GG                | 1945939619               |

| SNPs IDs              | Chromosome IDs | Chromosomes     | Physical positions (bp) | CDC Frontier (Reference genome) | (Pusa 256 & HPNB) | NCBI SNPdb Accession IDs |
|-----------------------|----------------|-----------------|-------------------------|---------------------------------|-------------------|--------------------------|
| SNP_P3_42695_21669427 | NC_021163.1    | Ca_kabuli_chr04 | 21669427                | GG                              | AA                | 1945939620               |
| SNP_P3_42696_21683961 | NC_021163.1    | Ca_kabuli_chr04 | 21683961                | AA                              | TT                | 1945939622               |
| SNP_P3_42697_21684038 | NC_021163.1    | Ca_kabuli_chr04 | 21684038                | AA                              | CC                | 1945939624               |
| SNP_P3_42698_21684093 | NC_021163.1    | Ca_kabuli_chr04 | 21684093                | TT                              | AA                | 1945939626               |
| SNP_P3_42699_21685888 | NC_021163.1    | Ca_kabuli_chr04 | 21685888                | TT                              | GG                | 1945939627               |
| SNP_P3_42700_21688569 | NC_021163.1    | Ca_kabuli_chr04 | 21688569                | GG                              | CC                | 1945939629               |
| SNP_P3_42701_21690361 | NC_021163.1    | Ca_kabuli_chr04 | 21690361                | CC                              | TT                | 1945939631               |
| SNP_P3_42702_21690405 | NC_021163.1    | Ca_kabuli_chr04 | 21690405                | GG                              | TT                | 1945939633               |
| SNP_P3_42703_21690616 | NC_021163.1    | Ca_kabuli_chr04 | 21690616                | CC                              | AA                | 1945939635               |
| SNP_P3_42704_21690748 | NC_021163.1    | Ca_kabuli_chr04 | 21690748                | AA                              | GG                | 1945939636               |
| SNP_P3_42705_21691060 | NC_021163.1    | Ca_kabuli_chr04 | 21691060                | CC                              | TT                | 1945939638               |
| SNP_P3_42706_21694631 | NC_021163.1    | Ca_kabuli_chr04 | 21694631                | CC                              | TT                | 1945939640               |
| SNP_P3_42707_21694773 | NC_021163.1    | Ca_kabuli_chr04 | 21694773                | GG                              | TT                | 1945939642               |
| SNP_P3_42708_21701070 | NC_021163.1    | Ca_kabuli_chr04 | 21701070                | GG                              | AA                | 1945939643               |
| SNP_P3_42711_21731646 | NC_021163.1    | Ca_kabuli_chr04 | 21731646                | TT                              | CC                | 1945939645               |
| SNP_P3_42712_21735660 | NC_021163.1    | Ca_kabuli_chr04 | 21735660                | AA                              | GG                | 1945939647               |
| SNP_P3_42713_21736822 | NC_021163.1    | Ca_kabuli_chr04 | 21736822                | CC                              | TT                | 1945939649               |
| SNP_P3_42714_21744752 | NC_021163.1    | Ca_kabuli_chr04 | 21744752                | CC                              | TT                | 1945939650               |
| SNP_P3_42717_21790553 | NC_021163.1    | Ca_kabuli_chr04 | 21790553                | CC                              | TT                | 1945939652               |
| SNP_P3_42719_21790801 | NC_021163.1    | Ca_kabuli_chr04 | 21790801                | TT                              | CC                | 1945939654               |
| SNP_P3_42720_21793174 | NC_021163.1    | Ca_kabuli_chr04 | 21793174                | CC                              | TT                | 1945939656               |
| SNP_P3_42721_21793203 | NC_021163.1    | Ca_kabuli_chr04 | 21793203                | CC                              | GG                | 1945939657               |
| SNP_P3_42722_21793209 | NC_021163.1    | Ca_kabuli_chr04 | 21793209                | TT                              | CC                | 1945939659               |
| SNP_P3_42723_21793277 | NC_021163.1    | Ca_kabuli_chr04 | 21793277                | CC                              | TT                | 1945939661               |
| SNP_P3_42724_21804593 | NC_021163.1    | Ca_kabuli_chr04 | 21804593                | GG                              | AA                | 1945939663               |
| SNP_P3_42725_21804619 | NC_021163.1    | Ca_kabuli_chr04 | 21804619                | GG                              | AA                | 1945939665               |
| SNP_P3_42726_21804642 | NC_021163.1    | Ca_kabuli_chr04 | 21804642                | AA                              | TT                | 1945939666               |
| SNP_P3_42727_21804742 | NC_021163.1    | Ca_kabuli_chr04 | 21804742                | AA                              | GG                | 1945939668               |
| SNP_P3_42729_21804788 | NC_021163.1    | Ca_kabuli_chr04 | 21804788                | TT                              | GG                | 1945939670               |
| SNP_P3_42730_21804812 | NC_021163.1    | Ca_kabuli_chr04 | 21804812                | AA                              | GG                | 1945939672               |
| SNP_P3_42731_21804822 | NC_021163.1    | Ca_kabuli_chr04 | 21804822                | GG                              | AA                | 1945939673               |
| SNP_P3_42732_21805034 | NC_021163.1    | Ca_kabuli_chr04 | 21805034                | AA                              | TT                | 1945939675               |
| SNP_P3_42733_21848597 | NC_021163.1    | Ca_kabuli_chr04 | 21848597                | TT                              | CC                | 1945939677               |
| SNP_P3_42734_21848599 | NC_021163.1    | Ca_kabuli_chr04 | 21848599                | TT                              | CC                | 1945939679               |
| SNP_P3_42735_21848608 | NC_021163.1    | Ca_kabuli_chr04 | 21848608                | CC                              | TT                | 1945939681               |
| SNP_P3_42736_21849031 | NC_021163.1    | Ca_kabuli_chr04 | 21849031                | AA                              | GG                | 1945939682               |
| SNP_P3_42737_21849050 | NC_021163.1    | Ca_kabuli_chr04 | 21849050                | AA                              | CC                | 1945939684               |
| SNP_P3_42738_21849320 | NC_021163.1    | Ca_kabuli_chr04 | 21849320                | TT                              | CC                | 1945939686               |
| SNP_P3_42739_21856429 | NC_021163.1    | Ca_kabuli_chr04 | 21856429                | TT                              | CC                | 1945939688               |
| SNP_P3_42740_21865111 | NC_021163.1    | Ca_kabuli_chr04 | 21865111                | CC                              | AA                | 1945939689               |
| SNP_P3_42741_21928816 | NC_021163.1    | Ca_kabuli_chr04 | 21928816                | GG                              | AA                | 1945939691               |
| SNP_P3_42742_21930063 | NC_021163.1    | Ca_kabuli_chr04 | 21930063                | CC                              | AA                | 1945939693               |

| SNPs IDs              | Chromosome IDs | Chromosomes     | Physical positions (bp) | CDC Frontier (Reference genome) | (Pusa 256 & HPNB) | NCBI SNPdb Accession IDs |
|-----------------------|----------------|-----------------|-------------------------|---------------------------------|-------------------|--------------------------|
| SNP_P3_42744_21933804 | NC_021163.1    | Ca_kabuli_chr04 | 21933804                | AA                              | GG                | 1945939695               |
| SNP_P3_42745_21936398 | NC_021163.1    | Ca_kabuli_chr04 | 21936398                | GG                              | AA                | 1945939697               |
| SNP_P3_42746_21936417 | NC_021163.1    | Ca_kabuli_chr04 | 21936417                | TT                              | CC                | 1945939698               |
| SNP_P3_42747_21936452 | NC_021163.1    | Ca_kabuli_chr04 | 21936452                | AA                              | GG                | 1945939700               |
| SNP_P3_42748_21936521 | NC_021163.1    | Ca_kabuli_chr04 | 21936521                | CC                              | TT                | 1945939702               |
| SNP_P3_42750_21958840 | NC_021163.1    | Ca_kabuli_chr04 | 21958840                | AA                              | TT                | 1945939704               |
| SNP_P3_42751_21961538 | NC_021163.1    | Ca_kabuli_chr04 | 21961538                | CC                              | TT                | 1945939705               |
| SNP_P3_42753_22016328 | NC_021163.1    | Ca_kabuli_chr04 | 22016328                | GG                              | AA                | 1945939707               |
| SNP_P3_42755_22052881 | NC_021163.1    | Ca_kabuli_chr04 | 22052881                | GG                              | AA                | 1945939709               |
| SNP_P3_42756_22071228 | NC_021163.1    | Ca_kabuli_chr04 | 22071228                | CC                              | AA                | 1945939711               |
| SNP_P3_42758_22122046 | NC_021163.1    | Ca_kabuli_chr04 | 22122046                | GG                              | AA                | 1945939712               |
| SNP_P3_42759_22127622 | NC_021163.1    | Ca_kabuli_chr04 | 22127622                | TT                              | CC                | 1945939714               |
| SNP_P3_42760_22127639 | NC_021163.1    | Ca_kabuli_chr04 | 22127639                | GG                              | CC                | 1945939716               |
| SNP_P3_42761_22127645 | NC_021163.1    | Ca_kabuli_chr04 | 22127645                | TT                              | GG                | 1945939718               |
| SNP_P3_42762_22127662 | NC_021163.1    | Ca_kabuli_chr04 | 22127662                | CC                              | TT                | 1945939720               |
| SNP_P3_42763_22127999 | NC_021163.1    | Ca_kabuli_chr04 | 22127999                | CC                              | TT                | 1945939721               |
| SNP_P3_42764_22134669 | NC_021163.1    | Ca_kabuli_chr04 | 22134669                | AA                              | TT                | 1945939723               |
| SNP_P3_42766_22134757 | NC_021163.1    | Ca_kabuli_chr04 | 22134757                | CC                              | GG                | 1945939725               |
| SNP_P3_42767_22134969 | NC_021163.1    | Ca_kabuli_chr04 | 22134969                | GG                              | CC                | 1945939727               |
| SNP_P3_42769_22135016 | NC_021163.1    | Ca_kabuli_chr04 | 22135016                | TT                              | GG                | 1945939728               |
| SNP_P3_42770_22135023 | NC_021163.1    | Ca_kabuli_chr04 | 22135023                | AA                              | CC                | 1945939730               |
| SNP_P3_42771_22135052 | NC_021163.1    | Ca_kabuli_chr04 | 22135052                | TT                              | CC                | 1945939732               |
| SNP_P3_42772_22135108 | NC_021163.1    | Ca_kabuli_chr04 | 22135108                | AA                              | TT                | 1945939734               |
| SNP_P3_42773_22135296 | NC_021163.1    | Ca_kabuli_chr04 | 22135296                | TT                              | CC                | 1945939736               |
| SNP_P3_42774_22135299 | NC_021163.1    | Ca_kabuli_chr04 | 22135299                | CC                              | TT                | 1945939737               |
| SNP_P3_42775_22135326 | NC_021163.1    | Ca_kabuli_chr04 | 22135326                | CC                              | AA                | 1945939739               |
| SNP_P3_42776_22135439 | NC_021163.1    | Ca_kabuli_chr04 | 22135439                | AA                              | GG                | 1945939741               |
| SNP_P3_42777_22135451 | NC_021163.1    | Ca_kabuli_chr04 | 22135451                | CC                              | TT                | 1945939743               |
| SNP_P3_42778_22135485 | NC_021163.1    | Ca_kabuli_chr04 | 22135485                | GG                              | CC                | 1945939744               |
| SNP_P3_42779_22135519 | NC_021163.1    | Ca_kabuli_chr04 | 22135519                | GG                              | AA                | 1945939746               |
| SNP_P3_42780_22135523 | NC_021163.1    | Ca_kabuli_chr04 | 22135523                | AA                              | TT                | 1945939748               |
| SNP_P3_42781_22135542 | NC_021163.1    | Ca_kabuli_chr04 | 22135542                | AA                              | CC                | 1945939750               |
| SNP_P3_42782_22135556 | NC_021163.1    | Ca_kabuli_chr04 | 22135556                | TT                              | CC                | 1945939752               |
| SNP_P3_42783_22135622 | NC_021163.1    | Ca_kabuli_chr04 | 22135622                | TT                              | AA                | 1945939753               |
| SNP_P3_42784_22135690 | NC_021163.1    | Ca_kabuli_chr04 | 22135690                | AA                              | GG                | 1945939755               |
| SNP_P3_42785_22135714 | NC_021163.1    | Ca_kabuli_chr04 | 22135714                | GG                              | AA                | 1945939757               |
| SNP_P3_42786_22135718 | NC_021163.1    | Ca_kabuli_chr04 | 22135718                | GG                              | TT                | 1945939759               |
| SNP_P3_42787_22135724 | NC_021163.1    | Ca_kabuli_chr04 | 22135724                | CC                              | AA                | 1945939760               |
| SNP_P3_42788_22135737 | NC_021163.1    | Ca_kabuli_chr04 | 22135737                | GG                              | TT                | 1945939762               |
| SNP_P3_42789_22135774 | NC_021163.1    | Ca_kabuli_chr04 | 22135774                | GG                              | AA                | 1945939764               |
| SNP_P3_42790_22135787 | NC_021163.1    | Ca_kabuli_chr04 | 22135787                | GG                              | AA                | 1945939766               |
| SNP_P3_42791_22135788 | NC_021163.1    | Ca_kabuli_chr04 | 22135788                | TT                              | CC                | 1945939767               |

| SNPs IDs              | Chromosome IDs | Chromosomes     | Physical positions (bp) | CDC Frontier (Reference genome) | (Pusa 256 & HPNB) | NCBI SNPdb Accession IDs |
|-----------------------|----------------|-----------------|-------------------------|---------------------------------|-------------------|--------------------------|
| SNP_P3_42792_22135818 | NC_021163.1    | Ca_kabuli_chr04 | 22135818                | CC                              | TT                | 1945939769               |
| SNP_P3_42793_22135886 | NC_021163.1    | Ca_kabuli_chr04 | 22135886                | AA                              | CC                | 1945939771               |
| SNP_P3_42794_22135901 | NC_021163.1    | Ca_kabuli_chr04 | 22135901                | TT                              | CC                | 1945939773               |
| SNP_P3_42795_22135922 | NC_021163.1    | Ca_kabuli_chr04 | 22135922                | CC                              | AA                | 1945939775               |
| SNP_P3_42796_22135932 | NC_021163.1    | Ca_kabuli_chr04 | 22135932                | GG                              | CC                | 1945939776               |
| SNP_P3_42797_22135973 | NC_021163.1    | Ca_kabuli_chr04 | 22135973                | AA                              | TT                | 1945939778               |
| SNP_P3_42798_22135999 | NC_021163.1    | Ca_kabuli_chr04 | 22135999                | AA                              | GG                | 1945939780               |
| SNP_P3_42799_22136020 | NC_021163.1    | Ca_kabuli_chr04 | 22136020                | GG                              | AA                | 1945939782               |
| SNP_P3_42800_22136088 | NC_021163.1    | Ca_kabuli_chr04 | 22136088                | GG                              | TT                | 1945939783               |
| SNP_P3_42801_22136174 | NC_021163.1    | Ca_kabuli_chr04 | 22136174                | AA                              | TT                | 1945939785               |
| SNP_P3_42802_22136215 | NC_021163.1    | Ca_kabuli_chr04 | 22136215                | GG                              | AA                | 1945939787               |
| SNP_P3_42803_22136281 | NC_021163.1    | Ca_kabuli_chr04 | 22136281                | AA                              | GG                | 1945939789               |
| SNP_P3_42804_22136283 | NC_021163.1    | Ca_kabuli_chr04 | 22136283                | TT                              | CC                | 1945939791               |
| SNP_P3_42805_22136289 | NC_021163.1    | Ca_kabuli_chr04 | 22136289                | AA                              | CC                | 1945939792               |
| SNP_P3_42806_22136297 | NC_021163.1    | Ca_kabuli_chr04 | 22136297                | TT                              | AA                | 1945939794               |
| SNP_P3_42807_22136298 | NC_021163.1    | Ca_kabuli_chr04 | 22136298                | GG                              | AA                | 1945939796               |
| SNP_P3_42808_22136525 | NC_021163.1    | Ca_kabuli_chr04 | 22136525                | TT                              | CC                | 1945939798               |
| SNP_P3_42809_22137399 | NC_021163.1    | Ca_kabuli_chr04 | 22137399                | AA                              | GG                | 1945939799               |
| SNP_P3_42810_22139323 | NC_021163.1    | Ca_kabuli_chr04 | 22139323                | AA                              | GG                | 1945939801               |
| SNP_P3_42811_22159708 | NC_021163.1    | Ca_kabuli_chr04 | 22159708                | GG                              | CC                | 1945939803               |
| SNP_P3_42812_22206101 | NC_021163.1    | Ca_kabuli_chr04 | 22206101                | TT                              | AA                | 1945939805               |
| SNP_P3_42813_22206105 | NC_021163.1    | Ca_kabuli_chr04 | 22206105                | GG                              | AA                | 1945939806               |
| SNP_P3_42815_22239500 | NC_021163.1    | Ca_kabuli_chr04 | 22239500                | GG                              | TT                | 1945939808               |
| SNP_P3_42816_22255791 | NC_021163.1    | Ca_kabuli_chr04 | 22255791                | TT                              | GG                | 1945939810               |
| SNP_P3_42817_22256886 | NC_021163.1    | Ca_kabuli_chr04 | 22256886                | TT                              | CC                | 1945939812               |
| SNP_P3_42818_22298787 | NC_021163.1    | Ca_kabuli_chr04 | 22298787                | CC                              | GG                | 1945939814               |
| SNP_P3_42819_22304336 | NC_021163.1    | Ca_kabuli_chr04 | 22304336                | AA                              | CC                | 1945939815               |
| SNP_P3_42821_22369526 | NC_021163.1    | Ca_kabuli_chr04 | 22369526                | AA                              | GG                | 1945939817               |
| SNP_P3_42822_22381766 | NC_021163.1    | Ca_kabuli_chr04 | 22381766                | GG                              | AA                | 1945939819               |
| SNP_P3_42823_22398874 | NC_021163.1    | Ca_kabuli_chr04 | 22398874                | AA                              | GG                | 1945939821               |
| SNP_P3_42824_22412124 | NC_021163.1    | Ca_kabuli_chr04 | 22412124                | AA                              | GG                | 1945939822               |
| SNP_P3_42825_22412201 | NC_021163.1    | Ca_kabuli_chr04 | 22412201                | TT                              | CC                | 1945939824               |
| SNP_P3_42826_22412216 | NC_021163.1    | Ca_kabuli_chr04 | 22412216                | AA                              | GG                | 1945939826               |
| SNP_P3_42827_22412220 | NC_021163.1    | Ca_kabuli_chr04 | 22412220                | TT                              | CC                | 1945939828               |
| SNP_P3_42829_22444004 | NC_021163.1    | Ca_kabuli_chr04 | 22444004                | CC                              | TT                | 1945939830               |
| SNP_P3_42830_22444144 | NC_021163.1    | Ca_kabuli_chr04 | 22444144                | AA                              | TT                | 1945939831               |
| SNP_P3_42831_22444241 | NC_021163.1    | Ca_kabuli_chr04 | 22444241                | GG                              | AA                | 1945939833               |
| SNP_P3_42832_22444552 | NC_021163.1    | Ca_kabuli_chr04 | 22444552                | GG                              | AA                | 1945939835               |
| SNP_P3_42833_22444694 | NC_021163.1    | Ca_kabuli_chr04 | 22444694                | CC                              | TT                | 1945939837               |
| SNP_P3_42834_22445240 | NC_021163.1    | Ca_kabuli_chr04 | 22445240                | AA                              | GG                | 1945939838               |
| SNP_P3_42835_22445324 | NC_021163.1    | Ca_kabuli_chr04 | 22445324                | AA                              | GG                | 1945939840               |
| SNP_P3_42836_22456253 | NC_021163.1    | Ca_kabuli_chr04 | 22456253                | GG                              | TT                | 1945939842               |

| SNPs IDs              | Chromosome IDs | Chromosomes     | Physical positions (bp) | CDC Frontier (Reference genome) | (Pusa 256 & HPNB) | NCBI SNPdb Accession IDs |
|-----------------------|----------------|-----------------|-------------------------|---------------------------------|-------------------|--------------------------|
| SNP_P3_42837_22472719 | NC_021163.1    | Ca_kabuli_chr04 | 22472719                | CC                              | TT                | 1945939844               |
| SNP_P3_42838_22472722 | NC_021163.1    | Ca_kabuli_chr04 | 22472722                | AA                              | CC                | 1945939846               |
| SNP_P3_42839_22472751 | NC_021163.1    | Ca_kabuli_chr04 | 22472751                | AA                              | CC                | 1945939847               |
| SNP_P3_42840_22476833 | NC_021163.1    | Ca_kabuli_chr04 | 22476833                | GG                              | AA                | 1945939849               |
| SNP_P3_42841_22483695 | NC_021163.1    | Ca_kabuli_chr04 | 22483695                | CC                              | TT                | 1945939851               |
| SNP_P3_42842_22483835 | NC_021163.1    | Ca_kabuli_chr04 | 22483835                | TT                              | AA                | 1945939853               |
| SNP_P3_42843_22483854 | NC_021163.1    | Ca_kabuli_chr04 | 22483854                | AA                              | GG                | 1945939854               |
| SNP_P3_42844_22483941 | NC_021163.1    | Ca_kabuli_chr04 | 22483941                | TT                              | CC                | 1945939856               |
| SNP_P3_42845_22483996 | NC_021163.1    | Ca_kabuli_chr04 | 22483996                | TT                              | CC                | 1945939858               |
| SNP_P3_42846_22483998 | NC_021163.1    | Ca_kabuli_chr04 | 22483998                | GG                              | AA                | 1945939860               |
| SNP_P3_42847_22484236 | NC_021163.1    | Ca_kabuli_chr04 | 22484236                | TT                              | GG                | 1945939861               |
| SNP_P3_42848_22515970 | NC_021163.1    | Ca_kabuli_chr04 | 22515970                | TT                              | CC                | 1945939863               |
| SNP_P3_42849_22521172 | NC_021163.1    | Ca_kabuli_chr04 | 22521172                | GG                              | TT                | 1945939865               |
| SNP_P3_42850_22539168 | NC_021163.1    | Ca_kabuli_chr04 | 22539168                | CC                              | AA                | 1945939867               |
| SNP_P3_42852_22548111 | NC_021163.1    | Ca_kabuli_chr04 | 22548111                | AA                              | TT                | 1945939869               |
| SNP_P3_42853_22549547 | NC_021163.1    | Ca_kabuli_chr04 | 22549547                | AA                              | GG                | 1945939870               |
| SNP_P3_42854_22570045 | NC_021163.1    | Ca_kabuli_chr04 | 22570045                | AA                              | TT                | 1945939872               |
| SNP_P3_42855_22570384 | NC_021163.1    | Ca_kabuli_chr04 | 22570384                | TT                              | CC                | 1945939874               |
| SNP_P3_42856_22570443 | NC_021163.1    | Ca_kabuli_chr04 | 22570443                | TT                              | CC                | 1945939876               |
| SNP_P3_42857_22570496 | NC_021163.1    | Ca_kabuli_chr04 | 22570496                | AA                              | GG                | 1945939877               |
| SNP_P3_42858_22570833 | NC_021163.1    | Ca_kabuli_chr04 | 22570833                | GG                              | CC                | 1945939879               |
| SNP_P3_42859_22570989 | NC_021163.1    | Ca_kabuli_chr04 | 22570989                | AA                              | GG                | 1945939881               |
| SNP_P3_42860_22591735 | NC_021163.1    | Ca_kabuli_chr04 | 22591735                | CC                              | TT                | 1945939883               |
| SNP_P3_42861_22594591 | NC_021163.1    | Ca_kabuli_chr04 | 22594591                | CC                              | TT                | 1945939885               |
| SNP_P3_42862_22601099 | NC_021163.1    | Ca_kabuli_chr04 | 22601099                | AA                              | CC                | 1945939886               |
| SNP_P3_42863_22601338 | NC_021163.1    | Ca_kabuli_chr04 | 22601338                | TT                              | AA                | 1945939888               |
| SNP_P3_42864_22601350 | NC_021163.1    | Ca_kabuli_chr04 | 22601350                | AA                              | TT                | 1945939890               |
| SNP_P3_42865_22601657 | NC_021163.1    | Ca_kabuli_chr04 | 22601657                | TT                              | GG                | 1945939892               |
| SNP_P3_42866_22609218 | NC_021163.1    | Ca_kabuli_chr04 | 22609218                | TT                              | AA                | 1945939893               |
| SNP_P3_42867_22609494 | NC_021163.1    | Ca_kabuli_chr04 | 22609494                | TT                              | CC                | 1945939895               |
| SNP_P3_42868_22613605 | NC_021163.1    | Ca_kabuli_chr04 | 22613605                | GG                              | AA                | 1945939897               |
| SNP_P3_42869_22618011 | NC_021163.1    | Ca_kabuli_chr04 | 22618011                | TT                              | GG                | 1945939899               |
| SNP_P3_42870_22618276 | NC_021163.1    | Ca_kabuli_chr04 | 22618276                | TT                              | CC                | 1945939901               |
| SNP_P3_42871_22618309 | NC_021163.1    | Ca_kabuli_chr04 | 22618309                | TT                              | CC                | 1945939902               |
| SNP_P3_42872_22618371 | NC_021163.1    | Ca_kabuli_chr04 | 22618371                | CC                              | TT                | 1945939904               |
| SNP_P3_42873_22618397 | NC_021163.1    | Ca_kabuli_chr04 | 22618397                | TT                              | GG                | 1945939906               |
| SNP_P3_42874_22618404 | NC_021163.1    | Ca_kabuli_chr04 | 22618404                | CC                              | TT                | 1945939908               |
| SNP_P3_42875_22618427 | NC_021163.1    | Ca_kabuli_chr04 | 22618427                | CC                              | TT                | 1945939909               |
| SNP_P3_42876_22622199 | NC_021163.1    | Ca_kabuli_chr04 | 22622199                | GG                              | AA                | 1945939911               |
| SNP_P3_42877_22648627 | NC_021163.1    | Ca_kabuli_chr04 | 22648627                | CC                              | GG                | 1945939913               |
| SNP_P3_42878_22648775 | NC_021163.1    | Ca_kabuli_chr04 | 22648775                | CC                              | TT                | 1945939915               |
| SNP_P3_42879_22648939 | NC_021163.1    | Ca_kabuli_chr04 | 22648939                | GG                              | AA                | 1945939916               |

| SNPs IDs              | Chromosome IDs | Chromosomes     | Physical positions (bp) | CDC Frontier (Reference genome) | (Pusa 256 & HPNB) | NCBI SNPdb Accession IDs |
|-----------------------|----------------|-----------------|-------------------------|---------------------------------|-------------------|--------------------------|
| SNP_P3_42880_22649851 | NC_021163.1    | Ca_kabuli_chr04 | 22649851                | CC                              | TT                | 1945939918               |
| SNP_P3_42881_22649876 | NC_021163.1    | Ca_kabuli_chr04 | 22649876                | AA                              | TT                | 1945939920               |
| SNP_P3_42882_22649877 | NC_021163.1    | Ca_kabuli_chr04 | 22649877                | CC                              | TT                | 1945939922               |
| SNP_P3_42884_22650372 | NC_021163.1    | Ca_kabuli_chr04 | 22650372                | GG                              | AA                | 1945939924               |
| SNP_P3_42885_22650384 | NC_021163.1    | Ca_kabuli_chr04 | 22650384                | TT                              | CC                | 1945939925               |
| SNP_P3_42886_22656374 | NC_021163.1    | Ca_kabuli_chr04 | 22656374                | AA                              | GG                | 1945939927               |
| SNP_P3_42887_22658927 | NC_021163.1    | Ca_kabuli_chr04 | 22658927                | CC                              | TT                | 1945939929               |
| SNP_P3_42888_22660408 | NC_021163.1    | Ca_kabuli_chr04 | 22660408                | CC                              | GG                | 1945939931               |
| SNP_P3_42889_22662126 | NC_021163.1    | Ca_kabuli_chr04 | 22662126                | CC                              | TT                | 1945939932               |
| SNP_P3_42890_22662303 | NC_021163.1    | Ca_kabuli_chr04 | 22662303                | AA                              | CC                | 1945939934               |
| SNP_P3_42891_22662305 | NC_021163.1    | Ca_kabuli_chr04 | 22662305                | GG                              | AA                | 1945939936               |
| SNP_P3_42893_22663235 | NC_021163.1    | Ca_kabuli_chr04 | 22663235                | GG                              | AA                | 1945939938               |
| SNP_P3_42894_22663490 | NC_021163.1    | Ca_kabuli_chr04 | 22663490                | GG                              | CC                | 1945939940               |
| SNP_P3_42895_22663951 | NC_021163.1    | Ca_kabuli_chr04 | 22663951                | TT                              | CC                | 1945939941               |
| SNP_P3_42896_22663993 | NC_021163.1    | Ca_kabuli_chr04 | 22663993                | TT                              | GG                | 1945939943               |
| SNP_P3_42897_22664010 | NC_021163.1    | Ca_kabuli_chr04 | 22664010                | GG                              | TT                | 1945939945               |
| SNP_P3_42898_22664610 | NC_021163.1    | Ca_kabuli_chr04 | 22664610                | TT                              | AA                | 1945939947               |
| SNP_P3_42899_22664611 | NC_021163.1    | Ca_kabuli_chr04 | 22664611                | AA                              | TT                | 1945939948               |
| SNP_P3_42900_22664612 | NC_021163.1    | Ca_kabuli_chr04 | 22664612                | AA                              | GG                | 1945939950               |
| SNP_P3_42901_22665077 | NC_021163.1    | Ca_kabuli_chr04 | 22665077                | TT                              | GG                | 1945939952               |
| SNP_P3_42902_22666364 | NC_021163.1    | Ca_kabuli_chr04 | 22666364                | CC                              | AA                | 1945939954               |
| SNP_P3_42903_22666372 | NC_021163.1    | Ca_kabuli_chr04 | 22666372                | TT                              | GG                | 1945939956               |
| SNP_P3_42905_22667548 | NC_021163.1    | Ca_kabuli_chr04 | 22667548                | AA                              | CC                | 1945939957               |
| SNP_P3_42906_22667741 | NC_021163.1    | Ca_kabuli_chr04 | 22667741                | AA                              | GG                | 1945939959               |
| SNP_P3_42907_22667794 | NC_021163.1    | Ca_kabuli_chr04 | 22667794                | TT                              | GG                | 1945939961               |
| SNP_P3_42908_22667797 | NC_021163.1    | Ca_kabuli_chr04 | 22667797                | AA                              | GG                | 1945939963               |
| SNP_P3_42910_22668119 | NC_021163.1    | Ca_kabuli_chr04 | 22668119                | GG                              | AA                | 1945939964               |
| SNP_P3_42911_22668383 | NC_021163.1    | Ca_kabuli_chr04 | 22668383                | CC                              | TT                | 1945939966               |
| SNP_P3_42912_22669477 | NC_021163.1    | Ca_kabuli_chr04 | 22669477                | AA                              | TT                | 1945939968               |
| SNP_P3_42913_22671682 | NC_021163.1    | Ca_kabuli_chr04 | 22671682                | AA                              | GG                | 1945939970               |
| SNP_P3_42914_22671730 | NC_021163.1    | Ca_kabuli_chr04 | 22671730                | AA                              | GG                | 1945939971               |
| SNP_P3_42915_22671912 | NC_021163.1    | Ca_kabuli_chr04 | 22671912                | AA                              | TT                | 1945939973               |
| SNP_P3_42916_22671920 | NC_021163.1    | Ca_kabuli_chr04 | 22671920                | TT                              | CC                | 1945939975               |
| SNP_P3_42917_22671948 | NC_021163.1    | Ca_kabuli_chr04 | 22671948                | TT                              | GG                | 1945939977               |
| SNP_P3_42918_22671988 | NC_021163.1    | Ca_kabuli_chr04 | 22671988                | GG                              | CC                | 1945939979               |
| SNP_P3_42919_22671998 | NC_021163.1    | Ca_kabuli_chr04 | 22671998                | TT                              | GG                | 1945939980               |
| SNP_P3_42920_22672623 | NC_021163.1    | Ca_kabuli_chr04 | 22672623                | GG                              | CC                | 1945939982               |
| SNP_P3_42921_22673024 | NC_021163.1    | Ca_kabuli_chr04 | 22673024                | GG                              | TT                | 1945939984               |
| SNP_P3_42922_22673308 | NC_021163.1    | Ca_kabuli_chr04 | 22673308                | TT                              | GG                | 1945939986               |
| SNP_P3_42924_22675602 | NC_021163.1    | Ca_kabuli_chr04 | 22675602                | GG                              | TT                | 1945939987               |
| SNP_P3_42925_22676018 | NC_021163.1    | Ca_kabuli_chr04 | 22676018                | TT                              | AA                | 1945939989               |
| SNP_P3_42926_22676346 | NC_021163.1    | Ca_kabuli_chr04 | 22676346                | GG                              | CC                | 1945939991               |

| SNPs IDs              | Chromosome IDs | Chromosomes     | Physical positions (bp) | CDC Frontier (Reference genome) | (Pusa 256 & HPNB) | NCBI SNPdb Accession IDs |
|-----------------------|----------------|-----------------|-------------------------|---------------------------------|-------------------|--------------------------|
| SNP_P3_42927_22676874 | NC_021163.1    | Ca_kabuli_chr04 | 22676874                | CC                              | TT                | 1945939993               |
| SNP_P3_42928_22677605 | NC_021163.1    | Ca_kabuli_chr04 | 22677605                | CC                              | TT                | 1945939995               |
| SNP_P3_42929_22677894 | NC_021163.1    | Ca_kabuli_chr04 | 22677894                | GG                              | AA                | 1945939996               |
| SNP_P3_42930_22678275 | NC_021163.1    | Ca_kabuli_chr04 | 22678275                | AA                              | GG                | 1945939998               |
| SNP_P3_42931_22681898 | NC_021163.1    | Ca_kabuli_chr04 | 22681898                | CC                              | TT                | 1945940000               |
| SNP_P3_42932_22681901 | NC_021163.1    | Ca_kabuli_chr04 | 22681901                | AA                              | GG                | 1945940002               |
| SNP_P3_42933_22681938 | NC_021163.1    | Ca_kabuli_chr04 | 22681938                | AA                              | GG                | 1945940003               |
| SNP_P3_42934_22682239 | NC_021163.1    | Ca_kabuli_chr04 | 22682239                | TT                              | CC                | 1945940005               |
| SNP_P3_42935_22687046 | NC_021163.1    | Ca_kabuli_chr04 | 22687046                | CC                              | TT                | 1945940007               |
| SNP_P3_42936_22695532 | NC_021163.1    | Ca_kabuli_chr04 | 22695532                | TT                              | CC                | 1945940009               |
| SNP_P3_42937_22695861 | NC_021163.1    | Ca_kabuli_chr04 | 22695861                | TT                              | AA                | 1945940011               |
| SNP_P3_42938_22696087 | NC_021163.1    | Ca_kabuli_chr04 | 22696087                | AA                              | GG                | 1945940012               |
| SNP_P3_42939_22696146 | NC_021163.1    | Ca_kabuli_chr04 | 22696146                | GG                              | AA                | 1945940014               |
| SNP_P3_42940_22696355 | NC_021163.1    | Ca_kabuli_chr04 | 22696355                | AA                              | CC                | 1945940016               |
| SNP_P3_42941_22696502 | NC_021163.1    | Ca_kabuli_chr04 | 22696502                | TT                              | GG                | 1945940018               |
| SNP_P3_42942_22696689 | NC_021163.1    | Ca_kabuli_chr04 | 22696689                | CC                              | TT                | 1945940019               |
| SNP_P3_42943_22696690 | NC_021163.1    | Ca_kabuli_chr04 | 22696690                | TT                              | GG                | 1945940021               |
| SNP_P3_42944_22696773 | NC_021163.1    | Ca_kabuli_chr04 | 22696773                | AA                              | GG                | 1945940023               |
| SNP_P3_42945_22696895 | NC_021163.1    | Ca_kabuli_chr04 | 22696895                | AA                              | GG                | 1945940025               |
| SNP_P3_42946_22697091 | NC_021163.1    | Ca_kabuli_chr04 | 22697091                | CC                              | TT                | 1945940026               |
| SNP_P3_42947_22697377 | NC_021163.1    | Ca_kabuli_chr04 | 22697377                | CC                              | AA                | 1945940028               |
| SNP_P3_42948_22697448 | NC_021163.1    | Ca_kabuli_chr04 | 22697448                | CC                              | TT                | 1945940030               |
| SNP_P3_42949_22697451 | NC_021163.1    | Ca_kabuli_chr04 | 22697451                | TT                              | GG                | 1945940032               |
| SNP_P3_42950_22698209 | NC_021163.1    | Ca_kabuli_chr04 | 22698209                | AA                              | GG                | 1945940034               |
| SNP_P3_42951_22698215 | NC_021163.1    | Ca_kabuli_chr04 | 22698215                | TT                              | CC                | 1945940035               |
| SNP_P3_42952_22698275 | NC_021163.1    | Ca_kabuli_chr04 | 22698275                | AA                              | TT                | 1945940037               |
| SNP_P3_42953_22698276 | NC_021163.1    | Ca_kabuli_chr04 | 22698276                | TT                              | GG                | 1945940039               |
| SNP_P3_42954_22698530 | NC_021163.1    | Ca_kabuli_chr04 | 22698530                | AA                              | GG                | 1945940041               |
| SNP_P3_42955_22698597 | NC_021163.1    | Ca_kabuli_chr04 | 22698597                | CC                              | TT                | 1945940042               |
| SNP_P3_42956_22698679 | NC_021163.1    | Ca_kabuli_chr04 | 22698679                | CC                              | TT                | 1945940044               |
| SNP_P3_42957_22698735 | NC_021163.1    | Ca_kabuli_chr04 | 22698735                | GG                              | TT                | 1945940046               |
| SNP_P3_42958_22699771 | NC_021163.1    | Ca_kabuli_chr04 | 22699771                | TT                              | CC                | 1945940048               |
| SNP_P3_42959_22699809 | NC_021163.1    | Ca_kabuli_chr04 | 22699809                | GG                              | TT                | 1945940050               |
| SNP_P3_42960_22700114 | NC_021163.1    | Ca_kabuli_chr04 | 22700114                | CC                              | TT                | 1945940051               |
| SNP_P3_42961_22700124 | NC_021163.1    | Ca_kabuli_chr04 | 22700124                | CC                              | TT                | 1945940053               |
| SNP_P3_42962_22700669 | NC_021163.1    | Ca_kabuli_chr04 | 22700669                | TT                              | GG                | 1945940055               |
| SNP_P3_42963_22700678 | NC_021163.1    | Ca_kabuli_chr04 | 22700678                | AA                              | GG                | 1945940057               |
| SNP_P3_42964_22700686 | NC_021163.1    | Ca_kabuli_chr04 | 22700686                | TT                              | AA                | 1945940058               |
| SNP_P3_42965_22700692 | NC_021163.1    | Ca_kabuli_chr04 | 22700692                | TT                              | AA                | 1945940060               |
| SNP_P3_42966_22701649 | NC_021163.1    | Ca_kabuli_chr04 | 22701649                | AA                              | TT                | 1945940062               |
| SNP_P3_42970_22703627 | NC_021163.1    | Ca_kabuli_chr04 | 22703627                | TT                              | AA                | 1945940064               |
| SNP_P3_42971_22703643 | NC_021163.1    | Ca_kabuli_chr04 | 22703643                | CC                              | TT                | 1945940066               |



| SNPs IDs              | Chromosome IDs | Chromosomes     | Physical positions (bp) | CDC Frontier (Reference genome) | (Pusa 256 & HPNB) | NCBI SNPdb Accession IDs |
|-----------------------|----------------|-----------------|-------------------------|---------------------------------|-------------------|--------------------------|
| SNP_P3_42972_22703662 | NC_021163.1    | Ca_kabuli_chr04 | 22703662                | TT                              | CC                | 1945940067               |
| SNP_P3_42973_22704323 | NC_021163.1    | Ca_kabuli_chr04 | 22704323                | TT                              | CC                | 1945940069               |
| SNP_P3_42974_22706135 | NC_021163.1    | Ca_kabuli_chr04 | 22706135                | GG                              | TT                | 1945940071               |
| SNP_P3_42975_22707882 | NC_021163.1    | Ca_kabuli_chr04 | 22707882                | GG                              | AA                | 1945940073               |
| SNP_P3_42976_22718004 | NC_021163.1    | Ca_kabuli_chr04 | 22718004                | AA                              | TT                | 1945940074               |
| SNP_P3_42977_22718633 | NC_021163.1    | Ca_kabuli_chr04 | 22718633                | CC                              | TT                | 1945940076               |
| SNP_P3_42978_22718678 | NC_021163.1    | Ca_kabuli_chr04 | 22718678                | CC                              | TT                | 1945940078               |
| SNP_P3_42979_22719162 | NC_021163.1    | Ca_kabuli_chr04 | 22719162                | TT                              | CC                | 1945940080               |
| SNP_P3_42980_22719381 | NC_021163.1    | Ca_kabuli_chr04 | 22719381                | TT                              | AA                | 1945940081               |
| SNP_P3_42982_22720960 | NC_021163.1    | Ca_kabuli_chr04 | 22720960                | CC                              | TT                | 1945940083               |
| SNP_P3_42983_22723298 | NC_021163.1    | Ca_kabuli_chr04 | 22723298                | AA                              | TT                | 1945940085               |
| SNP_P3_42986_22723939 | NC_021163.1    | Ca_kabuli_chr04 | 22723939                | CC                              | TT                | 1945940087               |
| SNP_P3_42987_22723962 | NC_021163.1    | Ca_kabuli_chr04 | 22723962                | GG                              | AA                | 1945940089               |
| SNP_P3_42988_22724384 | NC_021163.1    | Ca_kabuli_chr04 | 22724384                | AA                              | GG                | 1945940090               |
| SNP_P3_42989_22724608 | NC_021163.1    | Ca_kabuli_chr04 | 22724608                | TT                              | AA                | 1945940092               |
| SNP_P3_42990_22725533 | NC_021163.1    | Ca_kabuli_chr04 | 22725533                | TT                              | CC                | 1945940094               |
| SNP_P3_42991_22726193 | NC_021163.1    | Ca_kabuli_chr04 | 22726193                | GG                              | CC                | 1945940096               |
| SNP_P3_42993_22728080 | NC_021163.1    | Ca_kabuli_chr04 | 22728080                | AA                              | TT                | 1945940097               |
| SNP_P3_42994_22728199 | NC_021163.1    | Ca_kabuli_chr04 | 22728199                | GG                              | AA                | 1945940099               |
| SNP_P3_42995_22728309 | NC_021163.1    | Ca_kabuli_chr04 | 22728309                | AA                              | GG                | 1945940101               |
| SNP_P3_42998_22732570 | NC_021163.1    | Ca_kabuli_chr04 | 22732570                | AA                              | TT                | 1945940103               |
| SNP_P3_42999_22733067 | NC_021163.1    | Ca_kabuli_chr04 | 22733067                | CC                              | TT                | 1945940105               |
| SNP_P3_43000_22735687 | NC_021163.1    | Ca_kabuli_chr04 | 22735687                | GG                              | AA                | 1945940106               |
| SNP_P3_43001_22735691 | NC_021163.1    | Ca_kabuli_chr04 | 22735691                | AA                              | GG                | 1945940108               |
| SNP_P3_43002_22736047 | NC_021163.1    | Ca_kabuli_chr04 | 22736047                | GG                              | AA                | 1945940110               |
| SNP_P3_43004_22738680 | NC_021163.1    | Ca_kabuli_chr04 | 22738680                | TT                              | CC                | 1945940112               |
| SNP_P3_43005_22741600 | NC_021163.1    | Ca_kabuli_chr04 | 22741600                | AA                              | GG                | 1945940113               |
| SNP_P3_43006_22741841 | NC_021163.1    | Ca_kabuli_chr04 | 22741841                | GG                              | TT                | 1945940115               |
| SNP_P3_43007_22744076 | NC_021163.1    | Ca_kabuli_chr04 | 22744076                | AA                              | TT                | 1945940117               |
| SNP_P3_43008_22744975 | NC_021163.1    | Ca_kabuli_chr04 | 22744975                | TT                              | AA                | 1945940119               |
| SNP_P3_43009_22745173 | NC_021163.1    | Ca_kabuli_chr04 | 22745173                | CC                              | TT                | 1945940121               |
| SNP_P3_43010_22745525 | NC_021163.1    | Ca_kabuli_chr04 | 22745525                | GG                              | AA                | 1945940122               |
| SNP_P3_43011_22745534 | NC_021163.1    | Ca_kabuli_chr04 | 22745534                | GG                              | AA                | 1945940124               |
| SNP_P3_43012_22747560 | NC_021163.1    | Ca_kabuli_chr04 | 22747560                | CC                              | TT                | 1945940126               |
| SNP_P3_43013_22747579 | NC_021163.1    | Ca_kabuli_chr04 | 22747579                | TT                              | CC                | 1945940128               |
| SNP_P3_43014_22748255 | NC_021163.1    | Ca_kabuli_chr04 | 22748255                | TT                              | GG                | 1945940129               |
| SNP_P3_43015_22748270 | NC_021163.1    | Ca_kabuli_chr04 | 22748270                | AA                              | GG                | 1945940131               |
| SNP_P3_43016_22748295 | NC_021163.1    | Ca_kabuli_chr04 | 22748295                | CC                              | AA                | 1945940133               |
| SNP_P3_43017_22748300 | NC_021163.1    | Ca_kabuli_chr04 | 22748300                | CC                              | TT                | 1945940135               |
| SNP_P3_43018_22748593 | NC_021163.1    | Ca_kabuli_chr04 | 22748593                | AA                              | CC                | 1945940136               |
| SNP_P3_43019_22749185 | NC_021163.1    | Ca_kabuli_chr04 | 22749185                | TT                              | CC                | 1945940138               |
| SNP_P3_43020_22749248 | NC_021163.1    | Ca_kabuli_chr04 | 22749248                | GG                              | CC                | 1945940140               |

| SNPs IDs              | Chromosome IDs | Chromosomes     | Physical positions (bp) | CDC Frontier (Reference genome) | (Pusa 256 & HPNB) | NCBI SNPdb Accession IDs |
|-----------------------|----------------|-----------------|-------------------------|---------------------------------|-------------------|--------------------------|
| SNP_P3_43021_22749266 | NC_021163.1    | Ca_kabuli_chr04 | 22749266                | AA                              | CC                | 1945940142               |
| SNP_P3_43022_22749275 | NC_021163.1    | Ca_kabuli_chr04 | 22749275                | TT                              | CC                | 1945940144               |
| SNP_P3_43023_22749290 | NC_021163.1    | Ca_kabuli_chr04 | 22749290                | CC                              | AA                | 1945940145               |
| SNP_P3_43024_22750049 | NC_021163.1    | Ca_kabuli_chr04 | 22750049                | CC                              | TT                | 1945940147               |
| SNP_P3_43025_22750324 | NC_021163.1    | Ca_kabuli_chr04 | 22750324                | AA                              | TT                | 1945940149               |
| SNP_P3_43027_22751295 | NC_021163.1    | Ca_kabuli_chr04 | 22751295                | CC                              | TT                | 1945940151               |
| SNP_P3_43028_22751297 | NC_021163.1    | Ca_kabuli_chr04 | 22751297                | GG                              | CC                | 1945940152               |
| SNP_P3_43030_22752712 | NC_021163.1    | Ca_kabuli_chr04 | 22752712                | TT                              | CC                | 1945940154               |
| SNP_P3_43032_22752789 | NC_021163.1    | Ca_kabuli_chr04 | 22752789                | CC                              | TT                | 1945940156               |
| SNP_P3_43033_22753192 | NC_021163.1    | Ca_kabuli_chr04 | 22753192                | GG                              | CC                | 1945940158               |
| SNP_P3_43034_22753273 | NC_021163.1    | Ca_kabuli_chr04 | 22753273                | AA                              | GG                | 1945940160               |
| SNP_P3_43035_22753286 | NC_021163.1    | Ca_kabuli_chr04 | 22753286                | TT                              | GG                | 1945940161               |
| SNP_P3_43036_22753305 | NC_021163.1    | Ca_kabuli_chr04 | 22753305                | CC                              | TT                | 1945940163               |
| SNP_P3_43037_22753354 | NC_021163.1    | Ca_kabuli_chr04 | 22753354                | AA                              | GG                | 1945940165               |
| SNP_P3_43038_22753429 | NC_021163.1    | Ca_kabuli_chr04 | 22753429                | CC                              | GG                | 1945940167               |
| SNP_P3_43039_22753758 | NC_021163.1    | Ca_kabuli_chr04 | 22753758                | GG                              | AA                | 1945940168               |
| SNP_P3_43040_22753853 | NC_021163.1    | Ca_kabuli_chr04 | 22753853                | GG                              | AA                | 1945940170               |
| SNP_P3_43041_22754042 | NC_021163.1    | Ca_kabuli_chr04 | 22754042                | AA                              | TT                | 1945940172               |
| SNP_P3_43042_22757274 | NC_021163.1    | Ca_kabuli_chr04 | 22757274                | AA                              | CC                | 1945940174               |
| SNP_P3_43043_22757293 | NC_021163.1    | Ca_kabuli_chr04 | 22757293                | GG                              | CC                | 1945940176               |
| SNP_P3_43044_22757314 | NC_021163.1    | Ca_kabuli_chr04 | 22757314                | AA                              | TT                | 1945940177               |
| SNP_P3_43045_22757658 | NC_021163.1    | Ca_kabuli_chr04 | 22757658                | TT                              | CC                | 1945940179               |
| SNP_P3_43046_22757666 | NC_021163.1    | Ca_kabuli_chr04 | 22757666                | AA                              | TT                | 1945940181               |
| SNP_P3_43047_22758427 | NC_021163.1    | Ca_kabuli_chr04 | 22758427                | TT                              | CC                | 1945940183               |
| SNP_P3_43049_22762999 | NC_021163.1    | Ca_kabuli_chr04 | 22762999                | AA                              | CC                | 1945940184               |
| SNP_P3_43050_22763037 | NC_021163.1    | Ca_kabuli_chr04 | 22763037                | TT                              | AA                | 1945940186               |
| SNP_P3_43051_22763038 | NC_021163.1    | Ca_kabuli_chr04 | 22763038                | GG                              | AA                | 1945940188               |
| SNP_P3_43052_22763040 | NC_021163.1    | Ca_kabuli_chr04 | 22763040                | AA                              | GG                | 1945940190               |
| SNP_P3_43053_22763194 | NC_021163.1    | Ca_kabuli_chr04 | 22763194                | AA                              | GG                | 1945940191               |
| SNP_P3_43054_22763231 | NC_021163.1    | Ca_kabuli_chr04 | 22763231                | TT                              | GG                | 1945940193               |
| SNP_P3_43055_22763389 | NC_021163.1    | Ca_kabuli_chr04 | 22763389                | CC                              | TT                | 1945940195               |
| SNP_P3_43057_22763929 | NC_021163.1    | Ca_kabuli_chr04 | 22763929                | TT                              | CC                | 1945940197               |
| SNP_P3_43058_22764512 | NC_021163.1    | Ca_kabuli_chr04 | 22764512                | TT                              | CC                | 1945940199               |
| SNP_P3_43059_22764541 | NC_021163.1    | Ca_kabuli_chr04 | 22764541                | GG                              | AA                | 1945940200               |
| SNP_P3_43060_22764564 | NC_021163.1    | Ca_kabuli_chr04 | 22764564                | GG                              | AA                | 1945940202               |
| SNP_P3_43061_22764582 | NC_021163.1    | Ca_kabuli_chr04 | 22764582                | TT                              | CC                | 1945940204               |
| SNP_P3_43062_22764850 | NC_021163.1    | Ca_kabuli_chr04 | 22764850                | AA                              | GG                | 1945940206               |
| SNP_P3_43063_22765211 | NC_021163.1    | Ca_kabuli_chr04 | 22765211                | TT                              | AA                | 1945940207               |
| SNP_P3_43064_22765296 | NC_021163.1    | Ca_kabuli_chr04 | 22765296                | TT                              | AA                | 1945940209               |
| SNP_P3_43065_22766161 | NC_021163.1    | Ca_kabuli_chr04 | 22766161                | GG                              | AA                | 1945940211               |
| SNP_P3_43066_22766556 | NC_021163.1    | Ca_kabuli_chr04 | 22766556                | CC                              | AA                | 1945940213               |
| SNP_P3_43068_22767904 | NC_021163.1    | Ca_kabuli_chr04 | 22767904                | CC                              | TT                | 1945940215               |

| SNPs IDs              | Chromosome IDs | Chromosomes     | Physical positions (bp) | CDC Frontier (Reference genome) | (Pusa 256 & HPNB) | NCBI SNPdb Accession IDs |
|-----------------------|----------------|-----------------|-------------------------|---------------------------------|-------------------|--------------------------|
| SNP_P3_43069_22767934 | NC_021163.1    | Ca_kabuli_chr04 | 22767934                | AA                              | TT                | 1945940216               |
| SNP_P3_43070_22767975 | NC_021163.1    | Ca_kabuli_chr04 | 22767975                | TT                              | CC                | 1945940218               |
| SNP_P3_43071_22768017 | NC_021163.1    | Ca_kabuli_chr04 | 22768017                | TT                              | CC                | 1945940220               |
| SNP_P3_43072_22768039 | NC_021163.1    | Ca_kabuli_chr04 | 22768039                | GG                              | AA                | 1945940222               |
| SNP_P3_43074_22769799 | NC_021163.1    | Ca_kabuli_chr04 | 22769799                | GG                              | AA                | 1945940223               |
| SNP_P3_43075_22771865 | NC_021163.1    | Ca_kabuli_chr04 | 22771865                | CC                              | TT                | 1945940225               |
| SNP_P3_43076_22771942 | NC_021163.1    | Ca_kabuli_chr04 | 22771942                | AA                              | CC                | 1945940227               |
| SNP_P3_43077_22774651 | NC_021163.1    | Ca_kabuli_chr04 | 22774651                | GG                              | AA                | 1945940229               |
| SNP_P3_43078_22774903 | NC_021163.1    | Ca_kabuli_chr04 | 22774903                | AA                              | CC                | 1945940231               |
| SNP_P3_43079_22774942 | NC_021163.1    | Ca_kabuli_chr04 | 22774942                | GG                              | TT                | 1945940232               |
| SNP_P3_43080_22775092 | NC_021163.1    | Ca_kabuli_chr04 | 22775092                | AA                              | TT                | 1945940234               |
| SNP_P3_43081_22775439 | NC_021163.1    | Ca_kabuli_chr04 | 22775439                | CC                              | TT                | 1945940236               |
| SNP_P3_43084_22783222 | NC_021163.1    | Ca_kabuli_chr04 | 22783222                | CC                              | TT                | 1945940238               |
| SNP_P3_43085_22783476 | NC_021163.1    | Ca_kabuli_chr04 | 22783476                | TT                              | CC                | 1945940239               |
| SNP_P3_43086_22788445 | NC_021163.1    | Ca_kabuli_chr04 | 22788445                | TT                              | AA                | 1945940241               |
| SNP_P3_43087_22788785 | NC_021163.1    | Ca_kabuli_chr04 | 22788785                | CC                              | TT                | 1945940243               |
| SNP_P3_43088_22788802 | NC_021163.1    | Ca_kabuli_chr04 | 22788802                | CC                              | TT                | 1945940245               |
| SNP_P3_43089_22788845 | NC_021163.1    | Ca_kabuli_chr04 | 22788845                | CC                              | TT                | 1945940246               |
| SNP_P3_43090_22788862 | NC_021163.1    | Ca_kabuli_chr04 | 22788862                | TT                              | CC                | 1945940248               |
| SNP_P3_43091_22788872 | NC_021163.1    | Ca_kabuli_chr04 | 22788872                | CC                              | TT                | 1945940250               |
| SNP_P3_43092_22788959 | NC_021163.1    | Ca_kabuli_chr04 | 22788959                | GG                              | AA                | 1945940252               |
| SNP_P3_43093_22788985 | NC_021163.1    | Ca_kabuli_chr04 | 22788985                | AA                              | CC                | 1945940254               |
| SNP_P3_43094_22788993 | NC_021163.1    | Ca_kabuli_chr04 | 22788993                | AA                              | CC                | 1945940255               |
| SNP_P3_43095_22789104 | NC_021163.1    | Ca_kabuli_chr04 | 22789104                | CC                              | TT                | 1945940257               |
| SNP_P3_43096_22789173 | NC_021163.1    | Ca_kabuli_chr04 | 22789173                | CC                              | TT                | 1945940259               |
| SNP_P3_43097_22789442 | NC_021163.1    | Ca_kabuli_chr04 | 22789442                | CC                              | TT                | 1945940261               |
| SNP_P3_43098_22789838 | NC_021163.1    | Ca_kabuli_chr04 | 22789838                | TT                              | CC                | 1945940262               |
| SNP_P3_43101_22793065 | NC_021163.1    | Ca_kabuli_chr04 | 22793065                | CC                              | TT                | 1945940264               |
| SNP_P3_43102_22793766 | NC_021163.1    | Ca_kabuli_chr04 | 22793766                | AA                              | GG                | 1945940266               |
| SNP_P3_43104_22797202 | NC_021163.1    | Ca_kabuli_chr04 | 22797202                | GG                              | AA                | 1945940268               |
| SNP_P3_43105_22797328 | NC_021163.1    | Ca_kabuli_chr04 | 22797328                | CC                              | TT                | 1945940270               |
| SNP_P3_43106_22797379 | NC_021163.1    | Ca_kabuli_chr04 | 22797379                | GG                              | AA                | 1945940271               |
| SNP_P3_43107_22797415 | NC_021163.1    | Ca_kabuli_chr04 | 22797415                | GG                              | AA                | 1945940273               |
| SNP_P3_43108_22797421 | NC_021163.1    | Ca_kabuli_chr04 | 22797421                | TT                              | CC                | 1945940275               |
| SNP_P3_43110_22797449 | NC_021163.1    | Ca_kabuli_chr04 | 22797449                | GG                              | CC                | 1945940277               |
| SNP_P3_43111_22798763 | NC_021163.1    | Ca_kabuli_chr04 | 22798763                | TT                              | CC                | 1945940278               |
| SNP_P3_43114_22800687 | NC_021163.1    | Ca_kabuli_chr04 | 22800687                | AA                              | TT                | 1945940280               |
| SNP_P3_43115_22800741 | NC_021163.1    | Ca_kabuli_chr04 | 22800741                | AA                              | TT                | 1945940282               |
| SNP_P3_43116_22801670 | NC_021163.1    | Ca_kabuli_chr04 | 22801670                | CC                              | TT                | 1945940284               |
| SNP_P3_43117_22801902 | NC_021163.1    | Ca_kabuli_chr04 | 22801902                | AA                              | CC                | 1945940286               |
| SNP_P3_43119_22805064 | NC_021163.1    | Ca_kabuli_chr04 | 22805064                | TT                              | CC                | 1945940287               |
| SNP_P3_43121_22806873 | NC_021163.1    | Ca_kabuli_chr04 | 22806873                | GG                              | AA                | 1945940289               |

| SNPs IDs              | Chromosome IDs | Chromosomes     | Physical positions (bp) | CDC Frontier (Reference genome) | (Pusa 256 & HPNB) | NCBI SNPdb Accession IDs |
|-----------------------|----------------|-----------------|-------------------------|---------------------------------|-------------------|--------------------------|
| SNP_P3_43122_22807551 | NC_021163.1    | Ca_kabuli_chr04 | 22807551                | CC                              | TT                | 1945940291               |
| SNP_P3_43125_22808692 | NC_021163.1    | Ca_kabuli_chr04 | 22808692                | AA                              | TT                | 1945940293               |
| SNP_P3_43126_22813270 | NC_021163.1    | Ca_kabuli_chr04 | 22813270                | AA                              | TT                | 1945940294               |
| SNP_P3_43127_22813684 | NC_021163.1    | Ca_kabuli_chr04 | 22813684                | CC                              | TT                | 1945940296               |
| SNP_P3_43128_22815855 | NC_021163.1    | Ca_kabuli_chr04 | 22815855                | AA                              | GG                | 1945940298               |
| SNP_P3_43129_22815877 | NC_021163.1    | Ca_kabuli_chr04 | 22815877                | AA                              | CC                | 1945940300               |
| SNP_P3_43131_22816181 | NC_021163.1    | Ca_kabuli_chr04 | 22816181                | GG                              | AA                | 1945940301               |
| SNP_P3_43132_22816227 | NC_021163.1    | Ca_kabuli_chr04 | 22816227                | AA                              | GG                | 1945940303               |
| SNP_P3_43134_22816772 | NC_021163.1    | Ca_kabuli_chr04 | 22816772                | TT                              | AA                | 1945940305               |
| SNP_P3_43135_22816783 | NC_021163.1    | Ca_kabuli_chr04 | 22816783                | TT                              | AA                | 1945940307               |
| SNP_P3_43136_22818105 | NC_021163.1    | Ca_kabuli_chr04 | 22818105                | GG                              | AA                | 1945940309               |
| SNP_P3_43137_22818111 | NC_021163.1    | Ca_kabuli_chr04 | 22818111                | TT                              | AA                | 1945940310               |
| SNP_P3_43138_22818158 | NC_021163.1    | Ca_kabuli_chr04 | 22818158                | CC                              | TT                | 1945940312               |
| SNP_P3_43139_22818180 | NC_021163.1    | Ca_kabuli_chr04 | 22818180                | GG                              | AA                | 1945940314               |
| SNP_P3_43140_22818183 | NC_021163.1    | Ca_kabuli_chr04 | 22818183                | TT                              | CC                | 1945940316               |
| SNP_P3_43141_22818390 | NC_021163.1    | Ca_kabuli_chr04 | 22818390                | TT                              | GG                | 1945940317               |
| SNP_P3_43142_22818421 | NC_021163.1    | Ca_kabuli_chr04 | 22818421                | CC                              | AA                | 1945940319               |
| SNP_P3_43143_22818429 | NC_021163.1    | Ca_kabuli_chr04 | 22818429                | GG                              | TT                | 1945940321               |
| SNP_P3_43145_22818540 | NC_021163.1    | Ca_kabuli_chr04 | 22818540                | AA                              | CC                | 1945940323               |
| SNP_P3_43146_22818616 | NC_021163.1    | Ca_kabuli_chr04 | 22818616                | TT                              | CC                | 1945940325               |
| SNP_P3_43147_22818638 | NC_021163.1    | Ca_kabuli_chr04 | 22818638                | CC                              | TT                | 1945940326               |
| SNP_P3_43148_22818647 | NC_021163.1    | Ca_kabuli_chr04 | 22818647                | TT                              | CC                | 1945940328               |
| SNP_P3_43149_22818868 | NC_021163.1    | Ca_kabuli_chr04 | 22818868                | CC                              | AA                | 1945940330               |
| SNP_P3_43150_22818896 | NC_021163.1    | Ca_kabuli_chr04 | 22818896                | TT                              | GG                | 1945940332               |
| SNP_P3_43151_22818908 | NC_021163.1    | Ca_kabuli_chr04 | 22818908                | AA                              | GG                | 1945940333               |
| SNP_P3_43152_22820278 | NC_021163.1    | Ca_kabuli_chr04 | 22820278                | TT                              | AA                | 1945940335               |
| SNP_P3_43153_22821202 | NC_021163.1    | Ca_kabuli_chr04 | 22821202                | TT                              | CC                | 1945940337               |
| SNP_P3_43154_22821450 | NC_021163.1    | Ca_kabuli_chr04 | 22821450                | AA                              | TT                | 1945940339               |
| SNP_P3_43155_22821454 | NC_021163.1    | Ca_kabuli_chr04 | 22821454                | AA                              | GG                | 1945940340               |
| SNP_P3_43156_22821585 | NC_021163.1    | Ca_kabuli_chr04 | 22821585                | GG                              | TT                | 1945940342               |
| SNP_P3_43157_22821615 | NC_021163.1    | Ca_kabuli_chr04 | 22821615                | GG                              | AA                | 1945940344               |
| SNP_P3_43159_22824892 | NC_021163.1    | Ca_kabuli_chr04 | 22824892                | GG                              | TT                | 1945940346               |
| SNP_P3_43160_22824924 | NC_021163.1    | Ca_kabuli_chr04 | 22824924                | TT                              | CC                | 1945940348               |
| SNP_P3_43161_22824980 | NC_021163.1    | Ca_kabuli_chr04 | 22824980                | TT                              | GG                | 1945940349               |
| SNP_P3_43163_22825343 | NC_021163.1    | Ca_kabuli_chr04 | 22825343                | GG                              | AA                | 1945940351               |
| SNP_P3_43164_22825346 | NC_021163.1    | Ca_kabuli_chr04 | 22825346                | CC                              | TT                | 1945940353               |
| SNP_P3_43165_22825349 | NC_021163.1    | Ca_kabuli_chr04 | 22825349                | AA                              | GG                | 1945940355               |
| SNP_P3_43166_22825359 | NC_021163.1    | Ca_kabuli_chr04 | 22825359                | TT                              | CC                | 1945940356               |
| SNP_P3_43167_22825372 | NC_021163.1    | Ca_kabuli_chr04 | 22825372                | TT                              | CC                | 1945940358               |
| SNP_P3_43168_22833560 | NC_021163.1    | Ca_kabuli_chr04 | 22833560                | GG                              | AA                | 1945940360               |
| SNP_P3_43169_22839062 | NC_021163.1    | Ca_kabuli_chr04 | 22839062                | CC                              | TT                | 1945940362               |
| SNP_P3_43170_22849101 | NC_021163.1    | Ca_kabuli_chr04 | 22849101                | GG                              | CC                | 1945940364               |

| SNPs IDs              | Chromosome IDs | Chromosomes     | Physical positions (bp) | CDC Frontier (Reference genome) | (Pusa 256 & HPNB) | NCBI SNPdb Accession IDs |
|-----------------------|----------------|-----------------|-------------------------|---------------------------------|-------------------|--------------------------|
| SNP_P3_43171_22850435 | NC_021163.1    | Ca_kabuli_chr04 | 22850435                | CC                              | TT                | 1945940365               |
| SNP_P3_43173_22867170 | NC_021163.1    | Ca_kabuli_chr04 | 22867170                | TT                              | AA                | 1945940367               |
| SNP_P3_43174_22867182 | NC_021163.1    | Ca_kabuli_chr04 | 22867182                | TT                              | CC                | 1945940369               |
| SNP_P3_43175_22867205 | NC_021163.1    | Ca_kabuli_chr04 | 22867205                | AA                              | GG                | 1945940371               |
| SNP_P3_43177_22867255 | NC_021163.1    | Ca_kabuli_chr04 | 22867255                | GG                              | TT                | 1945940372               |
| SNP_P3_43179_22870534 | NC_021163.1    | Ca_kabuli_chr04 | 22870534                | TT                              | AA                | 1945940374               |
| SNP_P3_43181_22874459 | NC_021163.1    | Ca_kabuli_chr04 | 22874459                | CC                              | TT                | 1945940376               |
| SNP_P3_43183_22874697 | NC_021163.1    | Ca_kabuli_chr04 | 22874697                | CC                              | AA                | 1945940378               |
| SNP_P3_43184_22874730 | NC_021163.1    | Ca_kabuli_chr04 | 22874730                | GG                              | TT                | 1945940380               |
| SNP_P3_43185_22874769 | NC_021163.1    | Ca_kabuli_chr04 | 22874769                | CC                              | TT                | 1945940381               |
| SNP_P3_43186_22876437 | NC_021163.1    | Ca_kabuli_chr04 | 22876437                | AA                              | GG                | 1945940383               |
| SNP_P3_43187_22876509 | NC_021163.1    | Ca_kabuli_chr04 | 22876509                | CC                              | TT                | 1945940385               |
| SNP_P3_43188_22876565 | NC_021163.1    | Ca_kabuli_chr04 | 22876565                | AA                              | GG                | 1945940387               |
| SNP_P3_43189_22876690 | NC_021163.1    | Ca_kabuli_chr04 | 22876690                | GG                              | TT                | 1945940388               |
| SNP_P3_43190_22876964 | NC_021163.1    | Ca_kabuli_chr04 | 22876964                | CC                              | TT                | 1945940390               |
| SNP_P3_43191_22877023 | NC_021163.1    | Ca_kabuli_chr04 | 22877023                | GG                              | TT                | 1945940392               |
| SNP_P3_43192_22877240 | NC_021163.1    | Ca_kabuli_chr04 | 22877240                | CC                              | AA                | 1945940394               |
| SNP_P3_43194_22877550 | NC_021163.1    | Ca_kabuli_chr04 | 22877550                | CC                              | TT                | 1945940395               |
| SNP_P3_43195_22877552 | NC_021163.1    | Ca_kabuli_chr04 | 22877552                | GG                              | TT                | 1945940397               |
| SNP_P3_43196_22878541 | NC_021163.1    | Ca_kabuli_chr04 | 22878541                | GG                              | AA                | 1945940399               |
| SNP_P3_43197_22878808 | NC_021163.1    | Ca_kabuli_chr04 | 22878808                | CC                              | TT                | 1945940401               |
| SNP_P3_43198_22878911 | NC_021163.1    | Ca_kabuli_chr04 | 22878911                | CC                              | AA                | 1945940403               |
| SNP_P3_43199_22879846 | NC_021163.1    | Ca_kabuli_chr04 | 22879846                | CC                              | TT                | 1945940404               |
| SNP_P3_43200_22879996 | NC_021163.1    | Ca_kabuli_chr04 | 22879996                | GG                              | AA                | 1945940406               |
| SNP_P3_43201_22880009 | NC_021163.1    | Ca_kabuli_chr04 | 22880009                | AA                              | GG                | 1945940408               |
| SNP_P3_43203_22880280 | NC_021163.1    | Ca_kabuli_chr04 | 22880280                | TT                              | AA                | 1945940410               |
| SNP_P3_43204_22880412 | NC_021163.1    | Ca_kabuli_chr04 | 22880412                | AA                              | TT                | 1945940411               |
| SNP_P3_43205_22880449 | NC_021163.1    | Ca_kabuli_chr04 | 22880449                | AA                              | GG                | 1945940413               |
| SNP_P3_43206_22880495 | NC_021163.1    | Ca_kabuli_chr04 | 22880495                | AA                              | GG                | 1945940415               |
| SNP_P3_43207_22880546 | NC_021163.1    | Ca_kabuli_chr04 | 22880546                | AA                              | GG                | 1945940417               |
| SNP_P3_43208_22880741 | NC_021163.1    | Ca_kabuli_chr04 | 22880741                | AA                              | TT                | 1945940419               |
| SNP_P3_43210_22881392 | NC_021163.1    | Ca_kabuli_chr04 | 22881392                | CC                              | TT                | 1945940420               |
| SNP_P3_43211_22884672 | NC_021163.1    | Ca_kabuli_chr04 | 22884672                | TT                              | CC                | 1945940422               |
| SNP_P3_43212_22886502 | NC_021163.1    | Ca_kabuli_chr04 | 22886502                | CC                              | TT                | 1945940424               |
| SNP_P3_43213_22886504 | NC_021163.1    | Ca_kabuli_chr04 | 22886504                | TT                              | GG                | 1945940426               |
| SNP_P3_43214_22886505 | NC_021163.1    | Ca_kabuli_chr04 | 22886505                | AA                              | GG                | 1945940427               |
| SNP_P3_43216_22889586 | NC_021163.1    | Ca_kabuli_chr04 | 22889586                | CC                              | GG                | 1945940429               |
| SNP_P3_43217_22890107 | NC_021163.1    | Ca_kabuli_chr04 | 22890107                | AA                              | GG                | 1945940431               |
| SNP_P3_43218_22890276 | NC_021163.1    | Ca_kabuli_chr04 | 22890276                | GG                              | CC                | 1945940433               |
| SNP_P3_43219_22890628 | NC_021163.1    | Ca_kabuli_chr04 | 22890628                | AA                              | GG                | 1945940435               |
| SNP_P3_43220_22890842 | NC_021163.1    | Ca_kabuli_chr04 | 22890842                | GG                              | AA                | 1945940436               |
| SNP_P3_43222_22894725 | NC_021163.1    | Ca_kabuli_chr04 | 22894725                | AA                              | GG                | 1945940438               |

| SNPs IDs              | Chromosome IDs | Chromosomes     | Physical positions (bp) | CDC Frontier (Reference genome) | (Pusa 256 & HPNB) | NCBI SNPdb Accession IDs |
|-----------------------|----------------|-----------------|-------------------------|---------------------------------|-------------------|--------------------------|
| SNP_P3_43223_22896317 | NC_021163.1    | Ca_kabuli_chr04 | 22896317                | CC                              | TT                | 1945940440               |
| SNP_P3_43224_22897495 | NC_021163.1    | Ca_kabuli_chr04 | 22897495                | AA                              | TT                | 1945940442               |
| SNP_P3_43225_22897531 | NC_021163.1    | Ca_kabuli_chr04 | 22897531                | GG                              | AA                | 1945940443               |
| SNP_P3_43226_22897810 | NC_021163.1    | Ca_kabuli_chr04 | 22897810                | CC                              | TT                | 1945940445               |
| SNP_P3_43227_22897833 | NC_021163.1    | Ca_kabuli_chr04 | 22897833                | TT                              | GG                | 1945940447               |
| SNP_P3_43229_22898054 | NC_021163.1    | Ca_kabuli_chr04 | 22898054                | CC                              | TT                | 1945940449               |
| SNP_P3_43232_22900438 | NC_021163.1    | Ca_kabuli_chr04 | 22900438                | GG                              | TT                | 1945940450               |
| SNP_P3_43233_22902256 | NC_021163.1    | Ca_kabuli_chr04 | 22902256                | TT                              | AA                | 1945940452               |
| SNP_P3_43236_22916596 | NC_021163.1    | Ca_kabuli_chr04 | 22916596                | TT                              | CC                | 1945940454               |
| SNP_P3_43237_22916967 | NC_021163.1    | Ca_kabuli_chr04 | 22916967                | GG                              | AA                | 1945940456               |
| SNP_P3_43238_22917215 | NC_021163.1    | Ca_kabuli_chr04 | 22917215                | TT                              | CC                | 1945940458               |
| SNP_P3_43239_22917729 | NC_021163.1    | Ca_kabuli_chr04 | 22917729                | TT                              | CC                | 1945940459               |
| SNP_P3_43240_22917890 | NC_021163.1    | Ca_kabuli_chr04 | 22917890                | TT                              | CC                | 1945940461               |
| SNP_P3_43241_22918934 | NC_021163.1    | Ca_kabuli_chr04 | 22918934                | AA                              | GG                | 1945940463               |
| SNP_P3_43242_22918961 | NC_021163.1    | Ca_kabuli_chr04 | 22918961                | AA                              | GG                | 1945940465               |
| SNP_P3_43243_22919186 | NC_021163.1    | Ca_kabuli_chr04 | 22919186                | AA                              | CC                | 1945940466               |
| SNP_P3_43244_22919194 | NC_021163.1    | Ca_kabuli_chr04 | 22919194                | AA                              | GG                | 1945940468               |
| SNP_P3_43245_22920834 | NC_021163.1    | Ca_kabuli_chr04 | 22920834                | TT                              | CC                | 1945940470               |
| SNP_P3_43247_22923614 | NC_021163.1    | Ca_kabuli_chr04 | 22923614                | TT                              | GG                | 1945940472               |
| SNP_P3_43248_22923827 | NC_021163.1    | Ca_kabuli_chr04 | 22923827                | GG                              | AA                | 1945940474               |
| SNP_P3_43249_22924436 | NC_021163.1    | Ca_kabuli_chr04 | 22924436                | TT                              | CC                | 1945940475               |
| SNP_P3_43250_22928958 | NC_021163.1    | Ca_kabuli_chr04 | 22928958                | AA                              | GG                | 1945940477               |
| SNP_P3_43251_22930475 | NC_021163.1    | Ca_kabuli_chr04 | 22930475                | GG                              | AA                | 1945940479               |
| SNP_P3_43252_22932932 | NC_021163.1    | Ca_kabuli_chr04 | 22932932                | CC                              | TT                | 1945940481               |
| SNP_P3_43253_22934498 | NC_021163.1    | Ca_kabuli_chr04 | 22934498                | TT                              | CC                | 1945940482               |
| SNP_P3_43254_22934501 | NC_021163.1    | Ca_kabuli_chr04 | 22934501                | AA                              | GG                | 1945940484               |
| SNP_P3_43255_22934538 | NC_021163.1    | Ca_kabuli_chr04 | 22934538                | TT                              | AA                | 1945940486               |
| SNP_P3_43256_22934732 | NC_021163.1    | Ca_kabuli_chr04 | 22934732                | CC                              | AA                | 1945940488               |
| SNP_P3_43258_22937426 | NC_021163.1    | Ca_kabuli_chr04 | 22937426                | TT                              | CC                | 1945940490               |
| SNP_P3_43259_22937663 | NC_021163.1    | Ca_kabuli_chr04 | 22937663                | AA                              | TT                | 1945940491               |
| SNP_P3_43261_22938331 | NC_021163.1    | Ca_kabuli_chr04 | 22938331                | AA                              | GG                | 1945940493               |
| SNP_P3_43262_22938359 | NC_021163.1    | Ca_kabuli_chr04 | 22938359                | TT                              | CC                | 1945940495               |
| SNP_P3_43263_22939401 | NC_021163.1    | Ca_kabuli_chr04 | 22939401                | TT                              | AA                | 1945940497               |
| SNP_P3_43264_22939719 | NC_021163.1    | Ca_kabuli_chr04 | 22939719                | AA                              | GG                | 1945940498               |
| SNP_P3_43265_22943337 | NC_021163.1    | Ca_kabuli_chr04 | 22943337                | AA                              | CC                | 1945940500               |
| SNP_P3_43266_22943340 | NC_021163.1    | Ca_kabuli_chr04 | 22943340                | CC                              | TT                | 1945940502               |
| SNP_P3_43267_22943349 | NC_021163.1    | Ca_kabuli_chr04 | 22943349                | TT                              | CC                | 1945940504               |
| SNP_P3_43268_22944912 | NC_021163.1    | Ca_kabuli_chr04 | 22944912                | CC                              | TT                | 1945940505               |
| SNP_P3_43269_22946209 | NC_021163.1    | Ca_kabuli_chr04 | 22946209                | GG                              | AA                | 1945940507               |
| SNP_P3_43270_22946218 | NC_021163.1    | Ca_kabuli_chr04 | 22946218                | AA                              | CC                | 1945940509               |
| SNP_P3_43271_22947094 | NC_021163.1    | Ca_kabuli_chr04 | 22947094                | AA                              | GG                | 1945940511               |
| SNP_P3_43273_22947571 | NC_021163.1    | Ca_kabuli_chr04 | 22947571                | AA                              | GG                | 1945940513               |

| SNPs IDs              | Chromosome IDs | Chromosomes     | Physical positions (bp) | CDC Frontier (Reference genome) | (Pusa 256 & HPNB) | NCBI SNPdb Accession IDs |
|-----------------------|----------------|-----------------|-------------------------|---------------------------------|-------------------|--------------------------|
| SNP_P3_43274_22947611 | NC_021163.1    | Ca_kabuli_chr04 | 22947611                | CC                              | TT                | 1945940514               |
| SNP_P3_43276_22948298 | NC_021163.1    | Ca_kabuli_chr04 | 22948298                | CC                              | TT                | 1945940516               |
| SNP_P3_43277_22948902 | NC_021163.1    | Ca_kabuli_chr04 | 22948902                | AA                              | GG                | 1945940518               |
| SNP_P3_43278_22948916 | NC_021163.1    | Ca_kabuli_chr04 | 22948916                | AA                              | TT                | 1945940520               |
| SNP_P3_43279_22950675 | NC_021163.1    | Ca_kabuli_chr04 | 22950675                | AA                              | GG                | 1945940521               |
| SNP_P3_43280_22951081 | NC_021163.1    | Ca_kabuli_chr04 | 22951081                | AA                              | GG                | 1945940523               |
| SNP_P3_43281_22951175 | NC_021163.1    | Ca_kabuli_chr04 | 22951175                | TT                              | AA                | 1945940525               |
| SNP_P3_43282_22951273 | NC_021163.1    | Ca_kabuli_chr04 | 22951273                | GG                              | AA                | 1945940527               |
| SNP_P3_43283_22951564 | NC_021163.1    | Ca_kabuli_chr04 | 22951564                | TT                              | CC                | 1945940529               |
| SNP_P3_43284_22954492 | NC_021163.1    | Ca_kabuli_chr04 | 22954492                | CC                              | TT                | 1945940530               |
| SNP_P3_43285_22954498 | NC_021163.1    | Ca_kabuli_chr04 | 22954498                | GG                              | AA                | 1945940532               |
| SNP_P3_43286_22957628 | NC_021163.1    | Ca_kabuli_chr04 | 22957628                | TT                              | CC                | 1945940534               |
| SNP_P3_43287_22957661 | NC_021163.1    | Ca_kabuli_chr04 | 22957661                | TT                              | CC                | 1945940536               |
| SNP_P3_43288_22957952 | NC_021163.1    | Ca_kabuli_chr04 | 22957952                | AA                              | GG                | 1945940537               |
| SNP_P3_43289_22958061 | NC_021163.1    | Ca_kabuli_chr04 | 22958061                | AA                              | CC                | 1945940539               |
| SNP_P3_43290_22960515 | NC_021163.1    | Ca_kabuli_chr04 | 22960515                | GG                              | AA                | 1945940541               |
| SNP_P3_43291_22963221 | NC_021163.1    | Ca_kabuli_chr04 | 22963221                | GG                              | AA                | 1945940543               |
| SNP_P3_43292_22964105 | NC_021163.1    | Ca_kabuli_chr04 | 22964105                | GG                              | AA                | 1945940545               |
| SNP_P3_43294_22966959 | NC_021163.1    | Ca_kabuli_chr04 | 22966959                | CC                              | TT                | 1945940546               |
| SNP_P3_43295_22967140 | NC_021163.1    | Ca_kabuli_chr04 | 22967140                | CC                              | AA                | 1945940548               |
| SNP_P3_43296_22970038 | NC_021163.1    | Ca_kabuli_chr04 | 22970038                | GG                              | AA                | 1945940550               |
| SNP_P3_43297_22970459 | NC_021163.1    | Ca_kabuli_chr04 | 22970459                | AA                              | GG                | 1945940552               |
| SNP_P3_43298_22970515 | NC_021163.1    | Ca_kabuli_chr04 | 22970515                | TT                              | CC                | 1945940553               |
| SNP_P3_43299_22970599 | NC_021163.1    | Ca_kabuli_chr04 | 22970599                | TT                              | CC                | 1945940555               |
| SNP_P3_43300_22970950 | NC_021163.1    | Ca_kabuli_chr04 | 22970950                | GG                              | AA                | 1945940557               |
| SNP_P3_43301_22970954 | NC_021163.1    | Ca_kabuli_chr04 | 22970954                | CC                              | TT                | 1945940559               |
| SNP_P3_43302_22970972 | NC_021163.1    | Ca_kabuli_chr04 | 22970972                | AA                              | GG                | 1945940560               |
| SNP_P3_43303_22970982 | NC_021163.1    | Ca_kabuli_chr04 | 22970982                | TT                              | CC                | 1945940562               |
| SNP_P3_43304_22973186 | NC_021163.1    | Ca_kabuli_chr04 | 22973186                | GG                              | TT                | 1945940564               |
| SNP_P3_43305_22973328 | NC_021163.1    | Ca_kabuli_chr04 | 22973328                | TT                              | CC                | 1945940566               |
| SNP_P3_43306_22973373 | NC_021163.1    | Ca_kabuli_chr04 | 22973373                | AA                              | GG                | 1945940568               |
| SNP_P3_43307_22973538 | NC_021163.1    | Ca_kabuli_chr04 | 22973538                | TT                              | CC                | 1945940569               |
| SNP_P3_43308_22973561 | NC_021163.1    | Ca_kabuli_chr04 | 22973561                | AA                              | CC                | 1945940571               |
| SNP_P3_43309_22973584 | NC_021163.1    | Ca_kabuli_chr04 | 22973584                | CC                              | TT                | 1945940573               |
| SNP_P3_43310_22973593 | NC_021163.1    | Ca_kabuli_chr04 | 22973593                | AA                              | CC                | 1945940575               |
| SNP_P3_43311_22973609 | NC_021163.1    | Ca_kabuli_chr04 | 22973609                | TT                              | AA                | 1945940576               |
| SNP_P3_43312_22973611 | NC_021163.1    | Ca_kabuli_chr04 | 22973611                | TT                              | CC                | 1945940578               |
| SNP_P3_43313_22973617 | NC_021163.1    | Ca_kabuli_chr04 | 22973617                | TT                              | AA                | 1945940580               |
| SNP_P3_43314_22973622 | NC_021163.1    | Ca_kabuli_chr04 | 22973622                | GG                              | AA                | 1945940582               |
| SNP_P3_43315_22973701 | NC_021163.1    | Ca_kabuli_chr04 | 22973701                | CC                              | TT                | 1945940584               |
| SNP_P3_43316_22973859 | NC_021163.1    | Ca_kabuli_chr04 | 22973859                | AA                              | TT                | 1945940585               |
| SNP_P3_43317_22973908 | NC_021163.1    | Ca_kabuli_chr04 | 22973908                | AA                              | GG                | 1945940587               |

| SNPs IDs              | Chromosome IDs | Chromosomes     | Physical positions (bp) | CDC Frontier (Reference genome) | (Pusa 256 & HPNB) | NCBI SNPdb Accession IDs |
|-----------------------|----------------|-----------------|-------------------------|---------------------------------|-------------------|--------------------------|
| SNP_P3_43318_22973909 | NC_021163.1    | Ca_kabuli_chr04 | 22973909                | AA                              | TT                | 1945940589               |
| SNP_P3_43319_22974191 | NC_021163.1    | Ca_kabuli_chr04 | 22974191                | AA                              | CC                | 1945940591               |
| SNP_P3_43320_22974201 | NC_021163.1    | Ca_kabuli_chr04 | 22974201                | CC                              | TT                | 1945940592               |
| SNP_P3_43321_22975300 | NC_021163.1    | Ca_kabuli_chr04 | 22975300                | TT                              | CC                | 1945940594               |
| SNP_P3_43322_22975311 | NC_021163.1    | Ca_kabuli_chr04 | 22975311                | TT                              | CC                | 1945940596               |
| SNP_P3_43323_22975594 | NC_021163.1    | Ca_kabuli_chr04 | 22975594                | CC                              | AA                | 1945940598               |
| SNP_P3_43324_22975599 | NC_021163.1    | Ca_kabuli_chr04 | 22975599                | CC                              | TT                | 1945940600               |
| SNP_P3_43325_22975901 | NC_021163.1    | Ca_kabuli_chr04 | 22975901                | TT                              | AA                | 1945940601               |
| SNP_P3_43326_22975905 | NC_021163.1    | Ca_kabuli_chr04 | 22975905                | TT                              | CC                | 1945940603               |
| SNP_P3_43327_22975912 | NC_021163.1    | Ca_kabuli_chr04 | 22975912                | CC                              | TT                | 1945940605               |
| SNP_P3_43328_22975960 | NC_021163.1    | Ca_kabuli_chr04 | 22975960                | TT                              | CC                | 1945940607               |
| SNP_P3_43329_22976529 | NC_021163.1    | Ca_kabuli_chr04 | 22976529                | GG                              | AA                | 1945940608               |
| SNP_P3_43330_22980805 | NC_021163.1    | Ca_kabuli_chr04 | 22980805                | AA                              | CC                | 1945940610               |
| SNP_P3_43331_22980812 | NC_021163.1    | Ca_kabuli_chr04 | 22980812                | GG                              | TT                | 1945940612               |
| SNP_P3_43332_22981011 | NC_021163.1    | Ca_kabuli_chr04 | 22981011                | GG                              | TT                | 1945940614               |
| SNP_P3_43333_22981029 | NC_021163.1    | Ca_kabuli_chr04 | 22981029                | GG                              | AA                | 1945940616               |
| SNP_P3_43334_22981053 | NC_021163.1    | Ca_kabuli_chr04 | 22981053                | CC                              | TT                | 1945940617               |
| SNP_P3_43335_22981090 | NC_021163.1    | Ca_kabuli_chr04 | 22981090                | GG                              | AA                | 1945940619               |
| SNP_P3_43337_22981332 | NC_021163.1    | Ca_kabuli_chr04 | 22981332                | GG                              | AA                | 1945940621               |
| SNP_P3_43339_22981360 | NC_021163.1    | Ca_kabuli_chr04 | 22981360                | CC                              | AA                | 1945940623               |
| SNP_P3_43340_22981384 | NC_021163.1    | Ca_kabuli_chr04 | 22981384                | GG                              | AA                | 1945940624               |
| SNP_P3_43341_22981739 | NC_021163.1    | Ca_kabuli_chr04 | 22981739                | AA                              | TT                | 1945940626               |
| SNP_P3_43342_22984689 | NC_021163.1    | Ca_kabuli_chr04 | 22984689                | CC                              | TT                | 1945940628               |
| SNP_P3_43343_22984944 | NC_021163.1    | Ca_kabuli_chr04 | 22984944                | AA                              | GG                | 1945940630               |
| SNP_P3_43344_22984974 | NC_021163.1    | Ca_kabuli_chr04 | 22984974                | CC                              | TT                | 1945940631               |
| SNP_P3_43345_22984979 | NC_021163.1    | Ca_kabuli_chr04 | 22984979                | TT                              | AA                | 1945940633               |
| SNP_P3_43347_22986324 | NC_021163.1    | Ca_kabuli_chr04 | 22986324                | GG                              | AA                | 1945940635               |
| SNP_P3_43349_22987719 | NC_021163.1    | Ca_kabuli_chr04 | 22987719                | CC                              | GG                | 1945940637               |
| SNP_P3_43350_22987752 | NC_021163.1    | Ca_kabuli_chr04 | 22987752                | TT                              | CC                | 1945940639               |
| SNP_P3_43351_22988122 | NC_021163.1    | Ca_kabuli_chr04 | 22988122                | GG                              | AA                | 1945940640               |
| SNP_P3_43352_22988147 | NC_021163.1    | Ca_kabuli_chr04 | 22988147                | GG                              | AA                | 1945940642               |
| SNP_P3_43353_22988796 | NC_021163.1    | Ca_kabuli_chr04 | 22988796                | CC                              | TT                | 1945940644               |
| SNP_P3_43354_22989085 | NC_021163.1    | Ca_kabuli_chr04 | 22989085                | GG                              | AA                | 1945940646               |
| SNP_P3_43355_22989382 | NC_021163.1    | Ca_kabuli_chr04 | 22989382                | CC                              | GG                | 1945940647               |
| SNP_P3_43356_22989384 | NC_021163.1    | Ca_kabuli_chr04 | 22989384                | CC                              | AA                | 1945940649               |
| SNP_P3_43357_22989399 | NC_021163.1    | Ca_kabuli_chr04 | 22989399                | GG                              | AA                | 1945940651               |
| SNP_P3_43358_22989405 | NC_021163.1    | Ca_kabuli_chr04 | 22989405                | AA                              | CC                | 1945940653               |
| SNP_P3_43359_22989406 | NC_021163.1    | Ca_kabuli_chr04 | 22989406                | TT                              | CC                | 1945940655               |
| SNP_P3_43360_22989409 | NC_021163.1    | Ca_kabuli_chr04 | 22989409                | CC                              | TT                | 1945940656               |
| SNP_P3_43361_22989433 | NC_021163.1    | Ca_kabuli_chr04 | 22989433                | AA                              | GG                | 1945940658               |
| SNP_P3_43362_22989444 | NC_021163.1    | Ca_kabuli_chr04 | 22989444                | AA                              | GG                | 1945940660               |
| SNP_P3_43363_22989530 | NC_021163.1    | Ca_kabuli_chr04 | 22989530                | TT                              | CC                | 1945940662               |



| SNPs IDs              | Chromosome IDs | Chromosomes     | Physical positions (bp) | CDC Frontier (Reference genome) | (Pusa 256 & HPNB) | NCBI SNPdb Accession IDs |
|-----------------------|----------------|-----------------|-------------------------|---------------------------------|-------------------|--------------------------|
| SNP_P3_43364_22989701 | NC_021163.1    | Ca_kabuli_chr04 | 22989701                | AA                              | TT                | 1945940663               |
| SNP_P3_43365_22989702 | NC_021163.1    | Ca_kabuli_chr04 | 22989702                | TT                              | CC                | 1945940665               |
| SNP_P3_43366_22989749 | NC_021163.1    | Ca_kabuli_chr04 | 22989749                | TT                              | CC                | 1945940667               |
| SNP_P3_43367_22989755 | NC_021163.1    | Ca_kabuli_chr04 | 22989755                | CC                              | AA                | 1945940669               |
| SNP_P3_43368_22992816 | NC_021163.1    | Ca_kabuli_chr04 | 22992816                | AA                              | CC                | 1945940671               |
| SNP_P3_43369_23002223 | NC_021163.1    | Ca_kabuli_chr04 | 23002223                | TT                              | CC                | 1945940672               |
| SNP_P3_43370_23002238 | NC_021163.1    | Ca_kabuli_chr04 | 23002238                | TT                              | CC                | 1945940674               |
| SNP_P3_43371_23002248 | NC_021163.1    | Ca_kabuli_chr04 | 23002248                | TT                              | CC                | 1945940676               |
| SNP_P3_43372_23002255 | NC_021163.1    | Ca_kabuli_chr04 | 23002255                | AA                              | GG                | 1945940678               |
| SNP_P3_43373_23002392 | NC_021163.1    | Ca_kabuli_chr04 | 23002392                | TT                              | CC                | 1945940679               |
| SNP_P3_43374_23002428 | NC_021163.1    | Ca_kabuli_chr04 | 23002428                | CC                              | GG                | 1945940681               |
| SNP_P3_43375_23002465 | NC_021163.1    | Ca_kabuli_chr04 | 23002465                | GG                              | AA                | 1945940683               |
| SNP_P3_43376_23002472 | NC_021163.1    | Ca_kabuli_chr04 | 23002472                | TT                              | CC                | 1945940685               |
| SNP_P3_43377_23002478 | NC_021163.1    | Ca_kabuli_chr04 | 23002478                | TT                              | AA                | 1945940687               |
| SNP_P3_43378_23002527 | NC_021163.1    | Ca_kabuli_chr04 | 23002527                | CC                              | TT                | 1945940688               |
| SNP_P3_43379_23002545 | NC_021163.1    | Ca_kabuli_chr04 | 23002545                | CC                              | AA                | 1945940690               |
| SNP_P3_43381_23002791 | NC_021163.1    | Ca_kabuli_chr04 | 23002791                | TT                              | AA                | 1945940692               |
| SNP_P3_43382_23002880 | NC_021163.1    | Ca_kabuli_chr04 | 23002880                | CC                              | TT                | 1945940694               |
| SNP_P3_43384_23015922 | NC_021163.1    | Ca_kabuli_chr04 | 23015922                | CC                              | TT                | 1945940695               |
| SNP_P3_43385_23016070 | NC_021163.1    | Ca_kabuli_chr04 | 23016070                | AA                              | GG                | 1945940697               |
| SNP_P3_43386_23018231 | NC_021163.1    | Ca_kabuli_chr04 | 23018231                | CC                              | TT                | 1945940699               |
| SNP_P3_43387_23019150 | NC_021163.1    | Ca_kabuli_chr04 | 23019150                | CC                              | AA                | 1945940701               |
| SNP_P3_43388_23020093 | NC_021163.1    | Ca_kabuli_chr04 | 23020093                | TT                              | CC                | 1945940702               |
| SNP_P3_43389_23020274 | NC_021163.1    | Ca_kabuli_chr04 | 23020274                | CC                              | TT                | 1945940704               |
| SNP_P3_43390_23020337 | NC_021163.1    | Ca_kabuli_chr04 | 23020337                | AA                              | GG                | 1945940706               |
| SNP_P3_43391_23020546 | NC_021163.1    | Ca_kabuli_chr04 | 23020546                | CC                              | TT                | 1945940708               |
| SNP_P3_43392_23020617 | NC_021163.1    | Ca_kabuli_chr04 | 23020617                | AA                              | GG                | 1945940710               |
| SNP_P3_43394_23029947 | NC_021163.1    | Ca_kabuli_chr04 | 23029947                | GG                              | AA                | 1945940711               |
| SNP_P3_43395_23029976 | NC_021163.1    | Ca_kabuli_chr04 | 23029976                | TT                              | CC                | 1945940713               |
| SNP_P3_43396_23030256 | NC_021163.1    | Ca_kabuli_chr04 | 23030256                | AA                              | CC                | 1945940715               |
| SNP_P3_43397_23030623 | NC_021163.1    | Ca_kabuli_chr04 | 23030623                | AA                              | GG                | 1945940717               |
| SNP_P3_43399_23030721 | NC_021163.1    | Ca_kabuli_chr04 | 23030721                | TT                              | AA                | 1945940718               |
| SNP_P3_43400_23032470 | NC_021163.1    | Ca_kabuli_chr04 | 23032470                | TT                              | GG                | 1945940720               |
| SNP_P3_43402_23033501 | NC_021163.1    | Ca_kabuli_chr04 | 23033501                | GG                              | AA                | 1945940722               |
| SNP_P3_43403_23033811 | NC_021163.1    | Ca_kabuli_chr04 | 23033811                | CC                              | TT                | 1945940724               |
| SNP_P3_43404_23035892 | NC_021163.1    | Ca_kabuli_chr04 | 23035892                | AA                              | GG                | 1945940726               |
| SNP_P3_43405_23035987 | NC_021163.1    | Ca_kabuli_chr04 | 23035987                | CC                              | GG                | 1945940727               |
| SNP_P3_43406_23036165 | NC_021163.1    | Ca_kabuli_chr04 | 23036165                | AA                              | CC                | 1945940729               |
| SNP_P3_43407_23036331 | NC_021163.1    | Ca_kabuli_chr04 | 23036331                | CC                              | TT                | 1945940731               |
| SNP_P3_43408_23036355 | NC_021163.1    | Ca_kabuli_chr04 | 23036355                | TT                              | CC                | 1945940733               |
| SNP_P3_43409_23036357 | NC_021163.1    | Ca_kabuli_chr04 | 23036357                | GG                              | AA                | 1945940734               |
| SNP_P3_43410_23036564 | NC_021163.1    | Ca_kabuli_chr04 | 23036564                | TT                              | GG                | 1945940736               |

| SNPs IDs              | Chromosome IDs | Chromosomes     | Physical positions (bp) | CDC Frontier (Reference genome) | (Pusa 256 & HPNB) | NCBI SNPdb Accession IDs |
|-----------------------|----------------|-----------------|-------------------------|---------------------------------|-------------------|--------------------------|
| SNP_P3_43411_23036790 | NC_021163.1    | Ca_kabuli_chr04 | 23036790                | CC                              | TT                | 1945940738               |
| SNP_P3_43412_23036811 | NC_021163.1    | Ca_kabuli_chr04 | 23036811                | GG                              | AA                | 1945940740               |
| SNP_P3_43413_23037150 | NC_021163.1    | Ca_kabuli_chr04 | 23037150                | GG                              | AA                | 1945940742               |
| SNP_P3_43414_23037157 | NC_021163.1    | Ca_kabuli_chr04 | 23037157                | GG                              | AA                | 1945940743               |
| SNP_P3_43415_23037628 | NC_021163.1    | Ca_kabuli_chr04 | 23037628                | GG                              | AA                | 1945940745               |
| SNP_P3_43416_23037666 | NC_021163.1    | Ca_kabuli_chr04 | 23037666                | GG                              | CC                | 1945940747               |
| SNP_P3_43417_23037720 | NC_021163.1    | Ca_kabuli_chr04 | 23037720                | GG                              | TT                | 1945940749               |
| SNP_P3_43418_23037754 | NC_021163.1    | Ca_kabuli_chr04 | 23037754                | TT                              | CC                | 1945940750               |
| SNP_P3_43419_23037783 | NC_021163.1    | Ca_kabuli_chr04 | 23037783                | CC                              | GG                | 1945940752               |
| SNP_P3_43420_23037933 | NC_021163.1    | Ca_kabuli_chr04 | 23037933                | AA                              | CC                | 1945940754               |
| SNP_P3_43421_23037934 | NC_021163.1    | Ca_kabuli_chr04 | 23037934                | TT                              | CC                | 1945940756               |
| SNP_P3_43422_23037938 | NC_021163.1    | Ca_kabuli_chr04 | 23037938                | GG                              | TT                | 1945940757               |
| SNP_P3_43423_23037972 | NC_021163.1    | Ca_kabuli_chr04 | 23037972                | CC                              | TT                | 1945940759               |
| SNP_P3_43424_23037976 | NC_021163.1    | Ca_kabuli_chr04 | 23037976                | AA                              | CC                | 1945940761               |
| SNP_P3_43425_23037997 | NC_021163.1    | Ca_kabuli_chr04 | 23037997                | TT                              | AA                | 1945940763               |
| SNP_P3_43426_23038034 | NC_021163.1    | Ca_kabuli_chr04 | 23038034                | CC                              | AA                | 1945940765               |
| SNP_P3_43427_23038044 | NC_021163.1    | Ca_kabuli_chr04 | 23038044                | CC                              | AA                | 1945940766               |
| SNP_P3_43428_23038062 | NC_021163.1    | Ca_kabuli_chr04 | 23038062                | CC                              | TT                | 1945940768               |
| SNP_P3_43429_23038380 | NC_021163.1    | Ca_kabuli_chr04 | 23038380                | TT                              | CC                | 1945940770               |
| SNP_P3_43430_23038421 | NC_021163.1    | Ca_kabuli_chr04 | 23038421                | GG                              | TT                | 1945940772               |
| SNP_P3_43431_23038455 | NC_021163.1    | Ca_kabuli_chr04 | 23038455                | GG                              | TT                | 1945940773               |
| SNP_P3_43432_23038786 | NC_021163.1    | Ca_kabuli_chr04 | 23038786                | AA                              | GG                | 1945940775               |
| SNP_P3_43433_23038885 | NC_021163.1    | Ca_kabuli_chr04 | 23038885                | TT                              | CC                | 1945940777               |
| SNP_P3_43434_23039132 | NC_021163.1    | Ca_kabuli_chr04 | 23039132                | CC                              | AA                | 1945940779               |
| SNP_P3_43435_23039155 | NC_021163.1    | Ca_kabuli_chr04 | 23039155                | CC                              | GG                | 1945940781               |
| SNP_P3_43436_23039157 | NC_021163.1    | Ca_kabuli_chr04 | 23039157                | AA                              | GG                | 1945940782               |
| SNP_P3_43437_23039165 | NC_021163.1    | Ca_kabuli_chr04 | 23039165                | GG                              | TT                | 1945940784               |
| SNP_P3_43438_23039169 | NC_021163.1    | Ca_kabuli_chr04 | 23039169                | AA                              | GG                | 1945940786               |
| SNP_P3_43440_23040402 | NC_021163.1    | Ca_kabuli_chr04 | 23040402                | TT                              | CC                | 1945940788               |
| SNP_P3_43441_23040521 | NC_021163.1    | Ca_kabuli_chr04 | 23040521                | AA                              | GG                | 1945940789               |
| SNP_P3_43442_23040547 | NC_021163.1    | Ca_kabuli_chr04 | 23040547                | TT                              | CC                | 1945940791               |
| SNP_P3_43443_23043755 | NC_021163.1    | Ca_kabuli_chr04 | 23043755                | TT                              | CC                | 1945940793               |
| SNP_P3_43444_23043784 | NC_021163.1    | Ca_kabuli_chr04 | 23043784                | AA                              | GG                | 1945940795               |
| SNP_P3_43445_23043800 | NC_021163.1    | Ca_kabuli_chr04 | 23043800                | CC                              | AA                | 1945940797               |
| SNP_P3_43446_23043824 | NC_021163.1    | Ca_kabuli_chr04 | 23043824                | TT                              | CC                | 1945940798               |
| SNP_P3_43447_23043826 | NC_021163.1    | Ca_kabuli_chr04 | 23043826                | AA                              | GG                | 1945940800               |
| SNP_P3_43448_23043850 | NC_021163.1    | Ca_kabuli_chr04 | 23043850                | GG                              | CC                | 1945940802               |
| SNP_P3_43449_23043900 | NC_021163.1    | Ca_kabuli_chr04 | 23043900                | GG                              | CC                | 1945940804               |
| SNP_P3_43450_23045871 | NC_021163.1    | Ca_kabuli_chr04 | 23045871                | CC                              | TT                | 1945940805               |
| SNP_P3_43451_23046146 | NC_021163.1    | Ca_kabuli_chr04 | 23046146                | GG                              | AA                | 1945940807               |
| SNP_P3_43452_23046228 | NC_021163.1    | Ca_kabuli_chr04 | 23046228                | AA                              | GG                | 1945940809               |
| SNP_P3_43453_23046235 | NC_021163.1    | Ca_kabuli_chr04 | 23046235                | AA                              | GG                | 1945940811               |

| SNPs IDs              | Chromosome IDs | Chromosomes     | Physical positions (bp) | CDC Frontier (Reference genome) | (Pusa 256 & HPNB) | NCBI SNPdb Accession IDs |
|-----------------------|----------------|-----------------|-------------------------|---------------------------------|-------------------|--------------------------|
| SNP_P3_43454_23046458 | NC_021163.1    | Ca_kabuli_chr04 | 23046458                | CC                              | GG                | 1945940812               |
| SNP_P3_43455_23046465 | NC_021163.1    | Ca_kabuli_chr04 | 23046465                | CC                              | TT                | 1945940814               |
| SNP_P3_43456_23046504 | NC_021163.1    | Ca_kabuli_chr04 | 23046504                | CC                              | TT                | 1945940816               |
| SNP_P3_43457_23046604 | NC_021163.1    | Ca_kabuli_chr04 | 23046604                | TT                              | CC                | 1945940818               |
| SNP_P3_43458_23046803 | NC_021163.1    | Ca_kabuli_chr04 | 23046803                | CC                              | AA                | 1945940820               |
| SNP_P3_43459_23048578 | NC_021163.1    | Ca_kabuli_chr04 | 23048578                | CC                              | TT                | 1945940821               |
| SNP_P3_43460_23048876 | NC_021163.1    | Ca_kabuli_chr04 | 23048876                | CC                              | TT                | 1945940823               |
| SNP_P3_43462_23049070 | NC_021163.1    | Ca_kabuli_chr04 | 23049070                | GG                              | CC                | 1945940825               |
| SNP_P3_43463_23049114 | NC_021163.1    | Ca_kabuli_chr04 | 23049114                | GG                              | AA                | 1945940827               |
| SNP_P3_43464_23049139 | NC_021163.1    | Ca_kabuli_chr04 | 23049139                | TT                              | GG                | 1945940828               |
| SNP_P3_43465_23049531 | NC_021163.1    | Ca_kabuli_chr04 | 23049531                | AA                              | TT                | 1945940830               |
| SNP_P3_43466_23049594 | NC_021163.1    | Ca_kabuli_chr04 | 23049594                | AA                              | TT                | 1945940832               |
| SNP_P3_43467_23051807 | NC_021163.1    | Ca_kabuli_chr04 | 23051807                | AA                              | GG                | 1945940834               |
| SNP_P3_43468_23054669 | NC_021163.1    | Ca_kabuli_chr04 | 23054669                | GG                              | TT                | 1945940836               |
| SNP_P3_43469_23054682 | NC_021163.1    | Ca_kabuli_chr04 | 23054682                | TT                              | CC                | 1945940837               |
| SNP_P3_43470_23056351 | NC_021163.1    | Ca_kabuli_chr04 | 23056351                | TT                              | CC                | 1945940839               |
| SNP_P3_43471_23056360 | NC_021163.1    | Ca_kabuli_chr04 | 23056360                | TT                              | AA                | 1945940841               |
| SNP_P3_43474_23057086 | NC_021163.1    | Ca_kabuli_chr04 | 23057086                | TT                              | AA                | 1945940843               |
| SNP_P3_43475_23057155 | NC_021163.1    | Ca_kabuli_chr04 | 23057155                | CC                              | TT                | 1945940844               |
| SNP_P3_43476_23057164 | NC_021163.1    | Ca_kabuli_chr04 | 23057164                | TT                              | CC                | 1945940846               |
| SNP_P3_43477_23057167 | NC_021163.1    | Ca_kabuli_chr04 | 23057167                | TT                              | CC                | 1945940848               |
| SNP_P3_43478_23057169 | NC_021163.1    | Ca_kabuli_chr04 | 23057169                | TT                              | CC                | 1945940850               |
| SNP_P3_43479_23057176 | NC_021163.1    | Ca_kabuli_chr04 | 23057176                | AA                              | GG                | 1945940852               |
| SNP_P3_43480_23057883 | NC_021163.1    | Ca_kabuli_chr04 | 23057883                | TT                              | CC                | 1945940853               |
| SNP_P3_43481_23058305 | NC_021163.1    | Ca_kabuli_chr04 | 23058305                | AA                              | GG                | 1945940855               |
| SNP_P3_43482_23058325 | NC_021163.1    | Ca_kabuli_chr04 | 23058325                | TT                              | AA                | 1945940857               |
| SNP_P3_43483_23058326 | NC_021163.1    | Ca_kabuli_chr04 | 23058326                | TT                              | AA                | 1945940859               |
| SNP_P3_43484_23058327 | NC_021163.1    | Ca_kabuli_chr04 | 23058327                | CC                              | AA                | 1945940860               |
| SNP_P3_43485_23058548 | NC_021163.1    | Ca_kabuli_chr04 | 23058548                | AA                              | TT                | 1945940862               |
| SNP_P3_43486_23058585 | NC_021163.1    | Ca_kabuli_chr04 | 23058585                | GG                              | AA                | 1945940864               |
| SNP_P3_43487_23059485 | NC_021163.1    | Ca_kabuli_chr04 | 23059485                | TT                              | AA                | 1945940866               |
| SNP_P3_43488_23059521 | NC_021163.1    | Ca_kabuli_chr04 | 23059521                | TT                              | CC                | 1945940867               |
| SNP_P3_43489_23059553 | NC_021163.1    | Ca_kabuli_chr04 | 23059553                | AA                              | GG                | 1945940869               |
| SNP_P3_43490_23059596 | NC_021163.1    | Ca_kabuli_chr04 | 23059596                | AA                              | GG                | 1945940871               |
| SNP_P3_43491_23059666 | NC_021163.1    | Ca_kabuli_chr04 | 23059666                | CC                              | TT                | 1945940873               |
| SNP_P3_43492_23059691 | NC_021163.1    | Ca_kabuli_chr04 | 23059691                | GG                              | CC                | 1945940875               |
| SNP_P3_43493_23059696 | NC_021163.1    | Ca_kabuli_chr04 | 23059696                | AA                              | CC                | 1945940876               |
| SNP_P3_43495_23059776 | NC_021163.1    | Ca_kabuli_chr04 | 23059776                | TT                              | GG                | 1945940878               |
| SNP_P3_43496_23061715 | NC_021163.1    | Ca_kabuli_chr04 | 23061715                | CC                              | GG                | 1945940880               |
| SNP_P3_43497_23065050 | NC_021163.1    | Ca_kabuli_chr04 | 23065050                | TT                              | CC                | 1945940882               |
| SNP_P3_43498_23065088 | NC_021163.1    | Ca_kabuli_chr04 | 23065088                | GG                              | CC                | 1945940883               |
| SNP_P3_43499_23065107 | NC_021163.1    | Ca_kabuli_chr04 | 23065107                | CC                              | AA                | 1945940885               |

| SNPs IDs              | Chromosome IDs | Chromosomes     | Physical positions (bp) | CDC Frontier (Reference genome) | (Pusa 256 & HPNB) | NCBI SNPdb Accession IDs |
|-----------------------|----------------|-----------------|-------------------------|---------------------------------|-------------------|--------------------------|
| SNP_P3_43500_23065331 | NC_021163.1    | Ca_kabuli_chr04 | 23065331                | GG                              | AA                | 1945940887               |
| SNP_P3_43501_23066467 | NC_021163.1    | Ca_kabuli_chr04 | 23066467                | GG                              | AA                | 1945940889               |
| SNP_P3_43502_23066472 | NC_021163.1    | Ca_kabuli_chr04 | 23066472                | GG                              | AA                | 1945940891               |
| SNP_P3_43503_23067247 | NC_021163.1    | Ca_kabuli_chr04 | 23067247                | GG                              | TT                | 1945940892               |
| SNP_P3_43507_23074802 | NC_021163.1    | Ca_kabuli_chr04 | 23074802                | GG                              | TT                | 1945940894               |
| SNP_P3_43508_23075752 | NC_021163.1    | Ca_kabuli_chr04 | 23075752                | AA                              | TT                | 1945940896               |
| SNP_P3_43509_23075989 | NC_021163.1    | Ca_kabuli_chr04 | 23075989                | AA                              | GG                | 1945940898               |
| SNP_P3_43510_23076070 | NC_021163.1    | Ca_kabuli_chr04 | 23076070                | CC                              | TT                | 1945940899               |
| SNP_P3_43512_23077417 | NC_021163.1    | Ca_kabuli_chr04 | 23077417                | CC                              | GG                | 1945940901               |
| SNP_P3_43513_23078747 | NC_021163.1    | Ca_kabuli_chr04 | 23078747                | GG                              | CC                | 1945940903               |
| SNP_P3_43514_23078751 | NC_021163.1    | Ca_kabuli_chr04 | 23078751                | CC                              | AA                | 1945940905               |
| SNP_P3_43516_23099103 | NC_021163.1    | Ca_kabuli_chr04 | 23099103                | CC                              | TT                | 1945940907               |
| SNP_P3_43517_23099843 | NC_021163.1    | Ca_kabuli_chr04 | 23099843                | AA                              | GG                | 1945940908               |
| SNP_P3_43518_23099844 | NC_021163.1    | Ca_kabuli_chr04 | 23099844                | TT                              | CC                | 1945940910               |
| SNP_P3_43519_23099870 | NC_021163.1    | Ca_kabuli_chr04 | 23099870                | TT                              | CC                | 1945940912               |
| SNP_P3_43521_23100837 | NC_021163.1    | Ca_kabuli_chr04 | 23100837                | TT                              | CC                | 1945940914               |
| SNP_P3_43522_23101091 | NC_021163.1    | Ca_kabuli_chr04 | 23101091                | CC                              | GG                | 1945940915               |
| SNP_P3_43523_23101725 | NC_021163.1    | Ca_kabuli_chr04 | 23101725                | TT                              | CC                | 1945940917               |
| SNP_P3_43524_23101990 | NC_021163.1    | Ca_kabuli_chr04 | 23101990                | GG                              | TT                | 1945940919               |
| SNP_P3_43525_23102013 | NC_021163.1    | Ca_kabuli_chr04 | 23102013                | CC                              | AA                | 1945940921               |
| SNP_P3_43526_23102045 | NC_021163.1    | Ca_kabuli_chr04 | 23102045                | AA                              | GG                | 1945940922               |
| SNP_P3_43527_23102073 | NC_021163.1    | Ca_kabuli_chr04 | 23102073                | AA                              | GG                | 1945940924               |
| SNP_P3_43528_23102247 | NC_021163.1    | Ca_kabuli_chr04 | 23102247                | CC                              | TT                | 1945940926               |
| SNP_P3_43529_23102252 | NC_021163.1    | Ca_kabuli_chr04 | 23102252                | TT                              | AA                | 1945940928               |
| SNP_P3_43531_23104154 | NC_021163.1    | Ca_kabuli_chr04 | 23104154                | TT                              | AA                | 1945940930               |
| SNP_P3_43532_23104173 | NC_021163.1    | Ca_kabuli_chr04 | 23104173                | TT                              | GG                | 1945940931               |
| SNP_P3_43533_23104980 | NC_021163.1    | Ca_kabuli_chr04 | 23104980                | AA                              | GG                | 1945940933               |
| SNP_P3_43534_23106445 | NC_021163.1    | Ca_kabuli_chr04 | 23106445                | CC                              | AA                | 1945940935               |
| SNP_P3_43535_23106462 | NC_021163.1    | Ca_kabuli_chr04 | 23106462                | TT                              | CC                | 1945940937               |
| SNP_P3_43537_23109065 | NC_021163.1    | Ca_kabuli_chr04 | 23109065                | TT                              | CC                | 1945940938               |
| SNP_P3_43538_23111865 | NC_021163.1    | Ca_kabuli_chr04 | 23111865                | CC                              | AA                | 1945940940               |
| SNP_P3_43539_23111882 | NC_021163.1    | Ca_kabuli_chr04 | 23111882                | CC                              | TT                | 1945940942               |
| SNP_P3_43540_23111984 | NC_021163.1    | Ca_kabuli_chr04 | 23111984                | CC                              | TT                | 1945940944               |
| SNP_P3_43541_23111985 | NC_021163.1    | Ca_kabuli_chr04 | 23111985                | CC                              | AA                | 1945940946               |
| SNP_P3_43542_23112003 | NC_021163.1    | Ca_kabuli_chr04 | 23112003                | AA                              | GG                | 1945940947               |
| SNP_P3_43543_23112192 | NC_021163.1    | Ca_kabuli_chr04 | 23112192                | CC                              | TT                | 1945940949               |
| SNP_P3_43544_23112217 | NC_021163.1    | Ca_kabuli_chr04 | 23112217                | CC                              | TT                | 1945940951               |
| SNP_P3_43545_23112233 | NC_021163.1    | Ca_kabuli_chr04 | 23112233                | TT                              | CC                | 1945940953               |
| SNP_P3_43546_23112250 | NC_021163.1    | Ca_kabuli_chr04 | 23112250                | TT                              | GG                | 1945940954               |
| SNP_P3_43547_23112272 | NC_021163.1    | Ca_kabuli_chr04 | 23112272                | TT                              | CC                | 1945940956               |
| SNP_P3_43549_23117255 | NC_021163.1    | Ca_kabuli_chr04 | 23117255                | TT                              | GG                | 1945940958               |
| SNP_P3_43550_23117257 | NC_021163.1    | Ca_kabuli_chr04 | 23117257                | GG                              | CC                | 1945940960               |

| SNPs IDs              | Chromosome IDs | Chromosomes     | Physical positions (bp) | CDC Frontier (Reference genome) | (Pusa 256 & HPNB) | NCBI SNPdb Accession IDs |
|-----------------------|----------------|-----------------|-------------------------|---------------------------------|-------------------|--------------------------|
| SNP_P3_43551_23117300 | NC_021163.1    | Ca_kabuli_chr04 | 23117300                | TT                              | GG                | 1945940961               |
| SNP_P3_43552_23118320 | NC_021163.1    | Ca_kabuli_chr04 | 23118320                | CC                              | TT                | 1945940963               |
| SNP_P3_43553_23118647 | NC_021163.1    | Ca_kabuli_chr04 | 23118647                | TT                              | CC                | 1945940965               |
| SNP_P3_43554_23118658 | NC_021163.1    | Ca_kabuli_chr04 | 23118658                | TT                              | CC                | 1945940967               |
| SNP_P3_43556_23118829 | NC_021163.1    | Ca_kabuli_chr04 | 23118829                | TT                              | CC                | 1945940969               |
| SNP_P3_43557_23118880 | NC_021163.1    | Ca_kabuli_chr04 | 23118880                | CC                              | TT                | 1945940970               |
| SNP_P3_43558_23118885 | NC_021163.1    | Ca_kabuli_chr04 | 23118885                | GG                              | TT                | 1945940972               |
| SNP_P3_43559_23118895 | NC_021163.1    | Ca_kabuli_chr04 | 23118895                | CC                              | TT                | 1945940974               |
| SNP_P3_43560_23119210 | NC_021163.1    | Ca_kabuli_chr04 | 23119210                | TT                              | GG                | 1945940976               |
| SNP_P3_43561_23119442 | NC_021163.1    | Ca_kabuli_chr04 | 23119442                | GG                              | AA                | 1945940977               |
| SNP_P3_43562_23119446 | NC_021163.1    | Ca_kabuli_chr04 | 23119446                | GG                              | AA                | 1945940979               |
| SNP_P3_43563_23119475 | NC_021163.1    | Ca_kabuli_chr04 | 23119475                | AA                              | GG                | 1945940981               |
| SNP_P3_43564_23119489 | NC_021163.1    | Ca_kabuli_chr04 | 23119489                | GG                              | AA                | 1945940983               |
| SNP_P3_43565_23120422 | NC_021163.1    | Ca_kabuli_chr04 | 23120422                | GG                              | AA                | 1945940985               |
| SNP_P3_43566_23120511 | NC_021163.1    | Ca_kabuli_chr04 | 23120511                | CC                              | TT                | 1945940986               |
| SNP_P3_43567_23120568 | NC_021163.1    | Ca_kabuli_chr04 | 23120568                | CC                              | TT                | 1945940988               |
| SNP_P3_43568_23120589 | NC_021163.1    | Ca_kabuli_chr04 | 23120589                | AA                              | GG                | 1945940990               |
| SNP_P3_43569_23120667 | NC_021163.1    | Ca_kabuli_chr04 | 23120667                | GG                              | AA                | 1945940992               |
| SNP_P3_43570_23120810 | NC_021163.1    | Ca_kabuli_chr04 | 23120810                | AA                              | GG                | 1945940993               |
| SNP_P3_43571_23120811 | NC_021163.1    | Ca_kabuli_chr04 | 23120811                | TT                              | CC                | 1945940995               |
| SNP_P3_43572_23120815 | NC_021163.1    | Ca_kabuli_chr04 | 23120815                | CC                              | TT                | 1945940997               |
| SNP_P3_43573_23120882 | NC_021163.1    | Ca_kabuli_chr04 | 23120882                | AA                              | TT                | 1945940999               |
| SNP_P3_43574_23120910 | NC_021163.1    | Ca_kabuli_chr04 | 23120910                | AA                              | CC                | 1945941000               |
| SNP_P3_43575_23120982 | NC_021163.1    | Ca_kabuli_chr04 | 23120982                | GG                              | CC                | 1945941002               |
| SNP_P3_43576_23121520 | NC_021163.1    | Ca_kabuli_chr04 | 23121520                | AA                              | GG                | 1945941004               |
| SNP_P3_43577_23121523 | NC_021163.1    | Ca_kabuli_chr04 | 23121523                | GG                              | TT                | 1945941006               |
| SNP_P3_43578_23121794 | NC_021163.1    | Ca_kabuli_chr04 | 23121794                | TT                              | GG                | 1945941008               |
| SNP_P3_43579_23121814 | NC_021163.1    | Ca_kabuli_chr04 | 23121814                | GG                              | AA                | 1945941009               |
| SNP_P3_43580_23121843 | NC_021163.1    | Ca_kabuli_chr04 | 23121843                | TT                              | CC                | 1945941011               |
| SNP_P3_43581_23122042 | NC_021163.1    | Ca_kabuli_chr04 | 23122042                | CC                              | TT                | 1945941013               |
| SNP_P3_43582_23129736 | NC_021163.1    | Ca_kabuli_chr04 | 23129736                | CC                              | TT                | 1945941015               |
| SNP_P3_43583_23129739 | NC_021163.1    | Ca_kabuli_chr04 | 23129739                | AA                              | GG                | 1945941016               |
| SNP_P3_43584_23133888 | NC_021163.1    | Ca_kabuli_chr04 | 23133888                | AA                              | TT                | 1945941018               |
| SNP_P3_43585_23133891 | NC_021163.1    | Ca_kabuli_chr04 | 23133891                | CC                              | TT                | 1945941020               |
| SNP_P3_43586_23134143 | NC_021163.1    | Ca_kabuli_chr04 | 23134143                | AA                              | GG                | 1945941022               |
| SNP_P3_43587_23134167 | NC_021163.1    | Ca_kabuli_chr04 | 23134167                | GG                              | AA                | 1945941024               |
| SNP_P3_43588_23134214 | NC_021163.1    | Ca_kabuli_chr04 | 23134214                | CC                              | AA                | 1945941025               |
| SNP_P3_43589_23134215 | NC_021163.1    | Ca_kabuli_chr04 | 23134215                | AA                              | GG                | 1945941027               |
| SNP_P3_43590_23134374 | NC_021163.1    | Ca_kabuli_chr04 | 23134374                | CC                              | GG                | 1945941029               |
| SNP_P3_43591_23134432 | NC_021163.1    | Ca_kabuli_chr04 | 23134432                | AA                              | GG                | 1945941031               |
| SNP_P3_43593_23134526 | NC_021163.1    | Ca_kabuli_chr04 | 23134526                | GG                              | AA                | 1945941032               |
| SNP_P3_43594_23134592 | NC_021163.1    | Ca_kabuli_chr04 | 23134592                | AA                              | GG                | 1945941034               |

| SNPs IDs              | Chromosome IDs | Chromosomes     | Physical positions (bp) | CDC Frontier (Reference genome) | (Pusa 256 & HPNB) | NCBI SNPdb Accession IDs |
|-----------------------|----------------|-----------------|-------------------------|---------------------------------|-------------------|--------------------------|
| SNP_P3_43595_23134847 | NC_021163.1    | Ca_kabuli_chr04 | 23134847                | GG                              | CC                | 1945941036               |
| SNP_P3_43596_23134875 | NC_021163.1    | Ca_kabuli_chr04 | 23134875                | GG                              | AA                | 1945941038               |
| SNP_P3_43597_23134945 | NC_021163.1    | Ca_kabuli_chr04 | 23134945                | TT                              | AA                | 1945941039               |
| SNP_P3_43599_23135178 | NC_021163.1    | Ca_kabuli_chr04 | 23135178                | AA                              | GG                | 1945941041               |
| SNP_P3_43600_23135190 | NC_021163.1    | Ca_kabuli_chr04 | 23135190                | TT                              | AA                | 1945941043               |
| SNP_P3_43601_23135202 | NC_021163.1    | Ca_kabuli_chr04 | 23135202                | CC                              | GG                | 1945941045               |
| SNP_P3_43602_23135229 | NC_021163.1    | Ca_kabuli_chr04 | 23135229                | CC                              | TT                | 1945941047               |
| SNP_P3_43604_23135516 | NC_021163.1    | Ca_kabuli_chr04 | 23135516                | GG                              | AA                | 1945941048               |
| SNP_P3_43605_23135664 | NC_021163.1    | Ca_kabuli_chr04 | 23135664                | TT                              | CC                | 1945941050               |
| SNP_P3_43607_23136559 | NC_021163.1    | Ca_kabuli_chr04 | 23136559                | TT                              | CC                | 1945941052               |
| SNP_P3_43608_23137556 | NC_021163.1    | Ca_kabuli_chr04 | 23137556                | GG                              | AA                | 1945941054               |
| SNP_P3_43609_23137780 | NC_021163.1    | Ca_kabuli_chr04 | 23137780                | TT                              | CC                | 1945941055               |
| SNP_P3_43610_23145281 | NC_021163.1    | Ca_kabuli_chr04 | 23145281                | AA                              | GG                | 1945941057               |
| SNP_P3_43612_23145615 | NC_021163.1    | Ca_kabuli_chr04 | 23145615                | CC                              | TT                | 1945941059               |
| SNP_P3_43615_23146023 | NC_021163.1    | Ca_kabuli_chr04 | 23146023                | AA                              | TT                | 1945941061               |
| SNP_P3_43616_23148204 | NC_021163.1    | Ca_kabuli_chr04 | 23148204                | AA                              | TT                | 1945941063               |
| SNP_P3_43617_23169134 | NC_021163.1    | Ca_kabuli_chr04 | 23169134                | AA                              | GG                | 1945941064               |
| SNP_P3_43618_23170150 | NC_021163.1    | Ca_kabuli_chr04 | 23170150                | TT                              | CC                | 1945941066               |
| SNP_P3_43619_23192269 | NC_021163.1    | Ca_kabuli_chr04 | 23192269                | TT                              | AA                | 1945941068               |
| SNP_P3_43620_23227256 | NC_021163.1    | Ca_kabuli_chr04 | 23227256                | AA                              | TT                | 1945941070               |
| SNP_P3_43621_23227257 | NC_021163.1    | Ca_kabuli_chr04 | 23227257                | CC                              | GG                | 1945941071               |
| SNP_P3_43622_23227269 | NC_021163.1    | Ca_kabuli_chr04 | 23227269                | AA                              | TT                | 1945941073               |
| SNP_P3_43623_23227611 | NC_021163.1    | Ca_kabuli_chr04 | 23227611                | CC                              | TT                | 1945941075               |
| SNP_P3_43624_23227772 | NC_021163.1    | Ca_kabuli_chr04 | 23227772                | TT                              | CC                | 1945941077               |
| SNP_P3_43625_23227887 | NC_021163.1    | Ca_kabuli_chr04 | 23227887                | TT                              | GG                | 1945941078               |
| SNP_P3_43626_23245240 | NC_021163.1    | Ca_kabuli_chr04 | 23245240                | CC                              | GG                | 1945941080               |
| SNP_P3_43627_23253004 | NC_021163.1    | Ca_kabuli_chr04 | 23253004                | TT                              | CC                | 1945941082               |
| SNP_P3_43628_23272971 | NC_021163.1    | Ca_kabuli_chr04 | 23272971                | TT                              | GG                | 1945941084               |
| SNP_P3_43630_23274379 | NC_021163.1    | Ca_kabuli_chr04 | 23274379                | AA                              | GG                | 1945941086               |
| SNP_P3_43631_23277116 | NC_021163.1    | Ca_kabuli_chr04 | 23277116                | CC                              | TT                | 1945941087               |
| SNP_P3_43632_23278017 | NC_021163.1    | Ca_kabuli_chr04 | 23278017                | GG                              | AA                | 1945941089               |
| SNP_P3_43633_23287131 | NC_021163.1    | Ca_kabuli_chr04 | 23287131                | AA                              | GG                | 1945941091               |
| SNP_P3_43634_23297819 | NC_021163.1    | Ca_kabuli_chr04 | 23297819                | CC                              | TT                | 1945941093               |
| SNP_P3_43636_23310260 | NC_021163.1    | Ca_kabuli_chr04 | 23310260                | AA                              | TT                | 1945941094               |
| SNP_P3_43637_23310297 | NC_021163.1    | Ca_kabuli_chr04 | 23310297                | CC                              | AA                | 1945941096               |
| SNP_P3_43638_23310615 | NC_021163.1    | Ca_kabuli_chr04 | 23310615                | TT                              | AA                | 1945941098               |
| SNP_P3_43639_23330130 | NC_021163.1    | Ca_kabuli_chr04 | 23330130                | GG                              | TT                | 1945941100               |
| SNP_P3_43640_23349679 | NC_021163.1    | Ca_kabuli_chr04 | 23349679                | AA                              | TT                | 1945941102               |
| SNP_P3_43642_23361643 | NC_021163.1    | Ca_kabuli_chr04 | 23361643                | GG                              | CC                | 1945941103               |
| SNP_P3_43643_23367343 | NC_021163.1    | Ca_kabuli_chr04 | 23367343                | CC                              | GG                | 1945941105               |
| SNP_P3_43644_23421217 | NC_021163.1    | Ca_kabuli_chr04 | 23421217                | TT                              | GG                | 1945941107               |
| SNP_P3_43645_23421297 | NC_021163.1    | Ca_kabuli_chr04 | 23421297                | GG                              | AA                | 1945941109               |

| SNPs IDs              | Chromosome IDs | Chromosomes     | Physical positions (bp) | CDC Frontier (Reference genome) | (Pusa 256 & HPNB) | NCBI SNPdb Accession IDs |
|-----------------------|----------------|-----------------|-------------------------|---------------------------------|-------------------|--------------------------|
| SNP_P3_43647_23421659 | NC_021163.1    | Ca_kabuli_chr04 | 23421659                | AA                              | GG                | 1945941110               |
| SNP_P3_43648_23421703 | NC_021163.1    | Ca_kabuli_chr04 | 23421703                | GG                              | AA                | 1945941112               |
| SNP_P3_43649_23421711 | NC_021163.1    | Ca_kabuli_chr04 | 23421711                | CC                              | AA                | 1945941114               |
| SNP_P3_43650_23421798 | NC_021163.1    | Ca_kabuli_chr04 | 23421798                | AA                              | GG                | 1945941116               |
| SNP_P3_43651_23421800 | NC_021163.1    | Ca_kabuli_chr04 | 23421800                | AA                              | GG                | 1945941117               |
| SNP_P3_43652_23421827 | NC_021163.1    | Ca_kabuli_chr04 | 23421827                | TT                              | CC                | 1945941119               |
| SNP_P3_43653_23421865 | NC_021163.1    | Ca_kabuli_chr04 | 23421865                | TT                              | CC                | 1945941121               |
| SNP_P3_43654_23426185 | NC_021163.1    | Ca_kabuli_chr04 | 23426185                | TT                              | CC                | 1945941123               |
| SNP_P3_43655_23426325 | NC_021163.1    | Ca_kabuli_chr04 | 23426325                | GG                              | AA                | 1945941125               |
| SNP_P3_43657_23508499 | NC_021163.1    | Ca_kabuli_chr04 | 23508499                | AA                              | GG                | 1945941126               |
| SNP_P3_43658_23508502 | NC_021163.1    | Ca_kabuli_chr04 | 23508502                | CC                              | TT                | 1945941128               |
| SNP_P3_43659_23508504 | NC_021163.1    | Ca_kabuli_chr04 | 23508504                | GG                              | TT                | 1945941130               |
| SNP_P3_43660_23508620 | NC_021163.1    | Ca_kabuli_chr04 | 23508620                | TT                              | CC                | 1945941132               |
| SNP_P3_43661_23508654 | NC_021163.1    | Ca_kabuli_chr04 | 23508654                | TT                              | CC                | 1945941133               |
| SNP_P3_43662_23508740 | NC_021163.1    | Ca_kabuli_chr04 | 23508740                | TT                              | CC                | 1945941135               |
| SNP_P3_43663_23508757 | NC_021163.1    | Ca_kabuli_chr04 | 23508757                | CC                              | TT                | 1945941137               |
| SNP_P3_43664_23508849 | NC_021163.1    | Ca_kabuli_chr04 | 23508849                | CC                              | TT                | 1945941139               |
| SNP_P3_43665_23508882 | NC_021163.1    | Ca_kabuli_chr04 | 23508882                | AA                              | GG                | 1945941141               |
| SNP_P3_43666_23508898 | NC_021163.1    | Ca_kabuli_chr04 | 23508898                | AA                              | CC                | 1945941142               |
| SNP_P3_43667_23522480 | NC_021163.1    | Ca_kabuli_chr04 | 23522480                | AA                              | TT                | 1945941144               |
| SNP_P3_43668_23522495 | NC_021163.1    | Ca_kabuli_chr04 | 23522495                | TT                              | GG                | 1945941146               |
| SNP_P3_43669_23522499 | NC_021163.1    | Ca_kabuli_chr04 | 23522499                | TT                              | GG                | 1945941148               |
| SNP_P3_43670_23522697 | NC_021163.1    | Ca_kabuli_chr04 | 23522697                | TT                              | AA                | 1945941149               |
| SNP_P3_43672_23530902 | NC_021163.1    | Ca_kabuli_chr04 | 23530902                | TT                              | AA                | 1945941151               |
| SNP_P3_43673_23547379 | NC_021163.1    | Ca_kabuli_chr04 | 23547379                | CC                              | TT                | 1945941153               |
| SNP_P3_43674_23556303 | NC_021163.1    | Ca_kabuli_chr04 | 23556303                | AA                              | TT                | 1945941155               |
| SNP_P3_43675_23573297 | NC_021163.1    | Ca_kabuli_chr04 | 23573297                | AA                              | GG                | 1945941157               |
| SNP_P3_43676_23585727 | NC_021163.1    | Ca_kabuli_chr04 | 23585727                | TT                              | CC                | 1945941158               |
| SNP_P3_43677_23587245 | NC_021163.1    | Ca_kabuli_chr04 | 23587245                | CC                              | TT                | 1945941160               |
| SNP_P3_43678_23587246 | NC_021163.1    | Ca_kabuli_chr04 | 23587246                | CC                              | TT                | 1945941162               |
| SNP_P3_43679_23587255 | NC_021163.1    | Ca_kabuli_chr04 | 23587255                | AA                              | TT                | 1945941164               |
| SNP_P3_43680_23587261 | NC_021163.1    | Ca_kabuli_chr04 | 23587261                | CC                              | AA                | 1945941165               |
| SNP_P3_43681_23606764 | NC_021163.1    | Ca_kabuli_chr04 | 23606764                | TT                              | AA                | 1945941167               |
| SNP_P3_43682_23616163 | NC_021163.1    | Ca_kabuli_chr04 | 23616163                | CC                              | TT                | 1945941169               |
| SNP_P3_43683_23619010 | NC_021163.1    | Ca_kabuli_chr04 | 23619010                | GG                              | TT                | 1945941171               |
| SNP_P3_43684_23620895 | NC_021163.1    | Ca_kabuli_chr04 | 23620895                | CC                              | TT                | 1945941172               |
| SNP_P3_43685_23625551 | NC_021163.1    | Ca_kabuli_chr04 | 23625551                | AA                              | TT                | 1945941174               |
| SNP_P3_43686_23647020 | NC_021163.1    | Ca_kabuli_chr04 | 23647020                | GG                              | CC                | 1945941176               |
| SNP_P3_43687_23663785 | NC_021163.1    | Ca_kabuli_chr04 | 23663785                | TT                              | GG                | 1945941178               |
| SNP_P3_43688_23663948 | NC_021163.1    | Ca_kabuli_chr04 | 23663948                | TT                              | CC                | 1945941180               |
| SNP_P3_43689_23664000 | NC_021163.1    | Ca_kabuli_chr04 | 23664000                | TT                              | CC                | 1945941181               |
| SNP_P3_43690_23664380 | NC_021163.1    | Ca_kabuli_chr04 | 23664380                | TT                              | GG                | 1945941183               |

| SNPs IDs              | Chromosome IDs | Chromosomes     | Physical positions (bp) | CDC Frontier (Reference genome) | (Pusa 256 & HPNB) | NCBI SNPdb Accession IDs |
|-----------------------|----------------|-----------------|-------------------------|---------------------------------|-------------------|--------------------------|
| SNP_P3_43691_23692398 | NC_021163.1    | Ca_kabuli_chr04 | 23692398                | AA                              | GG                | 1945941185               |
| SNP_P3_43692_23699517 | NC_021163.1    | Ca_kabuli_chr04 | 23699517                | TT                              | GG                | 1945941187               |
| SNP_P3_43693_23699523 | NC_021163.1    | Ca_kabuli_chr04 | 23699523                | TT                              | GG                | 1945941188               |
| SNP_P3_43694_23699525 | NC_021163.1    | Ca_kabuli_chr04 | 23699525                | AA                              | TT                | 1945941190               |
| SNP_P3_43695_23699532 | NC_021163.1    | Ca_kabuli_chr04 | 23699532                | GG                              | AA                | 1945941192               |
| SNP_P3_43696_23699540 | NC_021163.1    | Ca_kabuli_chr04 | 23699540                | CC                              | GG                | 1945941194               |
| SNP_P3_43697_23699628 | NC_021163.1    | Ca_kabuli_chr04 | 23699628                | GG                              | CC                | 1945941196               |
| SNP_P3_43698_23699629 | NC_021163.1    | Ca_kabuli_chr04 | 23699629                | TT                              | CC                | 1945941197               |
| SNP_P3_43699_23699658 | NC_021163.1    | Ca_kabuli_chr04 | 23699658                | AA                              | GG                | 1945941199               |
| SNP_P3_43700_23699807 | NC_021163.1    | Ca_kabuli_chr04 | 23699807                | CC                              | TT                | 1945941201               |
| SNP_P3_43701_23699964 | NC_021163.1    | Ca_kabuli_chr04 | 23699964                | AA                              | TT                | 1945941203               |
| SNP_P3_43702_23712197 | NC_021163.1    | Ca_kabuli_chr04 | 23712197                | AA                              | GG                | 1945941204               |
| SNP_P3_43703_23712208 | NC_021163.1    | Ca_kabuli_chr04 | 23712208                | TT                              | CC                | 1945941206               |
| SNP_P3_43704_23712245 | NC_021163.1    | Ca_kabuli_chr04 | 23712245                | AA                              | TT                | 1945941208               |
| SNP_P3_43705_23717315 | NC_021163.1    | Ca_kabuli_chr04 | 23717315                | TT                              | GG                | 1945941210               |
| SNP_P3_43706_23719800 | NC_021163.1    | Ca_kabuli_chr04 | 23719800                | AA                              | GG                | 1945941211               |
| SNP_P3_43707_23719811 | NC_021163.1    | Ca_kabuli_chr04 | 23719811                | TT                              | CC                | 1945941213               |
| SNP_P3_43708_23719813 | NC_021163.1    | Ca_kabuli_chr04 | 23719813                | AA                              | TT                | 1945941215               |
| SNP_P3_43709_23719815 | NC_021163.1    | Ca_kabuli_chr04 | 23719815                | TT                              | AA                | 1945941217               |
| SNP_P3_43711_23720338 | NC_021163.1    | Ca_kabuli_chr04 | 23720338                | AA                              | GG                | 1945941219               |
| SNP_P3_43712_23720360 | NC_021163.1    | Ca_kabuli_chr04 | 23720360                | TT                              | CC                | 1945941220               |
| SNP_P3_43713_23720873 | NC_021163.1    | Ca_kabuli_chr04 | 23720873                | AA                              | GG                | 1945941222               |
| SNP_P3_43715_23753163 | NC_021163.1    | Ca_kabuli_chr04 | 23753163                | TT                              | CC                | 1945941224               |
| SNP_P3_43716_23757424 | NC_021163.1    | Ca_kabuli_chr04 | 23757424                | TT                              | AA                | 1945941226               |
| SNP_P3_43717_23758609 | NC_021163.1    | Ca_kabuli_chr04 | 23758609                | AA                              | GG                | 1945941227               |
| SNP_P3_43718_23758620 | NC_021163.1    | Ca_kabuli_chr04 | 23758620                | TT                              | GG                | 1945941229               |
| SNP_P3_43719_23760468 | NC_021163.1    | Ca_kabuli_chr04 | 23760468                | TT                              | GG                | 1945941231               |
| SNP_P3_43720_23760470 | NC_021163.1    | Ca_kabuli_chr04 | 23760470                | AA                              | TT                | 1945941233               |
| SNP_P3_43721_23772913 | NC_021163.1    | Ca_kabuli_chr04 | 23772913                | AA                              | CC                | 1945941235               |
| SNP_P3_43722_23772930 | NC_021163.1    | Ca_kabuli_chr04 | 23772930                | AA                              | GG                | 1945941236               |
| SNP_P3_43723_23772939 | NC_021163.1    | Ca_kabuli_chr04 | 23772939                | TT                              | AA                | 1945941238               |
| SNP_P3_43724_23788124 | NC_021163.1    | Ca_kabuli_chr04 | 23788124                | AA                              | TT                | 1945941240               |
| SNP_P3_43725_23811522 | NC_021163.1    | Ca_kabuli_chr04 | 23811522                | GG                              | AA                | 1945941242               |
| SNP_P3_43726_23827778 | NC_021163.1    | Ca_kabuli_chr04 | 23827778                | AA                              | CC                | 1945941243               |
| SNP_P3_43727_23827811 | NC_021163.1    | Ca_kabuli_chr04 | 23827811                | GG                              | AA                | 1945941245               |
| SNP_P3_43728_23827817 | NC_021163.1    | Ca_kabuli_chr04 | 23827817                | TT                              | GG                | 1945941247               |
| SNP_P3_43729_23827904 | NC_021163.1    | Ca_kabuli_chr04 | 23827904                | CC                              | TT                | 1945941249               |
| SNP_P3_43730_23827913 | NC_021163.1    | Ca_kabuli_chr04 | 23827913                | TT                              | GG                | 1945941250               |
| SNP_P3_43731_23828018 | NC_021163.1    | Ca_kabuli_chr04 | 23828018                | CC                              | AA                | 1945941252               |
| SNP_P3_43732_23828033 | NC_021163.1    | Ca_kabuli_chr04 | 23828033                | AA                              | TT                | 1945941254               |
| SNP_P3_43734_23828135 | NC_021163.1    | Ca_kabuli_chr04 | 23828135                | GG                              | AA                | 1945941256               |
| SNP_P3_43735_23828187 | NC_021163.1    | Ca_kabuli_chr04 | 23828187                | AA                              | TT                | 1945941258               |



| SNPs IDs              | Chromosome IDs | Chromosomes     | Physical positions (bp) | CDC Frontier (Reference genome) | (Pusa 256 & HPNB) | NCBI SNPdb Accession IDs |
|-----------------------|----------------|-----------------|-------------------------|---------------------------------|-------------------|--------------------------|
| SNP_P3_43736_23828193 | NC_021163.1    | Ca_kabuli_chr04 | 23828193                | GG                              | AA                | 1945941259               |
| SNP_P3_43737_23828307 | NC_021163.1    | Ca_kabuli_chr04 | 23828307                | CC                              | TT                | 1945941261               |
| SNP_P3_43738_23828330 | NC_021163.1    | Ca_kabuli_chr04 | 23828330                | CC                              | TT                | 1945941263               |
| SNP_P3_43739_23837493 | NC_021163.1    | Ca_kabuli_chr04 | 23837493                | CC                              | AA                | 1945941265               |
| SNP_P3_43741_23923974 | NC_021163.1    | Ca_kabuli_chr04 | 23923974                | TT                              | CC                | 1945941266               |
| SNP_P3_43743_23945785 | NC_021163.1    | Ca_kabuli_chr04 | 23945785                | CC                              | TT                | 1945941268               |
| SNP_P3_43745_23965875 | NC_021163.1    | Ca_kabuli_chr04 | 23965875                | TT                              | CC                | 1945941270               |
| SNP_P3_43746_23981366 | NC_021163.1    | Ca_kabuli_chr04 | 23981366                | GG                              | TT                | 1945941272               |
| SNP_P3_43747_23990044 | NC_021163.1    | Ca_kabuli_chr04 | 23990044                | CC                              | TT                | 1945941274               |
| SNP_P3_43748_24005881 | NC_021163.1    | Ca_kabuli_chr04 | 24005881                | AA                              | GG                | 1945941275               |
| SNP_P3_43749_24007272 | NC_021163.1    | Ca_kabuli_chr04 | 24007272                | GG                              | CC                | 1945941277               |
| SNP_P3_43750_24020609 | NC_021163.1    | Ca_kabuli_chr04 | 24020609                | CC                              | TT                | 1945941279               |
| SNP_P3_43751_24021662 | NC_021163.1    | Ca_kabuli_chr04 | 24021662                | GG                              | TT                | 1945941281               |
| SNP_P3_43752_24021671 | NC_021163.1    | Ca_kabuli_chr04 | 24021671                | GG                              | CC                | 1945941282               |
| SNP_P3_43753_24031106 | NC_021163.1    | Ca_kabuli_chr04 | 24031106                | TT                              | CC                | 1945941284               |
| SNP_P3_43754_24034321 | NC_021163.1    | Ca_kabuli_chr04 | 24034321                | CC                              | TT                | 1945941286               |
| SNP_P3_43755_24057180 | NC_021163.1    | Ca_kabuli_chr04 | 24057180                | TT                              | CC                | 1945941288               |
| SNP_P3_43756_24063617 | NC_021163.1    | Ca_kabuli_chr04 | 24063617                | TT                              | CC                | 1945941289               |
| SNP_P3_43757_24076741 | NC_021163.1    | Ca_kabuli_chr04 | 24076741                | TT                              | AA                | 1945941291               |
| SNP_P3_43758_24112662 | NC_021163.1    | Ca_kabuli_chr04 | 24112662                | AA                              | CC                | 1945941293               |
| SNP_P3_43759_24112971 | NC_021163.1    | Ca_kabuli_chr04 | 24112971                | AA                              | GG                | 1945941295               |
| SNP_P3_43760_24112995 | NC_021163.1    | Ca_kabuli_chr04 | 24112995                | GG                              | AA                | 1945941297               |
| SNP_P3_43761_24113024 | NC_021163.1    | Ca_kabuli_chr04 | 24113024                | TT                              | GG                | 1945941298               |
| SNP_P3_43764_24160330 | NC_021163.1    | Ca_kabuli_chr04 | 24160330                | AA                              | GG                | 1945941300               |
| SNP_P3_43765_24179919 | NC_021163.1    | Ca_kabuli_chr04 | 24179919                | TT                              | GG                | 1945941302               |
| SNP_P3_43766_24180246 | NC_021163.1    | Ca_kabuli_chr04 | 24180246                | GG                              | AA                | 1945941304               |
| SNP_P3_43767_24190751 | NC_021163.1    | Ca_kabuli_chr04 | 24190751                | TT                              | CC                | 1945941306               |
| SNP_P3_43768_24215995 | NC_021163.1    | Ca_kabuli_chr04 | 24215995                | AA                              | TT                | 1945941307               |
| SNP_P3_43769_24219555 | NC_021163.1    | Ca_kabuli_chr04 | 24219555                | AA                              | GG                | 1945941309               |
| SNP_P3_43770_24230971 | NC_021163.1    | Ca_kabuli_chr04 | 24230971                | GG                              | AA                | 1945941311               |
| SNP_P3_43771_24231367 | NC_021163.1    | Ca_kabuli_chr04 | 24231367                | GG                              | AA                | 1945941313               |
| SNP_P3_43772_24231389 | NC_021163.1    | Ca_kabuli_chr04 | 24231389                | TT                              | CC                | 1945941314               |
| SNP_P3_43773_24239224 | NC_021163.1    | Ca_kabuli_chr04 | 24239224                | CC                              | TT                | 1945941316               |
| SNP_P3_43775_24276132 | NC_021163.1    | Ca_kabuli_chr04 | 24276132                | TT                              | CC                | 1945941318               |
| SNP_P3_43776_24311564 | NC_021163.1    | Ca_kabuli_chr04 | 24311564                | GG                              | AA                | 1945941320               |
| SNP_P3_43777_24311569 | NC_021163.1    | Ca_kabuli_chr04 | 24311569                | TT                              | CC                | 1945941321               |
| SNP_P3_43778_24311759 | NC_021163.1    | Ca_kabuli_chr04 | 24311759                | AA                              | TT                | 1945941323               |
| SNP_P3_43779_24311767 | NC_021163.1    | Ca_kabuli_chr04 | 24311767                | CC                              | TT                | 1945941325               |
| SNP_P3_43781_24330888 | NC_021163.1    | Ca_kabuli_chr04 | 24330888                | TT                              | CC                | 1945941327               |
| SNP_P3_43782_24330894 | NC_021163.1    | Ca_kabuli_chr04 | 24330894                | TT                              | CC                | 1945941329               |
| SNP_P3_43783_24347838 | NC_021163.1    | Ca_kabuli_chr04 | 24347838                | AA                              | TT                | 1945941330               |
| SNP_P3_43784_24350076 | NC_021163.1    | Ca_kabuli_chr04 | 24350076                | GG                              | CC                | 1945941332               |

| SNPs IDs              | Chromosome IDs | Chromosomes     | Physical positions (bp) | CDC Frontier (Reference genome) | (Pusa 256 & HPNB) | NCBI SNPdb Accession IDs |
|-----------------------|----------------|-----------------|-------------------------|---------------------------------|-------------------|--------------------------|
| SNP_P3_43785_24350085 | NC_021163.1    | Ca_kabuli_chr04 | 24350085                | AA                              | CC                | 1945941334               |
| SNP_P3_43786_24350107 | NC_021163.1    | Ca_kabuli_chr04 | 24350107                | TT                              | CC                | 1945941336               |
| SNP_P3_43787_24350109 | NC_021163.1    | Ca_kabuli_chr04 | 24350109                | TT                              | AA                | 1945941337               |
| SNP_P3_43788_24350110 | NC_021163.1    | Ca_kabuli_chr04 | 24350110                | CC                              | TT                | 1945941339               |
| SNP_P3_43789_24350112 | NC_021163.1    | Ca_kabuli_chr04 | 24350112                | TT                              | CC                | 1945941341               |
| SNP_P3_43790_24350118 | NC_021163.1    | Ca_kabuli_chr04 | 24350118                | GG                              | AA                | 1945941343               |
| SNP_P3_43791_24350136 | NC_021163.1    | Ca_kabuli_chr04 | 24350136                | TT                              | CC                | 1945941345               |
| SNP_P3_43792_24350159 | NC_021163.1    | Ca_kabuli_chr04 | 24350159                | TT                              | GG                | 1945941346               |
| SNP_P3_43793_24350213 | NC_021163.1    | Ca_kabuli_chr04 | 24350213                | TT                              | CC                | 1945941348               |
| SNP_P3_43794_24350245 | NC_021163.1    | Ca_kabuli_chr04 | 24350245                | CC                              | TT                | 1945941350               |
| SNP_P3_43795_24350289 | NC_021163.1    | Ca_kabuli_chr04 | 24350289                | CC                              | TT                | 1945941352               |
| SNP_P3_43797_24350422 | NC_021163.1    | Ca_kabuli_chr04 | 24350422                | CC                              | TT                | 1945941353               |
| SNP_P3_43798_24350424 | NC_021163.1    | Ca_kabuli_chr04 | 24350424                | AA                              | GG                | 1945941355               |
| SNP_P3_43799_24350433 | NC_021163.1    | Ca_kabuli_chr04 | 24350433                | TT                              | AA                | 1945941357               |
| SNP_P3_43801_24355566 | NC_021163.1    | Ca_kabuli_chr04 | 24355566                | AA                              | GG                | 1945941359               |
| SNP_P3_43802_24356940 | NC_021163.1    | Ca_kabuli_chr04 | 24356940                | AA                              | GG                | 1945941361               |
| SNP_P3_43803_24356954 | NC_021163.1    | Ca_kabuli_chr04 | 24356954                | TT                              | GG                | 1945941362               |
| SNP_P3_43804_24357038 | NC_021163.1    | Ca_kabuli_chr04 | 24357038                | CC                              | TT                | 1945941364               |
| SNP_P3_43805_24357039 | NC_021163.1    | Ca_kabuli_chr04 | 24357039                | TT                              | CC                | 1945941366               |
| SNP_P3_43806_24357057 | NC_021163.1    | Ca_kabuli_chr04 | 24357057                | TT                              | GG                | 1945941368               |
| SNP_P3_43807_24357070 | NC_021163.1    | Ca_kabuli_chr04 | 24357070                | TT                              | GG                | 1945941369               |
| SNP_P3_43809_24365186 | NC_021163.1    | Ca_kabuli_chr04 | 24365186                | TT                              | CC                | 1945941371               |
| SNP_P3_43810_24365456 | NC_021163.1    | Ca_kabuli_chr04 | 24365456                | AA                              | GG                | 1945941373               |
| SNP_P3_43811_24368035 | NC_021163.1    | Ca_kabuli_chr04 | 24368035                | AA                              | TT                | 1945941375               |
| SNP_P3_43813_24379818 | NC_021163.1    | Ca_kabuli_chr04 | 24379818                | GG                              | AA                | 1945941376               |
| SNP_P3_43814_24382621 | NC_021163.1    | Ca_kabuli_chr04 | 24382621                | GG                              | AA                | 1945941378               |
| SNP_P3_43815_24402943 | NC_021163.1    | Ca_kabuli_chr04 | 24402943                | CC                              | AA                | 1945941380               |
| SNP_P3_43816_24403401 | NC_021163.1    | Ca_kabuli_chr04 | 24403401                | CC                              | GG                | 1945941382               |
| SNP_P3_43817_24406457 | NC_021163.1    | Ca_kabuli_chr04 | 24406457                | AA                              | CC                | 1945941384               |
| SNP_P3_43818_24417297 | NC_021163.1    | Ca_kabuli_chr04 | 24417297                | AA                              | GG                | 1945941385               |
| SNP_P3_43821_24435997 | NC_021163.1    | Ca_kabuli_chr04 | 24435997                | TT                              | AA                | 1945941387               |
| SNP_P3_43822_24436562 | NC_021163.1    | Ca_kabuli_chr04 | 24436562                | GG                              | AA                | 1945941389               |
| SNP_P3_43823_24436836 | NC_021163.1    | Ca_kabuli_chr04 | 24436836                | CC                              | AA                | 1945941391               |
| SNP_P3_43824_24437737 | NC_021163.1    | Ca_kabuli_chr04 | 24437737                | TT                              | CC                | 1945941392               |
| SNP_P3_43825_24437885 | NC_021163.1    | Ca_kabuli_chr04 | 24437885                | CC                              | TT                | 1945941394               |
| SNP_P3_43827_24438182 | NC_021163.1    | Ca_kabuli_chr04 | 24438182                | AA                              | CC                | 1945941396               |
| SNP_P3_43828_24438224 | NC_021163.1    | Ca_kabuli_chr04 | 24438224                | GG                              | TT                | 1945941398               |
| SNP_P3_43829_24438228 | NC_021163.1    | Ca_kabuli_chr04 | 24438228                | TT                              | CC                | 1945941400               |
| SNP_P3_43830_24438231 | NC_021163.1    | Ca_kabuli_chr04 | 24438231                | TT                              | CC                | 1945941401               |
| SNP_P3_43831_24438244 | NC_021163.1    | Ca_kabuli_chr04 | 24438244                | CC                              | TT                | 1945941403               |
| SNP_P3_43832_24438297 | NC_021163.1    | Ca_kabuli_chr04 | 24438297                | TT                              | CC                | 1945941405               |
| SNP_P3_43833_24442902 | NC_021163.1    | Ca_kabuli_chr04 | 24442902                | GG                              | CC                | 1945941407               |

| SNPs IDs              | Chromosome IDs | Chromosomes     | Physical positions (bp) | CDC Frontier (Reference genome) | (Pusa 256 & HPNB) | NCBI SNPdb Accession IDs |
|-----------------------|----------------|-----------------|-------------------------|---------------------------------|-------------------|--------------------------|
| SNP_P3_43834_24442904 | NC_021163.1    | Ca_kabuli_chr04 | 24442904                | GG                              | AA                | 1945941408               |
| SNP_P3_43835_24442906 | NC_021163.1    | Ca_kabuli_chr04 | 24442906                | GG                              | AA                | 1945941410               |
| SNP_P3_43836_24442907 | NC_021163.1    | Ca_kabuli_chr04 | 24442907                | TT                              | CC                | 1945941412               |
| SNP_P3_43837_24442909 | NC_021163.1    | Ca_kabuli_chr04 | 24442909                | TT                              | CC                | 1945941414               |
| SNP_P3_43840_24449707 | NC_021163.1    | Ca_kabuli_chr04 | 24449707                | CC                              | TT                | 1945941416               |
| SNP_P3_43841_24453336 | NC_021163.1    | Ca_kabuli_chr04 | 24453336                | GG                              | AA                | 1945941417               |
| SNP_P3_43842_24453377 | NC_021163.1    | Ca_kabuli_chr04 | 24453377                | TT                              | GG                | 1945941419               |
| SNP_P3_43843_24453397 | NC_021163.1    | Ca_kabuli_chr04 | 24453397                | AA                              | CC                | 1945941421               |
| SNP_P3_43844_24453419 | NC_021163.1    | Ca_kabuli_chr04 | 24453419                | AA                              | TT                | 1945941423               |
| SNP_P3_43845_24453421 | NC_021163.1    | Ca_kabuli_chr04 | 24453421                | AA                              | CC                | 1945941424               |
| SNP_P3_43846_24453422 | NC_021163.1    | Ca_kabuli_chr04 | 24453422                | AA                              | GG                | 1945941426               |
| SNP_P3_43847_24453433 | NC_021163.1    | Ca_kabuli_chr04 | 24453433                | AA                              | TT                | 1945941428               |
| SNP_P3_43848_24453523 | NC_021163.1    | Ca_kabuli_chr04 | 24453523                | CC                              | TT                | 1945941430               |
| SNP_P3_43849_24453739 | NC_021163.1    | Ca_kabuli_chr04 | 24453739                | TT                              | AA                | 1945941431               |
| SNP_P3_43850_24453750 | NC_021163.1    | Ca_kabuli_chr04 | 24453750                | AA                              | GG                | 1945941433               |
| SNP_P3_43851_24453752 | NC_021163.1    | Ca_kabuli_chr04 | 24453752                | AA                              | TT                | 1945941435               |
| SNP_P3_43852_24460918 | NC_021163.1    | Ca_kabuli_chr04 | 24460918                | CC                              | TT                | 1945941437               |
| SNP_P3_43854_24474342 | NC_021163.1    | Ca_kabuli_chr04 | 24474342                | TT                              | GG                | 1945941439               |
| SNP_P3_43855_24478409 | NC_021163.1    | Ca_kabuli_chr04 | 24478409                | TT                              | CC                | 1945941440               |
| SNP_P3_43856_24478431 | NC_021163.1    | Ca_kabuli_chr04 | 24478431                | TT                              | GG                | 1945941442               |
| SNP_P3_43857_24478454 | NC_021163.1    | Ca_kabuli_chr04 | 24478454                | TT                              | AA                | 1945941444               |
| SNP_P3_43858_24478466 | NC_021163.1    | Ca_kabuli_chr04 | 24478466                | CC                              | TT                | 1945941446               |
| SNP_P3_43859_24478812 | NC_021163.1    | Ca_kabuli_chr04 | 24478812                | AA                              | GG                | 1945941447               |
| SNP_P3_43860_24478825 | NC_021163.1    | Ca_kabuli_chr04 | 24478825                | TT                              | AA                | 1945941449               |
| SNP_P3_43861_24478837 | NC_021163.1    | Ca_kabuli_chr04 | 24478837                | TT                              | CC                | 1945941451               |
| SNP_P3_43862_24478841 | NC_021163.1    | Ca_kabuli_chr04 | 24478841                | AA                              | CC                | 1945941453               |
| SNP_P3_43863_24478931 | NC_021163.1    | Ca_kabuli_chr04 | 24478931                | GG                              | CC                | 1945941455               |
| SNP_P3_43866_24479127 | NC_021163.1    | Ca_kabuli_chr04 | 24479127                | AA                              | CC                | 1945941456               |
| SNP_P3_43867_24479137 | NC_021163.1    | Ca_kabuli_chr04 | 24479137                | CC                              | TT                | 1945941458               |
| SNP_P3_43868_24479172 | NC_021163.1    | Ca_kabuli_chr04 | 24479172                | CC                              | TT                | 1945941460               |
| SNP_P3_43869_24479205 | NC_021163.1    | Ca_kabuli_chr04 | 24479205                | GG                              | AA                | 1945941462               |
| SNP_P3_43870_24479225 | NC_021163.1    | Ca_kabuli_chr04 | 24479225                | CC                              | AA                | 1945941463               |
| SNP_P3_43871_24479248 | NC_021163.1    | Ca_kabuli_chr04 | 24479248                | TT                              | AA                | 1945941465               |
| SNP_P3_43872_24479255 | NC_021163.1    | Ca_kabuli_chr04 | 24479255                | TT                              | CC                | 1945941467               |
| SNP_P3_43873_24479348 | NC_021163.1    | Ca_kabuli_chr04 | 24479348                | CC                              | GG                | 1945941469               |
| SNP_P3_43874_24479399 | NC_021163.1    | Ca_kabuli_chr04 | 24479399                | GG                              | AA                | 1945941471               |
| SNP_P3_43875_24482474 | NC_021163.1    | Ca_kabuli_chr04 | 24482474                | CC                              | TT                | 1945941472               |
| SNP_P3_43876_24482476 | NC_021163.1    | Ca_kabuli_chr04 | 24482476                | AA                              | GG                | 1945941474               |
| SNP_P3_43877_24483846 | NC_021163.1    | Ca_kabuli_chr04 | 24483846                | CC                              | AA                | 1945941476               |
| SNP_P3_43878_24484781 | NC_021163.1    | Ca_kabuli_chr04 | 24484781                | CC                              | TT                | 1945941478               |
| SNP_P3_43880_24489520 | NC_021163.1    | Ca_kabuli_chr04 | 24489520                | AA                              | GG                | 1945941479               |
| SNP_P3_43881_24489534 | NC_021163.1    | Ca_kabuli_chr04 | 24489534                | AA                              | GG                | 1945941481               |

| SNPs IDs              | Chromosome IDs | Chromosomes     | Physical positions (bp) | CDC Frontier (Reference genome) | (Pusa 256 & HPNB) | NCBI SNPdb Accession IDs |
|-----------------------|----------------|-----------------|-------------------------|---------------------------------|-------------------|--------------------------|
| SNP_P3_43882_24494560 | NC_021163.1    | Ca_kabuli_chr04 | 24494560                | GG                              | AA                | 1945941483               |
| SNP_P3_43883_24494648 | NC_021163.1    | Ca_kabuli_chr04 | 24494648                | TT                              | CC                | 1945941485               |
| SNP_P3_43884_24495118 | NC_021163.1    | Ca_kabuli_chr04 | 24495118                | TT                              | CC                | 1945941486               |
| SNP_P3_43886_24503506 | NC_021163.1    | Ca_kabuli_chr04 | 24503506                | GG                              | AA                | 1945941488               |
| SNP_P3_43888_24510797 | NC_021163.1    | Ca_kabuli_chr04 | 24510797                | GG                              | TT                | 1945941490               |
| SNP_P3_43889_24516970 | NC_021163.1    | Ca_kabuli_chr04 | 24516970                | AA                              | GG                | 1945941492               |
| SNP_P3_43891_24524880 | NC_021163.1    | Ca_kabuli_chr04 | 24524880                | AA                              | TT                | 1945941494               |
| SNP_P3_43892_24537099 | NC_021163.1    | Ca_kabuli_chr04 | 24537099                | GG                              | AA                | 1945941495               |
| SNP_P3_43893_24542912 | NC_021163.1    | Ca_kabuli_chr04 | 24542912                | GG                              | TT                | 1945941497               |
| SNP_P3_43894_24547941 | NC_021163.1    | Ca_kabuli_chr04 | 24547941                | CC                              | TT                | 1945941499               |
| SNP_P3_43896_24556522 | NC_021163.1    | Ca_kabuli_chr04 | 24556522                | CC                              | AA                | 1945941501               |
| SNP_P3_43897_24556523 | NC_021163.1    | Ca_kabuli_chr04 | 24556523                | CC                              | AA                | 1945941502               |
| SNP_P3_43898_24556535 | NC_021163.1    | Ca_kabuli_chr04 | 24556535                | CC                              | TT                | 1945941504               |
| SNP_P3_43899_24559183 | NC_021163.1    | Ca_kabuli_chr04 | 24559183                | AA                              | TT                | 1945941506               |
| SNP_P3_43900_24560053 | NC_021163.1    | Ca_kabuli_chr04 | 24560053                | GG                              | TT                | 1945941508               |
| SNP_P3_43901_24562940 | NC_021163.1    | Ca_kabuli_chr04 | 24562940                | CC                              | TT                | 1945941510               |
| SNP_P3_43902_24565955 | NC_021163.1    | Ca_kabuli_chr04 | 24565955                | AA                              | GG                | 1945941511               |
| SNP_P3_43903_24572371 | NC_021163.1    | Ca_kabuli_chr04 | 24572371                | GG                              | AA                | 1945941513               |
| SNP_P3_43904_24572781 | NC_021163.1    | Ca_kabuli_chr04 | 24572781                | GG                              | AA                | 1945941515               |
| SNP_P3_43905_24572946 | NC_021163.1    | Ca_kabuli_chr04 | 24572946                | AA                              | CC                | 1945941517               |
| SNP_P3_43906_24581708 | NC_021163.1    | Ca_kabuli_chr04 | 24581708                | AA                              | GG                | 1945941518               |
| SNP_P3_43907_24581720 | NC_021163.1    | Ca_kabuli_chr04 | 24581720                | AA                              | GG                | 1945941520               |
| SNP_P3_43908_24581967 | NC_021163.1    | Ca_kabuli_chr04 | 24581967                | CC                              | AA                | 1945941522               |
| SNP_P3_43909_24582380 | NC_021163.1    | Ca_kabuli_chr04 | 24582380                | GG                              | AA                | 1945941524               |
| SNP_P3_43910_24582386 | NC_021163.1    | Ca_kabuli_chr04 | 24582386                | TT                              | GG                | 1945941526               |
| SNP_P3_43912_24597193 | NC_021163.1    | Ca_kabuli_chr04 | 24597193                | CC                              | AA                | 1945941527               |
| SNP_P3_43916_24628286 | NC_021163.1    | Ca_kabuli_chr04 | 24628286                | TT                              | CC                | 1945941529               |
| SNP_P3_43917_24628721 | NC_021163.1    | Ca_kabuli_chr04 | 24628721                | TT                              | GG                | 1945941531               |
| SNP_P3_43918_24628729 | NC_021163.1    | Ca_kabuli_chr04 | 24628729                | AA                              | TT                | 1945941533               |
| SNP_P3_43919_24640727 | NC_021163.1    | Ca_kabuli_chr04 | 24640727                | TT                              | GG                | 1945941534               |
| SNP_P3_43920_24643397 | NC_021163.1    | Ca_kabuli_chr04 | 24643397                | CC                              | GG                | 1945941536               |
| SNP_P3_43922_24651783 | NC_021163.1    | Ca_kabuli_chr04 | 24651783                | AA                              | CC                | 1945941538               |
| SNP_P3_43923_24668624 | NC_021163.1    | Ca_kabuli_chr04 | 24668624                | GG                              | TT                | 1945941540               |
| SNP_P3_43924_24669271 | NC_021163.1    | Ca_kabuli_chr04 | 24669271                | TT                              | CC                | 1945941541               |
| SNP_P3_43926_24685620 | NC_021163.1    | Ca_kabuli_chr04 | 24685620                | AA                              | GG                | 1945941543               |
| SNP_P3_43927_24692658 | NC_021163.1    | Ca_kabuli_chr04 | 24692658                | CC                              | GG                | 1945941545               |
| SNP_P3_43929_24694500 | NC_021163.1    | Ca_kabuli_chr04 | 24694500                | AA                              | GG                | 1945941547               |
| SNP_P3_43930_24694903 | NC_021163.1    | Ca_kabuli_chr04 | 24694903                | GG                              | TT                | 1945941549               |
| SNP_P3_43931_24698498 | NC_021163.1    | Ca_kabuli_chr04 | 24698498                | CC                              | GG                | 1945941550               |
| SNP_P3_43932_24699962 | NC_021163.1    | Ca_kabuli_chr04 | 24699962                | AA                              | GG                | 1945941552               |
| SNP_P3_43933_24703000 | NC_021163.1    | Ca_kabuli_chr04 | 24703000                | CC                              | TT                | 1945941554               |
| SNP_P3_43934_24705748 | NC_021163.1    | Ca_kabuli_chr04 | 24705748                | CC                              | AA                | 1945941556               |

| SNPs IDs              | Chromosome IDs | Chromosomes     | Physical positions (bp) | CDC Frontier (Reference genome) | (Pusa 256 & HPNB) | NCBI SNPdb Accession IDs |
|-----------------------|----------------|-----------------|-------------------------|---------------------------------|-------------------|--------------------------|
| SNP_P3_43935_24713659 | NC_021163.1    | Ca_kabuli_chr04 | 24713659                | GG                              | AA                | 1945941557               |
| SNP_P3_43936_24718061 | NC_021163.1    | Ca_kabuli_chr04 | 24718061                | TT                              | CC                | 1945941559               |
| SNP_P3_43937_24736139 | NC_021163.1    | Ca_kabuli_chr04 | 24736139                | GG                              | CC                | 1945941561               |
| SNP_P3_43939_24760058 | NC_021163.1    | Ca_kabuli_chr04 | 24760058                | AA                              | GG                | 1945941563               |
| SNP_P3_43940_24760113 | NC_021163.1    | Ca_kabuli_chr04 | 24760113                | AA                              | TT                | 1945941565               |
| SNP_P3_43941_24760391 | NC_021163.1    | Ca_kabuli_chr04 | 24760391                | TT                              | GG                | 1945941566               |
| SNP_P3_43942_24760394 | NC_021163.1    | Ca_kabuli_chr04 | 24760394                | TT                              | CC                | 1945941568               |
| SNP_P3_43943_24760416 | NC_021163.1    | Ca_kabuli_chr04 | 24760416                | TT                              | CC                | 1945941570               |
| SNP_P3_43944_24760417 | NC_021163.1    | Ca_kabuli_chr04 | 24760417                | GG                              | AA                | 1945941572               |
| SNP_P3_43945_24760491 | NC_021163.1    | Ca_kabuli_chr04 | 24760491                | GG                              | AA                | 1945941573               |
| SNP_P3_43946_24760505 | NC_021163.1    | Ca_kabuli_chr04 | 24760505                | AA                              | CC                | 1945941575               |
| SNP_P3_43947_24777046 | NC_021163.1    | Ca_kabuli_chr04 | 24777046                | TT                              | CC                | 1945941577               |
| SNP_P3_43948_24777134 | NC_021163.1    | Ca_kabuli_chr04 | 24777134                | AA                              | CC                | 1945941579               |
| SNP_P3_43949_24777146 | NC_021163.1    | Ca_kabuli_chr04 | 24777146                | TT                              | CC                | 1945941581               |
| SNP_P3_43950_24777456 | NC_021163.1    | Ca_kabuli_chr04 | 24777456                | CC                              | AA                | 1945941582               |
| SNP_P3_43951_24777458 | NC_021163.1    | Ca_kabuli_chr04 | 24777458                | AA                              | GG                | 1945941584               |
| SNP_P3_43952_24777507 | NC_021163.1    | Ca_kabuli_chr04 | 24777507                | TT                              | AA                | 1945941586               |
| SNP_P3_43953_24777519 | NC_021163.1    | Ca_kabuli_chr04 | 24777519                | TT                              | CC                | 1945941588               |
| SNP_P3_43954_24777531 | NC_021163.1    | Ca_kabuli_chr04 | 24777531                | TT                              | CC                | 1945941589               |
| SNP_P3_43955_24778786 | NC_021163.1    | Ca_kabuli_chr04 | 24778786                | TT                              | GG                | 1945941591               |
| SNP_P3_43956_24785285 | NC_021163.1    | Ca_kabuli_chr04 | 24785285                | CC                              | TT                | 1945941593               |
| SNP_P3_43957_24786799 | NC_021163.1    | Ca_kabuli_chr04 | 24786799                | AA                              | GG                | 1945941595               |
| SNP_P3_43958_24786856 | NC_021163.1    | Ca_kabuli_chr04 | 24786856                | AA                              | GG                | 1945941596               |
| SNP_P3_43959_24786866 | NC_021163.1    | Ca_kabuli_chr04 | 24786866                | TT                              | CC                | 1945941598               |
| SNP_P3_43960_24786867 | NC_021163.1    | Ca_kabuli_chr04 | 24786867                | GG                              | AA                | 1945941600               |
| SNP_P3_43961_24786905 | NC_021163.1    | Ca_kabuli_chr04 | 24786905                | TT                              | CC                | 1945941602               |
| SNP_P3_43962_24786925 | NC_021163.1    | Ca_kabuli_chr04 | 24786925                | TT                              | CC                | 1945941604               |
| SNP_P3_43963_24786957 | NC_021163.1    | Ca_kabuli_chr04 | 24786957                | TT                              | CC                | 1945941605               |
| SNP_P3_43964_24787085 | NC_021163.1    | Ca_kabuli_chr04 | 24787085                | AA                              | GG                | 1945941607               |
| SNP_P3_43965_24787141 | NC_021163.1    | Ca_kabuli_chr04 | 24787141                | TT                              | CC                | 1945941609               |
| SNP_P3_43966_24787178 | NC_021163.1    | Ca_kabuli_chr04 | 24787178                | TT                              | CC                | 1945941611               |
| SNP_P3_43967_24789423 | NC_021163.1    | Ca_kabuli_chr04 | 24789423                | TT                              | CC                | 1945941612               |
| SNP_P3_43968_24789763 | NC_021163.1    | Ca_kabuli_chr04 | 24789763                | AA                              | GG                | 1945941614               |
| SNP_P3_43969_24793079 | NC_021163.1    | Ca_kabuli_chr04 | 24793079                | AA                              | GG                | 1945941616               |
| SNP_P3_43970_24805668 | NC_021163.1    | Ca_kabuli_chr04 | 24805668                | CC                              | AA                | 1945941618               |
| SNP_P3_43971_24808395 | NC_021163.1    | Ca_kabuli_chr04 | 24808395                | GG                              | CC                | 1945941620               |
| SNP_P3_43972_24809140 | NC_021163.1    | Ca_kabuli_chr04 | 24809140                | AA                              | GG                | 1945941621               |
| SNP_P3_43974_24827235 | NC_021163.1    | Ca_kabuli_chr04 | 24827235                | GG                              | TT                | 1945941623               |
| SNP_P3_43975_24827868 | NC_021163.1    | Ca_kabuli_chr04 | 24827868                | CC                              | GG                | 1945941625               |
| SNP_P3_43976_24827877 | NC_021163.1    | Ca_kabuli_chr04 | 24827877                | GG                              | AA                | 1945941627               |
| SNP_P3_43977_24828207 | NC_021163.1    | Ca_kabuli_chr04 | 24828207                | TT                              | CC                | 1945941628               |
| SNP_P3_43978_24828272 | NC_021163.1    | Ca_kabuli_chr04 | 24828272                | TT                              | CC                | 1945941630               |

| SNPs IDs              | Chromosome IDs | Chromosomes     | Physical positions (bp) | CDC Frontier (Reference genome) | (Pusa 256 & HPNB) | NCBI SNPdb Accession IDs |
|-----------------------|----------------|-----------------|-------------------------|---------------------------------|-------------------|--------------------------|
| SNP_P3_43980_24832431 | NC_021163.1    | Ca_kabuli_chr04 | 24832431                | GG                              | TT                | 1945941632               |
| SNP_P3_43981_24840434 | NC_021163.1    | Ca_kabuli_chr04 | 24840434                | GG                              | TT                | 1945941634               |
| SNP_P3_43982_24841541 | NC_021163.1    | Ca_kabuli_chr04 | 24841541                | CC                              | TT                | 1945941636               |
| SNP_P3_43983_24843322 | NC_021163.1    | Ca_kabuli_chr04 | 24843322                | AA                              | GG                | 1945941637               |
| SNP_P3_43984_24848223 | NC_021163.1    | Ca_kabuli_chr04 | 24848223                | AA                              | TT                | 1945941639               |
| SNP_P3_43985_24871715 | NC_021163.1    | Ca_kabuli_chr04 | 24871715                | CC                              | AA                | 1945941641               |
| SNP_P3_43987_24877299 | NC_021163.1    | Ca_kabuli_chr04 | 24877299                | GG                              | AA                | 1945941643               |
| SNP_P3_43988_24877472 | NC_021163.1    | Ca_kabuli_chr04 | 24877472                | CC                              | AA                | 1945941644               |
| SNP_P3_43989_24877556 | NC_021163.1    | Ca_kabuli_chr04 | 24877556                | AA                              | CC                | 1945941646               |
| SNP_P3_43990_24877584 | NC_021163.1    | Ca_kabuli_chr04 | 24877584                | AA                              | GG                | 1945941648               |
| SNP_P3_43991_24878301 | NC_021163.1    | Ca_kabuli_chr04 | 24878301                | AA                              | GG                | 1945941650               |
| SNP_P3_43992_24888479 | NC_021163.1    | Ca_kabuli_chr04 | 24888479                | TT                              | AA                | 1945941652               |
| SNP_P3_43994_24917959 | NC_021163.1    | Ca_kabuli_chr04 | 24917959                | GG                              | TT                | 1945941653               |
| SNP_P3_43995_24921438 | NC_021163.1    | Ca_kabuli_chr04 | 24921438                | TT                              | CC                | 1945941655               |
| SNP_P3_43996_24929314 | NC_021163.1    | Ca_kabuli_chr04 | 24929314                | AA                              | GG                | 1945941657               |
| SNP_P3_43997_24952006 | NC_021163.1    | Ca_kabuli_chr04 | 24952006                | GG                              | AA                | 1945941659               |
| SNP_P3_43998_24959180 | NC_021163.1    | Ca_kabuli_chr04 | 24959180                | AA                              | TT                | 1945941660               |
| SNP_P3_43999_24960804 | NC_021163.1    | Ca_kabuli_chr04 | 24960804                | TT                              | AA                | 1945941662               |
| SNP_P3_44000_24960977 | NC_021163.1    | Ca_kabuli_chr04 | 24960977                | TT                              | CC                | 1945941664               |
| SNP_P3_44001_24961019 | NC_021163.1    | Ca_kabuli_chr04 | 24961019                | TT                              | CC                | 1945941666               |
| SNP_P3_44002_24961855 | NC_021163.1    | Ca_kabuli_chr04 | 24961855                | AA                              | GG                | 1945941667               |
| SNP_P3_44003_24965366 | NC_021163.1    | Ca_kabuli_chr04 | 24965366                | AA                              | CC                | 1945941669               |
| SNP_P3_44004_24996662 | NC_021163.1    | Ca_kabuli_chr04 | 24996662                | GG                              | AA                | 1945941671               |
| SNP_P3_44005_24996722 | NC_021163.1    | Ca_kabuli_chr04 | 24996722                | TT                              | CC                | 1945941673               |
| SNP_P3_44006_24996749 | NC_021163.1    | Ca_kabuli_chr04 | 24996749                | GG                              | AA                | 1945941675               |
| SNP_P3_44007_24996985 | NC_021163.1    | Ca_kabuli_chr04 | 24996985                | GG                              | AA                | 1945941676               |
| SNP_P3_44009_24997314 | NC_021163.1    | Ca_kabuli_chr04 | 24997314                | TT                              | CC                | 1945941678               |
| SNP_P3_44010_25011199 | NC_021163.1    | Ca_kabuli_chr04 | 25011199                | TT                              | CC                | 1945941680               |
| SNP_P3_44011_25011236 | NC_021163.1    | Ca_kabuli_chr04 | 25011236                | AA                              | GG                | 1945941682               |
| SNP_P3_44012_25011251 | NC_021163.1    | Ca_kabuli_chr04 | 25011251                | AA                              | TT                | 1945941683               |
| SNP_P3_44013_25011271 | NC_021163.1    | Ca_kabuli_chr04 | 25011271                | CC                              | TT                | 1945941685               |
| SNP_P3_44014_25011285 | NC_021163.1    | Ca_kabuli_chr04 | 25011285                | CC                              | TT                | 1945941687               |
| SNP_P3_44015_25011287 | NC_021163.1    | Ca_kabuli_chr04 | 25011287                | TT                              | GG                | 1945941689               |
| SNP_P3_44016_25011311 | NC_021163.1    | Ca_kabuli_chr04 | 25011311                | GG                              | AA                | 1945941691               |
| SNP_P3_44017_25011320 | NC_021163.1    | Ca_kabuli_chr04 | 25011320                | AA                              | TT                | 1945941692               |
| SNP_P3_44018_25011326 | NC_021163.1    | Ca_kabuli_chr04 | 25011326                | AA                              | GG                | 1945941694               |
| SNP_P3_44019_25011356 | NC_021163.1    | Ca_kabuli_chr04 | 25011356                | GG                              | AA                | 1945941696               |
| SNP_P3_44020_25011635 | NC_021163.1    | Ca_kabuli_chr04 | 25011635                | TT                              | CC                | 1945941698               |
| SNP_P3_44021_25017373 | NC_021163.1    | Ca_kabuli_chr04 | 25017373                | CC                              | TT                | 1945941699               |
| SNP_P3_44022_25024256 | NC_021163.1    | Ca_kabuli_chr04 | 25024256                | GG                              | TT                | 1945941701               |
| SNP_P3_44023_25024608 | NC_021163.1    | Ca_kabuli_chr04 | 25024608                | CC                              | AA                | 1945941703               |
| SNP_P3_44024_25024623 | NC_021163.1    | Ca_kabuli_chr04 | 25024623                | AA                              | CC                | 1945941705               |

| SNPs IDs              | Chromosome IDs | Chromosomes     | Physical positions (bp) | CDC Frontier (Reference genome) | (Pusa 256 & HPNB) | NCBI SNPdb Accession IDs |
|-----------------------|----------------|-----------------|-------------------------|---------------------------------|-------------------|--------------------------|
| SNP_P3_44025_25024727 | NC_021163.1    | Ca_kabuli_chr04 | 25024727                | GG                              | AA                | 1945941707               |
| SNP_P3_44026_25024731 | NC_021163.1    | Ca_kabuli_chr04 | 25024731                | AA                              | TT                | 1945941708               |
| SNP_P3_44027_25025206 | NC_021163.1    | Ca_kabuli_chr04 | 25025206                | CC                              | TT                | 1945941710               |
| SNP_P3_44028_25025210 | NC_021163.1    | Ca_kabuli_chr04 | 25025210                | CC                              | TT                | 1945941712               |
| SNP_P3_44029_25026797 | NC_021163.1    | Ca_kabuli_chr04 | 25026797                | CC                              | TT                | 1945941714               |
| SNP_P3_44030_25026799 | NC_021163.1    | Ca_kabuli_chr04 | 25026799                | AA                              | GG                | 1945941715               |
| SNP_P3_44031_25026815 | NC_021163.1    | Ca_kabuli_chr04 | 25026815                | AA                              | GG                | 1945941717               |
| SNP_P3_44032_25026840 | NC_021163.1    | Ca_kabuli_chr04 | 25026840                | AA                              | TT                | 1945941719               |
| SNP_P3_44033_25026851 | NC_021163.1    | Ca_kabuli_chr04 | 25026851                | CC                              | TT                | 1945941721               |
| SNP_P3_44034_25026854 | NC_021163.1    | Ca_kabuli_chr04 | 25026854                | CC                              | TT                | 1945941722               |
| SNP_P3_44035_25026855 | NC_021163.1    | Ca_kabuli_chr04 | 25026855                | AA                              | GG                | 1945941724               |
| SNP_P3_44036_25028544 | NC_021163.1    | Ca_kabuli_chr04 | 25028544                | GG                              | TT                | 1945941726               |
| SNP_P3_44038_25041571 | NC_021163.1    | Ca_kabuli_chr04 | 25041571                | AA                              | CC                | 1945941728               |
| SNP_P3_44039_25046461 | NC_021163.1    | Ca_kabuli_chr04 | 25046461                | TT                              | GG                | 1945941730               |
| SNP_P3_44040_25046884 | NC_021163.1    | Ca_kabuli_chr04 | 25046884                | AA                              | CC                | 1945941731               |
| SNP_P3_44041_25046963 | NC_021163.1    | Ca_kabuli_chr04 | 25046963                | AA                              | GG                | 1945941733               |
| SNP_P3_44043_25047032 | NC_021163.1    | Ca_kabuli_chr04 | 25047032                | AA                              | GG                | 1945941735               |
| SNP_P3_44044_25047033 | NC_021163.1    | Ca_kabuli_chr04 | 25047033                | TT                              | GG                | 1945941737               |
| SNP_P3_44045_25047046 | NC_021163.1    | Ca_kabuli_chr04 | 25047046                | TT                              | GG                | 1945941738               |
| SNP_P3_44046_25047171 | NC_021163.1    | Ca_kabuli_chr04 | 25047171                | GG                              | CC                | 1945941740               |
| SNP_P3_44047_25047231 | NC_021163.1    | Ca_kabuli_chr04 | 25047231                | CC                              | TT                | 1945941742               |
| SNP_P3_44048_25047279 | NC_021163.1    | Ca_kabuli_chr04 | 25047279                | CC                              | GG                | 1945941744               |
| SNP_P3_44049_25047334 | NC_021163.1    | Ca_kabuli_chr04 | 25047334                | TT                              | CC                | 1945941746               |
| SNP_P3_44050_25047351 | NC_021163.1    | Ca_kabuli_chr04 | 25047351                | GG                              | AA                | 1945941747               |
| SNP_P3_44051_25047870 | NC_021163.1    | Ca_kabuli_chr04 | 25047870                | TT                              | GG                | 1945941749               |
| SNP_P3_44052_25048582 | NC_021163.1    | Ca_kabuli_chr04 | 25048582                | AA                              | TT                | 1945941751               |
| SNP_P3_44053_25051118 | NC_021163.1    | Ca_kabuli_chr04 | 25051118                | AA                              | CC                | 1945941753               |
| SNP_P3_44054_25053677 | NC_021163.1    | Ca_kabuli_chr04 | 25053677                | TT                              | GG                | 1945941754               |
| SNP_P3_44055_25054020 | NC_021163.1    | Ca_kabuli_chr04 | 25054020                | AA                              | CC                | 1945941756               |
| SNP_P3_44056_25055211 | NC_021163.1    | Ca_kabuli_chr04 | 25055211                | CC                              | TT                | 1945941758               |
| SNP_P3_44057_25055248 | NC_021163.1    | Ca_kabuli_chr04 | 25055248                | CC                              | TT                | 1945941760               |
| SNP_P3_44058_25057055 | NC_021163.1    | Ca_kabuli_chr04 | 25057055                | CC                              | AA                | 1945941762               |
| SNP_P3_44059_25059432 | NC_021163.1    | Ca_kabuli_chr04 | 25059432                | AA                              | GG                | 1945941763               |
| SNP_P3_44060_25059482 | NC_021163.1    | Ca_kabuli_chr04 | 25059482                | AA                              | GG                | 1945941765               |
| SNP_P3_44061_25059593 | NC_021163.1    | Ca_kabuli_chr04 | 25059593                | TT                              | CC                | 1945941767               |
| SNP_P3_44062_25060379 | NC_021163.1    | Ca_kabuli_chr04 | 25060379                | GG                              | AA                | 1945941769               |
| SNP_P3_44063_25062962 | NC_021163.1    | Ca_kabuli_chr04 | 25062962                | AA                              | CC                | 1945941770               |
| SNP_P3_44064_25064376 | NC_021163.1    | Ca_kabuli_chr04 | 25064376                | AA                              | GG                | 1945941772               |
| SNP_P3_44065_25066367 | NC_021163.1    | Ca_kabuli_chr04 | 25066367                | TT                              | CC                | 1945941774               |
| SNP_P3_44066_25066438 | NC_021163.1    | Ca_kabuli_chr04 | 25066438                | AA                              | GG                | 1945941776               |
| SNP_P3_44067_25067206 | NC_021163.1    | Ca_kabuli_chr04 | 25067206                | AA                              | CC                | 1945941778               |
| SNP_P3_44068_25067217 | NC_021163.1    | Ca_kabuli_chr04 | 25067217                | TT                              | AA                | 1945941779               |

| SNPs IDs              | Chromosome IDs | Chromosomes     | Physical positions (bp) | CDC Frontier (Reference genome) | (Pusa 256 & HPNB) | NCBI SNPdb Accession IDs |
|-----------------------|----------------|-----------------|-------------------------|---------------------------------|-------------------|--------------------------|
| SNP_P3_44069_25067222 | NC_021163.1    | Ca_kabuli_chr04 | 25067222                | CC                              | TT                | 1945941781               |
| SNP_P3_44071_25067592 | NC_021163.1    | Ca_kabuli_chr04 | 25067592                | TT                              | GG                | 1945941783               |
| SNP_P3_44072_25068341 | NC_021163.1    | Ca_kabuli_chr04 | 25068341                | GG                              | AA                | 1945941785               |
| SNP_P3_44073_25068354 | NC_021163.1    | Ca_kabuli_chr04 | 25068354                | AA                              | GG                | 1945941786               |
| SNP_P3_44074_25068414 | NC_021163.1    | Ca_kabuli_chr04 | 25068414                | CC                              | AA                | 1945941788               |
| SNP_P3_44075_25069627 | NC_021163.1    | Ca_kabuli_chr04 | 25069627                | GG                              | CC                | 1945941790               |
| SNP_P3_44076_25070295 | NC_021163.1    | Ca_kabuli_chr04 | 25070295                | AA                              | GG                | 1945941792               |
| SNP_P3_44077_25070308 | NC_021163.1    | Ca_kabuli_chr04 | 25070308                | GG                              | AA                | 1945941793               |
| SNP_P3_44078_25070326 | NC_021163.1    | Ca_kabuli_chr04 | 25070326                | CC                              | TT                | 1945941795               |
| SNP_P3_44079_25070433 | NC_021163.1    | Ca_kabuli_chr04 | 25070433                | CC                              | AA                | 1945941797               |
| SNP_P3_44080_25070986 | NC_021163.1    | Ca_kabuli_chr04 | 25070986                | CC                              | TT                | 1945941799               |
| SNP_P3_44081_25071009 | NC_021163.1    | Ca_kabuli_chr04 | 25071009                | CC                              | TT                | 1945941801               |
| SNP_P3_44082_25071094 | NC_021163.1    | Ca_kabuli_chr04 | 25071094                | CC                              | TT                | 1945941802               |
| SNP_P3_44083_25071164 | NC_021163.1    | Ca_kabuli_chr04 | 25071164                | GG                              | TT                | 1945941804               |
| SNP_P3_44085_25073322 | NC_021163.1    | Ca_kabuli_chr04 | 25073322                | AA                              | GG                | 1945941806               |
| SNP_P3_44086_25074117 | NC_021163.1    | Ca_kabuli_chr04 | 25074117                | AA                              | GG                | 1945941808               |
| SNP_P3_44087_25074132 | NC_021163.1    | Ca_kabuli_chr04 | 25074132                | TT                              | CC                | 1945941809               |
| SNP_P3_44088_25074251 | NC_021163.1    | Ca_kabuli_chr04 | 25074251                | TT                              | CC                | 1945941811               |
| SNP_P3_44089_25074448 | NC_021163.1    | Ca_kabuli_chr04 | 25074448                | AA                              | GG                | 1945941813               |
| SNP_P3_44090_25074508 | NC_021163.1    | Ca_kabuli_chr04 | 25074508                | TT                              | CC                | 1945941815               |
| SNP_P3_44091_25074574 | NC_021163.1    | Ca_kabuli_chr04 | 25074574                | CC                              | TT                | 1945941817               |
| SNP_P3_44092_25076382 | NC_021163.1    | Ca_kabuli_chr04 | 25076382                | CC                              | TT                | 1945941818               |
| SNP_P3_44093_25077382 | NC_021163.1    | Ca_kabuli_chr04 | 25077382                | CC                              | TT                | 1945941820               |
| SNP_P3_44095_25084074 | NC_021163.1    | Ca_kabuli_chr04 | 25084074                | CC                              | GG                | 1945941822               |
| SNP_P3_44097_25089310 | NC_021163.1    | Ca_kabuli_chr04 | 25089310                | TT                              | CC                | 1945941824               |
| SNP_P3_44098_25089354 | NC_021163.1    | Ca_kabuli_chr04 | 25089354                | AA                              | TT                | 1945941825               |
| SNP_P3_44099_25089362 | NC_021163.1    | Ca_kabuli_chr04 | 25089362                | CC                              | AA                | 1945941827               |
| SNP_P3_44100_25089375 | NC_021163.1    | Ca_kabuli_chr04 | 25089375                | AA                              | GG                | 1945941829               |
| SNP_P3_44101_25089497 | NC_021163.1    | Ca_kabuli_chr04 | 25089497                | TT                              | CC                | 1945941831               |
| SNP_P3_44102_25089725 | NC_021163.1    | Ca_kabuli_chr04 | 25089725                | AA                              | GG                | 1945941833               |
| SNP_P3_44103_25089794 | NC_021163.1    | Ca_kabuli_chr04 | 25089794                | AA                              | CC                | 1945941834               |
| SNP_P3_44104_25094609 | NC_021163.1    | Ca_kabuli_chr04 | 25094609                | TT                              | GG                | 1945941836               |
| SNP_P3_44105_25097754 | NC_021163.1    | Ca_kabuli_chr04 | 25097754                | AA                              | GG                | 1945941838               |
| SNP_P3_44106_25097841 | NC_021163.1    | Ca_kabuli_chr04 | 25097841                | CC                              | TT                | 1945941840               |
| SNP_P3_44107_25102187 | NC_021163.1    | Ca_kabuli_chr04 | 25102187                | CC                              | AA                | 1945941841               |
| SNP_P3_44108_25103915 | NC_021163.1    | Ca_kabuli_chr04 | 25103915                | GG                              | CC                | 1945941843               |
| SNP_P3_44109_25104513 | NC_021163.1    | Ca_kabuli_chr04 | 25104513                | AA                              | GG                | 1945941845               |
| SNP_P3_44110_25104611 | NC_021163.1    | Ca_kabuli_chr04 | 25104611                | GG                              | AA                | 1945941847               |
| SNP_P3_44111_25104636 | NC_021163.1    | Ca_kabuli_chr04 | 25104636                | TT                              | AA                | 1945941849               |
| SNP_P3_44112_25104652 | NC_021163.1    | Ca_kabuli_chr04 | 25104652                | CC                              | TT                | 1945941850               |
| SNP_P3_44113_25104708 | NC_021163.1    | Ca_kabuli_chr04 | 25104708                | AA                              | TT                | 1945941852               |
| SNP_P3_44115_25106533 | NC_021163.1    | Ca_kabuli_chr04 | 25106533                | TT                              | AA                | 1945941854               |



| SNPs IDs              | Chromosome IDs | Chromosomes     | Physical positions (bp) | CDC Frontier (Reference genome) | (Pusa 256 & HPNB) | NCBI SNPdb Accession IDs |
|-----------------------|----------------|-----------------|-------------------------|---------------------------------|-------------------|--------------------------|
| SNP_P3_44116_25109207 | NC_021163.1    | Ca_kabuli_chr04 | 25109207                | GG                              | AA                | 1945941856               |
| SNP_P3_44117_25111752 | NC_021163.1    | Ca_kabuli_chr04 | 25111752                | TT                              | GG                | 1945941857               |
| SNP_P3_44118_25117235 | NC_021163.1    | Ca_kabuli_chr04 | 25117235                | TT                              | CC                | 1945941859               |
| SNP_P3_44119_25117365 | NC_021163.1    | Ca_kabuli_chr04 | 25117365                | GG                              | AA                | 1945941861               |
| SNP_P3_44120_25118634 | NC_021163.1    | Ca_kabuli_chr04 | 25118634                | AA                              | TT                | 1945941863               |
| SNP_P3_44121_25120503 | NC_021163.1    | Ca_kabuli_chr04 | 25120503                | AA                              | CC                | 1945941864               |
| SNP_P3_44122_25125353 | NC_021163.1    | Ca_kabuli_chr04 | 25125353                | CC                              | GG                | 1945941866               |
| SNP_P3_44123_25125526 | NC_021163.1    | Ca_kabuli_chr04 | 25125526                | CC                              | AA                | 1945941868               |
| SNP_P3_44124_25125737 | NC_021163.1    | Ca_kabuli_chr04 | 25125737                | AA                              | TT                | 1945941870               |
| SNP_P3_44125_25129885 | NC_021163.1    | Ca_kabuli_chr04 | 25129885                | AA                              | GG                | 1945941872               |
| SNP_P3_44126_25132459 | NC_021163.1    | Ca_kabuli_chr04 | 25132459                | GG                              | AA                | 1945941873               |
| SNP_P3_44127_25134682 | NC_021163.1    | Ca_kabuli_chr04 | 25134682                | AA                              | TT                | 1945941875               |
| SNP_P3_44129_25136385 | NC_021163.1    | Ca_kabuli_chr04 | 25136385                | AA                              | GG                | 1945941877               |
| SNP_P3_44130_25137952 | NC_021163.1    | Ca_kabuli_chr04 | 25137952                | TT                              | AA                | 1945941879               |
| SNP_P3_44131_25142480 | NC_021163.1    | Ca_kabuli_chr04 | 25142480                | GG                              | AA                | 1945941880               |
| SNP_P3_44134_25148613 | NC_021163.1    | Ca_kabuli_chr04 | 25148613                | GG                              | TT                | 1945941882               |
| SNP_P3_44135_25151648 | NC_021163.1    | Ca_kabuli_chr04 | 25151648                | AA                              | GG                | 1945941884               |
| SNP_P3_44136_25151651 | NC_021163.1    | Ca_kabuli_chr04 | 25151651                | GG                              | TT                | 1945941886               |
| SNP_P3_44138_25153016 | NC_021163.1    | Ca_kabuli_chr04 | 25153016                | AA                              | GG                | 1945941888               |
| SNP_P3_44139_25156126 | NC_021163.1    | Ca_kabuli_chr04 | 25156126                | TT                              | AA                | 1945941889               |
| SNP_P3_44140_25165010 | NC_021163.1    | Ca_kabuli_chr04 | 25165010                | TT                              | CC                | 1945941891               |
| SNP_P3_44141_25166376 | NC_021163.1    | Ca_kabuli_chr04 | 25166376                | GG                              | AA                | 1945941893               |
| SNP_P3_44142_25168210 | NC_021163.1    | Ca_kabuli_chr04 | 25168210                | GG                              | AA                | 1945941895               |
| SNP_P3_44143_25168487 | NC_021163.1    | Ca_kabuli_chr04 | 25168487                | CC                              | AA                | 1945941896               |
| SNP_P3_44145_25168789 | NC_021163.1    | Ca_kabuli_chr04 | 25168789                | CC                              | AA                | 1945941898               |
| SNP_P3_44146_25168802 | NC_021163.1    | Ca_kabuli_chr04 | 25168802                | CC                              | TT                | 1945941900               |
| SNP_P3_44147_25169458 | NC_021163.1    | Ca_kabuli_chr04 | 25169458                | CC                              | TT                | 1945941902               |
| SNP_P3_44148_25169459 | NC_021163.1    | Ca_kabuli_chr04 | 25169459                | AA                              | TT                | 1945941904               |
| SNP_P3_44149_25173594 | NC_021163.1    | Ca_kabuli_chr04 | 25173594                | AA                              | GG                | 1945941905               |
| SNP_P3_44150_25174751 | NC_021163.1    | Ca_kabuli_chr04 | 25174751                | TT                              | CC                | 1945941907               |
| SNP_P3_44154_25178155 | NC_021163.1    | Ca_kabuli_chr04 | 25178155                | CC                              | GG                | 1945941909               |
| SNP_P3_44155_25178171 | NC_021163.1    | Ca_kabuli_chr04 | 25178171                | AA                              | GG                | 1945941911               |
| SNP_P3_44156_25178630 | NC_021163.1    | Ca_kabuli_chr04 | 25178630                | AA                              | GG                | 1945941912               |
| SNP_P3_44157_25182571 | NC_021163.1    | Ca_kabuli_chr04 | 25182571                | AA                              | TT                | 1945941914               |
| SNP_P3_44159_25185247 | NC_021163.1    | Ca_kabuli_chr04 | 25185247                | CC                              | TT                | 1945941916               |
| SNP_P3_44160_25187624 | NC_021163.1    | Ca_kabuli_chr04 | 25187624                | TT                              | CC                | 1945941918               |
| SNP_P3_44162_25187687 | NC_021163.1    | Ca_kabuli_chr04 | 25187687                | CC                              | TT                | 1945941919               |
| SNP_P3_44163_25189104 | NC_021163.1    | Ca_kabuli_chr04 | 25189104                | GG                              | AA                | 1945941921               |
| SNP_P3_44164_25190129 | NC_021163.1    | Ca_kabuli_chr04 | 25190129                | AA                              | GG                | 1945941923               |
| SNP_P3_44165_25191799 | NC_021163.1    | Ca_kabuli_chr04 | 25191799                | CC                              | AA                | 1945941925               |
| SNP_P3_44166_25193204 | NC_021163.1    | Ca_kabuli_chr04 | 25193204                | CC                              | TT                | 1945941927               |
| SNP_P3_44167_25196621 | NC_021163.1    | Ca_kabuli_chr04 | 25196621                | TT                              | AA                | 1945941928               |

| SNPs IDs              | Chromosome IDs | Chromosomes     | Physical positions (bp) | CDC Frontier (Reference genome) | (Pusa 256 & HPNB) | NCBI SNPdb Accession IDs |
|-----------------------|----------------|-----------------|-------------------------|---------------------------------|-------------------|--------------------------|
| SNP_P3_44168_25197224 | NC_021163.1    | Ca_kabuli_chr04 | 25197224                | AA                              | GG                | 1945941930               |
| SNP_P3_44169_25200782 | NC_021163.1    | Ca_kabuli_chr04 | 25200782                | TT                              | CC                | 1945941932               |
| SNP_P3_44170_25200978 | NC_021163.1    | Ca_kabuli_chr04 | 25200978                | GG                              | TT                | 1945941934               |
| SNP_P3_44171_25203053 | NC_021163.1    | Ca_kabuli_chr04 | 25203053                | AA                              | GG                | 1945941935               |
| SNP_P3_44172_25203401 | NC_021163.1    | Ca_kabuli_chr04 | 25203401                | TT                              | GG                | 1945941937               |
| SNP_P3_44173_25204619 | NC_021163.1    | Ca_kabuli_chr04 | 25204619                | AA                              | GG                | 1945941939               |
| SNP_P3_44174_25206024 | NC_021163.1    | Ca_kabuli_chr04 | 25206024                | AA                              | GG                | 1945941941               |
| SNP_P3_44175_25207259 | NC_021163.1    | Ca_kabuli_chr04 | 25207259                | GG                              | AA                | 1945941943               |
| SNP_P3_44176_25207515 | NC_021163.1    | Ca_kabuli_chr04 | 25207515                | CC                              | AA                | 1945941944               |
| SNP_P3_44177_25211921 | NC_021163.1    | Ca_kabuli_chr04 | 25211921                | AA                              | CC                | 1945941946               |
| SNP_P3_44178_25213707 | NC_021163.1    | Ca_kabuli_chr04 | 25213707                | GG                              | AA                | 1945941948               |
| SNP_P3_44179_25214183 | NC_021163.1    | Ca_kabuli_chr04 | 25214183                | TT                              | CC                | 1945941950               |
| SNP_P3_44181_25215265 | NC_021163.1    | Ca_kabuli_chr04 | 25215265                | GG                              | AA                | 1945941951               |
| SNP_P3_44182_25215272 | NC_021163.1    | Ca_kabuli_chr04 | 25215272                | GG                              | TT                | 1945941953               |
| SNP_P3_44183_25215276 | NC_021163.1    | Ca_kabuli_chr04 | 25215276                | TT                              | CC                | 1945941955               |
| SNP_P3_44184_25215600 | NC_021163.1    | Ca_kabuli_chr04 | 25215600                | GG                              | AA                | 1945941957               |
| SNP_P3_44186_25215609 | NC_021163.1    | Ca_kabuli_chr04 | 25215609                | TT                              | CC                | 1945941959               |
| SNP_P3_44187_25215617 | NC_021163.1    | Ca_kabuli_chr04 | 25215617                | AA                              | GG                | 1945941960               |
| SNP_P3_44188_25215631 | NC_021163.1    | Ca_kabuli_chr04 | 25215631                | TT                              | AA                | 1945941962               |
| SNP_P3_44189_25215632 | NC_021163.1    | Ca_kabuli_chr04 | 25215632                | TT                              | AA                | 1945941964               |
| SNP_P3_44190_25215643 | NC_021163.1    | Ca_kabuli_chr04 | 25215643                | AA                              | TT                | 1945941966               |
| SNP_P3_44191_25215669 | NC_021163.1    | Ca_kabuli_chr04 | 25215669                | GG                              | CC                | 1945941967               |
| SNP_P3_44192_25215683 | NC_021163.1    | Ca_kabuli_chr04 | 25215683                | AA                              | GG                | 1945941969               |
| SNP_P3_44193_25215725 | NC_021163.1    | Ca_kabuli_chr04 | 25215725                | AA                              | GG                | 1945941971               |
| SNP_P3_44194_25215829 | NC_021163.1    | Ca_kabuli_chr04 | 25215829                | GG                              | TT                | 1945941973               |
| SNP_P3_44195_25215954 | NC_021163.1    | Ca_kabuli_chr04 | 25215954                | GG                              | CC                | 1945941974               |
| SNP_P3_44196_25215997 | NC_021163.1    | Ca_kabuli_chr04 | 25215997                | TT                              | AA                | 1945941976               |
| SNP_P3_44197_25217817 | NC_021163.1    | Ca_kabuli_chr04 | 25217817                | AA                              | TT                | 1945941978               |
| SNP_P3_44198_25218288 | NC_021163.1    | Ca_kabuli_chr04 | 25218288                | AA                              | GG                | 1945941980               |
| SNP_P3_44200_25222725 | NC_021163.1    | Ca_kabuli_chr04 | 25222725                | CC                              | AA                | 1945941982               |
| SNP_P3_44201_25223163 | NC_021163.1    | Ca_kabuli_chr04 | 25223163                | CC                              | AA                | 1945941983               |
| SNP_P3_44202_25223787 | NC_021163.1    | Ca_kabuli_chr04 | 25223787                | AA                              | GG                | 1945941985               |
| SNP_P3_44204_25226129 | NC_021163.1    | Ca_kabuli_chr04 | 25226129                | CC                              | AA                | 1945941987               |
| SNP_P3_44205_25228113 | NC_021163.1    | Ca_kabuli_chr04 | 25228113                | CC                              | GG                | 1945941989               |
| SNP_P3_44206_25235098 | NC_021163.1    | Ca_kabuli_chr04 | 25235098                | GG                              | AA                | 1945941990               |
| SNP_P3_44207_25235101 | NC_021163.1    | Ca_kabuli_chr04 | 25235101                | TT                              | CC                | 1945941992               |
| SNP_P3_44208_25235369 | NC_021163.1    | Ca_kabuli_chr04 | 25235369                | TT                              | AA                | 1945941994               |
| SNP_P3_44209_25236319 | NC_021163.1    | Ca_kabuli_chr04 | 25236319                | CC                              | TT                | 1945941996               |
| SNP_P3_44210_25236321 | NC_021163.1    | Ca_kabuli_chr04 | 25236321                | AA                              | GG                | 1945941998               |
| SNP_P3_44212_25243133 | NC_021163.1    | Ca_kabuli_chr04 | 25243133                | CC                              | TT                | 1945941999               |
| SNP_P3_44213_25243192 | NC_021163.1    | Ca_kabuli_chr04 | 25243192                | CC                              | TT                | 1945942001               |
| SNP_P3_44214_25246576 | NC_021163.1    | Ca_kabuli_chr04 | 25246576                | CC                              | AA                | 1945942003               |

| SNPs IDs              | Chromosome IDs | Chromosomes     | Physical positions (bp) | CDC Frontier (Reference genome) | (Pusa 256 & HPNB) | NCBI SNPdb Accession IDs |
|-----------------------|----------------|-----------------|-------------------------|---------------------------------|-------------------|--------------------------|
| SNP_P3_44215_25248426 | NC_021163.1    | Ca_kabuli_chr04 | 25248426                | GG                              | AA                | 1945942005               |
| SNP_P3_44216_25248427 | NC_021163.1    | Ca_kabuli_chr04 | 25248427                | TT                              | CC                | 1945942006               |
| SNP_P3_44217_25248429 | NC_021163.1    | Ca_kabuli_chr04 | 25248429                | AA                              | GG                | 1945942008               |
| SNP_P3_44218_25248436 | NC_021163.1    | Ca_kabuli_chr04 | 25248436                | CC                              | TT                | 1945942010               |
| SNP_P3_44219_25249352 | NC_021163.1    | Ca_kabuli_chr04 | 25249352                | TT                              | CC                | 1945942012               |
| SNP_P3_44221_25249583 | NC_021163.1    | Ca_kabuli_chr04 | 25249583                | TT                              | CC                | 1945942014               |
| SNP_P3_44222_25250144 | NC_021163.1    | Ca_kabuli_chr04 | 25250144                | GG                              | AA                | 1945942015               |
| SNP_P3_44223_25251080 | NC_021163.1    | Ca_kabuli_chr04 | 25251080                | AA                              | TT                | 1945942017               |
| SNP_P3_44225_25251732 | NC_021163.1    | Ca_kabuli_chr04 | 25251732                | TT                              | GG                | 1945942019               |
| SNP_P3_44226_25251929 | NC_021163.1    | Ca_kabuli_chr04 | 25251929                | CC                              | GG                | 1945942021               |
| SNP_P3_44228_25252272 | NC_021163.1    | Ca_kabuli_chr04 | 25252272                | CC                              | TT                | 1945942022               |
| SNP_P3_44229_25253051 | NC_021163.1    | Ca_kabuli_chr04 | 25253051                | GG                              | TT                | 1945942024               |
| SNP_P3_44230_25253073 | NC_021163.1    | Ca_kabuli_chr04 | 25253073                | GG                              | TT                | 1945942026               |
| SNP_P3_44231_25255723 | NC_021163.1    | Ca_kabuli_chr04 | 25255723                | CC                              | TT                | 1945942028               |
| SNP_P3_44232_25258094 | NC_021163.1    | Ca_kabuli_chr04 | 25258094                | AA                              | GG                | 1945942029               |
| SNP_P3_44234_25258608 | NC_021163.1    | Ca_kabuli_chr04 | 25258608                | TT                              | AA                | 1945942031               |
| SNP_P3_44235_25258648 | NC_021163.1    | Ca_kabuli_chr04 | 25258648                | GG                              | AA                | 1945942033               |
| SNP_P3_44236_25258654 | NC_021163.1    | Ca_kabuli_chr04 | 25258654                | CC                              | TT                | 1945942035               |
| SNP_P3_44237_25258924 | NC_021163.1    | Ca_kabuli_chr04 | 25258924                | CC                              | TT                | 1945942037               |
| SNP_P3_44238_25258956 | NC_021163.1    | Ca_kabuli_chr04 | 25258956                | TT                              | CC                | 1945942038               |
| SNP_P3_44239_25259866 | NC_021163.1    | Ca_kabuli_chr04 | 25259866                | TT                              | CC                | 1945942040               |
| SNP_P3_44240_25260893 | NC_021163.1    | Ca_kabuli_chr04 | 25260893                | TT                              | AA                | 1945942042               |
| SNP_P3_44241_25261036 | NC_021163.1    | Ca_kabuli_chr04 | 25261036                | TT                              | AA                | 1945942044               |
| SNP_P3_44242_25261153 | NC_021163.1    | Ca_kabuli_chr04 | 25261153                | TT                              | CC                | 1945942045               |
| SNP_P3_44243_25274548 | NC_021163.1    | Ca_kabuli_chr04 | 25274548                | AA                              | GG                | 1945942047               |
| SNP_P3_44244_25275421 | NC_021163.1    | Ca_kabuli_chr04 | 25275421                | TT                              | CC                | 1945942049               |
| SNP_P3_44245_25275424 | NC_021163.1    | Ca_kabuli_chr04 | 25275424                | TT                              | CC                | 1945942051               |
| SNP_P3_44246_25275532 | NC_021163.1    | Ca_kabuli_chr04 | 25275532                | AA                              | GG                | 1945942053               |
| SNP_P3_44247_25275556 | NC_021163.1    | Ca_kabuli_chr04 | 25275556                | CC                              | GG                | 1945942054               |
| SNP_P3_44248_25275600 | NC_021163.1    | Ca_kabuli_chr04 | 25275600                | CC                              | TT                | 1945942056               |
| SNP_P3_44249_25275618 | NC_021163.1    | Ca_kabuli_chr04 | 25275618                | GG                              | AA                | 1945942058               |
| SNP_P3_44250_25275664 | NC_021163.1    | Ca_kabuli_chr04 | 25275664                | GG                              | AA                | 1945942060               |
| SNP_P3_44251_25279418 | NC_021163.1    | Ca_kabuli_chr04 | 25279418                | AA                              | CC                | 1945942061               |
| SNP_P3_44253_25280297 | NC_021163.1    | Ca_kabuli_chr04 | 25280297                | CC                              | TT                | 1945942063               |
| SNP_P3_44254_25280316 | NC_021163.1    | Ca_kabuli_chr04 | 25280316                | TT                              | GG                | 1945942065               |
| SNP_P3_44255_25285157 | NC_021163.1    | Ca_kabuli_chr04 | 25285157                | AA                              | GG                | 1945942067               |
| SNP_P3_44256_25287445 | NC_021163.1    | Ca_kabuli_chr04 | 25287445                | TT                              | GG                | 1945942069               |
| SNP_P3_44257_25287450 | NC_021163.1    | Ca_kabuli_chr04 | 25287450                | CC                              | TT                | 1945942070               |
| SNP_P3_44259_25290406 | NC_021163.1    | Ca_kabuli_chr04 | 25290406                | CC                              | TT                | 1945942072               |
| SNP_P3_44260_25290408 | NC_021163.1    | Ca_kabuli_chr04 | 25290408                | AA                              | GG                | 1945942074               |
| SNP_P3_44261_25290496 | NC_021163.1    | Ca_kabuli_chr04 | 25290496                | AA                              | GG                | 1945942076               |
| SNP_P3_44263_25292725 | NC_021163.1    | Ca_kabuli_chr04 | 25292725                | TT                              | AA                | 1945942077               |

| SNPs IDs              | Chromosome IDs | Chromosomes     | Physical positions (bp) | CDC Frontier (Reference genome) | (Pusa 256 & HPNB) | NCBI SNPdb Accession IDs |
|-----------------------|----------------|-----------------|-------------------------|---------------------------------|-------------------|--------------------------|
| SNP_P3_44265_25296896 | NC_021163.1    | Ca_kabuli_chr04 | 25296896                | CC                              | TT                | 1945942079               |
| SNP_P3_44266_25296903 | NC_021163.1    | Ca_kabuli_chr04 | 25296903                | AA                              | TT                | 1945942081               |
| SNP_P3_44267_25297098 | NC_021163.1    | Ca_kabuli_chr04 | 25297098                | TT                              | GG                | 1945942083               |
| SNP_P3_44268_25297111 | NC_021163.1    | Ca_kabuli_chr04 | 25297111                | CC                              | TT                | 1945942085               |
| SNP_P3_44269_25299291 | NC_021163.1    | Ca_kabuli_chr04 | 25299291                | CC                              | TT                | 1945942086               |
| SNP_P3_44270_25299512 | NC_021163.1    | Ca_kabuli_chr04 | 25299512                | CC                              | AA                | 1945942088               |
| SNP_P3_44271_25299536 | NC_021163.1    | Ca_kabuli_chr04 | 25299536                | TT                              | CC                | 1945942090               |
| SNP_P3_44272_25299545 | NC_021163.1    | Ca_kabuli_chr04 | 25299545                | GG                              | TT                | 1945942092               |
| SNP_P3_44273_25299547 | NC_021163.1    | Ca_kabuli_chr04 | 25299547                | AA                              | CC                | 1945942093               |
| SNP_P3_44274_25299602 | NC_021163.1    | Ca_kabuli_chr04 | 25299602                | AA                              | TT                | 1945942095               |
| SNP_P3_44275_25299829 | NC_021163.1    | Ca_kabuli_chr04 | 25299829                | GG                              | AA                | 1945942097               |
| SNP_P3_44276_25299848 | NC_021163.1    | Ca_kabuli_chr04 | 25299848                | AA                              | GG                | 1945942099               |
| SNP_P3_44277_25299990 | NC_021163.1    | Ca_kabuli_chr04 | 25299990                | CC                              | TT                | 1945942100               |
| SNP_P3_44278_25300039 | NC_021163.1    | Ca_kabuli_chr04 | 25300039                | GG                              | TT                | 1945942102               |
| SNP_P3_44279_25300353 | NC_021163.1    | Ca_kabuli_chr04 | 25300353                | CC                              | TT                | 1945942104               |
| SNP_P3_44280_25300383 | NC_021163.1    | Ca_kabuli_chr04 | 25300383                | TT                              | CC                | 1945942106               |
| SNP_P3_44281_25303354 | NC_021163.1    | Ca_kabuli_chr04 | 25303354                | CC                              | TT                | 1945942108               |
| SNP_P3_44282_25326903 | NC_021163.1    | Ca_kabuli_chr04 | 25326903                | AA                              | GG                | 1945942109               |
| SNP_P3_44283_25326990 | NC_021163.1    | Ca_kabuli_chr04 | 25326990                | CC                              | AA                | 1945942111               |
| SNP_P3_44284_25326998 | NC_021163.1    | Ca_kabuli_chr04 | 25326998                | AA                              | GG                | 1945942113               |
| SNP_P3_44285_25327019 | NC_021163.1    | Ca_kabuli_chr04 | 25327019                | GG                              | AA                | 1945942115               |
| SNP_P3_44286_25327040 | NC_021163.1    | Ca_kabuli_chr04 | 25327040                | AA                              | CC                | 1945942116               |
| SNP_P3_44287_25327068 | NC_021163.1    | Ca_kabuli_chr04 | 25327068                | AA                              | GG                | 1945942118               |
| SNP_P3_44288_25327095 | NC_021163.1    | Ca_kabuli_chr04 | 25327095                | TT                              | CC                | 1945942120               |
| SNP_P3_44289_25327101 | NC_021163.1    | Ca_kabuli_chr04 | 25327101                | CC                              | TT                | 1945942122               |
| SNP_P3_44290_25327104 | NC_021163.1    | Ca_kabuli_chr04 | 25327104                | CC                              | TT                | 1945942124               |
| SNP_P3_44291_25327119 | NC_021163.1    | Ca_kabuli_chr04 | 25327119                | AA                              | GG                | 1945942125               |
| SNP_P3_44292_25327131 | NC_021163.1    | Ca_kabuli_chr04 | 25327131                | TT                              | CC                | 1945942127               |
| SNP_P3_44293_25327171 | NC_021163.1    | Ca_kabuli_chr04 | 25327171                | TT                              | CC                | 1945942129               |
| SNP_P3_44294_25327187 | NC_021163.1    | Ca_kabuli_chr04 | 25327187                | GG                              | TT                | 1945942131               |
| SNP_P3_44295_25327260 | NC_021163.1    | Ca_kabuli_chr04 | 25327260                | GG                              | AA                | 1945942132               |
| SNP_P3_44296_25327420 | NC_021163.1    | Ca_kabuli_chr04 | 25327420                | TT                              | GG                | 1945942134               |
| SNP_P3_44297_25327458 | NC_021163.1    | Ca_kabuli_chr04 | 25327458                | CC                              | TT                | 1945942136               |
| SNP_P3_44298_25327460 | NC_021163.1    | Ca_kabuli_chr04 | 25327460                | TT                              | GG                | 1945942138               |
| SNP_P3_44299_25327468 | NC_021163.1    | Ca_kabuli_chr04 | 25327468                | TT                              | CC                | 1945942139               |
| SNP_P3_44300_25327535 | NC_021163.1    | Ca_kabuli_chr04 | 25327535                | TT                              | CC                | 1945942141               |
| SNP_P3_44301_25347656 | NC_021163.1    | Ca_kabuli_chr04 | 25347656                | TT                              | CC                | 1945942143               |
| SNP_P3_44302_25347679 | NC_021163.1    | Ca_kabuli_chr04 | 25347679                | TT                              | CC                | 1945942145               |
| SNP_P3_44304_25347863 | NC_021163.1    | Ca_kabuli_chr04 | 25347863                | AA                              | CC                | 1945942147               |
| SNP_P3_44305_25347883 | NC_021163.1    | Ca_kabuli_chr04 | 25347883                | GG                              | AA                | 1945942148               |
| SNP_P3_44306_25349391 | NC_021163.1    | Ca_kabuli_chr04 | 25349391                | AA                              | GG                | 1945942150               |
| SNP_P3_44308_25351514 | NC_021163.1    | Ca_kabuli_chr04 | 25351514                | AA                              | CC                | 1945942152               |

| SNPs IDs              | Chromosome IDs | Chromosomes     | Physical positions (bp) | CDC Frontier (Reference genome) | (Pusa 256 & HPNB) | NCBI SNPdb Accession IDs |
|-----------------------|----------------|-----------------|-------------------------|---------------------------------|-------------------|--------------------------|
| SNP_P3_44309_25351533 | NC_021163.1    | Ca_kabuli_chr04 | 25351533                | AA                              | TT                | 1945942154               |
| SNP_P3_44310_25352582 | NC_021163.1    | Ca_kabuli_chr04 | 25352582                | TT                              | CC                | 1945942155               |
| SNP_P3_44311_25352585 | NC_021163.1    | Ca_kabuli_chr04 | 25352585                | AA                              | CC                | 1945942157               |
| SNP_P3_44312_25352590 | NC_021163.1    | Ca_kabuli_chr04 | 25352590                | GG                              | AA                | 1945942159               |
| SNP_P3_44314_25352637 | NC_021163.1    | Ca_kabuli_chr04 | 25352637                | TT                              | CC                | 1945942161               |
| SNP_P3_44315_25352693 | NC_021163.1    | Ca_kabuli_chr04 | 25352693                | AA                              | TT                | 1945942163               |
| SNP_P3_44316_25352701 | NC_021163.1    | Ca_kabuli_chr04 | 25352701                | CC                              | AA                | 1945942164               |
| SNP_P3_44317_25352709 | NC_021163.1    | Ca_kabuli_chr04 | 25352709                | CC                              | TT                | 1945942166               |
| SNP_P3_44318_25352734 | NC_021163.1    | Ca_kabuli_chr04 | 25352734                | CC                              | TT                | 1945942168               |
| SNP_P3_44319_25352885 | NC_021163.1    | Ca_kabuli_chr04 | 25352885                | AA                              | TT                | 1945942170               |
| SNP_P3_44320_25352936 | NC_021163.1    | Ca_kabuli_chr04 | 25352936                | CC                              | TT                | 1945942171               |
| SNP_P3_44321_25352965 | NC_021163.1    | Ca_kabuli_chr04 | 25352965                | TT                              | AA                | 1945942173               |
| SNP_P3_44322_25352971 | NC_021163.1    | Ca_kabuli_chr04 | 25352971                | CC                              | AA                | 1945942175               |
| SNP_P3_44323_25352988 | NC_021163.1    | Ca_kabuli_chr04 | 25352988                | CC                              | TT                | 1945942177               |
| SNP_P3_44324_25353023 | NC_021163.1    | Ca_kabuli_chr04 | 25353023                | GG                              | AA                | 1945942179               |
| SNP_P3_44325_25353035 | NC_021163.1    | Ca_kabuli_chr04 | 25353035                | GG                              | AA                | 1945942180               |
| SNP_P3_44326_25353051 | NC_021163.1    | Ca_kabuli_chr04 | 25353051                | CC                              | AA                | 1945942182               |
| SNP_P3_44327_25353060 | NC_021163.1    | Ca_kabuli_chr04 | 25353060                | GG                              | TT                | 1945942184               |
| SNP_P3_44328_25353061 | NC_021163.1    | Ca_kabuli_chr04 | 25353061                | TT                              | AA                | 1945942186               |
| SNP_P3_44329_25353121 | NC_021163.1    | Ca_kabuli_chr04 | 25353121                | AA                              | GG                | 1945942187               |
| SNP_P3_44330_25353156 | NC_021163.1    | Ca_kabuli_chr04 | 25353156                | AA                              | TT                | 1945942189               |
| SNP_P3_44331_25353219 | NC_021163.1    | Ca_kabuli_chr04 | 25353219                | CC                              | TT                | 1945942191               |
| SNP_P3_44332_25353230 | NC_021163.1    | Ca_kabuli_chr04 | 25353230                | GG                              | TT                | 1945942193               |
| SNP_P3_44333_25353240 | NC_021163.1    | Ca_kabuli_chr04 | 25353240                | TT                              | GG                | 1945942195               |
| SNP_P3_44334_25353282 | NC_021163.1    | Ca_kabuli_chr04 | 25353282                | CC                              | AA                | 1945942196               |
| SNP_P3_44335_25353292 | NC_021163.1    | Ca_kabuli_chr04 | 25353292                | GG                              | AA                | 1945942198               |
| SNP_P3_44336_25353302 | NC_021163.1    | Ca_kabuli_chr04 | 25353302                | AA                              | GG                | 1945942200               |
| SNP_P3_44337_25353314 | NC_021163.1    | Ca_kabuli_chr04 | 25353314                | AA                              | TT                | 1945942202               |
| SNP_P3_44338_25353340 | NC_021163.1    | Ca_kabuli_chr04 | 25353340                | GG                              | TT                | 1945942203               |
| SNP_P3_44339_25353351 | NC_021163.1    | Ca_kabuli_chr04 | 25353351                | TT                              | AA                | 1945942205               |
| SNP_P3_44340_25353360 | NC_021163.1    | Ca_kabuli_chr04 | 25353360                | GG                              | TT                | 1945942207               |
| SNP_P3_44341_25353428 | NC_021163.1    | Ca_kabuli_chr04 | 25353428                | CC                              | GG                | 1945942209               |
| SNP_P3_44342_25353544 | NC_021163.1    | Ca_kabuli_chr04 | 25353544                | TT                              | CC                | 1945942210               |
| SNP_P3_44343_25353563 | NC_021163.1    | Ca_kabuli_chr04 | 25353563                | GG                              | AA                | 1945942212               |
| SNP_P3_44344_25353591 | NC_021163.1    | Ca_kabuli_chr04 | 25353591                | CC                              | TT                | 1945942214               |
| SNP_P3_44345_25353604 | NC_021163.1    | Ca_kabuli_chr04 | 25353604                | TT                              | CC                | 1945942216               |
| SNP_P3_44346_25353665 | NC_021163.1    | Ca_kabuli_chr04 | 25353665                | TT                              | AA                | 1945942218               |
| SNP_P3_44347_25353766 | NC_021163.1    | Ca_kabuli_chr04 | 25353766                | TT                              | AA                | 1945942219               |
| SNP_P3_44348_25353775 | NC_021163.1    | Ca_kabuli_chr04 | 25353775                | GG                              | AA                | 1945942221               |
| SNP_P3_44349_25354089 | NC_021163.1    | Ca_kabuli_chr04 | 25354089                | AA                              | GG                | 1945942223               |
| SNP_P3_44350_25354105 | NC_021163.1    | Ca_kabuli_chr04 | 25354105                | AA                              | CC                | 1945942225               |
| SNP_P3_44351_25354749 | NC_021163.1    | Ca_kabuli_chr04 | 25354749                | CC                              | AA                | 1945942226               |

| SNPs IDs              | Chromosome IDs | Chromosomes     | Physical positions (bp) | CDC Frontier (Reference genome) | (Pusa 256 & HPNB) | NCBI SNPdb Accession IDs |
|-----------------------|----------------|-----------------|-------------------------|---------------------------------|-------------------|--------------------------|
| SNP_P3_44352_25355012 | NC_021163.1    | Ca_kabuli_chr04 | 25355012                | AA                              | TT                | 1945942228               |
| SNP_P3_44353_25355022 | NC_021163.1    | Ca_kabuli_chr04 | 25355022                | GG                              | TT                | 1945942230               |
| SNP_P3_44354_25355051 | NC_021163.1    | Ca_kabuli_chr04 | 25355051                | TT                              | CC                | 1945942232               |
| SNP_P3_44355_25355052 | NC_021163.1    | Ca_kabuli_chr04 | 25355052                | GG                              | AA                | 1945942234               |
| SNP_P3_44356_25355377 | NC_021163.1    | Ca_kabuli_chr04 | 25355377                | CC                              | TT                | 1945942235               |
| SNP_P3_44357_25356661 | NC_021163.1    | Ca_kabuli_chr04 | 25356661                | CC                              | TT                | 1945942237               |
| SNP_P3_44358_25357044 | NC_021163.1    | Ca_kabuli_chr04 | 25357044                | AA                              | GG                | 1945942239               |
| SNP_P3_44360_25358284 | NC_021163.1    | Ca_kabuli_chr04 | 25358284                | AA                              | TT                | 1945942241               |
| SNP_P3_44361_25358330 | NC_021163.1    | Ca_kabuli_chr04 | 25358330                | GG                              | CC                | 1945942242               |
| SNP_P3_44362_25358376 | NC_021163.1    | Ca_kabuli_chr04 | 25358376                | CC                              | TT                | 1945942244               |
| SNP_P3_44363_25358590 | NC_021163.1    | Ca_kabuli_chr04 | 25358590                | CC                              | TT                | 1945942246               |
| SNP_P3_44364_25358616 | NC_021163.1    | Ca_kabuli_chr04 | 25358616                | AA                              | GG                | 1945942248               |
| SNP_P3_44365_25359549 | NC_021163.1    | Ca_kabuli_chr04 | 25359549                | TT                              | AA                | 1945942250               |
| SNP_P3_44366_25359808 | NC_021163.1    | Ca_kabuli_chr04 | 25359808                | AA                              | CC                | 1945942251               |
| SNP_P3_44367_25360237 | NC_021163.1    | Ca_kabuli_chr04 | 25360237                | AA                              | TT                | 1945942253               |
| SNP_P3_44368_25360800 | NC_021163.1    | Ca_kabuli_chr04 | 25360800                | CC                              | AA                | 1945942255               |
| SNP_P3_44369_25360876 | NC_021163.1    | Ca_kabuli_chr04 | 25360876                | CC                              | TT                | 1945942257               |
| SNP_P3_44370_25365344 | NC_021163.1    | Ca_kabuli_chr04 | 25365344                | TT                              | AA                | 1945942258               |
| SNP_P3_44371_25366368 | NC_021163.1    | Ca_kabuli_chr04 | 25366368                | TT                              | GG                | 1945942260               |
| SNP_P3_44372_25366699 | NC_021163.1    | Ca_kabuli_chr04 | 25366699                | GG                              | AA                | 1945942262               |
| SNP_P3_44373_25366762 | NC_021163.1    | Ca_kabuli_chr04 | 25366762                | AA                              | CC                | 1945942264               |
| SNP_P3_44374_25366807 | NC_021163.1    | Ca_kabuli_chr04 | 25366807                | GG                              | TT                | 1945942265               |
| SNP_P3_44375_25366958 | NC_021163.1    | Ca_kabuli_chr04 | 25366958                | CC                              | GG                | 1945942267               |
| SNP_P3_44376_25367008 | NC_021163.1    | Ca_kabuli_chr04 | 25367008                | CC                              | TT                | 1945942269               |
| SNP_P3_44377_25367041 | NC_021163.1    | Ca_kabuli_chr04 | 25367041                | GG                              | CC                | 1945942271               |
| SNP_P3_44379_25370836 | NC_021163.1    | Ca_kabuli_chr04 | 25370836                | TT                              | CC                | 1945942273               |
| SNP_P3_44380_25370888 | NC_021163.1    | Ca_kabuli_chr04 | 25370888                | GG                              | AA                | 1945942274               |
| SNP_P3_44381_25370900 | NC_021163.1    | Ca_kabuli_chr04 | 25370900                | AA                              | TT                | 1945942276               |
| SNP_P3_44382_25371143 | NC_021163.1    | Ca_kabuli_chr04 | 25371143                | AA                              | GG                | 1945942278               |
| SNP_P3_44383_25371493 | NC_021163.1    | Ca_kabuli_chr04 | 25371493                | CC                              | TT                | 1945942280               |
| SNP_P3_44384_25371517 | NC_021163.1    | Ca_kabuli_chr04 | 25371517                | CC                              | TT                | 1945942281               |
| SNP_P3_44385_25371520 | NC_021163.1    | Ca_kabuli_chr04 | 25371520                | CC                              | AA                | 1945942283               |
| SNP_P3_44386_25371523 | NC_021163.1    | Ca_kabuli_chr04 | 25371523                | AA                              | TT                | 1945942285               |
| SNP_P3_44388_25371880 | NC_021163.1    | Ca_kabuli_chr04 | 25371880                | AA                              | CC                | 1945942287               |
| SNP_P3_44389_25374911 | NC_021163.1    | Ca_kabuli_chr04 | 25374911                | AA                              | TT                | 1945942289               |
| SNP_P3_44390_25375189 | NC_021163.1    | Ca_kabuli_chr04 | 25375189                | GG                              | TT                | 1945942290               |
| SNP_P3_44391_25375245 | NC_021163.1    | Ca_kabuli_chr04 | 25375245                | AA                              | CC                | 1945942292               |
| SNP_P3_44392_25375301 | NC_021163.1    | Ca_kabuli_chr04 | 25375301                | TT                              | CC                | 1945942294               |
| SNP_P3_44393_25375309 | NC_021163.1    | Ca_kabuli_chr04 | 25375309                | CC                              | TT                | 1945942296               |
| SNP_P3_44394_25375568 | NC_021163.1    | Ca_kabuli_chr04 | 25375568                | CC                              | AA                | 1945942297               |
| SNP_P3_44396_25375608 | NC_021163.1    | Ca_kabuli_chr04 | 25375608                | GG                              | AA                | 1945942299               |
| SNP_P3_44397_25375618 | NC_021163.1    | Ca_kabuli_chr04 | 25375618                | GG                              | TT                | 1945942301               |

| SNPs IDs              | Chromosome IDs | Chromosomes     | Physical positions (bp) | CDC Frontier (Reference genome) | (Pusa 256 & HPNB) | NCBI SNPdb Accession IDs |
|-----------------------|----------------|-----------------|-------------------------|---------------------------------|-------------------|--------------------------|
| SNP_P3_44398_25375645 | NC_021163.1    | Ca_kabuli_chr04 | 25375645                | AA                              | GG                | 1945942303               |
| SNP_P3_44399_25375651 | NC_021163.1    | Ca_kabuli_chr04 | 25375651                | GG                              | AA                | 1945942305               |
| SNP_P3_44400_25375671 | NC_021163.1    | Ca_kabuli_chr04 | 25375671                | TT                              | CC                | 1945942306               |
| SNP_P3_44401_25375693 | NC_021163.1    | Ca_kabuli_chr04 | 25375693                | GG                              | AA                | 1945942308               |
| SNP_P3_44402_25375724 | NC_021163.1    | Ca_kabuli_chr04 | 25375724                | CC                              | TT                | 1945942310               |
| SNP_P3_44403_25375895 | NC_021163.1    | Ca_kabuli_chr04 | 25375895                | GG                              | AA                | 1945942312               |
| SNP_P3_44404_25375933 | NC_021163.1    | Ca_kabuli_chr04 | 25375933                | GG                              | AA                | 1945942313               |
| SNP_P3_44405_25376103 | NC_021163.1    | Ca_kabuli_chr04 | 25376103                | TT                              | CC                | 1945942315               |
| SNP_P3_44406_25376115 | NC_021163.1    | Ca_kabuli_chr04 | 25376115                | CC                              | AA                | 1945942317               |
| SNP_P3_44407_25376331 | NC_021163.1    | Ca_kabuli_chr04 | 25376331                | GG                              | TT                | 1945942319               |
| SNP_P3_44408_25376434 | NC_021163.1    | Ca_kabuli_chr04 | 25376434                | TT                              | AA                | 1945942320               |
| SNP_P3_44409_25376456 | NC_021163.1    | Ca_kabuli_chr04 | 25376456                | CC                              | TT                | 1945942322               |
| SNP_P3_44410_25376855 | NC_021163.1    | Ca_kabuli_chr04 | 25376855                | AA                              | GG                | 1945942324               |
| SNP_P3_44411_25378173 | NC_021163.1    | Ca_kabuli_chr04 | 25378173                | AA                              | CC                | 1945942326               |
| SNP_P3_44412_25389453 | NC_021163.1    | Ca_kabuli_chr04 | 25389453                | AA                              | GG                | 1945942328               |
| SNP_P3_44413_25389457 | NC_021163.1    | Ca_kabuli_chr04 | 25389457                | TT                              | CC                | 1945942329               |
| SNP_P3_44414_25389458 | NC_021163.1    | Ca_kabuli_chr04 | 25389458                | CC                              | TT                | 1945942331               |
| SNP_P3_44415_25389539 | NC_021163.1    | Ca_kabuli_chr04 | 25389539                | CC                              | TT                | 1945942333               |
| SNP_P3_44416_25390581 | NC_021163.1    | Ca_kabuli_chr04 | 25390581                | CC                              | AA                | 1945942335               |
| SNP_P3_44417_25391577 | NC_021163.1    | Ca_kabuli_chr04 | 25391577                | GG                              | TT                | 1945942336               |
| SNP_P3_44418_25391614 | NC_021163.1    | Ca_kabuli_chr04 | 25391614                | AA                              | GG                | 1945942338               |
| SNP_P3_44419_25392230 | NC_021163.1    | Ca_kabuli_chr04 | 25392230                | TT                              | CC                | 1945942340               |
| SNP_P3_44420_25392491 | NC_021163.1    | Ca_kabuli_chr04 | 25392491                | CC                              | GG                | 1945942342               |
| SNP_P3_44421_25393135 | NC_021163.1    | Ca_kabuli_chr04 | 25393135                | AA                              | GG                | 1945942344               |
| SNP_P3_44423_25393542 | NC_021163.1    | Ca_kabuli_chr04 | 25393542                | CC                              | TT                | 1945942345               |
| SNP_P3_44424_25393759 | NC_021163.1    | Ca_kabuli_chr04 | 25393759                | TT                              | GG                | 1945942347               |
| SNP_P3_44425_25393771 | NC_021163.1    | Ca_kabuli_chr04 | 25393771                | TT                              | CC                | 1945942349               |
| SNP_P3_44427_25393875 | NC_021163.1    | Ca_kabuli_chr04 | 25393875                | AA                              | TT                | 1945942351               |
| SNP_P3_44429_25434418 | NC_021163.1    | Ca_kabuli_chr04 | 25434418                | TT                              | CC                | 1945942352               |
| SNP_P3_44430_25434590 | NC_021163.1    | Ca_kabuli_chr04 | 25434590                | GG                              | CC                | 1945942354               |
| SNP_P3_44431_25434642 | NC_021163.1    | Ca_kabuli_chr04 | 25434642                | AA                              | TT                | 1945942356               |
| SNP_P3_44432_25439298 | NC_021163.1    | Ca_kabuli_chr04 | 25439298                | TT                              | CC                | 1945942358               |
| SNP_P3_44433_25440636 | NC_021163.1    | Ca_kabuli_chr04 | 25440636                | AA                              | GG                | 1945942360               |
| SNP_P3_44434_25440812 | NC_021163.1    | Ca_kabuli_chr04 | 25440812                | AA                              | TT                | 1945942361               |
| SNP_P3_44436_25441076 | NC_021163.1    | Ca_kabuli_chr04 | 25441076                | AA                              | GG                | 1945942363               |
| SNP_P3_44437_25441141 | NC_021163.1    | Ca_kabuli_chr04 | 25441141                | CC                              | AA                | 1945942365               |
| SNP_P3_44438_25441306 | NC_021163.1    | Ca_kabuli_chr04 | 25441306                | TT                              | CC                | 1945942367               |
| SNP_P3_44439_25441361 | NC_021163.1    | Ca_kabuli_chr04 | 25441361                | AA                              | CC                | 1945942368               |
| SNP_P3_44440_25441930 | NC_021163.1    | Ca_kabuli_chr04 | 25441930                | AA                              | CC                | 1945942370               |
| SNP_P3_44441_25441982 | NC_021163.1    | Ca_kabuli_chr04 | 25441982                | CC                              | AA                | 1945942372               |
| SNP_P3_44442_25446442 | NC_021163.1    | Ca_kabuli_chr04 | 25446442                | CC                              | TT                | 1945942374               |
| SNP_P3_44443_25448713 | NC_021163.1    | Ca_kabuli_chr04 | 25448713                | TT                              | AA                | 1945942376               |

| SNPs IDs              | Chromosome IDs | Chromosomes     | Physical positions (bp) | CDC Frontier (Reference genome) | (Pusa 256 & HPNB) | NCBI SNPdb Accession IDs |
|-----------------------|----------------|-----------------|-------------------------|---------------------------------|-------------------|--------------------------|
| SNP_P3_44444_25448721 | NC_021163.1    | Ca_kabuli_chr04 | 25448721                | AA                              | GG                | 1945942377               |
| SNP_P3_44445_25456294 | NC_021163.1    | Ca_kabuli_chr04 | 25456294                | AA                              | CC                | 1945942379               |
| SNP_P3_44446_25456643 | NC_021163.1    | Ca_kabuli_chr04 | 25456643                | GG                              | CC                | 1945942381               |
| SNP_P3_44447_25456656 | NC_021163.1    | Ca_kabuli_chr04 | 25456656                | GG                              | AA                | 1945942383               |
| SNP_P3_44448_25456869 | NC_021163.1    | Ca_kabuli_chr04 | 25456869                | GG                              | AA                | 1945942384               |
| SNP_P3_44449_25456942 | NC_021163.1    | Ca_kabuli_chr04 | 25456942                | CC                              | GG                | 1945942386               |
| SNP_P3_44450_25457031 | NC_021163.1    | Ca_kabuli_chr04 | 25457031                | AA                              | GG                | 1945942388               |
| SNP_P3_44453_25460349 | NC_021163.1    | Ca_kabuli_chr04 | 25460349                | AA                              | CC                | 1945942390               |
| SNP_P3_44454_25460356 | NC_021163.1    | Ca_kabuli_chr04 | 25460356                | GG                              | AA                | 1945942391               |
| SNP_P3_44455_25463676 | NC_021163.1    | Ca_kabuli_chr04 | 25463676                | TT                              | CC                | 1945942393               |
| SNP_P3_44456_25463687 | NC_021163.1    | Ca_kabuli_chr04 | 25463687                | TT                              | AA                | 1945942395               |
| SNP_P3_44457_25463688 | NC_021163.1    | Ca_kabuli_chr04 | 25463688                | GG                              | AA                | 1945942397               |
| SNP_P3_44458_25463689 | NC_021163.1    | Ca_kabuli_chr04 | 25463689                | GG                              | CC                | 1945942399               |
| SNP_P3_44459_25463764 | NC_021163.1    | Ca_kabuli_chr04 | 25463764                | GG                              | TT                | 1945942400               |
| SNP_P3_44461_25472778 | NC_021163.1    | Ca_kabuli_chr04 | 25472778                | TT                              | CC                | 1945942402               |
| SNP_P3_44462_25474392 | NC_021163.1    | Ca_kabuli_chr04 | 25474392                | GG                              | TT                | 1945942404               |
| SNP_P3_44463_25475401 | NC_021163.1    | Ca_kabuli_chr04 | 25475401                | GG                              | AA                | 1945942406               |
| SNP_P3_44464_25479893 | NC_021163.1    | Ca_kabuli_chr04 | 25479893                | AA                              | GG                | 1945942407               |
| SNP_P3_44465_25492372 | NC_021163.1    | Ca_kabuli_chr04 | 25492372                | AA                              | CC                | 1945942409               |
| SNP_P3_44466_25494362 | NC_021163.1    | Ca_kabuli_chr04 | 25494362                | CC                              | TT                | 1945942411               |
| SNP_P3_44467_25494804 | NC_021163.1    | Ca_kabuli_chr04 | 25494804                | TT                              | AA                | 1945942413               |
| SNP_P3_44468_25495164 | NC_021163.1    | Ca_kabuli_chr04 | 25495164                | AA                              | TT                | 1945942415               |
| SNP_P3_44470_25495536 | NC_021163.1    | Ca_kabuli_chr04 | 25495536                | TT                              | GG                | 1945942416               |
| SNP_P3_44471_25497678 | NC_021163.1    | Ca_kabuli_chr04 | 25497678                | TT                              | GG                | 1945942418               |
| SNP_P3_44472_25498004 | NC_021163.1    | Ca_kabuli_chr04 | 25498004                | GG                              | AA                | 1945942420               |
| SNP_P3_44473_25499711 | NC_021163.1    | Ca_kabuli_chr04 | 25499711                | GG                              | TT                | 1945942422               |
| SNP_P3_44474_25500119 | NC_021163.1    | Ca_kabuli_chr04 | 25500119                | GG                              | TT                | 1945942423               |
| SNP_P3_44475_25500352 | NC_021163.1    | Ca_kabuli_chr04 | 25500352                | CC                              | TT                | 1945942425               |
| SNP_P3_44476_25500789 | NC_021163.1    | Ca_kabuli_chr04 | 25500789                | CC                              | AA                | 1945942427               |
| SNP_P3_44478_25512633 | NC_021163.1    | Ca_kabuli_chr04 | 25512633                | AA                              | GG                | 1945942429               |
| SNP_P3_44479_25514435 | NC_021163.1    | Ca_kabuli_chr04 | 25514435                | AA                              | TT                | 1945942431               |
| SNP_P3_44480_25515314 | NC_021163.1    | Ca_kabuli_chr04 | 25515314                | GG                              | AA                | 1945942432               |
| SNP_P3_44481_25515338 | NC_021163.1    | Ca_kabuli_chr04 | 25515338                | GG                              | TT                | 1945942434               |
| SNP_P3_44482_25516516 | NC_021163.1    | Ca_kabuli_chr04 | 25516516                | TT                              | CC                | 1945942436               |
| SNP_P3_44483_25518878 | NC_021163.1    | Ca_kabuli_chr04 | 25518878                | CC                              | AA                | 1945942438               |
| SNP_P3_44484_25518879 | NC_021163.1    | Ca_kabuli_chr04 | 25518879                | AA                              | CC                | 1945942439               |
| SNP_P3_44485_25519290 | NC_021163.1    | Ca_kabuli_chr04 | 25519290                | TT                              | CC                | 1945942441               |
| SNP_P3_44486_25519319 | NC_021163.1    | Ca_kabuli_chr04 | 25519319                | GG                              | CC                | 1945942443               |
| SNP_P3_44487_25538011 | NC_021163.1    | Ca_kabuli_chr04 | 25538011                | TT                              | CC                | 1945942445               |
| SNP_P3_44488_25541860 | NC_021163.1    | Ca_kabuli_chr04 | 25541860                | GG                              | TT                | 1945942447               |
| SNP_P3_44489_25542976 | NC_021163.1    | Ca_kabuli_chr04 | 25542976                | TT                              | GG                | 1945942448               |
| SNP_P3_44490_25543210 | NC_021163.1    | Ca_kabuli_chr04 | 25543210                | GG                              | AA                | 1945942450               |



| SNPs IDs              | Chromosome IDs | Chromosomes     | Physical positions (bp) | CDC Frontier (Reference genome) | (Pusa 256 & HPNB) | NCBI SNPdb Accession IDs |
|-----------------------|----------------|-----------------|-------------------------|---------------------------------|-------------------|--------------------------|
| SNP_P3_44491_25543726 | NC_021163.1    | Ca_kabuli_chr04 | 25543726                | GG                              | AA                | 1945942452               |
| SNP_P3_44493_25543890 | NC_021163.1    | Ca_kabuli_chr04 | 25543890                | TT                              | CC                | 1945942454               |
| SNP_P3_44494_25555839 | NC_021163.1    | Ca_kabuli_chr04 | 25555839                | GG                              | AA                | 1945942455               |
| SNP_P3_44495_25557556 | NC_021163.1    | Ca_kabuli_chr04 | 25557556                | AA                              | TT                | 1945942457               |
| SNP_P3_44496_25557557 | NC_021163.1    | Ca_kabuli_chr04 | 25557557                | AA                              | CC                | 1945942459               |
| SNP_P3_44497_25557575 | NC_021163.1    | Ca_kabuli_chr04 | 25557575                | TT                              | GG                | 1945942461               |
| SNP_P3_44498_25558136 | NC_021163.1    | Ca_kabuli_chr04 | 25558136                | CC                              | TT                | 1945942463               |
| SNP_P3_44499_25558149 | NC_021163.1    | Ca_kabuli_chr04 | 25558149                | AA                              | GG                | 1945942464               |
| SNP_P3_44500_25563754 | NC_021163.1    | Ca_kabuli_chr04 | 25563754                | GG                              | AA                | 1945942466               |
| SNP_P3_44501_25564003 | NC_021163.1    | Ca_kabuli_chr04 | 25564003                | AA                              | GG                | 1945942468               |
| SNP_P3_44502_25564328 | NC_021163.1    | Ca_kabuli_chr04 | 25564328                | GG                              | AA                | 1945942470               |
| SNP_P3_44503_25566858 | NC_021163.1    | Ca_kabuli_chr04 | 25566858                | GG                              | TT                | 1945942471               |
| SNP_P3_44504_25578498 | NC_021163.1    | Ca_kabuli_chr04 | 25578498                | CC                              | GG                | 1945942473               |
| SNP_P3_44505_25579653 | NC_021163.1    | Ca_kabuli_chr04 | 25579653                | GG                              | CC                | 1945942475               |
| SNP_P3_44507_25580359 | NC_021163.1    | Ca_kabuli_chr04 | 25580359                | GG                              | CC                | 1945942477               |
| SNP_P3_44510_25596134 | NC_021163.1    | Ca_kabuli_chr04 | 25596134                | CC                              | TT                | 1945942478               |
| SNP_P3_44511_25596208 | NC_021163.1    | Ca_kabuli_chr04 | 25596208                | CC                              | TT                | 1945942480               |
| SNP_P3_44513_25607350 | NC_021163.1    | Ca_kabuli_chr04 | 25607350                | TT                              | CC                | 1945942482               |
| SNP_P3_44514_25615463 | NC_021163.1    | Ca_kabuli_chr04 | 25615463                | TT                              | CC                | 1945942484               |
| SNP_P3_44515_25627034 | NC_021163.1    | Ca_kabuli_chr04 | 25627034                | CC                              | TT                | 1945942486               |
| SNP_P3_44516_25628246 | NC_021163.1    | Ca_kabuli_chr04 | 25628246                | CC                              | GG                | 1945942487               |
| SNP_P3_44517_25628520 | NC_021163.1    | Ca_kabuli_chr04 | 25628520                | GG                              | AA                | 1945942489               |
| SNP_P3_44518_25628555 | NC_021163.1    | Ca_kabuli_chr04 | 25628555                | GG                              | AA                | 1945942491               |
| SNP_P3_44520_25632887 | NC_021163.1    | Ca_kabuli_chr04 | 25632887                | TT                              | CC                | 1945942493               |
| SNP_P3_44521_25634840 | NC_021163.1    | Ca_kabuli_chr04 | 25634840                | TT                              | AA                | 1945942494               |
| SNP_P3_44522_25634843 | NC_021163.1    | Ca_kabuli_chr04 | 25634843                | TT                              | AA                | 1945942496               |
| SNP_P3_44524_25642565 | NC_021163.1    | Ca_kabuli_chr04 | 25642565                | AA                              | TT                | 1945942498               |
| SNP_P3_44525_25643024 | NC_021163.1    | Ca_kabuli_chr04 | 25643024                | TT                              | CC                | 1945942500               |
| SNP_P3_44526_25644300 | NC_021163.1    | Ca_kabuli_chr04 | 25644300                | GG                              | AA                | 1945942502               |
| SNP_P3_44527_25653364 | NC_021163.1    | Ca_kabuli_chr04 | 25653364                | CC                              | TT                | 1945942503               |
| SNP_P3_44528_25667269 | NC_021163.1    | Ca_kabuli_chr04 | 25667269                | TT                              | CC                | 1945942505               |
| SNP_P3_44529_25670381 | NC_021163.1    | Ca_kabuli_chr04 | 25670381                | CC                              | TT                | 1945942507               |
| SNP_P3_44531_25675046 | NC_021163.1    | Ca_kabuli_chr04 | 25675046                | GG                              | AA                | 1945942509               |
| SNP_P3_44532_25679087 | NC_021163.1    | Ca_kabuli_chr04 | 25679087                | GG                              | AA                | 1945942510               |
| SNP_P3_44533_25679325 | NC_021163.1    | Ca_kabuli_chr04 | 25679325                | CC                              | TT                | 1945942512               |
| SNP_P3_44534_25681549 | NC_021163.1    | Ca_kabuli_chr04 | 25681549                | GG                              | AA                | 1945942514               |
| SNP_P3_44535_25681569 | NC_021163.1    | Ca_kabuli_chr04 | 25681569                | GG                              | AA                | 1945942516               |
| SNP_P3_44536_25681881 | NC_021163.1    | Ca_kabuli_chr04 | 25681881                | AA                              | GG                | 1945942518               |
| SNP_P3_44537_25681890 | NC_021163.1    | Ca_kabuli_chr04 | 25681890                | CC                              | TT                | 1945942519               |
| SNP_P3_44538_25682329 | NC_021163.1    | Ca_kabuli_chr04 | 25682329                | CC                              | TT                | 1945942521               |
| SNP_P3_44539_25683634 | NC_021163.1    | Ca_kabuli_chr04 | 25683634                | AA                              | GG                | 1945942523               |
| SNP_P3_44540_25684064 | NC_021163.1    | Ca_kabuli_chr04 | 25684064                | TT                              | CC                | 1945942525               |

| SNPs IDs              | Chromosome IDs | Chromosomes     | Physical positions (bp) | CDC Frontier (Reference genome) | (Pusa 256 & HPNB) | NCBI SNPdb Accession IDs |
|-----------------------|----------------|-----------------|-------------------------|---------------------------------|-------------------|--------------------------|
| SNP_P3_44541_25685113 | NC_021163.1    | Ca_kabuli_chr04 | 25685113                | GG                              | AA                | 1945942526               |
| SNP_P3_44542_25685306 | NC_021163.1    | Ca_kabuli_chr04 | 25685306                | AA                              | GG                | 1945942528               |
| SNP_P3_44543_25685405 | NC_021163.1    | Ca_kabuli_chr04 | 25685405                | GG                              | TT                | 1945942530               |
| SNP_P3_44544_25686198 | NC_021163.1    | Ca_kabuli_chr04 | 25686198                | GG                              | AA                | 1945942532               |
| SNP_P3_44545_25690077 | NC_021163.1    | Ca_kabuli_chr04 | 25690077                | AA                              | GG                | 1945942534               |
| SNP_P3_44546_25690392 | NC_021163.1    | Ca_kabuli_chr04 | 25690392                | AA                              | TT                | 1945942535               |
| SNP_P3_44547_25693558 | NC_021163.1    | Ca_kabuli_chr04 | 25693558                | GG                              | AA                | 1945942537               |
| SNP_P3_44549_25695917 | NC_021163.1    | Ca_kabuli_chr04 | 25695917                | TT                              | AA                | 1945942539               |
| SNP_P3_44550_25695958 | NC_021163.1    | Ca_kabuli_chr04 | 25695958                | TT                              | CC                | 1945942541               |
| SNP_P3_44551_25695974 | NC_021163.1    | Ca_kabuli_chr04 | 25695974                | CC                              | TT                | 1945942542               |
| SNP_P3_44552_25698629 | NC_021163.1    | Ca_kabuli_chr04 | 25698629                | GG                              | AA                | 1945942544               |
| SNP_P3_44553_25702951 | NC_021163.1    | Ca_kabuli_chr04 | 25702951                | CC                              | TT                | 1945942546               |
| SNP_P3_44554_25711061 | NC_021163.1    | Ca_kabuli_chr04 | 25711061                | CC                              | TT                | 1945942548               |
| SNP_P3_44555_25716265 | NC_021163.1    | Ca_kabuli_chr04 | 25716265                | CC                              | TT                | 1945942549               |
| SNP_P3_44556_25717483 | NC_021163.1    | Ca_kabuli_chr04 | 25717483                | TT                              | CC                | 1945942551               |
| SNP_P3_44557_25717684 | NC_021163.1    | Ca_kabuli_chr04 | 25717684                | TT                              | CC                | 1945942553               |
| SNP_P3_44558_25717945 | NC_021163.1    | Ca_kabuli_chr04 | 25717945                | GG                              | AA                | 1945942555               |
| SNP_P3_44559_25718282 | NC_021163.1    | Ca_kabuli_chr04 | 25718282                | AA                              | CC                | 1945942557               |
| SNP_P3_44561_25718318 | NC_021163.1    | Ca_kabuli_chr04 | 25718318                | TT                              | CC                | 1945942558               |
| SNP_P3_44562_25718480 | NC_021163.1    | Ca_kabuli_chr04 | 25718480                | GG                              | AA                | 1945942560               |
| SNP_P3_44563_25718980 | NC_021163.1    | Ca_kabuli_chr04 | 25718980                | CC                              | AA                | 1945942562               |
| SNP_P3_44564_25719391 | NC_021163.1    | Ca_kabuli_chr04 | 25719391                | AA                              | GG                | 1945942564               |
| SNP_P3_44565_25723398 | NC_021163.1    | Ca_kabuli_chr04 | 25723398                | GG                              | AA                | 1945942565               |
| SNP_P3_44566_25723399 | NC_021163.1    | Ca_kabuli_chr04 | 25723399                | TT                              | CC                | 1945942567               |
| SNP_P3_44568_25725469 | NC_021163.1    | Ca_kabuli_chr04 | 25725469                | TT                              | GG                | 1945942569               |
| SNP_P3_44569_25727137 | NC_021163.1    | Ca_kabuli_chr04 | 25727137                | GG                              | AA                | 1945942571               |
| SNP_P3_44571_25727772 | NC_021163.1    | Ca_kabuli_chr04 | 25727772                | CC                              | GG                | 1945942573               |
| SNP_P3_44573_25731043 | NC_021163.1    | Ca_kabuli_chr04 | 25731043                | CC                              | TT                | 1945942574               |
| SNP_P3_44574_25731102 | NC_021163.1    | Ca_kabuli_chr04 | 25731102                | CC                              | TT                | 1945942576               |
| SNP_P3_44575_25731400 | NC_021163.1    | Ca_kabuli_chr04 | 25731400                | GG                              | CC                | 1945942578               |
| SNP_P3_44576_25741517 | NC_021163.1    | Ca_kabuli_chr04 | 25741517                | AA                              | GG                | 1945942580               |
| SNP_P3_44577_25743694 | NC_021163.1    | Ca_kabuli_chr04 | 25743694                | CC                              | AA                | 1945942581               |
| SNP_P3_44579_25753280 | NC_021163.1    | Ca_kabuli_chr04 | 25753280                | TT                              | AA                | 1945942583               |
| SNP_P3_44580_25753283 | NC_021163.1    | Ca_kabuli_chr04 | 25753283                | AA                              | GG                | 1945942585               |
| SNP_P3_44582_25754687 | NC_021163.1    | Ca_kabuli_chr04 | 25754687                | CC                              | AA                | 1945942587               |
| SNP_P3_44583_25756897 | NC_021163.1    | Ca_kabuli_chr04 | 25756897                | TT                              | CC                | 1945942589               |
| SNP_P3_44584_25758049 | NC_021163.1    | Ca_kabuli_chr04 | 25758049                | CC                              | TT                | 1945942590               |
| SNP_P3_44585_25758254 | NC_021163.1    | Ca_kabuli_chr04 | 25758254                | AA                              | GG                | 1945942592               |
| SNP_P3_44587_25758945 | NC_021163.1    | Ca_kabuli_chr04 | 25758945                | GG                              | TT                | 1945942594               |
| SNP_P3_44588_25760014 | NC_021163.1    | Ca_kabuli_chr04 | 25760014                | AA                              | GG                | 1945942596               |
| SNP_P3_44590_25760566 | NC_021163.1    | Ca_kabuli_chr04 | 25760566                | CC                              | TT                | 1945942597               |
| SNP_P3_44591_25760572 | NC_021163.1    | Ca_kabuli_chr04 | 25760572                | TT                              | CC                | 1945942599               |

| SNPs IDs              | Chromosome IDs | Chromosomes     | Physical positions (bp) | CDC Frontier (Reference genome) | (Pusa 256 & HPNB) | NCBI SNPdb Accession IDs |
|-----------------------|----------------|-----------------|-------------------------|---------------------------------|-------------------|--------------------------|
| SNP_P3_44592_25766950 | NC_021163.1    | Ca_kabuli_chr04 | 25766950                | GG                              | TT                | 1945942601               |
| SNP_P3_44594_25768465 | NC_021163.1    | Ca_kabuli_chr04 | 25768465                | AA                              | GG                | 1945942603               |
| SNP_P3_44595_25768466 | NC_021163.1    | Ca_kabuli_chr04 | 25768466                | AA                              | GG                | 1945942605               |
| SNP_P3_44596_25768479 | NC_021163.1    | Ca_kabuli_chr04 | 25768479                | GG                              | TT                | 1945942606               |
| SNP_P3_44597_25768481 | NC_021163.1    | Ca_kabuli_chr04 | 25768481                | AA                              | GG                | 1945942608               |
| SNP_P3_44598_25769011 | NC_021163.1    | Ca_kabuli_chr04 | 25769011                | TT                              | CC                | 1945942610               |
| SNP_P3_44599_25769226 | NC_021163.1    | Ca_kabuli_chr04 | 25769226                | AA                              | GG                | 1945942612               |
| SNP_P3_44600_25772364 | NC_021163.1    | Ca_kabuli_chr04 | 25772364                | GG                              | AA                | 1945942613               |
| SNP_P3_44601_25773882 | NC_021163.1    | Ca_kabuli_chr04 | 25773882                | GG                              | AA                | 1945942615               |
| SNP_P3_44602_25773908 | NC_021163.1    | Ca_kabuli_chr04 | 25773908                | AA                              | GG                | 1945942617               |
| SNP_P3_44604_25774278 | NC_021163.1    | Ca_kabuli_chr04 | 25774278                | CC                              | TT                | 1945942619               |
| SNP_P3_44605_25776622 | NC_021163.1    | Ca_kabuli_chr04 | 25776622                | CC                              | TT                | 1945942620               |
| SNP_P3_44606_25778776 | NC_021163.1    | Ca_kabuli_chr04 | 25778776                | CC                              | AA                | 1945942622               |
| SNP_P3_44608_25779526 | NC_021163.1    | Ca_kabuli_chr04 | 25779526                | GG                              | AA                | 1945942624               |
| SNP_P3_44609_25780972 | NC_021163.1    | Ca_kabuli_chr04 | 25780972                | AA                              | TT                | 1945942626               |
| SNP_P3_44611_25784831 | NC_021163.1    | Ca_kabuli_chr04 | 25784831                | TT                              | AA                | 1945942628               |
| SNP_P3_44612_25784874 | NC_021163.1    | Ca_kabuli_chr04 | 25784874                | AA                              | TT                | 1945942629               |
| SNP_P3_44613_25785235 | NC_021163.1    | Ca_kabuli_chr04 | 25785235                | TT                              | CC                | 1945942631               |
| SNP_P3_44614_25785277 | NC_021163.1    | Ca_kabuli_chr04 | 25785277                | CC                              | TT                | 1945942633               |
| SNP_P3_44615_25790132 | NC_021163.1    | Ca_kabuli_chr04 | 25790132                | CC                              | TT                | 1945942635               |
| SNP_P3_44616_25790206 | NC_021163.1    | Ca_kabuli_chr04 | 25790206                | TT                              | GG                | 1945942636               |
| SNP_P3_44617_25790421 | NC_021163.1    | Ca_kabuli_chr04 | 25790421                | GG                              | TT                | 1945942638               |
| SNP_P3_44618_25790550 | NC_021163.1    | Ca_kabuli_chr04 | 25790550                | TT                              | CC                | 1945942640               |
| SNP_P3_44619_25790681 | NC_021163.1    | Ca_kabuli_chr04 | 25790681                | TT                              | GG                | 1945942642               |
| SNP_P3_44620_25790695 | NC_021163.1    | Ca_kabuli_chr04 | 25790695                | GG                              | AA                | 1945942644               |
| SNP_P3_44621_25790932 | NC_021163.1    | Ca_kabuli_chr04 | 25790932                | GG                              | AA                | 1945942645               |
| SNP_P3_44622_25793178 | NC_021163.1    | Ca_kabuli_chr04 | 25793178                | CC                              | AA                | 1945942647               |
| SNP_P3_44623_25793269 | NC_021163.1    | Ca_kabuli_chr04 | 25793269                | TT                              | AA                | 1945942649               |
| SNP_P3_44625_25803723 | NC_021163.1    | Ca_kabuli_chr04 | 25803723                | GG                              | AA                | 1945942651               |
| SNP_P3_44626_25804090 | NC_021163.1    | Ca_kabuli_chr04 | 25804090                | TT                              | CC                | 1945942652               |
| SNP_P3_44627_25804848 | NC_021163.1    | Ca_kabuli_chr04 | 25804848                | AA                              | TT                | 1945942654               |
| SNP_P3_44628_25806728 | NC_021163.1    | Ca_kabuli_chr04 | 25806728                | TT                              | AA                | 1945942656               |
| SNP_P3_44630_25812506 | NC_021163.1    | Ca_kabuli_chr04 | 25812506                | AA                              | TT                | 1945942658               |
| SNP_P3_44631_25814068 | NC_021163.1    | Ca_kabuli_chr04 | 25814068                | CC                              | GG                | 1945942660               |
| SNP_P3_44632_25815377 | NC_021163.1    | Ca_kabuli_chr04 | 25815377                | AA                              | GG                | 1945942661               |
| SNP_P3_44633_25821756 | NC_021163.1    | Ca_kabuli_chr04 | 25821756                | AA                              | GG                | 1945942663               |
| SNP_P3_44636_25825092 | NC_021163.1    | Ca_kabuli_chr04 | 25825092                | CC                              | GG                | 1945942665               |
| SNP_P3_44637_25828568 | NC_021163.1    | Ca_kabuli_chr04 | 25828568                | TT                              | CC                | 1945942667               |
| SNP_P3_44640_25831807 | NC_021163.1    | Ca_kabuli_chr04 | 25831807                | AA                              | GG                | 1945942668               |
| SNP_P3_44641_25832385 | NC_021163.1    | Ca_kabuli_chr04 | 25832385                | AA                              | GG                | 1945942670               |
| SNP_P3_44642_25832707 | NC_021163.1    | Ca_kabuli_chr04 | 25832707                | CC                              | TT                | 1945942672               |
| SNP_P3_44644_25834945 | NC_021163.1    | Ca_kabuli_chr04 | 25834945                | TT                              | CC                | 1945942674               |

| SNPs IDs              | Chromosome IDs | Chromosomes     | Physical positions (bp) | CDC Frontier (Reference genome) | (Pusa 256 & HPNB) | NCBI SNPdb Accession IDs |
|-----------------------|----------------|-----------------|-------------------------|---------------------------------|-------------------|--------------------------|
| SNP_P3_44646_25834982 | NC_021163.1    | Ca_kabuli_chr04 | 25834982                | CC                              | TT                | 1945942676               |
| SNP_P3_44647_25835700 | NC_021163.1    | Ca_kabuli_chr04 | 25835700                | GG                              | CC                | 1945942677               |
| SNP_P3_44648_25837131 | NC_021163.1    | Ca_kabuli_chr04 | 25837131                | AA                              | CC                | 1945942679               |
| SNP_P3_44650_25845278 | NC_021163.1    | Ca_kabuli_chr04 | 25845278                | AA                              | GG                | 1945942681               |
| SNP_P3_44651_25846417 | NC_021163.1    | Ca_kabuli_chr04 | 25846417                | GG                              | TT                | 1945942683               |
| SNP_P3_44652_25847277 | NC_021163.1    | Ca_kabuli_chr04 | 25847277                | GG                              | AA                | 1945942684               |
| SNP_P3_44653_25847288 | NC_021163.1    | Ca_kabuli_chr04 | 25847288                | GG                              | TT                | 1945942686               |
| SNP_P3_44654_25847303 | NC_021163.1    | Ca_kabuli_chr04 | 25847303                | CC                              | TT                | 1945942688               |
| SNP_P3_44655_25847598 | NC_021163.1    | Ca_kabuli_chr04 | 25847598                | GG                              | TT                | 1945942690               |
| SNP_P3_44656_25847599 | NC_021163.1    | Ca_kabuli_chr04 | 25847599                | AA                              | GG                | 1945942691               |
| SNP_P3_44657_25847655 | NC_021163.1    | Ca_kabuli_chr04 | 25847655                | CC                              | AA                | 1945942693               |
| SNP_P3_44659_25847740 | NC_021163.1    | Ca_kabuli_chr04 | 25847740                | GG                              | TT                | 1945942695               |
| SNP_P3_44660_25848042 | NC_021163.1    | Ca_kabuli_chr04 | 25848042                | AA                              | CC                | 1945942697               |
| SNP_P3_44661_25852254 | NC_021163.1    | Ca_kabuli_chr04 | 25852254                | CC                              | TT                | 1945942699               |
| SNP_P3_44662_25857405 | NC_021163.1    | Ca_kabuli_chr04 | 25857405                | TT                              | CC                | 1945942700               |
| SNP_P3_44663_25857682 | NC_021163.1    | Ca_kabuli_chr04 | 25857682                | TT                              | CC                | 1945942702               |
| SNP_P3_44664_25860451 | NC_021163.1    | Ca_kabuli_chr04 | 25860451                | CC                              | TT                | 1945942704               |
| SNP_P3_44665_25867704 | NC_021163.1    | Ca_kabuli_chr04 | 25867704                | CC                              | TT                | 1945942706               |
| SNP_P3_44667_25870166 | NC_021163.1    | Ca_kabuli_chr04 | 25870166                | AA                              | TT                | 1945942707               |
| SNP_P3_44668_25870535 | NC_021163.1    | Ca_kabuli_chr04 | 25870535                | AA                              | GG                | 1945942709               |
| SNP_P3_44669_25872141 | NC_021163.1    | Ca_kabuli_chr04 | 25872141                | CC                              | TT                | 1945942711               |
| SNP_P3_44670_25873492 | NC_021163.1    | Ca_kabuli_chr04 | 25873492                | GG                              | TT                | 1945942713               |
| SNP_P3_44671_25874509 | NC_021163.1    | Ca_kabuli_chr04 | 25874509                | TT                              | CC                | 1945942715               |
| SNP_P3_44672_25879932 | NC_021163.1    | Ca_kabuli_chr04 | 25879932                | AA                              | GG                | 1945942716               |
| SNP_P3_44673_25883195 | NC_021163.1    | Ca_kabuli_chr04 | 25883195                | TT                              | CC                | 1945942718               |
| SNP_P3_44674_25883221 | NC_021163.1    | Ca_kabuli_chr04 | 25883221                | CC                              | AA                | 1945942720               |
| SNP_P3_44675_25883493 | NC_021163.1    | Ca_kabuli_chr04 | 25883493                | GG                              | AA                | 1945942722               |
| SNP_P3_44676_25883869 | NC_021163.1    | Ca_kabuli_chr04 | 25883869                | GG                              | AA                | 1945942723               |
| SNP_P3_44677_25883910 | NC_021163.1    | Ca_kabuli_chr04 | 25883910                | AA                              | GG                | 1945942725               |
| SNP_P3_44678_25884462 | NC_021163.1    | Ca_kabuli_chr04 | 25884462                | GG                              | CC                | 1945942727               |
| SNP_P3_44680_25884871 | NC_021163.1    | Ca_kabuli_chr04 | 25884871                | GG                              | AA                | 1945942729               |
| SNP_P3_44681_25885426 | NC_021163.1    | Ca_kabuli_chr04 | 25885426                | AA                              | TT                | 1945942731               |
| SNP_P3_44682_25886998 | NC_021163.1    | Ca_kabuli_chr04 | 25886998                | CC                              | TT                | 1945942732               |
| SNP_P3_44683_25887777 | NC_021163.1    | Ca_kabuli_chr04 | 25887777                | CC                              | AA                | 1945942734               |
| SNP_P3_44684_25887822 | NC_021163.1    | Ca_kabuli_chr04 | 25887822                | GG                              | TT                | 1945942736               |
| SNP_P3_44685_25894141 | NC_021163.1    | Ca_kabuli_chr04 | 25894141                | TT                              | CC                | 1945942738               |
| SNP_P3_44686_25894362 | NC_021163.1    | Ca_kabuli_chr04 | 25894362                | AA                              | GG                | 1945942739               |
| SNP_P3_44687_25894390 | NC_021163.1    | Ca_kabuli_chr04 | 25894390                | AA                              | CC                | 1945942741               |
| SNP_P3_44688_25897464 | NC_021163.1    | Ca_kabuli_chr04 | 25897464                | CC                              | AA                | 1945942743               |
| SNP_P3_44689_25897842 | NC_021163.1    | Ca_kabuli_chr04 | 25897842                | TT                              | CC                | 1945942745               |
| SNP_P3_44691_25902414 | NC_021163.1    | Ca_kabuli_chr04 | 25902414                | TT                              | AA                | 1945942747               |
| SNP_P3_44692_25903762 | NC_021163.1    | Ca_kabuli_chr04 | 25903762                | GG                              | AA                | 1945942748               |

| SNPs IDs              | Chromosome IDs | Chromosomes     | Physical positions (bp) | CDC Frontier (Reference genome) | (Pusa 256 & HPNB) | NCBI SNPdb Accession IDs |
|-----------------------|----------------|-----------------|-------------------------|---------------------------------|-------------------|--------------------------|
| SNP_P3_44693_25905102 | NC_021163.1    | Ca_kabuli_chr04 | 25905102                | CC                              | TT                | 1945942750               |
| SNP_P3_44694_25905226 | NC_021163.1    | Ca_kabuli_chr04 | 25905226                | TT                              | CC                | 1945942752               |
| SNP_P3_44696_25907007 | NC_021163.1    | Ca_kabuli_chr04 | 25907007                | AA                              | TT                | 1945942754               |
| SNP_P3_44697_25909376 | NC_021163.1    | Ca_kabuli_chr04 | 25909376                | AA                              | GG                | 1945942755               |
| SNP_P3_44698_25909397 | NC_021163.1    | Ca_kabuli_chr04 | 25909397                | CC                              | TT                | 1945942757               |
| SNP_P3_44700_25909521 | NC_021163.1    | Ca_kabuli_chr04 | 25909521                | GG                              | TT                | 1945942759               |
| SNP_P3_44701_25910696 | NC_021163.1    | Ca_kabuli_chr04 | 25910696                | TT                              | CC                | 1945942761               |
| SNP_P3_44702_25911059 | NC_021163.1    | Ca_kabuli_chr04 | 25911059                | AA                              | GG                | 1945942762               |
| SNP_P3_44703_25911214 | NC_021163.1    | Ca_kabuli_chr04 | 25911214                | TT                              | CC                | 1945942764               |
| SNP_P3_44704_25911444 | NC_021163.1    | Ca_kabuli_chr04 | 25911444                | CC                              | AA                | 1945942766               |
| SNP_P3_44705_25912821 | NC_021163.1    | Ca_kabuli_chr04 | 25912821                | AA                              | GG                | 1945942768               |
| SNP_P3_44706_25912835 | NC_021163.1    | Ca_kabuli_chr04 | 25912835                | CC                              | TT                | 1945942770               |
| SNP_P3_44707_25913183 | NC_021163.1    | Ca_kabuli_chr04 | 25913183                | CC                              | TT                | 1945942771               |
| SNP_P3_44708_25913604 | NC_021163.1    | Ca_kabuli_chr04 | 25913604                | CC                              | TT                | 1945942773               |
| SNP_P3_44709_25913645 | NC_021163.1    | Ca_kabuli_chr04 | 25913645                | TT                              | GG                | 1945942775               |
| SNP_P3_44710_25915317 | NC_021163.1    | Ca_kabuli_chr04 | 25915317                | CC                              | TT                | 1945942777               |
| SNP_P3_44711_25915321 | NC_021163.1    | Ca_kabuli_chr04 | 25915321                | CC                              | GG                | 1945942778               |
| SNP_P3_44712_25916766 | NC_021163.1    | Ca_kabuli_chr04 | 25916766                | TT                              | AA                | 1945942780               |
| SNP_P3_44714_25916845 | NC_021163.1    | Ca_kabuli_chr04 | 25916845                | GG                              | AA                | 1945942782               |
| SNP_P3_44715_25916878 | NC_021163.1    | Ca_kabuli_chr04 | 25916878                | CC                              | TT                | 1945942784               |
| SNP_P3_44716_25916920 | NC_021163.1    | Ca_kabuli_chr04 | 25916920                | AA                              | CC                | 1945942786               |
| SNP_P3_44717_25916984 | NC_021163.1    | Ca_kabuli_chr04 | 25916984                | CC                              | AA                | 1945942787               |
| SNP_P3_44718_25917031 | NC_021163.1    | Ca_kabuli_chr04 | 25917031                | CC                              | TT                | 1945942789               |
| SNP_P3_44719_25917105 | NC_021163.1    | Ca_kabuli_chr04 | 25917105                | CC                              | TT                | 1945942791               |
| SNP_P3_44723_25935749 | NC_021163.1    | Ca_kabuli_chr04 | 25935749                | AA                              | GG                | 1945942793               |
| SNP_P3_44724_25939289 | NC_021163.1    | Ca_kabuli_chr04 | 25939289                | TT                              | AA                | 1945942794               |
| SNP_P3_44725_25939551 | NC_021163.1    | Ca_kabuli_chr04 | 25939551                | TT                              | CC                | 1945942796               |
| SNP_P3_44726_25940156 | NC_021163.1    | Ca_kabuli_chr04 | 25940156                | AA                              | GG                | 1945942798               |
| SNP_P3_44727_25940187 | NC_021163.1    | Ca_kabuli_chr04 | 25940187                | GG                              | TT                | 1945942800               |
| SNP_P3_44728_25940209 | NC_021163.1    | Ca_kabuli_chr04 | 25940209                | TT                              | AA                | 1945942802               |
| SNP_P3_44729_25941482 | NC_021163.1    | Ca_kabuli_chr04 | 25941482                | AA                              | GG                | 1945942803               |
| SNP_P3_44731_25941749 | NC_021163.1    | Ca_kabuli_chr04 | 25941749                | GG                              | AA                | 1945942805               |
| SNP_P3_44732_25942364 | NC_021163.1    | Ca_kabuli_chr04 | 25942364                | TT                              | AA                | 1945942807               |
| SNP_P3_44733_25942698 | NC_021163.1    | Ca_kabuli_chr04 | 25942698                | TT                              | CC                | 1945942809               |
| SNP_P3_44734_25943450 | NC_021163.1    | Ca_kabuli_chr04 | 25943450                | CC                              | AA                | 1945942810               |
| SNP_P3_44735_25943464 | NC_021163.1    | Ca_kabuli_chr04 | 25943464                | GG                              | CC                | 1945942812               |
| SNP_P3_44736_25943481 | NC_021163.1    | Ca_kabuli_chr04 | 25943481                | AA                              | TT                | 1945942814               |
| SNP_P3_44737_25944463 | NC_021163.1    | Ca_kabuli_chr04 | 25944463                | AA                              | CC                | 1945942816               |
| SNP_P3_44738_25944675 | NC_021163.1    | Ca_kabuli_chr04 | 25944675                | CC                              | TT                | 1945942817               |
| SNP_P3_44739_25944794 | NC_021163.1    | Ca_kabuli_chr04 | 25944794                | TT                              | CC                | 1945942819               |
| SNP_P3_44740_25944795 | NC_021163.1    | Ca_kabuli_chr04 | 25944795                | CC                              | TT                | 1945942821               |
| SNP_P3_44741_25946169 | NC_021163.1    | Ca_kabuli_chr04 | 25946169                | CC                              | TT                | 1945942823               |

| SNPs IDs              | Chromosome IDs | Chromosomes     | Physical positions (bp) | CDC Frontier (Reference genome) | (Pusa 256 & HPNB) | NCBI SNPdb Accession IDs |
|-----------------------|----------------|-----------------|-------------------------|---------------------------------|-------------------|--------------------------|
| SNP_P3_44742_25946425 | NC_021163.1    | Ca_kabuli_chr04 | 25946425                | GG                              | AA                | 1945942825               |
| SNP_P3_44743_25946454 | NC_021163.1    | Ca_kabuli_chr04 | 25946454                | AA                              | GG                | 1945942826               |
| SNP_P3_44744_25946498 | NC_021163.1    | Ca_kabuli_chr04 | 25946498                | TT                              | CC                | 1945942828               |
| SNP_P3_44745_25946657 | NC_021163.1    | Ca_kabuli_chr04 | 25946657                | GG                              | CC                | 1945942830               |
| SNP_P3_44747_25947242 | NC_021163.1    | Ca_kabuli_chr04 | 25947242                | CC                              | TT                | 1945942832               |
| SNP_P3_44748_25948023 | NC_021163.1    | Ca_kabuli_chr04 | 25948023                | TT                              | GG                | 1945942833               |
| SNP_P3_44749_25948055 | NC_021163.1    | Ca_kabuli_chr04 | 25948055                | CC                              | TT                | 1945942835               |
| SNP_P3_44750_25948355 | NC_021163.1    | Ca_kabuli_chr04 | 25948355                | AA                              | TT                | 1945942837               |
| SNP_P3_44751_25948430 | NC_021163.1    | Ca_kabuli_chr04 | 25948430                | CC                              | TT                | 1945942839               |
| SNP_P3_44752_25948813 | NC_021163.1    | Ca_kabuli_chr04 | 25948813                | CC                              | TT                | 1945942841               |
| SNP_P3_44753_25949189 | NC_021163.1    | Ca_kabuli_chr04 | 25949189                | GG                              | TT                | 1945942842               |
| SNP_P3_44754_25949209 | NC_021163.1    | Ca_kabuli_chr04 | 25949209                | CC                              | TT                | 1945942844               |
| SNP_P3_44755_25949616 | NC_021163.1    | Ca_kabuli_chr04 | 25949616                | GG                              | AA                | 1945942846               |
| SNP_P3_44756_25950191 | NC_021163.1    | Ca_kabuli_chr04 | 25950191                | CC                              | AA                | 1945942848               |
| SNP_P3_44757_25951898 | NC_021163.1    | Ca_kabuli_chr04 | 25951898                | TT                              | CC                | 1945942849               |
| SNP_P3_44758_25951902 | NC_021163.1    | Ca_kabuli_chr04 | 25951902                | TT                              | CC                | 1945942851               |
| SNP_P3_44759_25954035 | NC_021163.1    | Ca_kabuli_chr04 | 25954035                | GG                              | TT                | 1945942853               |
| SNP_P3_44761_25956691 | NC_021163.1    | Ca_kabuli_chr04 | 25956691                | GG                              | TT                | 1945942855               |
| SNP_P3_44762_25956891 | NC_021163.1    | Ca_kabuli_chr04 | 25956891                | GG                              | AA                | 1945942857               |
| SNP_P3_44763_25957493 | NC_021163.1    | Ca_kabuli_chr04 | 25957493                | AA                              | TT                | 1945942858               |
| SNP_P3_44764_25957494 | NC_021163.1    | Ca_kabuli_chr04 | 25957494                | AA                              | TT                | 1945942860               |
| SNP_P3_44765_25957495 | NC_021163.1    | Ca_kabuli_chr04 | 25957495                | GG                              | AA                | 1945942862               |
| SNP_P3_44767_25958045 | NC_021163.1    | Ca_kabuli_chr04 | 25958045                | CC                              | TT                | 1945942864               |
| SNP_P3_44768_25959049 | NC_021163.1    | Ca_kabuli_chr04 | 25959049                | CC                              | GG                | 1945942865               |
| SNP_P3_44770_25960293 | NC_021163.1    | Ca_kabuli_chr04 | 25960293                | TT                              | AA                | 1945942867               |
| SNP_P3_44771_25960642 | NC_021163.1    | Ca_kabuli_chr04 | 25960642                | TT                              | CC                | 1945942869               |
| SNP_P3_44772_25960686 | NC_021163.1    | Ca_kabuli_chr04 | 25960686                | CC                              | AA                | 1945942871               |
| SNP_P3_44773_25962282 | NC_021163.1    | Ca_kabuli_chr04 | 25962282                | AA                              | GG                | 1945942873               |
| SNP_P3_44774_25962651 | NC_021163.1    | Ca_kabuli_chr04 | 25962651                | CC                              | TT                | 1945942874               |
| SNP_P3_44775_25962759 | NC_021163.1    | Ca_kabuli_chr04 | 25962759                | TT                              | GG                | 1945942876               |
| SNP_P3_44776_25962799 | NC_021163.1    | Ca_kabuli_chr04 | 25962799                | TT                              | AA                | 1945942878               |
| SNP_P3_44778_25962875 | NC_021163.1    | Ca_kabuli_chr04 | 25962875                | AA                              | TT                | 1945942880               |
| SNP_P3_44779_25963017 | NC_021163.1    | Ca_kabuli_chr04 | 25963017                | AA                              | TT                | 1945942881               |
| SNP_P3_44780_25963259 | NC_021163.1    | Ca_kabuli_chr04 | 25963259                | GG                              | AA                | 1945942883               |
| SNP_P3_44781_25963301 | NC_021163.1    | Ca_kabuli_chr04 | 25963301                | TT                              | CC                | 1945942885               |
| SNP_P3_44782_25963305 | NC_021163.1    | Ca_kabuli_chr04 | 25963305                | AA                              | GG                | 1945942887               |
| SNP_P3_44783_25963410 | NC_021163.1    | Ca_kabuli_chr04 | 25963410                | CC                              | TT                | 1945942888               |
| SNP_P3_44784_25963465 | NC_021163.1    | Ca_kabuli_chr04 | 25963465                | GG                              | AA                | 1945942890               |
| SNP_P3_44786_25963486 | NC_021163.1    | Ca_kabuli_chr04 | 25963486                | AA                              | CC                | 1945942892               |
| SNP_P3_44787_25963487 | NC_021163.1    | Ca_kabuli_chr04 | 25963487                | GG                              | AA                | 1945942894               |
| SNP_P3_44788_25963505 | NC_021163.1    | Ca_kabuli_chr04 | 25963505                | AA                              | CC                | 1945942896               |
| SNP_P3_44789_25963509 | NC_021163.1    | Ca_kabuli_chr04 | 25963509                | GG                              | TT                | 1945942897               |

| SNPs IDs              | Chromosome IDs | Chromosomes     | Physical positions (bp) | CDC Frontier (Reference genome) | (Pusa 256 & HPNB) | NCBI SNPdb Accession IDs |
|-----------------------|----------------|-----------------|-------------------------|---------------------------------|-------------------|--------------------------|
| SNP_P3_44790_25963574 | NC_021163.1    | Ca_kabuli_chr04 | 25963574                | CC                              | TT                | 1945942899               |
| SNP_P3_44791_25963705 | NC_021163.1    | Ca_kabuli_chr04 | 25963705                | AA                              | TT                | 1945942901               |
| SNP_P3_44792_25964269 | NC_021163.1    | Ca_kabuli_chr04 | 25964269                | CC                              | AA                | 1945942903               |
| SNP_P3_44793_25964286 | NC_021163.1    | Ca_kabuli_chr04 | 25964286                | TT                              | CC                | 1945942904               |
| SNP_P3_44794_25964368 | NC_021163.1    | Ca_kabuli_chr04 | 25964368                | GG                              | AA                | 1945942906               |
| SNP_P3_44795_25964478 | NC_021163.1    | Ca_kabuli_chr04 | 25964478                | AA                              | GG                | 1945942908               |
| SNP_P3_44796_25964543 | NC_021163.1    | Ca_kabuli_chr04 | 25964543                | AA                              | GG                | 1945942910               |
| SNP_P3_44797_25964692 | NC_021163.1    | Ca_kabuli_chr04 | 25964692                | AA                              | CC                | 1945942912               |
| SNP_P3_44798_25964701 | NC_021163.1    | Ca_kabuli_chr04 | 25964701                | CC                              | TT                | 1945942913               |
| SNP_P3_44800_25964847 | NC_021163.1    | Ca_kabuli_chr04 | 25964847                | GG                              | TT                | 1945942915               |
| SNP_P3_44801_25964855 | NC_021163.1    | Ca_kabuli_chr04 | 25964855                | AA                              | CC                | 1945942917               |
| SNP_P3_44802_25965130 | NC_021163.1    | Ca_kabuli_chr04 | 25965130                | AA                              | GG                | 1945942919               |
| SNP_P3_44803_25965183 | NC_021163.1    | Ca_kabuli_chr04 | 25965183                | GG                              | AA                | 1945942920               |
| SNP_P3_44804_25965188 | NC_021163.1    | Ca_kabuli_chr04 | 25965188                | TT                              | GG                | 1945942922               |
| SNP_P3_44805_25965211 | NC_021163.1    | Ca_kabuli_chr04 | 25965211                | CC                              | TT                | 1945942924               |
| SNP_P3_44806_25965337 | NC_021163.1    | Ca_kabuli_chr04 | 25965337                | AA                              | CC                | 1945942926               |
| SNP_P3_44807_25965466 | NC_021163.1    | Ca_kabuli_chr04 | 25965466                | CC                              | AA                | 1945942928               |
| SNP_P3_44808_25965544 | NC_021163.1    | Ca_kabuli_chr04 | 25965544                | GG                              | CC                | 1945942929               |
| SNP_P3_44809_25965801 | NC_021163.1    | Ca_kabuli_chr04 | 25965801                | GG                              | TT                | 1945942931               |
| SNP_P3_44810_25965854 | NC_021163.1    | Ca_kabuli_chr04 | 25965854                | AA                              | CC                | 1945942933               |
| SNP_P3_44811_25965883 | NC_021163.1    | Ca_kabuli_chr04 | 25965883                | GG                              | AA                | 1945942935               |
| SNP_P3_44812_25965993 | NC_021163.1    | Ca_kabuli_chr04 | 25965993                | GG                              | AA                | 1945942936               |
| SNP_P3_44813_25966111 | NC_021163.1    | Ca_kabuli_chr04 | 25966111                | TT                              | GG                | 1945942938               |
| SNP_P3_44814_25966173 | NC_021163.1    | Ca_kabuli_chr04 | 25966173                | CC                              | TT                | 1945942940               |
| SNP_P3_44815_25966192 | NC_021163.1    | Ca_kabuli_chr04 | 25966192                | GG                              | TT                | 1945942942               |
| SNP_P3_44816_25966283 | NC_021163.1    | Ca_kabuli_chr04 | 25966283                | TT                              | GG                | 1945942943               |
| SNP_P3_44817_25966307 | NC_021163.1    | Ca_kabuli_chr04 | 25966307                | GG                              | AA                | 1945942945               |
| SNP_P3_44818_25966309 | NC_021163.1    | Ca_kabuli_chr04 | 25966309                | AA                              | GG                | 1945942947               |
| SNP_P3_44819_25966420 | NC_021163.1    | Ca_kabuli_chr04 | 25966420                | GG                              | AA                | 1945942949               |
| SNP_P3_44820_25966445 | NC_021163.1    | Ca_kabuli_chr04 | 25966445                | TT                              | AA                | 1945942951               |
| SNP_P3_44821_25966458 | NC_021163.1    | Ca_kabuli_chr04 | 25966458                | TT                              | AA                | 1945942952               |
| SNP_P3_44822_25966548 | NC_021163.1    | Ca_kabuli_chr04 | 25966548                | AA                              | GG                | 1945942954               |
| SNP_P3_44823_25966590 | NC_021163.1    | Ca_kabuli_chr04 | 25966590                | CC                              | TT                | 1945942956               |
| SNP_P3_44824_25966709 | NC_021163.1    | Ca_kabuli_chr04 | 25966709                | AA                              | GG                | 1945942958               |
| SNP_P3_44825_25966726 | NC_021163.1    | Ca_kabuli_chr04 | 25966726                | AA                              | GG                | 1945942959               |
| SNP_P3_44826_25966738 | NC_021163.1    | Ca_kabuli_chr04 | 25966738                | TT                              | GG                | 1945942961               |
| SNP_P3_44827_25966741 | NC_021163.1    | Ca_kabuli_chr04 | 25966741                | CC                              | AA                | 1945942963               |
| SNP_P3_44828_25966756 | NC_021163.1    | Ca_kabuli_chr04 | 25966756                | AA                              | TT                | 1945942965               |
| SNP_P3_44829_25966860 | NC_021163.1    | Ca_kabuli_chr04 | 25966860                | AA                              | TT                | 1945942967               |
| SNP_P3_44830_25966887 | NC_021163.1    | Ca_kabuli_chr04 | 25966887                | AA                              | TT                | 1945942968               |
| SNP_P3_44831_25966909 | NC_021163.1    | Ca_kabuli_chr04 | 25966909                | AA                              | GG                | 1945942970               |
| SNP_P3_44832_25966927 | NC_021163.1    | Ca_kabuli_chr04 | 25966927                | AA                              | GG                | 1945942972               |

| SNPs IDs              | Chromosome IDs | Chromosomes     | Physical positions (bp) | CDC Frontier (Reference genome) | (Pusa 256 & HPNB) | NCBI SNPdb Accession IDs |
|-----------------------|----------------|-----------------|-------------------------|---------------------------------|-------------------|--------------------------|
| SNP_P3_44833_25966935 | NC_021163.1    | Ca_kabuli_chr04 | 25966935                | CC                              | TT                | 1945942974               |
| SNP_P3_44834_25966953 | NC_021163.1    | Ca_kabuli_chr04 | 25966953                | GG                              | TT                | 1945942975               |
| SNP_P3_44835_25966999 | NC_021163.1    | Ca_kabuli_chr04 | 25966999                | CC                              | AA                | 1945942977               |
| SNP_P3_44836_25967073 | NC_021163.1    | Ca_kabuli_chr04 | 25967073                | GG                              | TT                | 1945942979               |
| SNP_P3_44837_25967142 | NC_021163.1    | Ca_kabuli_chr04 | 25967142                | AA                              | CC                | 1945942981               |
| SNP_P3_44838_25967711 | NC_021163.1    | Ca_kabuli_chr04 | 25967711                | TT                              | GG                | 1945942983               |
| SNP_P3_44839_25967968 | NC_021163.1    | Ca_kabuli_chr04 | 25967968                | CC                              | TT                | 1945942984               |
| SNP_P3_44841_25968001 | NC_021163.1    | Ca_kabuli_chr04 | 25968001                | CC                              | GG                | 1945942986               |
| SNP_P3_44842_25968019 | NC_021163.1    | Ca_kabuli_chr04 | 25968019                | CC                              | AA                | 1945942988               |
| SNP_P3_44843_25968020 | NC_021163.1    | Ca_kabuli_chr04 | 25968020                | AA                              | TT                | 1945942990               |
| SNP_P3_44844_25968028 | NC_021163.1    | Ca_kabuli_chr04 | 25968028                | CC                              | TT                | 1945942991               |
| SNP_P3_44845_25968065 | NC_021163.1    | Ca_kabuli_chr04 | 25968065                | TT                              | GG                | 1945942993               |
| SNP_P3_44846_25968240 | NC_021163.1    | Ca_kabuli_chr04 | 25968240                | TT                              | CC                | 1945942995               |
| SNP_P3_44847_25968297 | NC_021163.1    | Ca_kabuli_chr04 | 25968297                | TT                              | AA                | 1945942997               |
| SNP_P3_44848_25968319 | NC_021163.1    | Ca_kabuli_chr04 | 25968319                | CC                              | AA                | 1945942999               |
| SNP_P3_44849_25968364 | NC_021163.1    | Ca_kabuli_chr04 | 25968364                | AA                              | CC                | 1945943000               |
| SNP_P3_44850_25968422 | NC_021163.1    | Ca_kabuli_chr04 | 25968422                | CC                              | AA                | 1945943002               |
| SNP_P3_44851_25968462 | NC_021163.1    | Ca_kabuli_chr04 | 25968462                | TT                              | CC                | 1945943004               |
| SNP_P3_44852_25968501 | NC_021163.1    | Ca_kabuli_chr04 | 25968501                | TT                              | GG                | 1945943006               |
| SNP_P3_44853_25968765 | NC_021163.1    | Ca_kabuli_chr04 | 25968765                | TT                              | CC                | 1945943007               |
| SNP_P3_44855_25968852 | NC_021163.1    | Ca_kabuli_chr04 | 25968852                | TT                              | CC                | 1945943009               |
| SNP_P3_44856_25968923 | NC_021163.1    | Ca_kabuli_chr04 | 25968923                | TT                              | CC                | 1945943011               |
| SNP_P3_44857_25968976 | NC_021163.1    | Ca_kabuli_chr04 | 25968976                | CC                              | TT                | 1945943013               |
| SNP_P3_44858_25969138 | NC_021163.1    | Ca_kabuli_chr04 | 25969138                | TT                              | CC                | 1945943014               |
| SNP_P3_44859_25969257 | NC_021163.1    | Ca_kabuli_chr04 | 25969257                | AA                              | GG                | 1945943016               |
| SNP_P3_44860_25969297 | NC_021163.1    | Ca_kabuli_chr04 | 25969297                | GG                              | AA                | 1945943018               |
| SNP_P3_44861_25969321 | NC_021163.1    | Ca_kabuli_chr04 | 25969321                | AA                              | GG                | 1945943020               |
| SNP_P3_44862_25969326 | NC_021163.1    | Ca_kabuli_chr04 | 25969326                | GG                              | AA                | 1945943022               |
| SNP_P3_44863_25969351 | NC_021163.1    | Ca_kabuli_chr04 | 25969351                | GG                              | TT                | 1945943023               |
| SNP_P3_44864_25969370 | NC_021163.1    | Ca_kabuli_chr04 | 25969370                | CC                              | AA                | 1945943025               |
| SNP_P3_44865_25969373 | NC_021163.1    | Ca_kabuli_chr04 | 25969373                | TT                              | CC                | 1945943027               |
| SNP_P3_44866_25969489 | NC_021163.1    | Ca_kabuli_chr04 | 25969489                | CC                              | AA                | 1945943029               |
| SNP_P3_44868_25969551 | NC_021163.1    | Ca_kabuli_chr04 | 25969551                | GG                              | AA                | 1945943030               |
| SNP_P3_44869_25969578 | NC_021163.1    | Ca_kabuli_chr04 | 25969578                | CC                              | TT                | 1945943032               |
| SNP_P3_44870_25969613 | NC_021163.1    | Ca_kabuli_chr04 | 25969613                | CC                              | TT                | 1945943034               |
| SNP_P3_44871_25969625 | NC_021163.1    | Ca_kabuli_chr04 | 25969625                | CC                              | TT                | 1945943036               |
| SNP_P3_44872_25969630 | NC_021163.1    | Ca_kabuli_chr04 | 25969630                | GG                              | AA                | 1945943038               |
| SNP_P3_44873_25969715 | NC_021163.1    | Ca_kabuli_chr04 | 25969715                | GG                              | AA                | 1945943039               |
| SNP_P3_44874_25969738 | NC_021163.1    | Ca_kabuli_chr04 | 25969738                | AA                              | GG                | 1945943041               |
| SNP_P3_44875_25969792 | NC_021163.1    | Ca_kabuli_chr04 | 25969792                | AA                              | GG                | 1945943043               |
| SNP_P3_44876_25969813 | NC_021163.1    | Ca_kabuli_chr04 | 25969813                | AA                              | GG                | 1945943045               |
| SNP_P3_44877_25969849 | NC_021163.1    | Ca_kabuli_chr04 | 25969849                | TT                              | CC                | 1945943046               |



| SNPs IDs              | Chromosome IDs | Chromosomes     | Physical positions (bp) | CDC Frontier (Reference genome) | (Pusa 256 & HPNB) | NCBI SNPdb Accession IDs |
|-----------------------|----------------|-----------------|-------------------------|---------------------------------|-------------------|--------------------------|
| SNP_P3_44878_25969872 | NC_021163.1    | Ca_kabuli_chr04 | 25969872                | AA                              | GG                | 1945943048               |
| SNP_P3_44879_25969892 | NC_021163.1    | Ca_kabuli_chr04 | 25969892                | AA                              | GG                | 1945943050               |
| SNP_P3_44881_25970181 | NC_021163.1    | Ca_kabuli_chr04 | 25970181                | CC                              | TT                | 1945943052               |
| SNP_P3_44882_25970244 | NC_021163.1    | Ca_kabuli_chr04 | 25970244                | AA                              | TT                | 1945943054               |
| SNP_P3_44883_25970296 | NC_021163.1    | Ca_kabuli_chr04 | 25970296                | CC                              | TT                | 1945943055               |
| SNP_P3_44884_25970386 | NC_021163.1    | Ca_kabuli_chr04 | 25970386                | GG                              | AA                | 1945943057               |
| SNP_P3_44885_25970396 | NC_021163.1    | Ca_kabuli_chr04 | 25970396                | CC                              | TT                | 1945943059               |
| SNP_P3_44886_25970399 | NC_021163.1    | Ca_kabuli_chr04 | 25970399                | GG                              | AA                | 1945943061               |
| SNP_P3_44887_25970426 | NC_021163.1    | Ca_kabuli_chr04 | 25970426                | CC                              | AA                | 1945943062               |
| SNP_P3_44888_25970527 | NC_021163.1    | Ca_kabuli_chr04 | 25970527                | CC                              | AA                | 1945943064               |
| SNP_P3_44889_25970562 | NC_021163.1    | Ca_kabuli_chr04 | 25970562                | TT                              | GG                | 1945943066               |
| SNP_P3_44890_25970563 | NC_021163.1    | Ca_kabuli_chr04 | 25970563                | CC                              | AA                | 1945943068               |
| SNP_P3_44891_25970583 | NC_021163.1    | Ca_kabuli_chr04 | 25970583                | TT                              | AA                | 1945943070               |
| SNP_P3_44892_25970599 | NC_021163.1    | Ca_kabuli_chr04 | 25970599                | GG                              | TT                | 1945943071               |
| SNP_P3_44893_25970609 | NC_021163.1    | Ca_kabuli_chr04 | 25970609                | AA                              | CC                | 1945943073               |
| SNP_P3_44894_25970671 | NC_021163.1    | Ca_kabuli_chr04 | 25970671                | GG                              | AA                | 1945943075               |
| SNP_P3_44895_25970730 | NC_021163.1    | Ca_kabuli_chr04 | 25970730                | TT                              | GG                | 1945943077               |
| SNP_P3_44896_25970749 | NC_021163.1    | Ca_kabuli_chr04 | 25970749                | GG                              | AA                | 1945943078               |
| SNP_P3_44897_25970762 | NC_021163.1    | Ca_kabuli_chr04 | 25970762                | GG                              | AA                | 1945943080               |
| SNP_P3_44898_25970766 | NC_021163.1    | Ca_kabuli_chr04 | 25970766                | AA                              | GG                | 1945943082               |
| SNP_P3_44899_25970795 | NC_021163.1    | Ca_kabuli_chr04 | 25970795                | CC                              | AA                | 1945943084               |
| SNP_P3_44900_25970912 | NC_021163.1    | Ca_kabuli_chr04 | 25970912                | TT                              | GG                | 1945943086               |
| SNP_P3_44901_25970917 | NC_021163.1    | Ca_kabuli_chr04 | 25970917                | TT                              | AA                | 1945943087               |
| SNP_P3_44902_25970943 | NC_021163.1    | Ca_kabuli_chr04 | 25970943                | TT                              | AA                | 1945943089               |
| SNP_P3_44903_25970944 | NC_021163.1    | Ca_kabuli_chr04 | 25970944                | AA                              | TT                | 1945943091               |
| SNP_P3_44904_25970957 | NC_021163.1    | Ca_kabuli_chr04 | 25970957                | TT                              | CC                | 1945943093               |
| SNP_P3_44905_25971024 | NC_021163.1    | Ca_kabuli_chr04 | 25971024                | GG                              | TT                | 1945943094               |
| SNP_P3_44906_25971030 | NC_021163.1    | Ca_kabuli_chr04 | 25971030                | CC                              | TT                | 1945943096               |
| SNP_P3_44907_25971158 | NC_021163.1    | Ca_kabuli_chr04 | 25971158                | GG                              | AA                | 1945943098               |
| SNP_P3_44908_25971179 | NC_021163.1    | Ca_kabuli_chr04 | 25971179                | CC                              | AA                | 1945943100               |
| SNP_P3_44909_25971217 | NC_021163.1    | Ca_kabuli_chr04 | 25971217                | GG                              | AA                | 1945943101               |
| SNP_P3_44910_25971218 | NC_021163.1    | Ca_kabuli_chr04 | 25971218                | TT                              | AA                | 1945943103               |
| SNP_P3_44911_25971221 | NC_021163.1    | Ca_kabuli_chr04 | 25971221                | TT                              | CC                | 1945943105               |
| SNP_P3_44912_25971241 | NC_021163.1    | Ca_kabuli_chr04 | 25971241                | AA                              | TT                | 1945943107               |
| SNP_P3_44914_25971301 | NC_021163.1    | Ca_kabuli_chr04 | 25971301                | GG                              | CC                | 1945943109               |
| SNP_P3_44915_25971334 | NC_021163.1    | Ca_kabuli_chr04 | 25971334                | TT                              | GG                | 1945943110               |
| SNP_P3_44916_25971493 | NC_021163.1    | Ca_kabuli_chr04 | 25971493                | GG                              | TT                | 1945943112               |
| SNP_P3_44918_25971711 | NC_021163.1    | Ca_kabuli_chr04 | 25971711                | TT                              | GG                | 1945943114               |
| SNP_P3_44919_25971778 | NC_021163.1    | Ca_kabuli_chr04 | 25971778                | AA                              | CC                | 1945943116               |
| SNP_P3_44920_25971834 | NC_021163.1    | Ca_kabuli_chr04 | 25971834                | AA                              | CC                | 1945943117               |
| SNP_P3_44921_25971859 | NC_021163.1    | Ca_kabuli_chr04 | 25971859                | TT                              | GG                | 1945943119               |
| SNP_P3_44922_25971914 | NC_021163.1    | Ca_kabuli_chr04 | 25971914                | GG                              | AA                | 1945943121               |

| SNPs IDs              | Chromosome IDs | Chromosomes     | Physical positions (bp) | CDC Frontier (Reference genome) | (Pusa 256 & HPNB) | NCBI SNPdb Accession IDs |
|-----------------------|----------------|-----------------|-------------------------|---------------------------------|-------------------|--------------------------|
| SNP_P3_44923_25971935 | NC_021163.1    | Ca_kabuli_chr04 | 25971935                | GG                              | TT                | 1945943123               |
| SNP_P3_44924_25971970 | NC_021163.1    | Ca_kabuli_chr04 | 25971970                | AA                              | CC                | 1945943125               |
| SNP_P3_44925_25971982 | NC_021163.1    | Ca_kabuli_chr04 | 25971982                | AA                              | GG                | 1945943126               |
| SNP_P3_44926_25972029 | NC_021163.1    | Ca_kabuli_chr04 | 25972029                | GG                              | AA                | 1945943128               |
| SNP_P3_44927_25972155 | NC_021163.1    | Ca_kabuli_chr04 | 25972155                | TT                              | CC                | 1945943130               |
| SNP_P3_44928_25972173 | NC_021163.1    | Ca_kabuli_chr04 | 25972173                | CC                              | AA                | 1945943132               |
| SNP_P3_44929_25972204 | NC_021163.1    | Ca_kabuli_chr04 | 25972204                | CC                              | AA                | 1945943133               |
| SNP_P3_44930_25972211 | NC_021163.1    | Ca_kabuli_chr04 | 25972211                | GG                              | TT                | 1945943135               |
| SNP_P3_44931_25972223 | NC_021163.1    | Ca_kabuli_chr04 | 25972223                | AA                              | CC                | 1945943137               |
| SNP_P3_44932_25972505 | NC_021163.1    | Ca_kabuli_chr04 | 25972505                | CC                              | AA                | 1945943139               |
| SNP_P3_44933_25972524 | NC_021163.1    | Ca_kabuli_chr04 | 25972524                | AA                              | GG                | 1945943141               |
| SNP_P3_44934_25972545 | NC_021163.1    | Ca_kabuli_chr04 | 25972545                | TT                              | GG                | 1945943142               |
| SNP_P3_44936_25972667 | NC_021163.1    | Ca_kabuli_chr04 | 25972667                | GG                              | AA                | 1945943144               |
| SNP_P3_44937_25972668 | NC_021163.1    | Ca_kabuli_chr04 | 25972668                | GG                              | AA                | 1945943146               |
| SNP_P3_44938_25972702 | NC_021163.1    | Ca_kabuli_chr04 | 25972702                | AA                              | GG                | 1945943148               |
| SNP_P3_44939_25972745 | NC_021163.1    | Ca_kabuli_chr04 | 25972745                | AA                              | GG                | 1945943149               |
| SNP_P3_44940_25972832 | NC_021163.1    | Ca_kabuli_chr04 | 25972832                | TT                              | CC                | 1945943151               |
| SNP_P3_44941_25972949 | NC_021163.1    | Ca_kabuli_chr04 | 25972949                | AA                              | TT                | 1945943153               |
| SNP_P3_44942_25972964 | NC_021163.1    | Ca_kabuli_chr04 | 25972964                | GG                              | TT                | 1945943155               |
| SNP_P3_44943_25972973 | NC_021163.1    | Ca_kabuli_chr04 | 25972973                | TT                              | GG                | 1945943156               |
| SNP_P3_44944_25973013 | NC_021163.1    | Ca_kabuli_chr04 | 25973013                | AA                              | TT                | 1945943158               |
| SNP_P3_44945_25973164 | NC_021163.1    | Ca_kabuli_chr04 | 25973164                | GG                              | AA                | 1945943160               |
| SNP_P3_44946_25973263 | NC_021163.1    | Ca_kabuli_chr04 | 25973263                | AA                              | GG                | 1945943162               |
| SNP_P3_44947_25973273 | NC_021163.1    | Ca_kabuli_chr04 | 25973273                | TT                              | CC                | 1945943164               |
| SNP_P3_44948_25973283 | NC_021163.1    | Ca_kabuli_chr04 | 25973283                | AA                              | GG                | 1945943165               |
| SNP_P3_44949_25973303 | NC_021163.1    | Ca_kabuli_chr04 | 25973303                | TT                              | CC                | 1945943167               |
| SNP_P3_44950_25973395 | NC_021163.1    | Ca_kabuli_chr04 | 25973395                | CC                              | TT                | 1945943169               |
| SNP_P3_44951_25973413 | NC_021163.1    | Ca_kabuli_chr04 | 25973413                | CC                              | TT                | 1945943171               |
| SNP_P3_44952_25973522 | NC_021163.1    | Ca_kabuli_chr04 | 25973522                | AA                              | TT                | 1945943172               |
| SNP_P3_44953_25973588 | NC_021163.1    | Ca_kabuli_chr04 | 25973588                | TT                              | AA                | 1945943174               |
| SNP_P3_44954_25973671 | NC_021163.1    | Ca_kabuli_chr04 | 25973671                | CC                              | TT                | 1945943176               |
| SNP_P3_44955_25973737 | NC_021163.1    | Ca_kabuli_chr04 | 25973737                | TT                              | GG                | 1945943178               |
| SNP_P3_44956_25973756 | NC_021163.1    | Ca_kabuli_chr04 | 25973756                | AA                              | GG                | 1945943180               |
| SNP_P3_44957_25973793 | NC_021163.1    | Ca_kabuli_chr04 | 25973793                | TT                              | CC                | 1945943181               |
| SNP_P3_44958_25973795 | NC_021163.1    | Ca_kabuli_chr04 | 25973795                | GG                              | TT                | 1945943183               |
| SNP_P3_44959_25973933 | NC_021163.1    | Ca_kabuli_chr04 | 25973933                | TT                              | CC                | 1945943185               |
| SNP_P3_44960_25973984 | NC_021163.1    | Ca_kabuli_chr04 | 25973984                | TT                              | CC                | 1945943187               |
| SNP_P3_44961_25974035 | NC_021163.1    | Ca_kabuli_chr04 | 25974035                | GG                              | CC                | 1945943188               |
| SNP_P3_44962_25974065 | NC_021163.1    | Ca_kabuli_chr04 | 25974065                | GG                              | TT                | 1945943190               |
| SNP_P3_44963_25974075 | NC_021163.1    | Ca_kabuli_chr04 | 25974075                | GG                              | TT                | 1945943192               |
| SNP_P3_44964_25974143 | NC_021163.1    | Ca_kabuli_chr04 | 25974143                | AA                              | GG                | 1945943194               |
| SNP_P3_44965_25974174 | NC_021163.1    | Ca_kabuli_chr04 | 25974174                | GG                              | AA                | 1945943196               |

| SNPs IDs              | Chromosome IDs | Chromosomes     | Physical positions (bp) | CDC Frontier (Reference genome) | (Pusa 256 & HPNB) | NCBI SNPdb Accession IDs |
|-----------------------|----------------|-----------------|-------------------------|---------------------------------|-------------------|--------------------------|
| SNP_P3_44966_25974320 | NC_021163.1    | Ca_kabuli_chr04 | 25974320                | GG                              | AA                | 1945943197               |
| SNP_P3_44967_25974357 | NC_021163.1    | Ca_kabuli_chr04 | 25974357                | TT                              | CC                | 1945943199               |
| SNP_P3_44968_25974533 | NC_021163.1    | Ca_kabuli_chr04 | 25974533                | AA                              | GG                | 1945943201               |
| SNP_P3_44969_25974540 | NC_021163.1    | Ca_kabuli_chr04 | 25974540                | AA                              | GG                | 1945943203               |
| SNP_P3_44970_25974649 | NC_021163.1    | Ca_kabuli_chr04 | 25974649                | TT                              | CC                | 1945943204               |
| SNP_P3_44971_25974728 | NC_021163.1    | Ca_kabuli_chr04 | 25974728                | CC                              | TT                | 1945943206               |
| SNP_P3_44973_25974873 | NC_021163.1    | Ca_kabuli_chr04 | 25974873                | CC                              | TT                | 1945943208               |
| SNP_P3_44974_25974888 | NC_021163.1    | Ca_kabuli_chr04 | 25974888                | GG                              | AA                | 1945943210               |
| SNP_P3_44975_25974945 | NC_021163.1    | Ca_kabuli_chr04 | 25974945                | CC                              | GG                | 1945943212               |
| SNP_P3_44976_25974960 | NC_021163.1    | Ca_kabuli_chr04 | 25974960                | GG                              | TT                | 1945943213               |
| SNP_P3_44977_25975083 | NC_021163.1    | Ca_kabuli_chr04 | 25975083                | AA                              | GG                | 1945943215               |
| SNP_P3_44978_25975092 | NC_021163.1    | Ca_kabuli_chr04 | 25975092                | TT                              | CC                | 1945943217               |
| SNP_P3_44980_25975190 | NC_021163.1    | Ca_kabuli_chr04 | 25975190                | GG                              | AA                | 1945943219               |
| SNP_P3_44981_25975245 | NC_021163.1    | Ca_kabuli_chr04 | 25975245                | CC                              | TT                | 1945943220               |
| SNP_P3_44982_25975267 | NC_021163.1    | Ca_kabuli_chr04 | 25975267                | CC                              | TT                | 1945943222               |
| SNP_P3_44983_25975280 | NC_021163.1    | Ca_kabuli_chr04 | 25975280                | CC                              | TT                | 1945943224               |
| SNP_P3_44984_25975282 | NC_021163.1    | Ca_kabuli_chr04 | 25975282                | GG                              | AA                | 1945943226               |
| SNP_P3_44985_25975305 | NC_021163.1    | Ca_kabuli_chr04 | 25975305                | AA                              | GG                | 1945943228               |
| SNP_P3_44986_25975319 | NC_021163.1    | Ca_kabuli_chr04 | 25975319                | CC                              | TT                | 1945943229               |
| SNP_P3_44987_25975339 | NC_021163.1    | Ca_kabuli_chr04 | 25975339                | GG                              | TT                | 1945943231               |
| SNP_P3_44988_25975391 | NC_021163.1    | Ca_kabuli_chr04 | 25975391                | AA                              | CC                | 1945943233               |
| SNP_P3_44989_25975479 | NC_021163.1    | Ca_kabuli_chr04 | 25975479                | AA                              | GG                | 1945943235               |
| SNP_P3_44990_25975550 | NC_021163.1    | Ca_kabuli_chr04 | 25975550                | GG                              | TT                | 1945943236               |
| SNP_P3_44991_25975582 | NC_021163.1    | Ca_kabuli_chr04 | 25975582                | CC                              | TT                | 1945943238               |
| SNP_P3_44992_25975601 | NC_021163.1    | Ca_kabuli_chr04 | 25975601                | TT                              | CC                | 1945943240               |
| SNP_P3_44993_25975611 | NC_021163.1    | Ca_kabuli_chr04 | 25975611                | GG                              | CC                | 1945943242               |
| SNP_P3_44994_25975653 | NC_021163.1    | Ca_kabuli_chr04 | 25975653                | GG                              | AA                | 1945943244               |
| SNP_P3_44995_25975661 | NC_021163.1    | Ca_kabuli_chr04 | 25975661                | AA                              | GG                | 1945943245               |
| SNP_P3_44996_25975675 | NC_021163.1    | Ca_kabuli_chr04 | 25975675                | GG                              | CC                | 1945943247               |
| SNP_P3_44997_25976524 | NC_021163.1    | Ca_kabuli_chr04 | 25976524                | GG                              | AA                | 1945943249               |
| SNP_P3_44998_25976666 | NC_021163.1    | Ca_kabuli_chr04 | 25976666                | CC                              | AA                | 1945943251               |
| SNP_P3_44999_25976704 | NC_021163.1    | Ca_kabuli_chr04 | 25976704                | CC                              | TT                | 1945943252               |
| SNP_P3_45000_25976744 | NC_021163.1    | Ca_kabuli_chr04 | 25976744                | AA                              | GG                | 1945943254               |
| SNP_P3_45001_25976767 | NC_021163.1    | Ca_kabuli_chr04 | 25976767                | GG                              | AA                | 1945943256               |
| SNP_P3_45002_25976885 | NC_021163.1    | Ca_kabuli_chr04 | 25976885                | CC                              | TT                | 1945943258               |
| SNP_P3_45003_25976980 | NC_021163.1    | Ca_kabuli_chr04 | 25976980                | TT                              | CC                | 1945943259               |
| SNP_P3_45004_25977012 | NC_021163.1    | Ca_kabuli_chr04 | 25977012                | AA                              | GG                | 1945943261               |
| SNP_P3_45005_25977122 | NC_021163.1    | Ca_kabuli_chr04 | 25977122                | TT                              | AA                | 1945943263               |
| SNP_P3_45006_25977345 | NC_021163.1    | Ca_kabuli_chr04 | 25977345                | TT                              | CC                | 1945943265               |
| SNP_P3_45007_25977758 | NC_021163.1    | Ca_kabuli_chr04 | 25977758                | TT                              | GG                | 1945943267               |
| SNP_P3_45008_25977915 | NC_021163.1    | Ca_kabuli_chr04 | 25977915                | GG                              | CC                | 1945943268               |
| SNP_P3_45009_25977932 | NC_021163.1    | Ca_kabuli_chr04 | 25977932                | AA                              | TT                | 1945943270               |

| SNPs IDs              | Chromosome IDs | Chromosomes     | Physical positions (bp) | CDC Frontier (Reference genome) | (Pusa 256 & HPNB) | NCBI SNPdb Accession IDs |
|-----------------------|----------------|-----------------|-------------------------|---------------------------------|-------------------|--------------------------|
| SNP_P3_45010_25977950 | NC_021163.1    | Ca_kabuli_chr04 | 25977950                | CC                              | GG                | 1945943272               |
| SNP_P3_45011_25977983 | NC_021163.1    | Ca_kabuli_chr04 | 25977983                | CC                              | TT                | 1945943274               |
| SNP_P3_45012_25978005 | NC_021163.1    | Ca_kabuli_chr04 | 25978005                | GG                              | AA                | 1945943275               |
| SNP_P3_45013_25978130 | NC_021163.1    | Ca_kabuli_chr04 | 25978130                | GG                              | TT                | 1945943277               |
| SNP_P3_45015_25978520 | NC_021163.1    | Ca_kabuli_chr04 | 25978520                | TT                              | CC                | 1945943279               |
| SNP_P3_45016_25978751 | NC_021163.1    | Ca_kabuli_chr04 | 25978751                | TT                              | CC                | 1945943281               |
| SNP_P3_45017_25978919 | NC_021163.1    | Ca_kabuli_chr04 | 25978919                | AA                              | CC                | 1945943283               |
| SNP_P3_45018_25978935 | NC_021163.1    | Ca_kabuli_chr04 | 25978935                | GG                              | AA                | 1945943284               |
| SNP_P3_45019_25979184 | NC_021163.1    | Ca_kabuli_chr04 | 25979184                | CC                              | AA                | 1945943286               |
| SNP_P3_45020_25979225 | NC_021163.1    | Ca_kabuli_chr04 | 25979225                | CC                              | TT                | 1945943288               |
| SNP_P3_45021_25979324 | NC_021163.1    | Ca_kabuli_chr04 | 25979324                | GG                              | AA                | 1945943290               |
| SNP_P3_45022_25979377 | NC_021163.1    | Ca_kabuli_chr04 | 25979377                | GG                              | CC                | 1945943291               |
| SNP_P3_45023_25979582 | NC_021163.1    | Ca_kabuli_chr04 | 25979582                | CC                              | TT                | 1945943293               |
| SNP_P3_45024_25979606 | NC_021163.1    | Ca_kabuli_chr04 | 25979606                | TT                              | AA                | 1945943295               |
| SNP_P3_45025_25979657 | NC_021163.1    | Ca_kabuli_chr04 | 25979657                | AA                              | GG                | 1945943297               |
| SNP_P3_45027_25980550 | NC_021163.1    | Ca_kabuli_chr04 | 25980550                | CC                              | TT                | 1945943299               |
| SNP_P3_45028_25980566 | NC_021163.1    | Ca_kabuli_chr04 | 25980566                | GG                              | TT                | 1945943300               |
| SNP_P3_45029_25980630 | NC_021163.1    | Ca_kabuli_chr04 | 25980630                | CC                              | AA                | 1945943302               |
| SNP_P3_45030_25980776 | NC_021163.1    | Ca_kabuli_chr04 | 25980776                | AA                              | TT                | 1945943304               |
| SNP_P3_45031_25980870 | NC_021163.1    | Ca_kabuli_chr04 | 25980870                | TT                              | CC                | 1945943306               |
| SNP_P3_45033_25980995 | NC_021163.1    | Ca_kabuli_chr04 | 25980995                | GG                              | AA                | 1945943307               |
| SNP_P3_45034_25981042 | NC_021163.1    | Ca_kabuli_chr04 | 25981042                | GG                              | TT                | 1945943309               |
| SNP_P3_45035_25981293 | NC_021163.1    | Ca_kabuli_chr04 | 25981293                | AA                              | TT                | 1945943311               |
| SNP_P3_45036_25981541 | NC_021163.1    | Ca_kabuli_chr04 | 25981541                | AA                              | CC                | 1945943313               |
| SNP_P3_45037_25981653 | NC_021163.1    | Ca_kabuli_chr04 | 25981653                | AA                              | CC                | 1945943315               |
| SNP_P3_45038_25981697 | NC_021163.1    | Ca_kabuli_chr04 | 25981697                | TT                              | CC                | 1945943316               |
| SNP_P3_45039_25981715 | NC_021163.1    | Ca_kabuli_chr04 | 25981715                | CC                              | TT                | 1945943318               |
| SNP_P3_45040_25981738 | NC_021163.1    | Ca_kabuli_chr04 | 25981738                | AA                              | GG                | 1945943320               |
| SNP_P3_45041_25981852 | NC_021163.1    | Ca_kabuli_chr04 | 25981852                | AA                              | TT                | 1945943322               |
| SNP_P3_45042_25981891 | NC_021163.1    | Ca_kabuli_chr04 | 25981891                | GG                              | AA                | 1945943323               |
| SNP_P3_45043_25981973 | NC_021163.1    | Ca_kabuli_chr04 | 25981973                | AA                              | GG                | 1945943325               |
| SNP_P3_45044_25981974 | NC_021163.1    | Ca_kabuli_chr04 | 25981974                | TT                              | CC                | 1945943327               |
| SNP_P3_45045_25982065 | NC_021163.1    | Ca_kabuli_chr04 | 25982065                | GG                              | AA                | 1945943329               |
| SNP_P3_45046_25982085 | NC_021163.1    | Ca_kabuli_chr04 | 25982085                | CC                              | GG                | 1945943331               |
| SNP_P3_45047_25982121 | NC_021163.1    | Ca_kabuli_chr04 | 25982121                | AA                              | TT                | 1945943332               |
| SNP_P3_45048_25982137 | NC_021163.1    | Ca_kabuli_chr04 | 25982137                | TT                              | CC                | 1945943334               |
| SNP_P3_45049_25982149 | NC_021163.1    | Ca_kabuli_chr04 | 25982149                | CC                              | TT                | 1945943336               |
| SNP_P3_45050_25982188 | NC_021163.1    | Ca_kabuli_chr04 | 25982188                | CC                              | TT                | 1945943338               |
| SNP_P3_45051_25982226 | NC_021163.1    | Ca_kabuli_chr04 | 25982226                | CC                              | AA                | 1945943339               |
| SNP_P3_45052_25982275 | NC_021163.1    | Ca_kabuli_chr04 | 25982275                | GG                              | AA                | 1945943341               |
| SNP_P3_45053_25982330 | NC_021163.1    | Ca_kabuli_chr04 | 25982330                | AA                              | GG                | 1945943343               |
| SNP_P3_45055_25982534 | NC_021163.1    | Ca_kabuli_chr04 | 25982534                | GG                              | AA                | 1945943345               |

| SNPs IDs              | Chromosome IDs | Chromosomes     | Physical positions (bp) | CDC Frontier (Reference genome) | (Pusa 256 & HPNB) | NCBI SNPdb Accession IDs |
|-----------------------|----------------|-----------------|-------------------------|---------------------------------|-------------------|--------------------------|
| SNP_P3_45056_25982538 | NC_021163.1    | Ca_kabuli_chr04 | 25982538                | GG                              | AA                | 1945943346               |
| SNP_P3_45057_25982560 | NC_021163.1    | Ca_kabuli_chr04 | 25982560                | TT                              | AA                | 1945943348               |
| SNP_P3_45058_25982573 | NC_021163.1    | Ca_kabuli_chr04 | 25982573                | CC                              | TT                | 1945943350               |
| SNP_P3_45059_25982587 | NC_021163.1    | Ca_kabuli_chr04 | 25982587                | GG                              | TT                | 1945943352               |
| SNP_P3_45060_25982670 | NC_021163.1    | Ca_kabuli_chr04 | 25982670                | AA                              | GG                | 1945943354               |
| SNP_P3_45061_25982763 | NC_021163.1    | Ca_kabuli_chr04 | 25982763                | TT                              | CC                | 1945943355               |
| SNP_P3_45062_25982767 | NC_021163.1    | Ca_kabuli_chr04 | 25982767                | TT                              | AA                | 1945943357               |
| SNP_P3_45063_25982774 | NC_021163.1    | Ca_kabuli_chr04 | 25982774                | AA                              | TT                | 1945943359               |
| SNP_P3_45064_25982797 | NC_021163.1    | Ca_kabuli_chr04 | 25982797                | CC                              | GG                | 1945943361               |
| SNP_P3_45065_25982943 | NC_021163.1    | Ca_kabuli_chr04 | 25982943                | AA                              | CC                | 1945943362               |
| SNP_P3_45066_25982960 | NC_021163.1    | Ca_kabuli_chr04 | 25982960                | CC                              | TT                | 1945943364               |
| SNP_P3_45067_25982968 | NC_021163.1    | Ca_kabuli_chr04 | 25982968                | AA                              | GG                | 1945943366               |
| SNP_P3_45068_25983036 | NC_021163.1    | Ca_kabuli_chr04 | 25983036                | GG                              | AA                | 1945943368               |
| SNP_P3_45069_25983040 | NC_021163.1    | Ca_kabuli_chr04 | 25983040                | AA                              | GG                | 1945943370               |
| SNP_P3_45070_25983045 | NC_021163.1    | Ca_kabuli_chr04 | 25983045                | AA                              | CC                | 1945943371               |
| SNP_P3_45071_25983110 | NC_021163.1    | Ca_kabuli_chr04 | 25983110                | TT                              | AA                | 1945943373               |
| SNP_P3_45072_25983119 | NC_021163.1    | Ca_kabuli_chr04 | 25983119                | CC                              | AA                | 1945943375               |
| SNP_P3_45073_25983139 | NC_021163.1    | Ca_kabuli_chr04 | 25983139                | CC                              | TT                | 1945943377               |
| SNP_P3_45074_25983206 | NC_021163.1    | Ca_kabuli_chr04 | 25983206                | AA                              | TT                | 1945943378               |
| SNP_P3_45075_25983311 | NC_021163.1    | Ca_kabuli_chr04 | 25983311                | AA                              | GG                | 1945943380               |
| SNP_P3_45076_25983525 | NC_021163.1    | Ca_kabuli_chr04 | 25983525                | TT                              | GG                | 1945943382               |
| SNP_P3_45077_25983567 | NC_021163.1    | Ca_kabuli_chr04 | 25983567                | TT                              | GG                | 1945943384               |
| SNP_P3_45078_25983581 | NC_021163.1    | Ca_kabuli_chr04 | 25983581                | TT                              | GG                | 1945943386               |
| SNP_P3_45079_25983691 | NC_021163.1    | Ca_kabuli_chr04 | 25983691                | AA                              | GG                | 1945943387               |
| SNP_P3_45080_25983776 | NC_021163.1    | Ca_kabuli_chr04 | 25983776                | TT                              | GG                | 1945943389               |
| SNP_P3_45081_25983787 | NC_021163.1    | Ca_kabuli_chr04 | 25983787                | TT                              | AA                | 1945943391               |
| SNP_P3_45082_25983788 | NC_021163.1    | Ca_kabuli_chr04 | 25983788                | TT                              | AA                | 1945943393               |
| SNP_P3_45083_25983825 | NC_021163.1    | Ca_kabuli_chr04 | 25983825                | CC                              | AA                | 1945943394               |
| SNP_P3_45084_25983886 | NC_021163.1    | Ca_kabuli_chr04 | 25983886                | AA                              | CC                | 1945943396               |
| SNP_P3_45085_25983911 | NC_021163.1    | Ca_kabuli_chr04 | 25983911                | GG                              | AA                | 1945943398               |
| SNP_P3_45086_25983972 | NC_021163.1    | Ca_kabuli_chr04 | 25983972                | CC                              | TT                | 1945943400               |
| SNP_P3_45087_25983975 | NC_021163.1    | Ca_kabuli_chr04 | 25983975                | CC                              | GG                | 1945943402               |
| SNP_P3_45088_25983978 | NC_021163.1    | Ca_kabuli_chr04 | 25983978                | GG                              | TT                | 1945943403               |
| SNP_P3_45089_25983994 | NC_021163.1    | Ca_kabuli_chr04 | 25983994                | CC                              | AA                | 1945943405               |
| SNP_P3_45090_25984010 | NC_021163.1    | Ca_kabuli_chr04 | 25984010                | AA                              | TT                | 1945943407               |
| SNP_P3_45091_25984012 | NC_021163.1    | Ca_kabuli_chr04 | 25984012                | GG                              | AA                | 1945943409               |
| SNP_P3_45092_25984015 | NC_021163.1    | Ca_kabuli_chr04 | 25984015                | CC                              | AA                | 1945943410               |
| SNP_P3_45093_25984043 | NC_021163.1    | Ca_kabuli_chr04 | 25984043                | TT                              | CC                | 1945943412               |
| SNP_P3_45095_25984107 | NC_021163.1    | Ca_kabuli_chr04 | 25984107                | AA                              | GG                | 1945943414               |
| SNP_P3_45096_25984109 | NC_021163.1    | Ca_kabuli_chr04 | 25984109                | AA                              | GG                | 1945943416               |
| SNP_P3_45097_25984118 | NC_021163.1    | Ca_kabuli_chr04 | 25984118                | GG                              | AA                | 1945943418               |
| SNP_P3_45098_25984139 | NC_021163.1    | Ca_kabuli_chr04 | 25984139                | CC                              | TT                | 1945943419               |

| SNPs IDs              | Chromosome IDs | Chromosomes     | Physical positions (bp) | CDC Frontier (Reference genome) | (Pusa 256 & HPNB) | NCBI SNPdb Accession IDs |
|-----------------------|----------------|-----------------|-------------------------|---------------------------------|-------------------|--------------------------|
| SNP_P3_45099_25984180 | NC_021163.1    | Ca_kabuli_chr04 | 25984180                | TT                              | AA                | 1945943421               |
| SNP_P3_45100_25984211 | NC_021163.1    | Ca_kabuli_chr04 | 25984211                | TT                              | CC                | 1945943423               |
| SNP_P3_45101_25984285 | NC_021163.1    | Ca_kabuli_chr04 | 25984285                | TT                              | AA                | 1945943425               |
| SNP_P3_45102_25984330 | NC_021163.1    | Ca_kabuli_chr04 | 25984330                | GG                              | AA                | 1945943426               |
| SNP_P3_45103_25984368 | NC_021163.1    | Ca_kabuli_chr04 | 25984368                | GG                              | AA                | 1945943428               |
| SNP_P3_45105_25984416 | NC_021163.1    | Ca_kabuli_chr04 | 25984416                | TT                              | CC                | 1945943430               |
| SNP_P3_45106_25984421 | NC_021163.1    | Ca_kabuli_chr04 | 25984421                | AA                              | TT                | 1945943432               |
| SNP_P3_45108_25984623 | NC_021163.1    | Ca_kabuli_chr04 | 25984623                | AA                              | GG                | 1945943433               |
| SNP_P3_45109_25984647 | NC_021163.1    | Ca_kabuli_chr04 | 25984647                | AA                              | GG                | 1945943435               |
| SNP_P3_45110_25984785 | NC_021163.1    | Ca_kabuli_chr04 | 25984785                | AA                              | CC                | 1945943437               |
| SNP_P3_45111_25984857 | NC_021163.1    | Ca_kabuli_chr04 | 25984857                | GG                              | AA                | 1945943439               |
| SNP_P3_45112_25984933 | NC_021163.1    | Ca_kabuli_chr04 | 25984933                | CC                              | GG                | 1945943441               |
| SNP_P3_45113_25985095 | NC_021163.1    | Ca_kabuli_chr04 | 25985095                | CC                              | TT                | 1945943442               |
| SNP_P3_45114_25985099 | NC_021163.1    | Ca_kabuli_chr04 | 25985099                | TT                              | GG                | 1945943444               |
| SNP_P3_45115_25985120 | NC_021163.1    | Ca_kabuli_chr04 | 25985120                | CC                              | AA                | 1945943446               |
| SNP_P3_45116_25985217 | NC_021163.1    | Ca_kabuli_chr04 | 25985217                | GG                              | AA                | 1945943448               |
| SNP_P3_45117_25985231 | NC_021163.1    | Ca_kabuli_chr04 | 25985231                | TT                              | CC                | 1945943449               |
| SNP_P3_45118_25985243 | NC_021163.1    | Ca_kabuli_chr04 | 25985243                | TT                              | CC                | 1945943451               |
| SNP_P3_45119_25985465 | NC_021163.1    | Ca_kabuli_chr04 | 25985465                | TT                              | CC                | 1945943453               |
| SNP_P3_45120_25985469 | NC_021163.1    | Ca_kabuli_chr04 | 25985469                | TT                              | CC                | 1945943455               |
| SNP_P3_45121_25985484 | NC_021163.1    | Ca_kabuli_chr04 | 25985484                | CC                              | GG                | 1945943457               |
| SNP_P3_45122_25985498 | NC_021163.1    | Ca_kabuli_chr04 | 25985498                | CC                              | TT                | 1945943458               |
| SNP_P3_45123_25985500 | NC_021163.1    | Ca_kabuli_chr04 | 25985500                | CC                              | TT                | 1945943460               |
| SNP_P3_45124_25985801 | NC_021163.1    | Ca_kabuli_chr04 | 25985801                | TT                              | CC                | 1945943462               |
| SNP_P3_45125_25985819 | NC_021163.1    | Ca_kabuli_chr04 | 25985819                | AA                              | CC                | 1945943464               |
| SNP_P3_45126_25985871 | NC_021163.1    | Ca_kabuli_chr04 | 25985871                | TT                              | GG                | 1945943465               |
| SNP_P3_45127_25985974 | NC_021163.1    | Ca_kabuli_chr04 | 25985974                | CC                              | AA                | 1945943467               |
| SNP_P3_45128_25985982 | NC_021163.1    | Ca_kabuli_chr04 | 25985982                | GG                              | AA                | 1945943469               |
| SNP_P3_45129_25986031 | NC_021163.1    | Ca_kabuli_chr04 | 25986031                | TT                              | CC                | 1945943471               |
| SNP_P3_45130_25986047 | NC_021163.1    | Ca_kabuli_chr04 | 25986047                | CC                              | TT                | 1945943473               |
| SNP_P3_45131_25986063 | NC_021163.1    | Ca_kabuli_chr04 | 25986063                | AA                              | CC                | 1945943474               |
| SNP_P3_45132_25986093 | NC_021163.1    | Ca_kabuli_chr04 | 25986093                | TT                              | AA                | 1945943476               |
| SNP_P3_45133_25986124 | NC_021163.1    | Ca_kabuli_chr04 | 25986124                | CC                              | AA                | 1945943478               |
| SNP_P3_45134_25986176 | NC_021163.1    | Ca_kabuli_chr04 | 25986176                | TT                              | CC                | 1945943480               |
| SNP_P3_45135_25986300 | NC_021163.1    | Ca_kabuli_chr04 | 25986300                | AA                              | TT                | 1945943481               |
| SNP_P3_45136_25986382 | NC_021163.1    | Ca_kabuli_chr04 | 25986382                | CC                              | TT                | 1945943483               |
| SNP_P3_45137_25986440 | NC_021163.1    | Ca_kabuli_chr04 | 25986440                | CC                              | TT                | 1945943485               |
| SNP_P3_45138_25986623 | NC_021163.1    | Ca_kabuli_chr04 | 25986623                | GG                              | AA                | 1945943487               |
| SNP_P3_45139_25986632 | NC_021163.1    | Ca_kabuli_chr04 | 25986632                | GG                              | TT                | 1945943489               |
| SNP_P3_45140_25986658 | NC_021163.1    | Ca_kabuli_chr04 | 25986658                | TT                              | GG                | 1945943490               |
| SNP_P3_45141_25986858 | NC_021163.1    | Ca_kabuli_chr04 | 25986858                | AA                              | GG                | 1945943492               |
| SNP_P3_45142_25986900 | NC_021163.1    | Ca_kabuli_chr04 | 25986900                | TT                              | GG                | 1945943494               |

| SNPs IDs              | Chromosome IDs | Chromosomes     | Physical positions (bp) | CDC Frontier (Reference genome) | (Pusa 256 & HPNB) | NCBI SNPdb Accession IDs |
|-----------------------|----------------|-----------------|-------------------------|---------------------------------|-------------------|--------------------------|
| SNP_P3_45143_25986972 | NC_021163.1    | Ca_kabuli_chr04 | 25986972                | CC                              | TT                | 1945943496               |
| SNP_P3_45144_25987071 | NC_021163.1    | Ca_kabuli_chr04 | 25987071                | CC                              | TT                | 1945943497               |
| SNP_P3_45145_25987121 | NC_021163.1    | Ca_kabuli_chr04 | 25987121                | GG                              | AA                | 1945943499               |
| SNP_P3_45146_25987129 | NC_021163.1    | Ca_kabuli_chr04 | 25987129                | AA                              | GG                | 1945943501               |
| SNP_P3_45147_25987151 | NC_021163.1    | Ca_kabuli_chr04 | 25987151                | TT                              | CC                | 1945943503               |
| SNP_P3_45148_25987187 | NC_021163.1    | Ca_kabuli_chr04 | 25987187                | TT                              | AA                | 1945943505               |
| SNP_P3_45150_25987285 | NC_021163.1    | Ca_kabuli_chr04 | 25987285                | TT                              | GG                | 1945943506               |
| SNP_P3_45151_25987336 | NC_021163.1    | Ca_kabuli_chr04 | 25987336                | CC                              | TT                | 1945943508               |
| SNP_P3_45152_25987341 | NC_021163.1    | Ca_kabuli_chr04 | 25987341                | GG                              | AA                | 1945943510               |
| SNP_P3_45153_25987513 | NC_021163.1    | Ca_kabuli_chr04 | 25987513                | TT                              | GG                | 1945943512               |
| SNP_P3_45154_25987529 | NC_021163.1    | Ca_kabuli_chr04 | 25987529                | GG                              | AA                | 1945943513               |
| SNP_P3_45155_25987571 | NC_021163.1    | Ca_kabuli_chr04 | 25987571                | GG                              | AA                | 1945943515               |
| SNP_P3_45156_25987575 | NC_021163.1    | Ca_kabuli_chr04 | 25987575                | AA                              | GG                | 1945943517               |
| SNP_P3_45158_25987634 | NC_021163.1    | Ca_kabuli_chr04 | 25987634                | TT                              | CC                | 1945943519               |
| SNP_P3_45159_25987706 | NC_021163.1    | Ca_kabuli_chr04 | 25987706                | AA                              | CC                | 1945943520               |
| SNP_P3_45160_25987773 | NC_021163.1    | Ca_kabuli_chr04 | 25987773                | GG                              | TT                | 1945943522               |
| SNP_P3_45161_25987914 | NC_021163.1    | Ca_kabuli_chr04 | 25987914                | CC                              | TT                | 1945943524               |
| SNP_P3_45162_25987961 | NC_021163.1    | Ca_kabuli_chr04 | 25987961                | TT                              | CC                | 1945943526               |
| SNP_P3_45163_25988031 | NC_021163.1    | Ca_kabuli_chr04 | 25988031                | GG                              | CC                | 1945943528               |
| SNP_P3_45164_25988033 | NC_021163.1    | Ca_kabuli_chr04 | 25988033                | TT                              | AA                | 1945943529               |
| SNP_P3_45165_25988459 | NC_021163.1    | Ca_kabuli_chr04 | 25988459                | CC                              | GG                | 1945943531               |
| SNP_P3_45166_25988542 | NC_021163.1    | Ca_kabuli_chr04 | 25988542                | AA                              | CC                | 1945943533               |
| SNP_P3_45167_25988858 | NC_021163.1    | Ca_kabuli_chr04 | 25988858                | GG                              | AA                | 1945943535               |
| SNP_P3_45168_25988872 | NC_021163.1    | Ca_kabuli_chr04 | 25988872                | TT                              | GG                | 1945943536               |
| SNP_P3_45169_25988901 | NC_021163.1    | Ca_kabuli_chr04 | 25988901                | CC                              | GG                | 1945943538               |
| SNP_P3_45170_25988944 | NC_021163.1    | Ca_kabuli_chr04 | 25988944                | TT                              | GG                | 1945943540               |
| SNP_P3_45172_25989057 | NC_021163.1    | Ca_kabuli_chr04 | 25989057                | CC                              | TT                | 1945943542               |
| SNP_P3_45173_25989121 | NC_021163.1    | Ca_kabuli_chr04 | 25989121                | TT                              | CC                | 1945943544               |
| SNP_P3_45174_25989226 | NC_021163.1    | Ca_kabuli_chr04 | 25989226                | CC                              | TT                | 1945943545               |
| SNP_P3_45175_25989271 | NC_021163.1    | Ca_kabuli_chr04 | 25989271                | CC                              | TT                | 1945943547               |
| SNP_P3_45178_25989354 | NC_021163.1    | Ca_kabuli_chr04 | 25989354                | GG                              | TT                | 1945943549               |
| SNP_P3_45179_25989461 | NC_021163.1    | Ca_kabuli_chr04 | 25989461                | TT                              | CC                | 1945943551               |
| SNP_P3_45180_25989518 | NC_021163.1    | Ca_kabuli_chr04 | 25989518                | AA                              | CC                | 1945943552               |
| SNP_P3_45181_25989519 | NC_021163.1    | Ca_kabuli_chr04 | 25989519                | GG                              | TT                | 1945943554               |
| SNP_P3_45182_25989602 | NC_021163.1    | Ca_kabuli_chr04 | 25989602                | CC                              | TT                | 1945943556               |
| SNP_P3_45183_25989657 | NC_021163.1    | Ca_kabuli_chr04 | 25989657                | AA                              | GG                | 1945943558               |
| SNP_P3_45184_25989665 | NC_021163.1    | Ca_kabuli_chr04 | 25989665                | TT                              | AA                | 1945943560               |
| SNP_P3_45185_25989731 | NC_021163.1    | Ca_kabuli_chr04 | 25989731                | TT                              | GG                | 1945943561               |
| SNP_P3_45186_25989797 | NC_021163.1    | Ca_kabuli_chr04 | 25989797                | AA                              | CC                | 1945943563               |
| SNP_P3_45187_25989814 | NC_021163.1    | Ca_kabuli_chr04 | 25989814                | TT                              | CC                | 1945943565               |
| SNP_P3_45188_25989998 | NC_021163.1    | Ca_kabuli_chr04 | 25989998                | GG                              | AA                | 1945943567               |
| SNP_P3_45189_25990052 | NC_021163.1    | Ca_kabuli_chr04 | 25990052                | CC                              | AA                | 1945943568               |

| SNPs IDs              | Chromosome IDs | Chromosomes     | Physical positions (bp) | CDC Frontier (Reference genome) | (Pusa 256 & HPNB) | NCBI SNPdb Accession IDs |
|-----------------------|----------------|-----------------|-------------------------|---------------------------------|-------------------|--------------------------|
| SNP_P3_45190_25990055 | NC_021163.1    | Ca_kabuli_chr04 | 25990055                | TT                              | CC                | 1945943570               |
| SNP_P3_45191_25990107 | NC_021163.1    | Ca_kabuli_chr04 | 25990107                | AA                              | GG                | 1945943572               |
| SNP_P3_45192_25990110 | NC_021163.1    | Ca_kabuli_chr04 | 25990110                | AA                              | TT                | 1945943574               |
| SNP_P3_45193_25990140 | NC_021163.1    | Ca_kabuli_chr04 | 25990140                | AA                              | GG                | 1945943576               |
| SNP_P3_45194_25990218 | NC_021163.1    | Ca_kabuli_chr04 | 25990218                | TT                              | AA                | 1945943577               |
| SNP_P3_45195_25990343 | NC_021163.1    | Ca_kabuli_chr04 | 25990343                | CC                              | TT                | 1945943579               |
| SNP_P3_45196_25990353 | NC_021163.1    | Ca_kabuli_chr04 | 25990353                | TT                              | CC                | 1945943581               |
| SNP_P3_45197_25990556 | NC_021163.1    | Ca_kabuli_chr04 | 25990556                | CC                              | TT                | 1945943583               |
| SNP_P3_45198_25990720 | NC_021163.1    | Ca_kabuli_chr04 | 25990720                | AA                              | GG                | 1945943584               |
| SNP_P3_45199_25990816 | NC_021163.1    | Ca_kabuli_chr04 | 25990816                | CC                              | GG                | 1945943586               |
| SNP_P3_45200_25990827 | NC_021163.1    | Ca_kabuli_chr04 | 25990827                | GG                              | CC                | 1945943588               |
| SNP_P3_45201_25990857 | NC_021163.1    | Ca_kabuli_chr04 | 25990857                | TT                              | CC                | 1945943590               |
| SNP_P3_45203_25990929 | NC_021163.1    | Ca_kabuli_chr04 | 25990929                | CC                              | TT                | 1945943591               |
| SNP_P3_45204_25990939 | NC_021163.1    | Ca_kabuli_chr04 | 25990939                | CC                              | TT                | 1945943593               |
| SNP_P3_45205_25990954 | NC_021163.1    | Ca_kabuli_chr04 | 25990954                | GG                              | AA                | 1945943595               |
| SNP_P3_45206_25991002 | NC_021163.1    | Ca_kabuli_chr04 | 25991002                | AA                              | CC                | 1945943597               |
| SNP_P3_45207_25991539 | NC_021163.1    | Ca_kabuli_chr04 | 25991539                | TT                              | GG                | 1945943599               |
| SNP_P3_45208_25991574 | NC_021163.1    | Ca_kabuli_chr04 | 25991574                | AA                              | GG                | 1945943600               |
| SNP_P3_45209_25994040 | NC_021163.1    | Ca_kabuli_chr04 | 25994040                | AA                              | TT                | 1945943602               |
| SNP_P3_45210_25994041 | NC_021163.1    | Ca_kabuli_chr04 | 25994041                | TT                              | CC                | 1945943604               |
| SNP_P3_45211_25994045 | NC_021163.1    | Ca_kabuli_chr04 | 25994045                | TT                              | CC                | 1945943606               |
| SNP_P3_45212_25994074 | NC_021163.1    | Ca_kabuli_chr04 | 25994074                | TT                              | AA                | 1945943607               |
| SNP_P3_45213_25994152 | NC_021163.1    | Ca_kabuli_chr04 | 25994152                | GG                              | TT                | 1945943609               |
| SNP_P3_45214_25994177 | NC_021163.1    | Ca_kabuli_chr04 | 25994177                | GG                              | AA                | 1945943611               |
| SNP_P3_45215_25994294 | NC_021163.1    | Ca_kabuli_chr04 | 25994294                | GG                              | AA                | 1945943613               |
| SNP_P3_45216_25994341 | NC_021163.1    | Ca_kabuli_chr04 | 25994341                | GG                              | AA                | 1945943615               |
| SNP_P3_45218_25994468 | NC_021163.1    | Ca_kabuli_chr04 | 25994468                | GG                              | CC                | 1945943616               |
| SNP_P3_45220_25994645 | NC_021163.1    | Ca_kabuli_chr04 | 25994645                | TT                              | CC                | 1945943618               |
| SNP_P3_45221_25994652 | NC_021163.1    | Ca_kabuli_chr04 | 25994652                | CC                              | TT                | 1945943620               |
| SNP_P3_45222_25994686 | NC_021163.1    | Ca_kabuli_chr04 | 25994686                | TT                              | CC                | 1945943622               |
| SNP_P3_45224_25994789 | NC_021163.1    | Ca_kabuli_chr04 | 25994789                | AA                              | GG                | 1945943623               |
| SNP_P3_45225_25994977 | NC_021163.1    | Ca_kabuli_chr04 | 25994977                | GG                              | CC                | 1945943625               |
| SNP_P3_45226_25995054 | NC_021163.1    | Ca_kabuli_chr04 | 25995054                | TT                              | AA                | 1945943627               |
| SNP_P3_45228_25995103 | NC_021163.1    | Ca_kabuli_chr04 | 25995103                | CC                              | TT                | 1945943629               |
| SNP_P3_45229_25995170 | NC_021163.1    | Ca_kabuli_chr04 | 25995170                | GG                              | AA                | 1945943631               |
| SNP_P3_45230_25995457 | NC_021163.1    | Ca_kabuli_chr04 | 25995457                | GG                              | AA                | 1945943632               |
| SNP_P3_45231_25995499 | NC_021163.1    | Ca_kabuli_chr04 | 25995499                | AA                              | GG                | 1945943634               |
| SNP_P3_45232_25995536 | NC_021163.1    | Ca_kabuli_chr04 | 25995536                | CC                              | TT                | 1945943636               |
| SNP_P3_45233_25995563 | NC_021163.1    | Ca_kabuli_chr04 | 25995563                | TT                              | CC                | 1945943638               |
| SNP_P3_45234_25995694 | NC_021163.1    | Ca_kabuli_chr04 | 25995694                | TT                              | GG                | 1945943639               |
| SNP_P3_45235_25995698 | NC_021163.1    | Ca_kabuli_chr04 | 25995698                | GG                              | AA                | 1945943641               |
| SNP_P3_45236_25995728 | NC_021163.1    | Ca_kabuli_chr04 | 25995728                | AA                              | GG                | 1945943643               |



| SNPs IDs              | Chromosome IDs | Chromosomes     | Physical positions (bp) | CDC Frontier (Reference genome) | (Pusa 256 & HPNB) | NCBI SNPdb Accession IDs |
|-----------------------|----------------|-----------------|-------------------------|---------------------------------|-------------------|--------------------------|
| SNP_P3_45237_25995781 | NC_021163.1    | Ca_kabuli_chr04 | 25995781                | CC                              | TT                | 1945943645               |
| SNP_P3_45239_25995843 | NC_021163.1    | Ca_kabuli_chr04 | 25995843                | TT                              | CC                | 1945943647               |
| SNP_P3_45240_25995881 | NC_021163.1    | Ca_kabuli_chr04 | 25995881                | TT                              | CC                | 1945943648               |
| SNP_P3_45241_25995895 | NC_021163.1    | Ca_kabuli_chr04 | 25995895                | AA                              | CC                | 1945943650               |
| SNP_P3_45242_25995908 | NC_021163.1    | Ca_kabuli_chr04 | 25995908                | AA                              | GG                | 1945943652               |
| SNP_P3_45243_25995926 | NC_021163.1    | Ca_kabuli_chr04 | 25995926                | CC                              | AA                | 1945943654               |
| SNP_P3_45245_25995997 | NC_021163.1    | Ca_kabuli_chr04 | 25995997                | AA                              | TT                | 1945943655               |
| SNP_P3_45246_25996071 | NC_021163.1    | Ca_kabuli_chr04 | 25996071                | CC                              | GG                | 1945943657               |
| SNP_P3_45247_25996110 | NC_021163.1    | Ca_kabuli_chr04 | 25996110                | AA                              | TT                | 1945943659               |
| SNP_P3_45248_25996117 | NC_021163.1    | Ca_kabuli_chr04 | 25996117                | CC                              | TT                | 1945943661               |
| SNP_P3_45249_25996144 | NC_021163.1    | Ca_kabuli_chr04 | 25996144                | GG                              | AA                | 1945943663               |
| SNP_P3_45250_25996164 | NC_021163.1    | Ca_kabuli_chr04 | 25996164                | CC                              | TT                | 1945943664               |
| SNP_P3_45251_25996180 | NC_021163.1    | Ca_kabuli_chr04 | 25996180                | TT                              | AA                | 1945943666               |
| SNP_P3_45252_25996463 | NC_021163.1    | Ca_kabuli_chr04 | 25996463                | TT                              | AA                | 1945943668               |
| SNP_P3_45253_25997705 | NC_021163.1    | Ca_kabuli_chr04 | 25997705                | AA                              | GG                | 1945943670               |
| SNP_P3_45254_25997706 | NC_021163.1    | Ca_kabuli_chr04 | 25997706                | CC                              | TT                | 1945943671               |
| SNP_P3_45255_26000053 | NC_021163.1    | Ca_kabuli_chr04 | 26000053                | AA                              | TT                | 1945943673               |
| SNP_P3_45256_26000086 | NC_021163.1    | Ca_kabuli_chr04 | 26000086                | TT                              | CC                | 1945943675               |
| SNP_P3_45257_26000087 | NC_021163.1    | Ca_kabuli_chr04 | 26000087                | GG                              | TT                | 1945943677               |
| SNP_P3_45259_26001192 | NC_021163.1    | Ca_kabuli_chr04 | 26001192                | TT                              | CC                | 1945943679               |
| SNP_P3_45260_26001294 | NC_021163.1    | Ca_kabuli_chr04 | 26001294                | TT                              | GG                | 1945943680               |
| SNP_P3_45261_26001937 | NC_021163.1    | Ca_kabuli_chr04 | 26001937                | AA                              | CC                | 1945943682               |
| SNP_P3_45262_26002212 | NC_021163.1    | Ca_kabuli_chr04 | 26002212                | TT                              | CC                | 1945943684               |
| SNP_P3_45263_26002325 | NC_021163.1    | Ca_kabuli_chr04 | 26002325                | GG                              | TT                | 1945943686               |
| SNP_P3_45266_26010777 | NC_021163.1    | Ca_kabuli_chr04 | 26010777                | CC                              | AA                | 1945943687               |
| SNP_P3_45267_26010808 | NC_021163.1    | Ca_kabuli_chr04 | 26010808                | GG                              | TT                | 1945943689               |
| SNP_P3_45268_26012026 | NC_021163.1    | Ca_kabuli_chr04 | 26012026                | AA                              | GG                | 1945943691               |
| SNP_P3_45269_26012059 | NC_021163.1    | Ca_kabuli_chr04 | 26012059                | TT                              | CC                | 1945943693               |
| SNP_P3_45270_26012190 | NC_021163.1    | Ca_kabuli_chr04 | 26012190                | AA                              | GG                | 1945943694               |
| SNP_P3_45271_26012938 | NC_021163.1    | Ca_kabuli_chr04 | 26012938                | GG                              | AA                | 1945943696               |
| SNP_P3_45272_26012966 | NC_021163.1    | Ca_kabuli_chr04 | 26012966                | GG                              | CC                | 1945943698               |
| SNP_P3_45273_26012980 | NC_021163.1    | Ca_kabuli_chr04 | 26012980                | GG                              | AA                | 1945943700               |
| SNP_P3_45274_26014834 | NC_021163.1    | Ca_kabuli_chr04 | 26014834                | CC                              | AA                | 1945943702               |
| SNP_P3_45275_26014847 | NC_021163.1    | Ca_kabuli_chr04 | 26014847                | TT                              | CC                | 1945943703               |
| SNP_P3_45277_26017589 | NC_021163.1    | Ca_kabuli_chr04 | 26017589                | TT                              | AA                | 1945943705               |
| SNP_P3_45278_26017868 | NC_021163.1    | Ca_kabuli_chr04 | 26017868                | TT                              | CC                | 1945943707               |
| SNP_P3_45279_26018088 | NC_021163.1    | Ca_kabuli_chr04 | 26018088                | CC                              | TT                | 1945943709               |
| SNP_P3_45281_26018432 | NC_021163.1    | Ca_kabuli_chr04 | 26018432                | AA                              | GG                | 1945943710               |
| SNP_P3_45282_26019082 | NC_021163.1    | Ca_kabuli_chr04 | 26019082                | AA                              | GG                | 1945943712               |
| SNP_P3_45283_26021948 | NC_021163.1    | Ca_kabuli_chr04 | 26021948                | CC                              | GG                | 1945943714               |
| SNP_P3_45284_26023464 | NC_021163.1    | Ca_kabuli_chr04 | 26023464                | CC                              | AA                | 1945943716               |
| SNP_P3_45285_26025321 | NC_021163.1    | Ca_kabuli_chr04 | 26025321                | CC                              | TT                | 1945943718               |

| SNPs IDs              | Chromosome IDs | Chromosomes     | Physical positions (bp) | CDC Frontier (Reference genome) | (Pusa 256 & HPNB) | NCBI SNPdb Accession IDs |
|-----------------------|----------------|-----------------|-------------------------|---------------------------------|-------------------|--------------------------|
| SNP_P3_45286_26029803 | NC_021163.1    | Ca_kabuli_chr04 | 26029803                | AA                              | GG                | 1945943719               |
| SNP_P3_45287_26029915 | NC_021163.1    | Ca_kabuli_chr04 | 26029915                | AA                              | GG                | 1945943721               |
| SNP_P3_45288_26030895 | NC_021163.1    | Ca_kabuli_chr04 | 26030895                | CC                              | AA                | 1945943723               |
| SNP_P3_45289_26031226 | NC_021163.1    | Ca_kabuli_chr04 | 26031226                | AA                              | GG                | 1945943725               |
| SNP_P3_45290_26031599 | NC_021163.1    | Ca_kabuli_chr04 | 26031599                | AA                              | GG                | 1945943726               |
| SNP_P3_45291_26032993 | NC_021163.1    | Ca_kabuli_chr04 | 26032993                | AA                              | GG                | 1945943728               |
| SNP_P3_45293_26037396 | NC_021163.1    | Ca_kabuli_chr04 | 26037396                | TT                              | CC                | 1945943730               |
| SNP_P3_45296_26053114 | NC_021163.1    | Ca_kabuli_chr04 | 26053114                | CC                              | GG                | 1945943732               |
| SNP_P3_45297_26062977 | NC_021163.1    | Ca_kabuli_chr04 | 26062977                | CC                              | TT                | 1945943734               |
| SNP_P3_45298_26066956 | NC_021163.1    | Ca_kabuli_chr04 | 26066956                | TT                              | GG                | 1945943735               |
| SNP_P3_45299_26067252 | NC_021163.1    | Ca_kabuli_chr04 | 26067252                | TT                              | CC                | 1945943737               |
| SNP_P3_45301_26071062 | NC_021163.1    | Ca_kabuli_chr04 | 26071062                | CC                              | AA                | 1945943739               |
| SNP_P3_45302_26075602 | NC_021163.1    | Ca_kabuli_chr04 | 26075602                | TT                              | AA                | 1945943741               |
| SNP_P3_45303_26075612 | NC_021163.1    | Ca_kabuli_chr04 | 26075612                | TT                              | AA                | 1945943742               |
| SNP_P3_45304_26078777 | NC_021163.1    | Ca_kabuli_chr04 | 26078777                | CC                              | TT                | 1945943744               |
| SNP_P3_45306_26080170 | NC_021163.1    | Ca_kabuli_chr04 | 26080170                | GG                              | AA                | 1945943746               |
| SNP_P3_45307_26083139 | NC_021163.1    | Ca_kabuli_chr04 | 26083139                | TT                              | CC                | 1945943748               |
| SNP_P3_45310_26096284 | NC_021163.1    | Ca_kabuli_chr04 | 26096284                | AA                              | CC                | 1945943750               |
| SNP_P3_45311_26101419 | NC_021163.1    | Ca_kabuli_chr04 | 26101419                | TT                              | GG                | 1945943751               |
| SNP_P3_45313_26105610 | NC_021163.1    | Ca_kabuli_chr04 | 26105610                | AA                              | GG                | 1945943753               |
| SNP_P3_45314_26107440 | NC_021163.1    | Ca_kabuli_chr04 | 26107440                | AA                              | TT                | 1945943755               |
| SNP_P3_45315_26107926 | NC_021163.1    | Ca_kabuli_chr04 | 26107926                | TT                              | AA                | 1945943757               |
| SNP_P3_45316_26109221 | NC_021163.1    | Ca_kabuli_chr04 | 26109221                | CC                              | TT                | 1945943758               |
| SNP_P3_45317_26110959 | NC_021163.1    | Ca_kabuli_chr04 | 26110959                | TT                              | AA                | 1945943760               |
| SNP_P3_45318_26111356 | NC_021163.1    | Ca_kabuli_chr04 | 26111356                | GG                              | AA                | 1945943762               |
| SNP_P3_45319_26114038 | NC_021163.1    | Ca_kabuli_chr04 | 26114038                | CC                              | TT                | 1945943764               |
| SNP_P3_45320_26114291 | NC_021163.1    | Ca_kabuli_chr04 | 26114291                | AA                              | GG                | 1945943766               |
| SNP_P3_45321_26115735 | NC_021163.1    | Ca_kabuli_chr04 | 26115735                | AA                              | GG                | 1945943767               |
| SNP_P3_45322_26121970 | NC_021163.1    | Ca_kabuli_chr04 | 26121970                | CC                              | TT                | 1945943769               |
| SNP_P3_45323_26123023 | NC_021163.1    | Ca_kabuli_chr04 | 26123023                | TT                              | CC                | 1945943771               |
| SNP_P3_45324_26124154 | NC_021163.1    | Ca_kabuli_chr04 | 26124154                | TT                              | AA                | 1945943773               |
| SNP_P3_45325_26127766 | NC_021163.1    | Ca_kabuli_chr04 | 26127766                | AA                              | GG                | 1945943774               |
| SNP_P3_45326_26127774 | NC_021163.1    | Ca_kabuli_chr04 | 26127774                | CC                              | AA                | 1945943776               |
| SNP_P3_45327_26130857 | NC_021163.1    | Ca_kabuli_chr04 | 26130857                | CC                              | AA                | 1945943778               |
| SNP_P3_45328_26132209 | NC_021163.1    | Ca_kabuli_chr04 | 26132209                | AA                              | GG                | 1945943780               |
| SNP_P3_45329_26132409 | NC_021163.1    | Ca_kabuli_chr04 | 26132409                | CC                              | TT                | 1945943782               |
| SNP_P3_45330_26137463 | NC_021163.1    | Ca_kabuli_chr04 | 26137463                | CC                              | TT                | 1945943783               |
| SNP_P3_45331_26138273 | NC_021163.1    | Ca_kabuli_chr04 | 26138273                | TT                              | CC                | 1945943785               |
| SNP_P3_45332_26140769 | NC_021163.1    | Ca_kabuli_chr04 | 26140769                | CC                              | GG                | 1945943787               |
| SNP_P3_45333_26144568 | NC_021163.1    | Ca_kabuli_chr04 | 26144568                | AA                              | GG                | 1945943789               |
| SNP_P3_45334_26153015 | NC_021163.1    | Ca_kabuli_chr04 | 26153015                | CC                              | TT                | 1945943790               |
| SNP_P3_45335_26158476 | NC_021163.1    | Ca_kabuli_chr04 | 26158476                | CC                              | GG                | 1945943792               |

| SNPs IDs              | Chromosome IDs | Chromosomes     | Physical positions (bp) | CDC Frontier (Reference genome) | (Pusa 256 & HPNB) | NCBI SNPdb Accession IDs |
|-----------------------|----------------|-----------------|-------------------------|---------------------------------|-------------------|--------------------------|
| SNP_P3_45336_26159864 | NC_021163.1    | Ca_kabuli_chr04 | 26159864                | CC                              | TT                | 1945943794               |
| SNP_P3_45337_26162559 | NC_021163.1    | Ca_kabuli_chr04 | 26162559                | AA                              | GG                | 1945943796               |
| SNP_P3_45338_26162574 | NC_021163.1    | Ca_kabuli_chr04 | 26162574                | GG                              | AA                | 1945943798               |
| SNP_P3_45339_26163104 | NC_021163.1    | Ca_kabuli_chr04 | 26163104                | GG                              | AA                | 1945943799               |
| SNP_P3_45340_26166194 | NC_021163.1    | Ca_kabuli_chr04 | 26166194                | GG                              | AA                | 1945943801               |
| SNP_P3_45341_26166259 | NC_021163.1    | Ca_kabuli_chr04 | 26166259                | GG                              | AA                | 1945943803               |
| SNP_P3_45342_26166692 | NC_021163.1    | Ca_kabuli_chr04 | 26166692                | CC                              | TT                | 1945943805               |
| SNP_P3_45343_26171768 | NC_021163.1    | Ca_kabuli_chr04 | 26171768                | GG                              | AA                | 1945943806               |
| SNP_P3_45344_26172089 | NC_021163.1    | Ca_kabuli_chr04 | 26172089                | AA                              | TT                | 1945943808               |
| SNP_P3_45346_26176169 | NC_021163.1    | Ca_kabuli_chr04 | 26176169                | GG                              | AA                | 1945943810               |
| SNP_P3_45347_26176412 | NC_021163.1    | Ca_kabuli_chr04 | 26176412                | CC                              | TT                | 1945943812               |
| SNP_P3_45349_26178746 | NC_021163.1    | Ca_kabuli_chr04 | 26178746                | GG                              | AA                | 1945943814               |
| SNP_P3_45350_26178936 | NC_021163.1    | Ca_kabuli_chr04 | 26178936                | AA                              | GG                | 1945943815               |
| SNP_P3_45352_26179569 | NC_021163.1    | Ca_kabuli_chr04 | 26179569                | AA                              | GG                | 1945943817               |
| SNP_P3_45353_26179867 | NC_021163.1    | Ca_kabuli_chr04 | 26179867                | AA                              | GG                | 1945943819               |
| SNP_P3_45355_26181856 | NC_021163.1    | Ca_kabuli_chr04 | 26181856                | TT                              | GG                | 1945943821               |
| SNP_P3_45356_26182272 | NC_021163.1    | Ca_kabuli_chr04 | 26182272                | AA                              | GG                | 1945943822               |
| SNP_P3_45357_26183000 | NC_021163.1    | Ca_kabuli_chr04 | 26183000                | GG                              | AA                | 1945943824               |
| SNP_P3_45358_26187400 | NC_021163.1    | Ca_kabuli_chr04 | 26187400                | TT                              | GG                | 1945943826               |
| SNP_P3_45359_26187810 | NC_021163.1    | Ca_kabuli_chr04 | 26187810                | CC                              | TT                | 1945943828               |
| SNP_P3_45360_26187882 | NC_021163.1    | Ca_kabuli_chr04 | 26187882                | AA                              | GG                | 1945943829               |
| SNP_P3_45361_26188525 | NC_021163.1    | Ca_kabuli_chr04 | 26188525                | GG                              | AA                | 1945943831               |
| SNP_P3_45362_26189232 | NC_021163.1    | Ca_kabuli_chr04 | 26189232                | CC                              | TT                | 1945943833               |
| SNP_P3_45363_26190560 | NC_021163.1    | Ca_kabuli_chr04 | 26190560                | CC                              | AA                | 1945943835               |
| SNP_P3_45364_26190770 | NC_021163.1    | Ca_kabuli_chr04 | 26190770                | AA                              | GG                | 1945943837               |
| SNP_P3_45365_26190945 | NC_021163.1    | Ca_kabuli_chr04 | 26190945                | TT                              | CC                | 1945943838               |
| SNP_P3_45366_26193457 | NC_021163.1    | Ca_kabuli_chr04 | 26193457                | TT                              | AA                | 1945943840               |
| SNP_P3_45367_26197807 | NC_021163.1    | Ca_kabuli_chr04 | 26197807                | AA                              | TT                | 1945943842               |
| SNP_P3_45368_26198117 | NC_021163.1    | Ca_kabuli_chr04 | 26198117                | AA                              | GG                | 1945943844               |
| SNP_P3_45369_26198165 | NC_021163.1    | Ca_kabuli_chr04 | 26198165                | TT                              | CC                | 1945943845               |
| SNP_P3_45370_26200691 | NC_021163.1    | Ca_kabuli_chr04 | 26200691                | CC                              | AA                | 1945943847               |
| SNP_P3_45371_26200812 | NC_021163.1    | Ca_kabuli_chr04 | 26200812                | CC                              | TT                | 1945943849               |
| SNP_P3_45372_26200857 | NC_021163.1    | Ca_kabuli_chr04 | 26200857                | TT                              | CC                | 1945943851               |
| SNP_P3_45373_26200930 | NC_021163.1    | Ca_kabuli_chr04 | 26200930                | GG                              | AA                | 1945943853               |
| SNP_P3_45374_26202490 | NC_021163.1    | Ca_kabuli_chr04 | 26202490                | GG                              | AA                | 1945943854               |
| SNP_P3_45375_26207802 | NC_021163.1    | Ca_kabuli_chr04 | 26207802                | CC                              | GG                | 1945943856               |
| SNP_P3_45376_26207939 | NC_021163.1    | Ca_kabuli_chr04 | 26207939                | AA                              | GG                | 1945943858               |
| SNP_P3_45377_26209177 | NC_021163.1    | Ca_kabuli_chr04 | 26209177                | CC                              | TT                | 1945943860               |
| SNP_P3_45378_26209193 | NC_021163.1    | Ca_kabuli_chr04 | 26209193                | TT                              | CC                | 1945943861               |
| SNP_P3_45379_26214347 | NC_021163.1    | Ca_kabuli_chr04 | 26214347                | CC                              | TT                | 1945943863               |
| SNP_P3_45380_26215697 | NC_021163.1    | Ca_kabuli_chr04 | 26215697                | CC                              | TT                | 1945943865               |
| SNP_P3_45381_26221549 | NC_021163.1    | Ca_kabuli_chr04 | 26221549                | CC                              | TT                | 1945943867               |

| SNPs IDs              | Chromosome IDs | Chromosomes     | Physical positions (bp) | CDC Frontier (Reference genome) | (Pusa 256 & HPNB) | NCBI SNPdb Accession IDs |
|-----------------------|----------------|-----------------|-------------------------|---------------------------------|-------------------|--------------------------|
| SNP_P3_45382_26222359 | NC_021163.1    | Ca_kabuli_chr04 | 26222359                | AA                              | GG                | 1945943869               |
| SNP_P3_45383_26225809 | NC_021163.1    | Ca_kabuli_chr04 | 26225809                | AA                              | GG                | 1945943870               |
| SNP_P3_45385_26229640 | NC_021163.1    | Ca_kabuli_chr04 | 26229640                | TT                              | CC                | 1945943872               |
| SNP_P3_45386_26229724 | NC_021163.1    | Ca_kabuli_chr04 | 26229724                | AA                              | GG                | 1945943874               |
| SNP_P3_45387_26229765 | NC_021163.1    | Ca_kabuli_chr04 | 26229765                | GG                              | AA                | 1945943876               |
| SNP_P3_45388_26229812 | NC_021163.1    | Ca_kabuli_chr04 | 26229812                | AA                              | CC                | 1945943877               |
| SNP_P3_45389_26229933 | NC_021163.1    | Ca_kabuli_chr04 | 26229933                | CC                              | TT                | 1945943879               |
| SNP_P3_45390_26235011 | NC_021163.1    | Ca_kabuli_chr04 | 26235011                | CC                              | TT                | 1945943881               |
| SNP_P3_45391_26236527 | NC_021163.1    | Ca_kabuli_chr04 | 26236527                | TT                              | CC                | 1945943883               |
| SNP_P3_45392_26236643 | NC_021163.1    | Ca_kabuli_chr04 | 26236643                | TT                              | CC                | 1945943885               |
| SNP_P3_45393_26237813 | NC_021163.1    | Ca_kabuli_chr04 | 26237813                | TT                              | CC                | 1945943886               |
| SNP_P3_45394_26238012 | NC_021163.1    | Ca_kabuli_chr04 | 26238012                | GG                              | AA                | 1945943888               |
| SNP_P3_45395_26239324 | NC_021163.1    | Ca_kabuli_chr04 | 26239324                | AA                              | CC                | 1945943890               |
| SNP_P3_45396_26242509 | NC_021163.1    | Ca_kabuli_chr04 | 26242509                | CC                              | TT                | 1945943892               |
| SNP_P3_45397_26242611 | NC_021163.1    | Ca_kabuli_chr04 | 26242611                | GG                              | AA                | 1945943893               |
| SNP_P3_45398_26243097 | NC_021163.1    | Ca_kabuli_chr04 | 26243097                | GG                              | CC                | 1945943895               |
| SNP_P3_45399_26243150 | NC_021163.1    | Ca_kabuli_chr04 | 26243150                | TT                              | AA                | 1945943897               |
| SNP_P3_45400_26243163 | NC_021163.1    | Ca_kabuli_chr04 | 26243163                | TT                              | AA                | 1945943899               |
| SNP_P3_45401_26243175 | NC_021163.1    | Ca_kabuli_chr04 | 26243175                | GG                              | CC                | 1945943901               |
| SNP_P3_45402_26243390 | NC_021163.1    | Ca_kabuli_chr04 | 26243390                | TT                              | CC                | 1945943902               |
| SNP_P3_45403_26243423 | NC_021163.1    | Ca_kabuli_chr04 | 26243423                | CC                              | TT                | 1945943904               |
| SNP_P3_45404_26243446 | NC_021163.1    | Ca_kabuli_chr04 | 26243446                | CC                              | TT                | 1945943906               |
| SNP_P3_45405_26243468 | NC_021163.1    | Ca_kabuli_chr04 | 26243468                | AA                              | GG                | 1945943908               |
| SNP_P3_45406_26248875 | NC_021163.1    | Ca_kabuli_chr04 | 26248875                | AA                              | TT                | 1945943909               |
| SNP_P3_45407_26250540 | NC_021163.1    | Ca_kabuli_chr04 | 26250540                | CC                              | TT                | 1945943911               |
| SNP_P3_45408_26250957 | NC_021163.1    | Ca_kabuli_chr04 | 26250957                | GG                              | TT                | 1945943913               |
| SNP_P3_45409_26255426 | NC_021163.1    | Ca_kabuli_chr04 | 26255426                | TT                              | CC                | 1945943915               |
| SNP_P3_45410_26255427 | NC_021163.1    | Ca_kabuli_chr04 | 26255427                | GG                              | AA                | 1945943916               |
| SNP_P3_45411_26257084 | NC_021163.1    | Ca_kabuli_chr04 | 26257084                | AA                              | GG                | 1945943918               |
| SNP_P3_45412_26257604 | NC_021163.1    | Ca_kabuli_chr04 | 26257604                | TT                              | AA                | 1945943920               |
| SNP_P3_45413_26257699 | NC_021163.1    | Ca_kabuli_chr04 | 26257699                | TT                              | CC                | 1945943922               |
| SNP_P3_45414_26258549 | NC_021163.1    | Ca_kabuli_chr04 | 26258549                | TT                              | AA                | 1945943924               |
| SNP_P3_45415_26258884 | NC_021163.1    | Ca_kabuli_chr04 | 26258884                | AA                              | GG                | 1945943925               |
| SNP_P3_45417_26259138 | NC_021163.1    | Ca_kabuli_chr04 | 26259138                | AA                              | GG                | 1945943927               |
| SNP_P3_45418_26261766 | NC_021163.1    | Ca_kabuli_chr04 | 26261766                | TT                              | GG                | 1945943929               |
| SNP_P3_45419_26262745 | NC_021163.1    | Ca_kabuli_chr04 | 26262745                | AA                              | GG                | 1945943931               |
| SNP_P3_45420_26262780 | NC_021163.1    | Ca_kabuli_chr04 | 26262780                | GG                              | TT                | 1945943932               |
| SNP_P3_45421_26263193 | NC_021163.1    | Ca_kabuli_chr04 | 26263193                | CC                              | AA                | 1945943934               |
| SNP_P3_45422_26263195 | NC_021163.1    | Ca_kabuli_chr04 | 26263195                | AA                              | GG                | 1945943936               |
| SNP_P3_45423_26263429 | NC_021163.1    | Ca_kabuli_chr04 | 26263429                | GG                              | AA                | 1945943938               |
| SNP_P3_45424_26263444 | NC_021163.1    | Ca_kabuli_chr04 | 26263444                | TT                              | CC                | 1945943940               |
| SNP_P3_45425_26263447 | NC_021163.1    | Ca_kabuli_chr04 | 26263447                | TT                              | CC                | 1945943941               |

| SNPs IDs              | Chromosome IDs | Chromosomes     | Physical positions (bp) | CDC Frontier (Reference genome) | (Pusa 256 & HPNB) | NCBI SNPdb Accession IDs |
|-----------------------|----------------|-----------------|-------------------------|---------------------------------|-------------------|--------------------------|
| SNP_P3_45426_26263485 | NC_021163.1    | Ca_kabuli_chr04 | 26263485                | TT                              | CC                | 1945943943               |
| SNP_P3_45427_26263528 | NC_021163.1    | Ca_kabuli_chr04 | 26263528                | TT                              | CC                | 1945943945               |
| SNP_P3_45428_26263560 | NC_021163.1    | Ca_kabuli_chr04 | 26263560                | AA                              | GG                | 1945943947               |
| SNP_P3_45429_26263667 | NC_021163.1    | Ca_kabuli_chr04 | 26263667                | GG                              | AA                | 1945943948               |
| SNP_P3_45431_26263910 | NC_021163.1    | Ca_kabuli_chr04 | 26263910                | GG                              | AA                | 1945943950               |
| SNP_P3_45432_26264183 | NC_021163.1    | Ca_kabuli_chr04 | 26264183                | GG                              | AA                | 1945943952               |
| SNP_P3_45433_26283849 | NC_021163.1    | Ca_kabuli_chr04 | 26283849                | AA                              | TT                | 1945943954               |
| SNP_P3_45435_26287695 | NC_021163.1    | Ca_kabuli_chr04 | 26287695                | GG                              | AA                | 1945943956               |
| SNP_P3_45436_26289056 | NC_021163.1    | Ca_kabuli_chr04 | 26289056                | TT                              | CC                | 1945943957               |
| SNP_P3_45437_26294865 | NC_021163.1    | Ca_kabuli_chr04 | 26294865                | TT                              | CC                | 1945943959               |
| SNP_P3_45438_26295399 | NC_021163.1    | Ca_kabuli_chr04 | 26295399                | TT                              | CC                | 1945943961               |
| SNP_P3_45439_26300608 | NC_021163.1    | Ca_kabuli_chr04 | 26300608                | GG                              | AA                | 1945943963               |
| SNP_P3_45441_26304024 | NC_021163.1    | Ca_kabuli_chr04 | 26304024                | AA                              | TT                | 1945943964               |
| SNP_P3_45443_26306341 | NC_021163.1    | Ca_kabuli_chr04 | 26306341                | TT                              | GG                | 1945943966               |
| SNP_P3_45444_26306589 | NC_021163.1    | Ca_kabuli_chr04 | 26306589                | TT                              | GG                | 1945943968               |
| SNP_P3_45445_26306713 | NC_021163.1    | Ca_kabuli_chr04 | 26306713                | AA                              | CC                | 1945943970               |
| SNP_P3_45447_26306732 | NC_021163.1    | Ca_kabuli_chr04 | 26306732                | TT                              | GG                | 1945943972               |
| SNP_P3_45448_26307468 | NC_021163.1    | Ca_kabuli_chr04 | 26307468                | AA                              | GG                | 1945943973               |
| SNP_P3_45450_26310348 | NC_021163.1    | Ca_kabuli_chr04 | 26310348                | CC                              | TT                | 1945943975               |
| SNP_P3_45451_26310524 | NC_021163.1    | Ca_kabuli_chr04 | 26310524                | CC                              | AA                | 1945943977               |
| SNP_P3_45453_26330198 | NC_021163.1    | Ca_kabuli_chr04 | 26330198                | TT                              | GG                | 1945943979               |
| SNP_P3_45454_26332813 | NC_021163.1    | Ca_kabuli_chr04 | 26332813                | TT                              | AA                | 1945943980               |
| SNP_P3_45455_26337329 | NC_021163.1    | Ca_kabuli_chr04 | 26337329                | CC                              | TT                | 1945943982               |
| SNP_P3_45456_26337360 | NC_021163.1    | Ca_kabuli_chr04 | 26337360                | GG                              | TT                | 1945943984               |
| SNP_P3_45457_26338166 | NC_021163.1    | Ca_kabuli_chr04 | 26338166                | TT                              | GG                | 1945943986               |
| SNP_P3_45459_26341850 | NC_021163.1    | Ca_kabuli_chr04 | 26341850                | GG                              | AA                | 1945943988               |
| SNP_P3_45460_26343414 | NC_021163.1    | Ca_kabuli_chr04 | 26343414                | GG                              | AA                | 1945943989               |
| SNP_P3_45461_26349990 | NC_021163.1    | Ca_kabuli_chr04 | 26349990                | GG                              | AA                | 1945943991               |
| SNP_P3_45463_26354757 | NC_021163.1    | Ca_kabuli_chr04 | 26354757                | GG                              | AA                | 1945943993               |
| SNP_P3_45465_26355266 | NC_021163.1    | Ca_kabuli_chr04 | 26355266                | GG                              | AA                | 1945943995               |
| SNP_P3_45466_26355280 | NC_021163.1    | Ca_kabuli_chr04 | 26355280                | CC                              | TT                | 1945943996               |
| SNP_P3_45467_26355307 | NC_021163.1    | Ca_kabuli_chr04 | 26355307                | TT                              | CC                | 1945943998               |
| SNP_P3_45468_26355333 | NC_021163.1    | Ca_kabuli_chr04 | 26355333                | TT                              | CC                | 1945944000               |
| SNP_P3_45469_26358597 | NC_021163.1    | Ca_kabuli_chr04 | 26358597                | TT                              | CC                | 1945944002               |
| SNP_P3_45471_26365292 | NC_021163.1    | Ca_kabuli_chr04 | 26365292                | AA                              | CC                | 1945944004               |
| SNP_P3_45472_26365302 | NC_021163.1    | Ca_kabuli_chr04 | 26365302                | TT                              | AA                | 1945944005               |
| SNP_P3_45474_26370753 | NC_021163.1    | Ca_kabuli_chr04 | 26370753                | TT                              | GG                | 1945944007               |
| SNP_P3_45475_26370815 | NC_021163.1    | Ca_kabuli_chr04 | 26370815                | CC                              | TT                | 1945944009               |
| SNP_P3_45476_26370957 | NC_021163.1    | Ca_kabuli_chr04 | 26370957                | AA                              | CC                | 1945944011               |
| SNP_P3_45477_26372844 | NC_021163.1    | Ca_kabuli_chr04 | 26372844                | TT                              | CC                | 1945944013               |
| SNP_P3_45478_26373171 | NC_021163.1    | Ca_kabuli_chr04 | 26373171                | CC                              | TT                | 1945944014               |
| SNP_P3_45479_26373180 | NC_021163.1    | Ca_kabuli_chr04 | 26373180                | TT                              | GG                | 1945944016               |

| SNPs IDs              | Chromosome IDs | Chromosomes     | Physical positions (bp) | CDC Frontier (Reference genome) | (Pusa 256 & HPNB) | NCBI SNPdb Accession IDs |
|-----------------------|----------------|-----------------|-------------------------|---------------------------------|-------------------|--------------------------|
| SNP_P3_45480_26379377 | NC_021163.1    | Ca_kabuli_chr04 | 26379377                | CC                              | TT                | 1945944018               |
| SNP_P3_45481_26379654 | NC_021163.1    | Ca_kabuli_chr04 | 26379654                | AA                              | GG                | 1945944020               |
| SNP_P3_45482_26380064 | NC_021163.1    | Ca_kabuli_chr04 | 26380064                | GG                              | AA                | 1945944021               |
| SNP_P3_45483_26380447 | NC_021163.1    | Ca_kabuli_chr04 | 26380447                | CC                              | TT                | 1945944023               |
| SNP_P3_45484_26383177 | NC_021163.1    | Ca_kabuli_chr04 | 26383177                | TT                              | GG                | 1945944025               |
| SNP_P3_45485_26383596 | NC_021163.1    | Ca_kabuli_chr04 | 26383596                | CC                              | GG                | 1945944027               |
| SNP_P3_45486_26384237 | NC_021163.1    | Ca_kabuli_chr04 | 26384237                | TT                              | CC                | 1945944029               |
| SNP_P3_45487_26384648 | NC_021163.1    | Ca_kabuli_chr04 | 26384648                | CC                              | AA                | 1945944030               |
| SNP_P3_45488_26389917 | NC_021163.1    | Ca_kabuli_chr04 | 26389917                | AA                              | GG                | 1945944032               |
| SNP_P3_45489_26390807 | NC_021163.1    | Ca_kabuli_chr04 | 26390807                | GG                              | AA                | 1945944034               |
| SNP_P3_45490_26391235 | NC_021163.1    | Ca_kabuli_chr04 | 26391235                | CC                              | TT                | 1945944036               |
| SNP_P3_45491_26396785 | NC_021163.1    | Ca_kabuli_chr04 | 26396785                | AA                              | GG                | 1945944037               |
| SNP_P3_45492_26397220 | NC_021163.1    | Ca_kabuli_chr04 | 26397220                | AA                              | CC                | 1945944039               |
| SNP_P3_45493_26397396 | NC_021163.1    | Ca_kabuli_chr04 | 26397396                | CC                              | TT                | 1945944041               |
| SNP_P3_45494_26397458 | NC_021163.1    | Ca_kabuli_chr04 | 26397458                | TT                              | CC                | 1945944043               |
| SNP_P3_45495_26397656 | NC_021163.1    | Ca_kabuli_chr04 | 26397656                | GG                              | AA                | 1945944045               |
| SNP_P3_45496_26398671 | NC_021163.1    | Ca_kabuli_chr04 | 26398671                | AA                              | GG                | 1945944046               |
| SNP_P3_45497_26398825 | NC_021163.1    | Ca_kabuli_chr04 | 26398825                | TT                              | AA                | 1945944048               |
| SNP_P3_45498_26398830 | NC_021163.1    | Ca_kabuli_chr04 | 26398830                | AA                              | TT                | 1945944050               |
| SNP_P3_45500_26399000 | NC_021163.1    | Ca_kabuli_chr04 | 26399000                | CC                              | TT                | 1945944052               |
| SNP_P3_45501_26399129 | NC_021163.1    | Ca_kabuli_chr04 | 26399129                | AA                              | CC                | 1945944054               |
| SNP_P3_45502_26399221 | NC_021163.1    | Ca_kabuli_chr04 | 26399221                | TT                              | GG                | 1945944055               |
| SNP_P3_45503_26399327 | NC_021163.1    | Ca_kabuli_chr04 | 26399327                | CC                              | TT                | 1945944057               |
| SNP_P3_45504_26399442 | NC_021163.1    | Ca_kabuli_chr04 | 26399442                | GG                              | AA                | 1945944059               |
| SNP_P3_45505_26400715 | NC_021163.1    | Ca_kabuli_chr04 | 26400715                | GG                              | AA                | 1945944061               |
| SNP_P3_45506_26401827 | NC_021163.1    | Ca_kabuli_chr04 | 26401827                | GG                              | CC                | 1945944063               |
| SNP_P3_45507_26402560 | NC_021163.1    | Ca_kabuli_chr04 | 26402560                | GG                              | CC                | 1945944064               |
| SNP_P3_45508_26402605 | NC_021163.1    | Ca_kabuli_chr04 | 26402605                | TT                              | GG                | 1945944066               |
| SNP_P3_45510_26404468 | NC_021163.1    | Ca_kabuli_chr04 | 26404468                | CC                              | AA                | 1945944068               |
| SNP_P3_45511_26404680 | NC_021163.1    | Ca_kabuli_chr04 | 26404680                | CC                              | TT                | 1945944070               |
| SNP_P3_45512_26406444 | NC_021163.1    | Ca_kabuli_chr04 | 26406444                | TT                              | CC                | 1945944071               |
| SNP_P3_45513_26406787 | NC_021163.1    | Ca_kabuli_chr04 | 26406787                | TT                              | GG                | 1945944073               |
| SNP_P3_45514_26409230 | NC_021163.1    | Ca_kabuli_chr04 | 26409230                | TT                              | AA                | 1945944075               |
| SNP_P3_45515_26409507 | NC_021163.1    | Ca_kabuli_chr04 | 26409507                | AA                              | TT                | 1945944077               |
| SNP_P3_45517_26410864 | NC_021163.1    | Ca_kabuli_chr04 | 26410864                | GG                              | CC                | 1945944079               |
| SNP_P3_45518_26410875 | NC_021163.1    | Ca_kabuli_chr04 | 26410875                | CC                              | TT                | 1945944080               |
| SNP_P3_45519_26410891 | NC_021163.1    | Ca_kabuli_chr04 | 26410891                | AA                              | GG                | 1945944082               |
| SNP_P3_45520_26410912 | NC_021163.1    | Ca_kabuli_chr04 | 26410912                | CC                              | TT                | 1945944084               |
| SNP_P3_45521_26411090 | NC_021163.1    | Ca_kabuli_chr04 | 26411090                | AA                              | TT                | 1945944086               |
| SNP_P3_45522_26411091 | NC_021163.1    | Ca_kabuli_chr04 | 26411091                | GG                              | AA                | 1945944088               |
| SNP_P3_45523_26411141 | NC_021163.1    | Ca_kabuli_chr04 | 26411141                | AA                              | TT                | 1945944089               |
| SNP_P3_45524_26411203 | NC_021163.1    | Ca_kabuli_chr04 | 26411203                | TT                              | CC                | 1945944091               |

| SNPs IDs              | Chromosome IDs | Chromosomes     | Physical positions (bp) | CDC Frontier (Reference genome) | (Pusa 256 & HPNB) | NCBI SNPdb Accession IDs |
|-----------------------|----------------|-----------------|-------------------------|---------------------------------|-------------------|--------------------------|
| SNP_P3_45526_26411400 | NC_021163.1    | Ca_kabuli_chr04 | 26411400                | GG                              | AA                | 1945944093               |
| SNP_P3_45527_26411410 | NC_021163.1    | Ca_kabuli_chr04 | 26411410                | AA                              | GG                | 1945944095               |
| SNP_P3_45528_26411481 | NC_021163.1    | Ca_kabuli_chr04 | 26411481                | TT                              | AA                | 1945944096               |
| SNP_P3_45530_26411561 | NC_021163.1    | Ca_kabuli_chr04 | 26411561                | AA                              | GG                | 1945944098               |
| SNP_P3_45533_26456558 | NC_021163.1    | Ca_kabuli_chr04 | 26456558                | TT                              | AA                | 1945944100               |
| SNP_P3_45534_26457227 | NC_021163.1    | Ca_kabuli_chr04 | 26457227                | GG                              | AA                | 1945944102               |
| SNP_P3_45536_26460756 | NC_021163.1    | Ca_kabuli_chr04 | 26460756                | AA                              | GG                | 1945944104               |
| SNP_P3_45537_26460774 | NC_021163.1    | Ca_kabuli_chr04 | 26460774                | GG                              | AA                | 1945944105               |
| SNP_P3_45538_26460791 | NC_021163.1    | Ca_kabuli_chr04 | 26460791                | GG                              | AA                | 1945944107               |
| SNP_P3_45539_26460798 | NC_021163.1    | Ca_kabuli_chr04 | 26460798                | GG                              | AA                | 1945944109               |
| SNP_P3_45540_26460808 | NC_021163.1    | Ca_kabuli_chr04 | 26460808                | AA                              | GG                | 1945944111               |
| SNP_P3_45542_26462927 | NC_021163.1    | Ca_kabuli_chr04 | 26462927                | GG                              | CC                | 1945944113               |
| SNP_P3_45543_26463348 | NC_021163.1    | Ca_kabuli_chr04 | 26463348                | CC                              | TT                | 1945944114               |
| SNP_P3_45544_26468171 | NC_021163.1    | Ca_kabuli_chr04 | 26468171                | CC                              | TT                | 1945944116               |
| SNP_P3_45545_26469196 | NC_021163.1    | Ca_kabuli_chr04 | 26469196                | TT                              | CC                | 1945944118               |
| SNP_P3_45546_26472288 | NC_021163.1    | Ca_kabuli_chr04 | 26472288                | CC                              | GG                | 1945944120               |
| SNP_P3_45547_26472346 | NC_021163.1    | Ca_kabuli_chr04 | 26472346                | TT                              | CC                | 1945944121               |
| SNP_P3_45549_26483529 | NC_021163.1    | Ca_kabuli_chr04 | 26483529                | GG                              | CC                | 1945944123               |
| SNP_P3_45550_26486204 | NC_021163.1    | Ca_kabuli_chr04 | 26486204                | TT                              | CC                | 1945944125               |
| SNP_P3_45551_26489313 | NC_021163.1    | Ca_kabuli_chr04 | 26489313                | CC                              | TT                | 1945944127               |
| SNP_P3_45552_26489814 | NC_021163.1    | Ca_kabuli_chr04 | 26489814                | AA                              | GG                | 1945944129               |
| SNP_P3_45554_26492048 | NC_021163.1    | Ca_kabuli_chr04 | 26492048                | TT                              | CC                | 1945944130               |
| SNP_P3_45556_26492266 | NC_021163.1    | Ca_kabuli_chr04 | 26492266                | GG                              | AA                | 1945944132               |
| SNP_P3_45559_26499467 | NC_021163.1    | Ca_kabuli_chr04 | 26499467                | GG                              | TT                | 1945944134               |
| SNP_P3_45560_26500396 | NC_021163.1    | Ca_kabuli_chr04 | 26500396                | AA                              | TT                | 1945944136               |
| SNP_P3_45561_26501597 | NC_021163.1    | Ca_kabuli_chr04 | 26501597                | AA                              | GG                | 1945944138               |
| SNP_P3_45562_26502573 | NC_021163.1    | Ca_kabuli_chr04 | 26502573                | CC                              | TT                | 1945944139               |
| SNP_P3_45563_26509367 | NC_021163.1    | Ca_kabuli_chr04 | 26509367                | CC                              | TT                | 1945944141               |
| SNP_P3_45566_26519988 | NC_021163.1    | Ca_kabuli_chr04 | 26519988                | GG                              | AA                | 1945944143               |
| SNP_P3_45569_26527216 | NC_021163.1    | Ca_kabuli_chr04 | 26527216                | CC                              | AA                | 1945944145               |
| SNP_P3_45570_26532430 | NC_021163.1    | Ca_kabuli_chr04 | 26532430                | CC                              | AA                | 1945944146               |
| SNP_P3_45571_26532763 | NC_021163.1    | Ca_kabuli_chr04 | 26532763                | GG                              | TT                | 1945944148               |
| SNP_P3_45572_26533744 | NC_021163.1    | Ca_kabuli_chr04 | 26533744                | CC                              | TT                | 1945944150               |
| SNP_P3_45573_26533793 | NC_021163.1    | Ca_kabuli_chr04 | 26533793                | CC                              | GG                | 1945944152               |
| SNP_P3_45574_26534103 | NC_021163.1    | Ca_kabuli_chr04 | 26534103                | TT                              | CC                | 1945944154               |
| SNP_P3_45575_26542911 | NC_021163.1    | Ca_kabuli_chr04 | 26542911                | CC                              | GG                | 1945944155               |
| SNP_P3_45576_26545855 | NC_021163.1    | Ca_kabuli_chr04 | 26545855                | GG                              | AA                | 1945944157               |
| SNP_P3_45577_26547196 | NC_021163.1    | Ca_kabuli_chr04 | 26547196                | GG                              | TT                | 1945944159               |
| SNP_P3_45579_26551678 | NC_021163.1    | Ca_kabuli_chr04 | 26551678                | AA                              | GG                | 1945944161               |
| SNP_P3_45580_26552160 | NC_021163.1    | Ca_kabuli_chr04 | 26552160                | AA                              | GG                | 1945944163               |
| SNP_P3_45582_26552504 | NC_021163.1    | Ca_kabuli_chr04 | 26552504                | CC                              | TT                | 1945944164               |
| SNP_P3_45583_26555539 | NC_021163.1    | Ca_kabuli_chr04 | 26555539                | TT                              | CC                | 1945944166               |

| SNPs IDs              | Chromosome IDs | Chromosomes     | Physical positions (bp) | CDC Frontier (Reference genome) | (Pusa 256 & HPNB) | NCBI SNPdb Accession IDs |
|-----------------------|----------------|-----------------|-------------------------|---------------------------------|-------------------|--------------------------|
| SNP_P3_45584_26555664 | NC_021163.1    | Ca_kabuli_chr04 | 26555664                | TT                              | AA                | 1945944168               |
| SNP_P3_45585_26556012 | NC_021163.1    | Ca_kabuli_chr04 | 26556012                | CC                              | GG                | 1945944170               |
| SNP_P3_45587_26584501 | NC_021163.1    | Ca_kabuli_chr04 | 26584501                | CC                              | TT                | 1945944171               |
| SNP_P3_45588_26585795 | NC_021163.1    | Ca_kabuli_chr04 | 26585795                | GG                              | AA                | 1945944173               |
| SNP_P3_45589_26586062 | NC_021163.1    | Ca_kabuli_chr04 | 26586062                | TT                              | CC                | 1945944175               |
| SNP_P3_45590_26587492 | NC_021163.1    | Ca_kabuli_chr04 | 26587492                | TT                              | GG                | 1945944177               |
| SNP_P3_45591_26587847 | NC_021163.1    | Ca_kabuli_chr04 | 26587847                | GG                              | TT                | 1945944179               |
| SNP_P3_45592_26590887 | NC_021163.1    | Ca_kabuli_chr04 | 26590887                | GG                              | AA                | 1945944180               |
| SNP_P3_45593_26591392 | NC_021163.1    | Ca_kabuli_chr04 | 26591392                | CC                              | TT                | 1945944182               |
| SNP_P3_45594_26591704 | NC_021163.1    | Ca_kabuli_chr04 | 26591704                | TT                              | CC                | 1945944184               |
| SNP_P3_45596_26593984 | NC_021163.1    | Ca_kabuli_chr04 | 26593984                | GG                              | AA                | 1945944186               |
| SNP_P3_45597_26596705 | NC_021163.1    | Ca_kabuli_chr04 | 26596705                | CC                              | GG                | 1945944188               |
| SNP_P3_45598_26597434 | NC_021163.1    | Ca_kabuli_chr04 | 26597434                | GG                              | TT                | 1945944189               |
| SNP_P3_45599_26599369 | NC_021163.1    | Ca_kabuli_chr04 | 26599369                | GG                              | AA                | 1945944191               |
| SNP_P3_45600_26600498 | NC_021163.1    | Ca_kabuli_chr04 | 26600498                | TT                              | CC                | 1945944193               |
| SNP_P3_45601_26600954 | NC_021163.1    | Ca_kabuli_chr04 | 26600954                | TT                              | GG                | 1945944195               |
| SNP_P3_45602_26601478 | NC_021163.1    | Ca_kabuli_chr04 | 26601478                | AA                              | GG                | 1945944196               |
| SNP_P3_45603_26601496 | NC_021163.1    | Ca_kabuli_chr04 | 26601496                | TT                              | CC                | 1945944198               |
| SNP_P3_45604_26603070 | NC_021163.1    | Ca_kabuli_chr04 | 26603070                | TT                              | GG                | 1945944200               |
| SNP_P3_45605_26604951 | NC_021163.1    | Ca_kabuli_chr04 | 26604951                | AA                              | CC                | 1945944202               |
| SNP_P3_45606_26605314 | NC_021163.1    | Ca_kabuli_chr04 | 26605314                | TT                              | CC                | 1945944204               |
| SNP_P3_45607_26606250 | NC_021163.1    | Ca_kabuli_chr04 | 26606250                | GG                              | TT                | 1945944205               |
| SNP_P3_45608_26606278 | NC_021163.1    | Ca_kabuli_chr04 | 26606278                | TT                              | CC                | 1945944207               |
| SNP_P3_45609_26606722 | NC_021163.1    | Ca_kabuli_chr04 | 26606722                | AA                              | TT                | 1945944209               |
| SNP_P3_45610_26608156 | NC_021163.1    | Ca_kabuli_chr04 | 26608156                | GG                              | AA                | 1945944211               |
| SNP_P3_45611_26608172 | NC_021163.1    | Ca_kabuli_chr04 | 26608172                | GG                              | TT                | 1945944213               |
| SNP_P3_45612_26608421 | NC_021163.1    | Ca_kabuli_chr04 | 26608421                | AA                              | GG                | 1945944214               |
| SNP_P3_45613_26608439 | NC_021163.1    | Ca_kabuli_chr04 | 26608439                | CC                              | AA                | 1945944216               |
| SNP_P3_45614_26608501 | NC_021163.1    | Ca_kabuli_chr04 | 26608501                | AA                              | CC                | 1945944218               |
| SNP_P3_45615_26608595 | NC_021163.1    | Ca_kabuli_chr04 | 26608595                | CC                              | AA                | 1945944220               |
| SNP_P3_45616_26608936 | NC_021163.1    | Ca_kabuli_chr04 | 26608936                | GG                              | AA                | 1945944221               |
| SNP_P3_45617_26608958 | NC_021163.1    | Ca_kabuli_chr04 | 26608958                | CC                              | GG                | 1945944223               |
| SNP_P3_45618_26609027 | NC_021163.1    | Ca_kabuli_chr04 | 26609027                | TT                              | CC                | 1945944225               |
| SNP_P3_45619_26609127 | NC_021163.1    | Ca_kabuli_chr04 | 26609127                | CC                              | GG                | 1945944227               |
| SNP_P3_45620_26614059 | NC_021163.1    | Ca_kabuli_chr04 | 26614059                | CC                              | TT                | 1945944229               |
| SNP_P3_45622_26617096 | NC_021163.1    | Ca_kabuli_chr04 | 26617096                | GG                              | AA                | 1945944230               |
| SNP_P3_45623_26617142 | NC_021163.1    | Ca_kabuli_chr04 | 26617142                | GG                              | AA                | 1945944232               |
| SNP_P3_45624_26618881 | NC_021163.1    | Ca_kabuli_chr04 | 26618881                | GG                              | TT                | 1945944234               |
| SNP_P3_45625_26620556 | NC_021163.1    | Ca_kabuli_chr04 | 26620556                | GG                              | CC                | 1945944236               |
| SNP_P3_45629_26623414 | NC_021163.1    | Ca_kabuli_chr04 | 26623414                | GG                              | CC                | 1945944238               |
| SNP_P3_45630_26624630 | NC_021163.1    | Ca_kabuli_chr04 | 26624630                | AA                              | CC                | 1945944239               |
| SNP_P3_45631_26624633 | NC_021163.1    | Ca_kabuli_chr04 | 26624633                | AA                              | GG                | 1945944241               |



| SNPs IDs              | Chromosome IDs | Chromosomes     | Physical positions (bp) | CDC Frontier (Reference genome) | (Pusa 256 & HPNB) | NCBI SNPdb Accession IDs |
|-----------------------|----------------|-----------------|-------------------------|---------------------------------|-------------------|--------------------------|
| SNP_P3_45632_26624692 | NC_021163.1    | Ca_kabuli_chr04 | 26624692                | CC                              | TT                | 1945944243               |
| SNP_P3_45633_26624751 | NC_021163.1    | Ca_kabuli_chr04 | 26624751                | TT                              | GG                | 1945944245               |
| SNP_P3_45634_26626495 | NC_021163.1    | Ca_kabuli_chr04 | 26626495                | TT                              | CC                | 1945944246               |
| SNP_P3_45635_26628535 | NC_021163.1    | Ca_kabuli_chr04 | 26628535                | AA                              | TT                | 1945944248               |
| SNP_P3_45636_26628552 | NC_021163.1    | Ca_kabuli_chr04 | 26628552                | CC                              | TT                | 1945944250               |
| SNP_P3_45637_26629694 | NC_021163.1    | Ca_kabuli_chr04 | 26629694                | CC                              | AA                | 1945944252               |
| SNP_P3_45638_26630836 | NC_021163.1    | Ca_kabuli_chr04 | 26630836                | TT                              | CC                | 1945944254               |
| SNP_P3_45639_26631229 | NC_021163.1    | Ca_kabuli_chr04 | 26631229                | GG                              | TT                | 1945944255               |
| SNP_P3_45640_26631230 | NC_021163.1    | Ca_kabuli_chr04 | 26631230                | TT                              | GG                | 1945944257               |
| SNP_P3_45641_26634038 | NC_021163.1    | Ca_kabuli_chr04 | 26634038                | GG                              | AA                | 1945944259               |
| SNP_P3_45642_26635066 | NC_021163.1    | Ca_kabuli_chr04 | 26635066                | TT                              | CC                | 1945944261               |
| SNP_P3_45643_26635781 | NC_021163.1    | Ca_kabuli_chr04 | 26635781                | TT                              | CC                | 1945944263               |
| SNP_P3_45644_26638805 | NC_021163.1    | Ca_kabuli_chr04 | 26638805                | TT                              | GG                | 1945944264               |
| SNP_P3_45645_26644521 | NC_021163.1    | Ca_kabuli_chr04 | 26644521                | AA                              | GG                | 1945944266               |
| SNP_P3_45646_26644760 | NC_021163.1    | Ca_kabuli_chr04 | 26644760                | CC                              | TT                | 1945944268               |
| SNP_P3_45647_26648493 | NC_021163.1    | Ca_kabuli_chr04 | 26648493                | CC                              | TT                | 1945944270               |
| SNP_P3_45648_26648520 | NC_021163.1    | Ca_kabuli_chr04 | 26648520                | AA                              | CC                | 1945944271               |
| SNP_P3_45649_26648735 | NC_021163.1    | Ca_kabuli_chr04 | 26648735                | GG                              | AA                | 1945944273               |
| SNP_P3_45651_26650036 | NC_021163.1    | Ca_kabuli_chr04 | 26650036                | TT                              | CC                | 1945944275               |
| SNP_P3_45652_26650107 | NC_021163.1    | Ca_kabuli_chr04 | 26650107                | AA                              | GG                | 1945944277               |
| SNP_P3_45653_26653615 | NC_021163.1    | Ca_kabuli_chr04 | 26653615                | TT                              | CC                | 1945944279               |
| SNP_P3_45654_26653651 | NC_021163.1    | Ca_kabuli_chr04 | 26653651                | GG                              | AA                | 1945944280               |
| SNP_P3_45655_26660195 | NC_021163.1    | Ca_kabuli_chr04 | 26660195                | AA                              | TT                | 1945944282               |
| SNP_P3_45656_26660840 | NC_021163.1    | Ca_kabuli_chr04 | 26660840                | CC                              | TT                | 1945944284               |
| SNP_P3_45657_26661431 | NC_021163.1    | Ca_kabuli_chr04 | 26661431                | CC                              | TT                | 1945944286               |
| SNP_P3_45658_26661477 | NC_021163.1    | Ca_kabuli_chr04 | 26661477                | AA                              | GG                | 1945944288               |
| SNP_P3_45659_26662408 | NC_021163.1    | Ca_kabuli_chr04 | 26662408                | TT                              | CC                | 1945944289               |
| SNP_P3_45663_26664999 | NC_021163.1    | Ca_kabuli_chr04 | 26664999                | TT                              | AA                | 1945944291               |
| SNP_P3_45664_26665000 | NC_021163.1    | Ca_kabuli_chr04 | 26665000                | TT                              | AA                | 1945944293               |
| SNP_P3_45665_26684060 | NC_021163.1    | Ca_kabuli_chr04 | 26684060                | GG                              | AA                | 1945944295               |
| SNP_P3_45666_26696048 | NC_021163.1    | Ca_kabuli_chr04 | 26696048                | AA                              | CC                | 1945944296               |
| SNP_P3_45668_26702527 | NC_021163.1    | Ca_kabuli_chr04 | 26702527                | CC                              | AA                | 1945944298               |
| SNP_P3_45669_26723319 | NC_021163.1    | Ca_kabuli_chr04 | 26723319                | CC                              | AA                | 1945944300               |
| SNP_P3_45670_26726252 | NC_021163.1    | Ca_kabuli_chr04 | 26726252                | TT                              | CC                | 1945944302               |
| SNP_P3_45671_26726282 | NC_021163.1    | Ca_kabuli_chr04 | 26726282                | AA                              | GG                | 1945944304               |
| SNP_P3_45672_26726911 | NC_021163.1    | Ca_kabuli_chr04 | 26726911                | TT                              | CC                | 1945944305               |
| SNP_P3_45673_26727805 | NC_021163.1    | Ca_kabuli_chr04 | 26727805                | GG                              | AA                | 1945944307               |
| SNP_P3_45674_26727968 | NC_021163.1    | Ca_kabuli_chr04 | 26727968                | TT                              | CC                | 1945944309               |
| SNP_P3_45675_26728221 | NC_021163.1    | Ca_kabuli_chr04 | 26728221                | AA                              | CC                | 1945944311               |
| SNP_P3_45676_26728592 | NC_021163.1    | Ca_kabuli_chr04 | 26728592                | TT                              | CC                | 1945944313               |
| SNP_P3_45677_26729792 | NC_021163.1    | Ca_kabuli_chr04 | 26729792                | TT                              | GG                | 1945944314               |
| SNP_P3_45678_26730192 | NC_021163.1    | Ca_kabuli_chr04 | 26730192                | GG                              | AA                | 1945944316               |

| SNPs IDs              | Chromosome IDs | Chromosomes     | Physical positions (bp) | CDC Frontier (Reference genome) | (Pusa 256 & HPNB) | NCBI SNPdb Accession IDs |
|-----------------------|----------------|-----------------|-------------------------|---------------------------------|-------------------|--------------------------|
| SNP_P3_45679_26730273 | NC_021163.1    | Ca_kabuli_chr04 | 26730273                | GG                              | AA                | 1945944318               |
| SNP_P3_45680_26730366 | NC_021163.1    | Ca_kabuli_chr04 | 26730366                | CC                              | TT                | 1945944320               |
| SNP_P3_45681_26735211 | NC_021163.1    | Ca_kabuli_chr04 | 26735211                | CC                              | TT                | 1945944322               |
| SNP_P3_45682_26735240 | NC_021163.1    | Ca_kabuli_chr04 | 26735240                | CC                              | TT                | 1945944323               |
| SNP_P3_45684_26736343 | NC_021163.1    | Ca_kabuli_chr04 | 26736343                | GG                              | AA                | 1945944325               |
| SNP_P3_45685_26736384 | NC_021163.1    | Ca_kabuli_chr04 | 26736384                | AA                              | GG                | 1945944327               |
| SNP_P3_45686_26737476 | NC_021163.1    | Ca_kabuli_chr04 | 26737476                | GG                              | TT                | 1945944329               |
| SNP_P3_45687_26741194 | NC_021163.1    | Ca_kabuli_chr04 | 26741194                | AA                              | TT                | 1945944330               |
| SNP_P3_45688_26744309 | NC_021163.1    | Ca_kabuli_chr04 | 26744309                | TT                              | AA                | 1945944332               |
| SNP_P3_45689_26746221 | NC_021163.1    | Ca_kabuli_chr04 | 26746221                | CC                              | TT                | 1945944334               |
| SNP_P3_45690_26746575 | NC_021163.1    | Ca_kabuli_chr04 | 26746575                | TT                              | CC                | 1945944336               |
| SNP_P3_45691_26749364 | NC_021163.1    | Ca_kabuli_chr04 | 26749364                | GG                              | TT                | 1945944338               |
| SNP_P3_45694_26752513 | NC_021163.1    | Ca_kabuli_chr04 | 26752513                | AA                              | GG                | 1945944339               |
| SNP_P3_45696_26753125 | NC_021163.1    | Ca_kabuli_chr04 | 26753125                | TT                              | AA                | 1945944341               |
| SNP_P3_45697_26753146 | NC_021163.1    | Ca_kabuli_chr04 | 26753146                | GG                              | AA                | 1945944343               |
| SNP_P3_45699_26755525 | NC_021163.1    | Ca_kabuli_chr04 | 26755525                | AA                              | GG                | 1945944345               |
| SNP_P3_45700_26755696 | NC_021163.1    | Ca_kabuli_chr04 | 26755696                | TT                              | GG                | 1945944346               |
| SNP_P3_45701_26755904 | NC_021163.1    | Ca_kabuli_chr04 | 26755904                | GG                              | AA                | 1945944348               |
| SNP_P3_45703_26763506 | NC_021163.1    | Ca_kabuli_chr04 | 26763506                | TT                              | AA                | 1945944350               |
| SNP_P3_45704_26764896 | NC_021163.1    | Ca_kabuli_chr04 | 26764896                | AA                              | GG                | 1945944352               |
| SNP_P3_45707_26776009 | NC_021163.1    | Ca_kabuli_chr04 | 26776009                | CC                              | TT                | 1945944354               |
| SNP_P3_45708_26776588 | NC_021163.1    | Ca_kabuli_chr04 | 26776588                | AA                              | GG                | 1945944355               |
| SNP_P3_45709_26779067 | NC_021163.1    | Ca_kabuli_chr04 | 26779067                | AA                              | GG                | 1945944357               |
| SNP_P3_45711_26786300 | NC_021163.1    | Ca_kabuli_chr04 | 26786300                | GG                              | TT                | 1945944359               |
| SNP_P3_45713_26794395 | NC_021163.1    | Ca_kabuli_chr04 | 26794395                | GG                              | AA                | 1945944361               |
| SNP_P3_45714_26794993 | NC_021163.1    | Ca_kabuli_chr04 | 26794993                | AA                              | GG                | 1945944363               |
| SNP_P3_45715_26800264 | NC_021163.1    | Ca_kabuli_chr04 | 26800264                | CC                              | AA                | 1945944364               |
| SNP_P3_45716_26804202 | NC_021163.1    | Ca_kabuli_chr04 | 26804202                | CC                              | TT                | 1945944366               |
| SNP_P3_45717_26805605 | NC_021163.1    | Ca_kabuli_chr04 | 26805605                | GG                              | AA                | 1945944368               |
| SNP_P3_45718_26806031 | NC_021163.1    | Ca_kabuli_chr04 | 26806031                | GG                              | AA                | 1945944370               |
| SNP_P3_45719_26807395 | NC_021163.1    | Ca_kabuli_chr04 | 26807395                | AA                              | GG                | 1945944372               |
| SNP_P3_45720_26807441 | NC_021163.1    | Ca_kabuli_chr04 | 26807441                | AA                              | TT                | 1945944373               |
| SNP_P3_45721_26807953 | NC_021163.1    | Ca_kabuli_chr04 | 26807953                | TT                              | GG                | 1945944375               |
| SNP_P3_45722_26807962 | NC_021163.1    | Ca_kabuli_chr04 | 26807962                | CC                              | AA                | 1945944377               |
| SNP_P3_45723_26807985 | NC_021163.1    | Ca_kabuli_chr04 | 26807985                | TT                              | CC                | 1945944379               |
| SNP_P3_45724_26808083 | NC_021163.1    | Ca_kabuli_chr04 | 26808083                | GG                              | CC                | 1945944380               |
| SNP_P3_45725_26808107 | NC_021163.1    | Ca_kabuli_chr04 | 26808107                | TT                              | CC                | 1945944382               |
| SNP_P3_45726_26808224 | NC_021163.1    | Ca_kabuli_chr04 | 26808224                | CC                              | TT                | 1945944384               |
| SNP_P3_45727_26808230 | NC_021163.1    | Ca_kabuli_chr04 | 26808230                | CC                              | AA                | 1945944386               |
| SNP_P3_45728_26810599 | NC_021163.1    | Ca_kabuli_chr04 | 26810599                | GG                              | TT                | 1945944388               |
| SNP_P3_45729_26810674 | NC_021163.1    | Ca_kabuli_chr04 | 26810674                | AA                              | CC                | 1945944389               |
| SNP_P3_45730_26810680 | NC_021163.1    | Ca_kabuli_chr04 | 26810680                | CC                              | TT                | 1945944391               |

| SNPs IDs              | Chromosome IDs | Chromosomes     | Physical positions (bp) | CDC Frontier (Reference genome) | (Pusa 256 & HPNB) | NCBI SNPdb Accession IDs |
|-----------------------|----------------|-----------------|-------------------------|---------------------------------|-------------------|--------------------------|
| SNP_P3_45731_26810689 | NC_021163.1    | Ca_kabuli_chr04 | 26810689                | TT                              | CC                | 1945944393               |
| SNP_P3_45732_26810749 | NC_021163.1    | Ca_kabuli_chr04 | 26810749                | GG                              | AA                | 1945944395               |
| SNP_P3_45733_26810753 | NC_021163.1    | Ca_kabuli_chr04 | 26810753                | GG                              | AA                | 1945944397               |
| SNP_P3_45734_26813018 | NC_021163.1    | Ca_kabuli_chr04 | 26813018                | CC                              | GG                | 1945944398               |
| SNP_P3_45735_26815447 | NC_021163.1    | Ca_kabuli_chr04 | 26815447                | CC                              | TT                | 1945944400               |
| SNP_P3_45736_26818111 | NC_021163.1    | Ca_kabuli_chr04 | 26818111                | AA                              | TT                | 1945944402               |
| SNP_P3_45737_26818112 | NC_021163.1    | Ca_kabuli_chr04 | 26818112                | TT                              | CC                | 1945944404               |
| SNP_P3_45738_26819643 | NC_021163.1    | Ca_kabuli_chr04 | 26819643                | TT                              | AA                | 1945944405               |
| SNP_P3_45739_26821666 | NC_021163.1    | Ca_kabuli_chr04 | 26821666                | AA                              | TT                | 1945944407               |
| SNP_P3_45740_26821667 | NC_021163.1    | Ca_kabuli_chr04 | 26821667                | CC                              | AA                | 1945944409               |
| SNP_P3_45741_26839246 | NC_021163.1    | Ca_kabuli_chr04 | 26839246                | CC                              | TT                | 1945944411               |
| SNP_P3_45742_26839973 | NC_021163.1    | Ca_kabuli_chr04 | 26839973                | AA                              | GG                | 1945944413               |
| SNP_P3_45744_26847013 | NC_021163.1    | Ca_kabuli_chr04 | 26847013                | GG                              | AA                | 1945944414               |
| SNP_P3_45745_26847077 | NC_021163.1    | Ca_kabuli_chr04 | 26847077                | AA                              | GG                | 1945944416               |
| SNP_P3_45746_26847187 | NC_021163.1    | Ca_kabuli_chr04 | 26847187                | AA                              | GG                | 1945944418               |
| SNP_P3_45747_26847401 | NC_021163.1    | Ca_kabuli_chr04 | 26847401                | TT                              | CC                | 1945944420               |
| SNP_P3_45748_26847454 | NC_021163.1    | Ca_kabuli_chr04 | 26847454                | AA                              | GG                | 1945944422               |
| SNP_P3_45749_26847461 | NC_021163.1    | Ca_kabuli_chr04 | 26847461                | GG                              | TT                | 1945944423               |
| SNP_P3_45750_26847470 | NC_021163.1    | Ca_kabuli_chr04 | 26847470                | TT                              | CC                | 1945944425               |
| SNP_P3_45752_26850184 | NC_021163.1    | Ca_kabuli_chr04 | 26850184                | AA                              | TT                | 1945944427               |
| SNP_P3_45753_26850227 | NC_021163.1    | Ca_kabuli_chr04 | 26850227                | TT                              | CC                | 1945944429               |
| SNP_P3_45754_26850535 | NC_021163.1    | Ca_kabuli_chr04 | 26850535                | CC                              | GG                | 1945944430               |
| SNP_P3_45755_26852411 | NC_021163.1    | Ca_kabuli_chr04 | 26852411                | GG                              | AA                | 1945944432               |
| SNP_P3_45757_26858372 | NC_021163.1    | Ca_kabuli_chr04 | 26858372                | AA                              | GG                | 1945944434               |
| SNP_P3_45758_26859976 | NC_021163.1    | Ca_kabuli_chr04 | 26859976                | TT                              | CC                | 1945944436               |
| SNP_P3_45759_26864244 | NC_021163.1    | Ca_kabuli_chr04 | 26864244                | AA                              | GG                | 1945944438               |
| SNP_P3_45760_26866043 | NC_021163.1    | Ca_kabuli_chr04 | 26866043                | GG                              | AA                | 1945944439               |
| SNP_P3_45761_26867036 | NC_021163.1    | Ca_kabuli_chr04 | 26867036                | TT                              | CC                | 1945944441               |
| SNP_P3_45762_26868330 | NC_021163.1    | Ca_kabuli_chr04 | 26868330                | AA                              | GG                | 1945944443               |
| SNP_P3_45763_26868911 | NC_021163.1    | Ca_kabuli_chr04 | 26868911                | TT                              | CC                | 1945944445               |
| SNP_P3_45764_26868917 | NC_021163.1    | Ca_kabuli_chr04 | 26868917                | GG                              | CC                | 1945944447               |
| SNP_P3_45765_26898728 | NC_021163.1    | Ca_kabuli_chr04 | 26898728                | GG                              | AA                | 1945944448               |
| SNP_P3_45766_26900443 | NC_021163.1    | Ca_kabuli_chr04 | 26900443                | TT                              | CC                | 1945944450               |
| SNP_P3_45767_26900734 | NC_021163.1    | Ca_kabuli_chr04 | 26900734                | TT                              | CC                | 1945944452               |
| SNP_P3_45768_26902778 | NC_021163.1    | Ca_kabuli_chr04 | 26902778                | TT                              | GG                | 1945944454               |
| SNP_P3_45769_26902794 | NC_021163.1    | Ca_kabuli_chr04 | 26902794                | TT                              | CC                | 1945944456               |
| SNP_P3_45770_26902814 | NC_021163.1    | Ca_kabuli_chr04 | 26902814                | AA                              | CC                | 1945944457               |
| SNP_P3_45771_26903017 | NC_021163.1    | Ca_kabuli_chr04 | 26903017                | AA                              | GG                | 1945944459               |
| SNP_P3_45772_26903072 | NC_021163.1    | Ca_kabuli_chr04 | 26903072                | TT                              | CC                | 1945944461               |
| SNP_P3_45773_26903136 | NC_021163.1    | Ca_kabuli_chr04 | 26903136                | AA                              | TT                | 1945944463               |
| SNP_P3_45774_26903245 | NC_021163.1    | Ca_kabuli_chr04 | 26903245                | AA                              | GG                | 1945944465               |
| SNP_P3_45776_26903368 | NC_021163.1    | Ca_kabuli_chr04 | 26903368                | CC                              | AA                | 1945944466               |

| SNPs IDs              | Chromosome IDs | Chromosomes     | Physical positions (bp) | CDC Frontier (Reference genome) | (Pusa 256 & HPNB) | NCBI SNPdb Accession IDs |
|-----------------------|----------------|-----------------|-------------------------|---------------------------------|-------------------|--------------------------|
| SNP_P3_45777_26903464 | NC_021163.1    | Ca_kabuli_chr04 | 26903464                | AA                              | GG                | 1945944468               |
| SNP_P3_45778_26904127 | NC_021163.1    | Ca_kabuli_chr04 | 26904127                | TT                              | CC                | 1945944470               |
| SNP_P3_45779_26904549 | NC_021163.1    | Ca_kabuli_chr04 | 26904549                | GG                              | AA                | 1945944472               |
| SNP_P3_45781_26916177 | NC_021163.1    | Ca_kabuli_chr04 | 26916177                | TT                              | CC                | 1945944473               |
| SNP_P3_45782_26916471 | NC_021163.1    | Ca_kabuli_chr04 | 26916471                | TT                              | CC                | 1945944475               |
| SNP_P3_45783_26916826 | NC_021163.1    | Ca_kabuli_chr04 | 26916826                | AA                              | CC                | 1945944477               |
| SNP_P3_45784_26916889 | NC_021163.1    | Ca_kabuli_chr04 | 26916889                | GG                              | AA                | 1945944479               |
| SNP_P3_45785_26916917 | NC_021163.1    | Ca_kabuli_chr04 | 26916917                | CC                              | GG                | 1945944481               |
| SNP_P3_45786_26930194 | NC_021163.1    | Ca_kabuli_chr04 | 26930194                | AA                              | GG                | 1945944482               |
| SNP_P3_45787_26936463 | NC_021163.1    | Ca_kabuli_chr04 | 26936463                | TT                              | CC                | 1945944484               |
| SNP_P3_45788_26936495 | NC_021163.1    | Ca_kabuli_chr04 | 26936495                | AA                              | TT                | 1945944486               |
| SNP_P3_45789_26936497 | NC_021163.1    | Ca_kabuli_chr04 | 26936497                | AA                              | GG                | 1945944488               |
| SNP_P3_45790_26936524 | NC_021163.1    | Ca_kabuli_chr04 | 26936524                | CC                              | TT                | 1945944490               |
| SNP_P3_45791_26936554 | NC_021163.1    | Ca_kabuli_chr04 | 26936554                | GG                              | AA                | 1945944491               |
| SNP_P3_45792_26936771 | NC_021163.1    | Ca_kabuli_chr04 | 26936771                | GG                              | AA                | 1945944493               |
| SNP_P3_45793_26936787 | NC_021163.1    | Ca_kabuli_chr04 | 26936787                | TT                              | GG                | 1945944495               |
| SNP_P3_45794_26936921 | NC_021163.1    | Ca_kabuli_chr04 | 26936921                | AA                              | GG                | 1945944497               |
| SNP_P3_45795_26936939 | NC_021163.1    | Ca_kabuli_chr04 | 26936939                | AA                              | GG                | 1945944498               |
| SNP_P3_45796_26936951 | NC_021163.1    | Ca_kabuli_chr04 | 26936951                | AA                              | GG                | 1945944500               |
| SNP_P3_45797_26936954 | NC_021163.1    | Ca_kabuli_chr04 | 26936954                | TT                              | AA                | 1945944502               |
| SNP_P3_45798_26936964 | NC_021163.1    | Ca_kabuli_chr04 | 26936964                | TT                              | AA                | 1945944504               |
| SNP_P3_45799_26937283 | NC_021163.1    | Ca_kabuli_chr04 | 26937283                | CC                              | TT                | 1945944506               |
| SNP_P3_45800_26939494 | NC_021163.1    | Ca_kabuli_chr04 | 26939494                | GG                              | TT                | 1945944507               |
| SNP_P3_45801_26947662 | NC_021163.1    | Ca_kabuli_chr04 | 26947662                | AA                              | GG                | 1945944509               |
| SNP_P3_45802_26947663 | NC_021163.1    | Ca_kabuli_chr04 | 26947663                | AA                              | GG                | 1945944511               |
| SNP_P3_45803_26947666 | NC_021163.1    | Ca_kabuli_chr04 | 26947666                | AA                              | TT                | 1945944513               |
| SNP_P3_45804_26952429 | NC_021163.1    | Ca_kabuli_chr04 | 26952429                | GG                              | AA                | 1945944514               |
| SNP_P3_45807_26956723 | NC_021163.1    | Ca_kabuli_chr04 | 26956723                | TT                              | AA                | 1945944516               |
| SNP_P3_45808_26956988 | NC_021163.1    | Ca_kabuli_chr04 | 26956988                | CC                              | TT                | 1945944518               |
| SNP_P3_45809_26957874 | NC_021163.1    | Ca_kabuli_chr04 | 26957874                | TT                              | AA                | 1945944520               |
| SNP_P3_45810_26957884 | NC_021163.1    | Ca_kabuli_chr04 | 26957884                | TT                              | AA                | 1945944522               |
| SNP_P3_45811_26960651 | NC_021163.1    | Ca_kabuli_chr04 | 26960651                | AA                              | GG                | 1945944523               |
| SNP_P3_45812_26966282 | NC_021163.1    | Ca_kabuli_chr04 | 26966282                | TT                              | CC                | 1945944525               |
| SNP_P3_45814_26975820 | NC_021163.1    | Ca_kabuli_chr04 | 26975820                | AA                              | GG                | 1945944527               |
| SNP_P3_45815_26975868 | NC_021163.1    | Ca_kabuli_chr04 | 26975868                | CC                              | AA                | 1945944529               |
| SNP_P3_45816_26975869 | NC_021163.1    | Ca_kabuli_chr04 | 26975869                | AA                              | TT                | 1945944531               |
| SNP_P3_45817_26975870 | NC_021163.1    | Ca_kabuli_chr04 | 26975870                | TT                              | GG                | 1945944532               |
| SNP_P3_45818_26976003 | NC_021163.1    | Ca_kabuli_chr04 | 26976003                | GG                              | AA                | 1945944534               |
| SNP_P3_45819_26989011 | NC_021163.1    | Ca_kabuli_chr04 | 26989011                | GG                              | AA                | 1945944536               |
| SNP_P3_45820_26990773 | NC_021163.1    | Ca_kabuli_chr04 | 26990773                | CC                              | AA                | 1945944538               |
| SNP_P3_45821_26993713 | NC_021163.1    | Ca_kabuli_chr04 | 26993713                | CC                              | TT                | 1945944540               |
| SNP_P3_45822_26997482 | NC_021163.1    | Ca_kabuli_chr04 | 26997482                | TT                              | CC                | 1945944541               |

| SNPs IDs              | Chromosome IDs | Chromosomes     | Physical positions (bp) | CDC Frontier (Reference genome) | (Pusa 256 & HPNB) | NCBI SNPdb Accession IDs |
|-----------------------|----------------|-----------------|-------------------------|---------------------------------|-------------------|--------------------------|
| SNP_P3_45823_27002464 | NC_021163.1    | Ca_kabuli_chr04 | 27002464                | TT                              | AA                | 1945944543               |
| SNP_P3_45824_27002473 | NC_021163.1    | Ca_kabuli_chr04 | 27002473                | GG                              | CC                | 1945944545               |
| SNP_P3_45825_27003118 | NC_021163.1    | Ca_kabuli_chr04 | 27003118                | TT                              | GG                | 1945944547               |
| SNP_P3_45826_27003164 | NC_021163.1    | Ca_kabuli_chr04 | 27003164                | AA                              | GG                | 1945944548               |
| SNP_P3_45827_27006652 | NC_021163.1    | Ca_kabuli_chr04 | 27006652                | CC                              | TT                | 1945944550               |
| SNP_P3_45829_27009776 | NC_021163.1    | Ca_kabuli_chr04 | 27009776                | CC                              | AA                | 1945944552               |
| SNP_P3_45830_27010008 | NC_021163.1    | Ca_kabuli_chr04 | 27010008                | GG                              | AA                | 1945944554               |
| SNP_P3_45831_27010315 | NC_021163.1    | Ca_kabuli_chr04 | 27010315                | AA                              | CC                | 1945944556               |
| SNP_P3_45832_27016029 | NC_021163.1    | Ca_kabuli_chr04 | 27016029                | TT                              | CC                | 1945944557               |
| SNP_P3_45833_27016058 | NC_021163.1    | Ca_kabuli_chr04 | 27016058                | GG                              | AA                | 1945944559               |
| SNP_P3_45834_27016170 | NC_021163.1    | Ca_kabuli_chr04 | 27016170                | CC                              | TT                | 1945944561               |
| SNP_P3_45835_27016304 | NC_021163.1    | Ca_kabuli_chr04 | 27016304                | GG                              | AA                | 1945944563               |
| SNP_P3_45836_27016707 | NC_021163.1    | Ca_kabuli_chr04 | 27016707                | AA                              | CC                | 1945944564               |
| SNP_P3_45837_27017121 | NC_021163.1    | Ca_kabuli_chr04 | 27017121                | AA                              | GG                | 1945944566               |
| SNP_P3_45839_27017429 | NC_021163.1    | Ca_kabuli_chr04 | 27017429                | CC                              | AA                | 1945944568               |
| SNP_P3_45840_27017698 | NC_021163.1    | Ca_kabuli_chr04 | 27017698                | CC                              | TT                | 1945944570               |
| SNP_P3_45841_27018689 | NC_021163.1    | Ca_kabuli_chr04 | 27018689                | AA                              | TT                | 1945944572               |
| SNP_P3_45842_27019383 | NC_021163.1    | Ca_kabuli_chr04 | 27019383                | CC                              | TT                | 1945944573               |
| SNP_P3_45843_27019750 | NC_021163.1    | Ca_kabuli_chr04 | 27019750                | CC                              | AA                | 1945944575               |
| SNP_P3_45844_27019754 | NC_021163.1    | Ca_kabuli_chr04 | 27019754                | CC                              | AA                | 1945944577               |
| SNP_P3_45845_27020032 | NC_021163.1    | Ca_kabuli_chr04 | 27020032                | TT                              | GG                | 1945944579               |
| SNP_P3_45846_27020035 | NC_021163.1    | Ca_kabuli_chr04 | 27020035                | AA                              | GG                | 1945944581               |
| SNP_P3_45847_27021007 | NC_021163.1    | Ca_kabuli_chr04 | 27021007                | AA                              | GG                | 1945944582               |
| SNP_P3_45848_27021282 | NC_021163.1    | Ca_kabuli_chr04 | 27021282                | CC                              | TT                | 1945944584               |
| SNP_P3_45849_27021482 | NC_021163.1    | Ca_kabuli_chr04 | 27021482                | GG                              | AA                | 1945944586               |
| SNP_P3_45850_27021491 | NC_021163.1    | Ca_kabuli_chr04 | 27021491                | GG                              | AA                | 1945944588               |
| SNP_P3_45851_27022074 | NC_021163.1    | Ca_kabuli_chr04 | 27022074                | CC                              | GG                | 1945944590               |
| SNP_P3_45852_27022890 | NC_021163.1    | Ca_kabuli_chr04 | 27022890                | GG                              | TT                | 1945944591               |
| SNP_P3_45853_27025711 | NC_021163.1    | Ca_kabuli_chr04 | 27025711                | CC                              | TT                | 1945944593               |
| SNP_P3_45854_27030413 | NC_021163.1    | Ca_kabuli_chr04 | 27030413                | TT                              | CC                | 1945944595               |
| SNP_P3_45855_27034107 | NC_021163.1    | Ca_kabuli_chr04 | 27034107                | GG                              | TT                | 1945944597               |
| SNP_P3_45856_27037142 | NC_021163.1    | Ca_kabuli_chr04 | 27037142                | AA                              | TT                | 1945944598               |
| SNP_P3_45857_27037185 | NC_021163.1    | Ca_kabuli_chr04 | 27037185                | TT                              | CC                | 1945944600               |
| SNP_P3_45858_27037203 | NC_021163.1    | Ca_kabuli_chr04 | 27037203                | TT                              | GG                | 1945944602               |
| SNP_P3_45859_27037449 | NC_021163.1    | Ca_kabuli_chr04 | 27037449                | TT                              | GG                | 1945944604               |
| SNP_P3_45860_27038368 | NC_021163.1    | Ca_kabuli_chr04 | 27038368                | AA                              | CC                | 1945944606               |
| SNP_P3_45861_27047589 | NC_021163.1    | Ca_kabuli_chr04 | 27047589                | CC                              | TT                | 1945944607               |
| SNP_P3_45862_27047934 | NC_021163.1    | Ca_kabuli_chr04 | 27047934                | AA                              | CC                | 1945944609               |
| SNP_P3_45863_27048304 | NC_021163.1    | Ca_kabuli_chr04 | 27048304                | CC                              | TT                | 1945944611               |
| SNP_P3_45864_27048976 | NC_021163.1    | Ca_kabuli_chr04 | 27048976                | GG                              | TT                | 1945944613               |
| SNP_P3_45865_27058910 | NC_021163.1    | Ca_kabuli_chr04 | 27058910                | TT                              | GG                | 1945944614               |
| SNP_P3_45866_27061101 | NC_021163.1    | Ca_kabuli_chr04 | 27061101                | AA                              | GG                | 1945944616               |

| SNPs IDs              | Chromosome IDs | Chromosomes     | Physical positions (bp) | CDC Frontier (Reference genome) | (Pusa 256 & HPNB) | NCBI SNPdb Accession IDs |
|-----------------------|----------------|-----------------|-------------------------|---------------------------------|-------------------|--------------------------|
| SNP_P3_45867_27065069 | NC_021163.1    | Ca_kabuli_chr04 | 27065069                | AA                              | CC                | 1945944618               |
| SNP_P3_45868_27065196 | NC_021163.1    | Ca_kabuli_chr04 | 27065196                | GG                              | TT                | 1945944620               |
| SNP_P3_45869_27065197 | NC_021163.1    | Ca_kabuli_chr04 | 27065197                | GG                              | TT                | 1945944622               |
| SNP_P3_45870_27065199 | NC_021163.1    | Ca_kabuli_chr04 | 27065199                | GG                              | AA                | 1945944623               |
| SNP_P3_45871_27065212 | NC_021163.1    | Ca_kabuli_chr04 | 27065212                | TT                              | CC                | 1945944625               |
| SNP_P3_45872_27065258 | NC_021163.1    | Ca_kabuli_chr04 | 27065258                | TT                              | AA                | 1945944627               |
| SNP_P3_45873_27066039 | NC_021163.1    | Ca_kabuli_chr04 | 27066039                | TT                              | GG                | 1945944629               |
| SNP_P3_45874_27069090 | NC_021163.1    | Ca_kabuli_chr04 | 27069090                | CC                              | GG                | 1945944631               |
| SNP_P3_45875_27070384 | NC_021163.1    | Ca_kabuli_chr04 | 27070384                | AA                              | TT                | 1945944632               |
| SNP_P3_45876_27070430 | NC_021163.1    | Ca_kabuli_chr04 | 27070430                | TT                              | AA                | 1945944634               |
| SNP_P3_45877_27070454 | NC_021163.1    | Ca_kabuli_chr04 | 27070454                | AA                              | GG                | 1945944636               |
| SNP_P3_45878_27070513 | NC_021163.1    | Ca_kabuli_chr04 | 27070513                | CC                              | TT                | 1945944638               |
| SNP_P3_45879_27070970 | NC_021163.1    | Ca_kabuli_chr04 | 27070970                | GG                              | AA                | 1945944639               |
| SNP_P3_45880_27071353 | NC_021163.1    | Ca_kabuli_chr04 | 27071353                | TT                              | GG                | 1945944641               |
| SNP_P3_45881_27072687 | NC_021163.1    | Ca_kabuli_chr04 | 27072687                | TT                              | CC                | 1945944643               |
| SNP_P3_45882_27080429 | NC_021163.1    | Ca_kabuli_chr04 | 27080429                | CC                              | TT                | 1945944645               |
| SNP_P3_45883_27081760 | NC_021163.1    | Ca_kabuli_chr04 | 27081760                | CC                              | TT                | 1945944647               |
| SNP_P3_45884_27082279 | NC_021163.1    | Ca_kabuli_chr04 | 27082279                | AA                              | GG                | 1945944648               |
| SNP_P3_45885_27082391 | NC_021163.1    | Ca_kabuli_chr04 | 27082391                | TT                              | AA                | 1945944650               |
| SNP_P3_45886_27082859 | NC_021163.1    | Ca_kabuli_chr04 | 27082859                | GG                              | AA                | 1945944652               |
| SNP_P3_45887_27086323 | NC_021163.1    | Ca_kabuli_chr04 | 27086323                | TT                              | GG                | 1945944654               |
| SNP_P3_45888_27086327 | NC_021163.1    | Ca_kabuli_chr04 | 27086327                | AA                              | CC                | 1945944656               |
| SNP_P3_45889_27088073 | NC_021163.1    | Ca_kabuli_chr04 | 27088073                | AA                              | TT                | 1945944657               |
| SNP_P3_45890_27093762 | NC_021163.1    | Ca_kabuli_chr04 | 27093762                | TT                              | CC                | 1945944659               |
| SNP_P3_45891_27093865 | NC_021163.1    | Ca_kabuli_chr04 | 27093865                | GG                              | TT                | 1945944661               |
| SNP_P3_45892_27094992 | NC_021163.1    | Ca_kabuli_chr04 | 27094992                | GG                              | AA                | 1945944663               |
| SNP_P3_45893_27103792 | NC_021163.1    | Ca_kabuli_chr04 | 27103792                | CC                              | AA                | 1945944664               |
| SNP_P3_45894_27106769 | NC_021163.1    | Ca_kabuli_chr04 | 27106769                | AA                              | GG                | 1945944666               |
| SNP_P3_45895_27114614 | NC_021163.1    | Ca_kabuli_chr04 | 27114614                | CC                              | AA                | 1945944668               |
| SNP_P3_45896_27116320 | NC_021163.1    | Ca_kabuli_chr04 | 27116320                | TT                              | CC                | 1945944670               |
| SNP_P3_45897_27121119 | NC_021163.1    | Ca_kabuli_chr04 | 27121119                | GG                              | AA                | 1945944672               |
| SNP_P3_45898_27122680 | NC_021163.1    | Ca_kabuli_chr04 | 27122680                | GG                              | AA                | 1945944673               |
| SNP_P3_45899_27124747 | NC_021163.1    | Ca_kabuli_chr04 | 27124747                | AA                              | GG                | 1945944675               |
| SNP_P3_45900_27136363 | NC_021163.1    | Ca_kabuli_chr04 | 27136363                | AA                              | GG                | 1945944677               |
| SNP_P3_45901_27136403 | NC_021163.1    | Ca_kabuli_chr04 | 27136403                | GG                              | TT                | 1945944679               |
| SNP_P3_45902_27137640 | NC_021163.1    | Ca_kabuli_chr04 | 27137640                | TT                              | CC                | 1945944680               |
| SNP_P3_45903_27137808 | NC_021163.1    | Ca_kabuli_chr04 | 27137808                | GG                              | AA                | 1945944682               |
| SNP_P3_45904_27137811 | NC_021163.1    | Ca_kabuli_chr04 | 27137811                | CC                              | GG                | 1945944684               |
| SNP_P3_45905_27139577 | NC_021163.1    | Ca_kabuli_chr04 | 27139577                | GG                              | AA                | 1945944686               |
| SNP_P3_45906_27139740 | NC_021163.1    | Ca_kabuli_chr04 | 27139740                | CC                              | TT                | 1945944688               |
| SNP_P3_45907_27140367 | NC_021163.1    | Ca_kabuli_chr04 | 27140367                | TT                              | CC                | 1945944689               |
| SNP_P3_45908_27143030 | NC_021163.1    | Ca_kabuli_chr04 | 27143030                | CC                              | TT                | 1945944691               |

| SNPs IDs              | Chromosome IDs | Chromosomes     | Physical positions (bp) | CDC Frontier (Reference genome) | (Pusa 256 & HPNB) | NCBI SNPdb Accession IDs |
|-----------------------|----------------|-----------------|-------------------------|---------------------------------|-------------------|--------------------------|
| SNP_P3_45909_27143101 | NC_021163.1    | Ca_kabuli_chr04 | 27143101                | TT                              | GG                | 1945944693               |
| SNP_P3_45910_27143276 | NC_021163.1    | Ca_kabuli_chr04 | 27143276                | GG                              | AA                | 1945944695               |
| SNP_P3_45911_27143282 | NC_021163.1    | Ca_kabuli_chr04 | 27143282                | GG                              | AA                | 1945944697               |
| SNP_P3_45912_27143311 | NC_021163.1    | Ca_kabuli_chr04 | 27143311                | AA                              | GG                | 1945944698               |
| SNP_P3_45913_27143340 | NC_021163.1    | Ca_kabuli_chr04 | 27143340                | CC                              | AA                | 1945944700               |
| SNP_P3_45914_27143370 | NC_021163.1    | Ca_kabuli_chr04 | 27143370                | AA                              | CC                | 1945944702               |
| SNP_P3_45915_27143373 | NC_021163.1    | Ca_kabuli_chr04 | 27143373                | AA                              | GG                | 1945944704               |
| SNP_P3_45916_27145429 | NC_021163.1    | Ca_kabuli_chr04 | 27145429                | TT                              | AA                | 1945944705               |
| SNP_P3_45918_27150359 | NC_021163.1    | Ca_kabuli_chr04 | 27150359                | GG                              | AA                | 1945944707               |
| SNP_P3_45919_27150982 | NC_021163.1    | Ca_kabuli_chr04 | 27150982                | GG                              | CC                | 1945944709               |
| SNP_P3_45921_27168238 | NC_021163.1    | Ca_kabuli_chr04 | 27168238                | AA                              | GG                | 1945944711               |
| SNP_P3_45922_27168435 | NC_021163.1    | Ca_kabuli_chr04 | 27168435                | TT                              | GG                | 1945944713               |
| SNP_P3_45923_27170284 | NC_021163.1    | Ca_kabuli_chr04 | 27170284                | GG                              | TT                | 1945944714               |
| SNP_P3_45925_27171946 | NC_021163.1    | Ca_kabuli_chr04 | 27171946                | CC                              | AA                | 1945944716               |
| SNP_P3_45926_27172031 | NC_021163.1    | Ca_kabuli_chr04 | 27172031                | CC                              | TT                | 1945944718               |
| SNP_P3_45928_27175845 | NC_021163.1    | Ca_kabuli_chr04 | 27175845                | TT                              | GG                | 1945944720               |
| SNP_P3_45929_27176867 | NC_021163.1    | Ca_kabuli_chr04 | 27176867                | GG                              | AA                | 1945944721               |
| SNP_P3_45930_27177338 | NC_021163.1    | Ca_kabuli_chr04 | 27177338                | GG                              | AA                | 1945944723               |
| SNP_P3_45931_27185974 | NC_021163.1    | Ca_kabuli_chr04 | 27185974                | GG                              | CC                | 1945944725               |
| SNP_P3_45935_27198977 | NC_021163.1    | Ca_kabuli_chr04 | 27198977                | AA                              | GG                | 1945944727               |
| SNP_P3_45936_27199397 | NC_021163.1    | Ca_kabuli_chr04 | 27199397                | TT                              | CC                | 1945944729               |
| SNP_P3_45937_27199895 | NC_021163.1    | Ca_kabuli_chr04 | 27199895                | TT                              | CC                | 1945944730               |
| SNP_P3_45938_27199921 | NC_021163.1    | Ca_kabuli_chr04 | 27199921                | TT                              | GG                | 1945944732               |
| SNP_P3_45939_27200982 | NC_021163.1    | Ca_kabuli_chr04 | 27200982                | AA                              | GG                | 1945944734               |
| SNP_P3_45940_27201040 | NC_021163.1    | Ca_kabuli_chr04 | 27201040                | CC                              | TT                | 1945944736               |
| SNP_P3_45941_27201081 | NC_021163.1    | Ca_kabuli_chr04 | 27201081                | GG                              | AA                | 1945944738               |
| SNP_P3_45942_27201731 | NC_021163.1    | Ca_kabuli_chr04 | 27201731                | CC                              | TT                | 1945944739               |
| SNP_P3_45943_27208283 | NC_021163.1    | Ca_kabuli_chr04 | 27208283                | GG                              | AA                | 1945944741               |
| SNP_P3_45944_27208320 | NC_021163.1    | Ca_kabuli_chr04 | 27208320                | CC                              | AA                | 1945944743               |
| SNP_P3_45945_27208335 | NC_021163.1    | Ca_kabuli_chr04 | 27208335                | AA                              | GG                | 1945944745               |
| SNP_P3_45946_27210217 | NC_021163.1    | Ca_kabuli_chr04 | 27210217                | CC                              | GG                | 1945944747               |
| SNP_P3_45947_27210259 | NC_021163.1    | Ca_kabuli_chr04 | 27210259                | CC                              | AA                | 1945944748               |
| SNP_P3_45948_27210284 | NC_021163.1    | Ca_kabuli_chr04 | 27210284                | AA                              | GG                | 1945944750               |
| SNP_P3_45949_27210395 | NC_021163.1    | Ca_kabuli_chr04 | 27210395                | AA                              | TT                | 1945944752               |
| SNP_P3_45950_27212829 | NC_021163.1    | Ca_kabuli_chr04 | 27212829                | TT                              | AA                | 1945944754               |
| SNP_P3_45951_27213114 | NC_021163.1    | Ca_kabuli_chr04 | 27213114                | CC                              | TT                | 1945944755               |
| SNP_P3_45952_27213136 | NC_021163.1    | Ca_kabuli_chr04 | 27213136                | AA                              | CC                | 1945944757               |
| SNP_P3_45953_27213170 | NC_021163.1    | Ca_kabuli_chr04 | 27213170                | AA                              | GG                | 1945944759               |
| SNP_P3_45954_27213197 | NC_021163.1    | Ca_kabuli_chr04 | 27213197                | GG                              | AA                | 1945944761               |
| SNP_P3_45955_27213241 | NC_021163.1    | Ca_kabuli_chr04 | 27213241                | CC                              | GG                | 1945944763               |
| SNP_P3_45956_27213247 | NC_021163.1    | Ca_kabuli_chr04 | 27213247                | AA                              | GG                | 1945944764               |
| SNP_P3_45957_27216841 | NC_021163.1    | Ca_kabuli_chr04 | 27216841                | CC                              | TT                | 1945944766               |

| SNPs IDs              | Chromosome IDs | Chromosomes     | Physical positions (bp) | CDC Frontier (Reference genome) | (Pusa 256 & HPNB) | NCBI SNPdb Accession IDs |
|-----------------------|----------------|-----------------|-------------------------|---------------------------------|-------------------|--------------------------|
| SNP_P3_45958_27217022 | NC_021163.1    | Ca_kabuli_chr04 | 27217022                | TT                              | AA                | 1945944768               |
| SNP_P3_45960_27220227 | NC_021163.1    | Ca_kabuli_chr04 | 27220227                | AA                              | GG                | 1945944770               |
| SNP_P3_45961_27230372 | NC_021163.1    | Ca_kabuli_chr04 | 27230372                | AA                              | GG                | 1945944771               |
| SNP_P3_45962_27232267 | NC_021163.1    | Ca_kabuli_chr04 | 27232267                | AA                              | GG                | 1945944773               |
| SNP_P3_45963_27232415 | NC_021163.1    | Ca_kabuli_chr04 | 27232415                | CC                              | TT                | 1945944775               |
| SNP_P3_45965_27233702 | NC_021163.1    | Ca_kabuli_chr04 | 27233702                | CC                              | TT                | 1945944777               |
| SNP_P3_45966_27233719 | NC_021163.1    | Ca_kabuli_chr04 | 27233719                | TT                              | CC                | 1945944779               |
| SNP_P3_45967_27233732 | NC_021163.1    | Ca_kabuli_chr04 | 27233732                | CC                              | AA                | 1945944780               |
| SNP_P3_45968_27235684 | NC_021163.1    | Ca_kabuli_chr04 | 27235684                | AA                              | TT                | 1945944782               |
| SNP_P3_45969_27240400 | NC_021163.1    | Ca_kabuli_chr04 | 27240400                | TT                              | CC                | 1945944784               |
| SNP_P3_45970_27240882 | NC_021163.1    | Ca_kabuli_chr04 | 27240882                | TT                              | AA                | 1945944786               |
| SNP_P3_45971_27249015 | NC_021163.1    | Ca_kabuli_chr04 | 27249015                | AA                              | TT                | 1945944788               |
| SNP_P3_45972_27249806 | NC_021163.1    | Ca_kabuli_chr04 | 27249806                | CC                              | AA                | 1945944789               |
| SNP_P3_45973_27251554 | NC_021163.1    | Ca_kabuli_chr04 | 27251554                | CC                              | TT                | 1945944791               |
| SNP_P3_45974_27252931 | NC_021163.1    | Ca_kabuli_chr04 | 27252931                | TT                              | AA                | 1945944793               |
| SNP_P3_45975_27254529 | NC_021163.1    | Ca_kabuli_chr04 | 27254529                | CC                              | AA                | 1945944795               |
| SNP_P3_45976_27254764 | NC_021163.1    | Ca_kabuli_chr04 | 27254764                | GG                              | AA                | 1945944797               |
| SNP_P3_45977_27255592 | NC_021163.1    | Ca_kabuli_chr04 | 27255592                | AA                              | GG                | 1945944798               |
| SNP_P3_45978_27256232 | NC_021163.1    | Ca_kabuli_chr04 | 27256232                | TT                              | CC                | 1945944800               |
| SNP_P3_45979_27257036 | NC_021163.1    | Ca_kabuli_chr04 | 27257036                | TT                              | CC                | 1945944802               |
| SNP_P3_45980_27257469 | NC_021163.1    | Ca_kabuli_chr04 | 27257469                | AA                              | TT                | 1945944804               |
| SNP_P3_45981_27259752 | NC_021163.1    | Ca_kabuli_chr04 | 27259752                | TT                              | CC                | 1945944805               |
| SNP_P3_45982_27260023 | NC_021163.1    | Ca_kabuli_chr04 | 27260023                | TT                              | GG                | 1945944807               |
| SNP_P3_45984_27261983 | NC_021163.1    | Ca_kabuli_chr04 | 27261983                | TT                              | CC                | 1945944809               |
| SNP_P3_45985_27262305 | NC_021163.1    | Ca_kabuli_chr04 | 27262305                | CC                              | TT                | 1945944811               |
| SNP_P3_45986_27266239 | NC_021163.1    | Ca_kabuli_chr04 | 27266239                | TT                              | GG                | 1945944813               |
| SNP_P3_45987_27266248 | NC_021163.1    | Ca_kabuli_chr04 | 27266248                | TT                              | CC                | 1945944814               |
| SNP_P3_45988_27266317 | NC_021163.1    | Ca_kabuli_chr04 | 27266317                | CC                              | AA                | 1945944816               |
| SNP_P3_45989_27266481 | NC_021163.1    | Ca_kabuli_chr04 | 27266481                | GG                              | AA                | 1945944818               |
| SNP_P3_45990_27266505 | NC_021163.1    | Ca_kabuli_chr04 | 27266505                | CC                              | GG                | 1945944820               |
| SNP_P3_45991_27266567 | NC_021163.1    | Ca_kabuli_chr04 | 27266567                | AA                              | GG                | 1945944822               |
| SNP_P3_45992_27266594 | NC_021163.1    | Ca_kabuli_chr04 | 27266594                | AA                              | TT                | 1945944823               |
| SNP_P3_45993_27266607 | NC_021163.1    | Ca_kabuli_chr04 | 27266607                | GG                              | AA                | 1945944825               |
| SNP_P3_45994_27266635 | NC_021163.1    | Ca_kabuli_chr04 | 27266635                | CC                              | TT                | 1945944827               |
| SNP_P3_45995_27266644 | NC_021163.1    | Ca_kabuli_chr04 | 27266644                | CC                              | AA                | 1945944829               |
| SNP_P3_45996_27266658 | NC_021163.1    | Ca_kabuli_chr04 | 27266658                | TT                              | CC                | 1945944831               |
| SNP_P3_45997_27266660 | NC_021163.1    | Ca_kabuli_chr04 | 27266660                | AA                              | TT                | 1945944832               |
| SNP_P3_45998_27266748 | NC_021163.1    | Ca_kabuli_chr04 | 27266748                | TT                              | AA                | 1945944834               |
| SNP_P3_45999_27266780 | NC_021163.1    | Ca_kabuli_chr04 | 27266780                | GG                              | TT                | 1945944836               |
| SNP_P3_46000_27266849 | NC_021163.1    | Ca_kabuli_chr04 | 27266849                | AA                              | CC                | 1945944838               |
| SNP_P3_46001_27266887 | NC_021163.1    | Ca_kabuli_chr04 | 27266887                | AA                              | TT                | 1945944839               |
| SNP_P3_46002_27266933 | NC_021163.1    | Ca_kabuli_chr04 | 27266933                | TT                              | GG                | 1945944841               |



| SNPs IDs              | Chromosome IDs | Chromosomes     | Physical positions (bp) | CDC Frontier (Reference genome) | (Pusa 256 & HPNB) | NCBI SNPdb Accession IDs |
|-----------------------|----------------|-----------------|-------------------------|---------------------------------|-------------------|--------------------------|
| SNP_P3_46003_27266957 | NC_021163.1    | Ca_kabuli_chr04 | 27266957                | CC                              | TT                | 1945944843               |
| SNP_P3_46004_27266973 | NC_021163.1    | Ca_kabuli_chr04 | 27266973                | AA                              | GG                | 1945944845               |
| SNP_P3_46005_27267083 | NC_021163.1    | Ca_kabuli_chr04 | 27267083                | AA                              | GG                | 1945944847               |
| SNP_P3_46007_27267220 | NC_021163.1    | Ca_kabuli_chr04 | 27267220                | AA                              | GG                | 1945944848               |
| SNP_P3_46008_27267462 | NC_021163.1    | Ca_kabuli_chr04 | 27267462                | CC                              | AA                | 1945944850               |
| SNP_P3_46009_27270611 | NC_021163.1    | Ca_kabuli_chr04 | 27270611                | TT                              | GG                | 1945944852               |
| SNP_P3_46010_27270709 | NC_021163.1    | Ca_kabuli_chr04 | 27270709                | AA                              | GG                | 1945944854               |
| SNP_P3_46011_27270763 | NC_021163.1    | Ca_kabuli_chr04 | 27270763                | TT                              | CC                | 1945944856               |
| SNP_P3_46012_27270882 | NC_021163.1    | Ca_kabuli_chr04 | 27270882                | AA                              | GG                | 1945944857               |
| SNP_P3_46013_27270894 | NC_021163.1    | Ca_kabuli_chr04 | 27270894                | AA                              | GG                | 1945944859               |
| SNP_P3_46014_27270905 | NC_021163.1    | Ca_kabuli_chr04 | 27270905                | CC                              | TT                | 1945944861               |
| SNP_P3_46015_27272116 | NC_021163.1    | Ca_kabuli_chr04 | 27272116                | GG                              | TT                | 1945944863               |
| SNP_P3_46016_27272328 | NC_021163.1    | Ca_kabuli_chr04 | 27272328                | AA                              | CC                | 1945944864               |
| SNP_P3_46017_27272576 | NC_021163.1    | Ca_kabuli_chr04 | 27272576                | AA                              | GG                | 1945944866               |
| SNP_P3_46018_27274063 | NC_021163.1    | Ca_kabuli_chr04 | 27274063                | GG                              | AA                | 1945944868               |
| SNP_P3_46019_27274106 | NC_021163.1    | Ca_kabuli_chr04 | 27274106                | GG                              | TT                | 1945944870               |
| SNP_P3_46020_27274172 | NC_021163.1    | Ca_kabuli_chr04 | 27274172                | CC                              | TT                | 1945944872               |
| SNP_P3_46021_27274177 | NC_021163.1    | Ca_kabuli_chr04 | 27274177                | TT                              | AA                | 1945944873               |
| SNP_P3_46022_27274346 | NC_021163.1    | Ca_kabuli_chr04 | 27274346                | CC                              | TT                | 1945944875               |
| SNP_P3_46024_27274413 | NC_021163.1    | Ca_kabuli_chr04 | 27274413                | CC                              | TT                | 1945944877               |
| SNP_P3_46025_27274418 | NC_021163.1    | Ca_kabuli_chr04 | 27274418                | CC                              | TT                | 1945944879               |
| SNP_P3_46026_27274473 | NC_021163.1    | Ca_kabuli_chr04 | 27274473                | AA                              | TT                | 1945944881               |
| SNP_P3_46027_27274617 | NC_021163.1    | Ca_kabuli_chr04 | 27274617                | AA                              | GG                | 1945944882               |
| SNP_P3_46028_27282659 | NC_021163.1    | Ca_kabuli_chr04 | 27282659                | TT                              | GG                | 1945944884               |
| SNP_P3_46029_27283443 | NC_021163.1    | Ca_kabuli_chr04 | 27283443                | GG                              | AA                | 1945944886               |
| SNP_P3_46031_27283896 | NC_021163.1    | Ca_kabuli_chr04 | 27283896                | CC                              | TT                | 1945944888               |
| SNP_P3_46032_27283904 | NC_021163.1    | Ca_kabuli_chr04 | 27283904                | TT                              | CC                | 1945944889               |
| SNP_P3_46033_27283910 | NC_021163.1    | Ca_kabuli_chr04 | 27283910                | AA                              | TT                | 1945944891               |
| SNP_P3_46034_27285248 | NC_021163.1    | Ca_kabuli_chr04 | 27285248                | GG                              | AA                | 1945944893               |
| SNP_P3_46036_27313880 | NC_021163.1    | Ca_kabuli_chr04 | 27313880                | AA                              | TT                | 1945944895               |
| SNP_P3_46037_27314046 | NC_021163.1    | Ca_kabuli_chr04 | 27314046                | TT                              | GG                | 1945944897               |
| SNP_P3_46038_27314083 | NC_021163.1    | Ca_kabuli_chr04 | 27314083                | GG                              | TT                | 1945944898               |
| SNP_P3_46039_27314091 | NC_021163.1    | Ca_kabuli_chr04 | 27314091                | TT                              | CC                | 1945944900               |
| SNP_P3_46040_27314446 | NC_021163.1    | Ca_kabuli_chr04 | 27314446                | GG                              | AA                | 1945944902               |
| SNP_P3_46041_27314472 | NC_021163.1    | Ca_kabuli_chr04 | 27314472                | CC                              | AA                | 1945944904               |
| SNP_P3_46042_27314718 | NC_021163.1    | Ca_kabuli_chr04 | 27314718                | TT                              | CC                | 1945944906               |
| SNP_P3_46043_27314719 | NC_021163.1    | Ca_kabuli_chr04 | 27314719                | CC                              | AA                | 1945944907               |
| SNP_P3_46044_27314728 | NC_021163.1    | Ca_kabuli_chr04 | 27314728                | GG                              | AA                | 1945944909               |
| SNP_P3_46045_27314747 | NC_021163.1    | Ca_kabuli_chr04 | 27314747                | GG                              | AA                | 1945944911               |
| SNP_P3_46046_27314758 | NC_021163.1    | Ca_kabuli_chr04 | 27314758                | TT                              | CC                | 1945944913               |
| SNP_P3_46047_27314811 | NC_021163.1    | Ca_kabuli_chr04 | 27314811                | CC                              | TT                | 1945944914               |
| SNP_P3_46048_27314825 | NC_021163.1    | Ca_kabuli_chr04 | 27314825                | GG                              | AA                | 1945944916               |

| SNPs IDs              | Chromosome IDs | Chromosomes     | Physical positions (bp) | CDC Frontier (Reference genome) | (Pusa 256 & HPNB) | NCBI SNPdb Accession IDs |
|-----------------------|----------------|-----------------|-------------------------|---------------------------------|-------------------|--------------------------|
| SNP_P3_46049_27316645 | NC_021163.1    | Ca_kabuli_chr04 | 27316645                | TT                              | CC                | 1945944918               |
| SNP_P3_46050_27316668 | NC_021163.1    | Ca_kabuli_chr04 | 27316668                | AA                              | GG                | 1945944920               |
| SNP_P3_46051_27316710 | NC_021163.1    | Ca_kabuli_chr04 | 27316710                | TT                              | GG                | 1945944922               |
| SNP_P3_46052_27316965 | NC_021163.1    | Ca_kabuli_chr04 | 27316965                | AA                              | GG                | 1945944923               |
| SNP_P3_46053_27317042 | NC_021163.1    | Ca_kabuli_chr04 | 27317042                | TT                              | GG                | 1945944925               |
| SNP_P3_46054_27317067 | NC_021163.1    | Ca_kabuli_chr04 | 27317067                | TT                              | CC                | 1945944927               |
| SNP_P3_46055_27317265 | NC_021163.1    | Ca_kabuli_chr04 | 27317265                | CC                              | TT                | 1945944929               |
| SNP_P3_46056_27317283 | NC_021163.1    | Ca_kabuli_chr04 | 27317283                | TT                              | CC                | 1945944931               |
| SNP_P3_46057_27317325 | NC_021163.1    | Ca_kabuli_chr04 | 27317325                | CC                              | TT                | 1945944932               |
| SNP_P3_46058_27317326 | NC_021163.1    | Ca_kabuli_chr04 | 27317326                | AA                              | TT                | 1945944934               |
| SNP_P3_46059_27317372 | NC_021163.1    | Ca_kabuli_chr04 | 27317372                | AA                              | TT                | 1945944936               |
| SNP_P3_46060_27318108 | NC_021163.1    | Ca_kabuli_chr04 | 27318108                | TT                              | GG                | 1945944938               |
| SNP_P3_46061_27318110 | NC_021163.1    | Ca_kabuli_chr04 | 27318110                | GG                              | AA                | 1945944939               |
| SNP_P3_46062_27318138 | NC_021163.1    | Ca_kabuli_chr04 | 27318138                | GG                              | TT                | 1945944941               |
| SNP_P3_46063_27318139 | NC_021163.1    | Ca_kabuli_chr04 | 27318139                | AA                              | CC                | 1945944943               |
| SNP_P3_46064_27319229 | NC_021163.1    | Ca_kabuli_chr04 | 27319229                | CC                              | TT                | 1945944945               |
| SNP_P3_46065_27319231 | NC_021163.1    | Ca_kabuli_chr04 | 27319231                | AA                              | GG                | 1945944947               |
| SNP_P3_46066_27319291 | NC_021163.1    | Ca_kabuli_chr04 | 27319291                | GG                              | AA                | 1945944948               |
| SNP_P3_46067_27320384 | NC_021163.1    | Ca_kabuli_chr04 | 27320384                | AA                              | GG                | 1945944950               |
| SNP_P3_46068_27320693 | NC_021163.1    | Ca_kabuli_chr04 | 27320693                | AA                              | CC                | 1945944952               |
| SNP_P3_46069_27320909 | NC_021163.1    | Ca_kabuli_chr04 | 27320909                | GG                              | AA                | 1945944954               |
| SNP_P3_46070_27322290 | NC_021163.1    | Ca_kabuli_chr04 | 27322290                | CC                              | TT                | 1945944956               |
| SNP_P3_46071_27323478 | NC_021163.1    | Ca_kabuli_chr04 | 27323478                | AA                              | CC                | 1945944957               |
| SNP_P3_46072_27323485 | NC_021163.1    | Ca_kabuli_chr04 | 27323485                | AA                              | TT                | 1945944959               |
| SNP_P3_46073_27323498 | NC_021163.1    | Ca_kabuli_chr04 | 27323498                | CC                              | AA                | 1945944961               |
| SNP_P3_46074_27323505 | NC_021163.1    | Ca_kabuli_chr04 | 27323505                | AA                              | GG                | 1945944963               |
| SNP_P3_46075_27323618 | NC_021163.1    | Ca_kabuli_chr04 | 27323618                | AA                              | GG                | 1945944964               |
| SNP_P3_46076_27323657 | NC_021163.1    | Ca_kabuli_chr04 | 27323657                | TT                              | AA                | 1945944966               |
| SNP_P3_46077_27323668 | NC_021163.1    | Ca_kabuli_chr04 | 27323668                | TT                              | AA                | 1945944968               |
| SNP_P3_46078_27323669 | NC_021163.1    | Ca_kabuli_chr04 | 27323669                | GG                              | CC                | 1945944970               |
| SNP_P3_46079_27323894 | NC_021163.1    | Ca_kabuli_chr04 | 27323894                | TT                              | CC                | 1945944972               |
| SNP_P3_46080_27323903 | NC_021163.1    | Ca_kabuli_chr04 | 27323903                | AA                              | GG                | 1945944973               |
| SNP_P3_46081_27324753 | NC_021163.1    | Ca_kabuli_chr04 | 27324753                | GG                              | AA                | 1945944975               |
| SNP_P3_46082_27324760 | NC_021163.1    | Ca_kabuli_chr04 | 27324760                | CC                              | TT                | 1945944977               |
| SNP_P3_46083_27324817 | NC_021163.1    | Ca_kabuli_chr04 | 27324817                | AA                              | GG                | 1945944979               |
| SNP_P3_46084_27325567 | NC_021163.1    | Ca_kabuli_chr04 | 27325567                | AA                              | GG                | 1945944981               |
| SNP_P3_46086_27326189 | NC_021163.1    | Ca_kabuli_chr04 | 27326189                | GG                              | AA                | 1945944982               |
| SNP_P3_46087_27328398 | NC_021163.1    | Ca_kabuli_chr04 | 27328398                | TT                              | AA                | 1945944984               |
| SNP_P3_46088_27328407 | NC_021163.1    | Ca_kabuli_chr04 | 27328407                | TT                              | CC                | 1945944986               |
| SNP_P3_46089_27328612 | NC_021163.1    | Ca_kabuli_chr04 | 27328612                | TT                              | CC                | 1945944988               |
| SNP_P3_46090_27328646 | NC_021163.1    | Ca_kabuli_chr04 | 27328646                | TT                              | GG                | 1945944990               |
| SNP_P3_46091_27328654 | NC_021163.1    | Ca_kabuli_chr04 | 27328654                | CC                              | TT                | 1945944991               |

| SNPs IDs              | Chromosome IDs | Chromosomes     | Physical positions (bp) | CDC Frontier (Reference genome) | (Pusa 256 & HPNB) | NCBI SNPdb Accession IDs |
|-----------------------|----------------|-----------------|-------------------------|---------------------------------|-------------------|--------------------------|
| SNP_P3_46092_27328660 | NC_021163.1    | Ca_kabuli_chr04 | 27328660                | CC                              | TT                | 1945944993               |
| SNP_P3_46093_27329377 | NC_021163.1    | Ca_kabuli_chr04 | 27329377                | TT                              | AA                | 1945944995               |
| SNP_P3_46094_27329399 | NC_021163.1    | Ca_kabuli_chr04 | 27329399                | AA                              | GG                | 1945944997               |
| SNP_P3_46095_27329406 | NC_021163.1    | Ca_kabuli_chr04 | 27329406                | AA                              | TT                | 1945944999               |
| SNP_P3_46096_27330312 | NC_021163.1    | Ca_kabuli_chr04 | 27330312                | TT                              | GG                | 1945945000               |
| SNP_P3_46098_27331617 | NC_021163.1    | Ca_kabuli_chr04 | 27331617                | TT                              | AA                | 1945945002               |
| SNP_P3_46099_27331618 | NC_021163.1    | Ca_kabuli_chr04 | 27331618                | TT                              | AA                | 1945945004               |
| SNP_P3_46100_27331697 | NC_021163.1    | Ca_kabuli_chr04 | 27331697                | TT                              | CC                | 1945945006               |
| SNP_P3_46101_27331732 | NC_021163.1    | Ca_kabuli_chr04 | 27331732                | GG                              | AA                | 1945945008               |
| SNP_P3_46102_27331956 | NC_021163.1    | Ca_kabuli_chr04 | 27331956                | TT                              | CC                | 1945945009               |
| SNP_P3_46103_27332028 | NC_021163.1    | Ca_kabuli_chr04 | 27332028                | AA                              | TT                | 1945945011               |
| SNP_P3_46105_27340551 | NC_021163.1    | Ca_kabuli_chr04 | 27340551                | GG                              | TT                | 1945945013               |
| SNP_P3_46106_27340827 | NC_021163.1    | Ca_kabuli_chr04 | 27340827                | GG                              | TT                | 1945945015               |
| SNP_P3_46108_27340909 | NC_021163.1    | Ca_kabuli_chr04 | 27340909                | GG                              | AA                | 1945945016               |
| SNP_P3_46109_27341112 | NC_021163.1    | Ca_kabuli_chr04 | 27341112                | CC                              | TT                | 1945945018               |
| SNP_P3_46110_27341125 | NC_021163.1    | Ca_kabuli_chr04 | 27341125                | CC                              | TT                | 1945945020               |
| SNP_P3_46111_27341132 | NC_021163.1    | Ca_kabuli_chr04 | 27341132                | CC                              | TT                | 1945945022               |
| SNP_P3_46112_27341141 | NC_021163.1    | Ca_kabuli_chr04 | 27341141                | AA                              | GG                | 1945945024               |
| SNP_P3_46113_27348079 | NC_021163.1    | Ca_kabuli_chr04 | 27348079                | CC                              | TT                | 1945945025               |
| SNP_P3_46114_27348135 | NC_021163.1    | Ca_kabuli_chr04 | 27348135                | CC                              | TT                | 1945945027               |
| SNP_P3_46116_27350151 | NC_021163.1    | Ca_kabuli_chr04 | 27350151                | AA                              | TT                | 1945945029               |
| SNP_P3_46117_27350599 | NC_021163.1    | Ca_kabuli_chr04 | 27350599                | CC                              | GG                | 1945945031               |
| SNP_P3_46118_27350883 | NC_021163.1    | Ca_kabuli_chr04 | 27350883                | GG                              | AA                | 1945945033               |
| SNP_P3_46119_27351471 | NC_021163.1    | Ca_kabuli_chr04 | 27351471                | TT                              | CC                | 1945945034               |
| SNP_P3_46120_27351472 | NC_021163.1    | Ca_kabuli_chr04 | 27351472                | AA                              | CC                | 1945945036               |
| SNP_P3_46121_27352883 | NC_021163.1    | Ca_kabuli_chr04 | 27352883                | AA                              | GG                | 1945945038               |
| SNP_P3_46122_27352885 | NC_021163.1    | Ca_kabuli_chr04 | 27352885                | AA                              | CC                | 1945945040               |
| SNP_P3_46123_27353375 | NC_021163.1    | Ca_kabuli_chr04 | 27353375                | GG                              | CC                | 1945945042               |
| SNP_P3_46124_27353413 | NC_021163.1    | Ca_kabuli_chr04 | 27353413                | AA                              | GG                | 1945945043               |
| SNP_P3_46125_27354061 | NC_021163.1    | Ca_kabuli_chr04 | 27354061                | GG                              | TT                | 1945945045               |
| SNP_P3_46126_27354763 | NC_021163.1    | Ca_kabuli_chr04 | 27354763                | GG                              | AA                | 1945945047               |
| SNP_P3_46127_27354795 | NC_021163.1    | Ca_kabuli_chr04 | 27354795                | AA                              | TT                | 1945945049               |
| SNP_P3_46128_27355595 | NC_021163.1    | Ca_kabuli_chr04 | 27355595                | CC                              | TT                | 1945945050               |
| SNP_P3_46129_27355598 | NC_021163.1    | Ca_kabuli_chr04 | 27355598                | TT                              | GG                | 1945945052               |
| SNP_P3_46131_27355982 | NC_021163.1    | Ca_kabuli_chr04 | 27355982                | TT                              | AA                | 1945945054               |
| SNP_P3_46132_27362059 | NC_021163.1    | Ca_kabuli_chr04 | 27362059                | TT                              | CC                | 1945945056               |
| SNP_P3_46133_27362164 | NC_021163.1    | Ca_kabuli_chr04 | 27362164                | AA                              | GG                | 1945945058               |
| SNP_P3_46134_27362210 | NC_021163.1    | Ca_kabuli_chr04 | 27362210                | CC                              | TT                | 1945945059               |
| SNP_P3_46135_27362228 | NC_021163.1    | Ca_kabuli_chr04 | 27362228                | AA                              | TT                | 1945945061               |
| SNP_P3_46136_27362238 | NC_021163.1    | Ca_kabuli_chr04 | 27362238                | GG                              | AA                | 1945945063               |
| SNP_P3_46137_27362558 | NC_021163.1    | Ca_kabuli_chr04 | 27362558                | AA                              | GG                | 1945945065               |
| SNP_P3_46138_27362593 | NC_021163.1    | Ca_kabuli_chr04 | 27362593                | AA                              | GG                | 1945945067               |

| SNPs IDs              | Chromosome IDs | Chromosomes     | Physical positions (bp) | CDC Frontier (Reference genome) | (Pusa 256 & HPNB) | NCBI SNPdb Accession IDs |
|-----------------------|----------------|-----------------|-------------------------|---------------------------------|-------------------|--------------------------|
| SNP_P3_46139_27363859 | NC_021163.1    | Ca_kabuli_chr04 | 27363859                | TT                              | CC                | 1945945068               |
| SNP_P3_46140_27363863 | NC_021163.1    | Ca_kabuli_chr04 | 27363863                | TT                              | CC                | 1945945070               |
| SNP_P3_46141_27364649 | NC_021163.1    | Ca_kabuli_chr04 | 27364649                | AA                              | GG                | 1945945072               |
| SNP_P3_46142_27364651 | NC_021163.1    | Ca_kabuli_chr04 | 27364651                | CC                              | TT                | 1945945074               |
| SNP_P3_46143_27364655 | NC_021163.1    | Ca_kabuli_chr04 | 27364655                | AA                              | GG                | 1945945075               |
| SNP_P3_46144_27364672 | NC_021163.1    | Ca_kabuli_chr04 | 27364672                | TT                              | CC                | 1945945077               |
| SNP_P3_46145_27364680 | NC_021163.1    | Ca_kabuli_chr04 | 27364680                | TT                              | CC                | 1945945079               |
| SNP_P3_46146_27364710 | NC_021163.1    | Ca_kabuli_chr04 | 27364710                | TT                              | CC                | 1945945081               |
| SNP_P3_46148_27366720 | NC_021163.1    | Ca_kabuli_chr04 | 27366720                | GG                              | AA                | 1945945083               |
| SNP_P3_46149_27366729 | NC_021163.1    | Ca_kabuli_chr04 | 27366729                | TT                              | CC                | 1945945084               |
| SNP_P3_46150_27367463 | NC_021163.1    | Ca_kabuli_chr04 | 27367463                | AA                              | CC                | 1945945086               |
| SNP_P3_46151_27367721 | NC_021163.1    | Ca_kabuli_chr04 | 27367721                | CC                              | AA                | 1945945088               |
| SNP_P3_46152_27367749 | NC_021163.1    | Ca_kabuli_chr04 | 27367749                | AA                              | TT                | 1945945090               |
| SNP_P3_46153_27367984 | NC_021163.1    | Ca_kabuli_chr04 | 27367984                | AA                              | GG                | 1945945092               |
| SNP_P3_46154_27368031 | NC_021163.1    | Ca_kabuli_chr04 | 27368031                | AA                              | TT                | 1945945093               |
| SNP_P3_46155_27368069 | NC_021163.1    | Ca_kabuli_chr04 | 27368069                | AA                              | CC                | 1945945095               |
| SNP_P3_46156_27368070 | NC_021163.1    | Ca_kabuli_chr04 | 27368070                | AA                              | GG                | 1945945097               |
| SNP_P3_46157_27368090 | NC_021163.1    | Ca_kabuli_chr04 | 27368090                | AA                              | TT                | 1945945099               |
| SNP_P3_46158_27368124 | NC_021163.1    | Ca_kabuli_chr04 | 27368124                | AA                              | GG                | 1945945100               |
| SNP_P3_46160_27368181 | NC_021163.1    | Ca_kabuli_chr04 | 27368181                | AA                              | CC                | 1945945102               |
| SNP_P3_46161_27368198 | NC_021163.1    | Ca_kabuli_chr04 | 27368198                | TT                              | AA                | 1945945104               |
| SNP_P3_46162_27368223 | NC_021163.1    | Ca_kabuli_chr04 | 27368223                | CC                              | TT                | 1945945106               |
| SNP_P3_46163_27368275 | NC_021163.1    | Ca_kabuli_chr04 | 27368275                | GG                              | TT                | 1945945108               |
| SNP_P3_46164_27368280 | NC_021163.1    | Ca_kabuli_chr04 | 27368280                | AA                              | GG                | 1945945109               |
| SNP_P3_46165_27368324 | NC_021163.1    | Ca_kabuli_chr04 | 27368324                | AA                              | CC                | 1945945111               |
| SNP_P3_46166_27368326 | NC_021163.1    | Ca_kabuli_chr04 | 27368326                | CC                              | TT                | 1945945113               |
| SNP_P3_46167_27368375 | NC_021163.1    | Ca_kabuli_chr04 | 27368375                | TT                              | CC                | 1945945115               |
| SNP_P3_46169_27368409 | NC_021163.1    | Ca_kabuli_chr04 | 27368409                | CC                              | TT                | 1945945117               |
| SNP_P3_46170_27368475 | NC_021163.1    | Ca_kabuli_chr04 | 27368475                | AA                              | GG                | 1945945118               |
| SNP_P3_46171_27368593 | NC_021163.1    | Ca_kabuli_chr04 | 27368593                | AA                              | GG                | 1945945120               |
| SNP_P3_46173_27368698 | NC_021163.1    | Ca_kabuli_chr04 | 27368698                | TT                              | CC                | 1945945122               |
| SNP_P3_46174_27368700 | NC_021163.1    | Ca_kabuli_chr04 | 27368700                | AA                              | GG                | 1945945124               |
| SNP_P3_46175_27368731 | NC_021163.1    | Ca_kabuli_chr04 | 27368731                | GG                              | AA                | 1945945126               |
| SNP_P3_46176_27375334 | NC_021163.1    | Ca_kabuli_chr04 | 27375334                | CC                              | AA                | 1945945127               |
| SNP_P3_46178_27375485 | NC_021163.1    | Ca_kabuli_chr04 | 27375485                | CC                              | TT                | 1945945129               |
| SNP_P3_46179_27375492 | NC_021163.1    | Ca_kabuli_chr04 | 27375492                | TT                              | CC                | 1945945131               |
| SNP_P3_46182_27378530 | NC_021163.1    | Ca_kabuli_chr04 | 27378530                | AA                              | GG                | 1945945133               |
| SNP_P3_46183_27378816 | NC_021163.1    | Ca_kabuli_chr04 | 27378816                | TT                              | GG                | 1945945134               |
| SNP_P3_46184_27379297 | NC_021163.1    | Ca_kabuli_chr04 | 27379297                | TT                              | CC                | 1945945136               |
| SNP_P3_46185_27379857 | NC_021163.1    | Ca_kabuli_chr04 | 27379857                | CC                              | TT                | 1945945138               |
| SNP_P3_46186_27379892 | NC_021163.1    | Ca_kabuli_chr04 | 27379892                | AA                              | GG                | 1945945140               |
| SNP_P3_46188_27380105 | NC_021163.1    | Ca_kabuli_chr04 | 27380105                | AA                              | TT                | 1945945142               |

| SNPs IDs              | Chromosome IDs | Chromosomes     | Physical positions (bp) | CDC Frontier (Reference genome) | (Pusa 256 & HPNB) | NCBI SNPdb Accession IDs |
|-----------------------|----------------|-----------------|-------------------------|---------------------------------|-------------------|--------------------------|
| SNP_P3_46191_27383983 | NC_021163.1    | Ca_kabuli_chr04 | 27383983                | GG                              | AA                | 1945945143               |
| SNP_P3_46192_27384002 | NC_021163.1    | Ca_kabuli_chr04 | 27384002                | AA                              | GG                | 1945945145               |
| SNP_P3_46193_27390770 | NC_021163.1    | Ca_kabuli_chr04 | 27390770                | TT                              | CC                | 1945945147               |
| SNP_P3_46194_27390829 | NC_021163.1    | Ca_kabuli_chr04 | 27390829                | AA                              | TT                | 1945945149               |
| SNP_P3_46195_27390987 | NC_021163.1    | Ca_kabuli_chr04 | 27390987                | CC                              | TT                | 1945945151               |
| SNP_P3_46196_27391003 | NC_021163.1    | Ca_kabuli_chr04 | 27391003                | TT                              | GG                | 1945945152               |
| SNP_P3_46197_27391021 | NC_021163.1    | Ca_kabuli_chr04 | 27391021                | TT                              | CC                | 1945945154               |
| SNP_P3_46198_27394675 | NC_021163.1    | Ca_kabuli_chr04 | 27394675                | AA                              | CC                | 1945945156               |
| SNP_P3_46199_27394692 | NC_021163.1    | Ca_kabuli_chr04 | 27394692                | AA                              | GG                | 1945945158               |
| SNP_P3_46200_27394700 | NC_021163.1    | Ca_kabuli_chr04 | 27394700                | AA                              | CC                | 1945945159               |
| SNP_P3_46201_27394741 | NC_021163.1    | Ca_kabuli_chr04 | 27394741                | TT                              | CC                | 1945945161               |
| SNP_P3_46202_27394951 | NC_021163.1    | Ca_kabuli_chr04 | 27394951                | GG                              | AA                | 1945945163               |
| SNP_P3_46203_27394957 | NC_021163.1    | Ca_kabuli_chr04 | 27394957                | TT                              | AA                | 1945945165               |
| SNP_P3_46204_27394958 | NC_021163.1    | Ca_kabuli_chr04 | 27394958                | TT                              | AA                | 1945945167               |
| SNP_P3_46205_27395070 | NC_021163.1    | Ca_kabuli_chr04 | 27395070                | AA                              | CC                | 1945945168               |
| SNP_P3_46206_27395210 | NC_021163.1    | Ca_kabuli_chr04 | 27395210                | TT                              | AA                | 1945945170               |
| SNP_P3_46207_27395245 | NC_021163.1    | Ca_kabuli_chr04 | 27395245                | CC                              | AA                | 1945945172               |
| SNP_P3_46208_27395469 | NC_021163.1    | Ca_kabuli_chr04 | 27395469                | AA                              | GG                | 1945945174               |
| SNP_P3_46210_27395665 | NC_021163.1    | Ca_kabuli_chr04 | 27395665                | TT                              | CC                | 1945945176               |
| SNP_P3_46211_27397102 | NC_021163.1    | Ca_kabuli_chr04 | 27397102                | AA                              | GG                | 1945945177               |
| SNP_P3_46212_27397210 | NC_021163.1    | Ca_kabuli_chr04 | 27397210                | CC                              | TT                | 1945945179               |
| SNP_P3_46213_27397480 | NC_021163.1    | Ca_kabuli_chr04 | 27397480                | AA                              | TT                | 1945945181               |
| SNP_P3_46214_27398512 | NC_021163.1    | Ca_kabuli_chr04 | 27398512                | GG                              | TT                | 1945945183               |
| SNP_P3_46215_27398513 | NC_021163.1    | Ca_kabuli_chr04 | 27398513                | CC                              | TT                | 1945945184               |
| SNP_P3_46216_27398785 | NC_021163.1    | Ca_kabuli_chr04 | 27398785                | TT                              | CC                | 1945945186               |
| SNP_P3_46217_27398841 | NC_021163.1    | Ca_kabuli_chr04 | 27398841                | TT                              | CC                | 1945945188               |
| SNP_P3_46218_27399175 | NC_021163.1    | Ca_kabuli_chr04 | 27399175                | GG                              | TT                | 1945945190               |
| SNP_P3_46219_27399380 | NC_021163.1    | Ca_kabuli_chr04 | 27399380                | TT                              | CC                | 1945945192               |
| SNP_P3_46220_27399413 | NC_021163.1    | Ca_kabuli_chr04 | 27399413                | CC                              | TT                | 1945945193               |
| SNP_P3_46221_27402736 | NC_021163.1    | Ca_kabuli_chr04 | 27402736                | AA                              | TT                | 1945945195               |
| SNP_P3_46222_27402806 | NC_021163.1    | Ca_kabuli_chr04 | 27402806                | CC                              | TT                | 1945945197               |
| SNP_P3_46224_27404158 | NC_021163.1    | Ca_kabuli_chr04 | 27404158                | CC                              | AA                | 1945945199               |
| SNP_P3_46225_27405818 | NC_021163.1    | Ca_kabuli_chr04 | 27405818                | AA                              | GG                | 1945945201               |
| SNP_P3_46226_27405842 | NC_021163.1    | Ca_kabuli_chr04 | 27405842                | CC                              | TT                | 1945945202               |
| SNP_P3_46227_27409257 | NC_021163.1    | Ca_kabuli_chr04 | 27409257                | TT                              | GG                | 1945945204               |
| SNP_P3_46228_27410826 | NC_021163.1    | Ca_kabuli_chr04 | 27410826                | CC                              | TT                | 1945945206               |
| SNP_P3_46230_27411763 | NC_021163.1    | Ca_kabuli_chr04 | 27411763                | AA                              | CC                | 1945945208               |
| SNP_P3_46231_27412121 | NC_021163.1    | Ca_kabuli_chr04 | 27412121                | GG                              | AA                | 1945945209               |
| SNP_P3_46232_27412123 | NC_021163.1    | Ca_kabuli_chr04 | 27412123                | GG                              | AA                | 1945945211               |
| SNP_P3_46233_27412127 | NC_021163.1    | Ca_kabuli_chr04 | 27412127                | GG                              | AA                | 1945945213               |
| SNP_P3_46235_27412174 | NC_021163.1    | Ca_kabuli_chr04 | 27412174                | AA                              | CC                | 1945945215               |
| SNP_P3_46236_27419692 | NC_021163.1    | Ca_kabuli_chr04 | 27419692                | TT                              | CC                | 1945945216               |

| SNPs IDs              | Chromosome IDs | Chromosomes     | Physical positions (bp) | CDC Frontier (Reference genome) | (Pusa 256 & HPNB) | NCBI SNPdb Accession IDs |
|-----------------------|----------------|-----------------|-------------------------|---------------------------------|-------------------|--------------------------|
| SNP_P3_46237_27419694 | NC_021163.1    | Ca_kabuli_chr04 | 27419694                | GG                              | AA                | 1945945218               |
| SNP_P3_46238_27422171 | NC_021163.1    | Ca_kabuli_chr04 | 27422171                | GG                              | TT                | 1945945220               |
| SNP_P3_46239_27422236 | NC_021163.1    | Ca_kabuli_chr04 | 27422236                | AA                              | TT                | 1945945222               |
| SNP_P3_46241_27422241 | NC_021163.1    | Ca_kabuli_chr04 | 27422241                | AA                              | GG                | 1945945224               |
| SNP_P3_46242_27423224 | NC_021163.1    | Ca_kabuli_chr04 | 27423224                | CC                              | TT                | 1945945225               |
| SNP_P3_46243_27423297 | NC_021163.1    | Ca_kabuli_chr04 | 27423297                | CC                              | AA                | 1945945227               |
| SNP_P3_46244_27424596 | NC_021163.1    | Ca_kabuli_chr04 | 27424596                | GG                              | TT                | 1945945229               |
| SNP_P3_46245_27427182 | NC_021163.1    | Ca_kabuli_chr04 | 27427182                | TT                              | GG                | 1945945231               |
| SNP_P3_46246_27434784 | NC_021163.1    | Ca_kabuli_chr04 | 27434784                | TT                              | CC                | 1945945232               |
| SNP_P3_46248_27436252 | NC_021163.1    | Ca_kabuli_chr04 | 27436252                | CC                              | TT                | 1945945234               |
| SNP_P3_46249_27436486 | NC_021163.1    | Ca_kabuli_chr04 | 27436486                | CC                              | TT                | 1945945236               |
| SNP_P3_46250_27440475 | NC_021163.1    | Ca_kabuli_chr04 | 27440475                | GG                              | AA                | 1945945238               |
| SNP_P3_46251_27444376 | NC_021163.1    | Ca_kabuli_chr04 | 27444376                | TT                              | GG                | 1945945240               |
| SNP_P3_46252_27444392 | NC_021163.1    | Ca_kabuli_chr04 | 27444392                | GG                              | AA                | 1945945241               |
| SNP_P3_46253_27444415 | NC_021163.1    | Ca_kabuli_chr04 | 27444415                | AA                              | TT                | 1945945243               |
| SNP_P3_46254_27444433 | NC_021163.1    | Ca_kabuli_chr04 | 27444433                | TT                              | CC                | 1945945245               |
| SNP_P3_46255_27444438 | NC_021163.1    | Ca_kabuli_chr04 | 27444438                | AA                              | CC                | 1945945247               |
| SNP_P3_46256_27445954 | NC_021163.1    | Ca_kabuli_chr04 | 27445954                | GG                              | TT                | 1945945248               |
| SNP_P3_46257_27446287 | NC_021163.1    | Ca_kabuli_chr04 | 27446287                | TT                              | CC                | 1945945250               |
| SNP_P3_46258_27446290 | NC_021163.1    | Ca_kabuli_chr04 | 27446290                | TT                              | CC                | 1945945252               |
| SNP_P3_46259_27446321 | NC_021163.1    | Ca_kabuli_chr04 | 27446321                | AA                              | GG                | 1945945254               |
| SNP_P3_46260_27451408 | NC_021163.1    | Ca_kabuli_chr04 | 27451408                | AA                              | GG                | 1945945256               |
| SNP_P3_46261_27451784 | NC_021163.1    | Ca_kabuli_chr04 | 27451784                | TT                              | CC                | 1945945257               |
| SNP_P3_46262_27478344 | NC_021163.1    | Ca_kabuli_chr04 | 27478344                | AA                              | GG                | 1945945259               |
| SNP_P3_46263_27478345 | NC_021163.1    | Ca_kabuli_chr04 | 27478345                | GG                              | CC                | 1945945261               |
| SNP_P3_46264_27478446 | NC_021163.1    | Ca_kabuli_chr04 | 27478446                | AA                              | GG                | 1945945263               |
| SNP_P3_46265_27478525 | NC_021163.1    | Ca_kabuli_chr04 | 27478525                | AA                              | GG                | 1945945264               |
| SNP_P3_46266_27478556 | NC_021163.1    | Ca_kabuli_chr04 | 27478556                | TT                              | CC                | 1945945266               |
| SNP_P3_46267_27479549 | NC_021163.1    | Ca_kabuli_chr04 | 27479549                | AA                              | TT                | 1945945268               |
| SNP_P3_46268_27481233 | NC_021163.1    | Ca_kabuli_chr04 | 27481233                | AA                              | GG                | 1945945270               |
| SNP_P3_46269_27481304 | NC_021163.1    | Ca_kabuli_chr04 | 27481304                | CC                              | TT                | 1945945272               |
| SNP_P3_46270_27482836 | NC_021163.1    | Ca_kabuli_chr04 | 27482836                | TT                              | GG                | 1945945273               |
| SNP_P3_46271_27484380 | NC_021163.1    | Ca_kabuli_chr04 | 27484380                | GG                              | AA                | 1945945275               |
| SNP_P3_46272_27487288 | NC_021163.1    | Ca_kabuli_chr04 | 27487288                | AA                              | GG                | 1945945277               |
| SNP_P3_46273_27487309 | NC_021163.1    | Ca_kabuli_chr04 | 27487309                | GG                              | TT                | 1945945279               |
| SNP_P3_46274_27487334 | NC_021163.1    | Ca_kabuli_chr04 | 27487334                | TT                              | CC                | 1945945280               |
| SNP_P3_46275_27490827 | NC_021163.1    | Ca_kabuli_chr04 | 27490827                | AA                              | CC                | 1945945282               |
| SNP_P3_46277_27491156 | NC_021163.1    | Ca_kabuli_chr04 | 27491156                | AA                              | TT                | 1945945284               |
| SNP_P3_46278_27491197 | NC_021163.1    | Ca_kabuli_chr04 | 27491197                | AA                              | CC                | 1945945286               |
| SNP_P3_46280_27491879 | NC_021163.1    | Ca_kabuli_chr04 | 27491879                | GG                              | AA                | 1945945288               |
| SNP_P3_46281_27491933 | NC_021163.1    | Ca_kabuli_chr04 | 27491933                | GG                              | TT                | 1945945289               |
| SNP_P3_46282_27491965 | NC_021163.1    | Ca_kabuli_chr04 | 27491965                | TT                              | AA                | 1945945291               |

| SNPs IDs              | Chromosome IDs | Chromosomes     | Physical positions (bp) | CDC Frontier (Reference genome) | (Pusa 256 & HPNB) | NCBI SNPdb Accession IDs |
|-----------------------|----------------|-----------------|-------------------------|---------------------------------|-------------------|--------------------------|
| SNP_P3_46283_27494064 | NC_021163.1    | Ca_kabuli_chr04 | 27494064                | AA                              | CC                | 1945945293               |
| SNP_P3_46284_27494565 | NC_021163.1    | Ca_kabuli_chr04 | 27494565                | AA                              | TT                | 1945945295               |
| SNP_P3_46285_27494621 | NC_021163.1    | Ca_kabuli_chr04 | 27494621                | CC                              | TT                | 1945945296               |
| SNP_P3_46286_27498267 | NC_021163.1    | Ca_kabuli_chr04 | 27498267                | GG                              | CC                | 1945945298               |
| SNP_P3_46287_27498447 | NC_021163.1    | Ca_kabuli_chr04 | 27498447                | AA                              | GG                | 1945945300               |
| SNP_P3_46288_27498604 | NC_021163.1    | Ca_kabuli_chr04 | 27498604                | TT                              | CC                | 1945945302               |
| SNP_P3_46289_27499561 | NC_021163.1    | Ca_kabuli_chr04 | 27499561                | CC                              | GG                | 1945945304               |
| SNP_P3_46290_27499576 | NC_021163.1    | Ca_kabuli_chr04 | 27499576                | GG                              | AA                | 1945945305               |
| SNP_P3_46292_27500270 | NC_021163.1    | Ca_kabuli_chr04 | 27500270                | AA                              | TT                | 1945945307               |
| SNP_P3_46293_27501080 | NC_021163.1    | Ca_kabuli_chr04 | 27501080                | TT                              | CC                | 1945945309               |
| SNP_P3_46294_27501081 | NC_021163.1    | Ca_kabuli_chr04 | 27501081                | GG                              | AA                | 1945945311               |
| SNP_P3_46295_27501084 | NC_021163.1    | Ca_kabuli_chr04 | 27501084                | GG                              | TT                | 1945945312               |
| SNP_P3_46296_27504474 | NC_021163.1    | Ca_kabuli_chr04 | 27504474                | CC                              | AA                | 1945945314               |
| SNP_P3_46297_27507412 | NC_021163.1    | Ca_kabuli_chr04 | 27507412                | CC                              | TT                | 1945945316               |
| SNP_P3_46298_27507429 | NC_021163.1    | Ca_kabuli_chr04 | 27507429                | TT                              | CC                | 1945945318               |
| SNP_P3_46299_27508220 | NC_021163.1    | Ca_kabuli_chr04 | 27508220                | AA                              | CC                | 1945945320               |
| SNP_P3_46300_27508285 | NC_021163.1    | Ca_kabuli_chr04 | 27508285                | AA                              | CC                | 1945945321               |
| SNP_P3_46301_27508363 | NC_021163.1    | Ca_kabuli_chr04 | 27508363                | GG                              | AA                | 1945945323               |
| SNP_P3_46303_27509057 | NC_021163.1    | Ca_kabuli_chr04 | 27509057                | CC                              | AA                | 1945945325               |
| SNP_P3_46304_27509117 | NC_021163.1    | Ca_kabuli_chr04 | 27509117                | TT                              | GG                | 1945945327               |
| SNP_P3_46305_27509182 | NC_021163.1    | Ca_kabuli_chr04 | 27509182                | AA                              | GG                | 1945945328               |
| SNP_P3_46306_27509525 | NC_021163.1    | Ca_kabuli_chr04 | 27509525                | AA                              | TT                | 1945945330               |
| SNP_P3_46307_27509600 | NC_021163.1    | Ca_kabuli_chr04 | 27509600                | CC                              | AA                | 1945945332               |
| SNP_P3_46308_27509650 | NC_021163.1    | Ca_kabuli_chr04 | 27509650                | GG                              | AA                | 1945945334               |
| SNP_P3_46309_27509849 | NC_021163.1    | Ca_kabuli_chr04 | 27509849                | TT                              | GG                | 1945945336               |
| SNP_P3_46310_27509887 | NC_021163.1    | Ca_kabuli_chr04 | 27509887                | TT                              | CC                | 1945945337               |
| SNP_P3_46311_27509911 | NC_021163.1    | Ca_kabuli_chr04 | 27509911                | CC                              | AA                | 1945945339               |
| SNP_P3_46312_27510948 | NC_021163.1    | Ca_kabuli_chr04 | 27510948                | TT                              | CC                | 1945945341               |
| SNP_P3_46313_27511014 | NC_021163.1    | Ca_kabuli_chr04 | 27511014                | CC                              | TT                | 1945945343               |
| SNP_P3_46314_27511022 | NC_021163.1    | Ca_kabuli_chr04 | 27511022                | GG                              | AA                | 1945945344               |
| SNP_P3_46315_27513362 | NC_021163.1    | Ca_kabuli_chr04 | 27513362                | GG                              | AA                | 1945945346               |
| SNP_P3_46318_27516401 | NC_021163.1    | Ca_kabuli_chr04 | 27516401                | GG                              | AA                | 1945945348               |
| SNP_P3_46319_27522841 | NC_021163.1    | Ca_kabuli_chr04 | 27522841                | TT                              | CC                | 1945945350               |
| SNP_P3_46320_27530197 | NC_021163.1    | Ca_kabuli_chr04 | 27530197                | CC                              | TT                | 1945945352               |
| SNP_P3_46321_27531060 | NC_021163.1    | Ca_kabuli_chr04 | 27531060                | TT                              | CC                | 1945945353               |
| SNP_P3_46322_27533754 | NC_021163.1    | Ca_kabuli_chr04 | 27533754                | GG                              | TT                | 1945945355               |
| SNP_P3_46323_27534223 | NC_021163.1    | Ca_kabuli_chr04 | 27534223                | AA                              | TT                | 1945945357               |
| SNP_P3_46324_27534228 | NC_021163.1    | Ca_kabuli_chr04 | 27534228                | CC                              | TT                | 1945945359               |
| SNP_P3_46325_27534346 | NC_021163.1    | Ca_kabuli_chr04 | 27534346                | CC                              | TT                | 1945945360               |
| SNP_P3_46329_27538180 | NC_021163.1    | Ca_kabuli_chr04 | 27538180                | AA                              | GG                | 1945945362               |
| SNP_P3_46330_27538433 | NC_021163.1    | Ca_kabuli_chr04 | 27538433                | TT                              | CC                | 1945945364               |
| SNP_P3_46333_27545195 | NC_021163.1    | Ca_kabuli_chr04 | 27545195                | AA                              | CC                | 1945945366               |

| SNPs IDs              | Chromosome IDs | Chromosomes     | Physical positions (bp) | CDC Frontier (Reference genome) | (Pusa 256 & HPNB) | NCBI SNPdb Accession IDs |
|-----------------------|----------------|-----------------|-------------------------|---------------------------------|-------------------|--------------------------|
| SNP_P3_46334_27545196 | NC_021163.1    | Ca_kabuli_chr04 | 27545196                | TT                              | CC                | 1945945368               |
| SNP_P3_46335_27545242 | NC_021163.1    | Ca_kabuli_chr04 | 27545242                | CC                              | TT                | 1945945369               |
| SNP_P3_46336_27545247 | NC_021163.1    | Ca_kabuli_chr04 | 27545247                | CC                              | TT                | 1945945371               |
| SNP_P3_46337_27545546 | NC_021163.1    | Ca_kabuli_chr04 | 27545546                | TT                              | AA                | 1945945373               |
| SNP_P3_46338_27545597 | NC_021163.1    | Ca_kabuli_chr04 | 27545597                | TT                              | CC                | 1945945375               |
| SNP_P3_46339_27547780 | NC_021163.1    | Ca_kabuli_chr04 | 27547780                | AA                              | GG                | 1945945376               |
| SNP_P3_46340_27547900 | NC_021163.1    | Ca_kabuli_chr04 | 27547900                | AA                              | CC                | 1945945378               |
| SNP_P3_46341_27547906 | NC_021163.1    | Ca_kabuli_chr04 | 27547906                | CC                              | AA                | 1945945380               |
| SNP_P3_46342_27548153 | NC_021163.1    | Ca_kabuli_chr04 | 27548153                | AA                              | GG                | 1945945382               |
| SNP_P3_46344_27548872 | NC_021163.1    | Ca_kabuli_chr04 | 27548872                | CC                              | AA                | 1945945384               |
| SNP_P3_46345_27548876 | NC_021163.1    | Ca_kabuli_chr04 | 27548876                | GG                              | AA                | 1945945385               |
| SNP_P3_46346_27549091 | NC_021163.1    | Ca_kabuli_chr04 | 27549091                | GG                              | AA                | 1945945387               |
| SNP_P3_46347_27549284 | NC_021163.1    | Ca_kabuli_chr04 | 27549284                | AA                              | GG                | 1945945389               |
| SNP_P3_46348_27549752 | NC_021163.1    | Ca_kabuli_chr04 | 27549752                | AA                              | GG                | 1945945391               |
| SNP_P3_46349_27549765 | NC_021163.1    | Ca_kabuli_chr04 | 27549765                | TT                              | CC                | 1945945392               |
| SNP_P3_46350_27551176 | NC_021163.1    | Ca_kabuli_chr04 | 27551176                | TT                              | GG                | 1945945394               |
| SNP_P3_46351_27551225 | NC_021163.1    | Ca_kabuli_chr04 | 27551225                | GG                              | TT                | 1945945396               |
| SNP_P3_46352_27552017 | NC_021163.1    | Ca_kabuli_chr04 | 27552017                | AA                              | CC                | 1945945398               |
| SNP_P3_46353_27552897 | NC_021163.1    | Ca_kabuli_chr04 | 27552897                | CC                              | TT                | 1945945400               |
| SNP_P3_46354_27552973 | NC_021163.1    | Ca_kabuli_chr04 | 27552973                | TT                              | GG                | 1945945401               |
| SNP_P3_46355_27553256 | NC_021163.1    | Ca_kabuli_chr04 | 27553256                | TT                              | AA                | 1945945403               |
| SNP_P3_46356_27554412 | NC_021163.1    | Ca_kabuli_chr04 | 27554412                | AA                              | GG                | 1945945405               |
| SNP_P3_46357_27554429 | NC_021163.1    | Ca_kabuli_chr04 | 27554429                | TT                              | CC                | 1945945407               |
| SNP_P3_46358_27554465 | NC_021163.1    | Ca_kabuli_chr04 | 27554465                | CC                              | TT                | 1945945408               |
| SNP_P3_46359_27554546 | NC_021163.1    | Ca_kabuli_chr04 | 27554546                | TT                              | CC                | 1945945410               |
| SNP_P3_46360_27554548 | NC_021163.1    | Ca_kabuli_chr04 | 27554548                | AA                              | GG                | 1945945412               |
| SNP_P3_46361_27554549 | NC_021163.1    | Ca_kabuli_chr04 | 27554549                | AA                              | GG                | 1945945414               |
| SNP_P3_46362_27554559 | NC_021163.1    | Ca_kabuli_chr04 | 27554559                | AA                              | GG                | 1945945416               |
| SNP_P3_46363_27554579 | NC_021163.1    | Ca_kabuli_chr04 | 27554579                | AA                              | GG                | 1945945417               |
| SNP_P3_46365_27554669 | NC_021163.1    | Ca_kabuli_chr04 | 27554669                | GG                              | TT                | 1945945419               |
| SNP_P3_46366_27554681 | NC_021163.1    | Ca_kabuli_chr04 | 27554681                | TT                              | CC                | 1945945421               |
| SNP_P3_46367_27554831 | NC_021163.1    | Ca_kabuli_chr04 | 27554831                | TT                              | CC                | 1945945423               |
| SNP_P3_46368_27555141 | NC_021163.1    | Ca_kabuli_chr04 | 27555141                | CC                              | TT                | 1945945424               |
| SNP_P3_46369_27555488 | NC_021163.1    | Ca_kabuli_chr04 | 27555488                | GG                              | AA                | 1945945426               |
| SNP_P3_46370_27555494 | NC_021163.1    | Ca_kabuli_chr04 | 27555494                | TT                              | AA                | 1945945428               |
| SNP_P3_46371_27555496 | NC_021163.1    | Ca_kabuli_chr04 | 27555496                | GG                              | AA                | 1945945430               |
| SNP_P3_46372_27555497 | NC_021163.1    | Ca_kabuli_chr04 | 27555497                | AA                              | GG                | 1945945432               |
| SNP_P3_46373_27555533 | NC_021163.1    | Ca_kabuli_chr04 | 27555533                | TT                              | GG                | 1945945433               |
| SNP_P3_46374_27555548 | NC_021163.1    | Ca_kabuli_chr04 | 27555548                | AA                              | CC                | 1945945435               |
| SNP_P3_46375_27555573 | NC_021163.1    | Ca_kabuli_chr04 | 27555573                | AA                              | TT                | 1945945437               |
| SNP_P3_46376_27555664 | NC_021163.1    | Ca_kabuli_chr04 | 27555664                | CC                              | AA                | 1945945439               |
| SNP_P3_46377_27555898 | NC_021163.1    | Ca_kabuli_chr04 | 27555898                | TT                              | CC                | 1945945440               |



| SNPs IDs              | Chromosome IDs | Chromosomes     | Physical positions (bp) | CDC Frontier (Reference genome) | (Pusa 256 & HPNB) | NCBI SNPdb Accession IDs |
|-----------------------|----------------|-----------------|-------------------------|---------------------------------|-------------------|--------------------------|
| SNP_P3_46378_27558181 | NC_021163.1    | Ca_kabuli_chr04 | 27558181                | GG                              | AA                | 1945945442               |
| SNP_P3_46379_27558986 | NC_021163.1    | Ca_kabuli_chr04 | 27558986                | TT                              | CC                | 1945945444               |
| SNP_P3_46380_27559367 | NC_021163.1    | Ca_kabuli_chr04 | 27559367                | CC                              | AA                | 1945945446               |
| SNP_P3_46381_27559369 | NC_021163.1    | Ca_kabuli_chr04 | 27559369                | GG                              | AA                | 1945945448               |
| SNP_P3_46382_27559408 | NC_021163.1    | Ca_kabuli_chr04 | 27559408                | CC                              | TT                | 1945945449               |
| SNP_P3_46383_27561737 | NC_021163.1    | Ca_kabuli_chr04 | 27561737                | GG                              | AA                | 1945945451               |
| SNP_P3_46384_27562860 | NC_021163.1    | Ca_kabuli_chr04 | 27562860                | GG                              | CC                | 1945945453               |
| SNP_P3_46386_27563748 | NC_021163.1    | Ca_kabuli_chr04 | 27563748                | GG                              | TT                | 1945945455               |
| SNP_P3_46387_27563985 | NC_021163.1    | Ca_kabuli_chr04 | 27563985                | GG                              | AA                | 1945945456               |
| SNP_P3_46388_27564994 | NC_021163.1    | Ca_kabuli_chr04 | 27564994                | GG                              | AA                | 1945945458               |
| SNP_P3_46389_27565078 | NC_021163.1    | Ca_kabuli_chr04 | 27565078                | TT                              | GG                | 1945945460               |
| SNP_P3_46390_27565585 | NC_021163.1    | Ca_kabuli_chr04 | 27565585                | GG                              | AA                | 1945945462               |
| SNP_P3_46391_27567251 | NC_021163.1    | Ca_kabuli_chr04 | 27567251                | AA                              | GG                | 1945945464               |
| SNP_P3_46392_27567256 | NC_021163.1    | Ca_kabuli_chr04 | 27567256                | GG                              | AA                | 1945945465               |
| SNP_P3_46393_27567864 | NC_021163.1    | Ca_kabuli_chr04 | 27567864                | CC                              | TT                | 1945945467               |
| SNP_P3_46394_27569850 | NC_021163.1    | Ca_kabuli_chr04 | 27569850                | AA                              | CC                | 1945945469               |
| SNP_P3_46395_27569861 | NC_021163.1    | Ca_kabuli_chr04 | 27569861                | GG                              | AA                | 1945945471               |
| SNP_P3_46396_27570993 | NC_021163.1    | Ca_kabuli_chr04 | 27570993                | TT                              | CC                | 1945945472               |
| SNP_P3_46397_27571007 | NC_021163.1    | Ca_kabuli_chr04 | 27571007                | AA                              | CC                | 1945945474               |
| SNP_P3_46398_27571086 | NC_021163.1    | Ca_kabuli_chr04 | 27571086                | AA                              | GG                | 1945945476               |
| SNP_P3_46399_27572544 | NC_021163.1    | Ca_kabuli_chr04 | 27572544                | TT                              | CC                | 1945945478               |
| SNP_P3_46400_27573849 | NC_021163.1    | Ca_kabuli_chr04 | 27573849                | TT                              | GG                | 1945945479               |
| SNP_P3_46402_27573995 | NC_021163.1    | Ca_kabuli_chr04 | 27573995                | GG                              | AA                | 1945945481               |
| SNP_P3_46403_27574298 | NC_021163.1    | Ca_kabuli_chr04 | 27574298                | AA                              | GG                | 1945945483               |
| SNP_P3_46404_27574573 | NC_021163.1    | Ca_kabuli_chr04 | 27574573                | TT                              | CC                | 1945945485               |
| SNP_P3_46406_27576985 | NC_021163.1    | Ca_kabuli_chr04 | 27576985                | TT                              | GG                | 1945945487               |
| SNP_P3_46407_27577513 | NC_021163.1    | Ca_kabuli_chr04 | 27577513                | AA                              | CC                | 1945945488               |
| SNP_P3_46408_27578437 | NC_021163.1    | Ca_kabuli_chr04 | 27578437                | AA                              | TT                | 1945945490               |
| SNP_P3_46409_27584576 | NC_021163.1    | Ca_kabuli_chr04 | 27584576                | CC                              | TT                | 1945945492               |
| SNP_P3_46410_27584618 | NC_021163.1    | Ca_kabuli_chr04 | 27584618                | TT                              | CC                | 1945945494               |
| SNP_P3_46411_27585020 | NC_021163.1    | Ca_kabuli_chr04 | 27585020                | AA                              | GG                | 1945945495               |
| SNP_P3_46412_27585149 | NC_021163.1    | Ca_kabuli_chr04 | 27585149                | AA                              | TT                | 1945945497               |
| SNP_P3_46413_27585417 | NC_021163.1    | Ca_kabuli_chr04 | 27585417                | TT                              | CC                | 1945945499               |
| SNP_P3_46414_27587074 | NC_021163.1    | Ca_kabuli_chr04 | 27587074                | AA                              | CC                | 1945945501               |
| SNP_P3_46415_27587215 | NC_021163.1    | Ca_kabuli_chr04 | 27587215                | AA                              | GG                | 1945945503               |
| SNP_P3_46416_27587221 | NC_021163.1    | Ca_kabuli_chr04 | 27587221                | GG                              | AA                | 1945945504               |
| SNP_P3_46417_27587423 | NC_021163.1    | Ca_kabuli_chr04 | 27587423                | AA                              | CC                | 1945945506               |
| SNP_P3_46418_27587446 | NC_021163.1    | Ca_kabuli_chr04 | 27587446                | AA                              | GG                | 1945945508               |
| SNP_P3_46419_27587451 | NC_021163.1    | Ca_kabuli_chr04 | 27587451                | GG                              | AA                | 1945945510               |
| SNP_P3_46420_27587477 | NC_021163.1    | Ca_kabuli_chr04 | 27587477                | TT                              | GG                | 1945945511               |
| SNP_P3_46421_27587515 | NC_021163.1    | Ca_kabuli_chr04 | 27587515                | CC                              | TT                | 1945945513               |
| SNP_P3_46422_27587533 | NC_021163.1    | Ca_kabuli_chr04 | 27587533                | GG                              | AA                | 1945945515               |

| SNPs IDs              | Chromosome IDs | Chromosomes     | Physical positions (bp) | CDC Frontier (Reference genome) | (Pusa 256 & HPNB) | NCBI SNPdb Accession IDs |
|-----------------------|----------------|-----------------|-------------------------|---------------------------------|-------------------|--------------------------|
| SNP_P3_46423_27587750 | NC_021163.1    | Ca_kabuli_chr04 | 27587750                | GG                              | AA                | 1945945517               |
| SNP_P3_46424_27588313 | NC_021163.1    | Ca_kabuli_chr04 | 27588313                | TT                              | GG                | 1945945519               |
| SNP_P3_46425_27593034 | NC_021163.1    | Ca_kabuli_chr04 | 27593034                | TT                              | CC                | 1945945520               |
| SNP_P3_46426_27593319 | NC_021163.1    | Ca_kabuli_chr04 | 27593319                | AA                              | GG                | 1945945522               |
| SNP_P3_46428_27594363 | NC_021163.1    | Ca_kabuli_chr04 | 27594363                | GG                              | AA                | 1945945524               |
| SNP_P3_46429_27594507 | NC_021163.1    | Ca_kabuli_chr04 | 27594507                | TT                              | CC                | 1945945526               |
| SNP_P3_46430_27599518 | NC_021163.1    | Ca_kabuli_chr04 | 27599518                | GG                              | AA                | 1945945527               |
| SNP_P3_46431_27611195 | NC_021163.1    | Ca_kabuli_chr04 | 27611195                | AA                              | GG                | 1945945529               |
| SNP_P3_46432_27611361 | NC_021163.1    | Ca_kabuli_chr04 | 27611361                | GG                              | AA                | 1945945531               |
| SNP_P3_46433_27611445 | NC_021163.1    | Ca_kabuli_chr04 | 27611445                | TT                              | AA                | 1945945533               |
| SNP_P3_46434_27611598 | NC_021163.1    | Ca_kabuli_chr04 | 27611598                | AA                              | GG                | 1945945535               |
| SNP_P3_46436_27614221 | NC_021163.1    | Ca_kabuli_chr04 | 27614221                | GG                              | AA                | 1945945536               |
| SNP_P3_46437_27614958 | NC_021163.1    | Ca_kabuli_chr04 | 27614958                | AA                              | GG                | 1945945538               |
| SNP_P3_46439_27615308 | NC_021163.1    | Ca_kabuli_chr04 | 27615308                | GG                              | AA                | 1945945540               |
| SNP_P3_46440_27615558 | NC_021163.1    | Ca_kabuli_chr04 | 27615558                | CC                              | AA                | 1945945542               |
| SNP_P3_46441_27618457 | NC_021163.1    | Ca_kabuli_chr04 | 27618457                | CC                              | AA                | 1945945543               |
| SNP_P3_46442_27621144 | NC_021163.1    | Ca_kabuli_chr04 | 27621144                | GG                              | AA                | 1945945545               |
| SNP_P3_46443_27623984 | NC_021163.1    | Ca_kabuli_chr04 | 27623984                | AA                              | CC                | 1945945547               |
| SNP_P3_46444_27625772 | NC_021163.1    | Ca_kabuli_chr04 | 27625772                | TT                              | AA                | 1945945549               |
| SNP_P3_46445_27625894 | NC_021163.1    | Ca_kabuli_chr04 | 27625894                | CC                              | TT                | 1945945551               |
| SNP_P3_46446_27628240 | NC_021163.1    | Ca_kabuli_chr04 | 27628240                | TT                              | CC                | 1945945552               |
| SNP_P3_46447_27629340 | NC_021163.1    | Ca_kabuli_chr04 | 27629340                | AA                              | GG                | 1945945554               |
| SNP_P3_46449_27631393 | NC_021163.1    | Ca_kabuli_chr04 | 27631393                | TT                              | CC                | 1945945556               |
| SNP_P3_46450_27631675 | NC_021163.1    | Ca_kabuli_chr04 | 27631675                | CC                              | TT                | 1945945558               |
| SNP_P3_46451_27631758 | NC_021163.1    | Ca_kabuli_chr04 | 27631758                | GG                              | AA                | 1945945559               |
| SNP_P3_46452_27631761 | NC_021163.1    | Ca_kabuli_chr04 | 27631761                | AA                              | GG                | 1945945561               |
| SNP_P3_46453_27631774 | NC_021163.1    | Ca_kabuli_chr04 | 27631774                | TT                              | CC                | 1945945563               |
| SNP_P3_46454_27631781 | NC_021163.1    | Ca_kabuli_chr04 | 27631781                | CC                              | AA                | 1945945565               |
| SNP_P3_46455_27631784 | NC_021163.1    | Ca_kabuli_chr04 | 27631784                | TT                              | AA                | 1945945567               |
| SNP_P3_46456_27632026 | NC_021163.1    | Ca_kabuli_chr04 | 27632026                | TT                              | CC                | 1945945568               |
| SNP_P3_46457_27632029 | NC_021163.1    | Ca_kabuli_chr04 | 27632029                | TT                              | GG                | 1945945570               |
| SNP_P3_46458_27635037 | NC_021163.1    | Ca_kabuli_chr04 | 27635037                | GG                              | TT                | 1945945572               |
| SNP_P3_46459_27635038 | NC_021163.1    | Ca_kabuli_chr04 | 27635038                | GG                              | AA                | 1945945574               |
| SNP_P3_46460_27635445 | NC_021163.1    | Ca_kabuli_chr04 | 27635445                | AA                              | GG                | 1945945575               |
| SNP_P3_46461_27639730 | NC_021163.1    | Ca_kabuli_chr04 | 27639730                | TT                              | CC                | 1945945577               |
| SNP_P3_46462_27639767 | NC_021163.1    | Ca_kabuli_chr04 | 27639767                | GG                              | AA                | 1945945579               |
| SNP_P3_46463_27639781 | NC_021163.1    | Ca_kabuli_chr04 | 27639781                | GG                              | AA                | 1945945581               |
| SNP_P3_46464_27646290 | NC_021163.1    | Ca_kabuli_chr04 | 27646290                | TT                              | CC                | 1945945583               |
| SNP_P3_46465_27646315 | NC_021163.1    | Ca_kabuli_chr04 | 27646315                | CC                              | TT                | 1945945584               |
| SNP_P3_46466_27646317 | NC_021163.1    | Ca_kabuli_chr04 | 27646317                | GG                              | AA                | 1945945586               |
| SNP_P3_46467_27646324 | NC_021163.1    | Ca_kabuli_chr04 | 27646324                | TT                              | AA                | 1945945588               |
| SNP_P3_46468_27646396 | NC_021163.1    | Ca_kabuli_chr04 | 27646396                | TT                              | AA                | 1945945590               |

| SNPs IDs              | Chromosome IDs | Chromosomes     | Physical positions (bp) | CDC Frontier (Reference genome) | (Pusa 256 & HPNB) | NCBI SNPdb Accession IDs |
|-----------------------|----------------|-----------------|-------------------------|---------------------------------|-------------------|--------------------------|
| SNP_P3_46469_27646397 | NC_021163.1    | Ca_kabuli_chr04 | 27646397                | AA                              | CC                | 1945945591               |
| SNP_P3_46470_27646400 | NC_021163.1    | Ca_kabuli_chr04 | 27646400                | TT                              | CC                | 1945945593               |
| SNP_P3_46471_27646413 | NC_021163.1    | Ca_kabuli_chr04 | 27646413                | CC                              | TT                | 1945945595               |
| SNP_P3_46472_27646451 | NC_021163.1    | Ca_kabuli_chr04 | 27646451                | TT                              | CC                | 1945945597               |
| SNP_P3_46473_27646598 | NC_021163.1    | Ca_kabuli_chr04 | 27646598                | GG                              | TT                | 1945945599               |
| SNP_P3_46475_27646663 | NC_021163.1    | Ca_kabuli_chr04 | 27646663                | CC                              | TT                | 1945945600               |
| SNP_P3_46476_27647413 | NC_021163.1    | Ca_kabuli_chr04 | 27647413                | CC                              | TT                | 1945945602               |
| SNP_P3_46477_27647783 | NC_021163.1    | Ca_kabuli_chr04 | 27647783                | GG                              | AA                | 1945945604               |
| SNP_P3_46478_27648929 | NC_021163.1    | Ca_kabuli_chr04 | 27648929                | GG                              | CC                | 1945945606               |
| SNP_P3_46479_27650331 | NC_021163.1    | Ca_kabuli_chr04 | 27650331                | TT                              | CC                | 1945945607               |
| SNP_P3_46480_27653878 | NC_021163.1    | Ca_kabuli_chr04 | 27653878                | AA                              | GG                | 1945945609               |
| SNP_P3_46481_27654187 | NC_021163.1    | Ca_kabuli_chr04 | 27654187                | TT                              | CC                | 1945945611               |
| SNP_P3_46482_27655938 | NC_021163.1    | Ca_kabuli_chr04 | 27655938                | AA                              | TT                | 1945945613               |
| SNP_P3_46483_27655947 | NC_021163.1    | Ca_kabuli_chr04 | 27655947                | AA                              | TT                | 1945945615               |
| SNP_P3_46484_27656590 | NC_021163.1    | Ca_kabuli_chr04 | 27656590                | TT                              | GG                | 1945945616               |
| SNP_P3_46485_27656669 | NC_021163.1    | Ca_kabuli_chr04 | 27656669                | AA                              | GG                | 1945945618               |
| SNP_P3_46486_27657055 | NC_021163.1    | Ca_kabuli_chr04 | 27657055                | TT                              | CC                | 1945945620               |
| SNP_P3_46487_27657071 | NC_021163.1    | Ca_kabuli_chr04 | 27657071                | TT                              | GG                | 1945945622               |
| SNP_P3_46488_27657272 | NC_021163.1    | Ca_kabuli_chr04 | 27657272                | AA                              | GG                | 1945945623               |
| SNP_P3_46489_27657456 | NC_021163.1    | Ca_kabuli_chr04 | 27657456                | TT                              | GG                | 1945945625               |
| SNP_P3_46490_27674508 | NC_021163.1    | Ca_kabuli_chr04 | 27674508                | GG                              | CC                | 1945945627               |
| SNP_P3_46491_27675347 | NC_021163.1    | Ca_kabuli_chr04 | 27675347                | AA                              | GG                | 1945945629               |
| SNP_P3_46492_27675479 | NC_021163.1    | Ca_kabuli_chr04 | 27675479                | CC                              | TT                | 1945945631               |
| SNP_P3_46493_27675820 | NC_021163.1    | Ca_kabuli_chr04 | 27675820                | CC                              | GG                | 1945945632               |
| SNP_P3_46494_27675858 | NC_021163.1    | Ca_kabuli_chr04 | 27675858                | CC                              | TT                | 1945945634               |
| SNP_P3_46495_27684573 | NC_021163.1    | Ca_kabuli_chr04 | 27684573                | GG                              | TT                | 1945945636               |
| SNP_P3_46496_27690599 | NC_021163.1    | Ca_kabuli_chr04 | 27690599                | GG                              | AA                | 1945945638               |
| SNP_P3_46499_27694921 | NC_021163.1    | Ca_kabuli_chr04 | 27694921                | AA                              | GG                | 1945945639               |
| SNP_P3_46500_27695750 | NC_021163.1    | Ca_kabuli_chr04 | 27695750                | AA                              | GG                | 1945945641               |
| SNP_P3_46501_27696132 | NC_021163.1    | Ca_kabuli_chr04 | 27696132                | AA                              | GG                | 1945945643               |
| SNP_P3_46502_27698163 | NC_021163.1    | Ca_kabuli_chr04 | 27698163                | AA                              | CC                | 1945945645               |
| SNP_P3_46504_27703371 | NC_021163.1    | Ca_kabuli_chr04 | 27703371                | GG                              | AA                | 1945945647               |
| SNP_P3_46505_27703378 | NC_021163.1    | Ca_kabuli_chr04 | 27703378                | AA                              | TT                | 1945945648               |
| SNP_P3_46506_27703764 | NC_021163.1    | Ca_kabuli_chr04 | 27703764                | AA                              | GG                | 1945945650               |
| SNP_P3_46507_27703948 | NC_021163.1    | Ca_kabuli_chr04 | 27703948                | GG                              | AA                | 1945945652               |
| SNP_P3_46508_27710396 | NC_021163.1    | Ca_kabuli_chr04 | 27710396                | AA                              | GG                | 1945945654               |
| SNP_P3_46509_27710474 | NC_021163.1    | Ca_kabuli_chr04 | 27710474                | GG                              | CC                | 1945945656               |
| SNP_P3_46510_27715471 | NC_021163.1    | Ca_kabuli_chr04 | 27715471                | GG                              | AA                | 1945945657               |
| SNP_P3_46511_27715661 | NC_021163.1    | Ca_kabuli_chr04 | 27715661                | AA                              | GG                | 1945945659               |
| SNP_P3_46512_27715717 | NC_021163.1    | Ca_kabuli_chr04 | 27715717                | CC                              | AA                | 1945945661               |
| SNP_P3_46513_27715763 | NC_021163.1    | Ca_kabuli_chr04 | 27715763                | GG                              | AA                | 1945945663               |
| SNP_P3_46514_27716320 | NC_021163.1    | Ca_kabuli_chr04 | 27716320                | TT                              | CC                | 1945945664               |

| SNPs IDs              | Chromosome IDs | Chromosomes     | Physical positions (bp) | CDC Frontier (Reference genome) | (Pusa 256 & HPNB) | NCBI SNPdb Accession IDs |
|-----------------------|----------------|-----------------|-------------------------|---------------------------------|-------------------|--------------------------|
| SNP_P3_46515_27718590 | NC_021163.1    | Ca_kabuli_chr04 | 27718590                | AA                              | TT                | 1945945666               |
| SNP_P3_46516_27720921 | NC_021163.1    | Ca_kabuli_chr04 | 27720921                | TT                              | CC                | 1945945668               |
| SNP_P3_46518_27724832 | NC_021163.1    | Ca_kabuli_chr04 | 27724832                | GG                              | TT                | 1945945670               |
| SNP_P3_46519_27724894 | NC_021163.1    | Ca_kabuli_chr04 | 27724894                | CC                              | TT                | 1945945672               |
| SNP_P3_46520_27724947 | NC_021163.1    | Ca_kabuli_chr04 | 27724947                | GG                              | CC                | 1945945673               |
| SNP_P3_46521_27724987 | NC_021163.1    | Ca_kabuli_chr04 | 27724987                | GG                              | CC                | 1945945675               |
| SNP_P3_46522_27725053 | NC_021163.1    | Ca_kabuli_chr04 | 27725053                | GG                              | AA                | 1945945677               |
| SNP_P3_46523_27725196 | NC_021163.1    | Ca_kabuli_chr04 | 27725196                | AA                              | TT                | 1945945678               |
| SNP_P3_46524_27725220 | NC_021163.1    | Ca_kabuli_chr04 | 27725220                | GG                              | TT                | 1945945680               |
| SNP_P3_46525_27725264 | NC_021163.1    | Ca_kabuli_chr04 | 27725264                | TT                              | CC                | 1945945682               |
| SNP_P3_46526_27725541 | NC_021163.1    | Ca_kabuli_chr04 | 27725541                | TT                              | CC                | 1945945684               |
| SNP_P3_46527_27726439 | NC_021163.1    | Ca_kabuli_chr04 | 27726439                | AA                              | CC                | 1945945686               |
| SNP_P3_46528_27731122 | NC_021163.1    | Ca_kabuli_chr04 | 27731122                | AA                              | GG                | 1945945687               |
| SNP_P3_46529_27731359 | NC_021163.1    | Ca_kabuli_chr04 | 27731359                | CC                              | AA                | 1945945689               |
| SNP_P3_46530_27731577 | NC_021163.1    | Ca_kabuli_chr04 | 27731577                | AA                              | GG                | 1945945691               |
| SNP_P3_46531_27731585 | NC_021163.1    | Ca_kabuli_chr04 | 27731585                | GG                              | TT                | 1945945693               |
| SNP_P3_46532_27732577 | NC_021163.1    | Ca_kabuli_chr04 | 27732577                | TT                              | CC                | 1945945694               |
| SNP_P3_46533_27732886 | NC_021163.1    | Ca_kabuli_chr04 | 27732886                | AA                              | GG                | 1945945696               |
| SNP_P3_46534_27733410 | NC_021163.1    | Ca_kabuli_chr04 | 27733410                | TT                              | CC                | 1945945698               |
| SNP_P3_46535_27734187 | NC_021163.1    | Ca_kabuli_chr04 | 27734187                | AA                              | TT                | 1945945700               |
| SNP_P3_46536_27739295 | NC_021163.1    | Ca_kabuli_chr04 | 27739295                | CC                              | TT                | 1945945702               |
| SNP_P3_46537_27739310 | NC_021163.1    | Ca_kabuli_chr04 | 27739310                | TT                              | GG                | 1945945703               |
| SNP_P3_46538_27740109 | NC_021163.1    | Ca_kabuli_chr04 | 27740109                | GG                              | AA                | 1945945705               |
| SNP_P3_46539_27742599 | NC_021163.1    | Ca_kabuli_chr04 | 27742599                | TT                              | AA                | 1945945707               |
| SNP_P3_46542_27746689 | NC_021163.1    | Ca_kabuli_chr04 | 27746689                | CC                              | TT                | 1945945709               |
| SNP_P3_46543_27746721 | NC_021163.1    | Ca_kabuli_chr04 | 27746721                | TT                              | CC                | 1945945710               |
| SNP_P3_46544_27752848 | NC_021163.1    | Ca_kabuli_chr04 | 27752848                | CC                              | TT                | 1945945712               |
| SNP_P3_46545_27752949 | NC_021163.1    | Ca_kabuli_chr04 | 27752949                | CC                              | GG                | 1945945714               |
| SNP_P3_46546_27753553 | NC_021163.1    | Ca_kabuli_chr04 | 27753553                | AA                              | GG                | 1945945716               |
| SNP_P3_46547_27754700 | NC_021163.1    | Ca_kabuli_chr04 | 27754700                | CC                              | TT                | 1945945718               |
| SNP_P3_46548_27755853 | NC_021163.1    | Ca_kabuli_chr04 | 27755853                | TT                              | CC                | 1945945719               |
| SNP_P3_46549_27757747 | NC_021163.1    | Ca_kabuli_chr04 | 27757747                | GG                              | CC                | 1945945721               |
| SNP_P3_46550_27759383 | NC_021163.1    | Ca_kabuli_chr04 | 27759383                | TT                              | GG                | 1945945723               |
| SNP_P3_46551_27759621 | NC_021163.1    | Ca_kabuli_chr04 | 27759621                | GG                              | TT                | 1945945725               |
| SNP_P3_46553_27788825 | NC_021163.1    | Ca_kabuli_chr04 | 27788825                | AA                              | GG                | 1945945726               |
| SNP_P3_46554_27792800 | NC_021163.1    | Ca_kabuli_chr04 | 27792800                | AA                              | TT                | 1945945728               |
| SNP_P3_46555_27794298 | NC_021163.1    | Ca_kabuli_chr04 | 27794298                | TT                              | CC                | 1945945730               |
| SNP_P3_46557_27803160 | NC_021163.1    | Ca_kabuli_chr04 | 27803160                | TT                              | CC                | 1945945732               |
| SNP_P3_46558_27810340 | NC_021163.1    | Ca_kabuli_chr04 | 27810340                | GG                              | AA                | 1945945734               |
| SNP_P3_46559_27815526 | NC_021163.1    | Ca_kabuli_chr04 | 27815526                | CC                              | AA                | 1945945735               |
| SNP_P3_46560_27830385 | NC_021163.1    | Ca_kabuli_chr04 | 27830385                | TT                              | CC                | 1945945737               |
| SNP_P3_46561_27839666 | NC_021163.1    | Ca_kabuli_chr04 | 27839666                | GG                              | TT                | 1945945739               |

| SNPs IDs              | Chromosome IDs | Chromosomes     | Physical positions (bp) | CDC Frontier (Reference genome) | (Pusa 256 & HPNB) | NCBI SNPdb Accession IDs |
|-----------------------|----------------|-----------------|-------------------------|---------------------------------|-------------------|--------------------------|
| SNP_P3_46562_27847393 | NC_021163.1    | Ca_kabuli_chr04 | 27847393                | GG                              | AA                | 1945945741               |
| SNP_P3_46563_27847743 | NC_021163.1    | Ca_kabuli_chr04 | 27847743                | TT                              | CC                | 1945945742               |
| SNP_P3_46564_27854370 | NC_021163.1    | Ca_kabuli_chr04 | 27854370                | TT                              | GG                | 1945945744               |
| SNP_P3_46565_27854477 | NC_021163.1    | Ca_kabuli_chr04 | 27854477                | TT                              | CC                | 1945945746               |
| SNP_P3_46566_27857789 | NC_021163.1    | Ca_kabuli_chr04 | 27857789                | TT                              | CC                | 1945945748               |
| SNP_P3_46567_27860689 | NC_021163.1    | Ca_kabuli_chr04 | 27860689                | TT                              | GG                | 1945945749               |
| SNP_P3_46568_27867460 | NC_021163.1    | Ca_kabuli_chr04 | 27867460                | GG                              | AA                | 1945945751               |
| SNP_P3_46569_27872094 | NC_021163.1    | Ca_kabuli_chr04 | 27872094                | GG                              | AA                | 1945945753               |
| SNP_P3_46571_27876907 | NC_021163.1    | Ca_kabuli_chr04 | 27876907                | AA                              | TT                | 1945945755               |
| SNP_P3_46573_27887132 | NC_021163.1    | Ca_kabuli_chr04 | 27887132                | AA                              | GG                | 1945945757               |
| SNP_P3_46574_27887765 | NC_021163.1    | Ca_kabuli_chr04 | 27887765                | GG                              | AA                | 1945945758               |
| SNP_P3_46575_27891051 | NC_021163.1    | Ca_kabuli_chr04 | 27891051                | TT                              | GG                | 1945945760               |
| SNP_P3_46576_27894977 | NC_021163.1    | Ca_kabuli_chr04 | 27894977                | GG                              | TT                | 1945945762               |
| SNP_P3_46577_27896974 | NC_021163.1    | Ca_kabuli_chr04 | 27896974                | AA                              | TT                | 1945945764               |
| SNP_P3_46578_27898022 | NC_021163.1    | Ca_kabuli_chr04 | 27898022                | CC                              | AA                | 1945945765               |
| SNP_P3_46579_27902106 | NC_021163.1    | Ca_kabuli_chr04 | 27902106                | AA                              | GG                | 1945945767               |
| SNP_P3_46581_27912201 | NC_021163.1    | Ca_kabuli_chr04 | 27912201                | AA                              | CC                | 1945945769               |
| SNP_P3_46582_27915576 | NC_021163.1    | Ca_kabuli_chr04 | 27915576                | AA                              | CC                | 1945945771               |
| SNP_P3_46583_27916949 | NC_021163.1    | Ca_kabuli_chr04 | 27916949                | GG                              | TT                | 1945945773               |
| SNP_P3_46586_27926088 | NC_021163.1    | Ca_kabuli_chr04 | 27926088                | AA                              | GG                | 1945945774               |
| SNP_P3_46587_27926897 | NC_021163.1    | Ca_kabuli_chr04 | 27926897                | GG                              | AA                | 1945945776               |
| SNP_P3_46588_27928558 | NC_021163.1    | Ca_kabuli_chr04 | 27928558                | TT                              | CC                | 1945945778               |
| SNP_P3_46589_27928793 | NC_021163.1    | Ca_kabuli_chr04 | 27928793                | CC                              | TT                | 1945945780               |
| SNP_P3_46590_27928804 | NC_021163.1    | Ca_kabuli_chr04 | 27928804                | AA                              | CC                | 1945945781               |
| SNP_P3_46591_27928809 | NC_021163.1    | Ca_kabuli_chr04 | 27928809                | CC                              | AA                | 1945945783               |
| SNP_P3_46593_27928844 | NC_021163.1    | Ca_kabuli_chr04 | 27928844                | TT                              | CC                | 1945945785               |
| SNP_P3_46594_27928869 | NC_021163.1    | Ca_kabuli_chr04 | 27928869                | CC                              | TT                | 1945945787               |
| SNP_P3_46595_27928890 | NC_021163.1    | Ca_kabuli_chr04 | 27928890                | CC                              | GG                | 1945945789               |
| SNP_P3_46596_27928914 | NC_021163.1    | Ca_kabuli_chr04 | 27928914                | TT                              | AA                | 1945945790               |
| SNP_P3_46597_27928930 | NC_021163.1    | Ca_kabuli_chr04 | 27928930                | TT                              | GG                | 1945945792               |
| SNP_P3_46598_27928936 | NC_021163.1    | Ca_kabuli_chr04 | 27928936                | CC                              | GG                | 1945945794               |
| SNP_P3_46599_27928937 | NC_021163.1    | Ca_kabuli_chr04 | 27928937                | CC                              | TT                | 1945945796               |
| SNP_P3_46600_27928958 | NC_021163.1    | Ca_kabuli_chr04 | 27928958                | AA                              | CC                | 1945945797               |
| SNP_P3_46601_27929961 | NC_021163.1    | Ca_kabuli_chr04 | 27929961                | GG                              | TT                | 1945945799               |
| SNP_P3_46602_27930479 | NC_021163.1    | Ca_kabuli_chr04 | 27930479                | TT                              | CC                | 1945945801               |
| SNP_P3_46603_27930489 | NC_021163.1    | Ca_kabuli_chr04 | 27930489                | TT                              | CC                | 1945945803               |
| SNP_P3_46604_27930548 | NC_021163.1    | Ca_kabuli_chr04 | 27930548                | AA                              | GG                | 1945945805               |
| SNP_P3_46605_27930558 | NC_021163.1    | Ca_kabuli_chr04 | 27930558                | AA                              | CC                | 1945945806               |
| SNP_P3_46606_27930572 | NC_021163.1    | Ca_kabuli_chr04 | 27930572                | TT                              | CC                | 1945945808               |
| SNP_P3_46607_27930590 | NC_021163.1    | Ca_kabuli_chr04 | 27930590                | AA                              | GG                | 1945945810               |
| SNP_P3_46608_27930596 | NC_021163.1    | Ca_kabuli_chr04 | 27930596                | TT                              | GG                | 1945945812               |
| SNP_P3_46609_27930625 | NC_021163.1    | Ca_kabuli_chr04 | 27930625                | TT                              | GG                | 1945945813               |

| SNPs IDs              | Chromosome IDs | Chromosomes     | Physical positions (bp) | CDC Frontier (Reference genome) | (Pusa 256 & HPNB) | NCBI SNPdb Accession IDs |
|-----------------------|----------------|-----------------|-------------------------|---------------------------------|-------------------|--------------------------|
| SNP_P3_46610_27930790 | NC_021163.1    | Ca_kabuli_chr04 | 27930790                | TT                              | CC                | 1945945815               |
| SNP_P3_46611_27930821 | NC_021163.1    | Ca_kabuli_chr04 | 27930821                | TT                              | CC                | 1945945817               |
| SNP_P3_46612_27933099 | NC_021163.1    | Ca_kabuli_chr04 | 27933099                | AA                              | GG                | 1945945819               |
| SNP_P3_46613_27943511 | NC_021163.1    | Ca_kabuli_chr04 | 27943511                | GG                              | AA                | 1945945821               |
| SNP_P3_46614_27943570 | NC_021163.1    | Ca_kabuli_chr04 | 27943570                | CC                              | TT                | 1945945822               |
| SNP_P3_46615_27943636 | NC_021163.1    | Ca_kabuli_chr04 | 27943636                | TT                              | GG                | 1945945824               |
| SNP_P3_46616_27943642 | NC_021163.1    | Ca_kabuli_chr04 | 27943642                | CC                              | TT                | 1945945826               |
| SNP_P3_46617_27943693 | NC_021163.1    | Ca_kabuli_chr04 | 27943693                | TT                              | CC                | 1945945828               |
| SNP_P3_46618_27946409 | NC_021163.1    | Ca_kabuli_chr04 | 27946409                | GG                              | TT                | 1945945829               |
| SNP_P3_46619_27946410 | NC_021163.1    | Ca_kabuli_chr04 | 27946410                | TT                              | AA                | 1945945831               |
| SNP_P3_46620_27946901 | NC_021163.1    | Ca_kabuli_chr04 | 27946901                | GG                              | CC                | 1945945833               |
| SNP_P3_46621_27953155 | NC_021163.1    | Ca_kabuli_chr04 | 27953155                | CC                              | TT                | 1945945835               |
| SNP_P3_46623_27954781 | NC_021163.1    | Ca_kabuli_chr04 | 27954781                | TT                              | CC                | 1945945837               |
| SNP_P3_46624_27961328 | NC_021163.1    | Ca_kabuli_chr04 | 27961328                | TT                              | CC                | 1945945838               |
| SNP_P3_46626_27967237 | NC_021163.1    | Ca_kabuli_chr04 | 27967237                | CC                              | AA                | 1945945840               |
| SNP_P3_46627_27967733 | NC_021163.1    | Ca_kabuli_chr04 | 27967733                | GG                              | AA                | 1945945842               |
| SNP_P3_46628_27967746 | NC_021163.1    | Ca_kabuli_chr04 | 27967746                | TT                              | CC                | 1945945844               |
| SNP_P3_46629_27971515 | NC_021163.1    | Ca_kabuli_chr04 | 27971515                | GG                              | AA                | 1945945845               |
| SNP_P3_46631_27973126 | NC_021163.1    | Ca_kabuli_chr04 | 27973126                | TT                              | AA                | 1945945847               |
| SNP_P3_46633_27981651 | NC_021163.1    | Ca_kabuli_chr04 | 27981651                | CC                              | TT                | 1945945849               |
| SNP_P3_46634_27983785 | NC_021163.1    | Ca_kabuli_chr04 | 27983785                | TT                              | AA                | 1945945851               |
| SNP_P3_46635_27984670 | NC_021163.1    | Ca_kabuli_chr04 | 27984670                | GG                              | AA                | 1945945853               |
| SNP_P3_46636_27996949 | NC_021163.1    | Ca_kabuli_chr04 | 27996949                | CC                              | TT                | 1945945854               |
| SNP_P3_46637_27996958 | NC_021163.1    | Ca_kabuli_chr04 | 27996958                | CC                              | AA                | 1945945856               |
| SNP_P3_46638_27997115 | NC_021163.1    | Ca_kabuli_chr04 | 27997115                | GG                              | TT                | 1945945858               |
| SNP_P3_46639_27997226 | NC_021163.1    | Ca_kabuli_chr04 | 27997226                | CC                              | AA                | 1945945860               |
| SNP_P3_46640_27997230 | NC_021163.1    | Ca_kabuli_chr04 | 27997230                | CC                              | TT                | 1945945861               |
| SNP_P3_46641_27997235 | NC_021163.1    | Ca_kabuli_chr04 | 27997235                | CC                              | TT                | 1945945863               |
| SNP_P3_46642_27997243 | NC_021163.1    | Ca_kabuli_chr04 | 27997243                | AA                              | TT                | 1945945865               |
| SNP_P3_46643_27997335 | NC_021163.1    | Ca_kabuli_chr04 | 27997335                | CC                              | TT                | 1945945867               |
| SNP_P3_46644_27997512 | NC_021163.1    | Ca_kabuli_chr04 | 27997512                | AA                              | CC                | 1945945868               |
| SNP_P3_46645_27997527 | NC_021163.1    | Ca_kabuli_chr04 | 27997527                | CC                              | TT                | 1945945870               |
| SNP_P3_46646_27997536 | NC_021163.1    | Ca_kabuli_chr04 | 27997536                | AA                              | TT                | 1945945872               |
| SNP_P3_46647_27997538 | NC_021163.1    | Ca_kabuli_chr04 | 27997538                | TT                              | GG                | 1945945874               |
| SNP_P3_46648_27997568 | NC_021163.1    | Ca_kabuli_chr04 | 27997568                | TT                              | CC                | 1945945876               |
| SNP_P3_46649_27997595 | NC_021163.1    | Ca_kabuli_chr04 | 27997595                | AA                              | GG                | 1945945877               |
| SNP_P3_46650_28013415 | NC_021163.1    | Ca_kabuli_chr04 | 28013415                | GG                              | AA                | 1945945879               |
| SNP_P3_46651_28013429 | NC_021163.1    | Ca_kabuli_chr04 | 28013429                | AA                              | TT                | 1945945881               |
| SNP_P3_46652_28013450 | NC_021163.1    | Ca_kabuli_chr04 | 28013450                | TT                              | GG                | 1945945883               |
| SNP_P3_46653_28013475 | NC_021163.1    | Ca_kabuli_chr04 | 28013475                | AA                              | GG                | 1945945884               |
| SNP_P3_46654_28018945 | NC_021163.1    | Ca_kabuli_chr04 | 28018945                | CC                              | TT                | 1945945886               |
| SNP_P3_46655_28018969 | NC_021163.1    | Ca_kabuli_chr04 | 28018969                | AA                              | GG                | 1945945888               |

| SNPs IDs              | Chromosome IDs | Chromosomes     | Physical positions (bp) | CDC Frontier (Reference genome) | (Pusa 256 & HPNB) | NCBI SNPdb Accession IDs |
|-----------------------|----------------|-----------------|-------------------------|---------------------------------|-------------------|--------------------------|
| SNP_P3_46656_28019009 | NC_021163.1    | Ca_kabuli_chr04 | 28019009                | GG                              | AA                | 1945945890               |
| SNP_P3_46657_28019093 | NC_021163.1    | Ca_kabuli_chr04 | 28019093                | AA                              | TT                | 1945945892               |
| SNP_P3_46658_28019097 | NC_021163.1    | Ca_kabuli_chr04 | 28019097                | TT                              | AA                | 1945945893               |
| SNP_P3_46659_28019325 | NC_021163.1    | Ca_kabuli_chr04 | 28019325                | TT                              | CC                | 1945945895               |
| SNP_P3_46660_28020210 | NC_021163.1    | Ca_kabuli_chr04 | 28020210                | CC                              | TT                | 1945945897               |
| SNP_P3_46661_28020569 | NC_021163.1    | Ca_kabuli_chr04 | 28020569                | TT                              | GG                | 1945945899               |
| SNP_P3_46663_28020589 | NC_021163.1    | Ca_kabuli_chr04 | 28020589                | GG                              | AA                | 1945945900               |
| SNP_P3_46664_28020591 | NC_021163.1    | Ca_kabuli_chr04 | 28020591                | CC                              | TT                | 1945945902               |
| SNP_P3_46665_28020785 | NC_021163.1    | Ca_kabuli_chr04 | 28020785                | AA                              | GG                | 1945945904               |
| SNP_P3_46667_28021128 | NC_021163.1    | Ca_kabuli_chr04 | 28021128                | AA                              | CC                | 1945945906               |
| SNP_P3_46668_28021130 | NC_021163.1    | Ca_kabuli_chr04 | 28021130                | GG                              | TT                | 1945945908               |
| SNP_P3_46669_28021186 | NC_021163.1    | Ca_kabuli_chr04 | 28021186                | GG                              | AA                | 1945945909               |
| SNP_P3_46670_28021387 | NC_021163.1    | Ca_kabuli_chr04 | 28021387                | CC                              | TT                | 1945945911               |
| SNP_P3_46671_28024054 | NC_021163.1    | Ca_kabuli_chr04 | 28024054                | CC                              | TT                | 1945945913               |
| SNP_P3_46672_28024069 | NC_021163.1    | Ca_kabuli_chr04 | 28024069                | AA                              | TT                | 1945945915               |
| SNP_P3_46673_28024074 | NC_021163.1    | Ca_kabuli_chr04 | 28024074                | TT                              | AA                | 1945945916               |
| SNP_P3_46674_28024076 | NC_021163.1    | Ca_kabuli_chr04 | 28024076                | TT                              | GG                | 1945945918               |
| SNP_P3_46675_28026351 | NC_021163.1    | Ca_kabuli_chr04 | 28026351                | GG                              | AA                | 1945945920               |
| SNP_P3_46678_28026893 | NC_021163.1    | Ca_kabuli_chr04 | 28026893                | GG                              | TT                | 1945945922               |
| SNP_P3_46679_28026947 | NC_021163.1    | Ca_kabuli_chr04 | 28026947                | CC                              | AA                | 1945945924               |
| SNP_P3_46680_28026960 | NC_021163.1    | Ca_kabuli_chr04 | 28026960                | CC                              | TT                | 1945945925               |
| SNP_P3_46681_28027167 | NC_021163.1    | Ca_kabuli_chr04 | 28027167                | GG                              | TT                | 1945945927               |
| SNP_P3_46682_28027194 | NC_021163.1    | Ca_kabuli_chr04 | 28027194                | GG                              | AA                | 1945945929               |
| SNP_P3_46683_28027209 | NC_021163.1    | Ca_kabuli_chr04 | 28027209                | GG                              | AA                | 1945945931               |
| SNP_P3_46684_28027233 | NC_021163.1    | Ca_kabuli_chr04 | 28027233                | TT                              | GG                | 1945945932               |
| SNP_P3_46685_28033937 | NC_021163.1    | Ca_kabuli_chr04 | 28033937                | AA                              | TT                | 1945945934               |
| SNP_P3_46686_28034008 | NC_021163.1    | Ca_kabuli_chr04 | 28034008                | TT                              | CC                | 1945945936               |
| SNP_P3_46687_28034017 | NC_021163.1    | Ca_kabuli_chr04 | 28034017                | AA                              | TT                | 1945945938               |
| SNP_P3_46688_28034304 | NC_021163.1    | Ca_kabuli_chr04 | 28034304                | CC                              | TT                | 1945945940               |
| SNP_P3_46689_28034352 | NC_021163.1    | Ca_kabuli_chr04 | 28034352                | TT                              | CC                | 1945945941               |
| SNP_P3_46690_28035330 | NC_021163.1    | Ca_kabuli_chr04 | 28035330                | AA                              | TT                | 1945945943               |
| SNP_P3_46691_28041841 | NC_021163.1    | Ca_kabuli_chr04 | 28041841                | TT                              | GG                | 1945945945               |
| SNP_P3_46692_28042583 | NC_021163.1    | Ca_kabuli_chr04 | 28042583                | CC                              | TT                | 1945945947               |
| SNP_P3_46693_28042615 | NC_021163.1    | Ca_kabuli_chr04 | 28042615                | CC                              | TT                | 1945945949               |
| SNP_P3_46694_28042700 | NC_021163.1    | Ca_kabuli_chr04 | 28042700                | CC                              | AA                | 1945945950               |
| SNP_P3_46695_28042704 | NC_021163.1    | Ca_kabuli_chr04 | 28042704                | GG                              | TT                | 1945945952               |
| SNP_P3_46696_28042728 | NC_021163.1    | Ca_kabuli_chr04 | 28042728                | AA                              | GG                | 1945945954               |
| SNP_P3_46697_28042730 | NC_021163.1    | Ca_kabuli_chr04 | 28042730                | TT                              | CC                | 1945945956               |
| SNP_P3_46698_28042737 | NC_021163.1    | Ca_kabuli_chr04 | 28042737                | AA                              | GG                | 1945945957               |
| SNP_P3_46699_28043101 | NC_021163.1    | Ca_kabuli_chr04 | 28043101                | GG                              | TT                | 1945945959               |
| SNP_P3_46700_28043120 | NC_021163.1    | Ca_kabuli_chr04 | 28043120                | GG                              | AA                | 1945945961               |
| SNP_P3_46701_28043128 | NC_021163.1    | Ca_kabuli_chr04 | 28043128                | AA                              | GG                | 1945945963               |

| SNPs IDs              | Chromosome IDs | Chromosomes     | Physical positions (bp) | CDC Frontier (Reference genome) | (Pusa 256 & HPNB) | NCBI SNPdb Accession IDs |
|-----------------------|----------------|-----------------|-------------------------|---------------------------------|-------------------|--------------------------|
| SNP_P3_46702_28043466 | NC_021163.1    | Ca_kabuli_chr04 | 28043466                | TT                              | GG                | 1945945965               |
| SNP_P3_46703_28043511 | NC_021163.1    | Ca_kabuli_chr04 | 28043511                | TT                              | CC                | 1945945966               |
| SNP_P3_46704_28043513 | NC_021163.1    | Ca_kabuli_chr04 | 28043513                | CC                              | TT                | 1945945968               |
| SNP_P3_46705_28043554 | NC_021163.1    | Ca_kabuli_chr04 | 28043554                | CC                              | TT                | 1945945970               |
| SNP_P3_46706_28043679 | NC_021163.1    | Ca_kabuli_chr04 | 28043679                | AA                              | TT                | 1945945972               |
| SNP_P3_46707_28043680 | NC_021163.1    | Ca_kabuli_chr04 | 28043680                | AA                              | TT                | 1945945974               |
| SNP_P3_46708_28044075 | NC_021163.1    | Ca_kabuli_chr04 | 28044075                | CC                              | AA                | 1945945975               |
| SNP_P3_46709_28044401 | NC_021163.1    | Ca_kabuli_chr04 | 28044401                | CC                              | AA                | 1945945977               |
| SNP_P3_46710_28045722 | NC_021163.1    | Ca_kabuli_chr04 | 28045722                | GG                              | AA                | 1945945979               |
| SNP_P3_46712_28046445 | NC_021163.1    | Ca_kabuli_chr04 | 28046445                | TT                              | GG                | 1945945981               |
| SNP_P3_46713_28046446 | NC_021163.1    | Ca_kabuli_chr04 | 28046446                | CC                              | GG                | 1945945982               |
| SNP_P3_46714_28046509 | NC_021163.1    | Ca_kabuli_chr04 | 28046509                | GG                              | AA                | 1945945984               |
| SNP_P3_46715_28046845 | NC_021163.1    | Ca_kabuli_chr04 | 28046845                | CC                              | TT                | 1945945986               |
| SNP_P3_46716_28049613 | NC_021163.1    | Ca_kabuli_chr04 | 28049613                | CC                              | AA                | 1945945988               |
| SNP_P3_46717_28049938 | NC_021163.1    | Ca_kabuli_chr04 | 28049938                | GG                              | TT                | 1945945990               |
| SNP_P3_46718_28050881 | NC_021163.1    | Ca_kabuli_chr04 | 28050881                | CC                              | AA                | 1945945991               |
| SNP_P3_46719_28050985 | NC_021163.1    | Ca_kabuli_chr04 | 28050985                | GG                              | AA                | 1945945993               |
| SNP_P3_46720_28050989 | NC_021163.1    | Ca_kabuli_chr04 | 28050989                | GG                              | AA                | 1945945995               |
| SNP_P3_46721_28051043 | NC_021163.1    | Ca_kabuli_chr04 | 28051043                | CC                              | TT                | 1945945997               |
| SNP_P3_46722_28051816 | NC_021163.1    | Ca_kabuli_chr04 | 28051816                | TT                              | AA                | 1945945999               |
| SNP_P3_46723_28052123 | NC_021163.1    | Ca_kabuli_chr04 | 28052123                | CC                              | TT                | 1945946000               |
| SNP_P3_46725_28052480 | NC_021163.1    | Ca_kabuli_chr04 | 28052480                | GG                              | TT                | 1945946002               |
| SNP_P3_46726_28053240 | NC_021163.1    | Ca_kabuli_chr04 | 28053240                | TT                              | CC                | 1945946004               |
| SNP_P3_46727_28053637 | NC_021163.1    | Ca_kabuli_chr04 | 28053637                | TT                              | GG                | 1945946006               |
| SNP_P3_46728_28053638 | NC_021163.1    | Ca_kabuli_chr04 | 28053638                | AA                              | GG                | 1945946007               |
| SNP_P3_46729_28056742 | NC_021163.1    | Ca_kabuli_chr04 | 28056742                | AA                              | GG                | 1945946009               |
| SNP_P3_46730_28057337 | NC_021163.1    | Ca_kabuli_chr04 | 28057337                | AA                              | TT                | 1945946011               |
| SNP_P3_46731_28057441 | NC_021163.1    | Ca_kabuli_chr04 | 28057441                | GG                              | AA                | 1945946013               |
| SNP_P3_46732_28058340 | NC_021163.1    | Ca_kabuli_chr04 | 28058340                | GG                              | AA                | 1945946015               |
| SNP_P3_46733_28058677 | NC_021163.1    | Ca_kabuli_chr04 | 28058677                | GG                              | AA                | 1945946016               |
| SNP_P3_46734_28061093 | NC_021163.1    | Ca_kabuli_chr04 | 28061093                | AA                              | GG                | 1945946018               |
| SNP_P3_46735_28061807 | NC_021163.1    | Ca_kabuli_chr04 | 28061807                | CC                              | AA                | 1945946020               |
| SNP_P3_46736_28062097 | NC_021163.1    | Ca_kabuli_chr04 | 28062097                | CC                              | AA                | 1945946022               |
| SNP_P3_46737_28063802 | NC_021163.1    | Ca_kabuli_chr04 | 28063802                | GG                              | AA                | 1945946024               |
| SNP_P3_46738_28063822 | NC_021163.1    | Ca_kabuli_chr04 | 28063822                | TT                              | AA                | 1945946025               |
| SNP_P3_46739_28066548 | NC_021163.1    | Ca_kabuli_chr04 | 28066548                | GG                              | AA                | 1945946027               |
| SNP_P3_46740_28066718 | NC_021163.1    | Ca_kabuli_chr04 | 28066718                | TT                              | CC                | 1945946029               |
| SNP_P3_46741_28069235 | NC_021163.1    | Ca_kabuli_chr04 | 28069235                | CC                              | TT                | 1945946031               |
| SNP_P3_46743_28071980 | NC_021163.1    | Ca_kabuli_chr04 | 28071980                | AA                              | TT                | 1945946032               |
| SNP_P3_46744_28074419 | NC_021163.1    | Ca_kabuli_chr04 | 28074419                | CC                              | AA                | 1945946034               |
| SNP_P3_46745_28074708 | NC_021163.1    | Ca_kabuli_chr04 | 28074708                | CC                              | TT                | 1945946036               |
| SNP_P3_46746_28075664 | NC_021163.1    | Ca_kabuli_chr04 | 28075664                | CC                              | TT                | 1945946038               |



| SNPs IDs              | Chromosome IDs | Chromosomes     | Physical positions (bp) | CDC Frontier (Reference genome) | (Pusa 256 & HPNB) | NCBI SNPdb Accession IDs |
|-----------------------|----------------|-----------------|-------------------------|---------------------------------|-------------------|--------------------------|
| SNP_P3_46747_28076754 | NC_021163.1    | Ca_kabuli_chr04 | 28076754                | GG                              | AA                | 1945946040               |
| SNP_P3_46748_28079639 | NC_021163.1    | Ca_kabuli_chr04 | 28079639                | CC                              | TT                | 1945946041               |
| SNP_P3_46749_28089178 | NC_021163.1    | Ca_kabuli_chr04 | 28089178                | GG                              | AA                | 1945946043               |
| SNP_P3_46750_28099605 | NC_021163.1    | Ca_kabuli_chr04 | 28099605                | CC                              | TT                | 1945946045               |
| SNP_P3_46751_28100807 | NC_021163.1    | Ca_kabuli_chr04 | 28100807                | GG                              | AA                | 1945946047               |
| SNP_P3_46752_28100864 | NC_021163.1    | Ca_kabuli_chr04 | 28100864                | TT                              | CC                | 1945946049               |
| SNP_P3_46753_28101408 | NC_021163.1    | Ca_kabuli_chr04 | 28101408                | GG                              | AA                | 1945946050               |
| SNP_P3_46754_28101520 | NC_021163.1    | Ca_kabuli_chr04 | 28101520                | CC                              | AA                | 1945946052               |
| SNP_P3_46755_28103053 | NC_021163.1    | Ca_kabuli_chr04 | 28103053                | CC                              | GG                | 1945946054               |
| SNP_P3_46756_28103377 | NC_021163.1    | Ca_kabuli_chr04 | 28103377                | AA                              | CC                | 1945946056               |
| SNP_P3_46757_28105466 | NC_021163.1    | Ca_kabuli_chr04 | 28105466                | AA                              | GG                | 1945946057               |
| SNP_P3_46758_28106442 | NC_021163.1    | Ca_kabuli_chr04 | 28106442                | TT                              | AA                | 1945946059               |
| SNP_P3_46759_28107226 | NC_021163.1    | Ca_kabuli_chr04 | 28107226                | AA                              | CC                | 1945946061               |
| SNP_P3_46761_28111868 | NC_021163.1    | Ca_kabuli_chr04 | 28111868                | TT                              | CC                | 1945946063               |
| SNP_P3_46762_28112590 | NC_021163.1    | Ca_kabuli_chr04 | 28112590                | CC                              | TT                | 1945946065               |
| SNP_P3_46763_28112743 | NC_021163.1    | Ca_kabuli_chr04 | 28112743                | TT                              | AA                | 1945946066               |
| SNP_P3_46764_28119542 | NC_021163.1    | Ca_kabuli_chr04 | 28119542                | CC                              | TT                | 1945946068               |
| SNP_P3_46765_28121030 | NC_021163.1    | Ca_kabuli_chr04 | 28121030                | GG                              | AA                | 1945946070               |
| SNP_P3_46766_28121051 | NC_021163.1    | Ca_kabuli_chr04 | 28121051                | CC                              | AA                | 1945946072               |
| SNP_P3_46767_28122090 | NC_021163.1    | Ca_kabuli_chr04 | 28122090                | TT                              | CC                | 1945946074               |
| SNP_P3_46769_28136114 | NC_021163.1    | Ca_kabuli_chr04 | 28136114                | CC                              | TT                | 1945946075               |
| SNP_P3_46770_28138062 | NC_021163.1    | Ca_kabuli_chr04 | 28138062                | CC                              | TT                | 1945946077               |
| SNP_P3_46771_28138182 | NC_021163.1    | Ca_kabuli_chr04 | 28138182                | AA                              | TT                | 1945946079               |
| SNP_P3_46772_28139392 | NC_021163.1    | Ca_kabuli_chr04 | 28139392                | CC                              | TT                | 1945946081               |
| SNP_P3_46773_28139838 | NC_021163.1    | Ca_kabuli_chr04 | 28139838                | TT                              | CC                | 1945946082               |
| SNP_P3_46774_28139930 | NC_021163.1    | Ca_kabuli_chr04 | 28139930                | CC                              | AA                | 1945946084               |
| SNP_P3_46775_28139968 | NC_021163.1    | Ca_kabuli_chr04 | 28139968                | GG                              | TT                | 1945946086               |
| SNP_P3_46776_28140004 | NC_021163.1    | Ca_kabuli_chr04 | 28140004                | TT                              | CC                | 1945946088               |
| SNP_P3_46777_28140018 | NC_021163.1    | Ca_kabuli_chr04 | 28140018                | CC                              | AA                | 1945946090               |
| SNP_P3_46778_28140051 | NC_021163.1    | Ca_kabuli_chr04 | 28140051                | CC                              | GG                | 1945946091               |
| SNP_P3_46779_28140073 | NC_021163.1    | Ca_kabuli_chr04 | 28140073                | AA                              | GG                | 1945946093               |
| SNP_P3_46780_28140074 | NC_021163.1    | Ca_kabuli_chr04 | 28140074                | GG                              | TT                | 1945946095               |
| SNP_P3_46781_28140154 | NC_021163.1    | Ca_kabuli_chr04 | 28140154                | AA                              | GG                | 1945946097               |
| SNP_P3_46782_28140170 | NC_021163.1    | Ca_kabuli_chr04 | 28140170                | GG                              | TT                | 1945946099               |
| SNP_P3_46783_28140226 | NC_021163.1    | Ca_kabuli_chr04 | 28140226                | AA                              | GG                | 1945946100               |
| SNP_P3_46784_28140234 | NC_021163.1    | Ca_kabuli_chr04 | 28140234                | GG                              | AA                | 1945946102               |
| SNP_P3_46785_28140276 | NC_021163.1    | Ca_kabuli_chr04 | 28140276                | GG                              | AA                | 1945946104               |
| SNP_P3_46786_28140281 | NC_021163.1    | Ca_kabuli_chr04 | 28140281                | AA                              | CC                | 1945946106               |
| SNP_P3_46787_28140309 | NC_021163.1    | Ca_kabuli_chr04 | 28140309                | CC                              | TT                | 1945946107               |
| SNP_P3_46788_28140331 | NC_021163.1    | Ca_kabuli_chr04 | 28140331                | TT                              | CC                | 1945946109               |
| SNP_P3_46789_28140376 | NC_021163.1    | Ca_kabuli_chr04 | 28140376                | CC                              | TT                | 1945946111               |
| SNP_P3_46790_28142698 | NC_021163.1    | Ca_kabuli_chr04 | 28142698                | AA                              | GG                | 1945946113               |

| SNPs IDs              | Chromosome IDs | Chromosomes     | Physical positions (bp) | CDC Frontier (Reference genome) | (Pusa 256 & HPNB) | NCBI SNPdb Accession IDs |
|-----------------------|----------------|-----------------|-------------------------|---------------------------------|-------------------|--------------------------|
| SNP_P3_46791_28146295 | NC_021163.1    | Ca_kabuli_chr04 | 28146295                | CC                              | TT                | 1945946115               |
| SNP_P3_46792_28146311 | NC_021163.1    | Ca_kabuli_chr04 | 28146311                | GG                              | TT                | 1945946116               |
| SNP_P3_46793_28146314 | NC_021163.1    | Ca_kabuli_chr04 | 28146314                | CC                              | AA                | 1945946118               |
| SNP_P3_46794_28146522 | NC_021163.1    | Ca_kabuli_chr04 | 28146522                | GG                              | TT                | 1945946120               |
| SNP_P3_46795_28147200 | NC_021163.1    | Ca_kabuli_chr04 | 28147200                | GG                              | AA                | 1945946122               |
| SNP_P3_46796_28147210 | NC_021163.1    | Ca_kabuli_chr04 | 28147210                | GG                              | AA                | 1945946124               |
| SNP_P3_46797_28147211 | NC_021163.1    | Ca_kabuli_chr04 | 28147211                | GG                              | AA                | 1945946125               |
| SNP_P3_46798_28148220 | NC_021163.1    | Ca_kabuli_chr04 | 28148220                | GG                              | TT                | 1945946127               |
| SNP_P3_46799_28148231 | NC_021163.1    | Ca_kabuli_chr04 | 28148231                | TT                              | CC                | 1945946129               |
| SNP_P3_46800_28148272 | NC_021163.1    | Ca_kabuli_chr04 | 28148272                | AA                              | GG                | 1945946131               |
| SNP_P3_46801_28148492 | NC_021163.1    | Ca_kabuli_chr04 | 28148492                | TT                              | GG                | 1945946132               |
| SNP_P3_46803_28149458 | NC_021163.1    | Ca_kabuli_chr04 | 28149458                | GG                              | AA                | 1945946134               |
| SNP_P3_46804_28150451 | NC_021163.1    | Ca_kabuli_chr04 | 28150451                | TT                              | GG                | 1945946136               |
| SNP_P3_46805_28150479 | NC_021163.1    | Ca_kabuli_chr04 | 28150479                | AA                              | GG                | 1945946138               |
| SNP_P3_46806_28150522 | NC_021163.1    | Ca_kabuli_chr04 | 28150522                | GG                              | AA                | 1945946140               |
| SNP_P3_46807_28150612 | NC_021163.1    | Ca_kabuli_chr04 | 28150612                | AA                              | GG                | 1945946141               |
| SNP_P3_46808_28150863 | NC_021163.1    | Ca_kabuli_chr04 | 28150863                | CC                              | TT                | 1945946143               |
| SNP_P3_46809_28150877 | NC_021163.1    | Ca_kabuli_chr04 | 28150877                | AA                              | GG                | 1945946145               |
| SNP_P3_46810_28151113 | NC_021163.1    | Ca_kabuli_chr04 | 28151113                | TT                              | CC                | 1945946147               |
| SNP_P3_46811_28151240 | NC_021163.1    | Ca_kabuli_chr04 | 28151240                | AA                              | GG                | 1945946149               |
| SNP_P3_46812_28151255 | NC_021163.1    | Ca_kabuli_chr04 | 28151255                | GG                              | TT                | 1945946150               |
| SNP_P3_46813_28151406 | NC_021163.1    | Ca_kabuli_chr04 | 28151406                | CC                              | TT                | 1945946152               |
| SNP_P3_46814_28151526 | NC_021163.1    | Ca_kabuli_chr04 | 28151526                | TT                              | CC                | 1945946154               |
| SNP_P3_46815_28151537 | NC_021163.1    | Ca_kabuli_chr04 | 28151537                | AA                              | GG                | 1945946156               |
| SNP_P3_46816_28151633 | NC_021163.1    | Ca_kabuli_chr04 | 28151633                | GG                              | AA                | 1945946157               |
| SNP_P3_46817_28151729 | NC_021163.1    | Ca_kabuli_chr04 | 28151729                | TT                              | CC                | 1945946159               |
| SNP_P3_46818_28152028 | NC_021163.1    | Ca_kabuli_chr04 | 28152028                | GG                              | AA                | 1945946161               |
| SNP_P3_46819_28152276 | NC_021163.1    | Ca_kabuli_chr04 | 28152276                | CC                              | AA                | 1945946163               |
| SNP_P3_46821_28152462 | NC_021163.1    | Ca_kabuli_chr04 | 28152462                | GG                              | CC                | 1945946165               |
| SNP_P3_46822_28152546 | NC_021163.1    | Ca_kabuli_chr04 | 28152546                | AA                              | GG                | 1945946166               |
| SNP_P3_46823_28152576 | NC_021163.1    | Ca_kabuli_chr04 | 28152576                | TT                              | CC                | 1945946168               |
| SNP_P3_46825_28153271 | NC_021163.1    | Ca_kabuli_chr04 | 28153271                | CC                              | TT                | 1945946170               |
| SNP_P3_46827_28160833 | NC_021163.1    | Ca_kabuli_chr04 | 28160833                | TT                              | AA                | 1945946172               |
| SNP_P3_46830_28160974 | NC_021163.1    | Ca_kabuli_chr04 | 28160974                | AA                              | GG                | 1945946174               |
| SNP_P3_46831_28160978 | NC_021163.1    | Ca_kabuli_chr04 | 28160978                | CC                              | TT                | 1945946175               |
| SNP_P3_46832_28162454 | NC_021163.1    | Ca_kabuli_chr04 | 28162454                | AA                              | GG                | 1945946177               |
| SNP_P3_46833_28162488 | NC_021163.1    | Ca_kabuli_chr04 | 28162488                | AA                              | TT                | 1945946179               |
| SNP_P3_46834_28162562 | NC_021163.1    | Ca_kabuli_chr04 | 28162562                | GG                              | AA                | 1945946181               |
| SNP_P3_46835_28162821 | NC_021163.1    | Ca_kabuli_chr04 | 28162821                | TT                              | CC                | 1945946182               |
| SNP_P3_46836_28162834 | NC_021163.1    | Ca_kabuli_chr04 | 28162834                | CC                              | TT                | 1945946184               |
| SNP_P3_46838_28167256 | NC_021163.1    | Ca_kabuli_chr04 | 28167256                | TT                              | AA                | 1945946186               |
| SNP_P3_46839_28167257 | NC_021163.1    | Ca_kabuli_chr04 | 28167257                | CC                              | GG                | 1945946188               |

| SNPs IDs              | Chromosome IDs | Chromosomes     | Physical positions (bp) | CDC Frontier (Reference genome) | (Pusa 256 & HPNB) | NCBI SNPdb Accession IDs |
|-----------------------|----------------|-----------------|-------------------------|---------------------------------|-------------------|--------------------------|
| SNP_P3_46840_28168450 | NC_021163.1    | Ca_kabuli_chr04 | 28168450                | CC                              | AA                | 1945946190               |
| SNP_P3_46841_28168471 | NC_021163.1    | Ca_kabuli_chr04 | 28168471                | CC                              | TT                | 1945946191               |
| SNP_P3_46842_28168679 | NC_021163.1    | Ca_kabuli_chr04 | 28168679                | CC                              | AA                | 1945946193               |
| SNP_P3_46844_28169227 | NC_021163.1    | Ca_kabuli_chr04 | 28169227                | AA                              | TT                | 1945946195               |
| SNP_P3_46845_28169750 | NC_021163.1    | Ca_kabuli_chr04 | 28169750                | GG                              | CC                | 1945946197               |
| SNP_P3_46847_28170125 | NC_021163.1    | Ca_kabuli_chr04 | 28170125                | CC                              | TT                | 1945946199               |
| SNP_P3_46849_28170177 | NC_021163.1    | Ca_kabuli_chr04 | 28170177                | CC                              | TT                | 1945946200               |
| SNP_P3_46850_28171545 | NC_021163.1    | Ca_kabuli_chr04 | 28171545                | GG                              | AA                | 1945946202               |
| SNP_P3_46851_28172236 | NC_021163.1    | Ca_kabuli_chr04 | 28172236                | TT                              | AA                | 1945946204               |
| SNP_P3_46852_28172243 | NC_021163.1    | Ca_kabuli_chr04 | 28172243                | AA                              | GG                | 1945946206               |
| SNP_P3_46853_28172741 | NC_021163.1    | Ca_kabuli_chr04 | 28172741                | TT                              | CC                | 1945946207               |
| SNP_P3_46854_28173194 | NC_021163.1    | Ca_kabuli_chr04 | 28173194                | TT                              | AA                | 1945946209               |
| SNP_P3_46855_28174753 | NC_021163.1    | Ca_kabuli_chr04 | 28174753                | GG                              | TT                | 1945946211               |
| SNP_P3_46856_28177037 | NC_021163.1    | Ca_kabuli_chr04 | 28177037                | GG                              | AA                | 1945946213               |
| SNP_P3_46857_28177187 | NC_021163.1    | Ca_kabuli_chr04 | 28177187                | GG                              | CC                | 1945946215               |
| SNP_P3_46859_28179156 | NC_021163.1    | Ca_kabuli_chr04 | 28179156                | CC                              | GG                | 1945946216               |
| SNP_P3_46862_28180188 | NC_021163.1    | Ca_kabuli_chr04 | 28180188                | GG                              | CC                | 1945946218               |
| SNP_P3_46863_28180199 | NC_021163.1    | Ca_kabuli_chr04 | 28180199                | AA                              | GG                | 1945946220               |
| SNP_P3_46864_28180218 | NC_021163.1    | Ca_kabuli_chr04 | 28180218                | GG                              | TT                | 1945946222               |
| SNP_P3_46865_28180256 | NC_021163.1    | Ca_kabuli_chr04 | 28180256                | GG                              | TT                | 1945946224               |
| SNP_P3_46868_28180869 | NC_021163.1    | Ca_kabuli_chr04 | 28180869                | CC                              | GG                | 1945946225               |
| SNP_P3_46869_28181787 | NC_021163.1    | Ca_kabuli_chr04 | 28181787                | TT                              | CC                | 1945946227               |
| SNP_P3_46870_28182614 | NC_021163.1    | Ca_kabuli_chr04 | 28182614                | AA                              | CC                | 1945946229               |
| SNP_P3_46871_28182932 | NC_021163.1    | Ca_kabuli_chr04 | 28182932                | CC                              | AA                | 1945946231               |
| SNP_P3_46872_28182986 | NC_021163.1    | Ca_kabuli_chr04 | 28182986                | TT                              | CC                | 1945946232               |
| SNP_P3_46873_28183857 | NC_021163.1    | Ca_kabuli_chr04 | 28183857                | GG                              | AA                | 1945946234               |
| SNP_P3_46874_28183860 | NC_021163.1    | Ca_kabuli_chr04 | 28183860                | TT                              | CC                | 1945946236               |
| SNP_P3_46875_28183890 | NC_021163.1    | Ca_kabuli_chr04 | 28183890                | CC                              | AA                | 1945946238               |
| SNP_P3_46876_28184239 | NC_021163.1    | Ca_kabuli_chr04 | 28184239                | TT                              | GG                | 1945946240               |
| SNP_P3_46879_28185499 | NC_021163.1    | Ca_kabuli_chr04 | 28185499                | CC                              | TT                | 1945946241               |
| SNP_P3_46880_28204170 | NC_021163.1    | Ca_kabuli_chr04 | 28204170                | TT                              | AA                | 1945946243               |
| SNP_P3_46881_28204227 | NC_021163.1    | Ca_kabuli_chr04 | 28204227                | TT                              | CC                | 1945946245               |
| SNP_P3_46882_28204458 | NC_021163.1    | Ca_kabuli_chr04 | 28204458                | AA                              | GG                | 1945946247               |
| SNP_P3_46883_28205137 | NC_021163.1    | Ca_kabuli_chr04 | 28205137                | AA                              | TT                | 1945946249               |
| SNP_P3_46886_28206918 | NC_021163.1    | Ca_kabuli_chr04 | 28206918                | TT                              | CC                | 1945946250               |
| SNP_P3_46887_28206921 | NC_021163.1    | Ca_kabuli_chr04 | 28206921                | CC                              | TT                | 1945946252               |
| SNP_P3_46888_28206934 | NC_021163.1    | Ca_kabuli_chr04 | 28206934                | TT                              | CC                | 1945946254               |
| SNP_P3_46889_28206945 | NC_021163.1    | Ca_kabuli_chr04 | 28206945                | CC                              | TT                | 1945946256               |
| SNP_P3_46890_28209945 | NC_021163.1    | Ca_kabuli_chr04 | 28209945                | AA                              | TT                | 1945946257               |
| SNP_P3_46892_28209975 | NC_021163.1    | Ca_kabuli_chr04 | 28209975                | AA                              | TT                | 1945946259               |
| SNP_P3_46893_28209988 | NC_021163.1    | Ca_kabuli_chr04 | 28209988                | AA                              | GG                | 1945946261               |
| SNP_P3_46894_28210236 | NC_021163.1    | Ca_kabuli_chr04 | 28210236                | TT                              | GG                | 1945946263               |

| SNPs IDs              | Chromosome IDs | Chromosomes     | Physical positions (bp) | CDC Frontier (Reference genome) | (Pusa 256 & HPNB) | NCBI SNPdb Accession IDs |
|-----------------------|----------------|-----------------|-------------------------|---------------------------------|-------------------|--------------------------|
| SNP_P3_46896_28211722 | NC_021163.1    | Ca_kabuli_chr04 | 28211722                | TT                              | GG                | 1945946265               |
| SNP_P3_46898_28213858 | NC_021163.1    | Ca_kabuli_chr04 | 28213858                | CC                              | TT                | 1945946266               |
| SNP_P3_46899_28214236 | NC_021163.1    | Ca_kabuli_chr04 | 28214236                | TT                              | CC                | 1945946268               |
| SNP_P3_46900_28214422 | NC_021163.1    | Ca_kabuli_chr04 | 28214422                | CC                              | GG                | 1945946270               |
| SNP_P3_46901_28225807 | NC_021163.1    | Ca_kabuli_chr04 | 28225807                | GG                              | TT                | 1945946272               |
| SNP_P3_46902_28232693 | NC_021163.1    | Ca_kabuli_chr04 | 28232693                | CC                              | TT                | 1945946274               |
| SNP_P3_46903_28234778 | NC_021163.1    | Ca_kabuli_chr04 | 28234778                | GG                              | TT                | 1945946275               |
| SNP_P3_46904_28234794 | NC_021163.1    | Ca_kabuli_chr04 | 28234794                | GG                              | AA                | 1945946277               |
| SNP_P3_46905_28234809 | NC_021163.1    | Ca_kabuli_chr04 | 28234809                | TT                              | AA                | 1945946279               |
| SNP_P3_46906_28236940 | NC_021163.1    | Ca_kabuli_chr04 | 28236940                | CC                              | AA                | 1945946281               |
| SNP_P3_46907_28236953 | NC_021163.1    | Ca_kabuli_chr04 | 28236953                | GG                              | AA                | 1945946282               |
| SNP_P3_46908_28236977 | NC_021163.1    | Ca_kabuli_chr04 | 28236977                | CC                              | AA                | 1945946284               |
| SNP_P3_46909_28236991 | NC_021163.1    | Ca_kabuli_chr04 | 28236991                | CC                              | TT                | 1945946286               |
| SNP_P3_46910_28237052 | NC_021163.1    | Ca_kabuli_chr04 | 28237052                | GG                              | TT                | 1945946288               |
| SNP_P3_46911_28237742 | NC_021163.1    | Ca_kabuli_chr04 | 28237742                | CC                              | TT                | 1945946290               |
| SNP_P3_46912_28237764 | NC_021163.1    | Ca_kabuli_chr04 | 28237764                | AA                              | CC                | 1945946291               |
| SNP_P3_46913_28237818 | NC_021163.1    | Ca_kabuli_chr04 | 28237818                | CC                              | AA                | 1945946293               |
| SNP_P3_46914_28240334 | NC_021163.1    | Ca_kabuli_chr04 | 28240334                | CC                              | TT                | 1945946295               |
| SNP_P3_46915_28240347 | NC_021163.1    | Ca_kabuli_chr04 | 28240347                | GG                              | TT                | 1945946297               |
| SNP_P3_46916_28242505 | NC_021163.1    | Ca_kabuli_chr04 | 28242505                | TT                              | AA                | 1945946299               |
| SNP_P3_46917_28247059 | NC_021163.1    | Ca_kabuli_chr04 | 28247059                | GG                              | AA                | 1945946300               |
| SNP_P3_46918_28253098 | NC_021163.1    | Ca_kabuli_chr04 | 28253098                | CC                              | AA                | 1945946302               |
| SNP_P3_46920_28260503 | NC_021163.1    | Ca_kabuli_chr04 | 28260503                | AA                              | GG                | 1945946304               |
| SNP_P3_46921_28261811 | NC_021163.1    | Ca_kabuli_chr04 | 28261811                | GG                              | AA                | 1945946306               |
| SNP_P3_46922_28262140 | NC_021163.1    | Ca_kabuli_chr04 | 28262140                | GG                              | AA                | 1945946307               |
| SNP_P3_46923_28266389 | NC_021163.1    | Ca_kabuli_chr04 | 28266389                | TT                              | GG                | 1945946309               |
| SNP_P3_46924_28266562 | NC_021163.1    | Ca_kabuli_chr04 | 28266562                | TT                              | AA                | 1945946311               |
| SNP_P3_46925_28266960 | NC_021163.1    | Ca_kabuli_chr04 | 28266960                | AA                              | GG                | 1945946313               |
| SNP_P3_46926_28267062 | NC_021163.1    | Ca_kabuli_chr04 | 28267062                | AA                              | TT                | 1945946315               |
| SNP_P3_46927_28267527 | NC_021163.1    | Ca_kabuli_chr04 | 28267527                | CC                              | TT                | 1945946316               |
| SNP_P3_46929_28268373 | NC_021163.1    | Ca_kabuli_chr04 | 28268373                | AA                              | GG                | 1945946318               |
| SNP_P3_46930_28273889 | NC_021163.1    | Ca_kabuli_chr04 | 28273889                | CC                              | TT                | 1945946320               |
| SNP_P3_46931_28274059 | NC_021163.1    | Ca_kabuli_chr04 | 28274059                | GG                              | AA                | 1945946322               |
| SNP_P3_46934_28277113 | NC_021163.1    | Ca_kabuli_chr04 | 28277113                | TT                              | GG                | 1945946324               |
| SNP_P3_46935_28277758 | NC_021163.1    | Ca_kabuli_chr04 | 28277758                | CC                              | TT                | 1945946325               |
| SNP_P3_46936_28281363 | NC_021163.1    | Ca_kabuli_chr04 | 28281363                | AA                              | GG                | 1945946327               |
| SNP_P3_46937_28281392 | NC_021163.1    | Ca_kabuli_chr04 | 28281392                | CC                              | GG                | 1945946329               |
| SNP_P3_46938_28281396 | NC_021163.1    | Ca_kabuli_chr04 | 28281396                | CC                              | TT                | 1945946331               |
| SNP_P3_46939_28281403 | NC_021163.1    | Ca_kabuli_chr04 | 28281403                | TT                              | CC                | 1945946332               |
| SNP_P3_46941_28281483 | NC_021163.1    | Ca_kabuli_chr04 | 28281483                | AA                              | CC                | 1945946334               |
| SNP_P3_46945_28283360 | NC_021163.1    | Ca_kabuli_chr04 | 28283360                | AA                              | TT                | 1945946336               |
| SNP_P3_46946_28284562 | NC_021163.1    | Ca_kabuli_chr04 | 28284562                | AA                              | TT                | 1945946338               |

| SNPs IDs              | Chromosome IDs | Chromosomes     | Physical positions (bp) | CDC Frontier (Reference genome) | (Pusa 256 & HPNB) | NCBI SNPdb Accession IDs |
|-----------------------|----------------|-----------------|-------------------------|---------------------------------|-------------------|--------------------------|
| SNP_P3_46947_28284583 | NC_021163.1    | Ca_kabuli_chr04 | 28284583                | TT                              | CC                | 1945946340               |
| SNP_P3_46949_28286128 | NC_021163.1    | Ca_kabuli_chr04 | 28286128                | GG                              | AA                | 1945946341               |
| SNP_P3_46950_28286379 | NC_021163.1    | Ca_kabuli_chr04 | 28286379                | GG                              | AA                | 1945946343               |
| SNP_P3_46951_28286557 | NC_021163.1    | Ca_kabuli_chr04 | 28286557                | CC                              | GG                | 1945946345               |
| SNP_P3_46952_28287666 | NC_021163.1    | Ca_kabuli_chr04 | 28287666                | GG                              | CC                | 1945946347               |
| SNP_P3_46953_28287844 | NC_021163.1    | Ca_kabuli_chr04 | 28287844                | CC                              | TT                | 1945946349               |
| SNP_P3_46954_28287889 | NC_021163.1    | Ca_kabuli_chr04 | 28287889                | GG                              | AA                | 1945946350               |
| SNP_P3_46955_28287937 | NC_021163.1    | Ca_kabuli_chr04 | 28287937                | TT                              | GG                | 1945946352               |
| SNP_P3_46956_28288201 | NC_021163.1    | Ca_kabuli_chr04 | 28288201                | TT                              | CC                | 1945946354               |
| SNP_P3_46957_28288515 | NC_021163.1    | Ca_kabuli_chr04 | 28288515                | TT                              | AA                | 1945946356               |
| SNP_P3_46958_28289000 | NC_021163.1    | Ca_kabuli_chr04 | 28289000                | TT                              | GG                | 1945946358               |
| SNP_P3_46959_28289018 | NC_021163.1    | Ca_kabuli_chr04 | 28289018                | CC                              | TT                | 1945946359               |
| SNP_P3_46960_28289060 | NC_021163.1    | Ca_kabuli_chr04 | 28289060                | AA                              | GG                | 1945946361               |
| SNP_P3_46961_28289255 | NC_021163.1    | Ca_kabuli_chr04 | 28289255                | AA                              | TT                | 1945946363               |
| SNP_P3_46962_28289416 | NC_021163.1    | Ca_kabuli_chr04 | 28289416                | CC                              | TT                | 1945946365               |
| SNP_P3_46964_28290409 | NC_021163.1    | Ca_kabuli_chr04 | 28290409                | TT                              | CC                | 1945946366               |
| SNP_P3_46965_28290437 | NC_021163.1    | Ca_kabuli_chr04 | 28290437                | TT                              | CC                | 1945946368               |
| SNP_P3_46966_28290690 | NC_021163.1    | Ca_kabuli_chr04 | 28290690                | AA                              | GG                | 1945946370               |
| SNP_P3_46967_28293534 | NC_021163.1    | Ca_kabuli_chr04 | 28293534                | GG                              | CC                | 1945946372               |
| SNP_P3_46969_28295685 | NC_021163.1    | Ca_kabuli_chr04 | 28295685                | TT                              | CC                | 1945946374               |
| SNP_P3_46970_28295705 | NC_021163.1    | Ca_kabuli_chr04 | 28295705                | AA                              | GG                | 1945946375               |
| SNP_P3_46971_28295724 | NC_021163.1    | Ca_kabuli_chr04 | 28295724                | TT                              | CC                | 1945946377               |
| SNP_P3_46972_28295789 | NC_021163.1    | Ca_kabuli_chr04 | 28295789                | TT                              | CC                | 1945946379               |
| SNP_P3_46973_28295831 | NC_021163.1    | Ca_kabuli_chr04 | 28295831                | CC                              | AA                | 1945946381               |
| SNP_P3_46974_28295917 | NC_021163.1    | Ca_kabuli_chr04 | 28295917                | AA                              | GG                | 1945946382               |
| SNP_P3_46975_28297906 | NC_021163.1    | Ca_kabuli_chr04 | 28297906                | CC                              | AA                | 1945946384               |
| SNP_P3_46976_28297909 | NC_021163.1    | Ca_kabuli_chr04 | 28297909                | AA                              | TT                | 1945946386               |
| SNP_P3_46977_28303132 | NC_021163.1    | Ca_kabuli_chr04 | 28303132                | TT                              | CC                | 1945946388               |
| SNP_P3_46978_28303669 | NC_021163.1    | Ca_kabuli_chr04 | 28303669                | TT                              | CC                | 1945946390               |
| SNP_P3_46980_28314924 | NC_021163.1    | Ca_kabuli_chr04 | 28314924                | TT                              | CC                | 1945946391               |
| SNP_P3_46981_28315035 | NC_021163.1    | Ca_kabuli_chr04 | 28315035                | AA                              | GG                | 1945946393               |
| SNP_P3_46982_28315052 | NC_021163.1    | Ca_kabuli_chr04 | 28315052                | TT                              | CC                | 1945946395               |
| SNP_P3_46983_28315056 | NC_021163.1    | Ca_kabuli_chr04 | 28315056                | CC                              | TT                | 1945946397               |
| SNP_P3_46984_28315194 | NC_021163.1    | Ca_kabuli_chr04 | 28315194                | GG                              | AA                | 1945946399               |
| SNP_P3_46985_28315199 | NC_021163.1    | Ca_kabuli_chr04 | 28315199                | GG                              | TT                | 1945946400               |
| SNP_P3_46986_28315214 | NC_021163.1    | Ca_kabuli_chr04 | 28315214                | AA                              | GG                | 1945946402               |
| SNP_P3_46987_28315224 | NC_021163.1    | Ca_kabuli_chr04 | 28315224                | TT                              | CC                | 1945946404               |
| SNP_P3_46988_28315240 | NC_021163.1    | Ca_kabuli_chr04 | 28315240                | AA                              | GG                | 1945946406               |
| SNP_P3_46989_28315400 | NC_021163.1    | Ca_kabuli_chr04 | 28315400                | GG                              | TT                | 1945946408               |
| SNP_P3_46990_28315574 | NC_021163.1    | Ca_kabuli_chr04 | 28315574                | TT                              | GG                | 1945946409               |
| SNP_P3_46991_28315707 | NC_021163.1    | Ca_kabuli_chr04 | 28315707                | CC                              | TT                | 1945946411               |
| SNP_P3_46992_28316170 | NC_021163.1    | Ca_kabuli_chr04 | 28316170                | AA                              | GG                | 1945946413               |

| SNPs IDs              | Chromosome IDs | Chromosomes     | Physical positions (bp) | CDC Frontier (Reference genome) | (Pusa 256 & HPNB) | NCBI SNPdb Accession IDs |
|-----------------------|----------------|-----------------|-------------------------|---------------------------------|-------------------|--------------------------|
| SNP_P3_46993_28316972 | NC_021163.1    | Ca_kabuli_chr04 | 28316972                | GG                              | CC                | 1945946415               |
| SNP_P3_46994_28317224 | NC_021163.1    | Ca_kabuli_chr04 | 28317224                | CC                              | GG                | 1945946416               |
| SNP_P3_46995_28317701 | NC_021163.1    | Ca_kabuli_chr04 | 28317701                | GG                              | AA                | 1945946418               |
| SNP_P3_46996_28317725 | NC_021163.1    | Ca_kabuli_chr04 | 28317725                | CC                              | TT                | 1945946420               |
| SNP_P3_46998_28322708 | NC_021163.1    | Ca_kabuli_chr04 | 28322708                | CC                              | TT                | 1945946422               |
| SNP_P3_46999_28330904 | NC_021163.1    | Ca_kabuli_chr04 | 28330904                | GG                              | TT                | 1945946424               |
| SNP_P3_47000_28330914 | NC_021163.1    | Ca_kabuli_chr04 | 28330914                | GG                              | TT                | 1945946425               |
| SNP_P3_47001_28331319 | NC_021163.1    | Ca_kabuli_chr04 | 28331319                | TT                              | AA                | 1945946427               |
| SNP_P3_47002_28334512 | NC_021163.1    | Ca_kabuli_chr04 | 28334512                | AA                              | GG                | 1945946429               |
| SNP_P3_47003_28334589 | NC_021163.1    | Ca_kabuli_chr04 | 28334589                | CC                              | GG                | 1945946431               |
| SNP_P3_47005_28337026 | NC_021163.1    | Ca_kabuli_chr04 | 28337026                | CC                              | TT                | 1945946433               |
| SNP_P3_47006_28337359 | NC_021163.1    | Ca_kabuli_chr04 | 28337359                | TT                              | CC                | 1945946434               |
| SNP_P3_47007_28337372 | NC_021163.1    | Ca_kabuli_chr04 | 28337372                | CC                              | TT                | 1945946436               |
| SNP_P3_47009_28337516 | NC_021163.1    | Ca_kabuli_chr04 | 28337516                | AA                              | GG                | 1945946438               |
| SNP_P3_47010_28337544 | NC_021163.1    | Ca_kabuli_chr04 | 28337544                | GG                              | AA                | 1945946440               |
| SNP_P3_47012_28340192 | NC_021163.1    | Ca_kabuli_chr04 | 28340192                | CC                              | AA                | 1945946441               |
| SNP_P3_47013_28340316 | NC_021163.1    | Ca_kabuli_chr04 | 28340316                | CC                              | TT                | 1945946443               |
| SNP_P3_47014_28340335 | NC_021163.1    | Ca_kabuli_chr04 | 28340335                | GG                              | AA                | 1945946445               |
| SNP_P3_47015_28342625 | NC_021163.1    | Ca_kabuli_chr04 | 28342625                | AA                              | GG                | 1945946447               |
| SNP_P3_47017_28342651 | NC_021163.1    | Ca_kabuli_chr04 | 28342651                | TT                              | CC                | 1945946449               |
| SNP_P3_47018_28342719 | NC_021163.1    | Ca_kabuli_chr04 | 28342719                | AA                              | CC                | 1945946450               |
| SNP_P3_47019_28343009 | NC_021163.1    | Ca_kabuli_chr04 | 28343009                | GG                              | AA                | 1945946452               |
| SNP_P3_47020_28343097 | NC_021163.1    | Ca_kabuli_chr04 | 28343097                | GG                              | AA                | 1945946454               |
| SNP_P3_47021_28344282 | NC_021163.1    | Ca_kabuli_chr04 | 28344282                | GG                              | TT                | 1945946456               |
| SNP_P3_47022_28344284 | NC_021163.1    | Ca_kabuli_chr04 | 28344284                | CC                              | TT                | 1945946458               |
| SNP_P3_47024_28345271 | NC_021163.1    | Ca_kabuli_chr04 | 28345271                | CC                              | TT                | 1945946459               |
| SNP_P3_47026_28346711 | NC_021163.1    | Ca_kabuli_chr04 | 28346711                | AA                              | TT                | 1945946461               |
| SNP_P3_47027_28346962 | NC_021163.1    | Ca_kabuli_chr04 | 28346962                | GG                              | AA                | 1945946463               |
| SNP_P3_47028_28347191 | NC_021163.1    | Ca_kabuli_chr04 | 28347191                | GG                              | AA                | 1945946465               |
| SNP_P3_47029_28348830 | NC_021163.1    | Ca_kabuli_chr04 | 28348830                | GG                              | AA                | 1945946466               |
| SNP_P3_47030_28349180 | NC_021163.1    | Ca_kabuli_chr04 | 28349180                | CC                              | AA                | 1945946468               |
| SNP_P3_47032_28349385 | NC_021163.1    | Ca_kabuli_chr04 | 28349385                | CC                              | GG                | 1945946470               |
| SNP_P3_47033_28349482 | NC_021163.1    | Ca_kabuli_chr04 | 28349482                | CC                              | AA                | 1945946472               |
| SNP_P3_47034_28349499 | NC_021163.1    | Ca_kabuli_chr04 | 28349499                | AA                              | CC                | 1945946474               |
| SNP_P3_47035_28350942 | NC_021163.1    | Ca_kabuli_chr04 | 28350942                | AA                              | GG                | 1945946475               |
| SNP_P3_47036_28351595 | NC_021163.1    | Ca_kabuli_chr04 | 28351595                | GG                              | AA                | 1945946477               |
| SNP_P3_47038_28352009 | NC_021163.1    | Ca_kabuli_chr04 | 28352009                | CC                              | AA                | 1945946479               |
| SNP_P3_47039_28352034 | NC_021163.1    | Ca_kabuli_chr04 | 28352034                | GG                              | AA                | 1945946481               |
| SNP_P3_47040_28352636 | NC_021163.1    | Ca_kabuli_chr04 | 28352636                | CC                              | AA                | 1945946483               |
| SNP_P3_47041_28352991 | NC_021163.1    | Ca_kabuli_chr04 | 28352991                | AA                              | GG                | 1945946484               |
| SNP_P3_47042_28353503 | NC_021163.1    | Ca_kabuli_chr04 | 28353503                | CC                              | AA                | 1945946486               |
| SNP_P3_47043_28354004 | NC_021163.1    | Ca_kabuli_chr04 | 28354004                | GG                              | TT                | 1945946488               |

| SNPs IDs              | Chromosome IDs | Chromosomes     | Physical positions (bp) | CDC Frontier (Reference genome) | (Pusa 256 & HPNB) | NCBI SNPdb Accession IDs |
|-----------------------|----------------|-----------------|-------------------------|---------------------------------|-------------------|--------------------------|
| SNP_P3_47044_28354336 | NC_021163.1    | Ca_kabuli_chr04 | 28354336                | TT                              | CC                | 1945946490               |
| SNP_P3_47045_28354410 | NC_021163.1    | Ca_kabuli_chr04 | 28354410                | TT                              | CC                | 1945946491               |
| SNP_P3_47046_28354883 | NC_021163.1    | Ca_kabuli_chr04 | 28354883                | AA                              | CC                | 1945946493               |
| SNP_P3_47047_28355149 | NC_021163.1    | Ca_kabuli_chr04 | 28355149                | TT                              | CC                | 1945946495               |
| SNP_P3_47048_28356042 | NC_021163.1    | Ca_kabuli_chr04 | 28356042                | GG                              | AA                | 1945946497               |
| SNP_P3_47049_28356391 | NC_021163.1    | Ca_kabuli_chr04 | 28356391                | GG                              | CC                | 1945946499               |
| SNP_P3_47050_28356832 | NC_021163.1    | Ca_kabuli_chr04 | 28356832                | GG                              | AA                | 1945946500               |
| SNP_P3_47051_28356833 | NC_021163.1    | Ca_kabuli_chr04 | 28356833                | GG                              | TT                | 1945946502               |
| SNP_P3_47052_28357423 | NC_021163.1    | Ca_kabuli_chr04 | 28357423                | AA                              | GG                | 1945946504               |
| SNP_P3_47053_28357628 | NC_021163.1    | Ca_kabuli_chr04 | 28357628                | CC                              | TT                | 1945946506               |
| SNP_P3_47054_28357630 | NC_021163.1    | Ca_kabuli_chr04 | 28357630                | CC                              | GG                | 1945946508               |
| SNP_P3_47055_28359806 | NC_021163.1    | Ca_kabuli_chr04 | 28359806                | CC                              | TT                | 1945946509               |
| SNP_P3_47056_28360524 | NC_021163.1    | Ca_kabuli_chr04 | 28360524                | AA                              | GG                | 1945946511               |
| SNP_P3_47058_28360569 | NC_021163.1    | Ca_kabuli_chr04 | 28360569                | GG                              | TT                | 1945946513               |
| SNP_P3_47059_28360793 | NC_021163.1    | Ca_kabuli_chr04 | 28360793                | TT                              | CC                | 1945946515               |
| SNP_P3_47060_28360798 | NC_021163.1    | Ca_kabuli_chr04 | 28360798                | AA                              | GG                | 1945946516               |
| SNP_P3_47061_28360900 | NC_021163.1    | Ca_kabuli_chr04 | 28360900                | TT                              | CC                | 1945946518               |
| SNP_P3_47062_28361630 | NC_021163.1    | Ca_kabuli_chr04 | 28361630                | GG                              | TT                | 1945946520               |
| SNP_P3_47064_28362318 | NC_021163.1    | Ca_kabuli_chr04 | 28362318                | CC                              | TT                | 1945946522               |
| SNP_P3_47065_28362630 | NC_021163.1    | Ca_kabuli_chr04 | 28362630                | GG                              | AA                | 1945946524               |
| SNP_P3_47066_28362693 | NC_021163.1    | Ca_kabuli_chr04 | 28362693                | CC                              | GG                | 1945946525               |
| SNP_P3_47067_28363621 | NC_021163.1    | Ca_kabuli_chr04 | 28363621                | CC                              | TT                | 1945946527               |
| SNP_P3_47069_28364641 | NC_021163.1    | Ca_kabuli_chr04 | 28364641                | CC                              | TT                | 1945946529               |
| SNP_P3_47070_28365507 | NC_021163.1    | Ca_kabuli_chr04 | 28365507                | CC                              | TT                | 1945946531               |
| SNP_P3_47071_28367920 | NC_021163.1    | Ca_kabuli_chr04 | 28367920                | GG                              | CC                | 1945946532               |
| SNP_P3_47073_28371020 | NC_021163.1    | Ca_kabuli_chr04 | 28371020                | GG                              | AA                | 1945946534               |
| SNP_P3_47074_28371573 | NC_021163.1    | Ca_kabuli_chr04 | 28371573                | AA                              | TT                | 1945946536               |
| SNP_P3_47075_28373696 | NC_021163.1    | Ca_kabuli_chr04 | 28373696                | CC                              | TT                | 1945946538               |
| SNP_P3_47076_28374559 | NC_021163.1    | Ca_kabuli_chr04 | 28374559                | AA                              | CC                | 1945946540               |
| SNP_P3_47077_28376411 | NC_021163.1    | Ca_kabuli_chr04 | 28376411                | AA                              | GG                | 1945946541               |
| SNP_P3_47078_28377498 | NC_021163.1    | Ca_kabuli_chr04 | 28377498                | TT                              | CC                | 1945946543               |
| SNP_P3_47079_28377513 | NC_021163.1    | Ca_kabuli_chr04 | 28377513                | CC                              | TT                | 1945946545               |
| SNP_P3_47080_28377785 | NC_021163.1    | Ca_kabuli_chr04 | 28377785                | AA                              | TT                | 1945946547               |
| SNP_P3_47081_28378084 | NC_021163.1    | Ca_kabuli_chr04 | 28378084                | AA                              | GG                | 1945946549               |
| SNP_P3_47082_28378478 | NC_021163.1    | Ca_kabuli_chr04 | 28378478                | AA                              | GG                | 1945946550               |
| SNP_P3_47083_28379428 | NC_021163.1    | Ca_kabuli_chr04 | 28379428                | GG                              | AA                | 1945946552               |
| SNP_P3_47085_28383562 | NC_021163.1    | Ca_kabuli_chr04 | 28383562                | GG                              | TT                | 1945946554               |
| SNP_P3_47086_28385520 | NC_021163.1    | Ca_kabuli_chr04 | 28385520                | AA                              | TT                | 1945946556               |
| SNP_P3_47087_28387027 | NC_021163.1    | Ca_kabuli_chr04 | 28387027                | AA                              | GG                | 1945946557               |
| SNP_P3_47088_28387035 | NC_021163.1    | Ca_kabuli_chr04 | 28387035                | GG                              | TT                | 1945946559               |
| SNP_P3_47089_28387259 | NC_021163.1    | Ca_kabuli_chr04 | 28387259                | GG                              | CC                | 1945946561               |
| SNP_P3_47091_28387692 | NC_021163.1    | Ca_kabuli_chr04 | 28387692                | GG                              | AA                | 1945946563               |

| SNPs IDs              | Chromosome IDs | Chromosomes     | Physical positions (bp) | CDC Frontier (Reference genome) | (Pusa 256 & HPNB) | NCBI SNPdb Accession IDs |
|-----------------------|----------------|-----------------|-------------------------|---------------------------------|-------------------|--------------------------|
| SNP_P3_47092_28387699 | NC_021163.1    | Ca_kabuli_chr04 | 28387699                | TT                              | CC                | 1945946565               |
| SNP_P3_47093_28387733 | NC_021163.1    | Ca_kabuli_chr04 | 28387733                | AA                              | CC                | 1945946566               |
| SNP_P3_47094_28387888 | NC_021163.1    | Ca_kabuli_chr04 | 28387888                | CC                              | TT                | 1945946568               |
| SNP_P3_47095_28387915 | NC_021163.1    | Ca_kabuli_chr04 | 28387915                | AA                              | GG                | 1945946570               |
| SNP_P3_47096_28387921 | NC_021163.1    | Ca_kabuli_chr04 | 28387921                | GG                              | CC                | 1945946572               |
| SNP_P3_47097_28387943 | NC_021163.1    | Ca_kabuli_chr04 | 28387943                | AA                              | GG                | 1945946573               |
| SNP_P3_47098_28388328 | NC_021163.1    | Ca_kabuli_chr04 | 28388328                | GG                              | AA                | 1945946575               |
| SNP_P3_47099_28388588 | NC_021163.1    | Ca_kabuli_chr04 | 28388588                | CC                              | TT                | 1945946577               |
| SNP_P3_47100_28388604 | NC_021163.1    | Ca_kabuli_chr04 | 28388604                | GG                              | AA                | 1945946579               |
| SNP_P3_47101_28388624 | NC_021163.1    | Ca_kabuli_chr04 | 28388624                | GG                              | TT                | 1945946581               |
| SNP_P3_47102_28388713 | NC_021163.1    | Ca_kabuli_chr04 | 28388713                | GG                              | CC                | 1945946582               |
| SNP_P3_47103_28388803 | NC_021163.1    | Ca_kabuli_chr04 | 28388803                | GG                              | AA                | 1945946584               |
| SNP_P3_47104_28388814 | NC_021163.1    | Ca_kabuli_chr04 | 28388814                | AA                              | GG                | 1945946586               |
| SNP_P3_47105_28388913 | NC_021163.1    | Ca_kabuli_chr04 | 28388913                | CC                              | TT                | 1945946588               |
| SNP_P3_47106_28389012 | NC_021163.1    | Ca_kabuli_chr04 | 28389012                | GG                              | AA                | 1945946590               |
| SNP_P3_47107_28389015 | NC_021163.1    | Ca_kabuli_chr04 | 28389015                | CC                              | GG                | 1945946591               |
| SNP_P3_47108_28389055 | NC_021163.1    | Ca_kabuli_chr04 | 28389055                | TT                              | CC                | 1945946593               |
| SNP_P3_47109_28389247 | NC_021163.1    | Ca_kabuli_chr04 | 28389247                | AA                              | GG                | 1945946595               |
| SNP_P3_47110_28389269 | NC_021163.1    | Ca_kabuli_chr04 | 28389269                | CC                              | TT                | 1945946597               |
| SNP_P3_47111_28389452 | NC_021163.1    | Ca_kabuli_chr04 | 28389452                | TT                              | CC                | 1945946599               |
| SNP_P3_47112_28389524 | NC_021163.1    | Ca_kabuli_chr04 | 28389524                | GG                              | AA                | 1945946600               |
| SNP_P3_47113_28389611 | NC_021163.1    | Ca_kabuli_chr04 | 28389611                | GG                              | TT                | 1945946602               |
| SNP_P3_47114_28390147 | NC_021163.1    | Ca_kabuli_chr04 | 28390147                | GG                              | AA                | 1945946604               |
| SNP_P3_47115_28390149 | NC_021163.1    | Ca_kabuli_chr04 | 28390149                | GG                              | AA                | 1945946606               |
| SNP_P3_47116_28390163 | NC_021163.1    | Ca_kabuli_chr04 | 28390163                | GG                              | AA                | 1945946607               |
| SNP_P3_47117_28390212 | NC_021163.1    | Ca_kabuli_chr04 | 28390212                | TT                              | CC                | 1945946609               |
| SNP_P3_47118_28390229 | NC_021163.1    | Ca_kabuli_chr04 | 28390229                | AA                              | CC                | 1945946611               |
| SNP_P3_47119_28390231 | NC_021163.1    | Ca_kabuli_chr04 | 28390231                | TT                              | CC                | 1945946613               |
| SNP_P3_47121_28390285 | NC_021163.1    | Ca_kabuli_chr04 | 28390285                | TT                              | CC                | 1945946615               |
| SNP_P3_47122_28390293 | NC_021163.1    | Ca_kabuli_chr04 | 28390293                | GG                              | AA                | 1945946616               |
| SNP_P3_47123_28390316 | NC_021163.1    | Ca_kabuli_chr04 | 28390316                | TT                              | GG                | 1945946618               |
| SNP_P3_47124_28390330 | NC_021163.1    | Ca_kabuli_chr04 | 28390330                | AA                              | CC                | 1945946620               |
| SNP_P3_47125_28390342 | NC_021163.1    | Ca_kabuli_chr04 | 28390342                | GG                              | AA                | 1945946622               |
| SNP_P3_47126_28390394 | NC_021163.1    | Ca_kabuli_chr04 | 28390394                | GG                              | TT                | 1945946623               |
| SNP_P3_47127_28390410 | NC_021163.1    | Ca_kabuli_chr04 | 28390410                | GG                              | AA                | 1945946625               |
| SNP_P3_47129_28390532 | NC_021163.1    | Ca_kabuli_chr04 | 28390532                | CC                              | TT                | 1945946627               |
| SNP_P3_47130_28390570 | NC_021163.1    | Ca_kabuli_chr04 | 28390570                | AA                              | CC                | 1945946629               |
| SNP_P3_47131_28390580 | NC_021163.1    | Ca_kabuli_chr04 | 28390580                | AA                              | CC                | 1945946631               |
| SNP_P3_47132_28390674 | NC_021163.1    | Ca_kabuli_chr04 | 28390674                | GG                              | AA                | 1945946632               |
| SNP_P3_47133_28390675 | NC_021163.1    | Ca_kabuli_chr04 | 28390675                | GG                              | AA                | 1945946634               |
| SNP_P3_47134_28390682 | NC_021163.1    | Ca_kabuli_chr04 | 28390682                | CC                              | TT                | 1945946636               |
| SNP_P3_47135_28390697 | NC_021163.1    | Ca_kabuli_chr04 | 28390697                | CC                              | AA                | 1945946638               |



| SNPs IDs              | Chromosome IDs | Chromosomes     | Physical positions (bp) | CDC Frontier (Reference genome) | (Pusa 256 & HPNB) | NCBI SNPdb Accession IDs |
|-----------------------|----------------|-----------------|-------------------------|---------------------------------|-------------------|--------------------------|
| SNP_P3_47136_28390720 | NC_021163.1    | Ca_kabuli_chr04 | 28390720                | AA                              | GG                | 1945946640               |
| SNP_P3_47137_28390723 | NC_021163.1    | Ca_kabuli_chr04 | 28390723                | AA                              | CC                | 1945946641               |
| SNP_P3_47138_28390772 | NC_021163.1    | Ca_kabuli_chr04 | 28390772                | AA                              | CC                | 1945946643               |
| SNP_P3_47140_28390835 | NC_021163.1    | Ca_kabuli_chr04 | 28390835                | AA                              | GG                | 1945946645               |
| SNP_P3_47141_28390858 | NC_021163.1    | Ca_kabuli_chr04 | 28390858                | GG                              | AA                | 1945946647               |
| SNP_P3_47142_28390937 | NC_021163.1    | Ca_kabuli_chr04 | 28390937                | GG                              | TT                | 1945946648               |
| SNP_P3_47143_28402908 | NC_021163.1    | Ca_kabuli_chr04 | 28402908                | CC                              | TT                | 1945946650               |
| SNP_P3_47145_28403280 | NC_021163.1    | Ca_kabuli_chr04 | 28403280                | CC                              | TT                | 1945946652               |
| SNP_P3_47147_28404488 | NC_021163.1    | Ca_kabuli_chr04 | 28404488                | GG                              | AA                | 1945946654               |
| SNP_P3_47149_28405028 | NC_021163.1    | Ca_kabuli_chr04 | 28405028                | TT                              | CC                | 1945946656               |
| SNP_P3_47150_28405040 | NC_021163.1    | Ca_kabuli_chr04 | 28405040                | GG                              | AA                | 1945946657               |
| SNP_P3_47151_28405822 | NC_021163.1    | Ca_kabuli_chr04 | 28405822                | GG                              | TT                | 1945946659               |
| SNP_P3_47152_28405861 | NC_021163.1    | Ca_kabuli_chr04 | 28405861                | TT                              | GG                | 1945946661               |
| SNP_P3_47153_28405875 | NC_021163.1    | Ca_kabuli_chr04 | 28405875                | AA                              | GG                | 1945946663               |
| SNP_P3_47154_28406987 | NC_021163.1    | Ca_kabuli_chr04 | 28406987                | GG                              | TT                | 1945946665               |
| SNP_P3_47156_28407190 | NC_021163.1    | Ca_kabuli_chr04 | 28407190                | CC                              | AA                | 1945946666               |
| SNP_P3_47157_28407560 | NC_021163.1    | Ca_kabuli_chr04 | 28407560                | AA                              | CC                | 1945946668               |
| SNP_P3_47159_28407790 | NC_021163.1    | Ca_kabuli_chr04 | 28407790                | CC                              | TT                | 1945946670               |
| SNP_P3_47160_28407826 | NC_021163.1    | Ca_kabuli_chr04 | 28407826                | AA                              | CC                | 1945946672               |
| SNP_P3_47161_28408091 | NC_021163.1    | Ca_kabuli_chr04 | 28408091                | GG                              | AA                | 1945946673               |
| SNP_P3_47163_28408118 | NC_021163.1    | Ca_kabuli_chr04 | 28408118                | CC                              | AA                | 1945946675               |
| SNP_P3_47164_28408172 | NC_021163.1    | Ca_kabuli_chr04 | 28408172                | GG                              | TT                | 1945946677               |
| SNP_P3_47166_28408501 | NC_021163.1    | Ca_kabuli_chr04 | 28408501                | CC                              | TT                | 1945946679               |
| SNP_P3_47167_28408505 | NC_021163.1    | Ca_kabuli_chr04 | 28408505                | TT                              | GG                | 1945946681               |
| SNP_P3_47168_28408657 | NC_021163.1    | Ca_kabuli_chr04 | 28408657                | TT                              | CC                | 1945946682               |
| SNP_P3_47169_28409531 | NC_021163.1    | Ca_kabuli_chr04 | 28409531                | CC                              | GG                | 1945946684               |
| SNP_P3_47170_28410000 | NC_021163.1    | Ca_kabuli_chr04 | 28410000                | GG                              | TT                | 1945946686               |
| SNP_P3_47171_28410050 | NC_021163.1    | Ca_kabuli_chr04 | 28410050                | TT                              | CC                | 1945946688               |
| SNP_P3_47172_28410349 | NC_021163.1    | Ca_kabuli_chr04 | 28410349                | AA                              | TT                | 1945946690               |
| SNP_P3_47173_28412556 | NC_021163.1    | Ca_kabuli_chr04 | 28412556                | AA                              | CC                | 1945946691               |
| SNP_P3_47174_28412928 | NC_021163.1    | Ca_kabuli_chr04 | 28412928                | TT                              | CC                | 1945946693               |
| SNP_P3_47175_28413212 | NC_021163.1    | Ca_kabuli_chr04 | 28413212                | GG                              | AA                | 1945946695               |
| SNP_P3_47176_28413277 | NC_021163.1    | Ca_kabuli_chr04 | 28413277                | AA                              | TT                | 1945946697               |
| SNP_P3_47177_28413297 | NC_021163.1    | Ca_kabuli_chr04 | 28413297                | TT                              | AA                | 1945946698               |
| SNP_P3_47178_28414450 | NC_021163.1    | Ca_kabuli_chr04 | 28414450                | CC                              | TT                | 1945946700               |
| SNP_P3_47179_28415392 | NC_021163.1    | Ca_kabuli_chr04 | 28415392                | TT                              | CC                | 1945946702               |
| SNP_P3_47180_28415403 | NC_021163.1    | Ca_kabuli_chr04 | 28415403                | GG                              | AA                | 1945946704               |
| SNP_P3_47181_28415735 | NC_021163.1    | Ca_kabuli_chr04 | 28415735                | TT                              | CC                | 1945946706               |
| SNP_P3_47182_28416613 | NC_021163.1    | Ca_kabuli_chr04 | 28416613                | TT                              | AA                | 1945946707               |
| SNP_P3_47183_28417868 | NC_021163.1    | Ca_kabuli_chr04 | 28417868                | AA                              | GG                | 1945946709               |
| SNP_P3_47184_28417904 | NC_021163.1    | Ca_kabuli_chr04 | 28417904                | GG                              | CC                | 1945946711               |
| SNP_P3_47185_28418142 | NC_021163.1    | Ca_kabuli_chr04 | 28418142                | CC                              | TT                | 1945946713               |

| SNPs IDs              | Chromosome IDs | Chromosomes     | Physical positions (bp) | CDC Frontier (Reference genome) | (Pusa 256 & HPNB) | NCBI SNPdb Accession IDs |
|-----------------------|----------------|-----------------|-------------------------|---------------------------------|-------------------|--------------------------|
| SNP_P3_47187_28419554 | NC_021163.1    | Ca_kabuli_chr04 | 28419554                | GG                              | CC                | 1945946715               |
| SNP_P3_47189_28419593 | NC_021163.1    | Ca_kabuli_chr04 | 28419593                | AA                              | CC                | 1945946716               |
| SNP_P3_47190_28419619 | NC_021163.1    | Ca_kabuli_chr04 | 28419619                | CC                              | TT                | 1945946718               |
| SNP_P3_47191_28419924 | NC_021163.1    | Ca_kabuli_chr04 | 28419924                | GG                              | AA                | 1945946720               |
| SNP_P3_47192_28419949 | NC_021163.1    | Ca_kabuli_chr04 | 28419949                | TT                              | CC                | 1945946722               |
| SNP_P3_47193_28420266 | NC_021163.1    | Ca_kabuli_chr04 | 28420266                | AA                              | GG                | 1945946723               |
| SNP_P3_47196_28424893 | NC_021163.1    | Ca_kabuli_chr04 | 28424893                | CC                              | TT                | 1945946725               |
| SNP_P3_47197_28424898 | NC_021163.1    | Ca_kabuli_chr04 | 28424898                | TT                              | CC                | 1945946727               |
| SNP_P3_47198_28428249 | NC_021163.1    | Ca_kabuli_chr04 | 28428249                | GG                              | AA                | 1945946729               |
| SNP_P3_47200_28443414 | NC_021163.1    | Ca_kabuli_chr04 | 28443414                | TT                              | GG                | 1945946731               |
| SNP_P3_47202_28448008 | NC_021163.1    | Ca_kabuli_chr04 | 28448008                | TT                              | CC                | 1945946732               |
| SNP_P3_47203_28448015 | NC_021163.1    | Ca_kabuli_chr04 | 28448015                | GG                              | AA                | 1945946734               |
| SNP_P3_47204_28448471 | NC_021163.1    | Ca_kabuli_chr04 | 28448471                | CC                              | GG                | 1945946736               |
| SNP_P3_47205_28449130 | NC_021163.1    | Ca_kabuli_chr04 | 28449130                | CC                              | TT                | 1945946738               |
| SNP_P3_47206_28449879 | NC_021163.1    | Ca_kabuli_chr04 | 28449879                | GG                              | CC                | 1945946739               |
| SNP_P3_47207_28450300 | NC_021163.1    | Ca_kabuli_chr04 | 28450300                | GG                              | TT                | 1945946741               |
| SNP_P3_47208_28450381 | NC_021163.1    | Ca_kabuli_chr04 | 28450381                | TT                              | CC                | 1945946743               |
| SNP_P3_47209_28451820 | NC_021163.1    | Ca_kabuli_chr04 | 28451820                | CC                              | TT                | 1945946745               |
| SNP_P3_47210_28451839 | NC_021163.1    | Ca_kabuli_chr04 | 28451839                | TT                              | AA                | 1945946747               |
| SNP_P3_47211_28451927 | NC_021163.1    | Ca_kabuli_chr04 | 28451927                | AA                              | TT                | 1945946748               |
| SNP_P3_47212_28453906 | NC_021163.1    | Ca_kabuli_chr04 | 28453906                | CC                              | TT                | 1945946750               |
| SNP_P3_47213_28454093 | NC_021163.1    | Ca_kabuli_chr04 | 28454093                | CC                              | AA                | 1945946752               |
| SNP_P3_47214_28454410 | NC_021163.1    | Ca_kabuli_chr04 | 28454410                | CC                              | TT                | 1945946754               |
| SNP_P3_47215_28454435 | NC_021163.1    | Ca_kabuli_chr04 | 28454435                | CC                              | TT                | 1945946756               |
| SNP_P3_47216_28454476 | NC_021163.1    | Ca_kabuli_chr04 | 28454476                | AA                              | GG                | 1945946757               |
| SNP_P3_47218_28455687 | NC_021163.1    | Ca_kabuli_chr04 | 28455687                | TT                              | GG                | 1945946759               |
| SNP_P3_47219_28456070 | NC_021163.1    | Ca_kabuli_chr04 | 28456070                | CC                              | AA                | 1945946761               |
| SNP_P3_47221_28457925 | NC_021163.1    | Ca_kabuli_chr04 | 28457925                | GG                              | AA                | 1945946763               |
| SNP_P3_47223_28484288 | NC_021163.1    | Ca_kabuli_chr04 | 28484288                | CC                              | AA                | 1945946764               |
| SNP_P3_47224_28498478 | NC_021163.1    | Ca_kabuli_chr04 | 28498478                | AA                              | CC                | 1945946766               |
| SNP_P3_47226_28502604 | NC_021163.1    | Ca_kabuli_chr04 | 28502604                | TT                              | CC                | 1945946768               |
| SNP_P3_47227_28505701 | NC_021163.1    | Ca_kabuli_chr04 | 28505701                | TT                              | CC                | 1945946770               |
| SNP_P3_47231_28510687 | NC_021163.1    | Ca_kabuli_chr04 | 28510687                | CC                              | TT                | 1945946772               |
| SNP_P3_47232_28521496 | NC_021163.1    | Ca_kabuli_chr04 | 28521496                | TT                              | CC                | 1945946773               |
| SNP_P3_47234_28524428 | NC_021163.1    | Ca_kabuli_chr04 | 28524428                | GG                              | AA                | 1945946775               |
| SNP_P3_47235_28525317 | NC_021163.1    | Ca_kabuli_chr04 | 28525317                | AA                              | TT                | 1945946777               |
| SNP_P3_47236_28525612 | NC_021163.1    | Ca_kabuli_chr04 | 28525612                | AA                              | GG                | 1945946779               |
| SNP_P3_47237_28525892 | NC_021163.1    | Ca_kabuli_chr04 | 28525892                | AA                              | GG                | 1945946781               |
| SNP_P3_47238_28528183 | NC_021163.1    | Ca_kabuli_chr04 | 28528183                | GG                              | CC                | 1945946782               |
| SNP_P3_47239_28532177 | NC_021163.1    | Ca_kabuli_chr04 | 28532177                | CC                              | AA                | 1945946784               |
| SNP_P3_47240_28532431 | NC_021163.1    | Ca_kabuli_chr04 | 28532431                | CC                              | AA                | 1945946786               |
| SNP_P3_47241_28533639 | NC_021163.1    | Ca_kabuli_chr04 | 28533639                | TT                              | CC                | 1945946788               |

| SNPs IDs              | Chromosome IDs | Chromosomes     | Physical positions (bp) | CDC Frontier (Reference genome) | (Pusa 256 & HPNB) | NCBI SNPdb Accession IDs |
|-----------------------|----------------|-----------------|-------------------------|---------------------------------|-------------------|--------------------------|
| SNP_P3_47242_28533909 | NC_021163.1    | Ca_kabuli_chr04 | 28533909                | CC                              | TT                | 1945946789               |
| SNP_P3_47244_28538204 | NC_021163.1    | Ca_kabuli_chr04 | 28538204                | TT                              | GG                | 1945946791               |
| SNP_P3_47245_28541611 | NC_021163.1    | Ca_kabuli_chr04 | 28541611                | GG                              | AA                | 1945946793               |
| SNP_P3_47246_28541695 | NC_021163.1    | Ca_kabuli_chr04 | 28541695                | GG                              | TT                | 1945946795               |
| SNP_P3_47247_28542290 | NC_021163.1    | Ca_kabuli_chr04 | 28542290                | AA                              | GG                | 1945946797               |
| SNP_P3_47248_28548632 | NC_021163.1    | Ca_kabuli_chr04 | 28548632                | TT                              | AA                | 1945946798               |
| SNP_P3_47249_28548633 | NC_021163.1    | Ca_kabuli_chr04 | 28548633                | TT                              | AA                | 1945946800               |
| SNP_P3_47251_28548638 | NC_021163.1    | Ca_kabuli_chr04 | 28548638                | TT                              | CC                | 1945946802               |
| SNP_P3_47252_28549398 | NC_021163.1    | Ca_kabuli_chr04 | 28549398                | AA                              | TT                | 1945946804               |
| SNP_P3_47253_28550613 | NC_021163.1    | Ca_kabuli_chr04 | 28550613                | CC                              | GG                | 1945946806               |
| SNP_P3_47256_28559494 | NC_021163.1    | Ca_kabuli_chr04 | 28559494                | AA                              | CC                | 1945946807               |
| SNP_P3_47257_28563425 | NC_021163.1    | Ca_kabuli_chr04 | 28563425                | AA                              | CC                | 1945946809               |
| SNP_P3_47258_28563446 | NC_021163.1    | Ca_kabuli_chr04 | 28563446                | AA                              | TT                | 1945946811               |
| SNP_P3_47259_28563458 | NC_021163.1    | Ca_kabuli_chr04 | 28563458                | AA                              | TT                | 1945946813               |
| SNP_P3_47260_28563459 | NC_021163.1    | Ca_kabuli_chr04 | 28563459                | AA                              | TT                | 1945946814               |
| SNP_P3_47261_28563893 | NC_021163.1    | Ca_kabuli_chr04 | 28563893                | GG                              | AA                | 1945946816               |
| SNP_P3_47262_28564087 | NC_021163.1    | Ca_kabuli_chr04 | 28564087                | AA                              | GG                | 1945946818               |
| SNP_P3_47263_28564203 | NC_021163.1    | Ca_kabuli_chr04 | 28564203                | TT                              | GG                | 1945946820               |
| SNP_P3_47264_28571538 | NC_021163.1    | Ca_kabuli_chr04 | 28571538                | AA                              | GG                | 1945946822               |
| SNP_P3_47265_28575185 | NC_021163.1    | Ca_kabuli_chr04 | 28575185                | AA                              | GG                | 1945946823               |
| SNP_P3_47266_28582829 | NC_021163.1    | Ca_kabuli_chr04 | 28582829                | GG                              | AA                | 1945946825               |
| SNP_P3_47267_28582950 | NC_021163.1    | Ca_kabuli_chr04 | 28582950                | AA                              | TT                | 1945946827               |
| SNP_P3_47268_28582952 | NC_021163.1    | Ca_kabuli_chr04 | 28582952                | GG                              | AA                | 1945946829               |
| SNP_P3_47269_28583926 | NC_021163.1    | Ca_kabuli_chr04 | 28583926                | TT                              | AA                | 1945946831               |
| SNP_P3_47270_28585571 | NC_021163.1    | Ca_kabuli_chr04 | 28585571                | TT                              | GG                | 1945946832               |
| SNP_P3_47271_28585581 | NC_021163.1    | Ca_kabuli_chr04 | 28585581                | GG                              | AA                | 1945946834               |
| SNP_P3_47272_28585654 | NC_021163.1    | Ca_kabuli_chr04 | 28585654                | TT                              | AA                | 1945946836               |
| SNP_P3_47273_28586050 | NC_021163.1    | Ca_kabuli_chr04 | 28586050                | TT                              | CC                | 1945946838               |
| SNP_P3_47274_28586357 | NC_021163.1    | Ca_kabuli_chr04 | 28586357                | GG                              | AA                | 1945946839               |
| SNP_P3_47275_28586392 | NC_021163.1    | Ca_kabuli_chr04 | 28586392                | AA                              | GG                | 1945946841               |
| SNP_P3_47276_28588430 | NC_021163.1    | Ca_kabuli_chr04 | 28588430                | AA                              | GG                | 1945946843               |
| SNP_P3_47278_28590488 | NC_021163.1    | Ca_kabuli_chr04 | 28590488                | GG                              | AA                | 1945946845               |
| SNP_P3_47279_28591163 | NC_021163.1    | Ca_kabuli_chr04 | 28591163                | GG                              | AA                | 1945946847               |
| SNP_P3_47280_28591327 | NC_021163.1    | Ca_kabuli_chr04 | 28591327                | GG                              | AA                | 1945946848               |
| SNP_P3_47282_28592169 | NC_021163.1    | Ca_kabuli_chr04 | 28592169                | CC                              | AA                | 1945946850               |
| SNP_P3_47283_28592189 | NC_021163.1    | Ca_kabuli_chr04 | 28592189                | GG                              | CC                | 1945946852               |
| SNP_P3_47284_28596465 | NC_021163.1    | Ca_kabuli_chr04 | 28596465                | AA                              | TT                | 1945946854               |
| SNP_P3_47285_28600438 | NC_021163.1    | Ca_kabuli_chr04 | 28600438                | GG                              | TT                | 1945946856               |
| SNP_P3_47286_28601196 | NC_021163.1    | Ca_kabuli_chr04 | 28601196                | CC                              | TT                | 1945946857               |
| SNP_P3_47287_28601261 | NC_021163.1    | Ca_kabuli_chr04 | 28601261                | CC                              | TT                | 1945946859               |
| SNP_P3_47288_28601290 | NC_021163.1    | Ca_kabuli_chr04 | 28601290                | GG                              | AA                | 1945946861               |
| SNP_P3_47290_28606650 | NC_021163.1    | Ca_kabuli_chr04 | 28606650                | AA                              | CC                | 1945946863               |

| SNPs IDs              | Chromosome IDs | Chromosomes     | Physical positions (bp) | CDC Frontier (Reference genome) | (Pusa 256 & HPNB) | NCBI SNPdb Accession IDs |
|-----------------------|----------------|-----------------|-------------------------|---------------------------------|-------------------|--------------------------|
| SNP_P3_47291_28606655 | NC_021163.1    | Ca_kabuli_chr04 | 28606655                | AA                              | GG                | 1945946864               |
| SNP_P3_47292_28611675 | NC_021163.1    | Ca_kabuli_chr04 | 28611675                | AA                              | GG                | 1945946866               |
| SNP_P3_47293_28612303 | NC_021163.1    | Ca_kabuli_chr04 | 28612303                | CC                              | TT                | 1945946868               |
| SNP_P3_47294_28613572 | NC_021163.1    | Ca_kabuli_chr04 | 28613572                | GG                              | AA                | 1945946870               |
| SNP_P3_47295_28613610 | NC_021163.1    | Ca_kabuli_chr04 | 28613610                | CC                              | TT                | 1945946872               |
| SNP_P3_47297_28619310 | NC_021163.1    | Ca_kabuli_chr04 | 28619310                | GG                              | TT                | 1945946873               |
| SNP_P3_47299_28624540 | NC_021163.1    | Ca_kabuli_chr04 | 28624540                | AA                              | GG                | 1945946875               |
| SNP_P3_47300_28624792 | NC_021163.1    | Ca_kabuli_chr04 | 28624792                | TT                              | AA                | 1945946877               |
| SNP_P3_47302_28629497 | NC_021163.1    | Ca_kabuli_chr04 | 28629497                | AA                              | GG                | 1945946879               |
| SNP_P3_47303_28630055 | NC_021163.1    | Ca_kabuli_chr04 | 28630055                | TT                              | AA                | 1945946881               |
| SNP_P3_47304_28631070 | NC_021163.1    | Ca_kabuli_chr04 | 28631070                | AA                              | GG                | 1945946882               |
| SNP_P3_47305_28633809 | NC_021163.1    | Ca_kabuli_chr04 | 28633809                | TT                              | GG                | 1945946884               |
| SNP_P3_47306_28635821 | NC_021163.1    | Ca_kabuli_chr04 | 28635821                | CC                              | TT                | 1945946886               |
| SNP_P3_47307_28635982 | NC_021163.1    | Ca_kabuli_chr04 | 28635982                | TT                              | AA                | 1945946888               |
| SNP_P3_47308_28639063 | NC_021163.1    | Ca_kabuli_chr04 | 28639063                | CC                              | GG                | 1945946889               |
| SNP_P3_47309_28639437 | NC_021163.1    | Ca_kabuli_chr04 | 28639437                | GG                              | TT                | 1945946891               |
| SNP_P3_47310_28639484 | NC_021163.1    | Ca_kabuli_chr04 | 28639484                | TT                              | GG                | 1945946893               |
| SNP_P3_47311_28639974 | NC_021163.1    | Ca_kabuli_chr04 | 28639974                | GG                              | TT                | 1945946895               |
| SNP_P3_47312_28640117 | NC_021163.1    | Ca_kabuli_chr04 | 28640117                | GG                              | AA                | 1945946897               |
| SNP_P3_47313_28640374 | NC_021163.1    | Ca_kabuli_chr04 | 28640374                | CC                              | TT                | 1945946898               |
| SNP_P3_47314_28641139 | NC_021163.1    | Ca_kabuli_chr04 | 28641139                | GG                              | AA                | 1945946900               |
| SNP_P3_47315_28641456 | NC_021163.1    | Ca_kabuli_chr04 | 28641456                | CC                              | TT                | 1945946902               |
| SNP_P3_47316_28642096 | NC_021163.1    | Ca_kabuli_chr04 | 28642096                | CC                              | TT                | 1945946904               |
| SNP_P3_47317_28642275 | NC_021163.1    | Ca_kabuli_chr04 | 28642275                | CC                              | AA                | 1945946906               |
| SNP_P3_47319_28662590 | NC_021163.1    | Ca_kabuli_chr04 | 28662590                | TT                              | CC                | 1945946907               |
| SNP_P3_47320_28663633 | NC_021163.1    | Ca_kabuli_chr04 | 28663633                | AA                              | TT                | 1945946909               |
| SNP_P3_47321_28663976 | NC_021163.1    | Ca_kabuli_chr04 | 28663976                | GG                              | AA                | 1945946911               |
| SNP_P3_47322_28664000 | NC_021163.1    | Ca_kabuli_chr04 | 28664000                | GG                              | AA                | 1945946913               |
| SNP_P3_47323_28664010 | NC_021163.1    | Ca_kabuli_chr04 | 28664010                | GG                              | CC                | 1945946914               |
| SNP_P3_47324_28668069 | NC_021163.1    | Ca_kabuli_chr04 | 28668069                | AA                              | TT                | 1945946916               |
| SNP_P3_47325_28668072 | NC_021163.1    | Ca_kabuli_chr04 | 28668072                | GG                              | AA                | 1945946918               |
| SNP_P3_47326_28668097 | NC_021163.1    | Ca_kabuli_chr04 | 28668097                | GG                              | TT                | 1945946920               |
| SNP_P3_47328_28674392 | NC_021163.1    | Ca_kabuli_chr04 | 28674392                | TT                              | AA                | 1945946922               |
| SNP_P3_47329_28674577 | NC_021163.1    | Ca_kabuli_chr04 | 28674577                | GG                              | TT                | 1945946923               |
| SNP_P3_47330_28690569 | NC_021163.1    | Ca_kabuli_chr04 | 28690569                | TT                              | CC                | 1945946925               |
| SNP_P3_47331_28702370 | NC_021163.1    | Ca_kabuli_chr04 | 28702370                | GG                              | CC                | 1945946927               |
| SNP_P3_47332_28707954 | NC_021163.1    | Ca_kabuli_chr04 | 28707954                | CC                              | TT                | 1945946929               |
| SNP_P3_47333_28707958 | NC_021163.1    | Ca_kabuli_chr04 | 28707958                | TT                              | AA                | 1945946931               |
| SNP_P3_47335_28714888 | NC_021163.1    | Ca_kabuli_chr04 | 28714888                | CC                              | AA                | 1945946932               |
| SNP_P3_47336_28714936 | NC_021163.1    | Ca_kabuli_chr04 | 28714936                | AA                              | GG                | 1945946934               |
| SNP_P3_47337_28714938 | NC_021163.1    | Ca_kabuli_chr04 | 28714938                | CC                              | TT                | 1945946936               |
| SNP_P3_47338_28714941 | NC_021163.1    | Ca_kabuli_chr04 | 28714941                | CC                              | TT                | 1945946938               |

| SNPs IDs              | Chromosome IDs | Chromosomes     | Physical positions (bp) | CDC Frontier (Reference genome) | (Pusa 256 & HPNB) | NCBI SNPdb Accession IDs |
|-----------------------|----------------|-----------------|-------------------------|---------------------------------|-------------------|--------------------------|
| SNP_P3_47339_28714950 | NC_021163.1    | Ca_kabuli_chr04 | 28714950                | CC                              | TT                | 1945946939               |
| SNP_P3_47340_28714965 | NC_021163.1    | Ca_kabuli_chr04 | 28714965                | AA                              | GG                | 1945946941               |
| SNP_P3_47341_28714986 | NC_021163.1    | Ca_kabuli_chr04 | 28714986                | GG                              | AA                | 1945946943               |
| SNP_P3_47343_28715024 | NC_021163.1    | Ca_kabuli_chr04 | 28715024                | GG                              | AA                | 1945946945               |
| SNP_P3_47344_28715129 | NC_021163.1    | Ca_kabuli_chr04 | 28715129                | CC                              | TT                | 1945946947               |
| SNP_P3_47345_28715137 | NC_021163.1    | Ca_kabuli_chr04 | 28715137                | TT                              | GG                | 1945946948               |
| SNP_P3_47346_28715226 | NC_021163.1    | Ca_kabuli_chr04 | 28715226                | AA                              | GG                | 1945946950               |
| SNP_P3_47347_28727113 | NC_021163.1    | Ca_kabuli_chr04 | 28727113                | TT                              | AA                | 1945946952               |
| SNP_P3_47348_28727130 | NC_021163.1    | Ca_kabuli_chr04 | 28727130                | TT                              | AA                | 1945946954               |
| SNP_P3_47349_28727145 | NC_021163.1    | Ca_kabuli_chr04 | 28727145                | TT                              | CC                | 1945946956               |
| SNP_P3_47350_28727151 | NC_021163.1    | Ca_kabuli_chr04 | 28727151                | TT                              | AA                | 1945946957               |
| SNP_P3_47351_28727210 | NC_021163.1    | Ca_kabuli_chr04 | 28727210                | CC                              | TT                | 1945946959               |
| SNP_P3_47352_28772397 | NC_021163.1    | Ca_kabuli_chr04 | 28772397                | AA                              | GG                | 1945946961               |
| SNP_P3_47353_28773466 | NC_021163.1    | Ca_kabuli_chr04 | 28773466                | GG                              | AA                | 1945946963               |
| SNP_P3_47354_28774306 | NC_021163.1    | Ca_kabuli_chr04 | 28774306                | TT                              | CC                | 1945946964               |
| SNP_P3_47355_28774644 | NC_021163.1    | Ca_kabuli_chr04 | 28774644                | CC                              | TT                | 1945946966               |
| SNP_P3_47356_28780898 | NC_021163.1    | Ca_kabuli_chr04 | 28780898                | TT                              | CC                | 1945946968               |
| SNP_P3_47358_28781515 | NC_021163.1    | Ca_kabuli_chr04 | 28781515                | AA                              | TT                | 1945946970               |
| SNP_P3_47359_28783897 | NC_021163.1    | Ca_kabuli_chr04 | 28783897                | AA                              | GG                | 1945946972               |
| SNP_P3_47360_28783956 | NC_021163.1    | Ca_kabuli_chr04 | 28783956                | CC                              | AA                | 1945946973               |
| SNP_P3_47361_28784765 | NC_021163.1    | Ca_kabuli_chr04 | 28784765                | TT                              | CC                | 1945946975               |
| SNP_P3_47362_28791978 | NC_021163.1    | Ca_kabuli_chr04 | 28791978                | AA                              | CC                | 1945946977               |
| SNP_P3_47365_28793886 | NC_021163.1    | Ca_kabuli_chr04 | 28793886                | TT                              | CC                | 1945946979               |
| SNP_P3_47366_28793908 | NC_021163.1    | Ca_kabuli_chr04 | 28793908                | CC                              | TT                | 1945946980               |
| SNP_P3_47367_28793924 | NC_021163.1    | Ca_kabuli_chr04 | 28793924                | GG                              | AA                | 1945946982               |
| SNP_P3_47368_28793933 | NC_021163.1    | Ca_kabuli_chr04 | 28793933                | GG                              | CC                | 1945946984               |
| SNP_P3_47369_28794274 | NC_021163.1    | Ca_kabuli_chr04 | 28794274                | TT                              | AA                | 1945946986               |
| SNP_P3_47370_28794333 | NC_021163.1    | Ca_kabuli_chr04 | 28794333                | CC                              | TT                | 1945946988               |
| SNP_P3_47371_28794609 | NC_021163.1    | Ca_kabuli_chr04 | 28794609                | TT                              | CC                | 1945946989               |
| SNP_P3_47372_28794903 | NC_021163.1    | Ca_kabuli_chr04 | 28794903                | GG                              | TT                | 1945946991               |
| SNP_P3_47373_28794911 | NC_021163.1    | Ca_kabuli_chr04 | 28794911                | TT                              | CC                | 1945946993               |
| SNP_P3_47374_28794921 | NC_021163.1    | Ca_kabuli_chr04 | 28794921                | GG                              | TT                | 1945946995               |
| SNP_P3_47375_28795107 | NC_021163.1    | Ca_kabuli_chr04 | 28795107                | CC                              | TT                | 1945946997               |
| SNP_P3_47376_28795988 | NC_021163.1    | Ca_kabuli_chr04 | 28795988                | CC                              | TT                | 1945946998               |
| SNP_P3_47377_28796095 | NC_021163.1    | Ca_kabuli_chr04 | 28796095                | GG                              | AA                | 1945947000               |
| SNP_P3_47378_28796389 | NC_021163.1    | Ca_kabuli_chr04 | 28796389                | AA                              | GG                | 1945947002               |
| SNP_P3_47379_28797456 | NC_021163.1    | Ca_kabuli_chr04 | 28797456                | CC                              | TT                | 1945947004               |
| SNP_P3_47380_28799227 | NC_021163.1    | Ca_kabuli_chr04 | 28799227                | AA                              | GG                | 1945947005               |
| SNP_P3_47381_28799272 | NC_021163.1    | Ca_kabuli_chr04 | 28799272                | TT                              | CC                | 1945947007               |
| SNP_P3_47382_28799479 | NC_021163.1    | Ca_kabuli_chr04 | 28799479                | CC                              | TT                | 1945947009               |
| SNP_P3_47384_28799521 | NC_021163.1    | Ca_kabuli_chr04 | 28799521                | GG                              | AA                | 1945947011               |
| SNP_P3_47385_28799591 | NC_021163.1    | Ca_kabuli_chr04 | 28799591                | GG                              | AA                | 1945947013               |

| SNPs IDs              | Chromosome IDs | Chromosomes     | Physical positions (bp) | CDC Frontier (Reference genome) | (Pusa 256 & HPNB) | NCBI SNPdb Accession IDs |
|-----------------------|----------------|-----------------|-------------------------|---------------------------------|-------------------|--------------------------|
| SNP_P3_47386_28800768 | NC_021163.1    | Ca_kabuli_chr04 | 28800768                | GG                              | AA                | 1945947014               |
| SNP_P3_47387_28800775 | NC_021163.1    | Ca_kabuli_chr04 | 28800775                | CC                              | TT                | 1945947016               |
| SNP_P3_47388_28800791 | NC_021163.1    | Ca_kabuli_chr04 | 28800791                | GG                              | AA                | 1945947018               |
| SNP_P3_47389_28800831 | NC_021163.1    | Ca_kabuli_chr04 | 28800831                | TT                              | AA                | 1945947020               |
| SNP_P3_47390_28800834 | NC_021163.1    | Ca_kabuli_chr04 | 28800834                | GG                              | TT                | 1945947022               |
| SNP_P3_47391_28801233 | NC_021163.1    | Ca_kabuli_chr04 | 28801233                | AA                              | TT                | 1945947023               |
| SNP_P3_47392_28801245 | NC_021163.1    | Ca_kabuli_chr04 | 28801245                | AA                              | GG                | 1945947025               |
| SNP_P3_47393_28803030 | NC_021163.1    | Ca_kabuli_chr04 | 28803030                | AA                              | TT                | 1945947027               |
| SNP_P3_47394_28804936 | NC_021163.1    | Ca_kabuli_chr04 | 28804936                | AA                              | GG                | 1945947029               |
| SNP_P3_47395_28804965 | NC_021163.1    | Ca_kabuli_chr04 | 28804965                | CC                              | TT                | 1945947031               |
| SNP_P3_47396_28804998 | NC_021163.1    | Ca_kabuli_chr04 | 28804998                | TT                              | GG                | 1945947032               |
| SNP_P3_47397_28805307 | NC_021163.1    | Ca_kabuli_chr04 | 28805307                | TT                              | CC                | 1945947034               |
| SNP_P3_47398_28805319 | NC_021163.1    | Ca_kabuli_chr04 | 28805319                | AA                              | GG                | 1945947036               |
| SNP_P3_47399_28805322 | NC_021163.1    | Ca_kabuli_chr04 | 28805322                | CC                              | TT                | 1945947038               |
| SNP_P3_47400_28805327 | NC_021163.1    | Ca_kabuli_chr04 | 28805327                | GG                              | AA                | 1945947039               |
| SNP_P3_47401_28805354 | NC_021163.1    | Ca_kabuli_chr04 | 28805354                | AA                              | GG                | 1945947041               |
| SNP_P3_47402_28805551 | NC_021163.1    | Ca_kabuli_chr04 | 28805551                | AA                              | TT                | 1945947043               |
| SNP_P3_47403_28805553 | NC_021163.1    | Ca_kabuli_chr04 | 28805553                | AA                              | CC                | 1945947045               |
| SNP_P3_47404_28805637 | NC_021163.1    | Ca_kabuli_chr04 | 28805637                | CC                              | TT                | 1945947047               |
| SNP_P3_47405_28805639 | NC_021163.1    | Ca_kabuli_chr04 | 28805639                | AA                              | GG                | 1945947048               |
| SNP_P3_47406_28805834 | NC_021163.1    | Ca_kabuli_chr04 | 28805834                | GG                              | AA                | 1945947050               |
| SNP_P3_47407_28805835 | NC_021163.1    | Ca_kabuli_chr04 | 28805835                | AA                              | TT                | 1945947052               |
| SNP_P3_47408_28805855 | NC_021163.1    | Ca_kabuli_chr04 | 28805855                | TT                              | CC                | 1945947054               |
| SNP_P3_47409_28805887 | NC_021163.1    | Ca_kabuli_chr04 | 28805887                | AA                              | CC                | 1945947055               |
| SNP_P3_47410_28805897 | NC_021163.1    | Ca_kabuli_chr04 | 28805897                | AA                              | GG                | 1945947057               |
| SNP_P3_47411_28806149 | NC_021163.1    | Ca_kabuli_chr04 | 28806149                | GG                              | AA                | 1945947059               |
| SNP_P3_47412_28806197 | NC_021163.1    | Ca_kabuli_chr04 | 28806197                | TT                              | CC                | 1945947061               |
| SNP_P3_47413_28806202 | NC_021163.1    | Ca_kabuli_chr04 | 28806202                | GG                              | TT                | 1945947063               |
| SNP_P3_47414_28806438 | NC_021163.1    | Ca_kabuli_chr04 | 28806438                | GG                              | TT                | 1945947064               |
| SNP_P3_47416_28806709 | NC_021163.1    | Ca_kabuli_chr04 | 28806709                | CC                              | TT                | 1945947066               |
| SNP_P3_47418_28806758 | NC_021163.1    | Ca_kabuli_chr04 | 28806758                | GG                              | AA                | 1945947068               |
| SNP_P3_47419_28807048 | NC_021163.1    | Ca_kabuli_chr04 | 28807048                | AA                              | GG                | 1945947070               |
| SNP_P3_47420_28816709 | NC_021163.1    | Ca_kabuli_chr04 | 28816709                | AA                              | CC                | 1945947072               |
| SNP_P3_47421_28816715 | NC_021163.1    | Ca_kabuli_chr04 | 28816715                | CC                              | TT                | 1945947073               |
| SNP_P3_47422_28816724 | NC_021163.1    | Ca_kabuli_chr04 | 28816724                | CC                              | TT                | 1945947075               |
| SNP_P3_47423_28817523 | NC_021163.1    | Ca_kabuli_chr04 | 28817523                | GG                              | AA                | 1945947077               |
| SNP_P3_47424_28817560 | NC_021163.1    | Ca_kabuli_chr04 | 28817560                | CC                              | TT                | 1945947079               |
| SNP_P3_47425_28817562 | NC_021163.1    | Ca_kabuli_chr04 | 28817562                | CC                              | TT                | 1945947081               |
| SNP_P3_47426_28817692 | NC_021163.1    | Ca_kabuli_chr04 | 28817692                | CC                              | TT                | 1945947082               |
| SNP_P3_47428_28821658 | NC_021163.1    | Ca_kabuli_chr04 | 28821658                | TT                              | GG                | 1945947084               |
| SNP_P3_47429_28821673 | NC_021163.1    | Ca_kabuli_chr04 | 28821673                | CC                              | TT                | 1945947086               |
| SNP_P3_47430_28821705 | NC_021163.1    | Ca_kabuli_chr04 | 28821705                | CC                              | GG                | 1945947088               |

| SNPs IDs              | Chromosome IDs | Chromosomes     | Physical positions (bp) | CDC Frontier (Reference genome) | (Pusa 256 & HPNB) | NCBI SNPdb Accession IDs |
|-----------------------|----------------|-----------------|-------------------------|---------------------------------|-------------------|--------------------------|
| SNP_P3_47431_28821708 | NC_021163.1    | Ca_kabuli_chr04 | 28821708                | GG                              | TT                | 1945947089               |
| SNP_P3_47432_28821709 | NC_021163.1    | Ca_kabuli_chr04 | 28821709                | TT                              | AA                | 1945947091               |
| SNP_P3_47433_28821711 | NC_021163.1    | Ca_kabuli_chr04 | 28821711                | CC                              | GG                | 1945947093               |
| SNP_P3_47435_28821788 | NC_021163.1    | Ca_kabuli_chr04 | 28821788                | AA                              | GG                | 1945947095               |
| SNP_P3_47436_28822010 | NC_021163.1    | Ca_kabuli_chr04 | 28822010                | GG                              | AA                | 1945947097               |
| SNP_P3_47437_28822021 | NC_021163.1    | Ca_kabuli_chr04 | 28822021                | GG                              | AA                | 1945947098               |
| SNP_P3_47439_28822111 | NC_021163.1    | Ca_kabuli_chr04 | 28822111                | CC                              | TT                | 1945947100               |
| SNP_P3_47440_28822201 | NC_021163.1    | Ca_kabuli_chr04 | 28822201                | AA                              | GG                | 1945947102               |
| SNP_P3_47441_28822271 | NC_021163.1    | Ca_kabuli_chr04 | 28822271                | TT                              | GG                | 1945947104               |
| SNP_P3_47442_28822506 | NC_021163.1    | Ca_kabuli_chr04 | 28822506                | AA                              | GG                | 1945947106               |
| SNP_P3_47443_28822524 | NC_021163.1    | Ca_kabuli_chr04 | 28822524                | AA                              | GG                | 1945947107               |
| SNP_P3_47444_28822583 | NC_021163.1    | Ca_kabuli_chr04 | 28822583                | GG                              | AA                | 1945947109               |
| SNP_P3_47446_28822918 | NC_021163.1    | Ca_kabuli_chr04 | 28822918                | AA                              | GG                | 1945947111               |
| SNP_P3_47447_28823742 | NC_021163.1    | Ca_kabuli_chr04 | 28823742                | GG                              | AA                | 1945947113               |
| SNP_P3_47449_28825201 | NC_021163.1    | Ca_kabuli_chr04 | 28825201                | AA                              | CC                | 1945947114               |
| SNP_P3_47450_28825980 | NC_021163.1    | Ca_kabuli_chr04 | 28825980                | CC                              | TT                | 1945947116               |
| SNP_P3_47451_28828000 | NC_021163.1    | Ca_kabuli_chr04 | 28828000                | TT                              | CC                | 1945947118               |
| SNP_P3_47452_28828318 | NC_021163.1    | Ca_kabuli_chr04 | 28828318                | TT                              | GG                | 1945947120               |
| SNP_P3_47455_28830289 | NC_021163.1    | Ca_kabuli_chr04 | 28830289                | AA                              | GG                | 1945947122               |
| SNP_P3_47456_28831394 | NC_021163.1    | Ca_kabuli_chr04 | 28831394                | TT                              | GG                | 1945947123               |
| SNP_P3_47457_28832766 | NC_021163.1    | Ca_kabuli_chr04 | 28832766                | CC                              | TT                | 1945947125               |
| SNP_P3_47461_28833725 | NC_021163.1    | Ca_kabuli_chr04 | 28833725                | TT                              | AA                | 1945947127               |
| SNP_P3_47462_28839219 | NC_021163.1    | Ca_kabuli_chr04 | 28839219                | CC                              | AA                | 1945947129               |
| SNP_P3_47463_28839692 | NC_021163.1    | Ca_kabuli_chr04 | 28839692                | CC                              | AA                | 1945947131               |
| SNP_P3_47464_28842263 | NC_021163.1    | Ca_kabuli_chr04 | 28842263                | AA                              | GG                | 1945947132               |
| SNP_P3_47465_28842278 | NC_021163.1    | Ca_kabuli_chr04 | 28842278                | GG                              | AA                | 1945947134               |
| SNP_P3_47466_28848599 | NC_021163.1    | Ca_kabuli_chr04 | 28848599                | AA                              | TT                | 1945947136               |
| SNP_P3_47467_28849982 | NC_021163.1    | Ca_kabuli_chr04 | 28849982                | AA                              | GG                | 1945947138               |
| SNP_P3_47468_28851628 | NC_021163.1    | Ca_kabuli_chr04 | 28851628                | CC                              | TT                | 1945947139               |
| SNP_P3_47469_28853122 | NC_021163.1    | Ca_kabuli_chr04 | 28853122                | AA                              | GG                | 1945947141               |
| SNP_P3_47471_28853250 | NC_021163.1    | Ca_kabuli_chr04 | 28853250                | GG                              | AA                | 1945947143               |
| SNP_P3_47472_28853268 | NC_021163.1    | Ca_kabuli_chr04 | 28853268                | AA                              | GG                | 1945947145               |
| SNP_P3_47473_28853440 | NC_021163.1    | Ca_kabuli_chr04 | 28853440                | TT                              | CC                | 1945947147               |
| SNP_P3_47474_28854204 | NC_021163.1    | Ca_kabuli_chr04 | 28854204                | GG                              | AA                | 1945947148               |
| SNP_P3_47475_28854208 | NC_021163.1    | Ca_kabuli_chr04 | 28854208                | TT                              | AA                | 1945947150               |
| SNP_P3_47477_28856543 | NC_021163.1    | Ca_kabuli_chr04 | 28856543                | AA                              | CC                | 1945947152               |
| SNP_P3_47478_28856677 | NC_021163.1    | Ca_kabuli_chr04 | 28856677                | GG                              | AA                | 1945947154               |
| SNP_P3_47479_28859064 | NC_021163.1    | Ca_kabuli_chr04 | 28859064                | CC                              | TT                | 1945947156               |
| SNP_P3_47480_28862290 | NC_021163.1    | Ca_kabuli_chr04 | 28862290                | CC                              | TT                | 1945947157               |
| SNP_P3_47481_28862838 | NC_021163.1    | Ca_kabuli_chr04 | 28862838                | AA                              | GG                | 1945947159               |
| SNP_P3_47482_28863114 | NC_021163.1    | Ca_kabuli_chr04 | 28863114                | TT                              | GG                | 1945947161               |
| SNP_P3_47483_28863212 | NC_021163.1    | Ca_kabuli_chr04 | 28863212                | AA                              | CC                | 1945947163               |

| SNPs IDs              | Chromosome IDs | Chromosomes     | Physical positions (bp) | CDC Frontier (Reference genome) | (Pusa 256 & HPNB) | NCBI SNPdb Accession IDs |
|-----------------------|----------------|-----------------|-------------------------|---------------------------------|-------------------|--------------------------|
| SNP_P3_47484_28866376 | NC_021163.1    | Ca_kabuli_chr04 | 28866376                | AA                              | GG                | 1945947164               |
| SNP_P3_47485_28868606 | NC_021163.1    | Ca_kabuli_chr04 | 28868606                | CC                              | TT                | 1945947166               |
| SNP_P3_47486_28871187 | NC_021163.1    | Ca_kabuli_chr04 | 28871187                | CC                              | TT                | 1945947168               |
| SNP_P3_47487_28871221 | NC_021163.1    | Ca_kabuli_chr04 | 28871221                | CC                              | AA                | 1945947170               |
| SNP_P3_47488_28871254 | NC_021163.1    | Ca_kabuli_chr04 | 28871254                | GG                              | AA                | 1945947172               |
| SNP_P3_47490_28871910 | NC_021163.1    | Ca_kabuli_chr04 | 28871910                | GG                              | AA                | 1945947173               |
| SNP_P3_47491_28871967 | NC_021163.1    | Ca_kabuli_chr04 | 28871967                | TT                              | CC                | 1945947175               |
| SNP_P3_47492_28873902 | NC_021163.1    | Ca_kabuli_chr04 | 28873902                | AA                              | CC                | 1945947177               |
| SNP_P3_47493_28883169 | NC_021163.1    | Ca_kabuli_chr04 | 28883169                | AA                              | GG                | 1945947179               |
| SNP_P3_47494_28883178 | NC_021163.1    | Ca_kabuli_chr04 | 28883178                | TT                              | CC                | 1945947181               |
| SNP_P3_47495_28886152 | NC_021163.1    | Ca_kabuli_chr04 | 28886152                | GG                              | TT                | 1945947182               |
| SNP_P3_47496_28886259 | NC_021163.1    | Ca_kabuli_chr04 | 28886259                | TT                              | CC                | 1945947184               |
| SNP_P3_47497_28887296 | NC_021163.1    | Ca_kabuli_chr04 | 28887296                | AA                              | GG                | 1945947186               |
| SNP_P3_47498_28887325 | NC_021163.1    | Ca_kabuli_chr04 | 28887325                | CC                              | TT                | 1945947188               |
| SNP_P3_47499_28887375 | NC_021163.1    | Ca_kabuli_chr04 | 28887375                | GG                              | TT                | 1945947189               |
| SNP_P3_47500_28891743 | NC_021163.1    | Ca_kabuli_chr04 | 28891743                | AA                              | GG                | 1945947191               |
| SNP_P3_47501_28892601 | NC_021163.1    | Ca_kabuli_chr04 | 28892601                | AA                              | GG                | 1945947193               |
| SNP_P3_47502_28893365 | NC_021163.1    | Ca_kabuli_chr04 | 28893365                | CC                              | TT                | 1945947195               |
| SNP_P3_47503_28893371 | NC_021163.1    | Ca_kabuli_chr04 | 28893371                | TT                              | CC                | 1945947197               |
| SNP_P3_47504_28893420 | NC_021163.1    | Ca_kabuli_chr04 | 28893420                | AA                              | GG                | 1945947198               |
| SNP_P3_47505_28893426 | NC_021163.1    | Ca_kabuli_chr04 | 28893426                | GG                              | AA                | 1945947200               |
| SNP_P3_47506_28893466 | NC_021163.1    | Ca_kabuli_chr04 | 28893466                | TT                              | CC                | 1945947202               |
| SNP_P3_47507_28893470 | NC_021163.1    | Ca_kabuli_chr04 | 28893470                | CC                              | TT                | 1945947204               |
| SNP_P3_47509_28894040 | NC_021163.1    | Ca_kabuli_chr04 | 28894040                | TT                              | CC                | 1945947206               |
| SNP_P3_47510_28894061 | NC_021163.1    | Ca_kabuli_chr04 | 28894061                | GG                              | AA                | 1945947207               |
| SNP_P3_47511_28894910 | NC_021163.1    | Ca_kabuli_chr04 | 28894910                | TT                              | AA                | 1945947209               |
| SNP_P3_47512_28894912 | NC_021163.1    | Ca_kabuli_chr04 | 28894912                | CC                              | TT                | 1945947211               |
| SNP_P3_47513_28897978 | NC_021163.1    | Ca_kabuli_chr04 | 28897978                | TT                              | CC                | 1945947213               |
| SNP_P3_47514_28898144 | NC_021163.1    | Ca_kabuli_chr04 | 28898144                | CC                              | TT                | 1945947214               |
| SNP_P3_47515_28898148 | NC_021163.1    | Ca_kabuli_chr04 | 28898148                | CC                              | TT                | 1945947216               |
| SNP_P3_47516_28900350 | NC_021163.1    | Ca_kabuli_chr04 | 28900350                | GG                              | AA                | 1945947218               |
| SNP_P3_47517_28900358 | NC_021163.1    | Ca_kabuli_chr04 | 28900358                | CC                              | TT                | 1945947220               |
| SNP_P3_47518_28904629 | NC_021163.1    | Ca_kabuli_chr04 | 28904629                | GG                              | TT                | 1945947222               |
| SNP_P3_47519_28906827 | NC_021163.1    | Ca_kabuli_chr04 | 28906827                | CC                              | TT                | 1945947223               |
| SNP_P3_47520_28908221 | NC_021163.1    | Ca_kabuli_chr04 | 28908221                | CC                              | TT                | 1945947225               |
| SNP_P3_47521_28908658 | NC_021163.1    | Ca_kabuli_chr04 | 28908658                | TT                              | AA                | 1945947227               |
| SNP_P3_47522_28909839 | NC_021163.1    | Ca_kabuli_chr04 | 28909839                | GG                              | AA                | 1945947229               |
| SNP_P3_47523_28911379 | NC_021163.1    | Ca_kabuli_chr04 | 28911379                | CC                              | TT                | 1945947231               |
| SNP_P3_47526_28915537 | NC_021163.1    | Ca_kabuli_chr04 | 28915537                | TT                              | AA                | 1945947232               |
| SNP_P3_47527_28916966 | NC_021163.1    | Ca_kabuli_chr04 | 28916966                | TT                              | AA                | 1945947234               |
| SNP_P3_47528_28917421 | NC_021163.1    | Ca_kabuli_chr04 | 28917421                | GG                              | TT                | 1945947236               |
| SNP_P3_47529_28917549 | NC_021163.1    | Ca_kabuli_chr04 | 28917549                | GG                              | AA                | 1945947238               |



| SNPs IDs              | Chromosome IDs | Chromosomes     | Physical positions (bp) | CDC Frontier (Reference genome) | (Pusa 256 & HPNB) | NCBI SNPdb Accession IDs |
|-----------------------|----------------|-----------------|-------------------------|---------------------------------|-------------------|--------------------------|
| SNP_P3_47530_28921749 | NC_021163.1    | Ca_kabuli_chr04 | 28921749                | AA                              | GG                | 1945947239               |
| SNP_P3_47531_28922045 | NC_021163.1    | Ca_kabuli_chr04 | 28922045                | CC                              | TT                | 1945947241               |
| SNP_P3_47532_28926812 | NC_021163.1    | Ca_kabuli_chr04 | 28926812                | TT                              | GG                | 1945947243               |
| SNP_P3_47533_28929242 | NC_021163.1    | Ca_kabuli_chr04 | 28929242                | AA                              | CC                | 1945947245               |
| SNP_P3_47534_28929254 | NC_021163.1    | Ca_kabuli_chr04 | 28929254                | TT                              | CC                | 1945947247               |
| SNP_P3_47535_28930161 | NC_021163.1    | Ca_kabuli_chr04 | 28930161                | CC                              | AA                | 1945947248               |
| SNP_P3_47536_28931318 | NC_021163.1    | Ca_kabuli_chr04 | 28931318                | TT                              | CC                | 1945947250               |
| SNP_P3_47537_28932104 | NC_021163.1    | Ca_kabuli_chr04 | 28932104                | GG                              | AA                | 1945947252               |
| SNP_P3_47538_28934563 | NC_021163.1    | Ca_kabuli_chr04 | 28934563                | TT                              | CC                | 1945947254               |
| SNP_P3_47539_28934770 | NC_021163.1    | Ca_kabuli_chr04 | 28934770                | AA                              | CC                | 1945947256               |
| SNP_P3_47541_28937461 | NC_021163.1    | Ca_kabuli_chr04 | 28937461                | GG                              | TT                | 1945947257               |
| SNP_P3_47542_28938122 | NC_021163.1    | Ca_kabuli_chr04 | 28938122                | CC                              | TT                | 1945947259               |
| SNP_P3_47543_28946563 | NC_021163.1    | Ca_kabuli_chr04 | 28946563                | AA                              | GG                | 1945947261               |
| SNP_P3_47545_28951510 | NC_021163.1    | Ca_kabuli_chr04 | 28951510                | TT                              | GG                | 1945947263               |
| SNP_P3_47546_28952915 | NC_021163.1    | Ca_kabuli_chr04 | 28952915                | TT                              | CC                | 1945947264               |
| SNP_P3_47547_28953597 | NC_021163.1    | Ca_kabuli_chr04 | 28953597                | TT                              | CC                | 1945947266               |
| SNP_P3_47549_28955720 | NC_021163.1    | Ca_kabuli_chr04 | 28955720                | TT                              | CC                | 1945947268               |
| SNP_P3_47551_28956088 | NC_021163.1    | Ca_kabuli_chr04 | 28956088                | CC                              | TT                | 1945947270               |
| SNP_P3_47552_28956453 | NC_021163.1    | Ca_kabuli_chr04 | 28956453                | TT                              | CC                | 1945947272               |
| SNP_P3_47553_28959658 | NC_021163.1    | Ca_kabuli_chr04 | 28959658                | AA                              | GG                | 1945947273               |
| SNP_P3_47554_28959701 | NC_021163.1    | Ca_kabuli_chr04 | 28959701                | AA                              | GG                | 1945947275               |
| SNP_P3_47555_28961355 | NC_021163.1    | Ca_kabuli_chr04 | 28961355                | CC                              | GG                | 1945947277               |
| SNP_P3_47556_28961762 | NC_021163.1    | Ca_kabuli_chr04 | 28961762                | CC                              | AA                | 1945947279               |
| SNP_P3_47557_28961772 | NC_021163.1    | Ca_kabuli_chr04 | 28961772                | TT                              | CC                | 1945947281               |
| SNP_P3_47558_28964646 | NC_021163.1    | Ca_kabuli_chr04 | 28964646                | GG                              | AA                | 1945947282               |
| SNP_P3_47560_28965115 | NC_021163.1    | Ca_kabuli_chr04 | 28965115                | AA                              | GG                | 1945947284               |
| SNP_P3_47561_28966050 | NC_021163.1    | Ca_kabuli_chr04 | 28966050                | GG                              | CC                | 1945947286               |
| SNP_P3_47562_28966378 | NC_021163.1    | Ca_kabuli_chr04 | 28966378                | TT                              | GG                | 1945947288               |
| SNP_P3_47563_28966397 | NC_021163.1    | Ca_kabuli_chr04 | 28966397                | TT                              | CC                | 1945947289               |
| SNP_P3_47564_28970390 | NC_021163.1    | Ca_kabuli_chr04 | 28970390                | TT                              | CC                | 1945947291               |
| SNP_P3_47565_28970736 | NC_021163.1    | Ca_kabuli_chr04 | 28970736                | AA                              | CC                | 1945947293               |
| SNP_P3_47566_28981315 | NC_021163.1    | Ca_kabuli_chr04 | 28981315                | GG                              | TT                | 1945947295               |
| SNP_P3_47567_28981396 | NC_021163.1    | Ca_kabuli_chr04 | 28981396                | CC                              | TT                | 1945947297               |
| SNP_P3_47568_28981476 | NC_021163.1    | Ca_kabuli_chr04 | 28981476                | CC                              | TT                | 1945947298               |
| SNP_P3_47570_28981922 | NC_021163.1    | Ca_kabuli_chr04 | 28981922                | GG                              | AA                | 1945947300               |
| SNP_P3_47571_28982860 | NC_021163.1    | Ca_kabuli_chr04 | 28982860                | TT                              | CC                | 1945947302               |
| SNP_P3_47572_28982883 | NC_021163.1    | Ca_kabuli_chr04 | 28982883                | TT                              | CC                | 1945947304               |
| SNP_P3_47573_28983541 | NC_021163.1    | Ca_kabuli_chr04 | 28983541                | AA                              | GG                | 1945947305               |
| SNP_P3_47574_28986929 | NC_021163.1    | Ca_kabuli_chr04 | 28986929                | TT                              | CC                | 1945947307               |
| SNP_P3_47575_28988612 | NC_021163.1    | Ca_kabuli_chr04 | 28988612                | TT                              | GG                | 1945947309               |
| SNP_P3_47576_28988648 | NC_021163.1    | Ca_kabuli_chr04 | 28988648                | TT                              | CC                | 1945947311               |
| SNP_P3_47577_28989467 | NC_021163.1    | Ca_kabuli_chr04 | 28989467                | GG                              | AA                | 1945947313               |

| SNPs IDs              | Chromosome IDs | Chromosomes     | Physical positions (bp) | CDC Frontier (Reference genome) | (Pusa 256 & HPNB) | NCBI SNPdb Accession IDs |
|-----------------------|----------------|-----------------|-------------------------|---------------------------------|-------------------|--------------------------|
| SNP_P3_47578_28991647 | NC_021163.1    | Ca_kabuli_chr04 | 28991647                | GG                              | CC                | 1945947314               |
| SNP_P3_47582_28992674 | NC_021163.1    | Ca_kabuli_chr04 | 28992674                | TT                              | GG                | 1945947316               |
| SNP_P3_47584_28994293 | NC_021163.1    | Ca_kabuli_chr04 | 28994293                | TT                              | CC                | 1945947318               |
| SNP_P3_47585_28994317 | NC_021163.1    | Ca_kabuli_chr04 | 28994317                | GG                              | AA                | 1945947320               |
| SNP_P3_47586_28994380 | NC_021163.1    | Ca_kabuli_chr04 | 28994380                | GG                              | TT                | 1945947322               |
| SNP_P3_47587_28994405 | NC_021163.1    | Ca_kabuli_chr04 | 28994405                | AA                              | TT                | 1945947323               |
| SNP_P3_47588_28995369 | NC_021163.1    | Ca_kabuli_chr04 | 28995369                | CC                              | TT                | 1945947325               |
| SNP_P3_47589_28995370 | NC_021163.1    | Ca_kabuli_chr04 | 28995370                | TT                              | CC                | 1945947327               |
| SNP_P3_47590_28995372 | NC_021163.1    | Ca_kabuli_chr04 | 28995372                | TT                              | AA                | 1945947329               |
| SNP_P3_47591_28995384 | NC_021163.1    | Ca_kabuli_chr04 | 28995384                | CC                              | TT                | 1945947330               |
| SNP_P3_47593_28996093 | NC_021163.1    | Ca_kabuli_chr04 | 28996093                | TT                              | AA                | 1945947332               |
| SNP_P3_47595_28997323 | NC_021163.1    | Ca_kabuli_chr04 | 28997323                | TT                              | AA                | 1945947334               |
| SNP_P3_47596_28997325 | NC_021163.1    | Ca_kabuli_chr04 | 28997325                | CC                              | TT                | 1945947336               |
| SNP_P3_47597_29007994 | NC_021163.1    | Ca_kabuli_chr04 | 29007994                | GG                              | AA                | 1945947338               |
| SNP_P3_47598_29008004 | NC_021163.1    | Ca_kabuli_chr04 | 29008004                | GG                              | AA                | 1945947339               |
| SNP_P3_47599_29008029 | NC_021163.1    | Ca_kabuli_chr04 | 29008029                | GG                              | AA                | 1945947341               |
| SNP_P3_47600_29008051 | NC_021163.1    | Ca_kabuli_chr04 | 29008051                | AA                              | GG                | 1945947343               |
| SNP_P3_47601_29008175 | NC_021163.1    | Ca_kabuli_chr04 | 29008175                | TT                              | AA                | 1945947345               |
| SNP_P3_47602_29008225 | NC_021163.1    | Ca_kabuli_chr04 | 29008225                | AA                              | CC                | 1945947347               |
| SNP_P3_47604_29008483 | NC_021163.1    | Ca_kabuli_chr04 | 29008483                | AA                              | GG                | 1945947348               |
| SNP_P3_47605_29008497 | NC_021163.1    | Ca_kabuli_chr04 | 29008497                | AA                              | GG                | 1945947350               |
| SNP_P3_47606_29008501 | NC_021163.1    | Ca_kabuli_chr04 | 29008501                | GG                              | AA                | 1945947352               |
| SNP_P3_47607_29008507 | NC_021163.1    | Ca_kabuli_chr04 | 29008507                | GG                              | AA                | 1945947354               |
| SNP_P3_47608_29008529 | NC_021163.1    | Ca_kabuli_chr04 | 29008529                | AA                              | CC                | 1945947355               |
| SNP_P3_47609_29008533 | NC_021163.1    | Ca_kabuli_chr04 | 29008533                | AA                              | GG                | 1945947357               |
| SNP_P3_47610_29008538 | NC_021163.1    | Ca_kabuli_chr04 | 29008538                | AA                              | CC                | 1945947359               |
| SNP_P3_47611_29008763 | NC_021163.1    | Ca_kabuli_chr04 | 29008763                | AA                              | GG                | 1945947361               |
| SNP_P3_47612_29012323 | NC_021163.1    | Ca_kabuli_chr04 | 29012323                | TT                              | CC                | 1945947363               |
| SNP_P3_47613_29012325 | NC_021163.1    | Ca_kabuli_chr04 | 29012325                | GG                              | AA                | 1945947364               |
| SNP_P3_47614_29012338 | NC_021163.1    | Ca_kabuli_chr04 | 29012338                | TT                              | GG                | 1945947366               |
| SNP_P3_47615_29012365 | NC_021163.1    | Ca_kabuli_chr04 | 29012365                | TT                              | AA                | 1945947368               |
| SNP_P3_47616_29012617 | NC_021163.1    | Ca_kabuli_chr04 | 29012617                | GG                              | TT                | 1945947370               |
| SNP_P3_47617_29028279 | NC_021163.1    | Ca_kabuli_chr04 | 29028279                | TT                              | CC                | 1945947372               |
| SNP_P3_47618_29028330 | NC_021163.1    | Ca_kabuli_chr04 | 29028330                | AA                              | CC                | 1945947373               |
| SNP_P3_47619_29028376 | NC_021163.1    | Ca_kabuli_chr04 | 29028376                | AA                              | GG                | 1945947375               |
| SNP_P3_47620_29028377 | NC_021163.1    | Ca_kabuli_chr04 | 29028377                | GG                              | AA                | 1945947377               |
| SNP_P3_47621_29030654 | NC_021163.1    | Ca_kabuli_chr04 | 29030654                | CC                              | TT                | 1945947379               |
| SNP_P3_47622_29030715 | NC_021163.1    | Ca_kabuli_chr04 | 29030715                | AA                              | TT                | 1945947380               |
| SNP_P3_47623_29033695 | NC_021163.1    | Ca_kabuli_chr04 | 29033695                | TT                              | GG                | 1945947382               |
| SNP_P3_47624_29033704 | NC_021163.1    | Ca_kabuli_chr04 | 29033704                | CC                              | TT                | 1945947384               |
| SNP_P3_47625_29033781 | NC_021163.1    | Ca_kabuli_chr04 | 29033781                | GG                              | AA                | 1945947386               |
| SNP_P3_47626_29033991 | NC_021163.1    | Ca_kabuli_chr04 | 29033991                | AA                              | GG                | 1945947388               |

| SNPs IDs              | Chromosome IDs | Chromosomes     | Physical positions (bp) | CDC Frontier (Reference genome) | (Pusa 256 & HPNB) | NCBI SNPdb Accession IDs |
|-----------------------|----------------|-----------------|-------------------------|---------------------------------|-------------------|--------------------------|
| SNP_P3_47627_29034048 | NC_021163.1    | Ca_kabuli_chr04 | 29034048                | CC                              | TT                | 1945947389               |
| SNP_P3_47628_29034298 | NC_021163.1    | Ca_kabuli_chr04 | 29034298                | GG                              | AA                | 1945947391               |
| SNP_P3_47629_29034309 | NC_021163.1    | Ca_kabuli_chr04 | 29034309                | TT                              | CC                | 1945947393               |
| SNP_P3_47630_29034327 | NC_021163.1    | Ca_kabuli_chr04 | 29034327                | CC                              | GG                | 1945947395               |
| SNP_P3_47632_29034343 | NC_021163.1    | Ca_kabuli_chr04 | 29034343                | CC                              | TT                | 1945947397               |
| SNP_P3_47633_29034474 | NC_021163.1    | Ca_kabuli_chr04 | 29034474                | CC                              | TT                | 1945947398               |
| SNP_P3_47634_29034535 | NC_021163.1    | Ca_kabuli_chr04 | 29034535                | GG                              | AA                | 1945947400               |
| SNP_P3_47635_29034536 | NC_021163.1    | Ca_kabuli_chr04 | 29034536                | TT                              | CC                | 1945947402               |
| SNP_P3_47636_29035389 | NC_021163.1    | Ca_kabuli_chr04 | 29035389                | AA                              | GG                | 1945947404               |
| SNP_P3_47637_29035479 | NC_021163.1    | Ca_kabuli_chr04 | 29035479                | TT                              | AA                | 1945947405               |
| SNP_P3_47638_29035507 | NC_021163.1    | Ca_kabuli_chr04 | 29035507                | CC                              | TT                | 1945947407               |
| SNP_P3_47639_29035514 | NC_021163.1    | Ca_kabuli_chr04 | 29035514                | AA                              | TT                | 1945947409               |
| SNP_P3_47640_29036455 | NC_021163.1    | Ca_kabuli_chr04 | 29036455                | TT                              | GG                | 1945947411               |
| SNP_P3_47641_29036478 | NC_021163.1    | Ca_kabuli_chr04 | 29036478                | TT                              | GG                | 1945947413               |
| SNP_P3_47642_29036491 | NC_021163.1    | Ca_kabuli_chr04 | 29036491                | TT                              | GG                | 1945947414               |
| SNP_P3_47644_29037006 | NC_021163.1    | Ca_kabuli_chr04 | 29037006                | AA                              | CC                | 1945947416               |
| SNP_P3_47645_29037010 | NC_021163.1    | Ca_kabuli_chr04 | 29037010                | TT                              | AA                | 1945947418               |
| SNP_P3_47647_29037054 | NC_021163.1    | Ca_kabuli_chr04 | 29037054                | CC                              | AA                | 1945947420               |
| SNP_P3_47648_29037083 | NC_021163.1    | Ca_kabuli_chr04 | 29037083                | GG                              | AA                | 1945947421               |
| SNP_P3_47649_29037749 | NC_021163.1    | Ca_kabuli_chr04 | 29037749                | TT                              | GG                | 1945947423               |
| SNP_P3_47650_29037803 | NC_021163.1    | Ca_kabuli_chr04 | 29037803                | AA                              | CC                | 1945947425               |
| SNP_P3_47651_29037814 | NC_021163.1    | Ca_kabuli_chr04 | 29037814                | TT                              | AA                | 1945947427               |
| SNP_P3_47652_29037826 | NC_021163.1    | Ca_kabuli_chr04 | 29037826                | CC                              | AA                | 1945947429               |
| SNP_P3_47653_29037854 | NC_021163.1    | Ca_kabuli_chr04 | 29037854                | GG                              | AA                | 1945947430               |
| SNP_P3_47655_29048866 | NC_021163.1    | Ca_kabuli_chr04 | 29048866                | CC                              | AA                | 1945947432               |
| SNP_P3_47656_29048971 | NC_021163.1    | Ca_kabuli_chr04 | 29048971                | AA                              | GG                | 1945947434               |
| SNP_P3_47658_29050201 | NC_021163.1    | Ca_kabuli_chr04 | 29050201                | CC                              | TT                | 1945947436               |
| SNP_P3_47659_29050213 | NC_021163.1    | Ca_kabuli_chr04 | 29050213                | AA                              | TT                | 1945947438               |
| SNP_P3_47660_29050224 | NC_021163.1    | Ca_kabuli_chr04 | 29050224                | AA                              | TT                | 1945947439               |
| SNP_P3_47661_29050383 | NC_021163.1    | Ca_kabuli_chr04 | 29050383                | CC                              | TT                | 1945947441               |
| SNP_P3_47662_29050704 | NC_021163.1    | Ca_kabuli_chr04 | 29050704                | CC                              | TT                | 1945947443               |
| SNP_P3_47663_29050782 | NC_021163.1    | Ca_kabuli_chr04 | 29050782                | AA                              | GG                | 1945947445               |
| SNP_P3_47664_29050786 | NC_021163.1    | Ca_kabuli_chr04 | 29050786                | CC                              | AA                | 1945947446               |
| SNP_P3_47665_29052222 | NC_021163.1    | Ca_kabuli_chr04 | 29052222                | AA                              | TT                | 1945947448               |
| SNP_P3_47667_29052309 | NC_021163.1    | Ca_kabuli_chr04 | 29052309                | TT                              | AA                | 1945947450               |
| SNP_P3_47668_29052480 | NC_021163.1    | Ca_kabuli_chr04 | 29052480                | TT                              | CC                | 1945947452               |
| SNP_P3_47669_29052825 | NC_021163.1    | Ca_kabuli_chr04 | 29052825                | GG                              | CC                | 1945947454               |
| SNP_P3_47671_29053508 | NC_021163.1    | Ca_kabuli_chr04 | 29053508                | GG                              | CC                | 1945947455               |
| SNP_P3_47672_29053711 | NC_021163.1    | Ca_kabuli_chr04 | 29053711                | TT                              | AA                | 1945947457               |
| SNP_P3_47673_29053809 | NC_021163.1    | Ca_kabuli_chr04 | 29053809                | CC                              | TT                | 1945947459               |
| SNP_P3_47674_29053891 | NC_021163.1    | Ca_kabuli_chr04 | 29053891                | AA                              | GG                | 1945947461               |
| SNP_P3_47676_29054169 | NC_021163.1    | Ca_kabuli_chr04 | 29054169                | AA                              | CC                | 1945947462               |

| SNPs IDs              | Chromosome IDs | Chromosomes     | Physical positions (bp) | CDC Frontier (Reference genome) | (Pusa 256 & HPNB) | NCBI SNPdb Accession IDs |
|-----------------------|----------------|-----------------|-------------------------|---------------------------------|-------------------|--------------------------|
| SNP_P3_47677_29055998 | NC_021163.1    | Ca_kabuli_chr04 | 29055998                | TT                              | GG                | 1945947464               |
| SNP_P3_47678_29056000 | NC_021163.1    | Ca_kabuli_chr04 | 29056000                | CC                              | AA                | 1945947466               |
| SNP_P3_47679_29056864 | NC_021163.1    | Ca_kabuli_chr04 | 29056864                | CC                              | TT                | 1945947468               |
| SNP_P3_47680_29056872 | NC_021163.1    | Ca_kabuli_chr04 | 29056872                | GG                              | AA                | 1945947470               |
| SNP_P3_47681_29059769 | NC_021163.1    | Ca_kabuli_chr04 | 29059769                | CC                              | TT                | 1945947471               |
| SNP_P3_47682_29060780 | NC_021163.1    | Ca_kabuli_chr04 | 29060780                | AA                              | GG                | 1945947473               |
| SNP_P3_47683_29060949 | NC_021163.1    | Ca_kabuli_chr04 | 29060949                | TT                              | CC                | 1945947475               |
| SNP_P3_47685_29061039 | NC_021163.1    | Ca_kabuli_chr04 | 29061039                | AA                              | GG                | 1945947477               |
| SNP_P3_47686_29061050 | NC_021163.1    | Ca_kabuli_chr04 | 29061050                | AA                              | GG                | 1945947479               |
| SNP_P3_47687_29061051 | NC_021163.1    | Ca_kabuli_chr04 | 29061051                | GG                              | AA                | 1945947480               |
| SNP_P3_47688_29061258 | NC_021163.1    | Ca_kabuli_chr04 | 29061258                | AA                              | CC                | 1945947482               |
| SNP_P3_47689_29061259 | NC_021163.1    | Ca_kabuli_chr04 | 29061259                | TT                              | GG                | 1945947484               |
| SNP_P3_47690_29064367 | NC_021163.1    | Ca_kabuli_chr04 | 29064367                | AA                              | TT                | 1945947486               |
| SNP_P3_47691_29064557 | NC_021163.1    | Ca_kabuli_chr04 | 29064557                | GG                              | AA                | 1945947487               |
| SNP_P3_47692_29064761 | NC_021163.1    | Ca_kabuli_chr04 | 29064761                | CC                              | TT                | 1945947489               |
| SNP_P3_47693_29064979 | NC_021163.1    | Ca_kabuli_chr04 | 29064979                | AA                              | GG                | 1945947491               |
| SNP_P3_47695_29066199 | NC_021163.1    | Ca_kabuli_chr04 | 29066199                | GG                              | TT                | 1945947493               |
| SNP_P3_47696_29066658 | NC_021163.1    | Ca_kabuli_chr04 | 29066658                | CC                              | TT                | 1945947495               |
| SNP_P3_47697_29066662 | NC_021163.1    | Ca_kabuli_chr04 | 29066662                | GG                              | AA                | 1945947496               |
| SNP_P3_47698_29067017 | NC_021163.1    | Ca_kabuli_chr04 | 29067017                | CC                              | AA                | 1945947498               |
| SNP_P3_47699_29067020 | NC_021163.1    | Ca_kabuli_chr04 | 29067020                | TT                              | CC                | 1945947500               |
| SNP_P3_47700_29067029 | NC_021163.1    | Ca_kabuli_chr04 | 29067029                | TT                              | AA                | 1945947502               |
| SNP_P3_47701_29067074 | NC_021163.1    | Ca_kabuli_chr04 | 29067074                | TT                              | AA                | 1945947503               |
| SNP_P3_47702_29067113 | NC_021163.1    | Ca_kabuli_chr04 | 29067113                | TT                              | GG                | 1945947505               |
| SNP_P3_47704_29069978 | NC_021163.1    | Ca_kabuli_chr04 | 29069978                | TT                              | CC                | 1945947507               |
| SNP_P3_47705_29069992 | NC_021163.1    | Ca_kabuli_chr04 | 29069992                | GG                              | TT                | 1945947509               |
| SNP_P3_47706_29070006 | NC_021163.1    | Ca_kabuli_chr04 | 29070006                | TT                              | AA                | 1945947511               |
| SNP_P3_47707_29070303 | NC_021163.1    | Ca_kabuli_chr04 | 29070303                | AA                              | GG                | 1945947512               |
| SNP_P3_47709_29070711 | NC_021163.1    | Ca_kabuli_chr04 | 29070711                | TT                              | GG                | 1945947514               |
| SNP_P3_47710_29071770 | NC_021163.1    | Ca_kabuli_chr04 | 29071770                | CC                              | GG                | 1945947516               |
| SNP_P3_47711_29071806 | NC_021163.1    | Ca_kabuli_chr04 | 29071806                | GG                              | TT                | 1945947518               |
| SNP_P3_47712_29071807 | NC_021163.1    | Ca_kabuli_chr04 | 29071807                | TT                              | CC                | 1945947520               |
| SNP_P3_47713_29072255 | NC_021163.1    | Ca_kabuli_chr04 | 29072255                | AA                              | GG                | 1945947521               |
| SNP_P3_47714_29072275 | NC_021163.1    | Ca_kabuli_chr04 | 29072275                | AA                              | CC                | 1945947523               |
| SNP_P3_47715_29074177 | NC_021163.1    | Ca_kabuli_chr04 | 29074177                | TT                              | CC                | 1945947525               |
| SNP_P3_47716_29074183 | NC_021163.1    | Ca_kabuli_chr04 | 29074183                | TT                              | GG                | 1945947527               |
| SNP_P3_47717_29085123 | NC_021163.1    | Ca_kabuli_chr04 | 29085123                | TT                              | CC                | 1945947528               |
| SNP_P3_47718_29085142 | NC_021163.1    | Ca_kabuli_chr04 | 29085142                | TT                              | CC                | 1945947530               |
| SNP_P3_47719_29085144 | NC_021163.1    | Ca_kabuli_chr04 | 29085144                | GG                              | AA                | 1945947532               |
| SNP_P3_47725_29091648 | NC_021163.1    | Ca_kabuli_chr04 | 29091648                | TT                              | CC                | 1945947534               |
| SNP_P3_47726_29091678 | NC_021163.1    | Ca_kabuli_chr04 | 29091678                | TT                              | CC                | 1945947536               |
| SNP_P3_47727_29091704 | NC_021163.1    | Ca_kabuli_chr04 | 29091704                | CC                              | TT                | 1945947537               |

| SNPs IDs              | Chromosome IDs | Chromosomes     | Physical positions (bp) | CDC Frontier (Reference genome) | (Pusa 256 & HPNB) | NCBI SNPdb Accession IDs |
|-----------------------|----------------|-----------------|-------------------------|---------------------------------|-------------------|--------------------------|
| SNP_P3_47728_29091793 | NC_021163.1    | Ca_kabuli_chr04 | 29091793                | TT                              | GG                | 1945947539               |
| SNP_P3_47729_29091803 | NC_021163.1    | Ca_kabuli_chr04 | 29091803                | AA                              | CC                | 1945947541               |
| SNP_P3_47730_29091854 | NC_021163.1    | Ca_kabuli_chr04 | 29091854                | TT                              | CC                | 1945947543               |
| SNP_P3_47731_29092029 | NC_021163.1    | Ca_kabuli_chr04 | 29092029                | TT                              | CC                | 1945947544               |
| SNP_P3_47732_29092040 | NC_021163.1    | Ca_kabuli_chr04 | 29092040                | TT                              | CC                | 1945947546               |
| SNP_P3_47733_29092071 | NC_021163.1    | Ca_kabuli_chr04 | 29092071                | AA                              | GG                | 1945947548               |
| SNP_P3_47734_29092082 | NC_021163.1    | Ca_kabuli_chr04 | 29092082                | TT                              | CC                | 1945947550               |
| SNP_P3_47735_29092130 | NC_021163.1    | Ca_kabuli_chr04 | 29092130                | TT                              | AA                | 1945947552               |
| SNP_P3_47736_29092195 | NC_021163.1    | Ca_kabuli_chr04 | 29092195                | CC                              | TT                | 1945947553               |
| SNP_P3_47737_29092205 | NC_021163.1    | Ca_kabuli_chr04 | 29092205                | AA                              | GG                | 1945947555               |
| SNP_P3_47738_29092231 | NC_021163.1    | Ca_kabuli_chr04 | 29092231                | GG                              | AA                | 1945947557               |
| SNP_P3_47739_29092239 | NC_021163.1    | Ca_kabuli_chr04 | 29092239                | GG                              | AA                | 1945947559               |
| SNP_P3_47741_29094271 | NC_021163.1    | Ca_kabuli_chr04 | 29094271                | AA                              | GG                | 1945947560               |
| SNP_P3_47743_29098890 | NC_021163.1    | Ca_kabuli_chr04 | 29098890                | TT                              | CC                | 1945947562               |
| SNP_P3_47744_29099173 | NC_021163.1    | Ca_kabuli_chr04 | 29099173                | AA                              | GG                | 1945947564               |
| SNP_P3_47745_29100485 | NC_021163.1    | Ca_kabuli_chr04 | 29100485                | AA                              | GG                | 1945947566               |
| SNP_P3_47748_29100876 | NC_021163.1    | Ca_kabuli_chr04 | 29100876                | AA                              | GG                | 1945947568               |
| SNP_P3_47749_29100999 | NC_021163.1    | Ca_kabuli_chr04 | 29100999                | TT                              | CC                | 1945947569               |
| SNP_P3_47750_29101081 | NC_021163.1    | Ca_kabuli_chr04 | 29101081                | CC                              | TT                | 1945947571               |
| SNP_P3_47751_29101086 | NC_021163.1    | Ca_kabuli_chr04 | 29101086                | TT                              | CC                | 1945947573               |
| SNP_P3_47752_29101338 | NC_021163.1    | Ca_kabuli_chr04 | 29101338                | GG                              | AA                | 1945947575               |
| SNP_P3_47753_29101342 | NC_021163.1    | Ca_kabuli_chr04 | 29101342                | AA                              | GG                | 1945947577               |
| SNP_P3_47755_29109149 | NC_021163.1    | Ca_kabuli_chr04 | 29109149                | AA                              | GG                | 1945947578               |
| SNP_P3_47756_29109152 | NC_021163.1    | Ca_kabuli_chr04 | 29109152                | GG                              | CC                | 1945947580               |
| SNP_P3_47757_29109154 | NC_021163.1    | Ca_kabuli_chr04 | 29109154                | TT                              | CC                | 1945947582               |
| SNP_P3_47758_29109245 | NC_021163.1    | Ca_kabuli_chr04 | 29109245                | TT                              | CC                | 1945947584               |
| SNP_P3_47759_29109266 | NC_021163.1    | Ca_kabuli_chr04 | 29109266                | CC                              | TT                | 1945947585               |
| SNP_P3_47761_29110761 | NC_021163.1    | Ca_kabuli_chr04 | 29110761                | AA                              | CC                | 1945947587               |
| SNP_P3_47762_29110980 | NC_021163.1    | Ca_kabuli_chr04 | 29110980                | GG                              | CC                | 1945947589               |
| SNP_P3_47763_29110985 | NC_021163.1    | Ca_kabuli_chr04 | 29110985                | CC                              | TT                | 1945947591               |
| SNP_P3_47764_29112069 | NC_021163.1    | Ca_kabuli_chr04 | 29112069                | GG                              | CC                | 1945947593               |
| SNP_P3_47765_29112084 | NC_021163.1    | Ca_kabuli_chr04 | 29112084                | GG                              | AA                | 1945947594               |
| SNP_P3_47766_29113466 | NC_021163.1    | Ca_kabuli_chr04 | 29113466                | GG                              | AA                | 1945947596               |
| SNP_P3_47767_29114385 | NC_021163.1    | Ca_kabuli_chr04 | 29114385                | GG                              | TT                | 1945947598               |
| SNP_P3_47768_29115094 | NC_021163.1    | Ca_kabuli_chr04 | 29115094                | TT                              | CC                | 1945947600               |
| SNP_P3_47769_29115101 | NC_021163.1    | Ca_kabuli_chr04 | 29115101                | AA                              | GG                | 1945947601               |
| SNP_P3_47770_29115710 | NC_021163.1    | Ca_kabuli_chr04 | 29115710                | TT                              | CC                | 1945947603               |
| SNP_P3_47771_29117519 | NC_021163.1    | Ca_kabuli_chr04 | 29117519                | GG                              | AA                | 1945947605               |
| SNP_P3_47772_29117529 | NC_021163.1    | Ca_kabuli_chr04 | 29117529                | TT                              | CC                | 1945947607               |
| SNP_P3_47773_29117691 | NC_021163.1    | Ca_kabuli_chr04 | 29117691                | GG                              | TT                | 1945947609               |
| SNP_P3_47774_29119661 | NC_021163.1    | Ca_kabuli_chr04 | 29119661                | AA                              | GG                | 1945947610               |
| SNP_P3_47775_29119689 | NC_021163.1    | Ca_kabuli_chr04 | 29119689                | AA                              | GG                | 1945947612               |

| SNPs IDs              | Chromosome IDs | Chromosomes     | Physical positions (bp) | CDC Frontier (Reference genome) | (Pusa 256 & HPNB) | NCBI SNPdb Accession IDs |
|-----------------------|----------------|-----------------|-------------------------|---------------------------------|-------------------|--------------------------|
| SNP_P3_47777_29119884 | NC_021163.1    | Ca_kabuli_chr04 | 29119884                | GG                              | TT                | 1945947614               |
| SNP_P3_47778_29120169 | NC_021163.1    | Ca_kabuli_chr04 | 29120169                | GG                              | AA                | 1945947616               |
| SNP_P3_47779_29121102 | NC_021163.1    | Ca_kabuli_chr04 | 29121102                | AA                              | GG                | 1945947618               |
| SNP_P3_47780_29121131 | NC_021163.1    | Ca_kabuli_chr04 | 29121131                | AA                              | TT                | 1945947619               |
| SNP_P3_47781_29121161 | NC_021163.1    | Ca_kabuli_chr04 | 29121161                | GG                              | AA                | 1945947621               |
| SNP_P3_47782_29121369 | NC_021163.1    | Ca_kabuli_chr04 | 29121369                | AA                              | CC                | 1945947623               |
| SNP_P3_47783_29121393 | NC_021163.1    | Ca_kabuli_chr04 | 29121393                | AA                              | GG                | 1945947625               |
| SNP_P3_47784_29121420 | NC_021163.1    | Ca_kabuli_chr04 | 29121420                | TT                              | AA                | 1945947626               |
| SNP_P3_47785_29121522 | NC_021163.1    | Ca_kabuli_chr04 | 29121522                | TT                              | CC                | 1945947628               |
| SNP_P3_47787_29121721 | NC_021163.1    | Ca_kabuli_chr04 | 29121721                | AA                              | GG                | 1945947630               |
| SNP_P3_47788_29123554 | NC_021163.1    | Ca_kabuli_chr04 | 29123554                | AA                              | GG                | 1945947632               |
| SNP_P3_47789_29123567 | NC_021163.1    | Ca_kabuli_chr04 | 29123567                | GG                              | CC                | 1945947634               |
| SNP_P3_47790_29123571 | NC_021163.1    | Ca_kabuli_chr04 | 29123571                | CC                              | TT                | 1945947635               |
| SNP_P3_47791_29123612 | NC_021163.1    | Ca_kabuli_chr04 | 29123612                | CC                              | TT                | 1945947637               |
| SNP_P3_47792_29123971 | NC_021163.1    | Ca_kabuli_chr04 | 29123971                | AA                              | GG                | 1945947639               |
| SNP_P3_47793_29123973 | NC_021163.1    | Ca_kabuli_chr04 | 29123973                | TT                              | GG                | 1945947641               |
| SNP_P3_47794_29123984 | NC_021163.1    | Ca_kabuli_chr04 | 29123984                | TT                              | CC                | 1945947642               |
| SNP_P3_47795_29124190 | NC_021163.1    | Ca_kabuli_chr04 | 29124190                | CC                              | TT                | 1945947644               |
| SNP_P3_47796_29124266 | NC_021163.1    | Ca_kabuli_chr04 | 29124266                | CC                              | TT                | 1945947646               |
| SNP_P3_47797_29124660 | NC_021163.1    | Ca_kabuli_chr04 | 29124660                | AA                              | CC                | 1945947648               |
| SNP_P3_47799_29124944 | NC_021163.1    | Ca_kabuli_chr04 | 29124944                | TT                              | CC                | 1945947650               |
| SNP_P3_47800_29133501 | NC_021163.1    | Ca_kabuli_chr04 | 29133501                | GG                              | AA                | 1945947651               |
| SNP_P3_47801_29134683 | NC_021163.1    | Ca_kabuli_chr04 | 29134683                | CC                              | TT                | 1945947653               |
| SNP_P3_47802_29134750 | NC_021163.1    | Ca_kabuli_chr04 | 29134750                | TT                              | CC                | 1945947655               |
| SNP_P3_47803_29134752 | NC_021163.1    | Ca_kabuli_chr04 | 29134752                | TT                              | GG                | 1945947657               |
| SNP_P3_47804_29134770 | NC_021163.1    | Ca_kabuli_chr04 | 29134770                | AA                              | CC                | 1945947659               |
| SNP_P3_47805_29134772 | NC_021163.1    | Ca_kabuli_chr04 | 29134772                | TT                              | AA                | 1945947660               |
| SNP_P3_47806_29135460 | NC_021163.1    | Ca_kabuli_chr04 | 29135460                | CC                              | AA                | 1945947662               |
| SNP_P3_47807_29136338 | NC_021163.1    | Ca_kabuli_chr04 | 29136338                | TT                              | CC                | 1945947664               |
| SNP_P3_47808_29136789 | NC_021163.1    | Ca_kabuli_chr04 | 29136789                | AA                              | GG                | 1945947666               |
| SNP_P3_47809_29137210 | NC_021163.1    | Ca_kabuli_chr04 | 29137210                | GG                              | AA                | 1945947667               |
| SNP_P3_47810_29137216 | NC_021163.1    | Ca_kabuli_chr04 | 29137216                | GG                              | CC                | 1945947669               |
| SNP_P3_47811_29155368 | NC_021163.1    | Ca_kabuli_chr04 | 29155368                | AA                              | TT                | 1945947671               |
| SNP_P3_47812_29155530 | NC_021163.1    | Ca_kabuli_chr04 | 29155530                | GG                              | AA                | 1945947673               |
| SNP_P3_47814_29156352 | NC_021163.1    | Ca_kabuli_chr04 | 29156352                | CC                              | TT                | 1945947675               |
| SNP_P3_47815_29156376 | NC_021163.1    | Ca_kabuli_chr04 | 29156376                | AA                              | TT                | 1945947676               |
| SNP_P3_47816_29156652 | NC_021163.1    | Ca_kabuli_chr04 | 29156652                | TT                              | GG                | 1945947678               |
| SNP_P3_47818_29157027 | NC_021163.1    | Ca_kabuli_chr04 | 29157027                | TT                              | CC                | 1945947680               |
| SNP_P3_47819_29157735 | NC_021163.1    | Ca_kabuli_chr04 | 29157735                | AA                              | GG                | 1945947682               |
| SNP_P3_47820_29157787 | NC_021163.1    | Ca_kabuli_chr04 | 29157787                | CC                              | AA                | 1945947683               |
| SNP_P3_47822_29158029 | NC_021163.1    | Ca_kabuli_chr04 | 29158029                | AA                              | GG                | 1945947685               |
| SNP_P3_47824_29158389 | NC_021163.1    | Ca_kabuli_chr04 | 29158389                | GG                              | AA                | 1945947687               |

| SNPs IDs              | Chromosome IDs | Chromosomes     | Physical positions (bp) | CDC Frontier (Reference genome) | (Pusa 256 & HPNB) | NCBI SNPdb Accession IDs |
|-----------------------|----------------|-----------------|-------------------------|---------------------------------|-------------------|--------------------------|
| SNP_P3_47825_29158392 | NC_021163.1    | Ca_kabuli_chr04 | 29158392                | CC                              | TT                | 1945947689               |
| SNP_P3_47827_29162922 | NC_021163.1    | Ca_kabuli_chr04 | 29162922                | AA                              | CC                | 1945947691               |
| SNP_P3_47828_29163115 | NC_021163.1    | Ca_kabuli_chr04 | 29163115                | AA                              | GG                | 1945947692               |
| SNP_P3_47829_29175799 | NC_021163.1    | Ca_kabuli_chr04 | 29175799                | TT                              | CC                | 1945947694               |
| SNP_P3_47830_29176299 | NC_021163.1    | Ca_kabuli_chr04 | 29176299                | GG                              | AA                | 1945947696               |
| SNP_P3_47831_29176336 | NC_021163.1    | Ca_kabuli_chr04 | 29176336                | AA                              | TT                | 1945947698               |
| SNP_P3_47832_29176761 | NC_021163.1    | Ca_kabuli_chr04 | 29176761                | TT                              | CC                | 1945947700               |
| SNP_P3_47833_29177011 | NC_021163.1    | Ca_kabuli_chr04 | 29177011                | CC                              | TT                | 1945947701               |
| SNP_P3_47834_29177252 | NC_021163.1    | Ca_kabuli_chr04 | 29177252                | GG                              | AA                | 1945947703               |
| SNP_P3_47835_29183877 | NC_021163.1    | Ca_kabuli_chr04 | 29183877                | GG                              | AA                | 1945947705               |
| SNP_P3_47836_29185476 | NC_021163.1    | Ca_kabuli_chr04 | 29185476                | CC                              | AA                | 1945947707               |
| SNP_P3_47837_29186092 | NC_021163.1    | Ca_kabuli_chr04 | 29186092                | AA                              | CC                | 1945947708               |
| SNP_P3_47838_29186334 | NC_021163.1    | Ca_kabuli_chr04 | 29186334                | TT                              | CC                | 1945947710               |
| SNP_P3_47839_29186787 | NC_021163.1    | Ca_kabuli_chr04 | 29186787                | CC                              | TT                | 1945947712               |
| SNP_P3_47840_29188293 | NC_021163.1    | Ca_kabuli_chr04 | 29188293                | AA                              | TT                | 1945947714               |
| SNP_P3_47841_29188522 | NC_021163.1    | Ca_kabuli_chr04 | 29188522                | CC                              | GG                | 1945947716               |
| SNP_P3_47842_29188540 | NC_021163.1    | Ca_kabuli_chr04 | 29188540                | CC                              | TT                | 1945947717               |
| SNP_P3_47843_29188605 | NC_021163.1    | Ca_kabuli_chr04 | 29188605                | AA                              | TT                | 1945947719               |
| SNP_P3_47844_29189235 | NC_021163.1    | Ca_kabuli_chr04 | 29189235                | CC                              | GG                | 1945947721               |
| SNP_P3_47845_29190215 | NC_021163.1    | Ca_kabuli_chr04 | 29190215                | GG                              | CC                | 1945947723               |
| SNP_P3_47846_29190749 | NC_021163.1    | Ca_kabuli_chr04 | 29190749                | CC                              | TT                | 1945947724               |
| SNP_P3_47848_29191973 | NC_021163.1    | Ca_kabuli_chr04 | 29191973                | AA                              | GG                | 1945947726               |
| SNP_P3_47849_29194507 | NC_021163.1    | Ca_kabuli_chr04 | 29194507                | TT                              | CC                | 1945947728               |
| SNP_P3_47852_29195952 | NC_021163.1    | Ca_kabuli_chr04 | 29195952                | AA                              | GG                | 1945947730               |
| SNP_P3_47854_29202635 | NC_021163.1    | Ca_kabuli_chr04 | 29202635                | CC                              | TT                | 1945947732               |
| SNP_P3_47855_29202638 | NC_021163.1    | Ca_kabuli_chr04 | 29202638                | GG                              | AA                | 1945947733               |
| SNP_P3_47856_29203015 | NC_021163.1    | Ca_kabuli_chr04 | 29203015                | AA                              | GG                | 1945947735               |
| SNP_P3_47857_29203064 | NC_021163.1    | Ca_kabuli_chr04 | 29203064                | TT                              | GG                | 1945947737               |
| SNP_P3_47858_29203105 | NC_021163.1    | Ca_kabuli_chr04 | 29203105                | CC                              | TT                | 1945947739               |
| SNP_P3_47859_29203172 | NC_021163.1    | Ca_kabuli_chr04 | 29203172                | CC                              | AA                | 1945947741               |
| SNP_P3_47860_29203419 | NC_021163.1    | Ca_kabuli_chr04 | 29203419                | TT                              | CC                | 1945947742               |
| SNP_P3_47861_29203853 | NC_021163.1    | Ca_kabuli_chr04 | 29203853                | GG                              | CC                | 1945947744               |
| SNP_P3_47862_29204383 | NC_021163.1    | Ca_kabuli_chr04 | 29204383                | GG                              | TT                | 1945947746               |
| SNP_P3_47863_29204398 | NC_021163.1    | Ca_kabuli_chr04 | 29204398                | AA                              | GG                | 1945947748               |
| SNP_P3_47864_29204641 | NC_021163.1    | Ca_kabuli_chr04 | 29204641                | GG                              | AA                | 1945947749               |
| SNP_P3_47865_29204697 | NC_021163.1    | Ca_kabuli_chr04 | 29204697                | CC                              | GG                | 1945947751               |
| SNP_P3_47866_29207499 | NC_021163.1    | Ca_kabuli_chr04 | 29207499                | CC                              | TT                | 1945947753               |
| SNP_P3_47867_29208043 | NC_021163.1    | Ca_kabuli_chr04 | 29208043                | AA                              | CC                | 1945947755               |
| SNP_P3_47868_29208387 | NC_021163.1    | Ca_kabuli_chr04 | 29208387                | AA                              | TT                | 1945947757               |
| SNP_P3_47869_29208410 | NC_021163.1    | Ca_kabuli_chr04 | 29208410                | TT                              | CC                | 1945947758               |
| SNP_P3_47870_29208444 | NC_021163.1    | Ca_kabuli_chr04 | 29208444                | TT                              | CC                | 1945947760               |
| SNP_P3_47871_29208695 | NC_021163.1    | Ca_kabuli_chr04 | 29208695                | AA                              | GG                | 1945947762               |

| SNPs IDs              | Chromosome IDs | Chromosomes     | Physical positions (bp) | CDC Frontier (Reference genome) | (Pusa 256 & HPNB) | NCBI SNPdb Accession IDs |
|-----------------------|----------------|-----------------|-------------------------|---------------------------------|-------------------|--------------------------|
| SNP_P3_47872_29210857 | NC_021163.1    | Ca_kabuli_chr04 | 29210857                | AA                              | GG                | 1945947764               |
| SNP_P3_47873_29210865 | NC_021163.1    | Ca_kabuli_chr04 | 29210865                | CC                              | TT                | 1945947765               |
| SNP_P3_47875_29211164 | NC_021163.1    | Ca_kabuli_chr04 | 29211164                | AA                              | CC                | 1945947767               |
| SNP_P3_47876_29211507 | NC_021163.1    | Ca_kabuli_chr04 | 29211507                | TT                              | AA                | 1945947769               |
| SNP_P3_47877_29211556 | NC_021163.1    | Ca_kabuli_chr04 | 29211556                | CC                              | AA                | 1945947771               |
| SNP_P3_47878_29212042 | NC_021163.1    | Ca_kabuli_chr04 | 29212042                | GG                              | AA                | 1945947773               |
| SNP_P3_47879_29212083 | NC_021163.1    | Ca_kabuli_chr04 | 29212083                | GG                              | AA                | 1945947774               |
| SNP_P3_47880_29212085 | NC_021163.1    | Ca_kabuli_chr04 | 29212085                | GG                              | AA                | 1945947776               |
| SNP_P3_47881_29213924 | NC_021163.1    | Ca_kabuli_chr04 | 29213924                | CC                              | AA                | 1945947778               |
| SNP_P3_47882_29216056 | NC_021163.1    | Ca_kabuli_chr04 | 29216056                | CC                              | GG                | 1945947780               |
| SNP_P3_47883_29217963 | NC_021163.1    | Ca_kabuli_chr04 | 29217963                | TT                              | GG                | 1945947782               |
| SNP_P3_47884_29217988 | NC_021163.1    | Ca_kabuli_chr04 | 29217988                | TT                              | CC                | 1945947783               |
| SNP_P3_47885_29217994 | NC_021163.1    | Ca_kabuli_chr04 | 29217994                | GG                              | AA                | 1945947785               |
| SNP_P3_47886_29220553 | NC_021163.1    | Ca_kabuli_chr04 | 29220553                | AA                              | GG                | 1945947787               |
| SNP_P3_47887_29220937 | NC_021163.1    | Ca_kabuli_chr04 | 29220937                | AA                              | GG                | 1945947789               |
| SNP_P3_47889_29222271 | NC_021163.1    | Ca_kabuli_chr04 | 29222271                | AA                              | TT                | 1945947790               |
| SNP_P3_47891_29223141 | NC_021163.1    | Ca_kabuli_chr04 | 29223141                | GG                              | AA                | 1945947792               |
| SNP_P3_47892_29224789 | NC_021163.1    | Ca_kabuli_chr04 | 29224789                | TT                              | GG                | 1945947794               |
| SNP_P3_47893_29224834 | NC_021163.1    | Ca_kabuli_chr04 | 29224834                | TT                              | AA                | 1945947796               |
| SNP_P3_47894_29225997 | NC_021163.1    | Ca_kabuli_chr04 | 29225997                | CC                              | AA                | 1945947798               |
| SNP_P3_47895_29226167 | NC_021163.1    | Ca_kabuli_chr04 | 29226167                | CC                              | AA                | 1945947799               |
| SNP_P3_47896_29226644 | NC_021163.1    | Ca_kabuli_chr04 | 29226644                | AA                              | GG                | 1945947801               |
| SNP_P3_47897_29226681 | NC_021163.1    | Ca_kabuli_chr04 | 29226681                | CC                              | TT                | 1945947803               |
| SNP_P3_47898_29226705 | NC_021163.1    | Ca_kabuli_chr04 | 29226705                | TT                              | AA                | 1945947805               |
| SNP_P3_47899_29226722 | NC_021163.1    | Ca_kabuli_chr04 | 29226722                | GG                              | AA                | 1945947807               |
| SNP_P3_47900_29231938 | NC_021163.1    | Ca_kabuli_chr04 | 29231938                | TT                              | GG                | 1945947808               |
| SNP_P3_47901_29232014 | NC_021163.1    | Ca_kabuli_chr04 | 29232014                | AA                              | GG                | 1945947810               |
| SNP_P3_47902_29232207 | NC_021163.1    | Ca_kabuli_chr04 | 29232207                | CC                              | TT                | 1945947812               |
| SNP_P3_47903_29232270 | NC_021163.1    | Ca_kabuli_chr04 | 29232270                | GG                              | CC                | 1945947814               |
| SNP_P3_47904_29232294 | NC_021163.1    | Ca_kabuli_chr04 | 29232294                | AA                              | GG                | 1945947815               |
| SNP_P3_47905_29232332 | NC_021163.1    | Ca_kabuli_chr04 | 29232332                | CC                              | AA                | 1945947817               |
| SNP_P3_47906_29233170 | NC_021163.1    | Ca_kabuli_chr04 | 29233170                | GG                              | AA                | 1945947819               |
| SNP_P3_47907_29233177 | NC_021163.1    | Ca_kabuli_chr04 | 29233177                | AA                              | GG                | 1945947821               |
| SNP_P3_47908_29233178 | NC_021163.1    | Ca_kabuli_chr04 | 29233178                | GG                              | AA                | 1945947823               |
| SNP_P3_47909_29233187 | NC_021163.1    | Ca_kabuli_chr04 | 29233187                | CC                              | TT                | 1945947824               |
| SNP_P3_47910_29233258 | NC_021163.1    | Ca_kabuli_chr04 | 29233258                | AA                              | GG                | 1945947826               |
| SNP_P3_47912_29233427 | NC_021163.1    | Ca_kabuli_chr04 | 29233427                | AA                              | GG                | 1945947828               |
| SNP_P3_47913_29235903 | NC_021163.1    | Ca_kabuli_chr04 | 29235903                | TT                              | CC                | 1945947830               |
| SNP_P3_47914_29236233 | NC_021163.1    | Ca_kabuli_chr04 | 29236233                | GG                              | AA                | 1945947831               |
| SNP_P3_47915_29236720 | NC_021163.1    | Ca_kabuli_chr04 | 29236720                | AA                              | GG                | 1945947833               |
| SNP_P3_47916_29236722 | NC_021163.1    | Ca_kabuli_chr04 | 29236722                | GG                              | AA                | 1945947835               |
| SNP_P3_47917_29237381 | NC_021163.1    | Ca_kabuli_chr04 | 29237381                | GG                              | AA                | 1945947837               |



| SNPs IDs              | Chromosome IDs | Chromosomes     | Physical positions (bp) | CDC Frontier (Reference genome) | (Pusa 256 & HPNB) | NCBI SNPdb Accession IDs |
|-----------------------|----------------|-----------------|-------------------------|---------------------------------|-------------------|--------------------------|
| SNP_P3_47918_29237665 | NC_021163.1    | Ca_kabuli_chr04 | 29237665                | AA                              | GG                | 1945947839               |
| SNP_P3_47919_29237684 | NC_021163.1    | Ca_kabuli_chr04 | 29237684                | CC                              | GG                | 1945947840               |
| SNP_P3_47920_29239252 | NC_021163.1    | Ca_kabuli_chr04 | 29239252                | CC                              | TT                | 1945947842               |
| SNP_P3_47921_29239254 | NC_021163.1    | Ca_kabuli_chr04 | 29239254                | AA                              | GG                | 1945947844               |
| SNP_P3_47922_29239263 | NC_021163.1    | Ca_kabuli_chr04 | 29239263                | GG                              | TT                | 1945947846               |
| SNP_P3_47923_29239278 | NC_021163.1    | Ca_kabuli_chr04 | 29239278                | TT                              | GG                | 1945947848               |
| SNP_P3_47924_29239289 | NC_021163.1    | Ca_kabuli_chr04 | 29239289                | TT                              | GG                | 1945947849               |
| SNP_P3_47925_29239334 | NC_021163.1    | Ca_kabuli_chr04 | 29239334                | AA                              | GG                | 1945947851               |
| SNP_P3_47926_29239483 | NC_021163.1    | Ca_kabuli_chr04 | 29239483                | TT                              | GG                | 1945947853               |
| SNP_P3_47927_29239628 | NC_021163.1    | Ca_kabuli_chr04 | 29239628                | TT                              | GG                | 1945947855               |
| SNP_P3_47928_29239632 | NC_021163.1    | Ca_kabuli_chr04 | 29239632                | TT                              | CC                | 1945947856               |
| SNP_P3_47929_29239645 | NC_021163.1    | Ca_kabuli_chr04 | 29239645                | CC                              | AA                | 1945947858               |
| SNP_P3_47930_29240510 | NC_021163.1    | Ca_kabuli_chr04 | 29240510                | GG                              | AA                | 1945947860               |
| SNP_P3_47931_29240523 | NC_021163.1    | Ca_kabuli_chr04 | 29240523                | TT                              | AA                | 1945947862               |
| SNP_P3_47932_29240527 | NC_021163.1    | Ca_kabuli_chr04 | 29240527                | AA                              | TT                | 1945947864               |
| SNP_P3_47934_29240626 | NC_021163.1    | Ca_kabuli_chr04 | 29240626                | CC                              | GG                | 1945947865               |
| SNP_P3_47935_29240772 | NC_021163.1    | Ca_kabuli_chr04 | 29240772                | AA                              | TT                | 1945947867               |
| SNP_P3_47936_29240775 | NC_021163.1    | Ca_kabuli_chr04 | 29240775                | AA                              | GG                | 1945947869               |
| SNP_P3_47937_29241681 | NC_021163.1    | Ca_kabuli_chr04 | 29241681                | TT                              | AA                | 1945947871               |
| SNP_P3_47938_29241683 | NC_021163.1    | Ca_kabuli_chr04 | 29241683                | AA                              | TT                | 1945947873               |
| SNP_P3_47940_29242142 | NC_021163.1    | Ca_kabuli_chr04 | 29242142                | CC                              | AA                | 1945947874               |
| SNP_P3_47941_29242467 | NC_021163.1    | Ca_kabuli_chr04 | 29242467                | CC                              | TT                | 1945947876               |
| SNP_P3_47942_29242490 | NC_021163.1    | Ca_kabuli_chr04 | 29242490                | AA                              | CC                | 1945947878               |
| SNP_P3_47943_29242502 | NC_021163.1    | Ca_kabuli_chr04 | 29242502                | TT                              | CC                | 1945947880               |
| SNP_P3_47945_29243675 | NC_021163.1    | Ca_kabuli_chr04 | 29243675                | AA                              | TT                | 1945947881               |
| SNP_P3_47946_29244304 | NC_021163.1    | Ca_kabuli_chr04 | 29244304                | CC                              | TT                | 1945947883               |
| SNP_P3_47947_29245073 | NC_021163.1    | Ca_kabuli_chr04 | 29245073                | CC                              | TT                | 1945947885               |
| SNP_P3_47949_29245559 | NC_021163.1    | Ca_kabuli_chr04 | 29245559                | CC                              | AA                | 1945947887               |
| SNP_P3_47951_29246696 | NC_021163.1    | Ca_kabuli_chr04 | 29246696                | AA                              | TT                | 1945947889               |
| SNP_P3_47952_29247373 | NC_021163.1    | Ca_kabuli_chr04 | 29247373                | AA                              | GG                | 1945947890               |
| SNP_P3_47953_29248421 | NC_021163.1    | Ca_kabuli_chr04 | 29248421                | TT                              | CC                | 1945947892               |
| SNP_P3_47954_29248704 | NC_021163.1    | Ca_kabuli_chr04 | 29248704                | TT                              | CC                | 1945947894               |
| SNP_P3_47955_29248718 | NC_021163.1    | Ca_kabuli_chr04 | 29248718                | AA                              | GG                | 1945947896               |
| SNP_P3_47956_29249491 | NC_021163.1    | Ca_kabuli_chr04 | 29249491                | GG                              | TT                | 1945947897               |
| SNP_P3_47957_29249790 | NC_021163.1    | Ca_kabuli_chr04 | 29249790                | AA                              | TT                | 1945947899               |
| SNP_P3_47958_29250098 | NC_021163.1    | Ca_kabuli_chr04 | 29250098                | AA                              | GG                | 1945947901               |
| SNP_P3_47959_29262073 | NC_021163.1    | Ca_kabuli_chr04 | 29262073                | AA                              | GG                | 1945947903               |
| SNP_P3_47961_29262367 | NC_021163.1    | Ca_kabuli_chr04 | 29262367                | GG                              | TT                | 1945947905               |
| SNP_P3_47962_29262807 | NC_021163.1    | Ca_kabuli_chr04 | 29262807                | GG                              | AA                | 1945947906               |
| SNP_P3_47963_29264057 | NC_021163.1    | Ca_kabuli_chr04 | 29264057                | CC                              | TT                | 1945947908               |
| SNP_P3_47964_29264085 | NC_021163.1    | Ca_kabuli_chr04 | 29264085                | AA                              | CC                | 1945947910               |
| SNP_P3_47965_29264236 | NC_021163.1    | Ca_kabuli_chr04 | 29264236                | TT                              | CC                | 1945947912               |

| SNPs IDs              | Chromosome IDs | Chromosomes     | Physical positions (bp) | CDC Frontier (Reference genome) | (Pusa 256 & HPNB) | NCBI SNPdb Accession IDs |
|-----------------------|----------------|-----------------|-------------------------|---------------------------------|-------------------|--------------------------|
| SNP_P3_47966_29265484 | NC_021163.1    | Ca_kabuli_chr04 | 29265484                | CC                              | TT                | 1945947914               |
| SNP_P3_47967_29265585 | NC_021163.1    | Ca_kabuli_chr04 | 29265585                | CC                              | GG                | 1945947915               |
| SNP_P3_47968_29265643 | NC_021163.1    | Ca_kabuli_chr04 | 29265643                | GG                              | AA                | 1945947917               |
| SNP_P3_47969_29265673 | NC_021163.1    | Ca_kabuli_chr04 | 29265673                | TT                              | CC                | 1945947919               |
| SNP_P3_47970_29266366 | NC_021163.1    | Ca_kabuli_chr04 | 29266366                | GG                              | AA                | 1945947921               |
| SNP_P3_47971_29266433 | NC_021163.1    | Ca_kabuli_chr04 | 29266433                | AA                              | CC                | 1945947922               |
| SNP_P3_47972_29266685 | NC_021163.1    | Ca_kabuli_chr04 | 29266685                | GG                              | AA                | 1945947924               |
| SNP_P3_47973_29269211 | NC_021163.1    | Ca_kabuli_chr04 | 29269211                | AA                              | GG                | 1945947926               |
| SNP_P3_47974_29269236 | NC_021163.1    | Ca_kabuli_chr04 | 29269236                | GG                              | TT                | 1945947928               |
| SNP_P3_47975_29269481 | NC_021163.1    | Ca_kabuli_chr04 | 29269481                | GG                              | AA                | 1945947930               |
| SNP_P3_47976_29269506 | NC_021163.1    | Ca_kabuli_chr04 | 29269506                | CC                              | AA                | 1945947931               |
| SNP_P3_47977_29269533 | NC_021163.1    | Ca_kabuli_chr04 | 29269533                | GG                              | AA                | 1945947933               |
| SNP_P3_47978_29269580 | NC_021163.1    | Ca_kabuli_chr04 | 29269580                | CC                              | TT                | 1945947935               |
| SNP_P3_47979_29273574 | NC_021163.1    | Ca_kabuli_chr04 | 29273574                | GG                              | AA                | 1945947937               |
| SNP_P3_47982_29281434 | NC_021163.1    | Ca_kabuli_chr04 | 29281434                | GG                              | AA                | 1945947938               |
| SNP_P3_47983_29288095 | NC_021163.1    | Ca_kabuli_chr04 | 29288095                | AA                              | GG                | 1945947940               |
| SNP_P3_47984_29291902 | NC_021163.1    | Ca_kabuli_chr04 | 29291902                | GG                              | AA                | 1945947942               |
| SNP_P3_47985_29292251 | NC_021163.1    | Ca_kabuli_chr04 | 29292251                | TT                              | CC                | 1945947944               |
| SNP_P3_47986_29297975 | NC_021163.1    | Ca_kabuli_chr04 | 29297975                | TT                              | CC                | 1945947946               |
| SNP_P3_47987_29298024 | NC_021163.1    | Ca_kabuli_chr04 | 29298024                | CC                              | TT                | 1945947947               |
| SNP_P3_47988_29298045 | NC_021163.1    | Ca_kabuli_chr04 | 29298045                | GG                              | AA                | 1945947949               |
| SNP_P3_47989_29298313 | NC_021163.1    | Ca_kabuli_chr04 | 29298313                | GG                              | AA                | 1945947951               |
| SNP_P3_47990_29305341 | NC_021163.1    | Ca_kabuli_chr04 | 29305341                | TT                              | CC                | 1945947953               |
| SNP_P3_47991_29305707 | NC_021163.1    | Ca_kabuli_chr04 | 29305707                | CC                              | TT                | 1945947955               |
| SNP_P3_47992_29308102 | NC_021163.1    | Ca_kabuli_chr04 | 29308102                | GG                              | AA                | 1945947956               |
| SNP_P3_47993_29309809 | NC_021163.1    | Ca_kabuli_chr04 | 29309809                | CC                              | TT                | 1945947958               |
| SNP_P3_47994_29309829 | NC_021163.1    | Ca_kabuli_chr04 | 29309829                | TT                              | CC                | 1945947960               |
| SNP_P3_47995_29310017 | NC_021163.1    | Ca_kabuli_chr04 | 29310017                | AA                              | CC                | 1945947962               |
| SNP_P3_47996_29310019 | NC_021163.1    | Ca_kabuli_chr04 | 29310019                | CC                              | AA                | 1945947963               |
| SNP_P3_47997_29310190 | NC_021163.1    | Ca_kabuli_chr04 | 29310190                | AA                              | TT                | 1945947965               |
| SNP_P3_47998_29310199 | NC_021163.1    | Ca_kabuli_chr04 | 29310199                | TT                              | GG                | 1945947967               |
| SNP_P3_47999_29310200 | NC_021163.1    | Ca_kabuli_chr04 | 29310200                | TT                              | CC                | 1945947969               |
| SNP_P3_48000_29310886 | NC_021163.1    | Ca_kabuli_chr04 | 29310886                | AA                              | TT                | 1945947971               |
| SNP_P3_48001_29313741 | NC_021163.1    | Ca_kabuli_chr04 | 29313741                | AA                              | TT                | 1945947972               |
| SNP_P3_48002_29314052 | NC_021163.1    | Ca_kabuli_chr04 | 29314052                | GG                              | AA                | 1945947974               |
| SNP_P3_48003_29314089 | NC_021163.1    | Ca_kabuli_chr04 | 29314089                | TT                              | CC                | 1945947976               |
| SNP_P3_48004_29314108 | NC_021163.1    | Ca_kabuli_chr04 | 29314108                | TT                              | CC                | 1945947978               |
| SNP_P3_48008_29314646 | NC_021163.1    | Ca_kabuli_chr04 | 29314646                | AA                              | GG                | 1945947980               |
| SNP_P3_48009_29314869 | NC_021163.1    | Ca_kabuli_chr04 | 29314869                | TT                              | GG                | 1945947981               |
| SNP_P3_48010_29315220 | NC_021163.1    | Ca_kabuli_chr04 | 29315220                | TT                              | GG                | 1945947983               |
| SNP_P3_48012_29316127 | NC_021163.1    | Ca_kabuli_chr04 | 29316127                | TT                              | CC                | 1945947985               |
| SNP_P3_48013_29316157 | NC_021163.1    | Ca_kabuli_chr04 | 29316157                | CC                              | TT                | 1945947987               |

| SNPs IDs              | Chromosome IDs | Chromosomes     | Physical positions (bp) | CDC Frontier (Reference genome) | (Pusa 256 & HPNB) | NCBI SNPdb Accession IDs |
|-----------------------|----------------|-----------------|-------------------------|---------------------------------|-------------------|--------------------------|
| SNP_P3_48014_29316725 | NC_021163.1    | Ca_kabuli_chr04 | 29316725                | TT                              | GG                | 1945947988               |
| SNP_P3_48015_29317125 | NC_021163.1    | Ca_kabuli_chr04 | 29317125                | GG                              | AA                | 1945947990               |
| SNP_P3_48016_29318090 | NC_021163.1    | Ca_kabuli_chr04 | 29318090                | TT                              | CC                | 1945947992               |
| SNP_P3_48018_29320067 | NC_021163.1    | Ca_kabuli_chr04 | 29320067                | TT                              | GG                | 1945947994               |
| SNP_P3_48019_29320778 | NC_021163.1    | Ca_kabuli_chr04 | 29320778                | TT                              | GG                | 1945947996               |
| SNP_P3_48020_29320781 | NC_021163.1    | Ca_kabuli_chr04 | 29320781                | CC                              | AA                | 1945947997               |
| SNP_P3_48021_29320930 | NC_021163.1    | Ca_kabuli_chr04 | 29320930                | GG                              | AA                | 1945947999               |
| SNP_P3_48022_29321375 | NC_021163.1    | Ca_kabuli_chr04 | 29321375                | GG                              | CC                | 1945948001               |
| SNP_P3_48023_29321393 | NC_021163.1    | Ca_kabuli_chr04 | 29321393                | TT                              | CC                | 1945948003               |
| SNP_P3_48024_29321416 | NC_021163.1    | Ca_kabuli_chr04 | 29321416                | AA                              | TT                | 1945948004               |
| SNP_P3_48025_29321616 | NC_021163.1    | Ca_kabuli_chr04 | 29321616                | AA                              | GG                | 1945948006               |
| SNP_P3_48026_29321750 | NC_021163.1    | Ca_kabuli_chr04 | 29321750                | TT                              | CC                | 1945948008               |
| SNP_P3_48027_29322866 | NC_021163.1    | Ca_kabuli_chr04 | 29322866                | TT                              | GG                | 1945948010               |
| SNP_P3_48028_29323218 | NC_021163.1    | Ca_kabuli_chr04 | 29323218                | AA                              | CC                | 1945948012               |
| SNP_P3_48029_29323719 | NC_021163.1    | Ca_kabuli_chr04 | 29323719                | CC                              | TT                | 1945948013               |
| SNP_P3_48030_29323996 | NC_021163.1    | Ca_kabuli_chr04 | 29323996                | TT                              | CC                | 1945948015               |
| SNP_P3_48031_29325206 | NC_021163.1    | Ca_kabuli_chr04 | 29325206                | AA                              | CC                | 1945948017               |
| SNP_P3_48032_29325458 | NC_021163.1    | Ca_kabuli_chr04 | 29325458                | AA                              | GG                | 1945948019               |
| SNP_P3_48033_29326477 | NC_021163.1    | Ca_kabuli_chr04 | 29326477                | GG                              | TT                | 1945948021               |
| SNP_P3_48034_29326706 | NC_021163.1    | Ca_kabuli_chr04 | 29326706                | CC                              | AA                | 1945948022               |
| SNP_P3_48035_29326725 | NC_021163.1    | Ca_kabuli_chr04 | 29326725                | TT                              | CC                | 1945948024               |
| SNP_P3_48036_29326824 | NC_021163.1    | Ca_kabuli_chr04 | 29326824                | AA                              | CC                | 1945948026               |
| SNP_P3_48037_29326889 | NC_021163.1    | Ca_kabuli_chr04 | 29326889                | CC                              | AA                | 1945948028               |
| SNP_P3_48038_29326972 | NC_021163.1    | Ca_kabuli_chr04 | 29326972                | GG                              | AA                | 1945948029               |
| SNP_P3_48039_29328047 | NC_021163.1    | Ca_kabuli_chr04 | 29328047                | AA                              | GG                | 1945948031               |
| SNP_P3_48040_29328824 | NC_021163.1    | Ca_kabuli_chr04 | 29328824                | TT                              | CC                | 1945948033               |
| SNP_P3_48041_29329078 | NC_021163.1    | Ca_kabuli_chr04 | 29329078                | GG                              | TT                | 1945948035               |
| SNP_P3_48042_29329680 | NC_021163.1    | Ca_kabuli_chr04 | 29329680                | AA                              | GG                | 1945948037               |
| SNP_P3_48043_29331118 | NC_021163.1    | Ca_kabuli_chr04 | 29331118                | GG                              | AA                | 1945948038               |
| SNP_P3_48044_29332799 | NC_021163.1    | Ca_kabuli_chr04 | 29332799                | TT                              | CC                | 1945948040               |
| SNP_P3_48045_29332800 | NC_021163.1    | Ca_kabuli_chr04 | 29332800                | GG                              | AA                | 1945948042               |
| SNP_P3_48046_29332856 | NC_021163.1    | Ca_kabuli_chr04 | 29332856                | CC                              | AA                | 1945948044               |
| SNP_P3_48047_29333362 | NC_021163.1    | Ca_kabuli_chr04 | 29333362                | TT                              | GG                | 1945948045               |
| SNP_P3_48049_29334387 | NC_021163.1    | Ca_kabuli_chr04 | 29334387                | AA                              | GG                | 1945948047               |
| SNP_P3_48051_29338382 | NC_021163.1    | Ca_kabuli_chr04 | 29338382                | GG                              | AA                | 1945948049               |
| SNP_P3_48052_29342292 | NC_021163.1    | Ca_kabuli_chr04 | 29342292                | CC                              | TT                | 1945948051               |
| SNP_P3_48053_29342309 | NC_021163.1    | Ca_kabuli_chr04 | 29342309                | GG                              | AA                | 1945948053               |
| SNP_P3_48054_29343210 | NC_021163.1    | Ca_kabuli_chr04 | 29343210                | GG                              | TT                | 1945948054               |
| SNP_P3_48055_29343258 | NC_021163.1    | Ca_kabuli_chr04 | 29343258                | GG                              | TT                | 1945948056               |
| SNP_P3_48056_29343665 | NC_021163.1    | Ca_kabuli_chr04 | 29343665                | TT                              | AA                | 1945948058               |
| SNP_P3_48057_29348226 | NC_021163.1    | Ca_kabuli_chr04 | 29348226                | CC                              | TT                | 1945948060               |
| SNP_P3_48058_29348494 | NC_021163.1    | Ca_kabuli_chr04 | 29348494                | CC                              | TT                | 1945948062               |

| SNPs IDs              | Chromosome IDs | Chromosomes     | Physical positions (bp) | CDC Frontier (Reference genome) | (Pusa 256 & HPNB) | NCBI SNPdb Accession IDs |
|-----------------------|----------------|-----------------|-------------------------|---------------------------------|-------------------|--------------------------|
| SNP_P3_48059_29349220 | NC_021163.1    | Ca_kabuli_chr04 | 29349220                | CC                              | AA                | 1945948063               |
| SNP_P3_48060_29349288 | NC_021163.1    | Ca_kabuli_chr04 | 29349288                | AA                              | GG                | 1945948065               |
| SNP_P3_48061_29351197 | NC_021163.1    | Ca_kabuli_chr04 | 29351197                | TT                              | AA                | 1945948067               |
| SNP_P3_48062_29351198 | NC_021163.1    | Ca_kabuli_chr04 | 29351198                | CC                              | TT                | 1945948069               |
| SNP_P3_48063_29351273 | NC_021163.1    | Ca_kabuli_chr04 | 29351273                | AA                              | GG                | 1945948070               |
| SNP_P3_48064_29351366 | NC_021163.1    | Ca_kabuli_chr04 | 29351366                | GG                              | AA                | 1945948072               |
| SNP_P3_48066_29357798 | NC_021163.1    | Ca_kabuli_chr04 | 29357798                | AA                              | CC                | 1945948074               |
| SNP_P3_48068_29360631 | NC_021163.1    | Ca_kabuli_chr04 | 29360631                | AA                              | GG                | 1945948076               |
| SNP_P3_48070_29360928 | NC_021163.1    | Ca_kabuli_chr04 | 29360928                | AA                              | GG                | 1945948078               |
| SNP_P3_48072_29361940 | NC_021163.1    | Ca_kabuli_chr04 | 29361940                | CC                              | TT                | 1945948079               |
| SNP_P3_48073_29362452 | NC_021163.1    | Ca_kabuli_chr04 | 29362452                | TT                              | CC                | 1945948081               |
| SNP_P3_48074_29367439 | NC_021163.1    | Ca_kabuli_chr04 | 29367439                | AA                              | CC                | 1945948083               |
| SNP_P3_48075_29368906 | NC_021163.1    | Ca_kabuli_chr04 | 29368906                | AA                              | GG                | 1945948085               |
| SNP_P3_48076_29369452 | NC_021163.1    | Ca_kabuli_chr04 | 29369452                | AA                              | GG                | 1945948086               |
| SNP_P3_48077_29369488 | NC_021163.1    | Ca_kabuli_chr04 | 29369488                | CC                              | TT                | 1945948088               |
| SNP_P3_48080_29374865 | NC_021163.1    | Ca_kabuli_chr04 | 29374865                | TT                              | AA                | 1945948090               |
| SNP_P3_48081_29376452 | NC_021163.1    | Ca_kabuli_chr04 | 29376452                | AA                              | TT                | 1945948092               |
| SNP_P3_48082_29376455 | NC_021163.1    | Ca_kabuli_chr04 | 29376455                | CC                              | TT                | 1945948094               |
| SNP_P3_48083_29376829 | NC_021163.1    | Ca_kabuli_chr04 | 29376829                | CC                              | TT                | 1945948095               |
| SNP_P3_48087_29379263 | NC_021163.1    | Ca_kabuli_chr04 | 29379263                | CC                              | TT                | 1945948097               |
| SNP_P3_48088_29379295 | NC_021163.1    | Ca_kabuli_chr04 | 29379295                | AA                              | CC                | 1945948099               |
| SNP_P3_48089_29379920 | NC_021163.1    | Ca_kabuli_chr04 | 29379920                | CC                              | TT                | 1945948101               |
| SNP_P3_48090_29379976 | NC_021163.1    | Ca_kabuli_chr04 | 29379976                | AA                              | CC                | 1945948103               |
| SNP_P3_48092_29387079 | NC_021163.1    | Ca_kabuli_chr04 | 29387079                | TT                              | CC                | 1945948104               |
| SNP_P3_48093_29391474 | NC_021163.1    | Ca_kabuli_chr04 | 29391474                | TT                              | GG                | 1945948106               |
| SNP_P3_48094_29391800 | NC_021163.1    | Ca_kabuli_chr04 | 29391800                | AA                              | TT                | 1945948108               |
| SNP_P3_48095_29391813 | NC_021163.1    | Ca_kabuli_chr04 | 29391813                | CC                              | TT                | 1945948110               |
| SNP_P3_48096_29408490 | NC_021163.1    | Ca_kabuli_chr04 | 29408490                | AA                              | GG                | 1945948111               |
| SNP_P3_48098_29415819 | NC_021163.1    | Ca_kabuli_chr04 | 29415819                | CC                              | GG                | 1945948113               |
| SNP_P3_48099_29415834 | NC_021163.1    | Ca_kabuli_chr04 | 29415834                | GG                              | AA                | 1945948115               |
| SNP_P3_48100_29416283 | NC_021163.1    | Ca_kabuli_chr04 | 29416283                | GG                              | CC                | 1945948117               |
| SNP_P3_48101_29416290 | NC_021163.1    | Ca_kabuli_chr04 | 29416290                | AA                              | CC                | 1945948119               |
| SNP_P3_48104_29418655 | NC_021163.1    | Ca_kabuli_chr04 | 29418655                | AA                              | GG                | 1945948120               |
| SNP_P3_48106_29419685 | NC_021163.1    | Ca_kabuli_chr04 | 29419685                | AA                              | GG                | 1945948122               |
| SNP_P3_48107_29419929 | NC_021163.1    | Ca_kabuli_chr04 | 29419929                | GG                              | AA                | 1945948124               |
| SNP_P3_48108_29419933 | NC_021163.1    | Ca_kabuli_chr04 | 29419933                | TT                              | CC                | 1945948126               |
| SNP_P3_48109_29419964 | NC_021163.1    | Ca_kabuli_chr04 | 29419964                | AA                              | TT                | 1945948128               |
| SNP_P3_48110_29420332 | NC_021163.1    | Ca_kabuli_chr04 | 29420332                | GG                              | CC                | 1945948129               |
| SNP_P3_48111_29420673 | NC_021163.1    | Ca_kabuli_chr04 | 29420673                | TT                              | AA                | 1945948131               |
| SNP_P3_48112_29420674 | NC_021163.1    | Ca_kabuli_chr04 | 29420674                | TT                              | AA                | 1945948133               |
| SNP_P3_48113_29420935 | NC_021163.1    | Ca_kabuli_chr04 | 29420935                | AA                              | GG                | 1945948135               |
| SNP_P3_48114_29420973 | NC_021163.1    | Ca_kabuli_chr04 | 29420973                | GG                              | AA                | 1945948136               |

| SNPs IDs              | Chromosome IDs | Chromosomes     | Physical positions (bp) | CDC Frontier (Reference genome) | (Pusa 256 & HPNB) | NCBI SNPdb Accession IDs |
|-----------------------|----------------|-----------------|-------------------------|---------------------------------|-------------------|--------------------------|
| SNP_P3_48115_29420986 | NC_021163.1    | Ca_kabuli_chr04 | 29420986                | AA                              | CC                | 1945948138               |
| SNP_P3_48116_29433025 | NC_021163.1    | Ca_kabuli_chr04 | 29433025                | AA                              | GG                | 1945948140               |
| SNP_P3_48117_29435943 | NC_021163.1    | Ca_kabuli_chr04 | 29435943                | TT                              | CC                | 1945948142               |
| SNP_P3_48118_29438123 | NC_021163.1    | Ca_kabuli_chr04 | 29438123                | TT                              | GG                | 1945948144               |
| SNP_P3_48119_29443293 | NC_021163.1    | Ca_kabuli_chr04 | 29443293                | GG                              | AA                | 1945948145               |
| SNP_P3_48121_29447633 | NC_021163.1    | Ca_kabuli_chr04 | 29447633                | AA                              | GG                | 1945948147               |
| SNP_P3_48122_29447793 | NC_021163.1    | Ca_kabuli_chr04 | 29447793                | GG                              | AA                | 1945948149               |
| SNP_P3_48123_29452375 | NC_021163.1    | Ca_kabuli_chr04 | 29452375                | CC                              | TT                | 1945948151               |
| SNP_P3_48124_29452764 | NC_021163.1    | Ca_kabuli_chr04 | 29452764                | GG                              | AA                | 1945948152               |
| SNP_P3_48125_29452773 | NC_021163.1    | Ca_kabuli_chr04 | 29452773                | AA                              | GG                | 1945948154               |
| SNP_P3_48126_29452797 | NC_021163.1    | Ca_kabuli_chr04 | 29452797                | TT                              | CC                | 1945948156               |
| SNP_P3_48127_29452833 | NC_021163.1    | Ca_kabuli_chr04 | 29452833                | CC                              | TT                | 1945948158               |
| SNP_P3_48128_29452896 | NC_021163.1    | Ca_kabuli_chr04 | 29452896                | AA                              | GG                | 1945948160               |
| SNP_P3_48129_29453144 | NC_021163.1    | Ca_kabuli_chr04 | 29453144                | TT                              | CC                | 1945948161               |
| SNP_P3_48130_29453145 | NC_021163.1    | Ca_kabuli_chr04 | 29453145                | GG                              | AA                | 1945948163               |
| SNP_P3_48131_29453157 | NC_021163.1    | Ca_kabuli_chr04 | 29453157                | TT                              | GG                | 1945948165               |
| SNP_P3_48132_29453180 | NC_021163.1    | Ca_kabuli_chr04 | 29453180                | TT                              | CC                | 1945948167               |
| SNP_P3_48133_29453191 | NC_021163.1    | Ca_kabuli_chr04 | 29453191                | CC                              | TT                | 1945948169               |
| SNP_P3_48134_29453208 | NC_021163.1    | Ca_kabuli_chr04 | 29453208                | GG                              | AA                | 1945948170               |
| SNP_P3_48135_29461986 | NC_021163.1    | Ca_kabuli_chr04 | 29461986                | AA                              | TT                | 1945948172               |
| SNP_P3_48136_29462658 | NC_021163.1    | Ca_kabuli_chr04 | 29462658                | GG                              | AA                | 1945948174               |
| SNP_P3_48138_29466049 | NC_021163.1    | Ca_kabuli_chr04 | 29466049                | TT                              | GG                | 1945948176               |
| SNP_P3_48139_29466893 | NC_021163.1    | Ca_kabuli_chr04 | 29466893                | CC                              | TT                | 1945948177               |
| SNP_P3_48140_29467871 | NC_021163.1    | Ca_kabuli_chr04 | 29467871                | TT                              | GG                | 1945948179               |
| SNP_P3_48141_29467875 | NC_021163.1    | Ca_kabuli_chr04 | 29467875                | GG                              | AA                | 1945948181               |
| SNP_P3_48142_29469807 | NC_021163.1    | Ca_kabuli_chr04 | 29469807                | GG                              | AA                | 1945948183               |
| SNP_P3_48143_29471309 | NC_021163.1    | Ca_kabuli_chr04 | 29471309                | AA                              | TT                | 1945948185               |
| SNP_P3_48144_29472191 | NC_021163.1    | Ca_kabuli_chr04 | 29472191                | CC                              | GG                | 1945948186               |
| SNP_P3_48145_29472256 | NC_021163.1    | Ca_kabuli_chr04 | 29472256                | AA                              | GG                | 1945948188               |
| SNP_P3_48146_29472263 | NC_021163.1    | Ca_kabuli_chr04 | 29472263                | TT                              | CC                | 1945948190               |
| SNP_P3_48148_29475085 | NC_021163.1    | Ca_kabuli_chr04 | 29475085                | CC                              | TT                | 1945948192               |
| SNP_P3_48149_29475117 | NC_021163.1    | Ca_kabuli_chr04 | 29475117                | GG                              | TT                | 1945948194               |
| SNP_P3_48150_29475313 | NC_021163.1    | Ca_kabuli_chr04 | 29475313                | GG                              | AA                | 1945948195               |
| SNP_P3_48151_29475408 | NC_021163.1    | Ca_kabuli_chr04 | 29475408                | AA                              | GG                | 1945948197               |
| SNP_P3_48152_29477954 | NC_021163.1    | Ca_kabuli_chr04 | 29477954                | GG                              | AA                | 1945948199               |
| SNP_P3_48153_29479151 | NC_021163.1    | Ca_kabuli_chr04 | 29479151                | TT                              | AA                | 1945948201               |
| SNP_P3_48154_29481187 | NC_021163.1    | Ca_kabuli_chr04 | 29481187                | AA                              | CC                | 1945948202               |
| SNP_P3_48155_29481206 | NC_021163.1    | Ca_kabuli_chr04 | 29481206                | CC                              | TT                | 1945948204               |
| SNP_P3_48157_29482499 | NC_021163.1    | Ca_kabuli_chr04 | 29482499                | AA                              | GG                | 1945948206               |
| SNP_P3_48158_29486722 | NC_021163.1    | Ca_kabuli_chr04 | 29486722                | CC                              | GG                | 1945948208               |
| SNP_P3_48159_29487889 | NC_021163.1    | Ca_kabuli_chr04 | 29487889                | CC                              | TT                | 1945948210               |
| SNP_P3_48160_29487899 | NC_021163.1    | Ca_kabuli_chr04 | 29487899                | GG                              | AA                | 1945948211               |

| SNPs IDs              | Chromosome IDs | Chromosomes     | Physical positions (bp) | CDC Frontier (Reference genome) | (Pusa 256 & HPNB) | NCBI SNPdb Accession IDs |
|-----------------------|----------------|-----------------|-------------------------|---------------------------------|-------------------|--------------------------|
| SNP_P3_48161_29490800 | NC_021163.1    | Ca_kabuli_chr04 | 29490800                | TT                              | AA                | 1945948213               |
| SNP_P3_48162_29490826 | NC_021163.1    | Ca_kabuli_chr04 | 29490826                | GG                              | AA                | 1945948215               |
| SNP_P3_48163_29490839 | NC_021163.1    | Ca_kabuli_chr04 | 29490839                | AA                              | GG                | 1945948217               |
| SNP_P3_48164_29490857 | NC_021163.1    | Ca_kabuli_chr04 | 29490857                | AA                              | GG                | 1945948218               |
| SNP_P3_48165_29491024 | NC_021163.1    | Ca_kabuli_chr04 | 29491024                | TT                              | GG                | 1945948220               |
| SNP_P3_48166_29491031 | NC_021163.1    | Ca_kabuli_chr04 | 29491031                | CC                              | TT                | 1945948222               |
| SNP_P3_48167_29494884 | NC_021163.1    | Ca_kabuli_chr04 | 29494884                | GG                              | AA                | 1945948224               |
| SNP_P3_48169_29503551 | NC_021163.1    | Ca_kabuli_chr04 | 29503551                | CC                              | TT                | 1945948226               |
| SNP_P3_48170_29507638 | NC_021163.1    | Ca_kabuli_chr04 | 29507638                | GG                              | AA                | 1945948227               |
| SNP_P3_48171_29508005 | NC_021163.1    | Ca_kabuli_chr04 | 29508005                | GG                              | AA                | 1945948229               |
| SNP_P3_48172_29509576 | NC_021163.1    | Ca_kabuli_chr04 | 29509576                | AA                              | TT                | 1945948231               |
| SNP_P3_48174_29512825 | NC_021163.1    | Ca_kabuli_chr04 | 29512825                | TT                              | AA                | 1945948233               |
| SNP_P3_48175_29513064 | NC_021163.1    | Ca_kabuli_chr04 | 29513064                | GG                              | AA                | 1945948235               |
| SNP_P3_48176_29515673 | NC_021163.1    | Ca_kabuli_chr04 | 29515673                | TT                              | CC                | 1945948236               |
| SNP_P3_48177_29516383 | NC_021163.1    | Ca_kabuli_chr04 | 29516383                | CC                              | TT                | 1945948238               |
| SNP_P3_48178_29516398 | NC_021163.1    | Ca_kabuli_chr04 | 29516398                | CC                              | TT                | 1945948240               |
| SNP_P3_48179_29518869 | NC_021163.1    | Ca_kabuli_chr04 | 29518869                | TT                              | AA                | 1945948242               |
| SNP_P3_48180_29519496 | NC_021163.1    | Ca_kabuli_chr04 | 29519496                | AA                              | GG                | 1945948243               |
| SNP_P3_48183_29535460 | NC_021163.1    | Ca_kabuli_chr04 | 29535460                | GG                              | AA                | 1945948245               |
| SNP_P3_48184_29539068 | NC_021163.1    | Ca_kabuli_chr04 | 29539068                | AA                              | TT                | 1945948247               |
| SNP_P3_48185_29542562 | NC_021163.1    | Ca_kabuli_chr04 | 29542562                | AA                              | GG                | 1945948249               |
| SNP_P3_48186_29545507 | NC_021163.1    | Ca_kabuli_chr04 | 29545507                | CC                              | GG                | 1945948251               |
| SNP_P3_48187_29547339 | NC_021163.1    | Ca_kabuli_chr04 | 29547339                | AA                              | CC                | 1945948252               |
| SNP_P3_48188_29547453 | NC_021163.1    | Ca_kabuli_chr04 | 29547453                | CC                              | GG                | 1945948254               |
| SNP_P3_48189_29553008 | NC_021163.1    | Ca_kabuli_chr04 | 29553008                | CC                              | AA                | 1945948256               |
| SNP_P3_48190_29553830 | NC_021163.1    | Ca_kabuli_chr04 | 29553830                | CC                              | TT                | 1945948258               |
| SNP_P3_48191_29554367 | NC_021163.1    | Ca_kabuli_chr04 | 29554367                | CC                              | TT                | 1945948260               |
| SNP_P3_48192_29555557 | NC_021163.1    | Ca_kabuli_chr04 | 29555557                | AA                              | GG                | 1945948261               |
| SNP_P3_48193_29556482 | NC_021163.1    | Ca_kabuli_chr04 | 29556482                | AA                              | TT                | 1945948263               |
| SNP_P3_48194_29556568 | NC_021163.1    | Ca_kabuli_chr04 | 29556568                | CC                              | TT                | 1945948265               |
| SNP_P3_48195_29558998 | NC_021163.1    | Ca_kabuli_chr04 | 29558998                | CC                              | GG                | 1945948267               |
| SNP_P3_48196_29559276 | NC_021163.1    | Ca_kabuli_chr04 | 29559276                | CC                              | TT                | 1945948268               |
| SNP_P3_48197_29564779 | NC_021163.1    | Ca_kabuli_chr04 | 29564779                | CC                              | TT                | 1945948270               |
| SNP_P3_48198_29565539 | NC_021163.1    | Ca_kabuli_chr04 | 29565539                | CC                              | TT                | 1945948272               |
| SNP_P3_48199_29566664 | NC_021163.1    | Ca_kabuli_chr04 | 29566664                | GG                              | AA                | 1945948274               |
| SNP_P3_48200_29571306 | NC_021163.1    | Ca_kabuli_chr04 | 29571306                | TT                              | CC                | 1945948276               |
| SNP_P3_48201_29571385 | NC_021163.1    | Ca_kabuli_chr04 | 29571385                | GG                              | AA                | 1945948277               |
| SNP_P3_48202_29571466 | NC_021163.1    | Ca_kabuli_chr04 | 29571466                | TT                              | AA                | 1945948279               |
| SNP_P3_48203_29575141 | NC_021163.1    | Ca_kabuli_chr04 | 29575141                | TT                              | AA                | 1945948281               |
| SNP_P3_48204_29575365 | NC_021163.1    | Ca_kabuli_chr04 | 29575365                | AA                              | CC                | 1945948283               |
| SNP_P3_48205_29575416 | NC_021163.1    | Ca_kabuli_chr04 | 29575416                | GG                              | TT                | 1945948284               |
| SNP_P3_48206_29575420 | NC_021163.1    | Ca_kabuli_chr04 | 29575420                | AA                              | TT                | 1945948286               |

| SNPs IDs              | Chromosome IDs | Chromosomes     | Physical positions (bp) | CDC Frontier (Reference genome) | (Pusa 256 & HPNB) | NCBI SNPdb Accession IDs |
|-----------------------|----------------|-----------------|-------------------------|---------------------------------|-------------------|--------------------------|
| SNP_P3_48207_29581293 | NC_021163.1    | Ca_kabuli_chr04 | 29581293                | AA                              | GG                | 1945948288               |
| SNP_P3_48208_29581405 | NC_021163.1    | Ca_kabuli_chr04 | 29581405                | CC                              | TT                | 1945948290               |
| SNP_P3_48209_29582087 | NC_021163.1    | Ca_kabuli_chr04 | 29582087                | GG                              | TT                | 1945948292               |
| SNP_P3_48210_29582348 | NC_021163.1    | Ca_kabuli_chr04 | 29582348                | AA                              | TT                | 1945948293               |
| SNP_P3_48211_29582365 | NC_021163.1    | Ca_kabuli_chr04 | 29582365                | CC                              | AA                | 1945948295               |
| SNP_P3_48213_29582524 | NC_021163.1    | Ca_kabuli_chr04 | 29582524                | CC                              | GG                | 1945948297               |
| SNP_P3_48214_29583916 | NC_021163.1    | Ca_kabuli_chr04 | 29583916                | CC                              | TT                | 1945948299               |
| SNP_P3_48215_29587631 | NC_021163.1    | Ca_kabuli_chr04 | 29587631                | AA                              | GG                | 1945948300               |
| SNP_P3_48216_29587722 | NC_021163.1    | Ca_kabuli_chr04 | 29587722                | AA                              | GG                | 1945948302               |
| SNP_P3_48217_29593758 | NC_021163.1    | Ca_kabuli_chr04 | 29593758                | CC                              | TT                | 1945948304               |
| SNP_P3_48219_29602477 | NC_021163.1    | Ca_kabuli_chr04 | 29602477                | CC                              | TT                | 1945948306               |
| SNP_P3_48220_29602552 | NC_021163.1    | Ca_kabuli_chr04 | 29602552                | CC                              | GG                | 1945948308               |
| SNP_P3_48221_29602565 | NC_021163.1    | Ca_kabuli_chr04 | 29602565                | GG                              | CC                | 1945948309               |
| SNP_P3_48222_29602578 | NC_021163.1    | Ca_kabuli_chr04 | 29602578                | TT                              | CC                | 1945948311               |
| SNP_P3_48223_29602919 | NC_021163.1    | Ca_kabuli_chr04 | 29602919                | GG                              | AA                | 1945948312               |
| SNP_P3_48225_29603629 | NC_021163.1    | Ca_kabuli_chr04 | 29603629                | GG                              | AA                | 1945948314               |
| SNP_P3_48226_29605142 | NC_021163.1    | Ca_kabuli_chr04 | 29605142                | CC                              | TT                | 1945948316               |
| SNP_P3_48227_29605270 | NC_021163.1    | Ca_kabuli_chr04 | 29605270                | AA                              | GG                | 1945948318               |
| SNP_P3_48228_29605315 | NC_021163.1    | Ca_kabuli_chr04 | 29605315                | AA                              | GG                | 1945948319               |
| SNP_P3_48229_29605602 | NC_021163.1    | Ca_kabuli_chr04 | 29605602                | AA                              | GG                | 1945948321               |
| SNP_P3_48230_29616284 | NC_021163.1    | Ca_kabuli_chr04 | 29616284                | GG                              | AA                | 1945948323               |
| SNP_P3_48231_29619069 | NC_021163.1    | Ca_kabuli_chr04 | 29619069                | CC                              | AA                | 1945948325               |
| SNP_P3_48232_29619130 | NC_021163.1    | Ca_kabuli_chr04 | 29619130                | GG                              | AA                | 1945948327               |
| SNP_P3_48234_29619394 | NC_021163.1    | Ca_kabuli_chr04 | 29619394                | GG                              | AA                | 1945948328               |
| SNP_P3_48235_29619413 | NC_021163.1    | Ca_kabuli_chr04 | 29619413                | AA                              | GG                | 1945948330               |
| SNP_P3_48237_29620464 | NC_021163.1    | Ca_kabuli_chr04 | 29620464                | AA                              | GG                | 1945948332               |
| SNP_P3_48238_29620476 | NC_021163.1    | Ca_kabuli_chr04 | 29620476                | TT                              | CC                | 1945948334               |
| SNP_P3_48239_29620624 | NC_021163.1    | Ca_kabuli_chr04 | 29620624                | CC                              | TT                | 1945948335               |
| SNP_P3_48240_29620849 | NC_021163.1    | Ca_kabuli_chr04 | 29620849                | GG                              | TT                | 1945948337               |
| SNP_P3_48241_29621608 | NC_021163.1    | Ca_kabuli_chr04 | 29621608                | GG                              | TT                | 1945948339               |
| SNP_P3_48242_29621834 | NC_021163.1    | Ca_kabuli_chr04 | 29621834                | TT                              | CC                | 1945948341               |
| SNP_P3_48243_29624474 | NC_021163.1    | Ca_kabuli_chr04 | 29624474                | CC                              | TT                | 1945948343               |
| SNP_P3_48245_29624762 | NC_021163.1    | Ca_kabuli_chr04 | 29624762                | GG                              | AA                | 1945948344               |
| SNP_P3_48246_29624791 | NC_021163.1    | Ca_kabuli_chr04 | 29624791                | GG                              | AA                | 1945948346               |
| SNP_P3_48247_29625287 | NC_021163.1    | Ca_kabuli_chr04 | 29625287                | CC                              | TT                | 1945948348               |
| SNP_P3_48248_29625306 | NC_021163.1    | Ca_kabuli_chr04 | 29625306                | AA                              | GG                | 1945948350               |
| SNP_P3_48249_29625418 | NC_021163.1    | Ca_kabuli_chr04 | 29625418                | AA                              | CC                | 1945948352               |
| SNP_P3_48250_29625433 | NC_021163.1    | Ca_kabuli_chr04 | 29625433                | AA                              | GG                | 1945948353               |
| SNP_P3_48251_29625492 | NC_021163.1    | Ca_kabuli_chr04 | 29625492                | CC                              | TT                | 1945948355               |
| SNP_P3_48252_29625570 | NC_021163.1    | Ca_kabuli_chr04 | 29625570                | TT                              | CC                | 1945948357               |
| SNP_P3_48253_29628305 | NC_021163.1    | Ca_kabuli_chr04 | 29628305                | GG                              | TT                | 1945948359               |
| SNP_P3_48254_29628310 | NC_021163.1    | Ca_kabuli_chr04 | 29628310                | GG                              | CC                | 1945948360               |

| SNPs IDs              | Chromosome IDs | Chromosomes     | Physical positions (bp) | CDC Frontier (Reference genome) | (Pusa 256 & HPNB) | NCBI SNPdb Accession IDs |
|-----------------------|----------------|-----------------|-------------------------|---------------------------------|-------------------|--------------------------|
| SNP_P3_48255_29628325 | NC_021163.1    | Ca_kabuli_chr04 | 29628325                | GG                              | TT                | 1945948362               |
| SNP_P3_48256_29628330 | NC_021163.1    | Ca_kabuli_chr04 | 29628330                | AA                              | GG                | 1945948364               |
| SNP_P3_48257_29629727 | NC_021163.1    | Ca_kabuli_chr04 | 29629727                | AA                              | GG                | 1945948366               |
| SNP_P3_48258_29629921 | NC_021163.1    | Ca_kabuli_chr04 | 29629921                | GG                              | AA                | 1945948368               |
| SNP_P3_48259_29629936 | NC_021163.1    | Ca_kabuli_chr04 | 29629936                | CC                              | AA                | 1945948369               |
| SNP_P3_48260_29630113 | NC_021163.1    | Ca_kabuli_chr04 | 29630113                | CC                              | TT                | 1945948371               |
| SNP_P3_48261_29630376 | NC_021163.1    | Ca_kabuli_chr04 | 29630376                | CC                              | AA                | 1945948373               |
| SNP_P3_48263_29630460 | NC_021163.1    | Ca_kabuli_chr04 | 29630460                | CC                              | TT                | 1945948375               |
| SNP_P3_48264_29634480 | NC_021163.1    | Ca_kabuli_chr04 | 29634480                | CC                              | TT                | 1945948377               |
| SNP_P3_48265_29634728 | NC_021163.1    | Ca_kabuli_chr04 | 29634728                | TT                              | CC                | 1945948378               |
| SNP_P3_48266_29634739 | NC_021163.1    | Ca_kabuli_chr04 | 29634739                | GG                              | AA                | 1945948380               |
| SNP_P3_48267_29634768 | NC_021163.1    | Ca_kabuli_chr04 | 29634768                | TT                              | CC                | 1945948382               |
| SNP_P3_48268_29634794 | NC_021163.1    | Ca_kabuli_chr04 | 29634794                | AA                              | GG                | 1945948384               |
| SNP_P3_48269_29634934 | NC_021163.1    | Ca_kabuli_chr04 | 29634934                | AA                              | TT                | 1945948385               |
| SNP_P3_48270_29635157 | NC_021163.1    | Ca_kabuli_chr04 | 29635157                | GG                              | TT                | 1945948387               |
| SNP_P3_48271_29635299 | NC_021163.1    | Ca_kabuli_chr04 | 29635299                | TT                              | CC                | 1945948389               |
| SNP_P3_48272_29635316 | NC_021163.1    | Ca_kabuli_chr04 | 29635316                | CC                              | AA                | 1945948391               |
| SNP_P3_48273_29636087 | NC_021163.1    | Ca_kabuli_chr04 | 29636087                | TT                              | GG                | 1945948393               |
| SNP_P3_48274_29636117 | NC_021163.1    | Ca_kabuli_chr04 | 29636117                | TT                              | CC                | 1945948394               |
| SNP_P3_48275_29636587 | NC_021163.1    | Ca_kabuli_chr04 | 29636587                | TT                              | CC                | 1945948396               |
| SNP_P3_48276_29636589 | NC_021163.1    | Ca_kabuli_chr04 | 29636589                | CC                              | TT                | 1945948398               |
| SNP_P3_48277_29636845 | NC_021163.1    | Ca_kabuli_chr04 | 29636845                | TT                              | CC                | 1945948400               |
| SNP_P3_48278_29639234 | NC_021163.1    | Ca_kabuli_chr04 | 29639234                | GG                              | AA                | 1945948401               |
| SNP_P3_48279_29639277 | NC_021163.1    | Ca_kabuli_chr04 | 29639277                | AA                              | GG                | 1945948403               |
| SNP_P3_48280_29639640 | NC_021163.1    | Ca_kabuli_chr04 | 29639640                | TT                              | CC                | 1945948405               |
| SNP_P3_48281_29640033 | NC_021163.1    | Ca_kabuli_chr04 | 29640033                | CC                              | AA                | 1945948407               |
| SNP_P3_48282_29641613 | NC_021163.1    | Ca_kabuli_chr04 | 29641613                | GG                              | AA                | 1945948409               |
| SNP_P3_48283_29641947 | NC_021163.1    | Ca_kabuli_chr04 | 29641947                | CC                              | TT                | 1945948410               |
| SNP_P3_48284_29642018 | NC_021163.1    | Ca_kabuli_chr04 | 29642018                | CC                              | TT                | 1945948412               |
| SNP_P3_48286_29642210 | NC_021163.1    | Ca_kabuli_chr04 | 29642210                | AA                              | GG                | 1945948414               |
| SNP_P3_48287_29642240 | NC_021163.1    | Ca_kabuli_chr04 | 29642240                | GG                              | AA                | 1945948416               |
| SNP_P3_48288_29642439 | NC_021163.1    | Ca_kabuli_chr04 | 29642439                | GG                              | AA                | 1945948418               |
| SNP_P3_48289_29642499 | NC_021163.1    | Ca_kabuli_chr04 | 29642499                | TT                              | CC                | 1945948419               |
| SNP_P3_48290_29642627 | NC_021163.1    | Ca_kabuli_chr04 | 29642627                | AA                              | CC                | 1945948421               |
| SNP_P3_48291_29642780 | NC_021163.1    | Ca_kabuli_chr04 | 29642780                | GG                              | AA                | 1945948423               |
| SNP_P3_48292_29642782 | NC_021163.1    | Ca_kabuli_chr04 | 29642782                | CC                              | TT                | 1945948425               |
| SNP_P3_48293_29643106 | NC_021163.1    | Ca_kabuli_chr04 | 29643106                | TT                              | CC                | 1945948426               |
| SNP_P3_48294_29643108 | NC_021163.1    | Ca_kabuli_chr04 | 29643108                | GG                              | TT                | 1945948428               |
| SNP_P3_48295_29643439 | NC_021163.1    | Ca_kabuli_chr04 | 29643439                | GG                              | AA                | 1945948430               |
| SNP_P3_48296_29643456 | NC_021163.1    | Ca_kabuli_chr04 | 29643456                | AA                              | CC                | 1945948432               |
| SNP_P3_48297_29644066 | NC_021163.1    | Ca_kabuli_chr04 | 29644066                | CC                              | TT                | 1945948434               |
| SNP_P3_48298_29644856 | NC_021163.1    | Ca_kabuli_chr04 | 29644856                | TT                              | CC                | 1945948435               |



| SNPs IDs              | Chromosome IDs | Chromosomes     | Physical positions (bp) | CDC Frontier (Reference genome) | (Pusa 256 & HPNB) | NCBI SNPdb Accession IDs |
|-----------------------|----------------|-----------------|-------------------------|---------------------------------|-------------------|--------------------------|
| SNP_P3_48299_29645945 | NC_021163.1    | Ca_kabuli_chr04 | 29645945                | GG                              | TT                | 1945948437               |
| SNP_P3_48300_29645965 | NC_021163.1    | Ca_kabuli_chr04 | 29645965                | TT                              | CC                | 1945948439               |
| SNP_P3_48302_29647432 | NC_021163.1    | Ca_kabuli_chr04 | 29647432                | AA                              | GG                | 1945948441               |
| SNP_P3_48303_29647898 | NC_021163.1    | Ca_kabuli_chr04 | 29647898                | TT                              | CC                | 1945948443               |
| SNP_P3_48304_29648458 | NC_021163.1    | Ca_kabuli_chr04 | 29648458                | AA                              | GG                | 1945948444               |
| SNP_P3_48305_29648475 | NC_021163.1    | Ca_kabuli_chr04 | 29648475                | CC                              | TT                | 1945948446               |
| SNP_P3_48306_29648508 | NC_021163.1    | Ca_kabuli_chr04 | 29648508                | GG                              | TT                | 1945948448               |
| SNP_P3_48307_29648771 | NC_021163.1    | Ca_kabuli_chr04 | 29648771                | CC                              | TT                | 1945948450               |
| SNP_P3_48308_29648790 | NC_021163.1    | Ca_kabuli_chr04 | 29648790                | TT                              | CC                | 1945948451               |
| SNP_P3_48310_29650184 | NC_021163.1    | Ca_kabuli_chr04 | 29650184                | AA                              | TT                | 1945948453               |
| SNP_P3_48311_29650205 | NC_021163.1    | Ca_kabuli_chr04 | 29650205                | AA                              | TT                | 1945948455               |
| SNP_P3_48312_29650609 | NC_021163.1    | Ca_kabuli_chr04 | 29650609                | TT                              | CC                | 1945948457               |
| SNP_P3_48315_29651059 | NC_021163.1    | Ca_kabuli_chr04 | 29651059                | CC                              | AA                | 1945948459               |
| SNP_P3_48316_29651188 | NC_021163.1    | Ca_kabuli_chr04 | 29651188                | CC                              | GG                | 1945948460               |
| SNP_P3_48317_29651201 | NC_021163.1    | Ca_kabuli_chr04 | 29651201                | CC                              | TT                | 1945948462               |
| SNP_P3_48318_29651263 | NC_021163.1    | Ca_kabuli_chr04 | 29651263                | CC                              | TT                | 1945948464               |
| SNP_P3_48319_29651308 | NC_021163.1    | Ca_kabuli_chr04 | 29651308                | GG                              | AA                | 1945948466               |
| SNP_P3_48321_29651632 | NC_021163.1    | Ca_kabuli_chr04 | 29651632                | AA                              | TT                | 1945948467               |
| SNP_P3_48322_29651974 | NC_021163.1    | Ca_kabuli_chr04 | 29651974                | AA                              | CC                | 1945948469               |
| SNP_P3_48323_29652293 | NC_021163.1    | Ca_kabuli_chr04 | 29652293                | TT                              | CC                | 1945948471               |
| SNP_P3_48324_29652305 | NC_021163.1    | Ca_kabuli_chr04 | 29652305                | GG                              | TT                | 1945948473               |
| SNP_P3_48325_29652595 | NC_021163.1    | Ca_kabuli_chr04 | 29652595                | TT                              | CC                | 1945948475               |
| SNP_P3_48326_29652615 | NC_021163.1    | Ca_kabuli_chr04 | 29652615                | TT                              | AA                | 1945948476               |
| SNP_P3_48327_29653155 | NC_021163.1    | Ca_kabuli_chr04 | 29653155                | CC                              | TT                | 1945948478               |
| SNP_P3_48328_29653457 | NC_021163.1    | Ca_kabuli_chr04 | 29653457                | CC                              | TT                | 1945948480               |
| SNP_P3_48329_29653458 | NC_021163.1    | Ca_kabuli_chr04 | 29653458                | AA                              | GG                | 1945948482               |
| SNP_P3_48330_29653508 | NC_021163.1    | Ca_kabuli_chr04 | 29653508                | AA                              | CC                | 1945948484               |
| SNP_P3_48331_29653520 | NC_021163.1    | Ca_kabuli_chr04 | 29653520                | CC                              | TT                | 1945948485               |
| SNP_P3_48332_29653797 | NC_021163.1    | Ca_kabuli_chr04 | 29653797                | GG                              | AA                | 1945948487               |
| SNP_P3_48333_29653813 | NC_021163.1    | Ca_kabuli_chr04 | 29653813                | CC                              | TT                | 1945948489               |
| SNP_P3_48334_29653829 | NC_021163.1    | Ca_kabuli_chr04 | 29653829                | AA                              | GG                | 1945948491               |
| SNP_P3_48335_29654369 | NC_021163.1    | Ca_kabuli_chr04 | 29654369                | TT                              | GG                | 1945948492               |
| SNP_P3_48336_29654379 | NC_021163.1    | Ca_kabuli_chr04 | 29654379                | TT                              | CC                | 1945948494               |
| SNP_P3_48337_29654541 | NC_021163.1    | Ca_kabuli_chr04 | 29654541                | AA                              | CC                | 1945948496               |
| SNP_P3_48338_29654542 | NC_021163.1    | Ca_kabuli_chr04 | 29654542                | AA                              | GG                | 1945948498               |
| SNP_P3_48339_29654546 | NC_021163.1    | Ca_kabuli_chr04 | 29654546                | TT                              | CC                | 1945948500               |
| SNP_P3_48340_29656463 | NC_021163.1    | Ca_kabuli_chr04 | 29656463                | GG                              | AA                | 1945948501               |
| SNP_P3_48341_29656594 | NC_021163.1    | Ca_kabuli_chr04 | 29656594                | CC                              | TT                | 1945948503               |
| SNP_P3_48342_29656834 | NC_021163.1    | Ca_kabuli_chr04 | 29656834                | AA                              | GG                | 1945948505               |
| SNP_P3_48343_29656878 | NC_021163.1    | Ca_kabuli_chr04 | 29656878                | CC                              | TT                | 1945948507               |
| SNP_P3_48344_29659255 | NC_021163.1    | Ca_kabuli_chr04 | 29659255                | AA                              | GG                | 1945948509               |
| SNP_P3_48345_29659258 | NC_021163.1    | Ca_kabuli_chr04 | 29659258                | GG                              | AA                | 1945948510               |

| SNPs IDs              | Chromosome IDs | Chromosomes     | Physical positions (bp) | CDC Frontier (Reference genome) | (Pusa 256 & HPNB) | NCBI SNPdb Accession IDs |
|-----------------------|----------------|-----------------|-------------------------|---------------------------------|-------------------|--------------------------|
| SNP_P3_48346_29659849 | NC_021163.1    | Ca_kabuli_chr04 | 29659849                | TT                              | GG                | 1945948512               |
| SNP_P3_48347_29659968 | NC_021163.1    | Ca_kabuli_chr04 | 29659968                | AA                              | CC                | 1945948514               |
| SNP_P3_48348_29659999 | NC_021163.1    | Ca_kabuli_chr04 | 29659999                | GG                              | AA                | 1945948516               |
| SNP_P3_48349_29660018 | NC_021163.1    | Ca_kabuli_chr04 | 29660018                | TT                              | CC                | 1945948517               |
| SNP_P3_48350_29660119 | NC_021163.1    | Ca_kabuli_chr04 | 29660119                | CC                              | TT                | 1945948519               |
| SNP_P3_48351_29660127 | NC_021163.1    | Ca_kabuli_chr04 | 29660127                | AA                              | GG                | 1945948521               |
| SNP_P3_48352_29660168 | NC_021163.1    | Ca_kabuli_chr04 | 29660168                | GG                              | AA                | 1945948523               |
| SNP_P3_48353_29660226 | NC_021163.1    | Ca_kabuli_chr04 | 29660226                | CC                              | TT                | 1945948525               |
| SNP_P3_48354_29660253 | NC_021163.1    | Ca_kabuli_chr04 | 29660253                | GG                              | AA                | 1945948526               |
| SNP_P3_48355_29660317 | NC_021163.1    | Ca_kabuli_chr04 | 29660317                | AA                              | TT                | 1945948528               |
| SNP_P3_48356_29660324 | NC_021163.1    | Ca_kabuli_chr04 | 29660324                | CC                              | TT                | 1945948530               |
| SNP_P3_48357_29660665 | NC_021163.1    | Ca_kabuli_chr04 | 29660665                | TT                              | GG                | 1945948532               |
| SNP_P3_48358_29661271 | NC_021163.1    | Ca_kabuli_chr04 | 29661271                | CC                              | GG                | 1945948534               |
| SNP_P3_48359_29661331 | NC_021163.1    | Ca_kabuli_chr04 | 29661331                | TT                              | CC                | 1945948535               |
| SNP_P3_48360_29661646 | NC_021163.1    | Ca_kabuli_chr04 | 29661646                | CC                              | TT                | 1945948537               |
| SNP_P3_48361_29661789 | NC_021163.1    | Ca_kabuli_chr04 | 29661789                | GG                              | AA                | 1945948539               |
| SNP_P3_48362_29661796 | NC_021163.1    | Ca_kabuli_chr04 | 29661796                | CC                              | TT                | 1945948541               |
| SNP_P3_48363_29661811 | NC_021163.1    | Ca_kabuli_chr04 | 29661811                | GG                              | TT                | 1945948542               |
| SNP_P3_48364_29661825 | NC_021163.1    | Ca_kabuli_chr04 | 29661825                | CC                              | AA                | 1945948544               |
| SNP_P3_48365_29661859 | NC_021163.1    | Ca_kabuli_chr04 | 29661859                | CC                              | AA                | 1945948546               |
| SNP_P3_48366_29669760 | NC_021163.1    | Ca_kabuli_chr04 | 29669760                | AA                              | CC                | 1945948548               |
| SNP_P3_48367_29670432 | NC_021163.1    | Ca_kabuli_chr04 | 29670432                | AA                              | GG                | 1945948550               |
| SNP_P3_48368_29670632 | NC_021163.1    | Ca_kabuli_chr04 | 29670632                | TT                              | CC                | 1945948551               |
| SNP_P3_48369_29671042 | NC_021163.1    | Ca_kabuli_chr04 | 29671042                | CC                              | TT                | 1945948553               |
| SNP_P3_48370_29671068 | NC_021163.1    | Ca_kabuli_chr04 | 29671068                | TT                              | CC                | 1945948555               |
| SNP_P3_48371_29671076 | NC_021163.1    | Ca_kabuli_chr04 | 29671076                | CC                              | GG                | 1945948557               |
| SNP_P3_48372_29671363 | NC_021163.1    | Ca_kabuli_chr04 | 29671363                | CC                              | TT                | 1945948558               |
| SNP_P3_48373_29671417 | NC_021163.1    | Ca_kabuli_chr04 | 29671417                | CC                              | AA                | 1945948560               |
| SNP_P3_48374_29671497 | NC_021163.1    | Ca_kabuli_chr04 | 29671497                | TT                              | CC                | 1945948562               |
| SNP_P3_48376_29671974 | NC_021163.1    | Ca_kabuli_chr04 | 29671974                | GG                              | CC                | 1945948564               |
| SNP_P3_48377_29671990 | NC_021163.1    | Ca_kabuli_chr04 | 29671990                | CC                              | TT                | 1945948566               |
| SNP_P3_48378_29672711 | NC_021163.1    | Ca_kabuli_chr04 | 29672711                | CC                              | TT                | 1945948567               |
| SNP_P3_48380_29672823 | NC_021163.1    | Ca_kabuli_chr04 | 29672823                | CC                              | AA                | 1945948569               |
| SNP_P3_48381_29673873 | NC_021163.1    | Ca_kabuli_chr04 | 29673873                | CC                              | TT                | 1945948571               |
| SNP_P3_48382_29674884 | NC_021163.1    | Ca_kabuli_chr04 | 29674884                | GG                              | AA                | 1945948573               |
| SNP_P3_48383_29680412 | NC_021163.1    | Ca_kabuli_chr04 | 29680412                | TT                              | CC                | 1945948575               |
| SNP_P3_48384_29681011 | NC_021163.1    | Ca_kabuli_chr04 | 29681011                | TT                              | CC                | 1945948576               |
| SNP_P3_48385_29681367 | NC_021163.1    | Ca_kabuli_chr04 | 29681367                | CC                              | TT                | 1945948578               |
| SNP_P3_48386_29683718 | NC_021163.1    | Ca_kabuli_chr04 | 29683718                | AA                              | TT                | 1945948580               |
| SNP_P3_48388_29685151 | NC_021163.1    | Ca_kabuli_chr04 | 29685151                | CC                              | GG                | 1945948582               |
| SNP_P3_48389_29686047 | NC_021163.1    | Ca_kabuli_chr04 | 29686047                | AA                              | GG                | 1945948583               |
| SNP_P3_48392_29696128 | NC_021163.1    | Ca_kabuli_chr04 | 29696128                | AA                              | CC                | 1945948585               |

| SNPs IDs              | Chromosome IDs | Chromosomes     | Physical positions (bp) | CDC Frontier (Reference genome) | (Pusa 256 & HPNB) | NCBI SNPdb Accession IDs |
|-----------------------|----------------|-----------------|-------------------------|---------------------------------|-------------------|--------------------------|
| SNP_P3_48393_29698763 | NC_021163.1    | Ca_kabuli_chr04 | 29698763                | CC                              | AA                | 1945948587               |
| SNP_P3_48394_29699127 | NC_021163.1    | Ca_kabuli_chr04 | 29699127                | TT                              | AA                | 1945948589               |
| SNP_P3_48395_29699306 | NC_021163.1    | Ca_kabuli_chr04 | 29699306                | TT                              | CC                | 1945948591               |
| SNP_P3_48397_29700654 | NC_021163.1    | Ca_kabuli_chr04 | 29700654                | AA                              | GG                | 1945948592               |
| SNP_P3_48398_29700681 | NC_021163.1    | Ca_kabuli_chr04 | 29700681                | GG                              | AA                | 1945948594               |
| SNP_P3_48399_29700810 | NC_021163.1    | Ca_kabuli_chr04 | 29700810                | GG                              | AA                | 1945948596               |
| SNP_P3_48400_29703503 | NC_021163.1    | Ca_kabuli_chr04 | 29703503                | CC                              | TT                | 1945948598               |
| SNP_P3_48402_29710170 | NC_021163.1    | Ca_kabuli_chr04 | 29710170                | TT                              | AA                | 1945948600               |
| SNP_P3_48403_29710922 | NC_021163.1    | Ca_kabuli_chr04 | 29710922                | CC                              | TT                | 1945948601               |
| SNP_P3_48404_29712003 | NC_021163.1    | Ca_kabuli_chr04 | 29712003                | GG                              | AA                | 1945948603               |
| SNP_P3_48407_29715689 | NC_021163.1    | Ca_kabuli_chr04 | 29715689                | TT                              | GG                | 1945948605               |
| SNP_P3_48408_29716045 | NC_021163.1    | Ca_kabuli_chr04 | 29716045                | CC                              | TT                | 1945948607               |
| SNP_P3_48409_29716050 | NC_021163.1    | Ca_kabuli_chr04 | 29716050                | TT                              | GG                | 1945948608               |
| SNP_P3_48410_29716776 | NC_021163.1    | Ca_kabuli_chr04 | 29716776                | TT                              | CC                | 1945948610               |
| SNP_P3_48411_29716830 | NC_021163.1    | Ca_kabuli_chr04 | 29716830                | AA                              | GG                | 1945948612               |
| SNP_P3_48412_29717029 | NC_021163.1    | Ca_kabuli_chr04 | 29717029                | CC                              | TT                | 1945948614               |
| SNP_P3_48413_29717350 | NC_021163.1    | Ca_kabuli_chr04 | 29717350                | TT                              | GG                | 1945948616               |
| SNP_P3_48414_29717421 | NC_021163.1    | Ca_kabuli_chr04 | 29717421                | TT                              | CC                | 1945948617               |
| SNP_P3_48415_29717594 | NC_021163.1    | Ca_kabuli_chr04 | 29717594                | TT                              | CC                | 1945948619               |
| SNP_P3_48416_29747220 | NC_021163.1    | Ca_kabuli_chr04 | 29747220                | AA                              | GG                | 1945948621               |
| SNP_P3_48417_29747438 | NC_021163.1    | Ca_kabuli_chr04 | 29747438                | AA                              | GG                | 1945948623               |
| SNP_P3_48418_29754485 | NC_021163.1    | Ca_kabuli_chr04 | 29754485                | AA                              | GG                | 1945948625               |
| SNP_P3_48419_29754511 | NC_021163.1    | Ca_kabuli_chr04 | 29754511                | CC                              | TT                | 1945948626               |
| SNP_P3_48420_29754666 | NC_021163.1    | Ca_kabuli_chr04 | 29754666                | AA                              | CC                | 1945948628               |
| SNP_P3_48421_29754742 | NC_021163.1    | Ca_kabuli_chr04 | 29754742                | TT                              | AA                | 1945948630               |
| SNP_P3_48422_29754785 | NC_021163.1    | Ca_kabuli_chr04 | 29754785                | TT                              | GG                | 1945948632               |
| SNP_P3_48423_29754793 | NC_021163.1    | Ca_kabuli_chr04 | 29754793                | GG                              | CC                | 1945948633               |
| SNP_P3_48424_29762599 | NC_021163.1    | Ca_kabuli_chr04 | 29762599                | GG                              | AA                | 1945948635               |
| SNP_P3_48426_29768579 | NC_021163.1    | Ca_kabuli_chr04 | 29768579                | TT                              | CC                | 1945948637               |
| SNP_P3_48427_29770370 | NC_021163.1    | Ca_kabuli_chr04 | 29770370                | CC                              | TT                | 1945948639               |
| SNP_P3_48428_29770412 | NC_021163.1    | Ca_kabuli_chr04 | 29770412                | TT                              | AA                | 1945948641               |
| SNP_P3_48429_29771165 | NC_021163.1    | Ca_kabuli_chr04 | 29771165                | CC                              | TT                | 1945948642               |
| SNP_P3_48430_29774835 | NC_021163.1    | Ca_kabuli_chr04 | 29774835                | AA                              | GG                | 1945948644               |
| SNP_P3_48432_29775086 | NC_021163.1    | Ca_kabuli_chr04 | 29775086                | CC                              | TT                | 1945948646               |
| SNP_P3_48434_29782674 | NC_021163.1    | Ca_kabuli_chr04 | 29782674                | AA                              | GG                | 1945948648               |
| SNP_P3_48435_29784127 | NC_021163.1    | Ca_kabuli_chr04 | 29784127                | TT                              | CC                | 1945948649               |
| SNP_P3_48436_29784917 | NC_021163.1    | Ca_kabuli_chr04 | 29784917                | CC                              | GG                | 1945948651               |
| SNP_P3_48437_29803862 | NC_021163.1    | Ca_kabuli_chr04 | 29803862                | TT                              | CC                | 1945948653               |
| SNP_P3_48438_29804222 | NC_021163.1    | Ca_kabuli_chr04 | 29804222                | AA                              | TT                | 1945948655               |
| SNP_P3_48439_29808103 | NC_021163.1    | Ca_kabuli_chr04 | 29808103                | AA                              | TT                | 1945948657               |
| SNP_P3_48441_29812351 | NC_021163.1    | Ca_kabuli_chr04 | 29812351                | GG                              | CC                | 1945948658               |
| SNP_P3_48442_29813220 | NC_021163.1    | Ca_kabuli_chr04 | 29813220                | TT                              | AA                | 1945948660               |

| SNPs IDs              | Chromosome IDs | Chromosomes     | Physical positions (bp) | CDC Frontier (Reference genome) | (Pusa 256 & HPNB) | NCBI SNPdb Accession IDs |
|-----------------------|----------------|-----------------|-------------------------|---------------------------------|-------------------|--------------------------|
| SNP_P3_48444_29824473 | NC_021163.1    | Ca_kabuli_chr04 | 29824473                | CC                              | TT                | 1945948662               |
| SNP_P3_48447_29828961 | NC_021163.1    | Ca_kabuli_chr04 | 29828961                | CC                              | TT                | 1945948664               |
| SNP_P3_48448_29828962 | NC_021163.1    | Ca_kabuli_chr04 | 29828962                | AA                              | GG                | 1945948666               |
| SNP_P3_48449_29829016 | NC_021163.1    | Ca_kabuli_chr04 | 29829016                | TT                              | CC                | 1945948667               |
| SNP_P3_48450_29829357 | NC_021163.1    | Ca_kabuli_chr04 | 29829357                | TT                              | AA                | 1945948669               |
| SNP_P3_48451_29829402 | NC_021163.1    | Ca_kabuli_chr04 | 29829402                | AA                              | GG                | 1945948671               |
| SNP_P3_48452_29830241 | NC_021163.1    | Ca_kabuli_chr04 | 29830241                | TT                              | CC                | 1945948673               |
| SNP_P3_48453_29833205 | NC_021163.1    | Ca_kabuli_chr04 | 29833205                | GG                              | CC                | 1945948674               |
| SNP_P3_48454_29835726 | NC_021163.1    | Ca_kabuli_chr04 | 29835726                | CC                              | AA                | 1945948676               |
| SNP_P3_48455_29847435 | NC_021163.1    | Ca_kabuli_chr04 | 29847435                | AA                              | GG                | 1945948678               |
| SNP_P3_48456_29851737 | NC_021163.1    | Ca_kabuli_chr04 | 29851737                | TT                              | CC                | 1945948680               |
| SNP_P3_48457_29855795 | NC_021163.1    | Ca_kabuli_chr04 | 29855795                | CC                              | TT                | 1945948682               |
| SNP_P3_48458_29855849 | NC_021163.1    | Ca_kabuli_chr04 | 29855849                | TT                              | CC                | 1945948683               |
| SNP_P3_48459_29856080 | NC_021163.1    | Ca_kabuli_chr04 | 29856080                | TT                              | CC                | 1945948685               |
| SNP_P3_48460_29859792 | NC_021163.1    | Ca_kabuli_chr04 | 29859792                | CC                              | TT                | 1945948687               |
| SNP_P3_48461_29859960 | NC_021163.1    | Ca_kabuli_chr04 | 29859960                | GG                              | AA                | 1945948689               |
| SNP_P3_48462_29863830 | NC_021163.1    | Ca_kabuli_chr04 | 29863830                | TT                              | GG                | 1945948691               |
| SNP_P3_48464_29869713 | NC_021163.1    | Ca_kabuli_chr04 | 29869713                | TT                              | CC                | 1945948692               |
| SNP_P3_48465_29874087 | NC_021163.1    | Ca_kabuli_chr04 | 29874087                | AA                              | GG                | 1945948694               |
| SNP_P3_48466_29879234 | NC_021163.1    | Ca_kabuli_chr04 | 29879234                | AA                              | GG                | 1945948696               |
| SNP_P3_48467_29879243 | NC_021163.1    | Ca_kabuli_chr04 | 29879243                | CC                              | TT                | 1945948698               |
| SNP_P3_48468_29879553 | NC_021163.1    | Ca_kabuli_chr04 | 29879553                | TT                              | AA                | 1945948699               |
| SNP_P3_48469_29885108 | NC_021163.1    | Ca_kabuli_chr04 | 29885108                | CC                              | TT                | 1945948701               |
| SNP_P3_48470_29886744 | NC_021163.1    | Ca_kabuli_chr04 | 29886744                | CC                              | TT                | 1945948703               |
| SNP_P3_48471_29886761 | NC_021163.1    | Ca_kabuli_chr04 | 29886761                | GG                              | AA                | 1945948705               |
| SNP_P3_48473_29902511 | NC_021163.1    | Ca_kabuli_chr04 | 29902511                | TT                              | GG                | 1945948707               |
| SNP_P3_48474_29910626 | NC_021163.1    | Ca_kabuli_chr04 | 29910626                | AA                              | GG                | 1945948708               |
| SNP_P3_48475_29915390 | NC_021163.1    | Ca_kabuli_chr04 | 29915390                | CC                              | AA                | 1945948710               |
| SNP_P3_48476_29915917 | NC_021163.1    | Ca_kabuli_chr04 | 29915917                | TT                              | CC                | 1945948712               |
| SNP_P3_48478_29918573 | NC_021163.1    | Ca_kabuli_chr04 | 29918573                | TT                              | AA                | 1945948714               |
| SNP_P3_48479_29921812 | NC_021163.1    | Ca_kabuli_chr04 | 29921812                | CC                              | AA                | 1945948716               |
| SNP_P3_48481_29925040 | NC_021163.1    | Ca_kabuli_chr04 | 29925040                | TT                              | AA                | 1945948717               |
| SNP_P3_48482_29925359 | NC_021163.1    | Ca_kabuli_chr04 | 29925359                | CC                              | AA                | 1945948719               |
| SNP_P3_48485_29930748 | NC_021163.1    | Ca_kabuli_chr04 | 29930748                | CC                              | TT                | 1945948721               |
| SNP_P3_48486_29930782 | NC_021163.1    | Ca_kabuli_chr04 | 29930782                | GG                              | AA                | 1945948723               |
| SNP_P3_48487_29930814 | NC_021163.1    | Ca_kabuli_chr04 | 29930814                | TT                              | CC                | 1945948724               |
| SNP_P3_48488_29930829 | NC_021163.1    | Ca_kabuli_chr04 | 29930829                | AA                              | GG                | 1945948726               |
| SNP_P3_48489_29930862 | NC_021163.1    | Ca_kabuli_chr04 | 29930862                | TT                              | CC                | 1945948728               |
| SNP_P3_48490_29930879 | NC_021163.1    | Ca_kabuli_chr04 | 29930879                | GG                              | CC                | 1945948730               |
| SNP_P3_48491_29930916 | NC_021163.1    | Ca_kabuli_chr04 | 29930916                | AA                              | CC                | 1945948732               |
| SNP_P3_48492_29931040 | NC_021163.1    | Ca_kabuli_chr04 | 29931040                | CC                              | TT                | 1945948733               |
| SNP_P3_48495_29931374 | NC_021163.1    | Ca_kabuli_chr04 | 29931374                | TT                              | GG                | 1945948735               |

| SNPs IDs              | Chromosome IDs | Chromosomes     | Physical positions (bp) | CDC Frontier (Reference genome) | (Pusa 256 & HPNB) | NCBI SNPdb Accession IDs |
|-----------------------|----------------|-----------------|-------------------------|---------------------------------|-------------------|--------------------------|
| SNP_P3_48496_29931380 | NC_021163.1    | Ca_kabuli_chr04 | 29931380                | CC                              | TT                | 1945948737               |
| SNP_P3_48497_29931400 | NC_021163.1    | Ca_kabuli_chr04 | 29931400                | TT                              | CC                | 1945948739               |
| SNP_P3_48499_29931539 | NC_021163.1    | Ca_kabuli_chr04 | 29931539                | AA                              | GG                | 1945948741               |
| SNP_P3_48500_29932828 | NC_021163.1    | Ca_kabuli_chr04 | 29932828                | TT                              | CC                | 1945948742               |
| SNP_P3_48501_29932834 | NC_021163.1    | Ca_kabuli_chr04 | 29932834                | TT                              | GG                | 1945948744               |
| SNP_P3_48502_29932843 | NC_021163.1    | Ca_kabuli_chr04 | 29932843                | GG                              | TT                | 1945948746               |
| SNP_P3_48503_29932852 | NC_021163.1    | Ca_kabuli_chr04 | 29932852                | TT                              | CC                | 1945948748               |
| SNP_P3_48504_29932853 | NC_021163.1    | Ca_kabuli_chr04 | 29932853                | TT                              | CC                | 1945948749               |
| SNP_P3_48505_29932863 | NC_021163.1    | Ca_kabuli_chr04 | 29932863                | TT                              | CC                | 1945948751               |
| SNP_P3_48506_29932895 | NC_021163.1    | Ca_kabuli_chr04 | 29932895                | AA                              | TT                | 1945948753               |
| SNP_P3_48507_29933231 | NC_021163.1    | Ca_kabuli_chr04 | 29933231                | TT                              | GG                | 1945948755               |
| SNP_P3_48508_29933315 | NC_021163.1    | Ca_kabuli_chr04 | 29933315                | AA                              | GG                | 1945948757               |
| SNP_P3_48509_29933323 | NC_021163.1    | Ca_kabuli_chr04 | 29933323                | TT                              | CC                | 1945948758               |
| SNP_P3_48510_29933372 | NC_021163.1    | Ca_kabuli_chr04 | 29933372                | GG                              | CC                | 1945948760               |
| SNP_P3_48511_29933678 | NC_021163.1    | Ca_kabuli_chr04 | 29933678                | AA                              | GG                | 1945948762               |
| SNP_P3_48512_29933718 | NC_021163.1    | Ca_kabuli_chr04 | 29933718                | CC                              | GG                | 1945948764               |
| SNP_P3_48513_29933734 | NC_021163.1    | Ca_kabuli_chr04 | 29933734                | AA                              | CC                | 1945948765               |
| SNP_P3_48515_29933794 | NC_021163.1    | Ca_kabuli_chr04 | 29933794                | TT                              | GG                | 1945948767               |
| SNP_P3_48516_29933800 | NC_021163.1    | Ca_kabuli_chr04 | 29933800                | GG                              | TT                | 1945948769               |
| SNP_P3_48517_29934081 | NC_021163.1    | Ca_kabuli_chr04 | 29934081                | TT                              | CC                | 1945948771               |
| SNP_P3_48518_29934139 | NC_021163.1    | Ca_kabuli_chr04 | 29934139                | AA                              | GG                | 1945948773               |
| SNP_P3_48519_29934143 | NC_021163.1    | Ca_kabuli_chr04 | 29934143                | TT                              | CC                | 1945948774               |
| SNP_P3_48520_29934176 | NC_021163.1    | Ca_kabuli_chr04 | 29934176                | GG                              | CC                | 1945948776               |
| SNP_P3_48521_29934197 | NC_021163.1    | Ca_kabuli_chr04 | 29934197                | TT                              | CC                | 1945948778               |
| SNP_P3_48522_29934219 | NC_021163.1    | Ca_kabuli_chr04 | 29934219                | GG                              | TT                | 1945948780               |
| SNP_P3_48523_29934232 | NC_021163.1    | Ca_kabuli_chr04 | 29934232                | TT                              | GG                | 1945948782               |
| SNP_P3_48524_29934260 | NC_021163.1    | Ca_kabuli_chr04 | 29934260                | AA                              | CC                | 1945948783               |
| SNP_P3_48525_29934437 | NC_021163.1    | Ca_kabuli_chr04 | 29934437                | TT                              | CC                | 1945948785               |
| SNP_P3_48526_29934446 | NC_021163.1    | Ca_kabuli_chr04 | 29934446                | AA                              | CC                | 1945948787               |
| SNP_P3_48527_29934541 | NC_021163.1    | Ca_kabuli_chr04 | 29934541                | CC                              | TT                | 1945948789               |
| SNP_P3_48528_29934561 | NC_021163.1    | Ca_kabuli_chr04 | 29934561                | GG                              | TT                | 1945948790               |
| SNP_P3_48529_29934567 | NC_021163.1    | Ca_kabuli_chr04 | 29934567                | TT                              | CC                | 1945948792               |
| SNP_P3_48530_29936504 | NC_021163.1    | Ca_kabuli_chr04 | 29936504                | TT                              | CC                | 1945948794               |
| SNP_P3_48531_29939068 | NC_021163.1    | Ca_kabuli_chr04 | 29939068                | TT                              | AA                | 1945948796               |
| SNP_P3_48532_29939069 | NC_021163.1    | Ca_kabuli_chr04 | 29939069                | TT                              | AA                | 1945948798               |
| SNP_P3_48533_29939399 | NC_021163.1    | Ca_kabuli_chr04 | 29939399                | AA                              | GG                | 1945948799               |
| SNP_P3_48534_29939420 | NC_021163.1    | Ca_kabuli_chr04 | 29939420                | AA                              | GG                | 1945948801               |
| SNP_P3_48536_29940527 | NC_021163.1    | Ca_kabuli_chr04 | 29940527                | GG                              | TT                | 1945948803               |
| SNP_P3_48537_29944612 | NC_021163.1    | Ca_kabuli_chr04 | 29944612                | GG                              | AA                | 1945948805               |
| SNP_P3_48540_29944925 | NC_021163.1    | Ca_kabuli_chr04 | 29944925                | TT                              | CC                | 1945948807               |
| SNP_P3_48541_29944953 | NC_021163.1    | Ca_kabuli_chr04 | 29944953                | TT                              | AA                | 1945948808               |
| SNP_P3_48542_29944963 | NC_021163.1    | Ca_kabuli_chr04 | 29944963                | AA                              | TT                | 1945948810               |

| SNPs IDs              | Chromosome IDs | Chromosomes     | Physical positions (bp) | CDC Frontier (Reference genome) | (Pusa 256 & HPNB) | NCBI SNPdb Accession IDs |
|-----------------------|----------------|-----------------|-------------------------|---------------------------------|-------------------|--------------------------|
| SNP_P3_48543_29944992 | NC_021163.1    | Ca_kabuli_chr04 | 29944992                | AA                              | TT                | 1945948812               |
| SNP_P3_48544_29945017 | NC_021163.1    | Ca_kabuli_chr04 | 29945017                | GG                              | AA                | 1945948814               |
| SNP_P3_48545_29945900 | NC_021163.1    | Ca_kabuli_chr04 | 29945900                | TT                              | AA                | 1945948815               |
| SNP_P3_48546_29948528 | NC_021163.1    | Ca_kabuli_chr04 | 29948528                | GG                              | AA                | 1945948817               |
| SNP_P3_48547_29948560 | NC_021163.1    | Ca_kabuli_chr04 | 29948560                | TT                              | CC                | 1945948819               |
| SNP_P3_48548_29958113 | NC_021163.1    | Ca_kabuli_chr04 | 29958113                | GG                              | AA                | 1945948821               |
| SNP_P3_48549_29958122 | NC_021163.1    | Ca_kabuli_chr04 | 29958122                | TT                              | GG                | 1945948823               |
| SNP_P3_48550_29960542 | NC_021163.1    | Ca_kabuli_chr04 | 29960542                | CC                              | TT                | 1945948824               |
| SNP_P3_48551_29960615 | NC_021163.1    | Ca_kabuli_chr04 | 29960615                | CC                              | AA                | 1945948826               |
| SNP_P3_48552_29961635 | NC_021163.1    | Ca_kabuli_chr04 | 29961635                | GG                              | TT                | 1945948828               |
| SNP_P3_48553_29961731 | NC_021163.1    | Ca_kabuli_chr04 | 29961731                | AA                              | GG                | 1945948830               |
| SNP_P3_48554_29962001 | NC_021163.1    | Ca_kabuli_chr04 | 29962001                | TT                              | AA                | 1945948832               |
| SNP_P3_48555_29962014 | NC_021163.1    | Ca_kabuli_chr04 | 29962014                | AA                              | TT                | 1945948833               |
| SNP_P3_48558_29978219 | NC_021163.1    | Ca_kabuli_chr04 | 29978219                | TT                              | CC                | 1945948835               |
| SNP_P3_48559_29978270 | NC_021163.1    | Ca_kabuli_chr04 | 29978270                | TT                              | CC                | 1945948837               |
| SNP_P3_48560_29978274 | NC_021163.1    | Ca_kabuli_chr04 | 29978274                | CC                              | TT                | 1945948839               |
| SNP_P3_48561_29979470 | NC_021163.1    | Ca_kabuli_chr04 | 29979470                | GG                              | AA                | 1945948840               |
| SNP_P3_48562_29979505 | NC_021163.1    | Ca_kabuli_chr04 | 29979505                | TT                              | CC                | 1945948842               |
| SNP_P3_48563_29979507 | NC_021163.1    | Ca_kabuli_chr04 | 29979507                | GG                              | AA                | 1945948844               |
| SNP_P3_48564_29981670 | NC_021163.1    | Ca_kabuli_chr04 | 29981670                | TT                              | CC                | 1945948846               |
| SNP_P3_48565_29984728 | NC_021163.1    | Ca_kabuli_chr04 | 29984728                | CC                              | TT                | 1945948848               |
| SNP_P3_48566_29984730 | NC_021163.1    | Ca_kabuli_chr04 | 29984730                | AA                              | GG                | 1945948849               |
| SNP_P3_48567_29986237 | NC_021163.1    | Ca_kabuli_chr04 | 29986237                | GG                              | AA                | 1945948851               |
| SNP_P3_48568_29986491 | NC_021163.1    | Ca_kabuli_chr04 | 29986491                | CC                              | TT                | 1945948853               |
| SNP_P3_48570_29987087 | NC_021163.1    | Ca_kabuli_chr04 | 29987087                | GG                              | AA                | 1945948855               |
| SNP_P3_48573_29987956 | NC_021163.1    | Ca_kabuli_chr04 | 29987956                | CC                              | TT                | 1945948857               |
| SNP_P3_48574_29991477 | NC_021163.1    | Ca_kabuli_chr04 | 29991477                | AA                              | GG                | 1945948858               |
| SNP_P3_48575_29991496 | NC_021163.1    | Ca_kabuli_chr04 | 29991496                | AA                              | GG                | 1945948860               |
| SNP_P3_48576_29991509 | NC_021163.1    | Ca_kabuli_chr04 | 29991509                | AA                              | GG                | 1945948862               |
| SNP_P3_48577_29991553 | NC_021163.1    | Ca_kabuli_chr04 | 29991553                | GG                              | TT                | 1945948864               |
| SNP_P3_48579_30010130 | NC_021163.1    | Ca_kabuli_chr04 | 30010130                | CC                              | AA                | 1945948865               |
| SNP_P3_48580_30016421 | NC_021163.1    | Ca_kabuli_chr04 | 30016421                | GG                              | AA                | 1945948867               |
| SNP_P3_48581_30016422 | NC_021163.1    | Ca_kabuli_chr04 | 30016422                | GG                              | AA                | 1945948869               |
| SNP_P3_48582_30016424 | NC_021163.1    | Ca_kabuli_chr04 | 30016424                | TT                              | AA                | 1945948871               |
| SNP_P3_48583_30016446 | NC_021163.1    | Ca_kabuli_chr04 | 30016446                | GG                              | TT                | 1945948873               |
| SNP_P3_48584_30016477 | NC_021163.1    | Ca_kabuli_chr04 | 30016477                | GG                              | AA                | 1945948874               |
| SNP_P3_48585_30016494 | NC_021163.1    | Ca_kabuli_chr04 | 30016494                | TT                              | CC                | 1945948876               |
| SNP_P3_48586_30016545 | NC_021163.1    | Ca_kabuli_chr04 | 30016545                | GG                              | AA                | 1945948878               |
| SNP_P3_48587_30017588 | NC_021163.1    | Ca_kabuli_chr04 | 30017588                | AA                              | CC                | 1945948880               |
| SNP_P3_48588_30017624 | NC_021163.1    | Ca_kabuli_chr04 | 30017624                | GG                              | AA                | 1945948881               |
| SNP_P3_48589_30019892 | NC_021163.1    | Ca_kabuli_chr04 | 30019892                | AA                              | GG                | 1945948883               |
| SNP_P3_48590_30019895 | NC_021163.1    | Ca_kabuli_chr04 | 30019895                | GG                              | AA                | 1945948885               |

| SNPs IDs              | Chromosome IDs | Chromosomes     | Physical positions (bp) | CDC Frontier (Reference genome) | (Pusa 256 & HPNB) | NCBI SNPdb Accession IDs |
|-----------------------|----------------|-----------------|-------------------------|---------------------------------|-------------------|--------------------------|
| SNP_P3_48591_30019941 | NC_021163.1    | Ca_kabuli_chr04 | 30019941                | GG                              | TT                | 1945948887               |
| SNP_P3_48592_30019956 | NC_021163.1    | Ca_kabuli_chr04 | 30019956                | GG                              | TT                | 1945948889               |
| SNP_P3_48593_30019957 | NC_021163.1    | Ca_kabuli_chr04 | 30019957                | CC                              | TT                | 1945948890               |
| SNP_P3_48594_30020216 | NC_021163.1    | Ca_kabuli_chr04 | 30020216                | AA                              | GG                | 1945948892               |
| SNP_P3_48595_30020232 | NC_021163.1    | Ca_kabuli_chr04 | 30020232                | TT                              | CC                | 1945948894               |
| SNP_P3_48596_30020403 | NC_021163.1    | Ca_kabuli_chr04 | 30020403                | GG                              | AA                | 1945948896               |
| SNP_P3_48597_30020419 | NC_021163.1    | Ca_kabuli_chr04 | 30020419                | TT                              | GG                | 1945948898               |
| SNP_P3_48598_30020850 | NC_021163.1    | Ca_kabuli_chr04 | 30020850                | GG                              | AA                | 1945948899               |
| SNP_P3_48599_30020867 | NC_021163.1    | Ca_kabuli_chr04 | 30020867                | TT                              | AA                | 1945948901               |
| SNP_P3_48600_30025676 | NC_021163.1    | Ca_kabuli_chr04 | 30025676                | TT                              | CC                | 1945948903               |
| SNP_P3_48601_30025708 | NC_021163.1    | Ca_kabuli_chr04 | 30025708                | AA                              | GG                | 1945948905               |
| SNP_P3_48602_30025716 | NC_021163.1    | Ca_kabuli_chr04 | 30025716                | TT                              | CC                | 1945948906               |
| SNP_P3_48603_30025784 | NC_021163.1    | Ca_kabuli_chr04 | 30025784                | AA                              | GG                | 1945948908               |
| SNP_P3_48604_30025828 | NC_021163.1    | Ca_kabuli_chr04 | 30025828                | AA                              | GG                | 1945948910               |
| SNP_P3_48606_30026008 | NC_021163.1    | Ca_kabuli_chr04 | 30026008                | TT                              | CC                | 1945948912               |
| SNP_P3_48607_30026090 | NC_021163.1    | Ca_kabuli_chr04 | 30026090                | GG                              | AA                | 1945948914               |
| SNP_P3_48608_30026101 | NC_021163.1    | Ca_kabuli_chr04 | 30026101                | TT                              | CC                | 1945948915               |
| SNP_P3_48609_30033028 | NC_021163.1    | Ca_kabuli_chr04 | 30033028                | AA                              | CC                | 1945948917               |
| SNP_P3_48610_30033115 | NC_021163.1    | Ca_kabuli_chr04 | 30033115                | GG                              | AA                | 1945948919               |
| SNP_P3_48612_30033348 | NC_021163.1    | Ca_kabuli_chr04 | 30033348                | GG                              | TT                | 1945948921               |
| SNP_P3_48613_30033451 | NC_021163.1    | Ca_kabuli_chr04 | 30033451                | TT                              | CC                | 1945948923               |
| SNP_P3_48615_30042887 | NC_021163.1    | Ca_kabuli_chr04 | 30042887                | CC                              | AA                | 1945948924               |
| SNP_P3_48617_30046009 | NC_021163.1    | Ca_kabuli_chr04 | 30046009                | TT                              | AA                | 1945948926               |
| SNP_P3_48620_30049839 | NC_021163.1    | Ca_kabuli_chr04 | 30049839                | GG                              | AA                | 1945948928               |
| SNP_P3_48621_30050094 | NC_021163.1    | Ca_kabuli_chr04 | 30050094                | GG                              | AA                | 1945948930               |
| SNP_P3_48622_30051873 | NC_021163.1    | Ca_kabuli_chr04 | 30051873                | CC                              | AA                | 1945948931               |
| SNP_P3_48623_30052047 | NC_021163.1    | Ca_kabuli_chr04 | 30052047                | TT                              | CC                | 1945948933               |
| SNP_P3_48624_30053420 | NC_021163.1    | Ca_kabuli_chr04 | 30053420                | CC                              | AA                | 1945948935               |
| SNP_P3_48626_30055041 | NC_021163.1    | Ca_kabuli_chr04 | 30055041                | CC                              | TT                | 1945948937               |
| SNP_P3_48627_30055114 | NC_021163.1    | Ca_kabuli_chr04 | 30055114                | CC                              | TT                | 1945948939               |
| SNP_P3_48628_30061499 | NC_021163.1    | Ca_kabuli_chr04 | 30061499                | TT                              | CC                | 1945948940               |
| SNP_P3_48629_30074960 | NC_021163.1    | Ca_kabuli_chr04 | 30074960                | GG                              | AA                | 1945948942               |
| SNP_P3_48631_30077098 | NC_021163.1    | Ca_kabuli_chr04 | 30077098                | GG                              | TT                | 1945948944               |
| SNP_P3_48634_30077848 | NC_021163.1    | Ca_kabuli_chr04 | 30077848                | TT                              | CC                | 1945948946               |
| SNP_P3_48635_30081030 | NC_021163.1    | Ca_kabuli_chr04 | 30081030                | AA                              | CC                | 1945948947               |
| SNP_P3_48637_30081346 | NC_021163.1    | Ca_kabuli_chr04 | 30081346                | AA                              | GG                | 1945948949               |
| SNP_P3_48638_30081876 | NC_021163.1    | Ca_kabuli_chr04 | 30081876                | TT                              | GG                | 1945948951               |
| SNP_P3_48639_30082256 | NC_021163.1    | Ca_kabuli_chr04 | 30082256                | AA                              | CC                | 1945948953               |
| SNP_P3_48640_30084280 | NC_021163.1    | Ca_kabuli_chr04 | 30084280                | TT                              | CC                | 1945948955               |
| SNP_P3_48641_30084593 | NC_021163.1    | Ca_kabuli_chr04 | 30084593                | TT                              | CC                | 1945948956               |
| SNP_P3_48643_30085292 | NC_021163.1    | Ca_kabuli_chr04 | 30085292                | AA                              | GG                | 1945948958               |
| SNP_P3_48644_30085369 | NC_021163.1    | Ca_kabuli_chr04 | 30085369                | TT                              | AA                | 1945948960               |

| SNPs IDs              | Chromosome IDs | Chromosomes     | Physical positions (bp) | CDC Frontier (Reference genome) | (Pusa 256 & HPNB) | NCBI SNPdb Accession IDs |
|-----------------------|----------------|-----------------|-------------------------|---------------------------------|-------------------|--------------------------|
| SNP_P3_48645_30086075 | NC_021163.1    | Ca_kabuli_chr04 | 30086075                | AA                              | GG                | 1945948962               |
| SNP_P3_48646_30086844 | NC_021163.1    | Ca_kabuli_chr04 | 30086844                | TT                              | CC                | 1945948964               |
| SNP_P3_48648_30089872 | NC_021163.1    | Ca_kabuli_chr04 | 30089872                | TT                              | CC                | 1945948965               |
| SNP_P3_48653_30093258 | NC_021163.1    | Ca_kabuli_chr04 | 30093258                | GG                              | AA                | 1945948967               |
| SNP_P3_48655_30096222 | NC_021163.1    | Ca_kabuli_chr04 | 30096222                | AA                              | GG                | 1945948969               |
| SNP_P3_48656_30096478 | NC_021163.1    | Ca_kabuli_chr04 | 30096478                | CC                              | TT                | 1945948971               |
| SNP_P3_48657_30096483 | NC_021163.1    | Ca_kabuli_chr04 | 30096483                | GG                              | TT                | 1945948972               |
| SNP_P3_48658_30096503 | NC_021163.1    | Ca_kabuli_chr04 | 30096503                | TT                              | CC                | 1945948974               |
| SNP_P3_48659_30096531 | NC_021163.1    | Ca_kabuli_chr04 | 30096531                | CC                              | TT                | 1945948976               |
| SNP_P3_48660_30096706 | NC_021163.1    | Ca_kabuli_chr04 | 30096706                | AA                              | GG                | 1945948978               |
| SNP_P3_48661_30096856 | NC_021163.1    | Ca_kabuli_chr04 | 30096856                | AA                              | GG                | 1945948980               |
| SNP_P3_48662_30097869 | NC_021163.1    | Ca_kabuli_chr04 | 30097869                | GG                              | AA                | 1945948981               |
| SNP_P3_48663_30098153 | NC_021163.1    | Ca_kabuli_chr04 | 30098153                | CC                              | TT                | 1945948983               |
| SNP_P3_48664_30098578 | NC_021163.1    | Ca_kabuli_chr04 | 30098578                | AA                              | CC                | 1945948985               |
| SNP_P3_48665_30098612 | NC_021163.1    | Ca_kabuli_chr04 | 30098612                | TT                              | CC                | 1945948987               |
| SNP_P3_48666_30098624 | NC_021163.1    | Ca_kabuli_chr04 | 30098624                | GG                              | AA                | 1945948989               |
| SNP_P3_48667_30099916 | NC_021163.1    | Ca_kabuli_chr04 | 30099916                | TT                              | CC                | 1945948990               |
| SNP_P3_48668_30100616 | NC_021163.1    | Ca_kabuli_chr04 | 30100616                | GG                              | AA                | 1945948992               |
| SNP_P3_48669_30100617 | NC_021163.1    | Ca_kabuli_chr04 | 30100617                | AA                              | TT                | 1945948994               |
| SNP_P3_48670_30100871 | NC_021163.1    | Ca_kabuli_chr04 | 30100871                | TT                              | GG                | 1945948996               |
| SNP_P3_48671_30100889 | NC_021163.1    | Ca_kabuli_chr04 | 30100889                | CC                              | GG                | 1945948997               |
| SNP_P3_48672_30100949 | NC_021163.1    | Ca_kabuli_chr04 | 30100949                | CC                              | TT                | 1945948999               |
| SNP_P3_48673_30102025 | NC_021163.1    | Ca_kabuli_chr04 | 30102025                | GG                              | TT                | 1945949001               |
| SNP_P3_48674_30102048 | NC_021163.1    | Ca_kabuli_chr04 | 30102048                | TT                              | GG                | 1945949003               |
| SNP_P3_48675_30102049 | NC_021163.1    | Ca_kabuli_chr04 | 30102049                | CC                              | TT                | 1945949005               |
| SNP_P3_48677_30102143 | NC_021163.1    | Ca_kabuli_chr04 | 30102143                | GG                              | AA                | 1945949006               |
| SNP_P3_48678_30102341 | NC_021163.1    | Ca_kabuli_chr04 | 30102341                | GG                              | AA                | 1945949008               |
| SNP_P3_48680_30103191 | NC_021163.1    | Ca_kabuli_chr04 | 30103191                | AA                              | CC                | 1945949010               |
| SNP_P3_48681_30103244 | NC_021163.1    | Ca_kabuli_chr04 | 30103244                | CC                              | TT                | 1945949012               |
| SNP_P3_48682_30103870 | NC_021163.1    | Ca_kabuli_chr04 | 30103870                | TT                              | CC                | 1945949013               |
| SNP_P3_48684_30105644 | NC_021163.1    | Ca_kabuli_chr04 | 30105644                | TT                              | CC                | 1945949015               |
| SNP_P3_48685_30111461 | NC_021163.1    | Ca_kabuli_chr04 | 30111461                | TT                              | GG                | 1945949017               |
| SNP_P3_48686_30111464 | NC_021163.1    | Ca_kabuli_chr04 | 30111464                | CC                              | TT                | 1945949019               |
| SNP_P3_48687_30111496 | NC_021163.1    | Ca_kabuli_chr04 | 30111496                | GG                              | TT                | 1945949021               |
| SNP_P3_48688_30111740 | NC_021163.1    | Ca_kabuli_chr04 | 30111740                | TT                              | CC                | 1945949022               |
| SNP_P3_48689_30111767 | NC_021163.1    | Ca_kabuli_chr04 | 30111767                | TT                              | CC                | 1945949024               |
| SNP_P3_48691_30113550 | NC_021163.1    | Ca_kabuli_chr04 | 30113550                | AA                              | GG                | 1945949026               |
| SNP_P3_48692_30113663 | NC_021163.1    | Ca_kabuli_chr04 | 30113663                | CC                              | AA                | 1945949028               |
| SNP_P3_48693_30114962 | NC_021163.1    | Ca_kabuli_chr04 | 30114962                | TT                              | GG                | 1945949030               |
| SNP_P3_48694_30114981 | NC_021163.1    | Ca_kabuli_chr04 | 30114981                | GG                              | AA                | 1945949031               |
| SNP_P3_48695_30115607 | NC_021163.1    | Ca_kabuli_chr04 | 30115607                | AA                              | GG                | 1945949033               |
| SNP_P3_48696_30115649 | NC_021163.1    | Ca_kabuli_chr04 | 30115649                | GG                              | AA                | 1945949035               |



| SNPs IDs              | Chromosome IDs | Chromosomes     | Physical positions (bp) | CDC Frontier (Reference genome) | (Pusa 256 & HPNB) | NCBI SNPdb Accession IDs |
|-----------------------|----------------|-----------------|-------------------------|---------------------------------|-------------------|--------------------------|
| SNP_P3_48697_30115651 | NC_021163.1    | Ca_kabuli_chr04 | 30115651                | CC                              | GG                | 1945949037               |
| SNP_P3_48698_30115653 | NC_021163.1    | Ca_kabuli_chr04 | 30115653                | TT                              | CC                | 1945949038               |
| SNP_P3_48699_30115660 | NC_021163.1    | Ca_kabuli_chr04 | 30115660                | AA                              | GG                | 1945949040               |
| SNP_P3_48700_30115662 | NC_021163.1    | Ca_kabuli_chr04 | 30115662                | AA                              | GG                | 1945949042               |
| SNP_P3_48701_30115670 | NC_021163.1    | Ca_kabuli_chr04 | 30115670                | GG                              | TT                | 1945949044               |
| SNP_P3_48702_30115714 | NC_021163.1    | Ca_kabuli_chr04 | 30115714                | TT                              | AA                | 1945949046               |
| SNP_P3_48703_30116320 | NC_021163.1    | Ca_kabuli_chr04 | 30116320                | GG                              | CC                | 1945949047               |
| SNP_P3_48704_30116499 | NC_021163.1    | Ca_kabuli_chr04 | 30116499                | GG                              | AA                | 1945949049               |
| SNP_P3_48705_30116541 | NC_021163.1    | Ca_kabuli_chr04 | 30116541                | TT                              | CC                | 1945949051               |
| SNP_P3_48706_30116546 | NC_021163.1    | Ca_kabuli_chr04 | 30116546                | GG                              | TT                | 1945949053               |
| SNP_P3_48708_30117951 | NC_021163.1    | Ca_kabuli_chr04 | 30117951                | CC                              | TT                | 1945949054               |
| SNP_P3_48709_30118013 | NC_021163.1    | Ca_kabuli_chr04 | 30118013                | GG                              | AA                | 1945949056               |
| SNP_P3_48710_30119241 | NC_021163.1    | Ca_kabuli_chr04 | 30119241                | AA                              | GG                | 1945949058               |
| SNP_P3_48711_30119259 | NC_021163.1    | Ca_kabuli_chr04 | 30119259                | AA                              | GG                | 1945949060               |
| SNP_P3_48712_30119463 | NC_021163.1    | Ca_kabuli_chr04 | 30119463                | AA                              | GG                | 1945949062               |
| SNP_P3_48713_30119465 | NC_021163.1    | Ca_kabuli_chr04 | 30119465                | CC                              | TT                | 1945949063               |
| SNP_P3_48714_30119840 | NC_021163.1    | Ca_kabuli_chr04 | 30119840                | GG                              | CC                | 1945949065               |
| SNP_P3_48715_30120866 | NC_021163.1    | Ca_kabuli_chr04 | 30120866                | CC                              | TT                | 1945949067               |
| SNP_P3_48717_30122394 | NC_021163.1    | Ca_kabuli_chr04 | 30122394                | AA                              | GG                | 1945949069               |
| SNP_P3_48718_30122418 | NC_021163.1    | Ca_kabuli_chr04 | 30122418                | CC                              | TT                | 1945949071               |
| SNP_P3_48719_30122488 | NC_021163.1    | Ca_kabuli_chr04 | 30122488                | TT                              | AA                | 1945949072               |
| SNP_P3_48721_30122644 | NC_021163.1    | Ca_kabuli_chr04 | 30122644                | GG                              | TT                | 1945949074               |
| SNP_P3_48722_30122718 | NC_021163.1    | Ca_kabuli_chr04 | 30122718                | GG                              | CC                | 1945949076               |
| SNP_P3_48723_30122741 | NC_021163.1    | Ca_kabuli_chr04 | 30122741                | CC                              | AA                | 1945949078               |
| SNP_P3_48724_30122761 | NC_021163.1    | Ca_kabuli_chr04 | 30122761                | AA                              | CC                | 1945949079               |
| SNP_P3_48726_30122839 | NC_021163.1    | Ca_kabuli_chr04 | 30122839                | TT                              | CC                | 1945949081               |
| SNP_P3_48727_30122885 | NC_021163.1    | Ca_kabuli_chr04 | 30122885                | TT                              | CC                | 1945949083               |
| SNP_P3_48729_30122900 | NC_021163.1    | Ca_kabuli_chr04 | 30122900                | CC                              | TT                | 1945949085               |
| SNP_P3_48730_30123409 | NC_021163.1    | Ca_kabuli_chr04 | 30123409                | AA                              | TT                | 1945949087               |
| SNP_P3_48731_30124279 | NC_021163.1    | Ca_kabuli_chr04 | 30124279                | TT                              | CC                | 1945949088               |
| SNP_P3_48732_30124484 | NC_021163.1    | Ca_kabuli_chr04 | 30124484                | TT                              | CC                | 1945949090               |
| SNP_P3_48733_30124718 | NC_021163.1    | Ca_kabuli_chr04 | 30124718                | TT                              | CC                | 1945949092               |
| SNP_P3_48734_30124914 | NC_021163.1    | Ca_kabuli_chr04 | 30124914                | TT                              | AA                | 1945949094               |
| SNP_P3_48735_30124966 | NC_021163.1    | Ca_kabuli_chr04 | 30124966                | AA                              | TT                | 1945949096               |
| SNP_P3_48736_30125274 | NC_021163.1    | Ca_kabuli_chr04 | 30125274                | TT                              | GG                | 1945949097               |
| SNP_P3_48737_30125558 | NC_021163.1    | Ca_kabuli_chr04 | 30125558                | TT                              | CC                | 1945949099               |
| SNP_P3_48738_30125652 | NC_021163.1    | Ca_kabuli_chr04 | 30125652                | GG                              | AA                | 1945949101               |
| SNP_P3_48739_30129611 | NC_021163.1    | Ca_kabuli_chr04 | 30129611                | TT                              | CC                | 1945949103               |
| SNP_P3_48740_30129646 | NC_021163.1    | Ca_kabuli_chr04 | 30129646                | TT                              | GG                | 1945949104               |
| SNP_P3_48741_30129894 | NC_021163.1    | Ca_kabuli_chr04 | 30129894                | CC                              | TT                | 1945949106               |
| SNP_P3_48744_30130859 | NC_021163.1    | Ca_kabuli_chr04 | 30130859                | CC                              | TT                | 1945949108               |
| SNP_P3_48745_30130863 | NC_021163.1    | Ca_kabuli_chr04 | 30130863                | AA                              | GG                | 1945949110               |

| SNPs IDs              | Chromosome IDs | Chromosomes     | Physical positions (bp) | CDC Frontier (Reference genome) | (Pusa 256 & HPNB) | NCBI SNPdb Accession IDs |
|-----------------------|----------------|-----------------|-------------------------|---------------------------------|-------------------|--------------------------|
| SNP_P3_48746_30132219 | NC_021163.1    | Ca_kabuli_chr04 | 30132219                | TT                              | CC                | 1945949112               |
| SNP_P3_48747_30132251 | NC_021163.1    | Ca_kabuli_chr04 | 30132251                | GG                              | AA                | 1945949113               |
| SNP_P3_48748_30132417 | NC_021163.1    | Ca_kabuli_chr04 | 30132417                | GG                              | AA                | 1945949115               |
| SNP_P3_48749_30132449 | NC_021163.1    | Ca_kabuli_chr04 | 30132449                | CC                              | AA                | 1945949117               |
| SNP_P3_48750_30132456 | NC_021163.1    | Ca_kabuli_chr04 | 30132456                | CC                              | TT                | 1945949119               |
| SNP_P3_48752_30133599 | NC_021163.1    | Ca_kabuli_chr04 | 30133599                | CC                              | GG                | 1945949120               |
| SNP_P3_48753_30133685 | NC_021163.1    | Ca_kabuli_chr04 | 30133685                | AA                              | GG                | 1945949122               |
| SNP_P3_48754_30134192 | NC_021163.1    | Ca_kabuli_chr04 | 30134192                | GG                              | AA                | 1945949124               |
| SNP_P3_48755_30134401 | NC_021163.1    | Ca_kabuli_chr04 | 30134401                | AA                              | GG                | 1945949126               |
| SNP_P3_48756_30134407 | NC_021163.1    | Ca_kabuli_chr04 | 30134407                | TT                              | GG                | 1945949128               |
| SNP_P3_48757_30134528 | NC_021163.1    | Ca_kabuli_chr04 | 30134528                | GG                              | TT                | 1945949129               |
| SNP_P3_48758_30134582 | NC_021163.1    | Ca_kabuli_chr04 | 30134582                | TT                              | AA                | 1945949131               |
| SNP_P3_48759_30134586 | NC_021163.1    | Ca_kabuli_chr04 | 30134586                | TT                              | CC                | 1945949133               |
| SNP_P3_48760_30134619 | NC_021163.1    | Ca_kabuli_chr04 | 30134619                | AA                              | TT                | 1945949135               |
| SNP_P3_48761_30134829 | NC_021163.1    | Ca_kabuli_chr04 | 30134829                | GG                              | AA                | 1945949137               |
| SNP_P3_48762_30134907 | NC_021163.1    | Ca_kabuli_chr04 | 30134907                | CC                              | TT                | 1945949138               |
| SNP_P3_48764_30136218 | NC_021163.1    | Ca_kabuli_chr04 | 30136218                | CC                              | TT                | 1945949140               |
| SNP_P3_48765_30137809 | NC_021163.1    | Ca_kabuli_chr04 | 30137809                | AA                              | GG                | 1945949142               |
| SNP_P3_48767_30138302 | NC_021163.1    | Ca_kabuli_chr04 | 30138302                | CC                              | TT                | 1945949144               |
| SNP_P3_48768_30138656 | NC_021163.1    | Ca_kabuli_chr04 | 30138656                | GG                              | AA                | 1945949145               |
| SNP_P3_48770_30141711 | NC_021163.1    | Ca_kabuli_chr04 | 30141711                | CC                              | TT                | 1945949147               |
| SNP_P3_48771_30141961 | NC_021163.1    | Ca_kabuli_chr04 | 30141961                | CC                              | AA                | 1945949149               |
| SNP_P3_48772_30141969 | NC_021163.1    | Ca_kabuli_chr04 | 30141969                | TT                              | GG                | 1945949151               |
| SNP_P3_48773_30142008 | NC_021163.1    | Ca_kabuli_chr04 | 30142008                | CC                              | TT                | 1945949153               |
| SNP_P3_48774_30142075 | NC_021163.1    | Ca_kabuli_chr04 | 30142075                | AA                              | GG                | 1945949154               |
| SNP_P3_48775_30142088 | NC_021163.1    | Ca_kabuli_chr04 | 30142088                | CC                              | AA                | 1945949156               |
| SNP_P3_48776_30143148 | NC_021163.1    | Ca_kabuli_chr04 | 30143148                | CC                              | AA                | 1945949158               |
| SNP_P3_48777_30144330 | NC_021163.1    | Ca_kabuli_chr04 | 30144330                | TT                              | CC                | 1945949160               |
| SNP_P3_48778_30144343 | NC_021163.1    | Ca_kabuli_chr04 | 30144343                | GG                              | AA                | 1945949162               |
| SNP_P3_48779_30144391 | NC_021163.1    | Ca_kabuli_chr04 | 30144391                | GG                              | AA                | 1945949163               |
| SNP_P3_48780_30145823 | NC_021163.1    | Ca_kabuli_chr04 | 30145823                | GG                              | AA                | 1945949165               |
| SNP_P3_48781_30146134 | NC_021163.1    | Ca_kabuli_chr04 | 30146134                | GG                              | AA                | 1945949167               |
| SNP_P3_48782_30146173 | NC_021163.1    | Ca_kabuli_chr04 | 30146173                | AA                              | CC                | 1945949169               |
| SNP_P3_48783_30146183 | NC_021163.1    | Ca_kabuli_chr04 | 30146183                | CC                              | TT                | 1945949170               |
| SNP_P3_48785_30146230 | NC_021163.1    | Ca_kabuli_chr04 | 30146230                | TT                              | AA                | 1945949172               |
| SNP_P3_48786_30146469 | NC_021163.1    | Ca_kabuli_chr04 | 30146469                | TT                              | AA                | 1945949174               |
| SNP_P3_48787_30147828 | NC_021163.1    | Ca_kabuli_chr04 | 30147828                | AA                              | GG                | 1945949176               |
| SNP_P3_48789_30148408 | NC_021163.1    | Ca_kabuli_chr04 | 30148408                | AA                              | GG                | 1945949178               |
| SNP_P3_48790_30148436 | NC_021163.1    | Ca_kabuli_chr04 | 30148436                | GG                              | AA                | 1945949179               |
| SNP_P3_48792_30149318 | NC_021163.1    | Ca_kabuli_chr04 | 30149318                | TT                              | CC                | 1945949181               |
| SNP_P3_48793_30149592 | NC_021163.1    | Ca_kabuli_chr04 | 30149592                | GG                              | CC                | 1945949183               |
| SNP_P3_48794_30149596 | NC_021163.1    | Ca_kabuli_chr04 | 30149596                | GG                              | AA                | 1945949185               |

| SNPs IDs              | Chromosome IDs | Chromosomes     | Physical positions (bp) | CDC Frontier (Reference genome) | (Pusa 256 & HPNB) | NCBI SNPdb Accession IDs |
|-----------------------|----------------|-----------------|-------------------------|---------------------------------|-------------------|--------------------------|
| SNP_P3_48795_30149705 | NC_021163.1    | Ca_kabuli_chr04 | 30149705                | TT                              | AA                | 1945949186               |
| SNP_P3_48796_30151340 | NC_021163.1    | Ca_kabuli_chr04 | 30151340                | GG                              | AA                | 1945949188               |
| SNP_P3_48797_30151416 | NC_021163.1    | Ca_kabuli_chr04 | 30151416                | GG                              | AA                | 1945949190               |
| SNP_P3_48798_30152236 | NC_021163.1    | Ca_kabuli_chr04 | 30152236                | TT                              | CC                | 1945949192               |
| SNP_P3_48799_30152959 | NC_021163.1    | Ca_kabuli_chr04 | 30152959                | CC                              | TT                | 1945949194               |
| SNP_P3_48800_30155058 | NC_021163.1    | Ca_kabuli_chr04 | 30155058                | GG                              | CC                | 1945949195               |
| SNP_P3_48801_30155083 | NC_021163.1    | Ca_kabuli_chr04 | 30155083                | CC                              | TT                | 1945949197               |
| SNP_P3_48802_30155086 | NC_021163.1    | Ca_kabuli_chr04 | 30155086                | TT                              | CC                | 1945949199               |
| SNP_P3_48803_30167658 | NC_021163.1    | Ca_kabuli_chr04 | 30167658                | TT                              | AA                | 1945949201               |
| SNP_P3_48804_30167993 | NC_021163.1    | Ca_kabuli_chr04 | 30167993                | CC                              | AA                | 1945949203               |
| SNP_P3_48806_30169966 | NC_021163.1    | Ca_kabuli_chr04 | 30169966                | GG                              | TT                | 1945949204               |
| SNP_P3_48807_30171659 | NC_021163.1    | Ca_kabuli_chr04 | 30171659                | AA                              | GG                | 1945949206               |
| SNP_P3_48808_30171681 | NC_021163.1    | Ca_kabuli_chr04 | 30171681                | AA                              | CC                | 1945949208               |
| SNP_P3_48809_30171713 | NC_021163.1    | Ca_kabuli_chr04 | 30171713                | TT                              | CC                | 1945949210               |
| SNP_P3_48810_30171719 | NC_021163.1    | Ca_kabuli_chr04 | 30171719                | GG                              | AA                | 1945949211               |
| SNP_P3_48811_30171837 | NC_021163.1    | Ca_kabuli_chr04 | 30171837                | GG                              | AA                | 1945949213               |
| SNP_P3_48812_30171902 | NC_021163.1    | Ca_kabuli_chr04 | 30171902                | CC                              | GG                | 1945949215               |
| SNP_P3_48813_30172064 | NC_021163.1    | Ca_kabuli_chr04 | 30172064                | CC                              | TT                | 1945949217               |
| SNP_P3_48814_30172144 | NC_021163.1    | Ca_kabuli_chr04 | 30172144                | AA                              | GG                | 1945949219               |
| SNP_P3_48815_30172214 | NC_021163.1    | Ca_kabuli_chr04 | 30172214                | GG                              | AA                | 1945949220               |
| SNP_P3_48817_30172464 | NC_021163.1    | Ca_kabuli_chr04 | 30172464                | CC                              | AA                | 1945949222               |
| SNP_P3_48818_30172660 | NC_021163.1    | Ca_kabuli_chr04 | 30172660                | GG                              | TT                | 1945949224               |
| SNP_P3_48819_30172739 | NC_021163.1    | Ca_kabuli_chr04 | 30172739                | CC                              | AA                | 1945949226               |
| SNP_P3_48820_30172742 | NC_021163.1    | Ca_kabuli_chr04 | 30172742                | TT                              | AA                | 1945949227               |
| SNP_P3_48821_30172986 | NC_021163.1    | Ca_kabuli_chr04 | 30172986                | CC                              | AA                | 1945949229               |
| SNP_P3_48822_30172991 | NC_021163.1    | Ca_kabuli_chr04 | 30172991                | TT                              | CC                | 1945949231               |
| SNP_P3_48823_30173030 | NC_021163.1    | Ca_kabuli_chr04 | 30173030                | TT                              | GG                | 1945949233               |
| SNP_P3_48824_30173375 | NC_021163.1    | Ca_kabuli_chr04 | 30173375                | AA                              | TT                | 1945949235               |
| SNP_P3_48825_30173457 | NC_021163.1    | Ca_kabuli_chr04 | 30173457                | TT                              | AA                | 1945949236               |
| SNP_P3_48826_30173778 | NC_021163.1    | Ca_kabuli_chr04 | 30173778                | AA                              | CC                | 1945949238               |
| SNP_P3_48827_30173816 | NC_021163.1    | Ca_kabuli_chr04 | 30173816                | GG                              | AA                | 1945949240               |
| SNP_P3_48828_30174085 | NC_021163.1    | Ca_kabuli_chr04 | 30174085                | TT                              | CC                | 1945949242               |
| SNP_P3_48829_30176104 | NC_021163.1    | Ca_kabuli_chr04 | 30176104                | TT                              | CC                | 1945949244               |
| SNP_P3_48830_30176109 | NC_021163.1    | Ca_kabuli_chr04 | 30176109                | TT                              | CC                | 1945949245               |
| SNP_P3_48831_30176396 | NC_021163.1    | Ca_kabuli_chr04 | 30176396                | GG                              | AA                | 1945949247               |
| SNP_P3_48832_30176438 | NC_021163.1    | Ca_kabuli_chr04 | 30176438                | GG                              | AA                | 1945949249               |
| SNP_P3_48833_30176919 | NC_021163.1    | Ca_kabuli_chr04 | 30176919                | CC                              | TT                | 1945949251               |
| SNP_P3_48834_30177005 | NC_021163.1    | Ca_kabuli_chr04 | 30177005                | CC                              | TT                | 1945949252               |
| SNP_P3_48835_30177039 | NC_021163.1    | Ca_kabuli_chr04 | 30177039                | CC                              | TT                | 1945949254               |
| SNP_P3_48836_30177131 | NC_021163.1    | Ca_kabuli_chr04 | 30177131                | AA                              | GG                | 1945949256               |
| SNP_P3_48837_30177135 | NC_021163.1    | Ca_kabuli_chr04 | 30177135                | TT                              | CC                | 1945949258               |
| SNP_P3_48838_30177171 | NC_021163.1    | Ca_kabuli_chr04 | 30177171                | TT                              | CC                | 1945949260               |

| SNPs IDs              | Chromosome IDs | Chromosomes     | Physical positions (bp) | CDC Frontier (Reference genome) | (Pusa 256 & HPNB) | NCBI SNPdb Accession IDs |
|-----------------------|----------------|-----------------|-------------------------|---------------------------------|-------------------|--------------------------|
| SNP_P3_48839_30177210 | NC_021163.1    | Ca_kabuli_chr04 | 30177210                | AA                              | CC                | 1945949261               |
| SNP_P3_48840_30177296 | NC_021163.1    | Ca_kabuli_chr04 | 30177296                | TT                              | GG                | 1945949263               |
| SNP_P3_48841_30177308 | NC_021163.1    | Ca_kabuli_chr04 | 30177308                | CC                              | TT                | 1945949265               |
| SNP_P3_48842_30177344 | NC_021163.1    | Ca_kabuli_chr04 | 30177344                | CC                              | TT                | 1945949267               |
| SNP_P3_48843_30177584 | NC_021163.1    | Ca_kabuli_chr04 | 30177584                | TT                              | CC                | 1945949269               |
| SNP_P3_48844_30178624 | NC_021163.1    | Ca_kabuli_chr04 | 30178624                | TT                              | GG                | 1945949270               |
| SNP_P3_48845_30178632 | NC_021163.1    | Ca_kabuli_chr04 | 30178632                | AA                              | TT                | 1945949272               |
| SNP_P3_48846_30178667 | NC_021163.1    | Ca_kabuli_chr04 | 30178667                | CC                              | TT                | 1945949274               |
| SNP_P3_48847_30178670 | NC_021163.1    | Ca_kabuli_chr04 | 30178670                | GG                              | TT                | 1945949276               |
| SNP_P3_48848_30178712 | NC_021163.1    | Ca_kabuli_chr04 | 30178712                | GG                              | TT                | 1945949277               |
| SNP_P3_48849_30178870 | NC_021163.1    | Ca_kabuli_chr04 | 30178870                | TT                              | GG                | 1945949279               |
| SNP_P3_48850_30178885 | NC_021163.1    | Ca_kabuli_chr04 | 30178885                | CC                              | TT                | 1945949281               |
| SNP_P3_48851_30178888 | NC_021163.1    | Ca_kabuli_chr04 | 30178888                | TT                              | GG                | 1945949283               |
| SNP_P3_48852_30178940 | NC_021163.1    | Ca_kabuli_chr04 | 30178940                | TT                              | CC                | 1945949285               |
| SNP_P3_48853_30178966 | NC_021163.1    | Ca_kabuli_chr04 | 30178966                | AA                              | GG                | 1945949286               |
| SNP_P3_48854_30181760 | NC_021163.1    | Ca_kabuli_chr04 | 30181760                | AA                              | CC                | 1945949288               |
| SNP_P3_48855_30181769 | NC_021163.1    | Ca_kabuli_chr04 | 30181769                | CC                              | TT                | 1945949290               |
| SNP_P3_48856_30181830 | NC_021163.1    | Ca_kabuli_chr04 | 30181830                | GG                              | TT                | 1945949292               |
| SNP_P3_48857_30181833 | NC_021163.1    | Ca_kabuli_chr04 | 30181833                | AA                              | GG                | 1945949293               |
| SNP_P3_48858_30182003 | NC_021163.1    | Ca_kabuli_chr04 | 30182003                | AA                              | GG                | 1945949295               |
| SNP_P3_48859_30182010 | NC_021163.1    | Ca_kabuli_chr04 | 30182010                | TT                              | CC                | 1945949297               |
| SNP_P3_48860_30182025 | NC_021163.1    | Ca_kabuli_chr04 | 30182025                | TT                              | CC                | 1945949299               |
| SNP_P3_48861_30182040 | NC_021163.1    | Ca_kabuli_chr04 | 30182040                | AA                              | GG                | 1945949301               |
| SNP_P3_48862_30182043 | NC_021163.1    | Ca_kabuli_chr04 | 30182043                | GG                              | CC                | 1945949302               |
| SNP_P3_48863_30183245 | NC_021163.1    | Ca_kabuli_chr04 | 30183245                | TT                              | CC                | 1945949304               |
| SNP_P3_48864_30183247 | NC_021163.1    | Ca_kabuli_chr04 | 30183247                | CC                              | AA                | 1945949306               |
| SNP_P3_48865_30183461 | NC_021163.1    | Ca_kabuli_chr04 | 30183461                | CC                              | TT                | 1945949308               |
| SNP_P3_48866_30183822 | NC_021163.1    | Ca_kabuli_chr04 | 30183822                | AA                              | GG                | 1945949310               |
| SNP_P3_48867_30183823 | NC_021163.1    | Ca_kabuli_chr04 | 30183823                | TT                              | GG                | 1945949311               |
| SNP_P3_48868_30184196 | NC_021163.1    | Ca_kabuli_chr04 | 30184196                | CC                              | TT                | 1945949313               |
| SNP_P3_48869_30184462 | NC_021163.1    | Ca_kabuli_chr04 | 30184462                | TT                              | CC                | 1945949315               |
| SNP_P3_48870_30184513 | NC_021163.1    | Ca_kabuli_chr04 | 30184513                | TT                              | AA                | 1945949317               |
| SNP_P3_48872_30184739 | NC_021163.1    | Ca_kabuli_chr04 | 30184739                | CC                              | AA                | 1945949318               |
| SNP_P3_48874_30184825 | NC_021163.1    | Ca_kabuli_chr04 | 30184825                | CC                              | AA                | 1945949320               |
| SNP_P3_48875_30184868 | NC_021163.1    | Ca_kabuli_chr04 | 30184868                | TT                              | GG                | 1945949322               |
| SNP_P3_48876_30184876 | NC_021163.1    | Ca_kabuli_chr04 | 30184876                | CC                              | GG                | 1945949324               |
| SNP_P3_48877_30184908 | NC_021163.1    | Ca_kabuli_chr04 | 30184908                | TT                              | CC                | 1945949326               |
| SNP_P3_48878_30184955 | NC_021163.1    | Ca_kabuli_chr04 | 30184955                | CC                              | AA                | 1945949327               |
| SNP_P3_48879_30184963 | NC_021163.1    | Ca_kabuli_chr04 | 30184963                | AA                              | TT                | 1945949329               |
| SNP_P3_48880_30184964 | NC_021163.1    | Ca_kabuli_chr04 | 30184964                | TT                              | AA                | 1945949331               |
| SNP_P3_48882_30185060 | NC_021163.1    | Ca_kabuli_chr04 | 30185060                | TT                              | CC                | 1945949333               |
| SNP_P3_48883_30185089 | NC_021163.1    | Ca_kabuli_chr04 | 30185089                | CC                              | TT                | 1945949335               |

| SNPs IDs              | Chromosome IDs | Chromosomes     | Physical positions (bp) | CDC Frontier (Reference genome) | (Pusa 256 & HPNB) | NCBI SNPdb Accession IDs |
|-----------------------|----------------|-----------------|-------------------------|---------------------------------|-------------------|--------------------------|
| SNP_P3_48884_30185156 | NC_021163.1    | Ca_kabuli_chr04 | 30185156                | CC                              | AA                | 1945949336               |
| SNP_P3_48885_30185160 | NC_021163.1    | Ca_kabuli_chr04 | 30185160                | TT                              | CC                | 1945949338               |
| SNP_P3_48886_30185304 | NC_021163.1    | Ca_kabuli_chr04 | 30185304                | AA                              | GG                | 1945949340               |
| SNP_P3_48887_30185316 | NC_021163.1    | Ca_kabuli_chr04 | 30185316                | TT                              | CC                | 1945949342               |
| SNP_P3_48888_30185321 | NC_021163.1    | Ca_kabuli_chr04 | 30185321                | AA                              | TT                | 1945949343               |
| SNP_P3_48889_30185330 | NC_021163.1    | Ca_kabuli_chr04 | 30185330                | TT                              | GG                | 1945949345               |
| SNP_P3_48890_30187203 | NC_021163.1    | Ca_kabuli_chr04 | 30187203                | AA                              | GG                | 1945949347               |
| SNP_P3_48891_30187238 | NC_021163.1    | Ca_kabuli_chr04 | 30187238                | TT                              | CC                | 1945949349               |
| SNP_P3_48892_30187240 | NC_021163.1    | Ca_kabuli_chr04 | 30187240                | GG                              | TT                | 1945949351               |
| SNP_P3_48893_30187357 | NC_021163.1    | Ca_kabuli_chr04 | 30187357                | GG                              | AA                | 1945949352               |
| SNP_P3_48894_30187368 | NC_021163.1    | Ca_kabuli_chr04 | 30187368                | TT                              | CC                | 1945949354               |
| SNP_P3_48895_30187381 | NC_021163.1    | Ca_kabuli_chr04 | 30187381                | TT                              | GG                | 1945949356               |
| SNP_P3_48896_30187398 | NC_021163.1    | Ca_kabuli_chr04 | 30187398                | CC                              | TT                | 1945949358               |
| SNP_P3_48897_30187404 | NC_021163.1    | Ca_kabuli_chr04 | 30187404                | CC                              | TT                | 1945949360               |
| SNP_P3_48899_30188516 | NC_021163.1    | Ca_kabuli_chr04 | 30188516                | AA                              | CC                | 1945949361               |
| SNP_P3_48900_30188818 | NC_021163.1    | Ca_kabuli_chr04 | 30188818                | CC                              | AA                | 1945949363               |
| SNP_P3_48901_30188824 | NC_021163.1    | Ca_kabuli_chr04 | 30188824                | GG                              | TT                | 1945949365               |
| SNP_P3_48902_30188829 | NC_021163.1    | Ca_kabuli_chr04 | 30188829                | AA                              | GG                | 1945949367               |
| SNP_P3_48903_30188887 | NC_021163.1    | Ca_kabuli_chr04 | 30188887                | CC                              | TT                | 1945949368               |
| SNP_P3_48904_30188966 | NC_021163.1    | Ca_kabuli_chr04 | 30188966                | AA                              | GG                | 1945949370               |
| SNP_P3_48905_30188968 | NC_021163.1    | Ca_kabuli_chr04 | 30188968                | AA                              | TT                | 1945949372               |
| SNP_P3_48906_30189034 | NC_021163.1    | Ca_kabuli_chr04 | 30189034                | GG                              | AA                | 1945949374               |
| SNP_P3_48907_30189084 | NC_021163.1    | Ca_kabuli_chr04 | 30189084                | AA                              | GG                | 1945949376               |
| SNP_P3_48908_30189086 | NC_021163.1    | Ca_kabuli_chr04 | 30189086                | AA                              | GG                | 1945949377               |
| SNP_P3_48910_30190227 | NC_021163.1    | Ca_kabuli_chr04 | 30190227                | AA                              | GG                | 1945949379               |
| SNP_P3_48911_30190381 | NC_021163.1    | Ca_kabuli_chr04 | 30190381                | GG                              | CC                | 1945949381               |
| SNP_P3_48912_30190387 | NC_021163.1    | Ca_kabuli_chr04 | 30190387                | GG                              | AA                | 1945949383               |
| SNP_P3_48913_30190419 | NC_021163.1    | Ca_kabuli_chr04 | 30190419                | AA                              | GG                | 1945949385               |
| SNP_P3_48914_30194168 | NC_021163.1    | Ca_kabuli_chr04 | 30194168                | TT                              | CC                | 1945949386               |
| SNP_P3_48915_30194970 | NC_021163.1    | Ca_kabuli_chr04 | 30194970                | GG                              | AA                | 1945949388               |
| SNP_P3_48916_30194997 | NC_021163.1    | Ca_kabuli_chr04 | 30194997                | TT                              | AA                | 1945949390               |
| SNP_P3_48917_30195344 | NC_021163.1    | Ca_kabuli_chr04 | 30195344                | AA                              | CC                | 1945949392               |
| SNP_P3_48918_30195867 | NC_021163.1    | Ca_kabuli_chr04 | 30195867                | TT                              | CC                | 1945949393               |
| SNP_P3_48919_30195868 | NC_021163.1    | Ca_kabuli_chr04 | 30195868                | GG                              | TT                | 1945949395               |
| SNP_P3_48920_30195878 | NC_021163.1    | Ca_kabuli_chr04 | 30195878                | CC                              | TT                | 1945949397               |
| SNP_P3_48921_30195988 | NC_021163.1    | Ca_kabuli_chr04 | 30195988                | TT                              | CC                | 1945949399               |
| SNP_P3_48922_30196024 | NC_021163.1    | Ca_kabuli_chr04 | 30196024                | AA                              | GG                | 1945949401               |
| SNP_P3_48923_30196192 | NC_021163.1    | Ca_kabuli_chr04 | 30196192                | AA                              | CC                | 1945949402               |
| SNP_P3_48924_30196835 | NC_021163.1    | Ca_kabuli_chr04 | 30196835                | TT                              | AA                | 1945949404               |
| SNP_P3_48925_30196868 | NC_021163.1    | Ca_kabuli_chr04 | 30196868                | TT                              | CC                | 1945949406               |
| SNP_P3_48926_30197018 | NC_021163.1    | Ca_kabuli_chr04 | 30197018                | AA                              | CC                | 1945949408               |
| SNP_P3_48927_30197036 | NC_021163.1    | Ca_kabuli_chr04 | 30197036                | GG                              | AA                | 1945949410               |

| SNPs IDs              | Chromosome IDs | Chromosomes     | Physical positions (bp) | CDC Frontier (Reference genome) | (Pusa 256 & HPNB) | NCBI SNPdb Accession IDs |
|-----------------------|----------------|-----------------|-------------------------|---------------------------------|-------------------|--------------------------|
| SNP_P3_48929_30197564 | NC_021163.1    | Ca_kabuli_chr04 | 30197564                | CC                              | TT                | 1945949411               |
| SNP_P3_48930_30197767 | NC_021163.1    | Ca_kabuli_chr04 | 30197767                | CC                              | AA                | 1945949413               |
| SNP_P3_48933_30198410 | NC_021163.1    | Ca_kabuli_chr04 | 30198410                | GG                              | AA                | 1945949415               |
| SNP_P3_48934_30198487 | NC_021163.1    | Ca_kabuli_chr04 | 30198487                | GG                              | AA                | 1945949417               |
| SNP_P3_48935_30198533 | NC_021163.1    | Ca_kabuli_chr04 | 30198533                | TT                              | CC                | 1945949418               |
| SNP_P3_48936_30198550 | NC_021163.1    | Ca_kabuli_chr04 | 30198550                | GG                              | TT                | 1945949420               |
| SNP_P3_48937_30198556 | NC_021163.1    | Ca_kabuli_chr04 | 30198556                | AA                              | GG                | 1945949422               |
| SNP_P3_48938_30198558 | NC_021163.1    | Ca_kabuli_chr04 | 30198558                | AA                              | CC                | 1945949424               |
| SNP_P3_48939_30198721 | NC_021163.1    | Ca_kabuli_chr04 | 30198721                | AA                              | GG                | 1945949426               |
| SNP_P3_48940_30198752 | NC_021163.1    | Ca_kabuli_chr04 | 30198752                | AA                              | CC                | 1945949427               |
| SNP_P3_48941_30199282 | NC_021163.1    | Ca_kabuli_chr04 | 30199282                | GG                              | AA                | 1945949429               |
| SNP_P3_48942_30200773 | NC_021163.1    | Ca_kabuli_chr04 | 30200773                | GG                              | TT                | 1945949431               |
| SNP_P3_48944_30201061 | NC_021163.1    | Ca_kabuli_chr04 | 30201061                | CC                              | AA                | 1945949433               |
| SNP_P3_48945_30201900 | NC_021163.1    | Ca_kabuli_chr04 | 30201900                | CC                              | AA                | 1945949434               |
| SNP_P3_48946_30203000 | NC_021163.1    | Ca_kabuli_chr04 | 30203000                | CC                              | AA                | 1945949436               |
| SNP_P3_48947_30203041 | NC_021163.1    | Ca_kabuli_chr04 | 30203041                | CC                              | TT                | 1945949438               |
| SNP_P3_48948_30203291 | NC_021163.1    | Ca_kabuli_chr04 | 30203291                | AA                              | GG                | 1945949440               |
| SNP_P3_48949_30203547 | NC_021163.1    | Ca_kabuli_chr04 | 30203547                | TT                              | CC                | 1945949442               |
| SNP_P3_48950_30203576 | NC_021163.1    | Ca_kabuli_chr04 | 30203576                | TT                              | CC                | 1945949443               |
| SNP_P3_48951_30203781 | NC_021163.1    | Ca_kabuli_chr04 | 30203781                | CC                              | TT                | 1945949445               |
| SNP_P3_48952_30203783 | NC_021163.1    | Ca_kabuli_chr04 | 30203783                | CC                              | AA                | 1945949447               |
| SNP_P3_48953_30203825 | NC_021163.1    | Ca_kabuli_chr04 | 30203825                | AA                              | TT                | 1945949449               |
| SNP_P3_48954_30203827 | NC_021163.1    | Ca_kabuli_chr04 | 30203827                | CC                              | AA                | 1945949451               |
| SNP_P3_48955_30203884 | NC_021163.1    | Ca_kabuli_chr04 | 30203884                | AA                              | GG                | 1945949452               |
| SNP_P3_48956_30203886 | NC_021163.1    | Ca_kabuli_chr04 | 30203886                | TT                              | CC                | 1945949454               |
| SNP_P3_48957_30204154 | NC_021163.1    | Ca_kabuli_chr04 | 30204154                | AA                              | GG                | 1945949456               |
| SNP_P3_48958_30204160 | NC_021163.1    | Ca_kabuli_chr04 | 30204160                | AA                              | GG                | 1945949458               |
| SNP_P3_48959_30204179 | NC_021163.1    | Ca_kabuli_chr04 | 30204179                | AA                              | GG                | 1945949459               |
| SNP_P3_48960_30204585 | NC_021163.1    | Ca_kabuli_chr04 | 30204585                | CC                              | TT                | 1945949461               |
| SNP_P3_48961_30204981 | NC_021163.1    | Ca_kabuli_chr04 | 30204981                | CC                              | TT                | 1945949463               |
| SNP_P3_48962_30204984 | NC_021163.1    | Ca_kabuli_chr04 | 30204984                | GG                              | AA                | 1945949465               |
| SNP_P3_48963_30205288 | NC_021163.1    | Ca_kabuli_chr04 | 30205288                | GG                              | AA                | 1945949467               |
| SNP_P3_48964_30205716 | NC_021163.1    | Ca_kabuli_chr04 | 30205716                | AA                              | GG                | 1945949468               |
| SNP_P3_48966_30206007 | NC_021163.1    | Ca_kabuli_chr04 | 30206007                | TT                              | CC                | 1945949470               |
| SNP_P3_48967_30206009 | NC_021163.1    | Ca_kabuli_chr04 | 30206009                | CC                              | TT                | 1945949472               |
| SNP_P3_48968_30206054 | NC_021163.1    | Ca_kabuli_chr04 | 30206054                | AA                              | GG                | 1945949474               |
| SNP_P3_48969_30206100 | NC_021163.1    | Ca_kabuli_chr04 | 30206100                | GG                              | AA                | 1945949476               |
| SNP_P3_48970_30206104 | NC_021163.1    | Ca_kabuli_chr04 | 30206104                | CC                              | GG                | 1945949477               |
| SNP_P3_48972_30206294 | NC_021163.1    | Ca_kabuli_chr04 | 30206294                | AA                              | CC                | 1945949479               |
| SNP_P3_48976_30206814 | NC_021163.1    | Ca_kabuli_chr04 | 30206814                | TT                              | CC                | 1945949481               |
| SNP_P3_48977_30207302 | NC_021163.1    | Ca_kabuli_chr04 | 30207302                | GG                              | AA                | 1945949483               |
| SNP_P3_48979_30207367 | NC_021163.1    | Ca_kabuli_chr04 | 30207367                | CC                              | AA                | 1945949484               |

| SNPs IDs              | Chromosome IDs | Chromosomes     | Physical positions (bp) | CDC Frontier (Reference genome) | (Pusa 256 & HPNB) | NCBI SNPdb Accession IDs |
|-----------------------|----------------|-----------------|-------------------------|---------------------------------|-------------------|--------------------------|
| SNP_P3_48980_30207649 | NC_021163.1    | Ca_kabuli_chr04 | 30207649                | AA                              | CC                | 1945949486               |
| SNP_P3_48981_30207685 | NC_021163.1    | Ca_kabuli_chr04 | 30207685                | CC                              | AA                | 1945949488               |
| SNP_P3_48983_30211785 | NC_021163.1    | Ca_kabuli_chr04 | 30211785                | AA                              | GG                | 1945949490               |
| SNP_P3_48984_30212329 | NC_021163.1    | Ca_kabuli_chr04 | 30212329                | AA                              | TT                | 1945949492               |
| SNP_P3_48985_30212560 | NC_021163.1    | Ca_kabuli_chr04 | 30212560                | TT                              | CC                | 1945949493               |
| SNP_P3_48986_30213538 | NC_021163.1    | Ca_kabuli_chr04 | 30213538                | CC                              | TT                | 1945949495               |
| SNP_P3_48987_30213648 | NC_021163.1    | Ca_kabuli_chr04 | 30213648                | GG                              | AA                | 1945949497               |
| SNP_P3_48988_30214012 | NC_021163.1    | Ca_kabuli_chr04 | 30214012                | TT                              | CC                | 1945949499               |
| SNP_P3_48989_30216223 | NC_021163.1    | Ca_kabuli_chr04 | 30216223                | TT                              | GG                | 1945949501               |
| SNP_P3_48990_30217257 | NC_021163.1    | Ca_kabuli_chr04 | 30217257                | AA                              | GG                | 1945949502               |
| SNP_P3_48991_30218912 | NC_021163.1    | Ca_kabuli_chr04 | 30218912                | TT                              | CC                | 1945949504               |
| SNP_P3_48992_30218939 | NC_021163.1    | Ca_kabuli_chr04 | 30218939                | TT                              | AA                | 1945949506               |
| SNP_P3_48993_30218953 | NC_021163.1    | Ca_kabuli_chr04 | 30218953                | TT                              | AA                | 1945949508               |
| SNP_P3_48994_30218954 | NC_021163.1    | Ca_kabuli_chr04 | 30218954                | AA                              | TT                | 1945949509               |
| SNP_P3_48995_30219007 | NC_021163.1    | Ca_kabuli_chr04 | 30219007                | AA                              | GG                | 1945949511               |
| SNP_P3_48996_30219016 | NC_021163.1    | Ca_kabuli_chr04 | 30219016                | AA                              | GG                | 1945949513               |
| SNP_P3_48997_30219080 | NC_021163.1    | Ca_kabuli_chr04 | 30219080                | AA                              | GG                | 1945949515               |
| SNP_P3_48998_30219246 | NC_021163.1    | Ca_kabuli_chr04 | 30219246                | AA                              | TT                | 1945949517               |
| SNP_P3_48999_30223419 | NC_021163.1    | Ca_kabuli_chr04 | 30223419                | CC                              | TT                | 1945949518               |
| SNP_P3_49000_30223730 | NC_021163.1    | Ca_kabuli_chr04 | 30223730                | GG                              | AA                | 1945949520               |
| SNP_P3_49001_30224080 | NC_021163.1    | Ca_kabuli_chr04 | 30224080                | TT                              | CC                | 1945949522               |
| SNP_P3_49002_30226132 | NC_021163.1    | Ca_kabuli_chr04 | 30226132                | GG                              | AA                | 1945949524               |
| SNP_P3_49003_30226212 | NC_021163.1    | Ca_kabuli_chr04 | 30226212                | GG                              | AA                | 1945949526               |
| SNP_P3_49006_30227332 | NC_021163.1    | Ca_kabuli_chr04 | 30227332                | AA                              | GG                | 1945949527               |
| SNP_P3_49007_30227712 | NC_021163.1    | Ca_kabuli_chr04 | 30227712                | TT                              | CC                | 1945949529               |
| SNP_P3_49008_30227750 | NC_021163.1    | Ca_kabuli_chr04 | 30227750                | AA                              | GG                | 1945949531               |
| SNP_P3_49009_30227841 | NC_021163.1    | Ca_kabuli_chr04 | 30227841                | AA                              | TT                | 1945949533               |
| SNP_P3_49010_30228076 | NC_021163.1    | Ca_kabuli_chr04 | 30228076                | TT                              | AA                | 1945949534               |
| SNP_P3_49011_30228161 | NC_021163.1    | Ca_kabuli_chr04 | 30228161                | CC                              | TT                | 1945949536               |
| SNP_P3_49012_30228598 | NC_021163.1    | Ca_kabuli_chr04 | 30228598                | TT                              | CC                | 1945949538               |
| SNP_P3_49013_30228931 | NC_021163.1    | Ca_kabuli_chr04 | 30228931                | GG                              | AA                | 1945949540               |
| SNP_P3_49014_30229165 | NC_021163.1    | Ca_kabuli_chr04 | 30229165                | CC                              | TT                | 1945949542               |
| SNP_P3_49015_30229431 | NC_021163.1    | Ca_kabuli_chr04 | 30229431                | GG                              | AA                | 1945949543               |
| SNP_P3_49016_30229454 | NC_021163.1    | Ca_kabuli_chr04 | 30229454                | GG                              | AA                | 1945949545               |
| SNP_P3_49017_30229465 | NC_021163.1    | Ca_kabuli_chr04 | 30229465                | GG                              | AA                | 1945949547               |
| SNP_P3_49018_30229479 | NC_021163.1    | Ca_kabuli_chr04 | 30229479                | GG                              | AA                | 1945949549               |
| SNP_P3_49019_30230403 | NC_021163.1    | Ca_kabuli_chr04 | 30230403                | CC                              | AA                | 1945949551               |
| SNP_P3_49020_30230409 | NC_021163.1    | Ca_kabuli_chr04 | 30230409                | TT                              | GG                | 1945949552               |
| SNP_P3_49021_30230460 | NC_021163.1    | Ca_kabuli_chr04 | 30230460                | GG                              | TT                | 1945949554               |
| SNP_P3_49022_30230656 | NC_021163.1    | Ca_kabuli_chr04 | 30230656                | TT                              | CC                | 1945949556               |
| SNP_P3_49023_30238399 | NC_021163.1    | Ca_kabuli_chr04 | 30238399                | TT                              | AA                | 1945949558               |
| SNP_P3_49024_30240335 | NC_021163.1    | Ca_kabuli_chr04 | 30240335                | AA                              | CC                | 1945949559               |

| SNPs IDs              | Chromosome IDs | Chromosomes     | Physical positions (bp) | CDC Frontier (Reference genome) | (Pusa 256 & HPNB) | NCBI SNPdb Accession IDs |
|-----------------------|----------------|-----------------|-------------------------|---------------------------------|-------------------|--------------------------|
| SNP_P3_49026_30242037 | NC_021163.1    | Ca_kabuli_chr04 | 30242037                | CC                              | TT                | 1945949561               |
| SNP_P3_49028_30251145 | NC_021163.1    | Ca_kabuli_chr04 | 30251145                | TT                              | CC                | 1945949563               |
| SNP_P3_49029_30257214 | NC_021163.1    | Ca_kabuli_chr04 | 30257214                | TT                              | CC                | 1945949565               |
| SNP_P3_49030_30269399 | NC_021163.1    | Ca_kabuli_chr04 | 30269399                | CC                              | TT                | 1945949567               |
| SNP_P3_49031_30273377 | NC_021163.1    | Ca_kabuli_chr04 | 30273377                | CC                              | TT                | 1945949568               |
| SNP_P3_49032_30273698 | NC_021163.1    | Ca_kabuli_chr04 | 30273698                | TT                              | GG                | 1945949570               |
| SNP_P3_49033_30274170 | NC_021163.1    | Ca_kabuli_chr04 | 30274170                | CC                              | TT                | 1945949572               |
| SNP_P3_49034_30277069 | NC_021163.1    | Ca_kabuli_chr04 | 30277069                | GG                              | CC                | 1945949574               |
| SNP_P3_49035_30277125 | NC_021163.1    | Ca_kabuli_chr04 | 30277125                | CC                              | GG                | 1945949576               |
| SNP_P3_49036_30279102 | NC_021163.1    | Ca_kabuli_chr04 | 30279102                | CC                              | TT                | 1945949577               |
| SNP_P3_49037_30279498 | NC_021163.1    | Ca_kabuli_chr04 | 30279498                | TT                              | CC                | 1945949579               |
| SNP_P3_49038_30279892 | NC_021163.1    | Ca_kabuli_chr04 | 30279892                | AA                              | GG                | 1945949581               |
| SNP_P3_49039_30288238 | NC_021163.1    | Ca_kabuli_chr04 | 30288238                | GG                              | AA                | 1945949583               |
| SNP_P3_49040_30291034 | NC_021163.1    | Ca_kabuli_chr04 | 30291034                | CC                              | TT                | 1945949584               |
| SNP_P3_49041_30292582 | NC_021163.1    | Ca_kabuli_chr04 | 30292582                | AA                              | GG                | 1945949586               |
| SNP_P3_49042_30297858 | NC_021163.1    | Ca_kabuli_chr04 | 30297858                | CC                              | TT                | 1945949588               |
| SNP_P3_49043_30318294 | NC_021163.1    | Ca_kabuli_chr04 | 30318294                | AA                              | TT                | 1945949590               |
| SNP_P3_49044_30318943 | NC_021163.1    | Ca_kabuli_chr04 | 30318943                | CC                              | TT                | 1945949592               |
| SNP_P3_49045_30319615 | NC_021163.1    | Ca_kabuli_chr04 | 30319615                | GG                              | AA                | 1945949593               |
| SNP_P3_49046_30321992 | NC_021163.1    | Ca_kabuli_chr04 | 30321992                | TT                              | CC                | 1945949595               |
| SNP_P3_49047_30325067 | NC_021163.1    | Ca_kabuli_chr04 | 30325067                | AA                              | GG                | 1945949597               |
| SNP_P3_49048_30325926 | NC_021163.1    | Ca_kabuli_chr04 | 30325926                | CC                              | TT                | 1945949599               |
| SNP_P3_49050_30332689 | NC_021163.1    | Ca_kabuli_chr04 | 30332689                | CC                              | TT                | 1945949600               |
| SNP_P3_49051_30336382 | NC_021163.1    | Ca_kabuli_chr04 | 30336382                | AA                              | TT                | 1945949602               |
| SNP_P3_49052_30336463 | NC_021163.1    | Ca_kabuli_chr04 | 30336463                | CC                              | TT                | 1945949604               |
| SNP_P3_49053_30338778 | NC_021163.1    | Ca_kabuli_chr04 | 30338778                | TT                              | AA                | 1945949606               |
| SNP_P3_49054_30340902 | NC_021163.1    | Ca_kabuli_chr04 | 30340902                | CC                              | TT                | 1945949608               |
| SNP_P3_49055_30342994 | NC_021163.1    | Ca_kabuli_chr04 | 30342994                | AA                              | GG                | 1945949609               |
| SNP_P3_49056_30351183 | NC_021163.1    | Ca_kabuli_chr04 | 30351183                | GG                              | AA                | 1945949611               |
| SNP_P3_49059_30352790 | NC_021163.1    | Ca_kabuli_chr04 | 30352790                | CC                              | GG                | 1945949613               |
| SNP_P3_49060_30355240 | NC_021163.1    | Ca_kabuli_chr04 | 30355240                | TT                              | CC                | 1945949615               |
| SNP_P3_49062_30356787 | NC_021163.1    | Ca_kabuli_chr04 | 30356787                | AA                              | GG                | 1945949617               |
| SNP_P3_49063_30357977 | NC_021163.1    | Ca_kabuli_chr04 | 30357977                | TT                              | CC                | 1945949618               |
| SNP_P3_49064_30358002 | NC_021163.1    | Ca_kabuli_chr04 | 30358002                | GG                              | TT                | 1945949620               |
| SNP_P3_49065_30358223 | NC_021163.1    | Ca_kabuli_chr04 | 30358223                | TT                              | CC                | 1945949622               |
| SNP_P3_49066_30358225 | NC_021163.1    | Ca_kabuli_chr04 | 30358225                | GG                              | AA                | 1945949624               |
| SNP_P3_49067_30365325 | NC_021163.1    | Ca_kabuli_chr04 | 30365325                | CC                              | TT                | 1945949625               |
| SNP_P3_49068_30365673 | NC_021163.1    | Ca_kabuli_chr04 | 30365673                | CC                              | AA                | 1945949627               |
| SNP_P3_49069_30366587 | NC_021163.1    | Ca_kabuli_chr04 | 30366587                | AA                              | CC                | 1945949629               |
| SNP_P3_49070_30368678 | NC_021163.1    | Ca_kabuli_chr04 | 30368678                | CC                              | AA                | 1945949631               |
| SNP_P3_49071_30371308 | NC_021163.1    | Ca_kabuli_chr04 | 30371308                | AA                              | GG                | 1945949633               |
| SNP_P3_49073_30379086 | NC_021163.1    | Ca_kabuli_chr04 | 30379086                | TT                              | CC                | 1945949634               |



| SNPs IDs              | Chromosome IDs | Chromosomes     | Physical positions (bp) | CDC Frontier (Reference genome) | (Pusa 256 & HPNB) | NCBI SNPdb Accession IDs |
|-----------------------|----------------|-----------------|-------------------------|---------------------------------|-------------------|--------------------------|
| SNP_P3_49074_30379297 | NC_021163.1    | Ca_kabuli_chr04 | 30379297                | AA                              | GG                | 1945949636               |
| SNP_P3_49075_30379394 | NC_021163.1    | Ca_kabuli_chr04 | 30379394                | AA                              | CC                | 1945949638               |
| SNP_P3_49077_30384310 | NC_021163.1    | Ca_kabuli_chr04 | 30384310                | CC                              | TT                | 1945949640               |
| SNP_P3_49078_30384512 | NC_021163.1    | Ca_kabuli_chr04 | 30384512                | AA                              | GG                | 1945949642               |
| SNP_P3_49079_30390717 | NC_021163.1    | Ca_kabuli_chr04 | 30390717                | GG                              | TT                | 1945949643               |
| SNP_P3_49080_30390747 | NC_021163.1    | Ca_kabuli_chr04 | 30390747                | AA                              | TT                | 1945949645               |
| SNP_P3_49082_30395060 | NC_021163.1    | Ca_kabuli_chr04 | 30395060                | AA                              | GG                | 1945949647               |
| SNP_P3_49083_30398541 | NC_021163.1    | Ca_kabuli_chr04 | 30398541                | TT                              | AA                | 1945949649               |
| SNP_P3_49084_30398634 | NC_021163.1    | Ca_kabuli_chr04 | 30398634                | AA                              | GG                | 1945949650               |
| SNP_P3_49085_30398650 | NC_021163.1    | Ca_kabuli_chr04 | 30398650                | AA                              | CC                | 1945949652               |
| SNP_P3_49086_30398763 | NC_021163.1    | Ca_kabuli_chr04 | 30398763                | AA                              | GG                | 1945949654               |
| SNP_P3_49087_30398803 | NC_021163.1    | Ca_kabuli_chr04 | 30398803                | AA                              | GG                | 1945949656               |
| SNP_P3_49088_30398817 | NC_021163.1    | Ca_kabuli_chr04 | 30398817                | TT                              | CC                | 1945949658               |
| SNP_P3_49089_30398834 | NC_021163.1    | Ca_kabuli_chr04 | 30398834                | GG                              | AA                | 1945949659               |
| SNP_P3_49091_30406258 | NC_021163.1    | Ca_kabuli_chr04 | 30406258                | AA                              | GG                | 1945949661               |
| SNP_P3_49092_30406271 | NC_021163.1    | Ca_kabuli_chr04 | 30406271                | TT                              | CC                | 1945949663               |
| SNP_P3_49093_30406280 | NC_021163.1    | Ca_kabuli_chr04 | 30406280                | GG                              | AA                | 1945949665               |
| SNP_P3_49094_30406298 | NC_021163.1    | Ca_kabuli_chr04 | 30406298                | TT                              | CC                | 1945949667               |
| SNP_P3_49095_30406301 | NC_021163.1    | Ca_kabuli_chr04 | 30406301                | AA                              | GG                | 1945949668               |
| SNP_P3_49096_30406305 | NC_021163.1    | Ca_kabuli_chr04 | 30406305                | TT                              | CC                | 1945949670               |
| SNP_P3_49097_30408540 | NC_021163.1    | Ca_kabuli_chr04 | 30408540                | GG                              | AA                | 1945949672               |
| SNP_P3_49098_30408578 | NC_021163.1    | Ca_kabuli_chr04 | 30408578                | CC                              | TT                | 1945949674               |
| SNP_P3_49099_30408601 | NC_021163.1    | Ca_kabuli_chr04 | 30408601                | AA                              | GG                | 1945949675               |
| SNP_P3_49102_30409001 | NC_021163.1    | Ca_kabuli_chr04 | 30409001                | TT                              | CC                | 1945949677               |
| SNP_P3_49103_30409069 | NC_021163.1    | Ca_kabuli_chr04 | 30409069                | GG                              | AA                | 1945949679               |
| SNP_P3_49104_30409106 | NC_021163.1    | Ca_kabuli_chr04 | 30409106                | AA                              | CC                | 1945949681               |
| SNP_P3_49105_30409117 | NC_021163.1    | Ca_kabuli_chr04 | 30409117                | CC                              | TT                | 1945949683               |
| SNP_P3_49106_30409356 | NC_021163.1    | Ca_kabuli_chr04 | 30409356                | CC                              | TT                | 1945949684               |
| SNP_P3_49107_30409364 | NC_021163.1    | Ca_kabuli_chr04 | 30409364                | CC                              | TT                | 1945949686               |
| SNP_P3_49109_30409401 | NC_021163.1    | Ca_kabuli_chr04 | 30409401                | TT                              | CC                | 1945949688               |
| SNP_P3_49110_30409404 | NC_021163.1    | Ca_kabuli_chr04 | 30409404                | AA                              | GG                | 1945949690               |
| SNP_P3_49111_30409405 | NC_021163.1    | Ca_kabuli_chr04 | 30409405                | TT                              | CC                | 1945949692               |
| SNP_P3_49112_30413094 | NC_021163.1    | Ca_kabuli_chr04 | 30413094                | TT                              | CC                | 1945949693               |
| SNP_P3_49113_30413107 | NC_021163.1    | Ca_kabuli_chr04 | 30413107                | AA                              | CC                | 1945949695               |
| SNP_P3_49114_30416249 | NC_021163.1    | Ca_kabuli_chr04 | 30416249                | GG                              | AA                | 1945949697               |
| SNP_P3_49115_30416269 | NC_021163.1    | Ca_kabuli_chr04 | 30416269                | GG                              | CC                | 1945949699               |
| SNP_P3_49116_30416533 | NC_021163.1    | Ca_kabuli_chr04 | 30416533                | AA                              | GG                | 1945949700               |
| SNP_P3_49118_30419497 | NC_021163.1    | Ca_kabuli_chr04 | 30419497                | GG                              | TT                | 1945949702               |
| SNP_P3_49119_30421196 | NC_021163.1    | Ca_kabuli_chr04 | 30421196                | GG                              | TT                | 1945949704               |
| SNP_P3_49120_30421284 | NC_021163.1    | Ca_kabuli_chr04 | 30421284                | CC                              | AA                | 1945949706               |
| SNP_P3_49121_30421864 | NC_021163.1    | Ca_kabuli_chr04 | 30421864                | AA                              | TT                | 1945949708               |
| SNP_P3_49122_30421876 | NC_021163.1    | Ca_kabuli_chr04 | 30421876                | TT                              | CC                | 1945949709               |

| SNPs IDs              | Chromosome IDs | Chromosomes     | Physical positions (bp) | CDC Frontier (Reference genome) | (Pusa 256 & HPNB) | NCBI SNPdb Accession IDs |
|-----------------------|----------------|-----------------|-------------------------|---------------------------------|-------------------|--------------------------|
| SNP_P3_49124_30422233 | NC_021163.1    | Ca_kabuli_chr04 | 30422233                | AA                              | CC                | 1945949711               |
| SNP_P3_49125_30422240 | NC_021163.1    | Ca_kabuli_chr04 | 30422240                | AA                              | TT                | 1945949713               |
| SNP_P3_49127_30423039 | NC_021163.1    | Ca_kabuli_chr04 | 30423039                | TT                              | CC                | 1945949715               |
| SNP_P3_49128_30424185 | NC_021163.1    | Ca_kabuli_chr04 | 30424185                | AA                              | GG                | 1945949716               |
| SNP_P3_49129_30424596 | NC_021163.1    | Ca_kabuli_chr04 | 30424596                | GG                              | AA                | 1945949718               |
| SNP_P3_49130_30424963 | NC_021163.1    | Ca_kabuli_chr04 | 30424963                | GG                              | CC                | 1945949720               |
| SNP_P3_49131_30424968 | NC_021163.1    | Ca_kabuli_chr04 | 30424968                | TT                              | GG                | 1945949722               |
| SNP_P3_49132_30424980 | NC_021163.1    | Ca_kabuli_chr04 | 30424980                | AA                              | GG                | 1945949724               |
| SNP_P3_49133_30424981 | NC_021163.1    | Ca_kabuli_chr04 | 30424981                | TT                              | GG                | 1945949725               |
| SNP_P3_49134_30425327 | NC_021163.1    | Ca_kabuli_chr04 | 30425327                | TT                              | AA                | 1945949727               |
| SNP_P3_49135_30425331 | NC_021163.1    | Ca_kabuli_chr04 | 30425331                | AA                              | GG                | 1945949729               |
| SNP_P3_49136_30425367 | NC_021163.1    | Ca_kabuli_chr04 | 30425367                | CC                              | AA                | 1945949731               |
| SNP_P3_49137_30425994 | NC_021163.1    | Ca_kabuli_chr04 | 30425994                | TT                              | GG                | 1945949733               |
| SNP_P3_49138_30426534 | NC_021163.1    | Ca_kabuli_chr04 | 30426534                | GG                              | TT                | 1945949734               |
| SNP_P3_49139_30426541 | NC_021163.1    | Ca_kabuli_chr04 | 30426541                | TT                              | GG                | 1945949736               |
| SNP_P3_49140_30429972 | NC_021163.1    | Ca_kabuli_chr04 | 30429972                | CC                              | TT                | 1945949738               |
| SNP_P3_49141_30436732 | NC_021163.1    | Ca_kabuli_chr04 | 30436732                | GG                              | TT                | 1945949740               |
| SNP_P3_49142_30442835 | NC_021163.1    | Ca_kabuli_chr04 | 30442835                | CC                              | TT                | 1945949741               |
| SNP_P3_49143_30445444 | NC_021163.1    | Ca_kabuli_chr04 | 30445444                | TT                              | CC                | 1945949743               |
| SNP_P3_49144_30445481 | NC_021163.1    | Ca_kabuli_chr04 | 30445481                | TT                              | CC                | 1945949745               |
| SNP_P3_49145_30448038 | NC_021163.1    | Ca_kabuli_chr04 | 30448038                | GG                              | TT                | 1945949747               |
| SNP_P3_49146_30449991 | NC_021163.1    | Ca_kabuli_chr04 | 30449991                | TT                              | CC                | 1945949749               |
| SNP_P3_49147_30451321 | NC_021163.1    | Ca_kabuli_chr04 | 30451321                | GG                              | AA                | 1945949750               |
| SNP_P3_49148_30454725 | NC_021163.1    | Ca_kabuli_chr04 | 30454725                | TT                              | CC                | 1945949752               |
| SNP_P3_49150_30462892 | NC_021163.1    | Ca_kabuli_chr04 | 30462892                | AA                              | TT                | 1945949754               |
| SNP_P3_49151_30462893 | NC_021163.1    | Ca_kabuli_chr04 | 30462893                | AA                              | TT                | 1945949756               |
| SNP_P3_49152_30463063 | NC_021163.1    | Ca_kabuli_chr04 | 30463063                | CC                              | TT                | 1945949758               |
| SNP_P3_49154_30466523 | NC_021163.1    | Ca_kabuli_chr04 | 30466523                | TT                              | CC                | 1945949759               |
| SNP_P3_49155_30466532 | NC_021163.1    | Ca_kabuli_chr04 | 30466532                | CC                              | TT                | 1945949761               |
| SNP_P3_49156_30467982 | NC_021163.1    | Ca_kabuli_chr04 | 30467982                | TT                              | CC                | 1945949763               |
| SNP_P3_49157_30469505 | NC_021163.1    | Ca_kabuli_chr04 | 30469505                | TT                              | CC                | 1945949765               |
| SNP_P3_49158_30469678 | NC_021163.1    | Ca_kabuli_chr04 | 30469678                | CC                              | TT                | 1945949766               |
| SNP_P3_49159_30469681 | NC_021163.1    | Ca_kabuli_chr04 | 30469681                | AA                              | GG                | 1945949768               |
| SNP_P3_49160_30472168 | NC_021163.1    | Ca_kabuli_chr04 | 30472168                | AA                              | GG                | 1945949770               |
| SNP_P3_49161_30480229 | NC_021163.1    | Ca_kabuli_chr04 | 30480229                | AA                              | TT                | 1945949772               |
| SNP_P3_49162_30480276 | NC_021163.1    | Ca_kabuli_chr04 | 30480276                | GG                              | AA                | 1945949774               |
| SNP_P3_49164_30480698 | NC_021163.1    | Ca_kabuli_chr04 | 30480698                | AA                              | GG                | 1945949775               |
| SNP_P3_49166_30495760 | NC_021163.1    | Ca_kabuli_chr04 | 30495760                | CC                              | TT                | 1945949777               |
| SNP_P3_49167_30495985 | NC_021163.1    | Ca_kabuli_chr04 | 30495985                | AA                              | GG                | 1945949779               |
| SNP_P3_49168_30498128 | NC_021163.1    | Ca_kabuli_chr04 | 30498128                | TT                              | AA                | 1945949781               |
| SNP_P3_49169_30500325 | NC_021163.1    | Ca_kabuli_chr04 | 30500325                | TT                              | CC                | 1945949783               |
| SNP_P3_49171_30504118 | NC_021163.1    | Ca_kabuli_chr04 | 30504118                | TT                              | GG                | 1945949784               |

| SNPs IDs              | Chromosome IDs | Chromosomes     | Physical positions (bp) | CDC Frontier (Reference genome) | (Pusa 256 & HPNB) | NCBI SNPdb Accession IDs |
|-----------------------|----------------|-----------------|-------------------------|---------------------------------|-------------------|--------------------------|
| SNP_P3_49173_30507447 | NC_021163.1    | Ca_kabuli_chr04 | 30507447                | GG                              | AA                | 1945949786               |
| SNP_P3_49174_30508292 | NC_021163.1    | Ca_kabuli_chr04 | 30508292                | AA                              | GG                | 1945949788               |
| SNP_P3_49175_30510406 | NC_021163.1    | Ca_kabuli_chr04 | 30510406                | GG                              | TT                | 1945949790               |
| SNP_P3_49176_30510411 | NC_021163.1    | Ca_kabuli_chr04 | 30510411                | CC                              | TT                | 1945949791               |
| SNP_P3_49177_30510420 | NC_021163.1    | Ca_kabuli_chr04 | 30510420                | GG                              | AA                | 1945949793               |
| SNP_P3_49178_30518867 | NC_021163.1    | Ca_kabuli_chr04 | 30518867                | CC                              | AA                | 1945949795               |
| SNP_P3_49179_30521115 | NC_021163.1    | Ca_kabuli_chr04 | 30521115                | TT                              | CC                | 1945949797               |
| SNP_P3_49180_30521185 | NC_021163.1    | Ca_kabuli_chr04 | 30521185                | AA                              | GG                | 1945949799               |
| SNP_P3_49182_30521275 | NC_021163.1    | Ca_kabuli_chr04 | 30521275                | AA                              | TT                | 1945949800               |
| SNP_P3_49183_30521893 | NC_021163.1    | Ca_kabuli_chr04 | 30521893                | TT                              | CC                | 1945949802               |
| SNP_P3_49184_30523155 | NC_021163.1    | Ca_kabuli_chr04 | 30523155                | AA                              | GG                | 1945949804               |
| SNP_P3_49187_30528704 | NC_021163.1    | Ca_kabuli_chr04 | 30528704                | GG                              | AA                | 1945949806               |
| SNP_P3_49188_30529574 | NC_021163.1    | Ca_kabuli_chr04 | 30529574                | CC                              | AA                | 1945949808               |
| SNP_P3_49189_30529762 | NC_021163.1    | Ca_kabuli_chr04 | 30529762                | AA                              | GG                | 1945949809               |
| SNP_P3_49190_30534090 | NC_021163.1    | Ca_kabuli_chr04 | 30534090                | GG                              | AA                | 1945949811               |
| SNP_P3_49191_30534113 | NC_021163.1    | Ca_kabuli_chr04 | 30534113                | TT                              | CC                | 1945949813               |
| SNP_P3_49192_30534472 | NC_021163.1    | Ca_kabuli_chr04 | 30534472                | AA                              | CC                | 1945949815               |
| SNP_P3_49193_30535523 | NC_021163.1    | Ca_kabuli_chr04 | 30535523                | CC                              | TT                | 1945949816               |
| SNP_P3_49195_30535768 | NC_021163.1    | Ca_kabuli_chr04 | 30535768                | AA                              | GG                | 1945949818               |
| SNP_P3_49196_30535820 | NC_021163.1    | Ca_kabuli_chr04 | 30535820                | AA                              | GG                | 1945949820               |
| SNP_P3_49198_30536004 | NC_021163.1    | Ca_kabuli_chr04 | 30536004                | CC                              | TT                | 1945949822               |
| SNP_P3_49199_30536366 | NC_021163.1    | Ca_kabuli_chr04 | 30536366                | AA                              | GG                | 1945949824               |
| SNP_P3_49201_30537134 | NC_021163.1    | Ca_kabuli_chr04 | 30537134                | TT                              | GG                | 1945949825               |
| SNP_P3_49202_30537349 | NC_021163.1    | Ca_kabuli_chr04 | 30537349                | CC                              | TT                | 1945949827               |
| SNP_P3_49203_30537482 | NC_021163.1    | Ca_kabuli_chr04 | 30537482                | AA                              | GG                | 1945949829               |
| SNP_P3_49205_30537740 | NC_021163.1    | Ca_kabuli_chr04 | 30537740                | CC                              | TT                | 1945949831               |
| SNP_P3_49206_30537764 | NC_021163.1    | Ca_kabuli_chr04 | 30537764                | CC                              | AA                | 1945949833               |
| SNP_P3_49208_30538411 | NC_021163.1    | Ca_kabuli_chr04 | 30538411                | AA                              | GG                | 1945949834               |
| SNP_P3_49209_30538533 | NC_021163.1    | Ca_kabuli_chr04 | 30538533                | CC                              | TT                | 1945949836               |
| SNP_P3_49210_30539154 | NC_021163.1    | Ca_kabuli_chr04 | 30539154                | GG                              | AA                | 1945949838               |
| SNP_P3_49211_30539162 | NC_021163.1    | Ca_kabuli_chr04 | 30539162                | CC                              | TT                | 1945949840               |
| SNP_P3_49212_30539175 | NC_021163.1    | Ca_kabuli_chr04 | 30539175                | GG                              | AA                | 1945949841               |
| SNP_P3_49213_30539198 | NC_021163.1    | Ca_kabuli_chr04 | 30539198                | TT                              | CC                | 1945949843               |
| SNP_P3_49214_30539301 | NC_021163.1    | Ca_kabuli_chr04 | 30539301                | GG                              | AA                | 1945949845               |
| SNP_P3_49215_30539306 | NC_021163.1    | Ca_kabuli_chr04 | 30539306                | GG                              | AA                | 1945949847               |
| SNP_P3_49216_30539353 | NC_021163.1    | Ca_kabuli_chr04 | 30539353                | GG                              | AA                | 1945949849               |
| SNP_P3_49217_30539369 | NC_021163.1    | Ca_kabuli_chr04 | 30539369                | GG                              | AA                | 1945949850               |
| SNP_P3_49218_30539412 | NC_021163.1    | Ca_kabuli_chr04 | 30539412                | GG                              | AA                | 1945949852               |
| SNP_P3_49219_30539416 | NC_021163.1    | Ca_kabuli_chr04 | 30539416                | GG                              | CC                | 1945949854               |
| SNP_P3_49220_30539545 | NC_021163.1    | Ca_kabuli_chr04 | 30539545                | CC                              | AA                | 1945949856               |
| SNP_P3_49221_30539549 | NC_021163.1    | Ca_kabuli_chr04 | 30539549                | GG                              | AA                | 1945949857               |
| SNP_P3_49223_30539584 | NC_021163.1    | Ca_kabuli_chr04 | 30539584                | TT                              | GG                | 1945949859               |

| SNPs IDs              | Chromosome IDs | Chromosomes     | Physical positions (bp) | CDC Frontier (Reference genome) | (Pusa 256 & HPNB) | NCBI SNPdb Accession IDs |
|-----------------------|----------------|-----------------|-------------------------|---------------------------------|-------------------|--------------------------|
| SNP_P3_49224_30539630 | NC_021163.1    | Ca_kabuli_chr04 | 30539630                | GG                              | AA                | 1945949861               |
| SNP_P3_49225_30539634 | NC_021163.1    | Ca_kabuli_chr04 | 30539634                | AA                              | CC                | 1945949863               |
| SNP_P3_49226_30539707 | NC_021163.1    | Ca_kabuli_chr04 | 30539707                | AA                              | CC                | 1945949865               |
| SNP_P3_49228_30540317 | NC_021163.1    | Ca_kabuli_chr04 | 30540317                | AA                              | CC                | 1945949866               |
| SNP_P3_49229_30540499 | NC_021163.1    | Ca_kabuli_chr04 | 30540499                | CC                              | TT                | 1945949868               |
| SNP_P3_49230_30540847 | NC_021163.1    | Ca_kabuli_chr04 | 30540847                | TT                              | GG                | 1945949870               |
| SNP_P3_49231_30541034 | NC_021163.1    | Ca_kabuli_chr04 | 30541034                | CC                              | TT                | 1945949872               |
| SNP_P3_49232_30541308 | NC_021163.1    | Ca_kabuli_chr04 | 30541308                | CC                              | TT                | 1945949874               |
| SNP_P3_49233_30541315 | NC_021163.1    | Ca_kabuli_chr04 | 30541315                | TT                              | CC                | 1945949875               |
| SNP_P3_49234_30541352 | NC_021163.1    | Ca_kabuli_chr04 | 30541352                | AA                              | GG                | 1945949877               |
| SNP_P3_49235_30541371 | NC_021163.1    | Ca_kabuli_chr04 | 30541371                | GG                              | AA                | 1945949879               |
| SNP_P3_49236_30541374 | NC_021163.1    | Ca_kabuli_chr04 | 30541374                | CC                              | TT                | 1945949881               |
| SNP_P3_49238_30541418 | NC_021163.1    | Ca_kabuli_chr04 | 30541418                | TT                              | AA                | 1945949882               |
| SNP_P3_49239_30541497 | NC_021163.1    | Ca_kabuli_chr04 | 30541497                | TT                              | CC                | 1945949884               |
| SNP_P3_49240_30541538 | NC_021163.1    | Ca_kabuli_chr04 | 30541538                | TT                              | CC                | 1945949886               |
| SNP_P3_49241_30541542 | NC_021163.1    | Ca_kabuli_chr04 | 30541542                | GG                              | TT                | 1945949888               |
| SNP_P3_49242_30541548 | NC_021163.1    | Ca_kabuli_chr04 | 30541548                | TT                              | CC                | 1945949890               |
| SNP_P3_49243_30541556 | NC_021163.1    | Ca_kabuli_chr04 | 30541556                | AA                              | GG                | 1945949891               |
| SNP_P3_49244_30541561 | NC_021163.1    | Ca_kabuli_chr04 | 30541561                | GG                              | AA                | 1945949893               |
| SNP_P3_49245_30541578 | NC_021163.1    | Ca_kabuli_chr04 | 30541578                | CC                              | TT                | 1945949895               |
| SNP_P3_49246_30541582 | NC_021163.1    | Ca_kabuli_chr04 | 30541582                | GG                              | AA                | 1945949897               |
| SNP_P3_49247_30541592 | NC_021163.1    | Ca_kabuli_chr04 | 30541592                | CC                              | TT                | 1945949899               |
| SNP_P3_49248_30541598 | NC_021163.1    | Ca_kabuli_chr04 | 30541598                | CC                              | TT                | 1945949900               |
| SNP_P3_49249_30541607 | NC_021163.1    | Ca_kabuli_chr04 | 30541607                | AA                              | GG                | 1945949902               |
| SNP_P3_49250_30541634 | NC_021163.1    | Ca_kabuli_chr04 | 30541634                | AA                              | GG                | 1945949904               |
| SNP_P3_49251_30541645 | NC_021163.1    | Ca_kabuli_chr04 | 30541645                | GG                              | AA                | 1945949906               |
| SNP_P3_49252_30541656 | NC_021163.1    | Ca_kabuli_chr04 | 30541656                | TT                              | CC                | 1945949907               |
| SNP_P3_49253_30541657 | NC_021163.1    | Ca_kabuli_chr04 | 30541657                | TT                              | CC                | 1945949909               |
| SNP_P3_49254_30541736 | NC_021163.1    | Ca_kabuli_chr04 | 30541736                | GG                              | AA                | 1945949911               |
| SNP_P3_49255_30541791 | NC_021163.1    | Ca_kabuli_chr04 | 30541791                | TT                              | CC                | 1945949913               |
| SNP_P3_49256_30541795 | NC_021163.1    | Ca_kabuli_chr04 | 30541795                | CC                              | TT                | 1945949915               |
| SNP_P3_49257_30541812 | NC_021163.1    | Ca_kabuli_chr04 | 30541812                | AA                              | GG                | 1945949916               |
| SNP_P3_49258_30541818 | NC_021163.1    | Ca_kabuli_chr04 | 30541818                | AA                              | GG                | 1945949918               |
| SNP_P3_49259_30541866 | NC_021163.1    | Ca_kabuli_chr04 | 30541866                | AA                              | GG                | 1945949920               |
| SNP_P3_49260_30541868 | NC_021163.1    | Ca_kabuli_chr04 | 30541868                | AA                              | GG                | 1945949922               |
| SNP_P3_49261_30541918 | NC_021163.1    | Ca_kabuli_chr04 | 30541918                | CC                              | AA                | 1945949924               |
| SNP_P3_49262_30541936 | NC_021163.1    | Ca_kabuli_chr04 | 30541936                | AA                              | GG                | 1945949925               |
| SNP_P3_49263_30541961 | NC_021163.1    | Ca_kabuli_chr04 | 30541961                | GG                              | AA                | 1945949927               |
| SNP_P3_49264_30541998 | NC_021163.1    | Ca_kabuli_chr04 | 30541998                | AA                              | CC                | 1945949929               |
| SNP_P3_49265_30542003 | NC_021163.1    | Ca_kabuli_chr04 | 30542003                | TT                              | CC                | 1945949931               |
| SNP_P3_49266_30542004 | NC_021163.1    | Ca_kabuli_chr04 | 30542004                | TT                              | AA                | 1945949932               |
| SNP_P3_49267_30542034 | NC_021163.1    | Ca_kabuli_chr04 | 30542034                | CC                              | TT                | 1945949934               |

| SNPs IDs              | Chromosome IDs | Chromosomes     | Physical positions (bp) | CDC Frontier (Reference genome) | (Pusa 256 & HPNB) | NCBI SNPdb Accession IDs |
|-----------------------|----------------|-----------------|-------------------------|---------------------------------|-------------------|--------------------------|
| SNP_P3_49268_30542063 | NC_021163.1    | Ca_kabuli_chr04 | 30542063                | AA                              | TT                | 1945949936               |
| SNP_P3_49269_30542074 | NC_021163.1    | Ca_kabuli_chr04 | 30542074                | TT                              | CC                | 1945949938               |
| SNP_P3_49270_30542076 | NC_021163.1    | Ca_kabuli_chr04 | 30542076                | CC                              | AA                | 1945949940               |
| SNP_P3_49271_30542090 | NC_021163.1    | Ca_kabuli_chr04 | 30542090                | AA                              | GG                | 1945949941               |
| SNP_P3_49272_30542109 | NC_021163.1    | Ca_kabuli_chr04 | 30542109                | AA                              | CC                | 1945949943               |
| SNP_P3_49273_30542124 | NC_021163.1    | Ca_kabuli_chr04 | 30542124                | TT                              | AA                | 1945949945               |
| SNP_P3_49275_30542184 | NC_021163.1    | Ca_kabuli_chr04 | 30542184                | CC                              | TT                | 1945949947               |
| SNP_P3_49276_30542288 | NC_021163.1    | Ca_kabuli_chr04 | 30542288                | CC                              | AA                | 1945949948               |
| SNP_P3_49277_30542343 | NC_021163.1    | Ca_kabuli_chr04 | 30542343                | CC                              | AA                | 1945949950               |
| SNP_P3_49278_30542428 | NC_021163.1    | Ca_kabuli_chr04 | 30542428                | AA                              | GG                | 1945949952               |
| SNP_P3_49279_30542659 | NC_021163.1    | Ca_kabuli_chr04 | 30542659                | CC                              | TT                | 1945949954               |
| SNP_P3_49282_30542765 | NC_021163.1    | Ca_kabuli_chr04 | 30542765                | GG                              | AA                | 1945949956               |
| SNP_P3_49283_30542768 | NC_021163.1    | Ca_kabuli_chr04 | 30542768                | GG                              | TT                | 1945949957               |
| SNP_P3_49284_30542778 | NC_021163.1    | Ca_kabuli_chr04 | 30542778                | GG                              | AA                | 1945949959               |
| SNP_P3_49285_30542815 | NC_021163.1    | Ca_kabuli_chr04 | 30542815                | AA                              | CC                | 1945949961               |
| SNP_P3_49286_30542905 | NC_021163.1    | Ca_kabuli_chr04 | 30542905                | CC                              | GG                | 1945949963               |
| SNP_P3_49287_30542929 | NC_021163.1    | Ca_kabuli_chr04 | 30542929                | GG                              | TT                | 1945949965               |
| SNP_P3_49288_30542945 | NC_021163.1    | Ca_kabuli_chr04 | 30542945                | AA                              | CC                | 1945949966               |
| SNP_P3_49289_30542950 | NC_021163.1    | Ca_kabuli_chr04 | 30542950                | TT                              | CC                | 1945949968               |
| SNP_P3_49290_30543039 | NC_021163.1    | Ca_kabuli_chr04 | 30543039                | AA                              | GG                | 1945949970               |
| SNP_P3_49291_30543156 | NC_021163.1    | Ca_kabuli_chr04 | 30543156                | GG                              | AA                | 1945949972               |
| SNP_P3_49292_30543159 | NC_021163.1    | Ca_kabuli_chr04 | 30543159                | AA                              | GG                | 1945949973               |
| SNP_P3_49293_30543169 | NC_021163.1    | Ca_kabuli_chr04 | 30543169                | GG                              | CC                | 1945949975               |
| SNP_P3_49294_30543170 | NC_021163.1    | Ca_kabuli_chr04 | 30543170                | GG                              | AA                | 1945949977               |
| SNP_P3_49295_30543173 | NC_021163.1    | Ca_kabuli_chr04 | 30543173                | AA                              | GG                | 1945949979               |
| SNP_P3_49296_30543208 | NC_021163.1    | Ca_kabuli_chr04 | 30543208                | AA                              | CC                | 1945949981               |
| SNP_P3_49297_30543867 | NC_021163.1    | Ca_kabuli_chr04 | 30543867                | GG                              | TT                | 1945949982               |
| SNP_P3_49298_30543899 | NC_021163.1    | Ca_kabuli_chr04 | 30543899                | AA                              | GG                | 1945949984               |
| SNP_P3_49299_30543907 | NC_021163.1    | Ca_kabuli_chr04 | 30543907                | GG                              | TT                | 1945949986               |
| SNP_P3_49300_30543939 | NC_021163.1    | Ca_kabuli_chr04 | 30543939                | CC                              | GG                | 1945949988               |
| SNP_P3_49301_30544231 | NC_021163.1    | Ca_kabuli_chr04 | 30544231                | AA                              | GG                | 1945949990               |
| SNP_P3_49302_30544249 | NC_021163.1    | Ca_kabuli_chr04 | 30544249                | GG                              | TT                | 1945949991               |
| SNP_P3_49303_30544282 | NC_021163.1    | Ca_kabuli_chr04 | 30544282                | CC                              | TT                | 1945949993               |
| SNP_P3_49304_30544300 | NC_021163.1    | Ca_kabuli_chr04 | 30544300                | AA                              | CC                | 1945949995               |
| SNP_P3_49305_30544325 | NC_021163.1    | Ca_kabuli_chr04 | 30544325                | GG                              | AA                | 1945949997               |
| SNP_P3_49306_30544329 | NC_021163.1    | Ca_kabuli_chr04 | 30544329                | AA                              | GG                | 1945949998               |
| SNP_P3_49307_30544621 | NC_021163.1    | Ca_kabuli_chr04 | 30544621                | AA                              | CC                | 1945950000               |
| SNP_P3_49308_30544665 | NC_021163.1    | Ca_kabuli_chr04 | 30544665                | CC                              | TT                | 1945950002               |
| SNP_P3_49309_30545443 | NC_021163.1    | Ca_kabuli_chr04 | 30545443                | TT                              | CC                | 1945950004               |
| SNP_P3_49310_30545630 | NC_021163.1    | Ca_kabuli_chr04 | 30545630                | AA                              | TT                | 1945950006               |
| SNP_P3_49311_30545647 | NC_021163.1    | Ca_kabuli_chr04 | 30545647                | TT                              | GG                | 1945950007               |
| SNP_P3_49313_30546110 | NC_021163.1    | Ca_kabuli_chr04 | 30546110                | CC                              | TT                | 1945950009               |

| SNPs IDs              | Chromosome IDs | Chromosomes     | Physical positions (bp) | CDC Frontier (Reference genome) | (Pusa 256 & HPNB) | NCBI SNPdb Accession IDs |
|-----------------------|----------------|-----------------|-------------------------|---------------------------------|-------------------|--------------------------|
| SNP_P3_49314_30546121 | NC_021163.1    | Ca_kabuli_chr04 | 30546121                | CC                              | AA                | 1945950011               |
| SNP_P3_49315_30546150 | NC_021163.1    | Ca_kabuli_chr04 | 30546150                | TT                              | AA                | 1945950013               |
| SNP_P3_49316_30546179 | NC_021163.1    | Ca_kabuli_chr04 | 30546179                | TT                              | CC                | 1945950015               |
| SNP_P3_49317_30546181 | NC_021163.1    | Ca_kabuli_chr04 | 30546181                | GG                              | TT                | 1945950016               |
| SNP_P3_49318_30546193 | NC_021163.1    | Ca_kabuli_chr04 | 30546193                | CC                              | AA                | 1945950018               |
| SNP_P3_49319_30546358 | NC_021163.1    | Ca_kabuli_chr04 | 30546358                | CC                              | TT                | 1945950020               |
| SNP_P3_49320_30546379 | NC_021163.1    | Ca_kabuli_chr04 | 30546379                | TT                              | CC                | 1945950022               |
| SNP_P3_49321_30546452 | NC_021163.1    | Ca_kabuli_chr04 | 30546452                | CC                              | TT                | 1945950023               |
| SNP_P3_49322_30546464 | NC_021163.1    | Ca_kabuli_chr04 | 30546464                | TT                              | GG                | 1945950025               |
| SNP_P3_49323_30546488 | NC_021163.1    | Ca_kabuli_chr04 | 30546488                | AA                              | GG                | 1945950027               |
| SNP_P3_49324_30546646 | NC_021163.1    | Ca_kabuli_chr04 | 30546646                | AA                              | TT                | 1945950029               |
| SNP_P3_49325_30546653 | NC_021163.1    | Ca_kabuli_chr04 | 30546653                | CC                              | AA                | 1945950031               |
| SNP_P3_49326_30546716 | NC_021163.1    | Ca_kabuli_chr04 | 30546716                | TT                              | CC                | 1945950032               |
| SNP_P3_49327_30546780 | NC_021163.1    | Ca_kabuli_chr04 | 30546780                | AA                              | CC                | 1945950034               |
| SNP_P3_49328_30548519 | NC_021163.1    | Ca_kabuli_chr04 | 30548519                | TT                              | CC                | 1945950036               |
| SNP_P3_49329_30549082 | NC_021163.1    | Ca_kabuli_chr04 | 30549082                | CC                              | TT                | 1945950038               |
| SNP_P3_49330_30549098 | NC_021163.1    | Ca_kabuli_chr04 | 30549098                | AA                              | GG                | 1945950040               |
| SNP_P3_49332_30551629 | NC_021163.1    | Ca_kabuli_chr04 | 30551629                | AA                              | CC                | 1945950041               |
| SNP_P3_49334_30551854 | NC_021163.1    | Ca_kabuli_chr04 | 30551854                | CC                              | TT                | 1945950043               |
| SNP_P3_49335_30551881 | NC_021163.1    | Ca_kabuli_chr04 | 30551881                | AA                              | GG                | 1945950045               |
| SNP_P3_49336_30551940 | NC_021163.1    | Ca_kabuli_chr04 | 30551940                | GG                              | AA                | 1945950047               |
| SNP_P3_49339_30553063 | NC_021163.1    | Ca_kabuli_chr04 | 30553063                | AA                              | GG                | 1945950048               |
| SNP_P3_49340_30554089 | NC_021163.1    | Ca_kabuli_chr04 | 30554089                | TT                              | CC                | 1945950050               |
| SNP_P3_49341_30554328 | NC_021163.1    | Ca_kabuli_chr04 | 30554328                | GG                              | TT                | 1945950052               |
| SNP_P3_49342_30554352 | NC_021163.1    | Ca_kabuli_chr04 | 30554352                | GG                              | AA                | 1945950054               |
| SNP_P3_49343_30554374 | NC_021163.1    | Ca_kabuli_chr04 | 30554374                | CC                              | TT                | 1945950056               |
| SNP_P3_49344_30554399 | NC_021163.1    | Ca_kabuli_chr04 | 30554399                | AA                              | GG                | 1945950057               |
| SNP_P3_49345_30554463 | NC_021163.1    | Ca_kabuli_chr04 | 30554463                | AA                              | GG                | 1945950059               |
| SNP_P3_49346_30554505 | NC_021163.1    | Ca_kabuli_chr04 | 30554505                | TT                              | GG                | 1945950061               |
| SNP_P3_49347_30554637 | NC_021163.1    | Ca_kabuli_chr04 | 30554637                | CC                              | AA                | 1945950063               |
| SNP_P3_49348_30554894 | NC_021163.1    | Ca_kabuli_chr04 | 30554894                | AA                              | CC                | 1945950064               |
| SNP_P3_49349_30554901 | NC_021163.1    | Ca_kabuli_chr04 | 30554901                | GG                              | AA                | 1945950066               |
| SNP_P3_49350_30556689 | NC_021163.1    | Ca_kabuli_chr04 | 30556689                | AA                              | GG                | 1945950068               |
| SNP_P3_49351_30556723 | NC_021163.1    | Ca_kabuli_chr04 | 30556723                | GG                              | CC                | 1945950070               |
| SNP_P3_49352_30556725 | NC_021163.1    | Ca_kabuli_chr04 | 30556725                | AA                              | TT                | 1945950072               |
| SNP_P3_49353_30558207 | NC_021163.1    | Ca_kabuli_chr04 | 30558207                | AA                              | GG                | 1945950073               |
| SNP_P3_49354_30558210 | NC_021163.1    | Ca_kabuli_chr04 | 30558210                | TT                              | GG                | 1945950075               |
| SNP_P3_49356_30560194 | NC_021163.1    | Ca_kabuli_chr04 | 30560194                | TT                              | CC                | 1945950077               |
| SNP_P3_49358_30561698 | NC_021163.1    | Ca_kabuli_chr04 | 30561698                | GG                              | TT                | 1945950079               |
| SNP_P3_49359_30561916 | NC_021163.1    | Ca_kabuli_chr04 | 30561916                | TT                              | CC                | 1945950081               |
| SNP_P3_49360_30562000 | NC_021163.1    | Ca_kabuli_chr04 | 30562000                | AA                              | CC                | 1945950082               |
| SNP_P3_49361_30562078 | NC_021163.1    | Ca_kabuli_chr04 | 30562078                | TT                              | CC                | 1945950084               |

| SNPs IDs              | Chromosome IDs | Chromosomes     | Physical positions (bp) | CDC Frontier (Reference genome) | (Pusa 256 & HPNB) | NCBI SNPdb Accession IDs |
|-----------------------|----------------|-----------------|-------------------------|---------------------------------|-------------------|--------------------------|
| SNP_P3_49362_30562100 | NC_021163.1    | Ca_kabuli_chr04 | 30562100                | GG                              | AA                | 1945950086               |
| SNP_P3_49363_30562288 | NC_021163.1    | Ca_kabuli_chr04 | 30562288                | AA                              | GG                | 1945950088               |
| SNP_P3_49364_30562512 | NC_021163.1    | Ca_kabuli_chr04 | 30562512                | TT                              | CC                | 1945950089               |
| SNP_P3_49365_30563790 | NC_021163.1    | Ca_kabuli_chr04 | 30563790                | TT                              | CC                | 1945950091               |
| SNP_P3_49366_30564433 | NC_021163.1    | Ca_kabuli_chr04 | 30564433                | AA                              | CC                | 1945950093               |
| SNP_P3_49367_30564766 | NC_021163.1    | Ca_kabuli_chr04 | 30564766                | TT                              | CC                | 1945950095               |
| SNP_P3_49368_30565184 | NC_021163.1    | Ca_kabuli_chr04 | 30565184                | TT                              | CC                | 1945950097               |
| SNP_P3_49369_30565855 | NC_021163.1    | Ca_kabuli_chr04 | 30565855                | AA                              | CC                | 1945950098               |
| SNP_P3_49370_30570380 | NC_021163.1    | Ca_kabuli_chr04 | 30570380                | GG                              | AA                | 1945950100               |
| SNP_P3_49372_30572922 | NC_021163.1    | Ca_kabuli_chr04 | 30572922                | GG                              | AA                | 1945950102               |
| SNP_P3_49373_30573056 | NC_021163.1    | Ca_kabuli_chr04 | 30573056                | TT                              | CC                | 1945950104               |
| SNP_P3_49375_30574235 | NC_021163.1    | Ca_kabuli_chr04 | 30574235                | AA                              | GG                | 1945950106               |
| SNP_P3_49376_30576031 | NC_021163.1    | Ca_kabuli_chr04 | 30576031                | GG                              | AA                | 1945950107               |
| SNP_P3_49377_30579167 | NC_021163.1    | Ca_kabuli_chr04 | 30579167                | TT                              | AA                | 1945950109               |
| SNP_P3_49378_30579785 | NC_021163.1    | Ca_kabuli_chr04 | 30579785                | TT                              | CC                | 1945950111               |
| SNP_P3_49379_30579795 | NC_021163.1    | Ca_kabuli_chr04 | 30579795                | AA                              | GG                | 1945950113               |
| SNP_P3_49380_30580883 | NC_021163.1    | Ca_kabuli_chr04 | 30580883                | GG                              | AA                | 1945950114               |
| SNP_P3_49381_30581793 | NC_021163.1    | Ca_kabuli_chr04 | 30581793                | CC                              | AA                | 1945950116               |
| SNP_P3_49382_30582606 | NC_021163.1    | Ca_kabuli_chr04 | 30582606                | AA                              | TT                | 1945950118               |
| SNP_P3_49385_30584237 | NC_021163.1    | Ca_kabuli_chr04 | 30584237                | CC                              | TT                | 1945950120               |
| SNP_P3_49386_30584306 | NC_021163.1    | Ca_kabuli_chr04 | 30584306                | AA                              | GG                | 1945950122               |
| SNP_P3_49387_30584465 | NC_021163.1    | Ca_kabuli_chr04 | 30584465                | GG                              | AA                | 1945950123               |
| SNP_P3_49388_30584927 | NC_021163.1    | Ca_kabuli_chr04 | 30584927                | AA                              | TT                | 1945950125               |
| SNP_P3_49389_30585443 | NC_021163.1    | Ca_kabuli_chr04 | 30585443                | AA                              | GG                | 1945950127               |
| SNP_P3_49390_30586420 | NC_021163.1    | Ca_kabuli_chr04 | 30586420                | GG                              | AA                | 1945950129               |
| SNP_P3_49391_30586666 | NC_021163.1    | Ca_kabuli_chr04 | 30586666                | CC                              | AA                | 1945950131               |
| SNP_P3_49392_30588049 | NC_021163.1    | Ca_kabuli_chr04 | 30588049                | AA                              | GG                | 1945950132               |
| SNP_P3_49393_30588068 | NC_021163.1    | Ca_kabuli_chr04 | 30588068                | TT                              | GG                | 1945950134               |
| SNP_P3_49394_30589164 | NC_021163.1    | Ca_kabuli_chr04 | 30589164                | AA                              | GG                | 1945950136               |
| SNP_P3_49395_30590987 | NC_021163.1    | Ca_kabuli_chr04 | 30590987                | TT                              | CC                | 1945950138               |
| SNP_P3_49396_30591166 | NC_021163.1    | Ca_kabuli_chr04 | 30591166                | AA                              | GG                | 1945950139               |
| SNP_P3_49398_30592540 | NC_021163.1    | Ca_kabuli_chr04 | 30592540                | AA                              | CC                | 1945950141               |
| SNP_P3_49399_30592566 | NC_021163.1    | Ca_kabuli_chr04 | 30592566                | TT                              | AA                | 1945950143               |
| SNP_P3_49400_30593270 | NC_021163.1    | Ca_kabuli_chr04 | 30593270                | GG                              | AA                | 1945950145               |
| SNP_P3_49403_30597193 | NC_021163.1    | Ca_kabuli_chr04 | 30597193                | TT                              | CC                | 1945950147               |
| SNP_P3_49405_30601973 | NC_021163.1    | Ca_kabuli_chr04 | 30601973                | CC                              | TT                | 1945950148               |
| SNP_P3_49407_30606538 | NC_021163.1    | Ca_kabuli_chr04 | 30606538                | CC                              | TT                | 1945950150               |
| SNP_P3_49409_30607230 | NC_021163.1    | Ca_kabuli_chr04 | 30607230                | AA                              | GG                | 1945950152               |
| SNP_P3_49410_30608362 | NC_021163.1    | Ca_kabuli_chr04 | 30608362                | TT                              | CC                | 1945950154               |
| SNP_P3_49412_30608669 | NC_021163.1    | Ca_kabuli_chr04 | 30608669                | GG                              | AA                | 1945950155               |
| SNP_P3_49413_30608689 | NC_021163.1    | Ca_kabuli_chr04 | 30608689                | CC                              | TT                | 1945950157               |
| SNP_P3_49414_30608967 | NC_021163.1    | Ca_kabuli_chr04 | 30608967                | AA                              | GG                | 1945950159               |

| SNPs IDs              | Chromosome IDs | Chromosomes     | Physical positions (bp) | CDC Frontier (Reference genome) | (Pusa 256 & HPNB) | NCBI SNPdb Accession IDs |
|-----------------------|----------------|-----------------|-------------------------|---------------------------------|-------------------|--------------------------|
| SNP_P3_49415_30619688 | NC_021163.1    | Ca_kabuli_chr04 | 30619688                | AA                              | TT                | 1945950161               |
| SNP_P3_49417_30621752 | NC_021163.1    | Ca_kabuli_chr04 | 30621752                | TT                              | CC                | 1945950163               |
| SNP_P3_49418_30622487 | NC_021163.1    | Ca_kabuli_chr04 | 30622487                | TT                              | CC                | 1945950164               |
| SNP_P3_49419_30624685 | NC_021163.1    | Ca_kabuli_chr04 | 30624685                | AA                              | GG                | 1945950166               |
| SNP_P3_49420_30625548 | NC_021163.1    | Ca_kabuli_chr04 | 30625548                | CC                              | TT                | 1945950168               |
| SNP_P3_49421_30627251 | NC_021163.1    | Ca_kabuli_chr04 | 30627251                | CC                              | TT                | 1945950170               |
| SNP_P3_49422_30630604 | NC_021163.1    | Ca_kabuli_chr04 | 30630604                | TT                              | CC                | 1945950172               |
| SNP_P3_49423_30635371 | NC_021163.1    | Ca_kabuli_chr04 | 30635371                | AA                              | GG                | 1945950173               |
| SNP_P3_49424_30635550 | NC_021163.1    | Ca_kabuli_chr04 | 30635550                | AA                              | GG                | 1945950175               |
| SNP_P3_49425_30636032 | NC_021163.1    | Ca_kabuli_chr04 | 30636032                | GG                              | CC                | 1945950177               |
| SNP_P3_49426_30636859 | NC_021163.1    | Ca_kabuli_chr04 | 30636859                | GG                              | AA                | 1945950179               |
| SNP_P3_49427_30637688 | NC_021163.1    | Ca_kabuli_chr04 | 30637688                | TT                              | GG                | 1945950180               |
| SNP_P3_49428_30637709 | NC_021163.1    | Ca_kabuli_chr04 | 30637709                | AA                              | CC                | 1945950182               |
| SNP_P3_49430_30648703 | NC_021163.1    | Ca_kabuli_chr04 | 30648703                | GG                              | TT                | 1945950184               |
| SNP_P3_49431_30651495 | NC_021163.1    | Ca_kabuli_chr04 | 30651495                | CC                              | TT                | 1945950186               |
| SNP_P3_49432_30652804 | NC_021163.1    | Ca_kabuli_chr04 | 30652804                | TT                              | CC                | 1945950188               |
| SNP_P3_49433_30653013 | NC_021163.1    | Ca_kabuli_chr04 | 30653013                | TT                              | CC                | 1945950189               |
| SNP_P3_49436_30660173 | NC_021163.1    | Ca_kabuli_chr04 | 30660173                | CC                              | TT                | 1945950191               |
| SNP_P3_49437_30664177 | NC_021163.1    | Ca_kabuli_chr04 | 30664177                | GG                              | AA                | 1945950193               |
| SNP_P3_49438_30673458 | NC_021163.1    | Ca_kabuli_chr04 | 30673458                | AA                              | TT                | 1945950195               |
| SNP_P3_49439_30674994 | NC_021163.1    | Ca_kabuli_chr04 | 30674994                | AA                              | GG                | 1945950197               |
| SNP_P3_49440_30679006 | NC_021163.1    | Ca_kabuli_chr04 | 30679006                | CC                              | TT                | 1945950198               |
| SNP_P3_49441_30681128 | NC_021163.1    | Ca_kabuli_chr04 | 30681128                | TT                              | CC                | 1945950200               |
| SNP_P3_49442_30682833 | NC_021163.1    | Ca_kabuli_chr04 | 30682833                | TT                              | GG                | 1945950202               |
| SNP_P3_49444_30686908 | NC_021163.1    | Ca_kabuli_chr04 | 30686908                | TT                              | CC                | 1945950204               |
| SNP_P3_49445_30687126 | NC_021163.1    | Ca_kabuli_chr04 | 30687126                | CC                              | GG                | 1945950205               |
| SNP_P3_49447_30688901 | NC_021163.1    | Ca_kabuli_chr04 | 30688901                | GG                              | AA                | 1945950207               |
| SNP_P3_49448_30690709 | NC_021163.1    | Ca_kabuli_chr04 | 30690709                | GG                              | AA                | 1945950209               |
| SNP_P3_49450_30695912 | NC_021163.1    | Ca_kabuli_chr04 | 30695912                | TT                              | CC                | 1945950211               |
| SNP_P3_49451_30698935 | NC_021163.1    | Ca_kabuli_chr04 | 30698935                | AA                              | GG                | 1945950213               |
| SNP_P3_49454_30705531 | NC_021163.1    | Ca_kabuli_chr04 | 30705531                | TT                              | AA                | 1945950214               |
| SNP_P3_49455_30705853 | NC_021163.1    | Ca_kabuli_chr04 | 30705853                | CC                              | AA                | 1945950216               |
| SNP_P3_49456_30708808 | NC_021163.1    | Ca_kabuli_chr04 | 30708808                | AA                              | GG                | 1945950218               |
| SNP_P3_49457_30712219 | NC_021163.1    | Ca_kabuli_chr04 | 30712219                | CC                              | AA                | 1945950220               |
| SNP_P3_49458_30713634 | NC_021163.1    | Ca_kabuli_chr04 | 30713634                | CC                              | AA                | 1945950221               |
| SNP_P3_49459_30716478 | NC_021163.1    | Ca_kabuli_chr04 | 30716478                | AA                              | TT                | 1945950223               |
| SNP_P3_49460_30716774 | NC_021163.1    | Ca_kabuli_chr04 | 30716774                | AA                              | GG                | 1945950225               |
| SNP_P3_49461_30717561 | NC_021163.1    | Ca_kabuli_chr04 | 30717561                | CC                              | AA                | 1945950227               |
| SNP_P3_49462_30718353 | NC_021163.1    | Ca_kabuli_chr04 | 30718353                | AA                              | GG                | 1945950229               |
| SNP_P3_49463_30718491 | NC_021163.1    | Ca_kabuli_chr04 | 30718491                | AA                              | TT                | 1945950230               |
| SNP_P3_49464_30718897 | NC_021163.1    | Ca_kabuli_chr04 | 30718897                | GG                              | CC                | 1945950232               |
| SNP_P3_49465_30718914 | NC_021163.1    | Ca_kabuli_chr04 | 30718914                | AA                              | TT                | 1945950234               |



| SNPs IDs              | Chromosome IDs | Chromosomes     | Physical positions (bp) | CDC Frontier (Reference genome) | (Pusa 256 & HPNB) | NCBI SNPdb Accession IDs |
|-----------------------|----------------|-----------------|-------------------------|---------------------------------|-------------------|--------------------------|
| SNP_P3_49466_30719029 | NC_021163.1    | Ca_kabuli_chr04 | 30719029                | CC                              | TT                | 1945950236               |
| SNP_P3_49467_30719079 | NC_021163.1    | Ca_kabuli_chr04 | 30719079                | AA                              | TT                | 1945950238               |
| SNP_P3_49468_30719647 | NC_021163.1    | Ca_kabuli_chr04 | 30719647                | TT                              | GG                | 1945950239               |
| SNP_P3_49469_30719648 | NC_021163.1    | Ca_kabuli_chr04 | 30719648                | TT                              | AA                | 1945950241               |
| SNP_P3_49470_30719679 | NC_021163.1    | Ca_kabuli_chr04 | 30719679                | CC                              | TT                | 1945950243               |
| SNP_P3_49471_30719760 | NC_021163.1    | Ca_kabuli_chr04 | 30719760                | TT                              | GG                | 1945950245               |
| SNP_P3_49472_30720012 | NC_021163.1    | Ca_kabuli_chr04 | 30720012                | TT                              | GG                | 1945950246               |
| SNP_P3_49473_30720276 | NC_021163.1    | Ca_kabuli_chr04 | 30720276                | CC                              | TT                | 1945950248               |
| SNP_P3_49474_30720316 | NC_021163.1    | Ca_kabuli_chr04 | 30720316                | AA                              | TT                | 1945950250               |
| SNP_P3_49475_30720905 | NC_021163.1    | Ca_kabuli_chr04 | 30720905                | TT                              | AA                | 1945950252               |
| SNP_P3_49476_30721736 | NC_021163.1    | Ca_kabuli_chr04 | 30721736                | GG                              | TT                | 1945950254               |
| SNP_P3_49477_30722380 | NC_021163.1    | Ca_kabuli_chr04 | 30722380                | AA                              | GG                | 1945950255               |
| SNP_P3_49478_30723935 | NC_021163.1    | Ca_kabuli_chr04 | 30723935                | CC                              | TT                | 1945950257               |
| SNP_P3_49479_30726938 | NC_021163.1    | Ca_kabuli_chr04 | 30726938                | TT                              | CC                | 1945950259               |
| SNP_P3_49480_30727171 | NC_021163.1    | Ca_kabuli_chr04 | 30727171                | TT                              | CC                | 1945950261               |
| SNP_P3_49481_30729339 | NC_021163.1    | Ca_kabuli_chr04 | 30729339                | CC                              | TT                | 1945950263               |
| SNP_P3_49482_30735735 | NC_021163.1    | Ca_kabuli_chr04 | 30735735                | AA                              | GG                | 1945950264               |
| SNP_P3_49483_30735991 | NC_021163.1    | Ca_kabuli_chr04 | 30735991                | GG                              | CC                | 1945950266               |
| SNP_P3_49484_30737252 | NC_021163.1    | Ca_kabuli_chr04 | 30737252                | TT                              | CC                | 1945950268               |
| SNP_P3_49485_30738858 | NC_021163.1    | Ca_kabuli_chr04 | 30738858                | AA                              | TT                | 1945950270               |
| SNP_P3_49486_30739171 | NC_021163.1    | Ca_kabuli_chr04 | 30739171                | AA                              | GG                | 1945950271               |
| SNP_P3_49487_30739188 | NC_021163.1    | Ca_kabuli_chr04 | 30739188                | AA                              | GG                | 1945950273               |
| SNP_P3_49488_30739210 | NC_021163.1    | Ca_kabuli_chr04 | 30739210                | AA                              | TT                | 1945950275               |
| SNP_P3_49489_30739969 | NC_021163.1    | Ca_kabuli_chr04 | 30739969                | AA                              | GG                | 1945950277               |
| SNP_P3_49490_30741541 | NC_021163.1    | Ca_kabuli_chr04 | 30741541                | GG                              | TT                | 1945950279               |
| SNP_P3_49491_30742721 | NC_021163.1    | Ca_kabuli_chr04 | 30742721                | CC                              | TT                | 1945950280               |
| SNP_P3_49495_30759294 | NC_021163.1    | Ca_kabuli_chr04 | 30759294                | CC                              | TT                | 1945950282               |
| SNP_P3_49497_30766627 | NC_021163.1    | Ca_kabuli_chr04 | 30766627                | AA                              | GG                | 1945950284               |
| SNP_P3_49498_30768458 | NC_021163.1    | Ca_kabuli_chr04 | 30768458                | GG                              | TT                | 1945950286               |
| SNP_P3_49499_30769004 | NC_021163.1    | Ca_kabuli_chr04 | 30769004                | AA                              | CC                | 1945950288               |
| SNP_P3_49507_30775434 | NC_021163.1    | Ca_kabuli_chr04 | 30775434                | AA                              | CC                | 1945950289               |
| SNP_P3_49508_30775473 | NC_021163.1    | Ca_kabuli_chr04 | 30775473                | TT                              | CC                | 1945950291               |
| SNP_P3_49510_30776368 | NC_021163.1    | Ca_kabuli_chr04 | 30776368                | GG                              | AA                | 1945950293               |
| SNP_P3_49511_30779131 | NC_021163.1    | Ca_kabuli_chr04 | 30779131                | CC                              | TT                | 1945950295               |
| SNP_P3_49512_30784671 | NC_021163.1    | Ca_kabuli_chr04 | 30784671                | TT                              | GG                | 1945950296               |
| SNP_P3_49513_30787834 | NC_021163.1    | Ca_kabuli_chr04 | 30787834                | CC                              | TT                | 1945950298               |
| SNP_P3_49514_30787835 | NC_021163.1    | Ca_kabuli_chr04 | 30787835                | AA                              | GG                | 1945950300               |
| SNP_P3_49515_30789203 | NC_021163.1    | Ca_kabuli_chr04 | 30789203                | AA                              | GG                | 1945950302               |
| SNP_P3_49516_30789239 | NC_021163.1    | Ca_kabuli_chr04 | 30789239                | CC                              | AA                | 1945950304               |
| SNP_P3_49517_30789360 | NC_021163.1    | Ca_kabuli_chr04 | 30789360                | GG                              | TT                | 1945950305               |
| SNP_P3_49518_30795094 | NC_021163.1    | Ca_kabuli_chr04 | 30795094                | TT                              | CC                | 1945950307               |
| SNP_P3_49519_30795434 | NC_021163.1    | Ca_kabuli_chr04 | 30795434                | GG                              | AA                | 1945950309               |

| SNPs IDs              | Chromosome IDs | Chromosomes     | Physical positions (bp) | CDC Frontier (Reference genome) | (Pusa 256 & HPNB) | NCBI SNPdb Accession IDs |
|-----------------------|----------------|-----------------|-------------------------|---------------------------------|-------------------|--------------------------|
| SNP_P3_49520_30795887 | NC_021163.1    | Ca_kabuli_chr04 | 30795887                | GG                              | AA                | 1945950311               |
| SNP_P3_49521_30799061 | NC_021163.1    | Ca_kabuli_chr04 | 30799061                | CC                              | GG                | 1945950312               |
| SNP_P3_49522_30799090 | NC_021163.1    | Ca_kabuli_chr04 | 30799090                | TT                              | CC                | 1945950314               |
| SNP_P3_49523_30801217 | NC_021163.1    | Ca_kabuli_chr04 | 30801217                | CC                              | AA                | 1945950316               |
| SNP_P3_49525_30803924 | NC_021163.1    | Ca_kabuli_chr04 | 30803924                | AA                              | GG                | 1945950318               |
| SNP_P3_49526_30818200 | NC_021163.1    | Ca_kabuli_chr04 | 30818200                | GG                              | AA                | 1945950320               |
| SNP_P3_49527_30819399 | NC_021163.1    | Ca_kabuli_chr04 | 30819399                | TT                              | CC                | 1945950321               |
| SNP_P3_49528_30820975 | NC_021163.1    | Ca_kabuli_chr04 | 30820975                | TT                              | CC                | 1945950323               |
| SNP_P3_49530_30825341 | NC_021163.1    | Ca_kabuli_chr04 | 30825341                | TT                              | CC                | 1945950325               |
| SNP_P3_49531_30825883 | NC_021163.1    | Ca_kabuli_chr04 | 30825883                | TT                              | CC                | 1945950327               |
| SNP_P3_49533_30827427 | NC_021163.1    | Ca_kabuli_chr04 | 30827427                | GG                              | AA                | 1945950329               |
| SNP_P3_49534_30827437 | NC_021163.1    | Ca_kabuli_chr04 | 30827437                | GG                              | TT                | 1945950330               |
| SNP_P3_49535_30828938 | NC_021163.1    | Ca_kabuli_chr04 | 30828938                | TT                              | GG                | 1945950332               |
| SNP_P3_49536_30829404 | NC_021163.1    | Ca_kabuli_chr04 | 30829404                | AA                              | GG                | 1945950334               |
| SNP_P3_49537_30829655 | NC_021163.1    | Ca_kabuli_chr04 | 30829655                | TT                              | CC                | 1945950336               |
| SNP_P3_49538_30829672 | NC_021163.1    | Ca_kabuli_chr04 | 30829672                | TT                              | GG                | 1945950337               |
| SNP_P3_49539_30829681 | NC_021163.1    | Ca_kabuli_chr04 | 30829681                | AA                              | CC                | 1945950339               |
| SNP_P3_49540_30829877 | NC_021163.1    | Ca_kabuli_chr04 | 30829877                | TT                              | CC                | 1945950341               |
| SNP_P3_49541_30829934 | NC_021163.1    | Ca_kabuli_chr04 | 30829934                | GG                              | AA                | 1945950343               |
| SNP_P3_49542_30830250 | NC_021163.1    | Ca_kabuli_chr04 | 30830250                | AA                              | TT                | 1945950345               |
| SNP_P3_49543_30835541 | NC_021163.1    | Ca_kabuli_chr04 | 30835541                | CC                              | TT                | 1945950346               |
| SNP_P3_49544_30836262 | NC_021163.1    | Ca_kabuli_chr04 | 30836262                | CC                              | AA                | 1945950348               |
| SNP_P3_49545_30839745 | NC_021163.1    | Ca_kabuli_chr04 | 30839745                | AA                              | TT                | 1945950350               |
| SNP_P3_49546_30840005 | NC_021163.1    | Ca_kabuli_chr04 | 30840005                | GG                              | AA                | 1945950352               |
| SNP_P3_49547_30843200 | NC_021163.1    | Ca_kabuli_chr04 | 30843200                | CC                              | TT                | 1945950354               |
| SNP_P3_49548_30855314 | NC_021163.1    | Ca_kabuli_chr04 | 30855314                | AA                              | GG                | 1945950355               |
| SNP_P3_49549_30861531 | NC_021163.1    | Ca_kabuli_chr04 | 30861531                | CC                              | TT                | 1945950357               |
| SNP_P3_49550_30861539 | NC_021163.1    | Ca_kabuli_chr04 | 30861539                | GG                              | AA                | 1945950359               |
| SNP_P3_49551_30861554 | NC_021163.1    | Ca_kabuli_chr04 | 30861554                | GG                              | AA                | 1945950361               |
| SNP_P3_49552_30863101 | NC_021163.1    | Ca_kabuli_chr04 | 30863101                | CC                              | TT                | 1945950362               |
| SNP_P3_49553_30863123 | NC_021163.1    | Ca_kabuli_chr04 | 30863123                | CC                              | AA                | 1945950364               |
| SNP_P3_49554_30863297 | NC_021163.1    | Ca_kabuli_chr04 | 30863297                | GG                              | AA                | 1945950366               |
| SNP_P3_49555_30863694 | NC_021163.1    | Ca_kabuli_chr04 | 30863694                | TT                              | CC                | 1945950368               |
| SNP_P3_49556_30863900 | NC_021163.1    | Ca_kabuli_chr04 | 30863900                | AA                              | CC                | 1945950370               |
| SNP_P3_49557_30863903 | NC_021163.1    | Ca_kabuli_chr04 | 30863903                | AA                              | TT                | 1945950371               |
| SNP_P3_49558_30864899 | NC_021163.1    | Ca_kabuli_chr04 | 30864899                | CC                              | TT                | 1945950373               |
| SNP_P3_49559_30866865 | NC_021163.1    | Ca_kabuli_chr04 | 30866865                | TT                              | CC                | 1945950375               |
| SNP_P3_49560_30866877 | NC_021163.1    | Ca_kabuli_chr04 | 30866877                | GG                              | AA                | 1945950377               |
| SNP_P3_49561_30866878 | NC_021163.1    | Ca_kabuli_chr04 | 30866878                | AA                              | GG                | 1945950379               |
| SNP_P3_49562_30866892 | NC_021163.1    | Ca_kabuli_chr04 | 30866892                | AA                              | GG                | 1945950380               |
| SNP_P3_49563_30867811 | NC_021163.1    | Ca_kabuli_chr04 | 30867811                | AA                              | GG                | 1945950382               |
| SNP_P3_49564_30867967 | NC_021163.1    | Ca_kabuli_chr04 | 30867967                | GG                              | CC                | 1945950384               |

| SNPs IDs              | Chromosome IDs | Chromosomes     | Physical positions (bp) | CDC Frontier (Reference genome) | (Pusa 256 & HPNB) | NCBI SNPdb Accession IDs |
|-----------------------|----------------|-----------------|-------------------------|---------------------------------|-------------------|--------------------------|
| SNP_P3_49565_30867986 | NC_021163.1    | Ca_kabuli_chr04 | 30867986                | GG                              | AA                | 1945950386               |
| SNP_P3_49566_30868006 | NC_021163.1    | Ca_kabuli_chr04 | 30868006                | CC                              | AA                | 1945950387               |
| SNP_P3_49567_30868213 | NC_021163.1    | Ca_kabuli_chr04 | 30868213                | CC                              | AA                | 1945950389               |
| SNP_P3_49568_30868230 | NC_021163.1    | Ca_kabuli_chr04 | 30868230                | CC                              | TT                | 1945950391               |
| SNP_P3_49569_30868277 | NC_021163.1    | Ca_kabuli_chr04 | 30868277                | TT                              | GG                | 1945950393               |
| SNP_P3_49571_30868308 | NC_021163.1    | Ca_kabuli_chr04 | 30868308                | GG                              | AA                | 1945950395               |
| SNP_P3_49572_30868435 | NC_021163.1    | Ca_kabuli_chr04 | 30868435                | TT                              | CC                | 1945950396               |
| SNP_P3_49573_30868439 | NC_021163.1    | Ca_kabuli_chr04 | 30868439                | GG                              | AA                | 1945950398               |
| SNP_P3_49574_30869973 | NC_021163.1    | Ca_kabuli_chr04 | 30869973                | GG                              | TT                | 1945950400               |
| SNP_P3_49575_30870212 | NC_021163.1    | Ca_kabuli_chr04 | 30870212                | GG                              | AA                | 1945950402               |
| SNP_P3_49576_30871493 | NC_021163.1    | Ca_kabuli_chr04 | 30871493                | AA                              | TT                | 1945950404               |
| SNP_P3_49577_30871673 | NC_021163.1    | Ca_kabuli_chr04 | 30871673                | TT                              | CC                | 1945950405               |
| SNP_P3_49578_30871830 | NC_021163.1    | Ca_kabuli_chr04 | 30871830                | GG                              | TT                | 1945950407               |
| SNP_P3_49579_30871864 | NC_021163.1    | Ca_kabuli_chr04 | 30871864                | GG                              | CC                | 1945950409               |
| SNP_P3_49580_30871944 | NC_021163.1    | Ca_kabuli_chr04 | 30871944                | GG                              | TT                | 1945950411               |
| SNP_P3_49581_30872005 | NC_021163.1    | Ca_kabuli_chr04 | 30872005                | CC                              | AA                | 1945950412               |
| SNP_P3_49582_30872010 | NC_021163.1    | Ca_kabuli_chr04 | 30872010                | GG                              | CC                | 1945950414               |
| SNP_P3_49583_30872013 | NC_021163.1    | Ca_kabuli_chr04 | 30872013                | CC                              | TT                | 1945950416               |
| SNP_P3_49584_30872022 | NC_021163.1    | Ca_kabuli_chr04 | 30872022                | TT                              | AA                | 1945950418               |
| SNP_P3_49585_30872224 | NC_021163.1    | Ca_kabuli_chr04 | 30872224                | TT                              | GG                | 1945950420               |
| SNP_P3_49586_30872284 | NC_021163.1    | Ca_kabuli_chr04 | 30872284                | TT                              | CC                | 1945950421               |
| SNP_P3_49587_30872286 | NC_021163.1    | Ca_kabuli_chr04 | 30872286                | CC                              | TT                | 1945950423               |
| SNP_P3_49588_30872577 | NC_021163.1    | Ca_kabuli_chr04 | 30872577                | GG                              | AA                | 1945950425               |
| SNP_P3_49589_30872632 | NC_021163.1    | Ca_kabuli_chr04 | 30872632                | AA                              | GG                | 1945950427               |
| SNP_P3_49590_30872646 | NC_021163.1    | Ca_kabuli_chr04 | 30872646                | GG                              | TT                | 1945950428               |
| SNP_P3_49591_30873603 | NC_021163.1    | Ca_kabuli_chr04 | 30873603                | CC                              | TT                | 1945950430               |
| SNP_P3_49592_30873619 | NC_021163.1    | Ca_kabuli_chr04 | 30873619                | TT                              | CC                | 1945950432               |
| SNP_P3_49593_30874185 | NC_021163.1    | Ca_kabuli_chr04 | 30874185                | TT                              | AA                | 1945950434               |
| SNP_P3_49594_30874238 | NC_021163.1    | Ca_kabuli_chr04 | 30874238                | AA                              | GG                | 1945950436               |
| SNP_P3_49595_30874557 | NC_021163.1    | Ca_kabuli_chr04 | 30874557                | GG                              | AA                | 1945950437               |
| SNP_P3_49597_30883152 | NC_021163.1    | Ca_kabuli_chr04 | 30883152                | GG                              | AA                | 1945950439               |
| SNP_P3_49598_30883246 | NC_021163.1    | Ca_kabuli_chr04 | 30883246                | AA                              | CC                | 1945950441               |
| SNP_P3_49599_30883309 | NC_021163.1    | Ca_kabuli_chr04 | 30883309                | AA                              | CC                | 1945950443               |
| SNP_P3_49600_30883360 | NC_021163.1    | Ca_kabuli_chr04 | 30883360                | TT                              | GG                | 1945950445               |
| SNP_P3_49602_30883391 | NC_021163.1    | Ca_kabuli_chr04 | 30883391                | AA                              | CC                | 1945950446               |
| SNP_P3_49603_30883445 | NC_021163.1    | Ca_kabuli_chr04 | 30883445                | TT                              | GG                | 1945950448               |
| SNP_P3_49604_30883476 | NC_021163.1    | Ca_kabuli_chr04 | 30883476                | GG                              | TT                | 1945950450               |
| SNP_P3_49605_30883520 | NC_021163.1    | Ca_kabuli_chr04 | 30883520                | AA                              | GG                | 1945950452               |
| SNP_P3_49606_30883521 | NC_021163.1    | Ca_kabuli_chr04 | 30883521                | CC                              | TT                | 1945950453               |
| SNP_P3_49608_30883532 | NC_021163.1    | Ca_kabuli_chr04 | 30883532                | CC                              | TT                | 1945950455               |
| SNP_P3_49609_30883548 | NC_021163.1    | Ca_kabuli_chr04 | 30883548                | AA                              | GG                | 1945950457               |
| SNP_P3_49611_30883661 | NC_021163.1    | Ca_kabuli_chr04 | 30883661                | CC                              | TT                | 1945950459               |

| SNPs IDs              | Chromosome IDs | Chromosomes     | Physical positions (bp) | CDC Frontier (Reference genome) | (Pusa 256 & HPNB) | NCBI SNPdb Accession IDs |
|-----------------------|----------------|-----------------|-------------------------|---------------------------------|-------------------|--------------------------|
| SNP_P3_49612_30883889 | NC_021163.1    | Ca_kabuli_chr04 | 30883889                | TT                              | CC                | 1945950461               |
| SNP_P3_49613_30884883 | NC_021163.1    | Ca_kabuli_chr04 | 30884883                | CC                              | TT                | 1945950462               |
| SNP_P3_49614_30887617 | NC_021163.1    | Ca_kabuli_chr04 | 30887617                | GG                              | TT                | 1945950464               |
| SNP_P3_49615_30888130 | NC_021163.1    | Ca_kabuli_chr04 | 30888130                | AA                              | TT                | 1945950466               |
| SNP_P3_49616_30888141 | NC_021163.1    | Ca_kabuli_chr04 | 30888141                | CC                              | TT                | 1945950468               |
| SNP_P3_49617_30888359 | NC_021163.1    | Ca_kabuli_chr04 | 30888359                | AA                              | GG                | 1945950470               |
| SNP_P3_49618_30888583 | NC_021163.1    | Ca_kabuli_chr04 | 30888583                | AA                              | GG                | 1945950471               |
| SNP_P3_49619_30888626 | NC_021163.1    | Ca_kabuli_chr04 | 30888626                | CC                              | AA                | 1945950473               |
| SNP_P3_49620_30888650 | NC_021163.1    | Ca_kabuli_chr04 | 30888650                | AA                              | GG                | 1945950475               |
| SNP_P3_49621_30888923 | NC_021163.1    | Ca_kabuli_chr04 | 30888923                | CC                              | TT                | 1945950477               |
| SNP_P3_49622_30888927 | NC_021163.1    | Ca_kabuli_chr04 | 30888927                | GG                              | AA                | 1945950478               |
| SNP_P3_49623_30888952 | NC_021163.1    | Ca_kabuli_chr04 | 30888952                | CC                              | TT                | 1945950480               |
| SNP_P3_49624_30897428 | NC_021163.1    | Ca_kabuli_chr04 | 30897428                | TT                              | CC                | 1945950482               |
| SNP_P3_49625_30897467 | NC_021163.1    | Ca_kabuli_chr04 | 30897467                | GG                              | AA                | 1945950484               |
| SNP_P3_49626_30897500 | NC_021163.1    | Ca_kabuli_chr04 | 30897500                | CC                              | TT                | 1945950486               |
| SNP_P3_49627_30897574 | NC_021163.1    | Ca_kabuli_chr04 | 30897574                | TT                              | CC                | 1945950487               |
| SNP_P3_49628_30897584 | NC_021163.1    | Ca_kabuli_chr04 | 30897584                | TT                              | AA                | 1945950489               |
| SNP_P3_49629_30897870 | NC_021163.1    | Ca_kabuli_chr04 | 30897870                | AA                              | GG                | 1945950491               |
| SNP_P3_49630_30897873 | NC_021163.1    | Ca_kabuli_chr04 | 30897873                | TT                              | GG                | 1945950493               |
| SNP_P3_49632_30898028 | NC_021163.1    | Ca_kabuli_chr04 | 30898028                | CC                              | AA                | 1945950494               |
| SNP_P3_49633_30898046 | NC_021163.1    | Ca_kabuli_chr04 | 30898046                | TT                              | GG                | 1945950496               |
| SNP_P3_49634_30898050 | NC_021163.1    | Ca_kabuli_chr04 | 30898050                | GG                              | TT                | 1945950498               |
| SNP_P3_49635_30911625 | NC_021163.1    | Ca_kabuli_chr04 | 30911625                | AA                              | GG                | 1945950500               |
| SNP_P3_49636_30911643 | NC_021163.1    | Ca_kabuli_chr04 | 30911643                | TT                              | CC                | 1945950502               |
| SNP_P3_49637_30911645 | NC_021163.1    | Ca_kabuli_chr04 | 30911645                | TT                              | CC                | 1945950503               |
| SNP_P3_49638_30911655 | NC_021163.1    | Ca_kabuli_chr04 | 30911655                | AA                              | GG                | 1945950505               |
| SNP_P3_49639_30911660 | NC_021163.1    | Ca_kabuli_chr04 | 30911660                | TT                              | GG                | 1945950507               |
| SNP_P3_49640_30911666 | NC_021163.1    | Ca_kabuli_chr04 | 30911666                | TT                              | GG                | 1945950509               |
| SNP_P3_49641_30912001 | NC_021163.1    | Ca_kabuli_chr04 | 30912001                | CC                              | TT                | 1945950511               |
| SNP_P3_49642_30912041 | NC_021163.1    | Ca_kabuli_chr04 | 30912041                | CC                              | TT                | 1945950512               |
| SNP_P3_49643_30912064 | NC_021163.1    | Ca_kabuli_chr04 | 30912064                | TT                              | CC                | 1945950514               |
| SNP_P3_49644_30918821 | NC_021163.1    | Ca_kabuli_chr04 | 30918821                | TT                              | GG                | 1945950516               |
| SNP_P3_49645_30924360 | NC_021163.1    | Ca_kabuli_chr04 | 30924360                | TT                              | CC                | 1945950518               |
| SNP_P3_49646_30924363 | NC_021163.1    | Ca_kabuli_chr04 | 30924363                | TT                              | CC                | 1945950519               |
| SNP_P3_49647_30924415 | NC_021163.1    | Ca_kabuli_chr04 | 30924415                | AA                              | GG                | 1945950521               |
| SNP_P3_49649_30940707 | NC_021163.1    | Ca_kabuli_chr04 | 30940707                | TT                              | CC                | 1945950523               |
| SNP_P3_49650_30940895 | NC_021163.1    | Ca_kabuli_chr04 | 30940895                | GG                              | AA                | 1945950525               |
| SNP_P3_49651_30940933 | NC_021163.1    | Ca_kabuli_chr04 | 30940933                | TT                              | GG                | 1945950527               |
| SNP_P3_49652_30941377 | NC_021163.1    | Ca_kabuli_chr04 | 30941377                | CC                              | TT                | 1945950528               |
| SNP_P3_49653_30942043 | NC_021163.1    | Ca_kabuli_chr04 | 30942043                | TT                              | CC                | 1945950530               |
| SNP_P3_49654_30942072 | NC_021163.1    | Ca_kabuli_chr04 | 30942072                | AA                              | GG                | 1945950532               |
| SNP_P3_49655_30943613 | NC_021163.1    | Ca_kabuli_chr04 | 30943613                | GG                              | AA                | 1945950534               |

| SNPs IDs              | Chromosome IDs | Chromosomes     | Physical positions (bp) | CDC Frontier (Reference genome) | (Pusa 256 & HPNB) | NCBI SNPdb Accession IDs |
|-----------------------|----------------|-----------------|-------------------------|---------------------------------|-------------------|--------------------------|
| SNP_P3_49656_30944799 | NC_021163.1    | Ca_kabuli_chr04 | 30944799                | TT                              | CC                | 1945950536               |
| SNP_P3_49657_30944905 | NC_021163.1    | Ca_kabuli_chr04 | 30944905                | TT                              | CC                | 1945950537               |
| SNP_P3_49658_30945965 | NC_021163.1    | Ca_kabuli_chr04 | 30945965                | AA                              | TT                | 1945950539               |
| SNP_P3_49659_30946476 | NC_021163.1    | Ca_kabuli_chr04 | 30946476                | TT                              | CC                | 1945950541               |
| SNP_P3_49660_30946483 | NC_021163.1    | Ca_kabuli_chr04 | 30946483                | TT                              | CC                | 1945950543               |
| SNP_P3_49661_30946732 | NC_021163.1    | Ca_kabuli_chr04 | 30946732                | AA                              | GG                | 1945950544               |
| SNP_P3_49663_30950744 | NC_021163.1    | Ca_kabuli_chr04 | 30950744                | CC                              | AA                | 1945950546               |
| SNP_P3_49664_30950781 | NC_021163.1    | Ca_kabuli_chr04 | 30950781                | GG                              | AA                | 1945950548               |
| SNP_P3_49666_30952642 | NC_021163.1    | Ca_kabuli_chr04 | 30952642                | CC                              | TT                | 1945950550               |
| SNP_P3_49667_30952656 | NC_021163.1    | Ca_kabuli_chr04 | 30952656                | GG                              | TT                | 1945950552               |
| SNP_P3_49668_30952909 | NC_021163.1    | Ca_kabuli_chr04 | 30952909                | CC                              | TT                | 1945950553               |
| SNP_P3_49670_30954410 | NC_021163.1    | Ca_kabuli_chr04 | 30954410                | TT                              | AA                | 1945950555               |
| SNP_P3_49671_30954446 | NC_021163.1    | Ca_kabuli_chr04 | 30954446                | GG                              | TT                | 1945950557               |
| SNP_P3_49672_30954512 | NC_021163.1    | Ca_kabuli_chr04 | 30954512                | AA                              | GG                | 1945950559               |
| SNP_P3_49673_30954688 | NC_021163.1    | Ca_kabuli_chr04 | 30954688                | CC                              | TT                | 1945950561               |
| SNP_P3_49674_30954731 | NC_021163.1    | Ca_kabuli_chr04 | 30954731                | TT                              | GG                | 1945950562               |
| SNP_P3_49675_30954742 | NC_021163.1    | Ca_kabuli_chr04 | 30954742                | CC                              | GG                | 1945950564               |
| SNP_P3_49676_30954744 | NC_021163.1    | Ca_kabuli_chr04 | 30954744                | AA                              | GG                | 1945950566               |
| SNP_P3_49677_30954798 | NC_021163.1    | Ca_kabuli_chr04 | 30954798                | CC                              | TT                | 1945950568               |
| SNP_P3_49678_30954816 | NC_021163.1    | Ca_kabuli_chr04 | 30954816                | TT                              | GG                | 1945950569               |
| SNP_P3_49679_30954842 | NC_021163.1    | Ca_kabuli_chr04 | 30954842                | CC                              | TT                | 1945950571               |
| SNP_P3_49681_30955981 | NC_021163.1    | Ca_kabuli_chr04 | 30955981                | GG                              | AA                | 1945950573               |
| SNP_P3_49682_30956472 | NC_021163.1    | Ca_kabuli_chr04 | 30956472                | GG                              | AA                | 1945950575               |
| SNP_P3_49683_30956500 | NC_021163.1    | Ca_kabuli_chr04 | 30956500                | GG                              | AA                | 1945950577               |
| SNP_P3_49685_30958534 | NC_021163.1    | Ca_kabuli_chr04 | 30958534                | AA                              | TT                | 1945950578               |
| SNP_P3_49686_30958633 | NC_021163.1    | Ca_kabuli_chr04 | 30958633                | TT                              | AA                | 1945950580               |
| SNP_P3_49687_30958858 | NC_021163.1    | Ca_kabuli_chr04 | 30958858                | CC                              | TT                | 1945950582               |
| SNP_P3_49688_30958881 | NC_021163.1    | Ca_kabuli_chr04 | 30958881                | CC                              | TT                | 1945950584               |
| SNP_P3_49691_30959576 | NC_021163.1    | Ca_kabuli_chr04 | 30959576                | AA                              | TT                | 1945950585               |
| SNP_P3_49692_30959583 | NC_021163.1    | Ca_kabuli_chr04 | 30959583                | AA                              | GG                | 1945950587               |
| SNP_P3_49693_30959979 | NC_021163.1    | Ca_kabuli_chr04 | 30959979                | GG                              | AA                | 1945950589               |
| SNP_P3_49694_30960016 | NC_021163.1    | Ca_kabuli_chr04 | 30960016                | TT                              | GG                | 1945950591               |
| SNP_P3_49695_30960053 | NC_021163.1    | Ca_kabuli_chr04 | 30960053                | GG                              | CC                | 1945950593               |
| SNP_P3_49696_30960104 | NC_021163.1    | Ca_kabuli_chr04 | 30960104                | GG                              | CC                | 1945950594               |
| SNP_P3_49697_30960125 | NC_021163.1    | Ca_kabuli_chr04 | 30960125                | AA                              | CC                | 1945950596               |
| SNP_P3_49698_30963841 | NC_021163.1    | Ca_kabuli_chr04 | 30963841                | GG                              | AA                | 1945950598               |
| SNP_P3_49699_30963851 | NC_021163.1    | Ca_kabuli_chr04 | 30963851                | CC                              | TT                | 1945950600               |
| SNP_P3_49700_30964293 | NC_021163.1    | Ca_kabuli_chr04 | 30964293                | GG                              | AA                | 1945950602               |
| SNP_P3_49701_30964299 | NC_021163.1    | Ca_kabuli_chr04 | 30964299                | GG                              | TT                | 1945950603               |
| SNP_P3_49702_30964758 | NC_021163.1    | Ca_kabuli_chr04 | 30964758                | TT                              | CC                | 1945950605               |
| SNP_P3_49703_30964809 | NC_021163.1    | Ca_kabuli_chr04 | 30964809                | GG                              | AA                | 1945950607               |
| SNP_P3_49704_30965088 | NC_021163.1    | Ca_kabuli_chr04 | 30965088                | CC                              | TT                | 1945950609               |

| SNPs IDs              | Chromosome IDs | Chromosomes     | Physical positions (bp) | CDC Frontier (Reference genome) | (Pusa 256 & HPNB) | NCBI SNPdb Accession IDs |
|-----------------------|----------------|-----------------|-------------------------|---------------------------------|-------------------|--------------------------|
| SNP_P3_49705_30968037 | NC_021163.1    | Ca_kabuli_chr04 | 30968037                | CC                              | AA                | 1945950610               |
| SNP_P3_49707_30979799 | NC_021163.1    | Ca_kabuli_chr04 | 30979799                | GG                              | CC                | 1945950612               |
| SNP_P3_49708_30979803 | NC_021163.1    | Ca_kabuli_chr04 | 30979803                | TT                              | AA                | 1945950614               |
| SNP_P3_49709_30979804 | NC_021163.1    | Ca_kabuli_chr04 | 30979804                | TT                              | AA                | 1945950616               |
| SNP_P3_49710_30980299 | NC_021163.1    | Ca_kabuli_chr04 | 30980299                | CC                              | GG                | 1945950618               |
| SNP_P3_49711_30980344 | NC_021163.1    | Ca_kabuli_chr04 | 30980344                | CC                              | TT                | 1945950619               |
| SNP_P3_49712_30980357 | NC_021163.1    | Ca_kabuli_chr04 | 30980357                | CC                              | TT                | 1945950621               |
| SNP_P3_49713_30980363 | NC_021163.1    | Ca_kabuli_chr04 | 30980363                | CC                              | TT                | 1945950623               |
| SNP_P3_49714_30980407 | NC_021163.1    | Ca_kabuli_chr04 | 30980407                | AA                              | GG                | 1945950625               |
| SNP_P3_49716_30980668 | NC_021163.1    | Ca_kabuli_chr04 | 30980668                | CC                              | AA                | 1945950627               |
| SNP_P3_49717_30982037 | NC_021163.1    | Ca_kabuli_chr04 | 30982037                | CC                              | TT                | 1945950628               |
| SNP_P3_49718_30982081 | NC_021163.1    | Ca_kabuli_chr04 | 30982081                | AA                              | GG                | 1945950630               |
| SNP_P3_49719_30982101 | NC_021163.1    | Ca_kabuli_chr04 | 30982101                | TT                              | CC                | 1945950632               |
| SNP_P3_49720_30982341 | NC_021163.1    | Ca_kabuli_chr04 | 30982341                | GG                              | AA                | 1945950634               |
| SNP_P3_49721_30982606 | NC_021163.1    | Ca_kabuli_chr04 | 30982606                | GG                              | AA                | 1945950635               |
| SNP_P3_49722_30982656 | NC_021163.1    | Ca_kabuli_chr04 | 30982656                | TT                              | CC                | 1945950637               |
| SNP_P3_49723_30982846 | NC_021163.1    | Ca_kabuli_chr04 | 30982846                | GG                              | TT                | 1945950639               |
| SNP_P3_49724_30982877 | NC_021163.1    | Ca_kabuli_chr04 | 30982877                | AA                              | TT                | 1945950641               |
| SNP_P3_49725_30982993 | NC_021163.1    | Ca_kabuli_chr04 | 30982993                | CC                              | AA                | 1945950643               |
| SNP_P3_49726_30998109 | NC_021163.1    | Ca_kabuli_chr04 | 30998109                | AA                              | GG                | 1945950644               |
| SNP_P3_49727_30998174 | NC_021163.1    | Ca_kabuli_chr04 | 30998174                | GG                              | AA                | 1945950646               |
| SNP_P3_49728_30999460 | NC_021163.1    | Ca_kabuli_chr04 | 30999460                | AA                              | GG                | 1945950648               |
| SNP_P3_49729_31000049 | NC_021163.1    | Ca_kabuli_chr04 | 31000049                | AA                              | GG                | 1945950650               |
| SNP_P3_49730_31000144 | NC_021163.1    | Ca_kabuli_chr04 | 31000144                | CC                              | AA                | 1945950652               |
| SNP_P3_49731_31001004 | NC_021163.1    | Ca_kabuli_chr04 | 31001004                | TT                              | CC                | 1945950653               |
| SNP_P3_49732_31001287 | NC_021163.1    | Ca_kabuli_chr04 | 31001287                | GG                              | AA                | 1945950655               |
| SNP_P3_49733_31001425 | NC_021163.1    | Ca_kabuli_chr04 | 31001425                | AA                              | GG                | 1945950657               |
| SNP_P3_49734_31001583 | NC_021163.1    | Ca_kabuli_chr04 | 31001583                | AA                              | CC                | 1945950659               |
| SNP_P3_49735_31001587 | NC_021163.1    | Ca_kabuli_chr04 | 31001587                | TT                              | GG                | 1945950660               |
| SNP_P3_49736_31002090 | NC_021163.1    | Ca_kabuli_chr04 | 31002090                | TT                              | AA                | 1945950662               |
| SNP_P3_49738_31002407 | NC_021163.1    | Ca_kabuli_chr04 | 31002407                | TT                              | CC                | 1945950664               |
| SNP_P3_49739_31002578 | NC_021163.1    | Ca_kabuli_chr04 | 31002578                | GG                              | AA                | 1945950666               |
| SNP_P3_49740_31002773 | NC_021163.1    | Ca_kabuli_chr04 | 31002773                | TT                              | CC                | 1945950668               |
| SNP_P3_49741_31011384 | NC_021163.1    | Ca_kabuli_chr04 | 31011384                | CC                              | TT                | 1945950669               |
| SNP_P3_49742_31016155 | NC_021163.1    | Ca_kabuli_chr04 | 31016155                | TT                              | GG                | 1945950671               |
| SNP_P3_49743_31016182 | NC_021163.1    | Ca_kabuli_chr04 | 31016182                | TT                              | AA                | 1945950673               |
| SNP_P3_49744_31016343 | NC_021163.1    | Ca_kabuli_chr04 | 31016343                | TT                              | GG                | 1945950675               |
| SNP_P3_49746_31016647 | NC_021163.1    | Ca_kabuli_chr04 | 31016647                | GG                              | AA                | 1945950677               |
| SNP_P3_49747_31024393 | NC_021163.1    | Ca_kabuli_chr04 | 31024393                | CC                              | TT                | 1945950678               |
| SNP_P3_49749_31025794 | NC_021163.1    | Ca_kabuli_chr04 | 31025794                | TT                              | GG                | 1945950680               |
| SNP_P3_49750_31026590 | NC_021163.1    | Ca_kabuli_chr04 | 31026590                | TT                              | GG                | 1945950682               |
| SNP_P3_49751_31026618 | NC_021163.1    | Ca_kabuli_chr04 | 31026618                | CC                              | TT                | 1945950684               |

| SNPs IDs              | Chromosome IDs | Chromosomes     | Physical positions (bp) | CDC Frontier (Reference genome) | (Pusa 256 & HPNB) | NCBI SNPdb Accession IDs |
|-----------------------|----------------|-----------------|-------------------------|---------------------------------|-------------------|--------------------------|
| SNP_P3_49752_31026663 | NC_021163.1    | Ca_kabuli_chr04 | 31026663                | TT                              | CC                | 1945950685               |
| SNP_P3_49753_31026996 | NC_021163.1    | Ca_kabuli_chr04 | 31026996                | TT                              | CC                | 1945950687               |
| SNP_P3_49754_31027051 | NC_021163.1    | Ca_kabuli_chr04 | 31027051                | CC                              | GG                | 1945950689               |
| SNP_P3_49755_31049752 | NC_021163.1    | Ca_kabuli_chr04 | 31049752                | TT                              | CC                | 1945950691               |
| SNP_P3_49756_31049894 | NC_021163.1    | Ca_kabuli_chr04 | 31049894                | CC                              | AA                | 1945950693               |
| SNP_P3_49757_31051189 | NC_021163.1    | Ca_kabuli_chr04 | 31051189                | AA                              | GG                | 1945950694               |
| SNP_P3_49758_31051544 | NC_021163.1    | Ca_kabuli_chr04 | 31051544                | TT                              | CC                | 1945950696               |
| SNP_P3_49760_31051986 | NC_021163.1    | Ca_kabuli_chr04 | 31051986                | GG                              | TT                | 1945950698               |
| SNP_P3_49761_31052023 | NC_021163.1    | Ca_kabuli_chr04 | 31052023                | CC                              | TT                | 1945950700               |
| SNP_P3_49762_31052312 | NC_021163.1    | Ca_kabuli_chr04 | 31052312                | TT                              | CC                | 1945950702               |
| SNP_P3_49763_31052321 | NC_021163.1    | Ca_kabuli_chr04 | 31052321                | TT                              | GG                | 1945950703               |
| SNP_P3_49764_31052331 | NC_021163.1    | Ca_kabuli_chr04 | 31052331                | CC                              | AA                | 1945950705               |
| SNP_P3_49765_31052346 | NC_021163.1    | Ca_kabuli_chr04 | 31052346                | CC                              | AA                | 1945950707               |
| SNP_P3_49766_31052565 | NC_021163.1    | Ca_kabuli_chr04 | 31052565                | CC                              | TT                | 1945950709               |
| SNP_P3_49768_31053004 | NC_021163.1    | Ca_kabuli_chr04 | 31053004                | AA                              | GG                | 1945950710               |
| SNP_P3_49769_31053392 | NC_021163.1    | Ca_kabuli_chr04 | 31053392                | CC                              | TT                | 1945950712               |
| SNP_P3_49770_31053397 | NC_021163.1    | Ca_kabuli_chr04 | 31053397                | CC                              | TT                | 1945950714               |
| SNP_P3_49771_31053622 | NC_021163.1    | Ca_kabuli_chr04 | 31053622                | CC                              | TT                | 1945950716               |
| SNP_P3_49772_31053660 | NC_021163.1    | Ca_kabuli_chr04 | 31053660                | AA                              | TT                | 1945950718               |
| SNP_P3_49773_31053674 | NC_021163.1    | Ca_kabuli_chr04 | 31053674                | TT                              | GG                | 1945950719               |
| SNP_P3_49774_31053862 | NC_021163.1    | Ca_kabuli_chr04 | 31053862                | CC                              | GG                | 1945950721               |
| SNP_P3_49775_31054195 | NC_021163.1    | Ca_kabuli_chr04 | 31054195                | AA                              | TT                | 1945950723               |
| SNP_P3_49776_31054564 | NC_021163.1    | Ca_kabuli_chr04 | 31054564                | GG                              | TT                | 1945950725               |
| SNP_P3_49777_31054596 | NC_021163.1    | Ca_kabuli_chr04 | 31054596                | CC                              | TT                | 1945950727               |
| SNP_P3_49778_31054598 | NC_021163.1    | Ca_kabuli_chr04 | 31054598                | GG                              | TT                | 1945950728               |
| SNP_P3_49779_31055324 | NC_021163.1    | Ca_kabuli_chr04 | 31055324                | TT                              | GG                | 1945950730               |
| SNP_P3_49780_31055388 | NC_021163.1    | Ca_kabuli_chr04 | 31055388                | TT                              | CC                | 1945950732               |
| SNP_P3_49781_31055787 | NC_021163.1    | Ca_kabuli_chr04 | 31055787                | AA                              | GG                | 1945950734               |
| SNP_P3_49782_31056351 | NC_021163.1    | Ca_kabuli_chr04 | 31056351                | GG                              | CC                | 1945950735               |
| SNP_P3_49783_31056363 | NC_021163.1    | Ca_kabuli_chr04 | 31056363                | GG                              | TT                | 1945950737               |
| SNP_P3_49784_31056375 | NC_021163.1    | Ca_kabuli_chr04 | 31056375                | TT                              | GG                | 1945950739               |
| SNP_P3_49785_31056417 | NC_021163.1    | Ca_kabuli_chr04 | 31056417                | GG                              | AA                | 1945950741               |
| SNP_P3_49786_31056418 | NC_021163.1    | Ca_kabuli_chr04 | 31056418                | GG                              | AA                | 1945950743               |
| SNP_P3_49787_31057189 | NC_021163.1    | Ca_kabuli_chr04 | 31057189                | GG                              | AA                | 1945950744               |
| SNP_P3_49788_31057358 | NC_021163.1    | Ca_kabuli_chr04 | 31057358                | AA                              | GG                | 1945950746               |
| SNP_P3_49789_31057523 | NC_021163.1    | Ca_kabuli_chr04 | 31057523                | TT                              | AA                | 1945950748               |
| SNP_P3_49790_31057610 | NC_021163.1    | Ca_kabuli_chr04 | 31057610                | GG                              | CC                | 1945950750               |
| SNP_P3_49791_31057623 | NC_021163.1    | Ca_kabuli_chr04 | 31057623                | AA                              | CC                | 1945950752               |
| SNP_P3_49792_31057661 | NC_021163.1    | Ca_kabuli_chr04 | 31057661                | TT                              | CC                | 1945950753               |
| SNP_P3_49793_31058029 | NC_021163.1    | Ca_kabuli_chr04 | 31058029                | CC                              | TT                | 1945950755               |
| SNP_P3_49794_31060322 | NC_021163.1    | Ca_kabuli_chr04 | 31060322                | CC                              | AA                | 1945950757               |
| SNP_P3_49795_31060509 | NC_021163.1    | Ca_kabuli_chr04 | 31060509                | AA                              | GG                | 1945950759               |

| SNPs IDs              | Chromosome IDs | Chromosomes     | Physical positions (bp) | CDC Frontier (Reference genome) | (Pusa 256 & HPNB) | NCBI SNPdb Accession IDs |
|-----------------------|----------------|-----------------|-------------------------|---------------------------------|-------------------|--------------------------|
| SNP_P3_49796_31061021 | NC_021163.1    | Ca_kabuli_chr04 | 31061021                | CC                              | TT                | 1945950760               |
| SNP_P3_49797_31061191 | NC_021163.1    | Ca_kabuli_chr04 | 31061191                | CC                              | TT                | 1945950762               |
| SNP_P3_49798_31061211 | NC_021163.1    | Ca_kabuli_chr04 | 31061211                | AA                              | CC                | 1945950764               |
| SNP_P3_49799_31061252 | NC_021163.1    | Ca_kabuli_chr04 | 31061252                | AA                              | CC                | 1945950766               |
| SNP_P3_49800_31061287 | NC_021163.1    | Ca_kabuli_chr04 | 31061287                | GG                              | AA                | 1945950768               |
| SNP_P3_49801_31061293 | NC_021163.1    | Ca_kabuli_chr04 | 31061293                | GG                              | AA                | 1945950769               |
| SNP_P3_49802_31061295 | NC_021163.1    | Ca_kabuli_chr04 | 31061295                | GG                              | TT                | 1945950771               |
| SNP_P3_49803_31061335 | NC_021163.1    | Ca_kabuli_chr04 | 31061335                | GG                              | AA                | 1945950773               |
| SNP_P3_49804_31061401 | NC_021163.1    | Ca_kabuli_chr04 | 31061401                | CC                              | TT                | 1945950775               |
| SNP_P3_49805_31061445 | NC_021163.1    | Ca_kabuli_chr04 | 31061445                | AA                              | GG                | 1945950777               |
| SNP_P3_49806_31061499 | NC_021163.1    | Ca_kabuli_chr04 | 31061499                | CC                              | GG                | 1945950778               |
| SNP_P3_49807_31061541 | NC_021163.1    | Ca_kabuli_chr04 | 31061541                | CC                              | TT                | 1945950780               |
| SNP_P3_49808_31063075 | NC_021163.1    | Ca_kabuli_chr04 | 31063075                | AA                              | TT                | 1945950782               |
| SNP_P3_49809_31063394 | NC_021163.1    | Ca_kabuli_chr04 | 31063394                | AA                              | GG                | 1945950784               |
| SNP_P3_49810_31063439 | NC_021163.1    | Ca_kabuli_chr04 | 31063439                | AA                              | GG                | 1945950785               |
| SNP_P3_49811_31064297 | NC_021163.1    | Ca_kabuli_chr04 | 31064297                | GG                              | AA                | 1945950787               |
| SNP_P3_49812_31064680 | NC_021163.1    | Ca_kabuli_chr04 | 31064680                | AA                              | CC                | 1945950789               |
| SNP_P3_49813_31066094 | NC_021163.1    | Ca_kabuli_chr04 | 31066094                | TT                              | GG                | 1945950791               |
| SNP_P3_49814_31066124 | NC_021163.1    | Ca_kabuli_chr04 | 31066124                | AA                              | GG                | 1945950793               |
| SNP_P3_49815_31066169 | NC_021163.1    | Ca_kabuli_chr04 | 31066169                | TT                              | AA                | 1945950794               |
| SNP_P3_49816_31070462 | NC_021163.1    | Ca_kabuli_chr04 | 31070462                | TT                              | GG                | 1945950796               |
| SNP_P3_49817_31070692 | NC_021163.1    | Ca_kabuli_chr04 | 31070692                | AA                              | GG                | 1945950798               |
| SNP_P3_49818_31070713 | NC_021163.1    | Ca_kabuli_chr04 | 31070713                | GG                              | AA                | 1945950800               |
| SNP_P3_49819_31072255 | NC_021163.1    | Ca_kabuli_chr04 | 31072255                | TT                              | CC                | 1945950802               |
| SNP_P3_49820_31072286 | NC_021163.1    | Ca_kabuli_chr04 | 31072286                | GG                              | AA                | 1945950803               |
| SNP_P3_49821_31074281 | NC_021163.1    | Ca_kabuli_chr04 | 31074281                | CC                              | TT                | 1945950805               |
| SNP_P3_49822_31074588 | NC_021163.1    | Ca_kabuli_chr04 | 31074588                | TT                              | AA                | 1945950807               |
| SNP_P3_49823_31075565 | NC_021163.1    | Ca_kabuli_chr04 | 31075565                | CC                              | TT                | 1945950809               |
| SNP_P3_49824_31075612 | NC_021163.1    | Ca_kabuli_chr04 | 31075612                | TT                              | CC                | 1945950810               |
| SNP_P3_49825_31077063 | NC_021163.1    | Ca_kabuli_chr04 | 31077063                | AA                              | CC                | 1945950812               |
| SNP_P3_49826_31077079 | NC_021163.1    | Ca_kabuli_chr04 | 31077079                | TT                              | CC                | 1945950814               |
| SNP_P3_49827_31079279 | NC_021163.1    | Ca_kabuli_chr04 | 31079279                | TT                              | GG                | 1945950816               |
| SNP_P3_49828_31081954 | NC_021163.1    | Ca_kabuli_chr04 | 31081954                | GG                              | AA                | 1945950818               |
| SNP_P3_49830_31101614 | NC_021163.1    | Ca_kabuli_chr04 | 31101614                | TT                              | GG                | 1945950819               |
| SNP_P3_49831_31101660 | NC_021163.1    | Ca_kabuli_chr04 | 31101660                | GG                              | AA                | 1945950821               |
| SNP_P3_49832_31101768 | NC_021163.1    | Ca_kabuli_chr04 | 31101768                | GG                              | AA                | 1945950823               |
| SNP_P3_49833_31101889 | NC_021163.1    | Ca_kabuli_chr04 | 31101889                | CC                              | TT                | 1945950825               |
| SNP_P3_49834_31101892 | NC_021163.1    | Ca_kabuli_chr04 | 31101892                | AA                              | TT                | 1945950827               |
| SNP_P3_49835_31104082 | NC_021163.1    | Ca_kabuli_chr04 | 31104082                | CC                              | GG                | 1945950828               |
| SNP_P3_49836_31104122 | NC_021163.1    | Ca_kabuli_chr04 | 31104122                | GG                              | AA                | 1945950830               |
| SNP_P3_49837_31104591 | NC_021163.1    | Ca_kabuli_chr04 | 31104591                | TT                              | AA                | 1945950832               |
| SNP_P3_49838_31104667 | NC_021163.1    | Ca_kabuli_chr04 | 31104667                | TT                              | AA                | 1945950834               |



| SNPs IDs              | Chromosome IDs | Chromosomes     | Physical positions (bp) | CDC Frontier (Reference genome) | (Pusa 256 & HPNB) | NCBI SNPdb Accession IDs |
|-----------------------|----------------|-----------------|-------------------------|---------------------------------|-------------------|--------------------------|
| SNP_P3_49839_31104713 | NC_021163.1    | Ca_kabuli_chr04 | 31104713                | CC                              | AA                | 1945950835               |
| SNP_P3_49841_31104825 | NC_021163.1    | Ca_kabuli_chr04 | 31104825                | GG                              | CC                | 1945950837               |
| SNP_P3_49842_31105623 | NC_021163.1    | Ca_kabuli_chr04 | 31105623                | CC                              | TT                | 1945950839               |
| SNP_P3_49843_31106918 | NC_021163.1    | Ca_kabuli_chr04 | 31106918                | TT                              | GG                | 1945950841               |
| SNP_P3_49844_31107139 | NC_021163.1    | Ca_kabuli_chr04 | 31107139                | GG                              | TT                | 1945950843               |
| SNP_P3_49845_31107498 | NC_021163.1    | Ca_kabuli_chr04 | 31107498                | AA                              | GG                | 1945950844               |
| SNP_P3_49847_31108537 | NC_021163.1    | Ca_kabuli_chr04 | 31108537                | AA                              | GG                | 1945950846               |
| SNP_P3_49848_31108555 | NC_021163.1    | Ca_kabuli_chr04 | 31108555                | GG                              | AA                | 1945950848               |
| SNP_P3_49849_31108570 | NC_021163.1    | Ca_kabuli_chr04 | 31108570                | CC                              | TT                | 1945950850               |
| SNP_P3_49850_31108746 | NC_021163.1    | Ca_kabuli_chr04 | 31108746                | CC                              | AA                | 1945950852               |
| SNP_P3_49851_31109446 | NC_021163.1    | Ca_kabuli_chr04 | 31109446                | CC                              | GG                | 1945950853               |
| SNP_P3_49852_31109447 | NC_021163.1    | Ca_kabuli_chr04 | 31109447                | AA                              | GG                | 1945950855               |
| SNP_P3_49853_31109467 | NC_021163.1    | Ca_kabuli_chr04 | 31109467                | CC                              | GG                | 1945950857               |
| SNP_P3_49854_31109499 | NC_021163.1    | Ca_kabuli_chr04 | 31109499                | GG                              | AA                | 1945950859               |
| SNP_P3_49855_31109565 | NC_021163.1    | Ca_kabuli_chr04 | 31109565                | CC                              | GG                | 1945950860               |
| SNP_P3_49856_31111141 | NC_021163.1    | Ca_kabuli_chr04 | 31111141                | AA                              | CC                | 1945950862               |
| SNP_P3_49857_31111415 | NC_021163.1    | Ca_kabuli_chr04 | 31111415                | GG                              | TT                | 1945950864               |
| SNP_P3_49858_31111469 | NC_021163.1    | Ca_kabuli_chr04 | 31111469                | TT                              | CC                | 1945950866               |
| SNP_P3_49859_31111522 | NC_021163.1    | Ca_kabuli_chr04 | 31111522                | GG                              | AA                | 1945950868               |
| SNP_P3_49860_31111559 | NC_021163.1    | Ca_kabuli_chr04 | 31111559                | AA                              | CC                | 1945950869               |
| SNP_P3_49861_31113212 | NC_021163.1    | Ca_kabuli_chr04 | 31113212                | GG                              | AA                | 1945950871               |
| SNP_P3_49862_31113220 | NC_021163.1    | Ca_kabuli_chr04 | 31113220                | CC                              | TT                | 1945950873               |
| SNP_P3_49863_31113581 | NC_021163.1    | Ca_kabuli_chr04 | 31113581                | CC                              | TT                | 1945950875               |
| SNP_P3_49864_31113624 | NC_021163.1    | Ca_kabuli_chr04 | 31113624                | TT                              | AA                | 1945950877               |
| SNP_P3_49865_31113671 | NC_021163.1    | Ca_kabuli_chr04 | 31113671                | CC                              | TT                | 1945950878               |
| SNP_P3_49866_31113884 | NC_021163.1    | Ca_kabuli_chr04 | 31113884                | GG                              | CC                | 1945950880               |
| SNP_P3_49867_31113897 | NC_021163.1    | Ca_kabuli_chr04 | 31113897                | TT                              | GG                | 1945950882               |
| SNP_P3_49868_31113911 | NC_021163.1    | Ca_kabuli_chr04 | 31113911                | GG                              | AA                | 1945950884               |
| SNP_P3_49869_31114092 | NC_021163.1    | Ca_kabuli_chr04 | 31114092                | GG                              | TT                | 1945950885               |
| SNP_P3_49870_31114745 | NC_021163.1    | Ca_kabuli_chr04 | 31114745                | CC                              | AA                | 1945950887               |
| SNP_P3_49871_31115234 | NC_021163.1    | Ca_kabuli_chr04 | 31115234                | AA                              | GG                | 1945950889               |
| SNP_P3_49872_31115249 | NC_021163.1    | Ca_kabuli_chr04 | 31115249                | GG                              | AA                | 1945950891               |
| SNP_P3_49873_31115555 | NC_021163.1    | Ca_kabuli_chr04 | 31115555                | TT                              | CC                | 1945950893               |
| SNP_P3_49874_31115586 | NC_021163.1    | Ca_kabuli_chr04 | 31115586                | AA                              | TT                | 1945950894               |
| SNP_P3_49875_31115621 | NC_021163.1    | Ca_kabuli_chr04 | 31115621                | GG                              | AA                | 1945950896               |
| SNP_P3_49876_31115627 | NC_021163.1    | Ca_kabuli_chr04 | 31115627                | AA                              | CC                | 1945950898               |
| SNP_P3_49877_31115900 | NC_021163.1    | Ca_kabuli_chr04 | 31115900                | GG                              | TT                | 1945950900               |
| SNP_P3_49878_31117747 | NC_021163.1    | Ca_kabuli_chr04 | 31117747                | TT                              | AA                | 1945950901               |
| SNP_P3_49879_31118051 | NC_021163.1    | Ca_kabuli_chr04 | 31118051                | GG                              | AA                | 1945950903               |
| SNP_P3_49880_31118062 | NC_021163.1    | Ca_kabuli_chr04 | 31118062                | CC                              | AA                | 1945950905               |
| SNP_P3_49881_31118631 | NC_021163.1    | Ca_kabuli_chr04 | 31118631                | AA                              | GG                | 1945950907               |
| SNP_P3_49882_31118666 | NC_021163.1    | Ca_kabuli_chr04 | 31118666                | TT                              | GG                | 1945950909               |

| SNPs IDs              | Chromosome IDs | Chromosomes     | Physical positions (bp) | CDC Frontier (Reference genome) | (Pusa 256 & HPNB) | NCBI SNPdb Accession IDs |
|-----------------------|----------------|-----------------|-------------------------|---------------------------------|-------------------|--------------------------|
| SNP_P3_49884_31118943 | NC_021163.1    | Ca_kabuli_chr04 | 31118943                | GG                              | AA                | 1945950910               |
| SNP_P3_49885_31118957 | NC_021163.1    | Ca_kabuli_chr04 | 31118957                | GG                              | AA                | 1945950912               |
| SNP_P3_49886_31118967 | NC_021163.1    | Ca_kabuli_chr04 | 31118967                | CC                              | TT                | 1945950914               |
| SNP_P3_49887_31118968 | NC_021163.1    | Ca_kabuli_chr04 | 31118968                | TT                              | CC                | 1945950916               |
| SNP_P3_49888_31119027 | NC_021163.1    | Ca_kabuli_chr04 | 31119027                | TT                              | CC                | 1945950918               |
| SNP_P3_49889_31119094 | NC_021163.1    | Ca_kabuli_chr04 | 31119094                | AA                              | GG                | 1945950919               |
| SNP_P3_49892_31119311 | NC_021163.1    | Ca_kabuli_chr04 | 31119311                | AA                              | TT                | 1945950921               |
| SNP_P3_49893_31119327 | NC_021163.1    | Ca_kabuli_chr04 | 31119327                | AA                              | GG                | 1945950923               |
| SNP_P3_49894_31120635 | NC_021163.1    | Ca_kabuli_chr04 | 31120635                | GG                              | AA                | 1945950925               |
| SNP_P3_49895_31120654 | NC_021163.1    | Ca_kabuli_chr04 | 31120654                | AA                              | GG                | 1945950926               |
| SNP_P3_49896_31120871 | NC_021163.1    | Ca_kabuli_chr04 | 31120871                | AA                              | GG                | 1945950928               |
| SNP_P3_49897_31121256 | NC_021163.1    | Ca_kabuli_chr04 | 31121256                | TT                              | CC                | 1945950930               |
| SNP_P3_49898_31121393 | NC_021163.1    | Ca_kabuli_chr04 | 31121393                | CC                              | TT                | 1945950932               |
| SNP_P3_49899_31123659 | NC_021163.1    | Ca_kabuli_chr04 | 31123659                | AA                              | GG                | 1945950934               |
| SNP_P3_49900_31123684 | NC_021163.1    | Ca_kabuli_chr04 | 31123684                | GG                              | AA                | 1945950935               |
| SNP_P3_49901_31123968 | NC_021163.1    | Ca_kabuli_chr04 | 31123968                | TT                              | GG                | 1945950937               |
| SNP_P3_49902_31124057 | NC_021163.1    | Ca_kabuli_chr04 | 31124057                | TT                              | CC                | 1945950939               |
| SNP_P3_49903_31124069 | NC_021163.1    | Ca_kabuli_chr04 | 31124069                | AA                              | GG                | 1945950941               |
| SNP_P3_49904_31124590 | NC_021163.1    | Ca_kabuli_chr04 | 31124590                | TT                              | GG                | 1945950943               |
| SNP_P3_49905_31124624 | NC_021163.1    | Ca_kabuli_chr04 | 31124624                | CC                              | AA                | 1945950944               |
| SNP_P3_49906_31124757 | NC_021163.1    | Ca_kabuli_chr04 | 31124757                | GG                              | AA                | 1945950946               |
| SNP_P3_49907_31124795 | NC_021163.1    | Ca_kabuli_chr04 | 31124795                | AA                              | CC                | 1945950948               |
| SNP_P3_49908_31124837 | NC_021163.1    | Ca_kabuli_chr04 | 31124837                | AA                              | GG                | 1945950950               |
| SNP_P3_49909_31124926 | NC_021163.1    | Ca_kabuli_chr04 | 31124926                | GG                              | AA                | 1945950951               |
| SNP_P3_49910_31124963 | NC_021163.1    | Ca_kabuli_chr04 | 31124963                | TT                              | CC                | 1945950953               |
| SNP_P3_49911_31127514 | NC_021163.1    | Ca_kabuli_chr04 | 31127514                | CC                              | TT                | 1945950955               |
| SNP_P3_49912_31127572 | NC_021163.1    | Ca_kabuli_chr04 | 31127572                | AA                              | GG                | 1945950957               |
| SNP_P3_49913_31128577 | NC_021163.1    | Ca_kabuli_chr04 | 31128577                | GG                              | TT                | 1945950959               |
| SNP_P3_49914_31136153 | NC_021163.1    | Ca_kabuli_chr04 | 31136153                | AA                              | GG                | 1945950960               |
| SNP_P3_49916_31136514 | NC_021163.1    | Ca_kabuli_chr04 | 31136514                | TT                              | GG                | 1945950962               |
| SNP_P3_49917_31138052 | NC_021163.1    | Ca_kabuli_chr04 | 31138052                | TT                              | CC                | 1945950964               |
| SNP_P3_49918_31138053 | NC_021163.1    | Ca_kabuli_chr04 | 31138053                | TT                              | CC                | 1945950966               |
| SNP_P3_49919_31138137 | NC_021163.1    | Ca_kabuli_chr04 | 31138137                | CC                              | TT                | 1945950967               |
| SNP_P3_49920_31138381 | NC_021163.1    | Ca_kabuli_chr04 | 31138381                | TT                              | CC                | 1945950969               |
| SNP_P3_49921_31138386 | NC_021163.1    | Ca_kabuli_chr04 | 31138386                | TT                              | CC                | 1945950971               |
| SNP_P3_49922_31138457 | NC_021163.1    | Ca_kabuli_chr04 | 31138457                | AA                              | CC                | 1945950973               |
| SNP_P3_49923_31139902 | NC_021163.1    | Ca_kabuli_chr04 | 31139902                | TT                              | AA                | 1945950975               |
| SNP_P3_49925_31140379 | NC_021163.1    | Ca_kabuli_chr04 | 31140379                | AA                              | GG                | 1945950976               |
| SNP_P3_49926_31145115 | NC_021163.1    | Ca_kabuli_chr04 | 31145115                | AA                              | GG                | 1945950978               |
| SNP_P3_49927_31146682 | NC_021163.1    | Ca_kabuli_chr04 | 31146682                | AA                              | GG                | 1945950980               |
| SNP_P3_49928_31147612 | NC_021163.1    | Ca_kabuli_chr04 | 31147612                | CC                              | TT                | 1945950982               |
| SNP_P3_49929_31147737 | NC_021163.1    | Ca_kabuli_chr04 | 31147737                | GG                              | AA                | 1945950984               |

| SNPs IDs              | Chromosome IDs | Chromosomes     | Physical positions (bp) | CDC Frontier (Reference genome) | (Pusa 256 & HPNB) | NCBI SNPdb Accession IDs |
|-----------------------|----------------|-----------------|-------------------------|---------------------------------|-------------------|--------------------------|
| SNP_P3_49930_31148312 | NC_021163.1    | Ca_kabuli_chr04 | 31148312                | GG                              | TT                | 1945950985               |
| SNP_P3_49932_31152105 | NC_021163.1    | Ca_kabuli_chr04 | 31152105                | GG                              | AA                | 1945950987               |
| SNP_P3_49933_31155376 | NC_021163.1    | Ca_kabuli_chr04 | 31155376                | CC                              | TT                | 1945950989               |
| SNP_P3_49934_31157702 | NC_021163.1    | Ca_kabuli_chr04 | 31157702                | AA                              | GG                | 1945950991               |
| SNP_P3_49935_31159271 | NC_021163.1    | Ca_kabuli_chr04 | 31159271                | GG                              | AA                | 1945950992               |
| SNP_P3_49937_31173305 | NC_021163.1    | Ca_kabuli_chr04 | 31173305                | CC                              | TT                | 1945950994               |
| SNP_P3_49938_31173359 | NC_021163.1    | Ca_kabuli_chr04 | 31173359                | GG                              | AA                | 1945950996               |
| SNP_P3_49939_31173373 | NC_021163.1    | Ca_kabuli_chr04 | 31173373                | CC                              | GG                | 1945950998               |
| SNP_P3_49940_31173706 | NC_021163.1    | Ca_kabuli_chr04 | 31173706                | AA                              | TT                | 1945951000               |
| SNP_P3_49941_31173711 | NC_021163.1    | Ca_kabuli_chr04 | 31173711                | CC                              | TT                | 1945951001               |
| SNP_P3_49942_31179481 | NC_021163.1    | Ca_kabuli_chr04 | 31179481                | AA                              | CC                | 1945951003               |
| SNP_P3_49943_31179589 | NC_021163.1    | Ca_kabuli_chr04 | 31179589                | GG                              | AA                | 1945951005               |
| SNP_P3_49944_31183883 | NC_021163.1    | Ca_kabuli_chr04 | 31183883                | CC                              | TT                | 1945951007               |
| SNP_P3_49945_31185083 | NC_021163.1    | Ca_kabuli_chr04 | 31185083                | AA                              | GG                | 1945951009               |
| SNP_P3_49946_31189832 | NC_021163.1    | Ca_kabuli_chr04 | 31189832                | AA                              | GG                | 1945951010               |
| SNP_P3_49947_31190603 | NC_021163.1    | Ca_kabuli_chr04 | 31190603                | TT                              | CC                | 1945951012               |
| SNP_P3_49949_31194330 | NC_021163.1    | Ca_kabuli_chr04 | 31194330                | AA                              | GG                | 1945951014               |
| SNP_P3_49951_31206985 | NC_021163.1    | Ca_kabuli_chr04 | 31206985                | GG                              | AA                | 1945951016               |
| SNP_P3_49952_31207358 | NC_021163.1    | Ca_kabuli_chr04 | 31207358                | GG                              | TT                | 1945951017               |
| SNP_P3_49953_31208013 | NC_021163.1    | Ca_kabuli_chr04 | 31208013                | CC                              | TT                | 1945951019               |
| SNP_P3_49954_31208017 | NC_021163.1    | Ca_kabuli_chr04 | 31208017                | AA                              | CC                | 1945951021               |
| SNP_P3_49955_31208046 | NC_021163.1    | Ca_kabuli_chr04 | 31208046                | CC                              | AA                | 1945951023               |
| SNP_P3_49956_31208289 | NC_021163.1    | Ca_kabuli_chr04 | 31208289                | CC                              | TT                | 1945951025               |
| SNP_P3_49957_31213566 | NC_021163.1    | Ca_kabuli_chr04 | 31213566                | TT                              | CC                | 1945951026               |
| SNP_P3_49958_31217992 | NC_021163.1    | Ca_kabuli_chr04 | 31217992                | TT                              | CC                | 1945951028               |
| SNP_P3_49960_31222645 | NC_021163.1    | Ca_kabuli_chr04 | 31222645                | AA                              | GG                | 1945951030               |
| SNP_P3_49962_31222868 | NC_021163.1    | Ca_kabuli_chr04 | 31222868                | GG                              | AA                | 1945951032               |
| SNP_P3_49963_31223193 | NC_021163.1    | Ca_kabuli_chr04 | 31223193                | TT                              | CC                | 1945951034               |
| SNP_P3_49964_31223214 | NC_021163.1    | Ca_kabuli_chr04 | 31223214                | GG                              | AA                | 1945951035               |
| SNP_P3_49965_31225894 | NC_021163.1    | Ca_kabuli_chr04 | 31225894                | GG                              | TT                | 1945951037               |
| SNP_P3_49967_31228574 | NC_021163.1    | Ca_kabuli_chr04 | 31228574                | TT                              | CC                | 1945951039               |
| SNP_P3_49968_31228881 | NC_021163.1    | Ca_kabuli_chr04 | 31228881                | CC                              | TT                | 1945951041               |
| SNP_P3_49970_31230369 | NC_021163.1    | Ca_kabuli_chr04 | 31230369                | CC                              | TT                | 1945951042               |
| SNP_P3_49971_31230376 | NC_021163.1    | Ca_kabuli_chr04 | 31230376                | AA                              | GG                | 1945951044               |
| SNP_P3_49973_31236739 | NC_021163.1    | Ca_kabuli_chr04 | 31236739                | AA                              | TT                | 1945951046               |
| SNP_P3_49975_31248828 | NC_021163.1    | Ca_kabuli_chr04 | 31248828                | CC                              | TT                | 1945951048               |
| SNP_P3_49976_31248907 | NC_021163.1    | Ca_kabuli_chr04 | 31248907                | GG                              | AA                | 1945951050               |
| SNP_P3_49977_31248909 | NC_021163.1    | Ca_kabuli_chr04 | 31248909                | GG                              | AA                | 1945951051               |
| SNP_P3_49978_31250252 | NC_021163.1    | Ca_kabuli_chr04 | 31250252                | GG                              | AA                | 1945951053               |
| SNP_P3_49979_31250553 | NC_021163.1    | Ca_kabuli_chr04 | 31250553                | AA                              | CC                | 1945951055               |
| SNP_P3_49980_31251981 | NC_021163.1    | Ca_kabuli_chr04 | 31251981                | TT                              | CC                | 1945951057               |
| SNP_P3_49981_31252193 | NC_021163.1    | Ca_kabuli_chr04 | 31252193                | TT                              | CC                | 1945951059               |

| SNPs IDs              | Chromosome IDs | Chromosomes     | Physical positions (bp) | CDC Frontier (Reference genome) | (Pusa 256 & HPNB) | NCBI SNPdb Accession IDs |
|-----------------------|----------------|-----------------|-------------------------|---------------------------------|-------------------|--------------------------|
| SNP_P3_49982_31252403 | NC_021163.1    | Ca_kabuli_chr04 | 31252403                | AA                              | GG                | 1945951060               |
| SNP_P3_49983_31252492 | NC_021163.1    | Ca_kabuli_chr04 | 31252492                | AA                              | GG                | 1945951062               |
| SNP_P3_49984_31254223 | NC_021163.1    | Ca_kabuli_chr04 | 31254223                | CC                              | GG                | 1945951064               |
| SNP_P3_49985_31254227 | NC_021163.1    | Ca_kabuli_chr04 | 31254227                | CC                              | TT                | 1945951066               |
| SNP_P3_49986_31254281 | NC_021163.1    | Ca_kabuli_chr04 | 31254281                | GG                              | AA                | 1945951067               |
| SNP_P3_49988_31255332 | NC_021163.1    | Ca_kabuli_chr04 | 31255332                | CC                              | GG                | 1945951069               |
| SNP_P3_49991_31258925 | NC_021163.1    | Ca_kabuli_chr04 | 31258925                | GG                              | CC                | 1945951071               |
| SNP_P3_49992_31259002 | NC_021163.1    | Ca_kabuli_chr04 | 31259002                | AA                              | CC                | 1945951073               |
| SNP_P3_49993_31259027 | NC_021163.1    | Ca_kabuli_chr04 | 31259027                | CC                              | AA                | 1945951075               |
| SNP_P3_49994_31259056 | NC_021163.1    | Ca_kabuli_chr04 | 31259056                | TT                              | CC                | 1945951076               |
| SNP_P3_49995_31259323 | NC_021163.1    | Ca_kabuli_chr04 | 31259323                | TT                              | CC                | 1945951078               |
| SNP_P3_49996_31259336 | NC_021163.1    | Ca_kabuli_chr04 | 31259336                | AA                              | GG                | 1945951080               |
| SNP_P3_49997_31261688 | NC_021163.1    | Ca_kabuli_chr04 | 31261688                | GG                              | AA                | 1945951082               |
| SNP_P3_50000_31266369 | NC_021163.1    | Ca_kabuli_chr04 | 31266369                | GG                              | AA                | 1945951083               |
| SNP_P3_50001_31266393 | NC_021163.1    | Ca_kabuli_chr04 | 31266393                | GG                              | AA                | 1945951085               |
| SNP_P3_50002_31266506 | NC_021163.1    | Ca_kabuli_chr04 | 31266506                | GG                              | TT                | 1945951087               |
| SNP_P3_50004_31268913 | NC_021163.1    | Ca_kabuli_chr04 | 31268913                | TT                              | AA                | 1945951089               |
| SNP_P3_50005_31269204 | NC_021163.1    | Ca_kabuli_chr04 | 31269204                | CC                              | AA                | 1945951091               |
| SNP_P3_50006_31270683 | NC_021163.1    | Ca_kabuli_chr04 | 31270683                | TT                              | CC                | 1945951092               |
| SNP_P3_50007_31273217 | NC_021163.1    | Ca_kabuli_chr04 | 31273217                | TT                              | CC                | 1945951094               |
| SNP_P3_50008_31273228 | NC_021163.1    | Ca_kabuli_chr04 | 31273228                | GG                              | AA                | 1945951096               |
| SNP_P3_50009_31273664 | NC_021163.1    | Ca_kabuli_chr04 | 31273664                | CC                              | AA                | 1945951098               |
| SNP_P3_50010_31273894 | NC_021163.1    | Ca_kabuli_chr04 | 31273894                | AA                              | GG                | 1945951100               |
| SNP_P3_50011_31273895 | NC_021163.1    | Ca_kabuli_chr04 | 31273895                | CC                              | TT                | 1945951101               |
| SNP_P3_50012_31275585 | NC_021163.1    | Ca_kabuli_chr04 | 31275585                | AA                              | GG                | 1945951103               |
| SNP_P3_50013_31275658 | NC_021163.1    | Ca_kabuli_chr04 | 31275658                | AA                              | GG                | 1945951105               |
| SNP_P3_50014_31275691 | NC_021163.1    | Ca_kabuli_chr04 | 31275691                | GG                              | AA                | 1945951107               |
| SNP_P3_50017_31276944 | NC_021163.1    | Ca_kabuli_chr04 | 31276944                | GG                              | AA                | 1945951108               |
| SNP_P3_50018_31277318 | NC_021163.1    | Ca_kabuli_chr04 | 31277318                | GG                              | AA                | 1945951110               |
| SNP_P3_50021_31281822 | NC_021163.1    | Ca_kabuli_chr04 | 31281822                | TT                              | CC                | 1945951112               |
| SNP_P3_50022_31281863 | NC_021163.1    | Ca_kabuli_chr04 | 31281863                | TT                              | CC                | 1945951114               |
| SNP_P3_50023_31282012 | NC_021163.1    | Ca_kabuli_chr04 | 31282012                | AA                              | TT                | 1945951116               |
| SNP_P3_50024_31282083 | NC_021163.1    | Ca_kabuli_chr04 | 31282083                | GG                              | AA                | 1945951117               |
| SNP_P3_50025_31282238 | NC_021163.1    | Ca_kabuli_chr04 | 31282238                | TT                              | CC                | 1945951119               |
| SNP_P3_50026_31282271 | NC_021163.1    | Ca_kabuli_chr04 | 31282271                | AA                              | GG                | 1945951121               |
| SNP_P3_50027_31282674 | NC_021163.1    | Ca_kabuli_chr04 | 31282674                | GG                              | AA                | 1945951123               |
| SNP_P3_50028_31283222 | NC_021163.1    | Ca_kabuli_chr04 | 31283222                | CC                              | GG                | 1945951125               |
| SNP_P3_50029_31283722 | NC_021163.1    | Ca_kabuli_chr04 | 31283722                | TT                              | CC                | 1945951126               |
| SNP_P3_50030_31284173 | NC_021163.1    | Ca_kabuli_chr04 | 31284173                | TT                              | CC                | 1945951128               |
| SNP_P3_50031_31284187 | NC_021163.1    | Ca_kabuli_chr04 | 31284187                | AA                              | TT                | 1945951130               |
| SNP_P3_50032_31284208 | NC_021163.1    | Ca_kabuli_chr04 | 31284208                | GG                              | TT                | 1945951132               |
| SNP_P3_50033_31284236 | NC_021163.1    | Ca_kabuli_chr04 | 31284236                | TT                              | CC                | 1945951133               |

| SNPs IDs              | Chromosome IDs | Chromosomes     | Physical positions (bp) | CDC Frontier (Reference genome) | (Pusa 256 & HPNB) | NCBI SNPdb Accession IDs |
|-----------------------|----------------|-----------------|-------------------------|---------------------------------|-------------------|--------------------------|
| SNP_P3_50034_31284570 | NC_021163.1    | Ca_kabuli_chr04 | 31284570                | AA                              | GG                | 1945951135               |
| SNP_P3_50035_31285193 | NC_021163.1    | Ca_kabuli_chr04 | 31285193                | TT                              | GG                | 1945951137               |
| SNP_P3_50036_31285748 | NC_021163.1    | Ca_kabuli_chr04 | 31285748                | CC                              | TT                | 1945951139               |
| SNP_P3_50037_31285950 | NC_021163.1    | Ca_kabuli_chr04 | 31285950                | GG                              | AA                | 1945951141               |
| SNP_P3_50038_31285961 | NC_021163.1    | Ca_kabuli_chr04 | 31285961                | TT                              | CC                | 1945951142               |
| SNP_P3_50039_31289316 | NC_021163.1    | Ca_kabuli_chr04 | 31289316                | AA                              | GG                | 1945951144               |
| SNP_P3_50040_31289375 | NC_021163.1    | Ca_kabuli_chr04 | 31289375                | GG                              | AA                | 1945951146               |
| SNP_P3_50041_31289770 | NC_021163.1    | Ca_kabuli_chr04 | 31289770                | TT                              | AA                | 1945951148               |
| SNP_P3_50042_31290598 | NC_021163.1    | Ca_kabuli_chr04 | 31290598                | AA                              | GG                | 1945951149               |
| SNP_P3_50043_31290653 | NC_021163.1    | Ca_kabuli_chr04 | 31290653                | TT                              | CC                | 1945951151               |
| SNP_P3_50044_31290822 | NC_021163.1    | Ca_kabuli_chr04 | 31290822                | AA                              | TT                | 1945951153               |
| SNP_P3_50045_31290828 | NC_021163.1    | Ca_kabuli_chr04 | 31290828                | AA                              | GG                | 1945951155               |
| SNP_P3_50046_31290855 | NC_021163.1    | Ca_kabuli_chr04 | 31290855                | AA                              | GG                | 1945951157               |
| SNP_P3_50047_31290865 | NC_021163.1    | Ca_kabuli_chr04 | 31290865                | TT                              | GG                | 1945951158               |
| SNP_P3_50049_31290951 | NC_021163.1    | Ca_kabuli_chr04 | 31290951                | TT                              | GG                | 1945951160               |
| SNP_P3_50050_31291105 | NC_021163.1    | Ca_kabuli_chr04 | 31291105                | TT                              | CC                | 1945951162               |
| SNP_P3_50051_31291340 | NC_021163.1    | Ca_kabuli_chr04 | 31291340                | CC                              | AA                | 1945951164               |
| SNP_P3_50053_31292164 | NC_021163.1    | Ca_kabuli_chr04 | 31292164                | CC                              | TT                | 1945951166               |
| SNP_P3_50054_31293953 | NC_021163.1    | Ca_kabuli_chr04 | 31293953                | GG                              | AA                | 1945951167               |
| SNP_P3_50055_31294414 | NC_021163.1    | Ca_kabuli_chr04 | 31294414                | CC                              | TT                | 1945951169               |
| SNP_P3_50056_31296040 | NC_021163.1    | Ca_kabuli_chr04 | 31296040                | AA                              | TT                | 1945951171               |
| SNP_P3_50057_31296067 | NC_021163.1    | Ca_kabuli_chr04 | 31296067                | TT                              | AA                | 1945951173               |
| SNP_P3_50058_31296390 | NC_021163.1    | Ca_kabuli_chr04 | 31296390                | CC                              | TT                | 1945951174               |
| SNP_P3_50059_31296431 | NC_021163.1    | Ca_kabuli_chr04 | 31296431                | GG                              | CC                | 1945951176               |
| SNP_P3_50060_31296625 | NC_021163.1    | Ca_kabuli_chr04 | 31296625                | CC                              | TT                | 1945951178               |
| SNP_P3_50061_31296977 | NC_021163.1    | Ca_kabuli_chr04 | 31296977                | AA                              | TT                | 1945951180               |
| SNP_P3_50063_31306699 | NC_021163.1    | Ca_kabuli_chr04 | 31306699                | AA                              | GG                | 1945951182               |
| SNP_P3_50064_31306772 | NC_021163.1    | Ca_kabuli_chr04 | 31306772                | TT                              | CC                | 1945951183               |
| SNP_P3_50065_31307710 | NC_021163.1    | Ca_kabuli_chr04 | 31307710                | GG                              | AA                | 1945951185               |
| SNP_P3_50067_31307763 | NC_021163.1    | Ca_kabuli_chr04 | 31307763                | GG                              | AA                | 1945951187               |
| SNP_P3_50068_31307819 | NC_021163.1    | Ca_kabuli_chr04 | 31307819                | GG                              | AA                | 1945951189               |
| SNP_P3_50069_31307855 | NC_021163.1    | Ca_kabuli_chr04 | 31307855                | GG                              | AA                | 1945951191               |
| SNP_P3_50070_31311968 | NC_021163.1    | Ca_kabuli_chr04 | 31311968                | TT                              | CC                | 1945951192               |
| SNP_P3_50071_31312067 | NC_021163.1    | Ca_kabuli_chr04 | 31312067                | TT                              | CC                | 1945951194               |
| SNP_P3_50072_31312216 | NC_021163.1    | Ca_kabuli_chr04 | 31312216                | GG                              | AA                | 1945951196               |
| SNP_P3_50073_31312392 | NC_021163.1    | Ca_kabuli_chr04 | 31312392                | AA                              | CC                | 1945951198               |
| SNP_P3_50074_31312441 | NC_021163.1    | Ca_kabuli_chr04 | 31312441                | AA                              | CC                | 1945951199               |
| SNP_P3_50075_31312606 | NC_021163.1    | Ca_kabuli_chr04 | 31312606                | AA                              | GG                | 1945951201               |
| SNP_P3_50076_31312643 | NC_021163.1    | Ca_kabuli_chr04 | 31312643                | TT                              | CC                | 1945951203               |
| SNP_P3_50077_31312651 | NC_021163.1    | Ca_kabuli_chr04 | 31312651                | TT                              | CC                | 1945951205               |
| SNP_P3_50078_31314967 | NC_021163.1    | Ca_kabuli_chr04 | 31314967                | TT                              | CC                | 1945951207               |
| SNP_P3_50079_31314987 | NC_021163.1    | Ca_kabuli_chr04 | 31314987                | AA                              | GG                | 1945951208               |

| SNPs IDs              | Chromosome IDs | Chromosomes     | Physical positions (bp) | CDC Frontier (Reference genome) | (Pusa 256 & HPNB) | NCBI SNPdb Accession IDs |
|-----------------------|----------------|-----------------|-------------------------|---------------------------------|-------------------|--------------------------|
| SNP_P3_50080_31315078 | NC_021163.1    | Ca_kabuli_chr04 | 31315078                | AA                              | GG                | 1945951210               |
| SNP_P3_50081_31315287 | NC_021163.1    | Ca_kabuli_chr04 | 31315287                | CC                              | GG                | 1945951212               |
| SNP_P3_50082_31315466 | NC_021163.1    | Ca_kabuli_chr04 | 31315466                | GG                              | TT                | 1945951214               |
| SNP_P3_50083_31315467 | NC_021163.1    | Ca_kabuli_chr04 | 31315467                | TT                              | AA                | 1945951216               |
| SNP_P3_50084_31316163 | NC_021163.1    | Ca_kabuli_chr04 | 31316163                | AA                              | CC                | 1945951217               |
| SNP_P3_50086_31316814 | NC_021163.1    | Ca_kabuli_chr04 | 31316814                | GG                              | AA                | 1945951219               |
| SNP_P3_50087_31317436 | NC_021163.1    | Ca_kabuli_chr04 | 31317436                | CC                              | AA                | 1945951221               |
| SNP_P3_50088_31318328 | NC_021163.1    | Ca_kabuli_chr04 | 31318328                | GG                              | AA                | 1945951223               |
| SNP_P3_50089_31318336 | NC_021163.1    | Ca_kabuli_chr04 | 31318336                | CC                              | TT                | 1945951224               |
| SNP_P3_50090_31318549 | NC_021163.1    | Ca_kabuli_chr04 | 31318549                | TT                              | CC                | 1945951226               |
| SNP_P3_50091_31318556 | NC_021163.1    | Ca_kabuli_chr04 | 31318556                | GG                              | CC                | 1945951228               |
| SNP_P3_50092_31318581 | NC_021163.1    | Ca_kabuli_chr04 | 31318581                | TT                              | GG                | 1945951230               |
| SNP_P3_50093_31318634 | NC_021163.1    | Ca_kabuli_chr04 | 31318634                | AA                              | TT                | 1945951232               |
| SNP_P3_50094_31318644 | NC_021163.1    | Ca_kabuli_chr04 | 31318644                | CC                              | GG                | 1945951233               |
| SNP_P3_50095_31318680 | NC_021163.1    | Ca_kabuli_chr04 | 31318680                | CC                              | TT                | 1945951235               |
| SNP_P3_50096_31319559 | NC_021163.1    | Ca_kabuli_chr04 | 31319559                | TT                              | CC                | 1945951237               |
| SNP_P3_50098_31321038 | NC_021163.1    | Ca_kabuli_chr04 | 31321038                | GG                              | AA                | 1945951239               |
| SNP_P3_50099_31321107 | NC_021163.1    | Ca_kabuli_chr04 | 31321107                | GG                              | AA                | 1945951240               |
| SNP_P3_50100_31321245 | NC_021163.1    | Ca_kabuli_chr04 | 31321245                | GG                              | AA                | 1945951242               |
| SNP_P3_50101_31322384 | NC_021163.1    | Ca_kabuli_chr04 | 31322384                | CC                              | TT                | 1945951244               |
| SNP_P3_50102_31322390 | NC_021163.1    | Ca_kabuli_chr04 | 31322390                | AA                              | GG                | 1945951246               |
| SNP_P3_50105_31323710 | NC_021163.1    | Ca_kabuli_chr04 | 31323710                | CC                              | TT                | 1945951248               |
| SNP_P3_50106_31323733 | NC_021163.1    | Ca_kabuli_chr04 | 31323733                | GG                              | TT                | 1945951249               |
| SNP_P3_50107_31323735 | NC_021163.1    | Ca_kabuli_chr04 | 31323735                | AA                              | GG                | 1945951251               |
| SNP_P3_50108_31324140 | NC_021163.1    | Ca_kabuli_chr04 | 31324140                | GG                              | AA                | 1945951253               |
| SNP_P3_50109_31324257 | NC_021163.1    | Ca_kabuli_chr04 | 31324257                | AA                              | CC                | 1945951255               |
| SNP_P3_50110_31326919 | NC_021163.1    | Ca_kabuli_chr04 | 31326919                | AA                              | GG                | 1945951257               |
| SNP_P3_50111_31327879 | NC_021163.1    | Ca_kabuli_chr04 | 31327879                | GG                              | AA                | 1945951258               |
| SNP_P3_50112_31330725 | NC_021163.1    | Ca_kabuli_chr04 | 31330725                | AA                              | CC                | 1945951260               |
| SNP_P3_50113_31333492 | NC_021163.1    | Ca_kabuli_chr04 | 31333492                | AA                              | TT                | 1945951262               |
| SNP_P3_50114_31336053 | NC_021163.1    | Ca_kabuli_chr04 | 31336053                | AA                              | TT                | 1945951264               |
| SNP_P3_50115_31336364 | NC_021163.1    | Ca_kabuli_chr04 | 31336364                | CC                              | TT                | 1945951266               |
| SNP_P3_50116_31343184 | NC_021163.1    | Ca_kabuli_chr04 | 31343184                | TT                              | CC                | 1945951267               |
| SNP_P3_50117_31344029 | NC_021163.1    | Ca_kabuli_chr04 | 31344029                | CC                              | TT                | 1945951269               |
| SNP_P3_50118_31344473 | NC_021163.1    | Ca_kabuli_chr04 | 31344473                | AA                              | GG                | 1945951271               |
| SNP_P3_50119_31345215 | NC_021163.1    | Ca_kabuli_chr04 | 31345215                | TT                              | CC                | 1945951273               |
| SNP_P3_50120_31346316 | NC_021163.1    | Ca_kabuli_chr04 | 31346316                | GG                              | TT                | 1945951274               |
| SNP_P3_50121_31347334 | NC_021163.1    | Ca_kabuli_chr04 | 31347334                | CC                              | TT                | 1945951276               |
| SNP_P3_50123_31348811 | NC_021163.1    | Ca_kabuli_chr04 | 31348811                | AA                              | CC                | 1945951278               |
| SNP_P3_50125_31351946 | NC_021163.1    | Ca_kabuli_chr04 | 31351946                | TT                              | CC                | 1945951280               |
| SNP_P3_50126_31361905 | NC_021163.1    | Ca_kabuli_chr04 | 31361905                | AA                              | GG                | 1945951282               |
| SNP_P3_50127_31367904 | NC_021163.1    | Ca_kabuli_chr04 | 31367904                | TT                              | CC                | 1945951283               |

| SNPs IDs              | Chromosome IDs | Chromosomes     | Physical positions (bp) | CDC Frontier (Reference genome) | (Pusa 256 & HPNB) | NCBI SNPdb Accession IDs |
|-----------------------|----------------|-----------------|-------------------------|---------------------------------|-------------------|--------------------------|
| SNP_P3_50128_31375067 | NC_021163.1    | Ca_kabuli_chr04 | 31375067                | TT                              | CC                | 1945951285               |
| SNP_P3_50129_31375592 | NC_021163.1    | Ca_kabuli_chr04 | 31375592                | AA                              | GG                | 1945951287               |
| SNP_P3_50130_31376118 | NC_021163.1    | Ca_kabuli_chr04 | 31376118                | AA                              | TT                | 1945951289               |
| SNP_P3_50131_31376182 | NC_021163.1    | Ca_kabuli_chr04 | 31376182                | AA                              | GG                | 1945951290               |
| SNP_P3_50132_31380058 | NC_021163.1    | Ca_kabuli_chr04 | 31380058                | GG                              | AA                | 1945951292               |
| SNP_P3_50133_31380542 | NC_021163.1    | Ca_kabuli_chr04 | 31380542                | GG                              | TT                | 1945951294               |
| SNP_P3_50134_31384516 | NC_021163.1    | Ca_kabuli_chr04 | 31384516                | AA                              | GG                | 1945951296               |
| SNP_P3_50135_31385853 | NC_021163.1    | Ca_kabuli_chr04 | 31385853                | TT                              | GG                | 1945951298               |
| SNP_P3_50136_31385863 | NC_021163.1    | Ca_kabuli_chr04 | 31385863                | CC                              | TT                | 1945951299               |
| SNP_P3_50138_31387995 | NC_021163.1    | Ca_kabuli_chr04 | 31387995                | AA                              | CC                | 1945951301               |
| SNP_P3_50139_31388593 | NC_021163.1    | Ca_kabuli_chr04 | 31388593                | TT                              | GG                | 1945951303               |
| SNP_P3_50140_31394985 | NC_021163.1    | Ca_kabuli_chr04 | 31394985                | AA                              | TT                | 1945951305               |
| SNP_P3_50141_31394986 | NC_021163.1    | Ca_kabuli_chr04 | 31394986                | TT                              | GG                | 1945951307               |
| SNP_P3_50142_31400047 | NC_021163.1    | Ca_kabuli_chr04 | 31400047                | TT                              | CC                | 1945951308               |
| SNP_P3_50143_31400062 | NC_021163.1    | Ca_kabuli_chr04 | 31400062                | TT                              | CC                | 1945951310               |
| SNP_P3_50144_31400092 | NC_021163.1    | Ca_kabuli_chr04 | 31400092                | TT                              | GG                | 1945951312               |
| SNP_P3_50145_31400606 | NC_021163.1    | Ca_kabuli_chr04 | 31400606                | TT                              | GG                | 1945951314               |
| SNP_P3_50146_31400615 | NC_021163.1    | Ca_kabuli_chr04 | 31400615                | AA                              | GG                | 1945951315               |
| SNP_P3_50147_31400620 | NC_021163.1    | Ca_kabuli_chr04 | 31400620                | GG                              | TT                | 1945951317               |
| SNP_P3_50148_31400862 | NC_021163.1    | Ca_kabuli_chr04 | 31400862                | AA                              | GG                | 1945951319               |
| SNP_P3_50149_31400926 | NC_021163.1    | Ca_kabuli_chr04 | 31400926                | GG                              | AA                | 1945951321               |
| SNP_P3_50150_31400928 | NC_021163.1    | Ca_kabuli_chr04 | 31400928                | AA                              | GG                | 1945951323               |
| SNP_P3_50151_31416605 | NC_021163.1    | Ca_kabuli_chr04 | 31416605                | CC                              | TT                | 1945951324               |
| SNP_P3_50152_31417034 | NC_021163.1    | Ca_kabuli_chr04 | 31417034                | CC                              | TT                | 1945951326               |
| SNP_P3_50153_31423540 | NC_021163.1    | Ca_kabuli_chr04 | 31423540                | TT                              | AA                | 1945951328               |
| SNP_P3_50154_31423541 | NC_021163.1    | Ca_kabuli_chr04 | 31423541                | TT                              | AA                | 1945951330               |
| SNP_P3_50155_31423786 | NC_021163.1    | Ca_kabuli_chr04 | 31423786                | AA                              | CC                | 1945951332               |
| SNP_P3_50156_31424858 | NC_021163.1    | Ca_kabuli_chr04 | 31424858                | GG                              | AA                | 1945951333               |
| SNP_P3_50157_31424909 | NC_021163.1    | Ca_kabuli_chr04 | 31424909                | CC                              | TT                | 1945951335               |
| SNP_P3_50158_31425097 | NC_021163.1    | Ca_kabuli_chr04 | 31425097                | TT                              | CC                | 1945951337               |
| SNP_P3_50159_31425168 | NC_021163.1    | Ca_kabuli_chr04 | 31425168                | TT                              | CC                | 1945951339               |
| SNP_P3_50160_31425406 | NC_021163.1    | Ca_kabuli_chr04 | 31425406                | CC                              | GG                | 1945951340               |
| SNP_P3_50161_31444983 | NC_021163.1    | Ca_kabuli_chr04 | 31444983                | TT                              | CC                | 1945951342               |
| SNP_P3_50162_31444985 | NC_021163.1    | Ca_kabuli_chr04 | 31444985                | CC                              | TT                | 1945951344               |
| SNP_P3_50163_31445165 | NC_021163.1    | Ca_kabuli_chr04 | 31445165                | TT                              | CC                | 1945951346               |
| SNP_P3_50164_31445198 | NC_021163.1    | Ca_kabuli_chr04 | 31445198                | TT                              | CC                | 1945951348               |
| SNP_P3_50165_31445200 | NC_021163.1    | Ca_kabuli_chr04 | 31445200                | AA                              | GG                | 1945951349               |
| SNP_P3_50166_31445232 | NC_021163.1    | Ca_kabuli_chr04 | 31445232                | TT                              | CC                | 1945951351               |
| SNP_P3_50167_31445237 | NC_021163.1    | Ca_kabuli_chr04 | 31445237                | TT                              | AA                | 1945951353               |
| SNP_P3_50169_31445296 | NC_021163.1    | Ca_kabuli_chr04 | 31445296                | CC                              | TT                | 1945951355               |
| SNP_P3_50170_31448800 | NC_021163.1    | Ca_kabuli_chr04 | 31448800                | CC                              | TT                | 1945951357               |
| SNP_P3_50171_31451547 | NC_021163.1    | Ca_kabuli_chr04 | 31451547                | GG                              | AA                | 1945951358               |

| SNPs IDs              | Chromosome IDs | Chromosomes     | Physical positions (bp) | CDC Frontier (Reference genome) | (Pusa 256 & HPNB) | NCBI SNPdb Accession IDs |
|-----------------------|----------------|-----------------|-------------------------|---------------------------------|-------------------|--------------------------|
| SNP_P3_50172_31451584 | NC_021163.1    | Ca_kabuli_chr04 | 31451584                | AA                              | GG                | 1945951360               |
| SNP_P3_50173_31452126 | NC_021163.1    | Ca_kabuli_chr04 | 31452126                | AA                              | TT                | 1945951362               |
| SNP_P3_50174_31462775 | NC_021163.1    | Ca_kabuli_chr04 | 31462775                | TT                              | AA                | 1945951364               |
| SNP_P3_50175_31462980 | NC_021163.1    | Ca_kabuli_chr04 | 31462980                | CC                              | TT                | 1945951365               |
| SNP_P3_50176_31463012 | NC_021163.1    | Ca_kabuli_chr04 | 31463012                | GG                              | AA                | 1945951367               |
| SNP_P3_50178_31463326 | NC_021163.1    | Ca_kabuli_chr04 | 31463326                | GG                              | AA                | 1945951369               |
| SNP_P3_50179_31463815 | NC_021163.1    | Ca_kabuli_chr04 | 31463815                | GG                              | AA                | 1945951371               |
| SNP_P3_50180_31465462 | NC_021163.1    | Ca_kabuli_chr04 | 31465462                | CC                              | TT                | 1945951373               |
| SNP_P3_50181_31467535 | NC_021163.1    | Ca_kabuli_chr04 | 31467535                | CC                              | TT                | 1945951374               |
| SNP_P3_50182_31467918 | NC_021163.1    | Ca_kabuli_chr04 | 31467918                | TT                              | CC                | 1945951376               |
| SNP_P3_50183_31470393 | NC_021163.1    | Ca_kabuli_chr04 | 31470393                | GG                              | AA                | 1945951378               |
| SNP_P3_50184_31473554 | NC_021163.1    | Ca_kabuli_chr04 | 31473554                | AA                              | GG                | 1945951380               |
| SNP_P3_50185_31473587 | NC_021163.1    | Ca_kabuli_chr04 | 31473587                | AA                              | GG                | 1945951382               |
| SNP_P3_50186_31491287 | NC_021163.1    | Ca_kabuli_chr04 | 31491287                | TT                              | CC                | 1945951383               |
| SNP_P3_50187_31491306 | NC_021163.1    | Ca_kabuli_chr04 | 31491306                | AA                              | GG                | 1945951385               |
| SNP_P3_50188_31491317 | NC_021163.1    | Ca_kabuli_chr04 | 31491317                | GG                              | TT                | 1945951387               |
| SNP_P3_50190_31513639 | NC_021163.1    | Ca_kabuli_chr04 | 31513639                | TT                              | CC                | 1945951389               |
| SNP_P3_50191_31521842 | NC_021163.1    | Ca_kabuli_chr04 | 31521842                | CC                              | AA                | 1945951390               |
| SNP_P3_50193_31526305 | NC_021163.1    | Ca_kabuli_chr04 | 31526305                | AA                              | GG                | 1945951392               |
| SNP_P3_50194_31527203 | NC_021163.1    | Ca_kabuli_chr04 | 31527203                | CC                              | TT                | 1945951394               |
| SNP_P3_50197_31530974 | NC_021163.1    | Ca_kabuli_chr04 | 31530974                | AA                              | TT                | 1945951396               |
| SNP_P3_50198_31531565 | NC_021163.1    | Ca_kabuli_chr04 | 31531565                | AA                              | GG                | 1945951398               |
| SNP_P3_50199_31531569 | NC_021163.1    | Ca_kabuli_chr04 | 31531569                | TT                              | CC                | 1945951399               |
| SNP_P3_50200_31531574 | NC_021163.1    | Ca_kabuli_chr04 | 31531574                | TT                              | AA                | 1945951401               |
| SNP_P3_50201_31531579 | NC_021163.1    | Ca_kabuli_chr04 | 31531579                | TT                              | CC                | 1945951403               |
| SNP_P3_50202_31531589 | NC_021163.1    | Ca_kabuli_chr04 | 31531589                | AA                              | TT                | 1945951405               |
| SNP_P3_50204_31534712 | NC_021163.1    | Ca_kabuli_chr04 | 31534712                | AA                              | CC                | 1945951406               |
| SNP_P3_50205_31534724 | NC_021163.1    | Ca_kabuli_chr04 | 31534724                | CC                              | TT                | 1945951408               |
| SNP_P3_50206_31534777 | NC_021163.1    | Ca_kabuli_chr04 | 31534777                | TT                              | CC                | 1945951410               |
| SNP_P3_50207_31545838 | NC_021163.1    | Ca_kabuli_chr04 | 31545838                | CC                              | TT                | 1945951412               |
| SNP_P3_50208_31545871 | NC_021163.1    | Ca_kabuli_chr04 | 31545871                | AA                              | GG                | 1945951414               |
| SNP_P3_50209_31545874 | NC_021163.1    | Ca_kabuli_chr04 | 31545874                | GG                              | CC                | 1945951415               |
| SNP_P3_50210_31545891 | NC_021163.1    | Ca_kabuli_chr04 | 31545891                | GG                              | TT                | 1945951417               |
| SNP_P3_50211_31546157 | NC_021163.1    | Ca_kabuli_chr04 | 31546157                | TT                              | CC                | 1945951419               |
| SNP_P3_50212_31546189 | NC_021163.1    | Ca_kabuli_chr04 | 31546189                | GG                              | AA                | 1945951421               |
| SNP_P3_50213_31549737 | NC_021163.1    | Ca_kabuli_chr04 | 31549737                | GG                              | AA                | 1945951423               |
| SNP_P3_50214_31549742 | NC_021163.1    | Ca_kabuli_chr04 | 31549742                | AA                              | GG                | 1945951424               |
| SNP_P3_50215_31552621 | NC_021163.1    | Ca_kabuli_chr04 | 31552621                | CC                              | TT                | 1945951426               |
| SNP_P3_50216_31554945 | NC_021163.1    | Ca_kabuli_chr04 | 31554945                | TT                              | GG                | 1945951428               |
| SNP_P3_50217_31554985 | NC_021163.1    | Ca_kabuli_chr04 | 31554985                | AA                              | GG                | 1945951430               |
| SNP_P3_50218_31555723 | NC_021163.1    | Ca_kabuli_chr04 | 31555723                | AA                              | GG                | 1945951431               |
| SNP_P3_50219_31557671 | NC_021163.1    | Ca_kabuli_chr04 | 31557671                | GG                              | AA                | 1945951433               |



| SNPs IDs              | Chromosome IDs | Chromosomes     | Physical positions (bp) | CDC Frontier (Reference genome) | (Pusa 256 & HPNB) | NCBI SNPdb Accession IDs |
|-----------------------|----------------|-----------------|-------------------------|---------------------------------|-------------------|--------------------------|
| SNP_P3_50220_31557700 | NC_021163.1    | Ca_kabuli_chr04 | 31557700                | CC                              | TT                | 1945951435               |
| SNP_P3_50221_31557778 | NC_021163.1    | Ca_kabuli_chr04 | 31557778                | GG                              | TT                | 1945951437               |
| SNP_P3_50222_31558693 | NC_021163.1    | Ca_kabuli_chr04 | 31558693                | TT                              | GG                | 1945951439               |
| SNP_P3_50223_31558800 | NC_021163.1    | Ca_kabuli_chr04 | 31558800                | AA                              | GG                | 1945951440               |
| SNP_P3_50224_31558816 | NC_021163.1    | Ca_kabuli_chr04 | 31558816                | GG                              | CC                | 1945951442               |
| SNP_P3_50226_31560910 | NC_021163.1    | Ca_kabuli_chr04 | 31560910                | CC                              | AA                | 1945951444               |
| SNP_P3_50227_31561325 | NC_021163.1    | Ca_kabuli_chr04 | 31561325                | AA                              | GG                | 1945951446               |
| SNP_P3_50229_31562736 | NC_021163.1    | Ca_kabuli_chr04 | 31562736                | AA                              | GG                | 1945951448               |
| SNP_P3_50230_31564793 | NC_021163.1    | Ca_kabuli_chr04 | 31564793                | AA                              | CC                | 1945951449               |
| SNP_P3_50232_31565849 | NC_021163.1    | Ca_kabuli_chr04 | 31565849                | TT                              | CC                | 1945951451               |
| SNP_P3_50234_31567853 | NC_021163.1    | Ca_kabuli_chr04 | 31567853                | AA                              | TT                | 1945951453               |
| SNP_P3_50235_31568280 | NC_021163.1    | Ca_kabuli_chr04 | 31568280                | GG                              | TT                | 1945951455               |
| SNP_P3_50236_31568512 | NC_021163.1    | Ca_kabuli_chr04 | 31568512                | TT                              | CC                | 1945951456               |
| SNP_P3_50237_31568687 | NC_021163.1    | Ca_kabuli_chr04 | 31568687                | CC                              | TT                | 1945951458               |
| SNP_P3_50238_31569765 | NC_021163.1    | Ca_kabuli_chr04 | 31569765                | TT                              | CC                | 1945951460               |
| SNP_P3_50240_31571350 | NC_021163.1    | Ca_kabuli_chr04 | 31571350                | AA                              | GG                | 1945951462               |
| SNP_P3_50241_31571357 | NC_021163.1    | Ca_kabuli_chr04 | 31571357                | GG                              | AA                | 1945951464               |
| SNP_P3_50242_31578577 | NC_021163.1    | Ca_kabuli_chr04 | 31578577                | AA                              | GG                | 1945951465               |
| SNP_P3_50243_31578579 | NC_021163.1    | Ca_kabuli_chr04 | 31578579                | CC                              | TT                | 1945951467               |
| SNP_P3_50244_31578906 | NC_021163.1    | Ca_kabuli_chr04 | 31578906                | CC                              | TT                | 1945951469               |
| SNP_P3_50245_31579229 | NC_021163.1    | Ca_kabuli_chr04 | 31579229                | AA                              | GG                | 1945951471               |
| SNP_P3_50246_31580495 | NC_021163.1    | Ca_kabuli_chr04 | 31580495                | CC                              | TT                | 1945951473               |
| SNP_P3_50247_31580518 | NC_021163.1    | Ca_kabuli_chr04 | 31580518                | GG                              | AA                | 1945951474               |
| SNP_P3_50248_31580538 | NC_021163.1    | Ca_kabuli_chr04 | 31580538                | GG                              | TT                | 1945951476               |
| SNP_P3_50249_31581403 | NC_021163.1    | Ca_kabuli_chr04 | 31581403                | TT                              | CC                | 1945951478               |
| SNP_P3_50250_31581466 | NC_021163.1    | Ca_kabuli_chr04 | 31581466                | CC                              | TT                | 1945951480               |
| SNP_P3_50251_31582060 | NC_021163.1    | Ca_kabuli_chr04 | 31582060                | GG                              | AA                | 1945951481               |
| SNP_P3_50252_31582317 | NC_021163.1    | Ca_kabuli_chr04 | 31582317                | AA                              | GG                | 1945951483               |
| SNP_P3_50253_31582672 | NC_021163.1    | Ca_kabuli_chr04 | 31582672                | TT                              | AA                | 1945951485               |
| SNP_P3_50254_31582840 | NC_021163.1    | Ca_kabuli_chr04 | 31582840                | GG                              | TT                | 1945951487               |
| SNP_P3_50255_31583456 | NC_021163.1    | Ca_kabuli_chr04 | 31583456                | AA                              | CC                | 1945951489               |
| SNP_P3_50256_31584187 | NC_021163.1    | Ca_kabuli_chr04 | 31584187                | GG                              | AA                | 1945951490               |
| SNP_P3_50257_31584193 | NC_021163.1    | Ca_kabuli_chr04 | 31584193                | GG                              | AA                | 1945951492               |
| SNP_P3_50258_31584664 | NC_021163.1    | Ca_kabuli_chr04 | 31584664                | TT                              | CC                | 1945951494               |
| SNP_P3_50259_31590645 | NC_021163.1    | Ca_kabuli_chr04 | 31590645                | CC                              | TT                | 1945951496               |
| SNP_P3_50260_31590860 | NC_021163.1    | Ca_kabuli_chr04 | 31590860                | CC                              | GG                | 1945951498               |
| SNP_P3_50261_31600967 | NC_021163.1    | Ca_kabuli_chr04 | 31600967                | AA                              | GG                | 1945951499               |
| SNP_P3_50262_31606821 | NC_021163.1    | Ca_kabuli_chr04 | 31606821                | TT                              | AA                | 1945951501               |
| SNP_P3_50263_31611826 | NC_021163.1    | Ca_kabuli_chr04 | 31611826                | GG                              | AA                | 1945951503               |
| SNP_P3_50266_31612262 | NC_021163.1    | Ca_kabuli_chr04 | 31612262                | TT                              | CC                | 1945951505               |
| SNP_P3_50267_31614319 | NC_021163.1    | Ca_kabuli_chr04 | 31614319                | TT                              | AA                | 1945951506               |
| SNP_P3_50268_31614702 | NC_021163.1    | Ca_kabuli_chr04 | 31614702                | AA                              | GG                | 1945951508               |

| SNPs IDs              | Chromosome IDs | Chromosomes     | Physical positions (bp) | CDC Frontier (Reference genome) | (Pusa 256 & HPNB) | NCBI SNPdb Accession IDs |
|-----------------------|----------------|-----------------|-------------------------|---------------------------------|-------------------|--------------------------|
| SNP_P3_50269_31615393 | NC_021163.1    | Ca_kabuli_chr04 | 31615393                | CC                              | TT                | 1945951510               |
| SNP_P3_50271_31617270 | NC_021163.1    | Ca_kabuli_chr04 | 31617270                | AA                              | GG                | 1945951512               |
| SNP_P3_50272_31617669 | NC_021163.1    | Ca_kabuli_chr04 | 31617669                | TT                              | CC                | 1945951514               |
| SNP_P3_50273_31617676 | NC_021163.1    | Ca_kabuli_chr04 | 31617676                | TT                              | GG                | 1945951515               |
| SNP_P3_50274_31617707 | NC_021163.1    | Ca_kabuli_chr04 | 31617707                | AA                              | TT                | 1945951517               |
| SNP_P3_50275_31618179 | NC_021163.1    | Ca_kabuli_chr04 | 31618179                | CC                              | TT                | 1945951519               |
| SNP_P3_50276_31618949 | NC_021163.1    | Ca_kabuli_chr04 | 31618949                | AA                              | TT                | 1945951521               |
| SNP_P3_50277_31619071 | NC_021163.1    | Ca_kabuli_chr04 | 31619071                | CC                              | TT                | 1945951523               |
| SNP_P3_50278_31619137 | NC_021163.1    | Ca_kabuli_chr04 | 31619137                | GG                              | TT                | 1945951524               |
| SNP_P3_50279_31619159 | NC_021163.1    | Ca_kabuli_chr04 | 31619159                | CC                              | TT                | 1945951526               |
| SNP_P3_50280_31619380 | NC_021163.1    | Ca_kabuli_chr04 | 31619380                | AA                              | GG                | 1945951528               |
| SNP_P3_50281_31619386 | NC_021163.1    | Ca_kabuli_chr04 | 31619386                | CC                              | TT                | 1945951530               |
| SNP_P3_50282_31619397 | NC_021163.1    | Ca_kabuli_chr04 | 31619397                | AA                              | GG                | 1945951531               |
| SNP_P3_50283_31619416 | NC_021163.1    | Ca_kabuli_chr04 | 31619416                | AA                              | GG                | 1945951533               |
| SNP_P3_50284_31619525 | NC_021163.1    | Ca_kabuli_chr04 | 31619525                | GG                              | TT                | 1945951535               |
| SNP_P3_50286_31619817 | NC_021163.1    | Ca_kabuli_chr04 | 31619817                | AA                              | TT                | 1945951537               |
| SNP_P3_50288_31620618 | NC_021163.1    | Ca_kabuli_chr04 | 31620618                | TT                              | CC                | 1945951539               |
| SNP_P3_50291_31621069 | NC_021163.1    | Ca_kabuli_chr04 | 31621069                | AA                              | TT                | 1945951540               |
| SNP_P3_50292_31621086 | NC_021163.1    | Ca_kabuli_chr04 | 31621086                | GG                              | AA                | 1945951542               |
| SNP_P3_50293_31621966 | NC_021163.1    | Ca_kabuli_chr04 | 31621966                | CC                              | TT                | 1945951544               |
| SNP_P3_50294_31621968 | NC_021163.1    | Ca_kabuli_chr04 | 31621968                | AA                              | GG                | 1945951546               |
| SNP_P3_50295_31621971 | NC_021163.1    | Ca_kabuli_chr04 | 31621971                | AA                              | TT                | 1945951548               |
| SNP_P3_50296_31622230 | NC_021163.1    | Ca_kabuli_chr04 | 31622230                | AA                              | TT                | 1945951549               |
| SNP_P3_50297_31622756 | NC_021163.1    | Ca_kabuli_chr04 | 31622756                | CC                              | AA                | 1945951551               |
| SNP_P3_50298_31623663 | NC_021163.1    | Ca_kabuli_chr04 | 31623663                | AA                              | TT                | 1945951553               |
| SNP_P3_50299_31623696 | NC_021163.1    | Ca_kabuli_chr04 | 31623696                | CC                              | TT                | 1945951555               |
| SNP_P3_50300_31625274 | NC_021163.1    | Ca_kabuli_chr04 | 31625274                | AA                              | GG                | 1945951556               |
| SNP_P3_50301_31625283 | NC_021163.1    | Ca_kabuli_chr04 | 31625283                | CC                              | TT                | 1945951558               |
| SNP_P3_50302_31625285 | NC_021163.1    | Ca_kabuli_chr04 | 31625285                | CC                              | AA                | 1945951560               |
| SNP_P3_50304_31626011 | NC_021163.1    | Ca_kabuli_chr04 | 31626011                | GG                              | TT                | 1945951562               |
| SNP_P3_50305_31626024 | NC_021163.1    | Ca_kabuli_chr04 | 31626024                | GG                              | TT                | 1945951564               |
| SNP_P3_50307_31626549 | NC_021163.1    | Ca_kabuli_chr04 | 31626549                | GG                              | TT                | 1945951565               |
| SNP_P3_50308_31626624 | NC_021163.1    | Ca_kabuli_chr04 | 31626624                | AA                              | GG                | 1945951567               |
| SNP_P3_50311_31628094 | NC_021163.1    | Ca_kabuli_chr04 | 31628094                | CC                              | TT                | 1945951569               |
| SNP_P3_50312_31628144 | NC_021163.1    | Ca_kabuli_chr04 | 31628144                | CC                              | GG                | 1945951571               |
| SNP_P3_50313_31628194 | NC_021163.1    | Ca_kabuli_chr04 | 31628194                | AA                              | GG                | 1945951573               |
| SNP_P3_50314_31628251 | NC_021163.1    | Ca_kabuli_chr04 | 31628251                | AA                              | GG                | 1945951574               |
| SNP_P3_50315_31628278 | NC_021163.1    | Ca_kabuli_chr04 | 31628278                | AA                              | GG                | 1945951576               |
| SNP_P3_50316_31629171 | NC_021163.1    | Ca_kabuli_chr04 | 31629171                | TT                              | GG                | 1945951578               |
| SNP_P3_50317_31629172 | NC_021163.1    | Ca_kabuli_chr04 | 31629172                | AA                              | TT                | 1945951580               |
| SNP_P3_50318_31629951 | NC_021163.1    | Ca_kabuli_chr04 | 31629951                | GG                              | AA                | 1945951581               |
| SNP_P3_50320_31631649 | NC_021163.1    | Ca_kabuli_chr04 | 31631649                | AA                              | CC                | 1945951583               |

| SNPs IDs              | Chromosome IDs | Chromosomes     | Physical positions (bp) | CDC Frontier (Reference genome) | (Pusa 256 & HPNB) | NCBI SNPdb Accession IDs |
|-----------------------|----------------|-----------------|-------------------------|---------------------------------|-------------------|--------------------------|
| SNP_P3_50321_31631712 | NC_021163.1    | Ca_kabuli_chr04 | 31631712                | AA                              | GG                | 1945951585               |
| SNP_P3_50322_31631910 | NC_021163.1    | Ca_kabuli_chr04 | 31631910                | GG                              | AA                | 1945951587               |
| SNP_P3_50323_31632134 | NC_021163.1    | Ca_kabuli_chr04 | 31632134                | TT                              | CC                | 1945951589               |
| SNP_P3_50324_31632835 | NC_021163.1    | Ca_kabuli_chr04 | 31632835                | AA                              | CC                | 1945951590               |
| SNP_P3_50325_31633414 | NC_021163.1    | Ca_kabuli_chr04 | 31633414                | GG                              | AA                | 1945951592               |
| SNP_P3_50326_31633432 | NC_021163.1    | Ca_kabuli_chr04 | 31633432                | AA                              | TT                | 1945951594               |
| SNP_P3_50327_31633433 | NC_021163.1    | Ca_kabuli_chr04 | 31633433                | AA                              | GG                | 1945951596               |
| SNP_P3_50328_31634058 | NC_021163.1    | Ca_kabuli_chr04 | 31634058                | TT                              | AA                | 1945951598               |
| SNP_P3_50329_31634065 | NC_021163.1    | Ca_kabuli_chr04 | 31634065                | GG                              | AA                | 1945951599               |
| SNP_P3_50330_31634122 | NC_021163.1    | Ca_kabuli_chr04 | 31634122                | GG                              | AA                | 1945951601               |
| SNP_P3_50331_31634354 | NC_021163.1    | Ca_kabuli_chr04 | 31634354                | TT                              | CC                | 1945951603               |
| SNP_P3_50332_31634370 | NC_021163.1    | Ca_kabuli_chr04 | 31634370                | CC                              | TT                | 1945951605               |
| SNP_P3_50333_31634373 | NC_021163.1    | Ca_kabuli_chr04 | 31634373                | AA                              | TT                | 1945951606               |
| SNP_P3_50334_31634378 | NC_021163.1    | Ca_kabuli_chr04 | 31634378                | AA                              | TT                | 1945951608               |
| SNP_P3_50335_31634402 | NC_021163.1    | Ca_kabuli_chr04 | 31634402                | CC                              | TT                | 1945951610               |
| SNP_P3_50338_31637300 | NC_021163.1    | Ca_kabuli_chr04 | 31637300                | AA                              | GG                | 1945951612               |
| SNP_P3_50339_31637654 | NC_021163.1    | Ca_kabuli_chr04 | 31637654                | TT                              | AA                | 1945951614               |
| SNP_P3_50340_31638581 | NC_021163.1    | Ca_kabuli_chr04 | 31638581                | CC                              | GG                | 1945951615               |
| SNP_P3_50341_31638629 | NC_021163.1    | Ca_kabuli_chr04 | 31638629                | GG                              | TT                | 1945951617               |
| SNP_P3_50342_31638648 | NC_021163.1    | Ca_kabuli_chr04 | 31638648                | TT                              | CC                | 1945951619               |
| SNP_P3_50343_31638899 | NC_021163.1    | Ca_kabuli_chr04 | 31638899                | TT                              | CC                | 1945951621               |
| SNP_P3_50344_31638916 | NC_021163.1    | Ca_kabuli_chr04 | 31638916                | CC                              | TT                | 1945951622               |
| SNP_P3_50345_31638919 | NC_021163.1    | Ca_kabuli_chr04 | 31638919                | AA                              | GG                | 1945951624               |
| SNP_P3_50346_31638930 | NC_021163.1    | Ca_kabuli_chr04 | 31638930                | TT                              | AA                | 1945951626               |
| SNP_P3_50347_31639023 | NC_021163.1    | Ca_kabuli_chr04 | 31639023                | AA                              | CC                | 1945951628               |
| SNP_P3_50348_31639274 | NC_021163.1    | Ca_kabuli_chr04 | 31639274                | GG                              | AA                | 1945951630               |
| SNP_P3_50349_31639350 | NC_021163.1    | Ca_kabuli_chr04 | 31639350                | TT                              | CC                | 1945951631               |
| SNP_P3_50350_31639407 | NC_021163.1    | Ca_kabuli_chr04 | 31639407                | CC                              | TT                | 1945951633               |
| SNP_P3_50351_31640443 | NC_021163.1    | Ca_kabuli_chr04 | 31640443                | TT                              | GG                | 1945951635               |
| SNP_P3_50354_31644770 | NC_021163.1    | Ca_kabuli_chr04 | 31644770                | AA                              | TT                | 1945951637               |
| SNP_P3_50355_31646952 | NC_021163.1    | Ca_kabuli_chr04 | 31646952                | GG                              | AA                | 1945951639               |
| SNP_P3_50356_31648850 | NC_021163.1    | Ca_kabuli_chr04 | 31648850                | CC                              | TT                | 1945951640               |
| SNP_P3_50357_31649218 | NC_021163.1    | Ca_kabuli_chr04 | 31649218                | AA                              | GG                | 1945951642               |
| SNP_P3_50358_31649256 | NC_021163.1    | Ca_kabuli_chr04 | 31649256                | TT                              | CC                | 1945951644               |
| SNP_P3_50361_31651207 | NC_021163.1    | Ca_kabuli_chr04 | 31651207                | TT                              | GG                | 1945951646               |
| SNP_P3_50362_31651297 | NC_021163.1    | Ca_kabuli_chr04 | 31651297                | TT                              | CC                | 1945951647               |
| SNP_P3_50363_31651303 | NC_021163.1    | Ca_kabuli_chr04 | 31651303                | GG                              | AA                | 1945951649               |
| SNP_P3_50366_31666766 | NC_021163.1    | Ca_kabuli_chr04 | 31666766                | AA                              | TT                | 1945951651               |
| SNP_P3_50370_31672165 | NC_021163.1    | Ca_kabuli_chr04 | 31672165                | AA                              | TT                | 1945951653               |
| SNP_P3_50372_31679461 | NC_021163.1    | Ca_kabuli_chr04 | 31679461                | GG                              | AA                | 1945951655               |
| SNP_P3_50373_31683289 | NC_021163.1    | Ca_kabuli_chr04 | 31683289                | TT                              | AA                | 1945951656               |
| SNP_P3_50374_31683524 | NC_021163.1    | Ca_kabuli_chr04 | 31683524                | CC                              | TT                | 1945951658               |

| SNPs IDs              | Chromosome IDs | Chromosomes     | Physical positions (bp) | CDC Frontier (Reference genome) | (Pusa 256 & HPNB) | NCBI SNPdb Accession IDs |
|-----------------------|----------------|-----------------|-------------------------|---------------------------------|-------------------|--------------------------|
| SNP_P3_50375_31684236 | NC_021163.1    | Ca_kabuli_chr04 | 31684236                | CC                              | AA                | 1945951660               |
| SNP_P3_50376_31684340 | NC_021163.1    | Ca_kabuli_chr04 | 31684340                | AA                              | TT                | 1945951662               |
| SNP_P3_50377_31684345 | NC_021163.1    | Ca_kabuli_chr04 | 31684345                | GG                              | TT                | 1945951664               |
| SNP_P3_50378_31688458 | NC_021163.1    | Ca_kabuli_chr04 | 31688458                | GG                              | TT                | 1945951665               |
| SNP_P3_50379_31701951 | NC_021163.1    | Ca_kabuli_chr04 | 31701951                | CC                              | TT                | 1945951667               |
| SNP_P3_50380_31701960 | NC_021163.1    | Ca_kabuli_chr04 | 31701960                | CC                              | TT                | 1945951669               |
| SNP_P3_50381_31701975 | NC_021163.1    | Ca_kabuli_chr04 | 31701975                | TT                              | CC                | 1945951671               |
| SNP_P3_50382_31704119 | NC_021163.1    | Ca_kabuli_chr04 | 31704119                | CC                              | AA                | 1945951672               |
| SNP_P3_50383_31708229 | NC_021163.1    | Ca_kabuli_chr04 | 31708229                | AA                              | GG                | 1945951674               |
| SNP_P3_50384_31712438 | NC_021163.1    | Ca_kabuli_chr04 | 31712438                | GG                              | AA                | 1945951676               |
| SNP_P3_50386_31713214 | NC_021163.1    | Ca_kabuli_chr04 | 31713214                | TT                              | CC                | 1945951678               |
| SNP_P3_50387_31721998 | NC_021163.1    | Ca_kabuli_chr04 | 31721998                | TT                              | CC                | 1945951680               |
| SNP_P3_50388_31728591 | NC_021163.1    | Ca_kabuli_chr04 | 31728591                | AA                              | GG                | 1945951681               |
| SNP_P3_50389_31734024 | NC_021163.1    | Ca_kabuli_chr04 | 31734024                | CC                              | AA                | 1945951683               |
| SNP_P3_50390_31740109 | NC_021163.1    | Ca_kabuli_chr04 | 31740109                | AA                              | GG                | 1945951685               |
| SNP_P3_50391_31742096 | NC_021163.1    | Ca_kabuli_chr04 | 31742096                | AA                              | GG                | 1945951687               |
| SNP_P3_50392_31745366 | NC_021163.1    | Ca_kabuli_chr04 | 31745366                | CC                              | AA                | 1945951689               |
| SNP_P3_50393_31745404 | NC_021163.1    | Ca_kabuli_chr04 | 31745404                | GG                              | TT                | 1945951690               |
| SNP_P3_50394_31753402 | NC_021163.1    | Ca_kabuli_chr04 | 31753402                | AA                              | GG                | 1945951692               |
| SNP_P3_50395_31754050 | NC_021163.1    | Ca_kabuli_chr04 | 31754050                | AA                              | GG                | 1945951694               |
| SNP_P3_50396_31756925 | NC_021163.1    | Ca_kabuli_chr04 | 31756925                | TT                              | CC                | 1945951696               |
| SNP_P3_50398_31759332 | NC_021163.1    | Ca_kabuli_chr04 | 31759332                | AA                              | GG                | 1945951697               |
| SNP_P3_50399_31765938 | NC_021163.1    | Ca_kabuli_chr04 | 31765938                | AA                              | GG                | 1945951699               |
| SNP_P3_50400_31769855 | NC_021163.1    | Ca_kabuli_chr04 | 31769855                | TT                              | AA                | 1945951701               |
| SNP_P3_50402_31773982 | NC_021163.1    | Ca_kabuli_chr04 | 31773982                | TT                              | CC                | 1945951703               |
| SNP_P3_50403_31774775 | NC_021163.1    | Ca_kabuli_chr04 | 31774775                | TT                              | CC                | 1945951705               |
| SNP_P3_50404_31775130 | NC_021163.1    | Ca_kabuli_chr04 | 31775130                | TT                              | CC                | 1945951706               |
| SNP_P3_50405_31775157 | NC_021163.1    | Ca_kabuli_chr04 | 31775157                | TT                              | GG                | 1945951708               |
| SNP_P3_50406_31777574 | NC_021163.1    | Ca_kabuli_chr04 | 31777574                | GG                              | TT                | 1945951710               |
| SNP_P3_50408_31780403 | NC_021163.1    | Ca_kabuli_chr04 | 31780403                | TT                              | CC                | 1945951712               |
| SNP_P3_50409_31780432 | NC_021163.1    | Ca_kabuli_chr04 | 31780432                | GG                              | AA                | 1945951714               |
| SNP_P3_50410_31780488 | NC_021163.1    | Ca_kabuli_chr04 | 31780488                | TT                              | AA                | 1945951715               |
| SNP_P3_50411_31780534 | NC_021163.1    | Ca_kabuli_chr04 | 31780534                | GG                              | CC                | 1945951717               |
| SNP_P3_50412_31781847 | NC_021163.1    | Ca_kabuli_chr04 | 31781847                | AA                              | TT                | 1945951719               |
| SNP_P3_50413_31781857 | NC_021163.1    | Ca_kabuli_chr04 | 31781857                | TT                              | CC                | 1945951721               |
| SNP_P3_50414_31790030 | NC_021163.1    | Ca_kabuli_chr04 | 31790030                | TT                              | GG                | 1945951722               |
| SNP_P3_50415_31791736 | NC_021163.1    | Ca_kabuli_chr04 | 31791736                | TT                              | AA                | 1945951724               |
| SNP_P3_50416_31792010 | NC_021163.1    | Ca_kabuli_chr04 | 31792010                | CC                              | TT                | 1945951726               |
| SNP_P3_50417_31792246 | NC_021163.1    | Ca_kabuli_chr04 | 31792246                | CC                              | AA                | 1945951728               |
| SNP_P3_50418_31792290 | NC_021163.1    | Ca_kabuli_chr04 | 31792290                | TT                              | CC                | 1945951730               |
| SNP_P3_50419_31795568 | NC_021163.1    | Ca_kabuli_chr04 | 31795568                | CC                              | TT                | 1945951731               |
| SNP_P3_50420_31795632 | NC_021163.1    | Ca_kabuli_chr04 | 31795632                | AA                              | GG                | 1945951733               |

| SNPs IDs              | Chromosome IDs | Chromosomes     | Physical positions (bp) | CDC Frontier (Reference genome) | (Pusa 256 & HPNB) | NCBI SNPdb Accession IDs |
|-----------------------|----------------|-----------------|-------------------------|---------------------------------|-------------------|--------------------------|
| SNP_P3_50421_31800238 | NC_021163.1    | Ca_kabuli_chr04 | 31800238                | CC                              | TT                | 1945951735               |
| SNP_P3_50422_31801621 | NC_021163.1    | Ca_kabuli_chr04 | 31801621                | GG                              | AA                | 1945951737               |
| SNP_P3_50423_31803228 | NC_021163.1    | Ca_kabuli_chr04 | 31803228                | CC                              | AA                | 1945951739               |
| SNP_P3_50424_31805026 | NC_021163.1    | Ca_kabuli_chr04 | 31805026                | GG                              | AA                | 1945951740               |
| SNP_P3_50425_31806223 | NC_021163.1    | Ca_kabuli_chr04 | 31806223                | AA                              | GG                | 1945951742               |
| SNP_P3_50427_31807419 | NC_021163.1    | Ca_kabuli_chr04 | 31807419                | CC                              | AA                | 1945951744               |
| SNP_P3_50428_31807506 | NC_021163.1    | Ca_kabuli_chr04 | 31807506                | AA                              | CC                | 1945951746               |
| SNP_P3_50429_31810145 | NC_021163.1    | Ca_kabuli_chr04 | 31810145                | TT                              | AA                | 1945951747               |
| SNP_P3_50431_31810465 | NC_021163.1    | Ca_kabuli_chr04 | 31810465                | GG                              | AA                | 1945951749               |
| SNP_P3_50432_31812807 | NC_021163.1    | Ca_kabuli_chr04 | 31812807                | AA                              | CC                | 1945951751               |
| SNP_P3_50433_31813660 | NC_021163.1    | Ca_kabuli_chr04 | 31813660                | GG                              | AA                | 1945951753               |
| SNP_P3_50434_31814643 | NC_021163.1    | Ca_kabuli_chr04 | 31814643                | TT                              | CC                | 1945951755               |
| SNP_P3_50435_31814777 | NC_021163.1    | Ca_kabuli_chr04 | 31814777                | TT                              | CC                | 1945951756               |
| SNP_P3_50436_31821255 | NC_021163.1    | Ca_kabuli_chr04 | 31821255                | CC                              | TT                | 1945951758               |
| SNP_P3_50438_31826329 | NC_021163.1    | Ca_kabuli_chr04 | 31826329                | TT                              | CC                | 1945951760               |
| SNP_P3_50439_31827678 | NC_021163.1    | Ca_kabuli_chr04 | 31827678                | TT                              | GG                | 1945951762               |
| SNP_P3_50440_31831634 | NC_021163.1    | Ca_kabuli_chr04 | 31831634                | CC                              | TT                | 1945951763               |
| SNP_P3_50441_31831837 | NC_021163.1    | Ca_kabuli_chr04 | 31831837                | AA                              | TT                | 1945951765               |
| SNP_P3_50442_31832079 | NC_021163.1    | Ca_kabuli_chr04 | 31832079                | TT                              | CC                | 1945951767               |
| SNP_P3_50443_31834764 | NC_021163.1    | Ca_kabuli_chr04 | 31834764                | AA                              | CC                | 1945951769               |
| SNP_P3_50444_31834765 | NC_021163.1    | Ca_kabuli_chr04 | 31834765                | GG                              | AA                | 1945951771               |
| SNP_P3_50445_31844669 | NC_021163.1    | Ca_kabuli_chr04 | 31844669                | TT                              | CC                | 1945951772               |
| SNP_P3_50446_31851031 | NC_021163.1    | Ca_kabuli_chr04 | 31851031                | TT                              | GG                | 1945951774               |
| SNP_P3_50447_31852159 | NC_021163.1    | Ca_kabuli_chr04 | 31852159                | AA                              | CC                | 1945951776               |
| SNP_P3_50450_31860862 | NC_021163.1    | Ca_kabuli_chr04 | 31860862                | CC                              | GG                | 1945951778               |
| SNP_P3_50451_31866404 | NC_021163.1    | Ca_kabuli_chr04 | 31866404                | GG                              | AA                | 1945951780               |
| SNP_P3_50453_31871113 | NC_021163.1    | Ca_kabuli_chr04 | 31871113                | AA                              | GG                | 1945951781               |
| SNP_P3_50455_31873218 | NC_021163.1    | Ca_kabuli_chr04 | 31873218                | CC                              | AA                | 1945951783               |
| SNP_P3_50456_31877031 | NC_021163.1    | Ca_kabuli_chr04 | 31877031                | CC                              | TT                | 1945951785               |
| SNP_P3_50457_31881527 | NC_021163.1    | Ca_kabuli_chr04 | 31881527                | TT                              | GG                | 1945951787               |
| SNP_P3_50459_31891495 | NC_021163.1    | Ca_kabuli_chr04 | 31891495                | CC                              | AA                | 1945951788               |
| SNP_P3_50460_31893712 | NC_021163.1    | Ca_kabuli_chr04 | 31893712                | TT                              | CC                | 1945951790               |
| SNP_P3_50463_31894626 | NC_021163.1    | Ca_kabuli_chr04 | 31894626                | TT                              | CC                | 1945951792               |
| SNP_P3_50464_31908095 | NC_021163.1    | Ca_kabuli_chr04 | 31908095                | TT                              | CC                | 1945951794               |
| SNP_P3_50465_31908146 | NC_021163.1    | Ca_kabuli_chr04 | 31908146                | TT                              | CC                | 1945951796               |
| SNP_P3_50466_31910002 | NC_021163.1    | Ca_kabuli_chr04 | 31910002                | TT                              | GG                | 1945951797               |
| SNP_P3_50468_31911273 | NC_021163.1    | Ca_kabuli_chr04 | 31911273                | TT                              | GG                | 1945951799               |
| SNP_P3_50469_31911863 | NC_021163.1    | Ca_kabuli_chr04 | 31911863                | CC                              | TT                | 1945951801               |
| SNP_P3_50470_31915460 | NC_021163.1    | Ca_kabuli_chr04 | 31915460                | TT                              | CC                | 1945951803               |
| SNP_P3_50471_31916419 | NC_021163.1    | Ca_kabuli_chr04 | 31916419                | TT                              | CC                | 1945951805               |
| SNP_P3_50472_31916541 | NC_021163.1    | Ca_kabuli_chr04 | 31916541                | AA                              | CC                | 1945951806               |
| SNP_P3_50473_31916552 | NC_021163.1    | Ca_kabuli_chr04 | 31916552                | GG                              | TT                | 1945951808               |

| SNPs IDs              | Chromosome IDs | Chromosomes     | Physical positions (bp) | CDC Frontier (Reference genome) | (Pusa 256 & HPNB) | NCBI SNPdb Accession IDs |
|-----------------------|----------------|-----------------|-------------------------|---------------------------------|-------------------|--------------------------|
| SNP_P3_50474_31918213 | NC_021163.1    | Ca_kabuli_chr04 | 31918213                | TT                              | AA                | 1945951810               |
| SNP_P3_50475_31928491 | NC_021163.1    | Ca_kabuli_chr04 | 31928491                | TT                              | CC                | 1945951812               |
| SNP_P3_50476_31928769 | NC_021163.1    | Ca_kabuli_chr04 | 31928769                | GG                              | CC                | 1945951813               |
| SNP_P3_50477_31929055 | NC_021163.1    | Ca_kabuli_chr04 | 31929055                | AA                              | TT                | 1945951815               |
| SNP_P3_50479_31930475 | NC_021163.1    | Ca_kabuli_chr04 | 31930475                | AA                              | GG                | 1945951817               |
| SNP_P3_50480_31932165 | NC_021163.1    | Ca_kabuli_chr04 | 31932165                | CC                              | TT                | 1945951819               |
| SNP_P3_50481_31932452 | NC_021163.1    | Ca_kabuli_chr04 | 31932452                | CC                              | TT                | 1945951821               |
| SNP_P3_50484_31934530 | NC_021163.1    | Ca_kabuli_chr04 | 31934530                | GG                              | AA                | 1945951822               |
| SNP_P3_50485_31934917 | NC_021163.1    | Ca_kabuli_chr04 | 31934917                | AA                              | GG                | 1945951824               |
| SNP_P3_50486_31934955 | NC_021163.1    | Ca_kabuli_chr04 | 31934955                | CC                              | GG                | 1945951826               |
| SNP_P3_50487_31938071 | NC_021163.1    | Ca_kabuli_chr04 | 31938071                | AA                              | CC                | 1945951828               |
| SNP_P3_50488_31938191 | NC_021163.1    | Ca_kabuli_chr04 | 31938191                | TT                              | CC                | 1945951829               |
| SNP_P3_50489_31938222 | NC_021163.1    | Ca_kabuli_chr04 | 31938222                | TT                              | GG                | 1945951831               |
| SNP_P3_50491_31941768 | NC_021163.1    | Ca_kabuli_chr04 | 31941768                | AA                              | GG                | 1945951833               |
| SNP_P3_50492_31946183 | NC_021163.1    | Ca_kabuli_chr04 | 31946183                | TT                              | AA                | 1945951835               |
| SNP_P3_50493_31948705 | NC_021163.1    | Ca_kabuli_chr04 | 31948705                | TT                              | GG                | 1945951837               |
| SNP_P3_50494_31950527 | NC_021163.1    | Ca_kabuli_chr04 | 31950527                | AA                              | GG                | 1945951838               |
| SNP_P3_50496_31951139 | NC_021163.1    | Ca_kabuli_chr04 | 31951139                | TT                              | CC                | 1945951840               |
| SNP_P3_50497_31953517 | NC_021163.1    | Ca_kabuli_chr04 | 31953517                | TT                              | GG                | 1945951842               |
| SNP_P3_50498_31953850 | NC_021163.1    | Ca_kabuli_chr04 | 31953850                | TT                              | GG                | 1945951844               |
| SNP_P3_50499_31953854 | NC_021163.1    | Ca_kabuli_chr04 | 31953854                | AA                              | TT                | 1945951846               |
| SNP_P3_50500_31953893 | NC_021163.1    | Ca_kabuli_chr04 | 31953893                | AA                              | TT                | 1945951847               |
| SNP_P3_50501_31953894 | NC_021163.1    | Ca_kabuli_chr04 | 31953894                | AA                              | CC                | 1945951849               |
| SNP_P3_50502_31953922 | NC_021163.1    | Ca_kabuli_chr04 | 31953922                | TT                              | AA                | 1945951851               |
| SNP_P3_50503_31953936 | NC_021163.1    | Ca_kabuli_chr04 | 31953936                | AA                              | CC                | 1945951853               |
| SNP_P3_50504_31953937 | NC_021163.1    | Ca_kabuli_chr04 | 31953937                | GG                              | AA                | 1945951854               |
| SNP_P3_50505_31954628 | NC_021163.1    | Ca_kabuli_chr04 | 31954628                | AA                              | GG                | 1945951856               |
| SNP_P3_50506_31954629 | NC_021163.1    | Ca_kabuli_chr04 | 31954629                | CC                              | TT                | 1945951858               |
| SNP_P3_50507_31955631 | NC_021163.1    | Ca_kabuli_chr04 | 31955631                | CC                              | TT                | 1945951860               |
| SNP_P3_50508_31955633 | NC_021163.1    | Ca_kabuli_chr04 | 31955633                | AA                              | GG                | 1945951862               |
| SNP_P3_50509_31955669 | NC_021163.1    | Ca_kabuli_chr04 | 31955669                | TT                              | CC                | 1945951863               |
| SNP_P3_50510_31957540 | NC_021163.1    | Ca_kabuli_chr04 | 31957540                | TT                              | GG                | 1945951865               |
| SNP_P3_50511_31959553 | NC_021163.1    | Ca_kabuli_chr04 | 31959553                | AA                              | GG                | 1945951867               |
| SNP_P3_50512_31959691 | NC_021163.1    | Ca_kabuli_chr04 | 31959691                | GG                              | TT                | 1945951869               |
| SNP_P3_50513_31959693 | NC_021163.1    | Ca_kabuli_chr04 | 31959693                | CC                              | TT                | 1945951871               |
| SNP_P3_50514_31959701 | NC_021163.1    | Ca_kabuli_chr04 | 31959701                | AA                              | GG                | 1945951872               |
| SNP_P3_50515_31962515 | NC_021163.1    | Ca_kabuli_chr04 | 31962515                | CC                              | TT                | 1945951874               |
| SNP_P3_50516_31962545 | NC_021163.1    | Ca_kabuli_chr04 | 31962545                | CC                              | TT                | 1945951876               |
| SNP_P3_50517_31962690 | NC_021163.1    | Ca_kabuli_chr04 | 31962690                | AA                              | TT                | 1945951878               |
| SNP_P3_50519_31962960 | NC_021163.1    | Ca_kabuli_chr04 | 31962960                | CC                              | TT                | 1945951879               |
| SNP_P3_50520_31962963 | NC_021163.1    | Ca_kabuli_chr04 | 31962963                | CC                              | TT                | 1945951881               |
| SNP_P3_50521_31962965 | NC_021163.1    | Ca_kabuli_chr04 | 31962965                | GG                              | TT                | 1945951883               |

| SNPs IDs              | Chromosome IDs | Chromosomes     | Physical positions (bp) | CDC Frontier (Reference genome) | (Pusa 256 & HPNB) | NCBI SNPdb Accession IDs |
|-----------------------|----------------|-----------------|-------------------------|---------------------------------|-------------------|--------------------------|
| SNP_P3_50522_31962972 | NC_021163.1    | Ca_kabuli_chr04 | 31962972                | AA                              | GG                | 1945951885               |
| SNP_P3_50523_31962975 | NC_021163.1    | Ca_kabuli_chr04 | 31962975                | CC                              | TT                | 1945951887               |
| SNP_P3_50524_31962981 | NC_021163.1    | Ca_kabuli_chr04 | 31962981                | CC                              | TT                | 1945951888               |
| SNP_P3_50525_31962987 | NC_021163.1    | Ca_kabuli_chr04 | 31962987                | AA                              | TT                | 1945951890               |
| SNP_P3_50526_31963001 | NC_021163.1    | Ca_kabuli_chr04 | 31963001                | TT                              | GG                | 1945951892               |
| SNP_P3_50527_31963195 | NC_021163.1    | Ca_kabuli_chr04 | 31963195                | AA                              | TT                | 1945951894               |
| SNP_P3_50528_31963234 | NC_021163.1    | Ca_kabuli_chr04 | 31963234                | GG                              | AA                | 1945951895               |
| SNP_P3_50529_31963238 | NC_021163.1    | Ca_kabuli_chr04 | 31963238                | GG                              | TT                | 1945951897               |
| SNP_P3_50530_31963404 | NC_021163.1    | Ca_kabuli_chr04 | 31963404                | CC                              | TT                | 1945951899               |
| SNP_P3_50532_31966035 | NC_021163.1    | Ca_kabuli_chr04 | 31966035                | GG                              | AA                | 1945951901               |
| SNP_P3_50533_31966284 | NC_021163.1    | Ca_kabuli_chr04 | 31966284                | TT                              | CC                | 1945951903               |
| SNP_P3_50534_31966328 | NC_021163.1    | Ca_kabuli_chr04 | 31966328                | AA                              | CC                | 1945951904               |
| SNP_P3_50535_31966352 | NC_021163.1    | Ca_kabuli_chr04 | 31966352                | TT                              | GG                | 1945951906               |
| SNP_P3_50537_31968696 | NC_021163.1    | Ca_kabuli_chr04 | 31968696                | AA                              | GG                | 1945951908               |
| SNP_P3_50538_31969907 | NC_021163.1    | Ca_kabuli_chr04 | 31969907                | AA                              | CC                | 1945951910               |
| SNP_P3_50540_31970213 | NC_021163.1    | Ca_kabuli_chr04 | 31970213                | TT                              | CC                | 1945951912               |
| SNP_P3_50541_31973553 | NC_021163.1    | Ca_kabuli_chr04 | 31973553                | CC                              | TT                | 1945951913               |
| SNP_P3_50542_31973554 | NC_021163.1    | Ca_kabuli_chr04 | 31973554                | AA                              | TT                | 1945951915               |
| SNP_P3_50543_31973579 | NC_021163.1    | Ca_kabuli_chr04 | 31973579                | AA                              | GG                | 1945951917               |
| SNP_P3_50544_31973581 | NC_021163.1    | Ca_kabuli_chr04 | 31973581                | TT                              | CC                | 1945951919               |
| SNP_P3_50545_31973585 | NC_021163.1    | Ca_kabuli_chr04 | 31973585                | AA                              | GG                | 1945951921               |
| SNP_P3_50546_31973683 | NC_021163.1    | Ca_kabuli_chr04 | 31973683                | AA                              | GG                | 1945951922               |
| SNP_P3_50547_31974306 | NC_021163.1    | Ca_kabuli_chr04 | 31974306                | TT                              | AA                | 1945951924               |
| SNP_P3_50548_31974308 | NC_021163.1    | Ca_kabuli_chr04 | 31974308                | AA                              | CC                | 1945951926               |
| SNP_P3_50549_31974331 | NC_021163.1    | Ca_kabuli_chr04 | 31974331                | TT                              | CC                | 1945951928               |
| SNP_P3_50550_31975387 | NC_021163.1    | Ca_kabuli_chr04 | 31975387                | CC                              | TT                | 1945951929               |
| SNP_P3_50551_31975400 | NC_021163.1    | Ca_kabuli_chr04 | 31975400                | AA                              | GG                | 1945951931               |
| SNP_P3_50552_31975405 | NC_021163.1    | Ca_kabuli_chr04 | 31975405                | TT                              | AA                | 1945951933               |
| SNP_P3_50553_31975408 | NC_021163.1    | Ca_kabuli_chr04 | 31975408                | CC                              | TT                | 1945951935               |
| SNP_P3_50554_31975415 | NC_021163.1    | Ca_kabuli_chr04 | 31975415                | GG                              | AA                | 1945951937               |
| SNP_P3_50555_31975433 | NC_021163.1    | Ca_kabuli_chr04 | 31975433                | AA                              | TT                | 1945951938               |
| SNP_P3_50556_31976080 | NC_021163.1    | Ca_kabuli_chr04 | 31976080                | TT                              | CC                | 1945951940               |
| SNP_P3_50557_31977638 | NC_021163.1    | Ca_kabuli_chr04 | 31977638                | AA                              | GG                | 1945951942               |
| SNP_P3_50558_31978282 | NC_021163.1    | Ca_kabuli_chr04 | 31978282                | AA                              | TT                | 1945951944               |
| SNP_P3_50559_31978823 | NC_021163.1    | Ca_kabuli_chr04 | 31978823                | TT                              | GG                | 1945951946               |
| SNP_P3_50560_31978827 | NC_021163.1    | Ca_kabuli_chr04 | 31978827                | CC                              | AA                | 1945951947               |
| SNP_P3_50561_31978845 | NC_021163.1    | Ca_kabuli_chr04 | 31978845                | AA                              | GG                | 1945951949               |
| SNP_P3_50563_31980250 | NC_021163.1    | Ca_kabuli_chr04 | 31980250                | GG                              | AA                | 1945951951               |
| SNP_P3_50564_31983374 | NC_021163.1    | Ca_kabuli_chr04 | 31983374                | AA                              | TT                | 1945951953               |
| SNP_P3_50565_31988472 | NC_021163.1    | Ca_kabuli_chr04 | 31988472                | AA                              | CC                | 1945951954               |
| SNP_P3_50566_31988563 | NC_021163.1    | Ca_kabuli_chr04 | 31988563                | AA                              | GG                | 1945951956               |
| SNP_P3_50567_31988583 | NC_021163.1    | Ca_kabuli_chr04 | 31988583                | GG                              | AA                | 1945951958               |

| SNPs IDs              | Chromosome IDs | Chromosomes     | Physical positions (bp) | CDC Frontier (Reference genome) | (Pusa 256 & HPNB) | NCBI SNPdb Accession IDs |
|-----------------------|----------------|-----------------|-------------------------|---------------------------------|-------------------|--------------------------|
| SNP_P3_50569_31988649 | NC_021163.1    | Ca_kabuli_chr04 | 31988649                | GG                              | AA                | 1945951960               |
| SNP_P3_50570_31988864 | NC_021163.1    | Ca_kabuli_chr04 | 31988864                | AA                              | GG                | 1945951962               |
| SNP_P3_50571_31988876 | NC_021163.1    | Ca_kabuli_chr04 | 31988876                | CC                              | TT                | 1945951963               |
| SNP_P3_50572_31988889 | NC_021163.1    | Ca_kabuli_chr04 | 31988889                | GG                              | CC                | 1945951965               |
| SNP_P3_50574_31989482 | NC_021163.1    | Ca_kabuli_chr04 | 31989482                | TT                              | CC                | 1945951967               |
| SNP_P3_50575_31989501 | NC_021163.1    | Ca_kabuli_chr04 | 31989501                | GG                              | AA                | 1945951969               |
| SNP_P3_50576_31989655 | NC_021163.1    | Ca_kabuli_chr04 | 31989655                | TT                              | GG                | 1945951970               |
| SNP_P3_50577_31989786 | NC_021163.1    | Ca_kabuli_chr04 | 31989786                | AA                              | GG                | 1945951972               |
| SNP_P3_50578_31990086 | NC_021163.1    | Ca_kabuli_chr04 | 31990086                | TT                              | GG                | 1945951974               |
| SNP_P3_50579_31990313 | NC_021163.1    | Ca_kabuli_chr04 | 31990313                | CC                              | TT                | 1945951976               |
| SNP_P3_50580_31990362 | NC_021163.1    | Ca_kabuli_chr04 | 31990362                | GG                              | TT                | 1945951978               |
| SNP_P3_50581_31990722 | NC_021163.1    | Ca_kabuli_chr04 | 31990722                | GG                              | AA                | 1945951979               |
| SNP_P3_50582_31991222 | NC_021163.1    | Ca_kabuli_chr04 | 31991222                | AA                              | CC                | 1945951981               |
| SNP_P3_50583_31991837 | NC_021163.1    | Ca_kabuli_chr04 | 31991837                | AA                              | GG                | 1945951983               |
| SNP_P3_50584_31991860 | NC_021163.1    | Ca_kabuli_chr04 | 31991860                | TT                              | GG                | 1945951985               |
| SNP_P3_50585_31991907 | NC_021163.1    | Ca_kabuli_chr04 | 31991907                | GG                              | TT                | 1945951987               |
| SNP_P3_50586_31991908 | NC_021163.1    | Ca_kabuli_chr04 | 31991908                | TT                              | GG                | 1945951988               |
| SNP_P3_50587_31992546 | NC_021163.1    | Ca_kabuli_chr04 | 31992546                | TT                              | CC                | 1945951990               |
| SNP_P3_50588_31992889 | NC_021163.1    | Ca_kabuli_chr04 | 31992889                | CC                              | TT                | 1945951992               |
| SNP_P3_50590_31995688 | NC_021163.1    | Ca_kabuli_chr04 | 31995688                | TT                              | CC                | 1945951994               |
| SNP_P3_50591_31996416 | NC_021163.1    | Ca_kabuli_chr04 | 31996416                | AA                              | GG                | 1945951995               |
| SNP_P3_50592_31996476 | NC_021163.1    | Ca_kabuli_chr04 | 31996476                | AA                              | TT                | 1945951997               |
| SNP_P3_50593_31998044 | NC_021163.1    | Ca_kabuli_chr04 | 31998044                | GG                              | AA                | 1945951999               |
| SNP_P3_50594_31998442 | NC_021163.1    | Ca_kabuli_chr04 | 31998442                | CC                              | TT                | 1945952001               |
| SNP_P3_50595_31998672 | NC_021163.1    | Ca_kabuli_chr04 | 31998672                | GG                              | CC                | 1945952003               |
| SNP_P3_50596_31998753 | NC_021163.1    | Ca_kabuli_chr04 | 31998753                | AA                              | GG                | 1945952004               |
| SNP_P3_50597_31999354 | NC_021163.1    | Ca_kabuli_chr04 | 31999354                | GG                              | TT                | 1945952006               |
| SNP_P3_50598_31999386 | NC_021163.1    | Ca_kabuli_chr04 | 31999386                | CC                              | TT                | 1945952008               |
| SNP_P3_50599_31999454 | NC_021163.1    | Ca_kabuli_chr04 | 31999454                | AA                              | GG                | 1945952010               |
| SNP_P3_50600_32000096 | NC_021163.1    | Ca_kabuli_chr04 | 32000096                | CC                              | TT                | 1945952011               |
| SNP_P3_50601_32000113 | NC_021163.1    | Ca_kabuli_chr04 | 32000113                | CC                              | GG                | 1945952013               |
| SNP_P3_50602_32000114 | NC_021163.1    | Ca_kabuli_chr04 | 32000114                | AA                              | CC                | 1945952015               |
| SNP_P3_50603_32000115 | NC_021163.1    | Ca_kabuli_chr04 | 32000115                | TT                              | CC                | 1945952017               |
| SNP_P3_50604_32000130 | NC_021163.1    | Ca_kabuli_chr04 | 32000130                | TT                              | CC                | 1945952019               |
| SNP_P3_50605_32000133 | NC_021163.1    | Ca_kabuli_chr04 | 32000133                | GG                              | AA                | 1945952020               |
| SNP_P3_50606_32000242 | NC_021163.1    | Ca_kabuli_chr04 | 32000242                | GG                              | AA                | 1945952022               |
| SNP_P3_50607_32001792 | NC_021163.1    | Ca_kabuli_chr04 | 32001792                | CC                              | TT                | 1945952024               |
| SNP_P3_50608_32001798 | NC_021163.1    | Ca_kabuli_chr04 | 32001798                | TT                              | CC                | 1945952026               |
| SNP_P3_50609_32002086 | NC_021163.1    | Ca_kabuli_chr04 | 32002086                | TT                              | CC                | 1945952028               |
| SNP_P3_50610_32002516 | NC_021163.1    | Ca_kabuli_chr04 | 32002516                | CC                              | TT                | 1945952029               |
| SNP_P3_50611_32002539 | NC_021163.1    | Ca_kabuli_chr04 | 32002539                | TT                              | CC                | 1945952031               |
| SNP_P3_50612_32002559 | NC_021163.1    | Ca_kabuli_chr04 | 32002559                | CC                              | TT                | 1945952033               |



| SNPs IDs              | Chromosome IDs | Chromosomes     | Physical positions (bp) | CDC Frontier (Reference genome) | (Pusa 256 & HPNB) | NCBI SNPdb Accession IDs |
|-----------------------|----------------|-----------------|-------------------------|---------------------------------|-------------------|--------------------------|
| SNP_P3_50613_32002658 | NC_021163.1    | Ca_kabuli_chr04 | 32002658                | CC                              | TT                | 1945952035               |
| SNP_P3_50614_32002687 | NC_021163.1    | Ca_kabuli_chr04 | 32002687                | GG                              | AA                | 1945952036               |
| SNP_P3_50615_32002717 | NC_021163.1    | Ca_kabuli_chr04 | 32002717                | TT                              | AA                | 1945952038               |
| SNP_P3_50616_32002752 | NC_021163.1    | Ca_kabuli_chr04 | 32002752                | GG                              | AA                | 1945952040               |
| SNP_P3_50617_32003308 | NC_021163.1    | Ca_kabuli_chr04 | 32003308                | CC                              | TT                | 1945952042               |
| SNP_P3_50618_32003354 | NC_021163.1    | Ca_kabuli_chr04 | 32003354                | GG                              | AA                | 1945952044               |
| SNP_P3_50620_32004071 | NC_021163.1    | Ca_kabuli_chr04 | 32004071                | CC                              | GG                | 1945952045               |
| SNP_P3_50621_32004209 | NC_021163.1    | Ca_kabuli_chr04 | 32004209                | AA                              | GG                | 1945952047               |
| SNP_P3_50623_32005186 | NC_021163.1    | Ca_kabuli_chr04 | 32005186                | CC                              | TT                | 1945952049               |
| SNP_P3_50624_32005278 | NC_021163.1    | Ca_kabuli_chr04 | 32005278                | CC                              | GG                | 1945952051               |
| SNP_P3_50626_32005694 | NC_021163.1    | Ca_kabuli_chr04 | 32005694                | TT                              | GG                | 1945952053               |
| SNP_P3_50627_32006014 | NC_021163.1    | Ca_kabuli_chr04 | 32006014                | CC                              | TT                | 1945952054               |
| SNP_P3_50628_32006523 | NC_021163.1    | Ca_kabuli_chr04 | 32006523                | GG                              | CC                | 1945952056               |
| SNP_P3_50630_32007693 | NC_021163.1    | Ca_kabuli_chr04 | 32007693                | AA                              | GG                | 1945952058               |
| SNP_P3_50631_32007710 | NC_021163.1    | Ca_kabuli_chr04 | 32007710                | CC                              | TT                | 1945952060               |
| SNP_P3_50632_32007733 | NC_021163.1    | Ca_kabuli_chr04 | 32007733                | AA                              | TT                | 1945952061               |
| SNP_P3_50634_32008206 | NC_021163.1    | Ca_kabuli_chr04 | 32008206                | GG                              | TT                | 1945952063               |
| SNP_P3_50635_32008705 | NC_021163.1    | Ca_kabuli_chr04 | 32008705                | TT                              | CC                | 1945952065               |
| SNP_P3_50636_32009024 | NC_021163.1    | Ca_kabuli_chr04 | 32009024                | GG                              | AA                | 1945952067               |
| SNP_P3_50637_32011959 | NC_021163.1    | Ca_kabuli_chr04 | 32011959                | GG                              | TT                | 1945952069               |
| SNP_P3_50638_32011989 | NC_021163.1    | Ca_kabuli_chr04 | 32011989                | AA                              | CC                | 1945952070               |
| SNP_P3_50640_32012035 | NC_021163.1    | Ca_kabuli_chr04 | 32012035                | CC                              | GG                | 1945952072               |
| SNP_P3_50641_32012052 | NC_021163.1    | Ca_kabuli_chr04 | 32012052                | TT                              | GG                | 1945952074               |
| SNP_P3_50642_32012328 | NC_021163.1    | Ca_kabuli_chr04 | 32012328                | GG                              | AA                | 1945952076               |
| SNP_P3_50643_32012527 | NC_021163.1    | Ca_kabuli_chr04 | 32012527                | TT                              | GG                | 1945952078               |
| SNP_P3_50644_32012882 | NC_021163.1    | Ca_kabuli_chr04 | 32012882                | AA                              | GG                | 1945952079               |
| SNP_P3_50645_32012914 | NC_021163.1    | Ca_kabuli_chr04 | 32012914                | GG                              | CC                | 1945952081               |
| SNP_P3_50646_32013612 | NC_021163.1    | Ca_kabuli_chr04 | 32013612                | AA                              | CC                | 1945952083               |
| SNP_P3_50647_32013642 | NC_021163.1    | Ca_kabuli_chr04 | 32013642                | CC                              | AA                | 1945952085               |
| SNP_P3_50648_32014632 | NC_021163.1    | Ca_kabuli_chr04 | 32014632                | TT                              | CC                | 1945952086               |
| SNP_P3_50649_32014684 | NC_021163.1    | Ca_kabuli_chr04 | 32014684                | GG                              | AA                | 1945952088               |
| SNP_P3_50650_32015971 | NC_021163.1    | Ca_kabuli_chr04 | 32015971                | GG                              | AA                | 1945952090               |
| SNP_P3_50651_32015980 | NC_021163.1    | Ca_kabuli_chr04 | 32015980                | TT                              | CC                | 1945952092               |
| SNP_P3_50652_32016005 | NC_021163.1    | Ca_kabuli_chr04 | 32016005                | TT                              | CC                | 1945952094               |
| SNP_P3_50654_32017314 | NC_021163.1    | Ca_kabuli_chr04 | 32017314                | AA                              | GG                | 1945952095               |
| SNP_P3_50655_32017474 | NC_021163.1    | Ca_kabuli_chr04 | 32017474                | AA                              | GG                | 1945952097               |
| SNP_P3_50656_32017528 | NC_021163.1    | Ca_kabuli_chr04 | 32017528                | GG                              | TT                | 1945952099               |
| SNP_P3_50657_32017823 | NC_021163.1    | Ca_kabuli_chr04 | 32017823                | TT                              | CC                | 1945952101               |
| SNP_P3_50658_32018136 | NC_021163.1    | Ca_kabuli_chr04 | 32018136                | AA                              | GG                | 1945952103               |
| SNP_P3_50659_32018208 | NC_021163.1    | Ca_kabuli_chr04 | 32018208                | TT                              | CC                | 1945952104               |
| SNP_P3_50660_32018210 | NC_021163.1    | Ca_kabuli_chr04 | 32018210                | TT                              | AA                | 1945952106               |
| SNP_P3_50661_32018215 | NC_021163.1    | Ca_kabuli_chr04 | 32018215                | TT                              | CC                | 1945952108               |

| SNPs IDs              | Chromosome IDs | Chromosomes     | Physical positions (bp) | CDC Frontier (Reference genome) | (Pusa 256 & HPNB) | NCBI SNPdb Accession IDs |
|-----------------------|----------------|-----------------|-------------------------|---------------------------------|-------------------|--------------------------|
| SNP_P3_50662_32018220 | NC_021163.1    | Ca_kabuli_chr04 | 32018220                | AA                              | TT                | 1945952110               |
| SNP_P3_50664_32018283 | NC_021163.1    | Ca_kabuli_chr04 | 32018283                | AA                              | TT                | 1945952111               |
| SNP_P3_50665_32018286 | NC_021163.1    | Ca_kabuli_chr04 | 32018286                | TT                              | AA                | 1945952113               |
| SNP_P3_50666_32018291 | NC_021163.1    | Ca_kabuli_chr04 | 32018291                | TT                              | AA                | 1945952115               |
| SNP_P3_50668_32018470 | NC_021163.1    | Ca_kabuli_chr04 | 32018470                | GG                              | AA                | 1945952117               |
| SNP_P3_50669_32018499 | NC_021163.1    | Ca_kabuli_chr04 | 32018499                | TT                              | CC                | 1945952119               |
| SNP_P3_50670_32019465 | NC_021163.1    | Ca_kabuli_chr04 | 32019465                | TT                              | CC                | 1945952120               |
| SNP_P3_50672_32021880 | NC_021163.1    | Ca_kabuli_chr04 | 32021880                | TT                              | GG                | 1945952122               |
| SNP_P3_50673_32021905 | NC_021163.1    | Ca_kabuli_chr04 | 32021905                | GG                              | AA                | 1945952124               |
| SNP_P3_50674_32021918 | NC_021163.1    | Ca_kabuli_chr04 | 32021918                | GG                              | CC                | 1945952126               |
| SNP_P3_50675_32031837 | NC_021163.1    | Ca_kabuli_chr04 | 32031837                | AA                              | GG                | 1945952127               |
| SNP_P3_50676_32031912 | NC_021163.1    | Ca_kabuli_chr04 | 32031912                | CC                              | TT                | 1945952129               |
| SNP_P3_50677_32032014 | NC_021163.1    | Ca_kabuli_chr04 | 32032014                | TT                              | CC                | 1945952131               |
| SNP_P3_50678_32032074 | NC_021163.1    | Ca_kabuli_chr04 | 32032074                | GG                              | AA                | 1945952133               |
| SNP_P3_50681_32035068 | NC_021163.1    | Ca_kabuli_chr04 | 32035068                | AA                              | GG                | 1945952135               |
| SNP_P3_50682_32035069 | NC_021163.1    | Ca_kabuli_chr04 | 32035069                | TT                              | CC                | 1945952136               |
| SNP_P3_50683_32035108 | NC_021163.1    | Ca_kabuli_chr04 | 32035108                | TT                              | GG                | 1945952138               |
| SNP_P3_50684_32035610 | NC_021163.1    | Ca_kabuli_chr04 | 32035610                | AA                              | TT                | 1945952140               |
| SNP_P3_50685_32037820 | NC_021163.1    | Ca_kabuli_chr04 | 32037820                | CC                              | TT                | 1945952142               |
| SNP_P3_50686_32037926 | NC_021163.1    | Ca_kabuli_chr04 | 32037926                | GG                              | TT                | 1945952144               |
| SNP_P3_50687_32037941 | NC_021163.1    | Ca_kabuli_chr04 | 32037941                | GG                              | AA                | 1945952145               |
| SNP_P3_50688_32037970 | NC_021163.1    | Ca_kabuli_chr04 | 32037970                | AA                              | GG                | 1945952147               |
| SNP_P3_50689_32037995 | NC_021163.1    | Ca_kabuli_chr04 | 32037995                | AA                              | CC                | 1945952149               |
| SNP_P3_50690_32038032 | NC_021163.1    | Ca_kabuli_chr04 | 32038032                | GG                              | CC                | 1945952151               |
| SNP_P3_50691_32038214 | NC_021163.1    | Ca_kabuli_chr04 | 32038214                | AA                              | GG                | 1945952152               |
| SNP_P3_50692_32038215 | NC_021163.1    | Ca_kabuli_chr04 | 32038215                | CC                              | TT                | 1945952154               |
| SNP_P3_50694_32038241 | NC_021163.1    | Ca_kabuli_chr04 | 32038241                | AA                              | GG                | 1945952156               |
| SNP_P3_50695_32038475 | NC_021163.1    | Ca_kabuli_chr04 | 32038475                | AA                              | GG                | 1945952158               |
| SNP_P3_50696_32038479 | NC_021163.1    | Ca_kabuli_chr04 | 32038479                | TT                              | CC                | 1945952160               |
| SNP_P3_50697_32038505 | NC_021163.1    | Ca_kabuli_chr04 | 32038505                | CC                              | TT                | 1945952161               |
| SNP_P3_50698_32038508 | NC_021163.1    | Ca_kabuli_chr04 | 32038508                | GG                              | AA                | 1945952163               |
| SNP_P3_50699_32039428 | NC_021163.1    | Ca_kabuli_chr04 | 32039428                | CC                              | AA                | 1945952165               |
| SNP_P3_50700_32039431 | NC_021163.1    | Ca_kabuli_chr04 | 32039431                | TT                              | AA                | 1945952167               |
| SNP_P3_50701_32039436 | NC_021163.1    | Ca_kabuli_chr04 | 32039436                | GG                              | CC                | 1945952169               |
| SNP_P3_50702_32039467 | NC_021163.1    | Ca_kabuli_chr04 | 32039467                | GG                              | AA                | 1945952170               |
| SNP_P3_50703_32039471 | NC_021163.1    | Ca_kabuli_chr04 | 32039471                | GG                              | AA                | 1945952172               |
| SNP_P3_50705_32042895 | NC_021163.1    | Ca_kabuli_chr04 | 32042895                | CC                              | TT                | 1945952174               |
| SNP_P3_50706_32043165 | NC_021163.1    | Ca_kabuli_chr04 | 32043165                | AA                              | GG                | 1945952176               |
| SNP_P3_50707_32043237 | NC_021163.1    | Ca_kabuli_chr04 | 32043237                | GG                              | AA                | 1945952178               |
| SNP_P3_50710_32047164 | NC_021163.1    | Ca_kabuli_chr04 | 32047164                | TT                              | GG                | 1945952179               |
| SNP_P3_50711_32048064 | NC_021163.1    | Ca_kabuli_chr04 | 32048064                | TT                              | CC                | 1945952181               |
| SNP_P3_50712_32048074 | NC_021163.1    | Ca_kabuli_chr04 | 32048074                | CC                              | TT                | 1945952183               |

| SNPs IDs              | Chromosome IDs | Chromosomes     | Physical positions (bp) | CDC Frontier (Reference genome) | (Pusa 256 & HPNB) | NCBI SNPdb Accession IDs |
|-----------------------|----------------|-----------------|-------------------------|---------------------------------|-------------------|--------------------------|
| SNP_P3_50713_32051612 | NC_021163.1    | Ca_kabuli_chr04 | 32051612                | TT                              | CC                | 1945952185               |
| SNP_P3_50714_32051845 | NC_021163.1    | Ca_kabuli_chr04 | 32051845                | AA                              | GG                | 1945952186               |
| SNP_P3_50716_32051999 | NC_021163.1    | Ca_kabuli_chr04 | 32051999                | AA                              | GG                | 1945952188               |
| SNP_P3_50717_32052026 | NC_021163.1    | Ca_kabuli_chr04 | 32052026                | AA                              | GG                | 1945952190               |
| SNP_P3_50718_32052050 | NC_021163.1    | Ca_kabuli_chr04 | 32052050                | GG                              | AA                | 1945952192               |
| SNP_P3_50719_32052055 | NC_021163.1    | Ca_kabuli_chr04 | 32052055                | CC                              | TT                | 1945952194               |
| SNP_P3_50720_32052264 | NC_021163.1    | Ca_kabuli_chr04 | 32052264                | CC                              | TT                | 1945952195               |
| SNP_P3_50721_32052446 | NC_021163.1    | Ca_kabuli_chr04 | 32052446                | AA                              | GG                | 1945952197               |
| SNP_P3_50723_32054553 | NC_021163.1    | Ca_kabuli_chr04 | 32054553                | CC                              | AA                | 1945952199               |
| SNP_P3_50724_32054558 | NC_021163.1    | Ca_kabuli_chr04 | 32054558                | AA                              | GG                | 1945952201               |
| SNP_P3_50725_32054866 | NC_021163.1    | Ca_kabuli_chr04 | 32054866                | TT                              | CC                | 1945952202               |
| SNP_P3_50726_32054909 | NC_021163.1    | Ca_kabuli_chr04 | 32054909                | AA                              | GG                | 1945952204               |
| SNP_P3_50727_32054910 | NC_021163.1    | Ca_kabuli_chr04 | 32054910                | AA                              | TT                | 1945952206               |
| SNP_P3_50728_32054979 | NC_021163.1    | Ca_kabuli_chr04 | 32054979                | AA                              | TT                | 1945952208               |
| SNP_P3_50729_32055378 | NC_021163.1    | Ca_kabuli_chr04 | 32055378                | CC                              | TT                | 1945952210               |
| SNP_P3_50730_32056755 | NC_021163.1    | Ca_kabuli_chr04 | 32056755                | TT                              | AA                | 1945952211               |
| SNP_P3_50731_32056758 | NC_021163.1    | Ca_kabuli_chr04 | 32056758                | TT                              | AA                | 1945952213               |
| SNP_P3_50733_32056795 | NC_021163.1    | Ca_kabuli_chr04 | 32056795                | AA                              | TT                | 1945952215               |
| SNP_P3_50734_32056797 | NC_021163.1    | Ca_kabuli_chr04 | 32056797                | AA                              | CC                | 1945952217               |
| SNP_P3_50737_32057316 | NC_021163.1    | Ca_kabuli_chr04 | 32057316                | TT                              | CC                | 1945952219               |
| SNP_P3_50738_32057354 | NC_021163.1    | Ca_kabuli_chr04 | 32057354                | AA                              | GG                | 1945952220               |
| SNP_P3_50739_32057399 | NC_021163.1    | Ca_kabuli_chr04 | 32057399                | GG                              | AA                | 1945952222               |
| SNP_P3_50741_32057778 | NC_021163.1    | Ca_kabuli_chr04 | 32057778                | CC                              | TT                | 1945952224               |
| SNP_P3_50742_32060411 | NC_021163.1    | Ca_kabuli_chr04 | 32060411                | CC                              | TT                | 1945952226               |
| SNP_P3_50743_32060420 | NC_021163.1    | Ca_kabuli_chr04 | 32060420                | GG                              | CC                | 1945952227               |
| SNP_P3_50745_32062665 | NC_021163.1    | Ca_kabuli_chr04 | 32062665                | AA                              | CC                | 1945952229               |
| SNP_P3_50746_32062967 | NC_021163.1    | Ca_kabuli_chr04 | 32062967                | TT                              | CC                | 1945952231               |
| SNP_P3_50747_32063223 | NC_021163.1    | Ca_kabuli_chr04 | 32063223                | AA                              | CC                | 1945952233               |
| SNP_P3_50748_32067401 | NC_021163.1    | Ca_kabuli_chr04 | 32067401                | GG                              | AA                | 1945952235               |
| SNP_P3_50749_32067639 | NC_021163.1    | Ca_kabuli_chr04 | 32067639                | CC                              | GG                | 1945952236               |
| SNP_P3_50751_32067826 | NC_021163.1    | Ca_kabuli_chr04 | 32067826                | AA                              | GG                | 1945952238               |
| SNP_P3_50752_32083185 | NC_021163.1    | Ca_kabuli_chr04 | 32083185                | AA                              | GG                | 1945952240               |
| SNP_P3_50753_32083299 | NC_021163.1    | Ca_kabuli_chr04 | 32083299                | AA                              | GG                | 1945952242               |
| SNP_P3_50754_32083302 | NC_021163.1    | Ca_kabuli_chr04 | 32083302                | AA                              | TT                | 1945952243               |
| SNP_P3_50755_32083354 | NC_021163.1    | Ca_kabuli_chr04 | 32083354                | GG                              | AA                | 1945952245               |
| SNP_P3_50756_32083372 | NC_021163.1    | Ca_kabuli_chr04 | 32083372                | GG                              | AA                | 1945952247               |
| SNP_P3_50757_32083421 | NC_021163.1    | Ca_kabuli_chr04 | 32083421                | AA                              | GG                | 1945952249               |
| SNP_P3_50758_32083471 | NC_021163.1    | Ca_kabuli_chr04 | 32083471                | AA                              | TT                | 1945952251               |
| SNP_P3_50759_32083491 | NC_021163.1    | Ca_kabuli_chr04 | 32083491                | AA                              | GG                | 1945952252               |
| SNP_P3_50760_32083500 | NC_021163.1    | Ca_kabuli_chr04 | 32083500                | GG                              | AA                | 1945952254               |
| SNP_P3_50761_32083522 | NC_021163.1    | Ca_kabuli_chr04 | 32083522                | CC                              | TT                | 1945952256               |
| SNP_P3_50762_32083626 | NC_021163.1    | Ca_kabuli_chr04 | 32083626                | CC                              | TT                | 1945952258               |

| SNPs IDs              | Chromosome IDs | Chromosomes     | Physical positions (bp) | CDC Frontier (Reference genome) | (Pusa 256 & HPNB) | NCBI SNPdb Accession IDs |
|-----------------------|----------------|-----------------|-------------------------|---------------------------------|-------------------|--------------------------|
| SNP_P3_50763_32083693 | NC_021163.1    | Ca_kabuli_chr04 | 32083693                | CC                              | TT                | 1945952260               |
| SNP_P3_50764_32083760 | NC_021163.1    | Ca_kabuli_chr04 | 32083760                | AA                              | GG                | 1945952261               |
| SNP_P3_50765_32083774 | NC_021163.1    | Ca_kabuli_chr04 | 32083774                | TT                              | CC                | 1945952263               |
| SNP_P3_50766_32083776 | NC_021163.1    | Ca_kabuli_chr04 | 32083776                | GG                              | AA                | 1945952265               |
| SNP_P3_50767_32085937 | NC_021163.1    | Ca_kabuli_chr04 | 32085937                | CC                              | TT                | 1945952267               |
| SNP_P3_50768_32085938 | NC_021163.1    | Ca_kabuli_chr04 | 32085938                | AA                              | GG                | 1945952268               |
| SNP_P3_50769_32098767 | NC_021163.1    | Ca_kabuli_chr04 | 32098767                | CC                              | TT                | 1945952270               |
| SNP_P3_50770_32098778 | NC_021163.1    | Ca_kabuli_chr04 | 32098778                | GG                              | AA                | 1945952272               |
| SNP_P3_50771_32098814 | NC_021163.1    | Ca_kabuli_chr04 | 32098814                | AA                              | CC                | 1945952274               |
| SNP_P3_50772_32098816 | NC_021163.1    | Ca_kabuli_chr04 | 32098816                | GG                              | AA                | 1945952276               |
| SNP_P3_50773_32100740 | NC_021163.1    | Ca_kabuli_chr04 | 32100740                | AA                              | TT                | 1945952277               |
| SNP_P3_50774_32100816 | NC_021163.1    | Ca_kabuli_chr04 | 32100816                | TT                              | CC                | 1945952279               |
| SNP_P3_50775_32101949 | NC_021163.1    | Ca_kabuli_chr04 | 32101949                | AA                              | CC                | 1945952281               |
| SNP_P3_50776_32102895 | NC_021163.1    | Ca_kabuli_chr04 | 32102895                | AA                              | GG                | 1945952283               |
| SNP_P3_50778_32103397 | NC_021163.1    | Ca_kabuli_chr04 | 32103397                | CC                              | TT                | 1945952285               |
| SNP_P3_50779_32103944 | NC_021163.1    | Ca_kabuli_chr04 | 32103944                | AA                              | GG                | 1945952286               |
| SNP_P3_50780_32104494 | NC_021163.1    | Ca_kabuli_chr04 | 32104494                | AA                              | CC                | 1945952288               |
| SNP_P3_50782_32105279 | NC_021163.1    | Ca_kabuli_chr04 | 32105279                | CC                              | TT                | 1945952290               |
| SNP_P3_50783_32105430 | NC_021163.1    | Ca_kabuli_chr04 | 32105430                | CC                              | TT                | 1945952292               |
| SNP_P3_50784_32105435 | NC_021163.1    | Ca_kabuli_chr04 | 32105435                | TT                              | AA                | 1945952293               |
| SNP_P3_50785_32105659 | NC_021163.1    | Ca_kabuli_chr04 | 32105659                | TT                              | AA                | 1945952295               |
| SNP_P3_50788_32109012 | NC_021163.1    | Ca_kabuli_chr04 | 32109012                | CC                              | TT                | 1945952297               |
| SNP_P3_50789_32116341 | NC_021163.1    | Ca_kabuli_chr04 | 32116341                | GG                              | TT                | 1945952299               |
| SNP_P3_50790_32116368 | NC_021163.1    | Ca_kabuli_chr04 | 32116368                | CC                              | GG                | 1945952301               |
| SNP_P3_50791_32116606 | NC_021163.1    | Ca_kabuli_chr04 | 32116606                | TT                              | CC                | 1945952302               |
| SNP_P3_50792_32116957 | NC_021163.1    | Ca_kabuli_chr04 | 32116957                | GG                              | TT                | 1945952304               |
| SNP_P3_50793_32117002 | NC_021163.1    | Ca_kabuli_chr04 | 32117002                | GG                              | TT                | 1945952306               |
| SNP_P3_50794_32117041 | NC_021163.1    | Ca_kabuli_chr04 | 32117041                | GG                              | AA                | 1945952308               |
| SNP_P3_50796_32118423 | NC_021163.1    | Ca_kabuli_chr04 | 32118423                | GG                              | AA                | 1945952309               |
| SNP_P3_50797_32118559 | NC_021163.1    | Ca_kabuli_chr04 | 32118559                | CC                              | AA                | 1945952311               |
| SNP_P3_50799_32119122 | NC_021163.1    | Ca_kabuli_chr04 | 32119122                | AA                              | CC                | 1945952313               |
| SNP_P3_50800_32119194 | NC_021163.1    | Ca_kabuli_chr04 | 32119194                | TT                              | CC                | 1945952315               |
| SNP_P3_50801_32120848 | NC_021163.1    | Ca_kabuli_chr04 | 32120848                | AA                              | GG                | 1945952317               |
| SNP_P3_50802_32120981 | NC_021163.1    | Ca_kabuli_chr04 | 32120981                | GG                              | AA                | 1945952318               |
| SNP_P3_50803_32121033 | NC_021163.1    | Ca_kabuli_chr04 | 32121033                | CC                              | TT                | 1945952320               |
| SNP_P3_50804_32121050 | NC_021163.1    | Ca_kabuli_chr04 | 32121050                | AA                              | CC                | 1945952322               |
| SNP_P3_50805_32121052 | NC_021163.1    | Ca_kabuli_chr04 | 32121052                | TT                              | CC                | 1945952324               |
| SNP_P3_50806_32121081 | NC_021163.1    | Ca_kabuli_chr04 | 32121081                | CC                              | GG                | 1945952326               |
| SNP_P3_50807_32121093 | NC_021163.1    | Ca_kabuli_chr04 | 32121093                | GG                              | AA                | 1945952327               |
| SNP_P3_50808_32121151 | NC_021163.1    | Ca_kabuli_chr04 | 32121151                | CC                              | TT                | 1945952329               |
| SNP_P3_50809_32121222 | NC_021163.1    | Ca_kabuli_chr04 | 32121222                | AA                              | CC                | 1945952331               |
| SNP_P3_50810_32121229 | NC_021163.1    | Ca_kabuli_chr04 | 32121229                | GG                              | TT                | 1945952333               |

| SNPs IDs              | Chromosome IDs | Chromosomes     | Physical positions (bp) | CDC Frontier (Reference genome) | (Pusa 256 & HPNB) | NCBI SNPdb Accession IDs |
|-----------------------|----------------|-----------------|-------------------------|---------------------------------|-------------------|--------------------------|
| SNP_P3_50811_32121269 | NC_021163.1    | Ca_kabuli_chr04 | 32121269                | TT                              | CC                | 1945952334               |
| SNP_P3_50812_32121271 | NC_021163.1    | Ca_kabuli_chr04 | 32121271                | GG                              | AA                | 1945952336               |
| SNP_P3_50813_32121275 | NC_021163.1    | Ca_kabuli_chr04 | 32121275                | TT                              | GG                | 1945952338               |
| SNP_P3_50814_32121315 | NC_021163.1    | Ca_kabuli_chr04 | 32121315                | AA                              | GG                | 1945952340               |
| SNP_P3_50815_32121407 | NC_021163.1    | Ca_kabuli_chr04 | 32121407                | AA                              | TT                | 1945952342               |
| SNP_P3_50816_32121408 | NC_021163.1    | Ca_kabuli_chr04 | 32121408                | GG                              | AA                | 1945952343               |
| SNP_P3_50817_32121427 | NC_021163.1    | Ca_kabuli_chr04 | 32121427                | AA                              | GG                | 1945952345               |
| SNP_P3_50818_32121430 | NC_021163.1    | Ca_kabuli_chr04 | 32121430                | AA                              | TT                | 1945952347               |
| SNP_P3_50819_32121483 | NC_021163.1    | Ca_kabuli_chr04 | 32121483                | GG                              | AA                | 1945952349               |
| SNP_P3_50821_32122740 | NC_021163.1    | Ca_kabuli_chr04 | 32122740                | AA                              | GG                | 1945952351               |
| SNP_P3_50822_32122776 | NC_021163.1    | Ca_kabuli_chr04 | 32122776                | CC                              | TT                | 1945952352               |
| SNP_P3_50823_32122880 | NC_021163.1    | Ca_kabuli_chr04 | 32122880                | TT                              | CC                | 1945952354               |
| SNP_P3_50824_32122886 | NC_021163.1    | Ca_kabuli_chr04 | 32122886                | GG                              | AA                | 1945952356               |
| SNP_P3_50825_32125491 | NC_021163.1    | Ca_kabuli_chr04 | 32125491                | CC                              | TT                | 1945952358               |
| SNP_P3_50826_32135890 | NC_021163.1    | Ca_kabuli_chr04 | 32135890                | GG                              | AA                | 1945952359               |
| SNP_P3_50828_32137558 | NC_021163.1    | Ca_kabuli_chr04 | 32137558                | TT                              | CC                | 1945952361               |
| SNP_P3_50831_32139329 | NC_021163.1    | Ca_kabuli_chr04 | 32139329                | TT                              | CC                | 1945952363               |
| SNP_P3_50832_32139737 | NC_021163.1    | Ca_kabuli_chr04 | 32139737                | TT                              | AA                | 1945952365               |
| SNP_P3_50833_32139743 | NC_021163.1    | Ca_kabuli_chr04 | 32139743                | AA                              | TT                | 1945952367               |
| SNP_P3_50835_32140086 | NC_021163.1    | Ca_kabuli_chr04 | 32140086                | CC                              | TT                | 1945952368               |
| SNP_P3_50836_32140114 | NC_021163.1    | Ca_kabuli_chr04 | 32140114                | CC                              | TT                | 1945952370               |
| SNP_P3_50837_32140140 | NC_021163.1    | Ca_kabuli_chr04 | 32140140                | AA                              | GG                | 1945952372               |
| SNP_P3_50838_32140892 | NC_021163.1    | Ca_kabuli_chr04 | 32140892                | TT                              | CC                | 1945952374               |
| SNP_P3_50839_32140928 | NC_021163.1    | Ca_kabuli_chr04 | 32140928                | GG                              | AA                | 1945952376               |
| SNP_P3_50840_32140939 | NC_021163.1    | Ca_kabuli_chr04 | 32140939                | CC                              | TT                | 1945952377               |
| SNP_P3_50841_32140965 | NC_021163.1    | Ca_kabuli_chr04 | 32140965                | CC                              | TT                | 1945952379               |
| SNP_P3_50842_32141405 | NC_021163.1    | Ca_kabuli_chr04 | 32141405                | AA                              | GG                | 1945952381               |
| SNP_P3_50843_32141411 | NC_021163.1    | Ca_kabuli_chr04 | 32141411                | TT                              | GG                | 1945952383               |
| SNP_P3_50844_32141447 | NC_021163.1    | Ca_kabuli_chr04 | 32141447                | CC                              | TT                | 1945952384               |
| SNP_P3_50845_32141472 | NC_021163.1    | Ca_kabuli_chr04 | 32141472                | GG                              | AA                | 1945952386               |
| SNP_P3_50846_32141475 | NC_021163.1    | Ca_kabuli_chr04 | 32141475                | TT                              | GG                | 1945952388               |
| SNP_P3_50847_32141626 | NC_021163.1    | Ca_kabuli_chr04 | 32141626                | AA                              | GG                | 1945952390               |
| SNP_P3_50848_32142932 | NC_021163.1    | Ca_kabuli_chr04 | 32142932                | AA                              | TT                | 1945952392               |
| SNP_P3_50849_32143017 | NC_021163.1    | Ca_kabuli_chr04 | 32143017                | TT                              | AA                | 1945952393               |
| SNP_P3_50850_32143057 | NC_021163.1    | Ca_kabuli_chr04 | 32143057                | AA                              | TT                | 1945952395               |
| SNP_P3_50851_32143101 | NC_021163.1    | Ca_kabuli_chr04 | 32143101                | GG                              | AA                | 1945952397               |
| SNP_P3_50852_32143137 | NC_021163.1    | Ca_kabuli_chr04 | 32143137                | CC                              | TT                | 1945952399               |
| SNP_P3_50853_32143158 | NC_021163.1    | Ca_kabuli_chr04 | 32143158                | GG                              | TT                | 1945952400               |
| SNP_P3_50855_32143178 | NC_021163.1    | Ca_kabuli_chr04 | 32143178                | CC                              | TT                | 1945952402               |
| SNP_P3_50856_32143224 | NC_021163.1    | Ca_kabuli_chr04 | 32143224                | AA                              | GG                | 1945952404               |
| SNP_P3_50857_32143233 | NC_021163.1    | Ca_kabuli_chr04 | 32143233                | TT                              | CC                | 1945952406               |
| SNP_P3_50858_32143238 | NC_021163.1    | Ca_kabuli_chr04 | 32143238                | TT                              | CC                | 1945952408               |

| SNPs IDs              | Chromosome IDs | Chromosomes     | Physical positions (bp) | CDC Frontier (Reference genome) | (Pusa 256 & HPNB) | NCBI SNPdb Accession IDs |
|-----------------------|----------------|-----------------|-------------------------|---------------------------------|-------------------|--------------------------|
| SNP_P3_50859_32143240 | NC_021163.1    | Ca_kabuli_chr04 | 32143240                | GG                              | CC                | 1945952409               |
| SNP_P3_50862_32144014 | NC_021163.1    | Ca_kabuli_chr04 | 32144014                | AA                              | CC                | 1945952411               |
| SNP_P3_50863_32144265 | NC_021163.1    | Ca_kabuli_chr04 | 32144265                | AA                              | GG                | 1945952413               |
| SNP_P3_50867_32149581 | NC_021163.1    | Ca_kabuli_chr04 | 32149581                | GG                              | AA                | 1945952415               |
| SNP_P3_50868_32150022 | NC_021163.1    | Ca_kabuli_chr04 | 32150022                | AA                              | TT                | 1945952417               |
| SNP_P3_50869_32150041 | NC_021163.1    | Ca_kabuli_chr04 | 32150041                | CC                              | AA                | 1945952418               |
| SNP_P3_50870_32150085 | NC_021163.1    | Ca_kabuli_chr04 | 32150085                | TT                              | AA                | 1945952420               |
| SNP_P3_50871_32150686 | NC_021163.1    | Ca_kabuli_chr04 | 32150686                | GG                              | AA                | 1945952422               |
| SNP_P3_50872_32152250 | NC_021163.1    | Ca_kabuli_chr04 | 32152250                | TT                              | AA                | 1945952424               |
| SNP_P3_50873_32152251 | NC_021163.1    | Ca_kabuli_chr04 | 32152251                | TT                              | AA                | 1945952425               |
| SNP_P3_50874_32155274 | NC_021163.1    | Ca_kabuli_chr04 | 32155274                | CC                              | AA                | 1945952427               |
| SNP_P3_50875_32155304 | NC_021163.1    | Ca_kabuli_chr04 | 32155304                | AA                              | GG                | 1945952429               |
| SNP_P3_50876_32155601 | NC_021163.1    | Ca_kabuli_chr04 | 32155601                | AA                              | GG                | 1945952431               |
| SNP_P3_50878_32155633 | NC_021163.1    | Ca_kabuli_chr04 | 32155633                | AA                              | GG                | 1945952433               |
| SNP_P3_50879_32162813 | NC_021163.1    | Ca_kabuli_chr04 | 32162813                | TT                              | GG                | 1945952434               |
| SNP_P3_50880_32162814 | NC_021163.1    | Ca_kabuli_chr04 | 32162814                | AA                              | GG                | 1945952436               |
| SNP_P3_50881_32162820 | NC_021163.1    | Ca_kabuli_chr04 | 32162820                | CC                              | TT                | 1945952438               |
| SNP_P3_50882_32167378 | NC_021163.1    | Ca_kabuli_chr04 | 32167378                | GG                              | AA                | 1945952440               |
| SNP_P3_50883_32167408 | NC_021163.1    | Ca_kabuli_chr04 | 32167408                | TT                              | GG                | 1945952441               |
| SNP_P3_50884_32167684 | NC_021163.1    | Ca_kabuli_chr04 | 32167684                | AA                              | GG                | 1945952443               |
| SNP_P3_50885_32167736 | NC_021163.1    | Ca_kabuli_chr04 | 32167736                | GG                              | CC                | 1945952445               |
| SNP_P3_50887_32168181 | NC_021163.1    | Ca_kabuli_chr04 | 32168181                | GG                              | AA                | 1945952447               |
| SNP_P3_50888_32168230 | NC_021163.1    | Ca_kabuli_chr04 | 32168230                | CC                              | AA                | 1945952449               |
| SNP_P3_50889_32168236 | NC_021163.1    | Ca_kabuli_chr04 | 32168236                | GG                              | AA                | 1945952450               |
| SNP_P3_50890_32168370 | NC_021163.1    | Ca_kabuli_chr04 | 32168370                | TT                              | AA                | 1945952452               |
| SNP_P3_50891_32168393 | NC_021163.1    | Ca_kabuli_chr04 | 32168393                | TT                              | CC                | 1945952454               |
| SNP_P3_50892_32168394 | NC_021163.1    | Ca_kabuli_chr04 | 32168394                | CC                              | GG                | 1945952456               |
| SNP_P3_50893_32168397 | NC_021163.1    | Ca_kabuli_chr04 | 32168397                | GG                              | AA                | 1945952458               |
| SNP_P3_50894_32168403 | NC_021163.1    | Ca_kabuli_chr04 | 32168403                | CC                              | AA                | 1945952459               |
| SNP_P3_50895_32168742 | NC_021163.1    | Ca_kabuli_chr04 | 32168742                | TT                              | AA                | 1945952461               |
| SNP_P3_50896_32168935 | NC_021163.1    | Ca_kabuli_chr04 | 32168935                | GG                              | CC                | 1945952463               |
| SNP_P3_50898_32172724 | NC_021163.1    | Ca_kabuli_chr04 | 32172724                | AA                              | GG                | 1945952465               |
| SNP_P3_50899_32174625 | NC_021163.1    | Ca_kabuli_chr04 | 32174625                | GG                              | TT                | 1945952466               |
| SNP_P3_50900_32174665 | NC_021163.1    | Ca_kabuli_chr04 | 32174665                | TT                              | AA                | 1945952468               |
| SNP_P3_50901_32175094 | NC_021163.1    | Ca_kabuli_chr04 | 32175094                | CC                              | TT                | 1945952470               |
| SNP_P3_50902_32175099 | NC_021163.1    | Ca_kabuli_chr04 | 32175099                | AA                              | GG                | 1945952472               |
| SNP_P3_50903_32175109 | NC_021163.1    | Ca_kabuli_chr04 | 32175109                | CC                              | AA                | 1945952474               |
| SNP_P3_50904_32175111 | NC_021163.1    | Ca_kabuli_chr04 | 32175111                | AA                              | GG                | 1945952475               |
| SNP_P3_50905_32175456 | NC_021163.1    | Ca_kabuli_chr04 | 32175456                | AA                              | GG                | 1945952477               |
| SNP_P3_50906_32175502 | NC_021163.1    | Ca_kabuli_chr04 | 32175502                | GG                              | AA                | 1945952479               |
| SNP_P3_50907_32175657 | NC_021163.1    | Ca_kabuli_chr04 | 32175657                | AA                              | TT                | 1945952481               |
| SNP_P3_50908_32175667 | NC_021163.1    | Ca_kabuli_chr04 | 32175667                | AA                              | GG                | 1945952483               |

| SNPs IDs              | Chromosome IDs | Chromosomes     | Physical positions (bp) | CDC Frontier (Reference genome) | (Pusa 256 & HPNB) | NCBI SNPdb Accession IDs |
|-----------------------|----------------|-----------------|-------------------------|---------------------------------|-------------------|--------------------------|
| SNP_P3_50909_32175690 | NC_021163.1    | Ca_kabuli_chr04 | 32175690                | GG                              | AA                | 1945952484               |
| SNP_P3_50910_32176441 | NC_021163.1    | Ca_kabuli_chr04 | 32176441                | TT                              | CC                | 1945952486               |
| SNP_P3_50911_32177248 | NC_021163.1    | Ca_kabuli_chr04 | 32177248                | GG                              | AA                | 1945952488               |
| SNP_P3_50912_32177255 | NC_021163.1    | Ca_kabuli_chr04 | 32177255                | CC                              | TT                | 1945952490               |
| SNP_P3_50913_32177272 | NC_021163.1    | Ca_kabuli_chr04 | 32177272                | AA                              | TT                | 1945952491               |
| SNP_P3_50914_32177346 | NC_021163.1    | Ca_kabuli_chr04 | 32177346                | CC                              | TT                | 1945952493               |
| SNP_P3_50915_32179205 | NC_021163.1    | Ca_kabuli_chr04 | 32179205                | CC                              | TT                | 1945952495               |
| SNP_P3_50916_32179208 | NC_021163.1    | Ca_kabuli_chr04 | 32179208                | GG                              | AA                | 1945952497               |
| SNP_P3_50917_32179258 | NC_021163.1    | Ca_kabuli_chr04 | 32179258                | CC                              | TT                | 1945952499               |
| SNP_P3_50920_32179598 | NC_021163.1    | Ca_kabuli_chr04 | 32179598                | TT                              | CC                | 1945952500               |
| SNP_P3_50921_32179599 | NC_021163.1    | Ca_kabuli_chr04 | 32179599                | AA                              | CC                | 1945952502               |
| SNP_P3_50922_32179643 | NC_021163.1    | Ca_kabuli_chr04 | 32179643                | CC                              | TT                | 1945952504               |
| SNP_P3_50923_32179674 | NC_021163.1    | Ca_kabuli_chr04 | 32179674                | GG                              | TT                | 1945952506               |
| SNP_P3_50925_32180129 | NC_021163.1    | Ca_kabuli_chr04 | 32180129                | TT                              | AA                | 1945952507               |
| SNP_P3_50926_32180412 | NC_021163.1    | Ca_kabuli_chr04 | 32180412                | TT                              | CC                | 1945952509               |
| SNP_P3_50927_32180578 | NC_021163.1    | Ca_kabuli_chr04 | 32180578                | GG                              | AA                | 1945952511               |
| SNP_P3_50928_32180656 | NC_021163.1    | Ca_kabuli_chr04 | 32180656                | AA                              | TT                | 1945952513               |
| SNP_P3_50929_32180671 | NC_021163.1    | Ca_kabuli_chr04 | 32180671                | TT                              | GG                | 1945952515               |
| SNP_P3_50930_32180673 | NC_021163.1    | Ca_kabuli_chr04 | 32180673                | CC                              | GG                | 1945952516               |
| SNP_P3_50931_32181591 | NC_021163.1    | Ca_kabuli_chr04 | 32181591                | CC                              | TT                | 1945952518               |
| SNP_P3_50932_32181595 | NC_021163.1    | Ca_kabuli_chr04 | 32181595                | CC                              | TT                | 1945952520               |
| SNP_P3_50933_32181599 | NC_021163.1    | Ca_kabuli_chr04 | 32181599                | GG                              | CC                | 1945952522               |
| SNP_P3_50934_32181627 | NC_021163.1    | Ca_kabuli_chr04 | 32181627                | TT                              | CC                | 1945952524               |
| SNP_P3_50935_32181641 | NC_021163.1    | Ca_kabuli_chr04 | 32181641                | AA                              | GG                | 1945952525               |
| SNP_P3_50938_32186823 | NC_021163.1    | Ca_kabuli_chr04 | 32186823                | CC                              | GG                | 1945952527               |
| SNP_P3_50940_32187375 | NC_021163.1    | Ca_kabuli_chr04 | 32187375                | TT                              | GG                | 1945952529               |
| SNP_P3_50941_32187439 | NC_021163.1    | Ca_kabuli_chr04 | 32187439                | CC                              | TT                | 1945952531               |
| SNP_P3_50942_32188917 | NC_021163.1    | Ca_kabuli_chr04 | 32188917                | CC                              | AA                | 1945952532               |
| SNP_P3_50943_32192302 | NC_021163.1    | Ca_kabuli_chr04 | 32192302                | GG                              | AA                | 1945952534               |
| SNP_P3_50944_32202819 | NC_021163.1    | Ca_kabuli_chr04 | 32202819                | AA                              | GG                | 1945952536               |
| SNP_P3_50946_32202984 | NC_021163.1    | Ca_kabuli_chr04 | 32202984                | GG                              | AA                | 1945952538               |
| SNP_P3_50947_32203011 | NC_021163.1    | Ca_kabuli_chr04 | 32203011                | CC                              | TT                | 1945952540               |
| SNP_P3_50948_32203160 | NC_021163.1    | Ca_kabuli_chr04 | 32203160                | GG                              | TT                | 1945952541               |
| SNP_P3_50949_32203770 | NC_021163.1    | Ca_kabuli_chr04 | 32203770                | AA                              | TT                | 1945952543               |
| SNP_P3_50950_32204042 | NC_021163.1    | Ca_kabuli_chr04 | 32204042                | GG                              | CC                | 1945952545               |
| SNP_P3_50951_32205326 | NC_021163.1    | Ca_kabuli_chr04 | 32205326                | AA                              | GG                | 1945952547               |
| SNP_P3_50952_32206383 | NC_021163.1    | Ca_kabuli_chr04 | 32206383                | AA                              | GG                | 1945952548               |
| SNP_P3_50953_32206498 | NC_021163.1    | Ca_kabuli_chr04 | 32206498                | CC                              | TT                | 1945952550               |
| SNP_P3_50954_32206524 | NC_021163.1    | Ca_kabuli_chr04 | 32206524                | CC                              | AA                | 1945952552               |
| SNP_P3_50955_32206536 | NC_021163.1    | Ca_kabuli_chr04 | 32206536                | TT                              | CC                | 1945952554               |
| SNP_P3_50956_32206558 | NC_021163.1    | Ca_kabuli_chr04 | 32206558                | AA                              | GG                | 1945952556               |
| SNP_P3_50957_32206646 | NC_021163.1    | Ca_kabuli_chr04 | 32206646                | CC                              | TT                | 1945952557               |

| SNPs IDs              | Chromosome IDs | Chromosomes     | Physical positions (bp) | CDC Frontier (Reference genome) | (Pusa 256 & HPNB) | NCBI SNPdb Accession IDs |
|-----------------------|----------------|-----------------|-------------------------|---------------------------------|-------------------|--------------------------|
| SNP_P3_50958_32206658 | NC_021163.1    | Ca_kabuli_chr04 | 32206658                | AA                              | TT                | 1945952559               |
| SNP_P3_50960_32206997 | NC_021163.1    | Ca_kabuli_chr04 | 32206997                | AA                              | CC                | 1945952561               |
| SNP_P3_50961_32208497 | NC_021163.1    | Ca_kabuli_chr04 | 32208497                | AA                              | TT                | 1945952563               |
| SNP_P3_50962_32208515 | NC_021163.1    | Ca_kabuli_chr04 | 32208515                | TT                              | AA                | 1945952565               |
| SNP_P3_50963_32208735 | NC_021163.1    | Ca_kabuli_chr04 | 32208735                | TT                              | CC                | 1945952566               |
| SNP_P3_50964_32208757 | NC_021163.1    | Ca_kabuli_chr04 | 32208757                | AA                              | CC                | 1945952568               |
| SNP_P3_50965_32208759 | NC_021163.1    | Ca_kabuli_chr04 | 32208759                | AA                              | CC                | 1945952570               |
| SNP_P3_50966_32208771 | NC_021163.1    | Ca_kabuli_chr04 | 32208771                | AA                              | TT                | 1945952572               |
| SNP_P3_50967_32208797 | NC_021163.1    | Ca_kabuli_chr04 | 32208797                | GG                              | AA                | 1945952573               |
| SNP_P3_50968_32209260 | NC_021163.1    | Ca_kabuli_chr04 | 32209260                | GG                              | CC                | 1945952575               |
| SNP_P3_50969_32209610 | NC_021163.1    | Ca_kabuli_chr04 | 32209610                | TT                              | CC                | 1945952577               |
| SNP_P3_50970_32209659 | NC_021163.1    | Ca_kabuli_chr04 | 32209659                | GG                              | AA                | 1945952579               |
| SNP_P3_50971_32209925 | NC_021163.1    | Ca_kabuli_chr04 | 32209925                | TT                              | AA                | 1945952581               |
| SNP_P3_50972_32210223 | NC_021163.1    | Ca_kabuli_chr04 | 32210223                | GG                              | AA                | 1945952582               |
| SNP_P3_50973_32210234 | NC_021163.1    | Ca_kabuli_chr04 | 32210234                | GG                              | AA                | 1945952584               |
| SNP_P3_50974_32210260 | NC_021163.1    | Ca_kabuli_chr04 | 32210260                | TT                              | AA                | 1945952586               |
| SNP_P3_50975_32210852 | NC_021163.1    | Ca_kabuli_chr04 | 32210852                | AA                              | GG                | 1945952588               |
| SNP_P3_50976_32210873 | NC_021163.1    | Ca_kabuli_chr04 | 32210873                | TT                              | GG                | 1945952589               |
| SNP_P3_50977_32211162 | NC_021163.1    | Ca_kabuli_chr04 | 32211162                | CC                              | AA                | 1945952591               |
| SNP_P3_50978_32212899 | NC_021163.1    | Ca_kabuli_chr04 | 32212899                | GG                              | AA                | 1945952593               |
| SNP_P3_50979_32213582 | NC_021163.1    | Ca_kabuli_chr04 | 32213582                | TT                              | CC                | 1945952595               |
| SNP_P3_50980_32215070 | NC_021163.1    | Ca_kabuli_chr04 | 32215070                | AA                              | CC                | 1945952597               |
| SNP_P3_50981_32215071 | NC_021163.1    | Ca_kabuli_chr04 | 32215071                | TT                              | GG                | 1945952598               |
| SNP_P3_50982_32215072 | NC_021163.1    | Ca_kabuli_chr04 | 32215072                | GG                              | AA                | 1945952600               |
| SNP_P3_50983_32215685 | NC_021163.1    | Ca_kabuli_chr04 | 32215685                | TT                              | AA                | 1945952602               |
| SNP_P3_50984_32215690 | NC_021163.1    | Ca_kabuli_chr04 | 32215690                | CC                              | AA                | 1945952604               |
| SNP_P3_50985_32215691 | NC_021163.1    | Ca_kabuli_chr04 | 32215691                | AA                              | CC                | 1945952606               |
| SNP_P3_50986_32215717 | NC_021163.1    | Ca_kabuli_chr04 | 32215717                | TT                              | AA                | 1945952607               |
| SNP_P3_50987_32215733 | NC_021163.1    | Ca_kabuli_chr04 | 32215733                | TT                              | GG                | 1945952609               |
| SNP_P3_50990_32216404 | NC_021163.1    | Ca_kabuli_chr04 | 32216404                | TT                              | AA                | 1945952611               |
| SNP_P3_50992_32216710 | NC_021163.1    | Ca_kabuli_chr04 | 32216710                | GG                              | AA                | 1945952613               |
| SNP_P3_50993_32216729 | NC_021163.1    | Ca_kabuli_chr04 | 32216729                | TT                              | AA                | 1945952614               |
| SNP_P3_50994_32216730 | NC_021163.1    | Ca_kabuli_chr04 | 32216730                | CC                              | TT                | 1945952616               |
| SNP_P3_50995_32216987 | NC_021163.1    | Ca_kabuli_chr04 | 32216987                | GG                              | AA                | 1945952618               |
| SNP_P3_50996_32217011 | NC_021163.1    | Ca_kabuli_chr04 | 32217011                | AA                              | TT                | 1945952620               |
| SNP_P3_50997_32217275 | NC_021163.1    | Ca_kabuli_chr04 | 32217275                | CC                              | TT                | 1945952621               |
| SNP_P3_50998_32217897 | NC_021163.1    | Ca_kabuli_chr04 | 32217897                | TT                              | CC                | 1945952623               |
| SNP_P3_50999_32217961 | NC_021163.1    | Ca_kabuli_chr04 | 32217961                | TT                              | CC                | 1945952625               |
| SNP_P3_51000_32218176 | NC_021163.1    | Ca_kabuli_chr04 | 32218176                | GG                              | AA                | 1945952627               |
| SNP_P3_51001_32218261 | NC_021163.1    | Ca_kabuli_chr04 | 32218261                | CC                              | TT                | 1945952628               |
| SNP_P3_51002_32218569 | NC_021163.1    | Ca_kabuli_chr04 | 32218569                | AA                              | TT                | 1945952630               |
| SNP_P3_51004_32218761 | NC_021163.1    | Ca_kabuli_chr04 | 32218761                | AA                              | GG                | 1945952632               |



| SNPs IDs              | Chromosome IDs | Chromosomes     | Physical positions (bp) | CDC Frontier (Reference genome) | (Pusa 256 & HPNB) | NCBI SNPdb Accession IDs |
|-----------------------|----------------|-----------------|-------------------------|---------------------------------|-------------------|--------------------------|
| SNP_P3_51005_32218855 | NC_021163.1    | Ca_kabuli_chr04 | 32218855                | CC                              | TT                | 1945952634               |
| SNP_P3_51006_32218866 | NC_021163.1    | Ca_kabuli_chr04 | 32218866                | GG                              | TT                | 1945952635               |
| SNP_P3_51007_32218872 | NC_021163.1    | Ca_kabuli_chr04 | 32218872                | TT                              | CC                | 1945952637               |
| SNP_P3_51008_32218877 | NC_021163.1    | Ca_kabuli_chr04 | 32218877                | AA                              | GG                | 1945952639               |
| SNP_P3_51009_32219521 | NC_021163.1    | Ca_kabuli_chr04 | 32219521                | GG                              | TT                | 1945952641               |
| SNP_P3_51010_32219833 | NC_021163.1    | Ca_kabuli_chr04 | 32219833                | CC                              | TT                | 1945952643               |
| SNP_P3_51011_32220313 | NC_021163.1    | Ca_kabuli_chr04 | 32220313                | TT                              | CC                | 1945952644               |
| SNP_P3_51012_32221290 | NC_021163.1    | Ca_kabuli_chr04 | 32221290                | GG                              | CC                | 1945952646               |
| SNP_P3_51013_32221522 | NC_021163.1    | Ca_kabuli_chr04 | 32221522                | CC                              | TT                | 1945952648               |
| SNP_P3_51014_32221553 | NC_021163.1    | Ca_kabuli_chr04 | 32221553                | AA                              | GG                | 1945952650               |
| SNP_P3_51015_32221573 | NC_021163.1    | Ca_kabuli_chr04 | 32221573                | CC                              | TT                | 1945952651               |
| SNP_P3_51016_32221712 | NC_021163.1    | Ca_kabuli_chr04 | 32221712                | CC                              | TT                | 1945952653               |
| SNP_P3_51017_32221716 | NC_021163.1    | Ca_kabuli_chr04 | 32221716                | TT                              | CC                | 1945952655               |
| SNP_P3_51018_32222044 | NC_021163.1    | Ca_kabuli_chr04 | 32222044                | GG                              | AA                | 1945952657               |
| SNP_P3_51019_32222050 | NC_021163.1    | Ca_kabuli_chr04 | 32222050                | GG                              | TT                | 1945952658               |
| SNP_P3_51020_32222059 | NC_021163.1    | Ca_kabuli_chr04 | 32222059                | AA                              | GG                | 1945952660               |
| SNP_P3_51021_32222431 | NC_021163.1    | Ca_kabuli_chr04 | 32222431                | AA                              | GG                | 1945952662               |
| SNP_P3_51022_32222590 | NC_021163.1    | Ca_kabuli_chr04 | 32222590                | AA                              | CC                | 1945952664               |
| SNP_P3_51023_32222612 | NC_021163.1    | Ca_kabuli_chr04 | 32222612                | TT                              | CC                | 1945952665               |
| SNP_P3_51025_32222666 | NC_021163.1    | Ca_kabuli_chr04 | 32222666                | AA                              | GG                | 1945952667               |
| SNP_P3_51026_32222676 | NC_021163.1    | Ca_kabuli_chr04 | 32222676                | AA                              | GG                | 1945952669               |
| SNP_P3_51027_32222749 | NC_021163.1    | Ca_kabuli_chr04 | 32222749                | AA                              | GG                | 1945952671               |
| SNP_P3_51028_32222931 | NC_021163.1    | Ca_kabuli_chr04 | 32222931                | TT                              | AA                | 1945952673               |
| SNP_P3_51030_32222949 | NC_021163.1    | Ca_kabuli_chr04 | 32222949                | GG                              | TT                | 1945952674               |
| SNP_P3_51031_32222989 | NC_021163.1    | Ca_kabuli_chr04 | 32222989                | AA                              | GG                | 1945952676               |
| SNP_P3_51032_32223029 | NC_021163.1    | Ca_kabuli_chr04 | 32223029                | GG                              | AA                | 1945952678               |
| SNP_P3_51033_32223066 | NC_021163.1    | Ca_kabuli_chr04 | 32223066                | TT                              | CC                | 1945952680               |
| SNP_P3_51034_32223074 | NC_021163.1    | Ca_kabuli_chr04 | 32223074                | TT                              | GG                | 1945952681               |
| SNP_P3_51035_32223105 | NC_021163.1    | Ca_kabuli_chr04 | 32223105                | TT                              | AA                | 1945952683               |
| SNP_P3_51037_32223228 | NC_021163.1    | Ca_kabuli_chr04 | 32223228                | GG                              | TT                | 1945952685               |
| SNP_P3_51038_32223258 | NC_021163.1    | Ca_kabuli_chr04 | 32223258                | TT                              | GG                | 1945952687               |
| SNP_P3_51039_32223292 | NC_021163.1    | Ca_kabuli_chr04 | 32223292                | GG                              | AA                | 1945952688               |
| SNP_P3_51040_32223320 | NC_021163.1    | Ca_kabuli_chr04 | 32223320                | CC                              | TT                | 1945952690               |
| SNP_P3_51041_32223430 | NC_021163.1    | Ca_kabuli_chr04 | 32223430                | CC                              | AA                | 1945952692               |
| SNP_P3_51042_32223464 | NC_021163.1    | Ca_kabuli_chr04 | 32223464                | GG                              | TT                | 1945952694               |
| SNP_P3_51043_32224305 | NC_021163.1    | Ca_kabuli_chr04 | 32224305                | CC                              | TT                | 1945952696               |
| SNP_P3_51044_32224334 | NC_021163.1    | Ca_kabuli_chr04 | 32224334                | TT                              | CC                | 1945952697               |
| SNP_P3_51045_32224942 | NC_021163.1    | Ca_kabuli_chr04 | 32224942                | CC                              | TT                | 1945952699               |
| SNP_P3_51046_32225016 | NC_021163.1    | Ca_kabuli_chr04 | 32225016                | TT                              | CC                | 1945952701               |
| SNP_P3_51047_32225231 | NC_021163.1    | Ca_kabuli_chr04 | 32225231                | AA                              | GG                | 1945952703               |
| SNP_P3_51048_32225601 | NC_021163.1    | Ca_kabuli_chr04 | 32225601                | AA                              | GG                | 1945952704               |
| SNP_P3_51049_32225607 | NC_021163.1    | Ca_kabuli_chr04 | 32225607                | TT                              | CC                | 1945952706               |

| SNPs IDs              | Chromosome IDs | Chromosomes     | Physical positions (bp) | CDC Frontier (Reference genome) | (Pusa 256 & HPNB) | NCBI SNPdb Accession IDs |
|-----------------------|----------------|-----------------|-------------------------|---------------------------------|-------------------|--------------------------|
| SNP_P3_51050_32225624 | NC_021163.1    | Ca_kabuli_chr04 | 32225624                | AA                              | CC                | 1945952708               |
| SNP_P3_51052_32226840 | NC_021163.1    | Ca_kabuli_chr04 | 32226840                | AA                              | GG                | 1945952710               |
| SNP_P3_51053_32226877 | NC_021163.1    | Ca_kabuli_chr04 | 32226877                | AA                              | GG                | 1945952711               |
| SNP_P3_51054_32227024 | NC_021163.1    | Ca_kabuli_chr04 | 32227024                | TT                              | CC                | 1945952713               |
| SNP_P3_51056_32227679 | NC_021163.1    | Ca_kabuli_chr04 | 32227679                | GG                              | AA                | 1945952715               |
| SNP_P3_51057_32227759 | NC_021163.1    | Ca_kabuli_chr04 | 32227759                | GG                              | AA                | 1945952717               |
| SNP_P3_51059_32227878 | NC_021163.1    | Ca_kabuli_chr04 | 32227878                | GG                              | AA                | 1945952719               |
| SNP_P3_51060_32231537 | NC_021163.1    | Ca_kabuli_chr04 | 32231537                | GG                              | AA                | 1945952720               |
| SNP_P3_51061_32231606 | NC_021163.1    | Ca_kabuli_chr04 | 32231606                | AA                              | CC                | 1945952722               |
| SNP_P3_51062_32231620 | NC_021163.1    | Ca_kabuli_chr04 | 32231620                | AA                              | TT                | 1945952724               |
| SNP_P3_51063_32233528 | NC_021163.1    | Ca_kabuli_chr04 | 32233528                | GG                              | AA                | 1945952726               |
| SNP_P3_51064_32233684 | NC_021163.1    | Ca_kabuli_chr04 | 32233684                | TT                              | GG                | 1945952727               |
| SNP_P3_51065_32236177 | NC_021163.1    | Ca_kabuli_chr04 | 32236177                | TT                              | AA                | 1945952729               |
| SNP_P3_51066_32236412 | NC_021163.1    | Ca_kabuli_chr04 | 32236412                | CC                              | GG                | 1945952731               |
| SNP_P3_51067_32236466 | NC_021163.1    | Ca_kabuli_chr04 | 32236466                | AA                              | CC                | 1945952733               |
| SNP_P3_51068_32236498 | NC_021163.1    | Ca_kabuli_chr04 | 32236498                | TT                              | CC                | 1945952734               |
| SNP_P3_51069_32238090 | NC_021163.1    | Ca_kabuli_chr04 | 32238090                | GG                              | AA                | 1945952736               |
| SNP_P3_51070_32238509 | NC_021163.1    | Ca_kabuli_chr04 | 32238509                | TT                              | AA                | 1945952738               |
| SNP_P3_51071_32238576 | NC_021163.1    | Ca_kabuli_chr04 | 32238576                | TT                              | CC                | 1945952740               |
| SNP_P3_51072_32238616 | NC_021163.1    | Ca_kabuli_chr04 | 32238616                | CC                              | TT                | 1945952742               |
| SNP_P3_51073_32238639 | NC_021163.1    | Ca_kabuli_chr04 | 32238639                | TT                              | CC                | 1945952743               |
| SNP_P3_51074_32238855 | NC_021163.1    | Ca_kabuli_chr04 | 32238855                | GG                              | AA                | 1945952745               |
| SNP_P3_51075_32238901 | NC_021163.1    | Ca_kabuli_chr04 | 32238901                | AA                              | TT                | 1945952747               |
| SNP_P3_51076_32239443 | NC_021163.1    | Ca_kabuli_chr04 | 32239443                | TT                              | CC                | 1945952749               |
| SNP_P3_51077_32239689 | NC_021163.1    | Ca_kabuli_chr04 | 32239689                | AA                              | CC                | 1945952750               |
| SNP_P3_51078_32239718 | NC_021163.1    | Ca_kabuli_chr04 | 32239718                | GG                              | AA                | 1945952752               |
| SNP_P3_51080_32241380 | NC_021163.1    | Ca_kabuli_chr04 | 32241380                | GG                              | AA                | 1945952754               |
| SNP_P3_51082_32241978 | NC_021163.1    | Ca_kabuli_chr04 | 32241978                | TT                              | AA                | 1945952756               |
| SNP_P3_51083_32241981 | NC_021163.1    | Ca_kabuli_chr04 | 32241981                | AA                              | GG                | 1945952757               |
| SNP_P3_51084_32241983 | NC_021163.1    | Ca_kabuli_chr04 | 32241983                | CC                              | TT                | 1945952759               |
| SNP_P3_51085_32242184 | NC_021163.1    | Ca_kabuli_chr04 | 32242184                | TT                              | AA                | 1945952761               |
| SNP_P3_51086_32242205 | NC_021163.1    | Ca_kabuli_chr04 | 32242205                | AA                              | GG                | 1945952763               |
| SNP_P3_51088_32243157 | NC_021163.1    | Ca_kabuli_chr04 | 32243157                | AA                              | GG                | 1945952765               |
| SNP_P3_51089_32243210 | NC_021163.1    | Ca_kabuli_chr04 | 32243210                | AA                              | GG                | 1945952766               |
| SNP_P3_51091_32243892 | NC_021163.1    | Ca_kabuli_chr04 | 32243892                | TT                              | CC                | 1945952768               |
| SNP_P3_51092_32252646 | NC_021163.1    | Ca_kabuli_chr04 | 32252646                | GG                              | TT                | 1945952770               |
| SNP_P3_51093_32255413 | NC_021163.1    | Ca_kabuli_chr04 | 32255413                | AA                              | GG                | 1945952772               |
| SNP_P3_51094_32256007 | NC_021163.1    | Ca_kabuli_chr04 | 32256007                | GG                              | AA                | 1945952773               |
| SNP_P3_51095_32256224 | NC_021163.1    | Ca_kabuli_chr04 | 32256224                | AA                              | GG                | 1945952775               |
| SNP_P3_51096_32256264 | NC_021163.1    | Ca_kabuli_chr04 | 32256264                | TT                              | CC                | 1945952777               |
| SNP_P3_51098_32256327 | NC_021163.1    | Ca_kabuli_chr04 | 32256327                | TT                              | CC                | 1945952779               |
| SNP_P3_51099_32259513 | NC_021163.1    | Ca_kabuli_chr04 | 32259513                | CC                              | TT                | 1945952780               |

| SNPs IDs              | Chromosome IDs | Chromosomes     | Physical positions (bp) | CDC Frontier (Reference genome) | (Pusa 256 & HPNB) | NCBI SNPdb Accession IDs |
|-----------------------|----------------|-----------------|-------------------------|---------------------------------|-------------------|--------------------------|
| SNP_P3_51100_32259553 | NC_021163.1    | Ca_kabuli_chr04 | 32259553                | TT                              | CC                | 1945952782               |
| SNP_P3_51101_32259856 | NC_021163.1    | Ca_kabuli_chr04 | 32259856                | AA                              | TT                | 1945952784               |
| SNP_P3_51102_32259888 | NC_021163.1    | Ca_kabuli_chr04 | 32259888                | TT                              | CC                | 1945952786               |
| SNP_P3_51103_32259889 | NC_021163.1    | Ca_kabuli_chr04 | 32259889                | GG                              | AA                | 1945952788               |
| SNP_P3_51104_32263381 | NC_021163.1    | Ca_kabuli_chr04 | 32263381                | CC                              | TT                | 1945952789               |
| SNP_P3_51105_32263390 | NC_021163.1    | Ca_kabuli_chr04 | 32263390                | CC                              | AA                | 1945952791               |
| SNP_P3_51107_32263811 | NC_021163.1    | Ca_kabuli_chr04 | 32263811                | AA                              | GG                | 1945952793               |
| SNP_P3_51108_32263815 | NC_021163.1    | Ca_kabuli_chr04 | 32263815                | TT                              | CC                | 1945952795               |
| SNP_P3_51110_32264068 | NC_021163.1    | Ca_kabuli_chr04 | 32264068                | AA                              | GG                | 1945952796               |
| SNP_P3_51112_32264129 | NC_021163.1    | Ca_kabuli_chr04 | 32264129                | CC                              | TT                | 1945952798               |
| SNP_P3_51114_32264186 | NC_021163.1    | Ca_kabuli_chr04 | 32264186                | TT                              | CC                | 1945952800               |
| SNP_P3_51115_32264217 | NC_021163.1    | Ca_kabuli_chr04 | 32264217                | CC                              | TT                | 1945952802               |
| SNP_P3_51116_32264256 | NC_021163.1    | Ca_kabuli_chr04 | 32264256                | CC                              | TT                | 1945952804               |
| SNP_P3_51117_32264355 | NC_021163.1    | Ca_kabuli_chr04 | 32264355                | TT                              | CC                | 1945952805               |
| SNP_P3_51118_32264505 | NC_021163.1    | Ca_kabuli_chr04 | 32264505                | GG                              | AA                | 1945952807               |
| SNP_P3_51119_32264588 | NC_021163.1    | Ca_kabuli_chr04 | 32264588                | GG                              | AA                | 1945952809               |
| SNP_P3_51120_32264641 | NC_021163.1    | Ca_kabuli_chr04 | 32264641                | TT                              | GG                | 1945952811               |
| SNP_P3_51121_32264654 | NC_021163.1    | Ca_kabuli_chr04 | 32264654                | AA                              | CC                | 1945952813               |
| SNP_P3_51122_32264962 | NC_021163.1    | Ca_kabuli_chr04 | 32264962                | TT                              | CC                | 1945952814               |
| SNP_P3_51124_32266891 | NC_021163.1    | Ca_kabuli_chr04 | 32266891                | AA                              | GG                | 1945952816               |
| SNP_P3_51125_32266902 | NC_021163.1    | Ca_kabuli_chr04 | 32266902                | AA                              | GG                | 1945952818               |
| SNP_P3_51127_32266941 | NC_021163.1    | Ca_kabuli_chr04 | 32266941                | GG                              | AA                | 1945952820               |
| SNP_P3_51128_32267676 | NC_021163.1    | Ca_kabuli_chr04 | 32267676                | AA                              | GG                | 1945952821               |
| SNP_P3_51129_32291744 | NC_021163.1    | Ca_kabuli_chr04 | 32291744                | TT                              | CC                | 1945952823               |
| SNP_P3_51130_32291746 | NC_021163.1    | Ca_kabuli_chr04 | 32291746                | GG                              | AA                | 1945952825               |
| SNP_P3_51131_32294233 | NC_021163.1    | Ca_kabuli_chr04 | 32294233                | CC                              | TT                | 1945952827               |
| SNP_P3_51132_32294240 | NC_021163.1    | Ca_kabuli_chr04 | 32294240                | AA                              | TT                | 1945952829               |
| SNP_P3_51133_32294250 | NC_021163.1    | Ca_kabuli_chr04 | 32294250                | AA                              | CC                | 1945952830               |
| SNP_P3_51134_32294256 | NC_021163.1    | Ca_kabuli_chr04 | 32294256                | TT                              | AA                | 1945952832               |
| SNP_P3_51135_32296696 | NC_021163.1    | Ca_kabuli_chr04 | 32296696                | AA                              | GG                | 1945952834               |
| SNP_P3_51136_32297848 | NC_021163.1    | Ca_kabuli_chr04 | 32297848                | GG                              | AA                | 1945952836               |
| SNP_P3_51139_32299982 | NC_021163.1    | Ca_kabuli_chr04 | 32299982                | TT                              | CC                | 1945952837               |
| SNP_P3_51140_32299994 | NC_021163.1    | Ca_kabuli_chr04 | 32299994                | TT                              | AA                | 1945952839               |
| SNP_P3_51141_32300031 | NC_021163.1    | Ca_kabuli_chr04 | 32300031                | GG                              | TT                | 1945952841               |
| SNP_P3_51142_32300033 | NC_021163.1    | Ca_kabuli_chr04 | 32300033                | GG                              | AA                | 1945952843               |
| SNP_P3_51143_32300246 | NC_021163.1    | Ca_kabuli_chr04 | 32300246                | GG                              | AA                | 1945952845               |
| SNP_P3_51144_32300283 | NC_021163.1    | Ca_kabuli_chr04 | 32300283                | AA                              | GG                | 1945952846               |
| SNP_P3_51145_32300292 | NC_021163.1    | Ca_kabuli_chr04 | 32300292                | TT                              | CC                | 1945952848               |
| SNP_P3_51146_32300304 | NC_021163.1    | Ca_kabuli_chr04 | 32300304                | AA                              | GG                | 1945952850               |
| SNP_P3_51147_32301030 | NC_021163.1    | Ca_kabuli_chr04 | 32301030                | CC                              | AA                | 1945952852               |
| SNP_P3_51148_32301100 | NC_021163.1    | Ca_kabuli_chr04 | 32301100                | CC                              | TT                | 1945952854               |
| SNP_P3_51149_32301279 | NC_021163.1    | Ca_kabuli_chr04 | 32301279                | CC                              | GG                | 1945952855               |

| SNPs IDs              | Chromosome IDs | Chromosomes     | Physical positions (bp) | CDC Frontier (Reference genome) | (Pusa 256 & HPNB) | NCBI SNPdb Accession IDs |
|-----------------------|----------------|-----------------|-------------------------|---------------------------------|-------------------|--------------------------|
| SNP_P3_51151_32301542 | NC_021163.1    | Ca_kabuli_chr04 | 32301542                | TT                              | CC                | 1945952857               |
| SNP_P3_51152_32301560 | NC_021163.1    | Ca_kabuli_chr04 | 32301560                | AA                              | GG                | 1945952859               |
| SNP_P3_51154_32301709 | NC_021163.1    | Ca_kabuli_chr04 | 32301709                | CC                              | TT                | 1945952861               |
| SNP_P3_51155_32302620 | NC_021163.1    | Ca_kabuli_chr04 | 32302620                | GG                              | AA                | 1945952862               |
| SNP_P3_51156_32315002 | NC_021163.1    | Ca_kabuli_chr04 | 32315002                | CC                              | TT                | 1945952864               |
| SNP_P3_51157_32317424 | NC_021163.1    | Ca_kabuli_chr04 | 32317424                | TT                              | GG                | 1945952866               |
| SNP_P3_51158_32317429 | NC_021163.1    | Ca_kabuli_chr04 | 32317429                | AA                              | GG                | 1945952868               |
| SNP_P3_51159_32317630 | NC_021163.1    | Ca_kabuli_chr04 | 32317630                | AA                              | TT                | 1945952870               |
| SNP_P3_51160_32317640 | NC_021163.1    | Ca_kabuli_chr04 | 32317640                | CC                              | TT                | 1945952871               |
| SNP_P3_51161_32317649 | NC_021163.1    | Ca_kabuli_chr04 | 32317649                | CC                              | TT                | 1945952873               |
| SNP_P3_51162_32317650 | NC_021163.1    | Ca_kabuli_chr04 | 32317650                | TT                              | CC                | 1945952875               |
| SNP_P3_51163_32317811 | NC_021163.1    | Ca_kabuli_chr04 | 32317811                | GG                              | AA                | 1945952877               |
| SNP_P3_51164_32318471 | NC_021163.1    | Ca_kabuli_chr04 | 32318471                | GG                              | AA                | 1945952878               |
| SNP_P3_51165_32318482 | NC_021163.1    | Ca_kabuli_chr04 | 32318482                | CC                              | TT                | 1945952880               |
| SNP_P3_51166_32322020 | NC_021163.1    | Ca_kabuli_chr04 | 32322020                | AA                              | TT                | 1945952882               |
| SNP_P3_51167_32322030 | NC_021163.1    | Ca_kabuli_chr04 | 32322030                | GG                              | TT                | 1945952884               |
| SNP_P3_51168_32322052 | NC_021163.1    | Ca_kabuli_chr04 | 32322052                | AA                              | GG                | 1945952886               |
| SNP_P3_51170_32335055 | NC_021163.1    | Ca_kabuli_chr04 | 32335055                | AA                              | CC                | 1945952887               |
| SNP_P3_51171_32335153 | NC_021163.1    | Ca_kabuli_chr04 | 32335153                | TT                              | CC                | 1945952889               |
| SNP_P3_51172_32335160 | NC_021163.1    | Ca_kabuli_chr04 | 32335160                | CC                              | TT                | 1945952891               |
| SNP_P3_51174_32335220 | NC_021163.1    | Ca_kabuli_chr04 | 32335220                | TT                              | AA                | 1945952893               |
| SNP_P3_51175_32335401 | NC_021163.1    | Ca_kabuli_chr04 | 32335401                | CC                              | TT                | 1945952894               |
| SNP_P3_51176_32335526 | NC_021163.1    | Ca_kabuli_chr04 | 32335526                | CC                              | TT                | 1945952896               |
| SNP_P3_51177_32335620 | NC_021163.1    | Ca_kabuli_chr04 | 32335620                | CC                              | GG                | 1945952898               |
| SNP_P3_51178_32335699 | NC_021163.1    | Ca_kabuli_chr04 | 32335699                | TT                              | CC                | 1945952900               |
| SNP_P3_51179_32335720 | NC_021163.1    | Ca_kabuli_chr04 | 32335720                | CC                              | TT                | 1945952902               |
| SNP_P3_51180_32335742 | NC_021163.1    | Ca_kabuli_chr04 | 32335742                | TT                              | GG                | 1945952903               |
| SNP_P3_51181_32345383 | NC_021163.1    | Ca_kabuli_chr04 | 32345383                | AA                              | TT                | 1945952905               |
| SNP_P3_51182_32345391 | NC_021163.1    | Ca_kabuli_chr04 | 32345391                | CC                              | TT                | 1945952907               |
| SNP_P3_51183_32347914 | NC_021163.1    | Ca_kabuli_chr04 | 32347914                | GG                              | TT                | 1945952909               |
| SNP_P3_51184_32347948 | NC_021163.1    | Ca_kabuli_chr04 | 32347948                | AA                              | GG                | 1945952910               |
| SNP_P3_51185_32347961 | NC_021163.1    | Ca_kabuli_chr04 | 32347961                | AA                              | GG                | 1945952912               |
| SNP_P3_51186_32347966 | NC_021163.1    | Ca_kabuli_chr04 | 32347966                | GG                              | AA                | 1945952914               |
| SNP_P3_51187_32347970 | NC_021163.1    | Ca_kabuli_chr04 | 32347970                | GG                              | AA                | 1945952916               |
| SNP_P3_51188_32349289 | NC_021163.1    | Ca_kabuli_chr04 | 32349289                | TT                              | AA                | 1945952918               |
| SNP_P3_51189_32350523 | NC_021163.1    | Ca_kabuli_chr04 | 32350523                | TT                              | AA                | 1945952919               |
| SNP_P3_51190_32352149 | NC_021163.1    | Ca_kabuli_chr04 | 32352149                | TT                              | GG                | 1945952921               |
| SNP_P3_51191_32352892 | NC_021163.1    | Ca_kabuli_chr04 | 32352892                | AA                              | CC                | 1945952923               |
| SNP_P3_51192_32355632 | NC_021163.1    | Ca_kabuli_chr04 | 32355632                | TT                              | CC                | 1945952925               |
| SNP_P3_51193_32355640 | NC_021163.1    | Ca_kabuli_chr04 | 32355640                | TT                              | CC                | 1945952927               |
| SNP_P3_51194_32355642 | NC_021163.1    | Ca_kabuli_chr04 | 32355642                | GG                              | AA                | 1945952928               |
| SNP_P3_51195_32363811 | NC_021163.1    | Ca_kabuli_chr04 | 32363811                | GG                              | CC                | 1945952930               |

| SNPs IDs              | Chromosome IDs | Chromosomes     | Physical positions (bp) | CDC Frontier (Reference genome) | (Pusa 256 & HPNB) | NCBI SNPdb Accession IDs |
|-----------------------|----------------|-----------------|-------------------------|---------------------------------|-------------------|--------------------------|
| SNP_P3_51196_32363827 | NC_021163.1    | Ca_kabuli_chr04 | 32363827                | CC                              | TT                | 1945952932               |
| SNP_P3_51197_32364363 | NC_021163.1    | Ca_kabuli_chr04 | 32364363                | AA                              | GG                | 1945952934               |
| SNP_P3_51198_32365010 | NC_021163.1    | Ca_kabuli_chr04 | 32365010                | TT                              | CC                | 1945952935               |
| SNP_P3_51199_32365476 | NC_021163.1    | Ca_kabuli_chr04 | 32365476                | AA                              | GG                | 1945952937               |
| SNP_P3_51200_32365560 | NC_021163.1    | Ca_kabuli_chr04 | 32365560                | GG                              | AA                | 1945952939               |
| SNP_P3_51201_32365570 | NC_021163.1    | Ca_kabuli_chr04 | 32365570                | CC                              | TT                | 1945952941               |
| SNP_P3_51202_32366213 | NC_021163.1    | Ca_kabuli_chr04 | 32366213                | GG                              | AA                | 1945952943               |
| SNP_P3_51203_32366229 | NC_021163.1    | Ca_kabuli_chr04 | 32366229                | GG                              | AA                | 1945952944               |
| SNP_P3_51204_32366236 | NC_021163.1    | Ca_kabuli_chr04 | 32366236                | CC                              | TT                | 1945952946               |
| SNP_P3_51205_32366572 | NC_021163.1    | Ca_kabuli_chr04 | 32366572                | CC                              | GG                | 1945952948               |
| SNP_P3_51206_32368333 | NC_021163.1    | Ca_kabuli_chr04 | 32368333                | GG                              | CC                | 1945952950               |
| SNP_P3_51208_32371450 | NC_021163.1    | Ca_kabuli_chr04 | 32371450                | TT                              | CC                | 1945952951               |
| SNP_P3_51209_32373421 | NC_021163.1    | Ca_kabuli_chr04 | 32373421                | CC                              | TT                | 1945952953               |
| SNP_P3_51210_32374902 | NC_021163.1    | Ca_kabuli_chr04 | 32374902                | AA                              | TT                | 1945952955               |
| SNP_P3_51211_32375471 | NC_021163.1    | Ca_kabuli_chr04 | 32375471                | TT                              | CC                | 1945952957               |
| SNP_P3_51212_32375496 | NC_021163.1    | Ca_kabuli_chr04 | 32375496                | GG                              | AA                | 1945952959               |
| SNP_P3_51213_32375500 | NC_021163.1    | Ca_kabuli_chr04 | 32375500                | TT                              | CC                | 1945952960               |
| SNP_P3_51214_32375512 | NC_021163.1    | Ca_kabuli_chr04 | 32375512                | AA                              | TT                | 1945952962               |
| SNP_P3_51215_32375571 | NC_021163.1    | Ca_kabuli_chr04 | 32375571                | AA                              | GG                | 1945952964               |
| SNP_P3_51216_32376026 | NC_021163.1    | Ca_kabuli_chr04 | 32376026                | GG                              | TT                | 1945952966               |
| SNP_P3_51217_32376066 | NC_021163.1    | Ca_kabuli_chr04 | 32376066                | AA                              | TT                | 1945952967               |
| SNP_P3_51218_32377152 | NC_021163.1    | Ca_kabuli_chr04 | 32377152                | CC                              | GG                | 1945952969               |
| SNP_P3_51219_32377173 | NC_021163.1    | Ca_kabuli_chr04 | 32377173                | TT                              | GG                | 1945952971               |
| SNP_P3_51220_32377517 | NC_021163.1    | Ca_kabuli_chr04 | 32377517                | TT                              | CC                | 1945952973               |
| SNP_P3_51221_32377748 | NC_021163.1    | Ca_kabuli_chr04 | 32377748                | TT                              | GG                | 1945952975               |
| SNP_P3_51222_32377768 | NC_021163.1    | Ca_kabuli_chr04 | 32377768                | CC                              | AA                | 1945952976               |
| SNP_P3_51223_32377778 | NC_021163.1    | Ca_kabuli_chr04 | 32377778                | AA                              | CC                | 1945952978               |
| SNP_P3_51224_32377779 | NC_021163.1    | Ca_kabuli_chr04 | 32377779                | GG                              | AA                | 1945952980               |
| SNP_P3_51225_32377997 | NC_021163.1    | Ca_kabuli_chr04 | 32377997                | TT                              | CC                | 1945952982               |
| SNP_P3_51226_32378080 | NC_021163.1    | Ca_kabuli_chr04 | 32378080                | TT                              | GG                | 1945952984               |
| SNP_P3_51227_32378137 | NC_021163.1    | Ca_kabuli_chr04 | 32378137                | AA                              | GG                | 1945952985               |
| SNP_P3_51228_32378169 | NC_021163.1    | Ca_kabuli_chr04 | 32378169                | TT                              | CC                | 1945952987               |
| SNP_P3_51229_32378510 | NC_021163.1    | Ca_kabuli_chr04 | 32378510                | CC                              | AA                | 1945952989               |
| SNP_P3_51230_32378580 | NC_021163.1    | Ca_kabuli_chr04 | 32378580                | CC                              | TT                | 1945952991               |
| SNP_P3_51231_32378716 | NC_021163.1    | Ca_kabuli_chr04 | 32378716                | CC                              | GG                | 1945952992               |
| SNP_P3_51232_32379001 | NC_021163.1    | Ca_kabuli_chr04 | 32379001                | AA                              | CC                | 1945952994               |
| SNP_P3_51233_32380449 | NC_021163.1    | Ca_kabuli_chr04 | 32380449                | CC                              | TT                | 1945952996               |
| SNP_P3_51234_32380719 | NC_021163.1    | Ca_kabuli_chr04 | 32380719                | GG                              | AA                | 1945952998               |
| SNP_P3_51235_32381535 | NC_021163.1    | Ca_kabuli_chr04 | 32381535                | TT                              | CC                | 1945953000               |
| SNP_P3_51236_32381537 | NC_021163.1    | Ca_kabuli_chr04 | 32381537                | AA                              | GG                | 1945953001               |
| SNP_P3_51237_32381548 | NC_021163.1    | Ca_kabuli_chr04 | 32381548                | AA                              | CC                | 1945953003               |
| SNP_P3_51238_32381903 | NC_021163.1    | Ca_kabuli_chr04 | 32381903                | TT                              | AA                | 1945953005               |

| SNPs IDs              | Chromosome IDs | Chromosomes     | Physical positions (bp) | CDC Frontier (Reference genome) | (Pusa 256 & HPNB) | NCBI SNPdb Accession IDs |
|-----------------------|----------------|-----------------|-------------------------|---------------------------------|-------------------|--------------------------|
| SNP_P3_51239_32381917 | NC_021163.1    | Ca_kabuli_chr04 | 32381917                | TT                              | CC                | 1945953007               |
| SNP_P3_51240_32381970 | NC_021163.1    | Ca_kabuli_chr04 | 32381970                | AA                              | CC                | 1945953008               |
| SNP_P3_51241_32382548 | NC_021163.1    | Ca_kabuli_chr04 | 32382548                | AA                              | GG                | 1945953010               |
| SNP_P3_51242_32383613 | NC_021163.1    | Ca_kabuli_chr04 | 32383613                | GG                              | TT                | 1945953012               |
| SNP_P3_51245_32384437 | NC_021163.1    | Ca_kabuli_chr04 | 32384437                | GG                              | AA                | 1945953014               |
| SNP_P3_51247_32384783 | NC_021163.1    | Ca_kabuli_chr04 | 32384783                | TT                              | CC                | 1945953016               |
| SNP_P3_51248_32386992 | NC_021163.1    | Ca_kabuli_chr04 | 32386992                | AA                              | GG                | 1945953017               |
| SNP_P3_51249_32387266 | NC_021163.1    | Ca_kabuli_chr04 | 32387266                | CC                              | TT                | 1945953019               |
| SNP_P3_51252_32389492 | NC_021163.1    | Ca_kabuli_chr04 | 32389492                | GG                              | AA                | 1945953021               |
| SNP_P3_51253_32389713 | NC_021163.1    | Ca_kabuli_chr04 | 32389713                | AA                              | GG                | 1945953023               |
| SNP_P3_51255_32390746 | NC_021163.1    | Ca_kabuli_chr04 | 32390746                | CC                              | GG                | 1945953024               |
| SNP_P3_51256_32391053 | NC_021163.1    | Ca_kabuli_chr04 | 32391053                | AA                              | GG                | 1945953026               |
| SNP_P3_51257_32392237 | NC_021163.1    | Ca_kabuli_chr04 | 32392237                | CC                              | TT                | 1945953028               |
| SNP_P3_51258_32392330 | NC_021163.1    | Ca_kabuli_chr04 | 32392330                | CC                              | TT                | 1945953030               |
| SNP_P3_51260_32396419 | NC_021163.1    | Ca_kabuli_chr04 | 32396419                | TT                              | AA                | 1945953032               |
| SNP_P3_51261_32396420 | NC_021163.1    | Ca_kabuli_chr04 | 32396420                | TT                              | GG                | 1945953033               |
| SNP_P3_51262_32397804 | NC_021163.1    | Ca_kabuli_chr04 | 32397804                | GG                              | AA                | 1945953035               |
| SNP_P3_51263_32398049 | NC_021163.1    | Ca_kabuli_chr04 | 32398049                | GG                              | AA                | 1945953037               |
| SNP_P3_51264_32398075 | NC_021163.1    | Ca_kabuli_chr04 | 32398075                | TT                              | CC                | 1945953039               |
| SNP_P3_51265_32398089 | NC_021163.1    | Ca_kabuli_chr04 | 32398089                | AA                              | GG                | 1945953041               |
| SNP_P3_51266_32398113 | NC_021163.1    | Ca_kabuli_chr04 | 32398113                | GG                              | AA                | 1945953042               |
| SNP_P3_51267_32399693 | NC_021163.1    | Ca_kabuli_chr04 | 32399693                | CC                              | TT                | 1945953044               |
| SNP_P3_51269_32399897 | NC_021163.1    | Ca_kabuli_chr04 | 32399897                | TT                              | CC                | 1945953046               |
| SNP_P3_51270_32403910 | NC_021163.1    | Ca_kabuli_chr04 | 32403910                | CC                              | TT                | 1945953048               |
| SNP_P3_51271_32403915 | NC_021163.1    | Ca_kabuli_chr04 | 32403915                | TT                              | GG                | 1945953049               |
| SNP_P3_51272_32403916 | NC_021163.1    | Ca_kabuli_chr04 | 32403916                | GG                              | AA                | 1945953051               |
| SNP_P3_51273_32403969 | NC_021163.1    | Ca_kabuli_chr04 | 32403969                | AA                              | CC                | 1945953053               |
| SNP_P3_51274_32403975 | NC_021163.1    | Ca_kabuli_chr04 | 32403975                | CC                              | GG                | 1945953055               |
| SNP_P3_51275_32404159 | NC_021163.1    | Ca_kabuli_chr04 | 32404159                | CC                              | TT                | 1945953057               |
| SNP_P3_51276_32404197 | NC_021163.1    | Ca_kabuli_chr04 | 32404197                | TT                              | CC                | 1945953058               |
| SNP_P3_51277_32404203 | NC_021163.1    | Ca_kabuli_chr04 | 32404203                | CC                              | AA                | 1945953060               |
| SNP_P3_51278_32404213 | NC_021163.1    | Ca_kabuli_chr04 | 32404213                | AA                              | TT                | 1945953062               |
| SNP_P3_51279_32404241 | NC_021163.1    | Ca_kabuli_chr04 | 32404241                | TT                              | CC                | 1945953064               |
| SNP_P3_51280_32404258 | NC_021163.1    | Ca_kabuli_chr04 | 32404258                | TT                              | AA                | 1945953065               |
| SNP_P3_51281_32404268 | NC_021163.1    | Ca_kabuli_chr04 | 32404268                | CC                              | TT                | 1945953067               |
| SNP_P3_51282_32404276 | NC_021163.1    | Ca_kabuli_chr04 | 32404276                | AA                              | GG                | 1945953069               |
| SNP_P3_51284_32409427 | NC_021163.1    | Ca_kabuli_chr04 | 32409427                | GG                              | AA                | 1945953071               |
| SNP_P3_51285_32409718 | NC_021163.1    | Ca_kabuli_chr04 | 32409718                | CC                              | TT                | 1945953073               |
| SNP_P3_51286_32411359 | NC_021163.1    | Ca_kabuli_chr04 | 32411359                | GG                              | AA                | 1945953074               |
| SNP_P3_51287_32412059 | NC_021163.1    | Ca_kabuli_chr04 | 32412059                | GG                              | AA                | 1945953076               |
| SNP_P3_51288_32412335 | NC_021163.1    | Ca_kabuli_chr04 | 32412335                | AA                              | TT                | 1945953078               |
| SNP_P3_51289_32412339 | NC_021163.1    | Ca_kabuli_chr04 | 32412339                | AA                              | TT                | 1945953080               |

| SNPs IDs              | Chromosome IDs | Chromosomes     | Physical positions (bp) | CDC Frontier (Reference genome) | (Pusa 256 & HPNB) | NCBI SNPdb Accession IDs |
|-----------------------|----------------|-----------------|-------------------------|---------------------------------|-------------------|--------------------------|
| SNP_P3_51290_32412340 | NC_021163.1    | Ca_kabuli_chr04 | 32412340                | GG                              | TT                | 1945953082               |
| SNP_P3_51291_32412383 | NC_021163.1    | Ca_kabuli_chr04 | 32412383                | GG                              | AA                | 1945953083               |
| SNP_P3_51293_32413445 | NC_021163.1    | Ca_kabuli_chr04 | 32413445                | TT                              | CC                | 1945953085               |
| SNP_P3_51299_32416917 | NC_021163.1    | Ca_kabuli_chr04 | 32416917                | TT                              | CC                | 1945953087               |
| SNP_P3_51300_32422848 | NC_021163.1    | Ca_kabuli_chr04 | 32422848                | GG                              | TT                | 1945953089               |
| SNP_P3_51301_32423932 | NC_021163.1    | Ca_kabuli_chr04 | 32423932                | CC                              | TT                | 1945953090               |
| SNP_P3_51302_32428256 | NC_021163.1    | Ca_kabuli_chr04 | 32428256                | CC                              | TT                | 1945953092               |
| SNP_P3_51303_32431971 | NC_021163.1    | Ca_kabuli_chr04 | 32431971                | CC                              | TT                | 1945953094               |
| SNP_P3_51305_32432124 | NC_021163.1    | Ca_kabuli_chr04 | 32432124                | GG                              | AA                | 1945953096               |
| SNP_P3_51306_32432148 | NC_021163.1    | Ca_kabuli_chr04 | 32432148                | TT                              | CC                | 1945953098               |
| SNP_P3_51307_32432222 | NC_021163.1    | Ca_kabuli_chr04 | 32432222                | TT                              | AA                | 1945953099               |
| SNP_P3_51308_32432349 | NC_021163.1    | Ca_kabuli_chr04 | 32432349                | GG                              | AA                | 1945953101               |
| SNP_P3_51309_32432422 | NC_021163.1    | Ca_kabuli_chr04 | 32432422                | AA                              | GG                | 1945953103               |
| SNP_P3_51310_32433869 | NC_021163.1    | Ca_kabuli_chr04 | 32433869                | AA                              | TT                | 1945953105               |
| SNP_P3_51311_32433886 | NC_021163.1    | Ca_kabuli_chr04 | 32433886                | AA                              | GG                | 1945953107               |
| SNP_P3_51312_32433947 | NC_021163.1    | Ca_kabuli_chr04 | 32433947                | GG                              | AA                | 1945953108               |
| SNP_P3_51313_32433952 | NC_021163.1    | Ca_kabuli_chr04 | 32433952                | TT                              | CC                | 1945953110               |
| SNP_P3_51314_32450719 | NC_021163.1    | Ca_kabuli_chr04 | 32450719                | TT                              | CC                | 1945953112               |
| SNP_P3_51315_32450758 | NC_021163.1    | Ca_kabuli_chr04 | 32450758                | AA                              | CC                | 1945953114               |
| SNP_P3_51317_32457501 | NC_021163.1    | Ca_kabuli_chr04 | 32457501                | AA                              | TT                | 1945953115               |
| SNP_P3_51318_32458057 | NC_021163.1    | Ca_kabuli_chr04 | 32458057                | GG                              | AA                | 1945953117               |
| SNP_P3_51321_32460640 | NC_021163.1    | Ca_kabuli_chr04 | 32460640                | CC                              | AA                | 1945953119               |
| SNP_P3_51322_32466570 | NC_021163.1    | Ca_kabuli_chr04 | 32466570                | CC                              | TT                | 1945953121               |
| SNP_P3_51323_32466717 | NC_021163.1    | Ca_kabuli_chr04 | 32466717                | AA                              | CC                | 1945953123               |
| SNP_P3_51324_32467736 | NC_021163.1    | Ca_kabuli_chr04 | 32467736                | TT                              | AA                | 1945953124               |
| SNP_P3_51325_32470210 | NC_021163.1    | Ca_kabuli_chr04 | 32470210                | GG                              | AA                | 1945953126               |
| SNP_P3_51326_32470231 | NC_021163.1    | Ca_kabuli_chr04 | 32470231                | CC                              | TT                | 1945953128               |
| SNP_P3_51327_32470454 | NC_021163.1    | Ca_kabuli_chr04 | 32470454                | AA                              | GG                | 1945953130               |
| SNP_P3_51328_32471941 | NC_021163.1    | Ca_kabuli_chr04 | 32471941                | GG                              | AA                | 1945953131               |
| SNP_P3_51330_32473520 | NC_021163.1    | Ca_kabuli_chr04 | 32473520                | TT                              | CC                | 1945953133               |
| SNP_P3_51331_32474436 | NC_021163.1    | Ca_kabuli_chr04 | 32474436                | GG                              | TT                | 1945953135               |
| SNP_P3_51332_32474735 | NC_021163.1    | Ca_kabuli_chr04 | 32474735                | TT                              | CC                | 1945953137               |
| SNP_P3_51333_32474877 | NC_021163.1    | Ca_kabuli_chr04 | 32474877                | AA                              | GG                | 1945953139               |
| SNP_P3_51334_32474886 | NC_021163.1    | Ca_kabuli_chr04 | 32474886                | AA                              | CC                | 1945953140               |
| SNP_P3_51336_32475095 | NC_021163.1    | Ca_kabuli_chr04 | 32475095                | GG                              | AA                | 1945953142               |
| SNP_P3_51337_32478148 | NC_021163.1    | Ca_kabuli_chr04 | 32478148                | AA                              | TT                | 1945953144               |
| SNP_P3_51338_32478149 | NC_021163.1    | Ca_kabuli_chr04 | 32478149                | TT                              | AA                | 1945953146               |
| SNP_P3_51339_32478162 | NC_021163.1    | Ca_kabuli_chr04 | 32478162                | GG                              | AA                | 1945953148               |
| SNP_P3_51340_32479038 | NC_021163.1    | Ca_kabuli_chr04 | 32479038                | CC                              | TT                | 1945953149               |
| SNP_P3_51341_32480680 | NC_021163.1    | Ca_kabuli_chr04 | 32480680                | AA                              | GG                | 1945953151               |
| SNP_P3_51342_32480713 | NC_021163.1    | Ca_kabuli_chr04 | 32480713                | CC                              | GG                | 1945953153               |
| SNP_P3_51343_32480720 | NC_021163.1    | Ca_kabuli_chr04 | 32480720                | AA                              | TT                | 1945953155               |

| SNPs IDs              | Chromosome IDs | Chromosomes     | Physical positions (bp) | CDC Frontier (Reference genome) | (Pusa 256 & HPNB) | NCBI SNPdb Accession IDs |
|-----------------------|----------------|-----------------|-------------------------|---------------------------------|-------------------|--------------------------|
| SNP_P3_51344_32480846 | NC_021163.1    | Ca_kabuli_chr04 | 32480846                | CC                              | TT                | 1945953156               |
| SNP_P3_51345_32481367 | NC_021163.1    | Ca_kabuli_chr04 | 32481367                | GG                              | AA                | 1945953158               |
| SNP_P3_51346_32482047 | NC_021163.1    | Ca_kabuli_chr04 | 32482047                | GG                              | TT                | 1945953160               |
| SNP_P3_51348_32483063 | NC_021163.1    | Ca_kabuli_chr04 | 32483063                | TT                              | AA                | 1945953162               |
| SNP_P3_51349_32483357 | NC_021163.1    | Ca_kabuli_chr04 | 32483357                | CC                              | AA                | 1945953164               |
| SNP_P3_51350_32483615 | NC_021163.1    | Ca_kabuli_chr04 | 32483615                | AA                              | CC                | 1945953165               |
| SNP_P3_51351_32483874 | NC_021163.1    | Ca_kabuli_chr04 | 32483874                | GG                              | TT                | 1945953167               |
| SNP_P3_51352_32483877 | NC_021163.1    | Ca_kabuli_chr04 | 32483877                | AA                              | GG                | 1945953169               |
| SNP_P3_51353_32484442 | NC_021163.1    | Ca_kabuli_chr04 | 32484442                | AA                              | TT                | 1945953171               |
| SNP_P3_51354_32484772 | NC_021163.1    | Ca_kabuli_chr04 | 32484772                | GG                              | AA                | 1945953172               |
| SNP_P3_51355_32484795 | NC_021163.1    | Ca_kabuli_chr04 | 32484795                | TT                              | CC                | 1945953174               |
| SNP_P3_51356_32484972 | NC_021163.1    | Ca_kabuli_chr04 | 32484972                | TT                              | AA                | 1945953176               |
| SNP_P3_51357_32485240 | NC_021163.1    | Ca_kabuli_chr04 | 32485240                | CC                              | TT                | 1945953178               |
| SNP_P3_51358_32485398 | NC_021163.1    | Ca_kabuli_chr04 | 32485398                | TT                              | CC                | 1945953180               |
| SNP_P3_51359_32485524 | NC_021163.1    | Ca_kabuli_chr04 | 32485524                | CC                              | TT                | 1945953181               |
| SNP_P3_51360_32487663 | NC_021163.1    | Ca_kabuli_chr04 | 32487663                | AA                              | GG                | 1945953183               |
| SNP_P3_51361_32492211 | NC_021163.1    | Ca_kabuli_chr04 | 32492211                | GG                              | AA                | 1945953185               |
| SNP_P3_51362_32492637 | NC_021163.1    | Ca_kabuli_chr04 | 32492637                | CC                              | TT                | 1945953187               |
| SNP_P3_51363_32492642 | NC_021163.1    | Ca_kabuli_chr04 | 32492642                | AA                              | GG                | 1945953188               |
| SNP_P3_51364_32492681 | NC_021163.1    | Ca_kabuli_chr04 | 32492681                | TT                              | CC                | 1945953190               |
| SNP_P3_51365_32493743 | NC_021163.1    | Ca_kabuli_chr04 | 32493743                | AA                              | GG                | 1945953192               |
| SNP_P3_51367_32494372 | NC_021163.1    | Ca_kabuli_chr04 | 32494372                | TT                              | CC                | 1945953194               |
| SNP_P3_51368_32494495 | NC_021163.1    | Ca_kabuli_chr04 | 32494495                | AA                              | TT                | 1945953196               |
| SNP_P3_51369_32494741 | NC_021163.1    | Ca_kabuli_chr04 | 32494741                | AA                              | TT                | 1945953197               |
| SNP_P3_51370_32494816 | NC_021163.1    | Ca_kabuli_chr04 | 32494816                | AA                              | GG                | 1945953199               |
| SNP_P3_51372_32496636 | NC_021163.1    | Ca_kabuli_chr04 | 32496636                | CC                              | AA                | 1945953201               |
| SNP_P3_51373_32496942 | NC_021163.1    | Ca_kabuli_chr04 | 32496942                | AA                              | GG                | 1945953203               |
| SNP_P3_51374_32496960 | NC_021163.1    | Ca_kabuli_chr04 | 32496960                | AA                              | CC                | 1945953204               |
| SNP_P3_51375_32497734 | NC_021163.1    | Ca_kabuli_chr04 | 32497734                | GG                              | AA                | 1945953206               |
| SNP_P3_51376_32498617 | NC_021163.1    | Ca_kabuli_chr04 | 32498617                | AA                              | CC                | 1945953208               |
| SNP_P3_51377_32498636 | NC_021163.1    | Ca_kabuli_chr04 | 32498636                | CC                              | TT                | 1945953210               |
| SNP_P3_51379_32498903 | NC_021163.1    | Ca_kabuli_chr04 | 32498903                | AA                              | GG                | 1945953212               |
| SNP_P3_51380_32499032 | NC_021163.1    | Ca_kabuli_chr04 | 32499032                | GG                              | TT                | 1945953213               |
| SNP_P3_51381_32499040 | NC_021163.1    | Ca_kabuli_chr04 | 32499040                | TT                              | CC                | 1945953215               |
| SNP_P3_51382_32499119 | NC_021163.1    | Ca_kabuli_chr04 | 32499119                | CC                              | AA                | 1945953217               |
| SNP_P3_51383_32499309 | NC_021163.1    | Ca_kabuli_chr04 | 32499309                | TT                              | CC                | 1945953219               |
| SNP_P3_51384_32499670 | NC_021163.1    | Ca_kabuli_chr04 | 32499670                | CC                              | GG                | 1945953220               |
| SNP_P3_51385_32499843 | NC_021163.1    | Ca_kabuli_chr04 | 32499843                | TT                              | GG                | 1945953222               |
| SNP_P3_51386_32499996 | NC_021163.1    | Ca_kabuli_chr04 | 32499996                | CC                              | GG                | 1945953224               |
| SNP_P3_51387_32500164 | NC_021163.1    | Ca_kabuli_chr04 | 32500164                | AA                              | TT                | 1945953226               |
| SNP_P3_51388_32500228 | NC_021163.1    | Ca_kabuli_chr04 | 32500228                | GG                              | AA                | 1945953228               |
| SNP_P3_51389_32500345 | NC_021163.1    | Ca_kabuli_chr04 | 32500345                | TT                              | GG                | 1945953229               |



| SNPs IDs              | Chromosome IDs | Chromosomes     | Physical positions (bp) | CDC Frontier (Reference genome) | (Pusa 256 & HPNB) | NCBI SNPdb Accession IDs |
|-----------------------|----------------|-----------------|-------------------------|---------------------------------|-------------------|--------------------------|
| SNP_P3_51390_32500346 | NC_021163.1    | Ca_kabuli_chr04 | 32500346                | TT                              | AA                | 1945953231               |
| SNP_P3_51391_32500454 | NC_021163.1    | Ca_kabuli_chr04 | 32500454                | AA                              | TT                | 1945953233               |
| SNP_P3_51392_32500732 | NC_021163.1    | Ca_kabuli_chr04 | 32500732                | TT                              | CC                | 1945953235               |
| SNP_P3_51393_32501031 | NC_021163.1    | Ca_kabuli_chr04 | 32501031                | CC                              | TT                | 1945953237               |
| SNP_P3_51394_32501893 | NC_021163.1    | Ca_kabuli_chr04 | 32501893                | TT                              | CC                | 1945953238               |
| SNP_P3_51395_32501895 | NC_021163.1    | Ca_kabuli_chr04 | 32501895                | GG                              | TT                | 1945953240               |
| SNP_P3_51396_32501913 | NC_021163.1    | Ca_kabuli_chr04 | 32501913                | GG                              | CC                | 1945953242               |
| SNP_P3_51397_32506596 | NC_021163.1    | Ca_kabuli_chr04 | 32506596                | GG                              | TT                | 1945953244               |
| SNP_P3_51398_32506609 | NC_021163.1    | Ca_kabuli_chr04 | 32506609                | TT                              | CC                | 1945953245               |
| SNP_P3_51399_32509332 | NC_021163.1    | Ca_kabuli_chr04 | 32509332                | GG                              | AA                | 1945953247               |
| SNP_P3_51400_32509604 | NC_021163.1    | Ca_kabuli_chr04 | 32509604                | TT                              | GG                | 1945953249               |
| SNP_P3_51401_32510338 | NC_021163.1    | Ca_kabuli_chr04 | 32510338                | CC                              | TT                | 1945953251               |
| SNP_P3_51402_32510536 | NC_021163.1    | Ca_kabuli_chr04 | 32510536                | TT                              | CC                | 1945953253               |
| SNP_P3_51403_32510977 | NC_021163.1    | Ca_kabuli_chr04 | 32510977                | TT                              | CC                | 1945953254               |
| SNP_P3_51405_32511768 | NC_021163.1    | Ca_kabuli_chr04 | 32511768                | CC                              | TT                | 1945953256               |
| SNP_P3_51406_32512670 | NC_021163.1    | Ca_kabuli_chr04 | 32512670                | GG                              | TT                | 1945953258               |
| SNP_P3_51407_32512774 | NC_021163.1    | Ca_kabuli_chr04 | 32512774                | GG                              | AA                | 1945953260               |
| SNP_P3_51408_32513081 | NC_021163.1    | Ca_kabuli_chr04 | 32513081                | AA                              | CC                | 1945953261               |
| SNP_P3_51411_32516418 | NC_021163.1    | Ca_kabuli_chr04 | 32516418                | AA                              | GG                | 1945953263               |
| SNP_P3_51412_32516485 | NC_021163.1    | Ca_kabuli_chr04 | 32516485                | TT                              | GG                | 1945953265               |
| SNP_P3_51413_32517663 | NC_021163.1    | Ca_kabuli_chr04 | 32517663                | GG                              | AA                | 1945953267               |
| SNP_P3_51414_32517960 | NC_021163.1    | Ca_kabuli_chr04 | 32517960                | GG                              | AA                | 1945953269               |
| SNP_P3_51415_32517967 | NC_021163.1    | Ca_kabuli_chr04 | 32517967                | AA                              | CC                | 1945953270               |
| SNP_P3_51416_32517969 | NC_021163.1    | Ca_kabuli_chr04 | 32517969                | GG                              | AA                | 1945953272               |
| SNP_P3_51417_32518230 | NC_021163.1    | Ca_kabuli_chr04 | 32518230                | CC                              | TT                | 1945953274               |
| SNP_P3_51418_32519456 | NC_021163.1    | Ca_kabuli_chr04 | 32519456                | AA                              | GG                | 1945953276               |
| SNP_P3_51419_32522537 | NC_021163.1    | Ca_kabuli_chr04 | 32522537                | TT                              | GG                | 1945953277               |
| SNP_P3_51420_32522556 | NC_021163.1    | Ca_kabuli_chr04 | 32522556                | CC                              | TT                | 1945953279               |
| SNP_P3_51421_32523240 | NC_021163.1    | Ca_kabuli_chr04 | 32523240                | TT                              | AA                | 1945953281               |
| SNP_P3_51422_32523241 | NC_021163.1    | Ca_kabuli_chr04 | 32523241                | TT                              | AA                | 1945953283               |
| SNP_P3_51423_32523287 | NC_021163.1    | Ca_kabuli_chr04 | 32523287                | AA                              | CC                | 1945953285               |
| SNP_P3_51425_32523496 | NC_021163.1    | Ca_kabuli_chr04 | 32523496                | GG                              | AA                | 1945953286               |
| SNP_P3_51426_32523578 | NC_021163.1    | Ca_kabuli_chr04 | 32523578                | TT                              | AA                | 1945953288               |
| SNP_P3_51427_32523627 | NC_021163.1    | Ca_kabuli_chr04 | 32523627                | AA                              | TT                | 1945953290               |
| SNP_P3_51428_32523639 | NC_021163.1    | Ca_kabuli_chr04 | 32523639                | GG                              | AA                | 1945953292               |
| SNP_P3_51429_32523645 | NC_021163.1    | Ca_kabuli_chr04 | 32523645                | AA                              | GG                | 1945953293               |
| SNP_P3_51430_32523655 | NC_021163.1    | Ca_kabuli_chr04 | 32523655                | GG                              | AA                | 1945953295               |
| SNP_P3_51431_32523658 | NC_021163.1    | Ca_kabuli_chr04 | 32523658                | AA                              | CC                | 1945953297               |
| SNP_P3_51432_32523902 | NC_021163.1    | Ca_kabuli_chr04 | 32523902                | TT                              | CC                | 1945953299               |
| SNP_P3_51433_32523928 | NC_021163.1    | Ca_kabuli_chr04 | 32523928                | GG                              | AA                | 1945953301               |
| SNP_P3_51434_32524600 | NC_021163.1    | Ca_kabuli_chr04 | 32524600                | AA                              | GG                | 1945953302               |
| SNP_P3_51435_32524933 | NC_021163.1    | Ca_kabuli_chr04 | 32524933                | GG                              | AA                | 1945953304               |

| SNPs IDs              | Chromosome IDs | Chromosomes     | Physical positions (bp) | CDC Frontier (Reference genome) | (Pusa 256 & HPNB) | NCBI SNPdb Accession IDs |
|-----------------------|----------------|-----------------|-------------------------|---------------------------------|-------------------|--------------------------|
| SNP_P3_51436_32524968 | NC_021163.1    | Ca_kabuli_chr04 | 32524968                | TT                              | AA                | 1945953306               |
| SNP_P3_51438_32525823 | NC_021163.1    | Ca_kabuli_chr04 | 32525823                | AA                              | GG                | 1945953308               |
| SNP_P3_51439_32526490 | NC_021163.1    | Ca_kabuli_chr04 | 32526490                | AA                              | GG                | 1945953309               |
| SNP_P3_51440_32526509 | NC_021163.1    | Ca_kabuli_chr04 | 32526509                | GG                              | AA                | 1945953311               |
| SNP_P3_51441_32526905 | NC_021163.1    | Ca_kabuli_chr04 | 32526905                | CC                              | TT                | 1945953313               |
| SNP_P3_51442_32528017 | NC_021163.1    | Ca_kabuli_chr04 | 32528017                | GG                              | AA                | 1945953315               |
| SNP_P3_51443_32528052 | NC_021163.1    | Ca_kabuli_chr04 | 32528052                | TT                              | CC                | 1945953317               |
| SNP_P3_51444_32528272 | NC_021163.1    | Ca_kabuli_chr04 | 32528272                | CC                              | AA                | 1945953318               |
| SNP_P3_51445_32528278 | NC_021163.1    | Ca_kabuli_chr04 | 32528278                | GG                              | TT                | 1945953320               |
| SNP_P3_51446_32528283 | NC_021163.1    | Ca_kabuli_chr04 | 32528283                | GG                              | TT                | 1945953322               |
| SNP_P3_51447_32529515 | NC_021163.1    | Ca_kabuli_chr04 | 32529515                | CC                              | AA                | 1945953324               |
| SNP_P3_51448_32529608 | NC_021163.1    | Ca_kabuli_chr04 | 32529608                | TT                              | AA                | 1945953325               |
| SNP_P3_51449_32530074 | NC_021163.1    | Ca_kabuli_chr04 | 32530074                | TT                              | GG                | 1945953327               |
| SNP_P3_51450_32530114 | NC_021163.1    | Ca_kabuli_chr04 | 32530114                | AA                              | GG                | 1945953329               |
| SNP_P3_51451_32530126 | NC_021163.1    | Ca_kabuli_chr04 | 32530126                | TT                              | GG                | 1945953331               |
| SNP_P3_51453_32530286 | NC_021163.1    | Ca_kabuli_chr04 | 32530286                | AA                              | GG                | 1945953333               |
| SNP_P3_51454_32530517 | NC_021163.1    | Ca_kabuli_chr04 | 32530517                | GG                              | AA                | 1945953334               |
| SNP_P3_51455_32531221 | NC_021163.1    | Ca_kabuli_chr04 | 32531221                | CC                              | TT                | 1945953336               |
| SNP_P3_51457_32535899 | NC_021163.1    | Ca_kabuli_chr04 | 32535899                | CC                              | TT                | 1945953338               |
| SNP_P3_51458_32536269 | NC_021163.1    | Ca_kabuli_chr04 | 32536269                | TT                              | CC                | 1945953340               |
| SNP_P3_51459_32537519 | NC_021163.1    | Ca_kabuli_chr04 | 32537519                | AA                              | GG                | 1945953342               |
| SNP_P3_51460_32537857 | NC_021163.1    | Ca_kabuli_chr04 | 32537857                | TT                              | CC                | 1945953343               |
| SNP_P3_51461_32538215 | NC_021163.1    | Ca_kabuli_chr04 | 32538215                | CC                              | TT                | 1945953345               |
| SNP_P3_51462_32538218 | NC_021163.1    | Ca_kabuli_chr04 | 32538218                | CC                              | TT                | 1945953347               |
| SNP_P3_51463_32539226 | NC_021163.1    | Ca_kabuli_chr04 | 32539226                | TT                              | GG                | 1945953349               |
| SNP_P3_51464_32540318 | NC_021163.1    | Ca_kabuli_chr04 | 32540318                | AA                              | GG                | 1945953350               |
| SNP_P3_51465_32540324 | NC_021163.1    | Ca_kabuli_chr04 | 32540324                | GG                              | AA                | 1945953352               |
| SNP_P3_51466_32540476 | NC_021163.1    | Ca_kabuli_chr04 | 32540476                | GG                              | TT                | 1945953354               |
| SNP_P3_51467_32540485 | NC_021163.1    | Ca_kabuli_chr04 | 32540485                | CC                              | TT                | 1945953356               |
| SNP_P3_51468_32540607 | NC_021163.1    | Ca_kabuli_chr04 | 32540607                | CC                              | TT                | 1945953358               |
| SNP_P3_51469_32542363 | NC_021163.1    | Ca_kabuli_chr04 | 32542363                | TT                              | CC                | 1945953359               |
| SNP_P3_51470_32542367 | NC_021163.1    | Ca_kabuli_chr04 | 32542367                | AA                              | TT                | 1945953361               |
| SNP_P3_51471_32542696 | NC_021163.1    | Ca_kabuli_chr04 | 32542696                | GG                              | AA                | 1945953363               |
| SNP_P3_51472_32543289 | NC_021163.1    | Ca_kabuli_chr04 | 32543289                | GG                              | AA                | 1945953365               |
| SNP_P3_51473_32544531 | NC_021163.1    | Ca_kabuli_chr04 | 32544531                | AA                              | CC                | 1945953366               |
| SNP_P3_51474_32544788 | NC_021163.1    | Ca_kabuli_chr04 | 32544788                | TT                              | CC                | 1945953368               |
| SNP_P3_51475_32547176 | NC_021163.1    | Ca_kabuli_chr04 | 32547176                | CC                              | GG                | 1945953370               |
| SNP_P3_51476_32547200 | NC_021163.1    | Ca_kabuli_chr04 | 32547200                | AA                              | GG                | 1945953372               |
| SNP_P3_51478_32548645 | NC_021163.1    | Ca_kabuli_chr04 | 32548645                | AA                              | GG                | 1945953374               |
| SNP_P3_51479_32549314 | NC_021163.1    | Ca_kabuli_chr04 | 32549314                | AA                              | TT                | 1945953375               |
| SNP_P3_51480_32549422 | NC_021163.1    | Ca_kabuli_chr04 | 32549422                | TT                              | CC                | 1945953377               |
| SNP_P3_51481_32550486 | NC_021163.1    | Ca_kabuli_chr04 | 32550486                | AA                              | GG                | 1945953379               |

| SNPs IDs              | Chromosome IDs | Chromosomes     | Physical positions (bp) | CDC Frontier (Reference genome) | (Pusa 256 & HPNB) | NCBI SNPdb Accession IDs |
|-----------------------|----------------|-----------------|-------------------------|---------------------------------|-------------------|--------------------------|
| SNP_P3_51482_32550488 | NC_021163.1    | Ca_kabuli_chr04 | 32550488                | AA                              | GG                | 1945953381               |
| SNP_P3_51483_32550517 | NC_021163.1    | Ca_kabuli_chr04 | 32550517                | AA                              | GG                | 1945953382               |
| SNP_P3_51484_32550767 | NC_021163.1    | Ca_kabuli_chr04 | 32550767                | GG                              | AA                | 1945953384               |
| SNP_P3_51485_32552435 | NC_021163.1    | Ca_kabuli_chr04 | 32552435                | CC                              | TT                | 1945953386               |
| SNP_P3_51486_32552668 | NC_021163.1    | Ca_kabuli_chr04 | 32552668                | GG                              | AA                | 1945953388               |
| SNP_P3_51487_32552781 | NC_021163.1    | Ca_kabuli_chr04 | 32552781                | GG                              | TT                | 1945953390               |
| SNP_P3_51488_32552782 | NC_021163.1    | Ca_kabuli_chr04 | 32552782                | AA                              | GG                | 1945953391               |
| SNP_P3_51489_32552818 | NC_021163.1    | Ca_kabuli_chr04 | 32552818                | TT                              | AA                | 1945953393               |
| SNP_P3_51490_32552919 | NC_021163.1    | Ca_kabuli_chr04 | 32552919                | AA                              | GG                | 1945953395               |
| SNP_P3_51491_32552924 | NC_021163.1    | Ca_kabuli_chr04 | 32552924                | GG                              | TT                | 1945953397               |
| SNP_P3_51492_32552987 | NC_021163.1    | Ca_kabuli_chr04 | 32552987                | TT                              | CC                | 1945953399               |
| SNP_P3_51493_32552988 | NC_021163.1    | Ca_kabuli_chr04 | 32552988                | TT                              | CC                | 1945953400               |
| SNP_P3_51494_32554515 | NC_021163.1    | Ca_kabuli_chr04 | 32554515                | AA                              | TT                | 1945953402               |
| SNP_P3_51495_32554911 | NC_021163.1    | Ca_kabuli_chr04 | 32554911                | AA                              | TT                | 1945953404               |
| SNP_P3_51497_32559005 | NC_021163.1    | Ca_kabuli_chr04 | 32559005                | GG                              | AA                | 1945953406               |
| SNP_P3_51498_32559951 | NC_021163.1    | Ca_kabuli_chr04 | 32559951                | TT                              | CC                | 1945953407               |
| SNP_P3_51499_32560522 | NC_021163.1    | Ca_kabuli_chr04 | 32560522                | GG                              | AA                | 1945953409               |
| SNP_P3_51500_32561953 | NC_021163.1    | Ca_kabuli_chr04 | 32561953                | TT                              | CC                | 1945953411               |
| SNP_P3_51501_32562042 | NC_021163.1    | Ca_kabuli_chr04 | 32562042                | AA                              | TT                | 1945953413               |
| SNP_P3_51502_32562044 | NC_021163.1    | Ca_kabuli_chr04 | 32562044                | TT                              | CC                | 1945953415               |
| SNP_P3_51503_32562074 | NC_021163.1    | Ca_kabuli_chr04 | 32562074                | TT                              | AA                | 1945953416               |
| SNP_P3_51504_32562148 | NC_021163.1    | Ca_kabuli_chr04 | 32562148                | GG                              | AA                | 1945953418               |
| SNP_P3_51506_32562530 | NC_021163.1    | Ca_kabuli_chr04 | 32562530                | AA                              | GG                | 1945953420               |
| SNP_P3_51507_32562586 | NC_021163.1    | Ca_kabuli_chr04 | 32562586                | AA                              | GG                | 1945953422               |
| SNP_P3_51508_32562716 | NC_021163.1    | Ca_kabuli_chr04 | 32562716                | AA                              | GG                | 1945953423               |
| SNP_P3_51509_32565305 | NC_021163.1    | Ca_kabuli_chr04 | 32565305                | TT                              | CC                | 1945953425               |
| SNP_P3_51510_32565311 | NC_021163.1    | Ca_kabuli_chr04 | 32565311                | CC                              | TT                | 1945953427               |
| SNP_P3_51511_32569383 | NC_021163.1    | Ca_kabuli_chr04 | 32569383                | CC                              | TT                | 1945953429               |
| SNP_P3_51512_32570115 | NC_021163.1    | Ca_kabuli_chr04 | 32570115                | TT                              | AA                | 1945953431               |
| SNP_P3_51513_32571096 | NC_021163.1    | Ca_kabuli_chr04 | 32571096                | AA                              | GG                | 1945953432               |
| SNP_P3_51515_32573195 | NC_021163.1    | Ca_kabuli_chr04 | 32573195                | AA                              | GG                | 1945953434               |
| SNP_P3_51516_32573270 | NC_021163.1    | Ca_kabuli_chr04 | 32573270                | AA                              | GG                | 1945953436               |
| SNP_P3_51517_32573721 | NC_021163.1    | Ca_kabuli_chr04 | 32573721                | AA                              | TT                | 1945953438               |
| SNP_P3_51518_32573785 | NC_021163.1    | Ca_kabuli_chr04 | 32573785                | TT                              | GG                | 1945953439               |
| SNP_P3_51519_32573819 | NC_021163.1    | Ca_kabuli_chr04 | 32573819                | TT                              | CC                | 1945953441               |
| SNP_P3_51520_32576268 | NC_021163.1    | Ca_kabuli_chr04 | 32576268                | CC                              | AA                | 1945953443               |
| SNP_P3_51521_32576520 | NC_021163.1    | Ca_kabuli_chr04 | 32576520                | GG                              | TT                | 1945953445               |
| SNP_P3_51522_32576539 | NC_021163.1    | Ca_kabuli_chr04 | 32576539                | CC                              | TT                | 1945953447               |
| SNP_P3_51523_32576540 | NC_021163.1    | Ca_kabuli_chr04 | 32576540                | TT                              | CC                | 1945953448               |
| SNP_P3_51524_32576558 | NC_021163.1    | Ca_kabuli_chr04 | 32576558                | AA                              | CC                | 1945953450               |
| SNP_P3_51525_32576581 | NC_021163.1    | Ca_kabuli_chr04 | 32576581                | TT                              | CC                | 1945953452               |
| SNP_P3_51526_32576622 | NC_021163.1    | Ca_kabuli_chr04 | 32576622                | TT                              | AA                | 1945953454               |

| SNPs IDs              | Chromosome IDs | Chromosomes     | Physical positions (bp) | CDC Frontier (Reference genome) | (Pusa 256 & HPNB) | NCBI SNPdb Accession IDs |
|-----------------------|----------------|-----------------|-------------------------|---------------------------------|-------------------|--------------------------|
| SNP_P3_51527_32576638 | NC_021163.1    | Ca_kabuli_chr04 | 32576638                | AA                              | GG                | 1945953456               |
| SNP_P3_51528_32576674 | NC_021163.1    | Ca_kabuli_chr04 | 32576674                | TT                              | CC                | 1945953457               |
| SNP_P3_51529_32579127 | NC_021163.1    | Ca_kabuli_chr04 | 32579127                | CC                              | TT                | 1945953459               |
| SNP_P3_51530_32579130 | NC_021163.1    | Ca_kabuli_chr04 | 32579130                | TT                              | GG                | 1945953461               |
| SNP_P3_51531_32579352 | NC_021163.1    | Ca_kabuli_chr04 | 32579352                | AA                              | CC                | 1945953463               |
| SNP_P3_51532_32579408 | NC_021163.1    | Ca_kabuli_chr04 | 32579408                | TT                              | CC                | 1945953464               |
| SNP_P3_51533_32580800 | NC_021163.1    | Ca_kabuli_chr04 | 32580800                | TT                              | GG                | 1945953466               |
| SNP_P3_51534_32581167 | NC_021163.1    | Ca_kabuli_chr04 | 32581167                | TT                              | GG                | 1945953468               |
| SNP_P3_51535_32581205 | NC_021163.1    | Ca_kabuli_chr04 | 32581205                | TT                              | CC                | 1945953470               |
| SNP_P3_51536_32581366 | NC_021163.1    | Ca_kabuli_chr04 | 32581366                | TT                              | GG                | 1945953472               |
| SNP_P3_51537_32581371 | NC_021163.1    | Ca_kabuli_chr04 | 32581371                | TT                              | CC                | 1945953473               |
| SNP_P3_51538_32581392 | NC_021163.1    | Ca_kabuli_chr04 | 32581392                | CC                              | TT                | 1945953475               |
| SNP_P3_51539_32581393 | NC_021163.1    | Ca_kabuli_chr04 | 32581393                | AA                              | GG                | 1945953477               |
| SNP_P3_51540_32581402 | NC_021163.1    | Ca_kabuli_chr04 | 32581402                | GG                              | TT                | 1945953479               |
| SNP_P3_51541_32581441 | NC_021163.1    | Ca_kabuli_chr04 | 32581441                | GG                              | TT                | 1945953480               |
| SNP_P3_51542_32581442 | NC_021163.1    | Ca_kabuli_chr04 | 32581442                | AA                              | GG                | 1945953482               |
| SNP_P3_51543_32581734 | NC_021163.1    | Ca_kabuli_chr04 | 32581734                | GG                              | AA                | 1945953484               |
| SNP_P3_51544_32582836 | NC_021163.1    | Ca_kabuli_chr04 | 32582836                | AA                              | GG                | 1945953486               |
| SNP_P3_51545_32582865 | NC_021163.1    | Ca_kabuli_chr04 | 32582865                | AA                              | GG                | 1945953488               |
| SNP_P3_51546_32584056 | NC_021163.1    | Ca_kabuli_chr04 | 32584056                | CC                              | TT                | 1945953489               |
| SNP_P3_51547_32584139 | NC_021163.1    | Ca_kabuli_chr04 | 32584139                | CC                              | TT                | 1945953491               |
| SNP_P3_51548_32586610 | NC_021163.1    | Ca_kabuli_chr04 | 32586610                | GG                              | CC                | 1945953493               |
| SNP_P3_51549_32589280 | NC_021163.1    | Ca_kabuli_chr04 | 32589280                | AA                              | GG                | 1945953495               |
| SNP_P3_51550_32589359 | NC_021163.1    | Ca_kabuli_chr04 | 32589359                | TT                              | CC                | 1945953496               |
| SNP_P3_51551_32591850 | NC_021163.1    | Ca_kabuli_chr04 | 32591850                | TT                              | GG                | 1945953498               |
| SNP_P3_51552_32592183 | NC_021163.1    | Ca_kabuli_chr04 | 32592183                | CC                              | GG                | 1945953500               |
| SNP_P3_51553_32592206 | NC_021163.1    | Ca_kabuli_chr04 | 32592206                | AA                              | CC                | 1945953502               |
| SNP_P3_51554_32592421 | NC_021163.1    | Ca_kabuli_chr04 | 32592421                | CC                              | AA                | 1945953504               |
| SNP_P3_51555_32592616 | NC_021163.1    | Ca_kabuli_chr04 | 32592616                | TT                              | CC                | 1945953505               |
| SNP_P3_51556_32593013 | NC_021163.1    | Ca_kabuli_chr04 | 32593013                | GG                              | AA                | 1945953507               |
| SNP_P3_51558_32594299 | NC_021163.1    | Ca_kabuli_chr04 | 32594299                | CC                              | TT                | 1945953509               |
| SNP_P3_51559_32594307 | NC_021163.1    | Ca_kabuli_chr04 | 32594307                | GG                              | AA                | 1945953511               |
| SNP_P3_51560_32595191 | NC_021163.1    | Ca_kabuli_chr04 | 32595191                | AA                              | CC                | 1945953512               |
| SNP_P3_51561_32596208 | NC_021163.1    | Ca_kabuli_chr04 | 32596208                | GG                              | AA                | 1945953514               |
| SNP_P3_51562_32597457 | NC_021163.1    | Ca_kabuli_chr04 | 32597457                | AA                              | GG                | 1945953516               |
| SNP_P3_51563_32598185 | NC_021163.1    | Ca_kabuli_chr04 | 32598185                | TT                              | CC                | 1945953518               |
| SNP_P3_51564_32598208 | NC_021163.1    | Ca_kabuli_chr04 | 32598208                | CC                              | TT                | 1945953520               |
| SNP_P3_51565_32599850 | NC_021163.1    | Ca_kabuli_chr04 | 32599850                | AA                              | GG                | 1945953521               |
| SNP_P3_51566_32600278 | NC_021163.1    | Ca_kabuli_chr04 | 32600278                | GG                              | AA                | 1945953523               |
| SNP_P3_51567_32603823 | NC_021163.1    | Ca_kabuli_chr04 | 32603823                | CC                              | TT                | 1945953525               |
| SNP_P3_51568_32603828 | NC_021163.1    | Ca_kabuli_chr04 | 32603828                | CC                              | TT                | 1945953527               |
| SNP_P3_51569_32604017 | NC_021163.1    | Ca_kabuli_chr04 | 32604017                | TT                              | CC                | 1945953529               |

| SNPs IDs              | Chromosome IDs | Chromosomes     | Physical positions (bp) | CDC Frontier (Reference genome) | (Pusa 256 & HPNB) | NCBI SNPdb Accession IDs |
|-----------------------|----------------|-----------------|-------------------------|---------------------------------|-------------------|--------------------------|
| SNP_P3_51570_32604033 | NC_021163.1    | Ca_kabuli_chr04 | 32604033                | GG                              | TT                | 1945953530               |
| SNP_P3_51571_32604104 | NC_021163.1    | Ca_kabuli_chr04 | 32604104                | CC                              | TT                | 1945953532               |
| SNP_P3_51572_32609695 | NC_021163.1    | Ca_kabuli_chr04 | 32609695                | TT                              | CC                | 1945953534               |
| SNP_P3_51573_32609701 | NC_021163.1    | Ca_kabuli_chr04 | 32609701                | CC                              | AA                | 1945953536               |
| SNP_P3_51574_32609743 | NC_021163.1    | Ca_kabuli_chr04 | 32609743                | AA                              | CC                | 1945953537               |
| SNP_P3_51575_32610502 | NC_021163.1    | Ca_kabuli_chr04 | 32610502                | CC                              | TT                | 1945953539               |
| SNP_P3_51576_32610729 | NC_021163.1    | Ca_kabuli_chr04 | 32610729                | AA                              | GG                | 1945953541               |
| SNP_P3_51577_32610787 | NC_021163.1    | Ca_kabuli_chr04 | 32610787                | GG                              | AA                | 1945953543               |
| SNP_P3_51578_32610793 | NC_021163.1    | Ca_kabuli_chr04 | 32610793                | TT                              | GG                | 1945953545               |
| SNP_P3_51579_32615778 | NC_021163.1    | Ca_kabuli_chr04 | 32615778                | TT                              | CC                | 1945953546               |
| SNP_P3_51580_32615836 | NC_021163.1    | Ca_kabuli_chr04 | 32615836                | GG                              | AA                | 1945953548               |
| SNP_P3_51581_32616185 | NC_021163.1    | Ca_kabuli_chr04 | 32616185                | TT                              | CC                | 1945953550               |
| SNP_P3_51582_32617904 | NC_021163.1    | Ca_kabuli_chr04 | 32617904                | CC                              | AA                | 1945953552               |
| SNP_P3_51583_32617968 | NC_021163.1    | Ca_kabuli_chr04 | 32617968                | AA                              | GG                | 1945953553               |
| SNP_P3_51584_32618167 | NC_021163.1    | Ca_kabuli_chr04 | 32618167                | TT                              | AA                | 1945953555               |
| SNP_P3_51585_32618314 | NC_021163.1    | Ca_kabuli_chr04 | 32618314                | AA                              | GG                | 1945953557               |
| SNP_P3_51586_32618327 | NC_021163.1    | Ca_kabuli_chr04 | 32618327                | CC                              | TT                | 1945953559               |
| SNP_P3_51587_32618870 | NC_021163.1    | Ca_kabuli_chr04 | 32618870                | AA                              | GG                | 1945953561               |
| SNP_P3_51588_32618927 | NC_021163.1    | Ca_kabuli_chr04 | 32618927                | GG                              | AA                | 1945953562               |
| SNP_P3_51589_32620611 | NC_021163.1    | Ca_kabuli_chr04 | 32620611                | GG                              | AA                | 1945953564               |
| SNP_P3_51590_32620946 | NC_021163.1    | Ca_kabuli_chr04 | 32620946                | AA                              | GG                | 1945953566               |
| SNP_P3_51591_32621011 | NC_021163.1    | Ca_kabuli_chr04 | 32621011                | TT                              | CC                | 1945953568               |
| SNP_P3_51592_32622469 | NC_021163.1    | Ca_kabuli_chr04 | 32622469                | CC                              | TT                | 1945953569               |
| SNP_P3_51593_32622470 | NC_021163.1    | Ca_kabuli_chr04 | 32622470                | AA                              | CC                | 1945953571               |
| SNP_P3_51595_32622517 | NC_021163.1    | Ca_kabuli_chr04 | 32622517                | TT                              | AA                | 1945953573               |
| SNP_P3_51597_32623313 | NC_021163.1    | Ca_kabuli_chr04 | 32623313                | CC                              | TT                | 1945953575               |
| SNP_P3_51598_32625733 | NC_021163.1    | Ca_kabuli_chr04 | 32625733                | GG                              | TT                | 1945953577               |
| SNP_P3_51599_32626047 | NC_021163.1    | Ca_kabuli_chr04 | 32626047                | TT                              | AA                | 1945953578               |
| SNP_P3_51602_32637644 | NC_021163.1    | Ca_kabuli_chr04 | 32637644                | AA                              | TT                | 1945953580               |
| SNP_P3_51603_32638255 | NC_021163.1    | Ca_kabuli_chr04 | 32638255                | CC                              | TT                | 1945953582               |
| SNP_P3_51604_32638700 | NC_021163.1    | Ca_kabuli_chr04 | 32638700                | CC                              | TT                | 1945953584               |
| SNP_P3_51605_32639860 | NC_021163.1    | Ca_kabuli_chr04 | 32639860                | TT                              | CC                | 1945953585               |
| SNP_P3_51607_32639974 | NC_021163.1    | Ca_kabuli_chr04 | 32639974                | CC                              | TT                | 1945953587               |
| SNP_P3_51608_32640058 | NC_021163.1    | Ca_kabuli_chr04 | 32640058                | CC                              | TT                | 1945953589               |
| SNP_P3_51609_32640232 | NC_021163.1    | Ca_kabuli_chr04 | 32640232                | CC                              | AA                | 1945953591               |
| SNP_P3_51610_32645918 | NC_021163.1    | Ca_kabuli_chr04 | 32645918                | AA                              | GG                | 1945953593               |
| SNP_P3_51611_32646104 | NC_021163.1    | Ca_kabuli_chr04 | 32646104                | AA                              | GG                | 1945953594               |
| SNP_P3_51612_32646105 | NC_021163.1    | Ca_kabuli_chr04 | 32646105                | AA                              | GG                | 1945953596               |
| SNP_P3_51613_32646129 | NC_021163.1    | Ca_kabuli_chr04 | 32646129                | CC                              | TT                | 1945953598               |
| SNP_P3_51614_32646217 | NC_021163.1    | Ca_kabuli_chr04 | 32646217                | TT                              | CC                | 1945953600               |
| SNP_P3_51615_32646593 | NC_021163.1    | Ca_kabuli_chr04 | 32646593                | CC                              | AA                | 1945953601               |
| SNP_P3_51620_32657648 | NC_021163.1    | Ca_kabuli_chr04 | 32657648                | CC                              | TT                | 1945953603               |

| SNPs IDs              | Chromosome IDs | Chromosomes     | Physical positions (bp) | CDC Frontier (Reference genome) | (Pusa 256 & HPNB) | NCBI SNPdb Accession IDs |
|-----------------------|----------------|-----------------|-------------------------|---------------------------------|-------------------|--------------------------|
| SNP_P3_51621_32661129 | NC_021163.1    | Ca_kabuli_chr04 | 32661129                | CC                              | TT                | 1945953605               |
| SNP_P3_51623_32664304 | NC_021163.1    | Ca_kabuli_chr04 | 32664304                | TT                              | CC                | 1945953607               |
| SNP_P3_51624_32665041 | NC_021163.1    | Ca_kabuli_chr04 | 32665041                | GG                              | AA                | 1945953609               |
| SNP_P3_51625_32665248 | NC_021163.1    | Ca_kabuli_chr04 | 32665248                | TT                              | CC                | 1945953610               |
| SNP_P3_51626_32667452 | NC_021163.1    | Ca_kabuli_chr04 | 32667452                | AA                              | CC                | 1945953612               |
| SNP_P3_51627_32673185 | NC_021163.1    | Ca_kabuli_chr04 | 32673185                | GG                              | AA                | 1945953614               |
| SNP_P3_51628_32673191 | NC_021163.1    | Ca_kabuli_chr04 | 32673191                | AA                              | GG                | 1945953616               |
| SNP_P3_51629_32673206 | NC_021163.1    | Ca_kabuli_chr04 | 32673206                | TT                              | CC                | 1945953618               |
| SNP_P3_51630_32673237 | NC_021163.1    | Ca_kabuli_chr04 | 32673237                | AA                              | GG                | 1945953619               |
| SNP_P3_51631_32685850 | NC_021163.1    | Ca_kabuli_chr04 | 32685850                | CC                              | TT                | 1945953621               |
| SNP_P3_51632_32686342 | NC_021163.1    | Ca_kabuli_chr04 | 32686342                | AA                              | CC                | 1945953623               |
| SNP_P3_51633_32686861 | NC_021163.1    | Ca_kabuli_chr04 | 32686861                | GG                              | AA                | 1945953625               |
| SNP_P3_51634_32688452 | NC_021163.1    | Ca_kabuli_chr04 | 32688452                | TT                              | CC                | 1945953626               |
| SNP_P3_51635_32699821 | NC_021163.1    | Ca_kabuli_chr04 | 32699821                | GG                              | TT                | 1945953628               |
| SNP_P3_51636_32699892 | NC_021163.1    | Ca_kabuli_chr04 | 32699892                | GG                              | AA                | 1945953630               |
| SNP_P3_51638_32717726 | NC_021163.1    | Ca_kabuli_chr04 | 32717726                | TT                              | GG                | 1945953632               |
| SNP_P3_51639_32717732 | NC_021163.1    | Ca_kabuli_chr04 | 32717732                | GG                              | AA                | 1945953634               |
| SNP_P3_51640_32739723 | NC_021163.1    | Ca_kabuli_chr04 | 32739723                | CC                              | TT                | 1945953635               |
| SNP_P3_51641_32739737 | NC_021163.1    | Ca_kabuli_chr04 | 32739737                | TT                              | GG                | 1945953637               |
| SNP_P3_51642_32739993 | NC_021163.1    | Ca_kabuli_chr04 | 32739993                | GG                              | TT                | 1945953639               |
| SNP_P3_51643_32740006 | NC_021163.1    | Ca_kabuli_chr04 | 32740006                | CC                              | TT                | 1945953641               |
| SNP_P3_51644_32740034 | NC_021163.1    | Ca_kabuli_chr04 | 32740034                | GG                              | AA                | 1945953642               |
| SNP_P3_51645_32749473 | NC_021163.1    | Ca_kabuli_chr04 | 32749473                | AA                              | GG                | 1945953644               |
| SNP_P3_51646_32765112 | NC_021163.1    | Ca_kabuli_chr04 | 32765112                | TT                              | CC                | 1945953646               |
| SNP_P3_51647_32765146 | NC_021163.1    | Ca_kabuli_chr04 | 32765146                | GG                              | AA                | 1945953648               |
| SNP_P3_51648_32765580 | NC_021163.1    | Ca_kabuli_chr04 | 32765580                | AA                              | GG                | 1945953650               |
| SNP_P3_51649_32766058 | NC_021163.1    | Ca_kabuli_chr04 | 32766058                | TT                              | CC                | 1945953651               |
| SNP_P3_51650_32766152 | NC_021163.1    | Ca_kabuli_chr04 | 32766152                | CC                              | TT                | 1945953653               |
| SNP_P3_51651_32767031 | NC_021163.1    | Ca_kabuli_chr04 | 32767031                | CC                              | AA                | 1945953655               |
| SNP_P3_51652_32767038 | NC_021163.1    | Ca_kabuli_chr04 | 32767038                | TT                              | GG                | 1945953657               |
| SNP_P3_51653_32767057 | NC_021163.1    | Ca_kabuli_chr04 | 32767057                | GG                              | AA                | 1945953659               |
| SNP_P3_51654_32767079 | NC_021163.1    | Ca_kabuli_chr04 | 32767079                | CC                              | TT                | 1945953660               |
| SNP_P3_51655_32767189 | NC_021163.1    | Ca_kabuli_chr04 | 32767189                | GG                              | AA                | 1945953662               |
| SNP_P3_51656_32767200 | NC_021163.1    | Ca_kabuli_chr04 | 32767200                | AA                              | CC                | 1945953664               |
| SNP_P3_51657_32767211 | NC_021163.1    | Ca_kabuli_chr04 | 32767211                | AA                              | GG                | 1945953666               |
| SNP_P3_51658_32767218 | NC_021163.1    | Ca_kabuli_chr04 | 32767218                | AA                              | GG                | 1945953668               |
| SNP_P3_51659_32767246 | NC_021163.1    | Ca_kabuli_chr04 | 32767246                | CC                              | TT                | 1945953669               |
| SNP_P3_51660_32767267 | NC_021163.1    | Ca_kabuli_chr04 | 32767267                | AA                              | GG                | 1945953671               |
| SNP_P3_51661_32767270 | NC_021163.1    | Ca_kabuli_chr04 | 32767270                | TT                              | AA                | 1945953673               |
| SNP_P3_51662_32767272 | NC_021163.1    | Ca_kabuli_chr04 | 32767272                | CC                              | TT                | 1945953675               |
| SNP_P3_51663_32767287 | NC_021163.1    | Ca_kabuli_chr04 | 32767287                | CC                              | TT                | 1945953676               |
| SNP_P3_51664_32767306 | NC_021163.1    | Ca_kabuli_chr04 | 32767306                | TT                              | CC                | 1945953678               |

| SNPs IDs              | Chromosome IDs | Chromosomes     | Physical positions (bp) | CDC Frontier (Reference genome) | (Pusa 256 & HPNB) | NCBI SNPdb Accession IDs |
|-----------------------|----------------|-----------------|-------------------------|---------------------------------|-------------------|--------------------------|
| SNP_P3_51665_32767318 | NC_021163.1    | Ca_kabuli_chr04 | 32767318                | AA                              | CC                | 1945953680               |
| SNP_P3_51666_32767463 | NC_021163.1    | Ca_kabuli_chr04 | 32767463                | TT                              | CC                | 1945953682               |
| SNP_P3_51667_32767598 | NC_021163.1    | Ca_kabuli_chr04 | 32767598                | AA                              | GG                | 1945953684               |
| SNP_P3_51668_32767602 | NC_021163.1    | Ca_kabuli_chr04 | 32767602                | CC                              | GG                | 1945953685               |
| SNP_P3_51669_32767620 | NC_021163.1    | Ca_kabuli_chr04 | 32767620                | TT                              | GG                | 1945953687               |
| SNP_P3_51670_32767653 | NC_021163.1    | Ca_kabuli_chr04 | 32767653                | GG                              | AA                | 1945953689               |
| SNP_P3_51671_32768432 | NC_021163.1    | Ca_kabuli_chr04 | 32768432                | TT                              | AA                | 1945953691               |
| SNP_P3_51672_32768435 | NC_021163.1    | Ca_kabuli_chr04 | 32768435                | AA                              | CC                | 1945953693               |
| SNP_P3_51673_32768437 | NC_021163.1    | Ca_kabuli_chr04 | 32768437                | GG                              | AA                | 1945953694               |
| SNP_P3_51674_32768444 | NC_021163.1    | Ca_kabuli_chr04 | 32768444                | AA                              | CC                | 1945953696               |
| SNP_P3_51675_32768465 | NC_021163.1    | Ca_kabuli_chr04 | 32768465                | TT                              | CC                | 1945953698               |
| SNP_P3_51676_32768468 | NC_021163.1    | Ca_kabuli_chr04 | 32768468                | TT                              | AA                | 1945953700               |
| SNP_P3_51677_32768474 | NC_021163.1    | Ca_kabuli_chr04 | 32768474                | AA                              | GG                | 1945953701               |
| SNP_P3_51678_32768569 | NC_021163.1    | Ca_kabuli_chr04 | 32768569                | GG                              | AA                | 1945953703               |
| SNP_P3_51679_32768829 | NC_021163.1    | Ca_kabuli_chr04 | 32768829                | TT                              | CC                | 1945953705               |
| SNP_P3_51680_32790841 | NC_021163.1    | Ca_kabuli_chr04 | 32790841                | AA                              | GG                | 1945953707               |
| SNP_P3_51681_32793483 | NC_021163.1    | Ca_kabuli_chr04 | 32793483                | AA                              | GG                | 1945953709               |
| SNP_P3_51682_32802893 | NC_021163.1    | Ca_kabuli_chr04 | 32802893                | AA                              | GG                | 1945953710               |
| SNP_P3_51683_32811682 | NC_021163.1    | Ca_kabuli_chr04 | 32811682                | TT                              | CC                | 1945953712               |
| SNP_P3_51684_32811738 | NC_021163.1    | Ca_kabuli_chr04 | 32811738                | TT                              | CC                | 1945953714               |
| SNP_P3_51685_32811757 | NC_021163.1    | Ca_kabuli_chr04 | 32811757                | AA                              | GG                | 1945953716               |
| SNP_P3_51686_32811758 | NC_021163.1    | Ca_kabuli_chr04 | 32811758                | AA                              | CC                | 1945953717               |
| SNP_P3_51687_32812105 | NC_021163.1    | Ca_kabuli_chr04 | 32812105                | AA                              | GG                | 1945953719               |
| SNP_P3_51688_32830178 | NC_021163.1    | Ca_kabuli_chr04 | 32830178                | TT                              | CC                | 1945953721               |
| SNP_P3_51689_32832997 | NC_021163.1    | Ca_kabuli_chr04 | 32832997                | GG                              | AA                | 1945953723               |
| SNP_P3_51690_32861880 | NC_021163.1    | Ca_kabuli_chr04 | 32861880                | AA                              | GG                | 1945953725               |
| SNP_P3_51691_32861881 | NC_021163.1    | Ca_kabuli_chr04 | 32861881                | TT                              | CC                | 1945953726               |
| SNP_P3_51692_32861926 | NC_021163.1    | Ca_kabuli_chr04 | 32861926                | GG                              | AA                | 1945953728               |
| SNP_P3_51693_32861935 | NC_021163.1    | Ca_kabuli_chr04 | 32861935                | TT                              | CC                | 1945953730               |
| SNP_P3_51694_32866071 | NC_021163.1    | Ca_kabuli_chr04 | 32866071                | GG                              | AA                | 1945953732               |
| SNP_P3_51695_32871860 | NC_021163.1    | Ca_kabuli_chr04 | 32871860                | TT                              | AA                | 1945953733               |
| SNP_P3_51696_32873606 | NC_021163.1    | Ca_kabuli_chr04 | 32873606                | CC                              | TT                | 1945953735               |
| SNP_P3_51697_32882181 | NC_021163.1    | Ca_kabuli_chr04 | 32882181                | CC                              | TT                | 1945953737               |
| SNP_P3_51698_32885181 | NC_021163.1    | Ca_kabuli_chr04 | 32885181                | AA                              | GG                | 1945953739               |
| SNP_P3_51699_32885342 | NC_021163.1    | Ca_kabuli_chr04 | 32885342                | AA                              | GG                | 1945953741               |
| SNP_P3_51700_32885346 | NC_021163.1    | Ca_kabuli_chr04 | 32885346                | CC                              | TT                | 1945953742               |
| SNP_P3_51701_32885368 | NC_021163.1    | Ca_kabuli_chr04 | 32885368                | TT                              | GG                | 1945953744               |
| SNP_P3_51702_32885377 | NC_021163.1    | Ca_kabuli_chr04 | 32885377                | AA                              | GG                | 1945953746               |
| SNP_P3_51703_32885397 | NC_021163.1    | Ca_kabuli_chr04 | 32885397                | CC                              | AA                | 1945953748               |
| SNP_P3_51704_32885401 | NC_021163.1    | Ca_kabuli_chr04 | 32885401                | TT                              | GG                | 1945953749               |
| SNP_P3_51705_32885425 | NC_021163.1    | Ca_kabuli_chr04 | 32885425                | CC                              | TT                | 1945953751               |
| SNP_P3_51706_32885500 | NC_021163.1    | Ca_kabuli_chr04 | 32885500                | GG                              | AA                | 1945953753               |

| SNPs IDs              | Chromosome IDs | Chromosomes     | Physical positions (bp) | CDC Frontier (Reference genome) | (Pusa 256 & HPNB) | NCBI SNPdb Accession IDs |
|-----------------------|----------------|-----------------|-------------------------|---------------------------------|-------------------|--------------------------|
| SNP_P3_51707_32885560 | NC_021163.1    | Ca_kabuli_chr04 | 32885560                | GG                              | AA                | 1945953755               |
| SNP_P3_51708_32885574 | NC_021163.1    | Ca_kabuli_chr04 | 32885574                | CC                              | TT                | 1945953757               |
| SNP_P3_51709_32885592 | NC_021163.1    | Ca_kabuli_chr04 | 32885592                | CC                              | GG                | 1945953758               |
| SNP_P3_51710_32885600 | NC_021163.1    | Ca_kabuli_chr04 | 32885600                | AA                              | GG                | 1945953760               |
| SNP_P3_51711_32885614 | NC_021163.1    | Ca_kabuli_chr04 | 32885614                | AA                              | GG                | 1945953762               |
| SNP_P3_51712_32885640 | NC_021163.1    | Ca_kabuli_chr04 | 32885640                | TT                              | CC                | 1945953764               |
| SNP_P3_51713_32885657 | NC_021163.1    | Ca_kabuli_chr04 | 32885657                | CC                              | TT                | 1945953766               |
| SNP_P3_51714_32885694 | NC_021163.1    | Ca_kabuli_chr04 | 32885694                | AA                              | CC                | 1945953767               |
| SNP_P3_51715_32885943 | NC_021163.1    | Ca_kabuli_chr04 | 32885943                | GG                              | AA                | 1945953769               |
| SNP_P3_51716_32885951 | NC_021163.1    | Ca_kabuli_chr04 | 32885951                | TT                              | CC                | 1945953771               |
| SNP_P3_51717_32885987 | NC_021163.1    | Ca_kabuli_chr04 | 32885987                | AA                              | CC                | 1945953773               |
| SNP_P3_51718_32886023 | NC_021163.1    | Ca_kabuli_chr04 | 32886023                | CC                              | TT                | 1945953774               |
| SNP_P3_51719_32886149 | NC_021163.1    | Ca_kabuli_chr04 | 32886149                | AA                              | CC                | 1945953776               |
| SNP_P3_51720_32886157 | NC_021163.1    | Ca_kabuli_chr04 | 32886157                | TT                              | GG                | 1945953778               |
| SNP_P3_51721_32886200 | NC_021163.1    | Ca_kabuli_chr04 | 32886200                | AA                              | TT                | 1945953780               |
| SNP_P3_51722_32886217 | NC_021163.1    | Ca_kabuli_chr04 | 32886217                | CC                              | TT                | 1945953782               |
| SNP_P3_51723_32886233 | NC_021163.1    | Ca_kabuli_chr04 | 32886233                | GG                              | AA                | 1945953783               |
| SNP_P3_51724_32886314 | NC_021163.1    | Ca_kabuli_chr04 | 32886314                | AA                              | GG                | 1945953785               |
| SNP_P3_51725_32886372 | NC_021163.1    | Ca_kabuli_chr04 | 32886372                | AA                              | GG                | 1945953787               |
| SNP_P3_51727_32886408 | NC_021163.1    | Ca_kabuli_chr04 | 32886408                | TT                              | CC                | 1945953789               |
| SNP_P3_51728_32886437 | NC_021163.1    | Ca_kabuli_chr04 | 32886437                | GG                              | AA                | 1945953790               |
| SNP_P3_51729_32886446 | NC_021163.1    | Ca_kabuli_chr04 | 32886446                | CC                              | TT                | 1945953792               |
| SNP_P3_51730_32886477 | NC_021163.1    | Ca_kabuli_chr04 | 32886477                | GG                              | CC                | 1945953794               |
| SNP_P3_51731_32886496 | NC_021163.1    | Ca_kabuli_chr04 | 32886496                | TT                              | CC                | 1945953796               |
| SNP_P3_51732_32886580 | NC_021163.1    | Ca_kabuli_chr04 | 32886580                | GG                              | AA                | 1945953798               |
| SNP_P3_51733_32886668 | NC_021163.1    | Ca_kabuli_chr04 | 32886668                | CC                              | TT                | 1945953799               |
| SNP_P3_51734_32886676 | NC_021163.1    | Ca_kabuli_chr04 | 32886676                | AA                              | GG                | 1945953801               |
| SNP_P3_51735_32886749 | NC_021163.1    | Ca_kabuli_chr04 | 32886749                | AA                              | CC                | 1945953803               |
| SNP_P3_51736_32886801 | NC_021163.1    | Ca_kabuli_chr04 | 32886801                | TT                              | CC                | 1945953805               |
| SNP_P3_51737_32886887 | NC_021163.1    | Ca_kabuli_chr04 | 32886887                | AA                              | GG                | 1945953807               |
| SNP_P3_51738_32886914 | NC_021163.1    | Ca_kabuli_chr04 | 32886914                | CC                              | TT                | 1945953808               |
| SNP_P3_51739_32888492 | NC_021163.1    | Ca_kabuli_chr04 | 32888492                | GG                              | AA                | 1945953810               |
| SNP_P3_51740_32888518 | NC_021163.1    | Ca_kabuli_chr04 | 32888518                | AA                              | TT                | 1945953812               |
| SNP_P3_51741_32888536 | NC_021163.1    | Ca_kabuli_chr04 | 32888536                | AA                              | CC                | 1945953814               |
| SNP_P3_51742_32888538 | NC_021163.1    | Ca_kabuli_chr04 | 32888538                | GG                              | TT                | 1945953815               |
| SNP_P3_51743_32888819 | NC_021163.1    | Ca_kabuli_chr04 | 32888819                | AA                              | GG                | 1945953817               |
| SNP_P3_51745_32888845 | NC_021163.1    | Ca_kabuli_chr04 | 32888845                | TT                              | CC                | 1945953819               |
| SNP_P3_51746_32888869 | NC_021163.1    | Ca_kabuli_chr04 | 32888869                | AA                              | GG                | 1945953821               |
| SNP_P3_51747_32902358 | NC_021163.1    | Ca_kabuli_chr04 | 32902358                | CC                              | TT                | 1945953823               |
| SNP_P3_51748_32902638 | NC_021163.1    | Ca_kabuli_chr04 | 32902638                | AA                              | CC                | 1945953824               |
| SNP_P3_51749_32902670 | NC_021163.1    | Ca_kabuli_chr04 | 32902670                | CC                              | GG                | 1945953826               |
| SNP_P3_51750_32902704 | NC_021163.1    | Ca_kabuli_chr04 | 32902704                | GG                              | AA                | 1945953828               |



| SNPs IDs              | Chromosome IDs | Chromosomes     | Physical positions (bp) | CDC Frontier (Reference genome) | (Pusa 256 & HPNB) | NCBI SNPdb Accession IDs |
|-----------------------|----------------|-----------------|-------------------------|---------------------------------|-------------------|--------------------------|
| SNP_P3_51751_32902771 | NC_021163.1    | Ca_kabuli_chr04 | 32902771                | CC                              | TT                | 1945953830               |
| SNP_P3_51752_32902780 | NC_021163.1    | Ca_kabuli_chr04 | 32902780                | AA                              | CC                | 1945953831               |
| SNP_P3_51753_32902786 | NC_021163.1    | Ca_kabuli_chr04 | 32902786                | TT                              | CC                | 1945953833               |
| SNP_P3_51754_32902804 | NC_021163.1    | Ca_kabuli_chr04 | 32902804                | GG                              | AA                | 1945953835               |
| SNP_P3_51755_32902812 | NC_021163.1    | Ca_kabuli_chr04 | 32902812                | GG                              | CC                | 1945953837               |
| SNP_P3_51757_32909963 | NC_021163.1    | Ca_kabuli_chr04 | 32909963                | AA                              | GG                | 1945953839               |
| SNP_P3_51758_32911748 | NC_021163.1    | Ca_kabuli_chr04 | 32911748                | CC                              | TT                | 1945953840               |
| SNP_P3_51759_32917124 | NC_021163.1    | Ca_kabuli_chr04 | 32917124                | CC                              | TT                | 1945953842               |
| SNP_P3_51760_32941482 | NC_021163.1    | Ca_kabuli_chr04 | 32941482                | GG                              | AA                | 1945953844               |
| SNP_P3_51761_32967296 | NC_021163.1    | Ca_kabuli_chr04 | 32967296                | TT                              | CC                | 1945953846               |
| SNP_P3_51762_32967324 | NC_021163.1    | Ca_kabuli_chr04 | 32967324                | GG                              | TT                | 1945953847               |
| SNP_P3_51763_32967975 | NC_021163.1    | Ca_kabuli_chr04 | 32967975                | AA                              | CC                | 1945953849               |
| SNP_P3_51764_32994889 | NC_021163.1    | Ca_kabuli_chr04 | 32994889                | CC                              | TT                | 1945953851               |
| SNP_P3_51765_33019513 | NC_021163.1    | Ca_kabuli_chr04 | 33019513                | CC                              | AA                | 1945953853               |
| SNP_P3_51766_33034222 | NC_021163.1    | Ca_kabuli_chr04 | 33034222                | TT                              | CC                | 1945953855               |
| SNP_P3_51767_33048894 | NC_021163.1    | Ca_kabuli_chr04 | 33048894                | TT                              | CC                | 1945953856               |
| SNP_P3_51768_33059835 | NC_021163.1    | Ca_kabuli_chr04 | 33059835                | CC                              | TT                | 1945953858               |
| SNP_P3_51769_33062501 | NC_021163.1    | Ca_kabuli_chr04 | 33062501                | AA                              | GG                | 1945953860               |
| SNP_P3_51770_33065222 | NC_021163.1    | Ca_kabuli_chr04 | 33065222                | GG                              | AA                | 1945953862               |
| SNP_P3_51771_33067863 | NC_021163.1    | Ca_kabuli_chr04 | 33067863                | CC                              | TT                | 1945953864               |
| SNP_P3_51772_33069658 | NC_021163.1    | Ca_kabuli_chr04 | 33069658                | CC                              | AA                | 1945953865               |
| SNP_P3_51773_33076154 | NC_021163.1    | Ca_kabuli_chr04 | 33076154                | CC                              | TT                | 1945953867               |
| SNP_P3_51774_33076524 | NC_021163.1    | Ca_kabuli_chr04 | 33076524                | CC                              | AA                | 1945953869               |
| SNP_P3_51775_33076776 | NC_021163.1    | Ca_kabuli_chr04 | 33076776                | AA                              | GG                | 1945953870               |
| SNP_P3_51776_33076781 | NC_021163.1    | Ca_kabuli_chr04 | 33076781                | GG                              | AA                | 1945953872               |
| SNP_P3_51777_33086152 | NC_021163.1    | Ca_kabuli_chr04 | 33086152                | GG                              | AA                | 1945953874               |
| SNP_P3_51778_33090083 | NC_021163.1    | Ca_kabuli_chr04 | 33090083                | GG                              | CC                | 1945953876               |
| SNP_P3_51779_33095008 | NC_021163.1    | Ca_kabuli_chr04 | 33095008                | CC                              | GG                | 1945953878               |
| SNP_P3_51780_33095065 | NC_021163.1    | Ca_kabuli_chr04 | 33095065                | GG                              | AA                | 1945953879               |
| SNP_P3_51781_33098003 | NC_021163.1    | Ca_kabuli_chr04 | 33098003                | GG                              | CC                | 1945953881               |
| SNP_P3_51782_33107087 | NC_021163.1    | Ca_kabuli_chr04 | 33107087                | GG                              | TT                | 1945953883               |
| SNP_P3_51783_33108855 | NC_021163.1    | Ca_kabuli_chr04 | 33108855                | CC                              | GG                | 1945953885               |
| SNP_P3_51785_33115962 | NC_021163.1    | Ca_kabuli_chr04 | 33115962                | TT                              | GG                | 1945953887               |
| SNP_P3_51786_33121257 | NC_021163.1    | Ca_kabuli_chr04 | 33121257                | AA                              | TT                | 1945953888               |
| SNP_P3_51787_33127363 | NC_021163.1    | Ca_kabuli_chr04 | 33127363                | GG                              | AA                | 1945953890               |
| SNP_P3_51788_33130445 | NC_021163.1    | Ca_kabuli_chr04 | 33130445                | GG                              | TT                | 1945953892               |
| SNP_P3_51789_33130574 | NC_021163.1    | Ca_kabuli_chr04 | 33130574                | CC                              | TT                | 1945953894               |
| SNP_P3_51790_33135278 | NC_021163.1    | Ca_kabuli_chr04 | 33135278                | CC                              | TT                | 1945953895               |
| SNP_P3_51791_33135327 | NC_021163.1    | Ca_kabuli_chr04 | 33135327                | TT                              | CC                | 1945953897               |
| SNP_P3_51792_33136174 | NC_021163.1    | Ca_kabuli_chr04 | 33136174                | GG                              | AA                | 1945953899               |
| SNP_P3_51793_33140942 | NC_021163.1    | Ca_kabuli_chr04 | 33140942                | GG                              | AA                | 1945953901               |
| SNP_P3_51794_33143001 | NC_021163.1    | Ca_kabuli_chr04 | 33143001                | TT                              | CC                | 1945953903               |

| SNPs IDs              | Chromosome IDs | Chromosomes     | Physical positions (bp) | CDC Frontier (Reference genome) | (Pusa 256 & HPNB) | NCBI SNPdb Accession IDs |
|-----------------------|----------------|-----------------|-------------------------|---------------------------------|-------------------|--------------------------|
| SNP_P3_51795_33143941 | NC_021163.1    | Ca_kabuli_chr04 | 33143941                | AA                              | GG                | 1945953904               |
| SNP_P3_51796_33148943 | NC_021163.1    | Ca_kabuli_chr04 | 33148943                | GG                              | AA                | 1945953906               |
| SNP_P3_51797_33150186 | NC_021163.1    | Ca_kabuli_chr04 | 33150186                | CC                              | AA                | 1945953908               |
| SNP_P3_51798_33172197 | NC_021163.1    | Ca_kabuli_chr04 | 33172197                | GG                              | AA                | 1945953910               |
| SNP_P3_51799_33173580 | NC_021163.1    | Ca_kabuli_chr04 | 33173580                | TT                              | GG                | 1945953911               |
| SNP_P3_51802_33179160 | NC_021163.1    | Ca_kabuli_chr04 | 33179160                | TT                              | GG                | 1945953913               |
| SNP_P3_51803_33179805 | NC_021163.1    | Ca_kabuli_chr04 | 33179805                | AA                              | TT                | 1945953915               |
| SNP_P3_51804_33194000 | NC_021163.1    | Ca_kabuli_chr04 | 33194000                | CC                              | TT                | 1945953917               |
| SNP_P3_51805_33194004 | NC_021163.1    | Ca_kabuli_chr04 | 33194004                | GG                              | TT                | 1945953919               |
| SNP_P3_51806_33194723 | NC_021163.1    | Ca_kabuli_chr04 | 33194723                | AA                              | GG                | 1945953920               |
| SNP_P3_51808_33195063 | NC_021163.1    | Ca_kabuli_chr04 | 33195063                | CC                              | TT                | 1945953922               |
| SNP_P3_51809_33195073 | NC_021163.1    | Ca_kabuli_chr04 | 33195073                | TT                              | CC                | 1945953924               |
| SNP_P3_51810_33195074 | NC_021163.1    | Ca_kabuli_chr04 | 33195074                | CC                              | TT                | 1945953926               |
| SNP_P3_51811_33195226 | NC_021163.1    | Ca_kabuli_chr04 | 33195226                | GG                              | AA                | 1945953928               |
| SNP_P3_51812_33195589 | NC_021163.1    | Ca_kabuli_chr04 | 33195589                | CC                              | TT                | 1945953929               |
| SNP_P3_51813_33195601 | NC_021163.1    | Ca_kabuli_chr04 | 33195601                | GG                              | AA                | 1945953931               |
| SNP_P3_51814_33195625 | NC_021163.1    | Ca_kabuli_chr04 | 33195625                | CC                              | AA                | 1945953933               |
| SNP_P3_51815_33195811 | NC_021163.1    | Ca_kabuli_chr04 | 33195811                | GG                              | TT                | 1945953935               |
| SNP_P3_51817_33199917 | NC_021163.1    | Ca_kabuli_chr04 | 33199917                | AA                              | GG                | 1945953936               |
| SNP_P3_51818_33200124 | NC_021163.1    | Ca_kabuli_chr04 | 33200124                | TT                              | GG                | 1945953938               |
| SNP_P3_51819_33200704 | NC_021163.1    | Ca_kabuli_chr04 | 33200704                | AA                              | GG                | 1945953940               |
| SNP_P3_51820_33202423 | NC_021163.1    | Ca_kabuli_chr04 | 33202423                | GG                              | AA                | 1945953942               |
| SNP_P3_51822_33211957 | NC_021163.1    | Ca_kabuli_chr04 | 33211957                | GG                              | CC                | 1945953944               |
| SNP_P3_51823_33212596 | NC_021163.1    | Ca_kabuli_chr04 | 33212596                | TT                              | CC                | 1945953945               |
| SNP_P3_51824_33212598 | NC_021163.1    | Ca_kabuli_chr04 | 33212598                | AA                              | GG                | 1945953947               |
| SNP_P3_51825_33212600 | NC_021163.1    | Ca_kabuli_chr04 | 33212600                | TT                              | AA                | 1945953949               |
| SNP_P3_51826_33212601 | NC_021163.1    | Ca_kabuli_chr04 | 33212601                | GG                              | AA                | 1945953951               |
| SNP_P3_51827_33215269 | NC_021163.1    | Ca_kabuli_chr04 | 33215269                | TT                              | CC                | 1945953952               |
| SNP_P3_51828_33237626 | NC_021163.1    | Ca_kabuli_chr04 | 33237626                | GG                              | AA                | 1945953954               |
| SNP_P3_51829_33237642 | NC_021163.1    | Ca_kabuli_chr04 | 33237642                | TT                              | CC                | 1945953956               |
| SNP_P3_51830_33237908 | NC_021163.1    | Ca_kabuli_chr04 | 33237908                | GG                              | AA                | 1945953958               |
| SNP_P3_51831_33239287 | NC_021163.1    | Ca_kabuli_chr04 | 33239287                | GG                              | AA                | 1945953960               |
| SNP_P3_51832_33239420 | NC_021163.1    | Ca_kabuli_chr04 | 33239420                | CC                              | TT                | 1945953961               |
| SNP_P3_51833_33239540 | NC_021163.1    | Ca_kabuli_chr04 | 33239540                | GG                              | AA                | 1945953963               |
| SNP_P3_51834_33243916 | NC_021163.1    | Ca_kabuli_chr04 | 33243916                | AA                              | GG                | 1945953965               |
| SNP_P3_51836_33255537 | NC_021163.1    | Ca_kabuli_chr04 | 33255537                | GG                              | TT                | 1945953967               |
| SNP_P3_51837_33255566 | NC_021163.1    | Ca_kabuli_chr04 | 33255566                | AA                              | GG                | 1945953969               |
| SNP_P3_51838_33255613 | NC_021163.1    | Ca_kabuli_chr04 | 33255613                | CC                              | TT                | 1945953970               |
| SNP_P3_51839_33255725 | NC_021163.1    | Ca_kabuli_chr04 | 33255725                | AA                              | GG                | 1945953972               |
| SNP_P3_51840_33255862 | NC_021163.1    | Ca_kabuli_chr04 | 33255862                | GG                              | AA                | 1945953974               |
| SNP_P3_51841_33255876 | NC_021163.1    | Ca_kabuli_chr04 | 33255876                | AA                              | TT                | 1945953976               |
| SNP_P3_51843_33258050 | NC_021163.1    | Ca_kabuli_chr04 | 33258050                | GG                              | CC                | 1945953977               |

| SNPs IDs              | Chromosome IDs | Chromosomes     | Physical positions (bp) | CDC Frontier (Reference genome) | (Pusa 256 & HPNB) | NCBI SNPdb Accession IDs |
|-----------------------|----------------|-----------------|-------------------------|---------------------------------|-------------------|--------------------------|
| SNP_P3_51844_33259323 | NC_021163.1    | Ca_kabuli_chr04 | 33259323                | AA                              | GG                | 1945953979               |
| SNP_P3_51845_33259627 | NC_021163.1    | Ca_kabuli_chr04 | 33259627                | GG                              | AA                | 1945953981               |
| SNP_P3_51846_33259646 | NC_021163.1    | Ca_kabuli_chr04 | 33259646                | TT                              | GG                | 1945953983               |
| SNP_P3_51847_33259647 | NC_021163.1    | Ca_kabuli_chr04 | 33259647                | CC                              | AA                | 1945953984               |
| SNP_P3_51848_33259661 | NC_021163.1    | Ca_kabuli_chr04 | 33259661                | AA                              | GG                | 1945953986               |
| SNP_P3_51849_33260127 | NC_021163.1    | Ca_kabuli_chr04 | 33260127                | TT                              | AA                | 1945953988               |
| SNP_P3_51850_33260415 | NC_021163.1    | Ca_kabuli_chr04 | 33260415                | AA                              | GG                | 1945953990               |
| SNP_P3_51851_33260964 | NC_021163.1    | Ca_kabuli_chr04 | 33260964                | GG                              | TT                | 1945953992               |
| SNP_P3_51852_33264467 | NC_021163.1    | Ca_kabuli_chr04 | 33264467                | GG                              | AA                | 1945953993               |
| SNP_P3_51853_33267590 | NC_021163.1    | Ca_kabuli_chr04 | 33267590                | TT                              | CC                | 1945953995               |
| SNP_P3_51854_33269906 | NC_021163.1    | Ca_kabuli_chr04 | 33269906                | CC                              | TT                | 1945953997               |
| SNP_P3_51855_33269958 | NC_021163.1    | Ca_kabuli_chr04 | 33269958                | AA                              | GG                | 1945953999               |
| SNP_P3_51857_33272476 | NC_021163.1    | Ca_kabuli_chr04 | 33272476                | TT                              | GG                | 1945954000               |
| SNP_P3_51858_33285227 | NC_021163.1    | Ca_kabuli_chr04 | 33285227                | GG                              | AA                | 1945954002               |
| SNP_P3_51859_33286871 | NC_021163.1    | Ca_kabuli_chr04 | 33286871                | AA                              | GG                | 1945954004               |
| SNP_P3_51860_33288642 | NC_021163.1    | Ca_kabuli_chr04 | 33288642                | CC                              | AA                | 1945954006               |
| SNP_P3_51862_33298604 | NC_021163.1    | Ca_kabuli_chr04 | 33298604                | TT                              | AA                | 1945954008               |
| SNP_P3_51864_33302295 | NC_021163.1    | Ca_kabuli_chr04 | 33302295                | GG                              | TT                | 1945954009               |
| SNP_P3_51865_33303725 | NC_021163.1    | Ca_kabuli_chr04 | 33303725                | GG                              | AA                | 1945954011               |
| SNP_P3_51869_33312288 | NC_021163.1    | Ca_kabuli_chr04 | 33312288                | TT                              | CC                | 1945954013               |
| SNP_P3_51870_33312304 | NC_021163.1    | Ca_kabuli_chr04 | 33312304                | GG                              | TT                | 1945954015               |
| SNP_P3_51872_33314014 | NC_021163.1    | Ca_kabuli_chr04 | 33314014                | CC                              | GG                | 1945954016               |
| SNP_P3_51873_33316552 | NC_021163.1    | Ca_kabuli_chr04 | 33316552                | TT                              | CC                | 1945954018               |
| SNP_P3_51874_33318006 | NC_021163.1    | Ca_kabuli_chr04 | 33318006                | AA                              | GG                | 1945954020               |
| SNP_P3_51875_33320354 | NC_021163.1    | Ca_kabuli_chr04 | 33320354                | TT                              | CC                | 1945954022               |
| SNP_P3_51876_33320362 | NC_021163.1    | Ca_kabuli_chr04 | 33320362                | TT                              | GG                | 1945954024               |
| SNP_P3_51878_33327245 | NC_021163.1    | Ca_kabuli_chr04 | 33327245                | CC                              | AA                | 1945954025               |
| SNP_P3_51879_33327258 | NC_021163.1    | Ca_kabuli_chr04 | 33327258                | TT                              | GG                | 1945954027               |
| SNP_P3_51880_33327764 | NC_021163.1    | Ca_kabuli_chr04 | 33327764                | TT                              | AA                | 1945954029               |
| SNP_P3_51882_33328016 | NC_021163.1    | Ca_kabuli_chr04 | 33328016                | CC                              | TT                | 1945954031               |
| SNP_P3_51884_33328084 | NC_021163.1    | Ca_kabuli_chr04 | 33328084                | CC                              | TT                | 1945954033               |
| SNP_P3_51885_33328140 | NC_021163.1    | Ca_kabuli_chr04 | 33328140                | GG                              | TT                | 1945954034               |
| SNP_P3_51886_33329389 | NC_021163.1    | Ca_kabuli_chr04 | 33329389                | GG                              | TT                | 1945954036               |
| SNP_P3_51888_33329422 | NC_021163.1    | Ca_kabuli_chr04 | 33329422                | AA                              | GG                | 1945954038               |
| SNP_P3_51889_33329447 | NC_021163.1    | Ca_kabuli_chr04 | 33329447                | AA                              | GG                | 1945954040               |
| SNP_P3_51890_33329448 | NC_021163.1    | Ca_kabuli_chr04 | 33329448                | GG                              | AA                | 1945954041               |
| SNP_P3_51891_33330731 | NC_021163.1    | Ca_kabuli_chr04 | 33330731                | CC                              | GG                | 1945954043               |
| SNP_P3_51892_33330743 | NC_021163.1    | Ca_kabuli_chr04 | 33330743                | AA                              | GG                | 1945954045               |
| SNP_P3_51893_33331871 | NC_021163.1    | Ca_kabuli_chr04 | 33331871                | TT                              | GG                | 1945954047               |
| SNP_P3_51894_33332119 | NC_021163.1    | Ca_kabuli_chr04 | 33332119                | AA                              | CC                | 1945954049               |
| SNP_P3_51895_33332160 | NC_021163.1    | Ca_kabuli_chr04 | 33332160                | AA                              | CC                | 1945954050               |
| SNP_P3_51896_33332387 | NC_021163.1    | Ca_kabuli_chr04 | 33332387                | TT                              | GG                | 1945954052               |

| SNPs IDs              | Chromosome IDs | Chromosomes     | Physical positions (bp) | CDC Frontier (Reference genome) | (Pusa 256 & HPNB) | NCBI SNPdb Accession IDs |
|-----------------------|----------------|-----------------|-------------------------|---------------------------------|-------------------|--------------------------|
| SNP_P3_51897_33341366 | NC_021163.1    | Ca_kabuli_chr04 | 33341366                | CC                              | TT                | 1945954054               |
| SNP_P3_51898_33341382 | NC_021163.1    | Ca_kabuli_chr04 | 33341382                | GG                              | AA                | 1945954056               |
| SNP_P3_51899_33341400 | NC_021163.1    | Ca_kabuli_chr04 | 33341400                | AA                              | GG                | 1945954057               |
| SNP_P3_51900_33343032 | NC_021163.1    | Ca_kabuli_chr04 | 33343032                | GG                              | AA                | 1945954059               |
| SNP_P3_51901_33344386 | NC_021163.1    | Ca_kabuli_chr04 | 33344386                | AA                              | GG                | 1945954061               |
| SNP_P3_51903_33344976 | NC_021163.1    | Ca_kabuli_chr04 | 33344976                | TT                              | CC                | 1945954063               |
| SNP_P3_51904_33345005 | NC_021163.1    | Ca_kabuli_chr04 | 33345005                | TT                              | CC                | 1945954065               |
| SNP_P3_51905_33346340 | NC_021163.1    | Ca_kabuli_chr04 | 33346340                | TT                              | GG                | 1945954066               |
| SNP_P3_51906_33346347 | NC_021163.1    | Ca_kabuli_chr04 | 33346347                | TT                              | GG                | 1945954068               |
| SNP_P3_51907_33346358 | NC_021163.1    | Ca_kabuli_chr04 | 33346358                | AA                              | TT                | 1945954070               |
| SNP_P3_51908_33346395 | NC_021163.1    | Ca_kabuli_chr04 | 33346395                | AA                              | CC                | 1945954072               |
| SNP_P3_51909_33346565 | NC_021163.1    | Ca_kabuli_chr04 | 33346565                | TT                              | AA                | 1945954074               |
| SNP_P3_51910_33346573 | NC_021163.1    | Ca_kabuli_chr04 | 33346573                | TT                              | CC                | 1945954075               |
| SNP_P3_51911_33346582 | NC_021163.1    | Ca_kabuli_chr04 | 33346582                | GG                              | TT                | 1945954077               |
| SNP_P3_51912_33346586 | NC_021163.1    | Ca_kabuli_chr04 | 33346586                | AA                              | TT                | 1945954079               |
| SNP_P3_51913_33346604 | NC_021163.1    | Ca_kabuli_chr04 | 33346604                | GG                              | AA                | 1945954081               |
| SNP_P3_51914_33346741 | NC_021163.1    | Ca_kabuli_chr04 | 33346741                | AA                              | GG                | 1945954082               |
| SNP_P3_51915_33346804 | NC_021163.1    | Ca_kabuli_chr04 | 33346804                | GG                              | TT                | 1945954084               |
| SNP_P3_51916_33346832 | NC_021163.1    | Ca_kabuli_chr04 | 33346832                | TT                              | GG                | 1945954086               |
| SNP_P3_51918_33347072 | NC_021163.1    | Ca_kabuli_chr04 | 33347072                | CC                              | TT                | 1945954088               |
| SNP_P3_51919_33347134 | NC_021163.1    | Ca_kabuli_chr04 | 33347134                | AA                              | TT                | 1945954090               |
| SNP_P3_51920_33347258 | NC_021163.1    | Ca_kabuli_chr04 | 33347258                | AA                              | CC                | 1945954091               |
| SNP_P3_51921_33347299 | NC_021163.1    | Ca_kabuli_chr04 | 33347299                | TT                              | CC                | 1945954093               |
| SNP_P3_51922_33347416 | NC_021163.1    | Ca_kabuli_chr04 | 33347416                | GG                              | TT                | 1945954095               |
| SNP_P3_51923_33347451 | NC_021163.1    | Ca_kabuli_chr04 | 33347451                | TT                              | AA                | 1945954097               |
| SNP_P3_51924_33347508 | NC_021163.1    | Ca_kabuli_chr04 | 33347508                | TT                              | GG                | 1945954098               |
| SNP_P3_51925_33347516 | NC_021163.1    | Ca_kabuli_chr04 | 33347516                | TT                              | CC                | 1945954100               |
| SNP_P3_51926_33347529 | NC_021163.1    | Ca_kabuli_chr04 | 33347529                | CC                              | TT                | 1945954102               |
| SNP_P3_51927_33347589 | NC_021163.1    | Ca_kabuli_chr04 | 33347589                | AA                              | CC                | 1945954104               |
| SNP_P3_51928_33347651 | NC_021163.1    | Ca_kabuli_chr04 | 33347651                | TT                              | CC                | 1945954106               |
| SNP_P3_51929_33347670 | NC_021163.1    | Ca_kabuli_chr04 | 33347670                | AA                              | CC                | 1945954107               |
| SNP_P3_51930_33347692 | NC_021163.1    | Ca_kabuli_chr04 | 33347692                | TT                              | CC                | 1945954109               |
| SNP_P3_51931_33347726 | NC_021163.1    | Ca_kabuli_chr04 | 33347726                | CC                              | TT                | 1945954111               |
| SNP_P3_51932_33347732 | NC_021163.1    | Ca_kabuli_chr04 | 33347732                | GG                              | AA                | 1945954113               |
| SNP_P3_51933_33347736 | NC_021163.1    | Ca_kabuli_chr04 | 33347736                | TT                              | CC                | 1945954115               |
| SNP_P3_51934_33347746 | NC_021163.1    | Ca_kabuli_chr04 | 33347746                | AA                              | GG                | 1945954116               |
| SNP_P3_51935_33347870 | NC_021163.1    | Ca_kabuli_chr04 | 33347870                | AA                              | GG                | 1945954118               |
| SNP_P3_51937_33347913 | NC_021163.1    | Ca_kabuli_chr04 | 33347913                | CC                              | TT                | 1945954120               |
| SNP_P3_51938_33347924 | NC_021163.1    | Ca_kabuli_chr04 | 33347924                | AA                              | TT                | 1945954122               |
| SNP_P3_51939_33347991 | NC_021163.1    | Ca_kabuli_chr04 | 33347991                | AA                              | GG                | 1945954123               |
| SNP_P3_51940_33348054 | NC_021163.1    | Ca_kabuli_chr04 | 33348054                | CC                              | TT                | 1945954125               |
| SNP_P3_51941_33348163 | NC_021163.1    | Ca_kabuli_chr04 | 33348163                | AA                              | GG                | 1945954127               |

| SNPs IDs              | Chromosome IDs | Chromosomes     | Physical positions (bp) | CDC Frontier (Reference genome) | (Pusa 256 & HPNB) | NCBI SNPdb Accession IDs |
|-----------------------|----------------|-----------------|-------------------------|---------------------------------|-------------------|--------------------------|
| SNP_P3_51943_33348285 | NC_021163.1    | Ca_kabuli_chr04 | 33348285                | GG                              | TT                | 1945954129               |
| SNP_P3_51944_33348530 | NC_021163.1    | Ca_kabuli_chr04 | 33348530                | GG                              | TT                | 1945954131               |
| SNP_P3_51945_33348677 | NC_021163.1    | Ca_kabuli_chr04 | 33348677                | GG                              | TT                | 1945954132               |
| SNP_P3_51947_33349062 | NC_021163.1    | Ca_kabuli_chr04 | 33349062                | TT                              | CC                | 1945954134               |
| SNP_P3_51948_33349261 | NC_021163.1    | Ca_kabuli_chr04 | 33349261                | TT                              | GG                | 1945954136               |
| SNP_P3_51949_33352674 | NC_021163.1    | Ca_kabuli_chr04 | 33352674                | GG                              | TT                | 1945954138               |
| SNP_P3_51950_33353020 | NC_021163.1    | Ca_kabuli_chr04 | 33353020                | AA                              | GG                | 1945954139               |
| SNP_P3_51952_33355079 | NC_021163.1    | Ca_kabuli_chr04 | 33355079                | CC                              | TT                | 1945954141               |
| SNP_P3_51953_33355292 | NC_021163.1    | Ca_kabuli_chr04 | 33355292                | GG                              | TT                | 1945954143               |
| SNP_P3_51954_33355379 | NC_021163.1    | Ca_kabuli_chr04 | 33355379                | TT                              | CC                | 1945954145               |
| SNP_P3_51955_33356064 | NC_021163.1    | Ca_kabuli_chr04 | 33356064                | TT                              | AA                | 1945954147               |
| SNP_P3_51956_33356972 | NC_021163.1    | Ca_kabuli_chr04 | 33356972                | CC                              | TT                | 1945954148               |
| SNP_P3_51957_33359687 | NC_021163.1    | Ca_kabuli_chr04 | 33359687                | TT                              | GG                | 1945954150               |
| SNP_P3_51958_33367383 | NC_021163.1    | Ca_kabuli_chr04 | 33367383                | GG                              | TT                | 1945954152               |
| SNP_P3_51959_33368347 | NC_021163.1    | Ca_kabuli_chr04 | 33368347                | CC                              | TT                | 1945954154               |
| SNP_P3_51960_33375757 | NC_021163.1    | Ca_kabuli_chr04 | 33375757                | AA                              | GG                | 1945954155               |
| SNP_P3_51961_33376632 | NC_021163.1    | Ca_kabuli_chr04 | 33376632                | GG                              | AA                | 1945954157               |
| SNP_P3_51962_33386719 | NC_021163.1    | Ca_kabuli_chr04 | 33386719                | AA                              | TT                | 1945954159               |
| SNP_P3_51963_33386919 | NC_021163.1    | Ca_kabuli_chr04 | 33386919                | TT                              | CC                | 1945954161               |
| SNP_P3_51964_33394750 | NC_021163.1    | Ca_kabuli_chr04 | 33394750                | AA                              | GG                | 1945954163               |
| SNP_P3_51965_33396297 | NC_021163.1    | Ca_kabuli_chr04 | 33396297                | GG                              | TT                | 1945954164               |
| SNP_P3_51966_33400057 | NC_021163.1    | Ca_kabuli_chr04 | 33400057                | TT                              | AA                | 1945954166               |
| SNP_P3_51967_33401199 | NC_021163.1    | Ca_kabuli_chr04 | 33401199                | CC                              | TT                | 1945954168               |
| SNP_P3_51968_33401539 | NC_021163.1    | Ca_kabuli_chr04 | 33401539                | GG                              | TT                | 1945954170               |
| SNP_P3_51969_33404857 | NC_021163.1    | Ca_kabuli_chr04 | 33404857                | CC                              | GG                | 1945954171               |
| SNP_P3_51970_33405478 | NC_021163.1    | Ca_kabuli_chr04 | 33405478                | TT                              | GG                | 1945954173               |
| SNP_P3_51971_33405642 | NC_021163.1    | Ca_kabuli_chr04 | 33405642                | GG                              | AA                | 1945954175               |
| SNP_P3_51973_33413804 | NC_021163.1    | Ca_kabuli_chr04 | 33413804                | GG                              | AA                | 1945954177               |
| SNP_P3_51974_33424043 | NC_021163.1    | Ca_kabuli_chr04 | 33424043                | AA                              | TT                | 1945954179               |
| SNP_P3_51975_33424126 | NC_021163.1    | Ca_kabuli_chr04 | 33424126                | GG                              | AA                | 1945954180               |
| SNP_P3_51976_33427448 | NC_021163.1    | Ca_kabuli_chr04 | 33427448                | CC                              | TT                | 1945954182               |
| SNP_P3_51977_33434221 | NC_021163.1    | Ca_kabuli_chr04 | 33434221                | TT                              | CC                | 1945954184               |
| SNP_P3_51978_33434567 | NC_021163.1    | Ca_kabuli_chr04 | 33434567                | AA                              | GG                | 1945954186               |
| SNP_P3_51979_33435070 | NC_021163.1    | Ca_kabuli_chr04 | 33435070                | GG                              | AA                | 1945954188               |
| SNP_P3_51980_33444070 | NC_021163.1    | Ca_kabuli_chr04 | 33444070                | AA                              | GG                | 1945954189               |
| SNP_P3_51981_33444486 | NC_021163.1    | Ca_kabuli_chr04 | 33444486                | AA                              | GG                | 1945954191               |
| SNP_P3_51982_33446028 | NC_021163.1    | Ca_kabuli_chr04 | 33446028                | GG                              | TT                | 1945954193               |
| SNP_P3_51983_33452733 | NC_021163.1    | Ca_kabuli_chr04 | 33452733                | TT                              | CC                | 1945954195               |
| SNP_P3_51984_33454801 | NC_021163.1    | Ca_kabuli_chr04 | 33454801                | GG                              | AA                | 1945954196               |
| SNP_P3_51986_33465749 | NC_021163.1    | Ca_kabuli_chr04 | 33465749                | AA                              | CC                | 1945954198               |
| SNP_P3_51987_33466090 | NC_021163.1    | Ca_kabuli_chr04 | 33466090                | GG                              | AA                | 1945954200               |
| SNP_P3_51988_33468169 | NC_021163.1    | Ca_kabuli_chr04 | 33468169                | TT                              | CC                | 1945954202               |

| SNPs IDs              | Chromosome IDs | Chromosomes     | Physical positions (bp) | CDC Frontier (Reference genome) | (Pusa 256 & HPNB) | NCBI SNPdb Accession IDs |
|-----------------------|----------------|-----------------|-------------------------|---------------------------------|-------------------|--------------------------|
| SNP_P3_51989_33475000 | NC_021163.1    | Ca_kabuli_chr04 | 33475000                | TT                              | CC                | 1945954204               |
| SNP_P3_51990_33475002 | NC_021163.1    | Ca_kabuli_chr04 | 33475002                | GG                              | TT                | 1945954205               |
| SNP_P3_51991_33475681 | NC_021163.1    | Ca_kabuli_chr04 | 33475681                | TT                              | CC                | 1945954207               |
| SNP_P3_51992_33481121 | NC_021163.1    | Ca_kabuli_chr04 | 33481121                | AA                              | GG                | 1945954209               |
| SNP_P3_51993_33486804 | NC_021163.1    | Ca_kabuli_chr04 | 33486804                | TT                              | CC                | 1945954211               |
| SNP_P3_51994_33493637 | NC_021163.1    | Ca_kabuli_chr04 | 33493637                | TT                              | AA                | 1945954212               |
| SNP_P3_51995_33494137 | NC_021163.1    | Ca_kabuli_chr04 | 33494137                | CC                              | TT                | 1945954214               |
| SNP_P3_51996_33494322 | NC_021163.1    | Ca_kabuli_chr04 | 33494322                | AA                              | GG                | 1945954216               |
| SNP_P3_51997_33494713 | NC_021163.1    | Ca_kabuli_chr04 | 33494713                | GG                              | TT                | 1945954218               |
| SNP_P3_51998_33497460 | NC_021163.1    | Ca_kabuli_chr04 | 33497460                | AA                              | TT                | 1945954220               |
| SNP_P3_51999_33498155 | NC_021163.1    | Ca_kabuli_chr04 | 33498155                | GG                              | TT                | 1945954221               |
| SNP_P3_52000_33504174 | NC_021163.1    | Ca_kabuli_chr04 | 33504174                | AA                              | TT                | 1945954223               |
| SNP_P3_52001_33511529 | NC_021163.1    | Ca_kabuli_chr04 | 33511529                | AA                              | GG                | 1945954225               |
| SNP_P3_52002_33512998 | NC_021163.1    | Ca_kabuli_chr04 | 33512998                | GG                              | AA                | 1945954227               |
| SNP_P3_52004_33513021 | NC_021163.1    | Ca_kabuli_chr04 | 33513021                | TT                              | CC                | 1945954229               |
| SNP_P3_52005_33513032 | NC_021163.1    | Ca_kabuli_chr04 | 33513032                | TT                              | CC                | 1945954230               |
| SNP_P3_52006_33513033 | NC_021163.1    | Ca_kabuli_chr04 | 33513033                | TT                              | CC                | 1945954232               |
| SNP_P3_52007_33513073 | NC_021163.1    | Ca_kabuli_chr04 | 33513073                | AA                              | TT                | 1945954234               |
| SNP_P3_52008_33513250 | NC_021163.1    | Ca_kabuli_chr04 | 33513250                | AA                              | CC                | 1945954236               |
| SNP_P3_52009_33513271 | NC_021163.1    | Ca_kabuli_chr04 | 33513271                | TT                              | CC                | 1945954237               |
| SNP_P3_52010_33513281 | NC_021163.1    | Ca_kabuli_chr04 | 33513281                | CC                              | AA                | 1945954239               |
| SNP_P3_52011_33516654 | NC_021163.1    | Ca_kabuli_chr04 | 33516654                | GG                              | AA                | 1945954241               |
| SNP_P3_52012_33516678 | NC_021163.1    | Ca_kabuli_chr04 | 33516678                | GG                              | TT                | 1945954243               |
| SNP_P3_52013_33520303 | NC_021163.1    | Ca_kabuli_chr04 | 33520303                | TT                              | GG                | 1945954245               |
| SNP_P3_52014_33529153 | NC_021163.1    | Ca_kabuli_chr04 | 33529153                | TT                              | CC                | 1945954246               |
| SNP_P3_52015_33529587 | NC_021163.1    | Ca_kabuli_chr04 | 33529587                | TT                              | CC                | 1945954248               |
| SNP_P3_52017_33541296 | NC_021163.1    | Ca_kabuli_chr04 | 33541296                | GG                              | AA                | 1945954250               |
| SNP_P3_52018_33543054 | NC_021163.1    | Ca_kabuli_chr04 | 33543054                | AA                              | TT                | 1945954252               |
| SNP_P3_52019_33543072 | NC_021163.1    | Ca_kabuli_chr04 | 33543072                | TT                              | GG                | 1945954253               |
| SNP_P3_52020_33553524 | NC_021163.1    | Ca_kabuli_chr04 | 33553524                | CC                              | AA                | 1945954255               |
| SNP_P3_52021_33555136 | NC_021163.1    | Ca_kabuli_chr04 | 33555136                | GG                              | AA                | 1945954257               |
| SNP_P3_52023_33561128 | NC_021163.1    | Ca_kabuli_chr04 | 33561128                | CC                              | TT                | 1945954259               |
| SNP_P3_52024_33561198 | NC_021163.1    | Ca_kabuli_chr04 | 33561198                | GG                              | TT                | 1945954261               |
| SNP_P3_52025_33561415 | NC_021163.1    | Ca_kabuli_chr04 | 33561415                | AA                              | TT                | 1945954262               |
| SNP_P3_52026_33561440 | NC_021163.1    | Ca_kabuli_chr04 | 33561440                | TT                              | CC                | 1945954264               |
| SNP_P3_52027_33561506 | NC_021163.1    | Ca_kabuli_chr04 | 33561506                | TT                              | GG                | 1945954266               |
| SNP_P3_52028_33561516 | NC_021163.1    | Ca_kabuli_chr04 | 33561516                | TT                              | AA                | 1945954268               |
| SNP_P3_52029_33562624 | NC_021163.1    | Ca_kabuli_chr04 | 33562624                | AA                              | TT                | 1945954270               |
| SNP_P3_52030_33562804 | NC_021163.1    | Ca_kabuli_chr04 | 33562804                | TT                              | AA                | 1945954271               |
| SNP_P3_52031_33562858 | NC_021163.1    | Ca_kabuli_chr04 | 33562858                | AA                              | GG                | 1945954273               |
| SNP_P3_52032_33568773 | NC_021163.1    | Ca_kabuli_chr04 | 33568773                | CC                              | TT                | 1945954275               |
| SNP_P3_52033_33569972 | NC_021163.1    | Ca_kabuli_chr04 | 33569972                | TT                              | CC                | 1945954277               |

| SNPs IDs              | Chromosome IDs | Chromosomes     | Physical positions (bp) | CDC Frontier (Reference genome) | (Pusa 256 & HPNB) | NCBI SNPdb Accession IDs |
|-----------------------|----------------|-----------------|-------------------------|---------------------------------|-------------------|--------------------------|
| SNP_P3_52034_33570222 | NC_021163.1    | Ca_kabuli_chr04 | 33570222                | TT                              | AA                | 1945954278               |
| SNP_P3_52035_33570393 | NC_021163.1    | Ca_kabuli_chr04 | 33570393                | TT                              | CC                | 1945954280               |
| SNP_P3_52036_33570515 | NC_021163.1    | Ca_kabuli_chr04 | 33570515                | CC                              | GG                | 1945954282               |
| SNP_P3_52037_33570574 | NC_021163.1    | Ca_kabuli_chr04 | 33570574                | TT                              | AA                | 1945954284               |
| SNP_P3_52038_33570596 | NC_021163.1    | Ca_kabuli_chr04 | 33570596                | TT                              | CC                | 1945954286               |
| SNP_P3_52039_33570620 | NC_021163.1    | Ca_kabuli_chr04 | 33570620                | AA                              | CC                | 1945954287               |
| SNP_P3_52040_33570653 | NC_021163.1    | Ca_kabuli_chr04 | 33570653                | GG                              | TT                | 1945954289               |
| SNP_P3_52041_33570654 | NC_021163.1    | Ca_kabuli_chr04 | 33570654                | TT                              | CC                | 1945954291               |
| SNP_P3_52042_33570951 | NC_021163.1    | Ca_kabuli_chr04 | 33570951                | GG                              | AA                | 1945954293               |
| SNP_P3_52043_33575477 | NC_021163.1    | Ca_kabuli_chr04 | 33575477                | TT                              | AA                | 1945954294               |
| SNP_P3_52044_33583801 | NC_021163.1    | Ca_kabuli_chr04 | 33583801                | TT                              | CC                | 1945954296               |
| SNP_P3_52045_33585700 | NC_021163.1    | Ca_kabuli_chr04 | 33585700                | GG                              | AA                | 1945954298               |
| SNP_P3_52047_33588457 | NC_021163.1    | Ca_kabuli_chr04 | 33588457                | AA                              | GG                | 1945954300               |
| SNP_P3_52048_33589972 | NC_021163.1    | Ca_kabuli_chr04 | 33589972                | GG                              | AA                | 1945954302               |
| SNP_P3_52049_33590693 | NC_021163.1    | Ca_kabuli_chr04 | 33590693                | AA                              | CC                | 1945954303               |
| SNP_P3_52050_33600915 | NC_021163.1    | Ca_kabuli_chr04 | 33600915                | GG                              | AA                | 1945954305               |
| SNP_P3_52051_33601314 | NC_021163.1    | Ca_kabuli_chr04 | 33601314                | TT                              | CC                | 1945954307               |
| SNP_P3_52053_33607352 | NC_021163.1    | Ca_kabuli_chr04 | 33607352                | AA                              | GG                | 1945954309               |
| SNP_P3_52054_33612523 | NC_021163.1    | Ca_kabuli_chr04 | 33612523                | GG                              | TT                | 1945954310               |
| SNP_P3_52055_33614767 | NC_021163.1    | Ca_kabuli_chr04 | 33614767                | CC                              | AA                | 1945954312               |
| SNP_P3_52056_33614769 | NC_021163.1    | Ca_kabuli_chr04 | 33614769                | TT                              | AA                | 1945954314               |
| SNP_P3_52057_33614853 | NC_021163.1    | Ca_kabuli_chr04 | 33614853                | TT                              | AA                | 1945954316               |
| SNP_P3_52058_33615115 | NC_021163.1    | Ca_kabuli_chr04 | 33615115                | GG                              | TT                | 1945954318               |
| SNP_P3_52059_33615195 | NC_021163.1    | Ca_kabuli_chr04 | 33615195                | CC                              | TT                | 1945954319               |
| SNP_P3_52061_33615503 | NC_021163.1    | Ca_kabuli_chr04 | 33615503                | AA                              | GG                | 1945954321               |
| SNP_P3_52063_33615675 | NC_021163.1    | Ca_kabuli_chr04 | 33615675                | CC                              | AA                | 1945954323               |
| SNP_P3_52064_33615709 | NC_021163.1    | Ca_kabuli_chr04 | 33615709                | TT                              | AA                | 1945954325               |
| SNP_P3_52065_33615795 | NC_021163.1    | Ca_kabuli_chr04 | 33615795                | AA                              | GG                | 1945954326               |
| SNP_P3_52066_33615837 | NC_021163.1    | Ca_kabuli_chr04 | 33615837                | CC                              | TT                | 1945954328               |
| SNP_P3_52067_33616030 | NC_021163.1    | Ca_kabuli_chr04 | 33616030                | CC                              | TT                | 1945954330               |
| SNP_P3_52068_33616162 | NC_021163.1    | Ca_kabuli_chr04 | 33616162                | TT                              | CC                | 1945954332               |
| SNP_P3_52069_33616165 | NC_021163.1    | Ca_kabuli_chr04 | 33616165                | AA                              | TT                | 1945954334               |
| SNP_P3_52070_33616178 | NC_021163.1    | Ca_kabuli_chr04 | 33616178                | CC                              | TT                | 1945954335               |
| SNP_P3_52071_33616432 | NC_021163.1    | Ca_kabuli_chr04 | 33616432                | CC                              | AA                | 1945954337               |
| SNP_P3_52072_33616469 | NC_021163.1    | Ca_kabuli_chr04 | 33616469                | AA                              | CC                | 1945954339               |
| SNP_P3_52073_33616550 | NC_021163.1    | Ca_kabuli_chr04 | 33616550                | AA                              | GG                | 1945954341               |
| SNP_P3_52074_33616657 | NC_021163.1    | Ca_kabuli_chr04 | 33616657                | AA                              | GG                | 1945954343               |
| SNP_P3_52075_33616676 | NC_021163.1    | Ca_kabuli_chr04 | 33616676                | AA                              | GG                | 1945954344               |
| SNP_P3_52076_33616734 | NC_021163.1    | Ca_kabuli_chr04 | 33616734                | AA                              | GG                | 1945954346               |
| SNP_P3_52077_33616999 | NC_021163.1    | Ca_kabuli_chr04 | 33616999                | CC                              | TT                | 1945954348               |
| SNP_P3_52078_33617101 | NC_021163.1    | Ca_kabuli_chr04 | 33617101                | TT                              | CC                | 1945954350               |
| SNP_P3_52079_33617132 | NC_021163.1    | Ca_kabuli_chr04 | 33617132                | TT                              | CC                | 1945954351               |

| SNPs IDs              | Chromosome IDs | Chromosomes     | Physical positions (bp) | CDC Frontier (Reference genome) | (Pusa 256 & HPNB) | NCBI SNPdb Accession IDs |
|-----------------------|----------------|-----------------|-------------------------|---------------------------------|-------------------|--------------------------|
| SNP_P3_52080_33617274 | NC_021163.1    | Ca_kabuli_chr04 | 33617274                | TT                              | CC                | 1945954353               |
| SNP_P3_52083_33618672 | NC_021163.1    | Ca_kabuli_chr04 | 33618672                | AA                              | TT                | 1945954355               |
| SNP_P3_52084_33618689 | NC_021163.1    | Ca_kabuli_chr04 | 33618689                | CC                              | TT                | 1945954357               |
| SNP_P3_52085_33618888 | NC_021163.1    | Ca_kabuli_chr04 | 33618888                | TT                              | CC                | 1945954359               |
| SNP_P3_52086_33619084 | NC_021163.1    | Ca_kabuli_chr04 | 33619084                | AA                              | GG                | 1945954360               |
| SNP_P3_52087_33619100 | NC_021163.1    | Ca_kabuli_chr04 | 33619100                | TT                              | AA                | 1945954362               |
| SNP_P3_52088_33619106 | NC_021163.1    | Ca_kabuli_chr04 | 33619106                | CC                              | AA                | 1945954364               |
| SNP_P3_52090_33619267 | NC_021163.1    | Ca_kabuli_chr04 | 33619267                | TT                              | GG                | 1945954366               |
| SNP_P3_52092_33619709 | NC_021163.1    | Ca_kabuli_chr04 | 33619709                | GG                              | CC                | 1945954368               |
| SNP_P3_52093_33620078 | NC_021163.1    | Ca_kabuli_chr04 | 33620078                | CC                              | AA                | 1945954369               |
| SNP_P3_52094_33620129 | NC_021163.1    | Ca_kabuli_chr04 | 33620129                | GG                              | TT                | 1945954371               |
| SNP_P3_52096_33620406 | NC_021163.1    | Ca_kabuli_chr04 | 33620406                | GG                              | AA                | 1945954373               |
| SNP_P3_52097_33620543 | NC_021163.1    | Ca_kabuli_chr04 | 33620543                | CC                              | TT                | 1945954375               |
| SNP_P3_52098_33620552 | NC_021163.1    | Ca_kabuli_chr04 | 33620552                | TT                              | CC                | 1945954376               |
| SNP_P3_52099_33620567 | NC_021163.1    | Ca_kabuli_chr04 | 33620567                | TT                              | CC                | 1945954378               |
| SNP_P3_52100_33620607 | NC_021163.1    | Ca_kabuli_chr04 | 33620607                | CC                              | TT                | 1945954380               |
| SNP_P3_52101_33620611 | NC_021163.1    | Ca_kabuli_chr04 | 33620611                | GG                              | AA                | 1945954382               |
| SNP_P3_52102_33620619 | NC_021163.1    | Ca_kabuli_chr04 | 33620619                | AA                              | GG                | 1945954384               |
| SNP_P3_52103_33620670 | NC_021163.1    | Ca_kabuli_chr04 | 33620670                | TT                              | CC                | 1945954385               |
| SNP_P3_52104_33620675 | NC_021163.1    | Ca_kabuli_chr04 | 33620675                | GG                              | AA                | 1945954387               |
| SNP_P3_52105_33620778 | NC_021163.1    | Ca_kabuli_chr04 | 33620778                | CC                              | TT                | 1945954389               |
| SNP_P3_52106_33620781 | NC_021163.1    | Ca_kabuli_chr04 | 33620781                | AA                              | CC                | 1945954391               |
| SNP_P3_52107_33620782 | NC_021163.1    | Ca_kabuli_chr04 | 33620782                | TT                              | CC                | 1945954392               |
| SNP_P3_52108_33620786 | NC_021163.1    | Ca_kabuli_chr04 | 33620786                | GG                              | AA                | 1945954394               |
| SNP_P3_52109_33620787 | NC_021163.1    | Ca_kabuli_chr04 | 33620787                | AA                              | TT                | 1945954396               |
| SNP_P3_52110_33620823 | NC_021163.1    | Ca_kabuli_chr04 | 33620823                | TT                              | CC                | 1945954398               |
| SNP_P3_52111_33620843 | NC_021163.1    | Ca_kabuli_chr04 | 33620843                | CC                              | TT                | 1945954400               |
| SNP_P3_52112_33620861 | NC_021163.1    | Ca_kabuli_chr04 | 33620861                | TT                              | CC                | 1945954401               |
| SNP_P3_52113_33620867 | NC_021163.1    | Ca_kabuli_chr04 | 33620867                | TT                              | CC                | 1945954403               |
| SNP_P3_52114_33620876 | NC_021163.1    | Ca_kabuli_chr04 | 33620876                | GG                              | CC                | 1945954405               |
| SNP_P3_52115_33620880 | NC_021163.1    | Ca_kabuli_chr04 | 33620880                | AA                              | GG                | 1945954407               |
| SNP_P3_52116_33620908 | NC_021163.1    | Ca_kabuli_chr04 | 33620908                | AA                              | GG                | 1945954409               |
| SNP_P3_52117_33621016 | NC_021163.1    | Ca_kabuli_chr04 | 33621016                | TT                              | CC                | 1945954410               |
| SNP_P3_52118_33621114 | NC_021163.1    | Ca_kabuli_chr04 | 33621114                | AA                              | TT                | 1945954412               |
| SNP_P3_52119_33621150 | NC_021163.1    | Ca_kabuli_chr04 | 33621150                | AA                              | GG                | 1945954414               |
| SNP_P3_52120_33621317 | NC_021163.1    | Ca_kabuli_chr04 | 33621317                | GG                              | TT                | 1945954416               |
| SNP_P3_52121_33621320 | NC_021163.1    | Ca_kabuli_chr04 | 33621320                | GG                              | AA                | 1945954418               |
| SNP_P3_52122_33625840 | NC_021163.1    | Ca_kabuli_chr04 | 33625840                | TT                              | CC                | 1945954419               |
| SNP_P3_52123_33625860 | NC_021163.1    | Ca_kabuli_chr04 | 33625860                | CC                              | TT                | 1945954421               |
| SNP_P3_52124_33626146 | NC_021163.1    | Ca_kabuli_chr04 | 33626146                | CC                              | GG                | 1945954423               |
| SNP_P3_52126_33626163 | NC_021163.1    | Ca_kabuli_chr04 | 33626163                | CC                              | GG                | 1945954425               |
| SNP_P3_52127_33626165 | NC_021163.1    | Ca_kabuli_chr04 | 33626165                | CC                              | TT                | 1945954426               |



| SNPs IDs              | Chromosome IDs | Chromosomes     | Physical positions (bp) | CDC Frontier (Reference genome) | (Pusa 256 & HPNB) | NCBI SNPdb Accession IDs |
|-----------------------|----------------|-----------------|-------------------------|---------------------------------|-------------------|--------------------------|
| SNP_P3_52128_33626214 | NC_021163.1    | Ca_kabuli_chr04 | 33626214                | GG                              | CC                | 1945954428               |
| SNP_P3_52129_33626220 | NC_021163.1    | Ca_kabuli_chr04 | 33626220                | GG                              | AA                | 1945954430               |
| SNP_P3_52130_33626232 | NC_021163.1    | Ca_kabuli_chr04 | 33626232                | AA                              | TT                | 1945954432               |
| SNP_P3_52131_33626233 | NC_021163.1    | Ca_kabuli_chr04 | 33626233                | TT                              | CC                | 1945954434               |
| SNP_P3_52132_33626245 | NC_021163.1    | Ca_kabuli_chr04 | 33626245                | AA                              | GG                | 1945954435               |
| SNP_P3_52133_33626250 | NC_021163.1    | Ca_kabuli_chr04 | 33626250                | CC                              | TT                | 1945954437               |
| SNP_P3_52134_33626257 | NC_021163.1    | Ca_kabuli_chr04 | 33626257                | CC                              | TT                | 1945954439               |
| SNP_P3_52135_33626283 | NC_021163.1    | Ca_kabuli_chr04 | 33626283                | AA                              | CC                | 1945954441               |
| SNP_P3_52136_33626286 | NC_021163.1    | Ca_kabuli_chr04 | 33626286                | AA                              | CC                | 1945954442               |
| SNP_P3_52137_33626305 | NC_021163.1    | Ca_kabuli_chr04 | 33626305                | CC                              | TT                | 1945954444               |
| SNP_P3_52138_33626311 | NC_021163.1    | Ca_kabuli_chr04 | 33626311                | TT                              | CC                | 1945954446               |
| SNP_P3_52139_33626346 | NC_021163.1    | Ca_kabuli_chr04 | 33626346                | AA                              | GG                | 1945954448               |
| SNP_P3_52140_33629872 | NC_021163.1    | Ca_kabuli_chr04 | 33629872                | TT                              | CC                | 1945954450               |
| SNP_P3_52141_33629887 | NC_021163.1    | Ca_kabuli_chr04 | 33629887                | GG                              | AA                | 1945954451               |
| SNP_P3_52142_33629896 | NC_021163.1    | Ca_kabuli_chr04 | 33629896                | CC                              | TT                | 1945954453               |
| SNP_P3_52143_33629912 | NC_021163.1    | Ca_kabuli_chr04 | 33629912                | GG                              | AA                | 1945954455               |
| SNP_P3_52144_33629914 | NC_021163.1    | Ca_kabuli_chr04 | 33629914                | AA                              | GG                | 1945954457               |
| SNP_P3_52145_33629980 | NC_021163.1    | Ca_kabuli_chr04 | 33629980                | TT                              | CC                | 1945954459               |
| SNP_P3_52146_33629992 | NC_021163.1    | Ca_kabuli_chr04 | 33629992                | TT                              | CC                | 1945954460               |
| SNP_P3_52147_33630007 | NC_021163.1    | Ca_kabuli_chr04 | 33630007                | GG                              | AA                | 1945954462               |
| SNP_P3_52148_33630014 | NC_021163.1    | Ca_kabuli_chr04 | 33630014                | TT                              | CC                | 1945954464               |
| SNP_P3_52149_33630025 | NC_021163.1    | Ca_kabuli_chr04 | 33630025                | AA                              | TT                | 1945954466               |
| SNP_P3_52150_33630027 | NC_021163.1    | Ca_kabuli_chr04 | 33630027                | CC                              | GG                | 1945954467               |
| SNP_P3_52151_33630038 | NC_021163.1    | Ca_kabuli_chr04 | 33630038                | GG                              | CC                | 1945954469               |
| SNP_P3_52153_33634988 | NC_021163.1    | Ca_kabuli_chr04 | 33634988                | AA                              | TT                | 1945954471               |
| SNP_P3_52154_33638487 | NC_021163.1    | Ca_kabuli_chr04 | 33638487                | AA                              | GG                | 1945954473               |
| SNP_P3_52156_33651114 | NC_021163.1    | Ca_kabuli_chr04 | 33651114                | AA                              | GG                | 1945954475               |
| SNP_P3_52158_33654344 | NC_021163.1    | Ca_kabuli_chr04 | 33654344                | GG                              | AA                | 1945954476               |
| SNP_P3_52159_33661577 | NC_021163.1    | Ca_kabuli_chr04 | 33661577                | CC                              | AA                | 1945954478               |
| SNP_P3_52160_33664337 | NC_021163.1    | Ca_kabuli_chr04 | 33664337                | AA                              | GG                | 1945954480               |
| SNP_P3_52161_33664422 | NC_021163.1    | Ca_kabuli_chr04 | 33664422                | TT                              | CC                | 1945954482               |
| SNP_P3_52162_33667872 | NC_021163.1    | Ca_kabuli_chr04 | 33667872                | AA                              | CC                | 1945954483               |
| SNP_P3_52163_33670636 | NC_021163.1    | Ca_kabuli_chr04 | 33670636                | TT                              | AA                | 1945954485               |
| SNP_P3_52164_33675509 | NC_021163.1    | Ca_kabuli_chr04 | 33675509                | AA                              | GG                | 1945954487               |
| SNP_P3_52165_33675919 | NC_021163.1    | Ca_kabuli_chr04 | 33675919                | TT                              | CC                | 1945954489               |
| SNP_P3_52166_33676100 | NC_021163.1    | Ca_kabuli_chr04 | 33676100                | AA                              | TT                | 1945954491               |
| SNP_P3_52167_33685463 | NC_021163.1    | Ca_kabuli_chr04 | 33685463                | CC                              | TT                | 1945954492               |
| SNP_P3_52168_33685482 | NC_021163.1    | Ca_kabuli_chr04 | 33685482                | AA                              | GG                | 1945954494               |
| SNP_P3_52170_33685617 | NC_021163.1    | Ca_kabuli_chr04 | 33685617                | CC                              | TT                | 1945954496               |
| SNP_P3_52171_33704479 | NC_021163.1    | Ca_kabuli_chr04 | 33704479                | TT                              | AA                | 1945954498               |
| SNP_P3_52172_33704480 | NC_021163.1    | Ca_kabuli_chr04 | 33704480                | TT                              | AA                | 1945954500               |
| SNP_P3_52173_33704518 | NC_021163.1    | Ca_kabuli_chr04 | 33704518                | GG                              | CC                | 1945954501               |

| SNPs IDs              | Chromosome IDs | Chromosomes     | Physical positions (bp) | CDC Frontier (Reference genome) | (Pusa 256 & HPNB) | NCBI SNPdb Accession IDs |
|-----------------------|----------------|-----------------|-------------------------|---------------------------------|-------------------|--------------------------|
| SNP_P3_52175_33708305 | NC_021163.1    | Ca_kabuli_chr04 | 33708305                | AA                              | GG                | 1945954503               |
| SNP_P3_52176_33709111 | NC_021163.1    | Ca_kabuli_chr04 | 33709111                | GG                              | AA                | 1945954505               |
| SNP_P3_52177_33709380 | NC_021163.1    | Ca_kabuli_chr04 | 33709380                | AA                              | GG                | 1945954507               |
| SNP_P3_52179_33713100 | NC_021163.1    | Ca_kabuli_chr04 | 33713100                | TT                              | CC                | 1945954508               |
| SNP_P3_52180_33713233 | NC_021163.1    | Ca_kabuli_chr04 | 33713233                | TT                              | CC                | 1945954510               |
| SNP_P3_52181_33713245 | NC_021163.1    | Ca_kabuli_chr04 | 33713245                | CC                              | TT                | 1945954512               |
| SNP_P3_52182_33713320 | NC_021163.1    | Ca_kabuli_chr04 | 33713320                | CC                              | TT                | 1945954514               |
| SNP_P3_52183_33713866 | NC_021163.1    | Ca_kabuli_chr04 | 33713866                | TT                              | CC                | 1945954516               |
| SNP_P3_52184_33713955 | NC_021163.1    | Ca_kabuli_chr04 | 33713955                | CC                              | AA                | 1945954517               |
| SNP_P3_52185_33714031 | NC_021163.1    | Ca_kabuli_chr04 | 33714031                | GG                              | AA                | 1945954519               |
| SNP_P3_52186_33714074 | NC_021163.1    | Ca_kabuli_chr04 | 33714074                | TT                              | AA                | 1945954521               |
| SNP_P3_52189_33714593 | NC_021163.1    | Ca_kabuli_chr04 | 33714593                | GG                              | TT                | 1945954523               |
| SNP_P3_52190_33714737 | NC_021163.1    | Ca_kabuli_chr04 | 33714737                | AA                              | GG                | 1945954524               |
| SNP_P3_52191_33715120 | NC_021163.1    | Ca_kabuli_chr04 | 33715120                | GG                              | AA                | 1945954526               |
| SNP_P3_52192_33715138 | NC_021163.1    | Ca_kabuli_chr04 | 33715138                | GG                              | AA                | 1945954528               |
| SNP_P3_52193_33715217 | NC_021163.1    | Ca_kabuli_chr04 | 33715217                | AA                              | GG                | 1945954530               |
| SNP_P3_52195_33715962 | NC_021163.1    | Ca_kabuli_chr04 | 33715962                | CC                              | GG                | 1945954532               |
| SNP_P3_52196_33716339 | NC_021163.1    | Ca_kabuli_chr04 | 33716339                | AA                              | TT                | 1945954533               |
| SNP_P3_52197_33716607 | NC_021163.1    | Ca_kabuli_chr04 | 33716607                | GG                              | CC                | 1945954535               |
| SNP_P3_52198_33717044 | NC_021163.1    | Ca_kabuli_chr04 | 33717044                | GG                              | AA                | 1945954537               |
| SNP_P3_52199_33717195 | NC_021163.1    | Ca_kabuli_chr04 | 33717195                | AA                              | CC                | 1945954539               |
| SNP_P3_52200_33717350 | NC_021163.1    | Ca_kabuli_chr04 | 33717350                | TT                              | CC                | 1945954540               |
| SNP_P3_52201_33717427 | NC_021163.1    | Ca_kabuli_chr04 | 33717427                | AA                              | GG                | 1945954542               |
| SNP_P3_52202_33717748 | NC_021163.1    | Ca_kabuli_chr04 | 33717748                | GG                              | AA                | 1945954544               |
| SNP_P3_52203_33717802 | NC_021163.1    | Ca_kabuli_chr04 | 33717802                | TT                              | AA                | 1945954546               |
| SNP_P3_52205_33717957 | NC_021163.1    | Ca_kabuli_chr04 | 33717957                | AA                              | CC                | 1945954548               |
| SNP_P3_52206_33717964 | NC_021163.1    | Ca_kabuli_chr04 | 33717964                | GG                              | TT                | 1945954549               |
| SNP_P3_52207_33718341 | NC_021163.1    | Ca_kabuli_chr04 | 33718341                | TT                              | CC                | 1945954551               |
| SNP_P3_52208_33718355 | NC_021163.1    | Ca_kabuli_chr04 | 33718355                | TT                              | GG                | 1945954553               |
| SNP_P3_52209_33718511 | NC_021163.1    | Ca_kabuli_chr04 | 33718511                | CC                              | TT                | 1945954555               |
| SNP_P3_52210_33719215 | NC_021163.1    | Ca_kabuli_chr04 | 33719215                | TT                              | CC                | 1945954557               |
| SNP_P3_52211_33719243 | NC_021163.1    | Ca_kabuli_chr04 | 33719243                | CC                              | AA                | 1945954558               |
| SNP_P3_52212_33719502 | NC_021163.1    | Ca_kabuli_chr04 | 33719502                | AA                              | GG                | 1945954560               |
| SNP_P3_52213_33719553 | NC_021163.1    | Ca_kabuli_chr04 | 33719553                | CC                              | GG                | 1945954562               |
| SNP_P3_52214_33719576 | NC_021163.1    | Ca_kabuli_chr04 | 33719576                | TT                              | AA                | 1945954564               |
| SNP_P3_52215_33719687 | NC_021163.1    | Ca_kabuli_chr04 | 33719687                | AA                              | GG                | 1945954566               |
| SNP_P3_52216_33720042 | NC_021163.1    | Ca_kabuli_chr04 | 33720042                | CC                              | TT                | 1945954567               |
| SNP_P3_52217_33720303 | NC_021163.1    | Ca_kabuli_chr04 | 33720303                | CC                              | AA                | 1945954569               |
| SNP_P3_52218_33720513 | NC_021163.1    | Ca_kabuli_chr04 | 33720513                | AA                              | CC                | 1945954571               |
| SNP_P3_52219_33720742 | NC_021163.1    | Ca_kabuli_chr04 | 33720742                | AA                              | CC                | 1945954573               |
| SNP_P3_52220_33721019 | NC_021163.1    | Ca_kabuli_chr04 | 33721019                | TT                              | AA                | 1945954574               |
| SNP_P3_52221_33721483 | NC_021163.1    | Ca_kabuli_chr04 | 33721483                | GG                              | AA                | 1945954576               |

| SNPs IDs              | Chromosome IDs | Chromosomes     | Physical positions (bp) | CDC Frontier (Reference genome) | (Pusa 256 & HPNB) | NCBI SNPdb Accession IDs |
|-----------------------|----------------|-----------------|-------------------------|---------------------------------|-------------------|--------------------------|
| SNP_P3_52222_33721536 | NC_021163.1    | Ca_kabuli_chr04 | 33721536                | CC                              | TT                | 1945954578               |
| SNP_P3_52223_33721846 | NC_021163.1    | Ca_kabuli_chr04 | 33721846                | GG                              | AA                | 1945954580               |
| SNP_P3_52224_33721975 | NC_021163.1    | Ca_kabuli_chr04 | 33721975                | GG                              | AA                | 1945954582               |
| SNP_P3_52225_33721990 | NC_021163.1    | Ca_kabuli_chr04 | 33721990                | TT                              | CC                | 1945954583               |
| SNP_P3_52226_33722064 | NC_021163.1    | Ca_kabuli_chr04 | 33722064                | TT                              | CC                | 1945954585               |
| SNP_P3_52227_33722202 | NC_021163.1    | Ca_kabuli_chr04 | 33722202                | CC                              | AA                | 1945954587               |
| SNP_P3_52228_33722277 | NC_021163.1    | Ca_kabuli_chr04 | 33722277                | TT                              | AA                | 1945954589               |
| SNP_P3_52230_33733250 | NC_021163.1    | Ca_kabuli_chr04 | 33733250                | AA                              | GG                | 1945954590               |
| SNP_P3_52232_33734041 | NC_021163.1    | Ca_kabuli_chr04 | 33734041                | CC                              | TT                | 1945954592               |
| SNP_P3_52233_33734911 | NC_021163.1    | Ca_kabuli_chr04 | 33734911                | TT                              | AA                | 1945954594               |
| SNP_P3_52234_33736936 | NC_021163.1    | Ca_kabuli_chr04 | 33736936                | AA                              | GG                | 1945954596               |
| SNP_P3_52235_33736938 | NC_021163.1    | Ca_kabuli_chr04 | 33736938                | CC                              | TT                | 1945954598               |
| SNP_P3_52236_33737270 | NC_021163.1    | Ca_kabuli_chr04 | 33737270                | TT                              | CC                | 1945954599               |
| SNP_P3_52237_33737553 | NC_021163.1    | Ca_kabuli_chr04 | 33737553                | CC                              | TT                | 1945954601               |
| SNP_P3_52238_33740341 | NC_021163.1    | Ca_kabuli_chr04 | 33740341                | CC                              | TT                | 1945954603               |
| SNP_P3_52240_33743686 | NC_021163.1    | Ca_kabuli_chr04 | 33743686                | AA                              | GG                | 1945954605               |
| SNP_P3_52241_33743732 | NC_021163.1    | Ca_kabuli_chr04 | 33743732                | AA                              | TT                | 1945954606               |
| SNP_P3_52242_33743744 | NC_021163.1    | Ca_kabuli_chr04 | 33743744                | CC                              | TT                | 1945954608               |
| SNP_P3_52243_33751114 | NC_021163.1    | Ca_kabuli_chr04 | 33751114                | AA                              | GG                | 1945954610               |
| SNP_P3_52244_33751205 | NC_021163.1    | Ca_kabuli_chr04 | 33751205                | GG                              | AA                | 1945954612               |
| SNP_P3_52245_33755165 | NC_021163.1    | Ca_kabuli_chr04 | 33755165                | GG                              | AA                | 1945954614               |
| SNP_P3_52246_33755607 | NC_021163.1    | Ca_kabuli_chr04 | 33755607                | TT                              | GG                | 1945954615               |
| SNP_P3_52247_33756706 | NC_021163.1    | Ca_kabuli_chr04 | 33756706                | TT                              | GG                | 1945954617               |
| SNP_P3_52248_33757300 | NC_021163.1    | Ca_kabuli_chr04 | 33757300                | GG                              | AA                | 1945954619               |
| SNP_P3_52249_33757761 | NC_021163.1    | Ca_kabuli_chr04 | 33757761                | GG                              | AA                | 1945954621               |
| SNP_P3_52250_33758053 | NC_021163.1    | Ca_kabuli_chr04 | 33758053                | TT                              | GG                | 1945954623               |
| SNP_P3_52251_33760484 | NC_021163.1    | Ca_kabuli_chr04 | 33760484                | GG                              | TT                | 1945954624               |
| SNP_P3_52252_33760857 | NC_021163.1    | Ca_kabuli_chr04 | 33760857                | CC                              | AA                | 1945954626               |
| SNP_P3_52253_33763491 | NC_021163.1    | Ca_kabuli_chr04 | 33763491                | CC                              | GG                | 1945954628               |
| SNP_P3_52254_33763529 | NC_021163.1    | Ca_kabuli_chr04 | 33763529                | GG                              | AA                | 1945954630               |
| SNP_P3_52255_33763669 | NC_021163.1    | Ca_kabuli_chr04 | 33763669                | GG                              | AA                | 1945954631               |
| SNP_P3_52256_33763689 | NC_021163.1    | Ca_kabuli_chr04 | 33763689                | GG                              | AA                | 1945954633               |
| SNP_P3_52258_33767383 | NC_021163.1    | Ca_kabuli_chr04 | 33767383                | CC                              | TT                | 1945954635               |
| SNP_P3_52259_33767418 | NC_021163.1    | Ca_kabuli_chr04 | 33767418                | GG                              | AA                | 1945954637               |
| SNP_P3_52260_33767686 | NC_021163.1    | Ca_kabuli_chr04 | 33767686                | GG                              | CC                | 1945954639               |
| SNP_P3_52261_33768136 | NC_021163.1    | Ca_kabuli_chr04 | 33768136                | GG                              | AA                | 1945954640               |
| SNP_P3_52262_33768188 | NC_021163.1    | Ca_kabuli_chr04 | 33768188                | TT                              | CC                | 1945954642               |
| SNP_P3_52263_33768905 | NC_021163.1    | Ca_kabuli_chr04 | 33768905                | CC                              | TT                | 1945954644               |
| SNP_P3_52264_33768967 | NC_021163.1    | Ca_kabuli_chr04 | 33768967                | TT                              | CC                | 1945954646               |
| SNP_P3_52265_33772093 | NC_021163.1    | Ca_kabuli_chr04 | 33772093                | TT                              | CC                | 1945954647               |
| SNP_P3_52266_33772556 | NC_021163.1    | Ca_kabuli_chr04 | 33772556                | AA                              | GG                | 1945954649               |
| SNP_P3_52267_33772606 | NC_021163.1    | Ca_kabuli_chr04 | 33772606                | AA                              | GG                | 1945954651               |

| SNPs IDs              | Chromosome IDs | Chromosomes     | Physical positions (bp) | CDC Frontier (Reference genome) | (Pusa 256 & HPNB) | NCBI SNPdb Accession IDs |
|-----------------------|----------------|-----------------|-------------------------|---------------------------------|-------------------|--------------------------|
| SNP_P3_52268_33772702 | NC_021163.1    | Ca_kabuli_chr04 | 33772702                | TT                              | AA                | 1945954653               |
| SNP_P3_52269_33773046 | NC_021163.1    | Ca_kabuli_chr04 | 33773046                | CC                              | TT                | 1945954655               |
| SNP_P3_52270_33774132 | NC_021163.1    | Ca_kabuli_chr04 | 33774132                | GG                              | AA                | 1945954656               |
| SNP_P3_52271_33775574 | NC_021163.1    | Ca_kabuli_chr04 | 33775574                | TT                              | GG                | 1945954658               |
| SNP_P3_52272_33776070 | NC_021163.1    | Ca_kabuli_chr04 | 33776070                | AA                              | GG                | 1945954660               |
| SNP_P3_52273_33777032 | NC_021163.1    | Ca_kabuli_chr04 | 33777032                | GG                              | AA                | 1945954662               |
| SNP_P3_52274_33777120 | NC_021163.1    | Ca_kabuli_chr04 | 33777120                | TT                              | AA                | 1945954664               |
| SNP_P3_52275_33777534 | NC_021163.1    | Ca_kabuli_chr04 | 33777534                | CC                              | TT                | 1945954665               |
| SNP_P3_52276_33779343 | NC_021163.1    | Ca_kabuli_chr04 | 33779343                | AA                              | TT                | 1945954667               |
| SNP_P3_52277_33779582 | NC_021163.1    | Ca_kabuli_chr04 | 33779582                | AA                              | GG                | 1945954669               |
| SNP_P3_52278_33779655 | NC_021163.1    | Ca_kabuli_chr04 | 33779655                | AA                              | GG                | 1945954671               |
| SNP_P3_52279_33781236 | NC_021163.1    | Ca_kabuli_chr04 | 33781236                | GG                              | CC                | 1945954672               |
| SNP_P3_52280_33781859 | NC_021163.1    | Ca_kabuli_chr04 | 33781859                | GG                              | AA                | 1945954674               |
| SNP_P3_52281_33782265 | NC_021163.1    | Ca_kabuli_chr04 | 33782265                | GG                              | CC                | 1945954676               |
| SNP_P3_52282_33782287 | NC_021163.1    | Ca_kabuli_chr04 | 33782287                | GG                              | AA                | 1945954678               |
| SNP_P3_52283_33787395 | NC_021163.1    | Ca_kabuli_chr04 | 33787395                | TT                              | AA                | 1945954680               |
| SNP_P3_52285_33789766 | NC_021163.1    | Ca_kabuli_chr04 | 33789766                | GG                              | TT                | 1945954681               |
| SNP_P3_52286_33790329 | NC_021163.1    | Ca_kabuli_chr04 | 33790329                | GG                              | TT                | 1945954683               |
| SNP_P3_52287_33793708 | NC_021163.1    | Ca_kabuli_chr04 | 33793708                | AA                              | GG                | 1945954685               |
| SNP_P3_52288_33797841 | NC_021163.1    | Ca_kabuli_chr04 | 33797841                | GG                              | AA                | 1945954687               |
| SNP_P3_52289_33803088 | NC_021163.1    | Ca_kabuli_chr04 | 33803088                | AA                              | GG                | 1945954688               |
| SNP_P3_52290_33804795 | NC_021163.1    | Ca_kabuli_chr04 | 33804795                | GG                              | AA                | 1945954690               |
| SNP_P3_52291_33806340 | NC_021163.1    | Ca_kabuli_chr04 | 33806340                | CC                              | TT                | 1945954692               |
| SNP_P3_52292_33807542 | NC_021163.1    | Ca_kabuli_chr04 | 33807542                | AA                              | TT                | 1945954694               |
| SNP_P3_52293_33808066 | NC_021163.1    | Ca_kabuli_chr04 | 33808066                | GG                              | AA                | 1945954696               |
| SNP_P3_52294_33810401 | NC_021163.1    | Ca_kabuli_chr04 | 33810401                | GG                              | AA                | 1945954697               |
| SNP_P3_52295_33810413 | NC_021163.1    | Ca_kabuli_chr04 | 33810413                | TT                              | AA                | 1945954699               |
| SNP_P3_52296_33810423 | NC_021163.1    | Ca_kabuli_chr04 | 33810423                | AA                              | GG                | 1945954701               |
| SNP_P3_52297_33810679 | NC_021163.1    | Ca_kabuli_chr04 | 33810679                | TT                              | CC                | 1945954703               |
| SNP_P3_52298_33810691 | NC_021163.1    | Ca_kabuli_chr04 | 33810691                | AA                              | TT                | 1945954704               |
| SNP_P3_52299_33810713 | NC_021163.1    | Ca_kabuli_chr04 | 33810713                | AA                              | TT                | 1945954706               |
| SNP_P3_52300_33811038 | NC_021163.1    | Ca_kabuli_chr04 | 33811038                | GG                              | AA                | 1945954708               |
| SNP_P3_52301_33811363 | NC_021163.1    | Ca_kabuli_chr04 | 33811363                | AA                              | GG                | 1945954710               |
| SNP_P3_52302_33815776 | NC_021163.1    | Ca_kabuli_chr04 | 33815776                | CC                              | TT                | 1945954712               |
| SNP_P3_52303_33817993 | NC_021163.1    | Ca_kabuli_chr04 | 33817993                | CC                              | TT                | 1945954713               |
| SNP_P3_52304_33820907 | NC_021163.1    | Ca_kabuli_chr04 | 33820907                | GG                              | AA                | 1945954715               |
| SNP_P3_52305_33820954 | NC_021163.1    | Ca_kabuli_chr04 | 33820954                | CC                              | TT                | 1945954717               |
| SNP_P3_52307_33828604 | NC_021163.1    | Ca_kabuli_chr04 | 33828604                | GG                              | AA                | 1945954719               |
| SNP_P3_52308_33829216 | NC_021163.1    | Ca_kabuli_chr04 | 33829216                | GG                              | AA                | 1945954721               |
| SNP_P3_52309_33833532 | NC_021163.1    | Ca_kabuli_chr04 | 33833532                | AA                              | TT                | 1945954722               |
| SNP_P3_52310_33834358 | NC_021163.1    | Ca_kabuli_chr04 | 33834358                | TT                              | CC                | 1945954724               |
| SNP_P3_52311_33834510 | NC_021163.1    | Ca_kabuli_chr04 | 33834510                | CC                              | GG                | 1945954726               |

| SNPs IDs              | Chromosome IDs | Chromosomes     | Physical positions (bp) | CDC Frontier (Reference genome) | (Pusa 256 & HPNB) | NCBI SNPdb Accession IDs |
|-----------------------|----------------|-----------------|-------------------------|---------------------------------|-------------------|--------------------------|
| SNP_P3_52312_33834608 | NC_021163.1    | Ca_kabuli_chr04 | 33834608                | AA                              | GG                | 1945954728               |
| SNP_P3_52316_33838535 | NC_021163.1    | Ca_kabuli_chr04 | 33838535                | TT                              | CC                | 1945954729               |
| SNP_P3_52317_33838609 | NC_021163.1    | Ca_kabuli_chr04 | 33838609                | CC                              | TT                | 1945954731               |
| SNP_P3_52318_33841470 | NC_021163.1    | Ca_kabuli_chr04 | 33841470                | GG                              | AA                | 1945954733               |
| SNP_P3_52319_33842925 | NC_021163.1    | Ca_kabuli_chr04 | 33842925                | AA                              | CC                | 1945954735               |
| SNP_P3_52321_33845123 | NC_021163.1    | Ca_kabuli_chr04 | 33845123                | GG                              | AA                | 1945954737               |
| SNP_P3_52323_33849775 | NC_021163.1    | Ca_kabuli_chr04 | 33849775                | CC                              | TT                | 1945954738               |
| SNP_P3_52324_33853271 | NC_021163.1    | Ca_kabuli_chr04 | 33853271                | CC                              | GG                | 1945954740               |
| SNP_P3_52325_33853299 | NC_021163.1    | Ca_kabuli_chr04 | 33853299                | TT                              | CC                | 1945954742               |
| SNP_P3_52326_33853376 | NC_021163.1    | Ca_kabuli_chr04 | 33853376                | AA                              | GG                | 1945954744               |
| SNP_P3_52327_33853391 | NC_021163.1    | Ca_kabuli_chr04 | 33853391                | TT                              | AA                | 1945954745               |
| SNP_P3_52328_33853402 | NC_021163.1    | Ca_kabuli_chr04 | 33853402                | AA                              | TT                | 1945954747               |
| SNP_P3_52329_33853438 | NC_021163.1    | Ca_kabuli_chr04 | 33853438                | CC                              | TT                | 1945954749               |
| SNP_P3_52330_33853439 | NC_021163.1    | Ca_kabuli_chr04 | 33853439                | AA                              | GG                | 1945954751               |
| SNP_P3_52331_33853523 | NC_021163.1    | Ca_kabuli_chr04 | 33853523                | CC                              | TT                | 1945954753               |
| SNP_P3_52332_33853792 | NC_021163.1    | Ca_kabuli_chr04 | 33853792                | TT                              | CC                | 1945954754               |
| SNP_P3_52333_33853807 | NC_021163.1    | Ca_kabuli_chr04 | 33853807                | AA                              | CC                | 1945954756               |
| SNP_P3_52334_33853816 | NC_021163.1    | Ca_kabuli_chr04 | 33853816                | TT                              | CC                | 1945954758               |
| SNP_P3_52335_33853820 | NC_021163.1    | Ca_kabuli_chr04 | 33853820                | CC                              | TT                | 1945954760               |
| SNP_P3_52336_33853821 | NC_021163.1    | Ca_kabuli_chr04 | 33853821                | CC                              | AA                | 1945954762               |
| SNP_P3_52337_33853841 | NC_021163.1    | Ca_kabuli_chr04 | 33853841                | GG                              | AA                | 1945954763               |
| SNP_P3_52338_33853908 | NC_021163.1    | Ca_kabuli_chr04 | 33853908                | CC                              | AA                | 1945954765               |
| SNP_P3_52339_33856623 | NC_021163.1    | Ca_kabuli_chr04 | 33856623                | TT                              | AA                | 1945954767               |
| SNP_P3_52341_33858183 | NC_021163.1    | Ca_kabuli_chr04 | 33858183                | AA                              | GG                | 1945954769               |
| SNP_P3_52342_33861866 | NC_021163.1    | Ca_kabuli_chr04 | 33861866                | GG                              | AA                | 1945954770               |
| SNP_P3_52343_33865726 | NC_021163.1    | Ca_kabuli_chr04 | 33865726                | GG                              | TT                | 1945954772               |
| SNP_P3_52344_33871111 | NC_021163.1    | Ca_kabuli_chr04 | 33871111                | AA                              | GG                | 1945954774               |
| SNP_P3_52345_33871350 | NC_021163.1    | Ca_kabuli_chr04 | 33871350                | AA                              | GG                | 1945954776               |
| SNP_P3_52346_33871356 | NC_021163.1    | Ca_kabuli_chr04 | 33871356                | TT                              | CC                | 1945954778               |
| SNP_P3_52347_33871358 | NC_021163.1    | Ca_kabuli_chr04 | 33871358                | GG                              | AA                | 1945954779               |
| SNP_P3_52348_33871368 | NC_021163.1    | Ca_kabuli_chr04 | 33871368                | CC                              | TT                | 1945954781               |
| SNP_P3_52349_33871508 | NC_021163.1    | Ca_kabuli_chr04 | 33871508                | AA                              | TT                | 1945954783               |
| SNP_P3_52350_33871509 | NC_021163.1    | Ca_kabuli_chr04 | 33871509                | CC                              | GG                | 1945954785               |
| SNP_P3_52351_33871514 | NC_021163.1    | Ca_kabuli_chr04 | 33871514                | GG                              | CC                | 1945954787               |
| SNP_P3_52353_33871623 | NC_021163.1    | Ca_kabuli_chr04 | 33871623                | AA                              | CC                | 1945954788               |
| SNP_P3_52354_33871660 | NC_021163.1    | Ca_kabuli_chr04 | 33871660                | GG                              | TT                | 1945954790               |
| SNP_P3_52355_33873396 | NC_021163.1    | Ca_kabuli_chr04 | 33873396                | AA                              | GG                | 1945954792               |
| SNP_P3_52356_33873453 | NC_021163.1    | Ca_kabuli_chr04 | 33873453                | TT                              | CC                | 1945954794               |
| SNP_P3_52357_33875748 | NC_021163.1    | Ca_kabuli_chr04 | 33875748                | AA                              | GG                | 1945954795               |
| SNP_P3_52358_33879760 | NC_021163.1    | Ca_kabuli_chr04 | 33879760                | AA                              | GG                | 1945954797               |
| SNP_P3_52359_33881195 | NC_021163.1    | Ca_kabuli_chr04 | 33881195                | AA                              | GG                | 1945954799               |
| SNP_P3_52360_33882046 | NC_021163.1    | Ca_kabuli_chr04 | 33882046                | GG                              | TT                | 1945954801               |

| SNPs IDs              | Chromosome IDs | Chromosomes     | Physical positions (bp) | CDC Frontier (Reference genome) | (Pusa 256 & HPNB) | NCBI SNPdb Accession IDs |
|-----------------------|----------------|-----------------|-------------------------|---------------------------------|-------------------|--------------------------|
| SNP_P3_52361_33882451 | NC_021163.1    | Ca_kabuli_chr04 | 33882451                | GG                              | AA                | 1945954803               |
| SNP_P3_52363_33885047 | NC_021163.1    | Ca_kabuli_chr04 | 33885047                | TT                              | CC                | 1945954804               |
| SNP_P3_52364_33901323 | NC_021163.1    | Ca_kabuli_chr04 | 33901323                | GG                              | AA                | 1945954806               |
| SNP_P3_52365_33903623 | NC_021163.1    | Ca_kabuli_chr04 | 33903623                | CC                              | AA                | 1945954808               |
| SNP_P3_52367_33913973 | NC_021163.1    | Ca_kabuli_chr04 | 33913973                | TT                              | CC                | 1945954810               |
| SNP_P3_52368_33914635 | NC_021163.1    | Ca_kabuli_chr04 | 33914635                | AA                              | TT                | 1945954811               |
| SNP_P3_52369_33919432 | NC_021163.1    | Ca_kabuli_chr04 | 33919432                | TT                              | AA                | 1945954813               |
| SNP_P3_52372_33922759 | NC_021163.1    | Ca_kabuli_chr04 | 33922759                | TT                              | CC                | 1945954815               |
| SNP_P3_52374_33931825 | NC_021163.1    | Ca_kabuli_chr04 | 33931825                | TT                              | CC                | 1945954817               |
| SNP_P3_52375_33935950 | NC_021163.1    | Ca_kabuli_chr04 | 33935950                | AA                              | CC                | 1945954819               |
| SNP_P3_52376_33936188 | NC_021163.1    | Ca_kabuli_chr04 | 33936188                | AA                              | GG                | 1945954820               |
| SNP_P3_52377_33936210 | NC_021163.1    | Ca_kabuli_chr04 | 33936210                | AA                              | GG                | 1945954822               |
| SNP_P3_52378_33939024 | NC_021163.1    | Ca_kabuli_chr04 | 33939024                | TT                              | CC                | 1945954824               |
| SNP_P3_52379_33947660 | NC_021163.1    | Ca_kabuli_chr04 | 33947660                | TT                              | CC                | 1945954826               |
| SNP_P3_52380_33949233 | NC_021163.1    | Ca_kabuli_chr04 | 33949233                | AA                              | CC                | 1945954827               |
| SNP_P3_52381_33949234 | NC_021163.1    | Ca_kabuli_chr04 | 33949234                | AA                              | CC                | 1945954829               |
| SNP_P3_52383_33965641 | NC_021163.1    | Ca_kabuli_chr04 | 33965641                | CC                              | TT                | 1945954831               |
| SNP_P3_52385_33979019 | NC_021163.1    | Ca_kabuli_chr04 | 33979019                | CC                              | AA                | 1945954833               |
| SNP_P3_52386_33979685 | NC_021163.1    | Ca_kabuli_chr04 | 33979685                | CC                              | TT                | 1945954835               |
| SNP_P3_52387_33979914 | NC_021163.1    | Ca_kabuli_chr04 | 33979914                | CC                              | TT                | 1945954836               |
| SNP_P3_52388_33983227 | NC_021163.1    | Ca_kabuli_chr04 | 33983227                | GG                              | TT                | 1945954838               |
| SNP_P3_52389_33983695 | NC_021163.1    | Ca_kabuli_chr04 | 33983695                | AA                              | GG                | 1945954840               |
| SNP_P3_52390_33986565 | NC_021163.1    | Ca_kabuli_chr04 | 33986565                | CC                              | AA                | 1945954842               |
| SNP_P3_52391_33992174 | NC_021163.1    | Ca_kabuli_chr04 | 33992174                | GG                              | CC                | 1945954844               |
| SNP_P3_52392_34004468 | NC_021163.1    | Ca_kabuli_chr04 | 34004468                | GG                              | TT                | 1945954845               |
| SNP_P3_52393_34006493 | NC_021163.1    | Ca_kabuli_chr04 | 34006493                | CC                              | GG                | 1945954847               |
| SNP_P3_52395_34009073 | NC_021163.1    | Ca_kabuli_chr04 | 34009073                | CC                              | TT                | 1945954849               |
| SNP_P3_52396_34010123 | NC_021163.1    | Ca_kabuli_chr04 | 34010123                | AA                              | GG                | 1945954851               |
| SNP_P3_52398_34017073 | NC_021163.1    | Ca_kabuli_chr04 | 34017073                | TT                              | CC                | 1945954852               |
| SNP_P3_52399_34019191 | NC_021163.1    | Ca_kabuli_chr04 | 34019191                | TT                              | AA                | 1945954854               |
| SNP_P3_52400_34019195 | NC_021163.1    | Ca_kabuli_chr04 | 34019195                | TT                              | CC                | 1945954856               |
| SNP_P3_52401_34019196 | NC_021163.1    | Ca_kabuli_chr04 | 34019196                | GG                              | AA                | 1945954858               |
| SNP_P3_52402_34028346 | NC_021163.1    | Ca_kabuli_chr04 | 34028346                | GG                              | TT                | 1945954860               |
| SNP_P3_52403_34029970 | NC_021163.1    | Ca_kabuli_chr04 | 34029970                | AA                              | GG                | 1945954861               |
| SNP_P3_52404_34030170 | NC_021163.1    | Ca_kabuli_chr04 | 34030170                | AA                              | GG                | 1945954863               |
| SNP_P3_52405_34039692 | NC_021163.1    | Ca_kabuli_chr04 | 34039692                | TT                              | AA                | 1945954865               |
| SNP_P3_52406_34040366 | NC_021163.1    | Ca_kabuli_chr04 | 34040366                | GG                              | TT                | 1945954867               |
| SNP_P3_52407_34041540 | NC_021163.1    | Ca_kabuli_chr04 | 34041540                | TT                              | CC                | 1945954869               |
| SNP_P3_52408_34043793 | NC_021163.1    | Ca_kabuli_chr04 | 34043793                | TT                              | CC                | 1945954870               |
| SNP_P3_52409_34046116 | NC_021163.1    | Ca_kabuli_chr04 | 34046116                | AA                              | TT                | 1945954872               |
| SNP_P3_52410_34052308 | NC_021163.1    | Ca_kabuli_chr04 | 34052308                | TT                              | CC                | 1945954874               |
| SNP_P3_52411_34053389 | NC_021163.1    | Ca_kabuli_chr04 | 34053389                | GG                              | AA                | 1945954876               |

| SNPs IDs              | Chromosome IDs | Chromosomes     | Physical positions (bp) | CDC Frontier (Reference genome) | (Pusa 256 & HPNB) | NCBI SNPdb Accession IDs |
|-----------------------|----------------|-----------------|-------------------------|---------------------------------|-------------------|--------------------------|
| SNP_P3_52412_34053395 | NC_021163.1    | Ca_kabuli_chr04 | 34053395                | AA                              | TT                | 1945954877               |
| SNP_P3_52413_34055062 | NC_021163.1    | Ca_kabuli_chr04 | 34055062                | TT                              | CC                | 1945954879               |
| SNP_P3_52415_34057860 | NC_021163.1    | Ca_kabuli_chr04 | 34057860                | AA                              | TT                | 1945954881               |
| SNP_P3_52416_34060626 | NC_021163.1    | Ca_kabuli_chr04 | 34060626                | CC                              | GG                | 1945954883               |
| SNP_P3_52418_34071279 | NC_021163.1    | Ca_kabuli_chr04 | 34071279                | AA                              | GG                | 1945954885               |
| SNP_P3_52419_34078616 | NC_021163.1    | Ca_kabuli_chr04 | 34078616                | AA                              | CC                | 1945954886               |
| SNP_P3_52420_34078617 | NC_021163.1    | Ca_kabuli_chr04 | 34078617                | TT                              | AA                | 1945954888               |
| SNP_P3_52421_34078623 | NC_021163.1    | Ca_kabuli_chr04 | 34078623                | TT                              | CC                | 1945954890               |
| SNP_P3_52422_34078656 | NC_021163.1    | Ca_kabuli_chr04 | 34078656                | AA                              | GG                | 1945954892               |
| SNP_P3_52423_34079834 | NC_021163.1    | Ca_kabuli_chr04 | 34079834                | GG                              | AA                | 1945954894               |
| SNP_P3_52424_34082541 | NC_021163.1    | Ca_kabuli_chr04 | 34082541                | TT                              | CC                | 1945954895               |
| SNP_P3_52427_34088866 | NC_021163.1    | Ca_kabuli_chr04 | 34088866                | AA                              | GG                | 1945954897               |
| SNP_P3_52428_34096890 | NC_021163.1    | Ca_kabuli_chr04 | 34096890                | TT                              | CC                | 1945954899               |
| SNP_P3_52429_34100353 | NC_021163.1    | Ca_kabuli_chr04 | 34100353                | GG                              | AA                | 1945954901               |
| SNP_P3_52430_34117757 | NC_021163.1    | Ca_kabuli_chr04 | 34117757                | TT                              | GG                | 1945954902               |
| SNP_P3_52431_34118132 | NC_021163.1    | Ca_kabuli_chr04 | 34118132                | TT                              | GG                | 1945954904               |
| SNP_P3_52432_34121263 | NC_021163.1    | Ca_kabuli_chr04 | 34121263                | CC                              | AA                | 1945954906               |
| SNP_P3_52434_34123766 | NC_021163.1    | Ca_kabuli_chr04 | 34123766                | CC                              | TT                | 1945954908               |
| SNP_P3_52435_34126135 | NC_021163.1    | Ca_kabuli_chr04 | 34126135                | CC                              | TT                | 1945954910               |
| SNP_P3_52436_34126738 | NC_021163.1    | Ca_kabuli_chr04 | 34126738                | AA                              | TT                | 1945954911               |
| SNP_P3_52437_34129628 | NC_021163.1    | Ca_kabuli_chr04 | 34129628                | AA                              | GG                | 1945954913               |
| SNP_P3_52438_34129883 | NC_021163.1    | Ca_kabuli_chr04 | 34129883                | CC                              | TT                | 1945954915               |
| SNP_P3_52439_34152660 | NC_021163.1    | Ca_kabuli_chr04 | 34152660                | CC                              | AA                | 1945954917               |
| SNP_P3_52440_34152661 | NC_021163.1    | Ca_kabuli_chr04 | 34152661                | TT                              | GG                | 1945954918               |
| SNP_P3_52441_34152846 | NC_021163.1    | Ca_kabuli_chr04 | 34152846                | AA                              | GG                | 1945954920               |
| SNP_P3_52442_34152859 | NC_021163.1    | Ca_kabuli_chr04 | 34152859                | CC                              | TT                | 1945954922               |
| SNP_P3_52443_34156391 | NC_021163.1    | Ca_kabuli_chr04 | 34156391                | CC                              | TT                | 1945954924               |
| SNP_P3_52444_34157115 | NC_021163.1    | Ca_kabuli_chr04 | 34157115                | GG                              | TT                | 1945954926               |
| SNP_P3_52445_34159945 | NC_021163.1    | Ca_kabuli_chr04 | 34159945                | CC                              | TT                | 1945954927               |
| SNP_P3_52446_34160104 | NC_021163.1    | Ca_kabuli_chr04 | 34160104                | GG                              | AA                | 1945954929               |
| SNP_P3_52447_34161398 | NC_021163.1    | Ca_kabuli_chr04 | 34161398                | CC                              | GG                | 1945954931               |
| SNP_P3_52448_34161400 | NC_021163.1    | Ca_kabuli_chr04 | 34161400                | CC                              | TT                | 1945954933               |
| SNP_P3_52449_34161445 | NC_021163.1    | Ca_kabuli_chr04 | 34161445                | GG                              | AA                | 1945954934               |
| SNP_P3_52450_34161476 | NC_021163.1    | Ca_kabuli_chr04 | 34161476                | GG                              | AA                | 1945954936               |
| SNP_P3_52451_34166846 | NC_021163.1    | Ca_kabuli_chr04 | 34166846                | CC                              | TT                | 1945954938               |
| SNP_P3_52452_34168962 | NC_021163.1    | Ca_kabuli_chr04 | 34168962                | CC                              | TT                | 1945954940               |
| SNP_P3_52455_34170628 | NC_021163.1    | Ca_kabuli_chr04 | 34170628                | AA                              | CC                | 1945954942               |
| SNP_P3_52456_34179692 | NC_021163.1    | Ca_kabuli_chr04 | 34179692                | AA                              | TT                | 1945954943               |
| SNP_P3_52457_34179699 | NC_021163.1    | Ca_kabuli_chr04 | 34179699                | CC                              | AA                | 1945954945               |
| SNP_P3_52458_34180208 | NC_021163.1    | Ca_kabuli_chr04 | 34180208                | AA                              | TT                | 1945954947               |
| SNP_P3_52460_34188494 | NC_021163.1    | Ca_kabuli_chr04 | 34188494                | TT                              | CC                | 1945954949               |
| SNP_P3_52461_34188536 | NC_021163.1    | Ca_kabuli_chr04 | 34188536                | TT                              | CC                | 1945954950               |

| SNPs IDs              | Chromosome IDs | Chromosomes     | Physical positions (bp) | CDC Frontier (Reference genome) | (Pusa 256 & HPNB) | NCBI SNPdb Accession IDs |
|-----------------------|----------------|-----------------|-------------------------|---------------------------------|-------------------|--------------------------|
| SNP_P3_52462_34200048 | NC_021163.1    | Ca_kabuli_chr04 | 34200048                | AA                              | TT                | 1945954952               |
| SNP_P3_52463_34200098 | NC_021163.1    | Ca_kabuli_chr04 | 34200098                | TT                              | CC                | 1945954954               |
| SNP_P3_52464_34202367 | NC_021163.1    | Ca_kabuli_chr04 | 34202367                | TT                              | AA                | 1945954956               |
| SNP_P3_52465_34213012 | NC_021163.1    | Ca_kabuli_chr04 | 34213012                | TT                              | CC                | 1945954958               |
| SNP_P3_52466_34213838 | NC_021163.1    | Ca_kabuli_chr04 | 34213838                | GG                              | TT                | 1945954959               |
| SNP_P3_52467_34219029 | NC_021163.1    | Ca_kabuli_chr04 | 34219029                | TT                              | CC                | 1945954961               |
| SNP_P3_52468_34225160 | NC_021163.1    | Ca_kabuli_chr04 | 34225160                | GG                              | AA                | 1945954963               |
| SNP_P3_52469_34225180 | NC_021163.1    | Ca_kabuli_chr04 | 34225180                | AA                              | GG                | 1945954965               |
| SNP_P3_52470_34225229 | NC_021163.1    | Ca_kabuli_chr04 | 34225229                | AA                              | GG                | 1945954966               |
| SNP_P3_52473_34228359 | NC_021163.1    | Ca_kabuli_chr04 | 34228359                | AA                              | TT                | 1945954968               |
| SNP_P3_52474_34232769 | NC_021163.1    | Ca_kabuli_chr04 | 34232769                | AA                              | GG                | 1945954970               |
| SNP_P3_52475_34233462 | NC_021163.1    | Ca_kabuli_chr04 | 34233462                | GG                              | CC                | 1945954972               |
| SNP_P3_52476_34237417 | NC_021163.1    | Ca_kabuli_chr04 | 34237417                | GG                              | AA                | 1945954974               |
| SNP_P3_52477_34238639 | NC_021163.1    | Ca_kabuli_chr04 | 34238639                | AA                              | GG                | 1945954975               |
| SNP_P3_52480_34239971 | NC_021163.1    | Ca_kabuli_chr04 | 34239971                | AA                              | GG                | 1945954977               |
| SNP_P3_52481_34240005 | NC_021163.1    | Ca_kabuli_chr04 | 34240005                | CC                              | GG                | 1945954979               |
| SNP_P3_52482_34245110 | NC_021163.1    | Ca_kabuli_chr04 | 34245110                | CC                              | TT                | 1945954981               |
| SNP_P3_52484_34247300 | NC_021163.1    | Ca_kabuli_chr04 | 34247300                | GG                              | CC                | 1945954982               |
| SNP_P3_52485_34249048 | NC_021163.1    | Ca_kabuli_chr04 | 34249048                | CC                              | AA                | 1945954984               |
| SNP_P3_52486_34249053 | NC_021163.1    | Ca_kabuli_chr04 | 34249053                | CC                              | GG                | 1945954986               |
| SNP_P3_52487_34250977 | NC_021163.1    | Ca_kabuli_chr04 | 34250977                | AA                              | GG                | 1945954988               |
| SNP_P3_52488_34255374 | NC_021163.1    | Ca_kabuli_chr04 | 34255374                | CC                              | TT                | 1945954990               |
| SNP_P3_52490_34258039 | NC_021163.1    | Ca_kabuli_chr04 | 34258039                | TT                              | CC                | 1945954991               |
| SNP_P3_52491_34260493 | NC_021163.1    | Ca_kabuli_chr04 | 34260493                | CC                              | TT                | 1945954993               |
| SNP_P3_52492_34262341 | NC_021163.1    | Ca_kabuli_chr04 | 34262341                | TT                              | CC                | 1945954995               |
| SNP_P3_52495_34266211 | NC_021163.1    | Ca_kabuli_chr04 | 34266211                | AA                              | GG                | 1945954997               |
| SNP_P3_52496_34266313 | NC_021163.1    | Ca_kabuli_chr04 | 34266313                | AA                              | GG                | 1945954998               |
| SNP_P3_52497_34266579 | NC_021163.1    | Ca_kabuli_chr04 | 34266579                | TT                              | CC                | 1945955000               |
| SNP_P3_52499_34268691 | NC_021163.1    | Ca_kabuli_chr04 | 34268691                | TT                              | GG                | 1945955002               |
| SNP_P3_52500_34271997 | NC_021163.1    | Ca_kabuli_chr04 | 34271997                | TT                              | CC                | 1945955004               |
| SNP_P3_52501_34272265 | NC_021163.1    | Ca_kabuli_chr04 | 34272265                | GG                              | AA                | 1945955006               |
| SNP_P3_52502_34274345 | NC_021163.1    | Ca_kabuli_chr04 | 34274345                | TT                              | CC                | 1945955007               |
| SNP_P3_52503_34276510 | NC_021163.1    | Ca_kabuli_chr04 | 34276510                | GG                              | TT                | 1945955009               |
| SNP_P3_52504_34280335 | NC_021163.1    | Ca_kabuli_chr04 | 34280335                | CC                              | TT                | 1945955011               |
| SNP_P3_52505_34282038 | NC_021163.1    | Ca_kabuli_chr04 | 34282038                | TT                              | CC                | 1945955013               |
| SNP_P3_52506_34282581 | NC_021163.1    | Ca_kabuli_chr04 | 34282581                | CC                              | TT                | 1945955014               |
| SNP_P3_52507_34284618 | NC_021163.1    | Ca_kabuli_chr04 | 34284618                | AA                              | GG                | 1945955016               |
| SNP_P3_52508_34286807 | NC_021163.1    | Ca_kabuli_chr04 | 34286807                | CC                              | TT                | 1945955018               |
| SNP_P3_52509_34287951 | NC_021163.1    | Ca_kabuli_chr04 | 34287951                | CC                              | GG                | 1945955020               |
| SNP_P3_52510_34287956 | NC_021163.1    | Ca_kabuli_chr04 | 34287956                | AA                              | GG                | 1945955022               |
| SNP_P3_52511_34290639 | NC_021163.1    | Ca_kabuli_chr04 | 34290639                | TT                              | CC                | 1945955023               |
| SNP_P3_52512_34290677 | NC_021163.1    | Ca_kabuli_chr04 | 34290677                | CC                              | TT                | 1945955025               |



| SNPs IDs              | Chromosome IDs | Chromosomes     | Physical positions (bp) | CDC Frontier (Reference genome) | (Pusa 256 & HPNB) | NCBI SNPdb Accession IDs |
|-----------------------|----------------|-----------------|-------------------------|---------------------------------|-------------------|--------------------------|
| SNP_P3_52513_34293373 | NC_021163.1    | Ca_kabuli_chr04 | 34293373                | TT                              | GG                | 1945955027               |
| SNP_P3_52514_34294144 | NC_021163.1    | Ca_kabuli_chr04 | 34294144                | CC                              | TT                | 1945955029               |
| SNP_P3_52515_34294429 | NC_021163.1    | Ca_kabuli_chr04 | 34294429                | GG                              | AA                | 1945955030               |
| SNP_P3_52516_34294430 | NC_021163.1    | Ca_kabuli_chr04 | 34294430                | AA                              | GG                | 1945955032               |
| SNP_P3_52517_34294447 | NC_021163.1    | Ca_kabuli_chr04 | 34294447                | TT                              | CC                | 1945955034               |
| SNP_P3_52518_34301460 | NC_021163.1    | Ca_kabuli_chr04 | 34301460                | AA                              | GG                | 1945955036               |
| SNP_P3_52519_34317134 | NC_021163.1    | Ca_kabuli_chr04 | 34317134                | CC                              | TT                | 1945955038               |
| SNP_P3_52520_34325406 | NC_021163.1    | Ca_kabuli_chr04 | 34325406                | TT                              | AA                | 1945955039               |
| SNP_P3_52521_34325664 | NC_021163.1    | Ca_kabuli_chr04 | 34325664                | GG                              | AA                | 1945955041               |
| SNP_P3_52522_34328483 | NC_021163.1    | Ca_kabuli_chr04 | 34328483                | GG                              | AA                | 1945955043               |
| SNP_P3_52524_34331221 | NC_021163.1    | Ca_kabuli_chr04 | 34331221                | GG                              | AA                | 1945955045               |
| SNP_P3_52525_34334472 | NC_021163.1    | Ca_kabuli_chr04 | 34334472                | CC                              | TT                | 1945955046               |
| SNP_P3_52526_34334880 | NC_021163.1    | Ca_kabuli_chr04 | 34334880                | CC                              | TT                | 1945955048               |
| SNP_P3_52527_34335204 | NC_021163.1    | Ca_kabuli_chr04 | 34335204                | GG                              | AA                | 1945955050               |
| SNP_P3_52528_34338622 | NC_021163.1    | Ca_kabuli_chr04 | 34338622                | TT                              | CC                | 1945955052               |
| SNP_P3_52529_34339711 | NC_021163.1    | Ca_kabuli_chr04 | 34339711                | CC                              | TT                | 1945955054               |
| SNP_P3_52531_34350341 | NC_021163.1    | Ca_kabuli_chr04 | 34350341                | CC                              | TT                | 1945955055               |
| SNP_P3_52532_34351525 | NC_021163.1    | Ca_kabuli_chr04 | 34351525                | AA                              | GG                | 1945955057               |
| SNP_P3_52533_34369186 | NC_021163.1    | Ca_kabuli_chr04 | 34369186                | CC                              | GG                | 1945955059               |
| SNP_P3_52534_34370721 | NC_021163.1    | Ca_kabuli_chr04 | 34370721                | GG                              | AA                | 1945955061               |
| SNP_P3_52535_34373416 | NC_021163.1    | Ca_kabuli_chr04 | 34373416                | GG                              | AA                | 1945955062               |
| SNP_P3_52537_34375718 | NC_021163.1    | Ca_kabuli_chr04 | 34375718                | TT                              | GG                | 1945955064               |
| SNP_P3_52538_34376752 | NC_021163.1    | Ca_kabuli_chr04 | 34376752                | CC                              | TT                | 1945955066               |
| SNP_P3_52539_34380127 | NC_021163.1    | Ca_kabuli_chr04 | 34380127                | CC                              | TT                | 1945955068               |
| SNP_P3_52540_34380437 | NC_021163.1    | Ca_kabuli_chr04 | 34380437                | GG                              | AA                | 1945955070               |
| SNP_P3_52541_34384596 | NC_021163.1    | Ca_kabuli_chr04 | 34384596                | TT                              | CC                | 1945955071               |
| SNP_P3_52542_34387924 | NC_021163.1    | Ca_kabuli_chr04 | 34387924                | CC                              | TT                | 1945955073               |
| SNP_P3_52543_34387996 | NC_021163.1    | Ca_kabuli_chr04 | 34387996                | TT                              | GG                | 1945955075               |
| SNP_P3_52545_34388781 | NC_021163.1    | Ca_kabuli_chr04 | 34388781                | TT                              | GG                | 1945955077               |
| SNP_P3_52546_34390354 | NC_021163.1    | Ca_kabuli_chr04 | 34390354                | AA                              | CC                | 1945955078               |
| SNP_P3_52547_34393201 | NC_021163.1    | Ca_kabuli_chr04 | 34393201                | GG                              | AA                | 1945955080               |
| SNP_P3_52548_34401714 | NC_021163.1    | Ca_kabuli_chr04 | 34401714                | CC                              | TT                | 1945955082               |
| SNP_P3_52549_34402314 | NC_021163.1    | Ca_kabuli_chr04 | 34402314                | AA                              | GG                | 1945955084               |
| SNP_P3_52550_34404493 | NC_021163.1    | Ca_kabuli_chr04 | 34404493                | GG                              | AA                | 1945955086               |
| SNP_P3_52552_34414942 | NC_021163.1    | Ca_kabuli_chr04 | 34414942                | GG                              | AA                | 1945955087               |
| SNP_P3_52553_34417701 | NC_021163.1    | Ca_kabuli_chr04 | 34417701                | TT                              | CC                | 1945955089               |
| SNP_P3_52554_34419108 | NC_021163.1    | Ca_kabuli_chr04 | 34419108                | TT                              | GG                | 1945955091               |
| SNP_P3_52555_34421726 | NC_021163.1    | Ca_kabuli_chr04 | 34421726                | CC                              | AA                | 1945955093               |
| SNP_P3_52556_34422811 | NC_021163.1    | Ca_kabuli_chr04 | 34422811                | CC                              | GG                | 1945955094               |
| SNP_P3_52557_34424020 | NC_021163.1    | Ca_kabuli_chr04 | 34424020                | TT                              | CC                | 1945955096               |
| SNP_P3_52558_34430231 | NC_021163.1    | Ca_kabuli_chr04 | 34430231                | AA                              | GG                | 1945955098               |
| SNP_P3_52559_34430439 | NC_021163.1    | Ca_kabuli_chr04 | 34430439                | GG                              | AA                | 1945955100               |

| SNPs IDs              | Chromosome IDs | Chromosomes     | Physical positions (bp) | CDC Frontier (Reference genome) | (Pusa 256 & HPNB) | NCBI SNPdb Accession IDs |
|-----------------------|----------------|-----------------|-------------------------|---------------------------------|-------------------|--------------------------|
| SNP_P3_52560_34431258 | NC_021163.1    | Ca_kabuli_chr04 | 34431258                | CC                              | TT                | 1945955102               |
| SNP_P3_52561_34432940 | NC_021163.1    | Ca_kabuli_chr04 | 34432940                | TT                              | CC                | 1945955103               |
| SNP_P3_52562_34436552 | NC_021163.1    | Ca_kabuli_chr04 | 34436552                | CC                              | TT                | 1945955105               |
| SNP_P3_52563_34436760 | NC_021163.1    | Ca_kabuli_chr04 | 34436760                | CC                              | TT                | 1945955107               |
| SNP_P3_52564_34436852 | NC_021163.1    | Ca_kabuli_chr04 | 34436852                | TT                              | CC                | 1945955109               |
| SNP_P3_52565_34438500 | NC_021163.1    | Ca_kabuli_chr04 | 34438500                | GG                              | AA                | 1945955110               |
| SNP_P3_52566_34442355 | NC_021163.1    | Ca_kabuli_chr04 | 34442355                | TT                              | CC                | 1945955112               |
| SNP_P3_52567_34442705 | NC_021163.1    | Ca_kabuli_chr04 | 34442705                | TT                              | CC                | 1945955114               |
| SNP_P3_52568_34444315 | NC_021163.1    | Ca_kabuli_chr04 | 34444315                | GG                              | TT                | 1945955116               |
| SNP_P3_52569_34444808 | NC_021163.1    | Ca_kabuli_chr04 | 34444808                | TT                              | GG                | 1945955118               |
| SNP_P3_52570_34446220 | NC_021163.1    | Ca_kabuli_chr04 | 34446220                | TT                              | CC                | 1945955119               |
| SNP_P3_52571_34446825 | NC_021163.1    | Ca_kabuli_chr04 | 34446825                | AA                              | GG                | 1945955121               |
| SNP_P3_52572_34448082 | NC_021163.1    | Ca_kabuli_chr04 | 34448082                | CC                              | TT                | 1945955123               |
| SNP_P3_52573_34448401 | NC_021163.1    | Ca_kabuli_chr04 | 34448401                | AA                              | GG                | 1945955125               |
| SNP_P3_52574_34449078 | NC_021163.1    | Ca_kabuli_chr04 | 34449078                | TT                              | AA                | 1945955126               |
| SNP_P3_52575_34449401 | NC_021163.1    | Ca_kabuli_chr04 | 34449401                | GG                              | AA                | 1945955128               |
| SNP_P3_52576_34451325 | NC_021163.1    | Ca_kabuli_chr04 | 34451325                | CC                              | TT                | 1945955130               |
| SNP_P3_52577_34452177 | NC_021163.1    | Ca_kabuli_chr04 | 34452177                | AA                              | GG                | 1945955132               |
| SNP_P3_52578_34452818 | NC_021163.1    | Ca_kabuli_chr04 | 34452818                | GG                              | AA                | 1945955134               |
| SNP_P3_52579_34454256 | NC_021163.1    | Ca_kabuli_chr04 | 34454256                | TT                              | AA                | 1945955135               |
| SNP_P3_52580_34454279 | NC_021163.1    | Ca_kabuli_chr04 | 34454279                | TT                              | CC                | 1945955137               |
| SNP_P3_52581_34454489 | NC_021163.1    | Ca_kabuli_chr04 | 34454489                | AA                              | CC                | 1945955139               |
| SNP_P3_52583_34456024 | NC_021163.1    | Ca_kabuli_chr04 | 34456024                | TT                              | CC                | 1945955141               |
| SNP_P3_52584_34457434 | NC_021163.1    | Ca_kabuli_chr04 | 34457434                | CC                              | AA                | 1945955142               |
| SNP_P3_52586_34460149 | NC_021163.1    | Ca_kabuli_chr04 | 34460149                | TT                              | GG                | 1945955144               |
| SNP_P3_52587_34460248 | NC_021163.1    | Ca_kabuli_chr04 | 34460248                | CC                              | GG                | 1945955146               |
| SNP_P3_52588_34468114 | NC_021163.1    | Ca_kabuli_chr04 | 34468114                | AA                              | CC                | 1945955148               |
| SNP_P3_52591_34472342 | NC_021163.1    | Ca_kabuli_chr04 | 34472342                | TT                              | CC                | 1945955150               |
| SNP_P3_52593_34476430 | NC_021163.1    | Ca_kabuli_chr04 | 34476430                | AA                              | GG                | 1945955151               |
| SNP_P3_52595_34486983 | NC_021163.1    | Ca_kabuli_chr04 | 34486983                | GG                              | AA                | 1945955153               |
| SNP_P3_52596_34490566 | NC_021163.1    | Ca_kabuli_chr04 | 34490566                | TT                              | CC                | 1945955155               |
| SNP_P3_52597_34491652 | NC_021163.1    | Ca_kabuli_chr04 | 34491652                | AA                              | CC                | 1945955157               |
| SNP_P3_52598_34491653 | NC_021163.1    | Ca_kabuli_chr04 | 34491653                | AA                              | TT                | 1945955158               |
| SNP_P3_52600_34503629 | NC_021163.1    | Ca_kabuli_chr04 | 34503629                | GG                              | TT                | 1945955160               |
| SNP_P3_52601_34503636 | NC_021163.1    | Ca_kabuli_chr04 | 34503636                | GG                              | TT                | 1945955162               |
| SNP_P3_52603_34503644 | NC_021163.1    | Ca_kabuli_chr04 | 34503644                | AA                              | GG                | 1945955164               |
| SNP_P3_52604_34503797 | NC_021163.1    | Ca_kabuli_chr04 | 34503797                | CC                              | TT                | 1945955166               |
| SNP_P3_52605_34506369 | NC_021163.1    | Ca_kabuli_chr04 | 34506369                | GG                              | CC                | 1945955167               |
| SNP_P3_52606_34507885 | NC_021163.1    | Ca_kabuli_chr04 | 34507885                | GG                              | AA                | 1945955169               |
| SNP_P3_52607_34519887 | NC_021163.1    | Ca_kabuli_chr04 | 34519887                | AA                              | GG                | 1945955171               |
| SNP_P3_52608_34520614 | NC_021163.1    | Ca_kabuli_chr04 | 34520614                | TT                              | AA                | 1945955173               |
| SNP_P3_52609_34520659 | NC_021163.1    | Ca_kabuli_chr04 | 34520659                | CC                              | GG                | 1945955174               |

| SNPs IDs              | Chromosome IDs | Chromosomes     | Physical positions (bp) | CDC Frontier (Reference genome) | (Pusa 256 & HPNB) | NCBI SNPdb Accession IDs |
|-----------------------|----------------|-----------------|-------------------------|---------------------------------|-------------------|--------------------------|
| SNP_P3_52610_34520775 | NC_021163.1    | Ca_kabuli_chr04 | 34520775                | AA                              | TT                | 1945955176               |
| SNP_P3_52612_34520878 | NC_021163.1    | Ca_kabuli_chr04 | 34520878                | TT                              | CC                | 1945955178               |
| SNP_P3_52613_34520914 | NC_021163.1    | Ca_kabuli_chr04 | 34520914                | TT                              | AA                | 1945955180               |
| SNP_P3_52614_34520935 | NC_021163.1    | Ca_kabuli_chr04 | 34520935                | TT                              | GG                | 1945955182               |
| SNP_P3_52615_34520947 | NC_021163.1    | Ca_kabuli_chr04 | 34520947                | TT                              | CC                | 1945955183               |
| SNP_P3_52616_34524891 | NC_021163.1    | Ca_kabuli_chr04 | 34524891                | CC                              | AA                | 1945955185               |
| SNP_P3_52617_34525236 | NC_021163.1    | Ca_kabuli_chr04 | 34525236                | TT                              | CC                | 1945955187               |
| SNP_P3_52619_34526838 | NC_021163.1    | Ca_kabuli_chr04 | 34526838                | CC                              | AA                | 1945955189               |
| SNP_P3_52620_34554541 | NC_021163.1    | Ca_kabuli_chr04 | 34554541                | AA                              | GG                | 1945955190               |
| SNP_P3_52621_34566166 | NC_021163.1    | Ca_kabuli_chr04 | 34566166                | CC                              | TT                | 1945955192               |
| SNP_P3_52622_34566308 | NC_021163.1    | Ca_kabuli_chr04 | 34566308                | TT                              | AA                | 1945955194               |
| SNP_P3_52625_34566765 | NC_021163.1    | Ca_kabuli_chr04 | 34566765                | AA                              | CC                | 1945955196               |
| SNP_P3_52626_34566767 | NC_021163.1    | Ca_kabuli_chr04 | 34566767                | CC                              | TT                | 1945955198               |
| SNP_P3_52627_34568088 | NC_021163.1    | Ca_kabuli_chr04 | 34568088                | CC                              | TT                | 1945955199               |
| SNP_P3_52628_34568416 | NC_021163.1    | Ca_kabuli_chr04 | 34568416                | TT                              | CC                | 1945955201               |
| SNP_P3_52629_34582114 | NC_021163.1    | Ca_kabuli_chr04 | 34582114                | CC                              | TT                | 1945955203               |
| SNP_P3_52630_34582191 | NC_021163.1    | Ca_kabuli_chr04 | 34582191                | TT                              | CC                | 1945955205               |
| SNP_P3_52631_34582205 | NC_021163.1    | Ca_kabuli_chr04 | 34582205                | TT                              | AA                | 1945955206               |
| SNP_P3_52632_34582252 | NC_021163.1    | Ca_kabuli_chr04 | 34582252                | TT                              | CC                | 1945955208               |
| SNP_P3_52633_34582570 | NC_021163.1    | Ca_kabuli_chr04 | 34582570                | CC                              | AA                | 1945955210               |
| SNP_P3_52634_34582594 | NC_021163.1    | Ca_kabuli_chr04 | 34582594                | TT                              | GG                | 1945955212               |
| SNP_P3_52635_34586497 | NC_021163.1    | Ca_kabuli_chr04 | 34586497                | GG                              | CC                | 1945955214               |
| SNP_P3_52636_34586566 | NC_021163.1    | Ca_kabuli_chr04 | 34586566                | AA                              | GG                | 1945955215               |
| SNP_P3_52637_34586570 | NC_021163.1    | Ca_kabuli_chr04 | 34586570                | AA                              | TT                | 1945955217               |
| SNP_P3_52638_34586683 | NC_021163.1    | Ca_kabuli_chr04 | 34586683                | TT                              | AA                | 1945955219               |
| SNP_P3_52639_34586762 | NC_021163.1    | Ca_kabuli_chr04 | 34586762                | CC                              | TT                | 1945955221               |
| SNP_P3_52640_34586792 | NC_021163.1    | Ca_kabuli_chr04 | 34586792                | TT                              | AA                | 1945955222               |
| SNP_P3_52641_34588023 | NC_021163.1    | Ca_kabuli_chr04 | 34588023                | GG                              | CC                | 1945955224               |
| SNP_P3_52642_34588538 | NC_021163.1    | Ca_kabuli_chr04 | 34588538                | GG                              | TT                | 1945955226               |
| SNP_P3_52643_34588662 | NC_021163.1    | Ca_kabuli_chr04 | 34588662                | GG                              | AA                | 1945955228               |
| SNP_P3_52644_34588666 | NC_021163.1    | Ca_kabuli_chr04 | 34588666                | AA                              | GG                | 1945955229               |
| SNP_P3_52645_34588670 | NC_021163.1    | Ca_kabuli_chr04 | 34588670                | GG                              | AA                | 1945955231               |
| SNP_P3_52646_34588673 | NC_021163.1    | Ca_kabuli_chr04 | 34588673                | CC                              | GG                | 1945955233               |
| SNP_P3_52647_34588696 | NC_021163.1    | Ca_kabuli_chr04 | 34588696                | GG                              | CC                | 1945955235               |
| SNP_P3_52648_34588716 | NC_021163.1    | Ca_kabuli_chr04 | 34588716                | GG                              | AA                | 1945955237               |
| SNP_P3_52649_34588959 | NC_021163.1    | Ca_kabuli_chr04 | 34588959                | GG                              | TT                | 1945955238               |
| SNP_P3_52650_34588960 | NC_021163.1    | Ca_kabuli_chr04 | 34588960                | TT                              | CC                | 1945955240               |
| SNP_P3_52651_34589132 | NC_021163.1    | Ca_kabuli_chr04 | 34589132                | GG                              | AA                | 1945955242               |
| SNP_P3_52652_34589474 | NC_021163.1    | Ca_kabuli_chr04 | 34589474                | GG                              | TT                | 1945955244               |
| SNP_P3_52653_34589499 | NC_021163.1    | Ca_kabuli_chr04 | 34589499                | TT                              | GG                | 1945955245               |
| SNP_P3_52654_34593140 | NC_021163.1    | Ca_kabuli_chr04 | 34593140                | TT                              | AA                | 1945955247               |
| SNP_P3_52655_34598636 | NC_021163.1    | Ca_kabuli_chr04 | 34598636                | AA                              | CC                | 1945955249               |

| SNPs IDs              | Chromosome IDs | Chromosomes     | Physical positions (bp) | CDC Frontier (Reference genome) | (Pusa 256 & HPNB) | NCBI SNPdb Accession IDs |
|-----------------------|----------------|-----------------|-------------------------|---------------------------------|-------------------|--------------------------|
| SNP_P3_52656_34598674 | NC_021163.1    | Ca_kabuli_chr04 | 34598674                | TT                              | GG                | 1945955251               |
| SNP_P3_52657_34598702 | NC_021163.1    | Ca_kabuli_chr04 | 34598702                | CC                              | GG                | 1945955253               |
| SNP_P3_52658_34598842 | NC_021163.1    | Ca_kabuli_chr04 | 34598842                | AA                              | TT                | 1945955254               |
| SNP_P3_52659_34598904 | NC_021163.1    | Ca_kabuli_chr04 | 34598904                | AA                              | TT                | 1945955256               |
| SNP_P3_52660_34599239 | NC_021163.1    | Ca_kabuli_chr04 | 34599239                | GG                              | CC                | 1945955258               |
| SNP_P3_52661_34601572 | NC_021163.1    | Ca_kabuli_chr04 | 34601572                | GG                              | TT                | 1945955260               |
| SNP_P3_52662_34601739 | NC_021163.1    | Ca_kabuli_chr04 | 34601739                | AA                              | GG                | 1945955261               |
| SNP_P3_52663_34601854 | NC_021163.1    | Ca_kabuli_chr04 | 34601854                | CC                              | TT                | 1945955263               |
| SNP_P3_52664_34601884 | NC_021163.1    | Ca_kabuli_chr04 | 34601884                | GG                              | TT                | 1945955265               |
| SNP_P3_52665_34605209 | NC_021163.1    | Ca_kabuli_chr04 | 34605209                | GG                              | TT                | 1945955267               |
| SNP_P3_52666_34605424 | NC_021163.1    | Ca_kabuli_chr04 | 34605424                | AA                              | GG                | 1945955269               |
| SNP_P3_52667_34605516 | NC_021163.1    | Ca_kabuli_chr04 | 34605516                | AA                              | TT                | 1945955270               |
| SNP_P3_52668_34605521 | NC_021163.1    | Ca_kabuli_chr04 | 34605521                | AA                              | TT                | 1945955272               |
| SNP_P3_52669_34605547 | NC_021163.1    | Ca_kabuli_chr04 | 34605547                | AA                              | TT                | 1945955274               |
| SNP_P3_52670_34605564 | NC_021163.1    | Ca_kabuli_chr04 | 34605564                | GG                              | AA                | 1945955276               |
| SNP_P3_52671_34605570 | NC_021163.1    | Ca_kabuli_chr04 | 34605570                | TT                              | GG                | 1945955277               |
| SNP_P3_52672_34605593 | NC_021163.1    | Ca_kabuli_chr04 | 34605593                | GG                              | TT                | 1945955279               |
| SNP_P3_52673_34605595 | NC_021163.1    | Ca_kabuli_chr04 | 34605595                | TT                              | CC                | 1945955281               |
| SNP_P3_52674_34622059 | NC_021163.1    | Ca_kabuli_chr04 | 34622059                | CC                              | TT                | 1945955283               |
| SNP_P3_52675_34634905 | NC_021163.1    | Ca_kabuli_chr04 | 34634905                | TT                              | CC                | 1945955285               |
| SNP_P3_52676_34637073 | NC_021163.1    | Ca_kabuli_chr04 | 34637073                | AA                              | TT                | 1945955286               |
| SNP_P3_52677_34637188 | NC_021163.1    | Ca_kabuli_chr04 | 34637188                | AA                              | CC                | 1945955288               |
| SNP_P3_52678_34647154 | NC_021163.1    | Ca_kabuli_chr04 | 34647154                | CC                              | TT                | 1945955290               |
| SNP_P3_52679_34666589 | NC_021163.1    | Ca_kabuli_chr04 | 34666589                | TT                              | CC                | 1945955292               |
| SNP_P3_52680_34668934 | NC_021163.1    | Ca_kabuli_chr04 | 34668934                | TT                              | CC                | 1945955293               |
| SNP_P3_52681_34683516 | NC_021163.1    | Ca_kabuli_chr04 | 34683516                | AA                              | GG                | 1945955295               |
| SNP_P3_52682_34689759 | NC_021163.1    | Ca_kabuli_chr04 | 34689759                | AA                              | GG                | 1945955297               |
| SNP_P3_52683_34689761 | NC_021163.1    | Ca_kabuli_chr04 | 34689761                | AA                              | TT                | 1945955299               |
| SNP_P3_52684_34704178 | NC_021163.1    | Ca_kabuli_chr04 | 34704178                | GG                              | AA                | 1945955301               |
| SNP_P3_52685_34704245 | NC_021163.1    | Ca_kabuli_chr04 | 34704245                | TT                              | CC                | 1945955302               |
| SNP_P3_52686_34704249 | NC_021163.1    | Ca_kabuli_chr04 | 34704249                | CC                              | GG                | 1945955304               |
| SNP_P3_52687_34704305 | NC_021163.1    | Ca_kabuli_chr04 | 34704305                | TT                              | AA                | 1945955306               |
| SNP_P3_52688_34704307 | NC_021163.1    | Ca_kabuli_chr04 | 34704307                | TT                              | GG                | 1945955308               |
| SNP_P3_52689_34704436 | NC_021163.1    | Ca_kabuli_chr04 | 34704436                | TT                              | CC                | 1945955309               |
| SNP_P3_52690_34704802 | NC_021163.1    | Ca_kabuli_chr04 | 34704802                | GG                              | AA                | 1945955311               |
| SNP_P3_52691_34704816 | NC_021163.1    | Ca_kabuli_chr04 | 34704816                | TT                              | CC                | 1945955313               |
| SNP_P3_52692_34709594 | NC_021163.1    | Ca_kabuli_chr04 | 34709594                | TT                              | CC                | 1945955315               |
| SNP_P3_52693_34712597 | NC_021163.1    | Ca_kabuli_chr04 | 34712597                | TT                              | AA                | 1945955317               |
| SNP_P3_52694_34712672 | NC_021163.1    | Ca_kabuli_chr04 | 34712672                | CC                              | TT                | 1945955318               |
| SNP_P3_52695_34712771 | NC_021163.1    | Ca_kabuli_chr04 | 34712771                | AA                              | CC                | 1945955320               |
| SNP_P3_52696_34712775 | NC_021163.1    | Ca_kabuli_chr04 | 34712775                | GG                              | CC                | 1945955322               |
| SNP_P3_52697_34713400 | NC_021163.1    | Ca_kabuli_chr04 | 34713400                | TT                              | AA                | 1945955324               |

| SNPs IDs              | Chromosome IDs | Chromosomes     | Physical positions (bp) | CDC Frontier (Reference genome) | (Pusa 256 & HPNB) | NCBI SNPdb Accession IDs |
|-----------------------|----------------|-----------------|-------------------------|---------------------------------|-------------------|--------------------------|
| SNP_P3_52698_34725922 | NC_021163.1    | Ca_kabuli_chr04 | 34725922                | TT                              | CC                | 1945955325               |
| SNP_P3_52699_34731645 | NC_021163.1    | Ca_kabuli_chr04 | 34731645                | AA                              | GG                | 1945955327               |
| SNP_P3_52700_34731922 | NC_021163.1    | Ca_kabuli_chr04 | 34731922                | GG                              | CC                | 1945955329               |
| SNP_P3_52701_34774008 | NC_021163.1    | Ca_kabuli_chr04 | 34774008                | AA                              | TT                | 1945955331               |
| SNP_P3_52702_34833971 | NC_021163.1    | Ca_kabuli_chr04 | 34833971                | AA                              | GG                | 1945955333               |
| SNP_P3_52703_34834056 | NC_021163.1    | Ca_kabuli_chr04 | 34834056                | AA                              | TT                | 1945955334               |
| SNP_P3_52704_34834324 | NC_021163.1    | Ca_kabuli_chr04 | 34834324                | CC                              | GG                | 1945955336               |
| SNP_P3_52705_34834462 | NC_021163.1    | Ca_kabuli_chr04 | 34834462                | TT                              | CC                | 1945955338               |
| SNP_P3_52706_34834487 | NC_021163.1    | Ca_kabuli_chr04 | 34834487                | AA                              | CC                | 1945955340               |
| SNP_P3_52707_34834500 | NC_021163.1    | Ca_kabuli_chr04 | 34834500                | GG                              | AA                | 1945955341               |
| SNP_P3_52708_34834565 | NC_021163.1    | Ca_kabuli_chr04 | 34834565                | TT                              | CC                | 1945955343               |
| SNP_P3_52709_34834569 | NC_021163.1    | Ca_kabuli_chr04 | 34834569                | AA                              | GG                | 1945955345               |
| SNP_P3_52710_34844326 | NC_021163.1    | Ca_kabuli_chr04 | 34844326                | GG                              | AA                | 1945955347               |
| SNP_P3_52711_34875516 | NC_021163.1    | Ca_kabuli_chr04 | 34875516                | AA                              | GG                | 1945955349               |
| SNP_P3_52712_34883315 | NC_021163.1    | Ca_kabuli_chr04 | 34883315                | TT                              | CC                | 1945955350               |
| SNP_P3_52713_34883316 | NC_021163.1    | Ca_kabuli_chr04 | 34883316                | TT                              | CC                | 1945955352               |
| SNP_P3_52714_34883320 | NC_021163.1    | Ca_kabuli_chr04 | 34883320                | CC                              | TT                | 1945955354               |
| SNP_P3_52715_34883440 | NC_021163.1    | Ca_kabuli_chr04 | 34883440                | AA                              | GG                | 1945955356               |
| SNP_P3_52716_34883461 | NC_021163.1    | Ca_kabuli_chr04 | 34883461                | AA                              | GG                | 1945955357               |
| SNP_P3_52717_34883508 | NC_021163.1    | Ca_kabuli_chr04 | 34883508                | TT                              | GG                | 1945955359               |
| SNP_P3_52718_34883519 | NC_021163.1    | Ca_kabuli_chr04 | 34883519                | TT                              | CC                | 1945955361               |
| SNP_P3_52719_34883526 | NC_021163.1    | Ca_kabuli_chr04 | 34883526                | TT                              | CC                | 1945955363               |
| SNP_P3_52720_34883528 | NC_021163.1    | Ca_kabuli_chr04 | 34883528                | CC                              | TT                | 1945955365               |
| SNP_P3_52721_34883539 | NC_021163.1    | Ca_kabuli_chr04 | 34883539                | TT                              | CC                | 1945955366               |
| SNP_P3_52722_34883572 | NC_021163.1    | Ca_kabuli_chr04 | 34883572                | TT                              | GG                | 1945955368               |
| SNP_P3_52723_34883604 | NC_021163.1    | Ca_kabuli_chr04 | 34883604                | AA                              | GG                | 1945955370               |
| SNP_P3_52724_34883620 | NC_021163.1    | Ca_kabuli_chr04 | 34883620                | AA                              | GG                | 1945955372               |
| SNP_P3_52725_34883627 | NC_021163.1    | Ca_kabuli_chr04 | 34883627                | AA                              | GG                | 1945955373               |
| SNP_P3_52726_34883652 | NC_021163.1    | Ca_kabuli_chr04 | 34883652                | AA                              | GG                | 1945955375               |
| SNP_P3_52727_34883663 | NC_021163.1    | Ca_kabuli_chr04 | 34883663                | AA                              | GG                | 1945955377               |
| SNP_P3_52728_34883671 | NC_021163.1    | Ca_kabuli_chr04 | 34883671                | AA                              | GG                | 1945955379               |
| SNP_P3_52729_34883678 | NC_021163.1    | Ca_kabuli_chr04 | 34883678                | CC                              | TT                | 1945955381               |
| SNP_P3_52730_34883724 | NC_021163.1    | Ca_kabuli_chr04 | 34883724                | AA                              | CC                | 1945955382               |
| SNP_P3_52731_34883727 | NC_021163.1    | Ca_kabuli_chr04 | 34883727                | TT                              | AA                | 1945955384               |
| SNP_P3_52732_34883734 | NC_021163.1    | Ca_kabuli_chr04 | 34883734                | AA                              | GG                | 1945955386               |
| SNP_P3_52733_34883796 | NC_021163.1    | Ca_kabuli_chr04 | 34883796                | TT                              | GG                | 1945955388               |
| SNP_P3_52734_34883858 | NC_021163.1    | Ca_kabuli_chr04 | 34883858                | AA                              | GG                | 1945955389               |
| SNP_P3_52735_34883885 | NC_021163.1    | Ca_kabuli_chr04 | 34883885                | TT                              | AA                | 1945955391               |
| SNP_P3_52736_34883887 | NC_021163.1    | Ca_kabuli_chr04 | 34883887                | TT                              | CC                | 1945955393               |
| SNP_P3_52737_34883893 | NC_021163.1    | Ca_kabuli_chr04 | 34883893                | TT                              | AA                | 1945955395               |
| SNP_P3_52738_34883941 | NC_021163.1    | Ca_kabuli_chr04 | 34883941                | CC                              | AA                | 1945955397               |
| SNP_P3_52739_34883945 | NC_021163.1    | Ca_kabuli_chr04 | 34883945                | GG                              | AA                | 1945955398               |

| SNPs IDs              | Chromosome IDs | Chromosomes     | Physical positions (bp) | CDC Frontier (Reference genome) | (Pusa 256 & HPNB) | NCBI SNPdb Accession IDs |
|-----------------------|----------------|-----------------|-------------------------|---------------------------------|-------------------|--------------------------|
| SNP_P3_52740_34883960 | NC_021163.1    | Ca_kabuli_chr04 | 34883960                | AA                              | GG                | 1945955400               |
| SNP_P3_52741_34883965 | NC_021163.1    | Ca_kabuli_chr04 | 34883965                | TT                              | GG                | 1945955402               |
| SNP_P3_52742_34883978 | NC_021163.1    | Ca_kabuli_chr04 | 34883978                | TT                              | GG                | 1945955404               |
| SNP_P3_52743_34883996 | NC_021163.1    | Ca_kabuli_chr04 | 34883996                | AA                              | TT                | 1945955405               |
| SNP_P3_52744_34884038 | NC_021163.1    | Ca_kabuli_chr04 | 34884038                | AA                              | GG                | 1945955407               |
| SNP_P3_52745_34884092 | NC_021163.1    | Ca_kabuli_chr04 | 34884092                | TT                              | GG                | 1945955409               |
| SNP_P3_52746_34884096 | NC_021163.1    | Ca_kabuli_chr04 | 34884096                | CC                              | TT                | 1945955411               |
| SNP_P3_52747_34884112 | NC_021163.1    | Ca_kabuli_chr04 | 34884112                | TT                              | CC                | 1945955413               |
| SNP_P3_52748_34884459 | NC_021163.1    | Ca_kabuli_chr04 | 34884459                | CC                              | TT                | 1945955414               |
| SNP_P3_52749_34884505 | NC_021163.1    | Ca_kabuli_chr04 | 34884505                | AA                              | TT                | 1945955416               |
| SNP_P3_52750_34884518 | NC_021163.1    | Ca_kabuli_chr04 | 34884518                | AA                              | TT                | 1945955418               |
| SNP_P3_52751_34884536 | NC_021163.1    | Ca_kabuli_chr04 | 34884536                | CC                              | TT                | 1945955420               |
| SNP_P3_52752_34884589 | NC_021163.1    | Ca_kabuli_chr04 | 34884589                | TT                              | GG                | 1945955421               |
| SNP_P3_52753_34884590 | NC_021163.1    | Ca_kabuli_chr04 | 34884590                | TT                              | GG                | 1945955423               |
| SNP_P3_52754_34884603 | NC_021163.1    | Ca_kabuli_chr04 | 34884603                | TT                              | CC                | 1945955425               |
| SNP_P3_52755_34884610 | NC_021163.1    | Ca_kabuli_chr04 | 34884610                | AA                              | GG                | 1945955427               |
| SNP_P3_52756_34884737 | NC_021163.1    | Ca_kabuli_chr04 | 34884737                | AA                              | TT                | 1945955428               |
| SNP_P3_52758_34901707 | NC_021163.1    | Ca_kabuli_chr04 | 34901707                | TT                              | CC                | 1945955430               |
| SNP_P3_52759_34912961 | NC_021163.1    | Ca_kabuli_chr04 | 34912961                | CC                              | TT                | 1945955432               |
| SNP_P3_52760_34912982 | NC_021163.1    | Ca_kabuli_chr04 | 34912982                | CC                              | TT                | 1945955434               |
| SNP_P3_52761_34912990 | NC_021163.1    | Ca_kabuli_chr04 | 34912990                | TT                              | CC                | 1945955436               |
| SNP_P3_52762_34913006 | NC_021163.1    | Ca_kabuli_chr04 | 34913006                | AA                              | CC                | 1945955437               |
| SNP_P3_52763_34913083 | NC_021163.1    | Ca_kabuli_chr04 | 34913083                | AA                              | GG                | 1945955439               |
| SNP_P3_52764_34925529 | NC_021163.1    | Ca_kabuli_chr04 | 34925529                | TT                              | AA                | 1945955441               |
| SNP_P3_52765_34925536 | NC_021163.1    | Ca_kabuli_chr04 | 34925536                | AA                              | GG                | 1945955443               |
| SNP_P3_52766_34937139 | NC_021163.1    | Ca_kabuli_chr04 | 34937139                | GG                              | AA                | 1945955444               |
| SNP_P3_52768_34951083 | NC_021163.1    | Ca_kabuli_chr04 | 34951083                | AA                              | GG                | 1945955446               |
| SNP_P3_52769_34955174 | NC_021163.1    | Ca_kabuli_chr04 | 34955174                | GG                              | TT                | 1945955448               |
| SNP_P3_52770_34968864 | NC_021163.1    | Ca_kabuli_chr04 | 34968864                | AA                              | GG                | 1945955450               |
| SNP_P3_52771_34972094 | NC_021163.1    | Ca_kabuli_chr04 | 34972094                | TT                              | GG                | 1945955452               |
| SNP_P3_52772_34983095 | NC_021163.1    | Ca_kabuli_chr04 | 34983095                | GG                              | AA                | 1945955453               |
| SNP_P3_52773_34988258 | NC_021163.1    | Ca_kabuli_chr04 | 34988258                | AA                              | GG                | 1945955455               |
| SNP_P3_52774_34997477 | NC_021163.1    | Ca_kabuli_chr04 | 34997477                | CC                              | TT                | 1945955457               |
| SNP_P3_52775_35002930 | NC_021163.1    | Ca_kabuli_chr04 | 35002930                | TT                              | CC                | 1945955459               |
| SNP_P3_52776_35017812 | NC_021163.1    | Ca_kabuli_chr04 | 35017812                | GG                              | AA                | 1945955460               |
| SNP_P3_52777_35027994 | NC_021163.1    | Ca_kabuli_chr04 | 35027994                | AA                              | GG                | 1945955462               |
| SNP_P3_52779_35037251 | NC_021163.1    | Ca_kabuli_chr04 | 35037251                | AA                              | CC                | 1945955464               |
| SNP_P3_52780_35075343 | NC_021163.1    | Ca_kabuli_chr04 | 35075343                | GG                              | TT                | 1945955466               |
| SNP_P3_52781_35077224 | NC_021163.1    | Ca_kabuli_chr04 | 35077224                | AA                              | GG                | 1945955468               |
| SNP_P3_52782_35077243 | NC_021163.1    | Ca_kabuli_chr04 | 35077243                | AA                              | CC                | 1945955469               |
| SNP_P3_52783_35114825 | NC_021163.1    | Ca_kabuli_chr04 | 35114825                | AA                              | CC                | 1945955471               |
| SNP_P3_52784_35114980 | NC_021163.1    | Ca_kabuli_chr04 | 35114980                | AA                              | GG                | 1945955473               |

| SNPs IDs              | Chromosome IDs | Chromosomes     | Physical positions (bp) | CDC Frontier (Reference genome) | (Pusa 256 & HPNB) | NCBI SNPdb Accession IDs |
|-----------------------|----------------|-----------------|-------------------------|---------------------------------|-------------------|--------------------------|
| SNP_P3_52785_35115012 | NC_021163.1    | Ca_kabuli_chr04 | 35115012                | CC                              | AA                | 1945955475               |
| SNP_P3_52786_35115086 | NC_021163.1    | Ca_kabuli_chr04 | 35115086                | TT                              | CC                | 1945955476               |
| SNP_P3_52787_35115181 | NC_021163.1    | Ca_kabuli_chr04 | 35115181                | TT                              | CC                | 1945955478               |
| SNP_P3_52788_35115215 | NC_021163.1    | Ca_kabuli_chr04 | 35115215                | AA                              | CC                | 1945955480               |
| SNP_P3_52789_35115248 | NC_021163.1    | Ca_kabuli_chr04 | 35115248                | AA                              | GG                | 1945955482               |
| SNP_P3_52790_35115266 | NC_021163.1    | Ca_kabuli_chr04 | 35115266                | AA                              | GG                | 1945955484               |
| SNP_P3_52791_35115269 | NC_021163.1    | Ca_kabuli_chr04 | 35115269                | AA                              | GG                | 1945955485               |
| SNP_P3_52792_35115281 | NC_021163.1    | Ca_kabuli_chr04 | 35115281                | GG                              | AA                | 1945955487               |
| SNP_P3_52793_35115299 | NC_021163.1    | Ca_kabuli_chr04 | 35115299                | AA                              | GG                | 1945955489               |
| SNP_P3_52794_35115320 | NC_021163.1    | Ca_kabuli_chr04 | 35115320                | GG                              | TT                | 1945955491               |
| SNP_P3_52795_35158587 | NC_021163.1    | Ca_kabuli_chr04 | 35158587                | CC                              | AA                | 1945955492               |
| SNP_P3_52796_35176006 | NC_021163.1    | Ca_kabuli_chr04 | 35176006                | TT                              | GG                | 1945955494               |
| SNP_P3_52797_35180180 | NC_021163.1    | Ca_kabuli_chr04 | 35180180                | AA                              | GG                | 1945955496               |
| SNP_P3_52798_35185386 | NC_021163.1    | Ca_kabuli_chr04 | 35185386                | CC                              | TT                | 1945955498               |
| SNP_P3_52799_35187517 | NC_021163.1    | Ca_kabuli_chr04 | 35187517                | AA                              | TT                | 1945955500               |
| SNP_P3_52800_35187536 | NC_021163.1    | Ca_kabuli_chr04 | 35187536                | AA                              | TT                | 1945955501               |
| SNP_P3_52801_35187742 | NC_021163.1    | Ca_kabuli_chr04 | 35187742                | AA                              | GG                | 1945955503               |
| SNP_P3_52802_35187760 | NC_021163.1    | Ca_kabuli_chr04 | 35187760                | TT                              | CC                | 1945955505               |
| SNP_P3_52803_35194885 | NC_021163.1    | Ca_kabuli_chr04 | 35194885                | GG                              | AA                | 1945955507               |
| SNP_P3_52804_35194886 | NC_021163.1    | Ca_kabuli_chr04 | 35194886                | GG                              | TT                | 1945955508               |
| SNP_P3_52805_35195012 | NC_021163.1    | Ca_kabuli_chr04 | 35195012                | GG                              | AA                | 1945955510               |
| SNP_P3_52806_35195013 | NC_021163.1    | Ca_kabuli_chr04 | 35195013                | AA                              | GG                | 1945955512               |
| SNP_P3_52808_35246316 | NC_021163.1    | Ca_kabuli_chr04 | 35246316                | GG                              | AA                | 1945955514               |
| SNP_P3_52809_35257617 | NC_021163.1    | Ca_kabuli_chr04 | 35257617                | CC                              | AA                | 1945955516               |
| SNP_P3_52810_35257643 | NC_021163.1    | Ca_kabuli_chr04 | 35257643                | AA                              | CC                | 1945955517               |
| SNP_P3_52811_35258030 | NC_021163.1    | Ca_kabuli_chr04 | 35258030                | AA                              | CC                | 1945955519               |
| SNP_P3_52812_35258152 | NC_021163.1    | Ca_kabuli_chr04 | 35258152                | GG                              | TT                | 1945955521               |
| SNP_P3_52813_35277678 | NC_021163.1    | Ca_kabuli_chr04 | 35277678                | TT                              | CC                | 1945955523               |
| SNP_P3_52814_35303884 | NC_021163.1    | Ca_kabuli_chr04 | 35303884                | CC                              | AA                | 1945955524               |
| SNP_P3_52816_35342329 | NC_021163.1    | Ca_kabuli_chr04 | 35342329                | CC                              | TT                | 1945955526               |
| SNP_P3_52817_35342616 | NC_021163.1    | Ca_kabuli_chr04 | 35342616                | AA                              | GG                | 1945955528               |
| SNP_P3_52818_35342858 | NC_021163.1    | Ca_kabuli_chr04 | 35342858                | TT                              | CC                | 1945955530               |
| SNP_P3_52819_35343427 | NC_021163.1    | Ca_kabuli_chr04 | 35343427                | TT                              | GG                | 1945955532               |
| SNP_P3_52820_35343432 | NC_021163.1    | Ca_kabuli_chr04 | 35343432                | AA                              | GG                | 1945955533               |
| SNP_P3_52821_35343829 | NC_021163.1    | Ca_kabuli_chr04 | 35343829                | TT                              | GG                | 1945955535               |
| SNP_P3_52822_35343934 | NC_021163.1    | Ca_kabuli_chr04 | 35343934                | AA                              | GG                | 1945955537               |
| SNP_P3_52823_35343974 | NC_021163.1    | Ca_kabuli_chr04 | 35343974                | CC                              | TT                | 1945955539               |
| SNP_P3_52824_35344178 | NC_021163.1    | Ca_kabuli_chr04 | 35344178                | TT                              | CC                | 1945955540               |
| SNP_P3_52825_35345701 | NC_021163.1    | Ca_kabuli_chr04 | 35345701                | GG                              | AA                | 1945955542               |
| SNP_P3_52827_35345936 | NC_021163.1    | Ca_kabuli_chr04 | 35345936                | CC                              | TT                | 1945955544               |
| SNP_P3_52830_35369564 | NC_021163.1    | Ca_kabuli_chr04 | 35369564                | TT                              | GG                | 1945955546               |
| SNP_P3_52831_35391483 | NC_021163.1    | Ca_kabuli_chr04 | 35391483                | AA                              | GG                | 1945955548               |

| SNPs IDs              | Chromosome IDs | Chromosomes     | Physical positions (bp) | CDC Frontier (Reference genome) | (Pusa 256 & HPNB) | NCBI SNPdb Accession IDs |
|-----------------------|----------------|-----------------|-------------------------|---------------------------------|-------------------|--------------------------|
| SNP_P3_52832_35430382 | NC_021163.1    | Ca_kabuli_chr04 | 35430382                | TT                              | AA                | 1945955549               |
| SNP_P3_52833_35430854 | NC_021163.1    | Ca_kabuli_chr04 | 35430854                | TT                              | CC                | 1945955551               |
| SNP_P3_52834_35431031 | NC_021163.1    | Ca_kabuli_chr04 | 35431031                | AA                              | GG                | 1945955553               |
| SNP_P3_52835_35431591 | NC_021163.1    | Ca_kabuli_chr04 | 35431591                | CC                              | TT                | 1945955555               |
| SNP_P3_52836_35431628 | NC_021163.1    | Ca_kabuli_chr04 | 35431628                | AA                              | GG                | 1945955556               |
| SNP_P3_52837_35431648 | NC_021163.1    | Ca_kabuli_chr04 | 35431648                | AA                              | GG                | 1945955558               |
| SNP_P3_52838_35431680 | NC_021163.1    | Ca_kabuli_chr04 | 35431680                | CC                              | AA                | 1945955560               |
| SNP_P3_52839_35431816 | NC_021163.1    | Ca_kabuli_chr04 | 35431816                | CC                              | TT                | 1945955562               |
| SNP_P3_52840_35431897 | NC_021163.1    | Ca_kabuli_chr04 | 35431897                | AA                              | CC                | 1945955564               |
| SNP_P3_52841_35431910 | NC_021163.1    | Ca_kabuli_chr04 | 35431910                | AA                              | GG                | 1945955565               |
| SNP_P3_52842_35431944 | NC_021163.1    | Ca_kabuli_chr04 | 35431944                | CC                              | AA                | 1945955567               |
| SNP_P3_52843_35431977 | NC_021163.1    | Ca_kabuli_chr04 | 35431977                | TT                              | CC                | 1945955569               |
| SNP_P3_52844_35431995 | NC_021163.1    | Ca_kabuli_chr04 | 35431995                | CC                              | TT                | 1945955571               |
| SNP_P3_52846_35432022 | NC_021163.1    | Ca_kabuli_chr04 | 35432022                | GG                              | AA                | 1945955572               |
| SNP_P3_52847_35432082 | NC_021163.1    | Ca_kabuli_chr04 | 35432082                | GG                              | AA                | 1945955574               |
| SNP_P3_52848_35432335 | NC_021163.1    | Ca_kabuli_chr04 | 35432335                | AA                              | GG                | 1945955576               |
| SNP_P3_52849_35432465 | NC_021163.1    | Ca_kabuli_chr04 | 35432465                | GG                              | AA                | 1945955578               |
| SNP_P3_52850_35432506 | NC_021163.1    | Ca_kabuli_chr04 | 35432506                | TT                              | CC                | 1945955579               |
| SNP_P3_52851_35432513 | NC_021163.1    | Ca_kabuli_chr04 | 35432513                | GG                              | CC                | 1945955581               |
| SNP_P3_52852_35432547 | NC_021163.1    | Ca_kabuli_chr04 | 35432547                | TT                              | CC                | 1945955583               |
| SNP_P3_52853_35432552 | NC_021163.1    | Ca_kabuli_chr04 | 35432552                | GG                              | AA                | 1945955585               |
| SNP_P3_52854_35432589 | NC_021163.1    | Ca_kabuli_chr04 | 35432589                | AA                              | GG                | 1945955587               |
| SNP_P3_52855_35432599 | NC_021163.1    | Ca_kabuli_chr04 | 35432599                | GG                              | TT                | 1945955588               |
| SNP_P3_52856_35432683 | NC_021163.1    | Ca_kabuli_chr04 | 35432683                | TT                              | GG                | 1945955590               |
| SNP_P3_52857_35432763 | NC_021163.1    | Ca_kabuli_chr04 | 35432763                | TT                              | GG                | 1945955592               |
| SNP_P3_52858_35432814 | NC_021163.1    | Ca_kabuli_chr04 | 35432814                | CC                              | TT                | 1945955594               |
| SNP_P3_52859_35432824 | NC_021163.1    | Ca_kabuli_chr04 | 35432824                | GG                              | AA                | 1945955595               |
| SNP_P3_52861_35432884 | NC_021163.1    | Ca_kabuli_chr04 | 35432884                | TT                              | GG                | 1945955597               |
| SNP_P3_52862_35433183 | NC_021163.1    | Ca_kabuli_chr04 | 35433183                | GG                              | TT                | 1945955599               |
| SNP_P3_52865_35433360 | NC_021163.1    | Ca_kabuli_chr04 | 35433360                | TT                              | CC                | 1945955601               |
| SNP_P3_52866_35452518 | NC_021163.1    | Ca_kabuli_chr04 | 35452518                | TT                              | GG                | 1945955603               |
| SNP_P3_52867_35452728 | NC_021163.1    | Ca_kabuli_chr04 | 35452728                | AA                              | CC                | 1945955604               |
| SNP_P3_52868_35454842 | NC_021163.1    | Ca_kabuli_chr04 | 35454842                | CC                              | AA                | 1945955606               |
| SNP_P3_52869_35454883 | NC_021163.1    | Ca_kabuli_chr04 | 35454883                | CC                              | AA                | 1945955608               |
| SNP_P3_52870_35455062 | NC_021163.1    | Ca_kabuli_chr04 | 35455062                | TT                              | AA                | 1945955610               |
| SNP_P3_52871_35456525 | NC_021163.1    | Ca_kabuli_chr04 | 35456525                | CC                              | TT                | 1945955611               |
| SNP_P3_52872_35456538 | NC_021163.1    | Ca_kabuli_chr04 | 35456538                | TT                              | CC                | 1945955613               |
| SNP_P3_52874_35457119 | NC_021163.1    | Ca_kabuli_chr04 | 35457119                | TT                              | AA                | 1945955615               |
| SNP_P3_52875_35457161 | NC_021163.1    | Ca_kabuli_chr04 | 35457161                | GG                              | TT                | 1945955617               |
| SNP_P3_52876_35457303 | NC_021163.1    | Ca_kabuli_chr04 | 35457303                | GG                              | AA                | 1945955619               |
| SNP_P3_52877_35457304 | NC_021163.1    | Ca_kabuli_chr04 | 35457304                | CC                              | TT                | 1945955620               |
| SNP_P3_52878_35457316 | NC_021163.1    | Ca_kabuli_chr04 | 35457316                | TT                              | CC                | 1945955622               |



| SNPs IDs              | Chromosome IDs | Chromosomes     | Physical positions (bp) | CDC Frontier (Reference genome) | (Pusa 256 & HPNB) | NCBI SNPdb Accession IDs |
|-----------------------|----------------|-----------------|-------------------------|---------------------------------|-------------------|--------------------------|
| SNP_P3_52879_35457417 | NC_021163.1    | Ca_kabuli_chr04 | 35457417                | TT                              | CC                | 1945955624               |
| SNP_P3_52880_35457511 | NC_021163.1    | Ca_kabuli_chr04 | 35457511                | CC                              | GG                | 1945955626               |
| SNP_P3_52881_35457639 | NC_021163.1    | Ca_kabuli_chr04 | 35457639                | TT                              | AA                | 1945955627               |
| SNP_P3_52882_35461251 | NC_021163.1    | Ca_kabuli_chr04 | 35461251                | TT                              | CC                | 1945955629               |
| SNP_P3_52883_35469224 | NC_021163.1    | Ca_kabuli_chr04 | 35469224                | TT                              | CC                | 1945955631               |
| SNP_P3_52884_35469304 | NC_021163.1    | Ca_kabuli_chr04 | 35469304                | GG                              | AA                | 1945955633               |
| SNP_P3_52885_35469394 | NC_021163.1    | Ca_kabuli_chr04 | 35469394                | CC                              | TT                | 1945955635               |
| SNP_P3_52886_35469506 | NC_021163.1    | Ca_kabuli_chr04 | 35469506                | CC                              | TT                | 1945955636               |
| SNP_P3_52887_35469609 | NC_021163.1    | Ca_kabuli_chr04 | 35469609                | CC                              | TT                | 1945955638               |
| SNP_P3_52888_35469667 | NC_021163.1    | Ca_kabuli_chr04 | 35469667                | AA                              | CC                | 1945955640               |
| SNP_P3_52889_35469740 | NC_021163.1    | Ca_kabuli_chr04 | 35469740                | AA                              | TT                | 1945955642               |
| SNP_P3_52890_35469741 | NC_021163.1    | Ca_kabuli_chr04 | 35469741                | TT                              | GG                | 1945955643               |
| SNP_P3_52891_35469851 | NC_021163.1    | Ca_kabuli_chr04 | 35469851                | GG                              | AA                | 1945955645               |
| SNP_P3_52892_35469868 | NC_021163.1    | Ca_kabuli_chr04 | 35469868                | GG                              | AA                | 1945955647               |
| SNP_P3_52893_35469894 | NC_021163.1    | Ca_kabuli_chr04 | 35469894                | AA                              | TT                | 1945955649               |
| SNP_P3_52894_35469930 | NC_021163.1    | Ca_kabuli_chr04 | 35469930                | AA                              | TT                | 1945955651               |
| SNP_P3_52895_35469972 | NC_021163.1    | Ca_kabuli_chr04 | 35469972                | GG                              | AA                | 1945955652               |
| SNP_P3_52896_35470016 | NC_021163.1    | Ca_kabuli_chr04 | 35470016                | AA                              | GG                | 1945955654               |
| SNP_P3_52897_35470027 | NC_021163.1    | Ca_kabuli_chr04 | 35470027                | CC                              | TT                | 1945955656               |
| SNP_P3_52898_35470103 | NC_021163.1    | Ca_kabuli_chr04 | 35470103                | TT                              | AA                | 1945955658               |
| SNP_P3_52899_35470158 | NC_021163.1    | Ca_kabuli_chr04 | 35470158                | GG                              | CC                | 1945955659               |
| SNP_P3_52900_35470160 | NC_021163.1    | Ca_kabuli_chr04 | 35470160                | TT                              | CC                | 1945955661               |
| SNP_P3_52901_35470167 | NC_021163.1    | Ca_kabuli_chr04 | 35470167                | CC                              | TT                | 1945955663               |
| SNP_P3_52902_35470186 | NC_021163.1    | Ca_kabuli_chr04 | 35470186                | TT                              | CC                | 1945955665               |
| SNP_P3_52903_35470200 | NC_021163.1    | Ca_kabuli_chr04 | 35470200                | CC                              | TT                | 1945955667               |
| SNP_P3_52904_35470241 | NC_021163.1    | Ca_kabuli_chr04 | 35470241                | GG                              | AA                | 1945955668               |
| SNP_P3_52905_35470291 | NC_021163.1    | Ca_kabuli_chr04 | 35470291                | GG                              | AA                | 1945955670               |
| SNP_P3_52906_35470304 | NC_021163.1    | Ca_kabuli_chr04 | 35470304                | TT                              | CC                | 1945955672               |
| SNP_P3_52907_35470319 | NC_021163.1    | Ca_kabuli_chr04 | 35470319                | GG                              | AA                | 1945955674               |
| SNP_P3_52908_35470390 | NC_021163.1    | Ca_kabuli_chr04 | 35470390                | AA                              | TT                | 1945955675               |
| SNP_P3_52909_35470398 | NC_021163.1    | Ca_kabuli_chr04 | 35470398                | GG                              | AA                | 1945955677               |
| SNP_P3_52910_35470544 | NC_021163.1    | Ca_kabuli_chr04 | 35470544                | CC                              | AA                | 1945955679               |
| SNP_P3_52911_35473477 | NC_021163.1    | Ca_kabuli_chr04 | 35473477                | GG                              | AA                | 1945955681               |
| SNP_P3_52912_35487121 | NC_021163.1    | Ca_kabuli_chr04 | 35487121                | GG                              | AA                | 1945955683               |
| SNP_P3_52913_35490885 | NC_021163.1    | Ca_kabuli_chr04 | 35490885                | CC                              | TT                | 1945955684               |
| SNP_P3_52914_35491099 | NC_021163.1    | Ca_kabuli_chr04 | 35491099                | AA                              | GG                | 1945955686               |
| SNP_P3_52915_35498841 | NC_021163.1    | Ca_kabuli_chr04 | 35498841                | GG                              | AA                | 1945955688               |
| SNP_P3_52916_35503994 | NC_021163.1    | Ca_kabuli_chr04 | 35503994                | AA                              | TT                | 1945955690               |
| SNP_P3_52917_35503996 | NC_021163.1    | Ca_kabuli_chr04 | 35503996                | TT                              | AA                | 1945955691               |
| SNP_P3_52918_35511266 | NC_021163.1    | Ca_kabuli_chr04 | 35511266                | AA                              | GG                | 1945955693               |
| SNP_P3_52919_35511551 | NC_021163.1    | Ca_kabuli_chr04 | 35511551                | CC                              | TT                | 1945955695               |
| SNP_P3_52920_35511873 | NC_021163.1    | Ca_kabuli_chr04 | 35511873                | TT                              | CC                | 1945955697               |

| SNPs IDs              | Chromosome IDs | Chromosomes     | Physical positions (bp) | CDC Frontier (Reference genome) | (Pusa 256 & HPNB) | NCBI SNPdb Accession IDs |
|-----------------------|----------------|-----------------|-------------------------|---------------------------------|-------------------|--------------------------|
| SNP_P3_52921_35511955 | NC_021163.1    | Ca_kabuli_chr04 | 35511955                | GG                              | CC                | 1945955699               |
| SNP_P3_52922_35512412 | NC_021163.1    | Ca_kabuli_chr04 | 35512412                | GG                              | AA                | 1945955700               |
| SNP_P3_52923_35512474 | NC_021163.1    | Ca_kabuli_chr04 | 35512474                | CC                              | AA                | 1945955702               |
| SNP_P3_52924_35519172 | NC_021163.1    | Ca_kabuli_chr04 | 35519172                | CC                              | TT                | 1945955704               |
| SNP_P3_52926_35535956 | NC_021163.1    | Ca_kabuli_chr04 | 35535956                | AA                              | GG                | 1945955706               |
| SNP_P3_52927_35563436 | NC_021163.1    | Ca_kabuli_chr04 | 35563436                | AA                              | CC                | 1945955707               |
| SNP_P3_52928_35568528 | NC_021163.1    | Ca_kabuli_chr04 | 35568528                | AA                              | TT                | 1945955709               |
| SNP_P3_52929_35580332 | NC_021163.1    | Ca_kabuli_chr04 | 35580332                | TT                              | GG                | 1945955711               |
| SNP_P3_52930_35580336 | NC_021163.1    | Ca_kabuli_chr04 | 35580336                | AA                              | GG                | 1945955713               |
| SNP_P3_52931_35597891 | NC_021163.1    | Ca_kabuli_chr04 | 35597891                | CC                              | TT                | 1945955715               |
| SNP_P3_52932_35597907 | NC_021163.1    | Ca_kabuli_chr04 | 35597907                | TT                              | AA                | 1945955716               |
| SNP_P3_52933_35598847 | NC_021163.1    | Ca_kabuli_chr04 | 35598847                | TT                              | CC                | 1945955718               |
| SNP_P3_52934_35598861 | NC_021163.1    | Ca_kabuli_chr04 | 35598861                | TT                              | GG                | 1945955720               |
| SNP_P3_52935_35600761 | NC_021163.1    | Ca_kabuli_chr04 | 35600761                | AA                              | GG                | 1945955722               |
| SNP_P3_52936_35600897 | NC_021163.1    | Ca_kabuli_chr04 | 35600897                | CC                              | AA                | 1945955723               |
| SNP_P3_52937_35615862 | NC_021163.1    | Ca_kabuli_chr04 | 35615862                | TT                              | CC                | 1945955725               |
| SNP_P3_52938_35615895 | NC_021163.1    | Ca_kabuli_chr04 | 35615895                | AA                              | GG                | 1945955727               |
| SNP_P3_52939_35615912 | NC_021163.1    | Ca_kabuli_chr04 | 35615912                | TT                              | GG                | 1945955729               |
| SNP_P3_52940_35615979 | NC_021163.1    | Ca_kabuli_chr04 | 35615979                | GG                              | AA                | 1945955731               |
| SNP_P3_52941_35616293 | NC_021163.1    | Ca_kabuli_chr04 | 35616293                | CC                              | TT                | 1945955732               |
| SNP_P3_52942_35616382 | NC_021163.1    | Ca_kabuli_chr04 | 35616382                | AA                              | CC                | 1945955734               |
| SNP_P3_52943_35616806 | NC_021163.1    | Ca_kabuli_chr04 | 35616806                | GG                              | TT                | 1945955736               |
| SNP_P3_52944_35616892 | NC_021163.1    | Ca_kabuli_chr04 | 35616892                | GG                              | AA                | 1945955738               |
| SNP_P3_52945_35616921 | NC_021163.1    | Ca_kabuli_chr04 | 35616921                | GG                              | AA                | 1945955739               |
| SNP_P3_52946_35616942 | NC_021163.1    | Ca_kabuli_chr04 | 35616942                | CC                              | AA                | 1945955741               |
| SNP_P3_52947_35617111 | NC_021163.1    | Ca_kabuli_chr04 | 35617111                | TT                              | GG                | 1945955743               |
| SNP_P3_52948_35617112 | NC_021163.1    | Ca_kabuli_chr04 | 35617112                | AA                              | GG                | 1945955745               |
| SNP_P3_52949_35617119 | NC_021163.1    | Ca_kabuli_chr04 | 35617119                | AA                              | GG                | 1945955746               |
| SNP_P3_52950_35617122 | NC_021163.1    | Ca_kabuli_chr04 | 35617122                | TT                              | CC                | 1945955748               |
| SNP_P3_52951_35617195 | NC_021163.1    | Ca_kabuli_chr04 | 35617195                | TT                              | CC                | 1945955750               |
| SNP_P3_52952_35617252 | NC_021163.1    | Ca_kabuli_chr04 | 35617252                | GG                              | AA                | 1945955752               |
| SNP_P3_52953_35617259 | NC_021163.1    | Ca_kabuli_chr04 | 35617259                | CC                              | TT                | 1945955754               |
| SNP_P3_52955_35628813 | NC_021163.1    | Ca_kabuli_chr04 | 35628813                | TT                              | GG                | 1945955755               |
| SNP_P3_52956_35628815 | NC_021163.1    | Ca_kabuli_chr04 | 35628815                | AA                              | CC                | 1945955757               |
| SNP_P3_52957_35629680 | NC_021163.1    | Ca_kabuli_chr04 | 35629680                | AA                              | TT                | 1945955759               |
| SNP_P3_52958_35643538 | NC_021163.1    | Ca_kabuli_chr04 | 35643538                | CC                              | TT                | 1945955761               |
| SNP_P3_52959_35659857 | NC_021163.1    | Ca_kabuli_chr04 | 35659857                | GG                              | AA                | 1945955762               |
| SNP_P3_52960_35691584 | NC_021163.1    | Ca_kabuli_chr04 | 35691584                | CC                              | TT                | 1945955764               |
| SNP_P3_52961_35691657 | NC_021163.1    | Ca_kabuli_chr04 | 35691657                | CC                              | AA                | 1945955766               |
| SNP_P3_52962_35695354 | NC_021163.1    | Ca_kabuli_chr04 | 35695354                | GG                              | AA                | 1945955768               |
| SNP_P3_52963_35695400 | NC_021163.1    | Ca_kabuli_chr04 | 35695400                | CC                              | AA                | 1945955770               |
| SNP_P3_52964_35695641 | NC_021163.1    | Ca_kabuli_chr04 | 35695641                | AA                              | GG                | 1945955771               |

| SNPs IDs              | Chromosome IDs | Chromosomes     | Physical positions (bp) | CDC Frontier (Reference genome) | (Pusa 256 & HPNB) | NCBI SNPdb Accession IDs |
|-----------------------|----------------|-----------------|-------------------------|---------------------------------|-------------------|--------------------------|
| SNP_P3_52965_35695698 | NC_021163.1    | Ca_kabuli_chr04 | 35695698                | GG                              | AA                | 1945955773               |
| SNP_P3_52966_35695729 | NC_021163.1    | Ca_kabuli_chr04 | 35695729                | TT                              | GG                | 1945955775               |
| SNP_P3_52967_35695794 | NC_021163.1    | Ca_kabuli_chr04 | 35695794                | GG                              | AA                | 1945955777               |
| SNP_P3_52968_35695818 | NC_021163.1    | Ca_kabuli_chr04 | 35695818                | CC                              | GG                | 1945955778               |
| SNP_P3_52969_35696894 | NC_021163.1    | Ca_kabuli_chr04 | 35696894                | GG                              | CC                | 1945955780               |
| SNP_P3_52971_35708597 | NC_021163.1    | Ca_kabuli_chr04 | 35708597                | CC                              | AA                | 1945955782               |
| SNP_P3_52972_35708693 | NC_021163.1    | Ca_kabuli_chr04 | 35708693                | TT                              | CC                | 1945955784               |
| SNP_P3_52973_35708734 | NC_021163.1    | Ca_kabuli_chr04 | 35708734                | AA                              | GG                | 1945955786               |
| SNP_P3_52974_35708738 | NC_021163.1    | Ca_kabuli_chr04 | 35708738                | GG                              | AA                | 1945955787               |
| SNP_P3_52975_35708740 | NC_021163.1    | Ca_kabuli_chr04 | 35708740                | TT                              | CC                | 1945955789               |
| SNP_P3_52976_35708782 | NC_021163.1    | Ca_kabuli_chr04 | 35708782                | AA                              | GG                | 1945955791               |
| SNP_P3_52977_35720288 | NC_021163.1    | Ca_kabuli_chr04 | 35720288                | AA                              | GG                | 1945955793               |
| SNP_P3_52979_35723244 | NC_021163.1    | Ca_kabuli_chr04 | 35723244                | CC                              | AA                | 1945955794               |
| SNP_P3_52980_35740717 | NC_021163.1    | Ca_kabuli_chr04 | 35740717                | CC                              | TT                | 1945955796               |
| SNP_P3_52982_35753117 | NC_021163.1    | Ca_kabuli_chr04 | 35753117                | TT                              | CC                | 1945955798               |
| SNP_P3_52983_35767480 | NC_021163.1    | Ca_kabuli_chr04 | 35767480                | AA                              | GG                | 1945955800               |
| SNP_P3_52985_35780137 | NC_021163.1    | Ca_kabuli_chr04 | 35780137                | TT                              | CC                | 1945955802               |
| SNP_P3_52986_35780234 | NC_021163.1    | Ca_kabuli_chr04 | 35780234                | CC                              | AA                | 1945955803               |
| SNP_P3_52987_35780302 | NC_021163.1    | Ca_kabuli_chr04 | 35780302                | TT                              | AA                | 1945955805               |
| SNP_P3_52988_35780383 | NC_021163.1    | Ca_kabuli_chr04 | 35780383                | CC                              | TT                | 1945955807               |
| SNP_P3_52989_35780428 | NC_021163.1    | Ca_kabuli_chr04 | 35780428                | GG                              | AA                | 1945955809               |
| SNP_P3_52990_35780505 | NC_021163.1    | Ca_kabuli_chr04 | 35780505                | GG                              | AA                | 1945955810               |
| SNP_P3_52991_35780571 | NC_021163.1    | Ca_kabuli_chr04 | 35780571                | AA                              | CC                | 1945955812               |
| SNP_P3_52992_35780572 | NC_021163.1    | Ca_kabuli_chr04 | 35780572                | AA                              | CC                | 1945955814               |
| SNP_P3_52993_35780671 | NC_021163.1    | Ca_kabuli_chr04 | 35780671                | AA                              | GG                | 1945955816               |
| SNP_P3_52994_35791338 | NC_021163.1    | Ca_kabuli_chr04 | 35791338                | GG                              | AA                | 1945955818               |
| SNP_P3_52995_35791340 | NC_021163.1    | Ca_kabuli_chr04 | 35791340                | CC                              | GG                | 1945955819               |
| SNP_P3_52996_35791401 | NC_021163.1    | Ca_kabuli_chr04 | 35791401                | GG                              | AA                | 1945955821               |
| SNP_P3_52997_35791482 | NC_021163.1    | Ca_kabuli_chr04 | 35791482                | GG                              | TT                | 1945955823               |
| SNP_P3_52998_35791499 | NC_021163.1    | Ca_kabuli_chr04 | 35791499                | CC                              | TT                | 1945955825               |
| SNP_P3_52999_35791676 | NC_021163.1    | Ca_kabuli_chr04 | 35791676                | GG                              | CC                | 1945955826               |
| SNP_P3_53000_35791733 | NC_021163.1    | Ca_kabuli_chr04 | 35791733                | GG                              | AA                | 1945955828               |
| SNP_P3_53001_35791774 | NC_021163.1    | Ca_kabuli_chr04 | 35791774                | TT                              | AA                | 1945955830               |
| SNP_P3_53002_35791781 | NC_021163.1    | Ca_kabuli_chr04 | 35791781                | AA                              | TT                | 1945955832               |
| SNP_P3_53003_35792021 | NC_021163.1    | Ca_kabuli_chr04 | 35792021                | AA                              | GG                | 1945955834               |
| SNP_P3_53004_35792141 | NC_021163.1    | Ca_kabuli_chr04 | 35792141                | CC                              | TT                | 1945955835               |
| SNP_P3_53005_35792208 | NC_021163.1    | Ca_kabuli_chr04 | 35792208                | GG                              | AA                | 1945955837               |
| SNP_P3_53006_35793350 | NC_021163.1    | Ca_kabuli_chr04 | 35793350                | TT                              | CC                | 1945955839               |
| SNP_P3_53007_35798271 | NC_021163.1    | Ca_kabuli_chr04 | 35798271                | CC                              | TT                | 1945955841               |
| SNP_P3_53008_35798285 | NC_021163.1    | Ca_kabuli_chr04 | 35798285                | AA                              | TT                | 1945955842               |
| SNP_P3_53009_35798327 | NC_021163.1    | Ca_kabuli_chr04 | 35798327                | AA                              | GG                | 1945955844               |
| SNP_P3_53010_35798391 | NC_021163.1    | Ca_kabuli_chr04 | 35798391                | CC                              | AA                | 1945955846               |

| SNPs IDs              | Chromosome IDs | Chromosomes     | Physical positions (bp) | CDC Frontier (Reference genome) | (Pusa 256 & HPNB) | NCBI SNPdb Accession IDs |
|-----------------------|----------------|-----------------|-------------------------|---------------------------------|-------------------|--------------------------|
| SNP_P3_53011_35798427 | NC_021163.1    | Ca_kabuli_chr04 | 35798427                | TT                              | AA                | 1945955848               |
| SNP_P3_53012_35811581 | NC_021163.1    | Ca_kabuli_chr04 | 35811581                | CC                              | AA                | 1945955849               |
| SNP_P3_53013_35818144 | NC_021163.1    | Ca_kabuli_chr04 | 35818144                | TT                              | CC                | 1945955851               |
| SNP_P3_53014_35818152 | NC_021163.1    | Ca_kabuli_chr04 | 35818152                | AA                              | TT                | 1945955853               |
| SNP_P3_53015_35818731 | NC_021163.1    | Ca_kabuli_chr04 | 35818731                | TT                              | AA                | 1945955855               |
| SNP_P3_53016_35818733 | NC_021163.1    | Ca_kabuli_chr04 | 35818733                | TT                              | GG                | 1945955857               |
| SNP_P3_53017_35818735 | NC_021163.1    | Ca_kabuli_chr04 | 35818735                | TT                              | AA                | 1945955858               |
| SNP_P3_53018_35819027 | NC_021163.1    | Ca_kabuli_chr04 | 35819027                | CC                              | TT                | 1945955860               |
| SNP_P3_53019_35819088 | NC_021163.1    | Ca_kabuli_chr04 | 35819088                | AA                              | GG                | 1945955862               |
| SNP_P3_53020_35819233 | NC_021163.1    | Ca_kabuli_chr04 | 35819233                | TT                              | CC                | 1945955864               |
| SNP_P3_53021_35819642 | NC_021163.1    | Ca_kabuli_chr04 | 35819642                | AA                              | CC                | 1945955865               |
| SNP_P3_53022_35819729 | NC_021163.1    | Ca_kabuli_chr04 | 35819729                | TT                              | GG                | 1945955867               |
| SNP_P3_53024_35822553 | NC_021163.1    | Ca_kabuli_chr04 | 35822553                | TT                              | CC                | 1945955869               |
| SNP_P3_53025_35828521 | NC_021163.1    | Ca_kabuli_chr04 | 35828521                | AA                              | GG                | 1945955871               |
| SNP_P3_53026_35828698 | NC_021163.1    | Ca_kabuli_chr04 | 35828698                | TT                              | GG                | 1945955873               |
| SNP_P3_53027_35828742 | NC_021163.1    | Ca_kabuli_chr04 | 35828742                | AA                              | CC                | 1945955874               |
| SNP_P3_53028_35828798 | NC_021163.1    | Ca_kabuli_chr04 | 35828798                | AA                              | GG                | 1945955876               |
| SNP_P3_53029_35828819 | NC_021163.1    | Ca_kabuli_chr04 | 35828819                | AA                              | CC                | 1945955878               |
| SNP_P3_53030_35828919 | NC_021163.1    | Ca_kabuli_chr04 | 35828919                | CC                              | TT                | 1945955880               |
| SNP_P3_53031_35828930 | NC_021163.1    | Ca_kabuli_chr04 | 35828930                | GG                              | AA                | 1945955881               |
| SNP_P3_53032_35828974 | NC_021163.1    | Ca_kabuli_chr04 | 35828974                | CC                              | TT                | 1945955883               |
| SNP_P3_53033_35844639 | NC_021163.1    | Ca_kabuli_chr04 | 35844639                | TT                              | AA                | 1945955885               |
| SNP_P3_53034_35845000 | NC_021163.1    | Ca_kabuli_chr04 | 35845000                | AA                              | GG                | 1945955887               |
| SNP_P3_53035_35847015 | NC_021163.1    | Ca_kabuli_chr04 | 35847015                | TT                              | CC                | 1945955889               |
| SNP_P3_53036_35848337 | NC_021163.1    | Ca_kabuli_chr04 | 35848337                | AA                              | TT                | 1945955890               |
| SNP_P3_53037_35868019 | NC_021163.1    | Ca_kabuli_chr04 | 35868019                | CC                              | TT                | 1945955892               |
| SNP_P3_53038_35878151 | NC_021163.1    | Ca_kabuli_chr04 | 35878151                | TT                              | CC                | 1945955894               |
| SNP_P3_53039_35890814 | NC_021163.1    | Ca_kabuli_chr04 | 35890814                | TT                              | GG                | 1945955896               |
| SNP_P3_53040_35891186 | NC_021163.1    | Ca_kabuli_chr04 | 35891186                | TT                              | GG                | 1945955897               |
| SNP_P3_53041_35891213 | NC_021163.1    | Ca_kabuli_chr04 | 35891213                | TT                              | GG                | 1945955899               |
| SNP_P3_53042_35893386 | NC_021163.1    | Ca_kabuli_chr04 | 35893386                | GG                              | TT                | 1945955901               |
| SNP_P3_53043_35897765 | NC_021163.1    | Ca_kabuli_chr04 | 35897765                | CC                              | TT                | 1945955903               |
| SNP_P3_53044_35945143 | NC_021163.1    | Ca_kabuli_chr04 | 35945143                | TT                              | AA                | 1945955905               |
| SNP_P3_53045_35945531 | NC_021163.1    | Ca_kabuli_chr04 | 35945531                | GG                              | AA                | 1945955906               |
| SNP_P3_53047_35984541 | NC_021163.1    | Ca_kabuli_chr04 | 35984541                | TT                              | AA                | 1945955908               |
| SNP_P3_53048_36012964 | NC_021163.1    | Ca_kabuli_chr04 | 36012964                | AA                              | TT                | 1945955910               |
| SNP_P3_53049_36026921 | NC_021163.1    | Ca_kabuli_chr04 | 36026921                | AA                              | GG                | 1945955912               |
| SNP_P3_53050_36027244 | NC_021163.1    | Ca_kabuli_chr04 | 36027244                | CC                              | GG                | 1945955913               |
| SNP_P3_53051_36027246 | NC_021163.1    | Ca_kabuli_chr04 | 36027246                | TT                              | GG                | 1945955915               |
| SNP_P3_53052_36069859 | NC_021163.1    | Ca_kabuli_chr04 | 36069859                | GG                              | AA                | 1945955917               |
| SNP_P3_53053_36079077 | NC_021163.1    | Ca_kabuli_chr04 | 36079077                | CC                              | TT                | 1945955919               |
| SNP_P3_53054_36079104 | NC_021163.1    | Ca_kabuli_chr04 | 36079104                | CC                              | TT                | 1945955921               |

| SNPs IDs              | Chromosome IDs | Chromosomes     | Physical positions (bp) | CDC Frontier (Reference genome) | (Pusa 256 & HPNB) | NCBI SNPdb Accession IDs |
|-----------------------|----------------|-----------------|-------------------------|---------------------------------|-------------------|--------------------------|
| SNP_P3_53055_36079112 | NC_021163.1    | Ca_kabuli_chr04 | 36079112                | AA                              | TT                | 1945955922               |
| SNP_P3_53057_36079340 | NC_021163.1    | Ca_kabuli_chr04 | 36079340                | GG                              | AA                | 1945955924               |
| SNP_P3_53059_36098909 | NC_021163.1    | Ca_kabuli_chr04 | 36098909                | AA                              | GG                | 1945955926               |
| SNP_P3_53060_36099075 | NC_021163.1    | Ca_kabuli_chr04 | 36099075                | TT                              | GG                | 1945955927               |
| SNP_P3_53061_36099425 | NC_021163.1    | Ca_kabuli_chr04 | 36099425                | TT                              | CC                | 1945955929               |
| SNP_P3_53062_36112591 | NC_021163.1    | Ca_kabuli_chr04 | 36112591                | TT                              | CC                | 1945955931               |
| SNP_P3_53063_36118930 | NC_021163.1    | Ca_kabuli_chr04 | 36118930                | GG                              | TT                | 1945955933               |
| SNP_P3_53064_36118936 | NC_021163.1    | Ca_kabuli_chr04 | 36118936                | GG                              | TT                | 1945955935               |
| SNP_P3_53065_36118947 | NC_021163.1    | Ca_kabuli_chr04 | 36118947                | CC                              | AA                | 1945955936               |
| SNP_P3_53066_36118948 | NC_021163.1    | Ca_kabuli_chr04 | 36118948                | CC                              | TT                | 1945955938               |
| SNP_P3_53067_36118965 | NC_021163.1    | Ca_kabuli_chr04 | 36118965                | CC                              | TT                | 1945955940               |
| SNP_P3_53068_36138268 | NC_021163.1    | Ca_kabuli_chr04 | 36138268                | GG                              | TT                | 1945955942               |
| SNP_P3_53070_36138297 | NC_021163.1    | Ca_kabuli_chr04 | 36138297                | GG                              | TT                | 1945955943               |
| SNP_P3_53071_36140244 | NC_021163.1    | Ca_kabuli_chr04 | 36140244                | TT                              | CC                | 1945955945               |
| SNP_P3_53072_36161491 | NC_021163.1    | Ca_kabuli_chr04 | 36161491                | TT                              | CC                | 1945955947               |
| SNP_P3_53073_36170019 | NC_021163.1    | Ca_kabuli_chr04 | 36170019                | GG                              | TT                | 1945955949               |
| SNP_P3_53074_36170031 | NC_021163.1    | Ca_kabuli_chr04 | 36170031                | GG                              | AA                | 1945955951               |
| SNP_P3_53076_36291048 | NC_021163.1    | Ca_kabuli_chr04 | 36291048                | GG                              | AA                | 1945955952               |
| SNP_P3_53078_36300103 | NC_021163.1    | Ca_kabuli_chr04 | 36300103                | TT                              | CC                | 1945955954               |
| SNP_P3_53079_36300176 | NC_021163.1    | Ca_kabuli_chr04 | 36300176                | AA                              | GG                | 1945955956               |
| SNP_P3_53081_36300222 | NC_021163.1    | Ca_kabuli_chr04 | 36300222                | AA                              | GG                | 1945955958               |
| SNP_P3_53082_36300458 | NC_021163.1    | Ca_kabuli_chr04 | 36300458                | CC                              | TT                | 1945955959               |
| SNP_P3_53084_36335023 | NC_021163.1    | Ca_kabuli_chr04 | 36335023                | TT                              | AA                | 1945955961               |
| SNP_P3_53085_36335061 | NC_021163.1    | Ca_kabuli_chr04 | 36335061                | GG                              | AA                | 1945955963               |
| SNP_P3_53086_36335099 | NC_021163.1    | Ca_kabuli_chr04 | 36335099                | GG                              | TT                | 1945955965               |
| SNP_P3_53087_36335184 | NC_021163.1    | Ca_kabuli_chr04 | 36335184                | TT                              | CC                | 1945955967               |
| SNP_P3_53088_36335190 | NC_021163.1    | Ca_kabuli_chr04 | 36335190                | AA                              | GG                | 1945955968               |
| SNP_P3_53089_36335449 | NC_021163.1    | Ca_kabuli_chr04 | 36335449                | GG                              | AA                | 1945955970               |
| SNP_P3_53090_36335480 | NC_021163.1    | Ca_kabuli_chr04 | 36335480                | GG                              | AA                | 1945955972               |
| SNP_P3_53091_36335495 | NC_021163.1    | Ca_kabuli_chr04 | 36335495                | CC                              | TT                | 1945955974               |
| SNP_P3_53092_36335636 | NC_021163.1    | Ca_kabuli_chr04 | 36335636                | CC                              | TT                | 1945955975               |
| SNP_P3_53094_36335708 | NC_021163.1    | Ca_kabuli_chr04 | 36335708                | TT                              | CC                | 1945955977               |
| SNP_P3_53095_36335717 | NC_021163.1    | Ca_kabuli_chr04 | 36335717                | CC                              | TT                | 1945955979               |
| SNP_P3_53096_36335766 | NC_021163.1    | Ca_kabuli_chr04 | 36335766                | CC                              | TT                | 1945955981               |
| SNP_P3_53097_36335873 | NC_021163.1    | Ca_kabuli_chr04 | 36335873                | CC                              | TT                | 1945955983               |
| SNP_P3_53098_36335983 | NC_021163.1    | Ca_kabuli_chr04 | 36335983                | TT                              | CC                | 1945955984               |
| SNP_P3_53099_36336016 | NC_021163.1    | Ca_kabuli_chr04 | 36336016                | CC                              | AA                | 1945955986               |
| SNP_P3_53100_36336040 | NC_021163.1    | Ca_kabuli_chr04 | 36336040                | CC                              | TT                | 1945955988               |
| SNP_P3_53101_36336043 | NC_021163.1    | Ca_kabuli_chr04 | 36336043                | AA                              | GG                | 1945955990               |
| SNP_P3_53102_36336049 | NC_021163.1    | Ca_kabuli_chr04 | 36336049                | AA                              | TT                | 1945955991               |
| SNP_P3_53103_36336059 | NC_021163.1    | Ca_kabuli_chr04 | 36336059                | CC                              | TT                | 1945955993               |
| SNP_P3_53104_36336107 | NC_021163.1    | Ca_kabuli_chr04 | 36336107                | TT                              | CC                | 1945955995               |

| SNPs IDs              | Chromosome IDs | Chromosomes     | Physical positions (bp) | CDC Frontier (Reference genome) | (Pusa 256 & HPNB) | NCBI SNPdb Accession IDs |
|-----------------------|----------------|-----------------|-------------------------|---------------------------------|-------------------|--------------------------|
| SNP_P3_53105_36336128 | NC_021163.1    | Ca_kabuli_chr04 | 36336128                | AA                              | GG                | 1945955997               |
| SNP_P3_53106_36336220 | NC_021163.1    | Ca_kabuli_chr04 | 36336220                | CC                              | TT                | 1945955999               |
| SNP_P3_53107_36336293 | NC_021163.1    | Ca_kabuli_chr04 | 36336293                | CC                              | AA                | 1945956000               |
| SNP_P3_53108_36336701 | NC_021163.1    | Ca_kabuli_chr04 | 36336701                | GG                              | AA                | 1945956002               |
| SNP_P3_53109_36336712 | NC_021163.1    | Ca_kabuli_chr04 | 36336712                | TT                              | AA                | 1945956004               |
| SNP_P3_53110_36336722 | NC_021163.1    | Ca_kabuli_chr04 | 36336722                | CC                              | TT                | 1945956006               |
| SNP_P3_53111_36336741 | NC_021163.1    | Ca_kabuli_chr04 | 36336741                | TT                              | CC                | 1945956007               |
| SNP_P3_53112_36336755 | NC_021163.1    | Ca_kabuli_chr04 | 36336755                | CC                              | GG                | 1945956009               |
| SNP_P3_53113_36336860 | NC_021163.1    | Ca_kabuli_chr04 | 36336860                | TT                              | GG                | 1945956011               |
| SNP_P3_53114_36336872 | NC_021163.1    | Ca_kabuli_chr04 | 36336872                | GG                              | AA                | 1945956013               |
| SNP_P3_53116_36336927 | NC_021163.1    | Ca_kabuli_chr04 | 36336927                | CC                              | AA                | 1945956015               |
| SNP_P3_53117_36336951 | NC_021163.1    | Ca_kabuli_chr04 | 36336951                | CC                              | TT                | 1945956016               |
| SNP_P3_53118_36336967 | NC_021163.1    | Ca_kabuli_chr04 | 36336967                | AA                              | TT                | 1945956018               |
| SNP_P3_53119_36336968 | NC_021163.1    | Ca_kabuli_chr04 | 36336968                | AA                              | GG                | 1945956020               |
| SNP_P3_53120_36337004 | NC_021163.1    | Ca_kabuli_chr04 | 36337004                | AA                              | GG                | 1945956022               |
| SNP_P3_53121_36337010 | NC_021163.1    | Ca_kabuli_chr04 | 36337010                | CC                              | TT                | 1945956023               |
| SNP_P3_53122_36337106 | NC_021163.1    | Ca_kabuli_chr04 | 36337106                | AA                              | GG                | 1945956025               |
| SNP_P3_53123_36337115 | NC_021163.1    | Ca_kabuli_chr04 | 36337115                | AA                              | GG                | 1945956027               |
| SNP_P3_53125_36337230 | NC_021163.1    | Ca_kabuli_chr04 | 36337230                | GG                              | AA                | 1945956029               |
| SNP_P3_53127_36337313 | NC_021163.1    | Ca_kabuli_chr04 | 36337313                | AA                              | GG                | 1945956031               |
| SNP_P3_53128_36337318 | NC_021163.1    | Ca_kabuli_chr04 | 36337318                | CC                              | GG                | 1945956032               |
| SNP_P3_53130_36342735 | NC_021163.1    | Ca_kabuli_chr04 | 36342735                | CC                              | TT                | 1945956034               |
| SNP_P3_53131_36342747 | NC_021163.1    | Ca_kabuli_chr04 | 36342747                | CC                              | AA                | 1945956036               |
| SNP_P3_53132_36375830 | NC_021163.1    | Ca_kabuli_chr04 | 36375830                | GG                              | TT                | 1945956038               |
| SNP_P3_53133_36376744 | NC_021163.1    | Ca_kabuli_chr04 | 36376744                | CC                              | TT                | 1945956039               |
| SNP_P3_53134_36377144 | NC_021163.1    | Ca_kabuli_chr04 | 36377144                | CC                              | TT                | 1945956041               |
| SNP_P3_53135_36377192 | NC_021163.1    | Ca_kabuli_chr04 | 36377192                | TT                              | CC                | 1945956043               |
| SNP_P3_53136_36377205 | NC_021163.1    | Ca_kabuli_chr04 | 36377205                | AA                              | GG                | 1945956045               |
| SNP_P3_53137_36377482 | NC_021163.1    | Ca_kabuli_chr04 | 36377482                | TT                              | CC                | 1945956047               |
| SNP_P3_53138_36377491 | NC_021163.1    | Ca_kabuli_chr04 | 36377491                | AA                              | GG                | 1945956048               |
| SNP_P3_53139_36377676 | NC_021163.1    | Ca_kabuli_chr04 | 36377676                | GG                              | CC                | 1945956050               |
| SNP_P3_53140_36377758 | NC_021163.1    | Ca_kabuli_chr04 | 36377758                | GG                              | AA                | 1945956052               |
| SNP_P3_53141_36378321 | NC_021163.1    | Ca_kabuli_chr04 | 36378321                | GG                              | TT                | 1945956054               |
| SNP_P3_53142_36378526 | NC_021163.1    | Ca_kabuli_chr04 | 36378526                | GG                              | TT                | 1945956055               |
| SNP_P3_53143_36378735 | NC_021163.1    | Ca_kabuli_chr04 | 36378735                | AA                              | CC                | 1945956057               |
| SNP_P3_53144_36379250 | NC_021163.1    | Ca_kabuli_chr04 | 36379250                | GG                              | TT                | 1945956059               |
| SNP_P3_53145_36381181 | NC_021163.1    | Ca_kabuli_chr04 | 36381181                | GG                              | AA                | 1945956061               |
| SNP_P3_53146_36381301 | NC_021163.1    | Ca_kabuli_chr04 | 36381301                | GG                              | AA                | 1945956063               |
| SNP_P3_53147_36381303 | NC_021163.1    | Ca_kabuli_chr04 | 36381303                | CC                              | TT                | 1945956064               |
| SNP_P3_53148_36381610 | NC_021163.1    | Ca_kabuli_chr04 | 36381610                | AA                              | GG                | 1945956066               |
| SNP_P3_53149_36381642 | NC_021163.1    | Ca_kabuli_chr04 | 36381642                | TT                              | CC                | 1945956068               |
| SNP_P3_53150_36383657 | NC_021163.1    | Ca_kabuli_chr04 | 36383657                | AA                              | GG                | 1945956070               |

| SNPs IDs              | Chromosome IDs | Chromosomes     | Physical positions (bp) | CDC Frontier (Reference genome) | (Pusa 256 & HPNB) | NCBI SNPdb Accession IDs |
|-----------------------|----------------|-----------------|-------------------------|---------------------------------|-------------------|--------------------------|
| SNP_P3_53151_36383662 | NC_021163.1    | Ca_kabuli_chr04 | 36383662                | AA                              | GG                | 1945956071               |
| SNP_P3_53152_36383766 | NC_021163.1    | Ca_kabuli_chr04 | 36383766                | GG                              | TT                | 1945956073               |
| SNP_P3_53153_36383771 | NC_021163.1    | Ca_kabuli_chr04 | 36383771                | TT                              | GG                | 1945956075               |
| SNP_P3_53154_36384426 | NC_021163.1    | Ca_kabuli_chr04 | 36384426                | CC                              | TT                | 1945956077               |
| SNP_P3_53155_36384486 | NC_021163.1    | Ca_kabuli_chr04 | 36384486                | GG                              | CC                | 1945956079               |
| SNP_P3_53156_36384505 | NC_021163.1    | Ca_kabuli_chr04 | 36384505                | TT                              | CC                | 1945956080               |
| SNP_P3_53157_36387939 | NC_021163.1    | Ca_kabuli_chr04 | 36387939                | CC                              | TT                | 1945956082               |
| SNP_P3_53158_36388106 | NC_021163.1    | Ca_kabuli_chr04 | 36388106                | TT                              | GG                | 1945956084               |
| SNP_P3_53159_36388109 | NC_021163.1    | Ca_kabuli_chr04 | 36388109                | CC                              | TT                | 1945956086               |
| SNP_P3_53160_36388378 | NC_021163.1    | Ca_kabuli_chr04 | 36388378                | CC                              | AA                | 1945956087               |
| SNP_P3_53161_36388382 | NC_021163.1    | Ca_kabuli_chr04 | 36388382                | CC                              | TT                | 1945956089               |
| SNP_P3_53163_36390303 | NC_021163.1    | Ca_kabuli_chr04 | 36390303                | TT                              | AA                | 1945956091               |
| SNP_P3_53164_36391555 | NC_021163.1    | Ca_kabuli_chr04 | 36391555                | AA                              | CC                | 1945956093               |
| SNP_P3_53165_36391576 | NC_021163.1    | Ca_kabuli_chr04 | 36391576                | CC                              | TT                | 1945956095               |
| SNP_P3_53166_36391587 | NC_021163.1    | Ca_kabuli_chr04 | 36391587                | CC                              | TT                | 1945956096               |
| SNP_P3_53167_36391589 | NC_021163.1    | Ca_kabuli_chr04 | 36391589                | CC                              | AA                | 1945956098               |
| SNP_P3_53168_36393209 | NC_021163.1    | Ca_kabuli_chr04 | 36393209                | TT                              | CC                | 1945956100               |
| SNP_P3_53170_36395993 | NC_021163.1    | Ca_kabuli_chr04 | 36395993                | GG                              | AA                | 1945956102               |
| SNP_P3_53171_36396117 | NC_021163.1    | Ca_kabuli_chr04 | 36396117                | CC                              | TT                | 1945956103               |
| SNP_P3_53172_36396120 | NC_021163.1    | Ca_kabuli_chr04 | 36396120                | AA                              | TT                | 1945956105               |
| SNP_P3_53173_36396126 | NC_021163.1    | Ca_kabuli_chr04 | 36396126                | TT                              | AA                | 1945956107               |
| SNP_P3_53174_36396139 | NC_021163.1    | Ca_kabuli_chr04 | 36396139                | GG                              | AA                | 1945956109               |
| SNP_P3_53175_36396164 | NC_021163.1    | Ca_kabuli_chr04 | 36396164                | TT                              | AA                | 1945956111               |
| SNP_P3_53176_36396211 | NC_021163.1    | Ca_kabuli_chr04 | 36396211                | AA                              | TT                | 1945956112               |
| SNP_P3_53177_36396507 | NC_021163.1    | Ca_kabuli_chr04 | 36396507                | CC                              | AA                | 1945956114               |
| SNP_P3_53178_36401117 | NC_021163.1    | Ca_kabuli_chr04 | 36401117                | GG                              | AA                | 1945956116               |
| SNP_P3_53179_36403340 | NC_021163.1    | Ca_kabuli_chr04 | 36403340                | GG                              | AA                | 1945956118               |
| SNP_P3_53180_36403369 | NC_021163.1    | Ca_kabuli_chr04 | 36403369                | GG                              | AA                | 1945956119               |
| SNP_P3_53181_36408727 | NC_021163.1    | Ca_kabuli_chr04 | 36408727                | GG                              | TT                | 1945956121               |
| SNP_P3_53182_36408932 | NC_021163.1    | Ca_kabuli_chr04 | 36408932                | TT                              | CC                | 1945956123               |
| SNP_P3_53183_36408969 | NC_021163.1    | Ca_kabuli_chr04 | 36408969                | CC                              | TT                | 1945956125               |
| SNP_P3_53184_36408978 | NC_021163.1    | Ca_kabuli_chr04 | 36408978                | AA                              | GG                | 1945956127               |
| SNP_P3_53185_36409091 | NC_021163.1    | Ca_kabuli_chr04 | 36409091                | AA                              | TT                | 1945956128               |
| SNP_P3_53186_36409429 | NC_021163.1    | Ca_kabuli_chr04 | 36409429                | GG                              | TT                | 1945956130               |
| SNP_P3_53187_36410139 | NC_021163.1    | Ca_kabuli_chr04 | 36410139                | AA                              | GG                | 1945956132               |
| SNP_P3_53188_36410174 | NC_021163.1    | Ca_kabuli_chr04 | 36410174                | GG                              | TT                | 1945956134               |
| SNP_P3_53190_36410444 | NC_021163.1    | Ca_kabuli_chr04 | 36410444                | TT                              | AA                | 1945956135               |
| SNP_P3_53191_36410454 | NC_021163.1    | Ca_kabuli_chr04 | 36410454                | AA                              | CC                | 1945956137               |
| SNP_P3_53192_36410484 | NC_021163.1    | Ca_kabuli_chr04 | 36410484                | CC                              | AA                | 1945956139               |
| SNP_P3_53193_36419511 | NC_021163.1    | Ca_kabuli_chr04 | 36419511                | AA                              | CC                | 1945956141               |
| SNP_P3_53194_36419531 | NC_021163.1    | Ca_kabuli_chr04 | 36419531                | AA                              | TT                | 1945956142               |
| SNP_P3_53195_36419701 | NC_021163.1    | Ca_kabuli_chr04 | 36419701                | AA                              | GG                | 1945956144               |

| SNPs IDs              | Chromosome IDs | Chromosomes     | Physical positions (bp) | CDC Frontier (Reference genome) | (Pusa 256 & HPNB) | NCBI SNPdb Accession IDs |
|-----------------------|----------------|-----------------|-------------------------|---------------------------------|-------------------|--------------------------|
| SNP_P3_53196_36421616 | NC_021163.1    | Ca_kabuli_chr04 | 36421616                | CC                              | TT                | 1945956146               |
| SNP_P3_53197_36421659 | NC_021163.1    | Ca_kabuli_chr04 | 36421659                | TT                              | CC                | 1945956148               |
| SNP_P3_53198_36421660 | NC_021163.1    | Ca_kabuli_chr04 | 36421660                | TT                              | AA                | 1945956150               |
| SNP_P3_53199_36422346 | NC_021163.1    | Ca_kabuli_chr04 | 36422346                | TT                              | CC                | 1945956151               |
| SNP_P3_53200_36422376 | NC_021163.1    | Ca_kabuli_chr04 | 36422376                | AA                              | TT                | 1945956153               |
| SNP_P3_53201_36422697 | NC_021163.1    | Ca_kabuli_chr04 | 36422697                | GG                              | TT                | 1945956155               |
| SNP_P3_53202_36423220 | NC_021163.1    | Ca_kabuli_chr04 | 36423220                | GG                              | TT                | 1945956157               |
| SNP_P3_53203_36423483 | NC_021163.1    | Ca_kabuli_chr04 | 36423483                | TT                              | GG                | 1945956158               |
| SNP_P3_53204_36423589 | NC_021163.1    | Ca_kabuli_chr04 | 36423589                | AA                              | GG                | 1945956160               |
| SNP_P3_53205_36423811 | NC_021163.1    | Ca_kabuli_chr04 | 36423811                | CC                              | TT                | 1945956162               |
| SNP_P3_53207_36424364 | NC_021163.1    | Ca_kabuli_chr04 | 36424364                | AA                              | TT                | 1945956164               |
| SNP_P3_53208_36426251 | NC_021163.1    | Ca_kabuli_chr04 | 36426251                | CC                              | AA                | 1945956166               |
| SNP_P3_53209_36426259 | NC_021163.1    | Ca_kabuli_chr04 | 36426259                | AA                              | GG                | 1945956167               |
| SNP_P3_53210_36426320 | NC_021163.1    | Ca_kabuli_chr04 | 36426320                | AA                              | GG                | 1945956169               |
| SNP_P3_53212_36428545 | NC_021163.1    | Ca_kabuli_chr04 | 36428545                | TT                              | CC                | 1945956171               |
| SNP_P3_53213_36437622 | NC_021163.1    | Ca_kabuli_chr04 | 36437622                | TT                              | GG                | 1945956173               |
| SNP_P3_53214_36438006 | NC_021163.1    | Ca_kabuli_chr04 | 36438006                | AA                              | TT                | 1945956174               |
| SNP_P3_53215_36444731 | NC_021163.1    | Ca_kabuli_chr04 | 36444731                | AA                              | TT                | 1945956176               |
| SNP_P3_53216_36445345 | NC_021163.1    | Ca_kabuli_chr04 | 36445345                | GG                              | AA                | 1945956178               |
| SNP_P3_53217_36445367 | NC_021163.1    | Ca_kabuli_chr04 | 36445367                | AA                              | GG                | 1945956180               |
| SNP_P3_53218_36446201 | NC_021163.1    | Ca_kabuli_chr04 | 36446201                | GG                              | AA                | 1945956182               |
| SNP_P3_53219_36447111 | NC_021163.1    | Ca_kabuli_chr04 | 36447111                | TT                              | CC                | 1945956183               |
| SNP_P3_53220_36448212 | NC_021163.1    | Ca_kabuli_chr04 | 36448212                | CC                              | TT                | 1945956185               |
| SNP_P3_53222_36449698 | NC_021163.1    | Ca_kabuli_chr04 | 36449698                | GG                              | TT                | 1945956187               |
| SNP_P3_53223_36449727 | NC_021163.1    | Ca_kabuli_chr04 | 36449727                | AA                              | CC                | 1945956189               |
| SNP_P3_53224_36450010 | NC_021163.1    | Ca_kabuli_chr04 | 36450010                | TT                              | CC                | 1945956190               |
| SNP_P3_53226_36450445 | NC_021163.1    | Ca_kabuli_chr04 | 36450445                | GG                              | AA                | 1945956192               |
| SNP_P3_53227_36450556 | NC_021163.1    | Ca_kabuli_chr04 | 36450556                | CC                              | TT                | 1945956194               |
| SNP_P3_53228_36450567 | NC_021163.1    | Ca_kabuli_chr04 | 36450567                | TT                              | GG                | 1945956196               |
| SNP_P3_53229_36450582 | NC_021163.1    | Ca_kabuli_chr04 | 36450582                | CC                              | TT                | 1945956198               |
| SNP_P3_53230_36450706 | NC_021163.1    | Ca_kabuli_chr04 | 36450706                | TT                              | AA                | 1945956199               |
| SNP_P3_53232_36451684 | NC_021163.1    | Ca_kabuli_chr04 | 36451684                | CC                              | TT                | 1945956201               |
| SNP_P3_53233_36451725 | NC_021163.1    | Ca_kabuli_chr04 | 36451725                | CC                              | AA                | 1945956203               |
| SNP_P3_53234_36452833 | NC_021163.1    | Ca_kabuli_chr04 | 36452833                | TT                              | AA                | 1945956205               |
| SNP_P3_53235_36452886 | NC_021163.1    | Ca_kabuli_chr04 | 36452886                | CC                              | TT                | 1945956206               |
| SNP_P3_53236_36452938 | NC_021163.1    | Ca_kabuli_chr04 | 36452938                | CC                              | TT                | 1945956208               |
| SNP_P3_53237_36452948 | NC_021163.1    | Ca_kabuli_chr04 | 36452948                | TT                              | CC                | 1945956210               |
| SNP_P3_53238_36452980 | NC_021163.1    | Ca_kabuli_chr04 | 36452980                | TT                              | CC                | 1945956212               |
| SNP_P3_53239_36452991 | NC_021163.1    | Ca_kabuli_chr04 | 36452991                | CC                              | TT                | 1945956214               |
| SNP_P3_53240_36453035 | NC_021163.1    | Ca_kabuli_chr04 | 36453035                | CC                              | AA                | 1945956215               |
| SNP_P3_53241_36453051 | NC_021163.1    | Ca_kabuli_chr04 | 36453051                | AA                              | GG                | 1945956217               |
| SNP_P3_53242_36453060 | NC_021163.1    | Ca_kabuli_chr04 | 36453060                | GG                              | AA                | 1945956219               |



| SNPs IDs              | Chromosome IDs | Chromosomes     | Physical positions (bp) | CDC Frontier (Reference genome) | (Pusa 256 & HPNB) | NCBI SNPdb Accession IDs |
|-----------------------|----------------|-----------------|-------------------------|---------------------------------|-------------------|--------------------------|
| SNP_P3_53243_36453243 | NC_021163.1    | Ca_kabuli_chr04 | 36453243                | CC                              | TT                | 1945956221               |
| SNP_P3_53246_36457550 | NC_021163.1    | Ca_kabuli_chr04 | 36457550                | CC                              | AA                | 1945956223               |
| SNP_P3_53247_36459031 | NC_021163.1    | Ca_kabuli_chr04 | 36459031                | AA                              | GG                | 1945956224               |
| SNP_P3_53248_36459140 | NC_021163.1    | Ca_kabuli_chr04 | 36459140                | TT                              | AA                | 1945956226               |
| SNP_P3_53249_36462625 | NC_021163.1    | Ca_kabuli_chr04 | 36462625                | GG                              | CC                | 1945956228               |
| SNP_P3_53251_36464177 | NC_021163.1    | Ca_kabuli_chr04 | 36464177                | AA                              | GG                | 1945956230               |
| SNP_P3_53252_36464189 | NC_021163.1    | Ca_kabuli_chr04 | 36464189                | TT                              | AA                | 1945956231               |
| SNP_P3_53253_36464226 | NC_021163.1    | Ca_kabuli_chr04 | 36464226                | CC                              | AA                | 1945956233               |
| SNP_P3_53254_36464467 | NC_021163.1    | Ca_kabuli_chr04 | 36464467                | CC                              | GG                | 1945956235               |
| SNP_P3_53255_36464801 | NC_021163.1    | Ca_kabuli_chr04 | 36464801                | TT                              | CC                | 1945956237               |
| SNP_P3_53257_36465894 | NC_021163.1    | Ca_kabuli_chr04 | 36465894                | AA                              | GG                | 1945956239               |
| SNP_P3_53258_36467186 | NC_021163.1    | Ca_kabuli_chr04 | 36467186                | TT                              | CC                | 1945956240               |
| SNP_P3_53259_36467421 | NC_021163.1    | Ca_kabuli_chr04 | 36467421                | GG                              | AA                | 1945956242               |
| SNP_P3_53260_36467477 | NC_021163.1    | Ca_kabuli_chr04 | 36467477                | AA                              | CC                | 1945956244               |
| SNP_P3_53261_36467481 | NC_021163.1    | Ca_kabuli_chr04 | 36467481                | AA                              | TT                | 1945956246               |
| SNP_P3_53262_36467484 | NC_021163.1    | Ca_kabuli_chr04 | 36467484                | AA                              | GG                | 1945956247               |
| SNP_P3_53263_36467928 | NC_021163.1    | Ca_kabuli_chr04 | 36467928                | CC                              | TT                | 1945956249               |
| SNP_P3_53264_36467943 | NC_021163.1    | Ca_kabuli_chr04 | 36467943                | AA                              | GG                | 1945956251               |
| SNP_P3_53265_36467964 | NC_021163.1    | Ca_kabuli_chr04 | 36467964                | GG                              | AA                | 1945956253               |
| SNP_P3_53266_36468053 | NC_021163.1    | Ca_kabuli_chr04 | 36468053                | GG                              | AA                | 1945956255               |
| SNP_P3_53267_36468201 | NC_021163.1    | Ca_kabuli_chr04 | 36468201                | TT                              | CC                | 1945956256               |
| SNP_P3_53268_36468202 | NC_021163.1    | Ca_kabuli_chr04 | 36468202                | GG                              | AA                | 1945956258               |
| SNP_P3_53269_36468374 | NC_021163.1    | Ca_kabuli_chr04 | 36468374                | TT                              | AA                | 1945956260               |
| SNP_P3_53270_36468619 | NC_021163.1    | Ca_kabuli_chr04 | 36468619                | CC                              | TT                | 1945956262               |
| SNP_P3_53271_36468650 | NC_021163.1    | Ca_kabuli_chr04 | 36468650                | AA                              | TT                | 1945956263               |
| SNP_P3_53272_36468659 | NC_021163.1    | Ca_kabuli_chr04 | 36468659                | AA                              | CC                | 1945956265               |
| SNP_P3_53273_36469012 | NC_021163.1    | Ca_kabuli_chr04 | 36469012                | TT                              | CC                | 1945956267               |
| SNP_P3_53274_36469048 | NC_021163.1    | Ca_kabuli_chr04 | 36469048                | TT                              | CC                | 1945956269               |
| SNP_P3_53275_36469116 | NC_021163.1    | Ca_kabuli_chr04 | 36469116                | AA                              | CC                | 1945956271               |
| SNP_P3_53276_36469158 | NC_021163.1    | Ca_kabuli_chr04 | 36469158                | AA                              | GG                | 1945956272               |
| SNP_P3_53277_36469223 | NC_021163.1    | Ca_kabuli_chr04 | 36469223                | TT                              | CC                | 1945956274               |
| SNP_P3_53278_36469282 | NC_021163.1    | Ca_kabuli_chr04 | 36469282                | GG                              | AA                | 1945956276               |
| SNP_P3_53279_36469333 | NC_021163.1    | Ca_kabuli_chr04 | 36469333                | TT                              | AA                | 1945956278               |
| SNP_P3_53280_36469344 | NC_021163.1    | Ca_kabuli_chr04 | 36469344                | CC                              | TT                | 1945956279               |
| SNP_P3_53281_36469351 | NC_021163.1    | Ca_kabuli_chr04 | 36469351                | TT                              | AA                | 1945956281               |
| SNP_P3_53282_36469363 | NC_021163.1    | Ca_kabuli_chr04 | 36469363                | CC                              | TT                | 1945956283               |
| SNP_P3_53283_36470399 | NC_021163.1    | Ca_kabuli_chr04 | 36470399                | CC                              | TT                | 1945956285               |
| SNP_P3_53284_36470402 | NC_021163.1    | Ca_kabuli_chr04 | 36470402                | AA                              | GG                | 1945956287               |
| SNP_P3_53285_36471475 | NC_021163.1    | Ca_kabuli_chr04 | 36471475                | CC                              | TT                | 1945956288               |
| SNP_P3_53286_36471531 | NC_021163.1    | Ca_kabuli_chr04 | 36471531                | GG                              | TT                | 1945956290               |
| SNP_P3_53287_36471554 | NC_021163.1    | Ca_kabuli_chr04 | 36471554                | CC                              | AA                | 1945956292               |
| SNP_P3_53288_36471564 | NC_021163.1    | Ca_kabuli_chr04 | 36471564                | GG                              | AA                | 1945956294               |

| SNPs IDs              | Chromosome IDs | Chromosomes     | Physical positions (bp) | CDC Frontier (Reference genome) | (Pusa 256 & HPNB) | NCBI SNPdb Accession IDs |
|-----------------------|----------------|-----------------|-------------------------|---------------------------------|-------------------|--------------------------|
| SNP_P3_53289_36472204 | NC_021163.1    | Ca_kabuli_chr04 | 36472204                | CC                              | TT                | 1945956295               |
| SNP_P3_53291_36473369 | NC_021163.1    | Ca_kabuli_chr04 | 36473369                | AA                              | CC                | 1945956297               |
| SNP_P3_53292_36473558 | NC_021163.1    | Ca_kabuli_chr04 | 36473558                | GG                              | AA                | 1945956299               |
| SNP_P3_53293_36473620 | NC_021163.1    | Ca_kabuli_chr04 | 36473620                | AA                              | GG                | 1945956301               |
| SNP_P3_53294_36473947 | NC_021163.1    | Ca_kabuli_chr04 | 36473947                | CC                              | AA                | 1945956303               |
| SNP_P3_53295_36473948 | NC_021163.1    | Ca_kabuli_chr04 | 36473948                | CC                              | GG                | 1945956304               |
| SNP_P3_53296_36473986 | NC_021163.1    | Ca_kabuli_chr04 | 36473986                | AA                              | CC                | 1945956306               |
| SNP_P3_53297_36474162 | NC_021163.1    | Ca_kabuli_chr04 | 36474162                | AA                              | GG                | 1945956308               |
| SNP_P3_53299_36474647 | NC_021163.1    | Ca_kabuli_chr04 | 36474647                | TT                              | GG                | 1945956310               |
| SNP_P3_53300_36475044 | NC_021163.1    | Ca_kabuli_chr04 | 36475044                | GG                              | TT                | 1945956311               |
| SNP_P3_53301_36475074 | NC_021163.1    | Ca_kabuli_chr04 | 36475074                | TT                              | AA                | 1945956313               |
| SNP_P3_53302_36476891 | NC_021163.1    | Ca_kabuli_chr04 | 36476891                | TT                              | GG                | 1945956315               |
| SNP_P3_53303_36477174 | NC_021163.1    | Ca_kabuli_chr04 | 36477174                | AA                              | GG                | 1945956317               |
| SNP_P3_53304_36477247 | NC_021163.1    | Ca_kabuli_chr04 | 36477247                | AA                              | GG                | 1945956319               |
| SNP_P3_53305_36477262 | NC_021163.1    | Ca_kabuli_chr04 | 36477262                | TT                              | CC                | 1945956320               |
| SNP_P3_53306_36477497 | NC_021163.1    | Ca_kabuli_chr04 | 36477497                | TT                              | CC                | 1945956322               |
| SNP_P3_53307_36477878 | NC_021163.1    | Ca_kabuli_chr04 | 36477878                | AA                              | TT                | 1945956324               |
| SNP_P3_53308_36478028 | NC_021163.1    | Ca_kabuli_chr04 | 36478028                | TT                              | GG                | 1945956326               |
| SNP_P3_53309_36478040 | NC_021163.1    | Ca_kabuli_chr04 | 36478040                | CC                              | AA                | 1945956327               |
| SNP_P3_53311_36478364 | NC_021163.1    | Ca_kabuli_chr04 | 36478364                | AA                              | TT                | 1945956329               |
| SNP_P3_53312_36479269 | NC_021163.1    | Ca_kabuli_chr04 | 36479269                | AA                              | GG                | 1945956331               |
| SNP_P3_53313_36479293 | NC_021163.1    | Ca_kabuli_chr04 | 36479293                | TT                              | CC                | 1945956333               |
| SNP_P3_53314_36484432 | NC_021163.1    | Ca_kabuli_chr04 | 36484432                | TT                              | CC                | 1945956335               |
| SNP_P3_53315_36484455 | NC_021163.1    | Ca_kabuli_chr04 | 36484455                | GG                              | TT                | 1945956336               |
| SNP_P3_53316_36489134 | NC_021163.1    | Ca_kabuli_chr04 | 36489134                | TT                              | CC                | 1945956338               |
| SNP_P3_53317_36493233 | NC_021163.1    | Ca_kabuli_chr04 | 36493233                | CC                              | AA                | 1945956340               |
| SNP_P3_53318_36495245 | NC_021163.1    | Ca_kabuli_chr04 | 36495245                | TT                              | CC                | 1945956342               |
| SNP_P3_53319_36495268 | NC_021163.1    | Ca_kabuli_chr04 | 36495268                | GG                              | AA                | 1945956343               |
| SNP_P3_53320_36495543 | NC_021163.1    | Ca_kabuli_chr04 | 36495543                | TT                              | CC                | 1945956345               |
| SNP_P3_53321_36496636 | NC_021163.1    | Ca_kabuli_chr04 | 36496636                | TT                              | CC                | 1945956347               |
| SNP_P3_53322_36496669 | NC_021163.1    | Ca_kabuli_chr04 | 36496669                | TT                              | CC                | 1945956349               |
| SNP_P3_53323_36496671 | NC_021163.1    | Ca_kabuli_chr04 | 36496671                | GG                              | AA                | 1945956351               |
| SNP_P3_53325_36496943 | NC_021163.1    | Ca_kabuli_chr04 | 36496943                | CC                              | GG                | 1945956352               |
| SNP_P3_53326_36496955 | NC_021163.1    | Ca_kabuli_chr04 | 36496955                | AA                              | TT                | 1945956354               |
| SNP_P3_53327_36496966 | NC_021163.1    | Ca_kabuli_chr04 | 36496966                | GG                              | TT                | 1945956356               |
| SNP_P3_53328_36496969 | NC_021163.1    | Ca_kabuli_chr04 | 36496969                | TT                              | CC                | 1945956358               |
| SNP_P3_53329_36496997 | NC_021163.1    | Ca_kabuli_chr04 | 36496997                | TT                              | CC                | 1945956359               |
| SNP_P3_53330_36497241 | NC_021163.1    | Ca_kabuli_chr04 | 36497241                | GG                              | CC                | 1945956361               |
| SNP_P3_53331_36497650 | NC_021163.1    | Ca_kabuli_chr04 | 36497650                | TT                              | CC                | 1945956363               |
| SNP_P3_53332_36501252 | NC_021163.1    | Ca_kabuli_chr04 | 36501252                | AA                              | GG                | 1945956365               |
| SNP_P3_53333_36502100 | NC_021163.1    | Ca_kabuli_chr04 | 36502100                | TT                              | GG                | 1945956367               |
| SNP_P3_53334_36502497 | NC_021163.1    | Ca_kabuli_chr04 | 36502497                | TT                              | CC                | 1945956368               |

| SNPs IDs              | Chromosome IDs | Chromosomes     | Physical positions (bp) | CDC Frontier (Reference genome) | (Pusa 256 & HPNB) | NCBI SNPdb Accession IDs |
|-----------------------|----------------|-----------------|-------------------------|---------------------------------|-------------------|--------------------------|
| SNP_P3_53335_36502593 | NC_021163.1    | Ca_kabuli_chr04 | 36502593                | TT                              | CC                | 1945956370               |
| SNP_P3_53336_36502598 | NC_021163.1    | Ca_kabuli_chr04 | 36502598                | AA                              | TT                | 1945956372               |
| SNP_P3_53338_36502939 | NC_021163.1    | Ca_kabuli_chr04 | 36502939                | AA                              | GG                | 1945956374               |
| SNP_P3_53339_36504820 | NC_021163.1    | Ca_kabuli_chr04 | 36504820                | CC                              | TT                | 1945956375               |
| SNP_P3_53340_36504842 | NC_021163.1    | Ca_kabuli_chr04 | 36504842                | AA                              | TT                | 1945956377               |
| SNP_P3_53341_36504856 | NC_021163.1    | Ca_kabuli_chr04 | 36504856                | GG                              | AA                | 1945956379               |
| SNP_P3_53342_36504858 | NC_021163.1    | Ca_kabuli_chr04 | 36504858                | CC                              | GG                | 1945956381               |
| SNP_P3_53343_36504859 | NC_021163.1    | Ca_kabuli_chr04 | 36504859                | GG                              | AA                | 1945956383               |
| SNP_P3_53344_36504878 | NC_021163.1    | Ca_kabuli_chr04 | 36504878                | GG                              | TT                | 1945956384               |
| SNP_P3_53345_36504881 | NC_021163.1    | Ca_kabuli_chr04 | 36504881                | GG                              | AA                | 1945956386               |
| SNP_P3_53346_36505402 | NC_021163.1    | Ca_kabuli_chr04 | 36505402                | AA                              | GG                | 1945956388               |
| SNP_P3_53347_36505405 | NC_021163.1    | Ca_kabuli_chr04 | 36505405                | AA                              | TT                | 1945956390               |
| SNP_P3_53348_36505406 | NC_021163.1    | Ca_kabuli_chr04 | 36505406                | CC                              | TT                | 1945956391               |
| SNP_P3_53349_36505511 | NC_021163.1    | Ca_kabuli_chr04 | 36505511                | GG                              | AA                | 1945956393               |
| SNP_P3_53350_36507307 | NC_021163.1    | Ca_kabuli_chr04 | 36507307                | TT                              | GG                | 1945956395               |
| SNP_P3_53351_36508614 | NC_021163.1    | Ca_kabuli_chr04 | 36508614                | CC                              | GG                | 1945956397               |
| SNP_P3_53352_36509549 | NC_021163.1    | Ca_kabuli_chr04 | 36509549                | GG                              | AA                | 1945956399               |
| SNP_P3_53353_36509769 | NC_021163.1    | Ca_kabuli_chr04 | 36509769                | GG                              | TT                | 1945956400               |
| SNP_P3_53354_36509777 | NC_021163.1    | Ca_kabuli_chr04 | 36509777                | AA                              | CC                | 1945956402               |
| SNP_P3_53355_36510371 | NC_021163.1    | Ca_kabuli_chr04 | 36510371                | CC                              | TT                | 1945956404               |
| SNP_P3_53356_36510385 | NC_021163.1    | Ca_kabuli_chr04 | 36510385                | TT                              | CC                | 1945956406               |
| SNP_P3_53357_36510558 | NC_021163.1    | Ca_kabuli_chr04 | 36510558                | GG                              | TT                | 1945956407               |
| SNP_P3_53358_36515095 | NC_021163.1    | Ca_kabuli_chr04 | 36515095                | AA                              | GG                | 1945956409               |
| SNP_P3_53359_36515149 | NC_021163.1    | Ca_kabuli_chr04 | 36515149                | AA                              | GG                | 1945956411               |
| SNP_P3_53360_36515286 | NC_021163.1    | Ca_kabuli_chr04 | 36515286                | TT                              | CC                | 1945956413               |
| SNP_P3_53361_36515468 | NC_021163.1    | Ca_kabuli_chr04 | 36515468                | GG                              | AA                | 1945956415               |
| SNP_P3_53362_36515694 | NC_021163.1    | Ca_kabuli_chr04 | 36515694                | GG                              | AA                | 1945956416               |
| SNP_P3_53363_36515777 | NC_021163.1    | Ca_kabuli_chr04 | 36515777                | GG                              | AA                | 1945956418               |
| SNP_P3_53364_36518547 | NC_021163.1    | Ca_kabuli_chr04 | 36518547                | AA                              | GG                | 1945956420               |
| SNP_P3_53365_36523916 | NC_021163.1    | Ca_kabuli_chr04 | 36523916                | TT                              | CC                | 1945956422               |
| SNP_P3_53366_36530071 | NC_021163.1    | Ca_kabuli_chr04 | 36530071                | AA                              | TT                | 1945956424               |
| SNP_P3_53367_36530104 | NC_021163.1    | Ca_kabuli_chr04 | 36530104                | AA                              | GG                | 1945956425               |
| SNP_P3_53369_36532273 | NC_021163.1    | Ca_kabuli_chr04 | 36532273                | AA                              | TT                | 1945956427               |
| SNP_P3_53370_36533010 | NC_021163.1    | Ca_kabuli_chr04 | 36533010                | CC                              | AA                | 1945956429               |
| SNP_P3_53371_36534155 | NC_021163.1    | Ca_kabuli_chr04 | 36534155                | CC                              | TT                | 1945956431               |
| SNP_P3_53372_36534208 | NC_021163.1    | Ca_kabuli_chr04 | 36534208                | GG                              | CC                | 1945956432               |
| SNP_P3_53373_36534468 | NC_021163.1    | Ca_kabuli_chr04 | 36534468                | TT                              | CC                | 1945956434               |
| SNP_P3_53374_36537359 | NC_021163.1    | Ca_kabuli_chr04 | 36537359                | AA                              | GG                | 1945956436               |
| SNP_P3_53375_36537496 | NC_021163.1    | Ca_kabuli_chr04 | 36537496                | AA                              | GG                | 1945956438               |
| SNP_P3_53377_36537829 | NC_021163.1    | Ca_kabuli_chr04 | 36537829                | AA                              | TT                | 1945956440               |
| SNP_P3_53378_36537875 | NC_021163.1    | Ca_kabuli_chr04 | 36537875                | TT                              | AA                | 1945956441               |
| SNP_P3_53379_36538087 | NC_021163.1    | Ca_kabuli_chr04 | 36538087                | CC                              | GG                | 1945956443               |

| SNPs IDs              | Chromosome IDs | Chromosomes     | Physical positions (bp) | CDC Frontier (Reference genome) | (Pusa 256 & HPNB) | NCBI SNPdb Accession IDs |
|-----------------------|----------------|-----------------|-------------------------|---------------------------------|-------------------|--------------------------|
| SNP_P3_53380_36538415 | NC_021163.1    | Ca_kabuli_chr04 | 36538415                | CC                              | TT                | 1945956445               |
| SNP_P3_53381_36539146 | NC_021163.1    | Ca_kabuli_chr04 | 36539146                | CC                              | TT                | 1945956447               |
| SNP_P3_53382_36539461 | NC_021163.1    | Ca_kabuli_chr04 | 36539461                | CC                              | TT                | 1945956448               |
| SNP_P3_53383_36539548 | NC_021163.1    | Ca_kabuli_chr04 | 36539548                | TT                              | CC                | 1945956450               |
| SNP_P3_53384_36540333 | NC_021163.1    | Ca_kabuli_chr04 | 36540333                | GG                              | CC                | 1945956452               |
| SNP_P3_53385_36540393 | NC_021163.1    | Ca_kabuli_chr04 | 36540393                | GG                              | TT                | 1945956454               |
| SNP_P3_53386_36540601 | NC_021163.1    | Ca_kabuli_chr04 | 36540601                | AA                              | CC                | 1945956455               |
| SNP_P3_53387_36542283 | NC_021163.1    | Ca_kabuli_chr04 | 36542283                | CC                              | GG                | 1945956457               |
| SNP_P3_53388_36542739 | NC_021163.1    | Ca_kabuli_chr04 | 36542739                | CC                              | TT                | 1945956459               |
| SNP_P3_53389_36542882 | NC_021163.1    | Ca_kabuli_chr04 | 36542882                | TT                              | CC                | 1945956461               |
| SNP_P3_53390_36542884 | NC_021163.1    | Ca_kabuli_chr04 | 36542884                | TT                              | AA                | 1945956463               |
| SNP_P3_53391_36543612 | NC_021163.1    | Ca_kabuli_chr04 | 36543612                | CC                              | TT                | 1945956464               |
| SNP_P3_53392_36543709 | NC_021163.1    | Ca_kabuli_chr04 | 36543709                | AA                              | CC                | 1945956466               |
| SNP_P3_53393_36543778 | NC_021163.1    | Ca_kabuli_chr04 | 36543778                | CC                              | TT                | 1945956468               |
| SNP_P3_53394_36544839 | NC_021163.1    | Ca_kabuli_chr04 | 36544839                | CC                              | AA                | 1945956470               |
| SNP_P3_53395_36544963 | NC_021163.1    | Ca_kabuli_chr04 | 36544963                | CC                              | TT                | 1945956471               |
| SNP_P3_53396_36544997 | NC_021163.1    | Ca_kabuli_chr04 | 36544997                | GG                              | AA                | 1945956473               |
| SNP_P3_53397_36545003 | NC_021163.1    | Ca_kabuli_chr04 | 36545003                | CC                              | GG                | 1945956475               |
| SNP_P3_53398_36545034 | NC_021163.1    | Ca_kabuli_chr04 | 36545034                | AA                              | GG                | 1945956477               |
| SNP_P3_53399_36545359 | NC_021163.1    | Ca_kabuli_chr04 | 36545359                | GG                              | AA                | 1945956479               |
| SNP_P3_53400_36545398 | NC_021163.1    | Ca_kabuli_chr04 | 36545398                | TT                              | GG                | 1945956480               |
| SNP_P3_53402_36545495 | NC_021163.1    | Ca_kabuli_chr04 | 36545495                | AA                              | GG                | 1945956482               |
| SNP_P3_53403_36545836 | NC_021163.1    | Ca_kabuli_chr04 | 36545836                | TT                              | CC                | 1945956484               |
| SNP_P3_53404_36545864 | NC_021163.1    | Ca_kabuli_chr04 | 36545864                | CC                              | AA                | 1945956486               |
| SNP_P3_53405_36550736 | NC_021163.1    | Ca_kabuli_chr04 | 36550736                | TT                              | CC                | 1945956488               |
| SNP_P3_53406_36550742 | NC_021163.1    | Ca_kabuli_chr04 | 36550742                | CC                              | TT                | 1945956489               |
| SNP_P3_53407_36550749 | NC_021163.1    | Ca_kabuli_chr04 | 36550749                | TT                              | CC                | 1945956491               |
| SNP_P3_53408_36550752 | NC_021163.1    | Ca_kabuli_chr04 | 36550752                | GG                              | TT                | 1945956493               |
| SNP_P3_53409_36550756 | NC_021163.1    | Ca_kabuli_chr04 | 36550756                | CC                              | TT                | 1945956495               |
| SNP_P3_53410_36550802 | NC_021163.1    | Ca_kabuli_chr04 | 36550802                | CC                              | AA                | 1945956496               |
| SNP_P3_53411_36550822 | NC_021163.1    | Ca_kabuli_chr04 | 36550822                | CC                              | AA                | 1945956498               |
| SNP_P3_53412_36559031 | NC_021163.1    | Ca_kabuli_chr04 | 36559031                | AA                              | GG                | 1945956500               |
| SNP_P3_53413_36559668 | NC_021163.1    | Ca_kabuli_chr04 | 36559668                | GG                              | AA                | 1945956502               |
| SNP_P3_53414_36561146 | NC_021163.1    | Ca_kabuli_chr04 | 36561146                | GG                              | AA                | 1945956503               |
| SNP_P3_53415_36563426 | NC_021163.1    | Ca_kabuli_chr04 | 36563426                | GG                              | AA                | 1945956505               |
| SNP_P3_53417_36567207 | NC_021163.1    | Ca_kabuli_chr04 | 36567207                | CC                              | TT                | 1945956507               |
| SNP_P3_53418_36568011 | NC_021163.1    | Ca_kabuli_chr04 | 36568011                | TT                              | AA                | 1945956509               |
| SNP_P3_53419_36569191 | NC_021163.1    | Ca_kabuli_chr04 | 36569191                | TT                              | CC                | 1945956511               |
| SNP_P3_53421_36573666 | NC_021163.1    | Ca_kabuli_chr04 | 36573666                | GG                              | CC                | 1945956512               |
| SNP_P3_53422_36574089 | NC_021163.1    | Ca_kabuli_chr04 | 36574089                | GG                              | AA                | 1945956514               |
| SNP_P3_53423_36574106 | NC_021163.1    | Ca_kabuli_chr04 | 36574106                | CC                              | TT                | 1945956516               |
| SNP_P3_53424_36574122 | NC_021163.1    | Ca_kabuli_chr04 | 36574122                | CC                              | TT                | 1945956518               |

| SNPs IDs              | Chromosome IDs | Chromosomes     | Physical positions (bp) | CDC Frontier (Reference genome) | (Pusa 256 & HPNB) | NCBI SNPdb Accession IDs |
|-----------------------|----------------|-----------------|-------------------------|---------------------------------|-------------------|--------------------------|
| SNP_P3_53425_36574133 | NC_021163.1    | Ca_kabuli_chr04 | 36574133                | GG                              | CC                | 1945956519               |
| SNP_P3_53426_36574281 | NC_021163.1    | Ca_kabuli_chr04 | 36574281                | GG                              | AA                | 1945956521               |
| SNP_P3_53427_36575031 | NC_021163.1    | Ca_kabuli_chr04 | 36575031                | TT                              | CC                | 1945956523               |
| SNP_P3_53428_36575604 | NC_021163.1    | Ca_kabuli_chr04 | 36575604                | TT                              | GG                | 1945956525               |
| SNP_P3_53429_36576469 | NC_021163.1    | Ca_kabuli_chr04 | 36576469                | AA                              | GG                | 1945956527               |
| SNP_P3_53430_36576577 | NC_021163.1    | Ca_kabuli_chr04 | 36576577                | TT                              | AA                | 1945956528               |
| SNP_P3_53431_36576748 | NC_021163.1    | Ca_kabuli_chr04 | 36576748                | AA                              | GG                | 1945956530               |
| SNP_P3_53432_36578423 | NC_021163.1    | Ca_kabuli_chr04 | 36578423                | TT                              | CC                | 1945956532               |
| SNP_P3_53433_36582022 | NC_021163.1    | Ca_kabuli_chr04 | 36582022                | GG                              | AA                | 1945956534               |
| SNP_P3_53435_36589246 | NC_021163.1    | Ca_kabuli_chr04 | 36589246                | GG                              | TT                | 1945956535               |
| SNP_P3_53436_36589259 | NC_021163.1    | Ca_kabuli_chr04 | 36589259                | CC                              | TT                | 1945956537               |
| SNP_P3_53437_36589355 | NC_021163.1    | Ca_kabuli_chr04 | 36589355                | TT                              | CC                | 1945956539               |
| SNP_P3_53438_36589366 | NC_021163.1    | Ca_kabuli_chr04 | 36589366                | TT                              | CC                | 1945956541               |
| SNP_P3_53439_36589373 | NC_021163.1    | Ca_kabuli_chr04 | 36589373                | AA                              | GG                | 1945956543               |
| SNP_P3_53440_36589413 | NC_021163.1    | Ca_kabuli_chr04 | 36589413                | CC                              | TT                | 1945956544               |
| SNP_P3_53441_36589488 | NC_021163.1    | Ca_kabuli_chr04 | 36589488                | GG                              | AA                | 1945956546               |
| SNP_P3_53442_36589494 | NC_021163.1    | Ca_kabuli_chr04 | 36589494                | TT                              | CC                | 1945956548               |
| SNP_P3_53443_36589499 | NC_021163.1    | Ca_kabuli_chr04 | 36589499                | TT                              | CC                | 1945956550               |
| SNP_P3_53445_36590014 | NC_021163.1    | Ca_kabuli_chr04 | 36590014                | CC                              | AA                | 1945956551               |
| SNP_P3_53446_36592807 | NC_021163.1    | Ca_kabuli_chr04 | 36592807                | CC                              | GG                | 1945956553               |
| SNP_P3_53447_36592824 | NC_021163.1    | Ca_kabuli_chr04 | 36592824                | GG                              | TT                | 1945956555               |
| SNP_P3_53448_36592838 | NC_021163.1    | Ca_kabuli_chr04 | 36592838                | GG                              | AA                | 1945956557               |
| SNP_P3_53449_36592870 | NC_021163.1    | Ca_kabuli_chr04 | 36592870                | AA                              | GG                | 1945956559               |
| SNP_P3_53450_36592892 | NC_021163.1    | Ca_kabuli_chr04 | 36592892                | CC                              | TT                | 1945956560               |
| SNP_P3_53451_36593113 | NC_021163.1    | Ca_kabuli_chr04 | 36593113                | AA                              | TT                | 1945956562               |
| SNP_P3_53452_36593114 | NC_021163.1    | Ca_kabuli_chr04 | 36593114                | AA                              | GG                | 1945956564               |
| SNP_P3_53453_36593130 | NC_021163.1    | Ca_kabuli_chr04 | 36593130                | TT                              | AA                | 1945956566               |
| SNP_P3_53454_36593140 | NC_021163.1    | Ca_kabuli_chr04 | 36593140                | CC                              | TT                | 1945956567               |
| SNP_P3_53455_36593168 | NC_021163.1    | Ca_kabuli_chr04 | 36593168                | CC                              | AA                | 1945956569               |
| SNP_P3_53456_36593226 | NC_021163.1    | Ca_kabuli_chr04 | 36593226                | GG                              | AA                | 1945956571               |
| SNP_P3_53457_36593269 | NC_021163.1    | Ca_kabuli_chr04 | 36593269                | AA                              | GG                | 1945956573               |
| SNP_P3_53458_36593278 | NC_021163.1    | Ca_kabuli_chr04 | 36593278                | CC                              | AA                | 1945956575               |
| SNP_P3_53459_36593292 | NC_021163.1    | Ca_kabuli_chr04 | 36593292                | CC                              | GG                | 1945956576               |
| SNP_P3_53460_36593319 | NC_021163.1    | Ca_kabuli_chr04 | 36593319                | AA                              | GG                | 1945956578               |
| SNP_P3_53462_36593425 | NC_021163.1    | Ca_kabuli_chr04 | 36593425                | CC                              | TT                | 1945956580               |
| SNP_P3_53463_36593488 | NC_021163.1    | Ca_kabuli_chr04 | 36593488                | TT                              | CC                | 1945956582               |
| SNP_P3_53464_36593695 | NC_021163.1    | Ca_kabuli_chr04 | 36593695                | GG                              | AA                | 1945956583               |
| SNP_P3_53465_36593765 | NC_021163.1    | Ca_kabuli_chr04 | 36593765                | TT                              | AA                | 1945956585               |
| SNP_P3_53466_36593766 | NC_021163.1    | Ca_kabuli_chr04 | 36593766                | CC                              | TT                | 1945956587               |
| SNP_P3_53467_36593771 | NC_021163.1    | Ca_kabuli_chr04 | 36593771                | AA                              | GG                | 1945956589               |
| SNP_P3_53468_36593772 | NC_021163.1    | Ca_kabuli_chr04 | 36593772                | GG                              | AA                | 1945956591               |
| SNP_P3_53469_36593773 | NC_021163.1    | Ca_kabuli_chr04 | 36593773                | GG                              | AA                | 1945956592               |

| SNPs IDs              | Chromosome IDs | Chromosomes     | Physical positions (bp) | CDC Frontier (Reference genome) | (Pusa 256 & HPNB) | NCBI SNPdb Accession IDs |
|-----------------------|----------------|-----------------|-------------------------|---------------------------------|-------------------|--------------------------|
| SNP_P3_53470_36593782 | NC_021163.1    | Ca_kabuli_chr04 | 36593782                | GG                              | TT                | 1945956594               |
| SNP_P3_53471_36593784 | NC_021163.1    | Ca_kabuli_chr04 | 36593784                | AA                              | GG                | 1945956596               |
| SNP_P3_53472_36593811 | NC_021163.1    | Ca_kabuli_chr04 | 36593811                | TT                              | GG                | 1945956598               |
| SNP_P3_53473_36595319 | NC_021163.1    | Ca_kabuli_chr04 | 36595319                | CC                              | TT                | 1945956599               |
| SNP_P3_53474_36595320 | NC_021163.1    | Ca_kabuli_chr04 | 36595320                | CC                              | GG                | 1945956601               |
| SNP_P3_53475_36595323 | NC_021163.1    | Ca_kabuli_chr04 | 36595323                | AA                              | GG                | 1945956603               |
| SNP_P3_53476_36595365 | NC_021163.1    | Ca_kabuli_chr04 | 36595365                | TT                              | CC                | 1945956605               |
| SNP_P3_53477_36595696 | NC_021163.1    | Ca_kabuli_chr04 | 36595696                | CC                              | TT                | 1945956607               |
| SNP_P3_53478_36595718 | NC_021163.1    | Ca_kabuli_chr04 | 36595718                | AA                              | TT                | 1945956608               |
| SNP_P3_53479_36595964 | NC_021163.1    | Ca_kabuli_chr04 | 36595964                | CC                              | TT                | 1945956610               |
| SNP_P3_53480_36595976 | NC_021163.1    | Ca_kabuli_chr04 | 36595976                | CC                              | AA                | 1945956612               |
| SNP_P3_53481_36596013 | NC_021163.1    | Ca_kabuli_chr04 | 36596013                | AA                              | TT                | 1945956614               |
| SNP_P3_53482_36596027 | NC_021163.1    | Ca_kabuli_chr04 | 36596027                | AA                              | TT                | 1945956615               |
| SNP_P3_53483_36596049 | NC_021163.1    | Ca_kabuli_chr04 | 36596049                | CC                              | GG                | 1945956617               |
| SNP_P3_53484_36596262 | NC_021163.1    | Ca_kabuli_chr04 | 36596262                | CC                              | AA                | 1945956619               |
| SNP_P3_53485_36596895 | NC_021163.1    | Ca_kabuli_chr04 | 36596895                | CC                              | TT                | 1945956621               |
| SNP_P3_53486_36596969 | NC_021163.1    | Ca_kabuli_chr04 | 36596969                | AA                              | TT                | 1945956623               |
| SNP_P3_53487_36598439 | NC_021163.1    | Ca_kabuli_chr04 | 36598439                | CC                              | TT                | 1945956624               |
| SNP_P3_53488_36601169 | NC_021163.1    | Ca_kabuli_chr04 | 36601169                | CC                              | TT                | 1945956626               |
| SNP_P3_53489_36601356 | NC_021163.1    | Ca_kabuli_chr04 | 36601356                | CC                              | AA                | 1945956628               |
| SNP_P3_53490_36601751 | NC_021163.1    | Ca_kabuli_chr04 | 36601751                | AA                              | GG                | 1945956630               |
| SNP_P3_53491_36602660 | NC_021163.1    | Ca_kabuli_chr04 | 36602660                | TT                              | GG                | 1945956631               |
| SNP_P3_53492_36602679 | NC_021163.1    | Ca_kabuli_chr04 | 36602679                | AA                              | TT                | 1945956633               |
| SNP_P3_53493_36602772 | NC_021163.1    | Ca_kabuli_chr04 | 36602772                | TT                              | CC                | 1945956635               |
| SNP_P3_53494_36602908 | NC_021163.1    | Ca_kabuli_chr04 | 36602908                | CC                              | GG                | 1945956637               |
| SNP_P3_53495_36603837 | NC_021163.1    | Ca_kabuli_chr04 | 36603837                | CC                              | TT                | 1945956639               |
| SNP_P3_53497_36608538 | NC_021163.1    | Ca_kabuli_chr04 | 36608538                | GG                              | AA                | 1945956640               |
| SNP_P3_53499_36608725 | NC_021163.1    | Ca_kabuli_chr04 | 36608725                | TT                              | CC                | 1945956642               |
| SNP_P3_53501_36608976 | NC_021163.1    | Ca_kabuli_chr04 | 36608976                | CC                              | TT                | 1945956644               |
| SNP_P3_53502_36609113 | NC_021163.1    | Ca_kabuli_chr04 | 36609113                | TT                              | GG                | 1945956646               |
| SNP_P3_53503_36609276 | NC_021163.1    | Ca_kabuli_chr04 | 36609276                | GG                              | AA                | 1945956647               |
| SNP_P3_53504_36609278 | NC_021163.1    | Ca_kabuli_chr04 | 36609278                | TT                              | CC                | 1945956649               |
| SNP_P3_53505_36609319 | NC_021163.1    | Ca_kabuli_chr04 | 36609319                | CC                              | AA                | 1945956651               |
| SNP_P3_53507_36609625 | NC_021163.1    | Ca_kabuli_chr04 | 36609625                | AA                              | CC                | 1945956653               |
| SNP_P3_53508_36609637 | NC_021163.1    | Ca_kabuli_chr04 | 36609637                | CC                              | TT                | 1945956655               |
| SNP_P3_53509_36610036 | NC_021163.1    | Ca_kabuli_chr04 | 36610036                | GG                              | AA                | 1945956656               |
| SNP_P3_53510_36610247 | NC_021163.1    | Ca_kabuli_chr04 | 36610247                | TT                              | CC                | 1945956658               |
| SNP_P3_53511_36610397 | NC_021163.1    | Ca_kabuli_chr04 | 36610397                | TT                              | CC                | 1945956660               |
| SNP_P3_53512_36616349 | NC_021163.1    | Ca_kabuli_chr04 | 36616349                | AA                              | GG                | 1945956662               |
| SNP_P3_53514_36619323 | NC_021163.1    | Ca_kabuli_chr04 | 36619323                | TT                              | AA                | 1945956663               |
| SNP_P3_53515_36619656 | NC_021163.1    | Ca_kabuli_chr04 | 36619656                | TT                              | GG                | 1945956665               |
| SNP_P3_53516_36619770 | NC_021163.1    | Ca_kabuli_chr04 | 36619770                | CC                              | TT                | 1945956667               |

| SNPs IDs              | Chromosome IDs | Chromosomes     | Physical positions (bp) | CDC Frontier (Reference genome) | (Pusa 256 & HPNB) | NCBI SNPdb Accession IDs |
|-----------------------|----------------|-----------------|-------------------------|---------------------------------|-------------------|--------------------------|
| SNP_P3_53517_36619939 | NC_021163.1    | Ca_kabuli_chr04 | 36619939                | CC                              | TT                | 1945956669               |
| SNP_P3_53518_36620241 | NC_021163.1    | Ca_kabuli_chr04 | 36620241                | AA                              | GG                | 1945956670               |
| SNP_P3_53519_36620296 | NC_021163.1    | Ca_kabuli_chr04 | 36620296                | GG                              | TT                | 1945956672               |
| SNP_P3_53520_36620703 | NC_021163.1    | Ca_kabuli_chr04 | 36620703                | TT                              | CC                | 1945956674               |
| SNP_P3_53522_36620971 | NC_021163.1    | Ca_kabuli_chr04 | 36620971                | TT                              | CC                | 1945956676               |
| SNP_P3_53523_36621005 | NC_021163.1    | Ca_kabuli_chr04 | 36621005                | GG                              | AA                | 1945956678               |
| SNP_P3_53524_36621195 | NC_021163.1    | Ca_kabuli_chr04 | 36621195                | GG                              | AA                | 1945956679               |
| SNP_P3_53525_36621407 | NC_021163.1    | Ca_kabuli_chr04 | 36621407                | GG                              | CC                | 1945956681               |
| SNP_P3_53526_36621421 | NC_021163.1    | Ca_kabuli_chr04 | 36621421                | TT                              | GG                | 1945956683               |
| SNP_P3_53527_36621668 | NC_021163.1    | Ca_kabuli_chr04 | 36621668                | TT                              | CC                | 1945956685               |
| SNP_P3_53529_36622167 | NC_021163.1    | Ca_kabuli_chr04 | 36622167                | AA                              | GG                | 1945956686               |
| SNP_P3_53530_36622773 | NC_021163.1    | Ca_kabuli_chr04 | 36622773                | GG                              | TT                | 1945956688               |
| SNP_P3_53531_36622828 | NC_021163.1    | Ca_kabuli_chr04 | 36622828                | AA                              | TT                | 1945956690               |
| SNP_P3_53532_36624709 | NC_021163.1    | Ca_kabuli_chr04 | 36624709                | TT                              | CC                | 1945956692               |
| SNP_P3_53533_36624722 | NC_021163.1    | Ca_kabuli_chr04 | 36624722                | TT                              | AA                | 1945956693               |
| SNP_P3_53534_36624763 | NC_021163.1    | Ca_kabuli_chr04 | 36624763                | GG                              | CC                | 1945956695               |
| SNP_P3_53535_36624946 | NC_021163.1    | Ca_kabuli_chr04 | 36624946                | GG                              | AA                | 1945956697               |
| SNP_P3_53536_36624948 | NC_021163.1    | Ca_kabuli_chr04 | 36624948                | GG                              | AA                | 1945956699               |
| SNP_P3_53537_36625004 | NC_021163.1    | Ca_kabuli_chr04 | 36625004                | CC                              | TT                | 1945956701               |
| SNP_P3_53538_36628163 | NC_021163.1    | Ca_kabuli_chr04 | 36628163                | AA                              | GG                | 1945956702               |
| SNP_P3_53539_36628383 | NC_021163.1    | Ca_kabuli_chr04 | 36628383                | CC                              | TT                | 1945956704               |
| SNP_P3_53540_36631064 | NC_021163.1    | Ca_kabuli_chr04 | 36631064                | AA                              | CC                | 1945956706               |
| SNP_P3_53541_36631071 | NC_021163.1    | Ca_kabuli_chr04 | 36631071                | GG                              | TT                | 1945956708               |
| SNP_P3_53542_36631344 | NC_021163.1    | Ca_kabuli_chr04 | 36631344                | GG                              | TT                | 1945956709               |
| SNP_P3_53543_36631450 | NC_021163.1    | Ca_kabuli_chr04 | 36631450                | CC                              | TT                | 1945956711               |
| SNP_P3_53544_36631684 | NC_021163.1    | Ca_kabuli_chr04 | 36631684                | AA                              | GG                | 1945956713               |
| SNP_P3_53545_36633185 | NC_021163.1    | Ca_kabuli_chr04 | 36633185                | CC                              | TT                | 1945956715               |
| SNP_P3_53546_36633226 | NC_021163.1    | Ca_kabuli_chr04 | 36633226                | GG                              | AA                | 1945956717               |
| SNP_P3_53547_36633935 | NC_021163.1    | Ca_kabuli_chr04 | 36633935                | CC                              | GG                | 1945956718               |
| SNP_P3_53548_36633969 | NC_021163.1    | Ca_kabuli_chr04 | 36633969                | CC                              | TT                | 1945956720               |
| SNP_P3_53549_36634767 | NC_021163.1    | Ca_kabuli_chr04 | 36634767                | AA                              | GG                | 1945956722               |
| SNP_P3_53550_36635031 | NC_021163.1    | Ca_kabuli_chr04 | 36635031                | GG                              | TT                | 1945956724               |
| SNP_P3_53551_36635414 | NC_021163.1    | Ca_kabuli_chr04 | 36635414                | AA                              | GG                | 1945956725               |
| SNP_P3_53553_36638808 | NC_021163.1    | Ca_kabuli_chr04 | 36638808                | AA                              | CC                | 1945956727               |
| SNP_P3_53554_36638902 | NC_021163.1    | Ca_kabuli_chr04 | 36638902                | TT                              | CC                | 1945956729               |
| SNP_P3_53556_36638988 | NC_021163.1    | Ca_kabuli_chr04 | 36638988                | CC                              | TT                | 1945956731               |
| SNP_P3_53557_36639164 | NC_021163.1    | Ca_kabuli_chr04 | 36639164                | TT                              | AA                | 1945956733               |
| SNP_P3_53558_36639333 | NC_021163.1    | Ca_kabuli_chr04 | 36639333                | AA                              | TT                | 1945956734               |
| SNP_P3_53559_36641781 | NC_021163.1    | Ca_kabuli_chr04 | 36641781                | GG                              | AA                | 1945956736               |
| SNP_P3_53560_36642130 | NC_021163.1    | Ca_kabuli_chr04 | 36642130                | GG                              | TT                | 1945956738               |
| SNP_P3_53561_36642184 | NC_021163.1    | Ca_kabuli_chr04 | 36642184                | TT                              | AA                | 1945956740               |
| SNP_P3_53562_36642255 | NC_021163.1    | Ca_kabuli_chr04 | 36642255                | TT                              | CC                | 1945956741               |

| SNPs IDs              | Chromosome IDs | Chromosomes     | Physical positions (bp) | CDC Frontier (Reference genome) | (Pusa 256 & HPNB) | NCBI SNPdb Accession IDs |
|-----------------------|----------------|-----------------|-------------------------|---------------------------------|-------------------|--------------------------|
| SNP_P3_53565_36644567 | NC_021163.1    | Ca_kabuli_chr04 | 36644567                | CC                              | TT                | 1945956743               |
| SNP_P3_53566_36644929 | NC_021163.1    | Ca_kabuli_chr04 | 36644929                | CC                              | TT                | 1945956745               |
| SNP_P3_53567_36645313 | NC_021163.1    | Ca_kabuli_chr04 | 36645313                | GG                              | AA                | 1945956747               |
| SNP_P3_53568_36646015 | NC_021163.1    | Ca_kabuli_chr04 | 36646015                | GG                              | AA                | 1945956749               |
| SNP_P3_53570_36647686 | NC_021163.1    | Ca_kabuli_chr04 | 36647686                | GG                              | AA                | 1945956750               |
| SNP_P3_53571_36647957 | NC_021163.1    | Ca_kabuli_chr04 | 36647957                | TT                              | CC                | 1945956752               |
| SNP_P3_53573_36663140 | NC_021163.1    | Ca_kabuli_chr04 | 36663140                | CC                              | AA                | 1945956754               |
| SNP_P3_53574_36663436 | NC_021163.1    | Ca_kabuli_chr04 | 36663436                | AA                              | GG                | 1945956756               |
| SNP_P3_53575_36663448 | NC_021163.1    | Ca_kabuli_chr04 | 36663448                | CC                              | AA                | 1945956757               |
| SNP_P3_53576_36663465 | NC_021163.1    | Ca_kabuli_chr04 | 36663465                | AA                              | GG                | 1945956759               |
| SNP_P3_53577_36663863 | NC_021163.1    | Ca_kabuli_chr04 | 36663863                | AA                              | GG                | 1945956761               |
| SNP_P3_53578_36663883 | NC_021163.1    | Ca_kabuli_chr04 | 36663883                | AA                              | GG                | 1945956763               |
| SNP_P3_53579_36674183 | NC_021163.1    | Ca_kabuli_chr04 | 36674183                | TT                              | CC                | 1945956765               |
| SNP_P3_53580_36690439 | NC_021163.1    | Ca_kabuli_chr04 | 36690439                | GG                              | AA                | 1945956766               |
| SNP_P3_53581_36717227 | NC_021163.1    | Ca_kabuli_chr04 | 36717227                | GG                              | TT                | 1945956768               |
| SNP_P3_53582_36726607 | NC_021163.1    | Ca_kabuli_chr04 | 36726607                | TT                              | CC                | 1945956770               |
| SNP_P3_53583_36726627 | NC_021163.1    | Ca_kabuli_chr04 | 36726627                | TT                              | CC                | 1945956772               |
| SNP_P3_53584_36726657 | NC_021163.1    | Ca_kabuli_chr04 | 36726657                | TT                              | CC                | 1945956773               |
| SNP_P3_53585_36726660 | NC_021163.1    | Ca_kabuli_chr04 | 36726660                | TT                              | CC                | 1945956775               |
| SNP_P3_53586_36726681 | NC_021163.1    | Ca_kabuli_chr04 | 36726681                | CC                              | TT                | 1945956777               |
| SNP_P3_53588_36726704 | NC_021163.1    | Ca_kabuli_chr04 | 36726704                | TT                              | CC                | 1945956779               |
| SNP_P3_53589_36726720 | NC_021163.1    | Ca_kabuli_chr04 | 36726720                | AA                              | CC                | 1945956781               |
| SNP_P3_53590_36726750 | NC_021163.1    | Ca_kabuli_chr04 | 36726750                | AA                              | GG                | 1945956782               |
| SNP_P3_53591_36726819 | NC_021163.1    | Ca_kabuli_chr04 | 36726819                | CC                              | AA                | 1945956784               |
| SNP_P3_53592_36727041 | NC_021163.1    | Ca_kabuli_chr04 | 36727041                | CC                              | TT                | 1945956786               |
| SNP_P3_53593_36727061 | NC_021163.1    | Ca_kabuli_chr04 | 36727061                | AA                              | TT                | 1945956788               |
| SNP_P3_53594_36727121 | NC_021163.1    | Ca_kabuli_chr04 | 36727121                | TT                              | AA                | 1945956789               |
| SNP_P3_53595_36758643 | NC_021163.1    | Ca_kabuli_chr04 | 36758643                | TT                              | CC                | 1945956791               |
| SNP_P3_53596_36761432 | NC_021163.1    | Ca_kabuli_chr04 | 36761432                | CC                              | AA                | 1945956793               |
| SNP_P3_53597_36777104 | NC_021163.1    | Ca_kabuli_chr04 | 36777104                | TT                              | GG                | 1945956795               |
| SNP_P3_53599_36814829 | NC_021163.1    | Ca_kabuli_chr04 | 36814829                | CC                              | TT                | 1945956797               |
| SNP_P3_53600_36818563 | NC_021163.1    | Ca_kabuli_chr04 | 36818563                | CC                              | TT                | 1945956798               |
| SNP_P3_53601_36842665 | NC_021163.1    | Ca_kabuli_chr04 | 36842665                | CC                              | GG                | 1945956800               |
| SNP_P3_53602_36843584 | NC_021163.1    | Ca_kabuli_chr04 | 36843584                | TT                              | GG                | 1945956802               |
| SNP_P3_53603_36843587 | NC_021163.1    | Ca_kabuli_chr04 | 36843587                | TT                              | CC                | 1945956804               |
| SNP_P3_53604_36859655 | NC_021163.1    | Ca_kabuli_chr04 | 36859655                | GG                              | TT                | 1945956805               |
| SNP_P3_53605_36882619 | NC_021163.1    | Ca_kabuli_chr04 | 36882619                | TT                              | CC                | 1945956807               |
| SNP_P3_53606_36907569 | NC_021163.1    | Ca_kabuli_chr04 | 36907569                | TT                              | GG                | 1945956809               |
| SNP_P3_53607_36907572 | NC_021163.1    | Ca_kabuli_chr04 | 36907572                | GG                              | CC                | 1945956811               |
| SNP_P3_53608_36907602 | NC_021163.1    | Ca_kabuli_chr04 | 36907602                | AA                              | GG                | 1945956813               |
| SNP_P3_53609_36907623 | NC_021163.1    | Ca_kabuli_chr04 | 36907623                | AA                              | GG                | 1945956814               |
| SNP_P3_53610_36907648 | NC_021163.1    | Ca_kabuli_chr04 | 36907648                | GG                              | CC                | 1945956816               |



| SNPs IDs              | Chromosome IDs | Chromosomes     | Physical positions (bp) | CDC Frontier (Reference genome) | (Pusa 256 & HPNB) | NCBI SNPdb Accession IDs |
|-----------------------|----------------|-----------------|-------------------------|---------------------------------|-------------------|--------------------------|
| SNP_P3_53611_36907649 | NC_021163.1    | Ca_kabuli_chr04 | 36907649                | AA                              | CC                | 1945956818               |
| SNP_P3_53612_36907686 | NC_021163.1    | Ca_kabuli_chr04 | 36907686                | AA                              | GG                | 1945956820               |
| SNP_P3_53613_36907688 | NC_021163.1    | Ca_kabuli_chr04 | 36907688                | CC                              | TT                | 1945956821               |
| SNP_P3_53614_36907698 | NC_021163.1    | Ca_kabuli_chr04 | 36907698                | GG                              | AA                | 1945956823               |
| SNP_P3_53615_36908656 | NC_021163.1    | Ca_kabuli_chr04 | 36908656                | AA                              | GG                | 1945956825               |
| SNP_P3_53617_36920716 | NC_021163.1    | Ca_kabuli_chr04 | 36920716                | TT                              | CC                | 1945956827               |
| SNP_P3_53618_36920739 | NC_021163.1    | Ca_kabuli_chr04 | 36920739                | TT                              | GG                | 1945956829               |
| SNP_P3_53619_36927931 | NC_021163.1    | Ca_kabuli_chr04 | 36927931                | CC                              | TT                | 1945956830               |
| SNP_P3_53620_36937984 | NC_021163.1    | Ca_kabuli_chr04 | 36937984                | GG                              | TT                | 1945956832               |
| SNP_P3_53622_36952750 | NC_021163.1    | Ca_kabuli_chr04 | 36952750                | GG                              | TT                | 1945956834               |
| SNP_P3_53623_36953051 | NC_021163.1    | Ca_kabuli_chr04 | 36953051                | AA                              | CC                | 1945956836               |
| SNP_P3_53626_36955879 | NC_021163.1    | Ca_kabuli_chr04 | 36955879                | TT                              | AA                | 1945956837               |
| SNP_P3_53627_36955884 | NC_021163.1    | Ca_kabuli_chr04 | 36955884                | AA                              | TT                | 1945956839               |
| SNP_P3_53628_36955888 | NC_021163.1    | Ca_kabuli_chr04 | 36955888                | TT                              | AA                | 1945956841               |
| SNP_P3_53629_36955891 | NC_021163.1    | Ca_kabuli_chr04 | 36955891                | AA                              | TT                | 1945956843               |
| SNP_P3_53631_36956753 | NC_021163.1    | Ca_kabuli_chr04 | 36956753                | TT                              | CC                | 1945956845               |
| SNP_P3_53633_36956865 | NC_021163.1    | Ca_kabuli_chr04 | 36956865                | GG                              | AA                | 1945956846               |
| SNP_P3_53634_36956893 | NC_021163.1    | Ca_kabuli_chr04 | 36956893                | AA                              | TT                | 1945956848               |
| SNP_P3_53635_36957039 | NC_021163.1    | Ca_kabuli_chr04 | 36957039                | AA                              | TT                | 1945956850               |
| SNP_P3_53636_36957135 | NC_021163.1    | Ca_kabuli_chr04 | 36957135                | CC                              | GG                | 1945956852               |
| SNP_P3_53637_36959196 | NC_021163.1    | Ca_kabuli_chr04 | 36959196                | GG                              | TT                | 1945956853               |
| SNP_P3_53638_36959216 | NC_021163.1    | Ca_kabuli_chr04 | 36959216                | TT                              | CC                | 1945956855               |
| SNP_P3_53639_36959511 | NC_021163.1    | Ca_kabuli_chr04 | 36959511                | AA                              | GG                | 1945956857               |
| SNP_P3_53640_36959541 | NC_021163.1    | Ca_kabuli_chr04 | 36959541                | GG                              | AA                | 1945956859               |
| SNP_P3_53641_36959823 | NC_021163.1    | Ca_kabuli_chr04 | 36959823                | CC                              | AA                | 1945956860               |
| SNP_P3_53643_36960718 | NC_021163.1    | Ca_kabuli_chr04 | 36960718                | GG                              | AA                | 1945956862               |
| SNP_P3_53644_36960897 | NC_021163.1    | Ca_kabuli_chr04 | 36960897                | AA                              | GG                | 1945956864               |
| SNP_P3_53645_36960943 | NC_021163.1    | Ca_kabuli_chr04 | 36960943                | GG                              | TT                | 1945956866               |
| SNP_P3_53646_36960952 | NC_021163.1    | Ca_kabuli_chr04 | 36960952                | TT                              | CC                | 1945956868               |
| SNP_P3_53647_36960961 | NC_021163.1    | Ca_kabuli_chr04 | 36960961                | TT                              | GG                | 1945956869               |
| SNP_P3_53648_36960997 | NC_021163.1    | Ca_kabuli_chr04 | 36960997                | AA                              | GG                | 1945956871               |
| SNP_P3_53649_36961026 | NC_021163.1    | Ca_kabuli_chr04 | 36961026                | TT                              | CC                | 1945956873               |
| SNP_P3_53650_36961212 | NC_021163.1    | Ca_kabuli_chr04 | 36961212                | AA                              | CC                | 1945956875               |
| SNP_P3_53651_36961248 | NC_021163.1    | Ca_kabuli_chr04 | 36961248                | TT                              | CC                | 1945956876               |
| SNP_P3_53652_36961385 | NC_021163.1    | Ca_kabuli_chr04 | 36961385                | CC                              | AA                | 1945956878               |
| SNP_P3_53653_36964001 | NC_021163.1    | Ca_kabuli_chr04 | 36964001                | TT                              | CC                | 1945956880               |
| SNP_P3_53654_36964342 | NC_021163.1    | Ca_kabuli_chr04 | 36964342                | GG                              | AA                | 1945956882               |
| SNP_P3_53655_36964357 | NC_021163.1    | Ca_kabuli_chr04 | 36964357                | TT                              | CC                | 1945956884               |
| SNP_P3_53656_36965251 | NC_021163.1    | Ca_kabuli_chr04 | 36965251                | CC                              | TT                | 1945956885               |
| SNP_P3_53657_36965282 | NC_021163.1    | Ca_kabuli_chr04 | 36965282                | GG                              | AA                | 1945956887               |
| SNP_P3_53658_36965520 | NC_021163.1    | Ca_kabuli_chr04 | 36965520                | TT                              | CC                | 1945956889               |
| SNP_P3_53659_36965522 | NC_021163.1    | Ca_kabuli_chr04 | 36965522                | GG                              | AA                | 1945956891               |

| SNPs IDs              | Chromosome IDs | Chromosomes     | Physical positions (bp) | CDC Frontier (Reference genome) | (Pusa 256 & HPNB) | NCBI SNPdb Accession IDs |
|-----------------------|----------------|-----------------|-------------------------|---------------------------------|-------------------|--------------------------|
| SNP_P3_53660_36965795 | NC_021163.1    | Ca_kabuli_chr04 | 36965795                | TT                              | GG                | 1945956893               |
| SNP_P3_53661_36968078 | NC_021163.1    | Ca_kabuli_chr04 | 36968078                | AA                              | GG                | 1945956894               |
| SNP_P3_53662_36968112 | NC_021163.1    | Ca_kabuli_chr04 | 36968112                | AA                              | TT                | 1945956896               |
| SNP_P3_53664_36968258 | NC_021163.1    | Ca_kabuli_chr04 | 36968258                | TT                              | AA                | 1945956898               |
| SNP_P3_53666_36968304 | NC_021163.1    | Ca_kabuli_chr04 | 36968304                | CC                              | AA                | 1945956900               |
| SNP_P3_53667_36969577 | NC_021163.1    | Ca_kabuli_chr04 | 36969577                | AA                              | GG                | 1945956901               |
| SNP_P3_53669_36969702 | NC_021163.1    | Ca_kabuli_chr04 | 36969702                | GG                              | TT                | 1945956903               |
| SNP_P3_53670_36969768 | NC_021163.1    | Ca_kabuli_chr04 | 36969768                | AA                              | GG                | 1945956905               |
| SNP_P3_53671_36969774 | NC_021163.1    | Ca_kabuli_chr04 | 36969774                | TT                              | CC                | 1945956907               |
| SNP_P3_53673_36970037 | NC_021163.1    | Ca_kabuli_chr04 | 36970037                | GG                              | AA                | 1945956909               |
| SNP_P3_53674_36971456 | NC_021163.1    | Ca_kabuli_chr04 | 36971456                | CC                              | TT                | 1945956910               |
| SNP_P3_53675_36971526 | NC_021163.1    | Ca_kabuli_chr04 | 36971526                | AA                              | GG                | 1945956912               |
| SNP_P3_53676_36971775 | NC_021163.1    | Ca_kabuli_chr04 | 36971775                | GG                              | TT                | 1945956914               |
| SNP_P3_53677_36972077 | NC_021163.1    | Ca_kabuli_chr04 | 36972077                | AA                              | GG                | 1945956916               |
| SNP_P3_53680_36973084 | NC_021163.1    | Ca_kabuli_chr04 | 36973084                | AA                              | GG                | 1945956917               |
| SNP_P3_53682_36973147 | NC_021163.1    | Ca_kabuli_chr04 | 36973147                | AA                              | GG                | 1945956919               |
| SNP_P3_53683_36973155 | NC_021163.1    | Ca_kabuli_chr04 | 36973155                | CC                              | TT                | 1945956921               |
| SNP_P3_53685_36975360 | NC_021163.1    | Ca_kabuli_chr04 | 36975360                | GG                              | AA                | 1945956923               |
| SNP_P3_53686_36975361 | NC_021163.1    | Ca_kabuli_chr04 | 36975361                | CC                              | AA                | 1945956925               |
| SNP_P3_53688_36976029 | NC_021163.1    | Ca_kabuli_chr04 | 36976029                | AA                              | CC                | 1945956926               |
| SNP_P3_53689_36976279 | NC_021163.1    | Ca_kabuli_chr04 | 36976279                | TT                              | GG                | 1945956928               |
| SNP_P3_53690_36976281 | NC_021163.1    | Ca_kabuli_chr04 | 36976281                | AA                              | CC                | 1945956930               |
| SNP_P3_53691_36976579 | NC_021163.1    | Ca_kabuli_chr04 | 36976579                | CC                              | TT                | 1945956932               |
| SNP_P3_53692_36976584 | NC_021163.1    | Ca_kabuli_chr04 | 36976584                | AA                              | GG                | 1945956933               |
| SNP_P3_53693_36976608 | NC_021163.1    | Ca_kabuli_chr04 | 36976608                | CC                              | AA                | 1945956935               |
| SNP_P3_53694_36977961 | NC_021163.1    | Ca_kabuli_chr04 | 36977961                | TT                              | GG                | 1945956937               |
| SNP_P3_53695_36978092 | NC_021163.1    | Ca_kabuli_chr04 | 36978092                | TT                              | GG                | 1945956939               |
| SNP_P3_53696_36981273 | NC_021163.1    | Ca_kabuli_chr04 | 36981273                | GG                              | AA                | 1945956941               |
| SNP_P3_53697_36981357 | NC_021163.1    | Ca_kabuli_chr04 | 36981357                | AA                              | TT                | 1945956942               |
| SNP_P3_53698_36981360 | NC_021163.1    | Ca_kabuli_chr04 | 36981360                | AA                              | TT                | 1945956944               |
| SNP_P3_53699_36981963 | NC_021163.1    | Ca_kabuli_chr04 | 36981963                | GG                              | CC                | 1945956946               |
| SNP_P3_53700_36983778 | NC_021163.1    | Ca_kabuli_chr04 | 36983778                | GG                              | AA                | 1945956948               |
| SNP_P3_53701_36985533 | NC_021163.1    | Ca_kabuli_chr04 | 36985533                | TT                              | AA                | 1945956949               |
| SNP_P3_53702_36986095 | NC_021163.1    | Ca_kabuli_chr04 | 36986095                | GG                              | CC                | 1945956951               |
| SNP_P3_53703_36986180 | NC_021163.1    | Ca_kabuli_chr04 | 36986180                | AA                              | GG                | 1945956953               |
| SNP_P3_53704_36986734 | NC_021163.1    | Ca_kabuli_chr04 | 36986734                | GG                              | TT                | 1945956955               |
| SNP_P3_53705_36986933 | NC_021163.1    | Ca_kabuli_chr04 | 36986933                | AA                              | GG                | 1945956957               |
| SNP_P3_53706_36998743 | NC_021163.1    | Ca_kabuli_chr04 | 36998743                | AA                              | GG                | 1945956958               |
| SNP_P3_53707_37004706 | NC_021163.1    | Ca_kabuli_chr04 | 37004706                | AA                              | GG                | 1945956960               |
| SNP_P3_53708_37008823 | NC_021163.1    | Ca_kabuli_chr04 | 37008823                | CC                              | GG                | 1945956962               |
| SNP_P3_53709_37008843 | NC_021163.1    | Ca_kabuli_chr04 | 37008843                | TT                              | CC                | 1945956964               |
| SNP_P3_53710_37008848 | NC_021163.1    | Ca_kabuli_chr04 | 37008848                | TT                              | GG                | 1945956965               |

| SNPs IDs              | Chromosome IDs | Chromosomes     | Physical positions (bp) | CDC Frontier (Reference genome) | (Pusa 256 & HPNB) | NCBI SNPdb Accession IDs |
|-----------------------|----------------|-----------------|-------------------------|---------------------------------|-------------------|--------------------------|
| SNP_P3_53711_37009044 | NC_021163.1    | Ca_kabuli_chr04 | 37009044                | CC                              | TT                | 1945956967               |
| SNP_P3_53712_37009047 | NC_021163.1    | Ca_kabuli_chr04 | 37009047                | AA                              | CC                | 1945956969               |
| SNP_P3_53713_37009219 | NC_021163.1    | Ca_kabuli_chr04 | 37009219                | AA                              | GG                | 1945956971               |
| SNP_P3_53714_37009349 | NC_021163.1    | Ca_kabuli_chr04 | 37009349                | TT                              | GG                | 1945956973               |
| SNP_P3_53715_37009368 | NC_021163.1    | Ca_kabuli_chr04 | 37009368                | CC                              | TT                | 1945956974               |
| SNP_P3_53716_37009379 | NC_021163.1    | Ca_kabuli_chr04 | 37009379                | CC                              | TT                | 1945956976               |
| SNP_P3_53717_37009389 | NC_021163.1    | Ca_kabuli_chr04 | 37009389                | AA                              | TT                | 1945956978               |
| SNP_P3_53718_37009391 | NC_021163.1    | Ca_kabuli_chr04 | 37009391                | GG                              | AA                | 1945956980               |
| SNP_P3_53719_37011261 | NC_021163.1    | Ca_kabuli_chr04 | 37011261                | TT                              | CC                | 1945956981               |
| SNP_P3_53720_37011499 | NC_021163.1    | Ca_kabuli_chr04 | 37011499                | GG                              | TT                | 1945956983               |
| SNP_P3_53721_37011526 | NC_021163.1    | Ca_kabuli_chr04 | 37011526                | CC                              | TT                | 1945956985               |
| SNP_P3_53722_37011731 | NC_021163.1    | Ca_kabuli_chr04 | 37011731                | CC                              | GG                | 1945956987               |
| SNP_P3_53723_37012407 | NC_021163.1    | Ca_kabuli_chr04 | 37012407                | TT                              | CC                | 1945956989               |
| SNP_P3_53724_37012493 | NC_021163.1    | Ca_kabuli_chr04 | 37012493                | TT                              | CC                | 1945956990               |
| SNP_P3_53725_37012575 | NC_021163.1    | Ca_kabuli_chr04 | 37012575                | CC                              | TT                | 1945956992               |
| SNP_P3_53726_37012616 | NC_021163.1    | Ca_kabuli_chr04 | 37012616                | TT                              | CC                | 1945956994               |
| SNP_P3_53727_37012651 | NC_021163.1    | Ca_kabuli_chr04 | 37012651                | AA                              | GG                | 1945956996               |
| SNP_P3_53728_37012823 | NC_021163.1    | Ca_kabuli_chr04 | 37012823                | AA                              | CC                | 1945956997               |
| SNP_P3_53729_37012840 | NC_021163.1    | Ca_kabuli_chr04 | 37012840                | AA                              | CC                | 1945956999               |
| SNP_P3_53730_37012885 | NC_021163.1    | Ca_kabuli_chr04 | 37012885                | CC                              | TT                | 1945957001               |
| SNP_P3_53731_37013336 | NC_021163.1    | Ca_kabuli_chr04 | 37013336                | GG                              | AA                | 1945957003               |
| SNP_P3_53733_37013424 | NC_021163.1    | Ca_kabuli_chr04 | 37013424                | GG                              | AA                | 1945957005               |
| SNP_P3_53734_37013441 | NC_021163.1    | Ca_kabuli_chr04 | 37013441                | TT                              | CC                | 1945957006               |
| SNP_P3_53735_37013498 | NC_021163.1    | Ca_kabuli_chr04 | 37013498                | AA                              | CC                | 1945957008               |
| SNP_P3_53736_37013520 | NC_021163.1    | Ca_kabuli_chr04 | 37013520                | CC                              | TT                | 1945957010               |
| SNP_P3_53737_37013556 | NC_021163.1    | Ca_kabuli_chr04 | 37013556                | CC                              | TT                | 1945957012               |
| SNP_P3_53738_37013646 | NC_021163.1    | Ca_kabuli_chr04 | 37013646                | AA                              | GG                | 1945957013               |
| SNP_P3_53739_37013684 | NC_021163.1    | Ca_kabuli_chr04 | 37013684                | GG                              | TT                | 1945957015               |
| SNP_P3_53740_37013707 | NC_021163.1    | Ca_kabuli_chr04 | 37013707                | CC                              | TT                | 1945957017               |
| SNP_P3_53741_37013726 | NC_021163.1    | Ca_kabuli_chr04 | 37013726                | GG                              | TT                | 1945957019               |
| SNP_P3_53742_37013776 | NC_021163.1    | Ca_kabuli_chr04 | 37013776                | AA                              | GG                | 1945957020               |
| SNP_P3_53743_37013797 | NC_021163.1    | Ca_kabuli_chr04 | 37013797                | GG                              | AA                | 1945957022               |
| SNP_P3_53744_37013829 | NC_021163.1    | Ca_kabuli_chr04 | 37013829                | TT                              | CC                | 1945957024               |
| SNP_P3_53745_37015406 | NC_021163.1    | Ca_kabuli_chr04 | 37015406                | CC                              | AA                | 1945957026               |
| SNP_P3_53746_37015469 | NC_021163.1    | Ca_kabuli_chr04 | 37015469                | TT                              | GG                | 1945957028               |
| SNP_P3_53747_37015487 | NC_021163.1    | Ca_kabuli_chr04 | 37015487                | CC                              | TT                | 1945957029               |
| SNP_P3_53748_37015784 | NC_021163.1    | Ca_kabuli_chr04 | 37015784                | GG                              | AA                | 1945957031               |
| SNP_P3_53749_37025486 | NC_021163.1    | Ca_kabuli_chr04 | 37025486                | CC                              | AA                | 1945957033               |
| SNP_P3_53750_37025492 | NC_021163.1    | Ca_kabuli_chr04 | 37025492                | GG                              | AA                | 1945957035               |
| SNP_P3_53751_37025510 | NC_021163.1    | Ca_kabuli_chr04 | 37025510                | AA                              | GG                | 1945957036               |
| SNP_P3_53752_37025750 | NC_021163.1    | Ca_kabuli_chr04 | 37025750                | TT                              | AA                | 1945957038               |
| SNP_P3_53753_37027097 | NC_021163.1    | Ca_kabuli_chr04 | 37027097                | GG                              | TT                | 1945957040               |

| SNPs IDs              | Chromosome IDs | Chromosomes     | Physical positions (bp) | CDC Frontier (Reference genome) | (Pusa 256 & HPNB) | NCBI SNPdb Accession IDs |
|-----------------------|----------------|-----------------|-------------------------|---------------------------------|-------------------|--------------------------|
| SNP_P3_53754_37027299 | NC_021163.1    | Ca_kabuli_chr04 | 37027299                | TT                              | CC                | 1945957042               |
| SNP_P3_53755_37027454 | NC_021163.1    | Ca_kabuli_chr04 | 37027454                | CC                              | AA                | 1945957044               |
| SNP_P3_53756_37027462 | NC_021163.1    | Ca_kabuli_chr04 | 37027462                | GG                              | AA                | 1945957045               |
| SNP_P3_53757_37027465 | NC_021163.1    | Ca_kabuli_chr04 | 37027465                | CC                              | TT                | 1945957047               |
| SNP_P3_53758_37027471 | NC_021163.1    | Ca_kabuli_chr04 | 37027471                | GG                              | CC                | 1945957049               |
| SNP_P3_53759_37027649 | NC_021163.1    | Ca_kabuli_chr04 | 37027649                | AA                              | TT                | 1945957051               |
| SNP_P3_53760_37033689 | NC_021163.1    | Ca_kabuli_chr04 | 37033689                | CC                              | AA                | 1945957052               |
| SNP_P3_53761_37033715 | NC_021163.1    | Ca_kabuli_chr04 | 37033715                | CC                              | TT                | 1945957054               |
| SNP_P3_53762_37033732 | NC_021163.1    | Ca_kabuli_chr04 | 37033732                | TT                              | CC                | 1945957056               |
| SNP_P3_53763_37033992 | NC_021163.1    | Ca_kabuli_chr04 | 37033992                | GG                              | AA                | 1945957058               |
| SNP_P3_53765_37034303 | NC_021163.1    | Ca_kabuli_chr04 | 37034303                | TT                              | CC                | 1945957060               |
| SNP_P3_53766_37034306 | NC_021163.1    | Ca_kabuli_chr04 | 37034306                | AA                              | GG                | 1945957061               |
| SNP_P3_53767_37034332 | NC_021163.1    | Ca_kabuli_chr04 | 37034332                | GG                              | AA                | 1945957063               |
| SNP_P3_53768_37034341 | NC_021163.1    | Ca_kabuli_chr04 | 37034341                | GG                              | AA                | 1945957065               |
| SNP_P3_53769_37035023 | NC_021163.1    | Ca_kabuli_chr04 | 37035023                | AA                              | GG                | 1945957067               |
| SNP_P3_53770_37035055 | NC_021163.1    | Ca_kabuli_chr04 | 37035055                | AA                              | CC                | 1945957068               |
| SNP_P3_53772_37035779 | NC_021163.1    | Ca_kabuli_chr04 | 37035779                | AA                              | GG                | 1945957070               |
| SNP_P3_53774_37038635 | NC_021163.1    | Ca_kabuli_chr04 | 37038635                | CC                              | GG                | 1945957072               |
| SNP_P3_53775_37038704 | NC_021163.1    | Ca_kabuli_chr04 | 37038704                | AA                              | CC                | 1945957074               |
| SNP_P3_53776_37039020 | NC_021163.1    | Ca_kabuli_chr04 | 37039020                | GG                              | AA                | 1945957076               |
| SNP_P3_53777_37039140 | NC_021163.1    | Ca_kabuli_chr04 | 37039140                | CC                              | TT                | 1945957077               |
| SNP_P3_53778_37039143 | NC_021163.1    | Ca_kabuli_chr04 | 37039143                | GG                              | AA                | 1945957079               |
| SNP_P3_53779_37039280 | NC_021163.1    | Ca_kabuli_chr04 | 37039280                | GG                              | TT                | 1945957081               |
| SNP_P3_53780_37040396 | NC_021163.1    | Ca_kabuli_chr04 | 37040396                | AA                              | GG                | 1945957083               |
| SNP_P3_53782_37041783 | NC_021163.1    | Ca_kabuli_chr04 | 37041783                | TT                              | CC                | 1945957084               |
| SNP_P3_53783_37041816 | NC_021163.1    | Ca_kabuli_chr04 | 37041816                | TT                              | CC                | 1945957086               |
| SNP_P3_53784_37042750 | NC_021163.1    | Ca_kabuli_chr04 | 37042750                | TT                              | AA                | 1945957088               |
| SNP_P3_53785_37042854 | NC_021163.1    | Ca_kabuli_chr04 | 37042854                | AA                              | GG                | 1945957090               |
| SNP_P3_53786_37042861 | NC_021163.1    | Ca_kabuli_chr04 | 37042861                | TT                              | CC                | 1945957092               |
| SNP_P3_53788_37042896 | NC_021163.1    | Ca_kabuli_chr04 | 37042896                | CC                              | AA                | 1945957093               |
| SNP_P3_53789_37042917 | NC_021163.1    | Ca_kabuli_chr04 | 37042917                | GG                              | AA                | 1945957095               |
| SNP_P3_53790_37043057 | NC_021163.1    | Ca_kabuli_chr04 | 37043057                | GG                              | AA                | 1945957097               |
| SNP_P3_53791_37043059 | NC_021163.1    | Ca_kabuli_chr04 | 37043059                | AA                              | GG                | 1945957099               |
| SNP_P3_53793_37043304 | NC_021163.1    | Ca_kabuli_chr04 | 37043304                | CC                              | AA                | 1945957100               |
| SNP_P3_53794_37046460 | NC_021163.1    | Ca_kabuli_chr04 | 37046460                | AA                              | CC                | 1945957102               |
| SNP_P3_53795_37046480 | NC_021163.1    | Ca_kabuli_chr04 | 37046480                | TT                              | CC                | 1945957104               |
| SNP_P3_53796_37046494 | NC_021163.1    | Ca_kabuli_chr04 | 37046494                | TT                              | CC                | 1945957106               |
| SNP_P3_53797_37046609 | NC_021163.1    | Ca_kabuli_chr04 | 37046609                | GG                              | AA                | 1945957108               |
| SNP_P3_53799_37046779 | NC_021163.1    | Ca_kabuli_chr04 | 37046779                | TT                              | CC                | 1945957109               |
| SNP_P3_53800_37046835 | NC_021163.1    | Ca_kabuli_chr04 | 37046835                | GG                              | AA                | 1945957111               |
| SNP_P3_53801_37046836 | NC_021163.1    | Ca_kabuli_chr04 | 37046836                | GG                              | AA                | 1945957113               |
| SNP_P3_53802_37046893 | NC_021163.1    | Ca_kabuli_chr04 | 37046893                | AA                              | TT                | 1945957115               |

| SNPs IDs              | Chromosome IDs | Chromosomes     | Physical positions (bp) | CDC Frontier (Reference genome) | (Pusa 256 & HPNB) | NCBI SNPdb Accession IDs |
|-----------------------|----------------|-----------------|-------------------------|---------------------------------|-------------------|--------------------------|
| SNP_P3_53803_37046902 | NC_021163.1    | Ca_kabuli_chr04 | 37046902                | TT                              | CC                | 1945957116               |
| SNP_P3_53804_37046928 | NC_021163.1    | Ca_kabuli_chr04 | 37046928                | GG                              | TT                | 1945957118               |
| SNP_P3_53805_37047568 | NC_021163.1    | Ca_kabuli_chr04 | 37047568                | GG                              | AA                | 1945957120               |
| SNP_P3_53806_37048089 | NC_021163.1    | Ca_kabuli_chr04 | 37048089                | CC                              | TT                | 1945957122               |
| SNP_P3_53807_37048090 | NC_021163.1    | Ca_kabuli_chr04 | 37048090                | AA                              | GG                | 1945957124               |
| SNP_P3_53808_37048152 | NC_021163.1    | Ca_kabuli_chr04 | 37048152                | AA                              | GG                | 1945957125               |
| SNP_P3_53809_37048173 | NC_021163.1    | Ca_kabuli_chr04 | 37048173                | TT                              | CC                | 1945957127               |
| SNP_P3_53810_37048399 | NC_021163.1    | Ca_kabuli_chr04 | 37048399                | TT                              | AA                | 1945957129               |
| SNP_P3_53811_37048446 | NC_021163.1    | Ca_kabuli_chr04 | 37048446                | TT                              | AA                | 1945957131               |
| SNP_P3_53812_37050302 | NC_021163.1    | Ca_kabuli_chr04 | 37050302                | CC                              | GG                | 1945957132               |
| SNP_P3_53813_37055197 | NC_021163.1    | Ca_kabuli_chr04 | 37055197                | CC                              | GG                | 1945957134               |
| SNP_P3_53815_37065794 | NC_021163.1    | Ca_kabuli_chr04 | 37065794                | TT                              | CC                | 1945957136               |
| SNP_P3_53816_37066282 | NC_021163.1    | Ca_kabuli_chr04 | 37066282                | TT                              | CC                | 1945957138               |
| SNP_P3_53817_37067209 | NC_021163.1    | Ca_kabuli_chr04 | 37067209                | GG                              | TT                | 1945957140               |
| SNP_P3_53818_37067241 | NC_021163.1    | Ca_kabuli_chr04 | 37067241                | GG                              | AA                | 1945957141               |
| SNP_P3_53819_37067251 | NC_021163.1    | Ca_kabuli_chr04 | 37067251                | CC                              | GG                | 1945957143               |
| SNP_P3_53820_37076266 | NC_021163.1    | Ca_kabuli_chr04 | 37076266                | TT                              | AA                | 1945957145               |
| SNP_P3_53821_37076384 | NC_021163.1    | Ca_kabuli_chr04 | 37076384                | CC                              | TT                | 1945957147               |
| SNP_P3_53824_37082930 | NC_021163.1    | Ca_kabuli_chr04 | 37082930                | CC                              | TT                | 1945957148               |
| SNP_P3_53825_37082938 | NC_021163.1    | Ca_kabuli_chr04 | 37082938                | AA                              | GG                | 1945957150               |
| SNP_P3_53826_37083045 | NC_021163.1    | Ca_kabuli_chr04 | 37083045                | GG                              | TT                | 1945957152               |
| SNP_P3_53828_37083338 | NC_021163.1    | Ca_kabuli_chr04 | 37083338                | AA                              | GG                | 1945957154               |
| SNP_P3_53830_37083702 | NC_021163.1    | Ca_kabuli_chr04 | 37083702                | AA                              | GG                | 1945957156               |
| SNP_P3_53831_37083708 | NC_021163.1    | Ca_kabuli_chr04 | 37083708                | GG                              | TT                | 1945957157               |
| SNP_P3_53832_37083761 | NC_021163.1    | Ca_kabuli_chr04 | 37083761                | CC                              | TT                | 1945957159               |
| SNP_P3_53833_37083882 | NC_021163.1    | Ca_kabuli_chr04 | 37083882                | AA                              | TT                | 1945957161               |
| SNP_P3_53834_37083883 | NC_021163.1    | Ca_kabuli_chr04 | 37083883                | TT                              | AA                | 1945957163               |
| SNP_P3_53835_37083898 | NC_021163.1    | Ca_kabuli_chr04 | 37083898                | TT                              | CC                | 1945957164               |
| SNP_P3_53836_37083904 | NC_021163.1    | Ca_kabuli_chr04 | 37083904                | CC                              | AA                | 1945957166               |
| SNP_P3_53837_37083922 | NC_021163.1    | Ca_kabuli_chr04 | 37083922                | CC                              | AA                | 1945957168               |
| SNP_P3_53838_37083924 | NC_021163.1    | Ca_kabuli_chr04 | 37083924                | TT                              | AA                | 1945957170               |
| SNP_P3_53839_37085448 | NC_021163.1    | Ca_kabuli_chr04 | 37085448                | TT                              | CC                | 1945957172               |
| SNP_P3_53840_37086325 | NC_021163.1    | Ca_kabuli_chr04 | 37086325                | AA                              | GG                | 1945957173               |
| SNP_P3_53841_37086366 | NC_021163.1    | Ca_kabuli_chr04 | 37086366                | GG                              | AA                | 1945957175               |
| SNP_P3_53842_37087109 | NC_021163.1    | Ca_kabuli_chr04 | 37087109                | AA                              | GG                | 1945957177               |
| SNP_P3_53843_37087174 | NC_021163.1    | Ca_kabuli_chr04 | 37087174                | GG                              | CC                | 1945957179               |
| SNP_P3_53844_37087183 | NC_021163.1    | Ca_kabuli_chr04 | 37087183                | GG                              | TT                | 1945957180               |
| SNP_P3_53845_37087238 | NC_021163.1    | Ca_kabuli_chr04 | 37087238                | CC                              | TT                | 1945957182               |
| SNP_P3_53846_37087402 | NC_021163.1    | Ca_kabuli_chr04 | 37087402                | GG                              | AA                | 1945957184               |
| SNP_P3_53847_37087431 | NC_021163.1    | Ca_kabuli_chr04 | 37087431                | TT                              | AA                | 1945957186               |
| SNP_P3_53848_37087433 | NC_021163.1    | Ca_kabuli_chr04 | 37087433                | TT                              | AA                | 1945957188               |
| SNP_P3_53849_37087452 | NC_021163.1    | Ca_kabuli_chr04 | 37087452                | GG                              | AA                | 1945957189               |

| SNPs IDs              | Chromosome IDs | Chromosomes     | Physical positions (bp) | CDC Frontier (Reference genome) | (Pusa 256 & HPNB) | NCBI SNPdb Accession IDs |
|-----------------------|----------------|-----------------|-------------------------|---------------------------------|-------------------|--------------------------|
| SNP_P3_53850_37087556 | NC_021163.1    | Ca_kabuli_chr04 | 37087556                | AA                              | GG                | 1945957191               |
| SNP_P3_53851_37088481 | NC_021163.1    | Ca_kabuli_chr04 | 37088481                | GG                              | TT                | 1945957193               |
| SNP_P3_53852_37088497 | NC_021163.1    | Ca_kabuli_chr04 | 37088497                | CC                              | TT                | 1945957195               |
| SNP_P3_53853_37088843 | NC_021163.1    | Ca_kabuli_chr04 | 37088843                | GG                              | TT                | 1945957196               |
| SNP_P3_53854_37088865 | NC_021163.1    | Ca_kabuli_chr04 | 37088865                | GG                              | AA                | 1945957198               |
| SNP_P3_53855_37089017 | NC_021163.1    | Ca_kabuli_chr04 | 37089017                | TT                              | CC                | 1945957200               |
| SNP_P3_53856_37089039 | NC_021163.1    | Ca_kabuli_chr04 | 37089039                | TT                              | CC                | 1945957202               |
| SNP_P3_53857_37089040 | NC_021163.1    | Ca_kabuli_chr04 | 37089040                | GG                              | AA                | 1945957204               |
| SNP_P3_53858_37089066 | NC_021163.1    | Ca_kabuli_chr04 | 37089066                | TT                              | AA                | 1945957205               |
| SNP_P3_53859_37089067 | NC_021163.1    | Ca_kabuli_chr04 | 37089067                | GG                              | TT                | 1945957207               |
| SNP_P3_53860_37089490 | NC_021163.1    | Ca_kabuli_chr04 | 37089490                | AA                              | GG                | 1945957209               |
| SNP_P3_53861_37089503 | NC_021163.1    | Ca_kabuli_chr04 | 37089503                | AA                              | TT                | 1945957211               |
| SNP_P3_53862_37089555 | NC_021163.1    | Ca_kabuli_chr04 | 37089555                | TT                              | CC                | 1945957212               |
| SNP_P3_53863_37089627 | NC_021163.1    | Ca_kabuli_chr04 | 37089627                | AA                              | GG                | 1945957214               |
| SNP_P3_53864_37089636 | NC_021163.1    | Ca_kabuli_chr04 | 37089636                | GG                              | AA                | 1945957216               |
| SNP_P3_53866_37090112 | NC_021163.1    | Ca_kabuli_chr04 | 37090112                | CC                              | GG                | 1945957218               |
| SNP_P3_53867_37090452 | NC_021163.1    | Ca_kabuli_chr04 | 37090452                | GG                              | AA                | 1945957220               |
| SNP_P3_53868_37090459 | NC_021163.1    | Ca_kabuli_chr04 | 37090459                | AA                              | GG                | 1945957221               |
| SNP_P3_53869_37092534 | NC_021163.1    | Ca_kabuli_chr04 | 37092534                | AA                              | GG                | 1945957223               |
| SNP_P3_53870_37092560 | NC_021163.1    | Ca_kabuli_chr04 | 37092560                | AA                              | GG                | 1945957225               |
| SNP_P3_53871_37092593 | NC_021163.1    | Ca_kabuli_chr04 | 37092593                | AA                              | TT                | 1945957227               |
| SNP_P3_53872_37092618 | NC_021163.1    | Ca_kabuli_chr04 | 37092618                | TT                              | CC                | 1945957228               |
| SNP_P3_53873_37093646 | NC_021163.1    | Ca_kabuli_chr04 | 37093646                | AA                              | CC                | 1945957230               |
| SNP_P3_53874_37093986 | NC_021163.1    | Ca_kabuli_chr04 | 37093986                | TT                              | AA                | 1945957232               |
| SNP_P3_53875_37094010 | NC_021163.1    | Ca_kabuli_chr04 | 37094010                | CC                              | TT                | 1945957234               |
| SNP_P3_53876_37094041 | NC_021163.1    | Ca_kabuli_chr04 | 37094041                | CC                              | TT                | 1945957236               |
| SNP_P3_53877_37096393 | NC_021163.1    | Ca_kabuli_chr04 | 37096393                | AA                              | GG                | 1945957237               |
| SNP_P3_53878_37098310 | NC_021163.1    | Ca_kabuli_chr04 | 37098310                | GG                              | AA                | 1945957239               |
| SNP_P3_53879_37098311 | NC_021163.1    | Ca_kabuli_chr04 | 37098311                | AA                              | CC                | 1945957241               |
| SNP_P3_53880_37098341 | NC_021163.1    | Ca_kabuli_chr04 | 37098341                | TT                              | CC                | 1945957243               |
| SNP_P3_53881_37098354 | NC_021163.1    | Ca_kabuli_chr04 | 37098354                | TT                              | CC                | 1945957244               |
| SNP_P3_53882_37098391 | NC_021163.1    | Ca_kabuli_chr04 | 37098391                | TT                              | CC                | 1945957246               |
| SNP_P3_53883_37098581 | NC_021163.1    | Ca_kabuli_chr04 | 37098581                | GG                              | AA                | 1945957248               |
| SNP_P3_53885_37098639 | NC_021163.1    | Ca_kabuli_chr04 | 37098639                | CC                              | AA                | 1945957250               |
| SNP_P3_53886_37098671 | NC_021163.1    | Ca_kabuli_chr04 | 37098671                | CC                              | TT                | 1945957252               |
| SNP_P3_53888_37098882 | NC_021163.1    | Ca_kabuli_chr04 | 37098882                | AA                              | GG                | 1945957253               |
| SNP_P3_53889_37100208 | NC_021163.1    | Ca_kabuli_chr04 | 37100208                | GG                              | AA                | 1945957255               |
| SNP_P3_53890_37100245 | NC_021163.1    | Ca_kabuli_chr04 | 37100245                | TT                              | AA                | 1945957257               |
| SNP_P3_53891_37100839 | NC_021163.1    | Ca_kabuli_chr04 | 37100839                | CC                              | TT                | 1945957259               |
| SNP_P3_53892_37101364 | NC_021163.1    | Ca_kabuli_chr04 | 37101364                | AA                              | GG                | 1945957261               |
| SNP_P3_53893_37101396 | NC_021163.1    | Ca_kabuli_chr04 | 37101396                | AA                              | GG                | 1945957262               |
| SNP_P3_53894_37101508 | NC_021163.1    | Ca_kabuli_chr04 | 37101508                | GG                              | AA                | 1945957264               |

| SNPs IDs              | Chromosome IDs | Chromosomes     | Physical positions (bp) | CDC Frontier (Reference genome) | (Pusa 256 & HPNB) | NCBI SNPdb Accession IDs |
|-----------------------|----------------|-----------------|-------------------------|---------------------------------|-------------------|--------------------------|
| SNP_P3_53895_37101531 | NC_021163.1    | Ca_kabuli_chr04 | 37101531                | GG                              | AA                | 1945957266               |
| SNP_P3_53896_37101533 | NC_021163.1    | Ca_kabuli_chr04 | 37101533                | CC                              | TT                | 1945957268               |
| SNP_P3_53897_37101560 | NC_021163.1    | Ca_kabuli_chr04 | 37101560                | CC                              | TT                | 1945957269               |
| SNP_P3_53898_37101650 | NC_021163.1    | Ca_kabuli_chr04 | 37101650                | TT                              | AA                | 1945957271               |
| SNP_P3_53899_37101662 | NC_021163.1    | Ca_kabuli_chr04 | 37101662                | AA                              | GG                | 1945957273               |
| SNP_P3_53900_37103808 | NC_021163.1    | Ca_kabuli_chr04 | 37103808                | TT                              | CC                | 1945957275               |
| SNP_P3_53901_37103849 | NC_021163.1    | Ca_kabuli_chr04 | 37103849                | CC                              | TT                | 1945957277               |
| SNP_P3_53902_37103964 | NC_021163.1    | Ca_kabuli_chr04 | 37103964                | GG                              | AA                | 1945957278               |
| SNP_P3_53903_37104030 | NC_021163.1    | Ca_kabuli_chr04 | 37104030                | GG                              | AA                | 1945957280               |
| SNP_P3_53904_37104291 | NC_021163.1    | Ca_kabuli_chr04 | 37104291                | GG                              | TT                | 1945957282               |
| SNP_P3_53906_37104657 | NC_021163.1    | Ca_kabuli_chr04 | 37104657                | TT                              | CC                | 1945957284               |
| SNP_P3_53907_37104675 | NC_021163.1    | Ca_kabuli_chr04 | 37104675                | AA                              | CC                | 1945957285               |
| SNP_P3_53908_37104704 | NC_021163.1    | Ca_kabuli_chr04 | 37104704                | GG                              | TT                | 1945957287               |
| SNP_P3_53909_37104948 | NC_021163.1    | Ca_kabuli_chr04 | 37104948                | GG                              | AA                | 1945957289               |
| SNP_P3_53910_37105176 | NC_021163.1    | Ca_kabuli_chr04 | 37105176                | AA                              | GG                | 1945957291               |
| SNP_P3_53911_37105487 | NC_021163.1    | Ca_kabuli_chr04 | 37105487                | GG                              | AA                | 1945957293               |
| SNP_P3_53913_37105967 | NC_021163.1    | Ca_kabuli_chr04 | 37105967                | TT                              | AA                | 1945957294               |
| SNP_P3_53914_37106359 | NC_021163.1    | Ca_kabuli_chr04 | 37106359                | TT                              | AA                | 1945957296               |
| SNP_P3_53915_37106631 | NC_021163.1    | Ca_kabuli_chr04 | 37106631                | CC                              | TT                | 1945957298               |
| SNP_P3_53916_37106641 | NC_021163.1    | Ca_kabuli_chr04 | 37106641                | GG                              | AA                | 1945957300               |
| SNP_P3_53917_37106642 | NC_021163.1    | Ca_kabuli_chr04 | 37106642                | CC                              | TT                | 1945957301               |
| SNP_P3_53918_37106857 | NC_021163.1    | Ca_kabuli_chr04 | 37106857                | AA                              | CC                | 1945957303               |
| SNP_P3_53919_37106859 | NC_021163.1    | Ca_kabuli_chr04 | 37106859                | CC                              | TT                | 1945957305               |
| SNP_P3_53920_37106964 | NC_021163.1    | Ca_kabuli_chr04 | 37106964                | TT                              | CC                | 1945957307               |
| SNP_P3_53921_37107063 | NC_021163.1    | Ca_kabuli_chr04 | 37107063                | TT                              | CC                | 1945957309               |
| SNP_P3_53922_37107209 | NC_021163.1    | Ca_kabuli_chr04 | 37107209                | CC                              | AA                | 1945957310               |
| SNP_P3_53923_37107211 | NC_021163.1    | Ca_kabuli_chr04 | 37107211                | CC                              | TT                | 1945957312               |
| SNP_P3_53924_37107262 | NC_021163.1    | Ca_kabuli_chr04 | 37107262                | AA                              | GG                | 1945957314               |
| SNP_P3_53925_37107266 | NC_021163.1    | Ca_kabuli_chr04 | 37107266                | CC                              | AA                | 1945957316               |
| SNP_P3_53926_37107356 | NC_021163.1    | Ca_kabuli_chr04 | 37107356                | GG                              | AA                | 1945957317               |
| SNP_P3_53927_37107366 | NC_021163.1    | Ca_kabuli_chr04 | 37107366                | CC                              | GG                | 1945957319               |
| SNP_P3_53928_37107371 | NC_021163.1    | Ca_kabuli_chr04 | 37107371                | GG                              | TT                | 1945957321               |
| SNP_P3_53929_37107392 | NC_021163.1    | Ca_kabuli_chr04 | 37107392                | TT                              | AA                | 1945957323               |
| SNP_P3_53930_37107505 | NC_021163.1    | Ca_kabuli_chr04 | 37107505                | TT                              | GG                | 1945957325               |
| SNP_P3_53931_37108867 | NC_021163.1    | Ca_kabuli_chr04 | 37108867                | AA                              | CC                | 1945957326               |
| SNP_P3_53932_37108883 | NC_021163.1    | Ca_kabuli_chr04 | 37108883                | CC                              | TT                | 1945957328               |
| SNP_P3_53933_37108918 | NC_021163.1    | Ca_kabuli_chr04 | 37108918                | CC                              | GG                | 1945957330               |
| SNP_P3_53934_37108956 | NC_021163.1    | Ca_kabuli_chr04 | 37108956                | GG                              | AA                | 1945957332               |
| SNP_P3_53935_37108967 | NC_021163.1    | Ca_kabuli_chr04 | 37108967                | GG                              | TT                | 1945957333               |
| SNP_P3_53936_37109344 | NC_021163.1    | Ca_kabuli_chr04 | 37109344                | AA                              | GG                | 1945957335               |
| SNP_P3_53937_37117471 | NC_021163.1    | Ca_kabuli_chr04 | 37117471                | GG                              | CC                | 1945957337               |
| SNP_P3_53938_37117902 | NC_021163.1    | Ca_kabuli_chr04 | 37117902                | AA                              | TT                | 1945957339               |

| SNPs IDs              | Chromosome IDs | Chromosomes     | Physical positions (bp) | CDC Frontier (Reference genome) | (Pusa 256 & HPNB) | NCBI SNPdb Accession IDs |
|-----------------------|----------------|-----------------|-------------------------|---------------------------------|-------------------|--------------------------|
| SNP_P3_53940_37119311 | NC_021163.1    | Ca_kabuli_chr04 | 37119311                | TT                              | GG                | 1945957341               |
| SNP_P3_53942_37119362 | NC_021163.1    | Ca_kabuli_chr04 | 37119362                | CC                              | TT                | 1945957342               |
| SNP_P3_53943_37119566 | NC_021163.1    | Ca_kabuli_chr04 | 37119566                | TT                              | GG                | 1945957344               |
| SNP_P3_53944_37119583 | NC_021163.1    | Ca_kabuli_chr04 | 37119583                | TT                              | AA                | 1945957346               |
| SNP_P3_53945_37119655 | NC_021163.1    | Ca_kabuli_chr04 | 37119655                | AA                              | GG                | 1945957348               |
| SNP_P3_53946_37119937 | NC_021163.1    | Ca_kabuli_chr04 | 37119937                | AA                              | TT                | 1945957349               |
| SNP_P3_53947_37120017 | NC_021163.1    | Ca_kabuli_chr04 | 37120017                | AA                              | CC                | 1945957351               |
| SNP_P3_53948_37120045 | NC_021163.1    | Ca_kabuli_chr04 | 37120045                | GG                              | AA                | 1945957353               |
| SNP_P3_53949_37120054 | NC_021163.1    | Ca_kabuli_chr04 | 37120054                | CC                              | TT                | 1945957355               |
| SNP_P3_53950_37120277 | NC_021163.1    | Ca_kabuli_chr04 | 37120277                | GG                              | AA                | 1945957357               |
| SNP_P3_53951_37120362 | NC_021163.1    | Ca_kabuli_chr04 | 37120362                | AA                              | GG                | 1945957358               |
| SNP_P3_53952_37120366 | NC_021163.1    | Ca_kabuli_chr04 | 37120366                | CC                              | TT                | 1945957360               |
| SNP_P3_53953_37120370 | NC_021163.1    | Ca_kabuli_chr04 | 37120370                | CC                              | TT                | 1945957362               |
| SNP_P3_53954_37120453 | NC_021163.1    | Ca_kabuli_chr04 | 37120453                | TT                              | AA                | 1945957364               |
| SNP_P3_53955_37120471 | NC_021163.1    | Ca_kabuli_chr04 | 37120471                | AA                              | TT                | 1945957365               |
| SNP_P3_53956_37120507 | NC_021163.1    | Ca_kabuli_chr04 | 37120507                | CC                              | TT                | 1945957367               |
| SNP_P3_53957_37121293 | NC_021163.1    | Ca_kabuli_chr04 | 37121293                | AA                              | GG                | 1945957369               |
| SNP_P3_53958_37121352 | NC_021163.1    | Ca_kabuli_chr04 | 37121352                | AA                              | GG                | 1945957371               |
| SNP_P3_53960_37122019 | NC_021163.1    | Ca_kabuli_chr04 | 37122019                | AA                              | CC                | 1945957373               |
| SNP_P3_53961_37122277 | NC_021163.1    | Ca_kabuli_chr04 | 37122277                | GG                              | TT                | 1945957374               |
| SNP_P3_53962_37122422 | NC_021163.1    | Ca_kabuli_chr04 | 37122422                | CC                              | AA                | 1945957376               |
| SNP_P3_53963_37122631 | NC_021163.1    | Ca_kabuli_chr04 | 37122631                | AA                              | TT                | 1945957378               |
| SNP_P3_53964_37122691 | NC_021163.1    | Ca_kabuli_chr04 | 37122691                | TT                              | AA                | 1945957380               |
| SNP_P3_53965_37122740 | NC_021163.1    | Ca_kabuli_chr04 | 37122740                | TT                              | GG                | 1945957381               |
| SNP_P3_53966_37123066 | NC_021163.1    | Ca_kabuli_chr04 | 37123066                | TT                              | CC                | 1945957383               |
| SNP_P3_53967_37126887 | NC_021163.1    | Ca_kabuli_chr04 | 37126887                | GG                              | AA                | 1945957385               |
| SNP_P3_53968_37126897 | NC_021163.1    | Ca_kabuli_chr04 | 37126897                | AA                              | CC                | 1945957387               |
| SNP_P3_53969_37128233 | NC_021163.1    | Ca_kabuli_chr04 | 37128233                | AA                              | GG                | 1945957389               |
| SNP_P3_53970_37128236 | NC_021163.1    | Ca_kabuli_chr04 | 37128236                | TT                              | AA                | 1945957390               |
| SNP_P3_53971_37128237 | NC_021163.1    | Ca_kabuli_chr04 | 37128237                | TT                              | GG                | 1945957392               |
| SNP_P3_53972_37128243 | NC_021163.1    | Ca_kabuli_chr04 | 37128243                | AA                              | GG                | 1945957394               |
| SNP_P3_53973_37128297 | NC_021163.1    | Ca_kabuli_chr04 | 37128297                | GG                              | AA                | 1945957396               |
| SNP_P3_53974_37128298 | NC_021163.1    | Ca_kabuli_chr04 | 37128298                | GG                              | CC                | 1945957397               |
| SNP_P3_53975_37128407 | NC_021163.1    | Ca_kabuli_chr04 | 37128407                | TT                              | AA                | 1945957399               |
| SNP_P3_53976_37128417 | NC_021163.1    | Ca_kabuli_chr04 | 37128417                | GG                              | AA                | 1945957401               |
| SNP_P3_53977_37128448 | NC_021163.1    | Ca_kabuli_chr04 | 37128448                | AA                              | CC                | 1945957403               |
| SNP_P3_53979_37128566 | NC_021163.1    | Ca_kabuli_chr04 | 37128566                | GG                              | AA                | 1945957405               |
| SNP_P3_53980_37128598 | NC_021163.1    | Ca_kabuli_chr04 | 37128598                | CC                              | TT                | 1945957406               |
| SNP_P3_53981_37128602 | NC_021163.1    | Ca_kabuli_chr04 | 37128602                | CC                              | TT                | 1945957408               |
| SNP_P3_53982_37128744 | NC_021163.1    | Ca_kabuli_chr04 | 37128744                | CC                              | GG                | 1945957410               |
| SNP_P3_53983_37128760 | NC_021163.1    | Ca_kabuli_chr04 | 37128760                | GG                              | TT                | 1945957412               |
| SNP_P3_53985_37130375 | NC_021163.1    | Ca_kabuli_chr04 | 37130375                | AA                              | TT                | 1945957413               |



| SNPs IDs              | Chromosome IDs | Chromosomes     | Physical positions (bp) | CDC Frontier (Reference genome) | (Pusa 256 & HPNB) | NCBI SNPdb Accession IDs |
|-----------------------|----------------|-----------------|-------------------------|---------------------------------|-------------------|--------------------------|
| SNP_P3_53986_37131123 | NC_021163.1    | Ca_kabuli_chr04 | 37131123                | GG                              | AA                | 1945957415               |
| SNP_P3_53987_37131157 | NC_021163.1    | Ca_kabuli_chr04 | 37131157                | CC                              | TT                | 1945957417               |
| SNP_P3_53988_37131175 | NC_021163.1    | Ca_kabuli_chr04 | 37131175                | AA                              | GG                | 1945957419               |
| SNP_P3_53989_37131179 | NC_021163.1    | Ca_kabuli_chr04 | 37131179                | TT                              | AA                | 1945957421               |
| SNP_P3_53990_37131284 | NC_021163.1    | Ca_kabuli_chr04 | 37131284                | CC                              | GG                | 1945957422               |
| SNP_P3_53992_37131343 | NC_021163.1    | Ca_kabuli_chr04 | 37131343                | GG                              | AA                | 1945957424               |
| SNP_P3_53993_37131387 | NC_021163.1    | Ca_kabuli_chr04 | 37131387                | TT                              | CC                | 1945957426               |
| SNP_P3_53994_37131492 | NC_021163.1    | Ca_kabuli_chr04 | 37131492                | TT                              | AA                | 1945957428               |
| SNP_P3_53995_37131496 | NC_021163.1    | Ca_kabuli_chr04 | 37131496                | TT                              | AA                | 1945957430               |
| SNP_P3_53996_37148546 | NC_021163.1    | Ca_kabuli_chr04 | 37148546                | CC                              | AA                | 1945957431               |
| SNP_P3_53997_37149648 | NC_021163.1    | Ca_kabuli_chr04 | 37149648                | CC                              | TT                | 1945957433               |
| SNP_P3_53998_37151985 | NC_021163.1    | Ca_kabuli_chr04 | 37151985                | GG                              | AA                | 1945957435               |
| SNP_P3_53999_37154615 | NC_021163.1    | Ca_kabuli_chr04 | 37154615                | CC                              | TT                | 1945957437               |
| SNP_P3_54000_37154628 | NC_021163.1    | Ca_kabuli_chr04 | 37154628                | GG                              | CC                | 1945957438               |
| SNP_P3_54001_37156636 | NC_021163.1    | Ca_kabuli_chr04 | 37156636                | TT                              | CC                | 1945957440               |
| SNP_P3_54002_37156946 | NC_021163.1    | Ca_kabuli_chr04 | 37156946                | CC                              | AA                | 1945957442               |
| SNP_P3_54003_37158267 | NC_021163.1    | Ca_kabuli_chr04 | 37158267                | AA                              | GG                | 1945957444               |
| SNP_P3_54004_37158434 | NC_021163.1    | Ca_kabuli_chr04 | 37158434                | TT                              | CC                | 1945957446               |
| SNP_P3_54005_37159390 | NC_021163.1    | Ca_kabuli_chr04 | 37159390                | CC                              | TT                | 1945957447               |
| SNP_P3_54006_37159859 | NC_021163.1    | Ca_kabuli_chr04 | 37159859                | TT                              | CC                | 1945957449               |
| SNP_P3_54007_37163002 | NC_021163.1    | Ca_kabuli_chr04 | 37163002                | GG                              | AA                | 1945957451               |
| SNP_P3_54008_37163062 | NC_021163.1    | Ca_kabuli_chr04 | 37163062                | GG                              | AA                | 1945957453               |
| SNP_P3_54009_37169131 | NC_021163.1    | Ca_kabuli_chr04 | 37169131                | CC                              | TT                | 1945957454               |
| SNP_P3_54010_37169317 | NC_021163.1    | Ca_kabuli_chr04 | 37169317                | TT                              | CC                | 1945957456               |
| SNP_P3_54011_37172408 | NC_021163.1    | Ca_kabuli_chr04 | 37172408                | AA                              | GG                | 1945957458               |
| SNP_P3_54012_37172677 | NC_021163.1    | Ca_kabuli_chr04 | 37172677                | TT                              | CC                | 1945957460               |
| SNP_P3_54013_37173481 | NC_021163.1    | Ca_kabuli_chr04 | 37173481                | AA                              | CC                | 1945957462               |
| SNP_P3_54015_37173820 | NC_021163.1    | Ca_kabuli_chr04 | 37173820                | CC                              | GG                | 1945957463               |
| SNP_P3_54016_37174254 | NC_021163.1    | Ca_kabuli_chr04 | 37174254                | AA                              | GG                | 1945957465               |
| SNP_P3_54017_37175086 | NC_021163.1    | Ca_kabuli_chr04 | 37175086                | GG                              | AA                | 1945957467               |
| SNP_P3_54018_37178043 | NC_021163.1    | Ca_kabuli_chr04 | 37178043                | GG                              | AA                | 1945957469               |
| SNP_P3_54019_37181276 | NC_021163.1    | Ca_kabuli_chr04 | 37181276                | GG                              | AA                | 1945957470               |
| SNP_P3_54020_37181293 | NC_021163.1    | Ca_kabuli_chr04 | 37181293                | TT                              | AA                | 1945957472               |
| SNP_P3_54021_37181299 | NC_021163.1    | Ca_kabuli_chr04 | 37181299                | TT                              | AA                | 1945957474               |
| SNP_P3_54022_37181552 | NC_021163.1    | Ca_kabuli_chr04 | 37181552                | TT                              | AA                | 1945957476               |
| SNP_P3_54023_37185703 | NC_021163.1    | Ca_kabuli_chr04 | 37185703                | AA                              | GG                | 1945957477               |
| SNP_P3_54024_37185725 | NC_021163.1    | Ca_kabuli_chr04 | 37185725                | TT                              | CC                | 1945957479               |
| SNP_P3_54025_37188234 | NC_021163.1    | Ca_kabuli_chr04 | 37188234                | TT                              | GG                | 1945957481               |
| SNP_P3_54026_37195137 | NC_021163.1    | Ca_kabuli_chr04 | 37195137                | CC                              | TT                | 1945957483               |
| SNP_P3_54027_37195153 | NC_021163.1    | Ca_kabuli_chr04 | 37195153                | TT                              | CC                | 1945957485               |
| SNP_P3_54028_37196119 | NC_021163.1    | Ca_kabuli_chr04 | 37196119                | AA                              | GG                | 1945957486               |
| SNP_P3_54029_37196409 | NC_021163.1    | Ca_kabuli_chr04 | 37196409                | CC                              | TT                | 1945957488               |

| SNPs IDs              | Chromosome IDs | Chromosomes     | Physical positions (bp) | CDC Frontier (Reference genome) | (Pusa 256 & HPNB) | NCBI SNPdb Accession IDs |
|-----------------------|----------------|-----------------|-------------------------|---------------------------------|-------------------|--------------------------|
| SNP_P3_54030_37196804 | NC_021163.1    | Ca_kabuli_chr04 | 37196804                | AA                              | TT                | 1945957490               |
| SNP_P3_54031_37196831 | NC_021163.1    | Ca_kabuli_chr04 | 37196831                | AA                              | GG                | 1945957492               |
| SNP_P3_54032_37198878 | NC_021163.1    | Ca_kabuli_chr04 | 37198878                | GG                              | AA                | 1945957494               |
| SNP_P3_54035_37199991 | NC_021163.1    | Ca_kabuli_chr04 | 37199991                | GG                              | CC                | 1945957495               |
| SNP_P3_54036_37201688 | NC_021163.1    | Ca_kabuli_chr04 | 37201688                | AA                              | GG                | 1945957497               |
| SNP_P3_54037_37201710 | NC_021163.1    | Ca_kabuli_chr04 | 37201710                | AA                              | TT                | 1945957499               |
| SNP_P3_54038_37204264 | NC_021163.1    | Ca_kabuli_chr04 | 37204264                | CC                              | TT                | 1945957501               |
| SNP_P3_54039_37204679 | NC_021163.1    | Ca_kabuli_chr04 | 37204679                | AA                              | CC                | 1945957502               |
| SNP_P3_54040_37207660 | NC_021163.1    | Ca_kabuli_chr04 | 37207660                | TT                              | GG                | 1945957504               |
| SNP_P3_54041_37207873 | NC_021163.1    | Ca_kabuli_chr04 | 37207873                | AA                              | CC                | 1945957506               |
| SNP_P3_54042_37209039 | NC_021163.1    | Ca_kabuli_chr04 | 37209039                | TT                              | AA                | 1945957508               |
| SNP_P3_54043_37210592 | NC_021163.1    | Ca_kabuli_chr04 | 37210592                | GG                              | AA                | 1945957510               |
| SNP_P3_54044_37210635 | NC_021163.1    | Ca_kabuli_chr04 | 37210635                | GG                              | TT                | 1945957511               |
| SNP_P3_54045_37210642 | NC_021163.1    | Ca_kabuli_chr04 | 37210642                | AA                              | GG                | 1945957513               |
| SNP_P3_54046_37211287 | NC_021163.1    | Ca_kabuli_chr04 | 37211287                | TT                              | CC                | 1945957515               |
| SNP_P3_54047_37211984 | NC_021163.1    | Ca_kabuli_chr04 | 37211984                | AA                              | CC                | 1945957517               |
| SNP_P3_54048_37213424 | NC_021163.1    | Ca_kabuli_chr04 | 37213424                | GG                              | AA                | 1945957518               |
| SNP_P3_54049_37213427 | NC_021163.1    | Ca_kabuli_chr04 | 37213427                | GG                              | AA                | 1945957520               |
| SNP_P3_54050_37213436 | NC_021163.1    | Ca_kabuli_chr04 | 37213436                | GG                              | CC                | 1945957522               |
| SNP_P3_54051_37213771 | NC_021163.1    | Ca_kabuli_chr04 | 37213771                | TT                              | CC                | 1945957524               |
| SNP_P3_54052_37214024 | NC_021163.1    | Ca_kabuli_chr04 | 37214024                | GG                              | TT                | 1945957526               |
| SNP_P3_54053_37214306 | NC_021163.1    | Ca_kabuli_chr04 | 37214306                | TT                              | CC                | 1945957527               |
| SNP_P3_54054_37216029 | NC_021163.1    | Ca_kabuli_chr04 | 37216029                | AA                              | GG                | 1945957529               |
| SNP_P3_54055_37216152 | NC_021163.1    | Ca_kabuli_chr04 | 37216152                | TT                              | AA                | 1945957531               |
| SNP_P3_54056_37216289 | NC_021163.1    | Ca_kabuli_chr04 | 37216289                | GG                              | AA                | 1945957532               |
| SNP_P3_54057_37216373 | NC_021163.1    | Ca_kabuli_chr04 | 37216373                | CC                              | TT                | 1945957534               |
| SNP_P3_54058_37216632 | NC_021163.1    | Ca_kabuli_chr04 | 37216632                | TT                              | CC                | 1945957536               |
| SNP_P3_54059_37216633 | NC_021163.1    | Ca_kabuli_chr04 | 37216633                | GG                              | AA                | 1945957538               |
| SNP_P3_54060_37216674 | NC_021163.1    | Ca_kabuli_chr04 | 37216674                | CC                              | TT                | 1945957540               |
| SNP_P3_54061_37216678 | NC_021163.1    | Ca_kabuli_chr04 | 37216678                | GG                              | AA                | 1945957541               |
| SNP_P3_54062_37216687 | NC_021163.1    | Ca_kabuli_chr04 | 37216687                | AA                              | GG                | 1945957543               |
| SNP_P3_54063_37216689 | NC_021163.1    | Ca_kabuli_chr04 | 37216689                | CC                              | TT                | 1945957545               |
| SNP_P3_54064_37216740 | NC_021163.1    | Ca_kabuli_chr04 | 37216740                | CC                              | TT                | 1945957547               |
| SNP_P3_54065_37216782 | NC_021163.1    | Ca_kabuli_chr04 | 37216782                | TT                              | CC                | 1945957548               |
| SNP_P3_54066_37216783 | NC_021163.1    | Ca_kabuli_chr04 | 37216783                | CC                              | AA                | 1945957550               |
| SNP_P3_54067_37216801 | NC_021163.1    | Ca_kabuli_chr04 | 37216801                | TT                              | CC                | 1945957552               |
| SNP_P3_54068_37216871 | NC_021163.1    | Ca_kabuli_chr04 | 37216871                | CC                              | TT                | 1945957554               |
| SNP_P3_54069_37217021 | NC_021163.1    | Ca_kabuli_chr04 | 37217021                | AA                              | GG                | 1945957556               |
| SNP_P3_54070_37217049 | NC_021163.1    | Ca_kabuli_chr04 | 37217049                | TT                              | CC                | 1945957557               |
| SNP_P3_54071_37217590 | NC_021163.1    | Ca_kabuli_chr04 | 37217590                | AA                              | TT                | 1945957559               |
| SNP_P3_54072_37217631 | NC_021163.1    | Ca_kabuli_chr04 | 37217631                | CC                              | TT                | 1945957561               |
| SNP_P3_54073_37217673 | NC_021163.1    | Ca_kabuli_chr04 | 37217673                | TT                              | AA                | 1945957563               |

| SNPs IDs              | Chromosome IDs | Chromosomes     | Physical positions (bp) | CDC Frontier (Reference genome) | (Pusa 256 & HPNB) | NCBI SNPdb Accession IDs |
|-----------------------|----------------|-----------------|-------------------------|---------------------------------|-------------------|--------------------------|
| SNP_P3_54074_37217677 | NC_021163.1    | Ca_kabuli_chr04 | 37217677                | GG                              | AA                | 1945957564               |
| SNP_P3_54075_37217716 | NC_021163.1    | Ca_kabuli_chr04 | 37217716                | TT                              | GG                | 1945957566               |
| SNP_P3_54076_37217801 | NC_021163.1    | Ca_kabuli_chr04 | 37217801                | AA                              | TT                | 1945957568               |
| SNP_P3_54077_37217832 | NC_021163.1    | Ca_kabuli_chr04 | 37217832                | TT                              | CC                | 1945957570               |
| SNP_P3_54078_37217833 | NC_021163.1    | Ca_kabuli_chr04 | 37217833                | GG                              | AA                | 1945957572               |
| SNP_P3_54079_37217897 | NC_021163.1    | Ca_kabuli_chr04 | 37217897                | GG                              | AA                | 1945957573               |
| SNP_P3_54080_37218134 | NC_021163.1    | Ca_kabuli_chr04 | 37218134                | AA                              | TT                | 1945957575               |
| SNP_P3_54081_37218137 | NC_021163.1    | Ca_kabuli_chr04 | 37218137                | AA                              | CC                | 1945957577               |
| SNP_P3_54083_37219048 | NC_021163.1    | Ca_kabuli_chr04 | 37219048                | GG                              | AA                | 1945957579               |
| SNP_P3_54084_37219064 | NC_021163.1    | Ca_kabuli_chr04 | 37219064                | GG                              | AA                | 1945957580               |
| SNP_P3_54085_37220672 | NC_021163.1    | Ca_kabuli_chr04 | 37220672                | TT                              | AA                | 1945957582               |
| SNP_P3_54086_37220711 | NC_021163.1    | Ca_kabuli_chr04 | 37220711                | GG                              | AA                | 1945957584               |
| SNP_P3_54088_37221852 | NC_021163.1    | Ca_kabuli_chr04 | 37221852                | GG                              | AA                | 1945957586               |
| SNP_P3_54089_37222038 | NC_021163.1    | Ca_kabuli_chr04 | 37222038                | CC                              | TT                | 1945957588               |
| SNP_P3_54090_37222087 | NC_021163.1    | Ca_kabuli_chr04 | 37222087                | AA                              | GG                | 1945957589               |
| SNP_P3_54091_37222124 | NC_021163.1    | Ca_kabuli_chr04 | 37222124                | AA                              | CC                | 1945957591               |
| SNP_P3_54093_37223189 | NC_021163.1    | Ca_kabuli_chr04 | 37223189                | GG                              | AA                | 1945957593               |
| SNP_P3_54094_37223552 | NC_021163.1    | Ca_kabuli_chr04 | 37223552                | CC                              | TT                | 1945957595               |
| SNP_P3_54095_37225566 | NC_021163.1    | Ca_kabuli_chr04 | 37225566                | TT                              | CC                | 1945957596               |
| SNP_P3_54096_37225601 | NC_021163.1    | Ca_kabuli_chr04 | 37225601                | AA                              | CC                | 1945957598               |
| SNP_P3_54097_37225628 | NC_021163.1    | Ca_kabuli_chr04 | 37225628                | CC                              | TT                | 1945957600               |
| SNP_P3_54098_37225644 | NC_021163.1    | Ca_kabuli_chr04 | 37225644                | CC                              | TT                | 1945957602               |
| SNP_P3_54099_37225651 | NC_021163.1    | Ca_kabuli_chr04 | 37225651                | CC                              | TT                | 1945957604               |
| SNP_P3_54100_37225716 | NC_021163.1    | Ca_kabuli_chr04 | 37225716                | GG                              | AA                | 1945957605               |
| SNP_P3_54102_37226108 | NC_021163.1    | Ca_kabuli_chr04 | 37226108                | CC                              | TT                | 1945957607               |
| SNP_P3_54103_37226520 | NC_021163.1    | Ca_kabuli_chr04 | 37226520                | TT                              | CC                | 1945957609               |
| SNP_P3_54104_37229043 | NC_021163.1    | Ca_kabuli_chr04 | 37229043                | TT                              | AA                | 1945957611               |
| SNP_P3_54105_37230178 | NC_021163.1    | Ca_kabuli_chr04 | 37230178                | AA                              | GG                | 1945957612               |
| SNP_P3_54106_37231658 | NC_021163.1    | Ca_kabuli_chr04 | 37231658                | AA                              | GG                | 1945957614               |
| SNP_P3_54107_37232639 | NC_021163.1    | Ca_kabuli_chr04 | 37232639                | AA                              | GG                | 1945957616               |
| SNP_P3_54108_37233130 | NC_021163.1    | Ca_kabuli_chr04 | 37233130                | AA                              | GG                | 1945957618               |
| SNP_P3_54110_37233988 | NC_021163.1    | Ca_kabuli_chr04 | 37233988                | CC                              | GG                | 1945957620               |
| SNP_P3_54111_37234671 | NC_021163.1    | Ca_kabuli_chr04 | 37234671                | TT                              | CC                | 1945957621               |
| SNP_P3_54112_37234672 | NC_021163.1    | Ca_kabuli_chr04 | 37234672                | GG                              | AA                | 1945957623               |
| SNP_P3_54113_37235659 | NC_021163.1    | Ca_kabuli_chr04 | 37235659                | AA                              | GG                | 1945957625               |
| SNP_P3_54114_37235671 | NC_021163.1    | Ca_kabuli_chr04 | 37235671                | GG                              | AA                | 1945957627               |
| SNP_P3_54115_37235719 | NC_021163.1    | Ca_kabuli_chr04 | 37235719                | AA                              | GG                | 1945957628               |
| SNP_P3_54116_37236045 | NC_021163.1    | Ca_kabuli_chr04 | 37236045                | GG                              | AA                | 1945957630               |
| SNP_P3_54117_37236238 | NC_021163.1    | Ca_kabuli_chr04 | 37236238                | AA                              | TT                | 1945957632               |
| SNP_P3_54118_37239696 | NC_021163.1    | Ca_kabuli_chr04 | 37239696                | TT                              | CC                | 1945957634               |
| SNP_P3_54119_37240813 | NC_021163.1    | Ca_kabuli_chr04 | 37240813                | TT                              | AA                | 1945957636               |
| SNP_P3_54120_37241962 | NC_021163.1    | Ca_kabuli_chr04 | 37241962                | TT                              | CC                | 1945957637               |

| SNPs IDs              | Chromosome IDs | Chromosomes     | Physical positions (bp) | CDC Frontier (Reference genome) | (Pusa 256 & HPNB) | NCBI SNPdb Accession IDs |
|-----------------------|----------------|-----------------|-------------------------|---------------------------------|-------------------|--------------------------|
| SNP_P3_54121_37242311 | NC_021163.1    | Ca_kabuli_chr04 | 37242311                | AA                              | GG                | 1945957639               |
| SNP_P3_54122_37243012 | NC_021163.1    | Ca_kabuli_chr04 | 37243012                | TT                              | CC                | 1945957641               |
| SNP_P3_54123_37244902 | NC_021163.1    | Ca_kabuli_chr04 | 37244902                | CC                              | TT                | 1945957643               |
| SNP_P3_54124_37245245 | NC_021163.1    | Ca_kabuli_chr04 | 37245245                | AA                              | GG                | 1945957644               |
| SNP_P3_54125_37245266 | NC_021163.1    | Ca_kabuli_chr04 | 37245266                | TT                              | CC                | 1945957646               |
| SNP_P3_54126_37245293 | NC_021163.1    | Ca_kabuli_chr04 | 37245293                | AA                              | GG                | 1945957648               |
| SNP_P3_54127_37247175 | NC_021163.1    | Ca_kabuli_chr04 | 37247175                | GG                              | AA                | 1945957650               |
| SNP_P3_54128_37247493 | NC_021163.1    | Ca_kabuli_chr04 | 37247493                | TT                              | GG                | 1945957652               |
| SNP_P3_54129_37247533 | NC_021163.1    | Ca_kabuli_chr04 | 37247533                | GG                              | AA                | 1945957653               |
| SNP_P3_54130_37247844 | NC_021163.1    | Ca_kabuli_chr04 | 37247844                | AA                              | CC                | 1945957655               |
| SNP_P3_54132_37248004 | NC_021163.1    | Ca_kabuli_chr04 | 37248004                | AA                              | GG                | 1945957657               |
| SNP_P3_54134_37251958 | NC_021163.1    | Ca_kabuli_chr04 | 37251958                | CC                              | TT                | 1945957659               |
| SNP_P3_54135_37252002 | NC_021163.1    | Ca_kabuli_chr04 | 37252002                | CC                              | GG                | 1945957660               |
| SNP_P3_54136_37252267 | NC_021163.1    | Ca_kabuli_chr04 | 37252267                | AA                              | TT                | 1945957662               |
| SNP_P3_54137_37252294 | NC_021163.1    | Ca_kabuli_chr04 | 37252294                | AA                              | TT                | 1945957664               |
| SNP_P3_54138_37253005 | NC_021163.1    | Ca_kabuli_chr04 | 37253005                | TT                              | CC                | 1945957666               |
| SNP_P3_54139_37254625 | NC_021163.1    | Ca_kabuli_chr04 | 37254625                | GG                              | AA                | 1945957668               |
| SNP_P3_54140_37254797 | NC_021163.1    | Ca_kabuli_chr04 | 37254797                | CC                              | GG                | 1945957669               |
| SNP_P3_54141_37257750 | NC_021163.1    | Ca_kabuli_chr04 | 37257750                | GG                              | AA                | 1945957671               |
| SNP_P3_54142_37258238 | NC_021163.1    | Ca_kabuli_chr04 | 37258238                | CC                              | AA                | 1945957673               |
| SNP_P3_54143_37258515 | NC_021163.1    | Ca_kabuli_chr04 | 37258515                | GG                              | TT                | 1945957675               |
| SNP_P3_54144_37263249 | NC_021163.1    | Ca_kabuli_chr04 | 37263249                | GG                              | AA                | 1945957676               |
| SNP_P3_54145_37265638 | NC_021163.1    | Ca_kabuli_chr04 | 37265638                | TT                              | CC                | 1945957678               |
| SNP_P3_54146_37269328 | NC_021163.1    | Ca_kabuli_chr04 | 37269328                | CC                              | GG                | 1945957680               |
| SNP_P3_54147_37270183 | NC_021163.1    | Ca_kabuli_chr04 | 37270183                | GG                              | TT                | 1945957682               |
| SNP_P3_54148_37270184 | NC_021163.1    | Ca_kabuli_chr04 | 37270184                | AA                              | CC                | 1945957684               |
| SNP_P3_54149_37270430 | NC_021163.1    | Ca_kabuli_chr04 | 37270430                | CC                              | TT                | 1945957685               |
| SNP_P3_54150_37270444 | NC_021163.1    | Ca_kabuli_chr04 | 37270444                | GG                              | AA                | 1945957687               |
| SNP_P3_54151_37270453 | NC_021163.1    | Ca_kabuli_chr04 | 37270453                | AA                              | TT                | 1945957689               |
| SNP_P3_54152_37270458 | NC_021163.1    | Ca_kabuli_chr04 | 37270458                | TT                              | CC                | 1945957691               |
| SNP_P3_54153_37270527 | NC_021163.1    | Ca_kabuli_chr04 | 37270527                | CC                              | AA                | 1945957692               |
| SNP_P3_54154_37270581 | NC_021163.1    | Ca_kabuli_chr04 | 37270581                | TT                              | AA                | 1945957694               |
| SNP_P3_54155_37271313 | NC_021163.1    | Ca_kabuli_chr04 | 37271313                | CC                              | TT                | 1945957696               |
| SNP_P3_54156_37271337 | NC_021163.1    | Ca_kabuli_chr04 | 37271337                | CC                              | TT                | 1945957698               |
| SNP_P3_54157_37271547 | NC_021163.1    | Ca_kabuli_chr04 | 37271547                | GG                              | AA                | 1945957699               |
| SNP_P3_54158_37273260 | NC_021163.1    | Ca_kabuli_chr04 | 37273260                | AA                              | TT                | 1945957701               |
| SNP_P3_54159_37273592 | NC_021163.1    | Ca_kabuli_chr04 | 37273592                | TT                              | CC                | 1945957703               |
| SNP_P3_54160_37274931 | NC_021163.1    | Ca_kabuli_chr04 | 37274931                | CC                              | TT                | 1945957705               |
| SNP_P3_54161_37277122 | NC_021163.1    | Ca_kabuli_chr04 | 37277122                | GG                              | AA                | 1945957707               |
| SNP_P3_54162_37277891 | NC_021163.1    | Ca_kabuli_chr04 | 37277891                | TT                              | AA                | 1945957708               |
| SNP_P3_54163_37279549 | NC_021163.1    | Ca_kabuli_chr04 | 37279549                | CC                              | AA                | 1945957710               |
| SNP_P3_54164_37279550 | NC_021163.1    | Ca_kabuli_chr04 | 37279550                | AA                              | TT                | 1945957712               |

| SNPs IDs              | Chromosome IDs | Chromosomes     | Physical positions (bp) | CDC Frontier (Reference genome) | (Pusa 256 & HPNB) | NCBI SNPdb Accession IDs |
|-----------------------|----------------|-----------------|-------------------------|---------------------------------|-------------------|--------------------------|
| SNP_P3_54165_37280243 | NC_021163.1    | Ca_kabuli_chr04 | 37280243                | TT                              | GG                | 1945957714               |
| SNP_P3_54166_37282935 | NC_021163.1    | Ca_kabuli_chr04 | 37282935                | GG                              | TT                | 1945957715               |
| SNP_P3_54167_37282970 | NC_021163.1    | Ca_kabuli_chr04 | 37282970                | CC                              | TT                | 1945957717               |
| SNP_P3_54168_37283265 | NC_021163.1    | Ca_kabuli_chr04 | 37283265                | CC                              | TT                | 1945957719               |
| SNP_P3_54169_37283266 | NC_021163.1    | Ca_kabuli_chr04 | 37283266                | AA                              | TT                | 1945957721               |
| SNP_P3_54170_37283276 | NC_021163.1    | Ca_kabuli_chr04 | 37283276                | CC                              | AA                | 1945957723               |
| SNP_P3_54171_37283283 | NC_021163.1    | Ca_kabuli_chr04 | 37283283                | TT                              | CC                | 1945957724               |
| SNP_P3_54173_37283568 | NC_021163.1    | Ca_kabuli_chr04 | 37283568                | GG                              | AA                | 1945957726               |
| SNP_P3_54174_37283791 | NC_021163.1    | Ca_kabuli_chr04 | 37283791                | TT                              | CC                | 1945957728               |
| SNP_P3_54175_37283819 | NC_021163.1    | Ca_kabuli_chr04 | 37283819                | GG                              | AA                | 1945957730               |
| SNP_P3_54177_37284971 | NC_021163.1    | Ca_kabuli_chr04 | 37284971                | AA                              | TT                | 1945957731               |
| SNP_P3_54178_37284981 | NC_021163.1    | Ca_kabuli_chr04 | 37284981                | CC                              | AA                | 1945957733               |
| SNP_P3_54179_37285045 | NC_021163.1    | Ca_kabuli_chr04 | 37285045                | TT                              | CC                | 1945957735               |
| SNP_P3_54180_37285046 | NC_021163.1    | Ca_kabuli_chr04 | 37285046                | TT                              | GG                | 1945957737               |
| SNP_P3_54181_37285188 | NC_021163.1    | Ca_kabuli_chr04 | 37285188                | TT                              | GG                | 1945957739               |
| SNP_P3_54182_37285424 | NC_021163.1    | Ca_kabuli_chr04 | 37285424                | TT                              | GG                | 1945957740               |
| SNP_P3_54183_37285445 | NC_021163.1    | Ca_kabuli_chr04 | 37285445                | AA                              | GG                | 1945957742               |
| SNP_P3_54184_37285462 | NC_021163.1    | Ca_kabuli_chr04 | 37285462                | AA                              | GG                | 1945957744               |
| SNP_P3_54185_37285483 | NC_021163.1    | Ca_kabuli_chr04 | 37285483                | CC                              | GG                | 1945957746               |
| SNP_P3_54186_37286590 | NC_021163.1    | Ca_kabuli_chr04 | 37286590                | TT                              | AA                | 1945957747               |
| SNP_P3_54187_37286591 | NC_021163.1    | Ca_kabuli_chr04 | 37286591                | TT                              | AA                | 1945957749               |
| SNP_P3_54188_37286663 | NC_021163.1    | Ca_kabuli_chr04 | 37286663                | AA                              | GG                | 1945957751               |
| SNP_P3_54189_37287014 | NC_021163.1    | Ca_kabuli_chr04 | 37287014                | TT                              | CC                | 1945957753               |
| SNP_P3_54190_37287087 | NC_021163.1    | Ca_kabuli_chr04 | 37287087                | AA                              | GG                | 1945957755               |
| SNP_P3_54191_37291606 | NC_021163.1    | Ca_kabuli_chr04 | 37291606                | CC                              | TT                | 1945957756               |
| SNP_P3_54192_37292735 | NC_021163.1    | Ca_kabuli_chr04 | 37292735                | GG                              | AA                | 1945957758               |
| SNP_P3_54193_37294850 | NC_021163.1    | Ca_kabuli_chr04 | 37294850                | GG                              | AA                | 1945957760               |
| SNP_P3_54194_37295083 | NC_021163.1    | Ca_kabuli_chr04 | 37295083                | GG                              | AA                | 1945957762               |
| SNP_P3_54195_37295178 | NC_021163.1    | Ca_kabuli_chr04 | 37295178                | AA                              | GG                | 1945957763               |
| SNP_P3_54196_37295317 | NC_021163.1    | Ca_kabuli_chr04 | 37295317                | GG                              | AA                | 1945957765               |
| SNP_P3_54197_37295423 | NC_021163.1    | Ca_kabuli_chr04 | 37295423                | AA                              | GG                | 1945957767               |
| SNP_P3_54198_37295570 | NC_021163.1    | Ca_kabuli_chr04 | 37295570                | TT                              | CC                | 1945957769               |
| SNP_P3_54199_37295867 | NC_021163.1    | Ca_kabuli_chr04 | 37295867                | AA                              | GG                | 1945957771               |
| SNP_P3_54200_37297504 | NC_021163.1    | Ca_kabuli_chr04 | 37297504                | TT                              | AA                | 1945957772               |
| SNP_P3_54201_37297523 | NC_021163.1    | Ca_kabuli_chr04 | 37297523                | TT                              | GG                | 1945957774               |
| SNP_P3_54202_37297577 | NC_021163.1    | Ca_kabuli_chr04 | 37297577                | AA                              | CC                | 1945957776               |
| SNP_P3_54203_37297604 | NC_021163.1    | Ca_kabuli_chr04 | 37297604                | AA                              | GG                | 1945957778               |
| SNP_P3_54204_37297707 | NC_021163.1    | Ca_kabuli_chr04 | 37297707                | GG                              | TT                | 1945957779               |
| SNP_P3_54205_37297796 | NC_021163.1    | Ca_kabuli_chr04 | 37297796                | CC                              | TT                | 1945957781               |
| SNP_P3_54206_37298251 | NC_021163.1    | Ca_kabuli_chr04 | 37298251                | CC                              | GG                | 1945957783               |
| SNP_P3_54207_37299038 | NC_021163.1    | Ca_kabuli_chr04 | 37299038                | CC                              | AA                | 1945957785               |
| SNP_P3_54208_37299288 | NC_021163.1    | Ca_kabuli_chr04 | 37299288                | TT                              | GG                | 1945957787               |

| SNPs IDs              | Chromosome IDs | Chromosomes     | Physical positions (bp) | CDC Frontier (Reference genome) | (Pusa 256 & HPNB) | NCBI SNPdb Accession IDs |
|-----------------------|----------------|-----------------|-------------------------|---------------------------------|-------------------|--------------------------|
| SNP_P3_54209_37302611 | NC_021163.1    | Ca_kabuli_chr04 | 37302611                | AA                              | CC                | 1945957788               |
| SNP_P3_54211_37303016 | NC_021163.1    | Ca_kabuli_chr04 | 37303016                | GG                              | TT                | 1945957790               |
| SNP_P3_54212_37303017 | NC_021163.1    | Ca_kabuli_chr04 | 37303017                | CC                              | TT                | 1945957792               |
| SNP_P3_54213_37303035 | NC_021163.1    | Ca_kabuli_chr04 | 37303035                | GG                              | CC                | 1945957794               |
| SNP_P3_54214_37303326 | NC_021163.1    | Ca_kabuli_chr04 | 37303326                | TT                              | CC                | 1945957795               |
| SNP_P3_54216_37303528 | NC_021163.1    | Ca_kabuli_chr04 | 37303528                | TT                              | CC                | 1945957797               |
| SNP_P3_54217_37303698 | NC_021163.1    | Ca_kabuli_chr04 | 37303698                | CC                              | TT                | 1945957799               |
| SNP_P3_54218_37305431 | NC_021163.1    | Ca_kabuli_chr04 | 37305431                | TT                              | AA                | 1945957801               |
| SNP_P3_54219_37305476 | NC_021163.1    | Ca_kabuli_chr04 | 37305476                | AA                              | CC                | 1945957803               |
| SNP_P3_54220_37305495 | NC_021163.1    | Ca_kabuli_chr04 | 37305495                | GG                              | AA                | 1945957804               |
| SNP_P3_54221_37306158 | NC_021163.1    | Ca_kabuli_chr04 | 37306158                | GG                              | AA                | 1945957806               |
| SNP_P3_54223_37306598 | NC_021163.1    | Ca_kabuli_chr04 | 37306598                | AA                              | GG                | 1945957808               |
| SNP_P3_54224_37306633 | NC_021163.1    | Ca_kabuli_chr04 | 37306633                | TT                              | CC                | 1945957810               |
| SNP_P3_54225_37306642 | NC_021163.1    | Ca_kabuli_chr04 | 37306642                | GG                              | CC                | 1945957811               |
| SNP_P3_54226_37306648 | NC_021163.1    | Ca_kabuli_chr04 | 37306648                | GG                              | AA                | 1945957813               |
| SNP_P3_54227_37306650 | NC_021163.1    | Ca_kabuli_chr04 | 37306650                | AA                              | GG                | 1945957815               |
| SNP_P3_54228_37306654 | NC_021163.1    | Ca_kabuli_chr04 | 37306654                | CC                              | TT                | 1945957817               |
| SNP_P3_54229_37306672 | NC_021163.1    | Ca_kabuli_chr04 | 37306672                | GG                              | AA                | 1945957819               |
| SNP_P3_54230_37306692 | NC_021163.1    | Ca_kabuli_chr04 | 37306692                | TT                              | CC                | 1945957820               |
| SNP_P3_54231_37306694 | NC_021163.1    | Ca_kabuli_chr04 | 37306694                | GG                              | AA                | 1945957822               |
| SNP_P3_54232_37306768 | NC_021163.1    | Ca_kabuli_chr04 | 37306768                | TT                              | CC                | 1945957824               |
| SNP_P3_54233_37306782 | NC_021163.1    | Ca_kabuli_chr04 | 37306782                | CC                              | TT                | 1945957826               |
| SNP_P3_54234_37307055 | NC_021163.1    | Ca_kabuli_chr04 | 37307055                | TT                              | CC                | 1945957828               |
| SNP_P3_54235_37307950 | NC_021163.1    | Ca_kabuli_chr04 | 37307950                | AA                              | GG                | 1945957829               |
| SNP_P3_54236_37308027 | NC_021163.1    | Ca_kabuli_chr04 | 37308027                | AA                              | GG                | 1945957831               |
| SNP_P3_54237_37308090 | NC_021163.1    | Ca_kabuli_chr04 | 37308090                | GG                              | TT                | 1945957833               |
| SNP_P3_54238_37308122 | NC_021163.1    | Ca_kabuli_chr04 | 37308122                | GG                              | AA                | 1945957835               |
| SNP_P3_54239_37308123 | NC_021163.1    | Ca_kabuli_chr04 | 37308123                | CC                              | TT                | 1945957836               |
| SNP_P3_54240_37308283 | NC_021163.1    | Ca_kabuli_chr04 | 37308283                | GG                              | AA                | 1945957838               |
| SNP_P3_54241_37309527 | NC_021163.1    | Ca_kabuli_chr04 | 37309527                | GG                              | AA                | 1945957840               |
| SNP_P3_54242_37309551 | NC_021163.1    | Ca_kabuli_chr04 | 37309551                | GG                              | AA                | 1945957842               |
| SNP_P3_54243_37309664 | NC_021163.1    | Ca_kabuli_chr04 | 37309664                | TT                              | AA                | 1945957844               |
| SNP_P3_54244_37309668 | NC_021163.1    | Ca_kabuli_chr04 | 37309668                | AA                              | CC                | 1945957845               |
| SNP_P3_54245_37309734 | NC_021163.1    | Ca_kabuli_chr04 | 37309734                | AA                              | GG                | 1945957847               |
| SNP_P3_54246_37309737 | NC_021163.1    | Ca_kabuli_chr04 | 37309737                | CC                              | TT                | 1945957849               |
| SNP_P3_54247_37309760 | NC_021163.1    | Ca_kabuli_chr04 | 37309760                | GG                              | TT                | 1945957851               |
| SNP_P3_54248_37309771 | NC_021163.1    | Ca_kabuli_chr04 | 37309771                | CC                              | TT                | 1945957852               |
| SNP_P3_54249_37309893 | NC_021163.1    | Ca_kabuli_chr04 | 37309893                | TT                              | AA                | 1945957854               |
| SNP_P3_54250_37309896 | NC_021163.1    | Ca_kabuli_chr04 | 37309896                | AA                              | TT                | 1945957856               |
| SNP_P3_54251_37312168 | NC_021163.1    | Ca_kabuli_chr04 | 37312168                | GG                              | AA                | 1945957858               |
| SNP_P3_54252_37312184 | NC_021163.1    | Ca_kabuli_chr04 | 37312184                | GG                              | AA                | 1945957860               |
| SNP_P3_54253_37312214 | NC_021163.1    | Ca_kabuli_chr04 | 37312214                | GG                              | TT                | 1945957861               |

| SNPs IDs              | Chromosome IDs | Chromosomes     | Physical positions (bp) | CDC Frontier (Reference genome) | (Pusa 256 & HPNB) | NCBI SNPdb Accession IDs |
|-----------------------|----------------|-----------------|-------------------------|---------------------------------|-------------------|--------------------------|
| SNP_P3_54254_37312260 | NC_021163.1    | Ca_kabuli_chr04 | 37312260                | AA                              | GG                | 1945957863               |
| SNP_P3_54255_37312439 | NC_021163.1    | Ca_kabuli_chr04 | 37312439                | GG                              | AA                | 1945957865               |
| SNP_P3_54256_37312656 | NC_021163.1    | Ca_kabuli_chr04 | 37312656                | AA                              | TT                | 1945957867               |
| SNP_P3_54257_37312730 | NC_021163.1    | Ca_kabuli_chr04 | 37312730                | TT                              | AA                | 1945957868               |
| SNP_P3_54258_37312890 | NC_021163.1    | Ca_kabuli_chr04 | 37312890                | AA                              | GG                | 1945957870               |
| SNP_P3_54260_37313067 | NC_021163.1    | Ca_kabuli_chr04 | 37313067                | TT                              | CC                | 1945957872               |
| SNP_P3_54261_37313246 | NC_021163.1    | Ca_kabuli_chr04 | 37313246                | TT                              | CC                | 1945957874               |
| SNP_P3_54262_37313585 | NC_021163.1    | Ca_kabuli_chr04 | 37313585                | GG                              | AA                | 1945957876               |
| SNP_P3_54264_37313878 | NC_021163.1    | Ca_kabuli_chr04 | 37313878                | GG                              | AA                | 1945957877               |
| SNP_P3_54265_37314021 | NC_021163.1    | Ca_kabuli_chr04 | 37314021                | GG                              | TT                | 1945957879               |
| SNP_P3_54266_37317566 | NC_021163.1    | Ca_kabuli_chr04 | 37317566                | CC                              | TT                | 1945957881               |
| SNP_P3_54267_37318546 | NC_021163.1    | Ca_kabuli_chr04 | 37318546                | CC                              | AA                | 1945957883               |
| SNP_P3_54268_37321768 | NC_021163.1    | Ca_kabuli_chr04 | 37321768                | CC                              | TT                | 1945957884               |
| SNP_P3_54269_37322842 | NC_021163.1    | Ca_kabuli_chr04 | 37322842                | AA                              | GG                | 1945957886               |
| SNP_P3_54270_37323248 | NC_021163.1    | Ca_kabuli_chr04 | 37323248                | AA                              | GG                | 1945957888               |
| SNP_P3_54271_37323302 | NC_021163.1    | Ca_kabuli_chr04 | 37323302                | GG                              | AA                | 1945957890               |
| SNP_P3_54272_37326098 | NC_021163.1    | Ca_kabuli_chr04 | 37326098                | AA                              | TT                | 1945957892               |
| SNP_P3_54273_37328663 | NC_021163.1    | Ca_kabuli_chr04 | 37328663                | AA                              | GG                | 1945957893               |
| SNP_P3_54274_37329246 | NC_021163.1    | Ca_kabuli_chr04 | 37329246                | CC                              | GG                | 1945957895               |
| SNP_P3_54275_37329465 | NC_021163.1    | Ca_kabuli_chr04 | 37329465                | AA                              | GG                | 1945957897               |
| SNP_P3_54276_37329476 | NC_021163.1    | Ca_kabuli_chr04 | 37329476                | CC                              | AA                | 1945957899               |
| SNP_P3_54277_37329655 | NC_021163.1    | Ca_kabuli_chr04 | 37329655                | CC                              | GG                | 1945957900               |
| SNP_P3_54278_37330626 | NC_021163.1    | Ca_kabuli_chr04 | 37330626                | GG                              | AA                | 1945957902               |
| SNP_P3_54279_37330834 | NC_021163.1    | Ca_kabuli_chr04 | 37330834                | TT                              | AA                | 1945957904               |
| SNP_P3_54280_37331326 | NC_021163.1    | Ca_kabuli_chr04 | 37331326                | AA                              | GG                | 1945957906               |
| SNP_P3_54281_37331356 | NC_021163.1    | Ca_kabuli_chr04 | 37331356                | GG                              | AA                | 1945957908               |
| SNP_P3_54282_37331603 | NC_021163.1    | Ca_kabuli_chr04 | 37331603                | AA                              | GG                | 1945957909               |
| SNP_P3_54283_37331660 | NC_021163.1    | Ca_kabuli_chr04 | 37331660                | TT                              | CC                | 1945957911               |
| SNP_P3_54284_37331661 | NC_021163.1    | Ca_kabuli_chr04 | 37331661                | AA                              | GG                | 1945957913               |
| SNP_P3_54285_37331664 | NC_021163.1    | Ca_kabuli_chr04 | 37331664                | GG                              | AA                | 1945957915               |
| SNP_P3_54286_37331817 | NC_021163.1    | Ca_kabuli_chr04 | 37331817                | TT                              | CC                | 1945957916               |
| SNP_P3_54287_37331850 | NC_021163.1    | Ca_kabuli_chr04 | 37331850                | TT                              | CC                | 1945957918               |
| SNP_P3_54289_37331905 | NC_021163.1    | Ca_kabuli_chr04 | 37331905                | AA                              | GG                | 1945957920               |
| SNP_P3_54290_37331950 | NC_021163.1    | Ca_kabuli_chr04 | 37331950                | AA                              | GG                | 1945957922               |
| SNP_P3_54291_37331955 | NC_021163.1    | Ca_kabuli_chr04 | 37331955                | AA                              | GG                | 1945957924               |
| SNP_P3_54292_37331960 | NC_021163.1    | Ca_kabuli_chr04 | 37331960                | CC                              | TT                | 1945957925               |
| SNP_P3_54293_37332207 | NC_021163.1    | Ca_kabuli_chr04 | 37332207                | AA                              | GG                | 1945957927               |
| SNP_P3_54294_37332240 | NC_021163.1    | Ca_kabuli_chr04 | 37332240                | AA                              | TT                | 1945957929               |
| SNP_P3_54295_37332246 | NC_021163.1    | Ca_kabuli_chr04 | 37332246                | TT                              | CC                | 1945957931               |
| SNP_P3_54296_37332279 | NC_021163.1    | Ca_kabuli_chr04 | 37332279                | TT                              | CC                | 1945957932               |
| SNP_P3_54297_37332373 | NC_021163.1    | Ca_kabuli_chr04 | 37332373                | TT                              | GG                | 1945957934               |
| SNP_P3_54298_37332378 | NC_021163.1    | Ca_kabuli_chr04 | 37332378                | CC                              | GG                | 1945957936               |

| SNPs IDs              | Chromosome IDs | Chromosomes     | Physical positions (bp) | CDC Frontier (Reference genome) | (Pusa 256 & HPNB) | NCBI SNPdb Accession IDs |
|-----------------------|----------------|-----------------|-------------------------|---------------------------------|-------------------|--------------------------|
| SNP_P3_54299_37332397 | NC_021163.1    | Ca_kabuli_chr04 | 37332397                | AA                              | CC                | 1945957938               |
| SNP_P3_54300_37332443 | NC_021163.1    | Ca_kabuli_chr04 | 37332443                | AA                              | GG                | 1945957940               |
| SNP_P3_54301_37332448 | NC_021163.1    | Ca_kabuli_chr04 | 37332448                | CC                              | AA                | 1945957941               |
| SNP_P3_54302_37332456 | NC_021163.1    | Ca_kabuli_chr04 | 37332456                | GG                              | TT                | 1945957943               |
| SNP_P3_54303_37332495 | NC_021163.1    | Ca_kabuli_chr04 | 37332495                | TT                              | AA                | 1945957945               |
| SNP_P3_54304_37332902 | NC_021163.1    | Ca_kabuli_chr04 | 37332902                | GG                              | TT                | 1945957947               |
| SNP_P3_54306_37333185 | NC_021163.1    | Ca_kabuli_chr04 | 37333185                | GG                              | AA                | 1945957948               |
| SNP_P3_54307_37333478 | NC_021163.1    | Ca_kabuli_chr04 | 37333478                | CC                              | TT                | 1945957950               |
| SNP_P3_54308_37333482 | NC_021163.1    | Ca_kabuli_chr04 | 37333482                | TT                              | AA                | 1945957952               |
| SNP_P3_54309_37334005 | NC_021163.1    | Ca_kabuli_chr04 | 37334005                | GG                              | AA                | 1945957954               |
| SNP_P3_54310_37334049 | NC_021163.1    | Ca_kabuli_chr04 | 37334049                | GG                              | AA                | 1945957956               |
| SNP_P3_54312_37339931 | NC_021163.1    | Ca_kabuli_chr04 | 37339931                | AA                              | GG                | 1945957957               |
| SNP_P3_54313_37340353 | NC_021163.1    | Ca_kabuli_chr04 | 37340353                | CC                              | TT                | 1945957959               |
| SNP_P3_54314_37340505 | NC_021163.1    | Ca_kabuli_chr04 | 37340505                | GG                              | TT                | 1945957961               |
| SNP_P3_54315_37340523 | NC_021163.1    | Ca_kabuli_chr04 | 37340523                | GG                              | AA                | 1945957963               |
| SNP_P3_54316_37340524 | NC_021163.1    | Ca_kabuli_chr04 | 37340524                | CC                              | TT                | 1945957964               |
| SNP_P3_54317_37340527 | NC_021163.1    | Ca_kabuli_chr04 | 37340527                | AA                              | TT                | 1945957966               |
| SNP_P3_54318_37340569 | NC_021163.1    | Ca_kabuli_chr04 | 37340569                | GG                              | AA                | 1945957968               |
| SNP_P3_54319_37341713 | NC_021163.1    | Ca_kabuli_chr04 | 37341713                | AA                              | CC                | 1945957970               |
| SNP_P3_54320_37341771 | NC_021163.1    | Ca_kabuli_chr04 | 37341771                | TT                              | AA                | 1945957971               |
| SNP_P3_54321_37342085 | NC_021163.1    | Ca_kabuli_chr04 | 37342085                | CC                              | AA                | 1945957973               |
| SNP_P3_54322_37342493 | NC_021163.1    | Ca_kabuli_chr04 | 37342493                | GG                              | AA                | 1945957975               |
| SNP_P3_54323_37342502 | NC_021163.1    | Ca_kabuli_chr04 | 37342502                | TT                              | CC                | 1945957977               |
| SNP_P3_54324_37342519 | NC_021163.1    | Ca_kabuli_chr04 | 37342519                | TT                              | AA                | 1945957979               |
| SNP_P3_54325_37342808 | NC_021163.1    | Ca_kabuli_chr04 | 37342808                | GG                              | AA                | 1945957980               |
| SNP_P3_54326_37342872 | NC_021163.1    | Ca_kabuli_chr04 | 37342872                | TT                              | AA                | 1945957982               |
| SNP_P3_54327_37343193 | NC_021163.1    | Ca_kabuli_chr04 | 37343193                | GG                              | AA                | 1945957984               |
| SNP_P3_54328_37343340 | NC_021163.1    | Ca_kabuli_chr04 | 37343340                | TT                              | CC                | 1945957986               |
| SNP_P3_54329_37343452 | NC_021163.1    | Ca_kabuli_chr04 | 37343452                | GG                              | AA                | 1945957987               |
| SNP_P3_54330_37343478 | NC_021163.1    | Ca_kabuli_chr04 | 37343478                | AA                              | GG                | 1945957989               |
| SNP_P3_54331_37344034 | NC_021163.1    | Ca_kabuli_chr04 | 37344034                | AA                              | GG                | 1945957991               |
| SNP_P3_54332_37345129 | NC_021163.1    | Ca_kabuli_chr04 | 37345129                | CC                              | AA                | 1945957993               |
| SNP_P3_54334_37345177 | NC_021163.1    | Ca_kabuli_chr04 | 37345177                | CC                              | TT                | 1945957995               |
| SNP_P3_54335_37345418 | NC_021163.1    | Ca_kabuli_chr04 | 37345418                | GG                              | TT                | 1945957996               |
| SNP_P3_54336_37345431 | NC_021163.1    | Ca_kabuli_chr04 | 37345431                | AA                              | GG                | 1945957998               |
| SNP_P3_54337_37345444 | NC_021163.1    | Ca_kabuli_chr04 | 37345444                | AA                              | TT                | 1945958000               |
| SNP_P3_54338_37345455 | NC_021163.1    | Ca_kabuli_chr04 | 37345455                | AA                              | TT                | 1945958002               |
| SNP_P3_54340_37347006 | NC_021163.1    | Ca_kabuli_chr04 | 37347006                | AA                              | GG                | 1945958003               |
| SNP_P3_54341_37347457 | NC_021163.1    | Ca_kabuli_chr04 | 37347457                | AA                              | GG                | 1945958005               |
| SNP_P3_54342_37347749 | NC_021163.1    | Ca_kabuli_chr04 | 37347749                | CC                              | AA                | 1945958007               |
| SNP_P3_54343_37347754 | NC_021163.1    | Ca_kabuli_chr04 | 37347754                | GG                              | AA                | 1945958009               |
| SNP_P3_54344_37347787 | NC_021163.1    | Ca_kabuli_chr04 | 37347787                | CC                              | AA                | 1945958011               |



| SNPs IDs              | Chromosome IDs | Chromosomes     | Physical positions (bp) | CDC Frontier (Reference genome) | (Pusa 256 & HPNB) | NCBI SNPdb Accession IDs |
|-----------------------|----------------|-----------------|-------------------------|---------------------------------|-------------------|--------------------------|
| SNP_P3_54345_37347792 | NC_021163.1    | Ca_kabuli_chr04 | 37347792                | CC                              | AA                | 1945958012               |
| SNP_P3_54346_37348012 | NC_021163.1    | Ca_kabuli_chr04 | 37348012                | CC                              | GG                | 1945958014               |
| SNP_P3_54347_37348063 | NC_021163.1    | Ca_kabuli_chr04 | 37348063                | CC                              | AA                | 1945958016               |
| SNP_P3_54348_37348144 | NC_021163.1    | Ca_kabuli_chr04 | 37348144                | GG                              | AA                | 1945958018               |
| SNP_P3_54349_37348360 | NC_021163.1    | Ca_kabuli_chr04 | 37348360                | CC                              | AA                | 1945958019               |
| SNP_P3_54350_37349742 | NC_021163.1    | Ca_kabuli_chr04 | 37349742                | AA                              | TT                | 1945958021               |
| SNP_P3_54351_37349744 | NC_021163.1    | Ca_kabuli_chr04 | 37349744                | TT                              | AA                | 1945958023               |
| SNP_P3_54352_37349769 | NC_021163.1    | Ca_kabuli_chr04 | 37349769                | AA                              | GG                | 1945958025               |
| SNP_P3_54353_37349950 | NC_021163.1    | Ca_kabuli_chr04 | 37349950                | AA                              | GG                | 1945958027               |
| SNP_P3_54354_37350507 | NC_021163.1    | Ca_kabuli_chr04 | 37350507                | TT                              | CC                | 1945958028               |
| SNP_P3_54355_37350885 | NC_021163.1    | Ca_kabuli_chr04 | 37350885                | CC                              | TT                | 1945958030               |
| SNP_P3_54356_37350908 | NC_021163.1    | Ca_kabuli_chr04 | 37350908                | CC                              | TT                | 1945958032               |
| SNP_P3_54357_37351207 | NC_021163.1    | Ca_kabuli_chr04 | 37351207                | GG                              | AA                | 1945958034               |
| SNP_P3_54358_37351347 | NC_021163.1    | Ca_kabuli_chr04 | 37351347                | AA                              | TT                | 1945958035               |
| SNP_P3_54359_37351363 | NC_021163.1    | Ca_kabuli_chr04 | 37351363                | GG                              | TT                | 1945958037               |
| SNP_P3_54360_37351371 | NC_021163.1    | Ca_kabuli_chr04 | 37351371                | GG                              | CC                | 1945958039               |
| SNP_P3_54361_37351395 | NC_021163.1    | Ca_kabuli_chr04 | 37351395                | CC                              | TT                | 1945958041               |
| SNP_P3_54362_37351412 | NC_021163.1    | Ca_kabuli_chr04 | 37351412                | AA                              | GG                | 1945958043               |
| SNP_P3_54363_37351916 | NC_021163.1    | Ca_kabuli_chr04 | 37351916                | AA                              | GG                | 1945958044               |
| SNP_P3_54364_37352938 | NC_021163.1    | Ca_kabuli_chr04 | 37352938                | AA                              | GG                | 1945958046               |
| SNP_P3_54365_37358161 | NC_021163.1    | Ca_kabuli_chr04 | 37358161                | GG                              | AA                | 1945958048               |
| SNP_P3_54366_37361192 | NC_021163.1    | Ca_kabuli_chr04 | 37361192                | AA                              | GG                | 1945958050               |
| SNP_P3_54367_37361200 | NC_021163.1    | Ca_kabuli_chr04 | 37361200                | CC                              | TT                | 1945958051               |
| SNP_P3_54368_37361248 | NC_021163.1    | Ca_kabuli_chr04 | 37361248                | GG                              | TT                | 1945958053               |
| SNP_P3_54369_37362040 | NC_021163.1    | Ca_kabuli_chr04 | 37362040                | TT                              | AA                | 1945958055               |
| SNP_P3_54371_37362257 | NC_021163.1    | Ca_kabuli_chr04 | 37362257                | CC                              | TT                | 1945958057               |
| SNP_P3_54372_37363294 | NC_021163.1    | Ca_kabuli_chr04 | 37363294                | AA                              | GG                | 1945958059               |
| SNP_P3_54373_37364736 | NC_021163.1    | Ca_kabuli_chr04 | 37364736                | TT                              | AA                | 1945958060               |
| SNP_P3_54374_37366279 | NC_021163.1    | Ca_kabuli_chr04 | 37366279                | AA                              | CC                | 1945958062               |
| SNP_P3_54375_37366566 | NC_021163.1    | Ca_kabuli_chr04 | 37366566                | AA                              | CC                | 1945958064               |
| SNP_P3_54376_37366687 | NC_021163.1    | Ca_kabuli_chr04 | 37366687                | CC                              | GG                | 1945958066               |
| SNP_P3_54377_37366690 | NC_021163.1    | Ca_kabuli_chr04 | 37366690                | AA                              | TT                | 1945958067               |
| SNP_P3_54379_37367249 | NC_021163.1    | Ca_kabuli_chr04 | 37367249                | CC                              | TT                | 1945958069               |
| SNP_P3_54380_37369370 | NC_021163.1    | Ca_kabuli_chr04 | 37369370                | CC                              | TT                | 1945958071               |
| SNP_P3_54381_37370892 | NC_021163.1    | Ca_kabuli_chr04 | 37370892                | TT                              | CC                | 1945958073               |
| SNP_P3_54382_37372408 | NC_021163.1    | Ca_kabuli_chr04 | 37372408                | AA                              | GG                | 1945958075               |
| SNP_P3_54383_37374860 | NC_021163.1    | Ca_kabuli_chr04 | 37374860                | GG                              | AA                | 1945958076               |
| SNP_P3_54384_37374861 | NC_021163.1    | Ca_kabuli_chr04 | 37374861                | GG                              | AA                | 1945958078               |
| SNP_P3_54385_37374867 | NC_021163.1    | Ca_kabuli_chr04 | 37374867                | TT                              | CC                | 1945958080               |
| SNP_P3_54386_37375384 | NC_021163.1    | Ca_kabuli_chr04 | 37375384                | TT                              | AA                | 1945958082               |
| SNP_P3_54387_37375672 | NC_021163.1    | Ca_kabuli_chr04 | 37375672                | GG                              | AA                | 1945958083               |
| SNP_P3_54388_37375955 | NC_021163.1    | Ca_kabuli_chr04 | 37375955                | CC                              | TT                | 1945958085               |

| SNPs IDs              | Chromosome IDs | Chromosomes     | Physical positions (bp) | CDC Frontier (Reference genome) | (Pusa 256 & HPNB) | NCBI SNPdb Accession IDs |
|-----------------------|----------------|-----------------|-------------------------|---------------------------------|-------------------|--------------------------|
| SNP_P3_54389_37376061 | NC_021163.1    | Ca_kabuli_chr04 | 37376061                | AA                              | GG                | 1945958087               |
| SNP_P3_54390_37376495 | NC_021163.1    | Ca_kabuli_chr04 | 37376495                | CC                              | GG                | 1945958089               |
| SNP_P3_54392_37377243 | NC_021163.1    | Ca_kabuli_chr04 | 37377243                | GG                              | AA                | 1945958091               |
| SNP_P3_54394_37390170 | NC_021163.1    | Ca_kabuli_chr04 | 37390170                | TT                              | CC                | 1945958092               |
| SNP_P3_54395_37390182 | NC_021163.1    | Ca_kabuli_chr04 | 37390182                | GG                              | AA                | 1945958094               |
| SNP_P3_54396_37390255 | NC_021163.1    | Ca_kabuli_chr04 | 37390255                | GG                              | AA                | 1945958096               |
| SNP_P3_54397_37390380 | NC_021163.1    | Ca_kabuli_chr04 | 37390380                | TT                              | AA                | 1945958098               |
| SNP_P3_54398_37390381 | NC_021163.1    | Ca_kabuli_chr04 | 37390381                | TT                              | CC                | 1945958099               |
| SNP_P3_54399_37390388 | NC_021163.1    | Ca_kabuli_chr04 | 37390388                | AA                              | TT                | 1945958101               |
| SNP_P3_54400_37390410 | NC_021163.1    | Ca_kabuli_chr04 | 37390410                | TT                              | CC                | 1945958103               |
| SNP_P3_54401_37390411 | NC_021163.1    | Ca_kabuli_chr04 | 37390411                | TT                              | CC                | 1945958105               |
| SNP_P3_54402_37390413 | NC_021163.1    | Ca_kabuli_chr04 | 37390413                | TT                              | CC                | 1945958107               |
| SNP_P3_54403_37390415 | NC_021163.1    | Ca_kabuli_chr04 | 37390415                | CC                              | GG                | 1945958109               |
| SNP_P3_54404_37390416 | NC_021163.1    | Ca_kabuli_chr04 | 37390416                | AA                              | GG                | 1945958110               |
| SNP_P3_54405_37390614 | NC_021163.1    | Ca_kabuli_chr04 | 37390614                | CC                              | GG                | 1945958112               |
| SNP_P3_54406_37390652 | NC_021163.1    | Ca_kabuli_chr04 | 37390652                | AA                              | GG                | 1945958114               |
| SNP_P3_54407_37390684 | NC_021163.1    | Ca_kabuli_chr04 | 37390684                | CC                              | TT                | 1945958116               |
| SNP_P3_54409_37391764 | NC_021163.1    | Ca_kabuli_chr04 | 37391764                | GG                              | TT                | 1945958118               |
| SNP_P3_54410_37392167 | NC_021163.1    | Ca_kabuli_chr04 | 37392167                | TT                              | CC                | 1945958119               |
| SNP_P3_54411_37392168 | NC_021163.1    | Ca_kabuli_chr04 | 37392168                | AA                              | GG                | 1945958121               |
| SNP_P3_54412_37392193 | NC_021163.1    | Ca_kabuli_chr04 | 37392193                | GG                              | AA                | 1945958123               |
| SNP_P3_54413_37392205 | NC_021163.1    | Ca_kabuli_chr04 | 37392205                | GG                              | AA                | 1945958125               |
| SNP_P3_54414_37392206 | NC_021163.1    | Ca_kabuli_chr04 | 37392206                | GG                              | AA                | 1945958126               |
| SNP_P3_54415_37395026 | NC_021163.1    | Ca_kabuli_chr04 | 37395026                | TT                              | CC                | 1945958128               |
| SNP_P3_54416_37396797 | NC_021163.1    | Ca_kabuli_chr04 | 37396797                | GG                              | CC                | 1945958130               |
| SNP_P3_54417_37397352 | NC_021163.1    | Ca_kabuli_chr04 | 37397352                | AA                              | GG                | 1945958132               |
| SNP_P3_54418_37397359 | NC_021163.1    | Ca_kabuli_chr04 | 37397359                | GG                              | AA                | 1945958134               |
| SNP_P3_54420_37402951 | NC_021163.1    | Ca_kabuli_chr04 | 37402951                | GG                              | CC                | 1945958135               |
| SNP_P3_54421_37403098 | NC_021163.1    | Ca_kabuli_chr04 | 37403098                | AA                              | GG                | 1945958137               |
| SNP_P3_54422_37403323 | NC_021163.1    | Ca_kabuli_chr04 | 37403323                | TT                              | CC                | 1945958139               |
| SNP_P3_54423_37403584 | NC_021163.1    | Ca_kabuli_chr04 | 37403584                | GG                              | AA                | 1945958141               |
| SNP_P3_54426_37404710 | NC_021163.1    | Ca_kabuli_chr04 | 37404710                | TT                              | CC                | 1945958142               |
| SNP_P3_54427_37405610 | NC_021163.1    | Ca_kabuli_chr04 | 37405610                | AA                              | GG                | 1945958144               |
| SNP_P3_54428_37405627 | NC_021163.1    | Ca_kabuli_chr04 | 37405627                | CC                              | TT                | 1945958146               |
| SNP_P3_54429_37405715 | NC_021163.1    | Ca_kabuli_chr04 | 37405715                | TT                              | CC                | 1945958148               |
| SNP_P3_54430_37407192 | NC_021163.1    | Ca_kabuli_chr04 | 37407192                | GG                              | AA                | 1945958149               |
| SNP_P3_54431_37407232 | NC_021163.1    | Ca_kabuli_chr04 | 37407232                | CC                              | GG                | 1945958151               |
| SNP_P3_54432_37408592 | NC_021163.1    | Ca_kabuli_chr04 | 37408592                | AA                              | CC                | 1945958153               |
| SNP_P3_54433_37408598 | NC_021163.1    | Ca_kabuli_chr04 | 37408598                | CC                              | TT                | 1945958155               |
| SNP_P3_54435_37409485 | NC_021163.1    | Ca_kabuli_chr04 | 37409485                | TT                              | CC                | 1945958157               |
| SNP_P3_54436_37410764 | NC_021163.1    | Ca_kabuli_chr04 | 37410764                | TT                              | AA                | 1945958158               |
| SNP_P3_54438_37418543 | NC_021163.1    | Ca_kabuli_chr04 | 37418543                | CC                              | TT                | 1945958160               |

| SNPs IDs              | Chromosome IDs | Chromosomes     | Physical positions (bp) | CDC Frontier (Reference genome) | (Pusa 256 & HPNB) | NCBI SNPdb Accession IDs |
|-----------------------|----------------|-----------------|-------------------------|---------------------------------|-------------------|--------------------------|
| SNP_P3_54439_37418752 | NC_021163.1    | Ca_kabuli_chr04 | 37418752                | TT                              | CC                | 1945958162               |
| SNP_P3_54440_37419223 | NC_021163.1    | Ca_kabuli_chr04 | 37419223                | GG                              | AA                | 1945958164               |
| SNP_P3_54441_37419226 | NC_021163.1    | Ca_kabuli_chr04 | 37419226                | TT                              | CC                | 1945958165               |
| SNP_P3_54442_37419741 | NC_021163.1    | Ca_kabuli_chr04 | 37419741                | AA                              | TT                | 1945958167               |
| SNP_P3_54443_37419742 | NC_021163.1    | Ca_kabuli_chr04 | 37419742                | TT                              | GG                | 1945958169               |
| SNP_P3_54444_37419784 | NC_021163.1    | Ca_kabuli_chr04 | 37419784                | CC                              | AA                | 1945958171               |
| SNP_P3_54445_37420096 | NC_021163.1    | Ca_kabuli_chr04 | 37420096                | AA                              | CC                | 1945958173               |
| SNP_P3_54446_37420097 | NC_021163.1    | Ca_kabuli_chr04 | 37420097                | CC                              | TT                | 1945958174               |
| SNP_P3_54447_37420162 | NC_021163.1    | Ca_kabuli_chr04 | 37420162                | AA                              | TT                | 1945958176               |
| SNP_P3_54448_37420467 | NC_021163.1    | Ca_kabuli_chr04 | 37420467                | GG                              | AA                | 1945958178               |
| SNP_P3_54449_37420509 | NC_021163.1    | Ca_kabuli_chr04 | 37420509                | CC                              | TT                | 1945958180               |
| SNP_P3_54450_37422992 | NC_021163.1    | Ca_kabuli_chr04 | 37422992                | AA                              | TT                | 1945958181               |
| SNP_P3_54451_37422994 | NC_021163.1    | Ca_kabuli_chr04 | 37422994                | CC                              | AA                | 1945958183               |
| SNP_P3_54452_37423385 | NC_021163.1    | Ca_kabuli_chr04 | 37423385                | GG                              | AA                | 1945958185               |
| SNP_P3_54454_37424608 | NC_021163.1    | Ca_kabuli_chr04 | 37424608                | AA                              | TT                | 1945958187               |
| SNP_P3_54455_37435114 | NC_021163.1    | Ca_kabuli_chr04 | 37435114                | TT                              | AA                | 1945958189               |
| SNP_P3_54456_37435133 | NC_021163.1    | Ca_kabuli_chr04 | 37435133                | TT                              | CC                | 1945958190               |
| SNP_P3_54457_37435170 | NC_021163.1    | Ca_kabuli_chr04 | 37435170                | TT                              | CC                | 1945958192               |
| SNP_P3_54458_37435204 | NC_021163.1    | Ca_kabuli_chr04 | 37435204                | CC                              | TT                | 1945958194               |
| SNP_P3_54459_37435412 | NC_021163.1    | Ca_kabuli_chr04 | 37435412                | GG                              | AA                | 1945958196               |
| SNP_P3_54460_37435435 | NC_021163.1    | Ca_kabuli_chr04 | 37435435                | TT                              | CC                | 1945958197               |
| SNP_P3_54461_37435442 | NC_021163.1    | Ca_kabuli_chr04 | 37435442                | CC                              | TT                | 1945958199               |
| SNP_P3_54462_37435884 | NC_021163.1    | Ca_kabuli_chr04 | 37435884                | TT                              | GG                | 1945958201               |
| SNP_P3_54463_37437313 | NC_021163.1    | Ca_kabuli_chr04 | 37437313                | TT                              | GG                | 1945958203               |
| SNP_P3_54464_37437430 | NC_021163.1    | Ca_kabuli_chr04 | 37437430                | AA                              | CC                | 1945958204               |
| SNP_P3_54465_37437508 | NC_021163.1    | Ca_kabuli_chr04 | 37437508                | CC                              | TT                | 1945958206               |
| SNP_P3_54466_37437748 | NC_021163.1    | Ca_kabuli_chr04 | 37437748                | GG                              | AA                | 1945958208               |
| SNP_P3_54467_37437750 | NC_021163.1    | Ca_kabuli_chr04 | 37437750                | CC                              | GG                | 1945958210               |
| SNP_P3_54468_37437787 | NC_021163.1    | Ca_kabuli_chr04 | 37437787                | CC                              | TT                | 1945958212               |
| SNP_P3_54469_37437816 | NC_021163.1    | Ca_kabuli_chr04 | 37437816                | CC                              | TT                | 1945958213               |
| SNP_P3_54470_37440739 | NC_021163.1    | Ca_kabuli_chr04 | 37440739                | TT                              | GG                | 1945958215               |
| SNP_P3_54471_37441030 | NC_021163.1    | Ca_kabuli_chr04 | 37441030                | GG                              | AA                | 1945958217               |
| SNP_P3_54472_37441371 | NC_021163.1    | Ca_kabuli_chr04 | 37441371                | TT                              | CC                | 1945958219               |
| SNP_P3_54473_37442667 | NC_021163.1    | Ca_kabuli_chr04 | 37442667                | AA                              | GG                | 1945958220               |
| SNP_P3_54474_37442777 | NC_021163.1    | Ca_kabuli_chr04 | 37442777                | GG                              | AA                | 1945958222               |
| SNP_P3_54475_37442816 | NC_021163.1    | Ca_kabuli_chr04 | 37442816                | AA                              | GG                | 1945958224               |
| SNP_P3_54477_37444115 | NC_021163.1    | Ca_kabuli_chr04 | 37444115                | CC                              | TT                | 1945958226               |
| SNP_P3_54478_37444230 | NC_021163.1    | Ca_kabuli_chr04 | 37444230                | TT                              | CC                | 1945958227               |
| SNP_P3_54479_37444237 | NC_021163.1    | Ca_kabuli_chr04 | 37444237                | TT                              | CC                | 1945958229               |
| SNP_P3_54480_37446447 | NC_021163.1    | Ca_kabuli_chr04 | 37446447                | CC                              | AA                | 1945958231               |
| SNP_P3_54481_37446605 | NC_021163.1    | Ca_kabuli_chr04 | 37446605                | TT                              | AA                | 1945958233               |
| SNP_P3_54482_37446612 | NC_021163.1    | Ca_kabuli_chr04 | 37446612                | AA                              | CC                | 1945958234               |

| SNPs IDs              | Chromosome IDs | Chromosomes     | Physical positions (bp) | CDC Frontier (Reference genome) | (Pusa 256 & HPNB) | NCBI SNPdb Accession IDs |
|-----------------------|----------------|-----------------|-------------------------|---------------------------------|-------------------|--------------------------|
| SNP_P3_54483_37446762 | NC_021163.1    | Ca_kabuli_chr04 | 37446762                | CC                              | TT                | 1945958236               |
| SNP_P3_54484_37446767 | NC_021163.1    | Ca_kabuli_chr04 | 37446767                | AA                              | CC                | 1945958238               |
| SNP_P3_54485_37446818 | NC_021163.1    | Ca_kabuli_chr04 | 37446818                | AA                              | CC                | 1945958240               |
| SNP_P3_54486_37447541 | NC_021163.1    | Ca_kabuli_chr04 | 37447541                | TT                              | AA                | 1945958241               |
| SNP_P3_54487_37449777 | NC_021163.1    | Ca_kabuli_chr04 | 37449777                | GG                              | AA                | 1945958243               |
| SNP_P3_54488_37450326 | NC_021163.1    | Ca_kabuli_chr04 | 37450326                | TT                              | AA                | 1945958245               |
| SNP_P3_54489_37451962 | NC_021163.1    | Ca_kabuli_chr04 | 37451962                | GG                              | AA                | 1945958247               |
| SNP_P3_54490_37452359 | NC_021163.1    | Ca_kabuli_chr04 | 37452359                | TT                              | CC                | 1945958249               |
| SNP_P3_54491_37452421 | NC_021163.1    | Ca_kabuli_chr04 | 37452421                | TT                              | GG                | 1945958250               |
| SNP_P3_54492_37452598 | NC_021163.1    | Ca_kabuli_chr04 | 37452598                | AA                              | GG                | 1945958252               |
| SNP_P3_54493_37452606 | NC_021163.1    | Ca_kabuli_chr04 | 37452606                | TT                              | CC                | 1945958254               |
| SNP_P3_54494_37452613 | NC_021163.1    | Ca_kabuli_chr04 | 37452613                | TT                              | AA                | 1945958256               |
| SNP_P3_54495_37452618 | NC_021163.1    | Ca_kabuli_chr04 | 37452618                | GG                              | CC                | 1945958257               |
| SNP_P3_54496_37453712 | NC_021163.1    | Ca_kabuli_chr04 | 37453712                | TT                              | CC                | 1945958259               |
| SNP_P3_54497_37454070 | NC_021163.1    | Ca_kabuli_chr04 | 37454070                | CC                              | GG                | 1945958261               |
| SNP_P3_54498_37454428 | NC_021163.1    | Ca_kabuli_chr04 | 37454428                | CC                              | AA                | 1945958263               |
| SNP_P3_54499_37454527 | NC_021163.1    | Ca_kabuli_chr04 | 37454527                | CC                              | AA                | 1945958264               |
| SNP_P3_54500_37454541 | NC_021163.1    | Ca_kabuli_chr04 | 37454541                | GG                              | AA                | 1945958266               |
| SNP_P3_54501_37454571 | NC_021163.1    | Ca_kabuli_chr04 | 37454571                | CC                              | TT                | 1945958268               |
| SNP_P3_54503_37455378 | NC_021163.1    | Ca_kabuli_chr04 | 37455378                | TT                              | GG                | 1945958270               |
| SNP_P3_54504_37455555 | NC_021163.1    | Ca_kabuli_chr04 | 37455555                | TT                              | GG                | 1945958272               |
| SNP_P3_54505_37455580 | NC_021163.1    | Ca_kabuli_chr04 | 37455580                | CC                              | TT                | 1945958273               |
| SNP_P3_54506_37455802 | NC_021163.1    | Ca_kabuli_chr04 | 37455802                | GG                              | AA                | 1945958275               |
| SNP_P3_54507_37466022 | NC_021163.1    | Ca_kabuli_chr04 | 37466022                | GG                              | AA                | 1945958277               |
| SNP_P3_54508_37466026 | NC_021163.1    | Ca_kabuli_chr04 | 37466026                | CC                              | TT                | 1945958279               |
| SNP_P3_54509_37466331 | NC_021163.1    | Ca_kabuli_chr04 | 37466331                | GG                              | TT                | 1945958280               |
| SNP_P3_54510_37468034 | NC_021163.1    | Ca_kabuli_chr04 | 37468034                | TT                              | GG                | 1945958282               |
| SNP_P3_54511_37468093 | NC_021163.1    | Ca_kabuli_chr04 | 37468093                | AA                              | TT                | 1945958284               |
| SNP_P3_54512_37468136 | NC_021163.1    | Ca_kabuli_chr04 | 37468136                | GG                              | AA                | 1945958286               |
| SNP_P3_54513_37468494 | NC_021163.1    | Ca_kabuli_chr04 | 37468494                | AA                              | GG                | 1945958288               |
| SNP_P3_54514_37469409 | NC_021163.1    | Ca_kabuli_chr04 | 37469409                | GG                              | CC                | 1945958289               |
| SNP_P3_54516_37476154 | NC_021163.1    | Ca_kabuli_chr04 | 37476154                | CC                              | GG                | 1945958291               |
| SNP_P3_54518_37483232 | NC_021163.1    | Ca_kabuli_chr04 | 37483232                | TT                              | CC                | 1945958293               |
| SNP_P3_54519_37483667 | NC_021163.1    | Ca_kabuli_chr04 | 37483667                | AA                              | GG                | 1945958295               |
| SNP_P3_54521_37483897 | NC_021163.1    | Ca_kabuli_chr04 | 37483897                | CC                              | AA                | 1945958296               |
| SNP_P3_54522_37484475 | NC_021163.1    | Ca_kabuli_chr04 | 37484475                | GG                              | AA                | 1945958298               |
| SNP_P3_54523_37484478 | NC_021163.1    | Ca_kabuli_chr04 | 37484478                | TT                              | CC                | 1945958300               |
| SNP_P3_54524_37484535 | NC_021163.1    | Ca_kabuli_chr04 | 37484535                | AA                              | GG                | 1945958302               |
| SNP_P3_54525_37490224 | NC_021163.1    | Ca_kabuli_chr04 | 37490224                | TT                              | GG                | 1945958304               |
| SNP_P3_54527_37490274 | NC_021163.1    | Ca_kabuli_chr04 | 37490274                | TT                              | CC                | 1945958305               |
| SNP_P3_54528_37490285 | NC_021163.1    | Ca_kabuli_chr04 | 37490285                | AA                              | CC                | 1945958307               |
| SNP_P3_54529_37490286 | NC_021163.1    | Ca_kabuli_chr04 | 37490286                | TT                              | CC                | 1945958309               |

| SNPs IDs              | Chromosome IDs | Chromosomes     | Physical positions (bp) | CDC Frontier (Reference genome) | (Pusa 256 & HPNB) | NCBI SNPdb Accession IDs |
|-----------------------|----------------|-----------------|-------------------------|---------------------------------|-------------------|--------------------------|
| SNP_P3_54530_37490607 | NC_021163.1    | Ca_kabuli_chr04 | 37490607                | CC                              | AA                | 1945958311               |
| SNP_P3_54531_37491334 | NC_021163.1    | Ca_kabuli_chr04 | 37491334                | CC                              | TT                | 1945958312               |
| SNP_P3_54532_37491339 | NC_021163.1    | Ca_kabuli_chr04 | 37491339                | AA                              | GG                | 1945958314               |
| SNP_P3_54533_37491381 | NC_021163.1    | Ca_kabuli_chr04 | 37491381                | TT                              | CC                | 1945958316               |
| SNP_P3_54534_37491406 | NC_021163.1    | Ca_kabuli_chr04 | 37491406                | AA                              | CC                | 1945958318               |
| SNP_P3_54535_37491815 | NC_021163.1    | Ca_kabuli_chr04 | 37491815                | AA                              | GG                | 1945958320               |
| SNP_P3_54536_37492750 | NC_021163.1    | Ca_kabuli_chr04 | 37492750                | AA                              | CC                | 1945958321               |
| SNP_P3_54537_37492757 | NC_021163.1    | Ca_kabuli_chr04 | 37492757                | TT                              | CC                | 1945958323               |
| SNP_P3_54538_37492764 | NC_021163.1    | Ca_kabuli_chr04 | 37492764                | AA                              | GG                | 1945958325               |
| SNP_P3_54539_37492775 | NC_021163.1    | Ca_kabuli_chr04 | 37492775                | TT                              | CC                | 1945958327               |
| SNP_P3_54540_37492787 | NC_021163.1    | Ca_kabuli_chr04 | 37492787                | AA                              | CC                | 1945958328               |
| SNP_P3_54541_37493106 | NC_021163.1    | Ca_kabuli_chr04 | 37493106                | CC                              | TT                | 1945958330               |
| SNP_P3_54542_37493228 | NC_021163.1    | Ca_kabuli_chr04 | 37493228                | GG                              | AA                | 1945958332               |
| SNP_P3_54543_37495203 | NC_021163.1    | Ca_kabuli_chr04 | 37495203                | CC                              | AA                | 1945958334               |
| SNP_P3_54544_37495247 | NC_021163.1    | Ca_kabuli_chr04 | 37495247                | CC                              | TT                | 1945958336               |
| SNP_P3_54545_37495383 | NC_021163.1    | Ca_kabuli_chr04 | 37495383                | TT                              | CC                | 1945958337               |
| SNP_P3_54546_37495434 | NC_021163.1    | Ca_kabuli_chr04 | 37495434                | CC                              | TT                | 1945958339               |
| SNP_P3_54547_37495457 | NC_021163.1    | Ca_kabuli_chr04 | 37495457                | CC                              | AA                | 1945958341               |
| SNP_P3_54548_37495474 | NC_021163.1    | Ca_kabuli_chr04 | 37495474                | GG                              | AA                | 1945958343               |
| SNP_P3_54549_37495541 | NC_021163.1    | Ca_kabuli_chr04 | 37495541                | AA                              | TT                | 1945958344               |
| SNP_P3_54550_37495717 | NC_021163.1    | Ca_kabuli_chr04 | 37495717                | CC                              | TT                | 1945958346               |
| SNP_P3_54551_37495739 | NC_021163.1    | Ca_kabuli_chr04 | 37495739                | AA                              | CC                | 1945958348               |
| SNP_P3_54552_37496588 | NC_021163.1    | Ca_kabuli_chr04 | 37496588                | TT                              | CC                | 1945958350               |
| SNP_P3_54553_37496591 | NC_021163.1    | Ca_kabuli_chr04 | 37496591                | AA                              | CC                | 1945958351               |
| SNP_P3_54554_37498042 | NC_021163.1    | Ca_kabuli_chr04 | 37498042                | CC                              | TT                | 1945958353               |
| SNP_P3_54555_37498048 | NC_021163.1    | Ca_kabuli_chr04 | 37498048                | AA                              | GG                | 1945958355               |
| SNP_P3_54556_37498687 | NC_021163.1    | Ca_kabuli_chr04 | 37498687                | CC                              | TT                | 1945958357               |
| SNP_P3_54557_37498693 | NC_021163.1    | Ca_kabuli_chr04 | 37498693                | AA                              | TT                | 1945958359               |
| SNP_P3_54558_37499675 | NC_021163.1    | Ca_kabuli_chr04 | 37499675                | AA                              | CC                | 1945958360               |
| SNP_P3_54559_37499684 | NC_021163.1    | Ca_kabuli_chr04 | 37499684                | GG                              | AA                | 1945958362               |
| SNP_P3_54560_37499729 | NC_021163.1    | Ca_kabuli_chr04 | 37499729                | GG                              | AA                | 1945958364               |
| SNP_P3_54561_37499784 | NC_021163.1    | Ca_kabuli_chr04 | 37499784                | GG                              | AA                | 1945958366               |
| SNP_P3_54562_37500165 | NC_021163.1    | Ca_kabuli_chr04 | 37500165                | AA                              | GG                | 1945958367               |
| SNP_P3_54563_37500193 | NC_021163.1    | Ca_kabuli_chr04 | 37500193                | TT                              | AA                | 1945958369               |
| SNP_P3_54564_37502460 | NC_021163.1    | Ca_kabuli_chr04 | 37502460                | AA                              | TT                | 1945958371               |
| SNP_P3_54566_37502484 | NC_021163.1    | Ca_kabuli_chr04 | 37502484                | CC                              | TT                | 1945958373               |
| SNP_P3_54567_37502622 | NC_021163.1    | Ca_kabuli_chr04 | 37502622                | CC                              | TT                | 1945958375               |
| SNP_P3_54568_37502638 | NC_021163.1    | Ca_kabuli_chr04 | 37502638                | AA                              | TT                | 1945958376               |
| SNP_P3_54569_37502770 | NC_021163.1    | Ca_kabuli_chr04 | 37502770                | GG                              | TT                | 1945958378               |
| SNP_P3_54570_37502785 | NC_021163.1    | Ca_kabuli_chr04 | 37502785                | GG                              | AA                | 1945958380               |
| SNP_P3_54571_37502882 | NC_021163.1    | Ca_kabuli_chr04 | 37502882                | GG                              | AA                | 1945958382               |
| SNP_P3_54572_37502890 | NC_021163.1    | Ca_kabuli_chr04 | 37502890                | CC                              | TT                | 1945958383               |

| SNPs IDs              | Chromosome IDs | Chromosomes     | Physical positions (bp) | CDC Frontier (Reference genome) | (Pusa 256 & HPNB) | NCBI SNPdb Accession IDs |
|-----------------------|----------------|-----------------|-------------------------|---------------------------------|-------------------|--------------------------|
| SNP_P3_54573_37502893 | NC_021163.1    | Ca_kabuli_chr04 | 37502893                | GG                              | AA                | 1945958385               |
| SNP_P3_54574_37503126 | NC_021163.1    | Ca_kabuli_chr04 | 37503126                | AA                              | GG                | 1945958387               |
| SNP_P3_54575_37503141 | NC_021163.1    | Ca_kabuli_chr04 | 37503141                | CC                              | TT                | 1945958389               |
| SNP_P3_54576_37503783 | NC_021163.1    | Ca_kabuli_chr04 | 37503783                | AA                              | GG                | 1945958391               |
| SNP_P3_54577_37504088 | NC_021163.1    | Ca_kabuli_chr04 | 37504088                | CC                              | TT                | 1945958392               |
| SNP_P3_54578_37504915 | NC_021163.1    | Ca_kabuli_chr04 | 37504915                | TT                              | AA                | 1945958394               |
| SNP_P3_54579_37504916 | NC_021163.1    | Ca_kabuli_chr04 | 37504916                | AA                              | GG                | 1945958396               |
| SNP_P3_54580_37504929 | NC_021163.1    | Ca_kabuli_chr04 | 37504929                | AA                              | GG                | 1945958398               |
| SNP_P3_54581_37504988 | NC_021163.1    | Ca_kabuli_chr04 | 37504988                | GG                              | TT                | 1945958399               |
| SNP_P3_54582_37505253 | NC_021163.1    | Ca_kabuli_chr04 | 37505253                | TT                              | CC                | 1945958401               |
| SNP_P3_54583_37505277 | NC_021163.1    | Ca_kabuli_chr04 | 37505277                | CC                              | TT                | 1945958403               |
| SNP_P3_54584_37505278 | NC_021163.1    | Ca_kabuli_chr04 | 37505278                | CC                              | TT                | 1945958405               |
| SNP_P3_54585_37505837 | NC_021163.1    | Ca_kabuli_chr04 | 37505837                | CC                              | TT                | 1945958407               |
| SNP_P3_54586_37505843 | NC_021163.1    | Ca_kabuli_chr04 | 37505843                | AA                              | CC                | 1945958408               |
| SNP_P3_54587_37505988 | NC_021163.1    | Ca_kabuli_chr04 | 37505988                | TT                              | CC                | 1945958410               |
| SNP_P3_54588_37506249 | NC_021163.1    | Ca_kabuli_chr04 | 37506249                | GG                              | AA                | 1945958412               |
| SNP_P3_54589_37506273 | NC_021163.1    | Ca_kabuli_chr04 | 37506273                | GG                              | CC                | 1945958414               |
| SNP_P3_54590_37506278 | NC_021163.1    | Ca_kabuli_chr04 | 37506278                | CC                              | AA                | 1945958415               |
| SNP_P3_54591_37506472 | NC_021163.1    | Ca_kabuli_chr04 | 37506472                | CC                              | TT                | 1945958417               |
| SNP_P3_54592_37506479 | NC_021163.1    | Ca_kabuli_chr04 | 37506479                | GG                              | AA                | 1945958419               |
| SNP_P3_54593_37506916 | NC_021163.1    | Ca_kabuli_chr04 | 37506916                | GG                              | AA                | 1945958421               |
| SNP_P3_54594_37508189 | NC_021163.1    | Ca_kabuli_chr04 | 37508189                | AA                              | TT                | 1945958423               |
| SNP_P3_54595_37508458 | NC_021163.1    | Ca_kabuli_chr04 | 37508458                | TT                              | CC                | 1945958424               |
| SNP_P3_54597_37508740 | NC_021163.1    | Ca_kabuli_chr04 | 37508740                | TT                              | AA                | 1945958426               |
| SNP_P3_54598_37508741 | NC_021163.1    | Ca_kabuli_chr04 | 37508741                | AA                              | TT                | 1945958428               |
| SNP_P3_54599_37508750 | NC_021163.1    | Ca_kabuli_chr04 | 37508750                | AA                              | TT                | 1945958430               |
| SNP_P3_54600_37509049 | NC_021163.1    | Ca_kabuli_chr04 | 37509049                | AA                              | GG                | 1945958431               |
| SNP_P3_54601_37509428 | NC_021163.1    | Ca_kabuli_chr04 | 37509428                | AA                              | GG                | 1945958433               |
| SNP_P3_54602_37510239 | NC_021163.1    | Ca_kabuli_chr04 | 37510239                | GG                              | CC                | 1945958435               |
| SNP_P3_54603_37513089 | NC_021163.1    | Ca_kabuli_chr04 | 37513089                | TT                              | GG                | 1945958437               |
| SNP_P3_54604_37513174 | NC_021163.1    | Ca_kabuli_chr04 | 37513174                | AA                              | GG                | 1945958439               |
| SNP_P3_54605_37514157 | NC_021163.1    | Ca_kabuli_chr04 | 37514157                | CC                              | AA                | 1945958440               |
| SNP_P3_54606_37517784 | NC_021163.1    | Ca_kabuli_chr04 | 37517784                | CC                              | TT                | 1945958442               |
| SNP_P3_54607_37517822 | NC_021163.1    | Ca_kabuli_chr04 | 37517822                | TT                              | CC                | 1945958444               |
| SNP_P3_54608_37517834 | NC_021163.1    | Ca_kabuli_chr04 | 37517834                | AA                              | CC                | 1945958446               |
| SNP_P3_54610_37519893 | NC_021163.1    | Ca_kabuli_chr04 | 37519893                | AA                              | GG                | 1945958447               |
| SNP_P3_54611_37523152 | NC_021163.1    | Ca_kabuli_chr04 | 37523152                | GG                              | AA                | 1945958449               |
| SNP_P3_54612_37533549 | NC_021163.1    | Ca_kabuli_chr04 | 37533549                | AA                              | GG                | 1945958451               |
| SNP_P3_54613_37533561 | NC_021163.1    | Ca_kabuli_chr04 | 37533561                | GG                              | CC                | 1945958453               |
| SNP_P3_54614_37533609 | NC_021163.1    | Ca_kabuli_chr04 | 37533609                | TT                              | CC                | 1945958455               |
| SNP_P3_54615_37534370 | NC_021163.1    | Ca_kabuli_chr04 | 37534370                | TT                              | CC                | 1945958456               |
| SNP_P3_54616_37539935 | NC_021163.1    | Ca_kabuli_chr04 | 37539935                | GG                              | TT                | 1945958458               |

| SNPs IDs              | Chromosome IDs | Chromosomes     | Physical positions (bp) | CDC Frontier (Reference genome) | (Pusa 256 & HPNB) | NCBI SNPdb Accession IDs |
|-----------------------|----------------|-----------------|-------------------------|---------------------------------|-------------------|--------------------------|
| SNP_P3_54617_37539957 | NC_021163.1    | Ca_kabuli_chr04 | 37539957                | GG                              | AA                | 1945958460               |
| SNP_P3_54618_37539974 | NC_021163.1    | Ca_kabuli_chr04 | 37539974                | AA                              | GG                | 1945958462               |
| SNP_P3_54619_37540345 | NC_021163.1    | Ca_kabuli_chr04 | 37540345                | GG                              | AA                | 1945958463               |
| SNP_P3_54620_37541095 | NC_021163.1    | Ca_kabuli_chr04 | 37541095                | CC                              | TT                | 1945958465               |
| SNP_P3_54621_37542356 | NC_021163.1    | Ca_kabuli_chr04 | 37542356                | GG                              | AA                | 1945958467               |
| SNP_P3_54622_37542676 | NC_021163.1    | Ca_kabuli_chr04 | 37542676                | TT                              | CC                | 1945958469               |
| SNP_P3_54624_37543740 | NC_021163.1    | Ca_kabuli_chr04 | 37543740                | TT                              | CC                | 1945958471               |
| SNP_P3_54625_37544993 | NC_021163.1    | Ca_kabuli_chr04 | 37544993                | CC                              | GG                | 1945958472               |
| SNP_P3_54626_37545563 | NC_021163.1    | Ca_kabuli_chr04 | 37545563                | AA                              | TT                | 1945958474               |
| SNP_P3_54627_37548350 | NC_021163.1    | Ca_kabuli_chr04 | 37548350                | CC                              | TT                | 1945958476               |
| SNP_P3_54628_37549217 | NC_021163.1    | Ca_kabuli_chr04 | 37549217                | CC                              | TT                | 1945958478               |
| SNP_P3_54629_37549734 | NC_021163.1    | Ca_kabuli_chr04 | 37549734                | GG                              | AA                | 1945958479               |
| SNP_P3_54630_37549758 | NC_021163.1    | Ca_kabuli_chr04 | 37549758                | TT                              | GG                | 1945958481               |
| SNP_P3_54631_37549987 | NC_021163.1    | Ca_kabuli_chr04 | 37549987                | CC                              | TT                | 1945958483               |
| SNP_P3_54632_37553326 | NC_021163.1    | Ca_kabuli_chr04 | 37553326                | GG                              | TT                | 1945958485               |
| SNP_P3_54634_37555886 | NC_021163.1    | Ca_kabuli_chr04 | 37555886                | TT                              | CC                | 1945958487               |
| SNP_P3_54635_37556138 | NC_021163.1    | Ca_kabuli_chr04 | 37556138                | GG                              | CC                | 1945958488               |
| SNP_P3_54636_37557477 | NC_021163.1    | Ca_kabuli_chr04 | 37557477                | GG                              | AA                | 1945958490               |
| SNP_P3_54637_37560692 | NC_021163.1    | Ca_kabuli_chr04 | 37560692                | TT                              | CC                | 1945958492               |
| SNP_P3_54638_37560714 | NC_021163.1    | Ca_kabuli_chr04 | 37560714                | CC                              | TT                | 1945958494               |
| SNP_P3_54639_37561811 | NC_021163.1    | Ca_kabuli_chr04 | 37561811                | AA                              | CC                | 1945958496               |
| SNP_P3_54640_37562150 | NC_021163.1    | Ca_kabuli_chr04 | 37562150                | CC                              | TT                | 1945958497               |
| SNP_P3_54641_37564104 | NC_021163.1    | Ca_kabuli_chr04 | 37564104                | AA                              | TT                | 1945958499               |
| SNP_P3_54642_37565765 | NC_021163.1    | Ca_kabuli_chr04 | 37565765                | CC                              | TT                | 1945958501               |
| SNP_P3_54643_37568948 | NC_021163.1    | Ca_kabuli_chr04 | 37568948                | CC                              | TT                | 1945958503               |
| SNP_P3_54644_37569576 | NC_021163.1    | Ca_kabuli_chr04 | 37569576                | CC                              | TT                | 1945958504               |
| SNP_P3_54645_37569925 | NC_021163.1    | Ca_kabuli_chr04 | 37569925                | CC                              | TT                | 1945958506               |
| SNP_P3_54646_37570104 | NC_021163.1    | Ca_kabuli_chr04 | 37570104                | GG                              | TT                | 1945958508               |
| SNP_P3_54647_37572071 | NC_021163.1    | Ca_kabuli_chr04 | 37572071                | TT                              | CC                | 1945958510               |
| SNP_P3_54648_37572110 | NC_021163.1    | Ca_kabuli_chr04 | 37572110                | AA                              | GG                | 1945958512               |
| SNP_P3_54649_37576578 | NC_021163.1    | Ca_kabuli_chr04 | 37576578                | CC                              | AA                | 1945958513               |
| SNP_P3_54650_37578505 | NC_021163.1    | Ca_kabuli_chr04 | 37578505                | AA                              | CC                | 1945958515               |
| SNP_P3_54651_37578916 | NC_021163.1    | Ca_kabuli_chr04 | 37578916                | CC                              | GG                | 1945958517               |
| SNP_P3_54652_37579565 | NC_021163.1    | Ca_kabuli_chr04 | 37579565                | TT                              | CC                | 1945958519               |
| SNP_P3_54653_37582179 | NC_021163.1    | Ca_kabuli_chr04 | 37582179                | TT                              | CC                | 1945958520               |
| SNP_P3_54654_37586247 | NC_021163.1    | Ca_kabuli_chr04 | 37586247                | CC                              | TT                | 1945958522               |
| SNP_P3_54655_37586250 | NC_021163.1    | Ca_kabuli_chr04 | 37586250                | GG                              | TT                | 1945958524               |
| SNP_P3_54656_37586252 | NC_021163.1    | Ca_kabuli_chr04 | 37586252                | TT                              | CC                | 1945958526               |
| SNP_P3_54657_37586255 | NC_021163.1    | Ca_kabuli_chr04 | 37586255                | GG                              | AA                | 1945958528               |
| SNP_P3_54658_37586264 | NC_021163.1    | Ca_kabuli_chr04 | 37586264                | TT                              | CC                | 1945958529               |
| SNP_P3_54659_37586587 | NC_021163.1    | Ca_kabuli_chr04 | 37586587                | AA                              | GG                | 1945958531               |
| SNP_P3_54660_37586617 | NC_021163.1    | Ca_kabuli_chr04 | 37586617                | AA                              | GG                | 1945958533               |

| SNPs IDs              | Chromosome IDs | Chromosomes     | Physical positions (bp) | CDC Frontier (Reference genome) | (Pusa 256 & HPNB) | NCBI SNPdb Accession IDs |
|-----------------------|----------------|-----------------|-------------------------|---------------------------------|-------------------|--------------------------|
| SNP_P3_54661_37586630 | NC_021163.1    | Ca_kabuli_chr04 | 37586630                | GG                              | AA                | 1945958535               |
| SNP_P3_54662_37586648 | NC_021163.1    | Ca_kabuli_chr04 | 37586648                | CC                              | AA                | 1945958536               |
| SNP_P3_54663_37587577 | NC_021163.1    | Ca_kabuli_chr04 | 37587577                | GG                              | AA                | 1945958538               |
| SNP_P3_54664_37587597 | NC_021163.1    | Ca_kabuli_chr04 | 37587597                | AA                              | GG                | 1945958540               |
| SNP_P3_54665_37605674 | NC_021163.1    | Ca_kabuli_chr04 | 37605674                | CC                              | TT                | 1945958542               |
| SNP_P3_54667_37607555 | NC_021163.1    | Ca_kabuli_chr04 | 37607555                | AA                              | CC                | 1945958544               |
| SNP_P3_54668_37607874 | NC_021163.1    | Ca_kabuli_chr04 | 37607874                | CC                              | AA                | 1945958545               |
| SNP_P3_54670_37608767 | NC_021163.1    | Ca_kabuli_chr04 | 37608767                | GG                              | TT                | 1945958547               |
| SNP_P3_54671_37609164 | NC_021163.1    | Ca_kabuli_chr04 | 37609164                | GG                              | AA                | 1945958549               |
| SNP_P3_54673_37611422 | NC_021163.1    | Ca_kabuli_chr04 | 37611422                | AA                              | GG                | 1945958551               |
| SNP_P3_54674_37612889 | NC_021163.1    | Ca_kabuli_chr04 | 37612889                | AA                              | GG                | 1945958552               |
| SNP_P3_54675_37612903 | NC_021163.1    | Ca_kabuli_chr04 | 37612903                | AA                              | GG                | 1945958554               |
| SNP_P3_54676_37613088 | NC_021163.1    | Ca_kabuli_chr04 | 37613088                | AA                              | GG                | 1945958556               |
| SNP_P3_54677_37613298 | NC_021163.1    | Ca_kabuli_chr04 | 37613298                | TT                              | AA                | 1945958558               |
| SNP_P3_54678_37615669 | NC_021163.1    | Ca_kabuli_chr04 | 37615669                | AA                              | GG                | 1945958559               |
| SNP_P3_54679_37615671 | NC_021163.1    | Ca_kabuli_chr04 | 37615671                | GG                              | AA                | 1945958561               |
| SNP_P3_54680_37615694 | NC_021163.1    | Ca_kabuli_chr04 | 37615694                | TT                              | CC                | 1945958563               |
| SNP_P3_54681_37615727 | NC_021163.1    | Ca_kabuli_chr04 | 37615727                | TT                              | CC                | 1945958565               |
| SNP_P3_54682_37615728 | NC_021163.1    | Ca_kabuli_chr04 | 37615728                | AA                              | GG                | 1945958567               |
| SNP_P3_54683_37617681 | NC_021163.1    | Ca_kabuli_chr04 | 37617681                | GG                              | AA                | 1945958568               |
| SNP_P3_54684_37617716 | NC_021163.1    | Ca_kabuli_chr04 | 37617716                | GG                              | AA                | 1945958570               |
| SNP_P3_54685_37618015 | NC_021163.1    | Ca_kabuli_chr04 | 37618015                | CC                              | GG                | 1945958572               |
| SNP_P3_54686_37618022 | NC_021163.1    | Ca_kabuli_chr04 | 37618022                | GG                              | AA                | 1945958574               |
| SNP_P3_54687_37619159 | NC_021163.1    | Ca_kabuli_chr04 | 37619159                | GG                              | AA                | 1945958575               |
| SNP_P3_54689_37619677 | NC_021163.1    | Ca_kabuli_chr04 | 37619677                | CC                              | TT                | 1945958577               |
| SNP_P3_54690_37619824 | NC_021163.1    | Ca_kabuli_chr04 | 37619824                | CC                              | TT                | 1945958579               |
| SNP_P3_54691_37619858 | NC_021163.1    | Ca_kabuli_chr04 | 37619858                | AA                              | GG                | 1945958581               |
| SNP_P3_54692_37619899 | NC_021163.1    | Ca_kabuli_chr04 | 37619899                | CC                              | AA                | 1945958583               |
| SNP_P3_54693_37619938 | NC_021163.1    | Ca_kabuli_chr04 | 37619938                | CC                              | TT                | 1945958584               |
| SNP_P3_54694_37619940 | NC_021163.1    | Ca_kabuli_chr04 | 37619940                | TT                              | CC                | 1945958586               |
| SNP_P3_54695_37621835 | NC_021163.1    | Ca_kabuli_chr04 | 37621835                | AA                              | GG                | 1945958588               |
| SNP_P3_54696_37622180 | NC_021163.1    | Ca_kabuli_chr04 | 37622180                | AA                              | GG                | 1945958590               |
| SNP_P3_54697_37630840 | NC_021163.1    | Ca_kabuli_chr04 | 37630840                | AA                              | TT                | 1945958591               |
| SNP_P3_54698_37632972 | NC_021163.1    | Ca_kabuli_chr04 | 37632972                | TT                              | CC                | 1945958593               |
| SNP_P3_54699_37632973 | NC_021163.1    | Ca_kabuli_chr04 | 37632973                | AA                              | GG                | 1945958595               |
| SNP_P3_54700_37633044 | NC_021163.1    | Ca_kabuli_chr04 | 37633044                | TT                              | CC                | 1945958597               |
| SNP_P3_54702_37634286 | NC_021163.1    | Ca_kabuli_chr04 | 37634286                | TT                              | CC                | 1945958599               |
| SNP_P3_54703_37634347 | NC_021163.1    | Ca_kabuli_chr04 | 37634347                | TT                              | CC                | 1945958600               |
| SNP_P3_54704_37634409 | NC_021163.1    | Ca_kabuli_chr04 | 37634409                | CC                              | AA                | 1945958602               |
| SNP_P3_54705_37634721 | NC_021163.1    | Ca_kabuli_chr04 | 37634721                | CC                              | TT                | 1945958604               |
| SNP_P3_54706_37636388 | NC_021163.1    | Ca_kabuli_chr04 | 37636388                | TT                              | AA                | 1945958606               |
| SNP_P3_54707_37637844 | NC_021163.1    | Ca_kabuli_chr04 | 37637844                | TT                              | CC                | 1945958607               |



| SNPs IDs              | Chromosome IDs | Chromosomes     | Physical positions (bp) | CDC Frontier (Reference genome) | (Pusa 256 & HPNB) | NCBI SNPdb Accession IDs |
|-----------------------|----------------|-----------------|-------------------------|---------------------------------|-------------------|--------------------------|
| SNP_P3_54708_37637849 | NC_021163.1    | Ca_kabuli_chr04 | 37637849                | CC                              | TT                | 1945958609               |
| SNP_P3_54709_37637860 | NC_021163.1    | Ca_kabuli_chr04 | 37637860                | AA                              | GG                | 1945958611               |
| SNP_P3_54710_37637861 | NC_021163.1    | Ca_kabuli_chr04 | 37637861                | AA                              | GG                | 1945958613               |
| SNP_P3_54711_37638793 | NC_021163.1    | Ca_kabuli_chr04 | 37638793                | CC                              | TT                | 1945958615               |
| SNP_P3_54712_37641170 | NC_021163.1    | Ca_kabuli_chr04 | 37641170                | TT                              | CC                | 1945958616               |
| SNP_P3_54713_37642517 | NC_021163.1    | Ca_kabuli_chr04 | 37642517                | TT                              | CC                | 1945958618               |
| SNP_P3_54714_37643527 | NC_021163.1    | Ca_kabuli_chr04 | 37643527                | TT                              | CC                | 1945958620               |
| SNP_P3_54715_37644149 | NC_021163.1    | Ca_kabuli_chr04 | 37644149                | CC                              | AA                | 1945958622               |
| SNP_P3_54716_37644921 | NC_021163.1    | Ca_kabuli_chr04 | 37644921                | GG                              | CC                | 1945958623               |
| SNP_P3_54717_37644944 | NC_021163.1    | Ca_kabuli_chr04 | 37644944                | CC                              | AA                | 1945958625               |
| SNP_P3_54718_37645153 | NC_021163.1    | Ca_kabuli_chr04 | 37645153                | TT                              | AA                | 1945958627               |
| SNP_P3_54720_37647057 | NC_021163.1    | Ca_kabuli_chr04 | 37647057                | TT                              | GG                | 1945958629               |
| SNP_P3_54721_37647394 | NC_021163.1    | Ca_kabuli_chr04 | 37647394                | AA                              | CC                | 1945958631               |
| SNP_P3_54723_37652178 | NC_021163.1    | Ca_kabuli_chr04 | 37652178                | AA                              | GG                | 1945958632               |
| SNP_P3_54724_37652495 | NC_021163.1    | Ca_kabuli_chr04 | 37652495                | AA                              | GG                | 1945958634               |
| SNP_P3_54725_37652507 | NC_021163.1    | Ca_kabuli_chr04 | 37652507                | GG                              | CC                | 1945958636               |
| SNP_P3_54726_37652616 | NC_021163.1    | Ca_kabuli_chr04 | 37652616                | TT                              | CC                | 1945958638               |
| SNP_P3_54727_37652664 | NC_021163.1    | Ca_kabuli_chr04 | 37652664                | TT                              | AA                | 1945958639               |
| SNP_P3_54728_37652707 | NC_021163.1    | Ca_kabuli_chr04 | 37652707                | AA                              | GG                | 1945958641               |
| SNP_P3_54729_37660015 | NC_021163.1    | Ca_kabuli_chr04 | 37660015                | TT                              | CC                | 1945958643               |
| SNP_P3_54730_37660029 | NC_021163.1    | Ca_kabuli_chr04 | 37660029                | AA                              | GG                | 1945958645               |
| SNP_P3_54731_37660087 | NC_021163.1    | Ca_kabuli_chr04 | 37660087                | GG                              | AA                | 1945958647               |
| SNP_P3_54732_37660098 | NC_021163.1    | Ca_kabuli_chr04 | 37660098                | AA                              | CC                | 1945958648               |
| SNP_P3_54733_37660129 | NC_021163.1    | Ca_kabuli_chr04 | 37660129                | GG                              | AA                | 1945958650               |
| SNP_P3_54734_37662081 | NC_021163.1    | Ca_kabuli_chr04 | 37662081                | TT                              | CC                | 1945958652               |
| SNP_P3_54735_37662082 | NC_021163.1    | Ca_kabuli_chr04 | 37662082                | GG                              | AA                | 1945958654               |
| SNP_P3_54736_37662085 | NC_021163.1    | Ca_kabuli_chr04 | 37662085                | TT                              | CC                | 1945958655               |
| SNP_P3_54737_37662102 | NC_021163.1    | Ca_kabuli_chr04 | 37662102                | CC                              | TT                | 1945958657               |
| SNP_P3_54738_37662884 | NC_021163.1    | Ca_kabuli_chr04 | 37662884                | CC                              | TT                | 1945958659               |
| SNP_P3_54739_37663555 | NC_021163.1    | Ca_kabuli_chr04 | 37663555                | CC                              | TT                | 1945958661               |
| SNP_P3_54740_37671115 | NC_021163.1    | Ca_kabuli_chr04 | 37671115                | TT                              | GG                | 1945958663               |
| SNP_P3_54741_37671122 | NC_021163.1    | Ca_kabuli_chr04 | 37671122                | CC                              | TT                | 1945958664               |
| SNP_P3_54742_37671522 | NC_021163.1    | Ca_kabuli_chr04 | 37671522                | GG                              | AA                | 1945958666               |
| SNP_P3_54743_37671550 | NC_021163.1    | Ca_kabuli_chr04 | 37671550                | TT                              | CC                | 1945958668               |
| SNP_P3_54745_37677753 | NC_021163.1    | Ca_kabuli_chr04 | 37677753                | GG                              | AA                | 1945958670               |
| SNP_P3_54746_37678151 | NC_021163.1    | Ca_kabuli_chr04 | 37678151                | TT                              | AA                | 1945958671               |
| SNP_P3_54747_37678192 | NC_021163.1    | Ca_kabuli_chr04 | 37678192                | TT                              | CC                | 1945958673               |
| SNP_P3_54748_37678210 | NC_021163.1    | Ca_kabuli_chr04 | 37678210                | AA                              | GG                | 1945958675               |
| SNP_P3_54749_37678399 | NC_021163.1    | Ca_kabuli_chr04 | 37678399                | AA                              | GG                | 1945958677               |
| SNP_P3_54750_37678422 | NC_021163.1    | Ca_kabuli_chr04 | 37678422                | TT                              | GG                | 1945958679               |
| SNP_P3_54752_37678653 | NC_021163.1    | Ca_kabuli_chr04 | 37678653                | TT                              | GG                | 1945958680               |
| SNP_P3_54753_37678708 | NC_021163.1    | Ca_kabuli_chr04 | 37678708                | GG                              | AA                | 1945958682               |

| SNPs IDs              | Chromosome IDs | Chromosomes     | Physical positions (bp) | CDC Frontier (Reference genome) | (Pusa 256 & HPNB) | NCBI SNPdb Accession IDs |
|-----------------------|----------------|-----------------|-------------------------|---------------------------------|-------------------|--------------------------|
| SNP_P3_54754_37678710 | NC_021163.1    | Ca_kabuli_chr04 | 37678710                | TT                              | GG                | 1945958684               |
| SNP_P3_54755_37681852 | NC_021163.1    | Ca_kabuli_chr04 | 37681852                | AA                              | CC                | 1945958686               |
| SNP_P3_54756_37681893 | NC_021163.1    | Ca_kabuli_chr04 | 37681893                | CC                              | GG                | 1945958687               |
| SNP_P3_54757_37682202 | NC_021163.1    | Ca_kabuli_chr04 | 37682202                | TT                              | AA                | 1945958689               |
| SNP_P3_54758_37682262 | NC_021163.1    | Ca_kabuli_chr04 | 37682262                | GG                              | AA                | 1945958691               |
| SNP_P3_54759_37682371 | NC_021163.1    | Ca_kabuli_chr04 | 37682371                | CC                              | TT                | 1945958693               |
| SNP_P3_54760_37682376 | NC_021163.1    | Ca_kabuli_chr04 | 37682376                | TT                              | CC                | 1945958695               |
| SNP_P3_54761_37682495 | NC_021163.1    | Ca_kabuli_chr04 | 37682495                | TT                              | GG                | 1945958696               |
| SNP_P3_54762_37682505 | NC_021163.1    | Ca_kabuli_chr04 | 37682505                | AA                              | GG                | 1945958698               |
| SNP_P3_54763_37682538 | NC_021163.1    | Ca_kabuli_chr04 | 37682538                | AA                              | TT                | 1945958700               |
| SNP_P3_54764_37682583 | NC_021163.1    | Ca_kabuli_chr04 | 37682583                | GG                              | AA                | 1945958702               |
| SNP_P3_54765_37682681 | NC_021163.1    | Ca_kabuli_chr04 | 37682681                | GG                              | CC                | 1945958703               |
| SNP_P3_54766_37682785 | NC_021163.1    | Ca_kabuli_chr04 | 37682785                | TT                              | AA                | 1945958705               |
| SNP_P3_54767_37682831 | NC_021163.1    | Ca_kabuli_chr04 | 37682831                | GG                              | AA                | 1945958707               |
| SNP_P3_54768_37682952 | NC_021163.1    | Ca_kabuli_chr04 | 37682952                | GG                              | AA                | 1945958709               |
| SNP_P3_54769_37682957 | NC_021163.1    | Ca_kabuli_chr04 | 37682957                | CC                              | TT                | 1945958711               |
| SNP_P3_54770_37682966 | NC_021163.1    | Ca_kabuli_chr04 | 37682966                | TT                              | CC                | 1945958712               |
| SNP_P3_54774_37683602 | NC_021163.1    | Ca_kabuli_chr04 | 37683602                | TT                              | AA                | 1945958714               |
| SNP_P3_54775_37684228 | NC_021163.1    | Ca_kabuli_chr04 | 37684228                | TT                              | CC                | 1945958716               |
| SNP_P3_54776_37684755 | NC_021163.1    | Ca_kabuli_chr04 | 37684755                | CC                              | TT                | 1945958718               |
| SNP_P3_54777_37685315 | NC_021163.1    | Ca_kabuli_chr04 | 37685315                | GG                              | AA                | 1945958720               |
| SNP_P3_54778_37686422 | NC_021163.1    | Ca_kabuli_chr04 | 37686422                | AA                              | GG                | 1945958721               |
| SNP_P3_54779_37687937 | NC_021163.1    | Ca_kabuli_chr04 | 37687937                | TT                              | CC                | 1945958723               |
| SNP_P3_54781_37688361 | NC_021163.1    | Ca_kabuli_chr04 | 37688361                | GG                              | TT                | 1945958725               |
| SNP_P3_54783_37690030 | NC_021163.1    | Ca_kabuli_chr04 | 37690030                | AA                              | GG                | 1945958727               |
| SNP_P3_54784_37690384 | NC_021163.1    | Ca_kabuli_chr04 | 37690384                | GG                              | TT                | 1945958728               |
| SNP_P3_54785_37690528 | NC_021163.1    | Ca_kabuli_chr04 | 37690528                | TT                              | CC                | 1945958730               |
| SNP_P3_54786_37690690 | NC_021163.1    | Ca_kabuli_chr04 | 37690690                | CC                              | TT                | 1945958732               |
| SNP_P3_54787_37692292 | NC_021163.1    | Ca_kabuli_chr04 | 37692292                | GG                              | AA                | 1945958734               |
| SNP_P3_54788_37692318 | NC_021163.1    | Ca_kabuli_chr04 | 37692318                | GG                              | AA                | 1945958736               |
| SNP_P3_54789_37692509 | NC_021163.1    | Ca_kabuli_chr04 | 37692509                | TT                              | AA                | 1945958737               |
| SNP_P3_54790_37692639 | NC_021163.1    | Ca_kabuli_chr04 | 37692639                | AA                              | GG                | 1945958739               |
| SNP_P3_54791_37692748 | NC_021163.1    | Ca_kabuli_chr04 | 37692748                | AA                              | CC                | 1945958741               |
| SNP_P3_54792_37693463 | NC_021163.1    | Ca_kabuli_chr04 | 37693463                | TT                              | GG                | 1945958743               |
| SNP_P3_54793_37694113 | NC_021163.1    | Ca_kabuli_chr04 | 37694113                | TT                              | CC                | 1945958744               |
| SNP_P3_54794_37694115 | NC_021163.1    | Ca_kabuli_chr04 | 37694115                | AA                              | TT                | 1945958746               |
| SNP_P3_54795_37694133 | NC_021163.1    | Ca_kabuli_chr04 | 37694133                | AA                              | GG                | 1945958748               |
| SNP_P3_54796_37694694 | NC_021163.1    | Ca_kabuli_chr04 | 37694694                | CC                              | TT                | 1945958750               |
| SNP_P3_54798_37696762 | NC_021163.1    | Ca_kabuli_chr04 | 37696762                | CC                              | AA                | 1945958752               |
| SNP_P3_54799_37696987 | NC_021163.1    | Ca_kabuli_chr04 | 37696987                | GG                              | CC                | 1945958753               |
| SNP_P3_54800_37697803 | NC_021163.1    | Ca_kabuli_chr04 | 37697803                | CC                              | TT                | 1945958755               |
| SNP_P3_54801_37698436 | NC_021163.1    | Ca_kabuli_chr04 | 37698436                | TT                              | AA                | 1945958757               |

| SNPs IDs              | Chromosome IDs | Chromosomes     | Physical positions (bp) | CDC Frontier (Reference genome) | (Pusa 256 & HPNB) | NCBI SNPdb Accession IDs |
|-----------------------|----------------|-----------------|-------------------------|---------------------------------|-------------------|--------------------------|
| SNP_P3_54802_37698835 | NC_021163.1    | Ca_kabuli_chr04 | 37698835                | TT                              | CC                | 1945958759               |
| SNP_P3_54803_37699782 | NC_021163.1    | Ca_kabuli_chr04 | 37699782                | GG                              | AA                | 1945958760               |
| SNP_P3_54804_37699981 | NC_021163.1    | Ca_kabuli_chr04 | 37699981                | GG                              | TT                | 1945958762               |
| SNP_P3_54805_37700066 | NC_021163.1    | Ca_kabuli_chr04 | 37700066                | AA                              | GG                | 1945958764               |
| SNP_P3_54806_37700345 | NC_021163.1    | Ca_kabuli_chr04 | 37700345                | AA                              | GG                | 1945958766               |
| SNP_P3_54807_37700633 | NC_021163.1    | Ca_kabuli_chr04 | 37700633                | AA                              | GG                | 1945958768               |
| SNP_P3_54808_37701068 | NC_021163.1    | Ca_kabuli_chr04 | 37701068                | TT                              | CC                | 1945958769               |
| SNP_P3_54811_37701669 | NC_021163.1    | Ca_kabuli_chr04 | 37701669                | AA                              | TT                | 1945958771               |
| SNP_P3_54812_37701732 | NC_021163.1    | Ca_kabuli_chr04 | 37701732                | GG                              | TT                | 1945958773               |
| SNP_P3_54813_37701873 | NC_021163.1    | Ca_kabuli_chr04 | 37701873                | TT                              | AA                | 1945958775               |
| SNP_P3_54814_37702551 | NC_021163.1    | Ca_kabuli_chr04 | 37702551                | CC                              | TT                | 1945958777               |
| SNP_P3_54815_37702552 | NC_021163.1    | Ca_kabuli_chr04 | 37702552                | AA                              | GG                | 1945958778               |
| SNP_P3_54818_37703722 | NC_021163.1    | Ca_kabuli_chr04 | 37703722                | CC                              | TT                | 1945958780               |
| SNP_P3_54819_37703751 | NC_021163.1    | Ca_kabuli_chr04 | 37703751                | TT                              | CC                | 1945958782               |
| SNP_P3_54820_37703863 | NC_021163.1    | Ca_kabuli_chr04 | 37703863                | AA                              | TT                | 1945958784               |
| SNP_P3_54821_37703941 | NC_021163.1    | Ca_kabuli_chr04 | 37703941                | AA                              | GG                | 1945958785               |
| SNP_P3_54823_37704077 | NC_021163.1    | Ca_kabuli_chr04 | 37704077                | AA                              | CC                | 1945958787               |
| SNP_P3_54825_37704272 | NC_021163.1    | Ca_kabuli_chr04 | 37704272                | TT                              | GG                | 1945958789               |
| SNP_P3_54826_37704300 | NC_021163.1    | Ca_kabuli_chr04 | 37704300                | AA                              | CC                | 1945958791               |
| SNP_P3_54827_37704307 | NC_021163.1    | Ca_kabuli_chr04 | 37704307                | GG                              | AA                | 1945958793               |
| SNP_P3_54828_37704345 | NC_021163.1    | Ca_kabuli_chr04 | 37704345                | AA                              | GG                | 1945958794               |
| SNP_P3_54829_37704705 | NC_021163.1    | Ca_kabuli_chr04 | 37704705                | TT                              | GG                | 1945958796               |
| SNP_P3_54830_37704755 | NC_021163.1    | Ca_kabuli_chr04 | 37704755                | AA                              | CC                | 1945958798               |
| SNP_P3_54831_37704782 | NC_021163.1    | Ca_kabuli_chr04 | 37704782                | CC                              | AA                | 1945958800               |
| SNP_P3_54832_37705061 | NC_021163.1    | Ca_kabuli_chr04 | 37705061                | TT                              | AA                | 1945958801               |
| SNP_P3_54833_37705224 | NC_021163.1    | Ca_kabuli_chr04 | 37705224                | GG                              | TT                | 1945958803               |
| SNP_P3_54834_37705317 | NC_021163.1    | Ca_kabuli_chr04 | 37705317                | AA                              | GG                | 1945958805               |
| SNP_P3_54835_37705335 | NC_021163.1    | Ca_kabuli_chr04 | 37705335                | TT                              | CC                | 1945958807               |
| SNP_P3_54836_37705349 | NC_021163.1    | Ca_kabuli_chr04 | 37705349                | CC                              | TT                | 1945958809               |
| SNP_P3_54837_37705350 | NC_021163.1    | Ca_kabuli_chr04 | 37705350                | GG                              | AA                | 1945958810               |
| SNP_P3_54838_37705854 | NC_021163.1    | Ca_kabuli_chr04 | 37705854                | TT                              | AA                | 1945958812               |
| SNP_P3_54841_37706061 | NC_021163.1    | Ca_kabuli_chr04 | 37706061                | AA                              | GG                | 1945958814               |
| SNP_P3_54842_37706086 | NC_021163.1    | Ca_kabuli_chr04 | 37706086                | GG                              | TT                | 1945958816               |
| SNP_P3_54846_37707088 | NC_021163.1    | Ca_kabuli_chr04 | 37707088                | CC                              | TT                | 1945958818               |
| SNP_P3_54847_37707106 | NC_021163.1    | Ca_kabuli_chr04 | 37707106                | GG                              | CC                | 1945958819               |
| SNP_P3_54848_37707192 | NC_021163.1    | Ca_kabuli_chr04 | 37707192                | AA                              | TT                | 1945958821               |
| SNP_P3_54849_37707198 | NC_021163.1    | Ca_kabuli_chr04 | 37707198                | TT                              | GG                | 1945958823               |
| SNP_P3_54850_37707229 | NC_021163.1    | Ca_kabuli_chr04 | 37707229                | AA                              | GG                | 1945958825               |
| SNP_P3_54851_37707346 | NC_021163.1    | Ca_kabuli_chr04 | 37707346                | CC                              | GG                | 1945958826               |
| SNP_P3_54853_37708911 | NC_021163.1    | Ca_kabuli_chr04 | 37708911                | GG                              | CC                | 1945958828               |
| SNP_P3_54854_37708964 | NC_021163.1    | Ca_kabuli_chr04 | 37708964                | GG                              | TT                | 1945958830               |
| SNP_P3_54855_37708976 | NC_021163.1    | Ca_kabuli_chr04 | 37708976                | TT                              | CC                | 1945958832               |

| SNPs IDs              | Chromosome IDs | Chromosomes     | Physical positions (bp) | CDC Frontier (Reference genome) | (Pusa 256 & HPNB) | NCBI SNPdb Accession IDs |
|-----------------------|----------------|-----------------|-------------------------|---------------------------------|-------------------|--------------------------|
| SNP_P3_54856_37709043 | NC_021163.1    | Ca_kabuli_chr04 | 37709043                | GG                              | TT                | 1945958834               |
| SNP_P3_54857_37709251 | NC_021163.1    | Ca_kabuli_chr04 | 37709251                | TT                              | GG                | 1945958835               |
| SNP_P3_54858_37709255 | NC_021163.1    | Ca_kabuli_chr04 | 37709255                | AA                              | CC                | 1945958837               |
| SNP_P3_54859_37709257 | NC_021163.1    | Ca_kabuli_chr04 | 37709257                | AA                              | GG                | 1945958839               |
| SNP_P3_54861_37709552 | NC_021163.1    | Ca_kabuli_chr04 | 37709552                | CC                              | GG                | 1945958841               |
| SNP_P3_54862_37710093 | NC_021163.1    | Ca_kabuli_chr04 | 37710093                | TT                              | CC                | 1945958842               |
| SNP_P3_54864_37711851 | NC_021163.1    | Ca_kabuli_chr04 | 37711851                | CC                              | TT                | 1945958844               |
| SNP_P3_54865_37712132 | NC_021163.1    | Ca_kabuli_chr04 | 37712132                | TT                              | CC                | 1945958846               |
| SNP_P3_54866_37712140 | NC_021163.1    | Ca_kabuli_chr04 | 37712140                | GG                              | AA                | 1945958848               |
| SNP_P3_54868_37712311 | NC_021163.1    | Ca_kabuli_chr04 | 37712311                | GG                              | AA                | 1945958850               |
| SNP_P3_54869_37715050 | NC_021163.1    | Ca_kabuli_chr04 | 37715050                | CC                              | TT                | 1945958851               |
| SNP_P3_54870_37716223 | NC_021163.1    | Ca_kabuli_chr04 | 37716223                | AA                              | TT                | 1945958853               |
| SNP_P3_54872_37717154 | NC_021163.1    | Ca_kabuli_chr04 | 37717154                | CC                              | TT                | 1945958855               |
| SNP_P3_54873_37718972 | NC_021163.1    | Ca_kabuli_chr04 | 37718972                | CC                              | AA                | 1945958857               |
| SNP_P3_54874_37719470 | NC_021163.1    | Ca_kabuli_chr04 | 37719470                | GG                              | AA                | 1945958858               |
| SNP_P3_54875_37719683 | NC_021163.1    | Ca_kabuli_chr04 | 37719683                | TT                              | CC                | 1945958860               |
| SNP_P3_54876_37719686 | NC_021163.1    | Ca_kabuli_chr04 | 37719686                | CC                              | GG                | 1945958862               |
| SNP_P3_54877_37719814 | NC_021163.1    | Ca_kabuli_chr04 | 37719814                | GG                              | AA                | 1945958864               |
| SNP_P3_54878_37721509 | NC_021163.1    | Ca_kabuli_chr04 | 37721509                | AA                              | CC                | 1945958866               |
| SNP_P3_54880_37725466 | NC_021163.1    | Ca_kabuli_chr04 | 37725466                | AA                              | TT                | 1945958867               |
| SNP_P3_54881_37725470 | NC_021163.1    | Ca_kabuli_chr04 | 37725470                | TT                              | CC                | 1945958869               |
| SNP_P3_54882_37726549 | NC_021163.1    | Ca_kabuli_chr04 | 37726549                | AA                              | CC                | 1945958871               |
| SNP_P3_54883_37728622 | NC_021163.1    | Ca_kabuli_chr04 | 37728622                | TT                              | AA                | 1945958873               |
| SNP_P3_54884_37728632 | NC_021163.1    | Ca_kabuli_chr04 | 37728632                | TT                              | CC                | 1945958875               |
| SNP_P3_54885_37728935 | NC_021163.1    | Ca_kabuli_chr04 | 37728935                | AA                              | CC                | 1945958876               |
| SNP_P3_54886_37729125 | NC_021163.1    | Ca_kabuli_chr04 | 37729125                | CC                              | AA                | 1945958878               |
| SNP_P3_54887_37729144 | NC_021163.1    | Ca_kabuli_chr04 | 37729144                | TT                              | AA                | 1945958880               |
| SNP_P3_54889_37729508 | NC_021163.1    | Ca_kabuli_chr04 | 37729508                | CC                              | TT                | 1945958882               |
| SNP_P3_54890_37729516 | NC_021163.1    | Ca_kabuli_chr04 | 37729516                | CC                              | TT                | 1945958883               |
| SNP_P3_54891_37729551 | NC_021163.1    | Ca_kabuli_chr04 | 37729551                | AA                              | CC                | 1945958885               |
| SNP_P3_54892_37730031 | NC_021163.1    | Ca_kabuli_chr04 | 37730031                | CC                              | TT                | 1945958887               |
| SNP_P3_54893_37730621 | NC_021163.1    | Ca_kabuli_chr04 | 37730621                | CC                              | TT                | 1945958889               |
| SNP_P3_54894_37730630 | NC_021163.1    | Ca_kabuli_chr04 | 37730630                | AA                              | GG                | 1945958891               |
| SNP_P3_54895_37730652 | NC_021163.1    | Ca_kabuli_chr04 | 37730652                | TT                              | CC                | 1945958892               |
| SNP_P3_54896_37731102 | NC_021163.1    | Ca_kabuli_chr04 | 37731102                | CC                              | TT                | 1945958894               |
| SNP_P3_54897_37731299 | NC_021163.1    | Ca_kabuli_chr04 | 37731299                | CC                              | TT                | 1945958896               |
| SNP_P3_54898_37731500 | NC_021163.1    | Ca_kabuli_chr04 | 37731500                | TT                              | CC                | 1945958898               |
| SNP_P3_54899_37736226 | NC_021163.1    | Ca_kabuli_chr04 | 37736226                | GG                              | AA                | 1945958899               |
| SNP_P3_54900_37737804 | NC_021163.1    | Ca_kabuli_chr04 | 37737804                | AA                              | GG                | 1945958901               |
| SNP_P3_54901_37737859 | NC_021163.1    | Ca_kabuli_chr04 | 37737859                | AA                              | TT                | 1945958903               |
| SNP_P3_54902_37737892 | NC_021163.1    | Ca_kabuli_chr04 | 37737892                | TT                              | GG                | 1945958905               |
| SNP_P3_54903_37738040 | NC_021163.1    | Ca_kabuli_chr04 | 37738040                | TT                              | CC                | 1945958907               |

| SNPs IDs              | Chromosome IDs | Chromosomes     | Physical positions (bp) | CDC Frontier (Reference genome) | (Pusa 256 & HPNB) | NCBI SNPdb Accession IDs |
|-----------------------|----------------|-----------------|-------------------------|---------------------------------|-------------------|--------------------------|
| SNP_P3_54904_37738243 | NC_021163.1    | Ca_kabuli_chr04 | 37738243                | TT                              | CC                | 1945958908               |
| SNP_P3_54905_37738822 | NC_021163.1    | Ca_kabuli_chr04 | 37738822                | AA                              | CC                | 1945958910               |
| SNP_P3_54906_37739107 | NC_021163.1    | Ca_kabuli_chr04 | 37739107                | AA                              | CC                | 1945958912               |
| SNP_P3_54907_37739124 | NC_021163.1    | Ca_kabuli_chr04 | 37739124                | CC                              | TT                | 1945958914               |
| SNP_P3_54908_37739472 | NC_021163.1    | Ca_kabuli_chr04 | 37739472                | GG                              | TT                | 1945958915               |
| SNP_P3_54909_37740411 | NC_021163.1    | Ca_kabuli_chr04 | 37740411                | CC                              | TT                | 1945958917               |
| SNP_P3_54910_37740697 | NC_021163.1    | Ca_kabuli_chr04 | 37740697                | GG                              | CC                | 1945958919               |
| SNP_P3_54911_37741153 | NC_021163.1    | Ca_kabuli_chr04 | 37741153                | GG                              | AA                | 1945958921               |
| SNP_P3_54912_37742526 | NC_021163.1    | Ca_kabuli_chr04 | 37742526                | AA                              | TT                | 1945958923               |
| SNP_P3_54913_37743285 | NC_021163.1    | Ca_kabuli_chr04 | 37743285                | TT                              | AA                | 1945958924               |
| SNP_P3_54914_37743300 | NC_021163.1    | Ca_kabuli_chr04 | 37743300                | CC                              | GG                | 1945958926               |
| SNP_P3_54915_37743902 | NC_021163.1    | Ca_kabuli_chr04 | 37743902                | TT                              | CC                | 1945958928               |
| SNP_P3_54916_37743943 | NC_021163.1    | Ca_kabuli_chr04 | 37743943                | GG                              | CC                | 1945958930               |
| SNP_P3_54917_37744580 | NC_021163.1    | Ca_kabuli_chr04 | 37744580                | CC                              | TT                | 1945958932               |
| SNP_P3_54918_37744597 | NC_021163.1    | Ca_kabuli_chr04 | 37744597                | TT                              | CC                | 1945958933               |
| SNP_P3_54919_37744607 | NC_021163.1    | Ca_kabuli_chr04 | 37744607                | AA                              | GG                | 1945958935               |
| SNP_P3_54920_37746074 | NC_021163.1    | Ca_kabuli_chr04 | 37746074                | TT                              | CC                | 1945958937               |
| SNP_P3_54921_37746355 | NC_021163.1    | Ca_kabuli_chr04 | 37746355                | GG                              | TT                | 1945958939               |
| SNP_P3_54923_37746458 | NC_021163.1    | Ca_kabuli_chr04 | 37746458                | TT                              | CC                | 1945958940               |
| SNP_P3_54924_37746594 | NC_021163.1    | Ca_kabuli_chr04 | 37746594                | AA                              | GG                | 1945958942               |
| SNP_P3_54925_37748375 | NC_021163.1    | Ca_kabuli_chr04 | 37748375                | GG                              | AA                | 1945958944               |
| SNP_P3_54926_37748377 | NC_021163.1    | Ca_kabuli_chr04 | 37748377                | CC                              | TT                | 1945958946               |
| SNP_P3_54927_37749223 | NC_021163.1    | Ca_kabuli_chr04 | 37749223                | TT                              | CC                | 1945958948               |
| SNP_P3_54928_37751406 | NC_021163.1    | Ca_kabuli_chr04 | 37751406                | GG                              | AA                | 1945958949               |
| SNP_P3_54929_37753364 | NC_021163.1    | Ca_kabuli_chr04 | 37753364                | AA                              | CC                | 1945958951               |
| SNP_P3_54930_37755827 | NC_021163.1    | Ca_kabuli_chr04 | 37755827                | GG                              | TT                | 1945958953               |
| SNP_P3_54931_37755852 | NC_021163.1    | Ca_kabuli_chr04 | 37755852                | AA                              | GG                | 1945958955               |
| SNP_P3_54932_37756747 | NC_021163.1    | Ca_kabuli_chr04 | 37756747                | CC                              | AA                | 1945958956               |
| SNP_P3_54933_37762279 | NC_021163.1    | Ca_kabuli_chr04 | 37762279                | TT                              | CC                | 1945958958               |
| SNP_P3_54934_37768011 | NC_021163.1    | Ca_kabuli_chr04 | 37768011                | AA                              | CC                | 1945958960               |
| SNP_P3_54935_37769098 | NC_021163.1    | Ca_kabuli_chr04 | 37769098                | TT                              | GG                | 1945958962               |
| SNP_P3_54936_37769197 | NC_021163.1    | Ca_kabuli_chr04 | 37769197                | GG                              | AA                | 1945958964               |
| SNP_P3_54938_37773812 | NC_021163.1    | Ca_kabuli_chr04 | 37773812                | AA                              | TT                | 1945958965               |
| SNP_P3_54939_37774152 | NC_021163.1    | Ca_kabuli_chr04 | 37774152                | AA                              | GG                | 1945958967               |
| SNP_P3_54940_37776844 | NC_021163.1    | Ca_kabuli_chr04 | 37776844                | GG                              | AA                | 1945958969               |
| SNP_P3_54941_37780285 | NC_021163.1    | Ca_kabuli_chr04 | 37780285                | TT                              | CC                | 1945958971               |
| SNP_P3_54942_37782535 | NC_021163.1    | Ca_kabuli_chr04 | 37782535                | GG                              | AA                | 1945958972               |
| SNP_P3_54943_37782760 | NC_021163.1    | Ca_kabuli_chr04 | 37782760                | TT                              | CC                | 1945958974               |
| SNP_P3_54944_37783916 | NC_021163.1    | Ca_kabuli_chr04 | 37783916                | GG                              | AA                | 1945958976               |
| SNP_P3_54945_37784047 | NC_021163.1    | Ca_kabuli_chr04 | 37784047                | CC                              | TT                | 1945958978               |
| SNP_P3_54946_37784255 | NC_021163.1    | Ca_kabuli_chr04 | 37784255                | CC                              | TT                | 1945958980               |
| SNP_P3_54947_37784535 | NC_021163.1    | Ca_kabuli_chr04 | 37784535                | TT                              | AA                | 1945958981               |

| SNPs IDs              | Chromosome IDs | Chromosomes     | Physical positions (bp) | CDC Frontier (Reference genome) | (Pusa 256 & HPNB) | NCBI SNPdb Accession IDs |
|-----------------------|----------------|-----------------|-------------------------|---------------------------------|-------------------|--------------------------|
| SNP_P3_54948_37784642 | NC_021163.1    | Ca_kabuli_chr04 | 37784642                | TT                              | CC                | 1945958983               |
| SNP_P3_54949_37784663 | NC_021163.1    | Ca_kabuli_chr04 | 37784663                | CC                              | AA                | 1945958985               |
| SNP_P3_54951_37784846 | NC_021163.1    | Ca_kabuli_chr04 | 37784846                | AA                              | GG                | 1945958987               |
| SNP_P3_54952_37784848 | NC_021163.1    | Ca_kabuli_chr04 | 37784848                | AA                              | GG                | 1945958989               |
| SNP_P3_54953_37785020 | NC_021163.1    | Ca_kabuli_chr04 | 37785020                | TT                              | CC                | 1945958990               |
| SNP_P3_54954_37785073 | NC_021163.1    | Ca_kabuli_chr04 | 37785073                | AA                              | TT                | 1945958992               |
| SNP_P3_54955_37785626 | NC_021163.1    | Ca_kabuli_chr04 | 37785626                | AA                              | GG                | 1945958994               |
| SNP_P3_54956_37787975 | NC_021163.1    | Ca_kabuli_chr04 | 37787975                | GG                              | AA                | 1945958996               |
| SNP_P3_54957_37788485 | NC_021163.1    | Ca_kabuli_chr04 | 37788485                | TT                              | CC                | 1945958997               |
| SNP_P3_54958_37789564 | NC_021163.1    | Ca_kabuli_chr04 | 37789564                | TT                              | CC                | 1945958999               |
| SNP_P3_54959_37790288 | NC_021163.1    | Ca_kabuli_chr04 | 37790288                | CC                              | TT                | 1945959001               |
| SNP_P3_54960_37790589 | NC_021163.1    | Ca_kabuli_chr04 | 37790589                | CC                              | TT                | 1945959003               |
| SNP_P3_54961_37791186 | NC_021163.1    | Ca_kabuli_chr04 | 37791186                | AA                              | CC                | 1945959005               |
| SNP_P3_54962_37791572 | NC_021163.1    | Ca_kabuli_chr04 | 37791572                | TT                              | GG                | 1945959006               |
| SNP_P3_54963_37791687 | NC_021163.1    | Ca_kabuli_chr04 | 37791687                | TT                              | CC                | 1945959008               |
| SNP_P3_54964_37793997 | NC_021163.1    | Ca_kabuli_chr04 | 37793997                | AA                              | GG                | 1945959010               |
| SNP_P3_54965_37796523 | NC_021163.1    | Ca_kabuli_chr04 | 37796523                | AA                              | TT                | 1945959012               |
| SNP_P3_54966_37797461 | NC_021163.1    | Ca_kabuli_chr04 | 37797461                | GG                              | AA                | 1945959013               |
| SNP_P3_54967_37797485 | NC_021163.1    | Ca_kabuli_chr04 | 37797485                | CC                              | TT                | 1945959015               |
| SNP_P3_54968_37797766 | NC_021163.1    | Ca_kabuli_chr04 | 37797766                | CC                              | TT                | 1945959017               |
| SNP_P3_54969_37798208 | NC_021163.1    | Ca_kabuli_chr04 | 37798208                | AA                              | GG                | 1945959019               |
| SNP_P3_54970_37798353 | NC_021163.1    | Ca_kabuli_chr04 | 37798353                | CC                              | TT                | 1945959021               |
| SNP_P3_54971_37798593 | NC_021163.1    | Ca_kabuli_chr04 | 37798593                | CC                              | TT                | 1945959022               |
| SNP_P3_54972_37800495 | NC_021163.1    | Ca_kabuli_chr04 | 37800495                | GG                              | TT                | 1945959024               |
| SNP_P3_54973_37800629 | NC_021163.1    | Ca_kabuli_chr04 | 37800629                | AA                              | GG                | 1945959026               |
| SNP_P3_54974_37800640 | NC_021163.1    | Ca_kabuli_chr04 | 37800640                | GG                              | CC                | 1945959028               |
| SNP_P3_54975_37800645 | NC_021163.1    | Ca_kabuli_chr04 | 37800645                | AA                              | GG                | 1945959029               |
| SNP_P3_54976_37800679 | NC_021163.1    | Ca_kabuli_chr04 | 37800679                | AA                              | GG                | 1945959031               |
| SNP_P3_54977_37801746 | NC_021163.1    | Ca_kabuli_chr04 | 37801746                | AA                              | CC                | 1945959033               |
| SNP_P3_54978_37801747 | NC_021163.1    | Ca_kabuli_chr04 | 37801747                | TT                              | CC                | 1945959035               |
| SNP_P3_54979_37802059 | NC_021163.1    | Ca_kabuli_chr04 | 37802059                | GG                              | AA                | 1945959037               |
| SNP_P3_54980_37802062 | NC_021163.1    | Ca_kabuli_chr04 | 37802062                | TT                              | AA                | 1945959038               |
| SNP_P3_54981_37802065 | NC_021163.1    | Ca_kabuli_chr04 | 37802065                | TT                              | GG                | 1945959040               |
| SNP_P3_54982_37802721 | NC_021163.1    | Ca_kabuli_chr04 | 37802721                | CC                              | TT                | 1945959042               |
| SNP_P3_54983_37802723 | NC_021163.1    | Ca_kabuli_chr04 | 37802723                | TT                              | CC                | 1945959044               |
| SNP_P3_54984_37804257 | NC_021163.1    | Ca_kabuli_chr04 | 37804257                | TT                              | AA                | 1945959046               |
| SNP_P3_54985_37805568 | NC_021163.1    | Ca_kabuli_chr04 | 37805568                | GG                              | AA                | 1945959047               |
| SNP_P3_54986_37806689 | NC_021163.1    | Ca_kabuli_chr04 | 37806689                | TT                              | CC                | 1945959049               |
| SNP_P3_54987_37806715 | NC_021163.1    | Ca_kabuli_chr04 | 37806715                | GG                              | TT                | 1945959051               |
| SNP_P3_54988_37806745 | NC_021163.1    | Ca_kabuli_chr04 | 37806745                | AA                              | TT                | 1945959053               |
| SNP_P3_54989_37809310 | NC_021163.1    | Ca_kabuli_chr04 | 37809310                | GG                              | AA                | 1945959054               |
| SNP_P3_54990_37809422 | NC_021163.1    | Ca_kabuli_chr04 | 37809422                | TT                              | CC                | 1945959056               |

| SNPs IDs              | Chromosome IDs | Chromosomes     | Physical positions (bp) | CDC Frontier (Reference genome) | (Pusa 256 & HPNB) | NCBI SNPdb Accession IDs |
|-----------------------|----------------|-----------------|-------------------------|---------------------------------|-------------------|--------------------------|
| SNP_P3_54991_37810037 | NC_021163.1    | Ca_kabuli_chr04 | 37810037                | AA                              | GG                | 1945959058               |
| SNP_P3_54992_37810247 | NC_021163.1    | Ca_kabuli_chr04 | 37810247                | TT                              | GG                | 1945959060               |
| SNP_P3_54993_37810251 | NC_021163.1    | Ca_kabuli_chr04 | 37810251                | TT                              | CC                | 1945959062               |
| SNP_P3_54994_37810436 | NC_021163.1    | Ca_kabuli_chr04 | 37810436                | AA                              | GG                | 1945959063               |
| SNP_P3_54995_37810799 | NC_021163.1    | Ca_kabuli_chr04 | 37810799                | TT                              | CC                | 1945959065               |
| SNP_P3_54996_37810817 | NC_021163.1    | Ca_kabuli_chr04 | 37810817                | AA                              | GG                | 1945959067               |
| SNP_P3_54997_37810828 | NC_021163.1    | Ca_kabuli_chr04 | 37810828                | AA                              | GG                | 1945959069               |
| SNP_P3_54998_37815830 | NC_021163.1    | Ca_kabuli_chr04 | 37815830                | GG                              | CC                | 1945959070               |
| SNP_P3_54999_37815863 | NC_021163.1    | Ca_kabuli_chr04 | 37815863                | TT                              | GG                | 1945959072               |
| SNP_P3_55000_37816000 | NC_021163.1    | Ca_kabuli_chr04 | 37816000                | GG                              | TT                | 1945959074               |
| SNP_P3_55001_37816470 | NC_021163.1    | Ca_kabuli_chr04 | 37816470                | CC                              | TT                | 1945959076               |
| SNP_P3_55002_37816548 | NC_021163.1    | Ca_kabuli_chr04 | 37816548                | CC                              | AA                | 1945959078               |
| SNP_P3_55003_37816912 | NC_021163.1    | Ca_kabuli_chr04 | 37816912                | GG                              | AA                | 1945959079               |
| SNP_P3_55004_37818047 | NC_021163.1    | Ca_kabuli_chr04 | 37818047                | GG                              | CC                | 1945959081               |
| SNP_P3_55005_37819247 | NC_021163.1    | Ca_kabuli_chr04 | 37819247                | CC                              | GG                | 1945959083               |
| SNP_P3_55006_37819625 | NC_021163.1    | Ca_kabuli_chr04 | 37819625                | CC                              | TT                | 1945959085               |
| SNP_P3_55008_37824626 | NC_021163.1    | Ca_kabuli_chr04 | 37824626                | TT                              | CC                | 1945959086               |
| SNP_P3_55009_37824651 | NC_021163.1    | Ca_kabuli_chr04 | 37824651                | CC                              | GG                | 1945959088               |
| SNP_P3_55010_37824675 | NC_021163.1    | Ca_kabuli_chr04 | 37824675                | CC                              | GG                | 1945959090               |
| SNP_P3_55011_37825188 | NC_021163.1    | Ca_kabuli_chr04 | 37825188                | GG                              | TT                | 1945959092               |
| SNP_P3_55012_37825189 | NC_021163.1    | Ca_kabuli_chr04 | 37825189                | AA                              | TT                | 1945959094               |
| SNP_P3_55013_37825191 | NC_021163.1    | Ca_kabuli_chr04 | 37825191                | AA                              | CC                | 1945959095               |
| SNP_P3_55014_37825196 | NC_021163.1    | Ca_kabuli_chr04 | 37825196                | GG                              | AA                | 1945959097               |
| SNP_P3_55015_37827664 | NC_021163.1    | Ca_kabuli_chr04 | 37827664                | AA                              | TT                | 1945959099               |
| SNP_P3_55016_37827703 | NC_021163.1    | Ca_kabuli_chr04 | 37827703                | CC                              | AA                | 1945959101               |
| SNP_P3_55017_37827734 | NC_021163.1    | Ca_kabuli_chr04 | 37827734                | CC                              | TT                | 1945959103               |
| SNP_P3_55018_37829153 | NC_021163.1    | Ca_kabuli_chr04 | 37829153                | CC                              | TT                | 1945959104               |
| SNP_P3_55019_37829155 | NC_021163.1    | Ca_kabuli_chr04 | 37829155                | CC                              | AA                | 1945959106               |
| SNP_P3_55020_37837252 | NC_021163.1    | Ca_kabuli_chr04 | 37837252                | GG                              | AA                | 1945959108               |
| SNP_P3_55021_37837286 | NC_021163.1    | Ca_kabuli_chr04 | 37837286                | AA                              | GG                | 1945959110               |
| SNP_P3_55022_37838429 | NC_021163.1    | Ca_kabuli_chr04 | 37838429                | GG                              | AA                | 1945959111               |
| SNP_P3_55023_37838782 | NC_021163.1    | Ca_kabuli_chr04 | 37838782                | CC                              | TT                | 1945959113               |
| SNP_P3_55024_37838804 | NC_021163.1    | Ca_kabuli_chr04 | 37838804                | GG                              | AA                | 1945959115               |
| SNP_P3_55025_37838841 | NC_021163.1    | Ca_kabuli_chr04 | 37838841                | GG                              | AA                | 1945959117               |
| SNP_P3_55026_37839612 | NC_021163.1    | Ca_kabuli_chr04 | 37839612                | AA                              | GG                | 1945959119               |
| SNP_P3_55027_37842425 | NC_021163.1    | Ca_kabuli_chr04 | 37842425                | CC                              | TT                | 1945959120               |
| SNP_P3_55028_37842525 | NC_021163.1    | Ca_kabuli_chr04 | 37842525                | TT                              | CC                | 1945959122               |
| SNP_P3_55029_37842859 | NC_021163.1    | Ca_kabuli_chr04 | 37842859                | TT                              | CC                | 1945959124               |
| SNP_P3_55030_37842866 | NC_021163.1    | Ca_kabuli_chr04 | 37842866                | AA                              | CC                | 1945959126               |
| SNP_P3_55031_37842869 | NC_021163.1    | Ca_kabuli_chr04 | 37842869                | TT                              | GG                | 1945959127               |
| SNP_P3_55032_37846197 | NC_021163.1    | Ca_kabuli_chr04 | 37846197                | AA                              | GG                | 1945959129               |
| SNP_P3_55033_37846227 | NC_021163.1    | Ca_kabuli_chr04 | 37846227                | AA                              | CC                | 1945959131               |

| SNPs IDs              | Chromosome IDs | Chromosomes     | Physical positions (bp) | CDC Frontier (Reference genome) | (Pusa 256 & HPNB) | NCBI SNPdb Accession IDs |
|-----------------------|----------------|-----------------|-------------------------|---------------------------------|-------------------|--------------------------|
| SNP_P3_55034_37846941 | NC_021163.1    | Ca_kabuli_chr04 | 37846941                | GG                              | TT                | 1945959133               |
| SNP_P3_55035_37847225 | NC_021163.1    | Ca_kabuli_chr04 | 37847225                | CC                              | TT                | 1945959135               |
| SNP_P3_55036_37847280 | NC_021163.1    | Ca_kabuli_chr04 | 37847280                | TT                              | GG                | 1945959136               |
| SNP_P3_55037_37847290 | NC_021163.1    | Ca_kabuli_chr04 | 37847290                | GG                              | AA                | 1945959138               |
| SNP_P3_55038_37847291 | NC_021163.1    | Ca_kabuli_chr04 | 37847291                | TT                              | CC                | 1945959140               |
| SNP_P3_55039_37847808 | NC_021163.1    | Ca_kabuli_chr04 | 37847808                | TT                              | AA                | 1945959142               |
| SNP_P3_55040_37847822 | NC_021163.1    | Ca_kabuli_chr04 | 37847822                | TT                              | AA                | 1945959144               |
| SNP_P3_55041_37847827 | NC_021163.1    | Ca_kabuli_chr04 | 37847827                | CC                              | TT                | 1945959145               |
| SNP_P3_55042_37850408 | NC_021163.1    | Ca_kabuli_chr04 | 37850408                | GG                              | AA                | 1945959147               |
| SNP_P3_55043_37850496 | NC_021163.1    | Ca_kabuli_chr04 | 37850496                | GG                              | AA                | 1945959149               |
| SNP_P3_55044_37850503 | NC_021163.1    | Ca_kabuli_chr04 | 37850503                | CC                              | TT                | 1945959151               |
| SNP_P3_55045_37850521 | NC_021163.1    | Ca_kabuli_chr04 | 37850521                | TT                              | CC                | 1945959152               |
| SNP_P3_55046_37850919 | NC_021163.1    | Ca_kabuli_chr04 | 37850919                | AA                              | GG                | 1945959154               |
| SNP_P3_55047_37851577 | NC_021163.1    | Ca_kabuli_chr04 | 37851577                | CC                              | TT                | 1945959156               |
| SNP_P3_55048_37851587 | NC_021163.1    | Ca_kabuli_chr04 | 37851587                | GG                              | TT                | 1945959158               |
| SNP_P3_55049_37852092 | NC_021163.1    | Ca_kabuli_chr04 | 37852092                | TT                              | CC                | 1945959160               |
| SNP_P3_55050_37852097 | NC_021163.1    | Ca_kabuli_chr04 | 37852097                | GG                              | AA                | 1945959161               |
| SNP_P3_55051_37852489 | NC_021163.1    | Ca_kabuli_chr04 | 37852489                | CC                              | AA                | 1945959163               |
| SNP_P3_55052_37852519 | NC_021163.1    | Ca_kabuli_chr04 | 37852519                | AA                              | GG                | 1945959165               |
| SNP_P3_55053_37852528 | NC_021163.1    | Ca_kabuli_chr04 | 37852528                | TT                              | GG                | 1945959167               |
| SNP_P3_55054_37855704 | NC_021163.1    | Ca_kabuli_chr04 | 37855704                | CC                              | TT                | 1945959168               |
| SNP_P3_55056_37855848 | NC_021163.1    | Ca_kabuli_chr04 | 37855848                | AA                              | TT                | 1945959170               |
| SNP_P3_55057_37855849 | NC_021163.1    | Ca_kabuli_chr04 | 37855849                | AA                              | GG                | 1945959172               |
| SNP_P3_55058_37857029 | NC_021163.1    | Ca_kabuli_chr04 | 37857029                | AA                              | TT                | 1945959174               |
| SNP_P3_55059_37857035 | NC_021163.1    | Ca_kabuli_chr04 | 37857035                | GG                              | AA                | 1945959176               |
| SNP_P3_55060_37857059 | NC_021163.1    | Ca_kabuli_chr04 | 37857059                | AA                              | CC                | 1945959177               |
| SNP_P3_55061_37857060 | NC_021163.1    | Ca_kabuli_chr04 | 37857060                | AA                              | GG                | 1945959179               |
| SNP_P3_55062_37857143 | NC_021163.1    | Ca_kabuli_chr04 | 37857143                | TT                              | CC                | 1945959181               |
| SNP_P3_55063_37857358 | NC_021163.1    | Ca_kabuli_chr04 | 37857358                | AA                              | TT                | 1945959183               |
| SNP_P3_55064_37858157 | NC_021163.1    | Ca_kabuli_chr04 | 37858157                | GG                              | AA                | 1945959184               |
| SNP_P3_55065_37858187 | NC_021163.1    | Ca_kabuli_chr04 | 37858187                | CC                              | TT                | 1945959186               |
| SNP_P3_55066_37858457 | NC_021163.1    | Ca_kabuli_chr04 | 37858457                | TT                              | CC                | 1945959188               |
| SNP_P3_55067_37858487 | NC_021163.1    | Ca_kabuli_chr04 | 37858487                | AA                              | GG                | 1945959190               |
| SNP_P3_55069_37859629 | NC_021163.1    | Ca_kabuli_chr04 | 37859629                | CC                              | TT                | 1945959192               |
| SNP_P3_55072_37861941 | NC_021163.1    | Ca_kabuli_chr04 | 37861941                | CC                              | TT                | 1945959193               |
| SNP_P3_55073_37861974 | NC_021163.1    | Ca_kabuli_chr04 | 37861974                | AA                              | TT                | 1945959195               |
| SNP_P3_55075_37863718 | NC_021163.1    | Ca_kabuli_chr04 | 37863718                | GG                              | TT                | 1945959197               |
| SNP_P3_55076_37865831 | NC_021163.1    | Ca_kabuli_chr04 | 37865831                | GG                              | AA                | 1945959199               |
| SNP_P3_55078_37866889 | NC_021163.1    | Ca_kabuli_chr04 | 37866889                | CC                              | TT                | 1945959201               |
| SNP_P3_55080_37867018 | NC_021163.1    | Ca_kabuli_chr04 | 37867018                | AA                              | GG                | 1945959202               |
| SNP_P3_55081_37867183 | NC_021163.1    | Ca_kabuli_chr04 | 37867183                | AA                              | GG                | 1945959204               |
| SNP_P3_55082_37867194 | NC_021163.1    | Ca_kabuli_chr04 | 37867194                | GG                              | TT                | 1945959206               |



| SNPs IDs              | Chromosome IDs | Chromosomes     | Physical positions (bp) | CDC Frontier (Reference genome) | (Pusa 256 & HPNB) | NCBI SNPdb Accession IDs |
|-----------------------|----------------|-----------------|-------------------------|---------------------------------|-------------------|--------------------------|
| SNP_P3_55083_37868153 | NC_021163.1    | Ca_kabuli_chr04 | 37868153                | AA                              | GG                | 1945959208               |
| SNP_P3_55084_37868283 | NC_021163.1    | Ca_kabuli_chr04 | 37868283                | TT                              | AA                | 1945959209               |
| SNP_P3_55085_37871384 | NC_021163.1    | Ca_kabuli_chr04 | 37871384                | GG                              | AA                | 1945959211               |
| SNP_P3_55087_37871915 | NC_021163.1    | Ca_kabuli_chr04 | 37871915                | CC                              | TT                | 1945959213               |
| SNP_P3_55088_37872448 | NC_021163.1    | Ca_kabuli_chr04 | 37872448                | TT                              | GG                | 1945959215               |
| SNP_P3_55089_37872856 | NC_021163.1    | Ca_kabuli_chr04 | 37872856                | GG                              | AA                | 1945959217               |
| SNP_P3_55090_37872857 | NC_021163.1    | Ca_kabuli_chr04 | 37872857                | AA                              | TT                | 1945959218               |
| SNP_P3_55091_37872858 | NC_021163.1    | Ca_kabuli_chr04 | 37872858                | TT                              | GG                | 1945959220               |
| SNP_P3_55092_37876083 | NC_021163.1    | Ca_kabuli_chr04 | 37876083                | TT                              | AA                | 1945959222               |
| SNP_P3_55094_37879539 | NC_021163.1    | Ca_kabuli_chr04 | 37879539                | CC                              | GG                | 1945959224               |
| SNP_P3_55095_37879563 | NC_021163.1    | Ca_kabuli_chr04 | 37879563                | GG                              | AA                | 1945959225               |
| SNP_P3_55096_37879621 | NC_021163.1    | Ca_kabuli_chr04 | 37879621                | TT                              | GG                | 1945959227               |
| SNP_P3_55097_37880098 | NC_021163.1    | Ca_kabuli_chr04 | 37880098                | AA                              | TT                | 1945959229               |
| SNP_P3_55098_37880316 | NC_021163.1    | Ca_kabuli_chr04 | 37880316                | TT                              | CC                | 1945959231               |
| SNP_P3_55099_37880357 | NC_021163.1    | Ca_kabuli_chr04 | 37880357                | AA                              | GG                | 1945959233               |
| SNP_P3_55100_37881461 | NC_021163.1    | Ca_kabuli_chr04 | 37881461                | GG                              | CC                | 1945959234               |
| SNP_P3_55101_37881810 | NC_021163.1    | Ca_kabuli_chr04 | 37881810                | GG                              | TT                | 1945959236               |
| SNP_P3_55102_37881823 | NC_021163.1    | Ca_kabuli_chr04 | 37881823                | CC                              | TT                | 1945959238               |
| SNP_P3_55103_37881827 | NC_021163.1    | Ca_kabuli_chr04 | 37881827                | GG                              | AA                | 1945959240               |
| SNP_P3_55104_37881970 | NC_021163.1    | Ca_kabuli_chr04 | 37881970                | CC                              | TT                | 1945959241               |
| SNP_P3_55105_37881971 | NC_021163.1    | Ca_kabuli_chr04 | 37881971                | TT                              | CC                | 1945959243               |
| SNP_P3_55106_37882007 | NC_021163.1    | Ca_kabuli_chr04 | 37882007                | AA                              | GG                | 1945959245               |
| SNP_P3_55107_37883463 | NC_021163.1    | Ca_kabuli_chr04 | 37883463                | GG                              | CC                | 1945959247               |
| SNP_P3_55108_37883768 | NC_021163.1    | Ca_kabuli_chr04 | 37883768                | GG                              | AA                | 1945959249               |
| SNP_P3_55109_37883778 | NC_021163.1    | Ca_kabuli_chr04 | 37883778                | AA                              | GG                | 1945959250               |
| SNP_P3_55110_37883779 | NC_021163.1    | Ca_kabuli_chr04 | 37883779                | CC                              | TT                | 1945959252               |
| SNP_P3_55111_37885572 | NC_021163.1    | Ca_kabuli_chr04 | 37885572                | TT                              | CC                | 1945959254               |
| SNP_P3_55112_37886392 | NC_021163.1    | Ca_kabuli_chr04 | 37886392                | CC                              | TT                | 1945959256               |
| SNP_P3_55113_37886485 | NC_021163.1    | Ca_kabuli_chr04 | 37886485                | CC                              | TT                | 1945959258               |
| SNP_P3_55114_37886499 | NC_021163.1    | Ca_kabuli_chr04 | 37886499                | GG                              | AA                | 1945959259               |
| SNP_P3_55115_37886582 | NC_021163.1    | Ca_kabuli_chr04 | 37886582                | TT                              | AA                | 1945959261               |
| SNP_P3_55116_37887724 | NC_021163.1    | Ca_kabuli_chr04 | 37887724                | AA                              | TT                | 1945959263               |
| SNP_P3_55117_37887764 | NC_021163.1    | Ca_kabuli_chr04 | 37887764                | GG                              | AA                | 1945959265               |
| SNP_P3_55118_37887777 | NC_021163.1    | Ca_kabuli_chr04 | 37887777                | TT                              | GG                | 1945959266               |
| SNP_P3_55119_37887860 | NC_021163.1    | Ca_kabuli_chr04 | 37887860                | CC                              | TT                | 1945959268               |
| SNP_P3_55120_37891273 | NC_021163.1    | Ca_kabuli_chr04 | 37891273                | TT                              | CC                | 1945959270               |
| SNP_P3_55121_37892127 | NC_021163.1    | Ca_kabuli_chr04 | 37892127                | TT                              | CC                | 1945959272               |
| SNP_P3_55122_37895748 | NC_021163.1    | Ca_kabuli_chr04 | 37895748                | TT                              | CC                | 1945959274               |
| SNP_P3_55123_37896225 | NC_021163.1    | Ca_kabuli_chr04 | 37896225                | GG                              | AA                | 1945959275               |
| SNP_P3_55125_37896583 | NC_021163.1    | Ca_kabuli_chr04 | 37896583                | TT                              | AA                | 1945959277               |
| SNP_P3_55126_37901843 | NC_021163.1    | Ca_kabuli_chr04 | 37901843                | CC                              | GG                | 1945959279               |
| SNP_P3_55127_37903757 | NC_021163.1    | Ca_kabuli_chr04 | 37903757                | AA                              | GG                | 1945959281               |

| SNPs IDs              | Chromosome IDs | Chromosomes     | Physical positions (bp) | CDC Frontier (Reference genome) | (Pusa 256 & HPNB) | NCBI SNPdb Accession IDs |
|-----------------------|----------------|-----------------|-------------------------|---------------------------------|-------------------|--------------------------|
| SNP_P3_55128_37907236 | NC_021163.1    | Ca_kabuli_chr04 | 37907236                | GG                              | AA                | 1945959282               |
| SNP_P3_55130_37909209 | NC_021163.1    | Ca_kabuli_chr04 | 37909209                | CC                              | AA                | 1945959284               |
| SNP_P3_55131_37909210 | NC_021163.1    | Ca_kabuli_chr04 | 37909210                | AA                              | CC                | 1945959286               |
| SNP_P3_55132_37910097 | NC_021163.1    | Ca_kabuli_chr04 | 37910097                | CC                              | AA                | 1945959288               |
| SNP_P3_55133_37910800 | NC_021163.1    | Ca_kabuli_chr04 | 37910800                | AA                              | GG                | 1945959290               |
| SNP_P3_55134_37910806 | NC_021163.1    | Ca_kabuli_chr04 | 37910806                | CC                              | AA                | 1945959291               |
| SNP_P3_55135_37911071 | NC_021163.1    | Ca_kabuli_chr04 | 37911071                | GG                              | AA                | 1945959293               |
| SNP_P3_55136_37911105 | NC_021163.1    | Ca_kabuli_chr04 | 37911105                | TT                              | CC                | 1945959295               |
| SNP_P3_55137_37911558 | NC_021163.1    | Ca_kabuli_chr04 | 37911558                | CC                              | TT                | 1945959297               |
| SNP_P3_55138_37911566 | NC_021163.1    | Ca_kabuli_chr04 | 37911566                | CC                              | TT                | 1945959299               |
| SNP_P3_55139_37911568 | NC_021163.1    | Ca_kabuli_chr04 | 37911568                | AA                              | GG                | 1945959300               |
| SNP_P3_55140_37911893 | NC_021163.1    | Ca_kabuli_chr04 | 37911893                | GG                              | AA                | 1945959302               |
| SNP_P3_55141_37911897 | NC_021163.1    | Ca_kabuli_chr04 | 37911897                | CC                              | GG                | 1945959304               |
| SNP_P3_55142_37911916 | NC_021163.1    | Ca_kabuli_chr04 | 37911916                | GG                              | AA                | 1945959306               |
| SNP_P3_55143_37911918 | NC_021163.1    | Ca_kabuli_chr04 | 37911918                | GG                              | AA                | 1945959307               |
| SNP_P3_55144_37911927 | NC_021163.1    | Ca_kabuli_chr04 | 37911927                | GG                              | AA                | 1945959309               |
| SNP_P3_55145_37911993 | NC_021163.1    | Ca_kabuli_chr04 | 37911993                | TT                              | CC                | 1945959311               |
| SNP_P3_55146_37912092 | NC_021163.1    | Ca_kabuli_chr04 | 37912092                | CC                              | TT                | 1945959313               |
| SNP_P3_55147_37912124 | NC_021163.1    | Ca_kabuli_chr04 | 37912124                | AA                              | CC                | 1945959315               |
| SNP_P3_55148_37912127 | NC_021163.1    | Ca_kabuli_chr04 | 37912127                | AA                              | GG                | 1945959316               |
| SNP_P3_55149_37912978 | NC_021163.1    | Ca_kabuli_chr04 | 37912978                | AA                              | GG                | 1945959318               |
| SNP_P3_55150_37913003 | NC_021163.1    | Ca_kabuli_chr04 | 37913003                | AA                              | TT                | 1945959320               |
| SNP_P3_55151_37916101 | NC_021163.1    | Ca_kabuli_chr04 | 37916101                | GG                              | AA                | 1945959322               |
| SNP_P3_55152_37917057 | NC_021163.1    | Ca_kabuli_chr04 | 37917057                | TT                              | AA                | 1945959323               |
| SNP_P3_55153_37919309 | NC_021163.1    | Ca_kabuli_chr04 | 37919309                | AA                              | GG                | 1945959325               |
| SNP_P3_55155_37920004 | NC_021163.1    | Ca_kabuli_chr04 | 37920004                | CC                              | AA                | 1945959327               |
| SNP_P3_55156_37920666 | NC_021163.1    | Ca_kabuli_chr04 | 37920666                | GG                              | TT                | 1945959329               |
| SNP_P3_55157_37920696 | NC_021163.1    | Ca_kabuli_chr04 | 37920696                | TT                              | AA                | 1945959331               |
| SNP_P3_55158_37921022 | NC_021163.1    | Ca_kabuli_chr04 | 37921022                | GG                              | AA                | 1945959332               |
| SNP_P3_55159_37921132 | NC_021163.1    | Ca_kabuli_chr04 | 37921132                | TT                              | GG                | 1945959334               |
| SNP_P3_55160_37921251 | NC_021163.1    | Ca_kabuli_chr04 | 37921251                | TT                              | CC                | 1945959336               |
| SNP_P3_55161_37921256 | NC_021163.1    | Ca_kabuli_chr04 | 37921256                | TT                              | GG                | 1945959338               |
| SNP_P3_55162_37921529 | NC_021163.1    | Ca_kabuli_chr04 | 37921529                | AA                              | TT                | 1945959339               |
| SNP_P3_55163_37922147 | NC_021163.1    | Ca_kabuli_chr04 | 37922147                | TT                              | CC                | 1945959341               |
| SNP_P3_55164_37922180 | NC_021163.1    | Ca_kabuli_chr04 | 37922180                | AA                              | TT                | 1945959343               |
| SNP_P3_55165_37922202 | NC_021163.1    | Ca_kabuli_chr04 | 37922202                | AA                              | GG                | 1945959345               |
| SNP_P3_55166_37931007 | NC_021163.1    | Ca_kabuli_chr04 | 37931007                | CC                              | TT                | 1945959347               |
| SNP_P3_55167_37931173 | NC_021163.1    | Ca_kabuli_chr04 | 37931173                | CC                              | AA                | 1945959348               |
| SNP_P3_55168_37932121 | NC_021163.1    | Ca_kabuli_chr04 | 37932121                | AA                              | GG                | 1945959350               |
| SNP_P3_55169_37932173 | NC_021163.1    | Ca_kabuli_chr04 | 37932173                | GG                              | AA                | 1945959352               |
| SNP_P3_55170_37932757 | NC_021163.1    | Ca_kabuli_chr04 | 37932757                | GG                              | AA                | 1945959354               |
| SNP_P3_55171_37933662 | NC_021163.1    | Ca_kabuli_chr04 | 37933662                | CC                              | TT                | 1945959356               |

| SNPs IDs              | Chromosome IDs | Chromosomes     | Physical positions (bp) | CDC Frontier (Reference genome) | (Pusa 256 & HPNB) | NCBI SNPdb Accession IDs |
|-----------------------|----------------|-----------------|-------------------------|---------------------------------|-------------------|--------------------------|
| SNP_P3_55173_37933941 | NC_021163.1    | Ca_kabuli_chr04 | 37933941                | TT                              | GG                | 1945959357               |
| SNP_P3_55174_37934000 | NC_021163.1    | Ca_kabuli_chr04 | 37934000                | GG                              | CC                | 1945959359               |
| SNP_P3_55175_37935036 | NC_021163.1    | Ca_kabuli_chr04 | 37935036                | GG                              | AA                | 1945959361               |
| SNP_P3_55176_37935038 | NC_021163.1    | Ca_kabuli_chr04 | 37935038                | GG                              | AA                | 1945959363               |
| SNP_P3_55177_37935040 | NC_021163.1    | Ca_kabuli_chr04 | 37935040                | AA                              | GG                | 1945959364               |
| SNP_P3_55179_37935315 | NC_021163.1    | Ca_kabuli_chr04 | 37935315                | CC                              | TT                | 1945959366               |
| SNP_P3_55180_37935966 | NC_021163.1    | Ca_kabuli_chr04 | 37935966                | GG                              | TT                | 1945959368               |
| SNP_P3_55181_37936428 | NC_021163.1    | Ca_kabuli_chr04 | 37936428                | GG                              | AA                | 1945959370               |
| SNP_P3_55182_37936635 | NC_021163.1    | Ca_kabuli_chr04 | 37936635                | CC                              | AA                | 1945959372               |
| SNP_P3_55184_37936687 | NC_021163.1    | Ca_kabuli_chr04 | 37936687                | AA                              | GG                | 1945959373               |
| SNP_P3_55185_37936690 | NC_021163.1    | Ca_kabuli_chr04 | 37936690                | TT                              | AA                | 1945959375               |
| SNP_P3_55186_37936704 | NC_021163.1    | Ca_kabuli_chr04 | 37936704                | AA                              | TT                | 1945959377               |
| SNP_P3_55187_37936708 | NC_021163.1    | Ca_kabuli_chr04 | 37936708                | TT                              | GG                | 1945959379               |
| SNP_P3_55188_37936709 | NC_021163.1    | Ca_kabuli_chr04 | 37936709                | TT                              | CC                | 1945959380               |
| SNP_P3_55189_37936738 | NC_021163.1    | Ca_kabuli_chr04 | 37936738                | TT                              | GG                | 1945959382               |
| SNP_P3_55191_37938078 | NC_021163.1    | Ca_kabuli_chr04 | 37938078                | CC                              | GG                | 1945959384               |
| SNP_P3_55192_37938081 | NC_021163.1    | Ca_kabuli_chr04 | 37938081                | AA                              | TT                | 1945959386               |
| SNP_P3_55193_37938095 | NC_021163.1    | Ca_kabuli_chr04 | 37938095                | AA                              | GG                | 1945959388               |
| SNP_P3_55194_37938156 | NC_021163.1    | Ca_kabuli_chr04 | 37938156                | AA                              | CC                | 1945959389               |
| SNP_P3_55195_37938160 | NC_021163.1    | Ca_kabuli_chr04 | 37938160                | GG                              | AA                | 1945959391               |
| SNP_P3_55196_37938460 | NC_021163.1    | Ca_kabuli_chr04 | 37938460                | TT                              | CC                | 1945959393               |
| SNP_P3_55198_37941024 | NC_021163.1    | Ca_kabuli_chr04 | 37941024                | GG                              | CC                | 1945959395               |
| SNP_P3_55199_37941026 | NC_021163.1    | Ca_kabuli_chr04 | 37941026                | TT                              | CC                | 1945959396               |
| SNP_P3_55200_37941206 | NC_021163.1    | Ca_kabuli_chr04 | 37941206                | AA                              | TT                | 1945959398               |
| SNP_P3_55201_37941243 | NC_021163.1    | Ca_kabuli_chr04 | 37941243                | CC                              | GG                | 1945959400               |
| SNP_P3_55202_37953484 | NC_021163.1    | Ca_kabuli_chr04 | 37953484                | AA                              | GG                | 1945959402               |
| SNP_P3_55203_37953837 | NC_021163.1    | Ca_kabuli_chr04 | 37953837                | CC                              | TT                | 1945959404               |
| SNP_P3_55204_37953839 | NC_021163.1    | Ca_kabuli_chr04 | 37953839                | AA                              | GG                | 1945959405               |
| SNP_P3_55205_37972848 | NC_021163.1    | Ca_kabuli_chr04 | 37972848                | AA                              | GG                | 1945959407               |
| SNP_P3_55206_37972878 | NC_021163.1    | Ca_kabuli_chr04 | 37972878                | CC                              | AA                | 1945959409               |
| SNP_P3_55207_37974422 | NC_021163.1    | Ca_kabuli_chr04 | 37974422                | TT                              | CC                | 1945959411               |
| SNP_P3_55208_37974939 | NC_021163.1    | Ca_kabuli_chr04 | 37974939                | GG                              | AA                | 1945959413               |
| SNP_P3_55209_37974964 | NC_021163.1    | Ca_kabuli_chr04 | 37974964                | CC                              | TT                | 1945959414               |
| SNP_P3_55210_37976598 | NC_021163.1    | Ca_kabuli_chr04 | 37976598                | GG                              | AA                | 1945959416               |
| SNP_P3_55211_37977423 | NC_021163.1    | Ca_kabuli_chr04 | 37977423                | GG                              | CC                | 1945959418               |
| SNP_P3_55212_37977618 | NC_021163.1    | Ca_kabuli_chr04 | 37977618                | CC                              | TT                | 1945959420               |
| SNP_P3_55213_37977648 | NC_021163.1    | Ca_kabuli_chr04 | 37977648                | AA                              | GG                | 1945959421               |
| SNP_P3_55215_37977780 | NC_021163.1    | Ca_kabuli_chr04 | 37977780                | TT                              | AA                | 1945959423               |
| SNP_P3_55217_37978866 | NC_021163.1    | Ca_kabuli_chr04 | 37978866                | CC                              | GG                | 1945959425               |
| SNP_P3_55218_37979040 | NC_021163.1    | Ca_kabuli_chr04 | 37979040                | AA                              | CC                | 1945959427               |
| SNP_P3_55219_37979044 | NC_021163.1    | Ca_kabuli_chr04 | 37979044                | GG                              | AA                | 1945959429               |
| SNP_P3_55220_37980281 | NC_021163.1    | Ca_kabuli_chr04 | 37980281                | GG                              | CC                | 1945959430               |

| SNPs IDs              | Chromosome IDs | Chromosomes     | Physical positions (bp) | CDC Frontier (Reference genome) | (Pusa 256 & HPNB) | NCBI SNPdb Accession IDs |
|-----------------------|----------------|-----------------|-------------------------|---------------------------------|-------------------|--------------------------|
| SNP_P3_55221_37980547 | NC_021163.1    | Ca_kabuli_chr04 | 37980547                | CC                              | GG                | 1945959432               |
| SNP_P3_55222_37980554 | NC_021163.1    | Ca_kabuli_chr04 | 37980554                | CC                              | AA                | 1945959434               |
| SNP_P3_55224_37986127 | NC_021163.1    | Ca_kabuli_chr04 | 37986127                | AA                              | GG                | 1945959436               |
| SNP_P3_55225_37986303 | NC_021163.1    | Ca_kabuli_chr04 | 37986303                | CC                              | GG                | 1945959437               |
| SNP_P3_55226_37986310 | NC_021163.1    | Ca_kabuli_chr04 | 37986310                | GG                              | AA                | 1945959439               |
| SNP_P3_55227_37987004 | NC_021163.1    | Ca_kabuli_chr04 | 37987004                | TT                              | CC                | 1945959441               |
| SNP_P3_55228_37987218 | NC_021163.1    | Ca_kabuli_chr04 | 37987218                | AA                              | TT                | 1945959443               |
| SNP_P3_55229_37988530 | NC_021163.1    | Ca_kabuli_chr04 | 37988530                | TT                              | CC                | 1945959445               |
| SNP_P3_55230_37988941 | NC_021163.1    | Ca_kabuli_chr04 | 37988941                | CC                              | TT                | 1945959446               |
| SNP_P3_55231_37989239 | NC_021163.1    | Ca_kabuli_chr04 | 37989239                | CC                              | AA                | 1945959448               |
| SNP_P3_55233_37989780 | NC_021163.1    | Ca_kabuli_chr04 | 37989780                | TT                              | CC                | 1945959450               |
| SNP_P3_55234_37990022 | NC_021163.1    | Ca_kabuli_chr04 | 37990022                | AA                              | GG                | 1945959452               |
| SNP_P3_55235_37990379 | NC_021163.1    | Ca_kabuli_chr04 | 37990379                | TT                              | CC                | 1945959453               |
| SNP_P3_55236_37990398 | NC_021163.1    | Ca_kabuli_chr04 | 37990398                | GG                              | CC                | 1945959455               |
| SNP_P3_55237_37990852 | NC_021163.1    | Ca_kabuli_chr04 | 37990852                | TT                              | CC                | 1945959457               |
| SNP_P3_55239_37990895 | NC_021163.1    | Ca_kabuli_chr04 | 37990895                | AA                              | GG                | 1945959459               |
| SNP_P3_55240_37990898 | NC_021163.1    | Ca_kabuli_chr04 | 37990898                | GG                              | AA                | 1945959461               |
| SNP_P3_55241_37991048 | NC_021163.1    | Ca_kabuli_chr04 | 37991048                | CC                              | TT                | 1945959462               |
| SNP_P3_55242_37991071 | NC_021163.1    | Ca_kabuli_chr04 | 37991071                | CC                              | TT                | 1945959464               |
| SNP_P3_55243_37991079 | NC_021163.1    | Ca_kabuli_chr04 | 37991079                | GG                              | AA                | 1945959466               |
| SNP_P3_55244_37991100 | NC_021163.1    | Ca_kabuli_chr04 | 37991100                | GG                              | CC                | 1945959468               |
| SNP_P3_55245_37991115 | NC_021163.1    | Ca_kabuli_chr04 | 37991115                | GG                              | AA                | 1945959470               |
| SNP_P3_55246_37994415 | NC_021163.1    | Ca_kabuli_chr04 | 37994415                | CC                              | TT                | 1945959471               |
| SNP_P3_55247_37994498 | NC_021163.1    | Ca_kabuli_chr04 | 37994498                | GG                              | AA                | 1945959473               |
| SNP_P3_55248_37994503 | NC_021163.1    | Ca_kabuli_chr04 | 37994503                | TT                              | CC                | 1945959475               |
| SNP_P3_55249_38004976 | NC_021163.1    | Ca_kabuli_chr04 | 38004976                | TT                              | CC                | 1945959477               |
| SNP_P3_55250_38005486 | NC_021163.1    | Ca_kabuli_chr04 | 38005486                | CC                              | GG                | 1945959478               |
| SNP_P3_55251_38010070 | NC_021163.1    | Ca_kabuli_chr04 | 38010070                | CC                              | TT                | 1945959480               |
| SNP_P3_55252_38010072 | NC_021163.1    | Ca_kabuli_chr04 | 38010072                | AA                              | CC                | 1945959482               |
| SNP_P3_55253_38010116 | NC_021163.1    | Ca_kabuli_chr04 | 38010116                | CC                              | TT                | 1945959484               |
| SNP_P3_55254_38010394 | NC_021163.1    | Ca_kabuli_chr04 | 38010394                | CC                              | GG                | 1945959486               |
| SNP_P3_55255_38010418 | NC_021163.1    | Ca_kabuli_chr04 | 38010418                | CC                              | TT                | 1945959487               |
| SNP_P3_55256_38010460 | NC_021163.1    | Ca_kabuli_chr04 | 38010460                | GG                              | AA                | 1945959489               |
| SNP_P3_55257_38013953 | NC_021163.1    | Ca_kabuli_chr04 | 38013953                | TT                              | AA                | 1945959491               |
| SNP_P3_55258_38017491 | NC_021163.1    | Ca_kabuli_chr04 | 38017491                | AA                              | TT                | 1945959493               |
| SNP_P3_55259_38017788 | NC_021163.1    | Ca_kabuli_chr04 | 38017788                | GG                              | AA                | 1945959494               |
| SNP_P3_55261_38021119 | NC_021163.1    | Ca_kabuli_chr04 | 38021119                | CC                              | TT                | 1945959496               |
| SNP_P3_55263_38021523 | NC_021163.1    | Ca_kabuli_chr04 | 38021523                | TT                              | CC                | 1945959498               |
| SNP_P3_55264_38021563 | NC_021163.1    | Ca_kabuli_chr04 | 38021563                | GG                              | AA                | 1945959500               |
| SNP_P3_55265_38021870 | NC_021163.1    | Ca_kabuli_chr04 | 38021870                | AA                              | GG                | 1945959502               |
| SNP_P3_55266_38021904 | NC_021163.1    | Ca_kabuli_chr04 | 38021904                | CC                              | TT                | 1945959503               |
| SNP_P3_55267_38021916 | NC_021163.1    | Ca_kabuli_chr04 | 38021916                | AA                              | TT                | 1945959505               |

| SNPs IDs              | Chromosome IDs | Chromosomes     | Physical positions (bp) | CDC Frontier (Reference genome) | (Pusa 256 & HPNB) | NCBI SNPdb Accession IDs |
|-----------------------|----------------|-----------------|-------------------------|---------------------------------|-------------------|--------------------------|
| SNP_P3_55268_38021920 | NC_021163.1    | Ca_kabuli_chr04 | 38021920                | TT                              | CC                | 1945959507               |
| SNP_P3_55269_38022126 | NC_021163.1    | Ca_kabuli_chr04 | 38022126                | TT                              | CC                | 1945959509               |
| SNP_P3_55270_38022129 | NC_021163.1    | Ca_kabuli_chr04 | 38022129                | TT                              | GG                | 1945959510               |
| SNP_P3_55271_38024403 | NC_021163.1    | Ca_kabuli_chr04 | 38024403                | TT                              | AA                | 1945959512               |
| SNP_P3_55272_38025027 | NC_021163.1    | Ca_kabuli_chr04 | 38025027                | TT                              | AA                | 1945959514               |
| SNP_P3_55273_38026850 | NC_021163.1    | Ca_kabuli_chr04 | 38026850                | AA                              | GG                | 1945959516               |
| SNP_P3_55274_38027055 | NC_021163.1    | Ca_kabuli_chr04 | 38027055                | GG                              | AA                | 1945959518               |
| SNP_P3_55275_38028113 | NC_021163.1    | Ca_kabuli_chr04 | 38028113                | AA                              | GG                | 1945959519               |
| SNP_P3_55276_38028469 | NC_021163.1    | Ca_kabuli_chr04 | 38028469                | GG                              | TT                | 1945959521               |
| SNP_P3_55277_38028813 | NC_021163.1    | Ca_kabuli_chr04 | 38028813                | TT                              | CC                | 1945959523               |
| SNP_P3_55279_38030021 | NC_021163.1    | Ca_kabuli_chr04 | 38030021                | AA                              | CC                | 1945959525               |
| SNP_P3_55280_38030022 | NC_021163.1    | Ca_kabuli_chr04 | 38030022                | GG                              | AA                | 1945959527               |
| SNP_P3_55281_38031145 | NC_021163.1    | Ca_kabuli_chr04 | 38031145                | CC                              | AA                | 1945959528               |
| SNP_P3_55282_38032965 | NC_021163.1    | Ca_kabuli_chr04 | 38032965                | GG                              | AA                | 1945959530               |
| SNP_P3_55283_38033379 | NC_021163.1    | Ca_kabuli_chr04 | 38033379                | GG                              | AA                | 1945959532               |
| SNP_P3_55284_38033506 | NC_021163.1    | Ca_kabuli_chr04 | 38033506                | TT                              | AA                | 1945959534               |
| SNP_P3_55285_38033885 | NC_021163.1    | Ca_kabuli_chr04 | 38033885                | CC                              | TT                | 1945959535               |
| SNP_P3_55286_38033923 | NC_021163.1    | Ca_kabuli_chr04 | 38033923                | AA                              | GG                | 1945959537               |
| SNP_P3_55287_38033985 | NC_021163.1    | Ca_kabuli_chr04 | 38033985                | TT                              | AA                | 1945959539               |
| SNP_P3_55288_38034061 | NC_021163.1    | Ca_kabuli_chr04 | 38034061                | GG                              | AA                | 1945959541               |
| SNP_P3_55289_38034325 | NC_021163.1    | Ca_kabuli_chr04 | 38034325                | AA                              | CC                | 1945959543               |
| SNP_P3_55290_38034891 | NC_021163.1    | Ca_kabuli_chr04 | 38034891                | TT                              | CC                | 1945959544               |
| SNP_P3_55291_38034979 | NC_021163.1    | Ca_kabuli_chr04 | 38034979                | CC                              | TT                | 1945959546               |
| SNP_P3_55292_38035207 | NC_021163.1    | Ca_kabuli_chr04 | 38035207                | GG                              | AA                | 1945959548               |
| SNP_P3_55293_38035228 | NC_021163.1    | Ca_kabuli_chr04 | 38035228                | CC                              | TT                | 1945959550               |
| SNP_P3_55294_38035240 | NC_021163.1    | Ca_kabuli_chr04 | 38035240                | CC                              | TT                | 1945959551               |
| SNP_P3_55295_38035257 | NC_021163.1    | Ca_kabuli_chr04 | 38035257                | GG                              | AA                | 1945959553               |
| SNP_P3_55296_38035263 | NC_021163.1    | Ca_kabuli_chr04 | 38035263                | TT                              | AA                | 1945959555               |
| SNP_P3_55297_38036031 | NC_021163.1    | Ca_kabuli_chr04 | 38036031                | TT                              | CC                | 1945959557               |
| SNP_P3_55298_38037245 | NC_021163.1    | Ca_kabuli_chr04 | 38037245                | TT                              | CC                | 1945959559               |
| SNP_P3_55299_38037510 | NC_021163.1    | Ca_kabuli_chr04 | 38037510                | AA                              | GG                | 1945959560               |
| SNP_P3_55300_38037525 | NC_021163.1    | Ca_kabuli_chr04 | 38037525                | GG                              | TT                | 1945959562               |
| SNP_P3_55301_38037593 | NC_021163.1    | Ca_kabuli_chr04 | 38037593                | GG                              | CC                | 1945959564               |
| SNP_P3_55302_38037627 | NC_021163.1    | Ca_kabuli_chr04 | 38037627                | TT                              | CC                | 1945959566               |
| SNP_P3_55303_38037774 | NC_021163.1    | Ca_kabuli_chr04 | 38037774                | AA                              | TT                | 1945959567               |
| SNP_P3_55304_38038200 | NC_021163.1    | Ca_kabuli_chr04 | 38038200                | GG                              | AA                | 1945959569               |
| SNP_P3_55305_38038476 | NC_021163.1    | Ca_kabuli_chr04 | 38038476                | TT                              | GG                | 1945959571               |
| SNP_P3_55306_38038500 | NC_021163.1    | Ca_kabuli_chr04 | 38038500                | GG                              | AA                | 1945959573               |
| SNP_P3_55307_38039046 | NC_021163.1    | Ca_kabuli_chr04 | 38039046                | TT                              | CC                | 1945959575               |
| SNP_P3_55309_38046392 | NC_021163.1    | Ca_kabuli_chr04 | 38046392                | CC                              | AA                | 1945959576               |
| SNP_P3_55310_38046413 | NC_021163.1    | Ca_kabuli_chr04 | 38046413                | GG                              | AA                | 1945959578               |
| SNP_P3_55312_38049341 | NC_021163.1    | Ca_kabuli_chr04 | 38049341                | AA                              | CC                | 1945959580               |

| SNPs IDs              | Chromosome IDs | Chromosomes     | Physical positions (bp) | CDC Frontier (Reference genome) | (Pusa 256 & HPNB) | NCBI SNPdb Accession IDs |
|-----------------------|----------------|-----------------|-------------------------|---------------------------------|-------------------|--------------------------|
| SNP_P3_55313_38049396 | NC_021163.1    | Ca_kabuli_chr04 | 38049396                | GG                              | AA                | 1945959582               |
| SNP_P3_55314_38049466 | NC_021163.1    | Ca_kabuli_chr04 | 38049466                | AA                              | TT                | 1945959584               |
| SNP_P3_55315_38049498 | NC_021163.1    | Ca_kabuli_chr04 | 38049498                | TT                              | CC                | 1945959585               |
| SNP_P3_55316_38049508 | NC_021163.1    | Ca_kabuli_chr04 | 38049508                | TT                              | AA                | 1945959587               |
| SNP_P3_55317_38049690 | NC_021163.1    | Ca_kabuli_chr04 | 38049690                | TT                              | CC                | 1945959589               |
| SNP_P3_55318_38049765 | NC_021163.1    | Ca_kabuli_chr04 | 38049765                | CC                              | TT                | 1945959591               |
| SNP_P3_55319_38049776 | NC_021163.1    | Ca_kabuli_chr04 | 38049776                | GG                              | TT                | 1945959592               |
| SNP_P3_55320_38051079 | NC_021163.1    | Ca_kabuli_chr04 | 38051079                | AA                              | CC                | 1945959594               |
| SNP_P3_55321_38051476 | NC_021163.1    | Ca_kabuli_chr04 | 38051476                | GG                              | AA                | 1945959596               |
| SNP_P3_55322_38051749 | NC_021163.1    | Ca_kabuli_chr04 | 38051749                | AA                              | GG                | 1945959598               |
| SNP_P3_55323_38053262 | NC_021163.1    | Ca_kabuli_chr04 | 38053262                | TT                              | AA                | 1945959600               |
| SNP_P3_55324_38053266 | NC_021163.1    | Ca_kabuli_chr04 | 38053266                | AA                              | TT                | 1945959601               |
| SNP_P3_55325_38053478 | NC_021163.1    | Ca_kabuli_chr04 | 38053478                | TT                              | CC                | 1945959603               |
| SNP_P3_55326_38053510 | NC_021163.1    | Ca_kabuli_chr04 | 38053510                | AA                              | CC                | 1945959605               |
| SNP_P3_55327_38053519 | NC_021163.1    | Ca_kabuli_chr04 | 38053519                | CC                              | TT                | 1945959607               |
| SNP_P3_55328_38053527 | NC_021163.1    | Ca_kabuli_chr04 | 38053527                | TT                              | AA                | 1945959608               |
| SNP_P3_55329_38053590 | NC_021163.1    | Ca_kabuli_chr04 | 38053590                | TT                              | AA                | 1945959610               |
| SNP_P3_55330_38055405 | NC_021163.1    | Ca_kabuli_chr04 | 38055405                | CC                              | TT                | 1945959612               |
| SNP_P3_55331_38055441 | NC_021163.1    | Ca_kabuli_chr04 | 38055441                | CC                              | GG                | 1945959614               |
| SNP_P3_55332_38062634 | NC_021163.1    | Ca_kabuli_chr04 | 38062634                | AA                              | TT                | 1945959616               |
| SNP_P3_55333_38063958 | NC_021163.1    | Ca_kabuli_chr04 | 38063958                | TT                              | CC                | 1945959617               |
| SNP_P3_55335_38065070 | NC_021163.1    | Ca_kabuli_chr04 | 38065070                | TT                              | CC                | 1945959619               |
| SNP_P3_55336_38065119 | NC_021163.1    | Ca_kabuli_chr04 | 38065119                | TT                              | AA                | 1945959621               |
| SNP_P3_55337_38065126 | NC_021163.1    | Ca_kabuli_chr04 | 38065126                | CC                              | TT                | 1945959623               |
| SNP_P3_55338_38065351 | NC_021163.1    | Ca_kabuli_chr04 | 38065351                | GG                              | AA                | 1945959624               |
| SNP_P3_55339_38068278 | NC_021163.1    | Ca_kabuli_chr04 | 38068278                | CC                              | TT                | 1945959626               |
| SNP_P3_55340_38068286 | NC_021163.1    | Ca_kabuli_chr04 | 38068286                | CC                              | TT                | 1945959628               |
| SNP_P3_55341_38072246 | NC_021163.1    | Ca_kabuli_chr04 | 38072246                | GG                              | AA                | 1945959630               |
| SNP_P3_55342_38072257 | NC_021163.1    | Ca_kabuli_chr04 | 38072257                | GG                              | CC                | 1945959632               |
| SNP_P3_55343_38072627 | NC_021163.1    | Ca_kabuli_chr04 | 38072627                | AA                              | GG                | 1945959633               |
| SNP_P3_55344_38075705 | NC_021163.1    | Ca_kabuli_chr04 | 38075705                | GG                              | AA                | 1945959635               |
| SNP_P3_55345_38075719 | NC_021163.1    | Ca_kabuli_chr04 | 38075719                | CC                              | TT                | 1945959637               |
| SNP_P3_55347_38076645 | NC_021163.1    | Ca_kabuli_chr04 | 38076645                | GG                              | TT                | 1945959639               |
| SNP_P3_55348_38076787 | NC_021163.1    | Ca_kabuli_chr04 | 38076787                | TT                              | CC                | 1945959641               |
| SNP_P3_55349_38076795 | NC_021163.1    | Ca_kabuli_chr04 | 38076795                | AA                              | TT                | 1945959642               |
| SNP_P3_55350_38076849 | NC_021163.1    | Ca_kabuli_chr04 | 38076849                | GG                              | AA                | 1945959644               |
| SNP_P3_55351_38076860 | NC_021163.1    | Ca_kabuli_chr04 | 38076860                | CC                              | GG                | 1945959646               |
| SNP_P3_55352_38076867 | NC_021163.1    | Ca_kabuli_chr04 | 38076867                | GG                              | TT                | 1945959648               |
| SNP_P3_55353_38077305 | NC_021163.1    | Ca_kabuli_chr04 | 38077305                | AA                              | TT                | 1945959649               |
| SNP_P3_55355_38077955 | NC_021163.1    | Ca_kabuli_chr04 | 38077955                | GG                              | AA                | 1945959651               |
| SNP_P3_55356_38077959 | NC_021163.1    | Ca_kabuli_chr04 | 38077959                | TT                              | GG                | 1945959653               |
| SNP_P3_55357_38085197 | NC_021163.1    | Ca_kabuli_chr04 | 38085197                | TT                              | AA                | 1945959655               |

| SNPs IDs              | Chromosome IDs | Chromosomes     | Physical positions (bp) | CDC Frontier (Reference genome) | (Pusa 256 & HPNB) | NCBI SNPdb Accession IDs |
|-----------------------|----------------|-----------------|-------------------------|---------------------------------|-------------------|--------------------------|
| SNP_P3_55359_38085872 | NC_021163.1    | Ca_kabuli_chr04 | 38085872                | GG                              | AA                | 1945959657               |
| SNP_P3_55360_38092063 | NC_021163.1    | Ca_kabuli_chr04 | 38092063                | GG                              | AA                | 1945959658               |
| SNP_P3_55361_38092467 | NC_021163.1    | Ca_kabuli_chr04 | 38092467                | AA                              | TT                | 1945959660               |
| SNP_P3_55362_38092468 | NC_021163.1    | Ca_kabuli_chr04 | 38092468                | GG                              | TT                | 1945959662               |
| SNP_P3_55363_38099031 | NC_021163.1    | Ca_kabuli_chr04 | 38099031                | TT                              | CC                | 1945959664               |
| SNP_P3_55364_38099067 | NC_021163.1    | Ca_kabuli_chr04 | 38099067                | CC                              | TT                | 1945959665               |
| SNP_P3_55365_38099108 | NC_021163.1    | Ca_kabuli_chr04 | 38099108                | CC                              | TT                | 1945959667               |
| SNP_P3_55366_38099114 | NC_021163.1    | Ca_kabuli_chr04 | 38099114                | AA                              | GG                | 1945959669               |
| SNP_P3_55367_38099146 | NC_021163.1    | Ca_kabuli_chr04 | 38099146                | CC                              | TT                | 1945959671               |
| SNP_P3_55368_38099369 | NC_021163.1    | Ca_kabuli_chr04 | 38099369                | AA                              | GG                | 1945959673               |
| SNP_P3_55369_38099462 | NC_021163.1    | Ca_kabuli_chr04 | 38099462                | TT                              | CC                | 1945959674               |
| SNP_P3_55370_38102507 | NC_021163.1    | Ca_kabuli_chr04 | 38102507                | TT                              | AA                | 1945959676               |
| SNP_P3_55371_38102518 | NC_021163.1    | Ca_kabuli_chr04 | 38102518                | AA                              | GG                | 1945959678               |
| SNP_P3_55372_38102708 | NC_021163.1    | Ca_kabuli_chr04 | 38102708                | TT                              | AA                | 1945959680               |
| SNP_P3_55373_38102712 | NC_021163.1    | Ca_kabuli_chr04 | 38102712                | GG                              | AA                | 1945959681               |
| SNP_P3_55374_38103506 | NC_021163.1    | Ca_kabuli_chr04 | 38103506                | AA                              | TT                | 1945959683               |
| SNP_P3_55375_38103557 | NC_021163.1    | Ca_kabuli_chr04 | 38103557                | CC                              | AA                | 1945959685               |
| SNP_P3_55376_38106997 | NC_021163.1    | Ca_kabuli_chr04 | 38106997                | AA                              | CC                | 1945959687               |
| SNP_P3_55377_38107040 | NC_021163.1    | Ca_kabuli_chr04 | 38107040                | TT                              | CC                | 1945959689               |
| SNP_P3_55378_38107258 | NC_021163.1    | Ca_kabuli_chr04 | 38107258                | TT                              | AA                | 1945959690               |
| SNP_P3_55379_38108567 | NC_021163.1    | Ca_kabuli_chr04 | 38108567                | GG                              | CC                | 1945959692               |
| SNP_P3_55380_38108853 | NC_021163.1    | Ca_kabuli_chr04 | 38108853                | GG                              | TT                | 1945959694               |
| SNP_P3_55381_38108877 | NC_021163.1    | Ca_kabuli_chr04 | 38108877                | GG                              | CC                | 1945959696               |
| SNP_P3_55382_38109703 | NC_021163.1    | Ca_kabuli_chr04 | 38109703                | CC                              | GG                | 1945959698               |
| SNP_P3_55383_38109711 | NC_021163.1    | Ca_kabuli_chr04 | 38109711                | CC                              | TT                | 1945959699               |
| SNP_P3_55384_38110072 | NC_021163.1    | Ca_kabuli_chr04 | 38110072                | TT                              | CC                | 1945959701               |
| SNP_P3_55385_38112798 | NC_021163.1    | Ca_kabuli_chr04 | 38112798                | AA                              | GG                | 1945959703               |
| SNP_P3_55386_38112815 | NC_021163.1    | Ca_kabuli_chr04 | 38112815                | TT                              | AA                | 1945959705               |
| SNP_P3_55387_38112979 | NC_021163.1    | Ca_kabuli_chr04 | 38112979                | TT                              | GG                | 1945959706               |
| SNP_P3_55388_38113328 | NC_021163.1    | Ca_kabuli_chr04 | 38113328                | GG                              | AA                | 1945959708               |
| SNP_P3_55389_38113369 | NC_021163.1    | Ca_kabuli_chr04 | 38113369                | TT                              | CC                | 1945959710               |
| SNP_P3_55390_38113524 | NC_021163.1    | Ca_kabuli_chr04 | 38113524                | CC                              | AA                | 1945959712               |
| SNP_P3_55391_38113556 | NC_021163.1    | Ca_kabuli_chr04 | 38113556                | GG                              | TT                | 1945959714               |
| SNP_P3_55392_38113667 | NC_021163.1    | Ca_kabuli_chr04 | 38113667                | CC                              | TT                | 1945959715               |
| SNP_P3_55393_38113821 | NC_021163.1    | Ca_kabuli_chr04 | 38113821                | CC                              | AA                | 1945959717               |
| SNP_P3_55394_38113839 | NC_021163.1    | Ca_kabuli_chr04 | 38113839                | TT                              | AA                | 1945959719               |
| SNP_P3_55395_38113844 | NC_021163.1    | Ca_kabuli_chr04 | 38113844                | TT                              | AA                | 1945959721               |
| SNP_P3_55396_38114734 | NC_021163.1    | Ca_kabuli_chr04 | 38114734                | TT                              | CC                | 1945959722               |
| SNP_P3_55397_38115118 | NC_021163.1    | Ca_kabuli_chr04 | 38115118                | GG                              | AA                | 1945959724               |
| SNP_P3_55398_38115147 | NC_021163.1    | Ca_kabuli_chr04 | 38115147                | AA                              | GG                | 1945959726               |
| SNP_P3_55399_38115177 | NC_021163.1    | Ca_kabuli_chr04 | 38115177                | TT                              | CC                | 1945959728               |
| SNP_P3_55400_38115192 | NC_021163.1    | Ca_kabuli_chr04 | 38115192                | GG                              | AA                | 1945959730               |

| SNPs IDs              | Chromosome IDs | Chromosomes     | Physical positions (bp) | CDC Frontier (Reference genome) | (Pusa 256 & HPNB) | NCBI SNPdb Accession IDs |
|-----------------------|----------------|-----------------|-------------------------|---------------------------------|-------------------|--------------------------|
| SNP_P3_55401_38115688 | NC_021163.1    | Ca_kabuli_chr04 | 38115688                | GG                              | AA                | 1945959731               |
| SNP_P3_55402_38115692 | NC_021163.1    | Ca_kabuli_chr04 | 38115692                | TT                              | GG                | 1945959733               |
| SNP_P3_55403_38115992 | NC_021163.1    | Ca_kabuli_chr04 | 38115992                | GG                              | TT                | 1945959735               |
| SNP_P3_55404_38116276 | NC_021163.1    | Ca_kabuli_chr04 | 38116276                | AA                              | GG                | 1945959737               |
| SNP_P3_55405_38116280 | NC_021163.1    | Ca_kabuli_chr04 | 38116280                | AA                              | GG                | 1945959739               |
| SNP_P3_55406_38116291 | NC_021163.1    | Ca_kabuli_chr04 | 38116291                | AA                              | TT                | 1945959740               |
| SNP_P3_55408_38119254 | NC_021163.1    | Ca_kabuli_chr04 | 38119254                | AA                              | GG                | 1945959742               |
| SNP_P3_55409_38120378 | NC_021163.1    | Ca_kabuli_chr04 | 38120378                | CC                              | TT                | 1945959744               |
| SNP_P3_55411_38120421 | NC_021163.1    | Ca_kabuli_chr04 | 38120421                | GG                              | TT                | 1945959746               |
| SNP_P3_55412_38120514 | NC_021163.1    | Ca_kabuli_chr04 | 38120514                | GG                              | CC                | 1945959747               |
| SNP_P3_55413_38120779 | NC_021163.1    | Ca_kabuli_chr04 | 38120779                | CC                              | TT                | 1945959749               |
| SNP_P3_55415_38121305 | NC_021163.1    | Ca_kabuli_chr04 | 38121305                | TT                              | CC                | 1945959751               |
| SNP_P3_55416_38122365 | NC_021163.1    | Ca_kabuli_chr04 | 38122365                | GG                              | TT                | 1945959753               |
| SNP_P3_55417_38123064 | NC_021163.1    | Ca_kabuli_chr04 | 38123064                | GG                              | AA                | 1945959755               |
| SNP_P3_55418_38125349 | NC_021163.1    | Ca_kabuli_chr04 | 38125349                | GG                              | AA                | 1945959756               |
| SNP_P3_55419_38125350 | NC_021163.1    | Ca_kabuli_chr04 | 38125350                | GG                              | TT                | 1945959758               |
| SNP_P3_55420_38125447 | NC_021163.1    | Ca_kabuli_chr04 | 38125447                | CC                              | AA                | 1945959760               |
| SNP_P3_55421_38129420 | NC_021163.1    | Ca_kabuli_chr04 | 38129420                | AA                              | TT                | 1945959762               |
| SNP_P3_55422_38129492 | NC_021163.1    | Ca_kabuli_chr04 | 38129492                | CC                              | TT                | 1945959763               |
| SNP_P3_55423_38129553 | NC_021163.1    | Ca_kabuli_chr04 | 38129553                | CC                              | TT                | 1945959765               |
| SNP_P3_55424_38129566 | NC_021163.1    | Ca_kabuli_chr04 | 38129566                | CC                              | AA                | 1945959767               |
| SNP_P3_55425_38129642 | NC_021163.1    | Ca_kabuli_chr04 | 38129642                | TT                              | AA                | 1945959769               |
| SNP_P3_55428_38132075 | NC_021163.1    | Ca_kabuli_chr04 | 38132075                | GG                              | CC                | 1945959771               |
| SNP_P3_55429_38132077 | NC_021163.1    | Ca_kabuli_chr04 | 38132077                | AA                              | CC                | 1945959772               |
| SNP_P3_55430_38132084 | NC_021163.1    | Ca_kabuli_chr04 | 38132084                | TT                              | GG                | 1945959774               |
| SNP_P3_55431_38132240 | NC_021163.1    | Ca_kabuli_chr04 | 38132240                | TT                              | GG                | 1945959776               |
| SNP_P3_55432_38132572 | NC_021163.1    | Ca_kabuli_chr04 | 38132572                | AA                              | TT                | 1945959778               |
| SNP_P3_55433_38132669 | NC_021163.1    | Ca_kabuli_chr04 | 38132669                | TT                              | CC                | 1945959779               |
| SNP_P3_55435_38133516 | NC_021163.1    | Ca_kabuli_chr04 | 38133516                | AA                              | GG                | 1945959781               |
| SNP_P3_55436_38133887 | NC_021163.1    | Ca_kabuli_chr04 | 38133887                | TT                              | CC                | 1945959783               |
| SNP_P3_55437_38137442 | NC_021163.1    | Ca_kabuli_chr04 | 38137442                | GG                              | AA                | 1945959785               |
| SNP_P3_55438_38137524 | NC_021163.1    | Ca_kabuli_chr04 | 38137524                | GG                              | AA                | 1945959787               |
| SNP_P3_55439_38138171 | NC_021163.1    | Ca_kabuli_chr04 | 38138171                | CC                              | TT                | 1945959788               |
| SNP_P3_55440_38138256 | NC_021163.1    | Ca_kabuli_chr04 | 38138256                | GG                              | TT                | 1945959790               |
| SNP_P3_55441_38138257 | NC_021163.1    | Ca_kabuli_chr04 | 38138257                | AA                              | GG                | 1945959792               |
| SNP_P3_55442_38138258 | NC_021163.1    | Ca_kabuli_chr04 | 38138258                | CC                              | TT                | 1945959794               |
| SNP_P3_55443_38138266 | NC_021163.1    | Ca_kabuli_chr04 | 38138266                | TT                              | CC                | 1945959796               |
| SNP_P3_55444_38138274 | NC_021163.1    | Ca_kabuli_chr04 | 38138274                | AA                              | GG                | 1945959797               |
| SNP_P3_55445_38140558 | NC_021163.1    | Ca_kabuli_chr04 | 38140558                | GG                              | TT                | 1945959799               |
| SNP_P3_55447_38141586 | NC_021163.1    | Ca_kabuli_chr04 | 38141586                | CC                              | TT                | 1945959801               |
| SNP_P3_55448_38149541 | NC_021163.1    | Ca_kabuli_chr04 | 38149541                | TT                              | CC                | 1945959803               |
| SNP_P3_55449_38150155 | NC_021163.1    | Ca_kabuli_chr04 | 38150155                | CC                              | TT                | 1945959804               |



| SNPs IDs              | Chromosome IDs | Chromosomes     | Physical positions (bp) | CDC Frontier (Reference genome) | (Pusa 256 & HPNB) | NCBI SNPdb Accession IDs |
|-----------------------|----------------|-----------------|-------------------------|---------------------------------|-------------------|--------------------------|
| SNP_P3_55450_38150976 | NC_021163.1    | Ca_kabuli_chr04 | 38150976                | TT                              | AA                | 1945959806               |
| SNP_P3_55451_38151033 | NC_021163.1    | Ca_kabuli_chr04 | 38151033                | AA                              | GG                | 1945959808               |
| SNP_P3_55452_38153216 | NC_021163.1    | Ca_kabuli_chr04 | 38153216                | CC                              | TT                | 1945959810               |
| SNP_P3_55453_38153857 | NC_021163.1    | Ca_kabuli_chr04 | 38153857                | AA                              | TT                | 1945959812               |
| SNP_P3_55454_38154557 | NC_021163.1    | Ca_kabuli_chr04 | 38154557                | AA                              | GG                | 1945959813               |
| SNP_P3_55455_38154716 | NC_021163.1    | Ca_kabuli_chr04 | 38154716                | GG                              | CC                | 1945959815               |
| SNP_P3_55456_38154730 | NC_021163.1    | Ca_kabuli_chr04 | 38154730                | AA                              | TT                | 1945959817               |
| SNP_P3_55457_38154765 | NC_021163.1    | Ca_kabuli_chr04 | 38154765                | TT                              | CC                | 1945959819               |
| SNP_P3_55458_38154996 | NC_021163.1    | Ca_kabuli_chr04 | 38154996                | AA                              | GG                | 1945959820               |
| SNP_P3_55459_38155107 | NC_021163.1    | Ca_kabuli_chr04 | 38155107                | AA                              | GG                | 1945959822               |
| SNP_P3_55460_38155133 | NC_021163.1    | Ca_kabuli_chr04 | 38155133                | TT                              | GG                | 1945959824               |
| SNP_P3_55461_38155270 | NC_021163.1    | Ca_kabuli_chr04 | 38155270                | CC                              | TT                | 1945959826               |
| SNP_P3_55462_38155293 | NC_021163.1    | Ca_kabuli_chr04 | 38155293                | CC                              | GG                | 1945959828               |
| SNP_P3_55463_38155483 | NC_021163.1    | Ca_kabuli_chr04 | 38155483                | AA                              | TT                | 1945959829               |
| SNP_P3_55464_38157210 | NC_021163.1    | Ca_kabuli_chr04 | 38157210                | TT                              | GG                | 1945959831               |
| SNP_P3_55465_38157279 | NC_021163.1    | Ca_kabuli_chr04 | 38157279                | TT                              | AA                | 1945959833               |
| SNP_P3_55466_38157808 | NC_021163.1    | Ca_kabuli_chr04 | 38157808                | GG                              | TT                | 1945959835               |
| SNP_P3_55467_38159474 | NC_021163.1    | Ca_kabuli_chr04 | 38159474                | TT                              | CC                | 1945959836               |
| SNP_P3_55468_38159864 | NC_021163.1    | Ca_kabuli_chr04 | 38159864                | GG                              | AA                | 1945959838               |
| SNP_P3_55469_38160008 | NC_021163.1    | Ca_kabuli_chr04 | 38160008                | CC                              | AA                | 1945959840               |
| SNP_P3_55470_38160027 | NC_021163.1    | Ca_kabuli_chr04 | 38160027                | CC                              | TT                | 1945959842               |
| SNP_P3_55471_38160184 | NC_021163.1    | Ca_kabuli_chr04 | 38160184                | CC                              | TT                | 1945959844               |
| SNP_P3_55472_38160195 | NC_021163.1    | Ca_kabuli_chr04 | 38160195                | CC                              | TT                | 1945959845               |
| SNP_P3_55473_38160211 | NC_021163.1    | Ca_kabuli_chr04 | 38160211                | GG                              | TT                | 1945959847               |
| SNP_P3_55474_38160250 | NC_021163.1    | Ca_kabuli_chr04 | 38160250                | CC                              | TT                | 1945959849               |
| SNP_P3_55475_38160253 | NC_021163.1    | Ca_kabuli_chr04 | 38160253                | CC                              | TT                | 1945959851               |
| SNP_P3_55476_38160255 | NC_021163.1    | Ca_kabuli_chr04 | 38160255                | TT                              | CC                | 1945959853               |
| SNP_P3_55477_38160281 | NC_021163.1    | Ca_kabuli_chr04 | 38160281                | GG                              | AA                | 1945959854               |
| SNP_P3_55478_38160299 | NC_021163.1    | Ca_kabuli_chr04 | 38160299                | TT                              | GG                | 1945959856               |
| SNP_P3_55479_38160326 | NC_021163.1    | Ca_kabuli_chr04 | 38160326                | AA                              | GG                | 1945959858               |
| SNP_P3_55480_38160337 | NC_021163.1    | Ca_kabuli_chr04 | 38160337                | TT                              | CC                | 1945959860               |
| SNP_P3_55481_38160493 | NC_021163.1    | Ca_kabuli_chr04 | 38160493                | CC                              | AA                | 1945959861               |
| SNP_P3_55482_38160522 | NC_021163.1    | Ca_kabuli_chr04 | 38160522                | GG                              | AA                | 1945959863               |
| SNP_P3_55483_38160559 | NC_021163.1    | Ca_kabuli_chr04 | 38160559                | TT                              | GG                | 1945959865               |
| SNP_P3_55484_38160687 | NC_021163.1    | Ca_kabuli_chr04 | 38160687                | CC                              | TT                | 1945959867               |
| SNP_P3_55485_38160696 | NC_021163.1    | Ca_kabuli_chr04 | 38160696                | CC                              | TT                | 1945959869               |
| SNP_P3_55486_38160698 | NC_021163.1    | Ca_kabuli_chr04 | 38160698                | AA                              | GG                | 1945959870               |
| SNP_P3_55487_38160837 | NC_021163.1    | Ca_kabuli_chr04 | 38160837                | AA                              | GG                | 1945959872               |
| SNP_P3_55488_38160849 | NC_021163.1    | Ca_kabuli_chr04 | 38160849                | AA                              | TT                | 1945959874               |
| SNP_P3_55489_38160867 | NC_021163.1    | Ca_kabuli_chr04 | 38160867                | AA                              | TT                | 1945959876               |
| SNP_P3_55490_38161726 | NC_021163.1    | Ca_kabuli_chr04 | 38161726                | CC                              | AA                | 1945959877               |
| SNP_P3_55491_38161737 | NC_021163.1    | Ca_kabuli_chr04 | 38161737                | CC                              | TT                | 1945959879               |

| SNPs IDs              | Chromosome IDs | Chromosomes     | Physical positions (bp) | CDC Frontier (Reference genome) | (Pusa 256 & HPNB) | NCBI SNPdb Accession IDs |
|-----------------------|----------------|-----------------|-------------------------|---------------------------------|-------------------|--------------------------|
| SNP_P3_55492_38161892 | NC_021163.1    | Ca_kabuli_chr04 | 38161892                | AA                              | GG                | 1945959881               |
| SNP_P3_55493_38162613 | NC_021163.1    | Ca_kabuli_chr04 | 38162613                | GG                              | AA                | 1945959883               |
| SNP_P3_55494_38162619 | NC_021163.1    | Ca_kabuli_chr04 | 38162619                | AA                              | CC                | 1945959885               |
| SNP_P3_55495_38162623 | NC_021163.1    | Ca_kabuli_chr04 | 38162623                | AA                              | GG                | 1945959886               |
| SNP_P3_55496_38164688 | NC_021163.1    | Ca_kabuli_chr04 | 38164688                | CC                              | TT                | 1945959888               |
| SNP_P3_55497_38164695 | NC_021163.1    | Ca_kabuli_chr04 | 38164695                | TT                              | CC                | 1945959890               |
| SNP_P3_55498_38164708 | NC_021163.1    | Ca_kabuli_chr04 | 38164708                | TT                              | CC                | 1945959892               |
| SNP_P3_55499_38164722 | NC_021163.1    | Ca_kabuli_chr04 | 38164722                | GG                              | TT                | 1945959893               |
| SNP_P3_55500_38164761 | NC_021163.1    | Ca_kabuli_chr04 | 38164761                | CC                              | TT                | 1945959895               |
| SNP_P3_55501_38164881 | NC_021163.1    | Ca_kabuli_chr04 | 38164881                | GG                              | CC                | 1945959897               |
| SNP_P3_55502_38165038 | NC_021163.1    | Ca_kabuli_chr04 | 38165038                | CC                              | TT                | 1945959899               |
| SNP_P3_55503_38165042 | NC_021163.1    | Ca_kabuli_chr04 | 38165042                | CC                              | TT                | 1945959901               |
| SNP_P3_55504_38165368 | NC_021163.1    | Ca_kabuli_chr04 | 38165368                | AA                              | GG                | 1945959902               |
| SNP_P3_55505_38165907 | NC_021163.1    | Ca_kabuli_chr04 | 38165907                | AA                              | GG                | 1945959904               |
| SNP_P3_55506_38166746 | NC_021163.1    | Ca_kabuli_chr04 | 38166746                | AA                              | GG                | 1945959906               |
| SNP_P3_55507_38167132 | NC_021163.1    | Ca_kabuli_chr04 | 38167132                | TT                              | CC                | 1945959908               |
| SNP_P3_55508_38167498 | NC_021163.1    | Ca_kabuli_chr04 | 38167498                | TT                              | CC                | 1945959910               |
| SNP_P3_55509_38167507 | NC_021163.1    | Ca_kabuli_chr04 | 38167507                | GG                              | AA                | 1945959911               |
| SNP_P3_55510_38167521 | NC_021163.1    | Ca_kabuli_chr04 | 38167521                | GG                              | AA                | 1945959913               |
| SNP_P3_55511_38169646 | NC_021163.1    | Ca_kabuli_chr04 | 38169646                | TT                              | CC                | 1945959915               |
| SNP_P3_55512_38169662 | NC_021163.1    | Ca_kabuli_chr04 | 38169662                | TT                              | CC                | 1945959917               |
| SNP_P3_55513_38169807 | NC_021163.1    | Ca_kabuli_chr04 | 38169807                | CC                              | TT                | 1945959918               |
| SNP_P3_55514_38170030 | NC_021163.1    | Ca_kabuli_chr04 | 38170030                | CC                              | TT                | 1945959920               |
| SNP_P3_55515_38170130 | NC_021163.1    | Ca_kabuli_chr04 | 38170130                | TT                              | CC                | 1945959922               |
| SNP_P3_55516_38170140 | NC_021163.1    | Ca_kabuli_chr04 | 38170140                | GG                              | AA                | 1945959924               |
| SNP_P3_55517_38170144 | NC_021163.1    | Ca_kabuli_chr04 | 38170144                | CC                              | AA                | 1945959926               |
| SNP_P3_55518_38170147 | NC_021163.1    | Ca_kabuli_chr04 | 38170147                | GG                              | AA                | 1945959927               |
| SNP_P3_55519_38170185 | NC_021163.1    | Ca_kabuli_chr04 | 38170185                | AA                              | TT                | 1945959929               |
| SNP_P3_55520_38170206 | NC_021163.1    | Ca_kabuli_chr04 | 38170206                | GG                              | TT                | 1945959931               |
| SNP_P3_55522_38170461 | NC_021163.1    | Ca_kabuli_chr04 | 38170461                | AA                              | GG                | 1945959933               |
| SNP_P3_55524_38170501 | NC_021163.1    | Ca_kabuli_chr04 | 38170501                | GG                              | CC                | 1945959934               |
| SNP_P3_55525_38171784 | NC_021163.1    | Ca_kabuli_chr04 | 38171784                | CC                              | TT                | 1945959936               |
| SNP_P3_55526_38173857 | NC_021163.1    | Ca_kabuli_chr04 | 38173857                | AA                              | TT                | 1945959938               |
| SNP_P3_55527_38174779 | NC_021163.1    | Ca_kabuli_chr04 | 38174779                | AA                              | GG                | 1945959940               |
| SNP_P3_55528_38176184 | NC_021163.1    | Ca_kabuli_chr04 | 38176184                | TT                              | CC                | 1945959942               |
| SNP_P3_55529_38177756 | NC_021163.1    | Ca_kabuli_chr04 | 38177756                | TT                              | CC                | 1945959943               |
| SNP_P3_55530_38184014 | NC_021163.1    | Ca_kabuli_chr04 | 38184014                | AA                              | CC                | 1945959945               |
| SNP_P3_55531_38190936 | NC_021163.1    | Ca_kabuli_chr04 | 38190936                | GG                              | TT                | 1945959947               |
| SNP_P3_55532_38190956 | NC_021163.1    | Ca_kabuli_chr04 | 38190956                | CC                              | AA                | 1945959949               |
| SNP_P3_55533_38191715 | NC_021163.1    | Ca_kabuli_chr04 | 38191715                | AA                              | GG                | 1945959951               |
| SNP_P3_55534_38192124 | NC_021163.1    | Ca_kabuli_chr04 | 38192124                | CC                              | TT                | 1945959952               |
| SNP_P3_55535_38192135 | NC_021163.1    | Ca_kabuli_chr04 | 38192135                | GG                              | AA                | 1945959954               |

| SNPs IDs              | Chromosome IDs | Chromosomes     | Physical positions (bp) | CDC Frontier (Reference genome) | (Pusa 256 & HPNB) | NCBI SNPdb Accession IDs |
|-----------------------|----------------|-----------------|-------------------------|---------------------------------|-------------------|--------------------------|
| SNP_P3_55536_38192161 | NC_021163.1    | Ca_kabuli_chr04 | 38192161                | CC                              | AA                | 1945959956               |
| SNP_P3_55537_38192170 | NC_021163.1    | Ca_kabuli_chr04 | 38192170                | GG                              | AA                | 1945959958               |
| SNP_P3_55538_38192184 | NC_021163.1    | Ca_kabuli_chr04 | 38192184                | TT                              | CC                | 1945959959               |
| SNP_P3_55539_38192345 | NC_021163.1    | Ca_kabuli_chr04 | 38192345                | GG                              | AA                | 1945959961               |
| SNP_P3_55540_38192367 | NC_021163.1    | Ca_kabuli_chr04 | 38192367                | TT                              | CC                | 1945959963               |
| SNP_P3_55541_38194424 | NC_021163.1    | Ca_kabuli_chr04 | 38194424                | GG                              | TT                | 1945959965               |
| SNP_P3_55542_38194672 | NC_021163.1    | Ca_kabuli_chr04 | 38194672                | GG                              | TT                | 1945959967               |
| SNP_P3_55544_38200230 | NC_021163.1    | Ca_kabuli_chr04 | 38200230                | CC                              | TT                | 1945959968               |
| SNP_P3_55545_38200235 | NC_021163.1    | Ca_kabuli_chr04 | 38200235                | AA                              | GG                | 1945959970               |
| SNP_P3_55546_38200247 | NC_021163.1    | Ca_kabuli_chr04 | 38200247                | CC                              | GG                | 1945959972               |
| SNP_P3_55547_38200355 | NC_021163.1    | Ca_kabuli_chr04 | 38200355                | CC                              | TT                | 1945959974               |
| SNP_P3_55548_38200374 | NC_021163.1    | Ca_kabuli_chr04 | 38200374                | AA                              | GG                | 1945959975               |
| SNP_P3_55551_38200603 | NC_021163.1    | Ca_kabuli_chr04 | 38200603                | AA                              | CC                | 1945959977               |
| SNP_P3_55552_38201918 | NC_021163.1    | Ca_kabuli_chr04 | 38201918                | CC                              | TT                | 1945959979               |
| SNP_P3_55553_38201954 | NC_021163.1    | Ca_kabuli_chr04 | 38201954                | CC                              | TT                | 1945959981               |
| SNP_P3_55554_38201981 | NC_021163.1    | Ca_kabuli_chr04 | 38201981                | TT                              | CC                | 1945959983               |
| SNP_P3_55555_38201985 | NC_021163.1    | Ca_kabuli_chr04 | 38201985                | GG                              | AA                | 1945959984               |
| SNP_P3_55556_38201990 | NC_021163.1    | Ca_kabuli_chr04 | 38201990                | AA                              | CC                | 1945959986               |
| SNP_P3_55557_38202661 | NC_021163.1    | Ca_kabuli_chr04 | 38202661                | CC                              | AA                | 1945959988               |
| SNP_P3_55558_38205313 | NC_021163.1    | Ca_kabuli_chr04 | 38205313                | AA                              | GG                | 1945959990               |
| SNP_P3_55559_38205601 | NC_021163.1    | Ca_kabuli_chr04 | 38205601                | AA                              | GG                | 1945959992               |
| SNP_P3_55560_38210947 | NC_021163.1    | Ca_kabuli_chr04 | 38210947                | TT                              | AA                | 1945959993               |
| SNP_P3_55561_38210948 | NC_021163.1    | Ca_kabuli_chr04 | 38210948                | AA                              | TT                | 1945959995               |
| SNP_P3_55562_38210951 | NC_021163.1    | Ca_kabuli_chr04 | 38210951                | AA                              | TT                | 1945959997               |
| SNP_P3_55563_38210976 | NC_021163.1    | Ca_kabuli_chr04 | 38210976                | TT                              | CC                | 1945959999               |
| SNP_P3_55564_38210984 | NC_021163.1    | Ca_kabuli_chr04 | 38210984                | AA                              | GG                | 1945960000               |
| SNP_P3_55565_38210985 | NC_021163.1    | Ca_kabuli_chr04 | 38210985                | AA                              | GG                | 1945960002               |
| SNP_P3_55566_38211257 | NC_021163.1    | Ca_kabuli_chr04 | 38211257                | AA                              | CC                | 1945960004               |
| SNP_P3_55567_38213015 | NC_021163.1    | Ca_kabuli_chr04 | 38213015                | CC                              | TT                | 1945960006               |
| SNP_P3_55568_38213118 | NC_021163.1    | Ca_kabuli_chr04 | 38213118                | TT                              | CC                | 1945960008               |
| SNP_P3_55569_38213119 | NC_021163.1    | Ca_kabuli_chr04 | 38213119                | GG                              | TT                | 1945960009               |
| SNP_P3_55570_38213158 | NC_021163.1    | Ca_kabuli_chr04 | 38213158                | GG                              | AA                | 1945960011               |
| SNP_P3_55571_38213357 | NC_021163.1    | Ca_kabuli_chr04 | 38213357                | AA                              | TT                | 1945960013               |
| SNP_P3_55572_38221939 | NC_021163.1    | Ca_kabuli_chr04 | 38221939                | CC                              | TT                | 1945960015               |
| SNP_P3_55573_38222263 | NC_021163.1    | Ca_kabuli_chr04 | 38222263                | TT                              | CC                | 1945960016               |
| SNP_P3_55574_38222306 | NC_021163.1    | Ca_kabuli_chr04 | 38222306                | TT                              | CC                | 1945960018               |
| SNP_P3_55575_38222863 | NC_021163.1    | Ca_kabuli_chr04 | 38222863                | GG                              | AA                | 1945960020               |
| SNP_P3_55576_38223164 | NC_021163.1    | Ca_kabuli_chr04 | 38223164                | AA                              | GG                | 1945960022               |
| SNP_P3_55577_38224102 | NC_021163.1    | Ca_kabuli_chr04 | 38224102                | CC                              | TT                | 1945960024               |
| SNP_P3_55578_38224114 | NC_021163.1    | Ca_kabuli_chr04 | 38224114                | GG                              | TT                | 1945960025               |
| SNP_P3_55579_38224764 | NC_021163.1    | Ca_kabuli_chr04 | 38224764                | AA                              | GG                | 1945960027               |
| SNP_P3_55580_38224889 | NC_021163.1    | Ca_kabuli_chr04 | 38224889                | GG                              | CC                | 1945960029               |

| SNPs IDs              | Chromosome IDs | Chromosomes     | Physical positions (bp) | CDC Frontier (Reference genome) | (Pusa 256 & HPNB) | NCBI SNPdb Accession IDs |
|-----------------------|----------------|-----------------|-------------------------|---------------------------------|-------------------|--------------------------|
| SNP_P3_55581_38226144 | NC_021163.1    | Ca_kabuli_chr04 | 38226144                | TT                              | CC                | 1945960031               |
| SNP_P3_55582_38226176 | NC_021163.1    | Ca_kabuli_chr04 | 38226176                | GG                              | CC                | 1945960033               |
| SNP_P3_55583_38226207 | NC_021163.1    | Ca_kabuli_chr04 | 38226207                | GG                              | CC                | 1945960034               |
| SNP_P3_55584_38226269 | NC_021163.1    | Ca_kabuli_chr04 | 38226269                | GG                              | AA                | 1945960036               |
| SNP_P3_55585_38226563 | NC_021163.1    | Ca_kabuli_chr04 | 38226563                | GG                              | TT                | 1945960038               |
| SNP_P3_55586_38226569 | NC_021163.1    | Ca_kabuli_chr04 | 38226569                | CC                              | AA                | 1945960040               |
| SNP_P3_55587_38226583 | NC_021163.1    | Ca_kabuli_chr04 | 38226583                | TT                              | CC                | 1945960041               |
| SNP_P3_55588_38226599 | NC_021163.1    | Ca_kabuli_chr04 | 38226599                | GG                              | TT                | 1945960043               |
| SNP_P3_55589_38227387 | NC_021163.1    | Ca_kabuli_chr04 | 38227387                | TT                              | CC                | 1945960045               |
| SNP_P3_55590_38227401 | NC_021163.1    | Ca_kabuli_chr04 | 38227401                | CC                              | TT                | 1945960047               |
| SNP_P3_55591_38227421 | NC_021163.1    | Ca_kabuli_chr04 | 38227421                | GG                              | AA                | 1945960049               |
| SNP_P3_55592_38227639 | NC_021163.1    | Ca_kabuli_chr04 | 38227639                | GG                              | AA                | 1945960050               |
| SNP_P3_55593_38227645 | NC_021163.1    | Ca_kabuli_chr04 | 38227645                | TT                              | GG                | 1945960052               |
| SNP_P3_55594_38227684 | NC_021163.1    | Ca_kabuli_chr04 | 38227684                | AA                              | GG                | 1945960054               |
| SNP_P3_55595_38228792 | NC_021163.1    | Ca_kabuli_chr04 | 38228792                | AA                              | GG                | 1945960056               |
| SNP_P3_55597_38232052 | NC_021163.1    | Ca_kabuli_chr04 | 38232052                | AA                              | CC                | 1945960057               |
| SNP_P3_55598_38232416 | NC_021163.1    | Ca_kabuli_chr04 | 38232416                | AA                              | GG                | 1945960059               |
| SNP_P3_55599_38233658 | NC_021163.1    | Ca_kabuli_chr04 | 38233658                | GG                              | AA                | 1945960061               |
| SNP_P3_55600_38236378 | NC_021163.1    | Ca_kabuli_chr04 | 38236378                | GG                              | AA                | 1945960063               |
| SNP_P3_55601_38236381 | NC_021163.1    | Ca_kabuli_chr04 | 38236381                | AA                              | GG                | 1945960065               |
| SNP_P3_55602_38236992 | NC_021163.1    | Ca_kabuli_chr04 | 38236992                | AA                              | CC                | 1945960066               |
| SNP_P3_55603_38237083 | NC_021163.1    | Ca_kabuli_chr04 | 38237083                | TT                              | AA                | 1945960068               |
| SNP_P3_55606_38240447 | NC_021163.1    | Ca_kabuli_chr04 | 38240447                | GG                              | AA                | 1945960070               |
| SNP_P3_55607_38240735 | NC_021163.1    | Ca_kabuli_chr04 | 38240735                | CC                              | TT                | 1945960072               |
| SNP_P3_55608_38240791 | NC_021163.1    | Ca_kabuli_chr04 | 38240791                | CC                              | TT                | 1945960073               |
| SNP_P3_55610_38242561 | NC_021163.1    | Ca_kabuli_chr04 | 38242561                | TT                              | CC                | 1945960075               |
| SNP_P3_55611_38242580 | NC_021163.1    | Ca_kabuli_chr04 | 38242580                | AA                              | CC                | 1945960077               |
| SNP_P3_55612_38245889 | NC_021163.1    | Ca_kabuli_chr04 | 38245889                | AA                              | GG                | 1945960079               |
| SNP_P3_55613_38248079 | NC_021163.1    | Ca_kabuli_chr04 | 38248079                | TT                              | CC                | 1945960081               |
| SNP_P3_55615_38248398 | NC_021163.1    | Ca_kabuli_chr04 | 38248398                | TT                              | CC                | 1945960082               |
| SNP_P3_55616_38248405 | NC_021163.1    | Ca_kabuli_chr04 | 38248405                | AA                              | GG                | 1945960084               |
| SNP_P3_55617_38248408 | NC_021163.1    | Ca_kabuli_chr04 | 38248408                | AA                              | GG                | 1945960086               |
| SNP_P3_55618_38279037 | NC_021163.1    | Ca_kabuli_chr04 | 38279037                | AA                              | GG                | 1945960088               |
| SNP_P3_55619_38281266 | NC_021163.1    | Ca_kabuli_chr04 | 38281266                | TT                              | CC                | 1945960090               |
| SNP_P3_55620_38281291 | NC_021163.1    | Ca_kabuli_chr04 | 38281291                | AA                              | GG                | 1945960091               |
| SNP_P3_55621_38281326 | NC_021163.1    | Ca_kabuli_chr04 | 38281326                | AA                              | GG                | 1945960093               |
| SNP_P3_55622_38281362 | NC_021163.1    | Ca_kabuli_chr04 | 38281362                | AA                              | TT                | 1945960095               |
| SNP_P3_55623_38281610 | NC_021163.1    | Ca_kabuli_chr04 | 38281610                | CC                              | GG                | 1945960097               |
| SNP_P3_55624_38282418 | NC_021163.1    | Ca_kabuli_chr04 | 38282418                | AA                              | GG                | 1945960098               |
| SNP_P3_55625_38284088 | NC_021163.1    | Ca_kabuli_chr04 | 38284088                | GG                              | AA                | 1945960100               |
| SNP_P3_55626_38284400 | NC_021163.1    | Ca_kabuli_chr04 | 38284400                | GG                              | AA                | 1945960102               |
| SNP_P3_55627_38285660 | NC_021163.1    | Ca_kabuli_chr04 | 38285660                | TT                              | CC                | 1945960104               |

| SNPs IDs              | Chromosome IDs | Chromosomes     | Physical positions (bp) | CDC Frontier (Reference genome) | (Pusa 256 & HPNB) | NCBI SNPdb Accession IDs |
|-----------------------|----------------|-----------------|-------------------------|---------------------------------|-------------------|--------------------------|
| SNP_P3_55628_38287889 | NC_021163.1    | Ca_kabuli_chr04 | 38287889                | TT                              | CC                | 1945960106               |
| SNP_P3_55629_38288823 | NC_021163.1    | Ca_kabuli_chr04 | 38288823                | TT                              | GG                | 1945960107               |
| SNP_P3_55630_38289052 | NC_021163.1    | Ca_kabuli_chr04 | 38289052                | AA                              | GG                | 1945960109               |
| SNP_P3_55631_38289066 | NC_021163.1    | Ca_kabuli_chr04 | 38289066                | AA                              | GG                | 1945960111               |
| SNP_P3_55632_38289290 | NC_021163.1    | Ca_kabuli_chr04 | 38289290                | GG                              | AA                | 1945960113               |
| SNP_P3_55633_38289330 | NC_021163.1    | Ca_kabuli_chr04 | 38289330                | CC                              | TT                | 1945960114               |
| SNP_P3_55634_38289585 | NC_021163.1    | Ca_kabuli_chr04 | 38289585                | GG                              | AA                | 1945960116               |
| SNP_P3_55635_38291274 | NC_021163.1    | Ca_kabuli_chr04 | 38291274                | GG                              | CC                | 1945960118               |
| SNP_P3_55636_38293635 | NC_021163.1    | Ca_kabuli_chr04 | 38293635                | AA                              | TT                | 1945960120               |
| SNP_P3_55637_38294082 | NC_021163.1    | Ca_kabuli_chr04 | 38294082                | CC                              | AA                | 1945960122               |
| SNP_P3_55638_38294118 | NC_021163.1    | Ca_kabuli_chr04 | 38294118                | TT                              | AA                | 1945960123               |
| SNP_P3_55640_38294151 | NC_021163.1    | Ca_kabuli_chr04 | 38294151                | CC                              | AA                | 1945960125               |
| SNP_P3_55641_38294504 | NC_021163.1    | Ca_kabuli_chr04 | 38294504                | AA                              | GG                | 1945960127               |
| SNP_P3_55642_38303381 | NC_021163.1    | Ca_kabuli_chr04 | 38303381                | CC                              | TT                | 1945960129               |
| SNP_P3_55643_38303498 | NC_021163.1    | Ca_kabuli_chr04 | 38303498                | AA                              | CC                | 1945960131               |
| SNP_P3_55644_38303716 | NC_021163.1    | Ca_kabuli_chr04 | 38303716                | AA                              | TT                | 1945960132               |
| SNP_P3_55645_38303727 | NC_021163.1    | Ca_kabuli_chr04 | 38303727                | AA                              | TT                | 1945960134               |
| SNP_P3_55646_38306583 | NC_021163.1    | Ca_kabuli_chr04 | 38306583                | GG                              | AA                | 1945960136               |
| SNP_P3_55647_38307619 | NC_021163.1    | Ca_kabuli_chr04 | 38307619                | TT                              | GG                | 1945960138               |
| SNP_P3_55648_38307624 | NC_021163.1    | Ca_kabuli_chr04 | 38307624                | CC                              | TT                | 1945960139               |
| SNP_P3_55649_38307900 | NC_021163.1    | Ca_kabuli_chr04 | 38307900                | CC                              | TT                | 1945960141               |
| SNP_P3_55650_38309669 | NC_021163.1    | Ca_kabuli_chr04 | 38309669                | TT                              | CC                | 1945960143               |
| SNP_P3_55651_38311549 | NC_021163.1    | Ca_kabuli_chr04 | 38311549                | CC                              | TT                | 1945960145               |
| SNP_P3_55653_38311815 | NC_021163.1    | Ca_kabuli_chr04 | 38311815                | GG                              | CC                | 1945960147               |
| SNP_P3_55654_38311828 | NC_021163.1    | Ca_kabuli_chr04 | 38311828                | GG                              | AA                | 1945960148               |
| SNP_P3_55655_38311850 | NC_021163.1    | Ca_kabuli_chr04 | 38311850                | TT                              | CC                | 1945960150               |
| SNP_P3_55656_38311937 | NC_021163.1    | Ca_kabuli_chr04 | 38311937                | TT                              | CC                | 1945960152               |
| SNP_P3_55657_38311943 | NC_021163.1    | Ca_kabuli_chr04 | 38311943                | TT                              | CC                | 1945960154               |
| SNP_P3_55658_38311958 | NC_021163.1    | Ca_kabuli_chr04 | 38311958                | TT                              | CC                | 1945960155               |
| SNP_P3_55659_38311989 | NC_021163.1    | Ca_kabuli_chr04 | 38311989                | CC                              | TT                | 1945960157               |
| SNP_P3_55660_38311997 | NC_021163.1    | Ca_kabuli_chr04 | 38311997                | TT                              | CC                | 1945960159               |
| SNP_P3_55661_38312011 | NC_021163.1    | Ca_kabuli_chr04 | 38312011                | CC                              | TT                | 1945960161               |
| SNP_P3_55662_38312036 | NC_021163.1    | Ca_kabuli_chr04 | 38312036                | CC                              | TT                | 1945960163               |
| SNP_P3_55663_38312072 | NC_021163.1    | Ca_kabuli_chr04 | 38312072                | CC                              | TT                | 1945960164               |
| SNP_P3_55664_38312076 | NC_021163.1    | Ca_kabuli_chr04 | 38312076                | GG                              | CC                | 1945960166               |
| SNP_P3_55665_38312099 | NC_021163.1    | Ca_kabuli_chr04 | 38312099                | AA                              | GG                | 1945960168               |
| SNP_P3_55666_38312151 | NC_021163.1    | Ca_kabuli_chr04 | 38312151                | TT                              | CC                | 1945960170               |
| SNP_P3_55667_38312156 | NC_021163.1    | Ca_kabuli_chr04 | 38312156                | AA                              | GG                | 1945960171               |
| SNP_P3_55668_38312182 | NC_021163.1    | Ca_kabuli_chr04 | 38312182                | GG                              | TT                | 1945960173               |
| SNP_P3_55669_38312255 | NC_021163.1    | Ca_kabuli_chr04 | 38312255                | CC                              | AA                | 1945960175               |
| SNP_P3_55670_38312527 | NC_021163.1    | Ca_kabuli_chr04 | 38312527                | CC                              | TT                | 1945960177               |
| SNP_P3_55671_38312540 | NC_021163.1    | Ca_kabuli_chr04 | 38312540                | AA                              | GG                | 1945960179               |

| SNPs IDs              | Chromosome IDs | Chromosomes     | Physical positions (bp) | CDC Frontier (Reference genome) | (Pusa 256 & HPNB) | NCBI SNPdb Accession IDs |
|-----------------------|----------------|-----------------|-------------------------|---------------------------------|-------------------|--------------------------|
| SNP_P3_55672_38312541 | NC_021163.1    | Ca_kabuli_chr04 | 38312541                | GG                              | AA                | 1945960180               |
| SNP_P3_55673_38313557 | NC_021163.1    | Ca_kabuli_chr04 | 38313557                | CC                              | TT                | 1945960182               |
| SNP_P3_55674_38313560 | NC_021163.1    | Ca_kabuli_chr04 | 38313560                | GG                              | TT                | 1945960184               |
| SNP_P3_55675_38314093 | NC_021163.1    | Ca_kabuli_chr04 | 38314093                | TT                              | AA                | 1945960186               |
| SNP_P3_55676_38315007 | NC_021163.1    | Ca_kabuli_chr04 | 38315007                | CC                              | TT                | 1945960188               |
| SNP_P3_55677_38315037 | NC_021163.1    | Ca_kabuli_chr04 | 38315037                | GG                              | AA                | 1945960189               |
| SNP_P3_55678_38315197 | NC_021163.1    | Ca_kabuli_chr04 | 38315197                | TT                              | AA                | 1945960191               |
| SNP_P3_55679_38315576 | NC_021163.1    | Ca_kabuli_chr04 | 38315576                | TT                              | CC                | 1945960193               |
| SNP_P3_55680_38317358 | NC_021163.1    | Ca_kabuli_chr04 | 38317358                | TT                              | AA                | 1945960195               |
| SNP_P3_55681_38317394 | NC_021163.1    | Ca_kabuli_chr04 | 38317394                | AA                              | GG                | 1945960196               |
| SNP_P3_55683_38319889 | NC_021163.1    | Ca_kabuli_chr04 | 38319889                | TT                              | GG                | 1945960198               |
| SNP_P3_55684_38319967 | NC_021163.1    | Ca_kabuli_chr04 | 38319967                | CC                              | GG                | 1945960200               |
| SNP_P3_55686_38324278 | NC_021163.1    | Ca_kabuli_chr04 | 38324278                | TT                              | GG                | 1945960202               |
| SNP_P3_55687_38325959 | NC_021163.1    | Ca_kabuli_chr04 | 38325959                | CC                              | TT                | 1945960204               |
| SNP_P3_55688_38325991 | NC_021163.1    | Ca_kabuli_chr04 | 38325991                | AA                              | GG                | 1945960205               |
| SNP_P3_55689_38326123 | NC_021163.1    | Ca_kabuli_chr04 | 38326123                | GG                              | AA                | 1945960207               |
| SNP_P3_55690_38329397 | NC_021163.1    | Ca_kabuli_chr04 | 38329397                | TT                              | AA                | 1945960209               |
| SNP_P3_55691_38329684 | NC_021163.1    | Ca_kabuli_chr04 | 38329684                | TT                              | AA                | 1945960211               |
| SNP_P3_55692_38329719 | NC_021163.1    | Ca_kabuli_chr04 | 38329719                | TT                              | GG                | 1945960212               |
| SNP_P3_55693_38329735 | NC_021163.1    | Ca_kabuli_chr04 | 38329735                | AA                              | TT                | 1945960214               |
| SNP_P3_55694_38335653 | NC_021163.1    | Ca_kabuli_chr04 | 38335653                | TT                              | CC                | 1945960216               |
| SNP_P3_55695_38335773 | NC_021163.1    | Ca_kabuli_chr04 | 38335773                | AA                              | CC                | 1945960218               |
| SNP_P3_55696_38336050 | NC_021163.1    | Ca_kabuli_chr04 | 38336050                | GG                              | AA                | 1945960220               |
| SNP_P3_55697_38336251 | NC_021163.1    | Ca_kabuli_chr04 | 38336251                | TT                              | CC                | 1945960221               |
| SNP_P3_55698_38337435 | NC_021163.1    | Ca_kabuli_chr04 | 38337435                | AA                              | TT                | 1945960223               |
| SNP_P3_55699_38341723 | NC_021163.1    | Ca_kabuli_chr04 | 38341723                | TT                              | CC                | 1945960225               |
| SNP_P3_55700_38343097 | NC_021163.1    | Ca_kabuli_chr04 | 38343097                | GG                              | TT                | 1945960227               |
| SNP_P3_55701_38346042 | NC_021163.1    | Ca_kabuli_chr04 | 38346042                | CC                              | TT                | 1945960228               |
| SNP_P3_55702_38346286 | NC_021163.1    | Ca_kabuli_chr04 | 38346286                | GG                              | AA                | 1945960230               |
| SNP_P3_55703_38346323 | NC_021163.1    | Ca_kabuli_chr04 | 38346323                | CC                              | TT                | 1945960232               |
| SNP_P3_55704_38348682 | NC_021163.1    | Ca_kabuli_chr04 | 38348682                | TT                              | CC                | 1945960234               |
| SNP_P3_55705_38348692 | NC_021163.1    | Ca_kabuli_chr04 | 38348692                | GG                              | AA                | 1945960236               |
| SNP_P3_55706_38348700 | NC_021163.1    | Ca_kabuli_chr04 | 38348700                | TT                              | CC                | 1945960237               |
| SNP_P3_55707_38348703 | NC_021163.1    | Ca_kabuli_chr04 | 38348703                | CC                              | AA                | 1945960239               |
| SNP_P3_55708_38348845 | NC_021163.1    | Ca_kabuli_chr04 | 38348845                | CC                              | TT                | 1945960241               |
| SNP_P3_55709_38348851 | NC_021163.1    | Ca_kabuli_chr04 | 38348851                | CC                              | TT                | 1945960243               |
| SNP_P3_55710_38348868 | NC_021163.1    | Ca_kabuli_chr04 | 38348868                | CC                              | TT                | 1945960245               |
| SNP_P3_55711_38348869 | NC_021163.1    | Ca_kabuli_chr04 | 38348869                | AA                              | TT                | 1945960246               |
| SNP_P3_55712_38348872 | NC_021163.1    | Ca_kabuli_chr04 | 38348872                | AA                              | GG                | 1945960248               |
| SNP_P3_55713_38349584 | NC_021163.1    | Ca_kabuli_chr04 | 38349584                | AA                              | GG                | 1945960250               |
| SNP_P3_55714_38354267 | NC_021163.1    | Ca_kabuli_chr04 | 38354267                | AA                              | GG                | 1945960252               |
| SNP_P3_55715_38354328 | NC_021163.1    | Ca_kabuli_chr04 | 38354328                | AA                              | GG                | 1945960253               |

| SNPs IDs              | Chromosome IDs | Chromosomes     | Physical positions (bp) | CDC Frontier (Reference genome) | (Pusa 256 & HPNB) | NCBI SNPdb Accession IDs |
|-----------------------|----------------|-----------------|-------------------------|---------------------------------|-------------------|--------------------------|
| SNP_P3_55716_38355105 | NC_021163.1    | Ca_kabuli_chr04 | 38355105                | TT                              | CC                | 1945960255               |
| SNP_P3_55717_38355556 | NC_021163.1    | Ca_kabuli_chr04 | 38355556                | AA                              | GG                | 1945960257               |
| SNP_P3_55719_38367240 | NC_021163.1    | Ca_kabuli_chr04 | 38367240                | CC                              | TT                | 1945960259               |
| SNP_P3_55720_38367392 | NC_021163.1    | Ca_kabuli_chr04 | 38367392                | GG                              | AA                | 1945960261               |
| SNP_P3_55721_38368626 | NC_021163.1    | Ca_kabuli_chr04 | 38368626                | CC                              | AA                | 1945960262               |
| SNP_P3_55723_38369190 | NC_021163.1    | Ca_kabuli_chr04 | 38369190                | TT                              | CC                | 1945960264               |
| SNP_P3_55724_38370902 | NC_021163.1    | Ca_kabuli_chr04 | 38370902                | GG                              | AA                | 1945960266               |
| SNP_P3_55725_38370905 | NC_021163.1    | Ca_kabuli_chr04 | 38370905                | AA                              | GG                | 1945960268               |
| SNP_P3_55726_38371804 | NC_021163.1    | Ca_kabuli_chr04 | 38371804                | CC                              | AA                | 1945960269               |
| SNP_P3_55727_38371813 | NC_021163.1    | Ca_kabuli_chr04 | 38371813                | TT                              | CC                | 1945960271               |
| SNP_P3_55728_38371814 | NC_021163.1    | Ca_kabuli_chr04 | 38371814                | CC                              | TT                | 1945960273               |
| SNP_P3_55729_38371840 | NC_021163.1    | Ca_kabuli_chr04 | 38371840                | AA                              | GG                | 1945960275               |
| SNP_P3_55730_38373884 | NC_021163.1    | Ca_kabuli_chr04 | 38373884                | CC                              | TT                | 1945960277               |
| SNP_P3_55731_38374134 | NC_021163.1    | Ca_kabuli_chr04 | 38374134                | GG                              | AA                | 1945960278               |
| SNP_P3_55732_38374461 | NC_021163.1    | Ca_kabuli_chr04 | 38374461                | AA                              | TT                | 1945960280               |
| SNP_P3_55733_38374876 | NC_021163.1    | Ca_kabuli_chr04 | 38374876                | GG                              | AA                | 1945960282               |
| SNP_P3_55734_38374894 | NC_021163.1    | Ca_kabuli_chr04 | 38374894                | CC                              | GG                | 1945960284               |
| SNP_P3_55735_38377006 | NC_021163.1    | Ca_kabuli_chr04 | 38377006                | AA                              | TT                | 1945960285               |
| SNP_P3_55737_38378334 | NC_021163.1    | Ca_kabuli_chr04 | 38378334                | AA                              | CC                | 1945960287               |
| SNP_P3_55738_38378688 | NC_021163.1    | Ca_kabuli_chr04 | 38378688                | TT                              | AA                | 1945960289               |
| SNP_P3_55739_38380092 | NC_021163.1    | Ca_kabuli_chr04 | 38380092                | CC                              | TT                | 1945960291               |
| SNP_P3_55740_38381834 | NC_021163.1    | Ca_kabuli_chr04 | 38381834                | TT                              | CC                | 1945960293               |
| SNP_P3_55741_38388830 | NC_021163.1    | Ca_kabuli_chr04 | 38388830                | TT                              | CC                | 1945960294               |
| SNP_P3_55742_38400109 | NC_021163.1    | Ca_kabuli_chr04 | 38400109                | TT                              | CC                | 1945960296               |
| SNP_P3_55743_38413358 | NC_021163.1    | Ca_kabuli_chr04 | 38413358                | CC                              | TT                | 1945960298               |
| SNP_P3_55744_38413370 | NC_021163.1    | Ca_kabuli_chr04 | 38413370                | AA                              | GG                | 1945960300               |
| SNP_P3_55745_38416380 | NC_021163.1    | Ca_kabuli_chr04 | 38416380                | AA                              | CC                | 1945960302               |
| SNP_P3_55746_38417359 | NC_021163.1    | Ca_kabuli_chr04 | 38417359                | CC                              | AA                | 1945960303               |
| SNP_P3_55747_38417467 | NC_021163.1    | Ca_kabuli_chr04 | 38417467                | GG                              | CC                | 1945960305               |
| SNP_P3_55748_38417498 | NC_021163.1    | Ca_kabuli_chr04 | 38417498                | GG                              | AA                | 1945960307               |
| SNP_P3_55749_38417556 | NC_021163.1    | Ca_kabuli_chr04 | 38417556                | AA                              | CC                | 1945960309               |
| SNP_P3_55750_38417579 | NC_021163.1    | Ca_kabuli_chr04 | 38417579                | GG                              | CC                | 1945960310               |
| SNP_P3_55751_38417723 | NC_021163.1    | Ca_kabuli_chr04 | 38417723                | CC                              | TT                | 1945960312               |
| SNP_P3_55752_38417736 | NC_021163.1    | Ca_kabuli_chr04 | 38417736                | GG                              | AA                | 1945960314               |
| SNP_P3_55753_38417741 | NC_021163.1    | Ca_kabuli_chr04 | 38417741                | TT                              | CC                | 1945960316               |
| SNP_P3_55754_38418064 | NC_021163.1    | Ca_kabuli_chr04 | 38418064                | GG                              | CC                | 1945960318               |
| SNP_P3_55755_38418279 | NC_021163.1    | Ca_kabuli_chr04 | 38418279                | TT                              | CC                | 1945960319               |
| SNP_P3_55756_38418288 | NC_021163.1    | Ca_kabuli_chr04 | 38418288                | AA                              | GG                | 1945960321               |
| SNP_P3_55757_38421437 | NC_021163.1    | Ca_kabuli_chr04 | 38421437                | TT                              | AA                | 1945960323               |
| SNP_P3_55758_38422037 | NC_021163.1    | Ca_kabuli_chr04 | 38422037                | TT                              | CC                | 1945960325               |
| SNP_P3_55759_38423518 | NC_021163.1    | Ca_kabuli_chr04 | 38423518                | CC                              | AA                | 1945960326               |
| SNP_P3_55760_38423643 | NC_021163.1    | Ca_kabuli_chr04 | 38423643                | CC                              | TT                | 1945960328               |

| SNPs IDs              | Chromosome IDs | Chromosomes     | Physical positions (bp) | CDC Frontier (Reference genome) | (Pusa 256 & HPNB) | NCBI SNPdb Accession IDs |
|-----------------------|----------------|-----------------|-------------------------|---------------------------------|-------------------|--------------------------|
| SNP_P3_55761_38424785 | NC_021163.1    | Ca_kabuli_chr04 | 38424785                | GG                              | AA                | 1945960330               |
| SNP_P3_55762_38427301 | NC_021163.1    | Ca_kabuli_chr04 | 38427301                | TT                              | CC                | 1945960332               |
| SNP_P3_55763_38427340 | NC_021163.1    | Ca_kabuli_chr04 | 38427340                | CC                              | TT                | 1945960334               |
| SNP_P3_55764_38429407 | NC_021163.1    | Ca_kabuli_chr04 | 38429407                | TT                              | CC                | 1945960335               |
| SNP_P3_55765_38429418 | NC_021163.1    | Ca_kabuli_chr04 | 38429418                | CC                              | TT                | 1945960337               |
| SNP_P3_55766_38429688 | NC_021163.1    | Ca_kabuli_chr04 | 38429688                | CC                              | TT                | 1945960339               |
| SNP_P3_55767_38429991 | NC_021163.1    | Ca_kabuli_chr04 | 38429991                | GG                              | AA                | 1945960341               |
| SNP_P3_55768_38430024 | NC_021163.1    | Ca_kabuli_chr04 | 38430024                | CC                              | AA                | 1945960343               |
| SNP_P3_55769_38430208 | NC_021163.1    | Ca_kabuli_chr04 | 38430208                | CC                              | TT                | 1945960344               |
| SNP_P3_55770_38430242 | NC_021163.1    | Ca_kabuli_chr04 | 38430242                | CC                              | AA                | 1945960346               |
| SNP_P3_55771_38433090 | NC_021163.1    | Ca_kabuli_chr04 | 38433090                | CC                              | AA                | 1945960348               |
| SNP_P3_55772_38435112 | NC_021163.1    | Ca_kabuli_chr04 | 38435112                | CC                              | AA                | 1945960350               |
| SNP_P3_55774_38435458 | NC_021163.1    | Ca_kabuli_chr04 | 38435458                | AA                              | TT                | 1945960351               |
| SNP_P3_55775_38438541 | NC_021163.1    | Ca_kabuli_chr04 | 38438541                | CC                              | TT                | 1945960353               |
| SNP_P3_55776_38438601 | NC_021163.1    | Ca_kabuli_chr04 | 38438601                | AA                              | GG                | 1945960355               |
| SNP_P3_55777_38438605 | NC_021163.1    | Ca_kabuli_chr04 | 38438605                | TT                              | GG                | 1945960357               |
| SNP_P3_55779_38439442 | NC_021163.1    | Ca_kabuli_chr04 | 38439442                | TT                              | CC                | 1945960359               |
| SNP_P3_55780_38441667 | NC_021163.1    | Ca_kabuli_chr04 | 38441667                | TT                              | CC                | 1945960360               |
| SNP_P3_55781_38441708 | NC_021163.1    | Ca_kabuli_chr04 | 38441708                | GG                              | TT                | 1945960362               |
| SNP_P3_55782_38441934 | NC_021163.1    | Ca_kabuli_chr04 | 38441934                | CC                              | TT                | 1945960364               |
| SNP_P3_55783_38442228 | NC_021163.1    | Ca_kabuli_chr04 | 38442228                | CC                              | GG                | 1945960366               |
| SNP_P3_55784_38442491 | NC_021163.1    | Ca_kabuli_chr04 | 38442491                | TT                              | CC                | 1945960367               |
| SNP_P3_55785_38446256 | NC_021163.1    | Ca_kabuli_chr04 | 38446256                | TT                              | CC                | 1945960369               |
| SNP_P3_55786_38446279 | NC_021163.1    | Ca_kabuli_chr04 | 38446279                | GG                              | AA                | 1945960371               |
| SNP_P3_55787_38447082 | NC_021163.1    | Ca_kabuli_chr04 | 38447082                | AA                              | GG                | 1945960373               |
| SNP_P3_55788_38447121 | NC_021163.1    | Ca_kabuli_chr04 | 38447121                | GG                              | TT                | 1945960375               |
| SNP_P3_55789_38447128 | NC_021163.1    | Ca_kabuli_chr04 | 38447128                | AA                              | GG                | 1945960376               |
| SNP_P3_55790_38447130 | NC_021163.1    | Ca_kabuli_chr04 | 38447130                | GG                              | AA                | 1945960378               |
| SNP_P3_55792_38450746 | NC_021163.1    | Ca_kabuli_chr04 | 38450746                | CC                              | TT                | 1945960380               |
| SNP_P3_55793_38451674 | NC_021163.1    | Ca_kabuli_chr04 | 38451674                | CC                              | TT                | 1945960382               |
| SNP_P3_55794_38452319 | NC_021163.1    | Ca_kabuli_chr04 | 38452319                | GG                              | AA                | 1945960384               |
| SNP_P3_55795_38452647 | NC_021163.1    | Ca_kabuli_chr04 | 38452647                | TT                              | CC                | 1945960385               |
| SNP_P3_55796_38456129 | NC_021163.1    | Ca_kabuli_chr04 | 38456129                | AA                              | GG                | 1945960387               |
| SNP_P3_55797_38456556 | NC_021163.1    | Ca_kabuli_chr04 | 38456556                | CC                              | TT                | 1945960389               |
| SNP_P3_55799_38458020 | NC_021163.1    | Ca_kabuli_chr04 | 38458020                | TT                              | CC                | 1945960391               |
| SNP_P3_55800_38458649 | NC_021163.1    | Ca_kabuli_chr04 | 38458649                | GG                              | TT                | 1945960392               |
| SNP_P3_55801_38458671 | NC_021163.1    | Ca_kabuli_chr04 | 38458671                | CC                              | TT                | 1945960394               |
| SNP_P3_55802_38459548 | NC_021163.1    | Ca_kabuli_chr04 | 38459548                | GG                              | AA                | 1945960396               |
| SNP_P3_55803_38459580 | NC_021163.1    | Ca_kabuli_chr04 | 38459580                | GG                              | AA                | 1945960398               |
| SNP_P3_55804_38459609 | NC_021163.1    | Ca_kabuli_chr04 | 38459609                | TT                              | CC                | 1945960400               |
| SNP_P3_55805_38459741 | NC_021163.1    | Ca_kabuli_chr04 | 38459741                | TT                              | CC                | 1945960401               |
| SNP_P3_55806_38460409 | NC_021163.1    | Ca_kabuli_chr04 | 38460409                | TT                              | CC                | 1945960403               |



| SNPs IDs              | Chromosome IDs | Chromosomes     | Physical positions (bp) | CDC Frontier (Reference genome) | (Pusa 256 & HPNB) | NCBI SNPdb Accession IDs |
|-----------------------|----------------|-----------------|-------------------------|---------------------------------|-------------------|--------------------------|
| SNP_P3_55807_38460472 | NC_021163.1    | Ca_kabuli_chr04 | 38460472                | TT                              | GG                | 1945960405               |
| SNP_P3_55808_38460739 | NC_021163.1    | Ca_kabuli_chr04 | 38460739                | AA                              | GG                | 1945960407               |
| SNP_P3_55809_38460914 | NC_021163.1    | Ca_kabuli_chr04 | 38460914                | CC                              | AA                | 1945960408               |
| SNP_P3_55810_38461980 | NC_021163.1    | Ca_kabuli_chr04 | 38461980                | CC                              | TT                | 1945960410               |
| SNP_P3_55811_38461990 | NC_021163.1    | Ca_kabuli_chr04 | 38461990                | TT                              | CC                | 1945960412               |
| SNP_P3_55812_38464016 | NC_021163.1    | Ca_kabuli_chr04 | 38464016                | TT                              | CC                | 1945960414               |
| SNP_P3_55813_38465148 | NC_021163.1    | Ca_kabuli_chr04 | 38465148                | CC                              | AA                | 1945960416               |
| SNP_P3_55814_38465194 | NC_021163.1    | Ca_kabuli_chr04 | 38465194                | GG                              | AA                | 1945960417               |
| SNP_P3_55815_38465450 | NC_021163.1    | Ca_kabuli_chr04 | 38465450                | TT                              | GG                | 1945960419               |
| SNP_P3_55816_38465676 | NC_021163.1    | Ca_kabuli_chr04 | 38465676                | GG                              | AA                | 1945960421               |
| SNP_P3_55817_38465720 | NC_021163.1    | Ca_kabuli_chr04 | 38465720                | TT                              | GG                | 1945960423               |
| SNP_P3_55818_38465806 | NC_021163.1    | Ca_kabuli_chr04 | 38465806                | CC                              | TT                | 1945960424               |
| SNP_P3_55819_38466068 | NC_021163.1    | Ca_kabuli_chr04 | 38466068                | AA                              | GG                | 1945960426               |
| SNP_P3_55820_38466103 | NC_021163.1    | Ca_kabuli_chr04 | 38466103                | TT                              | CC                | 1945960428               |
| SNP_P3_55821_38466104 | NC_021163.1    | Ca_kabuli_chr04 | 38466104                | CC                              | TT                | 1945960430               |
| SNP_P3_55822_38466133 | NC_021163.1    | Ca_kabuli_chr04 | 38466133                | CC                              | TT                | 1945960432               |
| SNP_P3_55823_38466497 | NC_021163.1    | Ca_kabuli_chr04 | 38466497                | CC                              | TT                | 1945960433               |
| SNP_P3_55825_38466666 | NC_021163.1    | Ca_kabuli_chr04 | 38466666                | TT                              | CC                | 1945960435               |
| SNP_P3_55826_38466674 | NC_021163.1    | Ca_kabuli_chr04 | 38466674                | AA                              | GG                | 1945960437               |
| SNP_P3_55827_38466709 | NC_021163.1    | Ca_kabuli_chr04 | 38466709                | GG                              | TT                | 1945960439               |
| SNP_P3_55828_38466762 | NC_021163.1    | Ca_kabuli_chr04 | 38466762                | CC                              | AA                | 1945960441               |
| SNP_P3_55829_38466997 | NC_021163.1    | Ca_kabuli_chr04 | 38466997                | AA                              | TT                | 1945960442               |
| SNP_P3_55830_38467849 | NC_021163.1    | Ca_kabuli_chr04 | 38467849                | AA                              | GG                | 1945960444               |
| SNP_P3_55831_38467870 | NC_021163.1    | Ca_kabuli_chr04 | 38467870                | GG                              | TT                | 1945960446               |
| SNP_P3_55832_38468519 | NC_021163.1    | Ca_kabuli_chr04 | 38468519                | GG                              | AA                | 1945960448               |
| SNP_P3_55833_38468530 | NC_021163.1    | Ca_kabuli_chr04 | 38468530                | AA                              | TT                | 1945960449               |
| SNP_P3_55834_38472090 | NC_021163.1    | Ca_kabuli_chr04 | 38472090                | TT                              | CC                | 1945960451               |
| SNP_P3_55835_38479266 | NC_021163.1    | Ca_kabuli_chr04 | 38479266                | CC                              | TT                | 1945960453               |
| SNP_P3_55838_38481053 | NC_021163.1    | Ca_kabuli_chr04 | 38481053                | AA                              | TT                | 1945960455               |
| SNP_P3_55839_38481105 | NC_021163.1    | Ca_kabuli_chr04 | 38481105                | AA                              | TT                | 1945960457               |
| SNP_P3_55840_38481169 | NC_021163.1    | Ca_kabuli_chr04 | 38481169                | GG                              | AA                | 1945960458               |
| SNP_P3_55841_38481521 | NC_021163.1    | Ca_kabuli_chr04 | 38481521                | AA                              | TT                | 1945960460               |
| SNP_P3_55842_38482663 | NC_021163.1    | Ca_kabuli_chr04 | 38482663                | TT                              | CC                | 1945960462               |
| SNP_P3_55843_38482665 | NC_021163.1    | Ca_kabuli_chr04 | 38482665                | TT                              | CC                | 1945960464               |
| SNP_P3_55844_38482686 | NC_021163.1    | Ca_kabuli_chr04 | 38482686                | TT                              | CC                | 1945960465               |
| SNP_P3_55847_38483202 | NC_021163.1    | Ca_kabuli_chr04 | 38483202                | TT                              | CC                | 1945960467               |
| SNP_P3_55852_38484145 | NC_021163.1    | Ca_kabuli_chr04 | 38484145                | GG                              | CC                | 1945960469               |
| SNP_P3_55854_38484632 | NC_021163.1    | Ca_kabuli_chr04 | 38484632                | AA                              | GG                | 1945960471               |
| SNP_P3_55856_38484729 | NC_021163.1    | Ca_kabuli_chr04 | 38484729                | CC                              | TT                | 1945960473               |
| SNP_P3_55858_38486288 | NC_021163.1    | Ca_kabuli_chr04 | 38486288                | AA                              | GG                | 1945960474               |
| SNP_P3_55859_38488954 | NC_021163.1    | Ca_kabuli_chr04 | 38488954                | AA                              | GG                | 1945960476               |
| SNP_P3_55860_38489455 | NC_021163.1    | Ca_kabuli_chr04 | 38489455                | CC                              | AA                | 1945960478               |

| SNPs IDs              | Chromosome IDs | Chromosomes     | Physical positions (bp) | CDC Frontier (Reference genome) | (Pusa 256 & HPNB) | NCBI SNPdb Accession IDs |
|-----------------------|----------------|-----------------|-------------------------|---------------------------------|-------------------|--------------------------|
| SNP_P3_55861_38489660 | NC_021163.1    | Ca_kabuli_chr04 | 38489660                | CC                              | TT                | 1945960480               |
| SNP_P3_55862_38490100 | NC_021163.1    | Ca_kabuli_chr04 | 38490100                | AA                              | GG                | 1945960482               |
| SNP_P3_55863_38491574 | NC_021163.1    | Ca_kabuli_chr04 | 38491574                | TT                              | GG                | 1945960483               |
| SNP_P3_55864_38491577 | NC_021163.1    | Ca_kabuli_chr04 | 38491577                | GG                              | AA                | 1945960485               |
| SNP_P3_55865_38491638 | NC_021163.1    | Ca_kabuli_chr04 | 38491638                | CC                              | AA                | 1945960487               |
| SNP_P3_55866_38491685 | NC_021163.1    | Ca_kabuli_chr04 | 38491685                | CC                              | TT                | 1945960489               |
| SNP_P3_55867_38491803 | NC_021163.1    | Ca_kabuli_chr04 | 38491803                | AA                              | GG                | 1945960490               |
| SNP_P3_55868_38491817 | NC_021163.1    | Ca_kabuli_chr04 | 38491817                | AA                              | CC                | 1945960492               |
| SNP_P3_55869_38491955 | NC_021163.1    | Ca_kabuli_chr04 | 38491955                | TT                              | CC                | 1945960494               |
| SNP_P3_55870_38491974 | NC_021163.1    | Ca_kabuli_chr04 | 38491974                | CC                              | GG                | 1945960496               |
| SNP_P3_55871_38491983 | NC_021163.1    | Ca_kabuli_chr04 | 38491983                | CC                              | TT                | 1945960498               |
| SNP_P3_55872_38492023 | NC_021163.1    | Ca_kabuli_chr04 | 38492023                | AA                              | GG                | 1945960499               |
| SNP_P3_55873_38492281 | NC_021163.1    | Ca_kabuli_chr04 | 38492281                | GG                              | AA                | 1945960501               |
| SNP_P3_55874_38492590 | NC_021163.1    | Ca_kabuli_chr04 | 38492590                | GG                              | AA                | 1945960503               |
| SNP_P3_55875_38492639 | NC_021163.1    | Ca_kabuli_chr04 | 38492639                | CC                              | TT                | 1945960505               |
| SNP_P3_55876_38492869 | NC_021163.1    | Ca_kabuli_chr04 | 38492869                | CC                              | TT                | 1945960506               |
| SNP_P3_55877_38493039 | NC_021163.1    | Ca_kabuli_chr04 | 38493039                | TT                              | CC                | 1945960508               |
| SNP_P3_55878_38493381 | NC_021163.1    | Ca_kabuli_chr04 | 38493381                | CC                              | TT                | 1945960510               |
| SNP_P3_55879_38493397 | NC_021163.1    | Ca_kabuli_chr04 | 38493397                | AA                              | TT                | 1945960512               |
| SNP_P3_55880_38493812 | NC_021163.1    | Ca_kabuli_chr04 | 38493812                | GG                              | AA                | 1945960514               |
| SNP_P3_55881_38493838 | NC_021163.1    | Ca_kabuli_chr04 | 38493838                | GG                              | CC                | 1945960515               |
| SNP_P3_55882_38494060 | NC_021163.1    | Ca_kabuli_chr04 | 38494060                | AA                              | GG                | 1945960517               |
| SNP_P3_55883_38495096 | NC_021163.1    | Ca_kabuli_chr04 | 38495096                | AA                              | CC                | 1945960519               |
| SNP_P3_55885_38495666 | NC_021163.1    | Ca_kabuli_chr04 | 38495666                | TT                              | CC                | 1945960521               |
| SNP_P3_55886_38495774 | NC_021163.1    | Ca_kabuli_chr04 | 38495774                | TT                              | AA                | 1945960523               |
| SNP_P3_55887_38496011 | NC_021163.1    | Ca_kabuli_chr04 | 38496011                | TT                              | CC                | 1945960524               |
| SNP_P3_55888_38496313 | NC_021163.1    | Ca_kabuli_chr04 | 38496313                | TT                              | AA                | 1945960526               |
| SNP_P3_55889_38500636 | NC_021163.1    | Ca_kabuli_chr04 | 38500636                | TT                              | GG                | 1945960528               |
| SNP_P3_55890_38500820 | NC_021163.1    | Ca_kabuli_chr04 | 38500820                | CC                              | TT                | 1945960530               |
| SNP_P3_55892_38503430 | NC_021163.1    | Ca_kabuli_chr04 | 38503430                | GG                              | TT                | 1945960531               |
| SNP_P3_55893_38503605 | NC_021163.1    | Ca_kabuli_chr04 | 38503605                | CC                              | TT                | 1945960533               |
| SNP_P3_55895_38504228 | NC_021163.1    | Ca_kabuli_chr04 | 38504228                | TT                              | CC                | 1945960535               |
| SNP_P3_55896_38504464 | NC_021163.1    | Ca_kabuli_chr04 | 38504464                | CC                              | TT                | 1945960537               |
| SNP_P3_55898_38506300 | NC_021163.1    | Ca_kabuli_chr04 | 38506300                | CC                              | TT                | 1945960539               |
| SNP_P3_55899_38506404 | NC_021163.1    | Ca_kabuli_chr04 | 38506404                | CC                              | AA                | 1945960540               |
| SNP_P3_55901_38509239 | NC_021163.1    | Ca_kabuli_chr04 | 38509239                | GG                              | AA                | 1945960542               |
| SNP_P3_55902_38509390 | NC_021163.1    | Ca_kabuli_chr04 | 38509390                | CC                              | TT                | 1945960544               |
| SNP_P3_55903_38509398 | NC_021163.1    | Ca_kabuli_chr04 | 38509398                | AA                              | CC                | 1945960546               |
| SNP_P3_55904_38509552 | NC_021163.1    | Ca_kabuli_chr04 | 38509552                | CC                              | TT                | 1945960547               |
| SNP_P3_55905_38513854 | NC_021163.1    | Ca_kabuli_chr04 | 38513854                | TT                              | AA                | 1945960549               |
| SNP_P3_55906_38513882 | NC_021163.1    | Ca_kabuli_chr04 | 38513882                | TT                              | AA                | 1945960551               |
| SNP_P3_55907_38514687 | NC_021163.1    | Ca_kabuli_chr04 | 38514687                | AA                              | GG                | 1945960553               |

| SNPs IDs              | Chromosome IDs | Chromosomes     | Physical positions (bp) | CDC Frontier (Reference genome) | (Pusa 256 & HPNB) | NCBI SNPdb Accession IDs |
|-----------------------|----------------|-----------------|-------------------------|---------------------------------|-------------------|--------------------------|
| SNP_P3_55908_38514927 | NC_021163.1    | Ca_kabuli_chr04 | 38514927                | TT                              | CC                | 1945960555               |
| SNP_P3_55910_38520128 | NC_021163.1    | Ca_kabuli_chr04 | 38520128                | TT                              | GG                | 1945960556               |
| SNP_P3_55911_38520809 | NC_021163.1    | Ca_kabuli_chr04 | 38520809                | CC                              | TT                | 1945960558               |
| SNP_P3_55912_38521645 | NC_021163.1    | Ca_kabuli_chr04 | 38521645                | CC                              | TT                | 1945960560               |
| SNP_P3_55913_38521678 | NC_021163.1    | Ca_kabuli_chr04 | 38521678                | GG                              | AA                | 1945960562               |
| SNP_P3_55914_38521686 | NC_021163.1    | Ca_kabuli_chr04 | 38521686                | TT                              | AA                | 1945960564               |
| SNP_P3_55915_38521709 | NC_021163.1    | Ca_kabuli_chr04 | 38521709                | AA                              | GG                | 1945960565               |
| SNP_P3_55916_38521711 | NC_021163.1    | Ca_kabuli_chr04 | 38521711                | CC                              | TT                | 1945960567               |
| SNP_P3_55917_38522303 | NC_021163.1    | Ca_kabuli_chr04 | 38522303                | GG                              | TT                | 1945960569               |
| SNP_P3_55918_38522320 | NC_021163.1    | Ca_kabuli_chr04 | 38522320                | GG                              | AA                | 1945960571               |
| SNP_P3_55920_38524064 | NC_021163.1    | Ca_kabuli_chr04 | 38524064                | CC                              | TT                | 1945960572               |
| SNP_P3_55921_38524073 | NC_021163.1    | Ca_kabuli_chr04 | 38524073                | CC                              | TT                | 1945960574               |
| SNP_P3_55923_38524710 | NC_021163.1    | Ca_kabuli_chr04 | 38524710                | GG                              | AA                | 1945960576               |
| SNP_P3_55924_38524976 | NC_021163.1    | Ca_kabuli_chr04 | 38524976                | AA                              | GG                | 1945960578               |
| SNP_P3_55925_38525064 | NC_021163.1    | Ca_kabuli_chr04 | 38525064                | GG                              | AA                | 1945960580               |
| SNP_P3_55926_38525107 | NC_021163.1    | Ca_kabuli_chr04 | 38525107                | GG                              | AA                | 1945960581               |
| SNP_P3_55927_38525120 | NC_021163.1    | Ca_kabuli_chr04 | 38525120                | CC                              | AA                | 1945960583               |
| SNP_P3_55928_38525132 | NC_021163.1    | Ca_kabuli_chr04 | 38525132                | CC                              | TT                | 1945960585               |
| SNP_P3_55929_38526097 | NC_021163.1    | Ca_kabuli_chr04 | 38526097                | CC                              | TT                | 1945960587               |
| SNP_P3_55930_38526624 | NC_021163.1    | Ca_kabuli_chr04 | 38526624                | TT                              | CC                | 1945960588               |
| SNP_P3_55931_38526878 | NC_021163.1    | Ca_kabuli_chr04 | 38526878                | CC                              | TT                | 1945960590               |
| SNP_P3_55932_38527721 | NC_021163.1    | Ca_kabuli_chr04 | 38527721                | TT                              | GG                | 1945960592               |
| SNP_P3_55933_38528489 | NC_021163.1    | Ca_kabuli_chr04 | 38528489                | AA                              | TT                | 1945960594               |
| SNP_P3_55934_38534259 | NC_021163.1    | Ca_kabuli_chr04 | 38534259                | AA                              | GG                | 1945960596               |
| SNP_P3_55935_38534421 | NC_021163.1    | Ca_kabuli_chr04 | 38534421                | CC                              | TT                | 1945960597               |
| SNP_P3_55936_38534446 | NC_021163.1    | Ca_kabuli_chr04 | 38534446                | AA                              | GG                | 1945960599               |
| SNP_P3_55937_38534540 | NC_021163.1    | Ca_kabuli_chr04 | 38534540                | CC                              | TT                | 1945960601               |
| SNP_P3_55939_38536583 | NC_021163.1    | Ca_kabuli_chr04 | 38536583                | GG                              | CC                | 1945960603               |
| SNP_P3_55940_38536889 | NC_021163.1    | Ca_kabuli_chr04 | 38536889                | GG                              | AA                | 1945960604               |
| SNP_P3_55941_38539816 | NC_021163.1    | Ca_kabuli_chr04 | 38539816                | AA                              | CC                | 1945960606               |
| SNP_P3_55943_38550600 | NC_021163.1    | Ca_kabuli_chr04 | 38550600                | GG                              | AA                | 1945960608               |
| SNP_P3_55944_38551863 | NC_021163.1    | Ca_kabuli_chr04 | 38551863                | TT                              | CC                | 1945960610               |
| SNP_P3_55945_38551903 | NC_021163.1    | Ca_kabuli_chr04 | 38551903                | TT                              | CC                | 1945960612               |
| SNP_P3_55946_38552010 | NC_021163.1    | Ca_kabuli_chr04 | 38552010                | AA                              | GG                | 1945960613               |
| SNP_P3_55947_38552042 | NC_021163.1    | Ca_kabuli_chr04 | 38552042                | AA                              | CC                | 1945960615               |
| SNP_P3_55948_38552043 | NC_021163.1    | Ca_kabuli_chr04 | 38552043                | TT                              | CC                | 1945960617               |
| SNP_P3_55949_38552189 | NC_021163.1    | Ca_kabuli_chr04 | 38552189                | TT                              | GG                | 1945960619               |
| SNP_P3_55950_38552728 | NC_021163.1    | Ca_kabuli_chr04 | 38552728                | AA                              | GG                | 1945960621               |
| SNP_P3_55951_38552798 | NC_021163.1    | Ca_kabuli_chr04 | 38552798                | GG                              | AA                | 1945960622               |
| SNP_P3_55952_38553713 | NC_021163.1    | Ca_kabuli_chr04 | 38553713                | TT                              | GG                | 1945960624               |
| SNP_P3_55953_38553714 | NC_021163.1    | Ca_kabuli_chr04 | 38553714                | CC                              | TT                | 1945960626               |
| SNP_P3_55954_38553735 | NC_021163.1    | Ca_kabuli_chr04 | 38553735                | TT                              | GG                | 1945960628               |

| SNPs IDs              | Chromosome IDs | Chromosomes     | Physical positions (bp) | CDC Frontier (Reference genome) | (Pusa 256 & HPNB) | NCBI SNPdb Accession IDs |
|-----------------------|----------------|-----------------|-------------------------|---------------------------------|-------------------|--------------------------|
| SNP_P3_55955_38554594 | NC_021163.1    | Ca_kabuli_chr04 | 38554594                | GG                              | CC                | 1945960629               |
| SNP_P3_55956_38554609 | NC_021163.1    | Ca_kabuli_chr04 | 38554609                | CC                              | AA                | 1945960631               |
| SNP_P3_55957_38554661 | NC_021163.1    | Ca_kabuli_chr04 | 38554661                | CC                              | TT                | 1945960633               |
| SNP_P3_55958_38555807 | NC_021163.1    | Ca_kabuli_chr04 | 38555807                | AA                              | GG                | 1945960635               |
| SNP_P3_55959_38555873 | NC_021163.1    | Ca_kabuli_chr04 | 38555873                | CC                              | GG                | 1945960637               |
| SNP_P3_55960_38555888 | NC_021163.1    | Ca_kabuli_chr04 | 38555888                | TT                              | CC                | 1945960638               |
| SNP_P3_55961_38555892 | NC_021163.1    | Ca_kabuli_chr04 | 38555892                | TT                              | AA                | 1945960640               |
| SNP_P3_55962_38558103 | NC_021163.1    | Ca_kabuli_chr04 | 38558103                | AA                              | CC                | 1945960642               |
| SNP_P3_55963_38558111 | NC_021163.1    | Ca_kabuli_chr04 | 38558111                | AA                              | GG                | 1945960644               |
| SNP_P3_55964_38558237 | NC_021163.1    | Ca_kabuli_chr04 | 38558237                | CC                              | AA                | 1945960645               |
| SNP_P3_55967_38558945 | NC_021163.1    | Ca_kabuli_chr04 | 38558945                | TT                              | CC                | 1945960647               |
| SNP_P3_55968_38559017 | NC_021163.1    | Ca_kabuli_chr04 | 38559017                | AA                              | CC                | 1945960649               |
| SNP_P3_55969_38559887 | NC_021163.1    | Ca_kabuli_chr04 | 38559887                | GG                              | AA                | 1945960651               |
| SNP_P3_55970_38560078 | NC_021163.1    | Ca_kabuli_chr04 | 38560078                | CC                              | GG                | 1945960653               |
| SNP_P3_55971_38560301 | NC_021163.1    | Ca_kabuli_chr04 | 38560301                | TT                              | GG                | 1945960654               |
| SNP_P3_55972_38560310 | NC_021163.1    | Ca_kabuli_chr04 | 38560310                | CC                              | TT                | 1945960656               |
| SNP_P3_55974_38562019 | NC_021163.1    | Ca_kabuli_chr04 | 38562019                | GG                              | AA                | 1945960658               |
| SNP_P3_55975_38562035 | NC_021163.1    | Ca_kabuli_chr04 | 38562035                | CC                              | TT                | 1945960660               |
| SNP_P3_55976_38562154 | NC_021163.1    | Ca_kabuli_chr04 | 38562154                | CC                              | TT                | 1945960662               |
| SNP_P3_55977_38562248 | NC_021163.1    | Ca_kabuli_chr04 | 38562248                | TT                              | AA                | 1945960663               |
| SNP_P3_55979_38563347 | NC_021163.1    | Ca_kabuli_chr04 | 38563347                | AA                              | CC                | 1945960665               |
| SNP_P3_55980_38563834 | NC_021163.1    | Ca_kabuli_chr04 | 38563834                | GG                              | AA                | 1945960667               |
| SNP_P3_55981_38564132 | NC_021163.1    | Ca_kabuli_chr04 | 38564132                | AA                              | GG                | 1945960669               |
| SNP_P3_55983_38566445 | NC_021163.1    | Ca_kabuli_chr04 | 38566445                | AA                              | TT                | 1945960670               |
| SNP_P3_55984_38567191 | NC_021163.1    | Ca_kabuli_chr04 | 38567191                | GG                              | TT                | 1945960672               |
| SNP_P3_55985_38567217 | NC_021163.1    | Ca_kabuli_chr04 | 38567217                | AA                              | GG                | 1945960674               |
| SNP_P3_55987_38567418 | NC_021163.1    | Ca_kabuli_chr04 | 38567418                | GG                              | AA                | 1945960676               |
| SNP_P3_55988_38567464 | NC_021163.1    | Ca_kabuli_chr04 | 38567464                | AA                              | GG                | 1945960678               |
| SNP_P3_55991_38568670 | NC_021163.1    | Ca_kabuli_chr04 | 38568670                | AA                              | GG                | 1945960679               |
| SNP_P3_55992_38569321 | NC_021163.1    | Ca_kabuli_chr04 | 38569321                | TT                              | AA                | 1945960681               |
| SNP_P3_55993_38569473 | NC_021163.1    | Ca_kabuli_chr04 | 38569473                | AA                              | GG                | 1945960683               |
| SNP_P3_55994_38569498 | NC_021163.1    | Ca_kabuli_chr04 | 38569498                | GG                              | TT                | 1945960685               |
| SNP_P3_55995_38569518 | NC_021163.1    | Ca_kabuli_chr04 | 38569518                | AA                              | CC                | 1945960686               |
| SNP_P3_55996_38569545 | NC_021163.1    | Ca_kabuli_chr04 | 38569545                | TT                              | GG                | 1945960688               |
| SNP_P3_55997_38570517 | NC_021163.1    | Ca_kabuli_chr04 | 38570517                | TT                              | AA                | 1945960690               |
| SNP_P3_55998_38571732 | NC_021163.1    | Ca_kabuli_chr04 | 38571732                | CC                              | TT                | 1945960692               |
| SNP_P3_55999_38571855 | NC_021163.1    | Ca_kabuli_chr04 | 38571855                | TT                              | CC                | 1945960694               |
| SNP_P3_56002_38575443 | NC_021163.1    | Ca_kabuli_chr04 | 38575443                | CC                              | AA                | 1945960695               |
| SNP_P3_56003_38575635 | NC_021163.1    | Ca_kabuli_chr04 | 38575635                | GG                              | AA                | 1945960697               |
| SNP_P3_56004_38575647 | NC_021163.1    | Ca_kabuli_chr04 | 38575647                | TT                              | CC                | 1945960699               |
| SNP_P3_56005_38575662 | NC_021163.1    | Ca_kabuli_chr04 | 38575662                | CC                              | TT                | 1945960701               |
| SNP_P3_56006_38575823 | NC_021163.1    | Ca_kabuli_chr04 | 38575823                | GG                              | AA                | 1945960703               |

| SNPs IDs              | Chromosome IDs | Chromosomes     | Physical positions (bp) | CDC Frontier (Reference genome) | (Pusa 256 & HPNB) | NCBI SNPdb Accession IDs |
|-----------------------|----------------|-----------------|-------------------------|---------------------------------|-------------------|--------------------------|
| SNP_P3_56008_38575850 | NC_021163.1    | Ca_kabuli_chr04 | 38575850                | GG                              | AA                | 1945960704               |
| SNP_P3_56009_38576161 | NC_021163.1    | Ca_kabuli_chr04 | 38576161                | GG                              | TT                | 1945960706               |
| SNP_P3_56011_38579626 | NC_021163.1    | Ca_kabuli_chr04 | 38579626                | GG                              | AA                | 1945960708               |
| SNP_P3_56012_38579631 | NC_021163.1    | Ca_kabuli_chr04 | 38579631                | CC                              | AA                | 1945960710               |
| SNP_P3_56013_38579676 | NC_021163.1    | Ca_kabuli_chr04 | 38579676                | TT                              | AA                | 1945960711               |
| SNP_P3_56014_38579677 | NC_021163.1    | Ca_kabuli_chr04 | 38579677                | AA                              | TT                | 1945960713               |
| SNP_P3_56015_38579888 | NC_021163.1    | Ca_kabuli_chr04 | 38579888                | CC                              | GG                | 1945960715               |
| SNP_P3_56016_38579912 | NC_021163.1    | Ca_kabuli_chr04 | 38579912                | CC                              | TT                | 1945960717               |
| SNP_P3_56017_38579913 | NC_021163.1    | Ca_kabuli_chr04 | 38579913                | CC                              | AA                | 1945960719               |
| SNP_P3_56018_38579925 | NC_021163.1    | Ca_kabuli_chr04 | 38579925                | CC                              | TT                | 1945960720               |
| SNP_P3_56019_38579928 | NC_021163.1    | Ca_kabuli_chr04 | 38579928                | AA                              | GG                | 1945960722               |
| SNP_P3_56020_38579935 | NC_021163.1    | Ca_kabuli_chr04 | 38579935                | CC                              | AA                | 1945960724               |
| SNP_P3_56021_38580148 | NC_021163.1    | Ca_kabuli_chr04 | 38580148                | TT                              | CC                | 1945960726               |
| SNP_P3_56022_38580190 | NC_021163.1    | Ca_kabuli_chr04 | 38580190                | TT                              | CC                | 1945960727               |
| SNP_P3_56023_38580727 | NC_021163.1    | Ca_kabuli_chr04 | 38580727                | CC                              | GG                | 1945960729               |
| SNP_P3_56024_38580738 | NC_021163.1    | Ca_kabuli_chr04 | 38580738                | CC                              | GG                | 1945960731               |
| SNP_P3_56025_38580744 | NC_021163.1    | Ca_kabuli_chr04 | 38580744                | CC                              | AA                | 1945960733               |
| SNP_P3_56026_38580931 | NC_021163.1    | Ca_kabuli_chr04 | 38580931                | GG                              | AA                | 1945960735               |
| SNP_P3_56027_38580962 | NC_021163.1    | Ca_kabuli_chr04 | 38580962                | GG                              | CC                | 1945960736               |
| SNP_P3_56028_38581192 | NC_021163.1    | Ca_kabuli_chr04 | 38581192                | GG                              | TT                | 1945960738               |
| SNP_P3_56029_38581224 | NC_021163.1    | Ca_kabuli_chr04 | 38581224                | TT                              | CC                | 1945960740               |
| SNP_P3_56030_38581771 | NC_021163.1    | Ca_kabuli_chr04 | 38581771                | AA                              | GG                | 1945960742               |
| SNP_P3_56031_38581805 | NC_021163.1    | Ca_kabuli_chr04 | 38581805                | AA                              | GG                | 1945960744               |
| SNP_P3_56032_38582280 | NC_021163.1    | Ca_kabuli_chr04 | 38582280                | CC                              | TT                | 1945960745               |
| SNP_P3_56033_38582281 | NC_021163.1    | Ca_kabuli_chr04 | 38582281                | AA                              | GG                | 1945960747               |
| SNP_P3_56034_38583657 | NC_021163.1    | Ca_kabuli_chr04 | 38583657                | GG                              | CC                | 1945960749               |
| SNP_P3_56035_38583794 | NC_021163.1    | Ca_kabuli_chr04 | 38583794                | GG                              | AA                | 1945960751               |
| SNP_P3_56036_38583904 | NC_021163.1    | Ca_kabuli_chr04 | 38583904                | CC                              | TT                | 1945960752               |
| SNP_P3_56037_38583930 | NC_021163.1    | Ca_kabuli_chr04 | 38583930                | TT                              | CC                | 1945960754               |
| SNP_P3_56038_38583972 | NC_021163.1    | Ca_kabuli_chr04 | 38583972                | TT                              | AA                | 1945960756               |
| SNP_P3_56039_38583987 | NC_021163.1    | Ca_kabuli_chr04 | 38583987                | AA                              | GG                | 1945960758               |
| SNP_P3_56040_38584024 | NC_021163.1    | Ca_kabuli_chr04 | 38584024                | TT                              | CC                | 1945960760               |
| SNP_P3_56041_38584609 | NC_021163.1    | Ca_kabuli_chr04 | 38584609                | TT                              | CC                | 1945960761               |
| SNP_P3_56042_38586667 | NC_021163.1    | Ca_kabuli_chr04 | 38586667                | AA                              | GG                | 1945960763               |
| SNP_P3_56044_38588115 | NC_021163.1    | Ca_kabuli_chr04 | 38588115                | TT                              | CC                | 1945960765               |
| SNP_P3_56045_38588408 | NC_021163.1    | Ca_kabuli_chr04 | 38588408                | AA                              | GG                | 1945960767               |
| SNP_P3_56046_38588420 | NC_021163.1    | Ca_kabuli_chr04 | 38588420                | TT                              | AA                | 1945960768               |
| SNP_P3_56047_38589541 | NC_021163.1    | Ca_kabuli_chr04 | 38589541                | TT                              | CC                | 1945960770               |
| SNP_P3_56048_38589829 | NC_021163.1    | Ca_kabuli_chr04 | 38589829                | AA                              | CC                | 1945960772               |
| SNP_P3_56049_38593209 | NC_021163.1    | Ca_kabuli_chr04 | 38593209                | TT                              | CC                | 1945960774               |
| SNP_P3_56050_38594263 | NC_021163.1    | Ca_kabuli_chr04 | 38594263                | TT                              | AA                | 1945960776               |
| SNP_P3_56051_38595575 | NC_021163.1    | Ca_kabuli_chr04 | 38595575                | CC                              | TT                | 1945960777               |

| SNPs IDs              | Chromosome IDs | Chromosomes     | Physical positions (bp) | CDC Frontier (Reference genome) | (Pusa 256 & HPNB) | NCBI SNPdb Accession IDs |
|-----------------------|----------------|-----------------|-------------------------|---------------------------------|-------------------|--------------------------|
| SNP_P3_56052_38602077 | NC_021163.1    | Ca_kabuli_chr04 | 38602077                | AA                              | GG                | 1945960779               |
| SNP_P3_56053_38602086 | NC_021163.1    | Ca_kabuli_chr04 | 38602086                | AA                              | GG                | 1945960781               |
| SNP_P3_56054_38602123 | NC_021163.1    | Ca_kabuli_chr04 | 38602123                | GG                              | AA                | 1945960783               |
| SNP_P3_56055_38602374 | NC_021163.1    | Ca_kabuli_chr04 | 38602374                | GG                              | AA                | 1945960784               |
| SNP_P3_56056_38602382 | NC_021163.1    | Ca_kabuli_chr04 | 38602382                | GG                              | AA                | 1945960786               |
| SNP_P3_56057_38602385 | NC_021163.1    | Ca_kabuli_chr04 | 38602385                | GG                              | AA                | 1945960788               |
| SNP_P3_56058_38602407 | NC_021163.1    | Ca_kabuli_chr04 | 38602407                | TT                              | GG                | 1945960790               |
| SNP_P3_56059_38602583 | NC_021163.1    | Ca_kabuli_chr04 | 38602583                | AA                              | TT                | 1945960792               |
| SNP_P3_56060_38603637 | NC_021163.1    | Ca_kabuli_chr04 | 38603637                | CC                              | GG                | 1945960793               |
| SNP_P3_56061_38603811 | NC_021163.1    | Ca_kabuli_chr04 | 38603811                | GG                              | AA                | 1945960795               |
| SNP_P3_56062_38603845 | NC_021163.1    | Ca_kabuli_chr04 | 38603845                | AA                              | GG                | 1945960797               |
| SNP_P3_56063_38607669 | NC_021163.1    | Ca_kabuli_chr04 | 38607669                | AA                              | GG                | 1945960799               |
| SNP_P3_56064_38608106 | NC_021163.1    | Ca_kabuli_chr04 | 38608106                | CC                              | TT                | 1945960801               |
| SNP_P3_56065_38608876 | NC_021163.1    | Ca_kabuli_chr04 | 38608876                | GG                              | CC                | 1945960802               |
| SNP_P3_56066_38608897 | NC_021163.1    | Ca_kabuli_chr04 | 38608897                | GG                              | TT                | 1945960804               |
| SNP_P3_56067_38612783 | NC_021163.1    | Ca_kabuli_chr04 | 38612783                | AA                              | CC                | 1945960806               |
| SNP_P3_56068_38613386 | NC_021163.1    | Ca_kabuli_chr04 | 38613386                | AA                              | GG                | 1945960808               |
| SNP_P3_56069_38613593 | NC_021163.1    | Ca_kabuli_chr04 | 38613593                | GG                              | CC                | 1945960809               |
| SNP_P3_56070_38613599 | NC_021163.1    | Ca_kabuli_chr04 | 38613599                | GG                              | CC                | 1945960811               |
| SNP_P3_56071_38616290 | NC_021163.1    | Ca_kabuli_chr04 | 38616290                | AA                              | GG                | 1945960813               |
| SNP_P3_56072_38616304 | NC_021163.1    | Ca_kabuli_chr04 | 38616304                | GG                              | AA                | 1945960815               |
| SNP_P3_56073_38616686 | NC_021163.1    | Ca_kabuli_chr04 | 38616686                | CC                              | TT                | 1945960817               |
| SNP_P3_56074_38616895 | NC_021163.1    | Ca_kabuli_chr04 | 38616895                | AA                              | TT                | 1945960818               |
| SNP_P3_56075_38616942 | NC_021163.1    | Ca_kabuli_chr04 | 38616942                | CC                              | TT                | 1945960820               |
| SNP_P3_56076_38617111 | NC_021163.1    | Ca_kabuli_chr04 | 38617111                | AA                              | GG                | 1945960822               |
| SNP_P3_56077_38618150 | NC_021163.1    | Ca_kabuli_chr04 | 38618150                | TT                              | AA                | 1945960824               |
| SNP_P3_56078_38618610 | NC_021163.1    | Ca_kabuli_chr04 | 38618610                | AA                              | GG                | 1945960826               |
| SNP_P3_56080_38618860 | NC_021163.1    | Ca_kabuli_chr04 | 38618860                | AA                              | GG                | 1945960827               |
| SNP_P3_56081_38618938 | NC_021163.1    | Ca_kabuli_chr04 | 38618938                | AA                              | CC                | 1945960829               |
| SNP_P3_56082_38619368 | NC_021163.1    | Ca_kabuli_chr04 | 38619368                | GG                              | CC                | 1945960831               |
| SNP_P3_56083_38620068 | NC_021163.1    | Ca_kabuli_chr04 | 38620068                | TT                              | CC                | 1945960833               |
| SNP_P3_56084_38620579 | NC_021163.1    | Ca_kabuli_chr04 | 38620579                | CC                              | TT                | 1945960834               |
| SNP_P3_56085_38620620 | NC_021163.1    | Ca_kabuli_chr04 | 38620620                | AA                              | TT                | 1945960836               |
| SNP_P3_56086_38621182 | NC_021163.1    | Ca_kabuli_chr04 | 38621182                | CC                              | AA                | 1945960838               |
| SNP_P3_56087_38622161 | NC_021163.1    | Ca_kabuli_chr04 | 38622161                | TT                              | GG                | 1945960840               |
| SNP_P3_56088_38623002 | NC_021163.1    | Ca_kabuli_chr04 | 38623002                | AA                              | CC                | 1945960842               |
| SNP_P3_56089_38624004 | NC_021163.1    | Ca_kabuli_chr04 | 38624004                | GG                              | AA                | 1945960843               |
| SNP_P3_56090_38624244 | NC_021163.1    | Ca_kabuli_chr04 | 38624244                | GG                              | AA                | 1945960845               |
| SNP_P3_56091_38624278 | NC_021163.1    | Ca_kabuli_chr04 | 38624278                | AA                              | GG                | 1945960847               |
| SNP_P3_56092_38624285 | NC_021163.1    | Ca_kabuli_chr04 | 38624285                | AA                              | CC                | 1945960849               |
| SNP_P3_56093_38624501 | NC_021163.1    | Ca_kabuli_chr04 | 38624501                | CC                              | TT                | 1945960850               |
| SNP_P3_56094_38625820 | NC_021163.1    | Ca_kabuli_chr04 | 38625820                | CC                              | TT                | 1945960852               |

| SNPs IDs              | Chromosome IDs | Chromosomes     | Physical positions (bp) | CDC Frontier (Reference genome) | (Pusa 256 & HPNB) | NCBI SNPdb Accession IDs |
|-----------------------|----------------|-----------------|-------------------------|---------------------------------|-------------------|--------------------------|
| SNP_P3_56095_38626205 | NC_021163.1    | Ca_kabuli_chr04 | 38626205                | GG                              | AA                | 1945960854               |
| SNP_P3_56097_38626248 | NC_021163.1    | Ca_kabuli_chr04 | 38626248                | CC                              | TT                | 1945960856               |
| SNP_P3_56099_38627027 | NC_021163.1    | Ca_kabuli_chr04 | 38627027                | GG                              | TT                | 1945960858               |
| SNP_P3_56100_38628919 | NC_021163.1    | Ca_kabuli_chr04 | 38628919                | GG                              | TT                | 1945960859               |
| SNP_P3_56101_38633929 | NC_021163.1    | Ca_kabuli_chr04 | 38633929                | CC                              | AA                | 1945960861               |
| SNP_P3_56102_38639094 | NC_021163.1    | Ca_kabuli_chr04 | 38639094                | TT                              | CC                | 1945960863               |
| SNP_P3_56103_38639396 | NC_021163.1    | Ca_kabuli_chr04 | 38639396                | CC                              | TT                | 1945960865               |
| SNP_P3_56104_38639446 | NC_021163.1    | Ca_kabuli_chr04 | 38639446                | AA                              | GG                | 1945960867               |
| SNP_P3_56105_38639752 | NC_021163.1    | Ca_kabuli_chr04 | 38639752                | GG                              | CC                | 1945960868               |
| SNP_P3_56106_38639784 | NC_021163.1    | Ca_kabuli_chr04 | 38639784                | AA                              | TT                | 1945960870               |
| SNP_P3_56107_38639844 | NC_021163.1    | Ca_kabuli_chr04 | 38639844                | TT                              | GG                | 1945960872               |
| SNP_P3_56108_38639899 | NC_021163.1    | Ca_kabuli_chr04 | 38639899                | GG                              | AA                | 1945960874               |
| SNP_P3_56109_38640029 | NC_021163.1    | Ca_kabuli_chr04 | 38640029                | CC                              | TT                | 1945960875               |
| SNP_P3_56110_38645732 | NC_021163.1    | Ca_kabuli_chr04 | 38645732                | CC                              | TT                | 1945960877               |
| SNP_P3_56111_38645775 | NC_021163.1    | Ca_kabuli_chr04 | 38645775                | AA                              | GG                | 1945960879               |
| SNP_P3_56112_38645806 | NC_021163.1    | Ca_kabuli_chr04 | 38645806                | GG                              | AA                | 1945960881               |
| SNP_P3_56113_38645807 | NC_021163.1    | Ca_kabuli_chr04 | 38645807                | CC                              | AA                | 1945960883               |
| SNP_P3_56114_38645808 | NC_021163.1    | Ca_kabuli_chr04 | 38645808                | TT                              | CC                | 1945960884               |
| SNP_P3_56115_38645870 | NC_021163.1    | Ca_kabuli_chr04 | 38645870                | AA                              | GG                | 1945960886               |
| SNP_P3_56116_38645953 | NC_021163.1    | Ca_kabuli_chr04 | 38645953                | GG                              | AA                | 1945960888               |
| SNP_P3_56117_38645963 | NC_021163.1    | Ca_kabuli_chr04 | 38645963                | GG                              | AA                | 1945960890               |
| SNP_P3_56118_38645998 | NC_021163.1    | Ca_kabuli_chr04 | 38645998                | TT                              | CC                | 1945960891               |
| SNP_P3_56119_38646002 | NC_021163.1    | Ca_kabuli_chr04 | 38646002                | CC                              | TT                | 1945960893               |
| SNP_P3_56120_38646003 | NC_021163.1    | Ca_kabuli_chr04 | 38646003                | GG                              | AA                | 1945960895               |
| SNP_P3_56121_38646886 | NC_021163.1    | Ca_kabuli_chr04 | 38646886                | CC                              | TT                | 1945960897               |
| SNP_P3_56122_38646932 | NC_021163.1    | Ca_kabuli_chr04 | 38646932                | CC                              | TT                | 1945960899               |
| SNP_P3_56123_38646942 | NC_021163.1    | Ca_kabuli_chr04 | 38646942                | CC                              | TT                | 1945960900               |
| SNP_P3_56124_38647137 | NC_021163.1    | Ca_kabuli_chr04 | 38647137                | AA                              | TT                | 1945960902               |
| SNP_P3_56125_38647808 | NC_021163.1    | Ca_kabuli_chr04 | 38647808                | CC                              | TT                | 1945960904               |
| SNP_P3_56126_38648661 | NC_021163.1    | Ca_kabuli_chr04 | 38648661                | CC                              | TT                | 1945960906               |
| SNP_P3_56127_38648663 | NC_021163.1    | Ca_kabuli_chr04 | 38648663                | AA                              | GG                | 1945960907               |
| SNP_P3_56128_38648677 | NC_021163.1    | Ca_kabuli_chr04 | 38648677                | AA                              | GG                | 1945960909               |
| SNP_P3_56129_38648682 | NC_021163.1    | Ca_kabuli_chr04 | 38648682                | CC                              | TT                | 1945960911               |
| SNP_P3_56130_38648694 | NC_021163.1    | Ca_kabuli_chr04 | 38648694                | CC                              | TT                | 1945960913               |
| SNP_P3_56131_38648846 | NC_021163.1    | Ca_kabuli_chr04 | 38648846                | AA                              | GG                | 1945960915               |
| SNP_P3_56133_38651931 | NC_021163.1    | Ca_kabuli_chr04 | 38651931                | CC                              | TT                | 1945960916               |
| SNP_P3_56134_38651935 | NC_021163.1    | Ca_kabuli_chr04 | 38651935                | AA                              | GG                | 1945960918               |
| SNP_P3_56135_38652011 | NC_021163.1    | Ca_kabuli_chr04 | 38652011                | CC                              | TT                | 1945960920               |
| SNP_P3_56137_38656509 | NC_021163.1    | Ca_kabuli_chr04 | 38656509                | CC                              | TT                | 1945960922               |
| SNP_P3_56138_38656545 | NC_021163.1    | Ca_kabuli_chr04 | 38656545                | GG                              | AA                | 1945960924               |
| SNP_P3_56139_38657294 | NC_021163.1    | Ca_kabuli_chr04 | 38657294                | CC                              | TT                | 1945960925               |
| SNP_P3_56140_38657508 | NC_021163.1    | Ca_kabuli_chr04 | 38657508                | TT                              | CC                | 1945960927               |

| SNPs IDs              | Chromosome IDs | Chromosomes     | Physical positions (bp) | CDC Frontier (Reference genome) | (Pusa 256 & HPNB) | NCBI SNPdb Accession IDs |
|-----------------------|----------------|-----------------|-------------------------|---------------------------------|-------------------|--------------------------|
| SNP_P3_56141_38657542 | NC_021163.1    | Ca_kabuli_chr04 | 38657542                | GG                              | TT                | 1945960929               |
| SNP_P3_56142_38658426 | NC_021163.1    | Ca_kabuli_chr04 | 38658426                | AA                              | TT                | 1945960931               |
| SNP_P3_56143_38659278 | NC_021163.1    | Ca_kabuli_chr04 | 38659278                | GG                              | AA                | 1945960932               |
| SNP_P3_56144_38660586 | NC_021163.1    | Ca_kabuli_chr04 | 38660586                | AA                              | TT                | 1945960934               |
| SNP_P3_56145_38661924 | NC_021163.1    | Ca_kabuli_chr04 | 38661924                | GG                              | AA                | 1945960936               |
| SNP_P3_56146_38661936 | NC_021163.1    | Ca_kabuli_chr04 | 38661936                | AA                              | CC                | 1945960938               |
| SNP_P3_56147_38661977 | NC_021163.1    | Ca_kabuli_chr04 | 38661977                | TT                              | AA                | 1945960940               |
| SNP_P3_56148_38662464 | NC_021163.1    | Ca_kabuli_chr04 | 38662464                | GG                              | AA                | 1945960941               |
| SNP_P3_56149_38663012 | NC_021163.1    | Ca_kabuli_chr04 | 38663012                | GG                              | AA                | 1945960943               |
| SNP_P3_56150_38665325 | NC_021163.1    | Ca_kabuli_chr04 | 38665325                | GG                              | TT                | 1945960945               |
| SNP_P3_56152_38667569 | NC_021163.1    | Ca_kabuli_chr04 | 38667569                | CC                              | TT                | 1945960947               |
| SNP_P3_56153_38667798 | NC_021163.1    | Ca_kabuli_chr04 | 38667798                | AA                              | CC                | 1945960948               |
| SNP_P3_56154_38667999 | NC_021163.1    | Ca_kabuli_chr04 | 38667999                | AA                              | GG                | 1945960950               |
| SNP_P3_56155_38668194 | NC_021163.1    | Ca_kabuli_chr04 | 38668194                | CC                              | AA                | 1945960952               |
| SNP_P3_56156_38669034 | NC_021163.1    | Ca_kabuli_chr04 | 38669034                | TT                              | GG                | 1945960954               |
| SNP_P3_56157_38669035 | NC_021163.1    | Ca_kabuli_chr04 | 38669035                | AA                              | TT                | 1945960956               |
| SNP_P3_56158_38669073 | NC_021163.1    | Ca_kabuli_chr04 | 38669073                | GG                              | TT                | 1945960957               |
| SNP_P3_56159_38669305 | NC_021163.1    | Ca_kabuli_chr04 | 38669305                | GG                              | AA                | 1945960959               |
| SNP_P3_56160_38669635 | NC_021163.1    | Ca_kabuli_chr04 | 38669635                | TT                              | CC                | 1945960961               |
| SNP_P3_56161_38670035 | NC_021163.1    | Ca_kabuli_chr04 | 38670035                | GG                              | AA                | 1945960963               |
| SNP_P3_56162_38670059 | NC_021163.1    | Ca_kabuli_chr04 | 38670059                | GG                              | TT                | 1945960964               |
| SNP_P3_56163_38671217 | NC_021163.1    | Ca_kabuli_chr04 | 38671217                | CC                              | TT                | 1945960966               |
| SNP_P3_56164_38671580 | NC_021163.1    | Ca_kabuli_chr04 | 38671580                | AA                              | GG                | 1945960968               |
| SNP_P3_56165_38671876 | NC_021163.1    | Ca_kabuli_chr04 | 38671876                | GG                              | AA                | 1945960970               |
| SNP_P3_56166_38671885 | NC_021163.1    | Ca_kabuli_chr04 | 38671885                | CC                              | AA                | 1945960972               |
| SNP_P3_56167_38671902 | NC_021163.1    | Ca_kabuli_chr04 | 38671902                | CC                              | GG                | 1945960973               |
| SNP_P3_56168_38674185 | NC_021163.1    | Ca_kabuli_chr04 | 38674185                | TT                              | GG                | 1945960975               |
| SNP_P3_56169_38674565 | NC_021163.1    | Ca_kabuli_chr04 | 38674565                | AA                              | CC                | 1945960977               |
| SNP_P3_56170_38674951 | NC_021163.1    | Ca_kabuli_chr04 | 38674951                | AA                              | GG                | 1945960979               |
| SNP_P3_56171_38675065 | NC_021163.1    | Ca_kabuli_chr04 | 38675065                | TT                              | CC                | 1945960981               |
| SNP_P3_56172_38675130 | NC_021163.1    | Ca_kabuli_chr04 | 38675130                | TT                              | CC                | 1945960982               |
| SNP_P3_56173_38678472 | NC_021163.1    | Ca_kabuli_chr04 | 38678472                | GG                              | TT                | 1945960984               |
| SNP_P3_56174_38683234 | NC_021163.1    | Ca_kabuli_chr04 | 38683234                | TT                              | CC                | 1945960986               |
| SNP_P3_56175_38683534 | NC_021163.1    | Ca_kabuli_chr04 | 38683534                | CC                              | TT                | 1945960988               |
| SNP_P3_56176_38683601 | NC_021163.1    | Ca_kabuli_chr04 | 38683601                | CC                              | TT                | 1945960989               |
| SNP_P3_56177_38683737 | NC_021163.1    | Ca_kabuli_chr04 | 38683737                | GG                              | AA                | 1945960991               |
| SNP_P3_56178_38684156 | NC_021163.1    | Ca_kabuli_chr04 | 38684156                | AA                              | TT                | 1945960993               |
| SNP_P3_56179_38684158 | NC_021163.1    | Ca_kabuli_chr04 | 38684158                | TT                              | CC                | 1945960995               |
| SNP_P3_56180_38684176 | NC_021163.1    | Ca_kabuli_chr04 | 38684176                | CC                              | TT                | 1945960997               |
| SNP_P3_56181_38684526 | NC_021163.1    | Ca_kabuli_chr04 | 38684526                | CC                              | AA                | 1945960998               |
| SNP_P3_56182_38684559 | NC_021163.1    | Ca_kabuli_chr04 | 38684559                | CC                              | AA                | 1945961000               |
| SNP_P3_56184_38685154 | NC_021163.1    | Ca_kabuli_chr04 | 38685154                | TT                              | AA                | 1945961002               |



| SNPs IDs              | Chromosome IDs | Chromosomes     | Physical positions (bp) | CDC Frontier (Reference genome) | (Pusa 256 & HPNB) | NCBI SNPdb Accession IDs |
|-----------------------|----------------|-----------------|-------------------------|---------------------------------|-------------------|--------------------------|
| SNP_P3_56185_38685167 | NC_021163.1    | Ca_kabuli_chr04 | 38685167                | AA                              | CC                | 1945961004               |
| SNP_P3_56186_38685185 | NC_021163.1    | Ca_kabuli_chr04 | 38685185                | TT                              | CC                | 1945961005               |
| SNP_P3_56187_38685258 | NC_021163.1    | Ca_kabuli_chr04 | 38685258                | GG                              | TT                | 1945961007               |
| SNP_P3_56189_38687518 | NC_021163.1    | Ca_kabuli_chr04 | 38687518                | CC                              | AA                | 1945961009               |
| SNP_P3_56190_38687522 | NC_021163.1    | Ca_kabuli_chr04 | 38687522                | CC                              | TT                | 1945961011               |
| SNP_P3_56191_38687542 | NC_021163.1    | Ca_kabuli_chr04 | 38687542                | AA                              | GG                | 1945961013               |
| SNP_P3_56192_38688240 | NC_021163.1    | Ca_kabuli_chr04 | 38688240                | TT                              | CC                | 1945961014               |
| SNP_P3_56193_38690558 | NC_021163.1    | Ca_kabuli_chr04 | 38690558                | AA                              | TT                | 1945961016               |
| SNP_P3_56194_38690780 | NC_021163.1    | Ca_kabuli_chr04 | 38690780                | AA                              | GG                | 1945961018               |
| SNP_P3_56195_38691308 | NC_021163.1    | Ca_kabuli_chr04 | 38691308                | CC                              | TT                | 1945961020               |
| SNP_P3_56196_38691312 | NC_021163.1    | Ca_kabuli_chr04 | 38691312                | GG                              | AA                | 1945961022               |
| SNP_P3_56197_38693142 | NC_021163.1    | Ca_kabuli_chr04 | 38693142                | AA                              | GG                | 1945961023               |
| SNP_P3_56198_38693150 | NC_021163.1    | Ca_kabuli_chr04 | 38693150                | CC                              | TT                | 1945961025               |
| SNP_P3_56199_38693154 | NC_021163.1    | Ca_kabuli_chr04 | 38693154                | AA                              | CC                | 1945961027               |
| SNP_P3_56200_38693186 | NC_021163.1    | Ca_kabuli_chr04 | 38693186                | AA                              | GG                | 1945961029               |
| SNP_P3_56201_38694075 | NC_021163.1    | Ca_kabuli_chr04 | 38694075                | AA                              | TT                | 1945961030               |
| SNP_P3_56202_38694144 | NC_021163.1    | Ca_kabuli_chr04 | 38694144                | TT                              | AA                | 1945961032               |
| SNP_P3_56203_38694449 | NC_021163.1    | Ca_kabuli_chr04 | 38694449                | AA                              | GG                | 1945961034               |
| SNP_P3_56204_38695074 | NC_021163.1    | Ca_kabuli_chr04 | 38695074                | GG                              | AA                | 1945961036               |
| SNP_P3_56205_38696825 | NC_021163.1    | Ca_kabuli_chr04 | 38696825                | GG                              | AA                | 1945961038               |
| SNP_P3_56206_38697059 | NC_021163.1    | Ca_kabuli_chr04 | 38697059                | AA                              | GG                | 1945961039               |
| SNP_P3_56207_38697151 | NC_021163.1    | Ca_kabuli_chr04 | 38697151                | GG                              | TT                | 1945961041               |
| SNP_P3_56208_38697432 | NC_021163.1    | Ca_kabuli_chr04 | 38697432                | AA                              | GG                | 1945961043               |
| SNP_P3_56209_38697589 | NC_021163.1    | Ca_kabuli_chr04 | 38697589                | GG                              | AA                | 1945961045               |
| SNP_P3_56210_38697640 | NC_021163.1    | Ca_kabuli_chr04 | 38697640                | TT                              | GG                | 1945961046               |
| SNP_P3_56211_38697685 | NC_021163.1    | Ca_kabuli_chr04 | 38697685                | AA                              | GG                | 1945961048               |
| SNP_P3_56212_38698361 | NC_021163.1    | Ca_kabuli_chr04 | 38698361                | AA                              | GG                | 1945961050               |
| SNP_P3_56213_38698395 | NC_021163.1    | Ca_kabuli_chr04 | 38698395                | TT                              | CC                | 1945961052               |
| SNP_P3_56214_38701641 | NC_021163.1    | Ca_kabuli_chr04 | 38701641                | GG                              | TT                | 1945961054               |
| SNP_P3_56215_38701642 | NC_021163.1    | Ca_kabuli_chr04 | 38701642                | TT                              | GG                | 1945961055               |
| SNP_P3_56216_38701646 | NC_021163.1    | Ca_kabuli_chr04 | 38701646                | CC                              | TT                | 1945961057               |
| SNP_P3_56217_38703926 | NC_021163.1    | Ca_kabuli_chr04 | 38703926                | AA                              | GG                | 1945961059               |
| SNP_P3_56218_38704302 | NC_021163.1    | Ca_kabuli_chr04 | 38704302                | TT                              | CC                | 1945961061               |
| SNP_P3_56219_38705202 | NC_021163.1    | Ca_kabuli_chr04 | 38705202                | CC                              | TT                | 1945961063               |
| SNP_P3_56220_38705294 | NC_021163.1    | Ca_kabuli_chr04 | 38705294                | TT                              | CC                | 1945961064               |
| SNP_P3_56221_38705341 | NC_021163.1    | Ca_kabuli_chr04 | 38705341                | AA                              | CC                | 1945961066               |
| SNP_P3_56222_38705373 | NC_021163.1    | Ca_kabuli_chr04 | 38705373                | AA                              | GG                | 1945961068               |
| SNP_P3_56223_38705380 | NC_021163.1    | Ca_kabuli_chr04 | 38705380                | TT                              | CC                | 1945961070               |
| SNP_P3_56224_38705459 | NC_021163.1    | Ca_kabuli_chr04 | 38705459                | TT                              | AA                | 1945961071               |
| SNP_P3_56225_38705488 | NC_021163.1    | Ca_kabuli_chr04 | 38705488                | AA                              | GG                | 1945961073               |
| SNP_P3_56226_38705514 | NC_021163.1    | Ca_kabuli_chr04 | 38705514                | GG                              | AA                | 1945961075               |
| SNP_P3_56227_38705546 | NC_021163.1    | Ca_kabuli_chr04 | 38705546                | CC                              | TT                | 1945961077               |

| SNPs IDs              | Chromosome IDs | Chromosomes     | Physical positions (bp) | CDC Frontier (Reference genome) | (Pusa 256 & HPNB) | NCBI SNPdb Accession IDs |
|-----------------------|----------------|-----------------|-------------------------|---------------------------------|-------------------|--------------------------|
| SNP_P3_56228_38705551 | NC_021163.1    | Ca_kabuli_chr04 | 38705551                | AA                              | GG                | 1945961079               |
| SNP_P3_56229_38705570 | NC_021163.1    | Ca_kabuli_chr04 | 38705570                | CC                              | TT                | 1945961080               |
| SNP_P3_56230_38705580 | NC_021163.1    | Ca_kabuli_chr04 | 38705580                | GG                              | AA                | 1945961082               |
| SNP_P3_56231_38705606 | NC_021163.1    | Ca_kabuli_chr04 | 38705606                | AA                              | TT                | 1945961084               |
| SNP_P3_56232_38705680 | NC_021163.1    | Ca_kabuli_chr04 | 38705680                | GG                              | AA                | 1945961086               |
| SNP_P3_56234_38705804 | NC_021163.1    | Ca_kabuli_chr04 | 38705804                | GG                              | TT                | 1945961087               |
| SNP_P3_56235_38705808 | NC_021163.1    | Ca_kabuli_chr04 | 38705808                | AA                              | CC                | 1945961089               |
| SNP_P3_56237_38707464 | NC_021163.1    | Ca_kabuli_chr04 | 38707464                | TT                              | GG                | 1945961091               |
| SNP_P3_56238_38707479 | NC_021163.1    | Ca_kabuli_chr04 | 38707479                | CC                              | TT                | 1945961093               |
| SNP_P3_56239_38707489 | NC_021163.1    | Ca_kabuli_chr04 | 38707489                | AA                              | GG                | 1945961095               |
| SNP_P3_56240_38707490 | NC_021163.1    | Ca_kabuli_chr04 | 38707490                | AA                              | TT                | 1945961096               |
| SNP_P3_56241_38707503 | NC_021163.1    | Ca_kabuli_chr04 | 38707503                | TT                              | CC                | 1945961098               |
| SNP_P3_56242_38707715 | NC_021163.1    | Ca_kabuli_chr04 | 38707715                | CC                              | TT                | 1945961100               |
| SNP_P3_56243_38707771 | NC_021163.1    | Ca_kabuli_chr04 | 38707771                | CC                              | AA                | 1945961102               |
| SNP_P3_56244_38707786 | NC_021163.1    | Ca_kabuli_chr04 | 38707786                | CC                              | TT                | 1945961103               |
| SNP_P3_56245_38707823 | NC_021163.1    | Ca_kabuli_chr04 | 38707823                | TT                              | CC                | 1945961105               |
| SNP_P3_56246_38707945 | NC_021163.1    | Ca_kabuli_chr04 | 38707945                | AA                              | GG                | 1945961107               |
| SNP_P3_56248_38708633 | NC_021163.1    | Ca_kabuli_chr04 | 38708633                | TT                              | AA                | 1945961109               |
| SNP_P3_56249_38709097 | NC_021163.1    | Ca_kabuli_chr04 | 38709097                | AA                              | GG                | 1945961111               |
| SNP_P3_56250_38709125 | NC_021163.1    | Ca_kabuli_chr04 | 38709125                | TT                              | CC                | 1945961112               |
| SNP_P3_56251_38709815 | NC_021163.1    | Ca_kabuli_chr04 | 38709815                | GG                              | AA                | 1945961114               |
| SNP_P3_56252_38710074 | NC_021163.1    | Ca_kabuli_chr04 | 38710074                | TT                              | CC                | 1945961116               |
| SNP_P3_56253_38710076 | NC_021163.1    | Ca_kabuli_chr04 | 38710076                | AA                              | TT                | 1945961118               |
| SNP_P3_56254_38710080 | NC_021163.1    | Ca_kabuli_chr04 | 38710080                | AA                              | GG                | 1945961120               |
| SNP_P3_56255_38710086 | NC_021163.1    | Ca_kabuli_chr04 | 38710086                | GG                              | AA                | 1945961121               |
| SNP_P3_56256_38710117 | NC_021163.1    | Ca_kabuli_chr04 | 38710117                | TT                              | CC                | 1945961123               |
| SNP_P3_56257_38710198 | NC_021163.1    | Ca_kabuli_chr04 | 38710198                | GG                              | AA                | 1945961125               |
| SNP_P3_56258_38710512 | NC_021163.1    | Ca_kabuli_chr04 | 38710512                | AA                              | GG                | 1945961127               |
| SNP_P3_56259_38712049 | NC_021163.1    | Ca_kabuli_chr04 | 38712049                | TT                              | GG                | 1945961128               |
| SNP_P3_56260_38712959 | NC_021163.1    | Ca_kabuli_chr04 | 38712959                | CC                              | AA                | 1945961130               |
| SNP_P3_56261_38713823 | NC_021163.1    | Ca_kabuli_chr04 | 38713823                | TT                              | AA                | 1945961132               |
| SNP_P3_56262_38713824 | NC_021163.1    | Ca_kabuli_chr04 | 38713824                | TT                              | AA                | 1945961134               |
| SNP_P3_56263_38713991 | NC_021163.1    | Ca_kabuli_chr04 | 38713991                | CC                              | TT                | 1945961136               |
| SNP_P3_56264_38714031 | NC_021163.1    | Ca_kabuli_chr04 | 38714031                | CC                              | TT                | 1945961137               |
| SNP_P3_56265_38714032 | NC_021163.1    | Ca_kabuli_chr04 | 38714032                | TT                              | CC                | 1945961139               |
| SNP_P3_56266_38714108 | NC_021163.1    | Ca_kabuli_chr04 | 38714108                | AA                              | CC                | 1945961141               |
| SNP_P3_56267_38714148 | NC_021163.1    | Ca_kabuli_chr04 | 38714148                | TT                              | CC                | 1945961143               |
| SNP_P3_56268_38714154 | NC_021163.1    | Ca_kabuli_chr04 | 38714154                | TT                              | AA                | 1945961144               |
| SNP_P3_56269_38717709 | NC_021163.1    | Ca_kabuli_chr04 | 38717709                | CC                              | GG                | 1945961146               |
| SNP_P3_56270_38717723 | NC_021163.1    | Ca_kabuli_chr04 | 38717723                | TT                              | GG                | 1945961148               |
| SNP_P3_56271_38718167 | NC_021163.1    | Ca_kabuli_chr04 | 38718167                | AA                              | GG                | 1945961150               |
| SNP_P3_56272_38718657 | NC_021163.1    | Ca_kabuli_chr04 | 38718657                | GG                              | AA                | 1945961152               |

| SNPs IDs              | Chromosome IDs | Chromosomes     | Physical positions (bp) | CDC Frontier (Reference genome) | (Pusa 256 & HPNB) | NCBI SNPdb Accession IDs |
|-----------------------|----------------|-----------------|-------------------------|---------------------------------|-------------------|--------------------------|
| SNP_P3_56273_38719451 | NC_021163.1    | Ca_kabuli_chr04 | 38719451                | CC                              | TT                | 1945961153               |
| SNP_P3_56274_38719479 | NC_021163.1    | Ca_kabuli_chr04 | 38719479                | TT                              | CC                | 1945961155               |
| SNP_P3_56276_38721502 | NC_021163.1    | Ca_kabuli_chr04 | 38721502                | CC                              | TT                | 1945961157               |
| SNP_P3_56277_38722750 | NC_021163.1    | Ca_kabuli_chr04 | 38722750                | TT                              | CC                | 1945961159               |
| SNP_P3_56278_38722936 | NC_021163.1    | Ca_kabuli_chr04 | 38722936                | AA                              | GG                | 1945961161               |
| SNP_P3_56279_38723327 | NC_021163.1    | Ca_kabuli_chr04 | 38723327                | GG                              | TT                | 1945961162               |
| SNP_P3_56280_38723421 | NC_021163.1    | Ca_kabuli_chr04 | 38723421                | GG                              | AA                | 1945961164               |
| SNP_P3_56281_38723754 | NC_021163.1    | Ca_kabuli_chr04 | 38723754                | TT                              | AA                | 1945961166               |
| SNP_P3_56282_38727196 | NC_021163.1    | Ca_kabuli_chr04 | 38727196                | AA                              | CC                | 1945961168               |
| SNP_P3_56284_38727412 | NC_021163.1    | Ca_kabuli_chr04 | 38727412                | GG                              | AA                | 1945961169               |
| SNP_P3_56285_38727697 | NC_021163.1    | Ca_kabuli_chr04 | 38727697                | AA                              | CC                | 1945961171               |
| SNP_P3_56286_38727925 | NC_021163.1    | Ca_kabuli_chr04 | 38727925                | TT                              | AA                | 1945961173               |
| SNP_P3_56290_38732793 | NC_021163.1    | Ca_kabuli_chr04 | 38732793                | AA                              | TT                | 1945961175               |
| SNP_P3_56291_38733017 | NC_021163.1    | Ca_kabuli_chr04 | 38733017                | GG                              | AA                | 1945961177               |
| SNP_P3_56292_38734181 | NC_021163.1    | Ca_kabuli_chr04 | 38734181                | AA                              | GG                | 1945961178               |
| SNP_P3_56295_38735436 | NC_021163.1    | Ca_kabuli_chr04 | 38735436                | GG                              | AA                | 1945961180               |
| SNP_P3_56296_38735845 | NC_021163.1    | Ca_kabuli_chr04 | 38735845                | TT                              | CC                | 1945961182               |
| SNP_P3_56297_38737589 | NC_021163.1    | Ca_kabuli_chr04 | 38737589                | AA                              | CC                | 1945961184               |
| SNP_P3_56298_38738459 | NC_021163.1    | Ca_kabuli_chr04 | 38738459                | AA                              | TT                | 1945961185               |
| SNP_P3_56299_38738467 | NC_021163.1    | Ca_kabuli_chr04 | 38738467                | CC                              | GG                | 1945961187               |
| SNP_P3_56301_38740083 | NC_021163.1    | Ca_kabuli_chr04 | 38740083                | TT                              | CC                | 1945961189               |
| SNP_P3_56304_38742313 | NC_021163.1    | Ca_kabuli_chr04 | 38742313                | GG                              | TT                | 1945961191               |
| SNP_P3_56305_38743244 | NC_021163.1    | Ca_kabuli_chr04 | 38743244                | GG                              | AA                | 1945961193               |
| SNP_P3_56307_38747497 | NC_021163.1    | Ca_kabuli_chr04 | 38747497                | TT                              | AA                | 1945961194               |
| SNP_P3_56308_38749055 | NC_021163.1    | Ca_kabuli_chr04 | 38749055                | CC                              | TT                | 1945961196               |
| SNP_P3_56309_38749324 | NC_021163.1    | Ca_kabuli_chr04 | 38749324                | TT                              | AA                | 1945961198               |
| SNP_P3_56310_38749340 | NC_021163.1    | Ca_kabuli_chr04 | 38749340                | TT                              | GG                | 1945961200               |
| SNP_P3_56311_38749951 | NC_021163.1    | Ca_kabuli_chr04 | 38749951                | GG                              | AA                | 1945961202               |
| SNP_P3_56312_38750352 | NC_021163.1    | Ca_kabuli_chr04 | 38750352                | AA                              | GG                | 1945961203               |
| SNP_P3_56313_38750383 | NC_021163.1    | Ca_kabuli_chr04 | 38750383                | CC                              | TT                | 1945961205               |
| SNP_P3_56314_38750944 | NC_021163.1    | Ca_kabuli_chr04 | 38750944                | AA                              | GG                | 1945961207               |
| SNP_P3_56315_38752144 | NC_021163.1    | Ca_kabuli_chr04 | 38752144                | GG                              | AA                | 1945961209               |
| SNP_P3_56316_38752160 | NC_021163.1    | Ca_kabuli_chr04 | 38752160                | GG                              | AA                | 1945961210               |
| SNP_P3_56317_38755811 | NC_021163.1    | Ca_kabuli_chr04 | 38755811                | CC                              | GG                | 1945961212               |
| SNP_P3_56318_38755964 | NC_021163.1    | Ca_kabuli_chr04 | 38755964                | GG                              | CC                | 1945961214               |
| SNP_P3_56319_38756409 | NC_021163.1    | Ca_kabuli_chr04 | 38756409                | AA                              | TT                | 1945961216               |
| SNP_P3_56321_38758359 | NC_021163.1    | Ca_kabuli_chr04 | 38758359                | CC                              | TT                | 1945961218               |
| SNP_P3_56322_38758581 | NC_021163.1    | Ca_kabuli_chr04 | 38758581                | GG                              | AA                | 1945961219               |
| SNP_P3_56324_38759422 | NC_021163.1    | Ca_kabuli_chr04 | 38759422                | TT                              | CC                | 1945961221               |
| SNP_P3_56325_38759561 | NC_021163.1    | Ca_kabuli_chr04 | 38759561                | CC                              | TT                | 1945961223               |
| SNP_P3_56326_38760393 | NC_021163.1    | Ca_kabuli_chr04 | 38760393                | GG                              | AA                | 1945961225               |
| SNP_P3_56327_38760977 | NC_021163.1    | Ca_kabuli_chr04 | 38760977                | AA                              | GG                | 1945961226               |

| SNPs IDs              | Chromosome IDs | Chromosomes     | Physical positions (bp) | CDC Frontier (Reference genome) | (Pusa 256 & HPNB) | NCBI SNPdb Accession IDs |
|-----------------------|----------------|-----------------|-------------------------|---------------------------------|-------------------|--------------------------|
| SNP_P3_56328_38764404 | NC_021163.1    | Ca_kabuli_chr04 | 38764404                | CC                              | TT                | 1945961228               |
| SNP_P3_56329_38764690 | NC_021163.1    | Ca_kabuli_chr04 | 38764690                | CC                              | AA                | 1945961230               |
| SNP_P3_56330_38764709 | NC_021163.1    | Ca_kabuli_chr04 | 38764709                | AA                              | GG                | 1945961232               |
| SNP_P3_56331_38764716 | NC_021163.1    | Ca_kabuli_chr04 | 38764716                | GG                              | TT                | 1945961234               |
| SNP_P3_56332_38764718 | NC_021163.1    | Ca_kabuli_chr04 | 38764718                | TT                              | AA                | 1945961235               |
| SNP_P3_56333_38764725 | NC_021163.1    | Ca_kabuli_chr04 | 38764725                | GG                              | AA                | 1945961237               |
| SNP_P3_56334_38764739 | NC_021163.1    | Ca_kabuli_chr04 | 38764739                | GG                              | AA                | 1945961239               |
| SNP_P3_56335_38764755 | NC_021163.1    | Ca_kabuli_chr04 | 38764755                | TT                              | CC                | 1945961241               |
| SNP_P3_56336_38764766 | NC_021163.1    | Ca_kabuli_chr04 | 38764766                | AA                              | GG                | 1945961242               |
| SNP_P3_56337_38765013 | NC_021163.1    | Ca_kabuli_chr04 | 38765013                | AA                              | GG                | 1945961244               |
| SNP_P3_56338_38765883 | NC_021163.1    | Ca_kabuli_chr04 | 38765883                | AA                              | GG                | 1945961246               |
| SNP_P3_56339_38765913 | NC_021163.1    | Ca_kabuli_chr04 | 38765913                | CC                              | AA                | 1945961248               |
| SNP_P3_56341_38769284 | NC_021163.1    | Ca_kabuli_chr04 | 38769284                | TT                              | GG                | 1945961250               |
| SNP_P3_56342_38769328 | NC_021163.1    | Ca_kabuli_chr04 | 38769328                | CC                              | AA                | 1945961251               |
| SNP_P3_56343_38773324 | NC_021163.1    | Ca_kabuli_chr04 | 38773324                | AA                              | GG                | 1945961253               |
| SNP_P3_56345_38773547 | NC_021163.1    | Ca_kabuli_chr04 | 38773547                | TT                              | CC                | 1945961255               |
| SNP_P3_56346_38773646 | NC_021163.1    | Ca_kabuli_chr04 | 38773646                | TT                              | CC                | 1945961257               |
| SNP_P3_56347_38773654 | NC_021163.1    | Ca_kabuli_chr04 | 38773654                | GG                              | AA                | 1945961259               |
| SNP_P3_56348_38773660 | NC_021163.1    | Ca_kabuli_chr04 | 38773660                | CC                              | TT                | 1945961260               |
| SNP_P3_56349_38779712 | NC_021163.1    | Ca_kabuli_chr04 | 38779712                | GG                              | AA                | 1945961262               |
| SNP_P3_56350_38780791 | NC_021163.1    | Ca_kabuli_chr04 | 38780791                | AA                              | TT                | 1945961264               |
| SNP_P3_56351_38780834 | NC_021163.1    | Ca_kabuli_chr04 | 38780834                | GG                              | AA                | 1945961266               |
| SNP_P3_56352_38780850 | NC_021163.1    | Ca_kabuli_chr04 | 38780850                | CC                              | TT                | 1945961267               |
| SNP_P3_56353_38782887 | NC_021163.1    | Ca_kabuli_chr04 | 38782887                | AA                              | TT                | 1945961269               |
| SNP_P3_56354_38782894 | NC_021163.1    | Ca_kabuli_chr04 | 38782894                | AA                              | GG                | 1945961271               |
| SNP_P3_56355_38782908 | NC_021163.1    | Ca_kabuli_chr04 | 38782908                | GG                              | AA                | 1945961273               |
| SNP_P3_56356_38782915 | NC_021163.1    | Ca_kabuli_chr04 | 38782915                | AA                              | GG                | 1945961275               |
| SNP_P3_56357_38784500 | NC_021163.1    | Ca_kabuli_chr04 | 38784500                | GG                              | TT                | 1945961276               |
| SNP_P3_56358_38786540 | NC_021163.1    | Ca_kabuli_chr04 | 38786540                | AA                              | GG                | 1945961278               |
| SNP_P3_56359_38786701 | NC_021163.1    | Ca_kabuli_chr04 | 38786701                | CC                              | TT                | 1945961280               |
| SNP_P3_56360_38786925 | NC_021163.1    | Ca_kabuli_chr04 | 38786925                | GG                              | TT                | 1945961282               |
| SNP_P3_56361_38788850 | NC_021163.1    | Ca_kabuli_chr04 | 38788850                | CC                              | TT                | 1945961284               |
| SNP_P3_56362_38788854 | NC_021163.1    | Ca_kabuli_chr04 | 38788854                | CC                              | AA                | 1945961285               |
| SNP_P3_56363_38789051 | NC_021163.1    | Ca_kabuli_chr04 | 38789051                | TT                              | CC                | 1945961287               |
| SNP_P3_56364_38789074 | NC_021163.1    | Ca_kabuli_chr04 | 38789074                | TT                              | AA                | 1945961289               |
| SNP_P3_56365_38789109 | NC_021163.1    | Ca_kabuli_chr04 | 38789109                | AA                              | GG                | 1945961291               |
| SNP_P3_56366_38789330 | NC_021163.1    | Ca_kabuli_chr04 | 38789330                | AA                              | GG                | 1945961292               |
| SNP_P3_56367_38789331 | NC_021163.1    | Ca_kabuli_chr04 | 38789331                | GG                              | TT                | 1945961294               |
| SNP_P3_56368_38789352 | NC_021163.1    | Ca_kabuli_chr04 | 38789352                | CC                              | TT                | 1945961296               |
| SNP_P3_56369_38789386 | NC_021163.1    | Ca_kabuli_chr04 | 38789386                | GG                              | AA                | 1945961298               |
| SNP_P3_56370_38789399 | NC_021163.1    | Ca_kabuli_chr04 | 38789399                | AA                              | TT                | 1945961300               |
| SNP_P3_56371_38790280 | NC_021163.1    | Ca_kabuli_chr04 | 38790280                | GG                              | TT                | 1945961301               |

| SNPs IDs              | Chromosome IDs | Chromosomes     | Physical positions (bp) | CDC Frontier (Reference genome) | (Pusa 256 & HPNB) | NCBI SNPdb Accession IDs |
|-----------------------|----------------|-----------------|-------------------------|---------------------------------|-------------------|--------------------------|
| SNP_P3_56372_38795741 | NC_021163.1    | Ca_kabuli_chr04 | 38795741                | GG                              | CC                | 1945961303               |
| SNP_P3_56373_38795790 | NC_021163.1    | Ca_kabuli_chr04 | 38795790                | TT                              | CC                | 1945961305               |
| SNP_P3_56374_38800191 | NC_021163.1    | Ca_kabuli_chr04 | 38800191                | GG                              | AA                | 1945961307               |
| SNP_P3_56375_38800195 | NC_021163.1    | Ca_kabuli_chr04 | 38800195                | GG                              | AA                | 1945961309               |
| SNP_P3_56376_38800212 | NC_021163.1    | Ca_kabuli_chr04 | 38800212                | AA                              | GG                | 1945961310               |
| SNP_P3_56377_38800213 | NC_021163.1    | Ca_kabuli_chr04 | 38800213                | AA                              | GG                | 1945961312               |
| SNP_P3_56378_38800218 | NC_021163.1    | Ca_kabuli_chr04 | 38800218                | GG                              | AA                | 1945961314               |
| SNP_P3_56379_38800370 | NC_021163.1    | Ca_kabuli_chr04 | 38800370                | CC                              | TT                | 1945961316               |
| SNP_P3_56380_38800376 | NC_021163.1    | Ca_kabuli_chr04 | 38800376                | GG                              | AA                | 1945961317               |
| SNP_P3_56381_38800735 | NC_021163.1    | Ca_kabuli_chr04 | 38800735                | TT                              | AA                | 1945961319               |
| SNP_P3_56382_38806442 | NC_021163.1    | Ca_kabuli_chr04 | 38806442                | AA                              | GG                | 1945961321               |
| SNP_P3_56383_38806590 | NC_021163.1    | Ca_kabuli_chr04 | 38806590                | TT                              | AA                | 1945961323               |
| SNP_P3_56384_38806608 | NC_021163.1    | Ca_kabuli_chr04 | 38806608                | GG                              | AA                | 1945961325               |
| SNP_P3_56385_38806624 | NC_021163.1    | Ca_kabuli_chr04 | 38806624                | AA                              | TT                | 1945961326               |
| SNP_P3_56386_38806822 | NC_021163.1    | Ca_kabuli_chr04 | 38806822                | AA                              | CC                | 1945961328               |
| SNP_P3_56387_38807582 | NC_021163.1    | Ca_kabuli_chr04 | 38807582                | AA                              | GG                | 1945961330               |
| SNP_P3_56388_38810142 | NC_021163.1    | Ca_kabuli_chr04 | 38810142                | GG                              | AA                | 1945961332               |
| SNP_P3_56389_38810764 | NC_021163.1    | Ca_kabuli_chr04 | 38810764                | AA                              | CC                | 1945961334               |
| SNP_P3_56391_38813178 | NC_021163.1    | Ca_kabuli_chr04 | 38813178                | AA                              | GG                | 1945961335               |
| SNP_P3_56392_38813376 | NC_021163.1    | Ca_kabuli_chr04 | 38813376                | GG                              | AA                | 1945961337               |
| SNP_P3_56393_38813835 | NC_021163.1    | Ca_kabuli_chr04 | 38813835                | CC                              | TT                | 1945961339               |
| SNP_P3_56394_38814113 | NC_021163.1    | Ca_kabuli_chr04 | 38814113                | TT                              | CC                | 1945961341               |
| SNP_P3_56395_38814387 | NC_021163.1    | Ca_kabuli_chr04 | 38814387                | AA                              | GG                | 1945961342               |
| SNP_P3_56396_38814574 | NC_021163.1    | Ca_kabuli_chr04 | 38814574                | TT                              | GG                | 1945961344               |
| SNP_P3_56397_38814617 | NC_021163.1    | Ca_kabuli_chr04 | 38814617                | GG                              | AA                | 1945961346               |
| SNP_P3_56398_38814635 | NC_021163.1    | Ca_kabuli_chr04 | 38814635                | GG                              | AA                | 1945961348               |
| SNP_P3_56399_38814966 | NC_021163.1    | Ca_kabuli_chr04 | 38814966                | AA                              | CC                | 1945961350               |
| SNP_P3_56400_38814992 | NC_021163.1    | Ca_kabuli_chr04 | 38814992                | GG                              | CC                | 1945961351               |
| SNP_P3_56401_38815004 | NC_021163.1    | Ca_kabuli_chr04 | 38815004                | GG                              | AA                | 1945961353               |
| SNP_P3_56402_38815211 | NC_021163.1    | Ca_kabuli_chr04 | 38815211                | TT                              | CC                | 1945961355               |
| SNP_P3_56403_38815400 | NC_021163.1    | Ca_kabuli_chr04 | 38815400                | AA                              | GG                | 1945961357               |
| SNP_P3_56404_38815425 | NC_021163.1    | Ca_kabuli_chr04 | 38815425                | AA                              | TT                | 1945961359               |
| SNP_P3_56405_38816562 | NC_021163.1    | Ca_kabuli_chr04 | 38816562                | TT                              | AA                | 1945961360               |
| SNP_P3_56407_38816626 | NC_021163.1    | Ca_kabuli_chr04 | 38816626                | GG                              | AA                | 1945961362               |
| SNP_P3_56408_38816633 | NC_021163.1    | Ca_kabuli_chr04 | 38816633                | GG                              | AA                | 1945961364               |
| SNP_P3_56409_38816643 | NC_021163.1    | Ca_kabuli_chr04 | 38816643                | TT                              | CC                | 1945961366               |
| SNP_P3_56410_38816810 | NC_021163.1    | Ca_kabuli_chr04 | 38816810                | GG                              | AA                | 1945961367               |
| SNP_P3_56411_38817184 | NC_021163.1    | Ca_kabuli_chr04 | 38817184                | AA                              | TT                | 1945961369               |
| SNP_P3_56412_38818193 | NC_021163.1    | Ca_kabuli_chr04 | 38818193                | TT                              | CC                | 1945961371               |
| SNP_P3_56413_38818196 | NC_021163.1    | Ca_kabuli_chr04 | 38818196                | GG                              | AA                | 1945961373               |
| SNP_P3_56414_38818200 | NC_021163.1    | Ca_kabuli_chr04 | 38818200                | TT                              | CC                | 1945961375               |
| SNP_P3_56415_38818237 | NC_021163.1    | Ca_kabuli_chr04 | 38818237                | CC                              | AA                | 1945961376               |

| SNPs IDs              | Chromosome IDs | Chromosomes     | Physical positions (bp) | CDC Frontier (Reference genome) | (Pusa 256 & HPNB) | NCBI SNPdb Accession IDs |
|-----------------------|----------------|-----------------|-------------------------|---------------------------------|-------------------|--------------------------|
| SNP_P3_56416_38818249 | NC_021163.1    | Ca_kabuli_chr04 | 38818249                | GG                              | AA                | 1945961378               |
| SNP_P3_56417_38818250 | NC_021163.1    | Ca_kabuli_chr04 | 38818250                | AA                              | GG                | 1945961380               |
| SNP_P3_56418_38822286 | NC_021163.1    | Ca_kabuli_chr04 | 38822286                | TT                              | CC                | 1945961382               |
| SNP_P3_56420_38825754 | NC_021163.1    | Ca_kabuli_chr04 | 38825754                | TT                              | GG                | 1945961384               |
| SNP_P3_56421_38825774 | NC_021163.1    | Ca_kabuli_chr04 | 38825774                | GG                              | TT                | 1945961385               |
| SNP_P3_56423_38826605 | NC_021163.1    | Ca_kabuli_chr04 | 38826605                | TT                              | CC                | 1945961387               |
| SNP_P3_56424_38829551 | NC_021163.1    | Ca_kabuli_chr04 | 38829551                | AA                              | CC                | 1945961389               |
| SNP_P3_56427_38830732 | NC_021163.1    | Ca_kabuli_chr04 | 38830732                | AA                              | CC                | 1945961391               |
| SNP_P3_56428_38830784 | NC_021163.1    | Ca_kabuli_chr04 | 38830784                | GG                              | TT                | 1945961392               |
| SNP_P3_56430_38832524 | NC_021163.1    | Ca_kabuli_chr04 | 38832524                | TT                              | GG                | 1945961394               |
| SNP_P3_56431_38832543 | NC_021163.1    | Ca_kabuli_chr04 | 38832543                | AA                              | GG                | 1945961396               |
| SNP_P3_56432_38832554 | NC_021163.1    | Ca_kabuli_chr04 | 38832554                | GG                              | CC                | 1945961398               |
| SNP_P3_56433_38832568 | NC_021163.1    | Ca_kabuli_chr04 | 38832568                | TT                              | GG                | 1945961400               |
| SNP_P3_56434_38832577 | NC_021163.1    | Ca_kabuli_chr04 | 38832577                | AA                              | GG                | 1945961401               |
| SNP_P3_56436_38833011 | NC_021163.1    | Ca_kabuli_chr04 | 38833011                | AA                              | TT                | 1945961403               |
| SNP_P3_56437_38837704 | NC_021163.1    | Ca_kabuli_chr04 | 38837704                | GG                              | AA                | 1945961405               |
| SNP_P3_56438_38837947 | NC_021163.1    | Ca_kabuli_chr04 | 38837947                | TT                              | AA                | 1945961407               |
| SNP_P3_56439_38840151 | NC_021163.1    | Ca_kabuli_chr04 | 38840151                | TT                              | CC                | 1945961408               |
| SNP_P3_56440_38846920 | NC_021163.1    | Ca_kabuli_chr04 | 38846920                | CC                              | GG                | 1945961410               |
| SNP_P3_56441_38847986 | NC_021163.1    | Ca_kabuli_chr04 | 38847986                | TT                              | GG                | 1945961412               |
| SNP_P3_56442_38848009 | NC_021163.1    | Ca_kabuli_chr04 | 38848009                | CC                              | AA                | 1945961414               |
| SNP_P3_56443_38852101 | NC_021163.1    | Ca_kabuli_chr04 | 38852101                | AA                              | GG                | 1945961416               |
| SNP_P3_56444_38852334 | NC_021163.1    | Ca_kabuli_chr04 | 38852334                | CC                              | TT                | 1945961417               |
| SNP_P3_56445_38852340 | NC_021163.1    | Ca_kabuli_chr04 | 38852340                | CC                              | TT                | 1945961419               |
| SNP_P3_56446_38852343 | NC_021163.1    | Ca_kabuli_chr04 | 38852343                | GG                              | AA                | 1945961421               |
| SNP_P3_56447_38854638 | NC_021163.1    | Ca_kabuli_chr04 | 38854638                | CC                              | TT                | 1945961423               |
| SNP_P3_56448_38854674 | NC_021163.1    | Ca_kabuli_chr04 | 38854674                | TT                              | CC                | 1945961425               |
| SNP_P3_56449_38854947 | NC_021163.1    | Ca_kabuli_chr04 | 38854947                | GG                              | AA                | 1945961426               |
| SNP_P3_56450_38858164 | NC_021163.1    | Ca_kabuli_chr04 | 38858164                | GG                              | AA                | 1945961428               |
| SNP_P3_56451_38859914 | NC_021163.1    | Ca_kabuli_chr04 | 38859914                | CC                              | TT                | 1945961430               |
| SNP_P3_56452_38859922 | NC_021163.1    | Ca_kabuli_chr04 | 38859922                | GG                              | AA                | 1945961432               |
| SNP_P3_56453_38859923 | NC_021163.1    | Ca_kabuli_chr04 | 38859923                | TT                              | AA                | 1945961433               |
| SNP_P3_56454_38861225 | NC_021163.1    | Ca_kabuli_chr04 | 38861225                | GG                              | AA                | 1945961435               |
| SNP_P3_56455_38862793 | NC_021163.1    | Ca_kabuli_chr04 | 38862793                | AA                              | GG                | 1945961437               |
| SNP_P3_56456_38863990 | NC_021163.1    | Ca_kabuli_chr04 | 38863990                | AA                              | GG                | 1945961439               |
| SNP_P3_56457_38864021 | NC_021163.1    | Ca_kabuli_chr04 | 38864021                | TT                              | CC                | 1945961441               |
| SNP_P3_56458_38867461 | NC_021163.1    | Ca_kabuli_chr04 | 38867461                | TT                              | GG                | 1945961442               |
| SNP_P3_56459_38867491 | NC_021163.1    | Ca_kabuli_chr04 | 38867491                | GG                              | TT                | 1945961444               |
| SNP_P3_56460_38869207 | NC_021163.1    | Ca_kabuli_chr04 | 38869207                | CC                              | GG                | 1945961446               |
| SNP_P3_56461_38871867 | NC_021163.1    | Ca_kabuli_chr04 | 38871867                | TT                              | GG                | 1945961448               |
| SNP_P3_56462_38871900 | NC_021163.1    | Ca_kabuli_chr04 | 38871900                | GG                              | CC                | 1945961450               |
| SNP_P3_56463_38872175 | NC_021163.1    | Ca_kabuli_chr04 | 38872175                | CC                              | TT                | 1945961451               |

| SNPs IDs              | Chromosome IDs | Chromosomes     | Physical positions (bp) | CDC Frontier (Reference genome) | (Pusa 256 & HPNB) | NCBI SNPdb Accession IDs |
|-----------------------|----------------|-----------------|-------------------------|---------------------------------|-------------------|--------------------------|
| SNP_P3_56464_38872198 | NC_021163.1    | Ca_kabuli_chr04 | 38872198                | AA                              | GG                | 1945961453               |
| SNP_P3_56465_38872231 | NC_021163.1    | Ca_kabuli_chr04 | 38872231                | AA                              | GG                | 1945961455               |
| SNP_P3_56466_38872232 | NC_021163.1    | Ca_kabuli_chr04 | 38872232                | CC                              | TT                | 1945961457               |
| SNP_P3_56467_38873706 | NC_021163.1    | Ca_kabuli_chr04 | 38873706                | TT                              | AA                | 1945961459               |
| SNP_P3_56468_38873974 | NC_021163.1    | Ca_kabuli_chr04 | 38873974                | GG                              | AA                | 1945961460               |
| SNP_P3_56469_38873983 | NC_021163.1    | Ca_kabuli_chr04 | 38873983                | CC                              | TT                | 1945961462               |
| SNP_P3_56470_38874491 | NC_021163.1    | Ca_kabuli_chr04 | 38874491                | GG                              | AA                | 1945961464               |
| SNP_P3_56471_38876041 | NC_021163.1    | Ca_kabuli_chr04 | 38876041                | AA                              | GG                | 1945961466               |
| SNP_P3_56472_38876279 | NC_021163.1    | Ca_kabuli_chr04 | 38876279                | TT                              | CC                | 1945961467               |
| SNP_P3_56473_38876358 | NC_021163.1    | Ca_kabuli_chr04 | 38876358                | AA                              | CC                | 1945961469               |
| SNP_P3_56474_38878071 | NC_021163.1    | Ca_kabuli_chr04 | 38878071                | CC                              | AA                | 1945961471               |
| SNP_P3_56475_38878913 | NC_021163.1    | Ca_kabuli_chr04 | 38878913                | AA                              | TT                | 1945961473               |
| SNP_P3_56476_38880158 | NC_021163.1    | Ca_kabuli_chr04 | 38880158                | CC                              | TT                | 1945961475               |
| SNP_P3_56477_38880190 | NC_021163.1    | Ca_kabuli_chr04 | 38880190                | GG                              | AA                | 1945961476               |
| SNP_P3_56478_38880272 | NC_021163.1    | Ca_kabuli_chr04 | 38880272                | GG                              | AA                | 1945961478               |
| SNP_P3_56479_38880547 | NC_021163.1    | Ca_kabuli_chr04 | 38880547                | GG                              | TT                | 1945961480               |
| SNP_P3_56480_38880865 | NC_021163.1    | Ca_kabuli_chr04 | 38880865                | TT                              | AA                | 1945961482               |
| SNP_P3_56481_38880873 | NC_021163.1    | Ca_kabuli_chr04 | 38880873                | TT                              | CC                | 1945961483               |
| SNP_P3_56482_38881070 | NC_021163.1    | Ca_kabuli_chr04 | 38881070                | GG                              | CC                | 1945961485               |
| SNP_P3_56483_38881340 | NC_021163.1    | Ca_kabuli_chr04 | 38881340                | TT                              | CC                | 1945961487               |
| SNP_P3_56484_38881375 | NC_021163.1    | Ca_kabuli_chr04 | 38881375                | TT                              | CC                | 1945961489               |
| SNP_P3_56485_38881602 | NC_021163.1    | Ca_kabuli_chr04 | 38881602                | TT                              | CC                | 1945961491               |
| SNP_P3_56486_38881607 | NC_021163.1    | Ca_kabuli_chr04 | 38881607                | CC                              | AA                | 1945961492               |
| SNP_P3_56487_38881633 | NC_021163.1    | Ca_kabuli_chr04 | 38881633                | GG                              | AA                | 1945961494               |
| SNP_P3_56488_38881863 | NC_021163.1    | Ca_kabuli_chr04 | 38881863                | CC                              | AA                | 1945961496               |
| SNP_P3_56489_38881907 | NC_021163.1    | Ca_kabuli_chr04 | 38881907                | AA                              | GG                | 1945961498               |
| SNP_P3_56490_38881911 | NC_021163.1    | Ca_kabuli_chr04 | 38881911                | GG                              | AA                | 1945961500               |
| SNP_P3_56491_38882052 | NC_021163.1    | Ca_kabuli_chr04 | 38882052                | CC                              | TT                | 1945961501               |
| SNP_P3_56492_38882251 | NC_021163.1    | Ca_kabuli_chr04 | 38882251                | CC                              | TT                | 1945961503               |
| SNP_P3_56493_38882393 | NC_021163.1    | Ca_kabuli_chr04 | 38882393                | CC                              | GG                | 1945961505               |
| SNP_P3_56494_38882397 | NC_021163.1    | Ca_kabuli_chr04 | 38882397                | AA                              | CC                | 1945961507               |
| SNP_P3_56495_38883336 | NC_021163.1    | Ca_kabuli_chr04 | 38883336                | AA                              | GG                | 1945961509               |
| SNP_P3_56496_38883717 | NC_021163.1    | Ca_kabuli_chr04 | 38883717                | CC                              | TT                | 1945961510               |
| SNP_P3_56497_38883727 | NC_021163.1    | Ca_kabuli_chr04 | 38883727                | TT                              | CC                | 1945961512               |
| SNP_P3_56498_38883929 | NC_021163.1    | Ca_kabuli_chr04 | 38883929                | GG                              | AA                | 1945961514               |
| SNP_P3_56499_38883962 | NC_021163.1    | Ca_kabuli_chr04 | 38883962                | CC                              | TT                | 1945961516               |
| SNP_P3_56501_38884106 | NC_021163.1    | Ca_kabuli_chr04 | 38884106                | AA                              | GG                | 1945961517               |
| SNP_P3_56502_38885136 | NC_021163.1    | Ca_kabuli_chr04 | 38885136                | TT                              | CC                | 1945961519               |
| SNP_P3_56503_38886499 | NC_021163.1    | Ca_kabuli_chr04 | 38886499                | CC                              | TT                | 1945961521               |
| SNP_P3_56504_38886859 | NC_021163.1    | Ca_kabuli_chr04 | 38886859                | TT                              | CC                | 1945961523               |
| SNP_P3_56505_38886998 | NC_021163.1    | Ca_kabuli_chr04 | 38886998                | GG                              | AA                | 1945961525               |
| SNP_P3_56506_38887385 | NC_021163.1    | Ca_kabuli_chr04 | 38887385                | GG                              | AA                | 1945961526               |

| SNPs IDs              | Chromosome IDs | Chromosomes     | Physical positions (bp) | CDC Frontier (Reference genome) | (Pusa 256 & HPNB) | NCBI SNPdb Accession IDs |
|-----------------------|----------------|-----------------|-------------------------|---------------------------------|-------------------|--------------------------|
| SNP_P3_56507_38887417 | NC_021163.1    | Ca_kabuli_chr04 | 38887417                | GG                              | CC                | 1945961528               |
| SNP_P3_56508_38887452 | NC_021163.1    | Ca_kabuli_chr04 | 38887452                | CC                              | GG                | 1945961530               |
| SNP_P3_56509_38887469 | NC_021163.1    | Ca_kabuli_chr04 | 38887469                | GG                              | AA                | 1945961532               |
| SNP_P3_56510_38887483 | NC_021163.1    | Ca_kabuli_chr04 | 38887483                | TT                              | CC                | 1945961533               |
| SNP_P3_56511_38887498 | NC_021163.1    | Ca_kabuli_chr04 | 38887498                | GG                              | AA                | 1945961535               |
| SNP_P3_56512_38887646 | NC_021163.1    | Ca_kabuli_chr04 | 38887646                | CC                              | TT                | 1945961537               |
| SNP_P3_56513_38887877 | NC_021163.1    | Ca_kabuli_chr04 | 38887877                | AA                              | GG                | 1945961539               |
| SNP_P3_56514_38890128 | NC_021163.1    | Ca_kabuli_chr04 | 38890128                | TT                              | CC                | 1945961541               |
| SNP_P3_56515_38890356 | NC_021163.1    | Ca_kabuli_chr04 | 38890356                | AA                              | GG                | 1945961542               |
| SNP_P3_56516_38890845 | NC_021163.1    | Ca_kabuli_chr04 | 38890845                | CC                              | TT                | 1945961544               |
| SNP_P3_56517_38890847 | NC_021163.1    | Ca_kabuli_chr04 | 38890847                | TT                              | CC                | 1945961546               |
| SNP_P3_56518_38890857 | NC_021163.1    | Ca_kabuli_chr04 | 38890857                | CC                              | TT                | 1945961548               |
| SNP_P3_56519_38890867 | NC_021163.1    | Ca_kabuli_chr04 | 38890867                | CC                              | TT                | 1945961550               |
| SNP_P3_56520_38890870 | NC_021163.1    | Ca_kabuli_chr04 | 38890870                | AA                              | GG                | 1945961551               |
| SNP_P3_56521_38890893 | NC_021163.1    | Ca_kabuli_chr04 | 38890893                | AA                              | GG                | 1945961553               |
| SNP_P3_56522_38892047 | NC_021163.1    | Ca_kabuli_chr04 | 38892047                | AA                              | GG                | 1945961555               |
| SNP_P3_56523_38892200 | NC_021163.1    | Ca_kabuli_chr04 | 38892200                | TT                              | CC                | 1945961557               |
| SNP_P3_56524_38892313 | NC_021163.1    | Ca_kabuli_chr04 | 38892313                | CC                              | TT                | 1945961558               |
| SNP_P3_56525_38892347 | NC_021163.1    | Ca_kabuli_chr04 | 38892347                | TT                              | CC                | 1945961560               |
| SNP_P3_56526_38893630 | NC_021163.1    | Ca_kabuli_chr04 | 38893630                | AA                              | GG                | 1945961562               |
| SNP_P3_56527_38895452 | NC_021163.1    | Ca_kabuli_chr04 | 38895452                | GG                              | TT                | 1945961564               |
| SNP_P3_56528_38895456 | NC_021163.1    | Ca_kabuli_chr04 | 38895456                | AA                              | CC                | 1945961566               |
| SNP_P3_56529_38895534 | NC_021163.1    | Ca_kabuli_chr04 | 38895534                | GG                              | CC                | 1945961567               |
| SNP_P3_56530_38896224 | NC_021163.1    | Ca_kabuli_chr04 | 38896224                | TT                              | CC                | 1945961569               |
| SNP_P3_56531_38896258 | NC_021163.1    | Ca_kabuli_chr04 | 38896258                | AA                              | CC                | 1945961571               |
| SNP_P3_56532_38896838 | NC_021163.1    | Ca_kabuli_chr04 | 38896838                | CC                              | TT                | 1945961573               |
| SNP_P3_56533_38896924 | NC_021163.1    | Ca_kabuli_chr04 | 38896924                | CC                              | AA                | 1945961575               |
| SNP_P3_56534_38897135 | NC_021163.1    | Ca_kabuli_chr04 | 38897135                | AA                              | GG                | 1945961576               |
| SNP_P3_56535_38897154 | NC_021163.1    | Ca_kabuli_chr04 | 38897154                | AA                              | GG                | 1945961578               |
| SNP_P3_56536_38898902 | NC_021163.1    | Ca_kabuli_chr04 | 38898902                | TT                              | CC                | 1945961580               |
| SNP_P3_56537_38898907 | NC_021163.1    | Ca_kabuli_chr04 | 38898907                | AA                              | TT                | 1945961582               |
| SNP_P3_56538_38898918 | NC_021163.1    | Ca_kabuli_chr04 | 38898918                | TT                              | CC                | 1945961583               |
| SNP_P3_56539_38898931 | NC_021163.1    | Ca_kabuli_chr04 | 38898931                | TT                              | CC                | 1945961585               |
| SNP_P3_56540_38898943 | NC_021163.1    | Ca_kabuli_chr04 | 38898943                | CC                              | GG                | 1945961587               |
| SNP_P3_56541_38898962 | NC_021163.1    | Ca_kabuli_chr04 | 38898962                | TT                              | GG                | 1945961589               |
| SNP_P3_56542_38913179 | NC_021163.1    | Ca_kabuli_chr04 | 38913179                | AA                              | GG                | 1945961591               |
| SNP_P3_56543_38913180 | NC_021163.1    | Ca_kabuli_chr04 | 38913180                | GG                              | AA                | 1945961592               |
| SNP_P3_56544_38913194 | NC_021163.1    | Ca_kabuli_chr04 | 38913194                | CC                              | TT                | 1945961594               |
| SNP_P3_56545_38913215 | NC_021163.1    | Ca_kabuli_chr04 | 38913215                | CC                              | TT                | 1945961596               |
| SNP_P3_56546_38913491 | NC_021163.1    | Ca_kabuli_chr04 | 38913491                | GG                              | AA                | 1945961598               |
| SNP_P3_56547_38913504 | NC_021163.1    | Ca_kabuli_chr04 | 38913504                | GG                              | AA                | 1945961600               |
| SNP_P3_56548_38913972 | NC_021163.1    | Ca_kabuli_chr04 | 38913972                | GG                              | TT                | 1945961601               |



| SNPs IDs              | Chromosome IDs | Chromosomes     | Physical positions (bp) | CDC Frontier (Reference genome) | (Pusa 256 & HPNB) | NCBI SNPdb Accession IDs |
|-----------------------|----------------|-----------------|-------------------------|---------------------------------|-------------------|--------------------------|
| SNP_P3_56549_38913979 | NC_021163.1    | Ca_kabuli_chr04 | 38913979                | TT                              | CC                | 1945961603               |
| SNP_P3_56550_38913982 | NC_021163.1    | Ca_kabuli_chr04 | 38913982                | AA                              | GG                | 1945961605               |
| SNP_P3_56551_38913991 | NC_021163.1    | Ca_kabuli_chr04 | 38913991                | GG                              | AA                | 1945961607               |
| SNP_P3_56552_38914102 | NC_021163.1    | Ca_kabuli_chr04 | 38914102                | GG                              | AA                | 1945961608               |
| SNP_P3_56553_38914300 | NC_021163.1    | Ca_kabuli_chr04 | 38914300                | CC                              | TT                | 1945961610               |
| SNP_P3_56554_38915084 | NC_021163.1    | Ca_kabuli_chr04 | 38915084                | AA                              | GG                | 1945961612               |
| SNP_P3_56555_38915405 | NC_021163.1    | Ca_kabuli_chr04 | 38915405                | GG                              | TT                | 1945961614               |
| SNP_P3_56556_38916270 | NC_021163.1    | Ca_kabuli_chr04 | 38916270                | GG                              | AA                | 1945961616               |
| SNP_P3_56557_38916287 | NC_021163.1    | Ca_kabuli_chr04 | 38916287                | AA                              | CC                | 1945961617               |
| SNP_P3_56558_38916317 | NC_021163.1    | Ca_kabuli_chr04 | 38916317                | GG                              | AA                | 1945961619               |
| SNP_P3_56559_38916318 | NC_021163.1    | Ca_kabuli_chr04 | 38916318                | TT                              | CC                | 1945961621               |
| SNP_P3_56560_38916923 | NC_021163.1    | Ca_kabuli_chr04 | 38916923                | TT                              | GG                | 1945961623               |
| SNP_P3_56562_38917174 | NC_021163.1    | Ca_kabuli_chr04 | 38917174                | CC                              | TT                | 1945961625               |
| SNP_P3_56563_38917176 | NC_021163.1    | Ca_kabuli_chr04 | 38917176                | AA                              | GG                | 1945961626               |
| SNP_P3_56564_38917247 | NC_021163.1    | Ca_kabuli_chr04 | 38917247                | TT                              | CC                | 1945961628               |
| SNP_P3_56566_38918649 | NC_021163.1    | Ca_kabuli_chr04 | 38918649                | GG                              | CC                | 1945961630               |
| SNP_P3_56567_38924727 | NC_021163.1    | Ca_kabuli_chr04 | 38924727                | AA                              | GG                | 1945961632               |
| SNP_P3_56569_38925671 | NC_021163.1    | Ca_kabuli_chr04 | 38925671                | GG                              | AA                | 1945961633               |
| SNP_P3_56570_38926481 | NC_021163.1    | Ca_kabuli_chr04 | 38926481                | CC                              | TT                | 1945961635               |
| SNP_P3_56571_38926635 | NC_021163.1    | Ca_kabuli_chr04 | 38926635                | TT                              | CC                | 1945961637               |
| SNP_P3_56572_38926907 | NC_021163.1    | Ca_kabuli_chr04 | 38926907                | TT                              | AA                | 1945961639               |
| SNP_P3_56573_38927050 | NC_021163.1    | Ca_kabuli_chr04 | 38927050                | TT                              | AA                | 1945961641               |
| SNP_P3_56575_38928640 | NC_021163.1    | Ca_kabuli_chr04 | 38928640                | GG                              | CC                | 1945961642               |
| SNP_P3_56576_38928945 | NC_021163.1    | Ca_kabuli_chr04 | 38928945                | GG                              | CC                | 1945961644               |
| SNP_P3_56577_38929107 | NC_021163.1    | Ca_kabuli_chr04 | 38929107                | GG                              | CC                | 1945961646               |
| SNP_P3_56578_38929400 | NC_021163.1    | Ca_kabuli_chr04 | 38929400                | CC                              | TT                | 1945961648               |
| SNP_P3_56579_38931123 | NC_021163.1    | Ca_kabuli_chr04 | 38931123                | GG                              | CC                | 1945961650               |
| SNP_P3_56580_38931862 | NC_021163.1    | Ca_kabuli_chr04 | 38931862                | GG                              | TT                | 1945961651               |
| SNP_P3_56581_38931882 | NC_021163.1    | Ca_kabuli_chr04 | 38931882                | AA                              | GG                | 1945961653               |
| SNP_P3_56583_38932462 | NC_021163.1    | Ca_kabuli_chr04 | 38932462                | AA                              | GG                | 1945961655               |
| SNP_P3_56584_38936354 | NC_021163.1    | Ca_kabuli_chr04 | 38936354                | TT                              | GG                | 1945961657               |
| SNP_P3_56586_38938033 | NC_021163.1    | Ca_kabuli_chr04 | 38938033                | TT                              | GG                | 1945961658               |
| SNP_P3_56587_38938346 | NC_021163.1    | Ca_kabuli_chr04 | 38938346                | AA                              | TT                | 1945961660               |
| SNP_P3_56588_38938561 | NC_021163.1    | Ca_kabuli_chr04 | 38938561                | AA                              | TT                | 1945961662               |
| SNP_P3_56589_38943741 | NC_021163.1    | Ca_kabuli_chr04 | 38943741                | CC                              | TT                | 1945961664               |
| SNP_P3_56590_38943756 | NC_021163.1    | Ca_kabuli_chr04 | 38943756                | CC                              | TT                | 1945961666               |
| SNP_P3_56591_38944395 | NC_021163.1    | Ca_kabuli_chr04 | 38944395                | GG                              | AA                | 1945961667               |
| SNP_P3_56592_38946255 | NC_021163.1    | Ca_kabuli_chr04 | 38946255                | TT                              | AA                | 1945961669               |
| SNP_P3_56593_38946299 | NC_021163.1    | Ca_kabuli_chr04 | 38946299                | CC                              | TT                | 1945961671               |
| SNP_P3_56594_38946561 | NC_021163.1    | Ca_kabuli_chr04 | 38946561                | GG                              | AA                | 1945961673               |
| SNP_P3_56595_38947660 | NC_021163.1    | Ca_kabuli_chr04 | 38947660                | TT                              | CC                | 1945961675               |
| SNP_P3_56596_38948650 | NC_021163.1    | Ca_kabuli_chr04 | 38948650                | GG                              | AA                | 1945961676               |

| SNPs IDs              | Chromosome IDs | Chromosomes     | Physical positions (bp) | CDC Frontier (Reference genome) | (Pusa 256 & HPNB) | NCBI SNPdb Accession IDs |
|-----------------------|----------------|-----------------|-------------------------|---------------------------------|-------------------|--------------------------|
| SNP_P3_56598_38950380 | NC_021163.1    | Ca_kabuli_chr04 | 38950380                | AA                              | TT                | 1945961678               |
| SNP_P3_56599_38950393 | NC_021163.1    | Ca_kabuli_chr04 | 38950393                | AA                              | TT                | 1945961680               |
| SNP_P3_56600_38951095 | NC_021163.1    | Ca_kabuli_chr04 | 38951095                | GG                              | AA                | 1945961682               |
| SNP_P3_56601_38951609 | NC_021163.1    | Ca_kabuli_chr04 | 38951609                | CC                              | TT                | 1945961683               |
| SNP_P3_56602_38952641 | NC_021163.1    | Ca_kabuli_chr04 | 38952641                | GG                              | TT                | 1945961685               |
| SNP_P3_56603_38953289 | NC_021163.1    | Ca_kabuli_chr04 | 38953289                | GG                              | TT                | 1945961687               |
| SNP_P3_56604_38953336 | NC_021163.1    | Ca_kabuli_chr04 | 38953336                | AA                              | CC                | 1945961689               |
| SNP_P3_56605_38953846 | NC_021163.1    | Ca_kabuli_chr04 | 38953846                | CC                              | TT                | 1945961691               |
| SNP_P3_56606_38954501 | NC_021163.1    | Ca_kabuli_chr04 | 38954501                | GG                              | AA                | 1945961692               |
| SNP_P3_56608_38954839 | NC_021163.1    | Ca_kabuli_chr04 | 38954839                | TT                              | AA                | 1945961694               |
| SNP_P3_56609_38955067 | NC_021163.1    | Ca_kabuli_chr04 | 38955067                | CC                              | TT                | 1945961696               |
| SNP_P3_56613_38955854 | NC_021163.1    | Ca_kabuli_chr04 | 38955854                | TT                              | GG                | 1945961698               |
| SNP_P3_56614_38955855 | NC_021163.1    | Ca_kabuli_chr04 | 38955855                | AA                              | GG                | 1945961700               |
| SNP_P3_56615_38955861 | NC_021163.1    | Ca_kabuli_chr04 | 38955861                | AA                              | GG                | 1945961701               |
| SNP_P3_56616_38955938 | NC_021163.1    | Ca_kabuli_chr04 | 38955938                | GG                              | TT                | 1945961703               |
| SNP_P3_56617_38958985 | NC_021163.1    | Ca_kabuli_chr04 | 38958985                | CC                              | AA                | 1945961705               |
| SNP_P3_56618_38960027 | NC_021163.1    | Ca_kabuli_chr04 | 38960027                | AA                              | TT                | 1945961707               |
| SNP_P3_56619_38961175 | NC_021163.1    | Ca_kabuli_chr04 | 38961175                | GG                              | AA                | 1945961708               |
| SNP_P3_56620_38961604 | NC_021163.1    | Ca_kabuli_chr04 | 38961604                | TT                              | AA                | 1945961710               |
| SNP_P3_56621_38962186 | NC_021163.1    | Ca_kabuli_chr04 | 38962186                | TT                              | GG                | 1945961712               |
| SNP_P3_56622_38962443 | NC_021163.1    | Ca_kabuli_chr04 | 38962443                | AA                              | GG                | 1945961714               |
| SNP_P3_56623_38962472 | NC_021163.1    | Ca_kabuli_chr04 | 38962472                | CC                              | GG                | 1945961716               |
| SNP_P3_56625_38965172 | NC_021163.1    | Ca_kabuli_chr04 | 38965172                | AA                              | CC                | 1945961717               |
| SNP_P3_56626_38965182 | NC_021163.1    | Ca_kabuli_chr04 | 38965182                | AA                              | GG                | 1945961719               |
| SNP_P3_56628_38965820 | NC_021163.1    | Ca_kabuli_chr04 | 38965820                | TT                              | CC                | 1945961721               |
| SNP_P3_56629_38967345 | NC_021163.1    | Ca_kabuli_chr04 | 38967345                | TT                              | CC                | 1945961723               |
| SNP_P3_56630_38967380 | NC_021163.1    | Ca_kabuli_chr04 | 38967380                | CC                              | GG                | 1945961724               |
| SNP_P3_56631_38967597 | NC_021163.1    | Ca_kabuli_chr04 | 38967597                | CC                              | AA                | 1945961726               |
| SNP_P3_56632_38967717 | NC_021163.1    | Ca_kabuli_chr04 | 38967717                | GG                              | AA                | 1945961728               |
| SNP_P3_56633_38968711 | NC_021163.1    | Ca_kabuli_chr04 | 38968711                | GG                              | TT                | 1945961730               |
| SNP_P3_56634_38968712 | NC_021163.1    | Ca_kabuli_chr04 | 38968712                | TT                              | CC                | 1945961732               |
| SNP_P3_56635_38968737 | NC_021163.1    | Ca_kabuli_chr04 | 38968737                | CC                              | TT                | 1945961733               |
| SNP_P3_56636_38970032 | NC_021163.1    | Ca_kabuli_chr04 | 38970032                | GG                              | AA                | 1945961735               |
| SNP_P3_56637_38970043 | NC_021163.1    | Ca_kabuli_chr04 | 38970043                | AA                              | TT                | 1945961737               |
| SNP_P3_56638_38970047 | NC_021163.1    | Ca_kabuli_chr04 | 38970047                | GG                              | AA                | 1945961739               |
| SNP_P3_56640_38970908 | NC_021163.1    | Ca_kabuli_chr04 | 38970908                | TT                              | CC                | 1945961741               |
| SNP_P3_56641_38970920 | NC_021163.1    | Ca_kabuli_chr04 | 38970920                | CC                              | TT                | 1945961742               |
| SNP_P3_56642_38976271 | NC_021163.1    | Ca_kabuli_chr04 | 38976271                | TT                              | AA                | 1945961744               |
| SNP_P3_56643_38976273 | NC_021163.1    | Ca_kabuli_chr04 | 38976273                | TT                              | AA                | 1945961746               |
| SNP_P3_56644_38976822 | NC_021163.1    | Ca_kabuli_chr04 | 38976822                | AA                              | CC                | 1945961748               |
| SNP_P3_56645_38976835 | NC_021163.1    | Ca_kabuli_chr04 | 38976835                | TT                              | GG                | 1945961749               |
| SNP_P3_56646_38978462 | NC_021163.1    | Ca_kabuli_chr04 | 38978462                | GG                              | AA                | 1945961751               |

| SNPs IDs              | Chromosome IDs | Chromosomes     | Physical positions (bp) | CDC Frontier (Reference genome) | (Pusa 256 & HPNB) | NCBI SNPdb Accession IDs |
|-----------------------|----------------|-----------------|-------------------------|---------------------------------|-------------------|--------------------------|
| SNP_P3_56647_38981084 | NC_021163.1    | Ca_kabuli_chr04 | 38981084                | GG                              | CC                | 1945961753               |
| SNP_P3_56648_38983446 | NC_021163.1    | Ca_kabuli_chr04 | 38983446                | TT                              | AA                | 1945961755               |
| SNP_P3_56649_38983981 | NC_021163.1    | Ca_kabuli_chr04 | 38983981                | AA                              | GG                | 1945961757               |
| SNP_P3_56650_38983999 | NC_021163.1    | Ca_kabuli_chr04 | 38983999                | TT                              | AA                | 1945961758               |
| SNP_P3_56653_38987264 | NC_021163.1    | Ca_kabuli_chr04 | 38987264                | CC                              | AA                | 1945961760               |
| SNP_P3_56654_38987272 | NC_021163.1    | Ca_kabuli_chr04 | 38987272                | AA                              | GG                | 1945961762               |
| SNP_P3_56655_38987313 | NC_021163.1    | Ca_kabuli_chr04 | 38987313                | AA                              | GG                | 1945961764               |
| SNP_P3_56656_38988167 | NC_021163.1    | Ca_kabuli_chr04 | 38988167                | TT                              | CC                | 1945961766               |
| SNP_P3_56657_38993493 | NC_021163.1    | Ca_kabuli_chr04 | 38993493                | CC                              | TT                | 1945961767               |
| SNP_P3_56658_38994594 | NC_021163.1    | Ca_kabuli_chr04 | 38994594                | AA                              | GG                | 1945961769               |
| SNP_P3_56660_38994933 | NC_021163.1    | Ca_kabuli_chr04 | 38994933                | GG                              | AA                | 1945961771               |
| SNP_P3_56661_38995225 | NC_021163.1    | Ca_kabuli_chr04 | 38995225                | TT                              | CC                | 1945961773               |
| SNP_P3_56662_38997457 | NC_021163.1    | Ca_kabuli_chr04 | 38997457                | GG                              | AA                | 1945961774               |
| SNP_P3_56663_38997466 | NC_021163.1    | Ca_kabuli_chr04 | 38997466                | GG                              | AA                | 1945961776               |
| SNP_P3_56664_38997495 | NC_021163.1    | Ca_kabuli_chr04 | 38997495                | AA                              | TT                | 1945961778               |
| SNP_P3_56666_39001755 | NC_021163.1    | Ca_kabuli_chr04 | 39001755                | AA                              | GG                | 1945961780               |
| SNP_P3_56667_39002971 | NC_021163.1    | Ca_kabuli_chr04 | 39002971                | GG                              | TT                | 1945961782               |
| SNP_P3_56668_39003008 | NC_021163.1    | Ca_kabuli_chr04 | 39003008                | CC                              | TT                | 1945961783               |
| SNP_P3_56669_39003012 | NC_021163.1    | Ca_kabuli_chr04 | 39003012                | AA                              | GG                | 1945961785               |
| SNP_P3_56670_39003015 | NC_021163.1    | Ca_kabuli_chr04 | 39003015                | GG                              | AA                | 1945961787               |
| SNP_P3_56671_39003986 | NC_021163.1    | Ca_kabuli_chr04 | 39003986                | GG                              | AA                | 1945961789               |
| SNP_P3_56672_39004211 | NC_021163.1    | Ca_kabuli_chr04 | 39004211                | CC                              | AA                | 1945961791               |
| SNP_P3_56673_39004315 | NC_021163.1    | Ca_kabuli_chr04 | 39004315                | TT                              | CC                | 1945961792               |
| SNP_P3_56674_39005915 | NC_021163.1    | Ca_kabuli_chr04 | 39005915                | AA                              | GG                | 1945961794               |
| SNP_P3_56675_39006695 | NC_021163.1    | Ca_kabuli_chr04 | 39006695                | TT                              | GG                | 1945961796               |
| SNP_P3_56676_39008266 | NC_021163.1    | Ca_kabuli_chr04 | 39008266                | AA                              | GG                | 1945961798               |
| SNP_P3_56677_39013000 | NC_021163.1    | Ca_kabuli_chr04 | 39013000                | GG                              | CC                | 1945961799               |
| SNP_P3_56678_39013039 | NC_021163.1    | Ca_kabuli_chr04 | 39013039                | GG                              | TT                | 1945961801               |
| SNP_P3_56679_39013050 | NC_021163.1    | Ca_kabuli_chr04 | 39013050                | TT                              | AA                | 1945961803               |
| SNP_P3_56681_39013190 | NC_021163.1    | Ca_kabuli_chr04 | 39013190                | TT                              | GG                | 1945961805               |
| SNP_P3_56683_39015849 | NC_021163.1    | Ca_kabuli_chr04 | 39015849                | AA                              | TT                | 1945961807               |
| SNP_P3_56684_39015853 | NC_021163.1    | Ca_kabuli_chr04 | 39015853                | TT                              | AA                | 1945961808               |
| SNP_P3_56685_39015859 | NC_021163.1    | Ca_kabuli_chr04 | 39015859                | GG                              | TT                | 1945961810               |
| SNP_P3_56686_39015865 | NC_021163.1    | Ca_kabuli_chr04 | 39015865                | TT                              | AA                | 1945961812               |
| SNP_P3_56687_39017168 | NC_021163.1    | Ca_kabuli_chr04 | 39017168                | AA                              | GG                | 1945961814               |
| SNP_P3_56688_39017843 | NC_021163.1    | Ca_kabuli_chr04 | 39017843                | TT                              | CC                | 1945961816               |
| SNP_P3_56690_39017893 | NC_021163.1    | Ca_kabuli_chr04 | 39017893                | CC                              | AA                | 1945961817               |
| SNP_P3_56691_39017902 | NC_021163.1    | Ca_kabuli_chr04 | 39017902                | GG                              | CC                | 1945961819               |
| SNP_P3_56692_39018311 | NC_021163.1    | Ca_kabuli_chr04 | 39018311                | CC                              | TT                | 1945961821               |
| SNP_P3_56693_39018317 | NC_021163.1    | Ca_kabuli_chr04 | 39018317                | TT                              | CC                | 1945961823               |
| SNP_P3_56694_39018610 | NC_021163.1    | Ca_kabuli_chr04 | 39018610                | AA                              | TT                | 1945961824               |
| SNP_P3_56695_39018620 | NC_021163.1    | Ca_kabuli_chr04 | 39018620                | CC                              | TT                | 1945961826               |

| SNPs IDs              | Chromosome IDs | Chromosomes     | Physical positions (bp) | CDC Frontier (Reference genome) | (Pusa 256 & HPNB) | NCBI SNPdb Accession IDs |
|-----------------------|----------------|-----------------|-------------------------|---------------------------------|-------------------|--------------------------|
| SNP_P3_56697_39018729 | NC_021163.1    | Ca_kabuli_chr04 | 39018729                | GG                              | AA                | 1945961828               |
| SNP_P3_56698_39018744 | NC_021163.1    | Ca_kabuli_chr04 | 39018744                | TT                              | AA                | 1945961830               |
| SNP_P3_56699_39018904 | NC_021163.1    | Ca_kabuli_chr04 | 39018904                | TT                              | AA                | 1945961832               |
| SNP_P3_56700_39019017 | NC_021163.1    | Ca_kabuli_chr04 | 39019017                | AA                              | TT                | 1945961833               |
| SNP_P3_56701_39019305 | NC_021163.1    | Ca_kabuli_chr04 | 39019305                | GG                              | AA                | 1945961835               |
| SNP_P3_56702_39019934 | NC_021163.1    | Ca_kabuli_chr04 | 39019934                | AA                              | GG                | 1945961837               |
| SNP_P3_56703_39019953 | NC_021163.1    | Ca_kabuli_chr04 | 39019953                | CC                              | TT                | 1945961839               |
| SNP_P3_56704_39020267 | NC_021163.1    | Ca_kabuli_chr04 | 39020267                | AA                              | TT                | 1945961841               |
| SNP_P3_56705_39020275 | NC_021163.1    | Ca_kabuli_chr04 | 39020275                | CC                              | AA                | 1945961842               |
| SNP_P3_56706_39023630 | NC_021163.1    | Ca_kabuli_chr04 | 39023630                | AA                              | TT                | 1945961844               |
| SNP_P3_56707_39024076 | NC_021163.1    | Ca_kabuli_chr04 | 39024076                | CC                              | AA                | 1945961846               |
| SNP_P3_56708_39024360 | NC_021163.1    | Ca_kabuli_chr04 | 39024360                | CC                              | TT                | 1945961848               |
| SNP_P3_56709_39024416 | NC_021163.1    | Ca_kabuli_chr04 | 39024416                | TT                              | GG                | 1945961849               |
| SNP_P3_56710_39024706 | NC_021163.1    | Ca_kabuli_chr04 | 39024706                | GG                              | AA                | 1945961851               |
| SNP_P3_56712_39026569 | NC_021163.1    | Ca_kabuli_chr04 | 39026569                | AA                              | GG                | 1945961853               |
| SNP_P3_56713_39026705 | NC_021163.1    | Ca_kabuli_chr04 | 39026705                | AA                              | GG                | 1945961855               |
| SNP_P3_56714_39026723 | NC_021163.1    | Ca_kabuli_chr04 | 39026723                | GG                              | AA                | 1945961857               |
| SNP_P3_56715_39026855 | NC_021163.1    | Ca_kabuli_chr04 | 39026855                | TT                              | CC                | 1945961858               |
| SNP_P3_56716_39028225 | NC_021163.1    | Ca_kabuli_chr04 | 39028225                | GG                              | AA                | 1945961860               |
| SNP_P3_56717_39028687 | NC_021163.1    | Ca_kabuli_chr04 | 39028687                | TT                              | CC                | 1945961862               |
| SNP_P3_56718_39028736 | NC_021163.1    | Ca_kabuli_chr04 | 39028736                | CC                              | AA                | 1945961864               |
| SNP_P3_56719_39028756 | NC_021163.1    | Ca_kabuli_chr04 | 39028756                | AA                              | CC                | 1945961866               |
| SNP_P3_56720_39030829 | NC_021163.1    | Ca_kabuli_chr04 | 39030829                | GG                              | TT                | 1945961867               |
| SNP_P3_56721_39033073 | NC_021163.1    | Ca_kabuli_chr04 | 39033073                | CC                              | GG                | 1945961869               |
| SNP_P3_56723_39036835 | NC_021163.1    | Ca_kabuli_chr04 | 39036835                | CC                              | TT                | 1945961871               |
| SNP_P3_56724_39038071 | NC_021163.1    | Ca_kabuli_chr04 | 39038071                | AA                              | TT                | 1945961873               |
| SNP_P3_56726_39038659 | NC_021163.1    | Ca_kabuli_chr04 | 39038659                | GG                              | AA                | 1945961874               |
| SNP_P3_56727_39038708 | NC_021163.1    | Ca_kabuli_chr04 | 39038708                | AA                              | GG                | 1945961876               |
| SNP_P3_56728_39038864 | NC_021163.1    | Ca_kabuli_chr04 | 39038864                | TT                              | AA                | 1945961878               |
| SNP_P3_56729_39039744 | NC_021163.1    | Ca_kabuli_chr04 | 39039744                | GG                              | AA                | 1945961880               |
| SNP_P3_56730_39039763 | NC_021163.1    | Ca_kabuli_chr04 | 39039763                | GG                              | AA                | 1945961882               |
| SNP_P3_56731_39039796 | NC_021163.1    | Ca_kabuli_chr04 | 39039796                | GG                              | AA                | 1945961883               |
| SNP_P3_56732_39039944 | NC_021163.1    | Ca_kabuli_chr04 | 39039944                | CC                              | TT                | 1945961885               |
| SNP_P3_56733_39041306 | NC_021163.1    | Ca_kabuli_chr04 | 39041306                | TT                              | CC                | 1945961887               |
| SNP_P3_56734_39043121 | NC_021163.1    | Ca_kabuli_chr04 | 39043121                | GG                              | TT                | 1945961889               |
| SNP_P3_56735_39043179 | NC_021163.1    | Ca_kabuli_chr04 | 39043179                | TT                              | CC                | 1945961891               |
| SNP_P3_56736_39044055 | NC_021163.1    | Ca_kabuli_chr04 | 39044055                | CC                              | AA                | 1945961892               |
| SNP_P3_56737_39044057 | NC_021163.1    | Ca_kabuli_chr04 | 39044057                | TT                              | AA                | 1945961894               |
| SNP_P3_56738_39044397 | NC_021163.1    | Ca_kabuli_chr04 | 39044397                | AA                              | GG                | 1945961896               |
| SNP_P3_56739_39044400 | NC_021163.1    | Ca_kabuli_chr04 | 39044400                | CC                              | TT                | 1945961898               |
| SNP_P3_56740_39044412 | NC_021163.1    | Ca_kabuli_chr04 | 39044412                | CC                              | GG                | 1945961899               |
| SNP_P3_56741_39044478 | NC_021163.1    | Ca_kabuli_chr04 | 39044478                | GG                              | AA                | 1945961901               |

| SNPs IDs              | Chromosome IDs | Chromosomes     | Physical positions (bp) | CDC Frontier (Reference genome) | (Pusa 256 & HPNB) | NCBI SNPdb Accession IDs |
|-----------------------|----------------|-----------------|-------------------------|---------------------------------|-------------------|--------------------------|
| SNP_P3_56743_39046083 | NC_021163.1    | Ca_kabuli_chr04 | 39046083                | TT                              | CC                | 1945961903               |
| SNP_P3_56744_39048183 | NC_021163.1    | Ca_kabuli_chr04 | 39048183                | TT                              | CC                | 1945961905               |
| SNP_P3_56745_39049036 | NC_021163.1    | Ca_kabuli_chr04 | 39049036                | GG                              | AA                | 1945961907               |
| SNP_P3_56746_39049272 | NC_021163.1    | Ca_kabuli_chr04 | 39049272                | CC                              | TT                | 1945961908               |
| SNP_P3_56747_39051390 | NC_021163.1    | Ca_kabuli_chr04 | 39051390                | AA                              | GG                | 1945961910               |
| SNP_P3_56748_39051392 | NC_021163.1    | Ca_kabuli_chr04 | 39051392                | AA                              | GG                | 1945961912               |
| SNP_P3_56749_39051416 | NC_021163.1    | Ca_kabuli_chr04 | 39051416                | AA                              | GG                | 1945961914               |
| SNP_P3_56750_39051582 | NC_021163.1    | Ca_kabuli_chr04 | 39051582                | CC                              | TT                | 1945961916               |
| SNP_P3_56751_39053459 | NC_021163.1    | Ca_kabuli_chr04 | 39053459                | GG                              | AA                | 1945961917               |
| SNP_P3_56752_39054471 | NC_021163.1    | Ca_kabuli_chr04 | 39054471                | GG                              | AA                | 1945961919               |
| SNP_P3_56753_39054903 | NC_021163.1    | Ca_kabuli_chr04 | 39054903                | TT                              | AA                | 1945961921               |
| SNP_P3_56754_39055258 | NC_021163.1    | Ca_kabuli_chr04 | 39055258                | TT                              | CC                | 1945961923               |
| SNP_P3_56755_39055260 | NC_021163.1    | Ca_kabuli_chr04 | 39055260                | TT                              | AA                | 1945961925               |
| SNP_P3_56756_39055287 | NC_021163.1    | Ca_kabuli_chr04 | 39055287                | CC                              | GG                | 1945961926               |
| SNP_P3_56757_39056902 | NC_021163.1    | Ca_kabuli_chr04 | 39056902                | TT                              | CC                | 1945961928               |
| SNP_P3_56758_39057114 | NC_021163.1    | Ca_kabuli_chr04 | 39057114                | AA                              | GG                | 1945961930               |
| SNP_P3_56759_39058652 | NC_021163.1    | Ca_kabuli_chr04 | 39058652                | TT                              | CC                | 1945961932               |
| SNP_P3_56760_39060724 | NC_021163.1    | Ca_kabuli_chr04 | 39060724                | CC                              | TT                | 1945961933               |
| SNP_P3_56761_39061070 | NC_021163.1    | Ca_kabuli_chr04 | 39061070                | GG                              | AA                | 1945961935               |
| SNP_P3_56762_39061421 | NC_021163.1    | Ca_kabuli_chr04 | 39061421                | CC                              | AA                | 1945961937               |
| SNP_P3_56763_39062100 | NC_021163.1    | Ca_kabuli_chr04 | 39062100                | TT                              | CC                | 1945961939               |
| SNP_P3_56764_39062826 | NC_021163.1    | Ca_kabuli_chr04 | 39062826                | GG                              | AA                | 1945961941               |
| SNP_P3_56765_39063266 | NC_021163.1    | Ca_kabuli_chr04 | 39063266                | CC                              | AA                | 1945961942               |
| SNP_P3_56766_39063576 | NC_021163.1    | Ca_kabuli_chr04 | 39063576                | TT                              | CC                | 1945961944               |
| SNP_P3_56767_39063620 | NC_021163.1    | Ca_kabuli_chr04 | 39063620                | CC                              | TT                | 1945961946               |
| SNP_P3_56768_39063651 | NC_021163.1    | Ca_kabuli_chr04 | 39063651                | AA                              | CC                | 1945961948               |
| SNP_P3_56770_39063891 | NC_021163.1    | Ca_kabuli_chr04 | 39063891                | TT                              | GG                | 1945961950               |
| SNP_P3_56771_39063892 | NC_021163.1    | Ca_kabuli_chr04 | 39063892                | GG                              | AA                | 1945961951               |
| SNP_P3_56772_39063992 | NC_021163.1    | Ca_kabuli_chr04 | 39063992                | AA                              | GG                | 1945961953               |
| SNP_P3_56773_39064004 | NC_021163.1    | Ca_kabuli_chr04 | 39064004                | TT                              | CC                | 1945961955               |
| SNP_P3_56774_39064033 | NC_021163.1    | Ca_kabuli_chr04 | 39064033                | CC                              | TT                | 1945961957               |
| SNP_P3_56775_39064620 | NC_021163.1    | Ca_kabuli_chr04 | 39064620                | GG                              | AA                | 1945961958               |
| SNP_P3_56776_39067347 | NC_021163.1    | Ca_kabuli_chr04 | 39067347                | TT                              | CC                | 1945961960               |
| SNP_P3_56777_39070306 | NC_021163.1    | Ca_kabuli_chr04 | 39070306                | GG                              | AA                | 1945961962               |
| SNP_P3_56778_39070326 | NC_021163.1    | Ca_kabuli_chr04 | 39070326                | TT                              | AA                | 1945961964               |
| SNP_P3_56779_39070328 | NC_021163.1    | Ca_kabuli_chr04 | 39070328                | TT                              | GG                | 1945961966               |
| SNP_P3_56780_39070826 | NC_021163.1    | Ca_kabuli_chr04 | 39070826                | TT                              | CC                | 1945961967               |
| SNP_P3_56781_39074868 | NC_021163.1    | Ca_kabuli_chr04 | 39074868                | CC                              | AA                | 1945961969               |
| SNP_P3_56782_39074993 | NC_021163.1    | Ca_kabuli_chr04 | 39074993                | GG                              | TT                | 1945961971               |
| SNP_P3_56783_39075620 | NC_021163.1    | Ca_kabuli_chr04 | 39075620                | GG                              | AA                | 1945961973               |
| SNP_P3_56784_39076111 | NC_021163.1    | Ca_kabuli_chr04 | 39076111                | GG                              | TT                | 1945961975               |
| SNP_P3_56785_39076115 | NC_021163.1    | Ca_kabuli_chr04 | 39076115                | GG                              | AA                | 1945961976               |

| SNPs IDs              | Chromosome IDs | Chromosomes     | Physical positions (bp) | CDC Frontier (Reference genome) | (Pusa 256 & HPNB) | NCBI SNPdb Accession IDs |
|-----------------------|----------------|-----------------|-------------------------|---------------------------------|-------------------|--------------------------|
| SNP_P3_56786_39076128 | NC_021163.1    | Ca_kabuli_chr04 | 39076128                | AA                              | GG                | 1945961978               |
| SNP_P3_56787_39076190 | NC_021163.1    | Ca_kabuli_chr04 | 39076190                | GG                              | AA                | 1945961980               |
| SNP_P3_56788_39076269 | NC_021163.1    | Ca_kabuli_chr04 | 39076269                | AA                              | CC                | 1945961982               |
| SNP_P3_56789_39077066 | NC_021163.1    | Ca_kabuli_chr04 | 39077066                | GG                              | AA                | 1945961983               |
| SNP_P3_56791_39077332 | NC_021163.1    | Ca_kabuli_chr04 | 39077332                | CC                              | TT                | 1945961985               |
| SNP_P3_56792_39078284 | NC_021163.1    | Ca_kabuli_chr04 | 39078284                | GG                              | AA                | 1945961987               |
| SNP_P3_56793_39078779 | NC_021163.1    | Ca_kabuli_chr04 | 39078779                | TT                              | CC                | 1945961989               |
| SNP_P3_56794_39079234 | NC_021163.1    | Ca_kabuli_chr04 | 39079234                | CC                              | AA                | 1945961991               |
| SNP_P3_56795_39079238 | NC_021163.1    | Ca_kabuli_chr04 | 39079238                | GG                              | CC                | 1945961992               |
| SNP_P3_56797_39081046 | NC_021163.1    | Ca_kabuli_chr04 | 39081046                | AA                              | GG                | 1945961994               |
| SNP_P3_56798_39081611 | NC_021163.1    | Ca_kabuli_chr04 | 39081611                | CC                              | TT                | 1945961996               |
| SNP_P3_56799_39083824 | NC_021163.1    | Ca_kabuli_chr04 | 39083824                | AA                              | GG                | 1945961998               |
| SNP_P3_56800_39085821 | NC_021163.1    | Ca_kabuli_chr04 | 39085821                | CC                              | AA                | 1945962000               |
| SNP_P3_56801_39086182 | NC_021163.1    | Ca_kabuli_chr04 | 39086182                | TT                              | CC                | 1945962001               |
| SNP_P3_56802_39086345 | NC_021163.1    | Ca_kabuli_chr04 | 39086345                | CC                              | AA                | 1945962003               |
| SNP_P3_56803_39087902 | NC_021163.1    | Ca_kabuli_chr04 | 39087902                | AA                              | GG                | 1945962005               |
| SNP_P3_56804_39088210 | NC_021163.1    | Ca_kabuli_chr04 | 39088210                | AA                              | GG                | 1945962007               |
| SNP_P3_56805_39124789 | NC_021163.1    | Ca_kabuli_chr04 | 39124789                | AA                              | TT                | 1945962008               |
| SNP_P3_56806_39131022 | NC_021163.1    | Ca_kabuli_chr04 | 39131022                | TT                              | CC                | 1945962010               |
| SNP_P3_56807_39132475 | NC_021163.1    | Ca_kabuli_chr04 | 39132475                | CC                              | GG                | 1945962012               |
| SNP_P3_56808_39132520 | NC_021163.1    | Ca_kabuli_chr04 | 39132520                | CC                              | TT                | 1945962014               |
| SNP_P3_56809_39132528 | NC_021163.1    | Ca_kabuli_chr04 | 39132528                | TT                              | CC                | 1945962016               |
| SNP_P3_56810_39132695 | NC_021163.1    | Ca_kabuli_chr04 | 39132695                | GG                              | AA                | 1945962017               |
| SNP_P3_56811_39153741 | NC_021163.1    | Ca_kabuli_chr04 | 39153741                | TT                              | AA                | 1945962019               |
| SNP_P3_56812_39163940 | NC_021163.1    | Ca_kabuli_chr04 | 39163940                | CC                              | TT                | 1945962021               |
| SNP_P3_56814_39171822 | NC_021163.1    | Ca_kabuli_chr04 | 39171822                | GG                              | AA                | 1945962023               |
| SNP_P3_56816_39190055 | NC_021163.1    | Ca_kabuli_chr04 | 39190055                | GG                              | AA                | 1945962025               |
| SNP_P3_56817_39190063 | NC_021163.1    | Ca_kabuli_chr04 | 39190063                | GG                              | AA                | 1945962026               |
| SNP_P3_56818_39190389 | NC_021163.1    | Ca_kabuli_chr04 | 39190389                | GG                              | CC                | 1945962028               |
| SNP_P3_56819_39193971 | NC_021163.1    | Ca_kabuli_chr04 | 39193971                | CC                              | AA                | 1945962030               |
| SNP_P3_56820_39204142 | NC_021163.1    | Ca_kabuli_chr04 | 39204142                | CC                              | TT                | 1945962032               |
| SNP_P3_56821_39222262 | NC_021163.1    | Ca_kabuli_chr04 | 39222262                | AA                              | GG                | 1945962033               |
| SNP_P3_56823_39290575 | NC_021163.1    | Ca_kabuli_chr04 | 39290575                | AA                              | TT                | 1945962035               |
| SNP_P3_56824_39291392 | NC_021163.1    | Ca_kabuli_chr04 | 39291392                | GG                              | AA                | 1945962037               |
| SNP_P3_56825_39291434 | NC_021163.1    | Ca_kabuli_chr04 | 39291434                | GG                              | CC                | 1945962039               |
| SNP_P3_56826_39291464 | NC_021163.1    | Ca_kabuli_chr04 | 39291464                | CC                              | TT                | 1945962041               |
| SNP_P3_56827_39298518 | NC_021163.1    | Ca_kabuli_chr04 | 39298518                | GG                              | AA                | 1945962042               |
| SNP_P3_56828_39298599 | NC_021163.1    | Ca_kabuli_chr04 | 39298599                | AA                              | GG                | 1945962044               |
| SNP_P3_56829_39298732 | NC_021163.1    | Ca_kabuli_chr04 | 39298732                | AA                              | GG                | 1945962046               |
| SNP_P3_56830_39298786 | NC_021163.1    | Ca_kabuli_chr04 | 39298786                | AA                              | CC                | 1945962048               |
| SNP_P3_56831_39298960 | NC_021163.1    | Ca_kabuli_chr04 | 39298960                | TT                              | CC                | 1945962050               |
| SNP_P3_56832_39298978 | NC_021163.1    | Ca_kabuli_chr04 | 39298978                | AA                              | GG                | 1945962051               |

| SNPs IDs              | Chromosome IDs | Chromosomes     | Physical positions (bp) | CDC Frontier (Reference genome) | (Pusa 256 & HPNB) | NCBI SNPdb Accession IDs |
|-----------------------|----------------|-----------------|-------------------------|---------------------------------|-------------------|--------------------------|
| SNP_P3_56833_39298994 | NC_021163.1    | Ca_kabuli_chr04 | 39298994                | AA                              | GG                | 1945962053               |
| SNP_P3_56834_39299025 | NC_021163.1    | Ca_kabuli_chr04 | 39299025                | GG                              | CC                | 1945962055               |
| SNP_P3_56835_39299037 | NC_021163.1    | Ca_kabuli_chr04 | 39299037                | GG                              | TT                | 1945962057               |
| SNP_P3_56836_39299050 | NC_021163.1    | Ca_kabuli_chr04 | 39299050                | AA                              | GG                | 1945962058               |
| SNP_P3_56837_39299569 | NC_021163.1    | Ca_kabuli_chr04 | 39299569                | CC                              | TT                | 1945962060               |
| SNP_P3_56839_39367175 | NC_021163.1    | Ca_kabuli_chr04 | 39367175                | GG                              | CC                | 1945962062               |
| SNP_P3_56840_39392776 | NC_021163.1    | Ca_kabuli_chr04 | 39392776                | AA                              | GG                | 1945962064               |
| SNP_P3_56841_39393202 | NC_021163.1    | Ca_kabuli_chr04 | 39393202                | TT                              | CC                | 1945962066               |
| SNP_P3_56842_39643114 | NC_021163.1    | Ca_kabuli_chr04 | 39643114                | CC                              | AA                | 1945962067               |
| SNP_P3_56843_39644758 | NC_021163.1    | Ca_kabuli_chr04 | 39644758                | TT                              | CC                | 1945962069               |
| SNP_P3_56844_39644867 | NC_021163.1    | Ca_kabuli_chr04 | 39644867                | TT                              | CC                | 1945962071               |
| SNP_P3_56845_39644925 | NC_021163.1    | Ca_kabuli_chr04 | 39644925                | GG                              | TT                | 1945962073               |
| SNP_P3_56846_39646936 | NC_021163.1    | Ca_kabuli_chr04 | 39646936                | TT                              | CC                | 1945962075               |
| SNP_P3_56847_39648895 | NC_021163.1    | Ca_kabuli_chr04 | 39648895                | AA                              | GG                | 1945962076               |
| SNP_P3_56848_39648930 | NC_021163.1    | Ca_kabuli_chr04 | 39648930                | TT                              | AA                | 1945962078               |
| SNP_P3_56849_39659341 | NC_021163.1    | Ca_kabuli_chr04 | 39659341                | CC                              | TT                | 1945962080               |
| SNP_P3_56851_39689210 | NC_021163.1    | Ca_kabuli_chr04 | 39689210                | GG                              | AA                | 1945962082               |
| SNP_P3_56852_39689278 | NC_021163.1    | Ca_kabuli_chr04 | 39689278                | AA                              | CC                | 1945962083               |
| SNP_P3_56853_39689287 | NC_021163.1    | Ca_kabuli_chr04 | 39689287                | TT                              | GG                | 1945962085               |
| SNP_P3_56854_39689301 | NC_021163.1    | Ca_kabuli_chr04 | 39689301                | AA                              | CC                | 1945962087               |
| SNP_P3_56855_39689308 | NC_021163.1    | Ca_kabuli_chr04 | 39689308                | AA                              | GG                | 1945962089               |
| SNP_P3_56856_39689320 | NC_021163.1    | Ca_kabuli_chr04 | 39689320                | TT                              | CC                | 1945962091               |
| SNP_P3_56857_39689349 | NC_021163.1    | Ca_kabuli_chr04 | 39689349                | GG                              | AA                | 1945962092               |
| SNP_P3_56858_39689386 | NC_021163.1    | Ca_kabuli_chr04 | 39689386                | TT                              | AA                | 1945962094               |
| SNP_P3_56859_39689408 | NC_021163.1    | Ca_kabuli_chr04 | 39689408                | GG                              | TT                | 1945962096               |
| SNP_P3_56860_39691197 | NC_021163.1    | Ca_kabuli_chr04 | 39691197                | TT                              | CC                | 1945962098               |
| SNP_P3_56861_39691217 | NC_021163.1    | Ca_kabuli_chr04 | 39691217                | TT                              | CC                | 1945962100               |
| SNP_P3_56862_39691529 | NC_021163.1    | Ca_kabuli_chr04 | 39691529                | TT                              | CC                | 1945962101               |
| SNP_P3_56863_39691540 | NC_021163.1    | Ca_kabuli_chr04 | 39691540                | AA                              | GG                | 1945962103               |
| SNP_P3_56864_39691595 | NC_021163.1    | Ca_kabuli_chr04 | 39691595                | AA                              | GG                | 1945962105               |
| SNP_P3_56865_39699034 | NC_021163.1    | Ca_kabuli_chr04 | 39699034                | TT                              | CC                | 1945962107               |
| SNP_P3_56866_39734328 | NC_021163.1    | Ca_kabuli_chr04 | 39734328                | GG                              | AA                | 1945962108               |
| SNP_P3_56867_39766288 | NC_021163.1    | Ca_kabuli_chr04 | 39766288                | TT                              | CC                | 1945962110               |
| SNP_P3_56869_39786507 | NC_021163.1    | Ca_kabuli_chr04 | 39786507                | TT                              | AA                | 1945962112               |
| SNP_P3_56870_39792222 | NC_021163.1    | Ca_kabuli_chr04 | 39792222                | GG                              | TT                | 1945962114               |
| SNP_P3_56871_39798961 | NC_021163.1    | Ca_kabuli_chr04 | 39798961                | AA                              | GG                | 1945962116               |
| SNP_P3_56874_39889359 | NC_021163.1    | Ca_kabuli_chr04 | 39889359                | AA                              | GG                | 1945962117               |
| SNP_P3_56875_39889447 | NC_021163.1    | Ca_kabuli_chr04 | 39889447                | GG                              | AA                | 1945962119               |
| SNP_P3_56876_39889473 | NC_021163.1    | Ca_kabuli_chr04 | 39889473                | GG                              | AA                | 1945962121               |
| SNP_P3_56877_39889515 | NC_021163.1    | Ca_kabuli_chr04 | 39889515                | AA                              | TT                | 1945962123               |
| SNP_P3_56878_39889534 | NC_021163.1    | Ca_kabuli_chr04 | 39889534                | GG                              | AA                | 1945962125               |
| SNP_P3_56879_39894028 | NC_021163.1    | Ca_kabuli_chr04 | 39894028                | CC                              | TT                | 1945962126               |

| SNPs IDs              | Chromosome IDs | Chromosomes     | Physical positions (bp) | CDC Frontier (Reference genome) | (Pusa 256 & HPNB) | NCBI SNPdb Accession IDs |
|-----------------------|----------------|-----------------|-------------------------|---------------------------------|-------------------|--------------------------|
| SNP_P3_56880_39903351 | NC_021163.1    | Ca_kabuli_chr04 | 39903351                | CC                              | TT                | 1945962128               |
| SNP_P3_56881_39903408 | NC_021163.1    | Ca_kabuli_chr04 | 39903408                | AA                              | TT                | 1945962130               |
| SNP_P3_56882_39903739 | NC_021163.1    | Ca_kabuli_chr04 | 39903739                | TT                              | GG                | 1945962132               |
| SNP_P3_56883_39903744 | NC_021163.1    | Ca_kabuli_chr04 | 39903744                | TT                              | CC                | 1945962133               |
| SNP_P3_56884_39903772 | NC_021163.1    | Ca_kabuli_chr04 | 39903772                | TT                              | CC                | 1945962135               |
| SNP_P3_56885_39910981 | NC_021163.1    | Ca_kabuli_chr04 | 39910981                | TT                              | CC                | 1945962137               |
| SNP_P3_56886_39917910 | NC_021163.1    | Ca_kabuli_chr04 | 39917910                | GG                              | AA                | 1945962139               |
| SNP_P3_56887_39952003 | NC_021163.1    | Ca_kabuli_chr04 | 39952003                | TT                              | CC                | 1945962141               |
| SNP_P3_56888_39959454 | NC_021163.1    | Ca_kabuli_chr04 | 39959454                | AA                              | GG                | 1945962142               |
| SNP_P3_56889_39967417 | NC_021163.1    | Ca_kabuli_chr04 | 39967417                | GG                              | AA                | 1945962144               |
| SNP_P3_56890_39967429 | NC_021163.1    | Ca_kabuli_chr04 | 39967429                | AA                              | GG                | 1945962146               |
| SNP_P3_56891_39967443 | NC_021163.1    | Ca_kabuli_chr04 | 39967443                | TT                              | GG                | 1945962148               |
| SNP_P3_56892_39967530 | NC_021163.1    | Ca_kabuli_chr04 | 39967530                | TT                              | CC                | 1945962150               |
| SNP_P3_56893_39967794 | NC_021163.1    | Ca_kabuli_chr04 | 39967794                | AA                              | TT                | 1945962151               |
| SNP_P3_56894_39967857 | NC_021163.1    | Ca_kabuli_chr04 | 39967857                | TT                              | AA                | 1945962153               |
| SNP_P3_56895_39967884 | NC_021163.1    | Ca_kabuli_chr04 | 39967884                | TT                              | CC                | 1945962155               |
| SNP_P3_56896_39967917 | NC_021163.1    | Ca_kabuli_chr04 | 39967917                | CC                              | TT                | 1945962157               |
| SNP_P3_56897_39971126 | NC_021163.1    | Ca_kabuli_chr04 | 39971126                | AA                              | GG                | 1945962158               |
| SNP_P3_56898_39986634 | NC_021163.1    | Ca_kabuli_chr04 | 39986634                | GG                              | TT                | 1945962160               |
| SNP_P3_56899_39986657 | NC_021163.1    | Ca_kabuli_chr04 | 39986657                | AA                              | GG                | 1945962162               |
| SNP_P3_56900_39986658 | NC_021163.1    | Ca_kabuli_chr04 | 39986658                | GG                              | AA                | 1945962164               |
| SNP_P3_56901_39986690 | NC_021163.1    | Ca_kabuli_chr04 | 39986690                | AA                              | TT                | 1945962166               |
| SNP_P3_56902_39986700 | NC_021163.1    | Ca_kabuli_chr04 | 39986700                | TT                              | CC                | 1945962167               |
| SNP_P3_56903_39986708 | NC_021163.1    | Ca_kabuli_chr04 | 39986708                | TT                              | AA                | 1945962169               |
| SNP_P3_56904_39986757 | NC_021163.1    | Ca_kabuli_chr04 | 39986757                | CC                              | TT                | 1945962171               |
| SNP_P3_56905_39986759 | NC_021163.1    | Ca_kabuli_chr04 | 39986759                | GG                              | AA                | 1945962173               |
| SNP_P3_56906_39986973 | NC_021163.1    | Ca_kabuli_chr04 | 39986973                | GG                              | AA                | 1945962175               |
| SNP_P3_56907_39986974 | NC_021163.1    | Ca_kabuli_chr04 | 39986974                | GG                              | AA                | 1945962176               |
| SNP_P3_56908_39987138 | NC_021163.1    | Ca_kabuli_chr04 | 39987138                | TT                              | AA                | 1945962178               |
| SNP_P3_56909_39987165 | NC_021163.1    | Ca_kabuli_chr04 | 39987165                | TT                              | CC                | 1945962180               |
| SNP_P3_56910_39987259 | NC_021163.1    | Ca_kabuli_chr04 | 39987259                | AA                              | CC                | 1945962182               |
| SNP_P3_56911_39994027 | NC_021163.1    | Ca_kabuli_chr04 | 39994027                | TT                              | CC                | 1945962183               |
| SNP_P3_56912_39994029 | NC_021163.1    | Ca_kabuli_chr04 | 39994029                | GG                              | AA                | 1945962185               |
| SNP_P3_56914_40012429 | NC_021163.1    | Ca_kabuli_chr04 | 40012429                | GG                              | CC                | 1945962187               |
| SNP_P3_56915_40046770 | NC_021163.1    | Ca_kabuli_chr04 | 40046770                | CC                              | TT                | 1945962189               |
| SNP_P3_56916_40046772 | NC_021163.1    | Ca_kabuli_chr04 | 40046772                | TT                              | AA                | 1945962191               |
| SNP_P3_56917_40047116 | NC_021163.1    | Ca_kabuli_chr04 | 40047116                | TT                              | CC                | 1945962192               |
| SNP_P3_56918_40047126 | NC_021163.1    | Ca_kabuli_chr04 | 40047126                | AA                              | GG                | 1945962194               |
| SNP_P3_56919_40047151 | NC_021163.1    | Ca_kabuli_chr04 | 40047151                | AA                              | TT                | 1945962196               |
| SNP_P3_56920_40047173 | NC_021163.1    | Ca_kabuli_chr04 | 40047173                | TT                              | AA                | 1945962198               |
| SNP_P3_56922_40049596 | NC_021163.1    | Ca_kabuli_chr04 | 40049596                | TT                              | AA                | 1945962200               |
| SNP_P3_56923_40049597 | NC_021163.1    | Ca_kabuli_chr04 | 40049597                | TT                              | AA                | 1945962201               |



| SNPs IDs              | Chromosome IDs | Chromosomes     | Physical positions (bp) | CDC Frontier (Reference genome) | (Pusa 256 & HPNB) | NCBI SNPdb Accession IDs |
|-----------------------|----------------|-----------------|-------------------------|---------------------------------|-------------------|--------------------------|
| SNP_P3_56924_40049663 | NC_021163.1    | Ca_kabuli_chr04 | 40049663                | AA                              | CC                | 1945962203               |
| SNP_P3_56925_40059090 | NC_021163.1    | Ca_kabuli_chr04 | 40059090                | AA                              | GG                | 1945962205               |
| SNP_P3_56926_40078569 | NC_021163.1    | Ca_kabuli_chr04 | 40078569                | TT                              | CC                | 1945962207               |
| SNP_P3_56927_40097223 | NC_021163.1    | Ca_kabuli_chr04 | 40097223                | AA                              | GG                | 1945962208               |
| SNP_P3_56929_40114557 | NC_021163.1    | Ca_kabuli_chr04 | 40114557                | TT                              | CC                | 1945962210               |
| SNP_P3_56930_40114572 | NC_021163.1    | Ca_kabuli_chr04 | 40114572                | AA                              | GG                | 1945962212               |
| SNP_P3_56931_40114613 | NC_021163.1    | Ca_kabuli_chr04 | 40114613                | AA                              | GG                | 1945962214               |
| SNP_P3_56932_40115498 | NC_021163.1    | Ca_kabuli_chr04 | 40115498                | TT                              | CC                | 1945962216               |
| SNP_P3_56933_40126415 | NC_021163.1    | Ca_kabuli_chr04 | 40126415                | TT                              | CC                | 1945962217               |
| SNP_P3_56935_40171557 | NC_021163.1    | Ca_kabuli_chr04 | 40171557                | TT                              | CC                | 1945962219               |
| SNP_P3_56936_40171558 | NC_021163.1    | Ca_kabuli_chr04 | 40171558                | TT                              | CC                | 1945962221               |
| SNP_P3_56937_40171789 | NC_021163.1    | Ca_kabuli_chr04 | 40171789                | GG                              | AA                | 1945962223               |
| SNP_P3_56938_40171978 | NC_021163.1    | Ca_kabuli_chr04 | 40171978                | TT                              | CC                | 1945962225               |
| SNP_P3_56939_40265904 | NC_021163.1    | Ca_kabuli_chr04 | 40265904                | GG                              | CC                | 1945962226               |
| SNP_P3_56941_40300930 | NC_021163.1    | Ca_kabuli_chr04 | 40300930                | AA                              | GG                | 1945962228               |
| SNP_P3_56943_40334836 | NC_021163.1    | Ca_kabuli_chr04 | 40334836                | GG                              | AA                | 1945962230               |
| SNP_P3_56944_40334857 | NC_021163.1    | Ca_kabuli_chr04 | 40334857                | GG                              | AA                | 1945962232               |
| SNP_P3_56945_40334872 | NC_021163.1    | Ca_kabuli_chr04 | 40334872                | AA                              | TT                | 1945962233               |
| SNP_P3_56946_40334906 | NC_021163.1    | Ca_kabuli_chr04 | 40334906                | AA                              | GG                | 1945962235               |
| SNP_P3_56947_40334922 | NC_021163.1    | Ca_kabuli_chr04 | 40334922                | TT                              | CC                | 1945962237               |
| SNP_P3_56948_40334979 | NC_021163.1    | Ca_kabuli_chr04 | 40334979                | CC                              | TT                | 1945962239               |
| SNP_P3_56949_40335095 | NC_021163.1    | Ca_kabuli_chr04 | 40335095                | AA                              | GG                | 1945962241               |
| SNP_P3_56950_40335178 | NC_021163.1    | Ca_kabuli_chr04 | 40335178                | TT                              | CC                | 1945962242               |
| SNP_P3_56951_40335291 | NC_021163.1    | Ca_kabuli_chr04 | 40335291                | TT                              | CC                | 1945962244               |
| SNP_P3_56952_40335297 | NC_021163.1    | Ca_kabuli_chr04 | 40335297                | AA                              | CC                | 1945962246               |
| SNP_P3_56953_40335317 | NC_021163.1    | Ca_kabuli_chr04 | 40335317                | CC                              | AA                | 1945962248               |
| SNP_P3_56954_40335348 | NC_021163.1    | Ca_kabuli_chr04 | 40335348                | TT                              | GG                | 1945962250               |
| SNP_P3_56955_40335430 | NC_021163.1    | Ca_kabuli_chr04 | 40335430                | AA                              | GG                | 1945962251               |
| SNP_P3_56956_40335438 | NC_021163.1    | Ca_kabuli_chr04 | 40335438                | TT                              | CC                | 1945962253               |
| SNP_P3_56957_40335511 | NC_021163.1    | Ca_kabuli_chr04 | 40335511                | GG                              | AA                | 1945962255               |
| SNP_P3_56958_40337530 | NC_021163.1    | Ca_kabuli_chr04 | 40337530                | CC                              | GG                | 1945962257               |
| SNP_P3_56959_40341855 | NC_021163.1    | Ca_kabuli_chr04 | 40341855                | GG                              | AA                | 1945962258               |
| SNP_P3_56960_40341864 | NC_021163.1    | Ca_kabuli_chr04 | 40341864                | GG                              | AA                | 1945962260               |
| SNP_P3_56961_40341905 | NC_021163.1    | Ca_kabuli_chr04 | 40341905                | AA                              | GG                | 1945962262               |
| SNP_P3_56962_40341956 | NC_021163.1    | Ca_kabuli_chr04 | 40341956                | TT                              | AA                | 1945962264               |
| SNP_P3_56963_40341969 | NC_021163.1    | Ca_kabuli_chr04 | 40341969                | AA                              | GG                | 1945962266               |
| SNP_P3_56964_40342276 | NC_021163.1    | Ca_kabuli_chr04 | 40342276                | AA                              | GG                | 1945962267               |
| SNP_P3_56966_40406827 | NC_021163.1    | Ca_kabuli_chr04 | 40406827                | AA                              | TT                | 1945962269               |
| SNP_P3_56970_40472793 | NC_021163.1    | Ca_kabuli_chr04 | 40472793                | TT                              | GG                | 1945962271               |
| SNP_P3_56971_40474970 | NC_021163.1    | Ca_kabuli_chr04 | 40474970                | AA                              | TT                | 1945962273               |
| SNP_P3_56972_40478631 | NC_021163.1    | Ca_kabuli_chr04 | 40478631                | CC                              | TT                | 1945962275               |
| SNP_P3_56973_40478656 | NC_021163.1    | Ca_kabuli_chr04 | 40478656                | TT                              | CC                | 1945962276               |

| SNPs IDs              | Chromosome IDs | Chromosomes     | Physical positions (bp) | CDC Frontier (Reference genome) | (Pusa 256 & HPNB) | NCBI SNPdb Accession IDs |
|-----------------------|----------------|-----------------|-------------------------|---------------------------------|-------------------|--------------------------|
| SNP_P3_56976_40481903 | NC_021163.1    | Ca_kabuli_chr04 | 40481903                | CC                              | TT                | 1945962278               |
| SNP_P3_56977_40482288 | NC_021163.1    | Ca_kabuli_chr04 | 40482288                | TT                              | CC                | 1945962280               |
| SNP_P3_56978_40482307 | NC_021163.1    | Ca_kabuli_chr04 | 40482307                | TT                              | CC                | 1945962282               |
| SNP_P3_56979_40484393 | NC_021163.1    | Ca_kabuli_chr04 | 40484393                | TT                              | AA                | 1945962283               |
| SNP_P3_56981_40484690 | NC_021163.1    | Ca_kabuli_chr04 | 40484690                | GG                              | AA                | 1945962285               |
| SNP_P3_56982_40484694 | NC_021163.1    | Ca_kabuli_chr04 | 40484694                | AA                              | GG                | 1945962287               |
| SNP_P3_56983_40484959 | NC_021163.1    | Ca_kabuli_chr04 | 40484959                | GG                              | CC                | 1945962289               |
| SNP_P3_56984_40485285 | NC_021163.1    | Ca_kabuli_chr04 | 40485285                | TT                              | CC                | 1945962291               |
| SNP_P3_56985_40485975 | NC_021163.1    | Ca_kabuli_chr04 | 40485975                | GG                              | AA                | 1945962292               |
| SNP_P3_56986_40486017 | NC_021163.1    | Ca_kabuli_chr04 | 40486017                | AA                              | GG                | 1945962294               |
| SNP_P3_56987_40487810 | NC_021163.1    | Ca_kabuli_chr04 | 40487810                | AA                              | CC                | 1945962296               |
| SNP_P3_56988_40487840 | NC_021163.1    | Ca_kabuli_chr04 | 40487840                | TT                              | CC                | 1945962298               |
| SNP_P3_56989_40488591 | NC_021163.1    | Ca_kabuli_chr04 | 40488591                | GG                              | AA                | 1945962300               |
| SNP_P3_56990_40488828 | NC_021163.1    | Ca_kabuli_chr04 | 40488828                | TT                              | AA                | 1945962301               |
| SNP_P3_56992_40491505 | NC_021163.1    | Ca_kabuli_chr04 | 40491505                | AA                              | TT                | 1945962303               |
| SNP_P3_56993_40491507 | NC_021163.1    | Ca_kabuli_chr04 | 40491507                | GG                              | TT                | 1945962305               |
| SNP_P3_56994_40491544 | NC_021163.1    | Ca_kabuli_chr04 | 40491544                | AA                              | CC                | 1945962307               |
| SNP_P3_56995_40492358 | NC_021163.1    | Ca_kabuli_chr04 | 40492358                | CC                              | TT                | 1945962308               |
| SNP_P3_56996_40492382 | NC_021163.1    | Ca_kabuli_chr04 | 40492382                | TT                              | GG                | 1945962310               |
| SNP_P3_56997_40492416 | NC_021163.1    | Ca_kabuli_chr04 | 40492416                | CC                              | GG                | 1945962312               |
| SNP_P3_56998_40492432 | NC_021163.1    | Ca_kabuli_chr04 | 40492432                | AA                              | GG                | 1945962314               |
| SNP_P3_56999_40493822 | NC_021163.1    | Ca_kabuli_chr04 | 40493822                | TT                              | AA                | 1945962316               |
| SNP_P3_57000_40493952 | NC_021163.1    | Ca_kabuli_chr04 | 40493952                | CC                              | TT                | 1945962317               |
| SNP_P3_57001_40493955 | NC_021163.1    | Ca_kabuli_chr04 | 40493955                | CC                              | TT                | 1945962319               |
| SNP_P3_57002_40493982 | NC_021163.1    | Ca_kabuli_chr04 | 40493982                | TT                              | CC                | 1945962321               |
| SNP_P3_57003_40493990 | NC_021163.1    | Ca_kabuli_chr04 | 40493990                | CC                              | TT                | 1945962323               |
| SNP_P3_57004_40493991 | NC_021163.1    | Ca_kabuli_chr04 | 40493991                | TT                              | CC                | 1945962325               |
| SNP_P3_57005_40493993 | NC_021163.1    | Ca_kabuli_chr04 | 40493993                | AA                              | GG                | 1945962326               |
| SNP_P3_57006_40494003 | NC_021163.1    | Ca_kabuli_chr04 | 40494003                | TT                              | CC                | 1945962328               |
| SNP_P3_57007_40494004 | NC_021163.1    | Ca_kabuli_chr04 | 40494004                | AA                              | GG                | 1945962330               |
| SNP_P3_57008_40494041 | NC_021163.1    | Ca_kabuli_chr04 | 40494041                | AA                              | GG                | 1945962332               |
| SNP_P3_57010_40494285 | NC_021163.1    | Ca_kabuli_chr04 | 40494285                | CC                              | AA                | 1945962333               |
| SNP_P3_57011_40494395 | NC_021163.1    | Ca_kabuli_chr04 | 40494395                | TT                              | AA                | 1945962335               |
| SNP_P3_57012_40497257 | NC_021163.1    | Ca_kabuli_chr04 | 40497257                | AA                              | TT                | 1945962337               |
| SNP_P3_57013_40498035 | NC_021163.1    | Ca_kabuli_chr04 | 40498035                | GG                              | AA                | 1945962339               |
| SNP_P3_57014_40499317 | NC_021163.1    | Ca_kabuli_chr04 | 40499317                | GG                              | TT                | 1945962341               |
| SNP_P3_57015_40499347 | NC_021163.1    | Ca_kabuli_chr04 | 40499347                | CC                              | AA                | 1945962342               |
| SNP_P3_57018_40501107 | NC_021163.1    | Ca_kabuli_chr04 | 40501107                | AA                              | GG                | 1945962344               |
| SNP_P3_57019_40502049 | NC_021163.1    | Ca_kabuli_chr04 | 40502049                | TT                              | CC                | 1945962346               |
| SNP_P3_57020_40503265 | NC_021163.1    | Ca_kabuli_chr04 | 40503265                | GG                              | AA                | 1945962348               |
| SNP_P3_57021_40503503 | NC_021163.1    | Ca_kabuli_chr04 | 40503503                | CC                              | TT                | 1945962350               |
| SNP_P3_57022_40504379 | NC_021163.1    | Ca_kabuli_chr04 | 40504379                | CC                              | GG                | 1945962351               |

| SNPs IDs              | Chromosome IDs | Chromosomes     | Physical positions (bp) | CDC Frontier (Reference genome) | (Pusa 256 & HPNB) | NCBI SNPdb Accession IDs |
|-----------------------|----------------|-----------------|-------------------------|---------------------------------|-------------------|--------------------------|
| SNP_P3_57023_40504387 | NC_021163.1    | Ca_kabuli_chr04 | 40504387                | TT                              | CC                | 1945962353               |
| SNP_P3_57024_40504478 | NC_021163.1    | Ca_kabuli_chr04 | 40504478                | GG                              | AA                | 1945962355               |
| SNP_P3_57025_40504484 | NC_021163.1    | Ca_kabuli_chr04 | 40504484                | TT                              | CC                | 1945962357               |
| SNP_P3_57026_40504626 | NC_021163.1    | Ca_kabuli_chr04 | 40504626                | CC                              | TT                | 1945962358               |
| SNP_P3_57027_40504647 | NC_021163.1    | Ca_kabuli_chr04 | 40504647                | TT                              | GG                | 1945962360               |
| SNP_P3_57028_40505077 | NC_021163.1    | Ca_kabuli_chr04 | 40505077                | CC                              | TT                | 1945962362               |
| SNP_P3_57030_40505367 | NC_021163.1    | Ca_kabuli_chr04 | 40505367                | GG                              | AA                | 1945962364               |
| SNP_P3_57031_40505383 | NC_021163.1    | Ca_kabuli_chr04 | 40505383                | GG                              | AA                | 1945962366               |
| SNP_P3_57033_40507901 | NC_021163.1    | Ca_kabuli_chr04 | 40507901                | CC                              | GG                | 1945962367               |
| SNP_P3_57034_40507933 | NC_021163.1    | Ca_kabuli_chr04 | 40507933                | GG                              | CC                | 1945962369               |
| SNP_P3_57035_40507973 | NC_021163.1    | Ca_kabuli_chr04 | 40507973                | CC                              | TT                | 1945962371               |
| SNP_P3_57036_40508240 | NC_021163.1    | Ca_kabuli_chr04 | 40508240                | AA                              | GG                | 1945962373               |
| SNP_P3_57037_40508254 | NC_021163.1    | Ca_kabuli_chr04 | 40508254                | TT                              | GG                | 1945962375               |
| SNP_P3_57038_40508356 | NC_021163.1    | Ca_kabuli_chr04 | 40508356                | GG                              | AA                | 1945962376               |
| SNP_P3_57039_40508626 | NC_021163.1    | Ca_kabuli_chr04 | 40508626                | TT                              | CC                | 1945962378               |
| SNP_P3_57040_40508633 | NC_021163.1    | Ca_kabuli_chr04 | 40508633                | TT                              | CC                | 1945962380               |
| SNP_P3_57042_40509208 | NC_021163.1    | Ca_kabuli_chr04 | 40509208                | CC                              | GG                | 1945962382               |
| SNP_P3_57043_40510666 | NC_021163.1    | Ca_kabuli_chr04 | 40510666                | GG                              | AA                | 1945962383               |
| SNP_P3_57044_40510671 | NC_021163.1    | Ca_kabuli_chr04 | 40510671                | AA                              | GG                | 1945962385               |
| SNP_P3_57045_40511120 | NC_021163.1    | Ca_kabuli_chr04 | 40511120                | TT                              | GG                | 1945962387               |
| SNP_P3_57046_40511487 | NC_021163.1    | Ca_kabuli_chr04 | 40511487                | AA                              | CC                | 1945962389               |
| SNP_P3_57047_40511681 | NC_021163.1    | Ca_kabuli_chr04 | 40511681                | AA                              | GG                | 1945962391               |
| SNP_P3_57048_40511896 | NC_021163.1    | Ca_kabuli_chr04 | 40511896                | TT                              | CC                | 1945962392               |
| SNP_P3_57049_40511899 | NC_021163.1    | Ca_kabuli_chr04 | 40511899                | GG                              | TT                | 1945962394               |
| SNP_P3_57050_40511904 | NC_021163.1    | Ca_kabuli_chr04 | 40511904                | GG                              | AA                | 1945962396               |
| SNP_P3_57051_40511925 | NC_021163.1    | Ca_kabuli_chr04 | 40511925                | CC                              | TT                | 1945962398               |
| SNP_P3_57052_40512646 | NC_021163.1    | Ca_kabuli_chr04 | 40512646                | GG                              | TT                | 1945962400               |
| SNP_P3_57053_40513037 | NC_021163.1    | Ca_kabuli_chr04 | 40513037                | GG                              | AA                | 1945962401               |
| SNP_P3_57054_40513466 | NC_021163.1    | Ca_kabuli_chr04 | 40513466                | TT                              | AA                | 1945962403               |
| SNP_P3_57055_40513733 | NC_021163.1    | Ca_kabuli_chr04 | 40513733                | TT                              | CC                | 1945962405               |
| SNP_P3_57056_40515890 | NC_021163.1    | Ca_kabuli_chr04 | 40515890                | GG                              | AA                | 1945962407               |
| SNP_P3_57057_40515897 | NC_021163.1    | Ca_kabuli_chr04 | 40515897                | AA                              | GG                | 1945962408               |
| SNP_P3_57058_40515908 | NC_021163.1    | Ca_kabuli_chr04 | 40515908                | CC                              | TT                | 1945962410               |
| SNP_P3_57059_40515909 | NC_021163.1    | Ca_kabuli_chr04 | 40515909                | AA                              | GG                | 1945962412               |
| SNP_P3_57060_40515969 | NC_021163.1    | Ca_kabuli_chr04 | 40515969                | TT                              | GG                | 1945962414               |
| SNP_P3_57061_40515976 | NC_021163.1    | Ca_kabuli_chr04 | 40515976                | TT                              | CC                | 1945962416               |
| SNP_P3_57062_40516052 | NC_021163.1    | Ca_kabuli_chr04 | 40516052                | AA                              | GG                | 1945962417               |
| SNP_P3_57063_40516148 | NC_021163.1    | Ca_kabuli_chr04 | 40516148                | GG                              | AA                | 1945962419               |
| SNP_P3_57064_40516169 | NC_021163.1    | Ca_kabuli_chr04 | 40516169                | GG                              | AA                | 1945962421               |
| SNP_P3_57065_40516173 | NC_021163.1    | Ca_kabuli_chr04 | 40516173                | AA                              | GG                | 1945962423               |
| SNP_P3_57066_40516289 | NC_021163.1    | Ca_kabuli_chr04 | 40516289                | GG                              | AA                | 1945962425               |
| SNP_P3_57067_40516319 | NC_021163.1    | Ca_kabuli_chr04 | 40516319                | TT                              | AA                | 1945962426               |

| SNPs IDs              | Chromosome IDs | Chromosomes     | Physical positions (bp) | CDC Frontier (Reference genome) | (Pusa 256 & HPNB) | NCBI SNPdb Accession IDs |
|-----------------------|----------------|-----------------|-------------------------|---------------------------------|-------------------|--------------------------|
| SNP_P3_57068_40516475 | NC_021163.1    | Ca_kabuli_chr04 | 40516475                | AA                              | CC                | 1945962428               |
| SNP_P3_57069_40516497 | NC_021163.1    | Ca_kabuli_chr04 | 40516497                | TT                              | CC                | 1945962430               |
| SNP_P3_57070_40516509 | NC_021163.1    | Ca_kabuli_chr04 | 40516509                | CC                              | TT                | 1945962432               |
| SNP_P3_57071_40516511 | NC_021163.1    | Ca_kabuli_chr04 | 40516511                | AA                              | GG                | 1945962433               |
| SNP_P3_57072_40516518 | NC_021163.1    | Ca_kabuli_chr04 | 40516518                | CC                              | TT                | 1945962435               |
| SNP_P3_57073_40516526 | NC_021163.1    | Ca_kabuli_chr04 | 40516526                | AA                              | GG                | 1945962437               |
| SNP_P3_57074_40516563 | NC_021163.1    | Ca_kabuli_chr04 | 40516563                | TT                              | CC                | 1945962439               |
| SNP_P3_57075_40516778 | NC_021163.1    | Ca_kabuli_chr04 | 40516778                | CC                              | TT                | 1945962441               |
| SNP_P3_57076_40517956 | NC_021163.1    | Ca_kabuli_chr04 | 40517956                | GG                              | AA                | 1945962442               |
| SNP_P3_57077_40517985 | NC_021163.1    | Ca_kabuli_chr04 | 40517985                | CC                              | AA                | 1945962444               |
| SNP_P3_57078_40518007 | NC_021163.1    | Ca_kabuli_chr04 | 40518007                | AA                              | CC                | 1945962446               |
| SNP_P3_57079_40518041 | NC_021163.1    | Ca_kabuli_chr04 | 40518041                | TT                              | CC                | 1945962448               |
| SNP_P3_57080_40518064 | NC_021163.1    | Ca_kabuli_chr04 | 40518064                | AA                              | GG                | 1945962449               |
| SNP_P3_57081_40518114 | NC_021163.1    | Ca_kabuli_chr04 | 40518114                | TT                              | AA                | 1945962451               |
| SNP_P3_57082_40518115 | NC_021163.1    | Ca_kabuli_chr04 | 40518115                | CC                              | AA                | 1945962453               |
| SNP_P3_57083_40518125 | NC_021163.1    | Ca_kabuli_chr04 | 40518125                | CC                              | TT                | 1945962455               |
| SNP_P3_57084_40518741 | NC_021163.1    | Ca_kabuli_chr04 | 40518741                | GG                              | AA                | 1945962457               |
| SNP_P3_57085_40518744 | NC_021163.1    | Ca_kabuli_chr04 | 40518744                | GG                              | AA                | 1945962458               |
| SNP_P3_57086_40518762 | NC_021163.1    | Ca_kabuli_chr04 | 40518762                | GG                              | AA                | 1945962460               |
| SNP_P3_57087_40518763 | NC_021163.1    | Ca_kabuli_chr04 | 40518763                | TT                              | CC                | 1945962462               |
| SNP_P3_57088_40518769 | NC_021163.1    | Ca_kabuli_chr04 | 40518769                | GG                              | AA                | 1945962464               |
| SNP_P3_57089_40518782 | NC_021163.1    | Ca_kabuli_chr04 | 40518782                | CC                              | TT                | 1945962465               |
| SNP_P3_57090_40519072 | NC_021163.1    | Ca_kabuli_chr04 | 40519072                | AA                              | CC                | 1945962467               |
| SNP_P3_57091_40519073 | NC_021163.1    | Ca_kabuli_chr04 | 40519073                | CC                              | TT                | 1945962469               |
| SNP_P3_57092_40519111 | NC_021163.1    | Ca_kabuli_chr04 | 40519111                | GG                              | AA                | 1945962471               |
| SNP_P3_57094_40519502 | NC_021163.1    | Ca_kabuli_chr04 | 40519502                | CC                              | AA                | 1945962473               |
| SNP_P3_57096_40520000 | NC_021163.1    | Ca_kabuli_chr04 | 40520000                | AA                              | GG                | 1945962474               |
| SNP_P3_57097_40520039 | NC_021163.1    | Ca_kabuli_chr04 | 40520039                | AA                              | TT                | 1945962476               |
| SNP_P3_57098_40520232 | NC_021163.1    | Ca_kabuli_chr04 | 40520232                | GG                              | AA                | 1945962478               |
| SNP_P3_57099_40521630 | NC_021163.1    | Ca_kabuli_chr04 | 40521630                | CC                              | GG                | 1945962480               |
| SNP_P3_57100_40521684 | NC_021163.1    | Ca_kabuli_chr04 | 40521684                | AA                              | GG                | 1945962482               |
| SNP_P3_57102_40523864 | NC_021163.1    | Ca_kabuli_chr04 | 40523864                | TT                              | CC                | 1945962483               |
| SNP_P3_57103_40524596 | NC_021163.1    | Ca_kabuli_chr04 | 40524596                | CC                              | TT                | 1945962485               |
| SNP_P3_57104_40525705 | NC_021163.1    | Ca_kabuli_chr04 | 40525705                | CC                              | TT                | 1945962487               |
| SNP_P3_57106_40529002 | NC_021163.1    | Ca_kabuli_chr04 | 40529002                | TT                              | AA                | 1945962489               |
| SNP_P3_57107_40530327 | NC_021163.1    | Ca_kabuli_chr04 | 40530327                | TT                              | CC                | 1945962490               |
| SNP_P3_57108_40533165 | NC_021163.1    | Ca_kabuli_chr04 | 40533165                | GG                              | CC                | 1945962492               |
| SNP_P3_57109_40533234 | NC_021163.1    | Ca_kabuli_chr04 | 40533234                | TT                              | AA                | 1945962494               |
| SNP_P3_57110_40533365 | NC_021163.1    | Ca_kabuli_chr04 | 40533365                | AA                              | GG                | 1945962496               |
| SNP_P3_57111_40533785 | NC_021163.1    | Ca_kabuli_chr04 | 40533785                | TT                              | CC                | 1945962498               |
| SNP_P3_57112_40533821 | NC_021163.1    | Ca_kabuli_chr04 | 40533821                | CC                              | GG                | 1945962499               |
| SNP_P3_57113_40534053 | NC_021163.1    | Ca_kabuli_chr04 | 40534053                | CC                              | TT                | 1945962501               |

| SNPs IDs              | Chromosome IDs | Chromosomes     | Physical positions (bp) | CDC Frontier (Reference genome) | (Pusa 256 & HPNB) | NCBI SNPdb Accession IDs |
|-----------------------|----------------|-----------------|-------------------------|---------------------------------|-------------------|--------------------------|
| SNP_P3_57115_40537897 | NC_021163.1    | Ca_kabuli_chr04 | 40537897                | GG                              | TT                | 1945962503               |
| SNP_P3_57116_40537945 | NC_021163.1    | Ca_kabuli_chr04 | 40537945                | TT                              | GG                | 1945962505               |
| SNP_P3_57117_40537955 | NC_021163.1    | Ca_kabuli_chr04 | 40537955                | CC                              | AA                | 1945962507               |
| SNP_P3_57118_40539511 | NC_021163.1    | Ca_kabuli_chr04 | 40539511                | AA                              | GG                | 1945962508               |
| SNP_P3_57119_40539576 | NC_021163.1    | Ca_kabuli_chr04 | 40539576                | CC                              | TT                | 1945962510               |
| SNP_P3_57120_40539583 | NC_021163.1    | Ca_kabuli_chr04 | 40539583                | TT                              | CC                | 1945962512               |
| SNP_P3_57121_40539865 | NC_021163.1    | Ca_kabuli_chr04 | 40539865                | AA                              | GG                | 1945962514               |
| SNP_P3_57122_40539867 | NC_021163.1    | Ca_kabuli_chr04 | 40539867                | AA                              | TT                | 1945962515               |
| SNP_P3_57123_40539929 | NC_021163.1    | Ca_kabuli_chr04 | 40539929                | CC                              | TT                | 1945962517               |
| SNP_P3_57124_40540226 | NC_021163.1    | Ca_kabuli_chr04 | 40540226                | TT                              | AA                | 1945962519               |
| SNP_P3_57125_40540243 | NC_021163.1    | Ca_kabuli_chr04 | 40540243                | TT                              | GG                | 1945962521               |
| SNP_P3_57126_40540304 | NC_021163.1    | Ca_kabuli_chr04 | 40540304                | GG                              | AA                | 1945962523               |
| SNP_P3_57127_40540980 | NC_021163.1    | Ca_kabuli_chr04 | 40540980                | AA                              | GG                | 1945962524               |
| SNP_P3_57128_40541218 | NC_021163.1    | Ca_kabuli_chr04 | 40541218                | CC                              | TT                | 1945962526               |
| SNP_P3_57129_40542490 | NC_021163.1    | Ca_kabuli_chr04 | 40542490                | TT                              | CC                | 1945962528               |
| SNP_P3_57130_40542733 | NC_021163.1    | Ca_kabuli_chr04 | 40542733                | GG                              | AA                | 1945962530               |
| SNP_P3_57131_40542950 | NC_021163.1    | Ca_kabuli_chr04 | 40542950                | CC                              | TT                | 1945962532               |
| SNP_P3_57132_40542990 | NC_021163.1    | Ca_kabuli_chr04 | 40542990                | AA                              | GG                | 1945962533               |
| SNP_P3_57133_40547450 | NC_021163.1    | Ca_kabuli_chr04 | 40547450                | GG                              | AA                | 1945962535               |
| SNP_P3_57134_40547983 | NC_021163.1    | Ca_kabuli_chr04 | 40547983                | TT                              | CC                | 1945962537               |
| SNP_P3_57135_40549530 | NC_021163.1    | Ca_kabuli_chr04 | 40549530                | AA                              | TT                | 1945962539               |
| SNP_P3_57136_40550194 | NC_021163.1    | Ca_kabuli_chr04 | 40550194                | CC                              | GG                | 1945962540               |
| SNP_P3_57138_40551030 | NC_021163.1    | Ca_kabuli_chr04 | 40551030                | AA                              | CC                | 1945962542               |
| SNP_P3_57139_40551032 | NC_021163.1    | Ca_kabuli_chr04 | 40551032                | CC                              | TT                | 1945962544               |
| SNP_P3_57140_40551160 | NC_021163.1    | Ca_kabuli_chr04 | 40551160                | AA                              | GG                | 1945962546               |
| SNP_P3_57141_40551285 | NC_021163.1    | Ca_kabuli_chr04 | 40551285                | TT                              | AA                | 1945962548               |
| SNP_P3_57142_40551366 | NC_021163.1    | Ca_kabuli_chr04 | 40551366                | CC                              | TT                | 1945962549               |
| SNP_P3_57143_40551386 | NC_021163.1    | Ca_kabuli_chr04 | 40551386                | CC                              | AA                | 1945962551               |
| SNP_P3_57144_40551418 | NC_021163.1    | Ca_kabuli_chr04 | 40551418                | AA                              | GG                | 1945962553               |
| SNP_P3_57145_40551488 | NC_021163.1    | Ca_kabuli_chr04 | 40551488                | TT                              | CC                | 1945962555               |
| SNP_P3_57146_40551975 | NC_021163.1    | Ca_kabuli_chr04 | 40551975                | CC                              | TT                | 1945962557               |
| SNP_P3_57147_40552770 | NC_021163.1    | Ca_kabuli_chr04 | 40552770                | TT                              | GG                | 1945962558               |
| SNP_P3_57148_40552829 | NC_021163.1    | Ca_kabuli_chr04 | 40552829                | TT                              | CC                | 1945962560               |
| SNP_P3_57149_40552844 | NC_021163.1    | Ca_kabuli_chr04 | 40552844                | TT                              | AA                | 1945962562               |
| SNP_P3_57150_40552849 | NC_021163.1    | Ca_kabuli_chr04 | 40552849                | TT                              | AA                | 1945962564               |
| SNP_P3_57151_40553516 | NC_021163.1    | Ca_kabuli_chr04 | 40553516                | CC                              | AA                | 1945962565               |
| SNP_P3_57152_40553517 | NC_021163.1    | Ca_kabuli_chr04 | 40553517                | AA                              | TT                | 1945962567               |
| SNP_P3_57153_40553538 | NC_021163.1    | Ca_kabuli_chr04 | 40553538                | CC                              | GG                | 1945962569               |
| SNP_P3_57154_40553556 | NC_021163.1    | Ca_kabuli_chr04 | 40553556                | AA                              | TT                | 1945962571               |
| SNP_P3_57155_40553634 | NC_021163.1    | Ca_kabuli_chr04 | 40553634                | AA                              | GG                | 1945962573               |
| SNP_P3_57156_40553886 | NC_021163.1    | Ca_kabuli_chr04 | 40553886                | GG                              | CC                | 1945962574               |
| SNP_P3_57157_40553911 | NC_021163.1    | Ca_kabuli_chr04 | 40553911                | CC                              | TT                | 1945962576               |

| SNPs IDs              | Chromosome IDs | Chromosomes     | Physical positions (bp) | CDC Frontier (Reference genome) | (Pusa 256 & HPNB) | NCBI SNPdb Accession IDs |
|-----------------------|----------------|-----------------|-------------------------|---------------------------------|-------------------|--------------------------|
| SNP_P3_57158_40553964 | NC_021163.1    | Ca_kabuli_chr04 | 40553964                | GG                              | TT                | 1945962578               |
| SNP_P3_57159_40553971 | NC_021163.1    | Ca_kabuli_chr04 | 40553971                | GG                              | CC                | 1945962580               |
| SNP_P3_57160_40554126 | NC_021163.1    | Ca_kabuli_chr04 | 40554126                | GG                              | AA                | 1945962582               |
| SNP_P3_57161_40554154 | NC_021163.1    | Ca_kabuli_chr04 | 40554154                | TT                              | GG                | 1945962583               |
| SNP_P3_57162_40554810 | NC_021163.1    | Ca_kabuli_chr04 | 40554810                | TT                              | CC                | 1945962585               |
| SNP_P3_57163_40555171 | NC_021163.1    | Ca_kabuli_chr04 | 40555171                | TT                              | AA                | 1945962587               |
| SNP_P3_57164_40555499 | NC_021163.1    | Ca_kabuli_chr04 | 40555499                | CC                              | TT                | 1945962589               |
| SNP_P3_57165_40555546 | NC_021163.1    | Ca_kabuli_chr04 | 40555546                | TT                              | GG                | 1945962590               |
| SNP_P3_57166_40555931 | NC_021163.1    | Ca_kabuli_chr04 | 40555931                | TT                              | CC                | 1945962592               |
| SNP_P3_57167_40556000 | NC_021163.1    | Ca_kabuli_chr04 | 40556000                | CC                              | TT                | 1945962594               |
| SNP_P3_57168_40557678 | NC_021163.1    | Ca_kabuli_chr04 | 40557678                | TT                              | AA                | 1945962596               |
| SNP_P3_57169_40557716 | NC_021163.1    | Ca_kabuli_chr04 | 40557716                | CC                              | TT                | 1945962598               |
| SNP_P3_57170_40558081 | NC_021163.1    | Ca_kabuli_chr04 | 40558081                | CC                              | GG                | 1945962599               |
| SNP_P3_57171_40558126 | NC_021163.1    | Ca_kabuli_chr04 | 40558126                | AA                              | CC                | 1945962601               |
| SNP_P3_57172_40558964 | NC_021163.1    | Ca_kabuli_chr04 | 40558964                | AA                              | GG                | 1945962603               |
| SNP_P3_57173_40558984 | NC_021163.1    | Ca_kabuli_chr04 | 40558984                | TT                              | CC                | 1945962605               |
| SNP_P3_57174_40559003 | NC_021163.1    | Ca_kabuli_chr04 | 40559003                | TT                              | GG                | 1945962607               |
| SNP_P3_57175_40559009 | NC_021163.1    | Ca_kabuli_chr04 | 40559009                | TT                              | CC                | 1945962608               |
| SNP_P3_57176_40559037 | NC_021163.1    | Ca_kabuli_chr04 | 40559037                | GG                              | AA                | 1945962610               |
| SNP_P3_57177_40559047 | NC_021163.1    | Ca_kabuli_chr04 | 40559047                | GG                              | TT                | 1945962612               |
| SNP_P3_57178_40559104 | NC_021163.1    | Ca_kabuli_chr04 | 40559104                | AA                              | CC                | 1945962614               |
| SNP_P3_57179_40559167 | NC_021163.1    | Ca_kabuli_chr04 | 40559167                | AA                              | CC                | 1945962615               |
| SNP_P3_57180_40560337 | NC_021163.1    | Ca_kabuli_chr04 | 40560337                | AA                              | TT                | 1945962617               |
| SNP_P3_57181_40560387 | NC_021163.1    | Ca_kabuli_chr04 | 40560387                | TT                              | CC                | 1945962619               |
| SNP_P3_57182_40560392 | NC_021163.1    | Ca_kabuli_chr04 | 40560392                | TT                              | GG                | 1945962621               |
| SNP_P3_57183_40560410 | NC_021163.1    | Ca_kabuli_chr04 | 40560410                | AA                              | GG                | 1945962623               |
| SNP_P3_57184_40560670 | NC_021163.1    | Ca_kabuli_chr04 | 40560670                | TT                              | GG                | 1945962624               |
| SNP_P3_57185_40560737 | NC_021163.1    | Ca_kabuli_chr04 | 40560737                | TT                              | CC                | 1945962626               |
| SNP_P3_57186_40560982 | NC_021163.1    | Ca_kabuli_chr04 | 40560982                | AA                              | GG                | 1945962628               |
| SNP_P3_57187_40560995 | NC_021163.1    | Ca_kabuli_chr04 | 40560995                | TT                              | CC                | 1945962630               |
| SNP_P3_57188_40560996 | NC_021163.1    | Ca_kabuli_chr04 | 40560996                | GG                              | AA                | 1945962631               |
| SNP_P3_57189_40561317 | NC_021163.1    | Ca_kabuli_chr04 | 40561317                | CC                              | TT                | 1945962633               |
| SNP_P3_57190_40561327 | NC_021163.1    | Ca_kabuli_chr04 | 40561327                | CC                              | GG                | 1945962635               |
| SNP_P3_57191_40567847 | NC_021163.1    | Ca_kabuli_chr04 | 40567847                | GG                              | TT                | 1945962637               |
| SNP_P3_57192_40570832 | NC_021163.1    | Ca_kabuli_chr04 | 40570832                | AA                              | GG                | 1945962639               |
| SNP_P3_57193_40570864 | NC_021163.1    | Ca_kabuli_chr04 | 40570864                | AA                              | TT                | 1945962640               |
| SNP_P3_57195_40571650 | NC_021163.1    | Ca_kabuli_chr04 | 40571650                | GG                              | CC                | 1945962642               |
| SNP_P3_57196_40571661 | NC_021163.1    | Ca_kabuli_chr04 | 40571661                | GG                              | AA                | 1945962644               |
| SNP_P3_57197_40571814 | NC_021163.1    | Ca_kabuli_chr04 | 40571814                | CC                              | TT                | 1945962646               |
| SNP_P3_57198_40574896 | NC_021163.1    | Ca_kabuli_chr04 | 40574896                | TT                              | AA                | 1945962648               |
| SNP_P3_57199_40574914 | NC_021163.1    | Ca_kabuli_chr04 | 40574914                | CC                              | TT                | 1945962649               |
| SNP_P3_57200_40574928 | NC_021163.1    | Ca_kabuli_chr04 | 40574928                | CC                              | TT                | 1945962651               |

| SNPs IDs              | Chromosome IDs | Chromosomes     | Physical positions (bp) | CDC Frontier (Reference genome) | (Pusa 256 & HPNB) | NCBI SNPdb Accession IDs |
|-----------------------|----------------|-----------------|-------------------------|---------------------------------|-------------------|--------------------------|
| SNP_P3_57201_40575273 | NC_021163.1    | Ca_kabuli_chr04 | 40575273                | GG                              | AA                | 1945962653               |
| SNP_P3_57202_40576541 | NC_021163.1    | Ca_kabuli_chr04 | 40576541                | TT                              | AA                | 1945962655               |
| SNP_P3_57204_40576877 | NC_021163.1    | Ca_kabuli_chr04 | 40576877                | GG                              | AA                | 1945962656               |
| SNP_P3_57205_40576894 | NC_021163.1    | Ca_kabuli_chr04 | 40576894                | GG                              | AA                | 1945962658               |
| SNP_P3_57206_40576904 | NC_021163.1    | Ca_kabuli_chr04 | 40576904                | GG                              | CC                | 1945962660               |
| SNP_P3_57208_40586637 | NC_021163.1    | Ca_kabuli_chr04 | 40586637                | TT                              | GG                | 1945962662               |
| SNP_P3_57209_40587185 | NC_021163.1    | Ca_kabuli_chr04 | 40587185                | GG                              | AA                | 1945962664               |
| SNP_P3_57210_40587405 | NC_021163.1    | Ca_kabuli_chr04 | 40587405                | GG                              | AA                | 1945962665               |
| SNP_P3_57211_40587413 | NC_021163.1    | Ca_kabuli_chr04 | 40587413                | GG                              | TT                | 1945962667               |
| SNP_P3_57213_40588243 | NC_021163.1    | Ca_kabuli_chr04 | 40588243                | AA                              | GG                | 1945962669               |
| SNP_P3_57214_40590208 | NC_021163.1    | Ca_kabuli_chr04 | 40590208                | TT                              | CC                | 1945962671               |
| SNP_P3_57215_40590223 | NC_021163.1    | Ca_kabuli_chr04 | 40590223                | GG                              | AA                | 1945962673               |
| SNP_P3_57216_40590240 | NC_021163.1    | Ca_kabuli_chr04 | 40590240                | AA                              | CC                | 1945962674               |
| SNP_P3_57217_40590868 | NC_021163.1    | Ca_kabuli_chr04 | 40590868                | TT                              | AA                | 1945962676               |
| SNP_P3_57218_40590903 | NC_021163.1    | Ca_kabuli_chr04 | 40590903                | CC                              | TT                | 1945962678               |
| SNP_P3_57219_40591120 | NC_021163.1    | Ca_kabuli_chr04 | 40591120                | CC                              | TT                | 1945962680               |
| SNP_P3_57220_40591222 | NC_021163.1    | Ca_kabuli_chr04 | 40591222                | TT                              | CC                | 1945962682               |
| SNP_P3_57221_40591940 | NC_021163.1    | Ca_kabuli_chr04 | 40591940                | CC                              | TT                | 1945962683               |
| SNP_P3_57222_40592119 | NC_021163.1    | Ca_kabuli_chr04 | 40592119                | TT                              | AA                | 1945962685               |
| SNP_P3_57223_40592342 | NC_021163.1    | Ca_kabuli_chr04 | 40592342                | TT                              | CC                | 1945962687               |
| SNP_P3_57224_40592431 | NC_021163.1    | Ca_kabuli_chr04 | 40592431                | AA                              | TT                | 1945962689               |
| SNP_P3_57225_40593437 | NC_021163.1    | Ca_kabuli_chr04 | 40593437                | GG                              | AA                | 1945962690               |
| SNP_P3_57226_40593489 | NC_021163.1    | Ca_kabuli_chr04 | 40593489                | TT                              | CC                | 1945962692               |
| SNP_P3_57227_40593774 | NC_021163.1    | Ca_kabuli_chr04 | 40593774                | AA                              | GG                | 1945962694               |
| SNP_P3_57228_40594445 | NC_021163.1    | Ca_kabuli_chr04 | 40594445                | TT                              | AA                | 1945962696               |
| SNP_P3_57229_40596988 | NC_021163.1    | Ca_kabuli_chr04 | 40596988                | TT                              | CC                | 1945962698               |
| SNP_P3_57230_40597970 | NC_021163.1    | Ca_kabuli_chr04 | 40597970                | TT                              | AA                | 1945962699               |
| SNP_P3_57231_40598016 | NC_021163.1    | Ca_kabuli_chr04 | 40598016                | TT                              | GG                | 1945962701               |
| SNP_P3_57232_40598026 | NC_021163.1    | Ca_kabuli_chr04 | 40598026                | TT                              | AA                | 1945962703               |
| SNP_P3_57233_40598204 | NC_021163.1    | Ca_kabuli_chr04 | 40598204                | AA                              | TT                | 1945962705               |
| SNP_P3_57234_40598273 | NC_021163.1    | Ca_kabuli_chr04 | 40598273                | CC                              | TT                | 1945962707               |
| SNP_P3_57235_40598274 | NC_021163.1    | Ca_kabuli_chr04 | 40598274                | TT                              | GG                | 1945962708               |
| SNP_P3_57236_40599928 | NC_021163.1    | Ca_kabuli_chr04 | 40599928                | CC                              | AA                | 1945962710               |
| SNP_P3_57237_40600350 | NC_021163.1    | Ca_kabuli_chr04 | 40600350                | GG                              | AA                | 1945962712               |
| SNP_P3_57238_40600354 | NC_021163.1    | Ca_kabuli_chr04 | 40600354                | TT                              | GG                | 1945962714               |
| SNP_P3_57239_40605753 | NC_021163.1    | Ca_kabuli_chr04 | 40605753                | GG                              | AA                | 1945962715               |
| SNP_P3_57240_40608731 | NC_021163.1    | Ca_kabuli_chr04 | 40608731                | TT                              | CC                | 1945962717               |
| SNP_P3_57241_40613424 | NC_021163.1    | Ca_kabuli_chr04 | 40613424                | GG                              | AA                | 1945962719               |
| SNP_P3_57242_40613645 | NC_021163.1    | Ca_kabuli_chr04 | 40613645                | AA                              | CC                | 1945962721               |
| SNP_P3_57243_40616993 | NC_021163.1    | Ca_kabuli_chr04 | 40616993                | AA                              | GG                | 1945962723               |
| SNP_P3_57244_40620141 | NC_021163.1    | Ca_kabuli_chr04 | 40620141                | CC                              | TT                | 1945962724               |
| SNP_P3_57245_40620824 | NC_021163.1    | Ca_kabuli_chr04 | 40620824                | AA                              | TT                | 1945962726               |

| SNPs IDs              | Chromosome IDs | Chromosomes     | Physical positions (bp) | CDC Frontier (Reference genome) | (Pusa 256 & HPNB) | NCBI SNPdb Accession IDs |
|-----------------------|----------------|-----------------|-------------------------|---------------------------------|-------------------|--------------------------|
| SNP_P3_57246_40620840 | NC_021163.1    | Ca_kabuli_chr04 | 40620840                | CC                              | TT                | 1945962728               |
| SNP_P3_57247_40621859 | NC_021163.1    | Ca_kabuli_chr04 | 40621859                | GG                              | AA                | 1945962730               |
| SNP_P3_57249_40623128 | NC_021163.1    | Ca_kabuli_chr04 | 40623128                | GG                              | TT                | 1945962732               |
| SNP_P3_57250_40625207 | NC_021163.1    | Ca_kabuli_chr04 | 40625207                | GG                              | AA                | 1945962733               |
| SNP_P3_57251_40629607 | NC_021163.1    | Ca_kabuli_chr04 | 40629607                | TT                              | CC                | 1945962735               |
| SNP_P3_57252_40630366 | NC_021163.1    | Ca_kabuli_chr04 | 40630366                | TT                              | CC                | 1945962737               |
| SNP_P3_57253_40630367 | NC_021163.1    | Ca_kabuli_chr04 | 40630367                | AA                              | CC                | 1945962739               |
| SNP_P3_57254_40630368 | NC_021163.1    | Ca_kabuli_chr04 | 40630368                | GG                              | AA                | 1945962740               |
| SNP_P3_57255_40630369 | NC_021163.1    | Ca_kabuli_chr04 | 40630369                | TT                              | AA                | 1945962742               |
| SNP_P3_57256_40630370 | NC_021163.1    | Ca_kabuli_chr04 | 40630370                | TT                              | CC                | 1945962744               |
| SNP_P3_57257_40636307 | NC_021163.1    | Ca_kabuli_chr04 | 40636307                | TT                              | CC                | 1945962746               |
| SNP_P3_57258_40636341 | NC_021163.1    | Ca_kabuli_chr04 | 40636341                | CC                              | TT                | 1945962748               |
| SNP_P3_57259_40638439 | NC_021163.1    | Ca_kabuli_chr04 | 40638439                | CC                              | TT                | 1945962749               |
| SNP_P3_57260_40638748 | NC_021163.1    | Ca_kabuli_chr04 | 40638748                | TT                              | CC                | 1945962751               |
| SNP_P3_57261_40639322 | NC_021163.1    | Ca_kabuli_chr04 | 40639322                | AA                              | GG                | 1945962753               |
| SNP_P3_57262_40639741 | NC_021163.1    | Ca_kabuli_chr04 | 40639741                | TT                              | AA                | 1945962755               |
| SNP_P3_57265_40640353 | NC_021163.1    | Ca_kabuli_chr04 | 40640353                | TT                              | CC                | 1945962757               |
| SNP_P3_57267_40640689 | NC_021163.1    | Ca_kabuli_chr04 | 40640689                | AA                              | CC                | 1945962758               |
| SNP_P3_57268_40640693 | NC_021163.1    | Ca_kabuli_chr04 | 40640693                | GG                              | TT                | 1945962760               |
| SNP_P3_57269_40640903 | NC_021163.1    | Ca_kabuli_chr04 | 40640903                | TT                              | CC                | 1945962762               |
| SNP_P3_57270_40642306 | NC_021163.1    | Ca_kabuli_chr04 | 40642306                | AA                              | TT                | 1945962764               |
| SNP_P3_57271_40646602 | NC_021163.1    | Ca_kabuli_chr04 | 40646602                | AA                              | CC                | 1945962766               |
| SNP_P3_57272_40647065 | NC_021163.1    | Ca_kabuli_chr04 | 40647065                | GG                              | AA                | 1945962767               |
| SNP_P3_57273_40647474 | NC_021163.1    | Ca_kabuli_chr04 | 40647474                | TT                              | AA                | 1945962769               |
| SNP_P3_57275_40647938 | NC_021163.1    | Ca_kabuli_chr04 | 40647938                | AA                              | CC                | 1945962771               |
| SNP_P3_57276_40648207 | NC_021163.1    | Ca_kabuli_chr04 | 40648207                | CC                              | TT                | 1945962773               |
| SNP_P3_57277_40648290 | NC_021163.1    | Ca_kabuli_chr04 | 40648290                | TT                              | CC                | 1945962774               |
| SNP_P3_57278_40648438 | NC_021163.1    | Ca_kabuli_chr04 | 40648438                | CC                              | TT                | 1945962776               |
| SNP_P3_57281_40648653 | NC_021163.1    | Ca_kabuli_chr04 | 40648653                | GG                              | CC                | 1945962778               |
| SNP_P3_57282_40648710 | NC_021163.1    | Ca_kabuli_chr04 | 40648710                | AA                              | CC                | 1945962780               |
| SNP_P3_57283_40648743 | NC_021163.1    | Ca_kabuli_chr04 | 40648743                | CC                              | TT                | 1945962782               |
| SNP_P3_57284_40648780 | NC_021163.1    | Ca_kabuli_chr04 | 40648780                | AA                              | GG                | 1945962783               |
| SNP_P3_57285_40648845 | NC_021163.1    | Ca_kabuli_chr04 | 40648845                | TT                              | GG                | 1945962785               |
| SNP_P3_57286_40648869 | NC_021163.1    | Ca_kabuli_chr04 | 40648869                | TT                              | GG                | 1945962787               |
| SNP_P3_57287_40648877 | NC_021163.1    | Ca_kabuli_chr04 | 40648877                | CC                              | AA                | 1945962789               |
| SNP_P3_57289_40649120 | NC_021163.1    | Ca_kabuli_chr04 | 40649120                | TT                              | AA                | 1945962791               |
| SNP_P3_57290_40649556 | NC_021163.1    | Ca_kabuli_chr04 | 40649556                | AA                              | GG                | 1945962792               |
| SNP_P3_57291_40649614 | NC_021163.1    | Ca_kabuli_chr04 | 40649614                | TT                              | AA                | 1945962794               |
| SNP_P3_57292_40649623 | NC_021163.1    | Ca_kabuli_chr04 | 40649623                | TT                              | CC                | 1945962796               |
| SNP_P3_57294_40651356 | NC_021163.1    | Ca_kabuli_chr04 | 40651356                | AA                              | CC                | 1945962798               |
| SNP_P3_57295_40651358 | NC_021163.1    | Ca_kabuli_chr04 | 40651358                | AA                              | GG                | 1945962799               |
| SNP_P3_57296_40651378 | NC_021163.1    | Ca_kabuli_chr04 | 40651378                | CC                              | AA                | 1945962801               |



| SNPs IDs              | Chromosome IDs | Chromosomes     | Physical positions (bp) | CDC Frontier (Reference genome) | (Pusa 256 & HPNB) | NCBI SNPdb Accession IDs |
|-----------------------|----------------|-----------------|-------------------------|---------------------------------|-------------------|--------------------------|
| SNP_P3_57297_40651379 | NC_021163.1    | Ca_kabuli_chr04 | 40651379                | TT                              | CC                | 1945962803               |
| SNP_P3_57298_40651380 | NC_021163.1    | Ca_kabuli_chr04 | 40651380                | CC                              | GG                | 1945962805               |
| SNP_P3_57299_40652942 | NC_021163.1    | Ca_kabuli_chr04 | 40652942                | TT                              | GG                | 1945962807               |
| SNP_P3_57300_40653040 | NC_021163.1    | Ca_kabuli_chr04 | 40653040                | TT                              | AA                | 1945962808               |
| SNP_P3_57301_40653093 | NC_021163.1    | Ca_kabuli_chr04 | 40653093                | GG                              | TT                | 1945962810               |
| SNP_P3_57302_40653116 | NC_021163.1    | Ca_kabuli_chr04 | 40653116                | CC                              | AA                | 1945962812               |
| SNP_P3_57303_40653214 | NC_021163.1    | Ca_kabuli_chr04 | 40653214                | AA                              | TT                | 1945962814               |
| SNP_P3_57305_40653263 | NC_021163.1    | Ca_kabuli_chr04 | 40653263                | AA                              | CC                | 1945962815               |
| SNP_P3_57306_40653271 | NC_021163.1    | Ca_kabuli_chr04 | 40653271                | GG                              | AA                | 1945962817               |
| SNP_P3_57307_40653294 | NC_021163.1    | Ca_kabuli_chr04 | 40653294                | AA                              | GG                | 1945962819               |
| SNP_P3_57308_40653295 | NC_021163.1    | Ca_kabuli_chr04 | 40653295                | CC                              | TT                | 1945962821               |
| SNP_P3_57309_40653525 | NC_021163.1    | Ca_kabuli_chr04 | 40653525                | GG                              | AA                | 1945962823               |
| SNP_P3_57310_40654027 | NC_021163.1    | Ca_kabuli_chr04 | 40654027                | TT                              | AA                | 1945962824               |
| SNP_P3_57311_40654122 | NC_021163.1    | Ca_kabuli_chr04 | 40654122                | GG                              | AA                | 1945962826               |
| SNP_P3_57312_40654183 | NC_021163.1    | Ca_kabuli_chr04 | 40654183                | TT                              | AA                | 1945962828               |
| SNP_P3_57313_40701432 | NC_021163.1    | Ca_kabuli_chr04 | 40701432                | TT                              | GG                | 1945962830               |
| SNP_P3_57314_40701758 | NC_021163.1    | Ca_kabuli_chr04 | 40701758                | GG                              | AA                | 1945962832               |
| SNP_P3_57315_40702056 | NC_021163.1    | Ca_kabuli_chr04 | 40702056                | CC                              | TT                | 1945962833               |
| SNP_P3_57316_40702074 | NC_021163.1    | Ca_kabuli_chr04 | 40702074                | TT                              | CC                | 1945962835               |
| SNP_P3_57317_40702111 | NC_021163.1    | Ca_kabuli_chr04 | 40702111                | TT                              | GG                | 1945962837               |
| SNP_P3_57318_40702215 | NC_021163.1    | Ca_kabuli_chr04 | 40702215                | TT                              | CC                | 1945962839               |
| SNP_P3_57319_40702232 | NC_021163.1    | Ca_kabuli_chr04 | 40702232                | CC                              | TT                | 1945962841               |
| SNP_P3_57320_40702816 | NC_021163.1    | Ca_kabuli_chr04 | 40702816                | GG                              | AA                | 1945962842               |
| SNP_P3_57321_40703141 | NC_021163.1    | Ca_kabuli_chr04 | 40703141                | TT                              | CC                | 1945962844               |
| SNP_P3_57322_40704064 | NC_021163.1    | Ca_kabuli_chr04 | 40704064                | CC                              | GG                | 1945962846               |
| SNP_P3_57324_40704137 | NC_021163.1    | Ca_kabuli_chr04 | 40704137                | TT                              | CC                | 1945962848               |
| SNP_P3_57325_40708045 | NC_021163.1    | Ca_kabuli_chr04 | 40708045                | GG                              | AA                | 1945962849               |
| SNP_P3_57326_40709050 | NC_021163.1    | Ca_kabuli_chr04 | 40709050                | TT                              | CC                | 1945962851               |
| SNP_P3_57327_40716090 | NC_021163.1    | Ca_kabuli_chr04 | 40716090                | AA                              | TT                | 1945962853               |
| SNP_P3_57328_40716428 | NC_021163.1    | Ca_kabuli_chr04 | 40716428                | GG                              | AA                | 1945962855               |
| SNP_P3_57329_40717742 | NC_021163.1    | Ca_kabuli_chr04 | 40717742                | GG                              | AA                | 1945962857               |
| SNP_P3_57330_40718660 | NC_021163.1    | Ca_kabuli_chr04 | 40718660                | AA                              | GG                | 1945962858               |
| SNP_P3_57332_40728475 | NC_021163.1    | Ca_kabuli_chr04 | 40728475                | TT                              | GG                | 1945962860               |
| SNP_P3_57333_40728509 | NC_021163.1    | Ca_kabuli_chr04 | 40728509                | CC                              | TT                | 1945962862               |
| SNP_P3_57334_40729505 | NC_021163.1    | Ca_kabuli_chr04 | 40729505                | CC                              | TT                | 1945962864               |
| SNP_P3_57335_40729564 | NC_021163.1    | Ca_kabuli_chr04 | 40729564                | TT                              | CC                | 1945962866               |
| SNP_P3_57336_40729684 | NC_021163.1    | Ca_kabuli_chr04 | 40729684                | AA                              | GG                | 1945962867               |
| SNP_P3_57337_40729690 | NC_021163.1    | Ca_kabuli_chr04 | 40729690                | CC                              | GG                | 1945962869               |
| SNP_P3_57338_40729899 | NC_021163.1    | Ca_kabuli_chr04 | 40729899                | TT                              | CC                | 1945962871               |
| SNP_P3_57339_40729915 | NC_021163.1    | Ca_kabuli_chr04 | 40729915                | GG                              | AA                | 1945962873               |
| SNP_P3_57340_40729918 | NC_021163.1    | Ca_kabuli_chr04 | 40729918                | GG                              | TT                | 1945962874               |
| SNP_P3_57341_40729953 | NC_021163.1    | Ca_kabuli_chr04 | 40729953                | GG                              | AA                | 1945962876               |

| SNPs IDs              | Chromosome IDs | Chromosomes     | Physical positions (bp) | CDC Frontier (Reference genome) | (Pusa 256 & HPNB) | NCBI SNPdb Accession IDs |
|-----------------------|----------------|-----------------|-------------------------|---------------------------------|-------------------|--------------------------|
| SNP_P3_57342_40730032 | NC_021163.1    | Ca_kabuli_chr04 | 40730032                | AA                              | GG                | 1945962878               |
| SNP_P3_57343_40730038 | NC_021163.1    | Ca_kabuli_chr04 | 40730038                | TT                              | CC                | 1945962880               |
| SNP_P3_57344_40730213 | NC_021163.1    | Ca_kabuli_chr04 | 40730213                | GG                              | AA                | 1945962882               |
| SNP_P3_57345_40730225 | NC_021163.1    | Ca_kabuli_chr04 | 40730225                | AA                              | GG                | 1945962883               |
| SNP_P3_57346_40730260 | NC_021163.1    | Ca_kabuli_chr04 | 40730260                | CC                              | TT                | 1945962885               |
| SNP_P3_57347_40730291 | NC_021163.1    | Ca_kabuli_chr04 | 40730291                | GG                              | AA                | 1945962887               |
| SNP_P3_57349_40730436 | NC_021163.1    | Ca_kabuli_chr04 | 40730436                | GG                              | CC                | 1945962889               |
| SNP_P3_57350_40731810 | NC_021163.1    | Ca_kabuli_chr04 | 40731810                | AA                              | GG                | 1945962891               |
| SNP_P3_57351_40732224 | NC_021163.1    | Ca_kabuli_chr04 | 40732224                | AA                              | CC                | 1945962892               |
| SNP_P3_57352_40732228 | NC_021163.1    | Ca_kabuli_chr04 | 40732228                | AA                              | CC                | 1945962894               |
| SNP_P3_57353_40732280 | NC_021163.1    | Ca_kabuli_chr04 | 40732280                | CC                              | GG                | 1945962896               |
| SNP_P3_57354_40733256 | NC_021163.1    | Ca_kabuli_chr04 | 40733256                | AA                              | GG                | 1945962898               |
| SNP_P3_57355_40733575 | NC_021163.1    | Ca_kabuli_chr04 | 40733575                | AA                              | TT                | 1945962899               |
| SNP_P3_57356_40733589 | NC_021163.1    | Ca_kabuli_chr04 | 40733589                | AA                              | GG                | 1945962901               |
| SNP_P3_57357_40733601 | NC_021163.1    | Ca_kabuli_chr04 | 40733601                | TT                              | AA                | 1945962903               |
| SNP_P3_57358_40734273 | NC_021163.1    | Ca_kabuli_chr04 | 40734273                | GG                              | CC                | 1945962905               |
| SNP_P3_57359_40734461 | NC_021163.1    | Ca_kabuli_chr04 | 40734461                | CC                              | TT                | 1945962907               |
| SNP_P3_57360_40734494 | NC_021163.1    | Ca_kabuli_chr04 | 40734494                | AA                              | CC                | 1945962908               |
| SNP_P3_57362_40736952 | NC_021163.1    | Ca_kabuli_chr04 | 40736952                | AA                              | GG                | 1945962910               |
| SNP_P3_57363_40736958 | NC_021163.1    | Ca_kabuli_chr04 | 40736958                | GG                              | TT                | 1945962912               |
| SNP_P3_57364_40737230 | NC_021163.1    | Ca_kabuli_chr04 | 40737230                | TT                              | GG                | 1945962914               |
| SNP_P3_57365_40737260 | NC_021163.1    | Ca_kabuli_chr04 | 40737260                | TT                              | CC                | 1945962916               |
| SNP_P3_57366_40737424 | NC_021163.1    | Ca_kabuli_chr04 | 40737424                | AA                              | GG                | 1945962917               |
| SNP_P3_57367_40737462 | NC_021163.1    | Ca_kabuli_chr04 | 40737462                | AA                              | TT                | 1945962919               |
| SNP_P3_57369_40738402 | NC_021163.1    | Ca_kabuli_chr04 | 40738402                | TT                              | AA                | 1945962921               |
| SNP_P3_57370_40738572 | NC_021163.1    | Ca_kabuli_chr04 | 40738572                | TT                              | GG                | 1945962923               |
| SNP_P3_57372_40744101 | NC_021163.1    | Ca_kabuli_chr04 | 40744101                | CC                              | TT                | 1945962925               |
| SNP_P3_57373_40744116 | NC_021163.1    | Ca_kabuli_chr04 | 40744116                | TT                              | CC                | 1945962926               |
| SNP_P3_57374_40744170 | NC_021163.1    | Ca_kabuli_chr04 | 40744170                | TT                              | CC                | 1945962928               |
| SNP_P3_57375_40744190 | NC_021163.1    | Ca_kabuli_chr04 | 40744190                | CC                              | TT                | 1945962930               |
| SNP_P3_57376_40746001 | NC_021163.1    | Ca_kabuli_chr04 | 40746001                | GG                              | AA                | 1945962932               |
| SNP_P3_57377_40746005 | NC_021163.1    | Ca_kabuli_chr04 | 40746005                | AA                              | CC                | 1945962933               |
| SNP_P3_57378_40746231 | NC_021163.1    | Ca_kabuli_chr04 | 40746231                | GG                              | CC                | 1945962935               |
| SNP_P3_57380_40746765 | NC_021163.1    | Ca_kabuli_chr04 | 40746765                | GG                              | AA                | 1945962937               |
| SNP_P3_57381_40746793 | NC_021163.1    | Ca_kabuli_chr04 | 40746793                | TT                              | CC                | 1945962939               |
| SNP_P3_57382_40749115 | NC_021163.1    | Ca_kabuli_chr04 | 40749115                | TT                              | CC                | 1945962941               |
| SNP_P3_57383_40749133 | NC_021163.1    | Ca_kabuli_chr04 | 40749133                | GG                              | AA                | 1945962942               |
| SNP_P3_57384_40749153 | NC_021163.1    | Ca_kabuli_chr04 | 40749153                | AA                              | GG                | 1945962944               |
| SNP_P3_57385_40749512 | NC_021163.1    | Ca_kabuli_chr04 | 40749512                | AA                              | TT                | 1945962946               |
| SNP_P3_57386_40749518 | NC_021163.1    | Ca_kabuli_chr04 | 40749518                | AA                              | CC                | 1945962948               |
| SNP_P3_57387_40749620 | NC_021163.1    | Ca_kabuli_chr04 | 40749620                | TT                              | AA                | 1945962950               |
| SNP_P3_57388_40749658 | NC_021163.1    | Ca_kabuli_chr04 | 40749658                | GG                              | AA                | 1945962951               |

| SNPs IDs              | Chromosome IDs | Chromosomes     | Physical positions (bp) | CDC Frontier (Reference genome) | (Pusa 256 & HPNB) | NCBI SNPdb Accession IDs |
|-----------------------|----------------|-----------------|-------------------------|---------------------------------|-------------------|--------------------------|
| SNP_P3_57389_40749662 | NC_021163.1    | Ca_kabuli_chr04 | 40749662                | TT                              | CC                | 1945962953               |
| SNP_P3_57390_40749675 | NC_021163.1    | Ca_kabuli_chr04 | 40749675                | CC                              | TT                | 1945962955               |
| SNP_P3_57391_40749676 | NC_021163.1    | Ca_kabuli_chr04 | 40749676                | TT                              | CC                | 1945962957               |
| SNP_P3_57392_40751000 | NC_021163.1    | Ca_kabuli_chr04 | 40751000                | TT                              | CC                | 1945962958               |
| SNP_P3_57393_40754010 | NC_021163.1    | Ca_kabuli_chr04 | 40754010                | TT                              | CC                | 1945962960               |
| SNP_P3_57394_40754150 | NC_021163.1    | Ca_kabuli_chr04 | 40754150                | AA                              | CC                | 1945962962               |
| SNP_P3_57395_40754158 | NC_021163.1    | Ca_kabuli_chr04 | 40754158                | TT                              | AA                | 1945962964               |
| SNP_P3_57396_40754162 | NC_021163.1    | Ca_kabuli_chr04 | 40754162                | CC                              | TT                | 1945962966               |
| SNP_P3_57397_40756880 | NC_021163.1    | Ca_kabuli_chr04 | 40756880                | CC                              | TT                | 1945962967               |
| SNP_P3_57398_40759013 | NC_021163.1    | Ca_kabuli_chr04 | 40759013                | CC                              | TT                | 1945962969               |
| SNP_P3_57399_40761315 | NC_021163.1    | Ca_kabuli_chr04 | 40761315                | AA                              | TT                | 1945962971               |
| SNP_P3_57400_40761320 | NC_021163.1    | Ca_kabuli_chr04 | 40761320                | AA                              | CC                | 1945962973               |
| SNP_P3_57401_40761323 | NC_021163.1    | Ca_kabuli_chr04 | 40761323                | AA                              | TT                | 1945962975               |
| SNP_P3_57402_40762326 | NC_021163.1    | Ca_kabuli_chr04 | 40762326                | CC                              | AA                | 1945962976               |
| SNP_P3_57403_40762339 | NC_021163.1    | Ca_kabuli_chr04 | 40762339                | CC                              | TT                | 1945962978               |
| SNP_P3_57404_40762575 | NC_021163.1    | Ca_kabuli_chr04 | 40762575                | TT                              | CC                | 1945962980               |
| SNP_P3_57406_40764008 | NC_021163.1    | Ca_kabuli_chr04 | 40764008                | AA                              | GG                | 1945962982               |
| SNP_P3_57407_40765401 | NC_021163.1    | Ca_kabuli_chr04 | 40765401                | GG                              | AA                | 1945962983               |
| SNP_P3_57408_40765412 | NC_021163.1    | Ca_kabuli_chr04 | 40765412                | AA                              | GG                | 1945962985               |
| SNP_P3_57409_40765523 | NC_021163.1    | Ca_kabuli_chr04 | 40765523                | CC                              | TT                | 1945962987               |
| SNP_P3_57411_40765544 | NC_021163.1    | Ca_kabuli_chr04 | 40765544                | GG                              | TT                | 1945962989               |
| SNP_P3_57412_40767261 | NC_021163.1    | Ca_kabuli_chr04 | 40767261                | AA                              | TT                | 1945962991               |
| SNP_P3_57413_40767283 | NC_021163.1    | Ca_kabuli_chr04 | 40767283                | CC                              | GG                | 1945962992               |
| SNP_P3_57414_40767395 | NC_021163.1    | Ca_kabuli_chr04 | 40767395                | CC                              | AA                | 1945962994               |
| SNP_P3_57416_40769906 | NC_021163.1    | Ca_kabuli_chr04 | 40769906                | AA                              | TT                | 1945962996               |
| SNP_P3_57417_40770832 | NC_021163.1    | Ca_kabuli_chr04 | 40770832                | TT                              | CC                | 1945962998               |
| SNP_P3_57418_40772414 | NC_021163.1    | Ca_kabuli_chr04 | 40772414                | AA                              | GG                | 1945963000               |
| SNP_P3_57419_40772423 | NC_021163.1    | Ca_kabuli_chr04 | 40772423                | GG                              | AA                | 1945963001               |
| SNP_P3_57420_40772476 | NC_021163.1    | Ca_kabuli_chr04 | 40772476                | CC                              | TT                | 1945963003               |
| SNP_P3_57421_40772479 | NC_021163.1    | Ca_kabuli_chr04 | 40772479                | CC                              | TT                | 1945963005               |
| SNP_P3_57422_40772988 | NC_021163.1    | Ca_kabuli_chr04 | 40772988                | CC                              | GG                | 1945963007               |
| SNP_P3_57423_40772993 | NC_021163.1    | Ca_kabuli_chr04 | 40772993                | GG                              | AA                | 1945963008               |
| SNP_P3_57424_40773229 | NC_021163.1    | Ca_kabuli_chr04 | 40773229                | AA                              | GG                | 1945963010               |
| SNP_P3_57425_40773239 | NC_021163.1    | Ca_kabuli_chr04 | 40773239                | CC                              | TT                | 1945963012               |
| SNP_P3_57426_40773254 | NC_021163.1    | Ca_kabuli_chr04 | 40773254                | GG                              | AA                | 1945963014               |
| SNP_P3_57427_40773259 | NC_021163.1    | Ca_kabuli_chr04 | 40773259                | GG                              | TT                | 1945963016               |
| SNP_P3_57428_40773273 | NC_021163.1    | Ca_kabuli_chr04 | 40773273                | AA                              | GG                | 1945963017               |
| SNP_P3_57429_40773294 | NC_021163.1    | Ca_kabuli_chr04 | 40773294                | GG                              | AA                | 1945963019               |
| SNP_P3_57430_40773354 | NC_021163.1    | Ca_kabuli_chr04 | 40773354                | GG                              | TT                | 1945963021               |
| SNP_P3_57431_40773794 | NC_021163.1    | Ca_kabuli_chr04 | 40773794                | GG                              | AA                | 1945963023               |
| SNP_P3_57432_40773824 | NC_021163.1    | Ca_kabuli_chr04 | 40773824                | CC                              | TT                | 1945963025               |
| SNP_P3_57433_40773847 | NC_021163.1    | Ca_kabuli_chr04 | 40773847                | CC                              | AA                | 1945963026               |

| SNPs IDs              | Chromosome IDs | Chromosomes     | Physical positions (bp) | CDC Frontier (Reference genome) | (Pusa 256 & HPNB) | NCBI SNPdb Accession IDs |
|-----------------------|----------------|-----------------|-------------------------|---------------------------------|-------------------|--------------------------|
| SNP_P3_57434_40776257 | NC_021163.1    | Ca_kabuli_chr04 | 40776257                | TT                              | CC                | 1945963028               |
| SNP_P3_57435_40776262 | NC_021163.1    | Ca_kabuli_chr04 | 40776262                | CC                              | TT                | 1945963030               |
| SNP_P3_57437_40777655 | NC_021163.1    | Ca_kabuli_chr04 | 40777655                | TT                              | AA                | 1945963032               |
| SNP_P3_57438_40777681 | NC_021163.1    | Ca_kabuli_chr04 | 40777681                | GG                              | AA                | 1945963033               |
| SNP_P3_57439_40777761 | NC_021163.1    | Ca_kabuli_chr04 | 40777761                | CC                              | TT                | 1945963035               |
| SNP_P3_57440_40778095 | NC_021163.1    | Ca_kabuli_chr04 | 40778095                | TT                              | CC                | 1945963037               |
| SNP_P3_57441_40778134 | NC_021163.1    | Ca_kabuli_chr04 | 40778134                | CC                              | GG                | 1945963039               |
| SNP_P3_57442_40778141 | NC_021163.1    | Ca_kabuli_chr04 | 40778141                | AA                              | CC                | 1945963041               |
| SNP_P3_57443_40778395 | NC_021163.1    | Ca_kabuli_chr04 | 40778395                | TT                              | CC                | 1945963042               |
| SNP_P3_57444_40778464 | NC_021163.1    | Ca_kabuli_chr04 | 40778464                | TT                              | CC                | 1945963044               |
| SNP_P3_57445_40778884 | NC_021163.1    | Ca_kabuli_chr04 | 40778884                | GG                              | AA                | 1945963046               |
| SNP_P3_57446_40780407 | NC_021163.1    | Ca_kabuli_chr04 | 40780407                | CC                              | AA                | 1945963048               |
| SNP_P3_57447_40780436 | NC_021163.1    | Ca_kabuli_chr04 | 40780436                | CC                              | TT                | 1945963050               |
| SNP_P3_57448_40781429 | NC_021163.1    | Ca_kabuli_chr04 | 40781429                | TT                              | CC                | 1945963051               |
| SNP_P3_57449_40781503 | NC_021163.1    | Ca_kabuli_chr04 | 40781503                | AA                              | GG                | 1945963053               |
| SNP_P3_57450_40781507 | NC_021163.1    | Ca_kabuli_chr04 | 40781507                | GG                              | AA                | 1945963055               |
| SNP_P3_57451_40781540 | NC_021163.1    | Ca_kabuli_chr04 | 40781540                | GG                              | TT                | 1945963057               |
| SNP_P3_57452_40781881 | NC_021163.1    | Ca_kabuli_chr04 | 40781881                | GG                              | TT                | 1945963058               |
| SNP_P3_57453_40781891 | NC_021163.1    | Ca_kabuli_chr04 | 40781891                | GG                              | AA                | 1945963060               |
| SNP_P3_57454_40781928 | NC_021163.1    | Ca_kabuli_chr04 | 40781928                | AA                              | CC                | 1945963062               |
| SNP_P3_57455_40782208 | NC_021163.1    | Ca_kabuli_chr04 | 40782208                | GG                              | AA                | 1945963064               |
| SNP_P3_57456_40782211 | NC_021163.1    | Ca_kabuli_chr04 | 40782211                | TT                              | AA                | 1945963066               |
| SNP_P3_57457_40783723 | NC_021163.1    | Ca_kabuli_chr04 | 40783723                | TT                              | CC                | 1945963067               |
| SNP_P3_57458_40783810 | NC_021163.1    | Ca_kabuli_chr04 | 40783810                | AA                              | GG                | 1945963069               |
| SNP_P3_57460_40785001 | NC_021163.1    | Ca_kabuli_chr04 | 40785001                | AA                              | CC                | 1945963071               |
| SNP_P3_57461_40787980 | NC_021163.1    | Ca_kabuli_chr04 | 40787980                | GG                              | AA                | 1945963073               |
| SNP_P3_57462_40788012 | NC_021163.1    | Ca_kabuli_chr04 | 40788012                | TT                              | CC                | 1945963075               |
| SNP_P3_57463_40788022 | NC_021163.1    | Ca_kabuli_chr04 | 40788022                | AA                              | GG                | 1945963076               |
| SNP_P3_57464_40788698 | NC_021163.1    | Ca_kabuli_chr04 | 40788698                | CC                              | TT                | 1945963078               |
| SNP_P3_57466_40789601 | NC_021163.1    | Ca_kabuli_chr04 | 40789601                | TT                              | CC                | 1945963080               |
| SNP_P3_57468_40790359 | NC_021163.1    | Ca_kabuli_chr04 | 40790359                | CC                              | GG                | 1945963082               |
| SNP_P3_57469_40790360 | NC_021163.1    | Ca_kabuli_chr04 | 40790360                | CC                              | GG                | 1945963084               |
| SNP_P3_57472_40795085 | NC_021163.1    | Ca_kabuli_chr04 | 40795085                | GG                              | CC                | 1945963085               |
| SNP_P3_57473_40795158 | NC_021163.1    | Ca_kabuli_chr04 | 40795158                | CC                              | TT                | 1945963087               |
| SNP_P3_57474_40795161 | NC_021163.1    | Ca_kabuli_chr04 | 40795161                | AA                              | GG                | 1945963089               |
| SNP_P3_57475_40795175 | NC_021163.1    | Ca_kabuli_chr04 | 40795175                | TT                              | AA                | 1945963091               |
| SNP_P3_57476_40795179 | NC_021163.1    | Ca_kabuli_chr04 | 40795179                | TT                              | CC                | 1945963092               |
| SNP_P3_57477_40797028 | NC_021163.1    | Ca_kabuli_chr04 | 40797028                | TT                              | CC                | 1945963094               |
| SNP_P3_57478_40797057 | NC_021163.1    | Ca_kabuli_chr04 | 40797057                | CC                              | GG                | 1945963096               |
| SNP_P3_57479_40797069 | NC_021163.1    | Ca_kabuli_chr04 | 40797069                | TT                              | CC                | 1945963098               |
| SNP_P3_57480_40797084 | NC_021163.1    | Ca_kabuli_chr04 | 40797084                | TT                              | CC                | 1945963100               |
| SNP_P3_57481_40797450 | NC_021163.1    | Ca_kabuli_chr04 | 40797450                | GG                              | AA                | 1945963101               |

| SNPs IDs              | Chromosome IDs | Chromosomes     | Physical positions (bp) | CDC Frontier (Reference genome) | (Pusa 256 & HPNB) | NCBI SNPdb Accession IDs |
|-----------------------|----------------|-----------------|-------------------------|---------------------------------|-------------------|--------------------------|
| SNP_P3_57483_40797482 | NC_021163.1    | Ca_kabuli_chr04 | 40797482                | GG                              | CC                | 1945963103               |
| SNP_P3_57484_40797781 | NC_021163.1    | Ca_kabuli_chr04 | 40797781                | AA                              | GG                | 1945963105               |
| SNP_P3_57485_40797786 | NC_021163.1    | Ca_kabuli_chr04 | 40797786                | TT                              | GG                | 1945963107               |
| SNP_P3_57486_40797846 | NC_021163.1    | Ca_kabuli_chr04 | 40797846                | AA                              | GG                | 1945963109               |
| SNP_P3_57487_40798023 | NC_021163.1    | Ca_kabuli_chr04 | 40798023                | TT                              | CC                | 1945963110               |
| SNP_P3_57488_40802335 | NC_021163.1    | Ca_kabuli_chr04 | 40802335                | TT                              | AA                | 1945963112               |
| SNP_P3_57489_40802587 | NC_021163.1    | Ca_kabuli_chr04 | 40802587                | TT                              | AA                | 1945963114               |
| SNP_P3_57490_40802596 | NC_021163.1    | Ca_kabuli_chr04 | 40802596                | TT                              | CC                | 1945963116               |
| SNP_P3_57491_40802656 | NC_021163.1    | Ca_kabuli_chr04 | 40802656                | GG                              | CC                | 1945963117               |
| SNP_P3_57492_40803324 | NC_021163.1    | Ca_kabuli_chr04 | 40803324                | CC                              | TT                | 1945963119               |
| SNP_P3_57493_40803368 | NC_021163.1    | Ca_kabuli_chr04 | 40803368                | CC                              | TT                | 1945963121               |
| SNP_P3_57494_40803370 | NC_021163.1    | Ca_kabuli_chr04 | 40803370                | GG                              | AA                | 1945963123               |
| SNP_P3_57495_40803398 | NC_021163.1    | Ca_kabuli_chr04 | 40803398                | TT                              | CC                | 1945963125               |
| SNP_P3_57496_40803516 | NC_021163.1    | Ca_kabuli_chr04 | 40803516                | GG                              | AA                | 1945963126               |
| SNP_P3_57497_40803530 | NC_021163.1    | Ca_kabuli_chr04 | 40803530                | TT                              | GG                | 1945963128               |
| SNP_P3_57498_40803533 | NC_021163.1    | Ca_kabuli_chr04 | 40803533                | AA                              | CC                | 1945963130               |
| SNP_P3_57499_40803545 | NC_021163.1    | Ca_kabuli_chr04 | 40803545                | TT                              | GG                | 1945963132               |
| SNP_P3_57500_40803646 | NC_021163.1    | Ca_kabuli_chr04 | 40803646                | TT                              | GG                | 1945963134               |
| SNP_P3_57501_40803799 | NC_021163.1    | Ca_kabuli_chr04 | 40803799                | GG                              | TT                | 1945963135               |
| SNP_P3_57502_40803864 | NC_021163.1    | Ca_kabuli_chr04 | 40803864                | AA                              | TT                | 1945963137               |
| SNP_P3_57503_40803872 | NC_021163.1    | Ca_kabuli_chr04 | 40803872                | TT                              | CC                | 1945963139               |
| SNP_P3_57505_40804726 | NC_021163.1    | Ca_kabuli_chr04 | 40804726                | GG                              | TT                | 1945963141               |
| SNP_P3_57506_40804760 | NC_021163.1    | Ca_kabuli_chr04 | 40804760                | AA                              | GG                | 1945963142               |
| SNP_P3_57507_40804774 | NC_021163.1    | Ca_kabuli_chr04 | 40804774                | TT                              | GG                | 1945963144               |
| SNP_P3_57508_40804861 | NC_021163.1    | Ca_kabuli_chr04 | 40804861                | TT                              | CC                | 1945963146               |
| SNP_P3_57509_40805081 | NC_021163.1    | Ca_kabuli_chr04 | 40805081                | AA                              | GG                | 1945963148               |
| SNP_P3_57510_40805089 | NC_021163.1    | Ca_kabuli_chr04 | 40805089                | TT                              | GG                | 1945963150               |
| SNP_P3_57511_40805106 | NC_021163.1    | Ca_kabuli_chr04 | 40805106                | CC                              | TT                | 1945963151               |
| SNP_P3_57513_40805405 | NC_021163.1    | Ca_kabuli_chr04 | 40805405                | AA                              | TT                | 1945963153               |
| SNP_P3_57514_40805407 | NC_021163.1    | Ca_kabuli_chr04 | 40805407                | GG                              | TT                | 1945963155               |
| SNP_P3_57515_40805589 | NC_021163.1    | Ca_kabuli_chr04 | 40805589                | CC                              | GG                | 1945963157               |
| SNP_P3_57516_40805602 | NC_021163.1    | Ca_kabuli_chr04 | 40805602                | GG                              | AA                | 1945963159               |
| SNP_P3_57517_40805835 | NC_021163.1    | Ca_kabuli_chr04 | 40805835                | AA                              | CC                | 1945963160               |
| SNP_P3_57518_40805839 | NC_021163.1    | Ca_kabuli_chr04 | 40805839                | CC                              | TT                | 1945963162               |
| SNP_P3_57519_40806487 | NC_021163.1    | Ca_kabuli_chr04 | 40806487                | CC                              | GG                | 1945963164               |
| SNP_P3_57521_40807578 | NC_021163.1    | Ca_kabuli_chr04 | 40807578                | CC                              | TT                | 1945963166               |
| SNP_P3_57522_40808873 | NC_021163.1    | Ca_kabuli_chr04 | 40808873                | GG                              | AA                | 1945963167               |
| SNP_P3_57524_40808965 | NC_021163.1    | Ca_kabuli_chr04 | 40808965                | TT                              | GG                | 1945963169               |
| SNP_P3_57525_40808977 | NC_021163.1    | Ca_kabuli_chr04 | 40808977                | TT                              | CC                | 1945963171               |
| SNP_P3_57526_40809006 | NC_021163.1    | Ca_kabuli_chr04 | 40809006                | AA                              | GG                | 1945963173               |
| SNP_P3_57527_40809304 | NC_021163.1    | Ca_kabuli_chr04 | 40809304                | AA                              | GG                | 1945963175               |
| SNP_P3_57528_40809428 | NC_021163.1    | Ca_kabuli_chr04 | 40809428                | GG                              | TT                | 1945963176               |

| SNPs IDs              | Chromosome IDs | Chromosomes     | Physical positions (bp) | CDC Frontier (Reference genome) | (Pusa 256 & HPNB) | NCBI SNPdb Accession IDs |
|-----------------------|----------------|-----------------|-------------------------|---------------------------------|-------------------|--------------------------|
| SNP_P3_57529_40809515 | NC_021163.1    | Ca_kabuli_chr04 | 40809515                | TT                              | CC                | 1945963178               |
| SNP_P3_57532_40812029 | NC_021163.1    | Ca_kabuli_chr04 | 40812029                | TT                              | GG                | 1945963180               |
| SNP_P3_57533_40817238 | NC_021163.1    | Ca_kabuli_chr04 | 40817238                | GG                              | AA                | 1945963182               |
| SNP_P3_57534_40818311 | NC_021163.1    | Ca_kabuli_chr04 | 40818311                | CC                              | TT                | 1945963184               |
| SNP_P3_57536_40819567 | NC_021163.1    | Ca_kabuli_chr04 | 40819567                | GG                              | CC                | 1945963185               |
| SNP_P3_57537_40819584 | NC_021163.1    | Ca_kabuli_chr04 | 40819584                | TT                              | AA                | 1945963187               |
| SNP_P3_57539_40823005 | NC_021163.1    | Ca_kabuli_chr04 | 40823005                | CC                              | AA                | 1945963189               |
| SNP_P3_57540_40823110 | NC_021163.1    | Ca_kabuli_chr04 | 40823110                | CC                              | TT                | 1945963190               |
| SNP_P3_57541_40823371 | NC_021163.1    | Ca_kabuli_chr04 | 40823371                | GG                              | CC                | 1945963192               |
| SNP_P3_57542_40823385 | NC_021163.1    | Ca_kabuli_chr04 | 40823385                | CC                              | AA                | 1945963194               |
| SNP_P3_57543_40823386 | NC_021163.1    | Ca_kabuli_chr04 | 40823386                | CC                              | TT                | 1945963196               |
| SNP_P3_57544_40827434 | NC_021163.1    | Ca_kabuli_chr04 | 40827434                | CC                              | TT                | 1945963198               |
| SNP_P3_57545_40827520 | NC_021163.1    | Ca_kabuli_chr04 | 40827520                | AA                              | GG                | 1945963199               |
| SNP_P3_57546_40827573 | NC_021163.1    | Ca_kabuli_chr04 | 40827573                | CC                              | GG                | 1945963201               |
| SNP_P3_57547_40827696 | NC_021163.1    | Ca_kabuli_chr04 | 40827696                | AA                              | GG                | 1945963203               |
| SNP_P3_57548_40828797 | NC_021163.1    | Ca_kabuli_chr04 | 40828797                | GG                              | AA                | 1945963205               |
| SNP_P3_57549_40829302 | NC_021163.1    | Ca_kabuli_chr04 | 40829302                | GG                              | AA                | 1945963207               |
| SNP_P3_57550_40829652 | NC_021163.1    | Ca_kabuli_chr04 | 40829652                | TT                              | CC                | 1945963208               |
| SNP_P3_57551_40829953 | NC_021163.1    | Ca_kabuli_chr04 | 40829953                | GG                              | AA                | 1945963210               |
| SNP_P3_57552_40830886 | NC_021163.1    | Ca_kabuli_chr04 | 40830886                | TT                              | CC                | 1945963212               |
| SNP_P3_57553_40831041 | NC_021163.1    | Ca_kabuli_chr04 | 40831041                | CC                              | AA                | 1945963214               |
| SNP_P3_57554_40831100 | NC_021163.1    | Ca_kabuli_chr04 | 40831100                | AA                              | GG                | 1945963215               |
| SNP_P3_57555_40834340 | NC_021163.1    | Ca_kabuli_chr04 | 40834340                | TT                              | CC                | 1945963217               |
| SNP_P3_57556_40834422 | NC_021163.1    | Ca_kabuli_chr04 | 40834422                | CC                              | AA                | 1945963219               |
| SNP_P3_57557_40834527 | NC_021163.1    | Ca_kabuli_chr04 | 40834527                | TT                              | AA                | 1945963221               |
| SNP_P3_57558_40834616 | NC_021163.1    | Ca_kabuli_chr04 | 40834616                | TT                              | CC                | 1945963223               |
| SNP_P3_57559_40834628 | NC_021163.1    | Ca_kabuli_chr04 | 40834628                | TT                              | CC                | 1945963224               |
| SNP_P3_57560_40834642 | NC_021163.1    | Ca_kabuli_chr04 | 40834642                | AA                              | GG                | 1945963226               |
| SNP_P3_57561_40835055 | NC_021163.1    | Ca_kabuli_chr04 | 40835055                | GG                              | TT                | 1945963228               |
| SNP_P3_57562_40835056 | NC_021163.1    | Ca_kabuli_chr04 | 40835056                | AA                              | CC                | 1945963230               |
| SNP_P3_57563_40835832 | NC_021163.1    | Ca_kabuli_chr04 | 40835832                | AA                              | GG                | 1945963232               |
| SNP_P3_57564_40836596 | NC_021163.1    | Ca_kabuli_chr04 | 40836596                | GG                              | TT                | 1945963233               |
| SNP_P3_57565_40837549 | NC_021163.1    | Ca_kabuli_chr04 | 40837549                | CC                              | TT                | 1945963235               |
| SNP_P3_57567_40838339 | NC_021163.1    | Ca_kabuli_chr04 | 40838339                | AA                              | GG                | 1945963237               |
| SNP_P3_57568_40838999 | NC_021163.1    | Ca_kabuli_chr04 | 40838999                | TT                              | GG                | 1945963239               |
| SNP_P3_57569_40839005 | NC_021163.1    | Ca_kabuli_chr04 | 40839005                | AA                              | CC                | 1945963240               |
| SNP_P3_57570_40839141 | NC_021163.1    | Ca_kabuli_chr04 | 40839141                | GG                              | TT                | 1945963242               |
| SNP_P3_57571_40839316 | NC_021163.1    | Ca_kabuli_chr04 | 40839316                | CC                              | GG                | 1945963244               |
| SNP_P3_57572_40839347 | NC_021163.1    | Ca_kabuli_chr04 | 40839347                | GG                              | TT                | 1945963246               |
| SNP_P3_57573_40839352 | NC_021163.1    | Ca_kabuli_chr04 | 40839352                | GG                              | AA                | 1945963248               |
| SNP_P3_57574_40839609 | NC_021163.1    | Ca_kabuli_chr04 | 40839609                | GG                              | TT                | 1945963250               |
| SNP_P3_57575_40840853 | NC_021163.1    | Ca_kabuli_chr04 | 40840853                | AA                              | TT                | 1945963251               |

| SNPs IDs              | Chromosome IDs | Chromosomes     | Physical positions (bp) | CDC Frontier (Reference genome) | (Pusa 256 & HPNB) | NCBI SNPdb Accession IDs |
|-----------------------|----------------|-----------------|-------------------------|---------------------------------|-------------------|--------------------------|
| SNP_P3_57576_40841182 | NC_021163.1    | Ca_kabuli_chr04 | 40841182                | AA                              | GG                | 1945963253               |
| SNP_P3_57577_40841449 | NC_021163.1    | Ca_kabuli_chr04 | 40841449                | TT                              | CC                | 1945963255               |
| SNP_P3_57578_40841477 | NC_021163.1    | Ca_kabuli_chr04 | 40841477                | TT                              | AA                | 1945963257               |
| SNP_P3_57580_40842810 | NC_021163.1    | Ca_kabuli_chr04 | 40842810                | AA                              | GG                | 1945963258               |
| SNP_P3_57581_40843727 | NC_021163.1    | Ca_kabuli_chr04 | 40843727                | AA                              | GG                | 1945963260               |
| SNP_P3_57583_40843999 | NC_021163.1    | Ca_kabuli_chr04 | 40843999                | CC                              | TT                | 1945963262               |
| SNP_P3_57584_40844933 | NC_021163.1    | Ca_kabuli_chr04 | 40844933                | CC                              | TT                | 1945963264               |
| SNP_P3_57585_40844969 | NC_021163.1    | Ca_kabuli_chr04 | 40844969                | CC                              | TT                | 1945963266               |
| SNP_P3_57587_40845542 | NC_021163.1    | Ca_kabuli_chr04 | 40845542                | GG                              | TT                | 1945963267               |
| SNP_P3_57588_40846210 | NC_021163.1    | Ca_kabuli_chr04 | 40846210                | GG                              | TT                | 1945963269               |
| SNP_P3_57589_40846279 | NC_021163.1    | Ca_kabuli_chr04 | 40846279                | AA                              | CC                | 1945963271               |
| SNP_P3_57590_40847061 | NC_021163.1    | Ca_kabuli_chr04 | 40847061                | AA                              | GG                | 1945963273               |
| SNP_P3_57591_40847066 | NC_021163.1    | Ca_kabuli_chr04 | 40847066                | CC                              | GG                | 1945963275               |
| SNP_P3_57594_40848207 | NC_021163.1    | Ca_kabuli_chr04 | 40848207                | AA                              | GG                | 1945963276               |
| SNP_P3_57595_40848473 | NC_021163.1    | Ca_kabuli_chr04 | 40848473                | CC                              | TT                | 1945963278               |
| SNP_P3_57596_40850920 | NC_021163.1    | Ca_kabuli_chr04 | 40850920                | GG                              | AA                | 1945963280               |
| SNP_P3_57597_40851154 | NC_021163.1    | Ca_kabuli_chr04 | 40851154                | TT                              | GG                | 1945963282               |
| SNP_P3_57598_40851198 | NC_021163.1    | Ca_kabuli_chr04 | 40851198                | TT                              | AA                | 1945963283               |
| SNP_P3_57599_40851241 | NC_021163.1    | Ca_kabuli_chr04 | 40851241                | TT                              | GG                | 1945963285               |
| SNP_P3_57600_40851268 | NC_021163.1    | Ca_kabuli_chr04 | 40851268                | AA                              | GG                | 1945963287               |
| SNP_P3_57601_40851467 | NC_021163.1    | Ca_kabuli_chr04 | 40851467                | AA                              | CC                | 1945963289               |
| SNP_P3_57602_40851478 | NC_021163.1    | Ca_kabuli_chr04 | 40851478                | AA                              | TT                | 1945963291               |
| SNP_P3_57603_40851579 | NC_021163.1    | Ca_kabuli_chr04 | 40851579                | AA                              | CC                | 1945963292               |
| SNP_P3_57604_40851594 | NC_021163.1    | Ca_kabuli_chr04 | 40851594                | AA                              | TT                | 1945963294               |
| SNP_P3_57605_40851729 | NC_021163.1    | Ca_kabuli_chr04 | 40851729                | CC                              | AA                | 1945963296               |
| SNP_P3_57607_40851984 | NC_021163.1    | Ca_kabuli_chr04 | 40851984                | CC                              | TT                | 1945963298               |
| SNP_P3_57608_40851985 | NC_021163.1    | Ca_kabuli_chr04 | 40851985                | GG                              | TT                | 1945963299               |
| SNP_P3_57609_40851988 | NC_021163.1    | Ca_kabuli_chr04 | 40851988                | GG                              | TT                | 1945963301               |
| SNP_P3_57610_40852602 | NC_021163.1    | Ca_kabuli_chr04 | 40852602                | TT                              | AA                | 1945963303               |
| SNP_P3_57611_40852611 | NC_021163.1    | Ca_kabuli_chr04 | 40852611                | CC                              | TT                | 1945963305               |
| SNP_P3_57612_40852649 | NC_021163.1    | Ca_kabuli_chr04 | 40852649                | TT                              | AA                | 1945963307               |
| SNP_P3_57613_40852653 | NC_021163.1    | Ca_kabuli_chr04 | 40852653                | GG                              | AA                | 1945963308               |
| SNP_P3_57614_40879868 | NC_021163.1    | Ca_kabuli_chr04 | 40879868                | GG                              | AA                | 1945963310               |
| SNP_P3_57615_40879902 | NC_021163.1    | Ca_kabuli_chr04 | 40879902                | AA                              | CC                | 1945963312               |
| SNP_P3_57616_40879911 | NC_021163.1    | Ca_kabuli_chr04 | 40879911                | TT                              | AA                | 1945963314               |
| SNP_P3_57617_40879933 | NC_021163.1    | Ca_kabuli_chr04 | 40879933                | CC                              | TT                | 1945963316               |
| SNP_P3_57618_40880246 | NC_021163.1    | Ca_kabuli_chr04 | 40880246                | CC                              | GG                | 1945963318               |
| SNP_P3_57619_40880256 | NC_021163.1    | Ca_kabuli_chr04 | 40880256                | CC                              | AA                | 1945963319               |
| SNP_P3_57621_40880313 | NC_021163.1    | Ca_kabuli_chr04 | 40880313                | CC                              | TT                | 1945963321               |
| SNP_P3_57622_40880750 | NC_021163.1    | Ca_kabuli_chr04 | 40880750                | AA                              | GG                | 1945963323               |
| SNP_P3_57623_40880776 | NC_021163.1    | Ca_kabuli_chr04 | 40880776                | AA                              | CC                | 1945963325               |
| SNP_P3_57624_40880945 | NC_021163.1    | Ca_kabuli_chr04 | 40880945                | AA                              | TT                | 1945963327               |

| SNPs IDs              | Chromosome IDs | Chromosomes     | Physical positions (bp) | CDC Frontier (Reference genome) | (Pusa 256 & HPNB) | NCBI SNPdb Accession IDs |
|-----------------------|----------------|-----------------|-------------------------|---------------------------------|-------------------|--------------------------|
| SNP_P3_57625_40880960 | NC_021163.1    | Ca_kabuli_chr04 | 40880960                | CC                              | AA                | 1945963328               |
| SNP_P3_57626_40880971 | NC_021163.1    | Ca_kabuli_chr04 | 40880971                | GG                              | AA                | 1945963330               |
| SNP_P3_57627_40881037 | NC_021163.1    | Ca_kabuli_chr04 | 40881037                | AA                              | GG                | 1945963332               |
| SNP_P3_57628_40882674 | NC_021163.1    | Ca_kabuli_chr04 | 40882674                | TT                              | CC                | 1945963334               |
| SNP_P3_57629_40884229 | NC_021163.1    | Ca_kabuli_chr04 | 40884229                | GG                              | AA                | 1945963336               |
| SNP_P3_57630_40886552 | NC_021163.1    | Ca_kabuli_chr04 | 40886552                | AA                              | GG                | 1945963337               |
| SNP_P3_57631_40886583 | NC_021163.1    | Ca_kabuli_chr04 | 40886583                | AA                              | GG                | 1945963339               |
| SNP_P3_57632_40891925 | NC_021163.1    | Ca_kabuli_chr04 | 40891925                | TT                              | GG                | 1945963341               |
| SNP_P3_57633_40892121 | NC_021163.1    | Ca_kabuli_chr04 | 40892121                | GG                              | TT                | 1945963343               |
| SNP_P3_57634_40892125 | NC_021163.1    | Ca_kabuli_chr04 | 40892125                | CC                              | GG                | 1945963345               |
| SNP_P3_57635_40892356 | NC_021163.1    | Ca_kabuli_chr04 | 40892356                | GG                              | TT                | 1945963346               |
| SNP_P3_57636_40892501 | NC_021163.1    | Ca_kabuli_chr04 | 40892501                | TT                              | CC                | 1945963348               |
| SNP_P3_57637_40892511 | NC_021163.1    | Ca_kabuli_chr04 | 40892511                | CC                              | GG                | 1945963350               |
| SNP_P3_57638_40892542 | NC_021163.1    | Ca_kabuli_chr04 | 40892542                | TT                              | AA                | 1945963352               |
| SNP_P3_57639_40893185 | NC_021163.1    | Ca_kabuli_chr04 | 40893185                | AA                              | TT                | 1945963353               |
| SNP_P3_57641_40893467 | NC_021163.1    | Ca_kabuli_chr04 | 40893467                | CC                              | AA                | 1945963355               |
| SNP_P3_57642_40893469 | NC_021163.1    | Ca_kabuli_chr04 | 40893469                | AA                              | CC                | 1945963357               |
| SNP_P3_57644_40893559 | NC_021163.1    | Ca_kabuli_chr04 | 40893559                | TT                              | CC                | 1945963359               |
| SNP_P3_57645_40893574 | NC_021163.1    | Ca_kabuli_chr04 | 40893574                | TT                              | AA                | 1945963361               |
| SNP_P3_57646_40893579 | NC_021163.1    | Ca_kabuli_chr04 | 40893579                | TT                              | AA                | 1945963362               |
| SNP_P3_57647_40893583 | NC_021163.1    | Ca_kabuli_chr04 | 40893583                | TT                              | CC                | 1945963364               |
| SNP_P3_57648_40893586 | NC_021163.1    | Ca_kabuli_chr04 | 40893586                | GG                              | AA                | 1945963366               |
| SNP_P3_57649_40899064 | NC_021163.1    | Ca_kabuli_chr04 | 40899064                | GG                              | TT                | 1945963368               |
| SNP_P3_57651_40900585 | NC_021163.1    | Ca_kabuli_chr04 | 40900585                | AA                              | TT                | 1945963370               |
| SNP_P3_57652_40900589 | NC_021163.1    | Ca_kabuli_chr04 | 40900589                | GG                              | AA                | 1945963371               |
| SNP_P3_57653_40900608 | NC_021163.1    | Ca_kabuli_chr04 | 40900608                | AA                              | TT                | 1945963373               |
| SNP_P3_57654_40900844 | NC_021163.1    | Ca_kabuli_chr04 | 40900844                | CC                              | TT                | 1945963375               |
| SNP_P3_57655_40901036 | NC_021163.1    | Ca_kabuli_chr04 | 40901036                | CC                              | TT                | 1945963377               |
| SNP_P3_57658_40904057 | NC_021163.1    | Ca_kabuli_chr04 | 40904057                | GG                              | AA                | 1945963378               |
| SNP_P3_57659_40904248 | NC_021163.1    | Ca_kabuli_chr04 | 40904248                | CC                              | TT                | 1945963380               |
| SNP_P3_57660_40904285 | NC_021163.1    | Ca_kabuli_chr04 | 40904285                | AA                              | CC                | 1945963382               |
| SNP_P3_57661_40904287 | NC_021163.1    | Ca_kabuli_chr04 | 40904287                | CC                              | TT                | 1945963384               |
| SNP_P3_57662_40904295 | NC_021163.1    | Ca_kabuli_chr04 | 40904295                | AA                              | GG                | 1945963386               |
| SNP_P3_57663_40904300 | NC_021163.1    | Ca_kabuli_chr04 | 40904300                | TT                              | CC                | 1945963387               |
| SNP_P3_57664_40905230 | NC_021163.1    | Ca_kabuli_chr04 | 40905230                | CC                              | TT                | 1945963389               |
| SNP_P3_57666_40907620 | NC_021163.1    | Ca_kabuli_chr04 | 40907620                | GG                              | AA                | 1945963391               |
| SNP_P3_57667_40907657 | NC_021163.1    | Ca_kabuli_chr04 | 40907657                | CC                              | TT                | 1945963393               |
| SNP_P3_57668_40907658 | NC_021163.1    | Ca_kabuli_chr04 | 40907658                | GG                              | TT                | 1945963395               |
| SNP_P3_57669_40907706 | NC_021163.1    | Ca_kabuli_chr04 | 40907706                | TT                              | GG                | 1945963396               |
| SNP_P3_57670_40908344 | NC_021163.1    | Ca_kabuli_chr04 | 40908344                | GG                              | AA                | 1945963398               |
| SNP_P3_57671_40908521 | NC_021163.1    | Ca_kabuli_chr04 | 40908521                | CC                              | TT                | 1945963400               |
| SNP_P3_57672_40911658 | NC_021163.1    | Ca_kabuli_chr04 | 40911658                | TT                              | CC                | 1945963402               |



| SNPs IDs              | Chromosome IDs | Chromosomes     | Physical positions (bp) | CDC Frontier (Reference genome) | (Pusa 256 & HPNB) | NCBI SNPdb Accession IDs |
|-----------------------|----------------|-----------------|-------------------------|---------------------------------|-------------------|--------------------------|
| SNP_P3_57673_40913334 | NC_021163.1    | Ca_kabuli_chr04 | 40913334                | AA                              | GG                | 1945963403               |
| SNP_P3_57674_40913842 | NC_021163.1    | Ca_kabuli_chr04 | 40913842                | GG                              | AA                | 1945963405               |
| SNP_P3_57675_40914691 | NC_021163.1    | Ca_kabuli_chr04 | 40914691                | CC                              | GG                | 1945963407               |
| SNP_P3_57676_40917364 | NC_021163.1    | Ca_kabuli_chr04 | 40917364                | AA                              | GG                | 1945963409               |
| SNP_P3_57677_40918450 | NC_021163.1    | Ca_kabuli_chr04 | 40918450                | AA                              | GG                | 1945963411               |
| SNP_P3_57678_40918451 | NC_021163.1    | Ca_kabuli_chr04 | 40918451                | GG                              | CC                | 1945963412               |
| SNP_P3_57679_40918452 | NC_021163.1    | Ca_kabuli_chr04 | 40918452                | CC                              | TT                | 1945963414               |
| SNP_P3_57680_40919165 | NC_021163.1    | Ca_kabuli_chr04 | 40919165                | AA                              | GG                | 1945963416               |
| SNP_P3_57681_40920116 | NC_021163.1    | Ca_kabuli_chr04 | 40920116                | GG                              | TT                | 1945963418               |
| SNP_P3_57682_40920868 | NC_021163.1    | Ca_kabuli_chr04 | 40920868                | GG                              | AA                | 1945963420               |
| SNP_P3_57683_40920871 | NC_021163.1    | Ca_kabuli_chr04 | 40920871                | AA                              | TT                | 1945963421               |
| SNP_P3_57684_40920893 | NC_021163.1    | Ca_kabuli_chr04 | 40920893                | TT                              | CC                | 1945963423               |
| SNP_P3_57685_40920895 | NC_021163.1    | Ca_kabuli_chr04 | 40920895                | TT                              | GG                | 1945963425               |
| SNP_P3_57686_40921218 | NC_021163.1    | Ca_kabuli_chr04 | 40921218                | GG                              | TT                | 1945963427               |
| SNP_P3_57687_40921239 | NC_021163.1    | Ca_kabuli_chr04 | 40921239                | GG                              | TT                | 1945963429               |
| SNP_P3_57688_40921513 | NC_021163.1    | Ca_kabuli_chr04 | 40921513                | GG                              | AA                | 1945963430               |
| SNP_P3_57689_40921525 | NC_021163.1    | Ca_kabuli_chr04 | 40921525                | TT                              | CC                | 1945963432               |
| SNP_P3_57690_40921797 | NC_021163.1    | Ca_kabuli_chr04 | 40921797                | CC                              | TT                | 1945963434               |
| SNP_P3_57691_40922065 | NC_021163.1    | Ca_kabuli_chr04 | 40922065                | AA                              | GG                | 1945963436               |
| SNP_P3_57693_40922984 | NC_021163.1    | Ca_kabuli_chr04 | 40922984                | AA                              | GG                | 1945963437               |
| SNP_P3_57694_40924106 | NC_021163.1    | Ca_kabuli_chr04 | 40924106                | AA                              | GG                | 1945963439               |
| SNP_P3_57695_40924491 | NC_021163.1    | Ca_kabuli_chr04 | 40924491                | AA                              | GG                | 1945963441               |
| SNP_P3_57696_40925025 | NC_021163.1    | Ca_kabuli_chr04 | 40925025                | CC                              | TT                | 1945963443               |
| SNP_P3_57698_40928857 | NC_021163.1    | Ca_kabuli_chr04 | 40928857                | CC                              | TT                | 1945963445               |
| SNP_P3_57699_40928887 | NC_021163.1    | Ca_kabuli_chr04 | 40928887                | CC                              | TT                | 1945963446               |
| SNP_P3_57700_40928906 | NC_021163.1    | Ca_kabuli_chr04 | 40928906                | TT                              | CC                | 1945963448               |
| SNP_P3_57701_40928952 | NC_021163.1    | Ca_kabuli_chr04 | 40928952                | CC                              | TT                | 1945963450               |
| SNP_P3_57702_40928954 | NC_021163.1    | Ca_kabuli_chr04 | 40928954                | TT                              | CC                | 1945963452               |
| SNP_P3_57703_40928957 | NC_021163.1    | Ca_kabuli_chr04 | 40928957                | CC                              | TT                | 1945963453               |
| SNP_P3_57704_40929000 | NC_021163.1    | Ca_kabuli_chr04 | 40929000                | GG                              | AA                | 1945963455               |
| SNP_P3_57706_40929097 | NC_021163.1    | Ca_kabuli_chr04 | 40929097                | TT                              | CC                | 1945963457               |
| SNP_P3_57707_40929446 | NC_021163.1    | Ca_kabuli_chr04 | 40929446                | GG                              | AA                | 1945963459               |
| SNP_P3_57708_40929655 | NC_021163.1    | Ca_kabuli_chr04 | 40929655                | CC                              | AA                | 1945963461               |
| SNP_P3_57709_40929674 | NC_021163.1    | Ca_kabuli_chr04 | 40929674                | AA                              | GG                | 1945963462               |
| SNP_P3_57710_40929960 | NC_021163.1    | Ca_kabuli_chr04 | 40929960                | GG                              | AA                | 1945963464               |
| SNP_P3_57712_40931418 | NC_021163.1    | Ca_kabuli_chr04 | 40931418                | CC                              | AA                | 1945963466               |
| SNP_P3_57713_40931800 | NC_021163.1    | Ca_kabuli_chr04 | 40931800                | AA                              | TT                | 1945963468               |
| SNP_P3_57714_40931812 | NC_021163.1    | Ca_kabuli_chr04 | 40931812                | AA                              | CC                | 1945963469               |
| SNP_P3_57715_40933390 | NC_021163.1    | Ca_kabuli_chr04 | 40933390                | AA                              | TT                | 1945963471               |
| SNP_P3_57716_40934196 | NC_021163.1    | Ca_kabuli_chr04 | 40934196                | TT                              | GG                | 1945963473               |
| SNP_P3_57717_40934364 | NC_021163.1    | Ca_kabuli_chr04 | 40934364                | AA                              | CC                | 1945963475               |
| SNP_P3_57718_40934381 | NC_021163.1    | Ca_kabuli_chr04 | 40934381                | CC                              | TT                | 1945963477               |

| SNPs IDs              | Chromosome IDs | Chromosomes     | Physical positions (bp) | CDC Frontier (Reference genome) | (Pusa 256 & HPNB) | NCBI SNPdb Accession IDs |
|-----------------------|----------------|-----------------|-------------------------|---------------------------------|-------------------|--------------------------|
| SNP_P3_57719_40934393 | NC_021163.1    | Ca_kabuli_chr04 | 40934393                | GG                              | CC                | 1945963478               |
| SNP_P3_57720_40934576 | NC_021163.1    | Ca_kabuli_chr04 | 40934576                | CC                              | TT                | 1945963480               |
| SNP_P3_57721_40934616 | NC_021163.1    | Ca_kabuli_chr04 | 40934616                | AA                              | TT                | 1945963482               |
| SNP_P3_57723_40934748 | NC_021163.1    | Ca_kabuli_chr04 | 40934748                | CC                              | TT                | 1945963484               |
| SNP_P3_57724_40934812 | NC_021163.1    | Ca_kabuli_chr04 | 40934812                | CC                              | TT                | 1945963486               |
| SNP_P3_57725_40934815 | NC_021163.1    | Ca_kabuli_chr04 | 40934815                | GG                              | AA                | 1945963487               |
| SNP_P3_57726_40934858 | NC_021163.1    | Ca_kabuli_chr04 | 40934858                | TT                              | CC                | 1945963489               |
| SNP_P3_57727_40934860 | NC_021163.1    | Ca_kabuli_chr04 | 40934860                | AA                              | TT                | 1945963491               |
| SNP_P3_57728_40934954 | NC_021163.1    | Ca_kabuli_chr04 | 40934954                | AA                              | GG                | 1945963493               |
| SNP_P3_57729_40934957 | NC_021163.1    | Ca_kabuli_chr04 | 40934957                | TT                              | GG                | 1945963494               |
| SNP_P3_57730_40934990 | NC_021163.1    | Ca_kabuli_chr04 | 40934990                | TT                              | CC                | 1945963496               |
| SNP_P3_57731_40934996 | NC_021163.1    | Ca_kabuli_chr04 | 40934996                | GG                              | TT                | 1945963498               |
| SNP_P3_57732_40935004 | NC_021163.1    | Ca_kabuli_chr04 | 40935004                | AA                              | GG                | 1945963500               |
| SNP_P3_57733_40935025 | NC_021163.1    | Ca_kabuli_chr04 | 40935025                | AA                              | GG                | 1945963502               |
| SNP_P3_57734_40935076 | NC_021163.1    | Ca_kabuli_chr04 | 40935076                | TT                              | CC                | 1945963503               |
| SNP_P3_57735_40935297 | NC_021163.1    | Ca_kabuli_chr04 | 40935297                | GG                              | AA                | 1945963505               |
| SNP_P3_57736_40935323 | NC_021163.1    | Ca_kabuli_chr04 | 40935323                | AA                              | GG                | 1945963507               |
| SNP_P3_57737_40935330 | NC_021163.1    | Ca_kabuli_chr04 | 40935330                | GG                              | AA                | 1945963509               |
| SNP_P3_57738_40935386 | NC_021163.1    | Ca_kabuli_chr04 | 40935386                | CC                              | TT                | 1945963510               |
| SNP_P3_57740_40935582 | NC_021163.1    | Ca_kabuli_chr04 | 40935582                | GG                              | AA                | 1945963512               |
| SNP_P3_57741_40935617 | NC_021163.1    | Ca_kabuli_chr04 | 40935617                | CC                              | GG                | 1945963514               |
| SNP_P3_57742_40935702 | NC_021163.1    | Ca_kabuli_chr04 | 40935702                | TT                              | AA                | 1945963516               |
| SNP_P3_57743_40935706 | NC_021163.1    | Ca_kabuli_chr04 | 40935706                | CC                              | TT                | 1945963518               |
| SNP_P3_57744_40935760 | NC_021163.1    | Ca_kabuli_chr04 | 40935760                | CC                              | TT                | 1945963519               |
| SNP_P3_57745_40937628 | NC_021163.1    | Ca_kabuli_chr04 | 40937628                | AA                              | GG                | 1945963521               |
| SNP_P3_57746_40937707 | NC_021163.1    | Ca_kabuli_chr04 | 40937707                | GG                              | AA                | 1945963523               |
| SNP_P3_57747_40938705 | NC_021163.1    | Ca_kabuli_chr04 | 40938705                | TT                              | CC                | 1945963525               |
| SNP_P3_57748_40938719 | NC_021163.1    | Ca_kabuli_chr04 | 40938719                | TT                              | GG                | 1945963527               |
| SNP_P3_57749_40938721 | NC_021163.1    | Ca_kabuli_chr04 | 40938721                | CC                              | TT                | 1945963528               |
| SNP_P3_57750_40938953 | NC_021163.1    | Ca_kabuli_chr04 | 40938953                | AA                              | TT                | 1945963530               |
| SNP_P3_57751_40941959 | NC_021163.1    | Ca_kabuli_chr04 | 40941959                | AA                              | GG                | 1945963532               |
| SNP_P3_57753_40944502 | NC_021163.1    | Ca_kabuli_chr04 | 40944502                | GG                              | AA                | 1945963534               |
| SNP_P3_57754_40944528 | NC_021163.1    | Ca_kabuli_chr04 | 40944528                | CC                              | AA                | 1945963535               |
| SNP_P3_57755_40944530 | NC_021163.1    | Ca_kabuli_chr04 | 40944530                | GG                              | AA                | 1945963537               |
| SNP_P3_57756_40944535 | NC_021163.1    | Ca_kabuli_chr04 | 40944535                | GG                              | AA                | 1945963539               |
| SNP_P3_57757_40944733 | NC_021163.1    | Ca_kabuli_chr04 | 40944733                | CC                              | AA                | 1945963541               |
| SNP_P3_57758_40944817 | NC_021163.1    | Ca_kabuli_chr04 | 40944817                | TT                              | CC                | 1945963543               |
| SNP_P3_57760_40945017 | NC_021163.1    | Ca_kabuli_chr04 | 40945017                | TT                              | AA                | 1945963544               |
| SNP_P3_57761_40945019 | NC_021163.1    | Ca_kabuli_chr04 | 40945019                | CC                              | TT                | 1945963546               |
| SNP_P3_57762_40945210 | NC_021163.1    | Ca_kabuli_chr04 | 40945210                | TT                              | AA                | 1945963548               |
| SNP_P3_57763_40945214 | NC_021163.1    | Ca_kabuli_chr04 | 40945214                | AA                              | TT                | 1945963550               |
| SNP_P3_57764_40945221 | NC_021163.1    | Ca_kabuli_chr04 | 40945221                | CC                              | TT                | 1945963552               |

| SNPs IDs              | Chromosome IDs | Chromosomes     | Physical positions (bp) | CDC Frontier (Reference genome) | (Pusa 256 & HPNB) | NCBI SNPdb Accession IDs |
|-----------------------|----------------|-----------------|-------------------------|---------------------------------|-------------------|--------------------------|
| SNP_P3_57765_40945246 | NC_021163.1    | Ca_kabuli_chr04 | 40945246                | GG                              | AA                | 1945963553               |
| SNP_P3_57766_40945247 | NC_021163.1    | Ca_kabuli_chr04 | 40945247                | GG                              | AA                | 1945963555               |
| SNP_P3_57767_40947377 | NC_021163.1    | Ca_kabuli_chr04 | 40947377                | GG                              | TT                | 1945963557               |
| SNP_P3_57768_40948572 | NC_021163.1    | Ca_kabuli_chr04 | 40948572                | AA                              | GG                | 1945963559               |
| SNP_P3_57769_40948775 | NC_021163.1    | Ca_kabuli_chr04 | 40948775                | AA                              | GG                | 1945963560               |
| SNP_P3_57770_40949619 | NC_021163.1    | Ca_kabuli_chr04 | 40949619                | CC                              | TT                | 1945963562               |
| SNP_P3_57771_40949761 | NC_021163.1    | Ca_kabuli_chr04 | 40949761                | GG                              | AA                | 1945963564               |
| SNP_P3_57772_40950110 | NC_021163.1    | Ca_kabuli_chr04 | 40950110                | AA                              | TT                | 1945963566               |
| SNP_P3_57773_40950136 | NC_021163.1    | Ca_kabuli_chr04 | 40950136                | TT                              | AA                | 1945963568               |
| SNP_P3_57774_40950169 | NC_021163.1    | Ca_kabuli_chr04 | 40950169                | AA                              | TT                | 1945963569               |
| SNP_P3_57776_40950246 | NC_021163.1    | Ca_kabuli_chr04 | 40950246                | TT                              | AA                | 1945963571               |
| SNP_P3_57777_40950452 | NC_021163.1    | Ca_kabuli_chr04 | 40950452                | GG                              | AA                | 1945963573               |
| SNP_P3_57778_40950522 | NC_021163.1    | Ca_kabuli_chr04 | 40950522                | GG                              | AA                | 1945963575               |
| SNP_P3_57779_40950555 | NC_021163.1    | Ca_kabuli_chr04 | 40950555                | TT                              | CC                | 1945963576               |
| SNP_P3_57780_40950560 | NC_021163.1    | Ca_kabuli_chr04 | 40950560                | TT                              | AA                | 1945963578               |
| SNP_P3_57781_40950803 | NC_021163.1    | Ca_kabuli_chr04 | 40950803                | GG                              | AA                | 1945963580               |
| SNP_P3_57783_40955206 | NC_021163.1    | Ca_kabuli_chr04 | 40955206                | CC                              | TT                | 1945963582               |
| SNP_P3_57784_40955214 | NC_021163.1    | Ca_kabuli_chr04 | 40955214                | AA                              | GG                | 1945963583               |
| SNP_P3_57786_40955303 | NC_021163.1    | Ca_kabuli_chr04 | 40955303                | CC                              | TT                | 1945963585               |
| SNP_P3_57787_40955348 | NC_021163.1    | Ca_kabuli_chr04 | 40955348                | CC                              | TT                | 1945963587               |
| SNP_P3_57788_40955494 | NC_021163.1    | Ca_kabuli_chr04 | 40955494                | AA                              | GG                | 1945963589               |
| SNP_P3_57789_40955669 | NC_021163.1    | Ca_kabuli_chr04 | 40955669                | GG                              | AA                | 1945963590               |
| SNP_P3_57790_40955671 | NC_021163.1    | Ca_kabuli_chr04 | 40955671                | TT                              | CC                | 1945963592               |
| SNP_P3_57791_40955694 | NC_021163.1    | Ca_kabuli_chr04 | 40955694                | TT                              | GG                | 1945963594               |
| SNP_P3_57792_40955730 | NC_021163.1    | Ca_kabuli_chr04 | 40955730                | CC                              | TT                | 1945963596               |
| SNP_P3_57793_40955742 | NC_021163.1    | Ca_kabuli_chr04 | 40955742                | GG                              | AA                | 1945963598               |
| SNP_P3_57794_40955814 | NC_021163.1    | Ca_kabuli_chr04 | 40955814                | AA                              | GG                | 1945963599               |
| SNP_P3_57795_40955823 | NC_021163.1    | Ca_kabuli_chr04 | 40955823                | TT                              | CC                | 1945963601               |
| SNP_P3_57796_40955956 | NC_021163.1    | Ca_kabuli_chr04 | 40955956                | GG                              | AA                | 1945963603               |
| SNP_P3_57797_40956005 | NC_021163.1    | Ca_kabuli_chr04 | 40956005                | GG                              | AA                | 1945963605               |
| SNP_P3_57798_40956008 | NC_021163.1    | Ca_kabuli_chr04 | 40956008                | CC                              | TT                | 1945963606               |
| SNP_P3_57799_40957737 | NC_021163.1    | Ca_kabuli_chr04 | 40957737                | GG                              | AA                | 1945963608               |
| SNP_P3_57800_40957867 | NC_021163.1    | Ca_kabuli_chr04 | 40957867                | TT                              | CC                | 1945963610               |
| SNP_P3_57802_40958113 | NC_021163.1    | Ca_kabuli_chr04 | 40958113                | TT                              | GG                | 1945963612               |
| SNP_P3_57803_40958120 | NC_021163.1    | Ca_kabuli_chr04 | 40958120                | AA                              | GG                | 1945963614               |
| SNP_P3_57804_40958340 | NC_021163.1    | Ca_kabuli_chr04 | 40958340                | TT                              | AA                | 1945963615               |
| SNP_P3_57805_40958341 | NC_021163.1    | Ca_kabuli_chr04 | 40958341                | TT                              | AA                | 1945963617               |
| SNP_P3_57806_40958342 | NC_021163.1    | Ca_kabuli_chr04 | 40958342                | TT                              | AA                | 1945963619               |
| SNP_P3_57807_40958345 | NC_021163.1    | Ca_kabuli_chr04 | 40958345                | GG                              | AA                | 1945963621               |
| SNP_P3_57808_40959080 | NC_021163.1    | Ca_kabuli_chr04 | 40959080                | TT                              | GG                | 1945963622               |
| SNP_P3_57809_40959087 | NC_021163.1    | Ca_kabuli_chr04 | 40959087                | AA                              | CC                | 1945963624               |
| SNP_P3_57810_40959110 | NC_021163.1    | Ca_kabuli_chr04 | 40959110                | CC                              | TT                | 1945963626               |

| SNPs IDs              | Chromosome IDs | Chromosomes     | Physical positions (bp) | CDC Frontier (Reference genome) | (Pusa 256 & HPNB) | NCBI SNPdb Accession IDs |
|-----------------------|----------------|-----------------|-------------------------|---------------------------------|-------------------|--------------------------|
| SNP_P3_57811_40959470 | NC_021163.1    | Ca_kabuli_chr04 | 40959470                | TT                              | CC                | 1945963628               |
| SNP_P3_57812_40959475 | NC_021163.1    | Ca_kabuli_chr04 | 40959475                | CC                              | TT                | 1945963630               |
| SNP_P3_57813_40959478 | NC_021163.1    | Ca_kabuli_chr04 | 40959478                | CC                              | TT                | 1945963631               |
| SNP_P3_57814_40959845 | NC_021163.1    | Ca_kabuli_chr04 | 40959845                | AA                              | GG                | 1945963633               |
| SNP_P3_57815_40960173 | NC_021163.1    | Ca_kabuli_chr04 | 40960173                | TT                              | CC                | 1945963635               |
| SNP_P3_57816_40960194 | NC_021163.1    | Ca_kabuli_chr04 | 40960194                | AA                              | GG                | 1945963637               |
| SNP_P3_57817_40960233 | NC_021163.1    | Ca_kabuli_chr04 | 40960233                | CC                              | TT                | 1945963639               |
| SNP_P3_57818_40960240 | NC_021163.1    | Ca_kabuli_chr04 | 40960240                | GG                              | CC                | 1945963640               |
| SNP_P3_57819_40960246 | NC_021163.1    | Ca_kabuli_chr04 | 40960246                | AA                              | GG                | 1945963642               |
| SNP_P3_57820_40962400 | NC_021163.1    | Ca_kabuli_chr04 | 40962400                | GG                              | TT                | 1945963644               |
| SNP_P3_57821_40962565 | NC_021163.1    | Ca_kabuli_chr04 | 40962565                | CC                              | AA                | 1945963646               |
| SNP_P3_57822_40964373 | NC_021163.1    | Ca_kabuli_chr04 | 40964373                | CC                              | AA                | 1945963647               |
| SNP_P3_57823_40964714 | NC_021163.1    | Ca_kabuli_chr04 | 40964714                | AA                              | GG                | 1945963649               |
| SNP_P3_57824_40965198 | NC_021163.1    | Ca_kabuli_chr04 | 40965198                | GG                              | AA                | 1945963651               |
| SNP_P3_57825_40965577 | NC_021163.1    | Ca_kabuli_chr04 | 40965577                | CC                              | TT                | 1945963653               |
| SNP_P3_57826_40966419 | NC_021163.1    | Ca_kabuli_chr04 | 40966419                | CC                              | GG                | 1945963655               |
| SNP_P3_57827_40966879 | NC_021163.1    | Ca_kabuli_chr04 | 40966879                | GG                              | AA                | 1945963656               |
| SNP_P3_57828_40967296 | NC_021163.1    | Ca_kabuli_chr04 | 40967296                | TT                              | AA                | 1945963658               |
| SNP_P3_57829_40967393 | NC_021163.1    | Ca_kabuli_chr04 | 40967393                | CC                              | AA                | 1945963660               |
| SNP_P3_57830_40967863 | NC_021163.1    | Ca_kabuli_chr04 | 40967863                | AA                              | GG                | 1945963662               |
| SNP_P3_57831_40968056 | NC_021163.1    | Ca_kabuli_chr04 | 40968056                | GG                              | AA                | 1945963663               |
| SNP_P3_57832_40968705 | NC_021163.1    | Ca_kabuli_chr04 | 40968705                | GG                              | AA                | 1945963665               |
| SNP_P3_57833_40969350 | NC_021163.1    | Ca_kabuli_chr04 | 40969350                | TT                              | GG                | 1945963667               |
| SNP_P3_57834_40969383 | NC_021163.1    | Ca_kabuli_chr04 | 40969383                | AA                              | CC                | 1945963669               |
| SNP_P3_57835_40969579 | NC_021163.1    | Ca_kabuli_chr04 | 40969579                | AA                              | GG                | 1945963671               |
| SNP_P3_57836_40969626 | NC_021163.1    | Ca_kabuli_chr04 | 40969626                | CC                              | TT                | 1945963672               |
| SNP_P3_57837_40972093 | NC_021163.1    | Ca_kabuli_chr04 | 40972093                | AA                              | CC                | 1945963674               |
| SNP_P3_57838_40972115 | NC_021163.1    | Ca_kabuli_chr04 | 40972115                | TT                              | CC                | 1945963676               |
| SNP_P3_57839_40972172 | NC_021163.1    | Ca_kabuli_chr04 | 40972172                | TT                              | CC                | 1945963678               |
| SNP_P3_57840_40972359 | NC_021163.1    | Ca_kabuli_chr04 | 40972359                | TT                              | CC                | 1945963679               |
| SNP_P3_57841_40972369 | NC_021163.1    | Ca_kabuli_chr04 | 40972369                | CC                              | TT                | 1945963681               |
| SNP_P3_57842_40974270 | NC_021163.1    | Ca_kabuli_chr04 | 40974270                | GG                              | AA                | 1945963683               |
| SNP_P3_57843_40974426 | NC_021163.1    | Ca_kabuli_chr04 | 40974426                | CC                              | TT                | 1945963685               |
| SNP_P3_57844_40974484 | NC_021163.1    | Ca_kabuli_chr04 | 40974484                | TT                              | CC                | 1945963687               |
| SNP_P3_57845_40975925 | NC_021163.1    | Ca_kabuli_chr04 | 40975925                | CC                              | TT                | 1945963688               |
| SNP_P3_57846_40976314 | NC_021163.1    | Ca_kabuli_chr04 | 40976314                | AA                              | TT                | 1945963690               |
| SNP_P3_57847_40976654 | NC_021163.1    | Ca_kabuli_chr04 | 40976654                | AA                              | GG                | 1945963692               |
| SNP_P3_57848_40978300 | NC_021163.1    | Ca_kabuli_chr04 | 40978300                | CC                              | AA                | 1945963694               |
| SNP_P3_57849_40978329 | NC_021163.1    | Ca_kabuli_chr04 | 40978329                | TT                              | GG                | 1945963696               |
| SNP_P3_57851_40982001 | NC_021163.1    | Ca_kabuli_chr04 | 40982001                | AA                              | GG                | 1945963697               |
| SNP_P3_57853_40982127 | NC_021163.1    | Ca_kabuli_chr04 | 40982127                | TT                              | CC                | 1945963699               |
| SNP_P3_57854_40982157 | NC_021163.1    | Ca_kabuli_chr04 | 40982157                | CC                              | TT                | 1945963701               |

| SNPs IDs              | Chromosome IDs | Chromosomes     | Physical positions (bp) | CDC Frontier (Reference genome) | (Pusa 256 & HPNB) | NCBI SNPdb Accession IDs |
|-----------------------|----------------|-----------------|-------------------------|---------------------------------|-------------------|--------------------------|
| SNP_P3_57856_40982191 | NC_021163.1    | Ca_kabuli_chr04 | 40982191                | CC                              | TT                | 1945963703               |
| SNP_P3_57857_40982217 | NC_021163.1    | Ca_kabuli_chr04 | 40982217                | AA                              | GG                | 1945963704               |
| SNP_P3_57859_40982233 | NC_021163.1    | Ca_kabuli_chr04 | 40982233                | CC                              | TT                | 1945963706               |
| SNP_P3_57860_40982236 | NC_021163.1    | Ca_kabuli_chr04 | 40982236                | TT                              | CC                | 1945963708               |
| SNP_P3_57861_40982388 | NC_021163.1    | Ca_kabuli_chr04 | 40982388                | TT                              | GG                | 1945963710               |
| SNP_P3_57862_40982419 | NC_021163.1    | Ca_kabuli_chr04 | 40982419                | TT                              | AA                | 1945963712               |
| SNP_P3_57863_40982420 | NC_021163.1    | Ca_kabuli_chr04 | 40982420                | TT                              | CC                | 1945963713               |
| SNP_P3_57864_40982478 | NC_021163.1    | Ca_kabuli_chr04 | 40982478                | CC                              | TT                | 1945963715               |
| SNP_P3_57865_40982594 | NC_021163.1    | Ca_kabuli_chr04 | 40982594                | CC                              | GG                | 1945963717               |
| SNP_P3_57866_40982957 | NC_021163.1    | Ca_kabuli_chr04 | 40982957                | GG                              | AA                | 1945963719               |
| SNP_P3_57867_40983003 | NC_021163.1    | Ca_kabuli_chr04 | 40983003                | GG                              | AA                | 1945963721               |
| SNP_P3_57868_40988747 | NC_021163.1    | Ca_kabuli_chr04 | 40988747                | TT                              | GG                | 1945963722               |
| SNP_P3_57869_40989412 | NC_021163.1    | Ca_kabuli_chr04 | 40989412                | AA                              | TT                | 1945963724               |
| SNP_P3_57870_40989475 | NC_021163.1    | Ca_kabuli_chr04 | 40989475                | CC                              | TT                | 1945963726               |
| SNP_P3_57871_40990470 | NC_021163.1    | Ca_kabuli_chr04 | 40990470                | GG                              | AA                | 1945963728               |
| SNP_P3_57872_40990480 | NC_021163.1    | Ca_kabuli_chr04 | 40990480                | TT                              | GG                | 1945963729               |
| SNP_P3_57873_40991370 | NC_021163.1    | Ca_kabuli_chr04 | 40991370                | CC                              | TT                | 1945963731               |
| SNP_P3_57874_40993580 | NC_021163.1    | Ca_kabuli_chr04 | 40993580                | CC                              | AA                | 1945963733               |
| SNP_P3_57875_40995115 | NC_021163.1    | Ca_kabuli_chr04 | 40995115                | TT                              | CC                | 1945963735               |
| SNP_P3_57876_40995257 | NC_021163.1    | Ca_kabuli_chr04 | 40995257                | TT                              | CC                | 1945963737               |
| SNP_P3_57877_40995642 | NC_021163.1    | Ca_kabuli_chr04 | 40995642                | CC                              | AA                | 1945963738               |
| SNP_P3_57878_40997160 | NC_021163.1    | Ca_kabuli_chr04 | 40997160                | CC                              | TT                | 1945963740               |
| SNP_P3_57879_40997480 | NC_021163.1    | Ca_kabuli_chr04 | 40997480                | CC                              | GG                | 1945963742               |
| SNP_P3_57880_40998464 | NC_021163.1    | Ca_kabuli_chr04 | 40998464                | GG                              | AA                | 1945963744               |
| SNP_P3_57881_40998486 | NC_021163.1    | Ca_kabuli_chr04 | 40998486                | AA                              | CC                | 1945963746               |
| SNP_P3_57882_41004171 | NC_021163.1    | Ca_kabuli_chr04 | 41004171                | TT                              | AA                | 1945963747               |
| SNP_P3_57883_41004179 | NC_021163.1    | Ca_kabuli_chr04 | 41004179                | AA                              | GG                | 1945963749               |
| SNP_P3_57884_41004183 | NC_021163.1    | Ca_kabuli_chr04 | 41004183                | CC                              | TT                | 1945963751               |
| SNP_P3_57885_41007253 | NC_021163.1    | Ca_kabuli_chr04 | 41007253                | AA                              | CC                | 1945963753               |
| SNP_P3_57886_41007462 | NC_021163.1    | Ca_kabuli_chr04 | 41007462                | TT                              | CC                | 1945963754               |
| SNP_P3_57887_41009509 | NC_021163.1    | Ca_kabuli_chr04 | 41009509                | AA                              | CC                | 1945963756               |
| SNP_P3_57888_41010100 | NC_021163.1    | Ca_kabuli_chr04 | 41010100                | TT                              | AA                | 1945963758               |
| SNP_P3_57889_41012030 | NC_021163.1    | Ca_kabuli_chr04 | 41012030                | GG                              | AA                | 1945963760               |
| SNP_P3_57890_41012066 | NC_021163.1    | Ca_kabuli_chr04 | 41012066                | CC                              | TT                | 1945963762               |
| SNP_P3_57891_41012091 | NC_021163.1    | Ca_kabuli_chr04 | 41012091                | AA                              | GG                | 1945963763               |
| SNP_P3_57892_41013124 | NC_021163.1    | Ca_kabuli_chr04 | 41013124                | TT                              | CC                | 1945963765               |
| SNP_P3_57893_41015670 | NC_021163.1    | Ca_kabuli_chr04 | 41015670                | AA                              | TT                | 1945963767               |
| SNP_P3_57894_41015706 | NC_021163.1    | Ca_kabuli_chr04 | 41015706                | GG                              | CC                | 1945963769               |
| SNP_P3_57896_41017127 | NC_021163.1    | Ca_kabuli_chr04 | 41017127                | AA                              | TT                | 1945963771               |
| SNP_P3_57897_41017133 | NC_021163.1    | Ca_kabuli_chr04 | 41017133                | GG                              | AA                | 1945963772               |
| SNP_P3_57898_41018269 | NC_021163.1    | Ca_kabuli_chr04 | 41018269                | TT                              | GG                | 1945963774               |
| SNP_P3_57899_41018332 | NC_021163.1    | Ca_kabuli_chr04 | 41018332                | AA                              | GG                | 1945963776               |

| SNPs IDs              | Chromosome IDs | Chromosomes     | Physical positions (bp) | CDC Frontier (Reference genome) | (Pusa 256 & HPNB) | NCBI SNPdb Accession IDs |
|-----------------------|----------------|-----------------|-------------------------|---------------------------------|-------------------|--------------------------|
| SNP_P3_57900_41018346 | NC_021163.1    | Ca_kabuli_chr04 | 41018346                | CC                              | TT                | 1945963778               |
| SNP_P3_57901_41018357 | NC_021163.1    | Ca_kabuli_chr04 | 41018357                | AA                              | GG                | 1945963779               |
| SNP_P3_57906_41061386 | NC_021163.1    | Ca_kabuli_chr04 | 41061386                | TT                              | CC                | 1945963781               |
| SNP_P3_57907_41061441 | NC_021163.1    | Ca_kabuli_chr04 | 41061441                | AA                              | TT                | 1945963783               |
| SNP_P3_57909_41126152 | NC_021163.1    | Ca_kabuli_chr04 | 41126152                | AA                              | TT                | 1945963785               |
| SNP_P3_57910_41126153 | NC_021163.1    | Ca_kabuli_chr04 | 41126153                | AA                              | TT                | 1945963787               |
| SNP_P3_57911_41126156 | NC_021163.1    | Ca_kabuli_chr04 | 41126156                | GG                              | TT                | 1945963788               |
| SNP_P3_57912_41161022 | NC_021163.1    | Ca_kabuli_chr04 | 41161022                | CC                              | TT                | 1945963790               |
| SNP_P3_57915_41172737 | NC_021163.1    | Ca_kabuli_chr04 | 41172737                | AA                              | GG                | 1945963792               |
| SNP_P3_57916_41172744 | NC_021163.1    | Ca_kabuli_chr04 | 41172744                | AA                              | GG                | 1945963794               |
| SNP_P3_57917_41188492 | NC_021163.1    | Ca_kabuli_chr04 | 41188492                | TT                              | CC                | 1945963795               |
| SNP_P3_57918_41222701 | NC_021163.1    | Ca_kabuli_chr04 | 41222701                | GG                              | AA                | 1945963797               |
| SNP_P3_57919_41253415 | NC_021163.1    | Ca_kabuli_chr04 | 41253415                | CC                              | TT                | 1945963799               |
| SNP_P3_57921_41286823 | NC_021163.1    | Ca_kabuli_chr04 | 41286823                | TT                              | CC                | 1945963801               |
| SNP_P3_57924_41323258 | NC_021163.1    | Ca_kabuli_chr04 | 41323258                | GG                              | AA                | 1945963803               |
| SNP_P3_57925_41327864 | NC_021163.1    | Ca_kabuli_chr04 | 41327864                | TT                              | CC                | 1945963804               |
| SNP_P3_57927_41379386 | NC_021163.1    | Ca_kabuli_chr04 | 41379386                | AA                              | GG                | 1945963806               |
| SNP_P3_57928_41392504 | NC_021163.1    | Ca_kabuli_chr04 | 41392504                | GG                              | AA                | 1945963808               |
| SNP_P3_57929_41401937 | NC_021163.1    | Ca_kabuli_chr04 | 41401937                | TT                              | CC                | 1945963810               |
| SNP_P3_57930_41520344 | NC_021163.1    | Ca_kabuli_chr04 | 41520344                | GG                              | AA                | 1945963811               |
| SNP_P3_57931_41520345 | NC_021163.1    | Ca_kabuli_chr04 | 41520345                | AA                              | TT                | 1945963813               |
| SNP_P3_57932_41523723 | NC_021163.1    | Ca_kabuli_chr04 | 41523723                | TT                              | CC                | 1945963815               |
| SNP_P3_57933_41531369 | NC_021163.1    | Ca_kabuli_chr04 | 41531369                | AA                              | GG                | 1945963817               |
| SNP_P3_57934_41553068 | NC_021163.1    | Ca_kabuli_chr04 | 41553068                | GG                              | AA                | 1945963819               |
| SNP_P3_57936_41619018 | NC_021163.1    | Ca_kabuli_chr04 | 41619018                | CC                              | TT                | 1945963820               |
| SNP_P3_57937_41630609 | NC_021163.1    | Ca_kabuli_chr04 | 41630609                | CC                              | TT                | 1945963822               |
| SNP_P3_57938_41671316 | NC_021163.1    | Ca_kabuli_chr04 | 41671316                | GG                              | AA                | 1945963824               |
| SNP_P3_57939_41751523 | NC_021163.1    | Ca_kabuli_chr04 | 41751523                | AA                              | GG                | 1945963826               |
| SNP_P3_57940_41786255 | NC_021163.1    | Ca_kabuli_chr04 | 41786255                | AA                              | GG                | 1945963828               |
| SNP_P3_57941_41786256 | NC_021163.1    | Ca_kabuli_chr04 | 41786256                | TT                              | CC                | 1945963829               |
| SNP_P3_57942_41798869 | NC_021163.1    | Ca_kabuli_chr04 | 41798869                | GG                              | TT                | 1945963831               |
| SNP_P3_57943_41801877 | NC_021163.1    | Ca_kabuli_chr04 | 41801877                | AA                              | GG                | 1945963833               |
| SNP_P3_57945_41806255 | NC_021163.1    | Ca_kabuli_chr04 | 41806255                | CC                              | TT                | 1945963835               |
| SNP_P3_57948_41806637 | NC_021163.1    | Ca_kabuli_chr04 | 41806637                | TT                              | AA                | 1945963836               |
| SNP_P3_57949_41806645 | NC_021163.1    | Ca_kabuli_chr04 | 41806645                | CC                              | TT                | 1945963838               |
| SNP_P3_57950_41806670 | NC_021163.1    | Ca_kabuli_chr04 | 41806670                | CC                              | TT                | 1945963840               |
| SNP_P3_57951_41806681 | NC_021163.1    | Ca_kabuli_chr04 | 41806681                | AA                              | GG                | 1945963842               |
| SNP_P3_57953_41808271 | NC_021163.1    | Ca_kabuli_chr04 | 41808271                | AA                              | GG                | 1945963844               |
| SNP_P3_57954_41809943 | NC_021163.1    | Ca_kabuli_chr04 | 41809943                | CC                              | TT                | 1945963845               |
| SNP_P3_57955_41810995 | NC_021163.1    | Ca_kabuli_chr04 | 41810995                | CC                              | TT                | 1945963847               |
| SNP_P3_57956_41814644 | NC_021163.1    | Ca_kabuli_chr04 | 41814644                | GG                              | AA                | 1945963849               |
| SNP_P3_57957_41814654 | NC_021163.1    | Ca_kabuli_chr04 | 41814654                | AA                              | GG                | 1945963851               |

| SNPs IDs              | Chromosome IDs | Chromosomes     | Physical positions (bp) | CDC Frontier (Reference genome) | (Pusa 256 & HPNB) | NCBI SNPdb Accession IDs |
|-----------------------|----------------|-----------------|-------------------------|---------------------------------|-------------------|--------------------------|
| SNP_P3_57958_41822285 | NC_021163.1    | Ca_kabuli_chr04 | 41822285                | GG                              | AA                | 1945963852               |
| SNP_P3_57959_41823123 | NC_021163.1    | Ca_kabuli_chr04 | 41823123                | GG                              | AA                | 1945963854               |
| SNP_P3_57960_41823393 | NC_021163.1    | Ca_kabuli_chr04 | 41823393                | CC                              | GG                | 1945963856               |
| SNP_P3_57962_41823453 | NC_021163.1    | Ca_kabuli_chr04 | 41823453                | CC                              | TT                | 1945963858               |
| SNP_P3_57964_41823858 | NC_021163.1    | Ca_kabuli_chr04 | 41823858                | AA                              | CC                | 1945963859               |
| SNP_P3_57965_41823954 | NC_021163.1    | Ca_kabuli_chr04 | 41823954                | GG                              | AA                | 1945963861               |
| SNP_P3_57967_41824003 | NC_021163.1    | Ca_kabuli_chr04 | 41824003                | TT                              | CC                | 1945963863               |
| SNP_P3_57968_41825104 | NC_021163.1    | Ca_kabuli_chr04 | 41825104                | CC                              | TT                | 1945963865               |
| SNP_P3_57969_41825502 | NC_021163.1    | Ca_kabuli_chr04 | 41825502                | CC                              | TT                | 1945963867               |
| SNP_P3_57970_41825801 | NC_021163.1    | Ca_kabuli_chr04 | 41825801                | GG                              | AA                | 1945963868               |
| SNP_P3_57971_41825813 | NC_021163.1    | Ca_kabuli_chr04 | 41825813                | TT                              | CC                | 1945963870               |
| SNP_P3_57972_41825814 | NC_021163.1    | Ca_kabuli_chr04 | 41825814                | CC                              | TT                | 1945963872               |
| SNP_P3_57973_41826644 | NC_021163.1    | Ca_kabuli_chr04 | 41826644                | AA                              | GG                | 1945963874               |
| SNP_P3_57974_41826696 | NC_021163.1    | Ca_kabuli_chr04 | 41826696                | CC                              | TT                | 1945963876               |
| SNP_P3_57975_41826708 | NC_021163.1    | Ca_kabuli_chr04 | 41826708                | GG                              | CC                | 1945963877               |
| SNP_P3_57976_41826974 | NC_021163.1    | Ca_kabuli_chr04 | 41826974                | CC                              | AA                | 1945963879               |
| SNP_P3_57977_41826980 | NC_021163.1    | Ca_kabuli_chr04 | 41826980                | TT                              | GG                | 1945963881               |
| SNP_P3_57980_41830207 | NC_021163.1    | Ca_kabuli_chr04 | 41830207                | CC                              | GG                | 1945963883               |
| SNP_P3_57982_41833039 | NC_021163.1    | Ca_kabuli_chr04 | 41833039                | AA                              | TT                | 1945963884               |
| SNP_P3_57983_41833219 | NC_021163.1    | Ca_kabuli_chr04 | 41833219                | AA                              | TT                | 1945963886               |
| SNP_P3_57984_41836523 | NC_021163.1    | Ca_kabuli_chr04 | 41836523                | CC                              | TT                | 1945963888               |
| SNP_P3_57985_41888464 | NC_021163.1    | Ca_kabuli_chr04 | 41888464                | TT                              | AA                | 1945963890               |
| SNP_P3_57986_41892673 | NC_021163.1    | Ca_kabuli_chr04 | 41892673                | TT                              | CC                | 1945963892               |
| SNP_P3_57987_41905041 | NC_021163.1    | Ca_kabuli_chr04 | 41905041                | GG                              | CC                | 1945963893               |
| SNP_P3_57988_41905138 | NC_021163.1    | Ca_kabuli_chr04 | 41905138                | GG                              | TT                | 1945963895               |
| SNP_P3_57989_41912472 | NC_021163.1    | Ca_kabuli_chr04 | 41912472                | AA                              | GG                | 1945963897               |
| SNP_P3_57990_41913311 | NC_021163.1    | Ca_kabuli_chr04 | 41913311                | TT                              | CC                | 1945963899               |
| SNP_P3_57991_41913312 | NC_021163.1    | Ca_kabuli_chr04 | 41913312                | CC                              | TT                | 1945963900               |
| SNP_P3_57992_41913631 | NC_021163.1    | Ca_kabuli_chr04 | 41913631                | CC                              | TT                | 1945963902               |
| SNP_P3_57993_41913662 | NC_021163.1    | Ca_kabuli_chr04 | 41913662                | AA                              | TT                | 1945963904               |
| SNP_P3_57994_41925475 | NC_021163.1    | Ca_kabuli_chr04 | 41925475                | CC                              | TT                | 1945963906               |
| SNP_P3_57995_41946850 | NC_021163.1    | Ca_kabuli_chr04 | 41946850                | CC                              | AA                | 1945963908               |
| SNP_P3_57996_41956509 | NC_021163.1    | Ca_kabuli_chr04 | 41956509                | CC                              | TT                | 1945963909               |
| SNP_P3_57997_41972574 | NC_021163.1    | Ca_kabuli_chr04 | 41972574                | CC                              | TT                | 1945963911               |
| SNP_P3_57998_41982777 | NC_021163.1    | Ca_kabuli_chr04 | 41982777                | TT                              | GG                | 1945963913               |
| SNP_P3_57999_41982823 | NC_021163.1    | Ca_kabuli_chr04 | 41982823                | TT                              | CC                | 1945963915               |
| SNP_P3_58000_41983170 | NC_021163.1    | Ca_kabuli_chr04 | 41983170                | TT                              | CC                | 1945963916               |
| SNP_P3_58001_41983242 | NC_021163.1    | Ca_kabuli_chr04 | 41983242                | AA                              | GG                | 1945963918               |
| SNP_P3_58003_41984213 | NC_021163.1    | Ca_kabuli_chr04 | 41984213                | AA                              | TT                | 1945963920               |
| SNP_P3_58004_41984217 | NC_021163.1    | Ca_kabuli_chr04 | 41984217                | TT                              | CC                | 1945963922               |
| SNP_P3_58005_41984226 | NC_021163.1    | Ca_kabuli_chr04 | 41984226                | GG                              | TT                | 1945963924               |
| SNP_P3_58006_41985657 | NC_021163.1    | Ca_kabuli_chr04 | 41985657                | AA                              | GG                | 1945963925               |

| SNPs IDs              | Chromosome IDs | Chromosomes     | Physical positions (bp) | CDC Frontier (Reference genome) | (Pusa 256 & HPNB) | NCBI SNPdb Accession IDs |
|-----------------------|----------------|-----------------|-------------------------|---------------------------------|-------------------|--------------------------|
| SNP_P3_58007_41987404 | NC_021163.1    | Ca_kabuli_chr04 | 41987404                | CC                              | TT                | 1945963927               |
| SNP_P3_58009_42015256 | NC_021163.1    | Ca_kabuli_chr04 | 42015256                | TT                              | AA                | 1945963929               |
| SNP_P3_58010_42015269 | NC_021163.1    | Ca_kabuli_chr04 | 42015269                | AA                              | GG                | 1945963931               |
| SNP_P3_58011_42016625 | NC_021163.1    | Ca_kabuli_chr04 | 42016625                | GG                              | TT                | 1945963932               |
| SNP_P3_58012_42017427 | NC_021163.1    | Ca_kabuli_chr04 | 42017427                | GG                              | AA                | 1945963934               |
| SNP_P3_58013_42034865 | NC_021163.1    | Ca_kabuli_chr04 | 42034865                | TT                              | AA                | 1945963936               |
| SNP_P3_58014_42034874 | NC_021163.1    | Ca_kabuli_chr04 | 42034874                | TT                              | AA                | 1945963938               |
| SNP_P3_58015_42034875 | NC_021163.1    | Ca_kabuli_chr04 | 42034875                | AA                              | TT                | 1945963940               |
| SNP_P3_58016_42034876 | NC_021163.1    | Ca_kabuli_chr04 | 42034876                | TT                              | AA                | 1945963941               |
| SNP_P3_58017_42078518 | NC_021163.1    | Ca_kabuli_chr04 | 42078518                | GG                              | AA                | 1945963943               |
| SNP_P3_58019_42078713 | NC_021163.1    | Ca_kabuli_chr04 | 42078713                | TT                              | AA                | 1945963945               |
| SNP_P3_58020_42078837 | NC_021163.1    | Ca_kabuli_chr04 | 42078837                | TT                              | CC                | 1945963947               |
| SNP_P3_58021_42078844 | NC_021163.1    | Ca_kabuli_chr04 | 42078844                | CC                              | TT                | 1945963949               |
| SNP_P3_58022_42078865 | NC_021163.1    | Ca_kabuli_chr04 | 42078865                | AA                              | TT                | 1945963950               |
| SNP_P3_58023_42083393 | NC_021163.1    | Ca_kabuli_chr04 | 42083393                | AA                              | TT                | 1945963952               |
| SNP_P3_58024_42083506 | NC_021163.1    | Ca_kabuli_chr04 | 42083506                | AA                              | GG                | 1945963954               |
| SNP_P3_58025_42083601 | NC_021163.1    | Ca_kabuli_chr04 | 42083601                | TT                              | CC                | 1945963956               |
| SNP_P3_58026_42083770 | NC_021163.1    | Ca_kabuli_chr04 | 42083770                | TT                              | CC                | 1945963957               |
| SNP_P3_58027_42083840 | NC_021163.1    | Ca_kabuli_chr04 | 42083840                | GG                              | AA                | 1945963959               |
| SNP_P3_58028_42117783 | NC_021163.1    | Ca_kabuli_chr04 | 42117783                | CC                              | AA                | 1945963961               |
| SNP_P3_58029_42117834 | NC_021163.1    | Ca_kabuli_chr04 | 42117834                | AA                              | TT                | 1945963963               |
| SNP_P3_58030_42119016 | NC_021163.1    | Ca_kabuli_chr04 | 42119016                | AA                              | CC                | 1945963965               |
| SNP_P3_58031_42119020 | NC_021163.1    | Ca_kabuli_chr04 | 42119020                | TT                              | AA                | 1945963966               |
| SNP_P3_58032_42119024 | NC_021163.1    | Ca_kabuli_chr04 | 42119024                | CC                              | TT                | 1945963968               |
| SNP_P3_58033_42119025 | NC_021163.1    | Ca_kabuli_chr04 | 42119025                | CC                              | TT                | 1945963970               |
| SNP_P3_58034_42119027 | NC_021163.1    | Ca_kabuli_chr04 | 42119027                | CC                              | GG                | 1945963972               |
| SNP_P3_58035_42119062 | NC_021163.1    | Ca_kabuli_chr04 | 42119062                | AA                              | GG                | 1945963974               |
| SNP_P3_58036_42119194 | NC_021163.1    | Ca_kabuli_chr04 | 42119194                | TT                              | CC                | 1945963975               |
| SNP_P3_58037_42119232 | NC_021163.1    | Ca_kabuli_chr04 | 42119232                | AA                              | CC                | 1945963977               |
| SNP_P3_58038_42119269 | NC_021163.1    | Ca_kabuli_chr04 | 42119269                | CC                              | TT                | 1945963979               |
| SNP_P3_58039_42119401 | NC_021163.1    | Ca_kabuli_chr04 | 42119401                | CC                              | GG                | 1945963981               |
| SNP_P3_58040_42119423 | NC_021163.1    | Ca_kabuli_chr04 | 42119423                | GG                              | AA                | 1945963982               |
| SNP_P3_58041_42119513 | NC_021163.1    | Ca_kabuli_chr04 | 42119513                | TT                              | GG                | 1945963984               |
| SNP_P3_58042_42119704 | NC_021163.1    | Ca_kabuli_chr04 | 42119704                | TT                              | AA                | 1945963986               |
| SNP_P3_58043_42119716 | NC_021163.1    | Ca_kabuli_chr04 | 42119716                | GG                              | AA                | 1945963988               |
| SNP_P3_58044_42119757 | NC_021163.1    | Ca_kabuli_chr04 | 42119757                | GG                              | AA                | 1945963990               |
| SNP_P3_58045_42119889 | NC_021163.1    | Ca_kabuli_chr04 | 42119889                | AA                              | CC                | 1945963991               |
| SNP_P3_58046_42119936 | NC_021163.1    | Ca_kabuli_chr04 | 42119936                | GG                              | CC                | 1945963993               |
| SNP_P3_58047_42119945 | NC_021163.1    | Ca_kabuli_chr04 | 42119945                | TT                              | AA                | 1945963995               |
| SNP_P3_58048_42120012 | NC_021163.1    | Ca_kabuli_chr04 | 42120012                | CC                              | GG                | 1945963997               |
| SNP_P3_58049_42120055 | NC_021163.1    | Ca_kabuli_chr04 | 42120055                | AA                              | GG                | 1945963998               |
| SNP_P3_58050_42120201 | NC_021163.1    | Ca_kabuli_chr04 | 42120201                | GG                              | CC                | 1945964000               |



| SNPs IDs              | Chromosome IDs | Chromosomes     | Physical positions (bp) | CDC Frontier (Reference genome) | (Pusa 256 & HPNB) | NCBI SNPdb Accession IDs |
|-----------------------|----------------|-----------------|-------------------------|---------------------------------|-------------------|--------------------------|
| SNP_P3_58051_42120202 | NC_021163.1    | Ca_kabuli_chr04 | 42120202                | GG                              | TT                | 1945964002               |
| SNP_P3_58052_42120203 | NC_021163.1    | Ca_kabuli_chr04 | 42120203                | AA                              | GG                | 1945964004               |
| SNP_P3_58053_42120236 | NC_021163.1    | Ca_kabuli_chr04 | 42120236                | TT                              | CC                | 1945964006               |
| SNP_P3_58054_42120278 | NC_021163.1    | Ca_kabuli_chr04 | 42120278                | CC                              | GG                | 1945964007               |
| SNP_P3_58055_42120295 | NC_021163.1    | Ca_kabuli_chr04 | 42120295                | AA                              | GG                | 1945964009               |
| SNP_P3_58056_42120323 | NC_021163.1    | Ca_kabuli_chr04 | 42120323                | AA                              | GG                | 1945964011               |
| SNP_P3_58057_42120377 | NC_021163.1    | Ca_kabuli_chr04 | 42120377                | GG                              | AA                | 1945964013               |
| SNP_P3_58058_42120426 | NC_021163.1    | Ca_kabuli_chr04 | 42120426                | AA                              | GG                | 1945964015               |
| SNP_P3_58060_42120452 | NC_021163.1    | Ca_kabuli_chr04 | 42120452                | TT                              | CC                | 1945964016               |
| SNP_P3_58062_42120505 | NC_021163.1    | Ca_kabuli_chr04 | 42120505                | GG                              | AA                | 1945964018               |
| SNP_P3_58064_42120711 | NC_021163.1    | Ca_kabuli_chr04 | 42120711                | AA                              | GG                | 1945964020               |
| SNP_P3_58065_42136133 | NC_021163.1    | Ca_kabuli_chr04 | 42136133                | AA                              | GG                | 1945964022               |
| SNP_P3_58066_42147955 | NC_021163.1    | Ca_kabuli_chr04 | 42147955                | TT                              | AA                | 1945964024               |
| SNP_P3_58067_42147961 | NC_021163.1    | Ca_kabuli_chr04 | 42147961                | TT                              | CC                | 1945964025               |
| SNP_P3_58068_42148089 | NC_021163.1    | Ca_kabuli_chr04 | 42148089                | AA                              | TT                | 1945964027               |
| SNP_P3_58069_42148102 | NC_021163.1    | Ca_kabuli_chr04 | 42148102                | AA                              | GG                | 1945964029               |
| SNP_P3_58070_42148118 | NC_021163.1    | Ca_kabuli_chr04 | 42148118                | AA                              | GG                | 1945964031               |
| SNP_P3_58071_42148119 | NC_021163.1    | Ca_kabuli_chr04 | 42148119                | TT                              | CC                | 1945964032               |
| SNP_P3_58072_42148121 | NC_021163.1    | Ca_kabuli_chr04 | 42148121                | TT                              | GG                | 1945964034               |
| SNP_P3_58073_42148122 | NC_021163.1    | Ca_kabuli_chr04 | 42148122                | TT                              | AA                | 1945964036               |
| SNP_P3_58074_42148199 | NC_021163.1    | Ca_kabuli_chr04 | 42148199                | TT                              | CC                | 1945964038               |
| SNP_P3_58075_42148229 | NC_021163.1    | Ca_kabuli_chr04 | 42148229                | TT                              | CC                | 1945964040               |
| SNP_P3_58076_42148375 | NC_021163.1    | Ca_kabuli_chr04 | 42148375                | GG                              | AA                | 1945964041               |
| SNP_P3_58077_42148376 | NC_021163.1    | Ca_kabuli_chr04 | 42148376                | TT                              | GG                | 1945964043               |
| SNP_P3_58078_42204937 | NC_021163.1    | Ca_kabuli_chr04 | 42204937                | AA                              | GG                | 1945964045               |
| SNP_P3_58079_42210422 | NC_021163.1    | Ca_kabuli_chr04 | 42210422                | CC                              | GG                | 1945964047               |
| SNP_P3_58081_42259780 | NC_021163.1    | Ca_kabuli_chr04 | 42259780                | TT                              | GG                | 1945964048               |
| SNP_P3_58082_42259788 | NC_021163.1    | Ca_kabuli_chr04 | 42259788                | AA                              | GG                | 1945964050               |
| SNP_P3_58083_42259802 | NC_021163.1    | Ca_kabuli_chr04 | 42259802                | TT                              | GG                | 1945964052               |
| SNP_P3_58084_42259808 | NC_021163.1    | Ca_kabuli_chr04 | 42259808                | GG                              | AA                | 1945964054               |
| SNP_P3_58085_42285077 | NC_021163.1    | Ca_kabuli_chr04 | 42285077                | AA                              | TT                | 1945964056               |
| SNP_P3_58086_42285256 | NC_021163.1    | Ca_kabuli_chr04 | 42285256                | TT                              | CC                | 1945964057               |
| SNP_P3_58087_42285380 | NC_021163.1    | Ca_kabuli_chr04 | 42285380                | TT                              | AA                | 1945964059               |
| SNP_P3_58088_42286597 | NC_021163.1    | Ca_kabuli_chr04 | 42286597                | GG                              | CC                | 1945964061               |
| SNP_P3_58089_42287725 | NC_021163.1    | Ca_kabuli_chr04 | 42287725                | TT                              | GG                | 1945964063               |
| SNP_P3_58090_42300529 | NC_021163.1    | Ca_kabuli_chr04 | 42300529                | GG                              | AA                | 1945964065               |
| SNP_P3_58091_42302797 | NC_021163.1    | Ca_kabuli_chr04 | 42302797                | AA                              | GG                | 1945964066               |
| SNP_P3_58092_42302819 | NC_021163.1    | Ca_kabuli_chr04 | 42302819                | GG                              | AA                | 1945964068               |
| SNP_P3_58093_42305917 | NC_021163.1    | Ca_kabuli_chr04 | 42305917                | GG                              | AA                | 1945964070               |
| SNP_P3_58094_42306150 | NC_021163.1    | Ca_kabuli_chr04 | 42306150                | GG                              | AA                | 1945964072               |
| SNP_P3_58095_42306221 | NC_021163.1    | Ca_kabuli_chr04 | 42306221                | AA                              | GG                | 1945964074               |
| SNP_P3_58096_42308221 | NC_021163.1    | Ca_kabuli_chr04 | 42308221                | AA                              | GG                | 1945964075               |

| SNPs IDs              | Chromosome IDs | Chromosomes     | Physical positions (bp) | CDC Frontier (Reference genome) | (Pusa 256 & HPNB) | NCBI SNPdb Accession IDs |
|-----------------------|----------------|-----------------|-------------------------|---------------------------------|-------------------|--------------------------|
| SNP_P3_58097_42308316 | NC_021163.1    | Ca_kabuli_chr04 | 42308316                | AA                              | GG                | 1945964077               |
| SNP_P3_58098_42308317 | NC_021163.1    | Ca_kabuli_chr04 | 42308317                | AA                              | GG                | 1945964079               |
| SNP_P3_58099_42315132 | NC_021163.1    | Ca_kabuli_chr04 | 42315132                | GG                              | CC                | 1945964081               |
| SNP_P3_58100_42322882 | NC_021163.1    | Ca_kabuli_chr04 | 42322882                | GG                              | TT                | 1945964082               |
| SNP_P3_58102_42355726 | NC_021163.1    | Ca_kabuli_chr04 | 42355726                | GG                              | TT                | 1945964084               |
| SNP_P3_58103_42355728 | NC_021163.1    | Ca_kabuli_chr04 | 42355728                | TT                              | CC                | 1945964086               |
| SNP_P3_58104_42358159 | NC_021163.1    | Ca_kabuli_chr04 | 42358159                | AA                              | GG                | 1945964088               |
| SNP_P3_58105_42378336 | NC_021163.1    | Ca_kabuli_chr04 | 42378336                | CC                              | TT                | 1945964090               |
| SNP_P3_58106_42394073 | NC_021163.1    | Ca_kabuli_chr04 | 42394073                | CC                              | TT                | 1945964091               |
| SNP_P3_58107_42407140 | NC_021163.1    | Ca_kabuli_chr04 | 42407140                | AA                              | GG                | 1945964093               |
| SNP_P3_58108_42407151 | NC_021163.1    | Ca_kabuli_chr04 | 42407151                | TT                              | CC                | 1945964095               |
| SNP_P3_58109_42407455 | NC_021163.1    | Ca_kabuli_chr04 | 42407455                | CC                              | GG                | 1945964097               |
| SNP_P3_58110_42439297 | NC_021163.1    | Ca_kabuli_chr04 | 42439297                | AA                              | CC                | 1945964099               |
| SNP_P3_58111_42439694 | NC_021163.1    | Ca_kabuli_chr04 | 42439694                | GG                              | AA                | 1945964100               |
| SNP_P3_58112_42446632 | NC_021163.1    | Ca_kabuli_chr04 | 42446632                | GG                              | TT                | 1945964102               |
| SNP_P3_58113_42446635 | NC_021163.1    | Ca_kabuli_chr04 | 42446635                | CC                              | TT                | 1945964104               |
| SNP_P3_58114_42513654 | NC_021163.1    | Ca_kabuli_chr04 | 42513654                | GG                              | AA                | 1945964106               |
| SNP_P3_58115_42513811 | NC_021163.1    | Ca_kabuli_chr04 | 42513811                | AA                              | GG                | 1945964107               |
| SNP_P3_58116_42514032 | NC_021163.1    | Ca_kabuli_chr04 | 42514032                | TT                              | AA                | 1945964109               |
| SNP_P3_58118_42516755 | NC_021163.1    | Ca_kabuli_chr04 | 42516755                | TT                              | CC                | 1945964111               |
| SNP_P3_58119_42516759 | NC_021163.1    | Ca_kabuli_chr04 | 42516759                | AA                              | GG                | 1945964113               |
| SNP_P3_58120_42516789 | NC_021163.1    | Ca_kabuli_chr04 | 42516789                | TT                              | AA                | 1945964115               |
| SNP_P3_58121_42517015 | NC_021163.1    | Ca_kabuli_chr04 | 42517015                | GG                              | AA                | 1945964116               |
| SNP_P3_58122_42517051 | NC_021163.1    | Ca_kabuli_chr04 | 42517051                | AA                              | TT                | 1945964118               |
| SNP_P3_58123_42517057 | NC_021163.1    | Ca_kabuli_chr04 | 42517057                | AA                              | GG                | 1945964120               |
| SNP_P3_58124_42517079 | NC_021163.1    | Ca_kabuli_chr04 | 42517079                | AA                              | GG                | 1945964122               |
| SNP_P3_58125_42517101 | NC_021163.1    | Ca_kabuli_chr04 | 42517101                | CC                              | AA                | 1945964124               |
| SNP_P3_58126_42517120 | NC_021163.1    | Ca_kabuli_chr04 | 42517120                | GG                              | AA                | 1945964125               |
| SNP_P3_58129_42546825 | NC_021163.1    | Ca_kabuli_chr04 | 42546825                | AA                              | CC                | 1945964127               |
| SNP_P3_58130_42546842 | NC_021163.1    | Ca_kabuli_chr04 | 42546842                | TT                              | GG                | 1945964129               |
| SNP_P3_58131_42546907 | NC_021163.1    | Ca_kabuli_chr04 | 42546907                | AA                              | GG                | 1945964131               |
| SNP_P3_58134_42558243 | NC_021163.1    | Ca_kabuli_chr04 | 42558243                | CC                              | TT                | 1945964132               |
| SNP_P3_58135_42561028 | NC_021163.1    | Ca_kabuli_chr04 | 42561028                | TT                              | CC                | 1945964134               |
| SNP_P3_58136_42561124 | NC_021163.1    | Ca_kabuli_chr04 | 42561124                | GG                              | TT                | 1945964136               |
| SNP_P3_58137_42561382 | NC_021163.1    | Ca_kabuli_chr04 | 42561382                | AA                              | TT                | 1945964138               |
| SNP_P3_58138_42561400 | NC_021163.1    | Ca_kabuli_chr04 | 42561400                | CC                              | TT                | 1945964140               |
| SNP_P3_58139_42561427 | NC_021163.1    | Ca_kabuli_chr04 | 42561427                | GG                              | AA                | 1945964141               |
| SNP_P3_58140_42561444 | NC_021163.1    | Ca_kabuli_chr04 | 42561444                | AA                              | GG                | 1945964143               |
| SNP_P3_58142_42580703 | NC_021163.1    | Ca_kabuli_chr04 | 42580703                | AA                              | CC                | 1945964145               |
| SNP_P3_58143_42580774 | NC_021163.1    | Ca_kabuli_chr04 | 42580774                | GG                              | AA                | 1945964147               |
| SNP_P3_58144_42580795 | NC_021163.1    | Ca_kabuli_chr04 | 42580795                | AA                              | GG                | 1945964149               |
| SNP_P3_58145_42588557 | NC_021163.1    | Ca_kabuli_chr04 | 42588557                | TT                              | CC                | 1945964150               |

| SNPs IDs              | Chromosome IDs | Chromosomes     | Physical positions (bp) | CDC Frontier (Reference genome) | (Pusa 256 & HPNB) | NCBI SNPdb Accession IDs |
|-----------------------|----------------|-----------------|-------------------------|---------------------------------|-------------------|--------------------------|
| SNP_P3_58146_42588937 | NC_021163.1    | Ca_kabuli_chr04 | 42588937                | CC                              | TT                | 1945964152               |
| SNP_P3_58147_42588939 | NC_021163.1    | Ca_kabuli_chr04 | 42588939                | AA                              | TT                | 1945964154               |
| SNP_P3_58148_42589453 | NC_021163.1    | Ca_kabuli_chr04 | 42589453                | GG                              | AA                | 1945964156               |
| SNP_P3_58149_42609857 | NC_021163.1    | Ca_kabuli_chr04 | 42609857                | AA                              | GG                | 1945964157               |
| SNP_P3_58152_42681371 | NC_021163.1    | Ca_kabuli_chr04 | 42681371                | TT                              | AA                | 1945964159               |
| SNP_P3_58153_42681381 | NC_021163.1    | Ca_kabuli_chr04 | 42681381                | AA                              | GG                | 1945964161               |
| SNP_P3_58154_42684925 | NC_021163.1    | Ca_kabuli_chr04 | 42684925                | CC                              | TT                | 1945964163               |
| SNP_P3_58155_42685252 | NC_021163.1    | Ca_kabuli_chr04 | 42685252                | AA                              | GG                | 1945964165               |
| SNP_P3_58158_42685264 | NC_021163.1    | Ca_kabuli_chr04 | 42685264                | AA                              | GG                | 1945964166               |
| SNP_P3_58159_42685272 | NC_021163.1    | Ca_kabuli_chr04 | 42685272                | TT                              | AA                | 1945964168               |
| SNP_P3_58160_42692311 | NC_021163.1    | Ca_kabuli_chr04 | 42692311                | CC                              | TT                | 1945964170               |
| SNP_P3_58161_42704777 | NC_021163.1    | Ca_kabuli_chr04 | 42704777                | GG                              | AA                | 1945964172               |
| SNP_P3_58162_42704833 | NC_021163.1    | Ca_kabuli_chr04 | 42704833                | AA                              | GG                | 1945964174               |
| SNP_P3_58163_42705935 | NC_021163.1    | Ca_kabuli_chr04 | 42705935                | AA                              | GG                | 1945964175               |
| SNP_P3_58164_42705940 | NC_021163.1    | Ca_kabuli_chr04 | 42705940                | AA                              | GG                | 1945964177               |
| SNP_P3_58165_42706312 | NC_021163.1    | Ca_kabuli_chr04 | 42706312                | AA                              | CC                | 1945964179               |
| SNP_P3_58166_42706324 | NC_021163.1    | Ca_kabuli_chr04 | 42706324                | TT                              | CC                | 1945964181               |
| SNP_P3_58167_42706340 | NC_021163.1    | Ca_kabuli_chr04 | 42706340                | AA                              | GG                | 1945964183               |
| SNP_P3_58168_42755413 | NC_021163.1    | Ca_kabuli_chr04 | 42755413                | TT                              | CC                | 1945964184               |
| SNP_P3_58169_42765053 | NC_021163.1    | Ca_kabuli_chr04 | 42765053                | GG                              | AA                | 1945964186               |
| SNP_P3_58170_42765105 | NC_021163.1    | Ca_kabuli_chr04 | 42765105                | TT                              | CC                | 1945964188               |
| SNP_P3_58171_42765660 | NC_021163.1    | Ca_kabuli_chr04 | 42765660                | CC                              | AA                | 1945964190               |
| SNP_P3_58173_42807655 | NC_021163.1    | Ca_kabuli_chr04 | 42807655                | GG                              | AA                | 1945964191               |
| SNP_P3_58174_42807957 | NC_021163.1    | Ca_kabuli_chr04 | 42807957                | AA                              | GG                | 1945964193               |
| SNP_P3_58175_42820788 | NC_021163.1    | Ca_kabuli_chr04 | 42820788                | GG                              | AA                | 1945964195               |
| SNP_P3_58176_42820811 | NC_021163.1    | Ca_kabuli_chr04 | 42820811                | GG                              | AA                | 1945964197               |
| SNP_P3_58177_42820848 | NC_021163.1    | Ca_kabuli_chr04 | 42820848                | TT                              | GG                | 1945964199               |
| SNP_P3_58178_42821106 | NC_021163.1    | Ca_kabuli_chr04 | 42821106                | GG                              | AA                | 1945964200               |
| SNP_P3_58179_42821130 | NC_021163.1    | Ca_kabuli_chr04 | 42821130                | AA                              | CC                | 1945964202               |
| SNP_P3_58180_42821250 | NC_021163.1    | Ca_kabuli_chr04 | 42821250                | CC                              | TT                | 1945964204               |
| SNP_P3_58181_42827340 | NC_021163.1    | Ca_kabuli_chr04 | 42827340                | CC                              | TT                | 1945964206               |
| SNP_P3_58182_42827350 | NC_021163.1    | Ca_kabuli_chr04 | 42827350                | GG                              | AA                | 1945964208               |
| SNP_P3_58183_42829258 | NC_021163.1    | Ca_kabuli_chr04 | 42829258                | TT                              | CC                | 1945964209               |
| SNP_P3_58184_42829263 | NC_021163.1    | Ca_kabuli_chr04 | 42829263                | CC                              | TT                | 1945964211               |
| SNP_P3_58185_42829265 | NC_021163.1    | Ca_kabuli_chr04 | 42829265                | AA                              | GG                | 1945964213               |
| SNP_P3_58186_42829370 | NC_021163.1    | Ca_kabuli_chr04 | 42829370                | AA                              | TT                | 1945964215               |
| SNP_P3_58187_42829662 | NC_021163.1    | Ca_kabuli_chr04 | 42829662                | CC                              | TT                | 1945964216               |
| SNP_P3_58188_42829710 | NC_021163.1    | Ca_kabuli_chr04 | 42829710                | TT                              | CC                | 1945964218               |
| SNP_P3_58189_42829720 | NC_021163.1    | Ca_kabuli_chr04 | 42829720                | TT                              | CC                | 1945964220               |
| SNP_P3_58190_42838032 | NC_021163.1    | Ca_kabuli_chr04 | 42838032                | GG                              | CC                | 1945964222               |
| SNP_P3_58191_42843212 | NC_021163.1    | Ca_kabuli_chr04 | 42843212                | TT                              | CC                | 1945964223               |
| SNP_P3_58193_42845469 | NC_021163.1    | Ca_kabuli_chr04 | 42845469                | TT                              | AA                | 1945964225               |

| SNPs IDs              | Chromosome IDs | Chromosomes     | Physical positions (bp) | CDC Frontier (Reference genome) | (Pusa 256 & HPNB) | NCBI SNPdb Accession IDs |
|-----------------------|----------------|-----------------|-------------------------|---------------------------------|-------------------|--------------------------|
| SNP_P3_58194_42845517 | NC_021163.1    | Ca_kabuli_chr04 | 42845517                | AA                              | CC                | 1945964227               |
| SNP_P3_58195_42845562 | NC_021163.1    | Ca_kabuli_chr04 | 42845562                | TT                              | CC                | 1945964229               |
| SNP_P3_58196_42845599 | NC_021163.1    | Ca_kabuli_chr04 | 42845599                | AA                              | GG                | 1945964231               |
| SNP_P3_58197_42858101 | NC_021163.1    | Ca_kabuli_chr04 | 42858101                | AA                              | CC                | 1945964232               |
| SNP_P3_58198_42858102 | NC_021163.1    | Ca_kabuli_chr04 | 42858102                | AA                              | TT                | 1945964234               |
| SNP_P3_58199_42858118 | NC_021163.1    | Ca_kabuli_chr04 | 42858118                | GG                              | AA                | 1945964236               |
| SNP_P3_58200_42889032 | NC_021163.1    | Ca_kabuli_chr04 | 42889032                | CC                              | AA                | 1945964238               |
| SNP_P3_58201_42889055 | NC_021163.1    | Ca_kabuli_chr04 | 42889055                | CC                              | AA                | 1945964240               |
| SNP_P3_58202_42889074 | NC_021163.1    | Ca_kabuli_chr04 | 42889074                | GG                              | AA                | 1945964241               |
| SNP_P3_58203_42889091 | NC_021163.1    | Ca_kabuli_chr04 | 42889091                | GG                              | AA                | 1945964243               |
| SNP_P3_58204_42892593 | NC_021163.1    | Ca_kabuli_chr04 | 42892593                | AA                              | TT                | 1945964245               |
| SNP_P3_58205_42892600 | NC_021163.1    | Ca_kabuli_chr04 | 42892600                | TT                              | GG                | 1945964247               |
| SNP_P3_58206_42892620 | NC_021163.1    | Ca_kabuli_chr04 | 42892620                | TT                              | AA                | 1945964248               |
| SNP_P3_58207_42893318 | NC_021163.1    | Ca_kabuli_chr04 | 42893318                | AA                              | GG                | 1945964250               |
| SNP_P3_58208_42893382 | NC_021163.1    | Ca_kabuli_chr04 | 42893382                | TT                              | AA                | 1945964252               |
| SNP_P3_58209_42893394 | NC_021163.1    | Ca_kabuli_chr04 | 42893394                | CC                              | TT                | 1945964254               |
| SNP_P3_58210_42893400 | NC_021163.1    | Ca_kabuli_chr04 | 42893400                | GG                              | AA                | 1945964256               |
| SNP_P3_58211_42897101 | NC_021163.1    | Ca_kabuli_chr04 | 42897101                | AA                              | GG                | 1945964257               |
| SNP_P3_58212_42899569 | NC_021163.1    | Ca_kabuli_chr04 | 42899569                | GG                              | AA                | 1945964259               |
| SNP_P3_58213_42899816 | NC_021163.1    | Ca_kabuli_chr04 | 42899816                | GG                              | TT                | 1945964261               |
| SNP_P3_58214_42904493 | NC_021163.1    | Ca_kabuli_chr04 | 42904493                | TT                              | AA                | 1945964263               |
| SNP_P3_58215_42907910 | NC_021163.1    | Ca_kabuli_chr04 | 42907910                | TT                              | GG                | 1945964265               |
| SNP_P3_58216_42907916 | NC_021163.1    | Ca_kabuli_chr04 | 42907916                | CC                              | TT                | 1945964266               |
| SNP_P3_58217_42907922 | NC_021163.1    | Ca_kabuli_chr04 | 42907922                | AA                              | TT                | 1945964268               |
| SNP_P3_58218_42914834 | NC_021163.1    | Ca_kabuli_chr04 | 42914834                | GG                              | TT                | 1945964270               |
| SNP_P3_58219_42915842 | NC_021163.1    | Ca_kabuli_chr04 | 42915842                | CC                              | TT                | 1945964272               |
| SNP_P3_58220_42917940 | NC_021163.1    | Ca_kabuli_chr04 | 42917940                | AA                              | CC                | 1945964273               |
| SNP_P3_58221_42921005 | NC_021163.1    | Ca_kabuli_chr04 | 42921005                | TT                              | CC                | 1945964275               |
| SNP_P3_58222_42943908 | NC_021163.1    | Ca_kabuli_chr04 | 42943908                | CC                              | TT                | 1945964277               |
| SNP_P3_58223_42944796 | NC_021163.1    | Ca_kabuli_chr04 | 42944796                | CC                              | TT                | 1945964279               |
| SNP_P3_58224_42947345 | NC_021163.1    | Ca_kabuli_chr04 | 42947345                | CC                              | TT                | 1945964281               |
| SNP_P3_58225_42947372 | NC_021163.1    | Ca_kabuli_chr04 | 42947372                | AA                              | CC                | 1945964282               |
| SNP_P3_58226_42947414 | NC_021163.1    | Ca_kabuli_chr04 | 42947414                | TT                              | CC                | 1945964284               |
| SNP_P3_58227_42947437 | NC_021163.1    | Ca_kabuli_chr04 | 42947437                | TT                              | CC                | 1945964286               |
| SNP_P3_58228_42947736 | NC_021163.1    | Ca_kabuli_chr04 | 42947736                | CC                              | TT                | 1945964288               |
| SNP_P3_58229_42947815 | NC_021163.1    | Ca_kabuli_chr04 | 42947815                | CC                              | TT                | 1945964290               |
| SNP_P3_58230_42955529 | NC_021163.1    | Ca_kabuli_chr04 | 42955529                | CC                              | AA                | 1945964291               |
| SNP_P3_58231_42955885 | NC_021163.1    | Ca_kabuli_chr04 | 42955885                | CC                              | TT                | 1945964293               |
| SNP_P3_58232_42955950 | NC_021163.1    | Ca_kabuli_chr04 | 42955950                | AA                              | CC                | 1945964295               |
| SNP_P3_58233_42957305 | NC_021163.1    | Ca_kabuli_chr04 | 42957305                | CC                              | TT                | 1945964297               |
| SNP_P3_58234_42957806 | NC_021163.1    | Ca_kabuli_chr04 | 42957806                | AA                              | TT                | 1945964298               |
| SNP_P3_58235_42957815 | NC_021163.1    | Ca_kabuli_chr04 | 42957815                | AA                              | GG                | 1945964300               |

| SNPs IDs              | Chromosome IDs | Chromosomes     | Physical positions (bp) | CDC Frontier (Reference genome) | (Pusa 256 & HPNB) | NCBI SNPdb Accession IDs |
|-----------------------|----------------|-----------------|-------------------------|---------------------------------|-------------------|--------------------------|
| SNP_P3_58236_42960285 | NC_021163.1    | Ca_kabuli_chr04 | 42960285                | GG                              | CC                | 1945964302               |
| SNP_P3_58237_42971335 | NC_021163.1    | Ca_kabuli_chr04 | 42971335                | CC                              | TT                | 1945964304               |
| SNP_P3_58238_42973478 | NC_021163.1    | Ca_kabuli_chr04 | 42973478                | AA                              | TT                | 1945964306               |
| SNP_P3_58239_42973487 | NC_021163.1    | Ca_kabuli_chr04 | 42973487                | CC                              | AA                | 1945964307               |
| SNP_P3_58240_42973891 | NC_021163.1    | Ca_kabuli_chr04 | 42973891                | GG                              | AA                | 1945964309               |
| SNP_P3_58241_42973919 | NC_021163.1    | Ca_kabuli_chr04 | 42973919                | CC                              | TT                | 1945964311               |
| SNP_P3_58242_42973953 | NC_021163.1    | Ca_kabuli_chr04 | 42973953                | TT                              | AA                | 1945964313               |
| SNP_P3_58243_42973982 | NC_021163.1    | Ca_kabuli_chr04 | 42973982                | TT                              | CC                | 1945964315               |
| SNP_P3_58244_42973992 | NC_021163.1    | Ca_kabuli_chr04 | 42973992                | AA                              | GG                | 1945964316               |
| SNP_P3_58245_42974240 | NC_021163.1    | Ca_kabuli_chr04 | 42974240                | GG                              | CC                | 1945964318               |
| SNP_P3_58246_42974251 | NC_021163.1    | Ca_kabuli_chr04 | 42974251                | GG                              | CC                | 1945964320               |
| SNP_P3_58247_42981167 | NC_021163.1    | Ca_kabuli_chr04 | 42981167                | TT                              | CC                | 1945964322               |
| SNP_P3_58248_42983709 | NC_021163.1    | Ca_kabuli_chr04 | 42983709                | AA                              | GG                | 1945964323               |
| SNP_P3_58249_42983744 | NC_021163.1    | Ca_kabuli_chr04 | 42983744                | AA                              | GG                | 1945964325               |
| SNP_P3_58250_42988885 | NC_021163.1    | Ca_kabuli_chr04 | 42988885                | CC                              | TT                | 1945964327               |
| SNP_P3_58251_42992337 | NC_021163.1    | Ca_kabuli_chr04 | 42992337                | AA                              | GG                | 1945964329               |
| SNP_P3_58253_42994416 | NC_021163.1    | Ca_kabuli_chr04 | 42994416                | AA                              | TT                | 1945964331               |
| SNP_P3_58254_42994481 | NC_021163.1    | Ca_kabuli_chr04 | 42994481                | AA                              | TT                | 1945964332               |
| SNP_P3_58255_43001887 | NC_021163.1    | Ca_kabuli_chr04 | 43001887                | TT                              | GG                | 1945964334               |
| SNP_P3_58256_43001898 | NC_021163.1    | Ca_kabuli_chr04 | 43001898                | TT                              | AA                | 1945964336               |
| SNP_P3_58257_43002031 | NC_021163.1    | Ca_kabuli_chr04 | 43002031                | CC                              | TT                | 1945964338               |
| SNP_P3_58258_43002184 | NC_021163.1    | Ca_kabuli_chr04 | 43002184                | AA                              | GG                | 1945964340               |
| SNP_P3_58259_43002200 | NC_021163.1    | Ca_kabuli_chr04 | 43002200                | CC                              | TT                | 1945964341               |
| SNP_P3_58260_43002309 | NC_021163.1    | Ca_kabuli_chr04 | 43002309                | AA                              | TT                | 1945964343               |
| SNP_P3_58261_43002331 | NC_021163.1    | Ca_kabuli_chr04 | 43002331                | AA                              | TT                | 1945964345               |
| SNP_P3_58262_43002341 | NC_021163.1    | Ca_kabuli_chr04 | 43002341                | TT                              | AA                | 1945964347               |
| SNP_P3_58263_43002348 | NC_021163.1    | Ca_kabuli_chr04 | 43002348                | TT                              | AA                | 1945964348               |
| SNP_P3_58264_43002349 | NC_021163.1    | Ca_kabuli_chr04 | 43002349                | AA                              | TT                | 1945964350               |
| SNP_P3_58265_43002455 | NC_021163.1    | Ca_kabuli_chr04 | 43002455                | TT                              | AA                | 1945964351               |
| SNP_P3_58266_43002463 | NC_021163.1    | Ca_kabuli_chr04 | 43002463                | GG                              | TT                | 1945964354               |
| SNP_P3_58267_43002611 | NC_021163.1    | Ca_kabuli_chr04 | 43002611                | TT                              | CC                | 1945964355               |
| SNP_P3_58268_43002837 | NC_021163.1    | Ca_kabuli_chr04 | 43002837                | CC                              | TT                | 1945964357               |
| SNP_P3_58269_43002847 | NC_021163.1    | Ca_kabuli_chr04 | 43002847                | AA                              | GG                | 1945964359               |
| SNP_P3_58270_43005274 | NC_021163.1    | Ca_kabuli_chr04 | 43005274                | GG                              | AA                | 1945964361               |
| SNP_P3_58272_43006002 | NC_021163.1    | Ca_kabuli_chr04 | 43006002                | GG                              | TT                | 1945964363               |
| SNP_P3_58273_43006059 | NC_021163.1    | Ca_kabuli_chr04 | 43006059                | GG                              | TT                | 1945964364               |
| SNP_P3_58274_43006101 | NC_021163.1    | Ca_kabuli_chr04 | 43006101                | GG                              | AA                | 1945964366               |
| SNP_P3_58275_43006177 | NC_021163.1    | Ca_kabuli_chr04 | 43006177                | AA                              | TT                | 1945964368               |
| SNP_P3_58276_43006195 | NC_021163.1    | Ca_kabuli_chr04 | 43006195                | TT                              | AA                | 1945964370               |
| SNP_P3_58277_43006199 | NC_021163.1    | Ca_kabuli_chr04 | 43006199                | TT                              | AA                | 1945964371               |
| SNP_P3_58278_43006205 | NC_021163.1    | Ca_kabuli_chr04 | 43006205                | GG                              | TT                | 1945964373               |
| SNP_P3_58279_43006478 | NC_021163.1    | Ca_kabuli_chr04 | 43006478                | CC                              | TT                | 1945964375               |

| SNPs IDs              | Chromosome IDs | Chromosomes     | Physical positions (bp) | CDC Frontier (Reference genome) | (Pusa 256 & HPNB) | NCBI SNPdb Accession IDs |
|-----------------------|----------------|-----------------|-------------------------|---------------------------------|-------------------|--------------------------|
| SNP_P3_58280_43006487 | NC_021163.1    | Ca_kabuli_chr04 | 43006487                | AA                              | GG                | 1945964377               |
| SNP_P3_58281_43009855 | NC_021163.1    | Ca_kabuli_chr04 | 43009855                | AA                              | CC                | 1945964379               |
| SNP_P3_58282_43009914 | NC_021163.1    | Ca_kabuli_chr04 | 43009914                | TT                              | AA                | 1945964380               |
| SNP_P3_58283_43009986 | NC_021163.1    | Ca_kabuli_chr04 | 43009986                | GG                              | TT                | 1945964382               |
| SNP_P3_58284_43010219 | NC_021163.1    | Ca_kabuli_chr04 | 43010219                | TT                              | AA                | 1945964384               |
| SNP_P3_58285_43010267 | NC_021163.1    | Ca_kabuli_chr04 | 43010267                | AA                              | CC                | 1945964386               |
| SNP_P3_58286_43010273 | NC_021163.1    | Ca_kabuli_chr04 | 43010273                | GG                              | AA                | 1945964388               |
| SNP_P3_58287_43010349 | NC_021163.1    | Ca_kabuli_chr04 | 43010349                | TT                              | CC                | 1945964389               |
| SNP_P3_58288_43010353 | NC_021163.1    | Ca_kabuli_chr04 | 43010353                | CC                              | TT                | 1945964391               |
| SNP_P3_58289_43010356 | NC_021163.1    | Ca_kabuli_chr04 | 43010356                | GG                              | AA                | 1945964393               |
| SNP_P3_58290_43010371 | NC_021163.1    | Ca_kabuli_chr04 | 43010371                | GG                              | AA                | 1945964395               |
| SNP_P3_58291_43010396 | NC_021163.1    | Ca_kabuli_chr04 | 43010396                | GG                              | AA                | 1945964396               |
| SNP_P3_58292_43010409 | NC_021163.1    | Ca_kabuli_chr04 | 43010409                | TT                              | GG                | 1945964398               |
| SNP_P3_58293_43028638 | NC_021163.1    | Ca_kabuli_chr04 | 43028638                | AA                              | GG                | 1945964400               |
| SNP_P3_58294_43028684 | NC_021163.1    | Ca_kabuli_chr04 | 43028684                | TT                              | CC                | 1945964402               |
| SNP_P3_58295_43032001 | NC_021163.1    | Ca_kabuli_chr04 | 43032001                | CC                              | AA                | 1945964404               |
| SNP_P3_58296_43032211 | NC_021163.1    | Ca_kabuli_chr04 | 43032211                | AA                              | GG                | 1945964405               |
| SNP_P3_58297_43032225 | NC_021163.1    | Ca_kabuli_chr04 | 43032225                | TT                              | CC                | 1945964407               |
| SNP_P3_58298_43033476 | NC_021163.1    | Ca_kabuli_chr04 | 43033476                | TT                              | CC                | 1945964409               |
| SNP_P3_58299_43033485 | NC_021163.1    | Ca_kabuli_chr04 | 43033485                | GG                              | AA                | 1945964411               |
| SNP_P3_58300_43033510 | NC_021163.1    | Ca_kabuli_chr04 | 43033510                | GG                              | AA                | 1945964413               |
| SNP_P3_58301_43033511 | NC_021163.1    | Ca_kabuli_chr04 | 43033511                | AA                              | TT                | 1945964414               |
| SNP_P3_58302_43035384 | NC_021163.1    | Ca_kabuli_chr04 | 43035384                | CC                              | AA                | 1945964416               |
| SNP_P3_58303_43050301 | NC_021163.1    | Ca_kabuli_chr04 | 43050301                | CC                              | AA                | 1945964418               |
| SNP_P3_58304_43055373 | NC_021163.1    | Ca_kabuli_chr04 | 43055373                | AA                              | TT                | 1945964420               |
| SNP_P3_58305_43061818 | NC_021163.1    | Ca_kabuli_chr04 | 43061818                | CC                              | GG                | 1945964421               |
| SNP_P3_58306_43061853 | NC_021163.1    | Ca_kabuli_chr04 | 43061853                | AA                              | CC                | 1945964423               |
| SNP_P3_58307_43066144 | NC_021163.1    | Ca_kabuli_chr04 | 43066144                | AA                              | CC                | 1945964425               |
| SNP_P3_58308_43066464 | NC_021163.1    | Ca_kabuli_chr04 | 43066464                | GG                              | AA                | 1945964427               |
| SNP_P3_58309_43066470 | NC_021163.1    | Ca_kabuli_chr04 | 43066470                | AA                              | CC                | 1945964429               |
| SNP_P3_58310_43066477 | NC_021163.1    | Ca_kabuli_chr04 | 43066477                | GG                              | AA                | 1945964430               |
| SNP_P3_58311_43066492 | NC_021163.1    | Ca_kabuli_chr04 | 43066492                | CC                              | TT                | 1945964432               |
| SNP_P3_58312_43066501 | NC_021163.1    | Ca_kabuli_chr04 | 43066501                | GG                              | TT                | 1945964434               |
| SNP_P3_58313_43080803 | NC_021163.1    | Ca_kabuli_chr04 | 43080803                | CC                              | TT                | 1945964436               |
| SNP_P3_58314_43082100 | NC_021163.1    | Ca_kabuli_chr04 | 43082100                | TT                              | CC                | 1945964438               |
| SNP_P3_58315_43082453 | NC_021163.1    | Ca_kabuli_chr04 | 43082453                | GG                              | AA                | 1945964439               |
| SNP_P3_58316_43082504 | NC_021163.1    | Ca_kabuli_chr04 | 43082504                | CC                              | GG                | 1945964441               |
| SNP_P3_58317_43082643 | NC_021163.1    | Ca_kabuli_chr04 | 43082643                | CC                              | TT                | 1945964443               |
| SNP_P3_58318_43082657 | NC_021163.1    | Ca_kabuli_chr04 | 43082657                | GG                              | AA                | 1945964445               |
| SNP_P3_58319_43082705 | NC_021163.1    | Ca_kabuli_chr04 | 43082705                | CC                              | GG                | 1945964446               |
| SNP_P3_58320_43083212 | NC_021163.1    | Ca_kabuli_chr04 | 43083212                | AA                              | TT                | 1945964448               |
| SNP_P3_58321_43083219 | NC_021163.1    | Ca_kabuli_chr04 | 43083219                | AA                              | TT                | 1945964450               |

| SNPs IDs              | Chromosome IDs | Chromosomes     | Physical positions (bp) | CDC Frontier (Reference genome) | (Pusa 256 & HPNB) | NCBI SNPdb Accession IDs |
|-----------------------|----------------|-----------------|-------------------------|---------------------------------|-------------------|--------------------------|
| SNP_P3_58322_43083696 | NC_021163.1    | Ca_kabuli_chr04 | 43083696                | CC                              | AA                | 1945964452               |
| SNP_P3_58323_43084849 | NC_021163.1    | Ca_kabuli_chr04 | 43084849                | AA                              | GG                | 1945964454               |
| SNP_P3_58324_43084850 | NC_021163.1    | Ca_kabuli_chr04 | 43084850                | TT                              | GG                | 1945964455               |
| SNP_P3_58325_43086082 | NC_021163.1    | Ca_kabuli_chr04 | 43086082                | AA                              | TT                | 1945964457               |
| SNP_P3_58326_43086117 | NC_021163.1    | Ca_kabuli_chr04 | 43086117                | GG                              | AA                | 1945964459               |
| SNP_P3_58327_43086336 | NC_021163.1    | Ca_kabuli_chr04 | 43086336                | CC                              | TT                | 1945964461               |
| SNP_P3_58328_43093138 | NC_021163.1    | Ca_kabuli_chr04 | 43093138                | AA                              | CC                | 1945964462               |
| SNP_P3_58329_43093192 | NC_021163.1    | Ca_kabuli_chr04 | 43093192                | AA                              | GG                | 1945964464               |
| SNP_P3_58330_43093213 | NC_021163.1    | Ca_kabuli_chr04 | 43093213                | AA                              | CC                | 1945964466               |
| SNP_P3_58331_43093658 | NC_021163.1    | Ca_kabuli_chr04 | 43093658                | AA                              | TT                | 1945964468               |
| SNP_P3_58332_43093767 | NC_021163.1    | Ca_kabuli_chr04 | 43093767                | AA                              | GG                | 1945964470               |
| SNP_P3_58333_43093771 | NC_021163.1    | Ca_kabuli_chr04 | 43093771                | CC                              | AA                | 1945964471               |
| SNP_P3_58334_43093796 | NC_021163.1    | Ca_kabuli_chr04 | 43093796                | CC                              | TT                | 1945964473               |
| SNP_P3_58335_43111397 | NC_021163.1    | Ca_kabuli_chr04 | 43111397                | AA                              | TT                | 1945964475               |
| SNP_P3_58336_43111734 | NC_021163.1    | Ca_kabuli_chr04 | 43111734                | GG                              | AA                | 1945964477               |
| SNP_P3_58337_43116202 | NC_021163.1    | Ca_kabuli_chr04 | 43116202                | TT                              | CC                | 1945964479               |
| SNP_P3_58338_43116273 | NC_021163.1    | Ca_kabuli_chr04 | 43116273                | AA                              | CC                | 1945964480               |
| SNP_P3_58339_43116274 | NC_021163.1    | Ca_kabuli_chr04 | 43116274                | AA                              | GG                | 1945964482               |
| SNP_P3_58340_43116280 | NC_021163.1    | Ca_kabuli_chr04 | 43116280                | TT                              | CC                | 1945964484               |
| SNP_P3_58341_43119665 | NC_021163.1    | Ca_kabuli_chr04 | 43119665                | TT                              | AA                | 1945964486               |
| SNP_P3_58342_43119677 | NC_021163.1    | Ca_kabuli_chr04 | 43119677                | TT                              | AA                | 1945964487               |
| SNP_P3_58343_43123849 | NC_021163.1    | Ca_kabuli_chr04 | 43123849                | CC                              | GG                | 1945964489               |
| SNP_P3_58344_43127712 | NC_021163.1    | Ca_kabuli_chr04 | 43127712                | AA                              | TT                | 1945964491               |
| SNP_P3_58345_43142497 | NC_021163.1    | Ca_kabuli_chr04 | 43142497                | AA                              | GG                | 1945964493               |
| SNP_P3_58346_43144481 | NC_021163.1    | Ca_kabuli_chr04 | 43144481                | AA                              | GG                | 1945964495               |
| SNP_P3_58347_43145973 | NC_021163.1    | Ca_kabuli_chr04 | 43145973                | GG                              | AA                | 1945964496               |
| SNP_P3_58348_43146786 | NC_021163.1    | Ca_kabuli_chr04 | 43146786                | AA                              | TT                | 1945964498               |
| SNP_P3_58349_43146812 | NC_021163.1    | Ca_kabuli_chr04 | 43146812                | TT                              | CC                | 1945964500               |
| SNP_P3_58350_43146862 | NC_021163.1    | Ca_kabuli_chr04 | 43146862                | GG                              | TT                | 1945964502               |
| SNP_P3_58351_43146878 | NC_021163.1    | Ca_kabuli_chr04 | 43146878                | CC                              | GG                | 1945964504               |
| SNP_P3_58352_43146893 | NC_021163.1    | Ca_kabuli_chr04 | 43146893                | GG                              | AA                | 1945964505               |
| SNP_P3_58353_43147715 | NC_021163.1    | Ca_kabuli_chr04 | 43147715                | AA                              | GG                | 1945964507               |
| SNP_P3_58354_43157342 | NC_021163.1    | Ca_kabuli_chr04 | 43157342                | AA                              | GG                | 1945964509               |
| SNP_P3_58355_43164836 | NC_021163.1    | Ca_kabuli_chr04 | 43164836                | GG                              | AA                | 1945964511               |
| SNP_P3_58356_43164999 | NC_021163.1    | Ca_kabuli_chr04 | 43164999                | CC                              | AA                | 1945964513               |
| SNP_P3_58357_43165531 | NC_021163.1    | Ca_kabuli_chr04 | 43165531                | AA                              | TT                | 1945964514               |
| SNP_P3_58358_43168849 | NC_021163.1    | Ca_kabuli_chr04 | 43168849                | TT                              | AA                | 1945964516               |
| SNP_P3_58359_43168865 | NC_021163.1    | Ca_kabuli_chr04 | 43168865                | AA                              | GG                | 1945964518               |
| SNP_P3_58361_43192570 | NC_021163.1    | Ca_kabuli_chr04 | 43192570                | GG                              | CC                | 1945964520               |
| SNP_P3_58362_43193191 | NC_021163.1    | Ca_kabuli_chr04 | 43193191                | GG                              | AA                | 1945964521               |
| SNP_P3_58363_43200277 | NC_021163.1    | Ca_kabuli_chr04 | 43200277                | AA                              | CC                | 1945964523               |
| SNP_P3_58364_43205942 | NC_021163.1    | Ca_kabuli_chr04 | 43205942                | TT                              | CC                | 1945964525               |

| SNPs IDs              | Chromosome IDs | Chromosomes     | Physical positions (bp) | CDC Frontier (Reference genome) | (Pusa 256 & HPNB) | NCBI SNPdb Accession IDs |
|-----------------------|----------------|-----------------|-------------------------|---------------------------------|-------------------|--------------------------|
| SNP_P3_58365_43209604 | NC_021163.1    | Ca_kabuli_chr04 | 43209604                | TT                              | CC                | 1945964527               |
| SNP_P3_58366_43212036 | NC_021163.1    | Ca_kabuli_chr04 | 43212036                | TT                              | AA                | 1945964529               |
| SNP_P3_58367_43213639 | NC_021163.1    | Ca_kabuli_chr04 | 43213639                | TT                              | CC                | 1945964530               |
| SNP_P3_58368_43226564 | NC_021163.1    | Ca_kabuli_chr04 | 43226564                | AA                              | TT                | 1945964532               |
| SNP_P3_58369_43233180 | NC_021163.1    | Ca_kabuli_chr04 | 43233180                | TT                              | CC                | 1945964534               |
| SNP_P3_58370_43240566 | NC_021163.1    | Ca_kabuli_chr04 | 43240566                | AA                              | GG                | 1945964536               |
| SNP_P3_58371_43240572 | NC_021163.1    | Ca_kabuli_chr04 | 43240572                | AA                              | GG                | 1945964538               |
| SNP_P3_58372_43240667 | NC_021163.1    | Ca_kabuli_chr04 | 43240667                | AA                              | CC                | 1945964539               |
| SNP_P3_58373_43240839 | NC_021163.1    | Ca_kabuli_chr04 | 43240839                | AA                              | TT                | 1945964541               |
| SNP_P3_58374_43240933 | NC_021163.1    | Ca_kabuli_chr04 | 43240933                | AA                              | TT                | 1945964543               |
| SNP_P3_58375_43241005 | NC_021163.1    | Ca_kabuli_chr04 | 43241005                | TT                              | CC                | 1945964545               |
| SNP_P3_58376_43241011 | NC_021163.1    | Ca_kabuli_chr04 | 43241011                | AA                              | GG                | 1945964546               |
| SNP_P3_58377_43243610 | NC_021163.1    | Ca_kabuli_chr04 | 43243610                | GG                              | AA                | 1945964548               |
| SNP_P3_58378_43243646 | NC_021163.1    | Ca_kabuli_chr04 | 43243646                | AA                              | GG                | 1945964550               |
| SNP_P3_58379_43243713 | NC_021163.1    | Ca_kabuli_chr04 | 43243713                | TT                              | GG                | 1945964552               |
| SNP_P3_58380_43243718 | NC_021163.1    | Ca_kabuli_chr04 | 43243718                | TT                              | CC                | 1945964554               |
| SNP_P3_58381_43243945 | NC_021163.1    | Ca_kabuli_chr04 | 43243945                | GG                              | AA                | 1945964555               |
| SNP_P3_58382_43243955 | NC_021163.1    | Ca_kabuli_chr04 | 43243955                | GG                              | AA                | 1945964557               |
| SNP_P3_58383_43243963 | NC_021163.1    | Ca_kabuli_chr04 | 43243963                | TT                              | CC                | 1945964559               |
| SNP_P3_58384_43243984 | NC_021163.1    | Ca_kabuli_chr04 | 43243984                | CC                              | TT                | 1945964561               |
| SNP_P3_58385_43243990 | NC_021163.1    | Ca_kabuli_chr04 | 43243990                | AA                              | TT                | 1945964563               |
| SNP_P3_58386_43244008 | NC_021163.1    | Ca_kabuli_chr04 | 43244008                | TT                              | AA                | 1945964564               |
| SNP_P3_58387_43244018 | NC_021163.1    | Ca_kabuli_chr04 | 43244018                | AA                              | GG                | 1945964566               |
| SNP_P3_58388_43244073 | NC_021163.1    | Ca_kabuli_chr04 | 43244073                | CC                              | TT                | 1945964568               |
| SNP_P3_58389_43244133 | NC_021163.1    | Ca_kabuli_chr04 | 43244133                | GG                              | CC                | 1945964570               |
| SNP_P3_58390_43244137 | NC_021163.1    | Ca_kabuli_chr04 | 43244137                | AA                              | GG                | 1945964571               |
| SNP_P3_58392_43268543 | NC_021163.1    | Ca_kabuli_chr04 | 43268543                | AA                              | CC                | 1945964573               |
| SNP_P3_58393_43272939 | NC_021163.1    | Ca_kabuli_chr04 | 43272939                | GG                              | AA                | 1945964575               |
| SNP_P3_58394_43274576 | NC_021163.1    | Ca_kabuli_chr04 | 43274576                | CC                              | TT                | 1945964577               |
| SNP_P3_58395_43274785 | NC_021163.1    | Ca_kabuli_chr04 | 43274785                | TT                              | CC                | 1945964579               |
| SNP_P3_58396_43274786 | NC_021163.1    | Ca_kabuli_chr04 | 43274786                | CC                              | AA                | 1945964580               |
| SNP_P3_58397_43274792 | NC_021163.1    | Ca_kabuli_chr04 | 43274792                | CC                              | TT                | 1945964582               |
| SNP_P3_58398_43274798 | NC_021163.1    | Ca_kabuli_chr04 | 43274798                | GG                              | AA                | 1945964584               |
| SNP_P3_58399_43274816 | NC_021163.1    | Ca_kabuli_chr04 | 43274816                | GG                              | AA                | 1945964586               |
| SNP_P3_58400_43274849 | NC_021163.1    | Ca_kabuli_chr04 | 43274849                | GG                              | AA                | 1945964587               |
| SNP_P3_58401_43274864 | NC_021163.1    | Ca_kabuli_chr04 | 43274864                | TT                              | CC                | 1945964589               |
| SNP_P3_58402_43274894 | NC_021163.1    | Ca_kabuli_chr04 | 43274894                | CC                              | TT                | 1945964591               |
| SNP_P3_58403_43274911 | NC_021163.1    | Ca_kabuli_chr04 | 43274911                | TT                              | CC                | 1945964593               |
| SNP_P3_58404_43274912 | NC_021163.1    | Ca_kabuli_chr04 | 43274912                | CC                              | TT                | 1945964595               |
| SNP_P3_58405_43274932 | NC_021163.1    | Ca_kabuli_chr04 | 43274932                | TT                              | CC                | 1945964596               |
| SNP_P3_58406_43274933 | NC_021163.1    | Ca_kabuli_chr04 | 43274933                | GG                              | AA                | 1945964598               |
| SNP_P3_58407_43275190 | NC_021163.1    | Ca_kabuli_chr04 | 43275190                | AA                              | GG                | 1945964600               |



| SNPs IDs              | Chromosome IDs | Chromosomes     | Physical positions (bp) | CDC Frontier (Reference genome) | (Pusa 256 & HPNB) | NCBI SNPdb Accession IDs |
|-----------------------|----------------|-----------------|-------------------------|---------------------------------|-------------------|--------------------------|
| SNP_P3_58408_43275206 | NC_021163.1    | Ca_kabuli_chr04 | 43275206                | CC                              | TT                | 1945964602               |
| SNP_P3_58409_43275239 | NC_021163.1    | Ca_kabuli_chr04 | 43275239                | TT                              | CC                | 1945964604               |
| SNP_P3_58410_43275244 | NC_021163.1    | Ca_kabuli_chr04 | 43275244                | CC                              | TT                | 1945964605               |
| SNP_P3_58411_43275282 | NC_021163.1    | Ca_kabuli_chr04 | 43275282                | TT                              | GG                | 1945964607               |
| SNP_P3_58412_43277404 | NC_021163.1    | Ca_kabuli_chr04 | 43277404                | AA                              | CC                | 1945964609               |
| SNP_P3_58413_43278058 | NC_021163.1    | Ca_kabuli_chr04 | 43278058                | GG                              | AA                | 1945964611               |
| SNP_P3_58414_43278085 | NC_021163.1    | Ca_kabuli_chr04 | 43278085                | GG                              | AA                | 1945964612               |
| SNP_P3_58415_43285527 | NC_021163.1    | Ca_kabuli_chr04 | 43285527                | CC                              | TT                | 1945964614               |
| SNP_P3_58416_43290733 | NC_021163.1    | Ca_kabuli_chr04 | 43290733                | GG                              | AA                | 1945964616               |
| SNP_P3_58417_43290909 | NC_021163.1    | Ca_kabuli_chr04 | 43290909                | AA                              | GG                | 1945964618               |
| SNP_P3_58418_43290966 | NC_021163.1    | Ca_kabuli_chr04 | 43290966                | TT                              | CC                | 1945964620               |
| SNP_P3_58419_43293046 | NC_021163.1    | Ca_kabuli_chr04 | 43293046                | CC                              | GG                | 1945964621               |
| SNP_P3_58420_43301251 | NC_021163.1    | Ca_kabuli_chr04 | 43301251                | CC                              | TT                | 1945964623               |
| SNP_P3_58421_43301586 | NC_021163.1    | Ca_kabuli_chr04 | 43301586                | AA                              | CC                | 1945964625               |
| SNP_P3_58422_43302222 | NC_021163.1    | Ca_kabuli_chr04 | 43302222                | AA                              | TT                | 1945964627               |
| SNP_P3_58423_43302341 | NC_021163.1    | Ca_kabuli_chr04 | 43302341                | AA                              | CC                | 1945964629               |
| SNP_P3_58424_43304339 | NC_021163.1    | Ca_kabuli_chr04 | 43304339                | AA                              | TT                | 1945964630               |
| SNP_P3_58425_43304346 | NC_021163.1    | Ca_kabuli_chr04 | 43304346                | AA                              | TT                | 1945964632               |
| SNP_P3_58427_43305629 | NC_021163.1    | Ca_kabuli_chr04 | 43305629                | TT                              | AA                | 1945964634               |
| SNP_P3_58428_43308694 | NC_021163.1    | Ca_kabuli_chr04 | 43308694                | CC                              | GG                | 1945964636               |
| SNP_P3_58430_43308720 | NC_021163.1    | Ca_kabuli_chr04 | 43308720                | CC                              | GG                | 1945964637               |
| SNP_P3_58431_43310343 | NC_021163.1    | Ca_kabuli_chr04 | 43310343                | CC                              | TT                | 1945964639               |
| SNP_P3_58432_43312412 | NC_021163.1    | Ca_kabuli_chr04 | 43312412                | CC                              | TT                | 1945964641               |
| SNP_P3_58433_43312468 | NC_021163.1    | Ca_kabuli_chr04 | 43312468                | TT                              | CC                | 1945964643               |
| SNP_P3_58434_43312477 | NC_021163.1    | Ca_kabuli_chr04 | 43312477                | CC                              | TT                | 1945964645               |
| SNP_P3_58435_43316630 | NC_021163.1    | Ca_kabuli_chr04 | 43316630                | CC                              | TT                | 1945964646               |
| SNP_P3_58436_43316814 | NC_021163.1    | Ca_kabuli_chr04 | 43316814                | AA                              | GG                | 1945964648               |
| SNP_P3_58437_43316821 | NC_021163.1    | Ca_kabuli_chr04 | 43316821                | AA                              | CC                | 1945964650               |
| SNP_P3_58438_43316826 | NC_021163.1    | Ca_kabuli_chr04 | 43316826                | AA                              | GG                | 1945964652               |
| SNP_P3_58439_43317062 | NC_021163.1    | Ca_kabuli_chr04 | 43317062                | AA                              | CC                | 1945964654               |
| SNP_P3_58440_43317320 | NC_021163.1    | Ca_kabuli_chr04 | 43317320                | TT                              | AA                | 1945964655               |
| SNP_P3_58441_43317530 | NC_021163.1    | Ca_kabuli_chr04 | 43317530                | TT                              | CC                | 1945964657               |
| SNP_P3_58443_43317924 | NC_021163.1    | Ca_kabuli_chr04 | 43317924                | CC                              | TT                | 1945964659               |
| SNP_P3_58445_43320795 | NC_021163.1    | Ca_kabuli_chr04 | 43320795                | TT                              | CC                | 1945964661               |
| SNP_P3_58446_43323946 | NC_021163.1    | Ca_kabuli_chr04 | 43323946                | AA                              | GG                | 1945964662               |
| SNP_P3_58447_43324291 | NC_021163.1    | Ca_kabuli_chr04 | 43324291                | CC                              | TT                | 1945964664               |
| SNP_P3_58448_43324567 | NC_021163.1    | Ca_kabuli_chr04 | 43324567                | TT                              | GG                | 1945964666               |
| SNP_P3_58449_43327873 | NC_021163.1    | Ca_kabuli_chr04 | 43327873                | TT                              | CC                | 1945964668               |
| SNP_P3_58450_43328576 | NC_021163.1    | Ca_kabuli_chr04 | 43328576                | CC                              | AA                | 1945964670               |
| SNP_P3_58451_43333181 | NC_021163.1    | Ca_kabuli_chr04 | 43333181                | CC                              | TT                | 1945964671               |
| SNP_P3_58452_43333225 | NC_021163.1    | Ca_kabuli_chr04 | 43333225                | CC                              | TT                | 1945964673               |
| SNP_P3_58453_43334321 | NC_021163.1    | Ca_kabuli_chr04 | 43334321                | CC                              | TT                | 1945964675               |

| SNPs IDs              | Chromosome IDs | Chromosomes     | Physical positions (bp) | CDC Frontier (Reference genome) | (Pusa 256 & HPNB) | NCBI SNPdb Accession IDs |
|-----------------------|----------------|-----------------|-------------------------|---------------------------------|-------------------|--------------------------|
| SNP_P3_58454_43337722 | NC_021163.1    | Ca_kabuli_chr04 | 43337722                | TT                              | CC                | 1945964677               |
| SNP_P3_58455_43339242 | NC_021163.1    | Ca_kabuli_chr04 | 43339242                | TT                              | CC                | 1945964679               |
| SNP_P3_58456_43339780 | NC_021163.1    | Ca_kabuli_chr04 | 43339780                | GG                              | CC                | 1945964680               |
| SNP_P3_58457_43339811 | NC_021163.1    | Ca_kabuli_chr04 | 43339811                | AA                              | TT                | 1945964682               |
| SNP_P3_58458_43339847 | NC_021163.1    | Ca_kabuli_chr04 | 43339847                | GG                              | TT                | 1945964684               |
| SNP_P3_58460_43341339 | NC_021163.1    | Ca_kabuli_chr04 | 43341339                | CC                              | GG                | 1945964686               |
| SNP_P3_58461_43343071 | NC_021163.1    | Ca_kabuli_chr04 | 43343071                | CC                              | TT                | 1945964687               |
| SNP_P3_58462_43343455 | NC_021163.1    | Ca_kabuli_chr04 | 43343455                | AA                              | GG                | 1945964689               |
| SNP_P3_58463_43346571 | NC_021163.1    | Ca_kabuli_chr04 | 43346571                | AA                              | TT                | 1945964691               |
| SNP_P3_58464_43346768 | NC_021163.1    | Ca_kabuli_chr04 | 43346768                | AA                              | CC                | 1945964693               |
| SNP_P3_58467_43349715 | NC_021163.1    | Ca_kabuli_chr04 | 43349715                | AA                              | GG                | 1945964695               |
| SNP_P3_58468_43349794 | NC_021163.1    | Ca_kabuli_chr04 | 43349794                | GG                              | TT                | 1945964696               |
| SNP_P3_58469_43349795 | NC_021163.1    | Ca_kabuli_chr04 | 43349795                | GG                              | AA                | 1945964698               |
| SNP_P3_58470_43349817 | NC_021163.1    | Ca_kabuli_chr04 | 43349817                | GG                              | AA                | 1945964700               |
| SNP_P3_58471_43349863 | NC_021163.1    | Ca_kabuli_chr04 | 43349863                | GG                              | AA                | 1945964702               |
| SNP_P3_58472_43349874 | NC_021163.1    | Ca_kabuli_chr04 | 43349874                | CC                              | TT                | 1945964704               |
| SNP_P3_58473_43349952 | NC_021163.1    | Ca_kabuli_chr04 | 43349952                | GG                              | CC                | 1945964705               |
| SNP_P3_58474_43351130 | NC_021163.1    | Ca_kabuli_chr04 | 43351130                | GG                              | AA                | 1945964707               |
| SNP_P3_58475_43351164 | NC_021163.1    | Ca_kabuli_chr04 | 43351164                | TT                              | CC                | 1945964709               |
| SNP_P3_58476_43351169 | NC_021163.1    | Ca_kabuli_chr04 | 43351169                | CC                              | TT                | 1945964711               |
| SNP_P3_58477_43351171 | NC_021163.1    | Ca_kabuli_chr04 | 43351171                | AA                              | TT                | 1945964712               |
| SNP_P3_58478_43351213 | NC_021163.1    | Ca_kabuli_chr04 | 43351213                | GG                              | AA                | 1945964714               |
| SNP_P3_58479_43352006 | NC_021163.1    | Ca_kabuli_chr04 | 43352006                | GG                              | CC                | 1945964716               |
| SNP_P3_58480_43352481 | NC_021163.1    | Ca_kabuli_chr04 | 43352481                | CC                              | TT                | 1945964718               |
| SNP_P3_58481_43353993 | NC_021163.1    | Ca_kabuli_chr04 | 43353993                | CC                              | TT                | 1945964720               |
| SNP_P3_58482_43354662 | NC_021163.1    | Ca_kabuli_chr04 | 43354662                | GG                              | AA                | 1945964721               |
| SNP_P3_58483_43355239 | NC_021163.1    | Ca_kabuli_chr04 | 43355239                | CC                              | TT                | 1945964723               |
| SNP_P3_58484_43357423 | NC_021163.1    | Ca_kabuli_chr04 | 43357423                | AA                              | CC                | 1945964725               |
| SNP_P3_58485_43358155 | NC_021163.1    | Ca_kabuli_chr04 | 43358155                | AA                              | GG                | 1945964727               |
| SNP_P3_58486_43363356 | NC_021163.1    | Ca_kabuli_chr04 | 43363356                | GG                              | AA                | 1945964729               |
| SNP_P3_58487_43363373 | NC_021163.1    | Ca_kabuli_chr04 | 43363373                | CC                              | TT                | 1945964730               |
| SNP_P3_58488_43363377 | NC_021163.1    | Ca_kabuli_chr04 | 43363377                | TT                              | GG                | 1945964732               |
| SNP_P3_58489_43363378 | NC_021163.1    | Ca_kabuli_chr04 | 43363378                | GG                              | CC                | 1945964734               |
| SNP_P3_58491_43369448 | NC_021163.1    | Ca_kabuli_chr04 | 43369448                | TT                              | CC                | 1945964736               |
| SNP_P3_58492_43369633 | NC_021163.1    | Ca_kabuli_chr04 | 43369633                | CC                              | GG                | 1945964738               |
| SNP_P3_58493_43369967 | NC_021163.1    | Ca_kabuli_chr04 | 43369967                | TT                              | CC                | 1945964739               |
| SNP_P3_58494_43369981 | NC_021163.1    | Ca_kabuli_chr04 | 43369981                | AA                              | GG                | 1945964741               |
| SNP_P3_58495_43369989 | NC_021163.1    | Ca_kabuli_chr04 | 43369989                | GG                              | AA                | 1945964743               |
| SNP_P3_58496_43369997 | NC_021163.1    | Ca_kabuli_chr04 | 43369997                | GG                              | AA                | 1945964745               |
| SNP_P3_58497_43370735 | NC_021163.1    | Ca_kabuli_chr04 | 43370735                | AA                              | GG                | 1945964747               |
| SNP_P3_58498_43370752 | NC_021163.1    | Ca_kabuli_chr04 | 43370752                | AA                              | GG                | 1945964748               |
| SNP_P3_58499_43370780 | NC_021163.1    | Ca_kabuli_chr04 | 43370780                | AA                              | CC                | 1945964750               |

| SNPs IDs              | Chromosome IDs | Chromosomes     | Physical positions (bp) | CDC Frontier (Reference genome) | (Pusa 256 & HPNB) | NCBI SNPdb Accession IDs |
|-----------------------|----------------|-----------------|-------------------------|---------------------------------|-------------------|--------------------------|
| SNP_P3_58500_43370993 | NC_021163.1    | Ca_kabuli_chr04 | 43370993                | CC                              | AA                | 1945964752               |
| SNP_P3_58501_43371000 | NC_021163.1    | Ca_kabuli_chr04 | 43371000                | TT                              | AA                | 1945964754               |
| SNP_P3_58502_43371764 | NC_021163.1    | Ca_kabuli_chr04 | 43371764                | GG                              | CC                | 1945964756               |
| SNP_P3_58503_43371816 | NC_021163.1    | Ca_kabuli_chr04 | 43371816                | AA                              | GG                | 1945964757               |
| SNP_P3_58504_43372788 | NC_021163.1    | Ca_kabuli_chr04 | 43372788                | AA                              | GG                | 1945964759               |
| SNP_P3_58505_43372793 | NC_021163.1    | Ca_kabuli_chr04 | 43372793                | CC                              | AA                | 1945964761               |
| SNP_P3_58506_43373025 | NC_021163.1    | Ca_kabuli_chr04 | 43373025                | CC                              | TT                | 1945964763               |
| SNP_P3_58507_43374216 | NC_021163.1    | Ca_kabuli_chr04 | 43374216                | CC                              | AA                | 1945964765               |
| SNP_P3_58508_43382910 | NC_021163.1    | Ca_kabuli_chr04 | 43382910                | GG                              | AA                | 1945964766               |
| SNP_P3_58509_43383381 | NC_021163.1    | Ca_kabuli_chr04 | 43383381                | AA                              | GG                | 1945964768               |
| SNP_P3_58511_43391127 | NC_021163.1    | Ca_kabuli_chr04 | 43391127                | TT                              | CC                | 1945964770               |
| SNP_P3_58512_43399286 | NC_021163.1    | Ca_kabuli_chr04 | 43399286                | CC                              | GG                | 1945964772               |
| SNP_P3_58514_43399920 | NC_021163.1    | Ca_kabuli_chr04 | 43399920                | GG                              | AA                | 1945964773               |
| SNP_P3_58515_43399932 | NC_021163.1    | Ca_kabuli_chr04 | 43399932                | TT                              | CC                | 1945964775               |
| SNP_P3_58516_43399946 | NC_021163.1    | Ca_kabuli_chr04 | 43399946                | TT                              | AA                | 1945964777               |
| SNP_P3_58517_43401089 | NC_021163.1    | Ca_kabuli_chr04 | 43401089                | AA                              | GG                | 1945964779               |
| SNP_P3_58518_43401253 | NC_021163.1    | Ca_kabuli_chr04 | 43401253                | AA                              | GG                | 1945964781               |
| SNP_P3_58519_43402122 | NC_021163.1    | Ca_kabuli_chr04 | 43402122                | TT                              | CC                | 1945964782               |
| SNP_P3_58520_43407734 | NC_021163.1    | Ca_kabuli_chr04 | 43407734                | CC                              | TT                | 1945964784               |
| SNP_P3_58521_43407890 | NC_021163.1    | Ca_kabuli_chr04 | 43407890                | TT                              | AA                | 1945964786               |
| SNP_P3_58522_43407891 | NC_021163.1    | Ca_kabuli_chr04 | 43407891                | CC                              | TT                | 1945964788               |
| SNP_P3_58523_43408221 | NC_021163.1    | Ca_kabuli_chr04 | 43408221                | CC                              | GG                | 1945964790               |
| SNP_P3_58524_43409325 | NC_021163.1    | Ca_kabuli_chr04 | 43409325                | TT                              | CC                | 1945964791               |
| SNP_P3_58525_43409332 | NC_021163.1    | Ca_kabuli_chr04 | 43409332                | TT                              | CC                | 1945964793               |
| SNP_P3_58526_43409477 | NC_021163.1    | Ca_kabuli_chr04 | 43409477                | AA                              | GG                | 1945964795               |
| SNP_P3_58527_43409521 | NC_021163.1    | Ca_kabuli_chr04 | 43409521                | CC                              | TT                | 1945964797               |
| SNP_P3_58528_43409656 | NC_021163.1    | Ca_kabuli_chr04 | 43409656                | TT                              | CC                | 1945964798               |
| SNP_P3_58529_43409665 | NC_021163.1    | Ca_kabuli_chr04 | 43409665                | TT                              | AA                | 1945964800               |
| SNP_P3_58530_43409839 | NC_021163.1    | Ca_kabuli_chr04 | 43409839                | TT                              | AA                | 1945964802               |
| SNP_P3_58531_43409842 | NC_021163.1    | Ca_kabuli_chr04 | 43409842                | AA                              | CC                | 1945964804               |
| SNP_P3_58532_43411761 | NC_021163.1    | Ca_kabuli_chr04 | 43411761                | GG                              | TT                | 1945964806               |
| SNP_P3_58533_43412475 | NC_021163.1    | Ca_kabuli_chr04 | 43412475                | TT                              | CC                | 1945964807               |
| SNP_P3_58534_43413050 | NC_021163.1    | Ca_kabuli_chr04 | 43413050                | AA                              | CC                | 1945964809               |
| SNP_P3_58535_43413058 | NC_021163.1    | Ca_kabuli_chr04 | 43413058                | TT                              | CC                | 1945964811               |
| SNP_P3_58536_43414140 | NC_021163.1    | Ca_kabuli_chr04 | 43414140                | CC                              | TT                | 1945964813               |
| SNP_P3_58537_43414584 | NC_021163.1    | Ca_kabuli_chr04 | 43414584                | TT                              | CC                | 1945964815               |
| SNP_P3_58538_43423935 | NC_021163.1    | Ca_kabuli_chr04 | 43423935                | AA                              | CC                | 1945964816               |
| SNP_P3_58539_43424936 | NC_021163.1    | Ca_kabuli_chr04 | 43424936                | TT                              | CC                | 1945964818               |
| SNP_P3_58540_43424938 | NC_021163.1    | Ca_kabuli_chr04 | 43424938                | CC                              | AA                | 1945964820               |
| SNP_P3_58543_43426638 | NC_021163.1    | Ca_kabuli_chr04 | 43426638                | GG                              | AA                | 1945964822               |
| SNP_P3_58544_43428002 | NC_021163.1    | Ca_kabuli_chr04 | 43428002                | TT                              | AA                | 1945964823               |
| SNP_P3_58545_43428539 | NC_021163.1    | Ca_kabuli_chr04 | 43428539                | AA                              | CC                | 1945964825               |

| SNPs IDs              | Chromosome IDs | Chromosomes     | Physical positions (bp) | CDC Frontier (Reference genome) | (Pusa 256 & HPNB) | NCBI SNPdb Accession IDs |
|-----------------------|----------------|-----------------|-------------------------|---------------------------------|-------------------|--------------------------|
| SNP_P3_58546_43428696 | NC_021163.1    | Ca_kabuli_chr04 | 43428696                | AA                              | TT                | 1945964827               |
| SNP_P3_58547_43428751 | NC_021163.1    | Ca_kabuli_chr04 | 43428751                | GG                              | AA                | 1945964829               |
| SNP_P3_58548_43428923 | NC_021163.1    | Ca_kabuli_chr04 | 43428923                | AA                              | CC                | 1945964831               |
| SNP_P3_58549_43428946 | NC_021163.1    | Ca_kabuli_chr04 | 43428946                | TT                              | CC                | 1945964832               |
| SNP_P3_58550_43428963 | NC_021163.1    | Ca_kabuli_chr04 | 43428963                | CC                              | TT                | 1945964834               |
| SNP_P3_58551_43429417 | NC_021163.1    | Ca_kabuli_chr04 | 43429417                | CC                              | TT                | 1945964836               |
| SNP_P3_58552_43429460 | NC_021163.1    | Ca_kabuli_chr04 | 43429460                | TT                              | GG                | 1945964838               |
| SNP_P3_58553_43429461 | NC_021163.1    | Ca_kabuli_chr04 | 43429461                | CC                              | GG                | 1945964840               |
| SNP_P3_58554_43430643 | NC_021163.1    | Ca_kabuli_chr04 | 43430643                | GG                              | AA                | 1945964841               |
| SNP_P3_58555_43431031 | NC_021163.1    | Ca_kabuli_chr04 | 43431031                | AA                              | GG                | 1945964843               |
| SNP_P3_58556_43431411 | NC_021163.1    | Ca_kabuli_chr04 | 43431411                | CC                              | GG                | 1945964845               |
| SNP_P3_58557_43431770 | NC_021163.1    | Ca_kabuli_chr04 | 43431770                | CC                              | TT                | 1945964847               |
| SNP_P3_58558_43431772 | NC_021163.1    | Ca_kabuli_chr04 | 43431772                | AA                              | TT                | 1945964848               |
| SNP_P3_58559_43431815 | NC_021163.1    | Ca_kabuli_chr04 | 43431815                | GG                              | TT                | 1945964850               |
| SNP_P3_58561_43432389 | NC_021163.1    | Ca_kabuli_chr04 | 43432389                | TT                              | CC                | 1945964852               |
| SNP_P3_58562_43432431 | NC_021163.1    | Ca_kabuli_chr04 | 43432431                | CC                              | TT                | 1945964854               |
| SNP_P3_58563_43432604 | NC_021163.1    | Ca_kabuli_chr04 | 43432604                | TT                              | AA                | 1945964856               |
| SNP_P3_58564_43433620 | NC_021163.1    | Ca_kabuli_chr04 | 43433620                | GG                              | AA                | 1945964857               |
| SNP_P3_58565_43433640 | NC_021163.1    | Ca_kabuli_chr04 | 43433640                | TT                              | CC                | 1945964859               |
| SNP_P3_58566_43435171 | NC_021163.1    | Ca_kabuli_chr04 | 43435171                | TT                              | GG                | 1945964861               |
| SNP_P3_58567_43436013 | NC_021163.1    | Ca_kabuli_chr04 | 43436013                | TT                              | CC                | 1945964863               |
| SNP_P3_58568_43436303 | NC_021163.1    | Ca_kabuli_chr04 | 43436303                | CC                              | TT                | 1945964865               |
| SNP_P3_58569_43439798 | NC_021163.1    | Ca_kabuli_chr04 | 43439798                | TT                              | CC                | 1945964866               |
| SNP_P3_58571_43440079 | NC_021163.1    | Ca_kabuli_chr04 | 43440079                | TT                              | CC                | 1945964868               |
| SNP_P3_58572_43440356 | NC_021163.1    | Ca_kabuli_chr04 | 43440356                | GG                              | TT                | 1945964870               |
| SNP_P3_58573_43441196 | NC_021163.1    | Ca_kabuli_chr04 | 43441196                | AA                              | GG                | 1945964872               |
| SNP_P3_58576_43445361 | NC_021163.1    | Ca_kabuli_chr04 | 43445361                | GG                              | CC                | 1945964873               |
| SNP_P3_58577_43446203 | NC_021163.1    | Ca_kabuli_chr04 | 43446203                | AA                              | TT                | 1945964875               |
| SNP_P3_58578_43447227 | NC_021163.1    | Ca_kabuli_chr04 | 43447227                | AA                              | GG                | 1945964877               |
| SNP_P3_58579_43447256 | NC_021163.1    | Ca_kabuli_chr04 | 43447256                | AA                              | GG                | 1945964879               |
| SNP_P3_58580_43447598 | NC_021163.1    | Ca_kabuli_chr04 | 43447598                | GG                              | CC                | 1945964881               |
| SNP_P3_58581_43449165 | NC_021163.1    | Ca_kabuli_chr04 | 43449165                | CC                              | TT                | 1945964882               |
| SNP_P3_58583_43450525 | NC_021163.1    | Ca_kabuli_chr04 | 43450525                | TT                              | CC                | 1945964884               |
| SNP_P3_58584_43454394 | NC_021163.1    | Ca_kabuli_chr04 | 43454394                | CC                              | TT                | 1945964886               |
| SNP_P3_58585_43454467 | NC_021163.1    | Ca_kabuli_chr04 | 43454467                | GG                              | AA                | 1945964888               |
| SNP_P3_58586_43454819 | NC_021163.1    | Ca_kabuli_chr04 | 43454819                | GG                              | AA                | 1945964890               |
| SNP_P3_58587_43454835 | NC_021163.1    | Ca_kabuli_chr04 | 43454835                | CC                              | GG                | 1945964891               |
| SNP_P3_58588_43454836 | NC_021163.1    | Ca_kabuli_chr04 | 43454836                | TT                              | GG                | 1945964893               |
| SNP_P3_58589_43454917 | NC_021163.1    | Ca_kabuli_chr04 | 43454917                | TT                              | CC                | 1945964895               |
| SNP_P3_58590_43455258 | NC_021163.1    | Ca_kabuli_chr04 | 43455258                | CC                              | TT                | 1945964897               |
| SNP_P3_58591_43456519 | NC_021163.1    | Ca_kabuli_chr04 | 43456519                | TT                              | CC                | 1945964898               |
| SNP_P3_58592_43456529 | NC_021163.1    | Ca_kabuli_chr04 | 43456529                | TT                              | CC                | 1945964900               |

| SNPs IDs              | Chromosome IDs | Chromosomes     | Physical positions (bp) | CDC Frontier (Reference genome) | (Pusa 256 & HPNB) | NCBI SNPdb Accession IDs |
|-----------------------|----------------|-----------------|-------------------------|---------------------------------|-------------------|--------------------------|
| SNP_P3_58593_43456710 | NC_021163.1    | Ca_kabuli_chr04 | 43456710                | CC                              | TT                | 1945964902               |
| SNP_P3_58594_43456786 | NC_021163.1    | Ca_kabuli_chr04 | 43456786                | GG                              | AA                | 1945964904               |
| SNP_P3_58595_43456823 | NC_021163.1    | Ca_kabuli_chr04 | 43456823                | CC                              | GG                | 1945964906               |
| SNP_P3_58596_43459970 | NC_021163.1    | Ca_kabuli_chr04 | 43459970                | TT                              | CC                | 1945964907               |
| SNP_P3_58597_43460098 | NC_021163.1    | Ca_kabuli_chr04 | 43460098                | AA                              | CC                | 1945964909               |
| SNP_P3_58598_43460118 | NC_021163.1    | Ca_kabuli_chr04 | 43460118                | TT                              | AA                | 1945964911               |
| SNP_P3_58599_43460170 | NC_021163.1    | Ca_kabuli_chr04 | 43460170                | AA                              | GG                | 1945964913               |
| SNP_P3_58600_43466983 | NC_021163.1    | Ca_kabuli_chr04 | 43466983                | AA                              | GG                | 1945964914               |
| SNP_P3_58601_43468308 | NC_021163.1    | Ca_kabuli_chr04 | 43468308                | TT                              | CC                | 1945964916               |
| SNP_P3_58602_43468320 | NC_021163.1    | Ca_kabuli_chr04 | 43468320                | AA                              | CC                | 1945964918               |
| SNP_P3_58603_43468666 | NC_021163.1    | Ca_kabuli_chr04 | 43468666                | AA                              | CC                | 1945964920               |
| SNP_P3_58604_43472852 | NC_021163.1    | Ca_kabuli_chr04 | 43472852                | CC                              | TT                | 1945964922               |
| SNP_P3_58605_43473775 | NC_021163.1    | Ca_kabuli_chr04 | 43473775                | AA                              | GG                | 1945964923               |
| SNP_P3_58606_43475040 | NC_021163.1    | Ca_kabuli_chr04 | 43475040                | TT                              | CC                | 1945964925               |
| SNP_P3_58607_43475093 | NC_021163.1    | Ca_kabuli_chr04 | 43475093                | GG                              | TT                | 1945964927               |
| SNP_P3_58608_43475777 | NC_021163.1    | Ca_kabuli_chr04 | 43475777                | GG                              | AA                | 1945964929               |
| SNP_P3_58609_43480182 | NC_021163.1    | Ca_kabuli_chr04 | 43480182                | CC                              | AA                | 1945964930               |
| SNP_P3_58610_43482031 | NC_021163.1    | Ca_kabuli_chr04 | 43482031                | AA                              | GG                | 1945964932               |
| SNP_P3_58611_43482063 | NC_021163.1    | Ca_kabuli_chr04 | 43482063                | TT                              | CC                | 1945964934               |
| SNP_P3_58612_43482378 | NC_021163.1    | Ca_kabuli_chr04 | 43482378                | AA                              | TT                | 1945964936               |
| SNP_P3_58613_43482416 | NC_021163.1    | Ca_kabuli_chr04 | 43482416                | TT                              | GG                | 1945964938               |
| SNP_P3_58614_43482496 | NC_021163.1    | Ca_kabuli_chr04 | 43482496                | AA                              | GG                | 1945964939               |
| SNP_P3_58615_43482527 | NC_021163.1    | Ca_kabuli_chr04 | 43482527                | AA                              | GG                | 1945964941               |
| SNP_P3_58616_43482755 | NC_021163.1    | Ca_kabuli_chr04 | 43482755                | AA                              | CC                | 1945964943               |
| SNP_P3_58617_43482942 | NC_021163.1    | Ca_kabuli_chr04 | 43482942                | AA                              | GG                | 1945964945               |
| SNP_P3_58618_43482976 | NC_021163.1    | Ca_kabuli_chr04 | 43482976                | CC                              | TT                | 1945964947               |
| SNP_P3_58620_43485071 | NC_021163.1    | Ca_kabuli_chr04 | 43485071                | CC                              | GG                | 1945964948               |
| SNP_P3_58621_43485083 | NC_021163.1    | Ca_kabuli_chr04 | 43485083                | AA                              | TT                | 1945964950               |
| SNP_P3_58622_43485635 | NC_021163.1    | Ca_kabuli_chr04 | 43485635                | CC                              | AA                | 1945964952               |
| SNP_P3_58623_43497623 | NC_021163.1    | Ca_kabuli_chr04 | 43497623                | GG                              | TT                | 1945964954               |
| SNP_P3_58624_43497626 | NC_021163.1    | Ca_kabuli_chr04 | 43497626                | AA                              | GG                | 1945964956               |
| SNP_P3_58625_43497664 | NC_021163.1    | Ca_kabuli_chr04 | 43497664                | CC                              | TT                | 1945964957               |
| SNP_P3_58626_43497674 | NC_021163.1    | Ca_kabuli_chr04 | 43497674                | GG                              | AA                | 1945964959               |
| SNP_P3_58627_43497678 | NC_021163.1    | Ca_kabuli_chr04 | 43497678                | GG                              | AA                | 1945964961               |
| SNP_P3_58628_43497680 | NC_021163.1    | Ca_kabuli_chr04 | 43497680                | CC                              | TT                | 1945964963               |
| SNP_P3_58629_43497703 | NC_021163.1    | Ca_kabuli_chr04 | 43497703                | GG                              | AA                | 1945964964               |
| SNP_P3_58630_43510740 | NC_021163.1    | Ca_kabuli_chr04 | 43510740                | TT                              | CC                | 1945964966               |
| SNP_P3_58631_43510916 | NC_021163.1    | Ca_kabuli_chr04 | 43510916                | CC                              | TT                | 1945964968               |
| SNP_P3_58632_43510984 | NC_021163.1    | Ca_kabuli_chr04 | 43510984                | TT                              | GG                | 1945964970               |
| SNP_P3_58633_43510985 | NC_021163.1    | Ca_kabuli_chr04 | 43510985                | TT                              | CC                | 1945964971               |
| SNP_P3_58634_43511017 | NC_021163.1    | Ca_kabuli_chr04 | 43511017                | AA                              | CC                | 1945964973               |
| SNP_P3_58635_43511021 | NC_021163.1    | Ca_kabuli_chr04 | 43511021                | TT                              | CC                | 1945964975               |

| SNPs IDs              | Chromosome IDs | Chromosomes     | Physical positions (bp) | CDC Frontier (Reference genome) | (Pusa 256 & HPNB) | NCBI SNPdb Accession IDs |
|-----------------------|----------------|-----------------|-------------------------|---------------------------------|-------------------|--------------------------|
| SNP_P3_58636_43511030 | NC_021163.1    | Ca_kabuli_chr04 | 43511030                | CC                              | GG                | 1945964977               |
| SNP_P3_58637_43511036 | NC_021163.1    | Ca_kabuli_chr04 | 43511036                | AA                              | TT                | 1945964979               |
| SNP_P3_58638_43511091 | NC_021163.1    | Ca_kabuli_chr04 | 43511091                | TT                              | CC                | 1945964980               |
| SNP_P3_58639_43511098 | NC_021163.1    | Ca_kabuli_chr04 | 43511098                | TT                              | CC                | 1945964982               |
| SNP_P3_58640_43511101 | NC_021163.1    | Ca_kabuli_chr04 | 43511101                | TT                              | CC                | 1945964984               |
| SNP_P3_58641_43511104 | NC_021163.1    | Ca_kabuli_chr04 | 43511104                | CC                              | TT                | 1945964986               |
| SNP_P3_58642_43511138 | NC_021163.1    | Ca_kabuli_chr04 | 43511138                | GG                              | AA                | 1945964988               |
| SNP_P3_58643_43511316 | NC_021163.1    | Ca_kabuli_chr04 | 43511316                | CC                              | TT                | 1945964989               |
| SNP_P3_58644_43511329 | NC_021163.1    | Ca_kabuli_chr04 | 43511329                | GG                              | AA                | 1945964991               |
| SNP_P3_58645_43511405 | NC_021163.1    | Ca_kabuli_chr04 | 43511405                | AA                              | TT                | 1945964993               |
| SNP_P3_58646_43511664 | NC_021163.1    | Ca_kabuli_chr04 | 43511664                | GG                              | AA                | 1945964995               |
| SNP_P3_58647_43516829 | NC_021163.1    | Ca_kabuli_chr04 | 43516829                | TT                              | CC                | 1945964997               |
| SNP_P3_58648_43518040 | NC_021163.1    | Ca_kabuli_chr04 | 43518040                | AA                              | GG                | 1945964998               |
| SNP_P3_58650_43518537 | NC_021163.1    | Ca_kabuli_chr04 | 43518537                | GG                              | AA                | 1945965000               |
| SNP_P3_58651_43518569 | NC_021163.1    | Ca_kabuli_chr04 | 43518569                | TT                              | CC                | 1945965002               |
| SNP_P3_58652_43523672 | NC_021163.1    | Ca_kabuli_chr04 | 43523672                | AA                              | TT                | 1945965004               |
| SNP_P3_58653_43524210 | NC_021163.1    | Ca_kabuli_chr04 | 43524210                | AA                              | GG                | 1945965005               |
| SNP_P3_58654_43524229 | NC_021163.1    | Ca_kabuli_chr04 | 43524229                | GG                              | TT                | 1945965007               |
| SNP_P3_58655_43533015 | NC_021163.1    | Ca_kabuli_chr04 | 43533015                | TT                              | CC                | 1945965009               |
| SNP_P3_58656_43533278 | NC_021163.1    | Ca_kabuli_chr04 | 43533278                | TT                              | AA                | 1945965011               |
| SNP_P3_58657_43533662 | NC_021163.1    | Ca_kabuli_chr04 | 43533662                | GG                              | TT                | 1945965013               |
| SNP_P3_58658_43535093 | NC_021163.1    | Ca_kabuli_chr04 | 43535093                | CC                              | TT                | 1945965014               |
| SNP_P3_58659_43535113 | NC_021163.1    | Ca_kabuli_chr04 | 43535113                | GG                              | AA                | 1945965016               |
| SNP_P3_58661_43535205 | NC_021163.1    | Ca_kabuli_chr04 | 43535205                | CC                              | GG                | 1945965018               |
| SNP_P3_58663_43535834 | NC_021163.1    | Ca_kabuli_chr04 | 43535834                | TT                              | AA                | 1945965020               |
| SNP_P3_58664_43535968 | NC_021163.1    | Ca_kabuli_chr04 | 43535968                | AA                              | TT                | 1945965022               |
| SNP_P3_58665_43536329 | NC_021163.1    | Ca_kabuli_chr04 | 43536329                | CC                              | TT                | 1945965023               |
| SNP_P3_58666_43544485 | NC_021163.1    | Ca_kabuli_chr04 | 43544485                | TT                              | CC                | 1945965025               |
| SNP_P3_58667_43544504 | NC_021163.1    | Ca_kabuli_chr04 | 43544504                | AA                              | GG                | 1945965027               |
| SNP_P3_58668_43545777 | NC_021163.1    | Ca_kabuli_chr04 | 43545777                | CC                              | AA                | 1945965029               |
| SNP_P3_58669_43546514 | NC_021163.1    | Ca_kabuli_chr04 | 43546514                | CC                              | TT                | 1945965030               |
| SNP_P3_58670_43546882 | NC_021163.1    | Ca_kabuli_chr04 | 43546882                | GG                              | CC                | 1945965032               |
| SNP_P3_58671_43548382 | NC_021163.1    | Ca_kabuli_chr04 | 43548382                | AA                              | GG                | 1945965034               |
| SNP_P3_58673_43550014 | NC_021163.1    | Ca_kabuli_chr04 | 43550014                | GG                              | AA                | 1945965036               |
| SNP_P3_58674_43552246 | NC_021163.1    | Ca_kabuli_chr04 | 43552246                | TT                              | CC                | 1945965038               |
| SNP_P3_58675_43552727 | NC_021163.1    | Ca_kabuli_chr04 | 43552727                | AA                              | CC                | 1945965039               |
| SNP_P3_58676_43553354 | NC_021163.1    | Ca_kabuli_chr04 | 43553354                | AA                              | CC                | 1945965041               |
| SNP_P3_58677_43553366 | NC_021163.1    | Ca_kabuli_chr04 | 43553366                | AA                              | TT                | 1945965043               |
| SNP_P3_58678_43553696 | NC_021163.1    | Ca_kabuli_chr04 | 43553696                | AA                              | GG                | 1945965045               |
| SNP_P3_58679_43553701 | NC_021163.1    | Ca_kabuli_chr04 | 43553701                | TT                              | AA                | 1945965047               |
| SNP_P3_58680_43553703 | NC_021163.1    | Ca_kabuli_chr04 | 43553703                | AA                              | TT                | 1945965048               |
| SNP_P3_58681_43553725 | NC_021163.1    | Ca_kabuli_chr04 | 43553725                | CC                              | GG                | 1945965050               |

| SNPs IDs              | Chromosome IDs | Chromosomes     | Physical positions (bp) | CDC Frontier (Reference genome) | (Pusa 256 & HPNB) | NCBI SNPdb Accession IDs |
|-----------------------|----------------|-----------------|-------------------------|---------------------------------|-------------------|--------------------------|
| SNP_P3_58682_43554478 | NC_021163.1    | Ca_kabuli_chr04 | 43554478                | GG                              | AA                | 1945965052               |
| SNP_P3_58683_43554864 | NC_021163.1    | Ca_kabuli_chr04 | 43554864                | AA                              | GG                | 1945965054               |
| SNP_P3_58684_43556581 | NC_021163.1    | Ca_kabuli_chr04 | 43556581                | TT                              | CC                | 1945965055               |
| SNP_P3_58685_43556630 | NC_021163.1    | Ca_kabuli_chr04 | 43556630                | CC                              | TT                | 1945965057               |
| SNP_P3_58686_43559027 | NC_021163.1    | Ca_kabuli_chr04 | 43559027                | AA                              | GG                | 1945965059               |
| SNP_P3_58687_43559153 | NC_021163.1    | Ca_kabuli_chr04 | 43559153                | TT                              | CC                | 1945965061               |
| SNP_P3_58688_43560037 | NC_021163.1    | Ca_kabuli_chr04 | 43560037                | GG                              | CC                | 1945965063               |
| SNP_P3_58689_43561094 | NC_021163.1    | Ca_kabuli_chr04 | 43561094                | AA                              | GG                | 1945965064               |
| SNP_P3_58690_43561433 | NC_021163.1    | Ca_kabuli_chr04 | 43561433                | CC                              | TT                | 1945965066               |
| SNP_P3_58691_43563052 | NC_021163.1    | Ca_kabuli_chr04 | 43563052                | TT                              | CC                | 1945965068               |
| SNP_P3_58692_43563383 | NC_021163.1    | Ca_kabuli_chr04 | 43563383                | TT                              | AA                | 1945965070               |
| SNP_P3_58693_43563848 | NC_021163.1    | Ca_kabuli_chr04 | 43563848                | TT                              | CC                | 1945965072               |
| SNP_P3_58696_43565669 | NC_021163.1    | Ca_kabuli_chr04 | 43565669                | AA                              | GG                | 1945965073               |
| SNP_P3_58697_43566444 | NC_021163.1    | Ca_kabuli_chr04 | 43566444                | CC                              | TT                | 1945965075               |
| SNP_P3_58698_43566918 | NC_021163.1    | Ca_kabuli_chr04 | 43566918                | TT                              | CC                | 1945965077               |
| SNP_P3_58699_43579338 | NC_021163.1    | Ca_kabuli_chr04 | 43579338                | TT                              | AA                | 1945965079               |
| SNP_P3_58700_43579433 | NC_021163.1    | Ca_kabuli_chr04 | 43579433                | TT                              | AA                | 1945965080               |
| SNP_P3_58701_43579481 | NC_021163.1    | Ca_kabuli_chr04 | 43579481                | AA                              | TT                | 1945965082               |
| SNP_P3_58702_43590151 | NC_021163.1    | Ca_kabuli_chr04 | 43590151                | CC                              | AA                | 1945965084               |
| SNP_P3_58703_43605201 | NC_021163.1    | Ca_kabuli_chr04 | 43605201                | TT                              | CC                | 1945965086               |
| SNP_P3_58704_43628252 | NC_021163.1    | Ca_kabuli_chr04 | 43628252                | AA                              | CC                | 1945965088               |
| SNP_P3_58705_43636239 | NC_021163.1    | Ca_kabuli_chr04 | 43636239                | AA                              | GG                | 1945965089               |
| SNP_P3_58706_43636240 | NC_021163.1    | Ca_kabuli_chr04 | 43636240                | GG                              | TT                | 1945965091               |
| SNP_P3_58707_43636686 | NC_021163.1    | Ca_kabuli_chr04 | 43636686                | AA                              | TT                | 1945965093               |
| SNP_P3_58708_43668789 | NC_021163.1    | Ca_kabuli_chr04 | 43668789                | GG                              | CC                | 1945965095               |
| SNP_P3_58709_43668793 | NC_021163.1    | Ca_kabuli_chr04 | 43668793                | TT                              | AA                | 1945965097               |
| SNP_P3_58710_43736577 | NC_021163.1    | Ca_kabuli_chr04 | 43736577                | CC                              | AA                | 1945965098               |
| SNP_P3_58711_43757371 | NC_021163.1    | Ca_kabuli_chr04 | 43757371                | CC                              | GG                | 1945965100               |
| SNP_P3_58712_43757413 | NC_021163.1    | Ca_kabuli_chr04 | 43757413                | AA                              | GG                | 1945965102               |
| SNP_P3_58713_43757476 | NC_021163.1    | Ca_kabuli_chr04 | 43757476                | TT                              | CC                | 1945965104               |
| SNP_P3_58714_43757505 | NC_021163.1    | Ca_kabuli_chr04 | 43757505                | AA                              | GG                | 1945965105               |
| SNP_P3_58715_43819386 | NC_021163.1    | Ca_kabuli_chr04 | 43819386                | AA                              | GG                | 1945965107               |
| SNP_P3_58716_43824699 | NC_021163.1    | Ca_kabuli_chr04 | 43824699                | TT                              | CC                | 1945965109               |
| SNP_P3_58717_43845002 | NC_021163.1    | Ca_kabuli_chr04 | 43845002                | TT                              | GG                | 1945965111               |
| SNP_P3_58718_43849810 | NC_021163.1    | Ca_kabuli_chr04 | 43849810                | CC                              | TT                | 1945965113               |
| SNP_P3_58719_43851717 | NC_021163.1    | Ca_kabuli_chr04 | 43851717                | CC                              | TT                | 1945965114               |
| SNP_P3_58720_43871457 | NC_021163.1    | Ca_kabuli_chr04 | 43871457                | AA                              | CC                | 1945965116               |
| SNP_P3_58721_43953034 | NC_021163.1    | Ca_kabuli_chr04 | 43953034                | AA                              | GG                | 1945965118               |
| SNP_P3_58726_44088689 | NC_021163.1    | Ca_kabuli_chr04 | 44088689                | AA                              | CC                | 1945965120               |
| SNP_P3_58727_44134357 | NC_021163.1    | Ca_kabuli_chr04 | 44134357                | CC                              | AA                | 1945965122               |
| SNP_P3_58729_44134585 | NC_021163.1    | Ca_kabuli_chr04 | 44134585                | AA                              | CC                | 1945965123               |
| SNP_P3_58730_44134606 | NC_021163.1    | Ca_kabuli_chr04 | 44134606                | AA                              | GG                | 1945965125               |

| SNPs IDs              | Chromosome IDs | Chromosomes     | Physical positions (bp) | CDC Frontier (Reference genome) | (Pusa 256 & HPNB) | NCBI SNPdb Accession IDs |
|-----------------------|----------------|-----------------|-------------------------|---------------------------------|-------------------|--------------------------|
| SNP_P3_58731_44134618 | NC_021163.1    | Ca_kabuli_chr04 | 44134618                | CC                              | TT                | 1945965127               |
| SNP_P3_58732_44134635 | NC_021163.1    | Ca_kabuli_chr04 | 44134635                | AA                              | GG                | 1945965129               |
| SNP_P3_58733_44134674 | NC_021163.1    | Ca_kabuli_chr04 | 44134674                | CC                              | TT                | 1945965131               |
| SNP_P3_58734_44134774 | NC_021163.1    | Ca_kabuli_chr04 | 44134774                | AA                              | GG                | 1945965132               |
| SNP_P3_58735_44134784 | NC_021163.1    | Ca_kabuli_chr04 | 44134784                | CC                              | TT                | 1945965134               |
| SNP_P3_58736_44134836 | NC_021163.1    | Ca_kabuli_chr04 | 44134836                | CC                              | TT                | 1945965136               |
| SNP_P3_58737_44135175 | NC_021163.1    | Ca_kabuli_chr04 | 44135175                | TT                              | CC                | 1945965138               |
| SNP_P3_58738_44135203 | NC_021163.1    | Ca_kabuli_chr04 | 44135203                | TT                              | AA                | 1945965139               |
| SNP_P3_58739_44135205 | NC_021163.1    | Ca_kabuli_chr04 | 44135205                | TT                              | CC                | 1945965141               |
| SNP_P3_58740_44135362 | NC_021163.1    | Ca_kabuli_chr04 | 44135362                | TT                              | CC                | 1945965143               |
| SNP_P3_58741_44143980 | NC_021163.1    | Ca_kabuli_chr04 | 44143980                | CC                              | AA                | 1945965145               |
| SNP_P3_58742_44165370 | NC_021163.1    | Ca_kabuli_chr04 | 44165370                | AA                              | GG                | 1945965147               |
| SNP_P3_58743_44185184 | NC_021163.1    | Ca_kabuli_chr04 | 44185184                | TT                              | AA                | 1945965148               |
| SNP_P3_58744_44190824 | NC_021163.1    | Ca_kabuli_chr04 | 44190824                | GG                              | CC                | 1945965150               |
| SNP_P3_58745_44198072 | NC_021163.1    | Ca_kabuli_chr04 | 44198072                | CC                              | TT                | 1945965152               |
| SNP_P3_58746_44207729 | NC_021163.1    | Ca_kabuli_chr04 | 44207729                | TT                              | GG                | 1945965154               |
| SNP_P3_58747_44214239 | NC_021163.1    | Ca_kabuli_chr04 | 44214239                | TT                              | CC                | 1945965156               |
| SNP_P3_58748_44214331 | NC_021163.1    | Ca_kabuli_chr04 | 44214331                | CC                              | TT                | 1945965157               |
| SNP_P3_58749_44214566 | NC_021163.1    | Ca_kabuli_chr04 | 44214566                | TT                              | AA                | 1945965159               |
| SNP_P3_58750_44214584 | NC_021163.1    | Ca_kabuli_chr04 | 44214584                | TT                              | CC                | 1945965161               |
| SNP_P3_58751_44214704 | NC_021163.1    | Ca_kabuli_chr04 | 44214704                | AA                              | GG                | 1945965163               |
| SNP_P3_58752_44214709 | NC_021163.1    | Ca_kabuli_chr04 | 44214709                | TT                              | CC                | 1945965164               |
| SNP_P3_58753_44219092 | NC_021163.1    | Ca_kabuli_chr04 | 44219092                | CC                              | TT                | 1945965166               |
| SNP_P3_58754_44230013 | NC_021163.1    | Ca_kabuli_chr04 | 44230013                | TT                              | AA                | 1945965168               |
| SNP_P3_58755_44240989 | NC_021163.1    | Ca_kabuli_chr04 | 44240989                | TT                              | GG                | 1945965170               |
| SNP_P3_58756_44247689 | NC_021163.1    | Ca_kabuli_chr04 | 44247689                | GG                              | AA                | 1945965172               |
| SNP_P3_58757_44265351 | NC_021163.1    | Ca_kabuli_chr04 | 44265351                | TT                              | GG                | 1945965173               |
| SNP_P3_58758_44267500 | NC_021163.1    | Ca_kabuli_chr04 | 44267500                | GG                              | AA                | 1945965175               |
| SNP_P3_58759_44280596 | NC_021163.1    | Ca_kabuli_chr04 | 44280596                | GG                              | TT                | 1945965177               |
| SNP_P3_58760_44286597 | NC_021163.1    | Ca_kabuli_chr04 | 44286597                | CC                              | TT                | 1945965179               |
| SNP_P3_58761_44292792 | NC_021163.1    | Ca_kabuli_chr04 | 44292792                | GG                              | AA                | 1945965180               |
| SNP_P3_58762_44293924 | NC_021163.1    | Ca_kabuli_chr04 | 44293924                | CC                              | AA                | 1945965182               |
| SNP_P3_58763_44294073 | NC_021163.1    | Ca_kabuli_chr04 | 44294073                | AA                              | GG                | 1945965184               |
| SNP_P3_58764_44294440 | NC_021163.1    | Ca_kabuli_chr04 | 44294440                | TT                              | GG                | 1945965186               |
| SNP_P3_58765_44294514 | NC_021163.1    | Ca_kabuli_chr04 | 44294514                | TT                              | CC                | 1945965188               |
| SNP_P3_58766_44294585 | NC_021163.1    | Ca_kabuli_chr04 | 44294585                | GG                              | TT                | 1945965189               |
| SNP_P3_58767_44294595 | NC_021163.1    | Ca_kabuli_chr04 | 44294595                | TT                              | CC                | 1945965191               |
| SNP_P3_58768_44294621 | NC_021163.1    | Ca_kabuli_chr04 | 44294621                | AA                              | GG                | 1945965193               |
| SNP_P3_58769_44294737 | NC_021163.1    | Ca_kabuli_chr04 | 44294737                | TT                              | CC                | 1945965195               |
| SNP_P3_58771_44295260 | NC_021163.1    | Ca_kabuli_chr04 | 44295260                | CC                              | TT                | 1945965197               |
| SNP_P3_58772_44295280 | NC_021163.1    | Ca_kabuli_chr04 | 44295280                | AA                              | CC                | 1945965198               |
| SNP_P3_58773_44295325 | NC_021163.1    | Ca_kabuli_chr04 | 44295325                | TT                              | CC                | 1945965200               |



| SNPs IDs              | Chromosome IDs | Chromosomes     | Physical positions (bp) | CDC Frontier (Reference genome) | (Pusa 256 & HPNB) | NCBI SNPdb Accession IDs |
|-----------------------|----------------|-----------------|-------------------------|---------------------------------|-------------------|--------------------------|
| SNP_P3_58774_44295378 | NC_021163.1    | Ca_kabuli_chr04 | 44295378                | TT                              | CC                | 1945965202               |
| SNP_P3_58775_44313895 | NC_021163.1    | Ca_kabuli_chr04 | 44313895                | TT                              | CC                | 1945965204               |
| SNP_P3_58777_44335365 | NC_021163.1    | Ca_kabuli_chr04 | 44335365                | CC                              | AA                | 1945965205               |
| SNP_P3_58778_44338833 | NC_021163.1    | Ca_kabuli_chr04 | 44338833                | TT                              | CC                | 1945965207               |
| SNP_P3_58780_44383617 | NC_021163.1    | Ca_kabuli_chr04 | 44383617                | GG                              | AA                | 1945965209               |
| SNP_P3_58781_44405812 | NC_021163.1    | Ca_kabuli_chr04 | 44405812                | CC                              | TT                | 1945965211               |
| SNP_P3_58783_44444484 | NC_021163.1    | Ca_kabuli_chr04 | 44444484                | AA                              | CC                | 1945965213               |
| SNP_P3_58784_44465348 | NC_021163.1    | Ca_kabuli_chr04 | 44465348                | GG                              | TT                | 1945965214               |
| SNP_P3_58785_44465817 | NC_021163.1    | Ca_kabuli_chr04 | 44465817                | AA                              | TT                | 1945965216               |
| SNP_P3_58787_44486521 | NC_021163.1    | Ca_kabuli_chr04 | 44486521                | GG                              | CC                | 1945965218               |
| SNP_P3_58788_44486592 | NC_021163.1    | Ca_kabuli_chr04 | 44486592                | AA                              | GG                | 1945965220               |
| SNP_P3_58789_44487139 | NC_021163.1    | Ca_kabuli_chr04 | 44487139                | TT                              | GG                | 1945965221               |
| SNP_P3_58790_44487143 | NC_021163.1    | Ca_kabuli_chr04 | 44487143                | CC                              | TT                | 1945965223               |
| SNP_P3_58791_44487146 | NC_021163.1    | Ca_kabuli_chr04 | 44487146                | GG                              | CC                | 1945965225               |
| SNP_P3_58792_44487351 | NC_021163.1    | Ca_kabuli_chr04 | 44487351                | AA                              | GG                | 1945965227               |
| SNP_P3_58793_44487358 | NC_021163.1    | Ca_kabuli_chr04 | 44487358                | TT                              | CC                | 1945965229               |
| SNP_P3_58795_44487377 | NC_021163.1    | Ca_kabuli_chr04 | 44487377                | AA                              | GG                | 1945965230               |
| SNP_P3_58796_44488041 | NC_021163.1    | Ca_kabuli_chr04 | 44488041                | TT                              | AA                | 1945965232               |
| SNP_P3_58797_44488110 | NC_021163.1    | Ca_kabuli_chr04 | 44488110                | CC                              | TT                | 1945965234               |
| SNP_P3_58799_44488278 | NC_021163.1    | Ca_kabuli_chr04 | 44488278                | AA                              | GG                | 1945965236               |
| SNP_P3_58800_44488288 | NC_021163.1    | Ca_kabuli_chr04 | 44488288                | CC                              | TT                | 1945965238               |
| SNP_P3_58801_44488292 | NC_021163.1    | Ca_kabuli_chr04 | 44488292                | AA                              | GG                | 1945965239               |
| SNP_P3_58802_44488301 | NC_021163.1    | Ca_kabuli_chr04 | 44488301                | CC                              | TT                | 1945965241               |
| SNP_P3_58803_44489806 | NC_021163.1    | Ca_kabuli_chr04 | 44489806                | TT                              | CC                | 1945965243               |
| SNP_P3_58804_44490288 | NC_021163.1    | Ca_kabuli_chr04 | 44490288                | AA                              | TT                | 1945965245               |
| SNP_P3_58805_44490525 | NC_021163.1    | Ca_kabuli_chr04 | 44490525                | AA                              | GG                | 1945965246               |
| SNP_P3_58806_44490532 | NC_021163.1    | Ca_kabuli_chr04 | 44490532                | CC                              | TT                | 1945965248               |
| SNP_P3_58807_44490547 | NC_021163.1    | Ca_kabuli_chr04 | 44490547                | GG                              | AA                | 1945965250               |
| SNP_P3_58808_44490565 | NC_021163.1    | Ca_kabuli_chr04 | 44490565                | TT                              | CC                | 1945965252               |
| SNP_P3_58809_44490616 | NC_021163.1    | Ca_kabuli_chr04 | 44490616                | CC                              | AA                | 1945965254               |
| SNP_P3_58810_44490626 | NC_021163.1    | Ca_kabuli_chr04 | 44490626                | AA                              | GG                | 1945965255               |
| SNP_P3_58812_44491954 | NC_021163.1    | Ca_kabuli_chr04 | 44491954                | AA                              | GG                | 1945965257               |
| SNP_P3_58813_44494040 | NC_021163.1    | Ca_kabuli_chr04 | 44494040                | TT                              | AA                | 1945965259               |
| SNP_P3_58814_44494041 | NC_021163.1    | Ca_kabuli_chr04 | 44494041                | AA                              | TT                | 1945965261               |
| SNP_P3_58815_44494043 | NC_021163.1    | Ca_kabuli_chr04 | 44494043                | AA                              | TT                | 1945965263               |
| SNP_P3_58816_44494855 | NC_021163.1    | Ca_kabuli_chr04 | 44494855                | AA                              | GG                | 1945965264               |
| SNP_P3_58817_44497375 | NC_021163.1    | Ca_kabuli_chr04 | 44497375                | TT                              | CC                | 1945965266               |
| SNP_P3_58818_44497376 | NC_021163.1    | Ca_kabuli_chr04 | 44497376                | CC                              | TT                | 1945965268               |
| SNP_P3_58819_44498697 | NC_021163.1    | Ca_kabuli_chr04 | 44498697                | TT                              | AA                | 1945965270               |
| SNP_P3_58820_44499860 | NC_021163.1    | Ca_kabuli_chr04 | 44499860                | TT                              | GG                | 1945965272               |
| SNP_P3_58821_44500104 | NC_021163.1    | Ca_kabuli_chr04 | 44500104                | TT                              | CC                | 1945965273               |
| SNP_P3_58822_44500161 | NC_021163.1    | Ca_kabuli_chr04 | 44500161                | AA                              | CC                | 1945965275               |

| SNPs IDs              | Chromosome IDs | Chromosomes     | Physical positions (bp) | CDC Frontier (Reference genome) | (Pusa 256 & HPNB) | NCBI SNPdb Accession IDs |
|-----------------------|----------------|-----------------|-------------------------|---------------------------------|-------------------|--------------------------|
| SNP_P3_58823_44500174 | NC_021163.1    | Ca_kabuli_chr04 | 44500174                | TT                              | GG                | 1945965277               |
| SNP_P3_58824_44500373 | NC_021163.1    | Ca_kabuli_chr04 | 44500373                | AA                              | CC                | 1945965279               |
| SNP_P3_58825_44500383 | NC_021163.1    | Ca_kabuli_chr04 | 44500383                | GG                              | AA                | 1945965280               |
| SNP_P3_58826_44500392 | NC_021163.1    | Ca_kabuli_chr04 | 44500392                | GG                              | AA                | 1945965282               |
| SNP_P3_58827_44500428 | NC_021163.1    | Ca_kabuli_chr04 | 44500428                | AA                              | GG                | 1945965284               |
| SNP_P3_58828_44501589 | NC_021163.1    | Ca_kabuli_chr04 | 44501589                | CC                              | TT                | 1945965286               |
| SNP_P3_58829_44502284 | NC_021163.1    | Ca_kabuli_chr04 | 44502284                | GG                              | AA                | 1945965288               |
| SNP_P3_58830_44502558 | NC_021163.1    | Ca_kabuli_chr04 | 44502558                | GG                              | TT                | 1945965289               |
| SNP_P3_58831_44502562 | NC_021163.1    | Ca_kabuli_chr04 | 44502562                | AA                              | TT                | 1945965291               |
| SNP_P3_58832_44503989 | NC_021163.1    | Ca_kabuli_chr04 | 44503989                | TT                              | CC                | 1945965293               |
| SNP_P3_58833_44504177 | NC_021163.1    | Ca_kabuli_chr04 | 44504177                | TT                              | CC                | 1945965295               |
| SNP_P3_58834_44504565 | NC_021163.1    | Ca_kabuli_chr04 | 44504565                | AA                              | GG                | 1945965297               |
| SNP_P3_58835_44504572 | NC_021163.1    | Ca_kabuli_chr04 | 44504572                | AA                              | GG                | 1945965298               |
| SNP_P3_58836_44505576 | NC_021163.1    | Ca_kabuli_chr04 | 44505576                | TT                              | CC                | 1945965300               |
| SNP_P3_58837_44505582 | NC_021163.1    | Ca_kabuli_chr04 | 44505582                | GG                              | AA                | 1945965302               |
| SNP_P3_58838_44505900 | NC_021163.1    | Ca_kabuli_chr04 | 44505900                | TT                              | CC                | 1945965304               |
| SNP_P3_58839_44505942 | NC_021163.1    | Ca_kabuli_chr04 | 44505942                | CC                              | TT                | 1945965305               |
| SNP_P3_58840_44506477 | NC_021163.1    | Ca_kabuli_chr04 | 44506477                | GG                              | CC                | 1945965307               |
| SNP_P3_58841_44506512 | NC_021163.1    | Ca_kabuli_chr04 | 44506512                | TT                              | AA                | 1945965309               |
| SNP_P3_58842_44507256 | NC_021163.1    | Ca_kabuli_chr04 | 44507256                | AA                              | GG                | 1945965311               |
| SNP_P3_58843_44507258 | NC_021163.1    | Ca_kabuli_chr04 | 44507258                | GG                              | CC                | 1945965313               |
| SNP_P3_58844_44507694 | NC_021163.1    | Ca_kabuli_chr04 | 44507694                | CC                              | TT                | 1945965314               |
| SNP_P3_58846_44507984 | NC_021163.1    | Ca_kabuli_chr04 | 44507984                | TT                              | CC                | 1945965316               |
| SNP_P3_58848_44508504 | NC_021163.1    | Ca_kabuli_chr04 | 44508504                | TT                              | GG                | 1945965318               |
| SNP_P3_58849_44508550 | NC_021163.1    | Ca_kabuli_chr04 | 44508550                | CC                              | AA                | 1945965320               |
| SNP_P3_58851_44509350 | NC_021163.1    | Ca_kabuli_chr04 | 44509350                | CC                              | TT                | 1945965322               |
| SNP_P3_58852_44509387 | NC_021163.1    | Ca_kabuli_chr04 | 44509387                | CC                              | TT                | 1945965323               |
| SNP_P3_58853_44509584 | NC_021163.1    | Ca_kabuli_chr04 | 44509584                | CC                              | AA                | 1945965325               |
| SNP_P3_58854_44509589 | NC_021163.1    | Ca_kabuli_chr04 | 44509589                | TT                              | CC                | 1945965327               |
| SNP_P3_58855_44511295 | NC_021163.1    | Ca_kabuli_chr04 | 44511295                | CC                              | TT                | 1945965329               |
| SNP_P3_58856_44511477 | NC_021163.1    | Ca_kabuli_chr04 | 44511477                | TT                              | CC                | 1945965331               |
| SNP_P3_58857_44512120 | NC_021163.1    | Ca_kabuli_chr04 | 44512120                | GG                              | AA                | 1945965332               |
| SNP_P3_58858_44512130 | NC_021163.1    | Ca_kabuli_chr04 | 44512130                | GG                              | CC                | 1945965334               |
| SNP_P3_58859_44512145 | NC_021163.1    | Ca_kabuli_chr04 | 44512145                | AA                              | GG                | 1945965336               |
| SNP_P3_58860_44512150 | NC_021163.1    | Ca_kabuli_chr04 | 44512150                | CC                              | AA                | 1945965338               |
| SNP_P3_58861_44512391 | NC_021163.1    | Ca_kabuli_chr04 | 44512391                | AA                              | GG                | 1945965339               |
| SNP_P3_58862_44512559 | NC_021163.1    | Ca_kabuli_chr04 | 44512559                | TT                              | CC                | 1945965341               |
| SNP_P3_58863_44512574 | NC_021163.1    | Ca_kabuli_chr04 | 44512574                | GG                              | AA                | 1945965343               |
| SNP_P3_58864_44512762 | NC_021163.1    | Ca_kabuli_chr04 | 44512762                | TT                              | CC                | 1945965345               |
| SNP_P3_58865_44512788 | NC_021163.1    | Ca_kabuli_chr04 | 44512788                | AA                              | TT                | 1945965347               |
| SNP_P3_58866_44512790 | NC_021163.1    | Ca_kabuli_chr04 | 44512790                | AA                              | GG                | 1945965348               |
| SNP_P3_58867_44513092 | NC_021163.1    | Ca_kabuli_chr04 | 44513092                | GG                              | CC                | 1945965350               |

| SNPs IDs              | Chromosome IDs | Chromosomes     | Physical positions (bp) | CDC Frontier (Reference genome) | (Pusa 256 & HPNB) | NCBI SNPdb Accession IDs |
|-----------------------|----------------|-----------------|-------------------------|---------------------------------|-------------------|--------------------------|
| SNP_P3_58868_44513113 | NC_021163.1    | Ca_kabuli_chr04 | 44513113                | GG                              | TT                | 1945965352               |
| SNP_P3_58869_44513116 | NC_021163.1    | Ca_kabuli_chr04 | 44513116                | TT                              | CC                | 1945965354               |
| SNP_P3_58870_44513125 | NC_021163.1    | Ca_kabuli_chr04 | 44513125                | CC                              | AA                | 1945965355               |
| SNP_P3_58871_44513423 | NC_021163.1    | Ca_kabuli_chr04 | 44513423                | CC                              | TT                | 1945965357               |
| SNP_P3_58872_44514130 | NC_021163.1    | Ca_kabuli_chr04 | 44514130                | TT                              | GG                | 1945965359               |
| SNP_P3_58873_44514311 | NC_021163.1    | Ca_kabuli_chr04 | 44514311                | CC                              | TT                | 1945965361               |
| SNP_P3_58874_44514344 | NC_021163.1    | Ca_kabuli_chr04 | 44514344                | TT                              | AA                | 1945965363               |
| SNP_P3_58875_44514869 | NC_021163.1    | Ca_kabuli_chr04 | 44514869                | GG                              | AA                | 1945965364               |
| SNP_P3_58876_44514884 | NC_021163.1    | Ca_kabuli_chr04 | 44514884                | GG                              | AA                | 1945965366               |
| SNP_P3_58877_44515060 | NC_021163.1    | Ca_kabuli_chr04 | 44515060                | TT                              | GG                | 1945965368               |
| SNP_P3_58878_44515063 | NC_021163.1    | Ca_kabuli_chr04 | 44515063                | TT                              | CC                | 1945965370               |
| SNP_P3_58879_44515803 | NC_021163.1    | Ca_kabuli_chr04 | 44515803                | GG                              | AA                | 1945965372               |
| SNP_P3_58880_44515820 | NC_021163.1    | Ca_kabuli_chr04 | 44515820                | TT                              | CC                | 1945965373               |
| SNP_P3_58881_44515862 | NC_021163.1    | Ca_kabuli_chr04 | 44515862                | AA                              | GG                | 1945965375               |
| SNP_P3_58882_44516185 | NC_021163.1    | Ca_kabuli_chr04 | 44516185                | TT                              | CC                | 1945965377               |
| SNP_P3_58883_44516220 | NC_021163.1    | Ca_kabuli_chr04 | 44516220                | CC                              | AA                | 1945965379               |
| SNP_P3_58884_44516273 | NC_021163.1    | Ca_kabuli_chr04 | 44516273                | AA                              | GG                | 1945965380               |
| SNP_P3_58885_44517729 | NC_021163.1    | Ca_kabuli_chr04 | 44517729                | AA                              | GG                | 1945965382               |
| SNP_P3_58886_44517917 | NC_021163.1    | Ca_kabuli_chr04 | 44517917                | TT                              | GG                | 1945965384               |
| SNP_P3_58887_44520453 | NC_021163.1    | Ca_kabuli_chr04 | 44520453                | AA                              | GG                | 1945965386               |
| SNP_P3_58888_44520501 | NC_021163.1    | Ca_kabuli_chr04 | 44520501                | TT                              | CC                | 1945965388               |
| SNP_P3_58889_44520521 | NC_021163.1    | Ca_kabuli_chr04 | 44520521                | GG                              | AA                | 1945965389               |
| SNP_P3_58890_44520545 | NC_021163.1    | Ca_kabuli_chr04 | 44520545                | GG                              | AA                | 1945965391               |
| SNP_P3_58892_44520962 | NC_021163.1    | Ca_kabuli_chr04 | 44520962                | TT                              | GG                | 1945965393               |
| SNP_P3_58895_44521091 | NC_021163.1    | Ca_kabuli_chr04 | 44521091                | CC                              | GG                | 1945965395               |
| SNP_P3_58896_44521243 | NC_021163.1    | Ca_kabuli_chr04 | 44521243                | GG                              | AA                | 1945965396               |
| SNP_P3_58897_44521307 | NC_021163.1    | Ca_kabuli_chr04 | 44521307                | AA                              | GG                | 1945965398               |
| SNP_P3_58898_44521552 | NC_021163.1    | Ca_kabuli_chr04 | 44521552                | TT                              | GG                | 1945965400               |
| SNP_P3_58900_44522642 | NC_021163.1    | Ca_kabuli_chr04 | 44522642                | TT                              | CC                | 1945965402               |
| SNP_P3_58902_44523960 | NC_021163.1    | Ca_kabuli_chr04 | 44523960                | AA                              | GG                | 1945965404               |
| SNP_P3_58903_44523978 | NC_021163.1    | Ca_kabuli_chr04 | 44523978                | CC                              | AA                | 1945965405               |
| SNP_P3_58904_44523998 | NC_021163.1    | Ca_kabuli_chr04 | 44523998                | AA                              | GG                | 1945965407               |
| SNP_P3_58905_44524570 | NC_021163.1    | Ca_kabuli_chr04 | 44524570                | TT                              | AA                | 1945965409               |
| SNP_P3_58906_44524954 | NC_021163.1    | Ca_kabuli_chr04 | 44524954                | TT                              | CC                | 1945965411               |
| SNP_P3_58909_44529321 | NC_021163.1    | Ca_kabuli_chr04 | 44529321                | TT                              | GG                | 1945965412               |
| SNP_P3_58910_44529441 | NC_021163.1    | Ca_kabuli_chr04 | 44529441                | CC                              | TT                | 1945965414               |
| SNP_P3_58911_44529607 | NC_021163.1    | Ca_kabuli_chr04 | 44529607                | GG                              | AA                | 1945965416               |
| SNP_P3_58913_44531273 | NC_021163.1    | Ca_kabuli_chr04 | 44531273                | GG                              | TT                | 1945965418               |
| SNP_P3_58914_44531764 | NC_021163.1    | Ca_kabuli_chr04 | 44531764                | AA                              | CC                | 1945965420               |
| SNP_P3_58915_44531786 | NC_021163.1    | Ca_kabuli_chr04 | 44531786                | CC                              | TT                | 1945965421               |
| SNP_P3_58916_44531787 | NC_021163.1    | Ca_kabuli_chr04 | 44531787                | AA                              | TT                | 1945965423               |
| SNP_P3_58917_44531788 | NC_021163.1    | Ca_kabuli_chr04 | 44531788                | AA                              | TT                | 1945965425               |

| SNPs IDs              | Chromosome IDs | Chromosomes     | Physical positions (bp) | CDC Frontier (Reference genome) | (Pusa 256 & HPNB) | NCBI SNPdb Accession IDs |
|-----------------------|----------------|-----------------|-------------------------|---------------------------------|-------------------|--------------------------|
| SNP_P3_58918_44531789 | NC_021163.1    | Ca_kabuli_chr04 | 44531789                | AA                              | TT                | 1945965427               |
| SNP_P3_58919_44531790 | NC_021163.1    | Ca_kabuli_chr04 | 44531790                | AA                              | GG                | 1945965429               |
| SNP_P3_58920_44531802 | NC_021163.1    | Ca_kabuli_chr04 | 44531802                | GG                              | AA                | 1945965430               |
| SNP_P3_58922_44532061 | NC_021163.1    | Ca_kabuli_chr04 | 44532061                | AA                              | CC                | 1945965432               |
| SNP_P3_58924_44532666 | NC_021163.1    | Ca_kabuli_chr04 | 44532666                | CC                              | TT                | 1945965434               |
| SNP_P3_58925_44532715 | NC_021163.1    | Ca_kabuli_chr04 | 44532715                | AA                              | CC                | 1945965436               |
| SNP_P3_58926_44533027 | NC_021163.1    | Ca_kabuli_chr04 | 44533027                | AA                              | TT                | 1945965437               |
| SNP_P3_58927_44533040 | NC_021163.1    | Ca_kabuli_chr04 | 44533040                | GG                              | AA                | 1945965439               |
| SNP_P3_58928_44533055 | NC_021163.1    | Ca_kabuli_chr04 | 44533055                | CC                              | TT                | 1945965441               |
| SNP_P3_58929_44533088 | NC_021163.1    | Ca_kabuli_chr04 | 44533088                | TT                              | AA                | 1945965443               |
| SNP_P3_58930_44533092 | NC_021163.1    | Ca_kabuli_chr04 | 44533092                | TT                              | AA                | 1945965445               |
| SNP_P3_58932_44534888 | NC_021163.1    | Ca_kabuli_chr04 | 44534888                | GG                              | AA                | 1945965446               |
| SNP_P3_58933_44538938 | NC_021163.1    | Ca_kabuli_chr04 | 44538938                | CC                              | GG                | 1945965448               |
| SNP_P3_58934_44539395 | NC_021163.1    | Ca_kabuli_chr04 | 44539395                | AA                              | TT                | 1945965450               |
| SNP_P3_58935_44540117 | NC_021163.1    | Ca_kabuli_chr04 | 44540117                | AA                              | TT                | 1945965452               |
| SNP_P3_58937_44540432 | NC_021163.1    | Ca_kabuli_chr04 | 44540432                | CC                              | TT                | 1945965454               |
| SNP_P3_58938_44540438 | NC_021163.1    | Ca_kabuli_chr04 | 44540438                | AA                              | GG                | 1945965455               |
| SNP_P3_58939_44540440 | NC_021163.1    | Ca_kabuli_chr04 | 44540440                | CC                              | TT                | 1945965457               |
| SNP_P3_58940_44540442 | NC_021163.1    | Ca_kabuli_chr04 | 44540442                | GG                              | AA                | 1945965459               |
| SNP_P3_58941_44540573 | NC_021163.1    | Ca_kabuli_chr04 | 44540573                | GG                              | TT                | 1945965461               |
| SNP_P3_58942_44540593 | NC_021163.1    | Ca_kabuli_chr04 | 44540593                | CC                              | TT                | 1945965462               |
| SNP_P3_58945_44540656 | NC_021163.1    | Ca_kabuli_chr04 | 44540656                | AA                              | TT                | 1945965464               |
| SNP_P3_58946_44540755 | NC_021163.1    | Ca_kabuli_chr04 | 44540755                | AA                              | TT                | 1945965466               |
| SNP_P3_58947_44540757 | NC_021163.1    | Ca_kabuli_chr04 | 44540757                | TT                              | GG                | 1945965468               |
| SNP_P3_58948_44540772 | NC_021163.1    | Ca_kabuli_chr04 | 44540772                | CC                              | TT                | 1945965470               |
| SNP_P3_58949_44540779 | NC_021163.1    | Ca_kabuli_chr04 | 44540779                | GG                              | AA                | 1945965471               |
| SNP_P3_58951_44540943 | NC_021163.1    | Ca_kabuli_chr04 | 44540943                | GG                              | AA                | 1945965473               |
| SNP_P3_58952_44540959 | NC_021163.1    | Ca_kabuli_chr04 | 44540959                | CC                              | TT                | 1945965475               |
| SNP_P3_58953_44540963 | NC_021163.1    | Ca_kabuli_chr04 | 44540963                | AA                              | GG                | 1945965477               |
| SNP_P3_58954_44541009 | NC_021163.1    | Ca_kabuli_chr04 | 44541009                | AA                              | GG                | 1945965479               |
| SNP_P3_58955_44541057 | NC_021163.1    | Ca_kabuli_chr04 | 44541057                | TT                              | CC                | 1945965480               |
| SNP_P3_58956_44541071 | NC_021163.1    | Ca_kabuli_chr04 | 44541071                | AA                              | GG                | 1945965482               |
| SNP_P3_58957_44542339 | NC_021163.1    | Ca_kabuli_chr04 | 44542339                | GG                              | AA                | 1945965484               |
| SNP_P3_58958_44542357 | NC_021163.1    | Ca_kabuli_chr04 | 44542357                | GG                              | TT                | 1945965486               |
| SNP_P3_58959_44542496 | NC_021163.1    | Ca_kabuli_chr04 | 44542496                | AA                              | TT                | 1945965487               |
| SNP_P3_58960_44542808 | NC_021163.1    | Ca_kabuli_chr04 | 44542808                | GG                              | AA                | 1945965489               |
| SNP_P3_58961_44542859 | NC_021163.1    | Ca_kabuli_chr04 | 44542859                | CC                              | TT                | 1945965491               |
| SNP_P3_58962_44543057 | NC_021163.1    | Ca_kabuli_chr04 | 44543057                | CC                              | AA                | 1945965493               |
| SNP_P3_58963_44543119 | NC_021163.1    | Ca_kabuli_chr04 | 44543119                | TT                              | CC                | 1945965495               |
| SNP_P3_58964_44543434 | NC_021163.1    | Ca_kabuli_chr04 | 44543434                | TT                              | CC                | 1945965496               |
| SNP_P3_58965_44543487 | NC_021163.1    | Ca_kabuli_chr04 | 44543487                | GG                              | CC                | 1945965498               |
| SNP_P3_58966_44543492 | NC_021163.1    | Ca_kabuli_chr04 | 44543492                | GG                              | CC                | 1945965500               |

| SNPs IDs              | Chromosome IDs | Chromosomes     | Physical positions (bp) | CDC Frontier (Reference genome) | (Pusa 256 & HPNB) | NCBI SNPdb Accession IDs |
|-----------------------|----------------|-----------------|-------------------------|---------------------------------|-------------------|--------------------------|
| SNP_P3_58967_44543510 | NC_021163.1    | Ca_kabuli_chr04 | 44543510                | AA                              | GG                | 1945965502               |
| SNP_P3_58968_44543595 | NC_021163.1    | Ca_kabuli_chr04 | 44543595                | TT                              | AA                | 1945965503               |
| SNP_P3_58970_44543658 | NC_021163.1    | Ca_kabuli_chr04 | 44543658                | CC                              | TT                | 1945965505               |
| SNP_P3_58971_44543707 | NC_021163.1    | Ca_kabuli_chr04 | 44543707                | AA                              | CC                | 1945965507               |
| SNP_P3_58972_44543721 | NC_021163.1    | Ca_kabuli_chr04 | 44543721                | GG                              | AA                | 1945965509               |
| SNP_P3_58973_44543821 | NC_021163.1    | Ca_kabuli_chr04 | 44543821                | CC                              | TT                | 1945965511               |
| SNP_P3_58974_44543851 | NC_021163.1    | Ca_kabuli_chr04 | 44543851                | CC                              | AA                | 1945965512               |
| SNP_P3_58975_44543858 | NC_021163.1    | Ca_kabuli_chr04 | 44543858                | AA                              | CC                | 1945965514               |
| SNP_P3_58976_44543889 | NC_021163.1    | Ca_kabuli_chr04 | 44543889                | TT                              | CC                | 1945965516               |
| SNP_P3_58977_44543890 | NC_021163.1    | Ca_kabuli_chr04 | 44543890                | AA                              | GG                | 1945965518               |
| SNP_P3_58978_44543924 | NC_021163.1    | Ca_kabuli_chr04 | 44543924                | GG                              | AA                | 1945965520               |
| SNP_P3_58979_44543998 | NC_021163.1    | Ca_kabuli_chr04 | 44543998                | GG                              | AA                | 1945965521               |
| SNP_P3_58980_44543999 | NC_021163.1    | Ca_kabuli_chr04 | 44543999                | GG                              | AA                | 1945965523               |
| SNP_P3_58981_44544052 | NC_021163.1    | Ca_kabuli_chr04 | 44544052                | GG                              | AA                | 1945965525               |
| SNP_P3_58982_44544297 | NC_021163.1    | Ca_kabuli_chr04 | 44544297                | AA                              | GG                | 1945965527               |
| SNP_P3_58983_44544442 | NC_021163.1    | Ca_kabuli_chr04 | 44544442                | TT                              | AA                | 1945965528               |
| SNP_P3_58984_44544469 | NC_021163.1    | Ca_kabuli_chr04 | 44544469                | GG                              | TT                | 1945965530               |
| SNP_P3_58985_44544697 | NC_021163.1    | Ca_kabuli_chr04 | 44544697                | AA                              | GG                | 1945965532               |
| SNP_P3_58986_44544853 | NC_021163.1    | Ca_kabuli_chr04 | 44544853                | TT                              | CC                | 1945965534               |
| SNP_P3_58987_44545065 | NC_021163.1    | Ca_kabuli_chr04 | 44545065                | TT                              | AA                | 1945965536               |
| SNP_P3_58988_44545089 | NC_021163.1    | Ca_kabuli_chr04 | 44545089                | TT                              | CC                | 1945965537               |
| SNP_P3_58989_44545133 | NC_021163.1    | Ca_kabuli_chr04 | 44545133                | GG                              | AA                | 1945965539               |
| SNP_P3_58991_44545268 | NC_021163.1    | Ca_kabuli_chr04 | 44545268                | TT                              | GG                | 1945965541               |
| SNP_P3_58992_44545746 | NC_021163.1    | Ca_kabuli_chr04 | 44545746                | AA                              | GG                | 1945965543               |
| SNP_P3_58993_44547843 | NC_021163.1    | Ca_kabuli_chr04 | 44547843                | TT                              | CC                | 1945965545               |
| SNP_P3_58994_44550720 | NC_021163.1    | Ca_kabuli_chr04 | 44550720                | AA                              | GG                | 1945965546               |
| SNP_P3_58995_44550985 | NC_021163.1    | Ca_kabuli_chr04 | 44550985                | GG                              | TT                | 1945965548               |
| SNP_P3_58996_44551473 | NC_021163.1    | Ca_kabuli_chr04 | 44551473                | CC                              | AA                | 1945965550               |
| SNP_P3_58997_44551551 | NC_021163.1    | Ca_kabuli_chr04 | 44551551                | AA                              | GG                | 1945965552               |
| SNP_P3_58998_44551754 | NC_021163.1    | Ca_kabuli_chr04 | 44551754                | GG                              | AA                | 1945965553               |
| SNP_P3_59000_44553185 | NC_021163.1    | Ca_kabuli_chr04 | 44553185                | AA                              | GG                | 1945965555               |
| SNP_P3_59001_44553222 | NC_021163.1    | Ca_kabuli_chr04 | 44553222                | CC                              | AA                | 1945965557               |
| SNP_P3_59002_44553327 | NC_021163.1    | Ca_kabuli_chr04 | 44553327                | GG                              | TT                | 1945965559               |
| SNP_P3_59003_44554927 | NC_021163.1    | Ca_kabuli_chr04 | 44554927                | GG                              | CC                | 1945965561               |
| SNP_P3_59004_44555012 | NC_021163.1    | Ca_kabuli_chr04 | 44555012                | CC                              | TT                | 1945965562               |
| SNP_P3_59005_44555014 | NC_021163.1    | Ca_kabuli_chr04 | 44555014                | GG                              | AA                | 1945965564               |
| SNP_P3_59007_44555532 | NC_021163.1    | Ca_kabuli_chr04 | 44555532                | TT                              | CC                | 1945965566               |
| SNP_P3_59008_44555534 | NC_021163.1    | Ca_kabuli_chr04 | 44555534                | AA                              | GG                | 1945965568               |
| SNP_P3_59009_44555544 | NC_021163.1    | Ca_kabuli_chr04 | 44555544                | GG                              | AA                | 1945965570               |
| SNP_P3_59010_44555744 | NC_021163.1    | Ca_kabuli_chr04 | 44555744                | TT                              | GG                | 1945965571               |
| SNP_P3_59011_44555749 | NC_021163.1    | Ca_kabuli_chr04 | 44555749                | AA                              | GG                | 1945965573               |
| SNP_P3_59012_44555778 | NC_021163.1    | Ca_kabuli_chr04 | 44555778                | AA                              | TT                | 1945965575               |

| SNPs IDs              | Chromosome IDs | Chromosomes     | Physical positions (bp) | CDC Frontier (Reference genome) | (Pusa 256 & HPNB) | NCBI SNPdb Accession IDs |
|-----------------------|----------------|-----------------|-------------------------|---------------------------------|-------------------|--------------------------|
| SNP_P3_59013_44555780 | NC_021163.1    | Ca_kabuli_chr04 | 44555780                | TT                              | GG                | 1945965577               |
| SNP_P3_59014_44555788 | NC_021163.1    | Ca_kabuli_chr04 | 44555788                | CC                              | TT                | 1945965578               |
| SNP_P3_59015_44556590 | NC_021163.1    | Ca_kabuli_chr04 | 44556590                | AA                              | TT                | 1945965580               |
| SNP_P3_59016_44556691 | NC_021163.1    | Ca_kabuli_chr04 | 44556691                | AA                              | GG                | 1945965582               |
| SNP_P3_59018_44558929 | NC_021163.1    | Ca_kabuli_chr04 | 44558929                | TT                              | GG                | 1945965584               |
| SNP_P3_59019_44559160 | NC_021163.1    | Ca_kabuli_chr04 | 44559160                | CC                              | AA                | 1945965586               |
| SNP_P3_59020_44559161 | NC_021163.1    | Ca_kabuli_chr04 | 44559161                | AA                              | TT                | 1945965587               |
| SNP_P3_59021_44559167 | NC_021163.1    | Ca_kabuli_chr04 | 44559167                | TT                              | AA                | 1945965589               |
| SNP_P3_59022_44559172 | NC_021163.1    | Ca_kabuli_chr04 | 44559172                | CC                              | GG                | 1945965591               |
| SNP_P3_59023_44559193 | NC_021163.1    | Ca_kabuli_chr04 | 44559193                | GG                              | CC                | 1945965593               |
| SNP_P3_59024_44559695 | NC_021163.1    | Ca_kabuli_chr04 | 44559695                | TT                              | GG                | 1945965595               |
| SNP_P3_59025_44559697 | NC_021163.1    | Ca_kabuli_chr04 | 44559697                | CC                              | TT                | 1945965596               |
| SNP_P3_59027_44559987 | NC_021163.1    | Ca_kabuli_chr04 | 44559987                | GG                              | TT                | 1945965598               |
| SNP_P3_59028_44559993 | NC_021163.1    | Ca_kabuli_chr04 | 44559993                | TT                              | AA                | 1945965600               |
| SNP_P3_59029_44560141 | NC_021163.1    | Ca_kabuli_chr04 | 44560141                | CC                              | TT                | 1945965602               |
| SNP_P3_59030_44560410 | NC_021163.1    | Ca_kabuli_chr04 | 44560410                | CC                              | TT                | 1945965603               |
| SNP_P3_59031_44560566 | NC_021163.1    | Ca_kabuli_chr04 | 44560566                | CC                              | TT                | 1945965605               |
| SNP_P3_59032_44560583 | NC_021163.1    | Ca_kabuli_chr04 | 44560583                | GG                              | CC                | 1945965607               |
| SNP_P3_59033_44560620 | NC_021163.1    | Ca_kabuli_chr04 | 44560620                | CC                              | TT                | 1945965609               |
| SNP_P3_59034_44561046 | NC_021163.1    | Ca_kabuli_chr04 | 44561046                | CC                              | TT                | 1945965611               |
| SNP_P3_59036_44561295 | NC_021163.1    | Ca_kabuli_chr04 | 44561295                | AA                              | GG                | 1945965612               |
| SNP_P3_59037_44561296 | NC_021163.1    | Ca_kabuli_chr04 | 44561296                | TT                              | AA                | 1945965614               |
| SNP_P3_59038_44561347 | NC_021163.1    | Ca_kabuli_chr04 | 44561347                | TT                              | AA                | 1945965616               |
| SNP_P3_59039_44561372 | NC_021163.1    | Ca_kabuli_chr04 | 44561372                | TT                              | AA                | 1945965618               |
| SNP_P3_59040_44563477 | NC_021163.1    | Ca_kabuli_chr04 | 44563477                | GG                              | AA                | 1945965620               |
| SNP_P3_59041_44563479 | NC_021163.1    | Ca_kabuli_chr04 | 44563479                | CC                              | AA                | 1945965621               |
| SNP_P3_59043_44563558 | NC_021163.1    | Ca_kabuli_chr04 | 44563558                | TT                              | GG                | 1945965623               |
| SNP_P3_59044_44564745 | NC_021163.1    | Ca_kabuli_chr04 | 44564745                | TT                              | CC                | 1945965625               |
| SNP_P3_59045_44565598 | NC_021163.1    | Ca_kabuli_chr04 | 44565598                | TT                              | CC                | 1945965627               |
| SNP_P3_59046_44565601 | NC_021163.1    | Ca_kabuli_chr04 | 44565601                | CC                              | AA                | 1945965628               |
| SNP_P3_59047_44565605 | NC_021163.1    | Ca_kabuli_chr04 | 44565605                | GG                              | AA                | 1945965630               |
| SNP_P3_59048_44565719 | NC_021163.1    | Ca_kabuli_chr04 | 44565719                | CC                              | TT                | 1945965632               |
| SNP_P3_59049_44565749 | NC_021163.1    | Ca_kabuli_chr04 | 44565749                | TT                              | CC                | 1945965634               |
| SNP_P3_59050_44565786 | NC_021163.1    | Ca_kabuli_chr04 | 44565786                | TT                              | CC                | 1945965636               |
| SNP_P3_59051_44565797 | NC_021163.1    | Ca_kabuli_chr04 | 44565797                | TT                              | CC                | 1945965637               |
| SNP_P3_59052_44566415 | NC_021163.1    | Ca_kabuli_chr04 | 44566415                | TT                              | AA                | 1945965639               |
| SNP_P3_59053_44566430 | NC_021163.1    | Ca_kabuli_chr04 | 44566430                | GG                              | TT                | 1945965641               |
| SNP_P3_59054_44566441 | NC_021163.1    | Ca_kabuli_chr04 | 44566441                | GG                              | CC                | 1945965643               |
| SNP_P3_59055_44566642 | NC_021163.1    | Ca_kabuli_chr04 | 44566642                | CC                              | TT                | 1945965644               |
| SNP_P3_59056_44566967 | NC_021163.1    | Ca_kabuli_chr04 | 44566967                | TT                              | AA                | 1945965646               |
| SNP_P3_59057_44566968 | NC_021163.1    | Ca_kabuli_chr04 | 44566968                | AA                              | TT                | 1945965648               |
| SNP_P3_59058_44567129 | NC_021163.1    | Ca_kabuli_chr04 | 44567129                | TT                              | AA                | 1945965650               |

| SNPs IDs              | Chromosome IDs | Chromosomes     | Physical positions (bp) | CDC Frontier (Reference genome) | (Pusa 256 & HPNB) | NCBI SNPdb Accession IDs |
|-----------------------|----------------|-----------------|-------------------------|---------------------------------|-------------------|--------------------------|
| SNP_P3_59059_44567178 | NC_021163.1    | Ca_kabuli_chr04 | 44567178                | CC                              | TT                | 1945965652               |
| SNP_P3_59060_44567229 | NC_021163.1    | Ca_kabuli_chr04 | 44567229                | TT                              | AA                | 1945965653               |
| SNP_P3_59061_44567232 | NC_021163.1    | Ca_kabuli_chr04 | 44567232                | TT                              | CC                | 1945965655               |
| SNP_P3_59064_44569235 | NC_021163.1    | Ca_kabuli_chr04 | 44569235                | AA                              | GG                | 1945965657               |
| SNP_P3_59065_44569427 | NC_021163.1    | Ca_kabuli_chr04 | 44569427                | CC                              | TT                | 1945965659               |
| SNP_P3_59066_44570528 | NC_021163.1    | Ca_kabuli_chr04 | 44570528                | AA                              | TT                | 1945965660               |
| SNP_P3_59067_44570539 | NC_021163.1    | Ca_kabuli_chr04 | 44570539                | AA                              | CC                | 1945965662               |
| SNP_P3_59068_44570555 | NC_021163.1    | Ca_kabuli_chr04 | 44570555                | GG                              | TT                | 1945965664               |
| SNP_P3_59069_44571941 | NC_021163.1    | Ca_kabuli_chr04 | 44571941                | AA                              | CC                | 1945965666               |
| SNP_P3_59070_44571988 | NC_021163.1    | Ca_kabuli_chr04 | 44571988                | CC                              | AA                | 1945965668               |
| SNP_P3_59071_44572684 | NC_021163.1    | Ca_kabuli_chr04 | 44572684                | GG                              | AA                | 1945965669               |
| SNP_P3_59072_44577184 | NC_021163.1    | Ca_kabuli_chr04 | 44577184                | CC                              | GG                | 1945965671               |
| SNP_P3_59073_44578259 | NC_021163.1    | Ca_kabuli_chr04 | 44578259                | TT                              | CC                | 1945965673               |
| SNP_P3_59075_44578944 | NC_021163.1    | Ca_kabuli_chr04 | 44578944                | TT                              | AA                | 1945965675               |
| SNP_P3_59077_44579013 | NC_021163.1    | Ca_kabuli_chr04 | 44579013                | CC                              | TT                | 1945965677               |
| SNP_P3_59078_44579429 | NC_021163.1    | Ca_kabuli_chr04 | 44579429                | AA                              | GG                | 1945965678               |
| SNP_P3_59079_44579447 | NC_021163.1    | Ca_kabuli_chr04 | 44579447                | CC                              | TT                | 1945965680               |
| SNP_P3_59080_44579623 | NC_021163.1    | Ca_kabuli_chr04 | 44579623                | CC                              | TT                | 1945965682               |
| SNP_P3_59081_44580911 | NC_021163.1    | Ca_kabuli_chr04 | 44580911                | AA                              | CC                | 1945965684               |
| SNP_P3_59082_44580969 | NC_021163.1    | Ca_kabuli_chr04 | 44580969                | TT                              | CC                | 1945965685               |
| SNP_P3_59083_44580989 | NC_021163.1    | Ca_kabuli_chr04 | 44580989                | AA                              | TT                | 1945965687               |
| SNP_P3_59084_44581176 | NC_021163.1    | Ca_kabuli_chr04 | 44581176                | GG                              | AA                | 1945965689               |
| SNP_P3_59085_44581202 | NC_021163.1    | Ca_kabuli_chr04 | 44581202                | GG                              | CC                | 1945965691               |
| SNP_P3_59087_44581541 | NC_021163.1    | Ca_kabuli_chr04 | 44581541                | TT                              | AA                | 1945965693               |
| SNP_P3_59089_44581925 | NC_021163.1    | Ca_kabuli_chr04 | 44581925                | TT                              | GG                | 1945965694               |
| SNP_P3_59090_44583448 | NC_021163.1    | Ca_kabuli_chr04 | 44583448                | GG                              | CC                | 1945965696               |
| SNP_P3_59091_44583741 | NC_021163.1    | Ca_kabuli_chr04 | 44583741                | GG                              | AA                | 1945965698               |
| SNP_P3_59092_44583743 | NC_021163.1    | Ca_kabuli_chr04 | 44583743                | GG                              | TT                | 1945965700               |
| SNP_P3_59093_44583755 | NC_021163.1    | Ca_kabuli_chr04 | 44583755                | AA                              | GG                | 1945965702               |
| SNP_P3_59094_44583760 | NC_021163.1    | Ca_kabuli_chr04 | 44583760                | TT                              | CC                | 1945965703               |
| SNP_P3_59095_44583762 | NC_021163.1    | Ca_kabuli_chr04 | 44583762                | TT                              | CC                | 1945965705               |
| SNP_P3_59096_44583763 | NC_021163.1    | Ca_kabuli_chr04 | 44583763                | CC                              | TT                | 1945965707               |
| SNP_P3_59097_44583811 | NC_021163.1    | Ca_kabuli_chr04 | 44583811                | GG                              | AA                | 1945965709               |
| SNP_P3_59098_44584465 | NC_021163.1    | Ca_kabuli_chr04 | 44584465                | GG                              | AA                | 1945965710               |
| SNP_P3_59099_44584620 | NC_021163.1    | Ca_kabuli_chr04 | 44584620                | TT                              | GG                | 1945965712               |
| SNP_P3_59100_44584657 | NC_021163.1    | Ca_kabuli_chr04 | 44584657                | TT                              | CC                | 1945965714               |
| SNP_P3_59101_44584677 | NC_021163.1    | Ca_kabuli_chr04 | 44584677                | AA                              | GG                | 1945965716               |
| SNP_P3_59105_44588099 | NC_021163.1    | Ca_kabuli_chr04 | 44588099                | AA                              | CC                | 1945965718               |
| SNP_P3_59106_44588168 | NC_021163.1    | Ca_kabuli_chr04 | 44588168                | CC                              | TT                | 1945965719               |
| SNP_P3_59107_44588185 | NC_021163.1    | Ca_kabuli_chr04 | 44588185                | TT                              | CC                | 1945965721               |
| SNP_P3_59108_44588199 | NC_021163.1    | Ca_kabuli_chr04 | 44588199                | TT                              | CC                | 1945965723               |
| SNP_P3_59109_44589715 | NC_021163.1    | Ca_kabuli_chr04 | 44589715                | GG                              | AA                | 1945965725               |

| SNPs IDs              | Chromosome IDs | Chromosomes     | Physical positions (bp) | CDC Frontier (Reference genome) | (Pusa 256 & HPNB) | NCBI SNPdb Accession IDs |
|-----------------------|----------------|-----------------|-------------------------|---------------------------------|-------------------|--------------------------|
| SNP_P3_59110_44591019 | NC_021163.1    | Ca_kabuli_chr04 | 44591019                | TT                              | CC                | 1945965726               |
| SNP_P3_59111_44591405 | NC_021163.1    | Ca_kabuli_chr04 | 44591405                | GG                              | TT                | 1945965728               |
| SNP_P3_59112_44593445 | NC_021163.1    | Ca_kabuli_chr04 | 44593445                | CC                              | TT                | 1945965730               |
| SNP_P3_59113_44594472 | NC_021163.1    | Ca_kabuli_chr04 | 44594472                | TT                              | GG                | 1945965732               |
| SNP_P3_59114_44599132 | NC_021163.1    | Ca_kabuli_chr04 | 44599132                | TT                              | CC                | 1945965734               |
| SNP_P3_59115_44601078 | NC_021163.1    | Ca_kabuli_chr04 | 44601078                | GG                              | TT                | 1945965735               |
| SNP_P3_59116_44601334 | NC_021163.1    | Ca_kabuli_chr04 | 44601334                | TT                              | CC                | 1945965737               |
| SNP_P3_59117_44601481 | NC_021163.1    | Ca_kabuli_chr04 | 44601481                | GG                              | AA                | 1945965739               |
| SNP_P3_59118_44601641 | NC_021163.1    | Ca_kabuli_chr04 | 44601641                | TT                              | GG                | 1945965741               |
| SNP_P3_59119_44601642 | NC_021163.1    | Ca_kabuli_chr04 | 44601642                | AA                              | GG                | 1945965743               |
| SNP_P3_59120_44601647 | NC_021163.1    | Ca_kabuli_chr04 | 44601647                | AA                              | GG                | 1945965744               |
| SNP_P3_59122_44601747 | NC_021163.1    | Ca_kabuli_chr04 | 44601747                | AA                              | CC                | 1945965746               |
| SNP_P3_59123_44601966 | NC_021163.1    | Ca_kabuli_chr04 | 44601966                | TT                              | GG                | 1945965748               |
| SNP_P3_59124_44602137 | NC_021163.1    | Ca_kabuli_chr04 | 44602137                | GG                              | AA                | 1945965750               |
| SNP_P3_59125_44602386 | NC_021163.1    | Ca_kabuli_chr04 | 44602386                | GG                              | CC                | 1945965751               |
| SNP_P3_59126_44602460 | NC_021163.1    | Ca_kabuli_chr04 | 44602460                | GG                              | AA                | 1945965753               |
| SNP_P3_59127_44602719 | NC_021163.1    | Ca_kabuli_chr04 | 44602719                | AA                              | GG                | 1945965755               |
| SNP_P3_59128_44603479 | NC_021163.1    | Ca_kabuli_chr04 | 44603479                | GG                              | TT                | 1945965757               |
| SNP_P3_59129_44603525 | NC_021163.1    | Ca_kabuli_chr04 | 44603525                | GG                              | TT                | 1945965759               |
| SNP_P3_59130_44603527 | NC_021163.1    | Ca_kabuli_chr04 | 44603527                | CC                              | TT                | 1945965760               |
| SNP_P3_59131_44603577 | NC_021163.1    | Ca_kabuli_chr04 | 44603577                | TT                              | CC                | 1945965762               |
| SNP_P3_59132_44603593 | NC_021163.1    | Ca_kabuli_chr04 | 44603593                | AA                              | GG                | 1945965764               |
| SNP_P3_59133_44603602 | NC_021163.1    | Ca_kabuli_chr04 | 44603602                | GG                              | TT                | 1945965766               |
| SNP_P3_59134_44603618 | NC_021163.1    | Ca_kabuli_chr04 | 44603618                | AA                              | GG                | 1945965768               |
| SNP_P3_59135_44603632 | NC_021163.1    | Ca_kabuli_chr04 | 44603632                | CC                              | AA                | 1945965769               |
| SNP_P3_59136_44606405 | NC_021163.1    | Ca_kabuli_chr04 | 44606405                | CC                              | TT                | 1945965771               |
| SNP_P3_59139_44607769 | NC_021163.1    | Ca_kabuli_chr04 | 44607769                | AA                              | CC                | 1945965773               |
| SNP_P3_59140_44607804 | NC_021163.1    | Ca_kabuli_chr04 | 44607804                | GG                              | CC                | 1945965775               |
| SNP_P3_59141_44607806 | NC_021163.1    | Ca_kabuli_chr04 | 44607806                | TT                              | CC                | 1945965776               |
| SNP_P3_59142_44608773 | NC_021163.1    | Ca_kabuli_chr04 | 44608773                | CC                              | TT                | 1945965778               |
| SNP_P3_59143_44608774 | NC_021163.1    | Ca_kabuli_chr04 | 44608774                | CC                              | TT                | 1945965780               |
| SNP_P3_59144_44609654 | NC_021163.1    | Ca_kabuli_chr04 | 44609654                | CC                              | TT                | 1945965782               |
| SNP_P3_59145_44609720 | NC_021163.1    | Ca_kabuli_chr04 | 44609720                | CC                              | TT                | 1945965784               |
| SNP_P3_59146_44609727 | NC_021163.1    | Ca_kabuli_chr04 | 44609727                | TT                              | CC                | 1945965785               |
| SNP_P3_59147_44609834 | NC_021163.1    | Ca_kabuli_chr04 | 44609834                | CC                              | TT                | 1945965787               |
| SNP_P3_59148_44609838 | NC_021163.1    | Ca_kabuli_chr04 | 44609838                | GG                              | TT                | 1945965789               |
| SNP_P3_59149_44610149 | NC_021163.1    | Ca_kabuli_chr04 | 44610149                | AA                              | CC                | 1945965791               |
| SNP_P3_59150_44610564 | NC_021163.1    | Ca_kabuli_chr04 | 44610564                | TT                              | CC                | 1945965792               |
| SNP_P3_59151_44610835 | NC_021163.1    | Ca_kabuli_chr04 | 44610835                | GG                              | AA                | 1945965794               |
| SNP_P3_59152_44610840 | NC_021163.1    | Ca_kabuli_chr04 | 44610840                | AA                              | CC                | 1945965796               |
| SNP_P3_59153_44610843 | NC_021163.1    | Ca_kabuli_chr04 | 44610843                | GG                              | AA                | 1945965798               |
| SNP_P3_59155_44611259 | NC_021163.1    | Ca_kabuli_chr04 | 44611259                | AA                              | GG                | 1945965800               |



| SNPs IDs              | Chromosome IDs | Chromosomes     | Physical positions (bp) | CDC Frontier (Reference genome) | (Pusa 256 & HPNB) | NCBI SNPdb Accession IDs |
|-----------------------|----------------|-----------------|-------------------------|---------------------------------|-------------------|--------------------------|
| SNP_P3_59156_44611304 | NC_021163.1    | Ca_kabuli_chr04 | 44611304                | TT                              | CC                | 1945965801               |
| SNP_P3_59157_44611317 | NC_021163.1    | Ca_kabuli_chr04 | 44611317                | TT                              | CC                | 1945965803               |
| SNP_P3_59158_44612036 | NC_021163.1    | Ca_kabuli_chr04 | 44612036                | CC                              | TT                | 1945965805               |
| SNP_P3_59159_44612042 | NC_021163.1    | Ca_kabuli_chr04 | 44612042                | TT                              | CC                | 1945965807               |
| SNP_P3_59160_44612230 | NC_021163.1    | Ca_kabuli_chr04 | 44612230                | CC                              | AA                | 1945965809               |
| SNP_P3_59161_44612489 | NC_021163.1    | Ca_kabuli_chr04 | 44612489                | TT                              | AA                | 1945965810               |
| SNP_P3_59162_44612549 | NC_021163.1    | Ca_kabuli_chr04 | 44612549                | TT                              | GG                | 1945965812               |
| SNP_P3_59163_44612917 | NC_021163.1    | Ca_kabuli_chr04 | 44612917                | GG                              | TT                | 1945965814               |
| SNP_P3_59165_44613538 | NC_021163.1    | Ca_kabuli_chr04 | 44613538                | AA                              | CC                | 1945965816               |
| SNP_P3_59166_44613638 | NC_021163.1    | Ca_kabuli_chr04 | 44613638                | CC                              | TT                | 1945965817               |
| SNP_P3_59167_44616618 | NC_021163.1    | Ca_kabuli_chr04 | 44616618                | GG                              | TT                | 1945965819               |
| SNP_P3_59168_44617619 | NC_021163.1    | Ca_kabuli_chr04 | 44617619                | CC                              | TT                | 1945965821               |
| SNP_P3_59169_44617640 | NC_021163.1    | Ca_kabuli_chr04 | 44617640                | CC                              | GG                | 1945965823               |
| SNP_P3_59171_44618814 | NC_021163.1    | Ca_kabuli_chr04 | 44618814                | TT                              | AA                | 1945965825               |
| SNP_P3_59173_44621386 | NC_021163.1    | Ca_kabuli_chr04 | 44621386                | GG                              | AA                | 1945965826               |
| SNP_P3_59175_44622659 | NC_021163.1    | Ca_kabuli_chr04 | 44622659                | TT                              | AA                | 1945965828               |
| SNP_P3_59176_44625039 | NC_021163.1    | Ca_kabuli_chr04 | 44625039                | TT                              | AA                | 1945965830               |
| SNP_P3_59177_44625355 | NC_021163.1    | Ca_kabuli_chr04 | 44625355                | GG                              | AA                | 1945965832               |
| SNP_P3_59178_44626753 | NC_021163.1    | Ca_kabuli_chr04 | 44626753                | TT                              | CC                | 1945965834               |
| SNP_P3_59179_44626770 | NC_021163.1    | Ca_kabuli_chr04 | 44626770                | TT                              | GG                | 1945965835               |
| SNP_P3_59180_44628511 | NC_021163.1    | Ca_kabuli_chr04 | 44628511                | CC                              | AA                | 1945965837               |
| SNP_P3_59181_44628790 | NC_021163.1    | Ca_kabuli_chr04 | 44628790                | AA                              | CC                | 1945965839               |
| SNP_P3_59182_44630386 | NC_021163.1    | Ca_kabuli_chr04 | 44630386                | TT                              | AA                | 1945965841               |
| SNP_P3_59183_44630819 | NC_021163.1    | Ca_kabuli_chr04 | 44630819                | CC                              | TT                | 1945965842               |
| SNP_P3_59184_44631045 | NC_021163.1    | Ca_kabuli_chr04 | 44631045                | AA                              | GG                | 1945965844               |
| SNP_P3_59185_44631531 | NC_021163.1    | Ca_kabuli_chr04 | 44631531                | AA                              | TT                | 1945965846               |
| SNP_P3_59186_44632758 | NC_021163.1    | Ca_kabuli_chr04 | 44632758                | TT                              | GG                | 1945965848               |
| SNP_P3_59187_44632847 | NC_021163.1    | Ca_kabuli_chr04 | 44632847                | AA                              | CC                | 1945965850               |
| SNP_P3_59188_44632900 | NC_021163.1    | Ca_kabuli_chr04 | 44632900                | CC                              | AA                | 1945965851               |
| SNP_P3_59189_44632917 | NC_021163.1    | Ca_kabuli_chr04 | 44632917                | TT                              | CC                | 1945965853               |
| SNP_P3_59190_44632928 | NC_021163.1    | Ca_kabuli_chr04 | 44632928                | GG                              | AA                | 1945965855               |
| SNP_P3_59191_44632930 | NC_021163.1    | Ca_kabuli_chr04 | 44632930                | CC                              | AA                | 1945965857               |
| SNP_P3_59192_44632934 | NC_021163.1    | Ca_kabuli_chr04 | 44632934                | GG                              | AA                | 1945965858               |
| SNP_P3_59193_44633024 | NC_021163.1    | Ca_kabuli_chr04 | 44633024                | GG                              | AA                | 1945965860               |
| SNP_P3_59194_44633069 | NC_021163.1    | Ca_kabuli_chr04 | 44633069                | AA                              | TT                | 1945965862               |
| SNP_P3_59195_44633070 | NC_021163.1    | Ca_kabuli_chr04 | 44633070                | CC                              | TT                | 1945965864               |
| SNP_P3_59196_44633071 | NC_021163.1    | Ca_kabuli_chr04 | 44633071                | GG                              | AA                | 1945965866               |
| SNP_P3_59197_44633075 | NC_021163.1    | Ca_kabuli_chr04 | 44633075                | AA                              | GG                | 1945965867               |
| SNP_P3_59198_44633091 | NC_021163.1    | Ca_kabuli_chr04 | 44633091                | AA                              | GG                | 1945965869               |
| SNP_P3_59199_44633115 | NC_021163.1    | Ca_kabuli_chr04 | 44633115                | GG                              | AA                | 1945965871               |
| SNP_P3_59200_44633128 | NC_021163.1    | Ca_kabuli_chr04 | 44633128                | GG                              | AA                | 1945965873               |
| SNP_P3_59202_44633156 | NC_021163.1    | Ca_kabuli_chr04 | 44633156                | CC                              | TT                | 1945965875               |

| SNPs IDs              | Chromosome IDs | Chromosomes     | Physical positions (bp) | CDC Frontier (Reference genome) | (Pusa 256 & HPNB) | NCBI SNPdb Accession IDs |
|-----------------------|----------------|-----------------|-------------------------|---------------------------------|-------------------|--------------------------|
| SNP_P3_59203_44633197 | NC_021163.1    | Ca_kabuli_chr04 | 44633197                | GG                              | AA                | 1945965876               |
| SNP_P3_59204_44633208 | NC_021163.1    | Ca_kabuli_chr04 | 44633208                | AA                              | GG                | 1945965878               |
| SNP_P3_59205_44633220 | NC_021163.1    | Ca_kabuli_chr04 | 44633220                | AA                              | GG                | 1945965880               |
| SNP_P3_59206_44633329 | NC_021163.1    | Ca_kabuli_chr04 | 44633329                | GG                              | TT                | 1945965882               |
| SNP_P3_59207_44633396 | NC_021163.1    | Ca_kabuli_chr04 | 44633396                | AA                              | TT                | 1945965883               |
| SNP_P3_59208_44633421 | NC_021163.1    | Ca_kabuli_chr04 | 44633421                | GG                              | CC                | 1945965885               |
| SNP_P3_59209_44633551 | NC_021163.1    | Ca_kabuli_chr04 | 44633551                | GG                              | AA                | 1945965887               |
| SNP_P3_59210_44633805 | NC_021163.1    | Ca_kabuli_chr04 | 44633805                | TT                              | AA                | 1945965889               |
| SNP_P3_59211_44633825 | NC_021163.1    | Ca_kabuli_chr04 | 44633825                | CC                              | TT                | 1945965891               |
| SNP_P3_59212_44634148 | NC_021163.1    | Ca_kabuli_chr04 | 44634148                | GG                              | AA                | 1945965892               |
| SNP_P3_59213_44634170 | NC_021163.1    | Ca_kabuli_chr04 | 44634170                | AA                              | CC                | 1945965894               |
| SNP_P3_59214_44635580 | NC_021163.1    | Ca_kabuli_chr04 | 44635580                | AA                              | GG                | 1945965896               |
| SNP_P3_59215_44636720 | NC_021163.1    | Ca_kabuli_chr04 | 44636720                | TT                              | AA                | 1945965898               |
| SNP_P3_59216_44637064 | NC_021163.1    | Ca_kabuli_chr04 | 44637064                | AA                              | CC                | 1945965900               |
| SNP_P3_59217_44637079 | NC_021163.1    | Ca_kabuli_chr04 | 44637079                | CC                              | AA                | 1945965901               |
| SNP_P3_59218_44637344 | NC_021163.1    | Ca_kabuli_chr04 | 44637344                | GG                              | AA                | 1945965903               |
| SNP_P3_59219_44637414 | NC_021163.1    | Ca_kabuli_chr04 | 44637414                | CC                              | TT                | 1945965905               |
| SNP_P3_59220_44638490 | NC_021163.1    | Ca_kabuli_chr04 | 44638490                | CC                              | GG                | 1945965907               |
| SNP_P3_59221_44638759 | NC_021163.1    | Ca_kabuli_chr04 | 44638759                | CC                              | GG                | 1945965908               |
| SNP_P3_59222_44639919 | NC_021163.1    | Ca_kabuli_chr04 | 44639919                | TT                              | CC                | 1945965910               |
| SNP_P3_59223_44639930 | NC_021163.1    | Ca_kabuli_chr04 | 44639930                | GG                              | CC                | 1945965912               |
| SNP_P3_59224_44639951 | NC_021163.1    | Ca_kabuli_chr04 | 44639951                | GG                              | TT                | 1945965914               |
| SNP_P3_59225_44639955 | NC_021163.1    | Ca_kabuli_chr04 | 44639955                | TT                              | CC                | 1945965916               |
| SNP_P3_59226_44640178 | NC_021163.1    | Ca_kabuli_chr04 | 44640178                | TT                              | CC                | 1945965917               |
| SNP_P3_59227_44640193 | NC_021163.1    | Ca_kabuli_chr04 | 44640193                | TT                              | CC                | 1945965919               |
| SNP_P3_59228_44640224 | NC_021163.1    | Ca_kabuli_chr04 | 44640224                | AA                              | GG                | 1945965921               |
| SNP_P3_59229_44640526 | NC_021163.1    | Ca_kabuli_chr04 | 44640526                | GG                              | CC                | 1945965923               |
| SNP_P3_59231_44640792 | NC_021163.1    | Ca_kabuli_chr04 | 44640792                | GG                              | AA                | 1945965924               |
| SNP_P3_59232_44640843 | NC_021163.1    | Ca_kabuli_chr04 | 44640843                | TT                              | CC                | 1945965926               |
| SNP_P3_59234_44640906 | NC_021163.1    | Ca_kabuli_chr04 | 44640906                | GG                              | AA                | 1945965928               |
| SNP_P3_59235_44640990 | NC_021163.1    | Ca_kabuli_chr04 | 44640990                | CC                              | AA                | 1945965930               |
| SNP_P3_59236_44641168 | NC_021163.1    | Ca_kabuli_chr04 | 44641168                | GG                              | CC                | 1945965932               |
| SNP_P3_59237_44641355 | NC_021163.1    | Ca_kabuli_chr04 | 44641355                | AA                              | CC                | 1945965933               |
| SNP_P3_59238_44641386 | NC_021163.1    | Ca_kabuli_chr04 | 44641386                | GG                              | CC                | 1945965935               |
| SNP_P3_59239_44641589 | NC_021163.1    | Ca_kabuli_chr04 | 44641589                | GG                              | AA                | 1945965937               |
| SNP_P3_59240_44648562 | NC_021163.1    | Ca_kabuli_chr04 | 44648562                | TT                              | CC                | 1945965939               |
| SNP_P3_59241_44653543 | NC_021163.1    | Ca_kabuli_chr04 | 44653543                | CC                              | TT                | 1945965941               |
| SNP_P3_59242_44653690 | NC_021163.1    | Ca_kabuli_chr04 | 44653690                | AA                              | GG                | 1945965942               |
| SNP_P3_59243_44654405 | NC_021163.1    | Ca_kabuli_chr04 | 44654405                | TT                              | CC                | 1945965944               |
| SNP_P3_59244_44654415 | NC_021163.1    | Ca_kabuli_chr04 | 44654415                | TT                              | GG                | 1945965946               |
| SNP_P3_59245_44654478 | NC_021163.1    | Ca_kabuli_chr04 | 44654478                | CC                              | TT                | 1945965948               |
| SNP_P3_59246_44654586 | NC_021163.1    | Ca_kabuli_chr04 | 44654586                | AA                              | GG                | 1945965949               |

| SNPs IDs              | Chromosome IDs | Chromosomes     | Physical positions (bp) | CDC Frontier (Reference genome) | (Pusa 256 & HPNB) | NCBI SNPdb Accession IDs |
|-----------------------|----------------|-----------------|-------------------------|---------------------------------|-------------------|--------------------------|
| SNP_P3_59248_44658140 | NC_021163.1    | Ca_kabuli_chr04 | 44658140                | AA                              | TT                | 1945965951               |
| SNP_P3_59249_44658456 | NC_021163.1    | Ca_kabuli_chr04 | 44658456                | CC                              | TT                | 1945965953               |
| SNP_P3_59250_44661658 | NC_021163.1    | Ca_kabuli_chr04 | 44661658                | CC                              | AA                | 1945965955               |
| SNP_P3_59251_44661996 | NC_021163.1    | Ca_kabuli_chr04 | 44661996                | TT                              | CC                | 1945965956               |
| SNP_P3_59252_44662013 | NC_021163.1    | Ca_kabuli_chr04 | 44662013                | AA                              | GG                | 1945965958               |
| SNP_P3_59253_44662028 | NC_021163.1    | Ca_kabuli_chr04 | 44662028                | AA                              | CC                | 1945965960               |
| SNP_P3_59254_44662306 | NC_021163.1    | Ca_kabuli_chr04 | 44662306                | AA                              | CC                | 1945965962               |
| SNP_P3_59255_44662424 | NC_021163.1    | Ca_kabuli_chr04 | 44662424                | CC                              | TT                | 1945965964               |
| SNP_P3_59256_44662443 | NC_021163.1    | Ca_kabuli_chr04 | 44662443                | TT                              | AA                | 1945965965               |
| SNP_P3_59257_44662676 | NC_021163.1    | Ca_kabuli_chr04 | 44662676                | GG                              | AA                | 1945965967               |
| SNP_P3_59259_44664768 | NC_021163.1    | Ca_kabuli_chr04 | 44664768                | GG                              | TT                | 1945965969               |
| SNP_P3_59260_44664775 | NC_021163.1    | Ca_kabuli_chr04 | 44664775                | AA                              | GG                | 1945965971               |
| SNP_P3_59261_44665182 | NC_021163.1    | Ca_kabuli_chr04 | 44665182                | CC                              | TT                | 1945965973               |
| SNP_P3_59262_44665590 | NC_021163.1    | Ca_kabuli_chr04 | 44665590                | CC                              | GG                | 1945965974               |
| SNP_P3_59263_44667063 | NC_021163.1    | Ca_kabuli_chr04 | 44667063                | CC                              | TT                | 1945965976               |
| SNP_P3_59264_44667081 | NC_021163.1    | Ca_kabuli_chr04 | 44667081                | GG                              | AA                | 1945965978               |
| SNP_P3_59265_44668000 | NC_021163.1    | Ca_kabuli_chr04 | 44668000                | GG                              | AA                | 1945965980               |
| SNP_P3_59266_44668030 | NC_021163.1    | Ca_kabuli_chr04 | 44668030                | GG                              | AA                | 1945965981               |
| SNP_P3_59267_44668231 | NC_021163.1    | Ca_kabuli_chr04 | 44668231                | TT                              | GG                | 1945965983               |
| SNP_P3_59268_44668232 | NC_021163.1    | Ca_kabuli_chr04 | 44668232                | GG                              | TT                | 1945965985               |
| SNP_P3_59269_44668639 | NC_021163.1    | Ca_kabuli_chr04 | 44668639                | TT                              | AA                | 1945965987               |
| SNP_P3_59270_44668896 | NC_021163.1    | Ca_kabuli_chr04 | 44668896                | TT                              | GG                | 1945965989               |
| SNP_P3_59272_44671772 | NC_021163.1    | Ca_kabuli_chr04 | 44671772                | CC                              | TT                | 1945965990               |
| SNP_P3_59273_44672128 | NC_021163.1    | Ca_kabuli_chr04 | 44672128                | AA                              | GG                | 1945965992               |
| SNP_P3_59275_44672483 | NC_021163.1    | Ca_kabuli_chr04 | 44672483                | CC                              | TT                | 1945965994               |
| SNP_P3_59276_44672488 | NC_021163.1    | Ca_kabuli_chr04 | 44672488                | CC                              | TT                | 1945965996               |
| SNP_P3_59277_44673780 | NC_021163.1    | Ca_kabuli_chr04 | 44673780                | AA                              | GG                | 1945965997               |
| SNP_P3_59278_44675367 | NC_021163.1    | Ca_kabuli_chr04 | 44675367                | AA                              | TT                | 1945965999               |
| SNP_P3_59280_44675843 | NC_021163.1    | Ca_kabuli_chr04 | 44675843                | AA                              | CC                | 1945966001               |
| SNP_P3_59282_44676788 | NC_021163.1    | Ca_kabuli_chr04 | 44676788                | CC                              | AA                | 1945966003               |
| SNP_P3_59283_44677095 | NC_021163.1    | Ca_kabuli_chr04 | 44677095                | TT                              | CC                | 1945966005               |
| SNP_P3_59284_44677145 | NC_021163.1    | Ca_kabuli_chr04 | 44677145                | GG                              | AA                | 1945966006               |
| SNP_P3_59285_44677217 | NC_021163.1    | Ca_kabuli_chr04 | 44677217                | AA                              | GG                | 1945966008               |
| SNP_P3_59286_44678205 | NC_021163.1    | Ca_kabuli_chr04 | 44678205                | TT                              | CC                | 1945966010               |
| SNP_P3_59287_44678213 | NC_021163.1    | Ca_kabuli_chr04 | 44678213                | TT                              | CC                | 1945966012               |
| SNP_P3_59288_44678224 | NC_021163.1    | Ca_kabuli_chr04 | 44678224                | GG                              | AA                | 1945966014               |
| SNP_P3_59289_44678260 | NC_021163.1    | Ca_kabuli_chr04 | 44678260                | GG                              | AA                | 1945966015               |
| SNP_P3_59291_44679287 | NC_021163.1    | Ca_kabuli_chr04 | 44679287                | TT                              | AA                | 1945966017               |
| SNP_P3_59292_44679328 | NC_021163.1    | Ca_kabuli_chr04 | 44679328                | GG                              | CC                | 1945966019               |
| SNP_P3_59295_44679493 | NC_021163.1    | Ca_kabuli_chr04 | 44679493                | AA                              | TT                | 1945966021               |
| SNP_P3_59296_44679607 | NC_021163.1    | Ca_kabuli_chr04 | 44679607                | GG                              | TT                | 1945966022               |
| SNP_P3_59297_44679651 | NC_021163.1    | Ca_kabuli_chr04 | 44679651                | AA                              | GG                | 1945966024               |

| SNPs IDs              | Chromosome IDs | Chromosomes     | Physical positions (bp) | CDC Frontier (Reference genome) | (Pusa 256 & HPNB) | NCBI SNPdb Accession IDs |
|-----------------------|----------------|-----------------|-------------------------|---------------------------------|-------------------|--------------------------|
| SNP_P3_59298_44679743 | NC_021163.1    | Ca_kabuli_chr04 | 44679743                | AA                              | GG                | 1945966026               |
| SNP_P3_59299_44680370 | NC_021163.1    | Ca_kabuli_chr04 | 44680370                | GG                              | CC                | 1945966028               |
| SNP_P3_59300_44680403 | NC_021163.1    | Ca_kabuli_chr04 | 44680403                | TT                              | AA                | 1945966030               |
| SNP_P3_59302_44680800 | NC_021163.1    | Ca_kabuli_chr04 | 44680800                | TT                              | GG                | 1945966031               |
| SNP_P3_59303_44680835 | NC_021163.1    | Ca_kabuli_chr04 | 44680835                | TT                              | CC                | 1945966033               |
| SNP_P3_59304_44680847 | NC_021163.1    | Ca_kabuli_chr04 | 44680847                | TT                              | CC                | 1945966035               |
| SNP_P3_59305_44680997 | NC_021163.1    | Ca_kabuli_chr04 | 44680997                | AA                              | GG                | 1945966037               |
| SNP_P3_59306_44681778 | NC_021163.1    | Ca_kabuli_chr04 | 44681778                | TT                              | GG                | 1945966039               |
| SNP_P3_59307_44682047 | NC_021163.1    | Ca_kabuli_chr04 | 44682047                | TT                              | GG                | 1945966040               |
| SNP_P3_59309_44686163 | NC_021163.1    | Ca_kabuli_chr04 | 44686163                | GG                              | CC                | 1945966042               |
| SNP_P3_59310_44686194 | NC_021163.1    | Ca_kabuli_chr04 | 44686194                | CC                              | TT                | 1945966044               |
| SNP_P3_59311_44686201 | NC_021163.1    | Ca_kabuli_chr04 | 44686201                | GG                              | AA                | 1945966046               |
| SNP_P3_59312_44686411 | NC_021163.1    | Ca_kabuli_chr04 | 44686411                | GG                              | TT                | 1945966047               |
| SNP_P3_59313_44686633 | NC_021163.1    | Ca_kabuli_chr04 | 44686633                | GG                              | AA                | 1945966049               |
| SNP_P3_59314_44686655 | NC_021163.1    | Ca_kabuli_chr04 | 44686655                | AA                              | TT                | 1945966051               |
| SNP_P3_59315_44687363 | NC_021163.1    | Ca_kabuli_chr04 | 44687363                | GG                              | AA                | 1945966053               |
| SNP_P3_59316_44687368 | NC_021163.1    | Ca_kabuli_chr04 | 44687368                | CC                              | TT                | 1945966055               |
| SNP_P3_59317_44687374 | NC_021163.1    | Ca_kabuli_chr04 | 44687374                | AA                              | GG                | 1945966056               |
| SNP_P3_59318_44687376 | NC_021163.1    | Ca_kabuli_chr04 | 44687376                | GG                              | CC                | 1945966058               |
| SNP_P3_59319_44687406 | NC_021163.1    | Ca_kabuli_chr04 | 44687406                | TT                              | CC                | 1945966060               |
| SNP_P3_59321_44691169 | NC_021163.1    | Ca_kabuli_chr04 | 44691169                | TT                              | CC                | 1945966062               |
| SNP_P3_59323_44694027 | NC_021163.1    | Ca_kabuli_chr04 | 44694027                | TT                              | AA                | 1945966063               |
| SNP_P3_59324_44694029 | NC_021163.1    | Ca_kabuli_chr04 | 44694029                | TT                              | AA                | 1945966065               |
| SNP_P3_59327_44694306 | NC_021163.1    | Ca_kabuli_chr04 | 44694306                | TT                              | GG                | 1945966067               |
| SNP_P3_59328_44694332 | NC_021163.1    | Ca_kabuli_chr04 | 44694332                | TT                              | AA                | 1945966069               |
| SNP_P3_59329_44694493 | NC_021163.1    | Ca_kabuli_chr04 | 44694493                | AA                              | TT                | 1945966071               |
| SNP_P3_59330_44694498 | NC_021163.1    | Ca_kabuli_chr04 | 44694498                | TT                              | AA                | 1945966072               |
| SNP_P3_59331_44694508 | NC_021163.1    | Ca_kabuli_chr04 | 44694508                | TT                              | AA                | 1945966074               |
| SNP_P3_59332_44694633 | NC_021163.1    | Ca_kabuli_chr04 | 44694633                | AA                              | CC                | 1945966076               |
| SNP_P3_59334_44694695 | NC_021163.1    | Ca_kabuli_chr04 | 44694695                | TT                              | GG                | 1945966078               |
| SNP_P3_59336_44694745 | NC_021163.1    | Ca_kabuli_chr04 | 44694745                | AA                              | TT                | 1945966080               |
| SNP_P3_59337_44694750 | NC_021163.1    | Ca_kabuli_chr04 | 44694750                | CC                              | AA                | 1945966081               |
| SNP_P3_59338_44694751 | NC_021163.1    | Ca_kabuli_chr04 | 44694751                | AA                              | TT                | 1945966083               |
| SNP_P3_59339_44694795 | NC_021163.1    | Ca_kabuli_chr04 | 44694795                | TT                              | GG                | 1945966085               |
| SNP_P3_59340_44694957 | NC_021163.1    | Ca_kabuli_chr04 | 44694957                | TT                              | GG                | 1945966087               |
| SNP_P3_59341_44696226 | NC_021163.1    | Ca_kabuli_chr04 | 44696226                | GG                              | CC                | 1945966088               |
| SNP_P3_59342_44697667 | NC_021163.1    | Ca_kabuli_chr04 | 44697667                | AA                              | TT                | 1945966090               |
| SNP_P3_59343_44697690 | NC_021163.1    | Ca_kabuli_chr04 | 44697690                | AA                              | TT                | 1945966092               |
| SNP_P3_59344_44703064 | NC_021163.1    | Ca_kabuli_chr04 | 44703064                | AA                              | GG                | 1945966094               |
| SNP_P3_59345_44703547 | NC_021163.1    | Ca_kabuli_chr04 | 44703547                | TT                              | CC                | 1945966096               |
| SNP_P3_59346_44704524 | NC_021163.1    | Ca_kabuli_chr04 | 44704524                | TT                              | GG                | 1945966097               |
| SNP_P3_59347_44704888 | NC_021163.1    | Ca_kabuli_chr04 | 44704888                | GG                              | AA                | 1945966099               |

| SNPs IDs              | Chromosome IDs | Chromosomes     | Physical positions (bp) | CDC Frontier (Reference genome) | (Pusa 256 & HPNB) | NCBI SNPdb Accession IDs |
|-----------------------|----------------|-----------------|-------------------------|---------------------------------|-------------------|--------------------------|
| SNP_P3_59348_44704920 | NC_021163.1    | Ca_kabuli_chr04 | 44704920                | AA                              | TT                | 1945966101               |
| SNP_P3_59349_44704966 | NC_021163.1    | Ca_kabuli_chr04 | 44704966                | TT                              | CC                | 1945966103               |
| SNP_P3_59350_44705170 | NC_021163.1    | Ca_kabuli_chr04 | 44705170                | CC                              | TT                | 1945966104               |
| SNP_P3_59351_44705479 | NC_021163.1    | Ca_kabuli_chr04 | 44705479                | CC                              | TT                | 1945966106               |
| SNP_P3_59352_44706422 | NC_021163.1    | Ca_kabuli_chr04 | 44706422                | GG                              | AA                | 1945966108               |
| SNP_P3_59355_44706545 | NC_021163.1    | Ca_kabuli_chr04 | 44706545                | AA                              | GG                | 1945966110               |
| SNP_P3_59357_44706739 | NC_021163.1    | Ca_kabuli_chr04 | 44706739                | GG                              | AA                | 1945966112               |
| SNP_P3_59358_44707476 | NC_021163.1    | Ca_kabuli_chr04 | 44707476                | TT                              | CC                | 1945966113               |
| SNP_P3_59359_44708222 | NC_021163.1    | Ca_kabuli_chr04 | 44708222                | AA                              | TT                | 1945966115               |
| SNP_P3_59361_44708449 | NC_021163.1    | Ca_kabuli_chr04 | 44708449                | AA                              | GG                | 1945966117               |
| SNP_P3_59363_44710346 | NC_021163.1    | Ca_kabuli_chr04 | 44710346                | CC                              | TT                | 1945966119               |
| SNP_P3_59364_44710537 | NC_021163.1    | Ca_kabuli_chr04 | 44710537                | AA                              | GG                | 1945966120               |
| SNP_P3_59366_44710585 | NC_021163.1    | Ca_kabuli_chr04 | 44710585                | TT                              | GG                | 1945966122               |
| SNP_P3_59367_44710787 | NC_021163.1    | Ca_kabuli_chr04 | 44710787                | CC                              | AA                | 1945966124               |
| SNP_P3_59368_44713723 | NC_021163.1    | Ca_kabuli_chr04 | 44713723                | CC                              | TT                | 1945966126               |
| SNP_P3_59369_44713750 | NC_021163.1    | Ca_kabuli_chr04 | 44713750                | TT                              | CC                | 1945966128               |
| SNP_P3_59370_44714124 | NC_021163.1    | Ca_kabuli_chr04 | 44714124                | AA                              | CC                | 1945966129               |
| SNP_P3_59372_44714351 | NC_021163.1    | Ca_kabuli_chr04 | 44714351                | AA                              | GG                | 1945966131               |
| SNP_P3_59373_44714488 | NC_021163.1    | Ca_kabuli_chr04 | 44714488                | AA                              | TT                | 1945966133               |
| SNP_P3_59374_44714510 | NC_021163.1    | Ca_kabuli_chr04 | 44714510                | TT                              | AA                | 1945966135               |
| SNP_P3_59375_44714541 | NC_021163.1    | Ca_kabuli_chr04 | 44714541                | GG                              | AA                | 1945966137               |
| SNP_P3_59376_44714571 | NC_021163.1    | Ca_kabuli_chr04 | 44714571                | AA                              | GG                | 1945966138               |
| SNP_P3_59377_44714587 | NC_021163.1    | Ca_kabuli_chr04 | 44714587                | AA                              | GG                | 1945966140               |
| SNP_P3_59379_44714880 | NC_021163.1    | Ca_kabuli_chr04 | 44714880                | TT                              | CC                | 1945966142               |
| SNP_P3_59380_44718013 | NC_021163.1    | Ca_kabuli_chr04 | 44718013                | TT                              | CC                | 1945966144               |
| SNP_P3_59381_44718046 | NC_021163.1    | Ca_kabuli_chr04 | 44718046                | GG                              | CC                | 1945966145               |
| SNP_P3_59382_44718216 | NC_021163.1    | Ca_kabuli_chr04 | 44718216                | GG                              | AA                | 1945966147               |
| SNP_P3_59383_44718229 | NC_021163.1    | Ca_kabuli_chr04 | 44718229                | CC                              | GG                | 1945966149               |
| SNP_P3_59385_44718554 | NC_021163.1    | Ca_kabuli_chr04 | 44718554                | CC                              | TT                | 1945966151               |
| SNP_P3_59386_44718578 | NC_021163.1    | Ca_kabuli_chr04 | 44718578                | GG                              | CC                | 1945966153               |
| SNP_P3_59387_44718619 | NC_021163.1    | Ca_kabuli_chr04 | 44718619                | TT                              | GG                | 1945966154               |
| SNP_P3_59388_44718760 | NC_021163.1    | Ca_kabuli_chr04 | 44718760                | AA                              | TT                | 1945966156               |
| SNP_P3_59389_44719796 | NC_021163.1    | Ca_kabuli_chr04 | 44719796                | AA                              | GG                | 1945966158               |
| SNP_P3_59390_44721470 | NC_021163.1    | Ca_kabuli_chr04 | 44721470                | GG                              | TT                | 1945966160               |
| SNP_P3_59391_44723342 | NC_021163.1    | Ca_kabuli_chr04 | 44723342                | CC                              | TT                | 1945966162               |
| SNP_P3_59392_44723468 | NC_021163.1    | Ca_kabuli_chr04 | 44723468                | AA                              | GG                | 1945966163               |
| SNP_P3_59393_44723486 | NC_021163.1    | Ca_kabuli_chr04 | 44723486                | CC                              | TT                | 1945966165               |
| SNP_P3_59394_44723493 | NC_021163.1    | Ca_kabuli_chr04 | 44723493                | AA                              | CC                | 1945966167               |
| SNP_P3_59395_44725021 | NC_021163.1    | Ca_kabuli_chr04 | 44725021                | CC                              | TT                | 1945966169               |
| SNP_P3_59396_44725026 | NC_021163.1    | Ca_kabuli_chr04 | 44725026                | GG                              | AA                | 1945966170               |
| SNP_P3_59397_44725030 | NC_021163.1    | Ca_kabuli_chr04 | 44725030                | TT                              | GG                | 1945966172               |
| SNP_P3_59399_44725236 | NC_021163.1    | Ca_kabuli_chr04 | 44725236                | GG                              | AA                | 1945966174               |

| SNPs IDs              | Chromosome IDs | Chromosomes     | Physical positions (bp) | CDC Frontier (Reference genome) | (Pusa 256 & HPNB) | NCBI SNPdb Accession IDs |
|-----------------------|----------------|-----------------|-------------------------|---------------------------------|-------------------|--------------------------|
| SNP_P3_59400_44725267 | NC_021163.1    | Ca_kabuli_chr04 | 44725267                | CC                              | TT                | 1945966176               |
| SNP_P3_59401_44725283 | NC_021163.1    | Ca_kabuli_chr04 | 44725283                | CC                              | TT                | 1945966178               |
| SNP_P3_59402_44725418 | NC_021163.1    | Ca_kabuli_chr04 | 44725418                | CC                              | TT                | 1945966180               |
| SNP_P3_59403_44725420 | NC_021163.1    | Ca_kabuli_chr04 | 44725420                | CC                              | TT                | 1945966181               |
| SNP_P3_59404_44725427 | NC_021163.1    | Ca_kabuli_chr04 | 44725427                | TT                              | CC                | 1945966183               |
| SNP_P3_59405_44725461 | NC_021163.1    | Ca_kabuli_chr04 | 44725461                | CC                              | TT                | 1945966185               |
| SNP_P3_59406_44725496 | NC_021163.1    | Ca_kabuli_chr04 | 44725496                | TT                              | AA                | 1945966187               |
| SNP_P3_59407_44725786 | NC_021163.1    | Ca_kabuli_chr04 | 44725786                | CC                              | TT                | 1945966189               |
| SNP_P3_59408_44725836 | NC_021163.1    | Ca_kabuli_chr04 | 44725836                | AA                              | GG                | 1945966190               |
| SNP_P3_59409_44725988 | NC_021163.1    | Ca_kabuli_chr04 | 44725988                | AA                              | GG                | 1945966192               |
| SNP_P3_59412_44726684 | NC_021163.1    | Ca_kabuli_chr04 | 44726684                | GG                              | AA                | 1945966194               |
| SNP_P3_59413_44727349 | NC_021163.1    | Ca_kabuli_chr04 | 44727349                | TT                              | CC                | 1945966196               |
| SNP_P3_59414_44727362 | NC_021163.1    | Ca_kabuli_chr04 | 44727362                | AA                              | GG                | 1945966198               |
| SNP_P3_59415_44727581 | NC_021163.1    | Ca_kabuli_chr04 | 44727581                | AA                              | TT                | 1945966199               |
| SNP_P3_59416_44727679 | NC_021163.1    | Ca_kabuli_chr04 | 44727679                | CC                              | GG                | 1945966201               |
| SNP_P3_59417_44727828 | NC_021163.1    | Ca_kabuli_chr04 | 44727828                | AA                              | CC                | 1945966203               |
| SNP_P3_59418_44727876 | NC_021163.1    | Ca_kabuli_chr04 | 44727876                | GG                              | TT                | 1945966205               |
| SNP_P3_59420_44727929 | NC_021163.1    | Ca_kabuli_chr04 | 44727929                | GG                              | AA                | 1945966206               |
| SNP_P3_59421_44728082 | NC_021163.1    | Ca_kabuli_chr04 | 44728082                | CC                              | AA                | 1945966208               |
| SNP_P3_59422_44728132 | NC_021163.1    | Ca_kabuli_chr04 | 44728132                | TT                              | CC                | 1945966210               |
| SNP_P3_59423_44729155 | NC_021163.1    | Ca_kabuli_chr04 | 44729155                | TT                              | CC                | 1945966212               |
| SNP_P3_59424_44729440 | NC_021163.1    | Ca_kabuli_chr04 | 44729440                | TT                              | CC                | 1945966214               |
| SNP_P3_59425_44729728 | NC_021163.1    | Ca_kabuli_chr04 | 44729728                | AA                              | TT                | 1945966215               |
| SNP_P3_59426_44730125 | NC_021163.1    | Ca_kabuli_chr04 | 44730125                | CC                              | TT                | 1945966217               |
| SNP_P3_59427_44730141 | NC_021163.1    | Ca_kabuli_chr04 | 44730141                | CC                              | AA                | 1945966219               |
| SNP_P3_59428_44730363 | NC_021163.1    | Ca_kabuli_chr04 | 44730363                | AA                              | CC                | 1945966221               |
| SNP_P3_59430_44735012 | NC_021163.1    | Ca_kabuli_chr04 | 44735012                | GG                              | AA                | 1945966223               |
| SNP_P3_59431_44735451 | NC_021163.1    | Ca_kabuli_chr04 | 44735451                | GG                              | CC                | 1945966224               |
| SNP_P3_59432_44738011 | NC_021163.1    | Ca_kabuli_chr04 | 44738011                | AA                              | TT                | 1945966226               |
| SNP_P3_59434_44739709 | NC_021163.1    | Ca_kabuli_chr04 | 44739709                | TT                              | CC                | 1945966228               |
| SNP_P3_59435_44741835 | NC_021163.1    | Ca_kabuli_chr04 | 44741835                | AA                              | TT                | 1945966230               |
| SNP_P3_59436_44741888 | NC_021163.1    | Ca_kabuli_chr04 | 44741888                | CC                              | TT                | 1945966231               |
| SNP_P3_59437_44742852 | NC_021163.1    | Ca_kabuli_chr04 | 44742852                | AA                              | GG                | 1945966233               |
| SNP_P3_59438_44742917 | NC_021163.1    | Ca_kabuli_chr04 | 44742917                | AA                              | TT                | 1945966235               |
| SNP_P3_59439_44742952 | NC_021163.1    | Ca_kabuli_chr04 | 44742952                | TT                              | CC                | 1945966237               |
| SNP_P3_59440_44743163 | NC_021163.1    | Ca_kabuli_chr04 | 44743163                | AA                              | TT                | 1945966239               |
| SNP_P3_59441_44743170 | NC_021163.1    | Ca_kabuli_chr04 | 44743170                | TT                              | CC                | 1945966240               |
| SNP_P3_59442_44743289 | NC_021163.1    | Ca_kabuli_chr04 | 44743289                | AA                              | CC                | 1945966242               |
| SNP_P3_59443_44743630 | NC_021163.1    | Ca_kabuli_chr04 | 44743630                | GG                              | AA                | 1945966244               |
| SNP_P3_59444_44744345 | NC_021163.1    | Ca_kabuli_chr04 | 44744345                | GG                              | AA                | 1945966246               |
| SNP_P3_59445_44745545 | NC_021163.1    | Ca_kabuli_chr04 | 44745545                | GG                              | TT                | 1945966247               |
| SNP_P3_59446_44746731 | NC_021163.1    | Ca_kabuli_chr04 | 44746731                | TT                              | AA                | 1945966249               |

| SNPs IDs              | Chromosome IDs | Chromosomes     | Physical positions (bp) | CDC Frontier (Reference genome) | (Pusa 256 & HPNB) | NCBI SNPdb Accession IDs |
|-----------------------|----------------|-----------------|-------------------------|---------------------------------|-------------------|--------------------------|
| SNP_P3_59447_44747457 | NC_021163.1    | Ca_kabuli_chr04 | 44747457                | AA                              | GG                | 1945966251               |
| SNP_P3_59448_44747798 | NC_021163.1    | Ca_kabuli_chr04 | 44747798                | AA                              | TT                | 1945966253               |
| SNP_P3_59449_44747818 | NC_021163.1    | Ca_kabuli_chr04 | 44747818                | CC                              | TT                | 1945966255               |
| SNP_P3_59451_44748196 | NC_021163.1    | Ca_kabuli_chr04 | 44748196                | TT                              | CC                | 1945966256               |
| SNP_P3_59452_44748558 | NC_021163.1    | Ca_kabuli_chr04 | 44748558                | CC                              | TT                | 1945966259               |
| SNP_P3_59454_44748895 | NC_021163.1    | Ca_kabuli_chr04 | 44748895                | AA                              | TT                | 1945966361               |
| SNP_P3_59455_44748904 | NC_021163.1    | Ca_kabuli_chr04 | 44748904                | CC                              | TT                | 1945966493               |
| SNP_P3_59456_44748916 | NC_021163.1    | Ca_kabuli_chr04 | 44748916                | TT                              | CC                | 1945966666               |
| SNP_P3_59457_44749417 | NC_021163.1    | Ca_kabuli_chr04 | 44749417                | GG                              | AA                | 1945966784               |
| SNP_P3_59458_44750393 | NC_021163.1    | Ca_kabuli_chr04 | 44750393                | TT                              | GG                | 1945966935               |
| SNP_P3_59459_44750715 | NC_021163.1    | Ca_kabuli_chr04 | 44750715                | AA                              | TT                | 1945967113               |
| SNP_P3_59460_44750718 | NC_021163.1    | Ca_kabuli_chr04 | 44750718                | TT                              | GG                | 1945967312               |
| SNP_P3_59463_44750983 | NC_021163.1    | Ca_kabuli_chr04 | 44750983                | CC                              | AA                | 1945967514               |
| SNP_P3_59464_44751215 | NC_021163.1    | Ca_kabuli_chr04 | 44751215                | TT                              | CC                | 1945967713               |
| SNP_P3_59465_44751234 | NC_021163.1    | Ca_kabuli_chr04 | 44751234                | GG                              | AA                | 1945967915               |
| SNP_P3_59466_44751467 | NC_021163.1    | Ca_kabuli_chr04 | 44751467                | AA                              | TT                | 1945968109               |
| SNP_P3_59467_44751479 | NC_021163.1    | Ca_kabuli_chr04 | 44751479                | AA                              | GG                | 1945968307               |
| SNP_P3_59468_44751484 | NC_021163.1    | Ca_kabuli_chr04 | 44751484                | CC                              | TT                | 1945968492               |
| SNP_P3_59469_44753391 | NC_021163.1    | Ca_kabuli_chr04 | 44753391                | GG                              | TT                | 1945968684               |
| SNP_P3_59470_44758274 | NC_021163.1    | Ca_kabuli_chr04 | 44758274                | AA                              | GG                | 1945968878               |
| SNP_P3_59471_44758317 | NC_021163.1    | Ca_kabuli_chr04 | 44758317                | GG                              | CC                | 1945969062               |
| SNP_P3_59472_44758330 | NC_021163.1    | Ca_kabuli_chr04 | 44758330                | AA                              | GG                | 1945969254               |
| SNP_P3_59473_44759167 | NC_021163.1    | Ca_kabuli_chr04 | 44759167                | CC                              | TT                | 1945969452               |
| SNP_P3_59474_44763139 | NC_021163.1    | Ca_kabuli_chr04 | 44763139                | AA                              | TT                | 1945969639               |
| SNP_P3_59475_44763396 | NC_021163.1    | Ca_kabuli_chr04 | 44763396                | AA                              | GG                | 1945969819               |
| SNP_P3_59476_44763449 | NC_021163.1    | Ca_kabuli_chr04 | 44763449                | CC                              | AA                | 1945970012               |
| SNP_P3_59477_44763640 | NC_021163.1    | Ca_kabuli_chr04 | 44763640                | GG                              | AA                | 1945970195               |
| SNP_P3_59478_44763665 | NC_021163.1    | Ca_kabuli_chr04 | 44763665                | TT                              | AA                | 1945970393               |
| SNP_P3_59479_44764272 | NC_021163.1    | Ca_kabuli_chr04 | 44764272                | GG                              | AA                | 1945970586               |
| SNP_P3_59480_44764298 | NC_021163.1    | Ca_kabuli_chr04 | 44764298                | AA                              | GG                | 1945970761               |
| SNP_P3_59481_44764638 | NC_021163.1    | Ca_kabuli_chr04 | 44764638                | CC                              | TT                | 1945970937               |
| SNP_P3_59482_44764646 | NC_021163.1    | Ca_kabuli_chr04 | 44764646                | AA                              | GG                | 1945971130               |
| SNP_P3_59483_44764667 | NC_021163.1    | Ca_kabuli_chr04 | 44764667                | AA                              | CC                | 1945971331               |
| SNP_P3_59484_44764816 | NC_021163.1    | Ca_kabuli_chr04 | 44764816                | AA                              | TT                | 1945971523               |
| SNP_P3_59485_44764817 | NC_021163.1    | Ca_kabuli_chr04 | 44764817                | TT                              | AA                | 1945971693               |
| SNP_P3_59486_44765129 | NC_021163.1    | Ca_kabuli_chr04 | 44765129                | AA                              | GG                | 1945971884               |
| SNP_P3_59487_44765160 | NC_021163.1    | Ca_kabuli_chr04 | 44765160                | AA                              | GG                | 1945972073               |
| SNP_P3_59488_44765163 | NC_021163.1    | Ca_kabuli_chr04 | 44765163                | CC                              | TT                | 1945972250               |
| SNP_P3_59489_44765168 | NC_021163.1    | Ca_kabuli_chr04 | 44765168                | CC                              | TT                | 1945972442               |
| SNP_P3_59490_44765202 | NC_021163.1    | Ca_kabuli_chr04 | 44765202                | TT                              | CC                | 1945972626               |
| SNP_P3_59491_44765451 | NC_021163.1    | Ca_kabuli_chr04 | 44765451                | GG                              | CC                | 1945972816               |
| SNP_P3_59492_44765535 | NC_021163.1    | Ca_kabuli_chr04 | 44765535                | TT                              | CC                | 1945972998               |

| SNPs IDs              | Chromosome IDs | Chromosomes     | Physical positions (bp) | CDC Frontier (Reference genome) | (Pusa 256 & HPNB) | NCBI SNPdb Accession IDs |
|-----------------------|----------------|-----------------|-------------------------|---------------------------------|-------------------|--------------------------|
| SNP_P3_59493_44765747 | NC_021163.1    | Ca_kabuli_chr04 | 44765747                | TT                              | CC                | 1945973167               |
| SNP_P3_59494_44765769 | NC_021163.1    | Ca_kabuli_chr04 | 44765769                | GG                              | AA                | 1945973342               |
| SNP_P3_59495_44765835 | NC_021163.1    | Ca_kabuli_chr04 | 44765835                | TT                              | CC                | 1945973521               |
| SNP_P3_59496_44765891 | NC_021163.1    | Ca_kabuli_chr04 | 44765891                | CC                              | TT                | 1945973697               |
| SNP_P3_59497_44766044 | NC_021163.1    | Ca_kabuli_chr04 | 44766044                | AA                              | GG                | 1945973862               |
| SNP_P3_59498_44766416 | NC_021163.1    | Ca_kabuli_chr04 | 44766416                | CC                              | TT                | 1945974034               |
| SNP_P3_59499_44766673 | NC_021163.1    | Ca_kabuli_chr04 | 44766673                | TT                              | CC                | 1945974217               |
| SNP_P3_59500_44766725 | NC_021163.1    | Ca_kabuli_chr04 | 44766725                | GG                              | AA                | 1945974402               |
| SNP_P3_59502_44767050 | NC_021163.1    | Ca_kabuli_chr04 | 44767050                | GG                              | AA                | 1945974414               |
| SNP_P3_59503_44767072 | NC_021163.1    | Ca_kabuli_chr04 | 44767072                | TT                              | CC                | 1945974416               |
| SNP_P3_59504_44767926 | NC_021163.1    | Ca_kabuli_chr04 | 44767926                | GG                              | AA                | 1945974417               |
| SNP_P3_59505_44767991 | NC_021163.1    | Ca_kabuli_chr04 | 44767991                | TT                              | CC                | 1945974419               |
| SNP_P3_59506_44768002 | NC_021163.1    | Ca_kabuli_chr04 | 44768002                | TT                              | CC                | 1945974421               |
| SNP_P3_59507_44768172 | NC_021163.1    | Ca_kabuli_chr04 | 44768172                | GG                              | AA                | 1945974615               |
| SNP_P3_59508_44770452 | NC_021163.1    | Ca_kabuli_chr04 | 44770452                | GG                              | AA                | 1945974799               |
| SNP_P3_59509_44770981 | NC_021163.1    | Ca_kabuli_chr04 | 44770981                | GG                              | AA                | 1945974944               |
| SNP_P3_59510_44771276 | NC_021163.1    | Ca_kabuli_chr04 | 44771276                | TT                              | GG                | 1945975128               |
| SNP_P3_59512_44771561 | NC_021163.1    | Ca_kabuli_chr04 | 44771561                | AA                              | GG                | 1945975315               |
| SNP_P3_59513_44771571 | NC_021163.1    | Ca_kabuli_chr04 | 44771571                | CC                              | TT                | 1945975503               |
| SNP_P3_59514_44771770 | NC_021163.1    | Ca_kabuli_chr04 | 44771770                | AA                              | CC                | 1945975694               |
| SNP_P3_59515_44771781 | NC_021163.1    | Ca_kabuli_chr04 | 44771781                | GG                              | AA                | 1945975888               |
| SNP_P3_59516_44771788 | NC_021163.1    | Ca_kabuli_chr04 | 44771788                | CC                              | TT                | 1945976083               |
| SNP_P3_59517_44772416 | NC_021163.1    | Ca_kabuli_chr04 | 44772416                | TT                              | CC                | 1945976279               |
| SNP_P3_59518_44773259 | NC_021163.1    | Ca_kabuli_chr04 | 44773259                | AA                              | GG                | 1945976457               |
| SNP_P3_59519_44773285 | NC_021163.1    | Ca_kabuli_chr04 | 44773285                | CC                              | TT                | 1945976648               |
| SNP_P3_59520_44773967 | NC_021163.1    | Ca_kabuli_chr04 | 44773967                | AA                              | GG                | 1945976756               |
| SNP_P3_59521_44774114 | NC_021163.1    | Ca_kabuli_chr04 | 44774114                | GG                              | CC                | 1945976902               |
| SNP_P3_59522_44776440 | NC_021163.1    | Ca_kabuli_chr04 | 44776440                | AA                              | GG                | 1945977071               |
| SNP_P3_59523_44776447 | NC_021163.1    | Ca_kabuli_chr04 | 44776447                | AA                              | TT                | 1945977246               |
| SNP_P3_59524_44776698 | NC_021163.1    | Ca_kabuli_chr04 | 44776698                | TT                              | CC                | 1945977434               |
| SNP_P3_59525_44776701 | NC_021163.1    | Ca_kabuli_chr04 | 44776701                | CC                              | TT                | 1945977619               |
| SNP_P3_59526_44776825 | NC_021163.1    | Ca_kabuli_chr04 | 44776825                | GG                              | AA                | 1945977806               |
| SNP_P3_59528_44776907 | NC_021163.1    | Ca_kabuli_chr04 | 44776907                | CC                              | AA                | 1945977995               |
| SNP_P3_59529_44777038 | NC_021163.1    | Ca_kabuli_chr04 | 44777038                | AA                              | GG                | 1945978161               |
| SNP_P3_59530_44777076 | NC_021163.1    | Ca_kabuli_chr04 | 44777076                | CC                              | TT                | 1945978352               |
| SNP_P3_59531_44777310 | NC_021163.1    | Ca_kabuli_chr04 | 44777310                | CC                              | TT                | 1945978542               |
| SNP_P3_59532_44777502 | NC_021163.1    | Ca_kabuli_chr04 | 44777502                | TT                              | CC                | 1945978736               |
| SNP_P3_59533_44777503 | NC_021163.1    | Ca_kabuli_chr04 | 44777503                | GG                              | AA                | 1945978901               |
| SNP_P3_59534_44777519 | NC_021163.1    | Ca_kabuli_chr04 | 44777519                | AA                              | GG                | 1945979056               |
| SNP_P3_59535_44777520 | NC_021163.1    | Ca_kabuli_chr04 | 44777520                | TT                              | AA                | 1945979244               |
| SNP_P3_59536_44777657 | NC_021163.1    | Ca_kabuli_chr04 | 44777657                | CC                              | TT                | 1945979410               |
| SNP_P3_59537_44777706 | NC_021163.1    | Ca_kabuli_chr04 | 44777706                | GG                              | AA                | 1945979596               |



| SNPs IDs              | Chromosome IDs | Chromosomes     | Physical positions (bp) | CDC Frontier (Reference genome) | (Pusa 256 & HPNB) | NCBI SNPdb Accession IDs |
|-----------------------|----------------|-----------------|-------------------------|---------------------------------|-------------------|--------------------------|
| SNP_P3_59538_44777831 | NC_021163.1    | Ca_kabuli_chr04 | 44777831                | AA                              | GG                | 1945979783               |
| SNP_P3_59539_44778599 | NC_021163.1    | Ca_kabuli_chr04 | 44778599                | GG                              | AA                | 1945979959               |
| SNP_P3_59540_44778606 | NC_021163.1    | Ca_kabuli_chr04 | 44778606                | AA                              | GG                | 1945980130               |
| SNP_P3_59541_44779397 | NC_021163.1    | Ca_kabuli_chr04 | 44779397                | TT                              | GG                | 1945980310               |
| SNP_P3_59542_44779559 | NC_021163.1    | Ca_kabuli_chr04 | 44779559                | CC                              | TT                | 1945980500               |
| SNP_P3_59543_44779602 | NC_021163.1    | Ca_kabuli_chr04 | 44779602                | GG                              | AA                | 1945980693               |
| SNP_P3_59544_44780757 | NC_021163.1    | Ca_kabuli_chr04 | 44780757                | TT                              | GG                | 1945980870               |
| SNP_P3_59545_44781275 | NC_021163.1    | Ca_kabuli_chr04 | 44781275                | GG                              | AA                | 1945981015               |
| SNP_P3_59546_44783831 | NC_021163.1    | Ca_kabuli_chr04 | 44783831                | AA                              | GG                | 1945981202               |
| SNP_P3_59547_44785153 | NC_021163.1    | Ca_kabuli_chr04 | 44785153                | CC                              | TT                | 1945981372               |
| SNP_P3_59548_44785477 | NC_021163.1    | Ca_kabuli_chr04 | 44785477                | TT                              | AA                | 1945981564               |
| SNP_P3_59549_44786246 | NC_021163.1    | Ca_kabuli_chr04 | 44786246                | CC                              | TT                | 1945981744               |
| SNP_P3_59550_44786724 | NC_021163.1    | Ca_kabuli_chr04 | 44786724                | TT                              | CC                | 1945981926               |
| SNP_P3_59551_44786727 | NC_021163.1    | Ca_kabuli_chr04 | 44786727                | GG                              | TT                | 1945982075               |
| SNP_P3_59552_44786742 | NC_021163.1    | Ca_kabuli_chr04 | 44786742                | TT                              | AA                | 1945982259               |
| SNP_P3_59553_44787133 | NC_021163.1    | Ca_kabuli_chr04 | 44787133                | AA                              | GG                | 1945982430               |
| SNP_P3_59555_44789117 | NC_021163.1    | Ca_kabuli_chr04 | 44789117                | TT                              | CC                | 1945982606               |
| SNP_P3_59556_44790618 | NC_021163.1    | Ca_kabuli_chr04 | 44790618                | TT                              | CC                | 1945982791               |
| SNP_P3_59557_44790886 | NC_021163.1    | Ca_kabuli_chr04 | 44790886                | AA                              | GG                | 1945982988               |
| SNP_P3_59558_44793454 | NC_021163.1    | Ca_kabuli_chr04 | 44793454                | TT                              | CC                | 1945983167               |
| SNP_P3_59559_44793456 | NC_021163.1    | Ca_kabuli_chr04 | 44793456                | CC                              | AA                | 1945983356               |
| SNP_P3_59560_44793493 | NC_021163.1    | Ca_kabuli_chr04 | 44793493                | AA                              | TT                | 1945983523               |
| SNP_P3_59561_44793494 | NC_021163.1    | Ca_kabuli_chr04 | 44793494                | AA                              | GG                | 1945983717               |
| SNP_P3_59562_44793496 | NC_021163.1    | Ca_kabuli_chr04 | 44793496                | AA                              | GG                | 1945983886               |
| SNP_P3_59563_44793502 | NC_021163.1    | Ca_kabuli_chr04 | 44793502                | AA                              | TT                | 1945984077               |
| SNP_P3_59564_44794226 | NC_021163.1    | Ca_kabuli_chr04 | 44794226                | GG                              | TT                | 1945984262               |
| SNP_P3_59565_44794309 | NC_021163.1    | Ca_kabuli_chr04 | 44794309                | TT                              | CC                | 1945984440               |
| SNP_P3_59566_44794454 | NC_021163.1    | Ca_kabuli_chr04 | 44794454                | TT                              | AA                | 1945984594               |
| SNP_P3_59567_44794529 | NC_021163.1    | Ca_kabuli_chr04 | 44794529                | AA                              | TT                | 1945984781               |
| SNP_P3_59568_44794710 | NC_021163.1    | Ca_kabuli_chr04 | 44794710                | AA                              | TT                | 1945984876               |
| SNP_P3_59569_44794838 | NC_021163.1    | Ca_kabuli_chr04 | 44794838                | CC                              | TT                | 1945985049               |
| SNP_P3_59570_44794842 | NC_021163.1    | Ca_kabuli_chr04 | 44794842                | TT                              | CC                | 1945985235               |
| SNP_P3_59571_44794851 | NC_021163.1    | Ca_kabuli_chr04 | 44794851                | CC                              | TT                | 1945985429               |
| SNP_P3_59572_44795740 | NC_021163.1    | Ca_kabuli_chr04 | 44795740                | GG                              | AA                | 1945985615               |
| SNP_P3_59573_44795791 | NC_021163.1    | Ca_kabuli_chr04 | 44795791                | CC                              | AA                | 1945985792               |
| SNP_P3_59574_44797222 | NC_021163.1    | Ca_kabuli_chr04 | 44797222                | TT                              | CC                | 1945985952               |
| SNP_P3_59575_44797516 | NC_021163.1    | Ca_kabuli_chr04 | 44797516                | AA                              | GG                | 1945986139               |
| SNP_P3_59576_44797690 | NC_021163.1    | Ca_kabuli_chr04 | 44797690                | GG                              | AA                | 1945986318               |
| SNP_P3_59577_44797827 | NC_021163.1    | Ca_kabuli_chr04 | 44797827                | AA                              | GG                | 1945986501               |
| SNP_P3_59578_44797828 | NC_021163.1    | Ca_kabuli_chr04 | 44797828                | AA                              | GG                | 1945986693               |
| SNP_P3_59579_44798592 | NC_021163.1    | Ca_kabuli_chr04 | 44798592                | TT                              | CC                | 1945986864               |
| SNP_P3_59580_44799469 | NC_021163.1    | Ca_kabuli_chr04 | 44799469                | CC                              | TT                | 1945987053               |

| SNPs IDs              | Chromosome IDs | Chromosomes     | Physical positions (bp) | CDC Frontier (Reference genome) | (Pusa 256 & HPNB) | NCBI SNPdb Accession IDs |
|-----------------------|----------------|-----------------|-------------------------|---------------------------------|-------------------|--------------------------|
| SNP_P3_59581_44799515 | NC_021163.1    | Ca_kabuli_chr04 | 44799515                | TT                              | GG                | 1945987227               |
| SNP_P3_59582_44799516 | NC_021163.1    | Ca_kabuli_chr04 | 44799516                | GG                              | AA                | 1945987424               |
| SNP_P3_59583_44802364 | NC_021163.1    | Ca_kabuli_chr04 | 44802364                | AA                              | CC                | 1945987613               |
| SNP_P3_59584_44810563 | NC_021163.1    | Ca_kabuli_chr04 | 44810563                | CC                              | TT                | 1945987806               |
| SNP_P3_59585_44810634 | NC_021163.1    | Ca_kabuli_chr04 | 44810634                | CC                              | TT                | 1945987998               |
| SNP_P3_59586_44816284 | NC_021163.1    | Ca_kabuli_chr04 | 44816284                | CC                              | TT                | 1945988197               |
| SNP_P3_59587_44816551 | NC_021163.1    | Ca_kabuli_chr04 | 44816551                | TT                              | AA                | 1945988377               |
| SNP_P3_59588_44819556 | NC_021163.1    | Ca_kabuli_chr04 | 44819556                | GG                              | AA                | 1945988561               |
| SNP_P3_59589_44819602 | NC_021163.1    | Ca_kabuli_chr04 | 44819602                | AA                              | GG                | 1945988753               |
| SNP_P3_59590_44819653 | NC_021163.1    | Ca_kabuli_chr04 | 44819653                | AA                              | GG                | 1945988951               |
| SNP_P3_59591_44819671 | NC_021163.1    | Ca_kabuli_chr04 | 44819671                | CC                              | TT                | 1945989144               |
| SNP_P3_59592_44819682 | NC_021163.1    | Ca_kabuli_chr04 | 44819682                | AA                              | GG                | 1945989327               |
| SNP_P3_59593_44819870 | NC_021163.1    | Ca_kabuli_chr04 | 44819870                | AA                              | GG                | 1945989472               |
| SNP_P3_59594_44819915 | NC_021163.1    | Ca_kabuli_chr04 | 44819915                | CC                              | TT                | 1945989671               |
| SNP_P3_59595_44819922 | NC_021163.1    | Ca_kabuli_chr04 | 44819922                | CC                              | AA                | 1945989848               |
| SNP_P3_59596_44819941 | NC_021163.1    | Ca_kabuli_chr04 | 44819941                | TT                              | CC                | 1945990036               |
| SNP_P3_59597_44819950 | NC_021163.1    | Ca_kabuli_chr04 | 44819950                | CC                              | GG                | 1945990232               |
| SNP_P3_59598_44820024 | NC_021163.1    | Ca_kabuli_chr04 | 44820024                | GG                              | TT                | 1945990415               |
| SNP_P3_59599_44820037 | NC_021163.1    | Ca_kabuli_chr04 | 44820037                | AA                              | GG                | 1945990610               |
| SNP_P3_59600_44820050 | NC_021163.1    | Ca_kabuli_chr04 | 44820050                | TT                              | CC                | 1945990799               |
| SNP_P3_59601_44833156 | NC_021163.1    | Ca_kabuli_chr04 | 44833156                | TT                              | CC                | 1945990989               |
| SNP_P3_59603_44833499 | NC_021163.1    | Ca_kabuli_chr04 | 44833499                | CC                              | GG                | 1945991173               |
| SNP_P3_59604_44835135 | NC_021163.1    | Ca_kabuli_chr04 | 44835135                | AA                              | GG                | 1945991342               |
| SNP_P3_59605_44835157 | NC_021163.1    | Ca_kabuli_chr04 | 44835157                | AA                              | GG                | 1945991535               |
| SNP_P3_59606_44835203 | NC_021163.1    | Ca_kabuli_chr04 | 44835203                | AA                              | GG                | 1945991730               |
| SNP_P3_59607_44835207 | NC_021163.1    | Ca_kabuli_chr04 | 44835207                | AA                              | GG                | 1945991882               |
| SNP_P3_59608_44836319 | NC_021163.1    | Ca_kabuli_chr04 | 44836319                | GG                              | TT                | 1945992079               |
| SNP_P3_59609_44836328 | NC_021163.1    | Ca_kabuli_chr04 | 44836328                | CC                              | GG                | 1945992251               |
| SNP_P3_59610_44836367 | NC_021163.1    | Ca_kabuli_chr04 | 44836367                | CC                              | TT                | 1945992697               |
| SNP_P3_59611_44836845 | NC_021163.1    | Ca_kabuli_chr04 | 44836845                | TT                              | AA                | 1945992864               |
| SNP_P3_59612_44837685 | NC_021163.1    | Ca_kabuli_chr04 | 44837685                | CC                              | TT                | 1945993057               |
| SNP_P3_59613_44838554 | NC_021163.1    | Ca_kabuli_chr04 | 44838554                | CC                              | TT                | 1945993221               |
| SNP_P3_59615_44838938 | NC_021163.1    | Ca_kabuli_chr04 | 44838938                | CC                              | TT                | 1945993422               |
| SNP_P3_59616_44839016 | NC_021163.1    | Ca_kabuli_chr04 | 44839016                | TT                              | CC                | 1945993606               |
| SNP_P3_59617_44839069 | NC_021163.1    | Ca_kabuli_chr04 | 44839069                | AA                              | GG                | 1945993794               |
| SNP_P3_59618_44839199 | NC_021163.1    | Ca_kabuli_chr04 | 44839199                | GG                              | AA                | 1945993991               |
| SNP_P3_59619_44839225 | NC_021163.1    | Ca_kabuli_chr04 | 44839225                | GG                              | TT                | 1945994177               |
| SNP_P3_59620_44839243 | NC_021163.1    | Ca_kabuli_chr04 | 44839243                | GG                              | AA                | 1945994364               |
| SNP_P3_59621_44839279 | NC_021163.1    | Ca_kabuli_chr04 | 44839279                | GG                              | AA                | 1945994552               |
| SNP_P3_59622_44839297 | NC_021163.1    | Ca_kabuli_chr04 | 44839297                | TT                              | AA                | 1945994741               |
| SNP_P3_59623_44839338 | NC_021163.1    | Ca_kabuli_chr04 | 44839338                | GG                              | AA                | 1945994925               |
| SNP_P3_59624_44839350 | NC_021163.1    | Ca_kabuli_chr04 | 44839350                | AA                              | TT                | 1945995106               |

| SNPs IDs              | Chromosome IDs | Chromosomes     | Physical positions (bp) | CDC Frontier (Reference genome) | (Pusa 256 & HPNB) | NCBI SNPdb Accession IDs |
|-----------------------|----------------|-----------------|-------------------------|---------------------------------|-------------------|--------------------------|
| SNP_P3_59625_44839568 | NC_021163.1    | Ca_kabuli_chr04 | 44839568                | GG                              | TT                | 1945995272               |
| SNP_P3_59626_44842882 | NC_021163.1    | Ca_kabuli_chr04 | 44842882                | TT                              | CC                | 1945995455               |
| SNP_P3_59627_44842884 | NC_021163.1    | Ca_kabuli_chr04 | 44842884                | AA                              | GG                | 1945995655               |
| SNP_P3_59628_44843630 | NC_021163.1    | Ca_kabuli_chr04 | 44843630                | AA                              | TT                | 1945995843               |
| SNP_P3_59629_44843675 | NC_021163.1    | Ca_kabuli_chr04 | 44843675                | AA                              | GG                | 1945996015               |
| SNP_P3_59630_44844133 | NC_021163.1    | Ca_kabuli_chr04 | 44844133                | CC                              | TT                | 1945996211               |
| SNP_P3_59631_44844175 | NC_021163.1    | Ca_kabuli_chr04 | 44844175                | TT                              | CC                | 1945996268               |
| SNP_P3_59632_44844351 | NC_021163.1    | Ca_kabuli_chr04 | 44844351                | AA                              | GG                | 1945996358               |
| SNP_P3_59633_44844534 | NC_021163.1    | Ca_kabuli_chr04 | 44844534                | TT                              | CC                | 1945996520               |
| SNP_P3_59634_44844574 | NC_021163.1    | Ca_kabuli_chr04 | 44844574                | CC                              | TT                | 1945996714               |
| SNP_P3_59635_44844589 | NC_021163.1    | Ca_kabuli_chr04 | 44844589                | CC                              | TT                | 1945996855               |
| SNP_P3_59636_44844608 | NC_021163.1    | Ca_kabuli_chr04 | 44844608                | GG                              | AA                | 1945997009               |
| SNP_P3_59637_44844613 | NC_021163.1    | Ca_kabuli_chr04 | 44844613                | AA                              | GG                | 1945997203               |
| SNP_P3_59638_44844632 | NC_021163.1    | Ca_kabuli_chr04 | 44844632                | GG                              | AA                | 1945997382               |
| SNP_P3_59639_44845587 | NC_021163.1    | Ca_kabuli_chr04 | 44845587                | TT                              | GG                | 1945997556               |
| SNP_P3_59640_44845595 | NC_021163.1    | Ca_kabuli_chr04 | 44845595                | TT                              | GG                | 1945997737               |
| SNP_P3_59642_44845904 | NC_021163.1    | Ca_kabuli_chr04 | 44845904                | CC                              | AA                | 1945997872               |
| SNP_P3_59643_44845912 | NC_021163.1    | Ca_kabuli_chr04 | 44845912                | CC                              | GG                | 1945998064               |
| SNP_P3_59644_44845915 | NC_021163.1    | Ca_kabuli_chr04 | 44845915                | GG                              | CC                | 1945998238               |
| SNP_P3_59645_44845937 | NC_021163.1    | Ca_kabuli_chr04 | 44845937                | TT                              | CC                | 1945998434               |
| SNP_P3_59646_44846745 | NC_021163.1    | Ca_kabuli_chr04 | 44846745                | TT                              | CC                | 1945998596               |
| SNP_P3_59647_44846909 | NC_021163.1    | Ca_kabuli_chr04 | 44846909                | CC                              | GG                | 1945998745               |
| SNP_P3_59648_44848278 | NC_021163.1    | Ca_kabuli_chr04 | 44848278                | TT                              | GG                | 1945998917               |
| SNP_P3_59649_44849271 | NC_021163.1    | Ca_kabuli_chr04 | 44849271                | AA                              | GG                | 1945999114               |
| SNP_P3_59650_44850278 | NC_021163.1    | Ca_kabuli_chr04 | 44850278                | CC                              | TT                | 1945999299               |
| SNP_P3_59652_44850500 | NC_021163.1    | Ca_kabuli_chr04 | 44850500                | CC                              | GG                | 1945999482               |
| SNP_P3_59653_44850841 | NC_021163.1    | Ca_kabuli_chr04 | 44850841                | TT                              | CC                | 1945999675               |
| SNP_P3_59654_44850880 | NC_021163.1    | Ca_kabuli_chr04 | 44850880                | CC                              | TT                | 1945999857               |
| SNP_P3_59655_44854233 | NC_021163.1    | Ca_kabuli_chr04 | 44854233                | TT                              | AA                | 1946000051               |
| SNP_P3_59656_44854409 | NC_021163.1    | Ca_kabuli_chr04 | 44854409                | AA                              | TT                | 1946000237               |
| SNP_P3_59657_44854674 | NC_021163.1    | Ca_kabuli_chr04 | 44854674                | AA                              | CC                | 1946000413               |
| SNP_P3_59658_44855655 | NC_021163.1    | Ca_kabuli_chr04 | 44855655                | CC                              | TT                | 1946000586               |
| SNP_P3_59659_44855687 | NC_021163.1    | Ca_kabuli_chr04 | 44855687                | TT                              | AA                | 1946000769               |
| SNP_P3_59660_44855737 | NC_021163.1    | Ca_kabuli_chr04 | 44855737                | CC                              | TT                | 1946000956               |
| SNP_P3_59661_44855833 | NC_021163.1    | Ca_kabuli_chr04 | 44855833                | TT                              | CC                | 1946001146               |
| SNP_P3_59662_44855903 | NC_021163.1    | Ca_kabuli_chr04 | 44855903                | TT                              | AA                | 1946001336               |
| SNP_P3_59663_44855920 | NC_021163.1    | Ca_kabuli_chr04 | 44855920                | GG                              | AA                | 1946001527               |
| SNP_P3_59664_44856563 | NC_021163.1    | Ca_kabuli_chr04 | 44856563                | CC                              | TT                | 1946001710               |
| SNP_P3_59665_44856595 | NC_021163.1    | Ca_kabuli_chr04 | 44856595                | GG                              | TT                | 1946001873               |
| SNP_P3_59666_44856619 | NC_021163.1    | Ca_kabuli_chr04 | 44856619                | AA                              | GG                | 1946002021               |
| SNP_P3_59667_44856761 | NC_021163.1    | Ca_kabuli_chr04 | 44856761                | CC                              | AA                | 1946002176               |
| SNP_P3_59668_44856767 | NC_021163.1    | Ca_kabuli_chr04 | 44856767                | CC                              | TT                | 1946002371               |

| SNPs IDs              | Chromosome IDs | Chromosomes     | Physical positions (bp) | CDC Frontier (Reference genome) | (Pusa 256 & HPNB) | NCBI SNPdb Accession IDs |
|-----------------------|----------------|-----------------|-------------------------|---------------------------------|-------------------|--------------------------|
| SNP_P3_59669_44856772 | NC_021163.1    | Ca_kabuli_chr04 | 44856772                | TT                              | CC                | 1946002558               |
| SNP_P3_59670_44856914 | NC_021163.1    | Ca_kabuli_chr04 | 44856914                | AA                              | CC                | 1946002748               |
| SNP_P3_59671_44857797 | NC_021163.1    | Ca_kabuli_chr04 | 44857797                | GG                              | CC                | 1946002909               |
| SNP_P3_59672_44857803 | NC_021163.1    | Ca_kabuli_chr04 | 44857803                | TT                              | CC                | 1946003058               |
| SNP_P3_59673_44859340 | NC_021163.1    | Ca_kabuli_chr04 | 44859340                | GG                              | TT                | 1946003247               |
| SNP_P3_59674_44861321 | NC_021163.1    | Ca_kabuli_chr04 | 44861321                | AA                              | GG                | 1946003434               |
| SNP_P3_59675_44861486 | NC_021163.1    | Ca_kabuli_chr04 | 44861486                | CC                              | GG                | 1946003601               |
| SNP_P3_59676_44862904 | NC_021163.1    | Ca_kabuli_chr04 | 44862904                | AA                              | TT                | 1946003784               |
| SNP_P3_59678_44863329 | NC_021163.1    | Ca_kabuli_chr04 | 44863329                | TT                              | CC                | 1946003968               |
| SNP_P3_59679_44863333 | NC_021163.1    | Ca_kabuli_chr04 | 44863333                | AA                              | TT                | 1946004157               |
| SNP_P3_59680_44863601 | NC_021163.1    | Ca_kabuli_chr04 | 44863601                | GG                              | AA                | 1946004350               |
| SNP_P3_59681_44863616 | NC_021163.1    | Ca_kabuli_chr04 | 44863616                | TT                              | CC                | 1946004531               |
| SNP_P3_59682_44864267 | NC_021163.1    | Ca_kabuli_chr04 | 44864267                | GG                              | AA                | 1946004705               |
| SNP_P3_59683_44864289 | NC_021163.1    | Ca_kabuli_chr04 | 44864289                | TT                              | CC                | 1946004838               |
| SNP_P3_59684_44864300 | NC_021163.1    | Ca_kabuli_chr04 | 44864300                | TT                              | GG                | 1946005022               |
| SNP_P3_59685_44864304 | NC_021163.1    | Ca_kabuli_chr04 | 44864304                | TT                              | CC                | 1946005199               |
| SNP_P3_59686_44864468 | NC_021163.1    | Ca_kabuli_chr04 | 44864468                | AA                              | TT                | 1946005377               |
| SNP_P3_59687_44864596 | NC_021163.1    | Ca_kabuli_chr04 | 44864596                | AA                              | GG                | 1946005563               |
| SNP_P3_59688_44864601 | NC_021163.1    | Ca_kabuli_chr04 | 44864601                | CC                              | GG                | 1946005747               |
| SNP_P3_59689_44865191 | NC_021163.1    | Ca_kabuli_chr04 | 44865191                | CC                              | TT                | 1946005828               |
| SNP_P3_59690_44865472 | NC_021163.1    | Ca_kabuli_chr04 | 44865472                | TT                              | CC                | 1946005929               |
| SNP_P3_59691_44865484 | NC_021163.1    | Ca_kabuli_chr04 | 44865484                | AA                              | GG                | 1946006119               |
| SNP_P3_59693_44865527 | NC_021163.1    | Ca_kabuli_chr04 | 44865527                | TT                              | CC                | 1946006299               |
| SNP_P3_59694_44865731 | NC_021163.1    | Ca_kabuli_chr04 | 44865731                | GG                              | AA                | 1946006467               |
| SNP_P3_59695_44866035 | NC_021163.1    | Ca_kabuli_chr04 | 44866035                | GG                              | TT                | 1946006649               |
| SNP_P3_59696_44866265 | NC_021163.1    | Ca_kabuli_chr04 | 44866265                | AA                              | TT                | 1946006840               |
| SNP_P3_59697_44866567 | NC_021163.1    | Ca_kabuli_chr04 | 44866567                | AA                              | GG                | 1946006854               |
| SNP_P3_59698_44868431 | NC_021163.1    | Ca_kabuli_chr04 | 44868431                | TT                              | GG                | 1946006994               |
| SNP_P3_59699_44868432 | NC_021163.1    | Ca_kabuli_chr04 | 44868432                | AA                              | TT                | 1946007155               |
| SNP_P3_59702_44872157 | NC_021163.1    | Ca_kabuli_chr04 | 44872157                | AA                              | GG                | 1946007282               |
| SNP_P3_59703_44872230 | NC_021163.1    | Ca_kabuli_chr04 | 44872230                | AA                              | GG                | 1946007284               |
| SNP_P3_59704_44872237 | NC_021163.1    | Ca_kabuli_chr04 | 44872237                | CC                              | TT                | 1946007450               |
| SNP_P3_59705_44872500 | NC_021163.1    | Ca_kabuli_chr04 | 44872500                | GG                              | TT                | 1946007589               |
| SNP_P3_59706_44873502 | NC_021163.1    | Ca_kabuli_chr04 | 44873502                | GG                              | AA                | 1946007591               |
| SNP_P3_59708_44873753 | NC_021163.1    | Ca_kabuli_chr04 | 44873753                | CC                              | TT                | 1946007733               |
| SNP_P3_59709_44875563 | NC_021163.1    | Ca_kabuli_chr04 | 44875563                | TT                              | AA                | 1946007822               |
| SNP_P3_59710_44876217 | NC_021163.1    | Ca_kabuli_chr04 | 44876217                | AA                              | TT                | 1946007824               |
| SNP_P3_59711_44876552 | NC_021163.1    | Ca_kabuli_chr04 | 44876552                | CC                              | TT                | 1946007891               |
| SNP_P3_59712_44880348 | NC_021163.1    | Ca_kabuli_chr04 | 44880348                | AA                              | GG                | 1946008090               |
| SNP_P3_59713_44881440 | NC_021163.1    | Ca_kabuli_chr04 | 44881440                | AA                              | GG                | 1946008276               |
| SNP_P3_59714_44881922 | NC_021163.1    | Ca_kabuli_chr04 | 44881922                | GG                              | TT                | 1946008425               |
| SNP_P3_59715_44881972 | NC_021163.1    | Ca_kabuli_chr04 | 44881972                | CC                              | TT                | 1946008551               |

| SNPs IDs              | Chromosome IDs | Chromosomes     | Physical positions (bp) | CDC Frontier (Reference genome) | (Pusa 256 & HPNB) | NCBI SNPdb Accession IDs |
|-----------------------|----------------|-----------------|-------------------------|---------------------------------|-------------------|--------------------------|
| SNP_P3_59716_44882262 | NC_021163.1    | Ca_kabuli_chr04 | 44882262                | TT                              | CC                | 1946008695               |
| SNP_P3_59717_44884656 | NC_021163.1    | Ca_kabuli_chr04 | 44884656                | GG                              | AA                | 1946008837               |
| SNP_P3_59718_44886049 | NC_021163.1    | Ca_kabuli_chr04 | 44886049                | GG                              | AA                | 1946008976               |
| SNP_P3_59719_44886066 | NC_021163.1    | Ca_kabuli_chr04 | 44886066                | CC                              | TT                | 1946009141               |
| SNP_P3_59720_44886146 | NC_021163.1    | Ca_kabuli_chr04 | 44886146                | TT                              | CC                | 1946009255               |
| SNP_P3_59721_44886364 | NC_021163.1    | Ca_kabuli_chr04 | 44886364                | AA                              | GG                | 1946009377               |
| SNP_P3_59722_44886373 | NC_021163.1    | Ca_kabuli_chr04 | 44886373                | TT                              | CC                | 1946009541               |
| SNP_P3_59723_44886377 | NC_021163.1    | Ca_kabuli_chr04 | 44886377                | TT                              | CC                | 1946009714               |
| SNP_P3_59724_44886741 | NC_021163.1    | Ca_kabuli_chr04 | 44886741                | TT                              | GG                | 1946009886               |
| SNP_P3_59726_44887323 | NC_021163.1    | Ca_kabuli_chr04 | 44887323                | AA                              | GG                | 1946010068               |
| SNP_P3_59727_44887326 | NC_021163.1    | Ca_kabuli_chr04 | 44887326                | TT                              | GG                | 1946010305               |
| SNP_P3_59728_44887356 | NC_021163.1    | Ca_kabuli_chr04 | 44887356                | CC                              | GG                | 1946010544               |
| SNP_P3_59730_44887869 | NC_021163.1    | Ca_kabuli_chr04 | 44887869                | AA                              | CC                | 1946010719               |
| SNP_P3_59731_44887876 | NC_021163.1    | Ca_kabuli_chr04 | 44887876                | TT                              | AA                | 1946010891               |
| SNP_P3_59732_44889398 | NC_021163.1    | Ca_kabuli_chr04 | 44889398                | AA                              | TT                | 1946011068               |
| SNP_P3_59733_44889413 | NC_021163.1    | Ca_kabuli_chr04 | 44889413                | CC                              | TT                | 1946011249               |
| SNP_P3_59734_44889415 | NC_021163.1    | Ca_kabuli_chr04 | 44889415                | GG                              | TT                | 1946011440               |
| SNP_P3_59735_44889438 | NC_021163.1    | Ca_kabuli_chr04 | 44889438                | TT                              | CC                | 1946011632               |
| SNP_P3_59736_44889549 | NC_021163.1    | Ca_kabuli_chr04 | 44889549                | TT                              | GG                | 1946011809               |
| SNP_P3_59737_44889897 | NC_021163.1    | Ca_kabuli_chr04 | 44889897                | TT                              | CC                | 1946011988               |
| SNP_P3_59738_44890639 | NC_021163.1    | Ca_kabuli_chr04 | 44890639                | CC                              | TT                | 1946012168               |
| SNP_P3_59739_44891003 | NC_021163.1    | Ca_kabuli_chr04 | 44891003                | TT                              | CC                | 1946012324               |
| SNP_P3_59742_44898354 | NC_021163.1    | Ca_kabuli_chr04 | 44898354                | GG                              | TT                | 1946012493               |
| SNP_P3_59743_44898416 | NC_021163.1    | Ca_kabuli_chr04 | 44898416                | AA                              | GG                | 1946012643               |
| SNP_P3_59744_44900171 | NC_021163.1    | Ca_kabuli_chr04 | 44900171                | GG                              | AA                | 1946012813               |
| SNP_P3_59745_44900335 | NC_021163.1    | Ca_kabuli_chr04 | 44900335                | AA                              | TT                | 1946013010               |
| SNP_P3_59746_44900856 | NC_021163.1    | Ca_kabuli_chr04 | 44900856                | CC                              | GG                | 1946013207               |
| SNP_P3_59747_44900968 | NC_021163.1    | Ca_kabuli_chr04 | 44900968                | AA                              | TT                | 1946013400               |
| SNP_P3_59748_44900990 | NC_021163.1    | Ca_kabuli_chr04 | 44900990                | AA                              | TT                | 1946013589               |
| SNP_P3_59750_44901199 | NC_021163.1    | Ca_kabuli_chr04 | 44901199                | AA                              | GG                | 1946013735               |
| SNP_P3_59751_44901787 | NC_021163.1    | Ca_kabuli_chr04 | 44901787                | GG                              | AA                | 1946013922               |
| SNP_P3_59752_44901816 | NC_021163.1    | Ca_kabuli_chr04 | 44901816                | AA                              | TT                | 1946014120               |
| SNP_P3_59753_44903039 | NC_021163.1    | Ca_kabuli_chr04 | 44903039                | CC                              | GG                | 1946014291               |
| SNP_P3_59754_44904120 | NC_021163.1    | Ca_kabuli_chr04 | 44904120                | CC                              | TT                | 1946014467               |
| SNP_P3_59755_44904127 | NC_021163.1    | Ca_kabuli_chr04 | 44904127                | TT                              | CC                | 1946014629               |
| SNP_P3_59756_44904984 | NC_021163.1    | Ca_kabuli_chr04 | 44904984                | AA                              | GG                | 1946014817               |
| SNP_P3_59757_44904992 | NC_021163.1    | Ca_kabuli_chr04 | 44904992                | GG                              | AA                | 1946015015               |
| SNP_P3_59758_44905006 | NC_021163.1    | Ca_kabuli_chr04 | 44905006                | AA                              | TT                | 1946015071               |
| SNP_P3_59761_44905273 | NC_021163.1    | Ca_kabuli_chr04 | 44905273                | GG                              | CC                | 1946015174               |
| SNP_P3_59762_44905290 | NC_021163.1    | Ca_kabuli_chr04 | 44905290                | GG                              | AA                | 1946015341               |
| SNP_P3_59763_44905317 | NC_021163.1    | Ca_kabuli_chr04 | 44905317                | AA                              | TT                | 1946015540               |
| SNP_P3_59764_44905385 | NC_021163.1    | Ca_kabuli_chr04 | 44905385                | AA                              | GG                | 1946015737               |

| SNPs IDs              | Chromosome IDs | Chromosomes     | Physical positions (bp) | CDC Frontier (Reference genome) | (Pusa 256 & HPNB) | NCBI SNPdb Accession IDs |
|-----------------------|----------------|-----------------|-------------------------|---------------------------------|-------------------|--------------------------|
| SNP_P3_59765_44905447 | NC_021163.1    | Ca_kabuli_chr04 | 44905447                | GG                              | AA                | 1946015926               |
| SNP_P3_59766_44905811 | NC_021163.1    | Ca_kabuli_chr04 | 44905811                | GG                              | CC                | 1946016103               |
| SNP_P3_59767_44905814 | NC_021163.1    | Ca_kabuli_chr04 | 44905814                | TT                              | CC                | 1946016261               |
| SNP_P3_59768_44905938 | NC_021163.1    | Ca_kabuli_chr04 | 44905938                | AA                              | GG                | 1946016452               |
| SNP_P3_59769_44906255 | NC_021163.1    | Ca_kabuli_chr04 | 44906255                | AA                              | GG                | 1946016637               |
| SNP_P3_59770_44906617 | NC_021163.1    | Ca_kabuli_chr04 | 44906617                | TT                              | GG                | 1946016825               |
| SNP_P3_59771_44906930 | NC_021163.1    | Ca_kabuli_chr04 | 44906930                | GG                              | CC                | 1946016941               |
| SNP_P3_59772_44906932 | NC_021163.1    | Ca_kabuli_chr04 | 44906932                | TT                              | CC                | 1946017140               |
| SNP_P3_59773_44906937 | NC_021163.1    | Ca_kabuli_chr04 | 44906937                | TT                              | AA                | 1946017333               |
| SNP_P3_59774_44907108 | NC_021163.1    | Ca_kabuli_chr04 | 44907108                | CC                              | TT                | 1946017519               |
| SNP_P3_59775_44907530 | NC_021163.1    | Ca_kabuli_chr04 | 44907530                | CC                              | TT                | 1946017693               |
| SNP_P3_59776_44909661 | NC_021163.1    | Ca_kabuli_chr04 | 44909661                | CC                              | AA                | 1946017887               |
| SNP_P3_59777_44909668 | NC_021163.1    | Ca_kabuli_chr04 | 44909668                | AA                              | CC                | 1946018072               |
| SNP_P3_59778_44909684 | NC_021163.1    | Ca_kabuli_chr04 | 44909684                | GG                              | TT                | 1946018262               |
| SNP_P3_59779_44909694 | NC_021163.1    | Ca_kabuli_chr04 | 44909694                | AA                              | CC                | 1946018457               |
| SNP_P3_59780_44909712 | NC_021163.1    | Ca_kabuli_chr04 | 44909712                | AA                              | TT                | 1946018640               |
| SNP_P3_59781_44910163 | NC_021163.1    | Ca_kabuli_chr04 | 44910163                | CC                              | GG                | 1946018800               |
| SNP_P3_59782_44910177 | NC_021163.1    | Ca_kabuli_chr04 | 44910177                | GG                              | AA                | 1946018908               |
| SNP_P3_59783_44911157 | NC_021163.1    | Ca_kabuli_chr04 | 44911157                | TT                              | CC                | 1946019061               |
| SNP_P3_59784_44911180 | NC_021163.1    | Ca_kabuli_chr04 | 44911180                | GG                              | TT                | 1946019255               |
| SNP_P3_59785_44911190 | NC_021163.1    | Ca_kabuli_chr04 | 44911190                | GG                              | TT                | 1946019437               |
| SNP_P3_59786_44913269 | NC_021163.1    | Ca_kabuli_chr04 | 44913269                | CC                              | TT                | 1946019597               |
| SNP_P3_59787_44913321 | NC_021163.1    | Ca_kabuli_chr04 | 44913321                | TT                              | AA                | 1946019754               |
| SNP_P3_59788_44913356 | NC_021163.1    | Ca_kabuli_chr04 | 44913356                | CC                              | GG                | 1946019951               |
| SNP_P3_59789_44913762 | NC_021163.1    | Ca_kabuli_chr04 | 44913762                | AA                              | GG                | 1946020141               |
| SNP_P3_59790_44917187 | NC_021163.1    | Ca_kabuli_chr04 | 44917187                | AA                              | GG                | 1946020334               |
| SNP_P3_59792_44918612 | NC_021163.1    | Ca_kabuli_chr04 | 44918612                | GG                              | AA                | 1946020485               |
| SNP_P3_59793_44920630 | NC_021163.1    | Ca_kabuli_chr04 | 44920630                | CC                              | AA                | 1946020673               |
| SNP_P3_59794_44920893 | NC_021163.1    | Ca_kabuli_chr04 | 44920893                | GG                              | AA                | 1946020866               |
| SNP_P3_59795_44921315 | NC_021163.1    | Ca_kabuli_chr04 | 44921315                | GG                              | CC                | 1946021060               |
| SNP_P3_59796_44921335 | NC_021163.1    | Ca_kabuli_chr04 | 44921335                | GG                              | CC                | 1946021247               |
| SNP_P3_59797_44921563 | NC_021163.1    | Ca_kabuli_chr04 | 44921563                | TT                              | CC                | 1946021442               |
| SNP_P3_59798_44921594 | NC_021163.1    | Ca_kabuli_chr04 | 44921594                | AA                              | GG                | 1946021603               |
| SNP_P3_59799_44921629 | NC_021163.1    | Ca_kabuli_chr04 | 44921629                | CC                              | TT                | 1946021798               |
| SNP_P3_59800_44921635 | NC_021163.1    | Ca_kabuli_chr04 | 44921635                | TT                              | CC                | 1946021995               |
| SNP_P3_59801_44921649 | NC_021163.1    | Ca_kabuli_chr04 | 44921649                | GG                              | AA                | 1946022187               |
| SNP_P3_59802_44921652 | NC_021163.1    | Ca_kabuli_chr04 | 44921652                | CC                              | TT                | 1946022348               |
| SNP_P3_59803_44921664 | NC_021163.1    | Ca_kabuli_chr04 | 44921664                | TT                              | CC                | 1946022528               |
| SNP_P3_59804_44921667 | NC_021163.1    | Ca_kabuli_chr04 | 44921667                | CC                              | AA                | 1946022720               |
| SNP_P3_59805_44921685 | NC_021163.1    | Ca_kabuli_chr04 | 44921685                | CC                              | TT                | 1946022907               |
| SNP_P3_59806_44922212 | NC_021163.1    | Ca_kabuli_chr04 | 44922212                | GG                              | AA                | 1946023103               |
| SNP_P3_59808_44923617 | NC_021163.1    | Ca_kabuli_chr04 | 44923617                | TT                              | CC                | 1946023293               |

| SNPs IDs              | Chromosome IDs | Chromosomes     | Physical positions (bp) | CDC Frontier (Reference genome) | (Pusa 256 & HPNB) | NCBI SNPdb Accession IDs |
|-----------------------|----------------|-----------------|-------------------------|---------------------------------|-------------------|--------------------------|
| SNP_P3_59809_44923936 | NC_021163.1    | Ca_kabuli_chr04 | 44923936                | TT                              | CC                | 1946023414               |
| SNP_P3_59810_44924235 | NC_021163.1    | Ca_kabuli_chr04 | 44924235                | TT                              | CC                | 1946023611               |
| SNP_P3_59811_44924491 | NC_021163.1    | Ca_kabuli_chr04 | 44924491                | GG                              | AA                | 1946023809               |
| SNP_P3_59812_44924592 | NC_021163.1    | Ca_kabuli_chr04 | 44924592                | GG                              | AA                | 1946024007               |
| SNP_P3_59813_44924627 | NC_021163.1    | Ca_kabuli_chr04 | 44924627                | TT                              | AA                | 1946024190               |
| SNP_P3_59814_44925097 | NC_021163.1    | Ca_kabuli_chr04 | 44925097                | GG                              | AA                | 1946024365               |
| SNP_P3_59816_44927819 | NC_021163.1    | Ca_kabuli_chr04 | 44927819                | TT                              | GG                | 1946024553               |
| SNP_P3_59817_44929291 | NC_021163.1    | Ca_kabuli_chr04 | 44929291                | GG                              | TT                | 1946024751               |
| SNP_P3_59818_44932084 | NC_021163.1    | Ca_kabuli_chr04 | 44932084                | AA                              | TT                | 1946024772               |
| SNP_P3_59819_44932136 | NC_021163.1    | Ca_kabuli_chr04 | 44932136                | CC                              | TT                | 1946024955               |
| SNP_P3_59820_44932159 | NC_021163.1    | Ca_kabuli_chr04 | 44932159                | TT                              | AA                | 1946025154               |
| SNP_P3_59821_44932171 | NC_021163.1    | Ca_kabuli_chr04 | 44932171                | CC                              | TT                | 1946025353               |
| SNP_P3_59822_44932230 | NC_021163.1    | Ca_kabuli_chr04 | 44932230                | GG                              | CC                | 1946025546               |
| SNP_P3_59823_44933107 | NC_021163.1    | Ca_kabuli_chr04 | 44933107                | CC                              | GG                | 1946025745               |
| SNP_P3_59824_44933109 | NC_021163.1    | Ca_kabuli_chr04 | 44933109                | AA                              | CC                | 1946025939               |
| SNP_P3_59825_44933163 | NC_021163.1    | Ca_kabuli_chr04 | 44933163                | CC                              | TT                | 1946026119               |
| SNP_P3_59826_44933166 | NC_021163.1    | Ca_kabuli_chr04 | 44933166                | TT                              | CC                | 1946026315               |
| SNP_P3_59827_44933183 | NC_021163.1    | Ca_kabuli_chr04 | 44933183                | GG                              | AA                | 1946026505               |
| SNP_P3_59828_44933506 | NC_021163.1    | Ca_kabuli_chr04 | 44933506                | CC                              | AA                | 1946026696               |
| SNP_P3_59829_44933625 | NC_021163.1    | Ca_kabuli_chr04 | 44933625                | AA                              | GG                | 1946026888               |
| SNP_P3_59830_44933670 | NC_021163.1    | Ca_kabuli_chr04 | 44933670                | TT                              | CC                | 1946027060               |
| SNP_P3_59831_44933671 | NC_021163.1    | Ca_kabuli_chr04 | 44933671                | GG                              | AA                | 1946027257               |
| SNP_P3_59832_44933677 | NC_021163.1    | Ca_kabuli_chr04 | 44933677                | AA                              | GG                | 1946027455               |
| SNP_P3_59833_44933679 | NC_021163.1    | Ca_kabuli_chr04 | 44933679                | CC                              | TT                | 1946027653               |
| SNP_P3_59834_44933722 | NC_021163.1    | Ca_kabuli_chr04 | 44933722                | TT                              | CC                | 1946027821               |
| SNP_P3_59836_44934015 | NC_021163.1    | Ca_kabuli_chr04 | 44934015                | AA                              | TT                | 1946028003               |
| SNP_P3_59837_44934038 | NC_021163.1    | Ca_kabuli_chr04 | 44934038                | TT                              | GG                | 1946028195               |
| SNP_P3_59838_44935192 | NC_021163.1    | Ca_kabuli_chr04 | 44935192                | AA                              | TT                | 1946028391               |
| SNP_P3_59839_44935199 | NC_021163.1    | Ca_kabuli_chr04 | 44935199                | TT                              | CC                | 1946028590               |
| SNP_P3_59840_44935209 | NC_021163.1    | Ca_kabuli_chr04 | 44935209                | GG                              | AA                | 1946028773               |
| SNP_P3_59841_44935213 | NC_021163.1    | Ca_kabuli_chr04 | 44935213                | GG                              | CC                | 1946028976               |
| SNP_P3_59842_44935225 | NC_021163.1    | Ca_kabuli_chr04 | 44935225                | AA                              | TT                | 1946029146               |
| SNP_P3_59843_44935264 | NC_021163.1    | Ca_kabuli_chr04 | 44935264                | TT                              | AA                | 1946029341               |
| SNP_P3_59844_44935323 | NC_021163.1    | Ca_kabuli_chr04 | 44935323                | CC                              | AA                | 1946029527               |
| SNP_P3_59845_44936085 | NC_021163.1    | Ca_kabuli_chr04 | 44936085                | AA                              | TT                | 1946029701               |
| SNP_P3_59846_44936109 | NC_021163.1    | Ca_kabuli_chr04 | 44936109                | TT                              | CC                | 1946029878               |
| SNP_P3_59847_44936710 | NC_021163.1    | Ca_kabuli_chr04 | 44936710                | TT                              | GG                | 1946030044               |
| SNP_P3_59848_44937096 | NC_021163.1    | Ca_kabuli_chr04 | 44937096                | TT                              | CC                | 1946030236               |
| SNP_P3_59849_44937151 | NC_021163.1    | Ca_kabuli_chr04 | 44937151                | AA                              | TT                | 1946030422               |
| SNP_P3_59850_44939245 | NC_021163.1    | Ca_kabuli_chr04 | 44939245                | TT                              | AA                | 1946030620               |
| SNP_P3_59851_44939281 | NC_021163.1    | Ca_kabuli_chr04 | 44939281                | GG                              | AA                | 1946030775               |
| SNP_P3_59852_44939577 | NC_021163.1    | Ca_kabuli_chr04 | 44939577                | AA                              | GG                | 1946030968               |

| SNPs IDs              | Chromosome IDs | Chromosomes     | Physical positions (bp) | CDC Frontier (Reference genome) | (Pusa 256 & HPNB) | NCBI SNPdb Accession IDs |
|-----------------------|----------------|-----------------|-------------------------|---------------------------------|-------------------|--------------------------|
| SNP_P3_59853_44939579 | NC_021163.1    | Ca_kabuli_chr04 | 44939579                | AA                              | GG                | 1946031148               |
| SNP_P3_59854_44939587 | NC_021163.1    | Ca_kabuli_chr04 | 44939587                | TT                              | CC                | 1946031337               |
| SNP_P3_59855_44939615 | NC_021163.1    | Ca_kabuli_chr04 | 44939615                | TT                              | AA                | 1946031514               |
| SNP_P3_59857_44941310 | NC_021163.1    | Ca_kabuli_chr04 | 44941310                | CC                              | TT                | 1946031715               |
| SNP_P3_59858_44941340 | NC_021163.1    | Ca_kabuli_chr04 | 44941340                | GG                              | AA                | 1946031900               |
| SNP_P3_59859_44941610 | NC_021163.1    | Ca_kabuli_chr04 | 44941610                | TT                              | GG                | 1946032093               |
| SNP_P3_59860_44944705 | NC_021163.1    | Ca_kabuli_chr04 | 44944705                | GG                              | AA                | 1946032262               |
| SNP_P3_59861_44945086 | NC_021163.1    | Ca_kabuli_chr04 | 44945086                | GG                              | CC                | 1946032449               |
| SNP_P3_59862_44945415 | NC_021163.1    | Ca_kabuli_chr04 | 44945415                | CC                              | TT                | 1946032636               |
| SNP_P3_59863_44945713 | NC_021163.1    | Ca_kabuli_chr04 | 44945713                | CC                              | TT                | 1946032822               |
| SNP_P3_59864_44947874 | NC_021163.1    | Ca_kabuli_chr04 | 44947874                | GG                              | AA                | 1946032905               |
| SNP_P3_59865_44947878 | NC_021163.1    | Ca_kabuli_chr04 | 44947878                | AA                              | TT                | 1946033102               |
| SNP_P3_59866_44947888 | NC_021163.1    | Ca_kabuli_chr04 | 44947888                | CC                              | GG                | 1946033290               |
| SNP_P3_59867_44947898 | NC_021163.1    | Ca_kabuli_chr04 | 44947898                | GG                              | CC                | 1946033444               |
| SNP_P3_59868_44947939 | NC_021163.1    | Ca_kabuli_chr04 | 44947939                | CC                              | TT                | 1946033636               |
| SNP_P3_59869_44947940 | NC_021163.1    | Ca_kabuli_chr04 | 44947940                | GG                              | AA                | 1946033797               |
| SNP_P3_59870_44947941 | NC_021163.1    | Ca_kabuli_chr04 | 44947941                | AA                              | GG                | 1946033922               |
| SNP_P3_59871_44947952 | NC_021163.1    | Ca_kabuli_chr04 | 44947952                | CC                              | TT                | 1946034055               |
| SNP_P3_59872_44947994 | NC_021163.1    | Ca_kabuli_chr04 | 44947994                | CC                              | TT                | 1946034245               |
| SNP_P3_59873_44948019 | NC_021163.1    | Ca_kabuli_chr04 | 44948019                | GG                              | TT                | 1946034440               |
| SNP_P3_59875_44948233 | NC_021163.1    | Ca_kabuli_chr04 | 44948233                | TT                              | GG                | 1946034613               |
| SNP_P3_59876_44948245 | NC_021163.1    | Ca_kabuli_chr04 | 44948245                | TT                              | CC                | 1946034758               |
| SNP_P3_59877_44948264 | NC_021163.1    | Ca_kabuli_chr04 | 44948264                | GG                              | CC                | 1946034948               |
| SNP_P3_59878_44948321 | NC_021163.1    | Ca_kabuli_chr04 | 44948321                | TT                              | AA                | 1946035153               |
| SNP_P3_59879_44948974 | NC_021163.1    | Ca_kabuli_chr04 | 44948974                | GG                              | AA                | 1946035345               |
| SNP_P3_59881_44949277 | NC_021163.1    | Ca_kabuli_chr04 | 44949277                | AA                              | TT                | 1946035535               |
| SNP_P3_59882_44949312 | NC_021163.1    | Ca_kabuli_chr04 | 44949312                | GG                              | AA                | 1946035606               |
| SNP_P3_59883_44949619 | NC_021163.1    | Ca_kabuli_chr04 | 44949619                | TT                              | CC                | 1946035732               |
| SNP_P3_59884_44949620 | NC_021163.1    | Ca_kabuli_chr04 | 44949620                | CC                              | AA                | 1946035898               |
| SNP_P3_59885_44950035 | NC_021163.1    | Ca_kabuli_chr04 | 44950035                | CC                              | TT                | 1946036089               |
| SNP_P3_59886_44950094 | NC_021163.1    | Ca_kabuli_chr04 | 44950094                | AA                              | GG                | 1946036256               |
| SNP_P3_59887_44950138 | NC_021163.1    | Ca_kabuli_chr04 | 44950138                | GG                              | AA                | 1946036458               |
| SNP_P3_59888_44950413 | NC_021163.1    | Ca_kabuli_chr04 | 44950413                | CC                              | AA                | 1946036643               |
| SNP_P3_59889_44950446 | NC_021163.1    | Ca_kabuli_chr04 | 44950446                | TT                              | CC                | 1946036842               |
| SNP_P3_59890_44950448 | NC_021163.1    | Ca_kabuli_chr04 | 44950448                | AA                              | GG                | 1946037033               |
| SNP_P3_59891_44951384 | NC_021163.1    | Ca_kabuli_chr04 | 44951384                | AA                              | GG                | 1946037229               |
| SNP_P3_59892_44973477 | NC_021163.1    | Ca_kabuli_chr04 | 44973477                | TT                              | CC                | 1946037412               |
| SNP_P3_59893_44973518 | NC_021163.1    | Ca_kabuli_chr04 | 44973518                | TT                              | GG                | 1946037610               |
| SNP_P3_59894_44973560 | NC_021163.1    | Ca_kabuli_chr04 | 44973560                | CC                              | TT                | 1946037792               |
| SNP_P3_59895_44973703 | NC_021163.1    | Ca_kabuli_chr04 | 44973703                | TT                              | GG                | 1946037951               |
| SNP_P3_59896_44974976 | NC_021163.1    | Ca_kabuli_chr04 | 44974976                | CC                              | TT                | 1946038137               |
| SNP_P3_59897_45000653 | NC_021163.1    | Ca_kabuli_chr04 | 45000653                | GG                              | TT                | 1946038299               |



| SNPs IDs              | Chromosome IDs | Chromosomes     | Physical positions (bp) | CDC Frontier (Reference genome) | (Pusa 256 & HPNB) | NCBI SNPdb Accession IDs |
|-----------------------|----------------|-----------------|-------------------------|---------------------------------|-------------------|--------------------------|
| SNP_P3_59898_45012236 | NC_021163.1    | Ca_kabuli_chr04 | 45012236                | AA                              | GG                | 1946038490               |
| SNP_P3_59899_45048344 | NC_021163.1    | Ca_kabuli_chr04 | 45048344                | AA                              | TT                | 1946038689               |
| SNP_P3_59901_45054227 | NC_021163.1    | Ca_kabuli_chr04 | 45054227                | AA                              | GG                | 1946038836               |
| SNP_P3_59902_45054464 | NC_021163.1    | Ca_kabuli_chr04 | 45054464                | AA                              | GG                | 1946039033               |
| SNP_P3_59903_45055218 | NC_021163.1    | Ca_kabuli_chr04 | 45055218                | TT                              | CC                | 1946039227               |
| SNP_P3_59904_45055249 | NC_021163.1    | Ca_kabuli_chr04 | 45055249                | TT                              | CC                | 1946039310               |
| SNP_P3_59907_45060115 | NC_021163.1    | Ca_kabuli_chr04 | 45060115                | GG                              | AA                | 1946039397               |
| SNP_P3_59908_45061305 | NC_021163.1    | Ca_kabuli_chr04 | 45061305                | TT                              | GG                | 1946039519               |
| SNP_P3_59909_45061348 | NC_021163.1    | Ca_kabuli_chr04 | 45061348                | GG                              | AA                | 1946039688               |
| SNP_P3_59910_45062089 | NC_021163.1    | Ca_kabuli_chr04 | 45062089                | AA                              | CC                | 1946039860               |
| SNP_P3_59911_45062146 | NC_021163.1    | Ca_kabuli_chr04 | 45062146                | GG                              | AA                | 1946039984               |
| SNP_P3_59912_45062153 | NC_021163.1    | Ca_kabuli_chr04 | 45062153                | GG                              | TT                | 1946040165               |
| SNP_P3_59913_45063149 | NC_021163.1    | Ca_kabuli_chr04 | 45063149                | AA                              | GG                | 1946040358               |
| SNP_P3_59914_45063172 | NC_021163.1    | Ca_kabuli_chr04 | 45063172                | AA                              | GG                | 1946040558               |
| SNP_P3_59915_45063235 | NC_021163.1    | Ca_kabuli_chr04 | 45063235                | GG                              | AA                | 1946040761               |
| SNP_P3_59916_45065017 | NC_021163.1    | Ca_kabuli_chr04 | 45065017                | GG                              | AA                | 1946040943               |
| SNP_P3_59918_45066974 | NC_021163.1    | Ca_kabuli_chr04 | 45066974                | GG                              | AA                | 1946041141               |
| SNP_P3_59919_45067017 | NC_021163.1    | Ca_kabuli_chr04 | 45067017                | AA                              | GG                | 1946041331               |
| SNP_P3_59920_45067043 | NC_021163.1    | Ca_kabuli_chr04 | 45067043                | AA                              | GG                | 1946041501               |
| SNP_P3_59921_45067102 | NC_021163.1    | Ca_kabuli_chr04 | 45067102                | TT                              | AA                | 1946041703               |
| SNP_P3_59922_45067105 | NC_021163.1    | Ca_kabuli_chr04 | 45067105                | AA                              | GG                | 1946041864               |
| SNP_P3_59923_45073188 | NC_021163.1    | Ca_kabuli_chr04 | 45073188                | GG                              | AA                | 1946041982               |
| SNP_P3_59924_45073942 | NC_021163.1    | Ca_kabuli_chr04 | 45073942                | GG                              | CC                | 1946042161               |
| SNP_P3_59925_45073966 | NC_021163.1    | Ca_kabuli_chr04 | 45073966                | TT                              | CC                | 1946042352               |
| SNP_P3_59926_45074867 | NC_021163.1    | Ca_kabuli_chr04 | 45074867                | AA                              | GG                | 1946042552               |
| SNP_P3_59927_45075196 | NC_021163.1    | Ca_kabuli_chr04 | 45075196                | AA                              | CC                | 1946042748               |
| SNP_P3_59928_45075201 | NC_021163.1    | Ca_kabuli_chr04 | 45075201                | CC                              | GG                | 1946042937               |
| SNP_P3_59929_45075226 | NC_021163.1    | Ca_kabuli_chr04 | 45075226                | GG                              | AA                | 1946043129               |
| SNP_P3_59930_45075250 | NC_021163.1    | Ca_kabuli_chr04 | 45075250                | AA                              | GG                | 1946043306               |
| SNP_P3_59931_45075259 | NC_021163.1    | Ca_kabuli_chr04 | 45075259                | TT                              | CC                | 1946043495               |
| SNP_P3_59932_45075265 | NC_021163.1    | Ca_kabuli_chr04 | 45075265                | GG                              | TT                | 1946043693               |
| SNP_P3_59933_45076917 | NC_021163.1    | Ca_kabuli_chr04 | 45076917                | AA                              | CC                | 1946043893               |
| SNP_P3_59934_45077225 | NC_021163.1    | Ca_kabuli_chr04 | 45077225                | CC                              | AA                | 1946044043               |
| SNP_P3_59935_45077421 | NC_021163.1    | Ca_kabuli_chr04 | 45077421                | GG                              | CC                | 1946044239               |
| SNP_P3_59936_45077423 | NC_021163.1    | Ca_kabuli_chr04 | 45077423                | CC                              | TT                | 1946044427               |
| SNP_P3_59937_45077443 | NC_021163.1    | Ca_kabuli_chr04 | 45077443                | CC                              | GG                | 1946044627               |
| SNP_P3_59938_45077782 | NC_021163.1    | Ca_kabuli_chr04 | 45077782                | CC                              | AA                | 1946044812               |
| SNP_P3_59939_45079003 | NC_021163.1    | Ca_kabuli_chr04 | 45079003                | AA                              | GG                | 1946044999               |
| SNP_P3_59940_45079005 | NC_021163.1    | Ca_kabuli_chr04 | 45079005                | AA                              | GG                | 1946045186               |
| SNP_P3_59941_45079135 | NC_021163.1    | Ca_kabuli_chr04 | 45079135                | AA                              | GG                | 1946045394               |
| SNP_P3_59942_45080306 | NC_021163.1    | Ca_kabuli_chr04 | 45080306                | TT                              | CC                | 1946045601               |
| SNP_P3_59943_45081242 | NC_021163.1    | Ca_kabuli_chr04 | 45081242                | AA                              | TT                | 1946045794               |

| SNPs IDs              | Chromosome IDs | Chromosomes     | Physical positions (bp) | CDC Frontier (Reference genome) | (Pusa 256 & HPNB) | NCBI SNPdb Accession IDs |
|-----------------------|----------------|-----------------|-------------------------|---------------------------------|-------------------|--------------------------|
| SNP_P3_59944_45081243 | NC_021163.1    | Ca_kabuli_chr04 | 45081243                | AA                              | GG                | 1946045987               |
| SNP_P3_59945_45081244 | NC_021163.1    | Ca_kabuli_chr04 | 45081244                | AA                              | GG                | 1946046165               |
| SNP_P3_59946_45081275 | NC_021163.1    | Ca_kabuli_chr04 | 45081275                | GG                              | AA                | 1946046360               |
| SNP_P3_59947_45081282 | NC_021163.1    | Ca_kabuli_chr04 | 45081282                | CC                              | TT                | 1946046544               |
| SNP_P3_59949_45083339 | NC_021163.1    | Ca_kabuli_chr04 | 45083339                | GG                              | CC                | 1946046720               |
| SNP_P3_59950_45084828 | NC_021163.1    | Ca_kabuli_chr04 | 45084828                | GG                              | CC                | 1946046919               |
| SNP_P3_59951_45085096 | NC_021163.1    | Ca_kabuli_chr04 | 45085096                | CC                              | TT                | 1946047072               |
| SNP_P3_59952_45086371 | NC_021163.1    | Ca_kabuli_chr04 | 45086371                | CC                              | TT                | 1946047261               |
| SNP_P3_59953_45086744 | NC_021163.1    | Ca_kabuli_chr04 | 45086744                | GG                              | TT                | 1946047448               |
| SNP_P3_59954_45087956 | NC_021163.1    | Ca_kabuli_chr04 | 45087956                | AA                              | GG                | 1946047642               |
| SNP_P3_59955_45090215 | NC_021163.1    | Ca_kabuli_chr04 | 45090215                | AA                              | GG                | 1946047834               |
| SNP_P3_59956_45090287 | NC_021163.1    | Ca_kabuli_chr04 | 45090287                | TT                              | CC                | 1946047934               |
| SNP_P3_59957_45090439 | NC_021163.1    | Ca_kabuli_chr04 | 45090439                | CC                              | GG                | 1946047936               |
| SNP_P3_59958_45093719 | NC_021163.1    | Ca_kabuli_chr04 | 45093719                | TT                              | GG                | 1946047938               |
| SNP_P3_59959_45096152 | NC_021163.1    | Ca_kabuli_chr04 | 45096152                | TT                              | AA                | 1946047940               |
| SNP_P3_59960_45097721 | NC_021163.1    | Ca_kabuli_chr04 | 45097721                | AA                              | CC                | 1946047941               |
| SNP_P3_59962_45097995 | NC_021163.1    | Ca_kabuli_chr04 | 45097995                | CC                              | TT                | 1946047943               |
| SNP_P3_59963_45099025 | NC_021163.1    | Ca_kabuli_chr04 | 45099025                | GG                              | TT                | 1946047945               |
| SNP_P3_59964_45099031 | NC_021163.1    | Ca_kabuli_chr04 | 45099031                | AA                              | GG                | 1946047947               |
| SNP_P3_59965_45099251 | NC_021163.1    | Ca_kabuli_chr04 | 45099251                | AA                              | TT                | 1946047949               |
| SNP_P3_59966_45099373 | NC_021163.1    | Ca_kabuli_chr04 | 45099373                | CC                              | TT                | 1946047950               |
| SNP_P3_59967_45099561 | NC_021163.1    | Ca_kabuli_chr04 | 45099561                | AA                              | CC                | 1946047952               |
| SNP_P3_59968_45101146 | NC_021163.1    | Ca_kabuli_chr04 | 45101146                | AA                              | TT                | 1946047954               |
| SNP_P3_59969_45101147 | NC_021163.1    | Ca_kabuli_chr04 | 45101147                | TT                              | AA                | 1946047956               |
| SNP_P3_59972_45102302 | NC_021163.1    | Ca_kabuli_chr04 | 45102302                | CC                              | TT                | 1946047958               |
| SNP_P3_59973_45102323 | NC_021163.1    | Ca_kabuli_chr04 | 45102323                | CC                              | TT                | 1946047959               |
| SNP_P3_59974_45102369 | NC_021163.1    | Ca_kabuli_chr04 | 45102369                | AA                              | GG                | 1946047961               |
| SNP_P3_59975_45104406 | NC_021163.1    | Ca_kabuli_chr04 | 45104406                | AA                              | GG                | 1946047963               |
| SNP_P3_59976_45106565 | NC_021163.1    | Ca_kabuli_chr04 | 45106565                | TT                              | GG                | 1946047965               |
| SNP_P3_59977_45106882 | NC_021163.1    | Ca_kabuli_chr04 | 45106882                | TT                              | AA                | 1946047967               |
| SNP_P3_59978_45108007 | NC_021163.1    | Ca_kabuli_chr04 | 45108007                | AA                              | GG                | 1946047968               |
| SNP_P3_59979_45108022 | NC_021163.1    | Ca_kabuli_chr04 | 45108022                | AA                              | GG                | 1946047970               |
| SNP_P3_59980_45108055 | NC_021163.1    | Ca_kabuli_chr04 | 45108055                | AA                              | TT                | 1946047972               |
| SNP_P3_59981_45108075 | NC_021163.1    | Ca_kabuli_chr04 | 45108075                | AA                              | TT                | 1946047974               |
| SNP_P3_59982_45108117 | NC_021163.1    | Ca_kabuli_chr04 | 45108117                | TT                              | GG                | 1946047975               |
| SNP_P3_59983_45108166 | NC_021163.1    | Ca_kabuli_chr04 | 45108166                | TT                              | AA                | 1946047977               |
| SNP_P3_59985_45108476 | NC_021163.1    | Ca_kabuli_chr04 | 45108476                | TT                              | CC                | 1946047979               |
| SNP_P3_59986_45108493 | NC_021163.1    | Ca_kabuli_chr04 | 45108493                | TT                              | CC                | 1946047981               |
| SNP_P3_59987_45108990 | NC_021163.1    | Ca_kabuli_chr04 | 45108990                | TT                              | CC                | 1946047983               |
| SNP_P3_59988_45109411 | NC_021163.1    | Ca_kabuli_chr04 | 45109411                | GG                              | AA                | 1946048093               |
| SNP_P3_59989_45111471 | NC_021163.1    | Ca_kabuli_chr04 | 45111471                | TT                              | GG                | 1946048293               |
| SNP_P3_59990_45112423 | NC_021163.1    | Ca_kabuli_chr04 | 45112423                | CC                              | TT                | 1946048491               |

| SNPs IDs              | Chromosome IDs | Chromosomes     | Physical positions (bp) | CDC Frontier (Reference genome) | (Pusa 256 & HPNB) | NCBI SNPdb Accession IDs |
|-----------------------|----------------|-----------------|-------------------------|---------------------------------|-------------------|--------------------------|
| SNP_P3_59991_45112437 | NC_021163.1    | Ca_kabuli_chr04 | 45112437                | AA                              | TT                | 1946048687               |
| SNP_P3_59992_45112451 | NC_021163.1    | Ca_kabuli_chr04 | 45112451                | GG                              | AA                | 1946048878               |
| SNP_P3_59994_45113942 | NC_021163.1    | Ca_kabuli_chr04 | 45113942                | GG                              | AA                | 1946049079               |
| SNP_P3_59995_45114211 | NC_021163.1    | Ca_kabuli_chr04 | 45114211                | CC                              | TT                | 1946049270               |
| SNP_P3_59996_45114931 | NC_021163.1    | Ca_kabuli_chr04 | 45114931                | TT                              | GG                | 1946049455               |
| SNP_P3_59997_45114932 | NC_021163.1    | Ca_kabuli_chr04 | 45114932                | GG                              | AA                | 1946049651               |
| SNP_P3_59998_45115855 | NC_021163.1    | Ca_kabuli_chr04 | 45115855                | TT                              | CC                | 1946049846               |
| SNP_P3_60001_45116397 | NC_021163.1    | Ca_kabuli_chr04 | 45116397                | AA                              | GG                | 1946050044               |
| SNP_P3_60002_45116733 | NC_021163.1    | Ca_kabuli_chr04 | 45116733                | AA                              | GG                | 1946050239               |
| SNP_P3_60003_45118904 | NC_021163.1    | Ca_kabuli_chr04 | 45118904                | TT                              | AA                | 1946050426               |
| SNP_P3_60004_45120135 | NC_021163.1    | Ca_kabuli_chr04 | 45120135                | GG                              | AA                | 1946050627               |
| SNP_P3_60005_45120182 | NC_021163.1    | Ca_kabuli_chr04 | 45120182                | CC                              | TT                | 1946050823               |
| SNP_P3_60006_45120388 | NC_021163.1    | Ca_kabuli_chr04 | 45120388                | GG                              | AA                | 1946051016               |
| SNP_P3_60007_45120625 | NC_021163.1    | Ca_kabuli_chr04 | 45120625                | AA                              | TT                | 1946051216               |
| SNP_P3_60008_45120681 | NC_021163.1    | Ca_kabuli_chr04 | 45120681                | TT                              | GG                | 1946051416               |
| SNP_P3_60010_45123105 | NC_021163.1    | Ca_kabuli_chr04 | 45123105                | AA                              | GG                | 1946051605               |
| SNP_P3_60011_45124167 | NC_021163.1    | Ca_kabuli_chr04 | 45124167                | CC                              | AA                | 1946051803               |
| SNP_P3_60012_45125215 | NC_021163.1    | Ca_kabuli_chr04 | 45125215                | CC                              | AA                | 1946051996               |
| SNP_P3_60013_45125226 | NC_021163.1    | Ca_kabuli_chr04 | 45125226                | TT                              | AA                | 1946052191               |
| SNP_P3_60015_45126138 | NC_021163.1    | Ca_kabuli_chr04 | 45126138                | GG                              | AA                | 1946052385               |
| SNP_P3_60016_45126334 | NC_021163.1    | Ca_kabuli_chr04 | 45126334                | CC                              | TT                | 1946052581               |
| SNP_P3_60017_45126354 | NC_021163.1    | Ca_kabuli_chr04 | 45126354                | CC                              | GG                | 1946052771               |
| SNP_P3_60018_45126398 | NC_021163.1    | Ca_kabuli_chr04 | 45126398                | CC                              | TT                | 1946052971               |
| SNP_P3_60019_45126406 | NC_021163.1    | Ca_kabuli_chr04 | 45126406                | AA                              | TT                | 1946053163               |
| SNP_P3_60020_45126556 | NC_021163.1    | Ca_kabuli_chr04 | 45126556                | GG                              | AA                | 1946053356               |
| SNP_P3_60021_45127121 | NC_021163.1    | Ca_kabuli_chr04 | 45127121                | GG                              | AA                | 1946053555               |
| SNP_P3_60022_45129095 | NC_021163.1    | Ca_kabuli_chr04 | 45129095                | TT                              | GG                | 1946053747               |
| SNP_P3_60023_45129819 | NC_021163.1    | Ca_kabuli_chr04 | 45129819                | CC                              | TT                | 1946053945               |
| SNP_P3_60024_45130800 | NC_021163.1    | Ca_kabuli_chr04 | 45130800                | AA                              | TT                | 1946054143               |
| SNP_P3_60025_45131784 | NC_021163.1    | Ca_kabuli_chr04 | 45131784                | GG                              | TT                | 1946054337               |
| SNP_P3_60026_45131994 | NC_021163.1    | Ca_kabuli_chr04 | 45131994                | TT                              | CC                | 1946054535               |
| SNP_P3_60028_45132442 | NC_021163.1    | Ca_kabuli_chr04 | 45132442                | AA                              | GG                | 1946054729               |
| SNP_P3_60029_45132490 | NC_021163.1    | Ca_kabuli_chr04 | 45132490                | GG                              | AA                | 1946054746               |
| SNP_P3_60030_45132492 | NC_021163.1    | Ca_kabuli_chr04 | 45132492                | AA                              | GG                | 1946054747               |
| SNP_P3_60031_45132497 | NC_021163.1    | Ca_kabuli_chr04 | 45132497                | TT                              | CC                | 1946054749               |
| SNP_P3_60032_45132737 | NC_021163.1    | Ca_kabuli_chr04 | 45132737                | AA                              | GG                | 1946054751               |
| SNP_P3_60033_45132742 | NC_021163.1    | Ca_kabuli_chr04 | 45132742                | AA                              | CC                | 1946054753               |
| SNP_P3_60034_45133239 | NC_021163.1    | Ca_kabuli_chr04 | 45133239                | GG                              | TT                | 1946054754               |
| SNP_P3_60035_45135852 | NC_021163.1    | Ca_kabuli_chr04 | 45135852                | TT                              | AA                | 1946054756               |
| SNP_P3_60036_45135863 | NC_021163.1    | Ca_kabuli_chr04 | 45135863                | GG                              | AA                | 1946054758               |
| SNP_P3_60037_45136152 | NC_021163.1    | Ca_kabuli_chr04 | 45136152                | GG                              | AA                | 1946054760               |
| SNP_P3_60038_45136610 | NC_021163.1    | Ca_kabuli_chr04 | 45136610                | CC                              | GG                | 1946054762               |

| SNPs IDs              | Chromosome IDs | Chromosomes     | Physical positions (bp) | CDC Frontier (Reference genome) | (Pusa 256 & HPNB) | NCBI SNPdb Accession IDs |
|-----------------------|----------------|-----------------|-------------------------|---------------------------------|-------------------|--------------------------|
| SNP_P3_60039_45136944 | NC_021163.1    | Ca_kabuli_chr04 | 45136944                | AA                              | GG                | 1946054763               |
| SNP_P3_60040_45136945 | NC_021163.1    | Ca_kabuli_chr04 | 45136945                | CC                              | TT                | 1946054765               |
| SNP_P3_60041_45136965 | NC_021163.1    | Ca_kabuli_chr04 | 45136965                | GG                              | TT                | 1946054767               |
| SNP_P3_60042_45136988 | NC_021163.1    | Ca_kabuli_chr04 | 45136988                | GG                              | TT                | 1946054769               |
| SNP_P3_60043_45137016 | NC_021163.1    | Ca_kabuli_chr04 | 45137016                | AA                              | TT                | 1946054771               |
| SNP_P3_60044_45137102 | NC_021163.1    | Ca_kabuli_chr04 | 45137102                | AA                              | CC                | 1946054772               |
| SNP_P3_60045_45137107 | NC_021163.1    | Ca_kabuli_chr04 | 45137107                | GG                              | TT                | 1946054774               |
| SNP_P3_60046_45137138 | NC_021163.1    | Ca_kabuli_chr04 | 45137138                | GG                              | TT                | 1946054776               |
| SNP_P3_60047_45137223 | NC_021163.1    | Ca_kabuli_chr04 | 45137223                | TT                              | GG                | 1946054778               |
| SNP_P3_60048_45139329 | NC_021163.1    | Ca_kabuli_chr04 | 45139329                | GG                              | CC                | 1946054779               |
| SNP_P3_60049_45140153 | NC_021163.1    | Ca_kabuli_chr04 | 45140153                | GG                              | TT                | 1946054781               |
| SNP_P3_60050_45141410 | NC_021163.1    | Ca_kabuli_chr04 | 45141410                | GG                              | CC                | 1946054783               |
| SNP_P3_60051_45142631 | NC_021163.1    | Ca_kabuli_chr04 | 45142631                | CC                              | TT                | 1946054785               |
| SNP_P3_60052_45142632 | NC_021163.1    | Ca_kabuli_chr04 | 45142632                | CC                              | TT                | 1946054787               |
| SNP_P3_60053_45143200 | NC_021163.1    | Ca_kabuli_chr04 | 45143200                | AA                              | GG                | 1946054788               |
| SNP_P3_60054_45143201 | NC_021163.1    | Ca_kabuli_chr04 | 45143201                | CC                              | TT                | 1946054790               |
| SNP_P3_60055_45144204 | NC_021163.1    | Ca_kabuli_chr04 | 45144204                | GG                              | AA                | 1946054792               |
| SNP_P3_60056_45144359 | NC_021163.1    | Ca_kabuli_chr04 | 45144359                | TT                              | GG                | 1946054794               |
| SNP_P3_60058_45145765 | NC_021163.1    | Ca_kabuli_chr04 | 45145765                | TT                              | AA                | 1946054796               |
| SNP_P3_60059_45145797 | NC_021163.1    | Ca_kabuli_chr04 | 45145797                | GG                              | AA                | 1946054797               |
| SNP_P3_60060_45146906 | NC_021163.1    | Ca_kabuli_chr04 | 45146906                | AA                              | GG                | 1946054799               |
| SNP_P3_60061_45146907 | NC_021163.1    | Ca_kabuli_chr04 | 45146907                | CC                              | TT                | 1946054801               |
| SNP_P3_60062_45147611 | NC_021163.1    | Ca_kabuli_chr04 | 45147611                | TT                              | CC                | 1946054803               |
| SNP_P3_60063_45147630 | NC_021163.1    | Ca_kabuli_chr04 | 45147630                | AA                              | GG                | 1946054804               |
| SNP_P3_60064_45147683 | NC_021163.1    | Ca_kabuli_chr04 | 45147683                | AA                              | TT                | 1946054806               |
| SNP_P3_60065_45148261 | NC_021163.1    | Ca_kabuli_chr04 | 45148261                | AA                              | GG                | 1946054875               |
| SNP_P3_60066_45148463 | NC_021163.1    | Ca_kabuli_chr04 | 45148463                | AA                              | CC                | 1946055054               |
| SNP_P3_60067_45148716 | NC_021163.1    | Ca_kabuli_chr04 | 45148716                | TT                              | GG                | 1946055231               |
| SNP_P3_60068_45148732 | NC_021163.1    | Ca_kabuli_chr04 | 45148732                | GG                              | AA                | 1946055434               |
| SNP_P3_60069_45149269 | NC_021163.1    | Ca_kabuli_chr04 | 45149269                | GG                              | AA                | 1946055639               |
| SNP_P3_60070_45150159 | NC_021163.1    | Ca_kabuli_chr04 | 45150159                | AA                              | GG                | 1946055837               |
| SNP_P3_60071_45150292 | NC_021163.1    | Ca_kabuli_chr04 | 45150292                | CC                              | TT                | 1946056018               |
| SNP_P3_60072_45152602 | NC_021163.1    | Ca_kabuli_chr04 | 45152602                | CC                              | TT                | 1946056020               |
| SNP_P3_60073_45152635 | NC_021163.1    | Ca_kabuli_chr04 | 45152635                | AA                              | GG                | 1946056021               |
| SNP_P3_60074_45153256 | NC_021163.1    | Ca_kabuli_chr04 | 45153256                | GG                              | TT                | 1946056023               |
| SNP_P3_60076_45153822 | NC_021163.1    | Ca_kabuli_chr04 | 45153822                | CC                              | TT                | 1946056025               |
| SNP_P3_60077_45154402 | NC_021163.1    | Ca_kabuli_chr04 | 45154402                | AA                              | TT                | 1946056027               |
| SNP_P3_60078_45154409 | NC_021163.1    | Ca_kabuli_chr04 | 45154409                | AA                              | GG                | 1946056028               |
| SNP_P3_60080_45155019 | NC_021163.1    | Ca_kabuli_chr04 | 45155019                | CC                              | TT                | 1946056030               |
| SNP_P3_60081_45155267 | NC_021163.1    | Ca_kabuli_chr04 | 45155267                | TT                              | AA                | 1946056032               |
| SNP_P3_60082_45155268 | NC_021163.1    | Ca_kabuli_chr04 | 45155268                | TT                              | AA                | 1946056034               |
| SNP_P3_60083_45155311 | NC_021163.1    | Ca_kabuli_chr04 | 45155311                | AA                              | CC                | 1946056036               |

| SNPs IDs              | Chromosome IDs | Chromosomes     | Physical positions (bp) | CDC Frontier (Reference genome) | (Pusa 256 & HPNB) | NCBI SNPdb Accession IDs |
|-----------------------|----------------|-----------------|-------------------------|---------------------------------|-------------------|--------------------------|
| SNP_P3_60084_45157000 | NC_021163.1    | Ca_kabuli_chr04 | 45157000                | GG                              | AA                | 1946056037               |
| SNP_P3_60085_45158149 | NC_021163.1    | Ca_kabuli_chr04 | 45158149                | CC                              | AA                | 1946056039               |
| SNP_P3_60087_45160314 | NC_021163.1    | Ca_kabuli_chr04 | 45160314                | AA                              | TT                | 1946056041               |
| SNP_P3_60088_45160554 | NC_021163.1    | Ca_kabuli_chr04 | 45160554                | TT                              | CC                | 1946056043               |
| SNP_P3_60089_45160560 | NC_021163.1    | Ca_kabuli_chr04 | 45160560                | GG                              | TT                | 1946056045               |
| SNP_P3_60091_45161228 | NC_021163.1    | Ca_kabuli_chr04 | 45161228                | CC                              | TT                | 1946056046               |
| SNP_P3_60092_45162112 | NC_021163.1    | Ca_kabuli_chr04 | 45162112                | GG                              | AA                | 1946056048               |
| SNP_P3_60093_45162177 | NC_021163.1    | Ca_kabuli_chr04 | 45162177                | TT                              | CC                | 1946056050               |
| SNP_P3_60094_45163827 | NC_021163.1    | Ca_kabuli_chr04 | 45163827                | TT                              | CC                | 1946056052               |
| SNP_P3_60095_45164689 | NC_021163.1    | Ca_kabuli_chr04 | 45164689                | TT                              | GG                | 1946056053               |
| SNP_P3_60096_45164690 | NC_021163.1    | Ca_kabuli_chr04 | 45164690                | TT                              | AA                | 1946056055               |
| SNP_P3_60097_45164742 | NC_021163.1    | Ca_kabuli_chr04 | 45164742                | AA                              | GG                | 1946056057               |
| SNP_P3_60098_45164945 | NC_021163.1    | Ca_kabuli_chr04 | 45164945                | GG                              | AA                | 1946056059               |
| SNP_P3_60099_45164951 | NC_021163.1    | Ca_kabuli_chr04 | 45164951                | CC                              | GG                | 1946056061               |
| SNP_P3_60100_45164982 | NC_021163.1    | Ca_kabuli_chr04 | 45164982                | CC                              | TT                | 1946056062               |
| SNP_P3_60102_45165327 | NC_021163.1    | Ca_kabuli_chr04 | 45165327                | TT                              | CC                | 1946056064               |
| SNP_P3_60103_45166204 | NC_021163.1    | Ca_kabuli_chr04 | 45166204                | CC                              | GG                | 1946056066               |
| SNP_P3_60104_45166377 | NC_021163.1    | Ca_kabuli_chr04 | 45166377                | GG                              | AA                | 1946056068               |
| SNP_P3_60105_45166430 | NC_021163.1    | Ca_kabuli_chr04 | 45166430                | CC                              | TT                | 1946056070               |
| SNP_P3_60106_45166431 | NC_021163.1    | Ca_kabuli_chr04 | 45166431                | GG                              | AA                | 1946056071               |
| SNP_P3_60107_45166499 | NC_021163.1    | Ca_kabuli_chr04 | 45166499                | TT                              | CC                | 1946056073               |
| SNP_P3_60109_45167158 | NC_021163.1    | Ca_kabuli_chr04 | 45167158                | AA                              | TT                | 1946056075               |
| SNP_P3_60110_45167168 | NC_021163.1    | Ca_kabuli_chr04 | 45167168                | AA                              | TT                | 1946056253               |
| SNP_P3_60111_45168187 | NC_021163.1    | Ca_kabuli_chr04 | 45168187                | TT                              | CC                | 1946056459               |
| SNP_P3_60112_45168595 | NC_021163.1    | Ca_kabuli_chr04 | 45168595                | TT                              | CC                | 1946056656               |
| SNP_P3_60113_45174963 | NC_021163.1    | Ca_kabuli_chr04 | 45174963                | GG                              | CC                | 1946056860               |
| SNP_P3_60114_45174999 | NC_021163.1    | Ca_kabuli_chr04 | 45174999                | TT                              | CC                | 1946057062               |
| SNP_P3_60115_45175617 | NC_021163.1    | Ca_kabuli_chr04 | 45175617                | TT                              | CC                | 1946057270               |
| SNP_P3_60116_45175675 | NC_021163.1    | Ca_kabuli_chr04 | 45175675                | GG                              | AA                | 1946057462               |
| SNP_P3_60117_45175695 | NC_021163.1    | Ca_kabuli_chr04 | 45175695                | TT                              | CC                | 1946057649               |
| SNP_P3_60118_45175722 | NC_021163.1    | Ca_kabuli_chr04 | 45175722                | GG                              | TT                | 1946057838               |
| SNP_P3_60119_45175735 | NC_021163.1    | Ca_kabuli_chr04 | 45175735                | AA                              | CC                | 1946058027               |
| SNP_P3_60120_45175775 | NC_021163.1    | Ca_kabuli_chr04 | 45175775                | CC                              | TT                | 1946058217               |
| SNP_P3_60121_45175814 | NC_021163.1    | Ca_kabuli_chr04 | 45175814                | CC                              | TT                | 1946058409               |
| SNP_P3_60122_45175882 | NC_021163.1    | Ca_kabuli_chr04 | 45175882                | CC                              | TT                | 1946058600               |
| SNP_P3_60123_45175973 | NC_021163.1    | Ca_kabuli_chr04 | 45175973                | AA                              | GG                | 1946058788               |
| SNP_P3_60124_45175978 | NC_021163.1    | Ca_kabuli_chr04 | 45175978                | TT                              | AA                | 1946058985               |
| SNP_P3_60125_45176012 | NC_021163.1    | Ca_kabuli_chr04 | 45176012                | AA                              | GG                | 1946059179               |
| SNP_P3_60126_45176053 | NC_021163.1    | Ca_kabuli_chr04 | 45176053                | TT                              | CC                | 1946059367               |
| SNP_P3_60127_45176061 | NC_021163.1    | Ca_kabuli_chr04 | 45176061                | CC                              | TT                | 1946059556               |
| SNP_P3_60128_45176077 | NC_021163.1    | Ca_kabuli_chr04 | 45176077                | CC                              | TT                | 1946059744               |
| SNP_P3_60129_45178136 | NC_021163.1    | Ca_kabuli_chr04 | 45178136                | GG                              | AA                | 1946059936               |

| SNPs IDs              | Chromosome IDs | Chromosomes     | Physical positions (bp) | CDC Frontier (Reference genome) | (Pusa 256 & HPNB) | NCBI SNPdb Accession IDs |
|-----------------------|----------------|-----------------|-------------------------|---------------------------------|-------------------|--------------------------|
| SNP_P3_60130_45178159 | NC_021163.1    | Ca_kabuli_chr04 | 45178159                | GG                              | AA                | 1946060127               |
| SNP_P3_60131_45178177 | NC_021163.1    | Ca_kabuli_chr04 | 45178177                | AA                              | GG                | 1946060319               |
| SNP_P3_60132_45180768 | NC_021163.1    | Ca_kabuli_chr04 | 45180768                | AA                              | GG                | 1946060512               |
| SNP_P3_60133_45181468 | NC_021163.1    | Ca_kabuli_chr04 | 45181468                | AA                              | GG                | 1946060701               |
| SNP_P3_60134_45181472 | NC_021163.1    | Ca_kabuli_chr04 | 45181472                | AA                              | TT                | 1946060851               |
| SNP_P3_60135_45181481 | NC_021163.1    | Ca_kabuli_chr04 | 45181481                | AA                              | CC                | 1946060920               |
| SNP_P3_60136_45181630 | NC_021163.1    | Ca_kabuli_chr04 | 45181630                | AA                              | TT                | 1946061093               |
| SNP_P3_60137_45181728 | NC_021163.1    | Ca_kabuli_chr04 | 45181728                | GG                              | AA                | 1946061282               |
| SNP_P3_60138_45181791 | NC_021163.1    | Ca_kabuli_chr04 | 45181791                | CC                              | GG                | 1946061448               |
| SNP_P3_60139_45182050 | NC_021163.1    | Ca_kabuli_chr04 | 45182050                | GG                              | AA                | 1946061643               |
| SNP_P3_60140_45182053 | NC_021163.1    | Ca_kabuli_chr04 | 45182053                | TT                              | GG                | 1946061836               |
| SNP_P3_60141_45182057 | NC_021163.1    | Ca_kabuli_chr04 | 45182057                | GG                              | AA                | 1946062021               |
| SNP_P3_60142_45182205 | NC_021163.1    | Ca_kabuli_chr04 | 45182205                | TT                              | CC                | 1946062213               |
| SNP_P3_60144_45182560 | NC_021163.1    | Ca_kabuli_chr04 | 45182560                | TT                              | AA                | 1946062411               |
| SNP_P3_60145_45182566 | NC_021163.1    | Ca_kabuli_chr04 | 45182566                | TT                              | GG                | 1946062591               |
| SNP_P3_60146_45182568 | NC_021163.1    | Ca_kabuli_chr04 | 45182568                | CC                              | TT                | 1946062785               |
| SNP_P3_60147_45183857 | NC_021163.1    | Ca_kabuli_chr04 | 45183857                | AA                              | GG                | 1946062966               |
| SNP_P3_60148_45184326 | NC_021163.1    | Ca_kabuli_chr04 | 45184326                | GG                              | AA                | 1946063154               |
| SNP_P3_60149_45184333 | NC_021163.1    | Ca_kabuli_chr04 | 45184333                | CC                              | AA                | 1946063348               |
| SNP_P3_60150_45184391 | NC_021163.1    | Ca_kabuli_chr04 | 45184391                | GG                              | AA                | 1946063523               |
| SNP_P3_60151_45184401 | NC_021163.1    | Ca_kabuli_chr04 | 45184401                | CC                              | AA                | 1946063717               |
| SNP_P3_60152_45184410 | NC_021163.1    | Ca_kabuli_chr04 | 45184410                | TT                              | CC                | 1946063901               |
| SNP_P3_60153_45184428 | NC_021163.1    | Ca_kabuli_chr04 | 45184428                | CC                              | GG                | 1946064095               |
| SNP_P3_60154_45184504 | NC_021163.1    | Ca_kabuli_chr04 | 45184504                | AA                              | GG                | 1946064291               |
| SNP_P3_60156_45186475 | NC_021163.1    | Ca_kabuli_chr04 | 45186475                | GG                              | CC                | 1946064479               |
| SNP_P3_60157_45187531 | NC_021163.1    | Ca_kabuli_chr04 | 45187531                | CC                              | TT                | 1946064605               |
| SNP_P3_60158_45188017 | NC_021163.1    | Ca_kabuli_chr04 | 45188017                | TT                              | CC                | 1946064799               |
| SNP_P3_60159_45189615 | NC_021163.1    | Ca_kabuli_chr04 | 45189615                | GG                              | AA                | 1946064997               |
| SNP_P3_60161_45194268 | NC_021163.1    | Ca_kabuli_chr04 | 45194268                | CC                              | TT                | 1946065188               |
| SNP_P3_60162_45194529 | NC_021163.1    | Ca_kabuli_chr04 | 45194529                | AA                              | GG                | 1946065376               |
| SNP_P3_60163_45194697 | NC_021163.1    | Ca_kabuli_chr04 | 45194697                | CC                              | TT                | 1946065562               |
| SNP_P3_60164_45194704 | NC_021163.1    | Ca_kabuli_chr04 | 45194704                | CC                              | TT                | 1946065684               |
| SNP_P3_60165_45194742 | NC_021163.1    | Ca_kabuli_chr04 | 45194742                | GG                              | AA                | 1946065877               |
| SNP_P3_60166_45194752 | NC_021163.1    | Ca_kabuli_chr04 | 45194752                | AA                              | TT                | 1946066073               |
| SNP_P3_60167_45194824 | NC_021163.1    | Ca_kabuli_chr04 | 45194824                | TT                              | CC                | 1946066264               |
| SNP_P3_60168_45194829 | NC_021163.1    | Ca_kabuli_chr04 | 45194829                | TT                              | CC                | 1946066451               |
| SNP_P3_60169_45194947 | NC_021163.1    | Ca_kabuli_chr04 | 45194947                | TT                              | CC                | 1946066639               |
| SNP_P3_60170_45194976 | NC_021163.1    | Ca_kabuli_chr04 | 45194976                | GG                              | TT                | 1946066826               |
| SNP_P3_60171_45195022 | NC_021163.1    | Ca_kabuli_chr04 | 45195022                | AA                              | TT                | 1946067011               |
| SNP_P3_60172_45195047 | NC_021163.1    | Ca_kabuli_chr04 | 45195047                | AA                              | GG                | 1946067189               |
| SNP_P3_60173_45195872 | NC_021163.1    | Ca_kabuli_chr04 | 45195872                | GG                              | AA                | 1946067376               |
| SNP_P3_60174_45195874 | NC_021163.1    | Ca_kabuli_chr04 | 45195874                | GG                              | TT                | 1946067563               |

| SNPs IDs              | Chromosome IDs | Chromosomes     | Physical positions (bp) | CDC Frontier (Reference genome) | (Pusa 256 & HPNB) | NCBI SNPdb Accession IDs |
|-----------------------|----------------|-----------------|-------------------------|---------------------------------|-------------------|--------------------------|
| SNP_P3_60175_45196212 | NC_021163.1    | Ca_kabuli_chr04 | 45196212                | AA                              | CC                | 1946067752               |
| SNP_P3_60176_45197290 | NC_021163.1    | Ca_kabuli_chr04 | 45197290                | CC                              | TT                | 1946067947               |
| SNP_P3_60177_45198275 | NC_021163.1    | Ca_kabuli_chr04 | 45198275                | CC                              | TT                | 1946068143               |
| SNP_P3_60179_45198398 | NC_021163.1    | Ca_kabuli_chr04 | 45198398                | TT                              | CC                | 1946068335               |
| SNP_P3_60180_45198597 | NC_021163.1    | Ca_kabuli_chr04 | 45198597                | AA                              | GG                | 1946068516               |
| SNP_P3_60181_45198675 | NC_021163.1    | Ca_kabuli_chr04 | 45198675                | CC                              | TT                | 1946068709               |
| SNP_P3_60182_45198870 | NC_021163.1    | Ca_kabuli_chr04 | 45198870                | GG                              | AA                | 1946068907               |
| SNP_P3_60183_45198924 | NC_021163.1    | Ca_kabuli_chr04 | 45198924                | AA                              | GG                | 1946069097               |
| SNP_P3_60184_45198945 | NC_021163.1    | Ca_kabuli_chr04 | 45198945                | AA                              | GG                | 1946069295               |
| SNP_P3_60185_45199057 | NC_021163.1    | Ca_kabuli_chr04 | 45199057                | GG                              | AA                | 1946069491               |
| SNP_P3_60186_45199071 | NC_021163.1    | Ca_kabuli_chr04 | 45199071                | GG                              | TT                | 1946069683               |
| SNP_P3_60187_45199072 | NC_021163.1    | Ca_kabuli_chr04 | 45199072                | AA                              | GG                | 1946069869               |
| SNP_P3_60188_45199076 | NC_021163.1    | Ca_kabuli_chr04 | 45199076                | GG                              | AA                | 1946070060               |
| SNP_P3_60189_45199113 | NC_021163.1    | Ca_kabuli_chr04 | 45199113                | CC                              | TT                | 1946070245               |
| SNP_P3_60190_45199139 | NC_021163.1    | Ca_kabuli_chr04 | 45199139                | TT                              | CC                | 1946070435               |
| SNP_P3_60192_45199421 | NC_021163.1    | Ca_kabuli_chr04 | 45199421                | TT                              | AA                | 1946070629               |
| SNP_P3_60193_45200507 | NC_021163.1    | Ca_kabuli_chr04 | 45200507                | TT                              | AA                | 1946070823               |
| SNP_P3_60194_45201544 | NC_021163.1    | Ca_kabuli_chr04 | 45201544                | TT                              | CC                | 1946071012               |
| SNP_P3_60196_45204429 | NC_021163.1    | Ca_kabuli_chr04 | 45204429                | CC                              | TT                | 1946071201               |
| SNP_P3_60197_45204871 | NC_021163.1    | Ca_kabuli_chr04 | 45204871                | TT                              | CC                | 1946071391               |
| SNP_P3_60198_45205108 | NC_021163.1    | Ca_kabuli_chr04 | 45205108                | GG                              | AA                | 1946071573               |
| SNP_P3_60200_45205355 | NC_021163.1    | Ca_kabuli_chr04 | 45205355                | AA                              | TT                | 1946071760               |
| SNP_P3_60201_45205364 | NC_021163.1    | Ca_kabuli_chr04 | 45205364                | AA                              | GG                | 1946071955               |
| SNP_P3_60202_45205365 | NC_021163.1    | Ca_kabuli_chr04 | 45205365                | CC                              | TT                | 1946072150               |
| SNP_P3_60203_45205487 | NC_021163.1    | Ca_kabuli_chr04 | 45205487                | CC                              | TT                | 1946072345               |
| SNP_P3_60204_45205516 | NC_021163.1    | Ca_kabuli_chr04 | 45205516                | TT                              | GG                | 1946072536               |
| SNP_P3_60205_45205591 | NC_021163.1    | Ca_kabuli_chr04 | 45205591                | TT                              | AA                | 1946072728               |
| SNP_P3_60206_45205607 | NC_021163.1    | Ca_kabuli_chr04 | 45205607                | GG                              | CC                | 1946072923               |
| SNP_P3_60208_45206842 | NC_021163.1    | Ca_kabuli_chr04 | 45206842                | AA                              | GG                | 1946073121               |
| SNP_P3_60209_45206907 | NC_021163.1    | Ca_kabuli_chr04 | 45206907                | AA                              | GG                | 1946073307               |
| SNP_P3_60210_45206920 | NC_021163.1    | Ca_kabuli_chr04 | 45206920                | AA                              | GG                | 1946073498               |
| SNP_P3_60211_45209876 | NC_021163.1    | Ca_kabuli_chr04 | 45209876                | CC                              | TT                | 1946073691               |
| SNP_P3_60212_45210421 | NC_021163.1    | Ca_kabuli_chr04 | 45210421                | TT                              | CC                | 1946073879               |
| SNP_P3_60214_45211524 | NC_021163.1    | Ca_kabuli_chr04 | 45211524                | GG                              | TT                | 1946074073               |
| SNP_P3_60215_45211550 | NC_021163.1    | Ca_kabuli_chr04 | 45211550                | GG                              | AA                | 1946074261               |
| SNP_P3_60216_45216277 | NC_021163.1    | Ca_kabuli_chr04 | 45216277                | AA                              | GG                | 1946074446               |
| SNP_P3_60217_45219892 | NC_021163.1    | Ca_kabuli_chr04 | 45219892                | CC                              | AA                | 1946074637               |
| SNP_P3_60220_45222138 | NC_021163.1    | Ca_kabuli_chr04 | 45222138                | GG                              | TT                | 1946074820               |
| SNP_P3_60221_45222152 | NC_021163.1    | Ca_kabuli_chr04 | 45222152                | CC                              | GG                | 1946075011               |
| SNP_P3_60222_45222290 | NC_021163.1    | Ca_kabuli_chr04 | 45222290                | TT                              | AA                | 1946075209               |
| SNP_P3_60223_45222292 | NC_021163.1    | Ca_kabuli_chr04 | 45222292                | GG                              | AA                | 1946075404               |
| SNP_P3_60224_45222300 | NC_021163.1    | Ca_kabuli_chr04 | 45222300                | CC                              | TT                | 1946075594               |

| SNPs IDs              | Chromosome IDs | Chromosomes     | Physical positions (bp) | CDC Frontier (Reference genome) | (Pusa 256 & HPNB) | NCBI SNPdb Accession IDs |
|-----------------------|----------------|-----------------|-------------------------|---------------------------------|-------------------|--------------------------|
| SNP_P3_60225_45222334 | NC_021163.1    | Ca_kabuli_chr04 | 45222334                | TT                              | CC                | 1946075779               |
| SNP_P3_60227_45223106 | NC_021163.1    | Ca_kabuli_chr04 | 45223106                | GG                              | CC                | 1946075970               |
| SNP_P3_60228_45223210 | NC_021163.1    | Ca_kabuli_chr04 | 45223210                | GG                              | AA                | 1946076162               |
| SNP_P3_60230_45223317 | NC_021163.1    | Ca_kabuli_chr04 | 45223317                | AA                              | TT                | 1946076357               |
| SNP_P3_60232_45225059 | NC_021163.1    | Ca_kabuli_chr04 | 45225059                | GG                              | AA                | 1946076546               |
| SNP_P3_60234_45226830 | NC_021163.1    | Ca_kabuli_chr04 | 45226830                | TT                              | CC                | 1946076735               |
| SNP_P3_60235_45226837 | NC_021163.1    | Ca_kabuli_chr04 | 45226837                | TT                              | CC                | 1946076932               |
| SNP_P3_60236_45226878 | NC_021163.1    | Ca_kabuli_chr04 | 45226878                | TT                              | CC                | 1946077130               |
| SNP_P3_60237_45226882 | NC_021163.1    | Ca_kabuli_chr04 | 45226882                | AA                              | CC                | 1946077304               |
| SNP_P3_60239_45227049 | NC_021163.1    | Ca_kabuli_chr04 | 45227049                | GG                              | AA                | 1946077488               |
| SNP_P3_60240_45227076 | NC_021163.1    | Ca_kabuli_chr04 | 45227076                | TT                              | GG                | 1946077678               |
| SNP_P3_60241_45227095 | NC_021163.1    | Ca_kabuli_chr04 | 45227095                | GG                              | AA                | 1946077878               |
| SNP_P3_60242_45227112 | NC_021163.1    | Ca_kabuli_chr04 | 45227112                | TT                              | GG                | 1946078075               |
| SNP_P3_60243_45227155 | NC_021163.1    | Ca_kabuli_chr04 | 45227155                | CC                              | TT                | 1946078267               |
| SNP_P3_60244_45227157 | NC_021163.1    | Ca_kabuli_chr04 | 45227157                | AA                              | CC                | 1946078463               |
| SNP_P3_60245_45227161 | NC_021163.1    | Ca_kabuli_chr04 | 45227161                | GG                              | AA                | 1946078662               |
| SNP_P3_60246_45228152 | NC_021163.1    | Ca_kabuli_chr04 | 45228152                | CC                              | TT                | 1946078859               |
| SNP_P3_60247_45228158 | NC_021163.1    | Ca_kabuli_chr04 | 45228158                | GG                              | TT                | 1946079052               |
| SNP_P3_60248_45228259 | NC_021163.1    | Ca_kabuli_chr04 | 45228259                | TT                              | CC                | 1946079234               |
| SNP_P3_60250_45228478 | NC_021163.1    | Ca_kabuli_chr04 | 45228478                | TT                              | CC                | 1946079424               |
| SNP_P3_60251_45228740 | NC_021163.1    | Ca_kabuli_chr04 | 45228740                | AA                              | GG                | 1946079602               |
| SNP_P3_60253_45228905 | NC_021163.1    | Ca_kabuli_chr04 | 45228905                | GG                              | CC                | 1946079792               |
| SNP_P3_60254_45230393 | NC_021163.1    | Ca_kabuli_chr04 | 45230393                | AA                              | CC                | 1946079985               |
| SNP_P3_60255_45230697 | NC_021163.1    | Ca_kabuli_chr04 | 45230697                | GG                              | AA                | 1946080177               |
| SNP_P3_60256_45230727 | NC_021163.1    | Ca_kabuli_chr04 | 45230727                | TT                              | CC                | 1946080287               |
| SNP_P3_60257_45230729 | NC_021163.1    | Ca_kabuli_chr04 | 45230729                | GG                              | AA                | 1946080408               |
| SNP_P3_60258_45230737 | NC_021163.1    | Ca_kabuli_chr04 | 45230737                | AA                              | GG                | 1946080598               |
| SNP_P3_60259_45231209 | NC_021163.1    | Ca_kabuli_chr04 | 45231209                | GG                              | TT                | 1946080798               |
| SNP_P3_60260_45231573 | NC_021163.1    | Ca_kabuli_chr04 | 45231573                | CC                              | GG                | 1946080986               |
| SNP_P3_60262_45232819 | NC_021163.1    | Ca_kabuli_chr04 | 45232819                | AA                              | GG                | 1946081134               |
| SNP_P3_60263_45233572 | NC_021163.1    | Ca_kabuli_chr04 | 45233572                | TT                              | AA                | 1946081326               |
| SNP_P3_60264_45233677 | NC_021163.1    | Ca_kabuli_chr04 | 45233677                | GG                              | AA                | 1946081513               |
| SNP_P3_60265_45234138 | NC_021163.1    | Ca_kabuli_chr04 | 45234138                | CC                              | TT                | 1946081676               |
| SNP_P3_60266_45235037 | NC_021163.1    | Ca_kabuli_chr04 | 45235037                | TT                              | CC                | 1946081756               |
| SNP_P3_60267_45235458 | NC_021163.1    | Ca_kabuli_chr04 | 45235458                | GG                              | AA                | 1946081955               |
| SNP_P3_60270_45245507 | NC_021163.1    | Ca_kabuli_chr04 | 45245507                | CC                              | TT                | 1946082137               |
| SNP_P3_60271_45246210 | NC_021163.1    | Ca_kabuli_chr04 | 45246210                | TT                              | GG                | 1946082340               |
| SNP_P3_60272_45246214 | NC_021163.1    | Ca_kabuli_chr04 | 45246214                | TT                              | CC                | 1946082533               |
| SNP_P3_60274_45248134 | NC_021163.1    | Ca_kabuli_chr04 | 45248134                | GG                              | TT                | 1946082726               |
| SNP_P3_60275_45249558 | NC_021163.1    | Ca_kabuli_chr04 | 45249558                | CC                              | GG                | 1946082906               |
| SNP_P3_60276_45250496 | NC_021163.1    | Ca_kabuli_chr04 | 45250496                | AA                              | TT                | 1946083063               |
| SNP_P3_60278_45250734 | NC_021163.1    | Ca_kabuli_chr04 | 45250734                | AA                              | GG                | 1946083145               |



| SNPs IDs              | Chromosome IDs | Chromosomes     | Physical positions (bp) | CDC Frontier (Reference genome) | (Pusa 256 & HPNB) | NCBI SNPdb Accession IDs |
|-----------------------|----------------|-----------------|-------------------------|---------------------------------|-------------------|--------------------------|
| SNP_P3_60279_45250737 | NC_021163.1    | Ca_kabuli_chr04 | 45250737                | GG                              | TT                | 1946083345               |
| SNP_P3_60280_45251371 | NC_021163.1    | Ca_kabuli_chr04 | 45251371                | TT                              | CC                | 1946083547               |
| SNP_P3_60281_45251509 | NC_021163.1    | Ca_kabuli_chr04 | 45251509                | TT                              | AA                | 1946083750               |
| SNP_P3_60282_45251529 | NC_021163.1    | Ca_kabuli_chr04 | 45251529                | TT                              | CC                | 1946083956               |
| SNP_P3_60283_45254502 | NC_021163.1    | Ca_kabuli_chr04 | 45254502                | AA                              | GG                | 1946084152               |
| SNP_P3_60284_45257055 | NC_021163.1    | Ca_kabuli_chr04 | 45257055                | GG                              | AA                | 1946084336               |
| SNP_P3_60285_45257109 | NC_021163.1    | Ca_kabuli_chr04 | 45257109                | CC                              | TT                | 1946084532               |
| SNP_P3_60286_45257557 | NC_021163.1    | Ca_kabuli_chr04 | 45257557                | AA                              | TT                | 1946084730               |
| SNP_P3_60287_45257565 | NC_021163.1    | Ca_kabuli_chr04 | 45257565                | GG                              | AA                | 1946084911               |
| SNP_P3_60288_45257571 | NC_021163.1    | Ca_kabuli_chr04 | 45257571                | CC                              | TT                | 1946085099               |
| SNP_P3_60289_45257578 | NC_021163.1    | Ca_kabuli_chr04 | 45257578                | TT                              | AA                | 1946085292               |
| SNP_P3_60290_45257602 | NC_021163.1    | Ca_kabuli_chr04 | 45257602                | AA                              | GG                | 1946085484               |
| SNP_P3_60291_45258273 | NC_021163.1    | Ca_kabuli_chr04 | 45258273                | TT                              | CC                | 1946085678               |
| SNP_P3_60292_45258288 | NC_021163.1    | Ca_kabuli_chr04 | 45258288                | TT                              | GG                | 1946085865               |
| SNP_P3_60293_45258454 | NC_021163.1    | Ca_kabuli_chr04 | 45258454                | CC                              | TT                | 1946086055               |
| SNP_P3_60294_45258471 | NC_021163.1    | Ca_kabuli_chr04 | 45258471                | AA                              | GG                | 1946086223               |
| SNP_P3_60295_45258484 | NC_021163.1    | Ca_kabuli_chr04 | 45258484                | TT                              | CC                | 1946086403               |
| SNP_P3_60296_45258486 | NC_021163.1    | Ca_kabuli_chr04 | 45258486                | GG                              | CC                | 1946086595               |
| SNP_P3_60297_45258500 | NC_021163.1    | Ca_kabuli_chr04 | 45258500                | CC                              | TT                | 1946086792               |
| SNP_P3_60299_45261876 | NC_021163.1    | Ca_kabuli_chr04 | 45261876                | TT                              | AA                | 1946086991               |
| SNP_P3_60300_45262780 | NC_021163.1    | Ca_kabuli_chr04 | 45262780                | CC                              | GG                | 1946087182               |
| SNP_P3_60301_45265548 | NC_021163.1    | Ca_kabuli_chr04 | 45265548                | GG                              | AA                | 1946087373               |
| SNP_P3_60302_45265554 | NC_021163.1    | Ca_kabuli_chr04 | 45265554                | TT                              | CC                | 1946087560               |
| SNP_P3_60304_45265727 | NC_021163.1    | Ca_kabuli_chr04 | 45265727                | GG                              | TT                | 1946087763               |
| SNP_P3_60305_45265739 | NC_021163.1    | Ca_kabuli_chr04 | 45265739                | AA                              | GG                | 1946087955               |
| SNP_P3_60306_45265768 | NC_021163.1    | Ca_kabuli_chr04 | 45265768                | GG                              | CC                | 1946088152               |
| SNP_P3_60308_45268046 | NC_021163.1    | Ca_kabuli_chr04 | 45268046                | TT                              | AA                | 1946088347               |
| SNP_P3_60309_45268047 | NC_021163.1    | Ca_kabuli_chr04 | 45268047                | GG                              | TT                | 1946088544               |
| SNP_P3_60310_45268350 | NC_021163.1    | Ca_kabuli_chr04 | 45268350                | CC                              | TT                | 1946088737               |
| SNP_P3_60311_45268374 | NC_021163.1    | Ca_kabuli_chr04 | 45268374                | GG                              | TT                | 1946088936               |
| SNP_P3_60312_45268375 | NC_021163.1    | Ca_kabuli_chr04 | 45268375                | TT                              | AA                | 1946089134               |
| SNP_P3_60313_45268936 | NC_021163.1    | Ca_kabuli_chr04 | 45268936                | GG                              | AA                | 1946089329               |
| SNP_P3_60314_45269300 | NC_021163.1    | Ca_kabuli_chr04 | 45269300                | TT                              | AA                | 1946089525               |
| SNP_P3_60315_45269649 | NC_021163.1    | Ca_kabuli_chr04 | 45269649                | CC                              | GG                | 1946089719               |
| SNP_P3_60316_45269706 | NC_021163.1    | Ca_kabuli_chr04 | 45269706                | TT                              | GG                | 1946089908               |
| SNP_P3_60318_45270083 | NC_021163.1    | Ca_kabuli_chr04 | 45270083                | AA                              | GG                | 1946090109               |
| SNP_P3_60319_45270587 | NC_021163.1    | Ca_kabuli_chr04 | 45270587                | AA                              | GG                | 1946090308               |
| SNP_P3_60320_45270620 | NC_021163.1    | Ca_kabuli_chr04 | 45270620                | TT                              | CC                | 1946090511               |
| SNP_P3_60321_45270621 | NC_021163.1    | Ca_kabuli_chr04 | 45270621                | CC                              | AA                | 1946090708               |
| SNP_P3_60322_45270991 | NC_021163.1    | Ca_kabuli_chr04 | 45270991                | CC                              | AA                | 1946090905               |
| SNP_P3_60323_45270993 | NC_021163.1    | Ca_kabuli_chr04 | 45270993                | AA                              | CC                | 1946091099               |
| SNP_P3_60324_45271386 | NC_021163.1    | Ca_kabuli_chr04 | 45271386                | GG                              | AA                | 1946091292               |

| SNPs IDs              | Chromosome IDs | Chromosomes     | Physical positions (bp) | CDC Frontier (Reference genome) | (Pusa 256 & HPNB) | NCBI SNPdb Accession IDs |
|-----------------------|----------------|-----------------|-------------------------|---------------------------------|-------------------|--------------------------|
| SNP_P3_60325_45271396 | NC_021163.1    | Ca_kabuli_chr04 | 45271396                | CC                              | AA                | 1946091494               |
| SNP_P3_60326_45271605 | NC_021163.1    | Ca_kabuli_chr04 | 45271605                | TT                              | GG                | 1946091694               |
| SNP_P3_60327_45271948 | NC_021163.1    | Ca_kabuli_chr04 | 45271948                | CC                              | TT                | 1946091883               |
| SNP_P3_60328_45273148 | NC_021163.1    | Ca_kabuli_chr04 | 45273148                | AA                              | GG                | 1946092085               |
| SNP_P3_60329_45273150 | NC_021163.1    | Ca_kabuli_chr04 | 45273150                | TT                              | AA                | 1946092281               |
| SNP_P3_60330_45273163 | NC_021163.1    | Ca_kabuli_chr04 | 45273163                | TT                              | CC                | 1946092480               |
| SNP_P3_60331_45273174 | NC_021163.1    | Ca_kabuli_chr04 | 45273174                | AA                              | TT                | 1946092676               |
| SNP_P3_60332_45273185 | NC_021163.1    | Ca_kabuli_chr04 | 45273185                | AA                              | GG                | 1946092874               |
| SNP_P3_60333_45273189 | NC_021163.1    | Ca_kabuli_chr04 | 45273189                | AA                              | GG                | 1946093067               |
| SNP_P3_60334_45273382 | NC_021163.1    | Ca_kabuli_chr04 | 45273382                | AA                              | GG                | 1946093268               |
| SNP_P3_60336_45274702 | NC_021163.1    | Ca_kabuli_chr04 | 45274702                | AA                              | TT                | 1946093459               |
| SNP_P3_60337_45275735 | NC_021163.1    | Ca_kabuli_chr04 | 45275735                | TT                              | CC                | 1946093645               |
| SNP_P3_60338_45282371 | NC_021163.1    | Ca_kabuli_chr04 | 45282371                | AA                              | CC                | 1946093841               |
| SNP_P3_60339_45289110 | NC_021163.1    | Ca_kabuli_chr04 | 45289110                | GG                              | TT                | 1946094039               |
| SNP_P3_60340_45289136 | NC_021163.1    | Ca_kabuli_chr04 | 45289136                | AA                              | GG                | 1946094238               |
| SNP_P3_60342_45291961 | NC_021163.1    | Ca_kabuli_chr04 | 45291961                | TT                              | CC                | 1946094436               |
| SNP_P3_60343_45295287 | NC_021163.1    | Ca_kabuli_chr04 | 45295287                | GG                              | AA                | 1946094631               |
| SNP_P3_60344_45295411 | NC_021163.1    | Ca_kabuli_chr04 | 45295411                | TT                              | AA                | 1946094832               |
| SNP_P3_60345_45296255 | NC_021163.1    | Ca_kabuli_chr04 | 45296255                | TT                              | AA                | 1946095026               |
| SNP_P3_60346_45296262 | NC_021163.1    | Ca_kabuli_chr04 | 45296262                | AA                              | GG                | 1946095219               |
| SNP_P3_60347_45296445 | NC_021163.1    | Ca_kabuli_chr04 | 45296445                | TT                              | CC                | 1946095412               |
| SNP_P3_60348_45296456 | NC_021163.1    | Ca_kabuli_chr04 | 45296456                | AA                              | GG                | 1946095608               |
| SNP_P3_60349_45296457 | NC_021163.1    | Ca_kabuli_chr04 | 45296457                | CC                              | TT                | 1946095800               |
| SNP_P3_60350_45296499 | NC_021163.1    | Ca_kabuli_chr04 | 45296499                | CC                              | TT                | 1946095985               |
| SNP_P3_60351_45296505 | NC_021163.1    | Ca_kabuli_chr04 | 45296505                | AA                              | GG                | 1946096179               |
| SNP_P3_60352_45296506 | NC_021163.1    | Ca_kabuli_chr04 | 45296506                | GG                              | AA                | 1946096378               |
| SNP_P3_60353_45296509 | NC_021163.1    | Ca_kabuli_chr04 | 45296509                | GG                              | AA                | 1946096573               |
| SNP_P3_60354_45296608 | NC_021163.1    | Ca_kabuli_chr04 | 45296608                | TT                              | CC                | 1946096763               |
| SNP_P3_60355_45296611 | NC_021163.1    | Ca_kabuli_chr04 | 45296611                | TT                              | CC                | 1946096959               |
| SNP_P3_60356_45296616 | NC_021163.1    | Ca_kabuli_chr04 | 45296616                | GG                              | AA                | 1946097124               |
| SNP_P3_60357_45296623 | NC_021163.1    | Ca_kabuli_chr04 | 45296623                | GG                              | AA                | 1946097319               |
| SNP_P3_60358_45296982 | NC_021163.1    | Ca_kabuli_chr04 | 45296982                | CC                              | TT                | 1946097517               |
| SNP_P3_60359_45297014 | NC_021163.1    | Ca_kabuli_chr04 | 45297014                | AA                              | GG                | 1946097719               |
| SNP_P3_60360_45297262 | NC_021163.1    | Ca_kabuli_chr04 | 45297262                | AA                              | GG                | 1946097922               |
| SNP_P3_60361_45298312 | NC_021163.1    | Ca_kabuli_chr04 | 45298312                | AA                              | GG                | 1946098111               |
| SNP_P3_60362_45298330 | NC_021163.1    | Ca_kabuli_chr04 | 45298330                | AA                              | CC                | 1946098305               |
| SNP_P3_60363_45298548 | NC_021163.1    | Ca_kabuli_chr04 | 45298548                | TT                              | CC                | 1946098508               |
| SNP_P3_60364_45298669 | NC_021163.1    | Ca_kabuli_chr04 | 45298669                | CC                              | AA                | 1946098711               |
| SNP_P3_60365_45298670 | NC_021163.1    | Ca_kabuli_chr04 | 45298670                | AA                              | CC                | 1946098911               |
| SNP_P3_60366_45298691 | NC_021163.1    | Ca_kabuli_chr04 | 45298691                | TT                              | GG                | 1946099105               |
| SNP_P3_60367_45298692 | NC_021163.1    | Ca_kabuli_chr04 | 45298692                | GG                              | AA                | 1946099306               |
| SNP_P3_60368_45298693 | NC_021163.1    | Ca_kabuli_chr04 | 45298693                | GG                              | AA                | 1946099492               |

| SNPs IDs              | Chromosome IDs | Chromosomes     | Physical positions (bp) | CDC Frontier (Reference genome) | (Pusa 256 & HPNB) | NCBI SNPdb Accession IDs |
|-----------------------|----------------|-----------------|-------------------------|---------------------------------|-------------------|--------------------------|
| SNP_P3_60369_45298697 | NC_021163.1    | Ca_kabuli_chr04 | 45298697                | AA                              | GG                | 1946099677               |
| SNP_P3_60370_45298711 | NC_021163.1    | Ca_kabuli_chr04 | 45298711                | AA                              | GG                | 1946099864               |
| SNP_P3_60371_45298736 | NC_021163.1    | Ca_kabuli_chr04 | 45298736                | AA                              | GG                | 1946100061               |
| SNP_P3_60372_45298749 | NC_021163.1    | Ca_kabuli_chr04 | 45298749                | TT                              | CC                | 1946100250               |
| SNP_P3_60373_45299689 | NC_021163.1    | Ca_kabuli_chr04 | 45299689                | CC                              | GG                | 1946100450               |
| SNP_P3_60374_45299731 | NC_021163.1    | Ca_kabuli_chr04 | 45299731                | TT                              | CC                | 1946100637               |
| SNP_P3_60375_45300254 | NC_021163.1    | Ca_kabuli_chr04 | 45300254                | TT                              | CC                | 1946100830               |
| SNP_P3_60376_45301003 | NC_021163.1    | Ca_kabuli_chr04 | 45301003                | GG                              | AA                | 1946101027               |
| SNP_P3_60377_45303306 | NC_021163.1    | Ca_kabuli_chr04 | 45303306                | AA                              | CC                | 1946101227               |
| SNP_P3_60378_45307021 | NC_021163.1    | Ca_kabuli_chr04 | 45307021                | AA                              | GG                | 1946101416               |
| SNP_P3_60380_45310639 | NC_021163.1    | Ca_kabuli_chr04 | 45310639                | GG                              | AA                | 1946101614               |
| SNP_P3_60381_45319004 | NC_021163.1    | Ca_kabuli_chr04 | 45319004                | CC                              | TT                | 1946101804               |
| SNP_P3_60382_45319010 | NC_021163.1    | Ca_kabuli_chr04 | 45319010                | TT                              | AA                | 1946101995               |
| SNP_P3_60383_45319027 | NC_021163.1    | Ca_kabuli_chr04 | 45319027                | AA                              | TT                | 1946102156               |
| SNP_P3_60384_45320260 | NC_021163.1    | Ca_kabuli_chr04 | 45320260                | GG                              | AA                | 1946102318               |
| SNP_P3_60385_45320639 | NC_021163.1    | Ca_kabuli_chr04 | 45320639                | TT                              | CC                | 1946102507               |
| SNP_P3_60386_45321283 | NC_021163.1    | Ca_kabuli_chr04 | 45321283                | CC                              | TT                | 1946102695               |
| SNP_P3_60387_45323355 | NC_021163.1    | Ca_kabuli_chr04 | 45323355                | CC                              | GG                | 1946102882               |
| SNP_P3_60388_45323730 | NC_021163.1    | Ca_kabuli_chr04 | 45323730                | TT                              | CC                | 1946103073               |
| SNP_P3_60389_45323751 | NC_021163.1    | Ca_kabuli_chr04 | 45323751                | AA                              | GG                | 1946103265               |
| SNP_P3_60390_45324620 | NC_021163.1    | Ca_kabuli_chr04 | 45324620                | GG                              | CC                | 1946103458               |
| SNP_P3_60391_45330802 | NC_021163.1    | Ca_kabuli_chr04 | 45330802                | CC                              | GG                | 1946103655               |
| SNP_P3_60392_45331086 | NC_021163.1    | Ca_kabuli_chr04 | 45331086                | GG                              | TT                | 1946103834               |
| SNP_P3_60394_45331245 | NC_021163.1    | Ca_kabuli_chr04 | 45331245                | AA                              | CC                | 1946104026               |
| SNP_P3_60395_45331260 | NC_021163.1    | Ca_kabuli_chr04 | 45331260                | AA                              | GG                | 1946104213               |
| SNP_P3_60396_45331394 | NC_021163.1    | Ca_kabuli_chr04 | 45331394                | AA                              | GG                | 1946104404               |
| SNP_P3_60397_45331464 | NC_021163.1    | Ca_kabuli_chr04 | 45331464                | GG                              | CC                | 1946104587               |
| SNP_P3_60398_45331468 | NC_021163.1    | Ca_kabuli_chr04 | 45331468                | AA                              | GG                | 1946104770               |
| SNP_P3_60399_45331646 | NC_021163.1    | Ca_kabuli_chr04 | 45331646                | AA                              | GG                | 1946104962               |
| SNP_P3_60400_45331661 | NC_021163.1    | Ca_kabuli_chr04 | 45331661                | AA                              | CC                | 1946105153               |
| SNP_P3_60401_45331668 | NC_021163.1    | Ca_kabuli_chr04 | 45331668                | CC                              | TT                | 1946105287               |
| SNP_P3_60402_45331670 | NC_021163.1    | Ca_kabuli_chr04 | 45331670                | GG                              | AA                | 1946105472               |
| SNP_P3_60403_45332685 | NC_021163.1    | Ca_kabuli_chr04 | 45332685                | TT                              | CC                | 1946105657               |
| SNP_P3_60404_45332908 | NC_021163.1    | Ca_kabuli_chr04 | 45332908                | GG                              | AA                | 1946105848               |
| SNP_P3_60405_45332983 | NC_021163.1    | Ca_kabuli_chr04 | 45332983                | GG                              | CC                | 1946106043               |
| SNP_P3_60406_45333453 | NC_021163.1    | Ca_kabuli_chr04 | 45333453                | AA                              | GG                | 1946106230               |
| SNP_P3_60407_45333473 | NC_021163.1    | Ca_kabuli_chr04 | 45333473                | AA                              | CC                | 1946106420               |
| SNP_P3_60408_45333505 | NC_021163.1    | Ca_kabuli_chr04 | 45333505                | TT                              | CC                | 1946106618               |
| SNP_P3_60409_45333684 | NC_021163.1    | Ca_kabuli_chr04 | 45333684                | TT                              | AA                | 1946106810               |
| SNP_P3_60410_45333689 | NC_021163.1    | Ca_kabuli_chr04 | 45333689                | AA                              | GG                | 1946107006               |
| SNP_P3_60411_45333724 | NC_021163.1    | Ca_kabuli_chr04 | 45333724                | GG                              | AA                | 1946107190               |
| SNP_P3_60412_45333731 | NC_021163.1    | Ca_kabuli_chr04 | 45333731                | GG                              | AA                | 1946107390               |

| SNPs IDs              | Chromosome IDs | Chromosomes     | Physical positions (bp) | CDC Frontier (Reference genome) | (Pusa 256 & HPNB) | NCBI SNPdb Accession IDs |
|-----------------------|----------------|-----------------|-------------------------|---------------------------------|-------------------|--------------------------|
| SNP_P3_60413_45333735 | NC_021163.1    | Ca_kabuli_chr04 | 45333735                | AA                              | GG                | 1946107581               |
| SNP_P3_60414_45333753 | NC_021163.1    | Ca_kabuli_chr04 | 45333753                | GG                              | AA                | 1946107778               |
| SNP_P3_60415_45333773 | NC_021163.1    | Ca_kabuli_chr04 | 45333773                | GG                              | AA                | 1946107974               |
| SNP_P3_60416_45333777 | NC_021163.1    | Ca_kabuli_chr04 | 45333777                | AA                              | GG                | 1946108175               |
| SNP_P3_60417_45333779 | NC_021163.1    | Ca_kabuli_chr04 | 45333779                | GG                              | AA                | 1946108375               |
| SNP_P3_60418_45334402 | NC_021163.1    | Ca_kabuli_chr04 | 45334402                | TT                              | CC                | 1946108569               |
| SNP_P3_60419_45334776 | NC_021163.1    | Ca_kabuli_chr04 | 45334776                | CC                              | TT                | 1946108757               |
| SNP_P3_60420_45334819 | NC_021163.1    | Ca_kabuli_chr04 | 45334819                | GG                              | AA                | 1946108957               |
| SNP_P3_60422_45335548 | NC_021163.1    | Ca_kabuli_chr04 | 45335548                | AA                              | CC                | 1946109151               |
| SNP_P3_60423_45339326 | NC_021163.1    | Ca_kabuli_chr04 | 45339326                | AA                              | GG                | 1946109345               |
| SNP_P3_60424_45339344 | NC_021163.1    | Ca_kabuli_chr04 | 45339344                | AA                              | TT                | 1946109542               |
| SNP_P3_60425_45341247 | NC_021163.1    | Ca_kabuli_chr04 | 45341247                | AA                              | GG                | 1946109733               |
| SNP_P3_60427_45343852 | NC_021163.1    | Ca_kabuli_chr04 | 45343852                | TT                              | CC                | 1946109930               |
| SNP_P3_60429_45345769 | NC_021163.1    | Ca_kabuli_chr04 | 45345769                | AA                              | CC                | 1946110121               |
| SNP_P3_60430_45345799 | NC_021163.1    | Ca_kabuli_chr04 | 45345799                | GG                              | AA                | 1946110318               |
| SNP_P3_60431_45345813 | NC_021163.1    | Ca_kabuli_chr04 | 45345813                | GG                              | TT                | 1946110508               |
| SNP_P3_60432_45347361 | NC_021163.1    | Ca_kabuli_chr04 | 45347361                | TT                              | CC                | 1946110697               |
| SNP_P3_60433_45347405 | NC_021163.1    | Ca_kabuli_chr04 | 45347405                | AA                              | GG                | 1946110891               |
| SNP_P3_60434_45347724 | NC_021163.1    | Ca_kabuli_chr04 | 45347724                | AA                              | GG                | 1946111085               |
| SNP_P3_60435_45348638 | NC_021163.1    | Ca_kabuli_chr04 | 45348638                | AA                              | TT                | 1946111281               |
| SNP_P3_60436_45348894 | NC_021163.1    | Ca_kabuli_chr04 | 45348894                | GG                              | CC                | 1946111470               |
| SNP_P3_60437_45350296 | NC_021163.1    | Ca_kabuli_chr04 | 45350296                | TT                              | CC                | 1946111661               |
| SNP_P3_60439_45350451 | NC_021163.1    | Ca_kabuli_chr04 | 45350451                | CC                              | TT                | 1946111854               |
| SNP_P3_60440_45351163 | NC_021163.1    | Ca_kabuli_chr04 | 45351163                | GG                              | AA                | 1946112055               |
| SNP_P3_60442_45351231 | NC_021163.1    | Ca_kabuli_chr04 | 45351231                | CC                              | AA                | 1946112254               |
| SNP_P3_60443_45351562 | NC_021163.1    | Ca_kabuli_chr04 | 45351562                | AA                              | GG                | 1946112446               |
| SNP_P3_60444_45352564 | NC_021163.1    | Ca_kabuli_chr04 | 45352564                | GG                              | AA                | 1946112649               |
| SNP_P3_60445_45359932 | NC_021163.1    | Ca_kabuli_chr04 | 45359932                | GG                              | AA                | 1946112848               |
| SNP_P3_60446_45359983 | NC_021163.1    | Ca_kabuli_chr04 | 45359983                | CC                              | TT                | 1946113042               |
| SNP_P3_60449_45369208 | NC_021163.1    | Ca_kabuli_chr04 | 45369208                | GG                              | AA                | 1946113237               |
| SNP_P3_60450_45371839 | NC_021163.1    | Ca_kabuli_chr04 | 45371839                | GG                              | AA                | 1946113438               |
| SNP_P3_60451_45372047 | NC_021163.1    | Ca_kabuli_chr04 | 45372047                | TT                              | AA                | 1946113640               |
| SNP_P3_60452_45372097 | NC_021163.1    | Ca_kabuli_chr04 | 45372097                | CC                              | GG                | 1946113828               |
| SNP_P3_60453_45372248 | NC_021163.1    | Ca_kabuli_chr04 | 45372248                | GG                              | CC                | 1946113983               |
| SNP_P3_60454_45372381 | NC_021163.1    | Ca_kabuli_chr04 | 45372381                | GG                              | CC                | 1946114068               |
| SNP_P3_60455_45372507 | NC_021163.1    | Ca_kabuli_chr04 | 45372507                | AA                              | GG                | 1946114253               |
| SNP_P3_60456_45373007 | NC_021163.1    | Ca_kabuli_chr04 | 45373007                | TT                              | CC                | 1946114447               |
| SNP_P3_60457_45373080 | NC_021163.1    | Ca_kabuli_chr04 | 45373080                | CC                              | AA                | 1946114644               |
| SNP_P3_60458_45373259 | NC_021163.1    | Ca_kabuli_chr04 | 45373259                | GG                              | AA                | 1946114826               |
| SNP_P3_60459_45373260 | NC_021163.1    | Ca_kabuli_chr04 | 45373260                | AA                              | GG                | 1946115032               |
| SNP_P3_60460_45373277 | NC_021163.1    | Ca_kabuli_chr04 | 45373277                | AA                              | TT                | 1946115240               |
| SNP_P3_60461_45373285 | NC_021163.1    | Ca_kabuli_chr04 | 45373285                | GG                              | AA                | 1946115436               |

| SNPs IDs              | Chromosome IDs | Chromosomes     | Physical positions (bp) | CDC Frontier (Reference genome) | (Pusa 256 & HPNB) | NCBI SNPdb Accession IDs |
|-----------------------|----------------|-----------------|-------------------------|---------------------------------|-------------------|--------------------------|
| SNP_P3_60462_45373290 | NC_021163.1    | Ca_kabuli_chr04 | 45373290                | GG                              | AA                | 1946115618               |
| SNP_P3_60463_45373528 | NC_021163.1    | Ca_kabuli_chr04 | 45373528                | CC                              | TT                | 1946115802               |
| SNP_P3_60464_45373630 | NC_021163.1    | Ca_kabuli_chr04 | 45373630                | GG                              | TT                | 1946115916               |
| SNP_P3_60465_45373644 | NC_021163.1    | Ca_kabuli_chr04 | 45373644                | CC                              | TT                | 1946116018               |
| SNP_P3_60466_45373671 | NC_021163.1    | Ca_kabuli_chr04 | 45373671                | GG                              | TT                | 1946116208               |
| SNP_P3_60467_45376865 | NC_021163.1    | Ca_kabuli_chr04 | 45376865                | TT                              | CC                | 1946116408               |
| SNP_P3_60468_45376940 | NC_021163.1    | Ca_kabuli_chr04 | 45376940                | GG                              | AA                | 1946116603               |
| SNP_P3_60469_45377633 | NC_021163.1    | Ca_kabuli_chr04 | 45377633                | AA                              | TT                | 1946116796               |
| SNP_P3_60470_45377638 | NC_021163.1    | Ca_kabuli_chr04 | 45377638                | AA                              | GG                | 1946116998               |
| SNP_P3_60471_45379352 | NC_021163.1    | Ca_kabuli_chr04 | 45379352                | AA                              | TT                | 1946117193               |
| SNP_P3_60472_45380395 | NC_021163.1    | Ca_kabuli_chr04 | 45380395                | TT                              | CC                | 1946117385               |
| SNP_P3_60474_45380439 | NC_021163.1    | Ca_kabuli_chr04 | 45380439                | GG                              | AA                | 1946117580               |
| SNP_P3_60475_45380531 | NC_021163.1    | Ca_kabuli_chr04 | 45380531                | GG                              | AA                | 1946117780               |
| SNP_P3_60476_45380572 | NC_021163.1    | Ca_kabuli_chr04 | 45380572                | GG                              | TT                | 1946117974               |
| SNP_P3_60477_45380578 | NC_021163.1    | Ca_kabuli_chr04 | 45380578                | TT                              | AA                | 1946118161               |
| SNP_P3_60478_45380579 | NC_021163.1    | Ca_kabuli_chr04 | 45380579                | TT                              | AA                | 1946118357               |
| SNP_P3_60480_45382330 | NC_021163.1    | Ca_kabuli_chr04 | 45382330                | TT                              | CC                | 1946118549               |
| SNP_P3_60481_45382361 | NC_021163.1    | Ca_kabuli_chr04 | 45382361                | GG                              | TT                | 1946118736               |
| SNP_P3_60482_45383819 | NC_021163.1    | Ca_kabuli_chr04 | 45383819                | AA                              | GG                | 1946118886               |
| SNP_P3_60483_45384017 | NC_021163.1    | Ca_kabuli_chr04 | 45384017                | GG                              | CC                | 1946119065               |
| SNP_P3_60484_45384129 | NC_021163.1    | Ca_kabuli_chr04 | 45384129                | TT                              | GG                | 1946119264               |
| SNP_P3_60485_45384152 | NC_021163.1    | Ca_kabuli_chr04 | 45384152                | AA                              | GG                | 1946119459               |
| SNP_P3_60486_45384165 | NC_021163.1    | Ca_kabuli_chr04 | 45384165                | AA                              | GG                | 1946119649               |
| SNP_P3_60487_45384304 | NC_021163.1    | Ca_kabuli_chr04 | 45384304                | AA                              | GG                | 1946119834               |
| SNP_P3_60488_45384341 | NC_021163.1    | Ca_kabuli_chr04 | 45384341                | CC                              | TT                | 1946120021               |
| SNP_P3_60491_45385880 | NC_021163.1    | Ca_kabuli_chr04 | 45385880                | AA                              | GG                | 1946120216               |
| SNP_P3_60492_45385906 | NC_021163.1    | Ca_kabuli_chr04 | 45385906                | CC                              | GG                | 1946120411               |
| SNP_P3_60493_45387486 | NC_021163.1    | Ca_kabuli_chr04 | 45387486                | CC                              | TT                | 1946120603               |
| SNP_P3_60494_45387936 | NC_021163.1    | Ca_kabuli_chr04 | 45387936                | TT                              | CC                | 1946120796               |
| SNP_P3_60495_45387938 | NC_021163.1    | Ca_kabuli_chr04 | 45387938                | GG                              | TT                | 1946120993               |
| SNP_P3_60496_45388934 | NC_021163.1    | Ca_kabuli_chr04 | 45388934                | TT                              | CC                | 1946121192               |
| SNP_P3_60498_45388980 | NC_021163.1    | Ca_kabuli_chr04 | 45388980                | TT                              | CC                | 1946121388               |
| SNP_P3_60499_45389029 | NC_021163.1    | Ca_kabuli_chr04 | 45389029                | CC                              | TT                | 1946121577               |
| SNP_P3_60500_45389036 | NC_021163.1    | Ca_kabuli_chr04 | 45389036                | TT                              | AA                | 1946121761               |
| SNP_P3_60501_45389265 | NC_021163.1    | Ca_kabuli_chr04 | 45389265                | AA                              | GG                | 1946121957               |
| SNP_P3_60502_45389371 | NC_021163.1    | Ca_kabuli_chr04 | 45389371                | GG                              | CC                | 1946122138               |
| SNP_P3_60503_45389649 | NC_021163.1    | Ca_kabuli_chr04 | 45389649                | AA                              | TT                | 1946122329               |
| SNP_P3_60504_45389700 | NC_021163.1    | Ca_kabuli_chr04 | 45389700                | CC                              | TT                | 1946122513               |
| SNP_P3_60505_45389775 | NC_021163.1    | Ca_kabuli_chr04 | 45389775                | CC                              | AA                | 1946122709               |
| SNP_P3_60506_45390157 | NC_021163.1    | Ca_kabuli_chr04 | 45390157                | CC                              | TT                | 1946122903               |
| SNP_P3_60507_45390799 | NC_021163.1    | Ca_kabuli_chr04 | 45390799                | GG                              | TT                | 1946123076               |
| SNP_P3_60508_45390801 | NC_021163.1    | Ca_kabuli_chr04 | 45390801                | CC                              | TT                | 1946123261               |

| SNPs IDs              | Chromosome IDs | Chromosomes     | Physical positions (bp) | CDC Frontier (Reference genome) | (Pusa 256 & HPNB) | NCBI SNPdb Accession IDs |
|-----------------------|----------------|-----------------|-------------------------|---------------------------------|-------------------|--------------------------|
| SNP_P3_60509_45390833 | NC_021163.1    | Ca_kabuli_chr04 | 45390833                | GG                              | AA                | 1946123455               |
| SNP_P3_60510_45393190 | NC_021163.1    | Ca_kabuli_chr04 | 45393190                | GG                              | AA                | 1946123647               |
| SNP_P3_60511_45395105 | NC_021163.1    | Ca_kabuli_chr04 | 45395105                | AA                              | GG                | 1946123841               |
| SNP_P3_60512_45395116 | NC_021163.1    | Ca_kabuli_chr04 | 45395116                | AA                              | CC                | 1946124030               |
| SNP_P3_60513_45395118 | NC_021163.1    | Ca_kabuli_chr04 | 45395118                | AA                              | TT                | 1946124213               |
| SNP_P3_60514_45395163 | NC_021163.1    | Ca_kabuli_chr04 | 45395163                | TT                              | AA                | 1946124412               |
| SNP_P3_60515_45395174 | NC_021163.1    | Ca_kabuli_chr04 | 45395174                | AA                              | GG                | 1946124598               |
| SNP_P3_60516_45395596 | NC_021163.1    | Ca_kabuli_chr04 | 45395596                | TT                              | AA                | 1946124785               |
| SNP_P3_60517_45395610 | NC_021163.1    | Ca_kabuli_chr04 | 45395610                | GG                              | AA                | 1946124979               |
| SNP_P3_60518_45395821 | NC_021163.1    | Ca_kabuli_chr04 | 45395821                | GG                              | TT                | 1946125173               |
| SNP_P3_60519_45396020 | NC_021163.1    | Ca_kabuli_chr04 | 45396020                | TT                              | CC                | 1946125381               |
| SNP_P3_60520_45396920 | NC_021163.1    | Ca_kabuli_chr04 | 45396920                | GG                              | AA                | 1946125577               |
| SNP_P3_60521_45397151 | NC_021163.1    | Ca_kabuli_chr04 | 45397151                | TT                              | AA                | 1946125771               |
| SNP_P3_60522_45397182 | NC_021163.1    | Ca_kabuli_chr04 | 45397182                | AA                              | CC                | 1946125968               |
| SNP_P3_60523_45397183 | NC_021163.1    | Ca_kabuli_chr04 | 45397183                | AA                              | CC                | 1946126155               |
| SNP_P3_60524_45397806 | NC_021163.1    | Ca_kabuli_chr04 | 45397806                | GG                              | AA                | 1946126338               |
| SNP_P3_60525_45398475 | NC_021163.1    | Ca_kabuli_chr04 | 45398475                | TT                              | CC                | 1946126525               |
| SNP_P3_60526_45398494 | NC_021163.1    | Ca_kabuli_chr04 | 45398494                | AA                              | GG                | 1946126720               |
| SNP_P3_60527_45398529 | NC_021163.1    | Ca_kabuli_chr04 | 45398529                | TT                              | CC                | 1946126919               |
| SNP_P3_60529_45400280 | NC_021163.1    | Ca_kabuli_chr04 | 45400280                | CC                              | TT                | 1946127108               |
| SNP_P3_60530_45400322 | NC_021163.1    | Ca_kabuli_chr04 | 45400322                | AA                              | CC                | 1946127299               |
| SNP_P3_60531_45400327 | NC_021163.1    | Ca_kabuli_chr04 | 45400327                | CC                              | TT                | 1946127495               |
| SNP_P3_60532_45400646 | NC_021163.1    | Ca_kabuli_chr04 | 45400646                | GG                              | AA                | 1946127694               |
| SNP_P3_60533_45400685 | NC_021163.1    | Ca_kabuli_chr04 | 45400685                | GG                              | AA                | 1946127884               |
| SNP_P3_60534_45401066 | NC_021163.1    | Ca_kabuli_chr04 | 45401066                | GG                              | AA                | 1946128079               |
| SNP_P3_60535_45401720 | NC_021163.1    | Ca_kabuli_chr04 | 45401720                | CC                              | AA                | 1946128279               |
| SNP_P3_60537_45404456 | NC_021163.1    | Ca_kabuli_chr04 | 45404456                | AA                              | GG                | 1946128480               |
| SNP_P3_60538_45404467 | NC_021163.1    | Ca_kabuli_chr04 | 45404467                | CC                              | TT                | 1946128673               |
| SNP_P3_60539_45404498 | NC_021163.1    | Ca_kabuli_chr04 | 45404498                | CC                              | TT                | 1946128870               |
| SNP_P3_60540_45404529 | NC_021163.1    | Ca_kabuli_chr04 | 45404529                | TT                              | CC                | 1946129061               |
| SNP_P3_60541_45404553 | NC_021163.1    | Ca_kabuli_chr04 | 45404553                | CC                              | TT                | 1946129250               |
| SNP_P3_60542_45404749 | NC_021163.1    | Ca_kabuli_chr04 | 45404749                | CC                              | TT                | 1946129441               |
| SNP_P3_60544_45406828 | NC_021163.1    | Ca_kabuli_chr04 | 45406828                | TT                              | CC                | 1946129637               |
| SNP_P3_60546_45408070 | NC_021163.1    | Ca_kabuli_chr04 | 45408070                | GG                              | TT                | 1946129824               |
| SNP_P3_60547_45408412 | NC_021163.1    | Ca_kabuli_chr04 | 45408412                | CC                              | TT                | 1946130019               |
| SNP_P3_60548_45408554 | NC_021163.1    | Ca_kabuli_chr04 | 45408554                | AA                              | TT                | 1946130215               |
| SNP_P3_60549_45408556 | NC_021163.1    | Ca_kabuli_chr04 | 45408556                | AA                              | CC                | 1946130414               |
| SNP_P3_60550_45408684 | NC_021163.1    | Ca_kabuli_chr04 | 45408684                | GG                              | AA                | 1946130610               |
| SNP_P3_60551_45408691 | NC_021163.1    | Ca_kabuli_chr04 | 45408691                | TT                              | AA                | 1946130796               |
| SNP_P3_60552_45408703 | NC_021163.1    | Ca_kabuli_chr04 | 45408703                | TT                              | GG                | 1946130991               |
| SNP_P3_60553_45408730 | NC_021163.1    | Ca_kabuli_chr04 | 45408730                | GG                              | AA                | 1946131186               |
| SNP_P3_60554_45408741 | NC_021163.1    | Ca_kabuli_chr04 | 45408741                | GG                              | AA                | 1946131376               |

| SNPs IDs              | Chromosome IDs | Chromosomes     | Physical positions (bp) | CDC Frontier (Reference genome) | (Pusa 256 & HPNB) | NCBI SNPdb Accession IDs |
|-----------------------|----------------|-----------------|-------------------------|---------------------------------|-------------------|--------------------------|
| SNP_P3_60555_45408749 | NC_021163.1    | Ca_kabuli_chr04 | 45408749                | AA                              | GG                | 1946131570               |
| SNP_P3_60556_45408968 | NC_021163.1    | Ca_kabuli_chr04 | 45408968                | AA                              | GG                | 1946131759               |
| SNP_P3_60557_45408978 | NC_021163.1    | Ca_kabuli_chr04 | 45408978                | CC                              | AA                | 1946131956               |
| SNP_P3_60558_45408993 | NC_021163.1    | Ca_kabuli_chr04 | 45408993                | CC                              | TT                | 1946132152               |
| SNP_P3_60559_45409157 | NC_021163.1    | Ca_kabuli_chr04 | 45409157                | GG                              | AA                | 1946132338               |
| SNP_P3_60560_45409162 | NC_021163.1    | Ca_kabuli_chr04 | 45409162                | CC                              | AA                | 1946132522               |
| SNP_P3_60561_45409176 | NC_021163.1    | Ca_kabuli_chr04 | 45409176                | AA                              | CC                | 1946132718               |
| SNP_P3_60562_45409419 | NC_021163.1    | Ca_kabuli_chr04 | 45409419                | TT                              | AA                | 1946132905               |
| SNP_P3_60563_45409423 | NC_021163.1    | Ca_kabuli_chr04 | 45409423                | CC                              | TT                | 1946133104               |
| SNP_P3_60564_45409428 | NC_021163.1    | Ca_kabuli_chr04 | 45409428                | TT                              | CC                | 1946133301               |
| SNP_P3_60565_45409445 | NC_021163.1    | Ca_kabuli_chr04 | 45409445                | AA                              | GG                | 1946133486               |
| SNP_P3_60566_45409463 | NC_021163.1    | Ca_kabuli_chr04 | 45409463                | TT                              | CC                | 1946133609               |
| SNP_P3_60567_45409524 | NC_021163.1    | Ca_kabuli_chr04 | 45409524                | AA                              | CC                | 1946133718               |
| SNP_P3_60569_45411029 | NC_021163.1    | Ca_kabuli_chr04 | 45411029                | CC                              | GG                | 1946133873               |
| SNP_P3_60570_45411815 | NC_021163.1    | Ca_kabuli_chr04 | 45411815                | TT                              | CC                | 1946134033               |
| SNP_P3_60571_45414414 | NC_021163.1    | Ca_kabuli_chr04 | 45414414                | TT                              | CC                | 1946134190               |
| SNP_P3_60572_45414580 | NC_021163.1    | Ca_kabuli_chr04 | 45414580                | AA                              | TT                | 1946134339               |
| SNP_P3_60575_45416096 | NC_021163.1    | Ca_kabuli_chr04 | 45416096                | TT                              | CC                | 1946134502               |
| SNP_P3_60577_45416481 | NC_021163.1    | Ca_kabuli_chr04 | 45416481                | AA                              | GG                | 1946134662               |
| SNP_P3_60578_45416532 | NC_021163.1    | Ca_kabuli_chr04 | 45416532                | CC                              | TT                | 1946134814               |
| SNP_P3_60580_45416589 | NC_021163.1    | Ca_kabuli_chr04 | 45416589                | AA                              | TT                | 1946134983               |
| SNP_P3_60581_45417182 | NC_021163.1    | Ca_kabuli_chr04 | 45417182                | CC                              | GG                | 1946135165               |
| SNP_P3_60582_45417353 | NC_021163.1    | Ca_kabuli_chr04 | 45417353                | AA                              | CC                | 1946135349               |
| SNP_P3_60583_45418058 | NC_021163.1    | Ca_kabuli_chr04 | 45418058                | GG                              | AA                | 1946135630               |
| SNP_P3_60584_45418059 | NC_021163.1    | Ca_kabuli_chr04 | 45418059                | GG                              | AA                | 1946135827               |
| SNP_P3_60585_45418060 | NC_021163.1    | Ca_kabuli_chr04 | 45418060                | CC                              | AA                | 1946136001               |
| SNP_P3_60586_45418064 | NC_021163.1    | Ca_kabuli_chr04 | 45418064                | GG                              | AA                | 1946136190               |
| SNP_P3_60587_45418405 | NC_021163.1    | Ca_kabuli_chr04 | 45418405                | GG                              | CC                | 1946136377               |
| SNP_P3_60589_45421982 | NC_021163.1    | Ca_kabuli_chr04 | 45421982                | CC                              | GG                | 1946136569               |
| SNP_P3_60590_45421983 | NC_021163.1    | Ca_kabuli_chr04 | 45421983                | GG                              | TT                | 1946136761               |
| SNP_P3_60591_45422625 | NC_021163.1    | Ca_kabuli_chr04 | 45422625                | GG                              | TT                | 1946136952               |
| SNP_P3_60592_45422635 | NC_021163.1    | Ca_kabuli_chr04 | 45422635                | AA                              | GG                | 1946137143               |
| SNP_P3_60593_45429232 | NC_021163.1    | Ca_kabuli_chr04 | 45429232                | CC                              | AA                | 1946137336               |
| SNP_P3_60594_45430562 | NC_021163.1    | Ca_kabuli_chr04 | 45430562                | AA                              | GG                | 1946137534               |
| SNP_P3_60596_45431587 | NC_021163.1    | Ca_kabuli_chr04 | 45431587                | CC                              | AA                | 1946137717               |
| SNP_P3_60597_45431637 | NC_021163.1    | Ca_kabuli_chr04 | 45431637                | GG                              | AA                | 1946137909               |
| SNP_P3_60599_45432131 | NC_021163.1    | Ca_kabuli_chr04 | 45432131                | GG                              | AA                | 1946138105               |
| SNP_P3_60600_45432141 | NC_021163.1    | Ca_kabuli_chr04 | 45432141                | AA                              | GG                | 1946138281               |
| SNP_P3_60601_45432166 | NC_021163.1    | Ca_kabuli_chr04 | 45432166                | GG                              | AA                | 1946138468               |
| SNP_P3_60602_45433454 | NC_021163.1    | Ca_kabuli_chr04 | 45433454                | CC                              | TT                | 1946138668               |
| SNP_P3_60603_45433844 | NC_021163.1    | Ca_kabuli_chr04 | 45433844                | TT                              | AA                | 1946138860               |
| SNP_P3_60604_45433849 | NC_021163.1    | Ca_kabuli_chr04 | 45433849                | AA                              | GG                | 1946139061               |

| SNPs IDs              | Chromosome IDs | Chromosomes     | Physical positions (bp) | CDC Frontier (Reference genome) | (Pusa 256 & HPNB) | NCBI SNPdb Accession IDs |
|-----------------------|----------------|-----------------|-------------------------|---------------------------------|-------------------|--------------------------|
| SNP_P3_60605_45434858 | NC_021163.1    | Ca_kabuli_chr04 | 45434858                | CC                              | TT                | 1946139259               |
| SNP_P3_60606_45434884 | NC_021163.1    | Ca_kabuli_chr04 | 45434884                | AA                              | GG                | 1946139467               |
| SNP_P3_60607_45434935 | NC_021163.1    | Ca_kabuli_chr04 | 45434935                | GG                              | AA                | 1946139618               |
| SNP_P3_60608_45437588 | NC_021163.1    | Ca_kabuli_chr04 | 45437588                | AA                              | TT                | 1946139816               |
| SNP_P3_60609_45437602 | NC_021163.1    | Ca_kabuli_chr04 | 45437602                | GG                              | AA                | 1946140015               |
| SNP_P3_60610_45437646 | NC_021163.1    | Ca_kabuli_chr04 | 45437646                | GG                              | TT                | 1946140204               |
| SNP_P3_60611_45438596 | NC_021163.1    | Ca_kabuli_chr04 | 45438596                | CC                              | TT                | 1946140398               |
| SNP_P3_60612_45438781 | NC_021163.1    | Ca_kabuli_chr04 | 45438781                | AA                              | GG                | 1946140597               |
| SNP_P3_60613_45438798 | NC_021163.1    | Ca_kabuli_chr04 | 45438798                | TT                              | CC                | 1946140794               |
| SNP_P3_60614_45439298 | NC_021163.1    | Ca_kabuli_chr04 | 45439298                | AA                              | TT                | 1946140993               |
| SNP_P3_60615_45439307 | NC_021163.1    | Ca_kabuli_chr04 | 45439307                | CC                              | TT                | 1946141182               |
| SNP_P3_60616_45439537 | NC_021163.1    | Ca_kabuli_chr04 | 45439537                | TT                              | CC                | 1946141377               |
| SNP_P3_60617_45439659 | NC_021163.1    | Ca_kabuli_chr04 | 45439659                | AA                              | CC                | 1946141571               |
| SNP_P3_60618_45440023 | NC_021163.1    | Ca_kabuli_chr04 | 45440023                | GG                              | AA                | 1946141771               |
| SNP_P3_60619_45440028 | NC_021163.1    | Ca_kabuli_chr04 | 45440028                | CC                              | TT                | 1946141951               |
| SNP_P3_60622_45461099 | NC_021163.1    | Ca_kabuli_chr04 | 45461099                | AA                              | TT                | 1946142149               |
| SNP_P3_60623_45461100 | NC_021163.1    | Ca_kabuli_chr04 | 45461100                | AA                              | TT                | 1946142340               |
| SNP_P3_60624_45462773 | NC_021163.1    | Ca_kabuli_chr04 | 45462773                | AA                              | GG                | 1946142532               |
| SNP_P3_60625_45469568 | NC_021163.1    | Ca_kabuli_chr04 | 45469568                | TT                              | CC                | 1946142723               |
| SNP_P3_60626_45470106 | NC_021163.1    | Ca_kabuli_chr04 | 45470106                | GG                              | TT                | 1946142886               |
| SNP_P3_60627_45472043 | NC_021163.1    | Ca_kabuli_chr04 | 45472043                | GG                              | TT                | 1946143085               |
| SNP_P3_60629_45477982 | NC_021163.1    | Ca_kabuli_chr04 | 45477982                | AA                              | GG                | 1946143280               |
| SNP_P3_60630_45496198 | NC_021163.1    | Ca_kabuli_chr04 | 45496198                | GG                              | AA                | 1946143477               |
| SNP_P3_60633_45547833 | NC_021163.1    | Ca_kabuli_chr04 | 45547833                | TT                              | AA                | 1946143669               |
| SNP_P3_60634_45551595 | NC_021163.1    | Ca_kabuli_chr04 | 45551595                | CC                              | TT                | 1946143859               |
| SNP_P3_60636_45582951 | NC_021163.1    | Ca_kabuli_chr04 | 45582951                | AA                              | GG                | 1946144057               |
| SNP_P3_60637_45584456 | NC_021163.1    | Ca_kabuli_chr04 | 45584456                | CC                              | TT                | 1946144238               |
| SNP_P3_60638_45584639 | NC_021163.1    | Ca_kabuli_chr04 | 45584639                | AA                              | TT                | 1946144420               |
| SNP_P3_60640_45589880 | NC_021163.1    | Ca_kabuli_chr04 | 45589880                | TT                              | CC                | 1946144609               |
| SNP_P3_60641_45590166 | NC_021163.1    | Ca_kabuli_chr04 | 45590166                | GG                              | AA                | 1946144806               |
| SNP_P3_60642_45600433 | NC_021163.1    | Ca_kabuli_chr04 | 45600433                | GG                              | TT                | 1946145003               |
| SNP_P3_60643_45629202 | NC_021163.1    | Ca_kabuli_chr04 | 45629202                | TT                              | CC                | 1946145202               |
| SNP_P3_60644_45645663 | NC_021163.1    | Ca_kabuli_chr04 | 45645663                | GG                              | AA                | 1946145391               |
| SNP_P3_60645_45645926 | NC_021163.1    | Ca_kabuli_chr04 | 45645926                | AA                              | CC                | 1946145569               |
| SNP_P3_60647_45645951 | NC_021163.1    | Ca_kabuli_chr04 | 45645951                | GG                              | AA                | 1946145753               |
| SNP_P3_60648_45646086 | NC_021163.1    | Ca_kabuli_chr04 | 45646086                | TT                              | AA                | 1946145937               |
| SNP_P3_60649_45646089 | NC_021163.1    | Ca_kabuli_chr04 | 45646089                | CC                              | AA                | 1946146121               |
| SNP_P3_60651_45709391 | NC_021163.1    | Ca_kabuli_chr04 | 45709391                | TT                              | AA                | 1946146313               |
| SNP_P3_60652_45714154 | NC_021163.1    | Ca_kabuli_chr04 | 45714154                | TT                              | AA                | 1946146509               |
| SNP_P3_60654_45740338 | NC_021163.1    | Ca_kabuli_chr04 | 45740338                | AA                              | GG                | 1946146696               |
| SNP_P3_60655_45752707 | NC_021163.1    | Ca_kabuli_chr04 | 45752707                | CC                              | TT                | 1946146885               |
| SNP_P3_60656_45752756 | NC_021163.1    | Ca_kabuli_chr04 | 45752756                | GG                              | AA                | 1946147081               |



| SNPs IDs              | Chromosome IDs | Chromosomes     | Physical positions (bp) | CDC Frontier (Reference genome) | (Pusa 256 & HPNB) | NCBI SNPdb Accession IDs |
|-----------------------|----------------|-----------------|-------------------------|---------------------------------|-------------------|--------------------------|
| SNP_P3_60657_45752981 | NC_021163.1    | Ca_kabuli_chr04 | 45752981                | GG                              | TT                | 1946147160               |
| SNP_P3_60658_45756241 | NC_021163.1    | Ca_kabuli_chr04 | 45756241                | AA                              | GG                | 1946147325               |
| SNP_P3_60659_45756305 | NC_021163.1    | Ca_kabuli_chr04 | 45756305                | TT                              | AA                | 1946147526               |
| SNP_P3_60661_45756408 | NC_021163.1    | Ca_kabuli_chr04 | 45756408                | GG                              | TT                | 1946147725               |
| SNP_P3_60662_45756574 | NC_021163.1    | Ca_kabuli_chr04 | 45756574                | AA                              | TT                | 1946147918               |
| SNP_P3_60663_45756582 | NC_021163.1    | Ca_kabuli_chr04 | 45756582                | TT                              | AA                | 1946148125               |
| SNP_P3_60664_45756592 | NC_021163.1    | Ca_kabuli_chr04 | 45756592                | GG                              | TT                | 1946148327               |
| SNP_P3_60665_45756594 | NC_021163.1    | Ca_kabuli_chr04 | 45756594                | GG                              | TT                | 1946148528               |
| SNP_P3_60666_45756597 | NC_021163.1    | Ca_kabuli_chr04 | 45756597                | TT                              | AA                | 1946148739               |
| SNP_P3_60667_45756608 | NC_021163.1    | Ca_kabuli_chr04 | 45756608                | GG                              | AA                | 1946148951               |
| SNP_P3_60668_45771282 | NC_021163.1    | Ca_kabuli_chr04 | 45771282                | CC                              | AA                | 1946149158               |
| SNP_P3_60669_45810973 | NC_021163.1    | Ca_kabuli_chr04 | 45810973                | TT                              | CC                | 1946149369               |
| SNP_P3_60670_45826278 | NC_021163.1    | Ca_kabuli_chr04 | 45826278                | TT                              | CC                | 1946149567               |
| SNP_P3_60671_45830158 | NC_021163.1    | Ca_kabuli_chr04 | 45830158                | GG                              | AA                | 1946149766               |
| SNP_P3_60672_45845136 | NC_021163.1    | Ca_kabuli_chr04 | 45845136                | AA                              | GG                | 1946149959               |
| SNP_P3_60673_45845137 | NC_021163.1    | Ca_kabuli_chr04 | 45845137                | AA                              | GG                | 1946150158               |
| SNP_P3_60674_45845163 | NC_021163.1    | Ca_kabuli_chr04 | 45845163                | AA                              | TT                | 1946150345               |
| SNP_P3_60675_45845875 | NC_021163.1    | Ca_kabuli_chr04 | 45845875                | TT                              | CC                | 1946150533               |
| SNP_P3_60677_45892520 | NC_021163.1    | Ca_kabuli_chr04 | 45892520                | GG                              | AA                | 1946150732               |
| SNP_P3_60678_45896992 | NC_021163.1    | Ca_kabuli_chr04 | 45896992                | TT                              | AA                | 1946150928               |
| SNP_P3_60679_45915877 | NC_021163.1    | Ca_kabuli_chr04 | 45915877                | CC                              | TT                | 1946151119               |
| SNP_P3_60680_45922705 | NC_021163.1    | Ca_kabuli_chr04 | 45922705                | TT                              | CC                | 1946151303               |
| SNP_P3_60681_45926275 | NC_021163.1    | Ca_kabuli_chr04 | 45926275                | CC                              | AA                | 1946151504               |
| SNP_P3_60682_45929229 | NC_021163.1    | Ca_kabuli_chr04 | 45929229                | CC                              | TT                | 1946151706               |
| SNP_P3_60683_45937936 | NC_021163.1    | Ca_kabuli_chr04 | 45937936                | AA                              | GG                | 1946151896               |
| SNP_P3_60684_45941971 | NC_021163.1    | Ca_kabuli_chr04 | 45941971                | CC                              | TT                | 1946152086               |
| SNP_P3_60685_45948691 | NC_021163.1    | Ca_kabuli_chr04 | 45948691                | AA                              | GG                | 1946152281               |
| SNP_P3_60686_45949984 | NC_021163.1    | Ca_kabuli_chr04 | 45949984                | GG                              | TT                | 1946152471               |
| SNP_P3_60687_45960554 | NC_021163.1    | Ca_kabuli_chr04 | 45960554                | TT                              | AA                | 1946152661               |
| SNP_P3_60688_45979670 | NC_021163.1    | Ca_kabuli_chr04 | 45979670                | AA                              | GG                | 1946152858               |
| SNP_P3_60689_45981164 | NC_021163.1    | Ca_kabuli_chr04 | 45981164                | TT                              | CC                | 1946153060               |
| SNP_P3_60690_45993675 | NC_021163.1    | Ca_kabuli_chr04 | 45993675                | CC                              | TT                | 1946153259               |
| SNP_P3_60691_45993708 | NC_021163.1    | Ca_kabuli_chr04 | 45993708                | AA                              | TT                | 1946153461               |
| SNP_P3_60694_46005851 | NC_021163.1    | Ca_kabuli_chr04 | 46005851                | GG                              | AA                | 1946153661               |
| SNP_P3_60695_46005941 | NC_021163.1    | Ca_kabuli_chr04 | 46005941                | CC                              | TT                | 1946153857               |
| SNP_P3_60696_46006105 | NC_021163.1    | Ca_kabuli_chr04 | 46006105                | TT                              | AA                | 1946154051               |
| SNP_P3_60697_46011480 | NC_021163.1    | Ca_kabuli_chr04 | 46011480                | CC                              | GG                | 1946154253               |
| SNP_P3_60698_46027446 | NC_021163.1    | Ca_kabuli_chr04 | 46027446                | GG                              | CC                | 1946154444               |
| SNP_P3_60699_46027516 | NC_021163.1    | Ca_kabuli_chr04 | 46027516                | TT                              | AA                | 1946154640               |
| SNP_P3_60700_46031891 | NC_021163.1    | Ca_kabuli_chr04 | 46031891                | CC                              | TT                | 1946154839               |
| SNP_P3_60701_46032401 | NC_021163.1    | Ca_kabuli_chr04 | 46032401                | CC                              | TT                | 1946155016               |
| SNP_P3_60702_46032555 | NC_021163.1    | Ca_kabuli_chr04 | 46032555                | TT                              | AA                | 1946155179               |

| SNPs IDs              | Chromosome IDs | Chromosomes     | Physical positions (bp) | CDC Frontier (Reference genome) | (Pusa 256 & HPNB) | NCBI SNPdb Accession IDs |
|-----------------------|----------------|-----------------|-------------------------|---------------------------------|-------------------|--------------------------|
| SNP_P3_60703_46032737 | NC_021163.1    | Ca_kabuli_chr04 | 46032737                | GG                              | TT                | 1946155364               |
| SNP_P3_60704_46032772 | NC_021163.1    | Ca_kabuli_chr04 | 46032772                | GG                              | TT                | 1946155556               |
| SNP_P3_60705_46035454 | NC_021163.1    | Ca_kabuli_chr04 | 46035454                | GG                              | AA                | 1946155754               |
| SNP_P3_60706_46060479 | NC_021163.1    | Ca_kabuli_chr04 | 46060479                | TT                              | CC                | 1946155947               |
| SNP_P3_60707_46060502 | NC_021163.1    | Ca_kabuli_chr04 | 46060502                | AA                              | GG                | 1946156140               |
| SNP_P3_60708_46060549 | NC_021163.1    | Ca_kabuli_chr04 | 46060549                | AA                              | GG                | 1946156338               |
| SNP_P3_60709_46113467 | NC_021163.1    | Ca_kabuli_chr04 | 46113467                | GG                              | AA                | 1946156518               |
| SNP_P3_60710_46127896 | NC_021163.1    | Ca_kabuli_chr04 | 46127896                | AA                              | TT                | 1946156713               |
| SNP_P3_60712_46171113 | NC_021163.1    | Ca_kabuli_chr04 | 46171113                | CC                              | TT                | 1946156910               |
| SNP_P3_60713_46183015 | NC_021163.1    | Ca_kabuli_chr04 | 46183015                | CC                              | TT                | 1946157104               |
| SNP_P3_60714_46189304 | NC_021163.1    | Ca_kabuli_chr04 | 46189304                | GG                              | AA                | 1946157294               |
| SNP_P3_60715_46197123 | NC_021163.1    | Ca_kabuli_chr04 | 46197123                | AA                              | GG                | 1946157476               |
| SNP_P3_60716_46206221 | NC_021163.1    | Ca_kabuli_chr04 | 46206221                | CC                              | TT                | 1946157679               |
| SNP_P3_60717_46225537 | NC_021163.1    | Ca_kabuli_chr04 | 46225537                | GG                              | TT                | 1946157871               |
| SNP_P3_60718_46251357 | NC_021163.1    | Ca_kabuli_chr04 | 46251357                | TT                              | CC                | 1946158064               |
| SNP_P3_60719_46251368 | NC_021163.1    | Ca_kabuli_chr04 | 46251368                | TT                              | CC                | 1946158262               |
| SNP_P3_60720_46282131 | NC_021163.1    | Ca_kabuli_chr04 | 46282131                | TT                              | AA                | 1946158456               |
| SNP_P3_60721_46293323 | NC_021163.1    | Ca_kabuli_chr04 | 46293323                | CC                              | TT                | 1946158656               |
| SNP_P3_60722_46321989 | NC_021163.1    | Ca_kabuli_chr04 | 46321989                | AA                              | GG                | 1946158853               |
| SNP_P3_60723_46322024 | NC_021163.1    | Ca_kabuli_chr04 | 46322024                | AA                              | GG                | 1946159054               |
| SNP_P3_60724_46322268 | NC_021163.1    | Ca_kabuli_chr04 | 46322268                | AA                              | GG                | 1946159248               |
| SNP_P3_60725_46322341 | NC_021163.1    | Ca_kabuli_chr04 | 46322341                | GG                              | AA                | 1946159447               |
| SNP_P3_60726_46322521 | NC_021163.1    | Ca_kabuli_chr04 | 46322521                | GG                              | AA                | 1946159645               |
| SNP_P3_60727_46322553 | NC_021163.1    | Ca_kabuli_chr04 | 46322553                | GG                              | TT                | 1946159840               |
| SNP_P3_60728_46322560 | NC_021163.1    | Ca_kabuli_chr04 | 46322560                | AA                              | GG                | 1946160034               |
| SNP_P3_60729_46335082 | NC_021163.1    | Ca_kabuli_chr04 | 46335082                | CC                              | TT                | 1946160218               |
| SNP_P3_60730_46335289 | NC_021163.1    | Ca_kabuli_chr04 | 46335289                | GG                              | AA                | 1946160411               |
| SNP_P3_60731_46338501 | NC_021163.1    | Ca_kabuli_chr04 | 46338501                | TT                              | AA                | 1946160609               |
| SNP_P3_60732_46338504 | NC_021163.1    | Ca_kabuli_chr04 | 46338504                | GG                              | AA                | 1946160805               |
| SNP_P3_60733_46338506 | NC_021163.1    | Ca_kabuli_chr04 | 46338506                | CC                              | TT                | 1946160984               |
| SNP_P3_60734_46376377 | NC_021163.1    | Ca_kabuli_chr04 | 46376377                | TT                              | CC                | 1946161185               |
| SNP_P3_60735_46377539 | NC_021163.1    | Ca_kabuli_chr04 | 46377539                | AA                              | TT                | 1946161385               |
| SNP_P3_60738_46385774 | NC_021163.1    | Ca_kabuli_chr04 | 46385774                | GG                              | AA                | 1946161569               |
| SNP_P3_60739_46385956 | NC_021163.1    | Ca_kabuli_chr04 | 46385956                | CC                              | AA                | 1946161767               |
| SNP_P3_60740_46387930 | NC_021163.1    | Ca_kabuli_chr04 | 46387930                | TT                              | CC                | 1946161968               |
| SNP_P3_60741_46388109 | NC_021163.1    | Ca_kabuli_chr04 | 46388109                | AA                              | GG                | 1946162174               |
| SNP_P3_60742_46388170 | NC_021163.1    | Ca_kabuli_chr04 | 46388170                | GG                              | TT                | 1946162362               |
| SNP_P3_60743_46486640 | NC_021163.1    | Ca_kabuli_chr04 | 46486640                | AA                              | TT                | 1946162555               |
| SNP_P3_60744_46488716 | NC_021163.1    | Ca_kabuli_chr04 | 46488716                | CC                              | AA                | 1946162761               |
| SNP_P3_60745_46489027 | NC_021163.1    | Ca_kabuli_chr04 | 46489027                | GG                              | AA                | 1946162958               |
| SNP_P3_60746_46492967 | NC_021163.1    | Ca_kabuli_chr04 | 46492967                | GG                              | TT                | 1946163156               |
| SNP_P3_60748_46494958 | NC_021163.1    | Ca_kabuli_chr04 | 46494958                | AA                              | GG                | 1946163346               |

| SNPs IDs              | Chromosome IDs | Chromosomes     | Physical positions (bp) | CDC Frontier (Reference genome) | (Pusa 256 & HPNB) | NCBI SNPdb Accession IDs |
|-----------------------|----------------|-----------------|-------------------------|---------------------------------|-------------------|--------------------------|
| SNP_P3_60750_46495154 | NC_021163.1    | Ca_kabuli_chr04 | 46495154                | TT                              | CC                | 1946163555               |
| SNP_P3_60751_46495162 | NC_021163.1    | Ca_kabuli_chr04 | 46495162                | TT                              | AA                | 1946163754               |
| SNP_P3_60752_46495398 | NC_021163.1    | Ca_kabuli_chr04 | 46495398                | AA                              | GG                | 1946163954               |
| SNP_P3_60753_46495580 | NC_021163.1    | Ca_kabuli_chr04 | 46495580                | AA                              | GG                | 1946164157               |
| SNP_P3_60754_46495585 | NC_021163.1    | Ca_kabuli_chr04 | 46495585                | GG                              | AA                | 1946164354               |
| SNP_P3_60756_46499274 | NC_021163.1    | Ca_kabuli_chr04 | 46499274                | AA                              | GG                | 1946164559               |
| SNP_P3_60758_46514924 | NC_021163.1    | Ca_kabuli_chr04 | 46514924                | CC                              | AA                | 1946164740               |
| SNP_P3_60760_46546977 | NC_021163.1    | Ca_kabuli_chr04 | 46546977                | CC                              | TT                | 1946164949               |
| SNP_P3_60762_46581478 | NC_021163.1    | Ca_kabuli_chr04 | 46581478                | TT                              | AA                | 1946165149               |
| SNP_P3_60763_46582118 | NC_021163.1    | Ca_kabuli_chr04 | 46582118                | AA                              | GG                | 1946165342               |
| SNP_P3_60764_46583313 | NC_021163.1    | Ca_kabuli_chr04 | 46583313                | TT                              | CC                | 1946165542               |
| SNP_P3_60765_46583353 | NC_021163.1    | Ca_kabuli_chr04 | 46583353                | GG                              | AA                | 1946165724               |
| SNP_P3_60766_46597677 | NC_021163.1    | Ca_kabuli_chr04 | 46597677                | TT                              | GG                | 1946165756               |
| SNP_P3_60767_46615573 | NC_021163.1    | Ca_kabuli_chr04 | 46615573                | AA                              | GG                | 1946165957               |
| SNP_P3_60768_46633438 | NC_021163.1    | Ca_kabuli_chr04 | 46633438                | GG                              | AA                | 1946166157               |
| SNP_P3_60770_46638287 | NC_021163.1    | Ca_kabuli_chr04 | 46638287                | TT                              | CC                | 1946166349               |
| SNP_P3_60771_46658242 | NC_021163.1    | Ca_kabuli_chr04 | 46658242                | AA                              | CC                | 1946166538               |
| SNP_P3_60772_46674702 | NC_021163.1    | Ca_kabuli_chr04 | 46674702                | GG                              | AA                | 1946166742               |
| SNP_P3_60774_46674900 | NC_021163.1    | Ca_kabuli_chr04 | 46674900                | TT                              | GG                | 1946166940               |
| SNP_P3_60775_46674932 | NC_021163.1    | Ca_kabuli_chr04 | 46674932                | TT                              | CC                | 1946167137               |
| SNP_P3_60776_46674949 | NC_021163.1    | Ca_kabuli_chr04 | 46674949                | CC                              | TT                | 1946167341               |
| SNP_P3_60777_46675317 | NC_021163.1    | Ca_kabuli_chr04 | 46675317                | AA                              | GG                | 1946167536               |
| SNP_P3_60778_46675364 | NC_021163.1    | Ca_kabuli_chr04 | 46675364                | CC                              | TT                | 1946167724               |
| SNP_P3_60780_46691511 | NC_021163.1    | Ca_kabuli_chr04 | 46691511                | CC                              | TT                | 1946167914               |
| SNP_P3_60781_46703388 | NC_021163.1    | Ca_kabuli_chr04 | 46703388                | TT                              | CC                | 1946168107               |
| SNP_P3_60782_46703389 | NC_021163.1    | Ca_kabuli_chr04 | 46703389                | TT                              | GG                | 1946168312               |
| SNP_P3_60783_46705812 | NC_021163.1    | Ca_kabuli_chr04 | 46705812                | CC                              | GG                | 1946168503               |
| SNP_P3_60784_46705819 | NC_021163.1    | Ca_kabuli_chr04 | 46705819                | CC                              | TT                | 1946168693               |
| SNP_P3_60785_46705824 | NC_021163.1    | Ca_kabuli_chr04 | 46705824                | CC                              | AA                | 1946168889               |
| SNP_P3_60786_46706015 | NC_021163.1    | Ca_kabuli_chr04 | 46706015                | TT                              | CC                | 1946169069               |
| SNP_P3_60787_46706063 | NC_021163.1    | Ca_kabuli_chr04 | 46706063                | GG                              | CC                | 1946169267               |
| SNP_P3_60788_46706563 | NC_021163.1    | Ca_kabuli_chr04 | 46706563                | CC                              | TT                | 1946169465               |
| SNP_P3_60789_46707178 | NC_021163.1    | Ca_kabuli_chr04 | 46707178                | GG                              | CC                | 1946169657               |
| SNP_P3_60791_46707268 | NC_021163.1    | Ca_kabuli_chr04 | 46707268                | CC                              | AA                | 1946169835               |
| SNP_P3_60792_46707281 | NC_021163.1    | Ca_kabuli_chr04 | 46707281                | CC                              | TT                | 1946170031               |
| SNP_P3_60793_46707304 | NC_021163.1    | Ca_kabuli_chr04 | 46707304                | AA                              | TT                | 1946170210               |
| SNP_P3_60794_46707327 | NC_021163.1    | Ca_kabuli_chr04 | 46707327                | CC                              | GG                | 1946170387               |
| SNP_P3_60795_46707398 | NC_021163.1    | Ca_kabuli_chr04 | 46707398                | CC                              | TT                | 1946170548               |
| SNP_P3_60796_46707416 | NC_021163.1    | Ca_kabuli_chr04 | 46707416                | AA                              | TT                | 1946170737               |
| SNP_P3_60797_46707783 | NC_021163.1    | Ca_kabuli_chr04 | 46707783                | CC                              | TT                | 1946170881               |
| SNP_P3_60798_46707805 | NC_021163.1    | Ca_kabuli_chr04 | 46707805                | GG                              | TT                | 1946171078               |
| SNP_P3_60799_46708301 | NC_021163.1    | Ca_kabuli_chr04 | 46708301                | GG                              | AA                | 1946171275               |

| SNPs IDs              | Chromosome IDs | Chromosomes     | Physical positions (bp) | CDC Frontier (Reference genome) | (Pusa 256 & HPNB) | NCBI SNPdb Accession IDs |
|-----------------------|----------------|-----------------|-------------------------|---------------------------------|-------------------|--------------------------|
| SNP_P3_60800_46708837 | NC_021163.1    | Ca_kabuli_chr04 | 46708837                | GG                              | CC                | 1946171479               |
| SNP_P3_60801_46708872 | NC_021163.1    | Ca_kabuli_chr04 | 46708872                | GG                              | AA                | 1946171681               |
| SNP_P3_60802_46709319 | NC_021163.1    | Ca_kabuli_chr04 | 46709319                | GG                              | AA                | 1946171867               |
| SNP_P3_60803_46709583 | NC_021163.1    | Ca_kabuli_chr04 | 46709583                | AA                              | CC                | 1946172054               |
| SNP_P3_60804_46709621 | NC_021163.1    | Ca_kabuli_chr04 | 46709621                | TT                              | CC                | 1946172243               |
| SNP_P3_60805_46709631 | NC_021163.1    | Ca_kabuli_chr04 | 46709631                | AA                              | GG                | 1946172432               |
| SNP_P3_60806_46709669 | NC_021163.1    | Ca_kabuli_chr04 | 46709669                | AA                              | GG                | 1946172630               |
| SNP_P3_60807_46709675 | NC_021163.1    | Ca_kabuli_chr04 | 46709675                | CC                              | TT                | 1946172811               |
| SNP_P3_60808_46709687 | NC_021163.1    | Ca_kabuli_chr04 | 46709687                | CC                              | TT                | 1946172997               |
| SNP_P3_60809_46709838 | NC_021163.1    | Ca_kabuli_chr04 | 46709838                | TT                              | CC                | 1946173186               |
| SNP_P3_60810_46709960 | NC_021163.1    | Ca_kabuli_chr04 | 46709960                | AA                              | GG                | 1946173380               |
| SNP_P3_60811_46709968 | NC_021163.1    | Ca_kabuli_chr04 | 46709968                | GG                              | AA                | 1946173551               |
| SNP_P3_60812_46709975 | NC_021163.1    | Ca_kabuli_chr04 | 46709975                | TT                              | GG                | 1946173725               |
| SNP_P3_60813_46710044 | NC_021163.1    | Ca_kabuli_chr04 | 46710044                | GG                              | CC                | 1946173915               |
| SNP_P3_60814_46710053 | NC_021163.1    | Ca_kabuli_chr04 | 46710053                | TT                              | CC                | 1946174099               |
| SNP_P3_60815_46710092 | NC_021163.1    | Ca_kabuli_chr04 | 46710092                | GG                              | AA                | 1946174264               |
| SNP_P3_60816_46710101 | NC_021163.1    | Ca_kabuli_chr04 | 46710101                | AA                              | TT                | 1946174375               |
| SNP_P3_60817_46710144 | NC_021163.1    | Ca_kabuli_chr04 | 46710144                | CC                              | TT                | 1946174558               |
| SNP_P3_60818_46710413 | NC_021163.1    | Ca_kabuli_chr04 | 46710413                | AA                              | GG                | 1946174729               |
| SNP_P3_60819_46710669 | NC_021163.1    | Ca_kabuli_chr04 | 46710669                | TT                              | AA                | 1946174895               |
| SNP_P3_60820_46710880 | NC_021163.1    | Ca_kabuli_chr04 | 46710880                | GG                              | CC                | 1946174939               |
| SNP_P3_60821_46710949 | NC_021163.1    | Ca_kabuli_chr04 | 46710949                | AA                              | TT                | 1946175109               |
| SNP_P3_60822_46710963 | NC_021163.1    | Ca_kabuli_chr04 | 46710963                | GG                              | CC                | 1946175291               |
| SNP_P3_60823_46710977 | NC_021163.1    | Ca_kabuli_chr04 | 46710977                | TT                              | GG                | 1946175429               |
| SNP_P3_60824_46710983 | NC_021163.1    | Ca_kabuli_chr04 | 46710983                | TT                              | CC                | 1946175558               |
| SNP_P3_60825_46711029 | NC_021163.1    | Ca_kabuli_chr04 | 46711029                | CC                              | AA                | 1946175712               |
| SNP_P3_60826_46711049 | NC_021163.1    | Ca_kabuli_chr04 | 46711049                | TT                              | CC                | 1946175811               |
| SNP_P3_60827_46711068 | NC_021163.1    | Ca_kabuli_chr04 | 46711068                | TT                              | CC                | 1946175998               |
| SNP_P3_60829_46711226 | NC_021163.1    | Ca_kabuli_chr04 | 46711226                | CC                              | TT                | 1946176190               |
| SNP_P3_60830_46711232 | NC_021163.1    | Ca_kabuli_chr04 | 46711232                | CC                              | TT                | 1946176337               |
| SNP_P3_60831_46711259 | NC_021163.1    | Ca_kabuli_chr04 | 46711259                | CC                              | GG                | 1946176370               |
| SNP_P3_60833_46711340 | NC_021163.1    | Ca_kabuli_chr04 | 46711340                | TT                              | CC                | 1946176557               |
| SNP_P3_60834_46711452 | NC_021163.1    | Ca_kabuli_chr04 | 46711452                | AA                              | TT                | 1946176662               |
| SNP_P3_60837_46712299 | NC_021163.1    | Ca_kabuli_chr04 | 46712299                | CC                              | TT                | 1946176735               |
| SNP_P3_60838_46712322 | NC_021163.1    | Ca_kabuli_chr04 | 46712322                | TT                              | AA                | 1946176928               |
| SNP_P3_60839_46712476 | NC_021163.1    | Ca_kabuli_chr04 | 46712476                | AA                              | CC                | 1946177075               |
| SNP_P3_60840_46712510 | NC_021163.1    | Ca_kabuli_chr04 | 46712510                | AA                              | TT                | 1946177085               |
| SNP_P3_60843_46717200 | NC_021163.1    | Ca_kabuli_chr04 | 46717200                | CC                              | TT                | 1946177204               |
| SNP_P3_60844_46723483 | NC_021163.1    | Ca_kabuli_chr04 | 46723483                | AA                              | TT                | 1946177362               |
| SNP_P3_60845_46724700 | NC_021163.1    | Ca_kabuli_chr04 | 46724700                | CC                              | GG                | 1946177449               |
| SNP_P3_60846_46725838 | NC_021163.1    | Ca_kabuli_chr04 | 46725838                | GG                              | AA                | 1946177641               |
| SNP_P3_60847_46727203 | NC_021163.1    | Ca_kabuli_chr04 | 46727203                | CC                              | TT                | 1946177734               |

| SNPs IDs              | Chromosome IDs | Chromosomes     | Physical positions (bp) | CDC Frontier (Reference genome) | (Pusa 256 & HPNB) | NCBI SNPdb Accession IDs |
|-----------------------|----------------|-----------------|-------------------------|---------------------------------|-------------------|--------------------------|
| SNP_P3_60848_46727229 | NC_021163.1    | Ca_kabuli_chr04 | 46727229                | TT                              | CC                | 1946177791               |
| SNP_P3_60849_46727581 | NC_021163.1    | Ca_kabuli_chr04 | 46727581                | GG                              | AA                | 1946177956               |
| SNP_P3_60850_46727829 | NC_021163.1    | Ca_kabuli_chr04 | 46727829                | AA                              | CC                | 1946178103               |
| SNP_P3_60851_46727863 | NC_021163.1    | Ca_kabuli_chr04 | 46727863                | CC                              | TT                | 1946178223               |
| SNP_P3_60852_46728125 | NC_021163.1    | Ca_kabuli_chr04 | 46728125                | TT                              | CC                | 1946178409               |
| SNP_P3_60853_46728539 | NC_021163.1    | Ca_kabuli_chr04 | 46728539                | GG                              | AA                | 1946178517               |
| SNP_P3_60854_46730423 | NC_021163.1    | Ca_kabuli_chr04 | 46730423                | TT                              | AA                | 1946178716               |
| SNP_P3_60855_46730428 | NC_021163.1    | Ca_kabuli_chr04 | 46730428                | TT                              | CC                | 1946178758               |
| SNP_P3_60857_46730509 | NC_021163.1    | Ca_kabuli_chr04 | 46730509                | TT                              | AA                | 1946178787               |
| SNP_P3_60858_46730677 | NC_021163.1    | Ca_kabuli_chr04 | 46730677                | GG                              | TT                | 1946178813               |
| SNP_P3_60859_46730679 | NC_021163.1    | Ca_kabuli_chr04 | 46730679                | CC                              | TT                | 1946178913               |
| SNP_P3_60860_46730696 | NC_021163.1    | Ca_kabuli_chr04 | 46730696                | TT                              | CC                | 1946179111               |
| SNP_P3_60861_46730702 | NC_021163.1    | Ca_kabuli_chr04 | 46730702                | AA                              | GG                | 1946179216               |
| SNP_P3_60862_46730768 | NC_021163.1    | Ca_kabuli_chr04 | 46730768                | CC                              | TT                | 1946179375               |
| SNP_P3_60863_46731991 | NC_021163.1    | Ca_kabuli_chr04 | 46731991                | GG                              | TT                | 1946179430               |
| SNP_P3_60864_46732257 | NC_021163.1    | Ca_kabuli_chr04 | 46732257                | AA                              | TT                | 1946179514               |
| SNP_P3_60865_46732272 | NC_021163.1    | Ca_kabuli_chr04 | 46732272                | CC                              | TT                | 1946179695               |
| SNP_P3_60866_46732281 | NC_021163.1    | Ca_kabuli_chr04 | 46732281                | TT                              | CC                | 1946179836               |
| SNP_P3_60867_46732311 | NC_021163.1    | Ca_kabuli_chr04 | 46732311                | CC                              | AA                | 1946179900               |
| SNP_P3_60868_46732476 | NC_021163.1    | Ca_kabuli_chr04 | 46732476                | CC                              | GG                | 1946179942               |
| SNP_P3_60870_46734047 | NC_021163.1    | Ca_kabuli_chr04 | 46734047                | GG                              | AA                | 1946180070               |
| SNP_P3_60872_46734469 | NC_021163.1    | Ca_kabuli_chr04 | 46734469                | CC                              | TT                | 1946180160               |
| SNP_P3_60873_46734477 | NC_021163.1    | Ca_kabuli_chr04 | 46734477                | TT                              | AA                | 1946180247               |
| SNP_P3_60874_46735784 | NC_021163.1    | Ca_kabuli_chr04 | 46735784                | GG                              | TT                | 1946180448               |
| SNP_P3_60875_46735913 | NC_021163.1    | Ca_kabuli_chr04 | 46735913                | GG                              | AA                | 1946180630               |
| SNP_P3_60876_46735954 | NC_021163.1    | Ca_kabuli_chr04 | 46735954                | TT                              | AA                | 1946180816               |
| SNP_P3_60877_46736007 | NC_021163.1    | Ca_kabuli_chr04 | 46736007                | TT                              | CC                | 1946180983               |
| SNP_P3_60878_46736306 | NC_021163.1    | Ca_kabuli_chr04 | 46736306                | GG                              | CC                | 1946181150               |
| SNP_P3_60879_46736672 | NC_021163.1    | Ca_kabuli_chr04 | 46736672                | GG                              | TT                | 1946181316               |
| SNP_P3_60880_46736799 | NC_021163.1    | Ca_kabuli_chr04 | 46736799                | AA                              | GG                | 1946181501               |
| SNP_P3_60881_46736804 | NC_021163.1    | Ca_kabuli_chr04 | 46736804                | GG                              | AA                | 1946181684               |
| SNP_P3_60882_46736813 | NC_021163.1    | Ca_kabuli_chr04 | 46736813                | CC                              | TT                | 1946181872               |
| SNP_P3_60883_46736847 | NC_021163.1    | Ca_kabuli_chr04 | 46736847                | TT                              | CC                | 1946182024               |
| SNP_P3_60884_46736862 | NC_021163.1    | Ca_kabuli_chr04 | 46736862                | TT                              | CC                | 1946182204               |
| SNP_P3_60885_46736929 | NC_021163.1    | Ca_kabuli_chr04 | 46736929                | AA                              | GG                | 1946182390               |
| SNP_P3_60886_46737747 | NC_021163.1    | Ca_kabuli_chr04 | 46737747                | CC                              | TT                | 1946182576               |
| SNP_P3_60887_46737765 | NC_021163.1    | Ca_kabuli_chr04 | 46737765                | GG                              | AA                | 1946182770               |
| SNP_P3_60888_46737892 | NC_021163.1    | Ca_kabuli_chr04 | 46737892                | TT                              | AA                | 1946182965               |
| SNP_P3_60889_46738400 | NC_021163.1    | Ca_kabuli_chr04 | 46738400                | TT                              | CC                | 1946183154               |
| SNP_P3_60890_46739039 | NC_021163.1    | Ca_kabuli_chr04 | 46739039                | TT                              | AA                | 1946183352               |
| SNP_P3_60891_46739236 | NC_021163.1    | Ca_kabuli_chr04 | 46739236                | GG                              | CC                | 1946183534               |
| SNP_P3_60892_46739241 | NC_021163.1    | Ca_kabuli_chr04 | 46739241                | TT                              | CC                | 1946183728               |

| SNPs IDs              | Chromosome IDs | Chromosomes     | Physical positions (bp) | CDC Frontier (Reference genome) | (Pusa 256 & HPNB) | NCBI SNPdb Accession IDs |
|-----------------------|----------------|-----------------|-------------------------|---------------------------------|-------------------|--------------------------|
| SNP_P3_60893_46739244 | NC_021163.1    | Ca_kabuli_chr04 | 46739244                | CC                              | AA                | 1946183908               |
| SNP_P3_60894_46739964 | NC_021163.1    | Ca_kabuli_chr04 | 46739964                | TT                              | CC                | 1946184091               |
| SNP_P3_60895_46741436 | NC_021163.1    | Ca_kabuli_chr04 | 46741436                | AA                              | CC                | 1946184283               |
| SNP_P3_60896_46744293 | NC_021163.1    | Ca_kabuli_chr04 | 46744293                | TT                              | AA                | 1946184475               |
| SNP_P3_60897_46746405 | NC_021163.1    | Ca_kabuli_chr04 | 46746405                | GG                              | AA                | 1946184670               |
| SNP_P3_60898_46746487 | NC_021163.1    | Ca_kabuli_chr04 | 46746487                | CC                              | TT                | 1946184856               |
| SNP_P3_60899_46753172 | NC_021163.1    | Ca_kabuli_chr04 | 46753172                | TT                              | CC                | 1946185040               |
| SNP_P3_60900_46753203 | NC_021163.1    | Ca_kabuli_chr04 | 46753203                | TT                              | CC                | 1946185237               |
| SNP_P3_60901_46753220 | NC_021163.1    | Ca_kabuli_chr04 | 46753220                | AA                              | TT                | 1946185421               |
| SNP_P3_60902_46753267 | NC_021163.1    | Ca_kabuli_chr04 | 46753267                | AA                              | CC                | 1946185588               |
| SNP_P3_60903_46753273 | NC_021163.1    | Ca_kabuli_chr04 | 46753273                | CC                              | TT                | 1946185777               |
| SNP_P3_60904_46753488 | NC_021163.1    | Ca_kabuli_chr04 | 46753488                | TT                              | AA                | 1946185970               |
| SNP_P3_60905_46753497 | NC_021163.1    | Ca_kabuli_chr04 | 46753497                | CC                              | TT                | 1946186117               |
| SNP_P3_60906_46753586 | NC_021163.1    | Ca_kabuli_chr04 | 46753586                | GG                              | AA                | 1946186300               |
| SNP_P3_60907_46753598 | NC_021163.1    | Ca_kabuli_chr04 | 46753598                | TT                              | CC                | 1946186495               |
| SNP_P3_60908_46755472 | NC_021163.1    | Ca_kabuli_chr04 | 46755472                | GG                              | TT                | 1946186688               |
| SNP_P3_60909_46756165 | NC_021163.1    | Ca_kabuli_chr04 | 46756165                | TT                              | CC                | 1946186843               |
| SNP_P3_60910_46756168 | NC_021163.1    | Ca_kabuli_chr04 | 46756168                | AA                              | GG                | 1946187039               |
| SNP_P3_60911_46757859 | NC_021163.1    | Ca_kabuli_chr04 | 46757859                | TT                              | GG                | 1946187232               |
| SNP_P3_60912_46757954 | NC_021163.1    | Ca_kabuli_chr04 | 46757954                | TT                              | AA                | 1946187421               |
| SNP_P3_60913_46757969 | NC_021163.1    | Ca_kabuli_chr04 | 46757969                | CC                              | TT                | 1946187601               |
| SNP_P3_60914_46759091 | NC_021163.1    | Ca_kabuli_chr04 | 46759091                | AA                              | GG                | 1946187794               |
| SNP_P3_60915_46759449 | NC_021163.1    | Ca_kabuli_chr04 | 46759449                | CC                              | TT                | 1946187991               |
| SNP_P3_60916_46759522 | NC_021163.1    | Ca_kabuli_chr04 | 46759522                | GG                              | AA                | 1946188174               |
| SNP_P3_60918_46759973 | NC_021163.1    | Ca_kabuli_chr04 | 46759973                | AA                              | CC                | 1946188364               |
| SNP_P3_60919_46760066 | NC_021163.1    | Ca_kabuli_chr04 | 46760066                | GG                              | TT                | 1946188547               |
| SNP_P3_60920_46760077 | NC_021163.1    | Ca_kabuli_chr04 | 46760077                | TT                              | AA                | 1946188745               |
| SNP_P3_60921_46760078 | NC_021163.1    | Ca_kabuli_chr04 | 46760078                | TT                              | CC                | 1946188938               |
| SNP_P3_60922_46762102 | NC_021163.1    | Ca_kabuli_chr04 | 46762102                | TT                              | AA                | 1946189099               |
| SNP_P3_60923_46762528 | NC_021163.1    | Ca_kabuli_chr04 | 46762528                | AA                              | GG                | 1946189276               |
| SNP_P3_60924_46762709 | NC_021163.1    | Ca_kabuli_chr04 | 46762709                | TT                              | AA                | 1946189457               |
| SNP_P3_60925_46766851 | NC_021163.1    | Ca_kabuli_chr04 | 46766851                | CC                              | TT                | 1946189633               |
| SNP_P3_60926_46766856 | NC_021163.1    | Ca_kabuli_chr04 | 46766856                | CC                              | TT                | 1946189814               |
| SNP_P3_60927_46766961 | NC_021163.1    | Ca_kabuli_chr04 | 46766961                | TT                              | CC                | 1946190004               |
| SNP_P3_60928_46766965 | NC_021163.1    | Ca_kabuli_chr04 | 46766965                | AA                              | GG                | 1946190196               |
| SNP_P3_60929_46767127 | NC_021163.1    | Ca_kabuli_chr04 | 46767127                | CC                              | AA                | 1946190384               |
| SNP_P3_60930_46767134 | NC_021163.1    | Ca_kabuli_chr04 | 46767134                | TT                              | CC                | 1946190567               |
| SNP_P3_60931_46767200 | NC_021163.1    | Ca_kabuli_chr04 | 46767200                | TT                              | AA                | 1946190747               |
| SNP_P3_60932_46769073 | NC_021163.1    | Ca_kabuli_chr04 | 46769073                | AA                              | GG                | 1946190920               |
| SNP_P3_60933_46769077 | NC_021163.1    | Ca_kabuli_chr04 | 46769077                | CC                              | AA                | 1946191083               |
| SNP_P3_60934_46769871 | NC_021163.1    | Ca_kabuli_chr04 | 46769871                | CC                              | TT                | 1946191259               |
| SNP_P3_60935_46769889 | NC_021163.1    | Ca_kabuli_chr04 | 46769889                | TT                              | CC                | 1946191391               |

| SNPs IDs              | Chromosome IDs | Chromosomes     | Physical positions (bp) | CDC Frontier (Reference genome) | (Pusa 256 & HPNB) | NCBI SNPdb Accession IDs |
|-----------------------|----------------|-----------------|-------------------------|---------------------------------|-------------------|--------------------------|
| SNP_P3_60937_46771776 | NC_021163.1    | Ca_kabuli_chr04 | 46771776                | GG                              | AA                | 1946191585               |
| SNP_P3_60938_47156051 | NC_021163.1    | Ca_kabuli_chr04 | 47156051                | CC                              | AA                | 1946191775               |
| SNP_P3_60939_47192457 | NC_021163.1    | Ca_kabuli_chr04 | 47192457                | GG                              | AA                | 1946191967               |
| SNP_P3_60941_47193179 | NC_021163.1    | Ca_kabuli_chr04 | 47193179                | AA                              | GG                | 1946192142               |
| SNP_P3_60943_47194407 | NC_021163.1    | Ca_kabuli_chr04 | 47194407                | AA                              | GG                | 1946192318               |
| SNP_P3_60944_47194870 | NC_021163.1    | Ca_kabuli_chr04 | 47194870                | CC                              | TT                | 1946192476               |
| SNP_P3_60945_47195826 | NC_021163.1    | Ca_kabuli_chr04 | 47195826                | AA                              | TT                | 1946192658               |
| SNP_P3_60946_47197030 | NC_021163.1    | Ca_kabuli_chr04 | 47197030                | AA                              | CC                | 1946192835               |
| SNP_P3_60948_47197531 | NC_021163.1    | Ca_kabuli_chr04 | 47197531                | TT                              | CC                | 1946193023               |
| SNP_P3_60949_47198657 | NC_021163.1    | Ca_kabuli_chr04 | 47198657                | GG                              | AA                | 1946193217               |
| SNP_P3_60950_47198714 | NC_021163.1    | Ca_kabuli_chr04 | 47198714                | TT                              | CC                | 1946193414               |
| SNP_P3_60951_47198715 | NC_021163.1    | Ca_kabuli_chr04 | 47198715                | CC                              | TT                | 1946193612               |
| SNP_P3_60952_47199028 | NC_021163.1    | Ca_kabuli_chr04 | 47199028                | TT                              | AA                | 1946193802               |
| SNP_P3_60953_47199052 | NC_021163.1    | Ca_kabuli_chr04 | 47199052                | TT                              | CC                | 1946193964               |
| SNP_P3_60954_47204773 | NC_021163.1    | Ca_kabuli_chr04 | 47204773                | AA                              | GG                | 1946194150               |
| SNP_P3_60955_47206112 | NC_021163.1    | Ca_kabuli_chr04 | 47206112                | GG                              | AA                | 1946194258               |
| SNP_P3_60956_47206210 | NC_021163.1    | Ca_kabuli_chr04 | 47206210                | CC                              | AA                | 1946194447               |
| SNP_P3_60958_47206313 | NC_021163.1    | Ca_kabuli_chr04 | 47206313                | GG                              | AA                | 1946194634               |
| SNP_P3_60959_47206408 | NC_021163.1    | Ca_kabuli_chr04 | 47206408                | CC                              | AA                | 1946194790               |
| SNP_P3_60960_47206439 | NC_021163.1    | Ca_kabuli_chr04 | 47206439                | GG                              | CC                | 1946194989               |
| SNP_P3_60962_47209154 | NC_021163.1    | Ca_kabuli_chr04 | 47209154                | GG                              | AA                | 1946195148               |
| SNP_P3_60963_47210096 | NC_021163.1    | Ca_kabuli_chr04 | 47210096                | GG                              | AA                | 1946195344               |
| SNP_P3_60964_47210114 | NC_021163.1    | Ca_kabuli_chr04 | 47210114                | GG                              | AA                | 1946195521               |
| SNP_P3_60965_47210294 | NC_021163.1    | Ca_kabuli_chr04 | 47210294                | TT                              | AA                | 1946195721               |
| SNP_P3_60966_47210368 | NC_021163.1    | Ca_kabuli_chr04 | 47210368                | CC                              | AA                | 1946195904               |
| SNP_P3_60967_47210914 | NC_021163.1    | Ca_kabuli_chr04 | 47210914                | GG                              | AA                | 1946196095               |
| SNP_P3_60968_47211119 | NC_021163.1    | Ca_kabuli_chr04 | 47211119                | AA                              | GG                | 1946196274               |
| SNP_P3_60969_47211675 | NC_021163.1    | Ca_kabuli_chr04 | 47211675                | CC                              | TT                | 1946196443               |
| SNP_P3_60972_47211949 | NC_021163.1    | Ca_kabuli_chr04 | 47211949                | TT                              | CC                | 1946196638               |
| SNP_P3_60973_47214311 | NC_021163.1    | Ca_kabuli_chr04 | 47214311                | GG                              | TT                | 1946196826               |
| SNP_P3_60974_47215867 | NC_021163.1    | Ca_kabuli_chr04 | 47215867                | CC                              | TT                | 1946196981               |
| SNP_P3_60975_47216497 | NC_021163.1    | Ca_kabuli_chr04 | 47216497                | TT                              | GG                | 1946197105               |
| SNP_P3_60976_47217764 | NC_021163.1    | Ca_kabuli_chr04 | 47217764                | CC                              | AA                | 1946197272               |
| SNP_P3_60977_47218047 | NC_021163.1    | Ca_kabuli_chr04 | 47218047                | TT                              | GG                | 1946197463               |
| SNP_P3_60978_47218908 | NC_021163.1    | Ca_kabuli_chr04 | 47218908                | AA                              | GG                | 1946197656               |
| SNP_P3_60979_47219169 | NC_021163.1    | Ca_kabuli_chr04 | 47219169                | TT                              | CC                | 1946197839               |
| SNP_P3_60980_47219381 | NC_021163.1    | Ca_kabuli_chr04 | 47219381                | CC                              | TT                | 1946198036               |
| SNP_P3_60981_47219446 | NC_021163.1    | Ca_kabuli_chr04 | 47219446                | CC                              | TT                | 1946198228               |
| SNP_P3_60982_47219499 | NC_021163.1    | Ca_kabuli_chr04 | 47219499                | CC                              | TT                | 1946198422               |
| SNP_P3_60983_47219711 | NC_021163.1    | Ca_kabuli_chr04 | 47219711                | AA                              | GG                | 1946198610               |
| SNP_P3_60984_47219712 | NC_021163.1    | Ca_kabuli_chr04 | 47219712                | CC                              | TT                | 1946198789               |
| SNP_P3_60985_47219717 | NC_021163.1    | Ca_kabuli_chr04 | 47219717                | AA                              | GG                | 1946198975               |

| SNPs IDs              | Chromosome IDs | Chromosomes     | Physical positions (bp) | CDC Frontier (Reference genome) | (Pusa 256 & HPNB) | NCBI SNPdb Accession IDs |
|-----------------------|----------------|-----------------|-------------------------|---------------------------------|-------------------|--------------------------|
| SNP_P3_60986_47219874 | NC_021163.1    | Ca_kabuli_chr04 | 47219874                | GG                              | AA                | 1946199156               |
| SNP_P3_60987_47219986 | NC_021163.1    | Ca_kabuli_chr04 | 47219986                | CC                              | TT                | 1946199332               |
| SNP_P3_60988_47220208 | NC_021163.1    | Ca_kabuli_chr04 | 47220208                | CC                              | TT                | 1946199521               |
| SNP_P3_60989_47220222 | NC_021163.1    | Ca_kabuli_chr04 | 47220222                | CC                              | TT                | 1946199697               |
| SNP_P3_60990_47220609 | NC_021163.1    | Ca_kabuli_chr04 | 47220609                | GG                              | AA                | 1946199878               |
| SNP_P3_60991_47221085 | NC_021163.1    | Ca_kabuli_chr04 | 47221085                | GG                              | AA                | 1946200069               |
| SNP_P3_60992_47221109 | NC_021163.1    | Ca_kabuli_chr04 | 47221109                | TT                              | AA                | 1946200258               |
| SNP_P3_60993_47221110 | NC_021163.1    | Ca_kabuli_chr04 | 47221110                | GG                              | AA                | 1946200452               |
| SNP_P3_60994_47221116 | NC_021163.1    | Ca_kabuli_chr04 | 47221116                | GG                              | AA                | 1946200633               |
| SNP_P3_60995_47221127 | NC_021163.1    | Ca_kabuli_chr04 | 47221127                | GG                              | AA                | 1946200824               |
| SNP_P3_60996_47221131 | NC_021163.1    | Ca_kabuli_chr04 | 47221131                | CC                              | TT                | 1946200986               |
| SNP_P3_60997_47221143 | NC_021163.1    | Ca_kabuli_chr04 | 47221143                | AA                              | GG                | 1946201004               |
| SNP_P3_60998_47221235 | NC_021163.1    | Ca_kabuli_chr04 | 47221235                | CC                              | TT                | 1946201197               |
| SNP_P3_60999_47221297 | NC_021163.1    | Ca_kabuli_chr04 | 47221297                | AA                              | GG                | 1946201389               |
| SNP_P3_61000_47221301 | NC_021163.1    | Ca_kabuli_chr04 | 47221301                | TT                              | AA                | 1946201587               |
| SNP_P3_61001_47221309 | NC_021163.1    | Ca_kabuli_chr04 | 47221309                | GG                              | TT                | 1946201773               |
| SNP_P3_61002_47221336 | NC_021163.1    | Ca_kabuli_chr04 | 47221336                | TT                              | CC                | 1946201967               |
| SNP_P3_61003_47221809 | NC_021163.1    | Ca_kabuli_chr04 | 47221809                | AA                              | CC                | 1946202157               |
| SNP_P3_61004_47223016 | NC_021163.1    | Ca_kabuli_chr04 | 47223016                | TT                              | CC                | 1946202353               |
| SNP_P3_61005_47223047 | NC_021163.1    | Ca_kabuli_chr04 | 47223047                | AA                              | GG                | 1946202546               |
| SNP_P3_61006_47225690 | NC_021163.1    | Ca_kabuli_chr04 | 47225690                | CC                              | TT                | 1946202710               |
| SNP_P3_61008_47226271 | NC_021163.1    | Ca_kabuli_chr04 | 47226271                | TT                              | AA                | 1946202909               |
| SNP_P3_61009_47228631 | NC_021163.1    | Ca_kabuli_chr04 | 47228631                | GG                              | TT                | 1946203092               |
| SNP_P3_61010_47228783 | NC_021163.1    | Ca_kabuli_chr04 | 47228783                | TT                              | CC                | 1946203240               |
| SNP_P3_61012_47228879 | NC_021163.1    | Ca_kabuli_chr04 | 47228879                | GG                              | AA                | 1946203430               |
| SNP_P3_61013_47229045 | NC_021163.1    | Ca_kabuli_chr04 | 47229045                | AA                              | TT                | 1946203605               |
| SNP_P3_61014_47229064 | NC_021163.1    | Ca_kabuli_chr04 | 47229064                | AA                              | TT                | 1946203782               |
| SNP_P3_61015_47229987 | NC_021163.1    | Ca_kabuli_chr04 | 47229987                | GG                              | AA                | 1946203934               |
| SNP_P3_61016_47230005 | NC_021163.1    | Ca_kabuli_chr04 | 47230005                | GG                              | CC                | 1946204125               |
| SNP_P3_61017_47230191 | NC_021163.1    | Ca_kabuli_chr04 | 47230191                | AA                              | CC                | 1946204321               |
| SNP_P3_61018_47230192 | NC_021163.1    | Ca_kabuli_chr04 | 47230192                | GG                              | TT                | 1946204491               |
| SNP_P3_61019_47230338 | NC_021163.1    | Ca_kabuli_chr04 | 47230338                | GG                              | AA                | 1946204671               |
| SNP_P3_61020_47230359 | NC_021163.1    | Ca_kabuli_chr04 | 47230359                | CC                              | AA                | 1946204833               |
| SNP_P3_61021_47230549 | NC_021163.1    | Ca_kabuli_chr04 | 47230549                | GG                              | AA                | 1946205017               |
| SNP_P3_61022_47230581 | NC_021163.1    | Ca_kabuli_chr04 | 47230581                | GG                              | AA                | 1946205195               |
| SNP_P3_61023_47230602 | NC_021163.1    | Ca_kabuli_chr04 | 47230602                | AA                              | TT                | 1946205350               |
| SNP_P3_61024_47230657 | NC_021163.1    | Ca_kabuli_chr04 | 47230657                | TT                              | AA                | 1946205542               |
| SNP_P3_61025_47233129 | NC_021163.1    | Ca_kabuli_chr04 | 47233129                | GG                              | TT                | 1946205738               |
| SNP_P3_61026_47233131 | NC_021163.1    | Ca_kabuli_chr04 | 47233131                | AA                              | GG                | 1946205926               |
| SNP_P3_61027_47233151 | NC_021163.1    | Ca_kabuli_chr04 | 47233151                | TT                              | CC                | 1946206123               |
| SNP_P3_61028_47233299 | NC_021163.1    | Ca_kabuli_chr04 | 47233299                | GG                              | TT                | 1946206289               |
| SNP_P3_61029_47233329 | NC_021163.1    | Ca_kabuli_chr04 | 47233329                | TT                              | AA                | 1946206485               |



| SNPs IDs              | Chromosome IDs | Chromosomes     | Physical positions (bp) | CDC Frontier (Reference genome) | (Pusa 256 & HPNB) | NCBI SNPdb Accession IDs |
|-----------------------|----------------|-----------------|-------------------------|---------------------------------|-------------------|--------------------------|
| SNP_P3_61030_47233331 | NC_021163.1    | Ca_kabuli_chr04 | 47233331                | AA                              | TT                | 1946206674               |
| SNP_P3_61031_47233332 | NC_021163.1    | Ca_kabuli_chr04 | 47233332                | AA                              | TT                | 1946206868               |
| SNP_P3_61032_47233344 | NC_021163.1    | Ca_kabuli_chr04 | 47233344                | CC                              | TT                | 1946207029               |
| SNP_P3_61033_47233386 | NC_021163.1    | Ca_kabuli_chr04 | 47233386                | TT                              | CC                | 1946207217               |
| SNP_P3_61034_47233402 | NC_021163.1    | Ca_kabuli_chr04 | 47233402                | AA                              | TT                | 1946207401               |
| SNP_P3_61035_47233429 | NC_021163.1    | Ca_kabuli_chr04 | 47233429                | TT                              | CC                | 1946207583               |
| SNP_P3_61036_47234302 | NC_021163.1    | Ca_kabuli_chr04 | 47234302                | AA                              | CC                | 1946207780               |
| SNP_P3_61037_47234462 | NC_021163.1    | Ca_kabuli_chr04 | 47234462                | AA                              | GG                | 1946207960               |
| SNP_P3_61038_47234471 | NC_021163.1    | Ca_kabuli_chr04 | 47234471                | GG                              | AA                | 1946208157               |
| SNP_P3_61039_47234671 | NC_021163.1    | Ca_kabuli_chr04 | 47234671                | CC                              | TT                | 1946208353               |
| SNP_P3_61040_47235717 | NC_021163.1    | Ca_kabuli_chr04 | 47235717                | CC                              | TT                | 1946208536               |
| SNP_P3_61041_47236530 | NC_021163.1    | Ca_kabuli_chr04 | 47236530                | AA                              | TT                | 1946208731               |
| SNP_P3_61042_47238389 | NC_021163.1    | Ca_kabuli_chr04 | 47238389                | CC                              | TT                | 1946208925               |
| SNP_P3_61043_47238544 | NC_021163.1    | Ca_kabuli_chr04 | 47238544                | AA                              | GG                | 1946209092               |
| SNP_P3_61044_47238568 | NC_021163.1    | Ca_kabuli_chr04 | 47238568                | TT                              | CC                | 1946209262               |
| SNP_P3_61046_47238945 | NC_021163.1    | Ca_kabuli_chr04 | 47238945                | GG                              | AA                | 1946209460               |
| SNP_P3_61047_47239350 | NC_021163.1    | Ca_kabuli_chr04 | 47239350                | CC                              | TT                | 1946209647               |
| SNP_P3_61048_47239356 | NC_021163.1    | Ca_kabuli_chr04 | 47239356                | GG                              | AA                | 1946209841               |
| SNP_P3_61049_47239417 | NC_021163.1    | Ca_kabuli_chr04 | 47239417                | CC                              | TT                | 1946210005               |
| SNP_P3_61050_47239422 | NC_021163.1    | Ca_kabuli_chr04 | 47239422                | TT                              | CC                | 1946210189               |
| SNP_P3_61051_47239542 | NC_021163.1    | Ca_kabuli_chr04 | 47239542                | CC                              | TT                | 1946210337               |
| SNP_P3_61054_47239765 | NC_021163.1    | Ca_kabuli_chr04 | 47239765                | GG                              | AA                | 1946210528               |
| SNP_P3_61056_47241471 | NC_021163.1    | Ca_kabuli_chr04 | 47241471                | CC                              | TT                | 1946210671               |
| SNP_P3_61058_47242309 | NC_021163.1    | Ca_kabuli_chr04 | 47242309                | CC                              | TT                | 1946210871               |
| SNP_P3_61059_47242670 | NC_021163.1    | Ca_kabuli_chr04 | 47242670                | TT                              | CC                | 1946211036               |
| SNP_P3_61060_47244819 | NC_021163.1    | Ca_kabuli_chr04 | 47244819                | GG                              | CC                | 1946211216               |
| SNP_P3_61061_47245749 | NC_021163.1    | Ca_kabuli_chr04 | 47245749                | CC                              | TT                | 1946211286               |
| SNP_P3_61062_47247229 | NC_021163.1    | Ca_kabuli_chr04 | 47247229                | CC                              | AA                | 1946211400               |
| SNP_P3_61063_47247638 | NC_021163.1    | Ca_kabuli_chr04 | 47247638                | GG                              | AA                | 1946211588               |
| SNP_P3_61066_47250058 | NC_021163.1    | Ca_kabuli_chr04 | 47250058                | TT                              | CC                | 1946211730               |
| SNP_P3_61067_47250059 | NC_021163.1    | Ca_kabuli_chr04 | 47250059                | CC                              | AA                | 1946211732               |
| SNP_P3_61068_47250101 | NC_021163.1    | Ca_kabuli_chr04 | 47250101                | TT                              | AA                | 1946211824               |
| SNP_P3_61069_47250136 | NC_021163.1    | Ca_kabuli_chr04 | 47250136                | TT                              | CC                | 1946211888               |
| SNP_P3_61070_47250179 | NC_021163.1    | Ca_kabuli_chr04 | 47250179                | GG                              | AA                | 1946212080               |
| SNP_P3_61071_47254574 | NC_021163.1    | Ca_kabuli_chr04 | 47254574                | AA                              | CC                | 1946212165               |
| SNP_P3_61072_47255039 | NC_021163.1    | Ca_kabuli_chr04 | 47255039                | CC                              | AA                | 1946212278               |
| SNP_P3_61073_47255478 | NC_021163.1    | Ca_kabuli_chr04 | 47255478                | AA                              | GG                | 1946212463               |
| SNP_P3_61074_47256040 | NC_021163.1    | Ca_kabuli_chr04 | 47256040                | GG                              | AA                | 1946212660               |
| SNP_P3_61075_47256528 | NC_021163.1    | Ca_kabuli_chr04 | 47256528                | GG                              | CC                | 1946212841               |
| SNP_P3_61076_47256588 | NC_021163.1    | Ca_kabuli_chr04 | 47256588                | AA                              | GG                | 1946213034               |
| SNP_P3_61077_47257048 | NC_021163.1    | Ca_kabuli_chr04 | 47257048                | GG                              | AA                | 1946213167               |
| SNP_P3_61078_47262683 | NC_021163.1    | Ca_kabuli_chr04 | 47262683                | GG                              | AA                | 1946213351               |

| SNPs IDs              | Chromosome IDs | Chromosomes     | Physical positions (bp) | CDC Frontier (Reference genome) | (Pusa 256 & HPNB) | NCBI SNPdb Accession IDs |
|-----------------------|----------------|-----------------|-------------------------|---------------------------------|-------------------|--------------------------|
| SNP_P3_61079_47303779 | NC_021163.1    | Ca_kabuli_chr04 | 47303779                | TT                              | GG                | 1946213541               |
| SNP_P3_61080_47305460 | NC_021163.1    | Ca_kabuli_chr04 | 47305460                | AA                              | GG                | 1946213727               |
| SNP_P3_61081_47305468 | NC_021163.1    | Ca_kabuli_chr04 | 47305468                | AA                              | GG                | 1946213889               |
| SNP_P3_61083_47331089 | NC_021163.1    | Ca_kabuli_chr04 | 47331089                | CC                              | AA                | 1946214077               |
| SNP_P3_61084_47332462 | NC_021163.1    | Ca_kabuli_chr04 | 47332462                | AA                              | GG                | 1946214250               |
| SNP_P3_61085_47333767 | NC_021163.1    | Ca_kabuli_chr04 | 47333767                | AA                              | GG                | 1946214442               |
| SNP_P3_61086_47339817 | NC_021163.1    | Ca_kabuli_chr04 | 47339817                | GG                              | AA                | 1946214631               |
| SNP_P3_61087_47382549 | NC_021163.1    | Ca_kabuli_chr04 | 47382549                | CC                              | TT                | 1946214826               |
| SNP_P3_61088_47385262 | NC_021163.1    | Ca_kabuli_chr04 | 47385262                | AA                              | GG                | 1946215005               |
| SNP_P3_61089_47405000 | NC_021163.1    | Ca_kabuli_chr04 | 47405000                | TT                              | CC                | 1946215191               |
| SNP_P3_61090_47405685 | NC_021163.1    | Ca_kabuli_chr04 | 47405685                | TT                              | AA                | 1946215388               |
| SNP_P3_61091_47410226 | NC_021163.1    | Ca_kabuli_chr04 | 47410226                | CC                              | TT                | 1946215570               |
| SNP_P3_61093_47456370 | NC_021163.1    | Ca_kabuli_chr04 | 47456370                | GG                              | AA                | 1946215771               |
| SNP_P3_61096_47513359 | NC_021163.1    | Ca_kabuli_chr04 | 47513359                | TT                              | CC                | 1946215875               |
| SNP_P3_61097_47522529 | NC_021163.1    | Ca_kabuli_chr04 | 47522529                | TT                              | AA                | 1946216041               |
| SNP_P3_61098_47522875 | NC_021163.1    | Ca_kabuli_chr04 | 47522875                | AA                              | GG                | 1946216227               |
| SNP_P3_61099_47552320 | NC_021163.1    | Ca_kabuli_chr04 | 47552320                | TT                              | CC                | 1946216420               |
| SNP_P3_61100_47552332 | NC_021163.1    | Ca_kabuli_chr04 | 47552332                | GG                              | TT                | 1946216556               |
| SNP_P3_61101_47590521 | NC_021163.1    | Ca_kabuli_chr04 | 47590521                | CC                              | TT                | 1946216740               |
| SNP_P3_61102_47592455 | NC_021163.1    | Ca_kabuli_chr04 | 47592455                | CC                              | TT                | 1946216934               |
| SNP_P3_61103_47594073 | NC_021163.1    | Ca_kabuli_chr04 | 47594073                | GG                              | AA                | 1946217134               |
| SNP_P3_61104_47624811 | NC_021163.1    | Ca_kabuli_chr04 | 47624811                | AA                              | CC                | 1946217269               |
| SNP_P3_61105_47634440 | NC_021163.1    | Ca_kabuli_chr04 | 47634440                | TT                              | AA                | 1946217396               |
| SNP_P3_61106_47642827 | NC_021163.1    | Ca_kabuli_chr04 | 47642827                | AA                              | TT                | 1946217568               |
| SNP_P3_61107_47646038 | NC_021163.1    | Ca_kabuli_chr04 | 47646038                | AA                              | TT                | 1946217668               |
| SNP_P3_61109_47669489 | NC_021163.1    | Ca_kabuli_chr04 | 47669489                | CC                              | TT                | 1946217785               |
| SNP_P3_61110_47683141 | NC_021163.1    | Ca_kabuli_chr04 | 47683141                | TT                              | CC                | 1946217946               |
| SNP_P3_61111_47685777 | NC_021163.1    | Ca_kabuli_chr04 | 47685777                | CC                              | TT                | 1946217976               |
| SNP_P3_61112_47685837 | NC_021163.1    | Ca_kabuli_chr04 | 47685837                | GG                              | TT                | 1946218083               |
| SNP_P3_61114_47686007 | NC_021163.1    | Ca_kabuli_chr04 | 47686007                | GG                              | AA                | 1946218284               |
| SNP_P3_61115_47686118 | NC_021163.1    | Ca_kabuli_chr04 | 47686118                | AA                              | GG                | 1946218389               |
| SNP_P3_61116_47686129 | NC_021163.1    | Ca_kabuli_chr04 | 47686129                | CC                              | TT                | 1946218562               |
| SNP_P3_61117_47686187 | NC_021163.1    | Ca_kabuli_chr04 | 47686187                | AA                              | CC                | 1946218753               |
| SNP_P3_61118_47704370 | NC_021163.1    | Ca_kabuli_chr04 | 47704370                | GG                              | AA                | 1946218954               |
| SNP_P3_61119_47744029 | NC_021163.1    | Ca_kabuli_chr04 | 47744029                | TT                              | CC                | 1946219055               |
| SNP_P3_61120_47744137 | NC_021163.1    | Ca_kabuli_chr04 | 47744137                | TT                              | CC                | 1946219253               |
| SNP_P3_61121_47744428 | NC_021163.1    | Ca_kabuli_chr04 | 47744428                | CC                              | TT                | 1946219360               |
| SNP_P3_61122_47756524 | NC_021163.1    | Ca_kabuli_chr04 | 47756524                | AA                              | CC                | 1946219536               |
| SNP_P3_61123_47756775 | NC_021163.1    | Ca_kabuli_chr04 | 47756775                | CC                              | AA                | 1946219654               |
| SNP_P3_61125_47760382 | NC_021163.1    | Ca_kabuli_chr04 | 47760382                | AA                              | GG                | 1946219714               |
| SNP_P3_61126_47761640 | NC_021163.1    | Ca_kabuli_chr04 | 47761640                | GG                              | CC                | 1946219881               |
| SNP_P3_61127_47761652 | NC_021163.1    | Ca_kabuli_chr04 | 47761652                | CC                              | TT                | 1946220077               |

| SNPs IDs              | Chromosome IDs | Chromosomes     | Physical positions (bp) | CDC Frontier (Reference genome) | (Pusa 256 & HPNB) | NCBI SNPdb Accession IDs |
|-----------------------|----------------|-----------------|-------------------------|---------------------------------|-------------------|--------------------------|
| SNP_P3_61129_47782034 | NC_021163.1    | Ca_kabuli_chr04 | 47782034                | GG                              | AA                | 1946220269               |
| SNP_P3_61130_47782297 | NC_021163.1    | Ca_kabuli_chr04 | 47782297                | AA                              | GG                | 1946220454               |
| SNP_P3_61131_47782810 | NC_021163.1    | Ca_kabuli_chr04 | 47782810                | GG                              | AA                | 1946220646               |
| SNP_P3_61132_47792416 | NC_021163.1    | Ca_kabuli_chr04 | 47792416                | CC                              | TT                | 1946220837               |
| SNP_P3_61133_47801392 | NC_021163.1    | Ca_kabuli_chr04 | 47801392                | TT                              | CC                | 1946220996               |
| SNP_P3_61134_47806083 | NC_021163.1    | Ca_kabuli_chr04 | 47806083                | TT                              | GG                | 1946221170               |
| SNP_P3_61135_47816179 | NC_021163.1    | Ca_kabuli_chr04 | 47816179                | CC                              | TT                | 1946221365               |
| SNP_P3_61136_47838699 | NC_021163.1    | Ca_kabuli_chr04 | 47838699                | AA                              | GG                | 1946221556               |
| SNP_P3_61137_47843130 | NC_021163.1    | Ca_kabuli_chr04 | 47843130                | GG                              | TT                | 1946221753               |
| SNP_P3_61138_47851126 | NC_021163.1    | Ca_kabuli_chr04 | 47851126                | TT                              | CC                | 1946221932               |
| SNP_P3_61139_47908965 | NC_021163.1    | Ca_kabuli_chr04 | 47908965                | CC                              | TT                | 1946222117               |
| SNP_P3_61140_47914103 | NC_021163.1    | Ca_kabuli_chr04 | 47914103                | GG                              | AA                | 1946222314               |
| SNP_P3_61141_47928502 | NC_021163.1    | Ca_kabuli_chr04 | 47928502                | AA                              | CC                | 1946222499               |
| SNP_P3_61142_47935139 | NC_021163.1    | Ca_kabuli_chr04 | 47935139                | AA                              | GG                | 1946222673               |
| SNP_P3_61143_47935151 | NC_021163.1    | Ca_kabuli_chr04 | 47935151                | AA                              | CC                | 1946222865               |
| SNP_P3_61144_47938048 | NC_021163.1    | Ca_kabuli_chr04 | 47938048                | CC                              | TT                | 1946223048               |
| SNP_P3_61145_47939876 | NC_021163.1    | Ca_kabuli_chr04 | 47939876                | TT                              | AA                | 1946223245               |
| SNP_P3_61146_47944506 | NC_021163.1    | Ca_kabuli_chr04 | 47944506                | AA                              | GG                | 1946223444               |
| SNP_P3_61147_47944542 | NC_021163.1    | Ca_kabuli_chr04 | 47944542                | GG                              | AA                | 1946223597               |
| SNP_P3_61148_47945943 | NC_021163.1    | Ca_kabuli_chr04 | 47945943                | GG                              | AA                | 1946223605               |
| SNP_P3_61149_47947262 | NC_021163.1    | Ca_kabuli_chr04 | 47947262                | CC                              | TT                | 1946223799               |
| SNP_P3_61150_47955346 | NC_021163.1    | Ca_kabuli_chr04 | 47955346                | AA                              | TT                | 1946223977               |
| SNP_P3_61151_47955884 | NC_021163.1    | Ca_kabuli_chr04 | 47955884                | CC                              | GG                | 1946224162               |
| SNP_P3_61152_47955965 | NC_021163.1    | Ca_kabuli_chr04 | 47955965                | GG                              | AA                | 1946224321               |
| SNP_P3_61153_47956147 | NC_021163.1    | Ca_kabuli_chr04 | 47956147                | GG                              | TT                | 1946224510               |
| SNP_P3_61154_47956170 | NC_021163.1    | Ca_kabuli_chr04 | 47956170                | GG                              | TT                | 1946224699               |
| SNP_P3_61155_47961212 | NC_021163.1    | Ca_kabuli_chr04 | 47961212                | AA                              | TT                | 1946224895               |
| SNP_P3_61157_47961664 | NC_021163.1    | Ca_kabuli_chr04 | 47961664                | CC                              | TT                | 1946225048               |
| SNP_P3_61158_47961783 | NC_021163.1    | Ca_kabuli_chr04 | 47961783                | GG                              | AA                | 1946225238               |
| SNP_P3_61159_47961810 | NC_021163.1    | Ca_kabuli_chr04 | 47961810                | AA                              | GG                | 1946225428               |
| SNP_P3_61160_47962764 | NC_021163.1    | Ca_kabuli_chr04 | 47962764                | GG                              | AA                | 1946225607               |
| SNP_P3_61161_47980870 | NC_021163.1    | Ca_kabuli_chr04 | 47980870                | GG                              | AA                | 1946225797               |
| SNP_P3_61162_47981093 | NC_021163.1    | Ca_kabuli_chr04 | 47981093                | AA                              | CC                | 1946225986               |
| SNP_P3_61163_47981097 | NC_021163.1    | Ca_kabuli_chr04 | 47981097                | AA                              | TT                | 1946226184               |
| SNP_P3_61164_47982180 | NC_021163.1    | Ca_kabuli_chr04 | 47982180                | CC                              | GG                | 1946226361               |
| SNP_P3_61165_47982342 | NC_021163.1    | Ca_kabuli_chr04 | 47982342                | TT                              | GG                | 1946226559               |
| SNP_P3_61166_47982400 | NC_021163.1    | Ca_kabuli_chr04 | 47982400                | CC                              | AA                | 1946226735               |
| SNP_P3_61167_47982429 | NC_021163.1    | Ca_kabuli_chr04 | 47982429                | TT                              | AA                | 1946226922               |
| SNP_P3_61168_47982458 | NC_021163.1    | Ca_kabuli_chr04 | 47982458                | CC                              | TT                | 1946227109               |
| SNP_P3_61169_47982487 | NC_021163.1    | Ca_kabuli_chr04 | 47982487                | GG                              | TT                | 1946227304               |
| SNP_P3_61170_47982535 | NC_021163.1    | Ca_kabuli_chr04 | 47982535                | CC                              | AA                | 1946227499               |
| SNP_P3_61171_47982567 | NC_021163.1    | Ca_kabuli_chr04 | 47982567                | AA                              | GG                | 1946227695               |

| SNPs IDs              | Chromosome IDs | Chromosomes     | Physical positions (bp) | CDC Frontier (Reference genome) | (Pusa 256 & HPNB) | NCBI SNPdb Accession IDs |
|-----------------------|----------------|-----------------|-------------------------|---------------------------------|-------------------|--------------------------|
| SNP_P3_61172_47982587 | NC_021163.1    | Ca_kabuli_chr04 | 47982587                | TT                              | AA                | 1946227889               |
| SNP_P3_61174_47982839 | NC_021163.1    | Ca_kabuli_chr04 | 47982839                | CC                              | TT                | 1946228080               |
| SNP_P3_61175_47988056 | NC_021163.1    | Ca_kabuli_chr04 | 47988056                | CC                              | AA                | 1946228278               |
| SNP_P3_61176_47988069 | NC_021163.1    | Ca_kabuli_chr04 | 47988069                | CC                              | TT                | 1946228448               |
| SNP_P3_61177_47988077 | NC_021163.1    | Ca_kabuli_chr04 | 47988077                | GG                              | CC                | 1946228638               |
| SNP_P3_61178_47988108 | NC_021163.1    | Ca_kabuli_chr04 | 47988108                | AA                              | TT                | 1946228825               |
| SNP_P3_61179_47988136 | NC_021163.1    | Ca_kabuli_chr04 | 47988136                | CC                              | GG                | 1946229020               |
| SNP_P3_61180_47988316 | NC_021163.1    | Ca_kabuli_chr04 | 47988316                | CC                              | TT                | 1946229208               |
| SNP_P3_61181_47990971 | NC_021163.1    | Ca_kabuli_chr04 | 47990971                | TT                              | CC                | 1946229393               |
| SNP_P3_61183_47991322 | NC_021163.1    | Ca_kabuli_chr04 | 47991322                | CC                              | TT                | 1946229583               |
| SNP_P3_61184_47991452 | NC_021163.1    | Ca_kabuli_chr04 | 47991452                | AA                              | GG                | 1946229756               |
| SNP_P3_61185_47996985 | NC_021163.1    | Ca_kabuli_chr04 | 47996985                | TT                              | CC                | 1946229945               |
| SNP_P3_61186_47996997 | NC_021163.1    | Ca_kabuli_chr04 | 47996997                | TT                              | AA                | 1946230141               |
| SNP_P3_61187_47997041 | NC_021163.1    | Ca_kabuli_chr04 | 47997041                | CC                              | GG                | 1946230340               |
| SNP_P3_61188_47997241 | NC_021163.1    | Ca_kabuli_chr04 | 47997241                | CC                              | AA                | 1946230532               |
| SNP_P3_61189_47997323 | NC_021163.1    | Ca_kabuli_chr04 | 47997323                | TT                              | GG                | 1946230698               |
| SNP_P3_61190_47997421 | NC_021163.1    | Ca_kabuli_chr04 | 47997421                | CC                              | GG                | 1946230891               |
| SNP_P3_61191_47999511 | NC_021163.1    | Ca_kabuli_chr04 | 47999511                | CC                              | TT                | 1946231087               |
| SNP_P3_61192_48025771 | NC_021163.1    | Ca_kabuli_chr04 | 48025771                | TT                              | GG                | 1946231274               |
| SNP_P3_61193_48025773 | NC_021163.1    | Ca_kabuli_chr04 | 48025773                | TT                              | AA                | 1946231469               |
| SNP_P3_61194_48027876 | NC_021163.1    | Ca_kabuli_chr04 | 48027876                | AA                              | GG                | 1946231663               |
| SNP_P3_61195_48066894 | NC_021163.1    | Ca_kabuli_chr04 | 48066894                | CC                              | GG                | 1946231857               |
| SNP_P3_61197_48076433 | NC_021163.1    | Ca_kabuli_chr04 | 48076433                | CC                              | AA                | 1946232056               |
| SNP_P3_61198_48138236 | NC_021163.1    | Ca_kabuli_chr04 | 48138236                | TT                              | CC                | 1946232246               |
| SNP_P3_61199_48157286 | NC_021163.1    | Ca_kabuli_chr04 | 48157286                | GG                              | TT                | 1946232441               |
| SNP_P3_61200_48163093 | NC_021163.1    | Ca_kabuli_chr04 | 48163093                | AA                              | TT                | 1946232628               |
| SNP_P3_61202_48202928 | NC_021163.1    | Ca_kabuli_chr04 | 48202928                | GG                              | TT                | 1946232819               |
| SNP_P3_61203_48204633 | NC_021163.1    | Ca_kabuli_chr04 | 48204633                | AA                              | CC                | 1946233000               |
| SNP_P3_61204_48205191 | NC_021163.1    | Ca_kabuli_chr04 | 48205191                | TT                              | CC                | 1946233191               |
| SNP_P3_61205_48205478 | NC_021163.1    | Ca_kabuli_chr04 | 48205478                | CC                              | GG                | 1946233380               |
| SNP_P3_61206_48205706 | NC_021163.1    | Ca_kabuli_chr04 | 48205706                | AA                              | CC                | 1946233567               |
| SNP_P3_61207_48205923 | NC_021163.1    | Ca_kabuli_chr04 | 48205923                | CC                              | TT                | 1946233757               |
| SNP_P3_61208_48205949 | NC_021163.1    | Ca_kabuli_chr04 | 48205949                | TT                              | CC                | 1946233948               |
| SNP_P3_61210_48206808 | NC_021163.1    | Ca_kabuli_chr04 | 48206808                | AA                              | GG                | 1946234140               |
| SNP_P3_61211_48206815 | NC_021163.1    | Ca_kabuli_chr04 | 48206815                | GG                              | TT                | 1946234325               |
| SNP_P3_61212_48207413 | NC_021163.1    | Ca_kabuli_chr04 | 48207413                | CC                              | TT                | 1946234521               |
| SNP_P3_61213_48207438 | NC_021163.1    | Ca_kabuli_chr04 | 48207438                | TT                              | CC                | 1946234715               |
| SNP_P3_61214_48207463 | NC_021163.1    | Ca_kabuli_chr04 | 48207463                | AA                              | GG                | 1946234905               |
| SNP_P3_61215_48207527 | NC_021163.1    | Ca_kabuli_chr04 | 48207527                | CC                              | TT                | 1946235092               |
| SNP_P3_61216_48207668 | NC_021163.1    | Ca_kabuli_chr04 | 48207668                | TT                              | AA                | 1946235279               |
| SNP_P3_61217_48207684 | NC_021163.1    | Ca_kabuli_chr04 | 48207684                | GG                              | TT                | 1946235473               |
| SNP_P3_61218_48207858 | NC_021163.1    | Ca_kabuli_chr04 | 48207858                | AA                              | GG                | 1946235668               |

| SNPs IDs              | Chromosome IDs | Chromosomes     | Physical positions (bp) | CDC Frontier (Reference genome) | (Pusa 256 & HPNB) | NCBI SNPdb Accession IDs |
|-----------------------|----------------|-----------------|-------------------------|---------------------------------|-------------------|--------------------------|
| SNP_P3_61219_48208876 | NC_021163.1    | Ca_kabuli_chr04 | 48208876                | TT                              | AA                | 1946235750               |
| SNP_P3_61221_48209010 | NC_021163.1    | Ca_kabuli_chr04 | 48209010                | CC                              | TT                | 1946235886               |
| SNP_P3_61222_48209493 | NC_021163.1    | Ca_kabuli_chr04 | 48209493                | CC                              | GG                | 1946236073               |
| SNP_P3_61223_48209535 | NC_021163.1    | Ca_kabuli_chr04 | 48209535                | CC                              | TT                | 1946236272               |
| SNP_P3_61224_48209536 | NC_021163.1    | Ca_kabuli_chr04 | 48209536                | CC                              | TT                | 1946236468               |
| SNP_P3_61225_48211170 | NC_021163.1    | Ca_kabuli_chr04 | 48211170                | AA                              | TT                | 1946236668               |
| SNP_P3_61226_48211194 | NC_021163.1    | Ca_kabuli_chr04 | 48211194                | TT                              | GG                | 1946236859               |
| SNP_P3_61227_48212507 | NC_021163.1    | Ca_kabuli_chr04 | 48212507                | CC                              | TT                | 1946237043               |
| SNP_P3_61228_48215631 | NC_021163.1    | Ca_kabuli_chr04 | 48215631                | AA                              | GG                | 1946237221               |
| SNP_P3_61229_48216461 | NC_021163.1    | Ca_kabuli_chr04 | 48216461                | GG                              | AA                | 1946237418               |
| SNP_P3_61230_48216680 | NC_021163.1    | Ca_kabuli_chr04 | 48216680                | TT                              | CC                | 1946237611               |
| SNP_P3_61231_48217893 | NC_021163.1    | Ca_kabuli_chr04 | 48217893                | AA                              | GG                | 1946237801               |
| SNP_P3_61232_48217916 | NC_021163.1    | Ca_kabuli_chr04 | 48217916                | GG                              | AA                | 1946237999               |
| SNP_P3_61235_48221081 | NC_021163.1    | Ca_kabuli_chr04 | 48221081                | AA                              | GG                | 1946238183               |
| SNP_P3_61236_48221141 | NC_021163.1    | Ca_kabuli_chr04 | 48221141                | GG                              | AA                | 1946238363               |
| SNP_P3_61237_48221357 | NC_021163.1    | Ca_kabuli_chr04 | 48221357                | TT                              | AA                | 1946238530               |
| SNP_P3_61238_48221822 | NC_021163.1    | Ca_kabuli_chr04 | 48221822                | CC                              | TT                | 1946238719               |
| SNP_P3_61239_48223888 | NC_021163.1    | Ca_kabuli_chr04 | 48223888                | AA                              | GG                | 1946238915               |
| SNP_P3_61240_48225946 | NC_021163.1    | Ca_kabuli_chr04 | 48225946                | GG                              | AA                | 1946239103               |
| SNP_P3_61241_48227450 | NC_021163.1    | Ca_kabuli_chr04 | 48227450                | AA                              | TT                | 1946239303               |
| SNP_P3_61242_48229807 | NC_021163.1    | Ca_kabuli_chr04 | 48229807                | TT                              | CC                | 1946239504               |
| SNP_P3_61243_48231022 | NC_021163.1    | Ca_kabuli_chr04 | 48231022                | TT                              | CC                | 1946239705               |
| SNP_P3_61244_48231452 | NC_021163.1    | Ca_kabuli_chr04 | 48231452                | GG                              | CC                | 1946239900               |
| SNP_P3_61245_48231502 | NC_021163.1    | Ca_kabuli_chr04 | 48231502                | AA                              | GG                | 1946240097               |
| SNP_P3_61246_48231834 | NC_021163.1    | Ca_kabuli_chr04 | 48231834                | TT                              | CC                | 1946240263               |
| SNP_P3_61247_48232553 | NC_021163.1    | Ca_kabuli_chr04 | 48232553                | AA                              | GG                | 1946240453               |
| SNP_P3_61248_48234552 | NC_021163.1    | Ca_kabuli_chr04 | 48234552                | CC                              | TT                | 1946240641               |
| SNP_P3_61249_48234928 | NC_021163.1    | Ca_kabuli_chr04 | 48234928                | GG                              | TT                | 1946240835               |
| SNP_P3_61250_48234941 | NC_021163.1    | Ca_kabuli_chr04 | 48234941                | CC                              | AA                | 1946241025               |
| SNP_P3_61251_48235267 | NC_021163.1    | Ca_kabuli_chr04 | 48235267                | TT                              | CC                | 1946241223               |
| SNP_P3_61252_48235589 | NC_021163.1    | Ca_kabuli_chr04 | 48235589                | GG                              | AA                | 1946241420               |
| SNP_P3_61253_48236026 | NC_021163.1    | Ca_kabuli_chr04 | 48236026                | TT                              | CC                | 1946241609               |
| SNP_P3_61254_48236111 | NC_021163.1    | Ca_kabuli_chr04 | 48236111                | AA                              | CC                | 1946241790               |
| SNP_P3_61255_48237028 | NC_021163.1    | Ca_kabuli_chr04 | 48237028                | AA                              | GG                | 1946241982               |
| SNP_P3_61256_48237493 | NC_021163.1    | Ca_kabuli_chr04 | 48237493                | CC                              | TT                | 1946242176               |
| SNP_P3_61257_48237891 | NC_021163.1    | Ca_kabuli_chr04 | 48237891                | AA                              | GG                | 1946242369               |
| SNP_P3_61258_48239201 | NC_021163.1    | Ca_kabuli_chr04 | 48239201                | AA                              | GG                | 1946242566               |
| SNP_P3_61259_48241092 | NC_021163.1    | Ca_kabuli_chr04 | 48241092                | CC                              | GG                | 1946242753               |
| SNP_P3_61260_48241708 | NC_021163.1    | Ca_kabuli_chr04 | 48241708                | CC                              | TT                | 1946242928               |
| SNP_P3_61261_48241716 | NC_021163.1    | Ca_kabuli_chr04 | 48241716                | TT                              | CC                | 1946243123               |
| SNP_P3_61263_48244305 | NC_021163.1    | Ca_kabuli_chr04 | 48244305                | GG                              | AA                | 1946243302               |
| SNP_P3_61264_48245375 | NC_021163.1    | Ca_kabuli_chr04 | 48245375                | GG                              | CC                | 1946243497               |

| SNPs IDs              | Chromosome IDs | Chromosomes     | Physical positions (bp) | CDC Frontier (Reference genome) | (Pusa 256 & HPNB) | NCBI SNPdb Accession IDs |
|-----------------------|----------------|-----------------|-------------------------|---------------------------------|-------------------|--------------------------|
| SNP_P3_61265_48245385 | NC_021163.1    | Ca_kabuli_chr04 | 48245385                | CC                              | TT                | 1946243685               |
| SNP_P3_61266_48245401 | NC_021163.1    | Ca_kabuli_chr04 | 48245401                | AA                              | GG                | 1946243883               |
| SNP_P3_61267_48245415 | NC_021163.1    | Ca_kabuli_chr04 | 48245415                | TT                              | CC                | 1946244075               |
| SNP_P3_61268_48245416 | NC_021163.1    | Ca_kabuli_chr04 | 48245416                | GG                              | AA                | 1946244264               |
| SNP_P3_61269_48246231 | NC_021163.1    | Ca_kabuli_chr04 | 48246231                | CC                              | TT                | 1946244450               |
| SNP_P3_61270_48246883 | NC_021163.1    | Ca_kabuli_chr04 | 48246883                | TT                              | AA                | 1946244643               |
| SNP_P3_61272_48248170 | NC_021163.1    | Ca_kabuli_chr04 | 48248170                | AA                              | GG                | 1946244839               |
| SNP_P3_61273_48249977 | NC_021163.1    | Ca_kabuli_chr04 | 48249977                | AA                              | GG                | 1946245030               |
| SNP_P3_61274_48249984 | NC_021163.1    | Ca_kabuli_chr04 | 48249984                | AA                              | GG                | 1946245218               |
| SNP_P3_61275_48250011 | NC_021163.1    | Ca_kabuli_chr04 | 48250011                | CC                              | AA                | 1946245414               |
| SNP_P3_61276_48250047 | NC_021163.1    | Ca_kabuli_chr04 | 48250047                | TT                              | AA                | 1946245614               |
| SNP_P3_61277_48250088 | NC_021163.1    | Ca_kabuli_chr04 | 48250088                | AA                              | GG                | 1946245821               |
| SNP_P3_61278_48250217 | NC_021163.1    | Ca_kabuli_chr04 | 48250217                | CC                              | TT                | 1946246027               |
| SNP_P3_61279_48251080 | NC_021163.1    | Ca_kabuli_chr04 | 48251080                | AA                              | GG                | 1946246234               |
| SNP_P3_61280_48252211 | NC_021163.1    | Ca_kabuli_chr04 | 48252211                | TT                              | AA                | 1946246426               |
| SNP_P3_61281_48252303 | NC_021163.1    | Ca_kabuli_chr04 | 48252303                | GG                              | AA                | 1946246622               |
| SNP_P3_61282_48252304 | NC_021163.1    | Ca_kabuli_chr04 | 48252304                | GG                              | TT                | 1946246819               |
| SNP_P3_61283_48252325 | NC_021163.1    | Ca_kabuli_chr04 | 48252325                | AA                              | CC                | 1946247014               |
| SNP_P3_61284_48252337 | NC_021163.1    | Ca_kabuli_chr04 | 48252337                | CC                              | AA                | 1946247199               |
| SNP_P3_61285_48252608 | NC_021163.1    | Ca_kabuli_chr04 | 48252608                | TT                              | GG                | 1946247355               |
| SNP_P3_61286_48252797 | NC_021163.1    | Ca_kabuli_chr04 | 48252797                | AA                              | GG                | 1946247552               |
| SNP_P3_61287_48253777 | NC_021163.1    | Ca_kabuli_chr04 | 48253777                | AA                              | TT                | 1946247734               |
| SNP_P3_61288_48253791 | NC_021163.1    | Ca_kabuli_chr04 | 48253791                | TT                              | CC                | 1946247881               |
| SNP_P3_61289_48253808 | NC_021163.1    | Ca_kabuli_chr04 | 48253808                | TT                              | GG                | 1946248069               |
| SNP_P3_61290_48253823 | NC_021163.1    | Ca_kabuli_chr04 | 48253823                | AA                              | GG                | 1946248260               |
| SNP_P3_61291_48253826 | NC_021163.1    | Ca_kabuli_chr04 | 48253826                | AA                              | TT                | 1946248391               |
| SNP_P3_61294_48254876 | NC_021163.1    | Ca_kabuli_chr04 | 48254876                | CC                              | TT                | 1946248584               |
| SNP_P3_61295_48256600 | NC_021163.1    | Ca_kabuli_chr04 | 48256600                | CC                              | TT                | 1946248777               |
| SNP_P3_61296_48258624 | NC_021163.1    | Ca_kabuli_chr04 | 48258624                | GG                              | TT                | 1946248973               |
| SNP_P3_61297_48260675 | NC_021163.1    | Ca_kabuli_chr04 | 48260675                | CC                              | GG                | 1946249151               |
| SNP_P3_61298_48261439 | NC_021163.1    | Ca_kabuli_chr04 | 48261439                | AA                              | CC                | 1946249348               |
| SNP_P3_61299_48261511 | NC_021163.1    | Ca_kabuli_chr04 | 48261511                | CC                              | TT                | 1946249544               |
| SNP_P3_61300_48261524 | NC_021163.1    | Ca_kabuli_chr04 | 48261524                | TT                              | GG                | 1946249744               |
| SNP_P3_61301_48264741 | NC_021163.1    | Ca_kabuli_chr04 | 48264741                | GG                              | TT                | 1946249943               |
| SNP_P3_61302_48265524 | NC_021163.1    | Ca_kabuli_chr04 | 48265524                | GG                              | AA                | 1946250140               |
| SNP_P3_61303_48266889 | NC_021163.1    | Ca_kabuli_chr04 | 48266889                | TT                              | CC                | 1946250335               |
| SNP_P3_61304_48268163 | NC_021163.1    | Ca_kabuli_chr04 | 48268163                | TT                              | AA                | 1946250528               |
| SNP_P3_61305_48268868 | NC_021163.1    | Ca_kabuli_chr04 | 48268868                | TT                              | AA                | 1946250721               |
| SNP_P3_61306_48268949 | NC_021163.1    | Ca_kabuli_chr04 | 48268949                | TT                              | AA                | 1946250913               |
| SNP_P3_61308_48272422 | NC_021163.1    | Ca_kabuli_chr04 | 48272422                | GG                              | AA                | 1946251101               |
| SNP_P3_61309_48272837 | NC_021163.1    | Ca_kabuli_chr04 | 48272837                | CC                              | AA                | 1946251293               |
| SNP_P3_61310_48274370 | NC_021163.1    | Ca_kabuli_chr04 | 48274370                | TT                              | CC                | 1946251491               |

| SNPs IDs              | Chromosome IDs | Chromosomes     | Physical positions (bp) | CDC Frontier (Reference genome) | (Pusa 256 & HPNB) | NCBI SNPdb Accession IDs |
|-----------------------|----------------|-----------------|-------------------------|---------------------------------|-------------------|--------------------------|
| SNP_P3_61311_48277439 | NC_021163.1    | Ca_kabuli_chr04 | 48277439                | CC                              | TT                | 1946251680               |
| SNP_P3_61312_48277449 | NC_021163.1    | Ca_kabuli_chr04 | 48277449                | GG                              | AA                | 1946251878               |
| SNP_P3_61313_48277461 | NC_021163.1    | Ca_kabuli_chr04 | 48277461                | GG                              | AA                | 1946252068               |
| SNP_P3_61314_48277462 | NC_021163.1    | Ca_kabuli_chr04 | 48277462                | TT                              | CC                | 1946252266               |
| SNP_P3_61315_48277735 | NC_021163.1    | Ca_kabuli_chr04 | 48277735                | AA                              | CC                | 1946252463               |
| SNP_P3_61316_48278576 | NC_021163.1    | Ca_kabuli_chr04 | 48278576                | GG                              | AA                | 1946252658               |
| SNP_P3_61317_48278587 | NC_021163.1    | Ca_kabuli_chr04 | 48278587                | TT                              | GG                | 1946252854               |
| SNP_P3_61318_48278743 | NC_021163.1    | Ca_kabuli_chr04 | 48278743                | TT                              | CC                | 1946253047               |
| SNP_P3_61320_48280616 | NC_021163.1    | Ca_kabuli_chr04 | 48280616                | CC                              | TT                | 1946253245               |
| SNP_P3_61321_48280912 | NC_021163.1    | Ca_kabuli_chr04 | 48280912                | AA                              | GG                | 1946253442               |
| SNP_P3_61322_48280931 | NC_021163.1    | Ca_kabuli_chr04 | 48280931                | GG                              | AA                | 1946253630               |
| SNP_P3_61323_48280938 | NC_021163.1    | Ca_kabuli_chr04 | 48280938                | GG                              | TT                | 1946253821               |
| SNP_P3_61324_48291923 | NC_021163.1    | Ca_kabuli_chr04 | 48291923                | CC                              | AA                | 1946254015               |
| SNP_P3_61325_48291926 | NC_021163.1    | Ca_kabuli_chr04 | 48291926                | TT                              | CC                | 1946254158               |
| SNP_P3_61326_48291927 | NC_021163.1    | Ca_kabuli_chr04 | 48291927                | CC                              | AA                | 1946254356               |
| SNP_P3_61327_48291934 | NC_021163.1    | Ca_kabuli_chr04 | 48291934                | AA                              | GG                | 1946254512               |
| SNP_P3_61328_48291944 | NC_021163.1    | Ca_kabuli_chr04 | 48291944                | AA                              | GG                | 1946254713               |
| SNP_P3_61329_48291954 | NC_021163.1    | Ca_kabuli_chr04 | 48291954                | CC                              | AA                | 1946254877               |
| SNP_P3_61330_48291982 | NC_021163.1    | Ca_kabuli_chr04 | 48291982                | AA                              | GG                | 1946255072               |
| SNP_P3_61331_48292194 | NC_021163.1    | Ca_kabuli_chr04 | 48292194                | TT                              | GG                | 1946255270               |
| SNP_P3_61332_48295024 | NC_021163.1    | Ca_kabuli_chr04 | 48295024                | AA                              | GG                | 1946255468               |
| SNP_P3_61333_48295892 | NC_021163.1    | Ca_kabuli_chr04 | 48295892                | GG                              | AA                | 1946255671               |
| SNP_P3_61334_48296624 | NC_021163.1    | Ca_kabuli_chr04 | 48296624                | CC                              | AA                | 1946255868               |
| SNP_P3_61335_48296629 | NC_021163.1    | Ca_kabuli_chr04 | 48296629                | TT                              | AA                | 1946256065               |
| SNP_P3_61336_48298186 | NC_021163.1    | Ca_kabuli_chr04 | 48298186                | TT                              | AA                | 1946256262               |
| SNP_P3_61337_48299997 | NC_021163.1    | Ca_kabuli_chr04 | 48299997                | CC                              | TT                | 1946256462               |
| SNP_P3_61338_48299998 | NC_021163.1    | Ca_kabuli_chr04 | 48299998                | CC                              | AA                | 1946256657               |
| SNP_P3_61339_48300000 | NC_021163.1    | Ca_kabuli_chr04 | 48300000                | GG                              | AA                | 1946256853               |
| SNP_P3_61340_48300164 | NC_021163.1    | Ca_kabuli_chr04 | 48300164                | CC                              | TT                | 1946257045               |
| SNP_P3_61341_48301139 | NC_021163.1    | Ca_kabuli_chr04 | 48301139                | TT                              | CC                | 1946257240               |
| SNP_P3_61343_48301874 | NC_021163.1    | Ca_kabuli_chr04 | 48301874                | TT                              | AA                | 1946257432               |
| SNP_P3_61344_48301901 | NC_021163.1    | Ca_kabuli_chr04 | 48301901                | GG                              | CC                | 1946257616               |
| SNP_P3_61345_48301904 | NC_021163.1    | Ca_kabuli_chr04 | 48301904                | TT                              | CC                | 1946257810               |
| SNP_P3_61346_48304564 | NC_021163.1    | Ca_kabuli_chr04 | 48304564                | AA                              | TT                | 1946258001               |
| SNP_P3_61347_48304586 | NC_021163.1    | Ca_kabuli_chr04 | 48304586                | TT                              | AA                | 1946258140               |
| SNP_P3_61348_48307334 | NC_021163.1    | Ca_kabuli_chr04 | 48307334                | AA                              | GG                | 1946258338               |
| SNP_P3_61349_48307347 | NC_021163.1    | Ca_kabuli_chr04 | 48307347                | AA                              | GG                | 1946258534               |
| SNP_P3_61350_48308077 | NC_021163.1    | Ca_kabuli_chr04 | 48308077                | TT                              | CC                | 1946258733               |
| SNP_P3_61351_48308374 | NC_021163.1    | Ca_kabuli_chr04 | 48308374                | CC                              | TT                | 1946258932               |
| SNP_P3_61352_48308379 | NC_021163.1    | Ca_kabuli_chr04 | 48308379                | TT                              | CC                | 1946259128               |
| SNP_P3_61353_48308392 | NC_021163.1    | Ca_kabuli_chr04 | 48308392                | CC                              | AA                | 1946259317               |
| SNP_P3_61354_48309804 | NC_021163.1    | Ca_kabuli_chr04 | 48309804                | AA                              | CC                | 1946259514               |

| SNPs IDs              | Chromosome IDs | Chromosomes     | Physical positions (bp) | CDC Frontier (Reference genome) | (Pusa 256 & HPNB) | NCBI SNPdb Accession IDs |
|-----------------------|----------------|-----------------|-------------------------|---------------------------------|-------------------|--------------------------|
| SNP_P3_61357_48310461 | NC_021163.1    | Ca_kabuli_chr04 | 48310461                | AA                              | GG                | 1946259711               |
| SNP_P3_61358_48310688 | NC_021163.1    | Ca_kabuli_chr04 | 48310688                | TT                              | AA                | 1946259907               |
| SNP_P3_61359_48310843 | NC_021163.1    | Ca_kabuli_chr04 | 48310843                | AA                              | TT                | 1946260101               |
| SNP_P3_61360_48311318 | NC_021163.1    | Ca_kabuli_chr04 | 48311318                | CC                              | TT                | 1946260299               |
| SNP_P3_61361_48311534 | NC_021163.1    | Ca_kabuli_chr04 | 48311534                | TT                              | AA                | 1946260497               |
| SNP_P3_61362_48314503 | NC_021163.1    | Ca_kabuli_chr04 | 48314503                | AA                              | CC                | 1946260696               |
| SNP_P3_61364_48314983 | NC_021163.1    | Ca_kabuli_chr04 | 48314983                | AA                              | TT                | 1946260892               |
| SNP_P3_61366_48315017 | NC_021163.1    | Ca_kabuli_chr04 | 48315017                | CC                              | GG                | 1946261084               |
| SNP_P3_61367_48315082 | NC_021163.1    | Ca_kabuli_chr04 | 48315082                | TT                              | CC                | 1946261278               |
| SNP_P3_61368_48315274 | NC_021163.1    | Ca_kabuli_chr04 | 48315274                | CC                              | TT                | 1946261477               |
| SNP_P3_61369_48315275 | NC_021163.1    | Ca_kabuli_chr04 | 48315275                | AA                              | GG                | 1946261676               |
| SNP_P3_61370_48315535 | NC_021163.1    | Ca_kabuli_chr04 | 48315535                | TT                              | AA                | 1946261872               |
| SNP_P3_61371_48315814 | NC_021163.1    | Ca_kabuli_chr04 | 48315814                | AA                              | TT                | 1946262066               |
| SNP_P3_61372_48315824 | NC_021163.1    | Ca_kabuli_chr04 | 48315824                | AA                              | GG                | 1946262263               |
| SNP_P3_61373_48315862 | NC_021163.1    | Ca_kabuli_chr04 | 48315862                | AA                              | CC                | 1946262449               |
| SNP_P3_61374_48316063 | NC_021163.1    | Ca_kabuli_chr04 | 48316063                | AA                              | GG                | 1946262644               |
| SNP_P3_61375_48316075 | NC_021163.1    | Ca_kabuli_chr04 | 48316075                | AA                              | GG                | 1946262838               |
| SNP_P3_61376_48316442 | NC_021163.1    | Ca_kabuli_chr04 | 48316442                | TT                              | AA                | 1946262880               |
| SNP_P3_61377_48316444 | NC_021163.1    | Ca_kabuli_chr04 | 48316444                | GG                              | CC                | 1946263078               |
| SNP_P3_61378_48316462 | NC_021163.1    | Ca_kabuli_chr04 | 48316462                | AA                              | CC                | 1946263271               |
| SNP_P3_61379_48316479 | NC_021163.1    | Ca_kabuli_chr04 | 48316479                | GG                              | AA                | 1946263460               |
| SNP_P3_61380_48316848 | NC_021163.1    | Ca_kabuli_chr04 | 48316848                | AA                              | GG                | 1946263659               |
| SNP_P3_61382_48317793 | NC_021163.1    | Ca_kabuli_chr04 | 48317793                | TT                              | CC                | 1946263847               |
| SNP_P3_61383_48318365 | NC_021163.1    | Ca_kabuli_chr04 | 48318365                | AA                              | TT                | 1946264042               |
| SNP_P3_61384_48318380 | NC_021163.1    | Ca_kabuli_chr04 | 48318380                | AA                              | CC                | 1946264226               |
| SNP_P3_61386_48318601 | NC_021163.1    | Ca_kabuli_chr04 | 48318601                | TT                              | CC                | 1946264407               |
| SNP_P3_61387_48320343 | NC_021163.1    | Ca_kabuli_chr04 | 48320343                | AA                              | GG                | 1946264588               |
| SNP_P3_61388_48320568 | NC_021163.1    | Ca_kabuli_chr04 | 48320568                | GG                              | AA                | 1946264759               |
| SNP_P3_61389_48321546 | NC_021163.1    | Ca_kabuli_chr04 | 48321546                | AA                              | CC                | 1946264935               |
| SNP_P3_61390_48321733 | NC_021163.1    | Ca_kabuli_chr04 | 48321733                | TT                              | CC                | 1946265123               |
| SNP_P3_61391_48321738 | NC_021163.1    | Ca_kabuli_chr04 | 48321738                | GG                              | CC                | 1946265303               |
| SNP_P3_61393_48323465 | NC_021163.1    | Ca_kabuli_chr04 | 48323465                | TT                              | GG                | 1946265488               |
| SNP_P3_61394_48324873 | NC_021163.1    | Ca_kabuli_chr04 | 48324873                | TT                              | CC                | 1946265670               |
| SNP_P3_61395_48325103 | NC_021163.1    | Ca_kabuli_chr04 | 48325103                | TT                              | CC                | 1946265858               |
| SNP_P3_61396_48325143 | NC_021163.1    | Ca_kabuli_chr04 | 48325143                | GG                              | CC                | 1946266055               |
| SNP_P3_61397_48325611 | NC_021163.1    | Ca_kabuli_chr04 | 48325611                | GG                              | AA                | 1946266249               |
| SNP_P3_61398_48326201 | NC_021163.1    | Ca_kabuli_chr04 | 48326201                | CC                              | TT                | 1946266434               |
| SNP_P3_61399_48326893 | NC_021163.1    | Ca_kabuli_chr04 | 48326893                | TT                              | AA                | 1946266631               |
| SNP_P3_61400_48326898 | NC_021163.1    | Ca_kabuli_chr04 | 48326898                | AA                              | TT                | 1946266823               |
| SNP_P3_61401_48326952 | NC_021163.1    | Ca_kabuli_chr04 | 48326952                | CC                              | TT                | 1946266994               |
| SNP_P3_61402_48326976 | NC_021163.1    | Ca_kabuli_chr04 | 48326976                | TT                              | AA                | 1946267171               |
| SNP_P3_61403_48327014 | NC_021163.1    | Ca_kabuli_chr04 | 48327014                | AA                              | TT                | 1946267354               |



| SNPs IDs              | Chromosome IDs | Chromosomes     | Physical positions (bp) | CDC Frontier (Reference genome) | (Pusa 256 & HPNB) | NCBI SNPdb Accession IDs |
|-----------------------|----------------|-----------------|-------------------------|---------------------------------|-------------------|--------------------------|
| SNP_P3_61404_48327183 | NC_021163.1    | Ca_kabuli_chr04 | 48327183                | AA                              | GG                | 1946267540               |
| SNP_P3_61405_48329296 | NC_021163.1    | Ca_kabuli_chr04 | 48329296                | TT                              | CC                | 1946267731               |
| SNP_P3_61406_48330565 | NC_021163.1    | Ca_kabuli_chr04 | 48330565                | GG                              | TT                | 1946267915               |
| SNP_P3_61407_48332075 | NC_021163.1    | Ca_kabuli_chr04 | 48332075                | AA                              | GG                | 1946268117               |
| SNP_P3_61408_48332087 | NC_021163.1    | Ca_kabuli_chr04 | 48332087                | GG                              | AA                | 1946268308               |
| SNP_P3_61409_48332097 | NC_021163.1    | Ca_kabuli_chr04 | 48332097                | AA                              | GG                | 1946268494               |
| SNP_P3_61411_48332144 | NC_021163.1    | Ca_kabuli_chr04 | 48332144                | AA                              | GG                | 1946268679               |
| SNP_P3_61412_48332205 | NC_021163.1    | Ca_kabuli_chr04 | 48332205                | GG                              | TT                | 1946268757               |
| SNP_P3_61413_48332323 | NC_021163.1    | Ca_kabuli_chr04 | 48332323                | GG                              | TT                | 1946268910               |
| SNP_P3_61414_48336266 | NC_021163.1    | Ca_kabuli_chr04 | 48336266                | GG                              | TT                | 1946269103               |
| SNP_P3_61415_48336334 | NC_021163.1    | Ca_kabuli_chr04 | 48336334                | GG                              | AA                | 1946269291               |
| SNP_P3_61416_48336497 | NC_021163.1    | Ca_kabuli_chr04 | 48336497                | GG                              | CC                | 1946269481               |
| SNP_P3_61417_48336815 | NC_021163.1    | Ca_kabuli_chr04 | 48336815                | AA                              | GG                | 1946269669               |
| SNP_P3_61418_48337593 | NC_021163.1    | Ca_kabuli_chr04 | 48337593                | AA                              | TT                | 1946269855               |
| SNP_P3_61419_48337607 | NC_021163.1    | Ca_kabuli_chr04 | 48337607                | GG                              | AA                | 1946270040               |
| SNP_P3_61420_48338164 | NC_021163.1    | Ca_kabuli_chr04 | 48338164                | GG                              | TT                | 1946270229               |
| SNP_P3_61421_48338189 | NC_021163.1    | Ca_kabuli_chr04 | 48338189                | AA                              | GG                | 1946270389               |
| SNP_P3_61422_48338793 | NC_021163.1    | Ca_kabuli_chr04 | 48338793                | GG                              | TT                | 1946270539               |
| SNP_P3_61423_48338957 | NC_021163.1    | Ca_kabuli_chr04 | 48338957                | AA                              | CC                | 1946270688               |
| SNP_P3_61426_48340811 | NC_021163.1    | Ca_kabuli_chr04 | 48340811                | CC                              | TT                | 1946270784               |
| SNP_P3_61427_48340869 | NC_021163.1    | Ca_kabuli_chr04 | 48340869                | GG                              | TT                | 1946270808               |
| SNP_P3_61428_48340934 | NC_021163.1    | Ca_kabuli_chr04 | 48340934                | CC                              | TT                | 1946270890               |
| SNP_P3_61429_48341241 | NC_021163.1    | Ca_kabuli_chr04 | 48341241                | TT                              | CC                | 1946271001               |
| SNP_P3_61430_48342222 | NC_021163.1    | Ca_kabuli_chr04 | 48342222                | AA                              | TT                | 1946271159               |
| SNP_P3_61431_48342256 | NC_021163.1    | Ca_kabuli_chr04 | 48342256                | TT                              | AA                | 1946271329               |
| SNP_P3_61432_48342510 | NC_021163.1    | Ca_kabuli_chr04 | 48342510                | GG                              | CC                | 1946271515               |
| SNP_P3_61433_48342703 | NC_021163.1    | Ca_kabuli_chr04 | 48342703                | AA                              | GG                | 1946271658               |
| SNP_P3_61434_48343118 | NC_021163.1    | Ca_kabuli_chr04 | 48343118                | GG                              | AA                | 1946271796               |
| SNP_P3_61435_48343139 | NC_021163.1    | Ca_kabuli_chr04 | 48343139                | TT                              | CC                | 1946272106               |
| SNP_P3_61436_48343363 | NC_021163.1    | Ca_kabuli_chr04 | 48343363                | TT                              | CC                | 1946272296               |
| SNP_P3_61437_48343477 | NC_021163.1    | Ca_kabuli_chr04 | 48343477                | GG                              | CC                | 1946272488               |
| SNP_P3_61438_48347400 | NC_021163.1    | Ca_kabuli_chr04 | 48347400                | AA                              | TT                | 1946272679               |
| SNP_P3_61440_48351779 | NC_021163.1    | Ca_kabuli_chr04 | 48351779                | TT                              | CC                | 1946272771               |
| SNP_P3_61441_48351855 | NC_021163.1    | Ca_kabuli_chr04 | 48351855                | TT                              | GG                | 1946272954               |
| SNP_P3_61442_48351998 | NC_021163.1    | Ca_kabuli_chr04 | 48351998                | TT                              | CC                | 1946273122               |
| SNP_P3_61443_48352002 | NC_021163.1    | Ca_kabuli_chr04 | 48352002                | AA                              | GG                | 1946273298               |
| SNP_P3_61444_48352006 | NC_021163.1    | Ca_kabuli_chr04 | 48352006                | CC                              | TT                | 1946273454               |
| SNP_P3_61445_48352042 | NC_021163.1    | Ca_kabuli_chr04 | 48352042                | TT                              | GG                | 1946273618               |
| SNP_P3_61446_48353350 | NC_021163.1    | Ca_kabuli_chr04 | 48353350                | AA                              | GG                | 1946273782               |
| SNP_P3_61447_48355537 | NC_021163.1    | Ca_kabuli_chr04 | 48355537                | TT                              | CC                | 1946273974               |
| SNP_P3_61448_48359244 | NC_021163.1    | Ca_kabuli_chr04 | 48359244                | CC                              | TT                | 1946274167               |
| SNP_P3_61449_48359632 | NC_021163.1    | Ca_kabuli_chr04 | 48359632                | AA                              | GG                | 1946274353               |

| SNPs IDs              | Chromosome IDs | Chromosomes     | Physical positions (bp) | CDC Frontier (Reference genome) | (Pusa 256 & HPNB) | NCBI SNPdb Accession IDs |
|-----------------------|----------------|-----------------|-------------------------|---------------------------------|-------------------|--------------------------|
| SNP_P3_61450_48359674 | NC_021163.1    | Ca_kabuli_chr04 | 48359674                | CC                              | TT                | 1946274540               |
| SNP_P3_61451_48359900 | NC_021163.1    | Ca_kabuli_chr04 | 48359900                | GG                              | TT                | 1946274726               |
| SNP_P3_61452_48361612 | NC_021163.1    | Ca_kabuli_chr04 | 48361612                | GG                              | TT                | 1946274896               |
| SNP_P3_61453_48364812 | NC_021163.1    | Ca_kabuli_chr04 | 48364812                | CC                              | TT                | 1946275062               |
| SNP_P3_61454_48365729 | NC_021163.1    | Ca_kabuli_chr04 | 48365729                | CC                              | TT                | 1946275220               |
| SNP_P3_61455_48366445 | NC_021163.1    | Ca_kabuli_chr04 | 48366445                | AA                              | GG                | 1946275380               |
| SNP_P3_61456_48366564 | NC_021163.1    | Ca_kabuli_chr04 | 48366564                | GG                              | AA                | 1946275521               |
| SNP_P3_61457_48366633 | NC_021163.1    | Ca_kabuli_chr04 | 48366633                | CC                              | GG                | 1946275714               |
| SNP_P3_61458_48367568 | NC_021163.1    | Ca_kabuli_chr04 | 48367568                | TT                              | AA                | 1946275896               |
| SNP_P3_61459_48369088 | NC_021163.1    | Ca_kabuli_chr04 | 48369088                | CC                              | TT                | 1946276050               |
| SNP_P3_61460_48370407 | NC_021163.1    | Ca_kabuli_chr04 | 48370407                | TT                              | AA                | 1946276199               |
| SNP_P3_61461_48371633 | NC_021163.1    | Ca_kabuli_chr04 | 48371633                | CC                              | TT                | 1946276342               |
| SNP_P3_61462_48371682 | NC_021163.1    | Ca_kabuli_chr04 | 48371682                | TT                              | AA                | 1946276524               |
| SNP_P3_61463_48382145 | NC_021163.1    | Ca_kabuli_chr04 | 48382145                | CC                              | TT                | 1946276690               |
| SNP_P3_61464_48382456 | NC_021163.1    | Ca_kabuli_chr04 | 48382456                | AA                              | CC                | 1946276859               |
| SNP_P3_61465_48382666 | NC_021163.1    | Ca_kabuli_chr04 | 48382666                | CC                              | GG                | 1946276975               |
| SNP_P3_61466_48384876 | NC_021163.1    | Ca_kabuli_chr04 | 48384876                | GG                              | AA                | 1946277144               |
| SNP_P3_61467_48385011 | NC_021163.1    | Ca_kabuli_chr04 | 48385011                | CC                              | AA                | 1946277307               |
| SNP_P3_61468_48385715 | NC_021163.1    | Ca_kabuli_chr04 | 48385715                | AA                              | TT                | 1946277475               |
| SNP_P3_61469_48385758 | NC_021163.1    | Ca_kabuli_chr04 | 48385758                | TT                              | CC                | 1946277595               |
| SNP_P3_61470_48386480 | NC_021163.1    | Ca_kabuli_chr04 | 48386480                | CC                              | GG                | 1946277749               |
| SNP_P3_61471_48387002 | NC_021163.1    | Ca_kabuli_chr04 | 48387002                | CC                              | TT                | 1946277936               |
| SNP_P3_61472_48391712 | NC_021163.1    | Ca_kabuli_chr04 | 48391712                | GG                              | AA                | 1946278032               |
| SNP_P3_61473_48391718 | NC_021163.1    | Ca_kabuli_chr04 | 48391718                | TT                              | AA                | 1946278206               |
| SNP_P3_61474_48391725 | NC_021163.1    | Ca_kabuli_chr04 | 48391725                | TT                              | CC                | 1946278330               |
| SNP_P3_61476_48393296 | NC_021163.1    | Ca_kabuli_chr04 | 48393296                | AA                              | TT                | 1946278504               |
| SNP_P3_61477_48395444 | NC_021163.1    | Ca_kabuli_chr04 | 48395444                | AA                              | GG                | 1946278667               |
| SNP_P3_61478_48395454 | NC_021163.1    | Ca_kabuli_chr04 | 48395454                | TT                              | AA                | 1946278858               |
| SNP_P3_61479_48395640 | NC_021163.1    | Ca_kabuli_chr04 | 48395640                | GG                              | AA                | 1946279038               |
| SNP_P3_61480_48395705 | NC_021163.1    | Ca_kabuli_chr04 | 48395705                | AA                              | TT                | 1946279215               |
| SNP_P3_61481_48399606 | NC_021163.1    | Ca_kabuli_chr04 | 48399606                | CC                              | TT                | 1946279383               |
| SNP_P3_61482_48400805 | NC_021163.1    | Ca_kabuli_chr04 | 48400805                | GG                              | AA                | 1946279568               |
| SNP_P3_61483_48401197 | NC_021163.1    | Ca_kabuli_chr04 | 48401197                | CC                              | TT                | 1946279703               |
| SNP_P3_61484_48403714 | NC_021163.1    | Ca_kabuli_chr04 | 48403714                | TT                              | AA                | 1946279882               |
| SNP_P3_61485_48403722 | NC_021163.1    | Ca_kabuli_chr04 | 48403722                | AA                              | GG                | 1946280075               |
| SNP_P3_61486_48403730 | NC_021163.1    | Ca_kabuli_chr04 | 48403730                | AA                              | GG                | 1946280229               |
| SNP_P3_61487_48403777 | NC_021163.1    | Ca_kabuli_chr04 | 48403777                | TT                              | CC                | 1946280396               |
| SNP_P3_61488_48404005 | NC_021163.1    | Ca_kabuli_chr04 | 48404005                | CC                              | TT                | 1946280580               |
| SNP_P3_61489_48404522 | NC_021163.1    | Ca_kabuli_chr04 | 48404522                | CC                              | GG                | 1946280765               |
| SNP_P3_61490_48404613 | NC_021163.1    | Ca_kabuli_chr04 | 48404613                | GG                              | TT                | 1946280911               |
| SNP_P3_61491_48404846 | NC_021163.1    | Ca_kabuli_chr04 | 48404846                | TT                              | AA                | 1946281066               |
| SNP_P3_61493_48404988 | NC_021163.1    | Ca_kabuli_chr04 | 48404988                | TT                              | CC                | 1946281217               |

| SNPs IDs              | Chromosome IDs | Chromosomes     | Physical positions (bp) | CDC Frontier (Reference genome) | (Pusa 256 & HPNB) | NCBI SNPdb Accession IDs |
|-----------------------|----------------|-----------------|-------------------------|---------------------------------|-------------------|--------------------------|
| SNP_P3_61494_48407035 | NC_021163.1    | Ca_kabuli_chr04 | 48407035                | CC                              | TT                | 1946281410               |
| SNP_P3_61495_48407134 | NC_021163.1    | Ca_kabuli_chr04 | 48407134                | GG                              | AA                | 1946281606               |
| SNP_P3_61496_48407172 | NC_021163.1    | Ca_kabuli_chr04 | 48407172                | AA                              | TT                | 1946281753               |
| SNP_P3_61497_48409820 | NC_021163.1    | Ca_kabuli_chr04 | 48409820                | TT                              | AA                | 1946281921               |
| SNP_P3_61500_48414515 | NC_021163.1    | Ca_kabuli_chr04 | 48414515                | AA                              | GG                | 1946282118               |
| SNP_P3_61501_48414536 | NC_021163.1    | Ca_kabuli_chr04 | 48414536                | GG                              | AA                | 1946282297               |
| SNP_P3_61502_48415089 | NC_021163.1    | Ca_kabuli_chr04 | 48415089                | AA                              | GG                | 1946282465               |
| SNP_P3_61503_48415423 | NC_021163.1    | Ca_kabuli_chr04 | 48415423                | CC                              | AA                | 1946282643               |
| SNP_P3_61504_48418092 | NC_021163.1    | Ca_kabuli_chr04 | 48418092                | CC                              | AA                | 1946282805               |
| SNP_P3_61505_48418405 | NC_021163.1    | Ca_kabuli_chr04 | 48418405                | CC                              | GG                | 1946282994               |
| SNP_P3_61506_48419449 | NC_021163.1    | Ca_kabuli_chr04 | 48419449                | AA                              | GG                | 1946283154               |
| SNP_P3_61507_48419450 | NC_021163.1    | Ca_kabuli_chr04 | 48419450                | CC                              | AA                | 1946283349               |
| SNP_P3_61508_48428182 | NC_021163.1    | Ca_kabuli_chr04 | 48428182                | TT                              | GG                | 1946283489               |
| SNP_P3_61509_48428443 | NC_021163.1    | Ca_kabuli_chr04 | 48428443                | GG                              | AA                | 1946283678               |
| SNP_P3_61510_48428670 | NC_021163.1    | Ca_kabuli_chr04 | 48428670                | CC                              | TT                | 1946283850               |
| SNP_P3_61511_48428864 | NC_021163.1    | Ca_kabuli_chr04 | 48428864                | CC                              | AA                | 1946284031               |
| SNP_P3_61512_48428905 | NC_021163.1    | Ca_kabuli_chr04 | 48428905                | TT                              | CC                | 1946284207               |
| SNP_P3_61513_48429202 | NC_021163.1    | Ca_kabuli_chr04 | 48429202                | AA                              | GG                | 1946284378               |
| SNP_P3_61514_48431063 | NC_021163.1    | Ca_kabuli_chr04 | 48431063                | TT                              | CC                | 1946284530               |
| SNP_P3_61515_48431353 | NC_021163.1    | Ca_kabuli_chr04 | 48431353                | TT                              | AA                | 1946284660               |
| SNP_P3_61516_48431368 | NC_021163.1    | Ca_kabuli_chr04 | 48431368                | TT                              | CC                | 1946284815               |
| SNP_P3_61517_48431385 | NC_021163.1    | Ca_kabuli_chr04 | 48431385                | AA                              | GG                | 1946284992               |
| SNP_P3_61518_48432057 | NC_021163.1    | Ca_kabuli_chr04 | 48432057                | AA                              | GG                | 1946285148               |
| SNP_P3_61519_48432397 | NC_021163.1    | Ca_kabuli_chr04 | 48432397                | AA                              | GG                | 1946285313               |
| SNP_P3_61520_48434622 | NC_021163.1    | Ca_kabuli_chr04 | 48434622                | GG                              | AA                | 1946285446               |
| SNP_P3_61521_48434640 | NC_021163.1    | Ca_kabuli_chr04 | 48434640                | TT                              | CC                | 1946285562               |
| SNP_P3_61522_48434699 | NC_021163.1    | Ca_kabuli_chr04 | 48434699                | AA                              | GG                | 1946285761               |
| SNP_P3_61523_48434828 | NC_021163.1    | Ca_kabuli_chr04 | 48434828                | AA                              | TT                | 1946285946               |
| SNP_P3_61524_48435124 | NC_021163.1    | Ca_kabuli_chr04 | 48435124                | GG                              | AA                | 1946286137               |
| SNP_P3_61525_48435501 | NC_021163.1    | Ca_kabuli_chr04 | 48435501                | CC                              | TT                | 1946286314               |
| SNP_P3_61526_48435648 | NC_021163.1    | Ca_kabuli_chr04 | 48435648                | TT                              | CC                | 1946286503               |
| SNP_P3_61527_48435766 | NC_021163.1    | Ca_kabuli_chr04 | 48435766                | TT                              | AA                | 1946286654               |
| SNP_P3_61528_48436247 | NC_021163.1    | Ca_kabuli_chr04 | 48436247                | GG                              | AA                | 1946286843               |
| SNP_P3_61529_48436311 | NC_021163.1    | Ca_kabuli_chr04 | 48436311                | TT                              | AA                | 1946287030               |
| SNP_P3_61530_48436642 | NC_021163.1    | Ca_kabuli_chr04 | 48436642                | AA                              | GG                | 1946287205               |
| SNP_P3_61531_48436956 | NC_021163.1    | Ca_kabuli_chr04 | 48436956                | GG                              | AA                | 1946287359               |
| SNP_P3_61532_48437157 | NC_021163.1    | Ca_kabuli_chr04 | 48437157                | AA                              | GG                | 1946287549               |
| SNP_P3_61533_48437214 | NC_021163.1    | Ca_kabuli_chr04 | 48437214                | GG                              | AA                | 1946287716               |
| SNP_P3_61534_48440157 | NC_021163.1    | Ca_kabuli_chr04 | 48440157                | CC                              | TT                | 1946287904               |
| SNP_P3_61535_48440235 | NC_021163.1    | Ca_kabuli_chr04 | 48440235                | GG                              | AA                | 1946288079               |
| SNP_P3_61536_48440250 | NC_021163.1    | Ca_kabuli_chr04 | 48440250                | TT                              | GG                | 1946288249               |
| SNP_P3_61538_48441041 | NC_021163.1    | Ca_kabuli_chr04 | 48441041                | AA                              | GG                | 1946288415               |

| SNPs IDs              | Chromosome IDs | Chromosomes     | Physical positions (bp) | CDC Frontier (Reference genome) | (Pusa 256 & HPNB) | NCBI SNPdb Accession IDs |
|-----------------------|----------------|-----------------|-------------------------|---------------------------------|-------------------|--------------------------|
| SNP_P3_61539_48441688 | NC_021163.1    | Ca_kabuli_chr04 | 48441688                | CC                              | TT                | 1946288599               |
| SNP_P3_61540_48441829 | NC_021163.1    | Ca_kabuli_chr04 | 48441829                | AA                              | GG                | 1946288782               |
| SNP_P3_61541_48441881 | NC_021163.1    | Ca_kabuli_chr04 | 48441881                | TT                              | CC                | 1946288984               |
| SNP_P3_61542_48442001 | NC_021163.1    | Ca_kabuli_chr04 | 48442001                | TT                              | AA                | 1946289133               |
| SNP_P3_61544_48443345 | NC_021163.1    | Ca_kabuli_chr04 | 48443345                | CC                              | TT                | 1946289334               |
| SNP_P3_61545_48443507 | NC_021163.1    | Ca_kabuli_chr04 | 48443507                | CC                              | TT                | 1946289517               |
| SNP_P3_61546_48443548 | NC_021163.1    | Ca_kabuli_chr04 | 48443548                | AA                              | CC                | 1946289707               |
| SNP_P3_61547_48443554 | NC_021163.1    | Ca_kabuli_chr04 | 48443554                | TT                              | AA                | 1946289878               |
| SNP_P3_61548_48443707 | NC_021163.1    | Ca_kabuli_chr04 | 48443707                | CC                              | TT                | 1946290061               |
| SNP_P3_61549_48443713 | NC_021163.1    | Ca_kabuli_chr04 | 48443713                | AA                              | TT                | 1946290242               |
| SNP_P3_61550_48444140 | NC_021163.1    | Ca_kabuli_chr04 | 48444140                | GG                              | TT                | 1946290430               |
| SNP_P3_61551_48445117 | NC_021163.1    | Ca_kabuli_chr04 | 48445117                | GG                              | AA                | 1946290612               |
| SNP_P3_61552_48445275 | NC_021163.1    | Ca_kabuli_chr04 | 48445275                | CC                              | TT                | 1946290804               |
| SNP_P3_61553_48445983 | NC_021163.1    | Ca_kabuli_chr04 | 48445983                | AA                              | GG                | 1946291004               |
| SNP_P3_61554_48446181 | NC_021163.1    | Ca_kabuli_chr04 | 48446181                | CC                              | TT                | 1946291197               |
| SNP_P3_61555_48446285 | NC_021163.1    | Ca_kabuli_chr04 | 48446285                | TT                              | CC                | 1946291393               |
| SNP_P3_61556_48446292 | NC_021163.1    | Ca_kabuli_chr04 | 48446292                | TT                              | CC                | 1946291590               |
| SNP_P3_61557_48446315 | NC_021163.1    | Ca_kabuli_chr04 | 48446315                | AA                              | TT                | 1946291784               |
| SNP_P3_61558_48446535 | NC_021163.1    | Ca_kabuli_chr04 | 48446535                | GG                              | AA                | 1946291979               |
| SNP_P3_61559_48446561 | NC_021163.1    | Ca_kabuli_chr04 | 48446561                | GG                              | AA                | 1946292172               |
| SNP_P3_61560_48446563 | NC_021163.1    | Ca_kabuli_chr04 | 48446563                | AA                              | GG                | 1946292374               |
| SNP_P3_61561_48448520 | NC_021163.1    | Ca_kabuli_chr04 | 48448520                | TT                              | AA                | 1946292562               |
| SNP_P3_61562_48448774 | NC_021163.1    | Ca_kabuli_chr04 | 48448774                | AA                              | GG                | 1946292764               |
| SNP_P3_61563_48448788 | NC_021163.1    | Ca_kabuli_chr04 | 48448788                | AA                              | TT                | 1946292957               |
| SNP_P3_61564_48448889 | NC_021163.1    | Ca_kabuli_chr04 | 48448889                | CC                              | TT                | 1946293146               |
| SNP_P3_61565_48448892 | NC_021163.1    | Ca_kabuli_chr04 | 48448892                | CC                              | TT                | 1946293347               |
| SNP_P3_61566_48448951 | NC_021163.1    | Ca_kabuli_chr04 | 48448951                | AA                              | CC                | 1946293537               |
| SNP_P3_61567_48449277 | NC_021163.1    | Ca_kabuli_chr04 | 48449277                | CC                              | TT                | 1946293726               |
| SNP_P3_61568_48449303 | NC_021163.1    | Ca_kabuli_chr04 | 48449303                | AA                              | GG                | 1946293914               |
| SNP_P3_61569_48449337 | NC_021163.1    | Ca_kabuli_chr04 | 48449337                | AA                              | GG                | 1946294099               |
| SNP_P3_61570_48449364 | NC_021163.1    | Ca_kabuli_chr04 | 48449364                | TT                              | CC                | 1946294282               |
| SNP_P3_61571_48449536 | NC_021163.1    | Ca_kabuli_chr04 | 48449536                | TT                              | AA                | 1946294458               |
| SNP_P3_61572_48449575 | NC_021163.1    | Ca_kabuli_chr04 | 48449575                | AA                              | CC                | 1946294640               |
| SNP_P3_61573_48449963 | NC_021163.1    | Ca_kabuli_chr04 | 48449963                | CC                              | AA                | 1946294816               |
| SNP_P3_61578_48456736 | NC_021163.1    | Ca_kabuli_chr04 | 48456736                | AA                              | GG                | 1946294993               |
| SNP_P3_61579_48457268 | NC_021163.1    | Ca_kabuli_chr04 | 48457268                | CC                              | TT                | 1946295181               |
| SNP_P3_61580_48457876 | NC_021163.1    | Ca_kabuli_chr04 | 48457876                | TT                              | CC                | 1946295372               |
| SNP_P3_61581_48458854 | NC_021163.1    | Ca_kabuli_chr04 | 48458854                | TT                              | CC                | 1946295560               |
| SNP_P3_61582_48459089 | NC_021163.1    | Ca_kabuli_chr04 | 48459089                | TT                              | GG                | 1946295751               |
| SNP_P3_61583_48459223 | NC_021163.1    | Ca_kabuli_chr04 | 48459223                | GG                              | AA                | 1946295938               |
| SNP_P3_61585_48461884 | NC_021163.1    | Ca_kabuli_chr04 | 48461884                | TT                              | CC                | 1946296117               |
| SNP_P3_61586_48461903 | NC_021163.1    | Ca_kabuli_chr04 | 48461903                | GG                              | TT                | 1946296297               |

| SNPs IDs              | Chromosome IDs | Chromosomes     | Physical positions (bp) | CDC Frontier (Reference genome) | (Pusa 256 & HPNB) | NCBI SNPdb Accession IDs |
|-----------------------|----------------|-----------------|-------------------------|---------------------------------|-------------------|--------------------------|
| SNP_P3_61587_48462094 | NC_021163.1    | Ca_kabuli_chr04 | 48462094                | AA                              | GG                | 1946296482               |
| SNP_P3_61588_48462110 | NC_021163.1    | Ca_kabuli_chr04 | 48462110                | TT                              | CC                | 1946296660               |
| SNP_P3_61589_48462114 | NC_021163.1    | Ca_kabuli_chr04 | 48462114                | TT                              | GG                | 1946296840               |
| SNP_P3_61590_48462151 | NC_021163.1    | Ca_kabuli_chr04 | 48462151                | CC                              | GG                | 1946297032               |
| SNP_P3_61591_48464061 | NC_021163.1    | Ca_kabuli_chr04 | 48464061                | CC                              | TT                | 1946297230               |
| SNP_P3_61592_48465107 | NC_021163.1    | Ca_kabuli_chr04 | 48465107                | AA                              | GG                | 1946297427               |
| SNP_P3_61595_48469869 | NC_021163.1    | Ca_kabuli_chr04 | 48469869                | AA                              | GG                | 1946297613               |
| SNP_P3_61596_48470124 | NC_021163.1    | Ca_kabuli_chr04 | 48470124                | TT                              | GG                | 1946297801               |
| SNP_P3_61597_48470135 | NC_021163.1    | Ca_kabuli_chr04 | 48470135                | AA                              | CC                | 1946297985               |
| SNP_P3_61598_48470464 | NC_021163.1    | Ca_kabuli_chr04 | 48470464                | GG                              | TT                | 1946298175               |
| SNP_P3_61599_48470477 | NC_021163.1    | Ca_kabuli_chr04 | 48470477                | GG                              | AA                | 1946298368               |
| SNP_P3_61600_48472943 | NC_021163.1    | Ca_kabuli_chr04 | 48472943                | CC                              | AA                | 1946298554               |
| SNP_P3_61602_48473687 | NC_021163.1    | Ca_kabuli_chr04 | 48473687                | TT                              | AA                | 1946298748               |
| SNP_P3_61603_48473706 | NC_021163.1    | Ca_kabuli_chr04 | 48473706                | GG                              | CC                | 1946298958               |
| SNP_P3_61604_48475284 | NC_021163.1    | Ca_kabuli_chr04 | 48475284                | CC                              | TT                | 1946299153               |
| SNP_P3_61605_48475461 | NC_021163.1    | Ca_kabuli_chr04 | 48475461                | AA                              | GG                | 1946299331               |
| SNP_P3_61606_48475589 | NC_021163.1    | Ca_kabuli_chr04 | 48475589                | TT                              | AA                | 1946299508               |
| SNP_P3_61607_48477664 | NC_021163.1    | Ca_kabuli_chr04 | 48477664                | TT                              | CC                | 1946299696               |
| SNP_P3_61608_48478018 | NC_021163.1    | Ca_kabuli_chr04 | 48478018                | GG                              | AA                | 1946299831               |
| SNP_P3_61609_48478058 | NC_021163.1    | Ca_kabuli_chr04 | 48478058                | TT                              | CC                | 1946300013               |
| SNP_P3_61610_48481751 | NC_021163.1    | Ca_kabuli_chr04 | 48481751                | AA                              | TT                | 1946300172               |
| SNP_P3_61611_48481776 | NC_021163.1    | Ca_kabuli_chr04 | 48481776                | CC                              | AA                | 1946300321               |
| SNP_P3_61612_48483645 | NC_021163.1    | Ca_kabuli_chr04 | 48483645                | CC                              | TT                | 1946300489               |
| SNP_P3_61613_48488176 | NC_021163.1    | Ca_kabuli_chr04 | 48488176                | TT                              | AA                | 1946300665               |
| SNP_P3_61614_48488188 | NC_021163.1    | Ca_kabuli_chr04 | 48488188                | TT                              | AA                | 1946300843               |
| SNP_P3_61615_48488191 | NC_021163.1    | Ca_kabuli_chr04 | 48488191                | GG                              | TT                | 1946301016               |
| SNP_P3_61616_48488205 | NC_021163.1    | Ca_kabuli_chr04 | 48488205                | GG                              | AA                | 1946301180               |
| SNP_P3_61617_48488656 | NC_021163.1    | Ca_kabuli_chr04 | 48488656                | AA                              | TT                | 1946301349               |
| SNP_P3_61618_48488869 | NC_021163.1    | Ca_kabuli_chr04 | 48488869                | CC                              | GG                | 1946301526               |
| SNP_P3_61619_48492696 | NC_021163.1    | Ca_kabuli_chr04 | 48492696                | TT                              | AA                | 1946301634               |
| SNP_P3_61620_48492715 | NC_021163.1    | Ca_kabuli_chr04 | 48492715                | AA                              | GG                | 1946301795               |
| SNP_P3_61621_48492726 | NC_021163.1    | Ca_kabuli_chr04 | 48492726                | AA                              | TT                | 1946301981               |
| SNP_P3_61622_48492729 | NC_021163.1    | Ca_kabuli_chr04 | 48492729                | AA                              | CC                | 1946302171               |
| SNP_P3_61624_48493684 | NC_021163.1    | Ca_kabuli_chr04 | 48493684                | GG                              | CC                | 1946302340               |
| SNP_P3_61625_48493877 | NC_021163.1    | Ca_kabuli_chr04 | 48493877                | TT                              | CC                | 1946302508               |
| SNP_P3_61626_48494614 | NC_021163.1    | Ca_kabuli_chr04 | 48494614                | CC                              | TT                | 1946302687               |
| SNP_P3_61627_48494855 | NC_021163.1    | Ca_kabuli_chr04 | 48494855                | GG                              | AA                | 1946302867               |
| SNP_P3_61628_48494914 | NC_021163.1    | Ca_kabuli_chr04 | 48494914                | AA                              | GG                | 1946303059               |
| SNP_P3_61629_48495061 | NC_021163.1    | Ca_kabuli_chr04 | 48495061                | GG                              | AA                | 1946303234               |
| SNP_P3_61632_48497234 | NC_021163.1    | Ca_kabuli_chr04 | 48497234                | AA                              | GG                | 1946303405               |
| SNP_P3_61633_48497282 | NC_021163.1    | Ca_kabuli_chr04 | 48497282                | GG                              | AA                | 1946303572               |
| SNP_P3_61634_48497304 | NC_021163.1    | Ca_kabuli_chr04 | 48497304                | AA                              | GG                | 1946303731               |

| SNPs IDs              | Chromosome IDs | Chromosomes     | Physical positions (bp) | CDC Frontier (Reference genome) | (Pusa 256 & HPNB) | NCBI SNPdb Accession IDs |
|-----------------------|----------------|-----------------|-------------------------|---------------------------------|-------------------|--------------------------|
| SNP_P3_61635_48497308 | NC_021163.1    | Ca_kabuli_chr04 | 48497308                | AA                              | CC                | 1946303890               |
| SNP_P3_61636_48497323 | NC_021163.1    | Ca_kabuli_chr04 | 48497323                | AA                              | GG                | 1946304076               |
| SNP_P3_61637_48497326 | NC_021163.1    | Ca_kabuli_chr04 | 48497326                | TT                              | CC                | 1946304263               |
| SNP_P3_61638_48499130 | NC_021163.1    | Ca_kabuli_chr04 | 48499130                | GG                              | AA                | 1946304426               |
| SNP_P3_61639_48499132 | NC_021163.1    | Ca_kabuli_chr04 | 48499132                | AA                              | GG                | 1946304608               |
| SNP_P3_61640_48499469 | NC_021163.1    | Ca_kabuli_chr04 | 48499469                | GG                              | TT                | 1946304771               |
| SNP_P3_61641_48499477 | NC_021163.1    | Ca_kabuli_chr04 | 48499477                | TT                              | GG                | 1946304921               |
| SNP_P3_61642_48500293 | NC_021163.1    | Ca_kabuli_chr04 | 48500293                | TT                              | CC                | 1946305112               |
| SNP_P3_61643_48503841 | NC_021163.1    | Ca_kabuli_chr04 | 48503841                | CC                              | AA                | 1946305291               |
| SNP_P3_61644_48505584 | NC_021163.1    | Ca_kabuli_chr04 | 48505584                | CC                              | AA                | 1946305475               |
| SNP_P3_61645_48506955 | NC_021163.1    | Ca_kabuli_chr04 | 48506955                | CC                              | TT                | 1946305666               |
| SNP_P3_61646_48506977 | NC_021163.1    | Ca_kabuli_chr04 | 48506977                | AA                              | CC                | 1946305858               |
| SNP_P3_61648_48509030 | NC_021163.1    | Ca_kabuli_chr04 | 48509030                | CC                              | GG                | 1946306047               |
| SNP_P3_61649_48509036 | NC_021163.1    | Ca_kabuli_chr04 | 48509036                | GG                              | CC                | 1946306233               |
| SNP_P3_61650_48509798 | NC_021163.1    | Ca_kabuli_chr04 | 48509798                | TT                              | AA                | 1946306422               |
| SNP_P3_61651_48509807 | NC_021163.1    | Ca_kabuli_chr04 | 48509807                | CC                              | TT                | 1946306612               |
| SNP_P3_61652_48509817 | NC_021163.1    | Ca_kabuli_chr04 | 48509817                | GG                              | AA                | 1946306795               |
| SNP_P3_61653_48509846 | NC_021163.1    | Ca_kabuli_chr04 | 48509846                | AA                              | GG                | 1946306985               |
| SNP_P3_61654_48514227 | NC_021163.1    | Ca_kabuli_chr04 | 48514227                | TT                              | AA                | 1946307174               |
| SNP_P3_61655_48514244 | NC_021163.1    | Ca_kabuli_chr04 | 48514244                | GG                              | TT                | 1946307359               |
| SNP_P3_61656_48516540 | NC_021163.1    | Ca_kabuli_chr04 | 48516540                | TT                              | CC                | 1946307551               |
| SNP_P3_61657_48516572 | NC_021163.1    | Ca_kabuli_chr04 | 48516572                | GG                              | TT                | 1946307745               |
| SNP_P3_61658_48516573 | NC_021163.1    | Ca_kabuli_chr04 | 48516573                | CC                              | AA                | 1946307934               |
| SNP_P3_61659_48516584 | NC_021163.1    | Ca_kabuli_chr04 | 48516584                | AA                              | TT                | 1946308122               |
| SNP_P3_61660_48517202 | NC_021163.1    | Ca_kabuli_chr04 | 48517202                | CC                              | GG                | 1946308313               |
| SNP_P3_61661_48518189 | NC_021163.1    | Ca_kabuli_chr04 | 48518189                | GG                              | CC                | 1946308489               |
| SNP_P3_61662_48518226 | NC_021163.1    | Ca_kabuli_chr04 | 48518226                | GG                              | AA                | 1946308680               |
| SNP_P3_61663_48518246 | NC_021163.1    | Ca_kabuli_chr04 | 48518246                | GG                              | AA                | 1946308870               |
| SNP_P3_61664_48518431 | NC_021163.1    | Ca_kabuli_chr04 | 48518431                | CC                              | TT                | 1946309065               |
| SNP_P3_61665_48518440 | NC_021163.1    | Ca_kabuli_chr04 | 48518440                | CC                              | GG                | 1946309237               |
| SNP_P3_61667_48518754 | NC_021163.1    | Ca_kabuli_chr04 | 48518754                | TT                              | CC                | 1946309411               |
| SNP_P3_61669_48519531 | NC_021163.1    | Ca_kabuli_chr04 | 48519531                | TT                              | GG                | 1946309581               |
| SNP_P3_61670_48520857 | NC_021163.1    | Ca_kabuli_chr04 | 48520857                | CC                              | AA                | 1946309752               |
| SNP_P3_61671_48520867 | NC_021163.1    | Ca_kabuli_chr04 | 48520867                | CC                              | TT                | 1946309938               |
| SNP_P3_61672_48520878 | NC_021163.1    | Ca_kabuli_chr04 | 48520878                | CC                              | TT                | 1946310110               |
| SNP_P3_61673_48520916 | NC_021163.1    | Ca_kabuli_chr04 | 48520916                | GG                              | TT                | 1946310282               |
| SNP_P3_61674_48520922 | NC_021163.1    | Ca_kabuli_chr04 | 48520922                | TT                              | GG                | 1946310470               |
| SNP_P3_61675_48520943 | NC_021163.1    | Ca_kabuli_chr04 | 48520943                | CC                              | TT                | 1946310659               |
| SNP_P3_61676_48535947 | NC_021163.1    | Ca_kabuli_chr04 | 48535947                | CC                              | TT                | 1946310840               |
| SNP_P3_61677_48540738 | NC_021163.1    | Ca_kabuli_chr04 | 48540738                | TT                              | CC                | 1946311024               |
| SNP_P3_61678_48541105 | NC_021163.1    | Ca_kabuli_chr04 | 48541105                | GG                              | TT                | 1946311211               |
| SNP_P3_61679_48546811 | NC_021163.1    | Ca_kabuli_chr04 | 48546811                | TT                              | CC                | 1946311390               |

| SNPs IDs              | Chromosome IDs | Chromosomes     | Physical positions (bp) | CDC Frontier (Reference genome) | (Pusa 256 & HPNB) | NCBI SNPdb Accession IDs |
|-----------------------|----------------|-----------------|-------------------------|---------------------------------|-------------------|--------------------------|
| SNP_P3_61680_48563365 | NC_021163.1    | Ca_kabuli_chr04 | 48563365                | AA                              | GG                | 1946311582               |
| SNP_P3_61682_48575242 | NC_021163.1    | Ca_kabuli_chr04 | 48575242                | GG                              | TT                | 1946311754               |
| SNP_P3_61683_48576920 | NC_021163.1    | Ca_kabuli_chr04 | 48576920                | AA                              | TT                | 1946311929               |
| SNP_P3_61686_48580382 | NC_021163.1    | Ca_kabuli_chr04 | 48580382                | GG                              | AA                | 1946312110               |
| SNP_P3_61687_48580417 | NC_021163.1    | Ca_kabuli_chr04 | 48580417                | CC                              | TT                | 1946312267               |
| SNP_P3_61689_48620682 | NC_021163.1    | Ca_kabuli_chr04 | 48620682                | AA                              | GG                | 1946312411               |
| SNP_P3_61691_48658446 | NC_021163.1    | Ca_kabuli_chr04 | 48658446                | AA                              | GG                | 1946312604               |
| SNP_P3_61692_48658459 | NC_021163.1    | Ca_kabuli_chr04 | 48658459                | CC                              | TT                | 1946312787               |
| SNP_P3_61693_48658788 | NC_021163.1    | Ca_kabuli_chr04 | 48658788                | TT                              | CC                | 1946312984               |
| SNP_P3_61694_48660376 | NC_021163.1    | Ca_kabuli_chr04 | 48660376                | AA                              | GG                | 1946313178               |
| SNP_P3_61695_48661786 | NC_021163.1    | Ca_kabuli_chr04 | 48661786                | AA                              | GG                | 1946313361               |
| SNP_P3_61696_48662062 | NC_021163.1    | Ca_kabuli_chr04 | 48662062                | GG                              | CC                | 1946313554               |
| SNP_P3_61697_48662076 | NC_021163.1    | Ca_kabuli_chr04 | 48662076                | TT                              | CC                | 1946313744               |
| SNP_P3_61698_48662367 | NC_021163.1    | Ca_kabuli_chr04 | 48662367                | AA                              | GG                | 1946313932               |
| SNP_P3_61700_48662828 | NC_021163.1    | Ca_kabuli_chr04 | 48662828                | GG                              | AA                | 1946314103               |
| SNP_P3_61701_48663557 | NC_021163.1    | Ca_kabuli_chr04 | 48663557                | GG                              | AA                | 1946314296               |
| SNP_P3_61702_48663817 | NC_021163.1    | Ca_kabuli_chr04 | 48663817                | CC                              | GG                | 1946314488               |
| SNP_P3_61704_48665225 | NC_021163.1    | Ca_kabuli_chr04 | 48665225                | TT                              | CC                | 1946314679               |
| SNP_P3_61705_48665517 | NC_021163.1    | Ca_kabuli_chr04 | 48665517                | AA                              | GG                | 1946314869               |
| SNP_P3_61706_48665587 | NC_021163.1    | Ca_kabuli_chr04 | 48665587                | AA                              | GG                | 1946315061               |
| SNP_P3_61707_48665603 | NC_021163.1    | Ca_kabuli_chr04 | 48665603                | GG                              | AA                | 1946315243               |
| SNP_P3_61708_48665945 | NC_021163.1    | Ca_kabuli_chr04 | 48665945                | GG                              | AA                | 1946315405               |
| SNP_P3_61709_48666002 | NC_021163.1    | Ca_kabuli_chr04 | 48666002                | TT                              | CC                | 1946315579               |
| SNP_P3_61710_48666811 | NC_021163.1    | Ca_kabuli_chr04 | 48666811                | TT                              | GG                | 1946315754               |
| SNP_P3_61711_48666819 | NC_021163.1    | Ca_kabuli_chr04 | 48666819                | TT                              | CC                | 1946315939               |
| SNP_P3_61712_48667177 | NC_021163.1    | Ca_kabuli_chr04 | 48667177                | TT                              | CC                | 1946316126               |
| SNP_P3_61713_48670011 | NC_021163.1    | Ca_kabuli_chr04 | 48670011                | GG                              | AA                | 1946316307               |
| SNP_P3_61714_48670036 | NC_021163.1    | Ca_kabuli_chr04 | 48670036                | AA                              | GG                | 1946316352               |
| SNP_P3_61717_48670628 | NC_021163.1    | Ca_kabuli_chr04 | 48670628                | CC                              | AA                | 1946316519               |
| SNP_P3_61718_48670878 | NC_021163.1    | Ca_kabuli_chr04 | 48670878                | CC                              | TT                | 1946316702               |
| SNP_P3_61719_48671256 | NC_021163.1    | Ca_kabuli_chr04 | 48671256                | CC                              | TT                | 1946316896               |
| SNP_P3_61720_48671311 | NC_021163.1    | Ca_kabuli_chr04 | 48671311                | TT                              | AA                | 1946316986               |
| SNP_P3_61721_48673481 | NC_021163.1    | Ca_kabuli_chr04 | 48673481                | CC                              | AA                | 1946317172               |
| SNP_P3_61722_48673650 | NC_021163.1    | Ca_kabuli_chr04 | 48673650                | TT                              | CC                | 1946317364               |
| SNP_P3_61723_48676855 | NC_021163.1    | Ca_kabuli_chr04 | 48676855                | GG                              | TT                | 1946317557               |
| SNP_P3_61724_48676876 | NC_021163.1    | Ca_kabuli_chr04 | 48676876                | CC                              | TT                | 1946317753               |
| SNP_P3_61725_48680998 | NC_021163.1    | Ca_kabuli_chr04 | 48680998                | TT                              | CC                | 1946317946               |
| SNP_P3_61726_48681589 | NC_021163.1    | Ca_kabuli_chr04 | 48681589                | TT                              | AA                | 1946318134               |
| SNP_P3_61727_48681625 | NC_021163.1    | Ca_kabuli_chr04 | 48681625                | AA                              | GG                | 1946318320               |
| SNP_P3_61729_48683591 | NC_021163.1    | Ca_kabuli_chr04 | 48683591                | TT                              | AA                | 1946318510               |
| SNP_P3_61731_48684163 | NC_021163.1    | Ca_kabuli_chr04 | 48684163                | AA                              | GG                | 1946318695               |
| SNP_P3_61732_48684611 | NC_021163.1    | Ca_kabuli_chr04 | 48684611                | AA                              | TT                | 1946318858               |

| SNPs IDs              | Chromosome IDs | Chromosomes     | Physical positions (bp) | CDC Frontier (Reference genome) | (Pusa 256 & HPNB) | NCBI SNPdb Accession IDs |
|-----------------------|----------------|-----------------|-------------------------|---------------------------------|-------------------|--------------------------|
| SNP_P3_61733_48684887 | NC_021163.1    | Ca_kabuli_chr04 | 48684887                | TT                              | CC                | 1946319051               |
| SNP_P3_61734_48684899 | NC_021163.1    | Ca_kabuli_chr04 | 48684899                | CC                              | TT                | 1946319234               |
| SNP_P3_61736_48684940 | NC_021163.1    | Ca_kabuli_chr04 | 48684940                | AA                              | CC                | 1946319411               |
| SNP_P3_61737_48684962 | NC_021163.1    | Ca_kabuli_chr04 | 48684962                | AA                              | GG                | 1946319591               |
| SNP_P3_61738_48685262 | NC_021163.1    | Ca_kabuli_chr04 | 48685262                | GG                              | AA                | 1946319722               |
| SNP_P3_61739_48685331 | NC_021163.1    | Ca_kabuli_chr04 | 48685331                | AA                              | TT                | 1946319870               |
| SNP_P3_61740_48685339 | NC_021163.1    | Ca_kabuli_chr04 | 48685339                | TT                              | CC                | 1946320061               |
| SNP_P3_61741_48685610 | NC_021163.1    | Ca_kabuli_chr04 | 48685610                | TT                              | GG                | 1946320234               |
| SNP_P3_61742_48685627 | NC_021163.1    | Ca_kabuli_chr04 | 48685627                | AA                              | GG                | 1946320423               |
| SNP_P3_61744_48685920 | NC_021163.1    | Ca_kabuli_chr04 | 48685920                | AA                              | GG                | 1946320619               |
| SNP_P3_61745_48685951 | NC_021163.1    | Ca_kabuli_chr04 | 48685951                | TT                              | AA                | 1946320819               |
| SNP_P3_61747_48685996 | NC_021163.1    | Ca_kabuli_chr04 | 48685996                | TT                              | CC                | 1946321013               |
| SNP_P3_61748_48686871 | NC_021163.1    | Ca_kabuli_chr04 | 48686871                | GG                              | AA                | 1946321208               |
| SNP_P3_61749_48687080 | NC_021163.1    | Ca_kabuli_chr04 | 48687080                | CC                              | AA                | 1946321390               |
| SNP_P3_61750_48687096 | NC_021163.1    | Ca_kabuli_chr04 | 48687096                | AA                              | GG                | 1946321582               |
| SNP_P3_61751_48687110 | NC_021163.1    | Ca_kabuli_chr04 | 48687110                | AA                              | GG                | 1946321774               |
| SNP_P3_61752_48687126 | NC_021163.1    | Ca_kabuli_chr04 | 48687126                | CC                              | TT                | 1946321939               |
| SNP_P3_61753_48687140 | NC_021163.1    | Ca_kabuli_chr04 | 48687140                | GG                              | AA                | 1946322107               |
| SNP_P3_61754_48687286 | NC_021163.1    | Ca_kabuli_chr04 | 48687286                | AA                              | GG                | 1946322296               |
| SNP_P3_61755_48687300 | NC_021163.1    | Ca_kabuli_chr04 | 48687300                | AA                              | GG                | 1946322477               |
| SNP_P3_61756_48687769 | NC_021163.1    | Ca_kabuli_chr04 | 48687769                | AA                              | TT                | 1946322654               |
| SNP_P3_61757_48688598 | NC_021163.1    | Ca_kabuli_chr04 | 48688598                | TT                              | CC                | 1946322823               |
| SNP_P3_61758_48688599 | NC_021163.1    | Ca_kabuli_chr04 | 48688599                | AA                              | GG                | 1946323002               |
| SNP_P3_61759_48688915 | NC_021163.1    | Ca_kabuli_chr04 | 48688915                | TT                              | CC                | 1946323161               |
| SNP_P3_61760_48689121 | NC_021163.1    | Ca_kabuli_chr04 | 48689121                | AA                              | GG                | 1946323220               |
| SNP_P3_61761_48689952 | NC_021163.1    | Ca_kabuli_chr04 | 48689952                | CC                              | TT                | 1946323408               |
| SNP_P3_61762_48690163 | NC_021163.1    | Ca_kabuli_chr04 | 48690163                | CC                              | TT                | 1946323600               |
| SNP_P3_61763_48690947 | NC_021163.1    | Ca_kabuli_chr04 | 48690947                | GG                              | AA                | 1946323797               |
| SNP_P3_61764_48691756 | NC_021163.1    | Ca_kabuli_chr04 | 48691756                | GG                              | AA                | 1946323992               |
| SNP_P3_61765_48691889 | NC_021163.1    | Ca_kabuli_chr04 | 48691889                | GG                              | TT                | 1946324179               |
| SNP_P3_61766_48692146 | NC_021163.1    | Ca_kabuli_chr04 | 48692146                | AA                              | GG                | 1946324356               |
| SNP_P3_61767_48692157 | NC_021163.1    | Ca_kabuli_chr04 | 48692157                | AA                              | CC                | 1946324460               |
| SNP_P3_61768_48692164 | NC_021163.1    | Ca_kabuli_chr04 | 48692164                | TT                              | CC                | 1946324637               |
| SNP_P3_61769_48692181 | NC_021163.1    | Ca_kabuli_chr04 | 48692181                | TT                              | CC                | 1946324830               |
| SNP_P3_61771_48692602 | NC_021163.1    | Ca_kabuli_chr04 | 48692602                | AA                              | CC                | 1946325025               |
| SNP_P3_61772_48692608 | NC_021163.1    | Ca_kabuli_chr04 | 48692608                | AA                              | GG                | 1946325127               |
| SNP_P3_61773_48692636 | NC_021163.1    | Ca_kabuli_chr04 | 48692636                | AA                              | GG                | 1946325128               |
| SNP_P3_61774_48692643 | NC_021163.1    | Ca_kabuli_chr04 | 48692643                | CC                              | GG                | 1946325175               |
| SNP_P3_61775_48692903 | NC_021163.1    | Ca_kabuli_chr04 | 48692903                | CC                              | TT                | 1946325352               |
| SNP_P3_61776_48693064 | NC_021163.1    | Ca_kabuli_chr04 | 48693064                | AA                              | GG                | 1946325546               |
| SNP_P3_61777_48694678 | NC_021163.1    | Ca_kabuli_chr04 | 48694678                | CC                              | TT                | 1946325741               |
| SNP_P3_61779_48694711 | NC_021163.1    | Ca_kabuli_chr04 | 48694711                | AA                              | TT                | 1946325930               |



| SNPs IDs              | Chromosome IDs | Chromosomes     | Physical positions (bp) | CDC Frontier (Reference genome) | (Pusa 256 & HPNB) | NCBI SNPdb Accession IDs |
|-----------------------|----------------|-----------------|-------------------------|---------------------------------|-------------------|--------------------------|
| SNP_P3_61780_48695362 | NC_021163.1    | Ca_kabuli_chr04 | 48695362                | AA                              | GG                | 1946326110               |
| SNP_P3_61781_48696211 | NC_021163.1    | Ca_kabuli_chr04 | 48696211                | GG                              | TT                | 1946326241               |
| SNP_P3_61782_48696937 | NC_021163.1    | Ca_kabuli_chr04 | 48696937                | CC                              | TT                | 1946326429               |
| SNP_P3_61783_48697710 | NC_021163.1    | Ca_kabuli_chr04 | 48697710                | AA                              | GG                | 1946326618               |
| SNP_P3_61784_48697751 | NC_021163.1    | Ca_kabuli_chr04 | 48697751                | TT                              | CC                | 1946326808               |
| SNP_P3_61785_48700434 | NC_021163.1    | Ca_kabuli_chr04 | 48700434                | AA                              | GG                | 1946327004               |
| SNP_P3_61786_48706437 | NC_021163.1    | Ca_kabuli_chr04 | 48706437                | GG                              | AA                | 1946327198               |
| SNP_P3_61787_48707160 | NC_021163.1    | Ca_kabuli_chr04 | 48707160                | TT                              | CC                | 1946327392               |
| SNP_P3_61788_48707233 | NC_021163.1    | Ca_kabuli_chr04 | 48707233                | GG                              | AA                | 1946327582               |
| SNP_P3_61789_48707247 | NC_021163.1    | Ca_kabuli_chr04 | 48707247                | CC                              | TT                | 1946327775               |
| SNP_P3_61790_48707309 | NC_021163.1    | Ca_kabuli_chr04 | 48707309                | TT                              | CC                | 1946327961               |
| SNP_P3_61791_48707477 | NC_021163.1    | Ca_kabuli_chr04 | 48707477                | AA                              | CC                | 1946328150               |
| SNP_P3_61792_48707971 | NC_021163.1    | Ca_kabuli_chr04 | 48707971                | GG                              | AA                | 1946328339               |
| SNP_P3_61793_48708142 | NC_021163.1    | Ca_kabuli_chr04 | 48708142                | GG                              | AA                | 1946328531               |
| SNP_P3_61794_48708364 | NC_021163.1    | Ca_kabuli_chr04 | 48708364                | GG                              | AA                | 1946328726               |
| SNP_P3_61795_48708788 | NC_021163.1    | Ca_kabuli_chr04 | 48708788                | AA                              | CC                | 1946328922               |
| SNP_P3_61798_48711496 | NC_021163.1    | Ca_kabuli_chr04 | 48711496                | GG                              | AA                | 1946328961               |
| SNP_P3_61799_48711959 | NC_021163.1    | Ca_kabuli_chr04 | 48711959                | CC                              | AA                | 1946329071               |
| SNP_P3_61801_48714488 | NC_021163.1    | Ca_kabuli_chr04 | 48714488                | AA                              | GG                | 1946329178               |
| SNP_P3_61802_48714724 | NC_021163.1    | Ca_kabuli_chr04 | 48714724                | CC                              | TT                | 1946329354               |
| SNP_P3_61803_48714912 | NC_021163.1    | Ca_kabuli_chr04 | 48714912                | GG                              | AA                | 1946329545               |
| SNP_P3_61805_48717460 | NC_021163.1    | Ca_kabuli_chr04 | 48717460                | GG                              | AA                | 1946329735               |
| SNP_P3_61806_48717523 | NC_021163.1    | Ca_kabuli_chr04 | 48717523                | TT                              | AA                | 1946329925               |
| SNP_P3_61807_48719216 | NC_021163.1    | Ca_kabuli_chr04 | 48719216                | GG                              | AA                | 1946330064               |
| SNP_P3_61808_48723111 | NC_021163.1    | Ca_kabuli_chr04 | 48723111                | AA                              | CC                | 1946330252               |
| SNP_P3_61809_48723454 | NC_021163.1    | Ca_kabuli_chr04 | 48723454                | TT                              | CC                | 1946330443               |
| SNP_P3_61810_48723466 | NC_021163.1    | Ca_kabuli_chr04 | 48723466                | TT                              | CC                | 1946330631               |
| SNP_P3_61811_48723468 | NC_021163.1    | Ca_kabuli_chr04 | 48723468                | GG                              | AA                | 1946330810               |
| SNP_P3_61812_48723473 | NC_021163.1    | Ca_kabuli_chr04 | 48723473                | AA                              | TT                | 1946331007               |
| SNP_P3_61813_48723745 | NC_021163.1    | Ca_kabuli_chr04 | 48723745                | GG                              | AA                | 1946331198               |
| SNP_P3_61814_48723906 | NC_021163.1    | Ca_kabuli_chr04 | 48723906                | TT                              | CC                | 1946331384               |
| SNP_P3_61815_48723907 | NC_021163.1    | Ca_kabuli_chr04 | 48723907                | GG                              | AA                | 1946331576               |
| SNP_P3_61817_48724592 | NC_021163.1    | Ca_kabuli_chr04 | 48724592                | TT                              | CC                | 1946331756               |
| SNP_P3_61818_48725483 | NC_021163.1    | Ca_kabuli_chr04 | 48725483                | CC                              | TT                | 1946331951               |
| SNP_P3_61819_48725637 | NC_021163.1    | Ca_kabuli_chr04 | 48725637                | AA                              | GG                | 1946332134               |
| SNP_P3_61820_48725723 | NC_021163.1    | Ca_kabuli_chr04 | 48725723                | TT                              | GG                | 1946332332               |
| SNP_P3_61821_48725725 | NC_021163.1    | Ca_kabuli_chr04 | 48725725                | CC                              | AA                | 1946332519               |
| SNP_P3_61822_48725731 | NC_021163.1    | Ca_kabuli_chr04 | 48725731                | GG                              | TT                | 1946332704               |
| SNP_P3_61823_48725743 | NC_021163.1    | Ca_kabuli_chr04 | 48725743                | AA                              | GG                | 1946332898               |
| SNP_P3_61824_48727851 | NC_021163.1    | Ca_kabuli_chr04 | 48727851                | TT                              | CC                | 1946333080               |
| SNP_P3_61825_48729919 | NC_021163.1    | Ca_kabuli_chr04 | 48729919                | GG                              | AA                | 1946333271               |
| SNP_P3_61826_48729928 | NC_021163.1    | Ca_kabuli_chr04 | 48729928                | AA                              | GG                | 1946333454               |

| SNPs IDs              | Chromosome IDs | Chromosomes     | Physical positions (bp) | CDC Frontier (Reference genome) | (Pusa 256 & HPNB) | NCBI SNPdb Accession IDs |
|-----------------------|----------------|-----------------|-------------------------|---------------------------------|-------------------|--------------------------|
| SNP_P3_61827_48733495 | NC_021163.1    | Ca_kabuli_chr04 | 48733495                | CC                              | AA                | 1946333641               |
| SNP_P3_61828_48736991 | NC_021163.1    | Ca_kabuli_chr04 | 48736991                | GG                              | TT                | 1946333822               |
| SNP_P3_61829_48737015 | NC_021163.1    | Ca_kabuli_chr04 | 48737015                | GG                              | AA                | 1946333975               |
| SNP_P3_61830_48737050 | NC_021163.1    | Ca_kabuli_chr04 | 48737050                | AA                              | GG                | 1946334131               |
| SNP_P3_61831_48737254 | NC_021163.1    | Ca_kabuli_chr04 | 48737254                | AA                              | CC                | 1946334318               |
| SNP_P3_61832_48737259 | NC_021163.1    | Ca_kabuli_chr04 | 48737259                | AA                              | GG                | 1946334489               |
| SNP_P3_61833_48737432 | NC_021163.1    | Ca_kabuli_chr04 | 48737432                | AA                              | GG                | 1946334669               |
| SNP_P3_61834_48737472 | NC_021163.1    | Ca_kabuli_chr04 | 48737472                | CC                              | GG                | 1946334849               |
| SNP_P3_61835_48740080 | NC_021163.1    | Ca_kabuli_chr04 | 48740080                | AA                              | GG                | 1946335021               |
| SNP_P3_61836_48740087 | NC_021163.1    | Ca_kabuli_chr04 | 48740087                | CC                              | TT                | 1946335204               |
| SNP_P3_61837_48740557 | NC_021163.1    | Ca_kabuli_chr04 | 48740557                | AA                              | GG                | 1946335399               |
| SNP_P3_61838_48740558 | NC_021163.1    | Ca_kabuli_chr04 | 48740558                | GG                              | CC                | 1946335590               |
| SNP_P3_61839_48740572 | NC_021163.1    | Ca_kabuli_chr04 | 48740572                | AA                              | GG                | 1946335784               |
| SNP_P3_61840_48740578 | NC_021163.1    | Ca_kabuli_chr04 | 48740578                | AA                              | GG                | 1946335978               |
| SNP_P3_61841_48742386 | NC_021163.1    | Ca_kabuli_chr04 | 48742386                | TT                              | AA                | 1946336161               |
| SNP_P3_61843_48755155 | NC_021163.1    | Ca_kabuli_chr04 | 48755155                | CC                              | TT                | 1946336340               |
| SNP_P3_61844_48757502 | NC_021163.1    | Ca_kabuli_chr04 | 48757502                | CC                              | TT                | 1946336508               |
| SNP_P3_61845_48757507 | NC_021163.1    | Ca_kabuli_chr04 | 48757507                | CC                              | AA                | 1946336684               |
| SNP_P3_61846_48757511 | NC_021163.1    | Ca_kabuli_chr04 | 48757511                | TT                              | CC                | 1946336869               |
| SNP_P3_61848_48760624 | NC_021163.1    | Ca_kabuli_chr04 | 48760624                | CC                              | AA                | 1946337062               |
| SNP_P3_61849_48760983 | NC_021163.1    | Ca_kabuli_chr04 | 48760983                | AA                              | GG                | 1946337253               |
| SNP_P3_61850_48767559 | NC_021163.1    | Ca_kabuli_chr04 | 48767559                | TT                              | GG                | 1946337449               |
| SNP_P3_61851_48767578 | NC_021163.1    | Ca_kabuli_chr04 | 48767578                | CC                              | TT                | 1946337646               |
| SNP_P3_61852_48767615 | NC_021163.1    | Ca_kabuli_chr04 | 48767615                | CC                              | TT                | 1946337837               |
| SNP_P3_61853_48767645 | NC_021163.1    | Ca_kabuli_chr04 | 48767645                | GG                              | TT                | 1946338024               |
| SNP_P3_61854_48767957 | NC_021163.1    | Ca_kabuli_chr04 | 48767957                | TT                              | GG                | 1946338209               |
| SNP_P3_61855_48769686 | NC_021163.1    | Ca_kabuli_chr04 | 48769686                | AA                              | GG                | 1946338405               |
| SNP_P3_61857_48772357 | NC_021163.1    | Ca_kabuli_chr04 | 48772357                | AA                              | GG                | 1946338595               |
| SNP_P3_61858_48772362 | NC_021163.1    | Ca_kabuli_chr04 | 48772362                | AA                              | TT                | 1946338776               |
| SNP_P3_61859_48772398 | NC_021163.1    | Ca_kabuli_chr04 | 48772398                | AA                              | GG                | 1946338971               |
| SNP_P3_61860_48772572 | NC_021163.1    | Ca_kabuli_chr04 | 48772572                | TT                              | CC                | 1946339163               |
| SNP_P3_61861_48772641 | NC_021163.1    | Ca_kabuli_chr04 | 48772641                | AA                              | GG                | 1946339351               |
| SNP_P3_61863_48772892 | NC_021163.1    | Ca_kabuli_chr04 | 48772892                | CC                              | TT                | 1946339531               |
| SNP_P3_61864_48772964 | NC_021163.1    | Ca_kabuli_chr04 | 48772964                | AA                              | GG                | 1946339719               |
| SNP_P3_61865_48772983 | NC_021163.1    | Ca_kabuli_chr04 | 48772983                | AA                              | GG                | 1946339908               |
| SNP_P3_61866_48773177 | NC_021163.1    | Ca_kabuli_chr04 | 48773177                | GG                              | AA                | 1946340093               |
| SNP_P3_61867_48773497 | NC_021163.1    | Ca_kabuli_chr04 | 48773497                | AA                              | GG                | 1946340287               |
| SNP_P3_61868_48774160 | NC_021163.1    | Ca_kabuli_chr04 | 48774160                | AA                              | TT                | 1946340477               |
| SNP_P3_61869_48774166 | NC_021163.1    | Ca_kabuli_chr04 | 48774166                | TT                              | AA                | 1946340650               |
| SNP_P3_61870_48774576 | NC_021163.1    | Ca_kabuli_chr04 | 48774576                | GG                              | AA                | 1946340829               |
| SNP_P3_61871_48780890 | NC_021163.1    | Ca_kabuli_chr04 | 48780890                | CC                              | TT                | 1946341003               |
| SNP_P3_61872_48782524 | NC_021163.1    | Ca_kabuli_chr04 | 48782524                | CC                              | TT                | 1946341181               |

| SNPs IDs              | Chromosome IDs | Chromosomes     | Physical positions (bp) | CDC Frontier (Reference genome) | (Pusa 256 & HPNB) | NCBI SNPdb Accession IDs |
|-----------------------|----------------|-----------------|-------------------------|---------------------------------|-------------------|--------------------------|
| SNP_P3_61873_48782723 | NC_021163.1    | Ca_kabuli_chr04 | 48782723                | CC                              | TT                | 1946341351               |
| SNP_P3_61874_48783051 | NC_021163.1    | Ca_kabuli_chr04 | 48783051                | TT                              | CC                | 1946341486               |
| SNP_P3_61875_48783062 | NC_021163.1    | Ca_kabuli_chr04 | 48783062                | TT                              | CC                | 1946341673               |
| SNP_P3_61876_48783783 | NC_021163.1    | Ca_kabuli_chr04 | 48783783                | CC                              | AA                | 1946341866               |
| SNP_P3_61877_48783852 | NC_021163.1    | Ca_kabuli_chr04 | 48783852                | AA                              | TT                | 1946342063               |
| SNP_P3_61878_48784112 | NC_021163.1    | Ca_kabuli_chr04 | 48784112                | GG                              | AA                | 1946342247               |
| SNP_P3_61879_48784113 | NC_021163.1    | Ca_kabuli_chr04 | 48784113                | AA                              | TT                | 1946342437               |
| SNP_P3_61880_48784176 | NC_021163.1    | Ca_kabuli_chr04 | 48784176                | TT                              | CC                | 1946342630               |
| SNP_P3_61881_48784178 | NC_021163.1    | Ca_kabuli_chr04 | 48784178                | CC                              | GG                | 1946342827               |
| SNP_P3_61882_48784179 | NC_021163.1    | Ca_kabuli_chr04 | 48784179                | GG                              | AA                | 1946342995               |
| SNP_P3_61883_48786553 | NC_021163.1    | Ca_kabuli_chr04 | 48786553                | AA                              | GG                | 1946343178               |
| SNP_P3_61884_48788981 | NC_021163.1    | Ca_kabuli_chr04 | 48788981                | AA                              | GG                | 1946343366               |
| SNP_P3_61885_48788996 | NC_021163.1    | Ca_kabuli_chr04 | 48788996                | AA                              | CC                | 1946343553               |
| SNP_P3_61886_48789249 | NC_021163.1    | Ca_kabuli_chr04 | 48789249                | TT                              | CC                | 1946343750               |
| SNP_P3_61887_48789261 | NC_021163.1    | Ca_kabuli_chr04 | 48789261                | AA                              | GG                | 1946343933               |
| SNP_P3_61888_48789286 | NC_021163.1    | Ca_kabuli_chr04 | 48789286                | GG                              | AA                | 1946344118               |
| SNP_P3_61890_48789618 | NC_021163.1    | Ca_kabuli_chr04 | 48789618                | AA                              | GG                | 1946344315               |
| SNP_P3_61891_48790485 | NC_021163.1    | Ca_kabuli_chr04 | 48790485                | GG                              | AA                | 1946344512               |
| SNP_P3_61892_48790508 | NC_021163.1    | Ca_kabuli_chr04 | 48790508                | AA                              | GG                | 1946344696               |
| SNP_P3_61893_48790712 | NC_021163.1    | Ca_kabuli_chr04 | 48790712                | CC                              | AA                | 1946344890               |
| SNP_P3_61894_48793416 | NC_021163.1    | Ca_kabuli_chr04 | 48793416                | CC                              | TT                | 1946345086               |
| SNP_P3_61895_48793421 | NC_021163.1    | Ca_kabuli_chr04 | 48793421                | AA                              | GG                | 1946345280               |
| SNP_P3_61896_48793445 | NC_021163.1    | Ca_kabuli_chr04 | 48793445                | GG                              | AA                | 1946345465               |
| SNP_P3_61897_48793684 | NC_021163.1    | Ca_kabuli_chr04 | 48793684                | GG                              | TT                | 1946345656               |
| SNP_P3_61898_48793716 | NC_021163.1    | Ca_kabuli_chr04 | 48793716                | AA                              | GG                | 1946345849               |
| SNP_P3_61899_48793963 | NC_021163.1    | Ca_kabuli_chr04 | 48793963                | AA                              | GG                | 1946346031               |
| SNP_P3_61901_48794014 | NC_021163.1    | Ca_kabuli_chr04 | 48794014                | TT                              | CC                | 1946346208               |
| SNP_P3_61902_48794072 | NC_021163.1    | Ca_kabuli_chr04 | 48794072                | AA                              | CC                | 1946346386               |
| SNP_P3_61904_48797175 | NC_021163.1    | Ca_kabuli_chr04 | 48797175                | TT                              | GG                | 1946346566               |
| SNP_P3_61905_48798442 | NC_021163.1    | Ca_kabuli_chr04 | 48798442                | AA                              | CC                | 1946346757               |
| SNP_P3_61906_48798668 | NC_021163.1    | Ca_kabuli_chr04 | 48798668                | GG                              | AA                | 1946346947               |
| SNP_P3_61908_48799012 | NC_021163.1    | Ca_kabuli_chr04 | 48799012                | TT                              | CC                | 1946347138               |
| SNP_P3_61909_48799167 | NC_021163.1    | Ca_kabuli_chr04 | 48799167                | AA                              | TT                | 1946347336               |
| SNP_P3_61910_48799415 | NC_021163.1    | Ca_kabuli_chr04 | 48799415                | TT                              | AA                | 1946347530               |
| SNP_P3_61911_48800196 | NC_021163.1    | Ca_kabuli_chr04 | 48800196                | CC                              | AA                | 1946347725               |
| SNP_P3_61912_48801618 | NC_021163.1    | Ca_kabuli_chr04 | 48801618                | CC                              | TT                | 1946347919               |
| SNP_P3_61913_48809541 | NC_021163.1    | Ca_kabuli_chr04 | 48809541                | GG                              | AA                | 1946348114               |
| SNP_P3_61914_48809558 | NC_021163.1    | Ca_kabuli_chr04 | 48809558                | AA                              | GG                | 1946348307               |
| SNP_P3_61915_48810139 | NC_021163.1    | Ca_kabuli_chr04 | 48810139                | AA                              | GG                | 1946348487               |
| SNP_P3_61916_48810185 | NC_021163.1    | Ca_kabuli_chr04 | 48810185                | TT                              | CC                | 1946348673               |
| SNP_P3_61917_48810213 | NC_021163.1    | Ca_kabuli_chr04 | 48810213                | AA                              | GG                | 1946348861               |
| SNP_P3_61918_48810239 | NC_021163.1    | Ca_kabuli_chr04 | 48810239                | AA                              | GG                | 1946349055               |

| SNPs IDs              | Chromosome IDs | Chromosomes     | Physical positions (bp) | CDC Frontier (Reference genome) | (Pusa 256 & HPNB) | NCBI SNPdb Accession IDs |
|-----------------------|----------------|-----------------|-------------------------|---------------------------------|-------------------|--------------------------|
| SNP_P3_61919_48810707 | NC_021163.1    | Ca_kabuli_chr04 | 48810707                | AA                              | CC                | 1946349246               |
| SNP_P3_61920_48810726 | NC_021163.1    | Ca_kabuli_chr04 | 48810726                | CC                              | TT                | 1946349439               |
| SNP_P3_61921_48812575 | NC_021163.1    | Ca_kabuli_chr04 | 48812575                | CC                              | TT                | 1946349630               |
| SNP_P3_61922_48812984 | NC_021163.1    | Ca_kabuli_chr04 | 48812984                | GG                              | TT                | 1946349806               |
| SNP_P3_61923_48813011 | NC_021163.1    | Ca_kabuli_chr04 | 48813011                | GG                              | AA                | 1946349943               |
| SNP_P3_61925_48813216 | NC_021163.1    | Ca_kabuli_chr04 | 48813216                | GG                              | AA                | 1946350114               |
| SNP_P3_61926_48813290 | NC_021163.1    | Ca_kabuli_chr04 | 48813290                | TT                              | GG                | 1946350306               |
| SNP_P3_61927_48813901 | NC_021163.1    | Ca_kabuli_chr04 | 48813901                | TT                              | CC                | 1946350487               |
| SNP_P3_61928_48814826 | NC_021163.1    | Ca_kabuli_chr04 | 48814826                | AA                              | GG                | 1946350654               |
| SNP_P3_61929_48814853 | NC_021163.1    | Ca_kabuli_chr04 | 48814853                | TT                              | GG                | 1946350837               |
| SNP_P3_61930_48816555 | NC_021163.1    | Ca_kabuli_chr04 | 48816555                | AA                              | GG                | 1946351018               |
| SNP_P3_61931_48817860 | NC_021163.1    | Ca_kabuli_chr04 | 48817860                | TT                              | GG                | 1946351177               |
| SNP_P3_61932_48819354 | NC_021163.1    | Ca_kabuli_chr04 | 48819354                | CC                              | TT                | 1946351351               |
| SNP_P3_61933_48819396 | NC_021163.1    | Ca_kabuli_chr04 | 48819396                | TT                              | CC                | 1946351533               |
| SNP_P3_61934_48819439 | NC_021163.1    | Ca_kabuli_chr04 | 48819439                | GG                              | AA                | 1946351710               |
| SNP_P3_61935_48819524 | NC_021163.1    | Ca_kabuli_chr04 | 48819524                | TT                              | GG                | 1946351878               |
| SNP_P3_61936_48819577 | NC_021163.1    | Ca_kabuli_chr04 | 48819577                | TT                              | CC                | 1946352016               |
| SNP_P3_61937_48823497 | NC_021163.1    | Ca_kabuli_chr04 | 48823497                | TT                              | CC                | 1946352197               |
| SNP_P3_61938_48824359 | NC_021163.1    | Ca_kabuli_chr04 | 48824359                | TT                              | CC                | 1946352390               |
| SNP_P3_61939_48824581 | NC_021163.1    | Ca_kabuli_chr04 | 48824581                | GG                              | AA                | 1946352556               |
| SNP_P3_61940_48826072 | NC_021163.1    | Ca_kabuli_chr04 | 48826072                | TT                              | CC                | 1946352731               |
| SNP_P3_61941_48826110 | NC_021163.1    | Ca_kabuli_chr04 | 48826110                | TT                              | CC                | 1946352903               |
| SNP_P3_61942_48832104 | NC_021163.1    | Ca_kabuli_chr04 | 48832104                | TT                              | AA                | 1946353069               |
| SNP_P3_61943_48832440 | NC_021163.1    | Ca_kabuli_chr04 | 48832440                | AA                              | GG                | 1946353263               |
| SNP_P3_61944_48837010 | NC_021163.1    | Ca_kabuli_chr04 | 48837010                | TT                              | CC                | 1946353385               |
| SNP_P3_61946_48846060 | NC_021163.1    | Ca_kabuli_chr04 | 48846060                | CC                              | AA                | 1946353557               |
| SNP_P3_61947_48846112 | NC_021163.1    | Ca_kabuli_chr04 | 48846112                | GG                              | CC                | 1946353712               |
| SNP_P3_61948_48847337 | NC_021163.1    | Ca_kabuli_chr04 | 48847337                | AA                              | GG                | 1946353873               |
| SNP_P3_61949_48847727 | NC_021163.1    | Ca_kabuli_chr04 | 48847727                | CC                              | TT                | 1946354014               |
| SNP_P3_61950_48847873 | NC_021163.1    | Ca_kabuli_chr04 | 48847873                | CC                              | TT                | 1946354177               |
| SNP_P3_61951_48847913 | NC_021163.1    | Ca_kabuli_chr04 | 48847913                | AA                              | CC                | 1946354341               |
| SNP_P3_61953_48849704 | NC_021163.1    | Ca_kabuli_chr04 | 48849704                | TT                              | CC                | 1946354504               |
| SNP_P3_61954_48849718 | NC_021163.1    | Ca_kabuli_chr04 | 48849718                | AA                              | GG                | 1946354690               |
| SNP_P3_61955_48850011 | NC_021163.1    | Ca_kabuli_chr04 | 48850011                | CC                              | TT                | 1946354877               |
| SNP_P3_61957_48850064 | NC_021163.1    | Ca_kabuli_chr04 | 48850064                | GG                              | TT                | 1946355049               |
| SNP_P3_61958_48850982 | NC_021163.1    | Ca_kabuli_chr04 | 48850982                | TT                              | CC                | 1946355233               |
| SNP_P3_61959_48853416 | NC_021163.1    | Ca_kabuli_chr04 | 48853416                | AA                              | TT                | 1946355418               |
| SNP_P3_61960_48853464 | NC_021163.1    | Ca_kabuli_chr04 | 48853464                | TT                              | CC                | 1946355607               |
| SNP_P3_61961_48864515 | NC_021163.1    | Ca_kabuli_chr04 | 48864515                | GG                              | TT                | 1946355794               |
| SNP_P3_61962_48872506 | NC_021163.1    | Ca_kabuli_chr04 | 48872506                | TT                              | CC                | 1946355986               |
| SNP_P3_61963_48873354 | NC_021163.1    | Ca_kabuli_chr04 | 48873354                | GG                              | TT                | 1946356181               |
| SNP_P3_61964_48878545 | NC_021163.1    | Ca_kabuli_chr04 | 48878545                | AA                              | TT                | 1946356375               |

| SNPs IDs              | Chromosome IDs | Chromosomes     | Physical positions (bp) | CDC Frontier (Reference genome) | (Pusa 256 & HPNB) | NCBI SNPdb Accession IDs |
|-----------------------|----------------|-----------------|-------------------------|---------------------------------|-------------------|--------------------------|
| SNP_P3_61965_48879841 | NC_021163.1    | Ca_kabuli_chr04 | 48879841                | GG                              | AA                | 1946356566               |
| SNP_P3_61966_48879970 | NC_021163.1    | Ca_kabuli_chr04 | 48879970                | AA                              | GG                | 1946356756               |
| SNP_P3_61967_48880209 | NC_021163.1    | Ca_kabuli_chr04 | 48880209                | AA                              | GG                | 1946356953               |
| SNP_P3_61968_48880244 | NC_021163.1    | Ca_kabuli_chr04 | 48880244                | TT                              | AA                | 1946357148               |
| SNP_P3_61969_48880247 | NC_021163.1    | Ca_kabuli_chr04 | 48880247                | CC                              | TT                | 1946357341               |
| SNP_P3_61970_48880260 | NC_021163.1    | Ca_kabuli_chr04 | 48880260                | AA                              | GG                | 1946357537               |
| SNP_P3_61971_48880266 | NC_021163.1    | Ca_kabuli_chr04 | 48880266                | AA                              | GG                | 1946357731               |
| SNP_P3_61972_48880288 | NC_021163.1    | Ca_kabuli_chr04 | 48880288                | GG                              | TT                | 1946357924               |
| SNP_P3_61973_48880291 | NC_021163.1    | Ca_kabuli_chr04 | 48880291                | AA                              | GG                | 1946358122               |
| SNP_P3_61974_48880299 | NC_021163.1    | Ca_kabuli_chr04 | 48880299                | CC                              | AA                | 1946358314               |
| SNP_P3_61975_48880308 | NC_021163.1    | Ca_kabuli_chr04 | 48880308                | AA                              | TT                | 1946358509               |
| SNP_P3_61976_48884800 | NC_021163.1    | Ca_kabuli_chr04 | 48884800                | GG                              | AA                | 1946358696               |
| SNP_P3_61977_48884825 | NC_021163.1    | Ca_kabuli_chr04 | 48884825                | TT                              | GG                | 1946358886               |
| SNP_P3_61978_48905989 | NC_021163.1    | Ca_kabuli_chr04 | 48905989                | AA                              | GG                | 1946359061               |
| SNP_P3_61979_48932833 | NC_021163.1    | Ca_kabuli_chr04 | 48932833                | GG                              | AA                | 1946359238               |
| SNP_P3_61981_48943615 | NC_021163.1    | Ca_kabuli_chr04 | 48943615                | CC                              | TT                | 1946359422               |
| SNP_P3_61982_48945969 | NC_021163.1    | Ca_kabuli_chr04 | 48945969                | CC                              | TT                | 1946359600               |
| SNP_P3_61983_48946012 | NC_021163.1    | Ca_kabuli_chr04 | 48946012                | GG                              | TT                | 1946359782               |
| SNP_P3_61984_48949794 | NC_021163.1    | Ca_kabuli_chr04 | 48949794                | CC                              | TT                | 1946359976               |
| SNP_P3_61985_48950341 | NC_021163.1    | Ca_kabuli_chr04 | 48950341                | TT                              | CC                | 1946360168               |
| SNP_P3_61986_48958405 | NC_021163.1    | Ca_kabuli_chr04 | 48958405                | AA                              | GG                | 1946360363               |
| SNP_P3_61987_48962321 | NC_021163.1    | Ca_kabuli_chr04 | 48962321                | AA                              | GG                | 1946360532               |
| SNP_P3_61988_48962341 | NC_021163.1    | Ca_kabuli_chr04 | 48962341                | TT                              | CC                | 1946360710               |
| SNP_P3_61989_48962343 | NC_021163.1    | Ca_kabuli_chr04 | 48962343                | AA                              | GG                | 1946360889               |
| SNP_P3_61990_48975028 | NC_021163.1    | Ca_kabuli_chr04 | 48975028                | AA                              | CC                | 1946361067               |
| SNP_P3_61991_48975030 | NC_021163.1    | Ca_kabuli_chr04 | 48975030                | AA                              | GG                | 1946361236               |
| SNP_P3_61992_48975084 | NC_021163.1    | Ca_kabuli_chr04 | 48975084                | GG                              | AA                | 1946361424               |
| SNP_P3_61993_48975115 | NC_021163.1    | Ca_kabuli_chr04 | 48975115                | AA                              | GG                | 1946361620               |
| SNP_P3_61995_48975370 | NC_021163.1    | Ca_kabuli_chr04 | 48975370                | TT                              | GG                | 1946361811               |
| SNP_P3_61996_48975423 | NC_021163.1    | Ca_kabuli_chr04 | 48975423                | TT                              | GG                | 1946362006               |
| SNP_P3_61998_48976013 | NC_021163.1    | Ca_kabuli_chr04 | 48976013                | AA                              | GG                | 1946362200               |
| SNP_P3_61999_48976107 | NC_021163.1    | Ca_kabuli_chr04 | 48976107                | TT                              | GG                | 1946362393               |
| SNP_P3_62000_49065009 | NC_021163.1    | Ca_kabuli_chr04 | 49065009                | GG                              | AA                | 1946362586               |
| SNP_P3_62002_49097931 | NC_021163.1    | Ca_kabuli_chr04 | 49097931                | AA                              | GG                | 1946362771               |
| SNP_P3_62003_49097933 | NC_021163.1    | Ca_kabuli_chr04 | 49097933                | AA                              | CC                | 1946362958               |
| SNP_P3_62004_49098937 | NC_021163.1    | Ca_kabuli_chr04 | 49098937                | GG                              | AA                | 1946363148               |
| SNP_P3_62005_49107112 | NC_021163.1    | Ca_kabuli_chr04 | 49107112                | CC                              | AA                | 1946363341               |
| SNP_P3_62006_49115014 | NC_021163.1    | Ca_kabuli_chr04 | 49115014                | CC                              | TT                | 1946363532               |
| SNP_P3_62007_49159025 | NC_021163.1    | Ca_kabuli_chr04 | 49159025                | CC                              | TT                | 1946363721               |
| SNP_P3_62009_49163046 | NC_021163.1    | Ca_kabuli_chr04 | 49163046                | AA                              | GG                | 1946363914               |
| SNP_P3_62010_49168775 | NC_021163.1    | Ca_kabuli_chr04 | 49168775                | GG                              | TT                | 1946364103               |
| SNP_P3_62011_49191445 | NC_021163.1    | Ca_kabuli_chr04 | 49191445                | TT                              | GG                | 1946364286               |

| SNPs IDs              | Chromosome IDs | Chromosomes     | Physical positions (bp) | CDC Frontier (Reference genome) | (Pusa 256 & HPNB) | NCBI SNPdb Accession IDs |
|-----------------------|----------------|-----------------|-------------------------|---------------------------------|-------------------|--------------------------|
| SNP_P3_62012_49191450 | NC_021163.1    | Ca_kabuli_chr04 | 49191450                | TT                              | CC                | 1946364486               |
| SNP_P3_62014_27938    | NC_021164.1    | Ca_kabuli_chr05 | 27938                   | AA                              | GG                | 1946364684               |
| SNP_P3_62015_44701    | NC_021164.1    | Ca_kabuli_chr05 | 44701                   | TT                              | CC                | 1946364881               |
| SNP_P3_62016_44722    | NC_021164.1    | Ca_kabuli_chr05 | 44722                   | AA                              | CC                | 1946365075               |
| SNP_P3_62017_44883    | NC_021164.1    | Ca_kabuli_chr05 | 44883                   | GG                              | AA                | 1946365270               |
| SNP_P3_62018_44889    | NC_021164.1    | Ca_kabuli_chr05 | 44889                   | TT                              | CC                | 1946365459               |
| SNP_P3_62019_50507    | NC_021164.1    | Ca_kabuli_chr05 | 50507                   | TT                              | AA                | 1946365657               |
| SNP_P3_62020_56530    | NC_021164.1    | Ca_kabuli_chr05 | 56530                   | TT                              | GG                | 1946365850               |
| SNP_P3_62021_56556    | NC_021164.1    | Ca_kabuli_chr05 | 56556                   | CC                              | TT                | 1946366042               |
| SNP_P3_62022_56588    | NC_021164.1    | Ca_kabuli_chr05 | 56588                   | TT                              | CC                | 1946366235               |
| SNP_P3_62023_56595    | NC_021164.1    | Ca_kabuli_chr05 | 56595                   | TT                              | CC                | 1946366431               |
| SNP_P3_62024_57602    | NC_021164.1    | Ca_kabuli_chr05 | 57602                   | CC                              | TT                | 1946366629               |
| SNP_P3_62025_57659    | NC_021164.1    | Ca_kabuli_chr05 | 57659                   | CC                              | TT                | 1946366826               |
| SNP_P3_62026_57894    | NC_021164.1    | Ca_kabuli_chr05 | 57894                   | AA                              | CC                | 1946367019               |
| SNP_P3_62027_57895    | NC_021164.1    | Ca_kabuli_chr05 | 57895                   | CC                              | TT                | 1946367213               |
| SNP_P3_62028_57908    | NC_021164.1    | Ca_kabuli_chr05 | 57908                   | TT                              | AA                | 1946367405               |
| SNP_P3_62029_57910    | NC_021164.1    | Ca_kabuli_chr05 | 57910                   | GG                              | AA                | 1946367605               |
| SNP_P3_62031_73420    | NC_021164.1    | Ca_kabuli_chr05 | 73420                   | CC                              | GG                | 1946367799               |
| SNP_P3_62032_73451    | NC_021164.1    | Ca_kabuli_chr05 | 73451                   | TT                              | GG                | 1946367959               |
| SNP_P3_62033_75605    | NC_021164.1    | Ca_kabuli_chr05 | 75605                   | GG                              | AA                | 1946368157               |
| SNP_P3_62034_89119    | NC_021164.1    | Ca_kabuli_chr05 | 89119                   | CC                              | TT                | 1946368352               |
| SNP_P3_62035_93259    | NC_021164.1    | Ca_kabuli_chr05 | 93259                   | GG                              | AA                | 1946368542               |
| SNP_P3_62037_96625    | NC_021164.1    | Ca_kabuli_chr05 | 96625                   | AA                              | TT                | 1946368735               |
| SNP_P3_62038_96626    | NC_021164.1    | Ca_kabuli_chr05 | 96626                   | AA                              | GG                | 1946368928               |
| SNP_P3_62040_101170   | NC_021164.1    | Ca_kabuli_chr05 | 101170                  | AA                              | GG                | 1946369121               |
| SNP_P3_62041_114480   | NC_021164.1    | Ca_kabuli_chr05 | 114480                  | GG                              | CC                | 1946369312               |
| SNP_P3_62043_124869   | NC_021164.1    | Ca_kabuli_chr05 | 124869                  | TT                              | GG                | 1946369507               |
| SNP_P3_62044_131269   | NC_021164.1    | Ca_kabuli_chr05 | 131269                  | GG                              | AA                | 1946369706               |
| SNP_P3_62045_131289   | NC_021164.1    | Ca_kabuli_chr05 | 131289                  | GG                              | TT                | 1946369882               |
| SNP_P3_62046_131707   | NC_021164.1    | Ca_kabuli_chr05 | 131707                  | TT                              | CC                | 1946370071               |
| SNP_P3_62047_131746   | NC_021164.1    | Ca_kabuli_chr05 | 131746                  | CC                              | TT                | 1946370269               |
| SNP_P3_62048_131966   | NC_021164.1    | Ca_kabuli_chr05 | 131966                  | TT                              | CC                | 1946370453               |
| SNP_P3_62050_132781   | NC_021164.1    | Ca_kabuli_chr05 | 132781                  | AA                              | GG                | 1946370653               |
| SNP_P3_62051_132825   | NC_021164.1    | Ca_kabuli_chr05 | 132825                  | TT                              | CC                | 1946370854               |
| SNP_P3_62053_133179   | NC_021164.1    | Ca_kabuli_chr05 | 133179                  | TT                              | AA                | 1946371050               |
| SNP_P3_62055_133441   | NC_021164.1    | Ca_kabuli_chr05 | 133441                  | TT                              | CC                | 1946371244               |
| SNP_P3_62060_134678   | NC_021164.1    | Ca_kabuli_chr05 | 134678                  | TT                              | CC                | 1946371441               |
| SNP_P3_62062_134856   | NC_021164.1    | Ca_kabuli_chr05 | 134856                  | TT                              | CC                | 1946371622               |
| SNP_P3_62063_134858   | NC_021164.1    | Ca_kabuli_chr05 | 134858                  | CC                              | AA                | 1946371813               |
| SNP_P3_62064_134871   | NC_021164.1    | Ca_kabuli_chr05 | 134871                  | CC                              | TT                | 1946372011               |
| SNP_P3_62065_134888   | NC_021164.1    | Ca_kabuli_chr05 | 134888                  | CC                              | TT                | 1946372205               |
| SNP_P3_62066_134892   | NC_021164.1    | Ca_kabuli_chr05 | 134892                  | AA                              | GG                | 1946372398               |

| SNPs IDs            | Chromosome IDs | Chromosomes     | Physical positions (bp) | CDC Frontier (Reference genome) | (Pusa 256 & HPNB) | NCBI SNPdb Accession IDs |
|---------------------|----------------|-----------------|-------------------------|---------------------------------|-------------------|--------------------------|
| SNP_P3_62067_135033 | NC_021164.1    | Ca_kabuli_chr05 | 135033                  | AA                              | GG                | 1946372595               |
| SNP_P3_62068_135685 | NC_021164.1    | Ca_kabuli_chr05 | 135685                  | GG                              | AA                | 1946372793               |
| SNP_P3_62069_135931 | NC_021164.1    | Ca_kabuli_chr05 | 135931                  | CC                              | TT                | 1946372991               |
| SNP_P3_62070_136021 | NC_021164.1    | Ca_kabuli_chr05 | 136021                  | TT                              | AA                | 1946373183               |
| SNP_P3_62072_136542 | NC_021164.1    | Ca_kabuli_chr05 | 136542                  | CC                              | GG                | 1946373377               |
| SNP_P3_62073_136573 | NC_021164.1    | Ca_kabuli_chr05 | 136573                  | TT                              | AA                | 1946373571               |
| SNP_P3_62074_137861 | NC_021164.1    | Ca_kabuli_chr05 | 137861                  | AA                              | GG                | 1946373755               |
| SNP_P3_62075_137872 | NC_021164.1    | Ca_kabuli_chr05 | 137872                  | GG                              | AA                | 1946373947               |
| SNP_P3_62076_138182 | NC_021164.1    | Ca_kabuli_chr05 | 138182                  | TT                              | CC                | 1946374145               |
| SNP_P3_62077_146543 | NC_021164.1    | Ca_kabuli_chr05 | 146543                  | AA                              | GG                | 1946374339               |
| SNP_P3_62078_146787 | NC_021164.1    | Ca_kabuli_chr05 | 146787                  | GG                              | CC                | 1946374531               |
| SNP_P3_62079_148204 | NC_021164.1    | Ca_kabuli_chr05 | 148204                  | CC                              | TT                | 1946374723               |
| SNP_P3_62080_148222 | NC_021164.1    | Ca_kabuli_chr05 | 148222                  | AA                              | TT                | 1946374920               |
| SNP_P3_62081_148379 | NC_021164.1    | Ca_kabuli_chr05 | 148379                  | CC                              | TT                | 1946375117               |
| SNP_P3_62082_148420 | NC_021164.1    | Ca_kabuli_chr05 | 148420                  | AA                              | GG                | 1946375314               |
| SNP_P3_62083_149008 | NC_021164.1    | Ca_kabuli_chr05 | 149008                  | AA                              | TT                | 1946375509               |
| SNP_P3_62084_149024 | NC_021164.1    | Ca_kabuli_chr05 | 149024                  | GG                              | TT                | 1946375700               |
| SNP_P3_62086_150577 | NC_021164.1    | Ca_kabuli_chr05 | 150577                  | GG                              | AA                | 1946375896               |
| SNP_P3_62088_151489 | NC_021164.1    | Ca_kabuli_chr05 | 151489                  | CC                              | GG                | 1946376094               |
| SNP_P3_62089_152084 | NC_021164.1    | Ca_kabuli_chr05 | 152084                  | CC                              | TT                | 1946376295               |
| SNP_P3_62090_152416 | NC_021164.1    | Ca_kabuli_chr05 | 152416                  | AA                              | TT                | 1946376488               |
| SNP_P3_62091_152807 | NC_021164.1    | Ca_kabuli_chr05 | 152807                  | CC                              | GG                | 1946376674               |
| SNP_P3_62092_152834 | NC_021164.1    | Ca_kabuli_chr05 | 152834                  | TT                              | AA                | 1946376873               |
| SNP_P3_62094_158044 | NC_021164.1    | Ca_kabuli_chr05 | 158044                  | AA                              | TT                | 1946377014               |
| SNP_P3_62095_158514 | NC_021164.1    | Ca_kabuli_chr05 | 158514                  | CC                              | AA                | 1946377210               |
| SNP_P3_62096_158539 | NC_021164.1    | Ca_kabuli_chr05 | 158539                  | AA                              | TT                | 1946377407               |
| SNP_P3_62098_158835 | NC_021164.1    | Ca_kabuli_chr05 | 158835                  | TT                              | AA                | 1946377605               |
| SNP_P3_62099_161950 | NC_021164.1    | Ca_kabuli_chr05 | 161950                  | AA                              | CC                | 1946377805               |
| SNP_P3_62100_161965 | NC_021164.1    | Ca_kabuli_chr05 | 161965                  | GG                              | AA                | 1946378000               |
| SNP_P3_62101_162198 | NC_021164.1    | Ca_kabuli_chr05 | 162198                  | GG                              | AA                | 1946378197               |
| SNP_P3_62102_162458 | NC_021164.1    | Ca_kabuli_chr05 | 162458                  | TT                              | AA                | 1946378409               |
| SNP_P3_62103_162477 | NC_021164.1    | Ca_kabuli_chr05 | 162477                  | AA                              | GG                | 1946378606               |
| SNP_P3_62104_162532 | NC_021164.1    | Ca_kabuli_chr05 | 162532                  | AA                              | GG                | 1946378800               |
| SNP_P3_62106_162649 | NC_021164.1    | Ca_kabuli_chr05 | 162649                  | AA                              | GG                | 1946378978               |
| SNP_P3_62107_162955 | NC_021164.1    | Ca_kabuli_chr05 | 162955                  | GG                              | AA                | 1946379116               |
| SNP_P3_62108_162976 | NC_021164.1    | Ca_kabuli_chr05 | 162976                  | AA                              | GG                | 1946379292               |
| SNP_P3_62109_163010 | NC_021164.1    | Ca_kabuli_chr05 | 163010                  | GG                              | AA                | 1946379478               |
| SNP_P3_62110_163016 | NC_021164.1    | Ca_kabuli_chr05 | 163016                  | AA                              | GG                | 1946379598               |
| SNP_P3_62111_164185 | NC_021164.1    | Ca_kabuli_chr05 | 164185                  | TT                              | GG                | 1946379789               |
| SNP_P3_62112_164571 | NC_021164.1    | Ca_kabuli_chr05 | 164571                  | TT                              | AA                | 1946379985               |
| SNP_P3_62115_168218 | NC_021164.1    | Ca_kabuli_chr05 | 168218                  | CC                              | TT                | 1946380170               |
| SNP_P3_62116_168522 | NC_021164.1    | Ca_kabuli_chr05 | 168522                  | AA                              | TT                | 1946380363               |

| SNPs IDs            | Chromosome IDs | Chromosomes     | Physical positions (bp) | CDC Frontier (Reference genome) | (Pusa 256 & HPNB) | NCBI SNPdb Accession IDs |
|---------------------|----------------|-----------------|-------------------------|---------------------------------|-------------------|--------------------------|
| SNP_P3_62117_168529 | NC_021164.1    | Ca_kabuli_chr05 | 168529                  | GG                              | AA                | 1946380558               |
| SNP_P3_62118_168553 | NC_021164.1    | Ca_kabuli_chr05 | 168553                  | AA                              | TT                | 1946380731               |
| SNP_P3_62119_168573 | NC_021164.1    | Ca_kabuli_chr05 | 168573                  | AA                              | TT                | 1946380910               |
| SNP_P3_62120_168766 | NC_021164.1    | Ca_kabuli_chr05 | 168766                  | CC                              | GG                | 1946381088               |
| SNP_P3_62122_171067 | NC_021164.1    | Ca_kabuli_chr05 | 171067                  | TT                              | AA                | 1946381287               |
| SNP_P3_62124_171103 | NC_021164.1    | Ca_kabuli_chr05 | 171103                  | TT                              | AA                | 1946381487               |
| SNP_P3_62125_175240 | NC_021164.1    | Ca_kabuli_chr05 | 175240                  | CC                              | TT                | 1946381677               |
| SNP_P3_62126_175292 | NC_021164.1    | Ca_kabuli_chr05 | 175292                  | GG                              | AA                | 1946381870               |
| SNP_P3_62128_178588 | NC_021164.1    | Ca_kabuli_chr05 | 178588                  | GG                              | AA                | 1946381971               |
| SNP_P3_62131_178656 | NC_021164.1    | Ca_kabuli_chr05 | 178656                  | GG                              | AA                | 1946382107               |
| SNP_P3_62134_180182 | NC_021164.1    | Ca_kabuli_chr05 | 180182                  | AA                              | TT                | 1946382299               |
| SNP_P3_62135_180465 | NC_021164.1    | Ca_kabuli_chr05 | 180465                  | TT                              | GG                | 1946382498               |
| SNP_P3_62136_180466 | NC_021164.1    | Ca_kabuli_chr05 | 180466                  | TT                              | CC                | 1946382693               |
| SNP_P3_62137_180525 | NC_021164.1    | Ca_kabuli_chr05 | 180525                  | AA                              | GG                | 1946382854               |
| SNP_P3_62139_180707 | NC_021164.1    | Ca_kabuli_chr05 | 180707                  | TT                              | AA                | 1946383033               |
| SNP_P3_62140_180748 | NC_021164.1    | Ca_kabuli_chr05 | 180748                  | AA                              | TT                | 1946383203               |
| SNP_P3_62141_180986 | NC_021164.1    | Ca_kabuli_chr05 | 180986                  | TT                              | CC                | 1946383372               |
| SNP_P3_62142_182759 | NC_021164.1    | Ca_kabuli_chr05 | 182759                  | AA                              | TT                | 1946383551               |
| SNP_P3_62143_183119 | NC_021164.1    | Ca_kabuli_chr05 | 183119                  | AA                              | TT                | 1946383735               |
| SNP_P3_62144_184274 | NC_021164.1    | Ca_kabuli_chr05 | 184274                  | CC                              | TT                | 1946383928               |
| SNP_P3_62145_185532 | NC_021164.1    | Ca_kabuli_chr05 | 185532                  | CC                              | AA                | 1946384091               |
| SNP_P3_62146_186200 | NC_021164.1    | Ca_kabuli_chr05 | 186200                  | CC                              | GG                | 1946384288               |
| SNP_P3_62147_186251 | NC_021164.1    | Ca_kabuli_chr05 | 186251                  | AA                              | TT                | 1946384477               |
| SNP_P3_62150_191651 | NC_021164.1    | Ca_kabuli_chr05 | 191651                  | TT                              | GG                | 1946384662               |
| SNP_P3_62151_191664 | NC_021164.1    | Ca_kabuli_chr05 | 191664                  | CC                              | TT                | 1946384853               |
| SNP_P3_62154_192510 | NC_021164.1    | Ca_kabuli_chr05 | 192510                  | CC                              | TT                | 1946385043               |
| SNP_P3_62155_192798 | NC_021164.1    | Ca_kabuli_chr05 | 192798                  | TT                              | AA                | 1946385225               |
| SNP_P3_62157_193545 | NC_021164.1    | Ca_kabuli_chr05 | 193545                  | AA                              | GG                | 1946385412               |
| SNP_P3_62158_194196 | NC_021164.1    | Ca_kabuli_chr05 | 194196                  | CC                              | TT                | 1946385576               |
| SNP_P3_62159_194448 | NC_021164.1    | Ca_kabuli_chr05 | 194448                  | GG                              | AA                | 1946385775               |
| SNP_P3_62160_194803 | NC_021164.1    | Ca_kabuli_chr05 | 194803                  | CC                              | GG                | 1946385975               |
| SNP_P3_62161_194822 | NC_021164.1    | Ca_kabuli_chr05 | 194822                  | AA                              | GG                | 1946386168               |
| SNP_P3_62162_194843 | NC_021164.1    | Ca_kabuli_chr05 | 194843                  | AA                              | CC                | 1946386352               |
| SNP_P3_62163_194995 | NC_021164.1    | Ca_kabuli_chr05 | 194995                  | AA                              | GG                | 1946386394               |
| SNP_P3_62164_195737 | NC_021164.1    | Ca_kabuli_chr05 | 195737                  | GG                              | CC                | 1946386578               |
| SNP_P3_62166_196924 | NC_021164.1    | Ca_kabuli_chr05 | 196924                  | CC                              | TT                | 1946386618               |
| SNP_P3_62168_197700 | NC_021164.1    | Ca_kabuli_chr05 | 197700                  | AA                              | TT                | 1946386790               |
| SNP_P3_62169_197930 | NC_021164.1    | Ca_kabuli_chr05 | 197930                  | AA                              | GG                | 1946386966               |
| SNP_P3_62170_197940 | NC_021164.1    | Ca_kabuli_chr05 | 197940                  | CC                              | TT                | 1946387152               |
| SNP_P3_62171_198205 | NC_021164.1    | Ca_kabuli_chr05 | 198205                  | AA                              | GG                | 1946387316               |
| SNP_P3_62173_200962 | NC_021164.1    | Ca_kabuli_chr05 | 200962                  | TT                              | CC                | 1946387487               |
| SNP_P3_62174_201053 | NC_021164.1    | Ca_kabuli_chr05 | 201053                  | AA                              | TT                | 1946387674               |



| SNPs IDs            | Chromosome IDs | Chromosomes     | Physical positions (bp) | CDC Frontier (Reference genome) | (Pusa 256 & HPNB) | NCBI SNPdb Accession IDs |
|---------------------|----------------|-----------------|-------------------------|---------------------------------|-------------------|--------------------------|
| SNP_P3_62175_201443 | NC_021164.1    | Ca_kabuli_chr05 | 201443                  | TT                              | CC                | 1946387863               |
| SNP_P3_62176_201673 | NC_021164.1    | Ca_kabuli_chr05 | 201673                  | GG                              | TT                | 1946388051               |
| SNP_P3_62177_201679 | NC_021164.1    | Ca_kabuli_chr05 | 201679                  | GG                              | CC                | 1946388235               |
| SNP_P3_62178_201999 | NC_021164.1    | Ca_kabuli_chr05 | 201999                  | TT                              | CC                | 1946388430               |
| SNP_P3_62179_202031 | NC_021164.1    | Ca_kabuli_chr05 | 202031                  | AA                              | GG                | 1946388624               |
| SNP_P3_62180_202119 | NC_021164.1    | Ca_kabuli_chr05 | 202119                  | TT                              | GG                | 1946388818               |
| SNP_P3_62182_202577 | NC_021164.1    | Ca_kabuli_chr05 | 202577                  | TT                              | CC                | 1946389007               |
| SNP_P3_62183_202583 | NC_021164.1    | Ca_kabuli_chr05 | 202583                  | TT                              | CC                | 1946389204               |
| SNP_P3_62184_202602 | NC_021164.1    | Ca_kabuli_chr05 | 202602                  | GG                              | TT                | 1946389398               |
| SNP_P3_62185_203100 | NC_021164.1    | Ca_kabuli_chr05 | 203100                  | AA                              | CC                | 1946389578               |
| SNP_P3_62186_203326 | NC_021164.1    | Ca_kabuli_chr05 | 203326                  | AA                              | CC                | 1946389767               |
| SNP_P3_62187_203347 | NC_021164.1    | Ca_kabuli_chr05 | 203347                  | GG                              | AA                | 1946389942               |
| SNP_P3_62188_203464 | NC_021164.1    | Ca_kabuli_chr05 | 203464                  | AA                              | GG                | 1946390115               |
| SNP_P3_62189_203499 | NC_021164.1    | Ca_kabuli_chr05 | 203499                  | CC                              | AA                | 1946390284               |
| SNP_P3_62190_203510 | NC_021164.1    | Ca_kabuli_chr05 | 203510                  | TT                              | AA                | 1946390424               |
| SNP_P3_62191_203651 | NC_021164.1    | Ca_kabuli_chr05 | 203651                  | CC                              | AA                | 1946390608               |
| SNP_P3_62192_203787 | NC_021164.1    | Ca_kabuli_chr05 | 203787                  | TT                              | CC                | 1946390784               |
| SNP_P3_62194_206955 | NC_021164.1    | Ca_kabuli_chr05 | 206955                  | CC                              | GG                | 1946390968               |
| SNP_P3_62195_208156 | NC_021164.1    | Ca_kabuli_chr05 | 208156                  | GG                              | CC                | 1946391155               |
| SNP_P3_62197_208591 | NC_021164.1    | Ca_kabuli_chr05 | 208591                  | TT                              | GG                | 1946391349               |
| SNP_P3_62198_208632 | NC_021164.1    | Ca_kabuli_chr05 | 208632                  | TT                              | AA                | 1946391540               |
| SNP_P3_62199_209388 | NC_021164.1    | Ca_kabuli_chr05 | 209388                  | TT                              | CC                | 1946391721               |
| SNP_P3_62204_210125 | NC_021164.1    | Ca_kabuli_chr05 | 210125                  | AA                              | TT                | 1946391908               |
| SNP_P3_62206_210232 | NC_021164.1    | Ca_kabuli_chr05 | 210232                  | CC                              | GG                | 1946392106               |
| SNP_P3_62208_212339 | NC_021164.1    | Ca_kabuli_chr05 | 212339                  | AA                              | TT                | 1946392293               |
| SNP_P3_62209_212697 | NC_021164.1    | Ca_kabuli_chr05 | 212697                  | TT                              | AA                | 1946392475               |
| SNP_P3_62212_213312 | NC_021164.1    | Ca_kabuli_chr05 | 213312                  | GG                              | AA                | 1946392664               |
| SNP_P3_62213_213317 | NC_021164.1    | Ca_kabuli_chr05 | 213317                  | GG                              | AA                | 1946392858               |
| SNP_P3_62214_213538 | NC_021164.1    | Ca_kabuli_chr05 | 213538                  | CC                              | TT                | 1946393045               |
| SNP_P3_62215_214242 | NC_021164.1    | Ca_kabuli_chr05 | 214242                  | TT                              | GG                | 1946393217               |
| SNP_P3_62216_214250 | NC_021164.1    | Ca_kabuli_chr05 | 214250                  | AA                              | GG                | 1946393388               |
| SNP_P3_62217_214557 | NC_021164.1    | Ca_kabuli_chr05 | 214557                  | TT                              | CC                | 1946393563               |
| SNP_P3_62218_217554 | NC_021164.1    | Ca_kabuli_chr05 | 217554                  | TT                              | CC                | 1946393737               |
| SNP_P3_62219_217805 | NC_021164.1    | Ca_kabuli_chr05 | 217805                  | CC                              | TT                | 1946393915               |
| SNP_P3_62220_217859 | NC_021164.1    | Ca_kabuli_chr05 | 217859                  | CC                              | GG                | 1946394100               |
| SNP_P3_62221_217876 | NC_021164.1    | Ca_kabuli_chr05 | 217876                  | AA                              | TT                | 1946394292               |
| SNP_P3_62224_220847 | NC_021164.1    | Ca_kabuli_chr05 | 220847                  | GG                              | CC                | 1946394484               |
| SNP_P3_62225_221064 | NC_021164.1    | Ca_kabuli_chr05 | 221064                  | CC                              | GG                | 1946394674               |
| SNP_P3_62227_222260 | NC_021164.1    | Ca_kabuli_chr05 | 222260                  | TT                              | AA                | 1946394823               |
| SNP_P3_62228_222391 | NC_021164.1    | Ca_kabuli_chr05 | 222391                  | AA                              | GG                | 1946395020               |
| SNP_P3_62230_223351 | NC_021164.1    | Ca_kabuli_chr05 | 223351                  | AA                              | GG                | 1946395211               |
| SNP_P3_62231_223384 | NC_021164.1    | Ca_kabuli_chr05 | 223384                  | GG                              | CC                | 1946395410               |

| SNPs IDs            | Chromosome IDs | Chromosomes     | Physical positions (bp) | CDC Frontier (Reference genome) | (Pusa 256 & HPNB) | NCBI SNPdb Accession IDs |
|---------------------|----------------|-----------------|-------------------------|---------------------------------|-------------------|--------------------------|
| SNP_P3_62233_223978 | NC_021164.1    | Ca_kabuli_chr05 | 223978                  | AA                              | GG                | 1946395579               |
| SNP_P3_62234_224253 | NC_021164.1    | Ca_kabuli_chr05 | 224253                  | GG                              | AA                | 1946395777               |
| SNP_P3_62237_224966 | NC_021164.1    | Ca_kabuli_chr05 | 224966                  | TT                              | GG                | 1946395976               |
| SNP_P3_62238_225229 | NC_021164.1    | Ca_kabuli_chr05 | 225229                  | AA                              | CC                | 1946396179               |
| SNP_P3_62239_225574 | NC_021164.1    | Ca_kabuli_chr05 | 225574                  | TT                              | CC                | 1946396338               |
| SNP_P3_62240_225823 | NC_021164.1    | Ca_kabuli_chr05 | 225823                  | CC                              | AA                | 1946396535               |
| SNP_P3_62242_229646 | NC_021164.1    | Ca_kabuli_chr05 | 229646                  | TT                              | AA                | 1946396733               |
| SNP_P3_62243_229652 | NC_021164.1    | Ca_kabuli_chr05 | 229652                  | TT                              | AA                | 1946396936               |
| SNP_P3_62244_232958 | NC_021164.1    | Ca_kabuli_chr05 | 232958                  | GG                              | AA                | 1946397128               |
| SNP_P3_62248_237288 | NC_021164.1    | Ca_kabuli_chr05 | 237288                  | TT                              | CC                | 1946397253               |
| SNP_P3_62250_237536 | NC_021164.1    | Ca_kabuli_chr05 | 237536                  | CC                              | TT                | 1946397454               |
| SNP_P3_62251_237538 | NC_021164.1    | Ca_kabuli_chr05 | 237538                  | GG                              | AA                | 1946397652               |
| SNP_P3_62252_237713 | NC_021164.1    | Ca_kabuli_chr05 | 237713                  | TT                              | AA                | 1946397856               |
| SNP_P3_62254_238401 | NC_021164.1    | Ca_kabuli_chr05 | 238401                  | CC                              | TT                | 1946398057               |
| SNP_P3_62255_238765 | NC_021164.1    | Ca_kabuli_chr05 | 238765                  | GG                              | AA                | 1946398253               |
| SNP_P3_62256_239398 | NC_021164.1    | Ca_kabuli_chr05 | 239398                  | TT                              | GG                | 1946398446               |
| SNP_P3_62257_239400 | NC_021164.1    | Ca_kabuli_chr05 | 239400                  | TT                              | AA                | 1946398619               |
| SNP_P3_62258_239411 | NC_021164.1    | Ca_kabuli_chr05 | 239411                  | TT                              | CC                | 1946398813               |
| SNP_P3_62259_239431 | NC_021164.1    | Ca_kabuli_chr05 | 239431                  | TT                              | CC                | 1946399008               |
| SNP_P3_62261_239555 | NC_021164.1    | Ca_kabuli_chr05 | 239555                  | TT                              | CC                | 1946399208               |
| SNP_P3_62263_239784 | NC_021164.1    | Ca_kabuli_chr05 | 239784                  | GG                              | AA                | 1946399352               |
| SNP_P3_62265_240335 | NC_021164.1    | Ca_kabuli_chr05 | 240335                  | AA                              | TT                | 1946399542               |
| SNP_P3_62266_240337 | NC_021164.1    | Ca_kabuli_chr05 | 240337                  | CC                              | TT                | 1946399737               |
| SNP_P3_62267_240344 | NC_021164.1    | Ca_kabuli_chr05 | 240344                  | TT                              | CC                | 1946399940               |
| SNP_P3_62268_240505 | NC_021164.1    | Ca_kabuli_chr05 | 240505                  | AA                              | CC                | 1946400131               |
| SNP_P3_62269_240510 | NC_021164.1    | Ca_kabuli_chr05 | 240510                  | AA                              | CC                | 1946400318               |
| SNP_P3_62270_240562 | NC_021164.1    | Ca_kabuli_chr05 | 240562                  | CC                              | GG                | 1946400511               |
| SNP_P3_62271_240580 | NC_021164.1    | Ca_kabuli_chr05 | 240580                  | CC                              | TT                | 1946400704               |
| SNP_P3_62272_240593 | NC_021164.1    | Ca_kabuli_chr05 | 240593                  | GG                              | AA                | 1946400893               |
| SNP_P3_62273_240596 | NC_021164.1    | Ca_kabuli_chr05 | 240596                  | GG                              | AA                | 1946401085               |
| SNP_P3_62275_240988 | NC_021164.1    | Ca_kabuli_chr05 | 240988                  | GG                              | AA                | 1946401277               |
| SNP_P3_62277_241109 | NC_021164.1    | Ca_kabuli_chr05 | 241109                  | CC                              | GG                | 1946401470               |
| SNP_P3_62278_241123 | NC_021164.1    | Ca_kabuli_chr05 | 241123                  | AA                              | GG                | 1946401653               |
| SNP_P3_62279_241154 | NC_021164.1    | Ca_kabuli_chr05 | 241154                  | CC                              | AA                | 1946401833               |
| SNP_P3_62280_241159 | NC_021164.1    | Ca_kabuli_chr05 | 241159                  | TT                              | AA                | 1946402025               |
| SNP_P3_62281_241322 | NC_021164.1    | Ca_kabuli_chr05 | 241322                  | TT                              | CC                | 1946402214               |
| SNP_P3_62282_241343 | NC_021164.1    | Ca_kabuli_chr05 | 241343                  | AA                              | CC                | 1946402396               |
| SNP_P3_62283_241375 | NC_021164.1    | Ca_kabuli_chr05 | 241375                  | TT                              | CC                | 1946402571               |
| SNP_P3_62285_241405 | NC_021164.1    | Ca_kabuli_chr05 | 241405                  | AA                              | GG                | 1946402761               |
| SNP_P3_62286_243593 | NC_021164.1    | Ca_kabuli_chr05 | 243593                  | AA                              | GG                | 1946402964               |
| SNP_P3_62287_243786 | NC_021164.1    | Ca_kabuli_chr05 | 243786                  | GG                              | TT                | 1946403132               |
| SNP_P3_62288_243820 | NC_021164.1    | Ca_kabuli_chr05 | 243820                  | AA                              | GG                | 1946403301               |

| SNPs IDs            | Chromosome IDs | Chromosomes     | Physical positions (bp) | CDC Frontier (Reference genome) | (Pusa 256 & HPNB) | NCBI SNPdb Accession IDs |
|---------------------|----------------|-----------------|-------------------------|---------------------------------|-------------------|--------------------------|
| SNP_P3_62289_243929 | NC_021164.1    | Ca_kabuli_chr05 | 243929                  | CC                              | TT                | 1946403501               |
| SNP_P3_62290_243945 | NC_021164.1    | Ca_kabuli_chr05 | 243945                  | TT                              | CC                | 1946403701               |
| SNP_P3_62291_244169 | NC_021164.1    | Ca_kabuli_chr05 | 244169                  | CC                              | TT                | 1946403905               |
| SNP_P3_62292_244215 | NC_021164.1    | Ca_kabuli_chr05 | 244215                  | CC                              | AA                | 1946404103               |
| SNP_P3_62296_247485 | NC_021164.1    | Ca_kabuli_chr05 | 247485                  | TT                              | GG                | 1946404299               |
| SNP_P3_62297_260915 | NC_021164.1    | Ca_kabuli_chr05 | 260915                  | AA                              | CC                | 1946404462               |
| SNP_P3_62299_260966 | NC_021164.1    | Ca_kabuli_chr05 | 260966                  | AA                              | GG                | 1946404583               |
| SNP_P3_62300_261025 | NC_021164.1    | Ca_kabuli_chr05 | 261025                  | TT                              | CC                | 1946404718               |
| SNP_P3_62301_261261 | NC_021164.1    | Ca_kabuli_chr05 | 261261                  | GG                              | TT                | 1946404828               |
| SNP_P3_62304_262996 | NC_021164.1    | Ca_kabuli_chr05 | 262996                  | GG                              | AA                | 1946404968               |
| SNP_P3_62305_263554 | NC_021164.1    | Ca_kabuli_chr05 | 263554                  | GG                              | TT                | 1946405079               |
| SNP_P3_62307_265135 | NC_021164.1    | Ca_kabuli_chr05 | 265135                  | AA                              | GG                | 1946405199               |
| SNP_P3_62308_266004 | NC_021164.1    | Ca_kabuli_chr05 | 266004                  | TT                              | AA                | 1946405355               |
| SNP_P3_62309_267228 | NC_021164.1    | Ca_kabuli_chr05 | 267228                  | AA                              | GG                | 1946405517               |
| SNP_P3_62310_267247 | NC_021164.1    | Ca_kabuli_chr05 | 267247                  | CC                              | TT                | 1946405667               |
| SNP_P3_62311_272972 | NC_021164.1    | Ca_kabuli_chr05 | 272972                  | AA                              | TT                | 1946405823               |
| SNP_P3_62312_275427 | NC_021164.1    | Ca_kabuli_chr05 | 275427                  | GG                              | AA                | 1946405995               |
| SNP_P3_62313_275428 | NC_021164.1    | Ca_kabuli_chr05 | 275428                  | AA                              | GG                | 1946406176               |
| SNP_P3_62314_276413 | NC_021164.1    | Ca_kabuli_chr05 | 276413                  | AA                              | GG                | 1946406497               |
| SNP_P3_62315_278110 | NC_021164.1    | Ca_kabuli_chr05 | 278110                  | GG                              | AA                | 1946406668               |
| SNP_P3_62316_278940 | NC_021164.1    | Ca_kabuli_chr05 | 278940                  | GG                              | AA                | 1946406850               |
| SNP_P3_62317_279404 | NC_021164.1    | Ca_kabuli_chr05 | 279404                  | CC                              | TT                | 1946407031               |
| SNP_P3_62318_279848 | NC_021164.1    | Ca_kabuli_chr05 | 279848                  | TT                              | AA                | 1946407220               |
| SNP_P3_62319_280065 | NC_021164.1    | Ca_kabuli_chr05 | 280065                  | CC                              | TT                | 1946407379               |
| SNP_P3_62321_286473 | NC_021164.1    | Ca_kabuli_chr05 | 286473                  | TT                              | CC                | 1946407572               |
| SNP_P3_62322_286669 | NC_021164.1    | Ca_kabuli_chr05 | 286669                  | AA                              | GG                | 1946407763               |
| SNP_P3_62323_287524 | NC_021164.1    | Ca_kabuli_chr05 | 287524                  | TT                              | GG                | 1946407941               |
| SNP_P3_62324_287630 | NC_021164.1    | Ca_kabuli_chr05 | 287630                  | AA                              | CC                | 1946408120               |
| SNP_P3_62325_287671 | NC_021164.1    | Ca_kabuli_chr05 | 287671                  | AA                              | GG                | 1946408285               |
| SNP_P3_62326_288219 | NC_021164.1    | Ca_kabuli_chr05 | 288219                  | CC                              | AA                | 1946408468               |
| SNP_P3_62327_289683 | NC_021164.1    | Ca_kabuli_chr05 | 289683                  | AA                              | GG                | 1946408635               |
| SNP_P3_62328_289752 | NC_021164.1    | Ca_kabuli_chr05 | 289752                  | GG                              | AA                | 1946408798               |
| SNP_P3_62329_289758 | NC_021164.1    | Ca_kabuli_chr05 | 289758                  | AA                              | GG                | 1946408986               |
| SNP_P3_62330_289781 | NC_021164.1    | Ca_kabuli_chr05 | 289781                  | TT                              | AA                | 1946409165               |
| SNP_P3_62331_289794 | NC_021164.1    | Ca_kabuli_chr05 | 289794                  | GG                              | AA                | 1946409367               |
| SNP_P3_62333_290050 | NC_021164.1    | Ca_kabuli_chr05 | 290050                  | AA                              | TT                | 1946409560               |
| SNP_P3_62334_290051 | NC_021164.1    | Ca_kabuli_chr05 | 290051                  | TT                              | AA                | 1946409745               |
| SNP_P3_62335_290885 | NC_021164.1    | Ca_kabuli_chr05 | 290885                  | AA                              | TT                | 1946409929               |
| SNP_P3_62336_291039 | NC_021164.1    | Ca_kabuli_chr05 | 291039                  | AA                              | TT                | 1946410119               |
| SNP_P3_62337_291040 | NC_021164.1    | Ca_kabuli_chr05 | 291040                  | GG                              | CC                | 1946410318               |
| SNP_P3_62339_291116 | NC_021164.1    | Ca_kabuli_chr05 | 291116                  | TT                              | CC                | 1946410366               |
| SNP_P3_62340_291177 | NC_021164.1    | Ca_kabuli_chr05 | 291177                  | CC                              | TT                | 1946410465               |

| SNPs IDs            | Chromosome IDs | Chromosomes     | Physical positions (bp) | CDC Frontier (Reference genome) | (Pusa 256 & HPNB) | NCBI SNPdb Accession IDs |
|---------------------|----------------|-----------------|-------------------------|---------------------------------|-------------------|--------------------------|
| SNP_P3_62341_291228 | NC_021164.1    | Ca_kabuli_chr05 | 291228                  | GG                              | AA                | 1946410622               |
| SNP_P3_62342_291250 | NC_021164.1    | Ca_kabuli_chr05 | 291250                  | GG                              | AA                | 1946410819               |
| SNP_P3_62343_291296 | NC_021164.1    | Ca_kabuli_chr05 | 291296                  | GG                              | AA                | 1946411012               |
| SNP_P3_62344_291299 | NC_021164.1    | Ca_kabuli_chr05 | 291299                  | CC                              | GG                | 1946411207               |
| SNP_P3_62345_291301 | NC_021164.1    | Ca_kabuli_chr05 | 291301                  | AA                              | TT                | 1946411401               |
| SNP_P3_62346_291315 | NC_021164.1    | Ca_kabuli_chr05 | 291315                  | GG                              | AA                | 1946411592               |
| SNP_P3_62347_291347 | NC_021164.1    | Ca_kabuli_chr05 | 291347                  | AA                              | GG                | 1946411791               |
| SNP_P3_62349_291393 | NC_021164.1    | Ca_kabuli_chr05 | 291393                  | AA                              | CC                | 1946411993               |
| SNP_P3_62350_291439 | NC_021164.1    | Ca_kabuli_chr05 | 291439                  | GG                              | AA                | 1946412196               |
| SNP_P3_62351_291504 | NC_021164.1    | Ca_kabuli_chr05 | 291504                  | CC                              | AA                | 1946412400               |
| SNP_P3_62352_291546 | NC_021164.1    | Ca_kabuli_chr05 | 291546                  | AA                              | TT                | 1946412603               |
| SNP_P3_62355_291981 | NC_021164.1    | Ca_kabuli_chr05 | 291981                  | AA                              | CC                | 1946412806               |
| SNP_P3_62356_291986 | NC_021164.1    | Ca_kabuli_chr05 | 291986                  | GG                              | AA                | 1946413006               |
| SNP_P3_62357_292029 | NC_021164.1    | Ca_kabuli_chr05 | 292029                  | TT                              | AA                | 1946413211               |
| SNP_P3_62360_292255 | NC_021164.1    | Ca_kabuli_chr05 | 292255                  | CC                              | TT                | 1946413415               |
| SNP_P3_62361_292286 | NC_021164.1    | Ca_kabuli_chr05 | 292286                  | AA                              | GG                | 1946413608               |
| SNP_P3_62362_292296 | NC_021164.1    | Ca_kabuli_chr05 | 292296                  | TT                              | AA                | 1946413812               |
| SNP_P3_62363_292460 | NC_021164.1    | Ca_kabuli_chr05 | 292460                  | AA                              | CC                | 1946414013               |
| SNP_P3_62364_292517 | NC_021164.1    | Ca_kabuli_chr05 | 292517                  | CC                              | AA                | 1946414220               |
| SNP_P3_62365_292525 | NC_021164.1    | Ca_kabuli_chr05 | 292525                  | GG                              | TT                | 1946414417               |
| SNP_P3_62366_292652 | NC_021164.1    | Ca_kabuli_chr05 | 292652                  | CC                              | TT                | 1946414615               |
| SNP_P3_62367_292653 | NC_021164.1    | Ca_kabuli_chr05 | 292653                  | AA                              | CC                | 1946414816               |
| SNP_P3_62368_293793 | NC_021164.1    | Ca_kabuli_chr05 | 293793                  | GG                              | AA                | 1946415007               |
| SNP_P3_62369_296841 | NC_021164.1    | Ca_kabuli_chr05 | 296841                  | CC                              | TT                | 1946415185               |
| SNP_P3_62370_298190 | NC_021164.1    | Ca_kabuli_chr05 | 298190                  | CC                              | TT                | 1946415370               |
| SNP_P3_62371_298250 | NC_021164.1    | Ca_kabuli_chr05 | 298250                  | TT                              | CC                | 1946415545               |
| SNP_P3_62373_300976 | NC_021164.1    | Ca_kabuli_chr05 | 300976                  | GG                              | AA                | 1946415728               |
| SNP_P3_62374_301015 | NC_021164.1    | Ca_kabuli_chr05 | 301015                  | GG                              | CC                | 1946415917               |
| SNP_P3_62375_301620 | NC_021164.1    | Ca_kabuli_chr05 | 301620                  | CC                              | TT                | 1946416104               |
| SNP_P3_62376_301933 | NC_021164.1    | Ca_kabuli_chr05 | 301933                  | AA                              | GG                | 1946416297               |
| SNP_P3_62377_301992 | NC_021164.1    | Ca_kabuli_chr05 | 301992                  | AA                              | GG                | 1946416495               |
| SNP_P3_62378_302015 | NC_021164.1    | Ca_kabuli_chr05 | 302015                  | TT                              | CC                | 1946416687               |
| SNP_P3_62379_302099 | NC_021164.1    | Ca_kabuli_chr05 | 302099                  | AA                              | TT                | 1946416888               |
| SNP_P3_62380_304031 | NC_021164.1    | Ca_kabuli_chr05 | 304031                  | TT                              | CC                | 1946417093               |
| SNP_P3_62381_315356 | NC_021164.1    | Ca_kabuli_chr05 | 315356                  | AA                              | GG                | 1946417297               |
| SNP_P3_62383_316526 | NC_021164.1    | Ca_kabuli_chr05 | 316526                  | GG                              | TT                | 1946417498               |
| SNP_P3_62385_317821 | NC_021164.1    | Ca_kabuli_chr05 | 317821                  | GG                              | TT                | 1946417690               |
| SNP_P3_62386_319144 | NC_021164.1    | Ca_kabuli_chr05 | 319144                  | CC                              | AA                | 1946417891               |
| SNP_P3_62387_320088 | NC_021164.1    | Ca_kabuli_chr05 | 320088                  | CC                              | TT                | 1946418094               |
| SNP_P3_62388_323263 | NC_021164.1    | Ca_kabuli_chr05 | 323263                  | CC                              | TT                | 1946418291               |
| SNP_P3_62391_330104 | NC_021164.1    | Ca_kabuli_chr05 | 330104                  | CC                              | TT                | 1946418487               |
| SNP_P3_62392_335325 | NC_021164.1    | Ca_kabuli_chr05 | 335325                  | GG                              | AA                | 1946418683               |

| SNPs IDs            | Chromosome IDs | Chromosomes     | Physical positions (bp) | CDC Frontier (Reference genome) | (Pusa 256 & HPNB) | NCBI SNPdb Accession IDs |
|---------------------|----------------|-----------------|-------------------------|---------------------------------|-------------------|--------------------------|
| SNP_P3_62394_338595 | NC_021164.1    | Ca_kabuli_chr05 | 338595                  | CC                              | TT                | 1946418882               |
| SNP_P3_62395_347596 | NC_021164.1    | Ca_kabuli_chr05 | 347596                  | AA                              | CC                | 1946419082               |
| SNP_P3_62396_347634 | NC_021164.1    | Ca_kabuli_chr05 | 347634                  | AA                              | TT                | 1946419283               |
| SNP_P3_62397_347645 | NC_021164.1    | Ca_kabuli_chr05 | 347645                  | CC                              | TT                | 1946419486               |
| SNP_P3_62398_347656 | NC_021164.1    | Ca_kabuli_chr05 | 347656                  | GG                              | AA                | 1946419689               |
| SNP_P3_62399_347675 | NC_021164.1    | Ca_kabuli_chr05 | 347675                  | GG                              | AA                | 1946419886               |
| SNP_P3_62400_348034 | NC_021164.1    | Ca_kabuli_chr05 | 348034                  | GG                              | AA                | 1946420084               |
| SNP_P3_62401_357266 | NC_021164.1    | Ca_kabuli_chr05 | 357266                  | TT                              | CC                | 1946420292               |
| SNP_P3_62404_360165 | NC_021164.1    | Ca_kabuli_chr05 | 360165                  | TT                              | CC                | 1946420492               |
| SNP_P3_62406_362363 | NC_021164.1    | Ca_kabuli_chr05 | 362363                  | TT                              | CC                | 1946420695               |
| SNP_P3_62407_362389 | NC_021164.1    | Ca_kabuli_chr05 | 362389                  | AA                              | GG                | 1946420889               |
| SNP_P3_62408_362619 | NC_021164.1    | Ca_kabuli_chr05 | 362619                  | TT                              | AA                | 1946421085               |
| SNP_P3_62409_362831 | NC_021164.1    | Ca_kabuli_chr05 | 362831                  | TT                              | AA                | 1946421272               |
| SNP_P3_62410_362851 | NC_021164.1    | Ca_kabuli_chr05 | 362851                  | AA                              | CC                | 1946421471               |
| SNP_P3_62411_362971 | NC_021164.1    | Ca_kabuli_chr05 | 362971                  | AA                              | GG                | 1946421668               |
| SNP_P3_62412_362981 | NC_021164.1    | Ca_kabuli_chr05 | 362981                  | TT                              | CC                | 1946421869               |
| SNP_P3_62413_363104 | NC_021164.1    | Ca_kabuli_chr05 | 363104                  | AA                              | GG                | 1946422074               |
| SNP_P3_62414_368524 | NC_021164.1    | Ca_kabuli_chr05 | 368524                  | AA                              | TT                | 1946422275               |
| SNP_P3_62415_369925 | NC_021164.1    | Ca_kabuli_chr05 | 369925                  | GG                              | CC                | 1946422477               |
| SNP_P3_62416_372532 | NC_021164.1    | Ca_kabuli_chr05 | 372532                  | TT                              | CC                | 1946422672               |
| SNP_P3_62417_375127 | NC_021164.1    | Ca_kabuli_chr05 | 375127                  | TT                              | AA                | 1946422871               |
| SNP_P3_62418_378223 | NC_021164.1    | Ca_kabuli_chr05 | 378223                  | CC                              | TT                | 1946423057               |
| SNP_P3_62419_388423 | NC_021164.1    | Ca_kabuli_chr05 | 388423                  | CC                              | GG                | 1946423256               |
| SNP_P3_62420_396969 | NC_021164.1    | Ca_kabuli_chr05 | 396969                  | CC                              | TT                | 1946423461               |
| SNP_P3_62421_403799 | NC_021164.1    | Ca_kabuli_chr05 | 403799                  | GG                              | TT                | 1946423659               |
| SNP_P3_62422_405536 | NC_021164.1    | Ca_kabuli_chr05 | 405536                  | TT                              | CC                | 1946423858               |
| SNP_P3_62423_405618 | NC_021164.1    | Ca_kabuli_chr05 | 405618                  | AA                              | GG                | 1946424047               |
| SNP_P3_62424_407617 | NC_021164.1    | Ca_kabuli_chr05 | 407617                  | GG                              | TT                | 1946424232               |
| SNP_P3_62425_412472 | NC_021164.1    | Ca_kabuli_chr05 | 412472                  | GG                              | AA                | 1946424416               |
| SNP_P3_62426_412506 | NC_021164.1    | Ca_kabuli_chr05 | 412506                  | AA                              | TT                | 1946424600               |
| SNP_P3_62427_414258 | NC_021164.1    | Ca_kabuli_chr05 | 414258                  | GG                              | CC                | 1946424793               |
| SNP_P3_62428_414555 | NC_021164.1    | Ca_kabuli_chr05 | 414555                  | CC                              | TT                | 1946424972               |
| SNP_P3_62429_415437 | NC_021164.1    | Ca_kabuli_chr05 | 415437                  | TT                              | GG                | 1946425165               |
| SNP_P3_62430_415965 | NC_021164.1    | Ca_kabuli_chr05 | 415965                  | CC                              | TT                | 1946425362               |
| SNP_P3_62431_420218 | NC_021164.1    | Ca_kabuli_chr05 | 420218                  | CC                              | TT                | 1946425557               |
| SNP_P3_62432_420300 | NC_021164.1    | Ca_kabuli_chr05 | 420300                  | TT                              | CC                | 1946425743               |
| SNP_P3_62433_420397 | NC_021164.1    | Ca_kabuli_chr05 | 420397                  | TT                              | CC                | 1946425936               |
| SNP_P3_62434_422768 | NC_021164.1    | Ca_kabuli_chr05 | 422768                  | TT                              | CC                | 1946426130               |
| SNP_P3_62435_422802 | NC_021164.1    | Ca_kabuli_chr05 | 422802                  | TT                              | GG                | 1946426324               |
| SNP_P3_62437_426169 | NC_021164.1    | Ca_kabuli_chr05 | 426169                  | AA                              | GG                | 1946426515               |
| SNP_P3_62439_432078 | NC_021164.1    | Ca_kabuli_chr05 | 432078                  | GG                              | CC                | 1946426708               |
| SNP_P3_62441_435195 | NC_021164.1    | Ca_kabuli_chr05 | 435195                  | AA                              | GG                | 1946426905               |

| SNPs IDs            | Chromosome IDs | Chromosomes     | Physical positions (bp) | CDC Frontier (Reference genome) | (Pusa 256 & HPNB) | NCBI SNPdb Accession IDs |
|---------------------|----------------|-----------------|-------------------------|---------------------------------|-------------------|--------------------------|
| SNP_P3_62442_435762 | NC_021164.1    | Ca_kabuli_chr05 | 435762                  | AA                              | GG                | 1946427092               |
| SNP_P3_62443_437926 | NC_021164.1    | Ca_kabuli_chr05 | 437926                  | GG                              | AA                | 1946427285               |
| SNP_P3_62446_440251 | NC_021164.1    | Ca_kabuli_chr05 | 440251                  | CC                              | TT                | 1946427479               |
| SNP_P3_62447_440628 | NC_021164.1    | Ca_kabuli_chr05 | 440628                  | TT                              | CC                | 1946427660               |
| SNP_P3_62449_441289 | NC_021164.1    | Ca_kabuli_chr05 | 441289                  | TT                              | AA                | 1946427841               |
| SNP_P3_62450_441330 | NC_021164.1    | Ca_kabuli_chr05 | 441330                  | TT                              | CC                | 1946428032               |
| SNP_P3_62451_445248 | NC_021164.1    | Ca_kabuli_chr05 | 445248                  | CC                              | TT                | 1946428405               |
| SNP_P3_62453_446261 | NC_021164.1    | Ca_kabuli_chr05 | 446261                  | CC                              | AA                | 1946428406               |
| SNP_P3_62454_447617 | NC_021164.1    | Ca_kabuli_chr05 | 447617                  | TT                              | CC                | 1946428408               |
| SNP_P3_62455_455251 | NC_021164.1    | Ca_kabuli_chr05 | 455251                  | GG                              | AA                | 1946428409               |
| SNP_P3_62456_455624 | NC_021164.1    | Ca_kabuli_chr05 | 455624                  | TT                              | CC                | 1946428411               |
| SNP_P3_62458_457458 | NC_021164.1    | Ca_kabuli_chr05 | 457458                  | TT                              | CC                | 1946428412               |
| SNP_P3_62459_458116 | NC_021164.1    | Ca_kabuli_chr05 | 458116                  | GG                              | AA                | 1946428414               |
| SNP_P3_62460_458186 | NC_021164.1    | Ca_kabuli_chr05 | 458186                  | GG                              | TT                | 1946428415               |
| SNP_P3_62462_463843 | NC_021164.1    | Ca_kabuli_chr05 | 463843                  | TT                              | AA                | 1946428417               |
| SNP_P3_62464_470485 | NC_021164.1    | Ca_kabuli_chr05 | 470485                  | TT                              | GG                | 1946428418               |
| SNP_P3_62466_471157 | NC_021164.1    | Ca_kabuli_chr05 | 471157                  | AA                              | GG                | 1946428420               |
| SNP_P3_62467_475874 | NC_021164.1    | Ca_kabuli_chr05 | 475874                  | TT                              | CC                | 1946428421               |
| SNP_P3_62468_476215 | NC_021164.1    | Ca_kabuli_chr05 | 476215                  | CC                              | TT                | 1946428423               |
| SNP_P3_62470_479313 | NC_021164.1    | Ca_kabuli_chr05 | 479313                  | CC                              | TT                | 1946428424               |
| SNP_P3_62472_479501 | NC_021164.1    | Ca_kabuli_chr05 | 479501                  | CC                              | TT                | 1946428426               |
| SNP_P3_62473_479996 | NC_021164.1    | Ca_kabuli_chr05 | 479996                  | TT                              | CC                | 1946428427               |
| SNP_P3_62474_480060 | NC_021164.1    | Ca_kabuli_chr05 | 480060                  | TT                              | AA                | 1946428429               |
| SNP_P3_62475_480163 | NC_021164.1    | Ca_kabuli_chr05 | 480163                  | AA                              | GG                | 1946428430               |
| SNP_P3_62476_480245 | NC_021164.1    | Ca_kabuli_chr05 | 480245                  | AA                              | CC                | 1946428432               |
| SNP_P3_62477_480948 | NC_021164.1    | Ca_kabuli_chr05 | 480948                  | GG                              | AA                | 1946428433               |
| SNP_P3_62478_481681 | NC_021164.1    | Ca_kabuli_chr05 | 481681                  | TT                              | CC                | 1946428435               |
| SNP_P3_62480_481727 | NC_021164.1    | Ca_kabuli_chr05 | 481727                  | CC                              | AA                | 1946428436               |
| SNP_P3_62481_481731 | NC_021164.1    | Ca_kabuli_chr05 | 481731                  | CC                              | TT                | 1946428438               |
| SNP_P3_62482_481743 | NC_021164.1    | Ca_kabuli_chr05 | 481743                  | TT                              | CC                | 1946428439               |
| SNP_P3_62483_481770 | NC_021164.1    | Ca_kabuli_chr05 | 481770                  | CC                              | TT                | 1946428441               |
| SNP_P3_62484_481778 | NC_021164.1    | Ca_kabuli_chr05 | 481778                  | GG                              | AA                | 1946428443               |
| SNP_P3_62485_481805 | NC_021164.1    | Ca_kabuli_chr05 | 481805                  | GG                              | TT                | 1946428444               |
| SNP_P3_62487_482795 | NC_021164.1    | Ca_kabuli_chr05 | 482795                  | GG                              | AA                | 1946428446               |
| SNP_P3_62488_483187 | NC_021164.1    | Ca_kabuli_chr05 | 483187                  | AA                              | GG                | 1946428447               |
| SNP_P3_62489_484384 | NC_021164.1    | Ca_kabuli_chr05 | 484384                  | CC                              | TT                | 1946428449               |
| SNP_P3_62490_485056 | NC_021164.1    | Ca_kabuli_chr05 | 485056                  | TT                              | CC                | 1946428450               |
| SNP_P3_62491_485067 | NC_021164.1    | Ca_kabuli_chr05 | 485067                  | CC                              | TT                | 1946428452               |
| SNP_P3_62492_485111 | NC_021164.1    | Ca_kabuli_chr05 | 485111                  | AA                              | GG                | 1946428453               |
| SNP_P3_62493_485226 | NC_021164.1    | Ca_kabuli_chr05 | 485226                  | TT                              | AA                | 1946428454               |
| SNP_P3_62494_485628 | NC_021164.1    | Ca_kabuli_chr05 | 485628                  | AA                              | GG                | 1946428456               |
| SNP_P3_62495_487650 | NC_021164.1    | Ca_kabuli_chr05 | 487650                  | AA                              | GG                | 1946428457               |

| SNPs IDs            | Chromosome IDs | Chromosomes     | Physical positions (bp) | CDC Frontier (Reference genome) | (Pusa 256 & HPNB) | NCBI SNPdb Accession IDs |
|---------------------|----------------|-----------------|-------------------------|---------------------------------|-------------------|--------------------------|
| SNP_P3_62496_488291 | NC_021164.1    | Ca_kabuli_chr05 | 488291                  | GG                              | TT                | 1946428459               |
| SNP_P3_62497_489138 | NC_021164.1    | Ca_kabuli_chr05 | 489138                  | AA                              | GG                | 1946428460               |
| SNP_P3_62498_489922 | NC_021164.1    | Ca_kabuli_chr05 | 489922                  | TT                              | CC                | 1946428462               |
| SNP_P3_62499_489923 | NC_021164.1    | Ca_kabuli_chr05 | 489923                  | GG                              | TT                | 1946428463               |
| SNP_P3_62500_489985 | NC_021164.1    | Ca_kabuli_chr05 | 489985                  | GG                              | AA                | 1946428464               |
| SNP_P3_62501_490258 | NC_021164.1    | Ca_kabuli_chr05 | 490258                  | GG                              | AA                | 1946428466               |
| SNP_P3_62502_490263 | NC_021164.1    | Ca_kabuli_chr05 | 490263                  | AA                              | GG                | 1946428468               |
| SNP_P3_62505_491956 | NC_021164.1    | Ca_kabuli_chr05 | 491956                  | TT                              | CC                | 1946428469               |
| SNP_P3_62506_492007 | NC_021164.1    | Ca_kabuli_chr05 | 492007                  | TT                              | CC                | 1946428471               |
| SNP_P3_62507_492014 | NC_021164.1    | Ca_kabuli_chr05 | 492014                  | GG                              | AA                | 1946428472               |
| SNP_P3_62508_492064 | NC_021164.1    | Ca_kabuli_chr05 | 492064                  | AA                              | TT                | 1946428473               |
| SNP_P3_62509_492086 | NC_021164.1    | Ca_kabuli_chr05 | 492086                  | TT                              | GG                | 1946428475               |
| SNP_P3_62511_492145 | NC_021164.1    | Ca_kabuli_chr05 | 492145                  | AA                              | TT                | 1946428476               |
| SNP_P3_62512_492148 | NC_021164.1    | Ca_kabuli_chr05 | 492148                  | CC                              | TT                | 1946428478               |
| SNP_P3_62513_492196 | NC_021164.1    | Ca_kabuli_chr05 | 492196                  | TT                              | AA                | 1946428479               |
| SNP_P3_62514_492197 | NC_021164.1    | Ca_kabuli_chr05 | 492197                  | TT                              | CC                | 1946428481               |
| SNP_P3_62515_492198 | NC_021164.1    | Ca_kabuli_chr05 | 492198                  | TT                              | CC                | 1946428482               |
| SNP_P3_62516_492203 | NC_021164.1    | Ca_kabuli_chr05 | 492203                  | AA                              | GG                | 1946428484               |
| SNP_P3_62517_492251 | NC_021164.1    | Ca_kabuli_chr05 | 492251                  | CC                              | AA                | 1946428485               |
| SNP_P3_62518_492292 | NC_021164.1    | Ca_kabuli_chr05 | 492292                  | CC                              | GG                | 1946428486               |
| SNP_P3_62519_492447 | NC_021164.1    | Ca_kabuli_chr05 | 492447                  | AA                              | GG                | 1946428488               |
| SNP_P3_62520_492471 | NC_021164.1    | Ca_kabuli_chr05 | 492471                  | CC                              | TT                | 1946428489               |
| SNP_P3_62521_492511 | NC_021164.1    | Ca_kabuli_chr05 | 492511                  | AA                              | GG                | 1946428491               |
| SNP_P3_62522_492516 | NC_021164.1    | Ca_kabuli_chr05 | 492516                  | GG                              | TT                | 1946428492               |
| SNP_P3_62523_492585 | NC_021164.1    | Ca_kabuli_chr05 | 492585                  | TT                              | AA                | 1946428494               |
| SNP_P3_62524_492735 | NC_021164.1    | Ca_kabuli_chr05 | 492735                  | GG                              | TT                | 1946428495               |
| SNP_P3_62525_492868 | NC_021164.1    | Ca_kabuli_chr05 | 492868                  | AA                              | GG                | 1946428497               |
| SNP_P3_62526_492892 | NC_021164.1    | Ca_kabuli_chr05 | 492892                  | TT                              | AA                | 1946428498               |
| SNP_P3_62527_493025 | NC_021164.1    | Ca_kabuli_chr05 | 493025                  | GG                              | TT                | 1946428499               |
| SNP_P3_62528_493082 | NC_021164.1    | Ca_kabuli_chr05 | 493082                  | GG                              | AA                | 1946428501               |
| SNP_P3_62529_493122 | NC_021164.1    | Ca_kabuli_chr05 | 493122                  | AA                              | TT                | 1946428502               |
| SNP_P3_62530_496734 | NC_021164.1    | Ca_kabuli_chr05 | 496734                  | CC                              | TT                | 1946428504               |
| SNP_P3_62532_497152 | NC_021164.1    | Ca_kabuli_chr05 | 497152                  | GG                              | TT                | 1946428505               |
| SNP_P3_62533_497175 | NC_021164.1    | Ca_kabuli_chr05 | 497175                  | TT                              | GG                | 1946428507               |
| SNP_P3_62534_497203 | NC_021164.1    | Ca_kabuli_chr05 | 497203                  | TT                              | CC                | 1946428508               |
| SNP_P3_62535_497210 | NC_021164.1    | Ca_kabuli_chr05 | 497210                  | TT                              | GG                | 1946428510               |
| SNP_P3_62536_497215 | NC_021164.1    | Ca_kabuli_chr05 | 497215                  | CC                              | AA                | 1946428511               |
| SNP_P3_62537_497512 | NC_021164.1    | Ca_kabuli_chr05 | 497512                  | AA                              | GG                | 1946428513               |
| SNP_P3_62538_497519 | NC_021164.1    | Ca_kabuli_chr05 | 497519                  | AA                              | CC                | 1946428514               |
| SNP_P3_62539_497552 | NC_021164.1    | Ca_kabuli_chr05 | 497552                  | AA                              | CC                | 1946428516               |
| SNP_P3_62540_514898 | NC_021164.1    | Ca_kabuli_chr05 | 514898                  | GG                              | AA                | 1946428517               |
| SNP_P3_62541_532989 | NC_021164.1    | Ca_kabuli_chr05 | 532989                  | AA                              | GG                | 1946428519               |

| SNPs IDs            | Chromosome IDs | Chromosomes     | Physical positions (bp) | CDC Frontier (Reference genome) | (Pusa 256 & HPNB) | NCBI SNPdb Accession IDs |
|---------------------|----------------|-----------------|-------------------------|---------------------------------|-------------------|--------------------------|
| SNP_P3_62542_539418 | NC_021164.1    | Ca_kabuli_chr05 | 539418                  | AA                              | GG                | 1946428520               |
| SNP_P3_62543_548556 | NC_021164.1    | Ca_kabuli_chr05 | 548556                  | TT                              | CC                | 1946428522               |
| SNP_P3_62544_553076 | NC_021164.1    | Ca_kabuli_chr05 | 553076                  | GG                              | TT                | 1946428523               |
| SNP_P3_62545_560432 | NC_021164.1    | Ca_kabuli_chr05 | 560432                  | AA                              | GG                | 1946428525               |
| SNP_P3_62546_561222 | NC_021164.1    | Ca_kabuli_chr05 | 561222                  | AA                              | CC                | 1946428526               |
| SNP_P3_62547_561258 | NC_021164.1    | Ca_kabuli_chr05 | 561258                  | TT                              | CC                | 1946428527               |
| SNP_P3_62548_561263 | NC_021164.1    | Ca_kabuli_chr05 | 561263                  | GG                              | AA                | 1946428529               |
| SNP_P3_62549_561270 | NC_021164.1    | Ca_kabuli_chr05 | 561270                  | GG                              | AA                | 1946428530               |
| SNP_P3_62550_561604 | NC_021164.1    | Ca_kabuli_chr05 | 561604                  | TT                              | AA                | 1946428532               |
| SNP_P3_62551_561665 | NC_021164.1    | Ca_kabuli_chr05 | 561665                  | TT                              | AA                | 1946428533               |
| SNP_P3_62552_566206 | NC_021164.1    | Ca_kabuli_chr05 | 566206                  | TT                              | GG                | 1946428535               |
| SNP_P3_62554_584020 | NC_021164.1    | Ca_kabuli_chr05 | 584020                  | CC                              | TT                | 1946428536               |
| SNP_P3_62555_585617 | NC_021164.1    | Ca_kabuli_chr05 | 585617                  | TT                              | CC                | 1946428537               |
| SNP_P3_62556_617747 | NC_021164.1    | Ca_kabuli_chr05 | 617747                  | CC                              | TT                | 1946428539               |
| SNP_P3_62557_618757 | NC_021164.1    | Ca_kabuli_chr05 | 618757                  | TT                              | GG                | 1946428540               |
| SNP_P3_62558_618776 | NC_021164.1    | Ca_kabuli_chr05 | 618776                  | GG                              | AA                | 1946428541               |
| SNP_P3_62559_618805 | NC_021164.1    | Ca_kabuli_chr05 | 618805                  | GG                              | AA                | 1946428543               |
| SNP_P3_62560_619217 | NC_021164.1    | Ca_kabuli_chr05 | 619217                  | AA                              | GG                | 1946428544               |
| SNP_P3_62561_619275 | NC_021164.1    | Ca_kabuli_chr05 | 619275                  | AA                              | GG                | 1946428545               |
| SNP_P3_62562_622478 | NC_021164.1    | Ca_kabuli_chr05 | 622478                  | AA                              | GG                | 1946428547               |
| SNP_P3_62563_622549 | NC_021164.1    | Ca_kabuli_chr05 | 622549                  | TT                              | CC                | 1946428548               |
| SNP_P3_62564_622599 | NC_021164.1    | Ca_kabuli_chr05 | 622599                  | AA                              | GG                | 1946428550               |
| SNP_P3_62567_622729 | NC_021164.1    | Ca_kabuli_chr05 | 622729                  | GG                              | AA                | 1946428551               |
| SNP_P3_62568_622737 | NC_021164.1    | Ca_kabuli_chr05 | 622737                  | GG                              | AA                | 1946428553               |
| SNP_P3_62569_622774 | NC_021164.1    | Ca_kabuli_chr05 | 622774                  | GG                              | TT                | 1946428554               |
| SNP_P3_62570_622782 | NC_021164.1    | Ca_kabuli_chr05 | 622782                  | TT                              | CC                | 1946428556               |
| SNP_P3_62571_622798 | NC_021164.1    | Ca_kabuli_chr05 | 622798                  | CC                              | AA                | 1946428557               |
| SNP_P3_62572_622828 | NC_021164.1    | Ca_kabuli_chr05 | 622828                  | AA                              | GG                | 1946428558               |
| SNP_P3_62573_622837 | NC_021164.1    | Ca_kabuli_chr05 | 622837                  | CC                              | GG                | 1946428560               |
| SNP_P3_62574_622906 | NC_021164.1    | Ca_kabuli_chr05 | 622906                  | GG                              | CC                | 1946428561               |
| SNP_P3_62575_624977 | NC_021164.1    | Ca_kabuli_chr05 | 624977                  | TT                              | CC                | 1946428562               |
| SNP_P3_62576_625025 | NC_021164.1    | Ca_kabuli_chr05 | 625025                  | AA                              | GG                | 1946428564               |
| SNP_P3_62577_625164 | NC_021164.1    | Ca_kabuli_chr05 | 625164                  | TT                              | GG                | 1946428565               |
| SNP_P3_62578_625529 | NC_021164.1    | Ca_kabuli_chr05 | 625529                  | CC                              | AA                | 1946428567               |
| SNP_P3_62579_629999 | NC_021164.1    | Ca_kabuli_chr05 | 629999                  | AA                              | GG                | 1946428568               |
| SNP_P3_62580_630364 | NC_021164.1    | Ca_kabuli_chr05 | 630364                  | CC                              | AA                | 1946428570               |
| SNP_P3_62581_636118 | NC_021164.1    | Ca_kabuli_chr05 | 636118                  | GG                              | CC                | 1946428571               |
| SNP_P3_62582_641960 | NC_021164.1    | Ca_kabuli_chr05 | 641960                  | TT                              | AA                | 1946428573               |
| SNP_P3_62583_643195 | NC_021164.1    | Ca_kabuli_chr05 | 643195                  | GG                              | TT                | 1946428575               |
| SNP_P3_62584_643222 | NC_021164.1    | Ca_kabuli_chr05 | 643222                  | AA                              | GG                | 1946428576               |
| SNP_P3_62585_643373 | NC_021164.1    | Ca_kabuli_chr05 | 643373                  | GG                              | AA                | 1946428578               |
| SNP_P3_62586_643690 | NC_021164.1    | Ca_kabuli_chr05 | 643690                  | GG                              | TT                | 1946428579               |



| SNPs IDs            | Chromosome IDs | Chromosomes     | Physical positions (bp) | CDC Frontier (Reference genome) | (Pusa 256 & HPNB) | NCBI SNPdb Accession IDs |
|---------------------|----------------|-----------------|-------------------------|---------------------------------|-------------------|--------------------------|
| SNP_P3_62587_655320 | NC_021164.1    | Ca_kabuli_chr05 | 655320                  | AA                              | CC                | 1946428581               |
| SNP_P3_62588_655347 | NC_021164.1    | Ca_kabuli_chr05 | 655347                  | AA                              | GG                | 1946428582               |
| SNP_P3_62589_655409 | NC_021164.1    | Ca_kabuli_chr05 | 655409                  | GG                              | TT                | 1946428584               |
| SNP_P3_62590_655517 | NC_021164.1    | Ca_kabuli_chr05 | 655517                  | GG                              | AA                | 1946428585               |
| SNP_P3_62591_655518 | NC_021164.1    | Ca_kabuli_chr05 | 655518                  | CC                              | TT                | 1946428587               |
| SNP_P3_62592_655592 | NC_021164.1    | Ca_kabuli_chr05 | 655592                  | TT                              | AA                | 1946428588               |
| SNP_P3_62593_655632 | NC_021164.1    | Ca_kabuli_chr05 | 655632                  | TT                              | CC                | 1946428590               |
| SNP_P3_62594_655659 | NC_021164.1    | Ca_kabuli_chr05 | 655659                  | GG                              | CC                | 1946428591               |
| SNP_P3_62595_655668 | NC_021164.1    | Ca_kabuli_chr05 | 655668                  | TT                              | AA                | 1946428593               |
| SNP_P3_62596_655675 | NC_021164.1    | Ca_kabuli_chr05 | 655675                  | CC                              | TT                | 1946428594               |
| SNP_P3_62597_655781 | NC_021164.1    | Ca_kabuli_chr05 | 655781                  | AA                              | TT                | 1946428596               |
| SNP_P3_62598_656854 | NC_021164.1    | Ca_kabuli_chr05 | 656854                  | GG                              | AA                | 1946428597               |
| SNP_P3_62599_657118 | NC_021164.1    | Ca_kabuli_chr05 | 657118                  | AA                              | GG                | 1946428599               |
| SNP_P3_62600_660470 | NC_021164.1    | Ca_kabuli_chr05 | 660470                  | AA                              | GG                | 1946428600               |
| SNP_P3_62601_664351 | NC_021164.1    | Ca_kabuli_chr05 | 664351                  | GG                              | AA                | 1946428602               |
| SNP_P3_62602_664544 | NC_021164.1    | Ca_kabuli_chr05 | 664544                  | TT                              | AA                | 1946428603               |
| SNP_P3_62603_664702 | NC_021164.1    | Ca_kabuli_chr05 | 664702                  | TT                              | CC                | 1946428605               |
| SNP_P3_62604_664946 | NC_021164.1    | Ca_kabuli_chr05 | 664946                  | TT                              | CC                | 1946428606               |
| SNP_P3_62605_666157 | NC_021164.1    | Ca_kabuli_chr05 | 666157                  | AA                              | GG                | 1946428608               |
| SNP_P3_62606_666369 | NC_021164.1    | Ca_kabuli_chr05 | 666369                  | AA                              | TT                | 1946428609               |
| SNP_P3_62607_666490 | NC_021164.1    | Ca_kabuli_chr05 | 666490                  | AA                              | TT                | 1946428611               |
| SNP_P3_62608_666500 | NC_021164.1    | Ca_kabuli_chr05 | 666500                  | CC                              | AA                | 1946428612               |
| SNP_P3_62609_666502 | NC_021164.1    | Ca_kabuli_chr05 | 666502                  | GG                              | TT                | 1946428614               |
| SNP_P3_62610_666524 | NC_021164.1    | Ca_kabuli_chr05 | 666524                  | TT                              | CC                | 1946428615               |
| SNP_P3_62611_666539 | NC_021164.1    | Ca_kabuli_chr05 | 666539                  | AA                              | CC                | 1946428617               |
| SNP_P3_62613_666691 | NC_021164.1    | Ca_kabuli_chr05 | 666691                  | CC                              | AA                | 1946428618               |
| SNP_P3_62614_666779 | NC_021164.1    | Ca_kabuli_chr05 | 666779                  | TT                              | CC                | 1946428626               |
| SNP_P3_62615_666787 | NC_021164.1    | Ca_kabuli_chr05 | 666787                  | GG                              | AA                | 1946428627               |
| SNP_P3_62616_666879 | NC_021164.1    | Ca_kabuli_chr05 | 666879                  | GG                              | TT                | 1946428629               |
| SNP_P3_62617_667266 | NC_021164.1    | Ca_kabuli_chr05 | 667266                  | TT                              | CC                | 1946428630               |
| SNP_P3_62618_667292 | NC_021164.1    | Ca_kabuli_chr05 | 667292                  | AA                              | GG                | 1946428632               |
| SNP_P3_62619_667307 | NC_021164.1    | Ca_kabuli_chr05 | 667307                  | AA                              | GG                | 1946428633               |
| SNP_P3_62620_667801 | NC_021164.1    | Ca_kabuli_chr05 | 667801                  | GG                              | AA                | 1946428635               |
| SNP_P3_62621_667834 | NC_021164.1    | Ca_kabuli_chr05 | 667834                  | CC                              | TT                | 1946428636               |
| SNP_P3_62622_668029 | NC_021164.1    | Ca_kabuli_chr05 | 668029                  | CC                              | GG                | 1946428638               |
| SNP_P3_62623_668041 | NC_021164.1    | Ca_kabuli_chr05 | 668041                  | GG                              | TT                | 1946428639               |
| SNP_P3_62624_668142 | NC_021164.1    | Ca_kabuli_chr05 | 668142                  | AA                              | TT                | 1946428641               |
| SNP_P3_62625_668143 | NC_021164.1    | Ca_kabuli_chr05 | 668143                  | CC                              | AA                | 1946428642               |
| SNP_P3_62626_668156 | NC_021164.1    | Ca_kabuli_chr05 | 668156                  | CC                              | TT                | 1946428644               |
| SNP_P3_62627_668157 | NC_021164.1    | Ca_kabuli_chr05 | 668157                  | AA                              | CC                | 1946428645               |
| SNP_P3_62628_668279 | NC_021164.1    | Ca_kabuli_chr05 | 668279                  | CC                              | AA                | 1946428646               |
| SNP_P3_62629_668378 | NC_021164.1    | Ca_kabuli_chr05 | 668378                  | GG                              | TT                | 1946428648               |

| SNPs IDs            | Chromosome IDs | Chromosomes     | Physical positions (bp) | CDC Frontier (Reference genome) | (Pusa 256 & HPNB) | NCBI SNPdb Accession IDs |
|---------------------|----------------|-----------------|-------------------------|---------------------------------|-------------------|--------------------------|
| SNP_P3_62630_671416 | NC_021164.1    | Ca_kabuli_chr05 | 671416                  | TT                              | AA                | 1946428649               |
| SNP_P3_62631_671419 | NC_021164.1    | Ca_kabuli_chr05 | 671419                  | AA                              | GG                | 1946428651               |
| SNP_P3_62632_672174 | NC_021164.1    | Ca_kabuli_chr05 | 672174                  | CC                              | TT                | 1946428652               |
| SNP_P3_62633_676133 | NC_021164.1    | Ca_kabuli_chr05 | 676133                  | AA                              | CC                | 1946428654               |
| SNP_P3_62634_676203 | NC_021164.1    | Ca_kabuli_chr05 | 676203                  | GG                              | CC                | 1946428655               |
| SNP_P3_62635_676226 | NC_021164.1    | Ca_kabuli_chr05 | 676226                  | GG                              | CC                | 1946428657               |
| SNP_P3_62636_676853 | NC_021164.1    | Ca_kabuli_chr05 | 676853                  | AA                              | TT                | 1946428659               |
| SNP_P3_62637_677056 | NC_021164.1    | Ca_kabuli_chr05 | 677056                  | AA                              | GG                | 1946428660               |
| SNP_P3_62638_678215 | NC_021164.1    | Ca_kabuli_chr05 | 678215                  | CC                              | AA                | 1946428662               |
| SNP_P3_62639_681200 | NC_021164.1    | Ca_kabuli_chr05 | 681200                  | GG                              | TT                | 1946428663               |
| SNP_P3_62640_681330 | NC_021164.1    | Ca_kabuli_chr05 | 681330                  | AA                              | TT                | 1946428665               |
| SNP_P3_62641_681362 | NC_021164.1    | Ca_kabuli_chr05 | 681362                  | AA                              | CC                | 1946428666               |
| SNP_P3_62642_681363 | NC_021164.1    | Ca_kabuli_chr05 | 681363                  | AA                              | TT                | 1946428668               |
| SNP_P3_62643_681372 | NC_021164.1    | Ca_kabuli_chr05 | 681372                  | TT                              | CC                | 1946428669               |
| SNP_P3_62644_681374 | NC_021164.1    | Ca_kabuli_chr05 | 681374                  | TT                              | CC                | 1946428671               |
| SNP_P3_62645_681375 | NC_021164.1    | Ca_kabuli_chr05 | 681375                  | GG                              | AA                | 1946428672               |
| SNP_P3_62646_681575 | NC_021164.1    | Ca_kabuli_chr05 | 681575                  | GG                              | AA                | 1946428673               |
| SNP_P3_62647_681963 | NC_021164.1    | Ca_kabuli_chr05 | 681963                  | TT                              | AA                | 1946428675               |
| SNP_P3_62648_681977 | NC_021164.1    | Ca_kabuli_chr05 | 681977                  | GG                              | CC                | 1946428677               |
| SNP_P3_62649_681987 | NC_021164.1    | Ca_kabuli_chr05 | 681987                  | AA                              | GG                | 1946428678               |
| SNP_P3_62650_681994 | NC_021164.1    | Ca_kabuli_chr05 | 681994                  | CC                              | TT                | 1946428680               |
| SNP_P3_62651_682020 | NC_021164.1    | Ca_kabuli_chr05 | 682020                  | CC                              | TT                | 1946428681               |
| SNP_P3_62652_682045 | NC_021164.1    | Ca_kabuli_chr05 | 682045                  | CC                              | AA                | 1946428683               |
| SNP_P3_62653_682055 | NC_021164.1    | Ca_kabuli_chr05 | 682055                  | TT                              | CC                | 1946428684               |
| SNP_P3_62654_682077 | NC_021164.1    | Ca_kabuli_chr05 | 682077                  | GG                              | CC                | 1946428685               |
| SNP_P3_62655_682085 | NC_021164.1    | Ca_kabuli_chr05 | 682085                  | TT                              | CC                | 1946428687               |
| SNP_P3_62656_688826 | NC_021164.1    | Ca_kabuli_chr05 | 688826                  | GG                              | AA                | 1946428688               |
| SNP_P3_62657_696508 | NC_021164.1    | Ca_kabuli_chr05 | 696508                  | TT                              | CC                | 1946428690               |
| SNP_P3_62658_715272 | NC_021164.1    | Ca_kabuli_chr05 | 715272                  | CC                              | AA                | 1946428691               |
| SNP_P3_62659_715277 | NC_021164.1    | Ca_kabuli_chr05 | 715277                  | TT                              | CC                | 1946428693               |
| SNP_P3_62660_715290 | NC_021164.1    | Ca_kabuli_chr05 | 715290                  | TT                              | GG                | 1946428694               |
| SNP_P3_62661_715340 | NC_021164.1    | Ca_kabuli_chr05 | 715340                  | GG                              | AA                | 1946428696               |
| SNP_P3_62662_718071 | NC_021164.1    | Ca_kabuli_chr05 | 718071                  | AA                              | TT                | 1946428698               |
| SNP_P3_62663_719373 | NC_021164.1    | Ca_kabuli_chr05 | 719373                  | CC                              | TT                | 1946428700               |
| SNP_P3_62664_723388 | NC_021164.1    | Ca_kabuli_chr05 | 723388                  | TT                              | CC                | 1946428701               |
| SNP_P3_62665_724407 | NC_021164.1    | Ca_kabuli_chr05 | 724407                  | TT                              | CC                | 1946428703               |
| SNP_P3_62666_724422 | NC_021164.1    | Ca_kabuli_chr05 | 724422                  | TT                              | GG                | 1946428704               |
| SNP_P3_62667_733620 | NC_021164.1    | Ca_kabuli_chr05 | 733620                  | GG                              | TT                | 1946428706               |
| SNP_P3_62668_735262 | NC_021164.1    | Ca_kabuli_chr05 | 735262                  | GG                              | CC                | 1946428707               |
| SNP_P3_62669_738239 | NC_021164.1    | Ca_kabuli_chr05 | 738239                  | TT                              | AA                | 1946428709               |
| SNP_P3_62670_738240 | NC_021164.1    | Ca_kabuli_chr05 | 738240                  | GG                              | TT                | 1946428710               |
| SNP_P3_62671_738249 | NC_021164.1    | Ca_kabuli_chr05 | 738249                  | GG                              | CC                | 1946428712               |

| SNPs IDs             | Chromosome IDs | Chromosomes     | Physical positions (bp) | CDC Frontier (Reference genome) | (Pusa 256 & HPNB) | NCBI SNPdb Accession IDs |
|----------------------|----------------|-----------------|-------------------------|---------------------------------|-------------------|--------------------------|
| SNP_P3_62672_738250  | NC_021164.1    | Ca_kabuli_chr05 | 738250                  | GG                              | TT                | 1946428713               |
| SNP_P3_62673_746646  | NC_021164.1    | Ca_kabuli_chr05 | 746646                  | AA                              | GG                | 1946428715               |
| SNP_P3_62674_749938  | NC_021164.1    | Ca_kabuli_chr05 | 749938                  | CC                              | GG                | 1946428716               |
| SNP_P3_62675_749941  | NC_021164.1    | Ca_kabuli_chr05 | 749941                  | GG                              | AA                | 1946428718               |
| SNP_P3_62676_749952  | NC_021164.1    | Ca_kabuli_chr05 | 749952                  | GG                              | CC                | 1946428719               |
| SNP_P3_62677_755852  | NC_021164.1    | Ca_kabuli_chr05 | 755852                  | TT                              | GG                | 1946428721               |
| SNP_P3_62678_755867  | NC_021164.1    | Ca_kabuli_chr05 | 755867                  | TT                              | CC                | 1946428722               |
| SNP_P3_62679_756085  | NC_021164.1    | Ca_kabuli_chr05 | 756085                  | TT                              | AA                | 1946428723               |
| SNP_P3_62680_767394  | NC_021164.1    | Ca_kabuli_chr05 | 767394                  | CC                              | AA                | 1946428724               |
| SNP_P3_62681_805859  | NC_021164.1    | Ca_kabuli_chr05 | 805859                  | CC                              | TT                | 1946428725               |
| SNP_P3_62682_814651  | NC_021164.1    | Ca_kabuli_chr05 | 814651                  | TT                              | CC                | 1946428726               |
| SNP_P3_62683_834278  | NC_021164.1    | Ca_kabuli_chr05 | 834278                  | AA                              | GG                | 1946428727               |
| SNP_P3_62684_834609  | NC_021164.1    | Ca_kabuli_chr05 | 834609                  | GG                              | TT                | 1946428728               |
| SNP_P3_62685_834727  | NC_021164.1    | Ca_kabuli_chr05 | 834727                  | AA                              | GG                | 1946428730               |
| SNP_P3_62686_853328  | NC_021164.1    | Ca_kabuli_chr05 | 853328                  | CC                              | TT                | 1946428731               |
| SNP_P3_62687_853707  | NC_021164.1    | Ca_kabuli_chr05 | 853707                  | AA                              | GG                | 1946428733               |
| SNP_P3_62688_877433  | NC_021164.1    | Ca_kabuli_chr05 | 877433                  | AA                              | GG                | 1946428735               |
| SNP_P3_62689_877464  | NC_021164.1    | Ca_kabuli_chr05 | 877464                  | GG                              | AA                | 1946428736               |
| SNP_P3_62690_877485  | NC_021164.1    | Ca_kabuli_chr05 | 877485                  | AA                              | GG                | 1946428738               |
| SNP_P3_62691_897331  | NC_021164.1    | Ca_kabuli_chr05 | 897331                  | TT                              | GG                | 1946428739               |
| SNP_P3_62692_904530  | NC_021164.1    | Ca_kabuli_chr05 | 904530                  | TT                              | CC                | 1946428741               |
| SNP_P3_62693_904545  | NC_021164.1    | Ca_kabuli_chr05 | 904545                  | AA                              | GG                | 1946428742               |
| SNP_P3_62694_904563  | NC_021164.1    | Ca_kabuli_chr05 | 904563                  | TT                              | CC                | 1946428743               |
| SNP_P3_62695_904587  | NC_021164.1    | Ca_kabuli_chr05 | 904587                  | AA                              | TT                | 1946428745               |
| SNP_P3_62697_917727  | NC_021164.1    | Ca_kabuli_chr05 | 917727                  | GG                              | AA                | 1946428746               |
| SNP_P3_62699_927701  | NC_021164.1    | Ca_kabuli_chr05 | 927701                  | AA                              | GG                | 1946428748               |
| SNP_P3_62700_927931  | NC_021164.1    | Ca_kabuli_chr05 | 927931                  | TT                              | CC                | 1946428749               |
| SNP_P3_62701_928149  | NC_021164.1    | Ca_kabuli_chr05 | 928149                  | GG                              | AA                | 1946428751               |
| SNP_P3_62702_928151  | NC_021164.1    | Ca_kabuli_chr05 | 928151                  | CC                              | TT                | 1946428752               |
| SNP_P3_62703_928283  | NC_021164.1    | Ca_kabuli_chr05 | 928283                  | CC                              | TT                | 1946428754               |
| SNP_P3_62704_930722  | NC_021164.1    | Ca_kabuli_chr05 | 930722                  | TT                              | GG                | 1946428755               |
| SNP_P3_62705_930756  | NC_021164.1    | Ca_kabuli_chr05 | 930756                  | AA                              | GG                | 1946428757               |
| SNP_P3_62706_930809  | NC_021164.1    | Ca_kabuli_chr05 | 930809                  | AA                              | GG                | 1946428759               |
| SNP_P3_62707_931154  | NC_021164.1    | Ca_kabuli_chr05 | 931154                  | CC                              | TT                | 1946428760               |
| SNP_P3_62708_940186  | NC_021164.1    | Ca_kabuli_chr05 | 940186                  | CC                              | TT                | 1946428762               |
| SNP_P3_62709_944816  | NC_021164.1    | Ca_kabuli_chr05 | 944816                  | GG                              | TT                | 1946428763               |
| SNP_P3_62710_984610  | NC_021164.1    | Ca_kabuli_chr05 | 984610                  | TT                              | CC                | 1946428765               |
| SNP_P3_62711_1001844 | NC_021164.1    | Ca_kabuli_chr05 | 1001844                 | CC                              | AA                | 1946428766               |
| SNP_P3_62712_1001848 | NC_021164.1    | Ca_kabuli_chr05 | 1001848                 | AA                              | TT                | 1946428767               |
| SNP_P3_62713_1001851 | NC_021164.1    | Ca_kabuli_chr05 | 1001851                 | AA                              | CC                | 1946428769               |
| SNP_P3_62714_1001852 | NC_021164.1    | Ca_kabuli_chr05 | 1001852                 | AA                              | GG                | 1946428770               |
| SNP_P3_62715_1001853 | NC_021164.1    | Ca_kabuli_chr05 | 1001853                 | GG                              | AA                | 1946428772               |

| SNPs IDs             | Chromosome IDs | Chromosomes     | Physical positions (bp) | CDC Frontier (Reference genome) | (Pusa 256 & HPNB) | NCBI SNPdb Accession IDs |
|----------------------|----------------|-----------------|-------------------------|---------------------------------|-------------------|--------------------------|
| SNP_P3_62716_1010321 | NC_021164.1    | Ca_kabuli_chr05 | 1010321                 | CC                              | GG                | 1946428773               |
| SNP_P3_62717_1010350 | NC_021164.1    | Ca_kabuli_chr05 | 1010350                 | TT                              | GG                | 1946428775               |
| SNP_P3_62718_1010355 | NC_021164.1    | Ca_kabuli_chr05 | 1010355                 | GG                              | AA                | 1946428776               |
| SNP_P3_62719_1012077 | NC_021164.1    | Ca_kabuli_chr05 | 1012077                 | TT                              | CC                | 1946428778               |
| SNP_P3_62720_1012080 | NC_021164.1    | Ca_kabuli_chr05 | 1012080                 | AA                              | GG                | 1946428780               |
| SNP_P3_62721_1012338 | NC_021164.1    | Ca_kabuli_chr05 | 1012338                 | CC                              | TT                | 1946428781               |
| SNP_P3_62722_1012410 | NC_021164.1    | Ca_kabuli_chr05 | 1012410                 | GG                              | AA                | 1946428783               |
| SNP_P3_62723_1027681 | NC_021164.1    | Ca_kabuli_chr05 | 1027681                 | TT                              | CC                | 1946428784               |
| SNP_P3_62724_1033191 | NC_021164.1    | Ca_kabuli_chr05 | 1033191                 | AA                              | GG                | 1946428786               |
| SNP_P3_62725_1033374 | NC_021164.1    | Ca_kabuli_chr05 | 1033374                 | TT                              | CC                | 1946428787               |
| SNP_P3_62726_1038953 | NC_021164.1    | Ca_kabuli_chr05 | 1038953                 | GG                              | AA                | 1946428789               |
| SNP_P3_62727_1055297 | NC_021164.1    | Ca_kabuli_chr05 | 1055297                 | AA                              | GG                | 1946428790               |
| SNP_P3_62728_1055302 | NC_021164.1    | Ca_kabuli_chr05 | 1055302                 | AA                              | GG                | 1946428792               |
| SNP_P3_62729_1055551 | NC_021164.1    | Ca_kabuli_chr05 | 1055551                 | TT                              | GG                | 1946428793               |
| SNP_P3_62731_1065523 | NC_021164.1    | Ca_kabuli_chr05 | 1065523                 | TT                              | CC                | 1946428794               |
| SNP_P3_62732_1101208 | NC_021164.1    | Ca_kabuli_chr05 | 1101208                 | GG                              | TT                | 1946428796               |
| SNP_P3_62733_1101210 | NC_021164.1    | Ca_kabuli_chr05 | 1101210                 | AA                              | GG                | 1946428798               |
| SNP_P3_62735_1108380 | NC_021164.1    | Ca_kabuli_chr05 | 1108380                 | AA                              | CC                | 1946428799               |
| SNP_P3_62736_1111672 | NC_021164.1    | Ca_kabuli_chr05 | 1111672                 | GG                              | AA                | 1946428801               |
| SNP_P3_62737_1126429 | NC_021164.1    | Ca_kabuli_chr05 | 1126429                 | GG                              | AA                | 1946428802               |
| SNP_P3_62738_1126452 | NC_021164.1    | Ca_kabuli_chr05 | 1126452                 | TT                              | AA                | 1946428804               |
| SNP_P3_62740_1126768 | NC_021164.1    | Ca_kabuli_chr05 | 1126768                 | AA                              | GG                | 1946428805               |
| SNP_P3_62741_1139172 | NC_021164.1    | Ca_kabuli_chr05 | 1139172                 | CC                              | TT                | 1946428807               |
| SNP_P3_62742_1145375 | NC_021164.1    | Ca_kabuli_chr05 | 1145375                 | GG                              | AA                | 1946428808               |
| SNP_P3_62743_1148162 | NC_021164.1    | Ca_kabuli_chr05 | 1148162                 | CC                              | TT                | 1946428810               |
| SNP_P3_62744_1150695 | NC_021164.1    | Ca_kabuli_chr05 | 1150695                 | TT                              | GG                | 1946428811               |
| SNP_P3_62745_1151065 | NC_021164.1    | Ca_kabuli_chr05 | 1151065                 | CC                              | TT                | 1946428813               |
| SNP_P3_62746_1172000 | NC_021164.1    | Ca_kabuli_chr05 | 1172000                 | CC                              | AA                | 1946428814               |
| SNP_P3_62747_1172023 | NC_021164.1    | Ca_kabuli_chr05 | 1172023                 | CC                              | TT                | 1946428816               |
| SNP_P3_62748_1174416 | NC_021164.1    | Ca_kabuli_chr05 | 1174416                 | CC                              | TT                | 1946428818               |
| SNP_P3_62749_1174583 | NC_021164.1    | Ca_kabuli_chr05 | 1174583                 | GG                              | AA                | 1946428819               |
| SNP_P3_62750_1176077 | NC_021164.1    | Ca_kabuli_chr05 | 1176077                 | AA                              | GG                | 1946428821               |
| SNP_P3_62751_1176084 | NC_021164.1    | Ca_kabuli_chr05 | 1176084                 | AA                              | CC                | 1946428822               |
| SNP_P3_62752_1176104 | NC_021164.1    | Ca_kabuli_chr05 | 1176104                 | AA                              | CC                | 1946428824               |
| SNP_P3_62753_1176107 | NC_021164.1    | Ca_kabuli_chr05 | 1176107                 | TT                              | CC                | 1946428825               |
| SNP_P3_62754_1176118 | NC_021164.1    | Ca_kabuli_chr05 | 1176118                 | GG                              | AA                | 1946428827               |
| SNP_P3_62755_1176399 | NC_021164.1    | Ca_kabuli_chr05 | 1176399                 | AA                              | GG                | 1946428828               |
| SNP_P3_62756_1230375 | NC_021164.1    | Ca_kabuli_chr05 | 1230375                 | TT                              | CC                | 1946428829               |
| SNP_P3_62757_1230531 | NC_021164.1    | Ca_kabuli_chr05 | 1230531                 | TT                              | GG                | 1946428831               |
| SNP_P3_62759_1234821 | NC_021164.1    | Ca_kabuli_chr05 | 1234821                 | AA                              | GG                | 1946428832               |
| SNP_P3_62760_1246111 | NC_021164.1    | Ca_kabuli_chr05 | 1246111                 | TT                              | GG                | 1946428834               |
| SNP_P3_62761_1246114 | NC_021164.1    | Ca_kabuli_chr05 | 1246114                 | TT                              | CC                | 1946428835               |

| SNPs IDs             | Chromosome IDs | Chromosomes     | Physical positions (bp) | CDC Frontier (Reference genome) | (Pusa 256 & HPNB) | NCBI SNPdb Accession IDs |
|----------------------|----------------|-----------------|-------------------------|---------------------------------|-------------------|--------------------------|
| SNP_P3_62762_1275420 | NC_021164.1    | Ca_kabuli_chr05 | 1275420                 | GG                              | AA                | 1946428837               |
| SNP_P3_62763_1278681 | NC_021164.1    | Ca_kabuli_chr05 | 1278681                 | GG                              | CC                | 1946428838               |
| SNP_P3_62764_1288248 | NC_021164.1    | Ca_kabuli_chr05 | 1288248                 | AA                              | GG                | 1946428840               |
| SNP_P3_62766_1318652 | NC_021164.1    | Ca_kabuli_chr05 | 1318652                 | CC                              | TT                | 1946428841               |
| SNP_P3_62767_1336028 | NC_021164.1    | Ca_kabuli_chr05 | 1336028                 | AA                              | TT                | 1946428843               |
| SNP_P3_62768_1336041 | NC_021164.1    | Ca_kabuli_chr05 | 1336041                 | CC                              | AA                | 1946428845               |
| SNP_P3_62769_1336047 | NC_021164.1    | Ca_kabuli_chr05 | 1336047                 | TT                              | CC                | 1946428846               |
| SNP_P3_62770_1336307 | NC_021164.1    | Ca_kabuli_chr05 | 1336307                 | GG                              | AA                | 1946428848               |
| SNP_P3_62771_1346253 | NC_021164.1    | Ca_kabuli_chr05 | 1346253                 | CC                              | TT                | 1946428849               |
| SNP_P3_62772_1369494 | NC_021164.1    | Ca_kabuli_chr05 | 1369494                 | CC                              | GG                | 1946428851               |
| SNP_P3_62773_1372095 | NC_021164.1    | Ca_kabuli_chr05 | 1372095                 | GG                              | AA                | 1946428852               |
| SNP_P3_62774_1376858 | NC_021164.1    | Ca_kabuli_chr05 | 1376858                 | TT                              | GG                | 1946428854               |
| SNP_P3_62775_1376878 | NC_021164.1    | Ca_kabuli_chr05 | 1376878                 | GG                              | TT                | 1946428855               |
| SNP_P3_62776_1377276 | NC_021164.1    | Ca_kabuli_chr05 | 1377276                 | CC                              | GG                | 1946428857               |
| SNP_P3_62778_1378191 | NC_021164.1    | Ca_kabuli_chr05 | 1378191                 | GG                              | AA                | 1946428858               |
| SNP_P3_62779_1378192 | NC_021164.1    | Ca_kabuli_chr05 | 1378192                 | GG                              | AA                | 1946428860               |
| SNP_P3_62780_1378261 | NC_021164.1    | Ca_kabuli_chr05 | 1378261                 | GG                              | TT                | 1946428861               |
| SNP_P3_62781_1378285 | NC_021164.1    | Ca_kabuli_chr05 | 1378285                 | GG                              | TT                | 1946428863               |
| SNP_P3_62782_1378289 | NC_021164.1    | Ca_kabuli_chr05 | 1378289                 | TT                              | GG                | 1946428864               |
| SNP_P3_62783_1378475 | NC_021164.1    | Ca_kabuli_chr05 | 1378475                 | CC                              | TT                | 1946428866               |
| SNP_P3_62784_1378501 | NC_021164.1    | Ca_kabuli_chr05 | 1378501                 | CC                              | TT                | 1946428867               |
| SNP_P3_62785_1378502 | NC_021164.1    | Ca_kabuli_chr05 | 1378502                 | AA                              | GG                | 1946428869               |
| SNP_P3_62786_1380488 | NC_021164.1    | Ca_kabuli_chr05 | 1380488                 | GG                              | AA                | 1946428870               |
| SNP_P3_62787_1381077 | NC_021164.1    | Ca_kabuli_chr05 | 1381077                 | AA                              | GG                | 1946428872               |
| SNP_P3_62788_1381095 | NC_021164.1    | Ca_kabuli_chr05 | 1381095                 | AA                              | TT                | 1946428873               |
| SNP_P3_62789_1381130 | NC_021164.1    | Ca_kabuli_chr05 | 1381130                 | AA                              | GG                | 1946428875               |
| SNP_P3_62790_1381184 | NC_021164.1    | Ca_kabuli_chr05 | 1381184                 | AA                              | GG                | 1946428876               |
| SNP_P3_62791_1381542 | NC_021164.1    | Ca_kabuli_chr05 | 1381542                 | GG                              | AA                | 1946428878               |
| SNP_P3_62792_1384827 | NC_021164.1    | Ca_kabuli_chr05 | 1384827                 | CC                              | TT                | 1946428879               |
| SNP_P3_62793_1385750 | NC_021164.1    | Ca_kabuli_chr05 | 1385750                 | AA                              | GG                | 1946428881               |
| SNP_P3_62794_1392440 | NC_021164.1    | Ca_kabuli_chr05 | 1392440                 | GG                              | AA                | 1946428883               |
| SNP_P3_62795_1392488 | NC_021164.1    | Ca_kabuli_chr05 | 1392488                 | TT                              | AA                | 1946428885               |
| SNP_P3_62796_1393485 | NC_021164.1    | Ca_kabuli_chr05 | 1393485                 | CC                              | TT                | 1946428886               |
| SNP_P3_62797_1429371 | NC_021164.1    | Ca_kabuli_chr05 | 1429371                 | GG                              | CC                | 1946428888               |
| SNP_P3_62798_1429380 | NC_021164.1    | Ca_kabuli_chr05 | 1429380                 | AA                              | CC                | 1946428889               |
| SNP_P3_62799_1441609 | NC_021164.1    | Ca_kabuli_chr05 | 1441609                 | AA                              | TT                | 1946428891               |
| SNP_P3_62800_1445665 | NC_021164.1    | Ca_kabuli_chr05 | 1445665                 | CC                              | TT                | 1946428892               |
| SNP_P3_62801_1446723 | NC_021164.1    | Ca_kabuli_chr05 | 1446723                 | AA                              | GG                | 1946428896               |
| SNP_P3_62803_1457325 | NC_021164.1    | Ca_kabuli_chr05 | 1457325                 | CC                              | AA                | 1946428898               |
| SNP_P3_62804_1457333 | NC_021164.1    | Ca_kabuli_chr05 | 1457333                 | AA                              | CC                | 1946428899               |
| SNP_P3_62805_1457339 | NC_021164.1    | Ca_kabuli_chr05 | 1457339                 | CC                              | TT                | 1946428901               |
| SNP_P3_62806_1457500 | NC_021164.1    | Ca_kabuli_chr05 | 1457500                 | AA                              | CC                | 1946428902               |

| SNPs IDs             | Chromosome IDs | Chromosomes     | Physical positions (bp) | CDC Frontier (Reference genome) | (Pusa 256 & HPNB) | NCBI SNPdb Accession IDs |
|----------------------|----------------|-----------------|-------------------------|---------------------------------|-------------------|--------------------------|
| SNP_P3_62807_1457506 | NC_021164.1    | Ca_kabuli_chr05 | 1457506                 | CC                              | TT                | 1946428904               |
| SNP_P3_62808_1457528 | NC_021164.1    | Ca_kabuli_chr05 | 1457528                 | TT                              | CC                | 1946428905               |
| SNP_P3_62809_1458259 | NC_021164.1    | Ca_kabuli_chr05 | 1458259                 | AA                              | GG                | 1946428907               |
| SNP_P3_62810_1483052 | NC_021164.1    | Ca_kabuli_chr05 | 1483052                 | TT                              | AA                | 1946428908               |
| SNP_P3_62811_1492343 | NC_021164.1    | Ca_kabuli_chr05 | 1492343                 | CC                              | AA                | 1946428910               |
| SNP_P3_62812_1496806 | NC_021164.1    | Ca_kabuli_chr05 | 1496806                 | CC                              | AA                | 1946428911               |
| SNP_P3_62813_1497217 | NC_021164.1    | Ca_kabuli_chr05 | 1497217                 | TT                              | CC                | 1946428912               |
| SNP_P3_62814_1497230 | NC_021164.1    | Ca_kabuli_chr05 | 1497230                 | GG                              | AA                | 1946428914               |
| SNP_P3_62815_1497302 | NC_021164.1    | Ca_kabuli_chr05 | 1497302                 | TT                              | GG                | 1946428916               |
| SNP_P3_62816_1501641 | NC_021164.1    | Ca_kabuli_chr05 | 1501641                 | TT                              | CC                | 1946428917               |
| SNP_P3_62817_1510665 | NC_021164.1    | Ca_kabuli_chr05 | 1510665                 | CC                              | TT                | 1946428919               |
| SNP_P3_62818_1510686 | NC_021164.1    | Ca_kabuli_chr05 | 1510686                 | CC                              | TT                | 1946428920               |
| SNP_P3_62820_1510984 | NC_021164.1    | Ca_kabuli_chr05 | 1510984                 | AA                              | GG                | 1946428922               |
| SNP_P3_62821_1511058 | NC_021164.1    | Ca_kabuli_chr05 | 1511058                 | AA                              | GG                | 1946428923               |
| SNP_P3_62822_1511059 | NC_021164.1    | Ca_kabuli_chr05 | 1511059                 | TT                              | CC                | 1946428925               |
| SNP_P3_62823_1511105 | NC_021164.1    | Ca_kabuli_chr05 | 1511105                 | GG                              | TT                | 1946428926               |
| SNP_P3_62824_1511132 | NC_021164.1    | Ca_kabuli_chr05 | 1511132                 | CC                              | TT                | 1946428927               |
| SNP_P3_62825_1511146 | NC_021164.1    | Ca_kabuli_chr05 | 1511146                 | AA                              | CC                | 1946428929               |
| SNP_P3_62826_1511182 | NC_021164.1    | Ca_kabuli_chr05 | 1511182                 | AA                              | GG                | 1946428930               |
| SNP_P3_62827_1519147 | NC_021164.1    | Ca_kabuli_chr05 | 1519147                 | GG                              | AA                | 1946428932               |
| SNP_P3_62828_1526713 | NC_021164.1    | Ca_kabuli_chr05 | 1526713                 | CC                              | TT                | 1946428933               |
| SNP_P3_62829_1526729 | NC_021164.1    | Ca_kabuli_chr05 | 1526729                 | AA                              | TT                | 1946428935               |
| SNP_P3_62830_1526732 | NC_021164.1    | Ca_kabuli_chr05 | 1526732                 | TT                              | GG                | 1946428936               |
| SNP_P3_62831_1526756 | NC_021164.1    | Ca_kabuli_chr05 | 1526756                 | CC                              | TT                | 1946428938               |
| SNP_P3_62832_1526793 | NC_021164.1    | Ca_kabuli_chr05 | 1526793                 | AA                              | GG                | 1946428939               |
| SNP_P3_62833_1528101 | NC_021164.1    | Ca_kabuli_chr05 | 1528101                 | AA                              | GG                | 1946428941               |
| SNP_P3_62834_1535157 | NC_021164.1    | Ca_kabuli_chr05 | 1535157                 | TT                              | CC                | 1946428942               |
| SNP_P3_62835_1535169 | NC_021164.1    | Ca_kabuli_chr05 | 1535169                 | CC                              | AA                | 1946428944               |
| SNP_P3_62836_1535311 | NC_021164.1    | Ca_kabuli_chr05 | 1535311                 | AA                              | CC                | 1946428945               |
| SNP_P3_62837_1535321 | NC_021164.1    | Ca_kabuli_chr05 | 1535321                 | GG                              | CC                | 1946428947               |
| SNP_P3_62838_1535339 | NC_021164.1    | Ca_kabuli_chr05 | 1535339                 | GG                              | CC                | 1946428948               |
| SNP_P3_62839_1535341 | NC_021164.1    | Ca_kabuli_chr05 | 1535341                 | GG                              | AA                | 1946428950               |
| SNP_P3_62840_1535360 | NC_021164.1    | Ca_kabuli_chr05 | 1535360                 | TT                              | AA                | 1946428951               |
| SNP_P3_62841_1535373 | NC_021164.1    | Ca_kabuli_chr05 | 1535373                 | AA                              | GG                | 1946428953               |
| SNP_P3_62842_1535501 | NC_021164.1    | Ca_kabuli_chr05 | 1535501                 | TT                              | AA                | 1946428954               |
| SNP_P3_62843_1538871 | NC_021164.1    | Ca_kabuli_chr05 | 1538871                 | AA                              | CC                | 1946428955               |
| SNP_P3_62844_1562568 | NC_021164.1    | Ca_kabuli_chr05 | 1562568                 | AA                              | GG                | 1946428957               |
| SNP_P3_62846_1588522 | NC_021164.1    | Ca_kabuli_chr05 | 1588522                 | AA                              | TT                | 1946428958               |
| SNP_P3_62848_1605851 | NC_021164.1    | Ca_kabuli_chr05 | 1605851                 | CC                              | GG                | 1946428960               |
| SNP_P3_62850_1633688 | NC_021164.1    | Ca_kabuli_chr05 | 1633688                 | GG                              | AA                | 1946428961               |
| SNP_P3_62852_1679521 | NC_021164.1    | Ca_kabuli_chr05 | 1679521                 | CC                              | TT                | 1946428963               |
| SNP_P3_62853_1679540 | NC_021164.1    | Ca_kabuli_chr05 | 1679540                 | GG                              | CC                | 1946428964               |

| SNPs IDs             | Chromosome IDs | Chromosomes     | Physical positions (bp) | CDC Frontier (Reference genome) | (Pusa 256 & HPNB) | NCBI SNPdb Accession IDs |
|----------------------|----------------|-----------------|-------------------------|---------------------------------|-------------------|--------------------------|
| SNP_P3_62854_1679652 | NC_021164.1    | Ca_kabuli_chr05 | 1679652                 | CC                              | TT                | 1946428966               |
| SNP_P3_62855_1679832 | NC_021164.1    | Ca_kabuli_chr05 | 1679832                 | GG                              | TT                | 1946428968               |
| SNP_P3_62857_1681491 | NC_021164.1    | Ca_kabuli_chr05 | 1681491                 | TT                              | CC                | 1946428969               |
| SNP_P3_62858_1706300 | NC_021164.1    | Ca_kabuli_chr05 | 1706300                 | CC                              | GG                | 1946428970               |
| SNP_P3_62859_1706327 | NC_021164.1    | Ca_kabuli_chr05 | 1706327                 | GG                              | TT                | 1946428972               |
| SNP_P3_62860_1706428 | NC_021164.1    | Ca_kabuli_chr05 | 1706428                 | GG                              | AA                | 1946428973               |
| SNP_P3_62861_1706711 | NC_021164.1    | Ca_kabuli_chr05 | 1706711                 | GG                              | TT                | 1946428975               |
| SNP_P3_62862_1709560 | NC_021164.1    | Ca_kabuli_chr05 | 1709560                 | TT                              | AA                | 1946428976               |
| SNP_P3_62863_1762436 | NC_021164.1    | Ca_kabuli_chr05 | 1762436                 | TT                              | CC                | 1946428978               |
| SNP_P3_62864_1762456 | NC_021164.1    | Ca_kabuli_chr05 | 1762456                 | CC                              | GG                | 1946428979               |
| SNP_P3_62865_1763605 | NC_021164.1    | Ca_kabuli_chr05 | 1763605                 | GG                              | TT                | 1946428980               |
| SNP_P3_62866_1770168 | NC_021164.1    | Ca_kabuli_chr05 | 1770168                 | TT                              | CC                | 1946428982               |
| SNP_P3_62868_1771352 | NC_021164.1    | Ca_kabuli_chr05 | 1771352                 | GG                              | TT                | 1946428983               |
| SNP_P3_62869_1780075 | NC_021164.1    | Ca_kabuli_chr05 | 1780075                 | CC                              | TT                | 1946428985               |
| SNP_P3_62870_1780096 | NC_021164.1    | Ca_kabuli_chr05 | 1780096                 | AA                              | GG                | 1946428987               |
| SNP_P3_62871_1780451 | NC_021164.1    | Ca_kabuli_chr05 | 1780451                 | TT                              | CC                | 1946428988               |
| SNP_P3_62872_1780486 | NC_021164.1    | Ca_kabuli_chr05 | 1780486                 | TT                              | GG                | 1946428990               |
| SNP_P3_62873_1780727 | NC_021164.1    | Ca_kabuli_chr05 | 1780727                 | GG                              | TT                | 1946428991               |
| SNP_P3_62874_1780730 | NC_021164.1    | Ca_kabuli_chr05 | 1780730                 | TT                              | CC                | 1946428993               |
| SNP_P3_62875_1780761 | NC_021164.1    | Ca_kabuli_chr05 | 1780761                 | TT                              | AA                | 1946428994               |
| SNP_P3_62876_1781411 | NC_021164.1    | Ca_kabuli_chr05 | 1781411                 | GG                              | AA                | 1946428996               |
| SNP_P3_62877_1781413 | NC_021164.1    | Ca_kabuli_chr05 | 1781413                 | CC                              | TT                | 1946428997               |
| SNP_P3_62878_1781592 | NC_021164.1    | Ca_kabuli_chr05 | 1781592                 | GG                              | AA                | 1946428999               |
| SNP_P3_62880_1808163 | NC_021164.1    | Ca_kabuli_chr05 | 1808163                 | AA                              | TT                | 1946429000               |
| SNP_P3_62881_1808443 | NC_021164.1    | Ca_kabuli_chr05 | 1808443                 | TT                              | CC                | 1946429002               |
| SNP_P3_62882_1808785 | NC_021164.1    | Ca_kabuli_chr05 | 1808785                 | CC                              | TT                | 1946429003               |
| SNP_P3_62883_1808849 | NC_021164.1    | Ca_kabuli_chr05 | 1808849                 | TT                              | AA                | 1946429005               |
| SNP_P3_62884_1808852 | NC_021164.1    | Ca_kabuli_chr05 | 1808852                 | GG                              | CC                | 1946429007               |
| SNP_P3_62885_1808853 | NC_021164.1    | Ca_kabuli_chr05 | 1808853                 | TT                              | GG                | 1946429008               |
| SNP_P3_62886_1808860 | NC_021164.1    | Ca_kabuli_chr05 | 1808860                 | TT                              | CC                | 1946429010               |
| SNP_P3_62887_1808861 | NC_021164.1    | Ca_kabuli_chr05 | 1808861                 | GG                              | TT                | 1946429011               |
| SNP_P3_62888_1808867 | NC_021164.1    | Ca_kabuli_chr05 | 1808867                 | GG                              | AA                | 1946429013               |
| SNP_P3_62889_1809399 | NC_021164.1    | Ca_kabuli_chr05 | 1809399                 | AA                              | GG                | 1946429015               |
| SNP_P3_62890_1812447 | NC_021164.1    | Ca_kabuli_chr05 | 1812447                 | AA                              | CC                | 1946429016               |
| SNP_P3_62891_1813576 | NC_021164.1    | Ca_kabuli_chr05 | 1813576                 | AA                              | GG                | 1946429018               |
| SNP_P3_62892_1814489 | NC_021164.1    | Ca_kabuli_chr05 | 1814489                 | GG                              | AA                | 1946429019               |
| SNP_P3_62893_1814836 | NC_021164.1    | Ca_kabuli_chr05 | 1814836                 | TT                              | GG                | 1946429021               |
| SNP_P3_62894_1815812 | NC_021164.1    | Ca_kabuli_chr05 | 1815812                 | AA                              | GG                | 1946429022               |
| SNP_P3_62895_1816062 | NC_021164.1    | Ca_kabuli_chr05 | 1816062                 | AA                              | TT                | 1946429024               |
| SNP_P3_62896_1816213 | NC_021164.1    | Ca_kabuli_chr05 | 1816213                 | AA                              | CC                | 1946429025               |
| SNP_P3_62897_1816273 | NC_021164.1    | Ca_kabuli_chr05 | 1816273                 | GG                              | TT                | 1946429027               |
| SNP_P3_62898_1819162 | NC_021164.1    | Ca_kabuli_chr05 | 1819162                 | GG                              | CC                | 1946429028               |

| SNPs IDs             | Chromosome IDs | Chromosomes     | Physical positions (bp) | CDC Frontier (Reference genome) | (Pusa 256 & HPNB) | NCBI SNPdb Accession IDs |
|----------------------|----------------|-----------------|-------------------------|---------------------------------|-------------------|--------------------------|
| SNP_P3_62899_1819163 | NC_021164.1    | Ca_kabuli_chr05 | 1819163                 | TT                              | AA                | 1946429030               |
| SNP_P3_62900_1819315 | NC_021164.1    | Ca_kabuli_chr05 | 1819315                 | TT                              | CC                | 1946429031               |
| SNP_P3_62901_1819778 | NC_021164.1    | Ca_kabuli_chr05 | 1819778                 | CC                              | TT                | 1946429033               |
| SNP_P3_62902_1819781 | NC_021164.1    | Ca_kabuli_chr05 | 1819781                 | GG                              | TT                | 1946429034               |
| SNP_P3_62903_1823919 | NC_021164.1    | Ca_kabuli_chr05 | 1823919                 | GG                              | TT                | 1946429036               |
| SNP_P3_62904_1824030 | NC_021164.1    | Ca_kabuli_chr05 | 1824030                 | CC                              | TT                | 1946429037               |
| SNP_P3_62905_1825524 | NC_021164.1    | Ca_kabuli_chr05 | 1825524                 | CC                              | AA                | 1946429039               |
| SNP_P3_62906_1825575 | NC_021164.1    | Ca_kabuli_chr05 | 1825575                 | GG                              | AA                | 1946429040               |
| SNP_P3_62907_1825699 | NC_021164.1    | Ca_kabuli_chr05 | 1825699                 | AA                              | GG                | 1946429041               |
| SNP_P3_62908_1825706 | NC_021164.1    | Ca_kabuli_chr05 | 1825706                 | AA                              | GG                | 1946429043               |
| SNP_P3_62909_1825755 | NC_021164.1    | Ca_kabuli_chr05 | 1825755                 | TT                              | CC                | 1946429045               |
| SNP_P3_62910_1827738 | NC_021164.1    | Ca_kabuli_chr05 | 1827738                 | TT                              | GG                | 1946429046               |
| SNP_P3_62911_1827775 | NC_021164.1    | Ca_kabuli_chr05 | 1827775                 | TT                              | AA                | 1946429048               |
| SNP_P3_62912_1828535 | NC_021164.1    | Ca_kabuli_chr05 | 1828535                 | AA                              | GG                | 1946429049               |
| SNP_P3_62913_1828765 | NC_021164.1    | Ca_kabuli_chr05 | 1828765                 | AA                              | CC                | 1946429050               |
| SNP_P3_62914_1829568 | NC_021164.1    | Ca_kabuli_chr05 | 1829568                 | GG                              | AA                | 1946429052               |
| SNP_P3_62915_1829577 | NC_021164.1    | Ca_kabuli_chr05 | 1829577                 | AA                              | TT                | 1946429053               |
| SNP_P3_62916_1829597 | NC_021164.1    | Ca_kabuli_chr05 | 1829597                 | TT                              | CC                | 1946429055               |
| SNP_P3_62917_1829609 | NC_021164.1    | Ca_kabuli_chr05 | 1829609                 | AA                              | GG                | 1946429056               |
| SNP_P3_62918_1829610 | NC_021164.1    | Ca_kabuli_chr05 | 1829610                 | TT                              | GG                | 1946429058               |
| SNP_P3_62919_1829616 | NC_021164.1    | Ca_kabuli_chr05 | 1829616                 | GG                              | AA                | 1946429059               |
| SNP_P3_62920_1829637 | NC_021164.1    | Ca_kabuli_chr05 | 1829637                 | TT                              | CC                | 1946429061               |
| SNP_P3_62921_1829712 | NC_021164.1    | Ca_kabuli_chr05 | 1829712                 | AA                              | TT                | 1946429062               |
| SNP_P3_62922_1829716 | NC_021164.1    | Ca_kabuli_chr05 | 1829716                 | CC                              | TT                | 1946429064               |
| SNP_P3_62923_1830816 | NC_021164.1    | Ca_kabuli_chr05 | 1830816                 | TT                              | CC                | 1946429065               |
| SNP_P3_62924_1835916 | NC_021164.1    | Ca_kabuli_chr05 | 1835916                 | TT                              | GG                | 1946429067               |
| SNP_P3_62925_1835923 | NC_021164.1    | Ca_kabuli_chr05 | 1835923                 | GG                              | AA                | 1946429068               |
| SNP_P3_62926_1835939 | NC_021164.1    | Ca_kabuli_chr05 | 1835939                 | AA                              | TT                | 1946429070               |
| SNP_P3_62927_1835950 | NC_021164.1    | Ca_kabuli_chr05 | 1835950                 | CC                              | TT                | 1946429071               |
| SNP_P3_62928_1835954 | NC_021164.1    | Ca_kabuli_chr05 | 1835954                 | GG                              | TT                | 1946429073               |
| SNP_P3_62929_1836026 | NC_021164.1    | Ca_kabuli_chr05 | 1836026                 | CC                              | TT                | 1946429074               |
| SNP_P3_62930_1837567 | NC_021164.1    | Ca_kabuli_chr05 | 1837567                 | CC                              | TT                | 1946429076               |
| SNP_P3_62931_1837964 | NC_021164.1    | Ca_kabuli_chr05 | 1837964                 | CC                              | GG                | 1946429077               |
| SNP_P3_62932_1838474 | NC_021164.1    | Ca_kabuli_chr05 | 1838474                 | CC                              | TT                | 1946429078               |
| SNP_P3_62933_1838685 | NC_021164.1    | Ca_kabuli_chr05 | 1838685                 | CC                              | TT                | 1946429080               |
| SNP_P3_62934_1839038 | NC_021164.1    | Ca_kabuli_chr05 | 1839038                 | TT                              | CC                | 1946429082               |
| SNP_P3_62935_1839050 | NC_021164.1    | Ca_kabuli_chr05 | 1839050                 | AA                              | TT                | 1946429083               |
| SNP_P3_62936_1839209 | NC_021164.1    | Ca_kabuli_chr05 | 1839209                 | GG                              | TT                | 1946429085               |
| SNP_P3_62937_1839220 | NC_021164.1    | Ca_kabuli_chr05 | 1839220                 | GG                              | CC                | 1946429086               |
| SNP_P3_62938_1839258 | NC_021164.1    | Ca_kabuli_chr05 | 1839258                 | AA                              | GG                | 1946429088               |
| SNP_P3_62939_1839363 | NC_021164.1    | Ca_kabuli_chr05 | 1839363                 | CC                              | AA                | 1946429089               |
| SNP_P3_62940_1839395 | NC_021164.1    | Ca_kabuli_chr05 | 1839395                 | GG                              | AA                | 1946429090               |



| SNPs IDs             | Chromosome IDs | Chromosomes     | Physical positions (bp) | CDC Frontier (Reference genome) | (Pusa 256 & HPNB) | NCBI SNPdb Accession IDs |
|----------------------|----------------|-----------------|-------------------------|---------------------------------|-------------------|--------------------------|
| SNP_P3_62941_1839403 | NC_021164.1    | Ca_kabuli_chr05 | 1839403                 | TT                              | AA                | 1946429092               |
| SNP_P3_62942_1839431 | NC_021164.1    | Ca_kabuli_chr05 | 1839431                 | GG                              | CC                | 1946429093               |
| SNP_P3_62943_1839437 | NC_021164.1    | Ca_kabuli_chr05 | 1839437                 | AA                              | TT                | 1946429095               |
| SNP_P3_62944_1839441 | NC_021164.1    | Ca_kabuli_chr05 | 1839441                 | TT                              | AA                | 1946429096               |
| SNP_P3_62945_1839483 | NC_021164.1    | Ca_kabuli_chr05 | 1839483                 | CC                              | TT                | 1946429098               |
| SNP_P3_62946_1876046 | NC_021164.1    | Ca_kabuli_chr05 | 1876046                 | GG                              | TT                | 1946429099               |
| SNP_P3_62947_1876054 | NC_021164.1    | Ca_kabuli_chr05 | 1876054                 | GG                              | AA                | 1946429101               |
| SNP_P3_62948_1876075 | NC_021164.1    | Ca_kabuli_chr05 | 1876075                 | GG                              | AA                | 1946429102               |
| SNP_P3_62949_1876080 | NC_021164.1    | Ca_kabuli_chr05 | 1876080                 | AA                              | GG                | 1946429104               |
| SNP_P3_62950_1876141 | NC_021164.1    | Ca_kabuli_chr05 | 1876141                 | AA                              | GG                | 1946429105               |
| SNP_P3_62952_1876286 | NC_021164.1    | Ca_kabuli_chr05 | 1876286                 | GG                              | AA                | 1946429106               |
| SNP_P3_62954_1876446 | NC_021164.1    | Ca_kabuli_chr05 | 1876446                 | GG                              | AA                | 1946429108               |
| SNP_P3_62955_1876448 | NC_021164.1    | Ca_kabuli_chr05 | 1876448                 | AA                              | GG                | 1946429109               |
| SNP_P3_62956_1878876 | NC_021164.1    | Ca_kabuli_chr05 | 1878876                 | GG                              | CC                | 1946429111               |
| SNP_P3_62957_1879165 | NC_021164.1    | Ca_kabuli_chr05 | 1879165                 | AA                              | GG                | 1946429112               |
| SNP_P3_62958_1884765 | NC_021164.1    | Ca_kabuli_chr05 | 1884765                 | AA                              | TT                | 1946429114               |
| SNP_P3_62959_1884771 | NC_021164.1    | Ca_kabuli_chr05 | 1884771                 | TT                              | AA                | 1946429115               |
| SNP_P3_62960_1884780 | NC_021164.1    | Ca_kabuli_chr05 | 1884780                 | TT                              | GG                | 1946429117               |
| SNP_P3_62961_1884783 | NC_021164.1    | Ca_kabuli_chr05 | 1884783                 | TT                              | AA                | 1946429118               |
| SNP_P3_62962_1884788 | NC_021164.1    | Ca_kabuli_chr05 | 1884788                 | AA                              | TT                | 1946429120               |
| SNP_P3_62963_1884798 | NC_021164.1    | Ca_kabuli_chr05 | 1884798                 | TT                              | CC                | 1946429121               |
| SNP_P3_62964_1887646 | NC_021164.1    | Ca_kabuli_chr05 | 1887646                 | GG                              | AA                | 1946429122               |
| SNP_P3_62965_1887971 | NC_021164.1    | Ca_kabuli_chr05 | 1887971                 | CC                              | TT                | 1946429124               |
| SNP_P3_62966_1890294 | NC_021164.1    | Ca_kabuli_chr05 | 1890294                 | TT                              | GG                | 1946429125               |
| SNP_P3_62967_1890305 | NC_021164.1    | Ca_kabuli_chr05 | 1890305                 | TT                              | CC                | 1946429127               |
| SNP_P3_62968_1899051 | NC_021164.1    | Ca_kabuli_chr05 | 1899051                 | TT                              | CC                | 1946429128               |
| SNP_P3_62969_1899081 | NC_021164.1    | Ca_kabuli_chr05 | 1899081                 | GG                              | AA                | 1946429130               |
| SNP_P3_62970_1899105 | NC_021164.1    | Ca_kabuli_chr05 | 1899105                 | TT                              | AA                | 1946429131               |
| SNP_P3_62971_1899471 | NC_021164.1    | Ca_kabuli_chr05 | 1899471                 | AA                              | TT                | 1946429133               |
| SNP_P3_62972_1902831 | NC_021164.1    | Ca_kabuli_chr05 | 1902831                 | CC                              | TT                | 1946429135               |
| SNP_P3_62974_1903873 | NC_021164.1    | Ca_kabuli_chr05 | 1903873                 | GG                              | TT                | 1946429136               |
| SNP_P3_62975_1903878 | NC_021164.1    | Ca_kabuli_chr05 | 1903878                 | AA                              | GG                | 1946429138               |
| SNP_P3_62976_1904275 | NC_021164.1    | Ca_kabuli_chr05 | 1904275                 | AA                              | CC                | 1946429139               |
| SNP_P3_62977_1904306 | NC_021164.1    | Ca_kabuli_chr05 | 1904306                 | AA                              | TT                | 1946429141               |
| SNP_P3_62978_1904874 | NC_021164.1    | Ca_kabuli_chr05 | 1904874                 | CC                              | TT                | 1946429142               |
| SNP_P3_62979_1904882 | NC_021164.1    | Ca_kabuli_chr05 | 1904882                 | CC                              | TT                | 1946429144               |
| SNP_P3_62980_1904912 | NC_021164.1    | Ca_kabuli_chr05 | 1904912                 | TT                              | CC                | 1946429145               |
| SNP_P3_62981_1909969 | NC_021164.1    | Ca_kabuli_chr05 | 1909969                 | GG                              | AA                | 1946429146               |
| SNP_P3_62982_1911394 | NC_021164.1    | Ca_kabuli_chr05 | 1911394                 | GG                              | CC                | 1946429148               |
| SNP_P3_62983_1911783 | NC_021164.1    | Ca_kabuli_chr05 | 1911783                 | TT                              | GG                | 1946429149               |
| SNP_P3_62984_1925675 | NC_021164.1    | Ca_kabuli_chr05 | 1925675                 | CC                              | TT                | 1946429151               |
| SNP_P3_62985_1925719 | NC_021164.1    | Ca_kabuli_chr05 | 1925719                 | GG                              | AA                | 1946429152               |

| SNPs IDs             | Chromosome IDs | Chromosomes     | Physical positions (bp) | CDC Frontier (Reference genome) | (Pusa 256 & HPNB) | NCBI SNPdb Accession IDs |
|----------------------|----------------|-----------------|-------------------------|---------------------------------|-------------------|--------------------------|
| SNP_P3_62986_1925976 | NC_021164.1    | Ca_kabuli_chr05 | 1925976                 | GG                              | CC                | 1946429154               |
| SNP_P3_62987_1926016 | NC_021164.1    | Ca_kabuli_chr05 | 1926016                 | AA                              | CC                | 1946429155               |
| SNP_P3_62988_1926041 | NC_021164.1    | Ca_kabuli_chr05 | 1926041                 | AA                              | GG                | 1946429157               |
| SNP_P3_62989_1927001 | NC_021164.1    | Ca_kabuli_chr05 | 1927001                 | AA                              | GG                | 1946429158               |
| SNP_P3_62990_1930902 | NC_021164.1    | Ca_kabuli_chr05 | 1930902                 | CC                              | TT                | 1946429160               |
| SNP_P3_62991_1934925 | NC_021164.1    | Ca_kabuli_chr05 | 1934925                 | AA                              | TT                | 1946429161               |
| SNP_P3_62992_1934943 | NC_021164.1    | Ca_kabuli_chr05 | 1934943                 | GG                              | AA                | 1946429162               |
| SNP_P3_62993_1934959 | NC_021164.1    | Ca_kabuli_chr05 | 1934959                 | TT                              | CC                | 1946429164               |
| SNP_P3_62994_1935690 | NC_021164.1    | Ca_kabuli_chr05 | 1935690                 | CC                              | TT                | 1946429165               |
| SNP_P3_62995_1943988 | NC_021164.1    | Ca_kabuli_chr05 | 1943988                 | TT                              | GG                | 1946429167               |
| SNP_P3_62996_1945304 | NC_021164.1    | Ca_kabuli_chr05 | 1945304                 | TT                              | AA                | 1946429168               |
| SNP_P3_62997_1947883 | NC_021164.1    | Ca_kabuli_chr05 | 1947883                 | CC                              | TT                | 1946429169               |
| SNP_P3_62998_1948399 | NC_021164.1    | Ca_kabuli_chr05 | 1948399                 | GG                              | AA                | 1946429171               |
| SNP_P3_62999_1948472 | NC_021164.1    | Ca_kabuli_chr05 | 1948472                 | CC                              | TT                | 1946429173               |
| SNP_P3_63000_1952101 | NC_021164.1    | Ca_kabuli_chr05 | 1952101                 | CC                              | TT                | 1946429174               |
| SNP_P3_63001_1960624 | NC_021164.1    | Ca_kabuli_chr05 | 1960624                 | AA                              | GG                | 1946429196               |
| SNP_P3_63002_1967301 | NC_021164.1    | Ca_kabuli_chr05 | 1967301                 | CC                              | TT                | 1946429197               |
| SNP_P3_63003_1967814 | NC_021164.1    | Ca_kabuli_chr05 | 1967814                 | CC                              | AA                | 1946429199               |
| SNP_P3_63004_1967816 | NC_021164.1    | Ca_kabuli_chr05 | 1967816                 | TT                              | CC                | 1946429200               |
| SNP_P3_63005_1967821 | NC_021164.1    | Ca_kabuli_chr05 | 1967821                 | AA                              | GG                | 1946429202               |
| SNP_P3_63006_1979506 | NC_021164.1    | Ca_kabuli_chr05 | 1979506                 | GG                              | CC                | 1946429203               |
| SNP_P3_63007_1980533 | NC_021164.1    | Ca_kabuli_chr05 | 1980533                 | AA                              | CC                | 1946429205               |
| SNP_P3_63008_1980943 | NC_021164.1    | Ca_kabuli_chr05 | 1980943                 | GG                              | CC                | 1946429206               |
| SNP_P3_63009_1983501 | NC_021164.1    | Ca_kabuli_chr05 | 1983501                 | AA                              | CC                | 1946429207               |
| SNP_P3_63010_1984527 | NC_021164.1    | Ca_kabuli_chr05 | 1984527                 | TT                              | AA                | 1946429208               |
| SNP_P3_63011_1986257 | NC_021164.1    | Ca_kabuli_chr05 | 1986257                 | TT                              | AA                | 1946429209               |
| SNP_P3_63012_1988241 | NC_021164.1    | Ca_kabuli_chr05 | 1988241                 | CC                              | GG                | 1946429210               |
| SNP_P3_63013_1992213 | NC_021164.1    | Ca_kabuli_chr05 | 1992213                 | GG                              | AA                | 1946429211               |
| SNP_P3_63014_1994663 | NC_021164.1    | Ca_kabuli_chr05 | 1994663                 | CC                              | TT                | 1946429212               |
| SNP_P3_63015_1994738 | NC_021164.1    | Ca_kabuli_chr05 | 1994738                 | CC                              | GG                | 1946429213               |
| SNP_P3_63016_1995023 | NC_021164.1    | Ca_kabuli_chr05 | 1995023                 | AA                              | TT                | 1946429214               |
| SNP_P3_63017_1995028 | NC_021164.1    | Ca_kabuli_chr05 | 1995028                 | TT                              | AA                | 1946429215               |
| SNP_P3_63018_1995043 | NC_021164.1    | Ca_kabuli_chr05 | 1995043                 | CC                              | TT                | 1946429216               |
| SNP_P3_63019_1995066 | NC_021164.1    | Ca_kabuli_chr05 | 1995066                 | CC                              | TT                | 1946429217               |
| SNP_P3_63020_1995129 | NC_021164.1    | Ca_kabuli_chr05 | 1995129                 | AA                              | TT                | 1946429218               |
| SNP_P3_63021_1995157 | NC_021164.1    | Ca_kabuli_chr05 | 1995157                 | CC                              | GG                | 1946429219               |
| SNP_P3_63022_1995279 | NC_021164.1    | Ca_kabuli_chr05 | 1995279                 | TT                              | AA                | 1946429220               |
| SNP_P3_63024_1995563 | NC_021164.1    | Ca_kabuli_chr05 | 1995563                 | GG                              | CC                | 1946429221               |
| SNP_P3_63025_1995634 | NC_021164.1    | Ca_kabuli_chr05 | 1995634                 | GG                              | AA                | 1946429222               |
| SNP_P3_63026_1995644 | NC_021164.1    | Ca_kabuli_chr05 | 1995644                 | TT                              | AA                | 1946429223               |
| SNP_P3_63027_2000474 | NC_021164.1    | Ca_kabuli_chr05 | 2000474                 | AA                              | GG                | 1946429224               |
| SNP_P3_63028_2000494 | NC_021164.1    | Ca_kabuli_chr05 | 2000494                 | AA                              | GG                | 1946429225               |

| SNPs IDs             | Chromosome IDs | Chromosomes     | Physical positions (bp) | CDC Frontier (Reference genome) | (Pusa 256 & HPNB) | NCBI SNPdb Accession IDs |
|----------------------|----------------|-----------------|-------------------------|---------------------------------|-------------------|--------------------------|
| SNP_P3_63029_2000569 | NC_021164.1    | Ca_kabuli_chr05 | 2000569                 | AA                              | TT                | 1946429226               |
| SNP_P3_63030_2000590 | NC_021164.1    | Ca_kabuli_chr05 | 2000590                 | TT                              | CC                | 1946429227               |
| SNP_P3_63031_2000618 | NC_021164.1    | Ca_kabuli_chr05 | 2000618                 | AA                              | GG                | 1946429228               |
| SNP_P3_63032_2000669 | NC_021164.1    | Ca_kabuli_chr05 | 2000669                 | CC                              | TT                | 1946429229               |
| SNP_P3_63033_2000695 | NC_021164.1    | Ca_kabuli_chr05 | 2000695                 | AA                              | TT                | 1946429230               |
| SNP_P3_63034_2000730 | NC_021164.1    | Ca_kabuli_chr05 | 2000730                 | AA                              | TT                | 1946429231               |
| SNP_P3_63035_2000733 | NC_021164.1    | Ca_kabuli_chr05 | 2000733                 | GG                              | TT                | 1946429232               |
| SNP_P3_63036_2000747 | NC_021164.1    | Ca_kabuli_chr05 | 2000747                 | GG                              | TT                | 1946429233               |
| SNP_P3_63037_2002314 | NC_021164.1    | Ca_kabuli_chr05 | 2002314                 | TT                              | CC                | 1946429234               |
| SNP_P3_63038_2002320 | NC_021164.1    | Ca_kabuli_chr05 | 2002320                 | CC                              | TT                | 1946429235               |
| SNP_P3_63039_2002326 | NC_021164.1    | Ca_kabuli_chr05 | 2002326                 | TT                              | CC                | 1946429236               |
| SNP_P3_63040_2006878 | NC_021164.1    | Ca_kabuli_chr05 | 2006878                 | AA                              | TT                | 1946429237               |
| SNP_P3_63041_2008542 | NC_021164.1    | Ca_kabuli_chr05 | 2008542                 | TT                              | AA                | 1946429238               |
| SNP_P3_63042_2008777 | NC_021164.1    | Ca_kabuli_chr05 | 2008777                 | TT                              | CC                | 1946429239               |
| SNP_P3_63043_2008837 | NC_021164.1    | Ca_kabuli_chr05 | 2008837                 | TT                              | CC                | 1946429240               |
| SNP_P3_63044_2008849 | NC_021164.1    | Ca_kabuli_chr05 | 2008849                 | TT                              | CC                | 1946429241               |
| SNP_P3_63045_2008862 | NC_021164.1    | Ca_kabuli_chr05 | 2008862                 | GG                              | AA                | 1946429242               |
| SNP_P3_63046_2008870 | NC_021164.1    | Ca_kabuli_chr05 | 2008870                 | AA                              | CC                | 1946429244               |
| SNP_P3_63047_2008885 | NC_021164.1    | Ca_kabuli_chr05 | 2008885                 | TT                              | CC                | 1946429245               |
| SNP_P3_63048_2008903 | NC_021164.1    | Ca_kabuli_chr05 | 2008903                 | CC                              | TT                | 1946429247               |
| SNP_P3_63049_2008973 | NC_021164.1    | Ca_kabuli_chr05 | 2008973                 | TT                              | CC                | 1946429248               |
| SNP_P3_63050_2008990 | NC_021164.1    | Ca_kabuli_chr05 | 2008990                 | AA                              | GG                | 1946429250               |
| SNP_P3_63051_2009063 | NC_021164.1    | Ca_kabuli_chr05 | 2009063                 | TT                              | CC                | 1946429251               |
| SNP_P3_63052_2013532 | NC_021164.1    | Ca_kabuli_chr05 | 2013532                 | AA                              | TT                | 1946429252               |
| SNP_P3_63053_2018530 | NC_021164.1    | Ca_kabuli_chr05 | 2018530                 | AA                              | GG                | 1946429254               |
| SNP_P3_63054_2018786 | NC_021164.1    | Ca_kabuli_chr05 | 2018786                 | TT                              | AA                | 1946429255               |
| SNP_P3_63055_2031824 | NC_021164.1    | Ca_kabuli_chr05 | 2031824                 | CC                              | TT                | 1946429257               |
| SNP_P3_63056_2034538 | NC_021164.1    | Ca_kabuli_chr05 | 2034538                 | AA                              | GG                | 1946429258               |
| SNP_P3_63057_2037408 | NC_021164.1    | Ca_kabuli_chr05 | 2037408                 | TT                              | CC                | 1946429260               |
| SNP_P3_63058_2043227 | NC_021164.1    | Ca_kabuli_chr05 | 2043227                 | CC                              | GG                | 1946429262               |
| SNP_P3_63059_2043286 | NC_021164.1    | Ca_kabuli_chr05 | 2043286                 | GG                              | AA                | 1946429263               |
| SNP_P3_63060_2043314 | NC_021164.1    | Ca_kabuli_chr05 | 2043314                 | AA                              | CC                | 1946429265               |
| SNP_P3_63061_2043433 | NC_021164.1    | Ca_kabuli_chr05 | 2043433                 | TT                              | GG                | 1946429266               |
| SNP_P3_63062_2043494 | NC_021164.1    | Ca_kabuli_chr05 | 2043494                 | CC                              | TT                | 1946429268               |
| SNP_P3_63063_2043616 | NC_021164.1    | Ca_kabuli_chr05 | 2043616                 | GG                              | AA                | 1946429269               |
| SNP_P3_63064_2043651 | NC_021164.1    | Ca_kabuli_chr05 | 2043651                 | GG                              | AA                | 1946429271               |
| SNP_P3_63065_2068783 | NC_021164.1    | Ca_kabuli_chr05 | 2068783                 | CC                              | TT                | 1946429272               |
| SNP_P3_63066_2085507 | NC_021164.1    | Ca_kabuli_chr05 | 2085507                 | AA                              | CC                | 1946429273               |
| SNP_P3_63067_2085529 | NC_021164.1    | Ca_kabuli_chr05 | 2085529                 | TT                              | AA                | 1946429275               |
| SNP_P3_63068_2085566 | NC_021164.1    | Ca_kabuli_chr05 | 2085566                 | TT                              | GG                | 1946429276               |
| SNP_P3_63069_2085894 | NC_021164.1    | Ca_kabuli_chr05 | 2085894                 | GG                              | AA                | 1946429278               |
| SNP_P3_63070_2085924 | NC_021164.1    | Ca_kabuli_chr05 | 2085924                 | GG                              | CC                | 1946429279               |

| SNPs IDs             | Chromosome IDs | Chromosomes     | Physical positions (bp) | CDC Frontier (Reference genome) | (Pusa 256 & HPNB) | NCBI SNPdb Accession IDs |
|----------------------|----------------|-----------------|-------------------------|---------------------------------|-------------------|--------------------------|
| SNP_P3_63071_2095001 | NC_021164.1    | Ca_kabuli_chr05 | 2095001                 | AA                              | GG                | 1946429281               |
| SNP_P3_63072_2095028 | NC_021164.1    | Ca_kabuli_chr05 | 2095028                 | GG                              | AA                | 1946429282               |
| SNP_P3_63073_2095029 | NC_021164.1    | Ca_kabuli_chr05 | 2095029                 | TT                              | AA                | 1946429284               |
| SNP_P3_63074_2095051 | NC_021164.1    | Ca_kabuli_chr05 | 2095051                 | AA                              | GG                | 1946429285               |
| SNP_P3_63075_2095473 | NC_021164.1    | Ca_kabuli_chr05 | 2095473                 | CC                              | TT                | 1946429287               |
| SNP_P3_63076_2096863 | NC_021164.1    | Ca_kabuli_chr05 | 2096863                 | AA                              | GG                | 1946429288               |
| SNP_P3_63077_2097032 | NC_021164.1    | Ca_kabuli_chr05 | 2097032                 | TT                              | AA                | 1946429290               |
| SNP_P3_63078_2097039 | NC_021164.1    | Ca_kabuli_chr05 | 2097039                 | CC                              | TT                | 1946429291               |
| SNP_P3_63079_2097072 | NC_021164.1    | Ca_kabuli_chr05 | 2097072                 | AA                              | TT                | 1946429292               |
| SNP_P3_63080_2097073 | NC_021164.1    | Ca_kabuli_chr05 | 2097073                 | GG                              | TT                | 1946429294               |
| SNP_P3_63081_2097145 | NC_021164.1    | Ca_kabuli_chr05 | 2097145                 | AA                              | TT                | 1946429295               |
| SNP_P3_63082_2097357 | NC_021164.1    | Ca_kabuli_chr05 | 2097357                 | AA                              | CC                | 1946429297               |
| SNP_P3_63083_2098251 | NC_021164.1    | Ca_kabuli_chr05 | 2098251                 | CC                              | GG                | 1946429298               |
| SNP_P3_63084_2098803 | NC_021164.1    | Ca_kabuli_chr05 | 2098803                 | GG                              | AA                | 1946429300               |
| SNP_P3_63085_2098818 | NC_021164.1    | Ca_kabuli_chr05 | 2098818                 | CC                              | TT                | 1946429301               |
| SNP_P3_63086_2100307 | NC_021164.1    | Ca_kabuli_chr05 | 2100307                 | GG                              | AA                | 1946429303               |
| SNP_P3_63088_2100931 | NC_021164.1    | Ca_kabuli_chr05 | 2100931                 | GG                              | TT                | 1946429304               |
| SNP_P3_63089_2100942 | NC_021164.1    | Ca_kabuli_chr05 | 2100942                 | CC                              | TT                | 1946429306               |
| SNP_P3_63091_2131328 | NC_021164.1    | Ca_kabuli_chr05 | 2131328                 | CC                              | TT                | 1946429307               |
| SNP_P3_63092_2131330 | NC_021164.1    | Ca_kabuli_chr05 | 2131330                 | GG                              | AA                | 1946429309               |
| SNP_P3_63093_2131461 | NC_021164.1    | Ca_kabuli_chr05 | 2131461                 | TT                              | CC                | 1946429310               |
| SNP_P3_63094_2131647 | NC_021164.1    | Ca_kabuli_chr05 | 2131647                 | GG                              | TT                | 1946429312               |
| SNP_P3_63095_2131711 | NC_021164.1    | Ca_kabuli_chr05 | 2131711                 | AA                              | GG                | 1946429313               |
| SNP_P3_63097_2140843 | NC_021164.1    | Ca_kabuli_chr05 | 2140843                 | TT                              | AA                | 1946429315               |
| SNP_P3_63098_2159423 | NC_021164.1    | Ca_kabuli_chr05 | 2159423                 | AA                              | GG                | 1946429316               |
| SNP_P3_63100_2192263 | NC_021164.1    | Ca_kabuli_chr05 | 2192263                 | TT                              | CC                | 1946429318               |
| SNP_P3_63102_2194591 | NC_021164.1    | Ca_kabuli_chr05 | 2194591                 | CC                              | TT                | 1946429414               |
| SNP_P3_63103_2194599 | NC_021164.1    | Ca_kabuli_chr05 | 2194599                 | GG                              | AA                | 1946429415               |
| SNP_P3_63104_2246665 | NC_021164.1    | Ca_kabuli_chr05 | 2246665                 | GG                              | TT                | 1946429417               |
| SNP_P3_63105_2246685 | NC_021164.1    | Ca_kabuli_chr05 | 2246685                 | GG                              | CC                | 1946429418               |
| SNP_P3_63106_2248455 | NC_021164.1    | Ca_kabuli_chr05 | 2248455                 | AA                              | GG                | 1946429420               |
| SNP_P3_63108_2291160 | NC_021164.1    | Ca_kabuli_chr05 | 2291160                 | CC                              | TT                | 1946429421               |
| SNP_P3_63109_2293943 | NC_021164.1    | Ca_kabuli_chr05 | 2293943                 | CC                              | GG                | 1946429422               |
| SNP_P3_63111_2295090 | NC_021164.1    | Ca_kabuli_chr05 | 2295090                 | TT                              | CC                | 1946429424               |
| SNP_P3_63112_2296517 | NC_021164.1    | Ca_kabuli_chr05 | 2296517                 | GG                              | AA                | 1946429426               |
| SNP_P3_63113_2302945 | NC_021164.1    | Ca_kabuli_chr05 | 2302945                 | AA                              | GG                | 1946429427               |
| SNP_P3_63114_2304566 | NC_021164.1    | Ca_kabuli_chr05 | 2304566                 | TT                              | CC                | 1946429428               |
| SNP_P3_63115_2305207 | NC_021164.1    | Ca_kabuli_chr05 | 2305207                 | CC                              | AA                | 1946429430               |
| SNP_P3_63116_2305619 | NC_021164.1    | Ca_kabuli_chr05 | 2305619                 | TT                              | CC                | 1946429431               |
| SNP_P3_63117_2323228 | NC_021164.1    | Ca_kabuli_chr05 | 2323228                 | CC                              | TT                | 1946429433               |
| SNP_P3_63119_2323476 | NC_021164.1    | Ca_kabuli_chr05 | 2323476                 | TT                              | GG                | 1946429435               |
| SNP_P3_63120_2323564 | NC_021164.1    | Ca_kabuli_chr05 | 2323564                 | GG                              | AA                | 1946429436               |

| SNPs IDs             | Chromosome IDs | Chromosomes     | Physical positions (bp) | CDC Frontier (Reference genome) | (Pusa 256 & HPNB) | NCBI SNPdb Accession IDs |
|----------------------|----------------|-----------------|-------------------------|---------------------------------|-------------------|--------------------------|
| SNP_P3_63121_2323590 | NC_021164.1    | Ca_kabuli_chr05 | 2323590                 | AA                              | GG                | 1946429438               |
| SNP_P3_63122_2323599 | NC_021164.1    | Ca_kabuli_chr05 | 2323599                 | AA                              | CC                | 1946429439               |
| SNP_P3_63123_2323659 | NC_021164.1    | Ca_kabuli_chr05 | 2323659                 | CC                              | TT                | 1946429441               |
| SNP_P3_63124_2323727 | NC_021164.1    | Ca_kabuli_chr05 | 2323727                 | TT                              | CC                | 1946429442               |
| SNP_P3_63125_2323868 | NC_021164.1    | Ca_kabuli_chr05 | 2323868                 | CC                              | TT                | 1946429444               |
| SNP_P3_63126_2323904 | NC_021164.1    | Ca_kabuli_chr05 | 2323904                 | TT                              | CC                | 1946429445               |
| SNP_P3_63127_2323908 | NC_021164.1    | Ca_kabuli_chr05 | 2323908                 | CC                              | TT                | 1946429446               |
| SNP_P3_63128_2323935 | NC_021164.1    | Ca_kabuli_chr05 | 2323935                 | TT                              | AA                | 1946429448               |
| SNP_P3_63129_2324275 | NC_021164.1    | Ca_kabuli_chr05 | 2324275                 | TT                              | AA                | 1946429449               |
| SNP_P3_63130_2324295 | NC_021164.1    | Ca_kabuli_chr05 | 2324295                 | TT                              | CC                | 1946429451               |
| SNP_P3_63131_2324315 | NC_021164.1    | Ca_kabuli_chr05 | 2324315                 | CC                              | AA                | 1946429453               |
| SNP_P3_63132_2324326 | NC_021164.1    | Ca_kabuli_chr05 | 2324326                 | AA                              | CC                | 1946429454               |
| SNP_P3_63133_2324410 | NC_021164.1    | Ca_kabuli_chr05 | 2324410                 | TT                              | GG                | 1946429455               |
| SNP_P3_63134_2324452 | NC_021164.1    | Ca_kabuli_chr05 | 2324452                 | TT                              | AA                | 1946429457               |
| SNP_P3_63135_2324454 | NC_021164.1    | Ca_kabuli_chr05 | 2324454                 | AA                              | TT                | 1946429458               |
| SNP_P3_63136_2324535 | NC_021164.1    | Ca_kabuli_chr05 | 2324535                 | TT                              | GG                | 1946429460               |
| SNP_P3_63137_2324573 | NC_021164.1    | Ca_kabuli_chr05 | 2324573                 | TT                              | GG                | 1946429461               |
| SNP_P3_63138_2324630 | NC_021164.1    | Ca_kabuli_chr05 | 2324630                 | GG                              | AA                | 1946429463               |
| SNP_P3_63139_2324641 | NC_021164.1    | Ca_kabuli_chr05 | 2324641                 | CC                              | AA                | 1946429464               |
| SNP_P3_63140_2324665 | NC_021164.1    | Ca_kabuli_chr05 | 2324665                 | AA                              | GG                | 1946429465               |
| SNP_P3_63141_2324721 | NC_021164.1    | Ca_kabuli_chr05 | 2324721                 | GG                              | AA                | 1946429467               |
| SNP_P3_63142_2324815 | NC_021164.1    | Ca_kabuli_chr05 | 2324815                 | GG                              | CC                | 1946429468               |
| SNP_P3_63143_2324845 | NC_021164.1    | Ca_kabuli_chr05 | 2324845                 | TT                              | AA                | 1946429470               |
| SNP_P3_63144_2324915 | NC_021164.1    | Ca_kabuli_chr05 | 2324915                 | TT                              | GG                | 1946429471               |
| SNP_P3_63145_2324920 | NC_021164.1    | Ca_kabuli_chr05 | 2324920                 | TT                              | AA                | 1946429473               |
| SNP_P3_63146_2324934 | NC_021164.1    | Ca_kabuli_chr05 | 2324934                 | TT                              | CC                | 1946429475               |
| SNP_P3_63147_2325042 | NC_021164.1    | Ca_kabuli_chr05 | 2325042                 | TT                              | CC                | 1946429476               |
| SNP_P3_63148_2325059 | NC_021164.1    | Ca_kabuli_chr05 | 2325059                 | AA                              | CC                | 1946429477               |
| SNP_P3_63149_2325063 | NC_021164.1    | Ca_kabuli_chr05 | 2325063                 | TT                              | AA                | 1946429479               |
| SNP_P3_63150_2325064 | NC_021164.1    | Ca_kabuli_chr05 | 2325064                 | AA                              | GG                | 1946429480               |
| SNP_P3_63151_2325120 | NC_021164.1    | Ca_kabuli_chr05 | 2325120                 | AA                              | GG                | 1946429482               |
| SNP_P3_63152_2325154 | NC_021164.1    | Ca_kabuli_chr05 | 2325154                 | TT                              | AA                | 1946429483               |
| SNP_P3_63153_2325270 | NC_021164.1    | Ca_kabuli_chr05 | 2325270                 | AA                              | TT                | 1946429485               |
| SNP_P3_63154_2325458 | NC_021164.1    | Ca_kabuli_chr05 | 2325458                 | GG                              | AA                | 1946429486               |
| SNP_P3_63155_2325624 | NC_021164.1    | Ca_kabuli_chr05 | 2325624                 | GG                              | TT                | 1946429488               |
| SNP_P3_63156_2325629 | NC_021164.1    | Ca_kabuli_chr05 | 2325629                 | TT                              | CC                | 1946429489               |
| SNP_P3_63157_2325635 | NC_021164.1    | Ca_kabuli_chr05 | 2325635                 | TT                              | GG                | 1946429490               |
| SNP_P3_63158_2325878 | NC_021164.1    | Ca_kabuli_chr05 | 2325878                 | GG                              | AA                | 1946429492               |
| SNP_P3_63159_2325881 | NC_021164.1    | Ca_kabuli_chr05 | 2325881                 | GG                              | TT                | 1946429494               |
| SNP_P3_63160_2325928 | NC_021164.1    | Ca_kabuli_chr05 | 2325928                 | TT                              | CC                | 1946429495               |
| SNP_P3_63161_2326014 | NC_021164.1    | Ca_kabuli_chr05 | 2326014                 | GG                              | CC                | 1946429496               |
| SNP_P3_63162_2326349 | NC_021164.1    | Ca_kabuli_chr05 | 2326349                 | TT                              | AA                | 1946429498               |

| SNPs IDs             | Chromosome IDs | Chromosomes     | Physical positions (bp) | CDC Frontier (Reference genome) | (Pusa 256 & HPNB) | NCBI SNPdb Accession IDs |
|----------------------|----------------|-----------------|-------------------------|---------------------------------|-------------------|--------------------------|
| SNP_P3_63163_2326403 | NC_021164.1    | Ca_kabuli_chr05 | 2326403                 | GG                              | CC                | 1946429499               |
| SNP_P3_63164_2326415 | NC_021164.1    | Ca_kabuli_chr05 | 2326415                 | TT                              | GG                | 1946429501               |
| SNP_P3_63165_2326632 | NC_021164.1    | Ca_kabuli_chr05 | 2326632                 | CC                              | TT                | 1946429502               |
| SNP_P3_63166_2326682 | NC_021164.1    | Ca_kabuli_chr05 | 2326682                 | AA                              | CC                | 1946429504               |
| SNP_P3_63167_2326793 | NC_021164.1    | Ca_kabuli_chr05 | 2326793                 | AA                              | CC                | 1946429505               |
| SNP_P3_63168_2326873 | NC_021164.1    | Ca_kabuli_chr05 | 2326873                 | CC                              | TT                | 1946429506               |
| SNP_P3_63169_2326890 | NC_021164.1    | Ca_kabuli_chr05 | 2326890                 | AA                              | GG                | 1946429508               |
| SNP_P3_63170_2326917 | NC_021164.1    | Ca_kabuli_chr05 | 2326917                 | GG                              | CC                | 1946429509               |
| SNP_P3_63171_2326919 | NC_021164.1    | Ca_kabuli_chr05 | 2326919                 | AA                              | TT                | 1946429511               |
| SNP_P3_63172_2326968 | NC_021164.1    | Ca_kabuli_chr05 | 2326968                 | AA                              | GG                | 1946429512               |
| SNP_P3_63173_2327069 | NC_021164.1    | Ca_kabuli_chr05 | 2327069                 | CC                              | AA                | 1946429514               |
| SNP_P3_63174_2327108 | NC_021164.1    | Ca_kabuli_chr05 | 2327108                 | AA                              | CC                | 1946429515               |
| SNP_P3_63175_2327170 | NC_021164.1    | Ca_kabuli_chr05 | 2327170                 | CC                              | AA                | 1946429517               |
| SNP_P3_63176_2327178 | NC_021164.1    | Ca_kabuli_chr05 | 2327178                 | AA                              | TT                | 1946429518               |
| SNP_P3_63177_2327210 | NC_021164.1    | Ca_kabuli_chr05 | 2327210                 | TT                              | GG                | 1946429520               |
| SNP_P3_63178_2327225 | NC_021164.1    | Ca_kabuli_chr05 | 2327225                 | TT                              | CC                | 1946429521               |
| SNP_P3_63180_2327313 | NC_021164.1    | Ca_kabuli_chr05 | 2327313                 | AA                              | GG                | 1946429523               |
| SNP_P3_63181_2327323 | NC_021164.1    | Ca_kabuli_chr05 | 2327323                 | AA                              | GG                | 1946429524               |
| SNP_P3_63182_2327360 | NC_021164.1    | Ca_kabuli_chr05 | 2327360                 | AA                              | GG                | 1946429526               |
| SNP_P3_63183_2327361 | NC_021164.1    | Ca_kabuli_chr05 | 2327361                 | CC                              | TT                | 1946429527               |
| SNP_P3_63184_2327383 | NC_021164.1    | Ca_kabuli_chr05 | 2327383                 | TT                              | CC                | 1946429529               |
| SNP_P3_63185_2327390 | NC_021164.1    | Ca_kabuli_chr05 | 2327390                 | GG                              | TT                | 1946429530               |
| SNP_P3_63186_2327440 | NC_021164.1    | Ca_kabuli_chr05 | 2327440                 | AA                              | CC                | 1946429531               |
| SNP_P3_63187_2327472 | NC_021164.1    | Ca_kabuli_chr05 | 2327472                 | AA                              | GG                | 1946429533               |
| SNP_P3_63188_2327524 | NC_021164.1    | Ca_kabuli_chr05 | 2327524                 | TT                              | CC                | 1946429534               |
| SNP_P3_63189_2327561 | NC_021164.1    | Ca_kabuli_chr05 | 2327561                 | TT                              | AA                | 1946429536               |
| SNP_P3_63190_2327653 | NC_021164.1    | Ca_kabuli_chr05 | 2327653                 | CC                              | GG                | 1946429537               |
| SNP_P3_63191_2327912 | NC_021164.1    | Ca_kabuli_chr05 | 2327912                 | TT                              | AA                | 1946429539               |
| SNP_P3_63192_2327929 | NC_021164.1    | Ca_kabuli_chr05 | 2327929                 | TT                              | AA                | 1946429541               |
| SNP_P3_63193_2327930 | NC_021164.1    | Ca_kabuli_chr05 | 2327930                 | GG                              | AA                | 1946429542               |
| SNP_P3_63194_2327955 | NC_021164.1    | Ca_kabuli_chr05 | 2327955                 | CC                              | TT                | 1946429544               |
| SNP_P3_63195_2327980 | NC_021164.1    | Ca_kabuli_chr05 | 2327980                 | CC                              | TT                | 1946429545               |
| SNP_P3_63196_2328090 | NC_021164.1    | Ca_kabuli_chr05 | 2328090                 | TT                              | AA                | 1946429547               |
| SNP_P3_63197_2328128 | NC_021164.1    | Ca_kabuli_chr05 | 2328128                 | TT                              | CC                | 1946429548               |
| SNP_P3_63198_2328485 | NC_021164.1    | Ca_kabuli_chr05 | 2328485                 | AA                              | GG                | 1946429550               |
| SNP_P3_63199_2340150 | NC_021164.1    | Ca_kabuli_chr05 | 2340150                 | GG                              | AA                | 1946429551               |
| SNP_P3_63200_2340183 | NC_021164.1    | Ca_kabuli_chr05 | 2340183                 | TT                              | CC                | 1946429553               |
| SNP_P3_63201_2372812 | NC_021164.1    | Ca_kabuli_chr05 | 2372812                 | GG                              | AA                | 1946429554               |
| SNP_P3_63202_2372848 | NC_021164.1    | Ca_kabuli_chr05 | 2372848                 | GG                              | AA                | 1946429556               |
| SNP_P3_63203_2372985 | NC_021164.1    | Ca_kabuli_chr05 | 2372985                 | TT                              | CC                | 1946429557               |
| SNP_P3_63204_2375490 | NC_021164.1    | Ca_kabuli_chr05 | 2375490                 | TT                              | GG                | 1946429559               |
| SNP_P3_63205_2379997 | NC_021164.1    | Ca_kabuli_chr05 | 2379997                 | TT                              | AA                | 1946429560               |

| SNPs IDs             | Chromosome IDs | Chromosomes     | Physical positions (bp) | CDC Frontier (Reference genome) | (Pusa 256 & HPNB) | NCBI SNPdb Accession IDs |
|----------------------|----------------|-----------------|-------------------------|---------------------------------|-------------------|--------------------------|
| SNP_P3_63206_2384952 | NC_021164.1    | Ca_kabuli_chr05 | 2384952                 | TT                              | CC                | 1946429562               |
| SNP_P3_63207_2384964 | NC_021164.1    | Ca_kabuli_chr05 | 2384964                 | AA                              | TT                | 1946429563               |
| SNP_P3_63208_2385753 | NC_021164.1    | Ca_kabuli_chr05 | 2385753                 | GG                              | AA                | 1946429564               |
| SNP_P3_63209_2387041 | NC_021164.1    | Ca_kabuli_chr05 | 2387041                 | GG                              | CC                | 1946429566               |
| SNP_P3_63210_2387355 | NC_021164.1    | Ca_kabuli_chr05 | 2387355                 | AA                              | GG                | 1946429567               |
| SNP_P3_63211_2389232 | NC_021164.1    | Ca_kabuli_chr05 | 2389232                 | TT                              | CC                | 1946429569               |
| SNP_P3_63212_2402631 | NC_021164.1    | Ca_kabuli_chr05 | 2402631                 | GG                              | CC                | 1946429570               |
| SNP_P3_63214_2424192 | NC_021164.1    | Ca_kabuli_chr05 | 2424192                 | TT                              | GG                | 1946429572               |
| SNP_P3_63215_2449971 | NC_021164.1    | Ca_kabuli_chr05 | 2449971                 | GG                              | TT                | 1946429573               |
| SNP_P3_63216_2454809 | NC_021164.1    | Ca_kabuli_chr05 | 2454809                 | AA                              | CC                | 1946429575               |
| SNP_P3_63217_2454935 | NC_021164.1    | Ca_kabuli_chr05 | 2454935                 | CC                              | TT                | 1946429576               |
| SNP_P3_63218_2457302 | NC_021164.1    | Ca_kabuli_chr05 | 2457302                 | CC                              | TT                | 1946429578               |
| SNP_P3_63219_2474964 | NC_021164.1    | Ca_kabuli_chr05 | 2474964                 | TT                              | CC                | 1946429579               |
| SNP_P3_63221_2488032 | NC_021164.1    | Ca_kabuli_chr05 | 2488032                 | CC                              | TT                | 1946429581               |
| SNP_P3_63222_2495578 | NC_021164.1    | Ca_kabuli_chr05 | 2495578                 | GG                              | TT                | 1946429582               |
| SNP_P3_63223_2519218 | NC_021164.1    | Ca_kabuli_chr05 | 2519218                 | CC                              | TT                | 1946429583               |
| SNP_P3_63224_2519587 | NC_021164.1    | Ca_kabuli_chr05 | 2519587                 | AA                              | GG                | 1946429585               |
| SNP_P3_63225_2519728 | NC_021164.1    | Ca_kabuli_chr05 | 2519728                 | CC                              | TT                | 1946429586               |
| SNP_P3_63227_2521810 | NC_021164.1    | Ca_kabuli_chr05 | 2521810                 | TT                              | AA                | 1946429588               |
| SNP_P3_63228_2540094 | NC_021164.1    | Ca_kabuli_chr05 | 2540094                 | TT                              | GG                | 1946429590               |
| SNP_P3_63229_2540108 | NC_021164.1    | Ca_kabuli_chr05 | 2540108                 | TT                              | GG                | 1946429591               |
| SNP_P3_63230_2546738 | NC_021164.1    | Ca_kabuli_chr05 | 2546738                 | TT                              | CC                | 1946429593               |
| SNP_P3_63231_2547407 | NC_021164.1    | Ca_kabuli_chr05 | 2547407                 | CC                              | TT                | 1946429594               |
| SNP_P3_63232_2547681 | NC_021164.1    | Ca_kabuli_chr05 | 2547681                 | AA                              | GG                | 1946429595               |
| SNP_P3_63233_2548093 | NC_021164.1    | Ca_kabuli_chr05 | 2548093                 | TT                              | CC                | 1946429597               |
| SNP_P3_63236_2559111 | NC_021164.1    | Ca_kabuli_chr05 | 2559111                 | GG                              | AA                | 1946429598               |
| SNP_P3_63237_2567592 | NC_021164.1    | Ca_kabuli_chr05 | 2567592                 | GG                              | AA                | 1946429600               |
| SNP_P3_63239_2596699 | NC_021164.1    | Ca_kabuli_chr05 | 2596699                 | TT                              | AA                | 1946429601               |
| SNP_P3_63240_2598891 | NC_021164.1    | Ca_kabuli_chr05 | 2598891                 | TT                              | CC                | 1946429603               |
| SNP_P3_63241_2619175 | NC_021164.1    | Ca_kabuli_chr05 | 2619175                 | TT                              | GG                | 1946429604               |
| SNP_P3_63242_2619177 | NC_021164.1    | Ca_kabuli_chr05 | 2619177                 | TT                              | GG                | 1946429606               |
| SNP_P3_63243_2626646 | NC_021164.1    | Ca_kabuli_chr05 | 2626646                 | TT                              | CC                | 1946429607               |
| SNP_P3_63244_2626781 | NC_021164.1    | Ca_kabuli_chr05 | 2626781                 | AA                              | TT                | 1946429609               |
| SNP_P3_63245_2628422 | NC_021164.1    | Ca_kabuli_chr05 | 2628422                 | GG                              | TT                | 1946429611               |
| SNP_P3_63246_2628448 | NC_021164.1    | Ca_kabuli_chr05 | 2628448                 | AA                              | GG                | 1946429612               |
| SNP_P3_63247_2628499 | NC_021164.1    | Ca_kabuli_chr05 | 2628499                 | AA                              | TT                | 1946429613               |
| SNP_P3_63248_2628508 | NC_021164.1    | Ca_kabuli_chr05 | 2628508                 | TT                              | CC                | 1946429615               |
| SNP_P3_63249_2628538 | NC_021164.1    | Ca_kabuli_chr05 | 2628538                 | CC                              | TT                | 1946429616               |
| SNP_P3_63251_2628594 | NC_021164.1    | Ca_kabuli_chr05 | 2628594                 | GG                              | AA                | 1946429618               |
| SNP_P3_63252_2628664 | NC_021164.1    | Ca_kabuli_chr05 | 2628664                 | AA                              | GG                | 1946429619               |
| SNP_P3_63253_2628682 | NC_021164.1    | Ca_kabuli_chr05 | 2628682                 | CC                              | AA                | 1946429621               |
| SNP_P3_63254_2628891 | NC_021164.1    | Ca_kabuli_chr05 | 2628891                 | GG                              | AA                | 1946429622               |

| SNPs IDs             | Chromosome IDs | Chromosomes     | Physical positions (bp) | CDC Frontier (Reference genome) | (Pusa 256 & HPNB) | NCBI SNPdb Accession IDs |
|----------------------|----------------|-----------------|-------------------------|---------------------------------|-------------------|--------------------------|
| SNP_P3_63255_2628902 | NC_021164.1    | Ca_kabuli_chr05 | 2628902                 | GG                              | AA                | 1946429624               |
| SNP_P3_63256_2641065 | NC_021164.1    | Ca_kabuli_chr05 | 2641065                 | CC                              | TT                | 1946429625               |
| SNP_P3_63257_2641145 | NC_021164.1    | Ca_kabuli_chr05 | 2641145                 | CC                              | AA                | 1946429626               |
| SNP_P3_63258_2658390 | NC_021164.1    | Ca_kabuli_chr05 | 2658390                 | AA                              | CC                | 1946429628               |
| SNP_P3_63259_2663347 | NC_021164.1    | Ca_kabuli_chr05 | 2663347                 | TT                              | CC                | 1946429630               |
| SNP_P3_63260_2664079 | NC_021164.1    | Ca_kabuli_chr05 | 2664079                 | TT                              | GG                | 1946429631               |
| SNP_P3_63261_2664226 | NC_021164.1    | Ca_kabuli_chr05 | 2664226                 | AA                              | TT                | 1946429632               |
| SNP_P3_63262_2666747 | NC_021164.1    | Ca_kabuli_chr05 | 2666747                 | CC                              | TT                | 1946429634               |
| SNP_P3_63263_2666955 | NC_021164.1    | Ca_kabuli_chr05 | 2666955                 | GG                              | AA                | 1946429635               |
| SNP_P3_63264_2667310 | NC_021164.1    | Ca_kabuli_chr05 | 2667310                 | TT                              | CC                | 1946429637               |
| SNP_P3_63265_2667330 | NC_021164.1    | Ca_kabuli_chr05 | 2667330                 | CC                              | TT                | 1946429638               |
| SNP_P3_63266_2667333 | NC_021164.1    | Ca_kabuli_chr05 | 2667333                 | GG                              | TT                | 1946429640               |
| SNP_P3_63267_2669009 | NC_021164.1    | Ca_kabuli_chr05 | 2669009                 | TT                              | CC                | 1946429641               |
| SNP_P3_63268_2686812 | NC_021164.1    | Ca_kabuli_chr05 | 2686812                 | AA                              | TT                | 1946429643               |
| SNP_P3_63269_2726313 | NC_021164.1    | Ca_kabuli_chr05 | 2726313                 | GG                              | AA                | 1946429644               |
| SNP_P3_63270_2732411 | NC_021164.1    | Ca_kabuli_chr05 | 2732411                 | GG                              | CC                | 1946429646               |
| SNP_P3_63271_2732413 | NC_021164.1    | Ca_kabuli_chr05 | 2732413                 | GG                              | AA                | 1946429648               |
| SNP_P3_63272_2739470 | NC_021164.1    | Ca_kabuli_chr05 | 2739470                 | AA                              | GG                | 1946429649               |
| SNP_P3_63273_2744336 | NC_021164.1    | Ca_kabuli_chr05 | 2744336                 | GG                              | AA                | 1946429651               |
| SNP_P3_63274_2744383 | NC_021164.1    | Ca_kabuli_chr05 | 2744383                 | CC                              | TT                | 1946429652               |
| SNP_P3_63275_2744390 | NC_021164.1    | Ca_kabuli_chr05 | 2744390                 | TT                              | CC                | 1946429653               |
| SNP_P3_63276_2744583 | NC_021164.1    | Ca_kabuli_chr05 | 2744583                 | CC                              | AA                | 1946429655               |
| SNP_P3_63277_2744588 | NC_021164.1    | Ca_kabuli_chr05 | 2744588                 | CC                              | TT                | 1946429656               |
| SNP_P3_63278_2744639 | NC_021164.1    | Ca_kabuli_chr05 | 2744639                 | AA                              | GG                | 1946429658               |
| SNP_P3_63279_2744686 | NC_021164.1    | Ca_kabuli_chr05 | 2744686                 | TT                              | CC                | 1946429659               |
| SNP_P3_63280_2753644 | NC_021164.1    | Ca_kabuli_chr05 | 2753644                 | AA                              | GG                | 1946429661               |
| SNP_P3_63281_2754602 | NC_021164.1    | Ca_kabuli_chr05 | 2754602                 | GG                              | AA                | 1946429662               |
| SNP_P3_63283_2831185 | NC_021164.1    | Ca_kabuli_chr05 | 2831185                 | AA                              | GG                | 1946429664               |
| SNP_P3_63284_2852452 | NC_021164.1    | Ca_kabuli_chr05 | 2852452                 | TT                              | CC                | 1946429665               |
| SNP_P3_63285_2852454 | NC_021164.1    | Ca_kabuli_chr05 | 2852454                 | AA                              | TT                | 1946429667               |
| SNP_P3_63286_2912235 | NC_021164.1    | Ca_kabuli_chr05 | 2912235                 | CC                              | AA                | 1946429670               |
| SNP_P3_63287_2912237 | NC_021164.1    | Ca_kabuli_chr05 | 2912237                 | GG                              | AA                | 1946429672               |
| SNP_P3_63288_2912241 | NC_021164.1    | Ca_kabuli_chr05 | 2912241                 | CC                              | AA                | 1946429673               |
| SNP_P3_63289_2912253 | NC_021164.1    | Ca_kabuli_chr05 | 2912253                 | AA                              | CC                | 1946429675               |
| SNP_P3_63290_2912290 | NC_021164.1    | Ca_kabuli_chr05 | 2912290                 | AA                              | GG                | 1946429676               |
| SNP_P3_63291_2912297 | NC_021164.1    | Ca_kabuli_chr05 | 2912297                 | AA                              | GG                | 1946429678               |
| SNP_P3_63292_2912543 | NC_021164.1    | Ca_kabuli_chr05 | 2912543                 | AA                              | GG                | 1946429679               |
| SNP_P3_63293_2912789 | NC_021164.1    | Ca_kabuli_chr05 | 2912789                 | AA                              | GG                | 1946429681               |
| SNP_P3_63294_2917395 | NC_021164.1    | Ca_kabuli_chr05 | 2917395                 | GG                              | TT                | 1946429683               |
| SNP_P3_63295_2920680 | NC_021164.1    | Ca_kabuli_chr05 | 2920680                 | AA                              | GG                | 1946429684               |
| SNP_P3_63296_2932714 | NC_021164.1    | Ca_kabuli_chr05 | 2932714                 | TT                              | CC                | 1946429686               |
| SNP_P3_63297_2932716 | NC_021164.1    | Ca_kabuli_chr05 | 2932716                 | TT                              | GG                | 1946429687               |



| SNPs IDs             | Chromosome IDs | Chromosomes     | Physical positions (bp) | CDC Frontier (Reference genome) | (Pusa 256 & HPNB) | NCBI SNPdb Accession IDs |
|----------------------|----------------|-----------------|-------------------------|---------------------------------|-------------------|--------------------------|
| SNP_P3_63298_2948530 | NC_021164.1    | Ca_kabuli_chr05 | 2948530                 | GG                              | TT                | 1946429688               |
| SNP_P3_63299_2948531 | NC_021164.1    | Ca_kabuli_chr05 | 2948531                 | TT                              | CC                | 1946429690               |
| SNP_P3_63300_2950701 | NC_021164.1    | Ca_kabuli_chr05 | 2950701                 | CC                              | TT                | 1946429691               |
| SNP_P3_63301_2964351 | NC_021164.1    | Ca_kabuli_chr05 | 2964351                 | TT                              | GG                | 1946429693               |
| SNP_P3_63302_3059138 | NC_021164.1    | Ca_kabuli_chr05 | 3059138                 | TT                              | CC                | 1946429694               |
| SNP_P3_63303_3066729 | NC_021164.1    | Ca_kabuli_chr05 | 3066729                 | AA                              | GG                | 1946429696               |
| SNP_P3_63304_3066731 | NC_021164.1    | Ca_kabuli_chr05 | 3066731                 | GG                              | AA                | 1946429697               |
| SNP_P3_63305_3066790 | NC_021164.1    | Ca_kabuli_chr05 | 3066790                 | AA                              | GG                | 1946429699               |
| SNP_P3_63306_3067090 | NC_021164.1    | Ca_kabuli_chr05 | 3067090                 | GG                              | AA                | 1946429700               |
| SNP_P3_63307_3067114 | NC_021164.1    | Ca_kabuli_chr05 | 3067114                 | CC                              | TT                | 1946429702               |
| SNP_P3_63308_3067141 | NC_021164.1    | Ca_kabuli_chr05 | 3067141                 | AA                              | GG                | 1946429704               |
| SNP_P3_63309_3067337 | NC_021164.1    | Ca_kabuli_chr05 | 3067337                 | TT                              | GG                | 1946429705               |
| SNP_P3_63310_3067511 | NC_021164.1    | Ca_kabuli_chr05 | 3067511                 | TT                              | CC                | 1946429707               |
| SNP_P3_63311_3070154 | NC_021164.1    | Ca_kabuli_chr05 | 3070154                 | CC                              | TT                | 1946429708               |
| SNP_P3_63312_3070498 | NC_021164.1    | Ca_kabuli_chr05 | 3070498                 | AA                              | CC                | 1946429710               |
| SNP_P3_63313_3070542 | NC_021164.1    | Ca_kabuli_chr05 | 3070542                 | AA                              | GG                | 1946429711               |
| SNP_P3_63315_3116989 | NC_021164.1    | Ca_kabuli_chr05 | 3116989                 | CC                              | TT                | 1946429713               |
| SNP_P3_63316_3117498 | NC_021164.1    | Ca_kabuli_chr05 | 3117498                 | AA                              | CC                | 1946429714               |
| SNP_P3_63317_3117511 | NC_021164.1    | Ca_kabuli_chr05 | 3117511                 | CC                              | TT                | 1946429716               |
| SNP_P3_63318_3117517 | NC_021164.1    | Ca_kabuli_chr05 | 3117517                 | TT                              | GG                | 1946429717               |
| SNP_P3_63319_3117523 | NC_021164.1    | Ca_kabuli_chr05 | 3117523                 | TT                              | CC                | 1946429718               |
| SNP_P3_63320_3117812 | NC_021164.1    | Ca_kabuli_chr05 | 3117812                 | AA                              | TT                | 1946429720               |
| SNP_P3_63321_3117874 | NC_021164.1    | Ca_kabuli_chr05 | 3117874                 | AA                              | GG                | 1946429722               |
| SNP_P3_63322_3117888 | NC_021164.1    | Ca_kabuli_chr05 | 3117888                 | TT                              | GG                | 1946429723               |
| SNP_P3_63323_3117892 | NC_021164.1    | Ca_kabuli_chr05 | 3117892                 | TT                              | GG                | 1946429724               |
| SNP_P3_63324_3117975 | NC_021164.1    | Ca_kabuli_chr05 | 3117975                 | TT                              | GG                | 1946429726               |
| SNP_P3_63325_3118035 | NC_021164.1    | Ca_kabuli_chr05 | 3118035                 | CC                              | TT                | 1946429727               |
| SNP_P3_63326_3118053 | NC_021164.1    | Ca_kabuli_chr05 | 3118053                 | GG                              | AA                | 1946429729               |
| SNP_P3_63327_3118085 | NC_021164.1    | Ca_kabuli_chr05 | 3118085                 | TT                              | CC                | 1946429730               |
| SNP_P3_63328_3118475 | NC_021164.1    | Ca_kabuli_chr05 | 3118475                 | AA                              | TT                | 1946429732               |
| SNP_P3_63329_3150466 | NC_021164.1    | Ca_kabuli_chr05 | 3150466                 | GG                              | AA                | 1946429733               |
| SNP_P3_63330_3170635 | NC_021164.1    | Ca_kabuli_chr05 | 3170635                 | TT                              | CC                | 1946429735               |
| SNP_P3_63331_3170944 | NC_021164.1    | Ca_kabuli_chr05 | 3170944                 | AA                              | CC                | 1946429736               |
| SNP_P3_63332_3244333 | NC_021164.1    | Ca_kabuli_chr05 | 3244333                 | AA                              | GG                | 1946429738               |
| SNP_P3_63333_3254342 | NC_021164.1    | Ca_kabuli_chr05 | 3254342                 | CC                              | AA                | 1946429739               |
| SNP_P3_63334_3259808 | NC_021164.1    | Ca_kabuli_chr05 | 3259808                 | GG                              | AA                | 1946429741               |
| SNP_P3_63337_3297859 | NC_021164.1    | Ca_kabuli_chr05 | 3297859                 | GG                              | AA                | 1946429742               |
| SNP_P3_63338_3298378 | NC_021164.1    | Ca_kabuli_chr05 | 3298378                 | GG                              | AA                | 1946429744               |
| SNP_P3_63339_3298383 | NC_021164.1    | Ca_kabuli_chr05 | 3298383                 | AA                              | GG                | 1946429745               |
| SNP_P3_63340_3299614 | NC_021164.1    | Ca_kabuli_chr05 | 3299614                 | GG                              | TT                | 1946429746               |
| SNP_P3_63341_3299619 | NC_021164.1    | Ca_kabuli_chr05 | 3299619                 | GG                              | TT                | 1946429748               |
| SNP_P3_63342_3299643 | NC_021164.1    | Ca_kabuli_chr05 | 3299643                 | AA                              | GG                | 1946429749               |

| SNPs IDs             | Chromosome IDs | Chromosomes     | Physical positions (bp) | CDC Frontier (Reference genome) | (Pusa 256 & HPNB) | NCBI SNPdb Accession IDs |
|----------------------|----------------|-----------------|-------------------------|---------------------------------|-------------------|--------------------------|
| SNP_P3_63343_3299749 | NC_021164.1    | Ca_kabuli_chr05 | 3299749                 | CC                              | GG                | 1946429751               |
| SNP_P3_63344_3303597 | NC_021164.1    | Ca_kabuli_chr05 | 3303597                 | TT                              | CC                | 1946429753               |
| SNP_P3_63346_3336904 | NC_021164.1    | Ca_kabuli_chr05 | 3336904                 | CC                              | TT                | 1946429754               |
| SNP_P3_63347_3345367 | NC_021164.1    | Ca_kabuli_chr05 | 3345367                 | TT                              | CC                | 1946429756               |
| SNP_P3_63348_3352691 | NC_021164.1    | Ca_kabuli_chr05 | 3352691                 | CC                              | TT                | 1946429757               |
| SNP_P3_63349_3353004 | NC_021164.1    | Ca_kabuli_chr05 | 3353004                 | GG                              | AA                | 1946429759               |
| SNP_P3_63350_3353014 | NC_021164.1    | Ca_kabuli_chr05 | 3353014                 | TT                              | AA                | 1946429760               |
| SNP_P3_63351_3353375 | NC_021164.1    | Ca_kabuli_chr05 | 3353375                 | AA                              | GG                | 1946429761               |
| SNP_P3_63352_3367364 | NC_021164.1    | Ca_kabuli_chr05 | 3367364                 | GG                              | AA                | 1946429763               |
| SNP_P3_63353_3370956 | NC_021164.1    | Ca_kabuli_chr05 | 3370956                 | TT                              | GG                | 1946429764               |
| SNP_P3_63354_3376530 | NC_021164.1    | Ca_kabuli_chr05 | 3376530                 | TT                              | AA                | 1946429766               |
| SNP_P3_63355_3415302 | NC_021164.1    | Ca_kabuli_chr05 | 3415302                 | CC                              | TT                | 1946429767               |
| SNP_P3_63356_3415500 | NC_021164.1    | Ca_kabuli_chr05 | 3415500                 | AA                              | GG                | 1946429769               |
| SNP_P3_63357_3419873 | NC_021164.1    | Ca_kabuli_chr05 | 3419873                 | CC                              | AA                | 1946429770               |
| SNP_P3_63358_3419948 | NC_021164.1    | Ca_kabuli_chr05 | 3419948                 | GG                              | AA                | 1946429772               |
| SNP_P3_63359_3457088 | NC_021164.1    | Ca_kabuli_chr05 | 3457088                 | TT                              | CC                | 1946429774               |
| SNP_P3_63360_3457450 | NC_021164.1    | Ca_kabuli_chr05 | 3457450                 | AA                              | TT                | 1946429775               |
| SNP_P3_63361_3468403 | NC_021164.1    | Ca_kabuli_chr05 | 3468403                 | AA                              | GG                | 1946429776               |
| SNP_P3_63362_3468427 | NC_021164.1    | Ca_kabuli_chr05 | 3468427                 | AA                              | TT                | 1946429778               |
| SNP_P3_63363_3476687 | NC_021164.1    | Ca_kabuli_chr05 | 3476687                 | AA                              | CC                | 1946429779               |
| SNP_P3_63364_3476691 | NC_021164.1    | Ca_kabuli_chr05 | 3476691                 | GG                              | AA                | 1946429781               |
| SNP_P3_63365_3547159 | NC_021164.1    | Ca_kabuli_chr05 | 3547159                 | GG                              | AA                | 1946429782               |
| SNP_P3_63366_3549718 | NC_021164.1    | Ca_kabuli_chr05 | 3549718                 | TT                              | CC                | 1946429784               |
| SNP_P3_63367_3560432 | NC_021164.1    | Ca_kabuli_chr05 | 3560432                 | GG                              | AA                | 1946429785               |
| SNP_P3_63368_3569359 | NC_021164.1    | Ca_kabuli_chr05 | 3569359                 | CC                              | GG                | 1946429787               |
| SNP_P3_63369_3570448 | NC_021164.1    | Ca_kabuli_chr05 | 3570448                 | AA                              | GG                | 1946429788               |
| SNP_P3_63370_3570468 | NC_021164.1    | Ca_kabuli_chr05 | 3570468                 | AA                              | GG                | 1946429790               |
| SNP_P3_63371_3570504 | NC_021164.1    | Ca_kabuli_chr05 | 3570504                 | AA                              | GG                | 1946429791               |
| SNP_P3_63372_3570602 | NC_021164.1    | Ca_kabuli_chr05 | 3570602                 | GG                              | AA                | 1946429793               |
| SNP_P3_63373_3570619 | NC_021164.1    | Ca_kabuli_chr05 | 3570619                 | CC                              | TT                | 1946429795               |
| SNP_P3_63374_3570634 | NC_021164.1    | Ca_kabuli_chr05 | 3570634                 | GG                              | AA                | 1946429796               |
| SNP_P3_63376_3570676 | NC_021164.1    | Ca_kabuli_chr05 | 3570676                 | TT                              | GG                | 1946429798               |
| SNP_P3_63377_3570727 | NC_021164.1    | Ca_kabuli_chr05 | 3570727                 | TT                              | GG                | 1946429799               |
| SNP_P3_63378_3570746 | NC_021164.1    | Ca_kabuli_chr05 | 3570746                 | GG                              | AA                | 1946429801               |
| SNP_P3_63379_3570788 | NC_021164.1    | Ca_kabuli_chr05 | 3570788                 | AA                              | TT                | 1946429802               |
| SNP_P3_63380_3570796 | NC_021164.1    | Ca_kabuli_chr05 | 3570796                 | AA                              | TT                | 1946429803               |
| SNP_P3_63381_3570834 | NC_021164.1    | Ca_kabuli_chr05 | 3570834                 | CC                              | AA                | 1946429805               |
| SNP_P3_63382_3577752 | NC_021164.1    | Ca_kabuli_chr05 | 3577752                 | AA                              | GG                | 1946429807               |
| SNP_P3_63383_3577759 | NC_021164.1    | Ca_kabuli_chr05 | 3577759                 | TT                              | CC                | 1946429808               |
| SNP_P3_63384_3577794 | NC_021164.1    | Ca_kabuli_chr05 | 3577794                 | AA                              | GG                | 1946429810               |
| SNP_P3_63385_3577837 | NC_021164.1    | Ca_kabuli_chr05 | 3577837                 | AA                              | CC                | 1946429812               |
| SNP_P3_63386_3577885 | NC_021164.1    | Ca_kabuli_chr05 | 3577885                 | TT                              | CC                | 1946429813               |

| SNPs IDs             | Chromosome IDs | Chromosomes     | Physical positions (bp) | CDC Frontier (Reference genome) | (Pusa 256 & HPNB) | NCBI SNPdb Accession IDs |
|----------------------|----------------|-----------------|-------------------------|---------------------------------|-------------------|--------------------------|
| SNP_P3_63387_3578205 | NC_021164.1    | Ca_kabuli_chr05 | 3578205                 | AA                              | CC                | 1946429815               |
| SNP_P3_63388_3584597 | NC_021164.1    | Ca_kabuli_chr05 | 3584597                 | TT                              | GG                | 1946429816               |
| SNP_P3_63389_3589768 | NC_021164.1    | Ca_kabuli_chr05 | 3589768                 | AA                              | GG                | 1946429818               |
| SNP_P3_63390_3589828 | NC_021164.1    | Ca_kabuli_chr05 | 3589828                 | CC                              | TT                | 1946429819               |
| SNP_P3_63391_3589834 | NC_021164.1    | Ca_kabuli_chr05 | 3589834                 | TT                              | CC                | 1946429820               |
| SNP_P3_63392_3590337 | NC_021164.1    | Ca_kabuli_chr05 | 3590337                 | AA                              | GG                | 1946429822               |
| SNP_P3_63393_3590791 | NC_021164.1    | Ca_kabuli_chr05 | 3590791                 | GG                              | AA                | 1946429823               |
| SNP_P3_63394_3592428 | NC_021164.1    | Ca_kabuli_chr05 | 3592428                 | GG                              | TT                | 1946429825               |
| SNP_P3_63395_3592446 | NC_021164.1    | Ca_kabuli_chr05 | 3592446                 | AA                              | TT                | 1946429827               |
| SNP_P3_63396_3592452 | NC_021164.1    | Ca_kabuli_chr05 | 3592452                 | CC                              | AA                | 1946429828               |
| SNP_P3_63397_3596009 | NC_021164.1    | Ca_kabuli_chr05 | 3596009                 | TT                              | CC                | 1946429830               |
| SNP_P3_63398_3598098 | NC_021164.1    | Ca_kabuli_chr05 | 3598098                 | GG                              | AA                | 1946429831               |
| SNP_P3_63399_3624698 | NC_021164.1    | Ca_kabuli_chr05 | 3624698                 | TT                              | CC                | 1946429833               |
| SNP_P3_63400_3639262 | NC_021164.1    | Ca_kabuli_chr05 | 3639262                 | TT                              | CC                | 1946429834               |
| SNP_P3_63401_3639553 | NC_021164.1    | Ca_kabuli_chr05 | 3639553                 | TT                              | CC                | 1946429837               |
| SNP_P3_63402_3639576 | NC_021164.1    | Ca_kabuli_chr05 | 3639576                 | GG                              | AA                | 1946429838               |
| SNP_P3_63403_3639823 | NC_021164.1    | Ca_kabuli_chr05 | 3639823                 | AA                              | GG                | 1946429840               |
| SNP_P3_63404_3639824 | NC_021164.1    | Ca_kabuli_chr05 | 3639824                 | TT                              | CC                | 1946429841               |
| SNP_P3_63405_3645415 | NC_021164.1    | Ca_kabuli_chr05 | 3645415                 | AA                              | TT                | 1946429843               |
| SNP_P3_63406_3657653 | NC_021164.1    | Ca_kabuli_chr05 | 3657653                 | AA                              | GG                | 1946429844               |
| SNP_P3_63407_3691097 | NC_021164.1    | Ca_kabuli_chr05 | 3691097                 | AA                              | GG                | 1946429846               |
| SNP_P3_63408_3691099 | NC_021164.1    | Ca_kabuli_chr05 | 3691099                 | CC                              | TT                | 1946429847               |
| SNP_P3_63409_3705041 | NC_021164.1    | Ca_kabuli_chr05 | 3705041                 | AA                              | GG                | 1946429849               |
| SNP_P3_63410_3713947 | NC_021164.1    | Ca_kabuli_chr05 | 3713947                 | AA                              | TT                | 1946429851               |
| SNP_P3_63411_3717164 | NC_021164.1    | Ca_kabuli_chr05 | 3717164                 | TT                              | AA                | 1946429852               |
| SNP_P3_63412_3717186 | NC_021164.1    | Ca_kabuli_chr05 | 3717186                 | GG                              | AA                | 1946429853               |
| SNP_P3_63413_3717312 | NC_021164.1    | Ca_kabuli_chr05 | 3717312                 | TT                              | AA                | 1946429855               |
| SNP_P3_63415_3742124 | NC_021164.1    | Ca_kabuli_chr05 | 3742124                 | GG                              | AA                | 1946429856               |
| SNP_P3_63416_3742570 | NC_021164.1    | Ca_kabuli_chr05 | 3742570                 | TT                              | AA                | 1946429858               |
| SNP_P3_63417_3742626 | NC_021164.1    | Ca_kabuli_chr05 | 3742626                 | AA                              | GG                | 1946429859               |
| SNP_P3_63418_3742766 | NC_021164.1    | Ca_kabuli_chr05 | 3742766                 | AA                              | GG                | 1946429861               |
| SNP_P3_63419_3742807 | NC_021164.1    | Ca_kabuli_chr05 | 3742807                 | CC                              | TT                | 1946429862               |
| SNP_P3_63420_3749569 | NC_021164.1    | Ca_kabuli_chr05 | 3749569                 | TT                              | AA                | 1946429863               |
| SNP_P3_63421_3779301 | NC_021164.1    | Ca_kabuli_chr05 | 3779301                 | AA                              | GG                | 1946429919               |
| SNP_P3_63422_3782556 | NC_021164.1    | Ca_kabuli_chr05 | 3782556                 | GG                              | AA                | 1946429920               |
| SNP_P3_63423_3791250 | NC_021164.1    | Ca_kabuli_chr05 | 3791250                 | AA                              | GG                | 1946429921               |
| SNP_P3_63424_3791273 | NC_021164.1    | Ca_kabuli_chr05 | 3791273                 | TT                              | AA                | 1946429923               |
| SNP_P3_63425_3791274 | NC_021164.1    | Ca_kabuli_chr05 | 3791274                 | GG                              | AA                | 1946429924               |
| SNP_P3_63426_3791467 | NC_021164.1    | Ca_kabuli_chr05 | 3791467                 | AA                              | CC                | 1946429926               |
| SNP_P3_63427_3797799 | NC_021164.1    | Ca_kabuli_chr05 | 3797799                 | GG                              | TT                | 1946429928               |
| SNP_P3_63428_3798618 | NC_021164.1    | Ca_kabuli_chr05 | 3798618                 | AA                              | GG                | 1946429929               |
| SNP_P3_63429_3798693 | NC_021164.1    | Ca_kabuli_chr05 | 3798693                 | AA                              | GG                | 1946429930               |

| SNPs IDs             | Chromosome IDs | Chromosomes     | Physical positions (bp) | CDC Frontier (Reference genome) | (Pusa 256 & HPNB) | NCBI SNPdb Accession IDs |
|----------------------|----------------|-----------------|-------------------------|---------------------------------|-------------------|--------------------------|
| SNP_P3_63430_3798701 | NC_021164.1    | Ca_kabuli_chr05 | 3798701                 | TT                              | GG                | 1946429932               |
| SNP_P3_63431_3798714 | NC_021164.1    | Ca_kabuli_chr05 | 3798714                 | TT                              | CC                | 1946429933               |
| SNP_P3_63432_3798982 | NC_021164.1    | Ca_kabuli_chr05 | 3798982                 | TT                              | AA                | 1946429935               |
| SNP_P3_63433_3799007 | NC_021164.1    | Ca_kabuli_chr05 | 3799007                 | GG                              | AA                | 1946429936               |
| SNP_P3_63434_3799036 | NC_021164.1    | Ca_kabuli_chr05 | 3799036                 | TT                              | CC                | 1946429938               |
| SNP_P3_63435_3799059 | NC_021164.1    | Ca_kabuli_chr05 | 3799059                 | TT                              | AA                | 1946429939               |
| SNP_P3_63436_3799066 | NC_021164.1    | Ca_kabuli_chr05 | 3799066                 | TT                              | AA                | 1946429940               |
| SNP_P3_63437_3808700 | NC_021164.1    | Ca_kabuli_chr05 | 3808700                 | AA                              | GG                | 1946429942               |
| SNP_P3_63438_3808798 | NC_021164.1    | Ca_kabuli_chr05 | 3808798                 | TT                              | CC                | 1946429943               |
| SNP_P3_63439_3808882 | NC_021164.1    | Ca_kabuli_chr05 | 3808882                 | TT                              | CC                | 1946429945               |
| SNP_P3_63440_3808905 | NC_021164.1    | Ca_kabuli_chr05 | 3808905                 | TT                              | CC                | 1946429946               |
| SNP_P3_63441_3808955 | NC_021164.1    | Ca_kabuli_chr05 | 3808955                 | CC                              | TT                | 1946429948               |
| SNP_P3_63442_3809051 | NC_021164.1    | Ca_kabuli_chr05 | 3809051                 | CC                              | GG                | 1946429950               |
| SNP_P3_63443_3809087 | NC_021164.1    | Ca_kabuli_chr05 | 3809087                 | AA                              | GG                | 1946429951               |
| SNP_P3_63444_3809239 | NC_021164.1    | Ca_kabuli_chr05 | 3809239                 | AA                              | TT                | 1946429953               |
| SNP_P3_63445_3824207 | NC_021164.1    | Ca_kabuli_chr05 | 3824207                 | TT                              | CC                | 1946429954               |
| SNP_P3_63446_3831048 | NC_021164.1    | Ca_kabuli_chr05 | 3831048                 | AA                              | GG                | 1946429955               |
| SNP_P3_63447_3836284 | NC_021164.1    | Ca_kabuli_chr05 | 3836284                 | AA                              | TT                | 1946429957               |
| SNP_P3_63448_3836371 | NC_021164.1    | Ca_kabuli_chr05 | 3836371                 | GG                              | AA                | 1946429958               |
| SNP_P3_63449_3836672 | NC_021164.1    | Ca_kabuli_chr05 | 3836672                 | TT                              | AA                | 1946429960               |
| SNP_P3_63450_3837827 | NC_021164.1    | Ca_kabuli_chr05 | 3837827                 | TT                              | CC                | 1946429961               |
| SNP_P3_63451_3838149 | NC_021164.1    | Ca_kabuli_chr05 | 3838149                 | AA                              | CC                | 1946429962               |
| SNP_P3_63452_3838231 | NC_021164.1    | Ca_kabuli_chr05 | 3838231                 | TT                              | CC                | 1946429964               |
| SNP_P3_63453_3839179 | NC_021164.1    | Ca_kabuli_chr05 | 3839179                 | GG                              | AA                | 1946429965               |
| SNP_P3_63454_3839183 | NC_021164.1    | Ca_kabuli_chr05 | 3839183                 | AA                              | TT                | 1946429967               |
| SNP_P3_63455_3843942 | NC_021164.1    | Ca_kabuli_chr05 | 3843942                 | TT                              | AA                | 1946429968               |
| SNP_P3_63456_3851971 | NC_021164.1    | Ca_kabuli_chr05 | 3851971                 | TT                              | CC                | 1946429970               |
| SNP_P3_63457_3864961 | NC_021164.1    | Ca_kabuli_chr05 | 3864961                 | TT                              | AA                | 1946429971               |
| SNP_P3_63458_3865035 | NC_021164.1    | Ca_kabuli_chr05 | 3865035                 | AA                              | TT                | 1946429973               |
| SNP_P3_63459_3865052 | NC_021164.1    | Ca_kabuli_chr05 | 3865052                 | AA                              | TT                | 1946429974               |
| SNP_P3_63460_3865098 | NC_021164.1    | Ca_kabuli_chr05 | 3865098                 | TT                              | AA                | 1946429976               |
| SNP_P3_63461_3865353 | NC_021164.1    | Ca_kabuli_chr05 | 3865353                 | AA                              | TT                | 1946429977               |
| SNP_P3_63462_3865363 | NC_021164.1    | Ca_kabuli_chr05 | 3865363                 | AA                              | TT                | 1946429979               |
| SNP_P3_63463_3865364 | NC_021164.1    | Ca_kabuli_chr05 | 3865364                 | GG                              | AA                | 1946429980               |
| SNP_P3_63464_3865466 | NC_021164.1    | Ca_kabuli_chr05 | 3865466                 | TT                              | AA                | 1946429981               |
| SNP_P3_63465_3865497 | NC_021164.1    | Ca_kabuli_chr05 | 3865497                 | CC                              | TT                | 1946429983               |
| SNP_P3_63466_3865536 | NC_021164.1    | Ca_kabuli_chr05 | 3865536                 | TT                              | AA                | 1946429984               |
| SNP_P3_63467_3865616 | NC_021164.1    | Ca_kabuli_chr05 | 3865616                 | AA                              | TT                | 1946429986               |
| SNP_P3_63468_3865709 | NC_021164.1    | Ca_kabuli_chr05 | 3865709                 | AA                              | TT                | 1946429987               |
| SNP_P3_63469_3865747 | NC_021164.1    | Ca_kabuli_chr05 | 3865747                 | GG                              | AA                | 1946429989               |
| SNP_P3_63470_3865756 | NC_021164.1    | Ca_kabuli_chr05 | 3865756                 | CC                              | AA                | 1946429990               |
| SNP_P3_63471_3865773 | NC_021164.1    | Ca_kabuli_chr05 | 3865773                 | AA                              | GG                | 1946429992               |

| SNPs IDs             | Chromosome IDs | Chromosomes     | Physical positions (bp) | CDC Frontier (Reference genome) | (Pusa 256 & HPNB) | NCBI SNPdb Accession IDs |
|----------------------|----------------|-----------------|-------------------------|---------------------------------|-------------------|--------------------------|
| SNP_P3_63473_3865925 | NC_021164.1    | Ca_kabuli_chr05 | 3865925                 | GG                              | TT                | 1946429993               |
| SNP_P3_63474_3868815 | NC_021164.1    | Ca_kabuli_chr05 | 3868815                 | AA                              | TT                | 1946429995               |
| SNP_P3_63476_3869349 | NC_021164.1    | Ca_kabuli_chr05 | 3869349                 | TT                              | AA                | 1946429996               |
| SNP_P3_63477_3869459 | NC_021164.1    | Ca_kabuli_chr05 | 3869459                 | AA                              | GG                | 1946429998               |
| SNP_P3_63478_3874676 | NC_021164.1    | Ca_kabuli_chr05 | 3874676                 | TT                              | CC                | 1946429999               |
| SNP_P3_63480_3993169 | NC_021164.1    | Ca_kabuli_chr05 | 3993169                 | TT                              | AA                | 1946430001               |
| SNP_P3_63481_3993444 | NC_021164.1    | Ca_kabuli_chr05 | 3993444                 | GG                              | TT                | 1946430002               |
| SNP_P3_63482_4047094 | NC_021164.1    | Ca_kabuli_chr05 | 4047094                 | TT                              | CC                | 1946430004               |
| SNP_P3_63484_4064778 | NC_021164.1    | Ca_kabuli_chr05 | 4064778                 | GG                              | AA                | 1946430005               |
| SNP_P3_63485_4064911 | NC_021164.1    | Ca_kabuli_chr05 | 4064911                 | TT                              | CC                | 1946430007               |
| SNP_P3_63486_4071473 | NC_021164.1    | Ca_kabuli_chr05 | 4071473                 | AA                              | GG                | 1946430008               |
| SNP_P3_63487_4085924 | NC_021164.1    | Ca_kabuli_chr05 | 4085924                 | TT                              | AA                | 1946430009               |
| SNP_P3_63488_4124029 | NC_021164.1    | Ca_kabuli_chr05 | 4124029                 | CC                              | TT                | 1946430011               |
| SNP_P3_63489_4124033 | NC_021164.1    | Ca_kabuli_chr05 | 4124033                 | AA                              | TT                | 1946430013               |
| SNP_P3_63490_4124063 | NC_021164.1    | Ca_kabuli_chr05 | 4124063                 | AA                              | GG                | 1946430014               |
| SNP_P3_63491_4141170 | NC_021164.1    | Ca_kabuli_chr05 | 4141170                 | CC                              | AA                | 1946430016               |
| SNP_P3_63492_4141199 | NC_021164.1    | Ca_kabuli_chr05 | 4141199                 | CC                              | TT                | 1946430017               |
| SNP_P3_63493_4141255 | NC_021164.1    | Ca_kabuli_chr05 | 4141255                 | AA                              | CC                | 1946430019               |
| SNP_P3_63494_4141551 | NC_021164.1    | Ca_kabuli_chr05 | 4141551                 | GG                              | CC                | 1946430020               |
| SNP_P3_63495_4141582 | NC_021164.1    | Ca_kabuli_chr05 | 4141582                 | TT                              | AA                | 1946430021               |
| SNP_P3_63496_4141765 | NC_021164.1    | Ca_kabuli_chr05 | 4141765                 | CC                              | TT                | 1946430023               |
| SNP_P3_63497_4141806 | NC_021164.1    | Ca_kabuli_chr05 | 4141806                 | AA                              | GG                | 1946430024               |
| SNP_P3_63498_4141811 | NC_021164.1    | Ca_kabuli_chr05 | 4141811                 | GG                              | AA                | 1946430026               |
| SNP_P3_63499_4142004 | NC_021164.1    | Ca_kabuli_chr05 | 4142004                 | GG                              | TT                | 1946430027               |
| SNP_P3_63500_4142010 | NC_021164.1    | Ca_kabuli_chr05 | 4142010                 | AA                              | GG                | 1946430029               |
| SNP_P3_63501_4146335 | NC_021164.1    | Ca_kabuli_chr05 | 4146335                 | AA                              | GG                | 1946430030               |
| SNP_P3_63502_4147171 | NC_021164.1    | Ca_kabuli_chr05 | 4147171                 | AA                              | GG                | 1946430031               |
| SNP_P3_63503_4156295 | NC_021164.1    | Ca_kabuli_chr05 | 4156295                 | AA                              | GG                | 1946430033               |
| SNP_P3_63504_4156625 | NC_021164.1    | Ca_kabuli_chr05 | 4156625                 | AA                              | CC                | 1946430035               |
| SNP_P3_63505_4157717 | NC_021164.1    | Ca_kabuli_chr05 | 4157717                 | AA                              | CC                | 1946430036               |
| SNP_P3_63506_4158134 | NC_021164.1    | Ca_kabuli_chr05 | 4158134                 | TT                              | AA                | 1946430038               |
| SNP_P3_63507_4158242 | NC_021164.1    | Ca_kabuli_chr05 | 4158242                 | CC                              | TT                | 1946430039               |
| SNP_P3_63508_4158706 | NC_021164.1    | Ca_kabuli_chr05 | 4158706                 | CC                              | AA                | 1946430040               |
| SNP_P3_63509_4160876 | NC_021164.1    | Ca_kabuli_chr05 | 4160876                 | TT                              | AA                | 1946430042               |
| SNP_P3_63510_4161136 | NC_021164.1    | Ca_kabuli_chr05 | 4161136                 | CC                              | AA                | 1946430043               |
| SNP_P3_63511_4161158 | NC_021164.1    | Ca_kabuli_chr05 | 4161158                 | TT                              | AA                | 1946430045               |
| SNP_P3_63512_4161184 | NC_021164.1    | Ca_kabuli_chr05 | 4161184                 | CC                              | AA                | 1946430046               |
| SNP_P3_63513_4161189 | NC_021164.1    | Ca_kabuli_chr05 | 4161189                 | CC                              | GG                | 1946430048               |
| SNP_P3_63514_4161200 | NC_021164.1    | Ca_kabuli_chr05 | 4161200                 | TT                              | CC                | 1946430049               |
| SNP_P3_63515_4161225 | NC_021164.1    | Ca_kabuli_chr05 | 4161225                 | TT                              | AA                | 1946430051               |
| SNP_P3_63517_4172730 | NC_021164.1    | Ca_kabuli_chr05 | 4172730                 | TT                              | AA                | 1946430052               |
| SNP_P3_63518_4172823 | NC_021164.1    | Ca_kabuli_chr05 | 4172823                 | AA                              | GG                | 1946430054               |

| SNPs IDs             | Chromosome IDs | Chromosomes     | Physical positions (bp) | CDC Frontier (Reference genome) | (Pusa 256 & HPNB) | NCBI SNPdb Accession IDs |
|----------------------|----------------|-----------------|-------------------------|---------------------------------|-------------------|--------------------------|
| SNP_P3_63519_4178539 | NC_021164.1    | Ca_kabuli_chr05 | 4178539                 | TT                              | GG                | 1946430056               |
| SNP_P3_63520_4178647 | NC_021164.1    | Ca_kabuli_chr05 | 4178647                 | GG                              | AA                | 1946430057               |
| SNP_P3_63521_4179186 | NC_021164.1    | Ca_kabuli_chr05 | 4179186                 | GG                              | AA                | 1946430059               |
| SNP_P3_63522_4179222 | NC_021164.1    | Ca_kabuli_chr05 | 4179222                 | GG                              | CC                | 1946430060               |
| SNP_P3_63523_4179539 | NC_021164.1    | Ca_kabuli_chr05 | 4179539                 | CC                              | GG                | 1946430061               |
| SNP_P3_63527_4185225 | NC_021164.1    | Ca_kabuli_chr05 | 4185225                 | GG                              | AA                | 1946430063               |
| SNP_P3_63528_4185227 | NC_021164.1    | Ca_kabuli_chr05 | 4185227                 | TT                              | AA                | 1946430064               |
| SNP_P3_63529_4192414 | NC_021164.1    | Ca_kabuli_chr05 | 4192414                 | TT                              | CC                | 1946430066               |
| SNP_P3_63530_4194979 | NC_021164.1    | Ca_kabuli_chr05 | 4194979                 | GG                              | AA                | 1946430067               |
| SNP_P3_63531_4203873 | NC_021164.1    | Ca_kabuli_chr05 | 4203873                 | CC                              | GG                | 1946430069               |
| SNP_P3_63532_4211316 | NC_021164.1    | Ca_kabuli_chr05 | 4211316                 | GG                              | CC                | 1946430070               |
| SNP_P3_63534_4212401 | NC_021164.1    | Ca_kabuli_chr05 | 4212401                 | GG                              | AA                | 1946430071               |
| SNP_P3_63535_4212611 | NC_021164.1    | Ca_kabuli_chr05 | 4212611                 | CC                              | GG                | 1946430073               |
| SNP_P3_63536_4212757 | NC_021164.1    | Ca_kabuli_chr05 | 4212757                 | TT                              | GG                | 1946430075               |
| SNP_P3_63538_4213199 | NC_021164.1    | Ca_kabuli_chr05 | 4213199                 | AA                              | GG                | 1946430076               |
| SNP_P3_63539_4213317 | NC_021164.1    | Ca_kabuli_chr05 | 4213317                 | TT                              | CC                | 1946430078               |
| SNP_P3_63540_4213381 | NC_021164.1    | Ca_kabuli_chr05 | 4213381                 | GG                              | AA                | 1946430079               |
| SNP_P3_63541_4213704 | NC_021164.1    | Ca_kabuli_chr05 | 4213704                 | CC                              | AA                | 1946430081               |
| SNP_P3_63542_4217729 | NC_021164.1    | Ca_kabuli_chr05 | 4217729                 | GG                              | TT                | 1946430082               |
| SNP_P3_63543_4217747 | NC_021164.1    | Ca_kabuli_chr05 | 4217747                 | GG                              | TT                | 1946430083               |
| SNP_P3_63544_4219744 | NC_021164.1    | Ca_kabuli_chr05 | 4219744                 | AA                              | GG                | 1946430085               |
| SNP_P3_63545_4219809 | NC_021164.1    | Ca_kabuli_chr05 | 4219809                 | CC                              | AA                | 1946430086               |
| SNP_P3_63546_4219843 | NC_021164.1    | Ca_kabuli_chr05 | 4219843                 | GG                              | AA                | 1946430088               |
| SNP_P3_63547_4219858 | NC_021164.1    | Ca_kabuli_chr05 | 4219858                 | GG                              | TT                | 1946430089               |
| SNP_P3_63548_4219867 | NC_021164.1    | Ca_kabuli_chr05 | 4219867                 | AA                              | CC                | 1946430091               |
| SNP_P3_63549_4219913 | NC_021164.1    | Ca_kabuli_chr05 | 4219913                 | AA                              | CC                | 1946430092               |
| SNP_P3_63550_4220114 | NC_021164.1    | Ca_kabuli_chr05 | 4220114                 | AA                              | GG                | 1946430094               |
| SNP_P3_63551_4220212 | NC_021164.1    | Ca_kabuli_chr05 | 4220212                 | CC                              | TT                | 1946430096               |
| SNP_P3_63552_4220534 | NC_021164.1    | Ca_kabuli_chr05 | 4220534                 | TT                              | CC                | 1946430097               |
| SNP_P3_63553_4221019 | NC_021164.1    | Ca_kabuli_chr05 | 4221019                 | AA                              | GG                | 1946430099               |
| SNP_P3_63554_4221096 | NC_021164.1    | Ca_kabuli_chr05 | 4221096                 | AA                              | GG                | 1946430100               |
| SNP_P3_63555_4222649 | NC_021164.1    | Ca_kabuli_chr05 | 4222649                 | AA                              | GG                | 1946430102               |
| SNP_P3_63556_4222661 | NC_021164.1    | Ca_kabuli_chr05 | 4222661                 | AA                              | CC                | 1946430103               |
| SNP_P3_63557_4222754 | NC_021164.1    | Ca_kabuli_chr05 | 4222754                 | GG                              | AA                | 1946430105               |
| SNP_P3_63558_4222770 | NC_021164.1    | Ca_kabuli_chr05 | 4222770                 | AA                              | GG                | 1946430106               |
| SNP_P3_63559_4222836 | NC_021164.1    | Ca_kabuli_chr05 | 4222836                 | CC                              | TT                | 1946430108               |
| SNP_P3_63560_4223036 | NC_021164.1    | Ca_kabuli_chr05 | 4223036                 | CC                              | TT                | 1946430109               |
| SNP_P3_63561_4223039 | NC_021164.1    | Ca_kabuli_chr05 | 4223039                 | AA                              | GG                | 1946430110               |
| SNP_P3_63562_4223052 | NC_021164.1    | Ca_kabuli_chr05 | 4223052                 | AA                              | GG                | 1946430112               |
| SNP_P3_63563_4223064 | NC_021164.1    | Ca_kabuli_chr05 | 4223064                 | GG                              | AA                | 1946430113               |
| SNP_P3_63564_4225214 | NC_021164.1    | Ca_kabuli_chr05 | 4225214                 | AA                              | TT                | 1946430115               |
| SNP_P3_63565_4231395 | NC_021164.1    | Ca_kabuli_chr05 | 4231395                 | TT                              | GG                | 1946430117               |

| SNPs IDs             | Chromosome IDs | Chromosomes     | Physical positions (bp) | CDC Frontier (Reference genome) | (Pusa 256 & HPNB) | NCBI SNPdb Accession IDs |
|----------------------|----------------|-----------------|-------------------------|---------------------------------|-------------------|--------------------------|
| SNP_P3_63566_4231433 | NC_021164.1    | Ca_kabuli_chr05 | 4231433                 | AA                              | TT                | 1946430118               |
| SNP_P3_63567_4231668 | NC_021164.1    | Ca_kabuli_chr05 | 4231668                 | AA                              | GG                | 1946430120               |
| SNP_P3_63568_4231739 | NC_021164.1    | Ca_kabuli_chr05 | 4231739                 | GG                              | AA                | 1946430121               |
| SNP_P3_63569_4231835 | NC_021164.1    | Ca_kabuli_chr05 | 4231835                 | AA                              | GG                | 1946430122               |
| SNP_P3_63570_4231900 | NC_021164.1    | Ca_kabuli_chr05 | 4231900                 | TT                              | CC                | 1946430124               |
| SNP_P3_63571_4231918 | NC_021164.1    | Ca_kabuli_chr05 | 4231918                 | AA                              | GG                | 1946430125               |
| SNP_P3_63572_4232822 | NC_021164.1    | Ca_kabuli_chr05 | 4232822                 | TT                              | CC                | 1946430127               |
| SNP_P3_63573_4232859 | NC_021164.1    | Ca_kabuli_chr05 | 4232859                 | GG                              | TT                | 1946430128               |
| SNP_P3_63574_4233098 | NC_021164.1    | Ca_kabuli_chr05 | 4233098                 | AA                              | GG                | 1946430130               |
| SNP_P3_63575_4233099 | NC_021164.1    | Ca_kabuli_chr05 | 4233099                 | TT                              | GG                | 1946430131               |
| SNP_P3_63576_4233208 | NC_021164.1    | Ca_kabuli_chr05 | 4233208                 | AA                              | GG                | 1946430133               |
| SNP_P3_63577_4234315 | NC_021164.1    | Ca_kabuli_chr05 | 4234315                 | AA                              | TT                | 1946430134               |
| SNP_P3_63578_4234322 | NC_021164.1    | Ca_kabuli_chr05 | 4234322                 | AA                              | GG                | 1946430136               |
| SNP_P3_63579_4234371 | NC_021164.1    | Ca_kabuli_chr05 | 4234371                 | AA                              | TT                | 1946430137               |
| SNP_P3_63580_4234399 | NC_021164.1    | Ca_kabuli_chr05 | 4234399                 | AA                              | GG                | 1946430139               |
| SNP_P3_63581_4234408 | NC_021164.1    | Ca_kabuli_chr05 | 4234408                 | TT                              | CC                | 1946430140               |
| SNP_P3_63582_4237407 | NC_021164.1    | Ca_kabuli_chr05 | 4237407                 | TT                              | AA                | 1946430142               |
| SNP_P3_63583_4238251 | NC_021164.1    | Ca_kabuli_chr05 | 4238251                 | GG                              | AA                | 1946430143               |
| SNP_P3_63584_4238302 | NC_021164.1    | Ca_kabuli_chr05 | 4238302                 | CC                              | TT                | 1946430145               |
| SNP_P3_63585_4238645 | NC_021164.1    | Ca_kabuli_chr05 | 4238645                 | AA                              | GG                | 1946430146               |
| SNP_P3_63586_4238714 | NC_021164.1    | Ca_kabuli_chr05 | 4238714                 | TT                              | CC                | 1946430148               |
| SNP_P3_63587_4239796 | NC_021164.1    | Ca_kabuli_chr05 | 4239796                 | AA                              | TT                | 1946430149               |
| SNP_P3_63588_4239808 | NC_021164.1    | Ca_kabuli_chr05 | 4239808                 | CC                              | TT                | 1946430151               |
| SNP_P3_63589_4241414 | NC_021164.1    | Ca_kabuli_chr05 | 4241414                 | GG                              | AA                | 1946430152               |
| SNP_P3_63590_4241448 | NC_021164.1    | Ca_kabuli_chr05 | 4241448                 | CC                              | TT                | 1946430154               |
| SNP_P3_63591_4242265 | NC_021164.1    | Ca_kabuli_chr05 | 4242265                 | GG                              | AA                | 1946430156               |
| SNP_P3_63592_4242549 | NC_021164.1    | Ca_kabuli_chr05 | 4242549                 | AA                              | CC                | 1946430157               |
| SNP_P3_63594_4247753 | NC_021164.1    | Ca_kabuli_chr05 | 4247753                 | GG                              | TT                | 1946430159               |
| SNP_P3_63595_4250201 | NC_021164.1    | Ca_kabuli_chr05 | 4250201                 | GG                              | AA                | 1946430161               |
| SNP_P3_63596_4250293 | NC_021164.1    | Ca_kabuli_chr05 | 4250293                 | TT                              | GG                | 1946430162               |
| SNP_P3_63597_4250606 | NC_021164.1    | Ca_kabuli_chr05 | 4250606                 | AA                              | CC                | 1946430164               |
| SNP_P3_63598_4257261 | NC_021164.1    | Ca_kabuli_chr05 | 4257261                 | GG                              | AA                | 1946430165               |
| SNP_P3_63599_4257285 | NC_021164.1    | Ca_kabuli_chr05 | 4257285                 | TT                              | CC                | 1946430167               |
| SNP_P3_63600_4257286 | NC_021164.1    | Ca_kabuli_chr05 | 4257286                 | GG                              | AA                | 1946430168               |
| SNP_P3_63601_4257467 | NC_021164.1    | Ca_kabuli_chr05 | 4257467                 | GG                              | CC                | 1946430169               |
| SNP_P3_63602_4264060 | NC_021164.1    | Ca_kabuli_chr05 | 4264060                 | TT                              | CC                | 1946430171               |
| SNP_P3_63604_4269733 | NC_021164.1    | Ca_kabuli_chr05 | 4269733                 | GG                              | AA                | 1946430172               |
| SNP_P3_63605_4271641 | NC_021164.1    | Ca_kabuli_chr05 | 4271641                 | GG                              | AA                | 1946430174               |
| SNP_P3_63606_4271645 | NC_021164.1    | Ca_kabuli_chr05 | 4271645                 | AA                              | TT                | 1946430175               |
| SNP_P3_63607_4271649 | NC_021164.1    | Ca_kabuli_chr05 | 4271649                 | CC                              | AA                | 1946430177               |
| SNP_P3_63609_4278892 | NC_021164.1    | Ca_kabuli_chr05 | 4278892                 | TT                              | CC                | 1946430178               |
| SNP_P3_63610_4278953 | NC_021164.1    | Ca_kabuli_chr05 | 4278953                 | AA                              | CC                | 1946430180               |

| SNPs IDs             | Chromosome IDs | Chromosomes     | Physical positions (bp) | CDC Frontier (Reference genome) | (Pusa 256 & HPNB) | NCBI SNPdb Accession IDs |
|----------------------|----------------|-----------------|-------------------------|---------------------------------|-------------------|--------------------------|
| SNP_P3_63611_4279012 | NC_021164.1    | Ca_kabuli_chr05 | 4279012                 | CC                              | AA                | 1946430181               |
| SNP_P3_63612_4279048 | NC_021164.1    | Ca_kabuli_chr05 | 4279048                 | GG                              | AA                | 1946430183               |
| SNP_P3_63613_4279071 | NC_021164.1    | Ca_kabuli_chr05 | 4279071                 | GG                              | AA                | 1946430184               |
| SNP_P3_63614_4280289 | NC_021164.1    | Ca_kabuli_chr05 | 4280289                 | GG                              | AA                | 1946430186               |
| SNP_P3_63615_4280312 | NC_021164.1    | Ca_kabuli_chr05 | 4280312                 | GG                              | AA                | 1946430187               |
| SNP_P3_63616_4280349 | NC_021164.1    | Ca_kabuli_chr05 | 4280349                 | CC                              | AA                | 1946430189               |
| SNP_P3_63617_4280361 | NC_021164.1    | Ca_kabuli_chr05 | 4280361                 | TT                              | CC                | 1946430190               |
| SNP_P3_63618_4280725 | NC_021164.1    | Ca_kabuli_chr05 | 4280725                 | CC                              | AA                | 1946430191               |
| SNP_P3_63619_4297732 | NC_021164.1    | Ca_kabuli_chr05 | 4297732                 | AA                              | CC                | 1946430193               |
| SNP_P3_63620_4297737 | NC_021164.1    | Ca_kabuli_chr05 | 4297737                 | CC                              | TT                | 1946430194               |
| SNP_P3_63621_4297870 | NC_021164.1    | Ca_kabuli_chr05 | 4297870                 | CC                              | TT                | 1946430196               |
| SNP_P3_63622_4297914 | NC_021164.1    | Ca_kabuli_chr05 | 4297914                 | CC                              | TT                | 1946430197               |
| SNP_P3_63623_4297967 | NC_021164.1    | Ca_kabuli_chr05 | 4297967                 | AA                              | GG                | 1946430198               |
| SNP_P3_63624_4297983 | NC_021164.1    | Ca_kabuli_chr05 | 4297983                 | TT                              | GG                | 1946430200               |
| SNP_P3_63625_4298054 | NC_021164.1    | Ca_kabuli_chr05 | 4298054                 | AA                              | GG                | 1946430201               |
| SNP_P3_63626_4298070 | NC_021164.1    | Ca_kabuli_chr05 | 4298070                 | TT                              | CC                | 1946430203               |
| SNP_P3_63628_4305757 | NC_021164.1    | Ca_kabuli_chr05 | 4305757                 | GG                              | CC                | 1946430205               |
| SNP_P3_63629_4311806 | NC_021164.1    | Ca_kabuli_chr05 | 4311806                 | AA                              | CC                | 1946430206               |
| SNP_P3_63630_4313525 | NC_021164.1    | Ca_kabuli_chr05 | 4313525                 | CC                              | TT                | 1946430207               |
| SNP_P3_63631_4313563 | NC_021164.1    | Ca_kabuli_chr05 | 4313563                 | TT                              | CC                | 1946430209               |
| SNP_P3_63632_4314623 | NC_021164.1    | Ca_kabuli_chr05 | 4314623                 | GG                              | AA                | 1946430210               |
| SNP_P3_63633_4314908 | NC_021164.1    | Ca_kabuli_chr05 | 4314908                 | GG                              | TT                | 1946430212               |
| SNP_P3_63634_4314909 | NC_021164.1    | Ca_kabuli_chr05 | 4314909                 | TT                              | AA                | 1946430213               |
| SNP_P3_63635_4314961 | NC_021164.1    | Ca_kabuli_chr05 | 4314961                 | TT                              | AA                | 1946430215               |
| SNP_P3_63636_4315187 | NC_021164.1    | Ca_kabuli_chr05 | 4315187                 | AA                              | GG                | 1946430216               |
| SNP_P3_63637_4315189 | NC_021164.1    | Ca_kabuli_chr05 | 4315189                 | TT                              | AA                | 1946430217               |
| SNP_P3_63638_4315205 | NC_021164.1    | Ca_kabuli_chr05 | 4315205                 | CC                              | TT                | 1946430242               |
| SNP_P3_63639_4315258 | NC_021164.1    | Ca_kabuli_chr05 | 4315258                 | CC                              | TT                | 1946430244               |
| SNP_P3_63640_4315393 | NC_021164.1    | Ca_kabuli_chr05 | 4315393                 | AA                              | GG                | 1946430245               |
| SNP_P3_63641_4315683 | NC_021164.1    | Ca_kabuli_chr05 | 4315683                 | CC                              | GG                | 1946430247               |
| SNP_P3_63642_4318203 | NC_021164.1    | Ca_kabuli_chr05 | 4318203                 | GG                              | AA                | 1946430248               |
| SNP_P3_63643_4318273 | NC_021164.1    | Ca_kabuli_chr05 | 4318273                 | GG                              | AA                | 1946430250               |
| SNP_P3_63644_4319302 | NC_021164.1    | Ca_kabuli_chr05 | 4319302                 | AA                              | CC                | 1946430251               |
| SNP_P3_63645_4325757 | NC_021164.1    | Ca_kabuli_chr05 | 4325757                 | TT                              | AA                | 1946430253               |
| SNP_P3_63646_4344302 | NC_021164.1    | Ca_kabuli_chr05 | 4344302                 | AA                              | TT                | 1946430254               |
| SNP_P3_63647_4373306 | NC_021164.1    | Ca_kabuli_chr05 | 4373306                 | AA                              | GG                | 1946430255               |
| SNP_P3_63648_4373363 | NC_021164.1    | Ca_kabuli_chr05 | 4373363                 | TT                              | CC                | 1946430257               |
| SNP_P3_63649_4373371 | NC_021164.1    | Ca_kabuli_chr05 | 4373371                 | CC                              | TT                | 1946430259               |
| SNP_P3_63650_4373373 | NC_021164.1    | Ca_kabuli_chr05 | 4373373                 | TT                              | AA                | 1946430260               |
| SNP_P3_63651_4375937 | NC_021164.1    | Ca_kabuli_chr05 | 4375937                 | GG                              | AA                | 1946430262               |
| SNP_P3_63652_4379432 | NC_021164.1    | Ca_kabuli_chr05 | 4379432                 | GG                              | AA                | 1946430263               |
| SNP_P3_63653_4379477 | NC_021164.1    | Ca_kabuli_chr05 | 4379477                 | CC                              | AA                | 1946430264               |



| SNPs IDs             | Chromosome IDs | Chromosomes     | Physical positions (bp) | CDC Frontier (Reference genome) | (Pusa 256 & HPNB) | NCBI SNPdb Accession IDs |
|----------------------|----------------|-----------------|-------------------------|---------------------------------|-------------------|--------------------------|
| SNP_P3_63654_4379578 | NC_021164.1    | Ca_kabuli_chr05 | 4379578                 | AA                              | GG                | 1946430266               |
| SNP_P3_63655_4379601 | NC_021164.1    | Ca_kabuli_chr05 | 4379601                 | CC                              | TT                | 1946430267               |
| SNP_P3_63657_4397913 | NC_021164.1    | Ca_kabuli_chr05 | 4397913                 | CC                              | TT                | 1946430269               |
| SNP_P3_63658_4398803 | NC_021164.1    | Ca_kabuli_chr05 | 4398803                 | GG                              | AA                | 1946430270               |
| SNP_P3_63659_4401950 | NC_021164.1    | Ca_kabuli_chr05 | 4401950                 | TT                              | CC                | 1946430272               |
| SNP_P3_63660_4413263 | NC_021164.1    | Ca_kabuli_chr05 | 4413263                 | GG                              | AA                | 1946430273               |
| SNP_P3_63661_4433503 | NC_021164.1    | Ca_kabuli_chr05 | 4433503                 | CC                              | AA                | 1946430275               |
| SNP_P3_63662_4433506 | NC_021164.1    | Ca_kabuli_chr05 | 4433506                 | TT                              | CC                | 1946430276               |
| SNP_P3_63663_4433515 | NC_021164.1    | Ca_kabuli_chr05 | 4433515                 | AA                              | TT                | 1946430278               |
| SNP_P3_63664_4433759 | NC_021164.1    | Ca_kabuli_chr05 | 4433759                 | TT                              | CC                | 1946430279               |
| SNP_P3_63665_4433778 | NC_021164.1    | Ca_kabuli_chr05 | 4433778                 | AA                              | TT                | 1946430281               |
| SNP_P3_63666_4433783 | NC_021164.1    | Ca_kabuli_chr05 | 4433783                 | TT                              | AA                | 1946430282               |
| SNP_P3_63667_4433829 | NC_021164.1    | Ca_kabuli_chr05 | 4433829                 | GG                              | AA                | 1946430284               |
| SNP_P3_63668_4434019 | NC_021164.1    | Ca_kabuli_chr05 | 4434019                 | TT                              | GG                | 1946430285               |
| SNP_P3_63669_4437038 | NC_021164.1    | Ca_kabuli_chr05 | 4437038                 | GG                              | CC                | 1946430287               |
| SNP_P3_63670_4472340 | NC_021164.1    | Ca_kabuli_chr05 | 4472340                 | TT                              | AA                | 1946430288               |
| SNP_P3_63671_4483791 | NC_021164.1    | Ca_kabuli_chr05 | 4483791                 | CC                              | AA                | 1946430290               |
| SNP_P3_63672_4487227 | NC_021164.1    | Ca_kabuli_chr05 | 4487227                 | AA                              | GG                | 1946430291               |
| SNP_P3_63673_4492866 | NC_021164.1    | Ca_kabuli_chr05 | 4492866                 | TT                              | AA                | 1946430293               |
| SNP_P3_63674_4518638 | NC_021164.1    | Ca_kabuli_chr05 | 4518638                 | TT                              | CC                | 1946430294               |
| SNP_P3_63675_4521983 | NC_021164.1    | Ca_kabuli_chr05 | 4521983                 | GG                              | AA                | 1946430296               |
| SNP_P3_63676_4532390 | NC_021164.1    | Ca_kabuli_chr05 | 4532390                 | GG                              | AA                | 1946430297               |
| SNP_P3_63677_4536055 | NC_021164.1    | Ca_kabuli_chr05 | 4536055                 | AA                              | GG                | 1946430299               |
| SNP_P3_63678_4541754 | NC_021164.1    | Ca_kabuli_chr05 | 4541754                 | CC                              | TT                | 1946430300               |
| SNP_P3_63679_4541758 | NC_021164.1    | Ca_kabuli_chr05 | 4541758                 | AA                              | GG                | 1946430302               |
| SNP_P3_63680_4542175 | NC_021164.1    | Ca_kabuli_chr05 | 4542175                 | TT                              | CC                | 1946430303               |
| SNP_P3_63681_4542184 | NC_021164.1    | Ca_kabuli_chr05 | 4542184                 | CC                              | TT                | 1946430304               |
| SNP_P3_63682_4542198 | NC_021164.1    | Ca_kabuli_chr05 | 4542198                 | CC                              | GG                | 1946430306               |
| SNP_P3_63683_4542224 | NC_021164.1    | Ca_kabuli_chr05 | 4542224                 | TT                              | CC                | 1946430308               |
| SNP_P3_63684_4542230 | NC_021164.1    | Ca_kabuli_chr05 | 4542230                 | GG                              | TT                | 1946430309               |
| SNP_P3_63685_4542271 | NC_021164.1    | Ca_kabuli_chr05 | 4542271                 | CC                              | TT                | 1946430311               |
| SNP_P3_63686_4542276 | NC_021164.1    | Ca_kabuli_chr05 | 4542276                 | GG                              | AA                | 1946430312               |
| SNP_P3_63688_4543908 | NC_021164.1    | Ca_kabuli_chr05 | 4543908                 | AA                              | CC                | 1946430314               |
| SNP_P3_63690_4552587 | NC_021164.1    | Ca_kabuli_chr05 | 4552587                 | GG                              | AA                | 1946430315               |
| SNP_P3_63691_4552588 | NC_021164.1    | Ca_kabuli_chr05 | 4552588                 | GG                              | AA                | 1946430317               |
| SNP_P3_63692_4552597 | NC_021164.1    | Ca_kabuli_chr05 | 4552597                 | GG                              | AA                | 1946430318               |
| SNP_P3_63694_4565659 | NC_021164.1    | Ca_kabuli_chr05 | 4565659                 | GG                              | AA                | 1946430320               |
| SNP_P3_63695_4611897 | NC_021164.1    | Ca_kabuli_chr05 | 4611897                 | AA                              | GG                | 1946430321               |
| SNP_P3_63696_4611970 | NC_021164.1    | Ca_kabuli_chr05 | 4611970                 | TT                              | CC                | 1946430323               |
| SNP_P3_63697_4616014 | NC_021164.1    | Ca_kabuli_chr05 | 4616014                 | TT                              | CC                | 1946430325               |
| SNP_P3_63698_4616244 | NC_021164.1    | Ca_kabuli_chr05 | 4616244                 | TT                              | CC                | 1946430326               |
| SNP_P3_63699_4616257 | NC_021164.1    | Ca_kabuli_chr05 | 4616257                 | AA                              | GG                | 1946430328               |

| SNPs IDs             | Chromosome IDs | Chromosomes     | Physical positions (bp) | CDC Frontier (Reference genome) | (Pusa 256 & HPNB) | NCBI SNPdb Accession IDs |
|----------------------|----------------|-----------------|-------------------------|---------------------------------|-------------------|--------------------------|
| SNP_P3_63700_4616269 | NC_021164.1    | Ca_kabuli_chr05 | 4616269                 | AA                              | CC                | 1946430329               |
| SNP_P3_63701_4616270 | NC_021164.1    | Ca_kabuli_chr05 | 4616270                 | AA                              | GG                | 1946430331               |
| SNP_P3_63702_4616279 | NC_021164.1    | Ca_kabuli_chr05 | 4616279                 | AA                              | GG                | 1946430332               |
| SNP_P3_63703_4616298 | NC_021164.1    | Ca_kabuli_chr05 | 4616298                 | AA                              | CC                | 1946430334               |
| SNP_P3_63704_4616303 | NC_021164.1    | Ca_kabuli_chr05 | 4616303                 | AA                              | GG                | 1946430335               |
| SNP_P3_63705_4616320 | NC_021164.1    | Ca_kabuli_chr05 | 4616320                 | TT                              | CC                | 1946430337               |
| SNP_P3_63706_4616321 | NC_021164.1    | Ca_kabuli_chr05 | 4616321                 | GG                              | AA                | 1946430338               |
| SNP_P3_63707_4616334 | NC_021164.1    | Ca_kabuli_chr05 | 4616334                 | AA                              | GG                | 1946430340               |
| SNP_P3_63708_4620723 | NC_021164.1    | Ca_kabuli_chr05 | 4620723                 | GG                              | AA                | 1946430341               |
| SNP_P3_63709_4622240 | NC_021164.1    | Ca_kabuli_chr05 | 4622240                 | CC                              | TT                | 1946430343               |
| SNP_P3_63710_4673052 | NC_021164.1    | Ca_kabuli_chr05 | 4673052                 | AA                              | GG                | 1946430345               |
| SNP_P3_63711_4673053 | NC_021164.1    | Ca_kabuli_chr05 | 4673053                 | CC                              | AA                | 1946430347               |
| SNP_P3_63712_4673054 | NC_021164.1    | Ca_kabuli_chr05 | 4673054                 | CC                              | TT                | 1946430348               |
| SNP_P3_63713_4673063 | NC_021164.1    | Ca_kabuli_chr05 | 4673063                 | GG                              | AA                | 1946430350               |
| SNP_P3_63714_4673096 | NC_021164.1    | Ca_kabuli_chr05 | 4673096                 | TT                              | CC                | 1946430351               |
| SNP_P3_63715_4681520 | NC_021164.1    | Ca_kabuli_chr05 | 4681520                 | GG                              | CC                | 1946430353               |
| SNP_P3_63717_4681745 | NC_021164.1    | Ca_kabuli_chr05 | 4681745                 | TT                              | CC                | 1946430354               |
| SNP_P3_63718_4681747 | NC_021164.1    | Ca_kabuli_chr05 | 4681747                 | AA                              | GG                | 1946430355               |
| SNP_P3_63719_4685855 | NC_021164.1    | Ca_kabuli_chr05 | 4685855                 | AA                              | CC                | 1946430357               |
| SNP_P3_63720_4689578 | NC_021164.1    | Ca_kabuli_chr05 | 4689578                 | TT                              | GG                | 1946430358               |
| SNP_P3_63721_4711673 | NC_021164.1    | Ca_kabuli_chr05 | 4711673                 | GG                              | AA                | 1946430360               |
| SNP_P3_63722_4713666 | NC_021164.1    | Ca_kabuli_chr05 | 4713666                 | CC                              | TT                | 1946430362               |
| SNP_P3_63723_4713707 | NC_021164.1    | Ca_kabuli_chr05 | 4713707                 | TT                              | GG                | 1946430363               |
| SNP_P3_63724_4713984 | NC_021164.1    | Ca_kabuli_chr05 | 4713984                 | TT                              | GG                | 1946430365               |
| SNP_P3_63725_4714100 | NC_021164.1    | Ca_kabuli_chr05 | 4714100                 | AA                              | CC                | 1946430366               |
| SNP_P3_63726_4714107 | NC_021164.1    | Ca_kabuli_chr05 | 4714107                 | AA                              | GG                | 1946430368               |
| SNP_P3_63727_4717819 | NC_021164.1    | Ca_kabuli_chr05 | 4717819                 | AA                              | GG                | 1946430369               |
| SNP_P3_63728_4727479 | NC_021164.1    | Ca_kabuli_chr05 | 4727479                 | CC                              | TT                | 1946430371               |
| SNP_P3_63729_4728448 | NC_021164.1    | Ca_kabuli_chr05 | 4728448                 | CC                              | TT                | 1946430372               |
| SNP_P3_63730_4730928 | NC_021164.1    | Ca_kabuli_chr05 | 4730928                 | TT                              | CC                | 1946430374               |
| SNP_P3_63731_4731052 | NC_021164.1    | Ca_kabuli_chr05 | 4731052                 | GG                              | AA                | 1946430375               |
| SNP_P3_63732_4731379 | NC_021164.1    | Ca_kabuli_chr05 | 4731379                 | TT                              | CC                | 1946430377               |
| SNP_P3_63733_4731615 | NC_021164.1    | Ca_kabuli_chr05 | 4731615                 | AA                              | GG                | 1946430378               |
| SNP_P3_63735_4738547 | NC_021164.1    | Ca_kabuli_chr05 | 4738547                 | AA                              | GG                | 1946430380               |
| SNP_P3_63736_4738600 | NC_021164.1    | Ca_kabuli_chr05 | 4738600                 | AA                              | GG                | 1946430381               |
| SNP_P3_63737_4747663 | NC_021164.1    | Ca_kabuli_chr05 | 4747663                 | TT                              | GG                | 1946430382               |
| SNP_P3_63738_4747911 | NC_021164.1    | Ca_kabuli_chr05 | 4747911                 | TT                              | CC                | 1946430384               |
| SNP_P3_63739_4748102 | NC_021164.1    | Ca_kabuli_chr05 | 4748102                 | TT                              | CC                | 1946430385               |
| SNP_P3_63740_4748760 | NC_021164.1    | Ca_kabuli_chr05 | 4748760                 | TT                              | AA                | 1946430387               |
| SNP_P3_63741_4748935 | NC_021164.1    | Ca_kabuli_chr05 | 4748935                 | AA                              | TT                | 1946430388               |
| SNP_P3_63742_4751630 | NC_021164.1    | Ca_kabuli_chr05 | 4751630                 | TT                              | GG                | 1946430390               |
| SNP_P3_63743_4751874 | NC_021164.1    | Ca_kabuli_chr05 | 4751874                 | TT                              | GG                | 1946430391               |

| SNPs IDs             | Chromosome IDs | Chromosomes     | Physical positions (bp) | CDC Frontier (Reference genome) | (Pusa 256 & HPNB) | NCBI SNPdb Accession IDs |
|----------------------|----------------|-----------------|-------------------------|---------------------------------|-------------------|--------------------------|
| SNP_P3_63744_4762755 | NC_021164.1    | Ca_kabuli_chr05 | 4762755                 | AA                              | GG                | 1946430392               |
| SNP_P3_63745_4763141 | NC_021164.1    | Ca_kabuli_chr05 | 4763141                 | CC                              | GG                | 1946430394               |
| SNP_P3_63746_4763170 | NC_021164.1    | Ca_kabuli_chr05 | 4763170                 | CC                              | TT                | 1946430395               |
| SNP_P3_63747_4767646 | NC_021164.1    | Ca_kabuli_chr05 | 4767646                 | AA                              | GG                | 1946430398               |
| SNP_P3_63748_4767713 | NC_021164.1    | Ca_kabuli_chr05 | 4767713                 | TT                              | CC                | 1946430399               |
| SNP_P3_63749_4767730 | NC_021164.1    | Ca_kabuli_chr05 | 4767730                 | AA                              | GG                | 1946430401               |
| SNP_P3_63750_4767944 | NC_021164.1    | Ca_kabuli_chr05 | 4767944                 | CC                              | TT                | 1946430402               |
| SNP_P3_63751_4768004 | NC_021164.1    | Ca_kabuli_chr05 | 4768004                 | AA                              | TT                | 1946430404               |
| SNP_P3_63752_4768020 | NC_021164.1    | Ca_kabuli_chr05 | 4768020                 | GG                              | TT                | 1946430405               |
| SNP_P3_63753_4768040 | NC_021164.1    | Ca_kabuli_chr05 | 4768040                 | AA                              | GG                | 1946430406               |
| SNP_P3_63754_4768343 | NC_021164.1    | Ca_kabuli_chr05 | 4768343                 | TT                              | CC                | 1946430408               |
| SNP_P3_63755_4768367 | NC_021164.1    | Ca_kabuli_chr05 | 4768367                 | CC                              | TT                | 1946430410               |
| SNP_P3_63756_4768369 | NC_021164.1    | Ca_kabuli_chr05 | 4768369                 | TT                              | CC                | 1946430411               |
| SNP_P3_63757_4768376 | NC_021164.1    | Ca_kabuli_chr05 | 4768376                 | GG                              | AA                | 1946430413               |
| SNP_P3_63758_4768387 | NC_021164.1    | Ca_kabuli_chr05 | 4768387                 | TT                              | GG                | 1946430414               |
| SNP_P3_63759_4768408 | NC_021164.1    | Ca_kabuli_chr05 | 4768408                 | GG                              | AA                | 1946430416               |
| SNP_P3_63760_4768427 | NC_021164.1    | Ca_kabuli_chr05 | 4768427                 | TT                              | CC                | 1946430417               |
| SNP_P3_63761_4768442 | NC_021164.1    | Ca_kabuli_chr05 | 4768442                 | TT                              | CC                | 1946430418               |
| SNP_P3_63762_4768595 | NC_021164.1    | Ca_kabuli_chr05 | 4768595                 | CC                              | TT                | 1946430420               |
| SNP_P3_63764_4768638 | NC_021164.1    | Ca_kabuli_chr05 | 4768638                 | GG                              | TT                | 1946430421               |
| SNP_P3_63765_4768668 | NC_021164.1    | Ca_kabuli_chr05 | 4768668                 | AA                              | TT                | 1946430423               |
| SNP_P3_63766_4768706 | NC_021164.1    | Ca_kabuli_chr05 | 4768706                 | CC                              | TT                | 1946430424               |
| SNP_P3_63767_4768709 | NC_021164.1    | Ca_kabuli_chr05 | 4768709                 | TT                              | CC                | 1946430426               |
| SNP_P3_63768_4768723 | NC_021164.1    | Ca_kabuli_chr05 | 4768723                 | GG                              | AA                | 1946430427               |
| SNP_P3_63769_4768730 | NC_021164.1    | Ca_kabuli_chr05 | 4768730                 | CC                              | TT                | 1946430429               |
| SNP_P3_63770_4768769 | NC_021164.1    | Ca_kabuli_chr05 | 4768769                 | TT                              | AA                | 1946430431               |
| SNP_P3_63771_4768796 | NC_021164.1    | Ca_kabuli_chr05 | 4768796                 | TT                              | CC                | 1946430432               |
| SNP_P3_63772_4768802 | NC_021164.1    | Ca_kabuli_chr05 | 4768802                 | TT                              | CC                | 1946430433               |
| SNP_P3_63773_4768820 | NC_021164.1    | Ca_kabuli_chr05 | 4768820                 | TT                              | AA                | 1946430435               |
| SNP_P3_63774_4768841 | NC_021164.1    | Ca_kabuli_chr05 | 4768841                 | GG                              | AA                | 1946430436               |
| SNP_P3_63775_4793965 | NC_021164.1    | Ca_kabuli_chr05 | 4793965                 | CC                              | TT                | 1946430438               |
| SNP_P3_63776_4794656 | NC_021164.1    | Ca_kabuli_chr05 | 4794656                 | TT                              | CC                | 1946430439               |
| SNP_P3_63777_4794657 | NC_021164.1    | Ca_kabuli_chr05 | 4794657                 | GG                              | TT                | 1946430441               |
| SNP_P3_63778_4794743 | NC_021164.1    | Ca_kabuli_chr05 | 4794743                 | GG                              | AA                | 1946430442               |
| SNP_P3_63779_4816237 | NC_021164.1    | Ca_kabuli_chr05 | 4816237                 | TT                              | AA                | 1946430444               |
| SNP_P3_63780_4830568 | NC_021164.1    | Ca_kabuli_chr05 | 4830568                 | TT                              | CC                | 1946430445               |
| SNP_P3_63781_4833910 | NC_021164.1    | Ca_kabuli_chr05 | 4833910                 | AA                              | GG                | 1946430447               |
| SNP_P3_63783_4851498 | NC_021164.1    | Ca_kabuli_chr05 | 4851498                 | GG                              | TT                | 1946430448               |
| SNP_P3_63784_4855961 | NC_021164.1    | Ca_kabuli_chr05 | 4855961                 | TT                              | CC                | 1946430450               |
| SNP_P3_63785_4856044 | NC_021164.1    | Ca_kabuli_chr05 | 4856044                 | GG                              | AA                | 1946430451               |
| SNP_P3_63786_4856228 | NC_021164.1    | Ca_kabuli_chr05 | 4856228                 | GG                              | TT                | 1946430452               |
| SNP_P3_63787_4856264 | NC_021164.1    | Ca_kabuli_chr05 | 4856264                 | GG                              | TT                | 1946430454               |

| SNPs IDs             | Chromosome IDs | Chromosomes     | Physical positions (bp) | CDC Frontier (Reference genome) | (Pusa 256 & HPNB) | NCBI SNPdb Accession IDs |
|----------------------|----------------|-----------------|-------------------------|---------------------------------|-------------------|--------------------------|
| SNP_P3_63788_4856274 | NC_021164.1    | Ca_kabuli_chr05 | 4856274                 | TT                              | AA                | 1946430455               |
| SNP_P3_63789_4856388 | NC_021164.1    | Ca_kabuli_chr05 | 4856388                 | TT                              | GG                | 1946430457               |
| SNP_P3_63790_4856879 | NC_021164.1    | Ca_kabuli_chr05 | 4856879                 | CC                              | TT                | 1946430458               |
| SNP_P3_63791_4856945 | NC_021164.1    | Ca_kabuli_chr05 | 4856945                 | TT                              | CC                | 1946430460               |
| SNP_P3_63792_4856977 | NC_021164.1    | Ca_kabuli_chr05 | 4856977                 | AA                              | GG                | 1946430461               |
| SNP_P3_63793_4856987 | NC_021164.1    | Ca_kabuli_chr05 | 4856987                 | TT                              | GG                | 1946430463               |
| SNP_P3_63795_4857288 | NC_021164.1    | Ca_kabuli_chr05 | 4857288                 | AA                              | CC                | 1946430464               |
| SNP_P3_63796_4857333 | NC_021164.1    | Ca_kabuli_chr05 | 4857333                 | TT                              | CC                | 1946430466               |
| SNP_P3_63797_4857336 | NC_021164.1    | Ca_kabuli_chr05 | 4857336                 | AA                              | CC                | 1946430467               |
| SNP_P3_63799_4869275 | NC_021164.1    | Ca_kabuli_chr05 | 4869275                 | AA                              | GG                | 1946430469               |
| SNP_P3_63800_4869298 | NC_021164.1    | Ca_kabuli_chr05 | 4869298                 | TT                              | CC                | 1946430470               |
| SNP_P3_63801_4869494 | NC_021164.1    | Ca_kabuli_chr05 | 4869494                 | GG                              | TT                | 1946430472               |
| SNP_P3_63803_4869935 | NC_021164.1    | Ca_kabuli_chr05 | 4869935                 | CC                              | TT                | 1946430474               |
| SNP_P3_63804_4870492 | NC_021164.1    | Ca_kabuli_chr05 | 4870492                 | CC                              | TT                | 1946430475               |
| SNP_P3_63805_4870664 | NC_021164.1    | Ca_kabuli_chr05 | 4870664                 | CC                              | TT                | 1946430477               |
| SNP_P3_63806_4870698 | NC_021164.1    | Ca_kabuli_chr05 | 4870698                 | CC                              | AA                | 1946430478               |
| SNP_P3_63807_4882765 | NC_021164.1    | Ca_kabuli_chr05 | 4882765                 | GG                              | CC                | 1946430480               |
| SNP_P3_63808_4885274 | NC_021164.1    | Ca_kabuli_chr05 | 4885274                 | GG                              | TT                | 1946430481               |
| SNP_P3_63809_4894150 | NC_021164.1    | Ca_kabuli_chr05 | 4894150                 | GG                              | CC                | 1946430483               |
| SNP_P3_63810_4910639 | NC_021164.1    | Ca_kabuli_chr05 | 4910639                 | GG                              | AA                | 1946430484               |
| SNP_P3_63811_4910644 | NC_021164.1    | Ca_kabuli_chr05 | 4910644                 | TT                              | CC                | 1946430485               |
| SNP_P3_63813_4921664 | NC_021164.1    | Ca_kabuli_chr05 | 4921664                 | CC                              | TT                | 1946430487               |
| SNP_P3_63814_4921712 | NC_021164.1    | Ca_kabuli_chr05 | 4921712                 | GG                              | TT                | 1946430489               |
| SNP_P3_63815_4928176 | NC_021164.1    | Ca_kabuli_chr05 | 4928176                 | GG                              | TT                | 1946430490               |
| SNP_P3_63816_4928399 | NC_021164.1    | Ca_kabuli_chr05 | 4928399                 | GG                              | AA                | 1946430491               |
| SNP_P3_63817_4931710 | NC_021164.1    | Ca_kabuli_chr05 | 4931710                 | AA                              | TT                | 1946430493               |
| SNP_P3_63818_4955552 | NC_021164.1    | Ca_kabuli_chr05 | 4955552                 | AA                              | GG                | 1946430494               |
| SNP_P3_63819_4955590 | NC_021164.1    | Ca_kabuli_chr05 | 4955590                 | CC                              | AA                | 1946430496               |
| SNP_P3_63820_4955609 | NC_021164.1    | Ca_kabuli_chr05 | 4955609                 | TT                              | CC                | 1946430497               |
| SNP_P3_63821_4955906 | NC_021164.1    | Ca_kabuli_chr05 | 4955906                 | TT                              | CC                | 1946430498               |
| SNP_P3_63822_4959436 | NC_021164.1    | Ca_kabuli_chr05 | 4959436                 | AA                              | CC                | 1946430500               |
| SNP_P3_63823_4959462 | NC_021164.1    | Ca_kabuli_chr05 | 4959462                 | TT                              | CC                | 1946430501               |
| SNP_P3_63824_4959467 | NC_021164.1    | Ca_kabuli_chr05 | 4959467                 | TT                              | GG                | 1946430503               |
| SNP_P3_63825_4959519 | NC_021164.1    | Ca_kabuli_chr05 | 4959519                 | AA                              | CC                | 1946430504               |
| SNP_P3_63826_4959520 | NC_021164.1    | Ca_kabuli_chr05 | 4959520                 | GG                              | TT                | 1946430506               |
| SNP_P3_63827_4961707 | NC_021164.1    | Ca_kabuli_chr05 | 4961707                 | GG                              | AA                | 1946430507               |
| SNP_P3_63828_4962394 | NC_021164.1    | Ca_kabuli_chr05 | 4962394                 | CC                              | AA                | 1946430508               |
| SNP_P3_63829_4969267 | NC_021164.1    | Ca_kabuli_chr05 | 4969267                 | GG                              | AA                | 1946430510               |
| SNP_P3_63830_4969274 | NC_021164.1    | Ca_kabuli_chr05 | 4969274                 | TT                              | CC                | 1946430511               |
| SNP_P3_63831_4969350 | NC_021164.1    | Ca_kabuli_chr05 | 4969350                 | TT                              | CC                | 1946430512               |
| SNP_P3_63832_4969579 | NC_021164.1    | Ca_kabuli_chr05 | 4969579                 | CC                              | TT                | 1946430513               |
| SNP_P3_63833_4969686 | NC_021164.1    | Ca_kabuli_chr05 | 4969686                 | AA                              | TT                | 1946430514               |

| SNPs IDs             | Chromosome IDs | Chromosomes     | Physical positions (bp) | CDC Frontier (Reference genome) | (Pusa 256 & HPNB) | NCBI SNPdb Accession IDs |
|----------------------|----------------|-----------------|-------------------------|---------------------------------|-------------------|--------------------------|
| SNP_P3_63834_4969758 | NC_021164.1    | Ca_kabuli_chr05 | 4969758                 | AA                              | GG                | 1946430515               |
| SNP_P3_63835_4969792 | NC_021164.1    | Ca_kabuli_chr05 | 4969792                 | AA                              | GG                | 1946430516               |
| SNP_P3_63840_5083388 | NC_021164.1    | Ca_kabuli_chr05 | 5083388                 | GG                              | AA                | 1946430517               |
| SNP_P3_63841_5133905 | NC_021164.1    | Ca_kabuli_chr05 | 5133905                 | GG                              | AA                | 1946430518               |
| SNP_P3_63842_5146236 | NC_021164.1    | Ca_kabuli_chr05 | 5146236                 | AA                              | TT                | 1946430519               |
| SNP_P3_63843_5189440 | NC_021164.1    | Ca_kabuli_chr05 | 5189440                 | TT                              | GG                | 1946430520               |
| SNP_P3_63845_5193929 | NC_021164.1    | Ca_kabuli_chr05 | 5193929                 | TT                              | CC                | 1946430521               |
| SNP_P3_63846_5193938 | NC_021164.1    | Ca_kabuli_chr05 | 5193938                 | TT                              | AA                | 1946430522               |
| SNP_P3_63847_5193943 | NC_021164.1    | Ca_kabuli_chr05 | 5193943                 | TT                              | CC                | 1946430523               |
| SNP_P3_63848_5193962 | NC_021164.1    | Ca_kabuli_chr05 | 5193962                 | CC                              | TT                | 1946430524               |
| SNP_P3_63849_5194011 | NC_021164.1    | Ca_kabuli_chr05 | 5194011                 | AA                              | GG                | 1946430525               |
| SNP_P3_63850_5194030 | NC_021164.1    | Ca_kabuli_chr05 | 5194030                 | GG                              | TT                | 1946430526               |
| SNP_P3_63851_5194031 | NC_021164.1    | Ca_kabuli_chr05 | 5194031                 | AA                              | GG                | 1946430527               |
| SNP_P3_63852_5194049 | NC_021164.1    | Ca_kabuli_chr05 | 5194049                 | AA                              | GG                | 1946430528               |
| SNP_P3_63853_5194096 | NC_021164.1    | Ca_kabuli_chr05 | 5194096                 | TT                              | CC                | 1946430529               |
| SNP_P3_63854_5194103 | NC_021164.1    | Ca_kabuli_chr05 | 5194103                 | TT                              | CC                | 1946430530               |
| SNP_P3_63855_5194128 | NC_021164.1    | Ca_kabuli_chr05 | 5194128                 | TT                              | CC                | 1946430531               |
| SNP_P3_63856_5194140 | NC_021164.1    | Ca_kabuli_chr05 | 5194140                 | TT                              | GG                | 1946430532               |
| SNP_P3_63857_5194142 | NC_021164.1    | Ca_kabuli_chr05 | 5194142                 | TT                              | AA                | 1946430533               |
| SNP_P3_63858_5194168 | NC_021164.1    | Ca_kabuli_chr05 | 5194168                 | TT                              | CC                | 1946430534               |
| SNP_P3_63861_5235251 | NC_021164.1    | Ca_kabuli_chr05 | 5235251                 | AA                              | GG                | 1946430535               |
| SNP_P3_63862_5247826 | NC_021164.1    | Ca_kabuli_chr05 | 5247826                 | AA                              | CC                | 1946430536               |
| SNP_P3_63864_5269149 | NC_021164.1    | Ca_kabuli_chr05 | 5269149                 | GG                              | TT                | 1946430537               |
| SNP_P3_63865_5269192 | NC_021164.1    | Ca_kabuli_chr05 | 5269192                 | AA                              | GG                | 1946430538               |
| SNP_P3_63866_5269228 | NC_021164.1    | Ca_kabuli_chr05 | 5269228                 | TT                              | AA                | 1946430539               |
| SNP_P3_63867_5269246 | NC_021164.1    | Ca_kabuli_chr05 | 5269246                 | AA                              | GG                | 1946430540               |
| SNP_P3_63868_5269255 | NC_021164.1    | Ca_kabuli_chr05 | 5269255                 | TT                              | CC                | 1946430541               |
| SNP_P3_63869_5269276 | NC_021164.1    | Ca_kabuli_chr05 | 5269276                 | TT                              | CC                | 1946430542               |
| SNP_P3_63870_5269279 | NC_021164.1    | Ca_kabuli_chr05 | 5269279                 | TT                              | AA                | 1946430543               |
| SNP_P3_63871_5269291 | NC_021164.1    | Ca_kabuli_chr05 | 5269291                 | AA                              | GG                | 1946430544               |
| SNP_P3_63872_5271784 | NC_021164.1    | Ca_kabuli_chr05 | 5271784                 | TT                              | CC                | 1946430545               |
| SNP_P3_63873_5281169 | NC_021164.1    | Ca_kabuli_chr05 | 5281169                 | GG                              | AA                | 1946430546               |
| SNP_P3_63874_5299414 | NC_021164.1    | Ca_kabuli_chr05 | 5299414                 | CC                              | GG                | 1946430547               |
| SNP_P3_63875_5299472 | NC_021164.1    | Ca_kabuli_chr05 | 5299472                 | CC                              | TT                | 1946430548               |
| SNP_P3_63876_5299505 | NC_021164.1    | Ca_kabuli_chr05 | 5299505                 | CC                              | TT                | 1946430549               |
| SNP_P3_63877_5299520 | NC_021164.1    | Ca_kabuli_chr05 | 5299520                 | TT                              | CC                | 1946430550               |
| SNP_P3_63878_5299767 | NC_021164.1    | Ca_kabuli_chr05 | 5299767                 | TT                              | CC                | 1946430551               |
| SNP_P3_63879_5299771 | NC_021164.1    | Ca_kabuli_chr05 | 5299771                 | TT                              | CC                | 1946430552               |
| SNP_P3_63880_5299830 | NC_021164.1    | Ca_kabuli_chr05 | 5299830                 | AA                              | GG                | 1946430553               |
| SNP_P3_63881_5299870 | NC_021164.1    | Ca_kabuli_chr05 | 5299870                 | AA                              | CC                | 1946430554               |
| SNP_P3_63882_5299871 | NC_021164.1    | Ca_kabuli_chr05 | 5299871                 | TT                              | AA                | 1946430555               |
| SNP_P3_63883_5299883 | NC_021164.1    | Ca_kabuli_chr05 | 5299883                 | TT                              | CC                | 1946430556               |

| SNPs IDs             | Chromosome IDs | Chromosomes     | Physical positions (bp) | CDC Frontier (Reference genome) | (Pusa 256 & HPNB) | NCBI SNPdb Accession IDs |
|----------------------|----------------|-----------------|-------------------------|---------------------------------|-------------------|--------------------------|
| SNP_P3_63884_5299898 | NC_021164.1    | Ca_kabuli_chr05 | 5299898                 | TT                              | CC                | 1946430557               |
| SNP_P3_63885_5299936 | NC_021164.1    | Ca_kabuli_chr05 | 5299936                 | AA                              | GG                | 1946430558               |
| SNP_P3_63886_5300036 | NC_021164.1    | Ca_kabuli_chr05 | 5300036                 | TT                              | CC                | 1946430559               |
| SNP_P3_63887_5305862 | NC_021164.1    | Ca_kabuli_chr05 | 5305862                 | CC                              | AA                | 1946430560               |
| SNP_P3_63889_5318972 | NC_021164.1    | Ca_kabuli_chr05 | 5318972                 | CC                              | GG                | 1946430561               |
| SNP_P3_63890_5329838 | NC_021164.1    | Ca_kabuli_chr05 | 5329838                 | TT                              | AA                | 1946430562               |
| SNP_P3_63891_5350946 | NC_021164.1    | Ca_kabuli_chr05 | 5350946                 | CC                              | TT                | 1946430563               |
| SNP_P3_63892_5363215 | NC_021164.1    | Ca_kabuli_chr05 | 5363215                 | TT                              | GG                | 1946430564               |
| SNP_P3_63893_5363260 | NC_021164.1    | Ca_kabuli_chr05 | 5363260                 | TT                              | GG                | 1946430565               |
| SNP_P3_63894_5363282 | NC_021164.1    | Ca_kabuli_chr05 | 5363282                 | TT                              | CC                | 1946430566               |
| SNP_P3_63895_5363286 | NC_021164.1    | Ca_kabuli_chr05 | 5363286                 | CC                              | GG                | 1946430567               |
| SNP_P3_63896_5363301 | NC_021164.1    | Ca_kabuli_chr05 | 5363301                 | CC                              | AA                | 1946430568               |
| SNP_P3_63897_5363375 | NC_021164.1    | Ca_kabuli_chr05 | 5363375                 | AA                              | CC                | 1946430569               |
| SNP_P3_63898_5363516 | NC_021164.1    | Ca_kabuli_chr05 | 5363516                 | TT                              | CC                | 1946430570               |
| SNP_P3_63899_5363524 | NC_021164.1    | Ca_kabuli_chr05 | 5363524                 | TT                              | GG                | 1946430571               |
| SNP_P3_63900_5363545 | NC_021164.1    | Ca_kabuli_chr05 | 5363545                 | AA                              | CC                | 1946430572               |
| SNP_P3_63901_5363665 | NC_021164.1    | Ca_kabuli_chr05 | 5363665                 | GG                              | AA                | 1946430573               |
| SNP_P3_63902_5366159 | NC_021164.1    | Ca_kabuli_chr05 | 5366159                 | CC                              | TT                | 1946430574               |
| SNP_P3_63903_5381535 | NC_021164.1    | Ca_kabuli_chr05 | 5381535                 | GG                              | AA                | 1946430576               |
| SNP_P3_63904_5398511 | NC_021164.1    | Ca_kabuli_chr05 | 5398511                 | CC                              | TT                | 1946430578               |
| SNP_P3_63905_5405689 | NC_021164.1    | Ca_kabuli_chr05 | 5405689                 | TT                              | AA                | 1946430580               |
| SNP_P3_63906_5405714 | NC_021164.1    | Ca_kabuli_chr05 | 5405714                 | GG                              | CC                | 1946430581               |
| SNP_P3_63907_5405738 | NC_021164.1    | Ca_kabuli_chr05 | 5405738                 | CC                              | TT                | 1946430583               |
| SNP_P3_63908_5405816 | NC_021164.1    | Ca_kabuli_chr05 | 5405816                 | GG                              | AA                | 1946430584               |
| SNP_P3_63909_5422053 | NC_021164.1    | Ca_kabuli_chr05 | 5422053                 | CC                              | TT                | 1946430585               |
| SNP_P3_63910_5458039 | NC_021164.1    | Ca_kabuli_chr05 | 5458039                 | GG                              | AA                | 1946430587               |
| SNP_P3_63912_5504067 | NC_021164.1    | Ca_kabuli_chr05 | 5504067                 | TT                              | CC                | 1946430588               |
| SNP_P3_63913_5504068 | NC_021164.1    | Ca_kabuli_chr05 | 5504068                 | TT                              | CC                | 1946430590               |
| SNP_P3_63914_5530067 | NC_021164.1    | Ca_kabuli_chr05 | 5530067                 | AA                              | GG                | 1946430591               |
| SNP_P3_63915_5534071 | NC_021164.1    | Ca_kabuli_chr05 | 5534071                 | CC                              | TT                | 1946430593               |
| SNP_P3_63916_5534153 | NC_021164.1    | Ca_kabuli_chr05 | 5534153                 | AA                              | GG                | 1946430594               |
| SNP_P3_63917_5534229 | NC_021164.1    | Ca_kabuli_chr05 | 5534229                 | TT                              | CC                | 1946430596               |
| SNP_P3_63918_5534273 | NC_021164.1    | Ca_kabuli_chr05 | 5534273                 | GG                              | AA                | 1946430597               |
| SNP_P3_63919_5534293 | NC_021164.1    | Ca_kabuli_chr05 | 5534293                 | AA                              | GG                | 1946430599               |
| SNP_P3_63920_5534294 | NC_021164.1    | Ca_kabuli_chr05 | 5534294                 | TT                              | GG                | 1946430600               |
| SNP_P3_63921_5534354 | NC_021164.1    | Ca_kabuli_chr05 | 5534354                 | TT                              | GG                | 1946430602               |
| SNP_P3_63922_5534449 | NC_021164.1    | Ca_kabuli_chr05 | 5534449                 | AA                              | GG                | 1946430603               |
| SNP_P3_63923_5544592 | NC_021164.1    | Ca_kabuli_chr05 | 5544592                 | CC                              | TT                | 1946430604               |
| SNP_P3_63924_5548527 | NC_021164.1    | Ca_kabuli_chr05 | 5548527                 | GG                              | CC                | 1946430606               |
| SNP_P3_63925_5558482 | NC_021164.1    | Ca_kabuli_chr05 | 5558482                 | CC                              | GG                | 1946430607               |
| SNP_P3_63926_5558496 | NC_021164.1    | Ca_kabuli_chr05 | 5558496                 | GG                              | AA                | 1946430609               |
| SNP_P3_63927_5558514 | NC_021164.1    | Ca_kabuli_chr05 | 5558514                 | TT                              | CC                | 1946430610               |

| SNPs IDs             | Chromosome IDs | Chromosomes     | Physical positions (bp) | CDC Frontier (Reference genome) | (Pusa 256 & HPNB) | NCBI SNPdb Accession IDs |
|----------------------|----------------|-----------------|-------------------------|---------------------------------|-------------------|--------------------------|
| SNP_P3_63928_5558516 | NC_021164.1    | Ca_kabuli_chr05 | 5558516                 | GG                              | TT                | 1946430612               |
| SNP_P3_63929_5558525 | NC_021164.1    | Ca_kabuli_chr05 | 5558525                 | TT                              | GG                | 1946430613               |
| SNP_P3_63930_5558528 | NC_021164.1    | Ca_kabuli_chr05 | 5558528                 | GG                              | TT                | 1946430615               |
| SNP_P3_63931_5558560 | NC_021164.1    | Ca_kabuli_chr05 | 5558560                 | TT                              | AA                | 1946430616               |
| SNP_P3_63932_5578325 | NC_021164.1    | Ca_kabuli_chr05 | 5578325                 | AA                              | TT                | 1946430617               |
| SNP_P3_63934_5585799 | NC_021164.1    | Ca_kabuli_chr05 | 5585799                 | AA                              | TT                | 1946430619               |
| SNP_P3_63935_5585826 | NC_021164.1    | Ca_kabuli_chr05 | 5585826                 | AA                              | CC                | 1946430621               |
| SNP_P3_63936_5585827 | NC_021164.1    | Ca_kabuli_chr05 | 5585827                 | TT                              | CC                | 1946430622               |
| SNP_P3_63937_5585963 | NC_021164.1    | Ca_kabuli_chr05 | 5585963                 | TT                              | CC                | 1946430624               |
| SNP_P3_63938_5586003 | NC_021164.1    | Ca_kabuli_chr05 | 5586003                 | TT                              | CC                | 1946430625               |
| SNP_P3_63939_5586059 | NC_021164.1    | Ca_kabuli_chr05 | 5586059                 | TT                              | CC                | 1946430627               |
| SNP_P3_63940_5586094 | NC_021164.1    | Ca_kabuli_chr05 | 5586094                 | GG                              | CC                | 1946430628               |
| SNP_P3_63941_5586104 | NC_021164.1    | Ca_kabuli_chr05 | 5586104                 | AA                              | GG                | 1946430630               |
| SNP_P3_63942_5586111 | NC_021164.1    | Ca_kabuli_chr05 | 5586111                 | CC                              | GG                | 1946430631               |
| SNP_P3_63943_5586245 | NC_021164.1    | Ca_kabuli_chr05 | 5586245                 | GG                              | TT                | 1946430633               |
| SNP_P3_63944_5586247 | NC_021164.1    | Ca_kabuli_chr05 | 5586247                 | TT                              | CC                | 1946430634               |
| SNP_P3_63945_5586251 | NC_021164.1    | Ca_kabuli_chr05 | 5586251                 | CC                              | TT                | 1946430636               |
| SNP_P3_63946_5586286 | NC_021164.1    | Ca_kabuli_chr05 | 5586286                 | CC                              | TT                | 1946430637               |
| SNP_P3_63947_5590639 | NC_021164.1    | Ca_kabuli_chr05 | 5590639                 | AA                              | GG                | 1946430639               |
| SNP_P3_63948_5590816 | NC_021164.1    | Ca_kabuli_chr05 | 5590816                 | TT                              | CC                | 1946430640               |
| SNP_P3_63949_5590827 | NC_021164.1    | Ca_kabuli_chr05 | 5590827                 | TT                              | GG                | 1946430641               |
| SNP_P3_63950_5590860 | NC_021164.1    | Ca_kabuli_chr05 | 5590860                 | AA                              | GG                | 1946430642               |
| SNP_P3_63951_5591035 | NC_021164.1    | Ca_kabuli_chr05 | 5591035                 | TT                              | GG                | 1946430643               |
| SNP_P3_63953_5631208 | NC_021164.1    | Ca_kabuli_chr05 | 5631208                 | AA                              | GG                | 1946430644               |
| SNP_P3_63955_5702989 | NC_021164.1    | Ca_kabuli_chr05 | 5702989                 | AA                              | GG                | 1946430645               |
| SNP_P3_63956_5704589 | NC_021164.1    | Ca_kabuli_chr05 | 5704589                 | GG                              | TT                | 1946430646               |
| SNP_P3_63957_5704709 | NC_021164.1    | Ca_kabuli_chr05 | 5704709                 | CC                              | TT                | 1946430647               |
| SNP_P3_63959_5735405 | NC_021164.1    | Ca_kabuli_chr05 | 5735405                 | GG                              | AA                | 1946430648               |
| SNP_P3_63960_5735407 | NC_021164.1    | Ca_kabuli_chr05 | 5735407                 | TT                              | CC                | 1946430649               |
| SNP_P3_63961_5735411 | NC_021164.1    | Ca_kabuli_chr05 | 5735411                 | TT                              | CC                | 1946430650               |
| SNP_P3_63962_5735419 | NC_021164.1    | Ca_kabuli_chr05 | 5735419                 | AA                              | TT                | 1946430651               |
| SNP_P3_63963_5735426 | NC_021164.1    | Ca_kabuli_chr05 | 5735426                 | TT                              | CC                | 1946430652               |
| SNP_P3_63964_5735460 | NC_021164.1    | Ca_kabuli_chr05 | 5735460                 | GG                              | AA                | 1946430653               |
| SNP_P3_63965_5735465 | NC_021164.1    | Ca_kabuli_chr05 | 5735465                 | TT                              | AA                | 1946430654               |
| SNP_P3_63966_5735467 | NC_021164.1    | Ca_kabuli_chr05 | 5735467                 | GG                              | CC                | 1946430655               |
| SNP_P3_63967_5735472 | NC_021164.1    | Ca_kabuli_chr05 | 5735472                 | AA                              | TT                | 1946430656               |
| SNP_P3_63968_5735671 | NC_021164.1    | Ca_kabuli_chr05 | 5735671                 | TT                              | GG                | 1946430657               |
| SNP_P3_63969_5769866 | NC_021164.1    | Ca_kabuli_chr05 | 5769866                 | TT                              | GG                | 1946430658               |
| SNP_P3_63970_5769943 | NC_021164.1    | Ca_kabuli_chr05 | 5769943                 | CC                              | AA                | 1946430659               |
| SNP_P3_63971_5770143 | NC_021164.1    | Ca_kabuli_chr05 | 5770143                 | CC                              | TT                | 1946430660               |
| SNP_P3_63972_5770180 | NC_021164.1    | Ca_kabuli_chr05 | 5770180                 | TT                              | CC                | 1946430661               |
| SNP_P3_63973_5786947 | NC_021164.1    | Ca_kabuli_chr05 | 5786947                 | AA                              | GG                | 1946430662               |

| SNPs IDs             | Chromosome IDs | Chromosomes     | Physical positions (bp) | CDC Frontier (Reference genome) | (Pusa 256 & HPNB) | NCBI SNPdb Accession IDs |
|----------------------|----------------|-----------------|-------------------------|---------------------------------|-------------------|--------------------------|
| SNP_P3_63974_5787031 | NC_021164.1    | Ca_kabuli_chr05 | 5787031                 | CC                              | TT                | 1946430663               |
| SNP_P3_63977_5822622 | NC_021164.1    | Ca_kabuli_chr05 | 5822622                 | AA                              | GG                | 1946430664               |
| SNP_P3_63978_5822906 | NC_021164.1    | Ca_kabuli_chr05 | 5822906                 | AA                              | GG                | 1946430665               |
| SNP_P3_63979_5822910 | NC_021164.1    | Ca_kabuli_chr05 | 5822910                 | AA                              | GG                | 1946430666               |
| SNP_P3_63980_5823553 | NC_021164.1    | Ca_kabuli_chr05 | 5823553                 | AA                              | TT                | 1946430667               |
| SNP_P3_63981_5823727 | NC_021164.1    | Ca_kabuli_chr05 | 5823727                 | GG                              | AA                | 1946430668               |
| SNP_P3_63982_5823737 | NC_021164.1    | Ca_kabuli_chr05 | 5823737                 | CC                              | TT                | 1946430669               |
| SNP_P3_63983_5825113 | NC_021164.1    | Ca_kabuli_chr05 | 5825113                 | GG                              | AA                | 1946430670               |
| SNP_P3_63984_5825142 | NC_021164.1    | Ca_kabuli_chr05 | 5825142                 | TT                              | GG                | 1946430671               |
| SNP_P3_63985_5825443 | NC_021164.1    | Ca_kabuli_chr05 | 5825443                 | AA                              | GG                | 1946430672               |
| SNP_P3_63986_5825469 | NC_021164.1    | Ca_kabuli_chr05 | 5825469                 | TT                              | GG                | 1946430673               |
| SNP_P3_63987_5825577 | NC_021164.1    | Ca_kabuli_chr05 | 5825577                 | GG                              | AA                | 1946430674               |
| SNP_P3_63988_5825774 | NC_021164.1    | Ca_kabuli_chr05 | 5825774                 | GG                              | TT                | 1946430675               |
| SNP_P3_63989_5825819 | NC_021164.1    | Ca_kabuli_chr05 | 5825819                 | AA                              | CC                | 1946430676               |
| SNP_P3_63990_5825906 | NC_021164.1    | Ca_kabuli_chr05 | 5825906                 | GG                              | AA                | 1946430677               |
| SNP_P3_63991_5825910 | NC_021164.1    | Ca_kabuli_chr05 | 5825910                 | AA                              | CC                | 1946430678               |
| SNP_P3_63992_5825997 | NC_021164.1    | Ca_kabuli_chr05 | 5825997                 | TT                              | AA                | 1946430679               |
| SNP_P3_63993_5826033 | NC_021164.1    | Ca_kabuli_chr05 | 5826033                 | GG                              | AA                | 1946430680               |
| SNP_P3_63994_5826060 | NC_021164.1    | Ca_kabuli_chr05 | 5826060                 | AA                              | CC                | 1946430681               |
| SNP_P3_63995_5826063 | NC_021164.1    | Ca_kabuli_chr05 | 5826063                 | AA                              | GG                | 1946430682               |
| SNP_P3_63996_5826207 | NC_021164.1    | Ca_kabuli_chr05 | 5826207                 | AA                              | CC                | 1946430683               |
| SNP_P3_63997_5827337 | NC_021164.1    | Ca_kabuli_chr05 | 5827337                 | CC                              | TT                | 1946430684               |
| SNP_P3_63998_5827357 | NC_021164.1    | Ca_kabuli_chr05 | 5827357                 | TT                              | CC                | 1946430685               |
| SNP_P3_63999_5827402 | NC_021164.1    | Ca_kabuli_chr05 | 5827402                 | AA                              | TT                | 1946430687               |
| SNP_P3_64000_5827525 | NC_021164.1    | Ca_kabuli_chr05 | 5827525                 | CC                              | TT                | 1946430688               |
| SNP_P3_64001_5827550 | NC_021164.1    | Ca_kabuli_chr05 | 5827550                 | AA                              | CC                | 1946430690               |
| SNP_P3_64002_5827556 | NC_021164.1    | Ca_kabuli_chr05 | 5827556                 | AA                              | GG                | 1946430691               |
| SNP_P3_64003_5827560 | NC_021164.1    | Ca_kabuli_chr05 | 5827560                 | TT                              | AA                | 1946430693               |
| SNP_P3_64004_5827585 | NC_021164.1    | Ca_kabuli_chr05 | 5827585                 | TT                              | GG                | 1946430694               |
| SNP_P3_64005_5827634 | NC_021164.1    | Ca_kabuli_chr05 | 5827634                 | CC                              | TT                | 1946430696               |
| SNP_P3_64006_5827823 | NC_021164.1    | Ca_kabuli_chr05 | 5827823                 | CC                              | TT                | 1946430697               |
| SNP_P3_64007_5827833 | NC_021164.1    | Ca_kabuli_chr05 | 5827833                 | GG                              | AA                | 1946430699               |
| SNP_P3_64008_5827835 | NC_021164.1    | Ca_kabuli_chr05 | 5827835                 | CC                              | TT                | 1946430701               |
| SNP_P3_64009_5827837 | NC_021164.1    | Ca_kabuli_chr05 | 5827837                 | AA                              | GG                | 1946430702               |
| SNP_P3_64010_5828199 | NC_021164.1    | Ca_kabuli_chr05 | 5828199                 | TT                              | AA                | 1946430704               |
| SNP_P3_64011_5831378 | NC_021164.1    | Ca_kabuli_chr05 | 5831378                 | TT                              | GG                | 1946430705               |
| SNP_P3_64012_5831440 | NC_021164.1    | Ca_kabuli_chr05 | 5831440                 | GG                              | AA                | 1946430706               |
| SNP_P3_64013_5831442 | NC_021164.1    | Ca_kabuli_chr05 | 5831442                 | CC                              | GG                | 1946430708               |
| SNP_P3_64014_5831609 | NC_021164.1    | Ca_kabuli_chr05 | 5831609                 | GG                              | AA                | 1946430709               |
| SNP_P3_64015_5831649 | NC_021164.1    | Ca_kabuli_chr05 | 5831649                 | TT                              | CC                | 1946430711               |
| SNP_P3_64016_5832779 | NC_021164.1    | Ca_kabuli_chr05 | 5832779                 | AA                              | CC                | 1946430712               |
| SNP_P3_64017_5833192 | NC_021164.1    | Ca_kabuli_chr05 | 5833192                 | TT                              | GG                | 1946430714               |



| SNPs IDs             | Chromosome IDs | Chromosomes     | Physical positions (bp) | CDC Frontier (Reference genome) | (Pusa 256 & HPNB) | NCBI SNPdb Accession IDs |
|----------------------|----------------|-----------------|-------------------------|---------------------------------|-------------------|--------------------------|
| SNP_P3_64018_5835354 | NC_021164.1    | Ca_kabuli_chr05 | 5835354                 | AA                              | TT                | 1946430715               |
| SNP_P3_64019_5835422 | NC_021164.1    | Ca_kabuli_chr05 | 5835422                 | TT                              | AA                | 1946430716               |
| SNP_P3_64020_5835428 | NC_021164.1    | Ca_kabuli_chr05 | 5835428                 | TT                              | AA                | 1946430718               |
| SNP_P3_64021_5835433 | NC_021164.1    | Ca_kabuli_chr05 | 5835433                 | AA                              | TT                | 1946430719               |
| SNP_P3_64022_5835457 | NC_021164.1    | Ca_kabuli_chr05 | 5835457                 | AA                              | TT                | 1946430721               |
| SNP_P3_64023_5835517 | NC_021164.1    | Ca_kabuli_chr05 | 5835517                 | AA                              | GG                | 1946430723               |
| SNP_P3_64024_5835575 | NC_021164.1    | Ca_kabuli_chr05 | 5835575                 | GG                              | CC                | 1946430724               |
| SNP_P3_64025_5835725 | NC_021164.1    | Ca_kabuli_chr05 | 5835725                 | GG                              | TT                | 1946430725               |
| SNP_P3_64026_5836252 | NC_021164.1    | Ca_kabuli_chr05 | 5836252                 | AA                              | GG                | 1946430727               |
| SNP_P3_64027_5836341 | NC_021164.1    | Ca_kabuli_chr05 | 5836341                 | AA                              | TT                | 1946430728               |
| SNP_P3_64028_5836342 | NC_021164.1    | Ca_kabuli_chr05 | 5836342                 | TT                              | AA                | 1946430730               |
| SNP_P3_64029_5836376 | NC_021164.1    | Ca_kabuli_chr05 | 5836376                 | CC                              | TT                | 1946430731               |
| SNP_P3_64030_5836402 | NC_021164.1    | Ca_kabuli_chr05 | 5836402                 | TT                              | GG                | 1946430732               |
| SNP_P3_64031_5836473 | NC_021164.1    | Ca_kabuli_chr05 | 5836473                 | CC                              | TT                | 1946430734               |
| SNP_P3_64032_5836479 | NC_021164.1    | Ca_kabuli_chr05 | 5836479                 | CC                              | AA                | 1946430735               |
| SNP_P3_64033_5836528 | NC_021164.1    | Ca_kabuli_chr05 | 5836528                 | AA                              | CC                | 1946430737               |
| SNP_P3_64034_5836709 | NC_021164.1    | Ca_kabuli_chr05 | 5836709                 | CC                              | AA                | 1946430738               |
| SNP_P3_64035_5836718 | NC_021164.1    | Ca_kabuli_chr05 | 5836718                 | GG                              | AA                | 1946430739               |
| SNP_P3_64036_5836721 | NC_021164.1    | Ca_kabuli_chr05 | 5836721                 | GG                              | AA                | 1946430741               |
| SNP_P3_64038_5836913 | NC_021164.1    | Ca_kabuli_chr05 | 5836913                 | CC                              | GG                | 1946430742               |
| SNP_P3_64039_5836920 | NC_021164.1    | Ca_kabuli_chr05 | 5836920                 | TT                              | GG                | 1946430744               |
| SNP_P3_64040_5836955 | NC_021164.1    | Ca_kabuli_chr05 | 5836955                 | TT                              | GG                | 1946430745               |
| SNP_P3_64041_5836999 | NC_021164.1    | Ca_kabuli_chr05 | 5836999                 | TT                              | AA                | 1946430747               |
| SNP_P3_64042_5837024 | NC_021164.1    | Ca_kabuli_chr05 | 5837024                 | GG                              | AA                | 1946430748               |
| SNP_P3_64044_5837131 | NC_021164.1    | Ca_kabuli_chr05 | 5837131                 | TT                              | CC                | 1946430749               |
| SNP_P3_64045_5837271 | NC_021164.1    | Ca_kabuli_chr05 | 5837271                 | TT                              | CC                | 1946430751               |
| SNP_P3_64046_5837283 | NC_021164.1    | Ca_kabuli_chr05 | 5837283                 | AA                              | GG                | 1946430752               |
| SNP_P3_64047_5837327 | NC_021164.1    | Ca_kabuli_chr05 | 5837327                 | TT                              | AA                | 1946430754               |
| SNP_P3_64048_5837444 | NC_021164.1    | Ca_kabuli_chr05 | 5837444                 | CC                              | AA                | 1946430755               |
| SNP_P3_64049_5837487 | NC_021164.1    | Ca_kabuli_chr05 | 5837487                 | TT                              | AA                | 1946430757               |
| SNP_P3_64050_5837630 | NC_021164.1    | Ca_kabuli_chr05 | 5837630                 | GG                              | AA                | 1946430758               |
| SNP_P3_64051_5854984 | NC_021164.1    | Ca_kabuli_chr05 | 5854984                 | TT                              | CC                | 1946430760               |
| SNP_P3_64052_5855011 | NC_021164.1    | Ca_kabuli_chr05 | 5855011                 | TT                              | GG                | 1946430761               |
| SNP_P3_64053_5855829 | NC_021164.1    | Ca_kabuli_chr05 | 5855829                 | CC                              | AA                | 1946430763               |
| SNP_P3_64054_5855840 | NC_021164.1    | Ca_kabuli_chr05 | 5855840                 | GG                              | AA                | 1946430764               |
| SNP_P3_64055_5855971 | NC_021164.1    | Ca_kabuli_chr05 | 5855971                 | CC                              | AA                | 1946430765               |
| SNP_P3_64056_5857839 | NC_021164.1    | Ca_kabuli_chr05 | 5857839                 | TT                              | CC                | 1946430767               |
| SNP_P3_64057_5860526 | NC_021164.1    | Ca_kabuli_chr05 | 5860526                 | GG                              | AA                | 1946430768               |
| SNP_P3_64058_5869851 | NC_021164.1    | Ca_kabuli_chr05 | 5869851                 | AA                              | GG                | 1946430770               |
| SNP_P3_64059_5870240 | NC_021164.1    | Ca_kabuli_chr05 | 5870240                 | GG                              | TT                | 1946430771               |
| SNP_P3_64060_5870259 | NC_021164.1    | Ca_kabuli_chr05 | 5870259                 | AA                              | GG                | 1946430773               |
| SNP_P3_64061_5870288 | NC_021164.1    | Ca_kabuli_chr05 | 5870288                 | GG                              | TT                | 1946430774               |

| SNPs IDs             | Chromosome IDs | Chromosomes     | Physical positions (bp) | CDC Frontier (Reference genome) | (Pusa 256 & HPNB) | NCBI SNPdb Accession IDs |
|----------------------|----------------|-----------------|-------------------------|---------------------------------|-------------------|--------------------------|
| SNP_P3_64062_5870303 | NC_021164.1    | Ca_kabuli_chr05 | 5870303                 | CC                              | AA                | 1946430776               |
| SNP_P3_64063_5870306 | NC_021164.1    | Ca_kabuli_chr05 | 5870306                 | GG                              | AA                | 1946430777               |
| SNP_P3_64064_5873247 | NC_021164.1    | Ca_kabuli_chr05 | 5873247                 | GG                              | AA                | 1946430779               |
| SNP_P3_64066_5901638 | NC_021164.1    | Ca_kabuli_chr05 | 5901638                 | GG                              | AA                | 1946430780               |
| SNP_P3_64068_5919737 | NC_021164.1    | Ca_kabuli_chr05 | 5919737                 | AA                              | TT                | 1946430782               |
| SNP_P3_64069_5969749 | NC_021164.1    | Ca_kabuli_chr05 | 5969749                 | TT                              | AA                | 1946430783               |
| SNP_P3_64070_5969770 | NC_021164.1    | Ca_kabuli_chr05 | 5969770                 | AA                              | TT                | 1946430784               |
| SNP_P3_64071_5969798 | NC_021164.1    | Ca_kabuli_chr05 | 5969798                 | TT                              | CC                | 1946430786               |
| SNP_P3_64072_5969870 | NC_021164.1    | Ca_kabuli_chr05 | 5969870                 | AA                              | CC                | 1946430787               |
| SNP_P3_64073_5969957 | NC_021164.1    | Ca_kabuli_chr05 | 5969957                 | AA                              | CC                | 1946430789               |
| SNP_P3_64074_5969974 | NC_021164.1    | Ca_kabuli_chr05 | 5969974                 | GG                              | TT                | 1946430790               |
| SNP_P3_64075_5969978 | NC_021164.1    | Ca_kabuli_chr05 | 5969978                 | GG                              | TT                | 1946430792               |
| SNP_P3_64076_5970021 | NC_021164.1    | Ca_kabuli_chr05 | 5970021                 | AA                              | TT                | 1946430793               |
| SNP_P3_64077_5970030 | NC_021164.1    | Ca_kabuli_chr05 | 5970030                 | AA                              | GG                | 1946430795               |
| SNP_P3_64078_5970043 | NC_021164.1    | Ca_kabuli_chr05 | 5970043                 | AA                              | CC                | 1946430796               |
| SNP_P3_64079_5970132 | NC_021164.1    | Ca_kabuli_chr05 | 5970132                 | TT                              | CC                | 1946430798               |
| SNP_P3_64080_5970141 | NC_021164.1    | Ca_kabuli_chr05 | 5970141                 | AA                              | GG                | 1946430799               |
| SNP_P3_64081_5970145 | NC_021164.1    | Ca_kabuli_chr05 | 5970145                 | GG                              | AA                | 1946430801               |
| SNP_P3_64082_5970148 | NC_021164.1    | Ca_kabuli_chr05 | 5970148                 | AA                              | CC                | 1946430802               |
| SNP_P3_64083_5970184 | NC_021164.1    | Ca_kabuli_chr05 | 5970184                 | CC                              | GG                | 1946430804               |
| SNP_P3_64084_5970238 | NC_021164.1    | Ca_kabuli_chr05 | 5970238                 | GG                              | AA                | 1946430805               |
| SNP_P3_64085_5970262 | NC_021164.1    | Ca_kabuli_chr05 | 5970262                 | CC                              | TT                | 1946430807               |
| SNP_P3_64086_5970267 | NC_021164.1    | Ca_kabuli_chr05 | 5970267                 | CC                              | AA                | 1946430808               |
| SNP_P3_64087_5970295 | NC_021164.1    | Ca_kabuli_chr05 | 5970295                 | TT                              | CC                | 1946430810               |
| SNP_P3_64088_5970396 | NC_021164.1    | Ca_kabuli_chr05 | 5970396                 | AA                              | CC                | 1946430811               |
| SNP_P3_64089_5970402 | NC_021164.1    | Ca_kabuli_chr05 | 5970402                 | AA                              | GG                | 1946430813               |
| SNP_P3_64090_5970526 | NC_021164.1    | Ca_kabuli_chr05 | 5970526                 | TT                              | CC                | 1946430814               |
| SNP_P3_64091_5970626 | NC_021164.1    | Ca_kabuli_chr05 | 5970626                 | GG                              | CC                | 1946430816               |
| SNP_P3_64092_5971134 | NC_021164.1    | Ca_kabuli_chr05 | 5971134                 | AA                              | CC                | 1946430817               |
| SNP_P3_64093_5971136 | NC_021164.1    | Ca_kabuli_chr05 | 5971136                 | CC                              | TT                | 1946430818               |
| SNP_P3_64094_5975054 | NC_021164.1    | Ca_kabuli_chr05 | 5975054                 | TT                              | CC                | 1946430820               |
| SNP_P3_64095_5975058 | NC_021164.1    | Ca_kabuli_chr05 | 5975058                 | AA                              | GG                | 1946430822               |
| SNP_P3_64096_5975186 | NC_021164.1    | Ca_kabuli_chr05 | 5975186                 | GG                              | TT                | 1946430823               |
| SNP_P3_64097_5975208 | NC_021164.1    | Ca_kabuli_chr05 | 5975208                 | GG                              | AA                | 1946430825               |
| SNP_P3_64098_5975265 | NC_021164.1    | Ca_kabuli_chr05 | 5975265                 | AA                              | TT                | 1946430826               |
| SNP_P3_64099_5975889 | NC_021164.1    | Ca_kabuli_chr05 | 5975889                 | AA                              | TT                | 1946430828               |
| SNP_P3_64100_5985426 | NC_021164.1    | Ca_kabuli_chr05 | 5985426                 | CC                              | AA                | 1946430829               |
| SNP_P3_64101_5985447 | NC_021164.1    | Ca_kabuli_chr05 | 5985447                 | CC                              | AA                | 1946430831               |
| SNP_P3_64102_5985457 | NC_021164.1    | Ca_kabuli_chr05 | 5985457                 | TT                              | GG                | 1946430832               |
| SNP_P3_64103_5991325 | NC_021164.1    | Ca_kabuli_chr05 | 5991325                 | GG                              | TT                | 1946430834               |
| SNP_P3_64104_5991485 | NC_021164.1    | Ca_kabuli_chr05 | 5991485                 | GG                              | AA                | 1946430835               |
| SNP_P3_64105_5991840 | NC_021164.1    | Ca_kabuli_chr05 | 5991840                 | CC                              | TT                | 1946430836               |

| SNPs IDs             | Chromosome IDs | Chromosomes     | Physical positions (bp) | CDC Frontier (Reference genome) | (Pusa 256 & HPNB) | NCBI SNPdb Accession IDs |
|----------------------|----------------|-----------------|-------------------------|---------------------------------|-------------------|--------------------------|
| SNP_P3_64106_5992086 | NC_021164.1    | Ca_kabuli_chr05 | 5992086                 | CC                              | AA                | 1946430838               |
| SNP_P3_64107_5992350 | NC_021164.1    | Ca_kabuli_chr05 | 5992350                 | AA                              | GG                | 1946430839               |
| SNP_P3_64108_5992648 | NC_021164.1    | Ca_kabuli_chr05 | 5992648                 | AA                              | GG                | 1946430841               |
| SNP_P3_64109_5994806 | NC_021164.1    | Ca_kabuli_chr05 | 5994806                 | TT                              | AA                | 1946430843               |
| SNP_P3_64110_5994944 | NC_021164.1    | Ca_kabuli_chr05 | 5994944                 | AA                              | CC                | 1946430844               |
| SNP_P3_64111_6001370 | NC_021164.1    | Ca_kabuli_chr05 | 6001370                 | CC                              | GG                | 1946430846               |
| SNP_P3_64112_6021010 | NC_021164.1    | Ca_kabuli_chr05 | 6021010                 | CC                              | AA                | 1946430847               |
| SNP_P3_64113_6026299 | NC_021164.1    | Ca_kabuli_chr05 | 6026299                 | TT                              | AA                | 1946430849               |
| SNP_P3_64114_6045589 | NC_021164.1    | Ca_kabuli_chr05 | 6045589                 | CC                              | TT                | 1946430850               |
| SNP_P3_64115_6045846 | NC_021164.1    | Ca_kabuli_chr05 | 6045846                 | GG                              | TT                | 1946430852               |
| SNP_P3_64116_6045852 | NC_021164.1    | Ca_kabuli_chr05 | 6045852                 | AA                              | GG                | 1946430855               |
| SNP_P3_64117_6045875 | NC_021164.1    | Ca_kabuli_chr05 | 6045875                 | AA                              | GG                | 1946430856               |
| SNP_P3_64118_6045913 | NC_021164.1    | Ca_kabuli_chr05 | 6045913                 | AA                              | CC                | 1946430858               |
| SNP_P3_64119_6045918 | NC_021164.1    | Ca_kabuli_chr05 | 6045918                 | CC                              | AA                | 1946430859               |
| SNP_P3_64120_6045923 | NC_021164.1    | Ca_kabuli_chr05 | 6045923                 | TT                              | CC                | 1946430861               |
| SNP_P3_64121_6045944 | NC_021164.1    | Ca_kabuli_chr05 | 6045944                 | AA                              | GG                | 1946430862               |
| SNP_P3_64122_6045958 | NC_021164.1    | Ca_kabuli_chr05 | 6045958                 | TT                              | CC                | 1946430864               |
| SNP_P3_64123_6045972 | NC_021164.1    | Ca_kabuli_chr05 | 6045972                 | AA                              | CC                | 1946430865               |
| SNP_P3_64124_6063459 | NC_021164.1    | Ca_kabuli_chr05 | 6063459                 | GG                              | AA                | 1946430866               |
| SNP_P3_64126_6124423 | NC_021164.1    | Ca_kabuli_chr05 | 6124423                 | GG                              | TT                | 1946430868               |
| SNP_P3_64127_6124485 | NC_021164.1    | Ca_kabuli_chr05 | 6124485                 | AA                              | CC                | 1946430869               |
| SNP_P3_64128_6124817 | NC_021164.1    | Ca_kabuli_chr05 | 6124817                 | TT                              | CC                | 1946430871               |
| SNP_P3_64129_6124819 | NC_021164.1    | Ca_kabuli_chr05 | 6124819                 | GG                              | AA                | 1946430873               |
| SNP_P3_64130_6124853 | NC_021164.1    | Ca_kabuli_chr05 | 6124853                 | CC                              | TT                | 1946430874               |
| SNP_P3_64131_6143761 | NC_021164.1    | Ca_kabuli_chr05 | 6143761                 | GG                              | AA                | 1946430876               |
| SNP_P3_64132_6170566 | NC_021164.1    | Ca_kabuli_chr05 | 6170566                 | AA                              | GG                | 1946430877               |
| SNP_P3_64133_6198275 | NC_021164.1    | Ca_kabuli_chr05 | 6198275                 | GG                              | AA                | 1946430879               |
| SNP_P3_64134_6199861 | NC_021164.1    | Ca_kabuli_chr05 | 6199861                 | CC                              | GG                | 1946430880               |
| SNP_P3_64135_6199871 | NC_021164.1    | Ca_kabuli_chr05 | 6199871                 | CC                              | TT                | 1946430882               |
| SNP_P3_64136_6199901 | NC_021164.1    | Ca_kabuli_chr05 | 6199901                 | TT                              | CC                | 1946430883               |
| SNP_P3_64137_6199908 | NC_021164.1    | Ca_kabuli_chr05 | 6199908                 | TT                              | CC                | 1946430885               |
| SNP_P3_64138_6200068 | NC_021164.1    | Ca_kabuli_chr05 | 6200068                 | GG                              | AA                | 1946430886               |
| SNP_P3_64139_6200077 | NC_021164.1    | Ca_kabuli_chr05 | 6200077                 | CC                              | TT                | 1946430887               |
| SNP_P3_64140_6200078 | NC_021164.1    | Ca_kabuli_chr05 | 6200078                 | GG                              | TT                | 1946430889               |
| SNP_P3_64141_6200079 | NC_021164.1    | Ca_kabuli_chr05 | 6200079                 | AA                              | GG                | 1946430890               |
| SNP_P3_64143_6200128 | NC_021164.1    | Ca_kabuli_chr05 | 6200128                 | CC                              | TT                | 1946430892               |
| SNP_P3_64144_6200225 | NC_021164.1    | Ca_kabuli_chr05 | 6200225                 | CC                              | TT                | 1946430894               |
| SNP_P3_64145_6200347 | NC_021164.1    | Ca_kabuli_chr05 | 6200347                 | GG                              | TT                | 1946430895               |
| SNP_P3_64146_6200375 | NC_021164.1    | Ca_kabuli_chr05 | 6200375                 | TT                              | GG                | 1946430897               |
| SNP_P3_64147_6200468 | NC_021164.1    | Ca_kabuli_chr05 | 6200468                 | AA                              | GG                | 1946430898               |
| SNP_P3_64148_6200526 | NC_021164.1    | Ca_kabuli_chr05 | 6200526                 | TT                              | AA                | 1946430900               |
| SNP_P3_64149_6200532 | NC_021164.1    | Ca_kabuli_chr05 | 6200532                 | CC                              | TT                | 1946430901               |

| SNPs IDs             | Chromosome IDs | Chromosomes     | Physical positions (bp) | CDC Frontier (Reference genome) | (Pusa 256 & HPNB) | NCBI SNPdb Accession IDs |
|----------------------|----------------|-----------------|-------------------------|---------------------------------|-------------------|--------------------------|
| SNP_P3_64150_6221054 | NC_021164.1    | Ca_kabuli_chr05 | 6221054                 | TT                              | AA                | 1946430903               |
| SNP_P3_64151_6221197 | NC_021164.1    | Ca_kabuli_chr05 | 6221197                 | CC                              | AA                | 1946430904               |
| SNP_P3_64152_6237101 | NC_021164.1    | Ca_kabuli_chr05 | 6237101                 | TT                              | GG                | 1946430906               |
| SNP_P3_64153_6237181 | NC_021164.1    | Ca_kabuli_chr05 | 6237181                 | TT                              | CC                | 1946430907               |
| SNP_P3_64154_6239165 | NC_021164.1    | Ca_kabuli_chr05 | 6239165                 | CC                              | TT                | 1946430909               |
| SNP_P3_64155_6259852 | NC_021164.1    | Ca_kabuli_chr05 | 6259852                 | GG                              | CC                | 1946430910               |
| SNP_P3_64156_6263252 | NC_021164.1    | Ca_kabuli_chr05 | 6263252                 | AA                              | GG                | 1946430912               |
| SNP_P3_64157_6263471 | NC_021164.1    | Ca_kabuli_chr05 | 6263471                 | TT                              | CC                | 1946430914               |
| SNP_P3_64158_6263717 | NC_021164.1    | Ca_kabuli_chr05 | 6263717                 | TT                              | CC                | 1946430915               |
| SNP_P3_64159_6263756 | NC_021164.1    | Ca_kabuli_chr05 | 6263756                 | GG                              | AA                | 1946430917               |
| SNP_P3_64160_6263884 | NC_021164.1    | Ca_kabuli_chr05 | 6263884                 | AA                              | GG                | 1946430918               |
| SNP_P3_64161_6266666 | NC_021164.1    | Ca_kabuli_chr05 | 6266666                 | GG                              | AA                | 1946430920               |
| SNP_P3_64164_6290548 | NC_021164.1    | Ca_kabuli_chr05 | 6290548                 | TT                              | GG                | 1946430921               |
| SNP_P3_64165_6290938 | NC_021164.1    | Ca_kabuli_chr05 | 6290938                 | AA                              | GG                | 1946430922               |
| SNP_P3_64166_6307578 | NC_021164.1    | Ca_kabuli_chr05 | 6307578                 | CC                              | TT                | 1946430924               |
| SNP_P3_64167_6310422 | NC_021164.1    | Ca_kabuli_chr05 | 6310422                 | AA                              | GG                | 1946430925               |
| SNP_P3_64168_6310463 | NC_021164.1    | Ca_kabuli_chr05 | 6310463                 | TT                              | GG                | 1946430927               |
| SNP_P3_64169_6310483 | NC_021164.1    | Ca_kabuli_chr05 | 6310483                 | GG                              | CC                | 1946430969               |
| SNP_P3_64170_6310498 | NC_021164.1    | Ca_kabuli_chr05 | 6310498                 | AA                              | GG                | 1946430970               |
| SNP_P3_64171_6310538 | NC_021164.1    | Ca_kabuli_chr05 | 6310538                 | AA                              | GG                | 1946430972               |
| SNP_P3_64172_6310740 | NC_021164.1    | Ca_kabuli_chr05 | 6310740                 | AA                              | CC                | 1946430973               |
| SNP_P3_64173_6310934 | NC_021164.1    | Ca_kabuli_chr05 | 6310934                 | GG                              | AA                | 1946430975               |
| SNP_P3_64174_6310951 | NC_021164.1    | Ca_kabuli_chr05 | 6310951                 | CC                              | TT                | 1946430977               |
| SNP_P3_64175_6311053 | NC_021164.1    | Ca_kabuli_chr05 | 6311053                 | GG                              | AA                | 1946430978               |
| SNP_P3_64176_6334797 | NC_021164.1    | Ca_kabuli_chr05 | 6334797                 | CC                              | AA                | 1946430979               |
| SNP_P3_64177_6334801 | NC_021164.1    | Ca_kabuli_chr05 | 6334801                 | CC                              | AA                | 1946430981               |
| SNP_P3_64178_6334824 | NC_021164.1    | Ca_kabuli_chr05 | 6334824                 | GG                              | AA                | 1946430982               |
| SNP_P3_64179_6348512 | NC_021164.1    | Ca_kabuli_chr05 | 6348512                 | TT                              | CC                | 1946430984               |
| SNP_P3_64180_6348532 | NC_021164.1    | Ca_kabuli_chr05 | 6348532                 | AA                              | TT                | 1946430985               |
| SNP_P3_64182_6369197 | NC_021164.1    | Ca_kabuli_chr05 | 6369197                 | TT                              | AA                | 1946430987               |
| SNP_P3_64183_6369404 | NC_021164.1    | Ca_kabuli_chr05 | 6369404                 | GG                              | AA                | 1946430988               |
| SNP_P3_64184_6369424 | NC_021164.1    | Ca_kabuli_chr05 | 6369424                 | TT                              | GG                | 1946430989               |
| SNP_P3_64185_6369431 | NC_021164.1    | Ca_kabuli_chr05 | 6369431                 | TT                              | CC                | 1946430991               |
| SNP_P3_64186_6369432 | NC_021164.1    | Ca_kabuli_chr05 | 6369432                 | GG                              | AA                | 1946430992               |
| SNP_P3_64187_6369543 | NC_021164.1    | Ca_kabuli_chr05 | 6369543                 | AA                              | CC                | 1946430994               |
| SNP_P3_64188_6369638 | NC_021164.1    | Ca_kabuli_chr05 | 6369638                 | AA                              | GG                | 1946430995               |
| SNP_P3_64190_6369679 | NC_021164.1    | Ca_kabuli_chr05 | 6369679                 | CC                              | TT                | 1946430996               |
| SNP_P3_64191_6369731 | NC_021164.1    | Ca_kabuli_chr05 | 6369731                 | GG                              | AA                | 1946430998               |
| SNP_P3_64192_6369742 | NC_021164.1    | Ca_kabuli_chr05 | 6369742                 | GG                              | TT                | 1946430999               |
| SNP_P3_64193_6369878 | NC_021164.1    | Ca_kabuli_chr05 | 6369878                 | CC                              | AA                | 1946431001               |
| SNP_P3_64194_6416182 | NC_021164.1    | Ca_kabuli_chr05 | 6416182                 | CC                              | TT                | 1946431002               |
| SNP_P3_64195_6416194 | NC_021164.1    | Ca_kabuli_chr05 | 6416194                 | GG                              | AA                | 1946431010               |

| SNPs IDs             | Chromosome IDs | Chromosomes     | Physical positions (bp) | CDC Frontier (Reference genome) | (Pusa 256 & HPNB) | NCBI SNPdb Accession IDs |
|----------------------|----------------|-----------------|-------------------------|---------------------------------|-------------------|--------------------------|
| SNP_P3_64196_6416355 | NC_021164.1    | Ca_kabuli_chr05 | 6416355                 | AA                              | CC                | 1946431011               |
| SNP_P3_64198_6416567 | NC_021164.1    | Ca_kabuli_chr05 | 6416567                 | CC                              | TT                | 1946431013               |
| SNP_P3_64199_6416673 | NC_021164.1    | Ca_kabuli_chr05 | 6416673                 | AA                              | GG                | 1946431014               |
| SNP_P3_64200_6416698 | NC_021164.1    | Ca_kabuli_chr05 | 6416698                 | TT                              | CC                | 1946431015               |
| SNP_P3_64201_6420544 | NC_021164.1    | Ca_kabuli_chr05 | 6420544                 | TT                              | CC                | 1946431017               |
| SNP_P3_64202_6421051 | NC_021164.1    | Ca_kabuli_chr05 | 6421051                 | TT                              | CC                | 1946431018               |
| SNP_P3_64203_6421484 | NC_021164.1    | Ca_kabuli_chr05 | 6421484                 | AA                              | CC                | 1946431020               |
| SNP_P3_64204_6421534 | NC_021164.1    | Ca_kabuli_chr05 | 6421534                 | TT                              | CC                | 1946431021               |
| SNP_P3_64205_6421573 | NC_021164.1    | Ca_kabuli_chr05 | 6421573                 | GG                              | AA                | 1946431023               |
| SNP_P3_64206_6421747 | NC_021164.1    | Ca_kabuli_chr05 | 6421747                 | TT                              | CC                | 1946431024               |
| SNP_P3_64207_6421773 | NC_021164.1    | Ca_kabuli_chr05 | 6421773                 | GG                              | AA                | 1946431026               |
| SNP_P3_64208_6421867 | NC_021164.1    | Ca_kabuli_chr05 | 6421867                 | TT                              | GG                | 1946431027               |
| SNP_P3_64209_6421934 | NC_021164.1    | Ca_kabuli_chr05 | 6421934                 | GG                              | TT                | 1946431029               |
| SNP_P3_64211_6441718 | NC_021164.1    | Ca_kabuli_chr05 | 6441718                 | TT                              | AA                | 1946431030               |
| SNP_P3_64212_6443902 | NC_021164.1    | Ca_kabuli_chr05 | 6443902                 | GG                              | TT                | 1946431031               |
| SNP_P3_64213_6446810 | NC_021164.1    | Ca_kabuli_chr05 | 6446810                 | TT                              | AA                | 1946431033               |
| SNP_P3_64214_6474075 | NC_021164.1    | Ca_kabuli_chr05 | 6474075                 | AA                              | CC                | 1946431034               |
| SNP_P3_64215_6474100 | NC_021164.1    | Ca_kabuli_chr05 | 6474100                 | AA                              | GG                | 1946431036               |
| SNP_P3_64216_6474106 | NC_021164.1    | Ca_kabuli_chr05 | 6474106                 | AA                              | GG                | 1946431037               |
| SNP_P3_64217_6474112 | NC_021164.1    | Ca_kabuli_chr05 | 6474112                 | TT                              | GG                | 1946431038               |
| SNP_P3_64218_6474116 | NC_021164.1    | Ca_kabuli_chr05 | 6474116                 | GG                              | AA                | 1946431040               |
| SNP_P3_64219_6474119 | NC_021164.1    | Ca_kabuli_chr05 | 6474119                 | GG                              | CC                | 1946431041               |
| SNP_P3_64220_6474654 | NC_021164.1    | Ca_kabuli_chr05 | 6474654                 | GG                              | TT                | 1946431043               |
| SNP_P3_64221_6474806 | NC_021164.1    | Ca_kabuli_chr05 | 6474806                 | TT                              | GG                | 1946431044               |
| SNP_P3_64222_6474808 | NC_021164.1    | Ca_kabuli_chr05 | 6474808                 | TT                              | CC                | 1946431045               |
| SNP_P3_64223_6483857 | NC_021164.1    | Ca_kabuli_chr05 | 6483857                 | TT                              | AA                | 1946431047               |
| SNP_P3_64224_6486520 | NC_021164.1    | Ca_kabuli_chr05 | 6486520                 | AA                              | CC                | 1946431048               |
| SNP_P3_64225_6494037 | NC_021164.1    | Ca_kabuli_chr05 | 6494037                 | TT                              | CC                | 1946431050               |
| SNP_P3_64226_6494040 | NC_021164.1    | Ca_kabuli_chr05 | 6494040                 | GG                              | TT                | 1946431052               |
| SNP_P3_64227_6494063 | NC_021164.1    | Ca_kabuli_chr05 | 6494063                 | AA                              | GG                | 1946431053               |
| SNP_P3_64228_6494099 | NC_021164.1    | Ca_kabuli_chr05 | 6494099                 | GG                              | AA                | 1946431055               |
| SNP_P3_64229_6494111 | NC_021164.1    | Ca_kabuli_chr05 | 6494111                 | TT                              | CC                | 1946431056               |
| SNP_P3_64230_6494123 | NC_021164.1    | Ca_kabuli_chr05 | 6494123                 | AA                              | GG                | 1946431058               |
| SNP_P3_64231_6494150 | NC_021164.1    | Ca_kabuli_chr05 | 6494150                 | CC                              | TT                | 1946431059               |
| SNP_P3_64232_6494152 | NC_021164.1    | Ca_kabuli_chr05 | 6494152                 | TT                              | CC                | 1946431060               |
| SNP_P3_64233_6494156 | NC_021164.1    | Ca_kabuli_chr05 | 6494156                 | TT                              | GG                | 1946431062               |
| SNP_P3_64234_6494159 | NC_021164.1    | Ca_kabuli_chr05 | 6494159                 | TT                              | CC                | 1946431063               |
| SNP_P3_64235_6494162 | NC_021164.1    | Ca_kabuli_chr05 | 6494162                 | TT                              | CC                | 1946431065               |
| SNP_P3_64236_6494189 | NC_021164.1    | Ca_kabuli_chr05 | 6494189                 | TT                              | CC                | 1946431066               |
| SNP_P3_64237_6494201 | NC_021164.1    | Ca_kabuli_chr05 | 6494201                 | GG                              | TT                | 1946431067               |
| SNP_P3_64238_6494213 | NC_021164.1    | Ca_kabuli_chr05 | 6494213                 | AA                              | GG                | 1946431069               |
| SNP_P3_64239_6494234 | NC_021164.1    | Ca_kabuli_chr05 | 6494234                 | GG                              | AA                | 1946431070               |

| SNPs IDs             | Chromosome IDs | Chromosomes     | Physical positions (bp) | CDC Frontier (Reference genome) | (Pusa 256 & HPNB) | NCBI SNPdb Accession IDs |
|----------------------|----------------|-----------------|-------------------------|---------------------------------|-------------------|--------------------------|
| SNP_P3_64240_6494243 | NC_021164.1    | Ca_kabuli_chr05 | 6494243                 | AA                              | GG                | 1946431072               |
| SNP_P3_64241_6494252 | NC_021164.1    | Ca_kabuli_chr05 | 6494252                 | CC                              | TT                | 1946431073               |
| SNP_P3_64242_6494255 | NC_021164.1    | Ca_kabuli_chr05 | 6494255                 | AA                              | TT                | 1946431075               |
| SNP_P3_64243_6494257 | NC_021164.1    | Ca_kabuli_chr05 | 6494257                 | GG                              | AA                | 1946431076               |
| SNP_P3_64244_6494263 | NC_021164.1    | Ca_kabuli_chr05 | 6494263                 | AA                              | GG                | 1946431078               |
| SNP_P3_64245_6494270 | NC_021164.1    | Ca_kabuli_chr05 | 6494270                 | TT                              | GG                | 1946431079               |
| SNP_P3_64246_6494279 | NC_021164.1    | Ca_kabuli_chr05 | 6494279                 | CC                              | TT                | 1946431081               |
| SNP_P3_64247_6494494 | NC_021164.1    | Ca_kabuli_chr05 | 6494494                 | TT                              | CC                | 1946431082               |
| SNP_P3_64248_6494518 | NC_021164.1    | Ca_kabuli_chr05 | 6494518                 | CC                              | TT                | 1946431084               |
| SNP_P3_64249_6494527 | NC_021164.1    | Ca_kabuli_chr05 | 6494527                 | CC                              | TT                | 1946431085               |
| SNP_P3_64250_6494548 | NC_021164.1    | Ca_kabuli_chr05 | 6494548                 | TT                              | GG                | 1946431087               |
| SNP_P3_64251_6494566 | NC_021164.1    | Ca_kabuli_chr05 | 6494566                 | GG                              | AA                | 1946431088               |
| SNP_P3_64252_6505082 | NC_021164.1    | Ca_kabuli_chr05 | 6505082                 | CC                              | TT                | 1946431089               |
| SNP_P3_64254_6530924 | NC_021164.1    | Ca_kabuli_chr05 | 6530924                 | TT                              | AA                | 1946431091               |
| SNP_P3_64255_6532183 | NC_021164.1    | Ca_kabuli_chr05 | 6532183                 | GG                              | AA                | 1946431092               |
| SNP_P3_64257_6532822 | NC_021164.1    | Ca_kabuli_chr05 | 6532822                 | CC                              | TT                | 1946431094               |
| SNP_P3_64258_6535218 | NC_021164.1    | Ca_kabuli_chr05 | 6535218                 | TT                              | CC                | 1946431096               |
| SNP_P3_64259_6535226 | NC_021164.1    | Ca_kabuli_chr05 | 6535226                 | CC                              | TT                | 1946431097               |
| SNP_P3_64260_6535232 | NC_021164.1    | Ca_kabuli_chr05 | 6535232                 | TT                              | CC                | 1946431099               |
| SNP_P3_64261_6535261 | NC_021164.1    | Ca_kabuli_chr05 | 6535261                 | TT                              | CC                | 1946431100               |
| SNP_P3_64262_6535285 | NC_021164.1    | Ca_kabuli_chr05 | 6535285                 | AA                              | CC                | 1946431102               |
| SNP_P3_64263_6535322 | NC_021164.1    | Ca_kabuli_chr05 | 6535322                 | AA                              | GG                | 1946431103               |
| SNP_P3_64264_6535340 | NC_021164.1    | Ca_kabuli_chr05 | 6535340                 | AA                              | TT                | 1946431104               |
| SNP_P3_64265_6535353 | NC_021164.1    | Ca_kabuli_chr05 | 6535353                 | AA                              | GG                | 1946431106               |
| SNP_P3_64266_6535363 | NC_021164.1    | Ca_kabuli_chr05 | 6535363                 | TT                              | AA                | 1946431107               |
| SNP_P3_64267_6535385 | NC_021164.1    | Ca_kabuli_chr05 | 6535385                 | AA                              | CC                | 1946431109               |
| SNP_P3_64268_6535391 | NC_021164.1    | Ca_kabuli_chr05 | 6535391                 | AA                              | GG                | 1946431110               |
| SNP_P3_64269_6535439 | NC_021164.1    | Ca_kabuli_chr05 | 6535439                 | CC                              | TT                | 1946431112               |
| SNP_P3_64270_6535535 | NC_021164.1    | Ca_kabuli_chr05 | 6535535                 | AA                              | GG                | 1946431113               |
| SNP_P3_64271_6535576 | NC_021164.1    | Ca_kabuli_chr05 | 6535576                 | CC                              | TT                | 1946431115               |
| SNP_P3_64272_6535594 | NC_021164.1    | Ca_kabuli_chr05 | 6535594                 | TT                              | CC                | 1946431116               |
| SNP_P3_64273_6535747 | NC_021164.1    | Ca_kabuli_chr05 | 6535747                 | AA                              | CC                | 1946431118               |
| SNP_P3_64274_6535765 | NC_021164.1    | Ca_kabuli_chr05 | 6535765                 | AA                              | TT                | 1946431119               |
| SNP_P3_64275_6535780 | NC_021164.1    | Ca_kabuli_chr05 | 6535780                 | TT                              | AA                | 1946431121               |
| SNP_P3_64276_6535792 | NC_021164.1    | Ca_kabuli_chr05 | 6535792                 | AA                              | GG                | 1946431122               |
| SNP_P3_64277_6535801 | NC_021164.1    | Ca_kabuli_chr05 | 6535801                 | AA                              | TT                | 1946431123               |
| SNP_P3_64278_6535835 | NC_021164.1    | Ca_kabuli_chr05 | 6535835                 | TT                              | CC                | 1946431125               |
| SNP_P3_64279_6535837 | NC_021164.1    | Ca_kabuli_chr05 | 6535837                 | AA                              | GG                | 1946431126               |
| SNP_P3_64280_6535843 | NC_021164.1    | Ca_kabuli_chr05 | 6535843                 | AA                              | GG                | 1946431128               |
| SNP_P3_64281_6535868 | NC_021164.1    | Ca_kabuli_chr05 | 6535868                 | CC                              | AA                | 1946431129               |
| SNP_P3_64282_6535888 | NC_021164.1    | Ca_kabuli_chr05 | 6535888                 | TT                              | CC                | 1946431131               |
| SNP_P3_64283_6535889 | NC_021164.1    | Ca_kabuli_chr05 | 6535889                 | TT                              | CC                | 1946431132               |

| SNPs IDs             | Chromosome IDs | Chromosomes     | Physical positions (bp) | CDC Frontier (Reference genome) | (Pusa 256 & HPNB) | NCBI SNPdb Accession IDs |
|----------------------|----------------|-----------------|-------------------------|---------------------------------|-------------------|--------------------------|
| SNP_P3_64284_6535906 | NC_021164.1    | Ca_kabuli_chr05 | 6535906                 | GG                              | TT                | 1946431133               |
| SNP_P3_64285_6535919 | NC_021164.1    | Ca_kabuli_chr05 | 6535919                 | AA                              | GG                | 1946431135               |
| SNP_P3_64286_6535932 | NC_021164.1    | Ca_kabuli_chr05 | 6535932                 | AA                              | GG                | 1946431137               |
| SNP_P3_64287_6535935 | NC_021164.1    | Ca_kabuli_chr05 | 6535935                 | TT                              | CC                | 1946431138               |
| SNP_P3_64288_6536195 | NC_021164.1    | Ca_kabuli_chr05 | 6536195                 | CC                              | TT                | 1946431139               |
| SNP_P3_64289_6536202 | NC_021164.1    | Ca_kabuli_chr05 | 6536202                 | CC                              | GG                | 1946431141               |
| SNP_P3_64290_6536207 | NC_021164.1    | Ca_kabuli_chr05 | 6536207                 | AA                              | CC                | 1946431142               |
| SNP_P3_64291_6536258 | NC_021164.1    | Ca_kabuli_chr05 | 6536258                 | CC                              | AA                | 1946431144               |
| SNP_P3_64292_6536265 | NC_021164.1    | Ca_kabuli_chr05 | 6536265                 | AA                              | GG                | 1946431145               |
| SNP_P3_64293_6536303 | NC_021164.1    | Ca_kabuli_chr05 | 6536303                 | AA                              | CC                | 1946431147               |
| SNP_P3_64294_6536372 | NC_021164.1    | Ca_kabuli_chr05 | 6536372                 | GG                              | AA                | 1946431148               |
| SNP_P3_64295_6536595 | NC_021164.1    | Ca_kabuli_chr05 | 6536595                 | AA                              | TT                | 1946431150               |
| SNP_P3_64296_6536597 | NC_021164.1    | Ca_kabuli_chr05 | 6536597                 | CC                              | TT                | 1946431151               |
| SNP_P3_64297_6536750 | NC_021164.1    | Ca_kabuli_chr05 | 6536750                 | GG                              | AA                | 1946431153               |
| SNP_P3_64298_6536761 | NC_021164.1    | Ca_kabuli_chr05 | 6536761                 | CC                              | AA                | 1946431154               |
| SNP_P3_64300_6589954 | NC_021164.1    | Ca_kabuli_chr05 | 6589954                 | GG                              | AA                | 1946431156               |
| SNP_P3_64301_6590144 | NC_021164.1    | Ca_kabuli_chr05 | 6590144                 | CC                              | AA                | 1946431157               |
| SNP_P3_64302_6590167 | NC_021164.1    | Ca_kabuli_chr05 | 6590167                 | GG                              | AA                | 1946431158               |
| SNP_P3_64303_6590220 | NC_021164.1    | Ca_kabuli_chr05 | 6590220                 | AA                              | GG                | 1946431160               |
| SNP_P3_64304_6590284 | NC_021164.1    | Ca_kabuli_chr05 | 6590284                 | GG                              | CC                | 1946431161               |
| SNP_P3_64305_6590310 | NC_021164.1    | Ca_kabuli_chr05 | 6590310                 | GG                              | CC                | 1946431163               |
| SNP_P3_64306_6590329 | NC_021164.1    | Ca_kabuli_chr05 | 6590329                 | CC                              | AA                | 1946431165               |
| SNP_P3_64307_6590415 | NC_021164.1    | Ca_kabuli_chr05 | 6590415                 | CC                              | AA                | 1946431166               |
| SNP_P3_64308_6590548 | NC_021164.1    | Ca_kabuli_chr05 | 6590548                 | GG                              | CC                | 1946431168               |
| SNP_P3_64309_6590755 | NC_021164.1    | Ca_kabuli_chr05 | 6590755                 | TT                              | AA                | 1946431169               |
| SNP_P3_64310_6590821 | NC_021164.1    | Ca_kabuli_chr05 | 6590821                 | GG                              | AA                | 1946431171               |
| SNP_P3_64311_6591087 | NC_021164.1    | Ca_kabuli_chr05 | 6591087                 | CC                              | TT                | 1946431172               |
| SNP_P3_64312_6591106 | NC_021164.1    | Ca_kabuli_chr05 | 6591106                 | TT                              | AA                | 1946431174               |
| SNP_P3_64313_6591493 | NC_021164.1    | Ca_kabuli_chr05 | 6591493                 | TT                              | CC                | 1946431175               |
| SNP_P3_64314_6591590 | NC_021164.1    | Ca_kabuli_chr05 | 6591590                 | TT                              | GG                | 1946431177               |
| SNP_P3_64315_6607467 | NC_021164.1    | Ca_kabuli_chr05 | 6607467                 | TT                              | AA                | 1946431178               |
| SNP_P3_64316_6607490 | NC_021164.1    | Ca_kabuli_chr05 | 6607490                 | CC                              | TT                | 1946431179               |
| SNP_P3_64317_6607587 | NC_021164.1    | Ca_kabuli_chr05 | 6607587                 | GG                              | TT                | 1946431181               |
| SNP_P3_64318_6607675 | NC_021164.1    | Ca_kabuli_chr05 | 6607675                 | AA                              | GG                | 1946431182               |
| SNP_P3_64319_6607714 | NC_021164.1    | Ca_kabuli_chr05 | 6607714                 | AA                              | TT                | 1946431184               |
| SNP_P3_64320_6607945 | NC_021164.1    | Ca_kabuli_chr05 | 6607945                 | GG                              | AA                | 1946431186               |
| SNP_P3_64321_6607971 | NC_021164.1    | Ca_kabuli_chr05 | 6607971                 | AA                              | CC                | 1946431188               |
| SNP_P3_64322_6609001 | NC_021164.1    | Ca_kabuli_chr05 | 6609001                 | TT                              | AA                | 1946431189               |
| SNP_P3_64323_6609111 | NC_021164.1    | Ca_kabuli_chr05 | 6609111                 | AA                              | GG                | 1946431191               |
| SNP_P3_64324_6609715 | NC_021164.1    | Ca_kabuli_chr05 | 6609715                 | CC                              | GG                | 1946431193               |
| SNP_P3_64325_6609728 | NC_021164.1    | Ca_kabuli_chr05 | 6609728                 | TT                              | CC                | 1946431195               |
| SNP_P3_64326_6609993 | NC_021164.1    | Ca_kabuli_chr05 | 6609993                 | TT                              | CC                | 1946431196               |

| SNPs IDs             | Chromosome IDs | Chromosomes     | Physical positions (bp) | CDC Frontier (Reference genome) | (Pusa 256 & HPNB) | NCBI SNPdb Accession IDs |
|----------------------|----------------|-----------------|-------------------------|---------------------------------|-------------------|--------------------------|
| SNP_P3_64327_6610002 | NC_021164.1    | Ca_kabuli_chr05 | 6610002                 | GG                              | AA                | 1946431198               |
| SNP_P3_64328_6622833 | NC_021164.1    | Ca_kabuli_chr05 | 6622833                 | AA                              | CC                | 1946431199               |
| SNP_P3_64329_6623798 | NC_021164.1    | Ca_kabuli_chr05 | 6623798                 | CC                              | AA                | 1946431201               |
| SNP_P3_64330_6623802 | NC_021164.1    | Ca_kabuli_chr05 | 6623802                 | CC                              | GG                | 1946431203               |
| SNP_P3_64331_6623848 | NC_021164.1    | Ca_kabuli_chr05 | 6623848                 | CC                              | AA                | 1946431204               |
| SNP_P3_64332_6626553 | NC_021164.1    | Ca_kabuli_chr05 | 6626553                 | TT                              | GG                | 1946431205               |
| SNP_P3_64333_6626597 | NC_021164.1    | Ca_kabuli_chr05 | 6626597                 | CC                              | AA                | 1946431207               |
| SNP_P3_64334_6626619 | NC_021164.1    | Ca_kabuli_chr05 | 6626619                 | GG                              | AA                | 1946431208               |
| SNP_P3_64335_6626853 | NC_021164.1    | Ca_kabuli_chr05 | 6626853                 | GG                              | CC                | 1946431210               |
| SNP_P3_64336_6626857 | NC_021164.1    | Ca_kabuli_chr05 | 6626857                 | AA                              | TT                | 1946431211               |
| SNP_P3_64337_6646569 | NC_021164.1    | Ca_kabuli_chr05 | 6646569                 | CC                              | GG                | 1946431213               |
| SNP_P3_64338_6646741 | NC_021164.1    | Ca_kabuli_chr05 | 6646741                 | AA                              | CC                | 1946431214               |
| SNP_P3_64339_6646910 | NC_021164.1    | Ca_kabuli_chr05 | 6646910                 | AA                              | TT                | 1946431215               |
| SNP_P3_64340_6646921 | NC_021164.1    | Ca_kabuli_chr05 | 6646921                 | GG                              | TT                | 1946431217               |
| SNP_P3_64341_6647033 | NC_021164.1    | Ca_kabuli_chr05 | 6647033                 | TT                              | GG                | 1946431218               |
| SNP_P3_64342_6647178 | NC_021164.1    | Ca_kabuli_chr05 | 6647178                 | TT                              | CC                | 1946431220               |
| SNP_P3_64343_6647311 | NC_021164.1    | Ca_kabuli_chr05 | 6647311                 | TT                              | GG                | 1946431221               |
| SNP_P3_64344_6647492 | NC_021164.1    | Ca_kabuli_chr05 | 6647492                 | CC                              | GG                | 1946431223               |
| SNP_P3_64345_6647777 | NC_021164.1    | Ca_kabuli_chr05 | 6647777                 | CC                              | TT                | 1946431225               |
| SNP_P3_64346_6647799 | NC_021164.1    | Ca_kabuli_chr05 | 6647799                 | AA                              | CC                | 1946431226               |
| SNP_P3_64347_6647844 | NC_021164.1    | Ca_kabuli_chr05 | 6647844                 | CC                              | TT                | 1946431227               |
| SNP_P3_64348_6647860 | NC_021164.1    | Ca_kabuli_chr05 | 6647860                 | AA                              | TT                | 1946431229               |
| SNP_P3_64349_6647861 | NC_021164.1    | Ca_kabuli_chr05 | 6647861                 | CC                              | TT                | 1946431230               |
| SNP_P3_64350_6647890 | NC_021164.1    | Ca_kabuli_chr05 | 6647890                 | GG                              | CC                | 1946431232               |
| SNP_P3_64351_6647918 | NC_021164.1    | Ca_kabuli_chr05 | 6647918                 | CC                              | TT                | 1946431233               |
| SNP_P3_64352_6648795 | NC_021164.1    | Ca_kabuli_chr05 | 6648795                 | AA                              | TT                | 1946431235               |
| SNP_P3_64354_6667346 | NC_021164.1    | Ca_kabuli_chr05 | 6667346                 | CC                              | TT                | 1946431236               |
| SNP_P3_64355_6667347 | NC_021164.1    | Ca_kabuli_chr05 | 6667347                 | AA                              | GG                | 1946431238               |
| SNP_P3_64356_6667348 | NC_021164.1    | Ca_kabuli_chr05 | 6667348                 | CC                              | AA                | 1946431239               |
| SNP_P3_64357_6667351 | NC_021164.1    | Ca_kabuli_chr05 | 6667351                 | CC                              | TT                | 1946431241               |
| SNP_P3_64358_6669028 | NC_021164.1    | Ca_kabuli_chr05 | 6669028                 | CC                              | TT                | 1946431242               |
| SNP_P3_64359_6674875 | NC_021164.1    | Ca_kabuli_chr05 | 6674875                 | GG                              | AA                | 1946431244               |
| SNP_P3_64360_6674876 | NC_021164.1    | Ca_kabuli_chr05 | 6674876                 | TT                              | AA                | 1946431246               |
| SNP_P3_64361_6674882 | NC_021164.1    | Ca_kabuli_chr05 | 6674882                 | GG                              | CC                | 1946431247               |
| SNP_P3_64362_6674895 | NC_021164.1    | Ca_kabuli_chr05 | 6674895                 | GG                              | AA                | 1946431249               |
| SNP_P3_64363_6675183 | NC_021164.1    | Ca_kabuli_chr05 | 6675183                 | AA                              | GG                | 1946431250               |
| SNP_P3_64364_6675300 | NC_021164.1    | Ca_kabuli_chr05 | 6675300                 | CC                              | GG                | 1946431252               |
| SNP_P3_64365_6675342 | NC_021164.1    | Ca_kabuli_chr05 | 6675342                 | GG                              | TT                | 1946431253               |
| SNP_P3_64366_6684917 | NC_021164.1    | Ca_kabuli_chr05 | 6684917                 | TT                              | AA                | 1946431255               |
| SNP_P3_64367_6697729 | NC_021164.1    | Ca_kabuli_chr05 | 6697729                 | AA                              | TT                | 1946431257               |
| SNP_P3_64368_6698090 | NC_021164.1    | Ca_kabuli_chr05 | 6698090                 | AA                              | GG                | 1946431258               |
| SNP_P3_64369_6699967 | NC_021164.1    | Ca_kabuli_chr05 | 6699967                 | CC                              | TT                | 1946431260               |



| SNPs IDs             | Chromosome IDs | Chromosomes     | Physical positions (bp) | CDC Frontier (Reference genome) | (Pusa 256 & HPNB) | NCBI SNPdb Accession IDs |
|----------------------|----------------|-----------------|-------------------------|---------------------------------|-------------------|--------------------------|
| SNP_P3_64370_6699971 | NC_021164.1    | Ca_kabuli_chr05 | 6699971                 | CC                              | AA                | 1946431261               |
| SNP_P3_64371_6715042 | NC_021164.1    | Ca_kabuli_chr05 | 6715042                 | AA                              | CC                | 1946431263               |
| SNP_P3_64372_6715318 | NC_021164.1    | Ca_kabuli_chr05 | 6715318                 | CC                              | AA                | 1946431264               |
| SNP_P3_64373_6720815 | NC_021164.1    | Ca_kabuli_chr05 | 6720815                 | CC                              | TT                | 1946431265               |
| SNP_P3_64374_6723702 | NC_021164.1    | Ca_kabuli_chr05 | 6723702                 | GG                              | TT                | 1946431267               |
| SNP_P3_64375_6723706 | NC_021164.1    | Ca_kabuli_chr05 | 6723706                 | TT                              | CC                | 1946431268               |
| SNP_P3_64376_6723707 | NC_021164.1    | Ca_kabuli_chr05 | 6723707                 | TT                              | AA                | 1946431270               |
| SNP_P3_64377_6723949 | NC_021164.1    | Ca_kabuli_chr05 | 6723949                 | AA                              | CC                | 1946431271               |
| SNP_P3_64378_6724152 | NC_021164.1    | Ca_kabuli_chr05 | 6724152                 | TT                              | AA                | 1946431273               |
| SNP_P3_64380_6739607 | NC_021164.1    | Ca_kabuli_chr05 | 6739607                 | GG                              | AA                | 1946431274               |
| SNP_P3_64381_6739681 | NC_021164.1    | Ca_kabuli_chr05 | 6739681                 | TT                              | CC                | 1946431276               |
| SNP_P3_64382_6739688 | NC_021164.1    | Ca_kabuli_chr05 | 6739688                 | TT                              | CC                | 1946431277               |
| SNP_P3_64383_6739719 | NC_021164.1    | Ca_kabuli_chr05 | 6739719                 | CC                              | TT                | 1946431279               |
| SNP_P3_64384_6739736 | NC_021164.1    | Ca_kabuli_chr05 | 6739736                 | CC                              | TT                | 1946431280               |
| SNP_P3_64385_6739921 | NC_021164.1    | Ca_kabuli_chr05 | 6739921                 | TT                              | CC                | 1946431282               |
| SNP_P3_64386_6740034 | NC_021164.1    | Ca_kabuli_chr05 | 6740034                 | AA                              | GG                | 1946431284               |
| SNP_P3_64387_6740080 | NC_021164.1    | Ca_kabuli_chr05 | 6740080                 | CC                              | TT                | 1946431285               |
| SNP_P3_64388_6740120 | NC_021164.1    | Ca_kabuli_chr05 | 6740120                 | GG                              | AA                | 1946431287               |
| SNP_P3_64389_6740122 | NC_021164.1    | Ca_kabuli_chr05 | 6740122                 | TT                              | GG                | 1946431288               |
| SNP_P3_64390_6740202 | NC_021164.1    | Ca_kabuli_chr05 | 6740202                 | AA                              | GG                | 1946431290               |
| SNP_P3_64391_6753920 | NC_021164.1    | Ca_kabuli_chr05 | 6753920                 | TT                              | CC                | 1946431291               |
| SNP_P3_64392_6753953 | NC_021164.1    | Ca_kabuli_chr05 | 6753953                 | CC                              | GG                | 1946431293               |
| SNP_P3_64393_6753973 | NC_021164.1    | Ca_kabuli_chr05 | 6753973                 | CC                              | TT                | 1946431294               |
| SNP_P3_64394_6761059 | NC_021164.1    | Ca_kabuli_chr05 | 6761059                 | CC                              | AA                | 1946431296               |
| SNP_P3_64395_6761099 | NC_021164.1    | Ca_kabuli_chr05 | 6761099                 | TT                              | CC                | 1946431297               |
| SNP_P3_64397_6763319 | NC_021164.1    | Ca_kabuli_chr05 | 6763319                 | TT                              | GG                | 1946431299               |
| SNP_P3_64398_6763828 | NC_021164.1    | Ca_kabuli_chr05 | 6763828                 | TT                              | AA                | 1946431300               |
| SNP_P3_64399_6763830 | NC_021164.1    | Ca_kabuli_chr05 | 6763830                 | CC                              | AA                | 1946431302               |
| SNP_P3_64401_6763918 | NC_021164.1    | Ca_kabuli_chr05 | 6763918                 | AA                              | GG                | 1946431303               |
| SNP_P3_64402_6763964 | NC_021164.1    | Ca_kabuli_chr05 | 6763964                 | GG                              | CC                | 1946431305               |
| SNP_P3_64404_6764239 | NC_021164.1    | Ca_kabuli_chr05 | 6764239                 | CC                              | TT                | 1946431306               |
| SNP_P3_64405_6764258 | NC_021164.1    | Ca_kabuli_chr05 | 6764258                 | TT                              | AA                | 1946431308               |
| SNP_P3_64406_6764313 | NC_021164.1    | Ca_kabuli_chr05 | 6764313                 | CC                              | TT                | 1946431309               |
| SNP_P3_64407_6764605 | NC_021164.1    | Ca_kabuli_chr05 | 6764605                 | AA                              | GG                | 1946431311               |
| SNP_P3_64409_6765436 | NC_021164.1    | Ca_kabuli_chr05 | 6765436                 | AA                              | GG                | 1946431312               |
| SNP_P3_64411_6765544 | NC_021164.1    | Ca_kabuli_chr05 | 6765544                 | GG                              | AA                | 1946431314               |
| SNP_P3_64412_6769135 | NC_021164.1    | Ca_kabuli_chr05 | 6769135                 | TT                              | AA                | 1946431315               |
| SNP_P3_64413_6769140 | NC_021164.1    | Ca_kabuli_chr05 | 6769140                 | GG                              | AA                | 1946431317               |
| SNP_P3_64414_6769194 | NC_021164.1    | Ca_kabuli_chr05 | 6769194                 | TT                              | CC                | 1946431318               |
| SNP_P3_64415_6771981 | NC_021164.1    | Ca_kabuli_chr05 | 6771981                 | TT                              | CC                | 1946431320               |
| SNP_P3_64416_6772186 | NC_021164.1    | Ca_kabuli_chr05 | 6772186                 | AA                              | TT                | 1946431321               |
| SNP_P3_64417_6772228 | NC_021164.1    | Ca_kabuli_chr05 | 6772228                 | TT                              | GG                | 1946431323               |

| SNPs IDs             | Chromosome IDs | Chromosomes     | Physical positions (bp) | CDC Frontier (Reference genome) | (Pusa 256 & HPNB) | NCBI SNPdb Accession IDs |
|----------------------|----------------|-----------------|-------------------------|---------------------------------|-------------------|--------------------------|
| SNP_P3_64418_6772253 | NC_021164.1    | Ca_kabuli_chr05 | 6772253                 | AA                              | TT                | 1946431325               |
| SNP_P3_64419_6772277 | NC_021164.1    | Ca_kabuli_chr05 | 6772277                 | AA                              | TT                | 1946431326               |
| SNP_P3_64420_6772313 | NC_021164.1    | Ca_kabuli_chr05 | 6772313                 | TT                              | CC                | 1946431327               |
| SNP_P3_64421_6772366 | NC_021164.1    | Ca_kabuli_chr05 | 6772366                 | CC                              | TT                | 1946431329               |
| SNP_P3_64422_6772374 | NC_021164.1    | Ca_kabuli_chr05 | 6772374                 | TT                              | CC                | 1946431330               |
| SNP_P3_64424_6772502 | NC_021164.1    | Ca_kabuli_chr05 | 6772502                 | AA                              | CC                | 1946431332               |
| SNP_P3_64425_6772506 | NC_021164.1    | Ca_kabuli_chr05 | 6772506                 | CC                              | GG                | 1946431333               |
| SNP_P3_64426_6772577 | NC_021164.1    | Ca_kabuli_chr05 | 6772577                 | CC                              | GG                | 1946431335               |
| SNP_P3_64427_6772781 | NC_021164.1    | Ca_kabuli_chr05 | 6772781                 | TT                              | CC                | 1946431336               |
| SNP_P3_64428_6772856 | NC_021164.1    | Ca_kabuli_chr05 | 6772856                 | GG                              | AA                | 1946431338               |
| SNP_P3_64429_6772898 | NC_021164.1    | Ca_kabuli_chr05 | 6772898                 | CC                              | TT                | 1946431339               |
| SNP_P3_64430_6772974 | NC_021164.1    | Ca_kabuli_chr05 | 6772974                 | GG                              | AA                | 1946431341               |
| SNP_P3_64431_6772983 | NC_021164.1    | Ca_kabuli_chr05 | 6772983                 | TT                              | CC                | 1946431342               |
| SNP_P3_64432_6773134 | NC_021164.1    | Ca_kabuli_chr05 | 6773134                 | AA                              | GG                | 1946431344               |
| SNP_P3_64433_6773245 | NC_021164.1    | Ca_kabuli_chr05 | 6773245                 | GG                              | TT                | 1946431345               |
| SNP_P3_64434_6773348 | NC_021164.1    | Ca_kabuli_chr05 | 6773348                 | TT                              | AA                | 1946431347               |
| SNP_P3_64435_6773487 | NC_021164.1    | Ca_kabuli_chr05 | 6773487                 | AA                              | GG                | 1946431348               |
| SNP_P3_64436_6773602 | NC_021164.1    | Ca_kabuli_chr05 | 6773602                 | AA                              | GG                | 1946431350               |
| SNP_P3_64437_6773783 | NC_021164.1    | Ca_kabuli_chr05 | 6773783                 | TT                              | GG                | 1946431351               |
| SNP_P3_64438_6773797 | NC_021164.1    | Ca_kabuli_chr05 | 6773797                 | CC                              | TT                | 1946431353               |
| SNP_P3_64440_6812508 | NC_021164.1    | Ca_kabuli_chr05 | 6812508                 | TT                              | CC                | 1946431354               |
| SNP_P3_64441_6812515 | NC_021164.1    | Ca_kabuli_chr05 | 6812515                 | CC                              | TT                | 1946431355               |
| SNP_P3_64442_6830206 | NC_021164.1    | Ca_kabuli_chr05 | 6830206                 | CC                              | GG                | 1946431357               |
| SNP_P3_64443_6830293 | NC_021164.1    | Ca_kabuli_chr05 | 6830293                 | TT                              | GG                | 1946431358               |
| SNP_P3_64444_6830429 | NC_021164.1    | Ca_kabuli_chr05 | 6830429                 | TT                              | GG                | 1946431360               |
| SNP_P3_64445_6830446 | NC_021164.1    | Ca_kabuli_chr05 | 6830446                 | CC                              | TT                | 1946431362               |
| SNP_P3_64446_6830539 | NC_021164.1    | Ca_kabuli_chr05 | 6830539                 | GG                              | AA                | 1946431363               |
| SNP_P3_64447_6830578 | NC_021164.1    | Ca_kabuli_chr05 | 6830578                 | CC                              | TT                | 1946431365               |
| SNP_P3_64448_6830589 | NC_021164.1    | Ca_kabuli_chr05 | 6830589                 | CC                              | TT                | 1946431366               |
| SNP_P3_64449_6830679 | NC_021164.1    | Ca_kabuli_chr05 | 6830679                 | CC                              | TT                | 1946431368               |
| SNP_P3_64450_6830797 | NC_021164.1    | Ca_kabuli_chr05 | 6830797                 | AA                              | GG                | 1946431369               |
| SNP_P3_64451_6830875 | NC_021164.1    | Ca_kabuli_chr05 | 6830875                 | TT                              | GG                | 1946431371               |
| SNP_P3_64452_6830893 | NC_021164.1    | Ca_kabuli_chr05 | 6830893                 | AA                              | GG                | 1946431372               |
| SNP_P3_64453_6830920 | NC_021164.1    | Ca_kabuli_chr05 | 6830920                 | AA                              | GG                | 1946431373               |
| SNP_P3_64454_6830930 | NC_021164.1    | Ca_kabuli_chr05 | 6830930                 | CC                              | AA                | 1946431375               |
| SNP_P3_64455_6830933 | NC_021164.1    | Ca_kabuli_chr05 | 6830933                 | CC                              | TT                | 1946431376               |
| SNP_P3_64456_6830948 | NC_021164.1    | Ca_kabuli_chr05 | 6830948                 | AA                              | GG                | 1946431378               |
| SNP_P3_64458_6831456 | NC_021164.1    | Ca_kabuli_chr05 | 6831456                 | AA                              | GG                | 1946431379               |
| SNP_P3_64459_6831507 | NC_021164.1    | Ca_kabuli_chr05 | 6831507                 | GG                              | AA                | 1946431381               |
| SNP_P3_64460_6831715 | NC_021164.1    | Ca_kabuli_chr05 | 6831715                 | AA                              | GG                | 1946431382               |
| SNP_P3_64461_6831781 | NC_021164.1    | Ca_kabuli_chr05 | 6831781                 | AA                              | TT                | 1946431384               |
| SNP_P3_64462_6831805 | NC_021164.1    | Ca_kabuli_chr05 | 6831805                 | GG                              | CC                | 1946431385               |

| SNPs IDs             | Chromosome IDs | Chromosomes     | Physical positions (bp) | CDC Frontier (Reference genome) | (Pusa 256 & HPNB) | NCBI SNPdb Accession IDs |
|----------------------|----------------|-----------------|-------------------------|---------------------------------|-------------------|--------------------------|
| SNP_P3_64463_6832854 | NC_021164.1    | Ca_kabuli_chr05 | 6832854                 | TT                              | CC                | 1946431387               |
| SNP_P3_64464_6832855 | NC_021164.1    | Ca_kabuli_chr05 | 6832855                 | CC                              | TT                | 1946431388               |
| SNP_P3_64465_6832958 | NC_021164.1    | Ca_kabuli_chr05 | 6832958                 | GG                              | AA                | 1946431390               |
| SNP_P3_64466_6832968 | NC_021164.1    | Ca_kabuli_chr05 | 6832968                 | TT                              | AA                | 1946431391               |
| SNP_P3_64467_6832972 | NC_021164.1    | Ca_kabuli_chr05 | 6832972                 | TT                              | GG                | 1946431393               |
| SNP_P3_64469_6833203 | NC_021164.1    | Ca_kabuli_chr05 | 6833203                 | TT                              | CC                | 1946431394               |
| SNP_P3_64470_6833259 | NC_021164.1    | Ca_kabuli_chr05 | 6833259                 | AA                              | CC                | 1946431396               |
| SNP_P3_64471_6833658 | NC_021164.1    | Ca_kabuli_chr05 | 6833658                 | TT                              | AA                | 1946431400               |
| SNP_P3_64473_6833713 | NC_021164.1    | Ca_kabuli_chr05 | 6833713                 | GG                              | CC                | 1946431401               |
| SNP_P3_64474_6833769 | NC_021164.1    | Ca_kabuli_chr05 | 6833769                 | CC                              | TT                | 1946431403               |
| SNP_P3_64476_6833877 | NC_021164.1    | Ca_kabuli_chr05 | 6833877                 | GG                              | AA                | 1946431404               |
| SNP_P3_64479_6834233 | NC_021164.1    | Ca_kabuli_chr05 | 6834233                 | TT                              | CC                | 1946431406               |
| SNP_P3_64481_6834319 | NC_021164.1    | Ca_kabuli_chr05 | 6834319                 | AA                              | TT                | 1946431407               |
| SNP_P3_64482_6834393 | NC_021164.1    | Ca_kabuli_chr05 | 6834393                 | TT                              | GG                | 1946431408               |
| SNP_P3_64483_6834482 | NC_021164.1    | Ca_kabuli_chr05 | 6834482                 | AA                              | TT                | 1946431410               |
| SNP_P3_64484_6834492 | NC_021164.1    | Ca_kabuli_chr05 | 6834492                 | TT                              | CC                | 1946431411               |
| SNP_P3_64485_6834577 | NC_021164.1    | Ca_kabuli_chr05 | 6834577                 | GG                              | AA                | 1946431413               |
| SNP_P3_64486_6834614 | NC_021164.1    | Ca_kabuli_chr05 | 6834614                 | CC                              | TT                | 1946431414               |
| SNP_P3_64487_6834624 | NC_021164.1    | Ca_kabuli_chr05 | 6834624                 | GG                              | TT                | 1946431416               |
| SNP_P3_64488_6834675 | NC_021164.1    | Ca_kabuli_chr05 | 6834675                 | AA                              | CC                | 1946431417               |
| SNP_P3_64489_6834690 | NC_021164.1    | Ca_kabuli_chr05 | 6834690                 | TT                              | CC                | 1946431419               |
| SNP_P3_64490_6834698 | NC_021164.1    | Ca_kabuli_chr05 | 6834698                 | AA                              | CC                | 1946431420               |
| SNP_P3_64492_6834723 | NC_021164.1    | Ca_kabuli_chr05 | 6834723                 | TT                              | GG                | 1946431422               |
| SNP_P3_64493_6834755 | NC_021164.1    | Ca_kabuli_chr05 | 6834755                 | AA                              | TT                | 1946431423               |
| SNP_P3_64494_6834775 | NC_021164.1    | Ca_kabuli_chr05 | 6834775                 | TT                              | AA                | 1946431425               |
| SNP_P3_64495_6834835 | NC_021164.1    | Ca_kabuli_chr05 | 6834835                 | TT                              | AA                | 1946431426               |
| SNP_P3_64496_6834887 | NC_021164.1    | Ca_kabuli_chr05 | 6834887                 | CC                              | TT                | 1946431428               |
| SNP_P3_64497_6834888 | NC_021164.1    | Ca_kabuli_chr05 | 6834888                 | TT                              | AA                | 1946431429               |
| SNP_P3_64499_6835015 | NC_021164.1    | Ca_kabuli_chr05 | 6835015                 | TT                              | GG                | 1946431431               |
| SNP_P3_64500_6835547 | NC_021164.1    | Ca_kabuli_chr05 | 6835547                 | CC                              | AA                | 1946431432               |
| SNP_P3_64501_6835597 | NC_021164.1    | Ca_kabuli_chr05 | 6835597                 | CC                              | TT                | 1946431434               |
| SNP_P3_64502_6835690 | NC_021164.1    | Ca_kabuli_chr05 | 6835690                 | TT                              | AA                | 1946431435               |
| SNP_P3_64503_6835695 | NC_021164.1    | Ca_kabuli_chr05 | 6835695                 | TT                              | GG                | 1946431445               |
| SNP_P3_64504_6835750 | NC_021164.1    | Ca_kabuli_chr05 | 6835750                 | GG                              | AA                | 1946431447               |
| SNP_P3_64505_6835751 | NC_021164.1    | Ca_kabuli_chr05 | 6835751                 | TT                              | CC                | 1946431448               |
| SNP_P3_64506_6835784 | NC_021164.1    | Ca_kabuli_chr05 | 6835784                 | GG                              | AA                | 1946431450               |
| SNP_P3_64507_6835863 | NC_021164.1    | Ca_kabuli_chr05 | 6835863                 | TT                              | CC                | 1946431451               |
| SNP_P3_64508_6835878 | NC_021164.1    | Ca_kabuli_chr05 | 6835878                 | CC                              | TT                | 1946431453               |
| SNP_P3_64509_6836020 | NC_021164.1    | Ca_kabuli_chr05 | 6836020                 | CC                              | TT                | 1946431454               |
| SNP_P3_64510_6836141 | NC_021164.1    | Ca_kabuli_chr05 | 6836141                 | AA                              | GG                | 1946431456               |
| SNP_P3_64511_6836160 | NC_021164.1    | Ca_kabuli_chr05 | 6836160                 | TT                              | CC                | 1946431457               |
| SNP_P3_64512_6836214 | NC_021164.1    | Ca_kabuli_chr05 | 6836214                 | CC                              | GG                | 1946431459               |

| SNPs IDs             | Chromosome IDs | Chromosomes     | Physical positions (bp) | CDC Frontier (Reference genome) | (Pusa 256 & HPNB) | NCBI SNPdb Accession IDs |
|----------------------|----------------|-----------------|-------------------------|---------------------------------|-------------------|--------------------------|
| SNP_P3_64513_6836450 | NC_021164.1    | Ca_kabuli_chr05 | 6836450                 | CC                              | GG                | 1946431460               |
| SNP_P3_64514_6836513 | NC_021164.1    | Ca_kabuli_chr05 | 6836513                 | CC                              | TT                | 1946431462               |
| SNP_P3_64515_6836567 | NC_021164.1    | Ca_kabuli_chr05 | 6836567                 | CC                              | TT                | 1946431463               |
| SNP_P3_64516_6836571 | NC_021164.1    | Ca_kabuli_chr05 | 6836571                 | AA                              | CC                | 1946431465               |
| SNP_P3_64517_6836615 | NC_021164.1    | Ca_kabuli_chr05 | 6836615                 | AA                              | GG                | 1946431466               |
| SNP_P3_64518_6836626 | NC_021164.1    | Ca_kabuli_chr05 | 6836626                 | AA                              | GG                | 1946431468               |
| SNP_P3_64519_6837180 | NC_021164.1    | Ca_kabuli_chr05 | 6837180                 | TT                              | CC                | 1946431469               |
| SNP_P3_64520_6837235 | NC_021164.1    | Ca_kabuli_chr05 | 6837235                 | GG                              | AA                | 1946431470               |
| SNP_P3_64521_6837352 | NC_021164.1    | Ca_kabuli_chr05 | 6837352                 | AA                              | CC                | 1946431472               |
| SNP_P3_64522_6837385 | NC_021164.1    | Ca_kabuli_chr05 | 6837385                 | CC                              | TT                | 1946431473               |
| SNP_P3_64523_6837415 | NC_021164.1    | Ca_kabuli_chr05 | 6837415                 | AA                              | TT                | 1946431475               |
| SNP_P3_64524_6837425 | NC_021164.1    | Ca_kabuli_chr05 | 6837425                 | AA                              | GG                | 1946431476               |
| SNP_P3_64525_6837905 | NC_021164.1    | Ca_kabuli_chr05 | 6837905                 | GG                              | AA                | 1946431478               |
| SNP_P3_64526_6837956 | NC_021164.1    | Ca_kabuli_chr05 | 6837956                 | AA                              | GG                | 1946431479               |
| SNP_P3_64528_6838027 | NC_021164.1    | Ca_kabuli_chr05 | 6838027                 | AA                              | GG                | 1946431481               |
| SNP_P3_64529_6847340 | NC_021164.1    | Ca_kabuli_chr05 | 6847340                 | TT                              | CC                | 1946431482               |
| SNP_P3_64531_6849305 | NC_021164.1    | Ca_kabuli_chr05 | 6849305                 | CC                              | TT                | 1946431484               |
| SNP_P3_64532_6850056 | NC_021164.1    | Ca_kabuli_chr05 | 6850056                 | GG                              | AA                | 1946431485               |
| SNP_P3_64533_6850082 | NC_021164.1    | Ca_kabuli_chr05 | 6850082                 | AA                              | GG                | 1946431487               |
| SNP_P3_64535_6872084 | NC_021164.1    | Ca_kabuli_chr05 | 6872084                 | CC                              | AA                | 1946431488               |
| SNP_P3_64536_6872105 | NC_021164.1    | Ca_kabuli_chr05 | 6872105                 | AA                              | GG                | 1946431490               |
| SNP_P3_64537_6872226 | NC_021164.1    | Ca_kabuli_chr05 | 6872226                 | GG                              | CC                | 1946431491               |
| SNP_P3_64538_6872262 | NC_021164.1    | Ca_kabuli_chr05 | 6872262                 | CC                              | TT                | 1946431493               |
| SNP_P3_64539_6872417 | NC_021164.1    | Ca_kabuli_chr05 | 6872417                 | GG                              | AA                | 1946431494               |
| SNP_P3_64540_6872508 | NC_021164.1    | Ca_kabuli_chr05 | 6872508                 | CC                              | TT                | 1946431496               |
| SNP_P3_64542_6875422 | NC_021164.1    | Ca_kabuli_chr05 | 6875422                 | GG                              | TT                | 1946431497               |
| SNP_P3_64543_6875426 | NC_021164.1    | Ca_kabuli_chr05 | 6875426                 | AA                              | GG                | 1946431498               |
| SNP_P3_64544_6896640 | NC_021164.1    | Ca_kabuli_chr05 | 6896640                 | TT                              | CC                | 1946431500               |
| SNP_P3_64545_6896667 | NC_021164.1    | Ca_kabuli_chr05 | 6896667                 | GG                              | AA                | 1946431501               |
| SNP_P3_64546_6896671 | NC_021164.1    | Ca_kabuli_chr05 | 6896671                 | TT                              | AA                | 1946431503               |
| SNP_P3_64547_6897083 | NC_021164.1    | Ca_kabuli_chr05 | 6897083                 | TT                              | GG                | 1946431504               |
| SNP_P3_64548_6897825 | NC_021164.1    | Ca_kabuli_chr05 | 6897825                 | TT                              | GG                | 1946431506               |
| SNP_P3_64549_6897939 | NC_021164.1    | Ca_kabuli_chr05 | 6897939                 | AA                              | TT                | 1946431508               |
| SNP_P3_64550_6897958 | NC_021164.1    | Ca_kabuli_chr05 | 6897958                 | GG                              | AA                | 1946431509               |
| SNP_P3_64551_6901712 | NC_021164.1    | Ca_kabuli_chr05 | 6901712                 | CC                              | TT                | 1946431510               |
| SNP_P3_64552_6906629 | NC_021164.1    | Ca_kabuli_chr05 | 6906629                 | CC                              | TT                | 1946431512               |
| SNP_P3_64553_6906636 | NC_021164.1    | Ca_kabuli_chr05 | 6906636                 | AA                              | GG                | 1946431513               |
| SNP_P3_64554_6906665 | NC_021164.1    | Ca_kabuli_chr05 | 6906665                 | CC                              | AA                | 1946431515               |
| SNP_P3_64555_6906755 | NC_021164.1    | Ca_kabuli_chr05 | 6906755                 | TT                              | CC                | 1946431516               |
| SNP_P3_64556_6906774 | NC_021164.1    | Ca_kabuli_chr05 | 6906774                 | GG                              | CC                | 1946431518               |
| SNP_P3_64557_6906811 | NC_021164.1    | Ca_kabuli_chr05 | 6906811                 | AA                              | TT                | 1946431519               |
| SNP_P3_64558_6906930 | NC_021164.1    | Ca_kabuli_chr05 | 6906930                 | GG                              | TT                | 1946431521               |

| SNPs IDs             | Chromosome IDs | Chromosomes     | Physical positions (bp) | CDC Frontier (Reference genome) | (Pusa 256 & HPNB) | NCBI SNPdb Accession IDs |
|----------------------|----------------|-----------------|-------------------------|---------------------------------|-------------------|--------------------------|
| SNP_P3_64559_6907067 | NC_021164.1    | Ca_kabuli_chr05 | 6907067                 | CC                              | GG                | 1946431522               |
| SNP_P3_64560_6907236 | NC_021164.1    | Ca_kabuli_chr05 | 6907236                 | GG                              | AA                | 1946431524               |
| SNP_P3_64561_6907237 | NC_021164.1    | Ca_kabuli_chr05 | 6907237                 | TT                              | AA                | 1946431525               |
| SNP_P3_64562_6907238 | NC_021164.1    | Ca_kabuli_chr05 | 6907238                 | TT                              | AA                | 1946431527               |
| SNP_P3_64563_6907329 | NC_021164.1    | Ca_kabuli_chr05 | 6907329                 | TT                              | CC                | 1946431528               |
| SNP_P3_64564_6907335 | NC_021164.1    | Ca_kabuli_chr05 | 6907335                 | AA                              | GG                | 1946431530               |
| SNP_P3_64565_6907399 | NC_021164.1    | Ca_kabuli_chr05 | 6907399                 | GG                              | TT                | 1946431531               |
| SNP_P3_64566_6907407 | NC_021164.1    | Ca_kabuli_chr05 | 6907407                 | AA                              | CC                | 1946431533               |
| SNP_P3_64567_6907409 | NC_021164.1    | Ca_kabuli_chr05 | 6907409                 | AA                              | GG                | 1946431534               |
| SNP_P3_64568_6907474 | NC_021164.1    | Ca_kabuli_chr05 | 6907474                 | TT                              | CC                | 1946431536               |
| SNP_P3_64569_6907524 | NC_021164.1    | Ca_kabuli_chr05 | 6907524                 | GG                              | AA                | 1946431537               |
| SNP_P3_64570_6907546 | NC_021164.1    | Ca_kabuli_chr05 | 6907546                 | AA                              | GG                | 1946431539               |
| SNP_P3_64572_6907661 | NC_021164.1    | Ca_kabuli_chr05 | 6907661                 | CC                              | TT                | 1946431540               |
| SNP_P3_64573_6907712 | NC_021164.1    | Ca_kabuli_chr05 | 6907712                 | GG                              | CC                | 1946431542               |
| SNP_P3_64574_6907713 | NC_021164.1    | Ca_kabuli_chr05 | 6907713                 | AA                              | GG                | 1946431543               |
| SNP_P3_64575_6907720 | NC_021164.1    | Ca_kabuli_chr05 | 6907720                 | GG                              | AA                | 1946431545               |
| SNP_P3_64576_6907781 | NC_021164.1    | Ca_kabuli_chr05 | 6907781                 | AA                              | GG                | 1946431546               |
| SNP_P3_64578_6908161 | NC_021164.1    | Ca_kabuli_chr05 | 6908161                 | TT                              | CC                | 1946431548               |
| SNP_P3_64579_6908174 | NC_021164.1    | Ca_kabuli_chr05 | 6908174                 | TT                              | CC                | 1946431549               |
| SNP_P3_64580_6908242 | NC_021164.1    | Ca_kabuli_chr05 | 6908242                 | AA                              | GG                | 1946431551               |
| SNP_P3_64581_6908620 | NC_021164.1    | Ca_kabuli_chr05 | 6908620                 | CC                              | TT                | 1946431552               |
| SNP_P3_64582_6908768 | NC_021164.1    | Ca_kabuli_chr05 | 6908768                 | GG                              | TT                | 1946431554               |
| SNP_P3_64586_6909720 | NC_021164.1    | Ca_kabuli_chr05 | 6909720                 | GG                              | AA                | 1946431555               |
| SNP_P3_64587_6909722 | NC_021164.1    | Ca_kabuli_chr05 | 6909722                 | TT                              | CC                | 1946431557               |
| SNP_P3_64588_6909725 | NC_021164.1    | Ca_kabuli_chr05 | 6909725                 | TT                              | CC                | 1946431558               |
| SNP_P3_64589_6909817 | NC_021164.1    | Ca_kabuli_chr05 | 6909817                 | GG                              | AA                | 1946431559               |
| SNP_P3_64590_6909903 | NC_021164.1    | Ca_kabuli_chr05 | 6909903                 | CC                              | TT                | 1946431561               |
| SNP_P3_64591_6909912 | NC_021164.1    | Ca_kabuli_chr05 | 6909912                 | CC                              | TT                | 1946431562               |
| SNP_P3_64592_6909931 | NC_021164.1    | Ca_kabuli_chr05 | 6909931                 | TT                              | GG                | 1946431564               |
| SNP_P3_64594_6909995 | NC_021164.1    | Ca_kabuli_chr05 | 6909995                 | AA                              | GG                | 1946431566               |
| SNP_P3_64595_6910325 | NC_021164.1    | Ca_kabuli_chr05 | 6910325                 | GG                              | AA                | 1946431567               |
| SNP_P3_64597_6910707 | NC_021164.1    | Ca_kabuli_chr05 | 6910707                 | GG                              | TT                | 1946431569               |
| SNP_P3_64598_6910732 | NC_021164.1    | Ca_kabuli_chr05 | 6910732                 | TT                              | AA                | 1946431570               |
| SNP_P3_64599_6911925 | NC_021164.1    | Ca_kabuli_chr05 | 6911925                 | AA                              | GG                | 1946431572               |
| SNP_P3_64600_6911984 | NC_021164.1    | Ca_kabuli_chr05 | 6911984                 | CC                              | GG                | 1946431573               |
| SNP_P3_64601_6912786 | NC_021164.1    | Ca_kabuli_chr05 | 6912786                 | AA                              | GG                | 1946431575               |
| SNP_P3_64602_6913570 | NC_021164.1    | Ca_kabuli_chr05 | 6913570                 | CC                              | TT                | 1946431576               |
| SNP_P3_64603_6913609 | NC_021164.1    | Ca_kabuli_chr05 | 6913609                 | AA                              | GG                | 1946431578               |
| SNP_P3_64604_6913632 | NC_021164.1    | Ca_kabuli_chr05 | 6913632                 | CC                              | AA                | 1946431579               |
| SNP_P3_64605_6913635 | NC_021164.1    | Ca_kabuli_chr05 | 6913635                 | CC                              | GG                | 1946431581               |
| SNP_P3_64606_6913693 | NC_021164.1    | Ca_kabuli_chr05 | 6913693                 | CC                              | AA                | 1946431582               |
| SNP_P3_64607_6913695 | NC_021164.1    | Ca_kabuli_chr05 | 6913695                 | CC                              | TT                | 1946431584               |

| SNPs IDs             | Chromosome IDs | Chromosomes     | Physical positions (bp) | CDC Frontier (Reference genome) | (Pusa 256 & HPNB) | NCBI SNPdb Accession IDs |
|----------------------|----------------|-----------------|-------------------------|---------------------------------|-------------------|--------------------------|
| SNP_P3_64608_6913707 | NC_021164.1    | Ca_kabuli_chr05 | 6913707                 | CC                              | TT                | 1946431585               |
| SNP_P3_64609_6913853 | NC_021164.1    | Ca_kabuli_chr05 | 6913853                 | CC                              | TT                | 1946431587               |
| SNP_P3_64610_6913861 | NC_021164.1    | Ca_kabuli_chr05 | 6913861                 | TT                              | GG                | 1946431588               |
| SNP_P3_64611_6914049 | NC_021164.1    | Ca_kabuli_chr05 | 6914049                 | CC                              | TT                | 1946431590               |
| SNP_P3_64612_6914052 | NC_021164.1    | Ca_kabuli_chr05 | 6914052                 | AA                              | GG                | 1946431591               |
| SNP_P3_64613_6914194 | NC_021164.1    | Ca_kabuli_chr05 | 6914194                 | TT                              | CC                | 1946431593               |
| SNP_P3_64614_6914437 | NC_021164.1    | Ca_kabuli_chr05 | 6914437                 | AA                              | CC                | 1946431594               |
| SNP_P3_64615_6914449 | NC_021164.1    | Ca_kabuli_chr05 | 6914449                 | GG                              | AA                | 1946431596               |
| SNP_P3_64617_6914631 | NC_021164.1    | Ca_kabuli_chr05 | 6914631                 | GG                              | TT                | 1946431597               |
| SNP_P3_64618_6914729 | NC_021164.1    | Ca_kabuli_chr05 | 6914729                 | AA                              | GG                | 1946431599               |
| SNP_P3_64619_6914776 | NC_021164.1    | Ca_kabuli_chr05 | 6914776                 | CC                              | AA                | 1946431600               |
| SNP_P3_64620_6914793 | NC_021164.1    | Ca_kabuli_chr05 | 6914793                 | CC                              | TT                | 1946431602               |
| SNP_P3_64621_6914913 | NC_021164.1    | Ca_kabuli_chr05 | 6914913                 | CC                              | TT                | 1946431603               |
| SNP_P3_64622_6914934 | NC_021164.1    | Ca_kabuli_chr05 | 6914934                 | GG                              | TT                | 1946431605               |
| SNP_P3_64623_6915081 | NC_021164.1    | Ca_kabuli_chr05 | 6915081                 | CC                              | TT                | 1946431606               |
| SNP_P3_64624_6915088 | NC_021164.1    | Ca_kabuli_chr05 | 6915088                 | GG                              | AA                | 1946431608               |
| SNP_P3_64625_6915112 | NC_021164.1    | Ca_kabuli_chr05 | 6915112                 | GG                              | AA                | 1946431609               |
| SNP_P3_64626_6915173 | NC_021164.1    | Ca_kabuli_chr05 | 6915173                 | TT                              | GG                | 1946431611               |
| SNP_P3_64627_6915178 | NC_021164.1    | Ca_kabuli_chr05 | 6915178                 | CC                              | GG                | 1946431612               |
| SNP_P3_64628_6915186 | NC_021164.1    | Ca_kabuli_chr05 | 6915186                 | GG                              | AA                | 1946431614               |
| SNP_P3_64629_6915187 | NC_021164.1    | Ca_kabuli_chr05 | 6915187                 | TT                              | AA                | 1946431615               |
| SNP_P3_64630_6915191 | NC_021164.1    | Ca_kabuli_chr05 | 6915191                 | TT                              | CC                | 1946431617               |
| SNP_P3_64631_6915211 | NC_021164.1    | Ca_kabuli_chr05 | 6915211                 | GG                              | AA                | 1946431618               |
| SNP_P3_64632_6915267 | NC_021164.1    | Ca_kabuli_chr05 | 6915267                 | AA                              | CC                | 1946431620               |
| SNP_P3_64633_6915275 | NC_021164.1    | Ca_kabuli_chr05 | 6915275                 | AA                              | GG                | 1946431621               |
| SNP_P3_64634_6915282 | NC_021164.1    | Ca_kabuli_chr05 | 6915282                 | TT                              | CC                | 1946431623               |
| SNP_P3_64636_6987107 | NC_021164.1    | Ca_kabuli_chr05 | 6987107                 | GG                              | TT                | 1946431624               |
| SNP_P3_64637_6998583 | NC_021164.1    | Ca_kabuli_chr05 | 6998583                 | CC                              | AA                | 1946431626               |
| SNP_P3_64638_7000860 | NC_021164.1    | Ca_kabuli_chr05 | 7000860                 | GG                              | AA                | 1946431627               |
| SNP_P3_64639_7003273 | NC_021164.1    | Ca_kabuli_chr05 | 7003273                 | TT                              | CC                | 1946431629               |
| SNP_P3_64640_7003627 | NC_021164.1    | Ca_kabuli_chr05 | 7003627                 | AA                              | TT                | 1946431630               |
| SNP_P3_64641_7023675 | NC_021164.1    | Ca_kabuli_chr05 | 7023675                 | GG                              | AA                | 1946431632               |
| SNP_P3_64642_7023682 | NC_021164.1    | Ca_kabuli_chr05 | 7023682                 | TT                              | CC                | 1946431633               |
| SNP_P3_64644_7037587 | NC_021164.1    | Ca_kabuli_chr05 | 7037587                 | GG                              | AA                | 1946431635               |
| SNP_P3_64646_7092535 | NC_021164.1    | Ca_kabuli_chr05 | 7092535                 | AA                              | CC                | 1946431636               |
| SNP_P3_64647_7092556 | NC_021164.1    | Ca_kabuli_chr05 | 7092556                 | TT                              | CC                | 1946431638               |
| SNP_P3_64648_7092589 | NC_021164.1    | Ca_kabuli_chr05 | 7092589                 | AA                              | GG                | 1946431639               |
| SNP_P3_64649_7092636 | NC_021164.1    | Ca_kabuli_chr05 | 7092636                 | AA                              | TT                | 1946431641               |
| SNP_P3_64650_7092763 | NC_021164.1    | Ca_kabuli_chr05 | 7092763                 | TT                              | CC                | 1946431643               |
| SNP_P3_64651_7092771 | NC_021164.1    | Ca_kabuli_chr05 | 7092771                 | CC                              | AA                | 1946431644               |
| SNP_P3_64652_7092866 | NC_021164.1    | Ca_kabuli_chr05 | 7092866                 | TT                              | CC                | 1946431646               |
| SNP_P3_64653_7092870 | NC_021164.1    | Ca_kabuli_chr05 | 7092870                 | AA                              | GG                | 1946431647               |

| SNPs IDs             | Chromosome IDs | Chromosomes     | Physical positions (bp) | CDC Frontier (Reference genome) | (Pusa 256 & HPNB) | NCBI SNPdb Accession IDs |
|----------------------|----------------|-----------------|-------------------------|---------------------------------|-------------------|--------------------------|
| SNP_P3_64654_7103654 | NC_021164.1    | Ca_kabuli_chr05 | 7103654                 | AA                              | TT                | 1946431649               |
| SNP_P3_64655_7107072 | NC_021164.1    | Ca_kabuli_chr05 | 7107072                 | CC                              | GG                | 1946431650               |
| SNP_P3_64656_7107075 | NC_021164.1    | Ca_kabuli_chr05 | 7107075                 | AA                              | GG                | 1946431652               |
| SNP_P3_64657_7107342 | NC_021164.1    | Ca_kabuli_chr05 | 7107342                 | AA                              | CC                | 1946431653               |
| SNP_P3_64658_7107753 | NC_021164.1    | Ca_kabuli_chr05 | 7107753                 | TT                              | GG                | 1946431654               |
| SNP_P3_64659_7107804 | NC_021164.1    | Ca_kabuli_chr05 | 7107804                 | CC                              | TT                | 1946431656               |
| SNP_P3_64661_7114454 | NC_021164.1    | Ca_kabuli_chr05 | 7114454                 | GG                              | AA                | 1946431657               |
| SNP_P3_64662_7114459 | NC_021164.1    | Ca_kabuli_chr05 | 7114459                 | AA                              | GG                | 1946431659               |
| SNP_P3_64663_7114487 | NC_021164.1    | Ca_kabuli_chr05 | 7114487                 | TT                              | CC                | 1946431661               |
| SNP_P3_64664_7114495 | NC_021164.1    | Ca_kabuli_chr05 | 7114495                 | TT                              | GG                | 1946431662               |
| SNP_P3_64665_7114509 | NC_021164.1    | Ca_kabuli_chr05 | 7114509                 | CC                              | TT                | 1946431664               |
| SNP_P3_64666_7114510 | NC_021164.1    | Ca_kabuli_chr05 | 7114510                 | TT                              | CC                | 1946431665               |
| SNP_P3_64667_7114569 | NC_021164.1    | Ca_kabuli_chr05 | 7114569                 | AA                              | GG                | 1946431666               |
| SNP_P3_64668_7120141 | NC_021164.1    | Ca_kabuli_chr05 | 7120141                 | CC                              | TT                | 1946431668               |
| SNP_P3_64669_7125218 | NC_021164.1    | Ca_kabuli_chr05 | 7125218                 | GG                              | TT                | 1946431669               |
| SNP_P3_64670_7125227 | NC_021164.1    | Ca_kabuli_chr05 | 7125227                 | AA                              | CC                | 1946431671               |
| SNP_P3_64671_7125229 | NC_021164.1    | Ca_kabuli_chr05 | 7125229                 | GG                              | AA                | 1946431672               |
| SNP_P3_64672_7125503 | NC_021164.1    | Ca_kabuli_chr05 | 7125503                 | TT                              | CC                | 1946431675               |
| SNP_P3_64673_7125570 | NC_021164.1    | Ca_kabuli_chr05 | 7125570                 | AA                              | TT                | 1946431676               |
| SNP_P3_64674_7175000 | NC_021164.1    | Ca_kabuli_chr05 | 7175000                 | CC                              | TT                | 1946431678               |
| SNP_P3_64675_7175221 | NC_021164.1    | Ca_kabuli_chr05 | 7175221                 | CC                              | AA                | 1946431679               |
| SNP_P3_64676_7176823 | NC_021164.1    | Ca_kabuli_chr05 | 7176823                 | CC                              | GG                | 1946431681               |
| SNP_P3_64677_7211513 | NC_021164.1    | Ca_kabuli_chr05 | 7211513                 | AA                              | TT                | 1946431682               |
| SNP_P3_64678_7224787 | NC_021164.1    | Ca_kabuli_chr05 | 7224787                 | CC                              | TT                | 1946431684               |
| SNP_P3_64679_7227493 | NC_021164.1    | Ca_kabuli_chr05 | 7227493                 | AA                              | GG                | 1946431685               |
| SNP_P3_64680_7227497 | NC_021164.1    | Ca_kabuli_chr05 | 7227497                 | TT                              | GG                | 1946431687               |
| SNP_P3_64681_7227573 | NC_021164.1    | Ca_kabuli_chr05 | 7227573                 | AA                              | GG                | 1946431688               |
| SNP_P3_64682_7227622 | NC_021164.1    | Ca_kabuli_chr05 | 7227622                 | GG                              | AA                | 1946431690               |
| SNP_P3_64683_7227630 | NC_021164.1    | Ca_kabuli_chr05 | 7227630                 | CC                              | AA                | 1946431691               |
| SNP_P3_64684_7227631 | NC_021164.1    | Ca_kabuli_chr05 | 7227631                 | TT                              | CC                | 1946431693               |
| SNP_P3_64685_7227644 | NC_021164.1    | Ca_kabuli_chr05 | 7227644                 | GG                              | TT                | 1946431694               |
| SNP_P3_64686_7227648 | NC_021164.1    | Ca_kabuli_chr05 | 7227648                 | GG                              | AA                | 1946431696               |
| SNP_P3_64687_7227651 | NC_021164.1    | Ca_kabuli_chr05 | 7227651                 | AA                              | CC                | 1946431697               |
| SNP_P3_64688_7227719 | NC_021164.1    | Ca_kabuli_chr05 | 7227719                 | GG                              | CC                | 1946431699               |
| SNP_P3_64689_7227738 | NC_021164.1    | Ca_kabuli_chr05 | 7227738                 | AA                              | TT                | 1946431700               |
| SNP_P3_64690_7227740 | NC_021164.1    | Ca_kabuli_chr05 | 7227740                 | GG                              | CC                | 1946431702               |
| SNP_P3_64691_7227759 | NC_021164.1    | Ca_kabuli_chr05 | 7227759                 | AA                              | TT                | 1946431703               |
| SNP_P3_64692_7229248 | NC_021164.1    | Ca_kabuli_chr05 | 7229248                 | AA                              | GG                | 1946431705               |
| SNP_P3_64693_7232773 | NC_021164.1    | Ca_kabuli_chr05 | 7232773                 | TT                              | CC                | 1946431706               |
| SNP_P3_64694_7232850 | NC_021164.1    | Ca_kabuli_chr05 | 7232850                 | CC                              | TT                | 1946431708               |
| SNP_P3_64695_7236372 | NC_021164.1    | Ca_kabuli_chr05 | 7236372                 | CC                              | AA                | 1946431709               |
| SNP_P3_64696_7236374 | NC_021164.1    | Ca_kabuli_chr05 | 7236374                 | TT                              | GG                | 1946431711               |

| SNPs IDs             | Chromosome IDs | Chromosomes     | Physical positions (bp) | CDC Frontier (Reference genome) | (Pusa 256 & HPNB) | NCBI SNPdb Accession IDs |
|----------------------|----------------|-----------------|-------------------------|---------------------------------|-------------------|--------------------------|
| SNP_P3_64697_7236422 | NC_021164.1    | Ca_kabuli_chr05 | 7236422                 | TT                              | GG                | 1946431712               |
| SNP_P3_64698_7236555 | NC_021164.1    | Ca_kabuli_chr05 | 7236555                 | AA                              | GG                | 1946431714               |
| SNP_P3_64699_7236695 | NC_021164.1    | Ca_kabuli_chr05 | 7236695                 | TT                              | GG                | 1946431715               |
| SNP_P3_64700_7236784 | NC_021164.1    | Ca_kabuli_chr05 | 7236784                 | AA                              | CC                | 1946431717               |
| SNP_P3_64701_7236786 | NC_021164.1    | Ca_kabuli_chr05 | 7236786                 | AA                              | GG                | 1946431720               |
| SNP_P3_64702_7246770 | NC_021164.1    | Ca_kabuli_chr05 | 7246770                 | GG                              | AA                | 1946431721               |
| SNP_P3_64704_7263182 | NC_021164.1    | Ca_kabuli_chr05 | 7263182                 | GG                              | AA                | 1946431723               |
| SNP_P3_64705_7264047 | NC_021164.1    | Ca_kabuli_chr05 | 7264047                 | CC                              | TT                | 1946431724               |
| SNP_P3_64706_7264054 | NC_021164.1    | Ca_kabuli_chr05 | 7264054                 | CC                              | GG                | 1946431725               |
| SNP_P3_64707_7264067 | NC_021164.1    | Ca_kabuli_chr05 | 7264067                 | TT                              | CC                | 1946431727               |
| SNP_P3_64708_7266932 | NC_021164.1    | Ca_kabuli_chr05 | 7266932                 | AA                              | GG                | 1946431728               |
| SNP_P3_64709_7266935 | NC_021164.1    | Ca_kabuli_chr05 | 7266935                 | GG                              | TT                | 1946431730               |
| SNP_P3_64710_7293480 | NC_021164.1    | Ca_kabuli_chr05 | 7293480                 | AA                              | GG                | 1946431731               |
| SNP_P3_64711_7313354 | NC_021164.1    | Ca_kabuli_chr05 | 7313354                 | CC                              | AA                | 1946431733               |
| SNP_P3_64712_7316035 | NC_021164.1    | Ca_kabuli_chr05 | 7316035                 | CC                              | TT                | 1946431734               |
| SNP_P3_64713_7326932 | NC_021164.1    | Ca_kabuli_chr05 | 7326932                 | AA                              | TT                | 1946431736               |
| SNP_P3_64714_7326956 | NC_021164.1    | Ca_kabuli_chr05 | 7326956                 | AA                              | CC                | 1946431737               |
| SNP_P3_64715_7327010 | NC_021164.1    | Ca_kabuli_chr05 | 7327010                 | AA                              | GG                | 1946431739               |
| SNP_P3_64716_7327274 | NC_021164.1    | Ca_kabuli_chr05 | 7327274                 | AA                              | GG                | 1946431741               |
| SNP_P3_64717_7327278 | NC_021164.1    | Ca_kabuli_chr05 | 7327278                 | TT                              | CC                | 1946431742               |
| SNP_P3_64718_7327349 | NC_021164.1    | Ca_kabuli_chr05 | 7327349                 | TT                              | AA                | 1946431744               |
| SNP_P3_64719_7332881 | NC_021164.1    | Ca_kabuli_chr05 | 7332881                 | CC                              | TT                | 1946431745               |
| SNP_P3_64720_7358847 | NC_021164.1    | Ca_kabuli_chr05 | 7358847                 | GG                              | AA                | 1946431746               |
| SNP_P3_64721_7358852 | NC_021164.1    | Ca_kabuli_chr05 | 7358852                 | AA                              | GG                | 1946431748               |
| SNP_P3_64722_7359142 | NC_021164.1    | Ca_kabuli_chr05 | 7359142                 | AA                              | GG                | 1946431749               |
| SNP_P3_64723_7359148 | NC_021164.1    | Ca_kabuli_chr05 | 7359148                 | AA                              | GG                | 1946431751               |
| SNP_P3_64724_7359155 | NC_021164.1    | Ca_kabuli_chr05 | 7359155                 | AA                              | GG                | 1946431752               |
| SNP_P3_64725_7359185 | NC_021164.1    | Ca_kabuli_chr05 | 7359185                 | TT                              | CC                | 1946431754               |
| SNP_P3_64726_7359222 | NC_021164.1    | Ca_kabuli_chr05 | 7359222                 | TT                              | CC                | 1946431755               |
| SNP_P3_64727_7359312 | NC_021164.1    | Ca_kabuli_chr05 | 7359312                 | CC                              | TT                | 1946431757               |
| SNP_P3_64728_7359325 | NC_021164.1    | Ca_kabuli_chr05 | 7359325                 | GG                              | CC                | 1946431758               |
| SNP_P3_64729_7359550 | NC_021164.1    | Ca_kabuli_chr05 | 7359550                 | TT                              | GG                | 1946431760               |
| SNP_P3_64730_7359610 | NC_021164.1    | Ca_kabuli_chr05 | 7359610                 | AA                              | GG                | 1946431761               |
| SNP_P3_64731_7360052 | NC_021164.1    | Ca_kabuli_chr05 | 7360052                 | AA                              | GG                | 1946431763               |
| SNP_P3_64733_7365449 | NC_021164.1    | Ca_kabuli_chr05 | 7365449                 | CC                              | AA                | 1946431764               |
| SNP_P3_64734_7365464 | NC_021164.1    | Ca_kabuli_chr05 | 7365464                 | TT                              | CC                | 1946431766               |
| SNP_P3_64737_7387939 | NC_021164.1    | Ca_kabuli_chr05 | 7387939                 | TT                              | CC                | 1946431768               |
| SNP_P3_64738_7388214 | NC_021164.1    | Ca_kabuli_chr05 | 7388214                 | GG                              | TT                | 1946431769               |
| SNP_P3_64739_7388341 | NC_021164.1    | Ca_kabuli_chr05 | 7388341                 | GG                              | AA                | 1946431771               |
| SNP_P3_64740_7399442 | NC_021164.1    | Ca_kabuli_chr05 | 7399442                 | TT                              | CC                | 1946431772               |
| SNP_P3_64741_7404116 | NC_021164.1    | Ca_kabuli_chr05 | 7404116                 | TT                              | GG                | 1946431774               |
| SNP_P3_64742_7445785 | NC_021164.1    | Ca_kabuli_chr05 | 7445785                 | TT                              | CC                | 1946431775               |



| SNPs IDs             | Chromosome IDs | Chromosomes     | Physical positions (bp) | CDC Frontier (Reference genome) | (Pusa 256 & HPNB) | NCBI SNPdb Accession IDs |
|----------------------|----------------|-----------------|-------------------------|---------------------------------|-------------------|--------------------------|
| SNP_P3_64743_7480590 | NC_021164.1    | Ca_kabuli_chr05 | 7480590                 | TT                              | CC                | 1946431776               |
| SNP_P3_64744_7498661 | NC_021164.1    | Ca_kabuli_chr05 | 7498661                 | CC                              | TT                | 1946431778               |
| SNP_P3_64745_7502924 | NC_021164.1    | Ca_kabuli_chr05 | 7502924                 | AA                              | CC                | 1946431779               |
| SNP_P3_64746_7509277 | NC_021164.1    | Ca_kabuli_chr05 | 7509277                 | AA                              | TT                | 1946431781               |
| SNP_P3_64747_7509475 | NC_021164.1    | Ca_kabuli_chr05 | 7509475                 | AA                              | GG                | 1946431782               |
| SNP_P3_64748_7509515 | NC_021164.1    | Ca_kabuli_chr05 | 7509515                 | GG                              | AA                | 1946431784               |
| SNP_P3_64749_7509550 | NC_021164.1    | Ca_kabuli_chr05 | 7509550                 | CC                              | AA                | 1946431785               |
| SNP_P3_64750_7517273 | NC_021164.1    | Ca_kabuli_chr05 | 7517273                 | CC                              | TT                | 1946431787               |
| SNP_P3_64751_7518035 | NC_021164.1    | Ca_kabuli_chr05 | 7518035                 | TT                              | CC                | 1946431788               |
| SNP_P3_64752_7518057 | NC_021164.1    | Ca_kabuli_chr05 | 7518057                 | AA                              | TT                | 1946431790               |
| SNP_P3_64753_7518061 | NC_021164.1    | Ca_kabuli_chr05 | 7518061                 | GG                              | TT                | 1946431791               |
| SNP_P3_64756_7595125 | NC_021164.1    | Ca_kabuli_chr05 | 7595125                 | CC                              | AA                | 1946431793               |
| SNP_P3_64758_7617640 | NC_021164.1    | Ca_kabuli_chr05 | 7617640                 | GG                              | CC                | 1946431794               |
| SNP_P3_64759_7624127 | NC_021164.1    | Ca_kabuli_chr05 | 7624127                 | GG                              | AA                | 1946431796               |
| SNP_P3_64760_7648988 | NC_021164.1    | Ca_kabuli_chr05 | 7648988                 | TT                              | CC                | 1946431797               |
| SNP_P3_64761_7649078 | NC_021164.1    | Ca_kabuli_chr05 | 7649078                 | GG                              | AA                | 1946431799               |
| SNP_P3_64762_7649112 | NC_021164.1    | Ca_kabuli_chr05 | 7649112                 | CC                              | TT                | 1946431800               |
| SNP_P3_64763_7649114 | NC_021164.1    | Ca_kabuli_chr05 | 7649114                 | GG                              | AA                | 1946431802               |
| SNP_P3_64764_7654385 | NC_021164.1    | Ca_kabuli_chr05 | 7654385                 | TT                              | CC                | 1946431803               |
| SNP_P3_64765_7657553 | NC_021164.1    | Ca_kabuli_chr05 | 7657553                 | TT                              | CC                | 1946431805               |
| SNP_P3_64766_7660345 | NC_021164.1    | Ca_kabuli_chr05 | 7660345                 | TT                              | CC                | 1946431807               |
| SNP_P3_64768_7688076 | NC_021164.1    | Ca_kabuli_chr05 | 7688076                 | GG                              | TT                | 1946431808               |
| SNP_P3_64769_7688085 | NC_021164.1    | Ca_kabuli_chr05 | 7688085                 | GG                              | TT                | 1946431810               |
| SNP_P3_64770_7705350 | NC_021164.1    | Ca_kabuli_chr05 | 7705350                 | GG                              | AA                | 1946431811               |
| SNP_P3_64771_7707402 | NC_021164.1    | Ca_kabuli_chr05 | 7707402                 | AA                              | CC                | 1946431813               |
| SNP_P3_64772_7707429 | NC_021164.1    | Ca_kabuli_chr05 | 7707429                 | TT                              | CC                | 1946431814               |
| SNP_P3_64773_7707526 | NC_021164.1    | Ca_kabuli_chr05 | 7707526                 | TT                              | CC                | 1946431815               |
| SNP_P3_64774_7707536 | NC_021164.1    | Ca_kabuli_chr05 | 7707536                 | AA                              | GG                | 1946431817               |
| SNP_P3_64775_7707558 | NC_021164.1    | Ca_kabuli_chr05 | 7707558                 | AA                              | GG                | 1946431818               |
| SNP_P3_64776_7707569 | NC_021164.1    | Ca_kabuli_chr05 | 7707569                 | AA                              | CC                | 1946431820               |
| SNP_P3_64777_7707599 | NC_021164.1    | Ca_kabuli_chr05 | 7707599                 | TT                              | CC                | 1946431821               |
| SNP_P3_64778_7707637 | NC_021164.1    | Ca_kabuli_chr05 | 7707637                 | AA                              | GG                | 1946431823               |
| SNP_P3_64779_7707650 | NC_021164.1    | Ca_kabuli_chr05 | 7707650                 | AA                              | CC                | 1946431824               |
| SNP_P3_64780_7707665 | NC_021164.1    | Ca_kabuli_chr05 | 7707665                 | AA                              | GG                | 1946431826               |
| SNP_P3_64781_7707720 | NC_021164.1    | Ca_kabuli_chr05 | 7707720                 | CC                              | AA                | 1946431828               |
| SNP_P3_64782_7707869 | NC_021164.1    | Ca_kabuli_chr05 | 7707869                 | TT                              | CC                | 1946431829               |
| SNP_P3_64783_7707931 | NC_021164.1    | Ca_kabuli_chr05 | 7707931                 | GG                              | AA                | 1946431831               |
| SNP_P3_64784_7707948 | NC_021164.1    | Ca_kabuli_chr05 | 7707948                 | CC                              | TT                | 1946431832               |
| SNP_P3_64785_7708050 | NC_021164.1    | Ca_kabuli_chr05 | 7708050                 | GG                              | CC                | 1946431833               |
| SNP_P3_64786_7708068 | NC_021164.1    | Ca_kabuli_chr05 | 7708068                 | AA                              | GG                | 1946431835               |
| SNP_P3_64787_7710685 | NC_021164.1    | Ca_kabuli_chr05 | 7710685                 | GG                              | AA                | 1946431836               |
| SNP_P3_64788_7710692 | NC_021164.1    | Ca_kabuli_chr05 | 7710692                 | GG                              | AA                | 1946431838               |

| SNPs IDs             | Chromosome IDs | Chromosomes     | Physical positions (bp) | CDC Frontier (Reference genome) | (Pusa 256 & HPNB) | NCBI SNPdb Accession IDs |
|----------------------|----------------|-----------------|-------------------------|---------------------------------|-------------------|--------------------------|
| SNP_P3_64789_7749152 | NC_021164.1    | Ca_kabuli_chr05 | 7749152                 | CC                              | TT                | 1946431839               |
| SNP_P3_64790_7749438 | NC_021164.1    | Ca_kabuli_chr05 | 7749438                 | GG                              | AA                | 1946431841               |
| SNP_P3_64791_7751659 | NC_021164.1    | Ca_kabuli_chr05 | 7751659                 | TT                              | GG                | 1946431842               |
| SNP_P3_64792_7751818 | NC_021164.1    | Ca_kabuli_chr05 | 7751818                 | AA                              | CC                | 1946431843               |
| SNP_P3_64793_7751966 | NC_021164.1    | Ca_kabuli_chr05 | 7751966                 | GG                              | CC                | 1946431845               |
| SNP_P3_64794_7752009 | NC_021164.1    | Ca_kabuli_chr05 | 7752009                 | AA                              | GG                | 1946431847               |
| SNP_P3_64795_7752080 | NC_021164.1    | Ca_kabuli_chr05 | 7752080                 | AA                              | GG                | 1946431848               |
| SNP_P3_64796_7752108 | NC_021164.1    | Ca_kabuli_chr05 | 7752108                 | AA                              | GG                | 1946431850               |
| SNP_P3_64797_7752206 | NC_021164.1    | Ca_kabuli_chr05 | 7752206                 | GG                              | CC                | 1946431851               |
| SNP_P3_64798_7752244 | NC_021164.1    | Ca_kabuli_chr05 | 7752244                 | TT                              | CC                | 1946431853               |
| SNP_P3_64799_7752256 | NC_021164.1    | Ca_kabuli_chr05 | 7752256                 | GG                              | AA                | 1946431854               |
| SNP_P3_64800_7752284 | NC_021164.1    | Ca_kabuli_chr05 | 7752284                 | TT                              | AA                | 1946431856               |
| SNP_P3_64801_7752381 | NC_021164.1    | Ca_kabuli_chr05 | 7752381                 | TT                              | AA                | 1946431857               |
| SNP_P3_64802_7752725 | NC_021164.1    | Ca_kabuli_chr05 | 7752725                 | AA                              | GG                | 1946431859               |
| SNP_P3_64804_7752784 | NC_021164.1    | Ca_kabuli_chr05 | 7752784                 | AA                              | GG                | 1946431860               |
| SNP_P3_64805_7761618 | NC_021164.1    | Ca_kabuli_chr05 | 7761618                 | TT                              | CC                | 1946431862               |
| SNP_P3_64807_7774684 | NC_021164.1    | Ca_kabuli_chr05 | 7774684                 | GG                              | AA                | 1946431863               |
| SNP_P3_64808_7774768 | NC_021164.1    | Ca_kabuli_chr05 | 7774768                 | AA                              | TT                | 1946431865               |
| SNP_P3_64809_7775006 | NC_021164.1    | Ca_kabuli_chr05 | 7775006                 | AA                              | GG                | 1946431866               |
| SNP_P3_64810_7775055 | NC_021164.1    | Ca_kabuli_chr05 | 7775055                 | GG                              | AA                | 1946431868               |
| SNP_P3_64811_7775065 | NC_021164.1    | Ca_kabuli_chr05 | 7775065                 | AA                              | CC                | 1946431869               |
| SNP_P3_64812_7775100 | NC_021164.1    | Ca_kabuli_chr05 | 7775100                 | GG                              | AA                | 1946431871               |
| SNP_P3_64813_7775172 | NC_021164.1    | Ca_kabuli_chr05 | 7775172                 | TT                              | CC                | 1946431872               |
| SNP_P3_64814_7775219 | NC_021164.1    | Ca_kabuli_chr05 | 7775219                 | CC                              | GG                | 1946431874               |
| SNP_P3_64815_7775298 | NC_021164.1    | Ca_kabuli_chr05 | 7775298                 | AA                              | TT                | 1946431875               |
| SNP_P3_64816_7802423 | NC_021164.1    | Ca_kabuli_chr05 | 7802423                 | CC                              | TT                | 1946431876               |
| SNP_P3_64817_7802432 | NC_021164.1    | Ca_kabuli_chr05 | 7802432                 | GG                              | TT                | 1946431878               |
| SNP_P3_64818_7804454 | NC_021164.1    | Ca_kabuli_chr05 | 7804454                 | TT                              | AA                | 1946431879               |
| SNP_P3_64819_7805208 | NC_021164.1    | Ca_kabuli_chr05 | 7805208                 | TT                              | AA                | 1946431881               |
| SNP_P3_64820_7808088 | NC_021164.1    | Ca_kabuli_chr05 | 7808088                 | GG                              | TT                | 1946431882               |
| SNP_P3_64821_7808148 | NC_021164.1    | Ca_kabuli_chr05 | 7808148                 | CC                              | AA                | 1946431884               |
| SNP_P3_64822_7808154 | NC_021164.1    | Ca_kabuli_chr05 | 7808154                 | CC                              | TT                | 1946431885               |
| SNP_P3_64823_7808179 | NC_021164.1    | Ca_kabuli_chr05 | 7808179                 | TT                              | CC                | 1946431887               |
| SNP_P3_64825_7809268 | NC_021164.1    | Ca_kabuli_chr05 | 7809268                 | GG                              | AA                | 1946431888               |
| SNP_P3_64826_7809272 | NC_021164.1    | Ca_kabuli_chr05 | 7809272                 | GG                              | TT                | 1946431890               |
| SNP_P3_64827_7823450 | NC_021164.1    | Ca_kabuli_chr05 | 7823450                 | GG                              | AA                | 1946431892               |
| SNP_P3_64828_7823487 | NC_021164.1    | Ca_kabuli_chr05 | 7823487                 | AA                              | GG                | 1946431893               |
| SNP_P3_64829_7830854 | NC_021164.1    | Ca_kabuli_chr05 | 7830854                 | CC                              | TT                | 1946431895               |
| SNP_P3_64830_7836839 | NC_021164.1    | Ca_kabuli_chr05 | 7836839                 | TT                              | AA                | 1946431896               |
| SNP_P3_64831_7874049 | NC_021164.1    | Ca_kabuli_chr05 | 7874049                 | CC                              | AA                | 1946431898               |
| SNP_P3_64832_7883611 | NC_021164.1    | Ca_kabuli_chr05 | 7883611                 | TT                              | CC                | 1946431899               |
| SNP_P3_64833_7929579 | NC_021164.1    | Ca_kabuli_chr05 | 7929579                 | CC                              | TT                | 1946431901               |

| SNPs IDs             | Chromosome IDs | Chromosomes     | Physical positions (bp) | CDC Frontier (Reference genome) | (Pusa 256 & HPNB) | NCBI SNPdb Accession IDs |
|----------------------|----------------|-----------------|-------------------------|---------------------------------|-------------------|--------------------------|
| SNP_P3_64834_7929683 | NC_021164.1    | Ca_kabuli_chr05 | 7929683                 | AA                              | GG                | 1946431902               |
| SNP_P3_64835_7929793 | NC_021164.1    | Ca_kabuli_chr05 | 7929793                 | AA                              | CC                | 1946431904               |
| SNP_P3_64836_7929826 | NC_021164.1    | Ca_kabuli_chr05 | 7929826                 | CC                              | AA                | 1946431905               |
| SNP_P3_64837_7930124 | NC_021164.1    | Ca_kabuli_chr05 | 7930124                 | AA                              | CC                | 1946431906               |
| SNP_P3_64838_7930155 | NC_021164.1    | Ca_kabuli_chr05 | 7930155                 | AA                              | GG                | 1946431908               |
| SNP_P3_64839_7932637 | NC_021164.1    | Ca_kabuli_chr05 | 7932637                 | GG                              | TT                | 1946431910               |
| SNP_P3_64840_7937279 | NC_021164.1    | Ca_kabuli_chr05 | 7937279                 | CC                              | TT                | 1946431911               |
| SNP_P3_64841_7937594 | NC_021164.1    | Ca_kabuli_chr05 | 7937594                 | CC                              | AA                | 1946431913               |
| SNP_P3_64842_7937607 | NC_021164.1    | Ca_kabuli_chr05 | 7937607                 | AA                              | GG                | 1946431914               |
| SNP_P3_64843_7941007 | NC_021164.1    | Ca_kabuli_chr05 | 7941007                 | GG                              | AA                | 1946431916               |
| SNP_P3_64845_7941072 | NC_021164.1    | Ca_kabuli_chr05 | 7941072                 | AA                              | GG                | 1946431917               |
| SNP_P3_64846_7941361 | NC_021164.1    | Ca_kabuli_chr05 | 7941361                 | CC                              | TT                | 1946431919               |
| SNP_P3_64847_7941440 | NC_021164.1    | Ca_kabuli_chr05 | 7941440                 | TT                              | AA                | 1946431920               |
| SNP_P3_64848_7941482 | NC_021164.1    | Ca_kabuli_chr05 | 7941482                 | TT                              | CC                | 1946431922               |
| SNP_P3_64849_7941505 | NC_021164.1    | Ca_kabuli_chr05 | 7941505                 | AA                              | GG                | 1946431923               |
| SNP_P3_64850_7941524 | NC_021164.1    | Ca_kabuli_chr05 | 7941524                 | AA                              | GG                | 1946431925               |
| SNP_P3_64851_7941573 | NC_021164.1    | Ca_kabuli_chr05 | 7941573                 | TT                              | AA                | 1946431926               |
| SNP_P3_64852_7941646 | NC_021164.1    | Ca_kabuli_chr05 | 7941646                 | GG                              | AA                | 1946431928               |
| SNP_P3_64853_7941647 | NC_021164.1    | Ca_kabuli_chr05 | 7941647                 | GG                              | AA                | 1946431929               |
| SNP_P3_64854_7941677 | NC_021164.1    | Ca_kabuli_chr05 | 7941677                 | CC                              | TT                | 1946431930               |
| SNP_P3_64855_7941710 | NC_021164.1    | Ca_kabuli_chr05 | 7941710                 | AA                              | GG                | 1946431932               |
| SNP_P3_64856_7941712 | NC_021164.1    | Ca_kabuli_chr05 | 7941712                 | GG                              | TT                | 1946431933               |
| SNP_P3_64857_7941713 | NC_021164.1    | Ca_kabuli_chr05 | 7941713                 | CC                              | TT                | 1946431935               |
| SNP_P3_64859_7941881 | NC_021164.1    | Ca_kabuli_chr05 | 7941881                 | AA                              | GG                | 1946431936               |
| SNP_P3_64860_7941895 | NC_021164.1    | Ca_kabuli_chr05 | 7941895                 | GG                              | AA                | 1946431938               |
| SNP_P3_64861_7941907 | NC_021164.1    | Ca_kabuli_chr05 | 7941907                 | GG                              | TT                | 1946431939               |
| SNP_P3_64862_7958154 | NC_021164.1    | Ca_kabuli_chr05 | 7958154                 | GG                              | AA                | 1946431941               |
| SNP_P3_64863_7958172 | NC_021164.1    | Ca_kabuli_chr05 | 7958172                 | AA                              | GG                | 1946431942               |
| SNP_P3_64864_7958220 | NC_021164.1    | Ca_kabuli_chr05 | 7958220                 | TT                              | AA                | 1946431944               |
| SNP_P3_64865_7958453 | NC_021164.1    | Ca_kabuli_chr05 | 7958453                 | GG                              | AA                | 1946431945               |
| SNP_P3_64867_7990495 | NC_021164.1    | Ca_kabuli_chr05 | 7990495                 | GG                              | AA                | 1946431947               |
| SNP_P3_64868_8033330 | NC_021164.1    | Ca_kabuli_chr05 | 8033330                 | TT                              | GG                | 1946431948               |
| SNP_P3_64869_8035642 | NC_021164.1    | Ca_kabuli_chr05 | 8035642                 | CC                              | TT                | 1946431949               |
| SNP_P3_64870_8040292 | NC_021164.1    | Ca_kabuli_chr05 | 8040292                 | AA                              | GG                | 1946431951               |
| SNP_P3_64871_8040389 | NC_021164.1    | Ca_kabuli_chr05 | 8040389                 | TT                              | CC                | 1946431952               |
| SNP_P3_64872_8040438 | NC_021164.1    | Ca_kabuli_chr05 | 8040438                 | TT                              | CC                | 1946431954               |
| SNP_P3_64873_8040469 | NC_021164.1    | Ca_kabuli_chr05 | 8040469                 | TT                              | CC                | 1946431955               |
| SNP_P3_64874_8040483 | NC_021164.1    | Ca_kabuli_chr05 | 8040483                 | AA                              | GG                | 1946431957               |
| SNP_P3_64875_8040537 | NC_021164.1    | Ca_kabuli_chr05 | 8040537                 | TT                              | AA                | 1946431958               |
| SNP_P3_64876_8040643 | NC_021164.1    | Ca_kabuli_chr05 | 8040643                 | TT                              | GG                | 1946431960               |
| SNP_P3_64877_8040673 | NC_021164.1    | Ca_kabuli_chr05 | 8040673                 | CC                              | GG                | 1946431961               |
| SNP_P3_64878_8040703 | NC_021164.1    | Ca_kabuli_chr05 | 8040703                 | TT                              | GG                | 1946431963               |

| SNPs IDs             | Chromosome IDs | Chromosomes     | Physical positions (bp) | CDC Frontier (Reference genome) | (Pusa 256 & HPNB) | NCBI SNPdb Accession IDs |
|----------------------|----------------|-----------------|-------------------------|---------------------------------|-------------------|--------------------------|
| SNP_P3_64879_8047008 | NC_021164.1    | Ca_kabuli_chr05 | 8047008                 | TT                              | CC                | 1946431964               |
| SNP_P3_64880_8049808 | NC_021164.1    | Ca_kabuli_chr05 | 8049808                 | GG                              | AA                | 1946431966               |
| SNP_P3_64881_8051471 | NC_021164.1    | Ca_kabuli_chr05 | 8051471                 | AA                              | CC                | 1946431971               |
| SNP_P3_64883_8085750 | NC_021164.1    | Ca_kabuli_chr05 | 8085750                 | TT                              | CC                | 1946431972               |
| SNP_P3_64884_8087484 | NC_021164.1    | Ca_kabuli_chr05 | 8087484                 | GG                              | AA                | 1946431973               |
| SNP_P3_64885_8138709 | NC_021164.1    | Ca_kabuli_chr05 | 8138709                 | AA                              | CC                | 1946431975               |
| SNP_P3_64886_8138733 | NC_021164.1    | Ca_kabuli_chr05 | 8138733                 | TT                              | CC                | 1946431976               |
| SNP_P3_64887_8140944 | NC_021164.1    | Ca_kabuli_chr05 | 8140944                 | TT                              | CC                | 1946431978               |
| SNP_P3_64888_8140985 | NC_021164.1    | Ca_kabuli_chr05 | 8140985                 | TT                              | CC                | 1946431979               |
| SNP_P3_64889_8164630 | NC_021164.1    | Ca_kabuli_chr05 | 8164630                 | AA                              | GG                | 1946431981               |
| SNP_P3_64890_8164632 | NC_021164.1    | Ca_kabuli_chr05 | 8164632                 | AA                              | TT                | 1946431982               |
| SNP_P3_64891_8164726 | NC_021164.1    | Ca_kabuli_chr05 | 8164726                 | AA                              | TT                | 1946431984               |
| SNP_P3_64892_8173546 | NC_021164.1    | Ca_kabuli_chr05 | 8173546                 | CC                              | TT                | 1946431985               |
| SNP_P3_64893_8185844 | NC_021164.1    | Ca_kabuli_chr05 | 8185844                 | CC                              | TT                | 1946431987               |
| SNP_P3_64894_8185889 | NC_021164.1    | Ca_kabuli_chr05 | 8185889                 | AA                              | GG                | 1946431988               |
| SNP_P3_64895_8185966 | NC_021164.1    | Ca_kabuli_chr05 | 8185966                 | AA                              | GG                | 1946431990               |
| SNP_P3_64896_8186015 | NC_021164.1    | Ca_kabuli_chr05 | 8186015                 | GG                              | AA                | 1946431993               |
| SNP_P3_64897_8186229 | NC_021164.1    | Ca_kabuli_chr05 | 8186229                 | CC                              | TT                | 1946431994               |
| SNP_P3_64898_8186230 | NC_021164.1    | Ca_kabuli_chr05 | 8186230                 | CC                              | AA                | 1946431996               |
| SNP_P3_64899_8186271 | NC_021164.1    | Ca_kabuli_chr05 | 8186271                 | TT                              | GG                | 1946431997               |
| SNP_P3_64900_8186585 | NC_021164.1    | Ca_kabuli_chr05 | 8186585                 | TT                              | GG                | 1946431999               |
| SNP_P3_64901_8186631 | NC_021164.1    | Ca_kabuli_chr05 | 8186631                 | GG                              | CC                | 1946432001               |
| SNP_P3_64902_8198563 | NC_021164.1    | Ca_kabuli_chr05 | 8198563                 | CC                              | TT                | 1946432002               |
| SNP_P3_64903_8222906 | NC_021164.1    | Ca_kabuli_chr05 | 8222906                 | GG                              | AA                | 1946432004               |
| SNP_P3_64904_8222944 | NC_021164.1    | Ca_kabuli_chr05 | 8222944                 | CC                              | TT                | 1946432005               |
| SNP_P3_64905_8223744 | NC_021164.1    | Ca_kabuli_chr05 | 8223744                 | GG                              | CC                | 1946432006               |
| SNP_P3_64906_8227037 | NC_021164.1    | Ca_kabuli_chr05 | 8227037                 | AA                              | TT                | 1946432008               |
| SNP_P3_64907_8227661 | NC_021164.1    | Ca_kabuli_chr05 | 8227661                 | TT                              | CC                | 1946432009               |
| SNP_P3_64909_8233607 | NC_021164.1    | Ca_kabuli_chr05 | 8233607                 | AA                              | TT                | 1946432011               |
| SNP_P3_64910_8241012 | NC_021164.1    | Ca_kabuli_chr05 | 8241012                 | CC                              | TT                | 1946432012               |
| SNP_P3_64911_8241625 | NC_021164.1    | Ca_kabuli_chr05 | 8241625                 | GG                              | AA                | 1946432014               |
| SNP_P3_64912_8241683 | NC_021164.1    | Ca_kabuli_chr05 | 8241683                 | CC                              | TT                | 1946432015               |
| SNP_P3_64913_8259061 | NC_021164.1    | Ca_kabuli_chr05 | 8259061                 | CC                              | AA                | 1946432017               |
| SNP_P3_64914_8261198 | NC_021164.1    | Ca_kabuli_chr05 | 8261198                 | TT                              | CC                | 1946432019               |
| SNP_P3_64915_8261207 | NC_021164.1    | Ca_kabuli_chr05 | 8261207                 | GG                              | TT                | 1946432020               |
| SNP_P3_64916_8261245 | NC_021164.1    | Ca_kabuli_chr05 | 8261245                 | AA                              | GG                | 1946432022               |
| SNP_P3_64917_8261561 | NC_021164.1    | Ca_kabuli_chr05 | 8261561                 | CC                              | AA                | 1946432023               |
| SNP_P3_64918_8261591 | NC_021164.1    | Ca_kabuli_chr05 | 8261591                 | GG                              | AA                | 1946432024               |
| SNP_P3_64919_8262563 | NC_021164.1    | Ca_kabuli_chr05 | 8262563                 | AA                              | GG                | 1946432026               |
| SNP_P3_64920_8263121 | NC_021164.1    | Ca_kabuli_chr05 | 8263121                 | TT                              | CC                | 1946432027               |
| SNP_P3_64921_8263214 | NC_021164.1    | Ca_kabuli_chr05 | 8263214                 | CC                              | TT                | 1946432029               |
| SNP_P3_64922_8263249 | NC_021164.1    | Ca_kabuli_chr05 | 8263249                 | TT                              | CC                | 1946432030               |

| SNPs IDs             | Chromosome IDs | Chromosomes     | Physical positions (bp) | CDC Frontier (Reference genome) | (Pusa 256 & HPNB) | NCBI SNPdb Accession IDs |
|----------------------|----------------|-----------------|-------------------------|---------------------------------|-------------------|--------------------------|
| SNP_P3_64923_8263264 | NC_021164.1    | Ca_kabuli_chr05 | 8263264                 | TT                              | GG                | 1946432032               |
| SNP_P3_64924_8263304 | NC_021164.1    | Ca_kabuli_chr05 | 8263304                 | AA                              | GG                | 1946432033               |
| SNP_P3_64925_8263310 | NC_021164.1    | Ca_kabuli_chr05 | 8263310                 | AA                              | TT                | 1946432035               |
| SNP_P3_64926_8263421 | NC_021164.1    | Ca_kabuli_chr05 | 8263421                 | CC                              | TT                | 1946432036               |
| SNP_P3_64927_8263447 | NC_021164.1    | Ca_kabuli_chr05 | 8263447                 | AA                              | TT                | 1946432037               |
| SNP_P3_64928_8263483 | NC_021164.1    | Ca_kabuli_chr05 | 8263483                 | GG                              | AA                | 1946432039               |
| SNP_P3_64929_8263617 | NC_021164.1    | Ca_kabuli_chr05 | 8263617                 | AA                              | GG                | 1946432040               |
| SNP_P3_64930_8264941 | NC_021164.1    | Ca_kabuli_chr05 | 8264941                 | CC                              | AA                | 1946432042               |
| SNP_P3_64931_8264942 | NC_021164.1    | Ca_kabuli_chr05 | 8264942                 | GG                              | AA                | 1946432043               |
| SNP_P3_64932_8275392 | NC_021164.1    | Ca_kabuli_chr05 | 8275392                 | CC                              | TT                | 1946432045               |
| SNP_P3_64933_8284074 | NC_021164.1    | Ca_kabuli_chr05 | 8284074                 | TT                              | CC                | 1946432047               |
| SNP_P3_64934_8284168 | NC_021164.1    | Ca_kabuli_chr05 | 8284168                 | AA                              | CC                | 1946432048               |
| SNP_P3_64935_8293076 | NC_021164.1    | Ca_kabuli_chr05 | 8293076                 | TT                              | GG                | 1946432050               |
| SNP_P3_64936_8293302 | NC_021164.1    | Ca_kabuli_chr05 | 8293302                 | TT                              | CC                | 1946432051               |
| SNP_P3_64937_8293354 | NC_021164.1    | Ca_kabuli_chr05 | 8293354                 | TT                              | AA                | 1946432053               |
| SNP_P3_64938_8293355 | NC_021164.1    | Ca_kabuli_chr05 | 8293355                 | TT                              | CC                | 1946432054               |
| SNP_P3_64939_8293375 | NC_021164.1    | Ca_kabuli_chr05 | 8293375                 | AA                              | GG                | 1946432056               |
| SNP_P3_64940_8293396 | NC_021164.1    | Ca_kabuli_chr05 | 8293396                 | AA                              | TT                | 1946432057               |
| SNP_P3_64941_8293444 | NC_021164.1    | Ca_kabuli_chr05 | 8293444                 | CC                              | TT                | 1946432058               |
| SNP_P3_64942_8293468 | NC_021164.1    | Ca_kabuli_chr05 | 8293468                 | TT                              | CC                | 1946432060               |
| SNP_P3_64943_8293510 | NC_021164.1    | Ca_kabuli_chr05 | 8293510                 | CC                              | TT                | 1946432061               |
| SNP_P3_64944_8293520 | NC_021164.1    | Ca_kabuli_chr05 | 8293520                 | AA                              | GG                | 1946432063               |
| SNP_P3_64945_8293572 | NC_021164.1    | Ca_kabuli_chr05 | 8293572                 | GG                              | AA                | 1946432065               |
| SNP_P3_64946_8298188 | NC_021164.1    | Ca_kabuli_chr05 | 8298188                 | AA                              | GG                | 1946432066               |
| SNP_P3_64948_8300482 | NC_021164.1    | Ca_kabuli_chr05 | 8300482                 | TT                              | AA                | 1946432068               |
| SNP_P3_64949_8301638 | NC_021164.1    | Ca_kabuli_chr05 | 8301638                 | TT                              | GG                | 1946432069               |
| SNP_P3_64950_8311093 | NC_021164.1    | Ca_kabuli_chr05 | 8311093                 | CC                              | GG                | 1946432071               |
| SNP_P3_64951_8311105 | NC_021164.1    | Ca_kabuli_chr05 | 8311105                 | GG                              | AA                | 1946432072               |
| SNP_P3_64952_8314032 | NC_021164.1    | Ca_kabuli_chr05 | 8314032                 | CC                              | TT                | 1946432074               |
| SNP_P3_64953_8314034 | NC_021164.1    | Ca_kabuli_chr05 | 8314034                 | TT                              | AA                | 1946432075               |
| SNP_P3_64954_8314132 | NC_021164.1    | Ca_kabuli_chr05 | 8314132                 | AA                              | GG                | 1946432076               |
| SNP_P3_64955_8314154 | NC_021164.1    | Ca_kabuli_chr05 | 8314154                 | AA                              | TT                | 1946432078               |
| SNP_P3_64956_8314179 | NC_021164.1    | Ca_kabuli_chr05 | 8314179                 | TT                              | CC                | 1946432079               |
| SNP_P3_64957_8314199 | NC_021164.1    | Ca_kabuli_chr05 | 8314199                 | AA                              | CC                | 1946432081               |
| SNP_P3_64958_8314201 | NC_021164.1    | Ca_kabuli_chr05 | 8314201                 | AA                              | CC                | 1946432083               |
| SNP_P3_64959_8314228 | NC_021164.1    | Ca_kabuli_chr05 | 8314228                 | AA                              | GG                | 1946432084               |
| SNP_P3_64960_8314239 | NC_021164.1    | Ca_kabuli_chr05 | 8314239                 | GG                              | AA                | 1946432086               |
| SNP_P3_64962_8314353 | NC_021164.1    | Ca_kabuli_chr05 | 8314353                 | CC                              | TT                | 1946432087               |
| SNP_P3_64963_8314359 | NC_021164.1    | Ca_kabuli_chr05 | 8314359                 | TT                              | CC                | 1946432088               |
| SNP_P3_64964_8314368 | NC_021164.1    | Ca_kabuli_chr05 | 8314368                 | CC                              | GG                | 1946432090               |
| SNP_P3_64965_8314395 | NC_021164.1    | Ca_kabuli_chr05 | 8314395                 | CC                              | TT                | 1946432092               |
| SNP_P3_64966_8314448 | NC_021164.1    | Ca_kabuli_chr05 | 8314448                 | TT                              | CC                | 1946432093               |

| SNPs IDs             | Chromosome IDs | Chromosomes     | Physical positions (bp) | CDC Frontier (Reference genome) | (Pusa 256 & HPNB) | NCBI SNPdb Accession IDs |
|----------------------|----------------|-----------------|-------------------------|---------------------------------|-------------------|--------------------------|
| SNP_P3_64967_8318765 | NC_021164.1    | Ca_kabuli_chr05 | 8318765                 | TT                              | CC                | 1946432095               |
| SNP_P3_64968_8346490 | NC_021164.1    | Ca_kabuli_chr05 | 8346490                 | TT                              | GG                | 1946432096               |
| SNP_P3_64969_8346514 | NC_021164.1    | Ca_kabuli_chr05 | 8346514                 | AA                              | CC                | 1946432098               |
| SNP_P3_64970_8375321 | NC_021164.1    | Ca_kabuli_chr05 | 8375321                 | CC                              | TT                | 1946432099               |
| SNP_P3_64971_8386453 | NC_021164.1    | Ca_kabuli_chr05 | 8386453                 | GG                              | TT                | 1946432101               |
| SNP_P3_64972_8387195 | NC_021164.1    | Ca_kabuli_chr05 | 8387195                 | TT                              | GG                | 1946432102               |
| SNP_P3_64973_8399215 | NC_021164.1    | Ca_kabuli_chr05 | 8399215                 | TT                              | AA                | 1946432103               |
| SNP_P3_64975_8412227 | NC_021164.1    | Ca_kabuli_chr05 | 8412227                 | TT                              | CC                | 1946432105               |
| SNP_P3_64976_8413204 | NC_021164.1    | Ca_kabuli_chr05 | 8413204                 | AA                              | TT                | 1946432106               |
| SNP_P3_64978_8413487 | NC_021164.1    | Ca_kabuli_chr05 | 8413487                 | AA                              | GG                | 1946432108               |
| SNP_P3_64979_8413754 | NC_021164.1    | Ca_kabuli_chr05 | 8413754                 | CC                              | TT                | 1946432109               |
| SNP_P3_64980_8413758 | NC_021164.1    | Ca_kabuli_chr05 | 8413758                 | GG                              | AA                | 1946432111               |
| SNP_P3_64981_8434905 | NC_021164.1    | Ca_kabuli_chr05 | 8434905                 | GG                              | TT                | 1946432112               |
| SNP_P3_64982_8437797 | NC_021164.1    | Ca_kabuli_chr05 | 8437797                 | TT                              | CC                | 1946432114               |
| SNP_P3_64983_8473090 | NC_021164.1    | Ca_kabuli_chr05 | 8473090                 | TT                              | AA                | 1946432115               |
| SNP_P3_64984_8479665 | NC_021164.1    | Ca_kabuli_chr05 | 8479665                 | GG                              | AA                | 1946432117               |
| SNP_P3_64985_8479675 | NC_021164.1    | Ca_kabuli_chr05 | 8479675                 | TT                              | CC                | 1946432118               |
| SNP_P3_64986_8480965 | NC_021164.1    | Ca_kabuli_chr05 | 8480965                 | TT                              | CC                | 1946432120               |
| SNP_P3_64987_8482099 | NC_021164.1    | Ca_kabuli_chr05 | 8482099                 | TT                              | CC                | 1946432121               |
| SNP_P3_64988_8482235 | NC_021164.1    | Ca_kabuli_chr05 | 8482235                 | GG                              | AA                | 1946432123               |
| SNP_P3_64989_8482256 | NC_021164.1    | Ca_kabuli_chr05 | 8482256                 | AA                              | TT                | 1946432124               |
| SNP_P3_64990_8482288 | NC_021164.1    | Ca_kabuli_chr05 | 8482288                 | GG                              | AA                | 1946432126               |
| SNP_P3_64991_8482416 | NC_021164.1    | Ca_kabuli_chr05 | 8482416                 | TT                              | CC                | 1946432127               |
| SNP_P3_64992_8482438 | NC_021164.1    | Ca_kabuli_chr05 | 8482438                 | TT                              | AA                | 1946432129               |
| SNP_P3_64993_8482464 | NC_021164.1    | Ca_kabuli_chr05 | 8482464                 | TT                              | CC                | 1946432130               |
| SNP_P3_64994_8482495 | NC_021164.1    | Ca_kabuli_chr05 | 8482495                 | TT                              | CC                | 1946432132               |
| SNP_P3_64995_8482558 | NC_021164.1    | Ca_kabuli_chr05 | 8482558                 | AA                              | GG                | 1946432133               |
| SNP_P3_64996_8482626 | NC_021164.1    | Ca_kabuli_chr05 | 8482626                 | TT                              | CC                | 1946432135               |
| SNP_P3_64997_8482629 | NC_021164.1    | Ca_kabuli_chr05 | 8482629                 | TT                              | CC                | 1946432136               |
| SNP_P3_64998_8485559 | NC_021164.1    | Ca_kabuli_chr05 | 8485559                 | GG                              | AA                | 1946432138               |
| SNP_P3_64999_8485640 | NC_021164.1    | Ca_kabuli_chr05 | 8485640                 | AA                              | GG                | 1946432139               |
| SNP_P3_65000_8485665 | NC_021164.1    | Ca_kabuli_chr05 | 8485665                 | GG                              | AA                | 1946432141               |
| SNP_P3_65001_8485797 | NC_021164.1    | Ca_kabuli_chr05 | 8485797                 | GG                              | CC                | 1946432142               |
| SNP_P3_65002_8485895 | NC_021164.1    | Ca_kabuli_chr05 | 8485895                 | TT                              | CC                | 1946432143               |
| SNP_P3_65003_8485909 | NC_021164.1    | Ca_kabuli_chr05 | 8485909                 | AA                              | GG                | 1946432145               |
| SNP_P3_65004_8485920 | NC_021164.1    | Ca_kabuli_chr05 | 8485920                 | CC                              | TT                | 1946432146               |
| SNP_P3_65005_8485926 | NC_021164.1    | Ca_kabuli_chr05 | 8485926                 | CC                              | GG                | 1946432148               |
| SNP_P3_65006_8486002 | NC_021164.1    | Ca_kabuli_chr05 | 8486002                 | GG                              | AA                | 1946432149               |
| SNP_P3_65008_8512529 | NC_021164.1    | Ca_kabuli_chr05 | 8512529                 | TT                              | AA                | 1946432151               |
| SNP_P3_65009_8512612 | NC_021164.1    | Ca_kabuli_chr05 | 8512612                 | GG                              | AA                | 1946432152               |
| SNP_P3_65010_8531185 | NC_021164.1    | Ca_kabuli_chr05 | 8531185                 | TT                              | AA                | 1946432154               |
| SNP_P3_65011_8546359 | NC_021164.1    | Ca_kabuli_chr05 | 8546359                 | GG                              | AA                | 1946432155               |

| SNPs IDs             | Chromosome IDs | Chromosomes     | Physical positions (bp) | CDC Frontier (Reference genome) | (Pusa 256 & HPNB) | NCBI SNPdb Accession IDs |
|----------------------|----------------|-----------------|-------------------------|---------------------------------|-------------------|--------------------------|
| SNP_P3_65012_8568077 | NC_021164.1    | Ca_kabuli_chr05 | 8568077                 | AA                              | GG                | 1946432157               |
| SNP_P3_65014_8601347 | NC_021164.1    | Ca_kabuli_chr05 | 8601347                 | TT                              | CC                | 1946432158               |
| SNP_P3_65015_8611461 | NC_021164.1    | Ca_kabuli_chr05 | 8611461                 | TT                              | GG                | 1946432160               |
| SNP_P3_65016_8656001 | NC_021164.1    | Ca_kabuli_chr05 | 8656001                 | GG                              | AA                | 1946432161               |
| SNP_P3_65017_8702983 | NC_021164.1    | Ca_kabuli_chr05 | 8702983                 | AA                              | GG                | 1946432163               |
| SNP_P3_65019_8774244 | NC_021164.1    | Ca_kabuli_chr05 | 8774244                 | GG                              | AA                | 1946432164               |
| SNP_P3_65020_8805538 | NC_021164.1    | Ca_kabuli_chr05 | 8805538                 | CC                              | AA                | 1946432166               |
| SNP_P3_65021_8807196 | NC_021164.1    | Ca_kabuli_chr05 | 8807196                 | AA                              | GG                | 1946432167               |
| SNP_P3_65022_8807269 | NC_021164.1    | Ca_kabuli_chr05 | 8807269                 | TT                              | CC                | 1946432169               |
| SNP_P3_65023_8807320 | NC_021164.1    | Ca_kabuli_chr05 | 8807320                 | GG                              | CC                | 1946432170               |
| SNP_P3_65024_8808366 | NC_021164.1    | Ca_kabuli_chr05 | 8808366                 | TT                              | CC                | 1946432172               |
| SNP_P3_65025_8824095 | NC_021164.1    | Ca_kabuli_chr05 | 8824095                 | CC                              | TT                | 1946432173               |
| SNP_P3_65026_8824098 | NC_021164.1    | Ca_kabuli_chr05 | 8824098                 | CC                              | TT                | 1946432174               |
| SNP_P3_65030_8900727 | NC_021164.1    | Ca_kabuli_chr05 | 8900727                 | CC                              | TT                | 1946432176               |
| SNP_P3_65031_8917930 | NC_021164.1    | Ca_kabuli_chr05 | 8917930                 | GG                              | AA                | 1946432177               |
| SNP_P3_65032_8918375 | NC_021164.1    | Ca_kabuli_chr05 | 8918375                 | CC                              | AA                | 1946432179               |
| SNP_P3_65034_8975227 | NC_021164.1    | Ca_kabuli_chr05 | 8975227                 | TT                              | CC                | 1946432180               |
| SNP_P3_65035_8975239 | NC_021164.1    | Ca_kabuli_chr05 | 8975239                 | GG                              | AA                | 1946432182               |
| SNP_P3_65036_8995374 | NC_021164.1    | Ca_kabuli_chr05 | 8995374                 | AA                              | TT                | 1946432184               |
| SNP_P3_65037_8998862 | NC_021164.1    | Ca_kabuli_chr05 | 8998862                 | TT                              | CC                | 1946432185               |
| SNP_P3_65038_8998951 | NC_021164.1    | Ca_kabuli_chr05 | 8998951                 | AA                              | GG                | 1946432187               |
| SNP_P3_65040_8999002 | NC_021164.1    | Ca_kabuli_chr05 | 8999002                 | TT                              | AA                | 1946432188               |
| SNP_P3_65041_8999030 | NC_021164.1    | Ca_kabuli_chr05 | 8999030                 | TT                              | CC                | 1946432190               |
| SNP_P3_65042_8999459 | NC_021164.1    | Ca_kabuli_chr05 | 8999459                 | CC                              | GG                | 1946432191               |
| SNP_P3_65043_8999610 | NC_021164.1    | Ca_kabuli_chr05 | 8999610                 | CC                              | TT                | 1946432193               |
| SNP_P3_65044_8999612 | NC_021164.1    | Ca_kabuli_chr05 | 8999612                 | CC                              | AA                | 1946432194               |
| SNP_P3_65045_8999629 | NC_021164.1    | Ca_kabuli_chr05 | 8999629                 | CC                              | AA                | 1946432195               |
| SNP_P3_65046_8999636 | NC_021164.1    | Ca_kabuli_chr05 | 8999636                 | GG                              | AA                | 1946432197               |
| SNP_P3_65048_8999842 | NC_021164.1    | Ca_kabuli_chr05 | 8999842                 | AA                              | GG                | 1946432198               |
| SNP_P3_65049_8999930 | NC_021164.1    | Ca_kabuli_chr05 | 8999930                 | GG                              | AA                | 1946432200               |
| SNP_P3_65050_8999946 | NC_021164.1    | Ca_kabuli_chr05 | 8999946                 | GG                              | AA                | 1946432202               |
| SNP_P3_65051_8999967 | NC_021164.1    | Ca_kabuli_chr05 | 8999967                 | GG                              | AA                | 1946432203               |
| SNP_P3_65053_9000017 | NC_021164.1    | Ca_kabuli_chr05 | 9000017                 | AA                              | GG                | 1946432205               |
| SNP_P3_65054_9000338 | NC_021164.1    | Ca_kabuli_chr05 | 9000338                 | CC                              | TT                | 1946432206               |
| SNP_P3_65055_9000359 | NC_021164.1    | Ca_kabuli_chr05 | 9000359                 | TT                              | GG                | 1946432208               |
| SNP_P3_65056_9000400 | NC_021164.1    | Ca_kabuli_chr05 | 9000400                 | AA                              | TT                | 1946432209               |
| SNP_P3_65057_9000429 | NC_021164.1    | Ca_kabuli_chr05 | 9000429                 | GG                              | CC                | 1946432211               |
| SNP_P3_65058_9000433 | NC_021164.1    | Ca_kabuli_chr05 | 9000433                 | CC                              | TT                | 1946432212               |
| SNP_P3_65060_9091768 | NC_021164.1    | Ca_kabuli_chr05 | 9091768                 | AA                              | GG                | 1946432213               |
| SNP_P3_65061_9092155 | NC_021164.1    | Ca_kabuli_chr05 | 9092155                 | TT                              | CC                | 1946432215               |
| SNP_P3_65062_9092324 | NC_021164.1    | Ca_kabuli_chr05 | 9092324                 | CC                              | GG                | 1946432216               |
| SNP_P3_65063_9092328 | NC_021164.1    | Ca_kabuli_chr05 | 9092328                 | TT                              | CC                | 1946432218               |

| SNPs IDs             | Chromosome IDs | Chromosomes     | Physical positions (bp) | CDC Frontier (Reference genome) | (Pusa 256 & HPNB) | NCBI SNPdb Accession IDs |
|----------------------|----------------|-----------------|-------------------------|---------------------------------|-------------------|--------------------------|
| SNP_P3_65064_9092722 | NC_021164.1    | Ca_kabuli_chr05 | 9092722                 | TT                              | GG                | 1946432219               |
| SNP_P3_65065_9092745 | NC_021164.1    | Ca_kabuli_chr05 | 9092745                 | AA                              | GG                | 1946432221               |
| SNP_P3_65066_9121039 | NC_021164.1    | Ca_kabuli_chr05 | 9121039                 | CC                              | TT                | 1946432223               |
| SNP_P3_65067_9134166 | NC_021164.1    | Ca_kabuli_chr05 | 9134166                 | GG                              | AA                | 1946432224               |
| SNP_P3_65068_9161229 | NC_021164.1    | Ca_kabuli_chr05 | 9161229                 | AA                              | GG                | 1946432226               |
| SNP_P3_65069_9161230 | NC_021164.1    | Ca_kabuli_chr05 | 9161230                 | AA                              | CC                | 1946432227               |
| SNP_P3_65070_9187776 | NC_021164.1    | Ca_kabuli_chr05 | 9187776                 | AA                              | GG                | 1946432229               |
| SNP_P3_65071_9198081 | NC_021164.1    | Ca_kabuli_chr05 | 9198081                 | GG                              | TT                | 1946432230               |
| SNP_P3_65074_9201874 | NC_021164.1    | Ca_kabuli_chr05 | 9201874                 | TT                              | AA                | 1946432231               |
| SNP_P3_65075_9202432 | NC_021164.1    | Ca_kabuli_chr05 | 9202432                 | AA                              | GG                | 1946432233               |
| SNP_P3_65076_9202471 | NC_021164.1    | Ca_kabuli_chr05 | 9202471                 | TT                              | GG                | 1946432234               |
| SNP_P3_65077_9202647 | NC_021164.1    | Ca_kabuli_chr05 | 9202647                 | CC                              | TT                | 1946432236               |
| SNP_P3_65078_9203027 | NC_021164.1    | Ca_kabuli_chr05 | 9203027                 | GG                              | AA                | 1946432238               |
| SNP_P3_65080_9271869 | NC_021164.1    | Ca_kabuli_chr05 | 9271869                 | GG                              | AA                | 1946432239               |
| SNP_P3_65081_9294143 | NC_021164.1    | Ca_kabuli_chr05 | 9294143                 | GG                              | AA                | 1946432240               |
| SNP_P3_65082_9294161 | NC_021164.1    | Ca_kabuli_chr05 | 9294161                 | TT                              | GG                | 1946432242               |
| SNP_P3_65083_9299207 | NC_021164.1    | Ca_kabuli_chr05 | 9299207                 | CC                              | GG                | 1946432243               |
| SNP_P3_65085_9330366 | NC_021164.1    | Ca_kabuli_chr05 | 9330366                 | GG                              | AA                | 1946432245               |
| SNP_P3_65086_9365811 | NC_021164.1    | Ca_kabuli_chr05 | 9365811                 | CC                              | GG                | 1946432259               |
| SNP_P3_65087_9365889 | NC_021164.1    | Ca_kabuli_chr05 | 9365889                 | TT                              | CC                | 1946432261               |
| SNP_P3_65088_9365934 | NC_021164.1    | Ca_kabuli_chr05 | 9365934                 | GG                              | AA                | 1946432262               |
| SNP_P3_65089_9366003 | NC_021164.1    | Ca_kabuli_chr05 | 9366003                 | GG                              | AA                | 1946432264               |
| SNP_P3_65090_9366053 | NC_021164.1    | Ca_kabuli_chr05 | 9366053                 | AA                              | TT                | 1946432265               |
| SNP_P3_65091_9366054 | NC_021164.1    | Ca_kabuli_chr05 | 9366054                 | CC                              | AA                | 1946432267               |
| SNP_P3_65092_9366183 | NC_021164.1    | Ca_kabuli_chr05 | 9366183                 | AA                              | TT                | 1946432268               |
| SNP_P3_65093_9366210 | NC_021164.1    | Ca_kabuli_chr05 | 9366210                 | TT                              | AA                | 1946432270               |
| SNP_P3_65094_9366262 | NC_021164.1    | Ca_kabuli_chr05 | 9366262                 | AA                              | GG                | 1946432271               |
| SNP_P3_65095_9366291 | NC_021164.1    | Ca_kabuli_chr05 | 9366291                 | TT                              | CC                | 1946432273               |
| SNP_P3_65096_9366330 | NC_021164.1    | Ca_kabuli_chr05 | 9366330                 | TT                              | AA                | 1946432274               |
| SNP_P3_65097_9366350 | NC_021164.1    | Ca_kabuli_chr05 | 9366350                 | CC                              | AA                | 1946432275               |
| SNP_P3_65098_9366373 | NC_021164.1    | Ca_kabuli_chr05 | 9366373                 | CC                              | TT                | 1946432277               |
| SNP_P3_65099_9367548 | NC_021164.1    | Ca_kabuli_chr05 | 9367548                 | GG                              | AA                | 1946432278               |
| SNP_P3_65100_9372754 | NC_021164.1    | Ca_kabuli_chr05 | 9372754                 | TT                              | CC                | 1946432280               |
| SNP_P3_65101_9373964 | NC_021164.1    | Ca_kabuli_chr05 | 9373964                 | TT                              | GG                | 1946432282               |
| SNP_P3_65102_9373971 | NC_021164.1    | Ca_kabuli_chr05 | 9373971                 | TT                              | AA                | 1946432283               |
| SNP_P3_65103_9374297 | NC_021164.1    | Ca_kabuli_chr05 | 9374297                 | TT                              | CC                | 1946432285               |
| SNP_P3_65104_9374314 | NC_021164.1    | Ca_kabuli_chr05 | 9374314                 | GG                              | AA                | 1946432286               |
| SNP_P3_65105_9374487 | NC_021164.1    | Ca_kabuli_chr05 | 9374487                 | TT                              | GG                | 1946432288               |
| SNP_P3_65106_9374500 | NC_021164.1    | Ca_kabuli_chr05 | 9374500                 | TT                              | AA                | 1946432289               |
| SNP_P3_65107_9374572 | NC_021164.1    | Ca_kabuli_chr05 | 9374572                 | TT                              | AA                | 1946432291               |
| SNP_P3_65108_9374587 | NC_021164.1    | Ca_kabuli_chr05 | 9374587                 | CC                              | GG                | 1946432292               |
| SNP_P3_65109_9382553 | NC_021164.1    | Ca_kabuli_chr05 | 9382553                 | AA                              | GG                | 1946432294               |



| SNPs IDs             | Chromosome IDs | Chromosomes     | Physical positions (bp) | CDC Frontier (Reference genome) | (Pusa 256 & HPNB) | NCBI SNPdb Accession IDs |
|----------------------|----------------|-----------------|-------------------------|---------------------------------|-------------------|--------------------------|
| SNP_P3_65110_9384742 | NC_021164.1    | Ca_kabuli_chr05 | 9384742                 | GG                              | TT                | 1946432295               |
| SNP_P3_65111_9384808 | NC_021164.1    | Ca_kabuli_chr05 | 9384808                 | AA                              | CC                | 1946432297               |
| SNP_P3_65112_9393072 | NC_021164.1    | Ca_kabuli_chr05 | 9393072                 | AA                              | CC                | 1946432298               |
| SNP_P3_65113_9395609 | NC_021164.1    | Ca_kabuli_chr05 | 9395609                 | GG                              | TT                | 1946432300               |
| SNP_P3_65114_9403081 | NC_021164.1    | Ca_kabuli_chr05 | 9403081                 | AA                              | GG                | 1946432301               |
| SNP_P3_65115_9403091 | NC_021164.1    | Ca_kabuli_chr05 | 9403091                 | AA                              | TT                | 1946432303               |
| SNP_P3_65116_9403145 | NC_021164.1    | Ca_kabuli_chr05 | 9403145                 | TT                              | AA                | 1946432304               |
| SNP_P3_65117_9403160 | NC_021164.1    | Ca_kabuli_chr05 | 9403160                 | GG                              | AA                | 1946432306               |
| SNP_P3_65118_9403193 | NC_021164.1    | Ca_kabuli_chr05 | 9403193                 | GG                              | AA                | 1946432307               |
| SNP_P3_65119_9403389 | NC_021164.1    | Ca_kabuli_chr05 | 9403389                 | TT                              | CC                | 1946432309               |
| SNP_P3_65120_9403409 | NC_021164.1    | Ca_kabuli_chr05 | 9403409                 | AA                              | TT                | 1946432310               |
| SNP_P3_65122_9403491 | NC_021164.1    | Ca_kabuli_chr05 | 9403491                 | TT                              | CC                | 1946432312               |
| SNP_P3_65123_9403605 | NC_021164.1    | Ca_kabuli_chr05 | 9403605                 | AA                              | CC                | 1946432313               |
| SNP_P3_65124_9403641 | NC_021164.1    | Ca_kabuli_chr05 | 9403641                 | CC                              | AA                | 1946432315               |
| SNP_P3_65125_9403713 | NC_021164.1    | Ca_kabuli_chr05 | 9403713                 | CC                              | TT                | 1946432316               |
| SNP_P3_65126_9403722 | NC_021164.1    | Ca_kabuli_chr05 | 9403722                 | GG                              | AA                | 1946432318               |
| SNP_P3_65127_9405811 | NC_021164.1    | Ca_kabuli_chr05 | 9405811                 | TT                              | CC                | 1946432319               |
| SNP_P3_65128_9405812 | NC_021164.1    | Ca_kabuli_chr05 | 9405812                 | GG                              | AA                | 1946432321               |
| SNP_P3_65129_9405880 | NC_021164.1    | Ca_kabuli_chr05 | 9405880                 | TT                              | GG                | 1946432322               |
| SNP_P3_65130_9405889 | NC_021164.1    | Ca_kabuli_chr05 | 9405889                 | TT                              | CC                | 1946432324               |
| SNP_P3_65131_9406140 | NC_021164.1    | Ca_kabuli_chr05 | 9406140                 | AA                              | TT                | 1946432325               |
| SNP_P3_65132_9416536 | NC_021164.1    | Ca_kabuli_chr05 | 9416536                 | GG                              | TT                | 1946432327               |
| SNP_P3_65133_9416575 | NC_021164.1    | Ca_kabuli_chr05 | 9416575                 | TT                              | AA                | 1946432328               |
| SNP_P3_65134_9416641 | NC_021164.1    | Ca_kabuli_chr05 | 9416641                 | AA                              | GG                | 1946432330               |
| SNP_P3_65136_9422826 | NC_021164.1    | Ca_kabuli_chr05 | 9422826                 | AA                              | CC                | 1946432331               |
| SNP_P3_65137_9433384 | NC_021164.1    | Ca_kabuli_chr05 | 9433384                 | AA                              | GG                | 1946432333               |
| SNP_P3_65138_9433410 | NC_021164.1    | Ca_kabuli_chr05 | 9433410                 | TT                              | GG                | 1946432334               |
| SNP_P3_65139_9433448 | NC_021164.1    | Ca_kabuli_chr05 | 9433448                 | AA                              | GG                | 1946432336               |
| SNP_P3_65140_9433469 | NC_021164.1    | Ca_kabuli_chr05 | 9433469                 | AA                              | GG                | 1946432337               |
| SNP_P3_65141_9433577 | NC_021164.1    | Ca_kabuli_chr05 | 9433577                 | TT                              | CC                | 1946432338               |
| SNP_P3_65142_9433587 | NC_021164.1    | Ca_kabuli_chr05 | 9433587                 | TT                              | GG                | 1946432340               |
| SNP_P3_65143_9433683 | NC_021164.1    | Ca_kabuli_chr05 | 9433683                 | AA                              | GG                | 1946432341               |
| SNP_P3_65144_9433699 | NC_021164.1    | Ca_kabuli_chr05 | 9433699                 | AA                              | CC                | 1946432343               |
| SNP_P3_65145_9440120 | NC_021164.1    | Ca_kabuli_chr05 | 9440120                 | AA                              | GG                | 1946432344               |
| SNP_P3_65146_9441385 | NC_021164.1    | Ca_kabuli_chr05 | 9441385                 | GG                              | AA                | 1946432346               |
| SNP_P3_65148_9441657 | NC_021164.1    | Ca_kabuli_chr05 | 9441657                 | CC                              | TT                | 1946432347               |
| SNP_P3_65149_9441794 | NC_021164.1    | Ca_kabuli_chr05 | 9441794                 | TT                              | CC                | 1946432349               |
| SNP_P3_65150_9441997 | NC_021164.1    | Ca_kabuli_chr05 | 9441997                 | CC                              | GG                | 1946432350               |
| SNP_P3_65151_9442008 | NC_021164.1    | Ca_kabuli_chr05 | 9442008                 | CC                              | AA                | 1946432352               |
| SNP_P3_65152_9467123 | NC_021164.1    | Ca_kabuli_chr05 | 9467123                 | AA                              | GG                | 1946432353               |
| SNP_P3_65153_9467206 | NC_021164.1    | Ca_kabuli_chr05 | 9467206                 | GG                              | TT                | 1946432355               |
| SNP_P3_65154_9467215 | NC_021164.1    | Ca_kabuli_chr05 | 9467215                 | GG                              | AA                | 1946432356               |

| SNPs IDs             | Chromosome IDs | Chromosomes     | Physical positions (bp) | CDC Frontier (Reference genome) | (Pusa 256 & HPNB) | NCBI SNPdb Accession IDs |
|----------------------|----------------|-----------------|-------------------------|---------------------------------|-------------------|--------------------------|
| SNP_P3_65155_9467217 | NC_021164.1    | Ca_kabuli_chr05 | 9467217                 | GG                              | TT                | 1946432358               |
| SNP_P3_65156_9467705 | NC_021164.1    | Ca_kabuli_chr05 | 9467705                 | AA                              | GG                | 1946432359               |
| SNP_P3_65157_9467778 | NC_021164.1    | Ca_kabuli_chr05 | 9467778                 | TT                              | AA                | 1946432361               |
| SNP_P3_65158_9467784 | NC_021164.1    | Ca_kabuli_chr05 | 9467784                 | TT                              | CC                | 1946432362               |
| SNP_P3_65159_9467818 | NC_021164.1    | Ca_kabuli_chr05 | 9467818                 | AA                              | GG                | 1946432363               |
| SNP_P3_65160_9467905 | NC_021164.1    | Ca_kabuli_chr05 | 9467905                 | AA                              | GG                | 1946432365               |
| SNP_P3_65161_9467998 | NC_021164.1    | Ca_kabuli_chr05 | 9467998                 | AA                              | GG                | 1946432366               |
| SNP_P3_65162_9468067 | NC_021164.1    | Ca_kabuli_chr05 | 9468067                 | GG                              | AA                | 1946432368               |
| SNP_P3_65163_9468073 | NC_021164.1    | Ca_kabuli_chr05 | 9468073                 | TT                              | GG                | 1946432369               |
| SNP_P3_65164_9468203 | NC_021164.1    | Ca_kabuli_chr05 | 9468203                 | CC                              | TT                | 1946432371               |
| SNP_P3_65165_9468232 | NC_021164.1    | Ca_kabuli_chr05 | 9468232                 | TT                              | CC                | 1946432372               |
| SNP_P3_65166_9480977 | NC_021164.1    | Ca_kabuli_chr05 | 9480977                 | TT                              | GG                | 1946432373               |
| SNP_P3_65167_9495744 | NC_021164.1    | Ca_kabuli_chr05 | 9495744                 | TT                              | GG                | 1946432375               |
| SNP_P3_65168_9495812 | NC_021164.1    | Ca_kabuli_chr05 | 9495812                 | TT                              | CC                | 1946432377               |
| SNP_P3_65169_9496106 | NC_021164.1    | Ca_kabuli_chr05 | 9496106                 | GG                              | AA                | 1946432378               |
| SNP_P3_65170_9496126 | NC_021164.1    | Ca_kabuli_chr05 | 9496126                 | TT                              | CC                | 1946432380               |
| SNP_P3_65171_9501959 | NC_021164.1    | Ca_kabuli_chr05 | 9501959                 | GG                              | CC                | 1946432381               |
| SNP_P3_65172_9507362 | NC_021164.1    | Ca_kabuli_chr05 | 9507362                 | TT                              | CC                | 1946432382               |
| SNP_P3_65173_9507364 | NC_021164.1    | Ca_kabuli_chr05 | 9507364                 | AA                              | GG                | 1946432384               |
| SNP_P3_65174_9514147 | NC_021164.1    | Ca_kabuli_chr05 | 9514147                 | TT                              | CC                | 1946432385               |
| SNP_P3_65175_9514325 | NC_021164.1    | Ca_kabuli_chr05 | 9514325                 | TT                              | GG                | 1946432387               |
| SNP_P3_65176_9514327 | NC_021164.1    | Ca_kabuli_chr05 | 9514327                 | AA                              | CC                | 1946432388               |
| SNP_P3_65178_9553069 | NC_021164.1    | Ca_kabuli_chr05 | 9553069                 | GG                              | TT                | 1946432390               |
| SNP_P3_65179_9575817 | NC_021164.1    | Ca_kabuli_chr05 | 9575817                 | AA                              | TT                | 1946432391               |
| SNP_P3_65180_9584864 | NC_021164.1    | Ca_kabuli_chr05 | 9584864                 | TT                              | CC                | 1946432392               |
| SNP_P3_65181_9625659 | NC_021164.1    | Ca_kabuli_chr05 | 9625659                 | GG                              | CC                | 1946432394               |
| SNP_P3_65182_9625705 | NC_021164.1    | Ca_kabuli_chr05 | 9625705                 | AA                              | CC                | 1946432396               |
| SNP_P3_65184_9625934 | NC_021164.1    | Ca_kabuli_chr05 | 9625934                 | AA                              | TT                | 1946432398               |
| SNP_P3_65185_9626089 | NC_021164.1    | Ca_kabuli_chr05 | 9626089                 | GG                              | CC                | 1946432399               |
| SNP_P3_65187_9626230 | NC_021164.1    | Ca_kabuli_chr05 | 9626230                 | CC                              | AA                | 1946432401               |
| SNP_P3_65188_9627156 | NC_021164.1    | Ca_kabuli_chr05 | 9627156                 | CC                              | TT                | 1946432403               |
| SNP_P3_65189_9627184 | NC_021164.1    | Ca_kabuli_chr05 | 9627184                 | CC                              | TT                | 1946432404               |
| SNP_P3_65190_9627215 | NC_021164.1    | Ca_kabuli_chr05 | 9627215                 | CC                              | TT                | 1946432405               |
| SNP_P3_65191_9651840 | NC_021164.1    | Ca_kabuli_chr05 | 9651840                 | TT                              | CC                | 1946432407               |
| SNP_P3_65192_9651871 | NC_021164.1    | Ca_kabuli_chr05 | 9651871                 | AA                              | GG                | 1946432408               |
| SNP_P3_65193_9679841 | NC_021164.1    | Ca_kabuli_chr05 | 9679841                 | GG                              | CC                | 1946432410               |
| SNP_P3_65194_9690565 | NC_021164.1    | Ca_kabuli_chr05 | 9690565                 | CC                              | TT                | 1946432411               |
| SNP_P3_65195_9690578 | NC_021164.1    | Ca_kabuli_chr05 | 9690578                 | TT                              | CC                | 1946432413               |
| SNP_P3_65196_9690596 | NC_021164.1    | Ca_kabuli_chr05 | 9690596                 | AA                              | GG                | 1946432414               |
| SNP_P3_65197_9690623 | NC_021164.1    | Ca_kabuli_chr05 | 9690623                 | CC                              | AA                | 1946432416               |
| SNP_P3_65198_9690625 | NC_021164.1    | Ca_kabuli_chr05 | 9690625                 | TT                              | CC                | 1946432417               |
| SNP_P3_65199_9690761 | NC_021164.1    | Ca_kabuli_chr05 | 9690761                 | TT                              | AA                | 1946432418               |

| SNPs IDs              | Chromosome IDs | Chromosomes     | Physical positions (bp) | CDC Frontier (Reference genome) | (Pusa 256 & HPNB) | NCBI SNPdb Accession IDs |
|-----------------------|----------------|-----------------|-------------------------|---------------------------------|-------------------|--------------------------|
| SNP_P3_65200_9690872  | NC_021164.1    | Ca_kabuli_chr05 | 9690872                 | AA                              | GG                | 1946432420               |
| SNP_P3_65201_9690916  | NC_021164.1    | Ca_kabuli_chr05 | 9690916                 | GG                              | CC                | 1946432421               |
| SNP_P3_65202_9690917  | NC_021164.1    | Ca_kabuli_chr05 | 9690917                 | TT                              | GG                | 1946432424               |
| SNP_P3_65203_9690927  | NC_021164.1    | Ca_kabuli_chr05 | 9690927                 | TT                              | CC                | 1946432425               |
| SNP_P3_65204_9691537  | NC_021164.1    | Ca_kabuli_chr05 | 9691537                 | GG                              | AA                | 1946432427               |
| SNP_P3_65205_9707940  | NC_021164.1    | Ca_kabuli_chr05 | 9707940                 | TT                              | GG                | 1946432428               |
| SNP_P3_65207_9713854  | NC_021164.1    | Ca_kabuli_chr05 | 9713854                 | CC                              | TT                | 1946432430               |
| SNP_P3_65209_9742979  | NC_021164.1    | Ca_kabuli_chr05 | 9742979                 | AA                              | TT                | 1946432431               |
| SNP_P3_65210_9746188  | NC_021164.1    | Ca_kabuli_chr05 | 9746188                 | AA                              | GG                | 1946432432               |
| SNP_P3_65211_9746461  | NC_021164.1    | Ca_kabuli_chr05 | 9746461                 | AA                              | GG                | 1946432434               |
| SNP_P3_65212_9777047  | NC_021164.1    | Ca_kabuli_chr05 | 9777047                 | TT                              | CC                | 1946432435               |
| SNP_P3_65215_9847113  | NC_021164.1    | Ca_kabuli_chr05 | 9847113                 | AA                              | TT                | 1946432437               |
| SNP_P3_65216_9847158  | NC_021164.1    | Ca_kabuli_chr05 | 9847158                 | AA                              | GG                | 1946432438               |
| SNP_P3_65217_9847905  | NC_021164.1    | Ca_kabuli_chr05 | 9847905                 | CC                              | TT                | 1946432440               |
| SNP_P3_65218_9858764  | NC_021164.1    | Ca_kabuli_chr05 | 9858764                 | CC                              | GG                | 1946432441               |
| SNP_P3_65219_9886972  | NC_021164.1    | Ca_kabuli_chr05 | 9886972                 | AA                              | GG                | 1946432443               |
| SNP_P3_65221_9921190  | NC_021164.1    | Ca_kabuli_chr05 | 9921190                 | GG                              | AA                | 1946432445               |
| SNP_P3_65222_9921411  | NC_021164.1    | Ca_kabuli_chr05 | 9921411                 | TT                              | CC                | 1946432446               |
| SNP_P3_65223_9936203  | NC_021164.1    | Ca_kabuli_chr05 | 9936203                 | AA                              | TT                | 1946432447               |
| SNP_P3_65224_9937433  | NC_021164.1    | Ca_kabuli_chr05 | 9937433                 | TT                              | AA                | 1946432449               |
| SNP_P3_65225_9937560  | NC_021164.1    | Ca_kabuli_chr05 | 9937560                 | GG                              | TT                | 1946432450               |
| SNP_P3_65226_9937604  | NC_021164.1    | Ca_kabuli_chr05 | 9937604                 | GG                              | AA                | 1946432452               |
| SNP_P3_65227_9949915  | NC_021164.1    | Ca_kabuli_chr05 | 9949915                 | CC                              | TT                | 1946432453               |
| SNP_P3_65230_9972306  | NC_021164.1    | Ca_kabuli_chr05 | 9972306                 | AA                              | GG                | 1946432454               |
| SNP_P3_65231_9974092  | NC_021164.1    | Ca_kabuli_chr05 | 9974092                 | CC                              | TT                | 1946432456               |
| SNP_P3_65232_9984248  | NC_021164.1    | Ca_kabuli_chr05 | 9984248                 | CC                              | TT                | 1946432457               |
| SNP_P3_65233_10021506 | NC_021164.1    | Ca_kabuli_chr05 | 10021506                | CC                              | TT                | 1946432459               |
| SNP_P3_65234_10056571 | NC_021164.1    | Ca_kabuli_chr05 | 10056571                | TT                              | AA                | 1946432460               |
| SNP_P3_65235_10076960 | NC_021164.1    | Ca_kabuli_chr05 | 10076960                | TT                              | GG                | 1946432462               |
| SNP_P3_65236_10076968 | NC_021164.1    | Ca_kabuli_chr05 | 10076968                | TT                              | CC                | 1946432463               |
| SNP_P3_65237_10112461 | NC_021164.1    | Ca_kabuli_chr05 | 10112461                | GG                              | AA                | 1946432465               |
| SNP_P3_65239_10123734 | NC_021164.1    | Ca_kabuli_chr05 | 10123734                | GG                              | AA                | 1946432466               |
| SNP_P3_65240_10177933 | NC_021164.1    | Ca_kabuli_chr05 | 10177933                | GG                              | AA                | 1946432468               |
| SNP_P3_65241_10225051 | NC_021164.1    | Ca_kabuli_chr05 | 10225051                | CC                              | TT                | 1946432469               |
| SNP_P3_65242_10248667 | NC_021164.1    | Ca_kabuli_chr05 | 10248667                | GG                              | CC                | 1946432471               |
| SNP_P3_65243_10251200 | NC_021164.1    | Ca_kabuli_chr05 | 10251200                | TT                              | AA                | 1946432472               |
| SNP_P3_65244_10253735 | NC_021164.1    | Ca_kabuli_chr05 | 10253735                | GG                              | AA                | 1946432474               |
| SNP_P3_65245_10253770 | NC_021164.1    | Ca_kabuli_chr05 | 10253770                | CC                              | TT                | 1946432475               |
| SNP_P3_65246_10253845 | NC_021164.1    | Ca_kabuli_chr05 | 10253845                | GG                              | TT                | 1946432476               |
| SNP_P3_65247_10285157 | NC_021164.1    | Ca_kabuli_chr05 | 10285157                | TT                              | CC                | 1946432478               |
| SNP_P3_65248_10285174 | NC_021164.1    | Ca_kabuli_chr05 | 10285174                | CC                              | AA                | 1946432479               |
| SNP_P3_65249_10287151 | NC_021164.1    | Ca_kabuli_chr05 | 10287151                | AA                              | GG                | 1946432481               |

| SNPs IDs              | Chromosome IDs | Chromosomes     | Physical positions (bp) | CDC Frontier (Reference genome) | (Pusa 256 & HPNB) | NCBI SNPdb Accession IDs |
|-----------------------|----------------|-----------------|-------------------------|---------------------------------|-------------------|--------------------------|
| SNP_P3_65250_10287153 | NC_021164.1    | Ca_kabuli_chr05 | 10287153                | AA                              | GG                | 1946432482               |
| SNP_P3_65251_10293128 | NC_021164.1    | Ca_kabuli_chr05 | 10293128                | CC                              | TT                | 1946432483               |
| SNP_P3_65252_10303600 | NC_021164.1    | Ca_kabuli_chr05 | 10303600                | AA                              | TT                | 1946432485               |
| SNP_P3_65253_10312564 | NC_021164.1    | Ca_kabuli_chr05 | 10312564                | CC                              | TT                | 1946432486               |
| SNP_P3_65254_10331288 | NC_021164.1    | Ca_kabuli_chr05 | 10331288                | CC                              | TT                | 1946432488               |
| SNP_P3_65255_10332054 | NC_021164.1    | Ca_kabuli_chr05 | 10332054                | AA                              | GG                | 1946432489               |
| SNP_P3_65256_10333050 | NC_021164.1    | Ca_kabuli_chr05 | 10333050                | GG                              | AA                | 1946432491               |
| SNP_P3_65258_10341414 | NC_021164.1    | Ca_kabuli_chr05 | 10341414                | TT                              | CC                | 1946432492               |
| SNP_P3_65259_10348759 | NC_021164.1    | Ca_kabuli_chr05 | 10348759                | TT                              | GG                | 1946432494               |
| SNP_P3_65260_10348765 | NC_021164.1    | Ca_kabuli_chr05 | 10348765                | CC                              | TT                | 1946432495               |
| SNP_P3_65261_10349158 | NC_021164.1    | Ca_kabuli_chr05 | 10349158                | GG                              | CC                | 1946432497               |
| SNP_P3_65262_10349164 | NC_021164.1    | Ca_kabuli_chr05 | 10349164                | AA                              | CC                | 1946432498               |
| SNP_P3_65263_10349191 | NC_021164.1    | Ca_kabuli_chr05 | 10349191                | AA                              | GG                | 1946432499               |
| SNP_P3_65264_10362889 | NC_021164.1    | Ca_kabuli_chr05 | 10362889                | TT                              | CC                | 1946432501               |
| SNP_P3_65265_10380368 | NC_021164.1    | Ca_kabuli_chr05 | 10380368                | TT                              | CC                | 1946432502               |
| SNP_P3_65269_10434040 | NC_021164.1    | Ca_kabuli_chr05 | 10434040                | AA                              | GG                | 1946432504               |
| SNP_P3_65270_10451704 | NC_021164.1    | Ca_kabuli_chr05 | 10451704                | TT                              | CC                | 1946432505               |
| SNP_P3_65271_10475930 | NC_021164.1    | Ca_kabuli_chr05 | 10475930                | TT                              | GG                | 1946432507               |
| SNP_P3_65272_10507008 | NC_021164.1    | Ca_kabuli_chr05 | 10507008                | GG                              | AA                | 1946432509               |
| SNP_P3_65273_10526035 | NC_021164.1    | Ca_kabuli_chr05 | 10526035                | CC                              | TT                | 1946432510               |
| SNP_P3_65274_10526065 | NC_021164.1    | Ca_kabuli_chr05 | 10526065                | TT                              | GG                | 1946432512               |
| SNP_P3_65275_10526133 | NC_021164.1    | Ca_kabuli_chr05 | 10526133                | CC                              | AA                | 1946432513               |
| SNP_P3_65276_10545265 | NC_021164.1    | Ca_kabuli_chr05 | 10545265                | CC                              | AA                | 1946432514               |
| SNP_P3_65277_10572480 | NC_021164.1    | Ca_kabuli_chr05 | 10572480                | GG                              | CC                | 1946432516               |
| SNP_P3_65278_10572483 | NC_021164.1    | Ca_kabuli_chr05 | 10572483                | CC                              | TT                | 1946432517               |
| SNP_P3_65281_10604599 | NC_021164.1    | Ca_kabuli_chr05 | 10604599                | TT                              | AA                | 1946432519               |
| SNP_P3_65282_10604953 | NC_021164.1    | Ca_kabuli_chr05 | 10604953                | AA                              | GG                | 1946432520               |
| SNP_P3_65283_10605294 | NC_021164.1    | Ca_kabuli_chr05 | 10605294                | GG                              | AA                | 1946432522               |
| SNP_P3_65284_10616912 | NC_021164.1    | Ca_kabuli_chr05 | 10616912                | AA                              | TT                | 1946432523               |
| SNP_P3_65285_10617321 | NC_021164.1    | Ca_kabuli_chr05 | 10617321                | TT                              | GG                | 1946432525               |
| SNP_P3_65286_10617760 | NC_021164.1    | Ca_kabuli_chr05 | 10617760                | GG                              | AA                | 1946432526               |
| SNP_P3_65287_10620282 | NC_021164.1    | Ca_kabuli_chr05 | 10620282                | TT                              | GG                | 1946432529               |
| SNP_P3_65288_10623982 | NC_021164.1    | Ca_kabuli_chr05 | 10623982                | TT                              | AA                | 1946432531               |
| SNP_P3_65289_10624002 | NC_021164.1    | Ca_kabuli_chr05 | 10624002                | AA                              | TT                | 1946432532               |
| SNP_P3_65290_10634191 | NC_021164.1    | Ca_kabuli_chr05 | 10634191                | CC                              | TT                | 1946432534               |
| SNP_P3_65292_10634346 | NC_021164.1    | Ca_kabuli_chr05 | 10634346                | TT                              | CC                | 1946432535               |
| SNP_P3_65293_10634489 | NC_021164.1    | Ca_kabuli_chr05 | 10634489                | AA                              | GG                | 1946432537               |
| SNP_P3_65295_10646516 | NC_021164.1    | Ca_kabuli_chr05 | 10646516                | AA                              | GG                | 1946432538               |
| SNP_P3_65296_10646750 | NC_021164.1    | Ca_kabuli_chr05 | 10646750                | CC                              | AA                | 1946432540               |
| SNP_P3_65297_10646908 | NC_021164.1    | Ca_kabuli_chr05 | 10646908                | CC                              | TT                | 1946432541               |
| SNP_P3_65298_10646944 | NC_021164.1    | Ca_kabuli_chr05 | 10646944                | TT                              | AA                | 1946432543               |
| SNP_P3_65299_10646951 | NC_021164.1    | Ca_kabuli_chr05 | 10646951                | TT                              | GG                | 1946432544               |

| SNPs IDs              | Chromosome IDs | Chromosomes     | Physical positions (bp) | CDC Frontier (Reference genome) | (Pusa 256 & HPNB) | NCBI SNPdb Accession IDs |
|-----------------------|----------------|-----------------|-------------------------|---------------------------------|-------------------|--------------------------|
| SNP_P3_65300_10646966 | NC_021164.1    | Ca_kabuli_chr05 | 10646966                | GG                              | CC                | 1946432546               |
| SNP_P3_65301_10647041 | NC_021164.1    | Ca_kabuli_chr05 | 10647041                | CC                              | TT                | 1946432547               |
| SNP_P3_65302_10647042 | NC_021164.1    | Ca_kabuli_chr05 | 10647042                | GG                              | AA                | 1946432548               |
| SNP_P3_65303_10647112 | NC_021164.1    | Ca_kabuli_chr05 | 10647112                | AA                              | GG                | 1946432550               |
| SNP_P3_65304_10647477 | NC_021164.1    | Ca_kabuli_chr05 | 10647477                | GG                              | AA                | 1946432552               |
| SNP_P3_65305_10649978 | NC_021164.1    | Ca_kabuli_chr05 | 10649978                | GG                              | AA                | 1946432553               |
| SNP_P3_65306_10649986 | NC_021164.1    | Ca_kabuli_chr05 | 10649986                | GG                              | AA                | 1946432555               |
| SNP_P3_65307_10650234 | NC_021164.1    | Ca_kabuli_chr05 | 10650234                | GG                              | CC                | 1946432556               |
| SNP_P3_65308_10671916 | NC_021164.1    | Ca_kabuli_chr05 | 10671916                | GG                              | TT                | 1946432557               |
| SNP_P3_65309_10671984 | NC_021164.1    | Ca_kabuli_chr05 | 10671984                | TT                              | CC                | 1946432559               |
| SNP_P3_65310_10672091 | NC_021164.1    | Ca_kabuli_chr05 | 10672091                | AA                              | GG                | 1946432560               |
| SNP_P3_65311_10672102 | NC_021164.1    | Ca_kabuli_chr05 | 10672102                | CC                              | TT                | 1946432562               |
| SNP_P3_65312_10672108 | NC_021164.1    | Ca_kabuli_chr05 | 10672108                | TT                              | CC                | 1946432563               |
| SNP_P3_65313_10672242 | NC_021164.1    | Ca_kabuli_chr05 | 10672242                | GG                              | TT                | 1946432565               |
| SNP_P3_65314_10672246 | NC_021164.1    | Ca_kabuli_chr05 | 10672246                | CC                              | AA                | 1946432566               |
| SNP_P3_65315_10672313 | NC_021164.1    | Ca_kabuli_chr05 | 10672313                | AA                              | GG                | 1946432567               |
| SNP_P3_65316_10672325 | NC_021164.1    | Ca_kabuli_chr05 | 10672325                | CC                              | TT                | 1946432569               |
| SNP_P3_65317_10672377 | NC_021164.1    | Ca_kabuli_chr05 | 10672377                | GG                              | CC                | 1946432570               |
| SNP_P3_65318_10672419 | NC_021164.1    | Ca_kabuli_chr05 | 10672419                | TT                              | GG                | 1946432572               |
| SNP_P3_65319_10672510 | NC_021164.1    | Ca_kabuli_chr05 | 10672510                | CC                              | TT                | 1946432574               |
| SNP_P3_65320_10672635 | NC_021164.1    | Ca_kabuli_chr05 | 10672635                | GG                              | AA                | 1946432575               |
| SNP_P3_65321_10672825 | NC_021164.1    | Ca_kabuli_chr05 | 10672825                | CC                              | TT                | 1946432577               |
| SNP_P3_65322_10672969 | NC_021164.1    | Ca_kabuli_chr05 | 10672969                | TT                              | CC                | 1946432578               |
| SNP_P3_65323_10673009 | NC_021164.1    | Ca_kabuli_chr05 | 10673009                | TT                              | CC                | 1946432579               |
| SNP_P3_65324_10673127 | NC_021164.1    | Ca_kabuli_chr05 | 10673127                | GG                              | AA                | 1946432581               |
| SNP_P3_65325_10673403 | NC_021164.1    | Ca_kabuli_chr05 | 10673403                | CC                              | TT                | 1946432582               |
| SNP_P3_65326_10673520 | NC_021164.1    | Ca_kabuli_chr05 | 10673520                | GG                              | AA                | 1946432584               |
| SNP_P3_65327_10673524 | NC_021164.1    | Ca_kabuli_chr05 | 10673524                | GG                              | AA                | 1946432585               |
| SNP_P3_65328_10673542 | NC_021164.1    | Ca_kabuli_chr05 | 10673542                | GG                              | AA                | 1946432587               |
| SNP_P3_65329_10673602 | NC_021164.1    | Ca_kabuli_chr05 | 10673602                | TT                              | AA                | 1946432588               |
| SNP_P3_65330_10673605 | NC_021164.1    | Ca_kabuli_chr05 | 10673605                | TT                              | CC                | 1946432589               |
| SNP_P3_65331_10673614 | NC_021164.1    | Ca_kabuli_chr05 | 10673614                | AA                              | TT                | 1946432591               |
| SNP_P3_65332_10673619 | NC_021164.1    | Ca_kabuli_chr05 | 10673619                | GG                              | CC                | 1946432592               |
| SNP_P3_65333_10673624 | NC_021164.1    | Ca_kabuli_chr05 | 10673624                | GG                              | AA                | 1946432594               |
| SNP_P3_65334_10673788 | NC_021164.1    | Ca_kabuli_chr05 | 10673788                | TT                              | CC                | 1946432596               |
| SNP_P3_65335_10673819 | NC_021164.1    | Ca_kabuli_chr05 | 10673819                | GG                              | TT                | 1946432597               |
| SNP_P3_65336_10673820 | NC_021164.1    | Ca_kabuli_chr05 | 10673820                | TT                              | GG                | 1946432598               |
| SNP_P3_65337_10673821 | NC_021164.1    | Ca_kabuli_chr05 | 10673821                | GG                              | TT                | 1946432600               |
| SNP_P3_65338_10673831 | NC_021164.1    | Ca_kabuli_chr05 | 10673831                | GG                              | TT                | 1946432601               |
| SNP_P3_65339_10673882 | NC_021164.1    | Ca_kabuli_chr05 | 10673882                | TT                              | AA                | 1946432603               |
| SNP_P3_65340_10673913 | NC_021164.1    | Ca_kabuli_chr05 | 10673913                | AA                              | TT                | 1946432604               |
| SNP_P3_65341_10674136 | NC_021164.1    | Ca_kabuli_chr05 | 10674136                | GG                              | TT                | 1946432606               |

| SNPs IDs              | Chromosome IDs | Chromosomes     | Physical positions (bp) | CDC Frontier (Reference genome) | (Pusa 256 & HPNB) | NCBI SNPdb Accession IDs |
|-----------------------|----------------|-----------------|-------------------------|---------------------------------|-------------------|--------------------------|
| SNP_P3_65342_10674158 | NC_021164.1    | Ca_kabuli_chr05 | 10674158                | GG                              | AA                | 1946432607               |
| SNP_P3_65343_10674211 | NC_021164.1    | Ca_kabuli_chr05 | 10674211                | CC                              | TT                | 1946432609               |
| SNP_P3_65344_10674303 | NC_021164.1    | Ca_kabuli_chr05 | 10674303                | AA                              | TT                | 1946432610               |
| SNP_P3_65345_10674506 | NC_021164.1    | Ca_kabuli_chr05 | 10674506                | GG                              | TT                | 1946432612               |
| SNP_P3_65346_10674546 | NC_021164.1    | Ca_kabuli_chr05 | 10674546                | AA                              | GG                | 1946432613               |
| SNP_P3_65347_10674718 | NC_021164.1    | Ca_kabuli_chr05 | 10674718                | AA                              | GG                | 1946432615               |
| SNP_P3_65348_10674808 | NC_021164.1    | Ca_kabuli_chr05 | 10674808                | CC                              | AA                | 1946432616               |
| SNP_P3_65349_10675863 | NC_021164.1    | Ca_kabuli_chr05 | 10675863                | GG                              | AA                | 1946432618               |
| SNP_P3_65350_10676063 | NC_021164.1    | Ca_kabuli_chr05 | 10676063                | GG                              | CC                | 1946432619               |
| SNP_P3_65351_10676093 | NC_021164.1    | Ca_kabuli_chr05 | 10676093                | CC                              | TT                | 1946432621               |
| SNP_P3_65352_10676159 | NC_021164.1    | Ca_kabuli_chr05 | 10676159                | GG                              | AA                | 1946432622               |
| SNP_P3_65353_10676416 | NC_021164.1    | Ca_kabuli_chr05 | 10676416                | GG                              | AA                | 1946432624               |
| SNP_P3_65354_10676548 | NC_021164.1    | Ca_kabuli_chr05 | 10676548                | AA                              | TT                | 1946432625               |
| SNP_P3_65355_10676603 | NC_021164.1    | Ca_kabuli_chr05 | 10676603                | TT                              | CC                | 1946432627               |
| SNP_P3_65356_10676608 | NC_021164.1    | Ca_kabuli_chr05 | 10676608                | AA                              | GG                | 1946432629               |
| SNP_P3_65357_10676623 | NC_021164.1    | Ca_kabuli_chr05 | 10676623                | GG                              | AA                | 1946432630               |
| SNP_P3_65358_10676630 | NC_021164.1    | Ca_kabuli_chr05 | 10676630                | CC                              | TT                | 1946432632               |
| SNP_P3_65359_10676638 | NC_021164.1    | Ca_kabuli_chr05 | 10676638                | CC                              | AA                | 1946432633               |
| SNP_P3_65360_10676761 | NC_021164.1    | Ca_kabuli_chr05 | 10676761                | TT                              | GG                | 1946432635               |
| SNP_P3_65361_10677428 | NC_021164.1    | Ca_kabuli_chr05 | 10677428                | GG                              | AA                | 1946432636               |
| SNP_P3_65362_10677868 | NC_021164.1    | Ca_kabuli_chr05 | 10677868                | GG                              | AA                | 1946432638               |
| SNP_P3_65363_10678076 | NC_021164.1    | Ca_kabuli_chr05 | 10678076                | GG                              | CC                | 1946432639               |
| SNP_P3_65364_10678201 | NC_021164.1    | Ca_kabuli_chr05 | 10678201                | CC                              | TT                | 1946432641               |
| SNP_P3_65365_10678206 | NC_021164.1    | Ca_kabuli_chr05 | 10678206                | AA                              | GG                | 1946432642               |
| SNP_P3_65366_10678331 | NC_021164.1    | Ca_kabuli_chr05 | 10678331                | GG                              | AA                | 1946432644               |
| SNP_P3_65367_10679884 | NC_021164.1    | Ca_kabuli_chr05 | 10679884                | TT                              | AA                | 1946432645               |
| SNP_P3_65368_10679910 | NC_021164.1    | Ca_kabuli_chr05 | 10679910                | CC                              | TT                | 1946432647               |
| SNP_P3_65369_10679919 | NC_021164.1    | Ca_kabuli_chr05 | 10679919                | TT                              | CC                | 1946432648               |
| SNP_P3_65370_10679957 | NC_021164.1    | Ca_kabuli_chr05 | 10679957                | CC                              | TT                | 1946432650               |
| SNP_P3_65371_10679967 | NC_021164.1    | Ca_kabuli_chr05 | 10679967                | TT                              | GG                | 1946432651               |
| SNP_P3_65372_10679989 | NC_021164.1    | Ca_kabuli_chr05 | 10679989                | GG                              | CC                | 1946432652               |
| SNP_P3_65373_10679991 | NC_021164.1    | Ca_kabuli_chr05 | 10679991                | CC                              | AA                | 1946432654               |
| SNP_P3_65374_10680014 | NC_021164.1    | Ca_kabuli_chr05 | 10680014                | GG                              | AA                | 1946432655               |
| SNP_P3_65375_10680016 | NC_021164.1    | Ca_kabuli_chr05 | 10680016                | CC                              | TT                | 1946432657               |
| SNP_P3_65376_10680056 | NC_021164.1    | Ca_kabuli_chr05 | 10680056                | GG                              | AA                | 1946432658               |
| SNP_P3_65377_10680063 | NC_021164.1    | Ca_kabuli_chr05 | 10680063                | GG                              | TT                | 1946432660               |
| SNP_P3_65378_10680066 | NC_021164.1    | Ca_kabuli_chr05 | 10680066                | TT                              | CC                | 1946432662               |
| SNP_P3_65379_10680067 | NC_021164.1    | Ca_kabuli_chr05 | 10680067                | CC                              | TT                | 1946432663               |
| SNP_P3_65380_10680100 | NC_021164.1    | Ca_kabuli_chr05 | 10680100                | CC                              | AA                | 1946432665               |
| SNP_P3_65381_10680107 | NC_021164.1    | Ca_kabuli_chr05 | 10680107                | AA                              | GG                | 1946432666               |
| SNP_P3_65382_10680109 | NC_021164.1    | Ca_kabuli_chr05 | 10680109                | CC                              | AA                | 1946432667               |
| SNP_P3_65383_10680152 | NC_021164.1    | Ca_kabuli_chr05 | 10680152                | AA                              | TT                | 1946432669               |

| SNPs IDs              | Chromosome IDs | Chromosomes     | Physical positions (bp) | CDC Frontier (Reference genome) | (Pusa 256 & HPNB) | NCBI SNPdb Accession IDs |
|-----------------------|----------------|-----------------|-------------------------|---------------------------------|-------------------|--------------------------|
| SNP_P3_65384_10680168 | NC_021164.1    | Ca_kabuli_chr05 | 10680168                | AA                              | TT                | 1946432670               |
| SNP_P3_65385_10680170 | NC_021164.1    | Ca_kabuli_chr05 | 10680170                | GG                              | AA                | 1946432672               |
| SNP_P3_65386_10680185 | NC_021164.1    | Ca_kabuli_chr05 | 10680185                | CC                              | TT                | 1946432673               |
| SNP_P3_65387_10680193 | NC_021164.1    | Ca_kabuli_chr05 | 10680193                | TT                              | GG                | 1946432675               |
| SNP_P3_65388_10686889 | NC_021164.1    | Ca_kabuli_chr05 | 10686889                | AA                              | GG                | 1946432676               |
| SNP_P3_65389_10686922 | NC_021164.1    | Ca_kabuli_chr05 | 10686922                | CC                              | TT                | 1946432678               |
| SNP_P3_65390_10686957 | NC_021164.1    | Ca_kabuli_chr05 | 10686957                | TT                              | CC                | 1946432679               |
| SNP_P3_65391_10686975 | NC_021164.1    | Ca_kabuli_chr05 | 10686975                | TT                              | CC                | 1946432681               |
| SNP_P3_65393_10687100 | NC_021164.1    | Ca_kabuli_chr05 | 10687100                | TT                              | GG                | 1946432682               |
| SNP_P3_65394_10687131 | NC_021164.1    | Ca_kabuli_chr05 | 10687131                | AA                              | GG                | 1946432683               |
| SNP_P3_65395_10687204 | NC_021164.1    | Ca_kabuli_chr05 | 10687204                | TT                              | GG                | 1946432685               |
| SNP_P3_65396_10687251 | NC_021164.1    | Ca_kabuli_chr05 | 10687251                | GG                              | AA                | 1946432687               |
| SNP_P3_65397_10687320 | NC_021164.1    | Ca_kabuli_chr05 | 10687320                | GG                              | TT                | 1946432688               |
| SNP_P3_65398_10687375 | NC_021164.1    | Ca_kabuli_chr05 | 10687375                | TT                              | GG                | 1946432690               |
| SNP_P3_65399_10687455 | NC_021164.1    | Ca_kabuli_chr05 | 10687455                | AA                              | CC                | 1946432691               |
| SNP_P3_65400_10687490 | NC_021164.1    | Ca_kabuli_chr05 | 10687490                | TT                              | CC                | 1946432693               |
| SNP_P3_65401_10687500 | NC_021164.1    | Ca_kabuli_chr05 | 10687500                | TT                              | AA                | 1946432694               |
| SNP_P3_65402_10687502 | NC_021164.1    | Ca_kabuli_chr05 | 10687502                | CC                              | TT                | 1946432695               |
| SNP_P3_65403_10687823 | NC_021164.1    | Ca_kabuli_chr05 | 10687823                | TT                              | AA                | 1946432697               |
| SNP_P3_65405_10688182 | NC_021164.1    | Ca_kabuli_chr05 | 10688182                | AA                              | TT                | 1946432698               |
| SNP_P3_65406_10688185 | NC_021164.1    | Ca_kabuli_chr05 | 10688185                | GG                              | TT                | 1946432700               |
| SNP_P3_65407_10688278 | NC_021164.1    | Ca_kabuli_chr05 | 10688278                | GG                              | AA                | 1946432701               |
| SNP_P3_65408_10688368 | NC_021164.1    | Ca_kabuli_chr05 | 10688368                | TT                              | GG                | 1946432703               |
| SNP_P3_65409_10688549 | NC_021164.1    | Ca_kabuli_chr05 | 10688549                | GG                              | CC                | 1946432704               |
| SNP_P3_65411_10688585 | NC_021164.1    | Ca_kabuli_chr05 | 10688585                | CC                              | TT                | 1946432706               |
| SNP_P3_65413_10688847 | NC_021164.1    | Ca_kabuli_chr05 | 10688847                | GG                              | TT                | 1946432707               |
| SNP_P3_65414_10688886 | NC_021164.1    | Ca_kabuli_chr05 | 10688886                | CC                              | TT                | 1946432709               |
| SNP_P3_65415_10688896 | NC_021164.1    | Ca_kabuli_chr05 | 10688896                | TT                              | AA                | 1946432710               |
| SNP_P3_65416_10688907 | NC_021164.1    | Ca_kabuli_chr05 | 10688907                | AA                              | CC                | 1946432712               |
| SNP_P3_65417_10689051 | NC_021164.1    | Ca_kabuli_chr05 | 10689051                | GG                              | AA                | 1946432713               |
| SNP_P3_65419_10689336 | NC_021164.1    | Ca_kabuli_chr05 | 10689336                | AA                              | TT                | 1946432715               |
| SNP_P3_65421_10689387 | NC_021164.1    | Ca_kabuli_chr05 | 10689387                | TT                              | AA                | 1946432716               |
| SNP_P3_65422_10689433 | NC_021164.1    | Ca_kabuli_chr05 | 10689433                | TT                              | CC                | 1946432718               |
| SNP_P3_65424_10689693 | NC_021164.1    | Ca_kabuli_chr05 | 10689693                | GG                              | CC                | 1946432719               |
| SNP_P3_65425_10690070 | NC_021164.1    | Ca_kabuli_chr05 | 10690070                | AA                              | GG                | 1946432721               |
| SNP_P3_65426_10690076 | NC_021164.1    | Ca_kabuli_chr05 | 10690076                | TT                              | AA                | 1946432722               |
| SNP_P3_65427_10690245 | NC_021164.1    | Ca_kabuli_chr05 | 10690245                | AA                              | TT                | 1946432723               |
| SNP_P3_65428_10692068 | NC_021164.1    | Ca_kabuli_chr05 | 10692068                | AA                              | GG                | 1946432725               |
| SNP_P3_65429_10693715 | NC_021164.1    | Ca_kabuli_chr05 | 10693715                | TT                              | GG                | 1946432726               |
| SNP_P3_65431_10706517 | NC_021164.1    | Ca_kabuli_chr05 | 10706517                | TT                              | CC                | 1946432728               |
| SNP_P3_65432_10706883 | NC_021164.1    | Ca_kabuli_chr05 | 10706883                | TT                              | AA                | 1946432730               |
| SNP_P3_65433_10706935 | NC_021164.1    | Ca_kabuli_chr05 | 10706935                | AA                              | GG                | 1946432731               |

| SNPs IDs              | Chromosome IDs | Chromosomes     | Physical positions (bp) | CDC Frontier (Reference genome) | (Pusa 256 & HPNB) | NCBI SNPdb Accession IDs |
|-----------------------|----------------|-----------------|-------------------------|---------------------------------|-------------------|--------------------------|
| SNP_P3_65434_10713424 | NC_021164.1    | Ca_kabuli_chr05 | 10713424                | TT                              | CC                | 1946432733               |
| SNP_P3_65435_10713427 | NC_021164.1    | Ca_kabuli_chr05 | 10713427                | AA                              | GG                | 1946432734               |
| SNP_P3_65436_10719822 | NC_021164.1    | Ca_kabuli_chr05 | 10719822                | AA                              | GG                | 1946432735               |
| SNP_P3_65437_10719835 | NC_021164.1    | Ca_kabuli_chr05 | 10719835                | CC                              | TT                | 1946432737               |
| SNP_P3_65438_10719841 | NC_021164.1    | Ca_kabuli_chr05 | 10719841                | AA                              | GG                | 1946432738               |
| SNP_P3_65439_10721831 | NC_021164.1    | Ca_kabuli_chr05 | 10721831                | CC                              | TT                | 1946432740               |
| SNP_P3_65440_10747819 | NC_021164.1    | Ca_kabuli_chr05 | 10747819                | CC                              | AA                | 1946432741               |
| SNP_P3_65441_10759855 | NC_021164.1    | Ca_kabuli_chr05 | 10759855                | GG                              | TT                | 1946432743               |
| SNP_P3_65442_10775502 | NC_021164.1    | Ca_kabuli_chr05 | 10775502                | AA                              | GG                | 1946432744               |
| SNP_P3_65443_10775751 | NC_021164.1    | Ca_kabuli_chr05 | 10775751                | AA                              | CC                | 1946432745               |
| SNP_P3_65444_10794911 | NC_021164.1    | Ca_kabuli_chr05 | 10794911                | CC                              | AA                | 1946432747               |
| SNP_P3_65445_10794929 | NC_021164.1    | Ca_kabuli_chr05 | 10794929                | TT                              | GG                | 1946432748               |
| SNP_P3_65446_10794936 | NC_021164.1    | Ca_kabuli_chr05 | 10794936                | CC                              | TT                | 1946432750               |
| SNP_P3_65447_10794946 | NC_021164.1    | Ca_kabuli_chr05 | 10794946                | TT                              | AA                | 1946432752               |
| SNP_P3_65449_10904287 | NC_021164.1    | Ca_kabuli_chr05 | 10904287                | GG                              | AA                | 1946432753               |
| SNP_P3_65450_10943848 | NC_021164.1    | Ca_kabuli_chr05 | 10943848                | GG                              | AA                | 1946432754               |
| SNP_P3_65451_10954733 | NC_021164.1    | Ca_kabuli_chr05 | 10954733                | CC                              | TT                | 1946432756               |
| SNP_P3_65454_11074779 | NC_021164.1    | Ca_kabuli_chr05 | 11074779                | GG                              | AA                | 1946432757               |
| SNP_P3_65455_11075221 | NC_021164.1    | Ca_kabuli_chr05 | 11075221                | GG                              | TT                | 1946432759               |
| SNP_P3_65456_11075430 | NC_021164.1    | Ca_kabuli_chr05 | 11075430                | AA                              | GG                | 1946432760               |
| SNP_P3_65457_11075431 | NC_021164.1    | Ca_kabuli_chr05 | 11075431                | CC                              | TT                | 1946432761               |
| SNP_P3_65458_11075442 | NC_021164.1    | Ca_kabuli_chr05 | 11075442                | AA                              | GG                | 1946432763               |
| SNP_P3_65459_11075448 | NC_021164.1    | Ca_kabuli_chr05 | 11075448                | AA                              | GG                | 1946432764               |
| SNP_P3_65460_11075471 | NC_021164.1    | Ca_kabuli_chr05 | 11075471                | AA                              | GG                | 1946432766               |
| SNP_P3_65461_11075490 | NC_021164.1    | Ca_kabuli_chr05 | 11075490                | AA                              | GG                | 1946432767               |
| SNP_P3_65462_11075517 | NC_021164.1    | Ca_kabuli_chr05 | 11075517                | AA                              | CC                | 1946432769               |
| SNP_P3_65463_11075547 | NC_021164.1    | Ca_kabuli_chr05 | 11075547                | CC                              | TT                | 1946432770               |
| SNP_P3_65464_11075567 | NC_021164.1    | Ca_kabuli_chr05 | 11075567                | TT                              | AA                | 1946432771               |
| SNP_P3_65465_11075601 | NC_021164.1    | Ca_kabuli_chr05 | 11075601                | CC                              | TT                | 1946432773               |
| SNP_P3_65466_11126221 | NC_021164.1    | Ca_kabuli_chr05 | 11126221                | GG                              | AA                | 1946432774               |
| SNP_P3_65467_11126433 | NC_021164.1    | Ca_kabuli_chr05 | 11126433                | AA                              | TT                | 1946432776               |
| SNP_P3_65469_11131266 | NC_021164.1    | Ca_kabuli_chr05 | 11131266                | GG                              | TT                | 1946432777               |
| SNP_P3_65470_11131292 | NC_021164.1    | Ca_kabuli_chr05 | 11131292                | TT                              | AA                | 1946432779               |
| SNP_P3_65471_11131339 | NC_021164.1    | Ca_kabuli_chr05 | 11131339                | TT                              | CC                | 1946432780               |
| SNP_P3_65472_11131344 | NC_021164.1    | Ca_kabuli_chr05 | 11131344                | GG                              | AA                | 1946432782               |
| SNP_P3_65473_11131345 | NC_021164.1    | Ca_kabuli_chr05 | 11131345                | TT                              | GG                | 1946432783               |
| SNP_P3_65474_11131348 | NC_021164.1    | Ca_kabuli_chr05 | 11131348                | AA                              | GG                | 1946432785               |
| SNP_P3_65475_11131349 | NC_021164.1    | Ca_kabuli_chr05 | 11131349                | TT                              | CC                | 1946432786               |
| SNP_P3_65476_11131353 | NC_021164.1    | Ca_kabuli_chr05 | 11131353                | AA                              | TT                | 1946432787               |
| SNP_P3_65477_11131356 | NC_021164.1    | Ca_kabuli_chr05 | 11131356                | TT                              | CC                | 1946432789               |
| SNP_P3_65478_11131364 | NC_021164.1    | Ca_kabuli_chr05 | 11131364                | CC                              | AA                | 1946432790               |
| SNP_P3_65479_11131368 | NC_021164.1    | Ca_kabuli_chr05 | 11131368                | GG                              | AA                | 1946432792               |



| SNPs IDs              | Chromosome IDs | Chromosomes     | Physical positions (bp) | CDC Frontier (Reference genome) | (Pusa 256 & HPNB) | NCBI SNPdb Accession IDs |
|-----------------------|----------------|-----------------|-------------------------|---------------------------------|-------------------|--------------------------|
| SNP_P3_65480_11132368 | NC_021164.1    | Ca_kabuli_chr05 | 11132368                | CC                              | TT                | 1946432793               |
| SNP_P3_65481_11132374 | NC_021164.1    | Ca_kabuli_chr05 | 11132374                | CC                              | AA                | 1946432795               |
| SNP_P3_65482_11132450 | NC_021164.1    | Ca_kabuli_chr05 | 11132450                | AA                              | TT                | 1946432796               |
| SNP_P3_65483_11132490 | NC_021164.1    | Ca_kabuli_chr05 | 11132490                | CC                              | AA                | 1946432798               |
| SNP_P3_65484_11132502 | NC_021164.1    | Ca_kabuli_chr05 | 11132502                | CC                              | GG                | 1946432799               |
| SNP_P3_65486_11132559 | NC_021164.1    | Ca_kabuli_chr05 | 11132559                | TT                              | AA                | 1946432801               |
| SNP_P3_65487_11132616 | NC_021164.1    | Ca_kabuli_chr05 | 11132616                | AA                              | TT                | 1946432802               |
| SNP_P3_65488_11132747 | NC_021164.1    | Ca_kabuli_chr05 | 11132747                | TT                              | CC                | 1946432804               |
| SNP_P3_65489_11132778 | NC_021164.1    | Ca_kabuli_chr05 | 11132778                | CC                              | TT                | 1946432805               |
| SNP_P3_65490_11132876 | NC_021164.1    | Ca_kabuli_chr05 | 11132876                | AA                              | TT                | 1946432807               |
| SNP_P3_65491_11132945 | NC_021164.1    | Ca_kabuli_chr05 | 11132945                | GG                              | TT                | 1946432808               |
| SNP_P3_65493_11138900 | NC_021164.1    | Ca_kabuli_chr05 | 11138900                | CC                              | AA                | 1946432809               |
| SNP_P3_65494_11167551 | NC_021164.1    | Ca_kabuli_chr05 | 11167551                | TT                              | AA                | 1946432811               |
| SNP_P3_65495_11167607 | NC_021164.1    | Ca_kabuli_chr05 | 11167607                | AA                              | GG                | 1946432812               |
| SNP_P3_65496_11167696 | NC_021164.1    | Ca_kabuli_chr05 | 11167696                | TT                              | CC                | 1946432814               |
| SNP_P3_65497_11167756 | NC_021164.1    | Ca_kabuli_chr05 | 11167756                | GG                              | AA                | 1946432815               |
| SNP_P3_65498_11167766 | NC_021164.1    | Ca_kabuli_chr05 | 11167766                | TT                              | CC                | 1946432817               |
| SNP_P3_65499_11167791 | NC_021164.1    | Ca_kabuli_chr05 | 11167791                | AA                              | GG                | 1946432818               |
| SNP_P3_65500_11167841 | NC_021164.1    | Ca_kabuli_chr05 | 11167841                | TT                              | AA                | 1946432820               |
| SNP_P3_65501_11167868 | NC_021164.1    | Ca_kabuli_chr05 | 11167868                | GG                              | CC                | 1946432821               |
| SNP_P3_65502_11167878 | NC_021164.1    | Ca_kabuli_chr05 | 11167878                | TT                              | CC                | 1946432823               |
| SNP_P3_65503_11167883 | NC_021164.1    | Ca_kabuli_chr05 | 11167883                | AA                              | CC                | 1946432824               |
| SNP_P3_65504_11167887 | NC_021164.1    | Ca_kabuli_chr05 | 11167887                | TT                              | CC                | 1946432826               |
| SNP_P3_65505_11167891 | NC_021164.1    | Ca_kabuli_chr05 | 11167891                | GG                              | AA                | 1946432827               |
| SNP_P3_65506_11167892 | NC_021164.1    | Ca_kabuli_chr05 | 11167892                | TT                              | CC                | 1946432829               |
| SNP_P3_65507_11167898 | NC_021164.1    | Ca_kabuli_chr05 | 11167898                | AA                              | GG                | 1946432830               |
| SNP_P3_65508_11167900 | NC_021164.1    | Ca_kabuli_chr05 | 11167900                | TT                              | GG                | 1946432831               |
| SNP_P3_65509_11167944 | NC_021164.1    | Ca_kabuli_chr05 | 11167944                | GG                              | CC                | 1946432833               |
| SNP_P3_65510_11167948 | NC_021164.1    | Ca_kabuli_chr05 | 11167948                | CC                              | TT                | 1946432834               |
| SNP_P3_65511_11167969 | NC_021164.1    | Ca_kabuli_chr05 | 11167969                | GG                              | TT                | 1946432836               |
| SNP_P3_65512_11167975 | NC_021164.1    | Ca_kabuli_chr05 | 11167975                | TT                              | CC                | 1946432837               |
| SNP_P3_65513_11167977 | NC_021164.1    | Ca_kabuli_chr05 | 11167977                | CC                              | AA                | 1946432839               |
| SNP_P3_65514_11167986 | NC_021164.1    | Ca_kabuli_chr05 | 11167986                | TT                              | GG                | 1946432841               |
| SNP_P3_65515_11167997 | NC_021164.1    | Ca_kabuli_chr05 | 11167997                | CC                              | GG                | 1946432842               |
| SNP_P3_65516_11168012 | NC_021164.1    | Ca_kabuli_chr05 | 11168012                | GG                              | AA                | 1946432843               |
| SNP_P3_65517_11168022 | NC_021164.1    | Ca_kabuli_chr05 | 11168022                | TT                              | CC                | 1946432845               |
| SNP_P3_65518_11168046 | NC_021164.1    | Ca_kabuli_chr05 | 11168046                | TT                              | AA                | 1946432846               |
| SNP_P3_65519_11168052 | NC_021164.1    | Ca_kabuli_chr05 | 11168052                | TT                              | CC                | 1946432848               |
| SNP_P3_65520_11168115 | NC_021164.1    | Ca_kabuli_chr05 | 11168115                | CC                              | TT                | 1946432849               |
| SNP_P3_65521_11168142 | NC_021164.1    | Ca_kabuli_chr05 | 11168142                | AA                              | TT                | 1946432851               |
| SNP_P3_65522_11168165 | NC_021164.1    | Ca_kabuli_chr05 | 11168165                | GG                              | CC                | 1946432852               |
| SNP_P3_65523_11168237 | NC_021164.1    | Ca_kabuli_chr05 | 11168237                | AA                              | CC                | 1946432854               |

| SNPs IDs              | Chromosome IDs | Chromosomes     | Physical positions (bp) | CDC Frontier (Reference genome) | (Pusa 256 & HPNB) | NCBI SNPdb Accession IDs |
|-----------------------|----------------|-----------------|-------------------------|---------------------------------|-------------------|--------------------------|
| SNP_P3_65524_11168238 | NC_021164.1    | Ca_kabuli_chr05 | 11168238                | AA                              | TT                | 1946432855               |
| SNP_P3_65526_11168454 | NC_021164.1    | Ca_kabuli_chr05 | 11168454                | TT                              | CC                | 1946432857               |
| SNP_P3_65527_11168514 | NC_021164.1    | Ca_kabuli_chr05 | 11168514                | GG                              | AA                | 1946432858               |
| SNP_P3_65528_11168527 | NC_021164.1    | Ca_kabuli_chr05 | 11168527                | TT                              | CC                | 1946432860               |
| SNP_P3_65529_11168544 | NC_021164.1    | Ca_kabuli_chr05 | 11168544                | GG                              | TT                | 1946432861               |
| SNP_P3_65530_11168644 | NC_021164.1    | Ca_kabuli_chr05 | 11168644                | TT                              | CC                | 1946432863               |
| SNP_P3_65531_11168668 | NC_021164.1    | Ca_kabuli_chr05 | 11168668                | GG                              | TT                | 1946432864               |
| SNP_P3_65532_11168669 | NC_021164.1    | Ca_kabuli_chr05 | 11168669                | AA                              | GG                | 1946432866               |
| SNP_P3_65535_11168754 | NC_021164.1    | Ca_kabuli_chr05 | 11168754                | AA                              | GG                | 1946432867               |
| SNP_P3_65537_11168861 | NC_021164.1    | Ca_kabuli_chr05 | 11168861                | GG                              | AA                | 1946432868               |
| SNP_P3_65538_11168864 | NC_021164.1    | Ca_kabuli_chr05 | 11168864                | TT                              | AA                | 1946432870               |
| SNP_P3_65539_11168881 | NC_021164.1    | Ca_kabuli_chr05 | 11168881                | CC                              | TT                | 1946432871               |
| SNP_P3_65540_11168882 | NC_021164.1    | Ca_kabuli_chr05 | 11168882                | CC                              | TT                | 1946432873               |
| SNP_P3_65542_11168984 | NC_021164.1    | Ca_kabuli_chr05 | 11168984                | AA                              | TT                | 1946432874               |
| SNP_P3_65543_11168986 | NC_021164.1    | Ca_kabuli_chr05 | 11168986                | CC                              | AA                | 1946432876               |
| SNP_P3_65545_11169069 | NC_021164.1    | Ca_kabuli_chr05 | 11169069                | GG                              | AA                | 1946432877               |
| SNP_P3_65546_11169094 | NC_021164.1    | Ca_kabuli_chr05 | 11169094                | GG                              | TT                | 1946432879               |
| SNP_P3_65547_11169151 | NC_021164.1    | Ca_kabuli_chr05 | 11169151                | AA                              | GG                | 1946432880               |
| SNP_P3_65548_11169198 | NC_021164.1    | Ca_kabuli_chr05 | 11169198                | CC                              | AA                | 1946432882               |
| SNP_P3_65549_11169200 | NC_021164.1    | Ca_kabuli_chr05 | 11169200                | TT                              | AA                | 1946432883               |
| SNP_P3_65550_11169218 | NC_021164.1    | Ca_kabuli_chr05 | 11169218                | TT                              | CC                | 1946432884               |
| SNP_P3_65551_11169228 | NC_021164.1    | Ca_kabuli_chr05 | 11169228                | CC                              | TT                | 1946432886               |
| SNP_P3_65552_11169234 | NC_021164.1    | Ca_kabuli_chr05 | 11169234                | AA                              | CC                | 1946432887               |
| SNP_P3_65553_11169282 | NC_021164.1    | Ca_kabuli_chr05 | 11169282                | GG                              | AA                | 1946432889               |
| SNP_P3_65554_11169372 | NC_021164.1    | Ca_kabuli_chr05 | 11169372                | TT                              | CC                | 1946432890               |
| SNP_P3_65555_11169396 | NC_021164.1    | Ca_kabuli_chr05 | 11169396                | CC                              | AA                | 1946432892               |
| SNP_P3_65556_11169409 | NC_021164.1    | Ca_kabuli_chr05 | 11169409                | AA                              | GG                | 1946432893               |
| SNP_P3_65557_11169531 | NC_021164.1    | Ca_kabuli_chr05 | 11169531                | TT                              | GG                | 1946432895               |
| SNP_P3_65559_11169550 | NC_021164.1    | Ca_kabuli_chr05 | 11169550                | GG                              | TT                | 1946432896               |
| SNP_P3_65560_11169552 | NC_021164.1    | Ca_kabuli_chr05 | 11169552                | AA                              | GG                | 1946432898               |
| SNP_P3_65561_11169578 | NC_021164.1    | Ca_kabuli_chr05 | 11169578                | CC                              | GG                | 1946432899               |
| SNP_P3_65562_11169588 | NC_021164.1    | Ca_kabuli_chr05 | 11169588                | CC                              | TT                | 1946432901               |
| SNP_P3_65564_11169627 | NC_021164.1    | Ca_kabuli_chr05 | 11169627                | AA                              | CC                | 1946432902               |
| SNP_P3_65565_11169638 | NC_021164.1    | Ca_kabuli_chr05 | 11169638                | AA                              | GG                | 1946432904               |
| SNP_P3_65566_11169678 | NC_021164.1    | Ca_kabuli_chr05 | 11169678                | GG                              | AA                | 1946432905               |
| SNP_P3_65567_11180089 | NC_021164.1    | Ca_kabuli_chr05 | 11180089                | CC                              | TT                | 1946432907               |
| SNP_P3_65568_11180493 | NC_021164.1    | Ca_kabuli_chr05 | 11180493                | CC                              | TT                | 1946432908               |
| SNP_P3_65569_11180590 | NC_021164.1    | Ca_kabuli_chr05 | 11180590                | AA                              | TT                | 1946432909               |
| SNP_P3_65570_11181481 | NC_021164.1    | Ca_kabuli_chr05 | 11181481                | GG                              | TT                | 1946432911               |
| SNP_P3_65571_11181747 | NC_021164.1    | Ca_kabuli_chr05 | 11181747                | TT                              | AA                | 1946432913               |
| SNP_P3_65572_11181769 | NC_021164.1    | Ca_kabuli_chr05 | 11181769                | TT                              | AA                | 1946432914               |
| SNP_P3_65573_11181788 | NC_021164.1    | Ca_kabuli_chr05 | 11181788                | CC                              | GG                | 1946432916               |

| SNPs IDs              | Chromosome IDs | Chromosomes     | Physical positions (bp) | CDC Frontier (Reference genome) | (Pusa 256 & HPNB) | NCBI SNPdb Accession IDs |
|-----------------------|----------------|-----------------|-------------------------|---------------------------------|-------------------|--------------------------|
| SNP_P3_65574_11181865 | NC_021164.1    | Ca_kabuli_chr05 | 11181865                | TT                              | CC                | 1946432917               |
| SNP_P3_65575_11181963 | NC_021164.1    | Ca_kabuli_chr05 | 11181963                | CC                              | TT                | 1946432919               |
| SNP_P3_65576_11182020 | NC_021164.1    | Ca_kabuli_chr05 | 11182020                | AA                              | GG                | 1946432920               |
| SNP_P3_65577_11182140 | NC_021164.1    | Ca_kabuli_chr05 | 11182140                | GG                              | TT                | 1946432921               |
| SNP_P3_65578_11182235 | NC_021164.1    | Ca_kabuli_chr05 | 11182235                | CC                              | AA                | 1946432923               |
| SNP_P3_65579_11182506 | NC_021164.1    | Ca_kabuli_chr05 | 11182506                | AA                              | TT                | 1946432924               |
| SNP_P3_65580_11182561 | NC_021164.1    | Ca_kabuli_chr05 | 11182561                | TT                              | AA                | 1946432926               |
| SNP_P3_65581_11188080 | NC_021164.1    | Ca_kabuli_chr05 | 11188080                | CC                              | TT                | 1946432927               |
| SNP_P3_65582_11190221 | NC_021164.1    | Ca_kabuli_chr05 | 11190221                | CC                              | AA                | 1946432929               |
| SNP_P3_65583_11191033 | NC_021164.1    | Ca_kabuli_chr05 | 11191033                | TT                              | CC                | 1946432930               |
| SNP_P3_65584_11230713 | NC_021164.1    | Ca_kabuli_chr05 | 11230713                | TT                              | CC                | 1946432932               |
| SNP_P3_65585_11232966 | NC_021164.1    | Ca_kabuli_chr05 | 11232966                | GG                              | AA                | 1946432933               |
| SNP_P3_65586_11232984 | NC_021164.1    | Ca_kabuli_chr05 | 11232984                | CC                              | AA                | 1946432935               |
| SNP_P3_65587_11233259 | NC_021164.1    | Ca_kabuli_chr05 | 11233259                | CC                              | TT                | 1946432936               |
| SNP_P3_65588_11233456 | NC_021164.1    | Ca_kabuli_chr05 | 11233456                | GG                              | TT                | 1946432938               |
| SNP_P3_65589_11233805 | NC_021164.1    | Ca_kabuli_chr05 | 11233805                | GG                              | AA                | 1946432940               |
| SNP_P3_65590_11235459 | NC_021164.1    | Ca_kabuli_chr05 | 11235459                | CC                              | TT                | 1946432941               |
| SNP_P3_65591_11243458 | NC_021164.1    | Ca_kabuli_chr05 | 11243458                | CC                              | TT                | 1946432943               |
| SNP_P3_65592_11243661 | NC_021164.1    | Ca_kabuli_chr05 | 11243661                | CC                              | TT                | 1946432944               |
| SNP_P3_65593_11243728 | NC_021164.1    | Ca_kabuli_chr05 | 11243728                | TT                              | CC                | 1946432946               |
| SNP_P3_65594_11243886 | NC_021164.1    | Ca_kabuli_chr05 | 11243886                | CC                              | TT                | 1946432947               |
| SNP_P3_65595_11244028 | NC_021164.1    | Ca_kabuli_chr05 | 11244028                | AA                              | CC                | 1946432949               |
| SNP_P3_65596_11244064 | NC_021164.1    | Ca_kabuli_chr05 | 11244064                | GG                              | TT                | 1946432950               |
| SNP_P3_65597_11244084 | NC_021164.1    | Ca_kabuli_chr05 | 11244084                | TT                              | CC                | 1946432952               |
| SNP_P3_65598_11244182 | NC_021164.1    | Ca_kabuli_chr05 | 11244182                | AA                              | TT                | 1946432953               |
| SNP_P3_65599_11244241 | NC_021164.1    | Ca_kabuli_chr05 | 11244241                | TT                              | GG                | 1946432955               |
| SNP_P3_65600_11258644 | NC_021164.1    | Ca_kabuli_chr05 | 11258644                | TT                              | CC                | 1946432956               |
| SNP_P3_65601_11269494 | NC_021164.1    | Ca_kabuli_chr05 | 11269494                | GG                              | AA                | 1946432958               |
| SNP_P3_65602_11271174 | NC_021164.1    | Ca_kabuli_chr05 | 11271174                | GG                              | TT                | 1946432959               |
| SNP_P3_65604_11299064 | NC_021164.1    | Ca_kabuli_chr05 | 11299064                | AA                              | CC                | 1946432961               |
| SNP_P3_65605_11299126 | NC_021164.1    | Ca_kabuli_chr05 | 11299126                | GG                              | TT                | 1946432962               |
| SNP_P3_65606_11310025 | NC_021164.1    | Ca_kabuli_chr05 | 11310025                | TT                              | CC                | 1946432964               |
| SNP_P3_65608_11324668 | NC_021164.1    | Ca_kabuli_chr05 | 11324668                | CC                              | TT                | 1946432965               |
| SNP_P3_65609_11344766 | NC_021164.1    | Ca_kabuli_chr05 | 11344766                | GG                              | AA                | 1946432967               |
| SNP_P3_65610_11346317 | NC_021164.1    | Ca_kabuli_chr05 | 11346317                | TT                              | GG                | 1946432968               |
| SNP_P3_65611_11346428 | NC_021164.1    | Ca_kabuli_chr05 | 11346428                | GG                              | CC                | 1946432970               |
| SNP_P3_65612_11346441 | NC_021164.1    | Ca_kabuli_chr05 | 11346441                | TT                              | CC                | 1946432971               |
| SNP_P3_65613_11346647 | NC_021164.1    | Ca_kabuli_chr05 | 11346647                | TT                              | CC                | 1946432973               |
| SNP_P3_65614_11346677 | NC_021164.1    | Ca_kabuli_chr05 | 11346677                | AA                              | CC                | 1946432974               |
| SNP_P3_65615_11346683 | NC_021164.1    | Ca_kabuli_chr05 | 11346683                | TT                              | CC                | 1946432976               |
| SNP_P3_65616_11346695 | NC_021164.1    | Ca_kabuli_chr05 | 11346695                | GG                              | AA                | 1946432977               |
| SNP_P3_65617_11346704 | NC_021164.1    | Ca_kabuli_chr05 | 11346704                | GG                              | AA                | 1946432979               |

| SNPs IDs              | Chromosome IDs | Chromosomes     | Physical positions (bp) | CDC Frontier (Reference genome) | (Pusa 256 & HPNB) | NCBI SNPdb Accession IDs |
|-----------------------|----------------|-----------------|-------------------------|---------------------------------|-------------------|--------------------------|
| SNP_P3_65618_11346728 | NC_021164.1    | Ca_kabuli_chr05 | 11346728                | CC                              | TT                | 1946432980               |
| SNP_P3_65619_11346760 | NC_021164.1    | Ca_kabuli_chr05 | 11346760                | GG                              | TT                | 1946432982               |
| SNP_P3_65620_11346766 | NC_021164.1    | Ca_kabuli_chr05 | 11346766                | AA                              | GG                | 1946432983               |
| SNP_P3_65621_11346825 | NC_021164.1    | Ca_kabuli_chr05 | 11346825                | TT                              | CC                | 1946432985               |
| SNP_P3_65623_11415403 | NC_021164.1    | Ca_kabuli_chr05 | 11415403                | CC                              | TT                | 1946432986               |
| SNP_P3_65624_11420751 | NC_021164.1    | Ca_kabuli_chr05 | 11420751                | AA                              | CC                | 1946432988               |
| SNP_P3_65626_11431913 | NC_021164.1    | Ca_kabuli_chr05 | 11431913                | CC                              | GG                | 1946432990               |
| SNP_P3_65627_11464183 | NC_021164.1    | Ca_kabuli_chr05 | 11464183                | CC                              | AA                | 1946432992               |
| SNP_P3_65628_11464191 | NC_021164.1    | Ca_kabuli_chr05 | 11464191                | AA                              | CC                | 1946432994               |
| SNP_P3_65629_11473870 | NC_021164.1    | Ca_kabuli_chr05 | 11473870                | TT                              | CC                | 1946432996               |
| SNP_P3_65630_11476552 | NC_021164.1    | Ca_kabuli_chr05 | 11476552                | GG                              | AA                | 1946432997               |
| SNP_P3_65631_11476577 | NC_021164.1    | Ca_kabuli_chr05 | 11476577                | GG                              | TT                | 1946432998               |
| SNP_P3_65632_11476733 | NC_021164.1    | Ca_kabuli_chr05 | 11476733                | GG                              | CC                | 1946433000               |
| SNP_P3_65633_11483531 | NC_021164.1    | Ca_kabuli_chr05 | 11483531                | TT                              | CC                | 1946433001               |
| SNP_P3_65635_11512263 | NC_021164.1    | Ca_kabuli_chr05 | 11512263                | CC                              | TT                | 1946433003               |
| SNP_P3_65636_11512269 | NC_021164.1    | Ca_kabuli_chr05 | 11512269                | GG                              | AA                | 1946433004               |
| SNP_P3_65637_11512541 | NC_021164.1    | Ca_kabuli_chr05 | 11512541                | TT                              | CC                | 1946433006               |
| SNP_P3_65638_11512560 | NC_021164.1    | Ca_kabuli_chr05 | 11512560                | AA                              | GG                | 1946433007               |
| SNP_P3_65639_11512585 | NC_021164.1    | Ca_kabuli_chr05 | 11512585                | CC                              | TT                | 1946433009               |
| SNP_P3_65640_11512589 | NC_021164.1    | Ca_kabuli_chr05 | 11512589                | AA                              | CC                | 1946433010               |
| SNP_P3_65641_11512593 | NC_021164.1    | Ca_kabuli_chr05 | 11512593                | AA                              | GG                | 1946433012               |
| SNP_P3_65642_11512617 | NC_021164.1    | Ca_kabuli_chr05 | 11512617                | TT                              | CC                | 1946433013               |
| SNP_P3_65643_11512686 | NC_021164.1    | Ca_kabuli_chr05 | 11512686                | TT                              | CC                | 1946433015               |
| SNP_P3_65644_11512703 | NC_021164.1    | Ca_kabuli_chr05 | 11512703                | TT                              | GG                | 1946433016               |
| SNP_P3_65645_11512706 | NC_021164.1    | Ca_kabuli_chr05 | 11512706                | AA                              | GG                | 1946433018               |
| SNP_P3_65646_11512715 | NC_021164.1    | Ca_kabuli_chr05 | 11512715                | GG                              | TT                | 1946433019               |
| SNP_P3_65647_11512739 | NC_021164.1    | Ca_kabuli_chr05 | 11512739                | TT                              | AA                | 1946433021               |
| SNP_P3_65648_11512767 | NC_021164.1    | Ca_kabuli_chr05 | 11512767                | AA                              | GG                | 1946433022               |
| SNP_P3_65649_11512774 | NC_021164.1    | Ca_kabuli_chr05 | 11512774                | GG                              | AA                | 1946433023               |
| SNP_P3_65650_11512779 | NC_021164.1    | Ca_kabuli_chr05 | 11512779                | CC                              | TT                | 1946433025               |
| SNP_P3_65651_11512784 | NC_021164.1    | Ca_kabuli_chr05 | 11512784                | AA                              | GG                | 1946433026               |
| SNP_P3_65652_11512801 | NC_021164.1    | Ca_kabuli_chr05 | 11512801                | AA                              | GG                | 1946433028               |
| SNP_P3_65653_11512853 | NC_021164.1    | Ca_kabuli_chr05 | 11512853                | TT                              | CC                | 1946433029               |
| SNP_P3_65654_11515990 | NC_021164.1    | Ca_kabuli_chr05 | 11515990                | GG                              | AA                | 1946433031               |
| SNP_P3_65655_11516001 | NC_021164.1    | Ca_kabuli_chr05 | 11516001                | TT                              | CC                | 1946433032               |
| SNP_P3_65656_11516009 | NC_021164.1    | Ca_kabuli_chr05 | 11516009                | AA                              | GG                | 1946433034               |
| SNP_P3_65657_11516014 | NC_021164.1    | Ca_kabuli_chr05 | 11516014                | CC                              | GG                | 1946433035               |
| SNP_P3_65658_11516070 | NC_021164.1    | Ca_kabuli_chr05 | 11516070                | AA                              | CC                | 1946433037               |
| SNP_P3_65659_11516472 | NC_021164.1    | Ca_kabuli_chr05 | 11516472                | GG                              | AA                | 1946433039               |
| SNP_P3_65660_11516500 | NC_021164.1    | Ca_kabuli_chr05 | 11516500                | TT                              | CC                | 1946433040               |
| SNP_P3_65661_11517108 | NC_021164.1    | Ca_kabuli_chr05 | 11517108                | GG                              | AA                | 1946433042               |
| SNP_P3_65663_11522600 | NC_021164.1    | Ca_kabuli_chr05 | 11522600                | CC                              | AA                | 1946433043               |

| SNPs IDs              | Chromosome IDs | Chromosomes     | Physical positions (bp) | CDC Frontier (Reference genome) | (Pusa 256 & HPNB) | NCBI SNPdb Accession IDs |
|-----------------------|----------------|-----------------|-------------------------|---------------------------------|-------------------|--------------------------|
| SNP_P3_65664_11545381 | NC_021164.1    | Ca_kabuli_chr05 | 11545381                | TT                              | AA                | 1946433044               |
| SNP_P3_65665_11545662 | NC_021164.1    | Ca_kabuli_chr05 | 11545662                | TT                              | CC                | 1946433046               |
| SNP_P3_65666_11552014 | NC_021164.1    | Ca_kabuli_chr05 | 11552014                | TT                              | CC                | 1946433047               |
| SNP_P3_65667_11572403 | NC_021164.1    | Ca_kabuli_chr05 | 11572403                | TT                              | AA                | 1946433049               |
| SNP_P3_65668_11582780 | NC_021164.1    | Ca_kabuli_chr05 | 11582780                | GG                              | AA                | 1946433050               |
| SNP_P3_65669_11582926 | NC_021164.1    | Ca_kabuli_chr05 | 11582926                | TT                              | AA                | 1946433052               |
| SNP_P3_65670_11582978 | NC_021164.1    | Ca_kabuli_chr05 | 11582978                | TT                              | GG                | 1946433053               |
| SNP_P3_65671_11582991 | NC_021164.1    | Ca_kabuli_chr05 | 11582991                | CC                              | TT                | 1946433055               |
| SNP_P3_65672_11582994 | NC_021164.1    | Ca_kabuli_chr05 | 11582994                | CC                              | AA                | 1946433056               |
| SNP_P3_65673_11584487 | NC_021164.1    | Ca_kabuli_chr05 | 11584487                | CC                              | TT                | 1946433058               |
| SNP_P3_65674_11584531 | NC_021164.1    | Ca_kabuli_chr05 | 11584531                | GG                              | AA                | 1946433059               |
| SNP_P3_65675_11584534 | NC_021164.1    | Ca_kabuli_chr05 | 11584534                | CC                              | TT                | 1946433061               |
| SNP_P3_65677_11605069 | NC_021164.1    | Ca_kabuli_chr05 | 11605069                | TT                              | AA                | 1946433062               |
| SNP_P3_65678_11648799 | NC_021164.1    | Ca_kabuli_chr05 | 11648799                | GG                              | AA                | 1946433063               |
| SNP_P3_65679_11666630 | NC_021164.1    | Ca_kabuli_chr05 | 11666630                | TT                              | CC                | 1946433065               |
| SNP_P3_65681_11667071 | NC_021164.1    | Ca_kabuli_chr05 | 11667071                | TT                              | GG                | 1946433066               |
| SNP_P3_65682_11667087 | NC_021164.1    | Ca_kabuli_chr05 | 11667087                | TT                              | CC                | 1946433068               |
| SNP_P3_65683_11667517 | NC_021164.1    | Ca_kabuli_chr05 | 11667517                | TT                              | CC                | 1946433069               |
| SNP_P3_65684_11667531 | NC_021164.1    | Ca_kabuli_chr05 | 11667531                | AA                              | GG                | 1946433071               |
| SNP_P3_65685_11667537 | NC_021164.1    | Ca_kabuli_chr05 | 11667537                | CC                              | AA                | 1946433072               |
| SNP_P3_65686_11667538 | NC_021164.1    | Ca_kabuli_chr05 | 11667538                | TT                              | AA                | 1946433074               |
| SNP_P3_65687_11667543 | NC_021164.1    | Ca_kabuli_chr05 | 11667543                | TT                              | AA                | 1946433075               |
| SNP_P3_65688_11667546 | NC_021164.1    | Ca_kabuli_chr05 | 11667546                | AA                              | CC                | 1946433076               |
| SNP_P3_65689_11667549 | NC_021164.1    | Ca_kabuli_chr05 | 11667549                | AA                              | CC                | 1946433078               |
| SNP_P3_65690_11667573 | NC_021164.1    | Ca_kabuli_chr05 | 11667573                | AA                              | GG                | 1946433079               |
| SNP_P3_65691_11667574 | NC_021164.1    | Ca_kabuli_chr05 | 11667574                | TT                              | CC                | 1946433081               |
| SNP_P3_65692_11667708 | NC_021164.1    | Ca_kabuli_chr05 | 11667708                | AA                              | TT                | 1946433083               |
| SNP_P3_65693_11667919 | NC_021164.1    | Ca_kabuli_chr05 | 11667919                | TT                              | GG                | 1946433084               |
| SNP_P3_65694_11687225 | NC_021164.1    | Ca_kabuli_chr05 | 11687225                | CC                              | TT                | 1946433086               |
| SNP_P3_65695_11687489 | NC_021164.1    | Ca_kabuli_chr05 | 11687489                | AA                              | TT                | 1946433087               |
| SNP_P3_65696_11687520 | NC_021164.1    | Ca_kabuli_chr05 | 11687520                | AA                              | TT                | 1946433088               |
| SNP_P3_65697_11687588 | NC_021164.1    | Ca_kabuli_chr05 | 11687588                | AA                              | GG                | 1946433090               |
| SNP_P3_65698_11703849 | NC_021164.1    | Ca_kabuli_chr05 | 11703849                | TT                              | AA                | 1946433091               |
| SNP_P3_65699_11703852 | NC_021164.1    | Ca_kabuli_chr05 | 11703852                | AA                              | GG                | 1946433093               |
| SNP_P3_65700_11703872 | NC_021164.1    | Ca_kabuli_chr05 | 11703872                | AA                              | GG                | 1946433094               |
| SNP_P3_65701_11703923 | NC_021164.1    | Ca_kabuli_chr05 | 11703923                | GG                              | AA                | 1946433096               |
| SNP_P3_65702_11703947 | NC_021164.1    | Ca_kabuli_chr05 | 11703947                | AA                              | TT                | 1946433097               |
| SNP_P3_65703_11703953 | NC_021164.1    | Ca_kabuli_chr05 | 11703953                | GG                              | TT                | 1946433099               |
| SNP_P3_65704_11704218 | NC_021164.1    | Ca_kabuli_chr05 | 11704218                | GG                              | AA                | 1946433100               |
| SNP_P3_65705_11704287 | NC_021164.1    | Ca_kabuli_chr05 | 11704287                | TT                              | CC                | 1946433101               |
| SNP_P3_65706_11704294 | NC_021164.1    | Ca_kabuli_chr05 | 11704294                | CC                              | TT                | 1946433103               |
| SNP_P3_65707_11704315 | NC_021164.1    | Ca_kabuli_chr05 | 11704315                | CC                              | TT                | 1946433104               |

| SNPs IDs              | Chromosome IDs | Chromosomes     | Physical positions (bp) | CDC Frontier (Reference genome) | (Pusa 256 & HPNB) | NCBI SNPdb Accession IDs |
|-----------------------|----------------|-----------------|-------------------------|---------------------------------|-------------------|--------------------------|
| SNP_P3_65708_11704389 | NC_021164.1    | Ca_kabuli_chr05 | 11704389                | AA                              | TT                | 1946433106               |
| SNP_P3_65709_11707400 | NC_021164.1    | Ca_kabuli_chr05 | 11707400                | GG                              | AA                | 1946433107               |
| SNP_P3_65710_11707407 | NC_021164.1    | Ca_kabuli_chr05 | 11707407                | TT                              | CC                | 1946433109               |
| SNP_P3_65711_11707414 | NC_021164.1    | Ca_kabuli_chr05 | 11707414                | CC                              | TT                | 1946433110               |
| SNP_P3_65712_11713305 | NC_021164.1    | Ca_kabuli_chr05 | 11713305                | TT                              | GG                | 1946433112               |
| SNP_P3_65713_11713312 | NC_021164.1    | Ca_kabuli_chr05 | 11713312                | CC                              | GG                | 1946433113               |
| SNP_P3_65714_11713314 | NC_021164.1    | Ca_kabuli_chr05 | 11713314                | AA                              | GG                | 1946433115               |
| SNP_P3_65715_11713315 | NC_021164.1    | Ca_kabuli_chr05 | 11713315                | CC                              | AA                | 1946433116               |
| SNP_P3_65716_11713320 | NC_021164.1    | Ca_kabuli_chr05 | 11713320                | GG                              | AA                | 1946433118               |
| SNP_P3_65717_11720633 | NC_021164.1    | Ca_kabuli_chr05 | 11720633                | AA                              | GG                | 1946433119               |
| SNP_P3_65718_11720673 | NC_021164.1    | Ca_kabuli_chr05 | 11720673                | AA                              | CC                | 1946433120               |
| SNP_P3_65719_11721060 | NC_021164.1    | Ca_kabuli_chr05 | 11721060                | GG                              | AA                | 1946433122               |
| SNP_P3_65720_11722285 | NC_021164.1    | Ca_kabuli_chr05 | 11722285                | TT                              | AA                | 1946433123               |
| SNP_P3_65721_11727515 | NC_021164.1    | Ca_kabuli_chr05 | 11727515                | TT                              | GG                | 1946433125               |
| SNP_P3_65722_11727588 | NC_021164.1    | Ca_kabuli_chr05 | 11727588                | AA                              | GG                | 1946433126               |
| SNP_P3_65723_11727710 | NC_021164.1    | Ca_kabuli_chr05 | 11727710                | CC                              | TT                | 1946433128               |
| SNP_P3_65725_11729551 | NC_021164.1    | Ca_kabuli_chr05 | 11729551                | AA                              | GG                | 1946433129               |
| SNP_P3_65726_11729556 | NC_021164.1    | Ca_kabuli_chr05 | 11729556                | AA                              | TT                | 1946433131               |
| SNP_P3_65728_11729779 | NC_021164.1    | Ca_kabuli_chr05 | 11729779                | GG                              | AA                | 1946433132               |
| SNP_P3_65729_11729839 | NC_021164.1    | Ca_kabuli_chr05 | 11729839                | AA                              | GG                | 1946433133               |
| SNP_P3_65730_11742166 | NC_021164.1    | Ca_kabuli_chr05 | 11742166                | AA                              | TT                | 1946433134               |
| SNP_P3_65732_11823098 | NC_021164.1    | Ca_kabuli_chr05 | 11823098                | GG                              | AA                | 1946433135               |
| SNP_P3_65733_11830263 | NC_021164.1    | Ca_kabuli_chr05 | 11830263                | TT                              | CC                | 1946433136               |
| SNP_P3_65735_11878903 | NC_021164.1    | Ca_kabuli_chr05 | 11878903                | GG                              | TT                | 1946433137               |
| SNP_P3_65738_11879797 | NC_021164.1    | Ca_kabuli_chr05 | 11879797                | GG                              | AA                | 1946433139               |
| SNP_P3_65739_11900472 | NC_021164.1    | Ca_kabuli_chr05 | 11900472                | TT                              | CC                | 1946433140               |
| SNP_P3_65740_11913322 | NC_021164.1    | Ca_kabuli_chr05 | 11913322                | TT                              | CC                | 1946433141               |
| SNP_P3_65741_11913325 | NC_021164.1    | Ca_kabuli_chr05 | 11913325                | TT                              | CC                | 1946433143               |
| SNP_P3_65742_11913362 | NC_021164.1    | Ca_kabuli_chr05 | 11913362                | TT                              | GG                | 1946433144               |
| SNP_P3_65743_11913390 | NC_021164.1    | Ca_kabuli_chr05 | 11913390                | AA                              | GG                | 1946433146               |
| SNP_P3_65744_11913391 | NC_021164.1    | Ca_kabuli_chr05 | 11913391                | GG                              | CC                | 1946433147               |
| SNP_P3_65745_11913408 | NC_021164.1    | Ca_kabuli_chr05 | 11913408                | CC                              | TT                | 1946433149               |
| SNP_P3_65746_11927562 | NC_021164.1    | Ca_kabuli_chr05 | 11927562                | CC                              | TT                | 1946433151               |
| SNP_P3_65747_11927570 | NC_021164.1    | Ca_kabuli_chr05 | 11927570                | TT                              | CC                | 1946433153               |
| SNP_P3_65748_11927651 | NC_021164.1    | Ca_kabuli_chr05 | 11927651                | AA                              | TT                | 1946433154               |
| SNP_P3_65750_11979625 | NC_021164.1    | Ca_kabuli_chr05 | 11979625                | AA                              | GG                | 1946433156               |
| SNP_P3_65752_12010269 | NC_021164.1    | Ca_kabuli_chr05 | 12010269                | TT                              | CC                | 1946433157               |
| SNP_P3_65753_12010276 | NC_021164.1    | Ca_kabuli_chr05 | 12010276                | AA                              | GG                | 1946433159               |
| SNP_P3_65754_12010580 | NC_021164.1    | Ca_kabuli_chr05 | 12010580                | CC                              | TT                | 1946433160               |
| SNP_P3_65755_12010596 | NC_021164.1    | Ca_kabuli_chr05 | 12010596                | TT                              | GG                | 1946433162               |
| SNP_P3_65756_12091099 | NC_021164.1    | Ca_kabuli_chr05 | 12091099                | AA                              | GG                | 1946433163               |
| SNP_P3_65757_12091100 | NC_021164.1    | Ca_kabuli_chr05 | 12091100                | CC                              | TT                | 1946433165               |

| SNPs IDs              | Chromosome IDs | Chromosomes     | Physical positions (bp) | CDC Frontier (Reference genome) | (Pusa 256 & HPNB) | NCBI SNPdb Accession IDs |
|-----------------------|----------------|-----------------|-------------------------|---------------------------------|-------------------|--------------------------|
| SNP_P3_65758_12091153 | NC_021164.1    | Ca_kabuli_chr05 | 12091153                | GG                              | AA                | 1946433167               |
| SNP_P3_65759_12091167 | NC_021164.1    | Ca_kabuli_chr05 | 12091167                | AA                              | GG                | 1946433168               |
| SNP_P3_65760_12091408 | NC_021164.1    | Ca_kabuli_chr05 | 12091408                | AA                              | GG                | 1946433170               |
| SNP_P3_65761_12093198 | NC_021164.1    | Ca_kabuli_chr05 | 12093198                | AA                              | CC                | 1946433172               |
| SNP_P3_65762_12093404 | NC_021164.1    | Ca_kabuli_chr05 | 12093404                | TT                              | CC                | 1946433173               |
| SNP_P3_65763_12093621 | NC_021164.1    | Ca_kabuli_chr05 | 12093621                | CC                              | AA                | 1946433174               |
| SNP_P3_65764_12093637 | NC_021164.1    | Ca_kabuli_chr05 | 12093637                | TT                              | CC                | 1946433176               |
| SNP_P3_65765_12093639 | NC_021164.1    | Ca_kabuli_chr05 | 12093639                | GG                              | AA                | 1946433177               |
| SNP_P3_65766_12093643 | NC_021164.1    | Ca_kabuli_chr05 | 12093643                | TT                              | GG                | 1946433179               |
| SNP_P3_65767_12093649 | NC_021164.1    | Ca_kabuli_chr05 | 12093649                | AA                              | GG                | 1946433180               |
| SNP_P3_65768_12093706 | NC_021164.1    | Ca_kabuli_chr05 | 12093706                | TT                              | CC                | 1946433181               |
| SNP_P3_65769_12093747 | NC_021164.1    | Ca_kabuli_chr05 | 12093747                | GG                              | AA                | 1946433183               |
| SNP_P3_65770_12093764 | NC_021164.1    | Ca_kabuli_chr05 | 12093764                | GG                              | TT                | 1946433184               |
| SNP_P3_65771_12093793 | NC_021164.1    | Ca_kabuli_chr05 | 12093793                | TT                              | CC                | 1946433186               |
| SNP_P3_65772_12095769 | NC_021164.1    | Ca_kabuli_chr05 | 12095769                | TT                              | CC                | 1946433187               |
| SNP_P3_65774_12095849 | NC_021164.1    | Ca_kabuli_chr05 | 12095849                | TT                              | CC                | 1946433189               |
| SNP_P3_65775_12101420 | NC_021164.1    | Ca_kabuli_chr05 | 12101420                | AA                              | GG                | 1946433190               |
| SNP_P3_65776_12101422 | NC_021164.1    | Ca_kabuli_chr05 | 12101422                | TT                              | GG                | 1946433191               |
| SNP_P3_65777_12121773 | NC_021164.1    | Ca_kabuli_chr05 | 12121773                | AA                              | CC                | 1946433193               |
| SNP_P3_65778_12151462 | NC_021164.1    | Ca_kabuli_chr05 | 12151462                | AA                              | GG                | 1946433195               |
| SNP_P3_65779_12156441 | NC_021164.1    | Ca_kabuli_chr05 | 12156441                | CC                              | TT                | 1946433196               |
| SNP_P3_65780_12161721 | NC_021164.1    | Ca_kabuli_chr05 | 12161721                | CC                              | TT                | 1946433197               |
| SNP_P3_65781_12161736 | NC_021164.1    | Ca_kabuli_chr05 | 12161736                | TT                              | CC                | 1946433199               |
| SNP_P3_65782_12161802 | NC_021164.1    | Ca_kabuli_chr05 | 12161802                | GG                              | AA                | 1946433200               |
| SNP_P3_65783_12161871 | NC_021164.1    | Ca_kabuli_chr05 | 12161871                | AA                              | GG                | 1946433202               |
| SNP_P3_65784_12161933 | NC_021164.1    | Ca_kabuli_chr05 | 12161933                | CC                              | GG                | 1946433203               |
| SNP_P3_65785_12165921 | NC_021164.1    | Ca_kabuli_chr05 | 12165921                | AA                              | CC                | 1946433205               |
| SNP_P3_65786_12165922 | NC_021164.1    | Ca_kabuli_chr05 | 12165922                | GG                              | AA                | 1946433206               |
| SNP_P3_65787_12241369 | NC_021164.1    | Ca_kabuli_chr05 | 12241369                | TT                              | AA                | 1946433208               |
| SNP_P3_65788_12272919 | NC_021164.1    | Ca_kabuli_chr05 | 12272919                | GG                              | AA                | 1946433209               |
| SNP_P3_65789_12272966 | NC_021164.1    | Ca_kabuli_chr05 | 12272966                | TT                              | AA                | 1946433210               |
| SNP_P3_65790_12273385 | NC_021164.1    | Ca_kabuli_chr05 | 12273385                | AA                              | CC                | 1946433212               |
| SNP_P3_65791_12273390 | NC_021164.1    | Ca_kabuli_chr05 | 12273390                | CC                              | TT                | 1946433213               |
| SNP_P3_65792_12282510 | NC_021164.1    | Ca_kabuli_chr05 | 12282510                | CC                              | TT                | 1946433215               |
| SNP_P3_65793_12282538 | NC_021164.1    | Ca_kabuli_chr05 | 12282538                | GG                              | AA                | 1946433217               |
| SNP_P3_65794_12282556 | NC_021164.1    | Ca_kabuli_chr05 | 12282556                | AA                              | GG                | 1946433218               |
| SNP_P3_65795_12282874 | NC_021164.1    | Ca_kabuli_chr05 | 12282874                | AA                              | CC                | 1946433219               |
| SNP_P3_65796_12283590 | NC_021164.1    | Ca_kabuli_chr05 | 12283590                | GG                              | TT                | 1946433221               |
| SNP_P3_65797_12302273 | NC_021164.1    | Ca_kabuli_chr05 | 12302273                | TT                              | CC                | 1946433222               |
| SNP_P3_65798_12303093 | NC_021164.1    | Ca_kabuli_chr05 | 12303093                | GG                              | AA                | 1946433224               |
| SNP_P3_65799_12318714 | NC_021164.1    | Ca_kabuli_chr05 | 12318714                | GG                              | AA                | 1946433225               |
| SNP_P3_65800_12318880 | NC_021164.1    | Ca_kabuli_chr05 | 12318880                | TT                              | AA                | 1946433227               |

| SNPs IDs              | Chromosome IDs | Chromosomes     | Physical positions (bp) | CDC Frontier (Reference genome) | (Pusa 256 & HPNB) | NCBI SNPdb Accession IDs |
|-----------------------|----------------|-----------------|-------------------------|---------------------------------|-------------------|--------------------------|
| SNP_P3_65801_12347588 | NC_021164.1    | Ca_kabuli_chr05 | 12347588                | AA                              | GG                | 1946433228               |
| SNP_P3_65802_12360829 | NC_021164.1    | Ca_kabuli_chr05 | 12360829                | GG                              | AA                | 1946433229               |
| SNP_P3_65803_12442308 | NC_021164.1    | Ca_kabuli_chr05 | 12442308                | AA                              | GG                | 1946433231               |
| SNP_P3_65804_12442325 | NC_021164.1    | Ca_kabuli_chr05 | 12442325                | AA                              | TT                | 1946433232               |
| SNP_P3_65805_12442326 | NC_021164.1    | Ca_kabuli_chr05 | 12442326                | AA                              | GG                | 1946433234               |
| SNP_P3_65807_12462023 | NC_021164.1    | Ca_kabuli_chr05 | 12462023                | TT                              | CC                | 1946433235               |
| SNP_P3_65808_12473858 | NC_021164.1    | Ca_kabuli_chr05 | 12473858                | GG                              | TT                | 1946433237               |
| SNP_P3_65809_12489025 | NC_021164.1    | Ca_kabuli_chr05 | 12489025                | AA                              | TT                | 1946433239               |
| SNP_P3_65810_12490436 | NC_021164.1    | Ca_kabuli_chr05 | 12490436                | GG                              | CC                | 1946433240               |
| SNP_P3_65811_12496390 | NC_021164.1    | Ca_kabuli_chr05 | 12496390                | TT                              | GG                | 1946433241               |
| SNP_P3_65812_12496391 | NC_021164.1    | Ca_kabuli_chr05 | 12496391                | TT                              | GG                | 1946433243               |
| SNP_P3_65813_12507697 | NC_021164.1    | Ca_kabuli_chr05 | 12507697                | TT                              | CC                | 1946433244               |
| SNP_P3_65814_12532460 | NC_021164.1    | Ca_kabuli_chr05 | 12532460                | TT                              | CC                | 1946433246               |
| SNP_P3_65815_12532533 | NC_021164.1    | Ca_kabuli_chr05 | 12532533                | AA                              | GG                | 1946433247               |
| SNP_P3_65816_12532763 | NC_021164.1    | Ca_kabuli_chr05 | 12532763                | AA                              | CC                | 1946433249               |
| SNP_P3_65817_12532872 | NC_021164.1    | Ca_kabuli_chr05 | 12532872                | TT                              | CC                | 1946433250               |
| SNP_P3_65818_12545022 | NC_021164.1    | Ca_kabuli_chr05 | 12545022                | CC                              | GG                | 1946433251               |
| SNP_P3_65819_12577648 | NC_021164.1    | Ca_kabuli_chr05 | 12577648                | CC                              | TT                | 1946433253               |
| SNP_P3_65820_12588306 | NC_021164.1    | Ca_kabuli_chr05 | 12588306                | GG                              | AA                | 1946433254               |
| SNP_P3_65821_12588450 | NC_021164.1    | Ca_kabuli_chr05 | 12588450                | CC                              | TT                | 1946433256               |
| SNP_P3_65822_12588682 | NC_021164.1    | Ca_kabuli_chr05 | 12588682                | AA                              | CC                | 1946433257               |
| SNP_P3_65823_12588822 | NC_021164.1    | Ca_kabuli_chr05 | 12588822                | AA                              | CC                | 1946433259               |
| SNP_P3_65824_12588847 | NC_021164.1    | Ca_kabuli_chr05 | 12588847                | GG                              | AA                | 1946433260               |
| SNP_P3_65825_12628453 | NC_021164.1    | Ca_kabuli_chr05 | 12628453                | CC                              | TT                | 1946433262               |
| SNP_P3_65826_12634625 | NC_021164.1    | Ca_kabuli_chr05 | 12634625                | GG                              | AA                | 1946433263               |
| SNP_P3_65827_12635305 | NC_021164.1    | Ca_kabuli_chr05 | 12635305                | TT                              | CC                | 1946433265               |
| SNP_P3_65830_12658780 | NC_021164.1    | Ca_kabuli_chr05 | 12658780                | TT                              | CC                | 1946433266               |
| SNP_P3_65831_12658854 | NC_021164.1    | Ca_kabuli_chr05 | 12658854                | AA                              | TT                | 1946433267               |
| SNP_P3_65832_12658858 | NC_021164.1    | Ca_kabuli_chr05 | 12658858                | TT                              | AA                | 1946433269               |
| SNP_P3_65833_12658868 | NC_021164.1    | Ca_kabuli_chr05 | 12658868                | AA                              | TT                | 1946433270               |
| SNP_P3_65834_12658882 | NC_021164.1    | Ca_kabuli_chr05 | 12658882                | CC                              | TT                | 1946433272               |
| SNP_P3_65835_12659142 | NC_021164.1    | Ca_kabuli_chr05 | 12659142                | TT                              | GG                | 1946433273               |
| SNP_P3_65836_12659177 | NC_021164.1    | Ca_kabuli_chr05 | 12659177                | TT                              | GG                | 1946433275               |
| SNP_P3_65837_12659178 | NC_021164.1    | Ca_kabuli_chr05 | 12659178                | AA                              | TT                | 1946433276               |
| SNP_P3_65838_12659210 | NC_021164.1    | Ca_kabuli_chr05 | 12659210                | TT                              | CC                | 1946433277               |
| SNP_P3_65839_12659218 | NC_021164.1    | Ca_kabuli_chr05 | 12659218                | CC                              | AA                | 1946433279               |
| SNP_P3_65840_12659259 | NC_021164.1    | Ca_kabuli_chr05 | 12659259                | AA                              | GG                | 1946433280               |
| SNP_P3_65841_12659264 | NC_021164.1    | Ca_kabuli_chr05 | 12659264                | TT                              | CC                | 1946433282               |
| SNP_P3_65842_12659288 | NC_021164.1    | Ca_kabuli_chr05 | 12659288                | TT                              | CC                | 1946433283               |
| SNP_P3_65843_12672873 | NC_021164.1    | Ca_kabuli_chr05 | 12672873                | GG                              | AA                | 1946433284               |
| SNP_P3_65844_12672886 | NC_021164.1    | Ca_kabuli_chr05 | 12672886                | CC                              | TT                | 1946433286               |
| SNP_P3_65845_12673242 | NC_021164.1    | Ca_kabuli_chr05 | 12673242                | TT                              | CC                | 1946433287               |



| SNPs IDs              | Chromosome IDs | Chromosomes     | Physical positions (bp) | CDC Frontier (Reference genome) | (Pusa 256 & HPNB) | NCBI SNPdb Accession IDs |
|-----------------------|----------------|-----------------|-------------------------|---------------------------------|-------------------|--------------------------|
| SNP_P3_65846_12673256 | NC_021164.1    | Ca_kabuli_chr05 | 12673256                | AA                              | GG                | 1946433289               |
| SNP_P3_65847_12673284 | NC_021164.1    | Ca_kabuli_chr05 | 12673284                | CC                              | TT                | 1946433290               |
| SNP_P3_65848_12673305 | NC_021164.1    | Ca_kabuli_chr05 | 12673305                | AA                              | CC                | 1946433292               |
| SNP_P3_65849_12674504 | NC_021164.1    | Ca_kabuli_chr05 | 12674504                | AA                              | GG                | 1946433293               |
| SNP_P3_65850_13593307 | NC_021164.1    | Ca_kabuli_chr05 | 13593307                | AA                              | GG                | 1946433294               |
| SNP_P3_65851_13597142 | NC_021164.1    | Ca_kabuli_chr05 | 13597142                | TT                              | CC                | 1946433296               |
| SNP_P3_65852_13603856 | NC_021164.1    | Ca_kabuli_chr05 | 13603856                | CC                              | TT                | 1946433297               |
| SNP_P3_65853_13611760 | NC_021164.1    | Ca_kabuli_chr05 | 13611760                | AA                              | GG                | 1946433299               |
| SNP_P3_65854_13611775 | NC_021164.1    | Ca_kabuli_chr05 | 13611775                | GG                              | AA                | 1946433300               |
| SNP_P3_65855_13611853 | NC_021164.1    | Ca_kabuli_chr05 | 13611853                | AA                              | TT                | 1946433301               |
| SNP_P3_65856_13611905 | NC_021164.1    | Ca_kabuli_chr05 | 13611905                | GG                              | AA                | 1946433303               |
| SNP_P3_65857_13612084 | NC_021164.1    | Ca_kabuli_chr05 | 13612084                | CC                              | GG                | 1946433304               |
| SNP_P3_65858_13612107 | NC_021164.1    | Ca_kabuli_chr05 | 13612107                | CC                              | TT                | 1946433306               |
| SNP_P3_65859_13612168 | NC_021164.1    | Ca_kabuli_chr05 | 13612168                | GG                              | AA                | 1946433307               |
| SNP_P3_65860_13612188 | NC_021164.1    | Ca_kabuli_chr05 | 13612188                | TT                              | CC                | 1946433308               |
| SNP_P3_65861_13612192 | NC_021164.1    | Ca_kabuli_chr05 | 13612192                | GG                              | AA                | 1946433310               |
| SNP_P3_65862_13612196 | NC_021164.1    | Ca_kabuli_chr05 | 13612196                | GG                              | AA                | 1946433311               |
| SNP_P3_65863_13612212 | NC_021164.1    | Ca_kabuli_chr05 | 13612212                | TT                              | CC                | 1946433313               |
| SNP_P3_65864_13612221 | NC_021164.1    | Ca_kabuli_chr05 | 13612221                | AA                              | GG                | 1946433314               |
| SNP_P3_65865_13612295 | NC_021164.1    | Ca_kabuli_chr05 | 13612295                | CC                              | TT                | 1946433316               |
| SNP_P3_65866_13612299 | NC_021164.1    | Ca_kabuli_chr05 | 13612299                | GG                              | TT                | 1946433317               |
| SNP_P3_65867_13612337 | NC_021164.1    | Ca_kabuli_chr05 | 13612337                | AA                              | GG                | 1946433318               |
| SNP_P3_65868_13612354 | NC_021164.1    | Ca_kabuli_chr05 | 13612354                | TT                              | CC                | 1946433320               |
| SNP_P3_65870_13616029 | NC_021164.1    | Ca_kabuli_chr05 | 13616029                | CC                              | TT                | 1946433324               |
| SNP_P3_65871_13616089 | NC_021164.1    | Ca_kabuli_chr05 | 13616089                | CC                              | TT                | 1946433325               |
| SNP_P3_65872_13623728 | NC_021164.1    | Ca_kabuli_chr05 | 13623728                | AA                              | TT                | 1946433327               |
| SNP_P3_65873_13623833 | NC_021164.1    | Ca_kabuli_chr05 | 13623833                | GG                              | AA                | 1946433328               |
| SNP_P3_65874_13623877 | NC_021164.1    | Ca_kabuli_chr05 | 13623877                | AA                              | GG                | 1946433330               |
| SNP_P3_65875_13623898 | NC_021164.1    | Ca_kabuli_chr05 | 13623898                | TT                              | GG                | 1946433331               |
| SNP_P3_65876_13623978 | NC_021164.1    | Ca_kabuli_chr05 | 13623978                | GG                              | AA                | 1946433333               |
| SNP_P3_65877_13623983 | NC_021164.1    | Ca_kabuli_chr05 | 13623983                | GG                              | AA                | 1946433334               |
| SNP_P3_65878_13623989 | NC_021164.1    | Ca_kabuli_chr05 | 13623989                | GG                              | CC                | 1946433335               |
| SNP_P3_65879_13624005 | NC_021164.1    | Ca_kabuli_chr05 | 13624005                | CC                              | TT                | 1946433337               |
| SNP_P3_65880_13624006 | NC_021164.1    | Ca_kabuli_chr05 | 13624006                | AA                              | GG                | 1946433338               |
| SNP_P3_65881_13624047 | NC_021164.1    | Ca_kabuli_chr05 | 13624047                | AA                              | GG                | 1946433340               |
| SNP_P3_65882_13624077 | NC_021164.1    | Ca_kabuli_chr05 | 13624077                | GG                              | AA                | 1946433341               |
| SNP_P3_65884_13624305 | NC_021164.1    | Ca_kabuli_chr05 | 13624305                | TT                              | CC                | 1946433343               |
| SNP_P3_65885_13624307 | NC_021164.1    | Ca_kabuli_chr05 | 13624307                | TT                              | AA                | 1946433345               |
| SNP_P3_65886_13627069 | NC_021164.1    | Ca_kabuli_chr05 | 13627069                | GG                              | TT                | 1946433346               |
| SNP_P3_65887_13628536 | NC_021164.1    | Ca_kabuli_chr05 | 13628536                | GG                              | TT                | 1946433348               |
| SNP_P3_65888_13628593 | NC_021164.1    | Ca_kabuli_chr05 | 13628593                | TT                              | GG                | 1946433349               |
| SNP_P3_65889_13628598 | NC_021164.1    | Ca_kabuli_chr05 | 13628598                | TT                              | CC                | 1946433351               |

| SNPs IDs              | Chromosome IDs | Chromosomes     | Physical positions (bp) | CDC Frontier (Reference genome) | (Pusa 256 & HPNB) | NCBI SNPdb Accession IDs |
|-----------------------|----------------|-----------------|-------------------------|---------------------------------|-------------------|--------------------------|
| SNP_P3_65890_13628609 | NC_021164.1    | Ca_kabuli_chr05 | 13628609                | GG                              | TT                | 1946433352               |
| SNP_P3_65891_13628660 | NC_021164.1    | Ca_kabuli_chr05 | 13628660                | AA                              | CC                | 1946433353               |
| SNP_P3_65892_13628746 | NC_021164.1    | Ca_kabuli_chr05 | 13628746                | CC                              | AA                | 1946433355               |
| SNP_P3_65893_13628773 | NC_021164.1    | Ca_kabuli_chr05 | 13628773                | CC                              | TT                | 1946433356               |
| SNP_P3_65894_13628789 | NC_021164.1    | Ca_kabuli_chr05 | 13628789                | TT                              | GG                | 1946433358               |
| SNP_P3_65896_13628913 | NC_021164.1    | Ca_kabuli_chr05 | 13628913                | CC                              | AA                | 1946433359               |
| SNP_P3_65897_13628974 | NC_021164.1    | Ca_kabuli_chr05 | 13628974                | TT                              | AA                | 1946433361               |
| SNP_P3_65898_13629051 | NC_021164.1    | Ca_kabuli_chr05 | 13629051                | CC                              | GG                | 1946433362               |
| SNP_P3_65899_13629066 | NC_021164.1    | Ca_kabuli_chr05 | 13629066                | TT                              | AA                | 1946433364               |
| SNP_P3_65901_13636433 | NC_021164.1    | Ca_kabuli_chr05 | 13636433                | TT                              | CC                | 1946433365               |
| SNP_P3_65902_13636558 | NC_021164.1    | Ca_kabuli_chr05 | 13636558                | AA                              | CC                | 1946433367               |
| SNP_P3_65903_13636815 | NC_021164.1    | Ca_kabuli_chr05 | 13636815                | TT                              | CC                | 1946433368               |
| SNP_P3_65904_13636910 | NC_021164.1    | Ca_kabuli_chr05 | 13636910                | CC                              | GG                | 1946433369               |
| SNP_P3_65906_13637051 | NC_021164.1    | Ca_kabuli_chr05 | 13637051                | AA                              | TT                | 1946433371               |
| SNP_P3_65907_13637167 | NC_021164.1    | Ca_kabuli_chr05 | 13637167                | AA                              | GG                | 1946433372               |
| SNP_P3_65908_13637178 | NC_021164.1    | Ca_kabuli_chr05 | 13637178                | AA                              | GG                | 1946433374               |
| SNP_P3_65909_13637198 | NC_021164.1    | Ca_kabuli_chr05 | 13637198                | TT                              | CC                | 1946433375               |
| SNP_P3_65910_13647436 | NC_021164.1    | Ca_kabuli_chr05 | 13647436                | CC                              | AA                | 1946433377               |
| SNP_P3_65911_13650807 | NC_021164.1    | Ca_kabuli_chr05 | 13650807                | CC                              | AA                | 1946433378               |
| SNP_P3_65912_13650977 | NC_021164.1    | Ca_kabuli_chr05 | 13650977                | TT                              | GG                | 1946433379               |
| SNP_P3_65913_13651179 | NC_021164.1    | Ca_kabuli_chr05 | 13651179                | CC                              | TT                | 1946433381               |
| SNP_P3_65914_13651264 | NC_021164.1    | Ca_kabuli_chr05 | 13651264                | AA                              | GG                | 1946433382               |
| SNP_P3_65915_13651287 | NC_021164.1    | Ca_kabuli_chr05 | 13651287                | GG                              | AA                | 1946433384               |
| SNP_P3_65916_13651299 | NC_021164.1    | Ca_kabuli_chr05 | 13651299                | AA                              | GG                | 1946433385               |
| SNP_P3_65917_13651344 | NC_021164.1    | Ca_kabuli_chr05 | 13651344                | CC                              | TT                | 1946433387               |
| SNP_P3_65918_13675342 | NC_021164.1    | Ca_kabuli_chr05 | 13675342                | GG                              | AA                | 1946433388               |
| SNP_P3_65919_13675438 | NC_021164.1    | Ca_kabuli_chr05 | 13675438                | GG                              | AA                | 1946433390               |
| SNP_P3_65920_13683442 | NC_021164.1    | Ca_kabuli_chr05 | 13683442                | AA                              | TT                | 1946433391               |
| SNP_P3_65921_13683448 | NC_021164.1    | Ca_kabuli_chr05 | 13683448                | GG                              | CC                | 1946433393               |
| SNP_P3_65922_13693675 | NC_021164.1    | Ca_kabuli_chr05 | 13693675                | TT                              | CC                | 1946433394               |
| SNP_P3_65923_13693698 | NC_021164.1    | Ca_kabuli_chr05 | 13693698                | AA                              | TT                | 1946433395               |
| SNP_P3_65924_13695676 | NC_021164.1    | Ca_kabuli_chr05 | 13695676                | TT                              | CC                | 1946433397               |
| SNP_P3_65925_13696736 | NC_021164.1    | Ca_kabuli_chr05 | 13696736                | CC                              | TT                | 1946433398               |
| SNP_P3_65926_13696737 | NC_021164.1    | Ca_kabuli_chr05 | 13696737                | CC                              | AA                | 1946433400               |
| SNP_P3_65928_13712581 | NC_021164.1    | Ca_kabuli_chr05 | 13712581                | CC                              | TT                | 1946433401               |
| SNP_P3_65929_13726475 | NC_021164.1    | Ca_kabuli_chr05 | 13726475                | AA                              | TT                | 1946433403               |
| SNP_P3_65930_13737536 | NC_021164.1    | Ca_kabuli_chr05 | 13737536                | AA                              | GG                | 1946433404               |
| SNP_P3_65931_13737550 | NC_021164.1    | Ca_kabuli_chr05 | 13737550                | TT                              | CC                | 1946433405               |
| SNP_P3_65932_13737830 | NC_021164.1    | Ca_kabuli_chr05 | 13737830                | AA                              | GG                | 1946433407               |
| SNP_P3_65933_13745042 | NC_021164.1    | Ca_kabuli_chr05 | 13745042                | TT                              | GG                | 1946433409               |
| SNP_P3_65934_13770108 | NC_021164.1    | Ca_kabuli_chr05 | 13770108                | CC                              | TT                | 1946433410               |
| SNP_P3_65935_13810570 | NC_021164.1    | Ca_kabuli_chr05 | 13810570                | TT                              | CC                | 1946433412               |

| SNPs IDs              | Chromosome IDs | Chromosomes     | Physical positions (bp) | CDC Frontier (Reference genome) | (Pusa 256 & HPNB) | NCBI SNPdb Accession IDs |
|-----------------------|----------------|-----------------|-------------------------|---------------------------------|-------------------|--------------------------|
| SNP_P3_65937_13826378 | NC_021164.1    | Ca_kabuli_chr05 | 13826378                | AA                              | GG                | 1946433413               |
| SNP_P3_65938_13826400 | NC_021164.1    | Ca_kabuli_chr05 | 13826400                | AA                              | TT                | 1946433415               |
| SNP_P3_65939_13826404 | NC_021164.1    | Ca_kabuli_chr05 | 13826404                | TT                              | AA                | 1946433416               |
| SNP_P3_65940_13826406 | NC_021164.1    | Ca_kabuli_chr05 | 13826406                | AA                              | TT                | 1946433418               |
| SNP_P3_65941_13826413 | NC_021164.1    | Ca_kabuli_chr05 | 13826413                | TT                              | GG                | 1946433419               |
| SNP_P3_65942_13826419 | NC_021164.1    | Ca_kabuli_chr05 | 13826419                | AA                              | CC                | 1946433421               |
| SNP_P3_65943_13834304 | NC_021164.1    | Ca_kabuli_chr05 | 13834304                | CC                              | AA                | 1946433422               |
| SNP_P3_65944_13837553 | NC_021164.1    | Ca_kabuli_chr05 | 13837553                | AA                              | GG                | 1946433423               |
| SNP_P3_65945_13838380 | NC_021164.1    | Ca_kabuli_chr05 | 13838380                | AA                              | TT                | 1946433425               |
| SNP_P3_65946_13838381 | NC_021164.1    | Ca_kabuli_chr05 | 13838381                | AA                              | TT                | 1946433426               |
| SNP_P3_65947_13838445 | NC_021164.1    | Ca_kabuli_chr05 | 13838445                | AA                              | GG                | 1946433428               |
| SNP_P3_65948_13838453 | NC_021164.1    | Ca_kabuli_chr05 | 13838453                | TT                              | CC                | 1946433430               |
| SNP_P3_65949_13838996 | NC_021164.1    | Ca_kabuli_chr05 | 13838996                | AA                              | CC                | 1946433431               |
| SNP_P3_65950_13851143 | NC_021164.1    | Ca_kabuli_chr05 | 13851143                | CC                              | TT                | 1946433433               |
| SNP_P3_65951_13854174 | NC_021164.1    | Ca_kabuli_chr05 | 13854174                | TT                              | CC                | 1946433434               |
| SNP_P3_65952_13854176 | NC_021164.1    | Ca_kabuli_chr05 | 13854176                | CC                              | TT                | 1946433435               |
| SNP_P3_65953_13854185 | NC_021164.1    | Ca_kabuli_chr05 | 13854185                | TT                              | CC                | 1946433437               |
| SNP_P3_65954_13854186 | NC_021164.1    | Ca_kabuli_chr05 | 13854186                | TT                              | CC                | 1946433438               |
| SNP_P3_65955_13854216 | NC_021164.1    | Ca_kabuli_chr05 | 13854216                | CC                              | TT                | 1946433440               |
| SNP_P3_65956_13854383 | NC_021164.1    | Ca_kabuli_chr05 | 13854383                | TT                              | CC                | 1946433441               |
| SNP_P3_65957_13854579 | NC_021164.1    | Ca_kabuli_chr05 | 13854579                | GG                              | TT                | 1946433443               |
| SNP_P3_65958_13854583 | NC_021164.1    | Ca_kabuli_chr05 | 13854583                | TT                              | CC                | 1946433445               |
| SNP_P3_65959_13854592 | NC_021164.1    | Ca_kabuli_chr05 | 13854592                | TT                              | CC                | 1946433446               |
| SNP_P3_65960_13854614 | NC_021164.1    | Ca_kabuli_chr05 | 13854614                | AA                              | GG                | 1946433448               |
| SNP_P3_65961_13854627 | NC_021164.1    | Ca_kabuli_chr05 | 13854627                | AA                              | GG                | 1946433449               |
| SNP_P3_65962_13854631 | NC_021164.1    | Ca_kabuli_chr05 | 13854631                | GG                              | AA                | 1946433451               |
| SNP_P3_65963_13854640 | NC_021164.1    | Ca_kabuli_chr05 | 13854640                | AA                              | CC                | 1946433453               |
| SNP_P3_65964_13854652 | NC_021164.1    | Ca_kabuli_chr05 | 13854652                | GG                              | AA                | 1946433455               |
| SNP_P3_65965_13854655 | NC_021164.1    | Ca_kabuli_chr05 | 13854655                | TT                              | CC                | 1946433456               |
| SNP_P3_65966_13854663 | NC_021164.1    | Ca_kabuli_chr05 | 13854663                | TT                              | GG                | 1946433457               |
| SNP_P3_65967_13854677 | NC_021164.1    | Ca_kabuli_chr05 | 13854677                | CC                              | TT                | 1946433459               |
| SNP_P3_65968_13854694 | NC_021164.1    | Ca_kabuli_chr05 | 13854694                | CC                              | AA                | 1946433460               |
| SNP_P3_65969_13854730 | NC_021164.1    | Ca_kabuli_chr05 | 13854730                | GG                              | AA                | 1946433462               |
| SNP_P3_65971_13854751 | NC_021164.1    | Ca_kabuli_chr05 | 13854751                | CC                              | AA                | 1946433463               |
| SNP_P3_65972_13854757 | NC_021164.1    | Ca_kabuli_chr05 | 13854757                | CC                              | TT                | 1946433465               |
| SNP_P3_65973_13854775 | NC_021164.1    | Ca_kabuli_chr05 | 13854775                | TT                              | AA                | 1946433466               |
| SNP_P3_65974_13854826 | NC_021164.1    | Ca_kabuli_chr05 | 13854826                | GG                              | AA                | 1946433468               |
| SNP_P3_65975_13855220 | NC_021164.1    | Ca_kabuli_chr05 | 13855220                | CC                              | TT                | 1946433469               |
| SNP_P3_65976_13855484 | NC_021164.1    | Ca_kabuli_chr05 | 13855484                | AA                              | GG                | 1946433471               |
| SNP_P3_65977_13855569 | NC_021164.1    | Ca_kabuli_chr05 | 13855569                | TT                              | AA                | 1946433473               |
| SNP_P3_65978_13855650 | NC_021164.1    | Ca_kabuli_chr05 | 13855650                | TT                              | CC                | 1946433474               |
| SNP_P3_65979_13855720 | NC_021164.1    | Ca_kabuli_chr05 | 13855720                | CC                              | AA                | 1946433475               |

| SNPs IDs              | Chromosome IDs | Chromosomes     | Physical positions (bp) | CDC Frontier (Reference genome) | (Pusa 256 & HPNB) | NCBI SNPdb Accession IDs |
|-----------------------|----------------|-----------------|-------------------------|---------------------------------|-------------------|--------------------------|
| SNP_P3_65980_13855734 | NC_021164.1    | Ca_kabuli_chr05 | 13855734                | AA                              | GG                | 1946433477               |
| SNP_P3_65981_13855736 | NC_021164.1    | Ca_kabuli_chr05 | 13855736                | AA                              | TT                | 1946433479               |
| SNP_P3_65982_13855750 | NC_021164.1    | Ca_kabuli_chr05 | 13855750                | AA                              | CC                | 1946433480               |
| SNP_P3_65983_13855759 | NC_021164.1    | Ca_kabuli_chr05 | 13855759                | AA                              | GG                | 1946433482               |
| SNP_P3_65984_13855777 | NC_021164.1    | Ca_kabuli_chr05 | 13855777                | TT                              | CC                | 1946433483               |
| SNP_P3_65985_13855892 | NC_021164.1    | Ca_kabuli_chr05 | 13855892                | TT                              | CC                | 1946433485               |
| SNP_P3_65986_13855977 | NC_021164.1    | Ca_kabuli_chr05 | 13855977                | CC                              | TT                | 1946433487               |
| SNP_P3_65987_13856038 | NC_021164.1    | Ca_kabuli_chr05 | 13856038                | TT                              | GG                | 1946433488               |
| SNP_P3_65988_13856113 | NC_021164.1    | Ca_kabuli_chr05 | 13856113                | AA                              | GG                | 1946433490               |
| SNP_P3_65989_13856168 | NC_021164.1    | Ca_kabuli_chr05 | 13856168                | CC                              | TT                | 1946433491               |
| SNP_P3_65990_13856199 | NC_021164.1    | Ca_kabuli_chr05 | 13856199                | AA                              | GG                | 1946433493               |
| SNP_P3_65991_13856393 | NC_021164.1    | Ca_kabuli_chr05 | 13856393                | TT                              | GG                | 1946433494               |
| SNP_P3_65992_13858149 | NC_021164.1    | Ca_kabuli_chr05 | 13858149                | GG                              | AA                | 1946433496               |
| SNP_P3_65993_13858150 | NC_021164.1    | Ca_kabuli_chr05 | 13858150                | GG                              | AA                | 1946433497               |
| SNP_P3_65994_13858475 | NC_021164.1    | Ca_kabuli_chr05 | 13858475                | GG                              | AA                | 1946433499               |
| SNP_P3_65995_13858924 | NC_021164.1    | Ca_kabuli_chr05 | 13858924                | AA                              | CC                | 1946433500               |
| SNP_P3_65997_13892549 | NC_021164.1    | Ca_kabuli_chr05 | 13892549                | CC                              | TT                | 1946433502               |
| SNP_P3_65998_13892575 | NC_021164.1    | Ca_kabuli_chr05 | 13892575                | AA                              | GG                | 1946433503               |
| SNP_P3_65999_13892590 | NC_021164.1    | Ca_kabuli_chr05 | 13892590                | AA                              | GG                | 1946433505               |
| SNP_P3_66000_13892637 | NC_021164.1    | Ca_kabuli_chr05 | 13892637                | TT                              | CC                | 1946433506               |
| SNP_P3_66001_13892648 | NC_021164.1    | Ca_kabuli_chr05 | 13892648                | GG                              | TT                | 1946433508               |
| SNP_P3_66002_13892670 | NC_021164.1    | Ca_kabuli_chr05 | 13892670                | CC                              | TT                | 1946433510               |
| SNP_P3_66003_13892699 | NC_021164.1    | Ca_kabuli_chr05 | 13892699                | AA                              | GG                | 1946433511               |
| SNP_P3_66004_13892711 | NC_021164.1    | Ca_kabuli_chr05 | 13892711                | AA                              | GG                | 1946433513               |
| SNP_P3_66005_13892799 | NC_021164.1    | Ca_kabuli_chr05 | 13892799                | CC                              | TT                | 1946433514               |
| SNP_P3_66006_13892969 | NC_021164.1    | Ca_kabuli_chr05 | 13892969                | CC                              | TT                | 1946433516               |
| SNP_P3_66007_13892971 | NC_021164.1    | Ca_kabuli_chr05 | 13892971                | TT                              | CC                | 1946433517               |
| SNP_P3_66008_13893013 | NC_021164.1    | Ca_kabuli_chr05 | 13893013                | TT                              | CC                | 1946433518               |
| SNP_P3_66009_13893036 | NC_021164.1    | Ca_kabuli_chr05 | 13893036                | TT                              | CC                | 1946433520               |
| SNP_P3_66010_13893112 | NC_021164.1    | Ca_kabuli_chr05 | 13893112                | GG                              | AA                | 1946433521               |
| SNP_P3_66011_13893161 | NC_021164.1    | Ca_kabuli_chr05 | 13893161                | AA                              | CC                | 1946433523               |
| SNP_P3_66012_13917374 | NC_021164.1    | Ca_kabuli_chr05 | 13917374                | TT                              | CC                | 1946433524               |
| SNP_P3_66013_13928852 | NC_021164.1    | Ca_kabuli_chr05 | 13928852                | GG                              | AA                | 1946433526               |
| SNP_P3_66014_13934542 | NC_021164.1    | Ca_kabuli_chr05 | 13934542                | TT                              | CC                | 1946433527               |
| SNP_P3_66015_13936232 | NC_021164.1    | Ca_kabuli_chr05 | 13936232                | AA                              | CC                | 1946433529               |
| SNP_P3_66016_13936250 | NC_021164.1    | Ca_kabuli_chr05 | 13936250                | AA                              | GG                | 1946433531               |
| SNP_P3_66017_13936923 | NC_021164.1    | Ca_kabuli_chr05 | 13936923                | GG                              | AA                | 1946433532               |
| SNP_P3_66018_13937462 | NC_021164.1    | Ca_kabuli_chr05 | 13937462                | TT                              | CC                | 1946433534               |
| SNP_P3_66019_13937470 | NC_021164.1    | Ca_kabuli_chr05 | 13937470                | TT                              | CC                | 1946433535               |
| SNP_P3_66020_13937775 | NC_021164.1    | Ca_kabuli_chr05 | 13937775                | TT                              | CC                | 1946433537               |
| SNP_P3_66021_13939179 | NC_021164.1    | Ca_kabuli_chr05 | 13939179                | GG                              | CC                | 1946433538               |
| SNP_P3_66022_13939195 | NC_021164.1    | Ca_kabuli_chr05 | 13939195                | TT                              | AA                | 1946433540               |

| SNPs IDs              | Chromosome IDs | Chromosomes     | Physical positions (bp) | CDC Frontier (Reference genome) | (Pusa 256 & HPNB) | NCBI SNPdb Accession IDs |
|-----------------------|----------------|-----------------|-------------------------|---------------------------------|-------------------|--------------------------|
| SNP_P3_66023_13939232 | NC_021164.1    | Ca_kabuli_chr05 | 13939232                | AA                              | CC                | 1946433541               |
| SNP_P3_66024_13939251 | NC_021164.1    | Ca_kabuli_chr05 | 13939251                | GG                              | CC                | 1946433542               |
| SNP_P3_66025_13939270 | NC_021164.1    | Ca_kabuli_chr05 | 13939270                | AA                              | GG                | 1946433544               |
| SNP_P3_66026_13939286 | NC_021164.1    | Ca_kabuli_chr05 | 13939286                | CC                              | TT                | 1946433545               |
| SNP_P3_66027_13939383 | NC_021164.1    | Ca_kabuli_chr05 | 13939383                | GG                              | CC                | 1946433547               |
| SNP_P3_66028_13939465 | NC_021164.1    | Ca_kabuli_chr05 | 13939465                | AA                              | CC                | 1946433548               |
| SNP_P3_66029_13939528 | NC_021164.1    | Ca_kabuli_chr05 | 13939528                | TT                              | CC                | 1946433550               |
| SNP_P3_66030_13939529 | NC_021164.1    | Ca_kabuli_chr05 | 13939529                | AA                              | GG                | 1946433552               |
| SNP_P3_66031_13954384 | NC_021164.1    | Ca_kabuli_chr05 | 13954384                | CC                              | TT                | 1946433553               |
| SNP_P3_66032_13959935 | NC_021164.1    | Ca_kabuli_chr05 | 13959935                | AA                              | CC                | 1946433555               |
| SNP_P3_66033_13959944 | NC_021164.1    | Ca_kabuli_chr05 | 13959944                | GG                              | AA                | 1946433556               |
| SNP_P3_66036_13972029 | NC_021164.1    | Ca_kabuli_chr05 | 13972029                | TT                              | CC                | 1946433558               |
| SNP_P3_66037_13972686 | NC_021164.1    | Ca_kabuli_chr05 | 13972686                | AA                              | GG                | 1946433559               |
| SNP_P3_66038_13973367 | NC_021164.1    | Ca_kabuli_chr05 | 13973367                | CC                              | TT                | 1946433561               |
| SNP_P3_66039_13987092 | NC_021164.1    | Ca_kabuli_chr05 | 13987092                | AA                              | CC                | 1946433562               |
| SNP_P3_66041_14018141 | NC_021164.1    | Ca_kabuli_chr05 | 14018141                | GG                              | TT                | 1946433564               |
| SNP_P3_66042_14018190 | NC_021164.1    | Ca_kabuli_chr05 | 14018190                | AA                              | GG                | 1946433565               |
| SNP_P3_66043_14018422 | NC_021164.1    | Ca_kabuli_chr05 | 14018422                | AA                              | GG                | 1946433567               |
| SNP_P3_66044_14018488 | NC_021164.1    | Ca_kabuli_chr05 | 14018488                | AA                              | GG                | 1946433568               |
| SNP_P3_66045_14018552 | NC_021164.1    | Ca_kabuli_chr05 | 14018552                | TT                              | GG                | 1946433570               |
| SNP_P3_66046_14020378 | NC_021164.1    | Ca_kabuli_chr05 | 14020378                | AA                              | GG                | 1946433571               |
| SNP_P3_66048_14022512 | NC_021164.1    | Ca_kabuli_chr05 | 14022512                | AA                              | TT                | 1946433573               |
| SNP_P3_66049_14022577 | NC_021164.1    | Ca_kabuli_chr05 | 14022577                | TT                              | CC                | 1946433574               |
| SNP_P3_66051_14022688 | NC_021164.1    | Ca_kabuli_chr05 | 14022688                | GG                              | AA                | 1946433576               |
| SNP_P3_66052_14022690 | NC_021164.1    | Ca_kabuli_chr05 | 14022690                | TT                              | CC                | 1946433577               |
| SNP_P3_66053_14022906 | NC_021164.1    | Ca_kabuli_chr05 | 14022906                | AA                              | GG                | 1946433579               |
| SNP_P3_66054_14026027 | NC_021164.1    | Ca_kabuli_chr05 | 14026027                | CC                              | TT                | 1946433580               |
| SNP_P3_66055_14058224 | NC_021164.1    | Ca_kabuli_chr05 | 14058224                | CC                              | TT                | 1946433582               |
| SNP_P3_66056_14058233 | NC_021164.1    | Ca_kabuli_chr05 | 14058233                | CC                              | TT                | 1946433583               |
| SNP_P3_66057_14058275 | NC_021164.1    | Ca_kabuli_chr05 | 14058275                | TT                              | AA                | 1946433584               |
| SNP_P3_66058_14058299 | NC_021164.1    | Ca_kabuli_chr05 | 14058299                | TT                              | CC                | 1946433585               |
| SNP_P3_66059_14058315 | NC_021164.1    | Ca_kabuli_chr05 | 14058315                | CC                              | TT                | 1946433586               |
| SNP_P3_66060_14058329 | NC_021164.1    | Ca_kabuli_chr05 | 14058329                | GG                              | AA                | 1946433587               |
| SNP_P3_66061_14058360 | NC_021164.1    | Ca_kabuli_chr05 | 14058360                | GG                              | AA                | 1946433589               |
| SNP_P3_66062_14058363 | NC_021164.1    | Ca_kabuli_chr05 | 14058363                | TT                              | CC                | 1946433590               |
| SNP_P3_66063_14058380 | NC_021164.1    | Ca_kabuli_chr05 | 14058380                | TT                              | AA                | 1946433592               |
| SNP_P3_66064_14058384 | NC_021164.1    | Ca_kabuli_chr05 | 14058384                | CC                              | AA                | 1946433593               |
| SNP_P3_66065_14058389 | NC_021164.1    | Ca_kabuli_chr05 | 14058389                | GG                              | AA                | 1946433594               |
| SNP_P3_66066_14058398 | NC_021164.1    | Ca_kabuli_chr05 | 14058398                | CC                              | TT                | 1946433596               |
| SNP_P3_66067_14058557 | NC_021164.1    | Ca_kabuli_chr05 | 14058557                | CC                              | AA                | 1946433597               |
| SNP_P3_66068_14058678 | NC_021164.1    | Ca_kabuli_chr05 | 14058678                | AA                              | CC                | 1946433599               |
| SNP_P3_66069_14059493 | NC_021164.1    | Ca_kabuli_chr05 | 14059493                | GG                              | TT                | 1946433600               |

| SNPs IDs              | Chromosome IDs | Chromosomes     | Physical positions (bp) | CDC Frontier (Reference genome) | (Pusa 256 & HPNB) | NCBI SNPdb Accession IDs |
|-----------------------|----------------|-----------------|-------------------------|---------------------------------|-------------------|--------------------------|
| SNP_P3_66070_14125112 | NC_021164.1    | Ca_kabuli_chr05 | 14125112                | AA                              | GG                | 1946433602               |
| SNP_P3_66071_14125285 | NC_021164.1    | Ca_kabuli_chr05 | 14125285                | TT                              | AA                | 1946433603               |
| SNP_P3_66073_14168660 | NC_021164.1    | Ca_kabuli_chr05 | 14168660                | TT                              | CC                | 1946433605               |
| SNP_P3_66074_14171414 | NC_021164.1    | Ca_kabuli_chr05 | 14171414                | AA                              | CC                | 1946433606               |
| SNP_P3_66076_14229363 | NC_021164.1    | Ca_kabuli_chr05 | 14229363                | GG                              | TT                | 1946433608               |
| SNP_P3_66077_14229379 | NC_021164.1    | Ca_kabuli_chr05 | 14229379                | CC                              | TT                | 1946433609               |
| SNP_P3_66078_14229422 | NC_021164.1    | Ca_kabuli_chr05 | 14229422                | AA                              | GG                | 1946433611               |
| SNP_P3_66079_14229597 | NC_021164.1    | Ca_kabuli_chr05 | 14229597                | TT                              | CC                | 1946433612               |
| SNP_P3_66080_14229605 | NC_021164.1    | Ca_kabuli_chr05 | 14229605                | GG                              | AA                | 1946433614               |
| SNP_P3_66081_14272964 | NC_021164.1    | Ca_kabuli_chr05 | 14272964                | GG                              | AA                | 1946433616               |
| SNP_P3_66082_14273342 | NC_021164.1    | Ca_kabuli_chr05 | 14273342                | CC                              | TT                | 1946433617               |
| SNP_P3_66083_14273343 | NC_021164.1    | Ca_kabuli_chr05 | 14273343                | AA                              | GG                | 1946433619               |
| SNP_P3_66085_14345890 | NC_021164.1    | Ca_kabuli_chr05 | 14345890                | AA                              | GG                | 1946433620               |
| SNP_P3_66086_14365310 | NC_021164.1    | Ca_kabuli_chr05 | 14365310                | GG                              | AA                | 1946433622               |
| SNP_P3_66087_14365365 | NC_021164.1    | Ca_kabuli_chr05 | 14365365                | GG                              | CC                | 1946433623               |
| SNP_P3_66088_14393405 | NC_021164.1    | Ca_kabuli_chr05 | 14393405                | GG                              | AA                | 1946433625               |
| SNP_P3_66090_14394944 | NC_021164.1    | Ca_kabuli_chr05 | 14394944                | CC                              | TT                | 1946433626               |
| SNP_P3_66091_14394971 | NC_021164.1    | Ca_kabuli_chr05 | 14394971                | TT                              | CC                | 1946433628               |
| SNP_P3_66092_14394979 | NC_021164.1    | Ca_kabuli_chr05 | 14394979                | TT                              | CC                | 1946433629               |
| SNP_P3_66093_14395026 | NC_021164.1    | Ca_kabuli_chr05 | 14395026                | TT                              | CC                | 1946433631               |
| SNP_P3_66094_14395028 | NC_021164.1    | Ca_kabuli_chr05 | 14395028                | TT                              | CC                | 1946433632               |
| SNP_P3_66095_14395043 | NC_021164.1    | Ca_kabuli_chr05 | 14395043                | AA                              | CC                | 1946433634               |
| SNP_P3_66096_14395108 | NC_021164.1    | Ca_kabuli_chr05 | 14395108                | AA                              | CC                | 1946433635               |
| SNP_P3_66097_14395132 | NC_021164.1    | Ca_kabuli_chr05 | 14395132                | TT                              | CC                | 1946433637               |
| SNP_P3_66098_14395139 | NC_021164.1    | Ca_kabuli_chr05 | 14395139                | TT                              | CC                | 1946433638               |
| SNP_P3_66099_14395217 | NC_021164.1    | Ca_kabuli_chr05 | 14395217                | CC                              | TT                | 1946433640               |
| SNP_P3_66100_14395272 | NC_021164.1    | Ca_kabuli_chr05 | 14395272                | TT                              | CC                | 1946433641               |
| SNP_P3_66101_14395286 | NC_021164.1    | Ca_kabuli_chr05 | 14395286                | CC                              | TT                | 1946433643               |
| SNP_P3_66102_14395299 | NC_021164.1    | Ca_kabuli_chr05 | 14395299                | GG                              | TT                | 1946433644               |
| SNP_P3_66103_14395302 | NC_021164.1    | Ca_kabuli_chr05 | 14395302                | TT                              | CC                | 1946433646               |
| SNP_P3_66104_14395319 | NC_021164.1    | Ca_kabuli_chr05 | 14395319                | AA                              | GG                | 1946433647               |
| SNP_P3_66105_14395322 | NC_021164.1    | Ca_kabuli_chr05 | 14395322                | AA                              | GG                | 1946433649               |
| SNP_P3_66106_14395334 | NC_021164.1    | Ca_kabuli_chr05 | 14395334                | TT                              | AA                | 1946433650               |
| SNP_P3_66107_14395347 | NC_021164.1    | Ca_kabuli_chr05 | 14395347                | AA                              | TT                | 1946433652               |
| SNP_P3_66108_14395372 | NC_021164.1    | Ca_kabuli_chr05 | 14395372                | CC                              | GG                | 1946433653               |
| SNP_P3_66109_14395437 | NC_021164.1    | Ca_kabuli_chr05 | 14395437                | CC                              | TT                | 1946433655               |
| SNP_P3_66110_14403351 | NC_021164.1    | Ca_kabuli_chr05 | 14403351                | CC                              | TT                | 1946433656               |
| SNP_P3_66111_15126450 | NC_021164.1    | Ca_kabuli_chr05 | 15126450                | GG                              | TT                | 1946433658               |
| SNP_P3_66112_15126573 | NC_021164.1    | Ca_kabuli_chr05 | 15126573                | TT                              | AA                | 1946433659               |
| SNP_P3_66113_15142012 | NC_021164.1    | Ca_kabuli_chr05 | 15142012                | CC                              | AA                | 1946433661               |
| SNP_P3_66114_15155120 | NC_021164.1    | Ca_kabuli_chr05 | 15155120                | CC                              | TT                | 1946433662               |
| SNP_P3_66115_15155556 | NC_021164.1    | Ca_kabuli_chr05 | 15155556                | TT                              | GG                | 1946433664               |

| SNPs IDs              | Chromosome IDs | Chromosomes     | Physical positions (bp) | CDC Frontier (Reference genome) | (Pusa 256 & HPNB) | NCBI SNPdb Accession IDs |
|-----------------------|----------------|-----------------|-------------------------|---------------------------------|-------------------|--------------------------|
| SNP_P3_66116_15156294 | NC_021164.1    | Ca_kabuli_chr05 | 15156294                | TT                              | GG                | 1946433665               |
| SNP_P3_66117_15158049 | NC_021164.1    | Ca_kabuli_chr05 | 15158049                | GG                              | TT                | 1946433667               |
| SNP_P3_66118_15162884 | NC_021164.1    | Ca_kabuli_chr05 | 15162884                | GG                              | AA                | 1946433668               |
| SNP_P3_66119_15166269 | NC_021164.1    | Ca_kabuli_chr05 | 15166269                | CC                              | TT                | 1946433670               |
| SNP_P3_66120_15166306 | NC_021164.1    | Ca_kabuli_chr05 | 15166306                | GG                              | AA                | 1946433671               |
| SNP_P3_66121_15166327 | NC_021164.1    | Ca_kabuli_chr05 | 15166327                | TT                              | CC                | 1946433673               |
| SNP_P3_66122_15166439 | NC_021164.1    | Ca_kabuli_chr05 | 15166439                | AA                              | GG                | 1946433674               |
| SNP_P3_66123_15166456 | NC_021164.1    | Ca_kabuli_chr05 | 15166456                | CC                              | AA                | 1946433676               |
| SNP_P3_66124_15166612 | NC_021164.1    | Ca_kabuli_chr05 | 15166612                | TT                              | CC                | 1946433677               |
| SNP_P3_66125_15166626 | NC_021164.1    | Ca_kabuli_chr05 | 15166626                | AA                              | CC                | 1946433679               |
| SNP_P3_66126_15166718 | NC_021164.1    | Ca_kabuli_chr05 | 15166718                | AA                              | CC                | 1946433680               |
| SNP_P3_66127_15166750 | NC_021164.1    | Ca_kabuli_chr05 | 15166750                | TT                              | CC                | 1946433682               |
| SNP_P3_66128_15170652 | NC_021164.1    | Ca_kabuli_chr05 | 15170652                | GG                              | TT                | 1946433684               |
| SNP_P3_66129_15170912 | NC_021164.1    | Ca_kabuli_chr05 | 15170912                | GG                              | AA                | 1946433685               |
| SNP_P3_66130_15199223 | NC_021164.1    | Ca_kabuli_chr05 | 15199223                | AA                              | TT                | 1946433687               |
| SNP_P3_66131_15205030 | NC_021164.1    | Ca_kabuli_chr05 | 15205030                | AA                              | GG                | 1946433688               |
| SNP_P3_66132_15205033 | NC_021164.1    | Ca_kabuli_chr05 | 15205033                | AA                              | CC                | 1946433690               |
| SNP_P3_66133_15205070 | NC_021164.1    | Ca_kabuli_chr05 | 15205070                | AA                              | GG                | 1946433691               |
| SNP_P3_66134_15205076 | NC_021164.1    | Ca_kabuli_chr05 | 15205076                | GG                              | TT                | 1946433692               |
| SNP_P3_66135_15205145 | NC_021164.1    | Ca_kabuli_chr05 | 15205145                | GG                              | AA                | 1946433694               |
| SNP_P3_66136_15205166 | NC_021164.1    | Ca_kabuli_chr05 | 15205166                | CC                              | AA                | 1946433695               |
| SNP_P3_66137_15205180 | NC_021164.1    | Ca_kabuli_chr05 | 15205180                | CC                              | TT                | 1946433697               |
| SNP_P3_66138_15205215 | NC_021164.1    | Ca_kabuli_chr05 | 15205215                | GG                              | TT                | 1946433698               |
| SNP_P3_66139_15205486 | NC_021164.1    | Ca_kabuli_chr05 | 15205486                | TT                              | GG                | 1946433700               |
| SNP_P3_66140_15205493 | NC_021164.1    | Ca_kabuli_chr05 | 15205493                | AA                              | GG                | 1946433701               |
| SNP_P3_66141_15205518 | NC_021164.1    | Ca_kabuli_chr05 | 15205518                | CC                              | TT                | 1946433703               |
| SNP_P3_66142_15205659 | NC_021164.1    | Ca_kabuli_chr05 | 15205659                | GG                              | CC                | 1946433704               |
| SNP_P3_66143_15205679 | NC_021164.1    | Ca_kabuli_chr05 | 15205679                | CC                              | AA                | 1946433706               |
| SNP_P3_66144_15205706 | NC_021164.1    | Ca_kabuli_chr05 | 15205706                | CC                              | TT                | 1946433707               |
| SNP_P3_66145_15205736 | NC_021164.1    | Ca_kabuli_chr05 | 15205736                | TT                              | GG                | 1946433709               |
| SNP_P3_66146_15205767 | NC_021164.1    | Ca_kabuli_chr05 | 15205767                | GG                              | TT                | 1946433710               |
| SNP_P3_66147_15205786 | NC_021164.1    | Ca_kabuli_chr05 | 15205786                | TT                              | GG                | 1946433712               |
| SNP_P3_66149_15273306 | NC_021164.1    | Ca_kabuli_chr05 | 15273306                | GG                              | TT                | 1946433713               |
| SNP_P3_66151_15362485 | NC_021164.1    | Ca_kabuli_chr05 | 15362485                | TT                              | AA                | 1946433714               |
| SNP_P3_66152_15362529 | NC_021164.1    | Ca_kabuli_chr05 | 15362529                | GG                              | AA                | 1946433716               |
| SNP_P3_66153_15362628 | NC_021164.1    | Ca_kabuli_chr05 | 15362628                | CC                              | TT                | 1946433717               |
| SNP_P3_66154_15363023 | NC_021164.1    | Ca_kabuli_chr05 | 15363023                | CC                              | TT                | 1946433719               |
| SNP_P3_66155_15363029 | NC_021164.1    | Ca_kabuli_chr05 | 15363029                | CC                              | TT                | 1946433720               |
| SNP_P3_66156_15363031 | NC_021164.1    | Ca_kabuli_chr05 | 15363031                | TT                              | CC                | 1946433722               |
| SNP_P3_66157_15369074 | NC_021164.1    | Ca_kabuli_chr05 | 15369074                | CC                              | TT                | 1946433724               |
| SNP_P3_66158_15393108 | NC_021164.1    | Ca_kabuli_chr05 | 15393108                | GG                              | AA                | 1946433725               |
| SNP_P3_66159_15417177 | NC_021164.1    | Ca_kabuli_chr05 | 15417177                | AA                              | GG                | 1946433727               |

| SNPs IDs              | Chromosome IDs | Chromosomes     | Physical positions (bp) | CDC Frontier (Reference genome) | (Pusa 256 & HPNB) | NCBI SNPdb Accession IDs |
|-----------------------|----------------|-----------------|-------------------------|---------------------------------|-------------------|--------------------------|
| SNP_P3_66160_15417246 | NC_021164.1    | Ca_kabuli_chr05 | 15417246                | CC                              | GG                | 1946433728               |
| SNP_P3_66161_15417248 | NC_021164.1    | Ca_kabuli_chr05 | 15417248                | GG                              | TT                | 1946433730               |
| SNP_P3_66162_15417251 | NC_021164.1    | Ca_kabuli_chr05 | 15417251                | AA                              | CC                | 1946433731               |
| SNP_P3_66163_15417274 | NC_021164.1    | Ca_kabuli_chr05 | 15417274                | CC                              | GG                | 1946433733               |
| SNP_P3_66164_15417286 | NC_021164.1    | Ca_kabuli_chr05 | 15417286                | TT                              | CC                | 1946433734               |
| SNP_P3_66165_15417313 | NC_021164.1    | Ca_kabuli_chr05 | 15417313                | GG                              | AA                | 1946433736               |
| SNP_P3_66166_15417315 | NC_021164.1    | Ca_kabuli_chr05 | 15417315                | TT                              | AA                | 1946433737               |
| SNP_P3_66167_15417317 | NC_021164.1    | Ca_kabuli_chr05 | 15417317                | TT                              | CC                | 1946433738               |
| SNP_P3_66168_15417363 | NC_021164.1    | Ca_kabuli_chr05 | 15417363                | TT                              | CC                | 1946433740               |
| SNP_P3_66169_15417550 | NC_021164.1    | Ca_kabuli_chr05 | 15417550                | AA                              | GG                | 1946433741               |
| SNP_P3_66170_15417605 | NC_021164.1    | Ca_kabuli_chr05 | 15417605                | TT                              | GG                | 1946433743               |
| SNP_P3_66171_15417608 | NC_021164.1    | Ca_kabuli_chr05 | 15417608                | CC                              | AA                | 1946433745               |
| SNP_P3_66172_15417822 | NC_021164.1    | Ca_kabuli_chr05 | 15417822                | GG                              | AA                | 1946433746               |
| SNP_P3_66173_15417856 | NC_021164.1    | Ca_kabuli_chr05 | 15417856                | CC                              | AA                | 1946433748               |
| SNP_P3_66174_15417981 | NC_021164.1    | Ca_kabuli_chr05 | 15417981                | CC                              | TT                | 1946433749               |
| SNP_P3_66175_15421688 | NC_021164.1    | Ca_kabuli_chr05 | 15421688                | TT                              | CC                | 1946433751               |
| SNP_P3_66176_15421723 | NC_021164.1    | Ca_kabuli_chr05 | 15421723                | GG                              | AA                | 1946433752               |
| SNP_P3_66177_15422625 | NC_021164.1    | Ca_kabuli_chr05 | 15422625                | TT                              | GG                | 1946433754               |
| SNP_P3_66178_15422657 | NC_021164.1    | Ca_kabuli_chr05 | 15422657                | CC                              | TT                | 1946433755               |
| SNP_P3_66179_15422985 | NC_021164.1    | Ca_kabuli_chr05 | 15422985                | AA                              | GG                | 1946433757               |
| SNP_P3_66180_15424560 | NC_021164.1    | Ca_kabuli_chr05 | 15424560                | CC                              | TT                | 1946433758               |
| SNP_P3_66181_15424561 | NC_021164.1    | Ca_kabuli_chr05 | 15424561                | AA                              | GG                | 1946433760               |
| SNP_P3_66182_15424586 | NC_021164.1    | Ca_kabuli_chr05 | 15424586                | GG                              | CC                | 1946433761               |
| SNP_P3_66183_15424626 | NC_021164.1    | Ca_kabuli_chr05 | 15424626                | AA                              | GG                | 1946433763               |
| SNP_P3_66184_15424649 | NC_021164.1    | Ca_kabuli_chr05 | 15424649                | AA                              | GG                | 1946433765               |
| SNP_P3_66185_15424705 | NC_021164.1    | Ca_kabuli_chr05 | 15424705                | TT                              | GG                | 1946433766               |
| SNP_P3_66186_15424728 | NC_021164.1    | Ca_kabuli_chr05 | 15424728                | AA                              | GG                | 1946433768               |
| SNP_P3_66187_15424974 | NC_021164.1    | Ca_kabuli_chr05 | 15424974                | AA                              | GG                | 1946433769               |
| SNP_P3_66188_15424997 | NC_021164.1    | Ca_kabuli_chr05 | 15424997                | CC                              | AA                | 1946433770               |
| SNP_P3_66189_15439671 | NC_021164.1    | Ca_kabuli_chr05 | 15439671                | CC                              | TT                | 1946433772               |
| SNP_P3_66191_15444392 | NC_021164.1    | Ca_kabuli_chr05 | 15444392                | GG                              | AA                | 1946433773               |
| SNP_P3_66192_15448081 | NC_021164.1    | Ca_kabuli_chr05 | 15448081                | CC                              | TT                | 1946433775               |
| SNP_P3_66193_15448085 | NC_021164.1    | Ca_kabuli_chr05 | 15448085                | CC                              | TT                | 1946433776               |
| SNP_P3_66194_15448127 | NC_021164.1    | Ca_kabuli_chr05 | 15448127                | CC                              | AA                | 1946433778               |
| SNP_P3_66195_15448131 | NC_021164.1    | Ca_kabuli_chr05 | 15448131                | GG                              | AA                | 1946433779               |
| SNP_P3_66196_15448188 | NC_021164.1    | Ca_kabuli_chr05 | 15448188                | CC                              | AA                | 1946433781               |
| SNP_P3_66197_15448490 | NC_021164.1    | Ca_kabuli_chr05 | 15448490                | CC                              | AA                | 1946433782               |
| SNP_P3_66198_15448505 | NC_021164.1    | Ca_kabuli_chr05 | 15448505                | TT                              | AA                | 1946433783               |
| SNP_P3_66199_15467100 | NC_021164.1    | Ca_kabuli_chr05 | 15467100                | TT                              | CC                | 1946433785               |
| SNP_P3_66200_15503344 | NC_021164.1    | Ca_kabuli_chr05 | 15503344                | CC                              | TT                | 1946433787               |
| SNP_P3_66201_15503474 | NC_021164.1    | Ca_kabuli_chr05 | 15503474                | GG                              | AA                | 1946433788               |
| SNP_P3_66202_15503491 | NC_021164.1    | Ca_kabuli_chr05 | 15503491                | GG                              | AA                | 1946433790               |



| SNPs IDs              | Chromosome IDs | Chromosomes     | Physical positions (bp) | CDC Frontier (Reference genome) | (Pusa 256 & HPNB) | NCBI SNPdb Accession IDs |
|-----------------------|----------------|-----------------|-------------------------|---------------------------------|-------------------|--------------------------|
| SNP_P3_66203_15503599 | NC_021164.1    | Ca_kabuli_chr05 | 15503599                | GG                              | TT                | 1946433791               |
| SNP_P3_66204_15503603 | NC_021164.1    | Ca_kabuli_chr05 | 15503603                | TT                              | AA                | 1946433792               |
| SNP_P3_66205_15511389 | NC_021164.1    | Ca_kabuli_chr05 | 15511389                | TT                              | AA                | 1946433794               |
| SNP_P3_66206_15511983 | NC_021164.1    | Ca_kabuli_chr05 | 15511983                | AA                              | GG                | 1946433795               |
| SNP_P3_66207_15526431 | NC_021164.1    | Ca_kabuli_chr05 | 15526431                | TT                              | AA                | 1946433797               |
| SNP_P3_66208_15526483 | NC_021164.1    | Ca_kabuli_chr05 | 15526483                | TT                              | CC                | 1946433798               |
| SNP_P3_66209_15533821 | NC_021164.1    | Ca_kabuli_chr05 | 15533821                | TT                              | AA                | 1946433800               |
| SNP_P3_66210_15535240 | NC_021164.1    | Ca_kabuli_chr05 | 15535240                | GG                              | AA                | 1946433801               |
| SNP_P3_66211_15540326 | NC_021164.1    | Ca_kabuli_chr05 | 15540326                | CC                              | AA                | 1946433803               |
| SNP_P3_66212_15545994 | NC_021164.1    | Ca_kabuli_chr05 | 15545994                | GG                              | AA                | 1946433804               |
| SNP_P3_66213_15546009 | NC_021164.1    | Ca_kabuli_chr05 | 15546009                | TT                              | CC                | 1946433806               |
| SNP_P3_66214_15570853 | NC_021164.1    | Ca_kabuli_chr05 | 15570853                | AA                              | GG                | 1946433807               |
| SNP_P3_66215_15571200 | NC_021164.1    | Ca_kabuli_chr05 | 15571200                | CC                              | AA                | 1946433809               |
| SNP_P3_66216_15580123 | NC_021164.1    | Ca_kabuli_chr05 | 15580123                | TT                              | AA                | 1946433810               |
| SNP_P3_66217_15587146 | NC_021164.1    | Ca_kabuli_chr05 | 15587146                | TT                              | AA                | 1946433812               |
| SNP_P3_66218_15587751 | NC_021164.1    | Ca_kabuli_chr05 | 15587751                | AA                              | GG                | 1946433813               |
| SNP_P3_66219_15587783 | NC_021164.1    | Ca_kabuli_chr05 | 15587783                | GG                              | AA                | 1946433815               |
| SNP_P3_66220_15604004 | NC_021164.1    | Ca_kabuli_chr05 | 15604004                | CC                              | TT                | 1946433816               |
| SNP_P3_66221_15646724 | NC_021164.1    | Ca_kabuli_chr05 | 15646724                | AA                              | GG                | 1946433818               |
| SNP_P3_66222_15646745 | NC_021164.1    | Ca_kabuli_chr05 | 15646745                | TT                              | GG                | 1946433819               |
| SNP_P3_66224_15709374 | NC_021164.1    | Ca_kabuli_chr05 | 15709374                | GG                              | TT                | 1946433821               |
| SNP_P3_66225_15733255 | NC_021164.1    | Ca_kabuli_chr05 | 15733255                | AA                              | GG                | 1946433822               |
| SNP_P3_66226_15754804 | NC_021164.1    | Ca_kabuli_chr05 | 15754804                | CC                              | AA                | 1946433824               |
| SNP_P3_66229_15782674 | NC_021164.1    | Ca_kabuli_chr05 | 15782674                | CC                              | AA                | 1946433825               |
| SNP_P3_66230_15795284 | NC_021164.1    | Ca_kabuli_chr05 | 15795284                | AA                              | GG                | 1946433827               |
| SNP_P3_66231_15803978 | NC_021164.1    | Ca_kabuli_chr05 | 15803978                | AA                              | CC                | 1946433828               |
| SNP_P3_66232_15834892 | NC_021164.1    | Ca_kabuli_chr05 | 15834892                | AA                              | GG                | 1946433829               |
| SNP_P3_66233_15834987 | NC_021164.1    | Ca_kabuli_chr05 | 15834987                | GG                              | AA                | 1946433831               |
| SNP_P3_66234_15834994 | NC_021164.1    | Ca_kabuli_chr05 | 15834994                | GG                              | AA                | 1946433832               |
| SNP_P3_66235_15835203 | NC_021164.1    | Ca_kabuli_chr05 | 15835203                | CC                              | AA                | 1946433834               |
| SNP_P3_66236_15835233 | NC_021164.1    | Ca_kabuli_chr05 | 15835233                | AA                              | GG                | 1946433835               |
| SNP_P3_66237_15835278 | NC_021164.1    | Ca_kabuli_chr05 | 15835278                | TT                              | CC                | 1946433837               |
| SNP_P3_66238_15835338 | NC_021164.1    | Ca_kabuli_chr05 | 15835338                | AA                              | GG                | 1946433839               |
| SNP_P3_66239_15835352 | NC_021164.1    | Ca_kabuli_chr05 | 15835352                | TT                              | CC                | 1946433840               |
| SNP_P3_66240_15835371 | NC_021164.1    | Ca_kabuli_chr05 | 15835371                | GG                              | AA                | 1946433842               |
| SNP_P3_66241_15835401 | NC_021164.1    | Ca_kabuli_chr05 | 15835401                | CC                              | TT                | 1946433843               |
| SNP_P3_66242_15837948 | NC_021164.1    | Ca_kabuli_chr05 | 15837948                | CC                              | TT                | 1946433844               |
| SNP_P3_66243_15840603 | NC_021164.1    | Ca_kabuli_chr05 | 15840603                | AA                              | CC                | 1946433846               |
| SNP_P3_66244_15862598 | NC_021164.1    | Ca_kabuli_chr05 | 15862598                | TT                              | AA                | 1946433847               |
| SNP_P3_66246_15876969 | NC_021164.1    | Ca_kabuli_chr05 | 15876969                | GG                              | TT                | 1946433849               |
| SNP_P3_66247_15876973 | NC_021164.1    | Ca_kabuli_chr05 | 15876973                | TT                              | AA                | 1946433850               |
| SNP_P3_66248_15877053 | NC_021164.1    | Ca_kabuli_chr05 | 15877053                | GG                              | CC                | 1946433852               |

| SNPs IDs              | Chromosome IDs | Chromosomes     | Physical positions (bp) | CDC Frontier (Reference genome) | (Pusa 256 & HPNB) | NCBI SNPdb Accession IDs |
|-----------------------|----------------|-----------------|-------------------------|---------------------------------|-------------------|--------------------------|
| SNP_P3_66249_15877056 | NC_021164.1    | Ca_kabuli_chr05 | 15877056                | GG                              | CC                | 1946433853               |
| SNP_P3_66250_15877077 | NC_021164.1    | Ca_kabuli_chr05 | 15877077                | AA                              | GG                | 1946433854               |
| SNP_P3_66251_15877242 | NC_021164.1    | Ca_kabuli_chr05 | 15877242                | TT                              | AA                | 1946433856               |
| SNP_P3_66252_15877335 | NC_021164.1    | Ca_kabuli_chr05 | 15877335                | TT                              | CC                | 1946433857               |
| SNP_P3_66253_15884750 | NC_021164.1    | Ca_kabuli_chr05 | 15884750                | GG                              | CC                | 1946433859               |
| SNP_P3_66254_15893308 | NC_021164.1    | Ca_kabuli_chr05 | 15893308                | CC                              | TT                | 1946433861               |
| SNP_P3_66255_15893358 | NC_021164.1    | Ca_kabuli_chr05 | 15893358                | AA                              | TT                | 1946433862               |
| SNP_P3_66256_15893388 | NC_021164.1    | Ca_kabuli_chr05 | 15893388                | AA                              | CC                | 1946433863               |
| SNP_P3_66257_15893411 | NC_021164.1    | Ca_kabuli_chr05 | 15893411                | CC                              | TT                | 1946433865               |
| SNP_P3_66258_15894720 | NC_021164.1    | Ca_kabuli_chr05 | 15894720                | TT                              | AA                | 1946433866               |
| SNP_P3_66259_15894890 | NC_021164.1    | Ca_kabuli_chr05 | 15894890                | TT                              | AA                | 1946433868               |
| SNP_P3_66260_15908497 | NC_021164.1    | Ca_kabuli_chr05 | 15908497                | AA                              | GG                | 1946433869               |
| SNP_P3_66261_15908521 | NC_021164.1    | Ca_kabuli_chr05 | 15908521                | CC                              | TT                | 1946433871               |
| SNP_P3_66262_15908523 | NC_021164.1    | Ca_kabuli_chr05 | 15908523                | CC                              | TT                | 1946433872               |
| SNP_P3_66263_15908535 | NC_021164.1    | Ca_kabuli_chr05 | 15908535                | GG                              | AA                | 1946433874               |
| SNP_P3_66264_15910620 | NC_021164.1    | Ca_kabuli_chr05 | 15910620                | GG                              | AA                | 1946433875               |
| SNP_P3_66265_15910628 | NC_021164.1    | Ca_kabuli_chr05 | 15910628                | GG                              | AA                | 1946433877               |
| SNP_P3_66266_15910634 | NC_021164.1    | Ca_kabuli_chr05 | 15910634                | TT                              | CC                | 1946433878               |
| SNP_P3_66267_15910869 | NC_021164.1    | Ca_kabuli_chr05 | 15910869                | CC                              | AA                | 1946433880               |
| SNP_P3_66268_15910947 | NC_021164.1    | Ca_kabuli_chr05 | 15910947                | GG                              | AA                | 1946433881               |
| SNP_P3_66269_15912686 | NC_021164.1    | Ca_kabuli_chr05 | 15912686                | TT                              | CC                | 1946433883               |
| SNP_P3_66270_15929044 | NC_021164.1    | Ca_kabuli_chr05 | 15929044                | GG                              | CC                | 1946433884               |
| SNP_P3_66273_15929285 | NC_021164.1    | Ca_kabuli_chr05 | 15929285                | CC                              | TT                | 1946433886               |
| SNP_P3_66274_15929288 | NC_021164.1    | Ca_kabuli_chr05 | 15929288                | TT                              | AA                | 1946433887               |
| SNP_P3_66275_15929617 | NC_021164.1    | Ca_kabuli_chr05 | 15929617                | AA                              | CC                | 1946433889               |
| SNP_P3_66276_15929658 | NC_021164.1    | Ca_kabuli_chr05 | 15929658                | AA                              | TT                | 1946433890               |
| SNP_P3_66277_15931178 | NC_021164.1    | Ca_kabuli_chr05 | 15931178                | AA                              | GG                | 1946433892               |
| SNP_P3_66278_15931206 | NC_021164.1    | Ca_kabuli_chr05 | 15931206                | TT                              | CC                | 1946433895               |
| SNP_P3_66279_15931627 | NC_021164.1    | Ca_kabuli_chr05 | 15931627                | TT                              | AA                | 1946433896               |
| SNP_P3_66280_15936778 | NC_021164.1    | Ca_kabuli_chr05 | 15936778                | CC                              | TT                | 1946433897               |
| SNP_P3_66281_15939588 | NC_021164.1    | Ca_kabuli_chr05 | 15939588                | GG                              | TT                | 1946433899               |
| SNP_P3_66282_15939603 | NC_021164.1    | Ca_kabuli_chr05 | 15939603                | GG                              | AA                | 1946433900               |
| SNP_P3_66283_15948315 | NC_021164.1    | Ca_kabuli_chr05 | 15948315                | AA                              | CC                | 1946433902               |
| SNP_P3_66284_15954357 | NC_021164.1    | Ca_kabuli_chr05 | 15954357                | GG                              | TT                | 1946433903               |
| SNP_P3_66285_15984708 | NC_021164.1    | Ca_kabuli_chr05 | 15984708                | TT                              | AA                | 1946433905               |
| SNP_P3_66286_15995620 | NC_021164.1    | Ca_kabuli_chr05 | 15995620                | TT                              | CC                | 1946433906               |
| SNP_P3_66287_16004439 | NC_021164.1    | Ca_kabuli_chr05 | 16004439                | CC                              | TT                | 1946433908               |
| SNP_P3_66288_16005498 | NC_021164.1    | Ca_kabuli_chr05 | 16005498                | TT                              | CC                | 1946433909               |
| SNP_P3_66289_16005551 | NC_021164.1    | Ca_kabuli_chr05 | 16005551                | TT                              | CC                | 1946433911               |
| SNP_P3_66290_16022067 | NC_021164.1    | Ca_kabuli_chr05 | 16022067                | TT                              | CC                | 1946433913               |
| SNP_P3_66291_16022348 | NC_021164.1    | Ca_kabuli_chr05 | 16022348                | GG                              | AA                | 1946433914               |
| SNP_P3_66292_16022728 | NC_021164.1    | Ca_kabuli_chr05 | 16022728                | TT                              | CC                | 1946433916               |

| SNPs IDs              | Chromosome IDs | Chromosomes     | Physical positions (bp) | CDC Frontier (Reference genome) | (Pusa 256 & HPNB) | NCBI SNPdb Accession IDs |
|-----------------------|----------------|-----------------|-------------------------|---------------------------------|-------------------|--------------------------|
| SNP_P3_66293_16067157 | NC_021164.1    | Ca_kabuli_chr05 | 16067157                | GG                              | AA                | 1946433917               |
| SNP_P3_66294_16082747 | NC_021164.1    | Ca_kabuli_chr05 | 16082747                | CC                              | AA                | 1946433919               |
| SNP_P3_66295_16083241 | NC_021164.1    | Ca_kabuli_chr05 | 16083241                | AA                              | GG                | 1946433920               |
| SNP_P3_66296_16083267 | NC_021164.1    | Ca_kabuli_chr05 | 16083267                | GG                              | AA                | 1946433922               |
| SNP_P3_66297_16083460 | NC_021164.1    | Ca_kabuli_chr05 | 16083460                | TT                              | CC                | 1946433923               |
| SNP_P3_66298_16083503 | NC_021164.1    | Ca_kabuli_chr05 | 16083503                | TT                              | GG                | 1946433925               |
| SNP_P3_66299_16083504 | NC_021164.1    | Ca_kabuli_chr05 | 16083504                | TT                              | CC                | 1946433927               |
| SNP_P3_66300_16083549 | NC_021164.1    | Ca_kabuli_chr05 | 16083549                | TT                              | AA                | 1946433929               |
| SNP_P3_66301_16083613 | NC_021164.1    | Ca_kabuli_chr05 | 16083613                | AA                              | GG                | 1946433930               |
| SNP_P3_66302_16108726 | NC_021164.1    | Ca_kabuli_chr05 | 16108726                | AA                              | GG                | 1946433932               |
| SNP_P3_66303_16113656 | NC_021164.1    | Ca_kabuli_chr05 | 16113656                | AA                              | GG                | 1946433934               |
| SNP_P3_66304_16113664 | NC_021164.1    | Ca_kabuli_chr05 | 16113664                | TT                              | CC                | 1946433935               |
| SNP_P3_66305_16113812 | NC_021164.1    | Ca_kabuli_chr05 | 16113812                | CC                              | TT                | 1946433937               |
| SNP_P3_66306_16144887 | NC_021164.1    | Ca_kabuli_chr05 | 16144887                | AA                              | GG                | 1946433938               |
| SNP_P3_66307_16152144 | NC_021164.1    | Ca_kabuli_chr05 | 16152144                | GG                              | TT                | 1946433940               |
| SNP_P3_66308_16152239 | NC_021164.1    | Ca_kabuli_chr05 | 16152239                | GG                              | AA                | 1946433941               |
| SNP_P3_66309_16152299 | NC_021164.1    | Ca_kabuli_chr05 | 16152299                | AA                              | TT                | 1946433943               |
| SNP_P3_66310_16152304 | NC_021164.1    | Ca_kabuli_chr05 | 16152304                | GG                              | TT                | 1946433944               |
| SNP_P3_66311_16152340 | NC_021164.1    | Ca_kabuli_chr05 | 16152340                | AA                              | GG                | 1946433946               |
| SNP_P3_66312_16152400 | NC_021164.1    | Ca_kabuli_chr05 | 16152400                | TT                              | CC                | 1946433948               |
| SNP_P3_66313_16152444 | NC_021164.1    | Ca_kabuli_chr05 | 16152444                | TT                              | CC                | 1946433949               |
| SNP_P3_66315_16152590 | NC_021164.1    | Ca_kabuli_chr05 | 16152590                | AA                              | GG                | 1946433951               |
| SNP_P3_66316_16175254 | NC_021164.1    | Ca_kabuli_chr05 | 16175254                | CC                              | TT                | 1946433952               |
| SNP_P3_66317_16185238 | NC_021164.1    | Ca_kabuli_chr05 | 16185238                | CC                              | TT                | 1946433954               |
| SNP_P3_66318_16193641 | NC_021164.1    | Ca_kabuli_chr05 | 16193641                | CC                              | TT                | 1946433955               |
| SNP_P3_66319_16207972 | NC_021164.1    | Ca_kabuli_chr05 | 16207972                | TT                              | CC                | 1946433957               |
| SNP_P3_66320_16208338 | NC_021164.1    | Ca_kabuli_chr05 | 16208338                | AA                              | CC                | 1946433958               |
| SNP_P3_66321_16230576 | NC_021164.1    | Ca_kabuli_chr05 | 16230576                | AA                              | CC                | 1946433960               |
| SNP_P3_66322_16230633 | NC_021164.1    | Ca_kabuli_chr05 | 16230633                | CC                              | AA                | 1946433961               |
| SNP_P3_66323_16230639 | NC_021164.1    | Ca_kabuli_chr05 | 16230639                | GG                              | AA                | 1946433963               |
| SNP_P3_66325_16297781 | NC_021164.1    | Ca_kabuli_chr05 | 16297781                | CC                              | TT                | 1946433964               |
| SNP_P3_66326_16298078 | NC_021164.1    | Ca_kabuli_chr05 | 16298078                | GG                              | TT                | 1946433966               |
| SNP_P3_66327_16319742 | NC_021164.1    | Ca_kabuli_chr05 | 16319742                | TT                              | CC                | 1946433968               |
| SNP_P3_66328_16319793 | NC_021164.1    | Ca_kabuli_chr05 | 16319793                | TT                              | CC                | 1946433969               |
| SNP_P3_66329_16319801 | NC_021164.1    | Ca_kabuli_chr05 | 16319801                | GG                              | CC                | 1946433971               |
| SNP_P3_66330_16319897 | NC_021164.1    | Ca_kabuli_chr05 | 16319897                | GG                              | CC                | 1946433972               |
| SNP_P3_66332_16320013 | NC_021164.1    | Ca_kabuli_chr05 | 16320013                | CC                              | TT                | 1946433974               |
| SNP_P3_66333_16320045 | NC_021164.1    | Ca_kabuli_chr05 | 16320045                | CC                              | TT                | 1946433976               |
| SNP_P3_66334_16320123 | NC_021164.1    | Ca_kabuli_chr05 | 16320123                | AA                              | CC                | 1946433977               |
| SNP_P3_66335_16322032 | NC_021164.1    | Ca_kabuli_chr05 | 16322032                | AA                              | GG                | 1946433979               |
| SNP_P3_66336_16322048 | NC_021164.1    | Ca_kabuli_chr05 | 16322048                | AA                              | TT                | 1946433980               |
| SNP_P3_66337_16322082 | NC_021164.1    | Ca_kabuli_chr05 | 16322082                | TT                              | CC                | 1946433982               |

| SNPs IDs              | Chromosome IDs | Chromosomes     | Physical positions (bp) | CDC Frontier (Reference genome) | (Pusa 256 & HPNB) | NCBI SNPdb Accession IDs |
|-----------------------|----------------|-----------------|-------------------------|---------------------------------|-------------------|--------------------------|
| SNP_P3_66339_16361233 | NC_021164.1    | Ca_kabuli_chr05 | 16361233                | GG                              | AA                | 1946433983               |
| SNP_P3_66340_16361368 | NC_021164.1    | Ca_kabuli_chr05 | 16361368                | AA                              | GG                | 1946433985               |
| SNP_P3_66341_16361532 | NC_021164.1    | Ca_kabuli_chr05 | 16361532                | GG                              | AA                | 1946433987               |
| SNP_P3_66343_16374941 | NC_021164.1    | Ca_kabuli_chr05 | 16374941                | GG                              | AA                | 1946433988               |
| SNP_P3_66344_16405942 | NC_021164.1    | Ca_kabuli_chr05 | 16405942                | CC                              | GG                | 1946433990               |
| SNP_P3_66345_16429702 | NC_021164.1    | Ca_kabuli_chr05 | 16429702                | AA                              | TT                | 1946433992               |
| SNP_P3_66346_16441489 | NC_021164.1    | Ca_kabuli_chr05 | 16441489                | GG                              | AA                | 1946433993               |
| SNP_P3_66347_16488645 | NC_021164.1    | Ca_kabuli_chr05 | 16488645                | TT                              | CC                | 1946433995               |
| SNP_P3_66348_16500064 | NC_021164.1    | Ca_kabuli_chr05 | 16500064                | TT                              | CC                | 1946433996               |
| SNP_P3_66349_16507373 | NC_021164.1    | Ca_kabuli_chr05 | 16507373                | TT                              | GG                | 1946433998               |
| SNP_P3_66350_16532749 | NC_021164.1    | Ca_kabuli_chr05 | 16532749                | TT                              | CC                | 1946434000               |
| SNP_P3_66351_16551700 | NC_021164.1    | Ca_kabuli_chr05 | 16551700                | CC                              | AA                | 1946434002               |
| SNP_P3_66352_16551816 | NC_021164.1    | Ca_kabuli_chr05 | 16551816                | CC                              | TT                | 1946434003               |
| SNP_P3_66353_16551859 | NC_021164.1    | Ca_kabuli_chr05 | 16551859                | TT                              | CC                | 1946434005               |
| SNP_P3_66354_16553769 | NC_021164.1    | Ca_kabuli_chr05 | 16553769                | GG                              | AA                | 1946434006               |
| SNP_P3_66355_16553849 | NC_021164.1    | Ca_kabuli_chr05 | 16553849                | TT                              | CC                | 1946434008               |
| SNP_P3_66356_16572406 | NC_021164.1    | Ca_kabuli_chr05 | 16572406                | AA                              | TT                | 1946434010               |
| SNP_P3_66357_16611578 | NC_021164.1    | Ca_kabuli_chr05 | 16611578                | CC                              | TT                | 1946434011               |
| SNP_P3_66358_16611606 | NC_021164.1    | Ca_kabuli_chr05 | 16611606                | AA                              | GG                | 1946434013               |
| SNP_P3_66359_16611610 | NC_021164.1    | Ca_kabuli_chr05 | 16611610                | CC                              | TT                | 1946434014               |
| SNP_P3_66360_16620778 | NC_021164.1    | Ca_kabuli_chr05 | 16620778                | CC                              | TT                | 1946434016               |
| SNP_P3_66361_16624872 | NC_021164.1    | Ca_kabuli_chr05 | 16624872                | TT                              | CC                | 1946434018               |
| SNP_P3_66362_16629370 | NC_021164.1    | Ca_kabuli_chr05 | 16629370                | CC                              | TT                | 1946434019               |
| SNP_P3_66363_16636111 | NC_021164.1    | Ca_kabuli_chr05 | 16636111                | AA                              | GG                | 1946434021               |
| SNP_P3_66364_16636689 | NC_021164.1    | Ca_kabuli_chr05 | 16636689                | AA                              | GG                | 1946434023               |
| SNP_P3_66365_16636741 | NC_021164.1    | Ca_kabuli_chr05 | 16636741                | TT                              | GG                | 1946434024               |
| SNP_P3_66366_16639909 | NC_021164.1    | Ca_kabuli_chr05 | 16639909                | TT                              | CC                | 1946434026               |
| SNP_P3_66367_16642950 | NC_021164.1    | Ca_kabuli_chr05 | 16642950                | TT                              | CC                | 1946434027               |
| SNP_P3_66368_16644083 | NC_021164.1    | Ca_kabuli_chr05 | 16644083                | CC                              | TT                | 1946434029               |
| SNP_P3_66369_16644316 | NC_021164.1    | Ca_kabuli_chr05 | 16644316                | CC                              | TT                | 1946434030               |
| SNP_P3_66370_16644355 | NC_021164.1    | Ca_kabuli_chr05 | 16644355                | TT                              | AA                | 1946434032               |
| SNP_P3_66371_16644356 | NC_021164.1    | Ca_kabuli_chr05 | 16644356                | AA                              | TT                | 1946434033               |
| SNP_P3_66372_16650646 | NC_021164.1    | Ca_kabuli_chr05 | 16650646                | AA                              | GG                | 1946434035               |
| SNP_P3_66373_16651619 | NC_021164.1    | Ca_kabuli_chr05 | 16651619                | AA                              | GG                | 1946434037               |
| SNP_P3_66374_16663245 | NC_021164.1    | Ca_kabuli_chr05 | 16663245                | AA                              | GG                | 1946434039               |
| SNP_P3_66375_16703388 | NC_021164.1    | Ca_kabuli_chr05 | 16703388                | AA                              | GG                | 1946434040               |
| SNP_P3_66376_16703437 | NC_021164.1    | Ca_kabuli_chr05 | 16703437                | TT                              | CC                | 1946434042               |
| SNP_P3_66377_16703465 | NC_021164.1    | Ca_kabuli_chr05 | 16703465                | AA                              | GG                | 1946434043               |
| SNP_P3_66378_16703469 | NC_021164.1    | Ca_kabuli_chr05 | 16703469                | AA                              | GG                | 1946434045               |
| SNP_P3_66379_16703494 | NC_021164.1    | Ca_kabuli_chr05 | 16703494                | TT                              | CC                | 1946434046               |
| SNP_P3_66380_16703610 | NC_021164.1    | Ca_kabuli_chr05 | 16703610                | CC                              | TT                | 1946434048               |
| SNP_P3_66381_16703701 | NC_021164.1    | Ca_kabuli_chr05 | 16703701                | TT                              | CC                | 1946434049               |

| SNPs IDs              | Chromosome IDs | Chromosomes     | Physical positions (bp) | CDC Frontier (Reference genome) | (Pusa 256 & HPNB) | NCBI SNPdb Accession IDs |
|-----------------------|----------------|-----------------|-------------------------|---------------------------------|-------------------|--------------------------|
| SNP_P3_66382_16707010 | NC_021164.1    | Ca_kabuli_chr05 | 16707010                | CC                              | TT                | 1946434051               |
| SNP_P3_66383_16714905 | NC_021164.1    | Ca_kabuli_chr05 | 16714905                | CC                              | TT                | 1946434052               |
| SNP_P3_66385_16721169 | NC_021164.1    | Ca_kabuli_chr05 | 16721169                | GG                              | TT                | 1946434054               |
| SNP_P3_66386_16721176 | NC_021164.1    | Ca_kabuli_chr05 | 16721176                | GG                              | TT                | 1946434055               |
| SNP_P3_66387_16729987 | NC_021164.1    | Ca_kabuli_chr05 | 16729987                | AA                              | TT                | 1946434057               |
| SNP_P3_66388_16729988 | NC_021164.1    | Ca_kabuli_chr05 | 16729988                | AA                              | TT                | 1946434059               |
| SNP_P3_66389_16741381 | NC_021164.1    | Ca_kabuli_chr05 | 16741381                | AA                              | TT                | 1946434061               |
| SNP_P3_66391_16766060 | NC_021164.1    | Ca_kabuli_chr05 | 16766060                | GG                              | TT                | 1946434062               |
| SNP_P3_66392_16766069 | NC_021164.1    | Ca_kabuli_chr05 | 16766069                | TT                              | GG                | 1946434064               |
| SNP_P3_66393_16766130 | NC_021164.1    | Ca_kabuli_chr05 | 16766130                | AA                              | TT                | 1946434065               |
| SNP_P3_66394_16766132 | NC_021164.1    | Ca_kabuli_chr05 | 16766132                | TT                              | AA                | 1946434067               |
| SNP_P3_66395_16766167 | NC_021164.1    | Ca_kabuli_chr05 | 16766167                | CC                              | GG                | 1946434068               |
| SNP_P3_66396_16766978 | NC_021164.1    | Ca_kabuli_chr05 | 16766978                | AA                              | TT                | 1946434070               |
| SNP_P3_66397_16767958 | NC_021164.1    | Ca_kabuli_chr05 | 16767958                | GG                              | TT                | 1946434072               |
| SNP_P3_66398_16767965 | NC_021164.1    | Ca_kabuli_chr05 | 16767965                | AA                              | GG                | 1946434073               |
| SNP_P3_66399_16774892 | NC_021164.1    | Ca_kabuli_chr05 | 16774892                | AA                              | GG                | 1946434075               |
| SNP_P3_66400_16785924 | NC_021164.1    | Ca_kabuli_chr05 | 16785924                | TT                              | CC                | 1946434076               |
| SNP_P3_66401_16808013 | NC_021164.1    | Ca_kabuli_chr05 | 16808013                | GG                              | TT                | 1946434078               |
| SNP_P3_66402_16828085 | NC_021164.1    | Ca_kabuli_chr05 | 16828085                | GG                              | TT                | 1946434079               |
| SNP_P3_66403_16848621 | NC_021164.1    | Ca_kabuli_chr05 | 16848621                | GG                              | AA                | 1946434081               |
| SNP_P3_66404_16862380 | NC_021164.1    | Ca_kabuli_chr05 | 16862380                | CC                              | TT                | 1946434082               |
| SNP_P3_66405_16863799 | NC_021164.1    | Ca_kabuli_chr05 | 16863799                | AA                              | CC                | 1946434084               |
| SNP_P3_66406_16863814 | NC_021164.1    | Ca_kabuli_chr05 | 16863814                | GG                              | AA                | 1946434086               |
| SNP_P3_66407_16863986 | NC_021164.1    | Ca_kabuli_chr05 | 16863986                | TT                              | CC                | 1946434087               |
| SNP_P3_66408_16864193 | NC_021164.1    | Ca_kabuli_chr05 | 16864193                | TT                              | AA                | 1946434089               |
| SNP_P3_66409_16865795 | NC_021164.1    | Ca_kabuli_chr05 | 16865795                | CC                              | TT                | 1946434090               |
| SNP_P3_66410_16872394 | NC_021164.1    | Ca_kabuli_chr05 | 16872394                | GG                              | AA                | 1946434092               |
| SNP_P3_66411_16872733 | NC_021164.1    | Ca_kabuli_chr05 | 16872733                | GG                              | AA                | 1946434093               |
| SNP_P3_66412_16878790 | NC_021164.1    | Ca_kabuli_chr05 | 16878790                | AA                              | CC                | 1946434095               |
| SNP_P3_66414_16920589 | NC_021164.1    | Ca_kabuli_chr05 | 16920589                | CC                              | TT                | 1946434097               |
| SNP_P3_66415_16922532 | NC_021164.1    | Ca_kabuli_chr05 | 16922532                | AA                              | GG                | 1946434099               |
| SNP_P3_66416_16944010 | NC_021164.1    | Ca_kabuli_chr05 | 16944010                | CC                              | TT                | 1946434100               |
| SNP_P3_66417_16944011 | NC_021164.1    | Ca_kabuli_chr05 | 16944011                | AA                              | GG                | 1946434102               |
| SNP_P3_66418_16945707 | NC_021164.1    | Ca_kabuli_chr05 | 16945707                | TT                              | CC                | 1946434103               |
| SNP_P3_66419_16946145 | NC_021164.1    | Ca_kabuli_chr05 | 16946145                | AA                              | GG                | 1946434105               |
| SNP_P3_66421_16948672 | NC_021164.1    | Ca_kabuli_chr05 | 16948672                | AA                              | CC                | 1946434106               |
| SNP_P3_66422_16949252 | NC_021164.1    | Ca_kabuli_chr05 | 16949252                | AA                              | GG                | 1946434108               |
| SNP_P3_66423_16957706 | NC_021164.1    | Ca_kabuli_chr05 | 16957706                | GG                              | AA                | 1946434109               |
| SNP_P3_66424_16957721 | NC_021164.1    | Ca_kabuli_chr05 | 16957721                | GG                              | CC                | 1946434111               |
| SNP_P3_66425_16957739 | NC_021164.1    | Ca_kabuli_chr05 | 16957739                | CC                              | TT                | 1946434113               |
| SNP_P3_66426_16958048 | NC_021164.1    | Ca_kabuli_chr05 | 16958048                | GG                              | AA                | 1946434115               |
| SNP_P3_66427_16958100 | NC_021164.1    | Ca_kabuli_chr05 | 16958100                | GG                              | AA                | 1946434116               |

| SNPs IDs              | Chromosome IDs | Chromosomes     | Physical positions (bp) | CDC Frontier (Reference genome) | (Pusa 256 & HPNB) | NCBI SNPdb Accession IDs |
|-----------------------|----------------|-----------------|-------------------------|---------------------------------|-------------------|--------------------------|
| SNP_P3_66429_16995629 | NC_021164.1    | Ca_kabuli_chr05 | 16995629                | CC                              | TT                | 1946434118               |
| SNP_P3_66430_17012320 | NC_021164.1    | Ca_kabuli_chr05 | 17012320                | TT                              | CC                | 1946434119               |
| SNP_P3_66431_17012385 | NC_021164.1    | Ca_kabuli_chr05 | 17012385                | GG                              | AA                | 1946434121               |
| SNP_P3_66432_17012398 | NC_021164.1    | Ca_kabuli_chr05 | 17012398                | CC                              | TT                | 1946434122               |
| SNP_P3_66433_17012608 | NC_021164.1    | Ca_kabuli_chr05 | 17012608                | GG                              | AA                | 1946434124               |
| SNP_P3_66434_17012635 | NC_021164.1    | Ca_kabuli_chr05 | 17012635                | TT                              | CC                | 1946434126               |
| SNP_P3_66435_17012653 | NC_021164.1    | Ca_kabuli_chr05 | 17012653                | AA                              | GG                | 1946434127               |
| SNP_P3_66436_17012665 | NC_021164.1    | Ca_kabuli_chr05 | 17012665                | GG                              | AA                | 1946434129               |
| SNP_P3_66437_17012686 | NC_021164.1    | Ca_kabuli_chr05 | 17012686                | TT                              | AA                | 1946434131               |
| SNP_P3_66438_17012701 | NC_021164.1    | Ca_kabuli_chr05 | 17012701                | CC                              | TT                | 1946434132               |
| SNP_P3_66439_17012708 | NC_021164.1    | Ca_kabuli_chr05 | 17012708                | CC                              | TT                | 1946434134               |
| SNP_P3_66440_17012740 | NC_021164.1    | Ca_kabuli_chr05 | 17012740                | AA                              | GG                | 1946434135               |
| SNP_P3_66441_17013390 | NC_021164.1    | Ca_kabuli_chr05 | 17013390                | TT                              | CC                | 1946434136               |
| SNP_P3_66442_17013708 | NC_021164.1    | Ca_kabuli_chr05 | 17013708                | AA                              | CC                | 1946434138               |
| SNP_P3_66443_17013767 | NC_021164.1    | Ca_kabuli_chr05 | 17013767                | CC                              | TT                | 1946434139               |
| SNP_P3_66445_17020456 | NC_021164.1    | Ca_kabuli_chr05 | 17020456                | GG                              | AA                | 1946434141               |
| SNP_P3_66446_17035780 | NC_021164.1    | Ca_kabuli_chr05 | 17035780                | GG                              | AA                | 1946434142               |
| SNP_P3_66448_17056653 | NC_021164.1    | Ca_kabuli_chr05 | 17056653                | TT                              | GG                | 1946434143               |
| SNP_P3_66449_17062922 | NC_021164.1    | Ca_kabuli_chr05 | 17062922                | CC                              | TT                | 1946434145               |
| SNP_P3_66450_17062924 | NC_021164.1    | Ca_kabuli_chr05 | 17062924                | AA                              | GG                | 1946434146               |
| SNP_P3_66451_17062990 | NC_021164.1    | Ca_kabuli_chr05 | 17062990                | CC                              | TT                | 1946434148               |
| SNP_P3_66452_17063013 | NC_021164.1    | Ca_kabuli_chr05 | 17063013                | AA                              | GG                | 1946434150               |
| SNP_P3_66453_17063047 | NC_021164.1    | Ca_kabuli_chr05 | 17063047                | AA                              | GG                | 1946434151               |
| SNP_P3_66454_17063048 | NC_021164.1    | Ca_kabuli_chr05 | 17063048                | AA                              | GG                | 1946434153               |
| SNP_P3_66455_17063068 | NC_021164.1    | Ca_kabuli_chr05 | 17063068                | AA                              | GG                | 1946434154               |
| SNP_P3_66456_17063129 | NC_021164.1    | Ca_kabuli_chr05 | 17063129                | TT                              | AA                | 1946434156               |
| SNP_P3_66457_17122851 | NC_021164.1    | Ca_kabuli_chr05 | 17122851                | TT                              | CC                | 1946434157               |
| SNP_P3_66458_17172219 | NC_021164.1    | Ca_kabuli_chr05 | 17172219                | AA                              | TT                | 1946434159               |
| SNP_P3_66459_17172250 | NC_021164.1    | Ca_kabuli_chr05 | 17172250                | TT                              | CC                | 1946434161               |
| SNP_P3_66460_17172252 | NC_021164.1    | Ca_kabuli_chr05 | 17172252                | AA                              | GG                | 1946434162               |
| SNP_P3_66461_17174416 | NC_021164.1    | Ca_kabuli_chr05 | 17174416                | AA                              | GG                | 1946434164               |
| SNP_P3_66462_17199866 | NC_021164.1    | Ca_kabuli_chr05 | 17199866                | TT                              | GG                | 1946434166               |
| SNP_P3_66463_17219277 | NC_021164.1    | Ca_kabuli_chr05 | 17219277                | TT                              | CC                | 1946434167               |
| SNP_P3_66464_17233803 | NC_021164.1    | Ca_kabuli_chr05 | 17233803                | AA                              | GG                | 1946434169               |
| SNP_P3_66465_17233854 | NC_021164.1    | Ca_kabuli_chr05 | 17233854                | AA                              | TT                | 1946434170               |
| SNP_P3_66466_17233872 | NC_021164.1    | Ca_kabuli_chr05 | 17233872                | CC                              | TT                | 1946434171               |
| SNP_P3_66467_17233881 | NC_021164.1    | Ca_kabuli_chr05 | 17233881                | CC                              | TT                | 1946434173               |
| SNP_P3_66468_17233897 | NC_021164.1    | Ca_kabuli_chr05 | 17233897                | AA                              | GG                | 1946434174               |
| SNP_P3_66469_17233907 | NC_021164.1    | Ca_kabuli_chr05 | 17233907                | GG                              | AA                | 1946434176               |
| SNP_P3_66470_17233968 | NC_021164.1    | Ca_kabuli_chr05 | 17233968                | AA                              | GG                | 1946434177               |
| SNP_P3_66471_17233976 | NC_021164.1    | Ca_kabuli_chr05 | 17233976                | GG                              | AA                | 1946434179               |
| SNP_P3_66472_17233989 | NC_021164.1    | Ca_kabuli_chr05 | 17233989                | TT                              | CC                | 1946434180               |

| SNPs IDs              | Chromosome IDs | Chromosomes     | Physical positions (bp) | CDC Frontier (Reference genome) | (Pusa 256 & HPNB) | NCBI SNPdb Accession IDs |
|-----------------------|----------------|-----------------|-------------------------|---------------------------------|-------------------|--------------------------|
| SNP_P3_66473_17233995 | NC_021164.1    | Ca_kabuli_chr05 | 17233995                | AA                              | GG                | 1946434182               |
| SNP_P3_66474_17234235 | NC_021164.1    | Ca_kabuli_chr05 | 17234235                | CC                              | TT                | 1946434184               |
| SNP_P3_66475_17234267 | NC_021164.1    | Ca_kabuli_chr05 | 17234267                | GG                              | AA                | 1946434185               |
| SNP_P3_66476_17234279 | NC_021164.1    | Ca_kabuli_chr05 | 17234279                | TT                              | CC                | 1946434187               |
| SNP_P3_66477_17234361 | NC_021164.1    | Ca_kabuli_chr05 | 17234361                | CC                              | AA                | 1946434188               |
| SNP_P3_66478_17234362 | NC_021164.1    | Ca_kabuli_chr05 | 17234362                | AA                              | GG                | 1946434190               |
| SNP_P3_66479_17234665 | NC_021164.1    | Ca_kabuli_chr05 | 17234665                | AA                              | GG                | 1946434191               |
| SNP_P3_66480_17234704 | NC_021164.1    | Ca_kabuli_chr05 | 17234704                | GG                              | AA                | 1946434193               |
| SNP_P3_66481_17234740 | NC_021164.1    | Ca_kabuli_chr05 | 17234740                | TT                              | CC                | 1946434194               |
| SNP_P3_66482_17234746 | NC_021164.1    | Ca_kabuli_chr05 | 17234746                | GG                              | AA                | 1946434196               |
| SNP_P3_66483_17234779 | NC_021164.1    | Ca_kabuli_chr05 | 17234779                | AA                              | TT                | 1946434197               |
| SNP_P3_66484_17234783 | NC_021164.1    | Ca_kabuli_chr05 | 17234783                | GG                              | AA                | 1946434199               |
| SNP_P3_66485_17239539 | NC_021164.1    | Ca_kabuli_chr05 | 17239539                | CC                              | TT                | 1946434200               |
| SNP_P3_66486_17239623 | NC_021164.1    | Ca_kabuli_chr05 | 17239623                | GG                              | AA                | 1946434202               |
| SNP_P3_66487_17240613 | NC_021164.1    | Ca_kabuli_chr05 | 17240613                | TT                              | CC                | 1946434204               |
| SNP_P3_66488_17241041 | NC_021164.1    | Ca_kabuli_chr05 | 17241041                | GG                              | AA                | 1946434205               |
| SNP_P3_66489_17244321 | NC_021164.1    | Ca_kabuli_chr05 | 17244321                | AA                              | TT                | 1946434207               |
| SNP_P3_66491_17254721 | NC_021164.1    | Ca_kabuli_chr05 | 17254721                | TT                              | GG                | 1946434208               |
| SNP_P3_66492_17254722 | NC_021164.1    | Ca_kabuli_chr05 | 17254722                | TT                              | CC                | 1946434210               |
| SNP_P3_66493_17254742 | NC_021164.1    | Ca_kabuli_chr05 | 17254742                | TT                              | GG                | 1946434211               |
| SNP_P3_66494_17254791 | NC_021164.1    | Ca_kabuli_chr05 | 17254791                | TT                              | CC                | 1946434213               |
| SNP_P3_66495_17254825 | NC_021164.1    | Ca_kabuli_chr05 | 17254825                | TT                              | AA                | 1946434214               |
| SNP_P3_66496_17254858 | NC_021164.1    | Ca_kabuli_chr05 | 17254858                | CC                              | TT                | 1946434216               |
| SNP_P3_66497_17255078 | NC_021164.1    | Ca_kabuli_chr05 | 17255078                | TT                              | CC                | 1946434217               |
| SNP_P3_66498_17285922 | NC_021164.1    | Ca_kabuli_chr05 | 17285922                | AA                              | TT                | 1946434219               |
| SNP_P3_66499_17285951 | NC_021164.1    | Ca_kabuli_chr05 | 17285951                | TT                              | GG                | 1946434220               |
| SNP_P3_66500_17301832 | NC_021164.1    | Ca_kabuli_chr05 | 17301832                | GG                              | AA                | 1946434222               |
| SNP_P3_66501_17301875 | NC_021164.1    | Ca_kabuli_chr05 | 17301875                | AA                              | TT                | 1946434223               |
| SNP_P3_66502_17301909 | NC_021164.1    | Ca_kabuli_chr05 | 17301909                | CC                              | TT                | 1946434225               |
| SNP_P3_66503_17301923 | NC_021164.1    | Ca_kabuli_chr05 | 17301923                | TT                              | CC                | 1946434226               |
| SNP_P3_66505_17323827 | NC_021164.1    | Ca_kabuli_chr05 | 17323827                | AA                              | GG                | 1946434228               |
| SNP_P3_66506_17323996 | NC_021164.1    | Ca_kabuli_chr05 | 17323996                | TT                              | CC                | 1946434229               |
| SNP_P3_66507_17324019 | NC_021164.1    | Ca_kabuli_chr05 | 17324019                | AA                              | TT                | 1946434231               |
| SNP_P3_66508_17324040 | NC_021164.1    | Ca_kabuli_chr05 | 17324040                | TT                              | CC                | 1946434233               |
| SNP_P3_66509_17324049 | NC_021164.1    | Ca_kabuli_chr05 | 17324049                | AA                              | GG                | 1946434234               |
| SNP_P3_66510_17324080 | NC_021164.1    | Ca_kabuli_chr05 | 17324080                | AA                              | GG                | 1946434236               |
| SNP_P3_66511_17324112 | NC_021164.1    | Ca_kabuli_chr05 | 17324112                | CC                              | TT                | 1946434237               |
| SNP_P3_66512_17324113 | NC_021164.1    | Ca_kabuli_chr05 | 17324113                | AA                              | TT                | 1946434239               |
| SNP_P3_66513_17324168 | NC_021164.1    | Ca_kabuli_chr05 | 17324168                | GG                              | TT                | 1946434241               |
| SNP_P3_66514_17324224 | NC_021164.1    | Ca_kabuli_chr05 | 17324224                | TT                              | CC                | 1946434242               |
| SNP_P3_66515_17326926 | NC_021164.1    | Ca_kabuli_chr05 | 17326926                | CC                              | TT                | 1946434244               |
| SNP_P3_66516_17369906 | NC_021164.1    | Ca_kabuli_chr05 | 17369906                | CC                              | TT                | 1946434245               |

| SNPs IDs              | Chromosome IDs | Chromosomes     | Physical positions (bp) | CDC Frontier (Reference genome) | (Pusa 256 & HPNB) | NCBI SNPdb Accession IDs |
|-----------------------|----------------|-----------------|-------------------------|---------------------------------|-------------------|--------------------------|
| SNP_P3_66517_17369908 | NC_021164.1    | Ca_kabuli_chr05 | 17369908                | AA                              | TT                | 1946434247               |
| SNP_P3_66518_17369954 | NC_021164.1    | Ca_kabuli_chr05 | 17369954                | GG                              | AA                | 1946434248               |
| SNP_P3_66519_17370004 | NC_021164.1    | Ca_kabuli_chr05 | 17370004                | GG                              | AA                | 1946434250               |
| SNP_P3_66520_17382597 | NC_021164.1    | Ca_kabuli_chr05 | 17382597                | AA                              | GG                | 1946434251               |
| SNP_P3_66521_17407337 | NC_021164.1    | Ca_kabuli_chr05 | 17407337                | GG                              | AA                | 1946434253               |
| SNP_P3_66523_17449182 | NC_021164.1    | Ca_kabuli_chr05 | 17449182                | GG                              | AA                | 1946434254               |
| SNP_P3_66524_17450330 | NC_021164.1    | Ca_kabuli_chr05 | 17450330                | AA                              | TT                | 1946434256               |
| SNP_P3_66525_17463174 | NC_021164.1    | Ca_kabuli_chr05 | 17463174                | AA                              | GG                | 1946434257               |
| SNP_P3_66526_17482654 | NC_021164.1    | Ca_kabuli_chr05 | 17482654                | AA                              | GG                | 1946434259               |
| SNP_P3_66527_17494731 | NC_021164.1    | Ca_kabuli_chr05 | 17494731                | AA                              | CC                | 1946434260               |
| SNP_P3_66528_17494742 | NC_021164.1    | Ca_kabuli_chr05 | 17494742                | TT                              | GG                | 1946434262               |
| SNP_P3_66529_17494750 | NC_021164.1    | Ca_kabuli_chr05 | 17494750                | GG                              | AA                | 1946434263               |
| SNP_P3_66530_17494840 | NC_021164.1    | Ca_kabuli_chr05 | 17494840                | AA                              | GG                | 1946434265               |
| SNP_P3_66532_17494898 | NC_021164.1    | Ca_kabuli_chr05 | 17494898                | AA                              | GG                | 1946434266               |
| SNP_P3_66533_17503256 | NC_021164.1    | Ca_kabuli_chr05 | 17503256                | TT                              | CC                | 1946434268               |
| SNP_P3_66534_17503257 | NC_021164.1    | Ca_kabuli_chr05 | 17503257                | TT                              | CC                | 1946434269               |
| SNP_P3_66535_17510319 | NC_021164.1    | Ca_kabuli_chr05 | 17510319                | CC                              | TT                | 1946434271               |
| SNP_P3_66536_17526518 | NC_021164.1    | Ca_kabuli_chr05 | 17526518                | TT                              | AA                | 1946434272               |
| SNP_P3_66538_17526847 | NC_021164.1    | Ca_kabuli_chr05 | 17526847                | TT                              | CC                | 1946434274               |
| SNP_P3_66539_17526983 | NC_021164.1    | Ca_kabuli_chr05 | 17526983                | TT                              | AA                | 1946434275               |
| SNP_P3_66540_17542853 | NC_021164.1    | Ca_kabuli_chr05 | 17542853                | AA                              | TT                | 1946434277               |
| SNP_P3_66541_17543066 | NC_021164.1    | Ca_kabuli_chr05 | 17543066                | GG                              | AA                | 1946434278               |
| SNP_P3_66542_17543069 | NC_021164.1    | Ca_kabuli_chr05 | 17543069                | AA                              | TT                | 1946434280               |
| SNP_P3_66543_17570491 | NC_021164.1    | Ca_kabuli_chr05 | 17570491                | TT                              | CC                | 1946434281               |
| SNP_P3_66544_17575494 | NC_021164.1    | Ca_kabuli_chr05 | 17575494                | CC                              | TT                | 1946434283               |
| SNP_P3_66545_17575524 | NC_021164.1    | Ca_kabuli_chr05 | 17575524                | AA                              | CC                | 1946434284               |
| SNP_P3_66546_17575527 | NC_021164.1    | Ca_kabuli_chr05 | 17575527                | AA                              | GG                | 1946434286               |
| SNP_P3_66547_17595517 | NC_021164.1    | Ca_kabuli_chr05 | 17595517                | AA                              | GG                | 1946434287               |
| SNP_P3_66548_17595544 | NC_021164.1    | Ca_kabuli_chr05 | 17595544                | AA                              | GG                | 1946434289               |
| SNP_P3_66549_17595567 | NC_021164.1    | Ca_kabuli_chr05 | 17595567                | GG                              | AA                | 1946434290               |
| SNP_P3_66551_17595840 | NC_021164.1    | Ca_kabuli_chr05 | 17595840                | AA                              | GG                | 1946434292               |
| SNP_P3_66552_17595977 | NC_021164.1    | Ca_kabuli_chr05 | 17595977                | AA                              | GG                | 1946434293               |
| SNP_P3_66553_17610829 | NC_021164.1    | Ca_kabuli_chr05 | 17610829                | TT                              | GG                | 1946434295               |
| SNP_P3_66554_17610832 | NC_021164.1    | Ca_kabuli_chr05 | 17610832                | CC                              | TT                | 1946434296               |
| SNP_P3_66555_17612346 | NC_021164.1    | Ca_kabuli_chr05 | 17612346                | GG                              | AA                | 1946434298               |
| SNP_P3_66556_17612347 | NC_021164.1    | Ca_kabuli_chr05 | 17612347                | TT                              | AA                | 1946434300               |
| SNP_P3_66557_17612381 | NC_021164.1    | Ca_kabuli_chr05 | 17612381                | AA                              | GG                | 1946434301               |
| SNP_P3_66558_17612405 | NC_021164.1    | Ca_kabuli_chr05 | 17612405                | CC                              | AA                | 1946434303               |
| SNP_P3_66559_17612495 | NC_021164.1    | Ca_kabuli_chr05 | 17612495                | CC                              | TT                | 1946434304               |
| SNP_P3_66560_17612559 | NC_021164.1    | Ca_kabuli_chr05 | 17612559                | GG                              | AA                | 1946434306               |
| SNP_P3_66562_17612680 | NC_021164.1    | Ca_kabuli_chr05 | 17612680                | TT                              | AA                | 1946434307               |
| SNP_P3_66563_17612718 | NC_021164.1    | Ca_kabuli_chr05 | 17612718                | TT                              | AA                | 1946434309               |



| SNPs IDs              | Chromosome IDs | Chromosomes     | Physical positions (bp) | CDC Frontier (Reference genome) | (Pusa 256 & HPNB) | NCBI SNPdb Accession IDs |
|-----------------------|----------------|-----------------|-------------------------|---------------------------------|-------------------|--------------------------|
| SNP_P3_66564_17612758 | NC_021164.1    | Ca_kabuli_chr05 | 17612758                | AA                              | GG                | 1946434310               |
| SNP_P3_66565_17612770 | NC_021164.1    | Ca_kabuli_chr05 | 17612770                | AA                              | CC                | 1946434312               |
| SNP_P3_66566_17612901 | NC_021164.1    | Ca_kabuli_chr05 | 17612901                | CC                              | TT                | 1946434313               |
| SNP_P3_66567_17631322 | NC_021164.1    | Ca_kabuli_chr05 | 17631322                | TT                              | CC                | 1946434315               |
| SNP_P3_66568_17633202 | NC_021164.1    | Ca_kabuli_chr05 | 17633202                | AA                              | GG                | 1946434316               |
| SNP_P3_66569_17672037 | NC_021164.1    | Ca_kabuli_chr05 | 17672037                | CC                              | TT                | 1946434318               |
| SNP_P3_66570_17672076 | NC_021164.1    | Ca_kabuli_chr05 | 17672076                | CC                              | GG                | 1946434319               |
| SNP_P3_66571_17672092 | NC_021164.1    | Ca_kabuli_chr05 | 17672092                | GG                              | AA                | 1946434321               |
| SNP_P3_66572_17672137 | NC_021164.1    | Ca_kabuli_chr05 | 17672137                | AA                              | GG                | 1946434322               |
| SNP_P3_66573_17672148 | NC_021164.1    | Ca_kabuli_chr05 | 17672148                | TT                              | CC                | 1946434324               |
| SNP_P3_66574_17672406 | NC_021164.1    | Ca_kabuli_chr05 | 17672406                | GG                              | AA                | 1946434325               |
| SNP_P3_66575_17672420 | NC_021164.1    | Ca_kabuli_chr05 | 17672420                | TT                              | CC                | 1946434327               |
| SNP_P3_66576_17673982 | NC_021164.1    | Ca_kabuli_chr05 | 17673982                | CC                              | TT                | 1946434328               |
| SNP_P3_66577_17693836 | NC_021164.1    | Ca_kabuli_chr05 | 17693836                | TT                              | CC                | 1946434330               |
| SNP_P3_66578_17693889 | NC_021164.1    | Ca_kabuli_chr05 | 17693889                | TT                              | CC                | 1946434331               |
| SNP_P3_66579_17693891 | NC_021164.1    | Ca_kabuli_chr05 | 17693891                | TT                              | CC                | 1946434333               |
| SNP_P3_66580_17693892 | NC_021164.1    | Ca_kabuli_chr05 | 17693892                | TT                              | CC                | 1946434334               |
| SNP_P3_66581_17693909 | NC_021164.1    | Ca_kabuli_chr05 | 17693909                | CC                              | TT                | 1946434336               |
| SNP_P3_66582_17693922 | NC_021164.1    | Ca_kabuli_chr05 | 17693922                | CC                              | AA                | 1946434337               |
| SNP_P3_66583_17694337 | NC_021164.1    | Ca_kabuli_chr05 | 17694337                | AA                              | CC                | 1946434339               |
| SNP_P3_66584_17710929 | NC_021164.1    | Ca_kabuli_chr05 | 17710929                | GG                              | AA                | 1946434341               |
| SNP_P3_66586_17735111 | NC_021164.1    | Ca_kabuli_chr05 | 17735111                | CC                              | AA                | 1946434342               |
| SNP_P3_66588_17797996 | NC_021164.1    | Ca_kabuli_chr05 | 17797996                | AA                              | GG                | 1946434344               |
| SNP_P3_66589_17827301 | NC_021164.1    | Ca_kabuli_chr05 | 17827301                | GG                              | AA                | 1946434345               |
| SNP_P3_66590_17827342 | NC_021164.1    | Ca_kabuli_chr05 | 17827342                | GG                              | AA                | 1946434347               |
| SNP_P3_66592_17848749 | NC_021164.1    | Ca_kabuli_chr05 | 17848749                | AA                              | CC                | 1946434348               |
| SNP_P3_66593_17860968 | NC_021164.1    | Ca_kabuli_chr05 | 17860968                | AA                              | GG                | 1946434350               |
| SNP_P3_66594_17866107 | NC_021164.1    | Ca_kabuli_chr05 | 17866107                | TT                              | GG                | 1946434352               |
| SNP_P3_66595_17867094 | NC_021164.1    | Ca_kabuli_chr05 | 17867094                | GG                              | AA                | 1946434353               |
| SNP_P3_66596_17867151 | NC_021164.1    | Ca_kabuli_chr05 | 17867151                | AA                              | CC                | 1946434355               |
| SNP_P3_66597_17867326 | NC_021164.1    | Ca_kabuli_chr05 | 17867326                | GG                              | AA                | 1946434356               |
| SNP_P3_66598_17867384 | NC_021164.1    | Ca_kabuli_chr05 | 17867384                | CC                              | TT                | 1946434358               |
| SNP_P3_66599_17867397 | NC_021164.1    | Ca_kabuli_chr05 | 17867397                | CC                              | TT                | 1946434359               |
| SNP_P3_66600_17867502 | NC_021164.1    | Ca_kabuli_chr05 | 17867502                | CC                              | TT                | 1946434361               |
| SNP_P3_66601_17867556 | NC_021164.1    | Ca_kabuli_chr05 | 17867556                | TT                              | CC                | 1946434362               |
| SNP_P3_66602_17867787 | NC_021164.1    | Ca_kabuli_chr05 | 17867787                | CC                              | AA                | 1946434364               |
| SNP_P3_66603_17867916 | NC_021164.1    | Ca_kabuli_chr05 | 17867916                | GG                              | TT                | 1946434366               |
| SNP_P3_66604_17869391 | NC_021164.1    | Ca_kabuli_chr05 | 17869391                | GG                              | TT                | 1946434367               |
| SNP_P3_66605_17869431 | NC_021164.1    | Ca_kabuli_chr05 | 17869431                | CC                              | TT                | 1946434369               |
| SNP_P3_66606_17869986 | NC_021164.1    | Ca_kabuli_chr05 | 17869986                | GG                              | AA                | 1946434370               |
| SNP_P3_66607_17869992 | NC_021164.1    | Ca_kabuli_chr05 | 17869992                | CC                              | TT                | 1946434372               |
| SNP_P3_66608_17870005 | NC_021164.1    | Ca_kabuli_chr05 | 17870005                | AA                              | TT                | 1946434374               |

| SNPs IDs              | Chromosome IDs | Chromosomes     | Physical positions (bp) | CDC Frontier (Reference genome) | (Pusa 256 & HPNB) | NCBI SNPdb Accession IDs |
|-----------------------|----------------|-----------------|-------------------------|---------------------------------|-------------------|--------------------------|
| SNP_P3_66609_17870335 | NC_021164.1    | Ca_kabuli_chr05 | 17870335                | AA                              | GG                | 1946434375               |
| SNP_P3_66610_17874796 | NC_021164.1    | Ca_kabuli_chr05 | 17874796                | CC                              | GG                | 1946434377               |
| SNP_P3_66612_17876180 | NC_021164.1    | Ca_kabuli_chr05 | 17876180                | TT                              | CC                | 1946434378               |
| SNP_P3_66613_17876433 | NC_021164.1    | Ca_kabuli_chr05 | 17876433                | GG                              | AA                | 1946434380               |
| SNP_P3_66615_17876545 | NC_021164.1    | Ca_kabuli_chr05 | 17876545                | GG                              | AA                | 1946434381               |
| SNP_P3_66616_17876608 | NC_021164.1    | Ca_kabuli_chr05 | 17876608                | AA                              | CC                | 1946434383               |
| SNP_P3_66617_17876611 | NC_021164.1    | Ca_kabuli_chr05 | 17876611                | TT                              | AA                | 1946434385               |
| SNP_P3_66619_17876891 | NC_021164.1    | Ca_kabuli_chr05 | 17876891                | CC                              | GG                | 1946434386               |
| SNP_P3_66621_17877144 | NC_021164.1    | Ca_kabuli_chr05 | 17877144                | TT                              | CC                | 1946434388               |
| SNP_P3_66622_17899682 | NC_021164.1    | Ca_kabuli_chr05 | 17899682                | TT                              | AA                | 1946434389               |
| SNP_P3_66623_17899727 | NC_021164.1    | Ca_kabuli_chr05 | 17899727                | AA                              | TT                | 1946434391               |
| SNP_P3_66624_17899737 | NC_021164.1    | Ca_kabuli_chr05 | 17899737                | TT                              | AA                | 1946434392               |
| SNP_P3_66625_17900074 | NC_021164.1    | Ca_kabuli_chr05 | 17900074                | AA                              | TT                | 1946434394               |
| SNP_P3_66626_17900091 | NC_021164.1    | Ca_kabuli_chr05 | 17900091                | CC                              | TT                | 1946434395               |
| SNP_P3_66627_17900095 | NC_021164.1    | Ca_kabuli_chr05 | 17900095                | AA                              | GG                | 1946434397               |
| SNP_P3_66628_17922055 | NC_021164.1    | Ca_kabuli_chr05 | 17922055                | TT                              | AA                | 1946434398               |
| SNP_P3_66629_17936321 | NC_021164.1    | Ca_kabuli_chr05 | 17936321                | CC                              | TT                | 1946434400               |
| SNP_P3_66630_17936325 | NC_021164.1    | Ca_kabuli_chr05 | 17936325                | TT                              | AA                | 1946434402               |
| SNP_P3_66631_17987281 | NC_021164.1    | Ca_kabuli_chr05 | 17987281                | CC                              | TT                | 1946434403               |
| SNP_P3_66632_17994699 | NC_021164.1    | Ca_kabuli_chr05 | 17994699                | TT                              | CC                | 1946434405               |
| SNP_P3_66633_18002474 | NC_021164.1    | Ca_kabuli_chr05 | 18002474                | TT                              | GG                | 1946434406               |
| SNP_P3_66634_18002606 | NC_021164.1    | Ca_kabuli_chr05 | 18002606                | CC                              | TT                | 1946434408               |
| SNP_P3_66635_18003197 | NC_021164.1    | Ca_kabuli_chr05 | 18003197                | GG                              | AA                | 1946434409               |
| SNP_P3_66637_18023467 | NC_021164.1    | Ca_kabuli_chr05 | 18023467                | CC                              | TT                | 1946434411               |
| SNP_P3_66639_18062505 | NC_021164.1    | Ca_kabuli_chr05 | 18062505                | TT                              | GG                | 1946434413               |
| SNP_P3_66640_18062546 | NC_021164.1    | Ca_kabuli_chr05 | 18062546                | TT                              | GG                | 1946434414               |
| SNP_P3_66641_18062620 | NC_021164.1    | Ca_kabuli_chr05 | 18062620                | CC                              | TT                | 1946434416               |
| SNP_P3_66642_18066142 | NC_021164.1    | Ca_kabuli_chr05 | 18066142                | CC                              | TT                | 1946434417               |
| SNP_P3_66643_18078976 | NC_021164.1    | Ca_kabuli_chr05 | 18078976                | GG                              | TT                | 1946434419               |
| SNP_P3_66644_18079120 | NC_021164.1    | Ca_kabuli_chr05 | 18079120                | CC                              | TT                | 1946434420               |
| SNP_P3_66645_18110149 | NC_021164.1    | Ca_kabuli_chr05 | 18110149                | GG                              | TT                | 1946434422               |
| SNP_P3_66647_18181485 | NC_021164.1    | Ca_kabuli_chr05 | 18181485                | AA                              | GG                | 1946434424               |
| SNP_P3_66649_18199695 | NC_021164.1    | Ca_kabuli_chr05 | 18199695                | TT                              | CC                | 1946434425               |
| SNP_P3_66650_18201139 | NC_021164.1    | Ca_kabuli_chr05 | 18201139                | AA                              | CC                | 1946434427               |
| SNP_P3_66651_18209981 | NC_021164.1    | Ca_kabuli_chr05 | 18209981                | AA                              | GG                | 1946434428               |
| SNP_P3_66652_18258033 | NC_021164.1    | Ca_kabuli_chr05 | 18258033                | TT                              | CC                | 1946434430               |
| SNP_P3_66653_18258035 | NC_021164.1    | Ca_kabuli_chr05 | 18258035                | AA                              | GG                | 1946434431               |
| SNP_P3_66654_18258041 | NC_021164.1    | Ca_kabuli_chr05 | 18258041                | CC                              | TT                | 1946434433               |
| SNP_P3_66655_18282873 | NC_021164.1    | Ca_kabuli_chr05 | 18282873                | AA                              | CC                | 1946434435               |
| SNP_P3_66656_18282875 | NC_021164.1    | Ca_kabuli_chr05 | 18282875                | TT                              | GG                | 1946434436               |
| SNP_P3_66657_18282916 | NC_021164.1    | Ca_kabuli_chr05 | 18282916                | TT                              | CC                | 1946434437               |
| SNP_P3_66658_18282944 | NC_021164.1    | Ca_kabuli_chr05 | 18282944                | TT                              | CC                | 1946434439               |

| SNPs IDs              | Chromosome IDs | Chromosomes     | Physical positions (bp) | CDC Frontier (Reference genome) | (Pusa 256 & HPNB) | NCBI SNPdb Accession IDs |
|-----------------------|----------------|-----------------|-------------------------|---------------------------------|-------------------|--------------------------|
| SNP_P3_66659_18282952 | NC_021164.1    | Ca_kabuli_chr05 | 18282952                | CC                              | TT                | 1946434441               |
| SNP_P3_66660_18282978 | NC_021164.1    | Ca_kabuli_chr05 | 18282978                | GG                              | AA                | 1946434443               |
| SNP_P3_66661_18282985 | NC_021164.1    | Ca_kabuli_chr05 | 18282985                | CC                              | TT                | 1946434444               |
| SNP_P3_66662_18282988 | NC_021164.1    | Ca_kabuli_chr05 | 18282988                | GG                              | AA                | 1946434446               |
| SNP_P3_66663_18282997 | NC_021164.1    | Ca_kabuli_chr05 | 18282997                | TT                              | CC                | 1946434447               |
| SNP_P3_66664_18283009 | NC_021164.1    | Ca_kabuli_chr05 | 18283009                | GG                              | AA                | 1946434449               |
| SNP_P3_66665_18283182 | NC_021164.1    | Ca_kabuli_chr05 | 18283182                | TT                              | GG                | 1946434450               |
| SNP_P3_66666_18283197 | NC_021164.1    | Ca_kabuli_chr05 | 18283197                | TT                              | CC                | 1946434452               |
| SNP_P3_66667_18283237 | NC_021164.1    | Ca_kabuli_chr05 | 18283237                | AA                              | GG                | 1946434453               |
| SNP_P3_66668_18283310 | NC_021164.1    | Ca_kabuli_chr05 | 18283310                | GG                              | AA                | 1946434455               |
| SNP_P3_66669_18285826 | NC_021164.1    | Ca_kabuli_chr05 | 18285826                | CC                              | TT                | 1946434456               |
| SNP_P3_66670_18285860 | NC_021164.1    | Ca_kabuli_chr05 | 18285860                | AA                              | GG                | 1946434458               |
| SNP_P3_66671_18285911 | NC_021164.1    | Ca_kabuli_chr05 | 18285911                | AA                              | CC                | 1946434460               |
| SNP_P3_66672_18285926 | NC_021164.1    | Ca_kabuli_chr05 | 18285926                | CC                              | TT                | 1946434461               |
| SNP_P3_66674_18314132 | NC_021164.1    | Ca_kabuli_chr05 | 18314132                | CC                              | TT                | 1946434463               |
| SNP_P3_66675_18314276 | NC_021164.1    | Ca_kabuli_chr05 | 18314276                | TT                              | AA                | 1946434464               |
| SNP_P3_66676_18314394 | NC_021164.1    | Ca_kabuli_chr05 | 18314394                | TT                              | CC                | 1946434468               |
| SNP_P3_66677_18314395 | NC_021164.1    | Ca_kabuli_chr05 | 18314395                | AA                              | GG                | 1946434470               |
| SNP_P3_66678_18314465 | NC_021164.1    | Ca_kabuli_chr05 | 18314465                | TT                              | CC                | 1946434471               |
| SNP_P3_66679_18314495 | NC_021164.1    | Ca_kabuli_chr05 | 18314495                | TT                              | GG                | 1946434473               |
| SNP_P3_66680_18314500 | NC_021164.1    | Ca_kabuli_chr05 | 18314500                | GG                              | CC                | 1946434475               |
| SNP_P3_66681_18314509 | NC_021164.1    | Ca_kabuli_chr05 | 18314509                | GG                              | AA                | 1946434476               |
| SNP_P3_66682_18314599 | NC_021164.1    | Ca_kabuli_chr05 | 18314599                | CC                              | TT                | 1946434478               |
| SNP_P3_66683_18314629 | NC_021164.1    | Ca_kabuli_chr05 | 18314629                | GG                              | AA                | 1946434480               |
| SNP_P3_66684_18314632 | NC_021164.1    | Ca_kabuli_chr05 | 18314632                | AA                              | GG                | 1946434481               |
| SNP_P3_66685_18318096 | NC_021164.1    | Ca_kabuli_chr05 | 18318096                | TT                              | AA                | 1946434483               |
| SNP_P3_66686_18318449 | NC_021164.1    | Ca_kabuli_chr05 | 18318449                | TT                              | CC                | 1946434484               |
| SNP_P3_66687_18318455 | NC_021164.1    | Ca_kabuli_chr05 | 18318455                | TT                              | CC                | 1946434486               |
| SNP_P3_66688_18318484 | NC_021164.1    | Ca_kabuli_chr05 | 18318484                | AA                              | GG                | 1946434487               |
| SNP_P3_66689_18318544 | NC_021164.1    | Ca_kabuli_chr05 | 18318544                | CC                              | TT                | 1946434489               |
| SNP_P3_66690_18318578 | NC_021164.1    | Ca_kabuli_chr05 | 18318578                | TT                              | CC                | 1946434491               |
| SNP_P3_66691_18319890 | NC_021164.1    | Ca_kabuli_chr05 | 18319890                | AA                              | GG                | 1946434493               |
| SNP_P3_66692_18320214 | NC_021164.1    | Ca_kabuli_chr05 | 18320214                | GG                              | AA                | 1946434494               |
| SNP_P3_66693_18320245 | NC_021164.1    | Ca_kabuli_chr05 | 18320245                | TT                              | AA                | 1946434496               |
| SNP_P3_66694_18320280 | NC_021164.1    | Ca_kabuli_chr05 | 18320280                | AA                              | GG                | 1946434497               |
| SNP_P3_66695_18320293 | NC_021164.1    | Ca_kabuli_chr05 | 18320293                | CC                              | TT                | 1946434499               |
| SNP_P3_66696_18325015 | NC_021164.1    | Ca_kabuli_chr05 | 18325015                | AA                              | GG                | 1946434501               |
| SNP_P3_66697_18325448 | NC_021164.1    | Ca_kabuli_chr05 | 18325448                | TT                              | CC                | 1946434502               |
| SNP_P3_66698_18325955 | NC_021164.1    | Ca_kabuli_chr05 | 18325955                | GG                              | TT                | 1946434504               |
| SNP_P3_66699_18327177 | NC_021164.1    | Ca_kabuli_chr05 | 18327177                | AA                              | GG                | 1946434505               |
| SNP_P3_66700_18327194 | NC_021164.1    | Ca_kabuli_chr05 | 18327194                | AA                              | GG                | 1946434507               |
| SNP_P3_66701_18327215 | NC_021164.1    | Ca_kabuli_chr05 | 18327215                | GG                              | AA                | 1946434509               |

| SNPs IDs              | Chromosome IDs | Chromosomes     | Physical positions (bp) | CDC Frontier (Reference genome) | (Pusa 256 & HPNB) | NCBI SNPdb Accession IDs |
|-----------------------|----------------|-----------------|-------------------------|---------------------------------|-------------------|--------------------------|
| SNP_P3_66702_18327218 | NC_021164.1    | Ca_kabuli_chr05 | 18327218                | TT                              | CC                | 1946434511               |
| SNP_P3_66703_18327231 | NC_021164.1    | Ca_kabuli_chr05 | 18327231                | GG                              | TT                | 1946434512               |
| SNP_P3_66704_18340286 | NC_021164.1    | Ca_kabuli_chr05 | 18340286                | AA                              | TT                | 1946434514               |
| SNP_P3_66705_18416234 | NC_021164.1    | Ca_kabuli_chr05 | 18416234                | AA                              | TT                | 1946434515               |
| SNP_P3_66706_18416249 | NC_021164.1    | Ca_kabuli_chr05 | 18416249                | AA                              | GG                | 1946434517               |
| SNP_P3_66707_18436553 | NC_021164.1    | Ca_kabuli_chr05 | 18436553                | CC                              | AA                | 1946434519               |
| SNP_P3_66708_18519351 | NC_021164.1    | Ca_kabuli_chr05 | 18519351                | CC                              | TT                | 1946434520               |
| SNP_P3_66709_18519353 | NC_021164.1    | Ca_kabuli_chr05 | 18519353                | TT                              | CC                | 1946434522               |
| SNP_P3_66710_18519379 | NC_021164.1    | Ca_kabuli_chr05 | 18519379                | CC                              | TT                | 1946434524               |
| SNP_P3_66711_18519767 | NC_021164.1    | Ca_kabuli_chr05 | 18519767                | TT                              | CC                | 1946434525               |
| SNP_P3_66712_18519768 | NC_021164.1    | Ca_kabuli_chr05 | 18519768                | CC                              | TT                | 1946434527               |
| SNP_P3_66714_18556712 | NC_021164.1    | Ca_kabuli_chr05 | 18556712                | GG                              | TT                | 1946434528               |
| SNP_P3_66715_18562039 | NC_021164.1    | Ca_kabuli_chr05 | 18562039                | GG                              | AA                | 1946434530               |
| SNP_P3_66716_18590368 | NC_021164.1    | Ca_kabuli_chr05 | 18590368                | TT                              | AA                | 1946434532               |
| SNP_P3_66717_18590395 | NC_021164.1    | Ca_kabuli_chr05 | 18590395                | TT                              | AA                | 1946434533               |
| SNP_P3_66718_18590427 | NC_021164.1    | Ca_kabuli_chr05 | 18590427                | GG                              | TT                | 1946434535               |
| SNP_P3_66719_18590661 | NC_021164.1    | Ca_kabuli_chr05 | 18590661                | CC                              | TT                | 1946434536               |
| SNP_P3_66720_18590738 | NC_021164.1    | Ca_kabuli_chr05 | 18590738                | AA                              | GG                | 1946434538               |
| SNP_P3_66721_18590750 | NC_021164.1    | Ca_kabuli_chr05 | 18590750                | TT                              | CC                | 1946434540               |
| SNP_P3_66722_18590833 | NC_021164.1    | Ca_kabuli_chr05 | 18590833                | TT                              | CC                | 1946434541               |
| SNP_P3_66723_18592180 | NC_021164.1    | Ca_kabuli_chr05 | 18592180                | TT                              | CC                | 1946434543               |
| SNP_P3_66724_18592181 | NC_021164.1    | Ca_kabuli_chr05 | 18592181                | GG                              | CC                | 1946434544               |
| SNP_P3_66725_18592391 | NC_021164.1    | Ca_kabuli_chr05 | 18592391                | CC                              | GG                | 1946434546               |
| SNP_P3_66726_18592447 | NC_021164.1    | Ca_kabuli_chr05 | 18592447                | AA                              | GG                | 1946434548               |
| SNP_P3_66727_18592459 | NC_021164.1    | Ca_kabuli_chr05 | 18592459                | GG                              | AA                | 1946434549               |
| SNP_P3_66728_18592479 | NC_021164.1    | Ca_kabuli_chr05 | 18592479                | TT                              | CC                | 1946434551               |
| SNP_P3_66729_18593074 | NC_021164.1    | Ca_kabuli_chr05 | 18593074                | TT                              | GG                | 1946434552               |
| SNP_P3_66730_18593104 | NC_021164.1    | Ca_kabuli_chr05 | 18593104                | AA                              | GG                | 1946434554               |
| SNP_P3_66731_18593106 | NC_021164.1    | Ca_kabuli_chr05 | 18593106                | GG                              | TT                | 1946434556               |
| SNP_P3_66732_18593110 | NC_021164.1    | Ca_kabuli_chr05 | 18593110                | AA                              | GG                | 1946434558               |
| SNP_P3_66733_18593141 | NC_021164.1    | Ca_kabuli_chr05 | 18593141                | AA                              | GG                | 1946434560               |
| SNP_P3_66734_18593146 | NC_021164.1    | Ca_kabuli_chr05 | 18593146                | AA                              | GG                | 1946434562               |
| SNP_P3_66735_18593178 | NC_021164.1    | Ca_kabuli_chr05 | 18593178                | TT                              | GG                | 1946434563               |
| SNP_P3_66736_18593202 | NC_021164.1    | Ca_kabuli_chr05 | 18593202                | AA                              | GG                | 1946434565               |
| SNP_P3_66737_18593223 | NC_021164.1    | Ca_kabuli_chr05 | 18593223                | TT                              | GG                | 1946434566               |
| SNP_P3_66738_18593365 | NC_021164.1    | Ca_kabuli_chr05 | 18593365                | GG                              | AA                | 1946434568               |
| SNP_P3_66739_18593403 | NC_021164.1    | Ca_kabuli_chr05 | 18593403                | AA                              | GG                | 1946434569               |
| SNP_P3_66740_18593596 | NC_021164.1    | Ca_kabuli_chr05 | 18593596                | GG                              | TT                | 1946434571               |
| SNP_P3_66741_18593649 | NC_021164.1    | Ca_kabuli_chr05 | 18593649                | GG                              | CC                | 1946434572               |
| SNP_P3_66742_18593665 | NC_021164.1    | Ca_kabuli_chr05 | 18593665                | AA                              | TT                | 1946434574               |
| SNP_P3_66743_18593698 | NC_021164.1    | Ca_kabuli_chr05 | 18593698                | TT                              | CC                | 1946434576               |
| SNP_P3_66744_18593736 | NC_021164.1    | Ca_kabuli_chr05 | 18593736                | AA                              | GG                | 1946434578               |

| SNPs IDs              | Chromosome IDs | Chromosomes     | Physical positions (bp) | CDC Frontier (Reference genome) | (Pusa 256 & HPNB) | NCBI SNPdb Accession IDs |
|-----------------------|----------------|-----------------|-------------------------|---------------------------------|-------------------|--------------------------|
| SNP_P3_66745_18593780 | NC_021164.1    | Ca_kabuli_chr05 | 18593780                | AA                              | GG                | 1946434579               |
| SNP_P3_66746_18593830 | NC_021164.1    | Ca_kabuli_chr05 | 18593830                | GG                              | AA                | 1946434581               |
| SNP_P3_66748_18593958 | NC_021164.1    | Ca_kabuli_chr05 | 18593958                | AA                              | GG                | 1946434583               |
| SNP_P3_66749_18594132 | NC_021164.1    | Ca_kabuli_chr05 | 18594132                | GG                              | TT                | 1946434584               |
| SNP_P3_66750_18594303 | NC_021164.1    | Ca_kabuli_chr05 | 18594303                | AA                              | TT                | 1946434586               |
| SNP_P3_66752_18678592 | NC_021164.1    | Ca_kabuli_chr05 | 18678592                | TT                              | GG                | 1946434587               |
| SNP_P3_66753_18678615 | NC_021164.1    | Ca_kabuli_chr05 | 18678615                | TT                              | CC                | 1946434589               |
| SNP_P3_66754_18678649 | NC_021164.1    | Ca_kabuli_chr05 | 18678649                | AA                              | GG                | 1946434591               |
| SNP_P3_66755_18678701 | NC_021164.1    | Ca_kabuli_chr05 | 18678701                | AA                              | CC                | 1946434593               |
| SNP_P3_66756_18678703 | NC_021164.1    | Ca_kabuli_chr05 | 18678703                | GG                              | CC                | 1946434594               |
| SNP_P3_66757_18678723 | NC_021164.1    | Ca_kabuli_chr05 | 18678723                | AA                              | CC                | 1946434596               |
| SNP_P3_66758_18678724 | NC_021164.1    | Ca_kabuli_chr05 | 18678724                | CC                              | AA                | 1946434597               |
| SNP_P3_66759_18678736 | NC_021164.1    | Ca_kabuli_chr05 | 18678736                | AA                              | CC                | 1946434599               |
| SNP_P3_66760_18678773 | NC_021164.1    | Ca_kabuli_chr05 | 18678773                | GG                              | CC                | 1946434601               |
| SNP_P3_66761_18679655 | NC_021164.1    | Ca_kabuli_chr05 | 18679655                | AA                              | GG                | 1946434602               |
| SNP_P3_66762_18679660 | NC_021164.1    | Ca_kabuli_chr05 | 18679660                | GG                              | CC                | 1946434604               |
| SNP_P3_66763_18679730 | NC_021164.1    | Ca_kabuli_chr05 | 18679730                | TT                              | CC                | 1946434605               |
| SNP_P3_66765_18681549 | NC_021164.1    | Ca_kabuli_chr05 | 18681549                | TT                              | CC                | 1946434607               |
| SNP_P3_66766_18682979 | NC_021164.1    | Ca_kabuli_chr05 | 18682979                | AA                              | CC                | 1946434609               |
| SNP_P3_66767_18683064 | NC_021164.1    | Ca_kabuli_chr05 | 18683064                | TT                              | CC                | 1946434610               |
| SNP_P3_66768_18683156 | NC_021164.1    | Ca_kabuli_chr05 | 18683156                | TT                              | CC                | 1946434612               |
| SNP_P3_66769_18683174 | NC_021164.1    | Ca_kabuli_chr05 | 18683174                | AA                              | GG                | 1946434614               |
| SNP_P3_66771_18683922 | NC_021164.1    | Ca_kabuli_chr05 | 18683922                | AA                              | TT                | 1946434615               |
| SNP_P3_66772_18683950 | NC_021164.1    | Ca_kabuli_chr05 | 18683950                | TT                              | CC                | 1946434616               |
| SNP_P3_66773_18684021 | NC_021164.1    | Ca_kabuli_chr05 | 18684021                | CC                              | TT                | 1946434618               |
| SNP_P3_66774_18684035 | NC_021164.1    | Ca_kabuli_chr05 | 18684035                | AA                              | GG                | 1946434620               |
| SNP_P3_66775_18694592 | NC_021164.1    | Ca_kabuli_chr05 | 18694592                | CC                              | TT                | 1946434621               |
| SNP_P3_66776_18794048 | NC_021164.1    | Ca_kabuli_chr05 | 18794048                | GG                              | AA                | 1946434623               |
| SNP_P3_66777_18794060 | NC_021164.1    | Ca_kabuli_chr05 | 18794060                | AA                              | GG                | 1946434625               |
| SNP_P3_66778_18794069 | NC_021164.1    | Ca_kabuli_chr05 | 18794069                | AA                              | GG                | 1946434626               |
| SNP_P3_66779_18794114 | NC_021164.1    | Ca_kabuli_chr05 | 18794114                | GG                              | AA                | 1946434628               |
| SNP_P3_66780_18794142 | NC_021164.1    | Ca_kabuli_chr05 | 18794142                | TT                              | CC                | 1946434630               |
| SNP_P3_66781_18794162 | NC_021164.1    | Ca_kabuli_chr05 | 18794162                | TT                              | CC                | 1946434631               |
| SNP_P3_66783_18814348 | NC_021164.1    | Ca_kabuli_chr05 | 18814348                | TT                              | GG                | 1946434633               |
| SNP_P3_66784_18820942 | NC_021164.1    | Ca_kabuli_chr05 | 18820942                | TT                              | CC                | 1946434634               |
| SNP_P3_66785_18820952 | NC_021164.1    | Ca_kabuli_chr05 | 18820952                | TT                              | AA                | 1946434636               |
| SNP_P3_66786_18831679 | NC_021164.1    | Ca_kabuli_chr05 | 18831679                | GG                              | TT                | 1946434637               |
| SNP_P3_66787_18831694 | NC_021164.1    | Ca_kabuli_chr05 | 18831694                | CC                              | TT                | 1946434639               |
| SNP_P3_66788_18831699 | NC_021164.1    | Ca_kabuli_chr05 | 18831699                | GG                              | TT                | 1946434640               |
| SNP_P3_66789_18846044 | NC_021164.1    | Ca_kabuli_chr05 | 18846044                | AA                              | GG                | 1946434642               |
| SNP_P3_66790_18846053 | NC_021164.1    | Ca_kabuli_chr05 | 18846053                | AA                              | GG                | 1946434643               |
| SNP_P3_66791_18846111 | NC_021164.1    | Ca_kabuli_chr05 | 18846111                | AA                              | GG                | 1946434645               |

| SNPs IDs              | Chromosome IDs | Chromosomes     | Physical positions (bp) | CDC Frontier (Reference genome) | (Pusa 256 & HPNB) | NCBI SNPdb Accession IDs |
|-----------------------|----------------|-----------------|-------------------------|---------------------------------|-------------------|--------------------------|
| SNP_P3_66792_18846112 | NC_021164.1    | Ca_kabuli_chr05 | 18846112                | AA                              | GG                | 1946434647               |
| SNP_P3_66793_18846227 | NC_021164.1    | Ca_kabuli_chr05 | 18846227                | AA                              | GG                | 1946434648               |
| SNP_P3_66794_18846247 | NC_021164.1    | Ca_kabuli_chr05 | 18846247                | GG                              | AA                | 1946434650               |
| SNP_P3_66795_18869370 | NC_021164.1    | Ca_kabuli_chr05 | 18869370                | TT                              | CC                | 1946434651               |
| SNP_P3_66796_18876013 | NC_021164.1    | Ca_kabuli_chr05 | 18876013                | AA                              | TT                | 1946434653               |
| SNP_P3_66797_18879070 | NC_021164.1    | Ca_kabuli_chr05 | 18879070                | AA                              | TT                | 1946434654               |
| SNP_P3_66798_18879087 | NC_021164.1    | Ca_kabuli_chr05 | 18879087                | AA                              | GG                | 1946434656               |
| SNP_P3_66799_18887666 | NC_021164.1    | Ca_kabuli_chr05 | 18887666                | GG                              | AA                | 1946434657               |
| SNP_P3_66800_18898511 | NC_021164.1    | Ca_kabuli_chr05 | 18898511                | CC                              | TT                | 1946434659               |
| SNP_P3_66801_18923780 | NC_021164.1    | Ca_kabuli_chr05 | 18923780                | AA                              | GG                | 1946434661               |
| SNP_P3_66802_18944209 | NC_021164.1    | Ca_kabuli_chr05 | 18944209                | CC                              | TT                | 1946434662               |
| SNP_P3_66803_18944270 | NC_021164.1    | Ca_kabuli_chr05 | 18944270                | AA                              | GG                | 1946434664               |
| SNP_P3_66804_18944273 | NC_021164.1    | Ca_kabuli_chr05 | 18944273                | GG                              | AA                | 1946434665               |
| SNP_P3_66805_18944292 | NC_021164.1    | Ca_kabuli_chr05 | 18944292                | AA                              | TT                | 1946434667               |
| SNP_P3_66806_18944340 | NC_021164.1    | Ca_kabuli_chr05 | 18944340                | CC                              | TT                | 1946434668               |
| SNP_P3_66807_18944364 | NC_021164.1    | Ca_kabuli_chr05 | 18944364                | TT                              | GG                | 1946434670               |
| SNP_P3_66808_18944501 | NC_021164.1    | Ca_kabuli_chr05 | 18944501                | CC                              | TT                | 1946434671               |
| SNP_P3_66809_18944543 | NC_021164.1    | Ca_kabuli_chr05 | 18944543                | AA                              | CC                | 1946434673               |
| SNP_P3_66810_18944547 | NC_021164.1    | Ca_kabuli_chr05 | 18944547                | GG                              | CC                | 1946434674               |
| SNP_P3_66812_18944719 | NC_021164.1    | Ca_kabuli_chr05 | 18944719                | TT                              | AA                | 1946434675               |
| SNP_P3_66813_18944725 | NC_021164.1    | Ca_kabuli_chr05 | 18944725                | TT                              | GG                | 1946434677               |
| SNP_P3_66814_18944755 | NC_021164.1    | Ca_kabuli_chr05 | 18944755                | TT                              | CC                | 1946434678               |
| SNP_P3_66815_18944757 | NC_021164.1    | Ca_kabuli_chr05 | 18944757                | AA                              | GG                | 1946434679               |
| SNP_P3_66816_18947206 | NC_021164.1    | Ca_kabuli_chr05 | 18947206                | GG                              | AA                | 1946434680               |
| SNP_P3_66818_19305394 | NC_021164.1    | Ca_kabuli_chr05 | 19305394                | GG                              | AA                | 1946434681               |
| SNP_P3_66819_19305435 | NC_021164.1    | Ca_kabuli_chr05 | 19305435                | GG                              | AA                | 1946434682               |
| SNP_P3_66820_19305800 | NC_021164.1    | Ca_kabuli_chr05 | 19305800                | AA                              | TT                | 1946434683               |
| SNP_P3_66821_19305805 | NC_021164.1    | Ca_kabuli_chr05 | 19305805                | GG                              | AA                | 1946434685               |
| SNP_P3_66822_19323536 | NC_021164.1    | Ca_kabuli_chr05 | 19323536                | GG                              | AA                | 1946434687               |
| SNP_P3_66823_19324305 | NC_021164.1    | Ca_kabuli_chr05 | 19324305                | AA                              | GG                | 1946434688               |
| SNP_P3_66824_19324671 | NC_021164.1    | Ca_kabuli_chr05 | 19324671                | TT                              | CC                | 1946434690               |
| SNP_P3_66826_19375013 | NC_021164.1    | Ca_kabuli_chr05 | 19375013                | GG                              | CC                | 1946434691               |
| SNP_P3_66827_19375042 | NC_021164.1    | Ca_kabuli_chr05 | 19375042                | CC                              | AA                | 1946434693               |
| SNP_P3_66828_19375062 | NC_021164.1    | Ca_kabuli_chr05 | 19375062                | CC                              | TT                | 1946434694               |
| SNP_P3_66829_19375063 | NC_021164.1    | Ca_kabuli_chr05 | 19375063                | AA                              | CC                | 1946434696               |
| SNP_P3_66830_19381346 | NC_021164.1    | Ca_kabuli_chr05 | 19381346                | TT                              | CC                | 1946434697               |
| SNP_P3_66831_19385820 | NC_021164.1    | Ca_kabuli_chr05 | 19385820                | TT                              | AA                | 1946434699               |
| SNP_P3_66832_19385864 | NC_021164.1    | Ca_kabuli_chr05 | 19385864                | AA                              | TT                | 1946434700               |
| SNP_P3_66833_19386351 | NC_021164.1    | Ca_kabuli_chr05 | 19386351                | AA                              | GG                | 1946434702               |
| SNP_P3_66834_19386682 | NC_021164.1    | Ca_kabuli_chr05 | 19386682                | TT                              | AA                | 1946434704               |
| SNP_P3_66835_19387085 | NC_021164.1    | Ca_kabuli_chr05 | 19387085                | GG                              | CC                | 1946434705               |
| SNP_P3_66836_19396315 | NC_021164.1    | Ca_kabuli_chr05 | 19396315                | TT                              | CC                | 1946434707               |

| SNPs IDs              | Chromosome IDs | Chromosomes     | Physical positions (bp) | CDC Frontier (Reference genome) | (Pusa 256 & HPNB) | NCBI SNPdb Accession IDs |
|-----------------------|----------------|-----------------|-------------------------|---------------------------------|-------------------|--------------------------|
| SNP_P3_66837_19399641 | NC_021164.1    | Ca_kabuli_chr05 | 19399641                | GG                              | AA                | 1946434708               |
| SNP_P3_66838_19427752 | NC_021164.1    | Ca_kabuli_chr05 | 19427752                | CC                              | TT                | 1946434710               |
| SNP_P3_66839_19443334 | NC_021164.1    | Ca_kabuli_chr05 | 19443334                | CC                              | GG                | 1946434711               |
| SNP_P3_66840_19458061 | NC_021164.1    | Ca_kabuli_chr05 | 19458061                | CC                              | TT                | 1946434713               |
| SNP_P3_66841_19459146 | NC_021164.1    | Ca_kabuli_chr05 | 19459146                | CC                              | GG                | 1946434714               |
| SNP_P3_66842_19477902 | NC_021164.1    | Ca_kabuli_chr05 | 19477902                | AA                              | GG                | 1946434716               |
| SNP_P3_66843_19477905 | NC_021164.1    | Ca_kabuli_chr05 | 19477905                | AA                              | TT                | 1946434717               |
| SNP_P3_66844_19477973 | NC_021164.1    | Ca_kabuli_chr05 | 19477973                | TT                              | CC                | 1946434719               |
| SNP_P3_66845_19477974 | NC_021164.1    | Ca_kabuli_chr05 | 19477974                | AA                              | GG                | 1946434721               |
| SNP_P3_66846_19477998 | NC_021164.1    | Ca_kabuli_chr05 | 19477998                | AA                              | CC                | 1946434722               |
| SNP_P3_66847_19478117 | NC_021164.1    | Ca_kabuli_chr05 | 19478117                | AA                              | GG                | 1946434724               |
| SNP_P3_66848_19478219 | NC_021164.1    | Ca_kabuli_chr05 | 19478219                | TT                              | AA                | 1946434725               |
| SNP_P3_66849_19478360 | NC_021164.1    | Ca_kabuli_chr05 | 19478360                | AA                              | GG                | 1946434727               |
| SNP_P3_66850_19478390 | NC_021164.1    | Ca_kabuli_chr05 | 19478390                | TT                              | CC                | 1946434728               |
| SNP_P3_66851_19478393 | NC_021164.1    | Ca_kabuli_chr05 | 19478393                | AA                              | GG                | 1946434730               |
| SNP_P3_66852_19478449 | NC_021164.1    | Ca_kabuli_chr05 | 19478449                | AA                              | GG                | 1946434731               |
| SNP_P3_66853_19478450 | NC_021164.1    | Ca_kabuli_chr05 | 19478450                | AA                              | TT                | 1946434733               |
| SNP_P3_66854_19482511 | NC_021164.1    | Ca_kabuli_chr05 | 19482511                | AA                              | GG                | 1946434735               |
| SNP_P3_66855_19482888 | NC_021164.1    | Ca_kabuli_chr05 | 19482888                | AA                              | GG                | 1946434736               |
| SNP_P3_66856_19497458 | NC_021164.1    | Ca_kabuli_chr05 | 19497458                | AA                              | GG                | 1946434737               |
| SNP_P3_66857_19498200 | NC_021164.1    | Ca_kabuli_chr05 | 19498200                | CC                              | AA                | 1946434739               |
| SNP_P3_66858_19498331 | NC_021164.1    | Ca_kabuli_chr05 | 19498331                | GG                              | TT                | 1946434740               |
| SNP_P3_66859_19498586 | NC_021164.1    | Ca_kabuli_chr05 | 19498586                | AA                              | GG                | 1946434742               |
| SNP_P3_66860_19498588 | NC_021164.1    | Ca_kabuli_chr05 | 19498588                | AA                              | GG                | 1946434743               |
| SNP_P3_66861_19498610 | NC_021164.1    | Ca_kabuli_chr05 | 19498610                | CC                              | TT                | 1946434745               |
| SNP_P3_66862_19498641 | NC_021164.1    | Ca_kabuli_chr05 | 19498641                | CC                              | TT                | 1946434747               |
| SNP_P3_66863_19498649 | NC_021164.1    | Ca_kabuli_chr05 | 19498649                | TT                              | CC                | 1946434748               |
| SNP_P3_66864_19498692 | NC_021164.1    | Ca_kabuli_chr05 | 19498692                | AA                              | GG                | 1946434750               |
| SNP_P3_66865_19516883 | NC_021164.1    | Ca_kabuli_chr05 | 19516883                | TT                              | GG                | 1946434752               |
| SNP_P3_66866_19528633 | NC_021164.1    | Ca_kabuli_chr05 | 19528633                | AA                              | TT                | 1946434753               |
| SNP_P3_66867_19531083 | NC_021164.1    | Ca_kabuli_chr05 | 19531083                | AA                              | GG                | 1946434755               |
| SNP_P3_66868_19531091 | NC_021164.1    | Ca_kabuli_chr05 | 19531091                | GG                              | AA                | 1946434756               |
| SNP_P3_66869_19533810 | NC_021164.1    | Ca_kabuli_chr05 | 19533810                | TT                              | GG                | 1946434758               |
| SNP_P3_66870_19533871 | NC_021164.1    | Ca_kabuli_chr05 | 19533871                | TT                              | CC                | 1946434759               |
| SNP_P3_66871_19533992 | NC_021164.1    | Ca_kabuli_chr05 | 19533992                | CC                              | TT                | 1946434761               |
| SNP_P3_66872_19534218 | NC_021164.1    | Ca_kabuli_chr05 | 19534218                | CC                              | TT                | 1946434762               |
| SNP_P3_66873_19536081 | NC_021164.1    | Ca_kabuli_chr05 | 19536081                | TT                              | CC                | 1946434764               |
| SNP_P3_66874_19540008 | NC_021164.1    | Ca_kabuli_chr05 | 19540008                | CC                              | TT                | 1946434765               |
| SNP_P3_66876_19542846 | NC_021164.1    | Ca_kabuli_chr05 | 19542846                | CC                              | TT                | 1946434766               |
| SNP_P3_66878_19542904 | NC_021164.1    | Ca_kabuli_chr05 | 19542904                | TT                              | GG                | 1946434767               |
| SNP_P3_66879_19545066 | NC_021164.1    | Ca_kabuli_chr05 | 19545066                | TT                              | AA                | 1946434768               |
| SNP_P3_66880_19545067 | NC_021164.1    | Ca_kabuli_chr05 | 19545067                | GG                              | AA                | 1946434770               |

| SNPs IDs              | Chromosome IDs | Chromosomes     | Physical positions (bp) | CDC Frontier (Reference genome) | (Pusa 256 & HPNB) | NCBI SNPdb Accession IDs |
|-----------------------|----------------|-----------------|-------------------------|---------------------------------|-------------------|--------------------------|
| SNP_P3_66881_19545068 | NC_021164.1    | Ca_kabuli_chr05 | 19545068                | GG                              | CC                | 1946434772               |
| SNP_P3_66882_19545098 | NC_021164.1    | Ca_kabuli_chr05 | 19545098                | CC                              | AA                | 1946434773               |
| SNP_P3_66883_19545102 | NC_021164.1    | Ca_kabuli_chr05 | 19545102                | TT                              | GG                | 1946434775               |
| SNP_P3_66884_19545111 | NC_021164.1    | Ca_kabuli_chr05 | 19545111                | TT                              | CC                | 1946434776               |
| SNP_P3_66885_19545115 | NC_021164.1    | Ca_kabuli_chr05 | 19545115                | AA                              | GG                | 1946434777               |
| SNP_P3_66886_19545139 | NC_021164.1    | Ca_kabuli_chr05 | 19545139                | GG                              | CC                | 1946434779               |
| SNP_P3_66887_19545167 | NC_021164.1    | Ca_kabuli_chr05 | 19545167                | AA                              | CC                | 1946434781               |
| SNP_P3_66888_19545177 | NC_021164.1    | Ca_kabuli_chr05 | 19545177                | AA                              | GG                | 1946434783               |
| SNP_P3_66889_19545525 | NC_021164.1    | Ca_kabuli_chr05 | 19545525                | TT                              | CC                | 1946434784               |
| SNP_P3_66890_19573994 | NC_021164.1    | Ca_kabuli_chr05 | 19573994                | CC                              | AA                | 1946434786               |
| SNP_P3_66892_19590149 | NC_021164.1    | Ca_kabuli_chr05 | 19590149                | GG                              | TT                | 1946434787               |
| SNP_P3_66893_19590637 | NC_021164.1    | Ca_kabuli_chr05 | 19590637                | CC                              | TT                | 1946434789               |
| SNP_P3_66894_19590673 | NC_021164.1    | Ca_kabuli_chr05 | 19590673                | TT                              | CC                | 1946434790               |
| SNP_P3_66895_19590750 | NC_021164.1    | Ca_kabuli_chr05 | 19590750                | GG                              | TT                | 1946434792               |
| SNP_P3_66896_19590759 | NC_021164.1    | Ca_kabuli_chr05 | 19590759                | TT                              | CC                | 1946434793               |
| SNP_P3_66897_19590856 | NC_021164.1    | Ca_kabuli_chr05 | 19590856                | AA                              | TT                | 1946434795               |
| SNP_P3_66898_19591054 | NC_021164.1    | Ca_kabuli_chr05 | 19591054                | TT                              | AA                | 1946434797               |
| SNP_P3_66899_19591147 | NC_021164.1    | Ca_kabuli_chr05 | 19591147                | TT                              | CC                | 1946434799               |
| SNP_P3_66900_19591367 | NC_021164.1    | Ca_kabuli_chr05 | 19591367                | TT                              | CC                | 1946434800               |
| SNP_P3_66901_19591429 | NC_021164.1    | Ca_kabuli_chr05 | 19591429                | GG                              | TT                | 1946434802               |
| SNP_P3_66902_19655742 | NC_021164.1    | Ca_kabuli_chr05 | 19655742                | TT                              | AA                | 1946434804               |
| SNP_P3_66904_19667559 | NC_021164.1    | Ca_kabuli_chr05 | 19667559                | TT                              | CC                | 1946434805               |
| SNP_P3_66905_19667587 | NC_021164.1    | Ca_kabuli_chr05 | 19667587                | GG                              | TT                | 1946434807               |
| SNP_P3_66906_19667626 | NC_021164.1    | Ca_kabuli_chr05 | 19667626                | AA                              | GG                | 1946434808               |
| SNP_P3_66907_19667908 | NC_021164.1    | Ca_kabuli_chr05 | 19667908                | CC                              | AA                | 1946434810               |
| SNP_P3_66908_19669598 | NC_021164.1    | Ca_kabuli_chr05 | 19669598                | AA                              | GG                | 1946434812               |
| SNP_P3_66909_19669602 | NC_021164.1    | Ca_kabuli_chr05 | 19669602                | TT                              | CC                | 1946434813               |
| SNP_P3_66910_19669924 | NC_021164.1    | Ca_kabuli_chr05 | 19669924                | TT                              | CC                | 1946434815               |
| SNP_P3_66911_19674886 | NC_021164.1    | Ca_kabuli_chr05 | 19674886                | AA                              | GG                | 1946434817               |
| SNP_P3_66913_19703017 | NC_021164.1    | Ca_kabuli_chr05 | 19703017                | GG                              | AA                | 1946434819               |
| SNP_P3_66914_19705350 | NC_021164.1    | Ca_kabuli_chr05 | 19705350                | AA                              | CC                | 1946434820               |
| SNP_P3_66915_19705472 | NC_021164.1    | Ca_kabuli_chr05 | 19705472                | TT                              | AA                | 1946434822               |
| SNP_P3_66916_19706548 | NC_021164.1    | Ca_kabuli_chr05 | 19706548                | TT                              | CC                | 1946434823               |
| SNP_P3_66917_19725589 | NC_021164.1    | Ca_kabuli_chr05 | 19725589                | AA                              | GG                | 1946434825               |
| SNP_P3_66918_19725656 | NC_021164.1    | Ca_kabuli_chr05 | 19725656                | AA                              | GG                | 1946434827               |
| SNP_P3_66919_19725685 | NC_021164.1    | Ca_kabuli_chr05 | 19725685                | CC                              | TT                | 1946434828               |
| SNP_P3_66920_19725706 | NC_021164.1    | Ca_kabuli_chr05 | 19725706                | TT                              | CC                | 1946434830               |
| SNP_P3_66921_19725708 | NC_021164.1    | Ca_kabuli_chr05 | 19725708                | AA                              | GG                | 1946434832               |
| SNP_P3_66922_19725742 | NC_021164.1    | Ca_kabuli_chr05 | 19725742                | TT                              | GG                | 1946434833               |
| SNP_P3_66924_19725946 | NC_021164.1    | Ca_kabuli_chr05 | 19725946                | GG                              | AA                | 1946434835               |
| SNP_P3_66925_19725958 | NC_021164.1    | Ca_kabuli_chr05 | 19725958                | GG                              | TT                | 1946434837               |
| SNP_P3_66926_19725970 | NC_021164.1    | Ca_kabuli_chr05 | 19725970                | GG                              | AA                | 1946434838               |



| SNPs IDs              | Chromosome IDs | Chromosomes     | Physical positions (bp) | CDC Frontier (Reference genome) | (Pusa 256 & HPNB) | NCBI SNPdb Accession IDs |
|-----------------------|----------------|-----------------|-------------------------|---------------------------------|-------------------|--------------------------|
| SNP_P3_66927_19725973 | NC_021164.1    | Ca_kabuli_chr05 | 19725973                | AA                              | GG                | 1946434839               |
| SNP_P3_66928_19727107 | NC_021164.1    | Ca_kabuli_chr05 | 19727107                | TT                              | CC                | 1946434841               |
| SNP_P3_66929_19727203 | NC_021164.1    | Ca_kabuli_chr05 | 19727203                | CC                              | TT                | 1946434842               |
| SNP_P3_66930_19727526 | NC_021164.1    | Ca_kabuli_chr05 | 19727526                | CC                              | TT                | 1946434844               |
| SNP_P3_66931_19727596 | NC_021164.1    | Ca_kabuli_chr05 | 19727596                | AA                              | GG                | 1946434846               |
| SNP_P3_66932_19729365 | NC_021164.1    | Ca_kabuli_chr05 | 19729365                | TT                              | CC                | 1946434847               |
| SNP_P3_66933_19729390 | NC_021164.1    | Ca_kabuli_chr05 | 19729390                | TT                              | CC                | 1946434849               |
| SNP_P3_66934_19729419 | NC_021164.1    | Ca_kabuli_chr05 | 19729419                | CC                              | TT                | 1946434850               |
| SNP_P3_66935_19729420 | NC_021164.1    | Ca_kabuli_chr05 | 19729420                | TT                              | CC                | 1946434852               |
| SNP_P3_66936_19729422 | NC_021164.1    | Ca_kabuli_chr05 | 19729422                | GG                              | AA                | 1946434854               |
| SNP_P3_66937_19729566 | NC_021164.1    | Ca_kabuli_chr05 | 19729566                | AA                              | GG                | 1946434855               |
| SNP_P3_66938_19729749 | NC_021164.1    | Ca_kabuli_chr05 | 19729749                | GG                              | AA                | 1946434857               |
| SNP_P3_66939_19729785 | NC_021164.1    | Ca_kabuli_chr05 | 19729785                | CC                              | TT                | 1946434858               |
| SNP_P3_66940_19729788 | NC_021164.1    | Ca_kabuli_chr05 | 19729788                | CC                              | TT                | 1946434860               |
| SNP_P3_66941_19737145 | NC_021164.1    | Ca_kabuli_chr05 | 19737145                | AA                              | GG                | 1946434861               |
| SNP_P3_66944_19772155 | NC_021164.1    | Ca_kabuli_chr05 | 19772155                | GG                              | CC                | 1946434863               |
| SNP_P3_66945_19777085 | NC_021164.1    | Ca_kabuli_chr05 | 19777085                | AA                              | CC                | 1946434864               |
| SNP_P3_66946_19777196 | NC_021164.1    | Ca_kabuli_chr05 | 19777196                | AA                              | TT                | 1946434866               |
| SNP_P3_66947_19789045 | NC_021164.1    | Ca_kabuli_chr05 | 19789045                | GG                              | TT                | 1946434867               |
| SNP_P3_66948_19792221 | NC_021164.1    | Ca_kabuli_chr05 | 19792221                | GG                              | AA                | 1946434869               |
| SNP_P3_66949_19797885 | NC_021164.1    | Ca_kabuli_chr05 | 19797885                | TT                              | AA                | 1946434870               |
| SNP_P3_66950_19814513 | NC_021164.1    | Ca_kabuli_chr05 | 19814513                | TT                              | CC                | 1946434872               |
| SNP_P3_66951_19814543 | NC_021164.1    | Ca_kabuli_chr05 | 19814543                | TT                              | CC                | 1946434873               |
| SNP_P3_66953_19825036 | NC_021164.1    | Ca_kabuli_chr05 | 19825036                | TT                              | CC                | 1946434875               |
| SNP_P3_66954_19825041 | NC_021164.1    | Ca_kabuli_chr05 | 19825041                | TT                              | CC                | 1946434876               |
| SNP_P3_66955_19825043 | NC_021164.1    | Ca_kabuli_chr05 | 19825043                | GG                              | AA                | 1946434878               |
| SNP_P3_66956_19827284 | NC_021164.1    | Ca_kabuli_chr05 | 19827284                | GG                              | AA                | 1946434880               |
| SNP_P3_66957_19827301 | NC_021164.1    | Ca_kabuli_chr05 | 19827301                | TT                              | CC                | 1946434881               |
| SNP_P3_66958_19830715 | NC_021164.1    | Ca_kabuli_chr05 | 19830715                | GG                              | AA                | 1946434883               |
| SNP_P3_66959_19830717 | NC_021164.1    | Ca_kabuli_chr05 | 19830717                | AA                              | CC                | 1946434884               |
| SNP_P3_66960_19830718 | NC_021164.1    | Ca_kabuli_chr05 | 19830718                | AA                              | CC                | 1946434886               |
| SNP_P3_66961_19830784 | NC_021164.1    | Ca_kabuli_chr05 | 19830784                | GG                              | AA                | 1946434887               |
| SNP_P3_66962_19830806 | NC_021164.1    | Ca_kabuli_chr05 | 19830806                | TT                              | CC                | 1946434889               |
| SNP_P3_66963_19830985 | NC_021164.1    | Ca_kabuli_chr05 | 19830985                | GG                              | AA                | 1946434890               |
| SNP_P3_66964_19830997 | NC_021164.1    | Ca_kabuli_chr05 | 19830997                | GG                              | AA                | 1946434892               |
| SNP_P3_66965_19831009 | NC_021164.1    | Ca_kabuli_chr05 | 19831009                | TT                              | CC                | 1946434893               |
| SNP_P3_66966_19897025 | NC_021164.1    | Ca_kabuli_chr05 | 19897025                | AA                              | GG                | 1946434895               |
| SNP_P3_66968_19908777 | NC_021164.1    | Ca_kabuli_chr05 | 19908777                | TT                              | GG                | 1946434897               |
| SNP_P3_66969_19908788 | NC_021164.1    | Ca_kabuli_chr05 | 19908788                | CC                              | AA                | 1946434898               |
| SNP_P3_66970_19908815 | NC_021164.1    | Ca_kabuli_chr05 | 19908815                | AA                              | TT                | 1946434900               |
| SNP_P3_66971_19908818 | NC_021164.1    | Ca_kabuli_chr05 | 19908818                | TT                              | CC                | 1946434901               |
| SNP_P3_66972_19908926 | NC_021164.1    | Ca_kabuli_chr05 | 19908926                | AA                              | CC                | 1946434903               |

| SNPs IDs              | Chromosome IDs | Chromosomes     | Physical positions (bp) | CDC Frontier (Reference genome) | (Pusa 256 & HPNB) | NCBI SNPdb Accession IDs |
|-----------------------|----------------|-----------------|-------------------------|---------------------------------|-------------------|--------------------------|
| SNP_P3_66973_19908957 | NC_021164.1    | Ca_kabuli_chr05 | 19908957                | TT                              | AA                | 1946434904               |
| SNP_P3_66974_19908975 | NC_021164.1    | Ca_kabuli_chr05 | 19908975                | AA                              | TT                | 1946434906               |
| SNP_P3_66975_19909123 | NC_021164.1    | Ca_kabuli_chr05 | 19909123                | TT                              | CC                | 1946434907               |
| SNP_P3_66976_19911684 | NC_021164.1    | Ca_kabuli_chr05 | 19911684                | GG                              | AA                | 1946434909               |
| SNP_P3_66977_19911881 | NC_021164.1    | Ca_kabuli_chr05 | 19911881                | TT                              | CC                | 1946434910               |
| SNP_P3_66978_19911904 | NC_021164.1    | Ca_kabuli_chr05 | 19911904                | AA                              | GG                | 1946434911               |
| SNP_P3_66979_19911937 | NC_021164.1    | Ca_kabuli_chr05 | 19911937                | AA                              | GG                | 1946434913               |
| SNP_P3_66980_19912473 | NC_021164.1    | Ca_kabuli_chr05 | 19912473                | TT                              | AA                | 1946434914               |
| SNP_P3_66981_19912702 | NC_021164.1    | Ca_kabuli_chr05 | 19912702                | CC                              | AA                | 1946434916               |
| SNP_P3_66982_19912718 | NC_021164.1    | Ca_kabuli_chr05 | 19912718                | TT                              | GG                | 1946434917               |
| SNP_P3_66983_19912815 | NC_021164.1    | Ca_kabuli_chr05 | 19912815                | TT                              | CC                | 1946434919               |
| SNP_P3_66984_19914083 | NC_021164.1    | Ca_kabuli_chr05 | 19914083                | TT                              | CC                | 1946434920               |
| SNP_P3_66985_19914453 | NC_021164.1    | Ca_kabuli_chr05 | 19914453                | GG                              | CC                | 1946434922               |
| SNP_P3_66986_19914536 | NC_021164.1    | Ca_kabuli_chr05 | 19914536                | TT                              | CC                | 1946434924               |
| SNP_P3_66987_19914578 | NC_021164.1    | Ca_kabuli_chr05 | 19914578                | GG                              | AA                | 1946434925               |
| SNP_P3_66988_19914596 | NC_021164.1    | Ca_kabuli_chr05 | 19914596                | AA                              | CC                | 1946434927               |
| SNP_P3_66989_19914599 | NC_021164.1    | Ca_kabuli_chr05 | 19914599                | CC                              | TT                | 1946434928               |
| SNP_P3_66990_19914602 | NC_021164.1    | Ca_kabuli_chr05 | 19914602                | GG                              | AA                | 1946434930               |
| SNP_P3_66991_19914604 | NC_021164.1    | Ca_kabuli_chr05 | 19914604                | CC                              | TT                | 1946434931               |
| SNP_P3_66992_19914611 | NC_021164.1    | Ca_kabuli_chr05 | 19914611                | TT                              | AA                | 1946434933               |
| SNP_P3_66993_19922077 | NC_021164.1    | Ca_kabuli_chr05 | 19922077                | AA                              | CC                | 1946434934               |
| SNP_P3_66994_19922129 | NC_021164.1    | Ca_kabuli_chr05 | 19922129                | AA                              | GG                | 1946434936               |
| SNP_P3_66995_19922157 | NC_021164.1    | Ca_kabuli_chr05 | 19922157                | TT                              | CC                | 1946434937               |
| SNP_P3_66996_19922206 | NC_021164.1    | Ca_kabuli_chr05 | 19922206                | GG                              | AA                | 1946434939               |
| SNP_P3_66997_19922218 | NC_021164.1    | Ca_kabuli_chr05 | 19922218                | AA                              | GG                | 1946434941               |
| SNP_P3_66999_19922350 | NC_021164.1    | Ca_kabuli_chr05 | 19922350                | GG                              | TT                | 1946434942               |
| SNP_P3_67000_19922486 | NC_021164.1    | Ca_kabuli_chr05 | 19922486                | AA                              | GG                | 1946434943               |
| SNP_P3_67001_19922498 | NC_021164.1    | Ca_kabuli_chr05 | 19922498                | TT                              | AA                | 1946434945               |
| SNP_P3_67002_19922506 | NC_021164.1    | Ca_kabuli_chr05 | 19922506                | CC                              | TT                | 1946434946               |
| SNP_P3_67003_19922550 | NC_021164.1    | Ca_kabuli_chr05 | 19922550                | TT                              | CC                | 1946434948               |
| SNP_P3_67004_19923058 | NC_021164.1    | Ca_kabuli_chr05 | 19923058                | AA                              | GG                | 1946434950               |
| SNP_P3_67005_19926262 | NC_021164.1    | Ca_kabuli_chr05 | 19926262                | CC                              | GG                | 1946434951               |
| SNP_P3_67006_19926264 | NC_021164.1    | Ca_kabuli_chr05 | 19926264                | AA                              | CC                | 1946434953               |
| SNP_P3_67007_19926286 | NC_021164.1    | Ca_kabuli_chr05 | 19926286                | CC                              | GG                | 1946434954               |
| SNP_P3_67009_19936128 | NC_021164.1    | Ca_kabuli_chr05 | 19936128                | CC                              | TT                | 1946434956               |
| SNP_P3_67012_19998269 | NC_021164.1    | Ca_kabuli_chr05 | 19998269                | GG                              | AA                | 1946434957               |
| SNP_P3_67013_19998317 | NC_021164.1    | Ca_kabuli_chr05 | 19998317                | TT                              | CC                | 1946434959               |
| SNP_P3_67014_19998359 | NC_021164.1    | Ca_kabuli_chr05 | 19998359                | TT                              | CC                | 1946434960               |
| SNP_P3_67015_19998375 | NC_021164.1    | Ca_kabuli_chr05 | 19998375                | TT                              | CC                | 1946434962               |
| SNP_P3_67016_19998383 | NC_021164.1    | Ca_kabuli_chr05 | 19998383                | GG                              | AA                | 1946434963               |
| SNP_P3_67017_19998387 | NC_021164.1    | Ca_kabuli_chr05 | 19998387                | AA                              | GG                | 1946434965               |
| SNP_P3_67018_19998397 | NC_021164.1    | Ca_kabuli_chr05 | 19998397                | AA                              | GG                | 1946434967               |

| SNPs IDs              | Chromosome IDs | Chromosomes     | Physical positions (bp) | CDC Frontier (Reference genome) | (Pusa 256 & HPNB) | NCBI SNPdb Accession IDs |
|-----------------------|----------------|-----------------|-------------------------|---------------------------------|-------------------|--------------------------|
| SNP_P3_67019_19998437 | NC_021164.1    | Ca_kabuli_chr05 | 19998437                | TT                              | CC                | 1946434968               |
| SNP_P3_67020_19998479 | NC_021164.1    | Ca_kabuli_chr05 | 19998479                | AA                              | GG                | 1946434970               |
| SNP_P3_67021_20024734 | NC_021164.1    | Ca_kabuli_chr05 | 20024734                | TT                              | CC                | 1946434971               |
| SNP_P3_67022_20072765 | NC_021164.1    | Ca_kabuli_chr05 | 20072765                | TT                              | CC                | 1946434973               |
| SNP_P3_67023_20073961 | NC_021164.1    | Ca_kabuli_chr05 | 20073961                | AA                              | GG                | 1946434974               |
| SNP_P3_67024_20074004 | NC_021164.1    | Ca_kabuli_chr05 | 20074004                | TT                              | CC                | 1946434976               |
| SNP_P3_67025_20074306 | NC_021164.1    | Ca_kabuli_chr05 | 20074306                | TT                              | AA                | 1946434977               |
| SNP_P3_67026_20074337 | NC_021164.1    | Ca_kabuli_chr05 | 20074337                | CC                              | TT                | 1946434979               |
| SNP_P3_67027_20084598 | NC_021164.1    | Ca_kabuli_chr05 | 20084598                | AA                              | CC                | 1946434980               |
| SNP_P3_67028_20084961 | NC_021164.1    | Ca_kabuli_chr05 | 20084961                | GG                              | AA                | 1946434982               |
| SNP_P3_67030_20096333 | NC_021164.1    | Ca_kabuli_chr05 | 20096333                | TT                              | CC                | 1946434983               |
| SNP_P3_67032_20117280 | NC_021164.1    | Ca_kabuli_chr05 | 20117280                | CC                              | GG                | 1946435032               |
| SNP_P3_67035_20120071 | NC_021164.1    | Ca_kabuli_chr05 | 20120071                | TT                              | CC                | 1946435034               |
| SNP_P3_67036_20305040 | NC_021164.1    | Ca_kabuli_chr05 | 20305040                | GG                              | AA                | 1946435035               |
| SNP_P3_67038_20373417 | NC_021164.1    | Ca_kabuli_chr05 | 20373417                | CC                              | AA                | 1946435037               |
| SNP_P3_67039_20374674 | NC_021164.1    | Ca_kabuli_chr05 | 20374674                | TT                              | CC                | 1946435038               |
| SNP_P3_67040_20375081 | NC_021164.1    | Ca_kabuli_chr05 | 20375081                | AA                              | GG                | 1946435040               |
| SNP_P3_67041_20375136 | NC_021164.1    | Ca_kabuli_chr05 | 20375136                | AA                              | GG                | 1946435041               |
| SNP_P3_67042_20375152 | NC_021164.1    | Ca_kabuli_chr05 | 20375152                | AA                              | TT                | 1946435043               |
| SNP_P3_67043_20378406 | NC_021164.1    | Ca_kabuli_chr05 | 20378406                | GG                              | TT                | 1946435044               |
| SNP_P3_67044_20378461 | NC_021164.1    | Ca_kabuli_chr05 | 20378461                | GG                              | TT                | 1946435046               |
| SNP_P3_67045_20379411 | NC_021164.1    | Ca_kabuli_chr05 | 20379411                | AA                              | TT                | 1946435047               |
| SNP_P3_67046_20380813 | NC_021164.1    | Ca_kabuli_chr05 | 20380813                | CC                              | TT                | 1946435049               |
| SNP_P3_67047_20392292 | NC_021164.1    | Ca_kabuli_chr05 | 20392292                | AA                              | GG                | 1946435050               |
| SNP_P3_67048_20392707 | NC_021164.1    | Ca_kabuli_chr05 | 20392707                | TT                              | CC                | 1946435052               |
| SNP_P3_67049_20394342 | NC_021164.1    | Ca_kabuli_chr05 | 20394342                | TT                              | GG                | 1946435054               |
| SNP_P3_67050_20394374 | NC_021164.1    | Ca_kabuli_chr05 | 20394374                | TT                              | CC                | 1946435055               |
| SNP_P3_67051_20394386 | NC_021164.1    | Ca_kabuli_chr05 | 20394386                | AA                              | CC                | 1946435056               |
| SNP_P3_67052_20394434 | NC_021164.1    | Ca_kabuli_chr05 | 20394434                | TT                              | AA                | 1946435058               |
| SNP_P3_67053_20394441 | NC_021164.1    | Ca_kabuli_chr05 | 20394441                | AA                              | GG                | 1946435059               |
| SNP_P3_67054_20394445 | NC_021164.1    | Ca_kabuli_chr05 | 20394445                | AA                              | GG                | 1946435061               |
| SNP_P3_67055_20394465 | NC_021164.1    | Ca_kabuli_chr05 | 20394465                | TT                              | CC                | 1946435062               |
| SNP_P3_67056_20394499 | NC_021164.1    | Ca_kabuli_chr05 | 20394499                | TT                              | CC                | 1946435064               |
| SNP_P3_67057_20394674 | NC_021164.1    | Ca_kabuli_chr05 | 20394674                | TT                              | GG                | 1946435065               |
| SNP_P3_67058_20394694 | NC_021164.1    | Ca_kabuli_chr05 | 20394694                | CC                              | TT                | 1946435067               |
| SNP_P3_67059_20394872 | NC_021164.1    | Ca_kabuli_chr05 | 20394872                | AA                              | GG                | 1946435068               |
| SNP_P3_67060_20394894 | NC_021164.1    | Ca_kabuli_chr05 | 20394894                | AA                              | GG                | 1946435070               |
| SNP_P3_67061_20398248 | NC_021164.1    | Ca_kabuli_chr05 | 20398248                | CC                              | AA                | 1946435072               |
| SNP_P3_67062_20398289 | NC_021164.1    | Ca_kabuli_chr05 | 20398289                | GG                              | AA                | 1946435074               |
| SNP_P3_67063_20399044 | NC_021164.1    | Ca_kabuli_chr05 | 20399044                | TT                              | AA                | 1946435075               |
| SNP_P3_67064_20399088 | NC_021164.1    | Ca_kabuli_chr05 | 20399088                | TT                              | GG                | 1946435077               |
| SNP_P3_67065_20399211 | NC_021164.1    | Ca_kabuli_chr05 | 20399211                | TT                              | CC                | 1946435078               |

| SNPs IDs              | Chromosome IDs | Chromosomes     | Physical positions (bp) | CDC Frontier (Reference genome) | (Pusa 256 & HPNB) | NCBI SNPdb Accession IDs |
|-----------------------|----------------|-----------------|-------------------------|---------------------------------|-------------------|--------------------------|
| SNP_P3_67066_20399441 | NC_021164.1    | Ca_kabuli_chr05 | 20399441                | AA                              | TT                | 1946435079               |
| SNP_P3_67067_20402581 | NC_021164.1    | Ca_kabuli_chr05 | 20402581                | TT                              | CC                | 1946435081               |
| SNP_P3_67068_20402592 | NC_021164.1    | Ca_kabuli_chr05 | 20402592                | GG                              | AA                | 1946435082               |
| SNP_P3_67069_20402624 | NC_021164.1    | Ca_kabuli_chr05 | 20402624                | TT                              | GG                | 1946435084               |
| SNP_P3_67070_20402759 | NC_021164.1    | Ca_kabuli_chr05 | 20402759                | GG                              | CC                | 1946435085               |
| SNP_P3_67071_20402826 | NC_021164.1    | Ca_kabuli_chr05 | 20402826                | AA                              | GG                | 1946435087               |
| SNP_P3_67072_20402838 | NC_021164.1    | Ca_kabuli_chr05 | 20402838                | GG                              | CC                | 1946435088               |
| SNP_P3_67073_20402844 | NC_021164.1    | Ca_kabuli_chr05 | 20402844                | CC                              | TT                | 1946435089               |
| SNP_P3_67074_20406248 | NC_021164.1    | Ca_kabuli_chr05 | 20406248                | TT                              | CC                | 1946435091               |
| SNP_P3_67075_20406256 | NC_021164.1    | Ca_kabuli_chr05 | 20406256                | TT                              | GG                | 1946435093               |
| SNP_P3_67076_20406334 | NC_021164.1    | Ca_kabuli_chr05 | 20406334                | GG                              | TT                | 1946435094               |
| SNP_P3_67078_20406364 | NC_021164.1    | Ca_kabuli_chr05 | 20406364                | TT                              | GG                | 1946435096               |
| SNP_P3_67079_20406370 | NC_021164.1    | Ca_kabuli_chr05 | 20406370                | TT                              | GG                | 1946435097               |
| SNP_P3_67080_20406622 | NC_021164.1    | Ca_kabuli_chr05 | 20406622                | TT                              | CC                | 1946435098               |
| SNP_P3_67081_20406628 | NC_021164.1    | Ca_kabuli_chr05 | 20406628                | AA                              | GG                | 1946435100               |
| SNP_P3_67082_20414880 | NC_021164.1    | Ca_kabuli_chr05 | 20414880                | GG                              | CC                | 1946435101               |
| SNP_P3_67083_20418993 | NC_021164.1    | Ca_kabuli_chr05 | 20418993                | TT                              | AA                | 1946435103               |
| SNP_P3_67084_20420798 | NC_021164.1    | Ca_kabuli_chr05 | 20420798                | TT                              | CC                | 1946435104               |
| SNP_P3_67085_20420819 | NC_021164.1    | Ca_kabuli_chr05 | 20420819                | GG                              | TT                | 1946435106               |
| SNP_P3_67086_20420902 | NC_021164.1    | Ca_kabuli_chr05 | 20420902                | TT                              | CC                | 1946435108               |
| SNP_P3_67088_20433138 | NC_021164.1    | Ca_kabuli_chr05 | 20433138                | TT                              | CC                | 1946435109               |
| SNP_P3_67089_20433646 | NC_021164.1    | Ca_kabuli_chr05 | 20433646                | TT                              | CC                | 1946435111               |
| SNP_P3_67090_20433864 | NC_021164.1    | Ca_kabuli_chr05 | 20433864                | AA                              | CC                | 1946435112               |
| SNP_P3_67091_20433892 | NC_021164.1    | Ca_kabuli_chr05 | 20433892                | GG                              | CC                | 1946435115               |
| SNP_P3_67092_20433902 | NC_021164.1    | Ca_kabuli_chr05 | 20433902                | GG                              | AA                | 1946435117               |
| SNP_P3_67093_20433926 | NC_021164.1    | Ca_kabuli_chr05 | 20433926                | AA                              | GG                | 1946435118               |
| SNP_P3_67094_20433946 | NC_021164.1    | Ca_kabuli_chr05 | 20433946                | AA                              | TT                | 1946435119               |
| SNP_P3_67095_20438786 | NC_021164.1    | Ca_kabuli_chr05 | 20438786                | TT                              | CC                | 1946435121               |
| SNP_P3_67097_20438984 | NC_021164.1    | Ca_kabuli_chr05 | 20438984                | GG                              | TT                | 1946435123               |
| SNP_P3_67098_20439692 | NC_021164.1    | Ca_kabuli_chr05 | 20439692                | AA                              | GG                | 1946435124               |
| SNP_P3_67099_20453168 | NC_021164.1    | Ca_kabuli_chr05 | 20453168                | CC                              | TT                | 1946435126               |
| SNP_P3_67100_20453658 | NC_021164.1    | Ca_kabuli_chr05 | 20453658                | GG                              | TT                | 1946435127               |
| SNP_P3_67101_20462281 | NC_021164.1    | Ca_kabuli_chr05 | 20462281                | AA                              | GG                | 1946435128               |
| SNP_P3_67102_20462282 | NC_021164.1    | Ca_kabuli_chr05 | 20462282                | TT                              | GG                | 1946435130               |
| SNP_P3_67103_20478833 | NC_021164.1    | Ca_kabuli_chr05 | 20478833                | CC                              | TT                | 1946435131               |
| SNP_P3_67104_20520198 | NC_021164.1    | Ca_kabuli_chr05 | 20520198                | GG                              | CC                | 1946435133               |
| SNP_P3_67106_20520488 | NC_021164.1    | Ca_kabuli_chr05 | 20520488                | CC                              | TT                | 1946435135               |
| SNP_P3_67107_20520514 | NC_021164.1    | Ca_kabuli_chr05 | 20520514                | GG                              | TT                | 1946435136               |
| SNP_P3_67108_20520581 | NC_021164.1    | Ca_kabuli_chr05 | 20520581                | CC                              | TT                | 1946435138               |
| SNP_P3_67109_20520586 | NC_021164.1    | Ca_kabuli_chr05 | 20520586                | AA                              | GG                | 1946435139               |
| SNP_P3_67110_20520592 | NC_021164.1    | Ca_kabuli_chr05 | 20520592                | TT                              | GG                | 1946435140               |
| SNP_P3_67111_20520638 | NC_021164.1    | Ca_kabuli_chr05 | 20520638                | AA                              | GG                | 1946435142               |

| SNPs IDs              | Chromosome IDs | Chromosomes     | Physical positions (bp) | CDC Frontier (Reference genome) | (Pusa 256 & HPNB) | NCBI SNPdb Accession IDs |
|-----------------------|----------------|-----------------|-------------------------|---------------------------------|-------------------|--------------------------|
| SNP_P3_67112_20520673 | NC_021164.1    | Ca_kabuli_chr05 | 20520673                | CC                              | TT                | 1946435144               |
| SNP_P3_67113_20547265 | NC_021164.1    | Ca_kabuli_chr05 | 20547265                | GG                              | TT                | 1946435145               |
| SNP_P3_67115_20547373 | NC_021164.1    | Ca_kabuli_chr05 | 20547373                | GG                              | AA                | 1946435146               |
| SNP_P3_67116_20547724 | NC_021164.1    | Ca_kabuli_chr05 | 20547724                | AA                              | GG                | 1946435148               |
| SNP_P3_67117_20547725 | NC_021164.1    | Ca_kabuli_chr05 | 20547725                | GG                              | AA                | 1946435150               |
| SNP_P3_67118_20548242 | NC_021164.1    | Ca_kabuli_chr05 | 20548242                | TT                              | GG                | 1946435151               |
| SNP_P3_67119_20559010 | NC_021164.1    | Ca_kabuli_chr05 | 20559010                | TT                              | GG                | 1946435153               |
| SNP_P3_67120_20561418 | NC_021164.1    | Ca_kabuli_chr05 | 20561418                | AA                              | TT                | 1946435155               |
| SNP_P3_67121_20561419 | NC_021164.1    | Ca_kabuli_chr05 | 20561419                | AA                              | TT                | 1946435156               |
| SNP_P3_67122_20562556 | NC_021164.1    | Ca_kabuli_chr05 | 20562556                | GG                              | TT                | 1946435158               |
| SNP_P3_67123_20564728 | NC_021164.1    | Ca_kabuli_chr05 | 20564728                | AA                              | TT                | 1946435159               |
| SNP_P3_67124_20578206 | NC_021164.1    | Ca_kabuli_chr05 | 20578206                | CC                              | TT                | 1946435161               |
| SNP_P3_67126_20623962 | NC_021164.1    | Ca_kabuli_chr05 | 20623962                | GG                              | AA                | 1946435162               |
| SNP_P3_67127_20633649 | NC_021164.1    | Ca_kabuli_chr05 | 20633649                | GG                              | AA                | 1946435164               |
| SNP_P3_67128_20633651 | NC_021164.1    | Ca_kabuli_chr05 | 20633651                | AA                              | TT                | 1946435165               |
| SNP_P3_67129_20653493 | NC_021164.1    | Ca_kabuli_chr05 | 20653493                | AA                              | TT                | 1946435167               |
| SNP_P3_67130_20654590 | NC_021164.1    | Ca_kabuli_chr05 | 20654590                | GG                              | AA                | 1946435168               |
| SNP_P3_67131_20658428 | NC_021164.1    | Ca_kabuli_chr05 | 20658428                | TT                              | GG                | 1946435170               |
| SNP_P3_67132_20683353 | NC_021164.1    | Ca_kabuli_chr05 | 20683353                | CC                              | AA                | 1946435171               |
| SNP_P3_67133_20690758 | NC_021164.1    | Ca_kabuli_chr05 | 20690758                | AA                              | GG                | 1946435173               |
| SNP_P3_67134_20696375 | NC_021164.1    | Ca_kabuli_chr05 | 20696375                | GG                              | AA                | 1946435174               |
| SNP_P3_67135_20700186 | NC_021164.1    | Ca_kabuli_chr05 | 20700186                | AA                              | GG                | 1946435176               |
| SNP_P3_67136_20701061 | NC_021164.1    | Ca_kabuli_chr05 | 20701061                | GG                              | TT                | 1946435177               |
| SNP_P3_67137_20701118 | NC_021164.1    | Ca_kabuli_chr05 | 20701118                | TT                              | GG                | 1946435179               |
| SNP_P3_67138_20701152 | NC_021164.1    | Ca_kabuli_chr05 | 20701152                | CC                              | TT                | 1946435180               |
| SNP_P3_67139_20701157 | NC_021164.1    | Ca_kabuli_chr05 | 20701157                | CC                              | TT                | 1946435182               |
| SNP_P3_67140_20701223 | NC_021164.1    | Ca_kabuli_chr05 | 20701223                | CC                              | TT                | 1946435183               |
| SNP_P3_67142_20743456 | NC_021164.1    | Ca_kabuli_chr05 | 20743456                | AA                              | TT                | 1946435185               |
| SNP_P3_67144_20763279 | NC_021164.1    | Ca_kabuli_chr05 | 20763279                | AA                              | GG                | 1946435186               |
| SNP_P3_67145_20763503 | NC_021164.1    | Ca_kabuli_chr05 | 20763503                | AA                              | CC                | 1946435188               |
| SNP_P3_67146_20775084 | NC_021164.1    | Ca_kabuli_chr05 | 20775084                | GG                              | AA                | 1946435189               |
| SNP_P3_67148_20829071 | NC_021164.1    | Ca_kabuli_chr05 | 20829071                | CC                              | GG                | 1946435191               |
| SNP_P3_67149_20829085 | NC_021164.1    | Ca_kabuli_chr05 | 20829085                | AA                              | GG                | 1946435192               |
| SNP_P3_67150_20829098 | NC_021164.1    | Ca_kabuli_chr05 | 20829098                | AA                              | GG                | 1946435194               |
| SNP_P3_67151_20832334 | NC_021164.1    | Ca_kabuli_chr05 | 20832334                | CC                              | TT                | 1946435195               |
| SNP_P3_67152_20833585 | NC_021164.1    | Ca_kabuli_chr05 | 20833585                | CC                              | AA                | 1946435197               |
| SNP_P3_67153_20845062 | NC_021164.1    | Ca_kabuli_chr05 | 20845062                | CC                              | TT                | 1946435199               |
| SNP_P3_67154_20853333 | NC_021164.1    | Ca_kabuli_chr05 | 20853333                | AA                              | GG                | 1946435200               |
| SNP_P3_67155_20856693 | NC_021164.1    | Ca_kabuli_chr05 | 20856693                | TT                              | CC                | 1946435202               |
| SNP_P3_67156_20856696 | NC_021164.1    | Ca_kabuli_chr05 | 20856696                | TT                              | AA                | 1946435203               |
| SNP_P3_67157_20856701 | NC_021164.1    | Ca_kabuli_chr05 | 20856701                | TT                              | CC                | 1946435205               |
| SNP_P3_67158_20856775 | NC_021164.1    | Ca_kabuli_chr05 | 20856775                | TT                              | CC                | 1946435206               |

| SNPs IDs              | Chromosome IDs | Chromosomes     | Physical positions (bp) | CDC Frontier (Reference genome) | (Pusa 256 & HPNB) | NCBI SNPdb Accession IDs |
|-----------------------|----------------|-----------------|-------------------------|---------------------------------|-------------------|--------------------------|
| SNP_P3_67159_20856826 | NC_021164.1    | Ca_kabuli_chr05 | 20856826                | CC                              | TT                | 1946435207               |
| SNP_P3_67160_20856989 | NC_021164.1    | Ca_kabuli_chr05 | 20856989                | CC                              | TT                | 1946435209               |
| SNP_P3_67161_20857028 | NC_021164.1    | Ca_kabuli_chr05 | 20857028                | TT                              | GG                | 1946435210               |
| SNP_P3_67162_20857112 | NC_021164.1    | Ca_kabuli_chr05 | 20857112                | TT                              | CC                | 1946435212               |
| SNP_P3_67163_20857117 | NC_021164.1    | Ca_kabuli_chr05 | 20857117                | AA                              | GG                | 1946435214               |
| SNP_P3_67164_20857123 | NC_021164.1    | Ca_kabuli_chr05 | 20857123                | CC                              | TT                | 1946435215               |
| SNP_P3_67165_20863618 | NC_021164.1    | Ca_kabuli_chr05 | 20863618                | TT                              | CC                | 1946435217               |
| SNP_P3_67167_20971552 | NC_021164.1    | Ca_kabuli_chr05 | 20971552                | AA                              | CC                | 1946435219               |
| SNP_P3_67168_20971916 | NC_021164.1    | Ca_kabuli_chr05 | 20971916                | TT                              | CC                | 1946435220               |
| SNP_P3_67169_20973119 | NC_021164.1    | Ca_kabuli_chr05 | 20973119                | GG                              | AA                | 1946435222               |
| SNP_P3_67170_20975330 | NC_021164.1    | Ca_kabuli_chr05 | 20975330                | TT                              | AA                | 1946435223               |
| SNP_P3_67171_20978311 | NC_021164.1    | Ca_kabuli_chr05 | 20978311                | CC                              | TT                | 1946435225               |
| SNP_P3_67172_21032776 | NC_021164.1    | Ca_kabuli_chr05 | 21032776                | CC                              | AA                | 1946435226               |
| SNP_P3_67173_21072470 | NC_021164.1    | Ca_kabuli_chr05 | 21072470                | CC                              | TT                | 1946435228               |
| SNP_P3_67175_21085465 | NC_021164.1    | Ca_kabuli_chr05 | 21085465                | TT                              | CC                | 1946435229               |
| SNP_P3_67176_21088836 | NC_021164.1    | Ca_kabuli_chr05 | 21088836                | GG                              | TT                | 1946435231               |
| SNP_P3_67177_21088845 | NC_021164.1    | Ca_kabuli_chr05 | 21088845                | CC                              | TT                | 1946435233               |
| SNP_P3_67178_21088907 | NC_021164.1    | Ca_kabuli_chr05 | 21088907                | CC                              | TT                | 1946435234               |
| SNP_P3_67179_21100438 | NC_021164.1    | Ca_kabuli_chr05 | 21100438                | CC                              | TT                | 1946435236               |
| SNP_P3_67180_21116806 | NC_021164.1    | Ca_kabuli_chr05 | 21116806                | TT                              | AA                | 1946435238               |
| SNP_P3_67181_21117105 | NC_021164.1    | Ca_kabuli_chr05 | 21117105                | AA                              | GG                | 1946435239               |
| SNP_P3_67182_21181623 | NC_021164.1    | Ca_kabuli_chr05 | 21181623                | TT                              | AA                | 1946435241               |
| SNP_P3_67183_21204849 | NC_021164.1    | Ca_kabuli_chr05 | 21204849                | GG                              | TT                | 1946435242               |
| SNP_P3_67185_21246998 | NC_021164.1    | Ca_kabuli_chr05 | 21246998                | GG                              | CC                | 1946435244               |
| SNP_P3_67186_21247105 | NC_021164.1    | Ca_kabuli_chr05 | 21247105                | AA                              | GG                | 1946435246               |
| SNP_P3_67187_21250491 | NC_021164.1    | Ca_kabuli_chr05 | 21250491                | TT                              | CC                | 1946435247               |
| SNP_P3_67188_21250529 | NC_021164.1    | Ca_kabuli_chr05 | 21250529                | CC                              | TT                | 1946435249               |
| SNP_P3_67189_21250537 | NC_021164.1    | Ca_kabuli_chr05 | 21250537                | AA                              | GG                | 1946435250               |
| SNP_P3_67190_21265736 | NC_021164.1    | Ca_kabuli_chr05 | 21265736                | GG                              | TT                | 1946435252               |
| SNP_P3_67191_21267551 | NC_021164.1    | Ca_kabuli_chr05 | 21267551                | TT                              | AA                | 1946435253               |
| SNP_P3_67192_21279465 | NC_021164.1    | Ca_kabuli_chr05 | 21279465                | CC                              | TT                | 1946435255               |
| SNP_P3_67193_21279524 | NC_021164.1    | Ca_kabuli_chr05 | 21279524                | GG                              | AA                | 1946435256               |
| SNP_P3_67194_21281961 | NC_021164.1    | Ca_kabuli_chr05 | 21281961                | TT                              | GG                | 1946435258               |
| SNP_P3_67195_21283955 | NC_021164.1    | Ca_kabuli_chr05 | 21283955                | TT                              | AA                | 1946435260               |
| SNP_P3_67196_21284031 | NC_021164.1    | Ca_kabuli_chr05 | 21284031                | AA                              | GG                | 1946435261               |
| SNP_P3_67197_21284258 | NC_021164.1    | Ca_kabuli_chr05 | 21284258                | AA                              | GG                | 1946435263               |
| SNP_P3_67198_21284277 | NC_021164.1    | Ca_kabuli_chr05 | 21284277                | CC                              | AA                | 1946435264               |
| SNP_P3_67199_21284278 | NC_021164.1    | Ca_kabuli_chr05 | 21284278                | AA                              | TT                | 1946435266               |
| SNP_P3_67200_21284284 | NC_021164.1    | Ca_kabuli_chr05 | 21284284                | AA                              | GG                | 1946435268               |
| SNP_P3_67201_21284777 | NC_021164.1    | Ca_kabuli_chr05 | 21284777                | TT                              | GG                | 1946435269               |
| SNP_P3_67202_21288387 | NC_021164.1    | Ca_kabuli_chr05 | 21288387                | TT                              | CC                | 1946435271               |
| SNP_P3_67203_21318367 | NC_021164.1    | Ca_kabuli_chr05 | 21318367                | TT                              | AA                | 1946435272               |

| SNPs IDs              | Chromosome IDs | Chromosomes     | Physical positions (bp) | CDC Frontier (Reference genome) | (Pusa 256 & HPNB) | NCBI SNPdb Accession IDs |
|-----------------------|----------------|-----------------|-------------------------|---------------------------------|-------------------|--------------------------|
| SNP_P3_67204_21324009 | NC_021164.1    | Ca_kabuli_chr05 | 21324009                | GG                              | AA                | 1946435274               |
| SNP_P3_67205_21336462 | NC_021164.1    | Ca_kabuli_chr05 | 21336462                | GG                              | TT                | 1946435276               |
| SNP_P3_67207_21411275 | NC_021164.1    | Ca_kabuli_chr05 | 21411275                | AA                              | TT                | 1946435277               |
| SNP_P3_67208_21416688 | NC_021164.1    | Ca_kabuli_chr05 | 21416688                | GG                              | AA                | 1946435279               |
| SNP_P3_67209_21431346 | NC_021164.1    | Ca_kabuli_chr05 | 21431346                | GG                              | AA                | 1946435281               |
| SNP_P3_67210_21443251 | NC_021164.1    | Ca_kabuli_chr05 | 21443251                | AA                              | CC                | 1946435282               |
| SNP_P3_67211_21448692 | NC_021164.1    | Ca_kabuli_chr05 | 21448692                | TT                              | CC                | 1946435284               |
| SNP_P3_67213_21479344 | NC_021164.1    | Ca_kabuli_chr05 | 21479344                | CC                              | GG                | 1946435285               |
| SNP_P3_67214_21485385 | NC_021164.1    | Ca_kabuli_chr05 | 21485385                | TT                              | GG                | 1946435287               |
| SNP_P3_67215_21486921 | NC_021164.1    | Ca_kabuli_chr05 | 21486921                | TT                              | CC                | 1946435288               |
| SNP_P3_67216_21486957 | NC_021164.1    | Ca_kabuli_chr05 | 21486957                | TT                              | GG                | 1946435290               |
| SNP_P3_67217_21486959 | NC_021164.1    | Ca_kabuli_chr05 | 21486959                | TT                              | GG                | 1946435292               |
| SNP_P3_67218_21486963 | NC_021164.1    | Ca_kabuli_chr05 | 21486963                | TT                              | CC                | 1946435293               |
| SNP_P3_67219_21493974 | NC_021164.1    | Ca_kabuli_chr05 | 21493974                | GG                              | AA                | 1946435295               |
| SNP_P3_67220_21498128 | NC_021164.1    | Ca_kabuli_chr05 | 21498128                | TT                              | AA                | 1946435296               |
| SNP_P3_67221_21498142 | NC_021164.1    | Ca_kabuli_chr05 | 21498142                | TT                              | CC                | 1946435298               |
| SNP_P3_67222_21498147 | NC_021164.1    | Ca_kabuli_chr05 | 21498147                | GG                              | TT                | 1946435300               |
| SNP_P3_67223_21498206 | NC_021164.1    | Ca_kabuli_chr05 | 21498206                | AA                              | TT                | 1946435301               |
| SNP_P3_67224_21498312 | NC_021164.1    | Ca_kabuli_chr05 | 21498312                | TT                              | GG                | 1946435303               |
| SNP_P3_67225_21502446 | NC_021164.1    | Ca_kabuli_chr05 | 21502446                | TT                              | CC                | 1946435304               |
| SNP_P3_67226_21502447 | NC_021164.1    | Ca_kabuli_chr05 | 21502447                | AA                              | CC                | 1946435306               |
| SNP_P3_67227_21502838 | NC_021164.1    | Ca_kabuli_chr05 | 21502838                | GG                              | CC                | 1946435307               |
| SNP_P3_67228_21502844 | NC_021164.1    | Ca_kabuli_chr05 | 21502844                | AA                              | CC                | 1946435309               |
| SNP_P3_67229_21502851 | NC_021164.1    | Ca_kabuli_chr05 | 21502851                | CC                              | TT                | 1946435310               |
| SNP_P3_67230_21518690 | NC_021164.1    | Ca_kabuli_chr05 | 21518690                | CC                              | AA                | 1946435312               |
| SNP_P3_67231_21519036 | NC_021164.1    | Ca_kabuli_chr05 | 21519036                | GG                              | AA                | 1946435313               |
| SNP_P3_67232_21519041 | NC_021164.1    | Ca_kabuli_chr05 | 21519041                | GG                              | AA                | 1946435315               |
| SNP_P3_67233_21519133 | NC_021164.1    | Ca_kabuli_chr05 | 21519133                | CC                              | TT                | 1946435317               |
| SNP_P3_67234_21520611 | NC_021164.1    | Ca_kabuli_chr05 | 21520611                | TT                              | AA                | 1946435319               |
| SNP_P3_67235_21521000 | NC_021164.1    | Ca_kabuli_chr05 | 21521000                | CC                              | TT                | 1946435320               |
| SNP_P3_67236_21526772 | NC_021164.1    | Ca_kabuli_chr05 | 21526772                | CC                              | TT                | 1946435322               |
| SNP_P3_67237_21526948 | NC_021164.1    | Ca_kabuli_chr05 | 21526948                | AA                              | GG                | 1946435323               |
| SNP_P3_67238_21541726 | NC_021164.1    | Ca_kabuli_chr05 | 21541726                | GG                              | CC                | 1946435325               |
| SNP_P3_67239_21577235 | NC_021164.1    | Ca_kabuli_chr05 | 21577235                | CC                              | TT                | 1946435326               |
| SNP_P3_67240_21577238 | NC_021164.1    | Ca_kabuli_chr05 | 21577238                | AA                              | GG                | 1946435328               |
| SNP_P3_67241_21577256 | NC_021164.1    | Ca_kabuli_chr05 | 21577256                | AA                              | TT                | 1946435329               |
| SNP_P3_67242_21577268 | NC_021164.1    | Ca_kabuli_chr05 | 21577268                | GG                              | AA                | 1946435331               |
| SNP_P3_67243_21577298 | NC_021164.1    | Ca_kabuli_chr05 | 21577298                | TT                              | CC                | 1946435333               |
| SNP_P3_67244_21577307 | NC_021164.1    | Ca_kabuli_chr05 | 21577307                | AA                              | GG                | 1946435334               |
| SNP_P3_67245_21577325 | NC_021164.1    | Ca_kabuli_chr05 | 21577325                | CC                              | TT                | 1946435336               |
| SNP_P3_67246_21590067 | NC_021164.1    | Ca_kabuli_chr05 | 21590067                | GG                              | AA                | 1946435337               |
| SNP_P3_67247_21592533 | NC_021164.1    | Ca_kabuli_chr05 | 21592533                | GG                              | AA                | 1946435339               |

| SNPs IDs              | Chromosome IDs | Chromosomes     | Physical positions (bp) | CDC Frontier (Reference genome) | (Pusa 256 & HPNB) | NCBI SNPdb Accession IDs |
|-----------------------|----------------|-----------------|-------------------------|---------------------------------|-------------------|--------------------------|
| SNP_P3_67250_21622487 | NC_021164.1    | Ca_kabuli_chr05 | 21622487                | GG                              | AA                | 1946435340               |
| SNP_P3_67251_21623168 | NC_021164.1    | Ca_kabuli_chr05 | 21623168                | CC                              | TT                | 1946435342               |
| SNP_P3_67252_21623397 | NC_021164.1    | Ca_kabuli_chr05 | 21623397                | AA                              | TT                | 1946435343               |
| SNP_P3_67254_21623842 | NC_021164.1    | Ca_kabuli_chr05 | 21623842                | AA                              | TT                | 1946435345               |
| SNP_P3_67255_21623847 | NC_021164.1    | Ca_kabuli_chr05 | 21623847                | TT                              | GG                | 1946435346               |
| SNP_P3_67256_21623986 | NC_021164.1    | Ca_kabuli_chr05 | 21623986                | AA                              | GG                | 1946435348               |
| SNP_P3_67257_21624086 | NC_021164.1    | Ca_kabuli_chr05 | 21624086                | GG                              | CC                | 1946435349               |
| SNP_P3_67258_21624281 | NC_021164.1    | Ca_kabuli_chr05 | 21624281                | AA                              | CC                | 1946435351               |
| SNP_P3_67259_21629120 | NC_021164.1    | Ca_kabuli_chr05 | 21629120                | AA                              | GG                | 1946435353               |
| SNP_P3_67260_21644175 | NC_021164.1    | Ca_kabuli_chr05 | 21644175                | CC                              | TT                | 1946435354               |
| SNP_P3_67261_21644187 | NC_021164.1    | Ca_kabuli_chr05 | 21644187                | TT                              | GG                | 1946435356               |
| SNP_P3_67262_21656441 | NC_021164.1    | Ca_kabuli_chr05 | 21656441                | CC                              | TT                | 1946435357               |
| SNP_P3_67263_21658635 | NC_021164.1    | Ca_kabuli_chr05 | 21658635                | TT                              | GG                | 1946435359               |
| SNP_P3_67264_21658675 | NC_021164.1    | Ca_kabuli_chr05 | 21658675                | TT                              | AA                | 1946435361               |
| SNP_P3_67265_21658682 | NC_021164.1    | Ca_kabuli_chr05 | 21658682                | GG                              | TT                | 1946435363               |
| SNP_P3_67266_21658842 | NC_021164.1    | Ca_kabuli_chr05 | 21658842                | TT                              | AA                | 1946435364               |
| SNP_P3_67267_21658904 | NC_021164.1    | Ca_kabuli_chr05 | 21658904                | CC                              | TT                | 1946435366               |
| SNP_P3_67268_21658905 | NC_021164.1    | Ca_kabuli_chr05 | 21658905                | TT                              | GG                | 1946435367               |
| SNP_P3_67269_21663200 | NC_021164.1    | Ca_kabuli_chr05 | 21663200                | GG                              | TT                | 1946435369               |
| SNP_P3_67270_21663209 | NC_021164.1    | Ca_kabuli_chr05 | 21663209                | AA                              | GG                | 1946435370               |
| SNP_P3_67271_21663483 | NC_021164.1    | Ca_kabuli_chr05 | 21663483                | CC                              | AA                | 1946435372               |
| SNP_P3_67272_21663556 | NC_021164.1    | Ca_kabuli_chr05 | 21663556                | CC                              | TT                | 1946435376               |
| SNP_P3_67273_21665898 | NC_021164.1    | Ca_kabuli_chr05 | 21665898                | TT                              | CC                | 1946435378               |
| SNP_P3_67274_21665906 | NC_021164.1    | Ca_kabuli_chr05 | 21665906                | GG                              | AA                | 1946435380               |
| SNP_P3_67275_21665931 | NC_021164.1    | Ca_kabuli_chr05 | 21665931                | GG                              | TT                | 1946435381               |
| SNP_P3_67276_21666258 | NC_021164.1    | Ca_kabuli_chr05 | 21666258                | TT                              | CC                | 1946435383               |
| SNP_P3_67277_21670974 | NC_021164.1    | Ca_kabuli_chr05 | 21670974                | CC                              | TT                | 1946435384               |
| SNP_P3_67278_21670976 | NC_021164.1    | Ca_kabuli_chr05 | 21670976                | AA                              | GG                | 1946435386               |
| SNP_P3_67279_21671052 | NC_021164.1    | Ca_kabuli_chr05 | 21671052                | CC                              | AA                | 1946435387               |
| SNP_P3_67280_21671185 | NC_021164.1    | Ca_kabuli_chr05 | 21671185                | AA                              | GG                | 1946435389               |
| SNP_P3_67281_21673378 | NC_021164.1    | Ca_kabuli_chr05 | 21673378                | CC                              | AA                | 1946435391               |
| SNP_P3_67282_21673690 | NC_021164.1    | Ca_kabuli_chr05 | 21673690                | TT                              | CC                | 1946435392               |
| SNP_P3_67283_21673709 | NC_021164.1    | Ca_kabuli_chr05 | 21673709                | TT                              | CC                | 1946435394               |
| SNP_P3_67284_21684229 | NC_021164.1    | Ca_kabuli_chr05 | 21684229                | CC                              | TT                | 1946435395               |
| SNP_P3_67285_21684245 | NC_021164.1    | Ca_kabuli_chr05 | 21684245                | AA                              | GG                | 1946435397               |
| SNP_P3_67286_21684260 | NC_021164.1    | Ca_kabuli_chr05 | 21684260                | CC                              | TT                | 1946435398               |
| SNP_P3_67287_21684389 | NC_021164.1    | Ca_kabuli_chr05 | 21684389                | AA                              | GG                | 1946435400               |
| SNP_P3_67288_21684468 | NC_021164.1    | Ca_kabuli_chr05 | 21684468                | AA                              | GG                | 1946435401               |
| SNP_P3_67289_21684507 | NC_021164.1    | Ca_kabuli_chr05 | 21684507                | CC                              | GG                | 1946435403               |
| SNP_P3_67290_21684529 | NC_021164.1    | Ca_kabuli_chr05 | 21684529                | AA                              | GG                | 1946435404               |
| SNP_P3_67291_21684537 | NC_021164.1    | Ca_kabuli_chr05 | 21684537                | TT                              | CC                | 1946435406               |
| SNP_P3_67292_21684553 | NC_021164.1    | Ca_kabuli_chr05 | 21684553                | CC                              | AA                | 1946435407               |



| SNPs IDs              | Chromosome IDs | Chromosomes     | Physical positions (bp) | CDC Frontier (Reference genome) | (Pusa 256 & HPNB) | NCBI SNPdb Accession IDs |
|-----------------------|----------------|-----------------|-------------------------|---------------------------------|-------------------|--------------------------|
| SNP_P3_67293_21684825 | NC_021164.1    | Ca_kabuli_chr05 | 21684825                | GG                              | AA                | 1946435409               |
| SNP_P3_67294_21684929 | NC_021164.1    | Ca_kabuli_chr05 | 21684929                | CC                              | TT                | 1946435411               |
| SNP_P3_67295_21691010 | NC_021164.1    | Ca_kabuli_chr05 | 21691010                | TT                              | CC                | 1946435412               |
| SNP_P3_67296_21691022 | NC_021164.1    | Ca_kabuli_chr05 | 21691022                | AA                              | TT                | 1946435414               |
| SNP_P3_67297_21691330 | NC_021164.1    | Ca_kabuli_chr05 | 21691330                | TT                              | CC                | 1946435415               |
| SNP_P3_67298_21691523 | NC_021164.1    | Ca_kabuli_chr05 | 21691523                | GG                              | AA                | 1946435417               |
| SNP_P3_67299_21692447 | NC_021164.1    | Ca_kabuli_chr05 | 21692447                | CC                              | GG                | 1946435418               |
| SNP_P3_67300_21692488 | NC_021164.1    | Ca_kabuli_chr05 | 21692488                | TT                              | GG                | 1946435420               |
| SNP_P3_67301_21692711 | NC_021164.1    | Ca_kabuli_chr05 | 21692711                | AA                              | GG                | 1946435422               |
| SNP_P3_67302_21692938 | NC_021164.1    | Ca_kabuli_chr05 | 21692938                | TT                              | AA                | 1946435423               |
| SNP_P3_67303_21692946 | NC_021164.1    | Ca_kabuli_chr05 | 21692946                | CC                              | AA                | 1946435425               |
| SNP_P3_67304_21693164 | NC_021164.1    | Ca_kabuli_chr05 | 21693164                | CC                              | GG                | 1946435426               |
| SNP_P3_67305_21693165 | NC_021164.1    | Ca_kabuli_chr05 | 21693165                | AA                              | TT                | 1946435428               |
| SNP_P3_67306_21693261 | NC_021164.1    | Ca_kabuli_chr05 | 21693261                | GG                              | AA                | 1946435429               |
| SNP_P3_67307_21693382 | NC_021164.1    | Ca_kabuli_chr05 | 21693382                | AA                              | GG                | 1946435431               |
| SNP_P3_67308_21693399 | NC_021164.1    | Ca_kabuli_chr05 | 21693399                | AA                              | TT                | 1946435432               |
| SNP_P3_67309_21693530 | NC_021164.1    | Ca_kabuli_chr05 | 21693530                | TT                              | GG                | 1946435434               |
| SNP_P3_67310_21693635 | NC_021164.1    | Ca_kabuli_chr05 | 21693635                | TT                              | AA                | 1946435435               |
| SNP_P3_67311_21693671 | NC_021164.1    | Ca_kabuli_chr05 | 21693671                | GG                              | AA                | 1946435437               |
| SNP_P3_67312_21693672 | NC_021164.1    | Ca_kabuli_chr05 | 21693672                | TT                              | GG                | 1946435439               |
| SNP_P3_67313_21699260 | NC_021164.1    | Ca_kabuli_chr05 | 21699260                | CC                              | TT                | 1946435440               |
| SNP_P3_67314_21699491 | NC_021164.1    | Ca_kabuli_chr05 | 21699491                | CC                              | AA                | 1946435442               |
| SNP_P3_67315_21699522 | NC_021164.1    | Ca_kabuli_chr05 | 21699522                | GG                              | AA                | 1946435443               |
| SNP_P3_67316_21699571 | NC_021164.1    | Ca_kabuli_chr05 | 21699571                | GG                              | TT                | 1946435445               |
| SNP_P3_67317_21714029 | NC_021164.1    | Ca_kabuli_chr05 | 21714029                | CC                              | TT                | 1946435447               |
| SNP_P3_67318_21714030 | NC_021164.1    | Ca_kabuli_chr05 | 21714030                | AA                              | TT                | 1946435448               |
| SNP_P3_67319_21714045 | NC_021164.1    | Ca_kabuli_chr05 | 21714045                | CC                              | AA                | 1946435450               |
| SNP_P3_67320_21714079 | NC_021164.1    | Ca_kabuli_chr05 | 21714079                | AA                              | CC                | 1946435451               |
| SNP_P3_67321_21714085 | NC_021164.1    | Ca_kabuli_chr05 | 21714085                | CC                              | TT                | 1946435453               |
| SNP_P3_67322_21714096 | NC_021164.1    | Ca_kabuli_chr05 | 21714096                | AA                              | GG                | 1946435454               |
| SNP_P3_67323_21714097 | NC_021164.1    | Ca_kabuli_chr05 | 21714097                | AA                              | TT                | 1946435456               |
| SNP_P3_67324_21719736 | NC_021164.1    | Ca_kabuli_chr05 | 21719736                | AA                              | GG                | 1946435458               |
| SNP_P3_67325_21720465 | NC_021164.1    | Ca_kabuli_chr05 | 21720465                | TT                              | AA                | 1946435459               |
| SNP_P3_67326_21720516 | NC_021164.1    | Ca_kabuli_chr05 | 21720516                | GG                              | TT                | 1946435461               |
| SNP_P3_67327_21720786 | NC_021164.1    | Ca_kabuli_chr05 | 21720786                | CC                              | TT                | 1946435463               |
| SNP_P3_67328_21720909 | NC_021164.1    | Ca_kabuli_chr05 | 21720909                | CC                              | TT                | 1946435464               |
| SNP_P3_67329_21720973 | NC_021164.1    | Ca_kabuli_chr05 | 21720973                | GG                              | TT                | 1946435466               |
| SNP_P3_67330_21721001 | NC_021164.1    | Ca_kabuli_chr05 | 21721001                | CC                              | TT                | 1946435467               |
| SNP_P3_67332_21723266 | NC_021164.1    | Ca_kabuli_chr05 | 21723266                | CC                              | AA                | 1946435468               |
| SNP_P3_67333_21723302 | NC_021164.1    | Ca_kabuli_chr05 | 21723302                | TT                              | CC                | 1946435470               |
| SNP_P3_67334_21740920 | NC_021164.1    | Ca_kabuli_chr05 | 21740920                | TT                              | CC                | 1946435471               |
| SNP_P3_67335_21740939 | NC_021164.1    | Ca_kabuli_chr05 | 21740939                | TT                              | CC                | 1946435473               |

| SNPs IDs              | Chromosome IDs | Chromosomes     | Physical positions (bp) | CDC Frontier (Reference genome) | (Pusa 256 & HPNB) | NCBI SNPdb Accession IDs |
|-----------------------|----------------|-----------------|-------------------------|---------------------------------|-------------------|--------------------------|
| SNP_P3_67336_21740948 | NC_021164.1    | Ca_kabuli_chr05 | 21740948                | CC                              | TT                | 1946435474               |
| SNP_P3_67337_21740970 | NC_021164.1    | Ca_kabuli_chr05 | 21740970                | TT                              | CC                | 1946435476               |
| SNP_P3_67338_21740972 | NC_021164.1    | Ca_kabuli_chr05 | 21740972                | TT                              | AA                | 1946435478               |
| SNP_P3_67339_21740990 | NC_021164.1    | Ca_kabuli_chr05 | 21740990                | CC                              | TT                | 1946435479               |
| SNP_P3_67340_21741001 | NC_021164.1    | Ca_kabuli_chr05 | 21741001                | AA                              | CC                | 1946435481               |
| SNP_P3_67341_21741063 | NC_021164.1    | Ca_kabuli_chr05 | 21741063                | CC                              | TT                | 1946435482               |
| SNP_P3_67342_21741339 | NC_021164.1    | Ca_kabuli_chr05 | 21741339                | GG                              | AA                | 1946435484               |
| SNP_P3_67343_21745782 | NC_021164.1    | Ca_kabuli_chr05 | 21745782                | AA                              | TT                | 1946435485               |
| SNP_P3_67344_21745821 | NC_021164.1    | Ca_kabuli_chr05 | 21745821                | TT                              | AA                | 1946435487               |
| SNP_P3_67345_21745884 | NC_021164.1    | Ca_kabuli_chr05 | 21745884                | AA                              | CC                | 1946435488               |
| SNP_P3_67346_21746133 | NC_021164.1    | Ca_kabuli_chr05 | 21746133                | AA                              | TT                | 1946435490               |
| SNP_P3_67347_21746151 | NC_021164.1    | Ca_kabuli_chr05 | 21746151                | TT                              | CC                | 1946435491               |
| SNP_P3_67348_21746170 | NC_021164.1    | Ca_kabuli_chr05 | 21746170                | TT                              | CC                | 1946435493               |
| SNP_P3_67349_21746172 | NC_021164.1    | Ca_kabuli_chr05 | 21746172                | TT                              | CC                | 1946435495               |
| SNP_P3_67350_21746181 | NC_021164.1    | Ca_kabuli_chr05 | 21746181                | TT                              | CC                | 1946435496               |
| SNP_P3_67351_21746241 | NC_021164.1    | Ca_kabuli_chr05 | 21746241                | TT                              | GG                | 1946435498               |
| SNP_P3_67352_21746247 | NC_021164.1    | Ca_kabuli_chr05 | 21746247                | CC                              | GG                | 1946435499               |
| SNP_P3_67353_21747222 | NC_021164.1    | Ca_kabuli_chr05 | 21747222                | TT                              | CC                | 1946435501               |
| SNP_P3_67354_21765210 | NC_021164.1    | Ca_kabuli_chr05 | 21765210                | CC                              | TT                | 1946435502               |
| SNP_P3_67355_21784230 | NC_021164.1    | Ca_kabuli_chr05 | 21784230                | CC                              | AA                | 1946435504               |
| SNP_P3_67356_21784231 | NC_021164.1    | Ca_kabuli_chr05 | 21784231                | CC                              | AA                | 1946435505               |
| SNP_P3_67357_21807316 | NC_021164.1    | Ca_kabuli_chr05 | 21807316                | GG                              | AA                | 1946435507               |
| SNP_P3_67358_21822475 | NC_021164.1    | Ca_kabuli_chr05 | 21822475                | GG                              | AA                | 1946435508               |
| SNP_P3_67359_21822477 | NC_021164.1    | Ca_kabuli_chr05 | 21822477                | TT                              | CC                | 1946435510               |
| SNP_P3_67360_21822478 | NC_021164.1    | Ca_kabuli_chr05 | 21822478                | GG                              | AA                | 1946435511               |
| SNP_P3_67361_21822479 | NC_021164.1    | Ca_kabuli_chr05 | 21822479                | AA                              | GG                | 1946435513               |
| SNP_P3_67362_21822501 | NC_021164.1    | Ca_kabuli_chr05 | 21822501                | AA                              | GG                | 1946435515               |
| SNP_P3_67363_21845212 | NC_021164.1    | Ca_kabuli_chr05 | 21845212                | GG                              | AA                | 1946435516               |
| SNP_P3_67364_21845225 | NC_021164.1    | Ca_kabuli_chr05 | 21845225                | TT                              | CC                | 1946435518               |
| SNP_P3_67365_21846382 | NC_021164.1    | Ca_kabuli_chr05 | 21846382                | AA                              | TT                | 1946435519               |
| SNP_P3_67366_21846405 | NC_021164.1    | Ca_kabuli_chr05 | 21846405                | AA                              | GG                | 1946435521               |
| SNP_P3_67367_21846422 | NC_021164.1    | Ca_kabuli_chr05 | 21846422                | GG                              | AA                | 1946435522               |
| SNP_P3_67368_21846444 | NC_021164.1    | Ca_kabuli_chr05 | 21846444                | TT                              | AA                | 1946435524               |
| SNP_P3_67369_21846449 | NC_021164.1    | Ca_kabuli_chr05 | 21846449                | AA                              | GG                | 1946435525               |
| SNP_P3_67370_21846567 | NC_021164.1    | Ca_kabuli_chr05 | 21846567                | AA                              | TT                | 1946435527               |
| SNP_P3_67371_21846642 | NC_021164.1    | Ca_kabuli_chr05 | 21846642                | GG                              | TT                | 1946435528               |
| SNP_P3_67372_21846644 | NC_021164.1    | Ca_kabuli_chr05 | 21846644                | AA                              | TT                | 1946435530               |
| SNP_P3_67373_21846662 | NC_021164.1    | Ca_kabuli_chr05 | 21846662                | TT                              | GG                | 1946435532               |
| SNP_P3_67374_21846677 | NC_021164.1    | Ca_kabuli_chr05 | 21846677                | TT                              | CC                | 1946435533               |
| SNP_P3_67375_21846685 | NC_021164.1    | Ca_kabuli_chr05 | 21846685                | AA                              | GG                | 1946435535               |
| SNP_P3_67376_21846807 | NC_021164.1    | Ca_kabuli_chr05 | 21846807                | AA                              | TT                | 1946435536               |
| SNP_P3_67377_21851286 | NC_021164.1    | Ca_kabuli_chr05 | 21851286                | GG                              | TT                | 1946435538               |

| SNPs IDs              | Chromosome IDs | Chromosomes     | Physical positions (bp) | CDC Frontier (Reference genome) | (Pusa 256 & HPNB) | NCBI SNPdb Accession IDs |
|-----------------------|----------------|-----------------|-------------------------|---------------------------------|-------------------|--------------------------|
| SNP_P3_67378_21851290 | NC_021164.1    | Ca_kabuli_chr05 | 21851290                | GG                              | AA                | 1946435540               |
| SNP_P3_67379_21856803 | NC_021164.1    | Ca_kabuli_chr05 | 21856803                | AA                              | TT                | 1946435541               |
| SNP_P3_67380_21856805 | NC_021164.1    | Ca_kabuli_chr05 | 21856805                | CC                              | AA                | 1946435543               |
| SNP_P3_67381_21865103 | NC_021164.1    | Ca_kabuli_chr05 | 21865103                | TT                              | CC                | 1946435544               |
| SNP_P3_67382_21865429 | NC_021164.1    | Ca_kabuli_chr05 | 21865429                | TT                              | GG                | 1946435546               |
| SNP_P3_67383_21865444 | NC_021164.1    | Ca_kabuli_chr05 | 21865444                | TT                              | CC                | 1946435547               |
| SNP_P3_67384_21865490 | NC_021164.1    | Ca_kabuli_chr05 | 21865490                | TT                              | CC                | 1946435549               |
| SNP_P3_67385_21865540 | NC_021164.1    | Ca_kabuli_chr05 | 21865540                | AA                              | GG                | 1946435551               |
| SNP_P3_67386_21865543 | NC_021164.1    | Ca_kabuli_chr05 | 21865543                | AA                              | GG                | 1946435552               |
| SNP_P3_67387_21865652 | NC_021164.1    | Ca_kabuli_chr05 | 21865652                | AA                              | TT                | 1946435554               |
| SNP_P3_67388_21865706 | NC_021164.1    | Ca_kabuli_chr05 | 21865706                | AA                              | TT                | 1946435556               |
| SNP_P3_67389_21867653 | NC_021164.1    | Ca_kabuli_chr05 | 21867653                | AA                              | CC                | 1946435557               |
| SNP_P3_67390_21867659 | NC_021164.1    | Ca_kabuli_chr05 | 21867659                | AA                              | TT                | 1946435559               |
| SNP_P3_67391_21867725 | NC_021164.1    | Ca_kabuli_chr05 | 21867725                | TT                              | CC                | 1946435561               |
| SNP_P3_67392_21867734 | NC_021164.1    | Ca_kabuli_chr05 | 21867734                | AA                              | GG                | 1946435563               |
| SNP_P3_67393_21867849 | NC_021164.1    | Ca_kabuli_chr05 | 21867849                | TT                              | CC                | 1946435564               |
| SNP_P3_67394_21867963 | NC_021164.1    | Ca_kabuli_chr05 | 21867963                | AA                              | GG                | 1946435566               |
| SNP_P3_67395_21867965 | NC_021164.1    | Ca_kabuli_chr05 | 21867965                | AA                              | GG                | 1946435567               |
| SNP_P3_67396_21867967 | NC_021164.1    | Ca_kabuli_chr05 | 21867967                | TT                              | CC                | 1946435569               |
| SNP_P3_67398_21888950 | NC_021164.1    | Ca_kabuli_chr05 | 21888950                | TT                              | GG                | 1946435570               |
| SNP_P3_67399_21891815 | NC_021164.1    | Ca_kabuli_chr05 | 21891815                | AA                              | GG                | 1946435571               |
| SNP_P3_67400_21892004 | NC_021164.1    | Ca_kabuli_chr05 | 21892004                | AA                              | GG                | 1946435573               |
| SNP_P3_67401_21898491 | NC_021164.1    | Ca_kabuli_chr05 | 21898491                | GG                              | CC                | 1946435574               |
| SNP_P3_67402_21899296 | NC_021164.1    | Ca_kabuli_chr05 | 21899296                | AA                              | GG                | 1946435576               |
| SNP_P3_67404_21901094 | NC_021164.1    | Ca_kabuli_chr05 | 21901094                | GG                              | AA                | 1946435578               |
| SNP_P3_67405_21901113 | NC_021164.1    | Ca_kabuli_chr05 | 21901113                | TT                              | CC                | 1946435579               |
| SNP_P3_67406_21901124 | NC_021164.1    | Ca_kabuli_chr05 | 21901124                | GG                              | TT                | 1946435581               |
| SNP_P3_67407_21901149 | NC_021164.1    | Ca_kabuli_chr05 | 21901149                | AA                              | CC                | 1946435583               |
| SNP_P3_67408_21901206 | NC_021164.1    | Ca_kabuli_chr05 | 21901206                | AA                              | CC                | 1946435584               |
| SNP_P3_67409_21901207 | NC_021164.1    | Ca_kabuli_chr05 | 21901207                | TT                              | GG                | 1946435586               |
| SNP_P3_67410_21901208 | NC_021164.1    | Ca_kabuli_chr05 | 21901208                | GG                              | AA                | 1946435587               |
| SNP_P3_67411_21901224 | NC_021164.1    | Ca_kabuli_chr05 | 21901224                | GG                              | TT                | 1946435589               |
| SNP_P3_67412_21908414 | NC_021164.1    | Ca_kabuli_chr05 | 21908414                | TT                              | CC                | 1946435591               |
| SNP_P3_67413_21909051 | NC_021164.1    | Ca_kabuli_chr05 | 21909051                | CC                              | TT                | 1946435592               |
| SNP_P3_67415_21910345 | NC_021164.1    | Ca_kabuli_chr05 | 21910345                | CC                              | TT                | 1946435594               |
| SNP_P3_67417_21917338 | NC_021164.1    | Ca_kabuli_chr05 | 21917338                | AA                              | GG                | 1946435596               |
| SNP_P3_67418_21917379 | NC_021164.1    | Ca_kabuli_chr05 | 21917379                | AA                              | GG                | 1946435598               |
| SNP_P3_67419_21917422 | NC_021164.1    | Ca_kabuli_chr05 | 21917422                | TT                              | CC                | 1946435599               |
| SNP_P3_67420_21918777 | NC_021164.1    | Ca_kabuli_chr05 | 21918777                | TT                              | CC                | 1946435601               |
| SNP_P3_67421_21918804 | NC_021164.1    | Ca_kabuli_chr05 | 21918804                | AA                              | CC                | 1946435603               |
| SNP_P3_67422_21918813 | NC_021164.1    | Ca_kabuli_chr05 | 21918813                | AA                              | GG                | 1946435604               |
| SNP_P3_67423_21918846 | NC_021164.1    | Ca_kabuli_chr05 | 21918846                | TT                              | CC                | 1946435606               |

| SNPs IDs              | Chromosome IDs | Chromosomes     | Physical positions (bp) | CDC Frontier (Reference genome) | (Pusa 256 & HPNB) | NCBI SNPdb Accession IDs |
|-----------------------|----------------|-----------------|-------------------------|---------------------------------|-------------------|--------------------------|
| SNP_P3_67424_21918863 | NC_021164.1    | Ca_kabuli_chr05 | 21918863                | CC                              | GG                | 1946435607               |
| SNP_P3_67425_21918870 | NC_021164.1    | Ca_kabuli_chr05 | 21918870                | CC                              | TT                | 1946435609               |
| SNP_P3_67426_21918876 | NC_021164.1    | Ca_kabuli_chr05 | 21918876                | AA                              | GG                | 1946435610               |
| SNP_P3_67427_21918880 | NC_021164.1    | Ca_kabuli_chr05 | 21918880                | TT                              | CC                | 1946435612               |
| SNP_P3_67428_21918896 | NC_021164.1    | Ca_kabuli_chr05 | 21918896                | TT                              | GG                | 1946435614               |
| SNP_P3_67429_21918897 | NC_021164.1    | Ca_kabuli_chr05 | 21918897                | GG                              | AA                | 1946435615               |
| SNP_P3_67430_21918908 | NC_021164.1    | Ca_kabuli_chr05 | 21918908                | TT                              | CC                | 1946435617               |
| SNP_P3_67431_21919125 | NC_021164.1    | Ca_kabuli_chr05 | 21919125                | CC                              | TT                | 1946435619               |
| SNP_P3_67432_21920685 | NC_021164.1    | Ca_kabuli_chr05 | 21920685                | TT                              | GG                | 1946435620               |
| SNP_P3_67433_21921250 | NC_021164.1    | Ca_kabuli_chr05 | 21921250                | TT                              | CC                | 1946435622               |
| SNP_P3_67434_21921362 | NC_021164.1    | Ca_kabuli_chr05 | 21921362                | TT                              | GG                | 1946435623               |
| SNP_P3_67435_21921387 | NC_021164.1    | Ca_kabuli_chr05 | 21921387                | GG                              | AA                | 1946435625               |
| SNP_P3_67436_21921388 | NC_021164.1    | Ca_kabuli_chr05 | 21921388                | TT                              | GG                | 1946435626               |
| SNP_P3_67437_21921402 | NC_021164.1    | Ca_kabuli_chr05 | 21921402                | CC                              | AA                | 1946435628               |
| SNP_P3_67438_21921409 | NC_021164.1    | Ca_kabuli_chr05 | 21921409                | TT                              | AA                | 1946435630               |
| SNP_P3_67439_21921472 | NC_021164.1    | Ca_kabuli_chr05 | 21921472                | TT                              | AA                | 1946435631               |
| SNP_P3_67440_21921543 | NC_021164.1    | Ca_kabuli_chr05 | 21921543                | TT                              | AA                | 1946435633               |
| SNP_P3_67441_21921547 | NC_021164.1    | Ca_kabuli_chr05 | 21921547                | GG                              | CC                | 1946435634               |
| SNP_P3_67442_21921590 | NC_021164.1    | Ca_kabuli_chr05 | 21921590                | TT                              | GG                | 1946435636               |
| SNP_P3_67443_21921609 | NC_021164.1    | Ca_kabuli_chr05 | 21921609                | TT                              | CC                | 1946435638               |
| SNP_P3_67444_21921665 | NC_021164.1    | Ca_kabuli_chr05 | 21921665                | AA                              | GG                | 1946435639               |
| SNP_P3_67445_21921783 | NC_021164.1    | Ca_kabuli_chr05 | 21921783                | TT                              | AA                | 1946435641               |
| SNP_P3_67446_21921803 | NC_021164.1    | Ca_kabuli_chr05 | 21921803                | TT                              | AA                | 1946435642               |
| SNP_P3_67447_21944872 | NC_021164.1    | Ca_kabuli_chr05 | 21944872                | GG                              | AA                | 1946435644               |
| SNP_P3_67449_22044529 | NC_021164.1    | Ca_kabuli_chr05 | 22044529                | AA                              | TT                | 1946435646               |
| SNP_P3_67450_22048484 | NC_021164.1    | Ca_kabuli_chr05 | 22048484                | GG                              | CC                | 1946435647               |
| SNP_P3_67451_22056803 | NC_021164.1    | Ca_kabuli_chr05 | 22056803                | CC                              | TT                | 1946435649               |
| SNP_P3_67452_22056823 | NC_021164.1    | Ca_kabuli_chr05 | 22056823                | TT                              | CC                | 1946435650               |
| SNP_P3_67453_22056835 | NC_021164.1    | Ca_kabuli_chr05 | 22056835                | TT                              | CC                | 1946435652               |
| SNP_P3_67454_22058575 | NC_021164.1    | Ca_kabuli_chr05 | 22058575                | AA                              | GG                | 1946435654               |
| SNP_P3_67455_22090673 | NC_021164.1    | Ca_kabuli_chr05 | 22090673                | GG                              | AA                | 1946435655               |
| SNP_P3_67456_22100476 | NC_021164.1    | Ca_kabuli_chr05 | 22100476                | CC                              | TT                | 1946435657               |
| SNP_P3_67457_22144960 | NC_021164.1    | Ca_kabuli_chr05 | 22144960                | AA                              | CC                | 1946435658               |
| SNP_P3_67459_22189878 | NC_021164.1    | Ca_kabuli_chr05 | 22189878                | CC                              | TT                | 1946435660               |
| SNP_P3_67460_22205934 | NC_021164.1    | Ca_kabuli_chr05 | 22205934                | TT                              | GG                | 1946435662               |
| SNP_P3_67461_22205988 | NC_021164.1    | Ca_kabuli_chr05 | 22205988                | CC                              | TT                | 1946435663               |
| SNP_P3_67462_22210156 | NC_021164.1    | Ca_kabuli_chr05 | 22210156                | CC                              | TT                | 1946435665               |
| SNP_P3_67463_22210180 | NC_021164.1    | Ca_kabuli_chr05 | 22210180                | TT                              | CC                | 1946435666               |
| SNP_P3_67464_22210399 | NC_021164.1    | Ca_kabuli_chr05 | 22210399                | CC                              | AA                | 1946435668               |
| SNP_P3_67465_22210420 | NC_021164.1    | Ca_kabuli_chr05 | 22210420                | TT                              | AA                | 1946435669               |
| SNP_P3_67466_22210421 | NC_021164.1    | Ca_kabuli_chr05 | 22210421                | TT                              | AA                | 1946435671               |
| SNP_P3_67467_22210460 | NC_021164.1    | Ca_kabuli_chr05 | 22210460                | AA                              | TT                | 1946435673               |

| SNPs IDs              | Chromosome IDs | Chromosomes     | Physical positions (bp) | CDC Frontier (Reference genome) | (Pusa 256 & HPNB) | NCBI SNPdb Accession IDs |
|-----------------------|----------------|-----------------|-------------------------|---------------------------------|-------------------|--------------------------|
| SNP_P3_67468_22215832 | NC_021164.1    | Ca_kabuli_chr05 | 22215832                | CC                              | AA                | 1946435675               |
| SNP_P3_67469_22252082 | NC_021164.1    | Ca_kabuli_chr05 | 22252082                | GG                              | AA                | 1946435676               |
| SNP_P3_67470_22279101 | NC_021164.1    | Ca_kabuli_chr05 | 22279101                | GG                              | AA                | 1946435677               |
| SNP_P3_67471_22279128 | NC_021164.1    | Ca_kabuli_chr05 | 22279128                | CC                              | TT                | 1946435679               |
| SNP_P3_67472_22279701 | NC_021164.1    | Ca_kabuli_chr05 | 22279701                | CC                              | AA                | 1946435680               |
| SNP_P3_67473_22293794 | NC_021164.1    | Ca_kabuli_chr05 | 22293794                | TT                              | CC                | 1946435682               |
| SNP_P3_67474_22293878 | NC_021164.1    | Ca_kabuli_chr05 | 22293878                | AA                              | GG                | 1946435683               |
| SNP_P3_67475_22293909 | NC_021164.1    | Ca_kabuli_chr05 | 22293909                | TT                              | AA                | 1946435685               |
| SNP_P3_67476_22294175 | NC_021164.1    | Ca_kabuli_chr05 | 22294175                | GG                              | AA                | 1946435686               |
| SNP_P3_67477_22294247 | NC_021164.1    | Ca_kabuli_chr05 | 22294247                | CC                              | TT                | 1946435688               |
| SNP_P3_67478_22294563 | NC_021164.1    | Ca_kabuli_chr05 | 22294563                | CC                              | TT                | 1946435689               |
| SNP_P3_67480_22325827 | NC_021164.1    | Ca_kabuli_chr05 | 22325827                | TT                              | CC                | 1946435691               |
| SNP_P3_67481_22329684 | NC_021164.1    | Ca_kabuli_chr05 | 22329684                | TT                              | AA                | 1946435692               |
| SNP_P3_67482_22340812 | NC_021164.1    | Ca_kabuli_chr05 | 22340812                | CC                              | TT                | 1946435694               |
| SNP_P3_67483_22340843 | NC_021164.1    | Ca_kabuli_chr05 | 22340843                | TT                              | AA                | 1946435696               |
| SNP_P3_67484_22389336 | NC_021164.1    | Ca_kabuli_chr05 | 22389336                | TT                              | GG                | 1946435697               |
| SNP_P3_67487_22391898 | NC_021164.1    | Ca_kabuli_chr05 | 22391898                | AA                              | TT                | 1946435699               |
| SNP_P3_67488_22391922 | NC_021164.1    | Ca_kabuli_chr05 | 22391922                | GG                              | AA                | 1946435700               |
| SNP_P3_67489_22409234 | NC_021164.1    | Ca_kabuli_chr05 | 22409234                | CC                              | AA                | 1946435702               |
| SNP_P3_67490_22409240 | NC_021164.1    | Ca_kabuli_chr05 | 22409240                | CC                              | TT                | 1946435703               |
| SNP_P3_67491_22413301 | NC_021164.1    | Ca_kabuli_chr05 | 22413301                | GG                              | AA                | 1946435705               |
| SNP_P3_67492_22414254 | NC_021164.1    | Ca_kabuli_chr05 | 22414254                | GG                              | AA                | 1946435706               |
| SNP_P3_67493_22427258 | NC_021164.1    | Ca_kabuli_chr05 | 22427258                | TT                              | CC                | 1946435708               |
| SNP_P3_67494_22435198 | NC_021164.1    | Ca_kabuli_chr05 | 22435198                | AA                              | GG                | 1946435709               |
| SNP_P3_67495_22456724 | NC_021164.1    | Ca_kabuli_chr05 | 22456724                | GG                              | AA                | 1946435711               |
| SNP_P3_67496_22465024 | NC_021164.1    | Ca_kabuli_chr05 | 22465024                | TT                              | CC                | 1946435713               |
| SNP_P3_67497_22465033 | NC_021164.1    | Ca_kabuli_chr05 | 22465033                | TT                              | CC                | 1946435714               |
| SNP_P3_67498_22465426 | NC_021164.1    | Ca_kabuli_chr05 | 22465426                | TT                              | AA                | 1946435716               |
| SNP_P3_67499_22465439 | NC_021164.1    | Ca_kabuli_chr05 | 22465439                | AA                              | GG                | 1946435717               |
| SNP_P3_67500_22465469 | NC_021164.1    | Ca_kabuli_chr05 | 22465469                | CC                              | AA                | 1946435719               |
| SNP_P3_67501_22483024 | NC_021164.1    | Ca_kabuli_chr05 | 22483024                | TT                              | CC                | 1946435720               |
| SNP_P3_67502_22579857 | NC_021164.1    | Ca_kabuli_chr05 | 22579857                | CC                              | TT                | 1946435722               |
| SNP_P3_67503_22607518 | NC_021164.1    | Ca_kabuli_chr05 | 22607518                | AA                              | GG                | 1946435723               |
| SNP_P3_67505_22615803 | NC_021164.1    | Ca_kabuli_chr05 | 22615803                | TT                              | CC                | 1946435725               |
| SNP_P3_67507_22616048 | NC_021164.1    | Ca_kabuli_chr05 | 22616048                | TT                              | AA                | 1946435726               |
| SNP_P3_67508_22651830 | NC_021164.1    | Ca_kabuli_chr05 | 22651830                | GG                              | CC                | 1946435728               |
| SNP_P3_67509_22659211 | NC_021164.1    | Ca_kabuli_chr05 | 22659211                | CC                              | TT                | 1946435729               |
| SNP_P3_67510_22659218 | NC_021164.1    | Ca_kabuli_chr05 | 22659218                | CC                              | GG                | 1946435731               |
| SNP_P3_67511_22659219 | NC_021164.1    | Ca_kabuli_chr05 | 22659219                | AA                              | GG                | 1946435733               |
| SNP_P3_67512_22659248 | NC_021164.1    | Ca_kabuli_chr05 | 22659248                | CC                              | TT                | 1946435734               |
| SNP_P3_67514_22667893 | NC_021164.1    | Ca_kabuli_chr05 | 22667893                | CC                              | TT                | 1946435736               |
| SNP_P3_67515_22691809 | NC_021164.1    | Ca_kabuli_chr05 | 22691809                | GG                              | CC                | 1946435737               |

| SNPs IDs              | Chromosome IDs | Chromosomes     | Physical positions (bp) | CDC Frontier (Reference genome) | (Pusa 256 & HPNB) | NCBI SNPdb Accession IDs |
|-----------------------|----------------|-----------------|-------------------------|---------------------------------|-------------------|--------------------------|
| SNP_P3_67516_22691819 | NC_021164.1    | Ca_kabuli_chr05 | 22691819                | GG                              | TT                | 1946435739               |
| SNP_P3_67517_22691820 | NC_021164.1    | Ca_kabuli_chr05 | 22691820                | AA                              | TT                | 1946435741               |
| SNP_P3_67518_22691831 | NC_021164.1    | Ca_kabuli_chr05 | 22691831                | TT                              | GG                | 1946435742               |
| SNP_P3_67519_22691832 | NC_021164.1    | Ca_kabuli_chr05 | 22691832                | GG                              | CC                | 1946435744               |
| SNP_P3_67520_22691844 | NC_021164.1    | Ca_kabuli_chr05 | 22691844                | CC                              | GG                | 1946435745               |
| SNP_P3_67521_22691874 | NC_021164.1    | Ca_kabuli_chr05 | 22691874                | CC                              | AA                | 1946435747               |
| SNP_P3_67522_22691876 | NC_021164.1    | Ca_kabuli_chr05 | 22691876                | TT                              | GG                | 1946435748               |
| SNP_P3_67523_22691880 | NC_021164.1    | Ca_kabuli_chr05 | 22691880                | GG                              | AA                | 1946435750               |
| SNP_P3_67524_22691910 | NC_021164.1    | Ca_kabuli_chr05 | 22691910                | TT                              | CC                | 1946435752               |
| SNP_P3_67525_22691957 | NC_021164.1    | Ca_kabuli_chr05 | 22691957                | CC                              | GG                | 1946435753               |
| SNP_P3_67526_22691958 | NC_021164.1    | Ca_kabuli_chr05 | 22691958                | AA                              | GG                | 1946435755               |
| SNP_P3_67527_22692002 | NC_021164.1    | Ca_kabuli_chr05 | 22692002                | TT                              | CC                | 1946435756               |
| SNP_P3_67528_22692075 | NC_021164.1    | Ca_kabuli_chr05 | 22692075                | CC                              | TT                | 1946435758               |
| SNP_P3_67529_22693505 | NC_021164.1    | Ca_kabuli_chr05 | 22693505                | AA                              | TT                | 1946435759               |
| SNP_P3_67530_22693788 | NC_021164.1    | Ca_kabuli_chr05 | 22693788                | GG                              | TT                | 1946435761               |
| SNP_P3_67531_22693789 | NC_021164.1    | Ca_kabuli_chr05 | 22693789                | AA                              | CC                | 1946435763               |
| SNP_P3_67532_22693936 | NC_021164.1    | Ca_kabuli_chr05 | 22693936                | CC                              | AA                | 1946435764               |
| SNP_P3_67533_22694037 | NC_021164.1    | Ca_kabuli_chr05 | 22694037                | CC                              | AA                | 1946435766               |
| SNP_P3_67534_22694063 | NC_021164.1    | Ca_kabuli_chr05 | 22694063                | AA                              | GG                | 1946435767               |
| SNP_P3_67535_22695590 | NC_021164.1    | Ca_kabuli_chr05 | 22695590                | TT                              | CC                | 1946435769               |
| SNP_P3_67536_22722864 | NC_021164.1    | Ca_kabuli_chr05 | 22722864                | TT                              | CC                | 1946435771               |
| SNP_P3_67537_22722870 | NC_021164.1    | Ca_kabuli_chr05 | 22722870                | AA                              | GG                | 1946435772               |
| SNP_P3_67538_22722873 | NC_021164.1    | Ca_kabuli_chr05 | 22722873                | TT                              | CC                | 1946435774               |
| SNP_P3_67539_22726987 | NC_021164.1    | Ca_kabuli_chr05 | 22726987                | AA                              | TT                | 1946435776               |
| SNP_P3_67540_22751156 | NC_021164.1    | Ca_kabuli_chr05 | 22751156                | GG                              | TT                | 1946435778               |
| SNP_P3_67541_22752172 | NC_021164.1    | Ca_kabuli_chr05 | 22752172                | CC                              | TT                | 1946435779               |
| SNP_P3_67542_22752195 | NC_021164.1    | Ca_kabuli_chr05 | 22752195                | AA                              | GG                | 1946435781               |
| SNP_P3_67543_22752210 | NC_021164.1    | Ca_kabuli_chr05 | 22752210                | CC                              | TT                | 1946435782               |
| SNP_P3_67544_22752235 | NC_021164.1    | Ca_kabuli_chr05 | 22752235                | GG                              | TT                | 1946435784               |
| SNP_P3_67545_22752254 | NC_021164.1    | Ca_kabuli_chr05 | 22752254                | CC                              | TT                | 1946435785               |
| SNP_P3_67546_22781176 | NC_021164.1    | Ca_kabuli_chr05 | 22781176                | AA                              | GG                | 1946435787               |
| SNP_P3_67548_22796572 | NC_021164.1    | Ca_kabuli_chr05 | 22796572                | GG                              | CC                | 1946435788               |
| SNP_P3_67549_22832644 | NC_021164.1    | Ca_kabuli_chr05 | 22832644                | GG                              | AA                | 1946435790               |
| SNP_P3_67550_22864574 | NC_021164.1    | Ca_kabuli_chr05 | 22864574                | GG                              | TT                | 1946435792               |
| SNP_P3_67551_22864595 | NC_021164.1    | Ca_kabuli_chr05 | 22864595                | TT                              | CC                | 1946435793               |
| SNP_P3_67552_22864643 | NC_021164.1    | Ca_kabuli_chr05 | 22864643                | AA                              | GG                | 1946435795               |
| SNP_P3_67553_22865487 | NC_021164.1    | Ca_kabuli_chr05 | 22865487                | GG                              | CC                | 1946435796               |
| SNP_P3_67554_22865517 | NC_021164.1    | Ca_kabuli_chr05 | 22865517                | TT                              | CC                | 1946435798               |
| SNP_P3_67555_22865575 | NC_021164.1    | Ca_kabuli_chr05 | 22865575                | TT                              | CC                | 1946435799               |
| SNP_P3_67556_22867509 | NC_021164.1    | Ca_kabuli_chr05 | 22867509                | TT                              | CC                | 1946435801               |
| SNP_P3_67557_22867832 | NC_021164.1    | Ca_kabuli_chr05 | 22867832                | AA                              | GG                | 1946435802               |
| SNP_P3_67558_22868003 | NC_021164.1    | Ca_kabuli_chr05 | 22868003                | GG                              | AA                | 1946435804               |

| SNPs IDs              | Chromosome IDs | Chromosomes     | Physical positions (bp) | CDC Frontier (Reference genome) | (Pusa 256 & HPNB) | NCBI SNPdb Accession IDs |
|-----------------------|----------------|-----------------|-------------------------|---------------------------------|-------------------|--------------------------|
| SNP_P3_67559_22868018 | NC_021164.1    | Ca_kabuli_chr05 | 22868018                | GG                              | AA                | 1946435805               |
| SNP_P3_67560_22880225 | NC_021164.1    | Ca_kabuli_chr05 | 22880225                | GG                              | AA                | 1946435807               |
| SNP_P3_67561_22883979 | NC_021164.1    | Ca_kabuli_chr05 | 22883979                | AA                              | TT                | 1946435808               |
| SNP_P3_67562_22883980 | NC_021164.1    | Ca_kabuli_chr05 | 22883980                | TT                              | CC                | 1946435810               |
| SNP_P3_67563_22885129 | NC_021164.1    | Ca_kabuli_chr05 | 22885129                | AA                              | GG                | 1946435811               |
| SNP_P3_67564_22885140 | NC_021164.1    | Ca_kabuli_chr05 | 22885140                | GG                              | AA                | 1946435813               |
| SNP_P3_67565_22886526 | NC_021164.1    | Ca_kabuli_chr05 | 22886526                | CC                              | TT                | 1946435814               |
| SNP_P3_67566_22886789 | NC_021164.1    | Ca_kabuli_chr05 | 22886789                | AA                              | CC                | 1946435816               |
| SNP_P3_67567_22896259 | NC_021164.1    | Ca_kabuli_chr05 | 22896259                | GG                              | AA                | 1946435817               |
| SNP_P3_67568_22897636 | NC_021164.1    | Ca_kabuli_chr05 | 22897636                | TT                              | CC                | 1946435819               |
| SNP_P3_67569_22903480 | NC_021164.1    | Ca_kabuli_chr05 | 22903480                | AA                              | GG                | 1946435820               |
| SNP_P3_67570_22903493 | NC_021164.1    | Ca_kabuli_chr05 | 22903493                | AA                              | GG                | 1946435822               |
| SNP_P3_67571_22903497 | NC_021164.1    | Ca_kabuli_chr05 | 22903497                | AA                              | GG                | 1946435823               |
| SNP_P3_67572_22903500 | NC_021164.1    | Ca_kabuli_chr05 | 22903500                | TT                              | CC                | 1946435825               |
| SNP_P3_67573_22918054 | NC_021164.1    | Ca_kabuli_chr05 | 22918054                | GG                              | CC                | 1946435826               |
| SNP_P3_67575_22918209 | NC_021164.1    | Ca_kabuli_chr05 | 22918209                | AA                              | GG                | 1946435828               |
| SNP_P3_67576_22918293 | NC_021164.1    | Ca_kabuli_chr05 | 22918293                | AA                              | TT                | 1946435830               |
| SNP_P3_67577_22918353 | NC_021164.1    | Ca_kabuli_chr05 | 22918353                | TT                              | CC                | 1946435831               |
| SNP_P3_67578_22918357 | NC_021164.1    | Ca_kabuli_chr05 | 22918357                | CC                              | TT                | 1946435833               |
| SNP_P3_67579_22918439 | NC_021164.1    | Ca_kabuli_chr05 | 22918439                | CC                              | GG                | 1946435834               |
| SNP_P3_67582_22918579 | NC_021164.1    | Ca_kabuli_chr05 | 22918579                | AA                              | TT                | 1946435836               |
| SNP_P3_67583_22918580 | NC_021164.1    | Ca_kabuli_chr05 | 22918580                | TT                              | GG                | 1946435837               |
| SNP_P3_67584_22918582 | NC_021164.1    | Ca_kabuli_chr05 | 22918582                | AA                              | GG                | 1946435839               |
| SNP_P3_67585_22918600 | NC_021164.1    | Ca_kabuli_chr05 | 22918600                | CC                              | GG                | 1946435840               |
| SNP_P3_67586_22918622 | NC_021164.1    | Ca_kabuli_chr05 | 22918622                | CC                              | TT                | 1946435842               |
| SNP_P3_67587_22918640 | NC_021164.1    | Ca_kabuli_chr05 | 22918640                | AA                              | TT                | 1946435843               |
| SNP_P3_67588_22918677 | NC_021164.1    | Ca_kabuli_chr05 | 22918677                | AA                              | GG                | 1946435845               |
| SNP_P3_67589_22918684 | NC_021164.1    | Ca_kabuli_chr05 | 22918684                | TT                              | CC                | 1946435847               |
| SNP_P3_67590_22918685 | NC_021164.1    | Ca_kabuli_chr05 | 22918685                | CC                              | AA                | 1946435848               |
| SNP_P3_67591_22918694 | NC_021164.1    | Ca_kabuli_chr05 | 22918694                | TT                              | CC                | 1946435850               |
| SNP_P3_67592_22919314 | NC_021164.1    | Ca_kabuli_chr05 | 22919314                | TT                              | AA                | 1946435851               |
| SNP_P3_67593_22919387 | NC_021164.1    | Ca_kabuli_chr05 | 22919387                | AA                              | GG                | 1946435853               |
| SNP_P3_67594_22919393 | NC_021164.1    | Ca_kabuli_chr05 | 22919393                | TT                              | AA                | 1946435855               |
| SNP_P3_67595_22919430 | NC_021164.1    | Ca_kabuli_chr05 | 22919430                | AA                              | GG                | 1946435856               |
| SNP_P3_67596_22919484 | NC_021164.1    | Ca_kabuli_chr05 | 22919484                | TT                              | CC                | 1946435858               |
| SNP_P3_67598_22919703 | NC_021164.1    | Ca_kabuli_chr05 | 22919703                | GG                              | AA                | 1946435859               |
| SNP_P3_67600_22919734 | NC_021164.1    | Ca_kabuli_chr05 | 22919734                | GG                              | AA                | 1946435862               |
| SNP_P3_67601_22919760 | NC_021164.1    | Ca_kabuli_chr05 | 22919760                | TT                              | CC                | 1946435863               |
| SNP_P3_67602_22928289 | NC_021164.1    | Ca_kabuli_chr05 | 22928289                | CC                              | TT                | 1946435865               |
| SNP_P3_67603_22928301 | NC_021164.1    | Ca_kabuli_chr05 | 22928301                | TT                              | AA                | 1946435866               |
| SNP_P3_67604_22928381 | NC_021164.1    | Ca_kabuli_chr05 | 22928381                | TT                              | CC                | 1946435868               |
| SNP_P3_67605_22928382 | NC_021164.1    | Ca_kabuli_chr05 | 22928382                | GG                              | TT                | 1946435869               |

| SNPs IDs              | Chromosome IDs | Chromosomes     | Physical positions (bp) | CDC Frontier (Reference genome) | (Pusa 256 & HPNB) | NCBI SNPdb Accession IDs |
|-----------------------|----------------|-----------------|-------------------------|---------------------------------|-------------------|--------------------------|
| SNP_P3_67606_22954113 | NC_021164.1    | Ca_kabuli_chr05 | 22954113                | TT                              | CC                | 1946435871               |
| SNP_P3_67607_22955533 | NC_021164.1    | Ca_kabuli_chr05 | 22955533                | GG                              | TT                | 1946435872               |
| SNP_P3_67609_22956369 | NC_021164.1    | Ca_kabuli_chr05 | 22956369                | CC                              | TT                | 1946435874               |
| SNP_P3_67610_22956370 | NC_021164.1    | Ca_kabuli_chr05 | 22956370                | TT                              | GG                | 1946435876               |
| SNP_P3_67611_22956389 | NC_021164.1    | Ca_kabuli_chr05 | 22956389                | TT                              | GG                | 1946435877               |
| SNP_P3_67612_22959920 | NC_021164.1    | Ca_kabuli_chr05 | 22959920                | GG                              | AA                | 1946435879               |
| SNP_P3_67615_23071253 | NC_021164.1    | Ca_kabuli_chr05 | 23071253                | GG                              | AA                | 1946435881               |
| SNP_P3_67616_23080776 | NC_021164.1    | Ca_kabuli_chr05 | 23080776                | TT                              | CC                | 1946435882               |
| SNP_P3_67617_23080956 | NC_021164.1    | Ca_kabuli_chr05 | 23080956                | TT                              | CC                | 1946435883               |
| SNP_P3_67618_23080998 | NC_021164.1    | Ca_kabuli_chr05 | 23080998                | TT                              | CC                | 1946435885               |
| SNP_P3_67619_23085206 | NC_021164.1    | Ca_kabuli_chr05 | 23085206                | CC                              | GG                | 1946435887               |
| SNP_P3_67620_23085223 | NC_021164.1    | Ca_kabuli_chr05 | 23085223                | AA                              | GG                | 1946435888               |
| SNP_P3_67621_23096622 | NC_021164.1    | Ca_kabuli_chr05 | 23096622                | TT                              | CC                | 1946435890               |
| SNP_P3_67622_23096939 | NC_021164.1    | Ca_kabuli_chr05 | 23096939                | CC                              | TT                | 1946435891               |
| SNP_P3_67623_23096969 | NC_021164.1    | Ca_kabuli_chr05 | 23096969                | TT                              | AA                | 1946435893               |
| SNP_P3_67624_23097008 | NC_021164.1    | Ca_kabuli_chr05 | 23097008                | CC                              | TT                | 1946435894               |
| SNP_P3_67625_23099260 | NC_021164.1    | Ca_kabuli_chr05 | 23099260                | GG                              | TT                | 1946435896               |
| SNP_P3_67626_23132843 | NC_021164.1    | Ca_kabuli_chr05 | 23132843                | AA                              | CC                | 1946435897               |
| SNP_P3_67627_23176571 | NC_021164.1    | Ca_kabuli_chr05 | 23176571                | AA                              | GG                | 1946435899               |
| SNP_P3_67629_23221502 | NC_021164.1    | Ca_kabuli_chr05 | 23221502                | TT                              | CC                | 1946435901               |
| SNP_P3_67630_23227084 | NC_021164.1    | Ca_kabuli_chr05 | 23227084                | AA                              | TT                | 1946435902               |
| SNP_P3_67631_23246623 | NC_021164.1    | Ca_kabuli_chr05 | 23246623                | TT                              | AA                | 1946435904               |
| SNP_P3_67632_23272201 | NC_021164.1    | Ca_kabuli_chr05 | 23272201                | AA                              | GG                | 1946435905               |
| SNP_P3_67634_23313684 | NC_021164.1    | Ca_kabuli_chr05 | 23313684                | TT                              | CC                | 1946435907               |
| SNP_P3_67635_23313686 | NC_021164.1    | Ca_kabuli_chr05 | 23313686                | TT                              | GG                | 1946435908               |
| SNP_P3_67636_23335257 | NC_021164.1    | Ca_kabuli_chr05 | 23335257                | AA                              | GG                | 1946435910               |
| SNP_P3_67637_23336109 | NC_021164.1    | Ca_kabuli_chr05 | 23336109                | TT                              | AA                | 1946435911               |
| SNP_P3_67638_23336212 | NC_021164.1    | Ca_kabuli_chr05 | 23336212                | AA                              | CC                | 1946435913               |
| SNP_P3_67639_23336462 | NC_021164.1    | Ca_kabuli_chr05 | 23336462                | GG                              | TT                | 1946435914               |
| SNP_P3_67640_23336547 | NC_021164.1    | Ca_kabuli_chr05 | 23336547                | TT                              | AA                | 1946435916               |
| SNP_P3_67641_23336556 | NC_021164.1    | Ca_kabuli_chr05 | 23336556                | AA                              | GG                | 1946435918               |
| SNP_P3_67642_23336615 | NC_021164.1    | Ca_kabuli_chr05 | 23336615                | AA                              | GG                | 1946435920               |
| SNP_P3_67643_23338134 | NC_021164.1    | Ca_kabuli_chr05 | 23338134                | CC                              | TT                | 1946435921               |
| SNP_P3_67644_23352304 | NC_021164.1    | Ca_kabuli_chr05 | 23352304                | AA                              | GG                | 1946435923               |
| SNP_P3_67645_23352312 | NC_021164.1    | Ca_kabuli_chr05 | 23352312                | CC                              | AA                | 1946435924               |
| SNP_P3_67646_23352315 | NC_021164.1    | Ca_kabuli_chr05 | 23352315                | TT                              | CC                | 1946435926               |
| SNP_P3_67647_23352449 | NC_021164.1    | Ca_kabuli_chr05 | 23352449                | GG                              | AA                | 1946435927               |
| SNP_P3_67648_23352485 | NC_021164.1    | Ca_kabuli_chr05 | 23352485                | AA                              | TT                | 1946435929               |
| SNP_P3_67649_23352540 | NC_021164.1    | Ca_kabuli_chr05 | 23352540                | AA                              | GG                | 1946435930               |
| SNP_P3_67650_23354581 | NC_021164.1    | Ca_kabuli_chr05 | 23354581                | CC                              | TT                | 1946435932               |
| SNP_P3_67651_23354583 | NC_021164.1    | Ca_kabuli_chr05 | 23354583                | GG                              | AA                | 1946435933               |
| SNP_P3_67652_23378176 | NC_021164.1    | Ca_kabuli_chr05 | 23378176                | GG                              | AA                | 1946435935               |



| SNPs IDs              | Chromosome IDs | Chromosomes     | Physical positions (bp) | CDC Frontier (Reference genome) | (Pusa 256 & HPNB) | NCBI SNPdb Accession IDs |
|-----------------------|----------------|-----------------|-------------------------|---------------------------------|-------------------|--------------------------|
| SNP_P3_67653_23381538 | NC_021164.1    | Ca_kabuli_chr05 | 23381538                | GG                              | TT                | 1946435937               |
| SNP_P3_67654_23405585 | NC_021164.1    | Ca_kabuli_chr05 | 23405585                | TT                              | CC                | 1946435938               |
| SNP_P3_67655_23462452 | NC_021164.1    | Ca_kabuli_chr05 | 23462452                | GG                              | TT                | 1946435940               |
| SNP_P3_67656_23462461 | NC_021164.1    | Ca_kabuli_chr05 | 23462461                | TT                              | CC                | 1946435941               |
| SNP_P3_67657_23462946 | NC_021164.1    | Ca_kabuli_chr05 | 23462946                | AA                              | TT                | 1946435943               |
| SNP_P3_67658_23463327 | NC_021164.1    | Ca_kabuli_chr05 | 23463327                | TT                              | AA                | 1946435944               |
| SNP_P3_67659_23464514 | NC_021164.1    | Ca_kabuli_chr05 | 23464514                | AA                              | GG                | 1946435946               |
| SNP_P3_67660_23471798 | NC_021164.1    | Ca_kabuli_chr05 | 23471798                | TT                              | GG                | 1946435947               |
| SNP_P3_67661_23474723 | NC_021164.1    | Ca_kabuli_chr05 | 23474723                | GG                              | CC                | 1946435949               |
| SNP_P3_67662_23487805 | NC_021164.1    | Ca_kabuli_chr05 | 23487805                | GG                              | AA                | 1946435950               |
| SNP_P3_67663_23487809 | NC_021164.1    | Ca_kabuli_chr05 | 23487809                | AA                              | TT                | 1946435952               |
| SNP_P3_67664_23488250 | NC_021164.1    | Ca_kabuli_chr05 | 23488250                | CC                              | GG                | 1946435953               |
| SNP_P3_67666_23544470 | NC_021164.1    | Ca_kabuli_chr05 | 23544470                | AA                              | GG                | 1946435955               |
| SNP_P3_67667_23544693 | NC_021164.1    | Ca_kabuli_chr05 | 23544693                | GG                              | TT                | 1946435956               |
| SNP_P3_67668_23544732 | NC_021164.1    | Ca_kabuli_chr05 | 23544732                | CC                              | TT                | 1946435958               |
| SNP_P3_67669_23545065 | NC_021164.1    | Ca_kabuli_chr05 | 23545065                | GG                              | CC                | 1946435960               |
| SNP_P3_67670_23546721 | NC_021164.1    | Ca_kabuli_chr05 | 23546721                | AA                              | CC                | 1946435961               |
| SNP_P3_67672_23557378 | NC_021164.1    | Ca_kabuli_chr05 | 23557378                | CC                              | TT                | 1946435963               |
| SNP_P3_67673_23557481 | NC_021164.1    | Ca_kabuli_chr05 | 23557481                | CC                              | GG                | 1946435964               |
| SNP_P3_67674_23557505 | NC_021164.1    | Ca_kabuli_chr05 | 23557505                | AA                              | GG                | 1946435966               |
| SNP_P3_67676_23557651 | NC_021164.1    | Ca_kabuli_chr05 | 23557651                | AA                              | GG                | 1946435968               |
| SNP_P3_67677_23557661 | NC_021164.1    | Ca_kabuli_chr05 | 23557661                | CC                              | AA                | 1946435969               |
| SNP_P3_67678_23557662 | NC_021164.1    | Ca_kabuli_chr05 | 23557662                | GG                              | TT                | 1946435971               |
| SNP_P3_67679_23557665 | NC_021164.1    | Ca_kabuli_chr05 | 23557665                | GG                              | CC                | 1946435972               |
| SNP_P3_67680_23557666 | NC_021164.1    | Ca_kabuli_chr05 | 23557666                | AA                              | GG                | 1946435974               |
| SNP_P3_67681_23557703 | NC_021164.1    | Ca_kabuli_chr05 | 23557703                | TT                              | CC                | 1946435976               |
| SNP_P3_67682_23557735 | NC_021164.1    | Ca_kabuli_chr05 | 23557735                | TT                              | AA                | 1946435977               |
| SNP_P3_67683_23557754 | NC_021164.1    | Ca_kabuli_chr05 | 23557754                | TT                              | CC                | 1946435979               |
| SNP_P3_67684_23559200 | NC_021164.1    | Ca_kabuli_chr05 | 23559200                | TT                              | CC                | 1946435981               |
| SNP_P3_67685_23559208 | NC_021164.1    | Ca_kabuli_chr05 | 23559208                | TT                              | AA                | 1946435982               |
| SNP_P3_67686_23559219 | NC_021164.1    | Ca_kabuli_chr05 | 23559219                | TT                              | CC                | 1946435984               |
| SNP_P3_67687_23559226 | NC_021164.1    | Ca_kabuli_chr05 | 23559226                | TT                              | CC                | 1946435985               |
| SNP_P3_67688_23559232 | NC_021164.1    | Ca_kabuli_chr05 | 23559232                | CC                              | TT                | 1946435987               |
| SNP_P3_67689_23559237 | NC_021164.1    | Ca_kabuli_chr05 | 23559237                | TT                              | AA                | 1946435988               |
| SNP_P3_67690_23559271 | NC_021164.1    | Ca_kabuli_chr05 | 23559271                | CC                              | GG                | 1946435990               |
| SNP_P3_67691_23559280 | NC_021164.1    | Ca_kabuli_chr05 | 23559280                | TT                              | AA                | 1946435992               |
| SNP_P3_67692_23559292 | NC_021164.1    | Ca_kabuli_chr05 | 23559292                | TT                              | CC                | 1946435993               |
| SNP_P3_67693_23559294 | NC_021164.1    | Ca_kabuli_chr05 | 23559294                | AA                              | CC                | 1946435995               |
| SNP_P3_67694_23559296 | NC_021164.1    | Ca_kabuli_chr05 | 23559296                | GG                              | CC                | 1946435996               |
| SNP_P3_67695_23559302 | NC_021164.1    | Ca_kabuli_chr05 | 23559302                | GG                              | AA                | 1946435998               |
| SNP_P3_67696_23559310 | NC_021164.1    | Ca_kabuli_chr05 | 23559310                | AA                              | CC                | 1946435999               |
| SNP_P3_67697_23559311 | NC_021164.1    | Ca_kabuli_chr05 | 23559311                | TT                              | CC                | 1946436001               |

| SNPs IDs              | Chromosome IDs | Chromosomes     | Physical positions (bp) | CDC Frontier (Reference genome) | (Pusa 256 & HPNB) | NCBI SNPdb Accession IDs |
|-----------------------|----------------|-----------------|-------------------------|---------------------------------|-------------------|--------------------------|
| SNP_P3_67698_23566610 | NC_021164.1    | Ca_kabuli_chr05 | 23566610                | GG                              | TT                | 1946436003               |
| SNP_P3_67699_23566626 | NC_021164.1    | Ca_kabuli_chr05 | 23566626                | AA                              | CC                | 1946436004               |
| SNP_P3_67700_23567091 | NC_021164.1    | Ca_kabuli_chr05 | 23567091                | AA                              | CC                | 1946436006               |
| SNP_P3_67701_23567114 | NC_021164.1    | Ca_kabuli_chr05 | 23567114                | TT                              | GG                | 1946436007               |
| SNP_P3_67702_23567119 | NC_021164.1    | Ca_kabuli_chr05 | 23567119                | GG                              | TT                | 1946436009               |
| SNP_P3_67703_23567130 | NC_021164.1    | Ca_kabuli_chr05 | 23567130                | AA                              | TT                | 1946436010               |
| SNP_P3_67704_23567871 | NC_021164.1    | Ca_kabuli_chr05 | 23567871                | TT                              | CC                | 1946436012               |
| SNP_P3_67705_23573083 | NC_021164.1    | Ca_kabuli_chr05 | 23573083                | GG                              | AA                | 1946436013               |
| SNP_P3_67706_23583344 | NC_021164.1    | Ca_kabuli_chr05 | 23583344                | AA                              | GG                | 1946436015               |
| SNP_P3_67707_23583414 | NC_021164.1    | Ca_kabuli_chr05 | 23583414                | CC                              | TT                | 1946436016               |
| SNP_P3_67708_23583443 | NC_021164.1    | Ca_kabuli_chr05 | 23583443                | TT                              | GG                | 1946436018               |
| SNP_P3_67709_23583446 | NC_021164.1    | Ca_kabuli_chr05 | 23583446                | TT                              | AA                | 1946436020               |
| SNP_P3_67710_23583692 | NC_021164.1    | Ca_kabuli_chr05 | 23583692                | AA                              | GG                | 1946436021               |
| SNP_P3_67711_23585048 | NC_021164.1    | Ca_kabuli_chr05 | 23585048                | CC                              | AA                | 1946436023               |
| SNP_P3_67712_23585118 | NC_021164.1    | Ca_kabuli_chr05 | 23585118                | TT                              | CC                | 1946436024               |
| SNP_P3_67713_23585130 | NC_021164.1    | Ca_kabuli_chr05 | 23585130                | GG                              | TT                | 1946436026               |
| SNP_P3_67714_23585491 | NC_021164.1    | Ca_kabuli_chr05 | 23585491                | TT                              | CC                | 1946436027               |
| SNP_P3_67715_23585539 | NC_021164.1    | Ca_kabuli_chr05 | 23585539                | CC                              | GG                | 1946436029               |
| SNP_P3_67716_23588310 | NC_021164.1    | Ca_kabuli_chr05 | 23588310                | CC                              | AA                | 1946436031               |
| SNP_P3_67717_23588447 | NC_021164.1    | Ca_kabuli_chr05 | 23588447                | TT                              | CC                | 1946436032               |
| SNP_P3_67718_23588479 | NC_021164.1    | Ca_kabuli_chr05 | 23588479                | TT                              | CC                | 1946436034               |
| SNP_P3_67719_23588621 | NC_021164.1    | Ca_kabuli_chr05 | 23588621                | TT                              | AA                | 1946436035               |
| SNP_P3_67720_23589934 | NC_021164.1    | Ca_kabuli_chr05 | 23589934                | GG                              | CC                | 1946436037               |
| SNP_P3_67721_23589974 | NC_021164.1    | Ca_kabuli_chr05 | 23589974                | GG                              | TT                | 1946436039               |
| SNP_P3_67722_23590268 | NC_021164.1    | Ca_kabuli_chr05 | 23590268                | CC                              | TT                | 1946436040               |
| SNP_P3_67723_23593955 | NC_021164.1    | Ca_kabuli_chr05 | 23593955                | CC                              | AA                | 1946436042               |
| SNP_P3_67724_23594753 | NC_021164.1    | Ca_kabuli_chr05 | 23594753                | GG                              | TT                | 1946436043               |
| SNP_P3_67725_23594769 | NC_021164.1    | Ca_kabuli_chr05 | 23594769                | GG                              | TT                | 1946436045               |
| SNP_P3_67726_23595400 | NC_021164.1    | Ca_kabuli_chr05 | 23595400                | GG                              | TT                | 1946436046               |
| SNP_P3_67727_23595409 | NC_021164.1    | Ca_kabuli_chr05 | 23595409                | CC                              | TT                | 1946436048               |
| SNP_P3_67728_23595435 | NC_021164.1    | Ca_kabuli_chr05 | 23595435                | TT                              | GG                | 1946436050               |
| SNP_P3_67729_23596643 | NC_021164.1    | Ca_kabuli_chr05 | 23596643                | AA                              | GG                | 1946436051               |
| SNP_P3_67730_23596690 | NC_021164.1    | Ca_kabuli_chr05 | 23596690                | TT                              | CC                | 1946436053               |
| SNP_P3_67731_23596842 | NC_021164.1    | Ca_kabuli_chr05 | 23596842                | AA                              | GG                | 1946436054               |
| SNP_P3_67732_23606214 | NC_021164.1    | Ca_kabuli_chr05 | 23606214                | GG                              | AA                | 1946436056               |
| SNP_P3_67733_23606244 | NC_021164.1    | Ca_kabuli_chr05 | 23606244                | GG                              | AA                | 1946436057               |
| SNP_P3_67734_23606271 | NC_021164.1    | Ca_kabuli_chr05 | 23606271                | TT                              | AA                | 1946436059               |
| SNP_P3_67735_23606472 | NC_021164.1    | Ca_kabuli_chr05 | 23606472                | GG                              | AA                | 1946436060               |
| SNP_P3_67736_23606509 | NC_021164.1    | Ca_kabuli_chr05 | 23606509                | AA                              | CC                | 1946436061               |
| SNP_P3_67737_23606525 | NC_021164.1    | Ca_kabuli_chr05 | 23606525                | CC                              | AA                | 1946436063               |
| SNP_P3_67738_23606527 | NC_021164.1    | Ca_kabuli_chr05 | 23606527                | TT                              | CC                | 1946436065               |
| SNP_P3_67739_23606698 | NC_021164.1    | Ca_kabuli_chr05 | 23606698                | AA                              | GG                | 1946436066               |

| SNPs IDs              | Chromosome IDs | Chromosomes     | Physical positions (bp) | CDC Frontier (Reference genome) | (Pusa 256 & HPNB) | NCBI SNPdb Accession IDs |
|-----------------------|----------------|-----------------|-------------------------|---------------------------------|-------------------|--------------------------|
| SNP_P3_67740_23607292 | NC_021164.1    | Ca_kabuli_chr05 | 23607292                | CC                              | TT                | 1946436068               |
| SNP_P3_67741_23608740 | NC_021164.1    | Ca_kabuli_chr05 | 23608740                | CC                              | TT                | 1946436069               |
| SNP_P3_67742_23619252 | NC_021164.1    | Ca_kabuli_chr05 | 23619252                | AA                              | GG                | 1946436071               |
| SNP_P3_67743_23619493 | NC_021164.1    | Ca_kabuli_chr05 | 23619493                | TT                              | AA                | 1946436073               |
| SNP_P3_67745_23644704 | NC_021164.1    | Ca_kabuli_chr05 | 23644704                | TT                              | CC                | 1946436075               |
| SNP_P3_67746_23644770 | NC_021164.1    | Ca_kabuli_chr05 | 23644770                | TT                              | CC                | 1946436077               |
| SNP_P3_67747_23644991 | NC_021164.1    | Ca_kabuli_chr05 | 23644991                | AA                              | CC                | 1946436078               |
| SNP_P3_67748_23645018 | NC_021164.1    | Ca_kabuli_chr05 | 23645018                | GG                              | AA                | 1946436080               |
| SNP_P3_67749_23645021 | NC_021164.1    | Ca_kabuli_chr05 | 23645021                | GG                              | TT                | 1946436082               |
| SNP_P3_67750_23645153 | NC_021164.1    | Ca_kabuli_chr05 | 23645153                | GG                              | AA                | 1946436083               |
| SNP_P3_67751_23645186 | NC_021164.1    | Ca_kabuli_chr05 | 23645186                | AA                              | GG                | 1946436084               |
| SNP_P3_67752_23645206 | NC_021164.1    | Ca_kabuli_chr05 | 23645206                | AA                              | TT                | 1946436086               |
| SNP_P3_67753_23645213 | NC_021164.1    | Ca_kabuli_chr05 | 23645213                | AA                              | GG                | 1946436087               |
| SNP_P3_67754_23645215 | NC_021164.1    | Ca_kabuli_chr05 | 23645215                | AA                              | GG                | 1946436089               |
| SNP_P3_67755_23645228 | NC_021164.1    | Ca_kabuli_chr05 | 23645228                | AA                              | GG                | 1946436090               |
| SNP_P3_67756_23645241 | NC_021164.1    | Ca_kabuli_chr05 | 23645241                | TT                              | CC                | 1946436091               |
| SNP_P3_67757_23645243 | NC_021164.1    | Ca_kabuli_chr05 | 23645243                | TT                              | GG                | 1946436093               |
| SNP_P3_67758_23645289 | NC_021164.1    | Ca_kabuli_chr05 | 23645289                | CC                              | AA                | 1946436094               |
| SNP_P3_67759_23645295 | NC_021164.1    | Ca_kabuli_chr05 | 23645295                | GG                              | AA                | 1946436096               |
| SNP_P3_67760_23645961 | NC_021164.1    | Ca_kabuli_chr05 | 23645961                | CC                              | GG                | 1946436097               |
| SNP_P3_67761_23646303 | NC_021164.1    | Ca_kabuli_chr05 | 23646303                | AA                              | GG                | 1946436099               |
| SNP_P3_67762_23646400 | NC_021164.1    | Ca_kabuli_chr05 | 23646400                | TT                              | CC                | 1946436100               |
| SNP_P3_67763_23646484 | NC_021164.1    | Ca_kabuli_chr05 | 23646484                | GG                              | AA                | 1946436101               |
| SNP_P3_67764_23646535 | NC_021164.1    | Ca_kabuli_chr05 | 23646535                | GG                              | AA                | 1946436103               |
| SNP_P3_67765_23646559 | NC_021164.1    | Ca_kabuli_chr05 | 23646559                | AA                              | TT                | 1946436105               |
| SNP_P3_67766_23648992 | NC_021164.1    | Ca_kabuli_chr05 | 23648992                | CC                              | TT                | 1946436106               |
| SNP_P3_67767_23663069 | NC_021164.1    | Ca_kabuli_chr05 | 23663069                | TT                              | GG                | 1946436108               |
| SNP_P3_67768_23663093 | NC_021164.1    | Ca_kabuli_chr05 | 23663093                | AA                              | CC                | 1946436109               |
| SNP_P3_67771_23663168 | NC_021164.1    | Ca_kabuli_chr05 | 23663168                | AA                              | GG                | 1946436111               |
| SNP_P3_67772_23663195 | NC_021164.1    | Ca_kabuli_chr05 | 23663195                | CC                              | AA                | 1946436112               |
| SNP_P3_67773_23664201 | NC_021164.1    | Ca_kabuli_chr05 | 23664201                | AA                              | GG                | 1946436114               |
| SNP_P3_67774_23664245 | NC_021164.1    | Ca_kabuli_chr05 | 23664245                | TT                              | CC                | 1946436115               |
| SNP_P3_67775_23664292 | NC_021164.1    | Ca_kabuli_chr05 | 23664292                | AA                              | CC                | 1946436117               |
| SNP_P3_67776_23664301 | NC_021164.1    | Ca_kabuli_chr05 | 23664301                | AA                              | GG                | 1946436118               |
| SNP_P3_67777_23664373 | NC_021164.1    | Ca_kabuli_chr05 | 23664373                | AA                              | CC                | 1946436120               |
| SNP_P3_67778_23664483 | NC_021164.1    | Ca_kabuli_chr05 | 23664483                | AA                              | GG                | 1946436122               |
| SNP_P3_67779_23664514 | NC_021164.1    | Ca_kabuli_chr05 | 23664514                | AA                              | GG                | 1946436123               |
| SNP_P3_67780_23664561 | NC_021164.1    | Ca_kabuli_chr05 | 23664561                | TT                              | CC                | 1946436125               |
| SNP_P3_67782_23668830 | NC_021164.1    | Ca_kabuli_chr05 | 23668830                | GG                              | TT                | 1946436126               |
| SNP_P3_67783_23668919 | NC_021164.1    | Ca_kabuli_chr05 | 23668919                | GG                              | TT                | 1946436128               |
| SNP_P3_67784_23668943 | NC_021164.1    | Ca_kabuli_chr05 | 23668943                | GG                              | AA                | 1946436129               |
| SNP_P3_67785_23669358 | NC_021164.1    | Ca_kabuli_chr05 | 23669358                | TT                              | CC                | 1946436131               |

| SNPs IDs              | Chromosome IDs | Chromosomes     | Physical positions (bp) | CDC Frontier (Reference genome) | (Pusa 256 & HPNB) | NCBI SNPdb Accession IDs |
|-----------------------|----------------|-----------------|-------------------------|---------------------------------|-------------------|--------------------------|
| SNP_P3_67786_23669370 | NC_021164.1    | Ca_kabuli_chr05 | 23669370                | TT                              | CC                | 1946436132               |
| SNP_P3_67787_23670085 | NC_021164.1    | Ca_kabuli_chr05 | 23670085                | TT                              | CC                | 1946436134               |
| SNP_P3_67788_23670111 | NC_021164.1    | Ca_kabuli_chr05 | 23670111                | AA                              | GG                | 1946436135               |
| SNP_P3_67789_23670171 | NC_021164.1    | Ca_kabuli_chr05 | 23670171                | AA                              | CC                | 1946436137               |
| SNP_P3_67790_23670548 | NC_021164.1    | Ca_kabuli_chr05 | 23670548                | AA                              | GG                | 1946436138               |
| SNP_P3_67791_23670567 | NC_021164.1    | Ca_kabuli_chr05 | 23670567                | AA                              | GG                | 1946436140               |
| SNP_P3_67792_23670617 | NC_021164.1    | Ca_kabuli_chr05 | 23670617                | CC                              | TT                | 1946436141               |
| SNP_P3_67793_23670762 | NC_021164.1    | Ca_kabuli_chr05 | 23670762                | AA                              | GG                | 1946436142               |
| SNP_P3_67794_23670780 | NC_021164.1    | Ca_kabuli_chr05 | 23670780                | TT                              | CC                | 1946436144               |
| SNP_P3_67795_23670875 | NC_021164.1    | Ca_kabuli_chr05 | 23670875                | TT                              | CC                | 1946436145               |
| SNP_P3_67796_23670919 | NC_021164.1    | Ca_kabuli_chr05 | 23670919                | TT                              | AA                | 1946436147               |
| SNP_P3_67797_23670932 | NC_021164.1    | Ca_kabuli_chr05 | 23670932                | AA                              | CC                | 1946436148               |
| SNP_P3_67798_23671224 | NC_021164.1    | Ca_kabuli_chr05 | 23671224                | TT                              | CC                | 1946436150               |
| SNP_P3_67799_23671250 | NC_021164.1    | Ca_kabuli_chr05 | 23671250                | AA                              | GG                | 1946436151               |
| SNP_P3_67800_23671278 | NC_021164.1    | Ca_kabuli_chr05 | 23671278                | TT                              | CC                | 1946436153               |
| SNP_P3_67801_23671337 | NC_021164.1    | Ca_kabuli_chr05 | 23671337                | TT                              | CC                | 1946436154               |
| SNP_P3_67802_23671356 | NC_021164.1    | Ca_kabuli_chr05 | 23671356                | CC                              | AA                | 1946436156               |
| SNP_P3_67803_23671386 | NC_021164.1    | Ca_kabuli_chr05 | 23671386                | TT                              | CC                | 1946436157               |
| SNP_P3_67806_23673810 | NC_021164.1    | Ca_kabuli_chr05 | 23673810                | AA                              | GG                | 1946436159               |
| SNP_P3_67807_23674026 | NC_021164.1    | Ca_kabuli_chr05 | 23674026                | CC                              | TT                | 1946436160               |
| SNP_P3_67808_23674057 | NC_021164.1    | Ca_kabuli_chr05 | 23674057                | AA                              | GG                | 1946436162               |
| SNP_P3_67809_23674065 | NC_021164.1    | Ca_kabuli_chr05 | 23674065                | AA                              | CC                | 1946436163               |
| SNP_P3_67810_23674462 | NC_021164.1    | Ca_kabuli_chr05 | 23674462                | TT                              | CC                | 1946436165               |
| SNP_P3_67811_23674485 | NC_021164.1    | Ca_kabuli_chr05 | 23674485                | AA                              | GG                | 1946436166               |
| SNP_P3_67812_23674525 | NC_021164.1    | Ca_kabuli_chr05 | 23674525                | TT                              | CC                | 1946436168               |
| SNP_P3_67813_23674586 | NC_021164.1    | Ca_kabuli_chr05 | 23674586                | TT                              | CC                | 1946436169               |
| SNP_P3_67814_23674595 | NC_021164.1    | Ca_kabuli_chr05 | 23674595                | TT                              | CC                | 1946436171               |
| SNP_P3_67815_23674758 | NC_021164.1    | Ca_kabuli_chr05 | 23674758                | TT                              | CC                | 1946436172               |
| SNP_P3_67816_23674768 | NC_021164.1    | Ca_kabuli_chr05 | 23674768                | CC                              | TT                | 1946436173               |
| SNP_P3_67817_23674846 | NC_021164.1    | Ca_kabuli_chr05 | 23674846                | TT                              | CC                | 1946436175               |
| SNP_P3_67818_23674893 | NC_021164.1    | Ca_kabuli_chr05 | 23674893                | AA                              | GG                | 1946436176               |
| SNP_P3_67820_23689684 | NC_021164.1    | Ca_kabuli_chr05 | 23689684                | AA                              | GG                | 1946436178               |
| SNP_P3_67822_23740583 | NC_021164.1    | Ca_kabuli_chr05 | 23740583                | CC                              | TT                | 1946436180               |
| SNP_P3_67823_23754213 | NC_021164.1    | Ca_kabuli_chr05 | 23754213                | CC                              | GG                | 1946436181               |
| SNP_P3_67825_23918741 | NC_021164.1    | Ca_kabuli_chr05 | 23918741                | AA                              | GG                | 1946436183               |
| SNP_P3_67826_23922621 | NC_021164.1    | Ca_kabuli_chr05 | 23922621                | AA                              | GG                | 1946436184               |
| SNP_P3_67827_23948553 | NC_021164.1    | Ca_kabuli_chr05 | 23948553                | AA                              | TT                | 1946436186               |
| SNP_P3_67828_23974311 | NC_021164.1    | Ca_kabuli_chr05 | 23974311                | TT                              | CC                | 1946436187               |
| SNP_P3_67829_23978660 | NC_021164.1    | Ca_kabuli_chr05 | 23978660                | AA                              | CC                | 1946436189               |
| SNP_P3_67830_23978688 | NC_021164.1    | Ca_kabuli_chr05 | 23978688                | GG                              | AA                | 1946436190               |
| SNP_P3_67831_23979006 | NC_021164.1    | Ca_kabuli_chr05 | 23979006                | CC                              | TT                | 1946436192               |
| SNP_P3_67832_23981230 | NC_021164.1    | Ca_kabuli_chr05 | 23981230                | TT                              | GG                | 1946436194               |

| SNPs IDs              | Chromosome IDs | Chromosomes     | Physical positions (bp) | CDC Frontier (Reference genome) | (Pusa 256 & HPNB) | NCBI SNPdb Accession IDs |
|-----------------------|----------------|-----------------|-------------------------|---------------------------------|-------------------|--------------------------|
| SNP_P3_67833_23981262 | NC_021164.1    | Ca_kabuli_chr05 | 23981262                | TT                              | CC                | 1946436195               |
| SNP_P3_67835_24007395 | NC_021164.1    | Ca_kabuli_chr05 | 24007395                | CC                              | TT                | 1946436196               |
| SNP_P3_67836_24007396 | NC_021164.1    | Ca_kabuli_chr05 | 24007396                | AA                              | CC                | 1946436198               |
| SNP_P3_67837_24007434 | NC_021164.1    | Ca_kabuli_chr05 | 24007434                | GG                              | AA                | 1946436200               |
| SNP_P3_67839_24097291 | NC_021164.1    | Ca_kabuli_chr05 | 24097291                | TT                              | CC                | 1946436201               |
| SNP_P3_67841_24103564 | NC_021164.1    | Ca_kabuli_chr05 | 24103564                | AA                              | GG                | 1946436203               |
| SNP_P3_67842_24107466 | NC_021164.1    | Ca_kabuli_chr05 | 24107466                | TT                              | CC                | 1946436204               |
| SNP_P3_67843_24124147 | NC_021164.1    | Ca_kabuli_chr05 | 24124147                | TT                              | CC                | 1946436206               |
| SNP_P3_67844_24124148 | NC_021164.1    | Ca_kabuli_chr05 | 24124148                | CC                              | AA                | 1946436207               |
| SNP_P3_67845_24124217 | NC_021164.1    | Ca_kabuli_chr05 | 24124217                | TT                              | CC                | 1946436209               |
| SNP_P3_67846_24124499 | NC_021164.1    | Ca_kabuli_chr05 | 24124499                | AA                              | GG                | 1946436210               |
| SNP_P3_67847_24124520 | NC_021164.1    | Ca_kabuli_chr05 | 24124520                | AA                              | GG                | 1946436212               |
| SNP_P3_67848_24124616 | NC_021164.1    | Ca_kabuli_chr05 | 24124616                | TT                              | GG                | 1946436213               |
| SNP_P3_67849_24147920 | NC_021164.1    | Ca_kabuli_chr05 | 24147920                | GG                              | TT                | 1946436215               |
| SNP_P3_67850_24147951 | NC_021164.1    | Ca_kabuli_chr05 | 24147951                | TT                              | GG                | 1946436217               |
| SNP_P3_67852_24157268 | NC_021164.1    | Ca_kabuli_chr05 | 24157268                | CC                              | TT                | 1946436219               |
| SNP_P3_67853_24157305 | NC_021164.1    | Ca_kabuli_chr05 | 24157305                | CC                              | AA                | 1946436220               |
| SNP_P3_67854_24157319 | NC_021164.1    | Ca_kabuli_chr05 | 24157319                | CC                              | TT                | 1946436222               |
| SNP_P3_67855_24165853 | NC_021164.1    | Ca_kabuli_chr05 | 24165853                | TT                              | CC                | 1946436223               |
| SNP_P3_67856_24184848 | NC_021164.1    | Ca_kabuli_chr05 | 24184848                | GG                              | AA                | 1946436225               |
| SNP_P3_67857_24223887 | NC_021164.1    | Ca_kabuli_chr05 | 24223887                | TT                              | GG                | 1946436226               |
| SNP_P3_67858_24224156 | NC_021164.1    | Ca_kabuli_chr05 | 24224156                | TT                              | CC                | 1946436228               |
| SNP_P3_67859_24235555 | NC_021164.1    | Ca_kabuli_chr05 | 24235555                | CC                              | GG                | 1946436229               |
| SNP_P3_67860_24235883 | NC_021164.1    | Ca_kabuli_chr05 | 24235883                | CC                              | TT                | 1946436231               |
| SNP_P3_67861_24235923 | NC_021164.1    | Ca_kabuli_chr05 | 24235923                | GG                              | AA                | 1946436232               |
| SNP_P3_67862_24236270 | NC_021164.1    | Ca_kabuli_chr05 | 24236270                | GG                              | AA                | 1946436234               |
| SNP_P3_67864_24251813 | NC_021164.1    | Ca_kabuli_chr05 | 24251813                | CC                              | TT                | 1946436236               |
| SNP_P3_67865_24261364 | NC_021164.1    | Ca_kabuli_chr05 | 24261364                | GG                              | AA                | 1946436237               |
| SNP_P3_67866_24270348 | NC_021164.1    | Ca_kabuli_chr05 | 24270348                | TT                              | GG                | 1946436239               |
| SNP_P3_67867_24270698 | NC_021164.1    | Ca_kabuli_chr05 | 24270698                | AA                              | GG                | 1946436240               |
| SNP_P3_67868_24270727 | NC_021164.1    | Ca_kabuli_chr05 | 24270727                | AA                              | GG                | 1946436242               |
| SNP_P3_67869_24270825 | NC_021164.1    | Ca_kabuli_chr05 | 24270825                | GG                              | AA                | 1946436243               |
| SNP_P3_67870_24276039 | NC_021164.1    | Ca_kabuli_chr05 | 24276039                | TT                              | GG                | 1946436245               |
| SNP_P3_67871_24276047 | NC_021164.1    | Ca_kabuli_chr05 | 24276047                | TT                              | CC                | 1946436246               |
| SNP_P3_67872_24276052 | NC_021164.1    | Ca_kabuli_chr05 | 24276052                | TT                              | CC                | 1946436248               |
| SNP_P3_67873_24277139 | NC_021164.1    | Ca_kabuli_chr05 | 24277139                | AA                              | GG                | 1946436249               |
| SNP_P3_67874_24277168 | NC_021164.1    | Ca_kabuli_chr05 | 24277168                | AA                              | GG                | 1946436251               |
| SNP_P3_67875_24277172 | NC_021164.1    | Ca_kabuli_chr05 | 24277172                | AA                              | GG                | 1946436252               |
| SNP_P3_67877_24300954 | NC_021164.1    | Ca_kabuli_chr05 | 24300954                | AA                              | GG                | 1946436254               |
| SNP_P3_67878_24300993 | NC_021164.1    | Ca_kabuli_chr05 | 24300993                | TT                              | CC                | 1946436255               |
| SNP_P3_67879_24300995 | NC_021164.1    | Ca_kabuli_chr05 | 24300995                | GG                              | CC                | 1946436257               |
| SNP_P3_67880_24321268 | NC_021164.1    | Ca_kabuli_chr05 | 24321268                | CC                              | TT                | 1946436258               |

| SNPs IDs              | Chromosome IDs | Chromosomes     | Physical positions (bp) | CDC Frontier (Reference genome) | (Pusa 256 & HPNB) | NCBI SNPdb Accession IDs |
|-----------------------|----------------|-----------------|-------------------------|---------------------------------|-------------------|--------------------------|
| SNP_P3_67881_24326797 | NC_021164.1    | Ca_kabuli_chr05 | 24326797                | GG                              | AA                | 1946436260               |
| SNP_P3_67882_24327689 | NC_021164.1    | Ca_kabuli_chr05 | 24327689                | CC                              | TT                | 1946436261               |
| SNP_P3_67883_24327693 | NC_021164.1    | Ca_kabuli_chr05 | 24327693                | AA                              | CC                | 1946436263               |
| SNP_P3_67884_24327708 | NC_021164.1    | Ca_kabuli_chr05 | 24327708                | AA                              | GG                | 1946436264               |
| SNP_P3_67885_24327903 | NC_021164.1    | Ca_kabuli_chr05 | 24327903                | CC                              | TT                | 1946436266               |
| SNP_P3_67886_24327919 | NC_021164.1    | Ca_kabuli_chr05 | 24327919                | CC                              | TT                | 1946436267               |
| SNP_P3_67887_24331678 | NC_021164.1    | Ca_kabuli_chr05 | 24331678                | AA                              | CC                | 1946436269               |
| SNP_P3_67888_24334434 | NC_021164.1    | Ca_kabuli_chr05 | 24334434                | AA                              | GG                | 1946436271               |
| SNP_P3_67889_24359139 | NC_021164.1    | Ca_kabuli_chr05 | 24359139                | AA                              | CC                | 1946436272               |
| SNP_P3_67890_24419363 | NC_021164.1    | Ca_kabuli_chr05 | 24419363                | AA                              | GG                | 1946436274               |
| SNP_P3_67891_24452364 | NC_021164.1    | Ca_kabuli_chr05 | 24452364                | CC                              | TT                | 1946436275               |
| SNP_P3_67892_24493810 | NC_021164.1    | Ca_kabuli_chr05 | 24493810                | AA                              | GG                | 1946436277               |
| SNP_P3_67893_24498439 | NC_021164.1    | Ca_kabuli_chr05 | 24498439                | AA                              | GG                | 1946436279               |
| SNP_P3_67894_24505774 | NC_021164.1    | Ca_kabuli_chr05 | 24505774                | TT                              | GG                | 1946436280               |
| SNP_P3_67895_24505821 | NC_021164.1    | Ca_kabuli_chr05 | 24505821                | CC                              | TT                | 1946436282               |
| SNP_P3_67896_24505836 | NC_021164.1    | Ca_kabuli_chr05 | 24505836                | AA                              | GG                | 1946436283               |
| SNP_P3_67897_24505847 | NC_021164.1    | Ca_kabuli_chr05 | 24505847                | AA                              | GG                | 1946436285               |
| SNP_P3_67899_24509829 | NC_021164.1    | Ca_kabuli_chr05 | 24509829                | AA                              | CC                | 1946436287               |
| SNP_P3_67900_24529273 | NC_021164.1    | Ca_kabuli_chr05 | 24529273                | TT                              | CC                | 1946436288               |
| SNP_P3_67901_24532449 | NC_021164.1    | Ca_kabuli_chr05 | 24532449                | CC                              | TT                | 1946436290               |
| SNP_P3_67902_24532530 | NC_021164.1    | Ca_kabuli_chr05 | 24532530                | CC                              | TT                | 1946436291               |
| SNP_P3_67903_24532540 | NC_021164.1    | Ca_kabuli_chr05 | 24532540                | AA                              | GG                | 1946436293               |
| SNP_P3_67904_24532548 | NC_021164.1    | Ca_kabuli_chr05 | 24532548                | TT                              | CC                | 1946436295               |
| SNP_P3_67905_24532604 | NC_021164.1    | Ca_kabuli_chr05 | 24532604                | GG                              | AA                | 1946436296               |
| SNP_P3_67906_24532631 | NC_021164.1    | Ca_kabuli_chr05 | 24532631                | AA                              | GG                | 1946436298               |
| SNP_P3_67907_24532636 | NC_021164.1    | Ca_kabuli_chr05 | 24532636                | GG                              | AA                | 1946436300               |
| SNP_P3_67908_24532819 | NC_021164.1    | Ca_kabuli_chr05 | 24532819                | AA                              | TT                | 1946436301               |
| SNP_P3_67909_24532823 | NC_021164.1    | Ca_kabuli_chr05 | 24532823                | GG                              | TT                | 1946436303               |
| SNP_P3_67910_24532855 | NC_021164.1    | Ca_kabuli_chr05 | 24532855                | TT                              | CC                | 1946436304               |
| SNP_P3_67911_24532883 | NC_021164.1    | Ca_kabuli_chr05 | 24532883                | GG                              | AA                | 1946436306               |
| SNP_P3_67912_24532904 | NC_021164.1    | Ca_kabuli_chr05 | 24532904                | CC                              | TT                | 1946436308               |
| SNP_P3_67913_24532963 | NC_021164.1    | Ca_kabuli_chr05 | 24532963                | TT                              | CC                | 1946436309               |
| SNP_P3_67914_24563159 | NC_021164.1    | Ca_kabuli_chr05 | 24563159                | CC                              | TT                | 1946436311               |
| SNP_P3_67915_24563614 | NC_021164.1    | Ca_kabuli_chr05 | 24563614                | TT                              | AA                | 1946436312               |
| SNP_P3_67916_24565707 | NC_021164.1    | Ca_kabuli_chr05 | 24565707                | GG                              | AA                | 1946436314               |
| SNP_P3_67917_24573343 | NC_021164.1    | Ca_kabuli_chr05 | 24573343                | GG                              | AA                | 1946436316               |
| SNP_P3_67918_24576561 | NC_021164.1    | Ca_kabuli_chr05 | 24576561                | AA                              | GG                | 1946436317               |
| SNP_P3_67919_24576593 | NC_021164.1    | Ca_kabuli_chr05 | 24576593                | TT                              | CC                | 1946436319               |
| SNP_P3_67920_24581367 | NC_021164.1    | Ca_kabuli_chr05 | 24581367                | CC                              | TT                | 1946436321               |
| SNP_P3_67921_24581755 | NC_021164.1    | Ca_kabuli_chr05 | 24581755                | AA                              | GG                | 1946436322               |
| SNP_P3_67924_24627465 | NC_021164.1    | Ca_kabuli_chr05 | 24627465                | CC                              | TT                | 1946436324               |
| SNP_P3_67926_24639135 | NC_021164.1    | Ca_kabuli_chr05 | 24639135                | TT                              | GG                | 1946436325               |

| SNPs IDs              | Chromosome IDs | Chromosomes     | Physical positions (bp) | CDC Frontier (Reference genome) | (Pusa 256 & HPNB) | NCBI SNPdb Accession IDs |
|-----------------------|----------------|-----------------|-------------------------|---------------------------------|-------------------|--------------------------|
| SNP_P3_67927_24639254 | NC_021164.1    | Ca_kabuli_chr05 | 24639254                | TT                              | CC                | 1946436327               |
| SNP_P3_67928_24666597 | NC_021164.1    | Ca_kabuli_chr05 | 24666597                | AA                              | GG                | 1946436329               |
| SNP_P3_67929_24688483 | NC_021164.1    | Ca_kabuli_chr05 | 24688483                | CC                              | TT                | 1946436330               |
| SNP_P3_67931_24755888 | NC_021164.1    | Ca_kabuli_chr05 | 24755888                | TT                              | AA                | 1946436332               |
| SNP_P3_67932_24755893 | NC_021164.1    | Ca_kabuli_chr05 | 24755893                | GG                              | TT                | 1946436334               |
| SNP_P3_67933_24756023 | NC_021164.1    | Ca_kabuli_chr05 | 24756023                | GG                              | AA                | 1946436335               |
| SNP_P3_67934_24756085 | NC_021164.1    | Ca_kabuli_chr05 | 24756085                | GG                              | CC                | 1946436336               |
| SNP_P3_67935_24756122 | NC_021164.1    | Ca_kabuli_chr05 | 24756122                | CC                              | AA                | 1946436338               |
| SNP_P3_67937_24756401 | NC_021164.1    | Ca_kabuli_chr05 | 24756401                | AA                              | TT                | 1946436339               |
| SNP_P3_67938_24756413 | NC_021164.1    | Ca_kabuli_chr05 | 24756413                | TT                              | AA                | 1946436341               |
| SNP_P3_67939_24761240 | NC_021164.1    | Ca_kabuli_chr05 | 24761240                | TT                              | CC                | 1946436342               |
| SNP_P3_67940_24761256 | NC_021164.1    | Ca_kabuli_chr05 | 24761256                | TT                              | GG                | 1946436344               |
| SNP_P3_67941_24761274 | NC_021164.1    | Ca_kabuli_chr05 | 24761274                | GG                              | AA                | 1946436346               |
| SNP_P3_67942_24764245 | NC_021164.1    | Ca_kabuli_chr05 | 24764245                | TT                              | GG                | 1946436348               |
| SNP_P3_67943_24764496 | NC_021164.1    | Ca_kabuli_chr05 | 24764496                | CC                              | TT                | 1946436349               |
| SNP_P3_67944_24764497 | NC_021164.1    | Ca_kabuli_chr05 | 24764497                | TT                              | GG                | 1946436351               |
| SNP_P3_67945_24764498 | NC_021164.1    | Ca_kabuli_chr05 | 24764498                | TT                              | AA                | 1946436352               |
| SNP_P3_67946_24764499 | NC_021164.1    | Ca_kabuli_chr05 | 24764499                | CC                              | TT                | 1946436354               |
| SNP_P3_67947_24764503 | NC_021164.1    | Ca_kabuli_chr05 | 24764503                | CC                              | AA                | 1946436355               |
| SNP_P3_67948_24764505 | NC_021164.1    | Ca_kabuli_chr05 | 24764505                | TT                              | CC                | 1946436357               |
| SNP_P3_67949_24764639 | NC_021164.1    | Ca_kabuli_chr05 | 24764639                | CC                              | GG                | 1946436358               |
| SNP_P3_67950_24764659 | NC_021164.1    | Ca_kabuli_chr05 | 24764659                | AA                              | TT                | 1946436360               |
| SNP_P3_67951_24768796 | NC_021164.1    | Ca_kabuli_chr05 | 24768796                | CC                              | TT                | 1946436361               |
| SNP_P3_67952_24777893 | NC_021164.1    | Ca_kabuli_chr05 | 24777893                | CC                              | TT                | 1946436363               |
| SNP_P3_67953_24801666 | NC_021164.1    | Ca_kabuli_chr05 | 24801666                | GG                              | AA                | 1946436365               |
| SNP_P3_67955_24819898 | NC_021164.1    | Ca_kabuli_chr05 | 24819898                | GG                              | TT                | 1946436367               |
| SNP_P3_67956_24838208 | NC_021164.1    | Ca_kabuli_chr05 | 24838208                | GG                              | AA                | 1946436368               |
| SNP_P3_67957_24852094 | NC_021164.1    | Ca_kabuli_chr05 | 24852094                | AA                              | GG                | 1946436370               |
| SNP_P3_67958_24852111 | NC_021164.1    | Ca_kabuli_chr05 | 24852111                | CC                              | TT                | 1946436372               |
| SNP_P3_67959_24861677 | NC_021164.1    | Ca_kabuli_chr05 | 24861677                | TT                              | GG                | 1946436373               |
| SNP_P3_67960_24861974 | NC_021164.1    | Ca_kabuli_chr05 | 24861974                | CC                              | AA                | 1946436375               |
| SNP_P3_67961_24862085 | NC_021164.1    | Ca_kabuli_chr05 | 24862085                | TT                              | CC                | 1946436376               |
| SNP_P3_67962_24862734 | NC_021164.1    | Ca_kabuli_chr05 | 24862734                | TT                              | AA                | 1946436378               |
| SNP_P3_67963_24863031 | NC_021164.1    | Ca_kabuli_chr05 | 24863031                | GG                              | AA                | 1946436379               |
| SNP_P3_67964_24863175 | NC_021164.1    | Ca_kabuli_chr05 | 24863175                | AA                              | GG                | 1946436381               |
| SNP_P3_67965_24863994 | NC_021164.1    | Ca_kabuli_chr05 | 24863994                | AA                              | CC                | 1946436382               |
| SNP_P3_67967_24871804 | NC_021164.1    | Ca_kabuli_chr05 | 24871804                | GG                              | AA                | 1946436384               |
| SNP_P3_67968_24886527 | NC_021164.1    | Ca_kabuli_chr05 | 24886527                | AA                              | CC                | 1946436386               |
| SNP_P3_67969_24886530 | NC_021164.1    | Ca_kabuli_chr05 | 24886530                | AA                              | TT                | 1946436387               |
| SNP_P3_67970_24886533 | NC_021164.1    | Ca_kabuli_chr05 | 24886533                | TT                              | AA                | 1946436389               |
| SNP_P3_67972_24902138 | NC_021164.1    | Ca_kabuli_chr05 | 24902138                | GG                              | AA                | 1946436390               |
| SNP_P3_67974_24922969 | NC_021164.1    | Ca_kabuli_chr05 | 24922969                | TT                              | GG                | 1946436392               |

| SNPs IDs              | Chromosome IDs | Chromosomes     | Physical positions (bp) | CDC Frontier (Reference genome) | (Pusa 256 & HPNB) | NCBI SNPdb Accession IDs |
|-----------------------|----------------|-----------------|-------------------------|---------------------------------|-------------------|--------------------------|
| SNP_P3_67975_24922987 | NC_021164.1    | Ca_kabuli_chr05 | 24922987                | CC                              | AA                | 1946436393               |
| SNP_P3_67976_24923023 | NC_021164.1    | Ca_kabuli_chr05 | 24923023                | TT                              | CC                | 1946436395               |
| SNP_P3_67977_24923142 | NC_021164.1    | Ca_kabuli_chr05 | 24923142                | CC                              | TT                | 1946436396               |
| SNP_P3_67978_24923333 | NC_021164.1    | Ca_kabuli_chr05 | 24923333                | GG                              | AA                | 1946436398               |
| SNP_P3_67979_24923377 | NC_021164.1    | Ca_kabuli_chr05 | 24923377                | CC                              | TT                | 1946436399               |
| SNP_P3_67980_24923491 | NC_021164.1    | Ca_kabuli_chr05 | 24923491                | AA                              | CC                | 1946436401               |
| SNP_P3_67981_24923499 | NC_021164.1    | Ca_kabuli_chr05 | 24923499                | CC                              | GG                | 1946436402               |
| SNP_P3_67982_24923546 | NC_021164.1    | Ca_kabuli_chr05 | 24923546                | AA                              | GG                | 1946436404               |
| SNP_P3_67983_24923629 | NC_021164.1    | Ca_kabuli_chr05 | 24923629                | TT                              | CC                | 1946436405               |
| SNP_P3_67984_24923632 | NC_021164.1    | Ca_kabuli_chr05 | 24923632                | TT                              | AA                | 1946436407               |
| SNP_P3_67985_24928850 | NC_021164.1    | Ca_kabuli_chr05 | 24928850                | GG                              | AA                | 1946436408               |
| SNP_P3_67986_24982098 | NC_021164.1    | Ca_kabuli_chr05 | 24982098                | CC                              | GG                | 1946436410               |
| SNP_P3_67987_24982143 | NC_021164.1    | Ca_kabuli_chr05 | 24982143                | GG                              | AA                | 1946436411               |
| SNP_P3_67988_24983647 | NC_021164.1    | Ca_kabuli_chr05 | 24983647                | TT                              | CC                | 1946436413               |
| SNP_P3_67989_24983663 | NC_021164.1    | Ca_kabuli_chr05 | 24983663                | GG                              | CC                | 1946436414               |
| SNP_P3_67990_24983706 | NC_021164.1    | Ca_kabuli_chr05 | 24983706                | TT                              | CC                | 1946436415               |
| SNP_P3_67991_24994903 | NC_021164.1    | Ca_kabuli_chr05 | 24994903                | AA                              | GG                | 1946436417               |
| SNP_P3_67992_24994939 | NC_021164.1    | Ca_kabuli_chr05 | 24994939                | AA                              | GG                | 1946436418               |
| SNP_P3_67993_24994994 | NC_021164.1    | Ca_kabuli_chr05 | 24994994                | AA                              | GG                | 1946436420               |
| SNP_P3_67994_24995259 | NC_021164.1    | Ca_kabuli_chr05 | 24995259                | AA                              | TT                | 1946436421               |
| SNP_P3_67995_24998254 | NC_021164.1    | Ca_kabuli_chr05 | 24998254                | GG                              | AA                | 1946436423               |
| SNP_P3_67996_24999576 | NC_021164.1    | Ca_kabuli_chr05 | 24999576                | CC                              | TT                | 1946436424               |
| SNP_P3_67998_25068268 | NC_021164.1    | Ca_kabuli_chr05 | 25068268                | GG                              | AA                | 1946436425               |
| SNP_P3_68000_25092721 | NC_021164.1    | Ca_kabuli_chr05 | 25092721                | TT                              | CC                | 1946436427               |
| SNP_P3_68002_25136766 | NC_021164.1    | Ca_kabuli_chr05 | 25136766                | AA                              | TT                | 1946436428               |
| SNP_P3_68003_25157149 | NC_021164.1    | Ca_kabuli_chr05 | 25157149                | AA                              | CC                | 1946436430               |
| SNP_P3_68005_25230823 | NC_021164.1    | Ca_kabuli_chr05 | 25230823                | TT                              | AA                | 1946436432               |
| SNP_P3_68006_25230834 | NC_021164.1    | Ca_kabuli_chr05 | 25230834                | GG                              | AA                | 1946436433               |
| SNP_P3_68007_25230835 | NC_021164.1    | Ca_kabuli_chr05 | 25230835                | AA                              | CC                | 1946436434               |
| SNP_P3_68008_25230879 | NC_021164.1    | Ca_kabuli_chr05 | 25230879                | CC                              | AA                | 1946436436               |
| SNP_P3_68009_25230897 | NC_021164.1    | Ca_kabuli_chr05 | 25230897                | TT                              | AA                | 1946436437               |
| SNP_P3_68010_25230933 | NC_021164.1    | Ca_kabuli_chr05 | 25230933                | GG                              | TT                | 1946436439               |
| SNP_P3_68011_25230942 | NC_021164.1    | Ca_kabuli_chr05 | 25230942                | TT                              | AA                | 1946436440               |
| SNP_P3_68013_25232440 | NC_021164.1    | Ca_kabuli_chr05 | 25232440                | TT                              | CC                | 1946436442               |
| SNP_P3_68014_25232455 | NC_021164.1    | Ca_kabuli_chr05 | 25232455                | GG                              | CC                | 1946436443               |
| SNP_P3_68015_25232466 | NC_021164.1    | Ca_kabuli_chr05 | 25232466                | AA                              | CC                | 1946436445               |
| SNP_P3_68017_25232512 | NC_021164.1    | Ca_kabuli_chr05 | 25232512                | AA                              | CC                | 1946436446               |
| SNP_P3_68018_25232566 | NC_021164.1    | Ca_kabuli_chr05 | 25232566                | TT                              | AA                | 1946436448               |
| SNP_P3_68019_25232572 | NC_021164.1    | Ca_kabuli_chr05 | 25232572                | TT                              | GG                | 1946436449               |
| SNP_P3_68020_25232850 | NC_021164.1    | Ca_kabuli_chr05 | 25232850                | GG                              | AA                | 1946436451               |
| SNP_P3_68021_25232903 | NC_021164.1    | Ca_kabuli_chr05 | 25232903                | CC                              | TT                | 1946436452               |
| SNP_P3_68022_25239937 | NC_021164.1    | Ca_kabuli_chr05 | 25239937                | AA                              | CC                | 1946436454               |



| SNPs IDs              | Chromosome IDs | Chromosomes     | Physical positions (bp) | CDC Frontier (Reference genome) | (Pusa 256 & HPNB) | NCBI SNPdb Accession IDs |
|-----------------------|----------------|-----------------|-------------------------|---------------------------------|-------------------|--------------------------|
| SNP_P3_68023_25239941 | NC_021164.1    | Ca_kabuli_chr05 | 25239941                | GG                              | AA                | 1946436455               |
| SNP_P3_68024_25240259 | NC_021164.1    | Ca_kabuli_chr05 | 25240259                | AA                              | GG                | 1946436457               |
| SNP_P3_68025_25242183 | NC_021164.1    | Ca_kabuli_chr05 | 25242183                | CC                              | GG                | 1946436458               |
| SNP_P3_68026_25243049 | NC_021164.1    | Ca_kabuli_chr05 | 25243049                | AA                              | TT                | 1946436459               |
| SNP_P3_68027_25243379 | NC_021164.1    | Ca_kabuli_chr05 | 25243379                | AA                              | CC                | 1946436461               |
| SNP_P3_68028_25243441 | NC_021164.1    | Ca_kabuli_chr05 | 25243441                | GG                              | AA                | 1946436462               |
| SNP_P3_68029_25245845 | NC_021164.1    | Ca_kabuli_chr05 | 25245845                | TT                              | CC                | 1946436464               |
| SNP_P3_68030_25246214 | NC_021164.1    | Ca_kabuli_chr05 | 25246214                | TT                              | CC                | 1946436465               |
| SNP_P3_68031_25248470 | NC_021164.1    | Ca_kabuli_chr05 | 25248470                | GG                              | CC                | 1946436468               |
| SNP_P3_68032_25248511 | NC_021164.1    | Ca_kabuli_chr05 | 25248511                | CC                              | TT                | 1946436470               |
| SNP_P3_68033_25248519 | NC_021164.1    | Ca_kabuli_chr05 | 25248519                | AA                              | GG                | 1946436471               |
| SNP_P3_68034_25248523 | NC_021164.1    | Ca_kabuli_chr05 | 25248523                | CC                              | TT                | 1946436473               |
| SNP_P3_68035_25248606 | NC_021164.1    | Ca_kabuli_chr05 | 25248606                | CC                              | TT                | 1946436474               |
| SNP_P3_68036_25248868 | NC_021164.1    | Ca_kabuli_chr05 | 25248868                | CC                              | GG                | 1946436475               |
| SNP_P3_68037_25249536 | NC_021164.1    | Ca_kabuli_chr05 | 25249536                | GG                              | AA                | 1946436477               |
| SNP_P3_68038_25275121 | NC_021164.1    | Ca_kabuli_chr05 | 25275121                | TT                              | AA                | 1946436478               |
| SNP_P3_68039_25287534 | NC_021164.1    | Ca_kabuli_chr05 | 25287534                | GG                              | TT                | 1946436480               |
| SNP_P3_68041_25288153 | NC_021164.1    | Ca_kabuli_chr05 | 25288153                | GG                              | AA                | 1946436481               |
| SNP_P3_68042_25288535 | NC_021164.1    | Ca_kabuli_chr05 | 25288535                | GG                              | AA                | 1946436483               |
| SNP_P3_68043_25298830 | NC_021164.1    | Ca_kabuli_chr05 | 25298830                | GG                              | AA                | 1946436484               |
| SNP_P3_68044_25298833 | NC_021164.1    | Ca_kabuli_chr05 | 25298833                | AA                              | TT                | 1946436486               |
| SNP_P3_68045_25298888 | NC_021164.1    | Ca_kabuli_chr05 | 25298888                | TT                              | AA                | 1946436487               |
| SNP_P3_68046_25298890 | NC_021164.1    | Ca_kabuli_chr05 | 25298890                | CC                              | TT                | 1946436489               |
| SNP_P3_68047_25298896 | NC_021164.1    | Ca_kabuli_chr05 | 25298896                | TT                              | CC                | 1946436490               |
| SNP_P3_68048_25299069 | NC_021164.1    | Ca_kabuli_chr05 | 25299069                | CC                              | TT                | 1946436492               |
| SNP_P3_68049_25301444 | NC_021164.1    | Ca_kabuli_chr05 | 25301444                | TT                              | CC                | 1946436493               |
| SNP_P3_68050_25302916 | NC_021164.1    | Ca_kabuli_chr05 | 25302916                | TT                              | CC                | 1946436495               |
| SNP_P3_68051_25303579 | NC_021164.1    | Ca_kabuli_chr05 | 25303579                | AA                              | GG                | 1946436496               |
| SNP_P3_68053_25303928 | NC_021164.1    | Ca_kabuli_chr05 | 25303928                | AA                              | CC                | 1946436498               |
| SNP_P3_68054_25304243 | NC_021164.1    | Ca_kabuli_chr05 | 25304243                | TT                              | GG                | 1946436499               |
| SNP_P3_68055_25304246 | NC_021164.1    | Ca_kabuli_chr05 | 25304246                | CC                              | GG                | 1946436500               |
| SNP_P3_68056_25304255 | NC_021164.1    | Ca_kabuli_chr05 | 25304255                | AA                              | CC                | 1946436502               |
| SNP_P3_68057_25304290 | NC_021164.1    | Ca_kabuli_chr05 | 25304290                | TT                              | GG                | 1946436503               |
| SNP_P3_68058_25304307 | NC_021164.1    | Ca_kabuli_chr05 | 25304307                | TT                              | CC                | 1946436505               |
| SNP_P3_68059_25304311 | NC_021164.1    | Ca_kabuli_chr05 | 25304311                | GG                              | TT                | 1946436506               |
| SNP_P3_68060_25304408 | NC_021164.1    | Ca_kabuli_chr05 | 25304408                | TT                              | GG                | 1946436508               |
| SNP_P3_68061_25304447 | NC_021164.1    | Ca_kabuli_chr05 | 25304447                | TT                              | CC                | 1946436510               |
| SNP_P3_68062_25396435 | NC_021164.1    | Ca_kabuli_chr05 | 25396435                | GG                              | AA                | 1946436511               |
| SNP_P3_68063_25410414 | NC_021164.1    | Ca_kabuli_chr05 | 25410414                | AA                              | GG                | 1946436513               |
| SNP_P3_68064_25424056 | NC_021164.1    | Ca_kabuli_chr05 | 25424056                | TT                              | CC                | 1946436514               |
| SNP_P3_68065_25438693 | NC_021164.1    | Ca_kabuli_chr05 | 25438693                | TT                              | AA                | 1946436515               |
| SNP_P3_68066_25460210 | NC_021164.1    | Ca_kabuli_chr05 | 25460210                | TT                              | GG                | 1946436517               |

| SNPs IDs              | Chromosome IDs | Chromosomes     | Physical positions (bp) | CDC Frontier (Reference genome) | (Pusa 256 & HPNB) | NCBI SNPdb Accession IDs |
|-----------------------|----------------|-----------------|-------------------------|---------------------------------|-------------------|--------------------------|
| SNP_P3_68067_25490739 | NC_021164.1    | Ca_kabuli_chr05 | 25490739                | TT                              | CC                | 1946436518               |
| SNP_P3_68068_25491103 | NC_021164.1    | Ca_kabuli_chr05 | 25491103                | TT                              | CC                | 1946436520               |
| SNP_P3_68069_25522140 | NC_021164.1    | Ca_kabuli_chr05 | 25522140                | CC                              | GG                | 1946436521               |
| SNP_P3_68070_25524122 | NC_021164.1    | Ca_kabuli_chr05 | 25524122                | GG                              | AA                | 1946436523               |
| SNP_P3_68071_25524301 | NC_021164.1    | Ca_kabuli_chr05 | 25524301                | GG                              | AA                | 1946436524               |
| SNP_P3_68072_25524459 | NC_021164.1    | Ca_kabuli_chr05 | 25524459                | AA                              | CC                | 1946436526               |
| SNP_P3_68073_25531139 | NC_021164.1    | Ca_kabuli_chr05 | 25531139                | CC                              | TT                | 1946436527               |
| SNP_P3_68074_25531145 | NC_021164.1    | Ca_kabuli_chr05 | 25531145                | AA                              | CC                | 1946436529               |
| SNP_P3_68075_25531157 | NC_021164.1    | Ca_kabuli_chr05 | 25531157                | CC                              | TT                | 1946436530               |
| SNP_P3_68077_25534738 | NC_021164.1    | Ca_kabuli_chr05 | 25534738                | AA                              | TT                | 1946436532               |
| SNP_P3_68078_25534741 | NC_021164.1    | Ca_kabuli_chr05 | 25534741                | AA                              | CC                | 1946436533               |
| SNP_P3_68079_25534789 | NC_021164.1    | Ca_kabuli_chr05 | 25534789                | GG                              | AA                | 1946436535               |
| SNP_P3_68080_25542142 | NC_021164.1    | Ca_kabuli_chr05 | 25542142                | TT                              | CC                | 1946436537               |
| SNP_P3_68084_25576259 | NC_021164.1    | Ca_kabuli_chr05 | 25576259                | AA                              | TT                | 1946436538               |
| SNP_P3_68085_25578113 | NC_021164.1    | Ca_kabuli_chr05 | 25578113                | AA                              | CC                | 1946436540               |
| SNP_P3_68087_25614796 | NC_021164.1    | Ca_kabuli_chr05 | 25614796                | GG                              | AA                | 1946436542               |
| SNP_P3_68088_25657008 | NC_021164.1    | Ca_kabuli_chr05 | 25657008                | TT                              | CC                | 1946436543               |
| SNP_P3_68090_25674206 | NC_021164.1    | Ca_kabuli_chr05 | 25674206                | CC                              | TT                | 1946436545               |
| SNP_P3_68093_25746918 | NC_021164.1    | Ca_kabuli_chr05 | 25746918                | GG                              | AA                | 1946436546               |
| SNP_P3_68094_25760659 | NC_021164.1    | Ca_kabuli_chr05 | 25760659                | AA                              | GG                | 1946436548               |
| SNP_P3_68095_25760660 | NC_021164.1    | Ca_kabuli_chr05 | 25760660                | AA                              | CC                | 1946436549               |
| SNP_P3_68096_25769500 | NC_021164.1    | Ca_kabuli_chr05 | 25769500                | AA                              | GG                | 1946436551               |
| SNP_P3_68097_25801715 | NC_021164.1    | Ca_kabuli_chr05 | 25801715                | TT                              | CC                | 1946436552               |
| SNP_P3_68098_25801734 | NC_021164.1    | Ca_kabuli_chr05 | 25801734                | GG                              | TT                | 1946436553               |
| SNP_P3_68099_25802216 | NC_021164.1    | Ca_kabuli_chr05 | 25802216                | AA                              | GG                | 1946436555               |
| SNP_P3_68101_25802262 | NC_021164.1    | Ca_kabuli_chr05 | 25802262                | GG                              | AA                | 1946436556               |
| SNP_P3_68102_25803726 | NC_021164.1    | Ca_kabuli_chr05 | 25803726                | CC                              | GG                | 1946436558               |
| SNP_P3_68103_25803731 | NC_021164.1    | Ca_kabuli_chr05 | 25803731                | CC                              | TT                | 1946436559               |
| SNP_P3_68105_25803883 | NC_021164.1    | Ca_kabuli_chr05 | 25803883                | TT                              | GG                | 1946436561               |
| SNP_P3_68106_25803912 | NC_021164.1    | Ca_kabuli_chr05 | 25803912                | TT                              | CC                | 1946436563               |
| SNP_P3_68108_25804029 | NC_021164.1    | Ca_kabuli_chr05 | 25804029                | GG                              | AA                | 1946436564               |
| SNP_P3_68109_25804038 | NC_021164.1    | Ca_kabuli_chr05 | 25804038                | TT                              | AA                | 1946436566               |
| SNP_P3_68110_25804093 | NC_021164.1    | Ca_kabuli_chr05 | 25804093                | CC                              | TT                | 1946436567               |
| SNP_P3_68111_25804149 | NC_021164.1    | Ca_kabuli_chr05 | 25804149                | GG                              | AA                | 1946436569               |
| SNP_P3_68112_25804151 | NC_021164.1    | Ca_kabuli_chr05 | 25804151                | AA                              | GG                | 1946436570               |
| SNP_P3_68113_25804159 | NC_021164.1    | Ca_kabuli_chr05 | 25804159                | GG                              | CC                | 1946436572               |
| SNP_P3_68114_25804165 | NC_021164.1    | Ca_kabuli_chr05 | 25804165                | CC                              | GG                | 1946436573               |
| SNP_P3_68115_25804296 | NC_021164.1    | Ca_kabuli_chr05 | 25804296                | TT                              | AA                | 1946436575               |
| SNP_P3_68116_25809996 | NC_021164.1    | Ca_kabuli_chr05 | 25809996                | GG                              | AA                | 1946436576               |
| SNP_P3_68117_25810020 | NC_021164.1    | Ca_kabuli_chr05 | 25810020                | GG                              | AA                | 1946436577               |
| SNP_P3_68119_25832721 | NC_021164.1    | Ca_kabuli_chr05 | 25832721                | GG                              | TT                | 1946436579               |
| SNP_P3_68120_25836446 | NC_021164.1    | Ca_kabuli_chr05 | 25836446                | CC                              | AA                | 1946436580               |

| SNPs IDs              | Chromosome IDs | Chromosomes     | Physical positions (bp) | CDC Frontier (Reference genome) | (Pusa 256 & HPNB) | NCBI SNPdb Accession IDs |
|-----------------------|----------------|-----------------|-------------------------|---------------------------------|-------------------|--------------------------|
| SNP_P3_68121_25836538 | NC_021164.1    | Ca_kabuli_chr05 | 25836538                | TT                              | AA                | 1946436582               |
| SNP_P3_68122_25836584 | NC_021164.1    | Ca_kabuli_chr05 | 25836584                | CC                              | TT                | 1946436584               |
| SNP_P3_68123_25836586 | NC_021164.1    | Ca_kabuli_chr05 | 25836586                | CC                              | TT                | 1946436585               |
| SNP_P3_68124_25836635 | NC_021164.1    | Ca_kabuli_chr05 | 25836635                | CC                              | TT                | 1946436587               |
| SNP_P3_68125_25836643 | NC_021164.1    | Ca_kabuli_chr05 | 25836643                | TT                              | AA                | 1946436588               |
| SNP_P3_68126_25836682 | NC_021164.1    | Ca_kabuli_chr05 | 25836682                | AA                              | GG                | 1946436590               |
| SNP_P3_68127_25836690 | NC_021164.1    | Ca_kabuli_chr05 | 25836690                | AA                              | CC                | 1946436591               |
| SNP_P3_68128_25836706 | NC_021164.1    | Ca_kabuli_chr05 | 25836706                | TT                              | CC                | 1946436592               |
| SNP_P3_68129_25836756 | NC_021164.1    | Ca_kabuli_chr05 | 25836756                | CC                              | TT                | 1946436594               |
| SNP_P3_68131_25839839 | NC_021164.1    | Ca_kabuli_chr05 | 25839839                | TT                              | GG                | 1946436595               |
| SNP_P3_68132_25840875 | NC_021164.1    | Ca_kabuli_chr05 | 25840875                | CC                              | TT                | 1946436596               |
| SNP_P3_68133_25840887 | NC_021164.1    | Ca_kabuli_chr05 | 25840887                | TT                              | CC                | 1946436597               |
| SNP_P3_68134_25847880 | NC_021164.1    | Ca_kabuli_chr05 | 25847880                | AA                              | CC                | 1946436598               |
| SNP_P3_68135_25848326 | NC_021164.1    | Ca_kabuli_chr05 | 25848326                | TT                              | CC                | 1946436599               |
| SNP_P3_68136_25861494 | NC_021164.1    | Ca_kabuli_chr05 | 25861494                | TT                              | CC                | 1946436600               |
| SNP_P3_68137_25861512 | NC_021164.1    | Ca_kabuli_chr05 | 25861512                | TT                              | AA                | 1946436601               |
| SNP_P3_68138_25861617 | NC_021164.1    | Ca_kabuli_chr05 | 25861617                | TT                              | CC                | 1946436602               |
| SNP_P3_68139_25861960 | NC_021164.1    | Ca_kabuli_chr05 | 25861960                | GG                              | AA                | 1946436603               |
| SNP_P3_68140_25861967 | NC_021164.1    | Ca_kabuli_chr05 | 25861967                | AA                              | TT                | 1946436604               |
| SNP_P3_68141_25862013 | NC_021164.1    | Ca_kabuli_chr05 | 25862013                | GG                              | AA                | 1946436605               |
| SNP_P3_68142_25870334 | NC_021164.1    | Ca_kabuli_chr05 | 25870334                | CC                              | TT                | 1946436606               |
| SNP_P3_68143_25870734 | NC_021164.1    | Ca_kabuli_chr05 | 25870734                | TT                              | CC                | 1946436607               |
| SNP_P3_68144_25870737 | NC_021164.1    | Ca_kabuli_chr05 | 25870737                | GG                              | AA                | 1946436608               |
| SNP_P3_68145_25870752 | NC_021164.1    | Ca_kabuli_chr05 | 25870752                | GG                              | CC                | 1946436609               |
| SNP_P3_68146_25878933 | NC_021164.1    | Ca_kabuli_chr05 | 25878933                | GG                              | AA                | 1946436610               |
| SNP_P3_68147_25896494 | NC_021164.1    | Ca_kabuli_chr05 | 25896494                | CC                              | TT                | 1946436611               |
| SNP_P3_68148_25896775 | NC_021164.1    | Ca_kabuli_chr05 | 25896775                | TT                              | CC                | 1946436612               |
| SNP_P3_68149_25954280 | NC_021164.1    | Ca_kabuli_chr05 | 25954280                | GG                              | AA                | 1946436613               |
| SNP_P3_68150_25954800 | NC_021164.1    | Ca_kabuli_chr05 | 25954800                | CC                              | GG                | 1946436614               |
| SNP_P3_68151_25954810 | NC_021164.1    | Ca_kabuli_chr05 | 25954810                | TT                              | CC                | 1946436615               |
| SNP_P3_68152_25954815 | NC_021164.1    | Ca_kabuli_chr05 | 25954815                | AA                              | GG                | 1946436616               |
| SNP_P3_68153_25954816 | NC_021164.1    | Ca_kabuli_chr05 | 25954816                | GG                              | AA                | 1946436617               |
| SNP_P3_68154_25954837 | NC_021164.1    | Ca_kabuli_chr05 | 25954837                | AA                              | GG                | 1946436618               |
| SNP_P3_68155_25954842 | NC_021164.1    | Ca_kabuli_chr05 | 25954842                | GG                              | AA                | 1946436619               |
| SNP_P3_68156_25955179 | NC_021164.1    | Ca_kabuli_chr05 | 25955179                | AA                              | GG                | 1946436620               |
| SNP_P3_68157_25955187 | NC_021164.1    | Ca_kabuli_chr05 | 25955187                | TT                              | CC                | 1946436621               |
| SNP_P3_68159_25985508 | NC_021164.1    | Ca_kabuli_chr05 | 25985508                | AA                              | GG                | 1946436622               |
| SNP_P3_68160_26068342 | NC_021164.1    | Ca_kabuli_chr05 | 26068342                | CC                              | AA                | 1946436623               |
| SNP_P3_68161_26073264 | NC_021164.1    | Ca_kabuli_chr05 | 26073264                | AA                              | GG                | 1946436624               |
| SNP_P3_68162_26077290 | NC_021164.1    | Ca_kabuli_chr05 | 26077290                | AA                              | GG                | 1946436625               |
| SNP_P3_68163_26077341 | NC_021164.1    | Ca_kabuli_chr05 | 26077341                | CC                              | TT                | 1946436626               |
| SNP_P3_68164_26077393 | NC_021164.1    | Ca_kabuli_chr05 | 26077393                | AA                              | GG                | 1946436627               |

| SNPs IDs              | Chromosome IDs | Chromosomes     | Physical positions (bp) | CDC Frontier (Reference genome) | (Pusa 256 & HPNB) | NCBI SNPdb Accession IDs |
|-----------------------|----------------|-----------------|-------------------------|---------------------------------|-------------------|--------------------------|
| SNP_P3_68165_26077754 | NC_021164.1    | Ca_kabuli_chr05 | 26077754                | GG                              | TT                | 1946436628               |
| SNP_P3_68166_26077808 | NC_021164.1    | Ca_kabuli_chr05 | 26077808                | CC                              | TT                | 1946436629               |
| SNP_P3_68167_26077864 | NC_021164.1    | Ca_kabuli_chr05 | 26077864                | TT                              | GG                | 1946436630               |
| SNP_P3_68168_26077896 | NC_021164.1    | Ca_kabuli_chr05 | 26077896                | AA                              | CC                | 1946436631               |
| SNP_P3_68169_26077937 | NC_021164.1    | Ca_kabuli_chr05 | 26077937                | TT                              | CC                | 1946436632               |
| SNP_P3_68170_26078188 | NC_021164.1    | Ca_kabuli_chr05 | 26078188                | GG                              | AA                | 1946436633               |
| SNP_P3_68171_26079041 | NC_021164.1    | Ca_kabuli_chr05 | 26079041                | TT                              | CC                | 1946436634               |
| SNP_P3_68176_26263230 | NC_021164.1    | Ca_kabuli_chr05 | 26263230                | AA                              | GG                | 1946436635               |
| SNP_P3_68177_26263298 | NC_021164.1    | Ca_kabuli_chr05 | 26263298                | TT                              | CC                | 1946436636               |
| SNP_P3_68178_26263620 | NC_021164.1    | Ca_kabuli_chr05 | 26263620                | AA                              | GG                | 1946436637               |
| SNP_P3_68179_26263658 | NC_021164.1    | Ca_kabuli_chr05 | 26263658                | CC                              | TT                | 1946436638               |
| SNP_P3_68180_26267052 | NC_021164.1    | Ca_kabuli_chr05 | 26267052                | TT                              | AA                | 1946436639               |
| SNP_P3_68182_26281314 | NC_021164.1    | Ca_kabuli_chr05 | 26281314                | TT                              | AA                | 1946436640               |
| SNP_P3_68183_26285349 | NC_021164.1    | Ca_kabuli_chr05 | 26285349                | AA                              | GG                | 1946436641               |
| SNP_P3_68184_26285352 | NC_021164.1    | Ca_kabuli_chr05 | 26285352                | GG                              | AA                | 1946436642               |
| SNP_P3_68185_26285356 | NC_021164.1    | Ca_kabuli_chr05 | 26285356                | CC                              | TT                | 1946436643               |
| SNP_P3_68186_26285357 | NC_021164.1    | Ca_kabuli_chr05 | 26285357                | AA                              | CC                | 1946436644               |
| SNP_P3_68187_26285369 | NC_021164.1    | Ca_kabuli_chr05 | 26285369                | TT                              | AA                | 1946436645               |
| SNP_P3_68188_26285370 | NC_021164.1    | Ca_kabuli_chr05 | 26285370                | TT                              | CC                | 1946436646               |
| SNP_P3_68189_26285400 | NC_021164.1    | Ca_kabuli_chr05 | 26285400                | TT                              | AA                | 1946436647               |
| SNP_P3_68190_26285409 | NC_021164.1    | Ca_kabuli_chr05 | 26285409                | CC                              | TT                | 1946436648               |
| SNP_P3_68191_26327343 | NC_021164.1    | Ca_kabuli_chr05 | 26327343                | TT                              | CC                | 1946436649               |
| SNP_P3_68192_26327344 | NC_021164.1    | Ca_kabuli_chr05 | 26327344                | TT                              | CC                | 1946436650               |
| SNP_P3_68193_26333626 | NC_021164.1    | Ca_kabuli_chr05 | 26333626                | TT                              | CC                | 1946436651               |
| SNP_P3_68194_26378863 | NC_021164.1    | Ca_kabuli_chr05 | 26378863                | CC                              | TT                | 1946436652               |
| SNP_P3_68195_26379858 | NC_021164.1    | Ca_kabuli_chr05 | 26379858                | TT                              | AA                | 1946436653               |
| SNP_P3_68196_26397016 | NC_021164.1    | Ca_kabuli_chr05 | 26397016                | AA                              | TT                | 1946436654               |
| SNP_P3_68197_26424539 | NC_021164.1    | Ca_kabuli_chr05 | 26424539                | CC                              | AA                | 1946436655               |
| SNP_P3_68198_26424859 | NC_021164.1    | Ca_kabuli_chr05 | 26424859                | AA                              | GG                | 1946436656               |
| SNP_P3_68202_26449343 | NC_021164.1    | Ca_kabuli_chr05 | 26449343                | CC                              | TT                | 1946436657               |
| SNP_P3_68203_26453092 | NC_021164.1    | Ca_kabuli_chr05 | 26453092                | AA                              | GG                | 1946436658               |
| SNP_P3_68204_26453113 | NC_021164.1    | Ca_kabuli_chr05 | 26453113                | GG                              | AA                | 1946436659               |
| SNP_P3_68205_26454077 | NC_021164.1    | Ca_kabuli_chr05 | 26454077                | TT                              | GG                | 1946436660               |
| SNP_P3_68206_26454136 | NC_021164.1    | Ca_kabuli_chr05 | 26454136                | TT                              | AA                | 1946436661               |
| SNP_P3_68207_26454172 | NC_021164.1    | Ca_kabuli_chr05 | 26454172                | GG                              | AA                | 1946436662               |
| SNP_P3_68208_26454210 | NC_021164.1    | Ca_kabuli_chr05 | 26454210                | GG                              | AA                | 1946436663               |
| SNP_P3_68209_26454469 | NC_021164.1    | Ca_kabuli_chr05 | 26454469                | AA                              | TT                | 1946436664               |
| SNP_P3_68210_26454475 | NC_021164.1    | Ca_kabuli_chr05 | 26454475                | TT                              | GG                | 1946436665               |
| SNP_P3_68211_26454480 | NC_021164.1    | Ca_kabuli_chr05 | 26454480                | TT                              | CC                | 1946436666               |
| SNP_P3_68212_26454499 | NC_021164.1    | Ca_kabuli_chr05 | 26454499                | AA                              | GG                | 1946436667               |
| SNP_P3_68213_26456545 | NC_021164.1    | Ca_kabuli_chr05 | 26456545                | AA                              | GG                | 1946436668               |
| SNP_P3_68214_26456984 | NC_021164.1    | Ca_kabuli_chr05 | 26456984                | GG                              | AA                | 1946436669               |

| SNPs IDs              | Chromosome IDs | Chromosomes     | Physical positions (bp) | CDC Frontier (Reference genome) | (Pusa 256 & HPNB) | NCBI SNPdb Accession IDs |
|-----------------------|----------------|-----------------|-------------------------|---------------------------------|-------------------|--------------------------|
| SNP_P3_68215_26456995 | NC_021164.1    | Ca_kabuli_chr05 | 26456995                | TT                              | GG                | 1946436670               |
| SNP_P3_68216_26457056 | NC_021164.1    | Ca_kabuli_chr05 | 26457056                | AA                              | GG                | 1946436671               |
| SNP_P3_68217_26457176 | NC_021164.1    | Ca_kabuli_chr05 | 26457176                | AA                              | CC                | 1946436672               |
| SNP_P3_68218_26457181 | NC_021164.1    | Ca_kabuli_chr05 | 26457181                | TT                              | CC                | 1946436673               |
| SNP_P3_68219_26457198 | NC_021164.1    | Ca_kabuli_chr05 | 26457198                | TT                              | CC                | 1946436674               |
| SNP_P3_68220_26458436 | NC_021164.1    | Ca_kabuli_chr05 | 26458436                | TT                              | GG                | 1946436675               |
| SNP_P3_68221_26459687 | NC_021164.1    | Ca_kabuli_chr05 | 26459687                | CC                              | TT                | 1946436676               |
| SNP_P3_68222_26461676 | NC_021164.1    | Ca_kabuli_chr05 | 26461676                | CC                              | TT                | 1946436677               |
| SNP_P3_68223_26492896 | NC_021164.1    | Ca_kabuli_chr05 | 26492896                | GG                              | AA                | 1946436678               |
| SNP_P3_68224_26514204 | NC_021164.1    | Ca_kabuli_chr05 | 26514204                | CC                              | TT                | 1946436679               |
| SNP_P3_68225_26522992 | NC_021164.1    | Ca_kabuli_chr05 | 26522992                | TT                              | CC                | 1946436680               |
| SNP_P3_68226_26523306 | NC_021164.1    | Ca_kabuli_chr05 | 26523306                | AA                              | GG                | 1946436681               |
| SNP_P3_68227_26523381 | NC_021164.1    | Ca_kabuli_chr05 | 26523381                | AA                              | GG                | 1946436682               |
| SNP_P3_68228_26523392 | NC_021164.1    | Ca_kabuli_chr05 | 26523392                | AA                              | GG                | 1946436683               |
| SNP_P3_68229_26533388 | NC_021164.1    | Ca_kabuli_chr05 | 26533388                | TT                              | CC                | 1946436684               |
| SNP_P3_68230_26541490 | NC_021164.1    | Ca_kabuli_chr05 | 26541490                | GG                              | AA                | 1946436685               |
| SNP_P3_68234_26605966 | NC_021164.1    | Ca_kabuli_chr05 | 26605966                | AA                              | GG                | 1946436686               |
| SNP_P3_68235_26618392 | NC_021164.1    | Ca_kabuli_chr05 | 26618392                | GG                              | AA                | 1946436687               |
| SNP_P3_68237_26657441 | NC_021164.1    | Ca_kabuli_chr05 | 26657441                | CC                              | AA                | 1946436688               |
| SNP_P3_68238_26671556 | NC_021164.1    | Ca_kabuli_chr05 | 26671556                | TT                              | CC                | 1946436689               |
| SNP_P3_68239_26799718 | NC_021164.1    | Ca_kabuli_chr05 | 26799718                | CC                              | AA                | 1946436690               |
| SNP_P3_68240_26832254 | NC_021164.1    | Ca_kabuli_chr05 | 26832254                | GG                              | AA                | 1946436691               |
| SNP_P3_68241_26852524 | NC_021164.1    | Ca_kabuli_chr05 | 26852524                | CC                              | TT                | 1946436692               |
| SNP_P3_68242_26856682 | NC_021164.1    | Ca_kabuli_chr05 | 26856682                | AA                              | TT                | 1946436693               |
| SNP_P3_68243_26856916 | NC_021164.1    | Ca_kabuli_chr05 | 26856916                | CC                              | GG                | 1946436694               |
| SNP_P3_68244_26889538 | NC_021164.1    | Ca_kabuli_chr05 | 26889538                | GG                              | AA                | 1946436695               |
| SNP_P3_68245_26889539 | NC_021164.1    | Ca_kabuli_chr05 | 26889539                | TT                              | CC                | 1946436696               |
| SNP_P3_68246_26889555 | NC_021164.1    | Ca_kabuli_chr05 | 26889555                | GG                              | AA                | 1946436697               |
| SNP_P3_68247_26889557 | NC_021164.1    | Ca_kabuli_chr05 | 26889557                | TT                              | CC                | 1946436698               |
| SNP_P3_68248_26896917 | NC_021164.1    | Ca_kabuli_chr05 | 26896917                | AA                              | GG                | 1946436699               |
| SNP_P3_68249_26896921 | NC_021164.1    | Ca_kabuli_chr05 | 26896921                | TT                              | AA                | 1946436700               |
| SNP_P3_68252_26906706 | NC_021164.1    | Ca_kabuli_chr05 | 26906706                | CC                              | TT                | 1946436701               |
| SNP_P3_68253_26935803 | NC_021164.1    | Ca_kabuli_chr05 | 26935803                | CC                              | AA                | 1946436702               |
| SNP_P3_68254_26954425 | NC_021164.1    | Ca_kabuli_chr05 | 26954425                | GG                              | AA                | 1946436703               |
| SNP_P3_68255_26954495 | NC_021164.1    | Ca_kabuli_chr05 | 26954495                | GG                              | AA                | 1946436704               |
| SNP_P3_68256_26987645 | NC_021164.1    | Ca_kabuli_chr05 | 26987645                | TT                              | AA                | 1946436705               |
| SNP_P3_68257_26987679 | NC_021164.1    | Ca_kabuli_chr05 | 26987679                | AA                              | GG                | 1946436706               |
| SNP_P3_68258_26987707 | NC_021164.1    | Ca_kabuli_chr05 | 26987707                | TT                              | CC                | 1946436707               |
| SNP_P3_68259_26987788 | NC_021164.1    | Ca_kabuli_chr05 | 26987788                | AA                              | GG                | 1946436708               |
| SNP_P3_68260_26988136 | NC_021164.1    | Ca_kabuli_chr05 | 26988136                | GG                              | TT                | 1946436709               |
| SNP_P3_68261_26988162 | NC_021164.1    | Ca_kabuli_chr05 | 26988162                | TT                              | CC                | 1946436710               |
| SNP_P3_68262_26988206 | NC_021164.1    | Ca_kabuli_chr05 | 26988206                | CC                              | TT                | 1946436711               |

| SNPs IDs              | Chromosome IDs | Chromosomes     | Physical positions (bp) | CDC Frontier (Reference genome) | (Pusa 256 & HPNB) | NCBI SNPdb Accession IDs |
|-----------------------|----------------|-----------------|-------------------------|---------------------------------|-------------------|--------------------------|
| SNP_P3_68263_26988211 | NC_021164.1    | Ca_kabuli_chr05 | 26988211                | CC                              | TT                | 1946436712               |
| SNP_P3_68264_26988271 | NC_021164.1    | Ca_kabuli_chr05 | 26988271                | TT                              | CC                | 1946436713               |
| SNP_P3_68265_26988367 | NC_021164.1    | Ca_kabuli_chr05 | 26988367                | TT                              | CC                | 1946436715               |
| SNP_P3_68266_26988417 | NC_021164.1    | Ca_kabuli_chr05 | 26988417                | TT                              | CC                | 1946436716               |
| SNP_P3_68267_26988445 | NC_021164.1    | Ca_kabuli_chr05 | 26988445                | TT                              | CC                | 1946436718               |
| SNP_P3_68268_26989104 | NC_021164.1    | Ca_kabuli_chr05 | 26989104                | AA                              | TT                | 1946436719               |
| SNP_P3_68269_26989121 | NC_021164.1    | Ca_kabuli_chr05 | 26989121                | CC                              | TT                | 1946436721               |
| SNP_P3_68271_26989181 | NC_021164.1    | Ca_kabuli_chr05 | 26989181                | TT                              | CC                | 1946436722               |
| SNP_P3_68272_26989268 | NC_021164.1    | Ca_kabuli_chr05 | 26989268                | TT                              | AA                | 1946436724               |
| SNP_P3_68273_26989282 | NC_021164.1    | Ca_kabuli_chr05 | 26989282                | AA                              | CC                | 1946436725               |
| SNP_P3_68274_26989455 | NC_021164.1    | Ca_kabuli_chr05 | 26989455                | TT                              | CC                | 1946436726               |
| SNP_P3_68275_26989457 | NC_021164.1    | Ca_kabuli_chr05 | 26989457                | GG                              | AA                | 1946436728               |
| SNP_P3_68276_26994524 | NC_021164.1    | Ca_kabuli_chr05 | 26994524                | AA                              | TT                | 1946436729               |
| SNP_P3_68277_26994526 | NC_021164.1    | Ca_kabuli_chr05 | 26994526                | TT                              | AA                | 1946436731               |
| SNP_P3_68279_26994661 | NC_021164.1    | Ca_kabuli_chr05 | 26994661                | CC                              | AA                | 1946436732               |
| SNP_P3_68280_26994821 | NC_021164.1    | Ca_kabuli_chr05 | 26994821                | TT                              | GG                | 1946436734               |
| SNP_P3_68281_26994864 | NC_021164.1    | Ca_kabuli_chr05 | 26994864                | TT                              | CC                | 1946436735               |
| SNP_P3_68282_26994930 | NC_021164.1    | Ca_kabuli_chr05 | 26994930                | TT                              | CC                | 1946436737               |
| SNP_P3_68283_26994958 | NC_021164.1    | Ca_kabuli_chr05 | 26994958                | TT                              | CC                | 1946436738               |
| SNP_P3_68284_26994986 | NC_021164.1    | Ca_kabuli_chr05 | 26994986                | TT                              | CC                | 1946436740               |
| SNP_P3_68286_26995062 | NC_021164.1    | Ca_kabuli_chr05 | 26995062                | AA                              | GG                | 1946436741               |
| SNP_P3_68287_26995118 | NC_021164.1    | Ca_kabuli_chr05 | 26995118                | GG                              | AA                | 1946436743               |
| SNP_P3_68288_26995132 | NC_021164.1    | Ca_kabuli_chr05 | 26995132                | AA                              | TT                | 1946436744               |
| SNP_P3_68290_26996045 | NC_021164.1    | Ca_kabuli_chr05 | 26996045                | CC                              | AA                | 1946436746               |
| SNP_P3_68291_26996074 | NC_021164.1    | Ca_kabuli_chr05 | 26996074                | TT                              | CC                | 1946436747               |
| SNP_P3_68292_26996096 | NC_021164.1    | Ca_kabuli_chr05 | 26996096                | AA                              | GG                | 1946436748               |
| SNP_P3_68293_26996104 | NC_021164.1    | Ca_kabuli_chr05 | 26996104                | TT                              | CC                | 1946436750               |
| SNP_P3_68294_26996105 | NC_021164.1    | Ca_kabuli_chr05 | 26996105                | TT                              | CC                | 1946436751               |
| SNP_P3_68295_26996106 | NC_021164.1    | Ca_kabuli_chr05 | 26996106                | AA                              | GG                | 1946436753               |
| SNP_P3_68297_26996177 | NC_021164.1    | Ca_kabuli_chr05 | 26996177                | CC                              | GG                | 1946436755               |
| SNP_P3_68299_26996197 | NC_021164.1    | Ca_kabuli_chr05 | 26996197                | AA                              | GG                | 1946436756               |
| SNP_P3_68300_26996207 | NC_021164.1    | Ca_kabuli_chr05 | 26996207                | TT                              | CC                | 1946436758               |
| SNP_P3_68301_26996218 | NC_021164.1    | Ca_kabuli_chr05 | 26996218                | TT                              | GG                | 1946436759               |
| SNP_P3_68302_26996283 | NC_021164.1    | Ca_kabuli_chr05 | 26996283                | TT                              | CC                | 1946436760               |
| SNP_P3_68303_26996286 | NC_021164.1    | Ca_kabuli_chr05 | 26996286                | TT                              | CC                | 1946436762               |
| SNP_P3_68304_26996289 | NC_021164.1    | Ca_kabuli_chr05 | 26996289                | AA                              | GG                | 1946436763               |
| SNP_P3_68305_26996293 | NC_021164.1    | Ca_kabuli_chr05 | 26996293                | TT                              | CC                | 1946436765               |
| SNP_P3_68306_26996302 | NC_021164.1    | Ca_kabuli_chr05 | 26996302                | TT                              | GG                | 1946436766               |
| SNP_P3_68307_26996347 | NC_021164.1    | Ca_kabuli_chr05 | 26996347                | AA                              | GG                | 1946436768               |
| SNP_P3_68308_26996352 | NC_021164.1    | Ca_kabuli_chr05 | 26996352                | TT                              | CC                | 1946436769               |
| SNP_P3_68309_26996382 | NC_021164.1    | Ca_kabuli_chr05 | 26996382                | AA                              | GG                | 1946436771               |
| SNP_P3_68310_26996391 | NC_021164.1    | Ca_kabuli_chr05 | 26996391                | TT                              | GG                | 1946436773               |

| SNPs IDs              | Chromosome IDs | Chromosomes     | Physical positions (bp) | CDC Frontier (Reference genome) | (Pusa 256 & HPNB) | NCBI SNPdb Accession IDs |
|-----------------------|----------------|-----------------|-------------------------|---------------------------------|-------------------|--------------------------|
| SNP_P3_68311_26996409 | NC_021164.1    | Ca_kabuli_chr05 | 26996409                | AA                              | CC                | 1946436774               |
| SNP_P3_68312_26996436 | NC_021164.1    | Ca_kabuli_chr05 | 26996436                | AA                              | GG                | 1946436775               |
| SNP_P3_68313_26996475 | NC_021164.1    | Ca_kabuli_chr05 | 26996475                | AA                              | GG                | 1946436777               |
| SNP_P3_68314_26996485 | NC_021164.1    | Ca_kabuli_chr05 | 26996485                | AA                              | GG                | 1946436778               |
| SNP_P3_68315_26996515 | NC_021164.1    | Ca_kabuli_chr05 | 26996515                | TT                              | CC                | 1946436780               |
| SNP_P3_68316_26996536 | NC_021164.1    | Ca_kabuli_chr05 | 26996536                | TT                              | GG                | 1946436781               |
| SNP_P3_68317_26996555 | NC_021164.1    | Ca_kabuli_chr05 | 26996555                | TT                              | CC                | 1946436783               |
| SNP_P3_68318_26996764 | NC_021164.1    | Ca_kabuli_chr05 | 26996764                | AA                              | GG                | 1946436784               |
| SNP_P3_68319_26996793 | NC_021164.1    | Ca_kabuli_chr05 | 26996793                | AA                              | GG                | 1946436786               |
| SNP_P3_68321_26996819 | NC_021164.1    | Ca_kabuli_chr05 | 26996819                | CC                              | TT                | 1946436787               |
| SNP_P3_68322_26996903 | NC_021164.1    | Ca_kabuli_chr05 | 26996903                | GG                              | AA                | 1946436789               |
| SNP_P3_68323_26996912 | NC_021164.1    | Ca_kabuli_chr05 | 26996912                | GG                              | AA                | 1946436791               |
| SNP_P3_68324_26996927 | NC_021164.1    | Ca_kabuli_chr05 | 26996927                | AA                              | GG                | 1946436792               |
| SNP_P3_68325_26997057 | NC_021164.1    | Ca_kabuli_chr05 | 26997057                | TT                              | CC                | 1946436794               |
| SNP_P3_68326_26997067 | NC_021164.1    | Ca_kabuli_chr05 | 26997067                | AA                              | GG                | 1946436795               |
| SNP_P3_68327_26997209 | NC_021164.1    | Ca_kabuli_chr05 | 26997209                | TT                              | CC                | 1946436797               |
| SNP_P3_68328_26997245 | NC_021164.1    | Ca_kabuli_chr05 | 26997245                | TT                              | CC                | 1946436798               |
| SNP_P3_68329_26997263 | NC_021164.1    | Ca_kabuli_chr05 | 26997263                | AA                              | CC                | 1946436799               |
| SNP_P3_68330_26997489 | NC_021164.1    | Ca_kabuli_chr05 | 26997489                | AA                              | GG                | 1946436801               |
| SNP_P3_68331_26997512 | NC_021164.1    | Ca_kabuli_chr05 | 26997512                | TT                              | CC                | 1946436802               |
| SNP_P3_68332_26997632 | NC_021164.1    | Ca_kabuli_chr05 | 26997632                | TT                              | GG                | 1946436804               |
| SNP_P3_68333_26997647 | NC_021164.1    | Ca_kabuli_chr05 | 26997647                | TT                              | CC                | 1946436805               |
| SNP_P3_68334_26997826 | NC_021164.1    | Ca_kabuli_chr05 | 26997826                | TT                              | CC                | 1946436807               |
| SNP_P3_68335_26997832 | NC_021164.1    | Ca_kabuli_chr05 | 26997832                | TT                              | CC                | 1946436808               |
| SNP_P3_68336_26997868 | NC_021164.1    | Ca_kabuli_chr05 | 26997868                | AA                              | CC                | 1946436810               |
| SNP_P3_68337_26997927 | NC_021164.1    | Ca_kabuli_chr05 | 26997927                | AA                              | CC                | 1946436811               |
| SNP_P3_68338_26997937 | NC_021164.1    | Ca_kabuli_chr05 | 26997937                | TT                              | CC                | 1946436813               |
| SNP_P3_68339_26997968 | NC_021164.1    | Ca_kabuli_chr05 | 26997968                | AA                              | GG                | 1946436814               |
| SNP_P3_68340_26997987 | NC_021164.1    | Ca_kabuli_chr05 | 26997987                | TT                              | CC                | 1946436816               |
| SNP_P3_68341_26997997 | NC_021164.1    | Ca_kabuli_chr05 | 26997997                | TT                              | GG                | 1946436817               |
| SNP_P3_68342_26998004 | NC_021164.1    | Ca_kabuli_chr05 | 26998004                | TT                              | CC                | 1946436819               |
| SNP_P3_68343_26998028 | NC_021164.1    | Ca_kabuli_chr05 | 26998028                | TT                              | CC                | 1946436820               |
| SNP_P3_68344_26998036 | NC_021164.1    | Ca_kabuli_chr05 | 26998036                | AA                              | CC                | 1946436822               |
| SNP_P3_68345_26998051 | NC_021164.1    | Ca_kabuli_chr05 | 26998051                | AA                              | GG                | 1946436823               |
| SNP_P3_68346_26998141 | NC_021164.1    | Ca_kabuli_chr05 | 26998141                | AA                              | GG                | 1946436825               |
| SNP_P3_68347_26998172 | NC_021164.1    | Ca_kabuli_chr05 | 26998172                | AA                              | CC                | 1946436826               |
| SNP_P3_68348_26998219 | NC_021164.1    | Ca_kabuli_chr05 | 26998219                | TT                              | CC                | 1946436828               |
| SNP_P3_68349_26998354 | NC_021164.1    | Ca_kabuli_chr05 | 26998354                | TT                              | CC                | 1946436830               |
| SNP_P3_68350_26998414 | NC_021164.1    | Ca_kabuli_chr05 | 26998414                | TT                              | CC                | 1946436831               |
| SNP_P3_68351_26998429 | NC_021164.1    | Ca_kabuli_chr05 | 26998429                | TT                              | CC                | 1946436833               |
| SNP_P3_68352_26998483 | NC_021164.1    | Ca_kabuli_chr05 | 26998483                | TT                              | CC                | 1946436834               |
| SNP_P3_68353_26998558 | NC_021164.1    | Ca_kabuli_chr05 | 26998558                | GG                              | CC                | 1946436835               |

| SNPs IDs              | Chromosome IDs | Chromosomes     | Physical positions (bp) | CDC Frontier (Reference genome) | (Pusa 256 & HPNB) | NCBI SNPdb Accession IDs |
|-----------------------|----------------|-----------------|-------------------------|---------------------------------|-------------------|--------------------------|
| SNP_P3_68354_26998599 | NC_021164.1    | Ca_kabuli_chr05 | 26998599                | TT                              | CC                | 1946436837               |
| SNP_P3_68355_26998614 | NC_021164.1    | Ca_kabuli_chr05 | 26998614                | CC                              | GG                | 1946436838               |
| SNP_P3_68356_26998624 | NC_021164.1    | Ca_kabuli_chr05 | 26998624                | TT                              | CC                | 1946436840               |
| SNP_P3_68357_26998653 | NC_021164.1    | Ca_kabuli_chr05 | 26998653                | AA                              | GG                | 1946436841               |
| SNP_P3_68358_26998683 | NC_021164.1    | Ca_kabuli_chr05 | 26998683                | TT                              | CC                | 1946436843               |
| SNP_P3_68359_26998848 | NC_021164.1    | Ca_kabuli_chr05 | 26998848                | AA                              | CC                | 1946436844               |
| SNP_P3_68360_26998866 | NC_021164.1    | Ca_kabuli_chr05 | 26998866                | AA                              | GG                | 1946436845               |
| SNP_P3_68361_26998891 | NC_021164.1    | Ca_kabuli_chr05 | 26998891                | AA                              | GG                | 1946436847               |
| SNP_P3_68362_26998900 | NC_021164.1    | Ca_kabuli_chr05 | 26998900                | AA                              | GG                | 1946436849               |
| SNP_P3_68363_26998937 | NC_021164.1    | Ca_kabuli_chr05 | 26998937                | GG                              | TT                | 1946436850               |
| SNP_P3_68364_26999584 | NC_021164.1    | Ca_kabuli_chr05 | 26999584                | TT                              | CC                | 1946436852               |
| SNP_P3_68365_26999645 | NC_021164.1    | Ca_kabuli_chr05 | 26999645                | GG                              | TT                | 1946436853               |
| SNP_P3_68366_26999681 | NC_021164.1    | Ca_kabuli_chr05 | 26999681                | AA                              | CC                | 1946436855               |
| SNP_P3_68367_26999797 | NC_021164.1    | Ca_kabuli_chr05 | 26999797                | AA                              | GG                | 1946436856               |
| SNP_P3_68368_26999813 | NC_021164.1    | Ca_kabuli_chr05 | 26999813                | TT                              | GG                | 1946436858               |
| SNP_P3_68369_26999851 | NC_021164.1    | Ca_kabuli_chr05 | 26999851                | CC                              | AA                | 1946436859               |
| SNP_P3_68370_26999898 | NC_021164.1    | Ca_kabuli_chr05 | 26999898                | AA                              | GG                | 1946436861               |
| SNP_P3_68371_26999903 | NC_021164.1    | Ca_kabuli_chr05 | 26999903                | TT                              | AA                | 1946436862               |
| SNP_P3_68372_26999950 | NC_021164.1    | Ca_kabuli_chr05 | 26999950                | AA                              | TT                | 1946436863               |
| SNP_P3_68374_27000104 | NC_021164.1    | Ca_kabuli_chr05 | 27000104                | AA                              | CC                | 1946436865               |
| SNP_P3_68375_27000258 | NC_021164.1    | Ca_kabuli_chr05 | 27000258                | AA                              | GG                | 1946436866               |
| SNP_P3_68376_27000261 | NC_021164.1    | Ca_kabuli_chr05 | 27000261                | AA                              | GG                | 1946436868               |
| SNP_P3_68377_27000280 | NC_021164.1    | Ca_kabuli_chr05 | 27000280                | TT                              | GG                | 1946436870               |
| SNP_P3_68378_27000295 | NC_021164.1    | Ca_kabuli_chr05 | 27000295                | AA                              | CC                | 1946436871               |
| SNP_P3_68379_27000343 | NC_021164.1    | Ca_kabuli_chr05 | 27000343                | TT                              | CC                | 1946436873               |
| SNP_P3_68380_27000385 | NC_021164.1    | Ca_kabuli_chr05 | 27000385                | TT                              | CC                | 1946436874               |
| SNP_P3_68382_27000509 | NC_021164.1    | Ca_kabuli_chr05 | 27000509                | GG                              | AA                | 1946436875               |
| SNP_P3_68384_27000545 | NC_021164.1    | Ca_kabuli_chr05 | 27000545                | GG                              | TT                | 1946436877               |
| SNP_P3_68385_27000550 | NC_021164.1    | Ca_kabuli_chr05 | 27000550                | CC                              | TT                | 1946436878               |
| SNP_P3_68386_27000627 | NC_021164.1    | Ca_kabuli_chr05 | 27000627                | AA                              | CC                | 1946436880               |
| SNP_P3_68387_27000630 | NC_021164.1    | Ca_kabuli_chr05 | 27000630                | AA                              | GG                | 1946436881               |
| SNP_P3_68388_27000723 | NC_021164.1    | Ca_kabuli_chr05 | 27000723                | CC                              | TT                | 1946436883               |
| SNP_P3_68390_27000810 | NC_021164.1    | Ca_kabuli_chr05 | 27000810                | CC                              | TT                | 1946436884               |
| SNP_P3_68392_27000878 | NC_021164.1    | Ca_kabuli_chr05 | 27000878                | TT                              | AA                | 1946436885               |
| SNP_P3_68393_27000886 | NC_021164.1    | Ca_kabuli_chr05 | 27000886                | AA                              | CC                | 1946436887               |
| SNP_P3_68394_27000994 | NC_021164.1    | Ca_kabuli_chr05 | 27000994                | AA                              | CC                | 1946436889               |
| SNP_P3_68395_27001020 | NC_021164.1    | Ca_kabuli_chr05 | 27001020                | AA                              | CC                | 1946436890               |
| SNP_P3_68396_27001081 | NC_021164.1    | Ca_kabuli_chr05 | 27001081                | AA                              | GG                | 1946436892               |
| SNP_P3_68397_27001101 | NC_021164.1    | Ca_kabuli_chr05 | 27001101                | AA                              | TT                | 1946436893               |
| SNP_P3_68398_27001116 | NC_021164.1    | Ca_kabuli_chr05 | 27001116                | AA                              | GG                | 1946436895               |
| SNP_P3_68399_27001118 | NC_021164.1    | Ca_kabuli_chr05 | 27001118                | TT                              | CC                | 1946436896               |
| SNP_P3_68400_27001273 | NC_021164.1    | Ca_kabuli_chr05 | 27001273                | CC                              | AA                | 1946436898               |



| SNPs IDs              | Chromosome IDs | Chromosomes     | Physical positions (bp) | CDC Frontier (Reference genome) | (Pusa 256 & HPNB) | NCBI SNPdb Accession IDs |
|-----------------------|----------------|-----------------|-------------------------|---------------------------------|-------------------|--------------------------|
| SNP_P3_68401_27017154 | NC_021164.1    | Ca_kabuli_chr05 | 27017154                | TT                              | CC                | 1946436899               |
| SNP_P3_68403_27074491 | NC_021164.1    | Ca_kabuli_chr05 | 27074491                | CC                              | AA                | 1946436900               |
| SNP_P3_68404_27083599 | NC_021164.1    | Ca_kabuli_chr05 | 27083599                | CC                              | AA                | 1946436902               |
| SNP_P3_68405_27087601 | NC_021164.1    | Ca_kabuli_chr05 | 27087601                | TT                              | GG                | 1946436903               |
| SNP_P3_68406_27089788 | NC_021164.1    | Ca_kabuli_chr05 | 27089788                | AA                              | GG                | 1946436905               |
| SNP_P3_68407_27089806 | NC_021164.1    | Ca_kabuli_chr05 | 27089806                | GG                              | AA                | 1946436906               |
| SNP_P3_68408_27089812 | NC_021164.1    | Ca_kabuli_chr05 | 27089812                | CC                              | AA                | 1946436907               |
| SNP_P3_68409_27089819 | NC_021164.1    | Ca_kabuli_chr05 | 27089819                | GG                              | AA                | 1946436909               |
| SNP_P3_68410_27090240 | NC_021164.1    | Ca_kabuli_chr05 | 27090240                | GG                              | AA                | 1946436911               |
| SNP_P3_68411_27092238 | NC_021164.1    | Ca_kabuli_chr05 | 27092238                | AA                              | GG                | 1946436912               |
| SNP_P3_68412_27099221 | NC_021164.1    | Ca_kabuli_chr05 | 27099221                | GG                              | AA                | 1946436914               |
| SNP_P3_68414_27099232 | NC_021164.1    | Ca_kabuli_chr05 | 27099232                | TT                              | AA                | 1946436915               |
| SNP_P3_68415_27099252 | NC_021164.1    | Ca_kabuli_chr05 | 27099252                | AA                              | TT                | 1946436916               |
| SNP_P3_68416_27107278 | NC_021164.1    | Ca_kabuli_chr05 | 27107278                | AA                              | GG                | 1946436918               |
| SNP_P3_68417_27107343 | NC_021164.1    | Ca_kabuli_chr05 | 27107343                | AA                              | TT                | 1946436919               |
| SNP_P3_68418_27107349 | NC_021164.1    | Ca_kabuli_chr05 | 27107349                | TT                              | CC                | 1946436920               |
| SNP_P3_68419_27107383 | NC_021164.1    | Ca_kabuli_chr05 | 27107383                | AA                              | TT                | 1946436922               |
| SNP_P3_68420_27107639 | NC_021164.1    | Ca_kabuli_chr05 | 27107639                | CC                              | TT                | 1946436923               |
| SNP_P3_68421_27107725 | NC_021164.1    | Ca_kabuli_chr05 | 27107725                | TT                              | AA                | 1946436925               |
| SNP_P3_68423_27162079 | NC_021164.1    | Ca_kabuli_chr05 | 27162079                | CC                              | TT                | 1946436926               |
| SNP_P3_68424_27164955 | NC_021164.1    | Ca_kabuli_chr05 | 27164955                | AA                              | GG                | 1946436928               |
| SNP_P3_68425_27164956 | NC_021164.1    | Ca_kabuli_chr05 | 27164956                | TT                              | GG                | 1946436930               |
| SNP_P3_68427_27237392 | NC_021164.1    | Ca_kabuli_chr05 | 27237392                | CC                              | TT                | 1946436931               |
| SNP_P3_68428_27241997 | NC_021164.1    | Ca_kabuli_chr05 | 27241997                | CC                              | AA                | 1946436933               |
| SNP_P3_68429_27245000 | NC_021164.1    | Ca_kabuli_chr05 | 27245000                | AA                              | GG                | 1946436934               |
| SNP_P3_68430_27245029 | NC_021164.1    | Ca_kabuli_chr05 | 27245029                | AA                              | TT                | 1946436935               |
| SNP_P3_68431_27245074 | NC_021164.1    | Ca_kabuli_chr05 | 27245074                | TT                              | CC                | 1946436937               |
| SNP_P3_68432_27245099 | NC_021164.1    | Ca_kabuli_chr05 | 27245099                | TT                              | CC                | 1946436938               |
| SNP_P3_68433_27245167 | NC_021164.1    | Ca_kabuli_chr05 | 27245167                | GG                              | AA                | 1946436940               |
| SNP_P3_68434_27245359 | NC_021164.1    | Ca_kabuli_chr05 | 27245359                | GG                              | AA                | 1946436941               |
| SNP_P3_68435_27245485 | NC_021164.1    | Ca_kabuli_chr05 | 27245485                | GG                              | AA                | 1946436942               |
| SNP_P3_68436_27245486 | NC_021164.1    | Ca_kabuli_chr05 | 27245486                | CC                              | TT                | 1946436944               |
| SNP_P3_68437_27245518 | NC_021164.1    | Ca_kabuli_chr05 | 27245518                | AA                              | GG                | 1946436945               |
| SNP_P3_68438_27245607 | NC_021164.1    | Ca_kabuli_chr05 | 27245607                | CC                              | TT                | 1946436947               |
| SNP_P3_68439_27245639 | NC_021164.1    | Ca_kabuli_chr05 | 27245639                | GG                              | AA                | 1946436948               |
| SNP_P3_68442_27269651 | NC_021164.1    | Ca_kabuli_chr05 | 27269651                | CC                              | TT                | 1946436950               |
| SNP_P3_68443_27327344 | NC_021164.1    | Ca_kabuli_chr05 | 27327344                | CC                              | TT                | 1946436951               |
| SNP_P3_68444_27327353 | NC_021164.1    | Ca_kabuli_chr05 | 27327353                | CC                              | TT                | 1946436953               |
| SNP_P3_68445_27382678 | NC_021164.1    | Ca_kabuli_chr05 | 27382678                | CC                              | TT                | 1946436954               |
| SNP_P3_68446_27388096 | NC_021164.1    | Ca_kabuli_chr05 | 27388096                | AA                              | GG                | 1946436955               |
| SNP_P3_68447_27392954 | NC_021164.1    | Ca_kabuli_chr05 | 27392954                | TT                              | CC                | 1946436956               |
| SNP_P3_68448_27393154 | NC_021164.1    | Ca_kabuli_chr05 | 27393154                | CC                              | GG                | 1946436957               |

| SNPs IDs              | Chromosome IDs | Chromosomes     | Physical positions (bp) | CDC Frontier (Reference genome) | (Pusa 256 & HPNB) | NCBI SNPdb Accession IDs |
|-----------------------|----------------|-----------------|-------------------------|---------------------------------|-------------------|--------------------------|
| SNP_P3_68449_27419934 | NC_021164.1    | Ca_kabuli_chr05 | 27419934                | GG                              | AA                | 1946436958               |
| SNP_P3_68450_27427408 | NC_021164.1    | Ca_kabuli_chr05 | 27427408                | AA                              | TT                | 1946436959               |
| SNP_P3_68451_27427409 | NC_021164.1    | Ca_kabuli_chr05 | 27427409                | CC                              | TT                | 1946436960               |
| SNP_P3_68452_27427437 | NC_021164.1    | Ca_kabuli_chr05 | 27427437                | AA                              | TT                | 1946436961               |
| SNP_P3_68453_27427453 | NC_021164.1    | Ca_kabuli_chr05 | 27427453                | AA                              | GG                | 1946436962               |
| SNP_P3_68454_27427458 | NC_021164.1    | Ca_kabuli_chr05 | 27427458                | TT                              | AA                | 1946436963               |
| SNP_P3_68455_27427459 | NC_021164.1    | Ca_kabuli_chr05 | 27427459                | GG                              | TT                | 1946436964               |
| SNP_P3_68456_27427463 | NC_021164.1    | Ca_kabuli_chr05 | 27427463                | TT                              | GG                | 1946436966               |
| SNP_P3_68457_27427468 | NC_021164.1    | Ca_kabuli_chr05 | 27427468                | AA                              | TT                | 1946436967               |
| SNP_P3_68458_27427473 | NC_021164.1    | Ca_kabuli_chr05 | 27427473                | TT                              | CC                | 1946436969               |
| SNP_P3_68459_27427508 | NC_021164.1    | Ca_kabuli_chr05 | 27427508                | AA                              | GG                | 1946436971               |
| SNP_P3_68460_27427515 | NC_021164.1    | Ca_kabuli_chr05 | 27427515                | CC                              | AA                | 1946436972               |
| SNP_P3_68461_27427530 | NC_021164.1    | Ca_kabuli_chr05 | 27427530                | AA                              | CC                | 1946436973               |
| SNP_P3_68462_27427556 | NC_021164.1    | Ca_kabuli_chr05 | 27427556                | AA                              | CC                | 1946436974               |
| SNP_P3_68463_27427557 | NC_021164.1    | Ca_kabuli_chr05 | 27427557                | CC                              | AA                | 1946436976               |
| SNP_P3_68464_27427565 | NC_021164.1    | Ca_kabuli_chr05 | 27427565                | TT                              | AA                | 1946436977               |
| SNP_P3_68465_27427608 | NC_021164.1    | Ca_kabuli_chr05 | 27427608                | AA                              | GG                | 1946436978               |
| SNP_P3_68466_27427685 | NC_021164.1    | Ca_kabuli_chr05 | 27427685                | CC                              | TT                | 1946436980               |
| SNP_P3_68467_27427694 | NC_021164.1    | Ca_kabuli_chr05 | 27427694                | GG                              | AA                | 1946436981               |
| SNP_P3_68468_27427695 | NC_021164.1    | Ca_kabuli_chr05 | 27427695                | TT                              | CC                | 1946436983               |
| SNP_P3_68469_27427699 | NC_021164.1    | Ca_kabuli_chr05 | 27427699                | AA                              | TT                | 1946436984               |
| SNP_P3_68470_27427710 | NC_021164.1    | Ca_kabuli_chr05 | 27427710                | CC                              | AA                | 1946436986               |
| SNP_P3_68471_27427990 | NC_021164.1    | Ca_kabuli_chr05 | 27427990                | AA                              | TT                | 1946436987               |
| SNP_P3_68472_27428012 | NC_021164.1    | Ca_kabuli_chr05 | 27428012                | GG                              | AA                | 1946436989               |
| SNP_P3_68473_27428227 | NC_021164.1    | Ca_kabuli_chr05 | 27428227                | GG                              | AA                | 1946436990               |
| SNP_P3_68474_27428266 | NC_021164.1    | Ca_kabuli_chr05 | 27428266                | CC                              | TT                | 1946436992               |
| SNP_P3_68475_27428330 | NC_021164.1    | Ca_kabuli_chr05 | 27428330                | CC                              | TT                | 1946436993               |
| SNP_P3_68476_27428642 | NC_021164.1    | Ca_kabuli_chr05 | 27428642                | TT                              | CC                | 1946436995               |
| SNP_P3_68477_27428905 | NC_021164.1    | Ca_kabuli_chr05 | 27428905                | GG                              | TT                | 1946436996               |
| SNP_P3_68478_27428988 | NC_021164.1    | Ca_kabuli_chr05 | 27428988                | TT                              | CC                | 1946436998               |
| SNP_P3_68479_27446106 | NC_021164.1    | Ca_kabuli_chr05 | 27446106                | AA                              | GG                | 1946436999               |
| SNP_P3_68480_27469165 | NC_021164.1    | Ca_kabuli_chr05 | 27469165                | AA                              | GG                | 1946437001               |
| SNP_P3_68481_27471020 | NC_021164.1    | Ca_kabuli_chr05 | 27471020                | CC                              | AA                | 1946437002               |
| SNP_P3_68483_27477519 | NC_021164.1    | Ca_kabuli_chr05 | 27477519                | AA                              | TT                | 1946437004               |
| SNP_P3_68484_27526697 | NC_021164.1    | Ca_kabuli_chr05 | 27526697                | AA                              | GG                | 1946437005               |
| SNP_P3_68485_27526761 | NC_021164.1    | Ca_kabuli_chr05 | 27526761                | GG                              | AA                | 1946437007               |
| SNP_P3_68486_27527127 | NC_021164.1    | Ca_kabuli_chr05 | 27527127                | AA                              | GG                | 1946437008               |
| SNP_P3_68487_27531168 | NC_021164.1    | Ca_kabuli_chr05 | 27531168                | TT                              | CC                | 1946437010               |
| SNP_P3_68489_27563077 | NC_021164.1    | Ca_kabuli_chr05 | 27563077                | TT                              | AA                | 1946437011               |
| SNP_P3_68491_27567171 | NC_021164.1    | Ca_kabuli_chr05 | 27567171                | AA                              | GG                | 1946437013               |
| SNP_P3_68492_27567197 | NC_021164.1    | Ca_kabuli_chr05 | 27567197                | AA                              | CC                | 1946437014               |
| SNP_P3_68493_27567200 | NC_021164.1    | Ca_kabuli_chr05 | 27567200                | CC                              | AA                | 1946437015               |

| SNPs IDs              | Chromosome IDs | Chromosomes     | Physical positions (bp) | CDC Frontier (Reference genome) | (Pusa 256 & HPNB) | NCBI SNPdb Accession IDs |
|-----------------------|----------------|-----------------|-------------------------|---------------------------------|-------------------|--------------------------|
| SNP_P3_68494_27567237 | NC_021164.1    | Ca_kabuli_chr05 | 27567237                | TT                              | GG                | 1946437017               |
| SNP_P3_68495_27567254 | NC_021164.1    | Ca_kabuli_chr05 | 27567254                | AA                              | CC                | 1946437019               |
| SNP_P3_68496_27567545 | NC_021164.1    | Ca_kabuli_chr05 | 27567545                | GG                              | AA                | 1946437020               |
| SNP_P3_68497_27567659 | NC_021164.1    | Ca_kabuli_chr05 | 27567659                | TT                              | GG                | 1946437022               |
| SNP_P3_68498_27567675 | NC_021164.1    | Ca_kabuli_chr05 | 27567675                | TT                              | CC                | 1946437023               |
| SNP_P3_68499_27567681 | NC_021164.1    | Ca_kabuli_chr05 | 27567681                | TT                              | CC                | 1946437025               |
| SNP_P3_68500_27567710 | NC_021164.1    | Ca_kabuli_chr05 | 27567710                | AA                              | GG                | 1946437026               |
| SNP_P3_68501_27567730 | NC_021164.1    | Ca_kabuli_chr05 | 27567730                | GG                              | AA                | 1946437028               |
| SNP_P3_68502_27567731 | NC_021164.1    | Ca_kabuli_chr05 | 27567731                | TT                              | CC                | 1946437029               |
| SNP_P3_68503_27568101 | NC_021164.1    | Ca_kabuli_chr05 | 27568101                | TT                              | CC                | 1946437030               |
| SNP_P3_68504_27575045 | NC_021164.1    | Ca_kabuli_chr05 | 27575045                | AA                              | GG                | 1946437032               |
| SNP_P3_68505_27575047 | NC_021164.1    | Ca_kabuli_chr05 | 27575047                | AA                              | CC                | 1946437033               |
| SNP_P3_68506_27601841 | NC_021164.1    | Ca_kabuli_chr05 | 27601841                | CC                              | TT                | 1946437035               |
| SNP_P3_68508_27610388 | NC_021164.1    | Ca_kabuli_chr05 | 27610388                | GG                              | AA                | 1946437036               |
| SNP_P3_68509_27622805 | NC_021164.1    | Ca_kabuli_chr05 | 27622805                | CC                              | AA                | 1946437038               |
| SNP_P3_68510_27648905 | NC_021164.1    | Ca_kabuli_chr05 | 27648905                | TT                              | AA                | 1946437039               |
| SNP_P3_68511_27654801 | NC_021164.1    | Ca_kabuli_chr05 | 27654801                | AA                              | TT                | 1946437041               |
| SNP_P3_68512_27654802 | NC_021164.1    | Ca_kabuli_chr05 | 27654802                | AA                              | TT                | 1946437042               |
| SNP_P3_68513_27671817 | NC_021164.1    | Ca_kabuli_chr05 | 27671817                | TT                              | AA                | 1946437043               |
| SNP_P3_68514_27674600 | NC_021164.1    | Ca_kabuli_chr05 | 27674600                | CC                              | AA                | 1946437045               |
| SNP_P3_68515_27674668 | NC_021164.1    | Ca_kabuli_chr05 | 27674668                | TT                              | CC                | 1946437047               |
| SNP_P3_68516_27694847 | NC_021164.1    | Ca_kabuli_chr05 | 27694847                | CC                              | TT                | 1946437048               |
| SNP_P3_68517_27698890 | NC_021164.1    | Ca_kabuli_chr05 | 27698890                | CC                              | AA                | 1946437049               |
| SNP_P3_68520_27723811 | NC_021164.1    | Ca_kabuli_chr05 | 27723811                | GG                              | AA                | 1946437051               |
| SNP_P3_68522_27761086 | NC_021164.1    | Ca_kabuli_chr05 | 27761086                | CC                              | AA                | 1946437052               |
| SNP_P3_68523_27769792 | NC_021164.1    | Ca_kabuli_chr05 | 27769792                | TT                              | AA                | 1946437054               |
| SNP_P3_68524_27769799 | NC_021164.1    | Ca_kabuli_chr05 | 27769799                | GG                              | TT                | 1946437055               |
| SNP_P3_68526_27783819 | NC_021164.1    | Ca_kabuli_chr05 | 27783819                | AA                              | CC                | 1946437056               |
| SNP_P3_68527_27791633 | NC_021164.1    | Ca_kabuli_chr05 | 27791633                | GG                              | AA                | 1946437058               |
| SNP_P3_68528_27800772 | NC_021164.1    | Ca_kabuli_chr05 | 27800772                | TT                              | CC                | 1946437059               |
| SNP_P3_68529_27811625 | NC_021164.1    | Ca_kabuli_chr05 | 27811625                | CC                              | TT                | 1946437061               |
| SNP_P3_68530_27811943 | NC_021164.1    | Ca_kabuli_chr05 | 27811943                | AA                              | GG                | 1946437062               |
| SNP_P3_68531_27835135 | NC_021164.1    | Ca_kabuli_chr05 | 27835135                | GG                              | AA                | 1946437064               |
| SNP_P3_68532_27835141 | NC_021164.1    | Ca_kabuli_chr05 | 27835141                | CC                              | TT                | 1946437065               |
| SNP_P3_68533_27835228 | NC_021164.1    | Ca_kabuli_chr05 | 27835228                | AA                              | GG                | 1946437067               |
| SNP_P3_68534_27835250 | NC_021164.1    | Ca_kabuli_chr05 | 27835250                | CC                              | AA                | 1946437068               |
| SNP_P3_68535_27835545 | NC_021164.1    | Ca_kabuli_chr05 | 27835545                | CC                              | TT                | 1946437070               |
| SNP_P3_68536_27835663 | NC_021164.1    | Ca_kabuli_chr05 | 27835663                | TT                              | CC                | 1946437071               |
| SNP_P3_68537_27835701 | NC_021164.1    | Ca_kabuli_chr05 | 27835701                | CC                              | TT                | 1946437072               |
| SNP_P3_68538_27835712 | NC_021164.1    | Ca_kabuli_chr05 | 27835712                | GG                              | AA                | 1946437074               |
| SNP_P3_68539_27837092 | NC_021164.1    | Ca_kabuli_chr05 | 27837092                | GG                              | AA                | 1946437075               |
| SNP_P3_68540_27837244 | NC_021164.1    | Ca_kabuli_chr05 | 27837244                | GG                              | AA                | 1946437077               |

| SNPs IDs              | Chromosome IDs | Chromosomes     | Physical positions (bp) | CDC Frontier (Reference genome) | (Pusa 256 & HPNB) | NCBI SNPdb Accession IDs |
|-----------------------|----------------|-----------------|-------------------------|---------------------------------|-------------------|--------------------------|
| SNP_P3_68541_27837460 | NC_021164.1    | Ca_kabuli_chr05 | 27837460                | TT                              | GG                | 1946437078               |
| SNP_P3_68542_27839294 | NC_021164.1    | Ca_kabuli_chr05 | 27839294                | TT                              | CC                | 1946437080               |
| SNP_P3_68543_27839604 | NC_021164.1    | Ca_kabuli_chr05 | 27839604                | TT                              | CC                | 1946437081               |
| SNP_P3_68546_27878210 | NC_021164.1    | Ca_kabuli_chr05 | 27878210                | AA                              | GG                | 1946437082               |
| SNP_P3_68547_27903928 | NC_021164.1    | Ca_kabuli_chr05 | 27903928                | GG                              | AA                | 1946437083               |
| SNP_P3_68548_27912736 | NC_021164.1    | Ca_kabuli_chr05 | 27912736                | GG                              | AA                | 1946437085               |
| SNP_P3_68549_27923611 | NC_021164.1    | Ca_kabuli_chr05 | 27923611                | AA                              | TT                | 1946437086               |
| SNP_P3_68550_27930374 | NC_021164.1    | Ca_kabuli_chr05 | 27930374                | AA                              | GG                | 1946437089               |
| SNP_P3_68551_27950052 | NC_021164.1    | Ca_kabuli_chr05 | 27950052                | AA                              | TT                | 1946437090               |
| SNP_P3_68552_27950372 | NC_021164.1    | Ca_kabuli_chr05 | 27950372                | GG                              | TT                | 1946437092               |
| SNP_P3_68553_27953200 | NC_021164.1    | Ca_kabuli_chr05 | 27953200                | GG                              | AA                | 1946437093               |
| SNP_P3_68554_27953206 | NC_021164.1    | Ca_kabuli_chr05 | 27953206                | TT                              | AA                | 1946437095               |
| SNP_P3_68555_27953212 | NC_021164.1    | Ca_kabuli_chr05 | 27953212                | TT                              | AA                | 1946437096               |
| SNP_P3_68556_27953245 | NC_021164.1    | Ca_kabuli_chr05 | 27953245                | GG                              | AA                | 1946437097               |
| SNP_P3_68557_27953260 | NC_021164.1    | Ca_kabuli_chr05 | 27953260                | GG                              | AA                | 1946437099               |
| SNP_P3_68559_27953428 | NC_021164.1    | Ca_kabuli_chr05 | 27953428                | TT                              | CC                | 1946437100               |
| SNP_P3_68560_27953431 | NC_021164.1    | Ca_kabuli_chr05 | 27953431                | TT                              | AA                | 1946437102               |
| SNP_P3_68561_27953475 | NC_021164.1    | Ca_kabuli_chr05 | 27953475                | GG                              | CC                | 1946437104               |
| SNP_P3_68562_27953501 | NC_021164.1    | Ca_kabuli_chr05 | 27953501                | TT                              | CC                | 1946437105               |
| SNP_P3_68563_27953505 | NC_021164.1    | Ca_kabuli_chr05 | 27953505                | CC                              | GG                | 1946437107               |
| SNP_P3_68564_27953650 | NC_021164.1    | Ca_kabuli_chr05 | 27953650                | TT                              | CC                | 1946437108               |
| SNP_P3_68565_27953654 | NC_021164.1    | Ca_kabuli_chr05 | 27953654                | AA                              | GG                | 1946437109               |
| SNP_P3_68567_27954262 | NC_021164.1    | Ca_kabuli_chr05 | 27954262                | AA                              | TT                | 1946437111               |
| SNP_P3_68568_27954333 | NC_021164.1    | Ca_kabuli_chr05 | 27954333                | GG                              | CC                | 1946437112               |
| SNP_P3_68569_27954692 | NC_021164.1    | Ca_kabuli_chr05 | 27954692                | GG                              | AA                | 1946437114               |
| SNP_P3_68570_27954712 | NC_021164.1    | Ca_kabuli_chr05 | 27954712                | GG                              | AA                | 1946437115               |
| SNP_P3_68571_27954714 | NC_021164.1    | Ca_kabuli_chr05 | 27954714                | AA                              | TT                | 1946437117               |
| SNP_P3_68572_27954722 | NC_021164.1    | Ca_kabuli_chr05 | 27954722                | TT                              | AA                | 1946437118               |
| SNP_P3_68573_27954723 | NC_021164.1    | Ca_kabuli_chr05 | 27954723                | TT                              | AA                | 1946437119               |
| SNP_P3_68574_27954801 | NC_021164.1    | Ca_kabuli_chr05 | 27954801                | AA                              | GG                | 1946437121               |
| SNP_P3_68575_27954850 | NC_021164.1    | Ca_kabuli_chr05 | 27954850                | TT                              | GG                | 1946437122               |
| SNP_P3_68577_28021031 | NC_021164.1    | Ca_kabuli_chr05 | 28021031                | TT                              | AA                | 1946437124               |
| SNP_P3_68578_28025975 | NC_021164.1    | Ca_kabuli_chr05 | 28025975                | CC                              | TT                | 1946437126               |
| SNP_P3_68579_28055549 | NC_021164.1    | Ca_kabuli_chr05 | 28055549                | AA                              | GG                | 1946437127               |
| SNP_P3_68580_28056188 | NC_021164.1    | Ca_kabuli_chr05 | 28056188                | GG                              | AA                | 1946437129               |
| SNP_P3_68581_28064131 | NC_021164.1    | Ca_kabuli_chr05 | 28064131                | GG                              | AA                | 1946437130               |
| SNP_P3_68582_28091214 | NC_021164.1    | Ca_kabuli_chr05 | 28091214                | CC                              | TT                | 1946437132               |
| SNP_P3_68583_28104717 | NC_021164.1    | Ca_kabuli_chr05 | 28104717                | AA                              | GG                | 1946437133               |
| SNP_P3_68584_28125407 | NC_021164.1    | Ca_kabuli_chr05 | 28125407                | TT                              | GG                | 1946437134               |
| SNP_P3_68586_28134972 | NC_021164.1    | Ca_kabuli_chr05 | 28134972                | AA                              | GG                | 1946437136               |
| SNP_P3_68587_28136757 | NC_021164.1    | Ca_kabuli_chr05 | 28136757                | CC                              | TT                | 1946437137               |
| SNP_P3_68588_28143069 | NC_021164.1    | Ca_kabuli_chr05 | 28143069                | CC                              | GG                | 1946437139               |

| SNPs IDs              | Chromosome IDs | Chromosomes     | Physical positions (bp) | CDC Frontier (Reference genome) | (Pusa 256 & HPNB) | NCBI SNPdb Accession IDs |
|-----------------------|----------------|-----------------|-------------------------|---------------------------------|-------------------|--------------------------|
| SNP_P3_68589_28155678 | NC_021164.1    | Ca_kabuli_chr05 | 28155678                | TT                              | CC                | 1946437140               |
| SNP_P3_68590_28188236 | NC_021164.1    | Ca_kabuli_chr05 | 28188236                | TT                              | AA                | 1946437142               |
| SNP_P3_68593_28216712 | NC_021164.1    | Ca_kabuli_chr05 | 28216712                | TT                              | AA                | 1946437143               |
| SNP_P3_68594_28230458 | NC_021164.1    | Ca_kabuli_chr05 | 28230458                | TT                              | CC                | 1946437145               |
| SNP_P3_68595_28236230 | NC_021164.1    | Ca_kabuli_chr05 | 28236230                | CC                              | TT                | 1946437146               |
| SNP_P3_68597_28305498 | NC_021164.1    | Ca_kabuli_chr05 | 28305498                | AA                              | GG                | 1946437148               |
| SNP_P3_68598_28305499 | NC_021164.1    | Ca_kabuli_chr05 | 28305499                | TT                              | GG                | 1946437149               |
| SNP_P3_68599_28327868 | NC_021164.1    | Ca_kabuli_chr05 | 28327868                | GG                              | AA                | 1946437151               |
| SNP_P3_68602_28375006 | NC_021164.1    | Ca_kabuli_chr05 | 28375006                | GG                              | AA                | 1946437152               |
| SNP_P3_68603_28395218 | NC_021164.1    | Ca_kabuli_chr05 | 28395218                | TT                              | GG                | 1946437154               |
| SNP_P3_68605_28409782 | NC_021164.1    | Ca_kabuli_chr05 | 28409782                | TT                              | CC                | 1946437155               |
| SNP_P3_68607_28413468 | NC_021164.1    | Ca_kabuli_chr05 | 28413468                | TT                              | GG                | 1946437157               |
| SNP_P3_68608_28444799 | NC_021164.1    | Ca_kabuli_chr05 | 28444799                | GG                              | AA                | 1946437158               |
| SNP_P3_68611_28469452 | NC_021164.1    | Ca_kabuli_chr05 | 28469452                | CC                              | TT                | 1946437160               |
| SNP_P3_68612_28470266 | NC_021164.1    | Ca_kabuli_chr05 | 28470266                | TT                              | GG                | 1946437162               |
| SNP_P3_68613_28478220 | NC_021164.1    | Ca_kabuli_chr05 | 28478220                | AA                              | GG                | 1946437163               |
| SNP_P3_68614_28479949 | NC_021164.1    | Ca_kabuli_chr05 | 28479949                | AA                              | TT                | 1946437164               |
| SNP_P3_68615_28480018 | NC_021164.1    | Ca_kabuli_chr05 | 28480018                | TT                              | AA                | 1946437166               |
| SNP_P3_68616_28480051 | NC_021164.1    | Ca_kabuli_chr05 | 28480051                | AA                              | CC                | 1946437167               |
| SNP_P3_68617_28480125 | NC_021164.1    | Ca_kabuli_chr05 | 28480125                | CC                              | TT                | 1946437169               |
| SNP_P3_68618_28480126 | NC_021164.1    | Ca_kabuli_chr05 | 28480126                | TT                              | GG                | 1946437170               |
| SNP_P3_68619_28480325 | NC_021164.1    | Ca_kabuli_chr05 | 28480325                | GG                              | AA                | 1946437171               |
| SNP_P3_68620_28480372 | NC_021164.1    | Ca_kabuli_chr05 | 28480372                | AA                              | CC                | 1946437173               |
| SNP_P3_68621_28480396 | NC_021164.1    | Ca_kabuli_chr05 | 28480396                | AA                              | GG                | 1946437174               |
| SNP_P3_68622_28480454 | NC_021164.1    | Ca_kabuli_chr05 | 28480454                | TT                              | GG                | 1946437176               |
| SNP_P3_68623_28480455 | NC_021164.1    | Ca_kabuli_chr05 | 28480455                | AA                              | GG                | 1946437177               |
| SNP_P3_68624_28480505 | NC_021164.1    | Ca_kabuli_chr05 | 28480505                | TT                              | CC                | 1946437179               |
| SNP_P3_68625_28480511 | NC_021164.1    | Ca_kabuli_chr05 | 28480511                | TT                              | GG                | 1946437180               |
| SNP_P3_68626_28480574 | NC_021164.1    | Ca_kabuli_chr05 | 28480574                | TT                              | CC                | 1946437182               |
| SNP_P3_68627_28480938 | NC_021164.1    | Ca_kabuli_chr05 | 28480938                | GG                              | TT                | 1946437184               |
| SNP_P3_68628_28501202 | NC_021164.1    | Ca_kabuli_chr05 | 28501202                | TT                              | GG                | 1946437185               |
| SNP_P3_68629_28515721 | NC_021164.1    | Ca_kabuli_chr05 | 28515721                | AA                              | TT                | 1946437186               |
| SNP_P3_68630_28515723 | NC_021164.1    | Ca_kabuli_chr05 | 28515723                | TT                              | AA                | 1946437188               |
| SNP_P3_68632_28525088 | NC_021164.1    | Ca_kabuli_chr05 | 28525088                | TT                              | CC                | 1946437189               |
| SNP_P3_68633_28525109 | NC_021164.1    | Ca_kabuli_chr05 | 28525109                | AA                              | GG                | 1946437191               |
| SNP_P3_68634_28525127 | NC_021164.1    | Ca_kabuli_chr05 | 28525127                | AA                              | TT                | 1946437192               |
| SNP_P3_68635_28525151 | NC_021164.1    | Ca_kabuli_chr05 | 28525151                | AA                              | TT                | 1946437194               |
| SNP_P3_68636_28525158 | NC_021164.1    | Ca_kabuli_chr05 | 28525158                | GG                              | AA                | 1946437195               |
| SNP_P3_68637_28525162 | NC_021164.1    | Ca_kabuli_chr05 | 28525162                | AA                              | GG                | 1946437197               |
| SNP_P3_68638_28525200 | NC_021164.1    | Ca_kabuli_chr05 | 28525200                | AA                              | GG                | 1946437198               |
| SNP_P3_68639_28525282 | NC_021164.1    | Ca_kabuli_chr05 | 28525282                | AA                              | GG                | 1946437200               |
| SNP_P3_68640_28525383 | NC_021164.1    | Ca_kabuli_chr05 | 28525383                | AA                              | GG                | 1946437201               |

| SNPs IDs              | Chromosome IDs | Chromosomes     | Physical positions (bp) | CDC Frontier (Reference genome) | (Pusa 256 & HPNB) | NCBI SNPdb Accession IDs |
|-----------------------|----------------|-----------------|-------------------------|---------------------------------|-------------------|--------------------------|
| SNP_P3_68641_28525405 | NC_021164.1    | Ca_kabuli_chr05 | 28525405                | GG                              | AA                | 1946437203               |
| SNP_P3_68642_28525415 | NC_021164.1    | Ca_kabuli_chr05 | 28525415                | GG                              | AA                | 1946437204               |
| SNP_P3_68643_28525444 | NC_021164.1    | Ca_kabuli_chr05 | 28525444                | AA                              | GG                | 1946437206               |
| SNP_P3_68644_28525478 | NC_021164.1    | Ca_kabuli_chr05 | 28525478                | GG                              | AA                | 1946437207               |
| SNP_P3_68645_28525486 | NC_021164.1    | Ca_kabuli_chr05 | 28525486                | AA                              | TT                | 1946437209               |
| SNP_P3_68646_28525514 | NC_021164.1    | Ca_kabuli_chr05 | 28525514                | GG                              | CC                | 1946437210               |
| SNP_P3_68647_28525527 | NC_021164.1    | Ca_kabuli_chr05 | 28525527                | CC                              | TT                | 1946437212               |
| SNP_P3_68648_28525567 | NC_021164.1    | Ca_kabuli_chr05 | 28525567                | GG                              | AA                | 1946437213               |
| SNP_P3_68649_28525586 | NC_021164.1    | Ca_kabuli_chr05 | 28525586                | CC                              | TT                | 1946437215               |
| SNP_P3_68650_28525591 | NC_021164.1    | Ca_kabuli_chr05 | 28525591                | AA                              | GG                | 1946437216               |
| SNP_P3_68651_28525622 | NC_021164.1    | Ca_kabuli_chr05 | 28525622                | TT                              | CC                | 1946437218               |
| SNP_P3_68652_28525630 | NC_021164.1    | Ca_kabuli_chr05 | 28525630                | AA                              | TT                | 1946437219               |
| SNP_P3_68653_28525635 | NC_021164.1    | Ca_kabuli_chr05 | 28525635                | AA                              | GG                | 1946437221               |
| SNP_P3_68654_28525653 | NC_021164.1    | Ca_kabuli_chr05 | 28525653                | AA                              | GG                | 1946437222               |
| SNP_P3_68655_28525662 | NC_021164.1    | Ca_kabuli_chr05 | 28525662                | TT                              | CC                | 1946437224               |
| SNP_P3_68656_28525687 | NC_021164.1    | Ca_kabuli_chr05 | 28525687                | TT                              | CC                | 1946437225               |
| SNP_P3_68657_28525702 | NC_021164.1    | Ca_kabuli_chr05 | 28525702                | AA                              | GG                | 1946437227               |
| SNP_P3_68658_28531064 | NC_021164.1    | Ca_kabuli_chr05 | 28531064                | TT                              | AA                | 1946437228               |
| SNP_P3_68659_28549683 | NC_021164.1    | Ca_kabuli_chr05 | 28549683                | AA                              | GG                | 1946437230               |
| SNP_P3_68660_28551531 | NC_021164.1    | Ca_kabuli_chr05 | 28551531                | TT                              | CC                | 1946437231               |
| SNP_P3_68661_28569802 | NC_021164.1    | Ca_kabuli_chr05 | 28569802                | GG                              | AA                | 1946437233               |
| SNP_P3_68662_28569873 | NC_021164.1    | Ca_kabuli_chr05 | 28569873                | TT                              | CC                | 1946437234               |
| SNP_P3_68663_28569902 | NC_021164.1    | Ca_kabuli_chr05 | 28569902                | TT                              | CC                | 1946437236               |
| SNP_P3_68665_28603586 | NC_021164.1    | Ca_kabuli_chr05 | 28603586                | GG                              | CC                | 1946437237               |
| SNP_P3_68666_28651663 | NC_021164.1    | Ca_kabuli_chr05 | 28651663                | GG                              | AA                | 1946437239               |
| SNP_P3_68667_28651771 | NC_021164.1    | Ca_kabuli_chr05 | 28651771                | AA                              | GG                | 1946437240               |
| SNP_P3_68668_28651907 | NC_021164.1    | Ca_kabuli_chr05 | 28651907                | GG                              | TT                | 1946437242               |
| SNP_P3_68669_28651916 | NC_021164.1    | Ca_kabuli_chr05 | 28651916                | AA                              | TT                | 1946437244               |
| SNP_P3_68670_28651921 | NC_021164.1    | Ca_kabuli_chr05 | 28651921                | AA                              | CC                | 1946437245               |
| SNP_P3_68672_28709080 | NC_021164.1    | Ca_kabuli_chr05 | 28709080                | TT                              | GG                | 1946437247               |
| SNP_P3_68673_28723419 | NC_021164.1    | Ca_kabuli_chr05 | 28723419                | AA                              | GG                | 1946437248               |
| SNP_P3_68674_28727054 | NC_021164.1    | Ca_kabuli_chr05 | 28727054                | CC                              | TT                | 1946437250               |
| SNP_P3_68676_28766391 | NC_021164.1    | Ca_kabuli_chr05 | 28766391                | GG                              | AA                | 1946437251               |
| SNP_P3_68677_28767359 | NC_021164.1    | Ca_kabuli_chr05 | 28767359                | AA                              | GG                | 1946437252               |
| SNP_P3_68678_28767374 | NC_021164.1    | Ca_kabuli_chr05 | 28767374                | TT                              | CC                | 1946437254               |
| SNP_P3_68679_28794025 | NC_021164.1    | Ca_kabuli_chr05 | 28794025                | CC                              | TT                | 1946437255               |
| SNP_P3_68680_28810585 | NC_021164.1    | Ca_kabuli_chr05 | 28810585                | GG                              | TT                | 1946437257               |
| SNP_P3_68681_28850471 | NC_021164.1    | Ca_kabuli_chr05 | 28850471                | GG                              | AA                | 1946437258               |
| SNP_P3_68683_28894699 | NC_021164.1    | Ca_kabuli_chr05 | 28894699                | CC                              | TT                | 1946437260               |
| SNP_P3_68684_28905499 | NC_021164.1    | Ca_kabuli_chr05 | 28905499                | TT                              | AA                | 1946437262               |
| SNP_P3_68685_28905500 | NC_021164.1    | Ca_kabuli_chr05 | 28905500                | TT                              | CC                | 1946437263               |
| SNP_P3_68689_28977894 | NC_021164.1    | Ca_kabuli_chr05 | 28977894                | TT                              | CC                | 1946437265               |

| SNPs IDs              | Chromosome IDs | Chromosomes     | Physical positions (bp) | CDC Frontier (Reference genome) | (Pusa 256 & HPNB) | NCBI SNPdb Accession IDs |
|-----------------------|----------------|-----------------|-------------------------|---------------------------------|-------------------|--------------------------|
| SNP_P3_68690_28978002 | NC_021164.1    | Ca_kabuli_chr05 | 28978002                | AA                              | GG                | 1946437266               |
| SNP_P3_68691_28978013 | NC_021164.1    | Ca_kabuli_chr05 | 28978013                | TT                              | GG                | 1946437268               |
| SNP_P3_68692_28978096 | NC_021164.1    | Ca_kabuli_chr05 | 28978096                | TT                              | CC                | 1946437269               |
| SNP_P3_68693_28978106 | NC_021164.1    | Ca_kabuli_chr05 | 28978106                | AA                              | CC                | 1946437271               |
| SNP_P3_68694_28978168 | NC_021164.1    | Ca_kabuli_chr05 | 28978168                | GG                              | AA                | 1946437272               |
| SNP_P3_68695_29125965 | NC_021164.1    | Ca_kabuli_chr05 | 29125965                | GG                              | AA                | 1946437274               |
| SNP_P3_68696_29159438 | NC_021164.1    | Ca_kabuli_chr05 | 29159438                | CC                              | TT                | 1946437275               |
| SNP_P3_68697_29236058 | NC_021164.1    | Ca_kabuli_chr05 | 29236058                | TT                              | AA                | 1946437277               |
| SNP_P3_68698_29238237 | NC_021164.1    | Ca_kabuli_chr05 | 29238237                | CC                              | TT                | 1946437278               |
| SNP_P3_68701_29309198 | NC_021164.1    | Ca_kabuli_chr05 | 29309198                | CC                              | AA                | 1946437280               |
| SNP_P3_68702_29334524 | NC_021164.1    | Ca_kabuli_chr05 | 29334524                | AA                              | TT                | 1946437281               |
| SNP_P3_68703_29376039 | NC_021164.1    | Ca_kabuli_chr05 | 29376039                | TT                              | AA                | 1946437283               |
| SNP_P3_68708_29423303 | NC_021164.1    | Ca_kabuli_chr05 | 29423303                | GG                              | AA                | 1946437284               |
| SNP_P3_68709_29427086 | NC_021164.1    | Ca_kabuli_chr05 | 29427086                | CC                              | AA                | 1946437286               |
| SNP_P3_68710_29470747 | NC_021164.1    | Ca_kabuli_chr05 | 29470747                | TT                              | AA                | 1946437287               |
| SNP_P3_68711_29470750 | NC_021164.1    | Ca_kabuli_chr05 | 29470750                | AA                              | TT                | 1946437289               |
| SNP_P3_68712_29476146 | NC_021164.1    | Ca_kabuli_chr05 | 29476146                | TT                              | CC                | 1946437290               |
| SNP_P3_68713_29476543 | NC_021164.1    | Ca_kabuli_chr05 | 29476543                | TT                              | AA                | 1946437292               |
| SNP_P3_68714_29476544 | NC_021164.1    | Ca_kabuli_chr05 | 29476544                | GG                              | CC                | 1946437293               |
| SNP_P3_68715_29476881 | NC_021164.1    | Ca_kabuli_chr05 | 29476881                | GG                              | AA                | 1946437294               |
| SNP_P3_68716_29514470 | NC_021164.1    | Ca_kabuli_chr05 | 29514470                | GG                              | TT                | 1946437296               |
| SNP_P3_68717_29514479 | NC_021164.1    | Ca_kabuli_chr05 | 29514479                | GG                              | CC                | 1946437298               |
| SNP_P3_68718_29518833 | NC_021164.1    | Ca_kabuli_chr05 | 29518833                | AA                              | GG                | 1946437299               |
| SNP_P3_68719_29522228 | NC_021164.1    | Ca_kabuli_chr05 | 29522228                | AA                              | GG                | 1946437301               |
| SNP_P3_68720_29527358 | NC_021164.1    | Ca_kabuli_chr05 | 29527358                | GG                              | CC                | 1946437302               |
| SNP_P3_68721_29527380 | NC_021164.1    | Ca_kabuli_chr05 | 29527380                | TT                              | CC                | 1946437304               |
| SNP_P3_68722_29536189 | NC_021164.1    | Ca_kabuli_chr05 | 29536189                | TT                              | CC                | 1946437305               |
| SNP_P3_68723_29536303 | NC_021164.1    | Ca_kabuli_chr05 | 29536303                | TT                              | CC                | 1946437307               |
| SNP_P3_68724_29539818 | NC_021164.1    | Ca_kabuli_chr05 | 29539818                | TT                              | CC                | 1946437308               |
| SNP_P3_68726_29626480 | NC_021164.1    | Ca_kabuli_chr05 | 29626480                | AA                              | GG                | 1946437310               |
| SNP_P3_68731_29667351 | NC_021164.1    | Ca_kabuli_chr05 | 29667351                | TT                              | CC                | 1946437311               |
| SNP_P3_68732_29722437 | NC_021164.1    | Ca_kabuli_chr05 | 29722437                | CC                              | TT                | 1946437313               |
| SNP_P3_68733_29759720 | NC_021164.1    | Ca_kabuli_chr05 | 29759720                | TT                              | AA                | 1946437314               |
| SNP_P3_68734_29759752 | NC_021164.1    | Ca_kabuli_chr05 | 29759752                | AA                              | GG                | 1946437316               |
| SNP_P3_68736_29778113 | NC_021164.1    | Ca_kabuli_chr05 | 29778113                | CC                              | TT                | 1946437317               |
| SNP_P3_68739_29856975 | NC_021164.1    | Ca_kabuli_chr05 | 29856975                | CC                              | AA                | 1946437319               |
| SNP_P3_68740_29858315 | NC_021164.1    | Ca_kabuli_chr05 | 29858315                | CC                              | AA                | 1946437320               |
| SNP_P3_68742_29904792 | NC_021164.1    | Ca_kabuli_chr05 | 29904792                | CC                              | TT                | 1946437322               |
| SNP_P3_68745_29920999 | NC_021164.1    | Ca_kabuli_chr05 | 29920999                | AA                              | CC                | 1946437323               |
| SNP_P3_68746_29929408 | NC_021164.1    | Ca_kabuli_chr05 | 29929408                | CC                              | TT                | 1946437325               |
| SNP_P3_68747_29932064 | NC_021164.1    | Ca_kabuli_chr05 | 29932064                | TT                              | CC                | 1946437326               |
| SNP_P3_68748_29932135 | NC_021164.1    | Ca_kabuli_chr05 | 29932135                | GG                              | TT                | 1946437328               |

| SNPs IDs              | Chromosome IDs | Chromosomes     | Physical positions (bp) | CDC Frontier (Reference genome) | (Pusa 256 & HPNB) | NCBI SNPdb Accession IDs |
|-----------------------|----------------|-----------------|-------------------------|---------------------------------|-------------------|--------------------------|
| SNP_P3_68749_29932159 | NC_021164.1    | Ca_kabuli_chr05 | 29932159                | CC                              | TT                | 1946437329               |
| SNP_P3_68750_29932160 | NC_021164.1    | Ca_kabuli_chr05 | 29932160                | CC                              | GG                | 1946437331               |
| SNP_P3_68751_29932161 | NC_021164.1    | Ca_kabuli_chr05 | 29932161                | TT                              | AA                | 1946437332               |
| SNP_P3_68752_29932330 | NC_021164.1    | Ca_kabuli_chr05 | 29932330                | GG                              | AA                | 1946437334               |
| SNP_P3_68754_29932355 | NC_021164.1    | Ca_kabuli_chr05 | 29932355                | GG                              | AA                | 1946437335               |
| SNP_P3_68755_29932374 | NC_021164.1    | Ca_kabuli_chr05 | 29932374                | GG                              | AA                | 1946437337               |
| SNP_P3_68756_29932515 | NC_021164.1    | Ca_kabuli_chr05 | 29932515                | GG                              | AA                | 1946437338               |
| SNP_P3_68757_29933084 | NC_021164.1    | Ca_kabuli_chr05 | 29933084                | CC                              | GG                | 1946437340               |
| SNP_P3_68760_29933992 | NC_021164.1    | Ca_kabuli_chr05 | 29933992                | TT                              | CC                | 1946437341               |
| SNP_P3_68762_29938497 | NC_021164.1    | Ca_kabuli_chr05 | 29938497                | TT                              | GG                | 1946437343               |
| SNP_P3_68763_29963041 | NC_021164.1    | Ca_kabuli_chr05 | 29963041                | AA                              | TT                | 1946437344               |
| SNP_P3_68765_29999252 | NC_021164.1    | Ca_kabuli_chr05 | 29999252                | TT                              | GG                | 1946437346               |
| SNP_P3_68766_29999465 | NC_021164.1    | Ca_kabuli_chr05 | 29999465                | TT                              | GG                | 1946437347               |
| SNP_P3_68767_29999476 | NC_021164.1    | Ca_kabuli_chr05 | 29999476                | AA                              | GG                | 1946437349               |
| SNP_P3_68768_30019097 | NC_021164.1    | Ca_kabuli_chr05 | 30019097                | GG                              | AA                | 1946437350               |
| SNP_P3_68769_30035410 | NC_021164.1    | Ca_kabuli_chr05 | 30035410                | TT                              | CC                | 1946437352               |
| SNP_P3_68770_30036779 | NC_021164.1    | Ca_kabuli_chr05 | 30036779                | AA                              | TT                | 1946437353               |
| SNP_P3_68771_30056614 | NC_021164.1    | Ca_kabuli_chr05 | 30056614                | AA                              | GG                | 1946437355               |
| SNP_P3_68772_30078529 | NC_021164.1    | Ca_kabuli_chr05 | 30078529                | CC                              | TT                | 1946437356               |
| SNP_P3_68773_30081391 | NC_021164.1    | Ca_kabuli_chr05 | 30081391                | AA                              | TT                | 1946437358               |
| SNP_P3_68774_30082282 | NC_021164.1    | Ca_kabuli_chr05 | 30082282                | AA                              | TT                | 1946437359               |
| SNP_P3_68775_30089940 | NC_021164.1    | Ca_kabuli_chr05 | 30089940                | AA                              | GG                | 1946437361               |
| SNP_P3_68776_30106187 | NC_021164.1    | Ca_kabuli_chr05 | 30106187                | AA                              | GG                | 1946437362               |
| SNP_P3_68778_30108652 | NC_021164.1    | Ca_kabuli_chr05 | 30108652                | TT                              | GG                | 1946437363               |
| SNP_P3_68779_30108819 | NC_021164.1    | Ca_kabuli_chr05 | 30108819                | CC                              | GG                | 1946437365               |
| SNP_P3_68780_30108824 | NC_021164.1    | Ca_kabuli_chr05 | 30108824                | CC                              | GG                | 1946437366               |
| SNP_P3_68781_30108829 | NC_021164.1    | Ca_kabuli_chr05 | 30108829                | CC                              | TT                | 1946437368               |
| SNP_P3_68782_30108842 | NC_021164.1    | Ca_kabuli_chr05 | 30108842                | AA                              | GG                | 1946437369               |
| SNP_P3_68783_30109033 | NC_021164.1    | Ca_kabuli_chr05 | 30109033                | CC                              | TT                | 1946437371               |
| SNP_P3_68784_30109034 | NC_021164.1    | Ca_kabuli_chr05 | 30109034                | TT                              | CC                | 1946437372               |
| SNP_P3_68785_30109040 | NC_021164.1    | Ca_kabuli_chr05 | 30109040                | TT                              | CC                | 1946437374               |
| SNP_P3_68786_30109266 | NC_021164.1    | Ca_kabuli_chr05 | 30109266                | AA                              | GG                | 1946437375               |
| SNP_P3_68787_30109382 | NC_021164.1    | Ca_kabuli_chr05 | 30109382                | TT                              | CC                | 1946437376               |
| SNP_P3_68789_30110454 | NC_021164.1    | Ca_kabuli_chr05 | 30110454                | GG                              | CC                | 1946437378               |
| SNP_P3_68790_30112152 | NC_021164.1    | Ca_kabuli_chr05 | 30112152                | GG                              | AA                | 1946437379               |
| SNP_P3_68792_30116533 | NC_021164.1    | Ca_kabuli_chr05 | 30116533                | AA                              | CC                | 1946437380               |
| SNP_P3_68793_30118882 | NC_021164.1    | Ca_kabuli_chr05 | 30118882                | TT                              | CC                | 1946437382               |
| SNP_P3_68794_30119135 | NC_021164.1    | Ca_kabuli_chr05 | 30119135                | CC                              | TT                | 1946437383               |
| SNP_P3_68795_30119743 | NC_021164.1    | Ca_kabuli_chr05 | 30119743                | TT                              | GG                | 1946437385               |
| SNP_P3_68797_30120257 | NC_021164.1    | Ca_kabuli_chr05 | 30120257                | AA                              | GG                | 1946437386               |
| SNP_P3_68798_30120264 | NC_021164.1    | Ca_kabuli_chr05 | 30120264                | GG                              | AA                | 1946437387               |
| SNP_P3_68800_30122526 | NC_021164.1    | Ca_kabuli_chr05 | 30122526                | GG                              | AA                | 1946437389               |



| SNPs IDs              | Chromosome IDs | Chromosomes     | Physical positions (bp) | CDC Frontier (Reference genome) | (Pusa 256 & HPNB) | NCBI SNPdb Accession IDs |
|-----------------------|----------------|-----------------|-------------------------|---------------------------------|-------------------|--------------------------|
| SNP_P3_68801_30123327 | NC_021164.1    | Ca_kabuli_chr05 | 30123327                | CC                              | TT                | 1946437390               |
| SNP_P3_68802_30123407 | NC_021164.1    | Ca_kabuli_chr05 | 30123407                | GG                              | CC                | 1946437392               |
| SNP_P3_68803_30123675 | NC_021164.1    | Ca_kabuli_chr05 | 30123675                | GG                              | CC                | 1946437393               |
| SNP_P3_68804_30123687 | NC_021164.1    | Ca_kabuli_chr05 | 30123687                | CC                              | AA                | 1946437395               |
| SNP_P3_68805_30125552 | NC_021164.1    | Ca_kabuli_chr05 | 30125552                | AA                              | TT                | 1946437396               |
| SNP_P3_68807_30127094 | NC_021164.1    | Ca_kabuli_chr05 | 30127094                | TT                              | AA                | 1946437397               |
| SNP_P3_68808_30127283 | NC_021164.1    | Ca_kabuli_chr05 | 30127283                | GG                              | AA                | 1946437399               |
| SNP_P3_68809_30128762 | NC_021164.1    | Ca_kabuli_chr05 | 30128762                | CC                              | TT                | 1946437401               |
| SNP_P3_68811_30129022 | NC_021164.1    | Ca_kabuli_chr05 | 30129022                | AA                              | TT                | 1946437402               |
| SNP_P3_68812_30129094 | NC_021164.1    | Ca_kabuli_chr05 | 30129094                | CC                              | TT                | 1946437403               |
| SNP_P3_68814_30131107 | NC_021164.1    | Ca_kabuli_chr05 | 30131107                | TT                              | GG                | 1946437405               |
| SNP_P3_68815_30135399 | NC_021164.1    | Ca_kabuli_chr05 | 30135399                | AA                              | GG                | 1946437406               |
| SNP_P3_68816_30136055 | NC_021164.1    | Ca_kabuli_chr05 | 30136055                | CC                              | TT                | 1946437408               |
| SNP_P3_68818_30142834 | NC_021164.1    | Ca_kabuli_chr05 | 30142834                | TT                              | AA                | 1946437409               |
| SNP_P3_68819_30147290 | NC_021164.1    | Ca_kabuli_chr05 | 30147290                | TT                              | GG                | 1946437411               |
| SNP_P3_68820_30239274 | NC_021164.1    | Ca_kabuli_chr05 | 30239274                | CC                              | TT                | 1946437412               |
| SNP_P3_68822_30257131 | NC_021164.1    | Ca_kabuli_chr05 | 30257131                | CC                              | TT                | 1946437414               |
| SNP_P3_68824_30288480 | NC_021164.1    | Ca_kabuli_chr05 | 30288480                | CC                              | AA                | 1946437415               |
| SNP_P3_68825_30299373 | NC_021164.1    | Ca_kabuli_chr05 | 30299373                | GG                              | AA                | 1946437417               |
| SNP_P3_68826_30331225 | NC_021164.1    | Ca_kabuli_chr05 | 30331225                | AA                              | GG                | 1946437418               |
| SNP_P3_68827_30337994 | NC_021164.1    | Ca_kabuli_chr05 | 30337994                | TT                              | CC                | 1946437420               |
| SNP_P3_68828_30388855 | NC_021164.1    | Ca_kabuli_chr05 | 30388855                | GG                              | AA                | 1946437422               |
| SNP_P3_68829_30396428 | NC_021164.1    | Ca_kabuli_chr05 | 30396428                | CC                              | GG                | 1946437423               |
| SNP_P3_68830_30396495 | NC_021164.1    | Ca_kabuli_chr05 | 30396495                | AA                              | GG                | 1946437425               |
| SNP_P3_68831_30396633 | NC_021164.1    | Ca_kabuli_chr05 | 30396633                | AA                              | GG                | 1946437426               |
| SNP_P3_68832_30439568 | NC_021164.1    | Ca_kabuli_chr05 | 30439568                | GG                              | AA                | 1946437427               |
| SNP_P3_68833_30441050 | NC_021164.1    | Ca_kabuli_chr05 | 30441050                | TT                              | GG                | 1946437429               |
| SNP_P3_68834_30446524 | NC_021164.1    | Ca_kabuli_chr05 | 30446524                | GG                              | AA                | 1946437430               |
| SNP_P3_68835_30472572 | NC_021164.1    | Ca_kabuli_chr05 | 30472572                | CC                              | TT                | 1946437432               |
| SNP_P3_68838_30480146 | NC_021164.1    | Ca_kabuli_chr05 | 30480146                | TT                              | CC                | 1946437433               |
| SNP_P3_68840_30521486 | NC_021164.1    | Ca_kabuli_chr05 | 30521486                | CC                              | TT                | 1946437435               |
| SNP_P3_68842_30542079 | NC_021164.1    | Ca_kabuli_chr05 | 30542079                | TT                              | CC                | 1946437437               |
| SNP_P3_68843_30543001 | NC_021164.1    | Ca_kabuli_chr05 | 30543001                | GG                              | AA                | 1946437438               |
| SNP_P3_68844_30547556 | NC_021164.1    | Ca_kabuli_chr05 | 30547556                | AA                              | TT                | 1946437440               |
| SNP_P3_68845_30547557 | NC_021164.1    | Ca_kabuli_chr05 | 30547557                | CC                              | TT                | 1946437441               |
| SNP_P3_68846_30553649 | NC_021164.1    | Ca_kabuli_chr05 | 30553649                | TT                              | GG                | 1946437442               |
| SNP_P3_68847_30553660 | NC_021164.1    | Ca_kabuli_chr05 | 30553660                | TT                              | GG                | 1946437443               |
| SNP_P3_68848_30566331 | NC_021164.1    | Ca_kabuli_chr05 | 30566331                | GG                              | AA                | 1946437445               |
| SNP_P3_68849_30578855 | NC_021164.1    | Ca_kabuli_chr05 | 30578855                | GG                              | AA                | 1946437446               |
| SNP_P3_68850_30584240 | NC_021164.1    | Ca_kabuli_chr05 | 30584240                | TT                              | CC                | 1946437447               |
| SNP_P3_68854_30613489 | NC_021164.1    | Ca_kabuli_chr05 | 30613489                | AA                              | TT                | 1946437449               |
| SNP_P3_68855_30614550 | NC_021164.1    | Ca_kabuli_chr05 | 30614550                | CC                              | TT                | 1946437450               |

| SNPs IDs              | Chromosome IDs | Chromosomes     | Physical positions (bp) | CDC Frontier (Reference genome) | (Pusa 256 & HPNB) | NCBI SNPdb Accession IDs |
|-----------------------|----------------|-----------------|-------------------------|---------------------------------|-------------------|--------------------------|
| SNP_P3_68856_30614560 | NC_021164.1    | Ca_kabuli_chr05 | 30614560                | TT                              | CC                | 1946437451               |
| SNP_P3_68857_30619976 | NC_021164.1    | Ca_kabuli_chr05 | 30619976                | GG                              | AA                | 1946437453               |
| SNP_P3_68858_30623658 | NC_021164.1    | Ca_kabuli_chr05 | 30623658                | AA                              | GG                | 1946437454               |
| SNP_P3_68859_30623659 | NC_021164.1    | Ca_kabuli_chr05 | 30623659                | AA                              | TT                | 1946437456               |
| SNP_P3_68860_30641839 | NC_021164.1    | Ca_kabuli_chr05 | 30641839                | TT                              | CC                | 1946437457               |
| SNP_P3_68861_30643231 | NC_021164.1    | Ca_kabuli_chr05 | 30643231                | TT                              | GG                | 1946437458               |
| SNP_P3_68862_30678899 | NC_021164.1    | Ca_kabuli_chr05 | 30678899                | AA                              | GG                | 1946437460               |
| SNP_P3_68863_30684876 | NC_021164.1    | Ca_kabuli_chr05 | 30684876                | TT                              | CC                | 1946437461               |
| SNP_P3_68864_30703360 | NC_021164.1    | Ca_kabuli_chr05 | 30703360                | TT                              | CC                | 1946437463               |
| SNP_P3_68865_30707925 | NC_021164.1    | Ca_kabuli_chr05 | 30707925                | GG                              | AA                | 1946437464               |
| SNP_P3_68866_30718843 | NC_021164.1    | Ca_kabuli_chr05 | 30718843                | AA                              | GG                | 1946437466               |
| SNP_P3_68867_30731120 | NC_021164.1    | Ca_kabuli_chr05 | 30731120                | AA                              | TT                | 1946437467               |
| SNP_P3_68869_30753243 | NC_021164.1    | Ca_kabuli_chr05 | 30753243                | AA                              | TT                | 1946437468               |
| SNP_P3_68870_30767299 | NC_021164.1    | Ca_kabuli_chr05 | 30767299                | TT                              | AA                | 1946437470               |
| SNP_P3_68872_30777582 | NC_021164.1    | Ca_kabuli_chr05 | 30777582                | GG                              | AA                | 1946437471               |
| SNP_P3_68873_30777596 | NC_021164.1    | Ca_kabuli_chr05 | 30777596                | TT                              | CC                | 1946437473               |
| SNP_P3_68874_30777712 | NC_021164.1    | Ca_kabuli_chr05 | 30777712                | GG                              | AA                | 1946437474               |
| SNP_P3_68875_30777735 | NC_021164.1    | Ca_kabuli_chr05 | 30777735                | GG                              | AA                | 1946437476               |
| SNP_P3_68877_30837244 | NC_021164.1    | Ca_kabuli_chr05 | 30837244                | TT                              | CC                | 1946437478               |
| SNP_P3_68878_30862822 | NC_021164.1    | Ca_kabuli_chr05 | 30862822                | TT                              | CC                | 1946437479               |
| SNP_P3_68879_30875876 | NC_021164.1    | Ca_kabuli_chr05 | 30875876                | GG                              | AA                | 1946437481               |
| SNP_P3_68880_30879587 | NC_021164.1    | Ca_kabuli_chr05 | 30879587                | TT                              | CC                | 1946437482               |
| SNP_P3_68882_30886810 | NC_021164.1    | Ca_kabuli_chr05 | 30886810                | TT                              | CC                | 1946437483               |
| SNP_P3_68883_30887734 | NC_021164.1    | Ca_kabuli_chr05 | 30887734                | GG                              | TT                | 1946437485               |
| SNP_P3_68884_30904770 | NC_021164.1    | Ca_kabuli_chr05 | 30904770                | AA                              | GG                | 1946437486               |
| SNP_P3_68885_30912408 | NC_021164.1    | Ca_kabuli_chr05 | 30912408                | CC                              | TT                | 1946437488               |
| SNP_P3_68887_30927146 | NC_021164.1    | Ca_kabuli_chr05 | 30927146                | AA                              | CC                | 1946437489               |
| SNP_P3_68888_30927148 | NC_021164.1    | Ca_kabuli_chr05 | 30927148                | AA                              | CC                | 1946437490               |
| SNP_P3_68889_30935834 | NC_021164.1    | Ca_kabuli_chr05 | 30935834                | AA                              | GG                | 1946437492               |
| SNP_P3_68890_30935846 | NC_021164.1    | Ca_kabuli_chr05 | 30935846                | GG                              | AA                | 1946437494               |
| SNP_P3_68891_30935949 | NC_021164.1    | Ca_kabuli_chr05 | 30935949                | AA                              | TT                | 1946437495               |
| SNP_P3_68895_31017414 | NC_021164.1    | Ca_kabuli_chr05 | 31017414                | AA                              | GG                | 1946437497               |
| SNP_P3_68896_31017461 | NC_021164.1    | Ca_kabuli_chr05 | 31017461                | AA                              | GG                | 1946437498               |
| SNP_P3_68897_31017486 | NC_021164.1    | Ca_kabuli_chr05 | 31017486                | TT                              | CC                | 1946437499               |
| SNP_P3_68898_31027816 | NC_021164.1    | Ca_kabuli_chr05 | 31027816                | TT                              | CC                | 1946437501               |
| SNP_P3_68899_31030366 | NC_021164.1    | Ca_kabuli_chr05 | 31030366                | TT                              | CC                | 1946437502               |
| SNP_P3_68900_31039652 | NC_021164.1    | Ca_kabuli_chr05 | 31039652                | CC                              | TT                | 1946437504               |
| SNP_P3_68901_31060916 | NC_021164.1    | Ca_kabuli_chr05 | 31060916                | AA                              | CC                | 1946437505               |
| SNP_P3_68902_31064701 | NC_021164.1    | Ca_kabuli_chr05 | 31064701                | CC                              | AA                | 1946437506               |
| SNP_P3_68904_31075103 | NC_021164.1    | Ca_kabuli_chr05 | 31075103                | GG                              | CC                | 1946437508               |
| SNP_P3_68905_31085589 | NC_021164.1    | Ca_kabuli_chr05 | 31085589                | TT                              | CC                | 1946437509               |
| SNP_P3_68906_31096505 | NC_021164.1    | Ca_kabuli_chr05 | 31096505                | TT                              | CC                | 1946437511               |

| SNPs IDs              | Chromosome IDs | Chromosomes     | Physical positions (bp) | CDC Frontier (Reference genome) | (Pusa 256 & HPNB) | NCBI SNPdb Accession IDs |
|-----------------------|----------------|-----------------|-------------------------|---------------------------------|-------------------|--------------------------|
| SNP_P3_68907_31108863 | NC_021164.1    | Ca_kabuli_chr05 | 31108863                | CC                              | AA                | 1946437513               |
| SNP_P3_68908_31111422 | NC_021164.1    | Ca_kabuli_chr05 | 31111422                | TT                              | AA                | 1946437514               |
| SNP_P3_68909_31114917 | NC_021164.1    | Ca_kabuli_chr05 | 31114917                | CC                              | TT                | 1946437516               |
| SNP_P3_68910_31129729 | NC_021164.1    | Ca_kabuli_chr05 | 31129729                | TT                              | CC                | 1946437517               |
| SNP_P3_68912_31129973 | NC_021164.1    | Ca_kabuli_chr05 | 31129973                | TT                              | AA                | 1946437519               |
| SNP_P3_68913_31129979 | NC_021164.1    | Ca_kabuli_chr05 | 31129979                | AA                              | GG                | 1946437520               |
| SNP_P3_68914_31130014 | NC_021164.1    | Ca_kabuli_chr05 | 31130014                | AA                              | TT                | 1946437522               |
| SNP_P3_68915_31131752 | NC_021164.1    | Ca_kabuli_chr05 | 31131752                | CC                              | AA                | 1946437523               |
| SNP_P3_68917_31131943 | NC_021164.1    | Ca_kabuli_chr05 | 31131943                | GG                              | TT                | 1946437524               |
| SNP_P3_68918_31132144 | NC_021164.1    | Ca_kabuli_chr05 | 31132144                | CC                              | TT                | 1946437526               |
| SNP_P3_68919_31132568 | NC_021164.1    | Ca_kabuli_chr05 | 31132568                | AA                              | TT                | 1946437527               |
| SNP_P3_68921_31133737 | NC_021164.1    | Ca_kabuli_chr05 | 31133737                | AA                              | GG                | 1946437529               |
| SNP_P3_68923_31134259 | NC_021164.1    | Ca_kabuli_chr05 | 31134259                | CC                              | TT                | 1946437530               |
| SNP_P3_68925_31136127 | NC_021164.1    | Ca_kabuli_chr05 | 31136127                | GG                              | AA                | 1946437532               |
| SNP_P3_68926_31138124 | NC_021164.1    | Ca_kabuli_chr05 | 31138124                | CC                              | TT                | 1946437533               |
| SNP_P3_68927_31143291 | NC_021164.1    | Ca_kabuli_chr05 | 31143291                | AA                              | GG                | 1946437535               |
| SNP_P3_68928_31143457 | NC_021164.1    | Ca_kabuli_chr05 | 31143457                | CC                              | TT                | 1946437536               |
| SNP_P3_68930_31145046 | NC_021164.1    | Ca_kabuli_chr05 | 31145046                | AA                              | GG                | 1946437538               |
| SNP_P3_68931_31145310 | NC_021164.1    | Ca_kabuli_chr05 | 31145310                | GG                              | AA                | 1946437539               |
| SNP_P3_68932_31146691 | NC_021164.1    | Ca_kabuli_chr05 | 31146691                | AA                              | TT                | 1946437541               |
| SNP_P3_68933_31153719 | NC_021164.1    | Ca_kabuli_chr05 | 31153719                | GG                              | AA                | 1946437542               |
| SNP_P3_68934_31154270 | NC_021164.1    | Ca_kabuli_chr05 | 31154270                | GG                              | AA                | 1946437544               |
| SNP_P3_68935_31155392 | NC_021164.1    | Ca_kabuli_chr05 | 31155392                | AA                              | TT                | 1946437545               |
| SNP_P3_68936_31155471 | NC_021164.1    | Ca_kabuli_chr05 | 31155471                | TT                              | CC                | 1946437547               |
| SNP_P3_68937_31157037 | NC_021164.1    | Ca_kabuli_chr05 | 31157037                | CC                              | AA                | 1946437548               |
| SNP_P3_68938_31157370 | NC_021164.1    | Ca_kabuli_chr05 | 31157370                | AA                              | GG                | 1946437550               |
| SNP_P3_68939_31158582 | NC_021164.1    | Ca_kabuli_chr05 | 31158582                | GG                              | AA                | 1946437551               |
| SNP_P3_68941_31159264 | NC_021164.1    | Ca_kabuli_chr05 | 31159264                | TT                              | CC                | 1946437553               |
| SNP_P3_68942_31160674 | NC_021164.1    | Ca_kabuli_chr05 | 31160674                | TT                              | CC                | 1946437554               |
| SNP_P3_68943_31160820 | NC_021164.1    | Ca_kabuli_chr05 | 31160820                | CC                              | GG                | 1946437556               |
| SNP_P3_68944_31161864 | NC_021164.1    | Ca_kabuli_chr05 | 31161864                | AA                              | GG                | 1946437557               |
| SNP_P3_68945_31164746 | NC_021164.1    | Ca_kabuli_chr05 | 31164746                | AA                              | GG                | 1946437559               |
| SNP_P3_68946_31167543 | NC_021164.1    | Ca_kabuli_chr05 | 31167543                | TT                              | CC                | 1946437560               |
| SNP_P3_68948_31168221 | NC_021164.1    | Ca_kabuli_chr05 | 31168221                | CC                              | TT                | 1946437562               |
| SNP_P3_68949_31168912 | NC_021164.1    | Ca_kabuli_chr05 | 31168912                | TT                              | CC                | 1946437563               |
| SNP_P3_68950_31175436 | NC_021164.1    | Ca_kabuli_chr05 | 31175436                | TT                              | CC                | 1946437565               |
| SNP_P3_68952_31182757 | NC_021164.1    | Ca_kabuli_chr05 | 31182757                | TT                              | AA                | 1946437566               |
| SNP_P3_68954_31183201 | NC_021164.1    | Ca_kabuli_chr05 | 31183201                | GG                              | AA                | 1946437568               |
| SNP_P3_68955_31183231 | NC_021164.1    | Ca_kabuli_chr05 | 31183231                | TT                              | CC                | 1946437569               |
| SNP_P3_68956_31183243 | NC_021164.1    | Ca_kabuli_chr05 | 31183243                | AA                              | TT                | 1946437571               |
| SNP_P3_68957_31183817 | NC_021164.1    | Ca_kabuli_chr05 | 31183817                | GG                              | CC                | 1946437572               |
| SNP_P3_68958_31184014 | NC_021164.1    | Ca_kabuli_chr05 | 31184014                | AA                              | GG                | 1946437574               |

| SNPs IDs              | Chromosome IDs | Chromosomes     | Physical positions (bp) | CDC Frontier (Reference genome) | (Pusa 256 & HPNB) | NCBI SNPdb Accession IDs |
|-----------------------|----------------|-----------------|-------------------------|---------------------------------|-------------------|--------------------------|
| SNP_P3_68959_31185527 | NC_021164.1    | Ca_kabuli_chr05 | 31185527                | AA                              | GG                | 1946437575               |
| SNP_P3_68960_31187062 | NC_021164.1    | Ca_kabuli_chr05 | 31187062                | GG                              | AA                | 1946437576               |
| SNP_P3_68961_31187069 | NC_021164.1    | Ca_kabuli_chr05 | 31187069                | TT                              | AA                | 1946437578               |
| SNP_P3_68962_31187324 | NC_021164.1    | Ca_kabuli_chr05 | 31187324                | GG                              | AA                | 1946437579               |
| SNP_P3_68963_31187346 | NC_021164.1    | Ca_kabuli_chr05 | 31187346                | AA                              | GG                | 1946437581               |
| SNP_P3_68964_31189625 | NC_021164.1    | Ca_kabuli_chr05 | 31189625                | CC                              | TT                | 1946437582               |
| SNP_P3_68965_31190839 | NC_021164.1    | Ca_kabuli_chr05 | 31190839                | CC                              | GG                | 1946437584               |
| SNP_P3_68966_31230200 | NC_021164.1    | Ca_kabuli_chr05 | 31230200                | GG                              | CC                | 1946437585               |
| SNP_P3_68967_31230280 | NC_021164.1    | Ca_kabuli_chr05 | 31230280                | TT                              | AA                | 1946437587               |
| SNP_P3_68968_31230284 | NC_021164.1    | Ca_kabuli_chr05 | 31230284                | GG                              | AA                | 1946437588               |
| SNP_P3_68970_31266707 | NC_021164.1    | Ca_kabuli_chr05 | 31266707                | AA                              | TT                | 1946437590               |
| SNP_P3_68971_31276864 | NC_021164.1    | Ca_kabuli_chr05 | 31276864                | TT                              | CC                | 1946437591               |
| SNP_P3_68972_31317816 | NC_021164.1    | Ca_kabuli_chr05 | 31317816                | AA                              | GG                | 1946437593               |
| SNP_P3_68973_31318990 | NC_021164.1    | Ca_kabuli_chr05 | 31318990                | CC                              | AA                | 1946437594               |
| SNP_P3_68974_31337377 | NC_021164.1    | Ca_kabuli_chr05 | 31337377                | GG                              | CC                | 1946437596               |
| SNP_P3_68975_31359659 | NC_021164.1    | Ca_kabuli_chr05 | 31359659                | GG                              | AA                | 1946437597               |
| SNP_P3_68977_31409652 | NC_021164.1    | Ca_kabuli_chr05 | 31409652                | AA                              | GG                | 1946437599               |
| SNP_P3_68978_31452121 | NC_021164.1    | Ca_kabuli_chr05 | 31452121                | AA                              | TT                | 1946437600               |
| SNP_P3_68979_31452122 | NC_021164.1    | Ca_kabuli_chr05 | 31452122                | TT                              | AA                | 1946437602               |
| SNP_P3_68980_31452333 | NC_021164.1    | Ca_kabuli_chr05 | 31452333                | TT                              | CC                | 1946437603               |
| SNP_P3_68981_31452429 | NC_021164.1    | Ca_kabuli_chr05 | 31452429                | CC                              | TT                | 1946437604               |
| SNP_P3_68982_31452665 | NC_021164.1    | Ca_kabuli_chr05 | 31452665                | CC                              | AA                | 1946437606               |
| SNP_P3_68983_31452722 | NC_021164.1    | Ca_kabuli_chr05 | 31452722                | GG                              | AA                | 1946437608               |
| SNP_P3_68984_31452723 | NC_021164.1    | Ca_kabuli_chr05 | 31452723                | TT                              | GG                | 1946437609               |
| SNP_P3_68985_31452724 | NC_021164.1    | Ca_kabuli_chr05 | 31452724                | TT                              | CC                | 1946437611               |
| SNP_P3_68986_31453923 | NC_021164.1    | Ca_kabuli_chr05 | 31453923                | TT                              | CC                | 1946437612               |
| SNP_P3_68987_31460139 | NC_021164.1    | Ca_kabuli_chr05 | 31460139                | TT                              | AA                | 1946437613               |
| SNP_P3_68988_31467096 | NC_021164.1    | Ca_kabuli_chr05 | 31467096                | AA                              | GG                | 1946437615               |
| SNP_P3_68989_31507836 | NC_021164.1    | Ca_kabuli_chr05 | 31507836                | CC                              | TT                | 1946437616               |
| SNP_P3_68990_31540930 | NC_021164.1    | Ca_kabuli_chr05 | 31540930                | TT                              | GG                | 1946437618               |
| SNP_P3_68991_31540934 | NC_021164.1    | Ca_kabuli_chr05 | 31540934                | TT                              | AA                | 1946437619               |
| SNP_P3_68992_31550756 | NC_021164.1    | Ca_kabuli_chr05 | 31550756                | CC                              | TT                | 1946437621               |
| SNP_P3_68994_31599988 | NC_021164.1    | Ca_kabuli_chr05 | 31599988                | CC                              | TT                | 1946437622               |
| SNP_P3_68995_31600025 | NC_021164.1    | Ca_kabuli_chr05 | 31600025                | CC                              | TT                | 1946437624               |
| SNP_P3_68996_31600026 | NC_021164.1    | Ca_kabuli_chr05 | 31600026                | CC                              | TT                | 1946437626               |
| SNP_P3_68998_31719044 | NC_021164.1    | Ca_kabuli_chr05 | 31719044                | GG                              | CC                | 1946437627               |
| SNP_P3_68999_31754573 | NC_021164.1    | Ca_kabuli_chr05 | 31754573                | GG                              | AA                | 1946437629               |
| SNP_P3_69000_31809282 | NC_021164.1    | Ca_kabuli_chr05 | 31809282                | AA                              | TT                | 1946437630               |
| SNP_P3_69005_31848160 | NC_021164.1    | Ca_kabuli_chr05 | 31848160                | TT                              | CC                | 1946437632               |
| SNP_P3_69006_31850843 | NC_021164.1    | Ca_kabuli_chr05 | 31850843                | GG                              | AA                | 1946437633               |
| SNP_P3_69007_31930675 | NC_021164.1    | Ca_kabuli_chr05 | 31930675                | TT                              | AA                | 1946437635               |
| SNP_P3_69008_31930677 | NC_021164.1    | Ca_kabuli_chr05 | 31930677                | AA                              | TT                | 1946437636               |

| SNPs IDs              | Chromosome IDs | Chromosomes     | Physical positions (bp) | CDC Frontier (Reference genome) | (Pusa 256 & HPNB) | NCBI SNPdb Accession IDs |
|-----------------------|----------------|-----------------|-------------------------|---------------------------------|-------------------|--------------------------|
| SNP_P3_69010_31932675 | NC_021164.1    | Ca_kabuli_chr05 | 31932675                | AA                              | CC                | 1946437638               |
| SNP_P3_69012_31961787 | NC_021164.1    | Ca_kabuli_chr05 | 31961787                | AA                              | TT                | 1946437639               |
| SNP_P3_69013_31998810 | NC_021164.1    | Ca_kabuli_chr05 | 31998810                | TT                              | GG                | 1946437641               |
| SNP_P3_69014_32038066 | NC_021164.1    | Ca_kabuli_chr05 | 32038066                | TT                              | AA                | 1946437642               |
| SNP_P3_69015_32040708 | NC_021164.1    | Ca_kabuli_chr05 | 32040708                | AA                              | CC                | 1946437644               |
| SNP_P3_69016_32065972 | NC_021164.1    | Ca_kabuli_chr05 | 32065972                | AA                              | CC                | 1946437645               |
| SNP_P3_69018_32121176 | NC_021164.1    | Ca_kabuli_chr05 | 32121176                | GG                              | CC                | 1946437647               |
| SNP_P3_69019_32122178 | NC_021164.1    | Ca_kabuli_chr05 | 32122178                | CC                              | AA                | 1946437648               |
| SNP_P3_69020_32122433 | NC_021164.1    | Ca_kabuli_chr05 | 32122433                | GG                              | AA                | 1946437650               |
| SNP_P3_69021_32122474 | NC_021164.1    | Ca_kabuli_chr05 | 32122474                | CC                              | TT                | 1946437651               |
| SNP_P3_69022_32122723 | NC_021164.1    | Ca_kabuli_chr05 | 32122723                | TT                              | CC                | 1946437653               |
| SNP_P3_69023_32122829 | NC_021164.1    | Ca_kabuli_chr05 | 32122829                | AA                              | CC                | 1946437654               |
| SNP_P3_69024_32122979 | NC_021164.1    | Ca_kabuli_chr05 | 32122979                | GG                              | AA                | 1946437655               |
| SNP_P3_69025_32123010 | NC_021164.1    | Ca_kabuli_chr05 | 32123010                | TT                              | AA                | 1946437656               |
| SNP_P3_69026_32123080 | NC_021164.1    | Ca_kabuli_chr05 | 32123080                | TT                              | CC                | 1946437657               |
| SNP_P3_69027_32123127 | NC_021164.1    | Ca_kabuli_chr05 | 32123127                | AA                              | TT                | 1946437658               |
| SNP_P3_69028_32137370 | NC_021164.1    | Ca_kabuli_chr05 | 32137370                | GG                              | CC                | 1946437660               |
| SNP_P3_69029_32137502 | NC_021164.1    | Ca_kabuli_chr05 | 32137502                | CC                              | TT                | 1946437661               |
| SNP_P3_69031_32137779 | NC_021164.1    | Ca_kabuli_chr05 | 32137779                | AA                              | GG                | 1946437662               |
| SNP_P3_69032_32137782 | NC_021164.1    | Ca_kabuli_chr05 | 32137782                | CC                              | GG                | 1946437664               |
| SNP_P3_69033_32137914 | NC_021164.1    | Ca_kabuli_chr05 | 32137914                | GG                              | TT                | 1946437665               |
| SNP_P3_69034_32138539 | NC_021164.1    | Ca_kabuli_chr05 | 32138539                | AA                              | TT                | 1946437667               |
| SNP_P3_69036_32140117 | NC_021164.1    | Ca_kabuli_chr05 | 32140117                | TT                              | AA                | 1946437668               |
| SNP_P3_69038_32239799 | NC_021164.1    | Ca_kabuli_chr05 | 32239799                | TT                              | AA                | 1946437670               |
| SNP_P3_69039_32239800 | NC_021164.1    | Ca_kabuli_chr05 | 32239800                | TT                              | AA                | 1946437671               |
| SNP_P3_69040_32247698 | NC_021164.1    | Ca_kabuli_chr05 | 32247698                | TT                              | AA                | 1946437673               |
| SNP_P3_69041_32247699 | NC_021164.1    | Ca_kabuli_chr05 | 32247699                | AA                              | TT                | 1946437674               |
| SNP_P3_69042_32247704 | NC_021164.1    | Ca_kabuli_chr05 | 32247704                | CC                              | AA                | 1946437676               |
| SNP_P3_69043_32248470 | NC_021164.1    | Ca_kabuli_chr05 | 32248470                | AA                              | CC                | 1946437677               |
| SNP_P3_69044_32248485 | NC_021164.1    | Ca_kabuli_chr05 | 32248485                | TT                              | CC                | 1946437679               |
| SNP_P3_69045_32248548 | NC_021164.1    | Ca_kabuli_chr05 | 32248548                | TT                              | CC                | 1946437680               |
| SNP_P3_69046_32258946 | NC_021164.1    | Ca_kabuli_chr05 | 32258946                | GG                              | TT                | 1946437682               |
| SNP_P3_69047_32259264 | NC_021164.1    | Ca_kabuli_chr05 | 32259264                | AA                              | GG                | 1946437683               |
| SNP_P3_69048_32259298 | NC_021164.1    | Ca_kabuli_chr05 | 32259298                | TT                              | AA                | 1946437685               |
| SNP_P3_69049_32259306 | NC_021164.1    | Ca_kabuli_chr05 | 32259306                | AA                              | CC                | 1946437686               |
| SNP_P3_69050_32259336 | NC_021164.1    | Ca_kabuli_chr05 | 32259336                | AA                              | GG                | 1946437688               |
| SNP_P3_69051_32259464 | NC_021164.1    | Ca_kabuli_chr05 | 32259464                | GG                              | AA                | 1946437689               |
| SNP_P3_69053_32290627 | NC_021164.1    | Ca_kabuli_chr05 | 32290627                | TT                              | CC                | 1946437691               |
| SNP_P3_69054_32292902 | NC_021164.1    | Ca_kabuli_chr05 | 32292902                | GG                              | AA                | 1946437692               |
| SNP_P3_69056_32300823 | NC_021164.1    | Ca_kabuli_chr05 | 32300823                | CC                              | AA                | 1946437694               |
| SNP_P3_69057_32313907 | NC_021164.1    | Ca_kabuli_chr05 | 32313907                | CC                              | AA                | 1946437695               |
| SNP_P3_69058_32359188 | NC_021164.1    | Ca_kabuli_chr05 | 32359188                | CC                              | TT                | 1946437697               |

| SNPs IDs              | Chromosome IDs | Chromosomes     | Physical positions (bp) | CDC Frontier (Reference genome) | (Pusa 256 & HPNB) | NCBI SNPdb Accession IDs |
|-----------------------|----------------|-----------------|-------------------------|---------------------------------|-------------------|--------------------------|
| SNP_P3_69060_32385541 | NC_021164.1    | Ca_kabuli_chr05 | 32385541                | GG                              | TT                | 1946437699               |
| SNP_P3_69061_32388207 | NC_021164.1    | Ca_kabuli_chr05 | 32388207                | TT                              | CC                | 1946437700               |
| SNP_P3_69063_32388672 | NC_021164.1    | Ca_kabuli_chr05 | 32388672                | GG                              | AA                | 1946437702               |
| SNP_P3_69065_32395519 | NC_021164.1    | Ca_kabuli_chr05 | 32395519                | TT                              | CC                | 1946437703               |
| SNP_P3_69066_32467266 | NC_021164.1    | Ca_kabuli_chr05 | 32467266                | TT                              | AA                | 1946437705               |
| SNP_P3_69067_32467267 | NC_021164.1    | Ca_kabuli_chr05 | 32467267                | TT                              | GG                | 1946437706               |
| SNP_P3_69069_32529957 | NC_021164.1    | Ca_kabuli_chr05 | 32529957                | CC                              | GG                | 1946437708               |
| SNP_P3_69070_32544459 | NC_021164.1    | Ca_kabuli_chr05 | 32544459                | GG                              | AA                | 1946437709               |
| SNP_P3_69071_32575057 | NC_021164.1    | Ca_kabuli_chr05 | 32575057                | AA                              | GG                | 1946437711               |
| SNP_P3_69073_32600023 | NC_021164.1    | Ca_kabuli_chr05 | 32600023                | GG                              | AA                | 1946437713               |
| SNP_P3_69075_32608864 | NC_021164.1    | Ca_kabuli_chr05 | 32608864                | CC                              | TT                | 1946437714               |
| SNP_P3_69078_32649556 | NC_021164.1    | Ca_kabuli_chr05 | 32649556                | CC                              | TT                | 1946437715               |
| SNP_P3_69079_32649557 | NC_021164.1    | Ca_kabuli_chr05 | 32649557                | CC                              | TT                | 1946437717               |
| SNP_P3_69080_32663074 | NC_021164.1    | Ca_kabuli_chr05 | 32663074                | AA                              | GG                | 1946437718               |
| SNP_P3_69083_32707094 | NC_021164.1    | Ca_kabuli_chr05 | 32707094                | TT                              | AA                | 1946437720               |
| SNP_P3_69084_32709727 | NC_021164.1    | Ca_kabuli_chr05 | 32709727                | TT                              | AA                | 1946437721               |
| SNP_P3_69085_32723000 | NC_021164.1    | Ca_kabuli_chr05 | 32723000                | AA                              | TT                | 1946437723               |
| SNP_P3_69088_32745794 | NC_021164.1    | Ca_kabuli_chr05 | 32745794                | GG                              | AA                | 1946437724               |
| SNP_P3_69089_32746599 | NC_021164.1    | Ca_kabuli_chr05 | 32746599                | AA                              | GG                | 1946437726               |
| SNP_P3_69090_32763241 | NC_021164.1    | Ca_kabuli_chr05 | 32763241                | TT                              | AA                | 1946437727               |
| SNP_P3_69091_32764330 | NC_021164.1    | Ca_kabuli_chr05 | 32764330                | GG                              | CC                | 1946437728               |
| SNP_P3_69092_32770419 | NC_021164.1    | Ca_kabuli_chr05 | 32770419                | AA                              | GG                | 1946437730               |
| SNP_P3_69093_32770438 | NC_021164.1    | Ca_kabuli_chr05 | 32770438                | AA                              | TT                | 1946437732               |
| SNP_P3_69094_32786872 | NC_021164.1    | Ca_kabuli_chr05 | 32786872                | CC                              | TT                | 1946437733               |
| SNP_P3_69095_32792716 | NC_021164.1    | Ca_kabuli_chr05 | 32792716                | AA                              | GG                | 1946437735               |
| SNP_P3_69096_32792723 | NC_021164.1    | Ca_kabuli_chr05 | 32792723                | TT                              | GG                | 1946437736               |
| SNP_P3_69097_32818002 | NC_021164.1    | Ca_kabuli_chr05 | 32818002                | TT                              | CC                | 1946437738               |
| SNP_P3_69098_32834189 | NC_021164.1    | Ca_kabuli_chr05 | 32834189                | CC                              | TT                | 1946437739               |
| SNP_P3_69102_32896273 | NC_021164.1    | Ca_kabuli_chr05 | 32896273                | AA                              | CC                | 1946437741               |
| SNP_P3_69104_32964144 | NC_021164.1    | Ca_kabuli_chr05 | 32964144                | TT                              | AA                | 1946437742               |
| SNP_P3_69105_32985806 | NC_021164.1    | Ca_kabuli_chr05 | 32985806                | AA                              | GG                | 1946437744               |
| SNP_P3_69106_32988636 | NC_021164.1    | Ca_kabuli_chr05 | 32988636                | AA                              | GG                | 1946437745               |
| SNP_P3_69107_32995759 | NC_021164.1    | Ca_kabuli_chr05 | 32995759                | GG                              | AA                | 1946437747               |
| SNP_P3_69108_33007672 | NC_021164.1    | Ca_kabuli_chr05 | 33007672                | GG                              | AA                | 1946437748               |
| SNP_P3_69109_33016510 | NC_021164.1    | Ca_kabuli_chr05 | 33016510                | GG                              | AA                | 1946437750               |
| SNP_P3_69110_33069404 | NC_021164.1    | Ca_kabuli_chr05 | 33069404                | AA                              | GG                | 1946437751               |
| SNP_P3_69111_33087711 | NC_021164.1    | Ca_kabuli_chr05 | 33087711                | AA                              | GG                | 1946437753               |
| SNP_P3_69112_33094509 | NC_021164.1    | Ca_kabuli_chr05 | 33094509                | TT                              | AA                | 1946437754               |
| SNP_P3_69113_33099192 | NC_021164.1    | Ca_kabuli_chr05 | 33099192                | GG                              | TT                | 1946437756               |
| SNP_P3_69115_33099246 | NC_021164.1    | Ca_kabuli_chr05 | 33099246                | AA                              | CC                | 1946437758               |
| SNP_P3_69116_33099588 | NC_021164.1    | Ca_kabuli_chr05 | 33099588                | AA                              | GG                | 1946437760               |
| SNP_P3_69117_33099589 | NC_021164.1    | Ca_kabuli_chr05 | 33099589                | AA                              | GG                | 1946437761               |

| SNPs IDs              | Chromosome IDs | Chromosomes     | Physical positions (bp) | CDC Frontier (Reference genome) | (Pusa 256 & HPNB) | NCBI SNPdb Accession IDs |
|-----------------------|----------------|-----------------|-------------------------|---------------------------------|-------------------|--------------------------|
| SNP_P3_69118_33099598 | NC_021164.1    | Ca_kabuli_chr05 | 33099598                | AA                              | GG                | 1946437763               |
| SNP_P3_69119_33099604 | NC_021164.1    | Ca_kabuli_chr05 | 33099604                | TT                              | GG                | 1946437764               |
| SNP_P3_69120_33099608 | NC_021164.1    | Ca_kabuli_chr05 | 33099608                | TT                              | CC                | 1946437766               |
| SNP_P3_69121_33099634 | NC_021164.1    | Ca_kabuli_chr05 | 33099634                | AA                              | GG                | 1946437767               |
| SNP_P3_69122_33099641 | NC_021164.1    | Ca_kabuli_chr05 | 33099641                | TT                              | CC                | 1946437768               |
| SNP_P3_69123_33099643 | NC_021164.1    | Ca_kabuli_chr05 | 33099643                | AA                              | GG                | 1946437770               |
| SNP_P3_69125_33146742 | NC_021164.1    | Ca_kabuli_chr05 | 33146742                | GG                              | AA                | 1946437772               |
| SNP_P3_69126_33166193 | NC_021164.1    | Ca_kabuli_chr05 | 33166193                | GG                              | AA                | 1946437773               |
| SNP_P3_69127_33166197 | NC_021164.1    | Ca_kabuli_chr05 | 33166197                | GG                              | TT                | 1946437775               |
| SNP_P3_69128_33166345 | NC_021164.1    | Ca_kabuli_chr05 | 33166345                | CC                              | TT                | 1946437776               |
| SNP_P3_69129_33166393 | NC_021164.1    | Ca_kabuli_chr05 | 33166393                | TT                              | CC                | 1946437778               |
| SNP_P3_69130_33166809 | NC_021164.1    | Ca_kabuli_chr05 | 33166809                | CC                              | TT                | 1946437779               |
| SNP_P3_69131_33166935 | NC_021164.1    | Ca_kabuli_chr05 | 33166935                | GG                              | AA                | 1946437780               |
| SNP_P3_69132_33166936 | NC_021164.1    | Ca_kabuli_chr05 | 33166936                | AA                              | GG                | 1946437782               |
| SNP_P3_69133_33166941 | NC_021164.1    | Ca_kabuli_chr05 | 33166941                | TT                              | GG                | 1946437783               |
| SNP_P3_69134_33167138 | NC_021164.1    | Ca_kabuli_chr05 | 33167138                | CC                              | GG                | 1946437785               |
| SNP_P3_69136_33199033 | NC_021164.1    | Ca_kabuli_chr05 | 33199033                | TT                              | CC                | 1946437786               |
| SNP_P3_69137_33225248 | NC_021164.1    | Ca_kabuli_chr05 | 33225248                | AA                              | GG                | 1946437788               |
| SNP_P3_69138_33225287 | NC_021164.1    | Ca_kabuli_chr05 | 33225287                | AA                              | GG                | 1946437789               |
| SNP_P3_69139_33225329 | NC_021164.1    | Ca_kabuli_chr05 | 33225329                | CC                              | TT                | 1946437791               |
| SNP_P3_69140_33225588 | NC_021164.1    | Ca_kabuli_chr05 | 33225588                | CC                              | AA                | 1946437793               |
| SNP_P3_69141_33225621 | NC_021164.1    | Ca_kabuli_chr05 | 33225621                | AA                              | GG                | 1946437794               |
| SNP_P3_69142_33225629 | NC_021164.1    | Ca_kabuli_chr05 | 33225629                | GG                              | AA                | 1946437795               |
| SNP_P3_69143_33225721 | NC_021164.1    | Ca_kabuli_chr05 | 33225721                | TT                              | CC                | 1946437797               |
| SNP_P3_69144_33333596 | NC_021164.1    | Ca_kabuli_chr05 | 33333596                | CC                              | TT                | 1946437798               |
| SNP_P3_69146_33359812 | NC_021164.1    | Ca_kabuli_chr05 | 33359812                | TT                              | AA                | 1946437800               |
| SNP_P3_69147_33378371 | NC_021164.1    | Ca_kabuli_chr05 | 33378371                | AA                              | CC                | 1946437801               |
| SNP_P3_69149_33414106 | NC_021164.1    | Ca_kabuli_chr05 | 33414106                | CC                              | AA                | 1946437803               |
| SNP_P3_69150_33423266 | NC_021164.1    | Ca_kabuli_chr05 | 33423266                | CC                              | TT                | 1946437804               |
| SNP_P3_69151_33428697 | NC_021164.1    | Ca_kabuli_chr05 | 33428697                | GG                              | AA                | 1946437806               |
| SNP_P3_69152_33435713 | NC_021164.1    | Ca_kabuli_chr05 | 33435713                | TT                              | GG                | 1946437807               |
| SNP_P3_69153_33438074 | NC_021164.1    | Ca_kabuli_chr05 | 33438074                | GG                              | AA                | 1946437809               |
| SNP_P3_69154_33438876 | NC_021164.1    | Ca_kabuli_chr05 | 33438876                | GG                              | CC                | 1946437810               |
| SNP_P3_69155_33439192 | NC_021164.1    | Ca_kabuli_chr05 | 33439192                | TT                              | CC                | 1946437812               |
| SNP_P3_69156_33439198 | NC_021164.1    | Ca_kabuli_chr05 | 33439198                | GG                              | TT                | 1946437813               |
| SNP_P3_69158_33451021 | NC_021164.1    | Ca_kabuli_chr05 | 33451021                | CC                              | AA                | 1946437815               |
| SNP_P3_69160_33457504 | NC_021164.1    | Ca_kabuli_chr05 | 33457504                | CC                              | AA                | 1946437816               |
| SNP_P3_69161_33457639 | NC_021164.1    | Ca_kabuli_chr05 | 33457639                | TT                              | CC                | 1946437818               |
| SNP_P3_69162_33457689 | NC_021164.1    | Ca_kabuli_chr05 | 33457689                | CC                              | TT                | 1946437819               |
| SNP_P3_69163_33457884 | NC_021164.1    | Ca_kabuli_chr05 | 33457884                | GG                              | TT                | 1946437821               |
| SNP_P3_69165_33457965 | NC_021164.1    | Ca_kabuli_chr05 | 33457965                | GG                              | AA                | 1946437822               |
| SNP_P3_69166_33457987 | NC_021164.1    | Ca_kabuli_chr05 | 33457987                | TT                              | CC                | 1946437824               |

| SNPs IDs              | Chromosome IDs | Chromosomes     | Physical positions (bp) | CDC Frontier (Reference genome) | (Pusa 256 & HPNB) | NCBI SNPdb Accession IDs |
|-----------------------|----------------|-----------------|-------------------------|---------------------------------|-------------------|--------------------------|
| SNP_P3_69168_33520818 | NC_021164.1    | Ca_kabuli_chr05 | 33520818                | GG                              | TT                | 1946437825               |
| SNP_P3_69170_33546527 | NC_021164.1    | Ca_kabuli_chr05 | 33546527                | TT                              | CC                | 1946437827               |
| SNP_P3_69173_33566645 | NC_021164.1    | Ca_kabuli_chr05 | 33566645                | GG                              | AA                | 1946437829               |
| SNP_P3_69174_33600032 | NC_021164.1    | Ca_kabuli_chr05 | 33600032                | AA                              | CC                | 1946437830               |
| SNP_P3_69176_33600974 | NC_021164.1    | Ca_kabuli_chr05 | 33600974                | GG                              | CC                | 1946437832               |
| SNP_P3_69178_33606803 | NC_021164.1    | Ca_kabuli_chr05 | 33606803                | CC                              | AA                | 1946437833               |
| SNP_P3_69180_33607420 | NC_021164.1    | Ca_kabuli_chr05 | 33607420                | GG                              | TT                | 1946437835               |
| SNP_P3_69181_33607429 | NC_021164.1    | Ca_kabuli_chr05 | 33607429                | TT                              | CC                | 1946437836               |
| SNP_P3_69182_33609474 | NC_021164.1    | Ca_kabuli_chr05 | 33609474                | TT                              | AA                | 1946437837               |
| SNP_P3_69184_33625260 | NC_021164.1    | Ca_kabuli_chr05 | 33625260                | GG                              | AA                | 1946437839               |
| SNP_P3_69186_33672192 | NC_021164.1    | Ca_kabuli_chr05 | 33672192                | CC                              | TT                | 1946437840               |
| SNP_P3_69187_33684329 | NC_021164.1    | Ca_kabuli_chr05 | 33684329                | CC                              | TT                | 1946437842               |
| SNP_P3_69188_33728774 | NC_021164.1    | Ca_kabuli_chr05 | 33728774                | CC                              | TT                | 1946437843               |
| SNP_P3_69189_33772909 | NC_021164.1    | Ca_kabuli_chr05 | 33772909                | GG                              | AA                | 1946437845               |
| SNP_P3_69190_33805823 | NC_021164.1    | Ca_kabuli_chr05 | 33805823                | GG                              | AA                | 1946437846               |
| SNP_P3_69191_33825478 | NC_021164.1    | Ca_kabuli_chr05 | 33825478                | AA                              | TT                | 1946437848               |
| SNP_P3_69192_33836723 | NC_021164.1    | Ca_kabuli_chr05 | 33836723                | CC                              | TT                | 1946437849               |
| SNP_P3_69193_33865085 | NC_021164.1    | Ca_kabuli_chr05 | 33865085                | TT                              | CC                | 1946437851               |
| SNP_P3_69194_33889485 | NC_021164.1    | Ca_kabuli_chr05 | 33889485                | CC                              | TT                | 1946437852               |
| SNP_P3_69195_33889493 | NC_021164.1    | Ca_kabuli_chr05 | 33889493                | CC                              | TT                | 1946437854               |
| SNP_P3_69196_33911671 | NC_021164.1    | Ca_kabuli_chr05 | 33911671                | CC                              | TT                | 1946437855               |
| SNP_P3_69198_33925492 | NC_021164.1    | Ca_kabuli_chr05 | 33925492                | GG                              | AA                | 1946437856               |
| SNP_P3_69199_33940574 | NC_021164.1    | Ca_kabuli_chr05 | 33940574                | GG                              | TT                | 1946437858               |
| SNP_P3_69201_34103209 | NC_021164.1    | Ca_kabuli_chr05 | 34103209                | GG                              | AA                | 1946437859               |
| SNP_P3_69203_34163609 | NC_021164.1    | Ca_kabuli_chr05 | 34163609                | GG                              | CC                | 1946437861               |
| SNP_P3_69205_34168995 | NC_021164.1    | Ca_kabuli_chr05 | 34168995                | GG                              | AA                | 1946437862               |
| SNP_P3_69206_34171605 | NC_021164.1    | Ca_kabuli_chr05 | 34171605                | TT                              | CC                | 1946437864               |
| SNP_P3_69207_34186144 | NC_021164.1    | Ca_kabuli_chr05 | 34186144                | CC                              | TT                | 1946437865               |
| SNP_P3_69209_34192102 | NC_021164.1    | Ca_kabuli_chr05 | 34192102                | AA                              | TT                | 1946437867               |
| SNP_P3_69210_34192105 | NC_021164.1    | Ca_kabuli_chr05 | 34192105                | TT                              | AA                | 1946437868               |
| SNP_P3_69215_34229625 | NC_021164.1    | Ca_kabuli_chr05 | 34229625                | AA                              | CC                | 1946437869               |
| SNP_P3_69222_34364651 | NC_021164.1    | Ca_kabuli_chr05 | 34364651                | CC                              | TT                | 1946437871               |
| SNP_P3_69223_34375443 | NC_021164.1    | Ca_kabuli_chr05 | 34375443                | CC                              | TT                | 1946437873               |
| SNP_P3_69224_34380931 | NC_021164.1    | Ca_kabuli_chr05 | 34380931                | CC                              | AA                | 1946437874               |
| SNP_P3_69225_34381022 | NC_021164.1    | Ca_kabuli_chr05 | 34381022                | GG                              | AA                | 1946437876               |
| SNP_P3_69226_34381347 | NC_021164.1    | Ca_kabuli_chr05 | 34381347                | CC                              | GG                | 1946437877               |
| SNP_P3_69227_34381463 | NC_021164.1    | Ca_kabuli_chr05 | 34381463                | TT                              | CC                | 1946437879               |
| SNP_P3_69228_34381516 | NC_021164.1    | Ca_kabuli_chr05 | 34381516                | TT                              | CC                | 1946437880               |
| SNP_P3_69229_34382533 | NC_021164.1    | Ca_kabuli_chr05 | 34382533                | AA                              | TT                | 1946437881               |
| SNP_P3_69230_34443716 | NC_021164.1    | Ca_kabuli_chr05 | 34443716                | TT                              | AA                | 1946437883               |
| SNP_P3_69231_34463319 | NC_021164.1    | Ca_kabuli_chr05 | 34463319                | TT                              | GG                | 1946437884               |
| SNP_P3_69233_34483641 | NC_021164.1    | Ca_kabuli_chr05 | 34483641                | GG                              | AA                | 1946437886               |



| SNPs IDs              | Chromosome IDs | Chromosomes     | Physical positions (bp) | CDC Frontier (Reference genome) | (Pusa 256 & HPNB) | NCBI SNPdb Accession IDs |
|-----------------------|----------------|-----------------|-------------------------|---------------------------------|-------------------|--------------------------|
| SNP_P3_69234_34498797 | NC_021164.1    | Ca_kabuli_chr05 | 34498797                | AA                              | CC                | 1946437887               |
| SNP_P3_69235_34500239 | NC_021164.1    | Ca_kabuli_chr05 | 34500239                | AA                              | CC                | 1946437889               |
| SNP_P3_69236_34500242 | NC_021164.1    | Ca_kabuli_chr05 | 34500242                | AA                              | TT                | 1946437890               |
| SNP_P3_69237_34521416 | NC_021164.1    | Ca_kabuli_chr05 | 34521416                | TT                              | AA                | 1946437891               |
| SNP_P3_69238_34524127 | NC_021164.1    | Ca_kabuli_chr05 | 34524127                | TT                              | CC                | 1946437893               |
| SNP_P3_69239_34546422 | NC_021164.1    | Ca_kabuli_chr05 | 34546422                | GG                              | TT                | 1946437894               |
| SNP_P3_69241_34623790 | NC_021164.1    | Ca_kabuli_chr05 | 34623790                | CC                              | TT                | 1946437896               |
| SNP_P3_69242_34672313 | NC_021164.1    | Ca_kabuli_chr05 | 34672313                | AA                              | CC                | 1946437897               |
| SNP_P3_69243_34725934 | NC_021164.1    | Ca_kabuli_chr05 | 34725934                | GG                              | AA                | 1946437899               |
| SNP_P3_69245_34777131 | NC_021164.1    | Ca_kabuli_chr05 | 34777131                | AA                              | GG                | 1946437900               |
| SNP_P3_69246_34808223 | NC_021164.1    | Ca_kabuli_chr05 | 34808223                | CC                              | TT                | 1946437902               |
| SNP_P3_69247_34830003 | NC_021164.1    | Ca_kabuli_chr05 | 34830003                | TT                              | GG                | 1946437903               |
| SNP_P3_69248_34830326 | NC_021164.1    | Ca_kabuli_chr05 | 34830326                | AA                              | TT                | 1946437904               |
| SNP_P3_69252_34874557 | NC_021164.1    | Ca_kabuli_chr05 | 34874557                | GG                              | AA                | 1946437906               |
| SNP_P3_69253_34874947 | NC_021164.1    | Ca_kabuli_chr05 | 34874947                | CC                              | TT                | 1946437907               |
| SNP_P3_69254_34875212 | NC_021164.1    | Ca_kabuli_chr05 | 34875212                | AA                              | GG                | 1946437909               |
| SNP_P3_69255_34875286 | NC_021164.1    | Ca_kabuli_chr05 | 34875286                | TT                              | CC                | 1946437910               |
| SNP_P3_69256_34875308 | NC_021164.1    | Ca_kabuli_chr05 | 34875308                | AA                              | GG                | 1946437912               |
| SNP_P3_69257_34885324 | NC_021164.1    | Ca_kabuli_chr05 | 34885324                | AA                              | TT                | 1946437913               |
| SNP_P3_69258_34898389 | NC_021164.1    | Ca_kabuli_chr05 | 34898389                | TT                              | AA                | 1946437915               |
| SNP_P3_69259_34898497 | NC_021164.1    | Ca_kabuli_chr05 | 34898497                | CC                              | GG                | 1946437916               |
| SNP_P3_69260_34919353 | NC_021164.1    | Ca_kabuli_chr05 | 34919353                | AA                              | GG                | 1946437918               |
| SNP_P3_69261_34952778 | NC_021164.1    | Ca_kabuli_chr05 | 34952778                | GG                              | TT                | 1946437919               |
| SNP_P3_69262_34953354 | NC_021164.1    | Ca_kabuli_chr05 | 34953354                | AA                              | CC                | 1946437920               |
| SNP_P3_69263_34990700 | NC_021164.1    | Ca_kabuli_chr05 | 34990700                | AA                              | GG                | 1946437922               |
| SNP_P3_69264_34996160 | NC_021164.1    | Ca_kabuli_chr05 | 34996160                | TT                              | CC                | 1946437923               |
| SNP_P3_69265_34996241 | NC_021164.1    | Ca_kabuli_chr05 | 34996241                | GG                              | AA                | 1946437925               |
| SNP_P3_69266_34998343 | NC_021164.1    | Ca_kabuli_chr05 | 34998343                | TT                              | CC                | 1946437926               |
| SNP_P3_69269_35082991 | NC_021164.1    | Ca_kabuli_chr05 | 35082991                | AA                              | TT                | 1946437928               |
| SNP_P3_69270_35082994 | NC_021164.1    | Ca_kabuli_chr05 | 35082994                | TT                              | AA                | 1946437929               |
| SNP_P3_69273_35182967 | NC_021164.1    | Ca_kabuli_chr05 | 35182967                | TT                              | CC                | 1946437931               |
| SNP_P3_69275_35197432 | NC_021164.1    | Ca_kabuli_chr05 | 35197432                | GG                              | AA                | 1946437932               |
| SNP_P3_69276_35202350 | NC_021164.1    | Ca_kabuli_chr05 | 35202350                | TT                              | CC                | 1946437934               |
| SNP_P3_69277_35202352 | NC_021164.1    | Ca_kabuli_chr05 | 35202352                | TT                              | GG                | 1946437935               |
| SNP_P3_69280_35276588 | NC_021164.1    | Ca_kabuli_chr05 | 35276588                | TT                              | CC                | 1946437937               |
| SNP_P3_69281_35312501 | NC_021164.1    | Ca_kabuli_chr05 | 35312501                | AA                              | GG                | 1946437938               |
| SNP_P3_69283_35328414 | NC_021164.1    | Ca_kabuli_chr05 | 35328414                | CC                              | TT                | 1946437939               |
| SNP_P3_69285_35339616 | NC_021164.1    | Ca_kabuli_chr05 | 35339616                | GG                              | AA                | 1946437941               |
| SNP_P3_69286_35354234 | NC_021164.1    | Ca_kabuli_chr05 | 35354234                | GG                              | AA                | 1946437942               |
| SNP_P3_69287_35362481 | NC_021164.1    | Ca_kabuli_chr05 | 35362481                | CC                              | TT                | 1946437944               |
| SNP_P3_69288_35383911 | NC_021164.1    | Ca_kabuli_chr05 | 35383911                | CC                              | AA                | 1946437945               |
| SNP_P3_69289_35410591 | NC_021164.1    | Ca_kabuli_chr05 | 35410591                | TT                              | CC                | 1946437946               |

| SNPs IDs              | Chromosome IDs | Chromosomes     | Physical positions (bp) | CDC Frontier (Reference genome) | (Pusa 256 & HPNB) | NCBI SNPdb Accession IDs |
|-----------------------|----------------|-----------------|-------------------------|---------------------------------|-------------------|--------------------------|
| SNP_P3_69290_35419819 | NC_021164.1    | Ca_kabuli_chr05 | 35419819                | AA                              | TT                | 1946437948               |
| SNP_P3_69291_35433022 | NC_021164.1    | Ca_kabuli_chr05 | 35433022                | CC                              | TT                | 1946437949               |
| SNP_P3_69292_35434215 | NC_021164.1    | Ca_kabuli_chr05 | 35434215                | TT                              | AA                | 1946437951               |
| SNP_P3_69293_35446457 | NC_021164.1    | Ca_kabuli_chr05 | 35446457                | TT                              | CC                | 1946437952               |
| SNP_P3_69295_35507381 | NC_021164.1    | Ca_kabuli_chr05 | 35507381                | TT                              | AA                | 1946437954               |
| SNP_P3_69296_35508394 | NC_021164.1    | Ca_kabuli_chr05 | 35508394                | CC                              | TT                | 1946437955               |
| SNP_P3_69299_35556935 | NC_021164.1    | Ca_kabuli_chr05 | 35556935                | TT                              | CC                | 1946437957               |
| SNP_P3_69300_35563552 | NC_021164.1    | Ca_kabuli_chr05 | 35563552                | AA                              | TT                | 1946437958               |
| SNP_P3_69301_35570453 | NC_021164.1    | Ca_kabuli_chr05 | 35570453                | GG                              | TT                | 1946437960               |
| SNP_P3_69302_35570533 | NC_021164.1    | Ca_kabuli_chr05 | 35570533                | TT                              | AA                | 1946437961               |
| SNP_P3_69303_35571452 | NC_021164.1    | Ca_kabuli_chr05 | 35571452                | AA                              | CC                | 1946437963               |
| SNP_P3_69304_35571486 | NC_021164.1    | Ca_kabuli_chr05 | 35571486                | AA                              | CC                | 1946437964               |
| SNP_P3_69305_35571850 | NC_021164.1    | Ca_kabuli_chr05 | 35571850                | TT                              | AA                | 1946437965               |
| SNP_P3_69306_35583824 | NC_021164.1    | Ca_kabuli_chr05 | 35583824                | TT                              | CC                | 1946437967               |
| SNP_P3_69308_35602909 | NC_021164.1    | Ca_kabuli_chr05 | 35602909                | TT                              | CC                | 1946437968               |
| SNP_P3_69309_35606571 | NC_021164.1    | Ca_kabuli_chr05 | 35606571                | GG                              | AA                | 1946437970               |
| SNP_P3_69310_35610001 | NC_021164.1    | Ca_kabuli_chr05 | 35610001                | TT                              | CC                | 1946437971               |
| SNP_P3_69311_35624043 | NC_021164.1    | Ca_kabuli_chr05 | 35624043                | AA                              | CC                | 1946437973               |
| SNP_P3_69312_35638940 | NC_021164.1    | Ca_kabuli_chr05 | 35638940                | TT                              | GG                | 1946437974               |
| SNP_P3_69313_35648675 | NC_021164.1    | Ca_kabuli_chr05 | 35648675                | AA                              | TT                | 1946437975               |
| SNP_P3_69314_35651148 | NC_021164.1    | Ca_kabuli_chr05 | 35651148                | TT                              | GG                | 1946437977               |
| SNP_P3_69315_35651152 | NC_021164.1    | Ca_kabuli_chr05 | 35651152                | AA                              | CC                | 1946437979               |
| SNP_P3_69317_35678243 | NC_021164.1    | Ca_kabuli_chr05 | 35678243                | GG                              | AA                | 1946437980               |
| SNP_P3_69318_35689217 | NC_021164.1    | Ca_kabuli_chr05 | 35689217                | GG                              | AA                | 1946437982               |
| SNP_P3_69320_35751242 | NC_021164.1    | Ca_kabuli_chr05 | 35751242                | AA                              | TT                | 1946437983               |
| SNP_P3_69322_35769584 | NC_021164.1    | Ca_kabuli_chr05 | 35769584                | GG                              | AA                | 1946437984               |
| SNP_P3_69323_35787115 | NC_021164.1    | Ca_kabuli_chr05 | 35787115                | CC                              | TT                | 1946437986               |
| SNP_P3_69324_35798219 | NC_021164.1    | Ca_kabuli_chr05 | 35798219                | AA                              | TT                | 1946437987               |
| SNP_P3_69325_35869171 | NC_021164.1    | Ca_kabuli_chr05 | 35869171                | TT                              | CC                | 1946437989               |
| SNP_P3_69327_35872232 | NC_021164.1    | Ca_kabuli_chr05 | 35872232                | GG                              | AA                | 1946437990               |
| SNP_P3_69328_35896656 | NC_021164.1    | Ca_kabuli_chr05 | 35896656                | AA                              | GG                | 1946437992               |
| SNP_P3_69329_35909420 | NC_021164.1    | Ca_kabuli_chr05 | 35909420                | TT                              | GG                | 1946437993               |
| SNP_P3_69330_35909424 | NC_021164.1    | Ca_kabuli_chr05 | 35909424                | AA                              | TT                | 1946437994               |
| SNP_P3_69332_35915976 | NC_021164.1    | Ca_kabuli_chr05 | 35915976                | CC                              | TT                | 1946437996               |
| SNP_P3_69333_35916254 | NC_021164.1    | Ca_kabuli_chr05 | 35916254                | GG                              | AA                | 1946437997               |
| SNP_P3_69334_35916344 | NC_021164.1    | Ca_kabuli_chr05 | 35916344                | AA                              | TT                | 1946437999               |
| SNP_P3_69336_35922065 | NC_021164.1    | Ca_kabuli_chr05 | 35922065                | CC                              | TT                | 1946438000               |
| SNP_P3_69337_35962399 | NC_021164.1    | Ca_kabuli_chr05 | 35962399                | TT                              | CC                | 1946438002               |
| SNP_P3_69338_35962419 | NC_021164.1    | Ca_kabuli_chr05 | 35962419                | CC                              | AA                | 1946438003               |
| SNP_P3_69339_35983062 | NC_021164.1    | Ca_kabuli_chr05 | 35983062                | GG                              | AA                | 1946438005               |
| SNP_P3_69340_35993283 | NC_021164.1    | Ca_kabuli_chr05 | 35993283                | AA                              | CC                | 1946438006               |
| SNP_P3_69341_36043221 | NC_021164.1    | Ca_kabuli_chr05 | 36043221                | AA                              | TT                | 1946438008               |

| SNPs IDs              | Chromosome IDs | Chromosomes     | Physical positions (bp) | CDC Frontier (Reference genome) | (Pusa 256 & HPNB) | NCBI SNPdb Accession IDs |
|-----------------------|----------------|-----------------|-------------------------|---------------------------------|-------------------|--------------------------|
| SNP_P3_69342_36052579 | NC_021164.1    | Ca_kabuli_chr05 | 36052579                | AA                              | CC                | 1946438009               |
| SNP_P3_69343_36059481 | NC_021164.1    | Ca_kabuli_chr05 | 36059481                | GG                              | CC                | 1946438011               |
| SNP_P3_69344_36071844 | NC_021164.1    | Ca_kabuli_chr05 | 36071844                | CC                              | TT                | 1946438012               |
| SNP_P3_69345_36082533 | NC_021164.1    | Ca_kabuli_chr05 | 36082533                | TT                              | AA                | 1946438014               |
| SNP_P3_69346_36084329 | NC_021164.1    | Ca_kabuli_chr05 | 36084329                | TT                              | GG                | 1946438015               |
| SNP_P3_69347_36086402 | NC_021164.1    | Ca_kabuli_chr05 | 36086402                | GG                              | AA                | 1946438016               |
| SNP_P3_69349_36109463 | NC_021164.1    | Ca_kabuli_chr05 | 36109463                | CC                              | GG                | 1946438018               |
| SNP_P3_69350_36133831 | NC_021164.1    | Ca_kabuli_chr05 | 36133831                | GG                              | AA                | 1946438019               |
| SNP_P3_69351_36190753 | NC_021164.1    | Ca_kabuli_chr05 | 36190753                | GG                              | AA                | 1946438021               |
| SNP_P3_69352_36222645 | NC_021164.1    | Ca_kabuli_chr05 | 36222645                | TT                              | AA                | 1946438023               |
| SNP_P3_69353_36254208 | NC_021164.1    | Ca_kabuli_chr05 | 36254208                | CC                              | AA                | 1946438024               |
| SNP_P3_69354_36276541 | NC_021164.1    | Ca_kabuli_chr05 | 36276541                | AA                              | TT                | 1946438026               |
| SNP_P3_69358_36346780 | NC_021164.1    | Ca_kabuli_chr05 | 36346780                | TT                              | CC                | 1946438027               |
| SNP_P3_69359_36376950 | NC_021164.1    | Ca_kabuli_chr05 | 36376950                | TT                              | AA                | 1946438029               |
| SNP_P3_69360_36379162 | NC_021164.1    | Ca_kabuli_chr05 | 36379162                | TT                              | AA                | 1946438030               |
| SNP_P3_69361_36379387 | NC_021164.1    | Ca_kabuli_chr05 | 36379387                | TT                              | AA                | 1946438032               |
| SNP_P3_69362_36385165 | NC_021164.1    | Ca_kabuli_chr05 | 36385165                | GG                              | AA                | 1946438033               |
| SNP_P3_69363_36388830 | NC_021164.1    | Ca_kabuli_chr05 | 36388830                | TT                              | CC                | 1946438035               |
| SNP_P3_69364_36408719 | NC_021164.1    | Ca_kabuli_chr05 | 36408719                | GG                              | AA                | 1946438036               |
| SNP_P3_69366_36429373 | NC_021164.1    | Ca_kabuli_chr05 | 36429373                | CC                              | TT                | 1946438038               |
| SNP_P3_69367_36444533 | NC_021164.1    | Ca_kabuli_chr05 | 36444533                | GG                              | CC                | 1946438039               |
| SNP_P3_69368_36445229 | NC_021164.1    | Ca_kabuli_chr05 | 36445229                | TT                              | AA                | 1946438040               |
| SNP_P3_69369_36445324 | NC_021164.1    | Ca_kabuli_chr05 | 36445324                | CC                              | TT                | 1946438042               |
| SNP_P3_69370_36445326 | NC_021164.1    | Ca_kabuli_chr05 | 36445326                | CC                              | TT                | 1946438043               |
| SNP_P3_69371_36445350 | NC_021164.1    | Ca_kabuli_chr05 | 36445350                | GG                              | AA                | 1946438045               |
| SNP_P3_69372_36445365 | NC_021164.1    | Ca_kabuli_chr05 | 36445365                | AA                              | GG                | 1946438046               |
| SNP_P3_69373_36445369 | NC_021164.1    | Ca_kabuli_chr05 | 36445369                | CC                              | TT                | 1946438048               |
| SNP_P3_69374_36445372 | NC_021164.1    | Ca_kabuli_chr05 | 36445372                | TT                              | CC                | 1946438049               |
| SNP_P3_69376_36454565 | NC_021164.1    | Ca_kabuli_chr05 | 36454565                | TT                              | CC                | 1946438051               |
| SNP_P3_69377_36476848 | NC_021164.1    | Ca_kabuli_chr05 | 36476848                | CC                              | TT                | 1946438052               |
| SNP_P3_69378_36486198 | NC_021164.1    | Ca_kabuli_chr05 | 36486198                | GG                              | CC                | 1946438054               |
| SNP_P3_69379_36492417 | NC_021164.1    | Ca_kabuli_chr05 | 36492417                | AA                              | GG                | 1946438055               |
| SNP_P3_69380_36492445 | NC_021164.1    | Ca_kabuli_chr05 | 36492445                | AA                              | GG                | 1946438057               |
| SNP_P3_69381_36492446 | NC_021164.1    | Ca_kabuli_chr05 | 36492446                | AA                              | GG                | 1946438058               |
| SNP_P3_69382_36492487 | NC_021164.1    | Ca_kabuli_chr05 | 36492487                | CC                              | TT                | 1946438059               |
| SNP_P3_69383_36492753 | NC_021164.1    | Ca_kabuli_chr05 | 36492753                | AA                              | GG                | 1946438061               |
| SNP_P3_69384_36492851 | NC_021164.1    | Ca_kabuli_chr05 | 36492851                | AA                              | GG                | 1946438062               |
| SNP_P3_69385_36493240 | NC_021164.1    | Ca_kabuli_chr05 | 36493240                | AA                              | GG                | 1946438064               |
| SNP_P3_69386_36513977 | NC_021164.1    | Ca_kabuli_chr05 | 36513977                | CC                              | TT                | 1946438065               |
| SNP_P3_69387_36527379 | NC_021164.1    | Ca_kabuli_chr05 | 36527379                | AA                              | GG                | 1946438067               |
| SNP_P3_69388_36527914 | NC_021164.1    | Ca_kabuli_chr05 | 36527914                | CC                              | TT                | 1946438069               |
| SNP_P3_69389_36537165 | NC_021164.1    | Ca_kabuli_chr05 | 36537165                | GG                              | TT                | 1946438070               |

| SNPs IDs              | Chromosome IDs | Chromosomes     | Physical positions (bp) | CDC Frontier (Reference genome) | (Pusa 256 & HPNB) | NCBI SNPdb Accession IDs |
|-----------------------|----------------|-----------------|-------------------------|---------------------------------|-------------------|--------------------------|
| SNP_P3_69390_36538079 | NC_021164.1    | Ca_kabuli_chr05 | 36538079                | AA                              | GG                | 1946438072               |
| SNP_P3_69391_36550885 | NC_021164.1    | Ca_kabuli_chr05 | 36550885                | GG                              | AA                | 1946438073               |
| SNP_P3_69392_36551636 | NC_021164.1    | Ca_kabuli_chr05 | 36551636                | TT                              | AA                | 1946438074               |
| SNP_P3_69393_36559431 | NC_021164.1    | Ca_kabuli_chr05 | 36559431                | CC                              | AA                | 1946438076               |
| SNP_P3_69394_36582005 | NC_021164.1    | Ca_kabuli_chr05 | 36582005                | AA                              | GG                | 1946438077               |
| SNP_P3_69397_36607416 | NC_021164.1    | Ca_kabuli_chr05 | 36607416                | AA                              | GG                | 1946438079               |
| SNP_P3_69398_36639575 | NC_021164.1    | Ca_kabuli_chr05 | 36639575                | TT                              | CC                | 1946438080               |
| SNP_P3_69399_36659808 | NC_021164.1    | Ca_kabuli_chr05 | 36659808                | GG                              | AA                | 1946438082               |
| SNP_P3_69401_36670844 | NC_021164.1    | Ca_kabuli_chr05 | 36670844                | GG                              | AA                | 1946438083               |
| SNP_P3_69402_36726943 | NC_021164.1    | Ca_kabuli_chr05 | 36726943                | TT                              | CC                | 1946438085               |
| SNP_P3_69403_36726970 | NC_021164.1    | Ca_kabuli_chr05 | 36726970                | CC                              | TT                | 1946438086               |
| SNP_P3_69404_36739511 | NC_021164.1    | Ca_kabuli_chr05 | 36739511                | GG                              | AA                | 1946438088               |
| SNP_P3_69406_36747984 | NC_021164.1    | Ca_kabuli_chr05 | 36747984                | TT                              | CC                | 1946438090               |
| SNP_P3_69407_36751936 | NC_021164.1    | Ca_kabuli_chr05 | 36751936                | AA                              | GG                | 1946438091               |
| SNP_P3_69409_36829828 | NC_021164.1    | Ca_kabuli_chr05 | 36829828                | GG                              | AA                | 1946438093               |
| SNP_P3_69410_36883497 | NC_021164.1    | Ca_kabuli_chr05 | 36883497                | GG                              | AA                | 1946438094               |
| SNP_P3_69411_36884231 | NC_021164.1    | Ca_kabuli_chr05 | 36884231                | GG                              | AA                | 1946438096               |
| SNP_P3_69413_36903761 | NC_021164.1    | Ca_kabuli_chr05 | 36903761                | AA                              | GG                | 1946438097               |
| SNP_P3_69414_36903792 | NC_021164.1    | Ca_kabuli_chr05 | 36903792                | TT                              | CC                | 1946438099               |
| SNP_P3_69416_36951633 | NC_021164.1    | Ca_kabuli_chr05 | 36951633                | GG                              | AA                | 1946438100               |
| SNP_P3_69417_36957487 | NC_021164.1    | Ca_kabuli_chr05 | 36957487                | AA                              | CC                | 1946438102               |
| SNP_P3_69418_36957774 | NC_021164.1    | Ca_kabuli_chr05 | 36957774                | GG                              | AA                | 1946438103               |
| SNP_P3_69421_37088679 | NC_021164.1    | Ca_kabuli_chr05 | 37088679                | AA                              | GG                | 1946438105               |
| SNP_P3_69424_37115106 | NC_021164.1    | Ca_kabuli_chr05 | 37115106                | AA                              | CC                | 1946438106               |
| SNP_P3_69426_37125054 | NC_021164.1    | Ca_kabuli_chr05 | 37125054                | GG                              | AA                | 1946438108               |
| SNP_P3_69427_37173874 | NC_021164.1    | Ca_kabuli_chr05 | 37173874                | CC                              | TT                | 1946438109               |
| SNP_P3_69428_37174786 | NC_021164.1    | Ca_kabuli_chr05 | 37174786                | TT                              | CC                | 1946438111               |
| SNP_P3_69429_37183684 | NC_021164.1    | Ca_kabuli_chr05 | 37183684                | AA                              | CC                | 1946438112               |
| SNP_P3_69430_37183686 | NC_021164.1    | Ca_kabuli_chr05 | 37183686                | AA                              | CC                | 1946438114               |
| SNP_P3_69431_37217549 | NC_021164.1    | Ca_kabuli_chr05 | 37217549                | TT                              | AA                | 1946438115               |
| SNP_P3_69432_37217550 | NC_021164.1    | Ca_kabuli_chr05 | 37217550                | CC                              | TT                | 1946438117               |
| SNP_P3_69434_37223383 | NC_021164.1    | Ca_kabuli_chr05 | 37223383                | CC                              | TT                | 1946438118               |
| SNP_P3_69437_37236426 | NC_021164.1    | Ca_kabuli_chr05 | 37236426                | AA                              | GG                | 1946438120               |
| SNP_P3_69438_37278461 | NC_021164.1    | Ca_kabuli_chr05 | 37278461                | AA                              | GG                | 1946438121               |
| SNP_P3_69439_37285264 | NC_021164.1    | Ca_kabuli_chr05 | 37285264                | GG                              | AA                | 1946438123               |
| SNP_P3_69440_37285279 | NC_021164.1    | Ca_kabuli_chr05 | 37285279                | GG                              | CC                | 1946438124               |
| SNP_P3_69441_37285297 | NC_021164.1    | Ca_kabuli_chr05 | 37285297                | CC                              | TT                | 1946438125               |
| SNP_P3_69442_37285315 | NC_021164.1    | Ca_kabuli_chr05 | 37285315                | TT                              | AA                | 1946438127               |
| SNP_P3_69443_37285524 | NC_021164.1    | Ca_kabuli_chr05 | 37285524                | CC                              | TT                | 1946438128               |
| SNP_P3_69444_37285532 | NC_021164.1    | Ca_kabuli_chr05 | 37285532                | AA                              | TT                | 1946438130               |
| SNP_P3_69445_37285533 | NC_021164.1    | Ca_kabuli_chr05 | 37285533                | TT                              | AA                | 1946438131               |
| SNP_P3_69446_37285535 | NC_021164.1    | Ca_kabuli_chr05 | 37285535                | AA                              | GG                | 1946438133               |

| SNPs IDs              | Chromosome IDs | Chromosomes     | Physical positions (bp) | CDC Frontier (Reference genome) | (Pusa 256 & HPNB) | NCBI SNPdb Accession IDs |
|-----------------------|----------------|-----------------|-------------------------|---------------------------------|-------------------|--------------------------|
| SNP_P3_69447_37285963 | NC_021164.1    | Ca_kabuli_chr05 | 37285963                | TT                              | CC                | 1946438135               |
| SNP_P3_69448_37286079 | NC_021164.1    | Ca_kabuli_chr05 | 37286079                | CC                              | AA                | 1946438136               |
| SNP_P3_69451_37327287 | NC_021164.1    | Ca_kabuli_chr05 | 37327287                | AA                              | TT                | 1946438138               |
| SNP_P3_69452_37453729 | NC_021164.1    | Ca_kabuli_chr05 | 37453729                | CC                              | AA                | 1946438139               |
| SNP_P3_69453_37494457 | NC_021164.1    | Ca_kabuli_chr05 | 37494457                | TT                              | AA                | 1946438141               |
| SNP_P3_69454_37541286 | NC_021164.1    | Ca_kabuli_chr05 | 37541286                | CC                              | TT                | 1946438142               |
| SNP_P3_69455_37562226 | NC_021164.1    | Ca_kabuli_chr05 | 37562226                | GG                              | AA                | 1946438144               |
| SNP_P3_69456_37567325 | NC_021164.1    | Ca_kabuli_chr05 | 37567325                | AA                              | GG                | 1946438145               |
| SNP_P3_69457_37567418 | NC_021164.1    | Ca_kabuli_chr05 | 37567418                | AA                              | GG                | 1946438147               |
| SNP_P3_69458_37567436 | NC_021164.1    | Ca_kabuli_chr05 | 37567436                | AA                              | CC                | 1946438148               |
| SNP_P3_69459_37567532 | NC_021164.1    | Ca_kabuli_chr05 | 37567532                | AA                              | GG                | 1946438150               |
| SNP_P3_69460_37567689 | NC_021164.1    | Ca_kabuli_chr05 | 37567689                | AA                              | GG                | 1946438151               |
| SNP_P3_69461_37567806 | NC_021164.1    | Ca_kabuli_chr05 | 37567806                | AA                              | CC                | 1946438153               |
| SNP_P3_69462_37567915 | NC_021164.1    | Ca_kabuli_chr05 | 37567915                | TT                              | CC                | 1946438154               |
| SNP_P3_69463_37574828 | NC_021164.1    | Ca_kabuli_chr05 | 37574828                | GG                              | AA                | 1946438156               |
| SNP_P3_69467_37647148 | NC_021164.1    | Ca_kabuli_chr05 | 37647148                | GG                              | AA                | 1946438157               |
| SNP_P3_69469_37673293 | NC_021164.1    | Ca_kabuli_chr05 | 37673293                | GG                              | AA                | 1946438159               |
| SNP_P3_69470_37686471 | NC_021164.1    | Ca_kabuli_chr05 | 37686471                | GG                              | AA                | 1946438160               |
| SNP_P3_69471_37686472 | NC_021164.1    | Ca_kabuli_chr05 | 37686472                | GG                              | AA                | 1946438162               |
| SNP_P3_69472_37700529 | NC_021164.1    | Ca_kabuli_chr05 | 37700529                | GG                              | TT                | 1946438163               |
| SNP_P3_69473_37701887 | NC_021164.1    | Ca_kabuli_chr05 | 37701887                | AA                              | TT                | 1946438165               |
| SNP_P3_69474_37715530 | NC_021164.1    | Ca_kabuli_chr05 | 37715530                | CC                              | TT                | 1946438166               |
| SNP_P3_69475_37727759 | NC_021164.1    | Ca_kabuli_chr05 | 37727759                | AA                              | TT                | 1946438168               |
| SNP_P3_69477_37822139 | NC_021164.1    | Ca_kabuli_chr05 | 37822139                | CC                              | TT                | 1946438169               |
| SNP_P3_69478_37826277 | NC_021164.1    | Ca_kabuli_chr05 | 37826277                | TT                              | AA                | 1946438171               |
| SNP_P3_69479_37839251 | NC_021164.1    | Ca_kabuli_chr05 | 37839251                | GG                              | AA                | 1946438172               |
| SNP_P3_69481_37887670 | NC_021164.1    | Ca_kabuli_chr05 | 37887670                | AA                              | CC                | 1946438174               |
| SNP_P3_69482_37888337 | NC_021164.1    | Ca_kabuli_chr05 | 37888337                | AA                              | GG                | 1946438176               |
| SNP_P3_69483_37888343 | NC_021164.1    | Ca_kabuli_chr05 | 37888343                | AA                              | CC                | 1946438177               |
| SNP_P3_69484_37888347 | NC_021164.1    | Ca_kabuli_chr05 | 37888347                | AA                              | GG                | 1946438179               |
| SNP_P3_69486_37919734 | NC_021164.1    | Ca_kabuli_chr05 | 37919734                | TT                              | CC                | 1946438180               |
| SNP_P3_69487_37978366 | NC_021164.1    | Ca_kabuli_chr05 | 37978366                | TT                              | CC                | 1946438182               |
| SNP_P3_69488_37978371 | NC_021164.1    | Ca_kabuli_chr05 | 37978371                | AA                              | GG                | 1946438183               |
| SNP_P3_69490_37980963 | NC_021164.1    | Ca_kabuli_chr05 | 37980963                | TT                              | CC                | 1946438185               |
| SNP_P3_69491_37981025 | NC_021164.1    | Ca_kabuli_chr05 | 37981025                | AA                              | GG                | 1946438186               |
| SNP_P3_69492_37981030 | NC_021164.1    | Ca_kabuli_chr05 | 37981030                | AA                              | TT                | 1946438188               |
| SNP_P3_69493_37981066 | NC_021164.1    | Ca_kabuli_chr05 | 37981066                | AA                              | GG                | 1946438189               |
| SNP_P3_69494_37981131 | NC_021164.1    | Ca_kabuli_chr05 | 37981131                | CC                              | AA                | 1946438191               |
| SNP_P3_69495_37981954 | NC_021164.1    | Ca_kabuli_chr05 | 37981954                | GG                              | TT                | 1946438192               |
| SNP_P3_69496_37982074 | NC_021164.1    | Ca_kabuli_chr05 | 37982074                | TT                              | AA                | 1946438194               |
| SNP_P3_69497_37982092 | NC_021164.1    | Ca_kabuli_chr05 | 37982092                | CC                              | TT                | 1946438195               |
| SNP_P3_69498_37982285 | NC_021164.1    | Ca_kabuli_chr05 | 37982285                | CC                              | TT                | 1946438197               |

| SNPs IDs              | Chromosome IDs | Chromosomes     | Physical positions (bp) | CDC Frontier (Reference genome) | (Pusa 256 & HPNB) | NCBI SNPdb Accession IDs |
|-----------------------|----------------|-----------------|-------------------------|---------------------------------|-------------------|--------------------------|
| SNP_P3_69499_37982498 | NC_021164.1    | Ca_kabuli_chr05 | 37982498                | CC                              | GG                | 1946438198               |
| SNP_P3_69500_37983208 | NC_021164.1    | Ca_kabuli_chr05 | 37983208                | AA                              | GG                | 1946438200               |
| SNP_P3_69501_37983231 | NC_021164.1    | Ca_kabuli_chr05 | 37983231                | GG                              | AA                | 1946438201               |
| SNP_P3_69502_37985035 | NC_021164.1    | Ca_kabuli_chr05 | 37985035                | CC                              | AA                | 1946438202               |
| SNP_P3_69503_37985370 | NC_021164.1    | Ca_kabuli_chr05 | 37985370                | CC                              | TT                | 1946438204               |
| SNP_P3_69505_37986217 | NC_021164.1    | Ca_kabuli_chr05 | 37986217                | GG                              | AA                | 1946438205               |
| SNP_P3_69506_37986336 | NC_021164.1    | Ca_kabuli_chr05 | 37986336                | CC                              | GG                | 1946438207               |
| SNP_P3_69507_37986409 | NC_021164.1    | Ca_kabuli_chr05 | 37986409                | TT                              | AA                | 1946438208               |
| SNP_P3_69508_37986410 | NC_021164.1    | Ca_kabuli_chr05 | 37986410                | TT                              | AA                | 1946438210               |
| SNP_P3_69509_37986415 | NC_021164.1    | Ca_kabuli_chr05 | 37986415                | TT                              | CC                | 1946438211               |
| SNP_P3_69510_37986501 | NC_021164.1    | Ca_kabuli_chr05 | 37986501                | TT                              | GG                | 1946438213               |
| SNP_P3_69511_37986745 | NC_021164.1    | Ca_kabuli_chr05 | 37986745                | TT                              | CC                | 1946438214               |
| SNP_P3_69512_37987656 | NC_021164.1    | Ca_kabuli_chr05 | 37987656                | CC                              | TT                | 1946438216               |
| SNP_P3_69513_37987708 | NC_021164.1    | Ca_kabuli_chr05 | 37987708                | AA                              | TT                | 1946438217               |
| SNP_P3_69514_37987720 | NC_021164.1    | Ca_kabuli_chr05 | 37987720                | AA                              | CC                | 1946438219               |
| SNP_P3_69515_37987750 | NC_021164.1    | Ca_kabuli_chr05 | 37987750                | TT                              | CC                | 1946438220               |
| SNP_P3_69516_37987766 | NC_021164.1    | Ca_kabuli_chr05 | 37987766                | TT                              | CC                | 1946438222               |
| SNP_P3_69517_37987774 | NC_021164.1    | Ca_kabuli_chr05 | 37987774                | TT                              | CC                | 1946438223               |
| SNP_P3_69518_37988054 | NC_021164.1    | Ca_kabuli_chr05 | 37988054                | CC                              | GG                | 1946438225               |
| SNP_P3_69519_37988067 | NC_021164.1    | Ca_kabuli_chr05 | 37988067                | CC                              | GG                | 1946438226               |
| SNP_P3_69520_37988306 | NC_021164.1    | Ca_kabuli_chr05 | 37988306                | CC                              | TT                | 1946438227               |
| SNP_P3_69521_37988596 | NC_021164.1    | Ca_kabuli_chr05 | 37988596                | AA                              | GG                | 1946438229               |
| SNP_P3_69522_37988632 | NC_021164.1    | Ca_kabuli_chr05 | 37988632                | GG                              | TT                | 1946438230               |
| SNP_P3_69523_37988690 | NC_021164.1    | Ca_kabuli_chr05 | 37988690                | CC                              | TT                | 1946438232               |
| SNP_P3_69524_37988706 | NC_021164.1    | Ca_kabuli_chr05 | 37988706                | AA                              | GG                | 1946438233               |
| SNP_P3_69525_37989414 | NC_021164.1    | Ca_kabuli_chr05 | 37989414                | GG                              | TT                | 1946438235               |
| SNP_P3_69526_37989467 | NC_021164.1    | Ca_kabuli_chr05 | 37989467                | GG                              | CC                | 1946438236               |
| SNP_P3_69527_37989476 | NC_021164.1    | Ca_kabuli_chr05 | 37989476                | CC                              | AA                | 1946438238               |
| SNP_P3_69528_37991861 | NC_021164.1    | Ca_kabuli_chr05 | 37991861                | GG                              | TT                | 1946438239               |
| SNP_P3_69529_37992772 | NC_021164.1    | Ca_kabuli_chr05 | 37992772                | TT                              | CC                | 1946438241               |
| SNP_P3_69530_37993906 | NC_021164.1    | Ca_kabuli_chr05 | 37993906                | CC                              | TT                | 1946438242               |
| SNP_P3_69531_37999369 | NC_021164.1    | Ca_kabuli_chr05 | 37999369                | AA                              | GG                | 1946438244               |
| SNP_P3_69532_37999527 | NC_021164.1    | Ca_kabuli_chr05 | 37999527                | GG                              | AA                | 1946438245               |
| SNP_P3_69533_38005109 | NC_021164.1    | Ca_kabuli_chr05 | 38005109                | CC                              | AA                | 1946438247               |
| SNP_P3_69535_38010522 | NC_021164.1    | Ca_kabuli_chr05 | 38010522                | AA                              | GG                | 1946438248               |
| SNP_P3_69536_38011855 | NC_021164.1    | Ca_kabuli_chr05 | 38011855                | GG                              | AA                | 1946438250               |
| SNP_P3_69538_38015026 | NC_021164.1    | Ca_kabuli_chr05 | 38015026                | TT                              | GG                | 1946438251               |
| SNP_P3_69539_38015905 | NC_021164.1    | Ca_kabuli_chr05 | 38015905                | GG                              | CC                | 1946438253               |
| SNP_P3_69540_38016606 | NC_021164.1    | Ca_kabuli_chr05 | 38016606                | CC                              | TT                | 1946438254               |
| SNP_P3_69542_38016807 | NC_021164.1    | Ca_kabuli_chr05 | 38016807                | GG                              | AA                | 1946438256               |
| SNP_P3_69543_38016968 | NC_021164.1    | Ca_kabuli_chr05 | 38016968                | TT                              | GG                | 1946438257               |
| SNP_P3_69544_38017229 | NC_021164.1    | Ca_kabuli_chr05 | 38017229                | TT                              | AA                | 1946438259               |

| SNPs IDs              | Chromosome IDs | Chromosomes     | Physical positions (bp) | CDC Frontier (Reference genome) | (Pusa 256 & HPNB) | NCBI SNPdb Accession IDs |
|-----------------------|----------------|-----------------|-------------------------|---------------------------------|-------------------|--------------------------|
| SNP_P3_69545_38017313 | NC_021164.1    | Ca_kabuli_chr05 | 38017313                | TT                              | CC                | 1946438260               |
| SNP_P3_69546_38017322 | NC_021164.1    | Ca_kabuli_chr05 | 38017322                | AA                              | TT                | 1946438262               |
| SNP_P3_69547_38017666 | NC_021164.1    | Ca_kabuli_chr05 | 38017666                | TT                              | GG                | 1946438263               |
| SNP_P3_69548_38017952 | NC_021164.1    | Ca_kabuli_chr05 | 38017952                | TT                              | AA                | 1946438264               |
| SNP_P3_69549_38017968 | NC_021164.1    | Ca_kabuli_chr05 | 38017968                | GG                              | AA                | 1946438266               |
| SNP_P3_69551_38020607 | NC_021164.1    | Ca_kabuli_chr05 | 38020607                | AA                              | TT                | 1946438267               |
| SNP_P3_69552_38020668 | NC_021164.1    | Ca_kabuli_chr05 | 38020668                | TT                              | GG                | 1946438269               |
| SNP_P3_69553_38020701 | NC_021164.1    | Ca_kabuli_chr05 | 38020701                | CC                              | GG                | 1946438270               |
| SNP_P3_69554_38020708 | NC_021164.1    | Ca_kabuli_chr05 | 38020708                | TT                              | GG                | 1946438272               |
| SNP_P3_69555_38020715 | NC_021164.1    | Ca_kabuli_chr05 | 38020715                | GG                              | AA                | 1946438273               |
| SNP_P3_69556_38020718 | NC_021164.1    | Ca_kabuli_chr05 | 38020718                | TT                              | CC                | 1946438275               |
| SNP_P3_69557_38020962 | NC_021164.1    | Ca_kabuli_chr05 | 38020962                | CC                              | GG                | 1946438276               |
| SNP_P3_69558_38020984 | NC_021164.1    | Ca_kabuli_chr05 | 38020984                | GG                              | AA                | 1946438277               |
| SNP_P3_69559_38021380 | NC_021164.1    | Ca_kabuli_chr05 | 38021380                | AA                              | TT                | 1946438279               |
| SNP_P3_69560_38021585 | NC_021164.1    | Ca_kabuli_chr05 | 38021585                | AA                              | GG                | 1946438280               |
| SNP_P3_69561_38022660 | NC_021164.1    | Ca_kabuli_chr05 | 38022660                | GG                              | AA                | 1946438282               |
| SNP_P3_69562_38022661 | NC_021164.1    | Ca_kabuli_chr05 | 38022661                | AA                              | GG                | 1946438283               |
| SNP_P3_69563_38023075 | NC_021164.1    | Ca_kabuli_chr05 | 38023075                | CC                              | TT                | 1946438285               |
| SNP_P3_69564_38023269 | NC_021164.1    | Ca_kabuli_chr05 | 38023269                | GG                              | AA                | 1946438286               |
| SNP_P3_69565_38023296 | NC_021164.1    | Ca_kabuli_chr05 | 38023296                | CC                              | TT                | 1946438288               |
| SNP_P3_69566_38023297 | NC_021164.1    | Ca_kabuli_chr05 | 38023297                | TT                              | CC                | 1946438289               |
| SNP_P3_69567_38023332 | NC_021164.1    | Ca_kabuli_chr05 | 38023332                | GG                              | AA                | 1946438290               |
| SNP_P3_69568_38023344 | NC_021164.1    | Ca_kabuli_chr05 | 38023344                | AA                              | GG                | 1946438292               |
| SNP_P3_69569_38023934 | NC_021164.1    | Ca_kabuli_chr05 | 38023934                | AA                              | TT                | 1946438293               |
| SNP_P3_69570_38024283 | NC_021164.1    | Ca_kabuli_chr05 | 38024283                | CC                              | GG                | 1946438295               |
| SNP_P3_69571_38024289 | NC_021164.1    | Ca_kabuli_chr05 | 38024289                | CC                              | AA                | 1946438296               |
| SNP_P3_69572_38024744 | NC_021164.1    | Ca_kabuli_chr05 | 38024744                | TT                              | AA                | 1946438298               |
| SNP_P3_69573_38024866 | NC_021164.1    | Ca_kabuli_chr05 | 38024866                | AA                              | GG                | 1946438299               |
| SNP_P3_69574_38024868 | NC_021164.1    | Ca_kabuli_chr05 | 38024868                | CC                              | TT                | 1946438300               |
| SNP_P3_69575_38024884 | NC_021164.1    | Ca_kabuli_chr05 | 38024884                | GG                              | TT                | 1946438302               |
| SNP_P3_69578_38026194 | NC_021164.1    | Ca_kabuli_chr05 | 38026194                | CC                              | TT                | 1946438303               |
| SNP_P3_69579_38026752 | NC_021164.1    | Ca_kabuli_chr05 | 38026752                | CC                              | GG                | 1946438305               |
| SNP_P3_69581_38027093 | NC_021164.1    | Ca_kabuli_chr05 | 38027093                | CC                              | TT                | 1946438306               |
| SNP_P3_69582_38027131 | NC_021164.1    | Ca_kabuli_chr05 | 38027131                | TT                              | AA                | 1946438308               |
| SNP_P3_69583_38027271 | NC_021164.1    | Ca_kabuli_chr05 | 38027271                | CC                              | TT                | 1946438309               |
| SNP_P3_69585_38029876 | NC_021164.1    | Ca_kabuli_chr05 | 38029876                | CC                              | AA                | 1946438310               |
| SNP_P3_69586_38031524 | NC_021164.1    | Ca_kabuli_chr05 | 38031524                | CC                              | TT                | 1946438312               |
| SNP_P3_69587_38031765 | NC_021164.1    | Ca_kabuli_chr05 | 38031765                | TT                              | GG                | 1946438313               |
| SNP_P3_69588_38032686 | NC_021164.1    | Ca_kabuli_chr05 | 38032686                | CC                              | GG                | 1946438315               |
| SNP_P3_69589_38032694 | NC_021164.1    | Ca_kabuli_chr05 | 38032694                | AA                              | CC                | 1946438316               |
| SNP_P3_69590_38033163 | NC_021164.1    | Ca_kabuli_chr05 | 38033163                | AA                              | GG                | 1946438318               |
| SNP_P3_69591_38033325 | NC_021164.1    | Ca_kabuli_chr05 | 38033325                | AA                              | GG                | 1946438319               |

| SNPs IDs              | Chromosome IDs | Chromosomes     | Physical positions (bp) | CDC Frontier (Reference genome) | (Pusa 256 & HPNB) | NCBI SNPdb Accession IDs |
|-----------------------|----------------|-----------------|-------------------------|---------------------------------|-------------------|--------------------------|
| SNP_P3_69593_38033712 | NC_021164.1    | Ca_kabuli_chr05 | 38033712                | TT                              | CC                | 1946438321               |
| SNP_P3_69594_38033719 | NC_021164.1    | Ca_kabuli_chr05 | 38033719                | CC                              | TT                | 1946438322               |
| SNP_P3_69598_38036812 | NC_021164.1    | Ca_kabuli_chr05 | 38036812                | TT                              | CC                | 1946438323               |
| SNP_P3_69599_38036831 | NC_021164.1    | Ca_kabuli_chr05 | 38036831                | TT                              | CC                | 1946438325               |
| SNP_P3_69601_38043744 | NC_021164.1    | Ca_kabuli_chr05 | 38043744                | GG                              | CC                | 1946438326               |
| SNP_P3_69602_38043749 | NC_021164.1    | Ca_kabuli_chr05 | 38043749                | AA                              | TT                | 1946438328               |
| SNP_P3_69603_38043992 | NC_021164.1    | Ca_kabuli_chr05 | 38043992                | CC                              | AA                | 1946438329               |
| SNP_P3_69604_38043994 | NC_021164.1    | Ca_kabuli_chr05 | 38043994                | TT                              | AA                | 1946438331               |
| SNP_P3_69605_38044044 | NC_021164.1    | Ca_kabuli_chr05 | 38044044                | TT                              | AA                | 1946438332               |
| SNP_P3_69606_38044358 | NC_021164.1    | Ca_kabuli_chr05 | 38044358                | GG                              | AA                | 1946438334               |
| SNP_P3_69607_38044386 | NC_021164.1    | Ca_kabuli_chr05 | 38044386                | TT                              | AA                | 1946438335               |
| SNP_P3_69608_38044388 | NC_021164.1    | Ca_kabuli_chr05 | 38044388                | AA                              | GG                | 1946438336               |
| SNP_P3_69609_38045698 | NC_021164.1    | Ca_kabuli_chr05 | 38045698                | GG                              | AA                | 1946438338               |
| SNP_P3_69610_38046049 | NC_021164.1    | Ca_kabuli_chr05 | 38046049                | CC                              | TT                | 1946438339               |
| SNP_P3_69611_38046067 | NC_021164.1    | Ca_kabuli_chr05 | 38046067                | TT                              | AA                | 1946438341               |
| SNP_P3_69612_38047809 | NC_021164.1    | Ca_kabuli_chr05 | 38047809                | GG                              | AA                | 1946438342               |
| SNP_P3_69614_38048515 | NC_021164.1    | Ca_kabuli_chr05 | 38048515                | TT                              | GG                | 1946438344               |
| SNP_P3_69615_38048560 | NC_021164.1    | Ca_kabuli_chr05 | 38048560                | TT                              | CC                | 1946438345               |
| SNP_P3_69616_38048799 | NC_021164.1    | Ca_kabuli_chr05 | 38048799                | TT                              | AA                | 1946438346               |
| SNP_P3_69617_38048922 | NC_021164.1    | Ca_kabuli_chr05 | 38048922                | TT                              | AA                | 1946438348               |
| SNP_P3_69618_38049244 | NC_021164.1    | Ca_kabuli_chr05 | 38049244                | GG                              | AA                | 1946438349               |
| SNP_P3_69619_38050144 | NC_021164.1    | Ca_kabuli_chr05 | 38050144                | AA                              | GG                | 1946438351               |
| SNP_P3_69620_38050413 | NC_021164.1    | Ca_kabuli_chr05 | 38050413                | GG                              | TT                | 1946438352               |
| SNP_P3_69621_38050442 | NC_021164.1    | Ca_kabuli_chr05 | 38050442                | GG                              | AA                | 1946438353               |
| SNP_P3_69622_38052586 | NC_021164.1    | Ca_kabuli_chr05 | 38052586                | GG                              | AA                | 1946438355               |
| SNP_P3_69623_38052614 | NC_021164.1    | Ca_kabuli_chr05 | 38052614                | CC                              | TT                | 1946438356               |
| SNP_P3_69624_38052826 | NC_021164.1    | Ca_kabuli_chr05 | 38052826                | TT                              | AA                | 1946438358               |
| SNP_P3_69625_38053354 | NC_021164.1    | Ca_kabuli_chr05 | 38053354                | TT                              | CC                | 1946438359               |
| SNP_P3_69626_38055391 | NC_021164.1    | Ca_kabuli_chr05 | 38055391                | TT                              | CC                | 1946438361               |
| SNP_P3_69627_38055751 | NC_021164.1    | Ca_kabuli_chr05 | 38055751                | GG                              | AA                | 1946438362               |
| SNP_P3_69628_38057072 | NC_021164.1    | Ca_kabuli_chr05 | 38057072                | CC                              | TT                | 1946438364               |
| SNP_P3_69629_38058276 | NC_021164.1    | Ca_kabuli_chr05 | 38058276                | CC                              | TT                | 1946438365               |
| SNP_P3_69630_38058344 | NC_021164.1    | Ca_kabuli_chr05 | 38058344                | GG                              | AA                | 1946438367               |
| SNP_P3_69631_38059974 | NC_021164.1    | Ca_kabuli_chr05 | 38059974                | AA                              | GG                | 1946438368               |
| SNP_P3_69633_38062848 | NC_021164.1    | Ca_kabuli_chr05 | 38062848                | GG                              | TT                | 1946438369               |
| SNP_P3_69634_38063311 | NC_021164.1    | Ca_kabuli_chr05 | 38063311                | TT                              | GG                | 1946438371               |
| SNP_P3_69635_38063336 | NC_021164.1    | Ca_kabuli_chr05 | 38063336                | AA                              | GG                | 1946438372               |
| SNP_P3_69636_38063353 | NC_021164.1    | Ca_kabuli_chr05 | 38063353                | AA                              | GG                | 1946438374               |
| SNP_P3_69637_38063579 | NC_021164.1    | Ca_kabuli_chr05 | 38063579                | CC                              | TT                | 1946438375               |
| SNP_P3_69638_38063602 | NC_021164.1    | Ca_kabuli_chr05 | 38063602                | CC                              | TT                | 1946438377               |
| SNP_P3_69639_38063606 | NC_021164.1    | Ca_kabuli_chr05 | 38063606                | AA                              | GG                | 1946438378               |
| SNP_P3_69640_38063615 | NC_021164.1    | Ca_kabuli_chr05 | 38063615                | TT                              | AA                | 1946438380               |



| SNPs IDs              | Chromosome IDs | Chromosomes     | Physical positions (bp) | CDC Frontier (Reference genome) | (Pusa 256 & HPNB) | NCBI SNPdb Accession IDs |
|-----------------------|----------------|-----------------|-------------------------|---------------------------------|-------------------|--------------------------|
| SNP_P3_69641_38066557 | NC_021164.1    | Ca_kabuli_chr05 | 38066557                | CC                              | GG                | 1946438381               |
| SNP_P3_69642_38067074 | NC_021164.1    | Ca_kabuli_chr05 | 38067074                | AA                              | GG                | 1946438382               |
| SNP_P3_69643_38067355 | NC_021164.1    | Ca_kabuli_chr05 | 38067355                | TT                              | CC                | 1946438384               |
| SNP_P3_69644_38067399 | NC_021164.1    | Ca_kabuli_chr05 | 38067399                | CC                              | TT                | 1946438386               |
| SNP_P3_69645_38068301 | NC_021164.1    | Ca_kabuli_chr05 | 38068301                | TT                              | AA                | 1946438387               |
| SNP_P3_69646_38068585 | NC_021164.1    | Ca_kabuli_chr05 | 38068585                | GG                              | AA                | 1946438388               |
| SNP_P3_69647_38068593 | NC_021164.1    | Ca_kabuli_chr05 | 38068593                | GG                              | TT                | 1946438390               |
| SNP_P3_69649_38068736 | NC_021164.1    | Ca_kabuli_chr05 | 38068736                | GG                              | AA                | 1946438391               |
| SNP_P3_69650_38070884 | NC_021164.1    | Ca_kabuli_chr05 | 38070884                | AA                              | CC                | 1946438393               |
| SNP_P3_69651_38074762 | NC_021164.1    | Ca_kabuli_chr05 | 38074762                | CC                              | TT                | 1946438394               |
| SNP_P3_69653_38076469 | NC_021164.1    | Ca_kabuli_chr05 | 38076469                | CC                              | TT                | 1946438396               |
| SNP_P3_69654_38076525 | NC_021164.1    | Ca_kabuli_chr05 | 38076525                | TT                              | CC                | 1946438397               |
| SNP_P3_69655_38076551 | NC_021164.1    | Ca_kabuli_chr05 | 38076551                | AA                              | GG                | 1946438398               |
| SNP_P3_69656_38076831 | NC_021164.1    | Ca_kabuli_chr05 | 38076831                | TT                              | CC                | 1946438400               |
| SNP_P3_69657_38076925 | NC_021164.1    | Ca_kabuli_chr05 | 38076925                | AA                              | GG                | 1946438401               |
| SNP_P3_69658_38076950 | NC_021164.1    | Ca_kabuli_chr05 | 38076950                | GG                              | TT                | 1946438403               |
| SNP_P3_69660_38085784 | NC_021164.1    | Ca_kabuli_chr05 | 38085784                | AA                              | CC                | 1946438404               |
| SNP_P3_69661_38085793 | NC_021164.1    | Ca_kabuli_chr05 | 38085793                | GG                              | TT                | 1946438406               |
| SNP_P3_69662_38085816 | NC_021164.1    | Ca_kabuli_chr05 | 38085816                | TT                              | CC                | 1946438407               |
| SNP_P3_69663_38085841 | NC_021164.1    | Ca_kabuli_chr05 | 38085841                | AA                              | GG                | 1946438408               |
| SNP_P3_69664_38085857 | NC_021164.1    | Ca_kabuli_chr05 | 38085857                | TT                              | CC                | 1946438410               |
| SNP_P3_69665_38085894 | NC_021164.1    | Ca_kabuli_chr05 | 38085894                | TT                              | AA                | 1946438411               |
| SNP_P3_69666_38086139 | NC_021164.1    | Ca_kabuli_chr05 | 38086139                | GG                              | CC                | 1946438413               |
| SNP_P3_69667_38087643 | NC_021164.1    | Ca_kabuli_chr05 | 38087643                | TT                              | GG                | 1946438414               |
| SNP_P3_69668_38088189 | NC_021164.1    | Ca_kabuli_chr05 | 38088189                | GG                              | AA                | 1946438415               |
| SNP_P3_69669_38088715 | NC_021164.1    | Ca_kabuli_chr05 | 38088715                | TT                              | AA                | 1946438417               |
| SNP_P3_69670_38088718 | NC_021164.1    | Ca_kabuli_chr05 | 38088718                | TT                              | CC                | 1946438418               |
| SNP_P3_69671_38088794 | NC_021164.1    | Ca_kabuli_chr05 | 38088794                | TT                              | GG                | 1946438420               |
| SNP_P3_69673_38093980 | NC_021164.1    | Ca_kabuli_chr05 | 38093980                | AA                              | CC                | 1946438421               |
| SNP_P3_69674_38093984 | NC_021164.1    | Ca_kabuli_chr05 | 38093984                | CC                              | TT                | 1946438423               |
| SNP_P3_69675_38094026 | NC_021164.1    | Ca_kabuli_chr05 | 38094026                | CC                              | TT                | 1946438424               |
| SNP_P3_69676_38095630 | NC_021164.1    | Ca_kabuli_chr05 | 38095630                | GG                              | AA                | 1946438425               |
| SNP_P3_69677_38095649 | NC_021164.1    | Ca_kabuli_chr05 | 38095649                | TT                              | CC                | 1946438427               |
| SNP_P3_69678_38095783 | NC_021164.1    | Ca_kabuli_chr05 | 38095783                | CC                              | AA                | 1946438428               |
| SNP_P3_69679_38096321 | NC_021164.1    | Ca_kabuli_chr05 | 38096321                | TT                              | AA                | 1946438430               |
| SNP_P3_69680_38096493 | NC_021164.1    | Ca_kabuli_chr05 | 38096493                | TT                              | CC                | 1946438431               |
| SNP_P3_69681_38097795 | NC_021164.1    | Ca_kabuli_chr05 | 38097795                | CC                              | TT                | 1946438432               |
| SNP_P3_69682_38097910 | NC_021164.1    | Ca_kabuli_chr05 | 38097910                | CC                              | TT                | 1946438434               |
| SNP_P3_69683_38098072 | NC_021164.1    | Ca_kabuli_chr05 | 38098072                | AA                              | GG                | 1946438435               |
| SNP_P3_69684_38098081 | NC_021164.1    | Ca_kabuli_chr05 | 38098081                | CC                              | TT                | 1946438437               |
| SNP_P3_69685_38098102 | NC_021164.1    | Ca_kabuli_chr05 | 38098102                | TT                              | AA                | 1946438438               |
| SNP_P3_69686_38098660 | NC_021164.1    | Ca_kabuli_chr05 | 38098660                | AA                              | TT                | 1946438440               |

| SNPs IDs              | Chromosome IDs | Chromosomes     | Physical positions (bp) | CDC Frontier (Reference genome) | (Pusa 256 & HPNB) | NCBI SNPdb Accession IDs |
|-----------------------|----------------|-----------------|-------------------------|---------------------------------|-------------------|--------------------------|
| SNP_P3_69688_38099474 | NC_021164.1    | Ca_kabuli_chr05 | 38099474                | AA                              | GG                | 1946438441               |
| SNP_P3_69689_38099475 | NC_021164.1    | Ca_kabuli_chr05 | 38099475                | GG                              | AA                | 1946438443               |
| SNP_P3_69690_38099778 | NC_021164.1    | Ca_kabuli_chr05 | 38099778                | AA                              | GG                | 1946438444               |
| SNP_P3_69692_38102135 | NC_021164.1    | Ca_kabuli_chr05 | 38102135                | TT                              | CC                | 1946438446               |
| SNP_P3_69693_38102228 | NC_021164.1    | Ca_kabuli_chr05 | 38102228                | CC                              | TT                | 1946438447               |
| SNP_P3_69695_38103016 | NC_021164.1    | Ca_kabuli_chr05 | 38103016                | AA                              | GG                | 1946438448               |
| SNP_P3_69696_38103024 | NC_021164.1    | Ca_kabuli_chr05 | 38103024                | TT                              | AA                | 1946438450               |
| SNP_P3_69697_38103056 | NC_021164.1    | Ca_kabuli_chr05 | 38103056                | AA                              | CC                | 1946438451               |
| SNP_P3_69698_38103077 | NC_021164.1    | Ca_kabuli_chr05 | 38103077                | CC                              | TT                | 1946438453               |
| SNP_P3_69699_38103351 | NC_021164.1    | Ca_kabuli_chr05 | 38103351                | CC                              | TT                | 1946438454               |
| SNP_P3_69700_38103372 | NC_021164.1    | Ca_kabuli_chr05 | 38103372                | TT                              | CC                | 1946438455               |
| SNP_P3_69701_38103664 | NC_021164.1    | Ca_kabuli_chr05 | 38103664                | TT                              | CC                | 1946438457               |
| SNP_P3_69702_38103877 | NC_021164.1    | Ca_kabuli_chr05 | 38103877                | CC                              | TT                | 1946438458               |
| SNP_P3_69703_38107737 | NC_021164.1    | Ca_kabuli_chr05 | 38107737                | CC                              | TT                | 1946438460               |
| SNP_P3_69704_38109944 | NC_021164.1    | Ca_kabuli_chr05 | 38109944                | CC                              | AA                | 1946438461               |
| SNP_P3_69705_38110588 | NC_021164.1    | Ca_kabuli_chr05 | 38110588                | TT                              | GG                | 1946438463               |
| SNP_P3_69706_38110592 | NC_021164.1    | Ca_kabuli_chr05 | 38110592                | CC                              | TT                | 1946438464               |
| SNP_P3_69707_38115526 | NC_021164.1    | Ca_kabuli_chr05 | 38115526                | GG                              | CC                | 1946438465               |
| SNP_P3_69708_38115952 | NC_021164.1    | Ca_kabuli_chr05 | 38115952                | CC                              | TT                | 1946438467               |
| SNP_P3_69709_38116880 | NC_021164.1    | Ca_kabuli_chr05 | 38116880                | TT                              | CC                | 1946438468               |
| SNP_P3_69710_38116928 | NC_021164.1    | Ca_kabuli_chr05 | 38116928                | CC                              | TT                | 1946438470               |
| SNP_P3_69711_38116943 | NC_021164.1    | Ca_kabuli_chr05 | 38116943                | TT                              | CC                | 1946438471               |
| SNP_P3_69712_38117024 | NC_021164.1    | Ca_kabuli_chr05 | 38117024                | AA                              | TT                | 1946438473               |
| SNP_P3_69713_38117688 | NC_021164.1    | Ca_kabuli_chr05 | 38117688                | AA                              | GG                | 1946438474               |
| SNP_P3_69715_38118178 | NC_021164.1    | Ca_kabuli_chr05 | 38118178                | TT                              | GG                | 1946438475               |
| SNP_P3_69716_38118763 | NC_021164.1    | Ca_kabuli_chr05 | 38118763                | AA                              | GG                | 1946438477               |
| SNP_P3_69717_38118778 | NC_021164.1    | Ca_kabuli_chr05 | 38118778                | AA                              | TT                | 1946438479               |
| SNP_P3_69718_38119183 | NC_021164.1    | Ca_kabuli_chr05 | 38119183                | CC                              | TT                | 1946438480               |
| SNP_P3_69719_38119382 | NC_021164.1    | Ca_kabuli_chr05 | 38119382                | TT                              | AA                | 1946438481               |
| SNP_P3_69720_38120164 | NC_021164.1    | Ca_kabuli_chr05 | 38120164                | AA                              | CC                | 1946438483               |
| SNP_P3_69721_38120178 | NC_021164.1    | Ca_kabuli_chr05 | 38120178                | GG                              | AA                | 1946438484               |
| SNP_P3_69722_38121742 | NC_021164.1    | Ca_kabuli_chr05 | 38121742                | AA                              | GG                | 1946438485               |
| SNP_P3_69723_38126519 | NC_021164.1    | Ca_kabuli_chr05 | 38126519                | CC                              | TT                | 1946438486               |
| SNP_P3_69724_38126551 | NC_021164.1    | Ca_kabuli_chr05 | 38126551                | AA                              | TT                | 1946438487               |
| SNP_P3_69726_38127064 | NC_021164.1    | Ca_kabuli_chr05 | 38127064                | TT                              | CC                | 1946438488               |
| SNP_P3_69727_38127511 | NC_021164.1    | Ca_kabuli_chr05 | 38127511                | AA                              | GG                | 1946438489               |
| SNP_P3_69728_38127515 | NC_021164.1    | Ca_kabuli_chr05 | 38127515                | CC                              | GG                | 1946438490               |
| SNP_P3_69729_38127649 | NC_021164.1    | Ca_kabuli_chr05 | 38127649                | GG                              | TT                | 1946438491               |
| SNP_P3_69730_38127650 | NC_021164.1    | Ca_kabuli_chr05 | 38127650                | CC                              | AA                | 1946438492               |
| SNP_P3_69731_38131366 | NC_021164.1    | Ca_kabuli_chr05 | 38131366                | CC                              | GG                | 1946438493               |
| SNP_P3_69732_38131379 | NC_021164.1    | Ca_kabuli_chr05 | 38131379                | GG                              | TT                | 1946438494               |
| SNP_P3_69733_38132992 | NC_021164.1    | Ca_kabuli_chr05 | 38132992                | TT                              | CC                | 1946438495               |

| SNPs IDs              | Chromosome IDs | Chromosomes     | Physical positions (bp) | CDC Frontier (Reference genome) | (Pusa 256 & HPNB) | NCBI SNPdb Accession IDs |
|-----------------------|----------------|-----------------|-------------------------|---------------------------------|-------------------|--------------------------|
| SNP_P3_69734_38133045 | NC_021164.1    | Ca_kabuli_chr05 | 38133045                | AA                              | GG                | 1946438496               |
| SNP_P3_69735_38133194 | NC_021164.1    | Ca_kabuli_chr05 | 38133194                | GG                              | TT                | 1946438497               |
| SNP_P3_69736_38133278 | NC_021164.1    | Ca_kabuli_chr05 | 38133278                | TT                              | AA                | 1946438498               |
| SNP_P3_69737_38133320 | NC_021164.1    | Ca_kabuli_chr05 | 38133320                | GG                              | AA                | 1946438499               |
| SNP_P3_69738_38133794 | NC_021164.1    | Ca_kabuli_chr05 | 38133794                | CC                              | TT                | 1946438500               |
| SNP_P3_69739_38134102 | NC_021164.1    | Ca_kabuli_chr05 | 38134102                | TT                              | AA                | 1946438501               |
| SNP_P3_69740_38137038 | NC_021164.1    | Ca_kabuli_chr05 | 38137038                | CC                              | TT                | 1946438502               |
| SNP_P3_69741_38137039 | NC_021164.1    | Ca_kabuli_chr05 | 38137039                | TT                              | CC                | 1946438503               |
| SNP_P3_69742_38137083 | NC_021164.1    | Ca_kabuli_chr05 | 38137083                | GG                              | AA                | 1946438504               |
| SNP_P3_69743_38138148 | NC_021164.1    | Ca_kabuli_chr05 | 38138148                | TT                              | CC                | 1946438505               |
| SNP_P3_69744_38138715 | NC_021164.1    | Ca_kabuli_chr05 | 38138715                | AA                              | CC                | 1946438506               |
| SNP_P3_69746_38142316 | NC_021164.1    | Ca_kabuli_chr05 | 38142316                | AA                              | TT                | 1946438507               |
| SNP_P3_69747_38145741 | NC_021164.1    | Ca_kabuli_chr05 | 38145741                | TT                              | CC                | 1946438508               |
| SNP_P3_69748_38146272 | NC_021164.1    | Ca_kabuli_chr05 | 38146272                | GG                              | AA                | 1946438509               |
| SNP_P3_69749_38146277 | NC_021164.1    | Ca_kabuli_chr05 | 38146277                | TT                              | AA                | 1946438510               |
| SNP_P3_69750_38147773 | NC_021164.1    | Ca_kabuli_chr05 | 38147773                | GG                              | AA                | 1946438511               |
| SNP_P3_69751_38147858 | NC_021164.1    | Ca_kabuli_chr05 | 38147858                | AA                              | GG                | 1946438512               |
| SNP_P3_69752_38147886 | NC_021164.1    | Ca_kabuli_chr05 | 38147886                | CC                              | TT                | 1946438513               |
| SNP_P3_69753_38147913 | NC_021164.1    | Ca_kabuli_chr05 | 38147913                | AA                              | GG                | 1946438514               |
| SNP_P3_69754_38147914 | NC_021164.1    | Ca_kabuli_chr05 | 38147914                | AA                              | GG                | 1946438515               |
| SNP_P3_69755_38148149 | NC_021164.1    | Ca_kabuli_chr05 | 38148149                | CC                              | GG                | 1946438516               |
| SNP_P3_69756_38148221 | NC_021164.1    | Ca_kabuli_chr05 | 38148221                | CC                              | GG                | 1946438517               |
| SNP_P3_69757_38148353 | NC_021164.1    | Ca_kabuli_chr05 | 38148353                | AA                              | GG                | 1946438518               |
| SNP_P3_69759_38149204 | NC_021164.1    | Ca_kabuli_chr05 | 38149204                | CC                              | GG                | 1946438519               |
| SNP_P3_69760_38149354 | NC_021164.1    | Ca_kabuli_chr05 | 38149354                | AA                              | GG                | 1946438520               |
| SNP_P3_69761_38149460 | NC_021164.1    | Ca_kabuli_chr05 | 38149460                | GG                              | AA                | 1946438522               |
| SNP_P3_69762_38150389 | NC_021164.1    | Ca_kabuli_chr05 | 38150389                | AA                              | CC                | 1946438523               |
| SNP_P3_69763_38150426 | NC_021164.1    | Ca_kabuli_chr05 | 38150426                | CC                              | TT                | 1946438525               |
| SNP_P3_69764_38152784 | NC_021164.1    | Ca_kabuli_chr05 | 38152784                | AA                              | GG                | 1946438526               |
| SNP_P3_69765_38153143 | NC_021164.1    | Ca_kabuli_chr05 | 38153143                | AA                              | CC                | 1946438528               |
| SNP_P3_69766_38153552 | NC_021164.1    | Ca_kabuli_chr05 | 38153552                | CC                              | GG                | 1946438530               |
| SNP_P3_69767_38153757 | NC_021164.1    | Ca_kabuli_chr05 | 38153757                | GG                              | AA                | 1946438531               |
| SNP_P3_69768_38153824 | NC_021164.1    | Ca_kabuli_chr05 | 38153824                | TT                              | CC                | 1946438533               |
| SNP_P3_69769_38154688 | NC_021164.1    | Ca_kabuli_chr05 | 38154688                | CC                              | GG                | 1946438534               |
| SNP_P3_69771_38156792 | NC_021164.1    | Ca_kabuli_chr05 | 38156792                | GG                              | AA                | 1946438537               |
| SNP_P3_69772_38156806 | NC_021164.1    | Ca_kabuli_chr05 | 38156806                | CC                              | TT                | 1946438538               |
| SNP_P3_69773_38156807 | NC_021164.1    | Ca_kabuli_chr05 | 38156807                | TT                              | CC                | 1946438540               |
| SNP_P3_69774_38157116 | NC_021164.1    | Ca_kabuli_chr05 | 38157116                | CC                              | TT                | 1946438541               |
| SNP_P3_69775_38157117 | NC_021164.1    | Ca_kabuli_chr05 | 38157117                | TT                              | CC                | 1946438543               |
| SNP_P3_69776_38157122 | NC_021164.1    | Ca_kabuli_chr05 | 38157122                | GG                              | AA                | 1946438544               |
| SNP_P3_69777_38157659 | NC_021164.1    | Ca_kabuli_chr05 | 38157659                | AA                              | GG                | 1946438545               |
| SNP_P3_69778_38157667 | NC_021164.1    | Ca_kabuli_chr05 | 38157667                | GG                              | AA                | 1946438547               |

| SNPs IDs              | Chromosome IDs | Chromosomes     | Physical positions (bp) | CDC Frontier (Reference genome) | (Pusa 256 & HPNB) | NCBI SNPdb Accession IDs |
|-----------------------|----------------|-----------------|-------------------------|---------------------------------|-------------------|--------------------------|
| SNP_P3_69779_38157941 | NC_021164.1    | Ca_kabuli_chr05 | 38157941                | TT                              | CC                | 1946438548               |
| SNP_P3_69781_38159777 | NC_021164.1    | Ca_kabuli_chr05 | 38159777                | AA                              | GG                | 1946438550               |
| SNP_P3_69782_38159784 | NC_021164.1    | Ca_kabuli_chr05 | 38159784                | TT                              | CC                | 1946438551               |
| SNP_P3_69783_38159975 | NC_021164.1    | Ca_kabuli_chr05 | 38159975                | GG                              | AA                | 1946438553               |
| SNP_P3_69784_38159998 | NC_021164.1    | Ca_kabuli_chr05 | 38159998                | GG                              | AA                | 1946438554               |
| SNP_P3_69785_38160029 | NC_021164.1    | Ca_kabuli_chr05 | 38160029                | CC                              | TT                | 1946438556               |
| SNP_P3_69786_38160082 | NC_021164.1    | Ca_kabuli_chr05 | 38160082                | GG                              | CC                | 1946438558               |
| SNP_P3_69787_38160241 | NC_021164.1    | Ca_kabuli_chr05 | 38160241                | TT                              | CC                | 1946438559               |
| SNP_P3_69788_38160388 | NC_021164.1    | Ca_kabuli_chr05 | 38160388                | CC                              | GG                | 1946438561               |
| SNP_P3_69789_38160402 | NC_021164.1    | Ca_kabuli_chr05 | 38160402                | GG                              | TT                | 1946438562               |
| SNP_P3_69790_38160452 | NC_021164.1    | Ca_kabuli_chr05 | 38160452                | AA                              | GG                | 1946438563               |
| SNP_P3_69791_38160507 | NC_021164.1    | Ca_kabuli_chr05 | 38160507                | AA                              | GG                | 1946438565               |
| SNP_P3_69792_38165057 | NC_021164.1    | Ca_kabuli_chr05 | 38165057                | GG                              | CC                | 1946438566               |
| SNP_P3_69793_38165260 | NC_021164.1    | Ca_kabuli_chr05 | 38165260                | GG                              | AA                | 1946438568               |
| SNP_P3_69794_38165299 | NC_021164.1    | Ca_kabuli_chr05 | 38165299                | TT                              | CC                | 1946438569               |
| SNP_P3_69795_38165335 | NC_021164.1    | Ca_kabuli_chr05 | 38165335                | AA                              | TT                | 1946438571               |
| SNP_P3_69796_38210165 | NC_021164.1    | Ca_kabuli_chr05 | 38210165                | TT                              | CC                | 1946438572               |
| SNP_P3_69797_38220737 | NC_021164.1    | Ca_kabuli_chr05 | 38220737                | CC                              | GG                | 1946438574               |
| SNP_P3_69798_38224129 | NC_021164.1    | Ca_kabuli_chr05 | 38224129                | GG                              | AA                | 1946438575               |
| SNP_P3_69799_38228592 | NC_021164.1    | Ca_kabuli_chr05 | 38228592                | TT                              | GG                | 1946438601               |
| SNP_P3_69800_38228663 | NC_021164.1    | Ca_kabuli_chr05 | 38228663                | AA                              | GG                | 1946438602               |
| SNP_P3_69801_38228973 | NC_021164.1    | Ca_kabuli_chr05 | 38228973                | GG                              | AA                | 1946438604               |
| SNP_P3_69802_38229012 | NC_021164.1    | Ca_kabuli_chr05 | 38229012                | TT                              | CC                | 1946438605               |
| SNP_P3_69803_38229053 | NC_021164.1    | Ca_kabuli_chr05 | 38229053                | AA                              | GG                | 1946438607               |
| SNP_P3_69804_38235664 | NC_021164.1    | Ca_kabuli_chr05 | 38235664                | GG                              | CC                | 1946438608               |
| SNP_P3_69807_38261213 | NC_021164.1    | Ca_kabuli_chr05 | 38261213                | AA                              | GG                | 1946438610               |
| SNP_P3_69808_38261309 | NC_021164.1    | Ca_kabuli_chr05 | 38261309                | AA                              | CC                | 1946438611               |
| SNP_P3_69809_38285467 | NC_021164.1    | Ca_kabuli_chr05 | 38285467                | TT                              | CC                | 1946438613               |
| SNP_P3_69810_38323236 | NC_021164.1    | Ca_kabuli_chr05 | 38323236                | AA                              | GG                | 1946438614               |
| SNP_P3_69811_38323239 | NC_021164.1    | Ca_kabuli_chr05 | 38323239                | AA                              | GG                | 1946438616               |
| SNP_P3_69812_38365879 | NC_021164.1    | Ca_kabuli_chr05 | 38365879                | AA                              | GG                | 1946438617               |
| SNP_P3_69813_38373038 | NC_021164.1    | Ca_kabuli_chr05 | 38373038                | TT                              | CC                | 1946438619               |
| SNP_P3_69814_38406010 | NC_021164.1    | Ca_kabuli_chr05 | 38406010                | AA                              | CC                | 1946438620               |
| SNP_P3_69816_38407290 | NC_021164.1    | Ca_kabuli_chr05 | 38407290                | GG                              | AA                | 1946438622               |
| SNP_P3_69817_38407291 | NC_021164.1    | Ca_kabuli_chr05 | 38407291                | GG                              | AA                | 1946438623               |
| SNP_P3_69818_38407302 | NC_021164.1    | Ca_kabuli_chr05 | 38407302                | AA                              | GG                | 1946438625               |
| SNP_P3_69819_38407316 | NC_021164.1    | Ca_kabuli_chr05 | 38407316                | CC                              | AA                | 1946438626               |
| SNP_P3_69820_38407331 | NC_021164.1    | Ca_kabuli_chr05 | 38407331                | GG                              | TT                | 1946438628               |
| SNP_P3_69821_38407349 | NC_021164.1    | Ca_kabuli_chr05 | 38407349                | TT                              | CC                | 1946438629               |
| SNP_P3_69822_38407362 | NC_021164.1    | Ca_kabuli_chr05 | 38407362                | AA                              | GG                | 1946438631               |
| SNP_P3_69823_38407397 | NC_021164.1    | Ca_kabuli_chr05 | 38407397                | TT                              | AA                | 1946438632               |
| SNP_P3_69824_38407399 | NC_021164.1    | Ca_kabuli_chr05 | 38407399                | GG                              | AA                | 1946438634               |

| SNPs IDs              | Chromosome IDs | Chromosomes     | Physical positions (bp) | CDC Frontier (Reference genome) | (Pusa 256 & HPNB) | NCBI SNPdb Accession IDs |
|-----------------------|----------------|-----------------|-------------------------|---------------------------------|-------------------|--------------------------|
| SNP_P3_69825_38407420 | NC_021164.1    | Ca_kabuli_chr05 | 38407420                | GG                              | AA                | 1946438635               |
| SNP_P3_69826_38407428 | NC_021164.1    | Ca_kabuli_chr05 | 38407428                | TT                              | CC                | 1946438637               |
| SNP_P3_69827_38407439 | NC_021164.1    | Ca_kabuli_chr05 | 38407439                | GG                              | AA                | 1946438638               |
| SNP_P3_69828_38407529 | NC_021164.1    | Ca_kabuli_chr05 | 38407529                | AA                              | GG                | 1946438639               |
| SNP_P3_69829_38407532 | NC_021164.1    | Ca_kabuli_chr05 | 38407532                | CC                              | TT                | 1946438641               |
| SNP_P3_69830_38407581 | NC_021164.1    | Ca_kabuli_chr05 | 38407581                | AA                              | CC                | 1946438642               |
| SNP_P3_69831_38407630 | NC_021164.1    | Ca_kabuli_chr05 | 38407630                | AA                              | GG                | 1946438644               |
| SNP_P3_69832_38425388 | NC_021164.1    | Ca_kabuli_chr05 | 38425388                | TT                              | CC                | 1946438646               |
| SNP_P3_69833_38425532 | NC_021164.1    | Ca_kabuli_chr05 | 38425532                | CC                              | TT                | 1946438647               |
| SNP_P3_69834_38431010 | NC_021164.1    | Ca_kabuli_chr05 | 38431010                | AA                              | GG                | 1946438649               |
| SNP_P3_69835_38432466 | NC_021164.1    | Ca_kabuli_chr05 | 38432466                | TT                              | GG                | 1946438650               |
| SNP_P3_69836_38432585 | NC_021164.1    | Ca_kabuli_chr05 | 38432585                | CC                              | GG                | 1946438652               |
| SNP_P3_69837_38432627 | NC_021164.1    | Ca_kabuli_chr05 | 38432627                | TT                              | AA                | 1946438653               |
| SNP_P3_69838_38432763 | NC_021164.1    | Ca_kabuli_chr05 | 38432763                | TT                              | CC                | 1946438655               |
| SNP_P3_69839_38432881 | NC_021164.1    | Ca_kabuli_chr05 | 38432881                | AA                              | GG                | 1946438656               |
| SNP_P3_69840_38432936 | NC_021164.1    | Ca_kabuli_chr05 | 38432936                | AA                              | CC                | 1946438658               |
| SNP_P3_69841_38432991 | NC_021164.1    | Ca_kabuli_chr05 | 38432991                | CC                              | TT                | 1946438659               |
| SNP_P3_69842_38433089 | NC_021164.1    | Ca_kabuli_chr05 | 38433089                | AA                              | GG                | 1946438660               |
| SNP_P3_69843_38433195 | NC_021164.1    | Ca_kabuli_chr05 | 38433195                | AA                              | GG                | 1946438662               |
| SNP_P3_69844_38433296 | NC_021164.1    | Ca_kabuli_chr05 | 38433296                | TT                              | CC                | 1946438663               |
| SNP_P3_69845_38476431 | NC_021164.1    | Ca_kabuli_chr05 | 38476431                | GG                              | AA                | 1946438665               |
| SNP_P3_69846_38476563 | NC_021164.1    | Ca_kabuli_chr05 | 38476563                | GG                              | AA                | 1946438666               |
| SNP_P3_69847_38476621 | NC_021164.1    | Ca_kabuli_chr05 | 38476621                | GG                              | TT                | 1946438668               |
| SNP_P3_69849_38476789 | NC_021164.1    | Ca_kabuli_chr05 | 38476789                | AA                              | GG                | 1946438669               |
| SNP_P3_69850_38476801 | NC_021164.1    | Ca_kabuli_chr05 | 38476801                | TT                              | CC                | 1946438671               |
| SNP_P3_69851_38476869 | NC_021164.1    | Ca_kabuli_chr05 | 38476869                | AA                              | GG                | 1946438672               |
| SNP_P3_69852_38476879 | NC_021164.1    | Ca_kabuli_chr05 | 38476879                | TT                              | CC                | 1946438674               |
| SNP_P3_69853_38476894 | NC_021164.1    | Ca_kabuli_chr05 | 38476894                | TT                              | AA                | 1946438675               |
| SNP_P3_69854_38476895 | NC_021164.1    | Ca_kabuli_chr05 | 38476895                | CC                              | TT                | 1946438677               |
| SNP_P3_69855_38476934 | NC_021164.1    | Ca_kabuli_chr05 | 38476934                | AA                              | CC                | 1946438678               |
| SNP_P3_69856_38476935 | NC_021164.1    | Ca_kabuli_chr05 | 38476935                | TT                              | GG                | 1946438679               |
| SNP_P3_69857_38476989 | NC_021164.1    | Ca_kabuli_chr05 | 38476989                | AA                              | GG                | 1946438681               |
| SNP_P3_69858_38476990 | NC_021164.1    | Ca_kabuli_chr05 | 38476990                | AA                              | GG                | 1946438682               |
| SNP_P3_69859_38477009 | NC_021164.1    | Ca_kabuli_chr05 | 38477009                | TT                              | CC                | 1946438684               |
| SNP_P3_69861_38520337 | NC_021164.1    | Ca_kabuli_chr05 | 38520337                | AA                              | TT                | 1946438685               |
| SNP_P3_69862_38598619 | NC_021164.1    | Ca_kabuli_chr05 | 38598619                | TT                              | CC                | 1946438687               |
| SNP_P3_69863_38598658 | NC_021164.1    | Ca_kabuli_chr05 | 38598658                | CC                              | TT                | 1946438688               |
| SNP_P3_69864_38598660 | NC_021164.1    | Ca_kabuli_chr05 | 38598660                | AA                              | GG                | 1946438690               |
| SNP_P3_69865_38598687 | NC_021164.1    | Ca_kabuli_chr05 | 38598687                | CC                              | TT                | 1946438691               |
| SNP_P3_69866_38613576 | NC_021164.1    | Ca_kabuli_chr05 | 38613576                | TT                              | AA                | 1946438692               |
| SNP_P3_69867_38652326 | NC_021164.1    | Ca_kabuli_chr05 | 38652326                | AA                              | GG                | 1946438694               |
| SNP_P3_69868_38661236 | NC_021164.1    | Ca_kabuli_chr05 | 38661236                | TT                              | CC                | 1946438696               |

| SNPs IDs              | Chromosome IDs | Chromosomes     | Physical positions (bp) | CDC Frontier (Reference genome) | (Pusa 256 & HPNB) | NCBI SNPdb Accession IDs |
|-----------------------|----------------|-----------------|-------------------------|---------------------------------|-------------------|--------------------------|
| SNP_P3_69869_38692013 | NC_021164.1    | Ca_kabuli_chr05 | 38692013                | TT                              | CC                | 1946438697               |
| SNP_P3_69870_38692015 | NC_021164.1    | Ca_kabuli_chr05 | 38692015                | TT                              | CC                | 1946438699               |
| SNP_P3_69871_38723616 | NC_021164.1    | Ca_kabuli_chr05 | 38723616                | GG                              | AA                | 1946438700               |
| SNP_P3_69872_38724413 | NC_021164.1    | Ca_kabuli_chr05 | 38724413                | CC                              | TT                | 1946438702               |
| SNP_P3_69873_38749841 | NC_021164.1    | Ca_kabuli_chr05 | 38749841                | AA                              | CC                | 1946438703               |
| SNP_P3_69874_38753474 | NC_021164.1    | Ca_kabuli_chr05 | 38753474                | GG                              | AA                | 1946438705               |
| SNP_P3_69875_38755531 | NC_021164.1    | Ca_kabuli_chr05 | 38755531                | GG                              | TT                | 1946438706               |
| SNP_P3_69878_38765085 | NC_021164.1    | Ca_kabuli_chr05 | 38765085                | AA                              | CC                | 1946438707               |
| SNP_P3_69879_38779947 | NC_021164.1    | Ca_kabuli_chr05 | 38779947                | CC                              | TT                | 1946438709               |
| SNP_P3_69881_38813794 | NC_021164.1    | Ca_kabuli_chr05 | 38813794                | GG                              | AA                | 1946438710               |
| SNP_P3_69882_38815279 | NC_021164.1    | Ca_kabuli_chr05 | 38815279                | TT                              | GG                | 1946438712               |
| SNP_P3_69883_38815282 | NC_021164.1    | Ca_kabuli_chr05 | 38815282                | GG                              | CC                | 1946438713               |
| SNP_P3_69884_38844001 | NC_021164.1    | Ca_kabuli_chr05 | 38844001                | CC                              | TT                | 1946438715               |
| SNP_P3_69885_38849035 | NC_021164.1    | Ca_kabuli_chr05 | 38849035                | GG                              | AA                | 1946438717               |
| SNP_P3_69886_38849065 | NC_021164.1    | Ca_kabuli_chr05 | 38849065                | AA                              | GG                | 1946438718               |
| SNP_P3_69887_38849197 | NC_021164.1    | Ca_kabuli_chr05 | 38849197                | AA                              | GG                | 1946438719               |
| SNP_P3_69888_38849207 | NC_021164.1    | Ca_kabuli_chr05 | 38849207                | GG                              | TT                | 1946438721               |
| SNP_P3_69889_38850538 | NC_021164.1    | Ca_kabuli_chr05 | 38850538                | GG                              | CC                | 1946438722               |
| SNP_P3_69890_38883564 | NC_021164.1    | Ca_kabuli_chr05 | 38883564                | TT                              | GG                | 1946438724               |
| SNP_P3_69891_38887653 | NC_021164.1    | Ca_kabuli_chr05 | 38887653                | AA                              | TT                | 1946438725               |
| SNP_P3_69892_38969957 | NC_021164.1    | Ca_kabuli_chr05 | 38969957                | GG                              | AA                | 1946438727               |
| SNP_P3_69893_38977234 | NC_021164.1    | Ca_kabuli_chr05 | 38977234                | GG                              | AA                | 1946438728               |
| SNP_P3_69894_38992258 | NC_021164.1    | Ca_kabuli_chr05 | 38992258                | AA                              | GG                | 1946438730               |
| SNP_P3_69895_39014137 | NC_021164.1    | Ca_kabuli_chr05 | 39014137                | GG                              | AA                | 1946438731               |
| SNP_P3_69896_39040491 | NC_021164.1    | Ca_kabuli_chr05 | 39040491                | TT                              | CC                | 1946438733               |
| SNP_P3_69897_39055785 | NC_021164.1    | Ca_kabuli_chr05 | 39055785                | TT                              | CC                | 1946438734               |
| SNP_P3_69898_39055794 | NC_021164.1    | Ca_kabuli_chr05 | 39055794                | CC                              | TT                | 1946438736               |
| SNP_P3_69899_39055871 | NC_021164.1    | Ca_kabuli_chr05 | 39055871                | TT                              | CC                | 1946438737               |
| SNP_P3_69900_39056085 | NC_021164.1    | Ca_kabuli_chr05 | 39056085                | GG                              | AA                | 1946438739               |
| SNP_P3_69901_39056134 | NC_021164.1    | Ca_kabuli_chr05 | 39056134                | TT                              | AA                | 1946438740               |
| SNP_P3_69902_39056187 | NC_021164.1    | Ca_kabuli_chr05 | 39056187                | TT                              | CC                | 1946438742               |
| SNP_P3_69903_39056208 | NC_021164.1    | Ca_kabuli_chr05 | 39056208                | CC                              | GG                | 1946438743               |
| SNP_P3_69904_39056245 | NC_021164.1    | Ca_kabuli_chr05 | 39056245                | CC                              | TT                | 1946438745               |
| SNP_P3_69905_39056299 | NC_021164.1    | Ca_kabuli_chr05 | 39056299                | AA                              | GG                | 1946438746               |
| SNP_P3_69906_39068532 | NC_021164.1    | Ca_kabuli_chr05 | 39068532                | CC                              | TT                | 1946438748               |
| SNP_P3_69907_39069279 | NC_021164.1    | Ca_kabuli_chr05 | 39069279                | CC                              | TT                | 1946438749               |
| SNP_P3_69908_39069282 | NC_021164.1    | Ca_kabuli_chr05 | 39069282                | CC                              | TT                | 1946438751               |
| SNP_P3_69909_39070875 | NC_021164.1    | Ca_kabuli_chr05 | 39070875                | AA                              | CC                | 1946438752               |
| SNP_P3_69910_39070961 | NC_021164.1    | Ca_kabuli_chr05 | 39070961                | AA                              | GG                | 1946438754               |
| SNP_P3_69911_39070966 | NC_021164.1    | Ca_kabuli_chr05 | 39070966                | GG                              | AA                | 1946438755               |
| SNP_P3_69912_39107614 | NC_021164.1    | Ca_kabuli_chr05 | 39107614                | AA                              | GG                | 1946438757               |
| SNP_P3_69913_39118865 | NC_021164.1    | Ca_kabuli_chr05 | 39118865                | AA                              | CC                | 1946438758               |

| SNPs IDs              | Chromosome IDs | Chromosomes     | Physical positions (bp) | CDC Frontier (Reference genome) | (Pusa 256 & HPNB) | NCBI SNPdb Accession IDs |
|-----------------------|----------------|-----------------|-------------------------|---------------------------------|-------------------|--------------------------|
| SNP_P3_69914_39118874 | NC_021164.1    | Ca_kabuli_chr05 | 39118874                | TT                              | CC                | 1946438760               |
| SNP_P3_69915_39118904 | NC_021164.1    | Ca_kabuli_chr05 | 39118904                | AA                              | CC                | 1946438762               |
| SNP_P3_69916_39127405 | NC_021164.1    | Ca_kabuli_chr05 | 39127405                | GG                              | AA                | 1946438763               |
| SNP_P3_69919_39201200 | NC_021164.1    | Ca_kabuli_chr05 | 39201200                | AA                              | GG                | 1946438765               |
| SNP_P3_69920_39204639 | NC_021164.1    | Ca_kabuli_chr05 | 39204639                | CC                              | TT                | 1946438766               |
| SNP_P3_69921_39221975 | NC_021164.1    | Ca_kabuli_chr05 | 39221975                | AA                              | GG                | 1946438768               |
| SNP_P3_69922_39221976 | NC_021164.1    | Ca_kabuli_chr05 | 39221976                | TT                              | AA                | 1946438769               |
| SNP_P3_69923_39230771 | NC_021164.1    | Ca_kabuli_chr05 | 39230771                | AA                              | CC                | 1946438770               |
| SNP_P3_69924_39252590 | NC_021164.1    | Ca_kabuli_chr05 | 39252590                | TT                              | CC                | 1946438772               |
| SNP_P3_69925_39286796 | NC_021164.1    | Ca_kabuli_chr05 | 39286796                | GG                              | AA                | 1946438773               |
| SNP_P3_69926_39327083 | NC_021164.1    | Ca_kabuli_chr05 | 39327083                | TT                              | GG                | 1946438775               |
| SNP_P3_69927_39327110 | NC_021164.1    | Ca_kabuli_chr05 | 39327110                | AA                              | CC                | 1946438776               |
| SNP_P3_69928_39327116 | NC_021164.1    | Ca_kabuli_chr05 | 39327116                | CC                              | TT                | 1946438778               |
| SNP_P3_69929_39327154 | NC_021164.1    | Ca_kabuli_chr05 | 39327154                | AA                              | GG                | 1946438779               |
| SNP_P3_69930_39327180 | NC_021164.1    | Ca_kabuli_chr05 | 39327180                | AA                              | GG                | 1946438781               |
| SNP_P3_69931_39327224 | NC_021164.1    | Ca_kabuli_chr05 | 39327224                | TT                              | CC                | 1946438782               |
| SNP_P3_69932_39327262 | NC_021164.1    | Ca_kabuli_chr05 | 39327262                | GG                              | AA                | 1946438784               |
| SNP_P3_69933_39327295 | NC_021164.1    | Ca_kabuli_chr05 | 39327295                | AA                              | GG                | 1946438785               |
| SNP_P3_69934_39327323 | NC_021164.1    | Ca_kabuli_chr05 | 39327323                | GG                              | TT                | 1946438787               |
| SNP_P3_69935_39327343 | NC_021164.1    | Ca_kabuli_chr05 | 39327343                | AA                              | GG                | 1946438788               |
| SNP_P3_69936_39328925 | NC_021164.1    | Ca_kabuli_chr05 | 39328925                | GG                              | AA                | 1946438789               |
| SNP_P3_69937_39335879 | NC_021164.1    | Ca_kabuli_chr05 | 39335879                | GG                              | AA                | 1946438791               |
| SNP_P3_69939_39358674 | NC_021164.1    | Ca_kabuli_chr05 | 39358674                | CC                              | GG                | 1946438792               |
| SNP_P3_69941_39360699 | NC_021164.1    | Ca_kabuli_chr05 | 39360699                | CC                              | TT                | 1946438794               |
| SNP_P3_69943_39366062 | NC_021164.1    | Ca_kabuli_chr05 | 39366062                | CC                              | TT                | 1946438795               |
| SNP_P3_69944_39369661 | NC_021164.1    | Ca_kabuli_chr05 | 39369661                | GG                              | AA                | 1946438797               |
| SNP_P3_69945_39369893 | NC_021164.1    | Ca_kabuli_chr05 | 39369893                | CC                              | TT                | 1946438798               |
| SNP_P3_69946_39369937 | NC_021164.1    | Ca_kabuli_chr05 | 39369937                | AA                              | CC                | 1946438800               |
| SNP_P3_69947_39369939 | NC_021164.1    | Ca_kabuli_chr05 | 39369939                | GG                              | AA                | 1946438801               |
| SNP_P3_69948_39369944 | NC_021164.1    | Ca_kabuli_chr05 | 39369944                | TT                              | GG                | 1946438802               |
| SNP_P3_69949_39369955 | NC_021164.1    | Ca_kabuli_chr05 | 39369955                | TT                              | CC                | 1946438804               |
| SNP_P3_69950_39370020 | NC_021164.1    | Ca_kabuli_chr05 | 39370020                | GG                              | AA                | 1946438805               |
| SNP_P3_69951_39370115 | NC_021164.1    | Ca_kabuli_chr05 | 39370115                | TT                              | GG                | 1946438807               |
| SNP_P3_69952_39385448 | NC_021164.1    | Ca_kabuli_chr05 | 39385448                | GG                              | AA                | 1946438808               |
| SNP_P3_69953_39386190 | NC_021164.1    | Ca_kabuli_chr05 | 39386190                | CC                              | TT                | 1946438810               |
| SNP_P3_69954_39386204 | NC_021164.1    | Ca_kabuli_chr05 | 39386204                | CC                              | GG                | 1946438811               |
| SNP_P3_69956_39449635 | NC_021164.1    | Ca_kabuli_chr05 | 39449635                | GG                              | AA                | 1946438813               |
| SNP_P3_69957_39489155 | NC_021164.1    | Ca_kabuli_chr05 | 39489155                | GG                              | AA                | 1946438814               |
| SNP_P3_69958_39489160 | NC_021164.1    | Ca_kabuli_chr05 | 39489160                | AA                              | CC                | 1946438816               |
| SNP_P3_69959_39489173 | NC_021164.1    | Ca_kabuli_chr05 | 39489173                | AA                              | CC                | 1946438817               |
| SNP_P3_69960_39489179 | NC_021164.1    | Ca_kabuli_chr05 | 39489179                | AA                              | CC                | 1946438819               |
| SNP_P3_69961_39489217 | NC_021164.1    | Ca_kabuli_chr05 | 39489217                | GG                              | CC                | 1946438820               |

| SNPs IDs              | Chromosome IDs | Chromosomes     | Physical positions (bp) | CDC Frontier (Reference genome) | (Pusa 256 & HPNB) | NCBI SNPdb Accession IDs |
|-----------------------|----------------|-----------------|-------------------------|---------------------------------|-------------------|--------------------------|
| SNP_P3_69962_39525289 | NC_021164.1    | Ca_kabuli_chr05 | 39525289                | CC                              | TT                | 1946438821               |
| SNP_P3_69963_39525519 | NC_021164.1    | Ca_kabuli_chr05 | 39525519                | CC                              | TT                | 1946438823               |
| SNP_P3_69964_39530192 | NC_021164.1    | Ca_kabuli_chr05 | 39530192                | AA                              | GG                | 1946438824               |
| SNP_P3_69965_39530200 | NC_021164.1    | Ca_kabuli_chr05 | 39530200                | GG                              | CC                | 1946438826               |
| SNP_P3_69966_39530219 | NC_021164.1    | Ca_kabuli_chr05 | 39530219                | GG                              | AA                | 1946438827               |
| SNP_P3_69967_39530240 | NC_021164.1    | Ca_kabuli_chr05 | 39530240                | AA                              | TT                | 1946438829               |
| SNP_P3_69968_39530251 | NC_021164.1    | Ca_kabuli_chr05 | 39530251                | AA                              | CC                | 1946438830               |
| SNP_P3_69969_39530323 | NC_021164.1    | Ca_kabuli_chr05 | 39530323                | TT                              | CC                | 1946438831               |
| SNP_P3_69970_39530658 | NC_021164.1    | Ca_kabuli_chr05 | 39530658                | TT                              | GG                | 1946438833               |
| SNP_P3_69971_39530670 | NC_021164.1    | Ca_kabuli_chr05 | 39530670                | TT                              | CC                | 1946438835               |
| SNP_P3_69972_39534468 | NC_021164.1    | Ca_kabuli_chr05 | 39534468                | AA                              | GG                | 1946438836               |
| SNP_P3_69973_39537213 | NC_021164.1    | Ca_kabuli_chr05 | 39537213                | AA                              | CC                | 1946438838               |
| SNP_P3_69975_39537649 | NC_021164.1    | Ca_kabuli_chr05 | 39537649                | GG                              | AA                | 1946438839               |
| SNP_P3_69976_39547020 | NC_021164.1    | Ca_kabuli_chr05 | 39547020                | AA                              | GG                | 1946438840               |
| SNP_P3_69977_39553489 | NC_021164.1    | Ca_kabuli_chr05 | 39553489                | CC                              | TT                | 1946438842               |
| SNP_P3_69978_39553499 | NC_021164.1    | Ca_kabuli_chr05 | 39553499                | TT                              | AA                | 1946438843               |
| SNP_P3_69981_39576384 | NC_021164.1    | Ca_kabuli_chr05 | 39576384                | AA                              | GG                | 1946438845               |
| SNP_P3_69982_39627233 | NC_021164.1    | Ca_kabuli_chr05 | 39627233                | GG                              | AA                | 1946438846               |
| SNP_P3_69985_39671068 | NC_021164.1    | Ca_kabuli_chr05 | 39671068                | AA                              | GG                | 1946438848               |
| SNP_P3_69986_39695655 | NC_021164.1    | Ca_kabuli_chr05 | 39695655                | TT                              | AA                | 1946438849               |
| SNP_P3_69987_39706631 | NC_021164.1    | Ca_kabuli_chr05 | 39706631                | CC                              | TT                | 1946438850               |
| SNP_P3_69988_39706862 | NC_021164.1    | Ca_kabuli_chr05 | 39706862                | AA                              | CC                | 1946438852               |
| SNP_P3_69989_39707201 | NC_021164.1    | Ca_kabuli_chr05 | 39707201                | AA                              | GG                | 1946438853               |
| SNP_P3_69990_39720708 | NC_021164.1    | Ca_kabuli_chr05 | 39720708                | GG                              | AA                | 1946438855               |
| SNP_P3_69991_39731623 | NC_021164.1    | Ca_kabuli_chr05 | 39731623                | GG                              | TT                | 1946438856               |
| SNP_P3_69992_39741541 | NC_021164.1    | Ca_kabuli_chr05 | 39741541                | CC                              | TT                | 1946438858               |
| SNP_P3_69993_39741542 | NC_021164.1    | Ca_kabuli_chr05 | 39741542                | GG                              | AA                | 1946438859               |
| SNP_P3_69994_39744296 | NC_021164.1    | Ca_kabuli_chr05 | 39744296                | TT                              | CC                | 1946438860               |
| SNP_P3_69995_39748854 | NC_021164.1    | Ca_kabuli_chr05 | 39748854                | GG                              | AA                | 1946438862               |
| SNP_P3_69996_39762995 | NC_021164.1    | Ca_kabuli_chr05 | 39762995                | CC                              | TT                | 1946438864               |
| SNP_P3_69997_39777166 | NC_021164.1    | Ca_kabuli_chr05 | 39777166                | AA                              | TT                | 1946438865               |
| SNP_P3_69998_39777177 | NC_021164.1    | Ca_kabuli_chr05 | 39777177                | AA                              | TT                | 1946438867               |
| SNP_P3_70001_39799695 | NC_021164.1    | Ca_kabuli_chr05 | 39799695                | GG                              | AA                | 1946438868               |
| SNP_P3_70002_39800613 | NC_021164.1    | Ca_kabuli_chr05 | 39800613                | TT                              | CC                | 1946438869               |
| SNP_P3_70003_39804026 | NC_021164.1    | Ca_kabuli_chr05 | 39804026                | CC                              | TT                | 1946438871               |
| SNP_P3_70004_39806018 | NC_021164.1    | Ca_kabuli_chr05 | 39806018                | CC                              | GG                | 1946438872               |
| SNP_P3_70006_39856720 | NC_021164.1    | Ca_kabuli_chr05 | 39856720                | AA                              | CC                | 1946438874               |
| SNP_P3_70007_39873433 | NC_021164.1    | Ca_kabuli_chr05 | 39873433                | TT                              | CC                | 1946438875               |
| SNP_P3_70008_39874912 | NC_021164.1    | Ca_kabuli_chr05 | 39874912                | AA                              | GG                | 1946438877               |
| SNP_P3_70009_39880161 | NC_021164.1    | Ca_kabuli_chr05 | 39880161                | AA                              | CC                | 1946438878               |
| SNP_P3_70010_39884387 | NC_021164.1    | Ca_kabuli_chr05 | 39884387                | CC                              | TT                | 1946438881               |
| SNP_P3_70011_39884479 | NC_021164.1    | Ca_kabuli_chr05 | 39884479                | AA                              | GG                | 1946438882               |



| SNPs IDs              | Chromosome IDs | Chromosomes     | Physical positions (bp) | CDC Frontier (Reference genome) | (Pusa 256 & HPNB) | NCBI SNPdb Accession IDs |
|-----------------------|----------------|-----------------|-------------------------|---------------------------------|-------------------|--------------------------|
| SNP_P3_70012_39918059 | NC_021164.1    | Ca_kabuli_chr05 | 39918059                | CC                              | AA                | 1946438884               |
| SNP_P3_70017_39942797 | NC_021164.1    | Ca_kabuli_chr05 | 39942797                | GG                              | AA                | 1946438885               |
| SNP_P3_70018_39963301 | NC_021164.1    | Ca_kabuli_chr05 | 39963301                | TT                              | CC                | 1946438887               |
| SNP_P3_70019_39967683 | NC_021164.1    | Ca_kabuli_chr05 | 39967683                | AA                              | TT                | 1946438888               |
| SNP_P3_70020_39993322 | NC_021164.1    | Ca_kabuli_chr05 | 39993322                | CC                              | TT                | 1946438890               |
| SNP_P3_70021_40043179 | NC_021164.1    | Ca_kabuli_chr05 | 40043179                | AA                              | GG                | 1946438891               |
| SNP_P3_70022_40053325 | NC_021164.1    | Ca_kabuli_chr05 | 40053325                | AA                              | GG                | 1946438892               |
| SNP_P3_70023_40057624 | NC_021164.1    | Ca_kabuli_chr05 | 40057624                | AA                              | TT                | 1946438894               |
| SNP_P3_70024_40069672 | NC_021164.1    | Ca_kabuli_chr05 | 40069672                | CC                              | TT                | 1946438895               |
| SNP_P3_70025_40075746 | NC_021164.1    | Ca_kabuli_chr05 | 40075746                | GG                              | CC                | 1946438897               |
| SNP_P3_70026_40094298 | NC_021164.1    | Ca_kabuli_chr05 | 40094298                | AA                              | GG                | 1946438898               |
| SNP_P3_70027_40094300 | NC_021164.1    | Ca_kabuli_chr05 | 40094300                | GG                              | AA                | 1946438899               |
| SNP_P3_70028_40107487 | NC_021164.1    | Ca_kabuli_chr05 | 40107487                | TT                              | GG                | 1946438901               |
| SNP_P3_70029_40178988 | NC_021164.1    | Ca_kabuli_chr05 | 40178988                | GG                              | TT                | 1946438902               |
| SNP_P3_70030_40183940 | NC_021164.1    | Ca_kabuli_chr05 | 40183940                | GG                              | AA                | 1946438904               |
| SNP_P3_70031_40206846 | NC_021164.1    | Ca_kabuli_chr05 | 40206846                | CC                              | TT                | 1946438905               |
| SNP_P3_70032_40254066 | NC_021164.1    | Ca_kabuli_chr05 | 40254066                | CC                              | TT                | 1946438907               |
| SNP_P3_70033_40256857 | NC_021164.1    | Ca_kabuli_chr05 | 40256857                | AA                              | GG                | 1946438908               |
| SNP_P3_70034_40264739 | NC_021164.1    | Ca_kabuli_chr05 | 40264739                | TT                              | CC                | 1946438910               |
| SNP_P3_70035_40264890 | NC_021164.1    | Ca_kabuli_chr05 | 40264890                | TT                              | GG                | 1946438911               |
| SNP_P3_70036_40264897 | NC_021164.1    | Ca_kabuli_chr05 | 40264897                | TT                              | CC                | 1946438913               |
| SNP_P3_70037_40270374 | NC_021164.1    | Ca_kabuli_chr05 | 40270374                | TT                              | CC                | 1946438914               |
| SNP_P3_70039_40308894 | NC_021164.1    | Ca_kabuli_chr05 | 40308894                | TT                              | CC                | 1946438916               |
| SNP_P3_70040_40308906 | NC_021164.1    | Ca_kabuli_chr05 | 40308906                | TT                              | CC                | 1946438917               |
| SNP_P3_70041_40309255 | NC_021164.1    | Ca_kabuli_chr05 | 40309255                | GG                              | AA                | 1946438919               |
| SNP_P3_70042_40309327 | NC_021164.1    | Ca_kabuli_chr05 | 40309327                | TT                              | CC                | 1946438920               |
| SNP_P3_70043_40309342 | NC_021164.1    | Ca_kabuli_chr05 | 40309342                | TT                              | CC                | 1946438921               |
| SNP_P3_70044_40309401 | NC_021164.1    | Ca_kabuli_chr05 | 40309401                | AA                              | CC                | 1946438923               |
| SNP_P3_70045_40328636 | NC_021164.1    | Ca_kabuli_chr05 | 40328636                | AA                              | TT                | 1946438924               |
| SNP_P3_70046_40329282 | NC_021164.1    | Ca_kabuli_chr05 | 40329282                | AA                              | CC                | 1946438926               |
| SNP_P3_70047_40329311 | NC_021164.1    | Ca_kabuli_chr05 | 40329311                | CC                              | TT                | 1946438927               |
| SNP_P3_70048_40329979 | NC_021164.1    | Ca_kabuli_chr05 | 40329979                | TT                              | CC                | 1946438929               |
| SNP_P3_70049_40329980 | NC_021164.1    | Ca_kabuli_chr05 | 40329980                | AA                              | GG                | 1946438930               |
| SNP_P3_70050_40329992 | NC_021164.1    | Ca_kabuli_chr05 | 40329992                | GG                              | TT                | 1946438931               |
| SNP_P3_70051_40330012 | NC_021164.1    | Ca_kabuli_chr05 | 40330012                | CC                              | AA                | 1946438933               |
| SNP_P3_70052_40330948 | NC_021164.1    | Ca_kabuli_chr05 | 40330948                | GG                              | TT                | 1946438935               |
| SNP_P3_70053_40331495 | NC_021164.1    | Ca_kabuli_chr05 | 40331495                | AA                              | GG                | 1946438936               |
| SNP_P3_70054_40331774 | NC_021164.1    | Ca_kabuli_chr05 | 40331774                | GG                              | AA                | 1946438937               |
| SNP_P3_70055_40331775 | NC_021164.1    | Ca_kabuli_chr05 | 40331775                | GG                              | TT                | 1946438939               |
| SNP_P3_70056_40331785 | NC_021164.1    | Ca_kabuli_chr05 | 40331785                | CC                              | TT                | 1946438940               |
| SNP_P3_70057_40332429 | NC_021164.1    | Ca_kabuli_chr05 | 40332429                | CC                              | GG                | 1946438942               |
| SNP_P3_70058_40353588 | NC_021164.1    | Ca_kabuli_chr05 | 40353588                | GG                              | AA                | 1946438943               |

| SNPs IDs              | Chromosome IDs | Chromosomes     | Physical positions (bp) | CDC Frontier (Reference genome) | (Pusa 256 & HPNB) | NCBI SNPdb Accession IDs |
|-----------------------|----------------|-----------------|-------------------------|---------------------------------|-------------------|--------------------------|
| SNP_P3_70059_40361328 | NC_021164.1    | Ca_kabuli_chr05 | 40361328                | TT                              | AA                | 1946438944               |
| SNP_P3_70060_40381172 | NC_021164.1    | Ca_kabuli_chr05 | 40381172                | CC                              | TT                | 1946438945               |
| SNP_P3_70063_40400687 | NC_021164.1    | Ca_kabuli_chr05 | 40400687                | TT                              | AA                | 1946438946               |
| SNP_P3_70064_40419139 | NC_021164.1    | Ca_kabuli_chr05 | 40419139                | CC                              | TT                | 1946438947               |
| SNP_P3_70066_40435967 | NC_021164.1    | Ca_kabuli_chr05 | 40435967                | TT                              | AA                | 1946438948               |
| SNP_P3_70067_40443709 | NC_021164.1    | Ca_kabuli_chr05 | 40443709                | AA                              | GG                | 1946438949               |
| SNP_P3_70069_40511733 | NC_021164.1    | Ca_kabuli_chr05 | 40511733                | CC                              | TT                | 1946438950               |
| SNP_P3_70071_40512651 | NC_021164.1    | Ca_kabuli_chr05 | 40512651                | AA                              | GG                | 1946438951               |
| SNP_P3_70072_40512655 | NC_021164.1    | Ca_kabuli_chr05 | 40512655                | TT                              | CC                | 1946438952               |
| SNP_P3_70073_40529034 | NC_021164.1    | Ca_kabuli_chr05 | 40529034                | GG                              | AA                | 1946438954               |
| SNP_P3_70075_40573174 | NC_021164.1    | Ca_kabuli_chr05 | 40573174                | AA                              | GG                | 1946438955               |
| SNP_P3_70077_40593632 | NC_021164.1    | Ca_kabuli_chr05 | 40593632                | AA                              | TT                | 1946438956               |
| SNP_P3_70078_40600636 | NC_021164.1    | Ca_kabuli_chr05 | 40600636                | AA                              | GG                | 1946438958               |
| SNP_P3_70079_40600651 | NC_021164.1    | Ca_kabuli_chr05 | 40600651                | TT                              | CC                | 1946438959               |
| SNP_P3_70080_40600678 | NC_021164.1    | Ca_kabuli_chr05 | 40600678                | TT                              | CC                | 1946438961               |
| SNP_P3_70081_40604063 | NC_021164.1    | Ca_kabuli_chr05 | 40604063                | GG                              | AA                | 1946438962               |
| SNP_P3_70082_40604084 | NC_021164.1    | Ca_kabuli_chr05 | 40604084                | AA                              | GG                | 1946438964               |
| SNP_P3_70083_40604086 | NC_021164.1    | Ca_kabuli_chr05 | 40604086                | CC                              | GG                | 1946438965               |
| SNP_P3_70084_40604093 | NC_021164.1    | Ca_kabuli_chr05 | 40604093                | AA                              | GG                | 1946438966               |
| SNP_P3_70085_40604098 | NC_021164.1    | Ca_kabuli_chr05 | 40604098                | TT                              | AA                | 1946438968               |
| SNP_P3_70086_40608181 | NC_021164.1    | Ca_kabuli_chr05 | 40608181                | TT                              | CC                | 1946438969               |
| SNP_P3_70087_40616667 | NC_021164.1    | Ca_kabuli_chr05 | 40616667                | AA                              | GG                | 1946438971               |
| SNP_P3_70088_40651911 | NC_021164.1    | Ca_kabuli_chr05 | 40651911                | AA                              | GG                | 1946438972               |
| SNP_P3_70089_40652461 | NC_021164.1    | Ca_kabuli_chr05 | 40652461                | TT                              | CC                | 1946438974               |
| SNP_P3_70091_40689488 | NC_021164.1    | Ca_kabuli_chr05 | 40689488                | AA                              | TT                | 1946438975               |
| SNP_P3_70092_40693966 | NC_021164.1    | Ca_kabuli_chr05 | 40693966                | CC                              | TT                | 1946438977               |
| SNP_P3_70094_40780343 | NC_021164.1    | Ca_kabuli_chr05 | 40780343                | GG                              | AA                | 1946438978               |
| SNP_P3_70096_40835923 | NC_021164.1    | Ca_kabuli_chr05 | 40835923                | AA                              | GG                | 1946438980               |
| SNP_P3_70097_40841690 | NC_021164.1    | Ca_kabuli_chr05 | 40841690                | CC                              | TT                | 1946438981               |
| SNP_P3_70098_40858034 | NC_021164.1    | Ca_kabuli_chr05 | 40858034                | GG                              | AA                | 1946438982               |
| SNP_P3_70099_40858046 | NC_021164.1    | Ca_kabuli_chr05 | 40858046                | AA                              | GG                | 1946438984               |
| SNP_P3_70100_40858054 | NC_021164.1    | Ca_kabuli_chr05 | 40858054                | GG                              | AA                | 1946438985               |
| SNP_P3_70101_40858055 | NC_021164.1    | Ca_kabuli_chr05 | 40858055                | TT                              | AA                | 1946438987               |
| SNP_P3_70102_40858062 | NC_021164.1    | Ca_kabuli_chr05 | 40858062                | AA                              | CC                | 1946438988               |
| SNP_P3_70103_40858166 | NC_021164.1    | Ca_kabuli_chr05 | 40858166                | AA                              | TT                | 1946438990               |
| SNP_P3_70106_40881010 | NC_021164.1    | Ca_kabuli_chr05 | 40881010                | TT                              | AA                | 1946438991               |
| SNP_P3_70107_40904835 | NC_021164.1    | Ca_kabuli_chr05 | 40904835                | TT                              | AA                | 1946438992               |
| SNP_P3_70108_40906511 | NC_021164.1    | Ca_kabuli_chr05 | 40906511                | TT                              | CC                | 1946438994               |
| SNP_P3_70109_40917638 | NC_021164.1    | Ca_kabuli_chr05 | 40917638                | TT                              | AA                | 1946438995               |
| SNP_P3_70110_40929783 | NC_021164.1    | Ca_kabuli_chr05 | 40929783                | TT                              | AA                | 1946438997               |
| SNP_P3_70111_40969835 | NC_021164.1    | Ca_kabuli_chr05 | 40969835                | CC                              | GG                | 1946438998               |
| SNP_P3_70112_40982626 | NC_021164.1    | Ca_kabuli_chr05 | 40982626                | AA                              | CC                | 1946439000               |

| SNPs IDs              | Chromosome IDs | Chromosomes     | Physical positions (bp) | CDC Frontier (Reference genome) | (Pusa 256 & HPNB) | NCBI SNPdb Accession IDs |
|-----------------------|----------------|-----------------|-------------------------|---------------------------------|-------------------|--------------------------|
| SNP_P3_70113_40991299 | NC_021164.1    | Ca_kabuli_chr05 | 40991299                | CC                              | TT                | 1946439001               |
| SNP_P3_70114_40991573 | NC_021164.1    | Ca_kabuli_chr05 | 40991573                | AA                              | TT                | 1946439003               |
| SNP_P3_70115_40991871 | NC_021164.1    | Ca_kabuli_chr05 | 40991871                | TT                              | CC                | 1946439004               |
| SNP_P3_70116_40991918 | NC_021164.1    | Ca_kabuli_chr05 | 40991918                | GG                              | AA                | 1946439006               |
| SNP_P3_70117_40991923 | NC_021164.1    | Ca_kabuli_chr05 | 40991923                | CC                              | TT                | 1946439007               |
| SNP_P3_70118_40992049 | NC_021164.1    | Ca_kabuli_chr05 | 40992049                | TT                              | AA                | 1946439009               |
| SNP_P3_70119_41023126 | NC_021164.1    | Ca_kabuli_chr05 | 41023126                | GG                              | TT                | 1946439010               |
| SNP_P3_70121_41067177 | NC_021164.1    | Ca_kabuli_chr05 | 41067177                | TT                              | GG                | 1946439011               |
| SNP_P3_70123_41109845 | NC_021164.1    | Ca_kabuli_chr05 | 41109845                | TT                              | CC                | 1946439013               |
| SNP_P3_70124_41179552 | NC_021164.1    | Ca_kabuli_chr05 | 41179552                | TT                              | AA                | 1946439014               |
| SNP_P3_70127_41190630 | NC_021164.1    | Ca_kabuli_chr05 | 41190630                | GG                              | CC                | 1946439016               |
| SNP_P3_70128_41191083 | NC_021164.1    | Ca_kabuli_chr05 | 41191083                | AA                              | CC                | 1946439017               |
| SNP_P3_70129_41191469 | NC_021164.1    | Ca_kabuli_chr05 | 41191469                | AA                              | CC                | 1946439019               |
| SNP_P3_70130_41205550 | NC_021164.1    | Ca_kabuli_chr05 | 41205550                | AA                              | CC                | 1946439020               |
| SNP_P3_70132_41223992 | NC_021164.1    | Ca_kabuli_chr05 | 41223992                | CC                              | TT                | 1946439021               |
| SNP_P3_70133_41223994 | NC_021164.1    | Ca_kabuli_chr05 | 41223994                | CC                              | AA                | 1946439023               |
| SNP_P3_70134_41227517 | NC_021164.1    | Ca_kabuli_chr05 | 41227517                | TT                              | GG                | 1946439024               |
| SNP_P3_70135_41244941 | NC_021164.1    | Ca_kabuli_chr05 | 41244941                | AA                              | TT                | 1946439026               |
| SNP_P3_70136_41247961 | NC_021164.1    | Ca_kabuli_chr05 | 41247961                | TT                              | AA                | 1946439028               |
| SNP_P3_70137_41257481 | NC_021164.1    | Ca_kabuli_chr05 | 41257481                | AA                              | TT                | 1946439029               |
| SNP_P3_70139_41276893 | NC_021164.1    | Ca_kabuli_chr05 | 41276893                | AA                              | GG                | 1946439030               |
| SNP_P3_70140_41318811 | NC_021164.1    | Ca_kabuli_chr05 | 41318811                | TT                              | CC                | 1946439032               |
| SNP_P3_70141_41318859 | NC_021164.1    | Ca_kabuli_chr05 | 41318859                | CC                              | TT                | 1946439033               |
| SNP_P3_70142_41319216 | NC_021164.1    | Ca_kabuli_chr05 | 41319216                | CC                              | TT                | 1946439035               |
| SNP_P3_70143_41319272 | NC_021164.1    | Ca_kabuli_chr05 | 41319272                | AA                              | TT                | 1946439036               |
| SNP_P3_70144_41334027 | NC_021164.1    | Ca_kabuli_chr05 | 41334027                | GG                              | CC                | 1946439038               |
| SNP_P3_70145_41334182 | NC_021164.1    | Ca_kabuli_chr05 | 41334182                | TT                              | CC                | 1946439039               |
| SNP_P3_70146_41337254 | NC_021164.1    | Ca_kabuli_chr05 | 41337254                | GG                              | AA                | 1946439040               |
| SNP_P3_70148_41354124 | NC_021164.1    | Ca_kabuli_chr05 | 41354124                | AA                              | GG                | 1946439042               |
| SNP_P3_70149_41358333 | NC_021164.1    | Ca_kabuli_chr05 | 41358333                | CC                              | TT                | 1946439043               |
| SNP_P3_70150_41358604 | NC_021164.1    | Ca_kabuli_chr05 | 41358604                | CC                              | TT                | 1946439045               |
| SNP_P3_70151_41370878 | NC_021164.1    | Ca_kabuli_chr05 | 41370878                | GG                              | AA                | 1946439047               |
| SNP_P3_70152_41374172 | NC_021164.1    | Ca_kabuli_chr05 | 41374172                | GG                              | TT                | 1946439048               |
| SNP_P3_70153_41410992 | NC_021164.1    | Ca_kabuli_chr05 | 41410992                | AA                              | GG                | 1946439050               |
| SNP_P3_70154_41419987 | NC_021164.1    | Ca_kabuli_chr05 | 41419987                | TT                              | AA                | 1946439051               |
| SNP_P3_70155_41422979 | NC_021164.1    | Ca_kabuli_chr05 | 41422979                | TT                              | CC                | 1946439053               |
| SNP_P3_70156_41423192 | NC_021164.1    | Ca_kabuli_chr05 | 41423192                | GG                              | AA                | 1946439054               |
| SNP_P3_70157_41423210 | NC_021164.1    | Ca_kabuli_chr05 | 41423210                | TT                              | CC                | 1946439056               |
| SNP_P3_70158_41423259 | NC_021164.1    | Ca_kabuli_chr05 | 41423259                | CC                              | TT                | 1946439057               |
| SNP_P3_70159_41423291 | NC_021164.1    | Ca_kabuli_chr05 | 41423291                | CC                              | GG                | 1946439058               |
| SNP_P3_70160_41425809 | NC_021164.1    | Ca_kabuli_chr05 | 41425809                | CC                              | TT                | 1946439060               |
| SNP_P3_70161_41428660 | NC_021164.1    | Ca_kabuli_chr05 | 41428660                | AA                              | GG                | 1946439061               |

| SNPs IDs              | Chromosome IDs | Chromosomes     | Physical positions (bp) | CDC Frontier (Reference genome) | (Pusa 256 & HPNB) | NCBI SNPdb Accession IDs |
|-----------------------|----------------|-----------------|-------------------------|---------------------------------|-------------------|--------------------------|
| SNP_P3_70162_41428757 | NC_021164.1    | Ca_kabuli_chr05 | 41428757                | AA                              | TT                | 1946439063               |
| SNP_P3_70164_41428944 | NC_021164.1    | Ca_kabuli_chr05 | 41428944                | TT                              | CC                | 1946439064               |
| SNP_P3_70165_41428967 | NC_021164.1    | Ca_kabuli_chr05 | 41428967                | GG                              | AA                | 1946439066               |
| SNP_P3_70166_41428996 | NC_021164.1    | Ca_kabuli_chr05 | 41428996                | AA                              | GG                | 1946439067               |
| SNP_P3_70167_41429016 | NC_021164.1    | Ca_kabuli_chr05 | 41429016                | TT                              | AA                | 1946439069               |
| SNP_P3_70168_41429097 | NC_021164.1    | Ca_kabuli_chr05 | 41429097                | AA                              | GG                | 1946439070               |
| SNP_P3_70169_41429142 | NC_021164.1    | Ca_kabuli_chr05 | 41429142                | GG                              | AA                | 1946439072               |
| SNP_P3_70170_41430694 | NC_021164.1    | Ca_kabuli_chr05 | 41430694                | GG                              | AA                | 1946439074               |
| SNP_P3_70171_41430699 | NC_021164.1    | Ca_kabuli_chr05 | 41430699                | CC                              | TT                | 1946439075               |
| SNP_P3_70172_41434284 | NC_021164.1    | Ca_kabuli_chr05 | 41434284                | GG                              | CC                | 1946439077               |
| SNP_P3_70173_41434286 | NC_021164.1    | Ca_kabuli_chr05 | 41434286                | CC                              | TT                | 1946439078               |
| SNP_P3_70174_41434315 | NC_021164.1    | Ca_kabuli_chr05 | 41434315                | CC                              | TT                | 1946439080               |
| SNP_P3_70175_41434346 | NC_021164.1    | Ca_kabuli_chr05 | 41434346                | AA                              | GG                | 1946439081               |
| SNP_P3_70176_41436544 | NC_021164.1    | Ca_kabuli_chr05 | 41436544                | AA                              | GG                | 1946439083               |
| SNP_P3_70177_41437762 | NC_021164.1    | Ca_kabuli_chr05 | 41437762                | CC                              | TT                | 1946439084               |
| SNP_P3_70178_41438070 | NC_021164.1    | Ca_kabuli_chr05 | 41438070                | GG                              | CC                | 1946439086               |
| SNP_P3_70179_41438099 | NC_021164.1    | Ca_kabuli_chr05 | 41438099                | GG                              | TT                | 1946439087               |
| SNP_P3_70181_41460606 | NC_021164.1    | Ca_kabuli_chr05 | 41460606                | AA                              | TT                | 1946439089               |
| SNP_P3_70183_41463557 | NC_021164.1    | Ca_kabuli_chr05 | 41463557                | TT                              | CC                | 1946439090               |
| SNP_P3_70184_41463574 | NC_021164.1    | Ca_kabuli_chr05 | 41463574                | TT                              | CC                | 1946439092               |
| SNP_P3_70185_41463788 | NC_021164.1    | Ca_kabuli_chr05 | 41463788                | TT                              | GG                | 1946439093               |
| SNP_P3_70187_41467600 | NC_021164.1    | Ca_kabuli_chr05 | 41467600                | AA                              | CC                | 1946439095               |
| SNP_P3_70188_41467616 | NC_021164.1    | Ca_kabuli_chr05 | 41467616                | CC                              | AA                | 1946439096               |
| SNP_P3_70189_41467827 | NC_021164.1    | Ca_kabuli_chr05 | 41467827                | AA                              | GG                | 1946439098               |
| SNP_P3_70192_41468132 | NC_021164.1    | Ca_kabuli_chr05 | 41468132                | AA                              | GG                | 1946439099               |
| SNP_P3_70193_41468154 | NC_021164.1    | Ca_kabuli_chr05 | 41468154                | AA                              | CC                | 1946439101               |
| SNP_P3_70194_41468176 | NC_021164.1    | Ca_kabuli_chr05 | 41468176                | GG                              | AA                | 1946439102               |
| SNP_P3_70195_41468583 | NC_021164.1    | Ca_kabuli_chr05 | 41468583                | AA                              | TT                | 1946439104               |
| SNP_P3_70196_41468621 | NC_021164.1    | Ca_kabuli_chr05 | 41468621                | GG                              | TT                | 1946439105               |
| SNP_P3_70197_41468632 | NC_021164.1    | Ca_kabuli_chr05 | 41468632                | CC                              | TT                | 1946439106               |
| SNP_P3_70198_41468672 | NC_021164.1    | Ca_kabuli_chr05 | 41468672                | GG                              | AA                | 1946439108               |
| SNP_P3_70199_41468675 | NC_021164.1    | Ca_kabuli_chr05 | 41468675                | GG                              | AA                | 1946439109               |
| SNP_P3_70200_41468900 | NC_021164.1    | Ca_kabuli_chr05 | 41468900                | GG                              | CC                | 1946439111               |
| SNP_P3_70201_41471503 | NC_021164.1    | Ca_kabuli_chr05 | 41471503                | GG                              | AA                | 1946439113               |
| SNP_P3_70202_41471529 | NC_021164.1    | Ca_kabuli_chr05 | 41471529                | CC                              | TT                | 1946439114               |
| SNP_P3_70203_41477442 | NC_021164.1    | Ca_kabuli_chr05 | 41477442                | AA                              | TT                | 1946439116               |
| SNP_P3_70204_41477660 | NC_021164.1    | Ca_kabuli_chr05 | 41477660                | TT                              | CC                | 1946439117               |
| SNP_P3_70205_41477692 | NC_021164.1    | Ca_kabuli_chr05 | 41477692                | TT                              | GG                | 1946439119               |
| SNP_P3_70207_41553033 | NC_021164.1    | Ca_kabuli_chr05 | 41553033                | TT                              | CC                | 1946439120               |
| SNP_P3_70208_41564254 | NC_021164.1    | Ca_kabuli_chr05 | 41564254                | TT                              | AA                | 1946439121               |
| SNP_P3_70209_41591868 | NC_021164.1    | Ca_kabuli_chr05 | 41591868                | AA                              | GG                | 1946439123               |
| SNP_P3_70210_41605840 | NC_021164.1    | Ca_kabuli_chr05 | 41605840                | AA                              | GG                | 1946439124               |

| SNPs IDs              | Chromosome IDs | Chromosomes     | Physical positions (bp) | CDC Frontier (Reference genome) | (Pusa 256 & HPNB) | NCBI SNPdb Accession IDs |
|-----------------------|----------------|-----------------|-------------------------|---------------------------------|-------------------|--------------------------|
| SNP_P3_70211_41613984 | NC_021164.1    | Ca_kabuli_chr05 | 41613984                | TT                              | AA                | 1946439126               |
| SNP_P3_70212_41614034 | NC_021164.1    | Ca_kabuli_chr05 | 41614034                | CC                              | TT                | 1946439127               |
| SNP_P3_70213_41614443 | NC_021164.1    | Ca_kabuli_chr05 | 41614443                | GG                              | TT                | 1946439129               |
| SNP_P3_70214_41642850 | NC_021164.1    | Ca_kabuli_chr05 | 41642850                | AA                              | CC                | 1946439130               |
| SNP_P3_70215_41644011 | NC_021164.1    | Ca_kabuli_chr05 | 41644011                | TT                              | CC                | 1946439132               |
| SNP_P3_70216_41644340 | NC_021164.1    | Ca_kabuli_chr05 | 41644340                | AA                              | GG                | 1946439133               |
| SNP_P3_70217_41644347 | NC_021164.1    | Ca_kabuli_chr05 | 41644347                | AA                              | GG                | 1946439135               |
| SNP_P3_70218_41644348 | NC_021164.1    | Ca_kabuli_chr05 | 41644348                | GG                              | AA                | 1946439136               |
| SNP_P3_70219_41644364 | NC_021164.1    | Ca_kabuli_chr05 | 41644364                | AA                              | GG                | 1946439138               |
| SNP_P3_70220_41644405 | NC_021164.1    | Ca_kabuli_chr05 | 41644405                | TT                              | CC                | 1946439139               |
| SNP_P3_70221_41644414 | NC_021164.1    | Ca_kabuli_chr05 | 41644414                | TT                              | GG                | 1946439141               |
| SNP_P3_70222_41672227 | NC_021164.1    | Ca_kabuli_chr05 | 41672227                | GG                              | AA                | 1946439142               |
| SNP_P3_70223_41677766 | NC_021164.1    | Ca_kabuli_chr05 | 41677766                | CC                              | AA                | 1946439144               |
| SNP_P3_70224_41677773 | NC_021164.1    | Ca_kabuli_chr05 | 41677773                | TT                              | CC                | 1946439145               |
| SNP_P3_70225_41677791 | NC_021164.1    | Ca_kabuli_chr05 | 41677791                | AA                              | CC                | 1946439146               |
| SNP_P3_70226_41677966 | NC_021164.1    | Ca_kabuli_chr05 | 41677966                | TT                              | GG                | 1946439148               |
| SNP_P3_70227_41677967 | NC_021164.1    | Ca_kabuli_chr05 | 41677967                | AA                              | TT                | 1946439149               |
| SNP_P3_70228_41677979 | NC_021164.1    | Ca_kabuli_chr05 | 41677979                | CC                              | AA                | 1946439151               |
| SNP_P3_70229_41678072 | NC_021164.1    | Ca_kabuli_chr05 | 41678072                | AA                              | TT                | 1946439153               |
| SNP_P3_70231_41722246 | NC_021164.1    | Ca_kabuli_chr05 | 41722246                | CC                              | AA                | 1946439154               |
| SNP_P3_70232_41727327 | NC_021164.1    | Ca_kabuli_chr05 | 41727327                | AA                              | GG                | 1946439156               |
| SNP_P3_70233_41729670 | NC_021164.1    | Ca_kabuli_chr05 | 41729670                | GG                              | AA                | 1946439157               |
| SNP_P3_70234_41744350 | NC_021164.1    | Ca_kabuli_chr05 | 41744350                | CC                              | TT                | 1946439159               |
| SNP_P3_70235_41749669 | NC_021164.1    | Ca_kabuli_chr05 | 41749669                | AA                              | GG                | 1946439160               |
| SNP_P3_70236_41749684 | NC_021164.1    | Ca_kabuli_chr05 | 41749684                | CC                              | TT                | 1946439162               |
| SNP_P3_70237_41760226 | NC_021164.1    | Ca_kabuli_chr05 | 41760226                | CC                              | TT                | 1946439163               |
| SNP_P3_70238_41760230 | NC_021164.1    | Ca_kabuli_chr05 | 41760230                | AA                              | TT                | 1946439164               |
| SNP_P3_70240_41778523 | NC_021164.1    | Ca_kabuli_chr05 | 41778523                | AA                              | GG                | 1946439166               |
| SNP_P3_70241_41782808 | NC_021164.1    | Ca_kabuli_chr05 | 41782808                | GG                              | AA                | 1946439167               |
| SNP_P3_70242_41782813 | NC_021164.1    | Ca_kabuli_chr05 | 41782813                | GG                              | AA                | 1946439169               |
| SNP_P3_70243_41782819 | NC_021164.1    | Ca_kabuli_chr05 | 41782819                | AA                              | GG                | 1946439170               |
| SNP_P3_70245_41794813 | NC_021164.1    | Ca_kabuli_chr05 | 41794813                | TT                              | GG                | 1946439172               |
| SNP_P3_70246_41795075 | NC_021164.1    | Ca_kabuli_chr05 | 41795075                | CC                              | TT                | 1946439173               |
| SNP_P3_70247_41795326 | NC_021164.1    | Ca_kabuli_chr05 | 41795326                | AA                              | GG                | 1946439175               |
| SNP_P3_70248_41795560 | NC_021164.1    | Ca_kabuli_chr05 | 41795560                | CC                              | GG                | 1946439176               |
| SNP_P3_70249_41795694 | NC_021164.1    | Ca_kabuli_chr05 | 41795694                | GG                              | AA                | 1946439178               |
| SNP_P3_70250_41795809 | NC_021164.1    | Ca_kabuli_chr05 | 41795809                | CC                              | TT                | 1946439179               |
| SNP_P3_70251_41800062 | NC_021164.1    | Ca_kabuli_chr05 | 41800062                | AA                              | GG                | 1946439181               |
| SNP_P3_70252_41801270 | NC_021164.1    | Ca_kabuli_chr05 | 41801270                | TT                              | CC                | 1946439182               |
| SNP_P3_70253_41812775 | NC_021164.1    | Ca_kabuli_chr05 | 41812775                | GG                              | TT                | 1946439184               |
| SNP_P3_70254_41813446 | NC_021164.1    | Ca_kabuli_chr05 | 41813446                | AA                              | TT                | 1946439185               |
| SNP_P3_70255_41821073 | NC_021164.1    | Ca_kabuli_chr05 | 41821073                | GG                              | CC                | 1946439187               |

| SNPs IDs              | Chromosome IDs | Chromosomes     | Physical positions (bp) | CDC Frontier (Reference genome) | (Pusa 256 & HPNB) | NCBI SNPdb Accession IDs |
|-----------------------|----------------|-----------------|-------------------------|---------------------------------|-------------------|--------------------------|
| SNP_P3_70256_41821393 | NC_021164.1    | Ca_kabuli_chr05 | 41821393                | AA                              | CC                | 1946439189               |
| SNP_P3_70257_41821430 | NC_021164.1    | Ca_kabuli_chr05 | 41821430                | AA                              | GG                | 1946439190               |
| SNP_P3_70258_41821455 | NC_021164.1    | Ca_kabuli_chr05 | 41821455                | AA                              | GG                | 1946439192               |
| SNP_P3_70260_41859027 | NC_021164.1    | Ca_kabuli_chr05 | 41859027                | GG                              | AA                | 1946439193               |
| SNP_P3_70262_41905725 | NC_021164.1    | Ca_kabuli_chr05 | 41905725                | TT                              | CC                | 1946439195               |
| SNP_P3_70263_41905733 | NC_021164.1    | Ca_kabuli_chr05 | 41905733                | AA                              | TT                | 1946439196               |
| SNP_P3_70264_41909931 | NC_021164.1    | Ca_kabuli_chr05 | 41909931                | TT                              | GG                | 1946439198               |
| SNP_P3_70265_41914624 | NC_021164.1    | Ca_kabuli_chr05 | 41914624                | GG                              | TT                | 1946439199               |
| SNP_P3_70266_41949343 | NC_021164.1    | Ca_kabuli_chr05 | 41949343                | GG                              | TT                | 1946439200               |
| SNP_P3_70267_41953294 | NC_021164.1    | Ca_kabuli_chr05 | 41953294                | GG                              | CC                | 1946439202               |
| SNP_P3_70268_41953296 | NC_021164.1    | Ca_kabuli_chr05 | 41953296                | AA                              | GG                | 1946439203               |
| SNP_P3_70270_41957277 | NC_021164.1    | Ca_kabuli_chr05 | 41957277                | CC                              | TT                | 1946439205               |
| SNP_P3_70272_41994786 | NC_021164.1    | Ca_kabuli_chr05 | 41994786                | TT                              | GG                | 1946439207               |
| SNP_P3_70273_42065967 | NC_021164.1    | Ca_kabuli_chr05 | 42065967                | AA                              | GG                | 1946439208               |
| SNP_P3_70274_42067907 | NC_021164.1    | Ca_kabuli_chr05 | 42067907                | GG                              | TT                | 1946439211               |
| SNP_P3_70275_42071926 | NC_021164.1    | Ca_kabuli_chr05 | 42071926                | TT                              | AA                | 1946439212               |
| SNP_P3_70276_42104628 | NC_021164.1    | Ca_kabuli_chr05 | 42104628                | GG                              | AA                | 1946439214               |
| SNP_P3_70277_42107986 | NC_021164.1    | Ca_kabuli_chr05 | 42107986                | GG                              | AA                | 1946439215               |
| SNP_P3_70278_42111922 | NC_021164.1    | Ca_kabuli_chr05 | 42111922                | AA                              | GG                | 1946439217               |
| SNP_P3_70279_42216541 | NC_021164.1    | Ca_kabuli_chr05 | 42216541                | AA                              | GG                | 1946439218               |
| SNP_P3_70280_42219882 | NC_021164.1    | Ca_kabuli_chr05 | 42219882                | AA                              | CC                | 1946439220               |
| SNP_P3_70281_42227739 | NC_021164.1    | Ca_kabuli_chr05 | 42227739                | AA                              | GG                | 1946439221               |
| SNP_P3_70284_42236100 | NC_021164.1    | Ca_kabuli_chr05 | 42236100                | AA                              | TT                | 1946439223               |
| SNP_P3_70285_42241339 | NC_021164.1    | Ca_kabuli_chr05 | 42241339                | TT                              | GG                | 1946439224               |
| SNP_P3_70286_42248753 | NC_021164.1    | Ca_kabuli_chr05 | 42248753                | CC                              | TT                | 1946439226               |
| SNP_P3_70288_42343654 | NC_021164.1    | Ca_kabuli_chr05 | 42343654                | CC                              | TT                | 1946439227               |
| SNP_P3_70290_42392616 | NC_021164.1    | Ca_kabuli_chr05 | 42392616                | AA                              | GG                | 1946439229               |
| SNP_P3_70291_42392768 | NC_021164.1    | Ca_kabuli_chr05 | 42392768                | AA                              | TT                | 1946439230               |
| SNP_P3_70292_42407559 | NC_021164.1    | Ca_kabuli_chr05 | 42407559                | AA                              | GG                | 1946439232               |
| SNP_P3_70296_42557160 | NC_021164.1    | Ca_kabuli_chr05 | 42557160                | TT                              | CC                | 1946439233               |
| SNP_P3_70298_42577351 | NC_021164.1    | Ca_kabuli_chr05 | 42577351                | GG                              | AA                | 1946439235               |
| SNP_P3_70299_42585956 | NC_021164.1    | Ca_kabuli_chr05 | 42585956                | AA                              | GG                | 1946439236               |
| SNP_P3_70300_42590583 | NC_021164.1    | Ca_kabuli_chr05 | 42590583                | AA                              | GG                | 1946439238               |
| SNP_P3_70301_42593363 | NC_021164.1    | Ca_kabuli_chr05 | 42593363                | AA                              | CC                | 1946439239               |
| SNP_P3_70302_42664210 | NC_021164.1    | Ca_kabuli_chr05 | 42664210                | TT                              | AA                | 1946439241               |
| SNP_P3_70303_42674007 | NC_021164.1    | Ca_kabuli_chr05 | 42674007                | TT                              | GG                | 1946439242               |
| SNP_P3_70304_42695567 | NC_021164.1    | Ca_kabuli_chr05 | 42695567                | AA                              | GG                | 1946439243               |
| SNP_P3_70305_42720153 | NC_021164.1    | Ca_kabuli_chr05 | 42720153                | TT                              | CC                | 1946439245               |
| SNP_P3_70307_42736063 | NC_021164.1    | Ca_kabuli_chr05 | 42736063                | TT                              | CC                | 1946439246               |
| SNP_P3_70308_42737401 | NC_021164.1    | Ca_kabuli_chr05 | 42737401                | AA                              | TT                | 1946439248               |
| SNP_P3_70309_42793678 | NC_021164.1    | Ca_kabuli_chr05 | 42793678                | AA                              | GG                | 1946439250               |
| SNP_P3_70310_42794032 | NC_021164.1    | Ca_kabuli_chr05 | 42794032                | TT                              | CC                | 1946439251               |

| SNPs IDs              | Chromosome IDs | Chromosomes     | Physical positions (bp) | CDC Frontier (Reference genome) | (Pusa 256 & HPNB) | NCBI SNPdb Accession IDs |
|-----------------------|----------------|-----------------|-------------------------|---------------------------------|-------------------|--------------------------|
| SNP_P3_70314_42827798 | NC_021164.1    | Ca_kabuli_chr05 | 42827798                | AA                              | GG                | 1946439253               |
| SNP_P3_70315_42828157 | NC_021164.1    | Ca_kabuli_chr05 | 42828157                | AA                              | GG                | 1946439254               |
| SNP_P3_70316_42830537 | NC_021164.1    | Ca_kabuli_chr05 | 42830537                | CC                              | TT                | 1946439256               |
| SNP_P3_70317_42852552 | NC_021164.1    | Ca_kabuli_chr05 | 42852552                | CC                              | TT                | 1946439257               |
| SNP_P3_70318_42893700 | NC_021164.1    | Ca_kabuli_chr05 | 42893700                | GG                              | AA                | 1946439259               |
| SNP_P3_70320_42917204 | NC_021164.1    | Ca_kabuli_chr05 | 42917204                | AA                              | GG                | 1946439260               |
| SNP_P3_70321_42919928 | NC_021164.1    | Ca_kabuli_chr05 | 42919928                | TT                              | CC                | 1946439262               |
| SNP_P3_70322_42921669 | NC_021164.1    | Ca_kabuli_chr05 | 42921669                | TT                              | GG                | 1946439263               |
| SNP_P3_70323_42924340 | NC_021164.1    | Ca_kabuli_chr05 | 42924340                | GG                              | AA                | 1946439265               |
| SNP_P3_70324_42935696 | NC_021164.1    | Ca_kabuli_chr05 | 42935696                | CC                              | TT                | 1946439266               |
| SNP_P3_70325_42938590 | NC_021164.1    | Ca_kabuli_chr05 | 42938590                | AA                              | GG                | 1946439267               |
| SNP_P3_70326_42952950 | NC_021164.1    | Ca_kabuli_chr05 | 42952950                | GG                              | AA                | 1946439269               |
| SNP_P3_70327_42957749 | NC_021164.1    | Ca_kabuli_chr05 | 42957749                | AA                              | TT                | 1946439271               |
| SNP_P3_70329_42978187 | NC_021164.1    | Ca_kabuli_chr05 | 42978187                | AA                              | GG                | 1946439272               |
| SNP_P3_70330_42996595 | NC_021164.1    | Ca_kabuli_chr05 | 42996595                | GG                              | AA                | 1946439274               |
| SNP_P3_70331_43044693 | NC_021164.1    | Ca_kabuli_chr05 | 43044693                | CC                              | AA                | 1946439275               |
| SNP_P3_70332_43050871 | NC_021164.1    | Ca_kabuli_chr05 | 43050871                | AA                              | GG                | 1946439277               |
| SNP_P3_70333_43074539 | NC_021164.1    | Ca_kabuli_chr05 | 43074539                | GG                              | AA                | 1946439278               |
| SNP_P3_70334_43262446 | NC_021164.1    | Ca_kabuli_chr05 | 43262446                | TT                              | CC                | 1946439280               |
| SNP_P3_70335_43280232 | NC_021164.1    | Ca_kabuli_chr05 | 43280232                | CC                              | TT                | 1946439281               |
| SNP_P3_70339_43366832 | NC_021164.1    | Ca_kabuli_chr05 | 43366832                | TT                              | CC                | 1946439282               |
| SNP_P3_70340_43367091 | NC_021164.1    | Ca_kabuli_chr05 | 43367091                | AA                              | CC                | 1946439284               |
| SNP_P3_70341_43367121 | NC_021164.1    | Ca_kabuli_chr05 | 43367121                | GG                              | CC                | 1946439285               |
| SNP_P3_70342_43367123 | NC_021164.1    | Ca_kabuli_chr05 | 43367123                | TT                              | AA                | 1946439287               |
| SNP_P3_70343_43367124 | NC_021164.1    | Ca_kabuli_chr05 | 43367124                | GG                              | AA                | 1946439288               |
| SNP_P3_70344_43401407 | NC_021164.1    | Ca_kabuli_chr05 | 43401407                | AA                              | GG                | 1946439290               |
| SNP_P3_70345_43405206 | NC_021164.1    | Ca_kabuli_chr05 | 43405206                | AA                              | TT                | 1946439291               |
| SNP_P3_70346_43417950 | NC_021164.1    | Ca_kabuli_chr05 | 43417950                | TT                              | CC                | 1946439293               |
| SNP_P3_70347_43419690 | NC_021164.1    | Ca_kabuli_chr05 | 43419690                | AA                              | TT                | 1946439294               |
| SNP_P3_70348_43420230 | NC_021164.1    | Ca_kabuli_chr05 | 43420230                | GG                              | TT                | 1946439296               |
| SNP_P3_70349_43424012 | NC_021164.1    | Ca_kabuli_chr05 | 43424012                | TT                              | AA                | 1946439297               |
| SNP_P3_70350_43426338 | NC_021164.1    | Ca_kabuli_chr05 | 43426338                | GG                              | AA                | 1946439299               |
| SNP_P3_70354_43460756 | NC_021164.1    | Ca_kabuli_chr05 | 43460756                | TT                              | AA                | 1946439300               |
| SNP_P3_70355_43481069 | NC_021164.1    | Ca_kabuli_chr05 | 43481069                | TT                              | CC                | 1946439302               |
| SNP_P3_70356_43481098 | NC_021164.1    | Ca_kabuli_chr05 | 43481098                | AA                              | CC                | 1946439303               |
| SNP_P3_70357_43481174 | NC_021164.1    | Ca_kabuli_chr05 | 43481174                | GG                              | TT                | 1946439304               |
| SNP_P3_70358_43481216 | NC_021164.1    | Ca_kabuli_chr05 | 43481216                | GG                              | AA                | 1946439306               |
| SNP_P3_70359_43481263 | NC_021164.1    | Ca_kabuli_chr05 | 43481263                | CC                              | AA                | 1946439307               |
| SNP_P3_70361_43505481 | NC_021164.1    | Ca_kabuli_chr05 | 43505481                | CC                              | TT                | 1946439309               |
| SNP_P3_70363_43574420 | NC_021164.1    | Ca_kabuli_chr05 | 43574420                | TT                              | AA                | 1946439310               |
| SNP_P3_70364_43598048 | NC_021164.1    | Ca_kabuli_chr05 | 43598048                | GG                              | AA                | 1946439312               |
| SNP_P3_70365_43654872 | NC_021164.1    | Ca_kabuli_chr05 | 43654872                | AA                              | TT                | 1946439313               |

| SNPs IDs              | Chromosome IDs | Chromosomes     | Physical positions (bp) | CDC Frontier (Reference genome) | (Pusa 256 & HPNB) | NCBI SNPdb Accession IDs |
|-----------------------|----------------|-----------------|-------------------------|---------------------------------|-------------------|--------------------------|
| SNP_P3_70367_43699158 | NC_021164.1    | Ca_kabuli_chr05 | 43699158                | GG                              | TT                | 1946439314               |
| SNP_P3_70369_43777080 | NC_021164.1    | Ca_kabuli_chr05 | 43777080                | TT                              | GG                | 1946439316               |
| SNP_P3_70370_43777812 | NC_021164.1    | Ca_kabuli_chr05 | 43777812                | AA                              | GG                | 1946439317               |
| SNP_P3_70371_43787623 | NC_021164.1    | Ca_kabuli_chr05 | 43787623                | CC                              | TT                | 1946439319               |
| SNP_P3_70374_43904849 | NC_021164.1    | Ca_kabuli_chr05 | 43904849                | TT                              | CC                | 1946439320               |
| SNP_P3_70375_43904871 | NC_021164.1    | Ca_kabuli_chr05 | 43904871                | TT                              | CC                | 1946439322               |
| SNP_P3_70376_43904941 | NC_021164.1    | Ca_kabuli_chr05 | 43904941                | TT                              | GG                | 1946439323               |
| SNP_P3_70377_43905103 | NC_021164.1    | Ca_kabuli_chr05 | 43905103                | TT                              | CC                | 1946439325               |
| SNP_P3_70378_43905233 | NC_021164.1    | Ca_kabuli_chr05 | 43905233                | TT                              | CC                | 1946439326               |
| SNP_P3_70379_43905274 | NC_021164.1    | Ca_kabuli_chr05 | 43905274                | TT                              | AA                | 1946439328               |
| SNP_P3_70380_43905358 | NC_021164.1    | Ca_kabuli_chr05 | 43905358                | AA                              | GG                | 1946439329               |
| SNP_P3_70381_43910241 | NC_021164.1    | Ca_kabuli_chr05 | 43910241                | GG                              | AA                | 1946439330               |
| SNP_P3_70383_43918706 | NC_021164.1    | Ca_kabuli_chr05 | 43918706                | TT                              | AA                | 1946439332               |
| SNP_P3_70384_43918772 | NC_021164.1    | Ca_kabuli_chr05 | 43918772                | AA                              | GG                | 1946439333               |
| SNP_P3_70385_43918775 | NC_021164.1    | Ca_kabuli_chr05 | 43918775                | TT                              | CC                | 1946439335               |
| SNP_P3_70386_43918801 | NC_021164.1    | Ca_kabuli_chr05 | 43918801                | AA                              | CC                | 1946439336               |
| SNP_P3_70387_43918828 | NC_021164.1    | Ca_kabuli_chr05 | 43918828                | GG                              | TT                | 1946439337               |
| SNP_P3_70388_43918840 | NC_021164.1    | Ca_kabuli_chr05 | 43918840                | TT                              | AA                | 1946439339               |
| SNP_P3_70389_43918865 | NC_021164.1    | Ca_kabuli_chr05 | 43918865                | AA                              | TT                | 1946439341               |
| SNP_P3_70390_43918874 | NC_021164.1    | Ca_kabuli_chr05 | 43918874                | GG                              | AA                | 1946439342               |
| SNP_P3_70391_43918930 | NC_021164.1    | Ca_kabuli_chr05 | 43918930                | GG                              | AA                | 1946439344               |
| SNP_P3_70392_43918947 | NC_021164.1    | Ca_kabuli_chr05 | 43918947                | CC                              | TT                | 1946439345               |
| SNP_P3_70394_43919017 | NC_021164.1    | Ca_kabuli_chr05 | 43919017                | TT                              | GG                | 1946439346               |
| SNP_P3_70395_43919022 | NC_021164.1    | Ca_kabuli_chr05 | 43919022                | GG                              | CC                | 1946439348               |
| SNP_P3_70396_43919028 | NC_021164.1    | Ca_kabuli_chr05 | 43919028                | AA                              | GG                | 1946439349               |
| SNP_P3_70398_43919249 | NC_021164.1    | Ca_kabuli_chr05 | 43919249                | TT                              | AA                | 1946439351               |
| SNP_P3_70399_43919288 | NC_021164.1    | Ca_kabuli_chr05 | 43919288                | TT                              | GG                | 1946439352               |
| SNP_P3_70400_43920637 | NC_021164.1    | Ca_kabuli_chr05 | 43920637                | GG                              | CC                | 1946439353               |
| SNP_P3_70401_43920639 | NC_021164.1    | Ca_kabuli_chr05 | 43920639                | GG                              | AA                | 1946439355               |
| SNP_P3_70402_43920646 | NC_021164.1    | Ca_kabuli_chr05 | 43920646                | CC                              | TT                | 1946439356               |
| SNP_P3_70403_43920658 | NC_021164.1    | Ca_kabuli_chr05 | 43920658                | AA                              | GG                | 1946439358               |
| SNP_P3_70404_43920662 | NC_021164.1    | Ca_kabuli_chr05 | 43920662                | CC                              | TT                | 1946439359               |
| SNP_P3_70405_43920808 | NC_021164.1    | Ca_kabuli_chr05 | 43920808                | AA                              | CC                | 1946439360               |
| SNP_P3_70406_43920809 | NC_021164.1    | Ca_kabuli_chr05 | 43920809                | CC                              | TT                | 1946439362               |
| SNP_P3_70407_43920853 | NC_021164.1    | Ca_kabuli_chr05 | 43920853                | TT                              | CC                | 1946439363               |
| SNP_P3_70408_43920890 | NC_021164.1    | Ca_kabuli_chr05 | 43920890                | TT                              | AA                | 1946439365               |
| SNP_P3_70409_43920929 | NC_021164.1    | Ca_kabuli_chr05 | 43920929                | AA                              | GG                | 1946439366               |
| SNP_P3_70411_43921172 | NC_021164.1    | Ca_kabuli_chr05 | 43921172                | CC                              | TT                | 1946439368               |
| SNP_P3_70412_43921193 | NC_021164.1    | Ca_kabuli_chr05 | 43921193                | GG                              | TT                | 1946439369               |
| SNP_P3_70414_44035422 | NC_021164.1    | Ca_kabuli_chr05 | 44035422                | TT                              | CC                | 1946439371               |
| SNP_P3_70415_44035435 | NC_021164.1    | Ca_kabuli_chr05 | 44035435                | GG                              | CC                | 1946439372               |
| SNP_P3_70416_44052549 | NC_021164.1    | Ca_kabuli_chr05 | 44052549                | CC                              | TT                | 1946439374               |



| SNPs IDs              | Chromosome IDs | Chromosomes     | Physical positions (bp) | CDC Frontier (Reference genome) | (Pusa 256 & HPNB) | NCBI SNPdb Accession IDs |
|-----------------------|----------------|-----------------|-------------------------|---------------------------------|-------------------|--------------------------|
| SNP_P3_70417_44081311 | NC_021164.1    | Ca_kabuli_chr05 | 44081311                | TT                              | CC                | 1946439375               |
| SNP_P3_70421_44136789 | NC_021164.1    | Ca_kabuli_chr05 | 44136789                | TT                              | CC                | 1946439376               |
| SNP_P3_70422_44161485 | NC_021164.1    | Ca_kabuli_chr05 | 44161485                | CC                              | TT                | 1946439378               |
| SNP_P3_70423_44170131 | NC_021164.1    | Ca_kabuli_chr05 | 44170131                | AA                              | TT                | 1946439379               |
| SNP_P3_70425_44177885 | NC_021164.1    | Ca_kabuli_chr05 | 44177885                | TT                              | CC                | 1946439381               |
| SNP_P3_70428_44194846 | NC_021164.1    | Ca_kabuli_chr05 | 44194846                | AA                              | GG                | 1946439382               |
| SNP_P3_70429_44200061 | NC_021164.1    | Ca_kabuli_chr05 | 44200061                | CC                              | TT                | 1946439383               |
| SNP_P3_70430_44200089 | NC_021164.1    | Ca_kabuli_chr05 | 44200089                | CC                              | TT                | 1946439385               |
| SNP_P3_70432_44209134 | NC_021164.1    | Ca_kabuli_chr05 | 44209134                | GG                              | AA                | 1946439386               |
| SNP_P3_70433_44211645 | NC_021164.1    | Ca_kabuli_chr05 | 44211645                | TT                              | CC                | 1946439388               |
| SNP_P3_70434_44211648 | NC_021164.1    | Ca_kabuli_chr05 | 44211648                | CC                              | TT                | 1946439389               |
| SNP_P3_70435_44211667 | NC_021164.1    | Ca_kabuli_chr05 | 44211667                | GG                              | AA                | 1946439391               |
| SNP_P3_70436_44211673 | NC_021164.1    | Ca_kabuli_chr05 | 44211673                | AA                              | GG                | 1946439392               |
| SNP_P3_70437_44211701 | NC_021164.1    | Ca_kabuli_chr05 | 44211701                | TT                              | GG                | 1946439394               |
| SNP_P3_70438_44211706 | NC_021164.1    | Ca_kabuli_chr05 | 44211706                | AA                              | GG                | 1946439395               |
| SNP_P3_70439_44212038 | NC_021164.1    | Ca_kabuli_chr05 | 44212038                | TT                              | CC                | 1946439397               |
| SNP_P3_70442_44243928 | NC_021164.1    | Ca_kabuli_chr05 | 44243928                | TT                              | CC                | 1946439398               |
| SNP_P3_70445_44244238 | NC_021164.1    | Ca_kabuli_chr05 | 44244238                | TT                              | CC                | 1946439400               |
| SNP_P3_70446_44244241 | NC_021164.1    | Ca_kabuli_chr05 | 44244241                | AA                              | CC                | 1946439401               |
| SNP_P3_70447_44244260 | NC_021164.1    | Ca_kabuli_chr05 | 44244260                | GG                              | AA                | 1946439403               |
| SNP_P3_70448_44248952 | NC_021164.1    | Ca_kabuli_chr05 | 44248952                | TT                              | GG                | 1946439404               |
| SNP_P3_70450_44269323 | NC_021164.1    | Ca_kabuli_chr05 | 44269323                | CC                              | TT                | 1946439405               |
| SNP_P3_70451_44281718 | NC_021164.1    | Ca_kabuli_chr05 | 44281718                | AA                              | GG                | 1946439407               |
| SNP_P3_70452_44323712 | NC_021164.1    | Ca_kabuli_chr05 | 44323712                | CC                              | AA                | 1946439408               |
| SNP_P3_70454_44411901 | NC_021164.1    | Ca_kabuli_chr05 | 44411901                | TT                              | GG                | 1946439410               |
| SNP_P3_70456_44442882 | NC_021164.1    | Ca_kabuli_chr05 | 44442882                | CC                              | TT                | 1946439411               |
| SNP_P3_70457_44454858 | NC_021164.1    | Ca_kabuli_chr05 | 44454858                | TT                              | AA                | 1946439412               |
| SNP_P3_70458_44528084 | NC_021164.1    | Ca_kabuli_chr05 | 44528084                | TT                              | CC                | 1946439414               |
| SNP_P3_70459_44528090 | NC_021164.1    | Ca_kabuli_chr05 | 44528090                | TT                              | GG                | 1946439415               |
| SNP_P3_70460_44539408 | NC_021164.1    | Ca_kabuli_chr05 | 44539408                | CC                              | AA                | 1946439417               |
| SNP_P3_70463_44591817 | NC_021164.1    | Ca_kabuli_chr05 | 44591817                | GG                              | AA                | 1946439419               |
| SNP_P3_70464_44592097 | NC_021164.1    | Ca_kabuli_chr05 | 44592097                | CC                              | AA                | 1946439420               |
| SNP_P3_70465_44592121 | NC_021164.1    | Ca_kabuli_chr05 | 44592121                | TT                              | GG                | 1946439422               |
| SNP_P3_70466_44596762 | NC_021164.1    | Ca_kabuli_chr05 | 44596762                | TT                              | AA                | 1946439423               |
| SNP_P3_70467_44596763 | NC_021164.1    | Ca_kabuli_chr05 | 44596763                | TT                              | AA                | 1946439424               |
| SNP_P3_70469_44596823 | NC_021164.1    | Ca_kabuli_chr05 | 44596823                | TT                              | CC                | 1946439426               |
| SNP_P3_70470_44596933 | NC_021164.1    | Ca_kabuli_chr05 | 44596933                | AA                              | CC                | 1946439427               |
| SNP_P3_70471_44597003 | NC_021164.1    | Ca_kabuli_chr05 | 44597003                | CC                              | TT                | 1946439429               |
| SNP_P3_70474_44597163 | NC_021164.1    | Ca_kabuli_chr05 | 44597163                | TT                              | AA                | 1946439430               |
| SNP_P3_70475_44597168 | NC_021164.1    | Ca_kabuli_chr05 | 44597168                | CC                              | TT                | 1946439431               |
| SNP_P3_70476_44597207 | NC_021164.1    | Ca_kabuli_chr05 | 44597207                | TT                              | CC                | 1946439433               |
| SNP_P3_70477_44597222 | NC_021164.1    | Ca_kabuli_chr05 | 44597222                | TT                              | CC                | 1946439434               |

| SNPs IDs              | Chromosome IDs | Chromosomes     | Physical positions (bp) | CDC Frontier (Reference genome) | (Pusa 256 & HPNB) | NCBI SNPdb Accession IDs |
|-----------------------|----------------|-----------------|-------------------------|---------------------------------|-------------------|--------------------------|
| SNP_P3_70478_44597500 | NC_021164.1    | Ca_kabuli_chr05 | 44597500                | GG                              | AA                | 1946439436               |
| SNP_P3_70479_44649334 | NC_021164.1    | Ca_kabuli_chr05 | 44649334                | TT                              | AA                | 1946439437               |
| SNP_P3_70480_44707171 | NC_021164.1    | Ca_kabuli_chr05 | 44707171                | TT                              | CC                | 1946439439               |
| SNP_P3_70482_44724929 | NC_021164.1    | Ca_kabuli_chr05 | 44724929                | TT                              | CC                | 1946439440               |
| SNP_P3_70483_44744606 | NC_021164.1    | Ca_kabuli_chr05 | 44744606                | AA                              | TT                | 1946439442               |
| SNP_P3_70484_44775282 | NC_021164.1    | Ca_kabuli_chr05 | 44775282                | TT                              | CC                | 1946439443               |
| SNP_P3_70485_44844264 | NC_021164.1    | Ca_kabuli_chr05 | 44844264                | GG                              | AA                | 1946439445               |
| SNP_P3_70486_44844309 | NC_021164.1    | Ca_kabuli_chr05 | 44844309                | AA                              | GG                | 1946439446               |
| SNP_P3_70487_44857425 | NC_021164.1    | Ca_kabuli_chr05 | 44857425                | AA                              | TT                | 1946439448               |
| SNP_P3_70489_44925808 | NC_021164.1    | Ca_kabuli_chr05 | 44925808                | AA                              | GG                | 1946439449               |
| SNP_P3_70490_44947416 | NC_021164.1    | Ca_kabuli_chr05 | 44947416                | CC                              | TT                | 1946439451               |
| SNP_P3_70491_44963451 | NC_021164.1    | Ca_kabuli_chr05 | 44963451                | CC                              | AA                | 1946439452               |
| SNP_P3_70492_44967759 | NC_021164.1    | Ca_kabuli_chr05 | 44967759                | TT                              | CC                | 1946439454               |
| SNP_P3_70493_44987840 | NC_021164.1    | Ca_kabuli_chr05 | 44987840                | AA                              | GG                | 1946439455               |
| SNP_P3_70494_45010023 | NC_021164.1    | Ca_kabuli_chr05 | 45010023                | GG                              | TT                | 1946439456               |
| SNP_P3_70495_45010029 | NC_021164.1    | Ca_kabuli_chr05 | 45010029                | CC                              | TT                | 1946439458               |
| SNP_P3_70496_45038241 | NC_021164.1    | Ca_kabuli_chr05 | 45038241                | GG                              | AA                | 1946439460               |
| SNP_P3_70498_45042585 | NC_021164.1    | Ca_kabuli_chr05 | 45042585                | GG                              | AA                | 1946439461               |
| SNP_P3_70499_45053472 | NC_021164.1    | Ca_kabuli_chr05 | 45053472                | GG                              | AA                | 1946439463               |
| SNP_P3_70500_45071883 | NC_021164.1    | Ca_kabuli_chr05 | 45071883                | TT                              | CC                | 1946439464               |
| SNP_P3_70503_45082497 | NC_021164.1    | Ca_kabuli_chr05 | 45082497                | TT                              | AA                | 1946439466               |
| SNP_P3_70504_45085417 | NC_021164.1    | Ca_kabuli_chr05 | 45085417                | TT                              | AA                | 1946439467               |
| SNP_P3_70505_45086457 | NC_021164.1    | Ca_kabuli_chr05 | 45086457                | AA                              | GG                | 1946439469               |
| SNP_P3_70506_45086611 | NC_021164.1    | Ca_kabuli_chr05 | 45086611                | AA                              | TT                | 1946439470               |
| SNP_P3_70507_45086818 | NC_021164.1    | Ca_kabuli_chr05 | 45086818                | CC                              | TT                | 1946439472               |
| SNP_P3_70509_45087028 | NC_021164.1    | Ca_kabuli_chr05 | 45087028                | CC                              | TT                | 1946439473               |
| SNP_P3_70511_45094039 | NC_021164.1    | Ca_kabuli_chr05 | 45094039                | AA                              | GG                | 1946439475               |
| SNP_P3_70513_45094248 | NC_021164.1    | Ca_kabuli_chr05 | 45094248                | AA                              | GG                | 1946439476               |
| SNP_P3_70514_45094324 | NC_021164.1    | Ca_kabuli_chr05 | 45094324                | TT                              | AA                | 1946439478               |
| SNP_P3_70515_45094365 | NC_021164.1    | Ca_kabuli_chr05 | 45094365                | CC                              | TT                | 1946439479               |
| SNP_P3_70517_45094840 | NC_021164.1    | Ca_kabuli_chr05 | 45094840                | TT                              | GG                | 1946439481               |
| SNP_P3_70518_45095230 | NC_021164.1    | Ca_kabuli_chr05 | 45095230                | GG                              | CC                | 1946439482               |
| SNP_P3_70519_45095250 | NC_021164.1    | Ca_kabuli_chr05 | 45095250                | AA                              | GG                | 1946439484               |
| SNP_P3_70520_45095254 | NC_021164.1    | Ca_kabuli_chr05 | 45095254                | AA                              | GG                | 1946439485               |
| SNP_P3_70521_45095394 | NC_021164.1    | Ca_kabuli_chr05 | 45095394                | CC                              | GG                | 1946439487               |
| SNP_P3_70522_45095467 | NC_021164.1    | Ca_kabuli_chr05 | 45095467                | CC                              | AA                | 1946439488               |
| SNP_P3_70523_45095556 | NC_021164.1    | Ca_kabuli_chr05 | 45095556                | CC                              | TT                | 1946439490               |
| SNP_P3_70524_45095566 | NC_021164.1    | Ca_kabuli_chr05 | 45095566                | CC                              | GG                | 1946439491               |
| SNP_P3_70525_45096025 | NC_021164.1    | Ca_kabuli_chr05 | 45096025                | GG                              | AA                | 1946439492               |
| SNP_P3_70526_45096272 | NC_021164.1    | Ca_kabuli_chr05 | 45096272                | GG                              | AA                | 1946439494               |
| SNP_P3_70527_45097448 | NC_021164.1    | Ca_kabuli_chr05 | 45097448                | GG                              | AA                | 1946439495               |
| SNP_P3_70528_45097741 | NC_021164.1    | Ca_kabuli_chr05 | 45097741                | AA                              | CC                | 1946439497               |

| SNPs IDs              | Chromosome IDs | Chromosomes     | Physical positions (bp) | CDC Frontier (Reference genome) | (Pusa 256 & HPNB) | NCBI SNPdb Accession IDs |
|-----------------------|----------------|-----------------|-------------------------|---------------------------------|-------------------|--------------------------|
| SNP_P3_70529_45097789 | NC_021164.1    | Ca_kabuli_chr05 | 45097789                | TT                              | AA                | 1946439498               |
| SNP_P3_70530_45098761 | NC_021164.1    | Ca_kabuli_chr05 | 45098761                | TT                              | CC                | 1946439500               |
| SNP_P3_70532_45106869 | NC_021164.1    | Ca_kabuli_chr05 | 45106869                | GG                              | AA                | 1946439502               |
| SNP_P3_70533_45111424 | NC_021164.1    | Ca_kabuli_chr05 | 45111424                | TT                              | CC                | 1946439503               |
| SNP_P3_70535_45140212 | NC_021164.1    | Ca_kabuli_chr05 | 45140212                | TT                              | CC                | 1946439505               |
| SNP_P3_70536_45187040 | NC_021164.1    | Ca_kabuli_chr05 | 45187040                | TT                              | CC                | 1946439506               |
| SNP_P3_70537_45206277 | NC_021164.1    | Ca_kabuli_chr05 | 45206277                | CC                              | GG                | 1946439507               |
| SNP_P3_70538_45209560 | NC_021164.1    | Ca_kabuli_chr05 | 45209560                | AA                              | GG                | 1946439509               |
| SNP_P3_70539_45230272 | NC_021164.1    | Ca_kabuli_chr05 | 45230272                | CC                              | AA                | 1946439510               |
| SNP_P3_70540_45268005 | NC_021164.1    | Ca_kabuli_chr05 | 45268005                | GG                              | TT                | 1946439512               |
| SNP_P3_70542_45380947 | NC_021164.1    | Ca_kabuli_chr05 | 45380947                | GG                              | AA                | 1946439513               |
| SNP_P3_70543_45438671 | NC_021164.1    | Ca_kabuli_chr05 | 45438671                | CC                              | TT                | 1946439515               |
| SNP_P3_70544_45449512 | NC_021164.1    | Ca_kabuli_chr05 | 45449512                | GG                              | AA                | 1946439516               |
| SNP_P3_70545_45472870 | NC_021164.1    | Ca_kabuli_chr05 | 45472870                | TT                              | AA                | 1946439518               |
| SNP_P3_70546_45472871 | NC_021164.1    | Ca_kabuli_chr05 | 45472871                | TT                              | AA                | 1946439519               |
| SNP_P3_70547_45500412 | NC_021164.1    | Ca_kabuli_chr05 | 45500412                | CC                              | TT                | 1946439521               |
| SNP_P3_70550_45522382 | NC_021164.1    | Ca_kabuli_chr05 | 45522382                | AA                              | GG                | 1946439522               |
| SNP_P3_70554_45604139 | NC_021164.1    | Ca_kabuli_chr05 | 45604139                | TT                              | CC                | 1946439524               |
| SNP_P3_70556_45630905 | NC_021164.1    | Ca_kabuli_chr05 | 45630905                | CC                              | TT                | 1946439525               |
| SNP_P3_70558_45712070 | NC_021164.1    | Ca_kabuli_chr05 | 45712070                | CC                              | TT                | 1946439527               |
| SNP_P3_70560_45745864 | NC_021164.1    | Ca_kabuli_chr05 | 45745864                | TT                              | CC                | 1946439528               |
| SNP_P3_70561_45746955 | NC_021164.1    | Ca_kabuli_chr05 | 45746955                | AA                              | CC                | 1946439530               |
| SNP_P3_70562_45746960 | NC_021164.1    | Ca_kabuli_chr05 | 45746960                | CC                              | GG                | 1946439531               |
| SNP_P3_70564_45750144 | NC_021164.1    | Ca_kabuli_chr05 | 45750144                | AA                              | CC                | 1946439533               |
| SNP_P3_70565_45750181 | NC_021164.1    | Ca_kabuli_chr05 | 45750181                | CC                              | GG                | 1946439534               |
| SNP_P3_70566_45750222 | NC_021164.1    | Ca_kabuli_chr05 | 45750222                | AA                              | GG                | 1946439535               |
| SNP_P3_70567_45760127 | NC_021164.1    | Ca_kabuli_chr05 | 45760127                | AA                              | TT                | 1946439537               |
| SNP_P3_70568_45771267 | NC_021164.1    | Ca_kabuli_chr05 | 45771267                | GG                              | AA                | 1946439538               |
| SNP_P3_70569_45777864 | NC_021164.1    | Ca_kabuli_chr05 | 45777864                | AA                              | GG                | 1946439540               |
| SNP_P3_70571_45779631 | NC_021164.1    | Ca_kabuli_chr05 | 45779631                | AA                              | GG                | 1946439542               |
| SNP_P3_70572_45821193 | NC_021164.1    | Ca_kabuli_chr05 | 45821193                | AA                              | TT                | 1946439543               |
| SNP_P3_70573_45851521 | NC_021164.1    | Ca_kabuli_chr05 | 45851521                | GG                              | TT                | 1946439545               |
| SNP_P3_70574_45851552 | NC_021164.1    | Ca_kabuli_chr05 | 45851552                | GG                              | AA                | 1946439546               |
| SNP_P3_70575_45897361 | NC_021164.1    | Ca_kabuli_chr05 | 45897361                | AA                              | TT                | 1946439548               |
| SNP_P3_70577_45925222 | NC_021164.1    | Ca_kabuli_chr05 | 45925222                | TT                              | CC                | 1946439549               |
| SNP_P3_70579_45929658 | NC_021164.1    | Ca_kabuli_chr05 | 45929658                | GG                              | AA                | 1946439550               |
| SNP_P3_70580_45963348 | NC_021164.1    | Ca_kabuli_chr05 | 45963348                | TT                              | CC                | 1946439552               |
| SNP_P3_70582_45989437 | NC_021164.1    | Ca_kabuli_chr05 | 45989437                | CC                              | TT                | 1946439553               |
| SNP_P3_70584_45996228 | NC_021164.1    | Ca_kabuli_chr05 | 45996228                | GG                              | CC                | 1946439555               |
| SNP_P3_70586_46007755 | NC_021164.1    | Ca_kabuli_chr05 | 46007755                | CC                              | TT                | 1946439556               |
| SNP_P3_70587_46007762 | NC_021164.1    | Ca_kabuli_chr05 | 46007762                | CC                              | TT                | 1946439558               |
| SNP_P3_70588_46008148 | NC_021164.1    | Ca_kabuli_chr05 | 46008148                | AA                              | GG                | 1946439559               |

| SNPs IDs              | Chromosome IDs | Chromosomes     | Physical positions (bp) | CDC Frontier (Reference genome) | (Pusa 256 & HPNB) | NCBI SNPdb Accession IDs |
|-----------------------|----------------|-----------------|-------------------------|---------------------------------|-------------------|--------------------------|
| SNP_P3_70589_46008162 | NC_021164.1    | Ca_kabuli_chr05 | 46008162                | GG                              | AA                | 1946439561               |
| SNP_P3_70590_46023232 | NC_021164.1    | Ca_kabuli_chr05 | 46023232                | AA                              | CC                | 1946439563               |
| SNP_P3_70591_46033934 | NC_021164.1    | Ca_kabuli_chr05 | 46033934                | CC                              | TT                | 1946439564               |
| SNP_P3_70592_46033980 | NC_021164.1    | Ca_kabuli_chr05 | 46033980                | AA                              | CC                | 1946439566               |
| SNP_P3_70593_46034152 | NC_021164.1    | Ca_kabuli_chr05 | 46034152                | TT                              | CC                | 1946439567               |
| SNP_P3_70594_46039385 | NC_021164.1    | Ca_kabuli_chr05 | 46039385                | CC                              | AA                | 1946439568               |
| SNP_P3_70595_46041790 | NC_021164.1    | Ca_kabuli_chr05 | 46041790                | AA                              | TT                | 1946439570               |
| SNP_P3_70596_46041792 | NC_021164.1    | Ca_kabuli_chr05 | 46041792                | AA                              | TT                | 1946439571               |
| SNP_P3_70597_46041800 | NC_021164.1    | Ca_kabuli_chr05 | 46041800                | CC                              | TT                | 1946439573               |
| SNP_P3_70599_46201740 | NC_021164.1    | Ca_kabuli_chr05 | 46201740                | AA                              | TT                | 1946439574               |
| SNP_P3_70600_46204342 | NC_021164.1    | Ca_kabuli_chr05 | 46204342                | AA                              | GG                | 1946439576               |
| SNP_P3_70601_46204347 | NC_021164.1    | Ca_kabuli_chr05 | 46204347                | CC                              | TT                | 1946439577               |
| SNP_P3_70602_46204636 | NC_021164.1    | Ca_kabuli_chr05 | 46204636                | TT                              | CC                | 1946439579               |
| SNP_P3_70603_46204646 | NC_021164.1    | Ca_kabuli_chr05 | 46204646                | TT                              | CC                | 1946439581               |
| SNP_P3_70604_46208381 | NC_021164.1    | Ca_kabuli_chr05 | 46208381                | AA                              | TT                | 1946439582               |
| SNP_P3_70605_46208499 | NC_021164.1    | Ca_kabuli_chr05 | 46208499                | TT                              | CC                | 1946439583               |
| SNP_P3_70607_46212126 | NC_021164.1    | Ca_kabuli_chr05 | 46212126                | CC                              | AA                | 1946439585               |
| SNP_P3_70609_46228178 | NC_021164.1    | Ca_kabuli_chr05 | 46228178                | CC                              | TT                | 1946439586               |
| SNP_P3_70610_46228179 | NC_021164.1    | Ca_kabuli_chr05 | 46228179                | GG                              | AA                | 1946439588               |
| SNP_P3_70613_46244321 | NC_021164.1    | Ca_kabuli_chr05 | 46244321                | GG                              | AA                | 1946439589               |
| SNP_P3_70615_46278227 | NC_021164.1    | Ca_kabuli_chr05 | 46278227                | AA                              | TT                | 1946439591               |
| SNP_P3_70617_46333649 | NC_021164.1    | Ca_kabuli_chr05 | 46333649                | AA                              | CC                | 1946439592               |
| SNP_P3_70618_46333651 | NC_021164.1    | Ca_kabuli_chr05 | 46333651                | AA                              | CC                | 1946439594               |
| SNP_P3_70619_46349093 | NC_021164.1    | Ca_kabuli_chr05 | 46349093                | GG                              | AA                | 1946439595               |
| SNP_P3_70623_46418383 | NC_021164.1    | Ca_kabuli_chr05 | 46418383                | TT                              | CC                | 1946439596               |
| SNP_P3_70624_46488056 | NC_021164.1    | Ca_kabuli_chr05 | 46488056                | CC                              | TT                | 1946439598               |
| SNP_P3_70625_46494291 | NC_021164.1    | Ca_kabuli_chr05 | 46494291                | AA                              | GG                | 1946439599               |
| SNP_P3_70626_46496880 | NC_021164.1    | Ca_kabuli_chr05 | 46496880                | TT                              | AA                | 1946439601               |
| SNP_P3_70627_46532426 | NC_021164.1    | Ca_kabuli_chr05 | 46532426                | AA                              | CC                | 1946439603               |
| SNP_P3_70628_46565868 | NC_021164.1    | Ca_kabuli_chr05 | 46565868                | TT                              | CC                | 1946439604               |
| SNP_P3_70630_46608616 | NC_021164.1    | Ca_kabuli_chr05 | 46608616                | TT                              | GG                | 1946439606               |
| SNP_P3_70632_46655029 | NC_021164.1    | Ca_kabuli_chr05 | 46655029                | AA                              | TT                | 1946439607               |
| SNP_P3_70633_46655739 | NC_021164.1    | Ca_kabuli_chr05 | 46655739                | CC                              | TT                | 1946439609               |
| SNP_P3_70635_46662625 | NC_021164.1    | Ca_kabuli_chr05 | 46662625                | CC                              | GG                | 1946439610               |
| SNP_P3_70636_46662627 | NC_021164.1    | Ca_kabuli_chr05 | 46662627                | AA                              | GG                | 1946439612               |
| SNP_P3_70637_46673705 | NC_021164.1    | Ca_kabuli_chr05 | 46673705                | GG                              | AA                | 1946439613               |
| SNP_P3_70640_46752492 | NC_021164.1    | Ca_kabuli_chr05 | 46752492                | AA                              | CC                | 1946439614               |
| SNP_P3_70641_46764235 | NC_021164.1    | Ca_kabuli_chr05 | 46764235                | AA                              | TT                | 1946439616               |
| SNP_P3_70642_46782294 | NC_021164.1    | Ca_kabuli_chr05 | 46782294                | AA                              | TT                | 1946439617               |
| SNP_P3_70643_46782794 | NC_021164.1    | Ca_kabuli_chr05 | 46782794                | TT                              | CC                | 1946439620               |
| SNP_P3_70644_46783554 | NC_021164.1    | Ca_kabuli_chr05 | 46783554                | GG                              | CC                | 1946439621               |
| SNP_P3_70645_46798017 | NC_021164.1    | Ca_kabuli_chr05 | 46798017                | TT                              | AA                | 1946439623               |

| SNPs IDs              | Chromosome IDs | Chromosomes     | Physical positions (bp) | CDC Frontier (Reference genome) | (Pusa 256 & HPNB) | NCBI SNPdb Accession IDs |
|-----------------------|----------------|-----------------|-------------------------|---------------------------------|-------------------|--------------------------|
| SNP_P3_70646_46801693 | NC_021164.1    | Ca_kabuli_chr05 | 46801693                | TT                              | GG                | 1946439624               |
| SNP_P3_70647_46803469 | NC_021164.1    | Ca_kabuli_chr05 | 46803469                | AA                              | CC                | 1946439626               |
| SNP_P3_70648_46803473 | NC_021164.1    | Ca_kabuli_chr05 | 46803473                | TT                              | CC                | 1946439627               |
| SNP_P3_70649_46807575 | NC_021164.1    | Ca_kabuli_chr05 | 46807575                | CC                              | TT                | 1946439629               |
| SNP_P3_70650_46845341 | NC_021164.1    | Ca_kabuli_chr05 | 46845341                | TT                              | CC                | 1946439630               |
| SNP_P3_70651_46860359 | NC_021164.1    | Ca_kabuli_chr05 | 46860359                | AA                              | GG                | 1946439632               |
| SNP_P3_70652_46870374 | NC_021164.1    | Ca_kabuli_chr05 | 46870374                | TT                              | GG                | 1946439633               |
| SNP_P3_70653_46870629 | NC_021164.1    | Ca_kabuli_chr05 | 46870629                | CC                              | TT                | 1946439634               |
| SNP_P3_70654_46871016 | NC_021164.1    | Ca_kabuli_chr05 | 46871016                | AA                              | GG                | 1946439636               |
| SNP_P3_70655_46874829 | NC_021164.1    | Ca_kabuli_chr05 | 46874829                | CC                              | TT                | 1946439637               |
| SNP_P3_70656_46884971 | NC_021164.1    | Ca_kabuli_chr05 | 46884971                | AA                              | GG                | 1946439639               |
| SNP_P3_70657_46906351 | NC_021164.1    | Ca_kabuli_chr05 | 46906351                | GG                              | AA                | 1946439641               |
| SNP_P3_70658_46925765 | NC_021164.1    | Ca_kabuli_chr05 | 46925765                | AA                              | GG                | 1946439642               |
| SNP_P3_70660_46970553 | NC_021164.1    | Ca_kabuli_chr05 | 46970553                | TT                              | AA                | 1946439644               |
| SNP_P3_70663_47015127 | NC_021164.1    | Ca_kabuli_chr05 | 47015127                | CC                              | AA                | 1946439645               |
| SNP_P3_70664_47033385 | NC_021164.1    | Ca_kabuli_chr05 | 47033385                | GG                              | TT                | 1946439647               |
| SNP_P3_70666_47065238 | NC_021164.1    | Ca_kabuli_chr05 | 47065238                | GG                              | AA                | 1946439648               |
| SNP_P3_70667_47088078 | NC_021164.1    | Ca_kabuli_chr05 | 47088078                | TT                              | CC                | 1946439650               |
| SNP_P3_70668_47142126 | NC_021164.1    | Ca_kabuli_chr05 | 47142126                | TT                              | AA                | 1946439651               |
| SNP_P3_70669_47156203 | NC_021164.1    | Ca_kabuli_chr05 | 47156203                | GG                              | TT                | 1946439653               |
| SNP_P3_70670_47167484 | NC_021164.1    | Ca_kabuli_chr05 | 47167484                | CC                              | GG                | 1946439654               |
| SNP_P3_70671_47176414 | NC_021164.1    | Ca_kabuli_chr05 | 47176414                | AA                              | TT                | 1946439655               |
| SNP_P3_70672_47188103 | NC_021164.1    | Ca_kabuli_chr05 | 47188103                | CC                              | TT                | 1946439657               |
| SNP_P3_70673_47192790 | NC_021164.1    | Ca_kabuli_chr05 | 47192790                | TT                              | AA                | 1946439658               |
| SNP_P3_70674_47202129 | NC_021164.1    | Ca_kabuli_chr05 | 47202129                | AA                              | TT                | 1946439660               |
| SNP_P3_70675_47269424 | NC_021164.1    | Ca_kabuli_chr05 | 47269424                | GG                              | AA                | 1946439661               |
| SNP_P3_70677_47281193 | NC_021164.1    | Ca_kabuli_chr05 | 47281193                | CC                              | TT                | 1946439663               |
| SNP_P3_70678_47304292 | NC_021164.1    | Ca_kabuli_chr05 | 47304292                | CC                              | AA                | 1946439664               |
| SNP_P3_70679_47361333 | NC_021164.1    | Ca_kabuli_chr05 | 47361333                | TT                              | AA                | 1946439666               |
| SNP_P3_70680_47382738 | NC_021164.1    | Ca_kabuli_chr05 | 47382738                | AA                              | GG                | 1946439667               |
| SNP_P3_70681_47395366 | NC_021164.1    | Ca_kabuli_chr05 | 47395366                | TT                              | AA                | 1946439669               |
| SNP_P3_70682_47400652 | NC_021164.1    | Ca_kabuli_chr05 | 47400652                | GG                              | AA                | 1946439671               |
| SNP_P3_70683_47404515 | NC_021164.1    | Ca_kabuli_chr05 | 47404515                | CC                              | TT                | 1946439672               |
| SNP_P3_70684_47404517 | NC_021164.1    | Ca_kabuli_chr05 | 47404517                | AA                              | GG                | 1946439674               |
| SNP_P3_70685_47404520 | NC_021164.1    | Ca_kabuli_chr05 | 47404520                | TT                              | AA                | 1946439675               |
| SNP_P3_70686_47434915 | NC_021164.1    | Ca_kabuli_chr05 | 47434915                | TT                              | CC                | 1946439677               |
| SNP_P3_70687_47438028 | NC_021164.1    | Ca_kabuli_chr05 | 47438028                | TT                              | CC                | 1946439678               |
| SNP_P3_70688_47452677 | NC_021164.1    | Ca_kabuli_chr05 | 47452677                | GG                              | CC                | 1946439679               |
| SNP_P3_70689_47453240 | NC_021164.1    | Ca_kabuli_chr05 | 47453240                | TT                              | CC                | 1946439681               |
| SNP_P3_70690_47453293 | NC_021164.1    | Ca_kabuli_chr05 | 47453293                | TT                              | CC                | 1946439682               |
| SNP_P3_70691_47453298 | NC_021164.1    | Ca_kabuli_chr05 | 47453298                | TT                              | CC                | 1946439684               |
| SNP_P3_70692_47453352 | NC_021164.1    | Ca_kabuli_chr05 | 47453352                | AA                              | TT                | 1946439685               |

| SNPs IDs              | Chromosome IDs | Chromosomes     | Physical positions (bp) | CDC Frontier (Reference genome) | (Pusa 256 & HPNB) | NCBI SNPdb Accession IDs |
|-----------------------|----------------|-----------------|-------------------------|---------------------------------|-------------------|--------------------------|
| SNP_P3_70693_47453526 | NC_021164.1    | Ca_kabuli_chr05 | 47453526                | AA                              | TT                | 1946439687               |
| SNP_P3_70694_47453567 | NC_021164.1    | Ca_kabuli_chr05 | 47453567                | TT                              | CC                | 1946439688               |
| SNP_P3_70695_47453577 | NC_021164.1    | Ca_kabuli_chr05 | 47453577                | CC                              | TT                | 1946439690               |
| SNP_P3_70696_47453607 | NC_021164.1    | Ca_kabuli_chr05 | 47453607                | GG                              | AA                | 1946439691               |
| SNP_P3_70697_47453628 | NC_021164.1    | Ca_kabuli_chr05 | 47453628                | AA                              | CC                | 1946439693               |
| SNP_P3_70698_47454751 | NC_021164.1    | Ca_kabuli_chr05 | 47454751                | TT                              | AA                | 1946439694               |
| SNP_P3_70699_47454932 | NC_021164.1    | Ca_kabuli_chr05 | 47454932                | AA                              | GG                | 1946439696               |
| SNP_P3_70700_47454963 | NC_021164.1    | Ca_kabuli_chr05 | 47454963                | CC                              | TT                | 1946439697               |
| SNP_P3_70701_47455240 | NC_021164.1    | Ca_kabuli_chr05 | 47455240                | AA                              | CC                | 1946439699               |
| SNP_P3_70702_47455391 | NC_021164.1    | Ca_kabuli_chr05 | 47455391                | CC                              | TT                | 1946439700               |
| SNP_P3_70703_47455403 | NC_021164.1    | Ca_kabuli_chr05 | 47455403                | AA                              | GG                | 1946439702               |
| SNP_P3_70704_47455417 | NC_021164.1    | Ca_kabuli_chr05 | 47455417                | GG                              | AA                | 1946439703               |
| SNP_P3_70705_47455421 | NC_021164.1    | Ca_kabuli_chr05 | 47455421                | TT                              | CC                | 1946439704               |
| SNP_P3_70706_47455422 | NC_021164.1    | Ca_kabuli_chr05 | 47455422                | GG                              | AA                | 1946439706               |
| SNP_P3_70707_47455494 | NC_021164.1    | Ca_kabuli_chr05 | 47455494                | GG                              | CC                | 1946439707               |
| SNP_P3_70708_47455509 | NC_021164.1    | Ca_kabuli_chr05 | 47455509                | CC                              | TT                | 1946439709               |
| SNP_P3_70709_47455578 | NC_021164.1    | Ca_kabuli_chr05 | 47455578                | AA                              | TT                | 1946439710               |
| SNP_P3_70711_47519942 | NC_021164.1    | Ca_kabuli_chr05 | 47519942                | TT                              | AA                | 1946439712               |
| SNP_P3_70712_47555548 | NC_021164.1    | Ca_kabuli_chr05 | 47555548                | TT                              | CC                | 1946439714               |
| SNP_P3_70713_47557859 | NC_021164.1    | Ca_kabuli_chr05 | 47557859                | TT                              | GG                | 1946439715               |
| SNP_P3_70714_47572972 | NC_021164.1    | Ca_kabuli_chr05 | 47572972                | AA                              | GG                | 1946439717               |
| SNP_P3_70715_47576898 | NC_021164.1    | Ca_kabuli_chr05 | 47576898                | GG                              | TT                | 1946439718               |
| SNP_P3_70717_47662788 | NC_021164.1    | Ca_kabuli_chr05 | 47662788                | TT                              | CC                | 1946439719               |
| SNP_P3_70718_47674058 | NC_021164.1    | Ca_kabuli_chr05 | 47674058                | GG                              | AA                | 1946439721               |
| SNP_P3_70721_47692957 | NC_021164.1    | Ca_kabuli_chr05 | 47692957                | TT                              | CC                | 1946439722               |
| SNP_P3_70722_47692958 | NC_021164.1    | Ca_kabuli_chr05 | 47692958                | TT                              | GG                | 1946439724               |
| SNP_P3_70725_47798022 | NC_021164.1    | Ca_kabuli_chr05 | 47798022                | TT                              | AA                | 1946439725               |
| SNP_P3_70726_47849188 | NC_021164.1    | Ca_kabuli_chr05 | 47849188                | CC                              | TT                | 1946439727               |
| SNP_P3_70727_47849189 | NC_021164.1    | Ca_kabuli_chr05 | 47849189                | TT                              | GG                | 1946439728               |
| SNP_P3_70728_47875330 | NC_021164.1    | Ca_kabuli_chr05 | 47875330                | TT                              | CC                | 1946439730               |
| SNP_P3_70729_47875332 | NC_021164.1    | Ca_kabuli_chr05 | 47875332                | TT                              | CC                | 1946439732               |
| SNP_P3_70730_47939175 | NC_021164.1    | Ca_kabuli_chr05 | 47939175                | GG                              | AA                | 1946439733               |
| SNP_P3_70731_47955297 | NC_021164.1    | Ca_kabuli_chr05 | 47955297                | TT                              | AA                | 1946439735               |
| SNP_P3_70732_47963416 | NC_021164.1    | Ca_kabuli_chr05 | 47963416                | CC                              | TT                | 1946439736               |
| SNP_P3_70733_47983754 | NC_021164.1    | Ca_kabuli_chr05 | 47983754                | CC                              | GG                | 1946439737               |
| SNP_P3_70736_48034607 | NC_021164.1    | Ca_kabuli_chr05 | 48034607                | TT                              | CC                | 1946439739               |
| SNP_P3_70737_48034608 | NC_021164.1    | Ca_kabuli_chr05 | 48034608                | TT                              | GG                | 1946439740               |
| SNP_P3_70738_48064077 | NC_021164.1    | Ca_kabuli_chr05 | 48064077                | CC                              | TT                | 1946439742               |
| SNP_P3_70739_48071613 | NC_021164.1    | Ca_kabuli_chr05 | 48071613                | CC                              | TT                | 1946439743               |
| SNP_P3_70742_48137089 | NC_021164.1    | Ca_kabuli_chr05 | 48137089                | TT                              | CC                | 1946439745               |
| SNP_P3_70743_48153159 | NC_021164.1    | Ca_kabuli_chr05 | 48153159                | GG                              | AA                | 1946439746               |
| SNP_P3_70744_48153181 | NC_021164.1    | Ca_kabuli_chr05 | 48153181                | TT                              | CC                | 1946439747               |

| SNPs IDs              | Chromosome IDs | Chromosomes     | Physical positions (bp) | CDC Frontier (Reference genome) | (Pusa 256 & HPNB) | NCBI SNPdb Accession IDs |
|-----------------------|----------------|-----------------|-------------------------|---------------------------------|-------------------|--------------------------|
| SNP_P3_70745_48153219 | NC_021164.1    | Ca_kabuli_chr05 | 48153219                | GG                              | TT                | 1946439749               |
| SNP_P3_70746_48153493 | NC_021164.1    | Ca_kabuli_chr05 | 48153493                | AA                              | GG                | 1946439750               |
| SNP_P3_70747_48154369 | NC_021164.1    | Ca_kabuli_chr05 | 48154369                | TT                              | GG                | 1946439752               |
| SNP_P3_70749_48154817 | NC_021164.1    | Ca_kabuli_chr05 | 48154817                | TT                              | GG                | 1946439754               |
| SNP_P3_70750_48157577 | NC_021164.1    | Ca_kabuli_chr05 | 48157577                | TT                              | AA                | 1946439755               |
| SNP_P3_70751_48157623 | NC_021164.1    | Ca_kabuli_chr05 | 48157623                | GG                              | AA                | 1946439756               |
| SNP_P3_70752_48157630 | NC_021164.1    | Ca_kabuli_chr05 | 48157630                | TT                              | AA                | 1946439758               |
| SNP_P3_70753_48164369 | NC_021164.1    | Ca_kabuli_chr05 | 48164369                | AA                              | GG                | 1946439759               |
| SNP_P3_70754_48164375 | NC_021164.1    | Ca_kabuli_chr05 | 48164375                | TT                              | CC                | 1946439761               |
| SNP_P3_70755_23737    | NC_021165.1    | Ca_kabuli_chr06 | 23737                   | CC                              | TT                | 1946439762               |
| SNP_P3_70756_23921    | NC_021165.1    | Ca_kabuli_chr06 | 23921                   | GG                              | TT                | 1946439764               |
| SNP_P3_70757_24202    | NC_021165.1    | Ca_kabuli_chr06 | 24202                   | TT                              | GG                | 1946439765               |
| SNP_P3_70758_27307    | NC_021165.1    | Ca_kabuli_chr06 | 27307                   | AA                              | GG                | 1946439767               |
| SNP_P3_70759_28410    | NC_021165.1    | Ca_kabuli_chr06 | 28410                   | GG                              | AA                | 1946439768               |
| SNP_P3_70760_38603    | NC_021165.1    | Ca_kabuli_chr06 | 38603                   | GG                              | TT                | 1946439769               |
| SNP_P3_70762_59328    | NC_021165.1    | Ca_kabuli_chr06 | 59328                   | GG                              | AA                | 1946439771               |
| SNP_P3_70763_59716    | NC_021165.1    | Ca_kabuli_chr06 | 59716                   | AA                              | CC                | 1946439772               |
| SNP_P3_70765_75831    | NC_021165.1    | Ca_kabuli_chr06 | 75831                   | TT                              | GG                | 1946439774               |
| SNP_P3_70766_76840    | NC_021165.1    | Ca_kabuli_chr06 | 76840                   | GG                              | AA                | 1946439776               |
| SNP_P3_70767_77234    | NC_021165.1    | Ca_kabuli_chr06 | 77234                   | TT                              | GG                | 1946439777               |
| SNP_P3_70768_77262    | NC_021165.1    | Ca_kabuli_chr06 | 77262                   | AA                              | TT                | 1946439779               |
| SNP_P3_70769_77270    | NC_021165.1    | Ca_kabuli_chr06 | 77270                   | AA                              | TT                | 1946439780               |
| SNP_P3_70770_88102    | NC_021165.1    | Ca_kabuli_chr06 | 88102                   | AA                              | CC                | 1946439782               |
| SNP_P3_70771_93034    | NC_021165.1    | Ca_kabuli_chr06 | 93034                   | AA                              | GG                | 1946439783               |
| SNP_P3_70772_112807   | NC_021165.1    | Ca_kabuli_chr06 | 112807                  | AA                              | GG                | 1946439785               |
| SNP_P3_70773_112843   | NC_021165.1    | Ca_kabuli_chr06 | 112843                  | TT                              | GG                | 1946439786               |
| SNP_P3_70774_112866   | NC_021165.1    | Ca_kabuli_chr06 | 112866                  | CC                              | AA                | 1946439787               |
| SNP_P3_70776_113047   | NC_021165.1    | Ca_kabuli_chr06 | 113047                  | CC                              | TT                | 1946439789               |
| SNP_P3_70777_113101   | NC_021165.1    | Ca_kabuli_chr06 | 113101                  | GG                              | TT                | 1946439790               |
| SNP_P3_70778_113115   | NC_021165.1    | Ca_kabuli_chr06 | 113115                  | AA                              | GG                | 1946439792               |
| SNP_P3_70779_113128   | NC_021165.1    | Ca_kabuli_chr06 | 113128                  | GG                              | CC                | 1946439793               |
| SNP_P3_70780_113222   | NC_021165.1    | Ca_kabuli_chr06 | 113222                  | TT                              | CC                | 1946439795               |
| SNP_P3_70781_113251   | NC_021165.1    | Ca_kabuli_chr06 | 113251                  | AA                              | GG                | 1946439797               |
| SNP_P3_70782_113252   | NC_021165.1    | Ca_kabuli_chr06 | 113252                  | AA                              | GG                | 1946439798               |
| SNP_P3_70783_116424   | NC_021165.1    | Ca_kabuli_chr06 | 116424                  | TT                              | CC                | 1946439799               |
| SNP_P3_70784_120278   | NC_021165.1    | Ca_kabuli_chr06 | 120278                  | CC                              | AA                | 1946439801               |
| SNP_P3_70785_120303   | NC_021165.1    | Ca_kabuli_chr06 | 120303                  | GG                              | TT                | 1946439802               |
| SNP_P3_70786_120347   | NC_021165.1    | Ca_kabuli_chr06 | 120347                  | GG                              | AA                | 1946439804               |
| SNP_P3_70788_120556   | NC_021165.1    | Ca_kabuli_chr06 | 120556                  | CC                              | TT                | 1946439805               |
| SNP_P3_70789_125786   | NC_021165.1    | Ca_kabuli_chr06 | 125786                  | AA                              | CC                | 1946439807               |
| SNP_P3_70790_130553   | NC_021165.1    | Ca_kabuli_chr06 | 130553                  | CC                              | TT                | 1946439809               |
| SNP_P3_70791_130571   | NC_021165.1    | Ca_kabuli_chr06 | 130571                  | GG                              | AA                | 1946439810               |

| SNPs IDs            | Chromosome IDs | Chromosomes     | Physical positions (bp) | CDC Frontier (Reference genome) | (Pusa 256 & HPNB) | NCBI SNPdb Accession IDs |
|---------------------|----------------|-----------------|-------------------------|---------------------------------|-------------------|--------------------------|
| SNP_P3_70792_130579 | NC_021165.1    | Ca_kabuli_chr06 | 130579                  | GG                              | TT                | 1946439812               |
| SNP_P3_70793_130612 | NC_021165.1    | Ca_kabuli_chr06 | 130612                  | CC                              | GG                | 1946439813               |
| SNP_P3_70794_130986 | NC_021165.1    | Ca_kabuli_chr06 | 130986                  | AA                              | GG                | 1946439815               |
| SNP_P3_70795_131003 | NC_021165.1    | Ca_kabuli_chr06 | 131003                  | TT                              | CC                | 1946439816               |
| SNP_P3_70796_140816 | NC_021165.1    | Ca_kabuli_chr06 | 140816                  | AA                              | CC                | 1946439818               |
| SNP_P3_70797_140834 | NC_021165.1    | Ca_kabuli_chr06 | 140834                  | AA                              | TT                | 1946439820               |
| SNP_P3_70798_141073 | NC_021165.1    | Ca_kabuli_chr06 | 141073                  | AA                              | TT                | 1946439821               |
| SNP_P3_70799_141577 | NC_021165.1    | Ca_kabuli_chr06 | 141577                  | TT                              | CC                | 1946439823               |
| SNP_P3_70800_141906 | NC_021165.1    | Ca_kabuli_chr06 | 141906                  | CC                              | TT                | 1946439824               |
| SNP_P3_70801_141940 | NC_021165.1    | Ca_kabuli_chr06 | 141940                  | AA                              | GG                | 1946439825               |
| SNP_P3_70802_149626 | NC_021165.1    | Ca_kabuli_chr06 | 149626                  | CC                              | TT                | 1946439827               |
| SNP_P3_70803_159091 | NC_021165.1    | Ca_kabuli_chr06 | 159091                  | TT                              | AA                | 1946439828               |
| SNP_P3_70804_159101 | NC_021165.1    | Ca_kabuli_chr06 | 159101                  | CC                              | TT                | 1946439830               |
| SNP_P3_70805_159117 | NC_021165.1    | Ca_kabuli_chr06 | 159117                  | AA                              | GG                | 1946439832               |
| SNP_P3_70807_168226 | NC_021165.1    | Ca_kabuli_chr06 | 168226                  | TT                              | CC                | 1946439833               |
| SNP_P3_70808_168291 | NC_021165.1    | Ca_kabuli_chr06 | 168291                  | TT                              | CC                | 1946439835               |
| SNP_P3_70809_168304 | NC_021165.1    | Ca_kabuli_chr06 | 168304                  | CC                              | GG                | 1946439837               |
| SNP_P3_70810_168333 | NC_021165.1    | Ca_kabuli_chr06 | 168333                  | AA                              | CC                | 1946439838               |
| SNP_P3_70811_183341 | NC_021165.1    | Ca_kabuli_chr06 | 183341                  | TT                              | CC                | 1946439840               |
| SNP_P3_70812_189530 | NC_021165.1    | Ca_kabuli_chr06 | 189530                  | AA                              | GG                | 1946439841               |
| SNP_P3_70814_207551 | NC_021165.1    | Ca_kabuli_chr06 | 207551                  | GG                              | AA                | 1946439843               |
| SNP_P3_70816_240060 | NC_021165.1    | Ca_kabuli_chr06 | 240060                  | AA                              | GG                | 1946439845               |
| SNP_P3_70818_252478 | NC_021165.1    | Ca_kabuli_chr06 | 252478                  | CC                              | TT                | 1946439846               |
| SNP_P3_70820_287517 | NC_021165.1    | Ca_kabuli_chr06 | 287517                  | AA                              | GG                | 1946439848               |
| SNP_P3_70822_349312 | NC_021165.1    | Ca_kabuli_chr06 | 349312                  | TT                              | AA                | 1946439849               |
| SNP_P3_70824_374897 | NC_021165.1    | Ca_kabuli_chr06 | 374897                  | CC                              | TT                | 1946439851               |
| SNP_P3_70825_392732 | NC_021165.1    | Ca_kabuli_chr06 | 392732                  | CC                              | TT                | 1946439853               |
| SNP_P3_70826_398127 | NC_021165.1    | Ca_kabuli_chr06 | 398127                  | TT                              | GG                | 1946439854               |
| SNP_P3_70828_428028 | NC_021165.1    | Ca_kabuli_chr06 | 428028                  | CC                              | TT                | 1946439856               |
| SNP_P3_70829_463268 | NC_021165.1    | Ca_kabuli_chr06 | 463268                  | GG                              | AA                | 1946439857               |
| SNP_P3_70830_474489 | NC_021165.1    | Ca_kabuli_chr06 | 474489                  | CC                              | AA                | 1946439859               |
| SNP_P3_70831_508623 | NC_021165.1    | Ca_kabuli_chr06 | 508623                  | TT                              | AA                | 1946439860               |
| SNP_P3_70832_508624 | NC_021165.1    | Ca_kabuli_chr06 | 508624                  | AA                              | CC                | 1946439862               |
| SNP_P3_70833_563656 | NC_021165.1    | Ca_kabuli_chr06 | 563656                  | AA                              | TT                | 1946439863               |
| SNP_P3_70834_563657 | NC_021165.1    | Ca_kabuli_chr06 | 563657                  | AA                              | GG                | 1946439865               |
| SNP_P3_70836_571997 | NC_021165.1    | Ca_kabuli_chr06 | 571997                  | GG                              | AA                | 1946439866               |
| SNP_P3_70838_626824 | NC_021165.1    | Ca_kabuli_chr06 | 626824                  | GG                              | AA                | 1946439868               |
| SNP_P3_70839_631974 | NC_021165.1    | Ca_kabuli_chr06 | 631974                  | CC                              | AA                | 1946439870               |
| SNP_P3_70840_648011 | NC_021165.1    | Ca_kabuli_chr06 | 648011                  | CC                              | TT                | 1946439871               |
| SNP_P3_70841_664178 | NC_021165.1    | Ca_kabuli_chr06 | 664178                  | TT                              | AA                | 1946439873               |
| SNP_P3_70842_665123 | NC_021165.1    | Ca_kabuli_chr06 | 665123                  | TT                              | CC                | 1946439874               |
| SNP_P3_70843_675859 | NC_021165.1    | Ca_kabuli_chr06 | 675859                  | TT                              | CC                | 1946439876               |



| SNPs IDs             | Chromosome IDs | Chromosomes     | Physical positions (bp) | CDC Frontier (Reference genome) | (Pusa 256 & HPNB) | NCBI SNPdb Accession IDs |
|----------------------|----------------|-----------------|-------------------------|---------------------------------|-------------------|--------------------------|
| SNP_P3_70844_675875  | NC_021165.1    | Ca_kabuli_chr06 | 675875                  | AA                              | CC                | 1946439877               |
| SNP_P3_70845_688596  | NC_021165.1    | Ca_kabuli_chr06 | 688596                  | CC                              | AA                | 1946439879               |
| SNP_P3_70847_720573  | NC_021165.1    | Ca_kabuli_chr06 | 720573                  | AA                              | CC                | 1946439881               |
| SNP_P3_70848_748796  | NC_021165.1    | Ca_kabuli_chr06 | 748796                  | GG                              | AA                | 1946439882               |
| SNP_P3_70849_796153  | NC_021165.1    | Ca_kabuli_chr06 | 796153                  | CC                              | GG                | 1946439884               |
| SNP_P3_70850_796550  | NC_021165.1    | Ca_kabuli_chr06 | 796550                  | AA                              | GG                | 1946439885               |
| SNP_P3_70851_816942  | NC_021165.1    | Ca_kabuli_chr06 | 816942                  | TT                              | GG                | 1946439887               |
| SNP_P3_70852_816946  | NC_021165.1    | Ca_kabuli_chr06 | 816946                  | TT                              | AA                | 1946439888               |
| SNP_P3_70853_850859  | NC_021165.1    | Ca_kabuli_chr06 | 850859                  | TT                              | CC                | 1946439890               |
| SNP_P3_70855_851151  | NC_021165.1    | Ca_kabuli_chr06 | 851151                  | AA                              | TT                | 1946439892               |
| SNP_P3_70856_851212  | NC_021165.1    | Ca_kabuli_chr06 | 851212                  | CC                              | GG                | 1946439893               |
| SNP_P3_70857_851269  | NC_021165.1    | Ca_kabuli_chr06 | 851269                  | GG                              | TT                | 1946439895               |
| SNP_P3_70858_872336  | NC_021165.1    | Ca_kabuli_chr06 | 872336                  | CC                              | TT                | 1946439896               |
| SNP_P3_70859_876220  | NC_021165.1    | Ca_kabuli_chr06 | 876220                  | AA                              | GG                | 1946439898               |
| SNP_P3_70860_887775  | NC_021165.1    | Ca_kabuli_chr06 | 887775                  | AA                              | GG                | 1946439899               |
| SNP_P3_70861_892835  | NC_021165.1    | Ca_kabuli_chr06 | 892835                  | AA                              | GG                | 1946439901               |
| SNP_P3_70862_911281  | NC_021165.1    | Ca_kabuli_chr06 | 911281                  | TT                              | CC                | 1946439902               |
| SNP_P3_70863_931687  | NC_021165.1    | Ca_kabuli_chr06 | 931687                  | TT                              | GG                | 1946439904               |
| SNP_P3_70864_961805  | NC_021165.1    | Ca_kabuli_chr06 | 961805                  | CC                              | TT                | 1946439906               |
| SNP_P3_70865_1039227 | NC_021165.1    | Ca_kabuli_chr06 | 1039227                 | AA                              | GG                | 1946439907               |
| SNP_P3_70866_1056865 | NC_021165.1    | Ca_kabuli_chr06 | 1056865                 | CC                              | TT                | 1946439909               |
| SNP_P3_70867_1094916 | NC_021165.1    | Ca_kabuli_chr06 | 1094916                 | TT                              | CC                | 1946439910               |
| SNP_P3_70868_1095172 | NC_021165.1    | Ca_kabuli_chr06 | 1095172                 | GG                              | AA                | 1946439912               |
| SNP_P3_70869_1103769 | NC_021165.1    | Ca_kabuli_chr06 | 1103769                 | GG                              | AA                | 1946439913               |
| SNP_P3_70870_1168831 | NC_021165.1    | Ca_kabuli_chr06 | 1168831                 | AA                              | GG                | 1946439915               |
| SNP_P3_70871_1175620 | NC_021165.1    | Ca_kabuli_chr06 | 1175620                 | GG                              | AA                | 1946439916               |
| SNP_P3_70872_1175626 | NC_021165.1    | Ca_kabuli_chr06 | 1175626                 | TT                              | GG                | 1946439918               |
| SNP_P3_70873_1175639 | NC_021165.1    | Ca_kabuli_chr06 | 1175639                 | TT                              | GG                | 1946439919               |
| SNP_P3_70874_1175646 | NC_021165.1    | Ca_kabuli_chr06 | 1175646                 | TT                              | CC                | 1946439921               |
| SNP_P3_70875_1175648 | NC_021165.1    | Ca_kabuli_chr06 | 1175648                 | CC                              | TT                | 1946439922               |
| SNP_P3_70876_1175719 | NC_021165.1    | Ca_kabuli_chr06 | 1175719                 | AA                              | CC                | 1946439923               |
| SNP_P3_70878_1175753 | NC_021165.1    | Ca_kabuli_chr06 | 1175753                 | AA                              | TT                | 1946439925               |
| SNP_P3_70879_1175754 | NC_021165.1    | Ca_kabuli_chr06 | 1175754                 | TT                              | AA                | 1946439928               |
| SNP_P3_70880_1175775 | NC_021165.1    | Ca_kabuli_chr06 | 1175775                 | CC                              | TT                | 1946439929               |
| SNP_P3_70881_1175780 | NC_021165.1    | Ca_kabuli_chr06 | 1175780                 | TT                              | CC                | 1946439931               |
| SNP_P3_70882_1175914 | NC_021165.1    | Ca_kabuli_chr06 | 1175914                 | TT                              | CC                | 1946439932               |
| SNP_P3_70883_1175919 | NC_021165.1    | Ca_kabuli_chr06 | 1175919                 | TT                              | CC                | 1946439934               |
| SNP_P3_70884_1175922 | NC_021165.1    | Ca_kabuli_chr06 | 1175922                 | AA                              | GG                | 1946439935               |
| SNP_P3_70885_1176187 | NC_021165.1    | Ca_kabuli_chr06 | 1176187                 | TT                              | GG                | 1946439937               |
| SNP_P3_70886_1205668 | NC_021165.1    | Ca_kabuli_chr06 | 1205668                 | TT                              | CC                | 1946439938               |
| SNP_P3_70887_1205669 | NC_021165.1    | Ca_kabuli_chr06 | 1205669                 | TT                              | CC                | 1946439940               |
| SNP_P3_70888_1205678 | NC_021165.1    | Ca_kabuli_chr06 | 1205678                 | TT                              | AA                | 1946439941               |

| SNPs IDs             | Chromosome IDs | Chromosomes     | Physical positions (bp) | CDC Frontier (Reference genome) | (Pusa 256 & HPNB) | NCBI SNPdb Accession IDs |
|----------------------|----------------|-----------------|-------------------------|---------------------------------|-------------------|--------------------------|
| SNP_P3_70889_1223491 | NC_021165.1    | Ca_kabuli_chr06 | 1223491                 | GG                              | TT                | 1946439943               |
| SNP_P3_70891_1232722 | NC_021165.1    | Ca_kabuli_chr06 | 1232722                 | AA                              | TT                | 1946439944               |
| SNP_P3_70893_1286436 | NC_021165.1    | Ca_kabuli_chr06 | 1286436                 | CC                              | GG                | 1946439945               |
| SNP_P3_70894_1303695 | NC_021165.1    | Ca_kabuli_chr06 | 1303695                 | GG                              | AA                | 1946439947               |
| SNP_P3_70895_1304687 | NC_021165.1    | Ca_kabuli_chr06 | 1304687                 | TT                              | AA                | 1946439949               |
| SNP_P3_70896_1304691 | NC_021165.1    | Ca_kabuli_chr06 | 1304691                 | AA                              | CC                | 1946439950               |
| SNP_P3_70897_1337445 | NC_021165.1    | Ca_kabuli_chr06 | 1337445                 | TT                              | CC                | 1946439952               |
| SNP_P3_70898_1338910 | NC_021165.1    | Ca_kabuli_chr06 | 1338910                 | CC                              | AA                | 1946439953               |
| SNP_P3_70899_1338969 | NC_021165.1    | Ca_kabuli_chr06 | 1338969                 | TT                              | CC                | 1946439955               |
| SNP_P3_70900_1339024 | NC_021165.1    | Ca_kabuli_chr06 | 1339024                 | CC                              | TT                | 1946439956               |
| SNP_P3_70901_1339032 | NC_021165.1    | Ca_kabuli_chr06 | 1339032                 | TT                              | GG                | 1946439958               |
| SNP_P3_70902_1339034 | NC_021165.1    | Ca_kabuli_chr06 | 1339034                 | AA                              | CC                | 1946439959               |
| SNP_P3_70903_1339083 | NC_021165.1    | Ca_kabuli_chr06 | 1339083                 | AA                              | GG                | 1946439960               |
| SNP_P3_70904_1339112 | NC_021165.1    | Ca_kabuli_chr06 | 1339112                 | CC                              | TT                | 1946439962               |
| SNP_P3_70905_1339270 | NC_021165.1    | Ca_kabuli_chr06 | 1339270                 | AA                              | CC                | 1946439963               |
| SNP_P3_70906_1339273 | NC_021165.1    | Ca_kabuli_chr06 | 1339273                 | GG                              | TT                | 1946439965               |
| SNP_P3_70907_1339274 | NC_021165.1    | Ca_kabuli_chr06 | 1339274                 | TT                              | GG                | 1946439966               |
| SNP_P3_70908_1339458 | NC_021165.1    | Ca_kabuli_chr06 | 1339458                 | GG                              | TT                | 1946439968               |
| SNP_P3_70909_1339981 | NC_021165.1    | Ca_kabuli_chr06 | 1339981                 | TT                              | CC                | 1946439970               |
| SNP_P3_70910_1340822 | NC_021165.1    | Ca_kabuli_chr06 | 1340822                 | CC                              | AA                | 1946439971               |
| SNP_P3_70911_1341088 | NC_021165.1    | Ca_kabuli_chr06 | 1341088                 | TT                              | CC                | 1946439973               |
| SNP_P3_70913_1345259 | NC_021165.1    | Ca_kabuli_chr06 | 1345259                 | TT                              | GG                | 1946439974               |
| SNP_P3_70914_1345570 | NC_021165.1    | Ca_kabuli_chr06 | 1345570                 | CC                              | AA                | 1946439976               |
| SNP_P3_70916_1345619 | NC_021165.1    | Ca_kabuli_chr06 | 1345619                 | AA                              | CC                | 1946439977               |
| SNP_P3_70917_1348922 | NC_021165.1    | Ca_kabuli_chr06 | 1348922                 | AA                              | GG                | 1946439979               |
| SNP_P3_70918_1348954 | NC_021165.1    | Ca_kabuli_chr06 | 1348954                 | TT                              | CC                | 1946439980               |
| SNP_P3_70919_1349310 | NC_021165.1    | Ca_kabuli_chr06 | 1349310                 | CC                              | TT                | 1946439982               |
| SNP_P3_70920_1349335 | NC_021165.1    | Ca_kabuli_chr06 | 1349335                 | TT                              | CC                | 1946439983               |
| SNP_P3_70921_1349389 | NC_021165.1    | Ca_kabuli_chr06 | 1349389                 | GG                              | CC                | 1946439984               |
| SNP_P3_70922_1349463 | NC_021165.1    | Ca_kabuli_chr06 | 1349463                 | TT                              | GG                | 1946439986               |
| SNP_P3_70923_1349471 | NC_021165.1    | Ca_kabuli_chr06 | 1349471                 | AA                              | CC                | 1946439987               |
| SNP_P3_70924_1349476 | NC_021165.1    | Ca_kabuli_chr06 | 1349476                 | CC                              | TT                | 1946439989               |
| SNP_P3_70925_1349836 | NC_021165.1    | Ca_kabuli_chr06 | 1349836                 | CC                              | TT                | 1946439990               |
| SNP_P3_70926_1349926 | NC_021165.1    | Ca_kabuli_chr06 | 1349926                 | TT                              | CC                | 1946439992               |
| SNP_P3_70927_1350103 | NC_021165.1    | Ca_kabuli_chr06 | 1350103                 | TT                              | AA                | 1946439993               |
| SNP_P3_70928_1350274 | NC_021165.1    | Ca_kabuli_chr06 | 1350274                 | TT                              | AA                | 1946439995               |
| SNP_P3_70929_1350310 | NC_021165.1    | Ca_kabuli_chr06 | 1350310                 | AA                              | TT                | 1946439997               |
| SNP_P3_70930_1350790 | NC_021165.1    | Ca_kabuli_chr06 | 1350790                 | TT                              | GG                | 1946439998               |
| SNP_P3_70931_1350830 | NC_021165.1    | Ca_kabuli_chr06 | 1350830                 | AA                              | GG                | 1946440000               |
| SNP_P3_70933_1350965 | NC_021165.1    | Ca_kabuli_chr06 | 1350965                 | GG                              | AA                | 1946440001               |
| SNP_P3_70934_1351149 | NC_021165.1    | Ca_kabuli_chr06 | 1351149                 | TT                              | GG                | 1946440003               |
| SNP_P3_70935_1351173 | NC_021165.1    | Ca_kabuli_chr06 | 1351173                 | GG                              | AA                | 1946440004               |

| SNPs IDs             | Chromosome IDs | Chromosomes     | Physical positions (bp) | CDC Frontier (Reference genome) | (Pusa 256 & HPNB) | NCBI SNPdb Accession IDs |
|----------------------|----------------|-----------------|-------------------------|---------------------------------|-------------------|--------------------------|
| SNP_P3_70936_1351254 | NC_021165.1    | Ca_kabuli_chr06 | 1351254                 | CC                              | GG                | 1946440006               |
| SNP_P3_70937_1351284 | NC_021165.1    | Ca_kabuli_chr06 | 1351284                 | AA                              | GG                | 1946440007               |
| SNP_P3_70938_1351545 | NC_021165.1    | Ca_kabuli_chr06 | 1351545                 | CC                              | GG                | 1946440009               |
| SNP_P3_70940_1351745 | NC_021165.1    | Ca_kabuli_chr06 | 1351745                 | GG                              | AA                | 1946440010               |
| SNP_P3_70941_1351997 | NC_021165.1    | Ca_kabuli_chr06 | 1351997                 | TT                              | CC                | 1946440012               |
| SNP_P3_70942_1353871 | NC_021165.1    | Ca_kabuli_chr06 | 1353871                 | CC                              | AA                | 1946440013               |
| SNP_P3_70943_1354062 | NC_021165.1    | Ca_kabuli_chr06 | 1354062                 | GG                              | TT                | 1946440015               |
| SNP_P3_70944_1354127 | NC_021165.1    | Ca_kabuli_chr06 | 1354127                 | GG                              | AA                | 1946440016               |
| SNP_P3_70945_1354168 | NC_021165.1    | Ca_kabuli_chr06 | 1354168                 | AA                              | GG                | 1946440018               |
| SNP_P3_70946_1354172 | NC_021165.1    | Ca_kabuli_chr06 | 1354172                 | TT                              | CC                | 1946440019               |
| SNP_P3_70948_1354347 | NC_021165.1    | Ca_kabuli_chr06 | 1354347                 | GG                              | AA                | 1946440021               |
| SNP_P3_70949_1354351 | NC_021165.1    | Ca_kabuli_chr06 | 1354351                 | CC                              | TT                | 1946440022               |
| SNP_P3_70950_1354378 | NC_021165.1    | Ca_kabuli_chr06 | 1354378                 | AA                              | TT                | 1946440024               |
| SNP_P3_70951_1354424 | NC_021165.1    | Ca_kabuli_chr06 | 1354424                 | CC                              | TT                | 1946440025               |
| SNP_P3_70952_1359979 | NC_021165.1    | Ca_kabuli_chr06 | 1359979                 | CC                              | TT                | 1946440027               |
| SNP_P3_70953_1360619 | NC_021165.1    | Ca_kabuli_chr06 | 1360619                 | AA                              | GG                | 1946440028               |
| SNP_P3_70954_1362145 | NC_021165.1    | Ca_kabuli_chr06 | 1362145                 | CC                              | AA                | 1946440030               |
| SNP_P3_70955_1362178 | NC_021165.1    | Ca_kabuli_chr06 | 1362178                 | AA                              | GG                | 1946440031               |
| SNP_P3_70956_1362188 | NC_021165.1    | Ca_kabuli_chr06 | 1362188                 | TT                              | CC                | 1946440033               |
| SNP_P3_70957_1362261 | NC_021165.1    | Ca_kabuli_chr06 | 1362261                 | AA                              | CC                | 1946440034               |
| SNP_P3_70958_1362309 | NC_021165.1    | Ca_kabuli_chr06 | 1362309                 | TT                              | GG                | 1946440036               |
| SNP_P3_70959_1362354 | NC_021165.1    | Ca_kabuli_chr06 | 1362354                 | GG                              | AA                | 1946440037               |
| SNP_P3_70960_1362379 | NC_021165.1    | Ca_kabuli_chr06 | 1362379                 | AA                              | GG                | 1946440038               |
| SNP_P3_70961_1369107 | NC_021165.1    | Ca_kabuli_chr06 | 1369107                 | GG                              | AA                | 1946440040               |
| SNP_P3_70962_1369403 | NC_021165.1    | Ca_kabuli_chr06 | 1369403                 | AA                              | CC                | 1946440042               |
| SNP_P3_70963_1369758 | NC_021165.1    | Ca_kabuli_chr06 | 1369758                 | TT                              | CC                | 1946440043               |
| SNP_P3_70964_1369955 | NC_021165.1    | Ca_kabuli_chr06 | 1369955                 | AA                              | GG                | 1946440045               |
| SNP_P3_70965_1369959 | NC_021165.1    | Ca_kabuli_chr06 | 1369959                 | CC                              | TT                | 1946440046               |
| SNP_P3_70966_1369962 | NC_021165.1    | Ca_kabuli_chr06 | 1369962                 | TT                              | CC                | 1946440048               |
| SNP_P3_70967_1373846 | NC_021165.1    | Ca_kabuli_chr06 | 1373846                 | CC                              | TT                | 1946440049               |
| SNP_P3_70968_1377510 | NC_021165.1    | Ca_kabuli_chr06 | 1377510                 | AA                              | TT                | 1946440051               |
| SNP_P3_70969_1377521 | NC_021165.1    | Ca_kabuli_chr06 | 1377521                 | TT                              | GG                | 1946440052               |
| SNP_P3_70970_1377533 | NC_021165.1    | Ca_kabuli_chr06 | 1377533                 | AA                              | GG                | 1946440054               |
| SNP_P3_70971_1377539 | NC_021165.1    | Ca_kabuli_chr06 | 1377539                 | TT                              | CC                | 1946440055               |
| SNP_P3_70973_1377886 | NC_021165.1    | Ca_kabuli_chr06 | 1377886                 | CC                              | TT                | 1946440057               |
| SNP_P3_70974_1378144 | NC_021165.1    | Ca_kabuli_chr06 | 1378144                 | CC                              | GG                | 1946440059               |
| SNP_P3_70975_1378156 | NC_021165.1    | Ca_kabuli_chr06 | 1378156                 | GG                              | AA                | 1946440060               |
| SNP_P3_70976_1378218 | NC_021165.1    | Ca_kabuli_chr06 | 1378218                 | TT                              | CC                | 1946440062               |
| SNP_P3_70977_1386827 | NC_021165.1    | Ca_kabuli_chr06 | 1386827                 | GG                              | AA                | 1946440063               |
| SNP_P3_70978_1387173 | NC_021165.1    | Ca_kabuli_chr06 | 1387173                 | GG                              | CC                | 1946440065               |
| SNP_P3_70979_1387188 | NC_021165.1    | Ca_kabuli_chr06 | 1387188                 | GG                              | AA                | 1946440066               |
| SNP_P3_70980_1397051 | NC_021165.1    | Ca_kabuli_chr06 | 1397051                 | AA                              | CC                | 1946440068               |

| SNPs IDs             | Chromosome IDs | Chromosomes     | Physical positions (bp) | CDC Frontier (Reference genome) | (Pusa 256 & HPNB) | NCBI SNPdb Accession IDs |
|----------------------|----------------|-----------------|-------------------------|---------------------------------|-------------------|--------------------------|
| SNP_P3_70981_1397083 | NC_021165.1    | Ca_kabuli_chr06 | 1397083                 | TT                              | GG                | 1946440069               |
| SNP_P3_70982_1433416 | NC_021165.1    | Ca_kabuli_chr06 | 1433416                 | AA                              | CC                | 1946440071               |
| SNP_P3_70983_1433419 | NC_021165.1    | Ca_kabuli_chr06 | 1433419                 | CC                              | GG                | 1946440072               |
| SNP_P3_70984_1434718 | NC_021165.1    | Ca_kabuli_chr06 | 1434718                 | GG                              | AA                | 1946440074               |
| SNP_P3_70985_1434743 | NC_021165.1    | Ca_kabuli_chr06 | 1434743                 | TT                              | CC                | 1946440075               |
| SNP_P3_70986_1434773 | NC_021165.1    | Ca_kabuli_chr06 | 1434773                 | AA                              | GG                | 1946440077               |
| SNP_P3_70987_1434774 | NC_021165.1    | Ca_kabuli_chr06 | 1434774                 | TT                              | AA                | 1946440079               |
| SNP_P3_70988_1439548 | NC_021165.1    | Ca_kabuli_chr06 | 1439548                 | AA                              | GG                | 1946440081               |
| SNP_P3_70989_1439549 | NC_021165.1    | Ca_kabuli_chr06 | 1439549                 | AA                              | CC                | 1946440082               |
| SNP_P3_70990_1491398 | NC_021165.1    | Ca_kabuli_chr06 | 1491398                 | CC                              | TT                | 1946440084               |
| SNP_P3_70991_1491403 | NC_021165.1    | Ca_kabuli_chr06 | 1491403                 | AA                              | GG                | 1946440085               |
| SNP_P3_70992_1491472 | NC_021165.1    | Ca_kabuli_chr06 | 1491472                 | AA                              | CC                | 1946440087               |
| SNP_P3_70993_1491597 | NC_021165.1    | Ca_kabuli_chr06 | 1491597                 | TT                              | CC                | 1946440088               |
| SNP_P3_70994_1491673 | NC_021165.1    | Ca_kabuli_chr06 | 1491673                 | GG                              | CC                | 1946440090               |
| SNP_P3_70995_1491729 | NC_021165.1    | Ca_kabuli_chr06 | 1491729                 | GG                              | TT                | 1946440092               |
| SNP_P3_70996_1491748 | NC_021165.1    | Ca_kabuli_chr06 | 1491748                 | CC                              | TT                | 1946440093               |
| SNP_P3_70997_1491780 | NC_021165.1    | Ca_kabuli_chr06 | 1491780                 | AA                              | GG                | 1946440095               |
| SNP_P3_70998_1491810 | NC_021165.1    | Ca_kabuli_chr06 | 1491810                 | CC                              | TT                | 1946440096               |
| SNP_P3_70999_1491856 | NC_021165.1    | Ca_kabuli_chr06 | 1491856                 | GG                              | AA                | 1946440098               |
| SNP_P3_71000_1491865 | NC_021165.1    | Ca_kabuli_chr06 | 1491865                 | GG                              | AA                | 1946440099               |
| SNP_P3_71001_1491885 | NC_021165.1    | Ca_kabuli_chr06 | 1491885                 | AA                              | TT                | 1946440101               |
| SNP_P3_71003_1491957 | NC_021165.1    | Ca_kabuli_chr06 | 1491957                 | CC                              | TT                | 1946440102               |
| SNP_P3_71004_1491999 | NC_021165.1    | Ca_kabuli_chr06 | 1491999                 | CC                              | AA                | 1946440104               |
| SNP_P3_71005_1492011 | NC_021165.1    | Ca_kabuli_chr06 | 1492011                 | GG                              | AA                | 1946440105               |
| SNP_P3_71006_1492061 | NC_021165.1    | Ca_kabuli_chr06 | 1492061                 | GG                              | AA                | 1946440107               |
| SNP_P3_71007_1492064 | NC_021165.1    | Ca_kabuli_chr06 | 1492064                 | CC                              | AA                | 1946440108               |
| SNP_P3_71008_1492142 | NC_021165.1    | Ca_kabuli_chr06 | 1492142                 | GG                              | TT                | 1946440110               |
| SNP_P3_71009_1492144 | NC_021165.1    | Ca_kabuli_chr06 | 1492144                 | TT                              | AA                | 1946440112               |
| SNP_P3_71010_1492171 | NC_021165.1    | Ca_kabuli_chr06 | 1492171                 | GG                              | AA                | 1946440113               |
| SNP_P3_71012_1492246 | NC_021165.1    | Ca_kabuli_chr06 | 1492246                 | AA                              | GG                | 1946440115               |
| SNP_P3_71013_1492272 | NC_021165.1    | Ca_kabuli_chr06 | 1492272                 | TT                              | CC                | 1946440116               |
| SNP_P3_71014_1492280 | NC_021165.1    | Ca_kabuli_chr06 | 1492280                 | TT                              | AA                | 1946440118               |
| SNP_P3_71015_1492289 | NC_021165.1    | Ca_kabuli_chr06 | 1492289                 | AA                              | GG                | 1946440120               |
| SNP_P3_71016_1492310 | NC_021165.1    | Ca_kabuli_chr06 | 1492310                 | CC                              | TT                | 1946440121               |
| SNP_P3_71017_1492341 | NC_021165.1    | Ca_kabuli_chr06 | 1492341                 | CC                              | GG                | 1946440123               |
| SNP_P3_71019_1492388 | NC_021165.1    | Ca_kabuli_chr06 | 1492388                 | CC                              | TT                | 1946440124               |
| SNP_P3_71020_1492423 | NC_021165.1    | Ca_kabuli_chr06 | 1492423                 | GG                              | CC                | 1946440126               |
| SNP_P3_71021_1492432 | NC_021165.1    | Ca_kabuli_chr06 | 1492432                 | CC                              | AA                | 1946440127               |
| SNP_P3_71022_1492443 | NC_021165.1    | Ca_kabuli_chr06 | 1492443                 | GG                              | TT                | 1946440129               |
| SNP_P3_71023_1492545 | NC_021165.1    | Ca_kabuli_chr06 | 1492545                 | TT                              | CC                | 1946440130               |
| SNP_P3_71024_1492620 | NC_021165.1    | Ca_kabuli_chr06 | 1492620                 | AA                              | CC                | 1946440132               |
| SNP_P3_71025_1492681 | NC_021165.1    | Ca_kabuli_chr06 | 1492681                 | AA                              | GG                | 1946440133               |

| SNPs IDs             | Chromosome IDs | Chromosomes     | Physical positions (bp) | CDC Frontier (Reference genome) | (Pusa 256 & HPNB) | NCBI SNPdb Accession IDs |
|----------------------|----------------|-----------------|-------------------------|---------------------------------|-------------------|--------------------------|
| SNP_P3_71026_1492682 | NC_021165.1    | Ca_kabuli_chr06 | 1492682                 | CC                              | TT                | 1946440135               |
| SNP_P3_71027_1492721 | NC_021165.1    | Ca_kabuli_chr06 | 1492721                 | AA                              | TT                | 1946440137               |
| SNP_P3_71029_1492822 | NC_021165.1    | Ca_kabuli_chr06 | 1492822                 | GG                              | TT                | 1946440138               |
| SNP_P3_71030_1505916 | NC_021165.1    | Ca_kabuli_chr06 | 1505916                 | AA                              | TT                | 1946440140               |
| SNP_P3_71031_1506164 | NC_021165.1    | Ca_kabuli_chr06 | 1506164                 | AA                              | TT                | 1946440141               |
| SNP_P3_71032_1516843 | NC_021165.1    | Ca_kabuli_chr06 | 1516843                 | AA                              | GG                | 1946440143               |
| SNP_P3_71033_1516847 | NC_021165.1    | Ca_kabuli_chr06 | 1516847                 | TT                              | GG                | 1946440144               |
| SNP_P3_71034_1516865 | NC_021165.1    | Ca_kabuli_chr06 | 1516865                 | TT                              | CC                | 1946440146               |
| SNP_P3_71035_1516869 | NC_021165.1    | Ca_kabuli_chr06 | 1516869                 | TT                              | CC                | 1946440148               |
| SNP_P3_71036_1516877 | NC_021165.1    | Ca_kabuli_chr06 | 1516877                 | AA                              | CC                | 1946440149               |
| SNP_P3_71037_1516879 | NC_021165.1    | Ca_kabuli_chr06 | 1516879                 | TT                              | AA                | 1946440151               |
| SNP_P3_71038_1517109 | NC_021165.1    | Ca_kabuli_chr06 | 1517109                 | AA                              | GG                | 1946440152               |
| SNP_P3_71040_1540000 | NC_021165.1    | Ca_kabuli_chr06 | 1540000                 | TT                              | CC                | 1946440154               |
| SNP_P3_71041_1540006 | NC_021165.1    | Ca_kabuli_chr06 | 1540006                 | GG                              | TT                | 1946440155               |
| SNP_P3_71042_1540094 | NC_021165.1    | Ca_kabuli_chr06 | 1540094                 | TT                              | CC                | 1946440157               |
| SNP_P3_71043_1540110 | NC_021165.1    | Ca_kabuli_chr06 | 1540110                 | AA                              | GG                | 1946440158               |
| SNP_P3_71044_1540170 | NC_021165.1    | Ca_kabuli_chr06 | 1540170                 | AA                              | TT                | 1946440160               |
| SNP_P3_71045_1540298 | NC_021165.1    | Ca_kabuli_chr06 | 1540298                 | CC                              | GG                | 1946440162               |
| SNP_P3_71047_1540893 | NC_021165.1    | Ca_kabuli_chr06 | 1540893                 | CC                              | TT                | 1946440163               |
| SNP_P3_71048_1541813 | NC_021165.1    | Ca_kabuli_chr06 | 1541813                 | AA                              | GG                | 1946440165               |
| SNP_P3_71049_1541888 | NC_021165.1    | Ca_kabuli_chr06 | 1541888                 | GG                              | AA                | 1946440166               |
| SNP_P3_71050_1542030 | NC_021165.1    | Ca_kabuli_chr06 | 1542030                 | AA                              | CC                | 1946440168               |
| SNP_P3_71051_1542085 | NC_021165.1    | Ca_kabuli_chr06 | 1542085                 | GG                              | CC                | 1946440169               |
| SNP_P3_71052_1542219 | NC_021165.1    | Ca_kabuli_chr06 | 1542219                 | TT                              | AA                | 1946440171               |
| SNP_P3_71053_1542255 | NC_021165.1    | Ca_kabuli_chr06 | 1542255                 | AA                              | CC                | 1946440172               |
| SNP_P3_71054_1542284 | NC_021165.1    | Ca_kabuli_chr06 | 1542284                 | CC                              | TT                | 1946440174               |
| SNP_P3_71055_1542302 | NC_021165.1    | Ca_kabuli_chr06 | 1542302                 | TT                              | AA                | 1946440175               |
| SNP_P3_71056_1542375 | NC_021165.1    | Ca_kabuli_chr06 | 1542375                 | TT                              | CC                | 1946440177               |
| SNP_P3_71057_1542396 | NC_021165.1    | Ca_kabuli_chr06 | 1542396                 | TT                              | AA                | 1946440178               |
| SNP_P3_71058_1542456 | NC_021165.1    | Ca_kabuli_chr06 | 1542456                 | TT                              | CC                | 1946440180               |
| SNP_P3_71059_1542606 | NC_021165.1    | Ca_kabuli_chr06 | 1542606                 | TT                              | CC                | 1946440182               |
| SNP_P3_71060_1542620 | NC_021165.1    | Ca_kabuli_chr06 | 1542620                 | AA                              | TT                | 1946440183               |
| SNP_P3_71061_1542665 | NC_021165.1    | Ca_kabuli_chr06 | 1542665                 | TT                              | AA                | 1946440185               |
| SNP_P3_71062_1543767 | NC_021165.1    | Ca_kabuli_chr06 | 1543767                 | GG                              | AA                | 1946440186               |
| SNP_P3_71063_1543768 | NC_021165.1    | Ca_kabuli_chr06 | 1543768                 | AA                              | GG                | 1946440188               |
| SNP_P3_71064_1543785 | NC_021165.1    | Ca_kabuli_chr06 | 1543785                 | GG                              | AA                | 1946440189               |
| SNP_P3_71065_1543802 | NC_021165.1    | Ca_kabuli_chr06 | 1543802                 | GG                              | AA                | 1946440191               |
| SNP_P3_71066_1543831 | NC_021165.1    | Ca_kabuli_chr06 | 1543831                 | CC                              | TT                | 1946440192               |
| SNP_P3_71067_1543865 | NC_021165.1    | Ca_kabuli_chr06 | 1543865                 | CC                              | TT                | 1946440194               |
| SNP_P3_71068_1543943 | NC_021165.1    | Ca_kabuli_chr06 | 1543943                 | TT                              | AA                | 1946440195               |
| SNP_P3_71069_1544021 | NC_021165.1    | Ca_kabuli_chr06 | 1544021                 | TT                              | GG                | 1946440197               |
| SNP_P3_71070_1544036 | NC_021165.1    | Ca_kabuli_chr06 | 1544036                 | AA                              | TT                | 1946440198               |

| SNPs IDs             | Chromosome IDs | Chromosomes     | Physical positions (bp) | CDC Frontier (Reference genome) | (Pusa 256 & HPNB) | NCBI SNPdb Accession IDs |
|----------------------|----------------|-----------------|-------------------------|---------------------------------|-------------------|--------------------------|
| SNP_P3_71071_1544281 | NC_021165.1    | Ca_kabuli_chr06 | 1544281                 | AA                              | GG                | 1946440200               |
| SNP_P3_71072_1544283 | NC_021165.1    | Ca_kabuli_chr06 | 1544283                 | AA                              | TT                | 1946440202               |
| SNP_P3_71073_1546034 | NC_021165.1    | Ca_kabuli_chr06 | 1546034                 | GG                              | AA                | 1946440203               |
| SNP_P3_71074_1546108 | NC_021165.1    | Ca_kabuli_chr06 | 1546108                 | AA                              | TT                | 1946440205               |
| SNP_P3_71075_1546563 | NC_021165.1    | Ca_kabuli_chr06 | 1546563                 | CC                              | TT                | 1946440206               |
| SNP_P3_71076_1547355 | NC_021165.1    | Ca_kabuli_chr06 | 1547355                 | AA                              | GG                | 1946440208               |
| SNP_P3_71077_1547756 | NC_021165.1    | Ca_kabuli_chr06 | 1547756                 | GG                              | TT                | 1946440209               |
| SNP_P3_71078_1547764 | NC_021165.1    | Ca_kabuli_chr06 | 1547764                 | TT                              | CC                | 1946440211               |
| SNP_P3_71079_1547784 | NC_021165.1    | Ca_kabuli_chr06 | 1547784                 | CC                              | TT                | 1946440212               |
| SNP_P3_71080_1548101 | NC_021165.1    | Ca_kabuli_chr06 | 1548101                 | TT                              | CC                | 1946440214               |
| SNP_P3_71082_1548454 | NC_021165.1    | Ca_kabuli_chr06 | 1548454                 | TT                              | AA                | 1946440215               |
| SNP_P3_71083_1548455 | NC_021165.1    | Ca_kabuli_chr06 | 1548455                 | TT                              | AA                | 1946440217               |
| SNP_P3_71084_1548667 | NC_021165.1    | Ca_kabuli_chr06 | 1548667                 | CC                              | TT                | 1946440219               |
| SNP_P3_71085_1548685 | NC_021165.1    | Ca_kabuli_chr06 | 1548685                 | GG                              | AA                | 1946440220               |
| SNP_P3_71086_1548721 | NC_021165.1    | Ca_kabuli_chr06 | 1548721                 | AA                              | GG                | 1946440222               |
| SNP_P3_71087_1548907 | NC_021165.1    | Ca_kabuli_chr06 | 1548907                 | GG                              | TT                | 1946440223               |
| SNP_P3_71088_1549174 | NC_021165.1    | Ca_kabuli_chr06 | 1549174                 | AA                              | TT                | 1946440225               |
| SNP_P3_71089_1549237 | NC_021165.1    | Ca_kabuli_chr06 | 1549237                 | TT                              | GG                | 1946440226               |
| SNP_P3_71090_1549266 | NC_021165.1    | Ca_kabuli_chr06 | 1549266                 | GG                              | AA                | 1946440228               |
| SNP_P3_71092_1556141 | NC_021165.1    | Ca_kabuli_chr06 | 1556141                 | AA                              | GG                | 1946440229               |
| SNP_P3_71093_1556172 | NC_021165.1    | Ca_kabuli_chr06 | 1556172                 | GG                              | AA                | 1946440231               |
| SNP_P3_71094_1556215 | NC_021165.1    | Ca_kabuli_chr06 | 1556215                 | AA                              | GG                | 1946440232               |
| SNP_P3_71095_1556230 | NC_021165.1    | Ca_kabuli_chr06 | 1556230                 | AA                              | TT                | 1946440234               |
| SNP_P3_71096_1556231 | NC_021165.1    | Ca_kabuli_chr06 | 1556231                 | GG                              | TT                | 1946440235               |
| SNP_P3_71097_1556271 | NC_021165.1    | Ca_kabuli_chr06 | 1556271                 | AA                              | GG                | 1946440237               |
| SNP_P3_71098_1556313 | NC_021165.1    | Ca_kabuli_chr06 | 1556313                 | TT                              | AA                | 1946440239               |
| SNP_P3_71099_1556407 | NC_021165.1    | Ca_kabuli_chr06 | 1556407                 | TT                              | CC                | 1946440240               |
| SNP_P3_71100_1556427 | NC_021165.1    | Ca_kabuli_chr06 | 1556427                 | AA                              | CC                | 1946440241               |
| SNP_P3_71101_1556434 | NC_021165.1    | Ca_kabuli_chr06 | 1556434                 | CC                              | TT                | 1946440243               |
| SNP_P3_71102_1556538 | NC_021165.1    | Ca_kabuli_chr06 | 1556538                 | AA                              | GG                | 1946440244               |
| SNP_P3_71103_1556565 | NC_021165.1    | Ca_kabuli_chr06 | 1556565                 | GG                              | AA                | 1946440246               |
| SNP_P3_71104_1556618 | NC_021165.1    | Ca_kabuli_chr06 | 1556618                 | TT                              | CC                | 1946440247               |
| SNP_P3_71105_1556629 | NC_021165.1    | Ca_kabuli_chr06 | 1556629                 | CC                              | AA                | 1946440248               |
| SNP_P3_71106_1556677 | NC_021165.1    | Ca_kabuli_chr06 | 1556677                 | TT                              | CC                | 1946440250               |
| SNP_P3_71108_1556885 | NC_021165.1    | Ca_kabuli_chr06 | 1556885                 | AA                              | TT                | 1946440251               |
| SNP_P3_71109_1556938 | NC_021165.1    | Ca_kabuli_chr06 | 1556938                 | CC                              | TT                | 1946440253               |
| SNP_P3_71110_1556939 | NC_021165.1    | Ca_kabuli_chr06 | 1556939                 | TT                              | AA                | 1946440254               |
| SNP_P3_71111_1556972 | NC_021165.1    | Ca_kabuli_chr06 | 1556972                 | AA                              | GG                | 1946440256               |
| SNP_P3_71112_1557078 | NC_021165.1    | Ca_kabuli_chr06 | 1557078                 | GG                              | AA                | 1946440258               |
| SNP_P3_71113_1557141 | NC_021165.1    | Ca_kabuli_chr06 | 1557141                 | AA                              | GG                | 1946440260               |
| SNP_P3_71114_1557358 | NC_021165.1    | Ca_kabuli_chr06 | 1557358                 | GG                              | TT                | 1946440261               |
| SNP_P3_71115_1557513 | NC_021165.1    | Ca_kabuli_chr06 | 1557513                 | CC                              | TT                | 1946440263               |

| SNPs IDs             | Chromosome IDs | Chromosomes     | Physical positions (bp) | CDC Frontier (Reference genome) | (Pusa 256 & HPNB) | NCBI SNPdb Accession IDs |
|----------------------|----------------|-----------------|-------------------------|---------------------------------|-------------------|--------------------------|
| SNP_P3_71116_1557559 | NC_021165.1    | Ca_kabuli_chr06 | 1557559                 | TT                              | GG                | 1946440265               |
| SNP_P3_71117_1557588 | NC_021165.1    | Ca_kabuli_chr06 | 1557588                 | AA                              | GG                | 1946440266               |
| SNP_P3_71118_1557599 | NC_021165.1    | Ca_kabuli_chr06 | 1557599                 | CC                              | TT                | 1946440268               |
| SNP_P3_71119_1557610 | NC_021165.1    | Ca_kabuli_chr06 | 1557610                 | TT                              | GG                | 1946440269               |
| SNP_P3_71120_1557611 | NC_021165.1    | Ca_kabuli_chr06 | 1557611                 | CC                              | TT                | 1946440271               |
| SNP_P3_71121_1557632 | NC_021165.1    | Ca_kabuli_chr06 | 1557632                 | AA                              | GG                | 1946440272               |
| SNP_P3_71122_1557637 | NC_021165.1    | Ca_kabuli_chr06 | 1557637                 | GG                              | AA                | 1946440274               |
| SNP_P3_71123_1557655 | NC_021165.1    | Ca_kabuli_chr06 | 1557655                 | AA                              | CC                | 1946440275               |
| SNP_P3_71124_1557658 | NC_021165.1    | Ca_kabuli_chr06 | 1557658                 | CC                              | GG                | 1946440277               |
| SNP_P3_71125_1559161 | NC_021165.1    | Ca_kabuli_chr06 | 1559161                 | TT                              | CC                | 1946440279               |
| SNP_P3_71126_1559267 | NC_021165.1    | Ca_kabuli_chr06 | 1559267                 | CC                              | AA                | 1946440281               |
| SNP_P3_71128_1559396 | NC_021165.1    | Ca_kabuli_chr06 | 1559396                 | GG                              | AA                | 1946440282               |
| SNP_P3_71129_1559398 | NC_021165.1    | Ca_kabuli_chr06 | 1559398                 | AA                              | TT                | 1946440284               |
| SNP_P3_71131_1559485 | NC_021165.1    | Ca_kabuli_chr06 | 1559485                 | TT                              | AA                | 1946440285               |
| SNP_P3_71133_1559515 | NC_021165.1    | Ca_kabuli_chr06 | 1559515                 | CC                              | TT                | 1946440287               |
| SNP_P3_71134_1559555 | NC_021165.1    | Ca_kabuli_chr06 | 1559555                 | GG                              | AA                | 1946440289               |
| SNP_P3_71136_1559632 | NC_021165.1    | Ca_kabuli_chr06 | 1559632                 | AA                              | CC                | 1946440290               |
| SNP_P3_71137_1559664 | NC_021165.1    | Ca_kabuli_chr06 | 1559664                 | AA                              | TT                | 1946440292               |
| SNP_P3_71138_1559677 | NC_021165.1    | Ca_kabuli_chr06 | 1559677                 | TT                              | CC                | 1946440293               |
| SNP_P3_71139_1559836 | NC_021165.1    | Ca_kabuli_chr06 | 1559836                 | GG                              | AA                | 1946440295               |
| SNP_P3_71140_1559924 | NC_021165.1    | Ca_kabuli_chr06 | 1559924                 | GG                              | TT                | 1946440297               |
| SNP_P3_71142_1561424 | NC_021165.1    | Ca_kabuli_chr06 | 1561424                 | CC                              | TT                | 1946440298               |
| SNP_P3_71144_1589413 | NC_021165.1    | Ca_kabuli_chr06 | 1589413                 | TT                              | AA                | 1946440300               |
| SNP_P3_71145_1600010 | NC_021165.1    | Ca_kabuli_chr06 | 1600010                 | GG                              | TT                | 1946440302               |
| SNP_P3_71146_1600151 | NC_021165.1    | Ca_kabuli_chr06 | 1600151                 | AA                              | CC                | 1946440303               |
| SNP_P3_71147_1600438 | NC_021165.1    | Ca_kabuli_chr06 | 1600438                 | TT                              | CC                | 1946440305               |
| SNP_P3_71148_1622652 | NC_021165.1    | Ca_kabuli_chr06 | 1622652                 | AA                              | TT                | 1946440306               |
| SNP_P3_71149_1625350 | NC_021165.1    | Ca_kabuli_chr06 | 1625350                 | CC                              | TT                | 1946440308               |
| SNP_P3_71150_1636974 | NC_021165.1    | Ca_kabuli_chr06 | 1636974                 | AA                              | GG                | 1946440309               |
| SNP_P3_71151_1662479 | NC_021165.1    | Ca_kabuli_chr06 | 1662479                 | AA                              | GG                | 1946440311               |
| SNP_P3_71152_1666830 | NC_021165.1    | Ca_kabuli_chr06 | 1666830                 | CC                              | TT                | 1946440312               |
| SNP_P3_71153_1672973 | NC_021165.1    | Ca_kabuli_chr06 | 1672973                 | CC                              | TT                | 1946440314               |
| SNP_P3_71154_1682018 | NC_021165.1    | Ca_kabuli_chr06 | 1682018                 | GG                              | TT                | 1946440315               |
| SNP_P3_71155_1682060 | NC_021165.1    | Ca_kabuli_chr06 | 1682060                 | CC                              | TT                | 1946440317               |
| SNP_P3_71156_1682076 | NC_021165.1    | Ca_kabuli_chr06 | 1682076                 | CC                              | TT                | 1946440319               |
| SNP_P3_71157_1682101 | NC_021165.1    | Ca_kabuli_chr06 | 1682101                 | TT                              | CC                | 1946440320               |
| SNP_P3_71158_1682105 | NC_021165.1    | Ca_kabuli_chr06 | 1682105                 | CC                              | TT                | 1946440322               |
| SNP_P3_71159_1682193 | NC_021165.1    | Ca_kabuli_chr06 | 1682193                 | GG                              | AA                | 1946440324               |
| SNP_P3_71160_1682198 | NC_021165.1    | Ca_kabuli_chr06 | 1682198                 | GG                              | AA                | 1946440325               |
| SNP_P3_71161_1682219 | NC_021165.1    | Ca_kabuli_chr06 | 1682219                 | TT                              | CC                | 1946440327               |
| SNP_P3_71162_1682227 | NC_021165.1    | Ca_kabuli_chr06 | 1682227                 | AA                              | CC                | 1946440329               |
| SNP_P3_71163_1682289 | NC_021165.1    | Ca_kabuli_chr06 | 1682289                 | GG                              | AA                | 1946440330               |

| SNPs IDs             | Chromosome IDs | Chromosomes     | Physical positions (bp) | CDC Frontier (Reference genome) | (Pusa 256 & HPNB) | NCBI SNPdb Accession IDs |
|----------------------|----------------|-----------------|-------------------------|---------------------------------|-------------------|--------------------------|
| SNP_P3_71164_1682390 | NC_021165.1    | Ca_kabuli_chr06 | 1682390                 | GG                              | TT                | 1946440332               |
| SNP_P3_71165_1682439 | NC_021165.1    | Ca_kabuli_chr06 | 1682439                 | GG                              | AA                | 1946440333               |
| SNP_P3_71166_1682491 | NC_021165.1    | Ca_kabuli_chr06 | 1682491                 | AA                              | CC                | 1946440335               |
| SNP_P3_71167_1682534 | NC_021165.1    | Ca_kabuli_chr06 | 1682534                 | CC                              | TT                | 1946440336               |
| SNP_P3_71168_1682560 | NC_021165.1    | Ca_kabuli_chr06 | 1682560                 | CC                              | TT                | 1946440338               |
| SNP_P3_71169_1682576 | NC_021165.1    | Ca_kabuli_chr06 | 1682576                 | AA                              | GG                | 1946440340               |
| SNP_P3_71170_1682599 | NC_021165.1    | Ca_kabuli_chr06 | 1682599                 | TT                              | AA                | 1946440342               |
| SNP_P3_71171_1682602 | NC_021165.1    | Ca_kabuli_chr06 | 1682602                 | CC                              | TT                | 1946440343               |
| SNP_P3_71172_1682622 | NC_021165.1    | Ca_kabuli_chr06 | 1682622                 | GG                              | AA                | 1946440345               |
| SNP_P3_71173_1682693 | NC_021165.1    | Ca_kabuli_chr06 | 1682693                 | CC                              | TT                | 1946440347               |
| SNP_P3_71175_1682756 | NC_021165.1    | Ca_kabuli_chr06 | 1682756                 | AA                              | GG                | 1946440348               |
| SNP_P3_71176_1682769 | NC_021165.1    | Ca_kabuli_chr06 | 1682769                 | CC                              | TT                | 1946440350               |
| SNP_P3_71177_1682790 | NC_021165.1    | Ca_kabuli_chr06 | 1682790                 | AA                              | GG                | 1946440351               |
| SNP_P3_71178_1682807 | NC_021165.1    | Ca_kabuli_chr06 | 1682807                 | TT                              | CC                | 1946440353               |
| SNP_P3_71179_1682836 | NC_021165.1    | Ca_kabuli_chr06 | 1682836                 | TT                              | CC                | 1946440354               |
| SNP_P3_71180_1682862 | NC_021165.1    | Ca_kabuli_chr06 | 1682862                 | CC                              | TT                | 1946440356               |
| SNP_P3_71181_1682920 | NC_021165.1    | Ca_kabuli_chr06 | 1682920                 | TT                              | CC                | 1946440357               |
| SNP_P3_71182_1682965 | NC_021165.1    | Ca_kabuli_chr06 | 1682965                 | GG                              | AA                | 1946440359               |
| SNP_P3_71183_1682967 | NC_021165.1    | Ca_kabuli_chr06 | 1682967                 | TT                              | AA                | 1946440360               |
| SNP_P3_71184_1682968 | NC_021165.1    | Ca_kabuli_chr06 | 1682968                 | AA                              | TT                | 1946440362               |
| SNP_P3_71185_1683003 | NC_021165.1    | Ca_kabuli_chr06 | 1683003                 | CC                              | TT                | 1946440363               |
| SNP_P3_71186_1683033 | NC_021165.1    | Ca_kabuli_chr06 | 1683033                 | TT                              | CC                | 1946440365               |
| SNP_P3_71187_1683045 | NC_021165.1    | Ca_kabuli_chr06 | 1683045                 | AA                              | GG                | 1946440367               |
| SNP_P3_71188_1683046 | NC_021165.1    | Ca_kabuli_chr06 | 1683046                 | AA                              | CC                | 1946440368               |
| SNP_P3_71189_1683083 | NC_021165.1    | Ca_kabuli_chr06 | 1683083                 | GG                              | AA                | 1946440370               |
| SNP_P3_71190_1683118 | NC_021165.1    | Ca_kabuli_chr06 | 1683118                 | TT                              | CC                | 1946440371               |
| SNP_P3_71191_1683190 | NC_021165.1    | Ca_kabuli_chr06 | 1683190                 | CC                              | AA                | 1946440373               |
| SNP_P3_71192_1683221 | NC_021165.1    | Ca_kabuli_chr06 | 1683221                 | TT                              | CC                | 1946440374               |
| SNP_P3_71194_1683243 | NC_021165.1    | Ca_kabuli_chr06 | 1683243                 | GG                              | TT                | 1946440376               |
| SNP_P3_71196_1683348 | NC_021165.1    | Ca_kabuli_chr06 | 1683348                 | GG                              | TT                | 1946440378               |
| SNP_P3_71197_1683365 | NC_021165.1    | Ca_kabuli_chr06 | 1683365                 | TT                              | CC                | 1946440379               |
| SNP_P3_71198_1683401 | NC_021165.1    | Ca_kabuli_chr06 | 1683401                 | CC                              | TT                | 1946440381               |
| SNP_P3_71199_1683452 | NC_021165.1    | Ca_kabuli_chr06 | 1683452                 | CC                              | TT                | 1946440382               |
| SNP_P3_71201_1683512 | NC_021165.1    | Ca_kabuli_chr06 | 1683512                 | CC                              | TT                | 1946440384               |
| SNP_P3_71202_1683520 | NC_021165.1    | Ca_kabuli_chr06 | 1683520                 | TT                              | AA                | 1946440385               |
| SNP_P3_71203_1683528 | NC_021165.1    | Ca_kabuli_chr06 | 1683528                 | AA                              | TT                | 1946440387               |
| SNP_P3_71204_1683531 | NC_021165.1    | Ca_kabuli_chr06 | 1683531                 | GG                              | AA                | 1946440388               |
| SNP_P3_71205_1683536 | NC_021165.1    | Ca_kabuli_chr06 | 1683536                 | CC                              | AA                | 1946440390               |
| SNP_P3_71206_1683617 | NC_021165.1    | Ca_kabuli_chr06 | 1683617                 | GG                              | AA                | 1946440391               |
| SNP_P3_71207_1683653 | NC_021165.1    | Ca_kabuli_chr06 | 1683653                 | AA                              | GG                | 1946440393               |
| SNP_P3_71209_1694954 | NC_021165.1    | Ca_kabuli_chr06 | 1694954                 | TT                              | CC                | 1946440395               |
| SNP_P3_71210_1697930 | NC_021165.1    | Ca_kabuli_chr06 | 1697930                 | TT                              | CC                | 1946440396               |



| SNPs IDs             | Chromosome IDs | Chromosomes     | Physical positions (bp) | CDC Frontier (Reference genome) | (Pusa 256 & HPNB) | NCBI SNPdb Accession IDs |
|----------------------|----------------|-----------------|-------------------------|---------------------------------|-------------------|--------------------------|
| SNP_P3_71211_1706154 | NC_021165.1    | Ca_kabuli_chr06 | 1706154                 | AA                              | TT                | 1946440398               |
| SNP_P3_71212_1715835 | NC_021165.1    | Ca_kabuli_chr06 | 1715835                 | AA                              | TT                | 1946440399               |
| SNP_P3_71213_1722858 | NC_021165.1    | Ca_kabuli_chr06 | 1722858                 | GG                              | AA                | 1946440401               |
| SNP_P3_71214_1735981 | NC_021165.1    | Ca_kabuli_chr06 | 1735981                 | CC                              | TT                | 1946440402               |
| SNP_P3_71215_1753581 | NC_021165.1    | Ca_kabuli_chr06 | 1753581                 | TT                              | GG                | 1946440404               |
| SNP_P3_71216_1753584 | NC_021165.1    | Ca_kabuli_chr06 | 1753584                 | TT                              | CC                | 1946440405               |
| SNP_P3_71217_1782073 | NC_021165.1    | Ca_kabuli_chr06 | 1782073                 | CC                              | TT                | 1946440407               |
| SNP_P3_71218_1790858 | NC_021165.1    | Ca_kabuli_chr06 | 1790858                 | AA                              | TT                | 1946440408               |
| SNP_P3_71219_1795071 | NC_021165.1    | Ca_kabuli_chr06 | 1795071                 | CC                              | AA                | 1946440410               |
| SNP_P3_71220_1798345 | NC_021165.1    | Ca_kabuli_chr06 | 1798345                 | CC                              | TT                | 1946440411               |
| SNP_P3_71221_1800765 | NC_021165.1    | Ca_kabuli_chr06 | 1800765                 | GG                              | AA                | 1946440413               |
| SNP_P3_71222_1801598 | NC_021165.1    | Ca_kabuli_chr06 | 1801598                 | AA                              | GG                | 1946440415               |
| SNP_P3_71223_1801619 | NC_021165.1    | Ca_kabuli_chr06 | 1801619                 | TT                              | CC                | 1946440417               |
| SNP_P3_71224_1801645 | NC_021165.1    | Ca_kabuli_chr06 | 1801645                 | CC                              | TT                | 1946440418               |
| SNP_P3_71227_1802093 | NC_021165.1    | Ca_kabuli_chr06 | 1802093                 | AA                              | TT                | 1946440420               |
| SNP_P3_71228_1802147 | NC_021165.1    | Ca_kabuli_chr06 | 1802147                 | TT                              | AA                | 1946440421               |
| SNP_P3_71229_1803222 | NC_021165.1    | Ca_kabuli_chr06 | 1803222                 | CC                              | TT                | 1946440423               |
| SNP_P3_71230_1803248 | NC_021165.1    | Ca_kabuli_chr06 | 1803248                 | TT                              | CC                | 1946440424               |
| SNP_P3_71232_1803459 | NC_021165.1    | Ca_kabuli_chr06 | 1803459                 | AA                              | TT                | 1946440426               |
| SNP_P3_71233_1803474 | NC_021165.1    | Ca_kabuli_chr06 | 1803474                 | GG                              | TT                | 1946440428               |
| SNP_P3_71234_1803704 | NC_021165.1    | Ca_kabuli_chr06 | 1803704                 | AA                              | GG                | 1946440429               |
| SNP_P3_71236_1808567 | NC_021165.1    | Ca_kabuli_chr06 | 1808567                 | CC                              | TT                | 1946440431               |
| SNP_P3_71237_1808610 | NC_021165.1    | Ca_kabuli_chr06 | 1808610                 | AA                              | GG                | 1946440432               |
| SNP_P3_71238_1808781 | NC_021165.1    | Ca_kabuli_chr06 | 1808781                 | GG                              | AA                | 1946440434               |
| SNP_P3_71239_1809214 | NC_021165.1    | Ca_kabuli_chr06 | 1809214                 | GG                              | AA                | 1946440436               |
| SNP_P3_71240_1809940 | NC_021165.1    | Ca_kabuli_chr06 | 1809940                 | TT                              | CC                | 1946440437               |
| SNP_P3_71241_1810924 | NC_021165.1    | Ca_kabuli_chr06 | 1810924                 | GG                              | TT                | 1946440439               |
| SNP_P3_71242_1811077 | NC_021165.1    | Ca_kabuli_chr06 | 1811077                 | CC                              | TT                | 1946440440               |
| SNP_P3_71243_1811861 | NC_021165.1    | Ca_kabuli_chr06 | 1811861                 | CC                              | TT                | 1946440442               |
| SNP_P3_71244_1811873 | NC_021165.1    | Ca_kabuli_chr06 | 1811873                 | AA                              | TT                | 1946440443               |
| SNP_P3_71245_1813387 | NC_021165.1    | Ca_kabuli_chr06 | 1813387                 | AA                              | GG                | 1946440445               |
| SNP_P3_71249_1813864 | NC_021165.1    | Ca_kabuli_chr06 | 1813864                 | TT                              | AA                | 1946440446               |
| SNP_P3_71250_1813866 | NC_021165.1    | Ca_kabuli_chr06 | 1813866                 | AA                              | TT                | 1946440448               |
| SNP_P3_71251_1813871 | NC_021165.1    | Ca_kabuli_chr06 | 1813871                 | CC                              | TT                | 1946440449               |
| SNP_P3_71252_1813881 | NC_021165.1    | Ca_kabuli_chr06 | 1813881                 | TT                              | CC                | 1946440451               |
| SNP_P3_71253_1813926 | NC_021165.1    | Ca_kabuli_chr06 | 1813926                 | GG                              | AA                | 1946440452               |
| SNP_P3_71254_1813956 | NC_021165.1    | Ca_kabuli_chr06 | 1813956                 | CC                              | TT                | 1946440455               |
| SNP_P3_71255_1813963 | NC_021165.1    | Ca_kabuli_chr06 | 1813963                 | AA                              | CC                | 1946440456               |
| SNP_P3_71256_1813984 | NC_021165.1    | Ca_kabuli_chr06 | 1813984                 | TT                              | CC                | 1946440458               |
| SNP_P3_71257_1814037 | NC_021165.1    | Ca_kabuli_chr06 | 1814037                 | TT                              | CC                | 1946440459               |
| SNP_P3_71258_1814155 | NC_021165.1    | Ca_kabuli_chr06 | 1814155                 | AA                              | TT                | 1946440461               |
| SNP_P3_71259_1814179 | NC_021165.1    | Ca_kabuli_chr06 | 1814179                 | TT                              | GG                | 1946440462               |

| SNPs IDs             | Chromosome IDs | Chromosomes     | Physical positions (bp) | CDC Frontier (Reference genome) | (Pusa 256 & HPNB) | NCBI SNPdb Accession IDs |
|----------------------|----------------|-----------------|-------------------------|---------------------------------|-------------------|--------------------------|
| SNP_P3_71260_1814251 | NC_021165.1    | Ca_kabuli_chr06 | 1814251                 | GG                              | AA                | 1946440464               |
| SNP_P3_71261_1814273 | NC_021165.1    | Ca_kabuli_chr06 | 1814273                 | AA                              | CC                | 1946440465               |
| SNP_P3_71262_1814323 | NC_021165.1    | Ca_kabuli_chr06 | 1814323                 | AA                              | CC                | 1946440467               |
| SNP_P3_71263_1814356 | NC_021165.1    | Ca_kabuli_chr06 | 1814356                 | CC                              | TT                | 1946440468               |
| SNP_P3_71264_1814606 | NC_021165.1    | Ca_kabuli_chr06 | 1814606                 | CC                              | AA                | 1946440470               |
| SNP_P3_71265_1814947 | NC_021165.1    | Ca_kabuli_chr06 | 1814947                 | GG                              | AA                | 1946440471               |
| SNP_P3_71266_1815245 | NC_021165.1    | Ca_kabuli_chr06 | 1815245                 | CC                              | TT                | 1946440473               |
| SNP_P3_71267_1815278 | NC_021165.1    | Ca_kabuli_chr06 | 1815278                 | AA                              | GG                | 1946440475               |
| SNP_P3_71269_1815869 | NC_021165.1    | Ca_kabuli_chr06 | 1815869                 | CC                              | AA                | 1946440476               |
| SNP_P3_71270_1817286 | NC_021165.1    | Ca_kabuli_chr06 | 1817286                 | TT                              | AA                | 1946440478               |
| SNP_P3_71271_1819347 | NC_021165.1    | Ca_kabuli_chr06 | 1819347                 | AA                              | GG                | 1946440479               |
| SNP_P3_71272_1819551 | NC_021165.1    | Ca_kabuli_chr06 | 1819551                 | GG                              | AA                | 1946440481               |
| SNP_P3_71273_1820614 | NC_021165.1    | Ca_kabuli_chr06 | 1820614                 | AA                              | CC                | 1946440482               |
| SNP_P3_71274_1822094 | NC_021165.1    | Ca_kabuli_chr06 | 1822094                 | GG                              | AA                | 1946440484               |
| SNP_P3_71275_1823655 | NC_021165.1    | Ca_kabuli_chr06 | 1823655                 | GG                              | AA                | 1946440485               |
| SNP_P3_71276_1824006 | NC_021165.1    | Ca_kabuli_chr06 | 1824006                 | GG                              | AA                | 1946440486               |
| SNP_P3_71277_1824026 | NC_021165.1    | Ca_kabuli_chr06 | 1824026                 | TT                              | GG                | 1946440488               |
| SNP_P3_71278_1824068 | NC_021165.1    | Ca_kabuli_chr06 | 1824068                 | GG                              | TT                | 1946440489               |
| SNP_P3_71279_1824094 | NC_021165.1    | Ca_kabuli_chr06 | 1824094                 | TT                              | CC                | 1946440491               |
| SNP_P3_71281_1824167 | NC_021165.1    | Ca_kabuli_chr06 | 1824167                 | TT                              | CC                | 1946440492               |
| SNP_P3_71282_1824365 | NC_021165.1    | Ca_kabuli_chr06 | 1824365                 | CC                              | TT                | 1946440494               |
| SNP_P3_71286_1825085 | NC_021165.1    | Ca_kabuli_chr06 | 1825085                 | CC                              | AA                | 1946440496               |
| SNP_P3_71287_1825095 | NC_021165.1    | Ca_kabuli_chr06 | 1825095                 | AA                              | GG                | 1946440497               |
| SNP_P3_71288_1825099 | NC_021165.1    | Ca_kabuli_chr06 | 1825099                 | AA                              | GG                | 1946440499               |
| SNP_P3_71289_1825108 | NC_021165.1    | Ca_kabuli_chr06 | 1825108                 | CC                              | TT                | 1946440500               |
| SNP_P3_71290_1825126 | NC_021165.1    | Ca_kabuli_chr06 | 1825126                 | TT                              | CC                | 1946440502               |
| SNP_P3_71291_1825140 | NC_021165.1    | Ca_kabuli_chr06 | 1825140                 | TT                              | CC                | 1946440503               |
| SNP_P3_71292_1825156 | NC_021165.1    | Ca_kabuli_chr06 | 1825156                 | AA                              | GG                | 1946440505               |
| SNP_P3_71293_1825166 | NC_021165.1    | Ca_kabuli_chr06 | 1825166                 | AA                              | GG                | 1946440506               |
| SNP_P3_71295_1825345 | NC_021165.1    | Ca_kabuli_chr06 | 1825345                 | CC                              | GG                | 1946440508               |
| SNP_P3_71296_1825368 | NC_021165.1    | Ca_kabuli_chr06 | 1825368                 | GG                              | AA                | 1946440509               |
| SNP_P3_71297_1825394 | NC_021165.1    | Ca_kabuli_chr06 | 1825394                 | CC                              | TT                | 1946440511               |
| SNP_P3_71298_1825615 | NC_021165.1    | Ca_kabuli_chr06 | 1825615                 | CC                              | TT                | 1946440512               |
| SNP_P3_71299_1825913 | NC_021165.1    | Ca_kabuli_chr06 | 1825913                 | CC                              | GG                | 1946440514               |
| SNP_P3_71301_1829851 | NC_021165.1    | Ca_kabuli_chr06 | 1829851                 | TT                              | CC                | 1946440516               |
| SNP_P3_71304_1832707 | NC_021165.1    | Ca_kabuli_chr06 | 1832707                 | AA                              | CC                | 1946440517               |
| SNP_P3_71306_1833744 | NC_021165.1    | Ca_kabuli_chr06 | 1833744                 | CC                              | TT                | 1946440519               |
| SNP_P3_71307_1834335 | NC_021165.1    | Ca_kabuli_chr06 | 1834335                 | AA                              | TT                | 1946440520               |
| SNP_P3_71308_1842924 | NC_021165.1    | Ca_kabuli_chr06 | 1842924                 | GG                              | AA                | 1946440522               |
| SNP_P3_71310_1845209 | NC_021165.1    | Ca_kabuli_chr06 | 1845209                 | TT                              | AA                | 1946440523               |
| SNP_P3_71311_1845247 | NC_021165.1    | Ca_kabuli_chr06 | 1845247                 | TT                              | GG                | 1946440525               |
| SNP_P3_71313_1845291 | NC_021165.1    | Ca_kabuli_chr06 | 1845291                 | TT                              | CC                | 1946440526               |

| SNPs IDs             | Chromosome IDs | Chromosomes     | Physical positions (bp) | CDC Frontier (Reference genome) | (Pusa 256 & HPNB) | NCBI SNPdb Accession IDs |
|----------------------|----------------|-----------------|-------------------------|---------------------------------|-------------------|--------------------------|
| SNP_P3_71314_1845311 | NC_021165.1    | Ca_kabuli_chr06 | 1845311                 | TT                              | AA                | 1946440528               |
| SNP_P3_71315_1845396 | NC_021165.1    | Ca_kabuli_chr06 | 1845396                 | AA                              | TT                | 1946440529               |
| SNP_P3_71316_1846506 | NC_021165.1    | Ca_kabuli_chr06 | 1846506                 | AA                              | GG                | 1946440531               |
| SNP_P3_71318_1849736 | NC_021165.1    | Ca_kabuli_chr06 | 1849736                 | TT                              | AA                | 1946440532               |
| SNP_P3_71319_1849750 | NC_021165.1    | Ca_kabuli_chr06 | 1849750                 | GG                              | TT                | 1946440534               |
| SNP_P3_71320_1849780 | NC_021165.1    | Ca_kabuli_chr06 | 1849780                 | CC                              | TT                | 1946440536               |
| SNP_P3_71321_1851686 | NC_021165.1    | Ca_kabuli_chr06 | 1851686                 | TT                              | CC                | 1946440537               |
| SNP_P3_71322_1852021 | NC_021165.1    | Ca_kabuli_chr06 | 1852021                 | AA                              | TT                | 1946440539               |
| SNP_P3_71323_1852023 | NC_021165.1    | Ca_kabuli_chr06 | 1852023                 | CC                              | TT                | 1946440540               |
| SNP_P3_71324_1854040 | NC_021165.1    | Ca_kabuli_chr06 | 1854040                 | TT                              | CC                | 1946440542               |
| SNP_P3_71325_1854105 | NC_021165.1    | Ca_kabuli_chr06 | 1854105                 | TT                              | GG                | 1946440543               |
| SNP_P3_71326_1854296 | NC_021165.1    | Ca_kabuli_chr06 | 1854296                 | GG                              | TT                | 1946440545               |
| SNP_P3_71327_1854398 | NC_021165.1    | Ca_kabuli_chr06 | 1854398                 | TT                              | AA                | 1946440546               |
| SNP_P3_71328_1854425 | NC_021165.1    | Ca_kabuli_chr06 | 1854425                 | CC                              | TT                | 1946440548               |
| SNP_P3_71329_1858576 | NC_021165.1    | Ca_kabuli_chr06 | 1858576                 | TT                              | AA                | 1946440549               |
| SNP_P3_71330_1858606 | NC_021165.1    | Ca_kabuli_chr06 | 1858606                 | CC                              | AA                | 1946440551               |
| SNP_P3_71331_1860720 | NC_021165.1    | Ca_kabuli_chr06 | 1860720                 | CC                              | AA                | 1946440552               |
| SNP_P3_71332_1861504 | NC_021165.1    | Ca_kabuli_chr06 | 1861504                 | AA                              | GG                | 1946440554               |
| SNP_P3_71333_1861511 | NC_021165.1    | Ca_kabuli_chr06 | 1861511                 | AA                              | GG                | 1946440555               |
| SNP_P3_71334_1862074 | NC_021165.1    | Ca_kabuli_chr06 | 1862074                 | CC                              | TT                | 1946440557               |
| SNP_P3_71336_1862386 | NC_021165.1    | Ca_kabuli_chr06 | 1862386                 | AA                              | TT                | 1946440558               |
| SNP_P3_71337_1863670 | NC_021165.1    | Ca_kabuli_chr06 | 1863670                 | TT                              | AA                | 1946440560               |
| SNP_P3_71339_1864340 | NC_021165.1    | Ca_kabuli_chr06 | 1864340                 | GG                              | AA                | 1946440562               |
| SNP_P3_71340_1864537 | NC_021165.1    | Ca_kabuli_chr06 | 1864537                 | CC                              | TT                | 1946440563               |
| SNP_P3_71342_1864585 | NC_021165.1    | Ca_kabuli_chr06 | 1864585                 | AA                              | TT                | 1946440565               |
| SNP_P3_71343_1864590 | NC_021165.1    | Ca_kabuli_chr06 | 1864590                 | TT                              | CC                | 1946440566               |
| SNP_P3_71344_1864730 | NC_021165.1    | Ca_kabuli_chr06 | 1864730                 | GG                              | AA                | 1946440568               |
| SNP_P3_71345_1864781 | NC_021165.1    | Ca_kabuli_chr06 | 1864781                 | AA                              | GG                | 1946440569               |
| SNP_P3_71346_1865463 | NC_021165.1    | Ca_kabuli_chr06 | 1865463                 | TT                              | CC                | 1946440571               |
| SNP_P3_71347_1865579 | NC_021165.1    | Ca_kabuli_chr06 | 1865579                 | GG                              | AA                | 1946440572               |
| SNP_P3_71348_1865588 | NC_021165.1    | Ca_kabuli_chr06 | 1865588                 | GG                              | AA                | 1946440574               |
| SNP_P3_71349_1865837 | NC_021165.1    | Ca_kabuli_chr06 | 1865837                 | GG                              | AA                | 1946440575               |
| SNP_P3_71351_1865913 | NC_021165.1    | Ca_kabuli_chr06 | 1865913                 | GG                              | AA                | 1946440577               |
| SNP_P3_71352_1867086 | NC_021165.1    | Ca_kabuli_chr06 | 1867086                 | CC                              | TT                | 1946440579               |
| SNP_P3_71353_1867328 | NC_021165.1    | Ca_kabuli_chr06 | 1867328                 | AA                              | GG                | 1946440581               |
| SNP_P3_71354_1867678 | NC_021165.1    | Ca_kabuli_chr06 | 1867678                 | AA                              | TT                | 1946440582               |
| SNP_P3_71355_1867710 | NC_021165.1    | Ca_kabuli_chr06 | 1867710                 | CC                              | GG                | 1946440584               |
| SNP_P3_71357_1944375 | NC_021165.1    | Ca_kabuli_chr06 | 1944375                 | GG                              | AA                | 1946440586               |
| SNP_P3_71360_1966901 | NC_021165.1    | Ca_kabuli_chr06 | 1966901                 | GG                              | AA                | 1946440587               |
| SNP_P3_71366_1976791 | NC_021165.1    | Ca_kabuli_chr06 | 1976791                 | CC                              | AA                | 1946440589               |
| SNP_P3_71367_1976795 | NC_021165.1    | Ca_kabuli_chr06 | 1976795                 | AA                              | TT                | 1946440590               |
| SNP_P3_71368_1976815 | NC_021165.1    | Ca_kabuli_chr06 | 1976815                 | GG                              | TT                | 1946440592               |

| SNPs IDs             | Chromosome IDs | Chromosomes     | Physical positions (bp) | CDC Frontier (Reference genome) | (Pusa 256 & HPNB) | NCBI SNPdb Accession IDs |
|----------------------|----------------|-----------------|-------------------------|---------------------------------|-------------------|--------------------------|
| SNP_P3_71369_1976884 | NC_021165.1    | Ca_kabuli_chr06 | 1976884                 | GG                              | AA                | 1946440594               |
| SNP_P3_71370_1976911 | NC_021165.1    | Ca_kabuli_chr06 | 1976911                 | AA                              | GG                | 1946440595               |
| SNP_P3_71371_1977015 | NC_021165.1    | Ca_kabuli_chr06 | 1977015                 | AA                              | TT                | 1946440597               |
| SNP_P3_71372_1977026 | NC_021165.1    | Ca_kabuli_chr06 | 1977026                 | TT                              | AA                | 1946440599               |
| SNP_P3_71374_1977439 | NC_021165.1    | Ca_kabuli_chr06 | 1977439                 | TT                              | GG                | 1946440601               |
| SNP_P3_71375_1977482 | NC_021165.1    | Ca_kabuli_chr06 | 1977482                 | TT                              | CC                | 1946440602               |
| SNP_P3_71377_1977604 | NC_021165.1    | Ca_kabuli_chr06 | 1977604                 | TT                              | CC                | 1946440604               |
| SNP_P3_71378_1977620 | NC_021165.1    | Ca_kabuli_chr06 | 1977620                 | GG                              | AA                | 1946440605               |
| SNP_P3_71380_1978383 | NC_021165.1    | Ca_kabuli_chr06 | 1978383                 | TT                              | CC                | 1946440607               |
| SNP_P3_71381_1978421 | NC_021165.1    | Ca_kabuli_chr06 | 1978421                 | TT                              | CC                | 1946440609               |
| SNP_P3_71382_1978444 | NC_021165.1    | Ca_kabuli_chr06 | 1978444                 | TT                              | CC                | 1946440610               |
| SNP_P3_71384_1978531 | NC_021165.1    | Ca_kabuli_chr06 | 1978531                 | CC                              | AA                | 1946440612               |
| SNP_P3_71385_1978557 | NC_021165.1    | Ca_kabuli_chr06 | 1978557                 | AA                              | CC                | 1946440613               |
| SNP_P3_71386_1978629 | NC_021165.1    | Ca_kabuli_chr06 | 1978629                 | AA                              | GG                | 1946440614               |
| SNP_P3_71387_1978642 | NC_021165.1    | Ca_kabuli_chr06 | 1978642                 | TT                              | CC                | 1946440616               |
| SNP_P3_71388_1978750 | NC_021165.1    | Ca_kabuli_chr06 | 1978750                 | TT                              | CC                | 1946440618               |
| SNP_P3_71389_1978792 | NC_021165.1    | Ca_kabuli_chr06 | 1978792                 | CC                              | GG                | 1946440619               |
| SNP_P3_71390_1979293 | NC_021165.1    | Ca_kabuli_chr06 | 1979293                 | TT                              | CC                | 1946440621               |
| SNP_P3_71391_1979294 | NC_021165.1    | Ca_kabuli_chr06 | 1979294                 | CC                              | AA                | 1946440622               |
| SNP_P3_71392_1979296 | NC_021165.1    | Ca_kabuli_chr06 | 1979296                 | CC                              | TT                | 1946440624               |
| SNP_P3_71393_1979297 | NC_021165.1    | Ca_kabuli_chr06 | 1979297                 | CC                              | GG                | 1946440625               |
| SNP_P3_71394_1994850 | NC_021165.1    | Ca_kabuli_chr06 | 1994850                 | AA                              | GG                | 1946440627               |
| SNP_P3_71395_2031623 | NC_021165.1    | Ca_kabuli_chr06 | 2031623                 | AA                              | TT                | 1946440628               |
| SNP_P3_71396_2059620 | NC_021165.1    | Ca_kabuli_chr06 | 2059620                 | AA                              | GG                | 1946440630               |
| SNP_P3_71399_2103571 | NC_021165.1    | Ca_kabuli_chr06 | 2103571                 | AA                              | GG                | 1946440631               |
| SNP_P3_71403_2153602 | NC_021165.1    | Ca_kabuli_chr06 | 2153602                 | AA                              | GG                | 1946440633               |
| SNP_P3_71404_2193488 | NC_021165.1    | Ca_kabuli_chr06 | 2193488                 | AA                              | CC                | 1946440635               |
| SNP_P3_71406_2217140 | NC_021165.1    | Ca_kabuli_chr06 | 2217140                 | GG                              | AA                | 1946440636               |
| SNP_P3_71407_2233946 | NC_021165.1    | Ca_kabuli_chr06 | 2233946                 | GG                              | AA                | 1946440638               |
| SNP_P3_71408_2241235 | NC_021165.1    | Ca_kabuli_chr06 | 2241235                 | GG                              | CC                | 1946440639               |
| SNP_P3_71409_2248176 | NC_021165.1    | Ca_kabuli_chr06 | 2248176                 | GG                              | AA                | 1946440641               |
| SNP_P3_71411_2272201 | NC_021165.1    | Ca_kabuli_chr06 | 2272201                 | GG                              | AA                | 1946440643               |
| SNP_P3_71412_2272251 | NC_021165.1    | Ca_kabuli_chr06 | 2272251                 | AA                              | GG                | 1946440645               |
| SNP_P3_71414_2272417 | NC_021165.1    | Ca_kabuli_chr06 | 2272417                 | AA                              | GG                | 1946440646               |
| SNP_P3_71415_2272734 | NC_021165.1    | Ca_kabuli_chr06 | 2272734                 | AA                              | GG                | 1946440648               |
| SNP_P3_71416_2272923 | NC_021165.1    | Ca_kabuli_chr06 | 2272923                 | GG                              | AA                | 1946440649               |
| SNP_P3_71418_2302393 | NC_021165.1    | Ca_kabuli_chr06 | 2302393                 | TT                              | CC                | 1946440651               |
| SNP_P3_71419_2329718 | NC_021165.1    | Ca_kabuli_chr06 | 2329718                 | AA                              | GG                | 1946440652               |
| SNP_P3_71420_2336769 | NC_021165.1    | Ca_kabuli_chr06 | 2336769                 | CC                              | TT                | 1946440654               |
| SNP_P3_71423_2353239 | NC_021165.1    | Ca_kabuli_chr06 | 2353239                 | AA                              | GG                | 1946440655               |
| SNP_P3_71425_2356760 | NC_021165.1    | Ca_kabuli_chr06 | 2356760                 | AA                              | GG                | 1946440657               |
| SNP_P3_71426_2374498 | NC_021165.1    | Ca_kabuli_chr06 | 2374498                 | AA                              | GG                | 1946440659               |

| SNPs IDs             | Chromosome IDs | Chromosomes     | Physical positions (bp) | CDC Frontier (Reference genome) | (Pusa 256 & HPNB) | NCBI SNPdb Accession IDs |
|----------------------|----------------|-----------------|-------------------------|---------------------------------|-------------------|--------------------------|
| SNP_P3_71427_2374503 | NC_021165.1    | Ca_kabuli_chr06 | 2374503                 | TT                              | CC                | 1946440660               |
| SNP_P3_71428_2378236 | NC_021165.1    | Ca_kabuli_chr06 | 2378236                 | TT                              | AA                | 1946440662               |
| SNP_P3_71433_2433956 | NC_021165.1    | Ca_kabuli_chr06 | 2433956                 | AA                              | CC                | 1946440663               |
| SNP_P3_71434_2435749 | NC_021165.1    | Ca_kabuli_chr06 | 2435749                 | GG                              | AA                | 1946440665               |
| SNP_P3_71435_2436073 | NC_021165.1    | Ca_kabuli_chr06 | 2436073                 | AA                              | TT                | 1946440667               |
| SNP_P3_71436_2439117 | NC_021165.1    | Ca_kabuli_chr06 | 2439117                 | TT                              | GG                | 1946440668               |
| SNP_P3_71437_2441182 | NC_021165.1    | Ca_kabuli_chr06 | 2441182                 | TT                              | AA                | 1946440670               |
| SNP_P3_71438_2441200 | NC_021165.1    | Ca_kabuli_chr06 | 2441200                 | GG                              | AA                | 1946440671               |
| SNP_P3_71440_2459405 | NC_021165.1    | Ca_kabuli_chr06 | 2459405                 | GG                              | AA                | 1946440673               |
| SNP_P3_71441_2460193 | NC_021165.1    | Ca_kabuli_chr06 | 2460193                 | GG                              | AA                | 1946440674               |
| SNP_P3_71442_2464919 | NC_021165.1    | Ca_kabuli_chr06 | 2464919                 | CC                              | TT                | 1946440676               |
| SNP_P3_71443_2494627 | NC_021165.1    | Ca_kabuli_chr06 | 2494627                 | CC                              | TT                | 1946440677               |
| SNP_P3_71444_2495062 | NC_021165.1    | Ca_kabuli_chr06 | 2495062                 | TT                              | CC                | 1946440679               |
| SNP_P3_71446_2514841 | NC_021165.1    | Ca_kabuli_chr06 | 2514841                 | GG                              | TT                | 1946440681               |
| SNP_P3_71447_2517660 | NC_021165.1    | Ca_kabuli_chr06 | 2517660                 | GG                              | CC                | 1946440682               |
| SNP_P3_71448_2518774 | NC_021165.1    | Ca_kabuli_chr06 | 2518774                 | TT                              | AA                | 1946440684               |
| SNP_P3_71450_2518816 | NC_021165.1    | Ca_kabuli_chr06 | 2518816                 | GG                              | TT                | 1946440686               |
| SNP_P3_71451_2519041 | NC_021165.1    | Ca_kabuli_chr06 | 2519041                 | AA                              | CC                | 1946440687               |
| SNP_P3_71452_2519042 | NC_021165.1    | Ca_kabuli_chr06 | 2519042                 | GG                              | AA                | 1946440689               |
| SNP_P3_71453_2521142 | NC_021165.1    | Ca_kabuli_chr06 | 2521142                 | CC                              | TT                | 1946440691               |
| SNP_P3_71454_2521876 | NC_021165.1    | Ca_kabuli_chr06 | 2521876                 | GG                              | TT                | 1946440692               |
| SNP_P3_71455_2522033 | NC_021165.1    | Ca_kabuli_chr06 | 2522033                 | GG                              | AA                | 1946440694               |
| SNP_P3_71456_2522055 | NC_021165.1    | Ca_kabuli_chr06 | 2522055                 | AA                              | GG                | 1946440696               |
| SNP_P3_71457_2522087 | NC_021165.1    | Ca_kabuli_chr06 | 2522087                 | CC                              | GG                | 1946440697               |
| SNP_P3_71458_2522228 | NC_021165.1    | Ca_kabuli_chr06 | 2522228                 | GG                              | CC                | 1946440699               |
| SNP_P3_71459_2522601 | NC_021165.1    | Ca_kabuli_chr06 | 2522601                 | CC                              | TT                | 1946440700               |
| SNP_P3_71460_2523275 | NC_021165.1    | Ca_kabuli_chr06 | 2523275                 | AA                              | TT                | 1946440702               |
| SNP_P3_71461_2523302 | NC_021165.1    | Ca_kabuli_chr06 | 2523302                 | CC                              | GG                | 1946440704               |
| SNP_P3_71463_2523493 | NC_021165.1    | Ca_kabuli_chr06 | 2523493                 | TT                              | AA                | 1946440705               |
| SNP_P3_71464_2523495 | NC_021165.1    | Ca_kabuli_chr06 | 2523495                 | CC                              | TT                | 1946440707               |
| SNP_P3_71465_2523929 | NC_021165.1    | Ca_kabuli_chr06 | 2523929                 | GG                              | AA                | 1946440708               |
| SNP_P3_71466_2523959 | NC_021165.1    | Ca_kabuli_chr06 | 2523959                 | GG                              | TT                | 1946440710               |
| SNP_P3_71467_2523979 | NC_021165.1    | Ca_kabuli_chr06 | 2523979                 | AA                              | CC                | 1946440712               |
| SNP_P3_71469_2524021 | NC_021165.1    | Ca_kabuli_chr06 | 2524021                 | AA                              | TT                | 1946440714               |
| SNP_P3_71470_2524056 | NC_021165.1    | Ca_kabuli_chr06 | 2524056                 | AA                              | TT                | 1946440715               |
| SNP_P3_71471_2525184 | NC_021165.1    | Ca_kabuli_chr06 | 2525184                 | AA                              | CC                | 1946440717               |
| SNP_P3_71472_2525203 | NC_021165.1    | Ca_kabuli_chr06 | 2525203                 | CC                              | TT                | 1946440718               |
| SNP_P3_71473_2525208 | NC_021165.1    | Ca_kabuli_chr06 | 2525208                 | CC                              | TT                | 1946440720               |
| SNP_P3_71475_2525404 | NC_021165.1    | Ca_kabuli_chr06 | 2525404                 | GG                              | TT                | 1946440721               |
| SNP_P3_71477_2525711 | NC_021165.1    | Ca_kabuli_chr06 | 2525711                 | CC                              | AA                | 1946440723               |
| SNP_P3_71478_2525893 | NC_021165.1    | Ca_kabuli_chr06 | 2525893                 | TT                              | CC                | 1946440724               |
| SNP_P3_71479_2525899 | NC_021165.1    | Ca_kabuli_chr06 | 2525899                 | GG                              | AA                | 1946440726               |

| SNPs IDs             | Chromosome IDs | Chromosomes     | Physical positions (bp) | CDC Frontier (Reference genome) | (Pusa 256 & HPNB) | NCBI SNPdb Accession IDs |
|----------------------|----------------|-----------------|-------------------------|---------------------------------|-------------------|--------------------------|
| SNP_P3_71480_2527331 | NC_021165.1    | Ca_kabuli_chr06 | 2527331                 | AA                              | GG                | 1946440727               |
| SNP_P3_71481_2527335 | NC_021165.1    | Ca_kabuli_chr06 | 2527335                 | GG                              | AA                | 1946440729               |
| SNP_P3_71482_2527364 | NC_021165.1    | Ca_kabuli_chr06 | 2527364                 | AA                              | GG                | 1946440730               |
| SNP_P3_71483_2527497 | NC_021165.1    | Ca_kabuli_chr06 | 2527497                 | GG                              | AA                | 1946440732               |
| SNP_P3_71484_2528924 | NC_021165.1    | Ca_kabuli_chr06 | 2528924                 | AA                              | TT                | 1946440733               |
| SNP_P3_71486_2529500 | NC_021165.1    | Ca_kabuli_chr06 | 2529500                 | TT                              | AA                | 1946440735               |
| SNP_P3_71487_2529550 | NC_021165.1    | Ca_kabuli_chr06 | 2529550                 | GG                              | AA                | 1946440736               |
| SNP_P3_71488_2529567 | NC_021165.1    | Ca_kabuli_chr06 | 2529567                 | CC                              | TT                | 1946440738               |
| SNP_P3_71490_2529907 | NC_021165.1    | Ca_kabuli_chr06 | 2529907                 | AA                              | CC                | 1946440739               |
| SNP_P3_71491_2533554 | NC_021165.1    | Ca_kabuli_chr06 | 2533554                 | TT                              | CC                | 1946440741               |
| SNP_P3_71493_2539391 | NC_021165.1    | Ca_kabuli_chr06 | 2539391                 | AA                              | TT                | 1946440742               |
| SNP_P3_71494_2539402 | NC_021165.1    | Ca_kabuli_chr06 | 2539402                 | GG                              | AA                | 1946440744               |
| SNP_P3_71495_2539416 | NC_021165.1    | Ca_kabuli_chr06 | 2539416                 | AA                              | TT                | 1946440745               |
| SNP_P3_71496_2539461 | NC_021165.1    | Ca_kabuli_chr06 | 2539461                 | AA                              | TT                | 1946440747               |
| SNP_P3_71497_2539561 | NC_021165.1    | Ca_kabuli_chr06 | 2539561                 | AA                              | TT                | 1946440749               |
| SNP_P3_71498_2541179 | NC_021165.1    | Ca_kabuli_chr06 | 2541179                 | AA                              | TT                | 1946440750               |
| SNP_P3_71499_2541567 | NC_021165.1    | Ca_kabuli_chr06 | 2541567                 | TT                              | CC                | 1946440752               |
| SNP_P3_71500_2541669 | NC_021165.1    | Ca_kabuli_chr06 | 2541669                 | GG                              | AA                | 1946440753               |
| SNP_P3_71501_2541825 | NC_021165.1    | Ca_kabuli_chr06 | 2541825                 | TT                              | AA                | 1946440755               |
| SNP_P3_71502_2541828 | NC_021165.1    | Ca_kabuli_chr06 | 2541828                 | TT                              | AA                | 1946440756               |
| SNP_P3_71503_2541899 | NC_021165.1    | Ca_kabuli_chr06 | 2541899                 | GG                              | AA                | 1946440758               |
| SNP_P3_71504_2541915 | NC_021165.1    | Ca_kabuli_chr06 | 2541915                 | CC                              | GG                | 1946440760               |
| SNP_P3_71505_2541940 | NC_021165.1    | Ca_kabuli_chr06 | 2541940                 | TT                              | GG                | 1946440761               |
| SNP_P3_71507_2542818 | NC_021165.1    | Ca_kabuli_chr06 | 2542818                 | AA                              | GG                | 1946440763               |
| SNP_P3_71508_2543218 | NC_021165.1    | Ca_kabuli_chr06 | 2543218                 | GG                              | AA                | 1946440765               |
| SNP_P3_71509_2543258 | NC_021165.1    | Ca_kabuli_chr06 | 2543258                 | CC                              | GG                | 1946440767               |
| SNP_P3_71510_2543278 | NC_021165.1    | Ca_kabuli_chr06 | 2543278                 | AA                              | CC                | 1946440768               |
| SNP_P3_71511_2543431 | NC_021165.1    | Ca_kabuli_chr06 | 2543431                 | TT                              | AA                | 1946440770               |
| SNP_P3_71512_2543678 | NC_021165.1    | Ca_kabuli_chr06 | 2543678                 | TT                              | GG                | 1946440771               |
| SNP_P3_71513_2543759 | NC_021165.1    | Ca_kabuli_chr06 | 2543759                 | CC                              | GG                | 1946440773               |
| SNP_P3_71514_2543760 | NC_021165.1    | Ca_kabuli_chr06 | 2543760                 | AA                              | GG                | 1946440774               |
| SNP_P3_71515_2543796 | NC_021165.1    | Ca_kabuli_chr06 | 2543796                 | CC                              | TT                | 1946440776               |
| SNP_P3_71516_2544416 | NC_021165.1    | Ca_kabuli_chr06 | 2544416                 | CC                              | TT                | 1946440777               |
| SNP_P3_71517_2544417 | NC_021165.1    | Ca_kabuli_chr06 | 2544417                 | AA                              | TT                | 1946440779               |
| SNP_P3_71518_2544419 | NC_021165.1    | Ca_kabuli_chr06 | 2544419                 | GG                              | AA                | 1946440781               |
| SNP_P3_71519_2544429 | NC_021165.1    | Ca_kabuli_chr06 | 2544429                 | CC                              | GG                | 1946440782               |
| SNP_P3_71520_2544606 | NC_021165.1    | Ca_kabuli_chr06 | 2544606                 | CC                              | AA                | 1946440784               |
| SNP_P3_71521_2544652 | NC_021165.1    | Ca_kabuli_chr06 | 2544652                 | TT                              | CC                | 1946440785               |
| SNP_P3_71522_2544656 | NC_021165.1    | Ca_kabuli_chr06 | 2544656                 | GG                              | AA                | 1946440787               |
| SNP_P3_71523_2544850 | NC_021165.1    | Ca_kabuli_chr06 | 2544850                 | CC                              | GG                | 1946440789               |
| SNP_P3_71524_2546057 | NC_021165.1    | Ca_kabuli_chr06 | 2546057                 | GG                              | AA                | 1946440790               |
| SNP_P3_71525_2546061 | NC_021165.1    | Ca_kabuli_chr06 | 2546061                 | TT                              | AA                | 1946440792               |

| SNPs IDs             | Chromosome IDs | Chromosomes     | Physical positions (bp) | CDC Frontier (Reference genome) | (Pusa 256 & HPNB) | NCBI SNPdb Accession IDs |
|----------------------|----------------|-----------------|-------------------------|---------------------------------|-------------------|--------------------------|
| SNP_P3_71526_2549676 | NC_021165.1    | Ca_kabuli_chr06 | 2549676                 | AA                              | CC                | 1946440793               |
| SNP_P3_71527_2549991 | NC_021165.1    | Ca_kabuli_chr06 | 2549991                 | TT                              | CC                | 1946440795               |
| SNP_P3_71528_2553207 | NC_021165.1    | Ca_kabuli_chr06 | 2553207                 | AA                              | GG                | 1946440797               |
| SNP_P3_71529_2565937 | NC_021165.1    | Ca_kabuli_chr06 | 2565937                 | GG                              | AA                | 1946440798               |
| SNP_P3_71530_2572341 | NC_021165.1    | Ca_kabuli_chr06 | 2572341                 | AA                              | GG                | 1946440800               |
| SNP_P3_71531_2594863 | NC_021165.1    | Ca_kabuli_chr06 | 2594863                 | TT                              | GG                | 1946440801               |
| SNP_P3_71532_2597581 | NC_021165.1    | Ca_kabuli_chr06 | 2597581                 | TT                              | CC                | 1946440803               |
| SNP_P3_71533_2607447 | NC_021165.1    | Ca_kabuli_chr06 | 2607447                 | CC                              | TT                | 1946440805               |
| SNP_P3_71535_2674677 | NC_021165.1    | Ca_kabuli_chr06 | 2674677                 | GG                              | AA                | 1946440806               |
| SNP_P3_71536_2674682 | NC_021165.1    | Ca_kabuli_chr06 | 2674682                 | AA                              | GG                | 1946440808               |
| SNP_P3_71538_2675028 | NC_021165.1    | Ca_kabuli_chr06 | 2675028                 | AA                              | GG                | 1946440810               |
| SNP_P3_71539_2675032 | NC_021165.1    | Ca_kabuli_chr06 | 2675032                 | CC                              | TT                | 1946440812               |
| SNP_P3_71540_2675039 | NC_021165.1    | Ca_kabuli_chr06 | 2675039                 | TT                              | CC                | 1946440813               |
| SNP_P3_71541_2675068 | NC_021165.1    | Ca_kabuli_chr06 | 2675068                 | AA                              | GG                | 1946440815               |
| SNP_P3_71542_2683199 | NC_021165.1    | Ca_kabuli_chr06 | 2683199                 | AA                              | GG                | 1946440816               |
| SNP_P3_71543_2697120 | NC_021165.1    | Ca_kabuli_chr06 | 2697120                 | CC                              | TT                | 1946440818               |
| SNP_P3_71546_2721072 | NC_021165.1    | Ca_kabuli_chr06 | 2721072                 | AA                              | TT                | 1946440819               |
| SNP_P3_71551_2783893 | NC_021165.1    | Ca_kabuli_chr06 | 2783893                 | AA                              | CC                | 1946440821               |
| SNP_P3_71552_2784341 | NC_021165.1    | Ca_kabuli_chr06 | 2784341                 | GG                              | CC                | 1946440822               |
| SNP_P3_71553_2786816 | NC_021165.1    | Ca_kabuli_chr06 | 2786816                 | GG                              | CC                | 1946440824               |
| SNP_P3_71554_2878656 | NC_021165.1    | Ca_kabuli_chr06 | 2878656                 | TT                              | AA                | 1946440825               |
| SNP_P3_71555_2887235 | NC_021165.1    | Ca_kabuli_chr06 | 2887235                 | TT                              | GG                | 1946440827               |
| SNP_P3_71556_2891869 | NC_021165.1    | Ca_kabuli_chr06 | 2891869                 | CC                              | TT                | 1946440828               |
| SNP_P3_71557_2897277 | NC_021165.1    | Ca_kabuli_chr06 | 2897277                 | TT                              | AA                | 1946440830               |
| SNP_P3_71558_2903274 | NC_021165.1    | Ca_kabuli_chr06 | 2903274                 | CC                              | AA                | 1946440831               |
| SNP_P3_71559_2909860 | NC_021165.1    | Ca_kabuli_chr06 | 2909860                 | AA                              | GG                | 1946440833               |
| SNP_P3_71560_2925057 | NC_021165.1    | Ca_kabuli_chr06 | 2925057                 | CC                              | TT                | 1946440834               |
| SNP_P3_71562_2954729 | NC_021165.1    | Ca_kabuli_chr06 | 2954729                 | GG                              | AA                | 1946440836               |
| SNP_P3_71564_2961821 | NC_021165.1    | Ca_kabuli_chr06 | 2961821                 | GG                              | AA                | 1946440838               |
| SNP_P3_71566_3023069 | NC_021165.1    | Ca_kabuli_chr06 | 3023069                 | AA                              | GG                | 1946440839               |
| SNP_P3_71567_3091334 | NC_021165.1    | Ca_kabuli_chr06 | 3091334                 | TT                              | CC                | 1946440841               |
| SNP_P3_71568_3096293 | NC_021165.1    | Ca_kabuli_chr06 | 3096293                 | AA                              | GG                | 1946440843               |
| SNP_P3_71569_3097631 | NC_021165.1    | Ca_kabuli_chr06 | 3097631                 | AA                              | GG                | 1946440844               |
| SNP_P3_71571_3103939 | NC_021165.1    | Ca_kabuli_chr06 | 3103939                 | CC                              | TT                | 1946440846               |
| SNP_P3_71572_3106978 | NC_021165.1    | Ca_kabuli_chr06 | 3106978                 | AA                              | CC                | 1946440847               |
| SNP_P3_71574_3111026 | NC_021165.1    | Ca_kabuli_chr06 | 3111026                 | CC                              | TT                | 1946440849               |
| SNP_P3_71575_3111776 | NC_021165.1    | Ca_kabuli_chr06 | 3111776                 | GG                              | AA                | 1946440850               |
| SNP_P3_71576_3117483 | NC_021165.1    | Ca_kabuli_chr06 | 3117483                 | CC                              | AA                | 1946440852               |
| SNP_P3_71577_3133209 | NC_021165.1    | Ca_kabuli_chr06 | 3133209                 | CC                              | AA                | 1946440854               |
| SNP_P3_71578_3133237 | NC_021165.1    | Ca_kabuli_chr06 | 3133237                 | CC                              | AA                | 1946440855               |
| SNP_P3_71579_3133253 | NC_021165.1    | Ca_kabuli_chr06 | 3133253                 | TT                              | GG                | 1946440857               |
| SNP_P3_71580_3133298 | NC_021165.1    | Ca_kabuli_chr06 | 3133298                 | CC                              | GG                | 1946440859               |

| SNPs IDs             | Chromosome IDs | Chromosomes     | Physical positions (bp) | CDC Frontier (Reference genome) | (Pusa 256 & HPNB) | NCBI SNPdb Accession IDs |
|----------------------|----------------|-----------------|-------------------------|---------------------------------|-------------------|--------------------------|
| SNP_P3_71581_3134224 | NC_021165.1    | Ca_kabuli_chr06 | 3134224                 | GG                              | AA                | 1946440860               |
| SNP_P3_71582_3134251 | NC_021165.1    | Ca_kabuli_chr06 | 3134251                 | TT                              | CC                | 1946440862               |
| SNP_P3_71583_3134295 | NC_021165.1    | Ca_kabuli_chr06 | 3134295                 | CC                              | AA                | 1946440864               |
| SNP_P3_71584_3134310 | NC_021165.1    | Ca_kabuli_chr06 | 3134310                 | GG                              | AA                | 1946440865               |
| SNP_P3_71585_3134311 | NC_021165.1    | Ca_kabuli_chr06 | 3134311                 | GG                              | AA                | 1946440867               |
| SNP_P3_71586_3134345 | NC_021165.1    | Ca_kabuli_chr06 | 3134345                 | GG                              | AA                | 1946440869               |
| SNP_P3_71587_3134348 | NC_021165.1    | Ca_kabuli_chr06 | 3134348                 | GG                              | TT                | 1946440870               |
| SNP_P3_71588_3134353 | NC_021165.1    | Ca_kabuli_chr06 | 3134353                 | CC                              | GG                | 1946440872               |
| SNP_P3_71589_3134383 | NC_021165.1    | Ca_kabuli_chr06 | 3134383                 | GG                              | TT                | 1946440873               |
| SNP_P3_71590_3134384 | NC_021165.1    | Ca_kabuli_chr06 | 3134384                 | TT                              | GG                | 1946440875               |
| SNP_P3_71591_3134405 | NC_021165.1    | Ca_kabuli_chr06 | 3134405                 | GG                              | AA                | 1946440876               |
| SNP_P3_71592_3134416 | NC_021165.1    | Ca_kabuli_chr06 | 3134416                 | TT                              | CC                | 1946440878               |
| SNP_P3_71593_3134501 | NC_021165.1    | Ca_kabuli_chr06 | 3134501                 | GG                              | AA                | 1946440879               |
| SNP_P3_71594_3134507 | NC_021165.1    | Ca_kabuli_chr06 | 3134507                 | TT                              | AA                | 1946440881               |
| SNP_P3_71595_3134511 | NC_021165.1    | Ca_kabuli_chr06 | 3134511                 | CC                              | TT                | 1946440883               |
| SNP_P3_71596_3134526 | NC_021165.1    | Ca_kabuli_chr06 | 3134526                 | AA                              | GG                | 1946440884               |
| SNP_P3_71597_3134537 | NC_021165.1    | Ca_kabuli_chr06 | 3134537                 | TT                              | CC                | 1946440886               |
| SNP_P3_71598_3135011 | NC_021165.1    | Ca_kabuli_chr06 | 3135011                 | GG                              | AA                | 1946440888               |
| SNP_P3_71599_3145623 | NC_021165.1    | Ca_kabuli_chr06 | 3145623                 | CC                              | AA                | 1946440889               |
| SNP_P3_71600_3145628 | NC_021165.1    | Ca_kabuli_chr06 | 3145628                 | CC                              | TT                | 1946440891               |
| SNP_P3_71601_3145631 | NC_021165.1    | Ca_kabuli_chr06 | 3145631                 | TT                              | GG                | 1946440893               |
| SNP_P3_71602_3145632 | NC_021165.1    | Ca_kabuli_chr06 | 3145632                 | GG                              | AA                | 1946440894               |
| SNP_P3_71603_3158919 | NC_021165.1    | Ca_kabuli_chr06 | 3158919                 | TT                              | GG                | 1946440896               |
| SNP_P3_71604_3162139 | NC_021165.1    | Ca_kabuli_chr06 | 3162139                 | CC                              | TT                | 1946440897               |
| SNP_P3_71605_3162152 | NC_021165.1    | Ca_kabuli_chr06 | 3162152                 | AA                              | TT                | 1946440899               |
| SNP_P3_71606_3162446 | NC_021165.1    | Ca_kabuli_chr06 | 3162446                 | GG                              | AA                | 1946440900               |
| SNP_P3_71607_3162511 | NC_021165.1    | Ca_kabuli_chr06 | 3162511                 | AA                              | GG                | 1946440902               |
| SNP_P3_71608_3164467 | NC_021165.1    | Ca_kabuli_chr06 | 3164467                 | TT                              | AA                | 1946440903               |
| SNP_P3_71609_3164486 | NC_021165.1    | Ca_kabuli_chr06 | 3164486                 | CC                              | TT                | 1946440905               |
| SNP_P3_71610_3164509 | NC_021165.1    | Ca_kabuli_chr06 | 3164509                 | CC                              | TT                | 1946440906               |
| SNP_P3_71611_3164558 | NC_021165.1    | Ca_kabuli_chr06 | 3164558                 | AA                              | CC                | 1946440907               |
| SNP_P3_71612_3164560 | NC_021165.1    | Ca_kabuli_chr06 | 3164560                 | GG                              | AA                | 1946440908               |
| SNP_P3_71613_3165087 | NC_021165.1    | Ca_kabuli_chr06 | 3165087                 | GG                              | AA                | 1946440909               |
| SNP_P3_71614_3165100 | NC_021165.1    | Ca_kabuli_chr06 | 3165100                 | AA                              | CC                | 1946440910               |
| SNP_P3_71615_3165127 | NC_021165.1    | Ca_kabuli_chr06 | 3165127                 | GG                              | AA                | 1946440911               |
| SNP_P3_71616_3165404 | NC_021165.1    | Ca_kabuli_chr06 | 3165404                 | GG                              | AA                | 1946440912               |
| SNP_P3_71617_3165814 | NC_021165.1    | Ca_kabuli_chr06 | 3165814                 | CC                              | AA                | 1946440913               |
| SNP_P3_71619_3166264 | NC_021165.1    | Ca_kabuli_chr06 | 3166264                 | GG                              | AA                | 1946440914               |
| SNP_P3_71620_3167431 | NC_021165.1    | Ca_kabuli_chr06 | 3167431                 | GG                              | AA                | 1946440915               |
| SNP_P3_71621_3167493 | NC_021165.1    | Ca_kabuli_chr06 | 3167493                 | AA                              | GG                | 1946440916               |
| SNP_P3_71622_3170662 | NC_021165.1    | Ca_kabuli_chr06 | 3170662                 | CC                              | TT                | 1946440918               |
| SNP_P3_71625_3175668 | NC_021165.1    | Ca_kabuli_chr06 | 3175668                 | CC                              | TT                | 1946440919               |



| SNPs IDs             | Chromosome IDs | Chromosomes     | Physical positions (bp) | CDC Frontier (Reference genome) | (Pusa 256 & HPNB) | NCBI SNPdb Accession IDs |
|----------------------|----------------|-----------------|-------------------------|---------------------------------|-------------------|--------------------------|
| SNP_P3_71626_3175694 | NC_021165.1    | Ca_kabuli_chr06 | 3175694                 | TT                              | CC                | 1946440921               |
| SNP_P3_71627_3175709 | NC_021165.1    | Ca_kabuli_chr06 | 3175709                 | GG                              | AA                | 1946440922               |
| SNP_P3_71628_3175714 | NC_021165.1    | Ca_kabuli_chr06 | 3175714                 | AA                              | TT                | 1946440924               |
| SNP_P3_71629_3175728 | NC_021165.1    | Ca_kabuli_chr06 | 3175728                 | TT                              | CC                | 1946440925               |
| SNP_P3_71630_3175780 | NC_021165.1    | Ca_kabuli_chr06 | 3175780                 | CC                              | AA                | 1946440927               |
| SNP_P3_71631_3175788 | NC_021165.1    | Ca_kabuli_chr06 | 3175788                 | TT                              | AA                | 1946440929               |
| SNP_P3_71634_3183181 | NC_021165.1    | Ca_kabuli_chr06 | 3183181                 | GG                              | AA                | 1946440930               |
| SNP_P3_71635_3195869 | NC_021165.1    | Ca_kabuli_chr06 | 3195869                 | GG                              | TT                | 1946440932               |
| SNP_P3_71636_3209730 | NC_021165.1    | Ca_kabuli_chr06 | 3209730                 | CC                              | GG                | 1946440933               |
| SNP_P3_71637_3213910 | NC_021165.1    | Ca_kabuli_chr06 | 3213910                 | GG                              | AA                | 1946440935               |
| SNP_P3_71639_3223735 | NC_021165.1    | Ca_kabuli_chr06 | 3223735                 | AA                              | GG                | 1946440936               |
| SNP_P3_71641_3249230 | NC_021165.1    | Ca_kabuli_chr06 | 3249230                 | GG                              | AA                | 1946440938               |
| SNP_P3_71642_3250130 | NC_021165.1    | Ca_kabuli_chr06 | 3250130                 | TT                              | GG                | 1946440940               |
| SNP_P3_71643_3250138 | NC_021165.1    | Ca_kabuli_chr06 | 3250138                 | AA                              | GG                | 1946440941               |
| SNP_P3_71644_3250221 | NC_021165.1    | Ca_kabuli_chr06 | 3250221                 | TT                              | GG                | 1946440943               |
| SNP_P3_71645_3250227 | NC_021165.1    | Ca_kabuli_chr06 | 3250227                 | GG                              | AA                | 1946440944               |
| SNP_P3_71646_3250363 | NC_021165.1    | Ca_kabuli_chr06 | 3250363                 | CC                              | AA                | 1946440946               |
| SNP_P3_71647_3250388 | NC_021165.1    | Ca_kabuli_chr06 | 3250388                 | CC                              | AA                | 1946440947               |
| SNP_P3_71648_3250429 | NC_021165.1    | Ca_kabuli_chr06 | 3250429                 | CC                              | AA                | 1946440949               |
| SNP_P3_71649_3250445 | NC_021165.1    | Ca_kabuli_chr06 | 3250445                 | TT                              | CC                | 1946440950               |
| SNP_P3_71650_3250448 | NC_021165.1    | Ca_kabuli_chr06 | 3250448                 | GG                              | AA                | 1946440952               |
| SNP_P3_71651_3250482 | NC_021165.1    | Ca_kabuli_chr06 | 3250482                 | CC                              | TT                | 1946440953               |
| SNP_P3_71652_3250529 | NC_021165.1    | Ca_kabuli_chr06 | 3250529                 | AA                              | TT                | 1946440955               |
| SNP_P3_71653_3250552 | NC_021165.1    | Ca_kabuli_chr06 | 3250552                 | GG                              | AA                | 1946440956               |
| SNP_P3_71654_3250558 | NC_021165.1    | Ca_kabuli_chr06 | 3250558                 | GG                              | AA                | 1946440958               |
| SNP_P3_71655_3250564 | NC_021165.1    | Ca_kabuli_chr06 | 3250564                 | GG                              | AA                | 1946440960               |
| SNP_P3_71656_3250593 | NC_021165.1    | Ca_kabuli_chr06 | 3250593                 | AA                              | TT                | 1946440961               |
| SNP_P3_71657_3252140 | NC_021165.1    | Ca_kabuli_chr06 | 3252140                 | TT                              | CC                | 1946440963               |
| SNP_P3_71659_3267585 | NC_021165.1    | Ca_kabuli_chr06 | 3267585                 | AA                              | TT                | 1946440965               |
| SNP_P3_71660_3305894 | NC_021165.1    | Ca_kabuli_chr06 | 3305894                 | CC                              | TT                | 1946440966               |
| SNP_P3_71662_3334943 | NC_021165.1    | Ca_kabuli_chr06 | 3334943                 | AA                              | GG                | 1946440968               |
| SNP_P3_71665_3346890 | NC_021165.1    | Ca_kabuli_chr06 | 3346890                 | AA                              | GG                | 1946440969               |
| SNP_P3_71666_3346906 | NC_021165.1    | Ca_kabuli_chr06 | 3346906                 | TT                              | CC                | 1946440971               |
| SNP_P3_71667_3347261 | NC_021165.1    | Ca_kabuli_chr06 | 3347261                 | CC                              | TT                | 1946440972               |
| SNP_P3_71668_3347279 | NC_021165.1    | Ca_kabuli_chr06 | 3347279                 | AA                              | TT                | 1946440974               |
| SNP_P3_71669_3347280 | NC_021165.1    | Ca_kabuli_chr06 | 3347280                 | AA                              | TT                | 1946440975               |
| SNP_P3_71670_3347283 | NC_021165.1    | Ca_kabuli_chr06 | 3347283                 | TT                              | CC                | 1946440977               |
| SNP_P3_71671_3347304 | NC_021165.1    | Ca_kabuli_chr06 | 3347304                 | GG                              | TT                | 1946440978               |
| SNP_P3_71672_3347408 | NC_021165.1    | Ca_kabuli_chr06 | 3347408                 | CC                              | TT                | 1946440980               |
| SNP_P3_71673_3347709 | NC_021165.1    | Ca_kabuli_chr06 | 3347709                 | AA                              | GG                | 1946440981               |
| SNP_P3_71674_3347730 | NC_021165.1    | Ca_kabuli_chr06 | 3347730                 | CC                              | GG                | 1946440983               |
| SNP_P3_71675_3348760 | NC_021165.1    | Ca_kabuli_chr06 | 3348760                 | TT                              | GG                | 1946440984               |

| SNPs IDs             | Chromosome IDs | Chromosomes     | Physical positions (bp) | CDC Frontier (Reference genome) | (Pusa 256 & HPNB) | NCBI SNPdb Accession IDs |
|----------------------|----------------|-----------------|-------------------------|---------------------------------|-------------------|--------------------------|
| SNP_P3_71676_3348847 | NC_021165.1    | Ca_kabuli_chr06 | 3348847                 | GG                              | AA                | 1946440986               |
| SNP_P3_71677_3348891 | NC_021165.1    | Ca_kabuli_chr06 | 3348891                 | AA                              | GG                | 1946440987               |
| SNP_P3_71678_3349145 | NC_021165.1    | Ca_kabuli_chr06 | 3349145                 | TT                              | GG                | 1946440989               |
| SNP_P3_71679_3349196 | NC_021165.1    | Ca_kabuli_chr06 | 3349196                 | GG                              | TT                | 1946440990               |
| SNP_P3_71680_3349276 | NC_021165.1    | Ca_kabuli_chr06 | 3349276                 | CC                              | TT                | 1946440992               |
| SNP_P3_71681_3349709 | NC_021165.1    | Ca_kabuli_chr06 | 3349709                 | CC                              | TT                | 1946440993               |
| SNP_P3_71683_3351468 | NC_021165.1    | Ca_kabuli_chr06 | 3351468                 | CC                              | TT                | 1946440994               |
| SNP_P3_71685_3351594 | NC_021165.1    | Ca_kabuli_chr06 | 3351594                 | GG                              | TT                | 1946440996               |
| SNP_P3_71686_3351645 | NC_021165.1    | Ca_kabuli_chr06 | 3351645                 | GG                              | CC                | 1946440998               |
| SNP_P3_71688_3351689 | NC_021165.1    | Ca_kabuli_chr06 | 3351689                 | AA                              | GG                | 1946440999               |
| SNP_P3_71689_3351690 | NC_021165.1    | Ca_kabuli_chr06 | 3351690                 | AA                              | GG                | 1946441001               |
| SNP_P3_71691_3351812 | NC_021165.1    | Ca_kabuli_chr06 | 3351812                 | AA                              | GG                | 1946441002               |
| SNP_P3_71692_3351841 | NC_021165.1    | Ca_kabuli_chr06 | 3351841                 | TT                              | CC                | 1946441004               |
| SNP_P3_71693_3351874 | NC_021165.1    | Ca_kabuli_chr06 | 3351874                 | AA                              | GG                | 1946441005               |
| SNP_P3_71694_3351889 | NC_021165.1    | Ca_kabuli_chr06 | 3351889                 | AA                              | GG                | 1946441007               |
| SNP_P3_71695_3352838 | NC_021165.1    | Ca_kabuli_chr06 | 3352838                 | GG                              | AA                | 1946441008               |
| SNP_P3_71697_3352963 | NC_021165.1    | Ca_kabuli_chr06 | 3352963                 | GG                              | AA                | 1946441010               |
| SNP_P3_71698_3353060 | NC_021165.1    | Ca_kabuli_chr06 | 3353060                 | GG                              | AA                | 1946441011               |
| SNP_P3_71699_3353065 | NC_021165.1    | Ca_kabuli_chr06 | 3353065                 | TT                              | CC                | 1946441013               |
| SNP_P3_71700_3353066 | NC_021165.1    | Ca_kabuli_chr06 | 3353066                 | GG                              | AA                | 1946441014               |
| SNP_P3_71701_3353108 | NC_021165.1    | Ca_kabuli_chr06 | 3353108                 | TT                              | AA                | 1946441016               |
| SNP_P3_71702_3353142 | NC_021165.1    | Ca_kabuli_chr06 | 3353142                 | GG                              | TT                | 1946441018               |
| SNP_P3_71703_3353160 | NC_021165.1    | Ca_kabuli_chr06 | 3353160                 | TT                              | AA                | 1946441019               |
| SNP_P3_71704_3353197 | NC_021165.1    | Ca_kabuli_chr06 | 3353197                 | CC                              | TT                | 1946441021               |
| SNP_P3_71705_3353202 | NC_021165.1    | Ca_kabuli_chr06 | 3353202                 | AA                              | CC                | 1946441022               |
| SNP_P3_71706_3353204 | NC_021165.1    | Ca_kabuli_chr06 | 3353204                 | AA                              | GG                | 1946441024               |
| SNP_P3_71707_3353211 | NC_021165.1    | Ca_kabuli_chr06 | 3353211                 | AA                              | GG                | 1946441026               |
| SNP_P3_71708_3353247 | NC_021165.1    | Ca_kabuli_chr06 | 3353247                 | TT                              | CC                | 1946441027               |
| SNP_P3_71709_3353420 | NC_021165.1    | Ca_kabuli_chr06 | 3353420                 | AA                              | CC                | 1946441029               |
| SNP_P3_71710_3354029 | NC_021165.1    | Ca_kabuli_chr06 | 3354029                 | TT                              | AA                | 1946441030               |
| SNP_P3_71711_3354032 | NC_021165.1    | Ca_kabuli_chr06 | 3354032                 | AA                              | GG                | 1946441032               |
| SNP_P3_71712_3354042 | NC_021165.1    | Ca_kabuli_chr06 | 3354042                 | CC                              | TT                | 1946441033               |
| SNP_P3_71713_3354090 | NC_021165.1    | Ca_kabuli_chr06 | 3354090                 | TT                              | CC                | 1946441035               |
| SNP_P3_71714_3354094 | NC_021165.1    | Ca_kabuli_chr06 | 3354094                 | GG                              | AA                | 1946441036               |
| SNP_P3_71715_3354164 | NC_021165.1    | Ca_kabuli_chr06 | 3354164                 | TT                              | CC                | 1946441038               |
| SNP_P3_71716_3354179 | NC_021165.1    | Ca_kabuli_chr06 | 3354179                 | GG                              | AA                | 1946441040               |
| SNP_P3_71717_3354259 | NC_021165.1    | Ca_kabuli_chr06 | 3354259                 | CC                              | TT                | 1946441041               |
| SNP_P3_71718_3354505 | NC_021165.1    | Ca_kabuli_chr06 | 3354505                 | AA                              | GG                | 1946441043               |
| SNP_P3_71720_3355372 | NC_021165.1    | Ca_kabuli_chr06 | 3355372                 | GG                              | TT                | 1946441044               |
| SNP_P3_71721_3355386 | NC_021165.1    | Ca_kabuli_chr06 | 3355386                 | CC                              | AA                | 1946441046               |
| SNP_P3_71722_3355613 | NC_021165.1    | Ca_kabuli_chr06 | 3355613                 | TT                              | CC                | 1946441047               |
| SNP_P3_71723_3355644 | NC_021165.1    | Ca_kabuli_chr06 | 3355644                 | AA                              | GG                | 1946441049               |

| SNPs IDs             | Chromosome IDs | Chromosomes     | Physical positions (bp) | CDC Frontier (Reference genome) | (Pusa 256 & HPNB) | NCBI SNPdb Accession IDs |
|----------------------|----------------|-----------------|-------------------------|---------------------------------|-------------------|--------------------------|
| SNP_P3_71724_3355720 | NC_021165.1    | Ca_kabuli_chr06 | 3355720                 | GG                              | AA                | 1946441050               |
| SNP_P3_71725_3355726 | NC_021165.1    | Ca_kabuli_chr06 | 3355726                 | CC                              | AA                | 1946441052               |
| SNP_P3_71726_3355753 | NC_021165.1    | Ca_kabuli_chr06 | 3355753                 | AA                              | GG                | 1946441053               |
| SNP_P3_71728_3355898 | NC_021165.1    | Ca_kabuli_chr06 | 3355898                 | AA                              | TT                | 1946441055               |
| SNP_P3_71729_3355954 | NC_021165.1    | Ca_kabuli_chr06 | 3355954                 | CC                              | TT                | 1946441056               |
| SNP_P3_71730_3355961 | NC_021165.1    | Ca_kabuli_chr06 | 3355961                 | AA                              | GG                | 1946441058               |
| SNP_P3_71731_3356057 | NC_021165.1    | Ca_kabuli_chr06 | 3356057                 | TT                              | CC                | 1946441059               |
| SNP_P3_71732_3356083 | NC_021165.1    | Ca_kabuli_chr06 | 3356083                 | AA                              | GG                | 1946441061               |
| SNP_P3_71733_3356120 | NC_021165.1    | Ca_kabuli_chr06 | 3356120                 | TT                              | AA                | 1946441062               |
| SNP_P3_71734_3356150 | NC_021165.1    | Ca_kabuli_chr06 | 3356150                 | CC                              | AA                | 1946441064               |
| SNP_P3_71735_3356152 | NC_021165.1    | Ca_kabuli_chr06 | 3356152                 | GG                              | AA                | 1946441065               |
| SNP_P3_71736_3356198 | NC_021165.1    | Ca_kabuli_chr06 | 3356198                 | TT                              | CC                | 1946441067               |
| SNP_P3_71737_3356222 | NC_021165.1    | Ca_kabuli_chr06 | 3356222                 | GG                              | TT                | 1946441068               |
| SNP_P3_71738_3356250 | NC_021165.1    | Ca_kabuli_chr06 | 3356250                 | CC                              | AA                | 1946441070               |
| SNP_P3_71739_3356260 | NC_021165.1    | Ca_kabuli_chr06 | 3356260                 | GG                              | AA                | 1946441071               |
| SNP_P3_71740_3356280 | NC_021165.1    | Ca_kabuli_chr06 | 3356280                 | GG                              | AA                | 1946441073               |
| SNP_P3_71741_3356377 | NC_021165.1    | Ca_kabuli_chr06 | 3356377                 | TT                              | GG                | 1946441074               |
| SNP_P3_71742_3356425 | NC_021165.1    | Ca_kabuli_chr06 | 3356425                 | GG                              | AA                | 1946441076               |
| SNP_P3_71743_3356473 | NC_021165.1    | Ca_kabuli_chr06 | 3356473                 | TT                              | CC                | 1946441077               |
| SNP_P3_71744_3374657 | NC_021165.1    | Ca_kabuli_chr06 | 3374657                 | AA                              | TT                | 1946441079               |
| SNP_P3_71745_3374707 | NC_021165.1    | Ca_kabuli_chr06 | 3374707                 | AA                              | GG                | 1946441080               |
| SNP_P3_71747_3374899 | NC_021165.1    | Ca_kabuli_chr06 | 3374899                 | AA                              | TT                | 1946441082               |
| SNP_P3_71748_3374906 | NC_021165.1    | Ca_kabuli_chr06 | 3374906                 | CC                              | TT                | 1946441083               |
| SNP_P3_71749_3374986 | NC_021165.1    | Ca_kabuli_chr06 | 3374986                 | AA                              | GG                | 1946441085               |
| SNP_P3_71750_3375015 | NC_021165.1    | Ca_kabuli_chr06 | 3375015                 | TT                              | CC                | 1946441087               |
| SNP_P3_71751_3375209 | NC_021165.1    | Ca_kabuli_chr06 | 3375209                 | CC                              | TT                | 1946441088               |
| SNP_P3_71752_3376203 | NC_021165.1    | Ca_kabuli_chr06 | 3376203                 | CC                              | TT                | 1946441090               |
| SNP_P3_71754_3377867 | NC_021165.1    | Ca_kabuli_chr06 | 3377867                 | GG                              | TT                | 1946441091               |
| SNP_P3_71755_3378086 | NC_021165.1    | Ca_kabuli_chr06 | 3378086                 | AA                              | CC                | 1946441093               |
| SNP_P3_71756_3378096 | NC_021165.1    | Ca_kabuli_chr06 | 3378096                 | TT                              | CC                | 1946441094               |
| SNP_P3_71757_3378114 | NC_021165.1    | Ca_kabuli_chr06 | 3378114                 | GG                              | AA                | 1946441096               |
| SNP_P3_71759_3378129 | NC_021165.1    | Ca_kabuli_chr06 | 3378129                 | TT                              | GG                | 1946441098               |
| SNP_P3_71760_3378397 | NC_021165.1    | Ca_kabuli_chr06 | 3378397                 | CC                              | TT                | 1946441099               |
| SNP_P3_71761_3378404 | NC_021165.1    | Ca_kabuli_chr06 | 3378404                 | AA                              | GG                | 1946441101               |
| SNP_P3_71762_3378491 | NC_021165.1    | Ca_kabuli_chr06 | 3378491                 | CC                              | AA                | 1946441102               |
| SNP_P3_71763_3378505 | NC_021165.1    | Ca_kabuli_chr06 | 3378505                 | CC                              | TT                | 1946441104               |
| SNP_P3_71764_3378760 | NC_021165.1    | Ca_kabuli_chr06 | 3378760                 | GG                              | CC                | 1946441105               |
| SNP_P3_71765_3378765 | NC_021165.1    | Ca_kabuli_chr06 | 3378765                 | CC                              | TT                | 1946441107               |
| SNP_P3_71766_3378773 | NC_021165.1    | Ca_kabuli_chr06 | 3378773                 | CC                              | TT                | 1946441108               |
| SNP_P3_71767_3378864 | NC_021165.1    | Ca_kabuli_chr06 | 3378864                 | GG                              | AA                | 1946441110               |
| SNP_P3_71768_3379238 | NC_021165.1    | Ca_kabuli_chr06 | 3379238                 | CC                              | AA                | 1946441112               |
| SNP_P3_71769_3379358 | NC_021165.1    | Ca_kabuli_chr06 | 3379358                 | TT                              | CC                | 1946441113               |

| SNPs IDs             | Chromosome IDs | Chromosomes     | Physical positions (bp) | CDC Frontier (Reference genome) | (Pusa 256 & HPNB) | NCBI SNPdb Accession IDs |
|----------------------|----------------|-----------------|-------------------------|---------------------------------|-------------------|--------------------------|
| SNP_P3_71770_3382680 | NC_021165.1    | Ca_kabuli_chr06 | 3382680                 | CC                              | TT                | 1946441115               |
| SNP_P3_71771_3382730 | NC_021165.1    | Ca_kabuli_chr06 | 3382730                 | AA                              | TT                | 1946441116               |
| SNP_P3_71772_3382747 | NC_021165.1    | Ca_kabuli_chr06 | 3382747                 | GG                              | AA                | 1946441118               |
| SNP_P3_71773_3382770 | NC_021165.1    | Ca_kabuli_chr06 | 3382770                 | AA                              | GG                | 1946441119               |
| SNP_P3_71774_3382771 | NC_021165.1    | Ca_kabuli_chr06 | 3382771                 | TT                              | AA                | 1946441121               |
| SNP_P3_71776_3382848 | NC_021165.1    | Ca_kabuli_chr06 | 3382848                 | GG                              | TT                | 1946441122               |
| SNP_P3_71777_3382890 | NC_021165.1    | Ca_kabuli_chr06 | 3382890                 | AA                              | CC                | 1946441124               |
| SNP_P3_71779_3382960 | NC_021165.1    | Ca_kabuli_chr06 | 3382960                 | TT                              | GG                | 1946441126               |
| SNP_P3_71780_3383016 | NC_021165.1    | Ca_kabuli_chr06 | 3383016                 | TT                              | AA                | 1946441127               |
| SNP_P3_71781_3383066 | NC_021165.1    | Ca_kabuli_chr06 | 3383066                 | AA                              | GG                | 1946441129               |
| SNP_P3_71782_3383082 | NC_021165.1    | Ca_kabuli_chr06 | 3383082                 | GG                              | TT                | 1946441130               |
| SNP_P3_71784_3387473 | NC_021165.1    | Ca_kabuli_chr06 | 3387473                 | TT                              | AA                | 1946441132               |
| SNP_P3_71785_3387531 | NC_021165.1    | Ca_kabuli_chr06 | 3387531                 | TT                              | CC                | 1946441133               |
| SNP_P3_71786_3387540 | NC_021165.1    | Ca_kabuli_chr06 | 3387540                 | AA                              | GG                | 1946441135               |
| SNP_P3_71787_3387543 | NC_021165.1    | Ca_kabuli_chr06 | 3387543                 | GG                              | CC                | 1946441136               |
| SNP_P3_71788_3387610 | NC_021165.1    | Ca_kabuli_chr06 | 3387610                 | CC                              | TT                | 1946441138               |
| SNP_P3_71789_3387751 | NC_021165.1    | Ca_kabuli_chr06 | 3387751                 | GG                              | AA                | 1946441140               |
| SNP_P3_71794_3393110 | NC_021165.1    | Ca_kabuli_chr06 | 3393110                 | GG                              | AA                | 1946441141               |
| SNP_P3_71795_3393124 | NC_021165.1    | Ca_kabuli_chr06 | 3393124                 | AA                              | CC                | 1946441143               |
| SNP_P3_71796_3393169 | NC_021165.1    | Ca_kabuli_chr06 | 3393169                 | GG                              | AA                | 1946441144               |
| SNP_P3_71797_3393223 | NC_021165.1    | Ca_kabuli_chr06 | 3393223                 | CC                              | TT                | 1946441146               |
| SNP_P3_71798_3393236 | NC_021165.1    | Ca_kabuli_chr06 | 3393236                 | AA                              | TT                | 1946441147               |
| SNP_P3_71799_3393426 | NC_021165.1    | Ca_kabuli_chr06 | 3393426                 | GG                              | AA                | 1946441149               |
| SNP_P3_71800_3393462 | NC_021165.1    | Ca_kabuli_chr06 | 3393462                 | TT                              | CC                | 1946441151               |
| SNP_P3_71801_3393463 | NC_021165.1    | Ca_kabuli_chr06 | 3393463                 | TT                              | GG                | 1946441152               |
| SNP_P3_71802_3393465 | NC_021165.1    | Ca_kabuli_chr06 | 3393465                 | CC                              | TT                | 1946441154               |
| SNP_P3_71803_3393497 | NC_021165.1    | Ca_kabuli_chr06 | 3393497                 | CC                              | TT                | 1946441155               |
| SNP_P3_71804_3393513 | NC_021165.1    | Ca_kabuli_chr06 | 3393513                 | TT                              | GG                | 1946441157               |
| SNP_P3_71805_3393539 | NC_021165.1    | Ca_kabuli_chr06 | 3393539                 | CC                              | GG                | 1946441158               |
| SNP_P3_71807_3393593 | NC_021165.1    | Ca_kabuli_chr06 | 3393593                 | GG                              | AA                | 1946441160               |
| SNP_P3_71810_3393691 | NC_021165.1    | Ca_kabuli_chr06 | 3393691                 | AA                              | GG                | 1946441161               |
| SNP_P3_71811_3393740 | NC_021165.1    | Ca_kabuli_chr06 | 3393740                 | TT                              | GG                | 1946441163               |
| SNP_P3_71812_3393753 | NC_021165.1    | Ca_kabuli_chr06 | 3393753                 | AA                              | GG                | 1946441165               |
| SNP_P3_71813_3393761 | NC_021165.1    | Ca_kabuli_chr06 | 3393761                 | AA                              | TT                | 1946441166               |
| SNP_P3_71814_3393782 | NC_021165.1    | Ca_kabuli_chr06 | 3393782                 | CC                              | TT                | 1946441168               |
| SNP_P3_71815_3393784 | NC_021165.1    | Ca_kabuli_chr06 | 3393784                 | TT                              | CC                | 1946441169               |
| SNP_P3_71816_3393792 | NC_021165.1    | Ca_kabuli_chr06 | 3393792                 | AA                              | CC                | 1946441171               |
| SNP_P3_71817_3393831 | NC_021165.1    | Ca_kabuli_chr06 | 3393831                 | TT                              | GG                | 1946441172               |
| SNP_P3_71818_3393843 | NC_021165.1    | Ca_kabuli_chr06 | 3393843                 | AA                              | GG                | 1946441174               |
| SNP_P3_71819_3393850 | NC_021165.1    | Ca_kabuli_chr06 | 3393850                 | TT                              | CC                | 1946441175               |
| SNP_P3_71820_3393923 | NC_021165.1    | Ca_kabuli_chr06 | 3393923                 | AA                              | GG                | 1946441177               |
| SNP_P3_71821_3393933 | NC_021165.1    | Ca_kabuli_chr06 | 3393933                 | CC                              | TT                | 1946441178               |

| SNPs IDs             | Chromosome IDs | Chromosomes     | Physical positions (bp) | CDC Frontier (Reference genome) | (Pusa 256 & HPNB) | NCBI SNPdb Accession IDs |
|----------------------|----------------|-----------------|-------------------------|---------------------------------|-------------------|--------------------------|
| SNP_P3_71822_3394013 | NC_021165.1    | Ca_kabuli_chr06 | 3394013                 | AA                              | GG                | 1946441180               |
| SNP_P3_71823_3394024 | NC_021165.1    | Ca_kabuli_chr06 | 3394024                 | AA                              | GG                | 1946441181               |
| SNP_P3_71824_3394025 | NC_021165.1    | Ca_kabuli_chr06 | 3394025                 | TT                              | CC                | 1946441183               |
| SNP_P3_71825_3394044 | NC_021165.1    | Ca_kabuli_chr06 | 3394044                 | GG                              | AA                | 1946441184               |
| SNP_P3_71826_3394064 | NC_021165.1    | Ca_kabuli_chr06 | 3394064                 | CC                              | TT                | 1946441186               |
| SNP_P3_71828_3394244 | NC_021165.1    | Ca_kabuli_chr06 | 3394244                 | AA                              | GG                | 1946441187               |
| SNP_P3_71829_3394257 | NC_021165.1    | Ca_kabuli_chr06 | 3394257                 | TT                              | CC                | 1946441189               |
| SNP_P3_71830_3394293 | NC_021165.1    | Ca_kabuli_chr06 | 3394293                 | CC                              | TT                | 1946441191               |
| SNP_P3_71831_3394322 | NC_021165.1    | Ca_kabuli_chr06 | 3394322                 | TT                              | GG                | 1946441192               |
| SNP_P3_71832_3394327 | NC_021165.1    | Ca_kabuli_chr06 | 3394327                 | AA                              | GG                | 1946441194               |
| SNP_P3_71833_3394383 | NC_021165.1    | Ca_kabuli_chr06 | 3394383                 | TT                              | CC                | 1946441195               |
| SNP_P3_71834_3394481 | NC_021165.1    | Ca_kabuli_chr06 | 3394481                 | TT                              | AA                | 1946441196               |
| SNP_P3_71835_3394604 | NC_021165.1    | Ca_kabuli_chr06 | 3394604                 | CC                              | AA                | 1946441198               |
| SNP_P3_71836_3394656 | NC_021165.1    | Ca_kabuli_chr06 | 3394656                 | TT                              | CC                | 1946441199               |
| SNP_P3_71837_3394697 | NC_021165.1    | Ca_kabuli_chr06 | 3394697                 | GG                              | AA                | 1946441201               |
| SNP_P3_71838_3394747 | NC_021165.1    | Ca_kabuli_chr06 | 3394747                 | CC                              | TT                | 1946441202               |
| SNP_P3_71839_3394774 | NC_021165.1    | Ca_kabuli_chr06 | 3394774                 | CC                              | TT                | 1946441204               |
| SNP_P3_71840_3394784 | NC_021165.1    | Ca_kabuli_chr06 | 3394784                 | CC                              | GG                | 1946441205               |
| SNP_P3_71841_3394857 | NC_021165.1    | Ca_kabuli_chr06 | 3394857                 | CC                              | TT                | 1946441207               |
| SNP_P3_71842_3394876 | NC_021165.1    | Ca_kabuli_chr06 | 3394876                 | GG                              | AA                | 1946441208               |
| SNP_P3_71843_3394898 | NC_021165.1    | Ca_kabuli_chr06 | 3394898                 | AA                              | TT                | 1946441210               |
| SNP_P3_71844_3395024 | NC_021165.1    | Ca_kabuli_chr06 | 3395024                 | GG                              | AA                | 1946441211               |
| SNP_P3_71845_3395253 | NC_021165.1    | Ca_kabuli_chr06 | 3395253                 | GG                              | AA                | 1946441213               |
| SNP_P3_71847_3395440 | NC_021165.1    | Ca_kabuli_chr06 | 3395440                 | AA                              | GG                | 1946441215               |
| SNP_P3_71848_3395467 | NC_021165.1    | Ca_kabuli_chr06 | 3395467                 | TT                              | GG                | 1946441216               |
| SNP_P3_71849_3395491 | NC_021165.1    | Ca_kabuli_chr06 | 3395491                 | TT                              | CC                | 1946441218               |
| SNP_P3_71850_3395492 | NC_021165.1    | Ca_kabuli_chr06 | 3395492                 | GG                              | AA                | 1946441219               |
| SNP_P3_71851_3395508 | NC_021165.1    | Ca_kabuli_chr06 | 3395508                 | AA                              | GG                | 1946441220               |
| SNP_P3_71852_3395512 | NC_021165.1    | Ca_kabuli_chr06 | 3395512                 | AA                              | TT                | 1946441222               |
| SNP_P3_71853_3395528 | NC_021165.1    | Ca_kabuli_chr06 | 3395528                 | CC                              | TT                | 1946441224               |
| SNP_P3_71854_3395590 | NC_021165.1    | Ca_kabuli_chr06 | 3395590                 | TT                              | CC                | 1946441225               |
| SNP_P3_71855_3395617 | NC_021165.1    | Ca_kabuli_chr06 | 3395617                 | GG                              | CC                | 1946441226               |
| SNP_P3_71856_3395620 | NC_021165.1    | Ca_kabuli_chr06 | 3395620                 | TT                              | CC                | 1946441228               |
| SNP_P3_71858_3395651 | NC_021165.1    | Ca_kabuli_chr06 | 3395651                 | CC                              | GG                | 1946441229               |
| SNP_P3_71859_3395654 | NC_021165.1    | Ca_kabuli_chr06 | 3395654                 | CC                              | TT                | 1946441231               |
| SNP_P3_71860_3395676 | NC_021165.1    | Ca_kabuli_chr06 | 3395676                 | GG                              | AA                | 1946441232               |
| SNP_P3_71861_3395698 | NC_021165.1    | Ca_kabuli_chr06 | 3395698                 | CC                              | AA                | 1946441234               |
| SNP_P3_71862_3395700 | NC_021165.1    | Ca_kabuli_chr06 | 3395700                 | GG                              | AA                | 1946441235               |
| SNP_P3_71863_3395740 | NC_021165.1    | Ca_kabuli_chr06 | 3395740                 | AA                              | GG                | 1946441237               |
| SNP_P3_71864_3395975 | NC_021165.1    | Ca_kabuli_chr06 | 3395975                 | AA                              | CC                | 1946441238               |
| SNP_P3_71865_3407326 | NC_021165.1    | Ca_kabuli_chr06 | 3407326                 | TT                              | AA                | 1946441240               |
| SNP_P3_71867_3453525 | NC_021165.1    | Ca_kabuli_chr06 | 3453525                 | TT                              | CC                | 1946441242               |

| SNPs IDs             | Chromosome IDs | Chromosomes     | Physical positions (bp) | CDC Frontier (Reference genome) | (Pusa 256 & HPNB) | NCBI SNPdb Accession IDs |
|----------------------|----------------|-----------------|-------------------------|---------------------------------|-------------------|--------------------------|
| SNP_P3_71868_3461974 | NC_021165.1    | Ca_kabuli_chr06 | 3461974                 | GG                              | AA                | 1946441243               |
| SNP_P3_71870_3480072 | NC_021165.1    | Ca_kabuli_chr06 | 3480072                 | CC                              | TT                | 1946441245               |
| SNP_P3_71872_3526200 | NC_021165.1    | Ca_kabuli_chr06 | 3526200                 | TT                              | CC                | 1946441246               |
| SNP_P3_71873_3591393 | NC_021165.1    | Ca_kabuli_chr06 | 3591393                 | GG                              | AA                | 1946441248               |
| SNP_P3_71874_3591403 | NC_021165.1    | Ca_kabuli_chr06 | 3591403                 | TT                              | GG                | 1946441249               |
| SNP_P3_71875_3591461 | NC_021165.1    | Ca_kabuli_chr06 | 3591461                 | AA                              | GG                | 1946441251               |
| SNP_P3_71876_3591533 | NC_021165.1    | Ca_kabuli_chr06 | 3591533                 | AA                              | CC                | 1946441252               |
| SNP_P3_71877_3591602 | NC_021165.1    | Ca_kabuli_chr06 | 3591602                 | AA                              | GG                | 1946441254               |
| SNP_P3_71878_3591808 | NC_021165.1    | Ca_kabuli_chr06 | 3591808                 | AA                              | CC                | 1946441255               |
| SNP_P3_71879_3591920 | NC_021165.1    | Ca_kabuli_chr06 | 3591920                 | TT                              | AA                | 1946441257               |
| SNP_P3_71880_3591935 | NC_021165.1    | Ca_kabuli_chr06 | 3591935                 | GG                              | AA                | 1946441258               |
| SNP_P3_71881_3591949 | NC_021165.1    | Ca_kabuli_chr06 | 3591949                 | CC                              | TT                | 1946441260               |
| SNP_P3_71882_3599525 | NC_021165.1    | Ca_kabuli_chr06 | 3599525                 | AA                              | CC                | 1946441261               |
| SNP_P3_71883_3636638 | NC_021165.1    | Ca_kabuli_chr06 | 3636638                 | TT                              | CC                | 1946441263               |
| SNP_P3_71884_3648098 | NC_021165.1    | Ca_kabuli_chr06 | 3648098                 | TT                              | AA                | 1946441264               |
| SNP_P3_71886_3655465 | NC_021165.1    | Ca_kabuli_chr06 | 3655465                 | GG                              | TT                | 1946441266               |
| SNP_P3_71887_3656738 | NC_021165.1    | Ca_kabuli_chr06 | 3656738                 | AA                              | CC                | 1946441268               |
| SNP_P3_71888_3656741 | NC_021165.1    | Ca_kabuli_chr06 | 3656741                 | TT                              | CC                | 1946441269               |
| SNP_P3_71890_3668995 | NC_021165.1    | Ca_kabuli_chr06 | 3668995                 | CC                              | TT                | 1946441271               |
| SNP_P3_71891_3672271 | NC_021165.1    | Ca_kabuli_chr06 | 3672271                 | CC                              | TT                | 1946441272               |
| SNP_P3_71892_3672394 | NC_021165.1    | Ca_kabuli_chr06 | 3672394                 | GG                              | TT                | 1946441274               |
| SNP_P3_71893_3672408 | NC_021165.1    | Ca_kabuli_chr06 | 3672408                 | GG                              | AA                | 1946441276               |
| SNP_P3_71894_3672504 | NC_021165.1    | Ca_kabuli_chr06 | 3672504                 | TT                              | GG                | 1946441277               |
| SNP_P3_71895_3672637 | NC_021165.1    | Ca_kabuli_chr06 | 3672637                 | AA                              | GG                | 1946441279               |
| SNP_P3_71896_3685370 | NC_021165.1    | Ca_kabuli_chr06 | 3685370                 | AA                              | TT                | 1946441280               |
| SNP_P3_71897_3685371 | NC_021165.1    | Ca_kabuli_chr06 | 3685371                 | AA                              | TT                | 1946441282               |
| SNP_P3_71898_3685372 | NC_021165.1    | Ca_kabuli_chr06 | 3685372                 | AA                              | TT                | 1946441283               |
| SNP_P3_71899_3724095 | NC_021165.1    | Ca_kabuli_chr06 | 3724095                 | TT                              | GG                | 1946441285               |
| SNP_P3_71900_3725064 | NC_021165.1    | Ca_kabuli_chr06 | 3725064                 | AA                              | GG                | 1946441286               |
| SNP_P3_71901_3739196 | NC_021165.1    | Ca_kabuli_chr06 | 3739196                 | AA                              | GG                | 1946441288               |
| SNP_P3_71902_3753579 | NC_021165.1    | Ca_kabuli_chr06 | 3753579                 | CC                              | TT                | 1946441290               |
| SNP_P3_71903_3806778 | NC_021165.1    | Ca_kabuli_chr06 | 3806778                 | AA                              | TT                | 1946441292               |
| SNP_P3_71904_3838743 | NC_021165.1    | Ca_kabuli_chr06 | 3838743                 | TT                              | GG                | 1946441294               |
| SNP_P3_71905_3839598 | NC_021165.1    | Ca_kabuli_chr06 | 3839598                 | GG                              | AA                | 1946441296               |
| SNP_P3_71906_3864189 | NC_021165.1    | Ca_kabuli_chr06 | 3864189                 | TT                              | CC                | 1946441298               |
| SNP_P3_71908_3939516 | NC_021165.1    | Ca_kabuli_chr06 | 3939516                 | AA                              | GG                | 1946441299               |
| SNP_P3_71909_3940066 | NC_021165.1    | Ca_kabuli_chr06 | 3940066                 | TT                              | GG                | 1946441301               |
| SNP_P3_71910_3956445 | NC_021165.1    | Ca_kabuli_chr06 | 3956445                 | GG                              | TT                | 1946441302               |
| SNP_P3_71911_3975477 | NC_021165.1    | Ca_kabuli_chr06 | 3975477                 | CC                              | GG                | 1946441304               |
| SNP_P3_71912_3975479 | NC_021165.1    | Ca_kabuli_chr06 | 3975479                 | AA                              | GG                | 1946441305               |
| SNP_P3_71914_4020838 | NC_021165.1    | Ca_kabuli_chr06 | 4020838                 | AA                              | TT                | 1946441307               |
| SNP_P3_71915_4021131 | NC_021165.1    | Ca_kabuli_chr06 | 4021131                 | TT                              | GG                | 1946441308               |

| SNPs IDs             | Chromosome IDs | Chromosomes     | Physical positions (bp) | CDC Frontier (Reference genome) | (Pusa 256 & HPNB) | NCBI SNPdb Accession IDs |
|----------------------|----------------|-----------------|-------------------------|---------------------------------|-------------------|--------------------------|
| SNP_P3_71916_4027629 | NC_021165.1    | Ca_kabuli_chr06 | 4027629                 | TT                              | AA                | 1946441310               |
| SNP_P3_71917_4033557 | NC_021165.1    | Ca_kabuli_chr06 | 4033557                 | GG                              | CC                | 1946441312               |
| SNP_P3_71918_4039789 | NC_021165.1    | Ca_kabuli_chr06 | 4039789                 | CC                              | TT                | 1946441313               |
| SNP_P3_71919_4055636 | NC_021165.1    | Ca_kabuli_chr06 | 4055636                 | AA                              | TT                | 1946441315               |
| SNP_P3_71920_4064879 | NC_021165.1    | Ca_kabuli_chr06 | 4064879                 | TT                              | AA                | 1946441316               |
| SNP_P3_71921_4064881 | NC_021165.1    | Ca_kabuli_chr06 | 4064881                 | TT                              | AA                | 1946441318               |
| SNP_P3_71922_4072779 | NC_021165.1    | Ca_kabuli_chr06 | 4072779                 | TT                              | CC                | 1946441320               |
| SNP_P3_71923_4073177 | NC_021165.1    | Ca_kabuli_chr06 | 4073177                 | CC                              | TT                | 1946441321               |
| SNP_P3_71924_4075145 | NC_021165.1    | Ca_kabuli_chr06 | 4075145                 | TT                              | CC                | 1946441323               |
| SNP_P3_71925_4212039 | NC_021165.1    | Ca_kabuli_chr06 | 4212039                 | AA                              | GG                | 1946441325               |
| SNP_P3_71926_4241708 | NC_021165.1    | Ca_kabuli_chr06 | 4241708                 | CC                              | TT                | 1946441327               |
| SNP_P3_71927_4241738 | NC_021165.1    | Ca_kabuli_chr06 | 4241738                 | TT                              | CC                | 1946441328               |
| SNP_P3_71929_4249280 | NC_021165.1    | Ca_kabuli_chr06 | 4249280                 | AA                              | GG                | 1946441330               |
| SNP_P3_71930_4249297 | NC_021165.1    | Ca_kabuli_chr06 | 4249297                 | CC                              | TT                | 1946441331               |
| SNP_P3_71931_4251367 | NC_021165.1    | Ca_kabuli_chr06 | 4251367                 | AA                              | GG                | 1946441333               |
| SNP_P3_71933_4290648 | NC_021165.1    | Ca_kabuli_chr06 | 4290648                 | AA                              | CC                | 1946441335               |
| SNP_P3_71934_4290885 | NC_021165.1    | Ca_kabuli_chr06 | 4290885                 | TT                              | CC                | 1946441336               |
| SNP_P3_71935_4291065 | NC_021165.1    | Ca_kabuli_chr06 | 4291065                 | GG                              | AA                | 1946441338               |
| SNP_P3_71936_4323605 | NC_021165.1    | Ca_kabuli_chr06 | 4323605                 | AA                              | GG                | 1946441339               |
| SNP_P3_71937_4385936 | NC_021165.1    | Ca_kabuli_chr06 | 4385936                 | TT                              | CC                | 1946441341               |
| SNP_P3_71938_4389252 | NC_021165.1    | Ca_kabuli_chr06 | 4389252                 | GG                              | AA                | 1946441342               |
| SNP_P3_71941_4443683 | NC_021165.1    | Ca_kabuli_chr06 | 4443683                 | CC                              | TT                | 1946441344               |
| SNP_P3_71943_4447482 | NC_021165.1    | Ca_kabuli_chr06 | 4447482                 | AA                              | GG                | 1946441346               |
| SNP_P3_71944_4465294 | NC_021165.1    | Ca_kabuli_chr06 | 4465294                 | TT                              | CC                | 1946441347               |
| SNP_P3_71945_4470406 | NC_021165.1    | Ca_kabuli_chr06 | 4470406                 | AA                              | GG                | 1946441349               |
| SNP_P3_71947_4491937 | NC_021165.1    | Ca_kabuli_chr06 | 4491937                 | AA                              | GG                | 1946441350               |
| SNP_P3_71951_4635376 | NC_021165.1    | Ca_kabuli_chr06 | 4635376                 | TT                              | CC                | 1946441352               |
| SNP_P3_71953_4658183 | NC_021165.1    | Ca_kabuli_chr06 | 4658183                 | AA                              | GG                | 1946441353               |
| SNP_P3_71954_4692709 | NC_021165.1    | Ca_kabuli_chr06 | 4692709                 | AA                              | TT                | 1946441355               |
| SNP_P3_71955_4692729 | NC_021165.1    | Ca_kabuli_chr06 | 4692729                 | AA                              | TT                | 1946441357               |
| SNP_P3_71956_4692848 | NC_021165.1    | Ca_kabuli_chr06 | 4692848                 | TT                              | GG                | 1946441358               |
| SNP_P3_71958_4697481 | NC_021165.1    | Ca_kabuli_chr06 | 4697481                 | GG                              | TT                | 1946441360               |
| SNP_P3_71959_4697490 | NC_021165.1    | Ca_kabuli_chr06 | 4697490                 | AA                              | GG                | 1946441361               |
| SNP_P3_71960_4699343 | NC_021165.1    | Ca_kabuli_chr06 | 4699343                 | AA                              | GG                | 1946441362               |
| SNP_P3_71961_4699503 | NC_021165.1    | Ca_kabuli_chr06 | 4699503                 | GG                              | AA                | 1946441363               |
| SNP_P3_71964_4699620 | NC_021165.1    | Ca_kabuli_chr06 | 4699620                 | AA                              | GG                | 1946441364               |
| SNP_P3_71965_4699725 | NC_021165.1    | Ca_kabuli_chr06 | 4699725                 | TT                              | AA                | 1946441365               |
| SNP_P3_71966_4699773 | NC_021165.1    | Ca_kabuli_chr06 | 4699773                 | TT                              | AA                | 1946441367               |
| SNP_P3_71968_4712912 | NC_021165.1    | Ca_kabuli_chr06 | 4712912                 | AA                              | GG                | 1946441368               |
| SNP_P3_71969_4713064 | NC_021165.1    | Ca_kabuli_chr06 | 4713064                 | TT                              | AA                | 1946441370               |
| SNP_P3_71970_4713103 | NC_021165.1    | Ca_kabuli_chr06 | 4713103                 | TT                              | CC                | 1946441372               |
| SNP_P3_71971_4713164 | NC_021165.1    | Ca_kabuli_chr06 | 4713164                 | AA                              | TT                | 1946441373               |

| SNPs IDs             | Chromosome IDs | Chromosomes     | Physical positions (bp) | CDC Frontier (Reference genome) | (Pusa 256 & HPNB) | NCBI SNPdb Accession IDs |
|----------------------|----------------|-----------------|-------------------------|---------------------------------|-------------------|--------------------------|
| SNP_P3_71972_4713260 | NC_021165.1    | Ca_kabuli_chr06 | 4713260                 | TT                              | AA                | 1946441375               |
| SNP_P3_71973_4724539 | NC_021165.1    | Ca_kabuli_chr06 | 4724539                 | CC                              | AA                | 1946441377               |
| SNP_P3_71975_4737522 | NC_021165.1    | Ca_kabuli_chr06 | 4737522                 | TT                              | AA                | 1946441378               |
| SNP_P3_71976_4747279 | NC_021165.1    | Ca_kabuli_chr06 | 4747279                 | CC                              | TT                | 1946441380               |
| SNP_P3_71977_4747321 | NC_021165.1    | Ca_kabuli_chr06 | 4747321                 | GG                              | AA                | 1946441382               |
| SNP_P3_71978_4747354 | NC_021165.1    | Ca_kabuli_chr06 | 4747354                 | GG                              | AA                | 1946441383               |
| SNP_P3_71979_4747765 | NC_021165.1    | Ca_kabuli_chr06 | 4747765                 | CC                              | TT                | 1946441385               |
| SNP_P3_71983_4837157 | NC_021165.1    | Ca_kabuli_chr06 | 4837157                 | CC                              | GG                | 1946441387               |
| SNP_P3_71984_4856361 | NC_021165.1    | Ca_kabuli_chr06 | 4856361                 | TT                              | CC                | 1946441388               |
| SNP_P3_71985_4874481 | NC_021165.1    | Ca_kabuli_chr06 | 4874481                 | TT                              | CC                | 1946441390               |
| SNP_P3_71986_4925903 | NC_021165.1    | Ca_kabuli_chr06 | 4925903                 | TT                              | CC                | 1946441392               |
| SNP_P3_71987_4946211 | NC_021165.1    | Ca_kabuli_chr06 | 4946211                 | GG                              | AA                | 1946441393               |
| SNP_P3_71988_4949030 | NC_021165.1    | Ca_kabuli_chr06 | 4949030                 | GG                              | TT                | 1946441395               |
| SNP_P3_71989_4953017 | NC_021165.1    | Ca_kabuli_chr06 | 4953017                 | AA                              | GG                | 1946441397               |
| SNP_P3_71991_4953027 | NC_021165.1    | Ca_kabuli_chr06 | 4953027                 | TT                              | AA                | 1946441398               |
| SNP_P3_71993_4975941 | NC_021165.1    | Ca_kabuli_chr06 | 4975941                 | TT                              | AA                | 1946441400               |
| SNP_P3_71995_5074925 | NC_021165.1    | Ca_kabuli_chr06 | 5074925                 | AA                              | TT                | 1946441401               |
| SNP_P3_71996_5153721 | NC_021165.1    | Ca_kabuli_chr06 | 5153721                 | TT                              | CC                | 1946441403               |
| SNP_P3_71999_5208429 | NC_021165.1    | Ca_kabuli_chr06 | 5208429                 | TT                              | CC                | 1946441405               |
| SNP_P3_72000_5215498 | NC_021165.1    | Ca_kabuli_chr06 | 5215498                 | AA                              | TT                | 1946441406               |
| SNP_P3_72001_5221277 | NC_021165.1    | Ca_kabuli_chr06 | 5221277                 | CC                              | TT                | 1946441408               |
| SNP_P3_72002_5245304 | NC_021165.1    | Ca_kabuli_chr06 | 5245304                 | GG                              | AA                | 1946441409               |
| SNP_P3_72003_5246303 | NC_021165.1    | Ca_kabuli_chr06 | 5246303                 | AA                              | TT                | 1946441411               |
| SNP_P3_72004_5264877 | NC_021165.1    | Ca_kabuli_chr06 | 5264877                 | AA                              | TT                | 1946441412               |
| SNP_P3_72006_5287617 | NC_021165.1    | Ca_kabuli_chr06 | 5287617                 | GG                              | AA                | 1946441414               |
| SNP_P3_72007_5287633 | NC_021165.1    | Ca_kabuli_chr06 | 5287633                 | TT                              | AA                | 1946441415               |
| SNP_P3_72008_5287636 | NC_021165.1    | Ca_kabuli_chr06 | 5287636                 | GG                              | AA                | 1946441417               |
| SNP_P3_72009_5287885 | NC_021165.1    | Ca_kabuli_chr06 | 5287885                 | AA                              | GG                | 1946441418               |
| SNP_P3_72010_5287898 | NC_021165.1    | Ca_kabuli_chr06 | 5287898                 | AA                              | TT                | 1946441420               |
| SNP_P3_72011_5287955 | NC_021165.1    | Ca_kabuli_chr06 | 5287955                 | TT                              | GG                | 1946441421               |
| SNP_P3_72013_5327209 | NC_021165.1    | Ca_kabuli_chr06 | 5327209                 | AA                              | GG                | 1946441423               |
| SNP_P3_72014_5328878 | NC_021165.1    | Ca_kabuli_chr06 | 5328878                 | TT                              | AA                | 1946441425               |
| SNP_P3_72017_5335336 | NC_021165.1    | Ca_kabuli_chr06 | 5335336                 | AA                              | CC                | 1946441426               |
| SNP_P3_72018_5335617 | NC_021165.1    | Ca_kabuli_chr06 | 5335617                 | TT                              | CC                | 1946441428               |
| SNP_P3_72019_5382485 | NC_021165.1    | Ca_kabuli_chr06 | 5382485                 | TT                              | AA                | 1946441429               |
| SNP_P3_72020_5385822 | NC_021165.1    | Ca_kabuli_chr06 | 5385822                 | TT                              | CC                | 1946441430               |
| SNP_P3_72024_5438513 | NC_021165.1    | Ca_kabuli_chr06 | 5438513                 | TT                              | CC                | 1946441432               |
| SNP_P3_72026_5450202 | NC_021165.1    | Ca_kabuli_chr06 | 5450202                 | CC                              | TT                | 1946441433               |
| SNP_P3_72027_5462954 | NC_021165.1    | Ca_kabuli_chr06 | 5462954                 | TT                              | GG                | 1946441435               |
| SNP_P3_72029_5475957 | NC_021165.1    | Ca_kabuli_chr06 | 5475957                 | AA                              | GG                | 1946441436               |
| SNP_P3_72030_5475958 | NC_021165.1    | Ca_kabuli_chr06 | 5475958                 | TT                              | AA                | 1946441438               |
| SNP_P3_72031_5475959 | NC_021165.1    | Ca_kabuli_chr06 | 5475959                 | TT                              | GG                | 1946441440               |



| SNPs IDs             | Chromosome IDs | Chromosomes     | Physical positions (bp) | CDC Frontier (Reference genome) | (Pusa 256 & HPNB) | NCBI SNPdb Accession IDs |
|----------------------|----------------|-----------------|-------------------------|---------------------------------|-------------------|--------------------------|
| SNP_P3_72032_5475973 | NC_021165.1    | Ca_kabuli_chr06 | 5475973                 | AA                              | TT                | 1946441441               |
| SNP_P3_72033_5522805 | NC_021165.1    | Ca_kabuli_chr06 | 5522805                 | TT                              | GG                | 1946441443               |
| SNP_P3_72034_5549415 | NC_021165.1    | Ca_kabuli_chr06 | 5549415                 | AA                              | GG                | 1946441444               |
| SNP_P3_72035_5594986 | NC_021165.1    | Ca_kabuli_chr06 | 5594986                 | AA                              | GG                | 1946441446               |
| SNP_P3_72036_5597296 | NC_021165.1    | Ca_kabuli_chr06 | 5597296                 | CC                              | TT                | 1946441447               |
| SNP_P3_72037_5603951 | NC_021165.1    | Ca_kabuli_chr06 | 5603951                 | AA                              | GG                | 1946441449               |
| SNP_P3_72041_5657237 | NC_021165.1    | Ca_kabuli_chr06 | 5657237                 | TT                              | AA                | 1946441450               |
| SNP_P3_72042_5666346 | NC_021165.1    | Ca_kabuli_chr06 | 5666346                 | AA                              | TT                | 1946441452               |
| SNP_P3_72043_5737118 | NC_021165.1    | Ca_kabuli_chr06 | 5737118                 | GG                              | AA                | 1946441453               |
| SNP_P3_72045_5777217 | NC_021165.1    | Ca_kabuli_chr06 | 5777217                 | CC                              | TT                | 1946441455               |
| SNP_P3_72046_5795459 | NC_021165.1    | Ca_kabuli_chr06 | 5795459                 | TT                              | CC                | 1946441456               |
| SNP_P3_72047_5795764 | NC_021165.1    | Ca_kabuli_chr06 | 5795764                 | TT                              | AA                | 1946441458               |
| SNP_P3_72048_5810377 | NC_021165.1    | Ca_kabuli_chr06 | 5810377                 | TT                              | AA                | 1946441459               |
| SNP_P3_72049_5846444 | NC_021165.1    | Ca_kabuli_chr06 | 5846444                 | AA                              | GG                | 1946441461               |
| SNP_P3_72054_5914997 | NC_021165.1    | Ca_kabuli_chr06 | 5914997                 | AA                              | TT                | 1946441462               |
| SNP_P3_72055_5946265 | NC_021165.1    | Ca_kabuli_chr06 | 5946265                 | AA                              | CC                | 1946441464               |
| SNP_P3_72056_5946266 | NC_021165.1    | Ca_kabuli_chr06 | 5946266                 | AA                              | TT                | 1946441465               |
| SNP_P3_72057_5951942 | NC_021165.1    | Ca_kabuli_chr06 | 5951942                 | TT                              | GG                | 1946441467               |
| SNP_P3_72058_5953929 | NC_021165.1    | Ca_kabuli_chr06 | 5953929                 | TT                              | AA                | 1946441468               |
| SNP_P3_72059_5969691 | NC_021165.1    | Ca_kabuli_chr06 | 5969691                 | GG                              | AA                | 1946441470               |
| SNP_P3_72060_5993072 | NC_021165.1    | Ca_kabuli_chr06 | 5993072                 | TT                              | CC                | 1946441471               |
| SNP_P3_72061_6001917 | NC_021165.1    | Ca_kabuli_chr06 | 6001917                 | GG                              | AA                | 1946441473               |
| SNP_P3_72063_6058211 | NC_021165.1    | Ca_kabuli_chr06 | 6058211                 | TT                              | CC                | 1946441475               |
| SNP_P3_72064_6062760 | NC_021165.1    | Ca_kabuli_chr06 | 6062760                 | TT                              | CC                | 1946441476               |
| SNP_P3_72065_6071518 | NC_021165.1    | Ca_kabuli_chr06 | 6071518                 | AA                              | GG                | 1946441478               |
| SNP_P3_72069_6120280 | NC_021165.1    | Ca_kabuli_chr06 | 6120280                 | GG                              | TT                | 1946441479               |
| SNP_P3_72071_6134321 | NC_021165.1    | Ca_kabuli_chr06 | 6134321                 | AA                              | GG                | 1946441481               |
| SNP_P3_72072_6149837 | NC_021165.1    | Ca_kabuli_chr06 | 6149837                 | GG                              | AA                | 1946441482               |
| SNP_P3_72073_6150510 | NC_021165.1    | Ca_kabuli_chr06 | 6150510                 | TT                              | CC                | 1946441484               |
| SNP_P3_72075_6153784 | NC_021165.1    | Ca_kabuli_chr06 | 6153784                 | CC                              | AA                | 1946441485               |
| SNP_P3_72080_6224698 | NC_021165.1    | Ca_kabuli_chr06 | 6224698                 | AA                              | TT                | 1946441487               |
| SNP_P3_72081_6233670 | NC_021165.1    | Ca_kabuli_chr06 | 6233670                 | TT                              | CC                | 1946441488               |
| SNP_P3_72082_6242422 | NC_021165.1    | Ca_kabuli_chr06 | 6242422                 | CC                              | AA                | 1946441490               |
| SNP_P3_72084_6303820 | NC_021165.1    | Ca_kabuli_chr06 | 6303820                 | CC                              | AA                | 1946441492               |
| SNP_P3_72085_6334322 | NC_021165.1    | Ca_kabuli_chr06 | 6334322                 | TT                              | CC                | 1946441493               |
| SNP_P3_72086_6334324 | NC_021165.1    | Ca_kabuli_chr06 | 6334324                 | TT                              | CC                | 1946441495               |
| SNP_P3_72087_6357817 | NC_021165.1    | Ca_kabuli_chr06 | 6357817                 | AA                              | TT                | 1946441496               |
| SNP_P3_72089_6390206 | NC_021165.1    | Ca_kabuli_chr06 | 6390206                 | TT                              | AA                | 1946441498               |
| SNP_P3_72090_6392616 | NC_021165.1    | Ca_kabuli_chr06 | 6392616                 | GG                              | AA                | 1946441499               |
| SNP_P3_72091_6393541 | NC_021165.1    | Ca_kabuli_chr06 | 6393541                 | TT                              | GG                | 1946441501               |
| SNP_P3_72092_6405995 | NC_021165.1    | Ca_kabuli_chr06 | 6405995                 | TT                              | CC                | 1946441502               |
| SNP_P3_72093_6409563 | NC_021165.1    | Ca_kabuli_chr06 | 6409563                 | CC                              | TT                | 1946441504               |

| SNPs IDs             | Chromosome IDs | Chromosomes     | Physical positions (bp) | CDC Frontier (Reference genome) | (Pusa 256 & HPNB) | NCBI SNPdb Accession IDs |
|----------------------|----------------|-----------------|-------------------------|---------------------------------|-------------------|--------------------------|
| SNP_P3_72095_6410056 | NC_021165.1    | Ca_kabuli_chr06 | 6410056                 | GG                              | AA                | 1946441505               |
| SNP_P3_72096_6410090 | NC_021165.1    | Ca_kabuli_chr06 | 6410090                 | TT                              | GG                | 1946441507               |
| SNP_P3_72097_6410097 | NC_021165.1    | Ca_kabuli_chr06 | 6410097                 | TT                              | CC                | 1946441508               |
| SNP_P3_72098_6410106 | NC_021165.1    | Ca_kabuli_chr06 | 6410106                 | AA                              | CC                | 1946441510               |
| SNP_P3_72099_6410126 | NC_021165.1    | Ca_kabuli_chr06 | 6410126                 | CC                              | GG                | 1946441512               |
| SNP_P3_72101_6410507 | NC_021165.1    | Ca_kabuli_chr06 | 6410507                 | GG                              | AA                | 1946441513               |
| SNP_P3_72102_6410534 | NC_021165.1    | Ca_kabuli_chr06 | 6410534                 | CC                              | AA                | 1946441515               |
| SNP_P3_72103_6410552 | NC_021165.1    | Ca_kabuli_chr06 | 6410552                 | CC                              | AA                | 1946441516               |
| SNP_P3_72104_6410564 | NC_021165.1    | Ca_kabuli_chr06 | 6410564                 | CC                              | AA                | 1946441518               |
| SNP_P3_72105_6410573 | NC_021165.1    | Ca_kabuli_chr06 | 6410573                 | TT                              | CC                | 1946441519               |
| SNP_P3_72106_6410737 | NC_021165.1    | Ca_kabuli_chr06 | 6410737                 | CC                              | TT                | 1946441520               |
| SNP_P3_72107_6411115 | NC_021165.1    | Ca_kabuli_chr06 | 6411115                 | CC                              | TT                | 1946441522               |
| SNP_P3_72109_6411271 | NC_021165.1    | Ca_kabuli_chr06 | 6411271                 | AA                              | GG                | 1946441523               |
| SNP_P3_72112_6417593 | NC_021165.1    | Ca_kabuli_chr06 | 6417593                 | TT                              | CC                | 1946441525               |
| SNP_P3_72113_6475269 | NC_021165.1    | Ca_kabuli_chr06 | 6475269                 | AA                              | GG                | 1946441526               |
| SNP_P3_72115_6512882 | NC_021165.1    | Ca_kabuli_chr06 | 6512882                 | CC                              | TT                | 1946441531               |
| SNP_P3_72116_6512897 | NC_021165.1    | Ca_kabuli_chr06 | 6512897                 | CC                              | TT                | 1946441533               |
| SNP_P3_72118_6541023 | NC_021165.1    | Ca_kabuli_chr06 | 6541023                 | GG                              | AA                | 1946441534               |
| SNP_P3_72119_6580437 | NC_021165.1    | Ca_kabuli_chr06 | 6580437                 | TT                              | CC                | 1946441536               |
| SNP_P3_72122_6593310 | NC_021165.1    | Ca_kabuli_chr06 | 6593310                 | GG                              | TT                | 1946441537               |
| SNP_P3_72124_6622539 | NC_021165.1    | Ca_kabuli_chr06 | 6622539                 | AA                              | CC                | 1946441538               |
| SNP_P3_72126_6667696 | NC_021165.1    | Ca_kabuli_chr06 | 6667696                 | CC                              | TT                | 1946441540               |
| SNP_P3_72127_6702892 | NC_021165.1    | Ca_kabuli_chr06 | 6702892                 | GG                              | AA                | 1946441542               |
| SNP_P3_72128_6720059 | NC_021165.1    | Ca_kabuli_chr06 | 6720059                 | GG                              | AA                | 1946441543               |
| SNP_P3_72129_6747065 | NC_021165.1    | Ca_kabuli_chr06 | 6747065                 | CC                              | AA                | 1946441545               |
| SNP_P3_72130_6749198 | NC_021165.1    | Ca_kabuli_chr06 | 6749198                 | AA                              | GG                | 1946441547               |
| SNP_P3_72133_6783267 | NC_021165.1    | Ca_kabuli_chr06 | 6783267                 | TT                              | GG                | 1946441548               |
| SNP_P3_72134_6798221 | NC_021165.1    | Ca_kabuli_chr06 | 6798221                 | TT                              | CC                | 1946441550               |
| SNP_P3_72135_6798223 | NC_021165.1    | Ca_kabuli_chr06 | 6798223                 | GG                              | CC                | 1946441551               |
| SNP_P3_72139_6913879 | NC_021165.1    | Ca_kabuli_chr06 | 6913879                 | CC                              | TT                | 1946441553               |
| SNP_P3_72140_6914084 | NC_021165.1    | Ca_kabuli_chr06 | 6914084                 | CC                              | TT                | 1946441554               |
| SNP_P3_72142_6914726 | NC_021165.1    | Ca_kabuli_chr06 | 6914726                 | AA                              | CC                | 1946441556               |
| SNP_P3_72143_6922259 | NC_021165.1    | Ca_kabuli_chr06 | 6922259                 | AA                              | CC                | 1946441557               |
| SNP_P3_72144_6922421 | NC_021165.1    | Ca_kabuli_chr06 | 6922421                 | AA                              | TT                | 1946441559               |
| SNP_P3_72145_6922605 | NC_021165.1    | Ca_kabuli_chr06 | 6922605                 | TT                              | CC                | 1946441560               |
| SNP_P3_72146_6922873 | NC_021165.1    | Ca_kabuli_chr06 | 6922873                 | CC                              | AA                | 1946441562               |
| SNP_P3_72147_6922950 | NC_021165.1    | Ca_kabuli_chr06 | 6922950                 | TT                              | AA                | 1946441563               |
| SNP_P3_72149_6934135 | NC_021165.1    | Ca_kabuli_chr06 | 6934135                 | TT                              | CC                | 1946441565               |
| SNP_P3_72150_6967998 | NC_021165.1    | Ca_kabuli_chr06 | 6967998                 | TT                              | CC                | 1946441567               |
| SNP_P3_72151_6968002 | NC_021165.1    | Ca_kabuli_chr06 | 6968002                 | GG                              | AA                | 1946441568               |
| SNP_P3_72152_6968050 | NC_021165.1    | Ca_kabuli_chr06 | 6968050                 | TT                              | CC                | 1946441570               |
| SNP_P3_72153_6968052 | NC_021165.1    | Ca_kabuli_chr06 | 6968052                 | TT                              | AA                | 1946441571               |

| SNPs IDs             | Chromosome IDs | Chromosomes     | Physical positions (bp) | CDC Frontier (Reference genome) | (Pusa 256 & HPNB) | NCBI SNPdb Accession IDs |
|----------------------|----------------|-----------------|-------------------------|---------------------------------|-------------------|--------------------------|
| SNP_P3_72154_6984565 | NC_021165.1    | Ca_kabuli_chr06 | 6984565                 | TT                              | GG                | 1946441573               |
| SNP_P3_72156_7015316 | NC_021165.1    | Ca_kabuli_chr06 | 7015316                 | AA                              | GG                | 1946441574               |
| SNP_P3_72157_7015483 | NC_021165.1    | Ca_kabuli_chr06 | 7015483                 | AA                              | GG                | 1946441576               |
| SNP_P3_72158_7030113 | NC_021165.1    | Ca_kabuli_chr06 | 7030113                 | AA                              | GG                | 1946441577               |
| SNP_P3_72159_7038386 | NC_021165.1    | Ca_kabuli_chr06 | 7038386                 | CC                              | TT                | 1946441579               |
| SNP_P3_72160_7099522 | NC_021165.1    | Ca_kabuli_chr06 | 7099522                 | GG                              | AA                | 1946441580               |
| SNP_P3_72161_7099589 | NC_021165.1    | Ca_kabuli_chr06 | 7099589                 | TT                              | CC                | 1946441582               |
| SNP_P3_72162_7099591 | NC_021165.1    | Ca_kabuli_chr06 | 7099591                 | AA                              | CC                | 1946441584               |
| SNP_P3_72163_7112496 | NC_021165.1    | Ca_kabuli_chr06 | 7112496                 | GG                              | AA                | 1946441585               |
| SNP_P3_72164_7112641 | NC_021165.1    | Ca_kabuli_chr06 | 7112641                 | TT                              | CC                | 1946441587               |
| SNP_P3_72165_7125932 | NC_021165.1    | Ca_kabuli_chr06 | 7125932                 | TT                              | CC                | 1946441588               |
| SNP_P3_72166_7126738 | NC_021165.1    | Ca_kabuli_chr06 | 7126738                 | CC                              | GG                | 1946441590               |
| SNP_P3_72167_7126769 | NC_021165.1    | Ca_kabuli_chr06 | 7126769                 | CC                              | TT                | 1946441591               |
| SNP_P3_72168_7144277 | NC_021165.1    | Ca_kabuli_chr06 | 7144277                 | TT                              | CC                | 1946441593               |
| SNP_P3_72169_7151344 | NC_021165.1    | Ca_kabuli_chr06 | 7151344                 | TT                              | AA                | 1946441594               |
| SNP_P3_72170_7151352 | NC_021165.1    | Ca_kabuli_chr06 | 7151352                 | TT                              | GG                | 1946441596               |
| SNP_P3_72171_7151356 | NC_021165.1    | Ca_kabuli_chr06 | 7151356                 | TT                              | CC                | 1946441597               |
| SNP_P3_72172_7160406 | NC_021165.1    | Ca_kabuli_chr06 | 7160406                 | TT                              | CC                | 1946441599               |
| SNP_P3_72173_7162449 | NC_021165.1    | Ca_kabuli_chr06 | 7162449                 | GG                              | AA                | 1946441600               |
| SNP_P3_72174_7192204 | NC_021165.1    | Ca_kabuli_chr06 | 7192204                 | CC                              | TT                | 1946441602               |
| SNP_P3_72175_7192206 | NC_021165.1    | Ca_kabuli_chr06 | 7192206                 | CC                              | TT                | 1946441604               |
| SNP_P3_72176_7232362 | NC_021165.1    | Ca_kabuli_chr06 | 7232362                 | CC                              | TT                | 1946441605               |
| SNP_P3_72180_7344708 | NC_021165.1    | Ca_kabuli_chr06 | 7344708                 | CC                              | GG                | 1946441607               |
| SNP_P3_72181_7344748 | NC_021165.1    | Ca_kabuli_chr06 | 7344748                 | TT                              | CC                | 1946441609               |
| SNP_P3_72183_7370336 | NC_021165.1    | Ca_kabuli_chr06 | 7370336                 | AA                              | TT                | 1946441610               |
| SNP_P3_72185_7389643 | NC_021165.1    | Ca_kabuli_chr06 | 7389643                 | CC                              | GG                | 1946441612               |
| SNP_P3_72186_7395245 | NC_021165.1    | Ca_kabuli_chr06 | 7395245                 | CC                              | TT                | 1946441613               |
| SNP_P3_72187_7403707 | NC_021165.1    | Ca_kabuli_chr06 | 7403707                 | CC                              | AA                | 1946441615               |
| SNP_P3_72189_7460121 | NC_021165.1    | Ca_kabuli_chr06 | 7460121                 | CC                              | TT                | 1946441616               |
| SNP_P3_72190_7537689 | NC_021165.1    | Ca_kabuli_chr06 | 7537689                 | AA                              | GG                | 1946441618               |
| SNP_P3_72191_7558455 | NC_021165.1    | Ca_kabuli_chr06 | 7558455                 | AA                              | GG                | 1946441619               |
| SNP_P3_72192_7567824 | NC_021165.1    | Ca_kabuli_chr06 | 7567824                 | AA                              | GG                | 1946441621               |
| SNP_P3_72193_7572714 | NC_021165.1    | Ca_kabuli_chr06 | 7572714                 | GG                              | AA                | 1946441623               |
| SNP_P3_72194_7573584 | NC_021165.1    | Ca_kabuli_chr06 | 7573584                 | AA                              | GG                | 1946441625               |
| SNP_P3_72195_7580459 | NC_021165.1    | Ca_kabuli_chr06 | 7580459                 | GG                              | AA                | 1946441626               |
| SNP_P3_72196_7581678 | NC_021165.1    | Ca_kabuli_chr06 | 7581678                 | TT                              | GG                | 1946441628               |
| SNP_P3_72198_7593645 | NC_021165.1    | Ca_kabuli_chr06 | 7593645                 | CC                              | GG                | 1946441629               |
| SNP_P3_72199_7593646 | NC_021165.1    | Ca_kabuli_chr06 | 7593646                 | CC                              | TT                | 1946441631               |
| SNP_P3_72200_7595418 | NC_021165.1    | Ca_kabuli_chr06 | 7595418                 | GG                              | AA                | 1946441632               |
| SNP_P3_72201_7596821 | NC_021165.1    | Ca_kabuli_chr06 | 7596821                 | CC                              | TT                | 1946441634               |
| SNP_P3_72202_7597345 | NC_021165.1    | Ca_kabuli_chr06 | 7597345                 | TT                              | CC                | 1946441635               |
| SNP_P3_72203_7609365 | NC_021165.1    | Ca_kabuli_chr06 | 7609365                 | AA                              | GG                | 1946441637               |

| SNPs IDs             | Chromosome IDs | Chromosomes     | Physical positions (bp) | CDC Frontier (Reference genome) | (Pusa 256 & HPNB) | NCBI SNPdb Accession IDs |
|----------------------|----------------|-----------------|-------------------------|---------------------------------|-------------------|--------------------------|
| SNP_P3_72204_7615454 | NC_021165.1    | Ca_kabuli_chr06 | 7615454                 | CC                              | TT                | 1946441639               |
| SNP_P3_72205_7620939 | NC_021165.1    | Ca_kabuli_chr06 | 7620939                 | CC                              | GG                | 1946441641               |
| SNP_P3_72206_7629102 | NC_021165.1    | Ca_kabuli_chr06 | 7629102                 | AA                              | GG                | 1946441642               |
| SNP_P3_72207_7629906 | NC_021165.1    | Ca_kabuli_chr06 | 7629906                 | GG                              | CC                | 1946441644               |
| SNP_P3_72208_7630586 | NC_021165.1    | Ca_kabuli_chr06 | 7630586                 | AA                              | GG                | 1946441646               |
| SNP_P3_72209_7634008 | NC_021165.1    | Ca_kabuli_chr06 | 7634008                 | TT                              | CC                | 1946441647               |
| SNP_P3_72210_7641907 | NC_021165.1    | Ca_kabuli_chr06 | 7641907                 | AA                              | GG                | 1946441649               |
| SNP_P3_72212_7649589 | NC_021165.1    | Ca_kabuli_chr06 | 7649589                 | CC                              | TT                | 1946441650               |
| SNP_P3_72214_7660268 | NC_021165.1    | Ca_kabuli_chr06 | 7660268                 | AA                              | GG                | 1946441652               |
| SNP_P3_72215_7662087 | NC_021165.1    | Ca_kabuli_chr06 | 7662087                 | CC                              | TT                | 1946441653               |
| SNP_P3_72216_7669217 | NC_021165.1    | Ca_kabuli_chr06 | 7669217                 | AA                              | GG                | 1946441655               |
| SNP_P3_72218_7673202 | NC_021165.1    | Ca_kabuli_chr06 | 7673202                 | TT                              | CC                | 1946441657               |
| SNP_P3_72219_7679095 | NC_021165.1    | Ca_kabuli_chr06 | 7679095                 | TT                              | AA                | 1946441659               |
| SNP_P3_72220_7679151 | NC_021165.1    | Ca_kabuli_chr06 | 7679151                 | GG                              | AA                | 1946441660               |
| SNP_P3_72221_7679745 | NC_021165.1    | Ca_kabuli_chr06 | 7679745                 | GG                              | CC                | 1946441662               |
| SNP_P3_72225_7694460 | NC_021165.1    | Ca_kabuli_chr06 | 7694460                 | AA                              | TT                | 1946441663               |
| SNP_P3_72226_7702765 | NC_021165.1    | Ca_kabuli_chr06 | 7702765                 | TT                              | CC                | 1946441665               |
| SNP_P3_72227_7705917 | NC_021165.1    | Ca_kabuli_chr06 | 7705917                 | TT                              | CC                | 1946441666               |
| SNP_P3_72228_7705920 | NC_021165.1    | Ca_kabuli_chr06 | 7705920                 | TT                              | CC                | 1946441668               |
| SNP_P3_72230_7709245 | NC_021165.1    | Ca_kabuli_chr06 | 7709245                 | AA                              | CC                | 1946441669               |
| SNP_P3_72232_7718204 | NC_021165.1    | Ca_kabuli_chr06 | 7718204                 | TT                              | AA                | 1946441671               |
| SNP_P3_72233_7718836 | NC_021165.1    | Ca_kabuli_chr06 | 7718836                 | CC                              | AA                | 1946441672               |
| SNP_P3_72234_7718837 | NC_021165.1    | Ca_kabuli_chr06 | 7718837                 | CC                              | GG                | 1946441673               |
| SNP_P3_72235_7719058 | NC_021165.1    | Ca_kabuli_chr06 | 7719058                 | TT                              | AA                | 1946441674               |
| SNP_P3_72237_7729362 | NC_021165.1    | Ca_kabuli_chr06 | 7729362                 | AA                              | GG                | 1946441676               |
| SNP_P3_72238_7733336 | NC_021165.1    | Ca_kabuli_chr06 | 7733336                 | AA                              | GG                | 1946441677               |
| SNP_P3_72239_7733394 | NC_021165.1    | Ca_kabuli_chr06 | 7733394                 | TT                              | AA                | 1946441679               |
| SNP_P3_72241_7734979 | NC_021165.1    | Ca_kabuli_chr06 | 7734979                 | AA                              | TT                | 1946441680               |
| SNP_P3_72242_7741804 | NC_021165.1    | Ca_kabuli_chr06 | 7741804                 | AA                              | GG                | 1946441682               |
| SNP_P3_72243_7745726 | NC_021165.1    | Ca_kabuli_chr06 | 7745726                 | AA                              | TT                | 1946441683               |
| SNP_P3_72244_7750383 | NC_021165.1    | Ca_kabuli_chr06 | 7750383                 | TT                              | CC                | 1946441685               |
| SNP_P3_72245_7752658 | NC_021165.1    | Ca_kabuli_chr06 | 7752658                 | GG                              | AA                | 1946441687               |
| SNP_P3_72246_7752679 | NC_021165.1    | Ca_kabuli_chr06 | 7752679                 | CC                              | TT                | 1946441688               |
| SNP_P3_72247_7752737 | NC_021165.1    | Ca_kabuli_chr06 | 7752737                 | CC                              | TT                | 1946441690               |
| SNP_P3_72248_7754846 | NC_021165.1    | Ca_kabuli_chr06 | 7754846                 | AA                              | TT                | 1946441691               |
| SNP_P3_72249_7754882 | NC_021165.1    | Ca_kabuli_chr06 | 7754882                 | TT                              | CC                | 1946441693               |
| SNP_P3_72250_7754915 | NC_021165.1    | Ca_kabuli_chr06 | 7754915                 | GG                              | AA                | 1946441695               |
| SNP_P3_72251_7760924 | NC_021165.1    | Ca_kabuli_chr06 | 7760924                 | GG                              | TT                | 1946441696               |
| SNP_P3_72252_7761932 | NC_021165.1    | Ca_kabuli_chr06 | 7761932                 | AA                              | TT                | 1946441698               |
| SNP_P3_72253_7761954 | NC_021165.1    | Ca_kabuli_chr06 | 7761954                 | TT                              | GG                | 1946441699               |
| SNP_P3_72254_7770686 | NC_021165.1    | Ca_kabuli_chr06 | 7770686                 | AA                              | GG                | 1946441701               |
| SNP_P3_72255_7774728 | NC_021165.1    | Ca_kabuli_chr06 | 7774728                 | AA                              | GG                | 1946441702               |

| SNPs IDs             | Chromosome IDs | Chromosomes     | Physical positions (bp) | CDC Frontier (Reference genome) | (Pusa 256 & HPNB) | NCBI SNPdb Accession IDs |
|----------------------|----------------|-----------------|-------------------------|---------------------------------|-------------------|--------------------------|
| SNP_P3_72256_7774743 | NC_021165.1    | Ca_kabuli_chr06 | 7774743                 | AA                              | GG                | 1946441704               |
| SNP_P3_72257_7784523 | NC_021165.1    | Ca_kabuli_chr06 | 7784523                 | AA                              | TT                | 1946441705               |
| SNP_P3_72258_7785479 | NC_021165.1    | Ca_kabuli_chr06 | 7785479                 | AA                              | GG                | 1946441707               |
| SNP_P3_72259_7785932 | NC_021165.1    | Ca_kabuli_chr06 | 7785932                 | GG                              | AA                | 1946441708               |
| SNP_P3_72261_7803477 | NC_021165.1    | Ca_kabuli_chr06 | 7803477                 | TT                              | CC                | 1946441710               |
| SNP_P3_72263_7811805 | NC_021165.1    | Ca_kabuli_chr06 | 7811805                 | TT                              | CC                | 1946441711               |
| SNP_P3_72264_7812007 | NC_021165.1    | Ca_kabuli_chr06 | 7812007                 | GG                              | AA                | 1946441713               |
| SNP_P3_72265_7816366 | NC_021165.1    | Ca_kabuli_chr06 | 7816366                 | CC                              | TT                | 1946441715               |
| SNP_P3_72266_7817205 | NC_021165.1    | Ca_kabuli_chr06 | 7817205                 | CC                              | TT                | 1946441716               |
| SNP_P3_72267_7820481 | NC_021165.1    | Ca_kabuli_chr06 | 7820481                 | CC                              | TT                | 1946441718               |
| SNP_P3_72268_7825857 | NC_021165.1    | Ca_kabuli_chr06 | 7825857                 | AA                              | GG                | 1946441719               |
| SNP_P3_72269_7826608 | NC_021165.1    | Ca_kabuli_chr06 | 7826608                 | CC                              | TT                | 1946441721               |
| SNP_P3_72270_7829272 | NC_021165.1    | Ca_kabuli_chr06 | 7829272                 | CC                              | TT                | 1946441722               |
| SNP_P3_72271_7831334 | NC_021165.1    | Ca_kabuli_chr06 | 7831334                 | TT                              | CC                | 1946441724               |
| SNP_P3_72272_7839094 | NC_021165.1    | Ca_kabuli_chr06 | 7839094                 | TT                              | CC                | 1946441725               |
| SNP_P3_72273_7839106 | NC_021165.1    | Ca_kabuli_chr06 | 7839106                 | TT                              | CC                | 1946441727               |
| SNP_P3_72274_7839107 | NC_021165.1    | Ca_kabuli_chr06 | 7839107                 | TT                              | CC                | 1946441728               |
| SNP_P3_72275_7840163 | NC_021165.1    | Ca_kabuli_chr06 | 7840163                 | GG                              | TT                | 1946441730               |
| SNP_P3_72278_7845670 | NC_021165.1    | Ca_kabuli_chr06 | 7845670                 | TT                              | CC                | 1946441731               |
| SNP_P3_72279_7845732 | NC_021165.1    | Ca_kabuli_chr06 | 7845732                 | TT                              | CC                | 1946441733               |
| SNP_P3_72280_7854545 | NC_021165.1    | Ca_kabuli_chr06 | 7854545                 | GG                              | TT                | 1946441734               |
| SNP_P3_72281_7854553 | NC_021165.1    | Ca_kabuli_chr06 | 7854553                 | AA                              | TT                | 1946441736               |
| SNP_P3_72282_7855974 | NC_021165.1    | Ca_kabuli_chr06 | 7855974                 | TT                              | CC                | 1946441737               |
| SNP_P3_72283_7856053 | NC_021165.1    | Ca_kabuli_chr06 | 7856053                 | AA                              | GG                | 1946441739               |
| SNP_P3_72284_7860998 | NC_021165.1    | Ca_kabuli_chr06 | 7860998                 | TT                              | CC                | 1946441740               |
| SNP_P3_72286_7861173 | NC_021165.1    | Ca_kabuli_chr06 | 7861173                 | GG                              | AA                | 1946441742               |
| SNP_P3_72287_7861665 | NC_021165.1    | Ca_kabuli_chr06 | 7861665                 | AA                              | GG                | 1946441743               |
| SNP_P3_72288_7861740 | NC_021165.1    | Ca_kabuli_chr06 | 7861740                 | GG                              | AA                | 1946441745               |
| SNP_P3_72289_7865951 | NC_021165.1    | Ca_kabuli_chr06 | 7865951                 | GG                              | TT                | 1946441746               |
| SNP_P3_72291_7867313 | NC_021165.1    | Ca_kabuli_chr06 | 7867313                 | AA                              | GG                | 1946441748               |
| SNP_P3_72292_7871269 | NC_021165.1    | Ca_kabuli_chr06 | 7871269                 | TT                              | AA                | 1946441750               |
| SNP_P3_72293_7871279 | NC_021165.1    | Ca_kabuli_chr06 | 7871279                 | GG                              | TT                | 1946441752               |
| SNP_P3_72294_7872452 | NC_021165.1    | Ca_kabuli_chr06 | 7872452                 | CC                              | TT                | 1946441753               |
| SNP_P3_72295_7872596 | NC_021165.1    | Ca_kabuli_chr06 | 7872596                 | GG                              | TT                | 1946441755               |
| SNP_P3_72296_7873759 | NC_021165.1    | Ca_kabuli_chr06 | 7873759                 | GG                              | AA                | 1946441756               |
| SNP_P3_72297_7876547 | NC_021165.1    | Ca_kabuli_chr06 | 7876547                 | AA                              | CC                | 1946441758               |
| SNP_P3_72298_7876550 | NC_021165.1    | Ca_kabuli_chr06 | 7876550                 | CC                              | AA                | 1946441760               |
| SNP_P3_72299_7882762 | NC_021165.1    | Ca_kabuli_chr06 | 7882762                 | CC                              | AA                | 1946441761               |
| SNP_P3_72300_7891645 | NC_021165.1    | Ca_kabuli_chr06 | 7891645                 | TT                              | AA                | 1946441762               |
| SNP_P3_72301_7893645 | NC_021165.1    | Ca_kabuli_chr06 | 7893645                 | TT                              | CC                | 1946441764               |
| SNP_P3_72302_7895806 | NC_021165.1    | Ca_kabuli_chr06 | 7895806                 | AA                              | GG                | 1946441766               |
| SNP_P3_72303_7900746 | NC_021165.1    | Ca_kabuli_chr06 | 7900746                 | TT                              | CC                | 1946441767               |

| SNPs IDs             | Chromosome IDs | Chromosomes     | Physical positions (bp) | CDC Frontier (Reference genome) | (Pusa 256 & HPNB) | NCBI SNPdb Accession IDs |
|----------------------|----------------|-----------------|-------------------------|---------------------------------|-------------------|--------------------------|
| SNP_P3_72304_7900749 | NC_021165.1    | Ca_kabuli_chr06 | 7900749                 | TT                              | AA                | 1946441769               |
| SNP_P3_72305_7900753 | NC_021165.1    | Ca_kabuli_chr06 | 7900753                 | TT                              | CC                | 1946441770               |
| SNP_P3_72306_7907013 | NC_021165.1    | Ca_kabuli_chr06 | 7907013                 | GG                              | AA                | 1946441772               |
| SNP_P3_72307_7907797 | NC_021165.1    | Ca_kabuli_chr06 | 7907797                 | AA                              | GG                | 1946441773               |
| SNP_P3_72308_7913693 | NC_021165.1    | Ca_kabuli_chr06 | 7913693                 | GG                              | AA                | 1946441775               |
| SNP_P3_72309_7916715 | NC_021165.1    | Ca_kabuli_chr06 | 7916715                 | AA                              | GG                | 1946441776               |
| SNP_P3_72310_7920944 | NC_021165.1    | Ca_kabuli_chr06 | 7920944                 | AA                              | GG                | 1946441778               |
| SNP_P3_72311_7922118 | NC_021165.1    | Ca_kabuli_chr06 | 7922118                 | TT                              | GG                | 1946441780               |
| SNP_P3_72312_7922146 | NC_021165.1    | Ca_kabuli_chr06 | 7922146                 | AA                              | TT                | 1946441781               |
| SNP_P3_72313_7927061 | NC_021165.1    | Ca_kabuli_chr06 | 7927061                 | TT                              | AA                | 1946441783               |
| SNP_P3_72314_7927097 | NC_021165.1    | Ca_kabuli_chr06 | 7927097                 | TT                              | AA                | 1946441785               |
| SNP_P3_72315_7927120 | NC_021165.1    | Ca_kabuli_chr06 | 7927120                 | GG                              | AA                | 1946441786               |
| SNP_P3_72316_7927148 | NC_021165.1    | Ca_kabuli_chr06 | 7927148                 | GG                              | AA                | 1946441788               |
| SNP_P3_72317_7929338 | NC_021165.1    | Ca_kabuli_chr06 | 7929338                 | TT                              | CC                | 1946441789               |
| SNP_P3_72318_7929339 | NC_021165.1    | Ca_kabuli_chr06 | 7929339                 | GG                              | AA                | 1946441791               |
| SNP_P3_72319_7931119 | NC_021165.1    | Ca_kabuli_chr06 | 7931119                 | GG                              | AA                | 1946441792               |
| SNP_P3_72320_7935413 | NC_021165.1    | Ca_kabuli_chr06 | 7935413                 | TT                              | GG                | 1946441794               |
| SNP_P3_72321_7942026 | NC_021165.1    | Ca_kabuli_chr06 | 7942026                 | AA                              | TT                | 1946441795               |
| SNP_P3_72322_7942985 | NC_021165.1    | Ca_kabuli_chr06 | 7942985                 | GG                              | AA                | 1946441797               |
| SNP_P3_72323_7950817 | NC_021165.1    | Ca_kabuli_chr06 | 7950817                 | TT                              | CC                | 1946441798               |
| SNP_P3_72324_7955634 | NC_021165.1    | Ca_kabuli_chr06 | 7955634                 | CC                              | TT                | 1946441800               |
| SNP_P3_72325_7955680 | NC_021165.1    | Ca_kabuli_chr06 | 7955680                 | AA                              | CC                | 1946441801               |
| SNP_P3_72326_7955745 | NC_021165.1    | Ca_kabuli_chr06 | 7955745                 | GG                              | TT                | 1946441803               |
| SNP_P3_72327_7957334 | NC_021165.1    | Ca_kabuli_chr06 | 7957334                 | TT                              | CC                | 1946441805               |
| SNP_P3_72329_7975960 | NC_021165.1    | Ca_kabuli_chr06 | 7975960                 | TT                              | CC                | 1946441806               |
| SNP_P3_72330_7976995 | NC_021165.1    | Ca_kabuli_chr06 | 7976995                 | AA                              | GG                | 1946441808               |
| SNP_P3_72331_7977172 | NC_021165.1    | Ca_kabuli_chr06 | 7977172                 | GG                              | AA                | 1946441809               |
| SNP_P3_72332_7978102 | NC_021165.1    | Ca_kabuli_chr06 | 7978102                 | GG                              | TT                | 1946441811               |
| SNP_P3_72334_7985160 | NC_021165.1    | Ca_kabuli_chr06 | 7985160                 | GG                              | AA                | 1946441813               |
| SNP_P3_72335_7988522 | NC_021165.1    | Ca_kabuli_chr06 | 7988522                 | AA                              | GG                | 1946441814               |
| SNP_P3_72336_7992355 | NC_021165.1    | Ca_kabuli_chr06 | 7992355                 | TT                              | CC                | 1946441816               |
| SNP_P3_72338_7999105 | NC_021165.1    | Ca_kabuli_chr06 | 7999105                 | CC                              | TT                | 1946441817               |
| SNP_P3_72339_7999109 | NC_021165.1    | Ca_kabuli_chr06 | 7999109                 | CC                              | GG                | 1946441819               |
| SNP_P3_72340_7999430 | NC_021165.1    | Ca_kabuli_chr06 | 7999430                 | TT                              | CC                | 1946441820               |
| SNP_P3_72341_8000033 | NC_021165.1    | Ca_kabuli_chr06 | 8000033                 | GG                              | AA                | 1946441822               |
| SNP_P3_72342_8000910 | NC_021165.1    | Ca_kabuli_chr06 | 8000910                 | CC                              | TT                | 1946441823               |
| SNP_P3_72343_8004049 | NC_021165.1    | Ca_kabuli_chr06 | 8004049                 | GG                              | TT                | 1946441825               |
| SNP_P3_72344_8004375 | NC_021165.1    | Ca_kabuli_chr06 | 8004375                 | CC                              | AA                | 1946441826               |
| SNP_P3_72346_8022253 | NC_021165.1    | Ca_kabuli_chr06 | 8022253                 | AA                              | GG                | 1946441828               |
| SNP_P3_72347_8029708 | NC_021165.1    | Ca_kabuli_chr06 | 8029708                 | TT                              | CC                | 1946441830               |
| SNP_P3_72348_8033080 | NC_021165.1    | Ca_kabuli_chr06 | 8033080                 | TT                              | AA                | 1946441831               |
| SNP_P3_72349_8033976 | NC_021165.1    | Ca_kabuli_chr06 | 8033976                 | TT                              | CC                | 1946441833               |

| SNPs IDs             | Chromosome IDs | Chromosomes     | Physical positions (bp) | CDC Frontier (Reference genome) | (Pusa 256 & HPNB) | NCBI SNPdb Accession IDs |
|----------------------|----------------|-----------------|-------------------------|---------------------------------|-------------------|--------------------------|
| SNP_P3_72351_8048415 | NC_021165.1    | Ca_kabuli_chr06 | 8048415                 | AA                              | CC                | 1946441834               |
| SNP_P3_72352_8056737 | NC_021165.1    | Ca_kabuli_chr06 | 8056737                 | CC                              | TT                | 1946441836               |
| SNP_P3_72353_8062601 | NC_021165.1    | Ca_kabuli_chr06 | 8062601                 | CC                              | TT                | 1946441837               |
| SNP_P3_72354_8062630 | NC_021165.1    | Ca_kabuli_chr06 | 8062630                 | GG                              | CC                | 1946441838               |
| SNP_P3_72355_8067064 | NC_021165.1    | Ca_kabuli_chr06 | 8067064                 | CC                              | TT                | 1946441839               |
| SNP_P3_72356_8072475 | NC_021165.1    | Ca_kabuli_chr06 | 8072475                 | TT                              | GG                | 1946441840               |
| SNP_P3_72357_8072568 | NC_021165.1    | Ca_kabuli_chr06 | 8072568                 | GG                              | CC                | 1946441842               |
| SNP_P3_72358_8072896 | NC_021165.1    | Ca_kabuli_chr06 | 8072896                 | CC                              | AA                | 1946441844               |
| SNP_P3_72359_8075973 | NC_021165.1    | Ca_kabuli_chr06 | 8075973                 | GG                              | TT                | 1946441846               |
| SNP_P3_72360_8079047 | NC_021165.1    | Ca_kabuli_chr06 | 8079047                 | TT                              | AA                | 1946441847               |
| SNP_P3_72361_8080646 | NC_021165.1    | Ca_kabuli_chr06 | 8080646                 | TT                              | GG                | 1946441849               |
| SNP_P3_72362_8080995 | NC_021165.1    | Ca_kabuli_chr06 | 8080995                 | TT                              | GG                | 1946441850               |
| SNP_P3_72363_8084950 | NC_021165.1    | Ca_kabuli_chr06 | 8084950                 | TT                              | AA                | 1946441852               |
| SNP_P3_72364_8085214 | NC_021165.1    | Ca_kabuli_chr06 | 8085214                 | CC                              | TT                | 1946441853               |
| SNP_P3_72366_8088556 | NC_021165.1    | Ca_kabuli_chr06 | 8088556                 | CC                              | GG                | 1946441855               |
| SNP_P3_72367_8088593 | NC_021165.1    | Ca_kabuli_chr06 | 8088593                 | CC                              | TT                | 1946441856               |
| SNP_P3_72368_8088747 | NC_021165.1    | Ca_kabuli_chr06 | 8088747                 | CC                              | TT                | 1946441858               |
| SNP_P3_72369_8095839 | NC_021165.1    | Ca_kabuli_chr06 | 8095839                 | TT                              | CC                | 1946441859               |
| SNP_P3_72370_8095992 | NC_021165.1    | Ca_kabuli_chr06 | 8095992                 | GG                              | AA                | 1946441861               |
| SNP_P3_72371_8100893 | NC_021165.1    | Ca_kabuli_chr06 | 8100893                 | AA                              | GG                | 1946441862               |
| SNP_P3_72372_8100905 | NC_021165.1    | Ca_kabuli_chr06 | 8100905                 | AA                              | GG                | 1946441864               |
| SNP_P3_72373_8101266 | NC_021165.1    | Ca_kabuli_chr06 | 8101266                 | TT                              | CC                | 1946441866               |
| SNP_P3_72376_8120048 | NC_021165.1    | Ca_kabuli_chr06 | 8120048                 | TT                              | CC                | 1946441867               |
| SNP_P3_72377_8120066 | NC_021165.1    | Ca_kabuli_chr06 | 8120066                 | AA                              | GG                | 1946441869               |
| SNP_P3_72378_8124314 | NC_021165.1    | Ca_kabuli_chr06 | 8124314                 | AA                              | TT                | 1946441870               |
| SNP_P3_72379_8124584 | NC_021165.1    | Ca_kabuli_chr06 | 8124584                 | TT                              | GG                | 1946441872               |
| SNP_P3_72380_8124759 | NC_021165.1    | Ca_kabuli_chr06 | 8124759                 | GG                              | TT                | 1946441873               |
| SNP_P3_72381_8124763 | NC_021165.1    | Ca_kabuli_chr06 | 8124763                 | CC                              | TT                | 1946441875               |
| SNP_P3_72382_8124820 | NC_021165.1    | Ca_kabuli_chr06 | 8124820                 | CC                              | TT                | 1946441876               |
| SNP_P3_72383_8124825 | NC_021165.1    | Ca_kabuli_chr06 | 8124825                 | GG                              | AA                | 1946441878               |
| SNP_P3_72384_8124842 | NC_021165.1    | Ca_kabuli_chr06 | 8124842                 | AA                              | TT                | 1946441880               |
| SNP_P3_72385_8124845 | NC_021165.1    | Ca_kabuli_chr06 | 8124845                 | TT                              | CC                | 1946441881               |
| SNP_P3_72386_8126866 | NC_021165.1    | Ca_kabuli_chr06 | 8126866                 | AA                              | TT                | 1946441883               |
| SNP_P3_72387_8129400 | NC_021165.1    | Ca_kabuli_chr06 | 8129400                 | GG                              | AA                | 1946441885               |
| SNP_P3_72388_8129714 | NC_021165.1    | Ca_kabuli_chr06 | 8129714                 | AA                              | CC                | 1946441886               |
| SNP_P3_72389_8132080 | NC_021165.1    | Ca_kabuli_chr06 | 8132080                 | AA                              | GG                | 1946441888               |
| SNP_P3_72390_8135640 | NC_021165.1    | Ca_kabuli_chr06 | 8135640                 | AA                              | GG                | 1946441889               |
| SNP_P3_72391_8135649 | NC_021165.1    | Ca_kabuli_chr06 | 8135649                 | AA                              | GG                | 1946441891               |
| SNP_P3_72392_8135680 | NC_021165.1    | Ca_kabuli_chr06 | 8135680                 | AA                              | GG                | 1946441892               |
| SNP_P3_72393_8139446 | NC_021165.1    | Ca_kabuli_chr06 | 8139446                 | CC                              | AA                | 1946441894               |
| SNP_P3_72394_8141297 | NC_021165.1    | Ca_kabuli_chr06 | 8141297                 | GG                              | AA                | 1946441895               |
| SNP_P3_72395_8141340 | NC_021165.1    | Ca_kabuli_chr06 | 8141340                 | AA                              | CC                | 1946441897               |

| SNPs IDs             | Chromosome IDs | Chromosomes     | Physical positions (bp) | CDC Frontier (Reference genome) | (Pusa 256 & HPNB) | NCBI SNPdb Accession IDs |
|----------------------|----------------|-----------------|-------------------------|---------------------------------|-------------------|--------------------------|
| SNP_P3_72396_8141358 | NC_021165.1    | Ca_kabuli_chr06 | 8141358                 | TT                              | CC                | 1946441898               |
| SNP_P3_72397_8141770 | NC_021165.1    | Ca_kabuli_chr06 | 8141770                 | TT                              | AA                | 1946441900               |
| SNP_P3_72398_8142566 | NC_021165.1    | Ca_kabuli_chr06 | 8142566                 | CC                              | TT                | 1946441901               |
| SNP_P3_72399_8144829 | NC_021165.1    | Ca_kabuli_chr06 | 8144829                 | CC                              | TT                | 1946441903               |
| SNP_P3_72400_8159694 | NC_021165.1    | Ca_kabuli_chr06 | 8159694                 | TT                              | CC                | 1946441905               |
| SNP_P3_72401_8167131 | NC_021165.1    | Ca_kabuli_chr06 | 8167131                 | TT                              | GG                | 1946441906               |
| SNP_P3_72402_8171090 | NC_021165.1    | Ca_kabuli_chr06 | 8171090                 | CC                              | TT                | 1946441908               |
| SNP_P3_72404_8176653 | NC_021165.1    | Ca_kabuli_chr06 | 8176653                 | GG                              | AA                | 1946441909               |
| SNP_P3_72405_8176663 | NC_021165.1    | Ca_kabuli_chr06 | 8176663                 | AA                              | GG                | 1946441911               |
| SNP_P3_72406_8176675 | NC_021165.1    | Ca_kabuli_chr06 | 8176675                 | AA                              | GG                | 1946441912               |
| SNP_P3_72407_8176780 | NC_021165.1    | Ca_kabuli_chr06 | 8176780                 | TT                              | CC                | 1946441914               |
| SNP_P3_72408_8179739 | NC_021165.1    | Ca_kabuli_chr06 | 8179739                 | GG                              | CC                | 1946441916               |
| SNP_P3_72409_8182437 | NC_021165.1    | Ca_kabuli_chr06 | 8182437                 | TT                              | CC                | 1946441917               |
| SNP_P3_72410_8192965 | NC_021165.1    | Ca_kabuli_chr06 | 8192965                 | GG                              | AA                | 1946441919               |
| SNP_P3_72411_8193322 | NC_021165.1    | Ca_kabuli_chr06 | 8193322                 | TT                              | AA                | 1946441920               |
| SNP_P3_72412_8193522 | NC_021165.1    | Ca_kabuli_chr06 | 8193522                 | TT                              | GG                | 1946441922               |
| SNP_P3_72413_8195105 | NC_021165.1    | Ca_kabuli_chr06 | 8195105                 | AA                              | TT                | 1946441925               |
| SNP_P3_72414_8213022 | NC_021165.1    | Ca_kabuli_chr06 | 8213022                 | AA                              | TT                | 1946441926               |
| SNP_P3_72415_8223176 | NC_021165.1    | Ca_kabuli_chr06 | 8223176                 | TT                              | AA                | 1946441928               |
| SNP_P3_72416_8230177 | NC_021165.1    | Ca_kabuli_chr06 | 8230177                 | TT                              | GG                | 1946441929               |
| SNP_P3_72417_8230180 | NC_021165.1    | Ca_kabuli_chr06 | 8230180                 | TT                              | GG                | 1946441931               |
| SNP_P3_72423_8279402 | NC_021165.1    | Ca_kabuli_chr06 | 8279402                 | GG                              | AA                | 1946441932               |
| SNP_P3_72424_8281762 | NC_021165.1    | Ca_kabuli_chr06 | 8281762                 | AA                              | TT                | 1946441934               |
| SNP_P3_72425_8284123 | NC_021165.1    | Ca_kabuli_chr06 | 8284123                 | TT                              | AA                | 1946441936               |
| SNP_P3_72426_8298145 | NC_021165.1    | Ca_kabuli_chr06 | 8298145                 | AA                              | TT                | 1946441937               |
| SNP_P3_72427_8299602 | NC_021165.1    | Ca_kabuli_chr06 | 8299602                 | TT                              | CC                | 1946441939               |
| SNP_P3_72429_8317170 | NC_021165.1    | Ca_kabuli_chr06 | 8317170                 | TT                              | CC                | 1946441940               |
| SNP_P3_72430_8318357 | NC_021165.1    | Ca_kabuli_chr06 | 8318357                 | TT                              | CC                | 1946441942               |
| SNP_P3_72431_8333689 | NC_021165.1    | Ca_kabuli_chr06 | 8333689                 | TT                              | CC                | 1946441944               |
| SNP_P3_72432_8339078 | NC_021165.1    | Ca_kabuli_chr06 | 8339078                 | TT                              | GG                | 1946441945               |
| SNP_P3_72433_8339095 | NC_021165.1    | Ca_kabuli_chr06 | 8339095                 | AA                              | GG                | 1946441947               |
| SNP_P3_72434_8349780 | NC_021165.1    | Ca_kabuli_chr06 | 8349780                 | TT                              | AA                | 1946441948               |
| SNP_P3_72435_8364641 | NC_021165.1    | Ca_kabuli_chr06 | 8364641                 | GG                              | AA                | 1946441950               |
| SNP_P3_72437_8365374 | NC_021165.1    | Ca_kabuli_chr06 | 8365374                 | GG                              | AA                | 1946441951               |
| SNP_P3_72438_8378186 | NC_021165.1    | Ca_kabuli_chr06 | 8378186                 | AA                              | GG                | 1946441953               |
| SNP_P3_72440_8397997 | NC_021165.1    | Ca_kabuli_chr06 | 8397997                 | TT                              | CC                | 1946441954               |
| SNP_P3_72442_8417693 | NC_021165.1    | Ca_kabuli_chr06 | 8417693                 | GG                              | AA                | 1946441956               |
| SNP_P3_72443_8418651 | NC_021165.1    | Ca_kabuli_chr06 | 8418651                 | CC                              | TT                | 1946441958               |
| SNP_P3_72444_8418660 | NC_021165.1    | Ca_kabuli_chr06 | 8418660                 | TT                              | CC                | 1946441959               |
| SNP_P3_72445_8433740 | NC_021165.1    | Ca_kabuli_chr06 | 8433740                 | AA                              | GG                | 1946441961               |
| SNP_P3_72446_8448310 | NC_021165.1    | Ca_kabuli_chr06 | 8448310                 | AA                              | GG                | 1946441962               |
| SNP_P3_72447_8448335 | NC_021165.1    | Ca_kabuli_chr06 | 8448335                 | TT                              | GG                | 1946441964               |



| SNPs IDs             | Chromosome IDs | Chromosomes     | Physical positions (bp) | CDC Frontier (Reference genome) | (Pusa 256 & HPNB) | NCBI SNPdb Accession IDs |
|----------------------|----------------|-----------------|-------------------------|---------------------------------|-------------------|--------------------------|
| SNP_P3_72448_8448714 | NC_021165.1    | Ca_kabuli_chr06 | 8448714                 | GG                              | AA                | 1946441966               |
| SNP_P3_72449_8448715 | NC_021165.1    | Ca_kabuli_chr06 | 8448715                 | CC                              | TT                | 1946441967               |
| SNP_P3_72450_8448729 | NC_021165.1    | Ca_kabuli_chr06 | 8448729                 | TT                              | AA                | 1946441969               |
| SNP_P3_72451_8448741 | NC_021165.1    | Ca_kabuli_chr06 | 8448741                 | CC                              | AA                | 1946441970               |
| SNP_P3_72452_8448823 | NC_021165.1    | Ca_kabuli_chr06 | 8448823                 | CC                              | TT                | 1946441972               |
| SNP_P3_72453_8448825 | NC_021165.1    | Ca_kabuli_chr06 | 8448825                 | AA                              | GG                | 1946441973               |
| SNP_P3_72454_8448835 | NC_021165.1    | Ca_kabuli_chr06 | 8448835                 | AA                              | GG                | 1946441975               |
| SNP_P3_72455_8448846 | NC_021165.1    | Ca_kabuli_chr06 | 8448846                 | CC                              | TT                | 1946441976               |
| SNP_P3_72456_8448848 | NC_021165.1    | Ca_kabuli_chr06 | 8448848                 | AA                              | CC                | 1946441978               |
| SNP_P3_72457_8448862 | NC_021165.1    | Ca_kabuli_chr06 | 8448862                 | TT                              | GG                | 1946441980               |
| SNP_P3_72458_8451627 | NC_021165.1    | Ca_kabuli_chr06 | 8451627                 | GG                              | CC                | 1946441981               |
| SNP_P3_72459_8452359 | NC_021165.1    | Ca_kabuli_chr06 | 8452359                 | CC                              | TT                | 1946441983               |
| SNP_P3_72460_8452376 | NC_021165.1    | Ca_kabuli_chr06 | 8452376                 | AA                              | GG                | 1946441984               |
| SNP_P3_72461_8477671 | NC_021165.1    | Ca_kabuli_chr06 | 8477671                 | CC                              | TT                | 1946441986               |
| SNP_P3_72462_8478122 | NC_021165.1    | Ca_kabuli_chr06 | 8478122                 | GG                              | AA                | 1946441988               |
| SNP_P3_72463_8478613 | NC_021165.1    | Ca_kabuli_chr06 | 8478613                 | TT                              | CC                | 1946441989               |
| SNP_P3_72464_8487330 | NC_021165.1    | Ca_kabuli_chr06 | 8487330                 | TT                              | AA                | 1946441991               |
| SNP_P3_72465_8500746 | NC_021165.1    | Ca_kabuli_chr06 | 8500746                 | GG                              | AA                | 1946441992               |
| SNP_P3_72466_8522049 | NC_021165.1    | Ca_kabuli_chr06 | 8522049                 | CC                              | TT                | 1946441994               |
| SNP_P3_72467_8522061 | NC_021165.1    | Ca_kabuli_chr06 | 8522061                 | TT                              | AA                | 1946441996               |
| SNP_P3_72468_8522256 | NC_021165.1    | Ca_kabuli_chr06 | 8522256                 | TT                              | CC                | 1946441997               |
| SNP_P3_72469_8522391 | NC_021165.1    | Ca_kabuli_chr06 | 8522391                 | CC                              | TT                | 1946441999               |
| SNP_P3_72470_8522512 | NC_021165.1    | Ca_kabuli_chr06 | 8522512                 | GG                              | TT                | 1946442000               |
| SNP_P3_72471_8522576 | NC_021165.1    | Ca_kabuli_chr06 | 8522576                 | TT                              | AA                | 1946442002               |
| SNP_P3_72472_8523490 | NC_021165.1    | Ca_kabuli_chr06 | 8523490                 | GG                              | AA                | 1946442004               |
| SNP_P3_72473_8523504 | NC_021165.1    | Ca_kabuli_chr06 | 8523504                 | AA                              | GG                | 1946442005               |
| SNP_P3_72474_8523505 | NC_021165.1    | Ca_kabuli_chr06 | 8523505                 | TT                              | AA                | 1946442007               |
| SNP_P3_72475_8531517 | NC_021165.1    | Ca_kabuli_chr06 | 8531517                 | TT                              | AA                | 1946442008               |
| SNP_P3_72476_8533227 | NC_021165.1    | Ca_kabuli_chr06 | 8533227                 | CC                              | TT                | 1946442010               |
| SNP_P3_72477_8533262 | NC_021165.1    | Ca_kabuli_chr06 | 8533262                 | CC                              | TT                | 1946442012               |
| SNP_P3_72479_8539964 | NC_021165.1    | Ca_kabuli_chr06 | 8539964                 | AA                              | GG                | 1946442013               |
| SNP_P3_72480_8539968 | NC_021165.1    | Ca_kabuli_chr06 | 8539968                 | CC                              | AA                | 1946442014               |
| SNP_P3_72481_8556095 | NC_021165.1    | Ca_kabuli_chr06 | 8556095                 | GG                              | TT                | 1946442016               |
| SNP_P3_72482_8556477 | NC_021165.1    | Ca_kabuli_chr06 | 8556477                 | TT                              | CC                | 1946442017               |
| SNP_P3_72483_8557805 | NC_021165.1    | Ca_kabuli_chr06 | 8557805                 | GG                              | AA                | 1946442019               |
| SNP_P3_72484_8557809 | NC_021165.1    | Ca_kabuli_chr06 | 8557809                 | CC                              | TT                | 1946442020               |
| SNP_P3_72485_8557812 | NC_021165.1    | Ca_kabuli_chr06 | 8557812                 | AA                              | GG                | 1946442022               |
| SNP_P3_72486_8557817 | NC_021165.1    | Ca_kabuli_chr06 | 8557817                 | TT                              | AA                | 1946442024               |
| SNP_P3_72487_8558114 | NC_021165.1    | Ca_kabuli_chr06 | 8558114                 | TT                              | GG                | 1946442025               |
| SNP_P3_72488_8558126 | NC_021165.1    | Ca_kabuli_chr06 | 8558126                 | TT                              | CC                | 1946442027               |
| SNP_P3_72489_8572569 | NC_021165.1    | Ca_kabuli_chr06 | 8572569                 | GG                              | AA                | 1946442028               |
| SNP_P3_72490_8610062 | NC_021165.1    | Ca_kabuli_chr06 | 8610062                 | CC                              | GG                | 1946442030               |

| SNPs IDs             | Chromosome IDs | Chromosomes     | Physical positions (bp) | CDC Frontier (Reference genome) | (Pusa 256 & HPNB) | NCBI SNPdb Accession IDs |
|----------------------|----------------|-----------------|-------------------------|---------------------------------|-------------------|--------------------------|
| SNP_P3_72491_8616670 | NC_021165.1    | Ca_kabuli_chr06 | 8616670                 | TT                              | GG                | 1946442031               |
| SNP_P3_72492_8628526 | NC_021165.1    | Ca_kabuli_chr06 | 8628526                 | AA                              | GG                | 1946442033               |
| SNP_P3_72493_8645812 | NC_021165.1    | Ca_kabuli_chr06 | 8645812                 | CC                              | AA                | 1946442034               |
| SNP_P3_72494_8663797 | NC_021165.1    | Ca_kabuli_chr06 | 8663797                 | AA                              | GG                | 1946442036               |
| SNP_P3_72495_8675762 | NC_021165.1    | Ca_kabuli_chr06 | 8675762                 | CC                              | TT                | 1946442037               |
| SNP_P3_72496_8679602 | NC_021165.1    | Ca_kabuli_chr06 | 8679602                 | AA                              | GG                | 1946442039               |
| SNP_P3_72497_8682586 | NC_021165.1    | Ca_kabuli_chr06 | 8682586                 | AA                              | CC                | 1946442041               |
| SNP_P3_72498_8682588 | NC_021165.1    | Ca_kabuli_chr06 | 8682588                 | AA                              | GG                | 1946442042               |
| SNP_P3_72499_8698418 | NC_021165.1    | Ca_kabuli_chr06 | 8698418                 | AA                              | GG                | 1946442044               |
| SNP_P3_72502_8755862 | NC_021165.1    | Ca_kabuli_chr06 | 8755862                 | AA                              | GG                | 1946442046               |
| SNP_P3_72503_8779978 | NC_021165.1    | Ca_kabuli_chr06 | 8779978                 | TT                              | CC                | 1946442047               |
| SNP_P3_72504_8795652 | NC_021165.1    | Ca_kabuli_chr06 | 8795652                 | GG                              | AA                | 1946442049               |
| SNP_P3_72505_8796436 | NC_021165.1    | Ca_kabuli_chr06 | 8796436                 | TT                              | CC                | 1946442050               |
| SNP_P3_72506_8796585 | NC_021165.1    | Ca_kabuli_chr06 | 8796585                 | TT                              | AA                | 1946442052               |
| SNP_P3_72507_8796693 | NC_021165.1    | Ca_kabuli_chr06 | 8796693                 | CC                              | TT                | 1946442053               |
| SNP_P3_72508_8796701 | NC_021165.1    | Ca_kabuli_chr06 | 8796701                 | CC                              | TT                | 1946442055               |
| SNP_P3_72509_8796873 | NC_021165.1    | Ca_kabuli_chr06 | 8796873                 | AA                              | CC                | 1946442056               |
| SNP_P3_72510_8796939 | NC_021165.1    | Ca_kabuli_chr06 | 8796939                 | CC                              | AA                | 1946442058               |
| SNP_P3_72512_8803999 | NC_021165.1    | Ca_kabuli_chr06 | 8803999                 | AA                              | TT                | 1946442059               |
| SNP_P3_72514_8829311 | NC_021165.1    | Ca_kabuli_chr06 | 8829311                 | GG                              | AA                | 1946442061               |
| SNP_P3_72516_8835756 | NC_021165.1    | Ca_kabuli_chr06 | 8835756                 | AA                              | TT                | 1946442063               |
| SNP_P3_72517_8840365 | NC_021165.1    | Ca_kabuli_chr06 | 8840365                 | TT                              | CC                | 1946442065               |
| SNP_P3_72518_8843257 | NC_021165.1    | Ca_kabuli_chr06 | 8843257                 | TT                              | CC                | 1946442066               |
| SNP_P3_72519_8843300 | NC_021165.1    | Ca_kabuli_chr06 | 8843300                 | TT                              | CC                | 1946442068               |
| SNP_P3_72520_8847575 | NC_021165.1    | Ca_kabuli_chr06 | 8847575                 | TT                              | CC                | 1946442069               |
| SNP_P3_72521_8847577 | NC_021165.1    | Ca_kabuli_chr06 | 8847577                 | TT                              | GG                | 1946442071               |
| SNP_P3_72522_8847585 | NC_021165.1    | Ca_kabuli_chr06 | 8847585                 | CC                              | TT                | 1946442072               |
| SNP_P3_72523_8860036 | NC_021165.1    | Ca_kabuli_chr06 | 8860036                 | GG                              | AA                | 1946442074               |
| SNP_P3_72524_8861590 | NC_021165.1    | Ca_kabuli_chr06 | 8861590                 | TT                              | CC                | 1946442075               |
| SNP_P3_72526_8914484 | NC_021165.1    | Ca_kabuli_chr06 | 8914484                 | GG                              | TT                | 1946442077               |
| SNP_P3_72529_8945017 | NC_021165.1    | Ca_kabuli_chr06 | 8945017                 | TT                              | CC                | 1946442078               |
| SNP_P3_72530_8987539 | NC_021165.1    | Ca_kabuli_chr06 | 8987539                 | TT                              | CC                | 1946442080               |
| SNP_P3_72531_9000138 | NC_021165.1    | Ca_kabuli_chr06 | 9000138                 | AA                              | GG                | 1946442082               |
| SNP_P3_72532_9000470 | NC_021165.1    | Ca_kabuli_chr06 | 9000470                 | GG                              | AA                | 1946442083               |
| SNP_P3_72533_9000496 | NC_021165.1    | Ca_kabuli_chr06 | 9000496                 | GG                              | TT                | 1946442085               |
| SNP_P3_72534_9000501 | NC_021165.1    | Ca_kabuli_chr06 | 9000501                 | TT                              | GG                | 1946442087               |
| SNP_P3_72535_9002557 | NC_021165.1    | Ca_kabuli_chr06 | 9002557                 | TT                              | CC                | 1946442089               |
| SNP_P3_72536_9002932 | NC_021165.1    | Ca_kabuli_chr06 | 9002932                 | GG                              | CC                | 1946442090               |
| SNP_P3_72537_9010732 | NC_021165.1    | Ca_kabuli_chr06 | 9010732                 | AA                              | GG                | 1946442092               |
| SNP_P3_72539_9030714 | NC_021165.1    | Ca_kabuli_chr06 | 9030714                 | CC                              | GG                | 1946442094               |
| SNP_P3_72541_9056298 | NC_021165.1    | Ca_kabuli_chr06 | 9056298                 | GG                              | TT                | 1946442095               |
| SNP_P3_72542_9056299 | NC_021165.1    | Ca_kabuli_chr06 | 9056299                 | TT                              | CC                | 1946442097               |

| SNPs IDs             | Chromosome IDs | Chromosomes     | Physical positions (bp) | CDC Frontier (Reference genome) | (Pusa 256 & HPNB) | NCBI SNPdb Accession IDs |
|----------------------|----------------|-----------------|-------------------------|---------------------------------|-------------------|--------------------------|
| SNP_P3_72543_9056322 | NC_021165.1    | Ca_kabuli_chr06 | 9056322                 | TT                              | CC                | 1946442099               |
| SNP_P3_72544_9056328 | NC_021165.1    | Ca_kabuli_chr06 | 9056328                 | CC                              | GG                | 1946442101               |
| SNP_P3_72545_9056337 | NC_021165.1    | Ca_kabuli_chr06 | 9056337                 | AA                              | CC                | 1946442102               |
| SNP_P3_72546_9056865 | NC_021165.1    | Ca_kabuli_chr06 | 9056865                 | GG                              | AA                | 1946442104               |
| SNP_P3_72547_9060357 | NC_021165.1    | Ca_kabuli_chr06 | 9060357                 | CC                              | GG                | 1946442106               |
| SNP_P3_72548_9060366 | NC_021165.1    | Ca_kabuli_chr06 | 9060366                 | CC                              | TT                | 1946442107               |
| SNP_P3_72549_9060384 | NC_021165.1    | Ca_kabuli_chr06 | 9060384                 | GG                              | AA                | 1946442109               |
| SNP_P3_72551_9060465 | NC_021165.1    | Ca_kabuli_chr06 | 9060465                 | AA                              | CC                | 1946442110               |
| SNP_P3_72552_9060481 | NC_021165.1    | Ca_kabuli_chr06 | 9060481                 | GG                              | TT                | 1946442112               |
| SNP_P3_72553_9060495 | NC_021165.1    | Ca_kabuli_chr06 | 9060495                 | AA                              | CC                | 1946442113               |
| SNP_P3_72554_9060621 | NC_021165.1    | Ca_kabuli_chr06 | 9060621                 | AA                              | GG                | 1946442115               |
| SNP_P3_72555_9060653 | NC_021165.1    | Ca_kabuli_chr06 | 9060653                 | GG                              | CC                | 1946442117               |
| SNP_P3_72556_9060696 | NC_021165.1    | Ca_kabuli_chr06 | 9060696                 | CC                              | TT                | 1946442118               |
| SNP_P3_72557_9060855 | NC_021165.1    | Ca_kabuli_chr06 | 9060855                 | TT                              | CC                | 1946442120               |
| SNP_P3_72559_9101312 | NC_021165.1    | Ca_kabuli_chr06 | 9101312                 | GG                              | TT                | 1946442121               |
| SNP_P3_72560_9101468 | NC_021165.1    | Ca_kabuli_chr06 | 9101468                 | GG                              | TT                | 1946442123               |
| SNP_P3_72561_9101653 | NC_021165.1    | Ca_kabuli_chr06 | 9101653                 | TT                              | AA                | 1946442125               |
| SNP_P3_72563_9103094 | NC_021165.1    | Ca_kabuli_chr06 | 9103094                 | TT                              | AA                | 1946442126               |
| SNP_P3_72564_9104558 | NC_021165.1    | Ca_kabuli_chr06 | 9104558                 | GG                              | AA                | 1946442128               |
| SNP_P3_72566_9128629 | NC_021165.1    | Ca_kabuli_chr06 | 9128629                 | GG                              | AA                | 1946442129               |
| SNP_P3_72567_9134654 | NC_021165.1    | Ca_kabuli_chr06 | 9134654                 | GG                              | AA                | 1946442130               |
| SNP_P3_72568_9139357 | NC_021165.1    | Ca_kabuli_chr06 | 9139357                 | TT                              | CC                | 1946442131               |
| SNP_P3_72570_9203551 | NC_021165.1    | Ca_kabuli_chr06 | 9203551                 | AA                              | GG                | 1946442132               |
| SNP_P3_72572_9204000 | NC_021165.1    | Ca_kabuli_chr06 | 9204000                 | TT                              | CC                | 1946442133               |
| SNP_P3_72573_9220021 | NC_021165.1    | Ca_kabuli_chr06 | 9220021                 | GG                              | CC                | 1946442134               |
| SNP_P3_72574_9231357 | NC_021165.1    | Ca_kabuli_chr06 | 9231357                 | AA                              | GG                | 1946442135               |
| SNP_P3_72575_9238610 | NC_021165.1    | Ca_kabuli_chr06 | 9238610                 | AA                              | CC                | 1946442136               |
| SNP_P3_72576_9264123 | NC_021165.1    | Ca_kabuli_chr06 | 9264123                 | GG                              | AA                | 1946442138               |
| SNP_P3_72577_9266717 | NC_021165.1    | Ca_kabuli_chr06 | 9266717                 | CC                              | TT                | 1946442139               |
| SNP_P3_72580_9297506 | NC_021165.1    | Ca_kabuli_chr06 | 9297506                 | CC                              | GG                | 1946442141               |
| SNP_P3_72581_9297510 | NC_021165.1    | Ca_kabuli_chr06 | 9297510                 | GG                              | AA                | 1946442142               |
| SNP_P3_72582_9319004 | NC_021165.1    | Ca_kabuli_chr06 | 9319004                 | AA                              | GG                | 1946442144               |
| SNP_P3_72583_9321771 | NC_021165.1    | Ca_kabuli_chr06 | 9321771                 | TT                              | CC                | 1946442145               |
| SNP_P3_72585_9393726 | NC_021165.1    | Ca_kabuli_chr06 | 9393726                 | TT                              | CC                | 1946442147               |
| SNP_P3_72587_9436639 | NC_021165.1    | Ca_kabuli_chr06 | 9436639                 | TT                              | GG                | 1946442149               |
| SNP_P3_72588_9436640 | NC_021165.1    | Ca_kabuli_chr06 | 9436640                 | TT                              | CC                | 1946442150               |
| SNP_P3_72589_9455000 | NC_021165.1    | Ca_kabuli_chr06 | 9455000                 | TT                              | AA                | 1946442151               |
| SNP_P3_72590_9466073 | NC_021165.1    | Ca_kabuli_chr06 | 9466073                 | CC                              | TT                | 1946442153               |
| SNP_P3_72592_9519481 | NC_021165.1    | Ca_kabuli_chr06 | 9519481                 | CC                              | TT                | 1946442154               |
| SNP_P3_72593_9533955 | NC_021165.1    | Ca_kabuli_chr06 | 9533955                 | AA                              | CC                | 1946442156               |
| SNP_P3_72594_9545266 | NC_021165.1    | Ca_kabuli_chr06 | 9545266                 | GG                              | CC                | 1946442158               |
| SNP_P3_72595_9545973 | NC_021165.1    | Ca_kabuli_chr06 | 9545973                 | CC                              | AA                | 1946442159               |

| SNPs IDs              | Chromosome IDs | Chromosomes     | Physical positions (bp) | CDC Frontier (Reference genome) | (Pusa 256 & HPNB) | NCBI SNPdb Accession IDs |
|-----------------------|----------------|-----------------|-------------------------|---------------------------------|-------------------|--------------------------|
| SNP_P3_72596_9545979  | NC_021165.1    | Ca_kabuli_chr06 | 9545979                 | CC                              | TT                | 1946442161               |
| SNP_P3_72598_9579545  | NC_021165.1    | Ca_kabuli_chr06 | 9579545                 | GG                              | AA                | 1946442162               |
| SNP_P3_72601_9647394  | NC_021165.1    | Ca_kabuli_chr06 | 9647394                 | AA                              | GG                | 1946442164               |
| SNP_P3_72602_9649374  | NC_021165.1    | Ca_kabuli_chr06 | 9649374                 | TT                              | CC                | 1946442166               |
| SNP_P3_72603_9663648  | NC_021165.1    | Ca_kabuli_chr06 | 9663648                 | AA                              | TT                | 1946442167               |
| SNP_P3_72605_9683901  | NC_021165.1    | Ca_kabuli_chr06 | 9683901                 | AA                              | GG                | 1946442169               |
| SNP_P3_72606_9701681  | NC_021165.1    | Ca_kabuli_chr06 | 9701681                 | TT                              | CC                | 1946442170               |
| SNP_P3_72607_9719588  | NC_021165.1    | Ca_kabuli_chr06 | 9719588                 | GG                              | AA                | 1946442172               |
| SNP_P3_72609_9755262  | NC_021165.1    | Ca_kabuli_chr06 | 9755262                 | AA                              | TT                | 1946442174               |
| SNP_P3_72610_9757937  | NC_021165.1    | Ca_kabuli_chr06 | 9757937                 | CC                              | AA                | 1946442175               |
| SNP_P3_72611_9781434  | NC_021165.1    | Ca_kabuli_chr06 | 9781434                 | CC                              | TT                | 1946442177               |
| SNP_P3_72612_9811766  | NC_021165.1    | Ca_kabuli_chr06 | 9811766                 | TT                              | CC                | 1946442178               |
| SNP_P3_72613_9870838  | NC_021165.1    | Ca_kabuli_chr06 | 9870838                 | AA                              | CC                | 1946442180               |
| SNP_P3_72616_9884688  | NC_021165.1    | Ca_kabuli_chr06 | 9884688                 | TT                              | CC                | 1946442181               |
| SNP_P3_72617_9884692  | NC_021165.1    | Ca_kabuli_chr06 | 9884692                 | AA                              | TT                | 1946442182               |
| SNP_P3_72618_9885428  | NC_021165.1    | Ca_kabuli_chr06 | 9885428                 | GG                              | AA                | 1946442183               |
| SNP_P3_72619_9887393  | NC_021165.1    | Ca_kabuli_chr06 | 9887393                 | CC                              | TT                | 1946442184               |
| SNP_P3_72620_9901388  | NC_021165.1    | Ca_kabuli_chr06 | 9901388                 | GG                              | AA                | 1946442186               |
| SNP_P3_72621_9912639  | NC_021165.1    | Ca_kabuli_chr06 | 9912639                 | CC                              | TT                | 1946442187               |
| SNP_P3_72624_10024516 | NC_021165.1    | Ca_kabuli_chr06 | 10024516                | CC                              | TT                | 1946442189               |
| SNP_P3_72625_10067046 | NC_021165.1    | Ca_kabuli_chr06 | 10067046                | AA                              | GG                | 1946442190               |
| SNP_P3_72626_10082427 | NC_021165.1    | Ca_kabuli_chr06 | 10082427                | AA                              | TT                | 1946442192               |
| SNP_P3_72628_10107280 | NC_021165.1    | Ca_kabuli_chr06 | 10107280                | TT                              | CC                | 1946442193               |
| SNP_P3_72629_10126848 | NC_021165.1    | Ca_kabuli_chr06 | 10126848                | GG                              | AA                | 1946442195               |
| SNP_P3_72634_10170774 | NC_021165.1    | Ca_kabuli_chr06 | 10170774                | AA                              | TT                | 1946442197               |
| SNP_P3_72637_10230792 | NC_021165.1    | Ca_kabuli_chr06 | 10230792                | TT                              | CC                | 1946442198               |
| SNP_P3_72638_10230817 | NC_021165.1    | Ca_kabuli_chr06 | 10230817                | TT                              | CC                | 1946442200               |
| SNP_P3_72640_10256960 | NC_021165.1    | Ca_kabuli_chr06 | 10256960                | AA                              | GG                | 1946442202               |
| SNP_P3_72641_10272238 | NC_021165.1    | Ca_kabuli_chr06 | 10272238                | CC                              | TT                | 1946442203               |
| SNP_P3_72643_10283903 | NC_021165.1    | Ca_kabuli_chr06 | 10283903                | GG                              | TT                | 1946442205               |
| SNP_P3_72645_10321883 | NC_021165.1    | Ca_kabuli_chr06 | 10321883                | AA                              | GG                | 1946442206               |
| SNP_P3_72646_10331130 | NC_021165.1    | Ca_kabuli_chr06 | 10331130                | CC                              | TT                | 1946442208               |
| SNP_P3_72648_10372253 | NC_021165.1    | Ca_kabuli_chr06 | 10372253                | AA                              | GG                | 1946442209               |
| SNP_P3_72649_10374599 | NC_021165.1    | Ca_kabuli_chr06 | 10374599                | CC                              | GG                | 1946442211               |
| SNP_P3_72650_10375394 | NC_021165.1    | Ca_kabuli_chr06 | 10375394                | AA                              | GG                | 1946442213               |
| SNP_P3_72651_10390088 | NC_021165.1    | Ca_kabuli_chr06 | 10390088                | CC                              | TT                | 1946442214               |
| SNP_P3_72652_10416270 | NC_021165.1    | Ca_kabuli_chr06 | 10416270                | AA                              | GG                | 1946442216               |
| SNP_P3_72653_10422984 | NC_021165.1    | Ca_kabuli_chr06 | 10422984                | GG                              | AA                | 1946442217               |
| SNP_P3_72654_10425870 | NC_021165.1    | Ca_kabuli_chr06 | 10425870                | AA                              | GG                | 1946442219               |
| SNP_P3_72656_10498273 | NC_021165.1    | Ca_kabuli_chr06 | 10498273                | GG                              | AA                | 1946442220               |
| SNP_P3_72658_10502320 | NC_021165.1    | Ca_kabuli_chr06 | 10502320                | TT                              | CC                | 1946442222               |
| SNP_P3_72660_10502355 | NC_021165.1    | Ca_kabuli_chr06 | 10502355                | AA                              | GG                | 1946442223               |

| SNPs IDs              | Chromosome IDs | Chromosomes     | Physical positions (bp) | CDC Frontier (Reference genome) | (Pusa 256 & HPNB) | NCBI SNPdb Accession IDs |
|-----------------------|----------------|-----------------|-------------------------|---------------------------------|-------------------|--------------------------|
| SNP_P3_72661_10502381 | NC_021165.1    | Ca_kabuli_chr06 | 10502381                | GG                              | AA                | 1946442225               |
| SNP_P3_72662_10502387 | NC_021165.1    | Ca_kabuli_chr06 | 10502387                | AA                              | CC                | 1946442226               |
| SNP_P3_72663_10502443 | NC_021165.1    | Ca_kabuli_chr06 | 10502443                | TT                              | CC                | 1946442228               |
| SNP_P3_72664_10502508 | NC_021165.1    | Ca_kabuli_chr06 | 10502508                | TT                              | AA                | 1946442229               |
| SNP_P3_72665_10502624 | NC_021165.1    | Ca_kabuli_chr06 | 10502624                | CC                              | GG                | 1946442231               |
| SNP_P3_72666_10502630 | NC_021165.1    | Ca_kabuli_chr06 | 10502630                | AA                              | GG                | 1946442232               |
| SNP_P3_72668_10503385 | NC_021165.1    | Ca_kabuli_chr06 | 10503385                | GG                              | AA                | 1946442234               |
| SNP_P3_72669_10504500 | NC_021165.1    | Ca_kabuli_chr06 | 10504500                | CC                              | TT                | 1946442235               |
| SNP_P3_72670_10504786 | NC_021165.1    | Ca_kabuli_chr06 | 10504786                | CC                              | AA                | 1946442237               |
| SNP_P3_72671_10504795 | NC_021165.1    | Ca_kabuli_chr06 | 10504795                | GG                              | AA                | 1946442238               |
| SNP_P3_72672_10504863 | NC_021165.1    | Ca_kabuli_chr06 | 10504863                | AA                              | TT                | 1946442240               |
| SNP_P3_72673_10507051 | NC_021165.1    | Ca_kabuli_chr06 | 10507051                | GG                              | TT                | 1946442241               |
| SNP_P3_72675_10507190 | NC_021165.1    | Ca_kabuli_chr06 | 10507190                | TT                              | GG                | 1946442243               |
| SNP_P3_72676_10507239 | NC_021165.1    | Ca_kabuli_chr06 | 10507239                | CC                              | AA                | 1946442244               |
| SNP_P3_72677_10507468 | NC_021165.1    | Ca_kabuli_chr06 | 10507468                | GG                              | TT                | 1946442245               |
| SNP_P3_72678_10507686 | NC_021165.1    | Ca_kabuli_chr06 | 10507686                | TT                              | CC                | 1946442247               |
| SNP_P3_72680_10508217 | NC_021165.1    | Ca_kabuli_chr06 | 10508217                | GG                              | AA                | 1946442249               |
| SNP_P3_72681_10508218 | NC_021165.1    | Ca_kabuli_chr06 | 10508218                | TT                              | CC                | 1946442251               |
| SNP_P3_72682_10508292 | NC_021165.1    | Ca_kabuli_chr06 | 10508292                | CC                              | TT                | 1946442252               |
| SNP_P3_72683_10508295 | NC_021165.1    | Ca_kabuli_chr06 | 10508295                | GG                              | AA                | 1946442254               |
| SNP_P3_72684_10508416 | NC_021165.1    | Ca_kabuli_chr06 | 10508416                | GG                              | CC                | 1946442255               |
| SNP_P3_72685_10509517 | NC_021165.1    | Ca_kabuli_chr06 | 10509517                | GG                              | AA                | 1946442256               |
| SNP_P3_72686_10509893 | NC_021165.1    | Ca_kabuli_chr06 | 10509893                | GG                              | AA                | 1946442258               |
| SNP_P3_72687_10510287 | NC_021165.1    | Ca_kabuli_chr06 | 10510287                | GG                              | AA                | 1946442259               |
| SNP_P3_72689_10511301 | NC_021165.1    | Ca_kabuli_chr06 | 10511301                | AA                              | GG                | 1946442261               |
| SNP_P3_72693_10515445 | NC_021165.1    | Ca_kabuli_chr06 | 10515445                | CC                              | TT                | 1946442262               |
| SNP_P3_72694_10517374 | NC_021165.1    | Ca_kabuli_chr06 | 10517374                | TT                              | GG                | 1946442264               |
| SNP_P3_72695_10517548 | NC_021165.1    | Ca_kabuli_chr06 | 10517548                | AA                              | GG                | 1946442266               |
| SNP_P3_72696_10551583 | NC_021165.1    | Ca_kabuli_chr06 | 10551583                | GG                              | AA                | 1946442267               |
| SNP_P3_72697_10552343 | NC_021165.1    | Ca_kabuli_chr06 | 10552343                | AA                              | CC                | 1946442269               |
| SNP_P3_72698_10553281 | NC_021165.1    | Ca_kabuli_chr06 | 10553281                | TT                              | AA                | 1946442270               |
| SNP_P3_72699_10555983 | NC_021165.1    | Ca_kabuli_chr06 | 10555983                | GG                              | AA                | 1946442272               |
| SNP_P3_72700_10556047 | NC_021165.1    | Ca_kabuli_chr06 | 10556047                | CC                              | TT                | 1946442273               |
| SNP_P3_72701_10556124 | NC_021165.1    | Ca_kabuli_chr06 | 10556124                | TT                              | AA                | 1946442275               |
| SNP_P3_72702_10556557 | NC_021165.1    | Ca_kabuli_chr06 | 10556557                | TT                              | GG                | 1946442276               |
| SNP_P3_72703_10556803 | NC_021165.1    | Ca_kabuli_chr06 | 10556803                | CC                              | TT                | 1946442277               |
| SNP_P3_72705_10556928 | NC_021165.1    | Ca_kabuli_chr06 | 10556928                | CC                              | TT                | 1946442279               |
| SNP_P3_72706_10556940 | NC_021165.1    | Ca_kabuli_chr06 | 10556940                | GG                              | AA                | 1946442280               |
| SNP_P3_72707_10556948 | NC_021165.1    | Ca_kabuli_chr06 | 10556948                | CC                              | TT                | 1946442282               |
| SNP_P3_72708_10556954 | NC_021165.1    | Ca_kabuli_chr06 | 10556954                | GG                              | AA                | 1946442283               |
| SNP_P3_72709_10556956 | NC_021165.1    | Ca_kabuli_chr06 | 10556956                | GG                              | TT                | 1946442285               |
| SNP_P3_72710_10556982 | NC_021165.1    | Ca_kabuli_chr06 | 10556982                | CC                              | TT                | 1946442286               |

| SNPs IDs              | Chromosome IDs | Chromosomes     | Physical positions (bp) | CDC Frontier (Reference genome) | (Pusa 256 & HPNB) | NCBI SNPdb Accession IDs |
|-----------------------|----------------|-----------------|-------------------------|---------------------------------|-------------------|--------------------------|
| SNP_P3_72711_10559448 | NC_021165.1    | Ca_kabuli_chr06 | 10559448                | TT                              | CC                | 1946442288               |
| SNP_P3_72712_10559944 | NC_021165.1    | Ca_kabuli_chr06 | 10559944                | AA                              | GG                | 1946442289               |
| SNP_P3_72713_10560139 | NC_021165.1    | Ca_kabuli_chr06 | 10560139                | AA                              | TT                | 1946442291               |
| SNP_P3_72714_10560157 | NC_021165.1    | Ca_kabuli_chr06 | 10560157                | TT                              | CC                | 1946442292               |
| SNP_P3_72715_10560164 | NC_021165.1    | Ca_kabuli_chr06 | 10560164                | CC                              | TT                | 1946442294               |
| SNP_P3_72716_10560167 | NC_021165.1    | Ca_kabuli_chr06 | 10560167                | GG                              | AA                | 1946442295               |
| SNP_P3_72717_10560754 | NC_021165.1    | Ca_kabuli_chr06 | 10560754                | AA                              | TT                | 1946442297               |
| SNP_P3_72718_10560761 | NC_021165.1    | Ca_kabuli_chr06 | 10560761                | CC                              | TT                | 1946442298               |
| SNP_P3_72719_10560762 | NC_021165.1    | Ca_kabuli_chr06 | 10560762                | AA                              | GG                | 1946442299               |
| SNP_P3_72720_10562007 | NC_021165.1    | Ca_kabuli_chr06 | 10562007                | AA                              | TT                | 1946442301               |
| SNP_P3_72721_10562208 | NC_021165.1    | Ca_kabuli_chr06 | 10562208                | CC                              | TT                | 1946442302               |
| SNP_P3_72722_10562817 | NC_021165.1    | Ca_kabuli_chr06 | 10562817                | AA                              | TT                | 1946442304               |
| SNP_P3_72723_10563084 | NC_021165.1    | Ca_kabuli_chr06 | 10563084                | AA                              | TT                | 1946442305               |
| SNP_P3_72724_10563969 | NC_021165.1    | Ca_kabuli_chr06 | 10563969                | CC                              | TT                | 1946442307               |
| SNP_P3_72725_10564748 | NC_021165.1    | Ca_kabuli_chr06 | 10564748                | CC                              | GG                | 1946442308               |
| SNP_P3_72726_10566137 | NC_021165.1    | Ca_kabuli_chr06 | 10566137                | AA                              | CC                | 1946442309               |
| SNP_P3_72727_10566181 | NC_021165.1    | Ca_kabuli_chr06 | 10566181                | AA                              | GG                | 1946442311               |
| SNP_P3_72728_10566241 | NC_021165.1    | Ca_kabuli_chr06 | 10566241                | AA                              | GG                | 1946442312               |
| SNP_P3_72729_10566393 | NC_021165.1    | Ca_kabuli_chr06 | 10566393                | AA                              | CC                | 1946442314               |
| SNP_P3_72730_10566396 | NC_021165.1    | Ca_kabuli_chr06 | 10566396                | GG                              | TT                | 1946442315               |
| SNP_P3_72731_10566416 | NC_021165.1    | Ca_kabuli_chr06 | 10566416                | TT                              | CC                | 1946442316               |
| SNP_P3_72732_10566453 | NC_021165.1    | Ca_kabuli_chr06 | 10566453                | GG                              | AA                | 1946442318               |
| SNP_P3_72733_10566868 | NC_021165.1    | Ca_kabuli_chr06 | 10566868                | CC                              | TT                | 1946442320               |
| SNP_P3_72734_10566906 | NC_021165.1    | Ca_kabuli_chr06 | 10566906                | CC                              | AA                | 1946442321               |
| SNP_P3_72735_10566919 | NC_021165.1    | Ca_kabuli_chr06 | 10566919                | TT                              | GG                | 1946442323               |
| SNP_P3_72736_10566994 | NC_021165.1    | Ca_kabuli_chr06 | 10566994                | GG                              | AA                | 1946442324               |
| SNP_P3_72737_10567156 | NC_021165.1    | Ca_kabuli_chr06 | 10567156                | AA                              | GG                | 1946442326               |
| SNP_P3_72738_10567211 | NC_021165.1    | Ca_kabuli_chr06 | 10567211                | GG                              | CC                | 1946442327               |
| SNP_P3_72739_10569827 | NC_021165.1    | Ca_kabuli_chr06 | 10569827                | GG                              | AA                | 1946442328               |
| SNP_P3_72740_10571908 | NC_021165.1    | Ca_kabuli_chr06 | 10571908                | AA                              | GG                | 1946442330               |
| SNP_P3_72745_10576157 | NC_021165.1    | Ca_kabuli_chr06 | 10576157                | TT                              | CC                | 1946442331               |
| SNP_P3_72747_10576388 | NC_021165.1    | Ca_kabuli_chr06 | 10576388                | CC                              | TT                | 1946442333               |
| SNP_P3_72748_10576413 | NC_021165.1    | Ca_kabuli_chr06 | 10576413                | TT                              | GG                | 1946442334               |
| SNP_P3_72749_10576713 | NC_021165.1    | Ca_kabuli_chr06 | 10576713                | CC                              | TT                | 1946442336               |
| SNP_P3_72750_10576736 | NC_021165.1    | Ca_kabuli_chr06 | 10576736                | CC                              | TT                | 1946442337               |
| SNP_P3_72751_10576758 | NC_021165.1    | Ca_kabuli_chr06 | 10576758                | AA                              | GG                | 1946442339               |
| SNP_P3_72752_10576760 | NC_021165.1    | Ca_kabuli_chr06 | 10576760                | AA                              | GG                | 1946442340               |
| SNP_P3_72753_10576777 | NC_021165.1    | Ca_kabuli_chr06 | 10576777                | GG                              | AA                | 1946442342               |
| SNP_P3_72754_10576790 | NC_021165.1    | Ca_kabuli_chr06 | 10576790                | AA                              | GG                | 1946442343               |
| SNP_P3_72755_10577044 | NC_021165.1    | Ca_kabuli_chr06 | 10577044                | CC                              | TT                | 1946442345               |
| SNP_P3_72756_10577072 | NC_021165.1    | Ca_kabuli_chr06 | 10577072                | TT                              | AA                | 1946442346               |
| SNP_P3_72757_10577092 | NC_021165.1    | Ca_kabuli_chr06 | 10577092                | CC                              | TT                | 1946442348               |

| SNPs IDs              | Chromosome IDs | Chromosomes     | Physical positions (bp) | CDC Frontier (Reference genome) | (Pusa 256 & HPNB) | NCBI SNPdb Accession IDs |
|-----------------------|----------------|-----------------|-------------------------|---------------------------------|-------------------|--------------------------|
| SNP_P3_72758_10577097 | NC_021165.1    | Ca_kabuli_chr06 | 10577097                | TT                              | CC                | 1946442349               |
| SNP_P3_72759_10577328 | NC_021165.1    | Ca_kabuli_chr06 | 10577328                | GG                              | AA                | 1946442351               |
| SNP_P3_72760_10577365 | NC_021165.1    | Ca_kabuli_chr06 | 10577365                | TT                              | CC                | 1946442352               |
| SNP_P3_72761_10577369 | NC_021165.1    | Ca_kabuli_chr06 | 10577369                | GG                              | AA                | 1946442354               |
| SNP_P3_72762_10577427 | NC_021165.1    | Ca_kabuli_chr06 | 10577427                | AA                              | TT                | 1946442355               |
| SNP_P3_72764_10578307 | NC_021165.1    | Ca_kabuli_chr06 | 10578307                | CC                              | GG                | 1946442357               |
| SNP_P3_72765_10578325 | NC_021165.1    | Ca_kabuli_chr06 | 10578325                | GG                              | AA                | 1946442359               |
| SNP_P3_72766_10578404 | NC_021165.1    | Ca_kabuli_chr06 | 10578404                | CC                              | AA                | 1946442360               |
| SNP_P3_72767_10578553 | NC_021165.1    | Ca_kabuli_chr06 | 10578553                | TT                              | CC                | 1946442361               |
| SNP_P3_72768_10578960 | NC_021165.1    | Ca_kabuli_chr06 | 10578960                | TT                              | GG                | 1946442363               |
| SNP_P3_72769_10578970 | NC_021165.1    | Ca_kabuli_chr06 | 10578970                | GG                              | AA                | 1946442364               |
| SNP_P3_72770_10578979 | NC_021165.1    | Ca_kabuli_chr06 | 10578979                | AA                              | CC                | 1946442366               |
| SNP_P3_72771_10578988 | NC_021165.1    | Ca_kabuli_chr06 | 10578988                | GG                              | CC                | 1946442367               |
| SNP_P3_72772_10579352 | NC_021165.1    | Ca_kabuli_chr06 | 10579352                | TT                              | CC                | 1946442369               |
| SNP_P3_72773_10582297 | NC_021165.1    | Ca_kabuli_chr06 | 10582297                | CC                              | TT                | 1946442370               |
| SNP_P3_72774_10583261 | NC_021165.1    | Ca_kabuli_chr06 | 10583261                | GG                              | AA                | 1946442372               |
| SNP_P3_72775_10583324 | NC_021165.1    | Ca_kabuli_chr06 | 10583324                | GG                              | CC                | 1946442373               |
| SNP_P3_72776_10583696 | NC_021165.1    | Ca_kabuli_chr06 | 10583696                | TT                              | AA                | 1946442375               |
| SNP_P3_72777_10584947 | NC_021165.1    | Ca_kabuli_chr06 | 10584947                | AA                              | GG                | 1946442376               |
| SNP_P3_72778_10584950 | NC_021165.1    | Ca_kabuli_chr06 | 10584950                | TT                              | GG                | 1946442378               |
| SNP_P3_72779_10585800 | NC_021165.1    | Ca_kabuli_chr06 | 10585800                | CC                              | TT                | 1946442379               |
| SNP_P3_72780_10585834 | NC_021165.1    | Ca_kabuli_chr06 | 10585834                | AA                              | TT                | 1946442381               |
| SNP_P3_72781_10585841 | NC_021165.1    | Ca_kabuli_chr06 | 10585841                | TT                              | AA                | 1946442382               |
| SNP_P3_72782_10585848 | NC_021165.1    | Ca_kabuli_chr06 | 10585848                | TT                              | CC                | 1946442384               |
| SNP_P3_72783_10586064 | NC_021165.1    | Ca_kabuli_chr06 | 10586064                | GG                              | AA                | 1946442385               |
| SNP_P3_72784_10586196 | NC_021165.1    | Ca_kabuli_chr06 | 10586196                | GG                              | CC                | 1946442387               |
| SNP_P3_72785_10586197 | NC_021165.1    | Ca_kabuli_chr06 | 10586197                | GG                              | AA                | 1946442388               |
| SNP_P3_72786_10586198 | NC_021165.1    | Ca_kabuli_chr06 | 10586198                | CC                              | AA                | 1946442390               |
| SNP_P3_72788_10586236 | NC_021165.1    | Ca_kabuli_chr06 | 10586236                | AA                              | GG                | 1946442391               |
| SNP_P3_72789_10586247 | NC_021165.1    | Ca_kabuli_chr06 | 10586247                | AA                              | GG                | 1946442392               |
| SNP_P3_72790_10586248 | NC_021165.1    | Ca_kabuli_chr06 | 10586248                | GG                              | AA                | 1946442394               |
| SNP_P3_72791_10586287 | NC_021165.1    | Ca_kabuli_chr06 | 10586287                | AA                              | GG                | 1946442395               |
| SNP_P3_72792_10586291 | NC_021165.1    | Ca_kabuli_chr06 | 10586291                | CC                              | TT                | 1946442397               |
| SNP_P3_72793_10586298 | NC_021165.1    | Ca_kabuli_chr06 | 10586298                | AA                              | CC                | 1946442399               |
| SNP_P3_72794_10586305 | NC_021165.1    | Ca_kabuli_chr06 | 10586305                | TT                              | CC                | 1946442400               |
| SNP_P3_72795_10586314 | NC_021165.1    | Ca_kabuli_chr06 | 10586314                | TT                              | CC                | 1946442402               |
| SNP_P3_72796_10586336 | NC_021165.1    | Ca_kabuli_chr06 | 10586336                | AA                              | GG                | 1946442403               |
| SNP_P3_72797_10586337 | NC_021165.1    | Ca_kabuli_chr06 | 10586337                | GG                              | AA                | 1946442405               |
| SNP_P3_72800_10586847 | NC_021165.1    | Ca_kabuli_chr06 | 10586847                | AA                              | GG                | 1946442406               |
| SNP_P3_72801_10586941 | NC_021165.1    | Ca_kabuli_chr06 | 10586941                | GG                              | CC                | 1946442408               |
| SNP_P3_72802_10587173 | NC_021165.1    | Ca_kabuli_chr06 | 10587173                | CC                              | GG                | 1946442409               |
| SNP_P3_72803_10587249 | NC_021165.1    | Ca_kabuli_chr06 | 10587249                | GG                              | AA                | 1946442411               |

| SNPs IDs              | Chromosome IDs | Chromosomes     | Physical positions (bp) | CDC Frontier (Reference genome) | (Pusa 256 & HPNB) | NCBI SNPdb Accession IDs |
|-----------------------|----------------|-----------------|-------------------------|---------------------------------|-------------------|--------------------------|
| SNP_P3_72804_10587483 | NC_021165.1    | Ca_kabuli_chr06 | 10587483                | TT                              | CC                | 1946442412               |
| SNP_P3_72805_10588633 | NC_021165.1    | Ca_kabuli_chr06 | 10588633                | GG                              | AA                | 1946442414               |
| SNP_P3_72806_10588822 | NC_021165.1    | Ca_kabuli_chr06 | 10588822                | GG                              | AA                | 1946442415               |
| SNP_P3_72808_10589388 | NC_021165.1    | Ca_kabuli_chr06 | 10589388                | AA                              | CC                | 1946442417               |
| SNP_P3_72809_10589566 | NC_021165.1    | Ca_kabuli_chr06 | 10589566                | AA                              | GG                | 1946442418               |
| SNP_P3_72810_10591187 | NC_021165.1    | Ca_kabuli_chr06 | 10591187                | TT                              | AA                | 1946442420               |
| SNP_P3_72812_10591498 | NC_021165.1    | Ca_kabuli_chr06 | 10591498                | CC                              | TT                | 1946442421               |
| SNP_P3_72813_10593635 | NC_021165.1    | Ca_kabuli_chr06 | 10593635                | AA                              | TT                | 1946442423               |
| SNP_P3_72815_10594803 | NC_021165.1    | Ca_kabuli_chr06 | 10594803                | TT                              | CC                | 1946442425               |
| SNP_P3_72816_10594840 | NC_021165.1    | Ca_kabuli_chr06 | 10594840                | CC                              | AA                | 1946442426               |
| SNP_P3_72817_10594887 | NC_021165.1    | Ca_kabuli_chr06 | 10594887                | TT                              | CC                | 1946442428               |
| SNP_P3_72818_10596215 | NC_021165.1    | Ca_kabuli_chr06 | 10596215                | AA                              | GG                | 1946442429               |
| SNP_P3_72819_10596398 | NC_021165.1    | Ca_kabuli_chr06 | 10596398                | TT                              | CC                | 1946442431               |
| SNP_P3_72820_10596399 | NC_021165.1    | Ca_kabuli_chr06 | 10596399                | CC                              | TT                | 1946442432               |
| SNP_P3_72821_10596404 | NC_021165.1    | Ca_kabuli_chr06 | 10596404                | TT                              | GG                | 1946442434               |
| SNP_P3_72822_10596405 | NC_021165.1    | Ca_kabuli_chr06 | 10596405                | AA                              | TT                | 1946442436               |
| SNP_P3_72823_10596416 | NC_021165.1    | Ca_kabuli_chr06 | 10596416                | AA                              | GG                | 1946442438               |
| SNP_P3_72824_10598079 | NC_021165.1    | Ca_kabuli_chr06 | 10598079                | AA                              | CC                | 1946442439               |
| SNP_P3_72825_10598103 | NC_021165.1    | Ca_kabuli_chr06 | 10598103                | AA                              | GG                | 1946442441               |
| SNP_P3_72826_10598141 | NC_021165.1    | Ca_kabuli_chr06 | 10598141                | AA                              | GG                | 1946442442               |
| SNP_P3_72827_10598498 | NC_021165.1    | Ca_kabuli_chr06 | 10598498                | AA                              | GG                | 1946442444               |
| SNP_P3_72828_10598693 | NC_021165.1    | Ca_kabuli_chr06 | 10598693                | TT                              | CC                | 1946442445               |
| SNP_P3_72829_10598694 | NC_021165.1    | Ca_kabuli_chr06 | 10598694                | GG                              | AA                | 1946442447               |
| SNP_P3_72830_10599554 | NC_021165.1    | Ca_kabuli_chr06 | 10599554                | TT                              | CC                | 1946442449               |
| SNP_P3_72832_10600485 | NC_021165.1    | Ca_kabuli_chr06 | 10600485                | GG                              | AA                | 1946442450               |
| SNP_P3_72833_10601005 | NC_021165.1    | Ca_kabuli_chr06 | 10601005                | CC                              | TT                | 1946442452               |
| SNP_P3_72834_10601202 | NC_021165.1    | Ca_kabuli_chr06 | 10601202                | AA                              | GG                | 1946442453               |
| SNP_P3_72835_10601207 | NC_021165.1    | Ca_kabuli_chr06 | 10601207                | CC                              | TT                | 1946442455               |
| SNP_P3_72836_10601226 | NC_021165.1    | Ca_kabuli_chr06 | 10601226                | GG                              | AA                | 1946442456               |
| SNP_P3_72837_10601247 | NC_021165.1    | Ca_kabuli_chr06 | 10601247                | GG                              | AA                | 1946442458               |
| SNP_P3_72838_10601578 | NC_021165.1    | Ca_kabuli_chr06 | 10601578                | AA                              | GG                | 1946442459               |
| SNP_P3_72839_10605099 | NC_021165.1    | Ca_kabuli_chr06 | 10605099                | GG                              | TT                | 1946442461               |
| SNP_P3_72840_10606205 | NC_021165.1    | Ca_kabuli_chr06 | 10606205                | GG                              | AA                | 1946442463               |
| SNP_P3_72841_10606410 | NC_021165.1    | Ca_kabuli_chr06 | 10606410                | TT                              | AA                | 1946442464               |
| SNP_P3_72842_10606482 | NC_021165.1    | Ca_kabuli_chr06 | 10606482                | AA                              | TT                | 1946442466               |
| SNP_P3_72844_10606668 | NC_021165.1    | Ca_kabuli_chr06 | 10606668                | CC                              | TT                | 1946442467               |
| SNP_P3_72845_10608756 | NC_021165.1    | Ca_kabuli_chr06 | 10608756                | TT                              | AA                | 1946442469               |
| SNP_P3_72846_10608850 | NC_021165.1    | Ca_kabuli_chr06 | 10608850                | AA                              | GG                | 1946442470               |
| SNP_P3_72848_10609075 | NC_021165.1    | Ca_kabuli_chr06 | 10609075                | AA                              | GG                | 1946442472               |
| SNP_P3_72849_10609089 | NC_021165.1    | Ca_kabuli_chr06 | 10609089                | GG                              | AA                | 1946442473               |
| SNP_P3_72850_10609211 | NC_021165.1    | Ca_kabuli_chr06 | 10609211                | CC                              | TT                | 1946442475               |
| SNP_P3_72851_10609282 | NC_021165.1    | Ca_kabuli_chr06 | 10609282                | AA                              | GG                | 1946442476               |



| SNPs IDs              | Chromosome IDs | Chromosomes     | Physical positions (bp) | CDC Frontier (Reference genome) | (Pusa 256 & HPNB) | NCBI SNPdb Accession IDs |
|-----------------------|----------------|-----------------|-------------------------|---------------------------------|-------------------|--------------------------|
| SNP_P3_72852_10609342 | NC_021165.1    | Ca_kabuli_chr06 | 10609342                | TT                              | CC                | 1946442478               |
| SNP_P3_72854_10609492 | NC_021165.1    | Ca_kabuli_chr06 | 10609492                | GG                              | AA                | 1946442480               |
| SNP_P3_72855_10609511 | NC_021165.1    | Ca_kabuli_chr06 | 10609511                | CC                              | TT                | 1946442482               |
| SNP_P3_72856_10609534 | NC_021165.1    | Ca_kabuli_chr06 | 10609534                | GG                              | AA                | 1946442483               |
| SNP_P3_72857_10609546 | NC_021165.1    | Ca_kabuli_chr06 | 10609546                | TT                              | CC                | 1946442485               |
| SNP_P3_72858_10609563 | NC_021165.1    | Ca_kabuli_chr06 | 10609563                | GG                              | AA                | 1946442486               |
| SNP_P3_72859_10609567 | NC_021165.1    | Ca_kabuli_chr06 | 10609567                | GG                              | AA                | 1946442488               |
| SNP_P3_72860_10609574 | NC_021165.1    | Ca_kabuli_chr06 | 10609574                | AA                              | GG                | 1946442489               |
| SNP_P3_72861_10609750 | NC_021165.1    | Ca_kabuli_chr06 | 10609750                | TT                              | CC                | 1946442491               |
| SNP_P3_72862_10609752 | NC_021165.1    | Ca_kabuli_chr06 | 10609752                | AA                              | GG                | 1946442492               |
| SNP_P3_72863_10609754 | NC_021165.1    | Ca_kabuli_chr06 | 10609754                | TT                              | AA                | 1946442494               |
| SNP_P3_72865_10610217 | NC_021165.1    | Ca_kabuli_chr06 | 10610217                | GG                              | TT                | 1946442495               |
| SNP_P3_72867_10611470 | NC_021165.1    | Ca_kabuli_chr06 | 10611470                | AA                              | GG                | 1946442497               |
| SNP_P3_72868_10612018 | NC_021165.1    | Ca_kabuli_chr06 | 10612018                | AA                              | CC                | 1946442499               |
| SNP_P3_72869_10614525 | NC_021165.1    | Ca_kabuli_chr06 | 10614525                | AA                              | GG                | 1946442500               |
| SNP_P3_72871_10616560 | NC_021165.1    | Ca_kabuli_chr06 | 10616560                | CC                              | TT                | 1946442502               |
| SNP_P3_72872_10616978 | NC_021165.1    | Ca_kabuli_chr06 | 10616978                | TT                              | AA                | 1946442503               |
| SNP_P3_72874_10617158 | NC_021165.1    | Ca_kabuli_chr06 | 10617158                | AA                              | GG                | 1946442505               |
| SNP_P3_72875_10617163 | NC_021165.1    | Ca_kabuli_chr06 | 10617163                | AA                              | TT                | 1946442506               |
| SNP_P3_72876_10617289 | NC_021165.1    | Ca_kabuli_chr06 | 10617289                | AA                              | GG                | 1946442507               |
| SNP_P3_72877_10617332 | NC_021165.1    | Ca_kabuli_chr06 | 10617332                | TT                              | GG                | 1946442509               |
| SNP_P3_72878_10618619 | NC_021165.1    | Ca_kabuli_chr06 | 10618619                | GG                              | AA                | 1946442510               |
| SNP_P3_72880_10619362 | NC_021165.1    | Ca_kabuli_chr06 | 10619362                | TT                              | CC                | 1946442512               |
| SNP_P3_72881_10619405 | NC_021165.1    | Ca_kabuli_chr06 | 10619405                | TT                              | CC                | 1946442513               |
| SNP_P3_72882_10619443 | NC_021165.1    | Ca_kabuli_chr06 | 10619443                | TT                              | AA                | 1946442515               |
| SNP_P3_72883_10619674 | NC_021165.1    | Ca_kabuli_chr06 | 10619674                | TT                              | GG                | 1946442516               |
| SNP_P3_72884_10619678 | NC_021165.1    | Ca_kabuli_chr06 | 10619678                | GG                              | CC                | 1946442518               |
| SNP_P3_72885_10619696 | NC_021165.1    | Ca_kabuli_chr06 | 10619696                | CC                              | TT                | 1946442520               |
| SNP_P3_72886_10619859 | NC_021165.1    | Ca_kabuli_chr06 | 10619859                | AA                              | GG                | 1946442521               |
| SNP_P3_72887_10620242 | NC_021165.1    | Ca_kabuli_chr06 | 10620242                | TT                              | AA                | 1946442523               |
| SNP_P3_72890_10620712 | NC_021165.1    | Ca_kabuli_chr06 | 10620712                | CC                              | AA                | 1946442525               |
| SNP_P3_72891_10620736 | NC_021165.1    | Ca_kabuli_chr06 | 10620736                | CC                              | TT                | 1946442526               |
| SNP_P3_72892_10621635 | NC_021165.1    | Ca_kabuli_chr06 | 10621635                | GG                              | TT                | 1946442527               |
| SNP_P3_72893_10621670 | NC_021165.1    | Ca_kabuli_chr06 | 10621670                | AA                              | GG                | 1946442529               |
| SNP_P3_72895_10621995 | NC_021165.1    | Ca_kabuli_chr06 | 10621995                | CC                              | TT                | 1946442531               |
| SNP_P3_72896_10622524 | NC_021165.1    | Ca_kabuli_chr06 | 10622524                | CC                              | TT                | 1946442532               |
| SNP_P3_72897_10622538 | NC_021165.1    | Ca_kabuli_chr06 | 10622538                | TT                              | CC                | 1946442534               |
| SNP_P3_72898_10622750 | NC_021165.1    | Ca_kabuli_chr06 | 10622750                | AA                              | TT                | 1946442535               |
| SNP_P3_72899_10622811 | NC_021165.1    | Ca_kabuli_chr06 | 10622811                | TT                              | AA                | 1946442537               |
| SNP_P3_72900_10622815 | NC_021165.1    | Ca_kabuli_chr06 | 10622815                | TT                              | CC                | 1946442539               |
| SNP_P3_72901_10622876 | NC_021165.1    | Ca_kabuli_chr06 | 10622876                | CC                              | AA                | 1946442540               |
| SNP_P3_72902_10623152 | NC_021165.1    | Ca_kabuli_chr06 | 10623152                | TT                              | CC                | 1946442542               |

| SNPs IDs              | Chromosome IDs | Chromosomes     | Physical positions (bp) | CDC Frontier (Reference genome) | (Pusa 256 & HPNB) | NCBI SNPdb Accession IDs |
|-----------------------|----------------|-----------------|-------------------------|---------------------------------|-------------------|--------------------------|
| SNP_P3_72903_10623164 | NC_021165.1    | Ca_kabuli_chr06 | 10623164                | TT                              | GG                | 1946442543               |
| SNP_P3_72904_10623168 | NC_021165.1    | Ca_kabuli_chr06 | 10623168                | AA                              | CC                | 1946442545               |
| SNP_P3_72906_10624144 | NC_021165.1    | Ca_kabuli_chr06 | 10624144                | TT                              | AA                | 1946442547               |
| SNP_P3_72907_10624179 | NC_021165.1    | Ca_kabuli_chr06 | 10624179                | TT                              | CC                | 1946442548               |
| SNP_P3_72908_10624180 | NC_021165.1    | Ca_kabuli_chr06 | 10624180                | CC                              | AA                | 1946442550               |
| SNP_P3_72909_10624218 | NC_021165.1    | Ca_kabuli_chr06 | 10624218                | CC                              | AA                | 1946442551               |
| SNP_P3_72910_10624241 | NC_021165.1    | Ca_kabuli_chr06 | 10624241                | CC                              | TT                | 1946442553               |
| SNP_P3_72911_10624254 | NC_021165.1    | Ca_kabuli_chr06 | 10624254                | TT                              | AA                | 1946442555               |
| SNP_P3_72912_10624453 | NC_021165.1    | Ca_kabuli_chr06 | 10624453                | GG                              | TT                | 1946442556               |
| SNP_P3_72913_10624458 | NC_021165.1    | Ca_kabuli_chr06 | 10624458                | GG                              | CC                | 1946442558               |
| SNP_P3_72914_10624481 | NC_021165.1    | Ca_kabuli_chr06 | 10624481                | GG                              | TT                | 1946442559               |
| SNP_P3_72915_10624486 | NC_021165.1    | Ca_kabuli_chr06 | 10624486                | CC                              | TT                | 1946442561               |
| SNP_P3_72916_10624487 | NC_021165.1    | Ca_kabuli_chr06 | 10624487                | TT                              | CC                | 1946442563               |
| SNP_P3_72917_10624500 | NC_021165.1    | Ca_kabuli_chr06 | 10624500                | AA                              | TT                | 1946442564               |
| SNP_P3_72919_10625671 | NC_021165.1    | Ca_kabuli_chr06 | 10625671                | GG                              | AA                | 1946442566               |
| SNP_P3_72920_10626894 | NC_021165.1    | Ca_kabuli_chr06 | 10626894                | AA                              | GG                | 1946442569               |
| SNP_P3_72921_10630195 | NC_021165.1    | Ca_kabuli_chr06 | 10630195                | CC                              | AA                | 1946442570               |
| SNP_P3_72922_10630434 | NC_021165.1    | Ca_kabuli_chr06 | 10630434                | GG                              | TT                | 1946442572               |
| SNP_P3_72924_10631937 | NC_021165.1    | Ca_kabuli_chr06 | 10631937                | TT                              | CC                | 1946442573               |
| SNP_P3_72925_10632087 | NC_021165.1    | Ca_kabuli_chr06 | 10632087                | CC                              | TT                | 1946442576               |
| SNP_P3_72928_10646168 | NC_021165.1    | Ca_kabuli_chr06 | 10646168                | GG                              | TT                | 1946442577               |
| SNP_P3_72929_10646184 | NC_021165.1    | Ca_kabuli_chr06 | 10646184                | GG                              | AA                | 1946442579               |
| SNP_P3_72930_10646198 | NC_021165.1    | Ca_kabuli_chr06 | 10646198                | GG                              | CC                | 1946442580               |
| SNP_P3_72931_10646461 | NC_021165.1    | Ca_kabuli_chr06 | 10646461                | CC                              | TT                | 1946442582               |
| SNP_P3_72932_10647609 | NC_021165.1    | Ca_kabuli_chr06 | 10647609                | TT                              | CC                | 1946442583               |
| SNP_P3_72933_10647841 | NC_021165.1    | Ca_kabuli_chr06 | 10647841                | CC                              | TT                | 1946442585               |
| SNP_P3_72934_10647882 | NC_021165.1    | Ca_kabuli_chr06 | 10647882                | TT                              | AA                | 1946442586               |
| SNP_P3_72935_10648405 | NC_021165.1    | Ca_kabuli_chr06 | 10648405                | TT                              | CC                | 1946442588               |
| SNP_P3_72936_10648480 | NC_021165.1    | Ca_kabuli_chr06 | 10648480                | CC                              | TT                | 1946442590               |
| SNP_P3_72937_10649821 | NC_021165.1    | Ca_kabuli_chr06 | 10649821                | GG                              | AA                | 1946442592               |
| SNP_P3_72938_10649825 | NC_021165.1    | Ca_kabuli_chr06 | 10649825                | CC                              | TT                | 1946442594               |
| SNP_P3_72939_10649881 | NC_021165.1    | Ca_kabuli_chr06 | 10649881                | CC                              | TT                | 1946442595               |
| SNP_P3_72940_10649883 | NC_021165.1    | Ca_kabuli_chr06 | 10649883                | CC                              | GG                | 1946442596               |
| SNP_P3_72942_10650821 | NC_021165.1    | Ca_kabuli_chr06 | 10650821                | GG                              | AA                | 1946442598               |
| SNP_P3_72943_10651386 | NC_021165.1    | Ca_kabuli_chr06 | 10651386                | GG                              | AA                | 1946442599               |
| SNP_P3_72944_10651637 | NC_021165.1    | Ca_kabuli_chr06 | 10651637                | AA                              | TT                | 1946442601               |
| SNP_P3_72945_10652062 | NC_021165.1    | Ca_kabuli_chr06 | 10652062                | AA                              | GG                | 1946442602               |
| SNP_P3_72946_10652066 | NC_021165.1    | Ca_kabuli_chr06 | 10652066                | CC                              | TT                | 1946442604               |
| SNP_P3_72947_10652096 | NC_021165.1    | Ca_kabuli_chr06 | 10652096                | GG                              | TT                | 1946442605               |
| SNP_P3_72949_10654374 | NC_021165.1    | Ca_kabuli_chr06 | 10654374                | GG                              | AA                | 1946442607               |
| SNP_P3_72950_10657210 | NC_021165.1    | Ca_kabuli_chr06 | 10657210                | AA                              | TT                | 1946442608               |
| SNP_P3_72951_10657211 | NC_021165.1    | Ca_kabuli_chr06 | 10657211                | TT                              | AA                | 1946442610               |

| SNPs IDs              | Chromosome IDs | Chromosomes     | Physical positions (bp) | CDC Frontier (Reference genome) | (Pusa 256 & HPNB) | NCBI SNPdb Accession IDs |
|-----------------------|----------------|-----------------|-------------------------|---------------------------------|-------------------|--------------------------|
| SNP_P3_72952_10657335 | NC_021165.1    | Ca_kabuli_chr06 | 10657335                | GG                              | TT                | 1946442611               |
| SNP_P3_72954_10657543 | NC_021165.1    | Ca_kabuli_chr06 | 10657543                | TT                              | CC                | 1946442613               |
| SNP_P3_72955_10657581 | NC_021165.1    | Ca_kabuli_chr06 | 10657581                | AA                              | GG                | 1946442614               |
| SNP_P3_72956_10657650 | NC_021165.1    | Ca_kabuli_chr06 | 10657650                | TT                              | CC                | 1946442616               |
| SNP_P3_72957_10657975 | NC_021165.1    | Ca_kabuli_chr06 | 10657975                | GG                              | TT                | 1946442617               |
| SNP_P3_72958_10659390 | NC_021165.1    | Ca_kabuli_chr06 | 10659390                | TT                              | AA                | 1946442619               |
| SNP_P3_72959_10660001 | NC_021165.1    | Ca_kabuli_chr06 | 10660001                | CC                              | AA                | 1946442620               |
| SNP_P3_72960_10660034 | NC_021165.1    | Ca_kabuli_chr06 | 10660034                | AA                              | GG                | 1946442622               |
| SNP_P3_72962_10661267 | NC_021165.1    | Ca_kabuli_chr06 | 10661267                | GG                              | AA                | 1946442623               |
| SNP_P3_72963_10662221 | NC_021165.1    | Ca_kabuli_chr06 | 10662221                | TT                              | CC                | 1946442625               |
| SNP_P3_72964_10662231 | NC_021165.1    | Ca_kabuli_chr06 | 10662231                | CC                              | TT                | 1946442626               |
| SNP_P3_72965_10662251 | NC_021165.1    | Ca_kabuli_chr06 | 10662251                | TT                              | AA                | 1946442628               |
| SNP_P3_72966_10662414 | NC_021165.1    | Ca_kabuli_chr06 | 10662414                | TT                              | GG                | 1946442629               |
| SNP_P3_72967_10662462 | NC_021165.1    | Ca_kabuli_chr06 | 10662462                | CC                              | TT                | 1946442631               |
| SNP_P3_72968_10662517 | NC_021165.1    | Ca_kabuli_chr06 | 10662517                | GG                              | AA                | 1946442633               |
| SNP_P3_72969_10662521 | NC_021165.1    | Ca_kabuli_chr06 | 10662521                | AA                              | GG                | 1946442634               |
| SNP_P3_72970_10662537 | NC_021165.1    | Ca_kabuli_chr06 | 10662537                | TT                              | CC                | 1946442636               |
| SNP_P3_72972_10662817 | NC_021165.1    | Ca_kabuli_chr06 | 10662817                | CC                              | TT                | 1946442637               |
| SNP_P3_72973_10663053 | NC_021165.1    | Ca_kabuli_chr06 | 10663053                | AA                              | CC                | 1946442639               |
| SNP_P3_72974_10663058 | NC_021165.1    | Ca_kabuli_chr06 | 10663058                | CC                              | TT                | 1946442640               |
| SNP_P3_72975_10663064 | NC_021165.1    | Ca_kabuli_chr06 | 10663064                | AA                              | GG                | 1946442642               |
| SNP_P3_72976_10663092 | NC_021165.1    | Ca_kabuli_chr06 | 10663092                | AA                              | GG                | 1946442643               |
| SNP_P3_72977_10663407 | NC_021165.1    | Ca_kabuli_chr06 | 10663407                | GG                              | AA                | 1946442645               |
| SNP_P3_72978_10663481 | NC_021165.1    | Ca_kabuli_chr06 | 10663481                | GG                              | AA                | 1946442646               |
| SNP_P3_72979_10664414 | NC_021165.1    | Ca_kabuli_chr06 | 10664414                | CC                              | AA                | 1946442648               |
| SNP_P3_72980_10665460 | NC_021165.1    | Ca_kabuli_chr06 | 10665460                | TT                              | CC                | 1946442649               |
| SNP_P3_72981_10665465 | NC_021165.1    | Ca_kabuli_chr06 | 10665465                | GG                              | AA                | 1946442651               |
| SNP_P3_72982_10665679 | NC_021165.1    | Ca_kabuli_chr06 | 10665679                | TT                              | AA                | 1946442653               |
| SNP_P3_72983_10665695 | NC_021165.1    | Ca_kabuli_chr06 | 10665695                | AA                              | TT                | 1946442654               |
| SNP_P3_72985_10666049 | NC_021165.1    | Ca_kabuli_chr06 | 10666049                | CC                              | TT                | 1946442656               |
| SNP_P3_72987_10670773 | NC_021165.1    | Ca_kabuli_chr06 | 10670773                | CC                              | AA                | 1946442657               |
| SNP_P3_72988_10671394 | NC_021165.1    | Ca_kabuli_chr06 | 10671394                | TT                              | CC                | 1946442659               |
| SNP_P3_72990_10673748 | NC_021165.1    | Ca_kabuli_chr06 | 10673748                | TT                              | GG                | 1946442660               |
| SNP_P3_72991_10673851 | NC_021165.1    | Ca_kabuli_chr06 | 10673851                | TT                              | GG                | 1946442662               |
| SNP_P3_72992_10675492 | NC_021165.1    | Ca_kabuli_chr06 | 10675492                | AA                              | GG                | 1946442663               |
| SNP_P3_72993_10676005 | NC_021165.1    | Ca_kabuli_chr06 | 10676005                | AA                              | CC                | 1946442667               |
| SNP_P3_72994_10676212 | NC_021165.1    | Ca_kabuli_chr06 | 10676212                | TT                              | CC                | 1946442669               |
| SNP_P3_72995_10676216 | NC_021165.1    | Ca_kabuli_chr06 | 10676216                | GG                              | AA                | 1946442670               |
| SNP_P3_72996_10676293 | NC_021165.1    | Ca_kabuli_chr06 | 10676293                | GG                              | AA                | 1946442672               |
| SNP_P3_72998_10677230 | NC_021165.1    | Ca_kabuli_chr06 | 10677230                | CC                              | AA                | 1946442673               |
| SNP_P3_72999_10680024 | NC_021165.1    | Ca_kabuli_chr06 | 10680024                | AA                              | GG                | 1946442675               |
| SNP_P3_73001_10684551 | NC_021165.1    | Ca_kabuli_chr06 | 10684551                | GG                              | AA                | 1946442676               |

| SNPs IDs              | Chromosome IDs | Chromosomes     | Physical positions (bp) | CDC Frontier (Reference genome) | (Pusa 256 & HPNB) | NCBI SNPdb Accession IDs |
|-----------------------|----------------|-----------------|-------------------------|---------------------------------|-------------------|--------------------------|
| SNP_P3_73002_10685094 | NC_021165.1    | Ca_kabuli_chr06 | 10685094                | GG                              | AA                | 1946442678               |
| SNP_P3_73003_10686673 | NC_021165.1    | Ca_kabuli_chr06 | 10686673                | CC                              | AA                | 1946442679               |
| SNP_P3_73004_10688305 | NC_021165.1    | Ca_kabuli_chr06 | 10688305                | GG                              | AA                | 1946442681               |
| SNP_P3_73005_10688306 | NC_021165.1    | Ca_kabuli_chr06 | 10688306                | AA                              | GG                | 1946442682               |
| SNP_P3_73006_10689050 | NC_021165.1    | Ca_kabuli_chr06 | 10689050                | CC                              | GG                | 1946442684               |
| SNP_P3_73007_10689088 | NC_021165.1    | Ca_kabuli_chr06 | 10689088                | AA                              | GG                | 1946442685               |
| SNP_P3_73009_10689297 | NC_021165.1    | Ca_kabuli_chr06 | 10689297                | CC                              | AA                | 1946442687               |
| SNP_P3_73010_10689703 | NC_021165.1    | Ca_kabuli_chr06 | 10689703                | AA                              | GG                | 1946442688               |
| SNP_P3_73011_10689721 | NC_021165.1    | Ca_kabuli_chr06 | 10689721                | CC                              | TT                | 1946442690               |
| SNP_P3_73012_10689737 | NC_021165.1    | Ca_kabuli_chr06 | 10689737                | GG                              | AA                | 1946442692               |
| SNP_P3_73013_10689738 | NC_021165.1    | Ca_kabuli_chr06 | 10689738                | GG                              | CC                | 1946442693               |
| SNP_P3_73014_10690331 | NC_021165.1    | Ca_kabuli_chr06 | 10690331                | GG                              | AA                | 1946442695               |
| SNP_P3_73015_10690622 | NC_021165.1    | Ca_kabuli_chr06 | 10690622                | CC                              | TT                | 1946442696               |
| SNP_P3_73016_10690804 | NC_021165.1    | Ca_kabuli_chr06 | 10690804                | AA                              | TT                | 1946442698               |
| SNP_P3_73017_10690987 | NC_021165.1    | Ca_kabuli_chr06 | 10690987                | GG                              | CC                | 1946442699               |
| SNP_P3_73018_10691001 | NC_021165.1    | Ca_kabuli_chr06 | 10691001                | GG                              | CC                | 1946442701               |
| SNP_P3_73019_10695710 | NC_021165.1    | Ca_kabuli_chr06 | 10695710                | TT                              | AA                | 1946442702               |
| SNP_P3_73021_10697064 | NC_021165.1    | Ca_kabuli_chr06 | 10697064                | AA                              | TT                | 1946442704               |
| SNP_P3_73022_10698301 | NC_021165.1    | Ca_kabuli_chr06 | 10698301                | TT                              | AA                | 1946442705               |
| SNP_P3_73023_10698412 | NC_021165.1    | Ca_kabuli_chr06 | 10698412                | AA                              | GG                | 1946442707               |
| SNP_P3_73024_10700161 | NC_021165.1    | Ca_kabuli_chr06 | 10700161                | TT                              | GG                | 1946442708               |
| SNP_P3_73025_10700448 | NC_021165.1    | Ca_kabuli_chr06 | 10700448                | AA                              | CC                | 1946442710               |
| SNP_P3_73026_10700535 | NC_021165.1    | Ca_kabuli_chr06 | 10700535                | CC                              | AA                | 1946442712               |
| SNP_P3_73027_10700597 | NC_021165.1    | Ca_kabuli_chr06 | 10700597                | TT                              | AA                | 1946442713               |
| SNP_P3_73029_10700737 | NC_021165.1    | Ca_kabuli_chr06 | 10700737                | AA                              | CC                | 1946442715               |
| SNP_P3_73030_10700978 | NC_021165.1    | Ca_kabuli_chr06 | 10700978                | CC                              | AA                | 1946442716               |
| SNP_P3_73031_10701054 | NC_021165.1    | Ca_kabuli_chr06 | 10701054                | TT                              | CC                | 1946442718               |
| SNP_P3_73032_10701073 | NC_021165.1    | Ca_kabuli_chr06 | 10701073                | AA                              | CC                | 1946442719               |
| SNP_P3_73033_10701086 | NC_021165.1    | Ca_kabuli_chr06 | 10701086                | TT                              | CC                | 1946442721               |
| SNP_P3_73034_10701353 | NC_021165.1    | Ca_kabuli_chr06 | 10701353                | TT                              | CC                | 1946442722               |
| SNP_P3_73035_10702577 | NC_021165.1    | Ca_kabuli_chr06 | 10702577                | AA                              | GG                | 1946442724               |
| SNP_P3_73036_10702580 | NC_021165.1    | Ca_kabuli_chr06 | 10702580                | CC                              | AA                | 1946442725               |
| SNP_P3_73037_10705454 | NC_021165.1    | Ca_kabuli_chr06 | 10705454                | AA                              | TT                | 1946442727               |
| SNP_P3_73038_10707520 | NC_021165.1    | Ca_kabuli_chr06 | 10707520                | TT                              | CC                | 1946442728               |
| SNP_P3_73039_10707534 | NC_021165.1    | Ca_kabuli_chr06 | 10707534                | CC                              | TT                | 1946442730               |
| SNP_P3_73042_10748740 | NC_021165.1    | Ca_kabuli_chr06 | 10748740                | GG                              | AA                | 1946442731               |
| SNP_P3_73043_10748765 | NC_021165.1    | Ca_kabuli_chr06 | 10748765                | CC                              | GG                | 1946442733               |
| SNP_P3_73044_10748776 | NC_021165.1    | Ca_kabuli_chr06 | 10748776                | GG                              | TT                | 1946442734               |
| SNP_P3_73045_10748783 | NC_021165.1    | Ca_kabuli_chr06 | 10748783                | GG                              | AA                | 1946442736               |
| SNP_P3_73046_10748785 | NC_021165.1    | Ca_kabuli_chr06 | 10748785                | TT                              | CC                | 1946442737               |
| SNP_P3_73047_10748859 | NC_021165.1    | Ca_kabuli_chr06 | 10748859                | AA                              | GG                | 1946442739               |
| SNP_P3_73048_10748940 | NC_021165.1    | Ca_kabuli_chr06 | 10748940                | GG                              | AA                | 1946442740               |

| SNPs IDs              | Chromosome IDs | Chromosomes     | Physical positions (bp) | CDC Frontier (Reference genome) | (Pusa 256 & HPNB) | NCBI SNPdb Accession IDs |
|-----------------------|----------------|-----------------|-------------------------|---------------------------------|-------------------|--------------------------|
| SNP_P3_73049_10748954 | NC_021165.1    | Ca_kabuli_chr06 | 10748954                | AA                              | GG                | 1946442742               |
| SNP_P3_73050_10748965 | NC_021165.1    | Ca_kabuli_chr06 | 10748965                | GG                              | CC                | 1946442743               |
| SNP_P3_73051_10750843 | NC_021165.1    | Ca_kabuli_chr06 | 10750843                | GG                              | AA                | 1946442745               |
| SNP_P3_73052_10751079 | NC_021165.1    | Ca_kabuli_chr06 | 10751079                | GG                              | AA                | 1946442746               |
| SNP_P3_73053_10751176 | NC_021165.1    | Ca_kabuli_chr06 | 10751176                | TT                              | AA                | 1946442748               |
| SNP_P3_73054_10751209 | NC_021165.1    | Ca_kabuli_chr06 | 10751209                | AA                              | TT                | 1946442749               |
| SNP_P3_73055_10753535 | NC_021165.1    | Ca_kabuli_chr06 | 10753535                | AA                              | GG                | 1946442751               |
| SNP_P3_73056_10753962 | NC_021165.1    | Ca_kabuli_chr06 | 10753962                | AA                              | GG                | 1946442752               |
| SNP_P3_73057_10756199 | NC_021165.1    | Ca_kabuli_chr06 | 10756199                | CC                              | TT                | 1946442754               |
| SNP_P3_73058_10757117 | NC_021165.1    | Ca_kabuli_chr06 | 10757117                | CC                              | TT                | 1946442755               |
| SNP_P3_73059_10774268 | NC_021165.1    | Ca_kabuli_chr06 | 10774268                | TT                              | CC                | 1946442756               |
| SNP_P3_73060_10775116 | NC_021165.1    | Ca_kabuli_chr06 | 10775116                | GG                              | TT                | 1946442758               |
| SNP_P3_73061_10794686 | NC_021165.1    | Ca_kabuli_chr06 | 10794686                | TT                              | AA                | 1946442759               |
| SNP_P3_73062_10794687 | NC_021165.1    | Ca_kabuli_chr06 | 10794687                | TT                              | AA                | 1946442761               |
| SNP_P3_73064_10822229 | NC_021165.1    | Ca_kabuli_chr06 | 10822229                | AA                              | CC                | 1946442762               |
| SNP_P3_73065_10822407 | NC_021165.1    | Ca_kabuli_chr06 | 10822407                | TT                              | AA                | 1946442764               |
| SNP_P3_73066_10822423 | NC_021165.1    | Ca_kabuli_chr06 | 10822423                | AA                              | CC                | 1946442765               |
| SNP_P3_73067_10822459 | NC_021165.1    | Ca_kabuli_chr06 | 10822459                | CC                              | GG                | 1946442767               |
| SNP_P3_73068_10822499 | NC_021165.1    | Ca_kabuli_chr06 | 10822499                | AA                              | GG                | 1946442768               |
| SNP_P3_73069_10826707 | NC_021165.1    | Ca_kabuli_chr06 | 10826707                | AA                              | CC                | 1946442769               |
| SNP_P3_73070_10841732 | NC_021165.1    | Ca_kabuli_chr06 | 10841732                | TT                              | CC                | 1946442771               |
| SNP_P3_73073_10861387 | NC_021165.1    | Ca_kabuli_chr06 | 10861387                | CC                              | TT                | 1946442773               |
| SNP_P3_73074_10875505 | NC_021165.1    | Ca_kabuli_chr06 | 10875505                | GG                              | TT                | 1946442774               |
| SNP_P3_73075_10876622 | NC_021165.1    | Ca_kabuli_chr06 | 10876622                | AA                              | GG                | 1946442776               |
| SNP_P3_73076_10890336 | NC_021165.1    | Ca_kabuli_chr06 | 10890336                | CC                              | TT                | 1946442777               |
| SNP_P3_73077_10904704 | NC_021165.1    | Ca_kabuli_chr06 | 10904704                | AA                              | GG                | 1946442779               |
| SNP_P3_73078_10916225 | NC_021165.1    | Ca_kabuli_chr06 | 10916225                | AA                              | TT                | 1946442780               |
| SNP_P3_73079_10930098 | NC_021165.1    | Ca_kabuli_chr06 | 10930098                | GG                              | CC                | 1946442781               |
| SNP_P3_73080_10930139 | NC_021165.1    | Ca_kabuli_chr06 | 10930139                | TT                              | AA                | 1946442783               |
| SNP_P3_73081_10948462 | NC_021165.1    | Ca_kabuli_chr06 | 10948462                | CC                              | TT                | 1946442784               |
| SNP_P3_73082_10948637 | NC_021165.1    | Ca_kabuli_chr06 | 10948637                | GG                              | TT                | 1946442786               |
| SNP_P3_73083_10948679 | NC_021165.1    | Ca_kabuli_chr06 | 10948679                | AA                              | GG                | 1946442787               |
| SNP_P3_73084_10948700 | NC_021165.1    | Ca_kabuli_chr06 | 10948700                | GG                              | CC                | 1946442788               |
| SNP_P3_73085_10948719 | NC_021165.1    | Ca_kabuli_chr06 | 10948719                | TT                              | CC                | 1946442790               |
| SNP_P3_73086_10948723 | NC_021165.1    | Ca_kabuli_chr06 | 10948723                | CC                              | AA                | 1946442791               |
| SNP_P3_73087_10952624 | NC_021165.1    | Ca_kabuli_chr06 | 10952624                | AA                              | TT                | 1946442793               |
| SNP_P3_73088_10952641 | NC_021165.1    | Ca_kabuli_chr06 | 10952641                | TT                              | GG                | 1946442794               |
| SNP_P3_73089_10953638 | NC_021165.1    | Ca_kabuli_chr06 | 10953638                | AA                              | GG                | 1946442796               |
| SNP_P3_73090_10953640 | NC_021165.1    | Ca_kabuli_chr06 | 10953640                | AA                              | TT                | 1946442797               |
| SNP_P3_73092_10972574 | NC_021165.1    | Ca_kabuli_chr06 | 10972574                | CC                              | TT                | 1946442799               |
| SNP_P3_73093_10994021 | NC_021165.1    | Ca_kabuli_chr06 | 10994021                | CC                              | GG                | 1946442800               |
| SNP_P3_73094_10998893 | NC_021165.1    | Ca_kabuli_chr06 | 10998893                | TT                              | AA                | 1946442802               |

| SNPs IDs              | Chromosome IDs | Chromosomes     | Physical positions (bp) | CDC Frontier (Reference genome) | (Pusa 256 & HPNB) | NCBI SNPdb Accession IDs |
|-----------------------|----------------|-----------------|-------------------------|---------------------------------|-------------------|--------------------------|
| SNP_P3_73095_10998894 | NC_021165.1    | Ca_kabuli_chr06 | 10998894                | TT                              | AA                | 1946442803               |
| SNP_P3_73096_11016018 | NC_021165.1    | Ca_kabuli_chr06 | 11016018                | CC                              | TT                | 1946442804               |
| SNP_P3_73097_11025025 | NC_021165.1    | Ca_kabuli_chr06 | 11025025                | GG                              | AA                | 1946442806               |
| SNP_P3_73099_11039586 | NC_021165.1    | Ca_kabuli_chr06 | 11039586                | TT                              | AA                | 1946442807               |
| SNP_P3_73100_11067513 | NC_021165.1    | Ca_kabuli_chr06 | 11067513                | GG                              | CC                | 1946442809               |
| SNP_P3_73101_11068442 | NC_021165.1    | Ca_kabuli_chr06 | 11068442                | GG                              | TT                | 1946442810               |
| SNP_P3_73102_11077036 | NC_021165.1    | Ca_kabuli_chr06 | 11077036                | GG                              | TT                | 1946442812               |
| SNP_P3_73104_11112055 | NC_021165.1    | Ca_kabuli_chr06 | 11112055                | AA                              | GG                | 1946442813               |
| SNP_P3_73105_11140599 | NC_021165.1    | Ca_kabuli_chr06 | 11140599                | GG                              | AA                | 1946442814               |
| SNP_P3_73106_11150182 | NC_021165.1    | Ca_kabuli_chr06 | 11150182                | GG                              | TT                | 1946442816               |
| SNP_P3_73107_11193467 | NC_021165.1    | Ca_kabuli_chr06 | 11193467                | AA                              | CC                | 1946442817               |
| SNP_P3_73108_11193867 | NC_021165.1    | Ca_kabuli_chr06 | 11193867                | CC                              | TT                | 1946442819               |
| SNP_P3_73109_11234648 | NC_021165.1    | Ca_kabuli_chr06 | 11234648                | TT                              | AA                | 1946442820               |
| SNP_P3_73111_11308949 | NC_021165.1    | Ca_kabuli_chr06 | 11308949                | AA                              | CC                | 1946442821               |
| SNP_P3_73112_11309088 | NC_021165.1    | Ca_kabuli_chr06 | 11309088                | CC                              | AA                | 1946442823               |
| SNP_P3_73113_11309346 | NC_021165.1    | Ca_kabuli_chr06 | 11309346                | AA                              | TT                | 1946442824               |
| SNP_P3_73114_11309834 | NC_021165.1    | Ca_kabuli_chr06 | 11309834                | GG                              | TT                | 1946442826               |
| SNP_P3_73116_11310383 | NC_021165.1    | Ca_kabuli_chr06 | 11310383                | CC                              | AA                | 1946442827               |
| SNP_P3_73117_11310559 | NC_021165.1    | Ca_kabuli_chr06 | 11310559                | AA                              | GG                | 1946442829               |
| SNP_P3_73118_11310568 | NC_021165.1    | Ca_kabuli_chr06 | 11310568                | GG                              | AA                | 1946442830               |
| SNP_P3_73119_11310610 | NC_021165.1    | Ca_kabuli_chr06 | 11310610                | TT                              | GG                | 1946442832               |
| SNP_P3_73120_11310654 | NC_021165.1    | Ca_kabuli_chr06 | 11310654                | CC                              | GG                | 1946442833               |
| SNP_P3_73121_11310678 | NC_021165.1    | Ca_kabuli_chr06 | 11310678                | TT                              | CC                | 1946442835               |
| SNP_P3_73122_11310736 | NC_021165.1    | Ca_kabuli_chr06 | 11310736                | AA                              | GG                | 1946442836               |
| SNP_P3_73124_11310788 | NC_021165.1    | Ca_kabuli_chr06 | 11310788                | TT                              | CC                | 1946442837               |
| SNP_P3_73125_11310810 | NC_021165.1    | Ca_kabuli_chr06 | 11310810                | CC                              | TT                | 1946442839               |
| SNP_P3_73126_11311012 | NC_021165.1    | Ca_kabuli_chr06 | 11311012                | CC                              | TT                | 1946442840               |
| SNP_P3_73127_11311101 | NC_021165.1    | Ca_kabuli_chr06 | 11311101                | TT                              | GG                | 1946442842               |
| SNP_P3_73128_11311118 | NC_021165.1    | Ca_kabuli_chr06 | 11311118                | CC                              | TT                | 1946442843               |
| SNP_P3_73129_11311154 | NC_021165.1    | Ca_kabuli_chr06 | 11311154                | GG                              | AA                | 1946442845               |
| SNP_P3_73130_11311238 | NC_021165.1    | Ca_kabuli_chr06 | 11311238                | CC                              | TT                | 1946442846               |
| SNP_P3_73131_11311281 | NC_021165.1    | Ca_kabuli_chr06 | 11311281                | TT                              | AA                | 1946442848               |
| SNP_P3_73132_11311282 | NC_021165.1    | Ca_kabuli_chr06 | 11311282                | CC                              | AA                | 1946442849               |
| SNP_P3_73133_11311283 | NC_021165.1    | Ca_kabuli_chr06 | 11311283                | AA                              | TT                | 1946442851               |
| SNP_P3_73134_11311304 | NC_021165.1    | Ca_kabuli_chr06 | 11311304                | TT                              | CC                | 1946442852               |
| SNP_P3_73135_11311425 | NC_021165.1    | Ca_kabuli_chr06 | 11311425                | TT                              | AA                | 1946442854               |
| SNP_P3_73136_11311483 | NC_021165.1    | Ca_kabuli_chr06 | 11311483                | CC                              | TT                | 1946442855               |
| SNP_P3_73137_11311669 | NC_021165.1    | Ca_kabuli_chr06 | 11311669                | GG                              | AA                | 1946442856               |
| SNP_P3_73138_11314190 | NC_021165.1    | Ca_kabuli_chr06 | 11314190                | TT                              | CC                | 1946442858               |
| SNP_P3_73139_11314198 | NC_021165.1    | Ca_kabuli_chr06 | 11314198                | AA                              | TT                | 1946442859               |
| SNP_P3_73140_11314339 | NC_021165.1    | Ca_kabuli_chr06 | 11314339                | CC                              | GG                | 1946442861               |
| SNP_P3_73141_11314362 | NC_021165.1    | Ca_kabuli_chr06 | 11314362                | TT                              | CC                | 1946442862               |

| SNPs IDs              | Chromosome IDs | Chromosomes     | Physical positions (bp) | CDC Frontier (Reference genome) | (Pusa 256 & HPNB) | NCBI SNPdb Accession IDs |
|-----------------------|----------------|-----------------|-------------------------|---------------------------------|-------------------|--------------------------|
| SNP_P3_73142_11315851 | NC_021165.1    | Ca_kabuli_chr06 | 11315851                | TT                              | CC                | 1946442863               |
| SNP_P3_73143_11315871 | NC_021165.1    | Ca_kabuli_chr06 | 11315871                | AA                              | GG                | 1946442865               |
| SNP_P3_73145_11316303 | NC_021165.1    | Ca_kabuli_chr06 | 11316303                | GG                              | TT                | 1946442866               |
| SNP_P3_73146_11316358 | NC_021165.1    | Ca_kabuli_chr06 | 11316358                | AA                              | TT                | 1946442868               |
| SNP_P3_73147_11316359 | NC_021165.1    | Ca_kabuli_chr06 | 11316359                | TT                              | AA                | 1946442869               |
| SNP_P3_73149_11363508 | NC_021165.1    | Ca_kabuli_chr06 | 11363508                | TT                              | CC                | 1946442871               |
| SNP_P3_73151_11381667 | NC_021165.1    | Ca_kabuli_chr06 | 11381667                | AA                              | GG                | 1946442873               |
| SNP_P3_73152_11387484 | NC_021165.1    | Ca_kabuli_chr06 | 11387484                | GG                              | AA                | 1946442874               |
| SNP_P3_73153_11402701 | NC_021165.1    | Ca_kabuli_chr06 | 11402701                | AA                              | TT                | 1946442876               |
| SNP_P3_73154_11421624 | NC_021165.1    | Ca_kabuli_chr06 | 11421624                | CC                              | TT                | 1946442877               |
| SNP_P3_73155_11442370 | NC_021165.1    | Ca_kabuli_chr06 | 11442370                | AA                              | TT                | 1946442879               |
| SNP_P3_73156_11457238 | NC_021165.1    | Ca_kabuli_chr06 | 11457238                | TT                              | CC                | 1946442880               |
| SNP_P3_73157_11462066 | NC_021165.1    | Ca_kabuli_chr06 | 11462066                | CC                              | GG                | 1946442881               |
| SNP_P3_73158_11484567 | NC_021165.1    | Ca_kabuli_chr06 | 11484567                | TT                              | CC                | 1946442883               |
| SNP_P3_73159_11487849 | NC_021165.1    | Ca_kabuli_chr06 | 11487849                | GG                              | TT                | 1946442884               |
| SNP_P3_73160_11490566 | NC_021165.1    | Ca_kabuli_chr06 | 11490566                | AA                              | CC                | 1946442886               |
| SNP_P3_73161_11493187 | NC_021165.1    | Ca_kabuli_chr06 | 11493187                | TT                              | GG                | 1946442887               |
| SNP_P3_73163_11496390 | NC_021165.1    | Ca_kabuli_chr06 | 11496390                | AA                              | CC                | 1946442889               |
| SNP_P3_73164_11513694 | NC_021165.1    | Ca_kabuli_chr06 | 11513694                | GG                              | CC                | 1946442890               |
| SNP_P3_73165_11524836 | NC_021165.1    | Ca_kabuli_chr06 | 11524836                | TT                              | CC                | 1946442891               |
| SNP_P3_73166_11532229 | NC_021165.1    | Ca_kabuli_chr06 | 11532229                | TT                              | CC                | 1946442893               |
| SNP_P3_73167_11532238 | NC_021165.1    | Ca_kabuli_chr06 | 11532238                | CC                              | TT                | 1946442894               |
| SNP_P3_73168_11532242 | NC_021165.1    | Ca_kabuli_chr06 | 11532242                | TT                              | CC                | 1946442896               |
| SNP_P3_73169_11532303 | NC_021165.1    | Ca_kabuli_chr06 | 11532303                | TT                              | CC                | 1946442897               |
| SNP_P3_73170_11532310 | NC_021165.1    | Ca_kabuli_chr06 | 11532310                | AA                              | TT                | 1946442899               |
| SNP_P3_73171_11532319 | NC_021165.1    | Ca_kabuli_chr06 | 11532319                | TT                              | CC                | 1946442900               |
| SNP_P3_73172_11532333 | NC_021165.1    | Ca_kabuli_chr06 | 11532333                | TT                              | CC                | 1946442901               |
| SNP_P3_73173_11532334 | NC_021165.1    | Ca_kabuli_chr06 | 11532334                | TT                              | CC                | 1946442903               |
| SNP_P3_73174_11532364 | NC_021165.1    | Ca_kabuli_chr06 | 11532364                | GG                              | AA                | 1946442904               |
| SNP_P3_73175_11532368 | NC_021165.1    | Ca_kabuli_chr06 | 11532368                | GG                              | AA                | 1946442906               |
| SNP_P3_73176_11545886 | NC_021165.1    | Ca_kabuli_chr06 | 11545886                | TT                              | CC                | 1946442907               |
| SNP_P3_73177_11545948 | NC_021165.1    | Ca_kabuli_chr06 | 11545948                | GG                              | AA                | 1946442909               |
| SNP_P3_73179_11546338 | NC_021165.1    | Ca_kabuli_chr06 | 11546338                | AA                              | CC                | 1946442910               |
| SNP_P3_73180_11546401 | NC_021165.1    | Ca_kabuli_chr06 | 11546401                | CC                              | TT                | 1946442912               |
| SNP_P3_73182_11546553 | NC_021165.1    | Ca_kabuli_chr06 | 11546553                | AA                              | GG                | 1946442913               |
| SNP_P3_73183_11546598 | NC_021165.1    | Ca_kabuli_chr06 | 11546598                | AA                              | TT                | 1946442915               |
| SNP_P3_73184_11546696 | NC_021165.1    | Ca_kabuli_chr06 | 11546696                | AA                              | TT                | 1946442916               |
| SNP_P3_73185_11546729 | NC_021165.1    | Ca_kabuli_chr06 | 11546729                | AA                              | TT                | 1946442918               |
| SNP_P3_73187_11591045 | NC_021165.1    | Ca_kabuli_chr06 | 11591045                | TT                              | CC                | 1946442919               |
| SNP_P3_73188_11591764 | NC_021165.1    | Ca_kabuli_chr06 | 11591764                | TT                              | CC                | 1946442921               |
| SNP_P3_73190_11593052 | NC_021165.1    | Ca_kabuli_chr06 | 11593052                | AA                              | CC                | 1946442922               |
| SNP_P3_73191_11593477 | NC_021165.1    | Ca_kabuli_chr06 | 11593477                | AA                              | CC                | 1946442924               |

| SNPs IDs              | Chromosome IDs | Chromosomes     | Physical positions (bp) | CDC Frontier (Reference genome) | (Pusa 256 & HPNB) | NCBI SNPdb Accession IDs |
|-----------------------|----------------|-----------------|-------------------------|---------------------------------|-------------------|--------------------------|
| SNP_P3_73192_11594736 | NC_021165.1    | Ca_kabuli_chr06 | 11594736                | AA                              | GG                | 1946442925               |
| SNP_P3_73193_11595485 | NC_021165.1    | Ca_kabuli_chr06 | 11595485                | TT                              | AA                | 1946442927               |
| SNP_P3_73194_11595486 | NC_021165.1    | Ca_kabuli_chr06 | 11595486                | GG                              | TT                | 1946442928               |
| SNP_P3_73195_11596614 | NC_021165.1    | Ca_kabuli_chr06 | 11596614                | GG                              | TT                | 1946442930               |
| SNP_P3_73197_11596805 | NC_021165.1    | Ca_kabuli_chr06 | 11596805                | GG                              | AA                | 1946442931               |
| SNP_P3_73198_11596991 | NC_021165.1    | Ca_kabuli_chr06 | 11596991                | GG                              | AA                | 1946442933               |
| SNP_P3_73199_11597399 | NC_021165.1    | Ca_kabuli_chr06 | 11597399                | TT                              | GG                | 1946442934               |
| SNP_P3_73200_11598419 | NC_021165.1    | Ca_kabuli_chr06 | 11598419                | GG                              | AA                | 1946442936               |
| SNP_P3_73201_11599109 | NC_021165.1    | Ca_kabuli_chr06 | 11599109                | CC                              | TT                | 1946442938               |
| SNP_P3_73202_11599349 | NC_021165.1    | Ca_kabuli_chr06 | 11599349                | GG                              | AA                | 1946442939               |
| SNP_P3_73203_11599671 | NC_021165.1    | Ca_kabuli_chr06 | 11599671                | AA                              | CC                | 1946442941               |
| SNP_P3_73204_11600040 | NC_021165.1    | Ca_kabuli_chr06 | 11600040                | TT                              | CC                | 1946442942               |
| SNP_P3_73205_11600061 | NC_021165.1    | Ca_kabuli_chr06 | 11600061                | TT                              | GG                | 1946442944               |
| SNP_P3_73207_11600318 | NC_021165.1    | Ca_kabuli_chr06 | 11600318                | TT                              | CC                | 1946442945               |
| SNP_P3_73208_11600337 | NC_021165.1    | Ca_kabuli_chr06 | 11600337                | AA                              | TT                | 1946442947               |
| SNP_P3_73210_11600399 | NC_021165.1    | Ca_kabuli_chr06 | 11600399                | TT                              | CC                | 1946442948               |
| SNP_P3_73211_11600407 | NC_021165.1    | Ca_kabuli_chr06 | 11600407                | AA                              | GG                | 1946442949               |
| SNP_P3_73212_11600462 | NC_021165.1    | Ca_kabuli_chr06 | 11600462                | GG                              | AA                | 1946442951               |
| SNP_P3_73214_11601662 | NC_021165.1    | Ca_kabuli_chr06 | 11601662                | TT                              | CC                | 1946442952               |
| SNP_P3_73215_11601704 | NC_021165.1    | Ca_kabuli_chr06 | 11601704                | CC                              | TT                | 1946442954               |
| SNP_P3_73216_11603221 | NC_021165.1    | Ca_kabuli_chr06 | 11603221                | AA                              | TT                | 1946442955               |
| SNP_P3_73217_11603294 | NC_021165.1    | Ca_kabuli_chr06 | 11603294                | AA                              | TT                | 1946442957               |
| SNP_P3_73218_11603574 | NC_021165.1    | Ca_kabuli_chr06 | 11603574                | AA                              | GG                | 1946442959               |
| SNP_P3_73219_11604852 | NC_021165.1    | Ca_kabuli_chr06 | 11604852                | CC                              | TT                | 1946442960               |
| SNP_P3_73220_11606810 | NC_021165.1    | Ca_kabuli_chr06 | 11606810                | CC                              | AA                | 1946442962               |
| SNP_P3_73221_11608173 | NC_021165.1    | Ca_kabuli_chr06 | 11608173                | CC                              | GG                | 1946442963               |
| SNP_P3_73222_11609274 | NC_021165.1    | Ca_kabuli_chr06 | 11609274                | GG                              | AA                | 1946442965               |
| SNP_P3_73223_11611012 | NC_021165.1    | Ca_kabuli_chr06 | 11611012                | TT                              | CC                | 1946442966               |
| SNP_P3_73224_11611931 | NC_021165.1    | Ca_kabuli_chr06 | 11611931                | CC                              | AA                | 1946442967               |
| SNP_P3_73225_11615920 | NC_021165.1    | Ca_kabuli_chr06 | 11615920                | TT                              | CC                | 1946442969               |
| SNP_P3_73226_11618507 | NC_021165.1    | Ca_kabuli_chr06 | 11618507                | TT                              | CC                | 1946442970               |
| SNP_P3_73227_11621395 | NC_021165.1    | Ca_kabuli_chr06 | 11621395                | AA                              | GG                | 1946442972               |
| SNP_P3_73228_11622752 | NC_021165.1    | Ca_kabuli_chr06 | 11622752                | CC                              | AA                | 1946442973               |
| SNP_P3_73229_11623342 | NC_021165.1    | Ca_kabuli_chr06 | 11623342                | AA                              | GG                | 1946442975               |
| SNP_P3_73230_11623365 | NC_021165.1    | Ca_kabuli_chr06 | 11623365                | GG                              | TT                | 1946442976               |
| SNP_P3_73231_11623452 | NC_021165.1    | Ca_kabuli_chr06 | 11623452                | AA                              | GG                | 1946442978               |
| SNP_P3_73233_11631087 | NC_021165.1    | Ca_kabuli_chr06 | 11631087                | TT                              | CC                | 1946442980               |
| SNP_P3_73239_11636540 | NC_021165.1    | Ca_kabuli_chr06 | 11636540                | AA                              | GG                | 1946442981               |
| SNP_P3_73241_11637220 | NC_021165.1    | Ca_kabuli_chr06 | 11637220                | TT                              | GG                | 1946442983               |
| SNP_P3_73242_11638715 | NC_021165.1    | Ca_kabuli_chr06 | 11638715                | TT                              | CC                | 1946442984               |
| SNP_P3_73243_11643966 | NC_021165.1    | Ca_kabuli_chr06 | 11643966                | TT                              | CC                | 1946442986               |
| SNP_P3_73244_11644708 | NC_021165.1    | Ca_kabuli_chr06 | 11644708                | GG                              | AA                | 1946442987               |



| SNPs IDs              | Chromosome IDs | Chromosomes     | Physical positions (bp) | CDC Frontier (Reference genome) | (Pusa 256 & HPNB) | NCBI SNPdb Accession IDs |
|-----------------------|----------------|-----------------|-------------------------|---------------------------------|-------------------|--------------------------|
| SNP_P3_73245_11644710 | NC_021165.1    | Ca_kabuli_chr06 | 11644710                | CC                              | AA                | 1946442989               |
| SNP_P3_73246_11647185 | NC_021165.1    | Ca_kabuli_chr06 | 11647185                | AA                              | TT                | 1946442990               |
| SNP_P3_73247_11647534 | NC_021165.1    | Ca_kabuli_chr06 | 11647534                | GG                              | AA                | 1946442992               |
| SNP_P3_73248_11649004 | NC_021165.1    | Ca_kabuli_chr06 | 11649004                | AA                              | GG                | 1946442993               |
| SNP_P3_73249_11649444 | NC_021165.1    | Ca_kabuli_chr06 | 11649444                | CC                              | TT                | 1946442995               |
| SNP_P3_73250_11649937 | NC_021165.1    | Ca_kabuli_chr06 | 11649937                | CC                              | TT                | 1946442996               |
| SNP_P3_73252_11654273 | NC_021165.1    | Ca_kabuli_chr06 | 11654273                | TT                              | AA                | 1946442998               |
| SNP_P3_73253_11654376 | NC_021165.1    | Ca_kabuli_chr06 | 11654376                | TT                              | AA                | 1946442999               |
| SNP_P3_73255_11657245 | NC_021165.1    | Ca_kabuli_chr06 | 11657245                | CC                              | TT                | 1946443001               |
| SNP_P3_73258_11661064 | NC_021165.1    | Ca_kabuli_chr06 | 11661064                | GG                              | AA                | 1946443002               |
| SNP_P3_73259_11663388 | NC_021165.1    | Ca_kabuli_chr06 | 11663388                | GG                              | AA                | 1946443004               |
| SNP_P3_73261_11667439 | NC_021165.1    | Ca_kabuli_chr06 | 11667439                | TT                              | GG                | 1946443005               |
| SNP_P3_73262_11669364 | NC_021165.1    | Ca_kabuli_chr06 | 11669364                | CC                              | GG                | 1946443007               |
| SNP_P3_73263_11669398 | NC_021165.1    | Ca_kabuli_chr06 | 11669398                | CC                              | TT                | 1946443008               |
| SNP_P3_73264_11671481 | NC_021165.1    | Ca_kabuli_chr06 | 11671481                | TT                              | CC                | 1946443010               |
| SNP_P3_73265_11671498 | NC_021165.1    | Ca_kabuli_chr06 | 11671498                | TT                              | CC                | 1946443011               |
| SNP_P3_73266_11672036 | NC_021165.1    | Ca_kabuli_chr06 | 11672036                | TT                              | AA                | 1946443012               |
| SNP_P3_73267_11672083 | NC_021165.1    | Ca_kabuli_chr06 | 11672083                | GG                              | TT                | 1946443014               |
| SNP_P3_73268_11672295 | NC_021165.1    | Ca_kabuli_chr06 | 11672295                | CC                              | TT                | 1946443015               |
| SNP_P3_73269_11674181 | NC_021165.1    | Ca_kabuli_chr06 | 11674181                | GG                              | TT                | 1946443017               |
| SNP_P3_73271_11677289 | NC_021165.1    | Ca_kabuli_chr06 | 11677289                | TT                              | CC                | 1946443019               |
| SNP_P3_73272_11677313 | NC_021165.1    | Ca_kabuli_chr06 | 11677313                | GG                              | AA                | 1946443020               |
| SNP_P3_73273_11677699 | NC_021165.1    | Ca_kabuli_chr06 | 11677699                | GG                              | AA                | 1946443022               |
| SNP_P3_73274_11677757 | NC_021165.1    | Ca_kabuli_chr06 | 11677757                | CC                              | GG                | 1946443023               |
| SNP_P3_73275_11677774 | NC_021165.1    | Ca_kabuli_chr06 | 11677774                | GG                              | AA                | 1946443025               |
| SNP_P3_73276_11677828 | NC_021165.1    | Ca_kabuli_chr06 | 11677828                | TT                              | CC                | 1946443026               |
| SNP_P3_73277_11678005 | NC_021165.1    | Ca_kabuli_chr06 | 11678005                | CC                              | TT                | 1946443028               |
| SNP_P3_73278_11678427 | NC_021165.1    | Ca_kabuli_chr06 | 11678427                | TT                              | CC                | 1946443029               |
| SNP_P3_73279_11682343 | NC_021165.1    | Ca_kabuli_chr06 | 11682343                | CC                              | AA                | 1946443031               |
| SNP_P3_73282_11687137 | NC_021165.1    | Ca_kabuli_chr06 | 11687137                | AA                              | GG                | 1946443032               |
| SNP_P3_73283_11687206 | NC_021165.1    | Ca_kabuli_chr06 | 11687206                | CC                              | GG                | 1946443034               |
| SNP_P3_73284_11687461 | NC_021165.1    | Ca_kabuli_chr06 | 11687461                | CC                              | AA                | 1946443035               |
| SNP_P3_73285_11690053 | NC_021165.1    | Ca_kabuli_chr06 | 11690053                | GG                              | CC                | 1946443037               |
| SNP_P3_73286_11690933 | NC_021165.1    | Ca_kabuli_chr06 | 11690933                | TT                              | CC                | 1946443039               |
| SNP_P3_73287_11690954 | NC_021165.1    | Ca_kabuli_chr06 | 11690954                | GG                              | TT                | 1946443040               |
| SNP_P3_73288_11693343 | NC_021165.1    | Ca_kabuli_chr06 | 11693343                | TT                              | AA                | 1946443042               |
| SNP_P3_73289_11693413 | NC_021165.1    | Ca_kabuli_chr06 | 11693413                | CC                              | TT                | 1946443043               |
| SNP_P3_73290_11696444 | NC_021165.1    | Ca_kabuli_chr06 | 11696444                | AA                              | CC                | 1946443044               |
| SNP_P3_73291_11696706 | NC_021165.1    | Ca_kabuli_chr06 | 11696706                | GG                              | AA                | 1946443046               |
| SNP_P3_73292_11696746 | NC_021165.1    | Ca_kabuli_chr06 | 11696746                | CC                              | TT                | 1946443047               |
| SNP_P3_73293_11697406 | NC_021165.1    | Ca_kabuli_chr06 | 11697406                | AA                              | TT                | 1946443048               |
| SNP_P3_73294_11697697 | NC_021165.1    | Ca_kabuli_chr06 | 11697697                | GG                              | AA                | 1946443049               |

| SNPs IDs              | Chromosome IDs | Chromosomes     | Physical positions (bp) | CDC Frontier (Reference genome) | (Pusa 256 & HPNB) | NCBI SNPdb Accession IDs |
|-----------------------|----------------|-----------------|-------------------------|---------------------------------|-------------------|--------------------------|
| SNP_P3_73295_11700312 | NC_021165.1    | Ca_kabuli_chr06 | 11700312                | AA                              | GG                | 1946443050               |
| SNP_P3_73296_11700329 | NC_021165.1    | Ca_kabuli_chr06 | 11700329                | CC                              | AA                | 1946443051               |
| SNP_P3_73297_11700400 | NC_021165.1    | Ca_kabuli_chr06 | 11700400                | AA                              | CC                | 1946443052               |
| SNP_P3_73298_11701688 | NC_021165.1    | Ca_kabuli_chr06 | 11701688                | AA                              | GG                | 1946443054               |
| SNP_P3_73299_11701692 | NC_021165.1    | Ca_kabuli_chr06 | 11701692                | AA                              | CC                | 1946443055               |
| SNP_P3_73300_11701714 | NC_021165.1    | Ca_kabuli_chr06 | 11701714                | CC                              | TT                | 1946443057               |
| SNP_P3_73301_11702046 | NC_021165.1    | Ca_kabuli_chr06 | 11702046                | GG                              | AA                | 1946443058               |
| SNP_P3_73302_11702651 | NC_021165.1    | Ca_kabuli_chr06 | 11702651                | AA                              | GG                | 1946443060               |
| SNP_P3_73303_11703234 | NC_021165.1    | Ca_kabuli_chr06 | 11703234                | TT                              | CC                | 1946443061               |
| SNP_P3_73304_11706047 | NC_021165.1    | Ca_kabuli_chr06 | 11706047                | GG                              | AA                | 1946443063               |
| SNP_P3_73306_11706114 | NC_021165.1    | Ca_kabuli_chr06 | 11706114                | GG                              | TT                | 1946443064               |
| SNP_P3_73307_11706410 | NC_021165.1    | Ca_kabuli_chr06 | 11706410                | CC                              | TT                | 1946443066               |
| SNP_P3_73308_11706736 | NC_021165.1    | Ca_kabuli_chr06 | 11706736                | TT                              | AA                | 1946443067               |
| SNP_P3_73309_11707575 | NC_021165.1    | Ca_kabuli_chr06 | 11707575                | TT                              | CC                | 1946443069               |
| SNP_P3_73310_11708561 | NC_021165.1    | Ca_kabuli_chr06 | 11708561                | CC                              | AA                | 1946443070               |
| SNP_P3_73311_11708572 | NC_021165.1    | Ca_kabuli_chr06 | 11708572                | CC                              | TT                | 1946443072               |
| SNP_P3_73312_11708840 | NC_021165.1    | Ca_kabuli_chr06 | 11708840                | GG                              | CC                | 1946443073               |
| SNP_P3_73313_11709504 | NC_021165.1    | Ca_kabuli_chr06 | 11709504                | TT                              | CC                | 1946443075               |
| SNP_P3_73314_11710341 | NC_021165.1    | Ca_kabuli_chr06 | 11710341                | TT                              | CC                | 1946443077               |
| SNP_P3_73315_11710399 | NC_021165.1    | Ca_kabuli_chr06 | 11710399                | TT                              | CC                | 1946443078               |
| SNP_P3_73316_11710424 | NC_021165.1    | Ca_kabuli_chr06 | 11710424                | AA                              | TT                | 1946443080               |
| SNP_P3_73317_11710426 | NC_021165.1    | Ca_kabuli_chr06 | 11710426                | AA                              | GG                | 1946443081               |
| SNP_P3_73319_11717260 | NC_021165.1    | Ca_kabuli_chr06 | 11717260                | AA                              | GG                | 1946443083               |
| SNP_P3_73320_11717305 | NC_021165.1    | Ca_kabuli_chr06 | 11717305                | CC                              | TT                | 1946443084               |
| SNP_P3_73321_11717744 | NC_021165.1    | Ca_kabuli_chr06 | 11717744                | TT                              | AA                | 1946443086               |
| SNP_P3_73322_11717763 | NC_021165.1    | Ca_kabuli_chr06 | 11717763                | TT                              | CC                | 1946443087               |
| SNP_P3_73323_11717814 | NC_021165.1    | Ca_kabuli_chr06 | 11717814                | GG                              | AA                | 1946443089               |
| SNP_P3_73324_11718154 | NC_021165.1    | Ca_kabuli_chr06 | 11718154                | GG                              | AA                | 1946443090               |
| SNP_P3_73325_11718894 | NC_021165.1    | Ca_kabuli_chr06 | 11718894                | GG                              | TT                | 1946443092               |
| SNP_P3_73327_11718920 | NC_021165.1    | Ca_kabuli_chr06 | 11718920                | GG                              | AA                | 1946443093               |
| SNP_P3_73328_11718946 | NC_021165.1    | Ca_kabuli_chr06 | 11718946                | CC                              | TT                | 1946443095               |
| SNP_P3_73329_11718988 | NC_021165.1    | Ca_kabuli_chr06 | 11718988                | CC                              | TT                | 1946443096               |
| SNP_P3_73331_11719100 | NC_021165.1    | Ca_kabuli_chr06 | 11719100                | GG                              | CC                | 1946443098               |
| SNP_P3_73332_11719478 | NC_021165.1    | Ca_kabuli_chr06 | 11719478                | AA                              | GG                | 1946443099               |
| SNP_P3_73333_11719931 | NC_021165.1    | Ca_kabuli_chr06 | 11719931                | AA                              | CC                | 1946443101               |
| SNP_P3_73334_11719959 | NC_021165.1    | Ca_kabuli_chr06 | 11719959                | TT                              | CC                | 1946443102               |
| SNP_P3_73335_11719963 | NC_021165.1    | Ca_kabuli_chr06 | 11719963                | GG                              | TT                | 1946443104               |
| SNP_P3_73336_11720780 | NC_021165.1    | Ca_kabuli_chr06 | 11720780                | CC                              | TT                | 1946443105               |
| SNP_P3_73337_11720791 | NC_021165.1    | Ca_kabuli_chr06 | 11720791                | CC                              | AA                | 1946443107               |
| SNP_P3_73338_11720806 | NC_021165.1    | Ca_kabuli_chr06 | 11720806                | AA                              | GG                | 1946443109               |
| SNP_P3_73339_11720854 | NC_021165.1    | Ca_kabuli_chr06 | 11720854                | GG                              | AA                | 1946443110               |
| SNP_P3_73340_11720856 | NC_021165.1    | Ca_kabuli_chr06 | 11720856                | GG                              | AA                | 1946443112               |

| SNPs IDs              | Chromosome IDs | Chromosomes     | Physical positions (bp) | CDC Frontier (Reference genome) | (Pusa 256 & HPNB) | NCBI SNPdb Accession IDs |
|-----------------------|----------------|-----------------|-------------------------|---------------------------------|-------------------|--------------------------|
| SNP_P3_73341_11721945 | NC_021165.1    | Ca_kabuli_chr06 | 11721945                | CC                              | TT                | 1946443114               |
| SNP_P3_73342_11721956 | NC_021165.1    | Ca_kabuli_chr06 | 11721956                | TT                              | CC                | 1946443115               |
| SNP_P3_73343_11721957 | NC_021165.1    | Ca_kabuli_chr06 | 11721957                | GG                              | CC                | 1946443117               |
| SNP_P3_73344_11721977 | NC_021165.1    | Ca_kabuli_chr06 | 11721977                | GG                              | TT                | 1946443119               |
| SNP_P3_73345_11721978 | NC_021165.1    | Ca_kabuli_chr06 | 11721978                | TT                              | CC                | 1946443120               |
| SNP_P3_73346_11725706 | NC_021165.1    | Ca_kabuli_chr06 | 11725706                | CC                              | AA                | 1946443122               |
| SNP_P3_73349_11728034 | NC_021165.1    | Ca_kabuli_chr06 | 11728034                | CC                              | TT                | 1946443123               |
| SNP_P3_73350_11728293 | NC_021165.1    | Ca_kabuli_chr06 | 11728293                | TT                              | AA                | 1946443125               |
| SNP_P3_73351_11730046 | NC_021165.1    | Ca_kabuli_chr06 | 11730046                | AA                              | TT                | 1946443126               |
| SNP_P3_73352_11730201 | NC_021165.1    | Ca_kabuli_chr06 | 11730201                | AA                              | GG                | 1946443128               |
| SNP_P3_73353_11730731 | NC_021165.1    | Ca_kabuli_chr06 | 11730731                | GG                              | AA                | 1946443129               |
| SNP_P3_73354_11735549 | NC_021165.1    | Ca_kabuli_chr06 | 11735549                | CC                              | TT                | 1946443131               |
| SNP_P3_73356_11736666 | NC_021165.1    | Ca_kabuli_chr06 | 11736666                | GG                              | TT                | 1946443132               |
| SNP_P3_73357_11737205 | NC_021165.1    | Ca_kabuli_chr06 | 11737205                | TT                              | CC                | 1946443134               |
| SNP_P3_73359_11737480 | NC_021165.1    | Ca_kabuli_chr06 | 11737480                | AA                              | TT                | 1946443135               |
| SNP_P3_73360_11738329 | NC_021165.1    | Ca_kabuli_chr06 | 11738329                | CC                              | TT                | 1946443137               |
| SNP_P3_73361_11738437 | NC_021165.1    | Ca_kabuli_chr06 | 11738437                | GG                              | AA                | 1946443138               |
| SNP_P3_73363_11739236 | NC_021165.1    | Ca_kabuli_chr06 | 11739236                | TT                              | CC                | 1946443140               |
| SNP_P3_73364_11739251 | NC_021165.1    | Ca_kabuli_chr06 | 11739251                | TT                              | CC                | 1946443142               |
| SNP_P3_73365_11739289 | NC_021165.1    | Ca_kabuli_chr06 | 11739289                | TT                              | AA                | 1946443143               |
| SNP_P3_73367_11739436 | NC_021165.1    | Ca_kabuli_chr06 | 11739436                | GG                              | AA                | 1946443145               |
| SNP_P3_73368_11739633 | NC_021165.1    | Ca_kabuli_chr06 | 11739633                | CC                              | AA                | 1946443146               |
| SNP_P3_73369_11740760 | NC_021165.1    | Ca_kabuli_chr06 | 11740760                | TT                              | CC                | 1946443148               |
| SNP_P3_73370_11740875 | NC_021165.1    | Ca_kabuli_chr06 | 11740875                | AA                              | GG                | 1946443150               |
| SNP_P3_73372_11746408 | NC_021165.1    | Ca_kabuli_chr06 | 11746408                | AA                              | GG                | 1946443151               |
| SNP_P3_73373_11746685 | NC_021165.1    | Ca_kabuli_chr06 | 11746685                | AA                              | GG                | 1946443153               |
| SNP_P3_73374_11747631 | NC_021165.1    | Ca_kabuli_chr06 | 11747631                | AA                              | GG                | 1946443154               |
| SNP_P3_73375_11750418 | NC_021165.1    | Ca_kabuli_chr06 | 11750418                | TT                              | CC                | 1946443156               |
| SNP_P3_73376_11752040 | NC_021165.1    | Ca_kabuli_chr06 | 11752040                | TT                              | CC                | 1946443157               |
| SNP_P3_73378_11752635 | NC_021165.1    | Ca_kabuli_chr06 | 11752635                | GG                              | AA                | 1946443159               |
| SNP_P3_73379_11752887 | NC_021165.1    | Ca_kabuli_chr06 | 11752887                | GG                              | AA                | 1946443161               |
| SNP_P3_73380_11754534 | NC_021165.1    | Ca_kabuli_chr06 | 11754534                | TT                              | CC                | 1946443162               |
| SNP_P3_73382_11755181 | NC_021165.1    | Ca_kabuli_chr06 | 11755181                | TT                              | AA                | 1946443164               |
| SNP_P3_73383_11757179 | NC_021165.1    | Ca_kabuli_chr06 | 11757179                | AA                              | CC                | 1946443165               |
| SNP_P3_73384_11757481 | NC_021165.1    | Ca_kabuli_chr06 | 11757481                | CC                              | TT                | 1946443167               |
| SNP_P3_73386_11761357 | NC_021165.1    | Ca_kabuli_chr06 | 11761357                | AA                              | GG                | 1946443169               |
| SNP_P3_73387_11761368 | NC_021165.1    | Ca_kabuli_chr06 | 11761368                | AA                              | TT                | 1946443171               |
| SNP_P3_73388_11762066 | NC_021165.1    | Ca_kabuli_chr06 | 11762066                | TT                              | AA                | 1946443172               |
| SNP_P3_73389_11762072 | NC_021165.1    | Ca_kabuli_chr06 | 11762072                | AA                              | CC                | 1946443174               |
| SNP_P3_73390_11762412 | NC_021165.1    | Ca_kabuli_chr06 | 11762412                | GG                              | AA                | 1946443175               |
| SNP_P3_73391_11763052 | NC_021165.1    | Ca_kabuli_chr06 | 11763052                | TT                              | CC                | 1946443177               |
| SNP_P3_73392_11763097 | NC_021165.1    | Ca_kabuli_chr06 | 11763097                | TT                              | CC                | 1946443178               |

| SNPs IDs              | Chromosome IDs | Chromosomes     | Physical positions (bp) | CDC Frontier (Reference genome) | (Pusa 256 & HPNB) | NCBI SNPdb Accession IDs |
|-----------------------|----------------|-----------------|-------------------------|---------------------------------|-------------------|--------------------------|
| SNP_P3_73393_11763130 | NC_021165.1    | Ca_kabuli_chr06 | 11763130                | AA                              | CC                | 1946443180               |
| SNP_P3_73394_11763131 | NC_021165.1    | Ca_kabuli_chr06 | 11763131                | AA                              | TT                | 1946443181               |
| SNP_P3_73395_11763149 | NC_021165.1    | Ca_kabuli_chr06 | 11763149                | TT                              | CC                | 1946443183               |
| SNP_P3_73396_11763409 | NC_021165.1    | Ca_kabuli_chr06 | 11763409                | TT                              | CC                | 1946443184               |
| SNP_P3_73397_11763434 | NC_021165.1    | Ca_kabuli_chr06 | 11763434                | GG                              | AA                | 1946443185               |
| SNP_P3_73398_11763450 | NC_021165.1    | Ca_kabuli_chr06 | 11763450                | AA                              | GG                | 1946443187               |
| SNP_P3_73399_11763454 | NC_021165.1    | Ca_kabuli_chr06 | 11763454                | TT                              | CC                | 1946443188               |
| SNP_P3_73400_11763458 | NC_021165.1    | Ca_kabuli_chr06 | 11763458                | GG                              | TT                | 1946443190               |
| SNP_P3_73401_11763497 | NC_021165.1    | Ca_kabuli_chr06 | 11763497                | GG                              | AA                | 1946443192               |
| SNP_P3_73402_11777007 | NC_021165.1    | Ca_kabuli_chr06 | 11777007                | CC                              | TT                | 1946443195               |
| SNP_P3_73403_11777424 | NC_021165.1    | Ca_kabuli_chr06 | 11777424                | AA                              | GG                | 1946443196               |
| SNP_P3_73405_11780043 | NC_021165.1    | Ca_kabuli_chr06 | 11780043                | CC                              | TT                | 1946443198               |
| SNP_P3_73406_11780325 | NC_021165.1    | Ca_kabuli_chr06 | 11780325                | TT                              | AA                | 1946443199               |
| SNP_P3_73407_11780328 | NC_021165.1    | Ca_kabuli_chr06 | 11780328                | AA                              | GG                | 1946443201               |
| SNP_P3_73408_11781369 | NC_021165.1    | Ca_kabuli_chr06 | 11781369                | CC                              | GG                | 1946443202               |
| SNP_P3_73409_11783888 | NC_021165.1    | Ca_kabuli_chr06 | 11783888                | CC                              | TT                | 1946443203               |
| SNP_P3_73410_11784017 | NC_021165.1    | Ca_kabuli_chr06 | 11784017                | TT                              | CC                | 1946443205               |
| SNP_P3_73411_11784054 | NC_021165.1    | Ca_kabuli_chr06 | 11784054                | TT                              | CC                | 1946443206               |
| SNP_P3_73413_11784395 | NC_021165.1    | Ca_kabuli_chr06 | 11784395                | CC                              | AA                | 1946443208               |
| SNP_P3_73414_11784399 | NC_021165.1    | Ca_kabuli_chr06 | 11784399                | AA                              | GG                | 1946443209               |
| SNP_P3_73415_11784425 | NC_021165.1    | Ca_kabuli_chr06 | 11784425                | CC                              | TT                | 1946443211               |
| SNP_P3_73416_11784451 | NC_021165.1    | Ca_kabuli_chr06 | 11784451                | TT                              | CC                | 1946443212               |
| SNP_P3_73417_11784483 | NC_021165.1    | Ca_kabuli_chr06 | 11784483                | CC                              | TT                | 1946443214               |
| SNP_P3_73418_11785544 | NC_021165.1    | Ca_kabuli_chr06 | 11785544                | AA                              | TT                | 1946443215               |
| SNP_P3_73419_11786044 | NC_021165.1    | Ca_kabuli_chr06 | 11786044                | GG                              | AA                | 1946443217               |
| SNP_P3_73420_11786264 | NC_021165.1    | Ca_kabuli_chr06 | 11786264                | TT                              | CC                | 1946443218               |
| SNP_P3_73421_11786272 | NC_021165.1    | Ca_kabuli_chr06 | 11786272                | GG                              | CC                | 1946443220               |
| SNP_P3_73422_11787568 | NC_021165.1    | Ca_kabuli_chr06 | 11787568                | AA                              | GG                | 1946443221               |
| SNP_P3_73423_11787933 | NC_021165.1    | Ca_kabuli_chr06 | 11787933                | GG                              | TT                | 1946443223               |
| SNP_P3_73424_11788578 | NC_021165.1    | Ca_kabuli_chr06 | 11788578                | TT                              | GG                | 1946443224               |
| SNP_P3_73425_11788589 | NC_021165.1    | Ca_kabuli_chr06 | 11788589                | GG                              | TT                | 1946443225               |
| SNP_P3_73426_11789681 | NC_021165.1    | Ca_kabuli_chr06 | 11789681                | CC                              | AA                | 1946443227               |
| SNP_P3_73427_11789995 | NC_021165.1    | Ca_kabuli_chr06 | 11789995                | AA                              | CC                | 1946443228               |
| SNP_P3_73428_11790861 | NC_021165.1    | Ca_kabuli_chr06 | 11790861                | GG                              | AA                | 1946443230               |
| SNP_P3_73429_11791072 | NC_021165.1    | Ca_kabuli_chr06 | 11791072                | CC                              | TT                | 1946443232               |
| SNP_P3_73430_11791536 | NC_021165.1    | Ca_kabuli_chr06 | 11791536                | TT                              | CC                | 1946443233               |
| SNP_P3_73432_11791656 | NC_021165.1    | Ca_kabuli_chr06 | 11791656                | TT                              | CC                | 1946443234               |
| SNP_P3_73434_11792600 | NC_021165.1    | Ca_kabuli_chr06 | 11792600                | AA                              | GG                | 1946443236               |
| SNP_P3_73436_11794748 | NC_021165.1    | Ca_kabuli_chr06 | 11794748                | AA                              | GG                | 1946443237               |
| SNP_P3_73437_11794821 | NC_021165.1    | Ca_kabuli_chr06 | 11794821                | AA                              | GG                | 1946443239               |
| SNP_P3_73438_11807351 | NC_021165.1    | Ca_kabuli_chr06 | 11807351                | GG                              | TT                | 1946443240               |
| SNP_P3_73439_11807697 | NC_021165.1    | Ca_kabuli_chr06 | 11807697                | AA                              | GG                | 1946443242               |

| SNPs IDs              | Chromosome IDs | Chromosomes     | Physical positions (bp) | CDC Frontier (Reference genome) | (Pusa 256 & HPNB) | NCBI SNPdb Accession IDs |
|-----------------------|----------------|-----------------|-------------------------|---------------------------------|-------------------|--------------------------|
| SNP_P3_73440_11809714 | NC_021165.1    | Ca_kabuli_chr06 | 11809714                | CC                              | AA                | 1946443243               |
| SNP_P3_73441_11811500 | NC_021165.1    | Ca_kabuli_chr06 | 11811500                | GG                              | AA                | 1946443244               |
| SNP_P3_73442_11812959 | NC_021165.1    | Ca_kabuli_chr06 | 11812959                | AA                              | CC                | 1946443246               |
| SNP_P3_73443_11813076 | NC_021165.1    | Ca_kabuli_chr06 | 11813076                | AA                              | TT                | 1946443247               |
| SNP_P3_73444_11813082 | NC_021165.1    | Ca_kabuli_chr06 | 11813082                | TT                              | CC                | 1946443249               |
| SNP_P3_73445_11813315 | NC_021165.1    | Ca_kabuli_chr06 | 11813315                | TT                              | GG                | 1946443250               |
| SNP_P3_73446_11813918 | NC_021165.1    | Ca_kabuli_chr06 | 11813918                | CC                              | TT                | 1946443251               |
| SNP_P3_73447_11813949 | NC_021165.1    | Ca_kabuli_chr06 | 11813949                | AA                              | GG                | 1946443253               |
| SNP_P3_73448_11827462 | NC_021165.1    | Ca_kabuli_chr06 | 11827462                | TT                              | GG                | 1946443255               |
| SNP_P3_73449_11827685 | NC_021165.1    | Ca_kabuli_chr06 | 11827685                | GG                              | AA                | 1946443256               |
| SNP_P3_73450_11839811 | NC_021165.1    | Ca_kabuli_chr06 | 11839811                | TT                              | CC                | 1946443258               |
| SNP_P3_73451_11839838 | NC_021165.1    | Ca_kabuli_chr06 | 11839838                | AA                              | TT                | 1946443259               |
| SNP_P3_73452_11840071 | NC_021165.1    | Ca_kabuli_chr06 | 11840071                | GG                              | AA                | 1946443260               |
| SNP_P3_73453_11840287 | NC_021165.1    | Ca_kabuli_chr06 | 11840287                | CC                              | TT                | 1946443262               |
| SNP_P3_73454_11840342 | NC_021165.1    | Ca_kabuli_chr06 | 11840342                | AA                              | TT                | 1946443263               |
| SNP_P3_73455_11840373 | NC_021165.1    | Ca_kabuli_chr06 | 11840373                | TT                              | CC                | 1946443265               |
| SNP_P3_73456_11840383 | NC_021165.1    | Ca_kabuli_chr06 | 11840383                | CC                              | AA                | 1946443266               |
| SNP_P3_73457_11840398 | NC_021165.1    | Ca_kabuli_chr06 | 11840398                | TT                              | CC                | 1946443268               |
| SNP_P3_73458_11840561 | NC_021165.1    | Ca_kabuli_chr06 | 11840561                | GG                              | AA                | 1946443269               |
| SNP_P3_73459_11850537 | NC_021165.1    | Ca_kabuli_chr06 | 11850537                | GG                              | AA                | 1946443271               |
| SNP_P3_73460_11851234 | NC_021165.1    | Ca_kabuli_chr06 | 11851234                | CC                              | TT                | 1946443272               |
| SNP_P3_73461_11868047 | NC_021165.1    | Ca_kabuli_chr06 | 11868047                | TT                              | AA                | 1946443274               |
| SNP_P3_73462_11868049 | NC_021165.1    | Ca_kabuli_chr06 | 11868049                | AA                              | GG                | 1946443276               |
| SNP_P3_73463_11868348 | NC_021165.1    | Ca_kabuli_chr06 | 11868348                | TT                              | CC                | 1946443277               |
| SNP_P3_73464_11883892 | NC_021165.1    | Ca_kabuli_chr06 | 11883892                | TT                              | AA                | 1946443279               |
| SNP_P3_73465_11883910 | NC_021165.1    | Ca_kabuli_chr06 | 11883910                | AA                              | GG                | 1946443280               |
| SNP_P3_73466_11885274 | NC_021165.1    | Ca_kabuli_chr06 | 11885274                | CC                              | AA                | 1946443282               |
| SNP_P3_73467_11903498 | NC_021165.1    | Ca_kabuli_chr06 | 11903498                | GG                              | AA                | 1946443283               |
| SNP_P3_73468_11911913 | NC_021165.1    | Ca_kabuli_chr06 | 11911913                | CC                              | TT                | 1946443285               |
| SNP_P3_73469_11969069 | NC_021165.1    | Ca_kabuli_chr06 | 11969069                | TT                              | GG                | 1946443286               |
| SNP_P3_73470_11969089 | NC_021165.1    | Ca_kabuli_chr06 | 11969089                | TT                              | CC                | 1946443288               |
| SNP_P3_73471_11969137 | NC_021165.1    | Ca_kabuli_chr06 | 11969137                | AA                              | GG                | 1946443289               |
| SNP_P3_73472_11969220 | NC_021165.1    | Ca_kabuli_chr06 | 11969220                | GG                              | TT                | 1946443291               |
| SNP_P3_73473_11969224 | NC_021165.1    | Ca_kabuli_chr06 | 11969224                | AA                              | GG                | 1946443292               |
| SNP_P3_73474_11969245 | NC_021165.1    | Ca_kabuli_chr06 | 11969245                | AA                              | CC                | 1946443293               |
| SNP_P3_73475_11969256 | NC_021165.1    | Ca_kabuli_chr06 | 11969256                | AA                              | GG                | 1946443295               |
| SNP_P3_73476_11969366 | NC_021165.1    | Ca_kabuli_chr06 | 11969366                | GG                              | AA                | 1946443297               |
| SNP_P3_73477_11977967 | NC_021165.1    | Ca_kabuli_chr06 | 11977967                | CC                              | AA                | 1946443298               |
| SNP_P3_73478_11977974 | NC_021165.1    | Ca_kabuli_chr06 | 11977974                | CC                              | AA                | 1946443300               |
| SNP_P3_73480_11996865 | NC_021165.1    | Ca_kabuli_chr06 | 11996865                | TT                              | CC                | 1946443301               |
| SNP_P3_73481_11996877 | NC_021165.1    | Ca_kabuli_chr06 | 11996877                | CC                              | TT                | 1946443303               |
| SNP_P3_73482_12006772 | NC_021165.1    | Ca_kabuli_chr06 | 12006772                | CC                              | TT                | 1946443304               |

| SNPs IDs              | Chromosome IDs | Chromosomes     | Physical positions (bp) | CDC Frontier (Reference genome) | (Pusa 256 & HPNB) | NCBI SNPdb Accession IDs |
|-----------------------|----------------|-----------------|-------------------------|---------------------------------|-------------------|--------------------------|
| SNP_P3_73483_12006797 | NC_021165.1    | Ca_kabuli_chr06 | 12006797                | AA                              | TT                | 1946443306               |
| SNP_P3_73484_12007280 | NC_021165.1    | Ca_kabuli_chr06 | 12007280                | AA                              | CC                | 1946443307               |
| SNP_P3_73486_12061811 | NC_021165.1    | Ca_kabuli_chr06 | 12061811                | AA                              | GG                | 1946443308               |
| SNP_P3_73487_12061813 | NC_021165.1    | Ca_kabuli_chr06 | 12061813                | TT                              | CC                | 1946443311               |
| SNP_P3_73489_12071156 | NC_021165.1    | Ca_kabuli_chr06 | 12071156                | TT                              | AA                | 1946443312               |
| SNP_P3_73490_12078344 | NC_021165.1    | Ca_kabuli_chr06 | 12078344                | TT                              | GG                | 1946443314               |
| SNP_P3_73491_12089508 | NC_021165.1    | Ca_kabuli_chr06 | 12089508                | TT                              | CC                | 1946443315               |
| SNP_P3_73492_12089558 | NC_021165.1    | Ca_kabuli_chr06 | 12089558                | TT                              | CC                | 1946443317               |
| SNP_P3_73493_12089561 | NC_021165.1    | Ca_kabuli_chr06 | 12089561                | GG                              | AA                | 1946443318               |
| SNP_P3_73494_12089612 | NC_021165.1    | Ca_kabuli_chr06 | 12089612                | TT                              | CC                | 1946443320               |
| SNP_P3_73495_12089634 | NC_021165.1    | Ca_kabuli_chr06 | 12089634                | GG                              | CC                | 1946443321               |
| SNP_P3_73496_12089707 | NC_021165.1    | Ca_kabuli_chr06 | 12089707                | TT                              | CC                | 1946443324               |
| SNP_P3_73497_12089835 | NC_021165.1    | Ca_kabuli_chr06 | 12089835                | GG                              | AA                | 1946443326               |
| SNP_P3_73498_12089868 | NC_021165.1    | Ca_kabuli_chr06 | 12089868                | GG                              | AA                | 1946443327               |
| SNP_P3_73499_12089920 | NC_021165.1    | Ca_kabuli_chr06 | 12089920                | TT                              | CC                | 1946443328               |
| SNP_P3_73501_12090906 | NC_021165.1    | Ca_kabuli_chr06 | 12090906                | TT                              | GG                | 1946443330               |
| SNP_P3_73502_12090923 | NC_021165.1    | Ca_kabuli_chr06 | 12090923                | AA                              | GG                | 1946443331               |
| SNP_P3_73503_12090984 | NC_021165.1    | Ca_kabuli_chr06 | 12090984                | AA                              | GG                | 1946443333               |
| SNP_P3_73504_12090997 | NC_021165.1    | Ca_kabuli_chr06 | 12090997                | TT                              | CC                | 1946443334               |
| SNP_P3_73505_12091432 | NC_021165.1    | Ca_kabuli_chr06 | 12091432                | AA                              | CC                | 1946443336               |
| SNP_P3_73506_12091458 | NC_021165.1    | Ca_kabuli_chr06 | 12091458                | GG                              | TT                | 1946443337               |
| SNP_P3_73507_12091466 | NC_021165.1    | Ca_kabuli_chr06 | 12091466                | CC                              | TT                | 1946443339               |
| SNP_P3_73508_12109386 | NC_021165.1    | Ca_kabuli_chr06 | 12109386                | CC                              | TT                | 1946443340               |
| SNP_P3_73509_12112901 | NC_021165.1    | Ca_kabuli_chr06 | 12112901                | CC                              | GG                | 1946443342               |
| SNP_P3_73510_12126927 | NC_021165.1    | Ca_kabuli_chr06 | 12126927                | TT                              | AA                | 1946443343               |
| SNP_P3_73511_12126956 | NC_021165.1    | Ca_kabuli_chr06 | 12126956                | AA                              | TT                | 1946443345               |
| SNP_P3_73512_12127257 | NC_021165.1    | Ca_kabuli_chr06 | 12127257                | TT                              | AA                | 1946443346               |
| SNP_P3_73513_12127474 | NC_021165.1    | Ca_kabuli_chr06 | 12127474                | CC                              | AA                | 1946443348               |
| SNP_P3_73514_12127481 | NC_021165.1    | Ca_kabuli_chr06 | 12127481                | GG                              | AA                | 1946443349               |
| SNP_P3_73515_12130313 | NC_021165.1    | Ca_kabuli_chr06 | 12130313                | TT                              | CC                | 1946443351               |
| SNP_P3_73517_12222158 | NC_021165.1    | Ca_kabuli_chr06 | 12222158                | GG                              | AA                | 1946443352               |
| SNP_P3_73518_12231864 | NC_021165.1    | Ca_kabuli_chr06 | 12231864                | TT                              | CC                | 1946443353               |
| SNP_P3_73519_12231888 | NC_021165.1    | Ca_kabuli_chr06 | 12231888                | GG                              | AA                | 1946443355               |
| SNP_P3_73521_12236494 | NC_021165.1    | Ca_kabuli_chr06 | 12236494                | TT                              | CC                | 1946443356               |
| SNP_P3_73522_12236535 | NC_021165.1    | Ca_kabuli_chr06 | 12236535                | TT                              | CC                | 1946443358               |
| SNP_P3_73523_12236576 | NC_021165.1    | Ca_kabuli_chr06 | 12236576                | TT                              | CC                | 1946443360               |
| SNP_P3_73524_12236595 | NC_021165.1    | Ca_kabuli_chr06 | 12236595                | TT                              | GG                | 1946443361               |
| SNP_P3_73525_12238250 | NC_021165.1    | Ca_kabuli_chr06 | 12238250                | GG                              | TT                | 1946443362               |
| SNP_P3_73526_12238253 | NC_021165.1    | Ca_kabuli_chr06 | 12238253                | GG                              | AA                | 1946443364               |
| SNP_P3_73527_12238275 | NC_021165.1    | Ca_kabuli_chr06 | 12238275                | AA                              | GG                | 1946443365               |
| SNP_P3_73528_12238293 | NC_021165.1    | Ca_kabuli_chr06 | 12238293                | GG                              | TT                | 1946443367               |
| SNP_P3_73529_12238386 | NC_021165.1    | Ca_kabuli_chr06 | 12238386                | TT                              | AA                | 1946443368               |

| SNPs IDs              | Chromosome IDs | Chromosomes     | Physical positions (bp) | CDC Frontier (Reference genome) | (Pusa 256 & HPNB) | NCBI SNPdb Accession IDs |
|-----------------------|----------------|-----------------|-------------------------|---------------------------------|-------------------|--------------------------|
| SNP_P3_73530_12238749 | NC_021165.1    | Ca_kabuli_chr06 | 12238749                | AA                              | TT                | 1946443370               |
| SNP_P3_73531_12248814 | NC_021165.1    | Ca_kabuli_chr06 | 12248814                | AA                              | GG                | 1946443371               |
| SNP_P3_73532_12251664 | NC_021165.1    | Ca_kabuli_chr06 | 12251664                | GG                              | AA                | 1946443373               |
| SNP_P3_73535_12258959 | NC_021165.1    | Ca_kabuli_chr06 | 12258959                | GG                              | AA                | 1946443374               |
| SNP_P3_73536_12258962 | NC_021165.1    | Ca_kabuli_chr06 | 12258962                | CC                              | GG                | 1946443376               |
| SNP_P3_73537_12260137 | NC_021165.1    | Ca_kabuli_chr06 | 12260137                | GG                              | AA                | 1946443377               |
| SNP_P3_73538_12260202 | NC_021165.1    | Ca_kabuli_chr06 | 12260202                | AA                              | CC                | 1946443379               |
| SNP_P3_73539_12260205 | NC_021165.1    | Ca_kabuli_chr06 | 12260205                | CC                              | TT                | 1946443380               |
| SNP_P3_73540_12260250 | NC_021165.1    | Ca_kabuli_chr06 | 12260250                | AA                              | GG                | 1946443382               |
| SNP_P3_73541_12260272 | NC_021165.1    | Ca_kabuli_chr06 | 12260272                | CC                              | TT                | 1946443384               |
| SNP_P3_73542_12260352 | NC_021165.1    | Ca_kabuli_chr06 | 12260352                | TT                              | CC                | 1946443385               |
| SNP_P3_73543_12260630 | NC_021165.1    | Ca_kabuli_chr06 | 12260630                | AA                              | GG                | 1946443387               |
| SNP_P3_73544_12303899 | NC_021165.1    | Ca_kabuli_chr06 | 12303899                | AA                              | CC                | 1946443388               |
| SNP_P3_73546_12315495 | NC_021165.1    | Ca_kabuli_chr06 | 12315495                | TT                              | CC                | 1946443390               |
| SNP_P3_73547_12328342 | NC_021165.1    | Ca_kabuli_chr06 | 12328342                | GG                              | TT                | 1946443391               |
| SNP_P3_73548_12334932 | NC_021165.1    | Ca_kabuli_chr06 | 12334932                | CC                              | AA                | 1946443393               |
| SNP_P3_73549_12334965 | NC_021165.1    | Ca_kabuli_chr06 | 12334965                | AA                              | TT                | 1946443394               |
| SNP_P3_73550_12335009 | NC_021165.1    | Ca_kabuli_chr06 | 12335009                | CC                              | AA                | 1946443395               |
| SNP_P3_73551_12335042 | NC_021165.1    | Ca_kabuli_chr06 | 12335042                | TT                              | CC                | 1946443397               |
| SNP_P3_73552_12335259 | NC_021165.1    | Ca_kabuli_chr06 | 12335259                | CC                              | AA                | 1946443398               |
| SNP_P3_73554_12335803 | NC_021165.1    | Ca_kabuli_chr06 | 12335803                | AA                              | TT                | 1946443400               |
| SNP_P3_73555_12335969 | NC_021165.1    | Ca_kabuli_chr06 | 12335969                | AA                              | GG                | 1946443402               |
| SNP_P3_73556_12339681 | NC_021165.1    | Ca_kabuli_chr06 | 12339681                | AA                              | CC                | 1946443403               |
| SNP_P3_73557_12345000 | NC_021165.1    | Ca_kabuli_chr06 | 12345000                | AA                              | GG                | 1946443405               |
| SNP_P3_73558_12345121 | NC_021165.1    | Ca_kabuli_chr06 | 12345121                | CC                              | GG                | 1946443406               |
| SNP_P3_73561_12442344 | NC_021165.1    | Ca_kabuli_chr06 | 12442344                | AA                              | TT                | 1946443408               |
| SNP_P3_73562_12445734 | NC_021165.1    | Ca_kabuli_chr06 | 12445734                | CC                              | GG                | 1946443409               |
| SNP_P3_73563_12496634 | NC_021165.1    | Ca_kabuli_chr06 | 12496634                | AA                              | GG                | 1946443411               |
| SNP_P3_73565_12529506 | NC_021165.1    | Ca_kabuli_chr06 | 12529506                | AA                              | TT                | 1946443412               |
| SNP_P3_73566_12529833 | NC_021165.1    | Ca_kabuli_chr06 | 12529833                | AA                              | CC                | 1946443414               |
| SNP_P3_73567_12529905 | NC_021165.1    | Ca_kabuli_chr06 | 12529905                | TT                              | AA                | 1946443415               |
| SNP_P3_73573_12616364 | NC_021165.1    | Ca_kabuli_chr06 | 12616364                | CC                              | AA                | 1946443417               |
| SNP_P3_73574_12621256 | NC_021165.1    | Ca_kabuli_chr06 | 12621256                | TT                              | CC                | 1946443418               |
| SNP_P3_73575_12628801 | NC_021165.1    | Ca_kabuli_chr06 | 12628801                | CC                              | AA                | 1946443420               |
| SNP_P3_73576_12629174 | NC_021165.1    | Ca_kabuli_chr06 | 12629174                | AA                              | GG                | 1946443421               |
| SNP_P3_73577_12629176 | NC_021165.1    | Ca_kabuli_chr06 | 12629176                | AA                              | GG                | 1946443423               |
| SNP_P3_73578_12636282 | NC_021165.1    | Ca_kabuli_chr06 | 12636282                | AA                              | CC                | 1946443424               |
| SNP_P3_73579_12659154 | NC_021165.1    | Ca_kabuli_chr06 | 12659154                | CC                              | TT                | 1946443426               |
| SNP_P3_73582_12680295 | NC_021165.1    | Ca_kabuli_chr06 | 12680295                | TT                              | CC                | 1946443427               |
| SNP_P3_73583_12712884 | NC_021165.1    | Ca_kabuli_chr06 | 12712884                | AA                              | GG                | 1946443429               |
| SNP_P3_73585_12734297 | NC_021165.1    | Ca_kabuli_chr06 | 12734297                | GG                              | TT                | 1946443430               |
| SNP_P3_73586_12734470 | NC_021165.1    | Ca_kabuli_chr06 | 12734470                | GG                              | AA                | 1946443432               |

| SNPs IDs              | Chromosome IDs | Chromosomes     | Physical positions (bp) | CDC Frontier (Reference genome) | (Pusa 256 & HPNB) | NCBI SNPdb Accession IDs |
|-----------------------|----------------|-----------------|-------------------------|---------------------------------|-------------------|--------------------------|
| SNP_P3_73587_12753531 | NC_021165.1    | Ca_kabuli_chr06 | 12753531                | GG                              | AA                | 1946443433               |
| SNP_P3_73589_12767096 | NC_021165.1    | Ca_kabuli_chr06 | 12767096                | GG                              | AA                | 1946443435               |
| SNP_P3_73590_12773162 | NC_021165.1    | Ca_kabuli_chr06 | 12773162                | AA                              | TT                | 1946443436               |
| SNP_P3_73592_12774646 | NC_021165.1    | Ca_kabuli_chr06 | 12774646                | CC                              | TT                | 1946443438               |
| SNP_P3_73595_12819293 | NC_021165.1    | Ca_kabuli_chr06 | 12819293                | CC                              | AA                | 1946443439               |
| SNP_P3_73596_12853552 | NC_021165.1    | Ca_kabuli_chr06 | 12853552                | TT                              | AA                | 1946443441               |
| SNP_P3_73598_12853850 | NC_021165.1    | Ca_kabuli_chr06 | 12853850                | TT                              | AA                | 1946443443               |
| SNP_P3_73599_12854781 | NC_021165.1    | Ca_kabuli_chr06 | 12854781                | CC                              | AA                | 1946443444               |
| SNP_P3_73600_12854782 | NC_021165.1    | Ca_kabuli_chr06 | 12854782                | CC                              | TT                | 1946443445               |
| SNP_P3_73601_12854941 | NC_021165.1    | Ca_kabuli_chr06 | 12854941                | AA                              | TT                | 1946443447               |
| SNP_P3_73603_12855425 | NC_021165.1    | Ca_kabuli_chr06 | 12855425                | AA                              | TT                | 1946443448               |
| SNP_P3_73604_12855845 | NC_021165.1    | Ca_kabuli_chr06 | 12855845                | TT                              | AA                | 1946443450               |
| SNP_P3_73605_12855912 | NC_021165.1    | Ca_kabuli_chr06 | 12855912                | GG                              | TT                | 1946443451               |
| SNP_P3_73608_12860510 | NC_021165.1    | Ca_kabuli_chr06 | 12860510                | GG                              | TT                | 1946443453               |
| SNP_P3_73609_12860518 | NC_021165.1    | Ca_kabuli_chr06 | 12860518                | CC                              | TT                | 1946443454               |
| SNP_P3_73611_12862085 | NC_021165.1    | Ca_kabuli_chr06 | 12862085                | CC                              | TT                | 1946443456               |
| SNP_P3_73612_12863314 | NC_021165.1    | Ca_kabuli_chr06 | 12863314                | CC                              | TT                | 1946443457               |
| SNP_P3_73613_12864815 | NC_021165.1    | Ca_kabuli_chr06 | 12864815                | GG                              | TT                | 1946443459               |
| SNP_P3_73614_12864953 | NC_021165.1    | Ca_kabuli_chr06 | 12864953                | GG                              | AA                | 1946443461               |
| SNP_P3_73615_12865164 | NC_021165.1    | Ca_kabuli_chr06 | 12865164                | CC                              | TT                | 1946443462               |
| SNP_P3_73616_12865175 | NC_021165.1    | Ca_kabuli_chr06 | 12865175                | AA                              | GG                | 1946443464               |
| SNP_P3_73617_12867944 | NC_021165.1    | Ca_kabuli_chr06 | 12867944                | TT                              | AA                | 1946443465               |
| SNP_P3_73618_12868265 | NC_021165.1    | Ca_kabuli_chr06 | 12868265                | AA                              | GG                | 1946443467               |
| SNP_P3_73620_12868746 | NC_021165.1    | Ca_kabuli_chr06 | 12868746                | TT                              | CC                | 1946443468               |
| SNP_P3_73622_12871346 | NC_021165.1    | Ca_kabuli_chr06 | 12871346                | AA                              | GG                | 1946443470               |
| SNP_P3_73623_12872427 | NC_021165.1    | Ca_kabuli_chr06 | 12872427                | TT                              | GG                | 1946443471               |
| SNP_P3_73624_12877206 | NC_021165.1    | Ca_kabuli_chr06 | 12877206                | CC                              | GG                | 1946443473               |
| SNP_P3_73625_12877278 | NC_021165.1    | Ca_kabuli_chr06 | 12877278                | GG                              | AA                | 1946443474               |
| SNP_P3_73627_12877357 | NC_021165.1    | Ca_kabuli_chr06 | 12877357                | TT                              | CC                | 1946443476               |
| SNP_P3_73628_12877364 | NC_021165.1    | Ca_kabuli_chr06 | 12877364                | CC                              | TT                | 1946443478               |
| SNP_P3_73629_12877529 | NC_021165.1    | Ca_kabuli_chr06 | 12877529                | GG                              | AA                | 1946443479               |
| SNP_P3_73631_12878854 | NC_021165.1    | Ca_kabuli_chr06 | 12878854                | CC                              | TT                | 1946443481               |
| SNP_P3_73634_12882627 | NC_021165.1    | Ca_kabuli_chr06 | 12882627                | GG                              | AA                | 1946443482               |
| SNP_P3_73635_12883303 | NC_021165.1    | Ca_kabuli_chr06 | 12883303                | AA                              | GG                | 1946443483               |
| SNP_P3_73636_12883866 | NC_021165.1    | Ca_kabuli_chr06 | 12883866                | TT                              | AA                | 1946443485               |
| SNP_P3_73637_12885837 | NC_021165.1    | Ca_kabuli_chr06 | 12885837                | TT                              | CC                | 1946443486               |
| SNP_P3_73638_12887005 | NC_021165.1    | Ca_kabuli_chr06 | 12887005                | TT                              | CC                | 1946443488               |
| SNP_P3_73639_12887019 | NC_021165.1    | Ca_kabuli_chr06 | 12887019                | CC                              | AA                | 1946443489               |
| SNP_P3_73640_12887025 | NC_021165.1    | Ca_kabuli_chr06 | 12887025                | GG                              | AA                | 1946443491               |
| SNP_P3_73641_12887027 | NC_021165.1    | Ca_kabuli_chr06 | 12887027                | CC                              | TT                | 1946443492               |
| SNP_P3_73642_12887033 | NC_021165.1    | Ca_kabuli_chr06 | 12887033                | AA                              | GG                | 1946443494               |
| SNP_P3_73643_12887035 | NC_021165.1    | Ca_kabuli_chr06 | 12887035                | TT                              | CC                | 1946443495               |



| SNPs IDs              | Chromosome IDs | Chromosomes     | Physical positions (bp) | CDC Frontier (Reference genome) | (Pusa 256 & HPNB) | NCBI SNPdb Accession IDs |
|-----------------------|----------------|-----------------|-------------------------|---------------------------------|-------------------|--------------------------|
| SNP_P3_73644_12887247 | NC_021165.1    | Ca_kabuli_chr06 | 12887247                | CC                              | TT                | 1946443497               |
| SNP_P3_73646_12888757 | NC_021165.1    | Ca_kabuli_chr06 | 12888757                | AA                              | CC                | 1946443498               |
| SNP_P3_73647_12888789 | NC_021165.1    | Ca_kabuli_chr06 | 12888789                | CC                              | TT                | 1946443500               |
| SNP_P3_73649_12889625 | NC_021165.1    | Ca_kabuli_chr06 | 12889625                | TT                              | CC                | 1946443501               |
| SNP_P3_73650_12890997 | NC_021165.1    | Ca_kabuli_chr06 | 12890997                | CC                              | TT                | 1946443503               |
| SNP_P3_73651_12891001 | NC_021165.1    | Ca_kabuli_chr06 | 12891001                | GG                              | TT                | 1946443504               |
| SNP_P3_73652_12891822 | NC_021165.1    | Ca_kabuli_chr06 | 12891822                | AA                              | GG                | 1946443506               |
| SNP_P3_73654_12892405 | NC_021165.1    | Ca_kabuli_chr06 | 12892405                | TT                              | AA                | 1946443507               |
| SNP_P3_73655_12892415 | NC_021165.1    | Ca_kabuli_chr06 | 12892415                | CC                              | TT                | 1946443509               |
| SNP_P3_73656_12893496 | NC_021165.1    | Ca_kabuli_chr06 | 12893496                | GG                              | AA                | 1946443510               |
| SNP_P3_73657_12894710 | NC_021165.1    | Ca_kabuli_chr06 | 12894710                | AA                              | CC                | 1946443512               |
| SNP_P3_73658_12894785 | NC_021165.1    | Ca_kabuli_chr06 | 12894785                | AA                              | GG                | 1946443513               |
| SNP_P3_73659_12894799 | NC_021165.1    | Ca_kabuli_chr06 | 12894799                | TT                              | CC                | 1946443515               |
| SNP_P3_73660_12894802 | NC_021165.1    | Ca_kabuli_chr06 | 12894802                | GG                              | AA                | 1946443517               |
| SNP_P3_73661_12896847 | NC_021165.1    | Ca_kabuli_chr06 | 12896847                | GG                              | CC                | 1946443518               |
| SNP_P3_73662_12896926 | NC_021165.1    | Ca_kabuli_chr06 | 12896926                | AA                              | GG                | 1946443520               |
| SNP_P3_73663_12896969 | NC_021165.1    | Ca_kabuli_chr06 | 12896969                | GG                              | TT                | 1946443521               |
| SNP_P3_73664_12896991 | NC_021165.1    | Ca_kabuli_chr06 | 12896991                | CC                              | TT                | 1946443523               |
| SNP_P3_73665_12897002 | NC_021165.1    | Ca_kabuli_chr06 | 12897002                | CC                              | TT                | 1946443524               |
| SNP_P3_73666_12897040 | NC_021165.1    | Ca_kabuli_chr06 | 12897040                | TT                              | AA                | 1946443526               |
| SNP_P3_73667_12898234 | NC_021165.1    | Ca_kabuli_chr06 | 12898234                | CC                              | TT                | 1946443527               |
| SNP_P3_73669_12898956 | NC_021165.1    | Ca_kabuli_chr06 | 12898956                | CC                              | TT                | 1946443529               |
| SNP_P3_73670_12898996 | NC_021165.1    | Ca_kabuli_chr06 | 12898996                | AA                              | GG                | 1946443530               |
| SNP_P3_73671_12898997 | NC_021165.1    | Ca_kabuli_chr06 | 12898997                | TT                              | AA                | 1946443531               |
| SNP_P3_73672_12904732 | NC_021165.1    | Ca_kabuli_chr06 | 12904732                | CC                              | TT                | 1946443533               |
| SNP_P3_73673_12904741 | NC_021165.1    | Ca_kabuli_chr06 | 12904741                | GG                              | CC                | 1946443535               |
| SNP_P3_73675_12905945 | NC_021165.1    | Ca_kabuli_chr06 | 12905945                | AA                              | GG                | 1946443536               |
| SNP_P3_73677_12905973 | NC_021165.1    | Ca_kabuli_chr06 | 12905973                | AA                              | CC                | 1946443538               |
| SNP_P3_73678_12907158 | NC_021165.1    | Ca_kabuli_chr06 | 12907158                | GG                              | AA                | 1946443539               |
| SNP_P3_73679_12908104 | NC_021165.1    | Ca_kabuli_chr06 | 12908104                | CC                              | GG                | 1946443541               |
| SNP_P3_73681_12908588 | NC_021165.1    | Ca_kabuli_chr06 | 12908588                | GG                              | CC                | 1946443542               |
| SNP_P3_73682_12908611 | NC_021165.1    | Ca_kabuli_chr06 | 12908611                | AA                              | CC                | 1946443544               |
| SNP_P3_73683_12908625 | NC_021165.1    | Ca_kabuli_chr06 | 12908625                | GG                              | AA                | 1946443545               |
| SNP_P3_73684_12909442 | NC_021165.1    | Ca_kabuli_chr06 | 12909442                | AA                              | TT                | 1946443547               |
| SNP_P3_73685_12910796 | NC_021165.1    | Ca_kabuli_chr06 | 12910796                | TT                              | GG                | 1946443548               |
| SNP_P3_73686_12910810 | NC_021165.1    | Ca_kabuli_chr06 | 12910810                | CC                              | TT                | 1946443550               |
| SNP_P3_73687_12917618 | NC_021165.1    | Ca_kabuli_chr06 | 12917618                | AA                              | GG                | 1946443551               |
| SNP_P3_73688_12917619 | NC_021165.1    | Ca_kabuli_chr06 | 12917619                | AA                              | GG                | 1946443553               |
| SNP_P3_73689_12919569 | NC_021165.1    | Ca_kabuli_chr06 | 12919569                | GG                              | AA                | 1946443554               |
| SNP_P3_73690_12919580 | NC_021165.1    | Ca_kabuli_chr06 | 12919580                | AA                              | CC                | 1946443556               |
| SNP_P3_73691_12921232 | NC_021165.1    | Ca_kabuli_chr06 | 12921232                | TT                              | CC                | 1946443557               |
| SNP_P3_73693_12921532 | NC_021165.1    | Ca_kabuli_chr06 | 12921532                | AA                              | TT                | 1946443559               |

| SNPs IDs              | Chromosome IDs | Chromosomes     | Physical positions (bp) | CDC Frontier (Reference genome) | (Pusa 256 & HPNB) | NCBI SNPdb Accession IDs |
|-----------------------|----------------|-----------------|-------------------------|---------------------------------|-------------------|--------------------------|
| SNP_P3_73694_12921546 | NC_021165.1    | Ca_kabuli_chr06 | 12921546                | CC                              | TT                | 1946443560               |
| SNP_P3_73695_12922043 | NC_021165.1    | Ca_kabuli_chr06 | 12922043                | TT                              | CC                | 1946443562               |
| SNP_P3_73696_12922393 | NC_021165.1    | Ca_kabuli_chr06 | 12922393                | GG                              | AA                | 1946443563               |
| SNP_P3_73697_12923884 | NC_021165.1    | Ca_kabuli_chr06 | 12923884                | GG                              | AA                | 1946443565               |
| SNP_P3_73698_12924774 | NC_021165.1    | Ca_kabuli_chr06 | 12924774                | CC                              | AA                | 1946443566               |
| SNP_P3_73699_12924971 | NC_021165.1    | Ca_kabuli_chr06 | 12924971                | CC                              | TT                | 1946443568               |
| SNP_P3_73700_12925158 | NC_021165.1    | Ca_kabuli_chr06 | 12925158                | TT                              | CC                | 1946443569               |
| SNP_P3_73701_12925322 | NC_021165.1    | Ca_kabuli_chr06 | 12925322                | AA                              | TT                | 1946443571               |
| SNP_P3_73703_12927383 | NC_021165.1    | Ca_kabuli_chr06 | 12927383                | CC                              | TT                | 1946443572               |
| SNP_P3_73704_12927439 | NC_021165.1    | Ca_kabuli_chr06 | 12927439                | AA                              | GG                | 1946443574               |
| SNP_P3_73705_12927453 | NC_021165.1    | Ca_kabuli_chr06 | 12927453                | AA                              | GG                | 1946443575               |
| SNP_P3_73707_12927544 | NC_021165.1    | Ca_kabuli_chr06 | 12927544                | GG                              | AA                | 1946443577               |
| SNP_P3_73708_12927978 | NC_021165.1    | Ca_kabuli_chr06 | 12927978                | GG                              | TT                | 1946443578               |
| SNP_P3_73710_12928526 | NC_021165.1    | Ca_kabuli_chr06 | 12928526                | GG                              | TT                | 1946443580               |
| SNP_P3_73711_12928607 | NC_021165.1    | Ca_kabuli_chr06 | 12928607                | AA                              | CC                | 1946443581               |
| SNP_P3_73712_12929195 | NC_021165.1    | Ca_kabuli_chr06 | 12929195                | CC                              | TT                | 1946443583               |
| SNP_P3_73713_12929793 | NC_021165.1    | Ca_kabuli_chr06 | 12929793                | TT                              | CC                | 1946443584               |
| SNP_P3_73714_12929937 | NC_021165.1    | Ca_kabuli_chr06 | 12929937                | TT                              | CC                | 1946443586               |
| SNP_P3_73715_12930248 | NC_021165.1    | Ca_kabuli_chr06 | 12930248                | TT                              | AA                | 1946443587               |
| SNP_P3_73716_12930414 | NC_021165.1    | Ca_kabuli_chr06 | 12930414                | CC                              | TT                | 1946443588               |
| SNP_P3_73717_12930417 | NC_021165.1    | Ca_kabuli_chr06 | 12930417                | TT                              | AA                | 1946443590               |
| SNP_P3_73718_12930431 | NC_021165.1    | Ca_kabuli_chr06 | 12930431                | CC                              | TT                | 1946443592               |
| SNP_P3_73719_12930447 | NC_021165.1    | Ca_kabuli_chr06 | 12930447                | CC                              | TT                | 1946443593               |
| SNP_P3_73722_12931208 | NC_021165.1    | Ca_kabuli_chr06 | 12931208                | AA                              | GG                | 1946443595               |
| SNP_P3_73723_12931262 | NC_021165.1    | Ca_kabuli_chr06 | 12931262                | GG                              | AA                | 1946443596               |
| SNP_P3_73726_12931688 | NC_021165.1    | Ca_kabuli_chr06 | 12931688                | GG                              | AA                | 1946443598               |
| SNP_P3_73727_12933516 | NC_021165.1    | Ca_kabuli_chr06 | 12933516                | TT                              | AA                | 1946443599               |
| SNP_P3_73728_12933646 | NC_021165.1    | Ca_kabuli_chr06 | 12933646                | TT                              | CC                | 1946443600               |
| SNP_P3_73729_12933772 | NC_021165.1    | Ca_kabuli_chr06 | 12933772                | GG                              | CC                | 1946443602               |
| SNP_P3_73730_12935418 | NC_021165.1    | Ca_kabuli_chr06 | 12935418                | CC                              | AA                | 1946443604               |
| SNP_P3_73731_12937137 | NC_021165.1    | Ca_kabuli_chr06 | 12937137                | AA                              | GG                | 1946443605               |
| SNP_P3_73732_12939021 | NC_021165.1    | Ca_kabuli_chr06 | 12939021                | GG                              | TT                | 1946443607               |
| SNP_P3_73733_12939085 | NC_021165.1    | Ca_kabuli_chr06 | 12939085                | AA                              | GG                | 1946443609               |
| SNP_P3_73734_12940053 | NC_021165.1    | Ca_kabuli_chr06 | 12940053                | AA                              | TT                | 1946443610               |
| SNP_P3_73735_12940151 | NC_021165.1    | Ca_kabuli_chr06 | 12940151                | AA                              | GG                | 1946443612               |
| SNP_P3_73737_12940196 | NC_021165.1    | Ca_kabuli_chr06 | 12940196                | GG                              | TT                | 1946443613               |
| SNP_P3_73738_12940579 | NC_021165.1    | Ca_kabuli_chr06 | 12940579                | TT                              | CC                | 1946443615               |
| SNP_P3_73739_12940638 | NC_021165.1    | Ca_kabuli_chr06 | 12940638                | CC                              | TT                | 1946443616               |
| SNP_P3_73741_12941284 | NC_021165.1    | Ca_kabuli_chr06 | 12941284                | GG                              | CC                | 1946443618               |
| SNP_P3_73743_12945123 | NC_021165.1    | Ca_kabuli_chr06 | 12945123                | GG                              | CC                | 1946443619               |
| SNP_P3_73744_12945363 | NC_021165.1    | Ca_kabuli_chr06 | 12945363                | TT                              | AA                | 1946443621               |
| SNP_P3_73745_12945370 | NC_021165.1    | Ca_kabuli_chr06 | 12945370                | TT                              | CC                | 1946443622               |

| SNPs IDs              | Chromosome IDs | Chromosomes     | Physical positions (bp) | CDC Frontier (Reference genome) | (Pusa 256 & HPNB) | NCBI SNPdb Accession IDs |
|-----------------------|----------------|-----------------|-------------------------|---------------------------------|-------------------|--------------------------|
| SNP_P3_73746_12945419 | NC_021165.1    | Ca_kabuli_chr06 | 12945419                | TT                              | GG                | 1946443624               |
| SNP_P3_73748_12945593 | NC_021165.1    | Ca_kabuli_chr06 | 12945593                | GG                              | CC                | 1946443625               |
| SNP_P3_73749_12945698 | NC_021165.1    | Ca_kabuli_chr06 | 12945698                | CC                              | TT                | 1946443627               |
| SNP_P3_73750_12945859 | NC_021165.1    | Ca_kabuli_chr06 | 12945859                | AA                              | GG                | 1946443628               |
| SNP_P3_73751_12945871 | NC_021165.1    | Ca_kabuli_chr06 | 12945871                | GG                              | AA                | 1946443630               |
| SNP_P3_73752_12945951 | NC_021165.1    | Ca_kabuli_chr06 | 12945951                | CC                              | TT                | 1946443631               |
| SNP_P3_73753_12945983 | NC_021165.1    | Ca_kabuli_chr06 | 12945983                | TT                              | AA                | 1946443633               |
| SNP_P3_73756_12946727 | NC_021165.1    | Ca_kabuli_chr06 | 12946727                | TT                              | AA                | 1946443634               |
| SNP_P3_73757_12947860 | NC_021165.1    | Ca_kabuli_chr06 | 12947860                | CC                              | TT                | 1946443636               |
| SNP_P3_73758_12947885 | NC_021165.1    | Ca_kabuli_chr06 | 12947885                | CC                              | TT                | 1946443637               |
| SNP_P3_73759_12948302 | NC_021165.1    | Ca_kabuli_chr06 | 12948302                | AA                              | GG                | 1946443639               |
| SNP_P3_73760_12948544 | NC_021165.1    | Ca_kabuli_chr06 | 12948544                | GG                              | TT                | 1946443640               |
| SNP_P3_73761_12949712 | NC_021165.1    | Ca_kabuli_chr06 | 12949712                | AA                              | GG                | 1946443642               |
| SNP_P3_73762_12949723 | NC_021165.1    | Ca_kabuli_chr06 | 12949723                | TT                              | CC                | 1946443643               |
| SNP_P3_73763_12949970 | NC_021165.1    | Ca_kabuli_chr06 | 12949970                | CC                              | AA                | 1946443645               |
| SNP_P3_73764_12950202 | NC_021165.1    | Ca_kabuli_chr06 | 12950202                | GG                              | AA                | 1946443646               |
| SNP_P3_73765_12950216 | NC_021165.1    | Ca_kabuli_chr06 | 12950216                | CC                              | TT                | 1946443648               |
| SNP_P3_73766_12950221 | NC_021165.1    | Ca_kabuli_chr06 | 12950221                | AA                              | GG                | 1946443649               |
| SNP_P3_73768_12950313 | NC_021165.1    | Ca_kabuli_chr06 | 12950313                | CC                              | TT                | 1946443651               |
| SNP_P3_73770_12952295 | NC_021165.1    | Ca_kabuli_chr06 | 12952295                | AA                              | GG                | 1946443652               |
| SNP_P3_73771_12952776 | NC_021165.1    | Ca_kabuli_chr06 | 12952776                | AA                              | TT                | 1946443654               |
| SNP_P3_73772_12952777 | NC_021165.1    | Ca_kabuli_chr06 | 12952777                | TT                              | GG                | 1946443655               |
| SNP_P3_73774_12953405 | NC_021165.1    | Ca_kabuli_chr06 | 12953405                | AA                              | CC                | 1946443657               |
| SNP_P3_73775_12953408 | NC_021165.1    | Ca_kabuli_chr06 | 12953408                | AA                              | CC                | 1946443658               |
| SNP_P3_73776_12953431 | NC_021165.1    | Ca_kabuli_chr06 | 12953431                | CC                              | GG                | 1946443660               |
| SNP_P3_73777_12954098 | NC_021165.1    | Ca_kabuli_chr06 | 12954098                | GG                              | TT                | 1946443661               |
| SNP_P3_73779_12954166 | NC_021165.1    | Ca_kabuli_chr06 | 12954166                | GG                              | AA                | 1946443663               |
| SNP_P3_73780_12954429 | NC_021165.1    | Ca_kabuli_chr06 | 12954429                | TT                              | AA                | 1946443664               |
| SNP_P3_73782_12954469 | NC_021165.1    | Ca_kabuli_chr06 | 12954469                | GG                              | AA                | 1946443666               |
| SNP_P3_73783_12954538 | NC_021165.1    | Ca_kabuli_chr06 | 12954538                | TT                              | CC                | 1946443667               |
| SNP_P3_73784_12955957 | NC_021165.1    | Ca_kabuli_chr06 | 12955957                | TT                              | GG                | 1946443669               |
| SNP_P3_73785_12956003 | NC_021165.1    | Ca_kabuli_chr06 | 12956003                | CC                              | AA                | 1946443670               |
| SNP_P3_73786_12956010 | NC_021165.1    | Ca_kabuli_chr06 | 12956010                | AA                              | GG                | 1946443672               |
| SNP_P3_73787_12956236 | NC_021165.1    | Ca_kabuli_chr06 | 12956236                | CC                              | TT                | 1946443673               |
| SNP_P3_73788_12956242 | NC_021165.1    | Ca_kabuli_chr06 | 12956242                | CC                              | TT                | 1946443675               |
| SNP_P3_73789_12956300 | NC_021165.1    | Ca_kabuli_chr06 | 12956300                | GG                              | AA                | 1946443676               |
| SNP_P3_73790_12956312 | NC_021165.1    | Ca_kabuli_chr06 | 12956312                | TT                              | AA                | 1946443678               |
| SNP_P3_73793_12956560 | NC_021165.1    | Ca_kabuli_chr06 | 12956560                | CC                              | TT                | 1946443679               |
| SNP_P3_73794_12956576 | NC_021165.1    | Ca_kabuli_chr06 | 12956576                | AA                              | GG                | 1946443681               |
| SNP_P3_73795_12957273 | NC_021165.1    | Ca_kabuli_chr06 | 12957273                | AA                              | GG                | 1946443682               |
| SNP_P3_73796_12957287 | NC_021165.1    | Ca_kabuli_chr06 | 12957287                | CC                              | TT                | 1946443684               |
| SNP_P3_73797_12957324 | NC_021165.1    | Ca_kabuli_chr06 | 12957324                | CC                              | TT                | 1946443685               |

| SNPs IDs              | Chromosome IDs | Chromosomes     | Physical positions (bp) | CDC Frontier (Reference genome) | (Pusa 256 & HPNB) | NCBI SNPdb Accession IDs |
|-----------------------|----------------|-----------------|-------------------------|---------------------------------|-------------------|--------------------------|
| SNP_P3_73799_12957555 | NC_021165.1    | Ca_kabuli_chr06 | 12957555                | CC                              | TT                | 1946443687               |
| SNP_P3_73800_12957998 | NC_021165.1    | Ca_kabuli_chr06 | 12957998                | CC                              | GG                | 1946443688               |
| SNP_P3_73801_12959167 | NC_021165.1    | Ca_kabuli_chr06 | 12959167                | TT                              | CC                | 1946443690               |
| SNP_P3_73802_12959200 | NC_021165.1    | Ca_kabuli_chr06 | 12959200                | AA                              | TT                | 1946443691               |
| SNP_P3_73803_12960157 | NC_021165.1    | Ca_kabuli_chr06 | 12960157                | AA                              | TT                | 1946443693               |
| SNP_P3_73804_12961735 | NC_021165.1    | Ca_kabuli_chr06 | 12961735                | TT                              | CC                | 1946443694               |
| SNP_P3_73805_12962637 | NC_021165.1    | Ca_kabuli_chr06 | 12962637                | AA                              | GG                | 1946443695               |
| SNP_P3_73806_12962912 | NC_021165.1    | Ca_kabuli_chr06 | 12962912                | AA                              | GG                | 1946443697               |
| SNP_P3_73808_12963060 | NC_021165.1    | Ca_kabuli_chr06 | 12963060                | TT                              | GG                | 1946443699               |
| SNP_P3_73809_12964392 | NC_021165.1    | Ca_kabuli_chr06 | 12964392                | CC                              | TT                | 1946443700               |
| SNP_P3_73810_12964393 | NC_021165.1    | Ca_kabuli_chr06 | 12964393                | TT                              | CC                | 1946443701               |
| SNP_P3_73811_12964406 | NC_021165.1    | Ca_kabuli_chr06 | 12964406                | GG                              | AA                | 1946443703               |
| SNP_P3_73812_12964692 | NC_021165.1    | Ca_kabuli_chr06 | 12964692                | AA                              | CC                | 1946443704               |
| SNP_P3_73813_12964748 | NC_021165.1    | Ca_kabuli_chr06 | 12964748                | CC                              | TT                | 1946443706               |
| SNP_P3_73814_12964755 | NC_021165.1    | Ca_kabuli_chr06 | 12964755                | GG                              | TT                | 1946443707               |
| SNP_P3_73816_12964780 | NC_021165.1    | Ca_kabuli_chr06 | 12964780                | TT                              | AA                | 1946443709               |
| SNP_P3_73817_12964840 | NC_021165.1    | Ca_kabuli_chr06 | 12964840                | CC                              | GG                | 1946443710               |
| SNP_P3_73818_12964847 | NC_021165.1    | Ca_kabuli_chr06 | 12964847                | TT                              | CC                | 1946443712               |
| SNP_P3_73819_12964866 | NC_021165.1    | Ca_kabuli_chr06 | 12964866                | AA                              | GG                | 1946443713               |
| SNP_P3_73821_12964960 | NC_021165.1    | Ca_kabuli_chr06 | 12964960                | TT                              | AA                | 1946443715               |
| SNP_P3_73822_12965016 | NC_021165.1    | Ca_kabuli_chr06 | 12965016                | CC                              | TT                | 1946443716               |
| SNP_P3_73823_12965107 | NC_021165.1    | Ca_kabuli_chr06 | 12965107                | GG                              | TT                | 1946443718               |
| SNP_P3_73824_12966479 | NC_021165.1    | Ca_kabuli_chr06 | 12966479                | TT                              | AA                | 1946443719               |
| SNP_P3_73825_12967249 | NC_021165.1    | Ca_kabuli_chr06 | 12967249                | CC                              | TT                | 1946443721               |
| SNP_P3_73827_12968097 | NC_021165.1    | Ca_kabuli_chr06 | 12968097                | CC                              | TT                | 1946443722               |
| SNP_P3_73828_12968129 | NC_021165.1    | Ca_kabuli_chr06 | 12968129                | AA                              | GG                | 1946443723               |
| SNP_P3_73829_12968961 | NC_021165.1    | Ca_kabuli_chr06 | 12968961                | GG                              | CC                | 1946443725               |
| SNP_P3_73830_12969262 | NC_021165.1    | Ca_kabuli_chr06 | 12969262                | CC                              | TT                | 1946443727               |
| SNP_P3_73831_12969948 | NC_021165.1    | Ca_kabuli_chr06 | 12969948                | TT                              | CC                | 1946443731               |
| SNP_P3_73832_12970197 | NC_021165.1    | Ca_kabuli_chr06 | 12970197                | AA                              | TT                | 1946443733               |
| SNP_P3_73833_12970453 | NC_021165.1    | Ca_kabuli_chr06 | 12970453                | CC                              | TT                | 1946443734               |
| SNP_P3_73834_12970470 | NC_021165.1    | Ca_kabuli_chr06 | 12970470                | CC                              | TT                | 1946443736               |
| SNP_P3_73835_12970474 | NC_021165.1    | Ca_kabuli_chr06 | 12970474                | TT                              | CC                | 1946443737               |
| SNP_P3_73837_12972278 | NC_021165.1    | Ca_kabuli_chr06 | 12972278                | GG                              | AA                | 1946443739               |
| SNP_P3_73838_12972627 | NC_021165.1    | Ca_kabuli_chr06 | 12972627                | TT                              | CC                | 1946443740               |
| SNP_P3_73840_12973198 | NC_021165.1    | Ca_kabuli_chr06 | 12973198                | TT                              | CC                | 1946443742               |
| SNP_P3_73841_12973446 | NC_021165.1    | Ca_kabuli_chr06 | 12973446                | GG                              | AA                | 1946443743               |
| SNP_P3_73842_12973483 | NC_021165.1    | Ca_kabuli_chr06 | 12973483                | TT                              | CC                | 1946443745               |
| SNP_P3_73843_12975122 | NC_021165.1    | Ca_kabuli_chr06 | 12975122                | GG                              | AA                | 1946443746               |
| SNP_P3_73844_12976382 | NC_021165.1    | Ca_kabuli_chr06 | 12976382                | TT                              | AA                | 1946443748               |
| SNP_P3_73845_12976390 | NC_021165.1    | Ca_kabuli_chr06 | 12976390                | CC                              | TT                | 1946443749               |
| SNP_P3_73846_12976409 | NC_021165.1    | Ca_kabuli_chr06 | 12976409                | GG                              | AA                | 1946443751               |

| SNPs IDs              | Chromosome IDs | Chromosomes     | Physical positions (bp) | CDC Frontier (Reference genome) | (Pusa 256 & HPNB) | NCBI SNPdb Accession IDs |
|-----------------------|----------------|-----------------|-------------------------|---------------------------------|-------------------|--------------------------|
| SNP_P3_73847_12976443 | NC_021165.1    | Ca_kabuli_chr06 | 12976443                | TT                              | AA                | 1946443752               |
| SNP_P3_73848_12976473 | NC_021165.1    | Ca_kabuli_chr06 | 12976473                | TT                              | AA                | 1946443754               |
| SNP_P3_73849_12976513 | NC_021165.1    | Ca_kabuli_chr06 | 12976513                | AA                              | GG                | 1946443755               |
| SNP_P3_73850_12976688 | NC_021165.1    | Ca_kabuli_chr06 | 12976688                | GG                              | AA                | 1946443756               |
| SNP_P3_73851_12976785 | NC_021165.1    | Ca_kabuli_chr06 | 12976785                | CC                              | AA                | 1946443758               |
| SNP_P3_73852_12976990 | NC_021165.1    | Ca_kabuli_chr06 | 12976990                | AA                              | TT                | 1946443759               |
| SNP_P3_73853_12977634 | NC_021165.1    | Ca_kabuli_chr06 | 12977634                | AA                              | CC                | 1946443761               |
| SNP_P3_73854_12977710 | NC_021165.1    | Ca_kabuli_chr06 | 12977710                | CC                              | TT                | 1946443763               |
| SNP_P3_73855_12977779 | NC_021165.1    | Ca_kabuli_chr06 | 12977779                | TT                              | AA                | 1946443764               |
| SNP_P3_73856_12977795 | NC_021165.1    | Ca_kabuli_chr06 | 12977795                | AA                              | TT                | 1946443766               |
| SNP_P3_73857_12977796 | NC_021165.1    | Ca_kabuli_chr06 | 12977796                | AA                              | TT                | 1946443767               |
| SNP_P3_73858_12977814 | NC_021165.1    | Ca_kabuli_chr06 | 12977814                | AA                              | GG                | 1946443768               |
| SNP_P3_73859_12977828 | NC_021165.1    | Ca_kabuli_chr06 | 12977828                | GG                              | AA                | 1946443770               |
| SNP_P3_73860_12977832 | NC_021165.1    | Ca_kabuli_chr06 | 12977832                | CC                              | AA                | 1946443771               |
| SNP_P3_73862_12977856 | NC_021165.1    | Ca_kabuli_chr06 | 12977856                | AA                              | TT                | 1946443773               |
| SNP_P3_73863_12977919 | NC_021165.1    | Ca_kabuli_chr06 | 12977919                | AA                              | TT                | 1946443774               |
| SNP_P3_73864_12978084 | NC_021165.1    | Ca_kabuli_chr06 | 12978084                | CC                              | GG                | 1946443776               |
| SNP_P3_73866_12978236 | NC_021165.1    | Ca_kabuli_chr06 | 12978236                | GG                              | AA                | 1946443777               |
| SNP_P3_73867_12978883 | NC_021165.1    | Ca_kabuli_chr06 | 12978883                | CC                              | AA                | 1946443778               |
| SNP_P3_73868_12978886 | NC_021165.1    | Ca_kabuli_chr06 | 12978886                | AA                              | TT                | 1946443780               |
| SNP_P3_73869_12978982 | NC_021165.1    | Ca_kabuli_chr06 | 12978982                | AA                              | GG                | 1946443781               |
| SNP_P3_73871_12979484 | NC_021165.1    | Ca_kabuli_chr06 | 12979484                | AA                              | GG                | 1946443783               |
| SNP_P3_73872_12979644 | NC_021165.1    | Ca_kabuli_chr06 | 12979644                | AA                              | CC                | 1946443784               |
| SNP_P3_73873_12980651 | NC_021165.1    | Ca_kabuli_chr06 | 12980651                | CC                              | TT                | 1946443786               |
| SNP_P3_73875_12980838 | NC_021165.1    | Ca_kabuli_chr06 | 12980838                | TT                              | AA                | 1946443787               |
| SNP_P3_73877_12981987 | NC_021165.1    | Ca_kabuli_chr06 | 12981987                | TT                              | AA                | 1946443789               |
| SNP_P3_73878_12982052 | NC_021165.1    | Ca_kabuli_chr06 | 12982052                | TT                              | AA                | 1946443790               |
| SNP_P3_73879_12994031 | NC_021165.1    | Ca_kabuli_chr06 | 12994031                | CC                              | TT                | 1946443792               |
| SNP_P3_73881_13007473 | NC_021165.1    | Ca_kabuli_chr06 | 13007473                | AA                              | TT                | 1946443793               |
| SNP_P3_73882_13016486 | NC_021165.1    | Ca_kabuli_chr06 | 13016486                | CC                              | TT                | 1946443794               |
| SNP_P3_73883_13017142 | NC_021165.1    | Ca_kabuli_chr06 | 13017142                | AA                              | GG                | 1946443796               |
| SNP_P3_73884_13017150 | NC_021165.1    | Ca_kabuli_chr06 | 13017150                | AA                              | GG                | 1946443797               |
| SNP_P3_73885_13017711 | NC_021165.1    | Ca_kabuli_chr06 | 13017711                | AA                              | TT                | 1946443799               |
| SNP_P3_73886_13023739 | NC_021165.1    | Ca_kabuli_chr06 | 13023739                | GG                              | CC                | 1946443800               |
| SNP_P3_73887_13024633 | NC_021165.1    | Ca_kabuli_chr06 | 13024633                | GG                              | AA                | 1946443802               |
| SNP_P3_73888_13025452 | NC_021165.1    | Ca_kabuli_chr06 | 13025452                | GG                              | AA                | 1946443803               |
| SNP_P3_73889_13029297 | NC_021165.1    | Ca_kabuli_chr06 | 13029297                | CC                              | TT                | 1946443805               |
| SNP_P3_73890_13033001 | NC_021165.1    | Ca_kabuli_chr06 | 13033001                | AA                              | GG                | 1946443807               |
| SNP_P3_73891_13033007 | NC_021165.1    | Ca_kabuli_chr06 | 13033007                | CC                              | TT                | 1946443808               |
| SNP_P3_73892_13033013 | NC_021165.1    | Ca_kabuli_chr06 | 13033013                | GG                              | AA                | 1946443809               |
| SNP_P3_73893_13033019 | NC_021165.1    | Ca_kabuli_chr06 | 13033019                | AA                              | TT                | 1946443811               |
| SNP_P3_73894_13033147 | NC_021165.1    | Ca_kabuli_chr06 | 13033147                | GG                              | AA                | 1946443812               |

| SNPs IDs              | Chromosome IDs | Chromosomes     | Physical positions (bp) | CDC Frontier (Reference genome) | (Pusa 256 & HPNB) | NCBI SNPdb Accession IDs |
|-----------------------|----------------|-----------------|-------------------------|---------------------------------|-------------------|--------------------------|
| SNP_P3_73895_13033158 | NC_021165.1    | Ca_kabuli_chr06 | 13033158                | TT                              | CC                | 1946443814               |
| SNP_P3_73896_13033163 | NC_021165.1    | Ca_kabuli_chr06 | 13033163                | GG                              | AA                | 1946443815               |
| SNP_P3_73897_13033195 | NC_021165.1    | Ca_kabuli_chr06 | 13033195                | GG                              | TT                | 1946443816               |
| SNP_P3_73898_13033270 | NC_021165.1    | Ca_kabuli_chr06 | 13033270                | CC                              | TT                | 1946443818               |
| SNP_P3_73899_13033364 | NC_021165.1    | Ca_kabuli_chr06 | 13033364                | TT                              | CC                | 1946443819               |
| SNP_P3_73900_13033578 | NC_021165.1    | Ca_kabuli_chr06 | 13033578                | GG                              | AA                | 1946443821               |
| SNP_P3_73901_13033686 | NC_021165.1    | Ca_kabuli_chr06 | 13033686                | CC                              | TT                | 1946443822               |
| SNP_P3_73902_13033728 | NC_021165.1    | Ca_kabuli_chr06 | 13033728                | GG                              | AA                | 1946443824               |
| SNP_P3_73903_13033824 | NC_021165.1    | Ca_kabuli_chr06 | 13033824                | CC                              | TT                | 1946443825               |
| SNP_P3_73904_13038549 | NC_021165.1    | Ca_kabuli_chr06 | 13038549                | AA                              | TT                | 1946443827               |
| SNP_P3_73905_13052941 | NC_021165.1    | Ca_kabuli_chr06 | 13052941                | GG                              | AA                | 1946443828               |
| SNP_P3_73908_13178631 | NC_021165.1    | Ca_kabuli_chr06 | 13178631                | AA                              | CC                | 1946443830               |
| SNP_P3_73913_13211054 | NC_021165.1    | Ca_kabuli_chr06 | 13211054                | CC                              | AA                | 1946443831               |
| SNP_P3_73914_13228354 | NC_021165.1    | Ca_kabuli_chr06 | 13228354                | AA                              | GG                | 1946443833               |
| SNP_P3_73915_13246342 | NC_021165.1    | Ca_kabuli_chr06 | 13246342                | GG                              | AA                | 1946443834               |
| SNP_P3_73917_13247770 | NC_021165.1    | Ca_kabuli_chr06 | 13247770                | TT                              | AA                | 1946443836               |
| SNP_P3_73918_13261911 | NC_021165.1    | Ca_kabuli_chr06 | 13261911                | CC                              | TT                | 1946443837               |
| SNP_P3_73919_13261935 | NC_021165.1    | Ca_kabuli_chr06 | 13261935                | CC                              | TT                | 1946443838               |
| SNP_P3_73921_13264237 | NC_021165.1    | Ca_kabuli_chr06 | 13264237                | CC                              | TT                | 1946443840               |
| SNP_P3_73922_13285877 | NC_021165.1    | Ca_kabuli_chr06 | 13285877                | AA                              | GG                | 1946443841               |
| SNP_P3_73923_13285928 | NC_021165.1    | Ca_kabuli_chr06 | 13285928                | AA                              | TT                | 1946443843               |
| SNP_P3_73924_13285953 | NC_021165.1    | Ca_kabuli_chr06 | 13285953                | AA                              | CC                | 1946443844               |
| SNP_P3_73925_13287093 | NC_021165.1    | Ca_kabuli_chr06 | 13287093                | TT                              | CC                | 1946443846               |
| SNP_P3_73926_13315551 | NC_021165.1    | Ca_kabuli_chr06 | 13315551                | TT                              | CC                | 1946443847               |
| SNP_P3_73927_13315552 | NC_021165.1    | Ca_kabuli_chr06 | 13315552                | TT                              | GG                | 1946443849               |
| SNP_P3_73928_13326910 | NC_021165.1    | Ca_kabuli_chr06 | 13326910                | CC                              | AA                | 1946443851               |
| SNP_P3_73929_13369602 | NC_021165.1    | Ca_kabuli_chr06 | 13369602                | CC                              | TT                | 1946443852               |
| SNP_P3_73930_13377503 | NC_021165.1    | Ca_kabuli_chr06 | 13377503                | TT                              | AA                | 1946443854               |
| SNP_P3_73933_13394395 | NC_021165.1    | Ca_kabuli_chr06 | 13394395                | AA                              | GG                | 1946443855               |
| SNP_P3_73934_13411049 | NC_021165.1    | Ca_kabuli_chr06 | 13411049                | TT                              | CC                | 1946443857               |
| SNP_P3_73935_13419122 | NC_021165.1    | Ca_kabuli_chr06 | 13419122                | GG                              | TT                | 1946443858               |
| SNP_P3_73939_13452872 | NC_021165.1    | Ca_kabuli_chr06 | 13452872                | CC                              | TT                | 1946443860               |
| SNP_P3_73940_13453014 | NC_021165.1    | Ca_kabuli_chr06 | 13453014                | CC                              | TT                | 1946443861               |
| SNP_P3_73941_13453333 | NC_021165.1    | Ca_kabuli_chr06 | 13453333                | GG                              | AA                | 1946443862               |
| SNP_P3_73942_13463300 | NC_021165.1    | Ca_kabuli_chr06 | 13463300                | TT                              | CC                | 1946443864               |
| SNP_P3_73943_13468187 | NC_021165.1    | Ca_kabuli_chr06 | 13468187                | CC                              | TT                | 1946443865               |
| SNP_P3_73944_13469175 | NC_021165.1    | Ca_kabuli_chr06 | 13469175                | AA                              | GG                | 1946443867               |
| SNP_P3_73947_13496756 | NC_021165.1    | Ca_kabuli_chr06 | 13496756                | AA                              | CC                | 1946443868               |
| SNP_P3_73949_13502324 | NC_021165.1    | Ca_kabuli_chr06 | 13502324                | GG                              | TT                | 1946443870               |
| SNP_P3_73950_13533952 | NC_021165.1    | Ca_kabuli_chr06 | 13533952                | TT                              | CC                | 1946443872               |
| SNP_P3_73951_13537714 | NC_021165.1    | Ca_kabuli_chr06 | 13537714                | TT                              | CC                | 1946443873               |
| SNP_P3_73952_13652493 | NC_021165.1    | Ca_kabuli_chr06 | 13652493                | TT                              | CC                | 1946443875               |

| SNPs IDs              | Chromosome IDs | Chromosomes     | Physical positions (bp) | CDC Frontier (Reference genome) | (Pusa 256 & HPNB) | NCBI SNPdb Accession IDs |
|-----------------------|----------------|-----------------|-------------------------|---------------------------------|-------------------|--------------------------|
| SNP_P3_73954_13674889 | NC_021165.1    | Ca_kabuli_chr06 | 13674889                | GG                              | CC                | 1946443876               |
| SNP_P3_73955_13730811 | NC_021165.1    | Ca_kabuli_chr06 | 13730811                | CC                              | TT                | 1946443878               |
| SNP_P3_73956_13796357 | NC_021165.1    | Ca_kabuli_chr06 | 13796357                | AA                              | GG                | 1946443879               |
| SNP_P3_73957_13816195 | NC_021165.1    | Ca_kabuli_chr06 | 13816195                | GG                              | AA                | 1946443881               |
| SNP_P3_73958_13825566 | NC_021165.1    | Ca_kabuli_chr06 | 13825566                | GG                              | AA                | 1946443882               |
| SNP_P3_73959_13836434 | NC_021165.1    | Ca_kabuli_chr06 | 13836434                | TT                              | CC                | 1946443884               |
| SNP_P3_73960_13836453 | NC_021165.1    | Ca_kabuli_chr06 | 13836453                | TT                              | CC                | 1946443885               |
| SNP_P3_73961_13836454 | NC_021165.1    | Ca_kabuli_chr06 | 13836454                | CC                              | GG                | 1946443887               |
| SNP_P3_73962_13836510 | NC_021165.1    | Ca_kabuli_chr06 | 13836510                | AA                              | GG                | 1946443888               |
| SNP_P3_73965_13839054 | NC_021165.1    | Ca_kabuli_chr06 | 13839054                | CC                              | TT                | 1946443889               |
| SNP_P3_73967_13839308 | NC_021165.1    | Ca_kabuli_chr06 | 13839308                | AA                              | GG                | 1946443891               |
| SNP_P3_73968_13927233 | NC_021165.1    | Ca_kabuli_chr06 | 13927233                | AA                              | GG                | 1946443893               |
| SNP_P3_73969_13933962 | NC_021165.1    | Ca_kabuli_chr06 | 13933962                | TT                              | GG                | 1946443894               |
| SNP_P3_73970_14003043 | NC_021165.1    | Ca_kabuli_chr06 | 14003043                | GG                              | AA                | 1946443896               |
| SNP_P3_73971_14004757 | NC_021165.1    | Ca_kabuli_chr06 | 14004757                | CC                              | TT                | 1946443897               |
| SNP_P3_73973_14064253 | NC_021165.1    | Ca_kabuli_chr06 | 14064253                | AA                              | GG                | 1946443899               |
| SNP_P3_73974_14064288 | NC_021165.1    | Ca_kabuli_chr06 | 14064288                | GG                              | CC                | 1946443900               |
| SNP_P3_73975_14064489 | NC_021165.1    | Ca_kabuli_chr06 | 14064489                | CC                              | TT                | 1946443902               |
| SNP_P3_73976_14064754 | NC_021165.1    | Ca_kabuli_chr06 | 14064754                | TT                              | GG                | 1946443903               |
| SNP_P3_73977_14064760 | NC_021165.1    | Ca_kabuli_chr06 | 14064760                | AA                              | TT                | 1946443905               |
| SNP_P3_73978_14065112 | NC_021165.1    | Ca_kabuli_chr06 | 14065112                | AA                              | TT                | 1946443906               |
| SNP_P3_73979_14084090 | NC_021165.1    | Ca_kabuli_chr06 | 14084090                | TT                              | CC                | 1946443908               |
| SNP_P3_73980_14096828 | NC_021165.1    | Ca_kabuli_chr06 | 14096828                | TT                              | GG                | 1946443910               |
| SNP_P3_73981_14105408 | NC_021165.1    | Ca_kabuli_chr06 | 14105408                | GG                              | AA                | 1946443911               |
| SNP_P3_73982_14136130 | NC_021165.1    | Ca_kabuli_chr06 | 14136130                | GG                              | AA                | 1946443913               |
| SNP_P3_73983_14194649 | NC_021165.1    | Ca_kabuli_chr06 | 14194649                | TT                              | GG                | 1946443914               |
| SNP_P3_73984_14210474 | NC_021165.1    | Ca_kabuli_chr06 | 14210474                | AA                              | GG                | 1946443916               |
| SNP_P3_73986_14242056 | NC_021165.1    | Ca_kabuli_chr06 | 14242056                | AA                              | CC                | 1946443917               |
| SNP_P3_73987_14246051 | NC_021165.1    | Ca_kabuli_chr06 | 14246051                | CC                              | TT                | 1946443919               |
| SNP_P3_73989_14274669 | NC_021165.1    | Ca_kabuli_chr06 | 14274669                | TT                              | AA                | 1946443920               |
| SNP_P3_73990_14277839 | NC_021165.1    | Ca_kabuli_chr06 | 14277839                | CC                              | GG                | 1946443922               |
| SNP_P3_73993_14279778 | NC_021165.1    | Ca_kabuli_chr06 | 14279778                | CC                              | AA                | 1946443923               |
| SNP_P3_73994_14282518 | NC_021165.1    | Ca_kabuli_chr06 | 14282518                | TT                              | CC                | 1946443925               |
| SNP_P3_73995_14282574 | NC_021165.1    | Ca_kabuli_chr06 | 14282574                | AA                              | TT                | 1946443927               |
| SNP_P3_73996_14282832 | NC_021165.1    | Ca_kabuli_chr06 | 14282832                | CC                              | GG                | 1946443928               |
| SNP_P3_73998_14351580 | NC_021165.1    | Ca_kabuli_chr06 | 14351580                | AA                              | GG                | 1946443930               |
| SNP_P3_74000_14398175 | NC_021165.1    | Ca_kabuli_chr06 | 14398175                | CC                              | TT                | 1946443931               |
| SNP_P3_74001_14403278 | NC_021165.1    | Ca_kabuli_chr06 | 14403278                | CC                              | TT                | 1946443933               |
| SNP_P3_74003_14452329 | NC_021165.1    | Ca_kabuli_chr06 | 14452329                | TT                              | AA                | 1946443934               |
| SNP_P3_74004_14452356 | NC_021165.1    | Ca_kabuli_chr06 | 14452356                | CC                              | AA                | 1946443936               |
| SNP_P3_74005_14455897 | NC_021165.1    | Ca_kabuli_chr06 | 14455897                | GG                              | AA                | 1946443937               |
| SNP_P3_74006_14455913 | NC_021165.1    | Ca_kabuli_chr06 | 14455913                | GG                              | AA                | 1946443938               |

| SNPs IDs              | Chromosome IDs | Chromosomes     | Physical positions (bp) | CDC Frontier (Reference genome) | (Pusa 256 & HPNB) | NCBI SNPdb Accession IDs |
|-----------------------|----------------|-----------------|-------------------------|---------------------------------|-------------------|--------------------------|
| SNP_P3_74007_14456095 | NC_021165.1    | Ca_kabuli_chr06 | 14456095                | AA                              | GG                | 1946443940               |
| SNP_P3_74008_14456106 | NC_021165.1    | Ca_kabuli_chr06 | 14456106                | GG                              | TT                | 1946443941               |
| SNP_P3_74009_14456117 | NC_021165.1    | Ca_kabuli_chr06 | 14456117                | CC                              | AA                | 1946443943               |
| SNP_P3_74010_14456128 | NC_021165.1    | Ca_kabuli_chr06 | 14456128                | TT                              | GG                | 1946443945               |
| SNP_P3_74011_14456131 | NC_021165.1    | Ca_kabuli_chr06 | 14456131                | GG                              | AA                | 1946443946               |
| SNP_P3_74012_14456179 | NC_021165.1    | Ca_kabuli_chr06 | 14456179                | CC                              | TT                | 1946443948               |
| SNP_P3_74013_14456188 | NC_021165.1    | Ca_kabuli_chr06 | 14456188                | AA                              | GG                | 1946443949               |
| SNP_P3_74014_14456376 | NC_021165.1    | Ca_kabuli_chr06 | 14456376                | GG                              | AA                | 1946443951               |
| SNP_P3_74016_14470388 | NC_021165.1    | Ca_kabuli_chr06 | 14470388                | CC                              | TT                | 1946443952               |
| SNP_P3_74017_14470415 | NC_021165.1    | Ca_kabuli_chr06 | 14470415                | CC                              | TT                | 1946443954               |
| SNP_P3_74018_14470474 | NC_021165.1    | Ca_kabuli_chr06 | 14470474                | CC                              | TT                | 1946443955               |
| SNP_P3_74019_14471026 | NC_021165.1    | Ca_kabuli_chr06 | 14471026                | AA                              | CC                | 1946443957               |
| SNP_P3_74020_14532708 | NC_021165.1    | Ca_kabuli_chr06 | 14532708                | GG                              | AA                | 1946443958               |
| SNP_P3_74021_14533977 | NC_021165.1    | Ca_kabuli_chr06 | 14533977                | CC                              | TT                | 1946443959               |
| SNP_P3_74022_14534321 | NC_021165.1    | Ca_kabuli_chr06 | 14534321                | CC                              | AA                | 1946443961               |
| SNP_P3_74023_14534331 | NC_021165.1    | Ca_kabuli_chr06 | 14534331                | CC                              | TT                | 1946443963               |
| SNP_P3_74025_14553476 | NC_021165.1    | Ca_kabuli_chr06 | 14553476                | AA                              | TT                | 1946443964               |
| SNP_P3_74026_14553477 | NC_021165.1    | Ca_kabuli_chr06 | 14553477                | TT                              | AA                | 1946443966               |
| SNP_P3_74027_14553639 | NC_021165.1    | Ca_kabuli_chr06 | 14553639                | TT                              | AA                | 1946443967               |
| SNP_P3_74028_14553671 | NC_021165.1    | Ca_kabuli_chr06 | 14553671                | AA                              | GG                | 1946443969               |
| SNP_P3_74029_14554090 | NC_021165.1    | Ca_kabuli_chr06 | 14554090                | CC                              | TT                | 1946443970               |
| SNP_P3_74030_14554109 | NC_021165.1    | Ca_kabuli_chr06 | 14554109                | TT                              | GG                | 1946443971               |
| SNP_P3_74031_14583100 | NC_021165.1    | Ca_kabuli_chr06 | 14583100                | AA                              | TT                | 1946443973               |
| SNP_P3_74033_14626154 | NC_021165.1    | Ca_kabuli_chr06 | 14626154                | GG                              | AA                | 1946443974               |
| SNP_P3_74034_14633003 | NC_021165.1    | Ca_kabuli_chr06 | 14633003                | TT                              | CC                | 1946443976               |
| SNP_P3_74035_14641832 | NC_021165.1    | Ca_kabuli_chr06 | 14641832                | CC                              | TT                | 1946443977               |
| SNP_P3_74036_14687879 | NC_021165.1    | Ca_kabuli_chr06 | 14687879                | GG                              | CC                | 1946443979               |
| SNP_P3_74037_14743747 | NC_021165.1    | Ca_kabuli_chr06 | 14743747                | TT                              | CC                | 1946443981               |
| SNP_P3_74038_14754948 | NC_021165.1    | Ca_kabuli_chr06 | 14754948                | TT                              | CC                | 1946443982               |
| SNP_P3_74039_14755095 | NC_021165.1    | Ca_kabuli_chr06 | 14755095                | CC                              | TT                | 1946443984               |
| SNP_P3_74040_14755186 | NC_021165.1    | Ca_kabuli_chr06 | 14755186                | TT                              | GG                | 1946443985               |
| SNP_P3_74041_14755507 | NC_021165.1    | Ca_kabuli_chr06 | 14755507                | AA                              | TT                | 1946443987               |
| SNP_P3_74044_14792511 | NC_021165.1    | Ca_kabuli_chr06 | 14792511                | GG                              | AA                | 1946443988               |
| SNP_P3_74045_14804017 | NC_021165.1    | Ca_kabuli_chr06 | 14804017                | TT                              | CC                | 1946443990               |
| SNP_P3_74046_14804313 | NC_021165.1    | Ca_kabuli_chr06 | 14804313                | TT                              | CC                | 1946443991               |
| SNP_P3_74047_14804688 | NC_021165.1    | Ca_kabuli_chr06 | 14804688                | AA                              | GG                | 1946443993               |
| SNP_P3_74048_14804713 | NC_021165.1    | Ca_kabuli_chr06 | 14804713                | TT                              | CC                | 1946443994               |
| SNP_P3_74049_14804732 | NC_021165.1    | Ca_kabuli_chr06 | 14804732                | AA                              | GG                | 1946443996               |
| SNP_P3_74050_14804734 | NC_021165.1    | Ca_kabuli_chr06 | 14804734                | AA                              | TT                | 1946443997               |
| SNP_P3_74051_14845790 | NC_021165.1    | Ca_kabuli_chr06 | 14845790                | AA                              | TT                | 1946443999               |
| SNP_P3_74053_14910622 | NC_021165.1    | Ca_kabuli_chr06 | 14910622                | AA                              | CC                | 1946444000               |
| SNP_P3_74054_14910623 | NC_021165.1    | Ca_kabuli_chr06 | 14910623                | AA                              | CC                | 1946444001               |



| SNPs IDs              | Chromosome IDs | Chromosomes     | Physical positions (bp) | CDC Frontier (Reference genome) | (Pusa 256 & HPNB) | NCBI SNPdb Accession IDs |
|-----------------------|----------------|-----------------|-------------------------|---------------------------------|-------------------|--------------------------|
| SNP_P3_74055_14918088 | NC_021165.1    | Ca_kabuli_chr06 | 14918088                | TT                              | AA                | 1946444003               |
| SNP_P3_74058_14988669 | NC_021165.1    | Ca_kabuli_chr06 | 14988669                | AA                              | GG                | 1946444004               |
| SNP_P3_74059_14997260 | NC_021165.1    | Ca_kabuli_chr06 | 14997260                | GG                              | TT                | 1946444006               |
| SNP_P3_74060_15025529 | NC_021165.1    | Ca_kabuli_chr06 | 15025529                | TT                              | CC                | 1946444007               |
| SNP_P3_74061_15034188 | NC_021165.1    | Ca_kabuli_chr06 | 15034188                | GG                              | AA                | 1946444009               |
| SNP_P3_74062_15080220 | NC_021165.1    | Ca_kabuli_chr06 | 15080220                | CC                              | TT                | 1946444010               |
| SNP_P3_74063_15080363 | NC_021165.1    | Ca_kabuli_chr06 | 15080363                | TT                              | GG                | 1946444012               |
| SNP_P3_74064_15080376 | NC_021165.1    | Ca_kabuli_chr06 | 15080376                | CC                              | GG                | 1946444013               |
| SNP_P3_74065_15080393 | NC_021165.1    | Ca_kabuli_chr06 | 15080393                | GG                              | CC                | 1946444015               |
| SNP_P3_74066_15080401 | NC_021165.1    | Ca_kabuli_chr06 | 15080401                | AA                              | GG                | 1946444016               |
| SNP_P3_74067_15080591 | NC_021165.1    | Ca_kabuli_chr06 | 15080591                | CC                              | AA                | 1946444017               |
| SNP_P3_74068_15080731 | NC_021165.1    | Ca_kabuli_chr06 | 15080731                | AA                              | GG                | 1946444019               |
| SNP_P3_74069_15080732 | NC_021165.1    | Ca_kabuli_chr06 | 15080732                | AA                              | TT                | 1946444020               |
| SNP_P3_74070_15083747 | NC_021165.1    | Ca_kabuli_chr06 | 15083747                | GG                              | AA                | 1946444022               |
| SNP_P3_74071_15083819 | NC_021165.1    | Ca_kabuli_chr06 | 15083819                | TT                              | CC                | 1946444023               |
| SNP_P3_74072_15083837 | NC_021165.1    | Ca_kabuli_chr06 | 15083837                | TT                              | CC                | 1946444025               |
| SNP_P3_74073_15083839 | NC_021165.1    | Ca_kabuli_chr06 | 15083839                | TT                              | GG                | 1946444026               |
| SNP_P3_74074_15083852 | NC_021165.1    | Ca_kabuli_chr06 | 15083852                | CC                              | TT                | 1946444028               |
| SNP_P3_74075_15084044 | NC_021165.1    | Ca_kabuli_chr06 | 15084044                | AA                              | GG                | 1946444029               |
| SNP_P3_74076_15084047 | NC_021165.1    | Ca_kabuli_chr06 | 15084047                | AA                              | GG                | 1946444030               |
| SNP_P3_74077_15084070 | NC_021165.1    | Ca_kabuli_chr06 | 15084070                | CC                              | TT                | 1946444033               |
| SNP_P3_74078_15107175 | NC_021165.1    | Ca_kabuli_chr06 | 15107175                | AA                              | TT                | 1946444035               |
| SNP_P3_74079_15107178 | NC_021165.1    | Ca_kabuli_chr06 | 15107178                | TT                              | GG                | 1946444036               |
| SNP_P3_74080_15115181 | NC_021165.1    | Ca_kabuli_chr06 | 15115181                | CC                              | TT                | 1946444038               |
| SNP_P3_74081_15116782 | NC_021165.1    | Ca_kabuli_chr06 | 15116782                | CC                              | TT                | 1946444039               |
| SNP_P3_74082_15148377 | NC_021165.1    | Ca_kabuli_chr06 | 15148377                | TT                              | AA                | 1946444041               |
| SNP_P3_74083_15180846 | NC_021165.1    | Ca_kabuli_chr06 | 15180846                | GG                              | AA                | 1946444042               |
| SNP_P3_74084_15193069 | NC_021165.1    | Ca_kabuli_chr06 | 15193069                | GG                              | CC                | 1946444043               |
| SNP_P3_74085_15193071 | NC_021165.1    | Ca_kabuli_chr06 | 15193071                | CC                              | AA                | 1946444045               |
| SNP_P3_74086_15193072 | NC_021165.1    | Ca_kabuli_chr06 | 15193072                | GG                              | AA                | 1946444046               |
| SNP_P3_74087_15195359 | NC_021165.1    | Ca_kabuli_chr06 | 15195359                | CC                              | GG                | 1946444048               |
| SNP_P3_74088_15218848 | NC_021165.1    | Ca_kabuli_chr06 | 15218848                | CC                              | TT                | 1946444049               |
| SNP_P3_74090_15244855 | NC_021165.1    | Ca_kabuli_chr06 | 15244855                | TT                              | CC                | 1946444051               |
| SNP_P3_74091_15247970 | NC_021165.1    | Ca_kabuli_chr06 | 15247970                | GG                              | AA                | 1946444052               |
| SNP_P3_74092_15256699 | NC_021165.1    | Ca_kabuli_chr06 | 15256699                | AA                              | TT                | 1946444054               |
| SNP_P3_74093_15256881 | NC_021165.1    | Ca_kabuli_chr06 | 15256881                | CC                              | TT                | 1946444056               |
| SNP_P3_74094_15258774 | NC_021165.1    | Ca_kabuli_chr06 | 15258774                | TT                              | CC                | 1946444058               |
| SNP_P3_74095_15260175 | NC_021165.1    | Ca_kabuli_chr06 | 15260175                | TT                              | CC                | 1946444059               |
| SNP_P3_74097_15277709 | NC_021165.1    | Ca_kabuli_chr06 | 15277709                | AA                              | CC                | 1946444061               |
| SNP_P3_74098_15277790 | NC_021165.1    | Ca_kabuli_chr06 | 15277790                | TT                              | AA                | 1946444062               |
| SNP_P3_74099_15301137 | NC_021165.1    | Ca_kabuli_chr06 | 15301137                | TT                              | CC                | 1946444064               |
| SNP_P3_74100_15312660 | NC_021165.1    | Ca_kabuli_chr06 | 15312660                | AA                              | TT                | 1946444065               |

| SNPs IDs              | Chromosome IDs | Chromosomes     | Physical positions (bp) | CDC Frontier (Reference genome) | (Pusa 256 & HPNB) | NCBI SNPdb Accession IDs |
|-----------------------|----------------|-----------------|-------------------------|---------------------------------|-------------------|--------------------------|
| SNP_P3_74101_15312677 | NC_021165.1    | Ca_kabuli_chr06 | 15312677                | TT                              | AA                | 1946444066               |
| SNP_P3_74102_15312681 | NC_021165.1    | Ca_kabuli_chr06 | 15312681                | CC                              | AA                | 1946444068               |
| SNP_P3_74103_15345535 | NC_021165.1    | Ca_kabuli_chr06 | 15345535                | TT                              | CC                | 1946444069               |
| SNP_P3_74106_15373114 | NC_021165.1    | Ca_kabuli_chr06 | 15373114                | AA                              | TT                | 1946444071               |
| SNP_P3_74107_15415543 | NC_021165.1    | Ca_kabuli_chr06 | 15415543                | CC                              | TT                | 1946444073               |
| SNP_P3_74108_15424694 | NC_021165.1    | Ca_kabuli_chr06 | 15424694                | TT                              | CC                | 1946444075               |
| SNP_P3_74109_15445475 | NC_021165.1    | Ca_kabuli_chr06 | 15445475                | CC                              | AA                | 1946444077               |
| SNP_P3_74110_15493004 | NC_021165.1    | Ca_kabuli_chr06 | 15493004                | CC                              | TT                | 1946444079               |
| SNP_P3_74111_15495023 | NC_021165.1    | Ca_kabuli_chr06 | 15495023                | AA                              | GG                | 1946444080               |
| SNP_P3_74112_15501561 | NC_021165.1    | Ca_kabuli_chr06 | 15501561                | AA                              | GG                | 1946444083               |
| SNP_P3_74114_15523312 | NC_021165.1    | Ca_kabuli_chr06 | 15523312                | GG                              | AA                | 1946444084               |
| SNP_P3_74116_15555549 | NC_021165.1    | Ca_kabuli_chr06 | 15555549                | GG                              | AA                | 1946444086               |
| SNP_P3_74117_15555553 | NC_021165.1    | Ca_kabuli_chr06 | 15555553                | TT                              | CC                | 1946444087               |
| SNP_P3_74118_15555582 | NC_021165.1    | Ca_kabuli_chr06 | 15555582                | TT                              | AA                | 1946444088               |
| SNP_P3_74120_15555869 | NC_021165.1    | Ca_kabuli_chr06 | 15555869                | AA                              | GG                | 1946444090               |
| SNP_P3_74121_15555914 | NC_021165.1    | Ca_kabuli_chr06 | 15555914                | AA                              | CC                | 1946444091               |
| SNP_P3_74122_15559111 | NC_021165.1    | Ca_kabuli_chr06 | 15559111                | AA                              | GG                | 1946444093               |
| SNP_P3_74124_15559178 | NC_021165.1    | Ca_kabuli_chr06 | 15559178                | CC                              | TT                | 1946444095               |
| SNP_P3_74125_15562545 | NC_021165.1    | Ca_kabuli_chr06 | 15562545                | TT                              | AA                | 1946444096               |
| SNP_P3_74126_15562582 | NC_021165.1    | Ca_kabuli_chr06 | 15562582                | TT                              | CC                | 1946444098               |
| SNP_P3_74127_15562631 | NC_021165.1    | Ca_kabuli_chr06 | 15562631                | GG                              | AA                | 1946444099               |
| SNP_P3_74128_15562679 | NC_021165.1    | Ca_kabuli_chr06 | 15562679                | GG                              | AA                | 1946444101               |
| SNP_P3_74129_15562687 | NC_021165.1    | Ca_kabuli_chr06 | 15562687                | GG                              | TT                | 1946444102               |
| SNP_P3_74130_15564011 | NC_021165.1    | Ca_kabuli_chr06 | 15564011                | AA                              | GG                | 1946444104               |
| SNP_P3_74131_15564391 | NC_021165.1    | Ca_kabuli_chr06 | 15564391                | GG                              | AA                | 1946444105               |
| SNP_P3_74132_15564424 | NC_021165.1    | Ca_kabuli_chr06 | 15564424                | AA                              | GG                | 1946444106               |
| SNP_P3_74133_15564439 | NC_021165.1    | Ca_kabuli_chr06 | 15564439                | AA                              | GG                | 1946444108               |
| SNP_P3_74134_15564537 | NC_021165.1    | Ca_kabuli_chr06 | 15564537                | TT                              | CC                | 1946444109               |
| SNP_P3_74135_15564552 | NC_021165.1    | Ca_kabuli_chr06 | 15564552                | GG                              | TT                | 1946444111               |
| SNP_P3_74136_15564557 | NC_021165.1    | Ca_kabuli_chr06 | 15564557                | AA                              | TT                | 1946444112               |
| SNP_P3_74137_15564562 | NC_021165.1    | Ca_kabuli_chr06 | 15564562                | CC                              | TT                | 1946444114               |
| SNP_P3_74138_15577118 | NC_021165.1    | Ca_kabuli_chr06 | 15577118                | TT                              | CC                | 1946444115               |
| SNP_P3_74139_15577467 | NC_021165.1    | Ca_kabuli_chr06 | 15577467                | CC                              | GG                | 1946444117               |
| SNP_P3_74141_15583904 | NC_021165.1    | Ca_kabuli_chr06 | 15583904                | TT                              | CC                | 1946444119               |
| SNP_P3_74142_15583910 | NC_021165.1    | Ca_kabuli_chr06 | 15583910                | GG                              | AA                | 1946444120               |
| SNP_P3_74143_15588801 | NC_021165.1    | Ca_kabuli_chr06 | 15588801                | GG                              | AA                | 1946444122               |
| SNP_P3_74144_15588821 | NC_021165.1    | Ca_kabuli_chr06 | 15588821                | TT                              | CC                | 1946444123               |
| SNP_P3_74145_15589027 | NC_021165.1    | Ca_kabuli_chr06 | 15589027                | TT                              | GG                | 1946444125               |
| SNP_P3_74146_15597906 | NC_021165.1    | Ca_kabuli_chr06 | 15597906                | AA                              | GG                | 1946444126               |
| SNP_P3_74147_15597911 | NC_021165.1    | Ca_kabuli_chr06 | 15597911                | GG                              | AA                | 1946444128               |
| SNP_P3_74148_15597921 | NC_021165.1    | Ca_kabuli_chr06 | 15597921                | GG                              | AA                | 1946444129               |
| SNP_P3_74149_15597960 | NC_021165.1    | Ca_kabuli_chr06 | 15597960                | TT                              | AA                | 1946444131               |

| SNPs IDs              | Chromosome IDs | Chromosomes     | Physical positions (bp) | CDC Frontier (Reference genome) | (Pusa 256 & HPNB) | NCBI SNPdb Accession IDs |
|-----------------------|----------------|-----------------|-------------------------|---------------------------------|-------------------|--------------------------|
| SNP_P3_74151_15598171 | NC_021165.1    | Ca_kabuli_chr06 | 15598171                | GG                              | CC                | 1946444132               |
| SNP_P3_74153_15612522 | NC_021165.1    | Ca_kabuli_chr06 | 15612522                | CC                              | TT                | 1946444134               |
| SNP_P3_74154_15612607 | NC_021165.1    | Ca_kabuli_chr06 | 15612607                | CC                              | GG                | 1946444135               |
| SNP_P3_74155_15612666 | NC_021165.1    | Ca_kabuli_chr06 | 15612666                | AA                              | CC                | 1946444137               |
| SNP_P3_74156_15612690 | NC_021165.1    | Ca_kabuli_chr06 | 15612690                | AA                              | GG                | 1946444138               |
| SNP_P3_74157_15612757 | NC_021165.1    | Ca_kabuli_chr06 | 15612757                | TT                              | CC                | 1946444140               |
| SNP_P3_74158_15612897 | NC_021165.1    | Ca_kabuli_chr06 | 15612897                | CC                              | AA                | 1946444141               |
| SNP_P3_74159_15612920 | NC_021165.1    | Ca_kabuli_chr06 | 15612920                | GG                              | AA                | 1946444142               |
| SNP_P3_74160_15612935 | NC_021165.1    | Ca_kabuli_chr06 | 15612935                | GG                              | AA                | 1946444144               |
| SNP_P3_74161_15612951 | NC_021165.1    | Ca_kabuli_chr06 | 15612951                | TT                              | CC                | 1946444145               |
| SNP_P3_74162_15613045 | NC_021165.1    | Ca_kabuli_chr06 | 15613045                | AA                              | CC                | 1946444147               |
| SNP_P3_74163_15613059 | NC_021165.1    | Ca_kabuli_chr06 | 15613059                | GG                              | TT                | 1946444148               |
| SNP_P3_74164_15616037 | NC_021165.1    | Ca_kabuli_chr06 | 15616037                | CC                              | AA                | 1946444150               |
| SNP_P3_74165_15621289 | NC_021165.1    | Ca_kabuli_chr06 | 15621289                | CC                              | TT                | 1946444151               |
| SNP_P3_74166_15626989 | NC_021165.1    | Ca_kabuli_chr06 | 15626989                | AA                              | TT                | 1946444152               |
| SNP_P3_74167_15656833 | NC_021165.1    | Ca_kabuli_chr06 | 15656833                | TT                              | GG                | 1946444154               |
| SNP_P3_74168_15657149 | NC_021165.1    | Ca_kabuli_chr06 | 15657149                | CC                              | GG                | 1946444155               |
| SNP_P3_74169_15657235 | NC_021165.1    | Ca_kabuli_chr06 | 15657235                | AA                              | TT                | 1946444157               |
| SNP_P3_74170_15672798 | NC_021165.1    | Ca_kabuli_chr06 | 15672798                | AA                              | GG                | 1946444159               |
| SNP_P3_74171_15680638 | NC_021165.1    | Ca_kabuli_chr06 | 15680638                | TT                              | CC                | 1946444160               |
| SNP_P3_74172_15680659 | NC_021165.1    | Ca_kabuli_chr06 | 15680659                | AA                              | GG                | 1946444162               |
| SNP_P3_74173_15680992 | NC_021165.1    | Ca_kabuli_chr06 | 15680992                | AA                              | CC                | 1946444163               |
| SNP_P3_74174_15681020 | NC_021165.1    | Ca_kabuli_chr06 | 15681020                | AA                              | TT                | 1946444165               |
| SNP_P3_74175_15696086 | NC_021165.1    | Ca_kabuli_chr06 | 15696086                | TT                              | GG                | 1946444166               |
| SNP_P3_74176_15705905 | NC_021165.1    | Ca_kabuli_chr06 | 15705905                | AA                              | GG                | 1946444168               |
| SNP_P3_74177_15727060 | NC_021165.1    | Ca_kabuli_chr06 | 15727060                | CC                              | AA                | 1946444169               |
| SNP_P3_74178_15727106 | NC_021165.1    | Ca_kabuli_chr06 | 15727106                | TT                              | CC                | 1946444171               |
| SNP_P3_74179_15727213 | NC_021165.1    | Ca_kabuli_chr06 | 15727213                | AA                              | GG                | 1946444172               |
| SNP_P3_74180_15727265 | NC_021165.1    | Ca_kabuli_chr06 | 15727265                | CC                              | AA                | 1946444174               |
| SNP_P3_74184_15729554 | NC_021165.1    | Ca_kabuli_chr06 | 15729554                | TT                              | AA                | 1946444175               |
| SNP_P3_74185_15729555 | NC_021165.1    | Ca_kabuli_chr06 | 15729555                | CC                              | AA                | 1946444177               |
| SNP_P3_74186_15729637 | NC_021165.1    | Ca_kabuli_chr06 | 15729637                | TT                              | CC                | 1946444178               |
| SNP_P3_74187_15730266 | NC_021165.1    | Ca_kabuli_chr06 | 15730266                | TT                              | GG                | 1946444180               |
| SNP_P3_74188_15730611 | NC_021165.1    | Ca_kabuli_chr06 | 15730611                | TT                              | AA                | 1946444182               |
| SNP_P3_74190_15730726 | NC_021165.1    | Ca_kabuli_chr06 | 15730726                | GG                              | CC                | 1946444183               |
| SNP_P3_74191_15730751 | NC_021165.1    | Ca_kabuli_chr06 | 15730751                | TT                              | GG                | 1946444185               |
| SNP_P3_74192_15730794 | NC_021165.1    | Ca_kabuli_chr06 | 15730794                | CC                              | TT                | 1946444186               |
| SNP_P3_74194_15730858 | NC_021165.1    | Ca_kabuli_chr06 | 15730858                | AA                              | GG                | 1946444188               |
| SNP_P3_74195_15730874 | NC_021165.1    | Ca_kabuli_chr06 | 15730874                | CC                              | AA                | 1946444189               |
| SNP_P3_74196_15730935 | NC_021165.1    | Ca_kabuli_chr06 | 15730935                | AA                              | TT                | 1946444191               |
| SNP_P3_74197_15730980 | NC_021165.1    | Ca_kabuli_chr06 | 15730980                | AA                              | GG                | 1946444192               |
| SNP_P3_74198_15731043 | NC_021165.1    | Ca_kabuli_chr06 | 15731043                | TT                              | AA                | 1946444194               |

| SNPs IDs              | Chromosome IDs | Chromosomes     | Physical positions (bp) | CDC Frontier (Reference genome) | (Pusa 256 & HPNB) | NCBI SNPdb Accession IDs |
|-----------------------|----------------|-----------------|-------------------------|---------------------------------|-------------------|--------------------------|
| SNP_P3_74200_15731068 | NC_021165.1    | Ca_kabuli_chr06 | 15731068                | AA                              | TT                | 1946444195               |
| SNP_P3_74201_15731077 | NC_021165.1    | Ca_kabuli_chr06 | 15731077                | CC                              | GG                | 1946444197               |
| SNP_P3_74202_15731112 | NC_021165.1    | Ca_kabuli_chr06 | 15731112                | CC                              | TT                | 1946444198               |
| SNP_P3_74203_15731119 | NC_021165.1    | Ca_kabuli_chr06 | 15731119                | CC                              | TT                | 1946444200               |
| SNP_P3_74204_15731304 | NC_021165.1    | Ca_kabuli_chr06 | 15731304                | GG                              | TT                | 1946444201               |
| SNP_P3_74205_15731305 | NC_021165.1    | Ca_kabuli_chr06 | 15731305                | GG                              | AA                | 1946444203               |
| SNP_P3_74206_15731332 | NC_021165.1    | Ca_kabuli_chr06 | 15731332                | CC                              | TT                | 1946444205               |
| SNP_P3_74207_15731348 | NC_021165.1    | Ca_kabuli_chr06 | 15731348                | GG                              | TT                | 1946444207               |
| SNP_P3_74208_15731354 | NC_021165.1    | Ca_kabuli_chr06 | 15731354                | CC                              | TT                | 1946444208               |
| SNP_P3_74209_15731381 | NC_021165.1    | Ca_kabuli_chr06 | 15731381                | TT                              | CC                | 1946444209               |
| SNP_P3_74210_15731385 | NC_021165.1    | Ca_kabuli_chr06 | 15731385                | CC                              | TT                | 1946444211               |
| SNP_P3_74211_15733545 | NC_021165.1    | Ca_kabuli_chr06 | 15733545                | TT                              | CC                | 1946444212               |
| SNP_P3_74212_15746448 | NC_021165.1    | Ca_kabuli_chr06 | 15746448                | AA                              | TT                | 1946444214               |
| SNP_P3_74213_15821007 | NC_021165.1    | Ca_kabuli_chr06 | 15821007                | TT                              | CC                | 1946444215               |
| SNP_P3_74214_15826128 | NC_021165.1    | Ca_kabuli_chr06 | 15826128                | CC                              | AA                | 1946444217               |
| SNP_P3_74215_15826129 | NC_021165.1    | Ca_kabuli_chr06 | 15826129                | TT                              | GG                | 1946444218               |
| SNP_P3_74216_15831613 | NC_021165.1    | Ca_kabuli_chr06 | 15831613                | AA                              | GG                | 1946444220               |
| SNP_P3_74217_15834627 | NC_021165.1    | Ca_kabuli_chr06 | 15834627                | GG                              | TT                | 1946444221               |
| SNP_P3_74218_15834628 | NC_021165.1    | Ca_kabuli_chr06 | 15834628                | GG                              | TT                | 1946444223               |
| SNP_P3_74220_15867441 | NC_021165.1    | Ca_kabuli_chr06 | 15867441                | TT                              | CC                | 1946444224               |
| SNP_P3_74221_15885800 | NC_021165.1    | Ca_kabuli_chr06 | 15885800                | GG                              | AA                | 1946444226               |
| SNP_P3_74222_15935767 | NC_021165.1    | Ca_kabuli_chr06 | 15935767                | CC                              | TT                | 1946444227               |
| SNP_P3_74224_15956788 | NC_021165.1    | Ca_kabuli_chr06 | 15956788                | TT                              | AA                | 1946444229               |
| SNP_P3_74225_15960029 | NC_021165.1    | Ca_kabuli_chr06 | 15960029                | TT                              | AA                | 1946444230               |
| SNP_P3_74228_15982024 | NC_021165.1    | Ca_kabuli_chr06 | 15982024                | AA                              | TT                | 1946444232               |
| SNP_P3_74229_15982085 | NC_021165.1    | Ca_kabuli_chr06 | 15982085                | GG                              | CC                | 1946444233               |
| SNP_P3_74230_15990884 | NC_021165.1    | Ca_kabuli_chr06 | 15990884                | AA                              | TT                | 1946444235               |
| SNP_P3_74231_15990958 | NC_021165.1    | Ca_kabuli_chr06 | 15990958                | TT                              | CC                | 1946444236               |
| SNP_P3_74232_15991143 | NC_021165.1    | Ca_kabuli_chr06 | 15991143                | TT                              | GG                | 1946444237               |
| SNP_P3_74233_15991147 | NC_021165.1    | Ca_kabuli_chr06 | 15991147                | AA                              | GG                | 1946444239               |
| SNP_P3_74234_15991154 | NC_021165.1    | Ca_kabuli_chr06 | 15991154                | GG                              | CC                | 1946444240               |
| SNP_P3_74235_15991177 | NC_021165.1    | Ca_kabuli_chr06 | 15991177                | CC                              | TT                | 1946444242               |
| SNP_P3_74236_15991239 | NC_021165.1    | Ca_kabuli_chr06 | 15991239                | TT                              | CC                | 1946444243               |
| SNP_P3_74237_15991354 | NC_021165.1    | Ca_kabuli_chr06 | 15991354                | GG                              | CC                | 1946444245               |
| SNP_P3_74238_15991357 | NC_021165.1    | Ca_kabuli_chr06 | 15991357                | TT                              | GG                | 1946444246               |
| SNP_P3_74239_15991729 | NC_021165.1    | Ca_kabuli_chr06 | 15991729                | CC                              | TT                | 1946444247               |
| SNP_P3_74240_15991762 | NC_021165.1    | Ca_kabuli_chr06 | 15991762                | TT                              | GG                | 1946444249               |
| SNP_P3_74241_15991775 | NC_021165.1    | Ca_kabuli_chr06 | 15991775                | GG                              | AA                | 1946444250               |
| SNP_P3_74242_15991852 | NC_021165.1    | Ca_kabuli_chr06 | 15991852                | AA                              | GG                | 1946444252               |
| SNP_P3_74243_15991873 | NC_021165.1    | Ca_kabuli_chr06 | 15991873                | AA                              | TT                | 1946444253               |
| SNP_P3_74244_15991875 | NC_021165.1    | Ca_kabuli_chr06 | 15991875                | TT                              | GG                | 1946444255               |
| SNP_P3_74245_15993358 | NC_021165.1    | Ca_kabuli_chr06 | 15993358                | TT                              | CC                | 1946444256               |

| SNPs IDs              | Chromosome IDs | Chromosomes     | Physical positions (bp) | CDC Frontier (Reference genome) | (Pusa 256 & HPNB) | NCBI SNPdb Accession IDs |
|-----------------------|----------------|-----------------|-------------------------|---------------------------------|-------------------|--------------------------|
| SNP_P3_74246_15993473 | NC_021165.1    | Ca_kabuli_chr06 | 15993473                | CC                              | AA                | 1946444257               |
| SNP_P3_74247_15993526 | NC_021165.1    | Ca_kabuli_chr06 | 15993526                | GG                              | AA                | 1946444259               |
| SNP_P3_74248_15993722 | NC_021165.1    | Ca_kabuli_chr06 | 15993722                | CC                              | AA                | 1946444260               |
| SNP_P3_74249_15993746 | NC_021165.1    | Ca_kabuli_chr06 | 15993746                | GG                              | CC                | 1946444262               |
| SNP_P3_74250_15996089 | NC_021165.1    | Ca_kabuli_chr06 | 15996089                | GG                              | AA                | 1946444263               |
| SNP_P3_74251_15996090 | NC_021165.1    | Ca_kabuli_chr06 | 15996090                | CC                              | TT                | 1946444265               |
| SNP_P3_74252_15996092 | NC_021165.1    | Ca_kabuli_chr06 | 15996092                | CC                              | TT                | 1946444266               |
| SNP_P3_74253_15999030 | NC_021165.1    | Ca_kabuli_chr06 | 15999030                | TT                              | CC                | 1946444267               |
| SNP_P3_74254_15999248 | NC_021165.1    | Ca_kabuli_chr06 | 15999248                | AA                              | GG                | 1946444269               |
| SNP_P3_74255_15999308 | NC_021165.1    | Ca_kabuli_chr06 | 15999308                | AA                              | GG                | 1946444270               |
| SNP_P3_74256_15999334 | NC_021165.1    | Ca_kabuli_chr06 | 15999334                | TT                              | CC                | 1946444272               |
| SNP_P3_74257_15999550 | NC_021165.1    | Ca_kabuli_chr06 | 15999550                | TT                              | GG                | 1946444274               |
| SNP_P3_74258_15999602 | NC_021165.1    | Ca_kabuli_chr06 | 15999602                | GG                              | AA                | 1946444275               |
| SNP_P3_74259_15999607 | NC_021165.1    | Ca_kabuli_chr06 | 15999607                | TT                              | CC                | 1946444276               |
| SNP_P3_74260_15999718 | NC_021165.1    | Ca_kabuli_chr06 | 15999718                | TT                              | GG                | 1946444278               |
| SNP_P3_74262_15999992 | NC_021165.1    | Ca_kabuli_chr06 | 15999992                | CC                              | AA                | 1946444279               |
| SNP_P3_74263_16010494 | NC_021165.1    | Ca_kabuli_chr06 | 16010494                | TT                              | AA                | 1946444281               |
| SNP_P3_74264_16010535 | NC_021165.1    | Ca_kabuli_chr06 | 16010535                | AA                              | TT                | 1946444282               |
| SNP_P3_74265_16010641 | NC_021165.1    | Ca_kabuli_chr06 | 16010641                | GG                              | TT                | 1946444283               |
| SNP_P3_74266_16010649 | NC_021165.1    | Ca_kabuli_chr06 | 16010649                | TT                              | AA                | 1946444285               |
| SNP_P3_74267_16010743 | NC_021165.1    | Ca_kabuli_chr06 | 16010743                | AA                              | GG                | 1946444286               |
| SNP_P3_74268_16010796 | NC_021165.1    | Ca_kabuli_chr06 | 16010796                | AA                              | GG                | 1946444288               |
| SNP_P3_74269_16010801 | NC_021165.1    | Ca_kabuli_chr06 | 16010801                | GG                              | CC                | 1946444289               |
| SNP_P3_74270_16010859 | NC_021165.1    | Ca_kabuli_chr06 | 16010859                | CC                              | TT                | 1946444291               |
| SNP_P3_74271_16010924 | NC_021165.1    | Ca_kabuli_chr06 | 16010924                | TT                              | CC                | 1946444292               |
| SNP_P3_74273_16011070 | NC_021165.1    | Ca_kabuli_chr06 | 16011070                | TT                              | AA                | 1946444293               |
| SNP_P3_74275_16013159 | NC_021165.1    | Ca_kabuli_chr06 | 16013159                | GG                              | AA                | 1946444295               |
| SNP_P3_74276_16013267 | NC_021165.1    | Ca_kabuli_chr06 | 16013267                | AA                              | GG                | 1946444297               |
| SNP_P3_74277_16013527 | NC_021165.1    | Ca_kabuli_chr06 | 16013527                | TT                              | GG                | 1946444298               |
| SNP_P3_74278_16018267 | NC_021165.1    | Ca_kabuli_chr06 | 16018267                | GG                              | AA                | 1946444300               |
| SNP_P3_74279_16018421 | NC_021165.1    | Ca_kabuli_chr06 | 16018421                | CC                              | GG                | 1946444301               |
| SNP_P3_74280_16018821 | NC_021165.1    | Ca_kabuli_chr06 | 16018821                | AA                              | GG                | 1946444303               |
| SNP_P3_74281_16019074 | NC_021165.1    | Ca_kabuli_chr06 | 16019074                | TT                              | CC                | 1946444304               |
| SNP_P3_74282_16019119 | NC_021165.1    | Ca_kabuli_chr06 | 16019119                | TT                              | CC                | 1946444306               |
| SNP_P3_74283_16019517 | NC_021165.1    | Ca_kabuli_chr06 | 16019517                | TT                              | GG                | 1946444307               |
| SNP_P3_74284_16019685 | NC_021165.1    | Ca_kabuli_chr06 | 16019685                | AA                              | GG                | 1946444308               |
| SNP_P3_74285_16019735 | NC_021165.1    | Ca_kabuli_chr06 | 16019735                | TT                              | CC                | 1946444310               |
| SNP_P3_74286_16019915 | NC_021165.1    | Ca_kabuli_chr06 | 16019915                | CC                              | AA                | 1946444311               |
| SNP_P3_74287_16020114 | NC_021165.1    | Ca_kabuli_chr06 | 16020114                | GG                              | TT                | 1946444313               |
| SNP_P3_74288_16020535 | NC_021165.1    | Ca_kabuli_chr06 | 16020535                | GG                              | AA                | 1946444314               |
| SNP_P3_74290_16028134 | NC_021165.1    | Ca_kabuli_chr06 | 16028134                | GG                              | AA                | 1946444316               |
| SNP_P3_74291_16038866 | NC_021165.1    | Ca_kabuli_chr06 | 16038866                | GG                              | AA                | 1946444317               |

| SNPs IDs              | Chromosome IDs | Chromosomes     | Physical positions (bp) | CDC Frontier (Reference genome) | (Pusa 256 & HPNB) | NCBI SNPdb Accession IDs |
|-----------------------|----------------|-----------------|-------------------------|---------------------------------|-------------------|--------------------------|
| SNP_P3_74293_16062986 | NC_021165.1    | Ca_kabuli_chr06 | 16062986                | TT                              | GG                | 1946444319               |
| SNP_P3_74294_16063301 | NC_021165.1    | Ca_kabuli_chr06 | 16063301                | AA                              | CC                | 1946444320               |
| SNP_P3_74295_16063323 | NC_021165.1    | Ca_kabuli_chr06 | 16063323                | TT                              | GG                | 1946444322               |
| SNP_P3_74296_16090303 | NC_021165.1    | Ca_kabuli_chr06 | 16090303                | CC                              | TT                | 1946444323               |
| SNP_P3_74298_16097071 | NC_021165.1    | Ca_kabuli_chr06 | 16097071                | CC                              | TT                | 1946444325               |
| SNP_P3_74299_16098354 | NC_021165.1    | Ca_kabuli_chr06 | 16098354                | TT                              | CC                | 1946444326               |
| SNP_P3_74300_16108068 | NC_021165.1    | Ca_kabuli_chr06 | 16108068                | CC                              | TT                | 1946444328               |
| SNP_P3_74301_16121312 | NC_021165.1    | Ca_kabuli_chr06 | 16121312                | CC                              | TT                | 1946444329               |
| SNP_P3_74302_16143744 | NC_021165.1    | Ca_kabuli_chr06 | 16143744                | CC                              | TT                | 1946444331               |
| SNP_P3_74303_16177079 | NC_021165.1    | Ca_kabuli_chr06 | 16177079                | CC                              | TT                | 1946444332               |
| SNP_P3_74304_16181607 | NC_021165.1    | Ca_kabuli_chr06 | 16181607                | TT                              | CC                | 1946444334               |
| SNP_P3_74305_16187423 | NC_021165.1    | Ca_kabuli_chr06 | 16187423                | AA                              | GG                | 1946444335               |
| SNP_P3_74306_16204793 | NC_021165.1    | Ca_kabuli_chr06 | 16204793                | AA                              | GG                | 1946444336               |
| SNP_P3_74307_16212796 | NC_021165.1    | Ca_kabuli_chr06 | 16212796                | TT                              | AA                | 1946444338               |
| SNP_P3_74308_16226619 | NC_021165.1    | Ca_kabuli_chr06 | 16226619                | TT                              | CC                | 1946444339               |
| SNP_P3_74310_16271150 | NC_021165.1    | Ca_kabuli_chr06 | 16271150                | AA                              | GG                | 1946444341               |
| SNP_P3_74311_16339648 | NC_021165.1    | Ca_kabuli_chr06 | 16339648                | CC                              | AA                | 1946444342               |
| SNP_P3_74313_16361531 | NC_021165.1    | Ca_kabuli_chr06 | 16361531                | GG                              | AA                | 1946444344               |
| SNP_P3_74314_16392106 | NC_021165.1    | Ca_kabuli_chr06 | 16392106                | GG                              | AA                | 1946444345               |
| SNP_P3_74315_16393511 | NC_021165.1    | Ca_kabuli_chr06 | 16393511                | AA                              | TT                | 1946444347               |
| SNP_P3_74316_16398014 | NC_021165.1    | Ca_kabuli_chr06 | 16398014                | TT                              | AA                | 1946444348               |
| SNP_P3_74317_16398637 | NC_021165.1    | Ca_kabuli_chr06 | 16398637                | CC                              | TT                | 1946444350               |
| SNP_P3_74318_16398795 | NC_021165.1    | Ca_kabuli_chr06 | 16398795                | AA                              | TT                | 1946444351               |
| SNP_P3_74319_16414994 | NC_021165.1    | Ca_kabuli_chr06 | 16414994                | GG                              | AA                | 1946444353               |
| SNP_P3_74320_16425951 | NC_021165.1    | Ca_kabuli_chr06 | 16425951                | TT                              | AA                | 1946444354               |
| SNP_P3_74321_16425952 | NC_021165.1    | Ca_kabuli_chr06 | 16425952                | CC                              | TT                | 1946444356               |
| SNP_P3_74322_16425996 | NC_021165.1    | Ca_kabuli_chr06 | 16425996                | GG                              | CC                | 1946444357               |
| SNP_P3_74323_16426198 | NC_021165.1    | Ca_kabuli_chr06 | 16426198                | TT                              | CC                | 1946444359               |
| SNP_P3_74324_16426245 | NC_021165.1    | Ca_kabuli_chr06 | 16426245                | AA                              | CC                | 1946444360               |
| SNP_P3_74325_16426262 | NC_021165.1    | Ca_kabuli_chr06 | 16426262                | GG                              | AA                | 1946444361               |
| SNP_P3_74326_16426333 | NC_021165.1    | Ca_kabuli_chr06 | 16426333                | AA                              | TT                | 1946444363               |
| SNP_P3_74327_16426350 | NC_021165.1    | Ca_kabuli_chr06 | 16426350                | AA                              | GG                | 1946444364               |
| SNP_P3_74328_16426392 | NC_021165.1    | Ca_kabuli_chr06 | 16426392                | TT                              | GG                | 1946444366               |
| SNP_P3_74329_16426414 | NC_021165.1    | Ca_kabuli_chr06 | 16426414                | AA                              | GG                | 1946444367               |
| SNP_P3_74330_16428132 | NC_021165.1    | Ca_kabuli_chr06 | 16428132                | AA                              | GG                | 1946444368               |
| SNP_P3_74331_16428134 | NC_021165.1    | Ca_kabuli_chr06 | 16428134                | AA                              | CC                | 1946444370               |
| SNP_P3_74332_16428164 | NC_021165.1    | Ca_kabuli_chr06 | 16428164                | AA                              | GG                | 1946444371               |
| SNP_P3_74333_16428178 | NC_021165.1    | Ca_kabuli_chr06 | 16428178                | TT                              | GG                | 1946444373               |
| SNP_P3_74334_16428190 | NC_021165.1    | Ca_kabuli_chr06 | 16428190                | GG                              | AA                | 1946444374               |
| SNP_P3_74335_16428202 | NC_021165.1    | Ca_kabuli_chr06 | 16428202                | TT                              | CC                | 1946444375               |
| SNP_P3_74336_16428260 | NC_021165.1    | Ca_kabuli_chr06 | 16428260                | CC                              | TT                | 1946444377               |
| SNP_P3_74337_16428412 | NC_021165.1    | Ca_kabuli_chr06 | 16428412                | TT                              | CC                | 1946444378               |

| SNPs IDs              | Chromosome IDs | Chromosomes     | Physical positions (bp) | CDC Frontier (Reference genome) | (Pusa 256 & HPNB) | NCBI SNPdb Accession IDs |
|-----------------------|----------------|-----------------|-------------------------|---------------------------------|-------------------|--------------------------|
| SNP_P3_74338_16428450 | NC_021165.1    | Ca_kabuli_chr06 | 16428450                | TT                              | CC                | 1946444380               |
| SNP_P3_74339_16442764 | NC_021165.1    | Ca_kabuli_chr06 | 16442764                | TT                              | AA                | 1946444381               |
| SNP_P3_74340_16442766 | NC_021165.1    | Ca_kabuli_chr06 | 16442766                | TT                              | CC                | 1946444383               |
| SNP_P3_74341_16452490 | NC_021165.1    | Ca_kabuli_chr06 | 16452490                | AA                              | GG                | 1946444385               |
| SNP_P3_74342_16452527 | NC_021165.1    | Ca_kabuli_chr06 | 16452527                | TT                              | CC                | 1946444386               |
| SNP_P3_74343_16475351 | NC_021165.1    | Ca_kabuli_chr06 | 16475351                | TT                              | CC                | 1946444388               |
| SNP_P3_74345_16476550 | NC_021165.1    | Ca_kabuli_chr06 | 16476550                | TT                              | CC                | 1946444389               |
| SNP_P3_74346_16532257 | NC_021165.1    | Ca_kabuli_chr06 | 16532257                | CC                              | TT                | 1946444390               |
| SNP_P3_74349_16566415 | NC_021165.1    | Ca_kabuli_chr06 | 16566415                | TT                              | AA                | 1946444392               |
| SNP_P3_74350_16576768 | NC_021165.1    | Ca_kabuli_chr06 | 16576768                | TT                              | CC                | 1946444393               |
| SNP_P3_74351_16583014 | NC_021165.1    | Ca_kabuli_chr06 | 16583014                | AA                              | GG                | 1946444395               |
| SNP_P3_74352_16600012 | NC_021165.1    | Ca_kabuli_chr06 | 16600012                | GG                              | AA                | 1946444396               |
| SNP_P3_74353_16600116 | NC_021165.1    | Ca_kabuli_chr06 | 16600116                | AA                              | CC                | 1946444398               |
| SNP_P3_74354_16600321 | NC_021165.1    | Ca_kabuli_chr06 | 16600321                | TT                              | CC                | 1946444399               |
| SNP_P3_74355_16624669 | NC_021165.1    | Ca_kabuli_chr06 | 16624669                | TT                              | AA                | 1946444401               |
| SNP_P3_74356_16624673 | NC_021165.1    | Ca_kabuli_chr06 | 16624673                | TT                              | GG                | 1946444402               |
| SNP_P3_74357_16660294 | NC_021165.1    | Ca_kabuli_chr06 | 16660294                | TT                              | CC                | 1946444404               |
| SNP_P3_74359_16718268 | NC_021165.1    | Ca_kabuli_chr06 | 16718268                | GG                              | AA                | 1946444405               |
| SNP_P3_74360_16747011 | NC_021165.1    | Ca_kabuli_chr06 | 16747011                | CC                              | TT                | 1946444407               |
| SNP_P3_74361_16762018 | NC_021165.1    | Ca_kabuli_chr06 | 16762018                | CC                              | AA                | 1946444408               |
| SNP_P3_74363_16762133 | NC_021165.1    | Ca_kabuli_chr06 | 16762133                | GG                              | AA                | 1946444410               |
| SNP_P3_74364_16762485 | NC_021165.1    | Ca_kabuli_chr06 | 16762485                | AA                              | GG                | 1946444411               |
| SNP_P3_74365_16786684 | NC_021165.1    | Ca_kabuli_chr06 | 16786684                | CC                              | TT                | 1946444412               |
| SNP_P3_74366_16805517 | NC_021165.1    | Ca_kabuli_chr06 | 16805517                | CC                              | AA                | 1946444414               |
| SNP_P3_74368_16810796 | NC_021165.1    | Ca_kabuli_chr06 | 16810796                | CC                              | TT                | 1946444415               |
| SNP_P3_74369_16810805 | NC_021165.1    | Ca_kabuli_chr06 | 16810805                | AA                              | CC                | 1946444417               |
| SNP_P3_74370_16810821 | NC_021165.1    | Ca_kabuli_chr06 | 16810821                | GG                              | AA                | 1946444418               |
| SNP_P3_74371_16810826 | NC_021165.1    | Ca_kabuli_chr06 | 16810826                | GG                              | AA                | 1946444420               |
| SNP_P3_74372_16810832 | NC_021165.1    | Ca_kabuli_chr06 | 16810832                | TT                              | GG                | 1946444421               |
| SNP_P3_74373_16811788 | NC_021165.1    | Ca_kabuli_chr06 | 16811788                | CC                              | TT                | 1946444422               |
| SNP_P3_74374_16821919 | NC_021165.1    | Ca_kabuli_chr06 | 16821919                | TT                              | AA                | 1946444424               |
| SNP_P3_74375_16822042 | NC_021165.1    | Ca_kabuli_chr06 | 16822042                | TT                              | CC                | 1946444426               |
| SNP_P3_74376_16822056 | NC_021165.1    | Ca_kabuli_chr06 | 16822056                | CC                              | TT                | 1946444427               |
| SNP_P3_74377_16822351 | NC_021165.1    | Ca_kabuli_chr06 | 16822351                | AA                              | GG                | 1946444429               |
| SNP_P3_74378_16822352 | NC_021165.1    | Ca_kabuli_chr06 | 16822352                | AA                              | GG                | 1946444430               |
| SNP_P3_74379_16822485 | NC_021165.1    | Ca_kabuli_chr06 | 16822485                | AA                              | GG                | 1946444431               |
| SNP_P3_74380_16825742 | NC_021165.1    | Ca_kabuli_chr06 | 16825742                | GG                              | AA                | 1946444433               |
| SNP_P3_74381_16827803 | NC_021165.1    | Ca_kabuli_chr06 | 16827803                | CC                              | TT                | 1946444434               |
| SNP_P3_74382_16833327 | NC_021165.1    | Ca_kabuli_chr06 | 16833327                | CC                              | TT                | 1946444436               |
| SNP_P3_74383_16847003 | NC_021165.1    | Ca_kabuli_chr06 | 16847003                | TT                              | CC                | 1946444437               |
| SNP_P3_74384_16853048 | NC_021165.1    | Ca_kabuli_chr06 | 16853048                | TT                              | CC                | 1946444439               |
| SNP_P3_74386_16854850 | NC_021165.1    | Ca_kabuli_chr06 | 16854850                | TT                              | AA                | 1946444440               |

| SNPs IDs              | Chromosome IDs | Chromosomes     | Physical positions (bp) | CDC Frontier (Reference genome) | (Pusa 256 & HPNB) | NCBI SNPdb Accession IDs |
|-----------------------|----------------|-----------------|-------------------------|---------------------------------|-------------------|--------------------------|
| SNP_P3_74387_16904194 | NC_021165.1    | Ca_kabuli_chr06 | 16904194                | TT                              | CC                | 1946444442               |
| SNP_P3_74388_16917124 | NC_021165.1    | Ca_kabuli_chr06 | 16917124                | AA                              | CC                | 1946444443               |
| SNP_P3_74389_16919884 | NC_021165.1    | Ca_kabuli_chr06 | 16919884                | TT                              | GG                | 1946444445               |
| SNP_P3_74390_16920481 | NC_021165.1    | Ca_kabuli_chr06 | 16920481                | AA                              | TT                | 1946444446               |
| SNP_P3_74391_16931756 | NC_021165.1    | Ca_kabuli_chr06 | 16931756                | CC                              | AA                | 1946444447               |
| SNP_P3_74392_16938616 | NC_021165.1    | Ca_kabuli_chr06 | 16938616                | TT                              | AA                | 1946444449               |
| SNP_P3_74393_16942627 | NC_021165.1    | Ca_kabuli_chr06 | 16942627                | AA                              | GG                | 1946444450               |
| SNP_P3_74394_16951043 | NC_021165.1    | Ca_kabuli_chr06 | 16951043                | CC                              | TT                | 1946444452               |
| SNP_P3_74395_16952937 | NC_021165.1    | Ca_kabuli_chr06 | 16952937                | CC                              | TT                | 1946444453               |
| SNP_P3_74396_16953365 | NC_021165.1    | Ca_kabuli_chr06 | 16953365                | AA                              | GG                | 1946444455               |
| SNP_P3_74397_16962111 | NC_021165.1    | Ca_kabuli_chr06 | 16962111                | GG                              | AA                | 1946444456               |
| SNP_P3_74398_16962131 | NC_021165.1    | Ca_kabuli_chr06 | 16962131                | AA                              | GG                | 1946444457               |
| SNP_P3_74399_16962132 | NC_021165.1    | Ca_kabuli_chr06 | 16962132                | CC                              | AA                | 1946444459               |
| SNP_P3_74400_16962134 | NC_021165.1    | Ca_kabuli_chr06 | 16962134                | AA                              | GG                | 1946444460               |
| SNP_P3_74401_16983553 | NC_021165.1    | Ca_kabuli_chr06 | 16983553                | AA                              | GG                | 1946444462               |
| SNP_P3_74402_16983559 | NC_021165.1    | Ca_kabuli_chr06 | 16983559                | AA                              | GG                | 1946444463               |
| SNP_P3_74403_16983560 | NC_021165.1    | Ca_kabuli_chr06 | 16983560                | CC                              | GG                | 1946444465               |
| SNP_P3_74404_16983580 | NC_021165.1    | Ca_kabuli_chr06 | 16983580                | CC                              | AA                | 1946444466               |
| SNP_P3_74405_16983581 | NC_021165.1    | Ca_kabuli_chr06 | 16983581                | AA                              | TT                | 1946444468               |
| SNP_P3_74406_16983584 | NC_021165.1    | Ca_kabuli_chr06 | 16983584                | TT                              | CC                | 1946444469               |
| SNP_P3_74407_16983612 | NC_021165.1    | Ca_kabuli_chr06 | 16983612                | TT                              | AA                | 1946444471               |
| SNP_P3_74408_16984998 | NC_021165.1    | Ca_kabuli_chr06 | 16984998                | AA                              | TT                | 1946444472               |
| SNP_P3_74411_16991797 | NC_021165.1    | Ca_kabuli_chr06 | 16991797                | CC                              | TT                | 1946444473               |
| SNP_P3_74412_16994573 | NC_021165.1    | Ca_kabuli_chr06 | 16994573                | CC                              | TT                | 1946444475               |
| SNP_P3_74413_16995176 | NC_021165.1    | Ca_kabuli_chr06 | 16995176                | TT                              | CC                | 1946444476               |
| SNP_P3_74414_16995428 | NC_021165.1    | Ca_kabuli_chr06 | 16995428                | AA                              | GG                | 1946444478               |
| SNP_P3_74415_16996537 | NC_021165.1    | Ca_kabuli_chr06 | 16996537                | AA                              | GG                | 1946444479               |
| SNP_P3_74416_16996805 | NC_021165.1    | Ca_kabuli_chr06 | 16996805                | TT                              | CC                | 1946444481               |
| SNP_P3_74417_16996827 | NC_021165.1    | Ca_kabuli_chr06 | 16996827                | AA                              | GG                | 1946444482               |
| SNP_P3_74419_16998274 | NC_021165.1    | Ca_kabuli_chr06 | 16998274                | TT                              | CC                | 1946444483               |
| SNP_P3_74420_16998528 | NC_021165.1    | Ca_kabuli_chr06 | 16998528                | AA                              | GG                | 1946444485               |
| SNP_P3_74422_17010166 | NC_021165.1    | Ca_kabuli_chr06 | 17010166                | AA                              | TT                | 1946444486               |
| SNP_P3_74424_17018941 | NC_021165.1    | Ca_kabuli_chr06 | 17018941                | CC                              | AA                | 1946444488               |
| SNP_P3_74425_17024659 | NC_021165.1    | Ca_kabuli_chr06 | 17024659                | GG                              | AA                | 1946444489               |
| SNP_P3_74427_17025545 | NC_021165.1    | Ca_kabuli_chr06 | 17025545                | AA                              | CC                | 1946444490               |
| SNP_P3_74429_17027323 | NC_021165.1    | Ca_kabuli_chr06 | 17027323                | AA                              | GG                | 1946444492               |
| SNP_P3_74430_17040063 | NC_021165.1    | Ca_kabuli_chr06 | 17040063                | AA                              | CC                | 1946444493               |
| SNP_P3_74431_17042020 | NC_021165.1    | Ca_kabuli_chr06 | 17042020                | AA                              | TT                | 1946444495               |
| SNP_P3_74432_17042226 | NC_021165.1    | Ca_kabuli_chr06 | 17042226                | GG                              | AA                | 1946444496               |
| SNP_P3_74434_17043858 | NC_021165.1    | Ca_kabuli_chr06 | 17043858                | GG                              | TT                | 1946444497               |
| SNP_P3_74436_17054130 | NC_021165.1    | Ca_kabuli_chr06 | 17054130                | TT                              | AA                | 1946444499               |
| SNP_P3_74437_17054535 | NC_021165.1    | Ca_kabuli_chr06 | 17054535                | TT                              | CC                | 1946444500               |



| SNPs IDs              | Chromosome IDs | Chromosomes     | Physical positions (bp) | CDC Frontier (Reference genome) | (Pusa 256 & HPNB) | NCBI SNPdb Accession IDs |
|-----------------------|----------------|-----------------|-------------------------|---------------------------------|-------------------|--------------------------|
| SNP_P3_74438_17054542 | NC_021165.1    | Ca_kabuli_chr06 | 17054542                | TT                              | CC                | 1946444502               |
| SNP_P3_74439_17054581 | NC_021165.1    | Ca_kabuli_chr06 | 17054581                | TT                              | AA                | 1946444503               |
| SNP_P3_74440_17054583 | NC_021165.1    | Ca_kabuli_chr06 | 17054583                | TT                              | CC                | 1946444505               |
| SNP_P3_74441_17054585 | NC_021165.1    | Ca_kabuli_chr06 | 17054585                | AA                              | GG                | 1946444506               |
| SNP_P3_74442_17057197 | NC_021165.1    | Ca_kabuli_chr06 | 17057197                | AA                              | GG                | 1946444507               |
| SNP_P3_74443_17057332 | NC_021165.1    | Ca_kabuli_chr06 | 17057332                | CC                              | TT                | 1946444509               |
| SNP_P3_74444_17058255 | NC_021165.1    | Ca_kabuli_chr06 | 17058255                | TT                              | GG                | 1946444510               |
| SNP_P3_74445_17058276 | NC_021165.1    | Ca_kabuli_chr06 | 17058276                | CC                              | TT                | 1946444512               |
| SNP_P3_74446_17058308 | NC_021165.1    | Ca_kabuli_chr06 | 17058308                | GG                              | AA                | 1946444513               |
| SNP_P3_74447_17058310 | NC_021165.1    | Ca_kabuli_chr06 | 17058310                | GG                              | AA                | 1946444514               |
| SNP_P3_74448_17058377 | NC_021165.1    | Ca_kabuli_chr06 | 17058377                | CC                              | TT                | 1946444516               |
| SNP_P3_74449_17058838 | NC_021165.1    | Ca_kabuli_chr06 | 17058838                | CC                              | TT                | 1946444517               |
| SNP_P3_74450_17059872 | NC_021165.1    | Ca_kabuli_chr06 | 17059872                | TT                              | GG                | 1946444519               |
| SNP_P3_74451_17061716 | NC_021165.1    | Ca_kabuli_chr06 | 17061716                | CC                              | GG                | 1946444520               |
| SNP_P3_74452_17061780 | NC_021165.1    | Ca_kabuli_chr06 | 17061780                | CC                              | TT                | 1946444522               |
| SNP_P3_74453_17064869 | NC_021165.1    | Ca_kabuli_chr06 | 17064869                | GG                              | CC                | 1946444523               |
| SNP_P3_74454_17064879 | NC_021165.1    | Ca_kabuli_chr06 | 17064879                | GG                              | TT                | 1946444524               |
| SNP_P3_74455_17065242 | NC_021165.1    | Ca_kabuli_chr06 | 17065242                | GG                              | AA                | 1946444526               |
| SNP_P3_74456_17065290 | NC_021165.1    | Ca_kabuli_chr06 | 17065290                | GG                              | AA                | 1946444527               |
| SNP_P3_74457_17065568 | NC_021165.1    | Ca_kabuli_chr06 | 17065568                | AA                              | GG                | 1946444529               |
| SNP_P3_74458_17065582 | NC_021165.1    | Ca_kabuli_chr06 | 17065582                | AA                              | GG                | 1946444531               |
| SNP_P3_74459_17068993 | NC_021165.1    | Ca_kabuli_chr06 | 17068993                | GG                              | AA                | 1946444532               |
| SNP_P3_74460_17069669 | NC_021165.1    | Ca_kabuli_chr06 | 17069669                | CC                              | TT                | 1946444534               |
| SNP_P3_74461_17069704 | NC_021165.1    | Ca_kabuli_chr06 | 17069704                | TT                              | CC                | 1946444535               |
| SNP_P3_74462_17069729 | NC_021165.1    | Ca_kabuli_chr06 | 17069729                | TT                              | CC                | 1946444537               |
| SNP_P3_74463_17069735 | NC_021165.1    | Ca_kabuli_chr06 | 17069735                | CC                              | TT                | 1946444538               |
| SNP_P3_74464_17070073 | NC_021165.1    | Ca_kabuli_chr06 | 17070073                | CC                              | TT                | 1946444539               |
| SNP_P3_74465_17070121 | NC_021165.1    | Ca_kabuli_chr06 | 17070121                | AA                              | GG                | 1946444541               |
| SNP_P3_74466_17070135 | NC_021165.1    | Ca_kabuli_chr06 | 17070135                | TT                              | CC                | 1946444542               |
| SNP_P3_74467_17070244 | NC_021165.1    | Ca_kabuli_chr06 | 17070244                | CC                              | TT                | 1946444544               |
| SNP_P3_74468_17070253 | NC_021165.1    | Ca_kabuli_chr06 | 17070253                | AA                              | GG                | 1946444545               |
| SNP_P3_74469_17070268 | NC_021165.1    | Ca_kabuli_chr06 | 17070268                | TT                              | CC                | 1946444547               |
| SNP_P3_74470_17070296 | NC_021165.1    | Ca_kabuli_chr06 | 17070296                | CC                              | TT                | 1946444548               |
| SNP_P3_74471_17070898 | NC_021165.1    | Ca_kabuli_chr06 | 17070898                | GG                              | AA                | 1946444550               |
| SNP_P3_74472_17072179 | NC_021165.1    | Ca_kabuli_chr06 | 17072179                | GG                              | AA                | 1946444551               |
| SNP_P3_74473_17072245 | NC_021165.1    | Ca_kabuli_chr06 | 17072245                | AA                              | GG                | 1946444553               |
| SNP_P3_74474_17072611 | NC_021165.1    | Ca_kabuli_chr06 | 17072611                | CC                              | TT                | 1946444554               |
| SNP_P3_74475_17072615 | NC_021165.1    | Ca_kabuli_chr06 | 17072615                | TT                              | CC                | 1946444556               |
| SNP_P3_74476_17072623 | NC_021165.1    | Ca_kabuli_chr06 | 17072623                | AA                              | CC                | 1946444557               |
| SNP_P3_74477_17072641 | NC_021165.1    | Ca_kabuli_chr06 | 17072641                | AA                              | GG                | 1946444559               |
| SNP_P3_74478_17072679 | NC_021165.1    | Ca_kabuli_chr06 | 17072679                | AA                              | CC                | 1946444560               |
| SNP_P3_74479_17072755 | NC_021165.1    | Ca_kabuli_chr06 | 17072755                | GG                              | AA                | 1946444562               |

| SNPs IDs              | Chromosome IDs | Chromosomes     | Physical positions (bp) | CDC Frontier (Reference genome) | (Pusa 256 & HPNB) | NCBI SNPdb Accession IDs |
|-----------------------|----------------|-----------------|-------------------------|---------------------------------|-------------------|--------------------------|
| SNP_P3_74480_17072818 | NC_021165.1    | Ca_kabuli_chr06 | 17072818                | CC                              | GG                | 1946444563               |
| SNP_P3_74481_17074504 | NC_021165.1    | Ca_kabuli_chr06 | 17074504                | AA                              | GG                | 1946444564               |
| SNP_P3_74483_17076918 | NC_021165.1    | Ca_kabuli_chr06 | 17076918                | AA                              | GG                | 1946444566               |
| SNP_P3_74484_17076991 | NC_021165.1    | Ca_kabuli_chr06 | 17076991                | CC                              | AA                | 1946444567               |
| SNP_P3_74485_17077026 | NC_021165.1    | Ca_kabuli_chr06 | 17077026                | TT                              | AA                | 1946444569               |
| SNP_P3_74486_17079083 | NC_021165.1    | Ca_kabuli_chr06 | 17079083                | TT                              | GG                | 1946444571               |
| SNP_P3_74487_17079374 | NC_021165.1    | Ca_kabuli_chr06 | 17079374                | CC                              | TT                | 1946444573               |
| SNP_P3_74488_17081912 | NC_021165.1    | Ca_kabuli_chr06 | 17081912                | TT                              | CC                | 1946444574               |
| SNP_P3_74490_17082962 | NC_021165.1    | Ca_kabuli_chr06 | 17082962                | CC                              | TT                | 1946444576               |
| SNP_P3_74491_17083048 | NC_021165.1    | Ca_kabuli_chr06 | 17083048                | CC                              | TT                | 1946444577               |
| SNP_P3_74493_17083155 | NC_021165.1    | Ca_kabuli_chr06 | 17083155                | TT                              | CC                | 1946444578               |
| SNP_P3_74494_17083178 | NC_021165.1    | Ca_kabuli_chr06 | 17083178                | AA                              | TT                | 1946444580               |
| SNP_P3_74495_17083193 | NC_021165.1    | Ca_kabuli_chr06 | 17083193                | TT                              | AA                | 1946444581               |
| SNP_P3_74496_17083197 | NC_021165.1    | Ca_kabuli_chr06 | 17083197                | GG                              | AA                | 1946444583               |
| SNP_P3_74497_17083200 | NC_021165.1    | Ca_kabuli_chr06 | 17083200                | AA                              | GG                | 1946444584               |
| SNP_P3_74498_17084193 | NC_021165.1    | Ca_kabuli_chr06 | 17084193                | CC                              | TT                | 1946444586               |
| SNP_P3_74499_17084194 | NC_021165.1    | Ca_kabuli_chr06 | 17084194                | TT                              | CC                | 1946444587               |
| SNP_P3_74500_17084399 | NC_021165.1    | Ca_kabuli_chr06 | 17084399                | TT                              | GG                | 1946444589               |
| SNP_P3_74501_17084457 | NC_021165.1    | Ca_kabuli_chr06 | 17084457                | GG                              | AA                | 1946444590               |
| SNP_P3_74503_17085877 | NC_021165.1    | Ca_kabuli_chr06 | 17085877                | TT                              | AA                | 1946444592               |
| SNP_P3_74504_17085969 | NC_021165.1    | Ca_kabuli_chr06 | 17085969                | TT                              | CC                | 1946444593               |
| SNP_P3_74505_17085975 | NC_021165.1    | Ca_kabuli_chr06 | 17085975                | TT                              | CC                | 1946444595               |
| SNP_P3_74506_17086054 | NC_021165.1    | Ca_kabuli_chr06 | 17086054                | TT                              | CC                | 1946444596               |
| SNP_P3_74507_17086946 | NC_021165.1    | Ca_kabuli_chr06 | 17086946                | AA                              | CC                | 1946444598               |
| SNP_P3_74509_17087327 | NC_021165.1    | Ca_kabuli_chr06 | 17087327                | CC                              | TT                | 1946444599               |
| SNP_P3_74510_17088517 | NC_021165.1    | Ca_kabuli_chr06 | 17088517                | AA                              | GG                | 1946444600               |
| SNP_P3_74511_17088699 | NC_021165.1    | Ca_kabuli_chr06 | 17088699                | GG                              | AA                | 1946444602               |
| SNP_P3_74513_17088823 | NC_021165.1    | Ca_kabuli_chr06 | 17088823                | TT                              | AA                | 1946444603               |
| SNP_P3_74514_17088848 | NC_021165.1    | Ca_kabuli_chr06 | 17088848                | TT                              | AA                | 1946444605               |
| SNP_P3_74515_17088859 | NC_021165.1    | Ca_kabuli_chr06 | 17088859                | AA                              | GG                | 1946444606               |
| SNP_P3_74516_17088936 | NC_021165.1    | Ca_kabuli_chr06 | 17088936                | GG                              | TT                | 1946444608               |
| SNP_P3_74517_17088958 | NC_021165.1    | Ca_kabuli_chr06 | 17088958                | CC                              | TT                | 1946444609               |
| SNP_P3_74518_17089007 | NC_021165.1    | Ca_kabuli_chr06 | 17089007                | TT                              | CC                | 1946444611               |
| SNP_P3_74519_17089027 | NC_021165.1    | Ca_kabuli_chr06 | 17089027                | TT                              | AA                | 1946444612               |
| SNP_P3_74520_17089043 | NC_021165.1    | Ca_kabuli_chr06 | 17089043                | AA                              | GG                | 1946444613               |
| SNP_P3_74521_17089277 | NC_021165.1    | Ca_kabuli_chr06 | 17089277                | CC                              | TT                | 1946444614               |
| SNP_P3_74523_17092364 | NC_021165.1    | Ca_kabuli_chr06 | 17092364                | AA                              | GG                | 1946444615               |
| SNP_P3_74524_17092380 | NC_021165.1    | Ca_kabuli_chr06 | 17092380                | CC                              | TT                | 1946444616               |
| SNP_P3_74525_17092381 | NC_021165.1    | Ca_kabuli_chr06 | 17092381                | AA                              | GG                | 1946444618               |
| SNP_P3_74526_17092871 | NC_021165.1    | Ca_kabuli_chr06 | 17092871                | AA                              | GG                | 1946444619               |
| SNP_P3_74527_17093285 | NC_021165.1    | Ca_kabuli_chr06 | 17093285                | AA                              | GG                | 1946444621               |
| SNP_P3_74528_17093526 | NC_021165.1    | Ca_kabuli_chr06 | 17093526                | CC                              | TT                | 1946444622               |

| SNPs IDs              | Chromosome IDs | Chromosomes     | Physical positions (bp) | CDC Frontier (Reference genome) | (Pusa 256 & HPNB) | NCBI SNPdb Accession IDs |
|-----------------------|----------------|-----------------|-------------------------|---------------------------------|-------------------|--------------------------|
| SNP_P3_74529_17093541 | NC_021165.1    | Ca_kabuli_chr06 | 17093541                | AA                              | TT                | 1946444623               |
| SNP_P3_74532_17095558 | NC_021165.1    | Ca_kabuli_chr06 | 17095558                | CC                              | AA                | 1946444625               |
| SNP_P3_74533_17096582 | NC_021165.1    | Ca_kabuli_chr06 | 17096582                | CC                              | TT                | 1946444626               |
| SNP_P3_74535_17097289 | NC_021165.1    | Ca_kabuli_chr06 | 17097289                | AA                              | GG                | 1946444628               |
| SNP_P3_74536_17097314 | NC_021165.1    | Ca_kabuli_chr06 | 17097314                | GG                              | AA                | 1946444629               |
| SNP_P3_74537_17097946 | NC_021165.1    | Ca_kabuli_chr06 | 17097946                | GG                              | AA                | 1946444631               |
| SNP_P3_74538_17097964 | NC_021165.1    | Ca_kabuli_chr06 | 17097964                | CC                              | AA                | 1946444632               |
| SNP_P3_74539_17098225 | NC_021165.1    | Ca_kabuli_chr06 | 17098225                | GG                              | AA                | 1946444634               |
| SNP_P3_74540_17098410 | NC_021165.1    | Ca_kabuli_chr06 | 17098410                | AA                              | GG                | 1946444635               |
| SNP_P3_74541_17098441 | NC_021165.1    | Ca_kabuli_chr06 | 17098441                | AA                              | GG                | 1946444636               |
| SNP_P3_74542_17098442 | NC_021165.1    | Ca_kabuli_chr06 | 17098442                | TT                              | CC                | 1946444638               |
| SNP_P3_74543_17098486 | NC_021165.1    | Ca_kabuli_chr06 | 17098486                | CC                              | TT                | 1946444639               |
| SNP_P3_74544_17098562 | NC_021165.1    | Ca_kabuli_chr06 | 17098562                | CC                              | TT                | 1946444641               |
| SNP_P3_74545_17099794 | NC_021165.1    | Ca_kabuli_chr06 | 17099794                | AA                              | CC                | 1946444642               |
| SNP_P3_74546_17100520 | NC_021165.1    | Ca_kabuli_chr06 | 17100520                | CC                              | TT                | 1946444643               |
| SNP_P3_74548_17100897 | NC_021165.1    | Ca_kabuli_chr06 | 17100897                | TT                              | CC                | 1946444645               |
| SNP_P3_74549_17100912 | NC_021165.1    | Ca_kabuli_chr06 | 17100912                | AA                              | TT                | 1946444646               |
| SNP_P3_74550_17101999 | NC_021165.1    | Ca_kabuli_chr06 | 17101999                | CC                              | TT                | 1946444648               |
| SNP_P3_74551_17102000 | NC_021165.1    | Ca_kabuli_chr06 | 17102000                | TT                              | AA                | 1946444649               |
| SNP_P3_74552_17102270 | NC_021165.1    | Ca_kabuli_chr06 | 17102270                | TT                              | CC                | 1946444651               |
| SNP_P3_74553_17102283 | NC_021165.1    | Ca_kabuli_chr06 | 17102283                | AA                              | GG                | 1946444652               |
| SNP_P3_74554_17103562 | NC_021165.1    | Ca_kabuli_chr06 | 17103562                | TT                              | CC                | 1946444654               |
| SNP_P3_74555_17103776 | NC_021165.1    | Ca_kabuli_chr06 | 17103776                | AA                              | GG                | 1946444655               |
| SNP_P3_74556_17104327 | NC_021165.1    | Ca_kabuli_chr06 | 17104327                | TT                              | GG                | 1946444657               |
| SNP_P3_74557_17104758 | NC_021165.1    | Ca_kabuli_chr06 | 17104758                | GG                              | TT                | 1946444658               |
| SNP_P3_74558_17104796 | NC_021165.1    | Ca_kabuli_chr06 | 17104796                | GG                              | AA                | 1946444660               |
| SNP_P3_74559_17105183 | NC_021165.1    | Ca_kabuli_chr06 | 17105183                | AA                              | GG                | 1946444661               |
| SNP_P3_74560_17106034 | NC_021165.1    | Ca_kabuli_chr06 | 17106034                | TT                              | CC                | 1946444662               |
| SNP_P3_74561_17106055 | NC_021165.1    | Ca_kabuli_chr06 | 17106055                | TT                              | CC                | 1946444664               |
| SNP_P3_74562_17106130 | NC_021165.1    | Ca_kabuli_chr06 | 17106130                | AA                              | TT                | 1946444665               |
| SNP_P3_74563_17106456 | NC_021165.1    | Ca_kabuli_chr06 | 17106456                | CC                              | TT                | 1946444667               |
| SNP_P3_74564_17106480 | NC_021165.1    | Ca_kabuli_chr06 | 17106480                | CC                              | GG                | 1946444668               |
| SNP_P3_74565_17106523 | NC_021165.1    | Ca_kabuli_chr06 | 17106523                | GG                              | AA                | 1946444670               |
| SNP_P3_74566_17107467 | NC_021165.1    | Ca_kabuli_chr06 | 17107467                | CC                              | GG                | 1946444671               |
| SNP_P3_74567_17107472 | NC_021165.1    | Ca_kabuli_chr06 | 17107472                | TT                              | CC                | 1946444672               |
| SNP_P3_74569_17108920 | NC_021165.1    | Ca_kabuli_chr06 | 17108920                | TT                              | AA                | 1946444674               |
| SNP_P3_74570_17108942 | NC_021165.1    | Ca_kabuli_chr06 | 17108942                | AA                              | GG                | 1946444676               |
| SNP_P3_74571_17110009 | NC_021165.1    | Ca_kabuli_chr06 | 17110009                | AA                              | GG                | 1946444677               |
| SNP_P3_74572_17110851 | NC_021165.1    | Ca_kabuli_chr06 | 17110851                | AA                              | TT                | 1946444679               |
| SNP_P3_74573_17110892 | NC_021165.1    | Ca_kabuli_chr06 | 17110892                | AA                              | CC                | 1946444680               |
| SNP_P3_74574_17110898 | NC_021165.1    | Ca_kabuli_chr06 | 17110898                | TT                              | AA                | 1946444681               |
| SNP_P3_74575_17110927 | NC_021165.1    | Ca_kabuli_chr06 | 17110927                | TT                              | AA                | 1946444683               |

| SNPs IDs              | Chromosome IDs | Chromosomes     | Physical positions (bp) | CDC Frontier (Reference genome) | (Pusa 256 & HPNB) | NCBI SNPdb Accession IDs |
|-----------------------|----------------|-----------------|-------------------------|---------------------------------|-------------------|--------------------------|
| SNP_P3_74576_17111106 | NC_021165.1    | Ca_kabuli_chr06 | 17111106                | TT                              | GG                | 1946444684               |
| SNP_P3_74577_17113682 | NC_021165.1    | Ca_kabuli_chr06 | 17113682                | TT                              | CC                | 1946444686               |
| SNP_P3_74578_17114720 | NC_021165.1    | Ca_kabuli_chr06 | 17114720                | CC                              | TT                | 1946444687               |
| SNP_P3_74579_17114815 | NC_021165.1    | Ca_kabuli_chr06 | 17114815                | CC                              | TT                | 1946444688               |
| SNP_P3_74580_17114979 | NC_021165.1    | Ca_kabuli_chr06 | 17114979                | GG                              | TT                | 1946444690               |
| SNP_P3_74581_17115067 | NC_021165.1    | Ca_kabuli_chr06 | 17115067                | TT                              | CC                | 1946444691               |
| SNP_P3_74583_17116097 | NC_021165.1    | Ca_kabuli_chr06 | 17116097                | AA                              | GG                | 1946444693               |
| SNP_P3_74584_17116152 | NC_021165.1    | Ca_kabuli_chr06 | 17116152                | AA                              | GG                | 1946444694               |
| SNP_P3_74585_17116913 | NC_021165.1    | Ca_kabuli_chr06 | 17116913                | GG                              | TT                | 1946444696               |
| SNP_P3_74586_17117414 | NC_021165.1    | Ca_kabuli_chr06 | 17117414                | GG                              | TT                | 1946444698               |
| SNP_P3_74587_17117689 | NC_021165.1    | Ca_kabuli_chr06 | 17117689                | AA                              | GG                | 1946444699               |
| SNP_P3_74588_17117857 | NC_021165.1    | Ca_kabuli_chr06 | 17117857                | AA                              | GG                | 1946444701               |
| SNP_P3_74589_17118588 | NC_021165.1    | Ca_kabuli_chr06 | 17118588                | CC                              | TT                | 1946444702               |
| SNP_P3_74590_17118978 | NC_021165.1    | Ca_kabuli_chr06 | 17118978                | CC                              | AA                | 1946444703               |
| SNP_P3_74592_17123519 | NC_021165.1    | Ca_kabuli_chr06 | 17123519                | TT                              | AA                | 1946444705               |
| SNP_P3_74594_17126061 | NC_021165.1    | Ca_kabuli_chr06 | 17126061                | TT                              | CC                | 1946444706               |
| SNP_P3_74595_17126217 | NC_021165.1    | Ca_kabuli_chr06 | 17126217                | CC                              | TT                | 1946444708               |
| SNP_P3_74596_17126309 | NC_021165.1    | Ca_kabuli_chr06 | 17126309                | TT                              | CC                | 1946444709               |
| SNP_P3_74597_17127220 | NC_021165.1    | Ca_kabuli_chr06 | 17127220                | AA                              | GG                | 1946444711               |
| SNP_P3_74598_17127235 | NC_021165.1    | Ca_kabuli_chr06 | 17127235                | GG                              | AA                | 1946444712               |
| SNP_P3_74599_17127858 | NC_021165.1    | Ca_kabuli_chr06 | 17127858                | AA                              | GG                | 1946444713               |
| SNP_P3_74600_17127925 | NC_021165.1    | Ca_kabuli_chr06 | 17127925                | GG                              | TT                | 1946444715               |
| SNP_P3_74602_17128648 | NC_021165.1    | Ca_kabuli_chr06 | 17128648                | TT                              | GG                | 1946444717               |
| SNP_P3_74603_17128708 | NC_021165.1    | Ca_kabuli_chr06 | 17128708                | TT                              | CC                | 1946444718               |
| SNP_P3_74604_17129574 | NC_021165.1    | Ca_kabuli_chr06 | 17129574                | AA                              | GG                | 1946444720               |
| SNP_P3_74605_17133521 | NC_021165.1    | Ca_kabuli_chr06 | 17133521                | CC                              | AA                | 1946444721               |
| SNP_P3_74606_17133550 | NC_021165.1    | Ca_kabuli_chr06 | 17133550                | GG                              | AA                | 1946444722               |
| SNP_P3_74607_17138292 | NC_021165.1    | Ca_kabuli_chr06 | 17138292                | GG                              | AA                | 1946444724               |
| SNP_P3_74608_17138659 | NC_021165.1    | Ca_kabuli_chr06 | 17138659                | AA                              | GG                | 1946444725               |
| SNP_P3_74610_17138873 | NC_021165.1    | Ca_kabuli_chr06 | 17138873                | TT                              | CC                | 1946444727               |
| SNP_P3_74611_17138874 | NC_021165.1    | Ca_kabuli_chr06 | 17138874                | CC                              | TT                | 1946444728               |
| SNP_P3_74613_17139082 | NC_021165.1    | Ca_kabuli_chr06 | 17139082                | TT                              | CC                | 1946444730               |
| SNP_P3_74614_17139126 | NC_021165.1    | Ca_kabuli_chr06 | 17139126                | CC                              | TT                | 1946444731               |
| SNP_P3_74615_17139447 | NC_021165.1    | Ca_kabuli_chr06 | 17139447                | CC                              | TT                | 1946444732               |
| SNP_P3_74616_17139506 | NC_021165.1    | Ca_kabuli_chr06 | 17139506                | CC                              | TT                | 1946444734               |
| SNP_P3_74617_17140516 | NC_021165.1    | Ca_kabuli_chr06 | 17140516                | CC                              | TT                | 1946444735               |
| SNP_P3_74618_17144378 | NC_021165.1    | Ca_kabuli_chr06 | 17144378                | CC                              | GG                | 1946444737               |
| SNP_P3_74619_17167543 | NC_021165.1    | Ca_kabuli_chr06 | 17167543                | CC                              | GG                | 1946444739               |
| SNP_P3_74620_17182775 | NC_021165.1    | Ca_kabuli_chr06 | 17182775                | TT                              | CC                | 1946444740               |
| SNP_P3_74621_17182799 | NC_021165.1    | Ca_kabuli_chr06 | 17182799                | GG                              | AA                | 1946444742               |
| SNP_P3_74622_17184884 | NC_021165.1    | Ca_kabuli_chr06 | 17184884                | AA                              | TT                | 1946444743               |
| SNP_P3_74623_17189445 | NC_021165.1    | Ca_kabuli_chr06 | 17189445                | TT                              | CC                | 1946444745               |

| SNPs IDs              | Chromosome IDs | Chromosomes     | Physical positions (bp) | CDC Frontier (Reference genome) | (Pusa 256 & HPNB) | NCBI SNPdb Accession IDs |
|-----------------------|----------------|-----------------|-------------------------|---------------------------------|-------------------|--------------------------|
| SNP_P3_74624_17208164 | NC_021165.1    | Ca_kabuli_chr06 | 17208164                | AA                              | GG                | 1946444746               |
| SNP_P3_74625_17208176 | NC_021165.1    | Ca_kabuli_chr06 | 17208176                | TT                              | GG                | 1946444747               |
| SNP_P3_74626_17221265 | NC_021165.1    | Ca_kabuli_chr06 | 17221265                | AA                              | GG                | 1946444749               |
| SNP_P3_74628_17237161 | NC_021165.1    | Ca_kabuli_chr06 | 17237161                | TT                              | CC                | 1946444750               |
| SNP_P3_74629_17241505 | NC_021165.1    | Ca_kabuli_chr06 | 17241505                | AA                              | GG                | 1946444752               |
| SNP_P3_74632_17306310 | NC_021165.1    | Ca_kabuli_chr06 | 17306310                | TT                              | CC                | 1946444753               |
| SNP_P3_74633_17347012 | NC_021165.1    | Ca_kabuli_chr06 | 17347012                | GG                              | AA                | 1946444755               |
| SNP_P3_74634_17362529 | NC_021165.1    | Ca_kabuli_chr06 | 17362529                | CC                              | TT                | 1946444756               |
| SNP_P3_74635_17374542 | NC_021165.1    | Ca_kabuli_chr06 | 17374542                | GG                              | AA                | 1946444758               |
| SNP_P3_74636_17380016 | NC_021165.1    | Ca_kabuli_chr06 | 17380016                | TT                              | CC                | 1946444759               |
| SNP_P3_74638_17391995 | NC_021165.1    | Ca_kabuli_chr06 | 17391995                | TT                              | AA                | 1946444761               |
| SNP_P3_74639_17391996 | NC_021165.1    | Ca_kabuli_chr06 | 17391996                | TT                              | AA                | 1946444762               |
| SNP_P3_74640_17392285 | NC_021165.1    | Ca_kabuli_chr06 | 17392285                | AA                              | TT                | 1946444764               |
| SNP_P3_74641_17412366 | NC_021165.1    | Ca_kabuli_chr06 | 17412366                | CC                              | GG                | 1946444765               |
| SNP_P3_74642_17423474 | NC_021165.1    | Ca_kabuli_chr06 | 17423474                | TT                              | CC                | 1946444766               |
| SNP_P3_74643_17425305 | NC_021165.1    | Ca_kabuli_chr06 | 17425305                | TT                              | AA                | 1946444768               |
| SNP_P3_74644_17461206 | NC_021165.1    | Ca_kabuli_chr06 | 17461206                | TT                              | AA                | 1946444769               |
| SNP_P3_74645_17461238 | NC_021165.1    | Ca_kabuli_chr06 | 17461238                | TT                              | CC                | 1946444771               |
| SNP_P3_74648_17489716 | NC_021165.1    | Ca_kabuli_chr06 | 17489716                | AA                              | CC                | 1946444772               |
| SNP_P3_74649_17489718 | NC_021165.1    | Ca_kabuli_chr06 | 17489718                | TT                              | CC                | 1946444774               |
| SNP_P3_74651_17503324 | NC_021165.1    | Ca_kabuli_chr06 | 17503324                | GG                              | AA                | 1946444775               |
| SNP_P3_74652_17511515 | NC_021165.1    | Ca_kabuli_chr06 | 17511515                | CC                              | TT                | 1946444777               |
| SNP_P3_74653_17511744 | NC_021165.1    | Ca_kabuli_chr06 | 17511744                | AA                              | GG                | 1946444778               |
| SNP_P3_74654_17521364 | NC_021165.1    | Ca_kabuli_chr06 | 17521364                | CC                              | TT                | 1946444779               |
| SNP_P3_74655_17521712 | NC_021165.1    | Ca_kabuli_chr06 | 17521712                | CC                              | TT                | 1946444781               |
| SNP_P3_74656_17521824 | NC_021165.1    | Ca_kabuli_chr06 | 17521824                | GG                              | AA                | 1946444783               |
| SNP_P3_74657_17536471 | NC_021165.1    | Ca_kabuli_chr06 | 17536471                | GG                              | AA                | 1946444784               |
| SNP_P3_74658_17567291 | NC_021165.1    | Ca_kabuli_chr06 | 17567291                | TT                              | GG                | 1946444786               |
| SNP_P3_74659_17572954 | NC_021165.1    | Ca_kabuli_chr06 | 17572954                | GG                              | AA                | 1946444787               |
| SNP_P3_74660_17610589 | NC_021165.1    | Ca_kabuli_chr06 | 17610589                | TT                              | CC                | 1946444789               |
| SNP_P3_74661_17614020 | NC_021165.1    | Ca_kabuli_chr06 | 17614020                | CC                              | TT                | 1946444790               |
| SNP_P3_74663_17676740 | NC_021165.1    | Ca_kabuli_chr06 | 17676740                | TT                              | CC                | 1946444791               |
| SNP_P3_74664_17710539 | NC_021165.1    | Ca_kabuli_chr06 | 17710539                | AA                              | GG                | 1946444793               |
| SNP_P3_74665_17738473 | NC_021165.1    | Ca_kabuli_chr06 | 17738473                | TT                              | AA                | 1946444794               |
| SNP_P3_74666_17752007 | NC_021165.1    | Ca_kabuli_chr06 | 17752007                | TT                              | CC                | 1946444796               |
| SNP_P3_74667_17752869 | NC_021165.1    | Ca_kabuli_chr06 | 17752869                | TT                              | CC                | 1946444797               |
| SNP_P3_74668_17753138 | NC_021165.1    | Ca_kabuli_chr06 | 17753138                | TT                              | GG                | 1946444799               |
| SNP_P3_74672_17859016 | NC_021165.1    | Ca_kabuli_chr06 | 17859016                | GG                              | CC                | 1946444800               |
| SNP_P3_74673_17912724 | NC_021165.1    | Ca_kabuli_chr06 | 17912724                | GG                              | TT                | 1946444802               |
| SNP_P3_74674_17913307 | NC_021165.1    | Ca_kabuli_chr06 | 17913307                | AA                              | GG                | 1946444803               |
| SNP_P3_74675_17913354 | NC_021165.1    | Ca_kabuli_chr06 | 17913354                | TT                              | CC                | 1946444804               |
| SNP_P3_74676_17915589 | NC_021165.1    | Ca_kabuli_chr06 | 17915589                | AA                              | GG                | 1946444806               |

| SNPs IDs              | Chromosome IDs | Chromosomes     | Physical positions (bp) | CDC Frontier (Reference genome) | (Pusa 256 & HPNB) | NCBI SNPdb Accession IDs |
|-----------------------|----------------|-----------------|-------------------------|---------------------------------|-------------------|--------------------------|
| SNP_P3_74678_17964166 | NC_021165.1    | Ca_kabuli_chr06 | 17964166                | TT                              | CC                | 1946444807               |
| SNP_P3_74679_17966312 | NC_021165.1    | Ca_kabuli_chr06 | 17966312                | AA                              | TT                | 1946444809               |
| SNP_P3_74681_17993602 | NC_021165.1    | Ca_kabuli_chr06 | 17993602                | CC                              | TT                | 1946444811               |
| SNP_P3_74682_17993605 | NC_021165.1    | Ca_kabuli_chr06 | 17993605                | CC                              | AA                | 1946444812               |
| SNP_P3_74683_17993613 | NC_021165.1    | Ca_kabuli_chr06 | 17993613                | TT                              | CC                | 1946444813               |
| SNP_P3_74684_17993642 | NC_021165.1    | Ca_kabuli_chr06 | 17993642                | CC                              | AA                | 1946444815               |
| SNP_P3_74685_17993649 | NC_021165.1    | Ca_kabuli_chr06 | 17993649                | CC                              | AA                | 1946444816               |
| SNP_P3_74686_17994499 | NC_021165.1    | Ca_kabuli_chr06 | 17994499                | GG                              | AA                | 1946444818               |
| SNP_P3_74687_17994880 | NC_021165.1    | Ca_kabuli_chr06 | 17994880                | AA                              | TT                | 1946444819               |
| SNP_P3_74688_18000924 | NC_021165.1    | Ca_kabuli_chr06 | 18000924                | CC                              | AA                | 1946444821               |
| SNP_P3_74689_18013466 | NC_021165.1    | Ca_kabuli_chr06 | 18013466                | TT                              | AA                | 1946444822               |
| SNP_P3_74690_18030070 | NC_021165.1    | Ca_kabuli_chr06 | 18030070                | GG                              | AA                | 1946444823               |
| SNP_P3_74691_18045940 | NC_021165.1    | Ca_kabuli_chr06 | 18045940                | CC                              | AA                | 1946444825               |
| SNP_P3_74692_18072395 | NC_021165.1    | Ca_kabuli_chr06 | 18072395                | AA                              | CC                | 1946444826               |
| SNP_P3_74693_18080452 | NC_021165.1    | Ca_kabuli_chr06 | 18080452                | TT                              | CC                | 1946444829               |
| SNP_P3_74694_18109634 | NC_021165.1    | Ca_kabuli_chr06 | 18109634                | CC                              | GG                | 1946444830               |
| SNP_P3_74695_18113820 | NC_021165.1    | Ca_kabuli_chr06 | 18113820                | GG                              | AA                | 1946444832               |
| SNP_P3_74696_18120858 | NC_021165.1    | Ca_kabuli_chr06 | 18120858                | AA                              | GG                | 1946444833               |
| SNP_P3_74697_18151037 | NC_021165.1    | Ca_kabuli_chr06 | 18151037                | CC                              | TT                | 1946444834               |
| SNP_P3_74698_18156653 | NC_021165.1    | Ca_kabuli_chr06 | 18156653                | GG                              | AA                | 1946444837               |
| SNP_P3_74699_18178351 | NC_021165.1    | Ca_kabuli_chr06 | 18178351                | GG                              | AA                | 1946444838               |
| SNP_P3_74700_18179128 | NC_021165.1    | Ca_kabuli_chr06 | 18179128                | AA                              | TT                | 1946444840               |
| SNP_P3_74702_18204531 | NC_021165.1    | Ca_kabuli_chr06 | 18204531                | CC                              | TT                | 1946444841               |
| SNP_P3_74703_18211560 | NC_021165.1    | Ca_kabuli_chr06 | 18211560                | CC                              | TT                | 1946444842               |
| SNP_P3_74705_18239336 | NC_021165.1    | Ca_kabuli_chr06 | 18239336                | CC                              | TT                | 1946444844               |
| SNP_P3_74706_18249158 | NC_021165.1    | Ca_kabuli_chr06 | 18249158                | TT                              | AA                | 1946444845               |
| SNP_P3_74707_18252935 | NC_021165.1    | Ca_kabuli_chr06 | 18252935                | CC                              | TT                | 1946444847               |
| SNP_P3_74709_18273944 | NC_021165.1    | Ca_kabuli_chr06 | 18273944                | TT                              | CC                | 1946444848               |
| SNP_P3_74712_18333424 | NC_021165.1    | Ca_kabuli_chr06 | 18333424                | GG                              | CC                | 1946444850               |
| SNP_P3_74713_18336148 | NC_021165.1    | Ca_kabuli_chr06 | 18336148                | TT                              | AA                | 1946444851               |
| SNP_P3_74714_18343439 | NC_021165.1    | Ca_kabuli_chr06 | 18343439                | TT                              | AA                | 1946444853               |
| SNP_P3_74715_18343567 | NC_021165.1    | Ca_kabuli_chr06 | 18343567                | TT                              | AA                | 1946444854               |
| SNP_P3_74716_18343651 | NC_021165.1    | Ca_kabuli_chr06 | 18343651                | CC                              | TT                | 1946444856               |
| SNP_P3_74717_18344041 | NC_021165.1    | Ca_kabuli_chr06 | 18344041                | TT                              | CC                | 1946444857               |
| SNP_P3_74718_18344071 | NC_021165.1    | Ca_kabuli_chr06 | 18344071                | CC                              | TT                | 1946444859               |
| SNP_P3_74719_18345581 | NC_021165.1    | Ca_kabuli_chr06 | 18345581                | TT                              | CC                | 1946444860               |
| SNP_P3_74720_18347525 | NC_021165.1    | Ca_kabuli_chr06 | 18347525                | GG                              | AA                | 1946444862               |
| SNP_P3_74721_18355459 | NC_021165.1    | Ca_kabuli_chr06 | 18355459                | AA                              | GG                | 1946444863               |
| SNP_P3_74722_18355460 | NC_021165.1    | Ca_kabuli_chr06 | 18355460                | TT                              | CC                | 1946444865               |
| SNP_P3_74723_18355482 | NC_021165.1    | Ca_kabuli_chr06 | 18355482                | CC                              | TT                | 1946444866               |
| SNP_P3_74724_18355516 | NC_021165.1    | Ca_kabuli_chr06 | 18355516                | CC                              | TT                | 1946444868               |
| SNP_P3_74725_18355544 | NC_021165.1    | Ca_kabuli_chr06 | 18355544                | CC                              | TT                | 1946444869               |

| SNPs IDs              | Chromosome IDs | Chromosomes     | Physical positions (bp) | CDC Frontier (Reference genome) | (Pusa 256 & HPNB) | NCBI SNPdb Accession IDs |
|-----------------------|----------------|-----------------|-------------------------|---------------------------------|-------------------|--------------------------|
| SNP_P3_74726_18355700 | NC_021165.1    | Ca_kabuli_chr06 | 18355700                | AA                              | GG                | 1946444870               |
| SNP_P3_74727_18355706 | NC_021165.1    | Ca_kabuli_chr06 | 18355706                | AA                              | TT                | 1946444872               |
| SNP_P3_74728_18355707 | NC_021165.1    | Ca_kabuli_chr06 | 18355707                | TT                              | CC                | 1946444873               |
| SNP_P3_74729_18355709 | NC_021165.1    | Ca_kabuli_chr06 | 18355709                | AA                              | GG                | 1946444875               |
| SNP_P3_74730_18355765 | NC_021165.1    | Ca_kabuli_chr06 | 18355765                | CC                              | TT                | 1946444876               |
| SNP_P3_74731_18355771 | NC_021165.1    | Ca_kabuli_chr06 | 18355771                | AA                              | TT                | 1946444878               |
| SNP_P3_74732_18355834 | NC_021165.1    | Ca_kabuli_chr06 | 18355834                | TT                              | CC                | 1946444879               |
| SNP_P3_74733_18357593 | NC_021165.1    | Ca_kabuli_chr06 | 18357593                | GG                              | TT                | 1946444881               |
| SNP_P3_74736_18429085 | NC_021165.1    | Ca_kabuli_chr06 | 18429085                | GG                              | AA                | 1946444883               |
| SNP_P3_74741_18483739 | NC_021165.1    | Ca_kabuli_chr06 | 18483739                | TT                              | CC                | 1946444884               |
| SNP_P3_74742_18503743 | NC_021165.1    | Ca_kabuli_chr06 | 18503743                | TT                              | AA                | 1946444886               |
| SNP_P3_74743_18532451 | NC_021165.1    | Ca_kabuli_chr06 | 18532451                | AA                              | TT                | 1946444887               |
| SNP_P3_74744_18535694 | NC_021165.1    | Ca_kabuli_chr06 | 18535694                | GG                              | TT                | 1946444889               |
| SNP_P3_74745_18543883 | NC_021165.1    | Ca_kabuli_chr06 | 18543883                | CC                              | AA                | 1946444890               |
| SNP_P3_74746_18544137 | NC_021165.1    | Ca_kabuli_chr06 | 18544137                | CC                              | TT                | 1946444891               |
| SNP_P3_74748_18571148 | NC_021165.1    | Ca_kabuli_chr06 | 18571148                | TT                              | AA                | 1946444893               |
| SNP_P3_74749_18575315 | NC_021165.1    | Ca_kabuli_chr06 | 18575315                | TT                              | GG                | 1946444894               |
| SNP_P3_74750_18579309 | NC_021165.1    | Ca_kabuli_chr06 | 18579309                | AA                              | TT                | 1946444896               |
| SNP_P3_74751_18591141 | NC_021165.1    | Ca_kabuli_chr06 | 18591141                | AA                              | CC                | 1946444897               |
| SNP_P3_74752_18594201 | NC_021165.1    | Ca_kabuli_chr06 | 18594201                | AA                              | CC                | 1946444899               |
| SNP_P3_74753_18594339 | NC_021165.1    | Ca_kabuli_chr06 | 18594339                | TT                              | GG                | 1946444900               |
| SNP_P3_74754_18594555 | NC_021165.1    | Ca_kabuli_chr06 | 18594555                | TT                              | GG                | 1946444901               |
| SNP_P3_74755_18594576 | NC_021165.1    | Ca_kabuli_chr06 | 18594576                | GG                              | TT                | 1946444903               |
| SNP_P3_74757_18601335 | NC_021165.1    | Ca_kabuli_chr06 | 18601335                | TT                              | CC                | 1946444904               |
| SNP_P3_74758_18603043 | NC_021165.1    | Ca_kabuli_chr06 | 18603043                | AA                              | GG                | 1946444906               |
| SNP_P3_74759_18603079 | NC_021165.1    | Ca_kabuli_chr06 | 18603079                | AA                              | GG                | 1946444907               |
| SNP_P3_74760_18603422 | NC_021165.1    | Ca_kabuli_chr06 | 18603422                | CC                              | TT                | 1946444909               |
| SNP_P3_74761_18603461 | NC_021165.1    | Ca_kabuli_chr06 | 18603461                | TT                              | CC                | 1946444910               |
| SNP_P3_74762_18606627 | NC_021165.1    | Ca_kabuli_chr06 | 18606627                | TT                              | GG                | 1946444912               |
| SNP_P3_74763_18617560 | NC_021165.1    | Ca_kabuli_chr06 | 18617560                | GG                              | CC                | 1946444913               |
| SNP_P3_74764_18617579 | NC_021165.1    | Ca_kabuli_chr06 | 18617579                | TT                              | CC                | 1946444914               |
| SNP_P3_74765_18617680 | NC_021165.1    | Ca_kabuli_chr06 | 18617680                | TT                              | CC                | 1946444916               |
| SNP_P3_74766_18617984 | NC_021165.1    | Ca_kabuli_chr06 | 18617984                | TT                              | CC                | 1946444917               |
| SNP_P3_74767_18618026 | NC_021165.1    | Ca_kabuli_chr06 | 18618026                | AA                              | GG                | 1946444919               |
| SNP_P3_74768_18618038 | NC_021165.1    | Ca_kabuli_chr06 | 18618038                | GG                              | TT                | 1946444920               |
| SNP_P3_74769_18618043 | NC_021165.1    | Ca_kabuli_chr06 | 18618043                | GG                              | CC                | 1946444922               |
| SNP_P3_74771_18622249 | NC_021165.1    | Ca_kabuli_chr06 | 18622249                | GG                              | AA                | 1946444923               |
| SNP_P3_74772_18638713 | NC_021165.1    | Ca_kabuli_chr06 | 18638713                | GG                              | AA                | 1946444925               |
| SNP_P3_74774_18667600 | NC_021165.1    | Ca_kabuli_chr06 | 18667600                | AA                              | GG                | 1946444926               |
| SNP_P3_74776_18698546 | NC_021165.1    | Ca_kabuli_chr06 | 18698546                | AA                              | GG                | 1946444927               |
| SNP_P3_74777_18699448 | NC_021165.1    | Ca_kabuli_chr06 | 18699448                | AA                              | GG                | 1946444929               |
| SNP_P3_74778_18699452 | NC_021165.1    | Ca_kabuli_chr06 | 18699452                | AA                              | TT                | 1946444930               |

| SNPs IDs              | Chromosome IDs | Chromosomes     | Physical positions (bp) | CDC Frontier (Reference genome) | (Pusa 256 & HPNB) | NCBI SNPdb Accession IDs |
|-----------------------|----------------|-----------------|-------------------------|---------------------------------|-------------------|--------------------------|
| SNP_P3_74779_18699485 | NC_021165.1    | Ca_kabuli_chr06 | 18699485                | AA                              | GG                | 1946444932               |
| SNP_P3_74781_18743611 | NC_021165.1    | Ca_kabuli_chr06 | 18743611                | TT                              | AA                | 1946444933               |
| SNP_P3_74783_18856910 | NC_021165.1    | Ca_kabuli_chr06 | 18856910                | GG                              | AA                | 1946444935               |
| SNP_P3_74784_18872108 | NC_021165.1    | Ca_kabuli_chr06 | 18872108                | GG                              | AA                | 1946444936               |
| SNP_P3_74785_18886381 | NC_021165.1    | Ca_kabuli_chr06 | 18886381                | TT                              | CC                | 1946444938               |
| SNP_P3_74787_18917034 | NC_021165.1    | Ca_kabuli_chr06 | 18917034                | GG                              | AA                | 1946444939               |
| SNP_P3_74788_18917045 | NC_021165.1    | Ca_kabuli_chr06 | 18917045                | AA                              | GG                | 1946444941               |
| SNP_P3_74789_18917047 | NC_021165.1    | Ca_kabuli_chr06 | 18917047                | GG                              | AA                | 1946444942               |
| SNP_P3_74790_18933037 | NC_021165.1    | Ca_kabuli_chr06 | 18933037                | GG                              | AA                | 1946444943               |
| SNP_P3_74791_18946162 | NC_021165.1    | Ca_kabuli_chr06 | 18946162                | GG                              | CC                | 1946444945               |
| SNP_P3_74792_19008309 | NC_021165.1    | Ca_kabuli_chr06 | 19008309                | TT                              | AA                | 1946444947               |
| SNP_P3_74793_19017819 | NC_021165.1    | Ca_kabuli_chr06 | 19017819                | TT                              | CC                | 1946444948               |
| SNP_P3_74794_19019742 | NC_021165.1    | Ca_kabuli_chr06 | 19019742                | CC                              | TT                | 1946444949               |
| SNP_P3_74795_19068707 | NC_021165.1    | Ca_kabuli_chr06 | 19068707                | GG                              | AA                | 1946444951               |
| SNP_P3_74796_19081957 | NC_021165.1    | Ca_kabuli_chr06 | 19081957                | CC                              | TT                | 1946444952               |
| SNP_P3_74797_19089512 | NC_021165.1    | Ca_kabuli_chr06 | 19089512                | CC                              | GG                | 1946444954               |
| SNP_P3_74799_19099831 | NC_021165.1    | Ca_kabuli_chr06 | 19099831                | CC                              | TT                | 1946444955               |
| SNP_P3_74800_19100349 | NC_021165.1    | Ca_kabuli_chr06 | 19100349                | TT                              | CC                | 1946444957               |
| SNP_P3_74801_19100359 | NC_021165.1    | Ca_kabuli_chr06 | 19100359                | GG                              | AA                | 1946444958               |
| SNP_P3_74802_19121663 | NC_021165.1    | Ca_kabuli_chr06 | 19121663                | AA                              | GG                | 1946444959               |
| SNP_P3_74803_19125207 | NC_021165.1    | Ca_kabuli_chr06 | 19125207                | TT                              | CC                | 1946444961               |
| SNP_P3_74804_19125208 | NC_021165.1    | Ca_kabuli_chr06 | 19125208                | GG                              | AA                | 1946444962               |
| SNP_P3_74806_19186804 | NC_021165.1    | Ca_kabuli_chr06 | 19186804                | TT                              | CC                | 1946444964               |
| SNP_P3_74808_19194297 | NC_021165.1    | Ca_kabuli_chr06 | 19194297                | GG                              | AA                | 1946444965               |
| SNP_P3_74809_19211328 | NC_021165.1    | Ca_kabuli_chr06 | 19211328                | AA                              | TT                | 1946444967               |
| SNP_P3_74810_19245362 | NC_021165.1    | Ca_kabuli_chr06 | 19245362                | CC                              | TT                | 1946444968               |
| SNP_P3_74812_19248823 | NC_021165.1    | Ca_kabuli_chr06 | 19248823                | AA                              | TT                | 1946444970               |
| SNP_P3_74813_19248824 | NC_021165.1    | Ca_kabuli_chr06 | 19248824                | AA                              | TT                | 1946444971               |
| SNP_P3_74814_19268974 | NC_021165.1    | Ca_kabuli_chr06 | 19268974                | TT                              | CC                | 1946444973               |
| SNP_P3_74815_19277024 | NC_021165.1    | Ca_kabuli_chr06 | 19277024                | CC                              | TT                | 1946444974               |
| SNP_P3_74816_19285689 | NC_021165.1    | Ca_kabuli_chr06 | 19285689                | AA                              | GG                | 1946444975               |
| SNP_P3_74817_19303200 | NC_021165.1    | Ca_kabuli_chr06 | 19303200                | AA                              | GG                | 1946444977               |
| SNP_P3_74818_19338698 | NC_021165.1    | Ca_kabuli_chr06 | 19338698                | GG                              | AA                | 1946444978               |
| SNP_P3_74819_19340108 | NC_021165.1    | Ca_kabuli_chr06 | 19340108                | TT                              | GG                | 1946444980               |
| SNP_P3_74821_19392502 | NC_021165.1    | Ca_kabuli_chr06 | 19392502                | AA                              | TT                | 1946444981               |
| SNP_P3_74823_19468703 | NC_021165.1    | Ca_kabuli_chr06 | 19468703                | AA                              | TT                | 1946444983               |
| SNP_P3_74824_19469671 | NC_021165.1    | Ca_kabuli_chr06 | 19469671                | CC                              | TT                | 1946444984               |
| SNP_P3_74825_19477378 | NC_021165.1    | Ca_kabuli_chr06 | 19477378                | TT                              | AA                | 1946444985               |
| SNP_P3_74826_19496143 | NC_021165.1    | Ca_kabuli_chr06 | 19496143                | AA                              | TT                | 1946444987               |
| SNP_P3_74828_19531733 | NC_021165.1    | Ca_kabuli_chr06 | 19531733                | AA                              | GG                | 1946444988               |
| SNP_P3_74829_19570451 | NC_021165.1    | Ca_kabuli_chr06 | 19570451                | TT                              | GG                | 1946444990               |
| SNP_P3_74830_19583292 | NC_021165.1    | Ca_kabuli_chr06 | 19583292                | CC                              | TT                | 1946444991               |



| SNPs IDs              | Chromosome IDs | Chromosomes     | Physical positions (bp) | CDC Frontier (Reference genome) | (Pusa 256 & HPNB) | NCBI SNPdb Accession IDs |
|-----------------------|----------------|-----------------|-------------------------|---------------------------------|-------------------|--------------------------|
| SNP_P3_74831_19640557 | NC_021165.1    | Ca_kabuli_chr06 | 19640557                | TT                              | CC                | 1946444993               |
| SNP_P3_74832_19654510 | NC_021165.1    | Ca_kabuli_chr06 | 19654510                | AA                              | GG                | 1946444994               |
| SNP_P3_74833_19656924 | NC_021165.1    | Ca_kabuli_chr06 | 19656924                | GG                              | AA                | 1946444995               |
| SNP_P3_74834_19670306 | NC_021165.1    | Ca_kabuli_chr06 | 19670306                | GG                              | AA                | 1946444997               |
| SNP_P3_74836_19726700 | NC_021165.1    | Ca_kabuli_chr06 | 19726700                | AA                              | TT                | 1946444998               |
| SNP_P3_74837_19739946 | NC_021165.1    | Ca_kabuli_chr06 | 19739946                | GG                              | AA                | 1946445000               |
| SNP_P3_74838_19751290 | NC_021165.1    | Ca_kabuli_chr06 | 19751290                | CC                              | TT                | 1946445001               |
| SNP_P3_74839_20493921 | NC_021165.1    | Ca_kabuli_chr06 | 20493921                | GG                              | AA                | 1946445002               |
| SNP_P3_74840_20494040 | NC_021165.1    | Ca_kabuli_chr06 | 20494040                | AA                              | GG                | 1946445004               |
| SNP_P3_74841_20494118 | NC_021165.1    | Ca_kabuli_chr06 | 20494118                | GG                              | TT                | 1946445005               |
| SNP_P3_74842_20494183 | NC_021165.1    | Ca_kabuli_chr06 | 20494183                | GG                              | AA                | 1946445007               |
| SNP_P3_74843_20494410 | NC_021165.1    | Ca_kabuli_chr06 | 20494410                | TT                              | CC                | 1946445008               |
| SNP_P3_74844_20494467 | NC_021165.1    | Ca_kabuli_chr06 | 20494467                | TT                              | CC                | 1946445010               |
| SNP_P3_74845_20505641 | NC_021165.1    | Ca_kabuli_chr06 | 20505641                | AA                              | TT                | 1946445011               |
| SNP_P3_74847_20523793 | NC_021165.1    | Ca_kabuli_chr06 | 20523793                | AA                              | GG                | 1946445012               |
| SNP_P3_74850_20551417 | NC_021165.1    | Ca_kabuli_chr06 | 20551417                | CC                              | TT                | 1946445014               |
| SNP_P3_74851_20582839 | NC_021165.1    | Ca_kabuli_chr06 | 20582839                | TT                              | AA                | 1946445015               |
| SNP_P3_74852_20603224 | NC_021165.1    | Ca_kabuli_chr06 | 20603224                | AA                              | GG                | 1946445017               |
| SNP_P3_74853_20623090 | NC_021165.1    | Ca_kabuli_chr06 | 20623090                | CC                              | TT                | 1946445018               |
| SNP_P3_74854_20623618 | NC_021165.1    | Ca_kabuli_chr06 | 20623618                | TT                              | CC                | 1946445019               |
| SNP_P3_74856_20626833 | NC_021165.1    | Ca_kabuli_chr06 | 20626833                | CC                              | TT                | 1946445021               |
| SNP_P3_74857_20649089 | NC_021165.1    | Ca_kabuli_chr06 | 20649089                | AA                              | TT                | 1946445023               |
| SNP_P3_74858_20654425 | NC_021165.1    | Ca_kabuli_chr06 | 20654425                | AA                              | CC                | 1946445024               |
| SNP_P3_74859_20671840 | NC_021165.1    | Ca_kabuli_chr06 | 20671840                | CC                              | TT                | 1946445026               |
| SNP_P3_74860_20675421 | NC_021165.1    | Ca_kabuli_chr06 | 20675421                | CC                              | TT                | 1946445027               |
| SNP_P3_74861_20675423 | NC_021165.1    | Ca_kabuli_chr06 | 20675423                | CC                              | AA                | 1946445029               |
| SNP_P3_74864_20700311 | NC_021165.1    | Ca_kabuli_chr06 | 20700311                | CC                              | AA                | 1946445030               |
| SNP_P3_74865_20705477 | NC_021165.1    | Ca_kabuli_chr06 | 20705477                | CC                              | TT                | 1946445031               |
| SNP_P3_74866_20709536 | NC_021165.1    | Ca_kabuli_chr06 | 20709536                | GG                              | CC                | 1946445033               |
| SNP_P3_74867_20711633 | NC_021165.1    | Ca_kabuli_chr06 | 20711633                | TT                              | AA                | 1946445034               |
| SNP_P3_74868_20711635 | NC_021165.1    | Ca_kabuli_chr06 | 20711635                | TT                              | AA                | 1946445036               |
| SNP_P3_74869_20716105 | NC_021165.1    | Ca_kabuli_chr06 | 20716105                | CC                              | TT                | 1946445037               |
| SNP_P3_74870_20716149 | NC_021165.1    | Ca_kabuli_chr06 | 20716149                | CC                              | TT                | 1946445038               |
| SNP_P3_74871_20716323 | NC_021165.1    | Ca_kabuli_chr06 | 20716323                | AA                              | GG                | 1946445040               |
| SNP_P3_74872_20745747 | NC_021165.1    | Ca_kabuli_chr06 | 20745747                | AA                              | GG                | 1946445041               |
| SNP_P3_74873_20779304 | NC_021165.1    | Ca_kabuli_chr06 | 20779304                | AA                              | GG                | 1946445043               |
| SNP_P3_74874_20799517 | NC_021165.1    | Ca_kabuli_chr06 | 20799517                | AA                              | CC                | 1946445045               |
| SNP_P3_74876_20829735 | NC_021165.1    | Ca_kabuli_chr06 | 20829735                | CC                              | AA                | 1946445047               |
| SNP_P3_74877_20829736 | NC_021165.1    | Ca_kabuli_chr06 | 20829736                | AA                              | GG                | 1946445048               |
| SNP_P3_74878_20837667 | NC_021165.1    | Ca_kabuli_chr06 | 20837667                | CC                              | AA                | 1946445049               |
| SNP_P3_74879_20840473 | NC_021165.1    | Ca_kabuli_chr06 | 20840473                | AA                              | CC                | 1946445051               |
| SNP_P3_74880_20842487 | NC_021165.1    | Ca_kabuli_chr06 | 20842487                | TT                              | CC                | 1946445052               |

| SNPs IDs              | Chromosome IDs | Chromosomes     | Physical positions (bp) | CDC Frontier (Reference genome) | (Pusa 256 & HPNB) | NCBI SNPdb Accession IDs |
|-----------------------|----------------|-----------------|-------------------------|---------------------------------|-------------------|--------------------------|
| SNP_P3_74881_20866647 | NC_021165.1    | Ca_kabuli_chr06 | 20866647                | TT                              | CC                | 1946445054               |
| SNP_P3_74882_20866847 | NC_021165.1    | Ca_kabuli_chr06 | 20866847                | AA                              | GG                | 1946445055               |
| SNP_P3_74883_20867075 | NC_021165.1    | Ca_kabuli_chr06 | 20867075                | GG                              | AA                | 1946445057               |
| SNP_P3_74884_20867251 | NC_021165.1    | Ca_kabuli_chr06 | 20867251                | CC                              | GG                | 1946445058               |
| SNP_P3_74885_20867836 | NC_021165.1    | Ca_kabuli_chr06 | 20867836                | CC                              | AA                | 1946445059               |
| SNP_P3_74886_20882764 | NC_021165.1    | Ca_kabuli_chr06 | 20882764                | GG                              | AA                | 1946445061               |
| SNP_P3_74888_20915126 | NC_021165.1    | Ca_kabuli_chr06 | 20915126                | AA                              | GG                | 1946445062               |
| SNP_P3_74889_20922828 | NC_021165.1    | Ca_kabuli_chr06 | 20922828                | TT                              | GG                | 1946445064               |
| SNP_P3_74890_20922829 | NC_021165.1    | Ca_kabuli_chr06 | 20922829                | TT                              | AA                | 1946445066               |
| SNP_P3_74892_20963234 | NC_021165.1    | Ca_kabuli_chr06 | 20963234                | TT                              | CC                | 1946445067               |
| SNP_P3_74893_20963237 | NC_021165.1    | Ca_kabuli_chr06 | 20963237                | AA                              | GG                | 1946445068               |
| SNP_P3_74894_20984311 | NC_021165.1    | Ca_kabuli_chr06 | 20984311                | CC                              | TT                | 1946445070               |
| SNP_P3_74895_20990611 | NC_021165.1    | Ca_kabuli_chr06 | 20990611                | GG                              | TT                | 1946445071               |
| SNP_P3_74896_20992916 | NC_021165.1    | Ca_kabuli_chr06 | 20992916                | TT                              | AA                | 1946445073               |
| SNP_P3_74897_20993269 | NC_021165.1    | Ca_kabuli_chr06 | 20993269                | CC                              | AA                | 1946445074               |
| SNP_P3_74898_20993281 | NC_021165.1    | Ca_kabuli_chr06 | 20993281                | CC                              | GG                | 1946445075               |
| SNP_P3_74899_21008438 | NC_021165.1    | Ca_kabuli_chr06 | 21008438                | TT                              | CC                | 1946445077               |
| SNP_P3_74900_21008440 | NC_021165.1    | Ca_kabuli_chr06 | 21008440                | AA                              | TT                | 1946445078               |
| SNP_P3_74901_21012006 | NC_021165.1    | Ca_kabuli_chr06 | 21012006                | CC                              | TT                | 1946445080               |
| SNP_P3_74902_21021037 | NC_021165.1    | Ca_kabuli_chr06 | 21021037                | AA                              | TT                | 1946445081               |
| SNP_P3_74904_21021624 | NC_021165.1    | Ca_kabuli_chr06 | 21021624                | GG                              | AA                | 1946445083               |
| SNP_P3_74905_21021700 | NC_021165.1    | Ca_kabuli_chr06 | 21021700                | AA                              | TT                | 1946445084               |
| SNP_P3_74906_21021717 | NC_021165.1    | Ca_kabuli_chr06 | 21021717                | AA                              | GG                | 1946445086               |
| SNP_P3_74907_21022036 | NC_021165.1    | Ca_kabuli_chr06 | 21022036                | TT                              | CC                | 1946445087               |
| SNP_P3_74908_21023741 | NC_021165.1    | Ca_kabuli_chr06 | 21023741                | CC                              | TT                | 1946445089               |
| SNP_P3_74911_21065335 | NC_021165.1    | Ca_kabuli_chr06 | 21065335                | GG                              | TT                | 1946445090               |
| SNP_P3_74912_21086933 | NC_021165.1    | Ca_kabuli_chr06 | 21086933                | AA                              | GG                | 1946445092               |
| SNP_P3_74913_21086936 | NC_021165.1    | Ca_kabuli_chr06 | 21086936                | AA                              | GG                | 1946445093               |
| SNP_P3_74914_21086976 | NC_021165.1    | Ca_kabuli_chr06 | 21086976                | TT                              | CC                | 1946445094               |
| SNP_P3_74917_21134225 | NC_021165.1    | Ca_kabuli_chr06 | 21134225                | TT                              | CC                | 1946445096               |
| SNP_P3_74918_21134231 | NC_021165.1    | Ca_kabuli_chr06 | 21134231                | AA                              | CC                | 1946445097               |
| SNP_P3_74919_21134278 | NC_021165.1    | Ca_kabuli_chr06 | 21134278                | TT                              | CC                | 1946445099               |
| SNP_P3_74920_21139038 | NC_021165.1    | Ca_kabuli_chr06 | 21139038                | CC                              | GG                | 1946445100               |
| SNP_P3_74922_21141069 | NC_021165.1    | Ca_kabuli_chr06 | 21141069                | AA                              | TT                | 1946445102               |
| SNP_P3_74923_21141490 | NC_021165.1    | Ca_kabuli_chr06 | 21141490                | CC                              | TT                | 1946445103               |
| SNP_P3_74924_21141520 | NC_021165.1    | Ca_kabuli_chr06 | 21141520                | CC                              | GG                | 1946445104               |
| SNP_P3_74925_21141532 | NC_021165.1    | Ca_kabuli_chr06 | 21141532                | CC                              | TT                | 1946445106               |
| SNP_P3_74927_21141749 | NC_021165.1    | Ca_kabuli_chr06 | 21141749                | CC                              | TT                | 1946445108               |
| SNP_P3_74928_21141919 | NC_021165.1    | Ca_kabuli_chr06 | 21141919                | CC                              | TT                | 1946445109               |
| SNP_P3_74929_21146671 | NC_021165.1    | Ca_kabuli_chr06 | 21146671                | GG                              | AA                | 1946445111               |
| SNP_P3_74931_21146755 | NC_021165.1    | Ca_kabuli_chr06 | 21146755                | AA                              | GG                | 1946445112               |
| SNP_P3_74932_21146764 | NC_021165.1    | Ca_kabuli_chr06 | 21146764                | CC                              | GG                | 1946445113               |

| SNPs IDs              | Chromosome IDs | Chromosomes     | Physical positions (bp) | CDC Frontier (Reference genome) | (Pusa 256 & HPNB) | NCBI SNPdb Accession IDs |
|-----------------------|----------------|-----------------|-------------------------|---------------------------------|-------------------|--------------------------|
| SNP_P3_74933_21147107 | NC_021165.1    | Ca_kabuli_chr06 | 21147107                | GG                              | AA                | 1946445115               |
| SNP_P3_74934_21147125 | NC_021165.1    | Ca_kabuli_chr06 | 21147125                | TT                              | CC                | 1946445116               |
| SNP_P3_74935_21147134 | NC_021165.1    | Ca_kabuli_chr06 | 21147134                | GG                              | AA                | 1946445118               |
| SNP_P3_74936_21147137 | NC_021165.1    | Ca_kabuli_chr06 | 21147137                | TT                              | GG                | 1946445119               |
| SNP_P3_74937_21147141 | NC_021165.1    | Ca_kabuli_chr06 | 21147141                | AA                              | GG                | 1946445121               |
| SNP_P3_74938_21147331 | NC_021165.1    | Ca_kabuli_chr06 | 21147331                | AA                              | GG                | 1946445122               |
| SNP_P3_74939_21147513 | NC_021165.1    | Ca_kabuli_chr06 | 21147513                | CC                              | TT                | 1946445124               |
| SNP_P3_74940_21148395 | NC_021165.1    | Ca_kabuli_chr06 | 21148395                | AA                              | GG                | 1946445125               |
| SNP_P3_74941_21148408 | NC_021165.1    | Ca_kabuli_chr06 | 21148408                | AA                              | TT                | 1946445127               |
| SNP_P3_74942_21151300 | NC_021165.1    | Ca_kabuli_chr06 | 21151300                | AA                              | GG                | 1946445128               |
| SNP_P3_74944_21153912 | NC_021165.1    | Ca_kabuli_chr06 | 21153912                | GG                              | AA                | 1946445130               |
| SNP_P3_74945_21154155 | NC_021165.1    | Ca_kabuli_chr06 | 21154155                | GG                              | AA                | 1946445131               |
| SNP_P3_74946_21154161 | NC_021165.1    | Ca_kabuli_chr06 | 21154161                | CC                              | TT                | 1946445133               |
| SNP_P3_74947_21154584 | NC_021165.1    | Ca_kabuli_chr06 | 21154584                | TT                              | CC                | 1946445134               |
| SNP_P3_74948_21154748 | NC_021165.1    | Ca_kabuli_chr06 | 21154748                | TT                              | CC                | 1946445136               |
| SNP_P3_74949_21154777 | NC_021165.1    | Ca_kabuli_chr06 | 21154777                | AA                              | GG                | 1946445137               |
| SNP_P3_74950_21154790 | NC_021165.1    | Ca_kabuli_chr06 | 21154790                | CC                              | TT                | 1946445139               |
| SNP_P3_74951_21155164 | NC_021165.1    | Ca_kabuli_chr06 | 21155164                | TT                              | CC                | 1946445140               |
| SNP_P3_74952_21155964 | NC_021165.1    | Ca_kabuli_chr06 | 21155964                | GG                              | TT                | 1946445141               |
| SNP_P3_74953_21182548 | NC_021165.1    | Ca_kabuli_chr06 | 21182548                | TT                              | GG                | 1946445143               |
| SNP_P3_74954_21188998 | NC_021165.1    | Ca_kabuli_chr06 | 21188998                | AA                              | GG                | 1946445144               |
| SNP_P3_74958_21241305 | NC_021165.1    | Ca_kabuli_chr06 | 21241305                | CC                              | TT                | 1946445146               |
| SNP_P3_74959_21259637 | NC_021165.1    | Ca_kabuli_chr06 | 21259637                | AA                              | TT                | 1946445147               |
| SNP_P3_74960_21259891 | NC_021165.1    | Ca_kabuli_chr06 | 21259891                | GG                              | AA                | 1946445149               |
| SNP_P3_74961_21259962 | NC_021165.1    | Ca_kabuli_chr06 | 21259962                | TT                              | AA                | 1946445151               |
| SNP_P3_74962_21260174 | NC_021165.1    | Ca_kabuli_chr06 | 21260174                | AA                              | GG                | 1946445152               |
| SNP_P3_74963_21260555 | NC_021165.1    | Ca_kabuli_chr06 | 21260555                | AA                              | TT                | 1946445153               |
| SNP_P3_74964_21260628 | NC_021165.1    | Ca_kabuli_chr06 | 21260628                | CC                              | TT                | 1946445155               |
| SNP_P3_74965_21261810 | NC_021165.1    | Ca_kabuli_chr06 | 21261810                | TT                              | GG                | 1946445156               |
| SNP_P3_74966_21276430 | NC_021165.1    | Ca_kabuli_chr06 | 21276430                | GG                              | CC                | 1946445158               |
| SNP_P3_74967_21310284 | NC_021165.1    | Ca_kabuli_chr06 | 21310284                | GG                              | AA                | 1946445159               |
| SNP_P3_74968_21318522 | NC_021165.1    | Ca_kabuli_chr06 | 21318522                | CC                              | TT                | 1946445161               |
| SNP_P3_74969_21353727 | NC_021165.1    | Ca_kabuli_chr06 | 21353727                | TT                              | CC                | 1946445162               |
| SNP_P3_74970_21353758 | NC_021165.1    | Ca_kabuli_chr06 | 21353758                | AA                              | GG                | 1946445163               |
| SNP_P3_74971_21353806 | NC_021165.1    | Ca_kabuli_chr06 | 21353806                | GG                              | TT                | 1946445165               |
| SNP_P3_74972_21353998 | NC_021165.1    | Ca_kabuli_chr06 | 21353998                | CC                              | TT                | 1946445166               |
| SNP_P3_74973_21355932 | NC_021165.1    | Ca_kabuli_chr06 | 21355932                | GG                              | AA                | 1946445168               |
| SNP_P3_74974_21376967 | NC_021165.1    | Ca_kabuli_chr06 | 21376967                | AA                              | CC                | 1946445169               |
| SNP_P3_74975_21384371 | NC_021165.1    | Ca_kabuli_chr06 | 21384371                | GG                              | AA                | 1946445171               |
| SNP_P3_74976_21393207 | NC_021165.1    | Ca_kabuli_chr06 | 21393207                | AA                              | GG                | 1946445172               |
| SNP_P3_74977_21393405 | NC_021165.1    | Ca_kabuli_chr06 | 21393405                | AA                              | GG                | 1946445174               |
| SNP_P3_74978_21397236 | NC_021165.1    | Ca_kabuli_chr06 | 21397236                | GG                              | AA                | 1946445175               |

| SNPs IDs              | Chromosome IDs | Chromosomes     | Physical positions (bp) | CDC Frontier (Reference genome) | (Pusa 256 & HPNB) | NCBI SNPdb Accession IDs |
|-----------------------|----------------|-----------------|-------------------------|---------------------------------|-------------------|--------------------------|
| SNP_P3_74979_21397237 | NC_021165.1    | Ca_kabuli_chr06 | 21397237                | TT                              | CC                | 1946445177               |
| SNP_P3_74980_21397357 | NC_021165.1    | Ca_kabuli_chr06 | 21397357                | AA                              | TT                | 1946445178               |
| SNP_P3_74981_21397524 | NC_021165.1    | Ca_kabuli_chr06 | 21397524                | TT                              | AA                | 1946445179               |
| SNP_P3_74982_21397589 | NC_021165.1    | Ca_kabuli_chr06 | 21397589                | AA                              | TT                | 1946445181               |
| SNP_P3_74983_21400676 | NC_021165.1    | Ca_kabuli_chr06 | 21400676                | GG                              | AA                | 1946445182               |
| SNP_P3_74984_21400764 | NC_021165.1    | Ca_kabuli_chr06 | 21400764                | GG                              | AA                | 1946445184               |
| SNP_P3_74985_21400766 | NC_021165.1    | Ca_kabuli_chr06 | 21400766                | AA                              | GG                | 1946445185               |
| SNP_P3_74986_21400914 | NC_021165.1    | Ca_kabuli_chr06 | 21400914                | CC                              | TT                | 1946445187               |
| SNP_P3_74987_21401149 | NC_021165.1    | Ca_kabuli_chr06 | 21401149                | TT                              | CC                | 1946445188               |
| SNP_P3_74988_21401225 | NC_021165.1    | Ca_kabuli_chr06 | 21401225                | GG                              | AA                | 1946445189               |
| SNP_P3_74989_21401248 | NC_021165.1    | Ca_kabuli_chr06 | 21401248                | AA                              | GG                | 1946445191               |
| SNP_P3_74991_21401577 | NC_021165.1    | Ca_kabuli_chr06 | 21401577                | GG                              | AA                | 1946445192               |
| SNP_P3_74992_21401656 | NC_021165.1    | Ca_kabuli_chr06 | 21401656                | CC                              | TT                | 1946445194               |
| SNP_P3_74993_21401773 | NC_021165.1    | Ca_kabuli_chr06 | 21401773                | TT                              | AA                | 1946445196               |
| SNP_P3_74994_21401815 | NC_021165.1    | Ca_kabuli_chr06 | 21401815                | GG                              | AA                | 1946445197               |
| SNP_P3_74996_21461317 | NC_021165.1    | Ca_kabuli_chr06 | 21461317                | GG                              | TT                | 1946445198               |
| SNP_P3_74999_21476832 | NC_021165.1    | Ca_kabuli_chr06 | 21476832                | TT                              | GG                | 1946445200               |
| SNP_P3_75000_21481389 | NC_021165.1    | Ca_kabuli_chr06 | 21481389                | GG                              | TT                | 1946445201               |
| SNP_P3_75001_21485207 | NC_021165.1    | Ca_kabuli_chr06 | 21485207                | CC                              | TT                | 1946445203               |
| SNP_P3_75002_21485249 | NC_021165.1    | Ca_kabuli_chr06 | 21485249                | CC                              | AA                | 1946445204               |
| SNP_P3_75003_21485363 | NC_021165.1    | Ca_kabuli_chr06 | 21485363                | GG                              | AA                | 1946445206               |
| SNP_P3_75004_21485391 | NC_021165.1    | Ca_kabuli_chr06 | 21485391                | AA                              | TT                | 1946445208               |
| SNP_P3_75005_21485436 | NC_021165.1    | Ca_kabuli_chr06 | 21485436                | TT                              | CC                | 1946445209               |
| SNP_P3_75006_21485502 | NC_021165.1    | Ca_kabuli_chr06 | 21485502                | TT                              | CC                | 1946445210               |
| SNP_P3_75007_21485530 | NC_021165.1    | Ca_kabuli_chr06 | 21485530                | AA                              | TT                | 1946445212               |
| SNP_P3_75009_21485610 | NC_021165.1    | Ca_kabuli_chr06 | 21485610                | GG                              | AA                | 1946445213               |
| SNP_P3_75010_21485656 | NC_021165.1    | Ca_kabuli_chr06 | 21485656                | TT                              | GG                | 1946445215               |
| SNP_P3_75012_21485966 | NC_021165.1    | Ca_kabuli_chr06 | 21485966                | AA                              | CC                | 1946445216               |
| SNP_P3_75015_21522456 | NC_021165.1    | Ca_kabuli_chr06 | 21522456                | AA                              | GG                | 1946445218               |
| SNP_P3_75016_21522873 | NC_021165.1    | Ca_kabuli_chr06 | 21522873                | AA                              | GG                | 1946445219               |
| SNP_P3_75017_21522993 | NC_021165.1    | Ca_kabuli_chr06 | 21522993                | GG                              | AA                | 1946445221               |
| SNP_P3_75018_21523000 | NC_021165.1    | Ca_kabuli_chr06 | 21523000                | AA                              | TT                | 1946445222               |
| SNP_P3_75019_21523008 | NC_021165.1    | Ca_kabuli_chr06 | 21523008                | GG                              | AA                | 1946445224               |
| SNP_P3_75020_21523277 | NC_021165.1    | Ca_kabuli_chr06 | 21523277                | GG                              | AA                | 1946445225               |
| SNP_P3_75021_21523301 | NC_021165.1    | Ca_kabuli_chr06 | 21523301                | GG                              | AA                | 1946445227               |
| SNP_P3_75022_21523310 | NC_021165.1    | Ca_kabuli_chr06 | 21523310                | GG                              | AA                | 1946445228               |
| SNP_P3_75023_21523337 | NC_021165.1    | Ca_kabuli_chr06 | 21523337                | GG                              | AA                | 1946445229               |
| SNP_P3_75024_21523379 | NC_021165.1    | Ca_kabuli_chr06 | 21523379                | AA                              | TT                | 1946445231               |
| SNP_P3_75025_21523409 | NC_021165.1    | Ca_kabuli_chr06 | 21523409                | TT                              | CC                | 1946445232               |
| SNP_P3_75026_21523412 | NC_021165.1    | Ca_kabuli_chr06 | 21523412                | GG                              | AA                | 1946445234               |
| SNP_P3_75027_21523667 | NC_021165.1    | Ca_kabuli_chr06 | 21523667                | TT                              | AA                | 1946445235               |
| SNP_P3_75028_21523676 | NC_021165.1    | Ca_kabuli_chr06 | 21523676                | CC                              | AA                | 1946445237               |

| SNPs IDs              | Chromosome IDs | Chromosomes     | Physical positions (bp) | CDC Frontier (Reference genome) | (Pusa 256 & HPNB) | NCBI SNPdb Accession IDs |
|-----------------------|----------------|-----------------|-------------------------|---------------------------------|-------------------|--------------------------|
| SNP_P3_75029_21523742 | NC_021165.1    | Ca_kabuli_chr06 | 21523742                | AA                              | TT                | 1946445238               |
| SNP_P3_75030_21523772 | NC_021165.1    | Ca_kabuli_chr06 | 21523772                | TT                              | CC                | 1946445239               |
| SNP_P3_75031_21523798 | NC_021165.1    | Ca_kabuli_chr06 | 21523798                | AA                              | GG                | 1946445241               |
| SNP_P3_75033_21524024 | NC_021165.1    | Ca_kabuli_chr06 | 21524024                | AA                              | CC                | 1946445242               |
| SNP_P3_75034_21524058 | NC_021165.1    | Ca_kabuli_chr06 | 21524058                | AA                              | GG                | 1946445244               |
| SNP_P3_75035_21524070 | NC_021165.1    | Ca_kabuli_chr06 | 21524070                | GG                              | AA                | 1946445246               |
| SNP_P3_75036_21524108 | NC_021165.1    | Ca_kabuli_chr06 | 21524108                | TT                              | AA                | 1946445247               |
| SNP_P3_75037_21524134 | NC_021165.1    | Ca_kabuli_chr06 | 21524134                | CC                              | TT                | 1946445248               |
| SNP_P3_75038_21524138 | NC_021165.1    | Ca_kabuli_chr06 | 21524138                | CC                              | TT                | 1946445250               |
| SNP_P3_75039_21524183 | NC_021165.1    | Ca_kabuli_chr06 | 21524183                | CC                              | TT                | 1946445251               |
| SNP_P3_75040_21524184 | NC_021165.1    | Ca_kabuli_chr06 | 21524184                | AA                              | GG                | 1946445253               |
| SNP_P3_75041_21524187 | NC_021165.1    | Ca_kabuli_chr06 | 21524187                | GG                              | AA                | 1946445254               |
| SNP_P3_75042_21530730 | NC_021165.1    | Ca_kabuli_chr06 | 21530730                | AA                              | CC                | 1946445255               |
| SNP_P3_75043_21530732 | NC_021165.1    | Ca_kabuli_chr06 | 21530732                | CC                              | TT                | 1946445257               |
| SNP_P3_75044_21530779 | NC_021165.1    | Ca_kabuli_chr06 | 21530779                | GG                              | AA                | 1946445258               |
| SNP_P3_75045_21530786 | NC_021165.1    | Ca_kabuli_chr06 | 21530786                | CC                              | TT                | 1946445260               |
| SNP_P3_75046_21530926 | NC_021165.1    | Ca_kabuli_chr06 | 21530926                | TT                              | CC                | 1946445261               |
| SNP_P3_75047_21620815 | NC_021165.1    | Ca_kabuli_chr06 | 21620815                | GG                              | TT                | 1946445263               |
| SNP_P3_75048_21620816 | NC_021165.1    | Ca_kabuli_chr06 | 21620816                | CC                              | GG                | 1946445264               |
| SNP_P3_75049_21634205 | NC_021165.1    | Ca_kabuli_chr06 | 21634205                | AA                              | GG                | 1946445265               |
| SNP_P3_75050_21666532 | NC_021165.1    | Ca_kabuli_chr06 | 21666532                | GG                              | TT                | 1946445267               |
| SNP_P3_75052_21697946 | NC_021165.1    | Ca_kabuli_chr06 | 21697946                | TT                              | CC                | 1946445269               |
| SNP_P3_75053_21710033 | NC_021165.1    | Ca_kabuli_chr06 | 21710033                | CC                              | GG                | 1946445270               |
| SNP_P3_75054_21710134 | NC_021165.1    | Ca_kabuli_chr06 | 21710134                | TT                              | CC                | 1946445272               |
| SNP_P3_75056_21733974 | NC_021165.1    | Ca_kabuli_chr06 | 21733974                | TT                              | CC                | 1946445273               |
| SNP_P3_75059_21773418 | NC_021165.1    | Ca_kabuli_chr06 | 21773418                | CC                              | AA                | 1946445274               |
| SNP_P3_75060_21777722 | NC_021165.1    | Ca_kabuli_chr06 | 21777722                | AA                              | TT                | 1946445276               |
| SNP_P3_75062_21779163 | NC_021165.1    | Ca_kabuli_chr06 | 21779163                | TT                              | CC                | 1946445277               |
| SNP_P3_75063_21779191 | NC_021165.1    | Ca_kabuli_chr06 | 21779191                | AA                              | GG                | 1946445279               |
| SNP_P3_75064_21779194 | NC_021165.1    | Ca_kabuli_chr06 | 21779194                | TT                              | AA                | 1946445280               |
| SNP_P3_75066_21782223 | NC_021165.1    | Ca_kabuli_chr06 | 21782223                | TT                              | CC                | 1946445282               |
| SNP_P3_75068_21782797 | NC_021165.1    | Ca_kabuli_chr06 | 21782797                | AA                              | GG                | 1946445283               |
| SNP_P3_75069_21782986 | NC_021165.1    | Ca_kabuli_chr06 | 21782986                | CC                              | TT                | 1946445284               |
| SNP_P3_75070_21782992 | NC_021165.1    | Ca_kabuli_chr06 | 21782992                | GG                              | CC                | 1946445286               |
| SNP_P3_75071_21787772 | NC_021165.1    | Ca_kabuli_chr06 | 21787772                | CC                              | TT                | 1946445287               |
| SNP_P3_75072_21787809 | NC_021165.1    | Ca_kabuli_chr06 | 21787809                | TT                              | CC                | 1946445289               |
| SNP_P3_75073_21789853 | NC_021165.1    | Ca_kabuli_chr06 | 21789853                | CC                              | TT                | 1946445291               |
| SNP_P3_75074_21789888 | NC_021165.1    | Ca_kabuli_chr06 | 21789888                | CC                              | TT                | 1946445292               |
| SNP_P3_75076_21790439 | NC_021165.1    | Ca_kabuli_chr06 | 21790439                | AA                              | GG                | 1946445294               |
| SNP_P3_75077_21790444 | NC_021165.1    | Ca_kabuli_chr06 | 21790444                | TT                              | CC                | 1946445295               |
| SNP_P3_75078_21792346 | NC_021165.1    | Ca_kabuli_chr06 | 21792346                | AA                              | GG                | 1946445297               |
| SNP_P3_75079_21792815 | NC_021165.1    | Ca_kabuli_chr06 | 21792815                | AA                              | GG                | 1946445298               |

| SNPs IDs              | Chromosome IDs | Chromosomes     | Physical positions (bp) | CDC Frontier (Reference genome) | (Pusa 256 & HPNB) | NCBI SNPdb Accession IDs |
|-----------------------|----------------|-----------------|-------------------------|---------------------------------|-------------------|--------------------------|
| SNP_P3_75080_21792825 | NC_021165.1    | Ca_kabuli_chr06 | 21792825                | GG                              | AA                | 1946445299               |
| SNP_P3_75081_21792938 | NC_021165.1    | Ca_kabuli_chr06 | 21792938                | CC                              | GG                | 1946445301               |
| SNP_P3_75082_21792956 | NC_021165.1    | Ca_kabuli_chr06 | 21792956                | CC                              | GG                | 1946445302               |
| SNP_P3_75083_21793888 | NC_021165.1    | Ca_kabuli_chr06 | 21793888                | TT                              | AA                | 1946445304               |
| SNP_P3_75084_21793901 | NC_021165.1    | Ca_kabuli_chr06 | 21793901                | TT                              | AA                | 1946445305               |
| SNP_P3_75085_21793920 | NC_021165.1    | Ca_kabuli_chr06 | 21793920                | GG                              | AA                | 1946445307               |
| SNP_P3_75087_21794577 | NC_021165.1    | Ca_kabuli_chr06 | 21794577                | GG                              | AA                | 1946445308               |
| SNP_P3_75089_21794689 | NC_021165.1    | Ca_kabuli_chr06 | 21794689                | TT                              | AA                | 1946445310               |
| SNP_P3_75091_21795210 | NC_021165.1    | Ca_kabuli_chr06 | 21795210                | AA                              | CC                | 1946445311               |
| SNP_P3_75092_21797062 | NC_021165.1    | Ca_kabuli_chr06 | 21797062                | TT                              | CC                | 1946445313               |
| SNP_P3_75093_21797107 | NC_021165.1    | Ca_kabuli_chr06 | 21797107                | CC                              | TT                | 1946445314               |
| SNP_P3_75096_21802038 | NC_021165.1    | Ca_kabuli_chr06 | 21802038                | CC                              | TT                | 1946445315               |
| SNP_P3_75097_21802064 | NC_021165.1    | Ca_kabuli_chr06 | 21802064                | GG                              | AA                | 1946445317               |
| SNP_P3_75098_21803776 | NC_021165.1    | Ca_kabuli_chr06 | 21803776                | AA                              | CC                | 1946445318               |
| SNP_P3_75099_21803812 | NC_021165.1    | Ca_kabuli_chr06 | 21803812                | CC                              | TT                | 1946445320               |
| SNP_P3_75101_21805240 | NC_021165.1    | Ca_kabuli_chr06 | 21805240                | TT                              | CC                | 1946445321               |
| SNP_P3_75102_21805250 | NC_021165.1    | Ca_kabuli_chr06 | 21805250                | AA                              | TT                | 1946445322               |
| SNP_P3_75103_21805483 | NC_021165.1    | Ca_kabuli_chr06 | 21805483                | CC                              | TT                | 1946445324               |
| SNP_P3_75104_21805512 | NC_021165.1    | Ca_kabuli_chr06 | 21805512                | CC                              | TT                | 1946445325               |
| SNP_P3_75105_21806229 | NC_021165.1    | Ca_kabuli_chr06 | 21806229                | CC                              | GG                | 1946445327               |
| SNP_P3_75106_21806234 | NC_021165.1    | Ca_kabuli_chr06 | 21806234                | GG                              | AA                | 1946445328               |
| SNP_P3_75107_21806247 | NC_021165.1    | Ca_kabuli_chr06 | 21806247                | GG                              | AA                | 1946445330               |
| SNP_P3_75108_21806255 | NC_021165.1    | Ca_kabuli_chr06 | 21806255                | GG                              | AA                | 1946445331               |
| SNP_P3_75110_21813652 | NC_021165.1    | Ca_kabuli_chr06 | 21813652                | AA                              | GG                | 1946445333               |
| SNP_P3_75111_21816467 | NC_021165.1    | Ca_kabuli_chr06 | 21816467                | AA                              | TT                | 1946445334               |
| SNP_P3_75112_21822449 | NC_021165.1    | Ca_kabuli_chr06 | 21822449                | TT                              | CC                | 1946445336               |
| SNP_P3_75113_21822458 | NC_021165.1    | Ca_kabuli_chr06 | 21822458                | TT                              | GG                | 1946445337               |
| SNP_P3_75114_21822597 | NC_021165.1    | Ca_kabuli_chr06 | 21822597                | AA                              | GG                | 1946445339               |
| SNP_P3_75115_21822824 | NC_021165.1    | Ca_kabuli_chr06 | 21822824                | GG                              | TT                | 1946445340               |
| SNP_P3_75116_21822978 | NC_021165.1    | Ca_kabuli_chr06 | 21822978                | AA                              | GG                | 1946445341               |
| SNP_P3_75117_21822991 | NC_021165.1    | Ca_kabuli_chr06 | 21822991                | TT                              | CC                | 1946445343               |
| SNP_P3_75118_21823034 | NC_021165.1    | Ca_kabuli_chr06 | 21823034                | GG                              | TT                | 1946445344               |
| SNP_P3_75119_21831596 | NC_021165.1    | Ca_kabuli_chr06 | 21831596                | TT                              | CC                | 1946445346               |
| SNP_P3_75120_21849679 | NC_021165.1    | Ca_kabuli_chr06 | 21849679                | GG                              | AA                | 1946445347               |
| SNP_P3_75121_21856547 | NC_021165.1    | Ca_kabuli_chr06 | 21856547                | AA                              | GG                | 1946445349               |
| SNP_P3_75123_21881581 | NC_021165.1    | Ca_kabuli_chr06 | 21881581                | GG                              | AA                | 1946445350               |
| SNP_P3_75124_21889737 | NC_021165.1    | Ca_kabuli_chr06 | 21889737                | CC                              | TT                | 1946445352               |
| SNP_P3_75126_21914741 | NC_021165.1    | Ca_kabuli_chr06 | 21914741                | AA                              | GG                | 1946445354               |
| SNP_P3_75128_21942175 | NC_021165.1    | Ca_kabuli_chr06 | 21942175                | GG                              | TT                | 1946445355               |
| SNP_P3_75129_21942206 | NC_021165.1    | Ca_kabuli_chr06 | 21942206                | GG                              | AA                | 1946445357               |
| SNP_P3_75130_21946824 | NC_021165.1    | Ca_kabuli_chr06 | 21946824                | AA                              | GG                | 1946445358               |
| SNP_P3_75131_21952603 | NC_021165.1    | Ca_kabuli_chr06 | 21952603                | TT                              | GG                | 1946445359               |

| SNPs IDs              | Chromosome IDs | Chromosomes     | Physical positions (bp) | CDC Frontier (Reference genome) | (Pusa 256 & HPNB) | NCBI SNPdb Accession IDs |
|-----------------------|----------------|-----------------|-------------------------|---------------------------------|-------------------|--------------------------|
| SNP_P3_75132_21952606 | NC_021165.1    | Ca_kabuli_chr06 | 21952606                | TT                              | GG                | 1946445361               |
| SNP_P3_75133_21952623 | NC_021165.1    | Ca_kabuli_chr06 | 21952623                | TT                              | CC                | 1946445362               |
| SNP_P3_75134_21994167 | NC_021165.1    | Ca_kabuli_chr06 | 21994167                | AA                              | GG                | 1946445364               |
| SNP_P3_75135_21994168 | NC_021165.1    | Ca_kabuli_chr06 | 21994168                | AA                              | GG                | 1946445365               |
| SNP_P3_75136_21994469 | NC_021165.1    | Ca_kabuli_chr06 | 21994469                | GG                              | AA                | 1946445367               |
| SNP_P3_75137_21996284 | NC_021165.1    | Ca_kabuli_chr06 | 21996284                | TT                              | CC                | 1946445368               |
| SNP_P3_75138_22099385 | NC_021165.1    | Ca_kabuli_chr06 | 22099385                | TT                              | CC                | 1946445370               |
| SNP_P3_75140_22099675 | NC_021165.1    | Ca_kabuli_chr06 | 22099675                | CC                              | TT                | 1946445371               |
| SNP_P3_75141_22099758 | NC_021165.1    | Ca_kabuli_chr06 | 22099758                | TT                              | CC                | 1946445372               |
| SNP_P3_75145_22143552 | NC_021165.1    | Ca_kabuli_chr06 | 22143552                | TT                              | CC                | 1946445374               |
| SNP_P3_75147_22152243 | NC_021165.1    | Ca_kabuli_chr06 | 22152243                | TT                              | CC                | 1946445376               |
| SNP_P3_75148_22168353 | NC_021165.1    | Ca_kabuli_chr06 | 22168353                | AA                              | TT                | 1946445377               |
| SNP_P3_75149_22197194 | NC_021165.1    | Ca_kabuli_chr06 | 22197194                | CC                              | AA                | 1946445379               |
| SNP_P3_75150_22231737 | NC_021165.1    | Ca_kabuli_chr06 | 22231737                | AA                              | TT                | 1946445380               |
| SNP_P3_75151_22248763 | NC_021165.1    | Ca_kabuli_chr06 | 22248763                | TT                              | CC                | 1946445382               |
| SNP_P3_75152_22272528 | NC_021165.1    | Ca_kabuli_chr06 | 22272528                | AA                              | TT                | 1946445383               |
| SNP_P3_75153_22282773 | NC_021165.1    | Ca_kabuli_chr06 | 22282773                | AA                              | TT                | 1946445384               |
| SNP_P3_75154_22285519 | NC_021165.1    | Ca_kabuli_chr06 | 22285519                | AA                              | TT                | 1946445386               |
| SNP_P3_75155_22285520 | NC_021165.1    | Ca_kabuli_chr06 | 22285520                | AA                              | TT                | 1946445387               |
| SNP_P3_75156_22285521 | NC_021165.1    | Ca_kabuli_chr06 | 22285521                | AA                              | TT                | 1946445389               |
| SNP_P3_75157_22285522 | NC_021165.1    | Ca_kabuli_chr06 | 22285522                | AA                              | TT                | 1946445390               |
| SNP_P3_75158_22313496 | NC_021165.1    | Ca_kabuli_chr06 | 22313496                | TT                              | AA                | 1946445392               |
| SNP_P3_75159_22313524 | NC_021165.1    | Ca_kabuli_chr06 | 22313524                | TT                              | AA                | 1946445393               |
| SNP_P3_75160_22320396 | NC_021165.1    | Ca_kabuli_chr06 | 22320396                | TT                              | CC                | 1946445395               |
| SNP_P3_75161_22320406 | NC_021165.1    | Ca_kabuli_chr06 | 22320406                | TT                              | GG                | 1946445397               |
| SNP_P3_75162_22320417 | NC_021165.1    | Ca_kabuli_chr06 | 22320417                | CC                              | TT                | 1946445398               |
| SNP_P3_75163_22320565 | NC_021165.1    | Ca_kabuli_chr06 | 22320565                | AA                              | TT                | 1946445399               |
| SNP_P3_75164_22322564 | NC_021165.1    | Ca_kabuli_chr06 | 22322564                | TT                              | AA                | 1946445401               |
| SNP_P3_75165_22322604 | NC_021165.1    | Ca_kabuli_chr06 | 22322604                | GG                              | TT                | 1946445402               |
| SNP_P3_75166_22322954 | NC_021165.1    | Ca_kabuli_chr06 | 22322954                | TT                              | CC                | 1946445404               |
| SNP_P3_75167_22322993 | NC_021165.1    | Ca_kabuli_chr06 | 22322993                | GG                              | AA                | 1946445405               |
| SNP_P3_75168_22323045 | NC_021165.1    | Ca_kabuli_chr06 | 22323045                | TT                              | AA                | 1946445406               |
| SNP_P3_75169_22326994 | NC_021165.1    | Ca_kabuli_chr06 | 22326994                | TT                              | AA                | 1946445408               |
| SNP_P3_75170_22337728 | NC_021165.1    | Ca_kabuli_chr06 | 22337728                | AA                              | CC                | 1946445409               |
| SNP_P3_75171_22391741 | NC_021165.1    | Ca_kabuli_chr06 | 22391741                | TT                              | AA                | 1946445411               |
| SNP_P3_75172_22397104 | NC_021165.1    | Ca_kabuli_chr06 | 22397104                | AA                              | TT                | 1946445412               |
| SNP_P3_75173_22397110 | NC_021165.1    | Ca_kabuli_chr06 | 22397110                | CC                              | TT                | 1946445414               |
| SNP_P3_75174_22397114 | NC_021165.1    | Ca_kabuli_chr06 | 22397114                | AA                              | TT                | 1946445415               |
| SNP_P3_75175_22419025 | NC_021165.1    | Ca_kabuli_chr06 | 22419025                | AA                              | TT                | 1946445417               |
| SNP_P3_75176_22419073 | NC_021165.1    | Ca_kabuli_chr06 | 22419073                | AA                              | GG                | 1946445418               |
| SNP_P3_75177_22419413 | NC_021165.1    | Ca_kabuli_chr06 | 22419413                | CC                              | TT                | 1946445420               |
| SNP_P3_75178_22419483 | NC_021165.1    | Ca_kabuli_chr06 | 22419483                | AA                              | GG                | 1946445421               |

| SNPs IDs              | Chromosome IDs | Chromosomes     | Physical positions (bp) | CDC Frontier (Reference genome) | (Pusa 256 & HPNB) | NCBI SNPdb Accession IDs |
|-----------------------|----------------|-----------------|-------------------------|---------------------------------|-------------------|--------------------------|
| SNP_P3_75180_22443618 | NC_021165.1    | Ca_kabuli_chr06 | 22443618                | TT                              | CC                | 1946445423               |
| SNP_P3_75181_22449001 | NC_021165.1    | Ca_kabuli_chr06 | 22449001                | GG                              | AA                | 1946445424               |
| SNP_P3_75182_22449003 | NC_021165.1    | Ca_kabuli_chr06 | 22449003                | AA                              | GG                | 1946445425               |
| SNP_P3_75183_22449004 | NC_021165.1    | Ca_kabuli_chr06 | 22449004                | GG                              | AA                | 1946445427               |
| SNP_P3_75184_22464326 | NC_021165.1    | Ca_kabuli_chr06 | 22464326                | CC                              | TT                | 1946445428               |
| SNP_P3_75185_22464676 | NC_021165.1    | Ca_kabuli_chr06 | 22464676                | CC                              | TT                | 1946445430               |
| SNP_P3_75186_22465088 | NC_021165.1    | Ca_kabuli_chr06 | 22465088                | GG                              | AA                | 1946445431               |
| SNP_P3_75187_22510109 | NC_021165.1    | Ca_kabuli_chr06 | 22510109                | TT                              | CC                | 1946445433               |
| SNP_P3_75189_22530505 | NC_021165.1    | Ca_kabuli_chr06 | 22530505                | TT                              | AA                | 1946445434               |
| SNP_P3_75190_22859127 | NC_021165.1    | Ca_kabuli_chr06 | 22859127                | CC                              | TT                | 1946445435               |
| SNP_P3_75191_22859442 | NC_021165.1    | Ca_kabuli_chr06 | 22859442                | CC                              | TT                | 1946445437               |
| SNP_P3_75192_22898696 | NC_021165.1    | Ca_kabuli_chr06 | 22898696                | CC                              | TT                | 1946445439               |
| SNP_P3_75193_22898980 | NC_021165.1    | Ca_kabuli_chr06 | 22898980                | AA                              | GG                | 1946445440               |
| SNP_P3_75194_22953487 | NC_021165.1    | Ca_kabuli_chr06 | 22953487                | CC                              | TT                | 1946445442               |
| SNP_P3_75195_22962674 | NC_021165.1    | Ca_kabuli_chr06 | 22962674                | AA                              | CC                | 1946445443               |
| SNP_P3_75197_22989968 | NC_021165.1    | Ca_kabuli_chr06 | 22989968                | CC                              | TT                | 1946445445               |
| SNP_P3_75198_22991869 | NC_021165.1    | Ca_kabuli_chr06 | 22991869                | AA                              | CC                | 1946445446               |
| SNP_P3_75199_23038994 | NC_021165.1    | Ca_kabuli_chr06 | 23038994                | TT                              | CC                | 1946445447               |
| SNP_P3_75200_23039459 | NC_021165.1    | Ca_kabuli_chr06 | 23039459                | CC                              | TT                | 1946445449               |
| SNP_P3_75201_23039850 | NC_021165.1    | Ca_kabuli_chr06 | 23039850                | AA                              | GG                | 1946445450               |
| SNP_P3_75202_23039901 | NC_021165.1    | Ca_kabuli_chr06 | 23039901                | TT                              | AA                | 1946445452               |
| SNP_P3_75203_23039925 | NC_021165.1    | Ca_kabuli_chr06 | 23039925                | AA                              | TT                | 1946445453               |
| SNP_P3_75204_23039955 | NC_021165.1    | Ca_kabuli_chr06 | 23039955                | AA                              | GG                | 1946445455               |
| SNP_P3_75205_23039956 | NC_021165.1    | Ca_kabuli_chr06 | 23039956                | GG                              | CC                | 1946445456               |
| SNP_P3_75206_23039961 | NC_021165.1    | Ca_kabuli_chr06 | 23039961                | CC                              | TT                | 1946445458               |
| SNP_P3_75207_23040091 | NC_021165.1    | Ca_kabuli_chr06 | 23040091                | TT                              | CC                | 1946445459               |
| SNP_P3_75208_23040157 | NC_021165.1    | Ca_kabuli_chr06 | 23040157                | AA                              | TT                | 1946445461               |
| SNP_P3_75209_23040522 | NC_021165.1    | Ca_kabuli_chr06 | 23040522                | TT                              | CC                | 1946445462               |
| SNP_P3_75210_23040528 | NC_021165.1    | Ca_kabuli_chr06 | 23040528                | AA                              | TT                | 1946445464               |
| SNP_P3_75211_23040553 | NC_021165.1    | Ca_kabuli_chr06 | 23040553                | TT                              | CC                | 1946445465               |
| SNP_P3_75212_23042723 | NC_021165.1    | Ca_kabuli_chr06 | 23042723                | TT                              | CC                | 1946445466               |
| SNP_P3_75213_23042738 | NC_021165.1    | Ca_kabuli_chr06 | 23042738                | GG                              | AA                | 1946445468               |
| SNP_P3_75214_23042745 | NC_021165.1    | Ca_kabuli_chr06 | 23042745                | AA                              | GG                | 1946445469               |
| SNP_P3_75216_23042861 | NC_021165.1    | Ca_kabuli_chr06 | 23042861                | AA                              | TT                | 1946445471               |
| SNP_P3_75217_23042929 | NC_021165.1    | Ca_kabuli_chr06 | 23042929                | AA                              | TT                | 1946445472               |
| SNP_P3_75218_23042940 | NC_021165.1    | Ca_kabuli_chr06 | 23042940                | CC                              | TT                | 1946445473               |
| SNP_P3_75219_23042946 | NC_021165.1    | Ca_kabuli_chr06 | 23042946                | GG                              | TT                | 1946445475               |
| SNP_P3_75221_23043052 | NC_021165.1    | Ca_kabuli_chr06 | 23043052                | AA                              | GG                | 1946445476               |
| SNP_P3_75222_23043057 | NC_021165.1    | Ca_kabuli_chr06 | 23043057                | TT                              | AA                | 1946445478               |
| SNP_P3_75223_23043419 | NC_021165.1    | Ca_kabuli_chr06 | 23043419                | CC                              | TT                | 1946445479               |
| SNP_P3_75224_23043424 | NC_021165.1    | Ca_kabuli_chr06 | 23043424                | CC                              | TT                | 1946445481               |
| SNP_P3_75226_23064173 | NC_021165.1    | Ca_kabuli_chr06 | 23064173                | TT                              | AA                | 1946445483               |



| SNPs IDs              | Chromosome IDs | Chromosomes     | Physical positions (bp) | CDC Frontier (Reference genome) | (Pusa 256 & HPNB) | NCBI SNPdb Accession IDs |
|-----------------------|----------------|-----------------|-------------------------|---------------------------------|-------------------|--------------------------|
| SNP_P3_75227_23064231 | NC_021165.1    | Ca_kabuli_chr06 | 23064231                | TT                              | CC                | 1946445484               |
| SNP_P3_75228_23064261 | NC_021165.1    | Ca_kabuli_chr06 | 23064261                | GG                              | AA                | 1946445486               |
| SNP_P3_75229_23064265 | NC_021165.1    | Ca_kabuli_chr06 | 23064265                | AA                              | CC                | 1946445487               |
| SNP_P3_75231_23064442 | NC_021165.1    | Ca_kabuli_chr06 | 23064442                | AA                              | GG                | 1946445488               |
| SNP_P3_75232_23064629 | NC_021165.1    | Ca_kabuli_chr06 | 23064629                | AA                              | GG                | 1946445490               |
| SNP_P3_75233_23064737 | NC_021165.1    | Ca_kabuli_chr06 | 23064737                | CC                              | TT                | 1946445491               |
| SNP_P3_75235_23064793 | NC_021165.1    | Ca_kabuli_chr06 | 23064793                | GG                              | AA                | 1946445493               |
| SNP_P3_75236_23064885 | NC_021165.1    | Ca_kabuli_chr06 | 23064885                | CC                              | TT                | 1946445494               |
| SNP_P3_75237_23065124 | NC_021165.1    | Ca_kabuli_chr06 | 23065124                | GG                              | CC                | 1946445496               |
| SNP_P3_75238_23065419 | NC_021165.1    | Ca_kabuli_chr06 | 23065419                | AA                              | GG                | 1946445497               |
| SNP_P3_75239_23065568 | NC_021165.1    | Ca_kabuli_chr06 | 23065568                | GG                              | TT                | 1946445499               |
| SNP_P3_75240_23065600 | NC_021165.1    | Ca_kabuli_chr06 | 23065600                | CC                              | TT                | 1946445500               |
| SNP_P3_75241_23070758 | NC_021165.1    | Ca_kabuli_chr06 | 23070758                | GG                              | CC                | 1946445501               |
| SNP_P3_75243_23071023 | NC_021165.1    | Ca_kabuli_chr06 | 23071023                | TT                              | AA                | 1946445503               |
| SNP_P3_75244_23071162 | NC_021165.1    | Ca_kabuli_chr06 | 23071162                | AA                              | GG                | 1946445505               |
| SNP_P3_75245_23071228 | NC_021165.1    | Ca_kabuli_chr06 | 23071228                | GG                              | AA                | 1946445506               |
| SNP_P3_75246_23071245 | NC_021165.1    | Ca_kabuli_chr06 | 23071245                | TT                              | AA                | 1946445507               |
| SNP_P3_75247_23071801 | NC_021165.1    | Ca_kabuli_chr06 | 23071801                | AA                              | TT                | 1946445509               |
| SNP_P3_75248_23071819 | NC_021165.1    | Ca_kabuli_chr06 | 23071819                | CC                              | AA                | 1946445510               |
| SNP_P3_75249_23071863 | NC_021165.1    | Ca_kabuli_chr06 | 23071863                | AA                              | GG                | 1946445512               |
| SNP_P3_75250_23072016 | NC_021165.1    | Ca_kabuli_chr06 | 23072016                | AA                              | GG                | 1946445513               |
| SNP_P3_75251_23072075 | NC_021165.1    | Ca_kabuli_chr06 | 23072075                | AA                              | GG                | 1946445514               |
| SNP_P3_75252_23072084 | NC_021165.1    | Ca_kabuli_chr06 | 23072084                | TT                              | CC                | 1946445516               |
| SNP_P3_75253_23072245 | NC_021165.1    | Ca_kabuli_chr06 | 23072245                | CC                              | TT                | 1946445517               |
| SNP_P3_75254_23076256 | NC_021165.1    | Ca_kabuli_chr06 | 23076256                | AA                              | GG                | 1946445519               |
| SNP_P3_75255_23076709 | NC_021165.1    | Ca_kabuli_chr06 | 23076709                | TT                              | GG                | 1946445520               |
| SNP_P3_75256_23076791 | NC_021165.1    | Ca_kabuli_chr06 | 23076791                | TT                              | CC                | 1946445522               |
| SNP_P3_75257_23076839 | NC_021165.1    | Ca_kabuli_chr06 | 23076839                | GG                              | AA                | 1946445525               |
| SNP_P3_75258_23076841 | NC_021165.1    | Ca_kabuli_chr06 | 23076841                | AA                              | GG                | 1946445526               |
| SNP_P3_75259_23076895 | NC_021165.1    | Ca_kabuli_chr06 | 23076895                | GG                              | AA                | 1946445528               |
| SNP_P3_75260_23076995 | NC_021165.1    | Ca_kabuli_chr06 | 23076995                | GG                              | AA                | 1946445529               |
| SNP_P3_75261_23077170 | NC_021165.1    | Ca_kabuli_chr06 | 23077170                | GG                              | AA                | 1946445530               |
| SNP_P3_75262_23077642 | NC_021165.1    | Ca_kabuli_chr06 | 23077642                | AA                              | GG                | 1946445532               |
| SNP_P3_75263_23077684 | NC_021165.1    | Ca_kabuli_chr06 | 23077684                | AA                              | GG                | 1946445533               |
| SNP_P3_75264_23077692 | NC_021165.1    | Ca_kabuli_chr06 | 23077692                | GG                              | TT                | 1946445535               |
| SNP_P3_75265_23077713 | NC_021165.1    | Ca_kabuli_chr06 | 23077713                | TT                              | CC                | 1946445536               |
| SNP_P3_75266_23077799 | NC_021165.1    | Ca_kabuli_chr06 | 23077799                | AA                              | CC                | 1946445537               |
| SNP_P3_75267_23077849 | NC_021165.1    | Ca_kabuli_chr06 | 23077849                | AA                              | GG                | 1946445539               |
| SNP_P3_75268_23077867 | NC_021165.1    | Ca_kabuli_chr06 | 23077867                | CC                              | TT                | 1946445540               |
| SNP_P3_75269_23078087 | NC_021165.1    | Ca_kabuli_chr06 | 23078087                | TT                              | GG                | 1946445542               |
| SNP_P3_75270_23078377 | NC_021165.1    | Ca_kabuli_chr06 | 23078377                | CC                              | TT                | 1946445543               |
| SNP_P3_75271_23078559 | NC_021165.1    | Ca_kabuli_chr06 | 23078559                | GG                              | AA                | 1946445544               |

| SNPs IDs              | Chromosome IDs | Chromosomes     | Physical positions (bp) | CDC Frontier (Reference genome) | (Pusa 256 & HPNB) | NCBI SNPdb Accession IDs |
|-----------------------|----------------|-----------------|-------------------------|---------------------------------|-------------------|--------------------------|
| SNP_P3_75272_23078705 | NC_021165.1    | Ca_kabuli_chr06 | 23078705                | GG                              | TT                | 1946445546               |
| SNP_P3_75274_23078804 | NC_021165.1    | Ca_kabuli_chr06 | 23078804                | GG                              | AA                | 1946445547               |
| SNP_P3_75275_23078847 | NC_021165.1    | Ca_kabuli_chr06 | 23078847                | TT                              | CC                | 1946445548               |
| SNP_P3_75277_23078963 | NC_021165.1    | Ca_kabuli_chr06 | 23078963                | CC                              | TT                | 1946445550               |
| SNP_P3_75278_23078967 | NC_021165.1    | Ca_kabuli_chr06 | 23078967                | TT                              | CC                | 1946445552               |
| SNP_P3_75279_23079094 | NC_021165.1    | Ca_kabuli_chr06 | 23079094                | TT                              | AA                | 1946445553               |
| SNP_P3_75280_23079141 | NC_021165.1    | Ca_kabuli_chr06 | 23079141                | TT                              | GG                | 1946445554               |
| SNP_P3_75281_23085734 | NC_021165.1    | Ca_kabuli_chr06 | 23085734                | AA                              | TT                | 1946445556               |
| SNP_P3_75282_23085741 | NC_021165.1    | Ca_kabuli_chr06 | 23085741                | CC                              | GG                | 1946445557               |
| SNP_P3_75283_23088961 | NC_021165.1    | Ca_kabuli_chr06 | 23088961                | AA                              | GG                | 1946445559               |
| SNP_P3_75284_23089155 | NC_021165.1    | Ca_kabuli_chr06 | 23089155                | TT                              | CC                | 1946445560               |
| SNP_P3_75285_23089323 | NC_021165.1    | Ca_kabuli_chr06 | 23089323                | GG                              | TT                | 1946445561               |
| SNP_P3_75286_23089326 | NC_021165.1    | Ca_kabuli_chr06 | 23089326                | TT                              | GG                | 1946445563               |
| SNP_P3_75288_23090205 | NC_021165.1    | Ca_kabuli_chr06 | 23090205                | AA                              | GG                | 1946445564               |
| SNP_P3_75289_23090221 | NC_021165.1    | Ca_kabuli_chr06 | 23090221                | GG                              | CC                | 1946445566               |
| SNP_P3_75291_23121844 | NC_021165.1    | Ca_kabuli_chr06 | 23121844                | AA                              | GG                | 1946445567               |
| SNP_P3_75292_23154793 | NC_021165.1    | Ca_kabuli_chr06 | 23154793                | AA                              | GG                | 1946445568               |
| SNP_P3_75293_23155135 | NC_021165.1    | Ca_kabuli_chr06 | 23155135                | TT                              | CC                | 1946445570               |
| SNP_P3_75294_23155138 | NC_021165.1    | Ca_kabuli_chr06 | 23155138                | GG                              | AA                | 1946445572               |
| SNP_P3_75295_23181621 | NC_021165.1    | Ca_kabuli_chr06 | 23181621                | TT                              | GG                | 1946445573               |
| SNP_P3_75297_23210914 | NC_021165.1    | Ca_kabuli_chr06 | 23210914                | CC                              | AA                | 1946445575               |
| SNP_P3_75298_23212273 | NC_021165.1    | Ca_kabuli_chr06 | 23212273                | GG                              | AA                | 1946445576               |
| SNP_P3_75300_23265453 | NC_021165.1    | Ca_kabuli_chr06 | 23265453                | AA                              | GG                | 1946445577               |
| SNP_P3_75302_23282593 | NC_021165.1    | Ca_kabuli_chr06 | 23282593                | AA                              | GG                | 1946445579               |
| SNP_P3_75303_23301186 | NC_021165.1    | Ca_kabuli_chr06 | 23301186                | TT                              | CC                | 1946445580               |
| SNP_P3_75304_23310488 | NC_021165.1    | Ca_kabuli_chr06 | 23310488                | TT                              | AA                | 1946445582               |
| SNP_P3_75305_23336922 | NC_021165.1    | Ca_kabuli_chr06 | 23336922                | TT                              | CC                | 1946445583               |
| SNP_P3_75307_23343415 | NC_021165.1    | Ca_kabuli_chr06 | 23343415                | CC                              | TT                | 1946445584               |
| SNP_P3_75309_23348406 | NC_021165.1    | Ca_kabuli_chr06 | 23348406                | CC                              | TT                | 1946445586               |
| SNP_P3_75310_23359711 | NC_021165.1    | Ca_kabuli_chr06 | 23359711                | AA                              | GG                | 1946445587               |
| SNP_P3_75311_23376289 | NC_021165.1    | Ca_kabuli_chr06 | 23376289                | TT                              | CC                | 1946445589               |
| SNP_P3_75312_23385614 | NC_021165.1    | Ca_kabuli_chr06 | 23385614                | TT                              | CC                | 1946445590               |
| SNP_P3_75313_23392059 | NC_021165.1    | Ca_kabuli_chr06 | 23392059                | CC                              | TT                | 1946445591               |
| SNP_P3_75314_23396822 | NC_021165.1    | Ca_kabuli_chr06 | 23396822                | TT                              | AA                | 1946445593               |
| SNP_P3_75318_23453768 | NC_021165.1    | Ca_kabuli_chr06 | 23453768                | TT                              | CC                | 1946445595               |
| SNP_P3_75319_23453774 | NC_021165.1    | Ca_kabuli_chr06 | 23453774                | CC                              | AA                | 1946445596               |
| SNP_P3_75320_23456016 | NC_021165.1    | Ca_kabuli_chr06 | 23456016                | CC                              | TT                | 1946445597               |
| SNP_P3_75321_23530559 | NC_021165.1    | Ca_kabuli_chr06 | 23530559                | CC                              | TT                | 1946445599               |
| SNP_P3_75322_23534517 | NC_021165.1    | Ca_kabuli_chr06 | 23534517                | AA                              | GG                | 1946445600               |
| SNP_P3_75324_23562557 | NC_021165.1    | Ca_kabuli_chr06 | 23562557                | AA                              | GG                | 1946445602               |
| SNP_P3_75326_23671654 | NC_021165.1    | Ca_kabuli_chr06 | 23671654                | AA                              | CC                | 1946445603               |
| SNP_P3_75327_23673631 | NC_021165.1    | Ca_kabuli_chr06 | 23673631                | CC                              | AA                | 1946445604               |

| SNPs IDs              | Chromosome IDs | Chromosomes     | Physical positions (bp) | CDC Frontier (Reference genome) | (Pusa 256 & HPNB) | NCBI SNPdb Accession IDs |
|-----------------------|----------------|-----------------|-------------------------|---------------------------------|-------------------|--------------------------|
| SNP_P3_75328_23682338 | NC_021165.1    | Ca_kabuli_chr06 | 23682338                | CC                              | TT                | 1946445606               |
| SNP_P3_75329_23684030 | NC_021165.1    | Ca_kabuli_chr06 | 23684030                | CC                              | GG                | 1946445607               |
| SNP_P3_75330_23755266 | NC_021165.1    | Ca_kabuli_chr06 | 23755266                | CC                              | TT                | 1946445609               |
| SNP_P3_75332_23755347 | NC_021165.1    | Ca_kabuli_chr06 | 23755347                | AA                              | GG                | 1946445610               |
| SNP_P3_75333_23755356 | NC_021165.1    | Ca_kabuli_chr06 | 23755356                | TT                              | CC                | 1946445612               |
| SNP_P3_75334_23755379 | NC_021165.1    | Ca_kabuli_chr06 | 23755379                | TT                              | CC                | 1946445613               |
| SNP_P3_75335_23755414 | NC_021165.1    | Ca_kabuli_chr06 | 23755414                | TT                              | CC                | 1946445615               |
| SNP_P3_75337_23755465 | NC_021165.1    | Ca_kabuli_chr06 | 23755465                | TT                              | CC                | 1946445616               |
| SNP_P3_75338_23755788 | NC_021165.1    | Ca_kabuli_chr06 | 23755788                | CC                              | TT                | 1946445618               |
| SNP_P3_75340_23826454 | NC_021165.1    | Ca_kabuli_chr06 | 23826454                | CC                              | AA                | 1946445619               |
| SNP_P3_75341_23828496 | NC_021165.1    | Ca_kabuli_chr06 | 23828496                | TT                              | GG                | 1946445620               |
| SNP_P3_75342_23882556 | NC_021165.1    | Ca_kabuli_chr06 | 23882556                | TT                              | AA                | 1946445622               |
| SNP_P3_75343_23959474 | NC_021165.1    | Ca_kabuli_chr06 | 23959474                | TT                              | GG                | 1946445623               |
| SNP_P3_75344_23980798 | NC_021165.1    | Ca_kabuli_chr06 | 23980798                | AA                              | GG                | 1946445625               |
| SNP_P3_75345_24027303 | NC_021165.1    | Ca_kabuli_chr06 | 24027303                | GG                              | AA                | 1946445626               |
| SNP_P3_75346_24087801 | NC_021165.1    | Ca_kabuli_chr06 | 24087801                | TT                              | CC                | 1946445627               |
| SNP_P3_75347_24091464 | NC_021165.1    | Ca_kabuli_chr06 | 24091464                | TT                              | AA                | 1946445629               |
| SNP_P3_75348_24117952 | NC_021165.1    | Ca_kabuli_chr06 | 24117952                | CC                              | GG                | 1946445630               |
| SNP_P3_75349_24125893 | NC_021165.1    | Ca_kabuli_chr06 | 24125893                | GG                              | AA                | 1946445632               |
| SNP_P3_75350_24126167 | NC_021165.1    | Ca_kabuli_chr06 | 24126167                | CC                              | AA                | 1946445634               |
| SNP_P3_75351_24126356 | NC_021165.1    | Ca_kabuli_chr06 | 24126356                | GG                              | TT                | 1946445636               |
| SNP_P3_75352_24126395 | NC_021165.1    | Ca_kabuli_chr06 | 24126395                | GG                              | AA                | 1946445637               |
| SNP_P3_75353_24126646 | NC_021165.1    | Ca_kabuli_chr06 | 24126646                | TT                              | CC                | 1946445639               |
| SNP_P3_75354_24126668 | NC_021165.1    | Ca_kabuli_chr06 | 24126668                | AA                              | GG                | 1946445640               |
| SNP_P3_75355_24126671 | NC_021165.1    | Ca_kabuli_chr06 | 24126671                | AA                              | GG                | 1946445642               |
| SNP_P3_75356_24126672 | NC_021165.1    | Ca_kabuli_chr06 | 24126672                | GG                              | AA                | 1946445643               |
| SNP_P3_75357_24126938 | NC_021165.1    | Ca_kabuli_chr06 | 24126938                | TT                              | AA                | 1946445644               |
| SNP_P3_75358_24126941 | NC_021165.1    | Ca_kabuli_chr06 | 24126941                | AA                              | TT                | 1946445646               |
| SNP_P3_75359_24126951 | NC_021165.1    | Ca_kabuli_chr06 | 24126951                | CC                              | AA                | 1946445647               |
| SNP_P3_75360_24126981 | NC_021165.1    | Ca_kabuli_chr06 | 24126981                | GG                              | TT                | 1946445649               |
| SNP_P3_75361_24127055 | NC_021165.1    | Ca_kabuli_chr06 | 24127055                | AA                              | GG                | 1946445650               |
| SNP_P3_75362_24127058 | NC_021165.1    | Ca_kabuli_chr06 | 24127058                | AA                              | GG                | 1946445651               |
| SNP_P3_75363_24127288 | NC_021165.1    | Ca_kabuli_chr06 | 24127288                | TT                              | CC                | 1946445653               |
| SNP_P3_75364_24127335 | NC_021165.1    | Ca_kabuli_chr06 | 24127335                | AA                              | TT                | 1946445654               |
| SNP_P3_75365_24127395 | NC_021165.1    | Ca_kabuli_chr06 | 24127395                | TT                              | GG                | 1946445656               |
| SNP_P3_75366_24127723 | NC_021165.1    | Ca_kabuli_chr06 | 24127723                | AA                              | GG                | 1946445657               |
| SNP_P3_75367_24127824 | NC_021165.1    | Ca_kabuli_chr06 | 24127824                | TT                              | CC                | 1946445658               |
| SNP_P3_75368_24127933 | NC_021165.1    | Ca_kabuli_chr06 | 24127933                | TT                              | GG                | 1946445660               |
| SNP_P3_75369_24136042 | NC_021165.1    | Ca_kabuli_chr06 | 24136042                | CC                              | AA                | 1946445661               |
| SNP_P3_75370_24136206 | NC_021165.1    | Ca_kabuli_chr06 | 24136206                | GG                              | AA                | 1946445663               |
| SNP_P3_75371_24136224 | NC_021165.1    | Ca_kabuli_chr06 | 24136224                | TT                              | AA                | 1946445664               |
| SNP_P3_75372_24136316 | NC_021165.1    | Ca_kabuli_chr06 | 24136316                | AA                              | TT                | 1946445666               |

| SNPs IDs              | Chromosome IDs | Chromosomes     | Physical positions (bp) | CDC Frontier (Reference genome) | (Pusa 256 & HPNB) | NCBI SNPdb Accession IDs |
|-----------------------|----------------|-----------------|-------------------------|---------------------------------|-------------------|--------------------------|
| SNP_P3_75373_24136319 | NC_021165.1    | Ca_kabuli_chr06 | 24136319                | AA                              | GG                | 1946445667               |
| SNP_P3_75374_24136521 | NC_021165.1    | Ca_kabuli_chr06 | 24136521                | TT                              | CC                | 1946445669               |
| SNP_P3_75375_24176957 | NC_021165.1    | Ca_kabuli_chr06 | 24176957                | AA                              | GG                | 1946445670               |
| SNP_P3_75376_24240675 | NC_021165.1    | Ca_kabuli_chr06 | 24240675                | TT                              | AA                | 1946445672               |
| SNP_P3_75377_24240719 | NC_021165.1    | Ca_kabuli_chr06 | 24240719                | TT                              | CC                | 1946445673               |
| SNP_P3_75378_24240762 | NC_021165.1    | Ca_kabuli_chr06 | 24240762                | CC                              | TT                | 1946445674               |
| SNP_P3_75379_24240764 | NC_021165.1    | Ca_kabuli_chr06 | 24240764                | AA                              | GG                | 1946445676               |
| SNP_P3_75380_24240810 | NC_021165.1    | Ca_kabuli_chr06 | 24240810                | AA                              | CC                | 1946445677               |
| SNP_P3_75381_24240841 | NC_021165.1    | Ca_kabuli_chr06 | 24240841                | GG                              | AA                | 1946445679               |
| SNP_P3_75382_24240852 | NC_021165.1    | Ca_kabuli_chr06 | 24240852                | TT                              | GG                | 1946445680               |
| SNP_P3_75383_24241040 | NC_021165.1    | Ca_kabuli_chr06 | 24241040                | CC                              | AA                | 1946445681               |
| SNP_P3_75384_24241211 | NC_021165.1    | Ca_kabuli_chr06 | 24241211                | AA                              | TT                | 1946445683               |
| SNP_P3_75385_24241256 | NC_021165.1    | Ca_kabuli_chr06 | 24241256                | TT                              | CC                | 1946445684               |
| SNP_P3_75386_24241261 | NC_021165.1    | Ca_kabuli_chr06 | 24241261                | CC                              | AA                | 1946445686               |
| SNP_P3_75387_24241463 | NC_021165.1    | Ca_kabuli_chr06 | 24241463                | CC                              | AA                | 1946445687               |
| SNP_P3_75388_24241478 | NC_021165.1    | Ca_kabuli_chr06 | 24241478                | AA                              | CC                | 1946445688               |
| SNP_P3_75389_24241603 | NC_021165.1    | Ca_kabuli_chr06 | 24241603                | AA                              | CC                | 1946445690               |
| SNP_P3_75390_24241630 | NC_021165.1    | Ca_kabuli_chr06 | 24241630                | CC                              | AA                | 1946445692               |
| SNP_P3_75391_24241780 | NC_021165.1    | Ca_kabuli_chr06 | 24241780                | GG                              | AA                | 1946445693               |
| SNP_P3_75392_24242013 | NC_021165.1    | Ca_kabuli_chr06 | 24242013                | AA                              | TT                | 1946445695               |
| SNP_P3_75393_24242029 | NC_021165.1    | Ca_kabuli_chr06 | 24242029                | AA                              | TT                | 1946445696               |
| SNP_P3_75394_24242035 | NC_021165.1    | Ca_kabuli_chr06 | 24242035                | TT                              | AA                | 1946445698               |
| SNP_P3_75395_24242053 | NC_021165.1    | Ca_kabuli_chr06 | 24242053                | AA                              | TT                | 1946445699               |
| SNP_P3_75396_24266107 | NC_021165.1    | Ca_kabuli_chr06 | 24266107                | GG                              | CC                | 1946445700               |
| SNP_P3_75398_24309681 | NC_021165.1    | Ca_kabuli_chr06 | 24309681                | CC                              | TT                | 1946445702               |
| SNP_P3_75399_24397174 | NC_021165.1    | Ca_kabuli_chr06 | 24397174                | CC                              | TT                | 1946445703               |
| SNP_P3_75400_24401315 | NC_021165.1    | Ca_kabuli_chr06 | 24401315                | TT                              | AA                | 1946445705               |
| SNP_P3_75401_24420251 | NC_021165.1    | Ca_kabuli_chr06 | 24420251                | TT                              | GG                | 1946445706               |
| SNP_P3_75402_24499457 | NC_021165.1    | Ca_kabuli_chr06 | 24499457                | AA                              | TT                | 1946445707               |
| SNP_P3_75403_24538861 | NC_021165.1    | Ca_kabuli_chr06 | 24538861                | TT                              | AA                | 1946445709               |
| SNP_P3_75404_24542042 | NC_021165.1    | Ca_kabuli_chr06 | 24542042                | GG                              | AA                | 1946445710               |
| SNP_P3_75405_24544543 | NC_021165.1    | Ca_kabuli_chr06 | 24544543                | CC                              | AA                | 1946445712               |
| SNP_P3_75406_24544554 | NC_021165.1    | Ca_kabuli_chr06 | 24544554                | AA                              | GG                | 1946445713               |
| SNP_P3_75408_24589380 | NC_021165.1    | Ca_kabuli_chr06 | 24589380                | AA                              | GG                | 1946445715               |
| SNP_P3_75409_24591936 | NC_021165.1    | Ca_kabuli_chr06 | 24591936                | AA                              | GG                | 1946445716               |
| SNP_P3_75410_24595474 | NC_021165.1    | Ca_kabuli_chr06 | 24595474                | GG                              | AA                | 1946445718               |
| SNP_P3_75411_24608085 | NC_021165.1    | Ca_kabuli_chr06 | 24608085                | TT                              | GG                | 1946445719               |
| SNP_P3_75413_24682499 | NC_021165.1    | Ca_kabuli_chr06 | 24682499                | GG                              | AA                | 1946445720               |
| SNP_P3_75414_24682515 | NC_021165.1    | Ca_kabuli_chr06 | 24682515                | CC                              | TT                | 1946445722               |
| SNP_P3_75415_24682519 | NC_021165.1    | Ca_kabuli_chr06 | 24682519                | AA                              | GG                | 1946445723               |
| SNP_P3_75416_24714626 | NC_021165.1    | Ca_kabuli_chr06 | 24714626                | AA                              | GG                | 1946445725               |
| SNP_P3_75417_24744182 | NC_021165.1    | Ca_kabuli_chr06 | 24744182                | AA                              | GG                | 1946445726               |

| SNPs IDs              | Chromosome IDs | Chromosomes     | Physical positions (bp) | CDC Frontier (Reference genome) | (Pusa 256 & HPNB) | NCBI SNPdb Accession IDs |
|-----------------------|----------------|-----------------|-------------------------|---------------------------------|-------------------|--------------------------|
| SNP_P3_75418_24744265 | NC_021165.1    | Ca_kabuli_chr06 | 24744265                | TT                              | CC                | 1946445728               |
| SNP_P3_75420_24744619 | NC_021165.1    | Ca_kabuli_chr06 | 24744619                | TT                              | GG                | 1946445729               |
| SNP_P3_75421_24745202 | NC_021165.1    | Ca_kabuli_chr06 | 24745202                | CC                              | AA                | 1946445730               |
| SNP_P3_75422_24770436 | NC_021165.1    | Ca_kabuli_chr06 | 24770436                | TT                              | CC                | 1946445732               |
| SNP_P3_75423_24770482 | NC_021165.1    | Ca_kabuli_chr06 | 24770482                | AA                              | GG                | 1946445733               |
| SNP_P3_75424_24770484 | NC_021165.1    | Ca_kabuli_chr06 | 24770484                | GG                              | AA                | 1946445735               |
| SNP_P3_75425_24770513 | NC_021165.1    | Ca_kabuli_chr06 | 24770513                | CC                              | TT                | 1946445737               |
| SNP_P3_75426_24770587 | NC_021165.1    | Ca_kabuli_chr06 | 24770587                | TT                              | CC                | 1946445738               |
| SNP_P3_75427_24770755 | NC_021165.1    | Ca_kabuli_chr06 | 24770755                | TT                              | CC                | 1946445740               |
| SNP_P3_75428_24770772 | NC_021165.1    | Ca_kabuli_chr06 | 24770772                | TT                              | GG                | 1946445741               |
| SNP_P3_75429_24770880 | NC_021165.1    | Ca_kabuli_chr06 | 24770880                | GG                              | TT                | 1946445743               |
| SNP_P3_75430_24770883 | NC_021165.1    | Ca_kabuli_chr06 | 24770883                | AA                              | GG                | 1946445744               |
| SNP_P3_75431_24770911 | NC_021165.1    | Ca_kabuli_chr06 | 24770911                | TT                              | AA                | 1946445745               |
| SNP_P3_75432_24855896 | NC_021165.1    | Ca_kabuli_chr06 | 24855896                | TT                              | CC                | 1946445747               |
| SNP_P3_75433_24855898 | NC_021165.1    | Ca_kabuli_chr06 | 24855898                | GG                              | CC                | 1946445748               |
| SNP_P3_75434_24855912 | NC_021165.1    | Ca_kabuli_chr06 | 24855912                | TT                              | CC                | 1946445750               |
| SNP_P3_75435_24856083 | NC_021165.1    | Ca_kabuli_chr06 | 24856083                | AA                              | TT                | 1946445751               |
| SNP_P3_75436_24856839 | NC_021165.1    | Ca_kabuli_chr06 | 24856839                | CC                              | AA                | 1946445753               |
| SNP_P3_75437_24857343 | NC_021165.1    | Ca_kabuli_chr06 | 24857343                | CC                              | AA                | 1946445754               |
| SNP_P3_75438_24857925 | NC_021165.1    | Ca_kabuli_chr06 | 24857925                | TT                              | GG                | 1946445755               |
| SNP_P3_75439_24857980 | NC_021165.1    | Ca_kabuli_chr06 | 24857980                | GG                              | AA                | 1946445757               |
| SNP_P3_75440_24876324 | NC_021165.1    | Ca_kabuli_chr06 | 24876324                | AA                              | GG                | 1946445759               |
| SNP_P3_75441_24876342 | NC_021165.1    | Ca_kabuli_chr06 | 24876342                | CC                              | TT                | 1946445760               |
| SNP_P3_75442_24876363 | NC_021165.1    | Ca_kabuli_chr06 | 24876363                | TT                              | CC                | 1946445762               |
| SNP_P3_75443_24876420 | NC_021165.1    | Ca_kabuli_chr06 | 24876420                | CC                              | GG                | 1946445763               |
| SNP_P3_75444_24877844 | NC_021165.1    | Ca_kabuli_chr06 | 24877844                | CC                              | TT                | 1946445765               |
| SNP_P3_75445_24894379 | NC_021165.1    | Ca_kabuli_chr06 | 24894379                | TT                              | AA                | 1946445766               |
| SNP_P3_75446_24903297 | NC_021165.1    | Ca_kabuli_chr06 | 24903297                | AA                              | GG                | 1946445767               |
| SNP_P3_75447_24903298 | NC_021165.1    | Ca_kabuli_chr06 | 24903298                | AA                              | GG                | 1946445769               |
| SNP_P3_75448_24903405 | NC_021165.1    | Ca_kabuli_chr06 | 24903405                | TT                              | AA                | 1946445770               |
| SNP_P3_75449_24904303 | NC_021165.1    | Ca_kabuli_chr06 | 24904303                | TT                              | CC                | 1946445772               |
| SNP_P3_75450_24904305 | NC_021165.1    | Ca_kabuli_chr06 | 24904305                | TT                              | AA                | 1946445773               |
| SNP_P3_75451_24904311 | NC_021165.1    | Ca_kabuli_chr06 | 24904311                | AA                              | GG                | 1946445775               |
| SNP_P3_75452_24905397 | NC_021165.1    | Ca_kabuli_chr06 | 24905397                | GG                              | TT                | 1946445776               |
| SNP_P3_75453_24905719 | NC_021165.1    | Ca_kabuli_chr06 | 24905719                | TT                              | CC                | 1946445778               |
| SNP_P3_75454_24905764 | NC_021165.1    | Ca_kabuli_chr06 | 24905764                | GG                              | AA                | 1946445779               |
| SNP_P3_75455_24924771 | NC_021165.1    | Ca_kabuli_chr06 | 24924771                | AA                              | GG                | 1946445781               |
| SNP_P3_75456_24930458 | NC_021165.1    | Ca_kabuli_chr06 | 24930458                | TT                              | AA                | 1946445782               |
| SNP_P3_75457_24930541 | NC_021165.1    | Ca_kabuli_chr06 | 24930541                | GG                              | AA                | 1946445784               |
| SNP_P3_75458_24930553 | NC_021165.1    | Ca_kabuli_chr06 | 24930553                | TT                              | CC                | 1946445785               |
| SNP_P3_75459_24930586 | NC_021165.1    | Ca_kabuli_chr06 | 24930586                | GG                              | CC                | 1946445787               |
| SNP_P3_75460_24941948 | NC_021165.1    | Ca_kabuli_chr06 | 24941948                | CC                              | TT                | 1946445788               |

| SNPs IDs              | Chromosome IDs | Chromosomes     | Physical positions (bp) | CDC Frontier (Reference genome) | (Pusa 256 & HPNB) | NCBI SNPdb Accession IDs |
|-----------------------|----------------|-----------------|-------------------------|---------------------------------|-------------------|--------------------------|
| SNP_P3_75461_24946772 | NC_021165.1    | Ca_kabuli_chr06 | 24946772                | CC                              | TT                | 1946445790               |
| SNP_P3_75462_24952690 | NC_021165.1    | Ca_kabuli_chr06 | 24952690                | AA                              | CC                | 1946445791               |
| SNP_P3_75463_24952744 | NC_021165.1    | Ca_kabuli_chr06 | 24952744                | AA                              | GG                | 1946445793               |
| SNP_P3_75464_24958768 | NC_021165.1    | Ca_kabuli_chr06 | 24958768                | AA                              | GG                | 1946445794               |
| SNP_P3_75466_24967440 | NC_021165.1    | Ca_kabuli_chr06 | 24967440                | AA                              | GG                | 1946445795               |
| SNP_P3_75467_24981309 | NC_021165.1    | Ca_kabuli_chr06 | 24981309                | GG                              | TT                | 1946445797               |
| SNP_P3_75468_24981333 | NC_021165.1    | Ca_kabuli_chr06 | 24981333                | CC                              | TT                | 1946445798               |
| SNP_P3_75469_24997390 | NC_021165.1    | Ca_kabuli_chr06 | 24997390                | GG                              | AA                | 1946445800               |
| SNP_P3_75470_25040997 | NC_021165.1    | Ca_kabuli_chr06 | 25040997                | TT                              | CC                | 1946445801               |
| SNP_P3_75471_25041036 | NC_021165.1    | Ca_kabuli_chr06 | 25041036                | GG                              | AA                | 1946445803               |
| SNP_P3_75472_25064522 | NC_021165.1    | Ca_kabuli_chr06 | 25064522                | AA                              | GG                | 1946445804               |
| SNP_P3_75473_25064529 | NC_021165.1    | Ca_kabuli_chr06 | 25064529                | TT                              | CC                | 1946445806               |
| SNP_P3_75474_25064799 | NC_021165.1    | Ca_kabuli_chr06 | 25064799                | GG                              | AA                | 1946445808               |
| SNP_P3_75475_25064801 | NC_021165.1    | Ca_kabuli_chr06 | 25064801                | GG                              | AA                | 1946445809               |
| SNP_P3_75476_25067190 | NC_021165.1    | Ca_kabuli_chr06 | 25067190                | GG                              | AA                | 1946445810               |
| SNP_P3_75477_25069187 | NC_021165.1    | Ca_kabuli_chr06 | 25069187                | TT                              | CC                | 1946445812               |
| SNP_P3_75478_25069583 | NC_021165.1    | Ca_kabuli_chr06 | 25069583                | AA                              | CC                | 1946445813               |
| SNP_P3_75479_25076070 | NC_021165.1    | Ca_kabuli_chr06 | 25076070                | CC                              | TT                | 1946445815               |
| SNP_P3_75480_25095513 | NC_021165.1    | Ca_kabuli_chr06 | 25095513                | CC                              | TT                | 1946445816               |
| SNP_P3_75482_25130866 | NC_021165.1    | Ca_kabuli_chr06 | 25130866                | GG                              | TT                | 1946445818               |
| SNP_P3_75484_25131144 | NC_021165.1    | Ca_kabuli_chr06 | 25131144                | CC                              | AA                | 1946445819               |
| SNP_P3_75485_25131149 | NC_021165.1    | Ca_kabuli_chr06 | 25131149                | AA                              | CC                | 1946445820               |
| SNP_P3_75487_25131451 | NC_021165.1    | Ca_kabuli_chr06 | 25131451                | GG                              | AA                | 1946445822               |
| SNP_P3_75488_25131457 | NC_021165.1    | Ca_kabuli_chr06 | 25131457                | CC                              | TT                | 1946445823               |
| SNP_P3_75489_25182049 | NC_021165.1    | Ca_kabuli_chr06 | 25182049                | GG                              | AA                | 1946445825               |
| SNP_P3_75490_25209958 | NC_021165.1    | Ca_kabuli_chr06 | 25209958                | CC                              | AA                | 1946445826               |
| SNP_P3_75491_25212720 | NC_021165.1    | Ca_kabuli_chr06 | 25212720                | CC                              | TT                | 1946445828               |
| SNP_P3_75492_25215628 | NC_021165.1    | Ca_kabuli_chr06 | 25215628                | TT                              | CC                | 1946445829               |
| SNP_P3_75493_25216080 | NC_021165.1    | Ca_kabuli_chr06 | 25216080                | TT                              | CC                | 1946445831               |
| SNP_P3_75494_25249115 | NC_021165.1    | Ca_kabuli_chr06 | 25249115                | TT                              | CC                | 1946445832               |
| SNP_P3_75495_25286382 | NC_021165.1    | Ca_kabuli_chr06 | 25286382                | TT                              | GG                | 1946445834               |
| SNP_P3_75496_25294467 | NC_021165.1    | Ca_kabuli_chr06 | 25294467                | AA                              | GG                | 1946445835               |
| SNP_P3_75497_25297977 | NC_021165.1    | Ca_kabuli_chr06 | 25297977                | AA                              | GG                | 1946445836               |
| SNP_P3_75498_25300226 | NC_021165.1    | Ca_kabuli_chr06 | 25300226                | TT                              | AA                | 1946445838               |
| SNP_P3_75499_25300230 | NC_021165.1    | Ca_kabuli_chr06 | 25300230                | TT                              | CC                | 1946445839               |
| SNP_P3_75500_25300272 | NC_021165.1    | Ca_kabuli_chr06 | 25300272                | TT                              | CC                | 1946445841               |
| SNP_P3_75501_25300288 | NC_021165.1    | Ca_kabuli_chr06 | 25300288                | TT                              | GG                | 1946445842               |
| SNP_P3_75502_25300324 | NC_021165.1    | Ca_kabuli_chr06 | 25300324                | TT                              | CC                | 1946445844               |
| SNP_P3_75503_25300327 | NC_021165.1    | Ca_kabuli_chr06 | 25300327                | CC                              | TT                | 1946445845               |
| SNP_P3_75504_25300363 | NC_021165.1    | Ca_kabuli_chr06 | 25300363                | AA                              | GG                | 1946445846               |
| SNP_P3_75505_25300377 | NC_021165.1    | Ca_kabuli_chr06 | 25300377                | GG                              | AA                | 1946445848               |
| SNP_P3_75506_25300378 | NC_021165.1    | Ca_kabuli_chr06 | 25300378                | TT                              | CC                | 1946445850               |

| SNPs IDs              | Chromosome IDs | Chromosomes     | Physical positions (bp) | CDC Frontier (Reference genome) | (Pusa 256 & HPNB) | NCBI SNPdb Accession IDs |
|-----------------------|----------------|-----------------|-------------------------|---------------------------------|-------------------|--------------------------|
| SNP_P3_75507_25300388 | NC_021165.1    | Ca_kabuli_chr06 | 25300388                | TT                              | CC                | 1946445851               |
| SNP_P3_75508_25300402 | NC_021165.1    | Ca_kabuli_chr06 | 25300402                | TT                              | GG                | 1946445853               |
| SNP_P3_75509_25300425 | NC_021165.1    | Ca_kabuli_chr06 | 25300425                | TT                              | CC                | 1946445854               |
| SNP_P3_75510_25300549 | NC_021165.1    | Ca_kabuli_chr06 | 25300549                | AA                              | TT                | 1946445855               |
| SNP_P3_75511_25300574 | NC_021165.1    | Ca_kabuli_chr06 | 25300574                | AA                              | GG                | 1946445857               |
| SNP_P3_75512_25302148 | NC_021165.1    | Ca_kabuli_chr06 | 25302148                | GG                              | AA                | 1946445858               |
| SNP_P3_75513_25302573 | NC_021165.1    | Ca_kabuli_chr06 | 25302573                | TT                              | CC                | 1946445860               |
| SNP_P3_75514_25302574 | NC_021165.1    | Ca_kabuli_chr06 | 25302574                | GG                              | AA                | 1946445861               |
| SNP_P3_75515_25302584 | NC_021165.1    | Ca_kabuli_chr06 | 25302584                | CC                              | TT                | 1946445862               |
| SNP_P3_75516_25302625 | NC_021165.1    | Ca_kabuli_chr06 | 25302625                | AA                              | GG                | 1946445864               |
| SNP_P3_75517_25302803 | NC_021165.1    | Ca_kabuli_chr06 | 25302803                | AA                              | GG                | 1946445865               |
| SNP_P3_75518_25303050 | NC_021165.1    | Ca_kabuli_chr06 | 25303050                | CC                              | AA                | 1946445867               |
| SNP_P3_75520_25314536 | NC_021165.1    | Ca_kabuli_chr06 | 25314536                | GG                              | AA                | 1946445868               |
| SNP_P3_75521_25314572 | NC_021165.1    | Ca_kabuli_chr06 | 25314572                | GG                              | TT                | 1946445869               |
| SNP_P3_75522_25314609 | NC_021165.1    | Ca_kabuli_chr06 | 25314609                | AA                              | TT                | 1946445871               |
| SNP_P3_75523_25314658 | NC_021165.1    | Ca_kabuli_chr06 | 25314658                | AA                              | CC                | 1946445873               |
| SNP_P3_75524_25314762 | NC_021165.1    | Ca_kabuli_chr06 | 25314762                | AA                              | GG                | 1946445874               |
| SNP_P3_75525_25314774 | NC_021165.1    | Ca_kabuli_chr06 | 25314774                | CC                              | TT                | 1946445875               |
| SNP_P3_75526_25314849 | NC_021165.1    | Ca_kabuli_chr06 | 25314849                | TT                              | CC                | 1946445877               |
| SNP_P3_75527_25314861 | NC_021165.1    | Ca_kabuli_chr06 | 25314861                | TT                              | CC                | 1946445878               |
| SNP_P3_75528_25314874 | NC_021165.1    | Ca_kabuli_chr06 | 25314874                | AA                              | TT                | 1946445880               |
| SNP_P3_75529_25314890 | NC_021165.1    | Ca_kabuli_chr06 | 25314890                | AA                              | GG                | 1946445881               |
| SNP_P3_75530_25314926 | NC_021165.1    | Ca_kabuli_chr06 | 25314926                | GG                              | AA                | 1946445883               |
| SNP_P3_75531_25314931 | NC_021165.1    | Ca_kabuli_chr06 | 25314931                | TT                              | GG                | 1946445884               |
| SNP_P3_75532_25314937 | NC_021165.1    | Ca_kabuli_chr06 | 25314937                | GG                              | AA                | 1946445886               |
| SNP_P3_75533_25314950 | NC_021165.1    | Ca_kabuli_chr06 | 25314950                | AA                              | GG                | 1946445887               |
| SNP_P3_75534_25314959 | NC_021165.1    | Ca_kabuli_chr06 | 25314959                | AA                              | GG                | 1946445888               |
| SNP_P3_75535_25316940 | NC_021165.1    | Ca_kabuli_chr06 | 25316940                | CC                              | TT                | 1946445890               |
| SNP_P3_75536_25320858 | NC_021165.1    | Ca_kabuli_chr06 | 25320858                | AA                              | TT                | 1946445892               |
| SNP_P3_75537_25324979 | NC_021165.1    | Ca_kabuli_chr06 | 25324979                | TT                              | GG                | 1946445893               |
| SNP_P3_75538_25325248 | NC_021165.1    | Ca_kabuli_chr06 | 25325248                | CC                              | TT                | 1946445895               |
| SNP_P3_75539_25325249 | NC_021165.1    | Ca_kabuli_chr06 | 25325249                | TT                              | CC                | 1946445896               |
| SNP_P3_75540_25325275 | NC_021165.1    | Ca_kabuli_chr06 | 25325275                | GG                              | AA                | 1946445897               |
| SNP_P3_75541_25325314 | NC_021165.1    | Ca_kabuli_chr06 | 25325314                | CC                              | TT                | 1946445899               |
| SNP_P3_75542_25325329 | NC_021165.1    | Ca_kabuli_chr06 | 25325329                | TT                              | CC                | 1946445900               |
| SNP_P3_75543_25325367 | NC_021165.1    | Ca_kabuli_chr06 | 25325367                | AA                              | TT                | 1946445902               |
| SNP_P3_75544_25325410 | NC_021165.1    | Ca_kabuli_chr06 | 25325410                | TT                              | CC                | 1946445903               |
| SNP_P3_75545_25325418 | NC_021165.1    | Ca_kabuli_chr06 | 25325418                | TT                              | CC                | 1946445904               |
| SNP_P3_75546_25325502 | NC_021165.1    | Ca_kabuli_chr06 | 25325502                | AA                              | CC                | 1946445906               |
| SNP_P3_75547_25338072 | NC_021165.1    | Ca_kabuli_chr06 | 25338072                | GG                              | CC                | 1946445907               |
| SNP_P3_75549_25338091 | NC_021165.1    | Ca_kabuli_chr06 | 25338091                | AA                              | GG                | 1946445909               |
| SNP_P3_75550_25338102 | NC_021165.1    | Ca_kabuli_chr06 | 25338102                | AA                              | GG                | 1946445910               |

| SNPs IDs              | Chromosome IDs | Chromosomes     | Physical positions (bp) | CDC Frontier (Reference genome) | (Pusa 256 & HPNB) | NCBI SNPdb Accession IDs |
|-----------------------|----------------|-----------------|-------------------------|---------------------------------|-------------------|--------------------------|
| SNP_P3_75551_25338114 | NC_021165.1    | Ca_kabuli_chr06 | 25338114                | CC                              | TT                | 1946445912               |
| SNP_P3_75552_25338214 | NC_021165.1    | Ca_kabuli_chr06 | 25338214                | GG                              | AA                | 1946445913               |
| SNP_P3_75553_25352458 | NC_021165.1    | Ca_kabuli_chr06 | 25352458                | AA                              | TT                | 1946445915               |
| SNP_P3_75554_25352576 | NC_021165.1    | Ca_kabuli_chr06 | 25352576                | TT                              | AA                | 1946445916               |
| SNP_P3_75555_25383139 | NC_021165.1    | Ca_kabuli_chr06 | 25383139                | TT                              | CC                | 1946445918               |
| SNP_P3_75556_25397682 | NC_021165.1    | Ca_kabuli_chr06 | 25397682                | CC                              | TT                | 1946445919               |
| SNP_P3_75557_25404990 | NC_021165.1    | Ca_kabuli_chr06 | 25404990                | AA                              | GG                | 1946445920               |
| SNP_P3_75558_25404995 | NC_021165.1    | Ca_kabuli_chr06 | 25404995                | TT                              | CC                | 1946445922               |
| SNP_P3_75559_25415935 | NC_021165.1    | Ca_kabuli_chr06 | 25415935                | AA                              | GG                | 1946445923               |
| SNP_P3_75560_25440651 | NC_021165.1    | Ca_kabuli_chr06 | 25440651                | GG                              | TT                | 1946445925               |
| SNP_P3_75561_25458961 | NC_021165.1    | Ca_kabuli_chr06 | 25458961                | TT                              | GG                | 1946445926               |
| SNP_P3_75562_25459843 | NC_021165.1    | Ca_kabuli_chr06 | 25459843                | GG                              | AA                | 1946445927               |
| SNP_P3_75564_25521077 | NC_021165.1    | Ca_kabuli_chr06 | 25521077                | AA                              | TT                | 1946445929               |
| SNP_P3_75565_25522743 | NC_021165.1    | Ca_kabuli_chr06 | 25522743                | AA                              | GG                | 1946445930               |
| SNP_P3_75566_25531267 | NC_021165.1    | Ca_kabuli_chr06 | 25531267                | TT                              | CC                | 1946445932               |
| SNP_P3_75567_25535605 | NC_021165.1    | Ca_kabuli_chr06 | 25535605                | CC                              | TT                | 1946445933               |
| SNP_P3_75568_25535639 | NC_021165.1    | Ca_kabuli_chr06 | 25535639                | AA                              | TT                | 1946445934               |
| SNP_P3_75569_25542762 | NC_021165.1    | Ca_kabuli_chr06 | 25542762                | CC                              | TT                | 1946445936               |
| SNP_P3_75570_25545553 | NC_021165.1    | Ca_kabuli_chr06 | 25545553                | TT                              | CC                | 1946445937               |
| SNP_P3_75571_25545991 | NC_021165.1    | Ca_kabuli_chr06 | 25545991                | AA                              | GG                | 1946445939               |
| SNP_P3_75572_25546164 | NC_021165.1    | Ca_kabuli_chr06 | 25546164                | AA                              | TT                | 1946445940               |
| SNP_P3_75573_25546485 | NC_021165.1    | Ca_kabuli_chr06 | 25546485                | AA                              | GG                | 1946445942               |
| SNP_P3_75574_25546495 | NC_021165.1    | Ca_kabuli_chr06 | 25546495                | TT                              | CC                | 1946445943               |
| SNP_P3_75575_25546516 | NC_021165.1    | Ca_kabuli_chr06 | 25546516                | TT                              | GG                | 1946445944               |
| SNP_P3_75576_25546533 | NC_021165.1    | Ca_kabuli_chr06 | 25546533                | CC                              | TT                | 1946445946               |
| SNP_P3_75577_25546736 | NC_021165.1    | Ca_kabuli_chr06 | 25546736                | AA                              | GG                | 1946445947               |
| SNP_P3_75578_25548298 | NC_021165.1    | Ca_kabuli_chr06 | 25548298                | TT                              | AA                | 1946445949               |
| SNP_P3_75579_25548640 | NC_021165.1    | Ca_kabuli_chr06 | 25548640                | CC                              | TT                | 1946445950               |
| SNP_P3_75580_25548722 | NC_021165.1    | Ca_kabuli_chr06 | 25548722                | GG                              | AA                | 1946445951               |
| SNP_P3_75581_25549602 | NC_021165.1    | Ca_kabuli_chr06 | 25549602                | TT                              | CC                | 1946445953               |
| SNP_P3_75582_25549620 | NC_021165.1    | Ca_kabuli_chr06 | 25549620                | GG                              | TT                | 1946445954               |
| SNP_P3_75583_25549639 | NC_021165.1    | Ca_kabuli_chr06 | 25549639                | TT                              | CC                | 1946445956               |
| SNP_P3_75584_25549648 | NC_021165.1    | Ca_kabuli_chr06 | 25549648                | TT                              | CC                | 1946445957               |
| SNP_P3_75585_25549666 | NC_021165.1    | Ca_kabuli_chr06 | 25549666                | TT                              | CC                | 1946445958               |
| SNP_P3_75586_25549678 | NC_021165.1    | Ca_kabuli_chr06 | 25549678                | TT                              | AA                | 1946445960               |
| SNP_P3_75587_25549693 | NC_021165.1    | Ca_kabuli_chr06 | 25549693                | TT                              | CC                | 1946445961               |
| SNP_P3_75588_25549696 | NC_021165.1    | Ca_kabuli_chr06 | 25549696                | TT                              | CC                | 1946445963               |
| SNP_P3_75589_25549711 | NC_021165.1    | Ca_kabuli_chr06 | 25549711                | TT                              | CC                | 1946445964               |
| SNP_P3_75590_25549712 | NC_021165.1    | Ca_kabuli_chr06 | 25549712                | TT                              | CC                | 1946445965               |
| SNP_P3_75591_25549744 | NC_021165.1    | Ca_kabuli_chr06 | 25549744                | AA                              | GG                | 1946445967               |
| SNP_P3_75592_25549783 | NC_021165.1    | Ca_kabuli_chr06 | 25549783                | AA                              | GG                | 1946445968               |
| SNP_P3_75593_25549798 | NC_021165.1    | Ca_kabuli_chr06 | 25549798                | TT                              | CC                | 1946445970               |



| SNPs IDs              | Chromosome IDs | Chromosomes     | Physical positions (bp) | CDC Frontier (Reference genome) | (Pusa 256 & HPNB) | NCBI SNPdb Accession IDs |
|-----------------------|----------------|-----------------|-------------------------|---------------------------------|-------------------|--------------------------|
| SNP_P3_75594_25549801 | NC_021165.1    | Ca_kabuli_chr06 | 25549801                | TT                              | GG                | 1946445971               |
| SNP_P3_75595_25549807 | NC_021165.1    | Ca_kabuli_chr06 | 25549807                | GG                              | AA                | 1946445972               |
| SNP_P3_75596_25549825 | NC_021165.1    | Ca_kabuli_chr06 | 25549825                | AA                              | GG                | 1946445974               |
| SNP_P3_75597_25549831 | NC_021165.1    | Ca_kabuli_chr06 | 25549831                | CC                              | TT                | 1946445975               |
| SNP_P3_75598_25549834 | NC_021165.1    | Ca_kabuli_chr06 | 25549834                | GG                              | AA                | 1946445977               |
| SNP_P3_75599_25549837 | NC_021165.1    | Ca_kabuli_chr06 | 25549837                | AA                              | GG                | 1946445979               |
| SNP_P3_75600_25549864 | NC_021165.1    | Ca_kabuli_chr06 | 25549864                | AA                              | GG                | 1946445983               |
| SNP_P3_75601_25549867 | NC_021165.1    | Ca_kabuli_chr06 | 25549867                | TT                              | AA                | 1946445986               |
| SNP_P3_75602_25550043 | NC_021165.1    | Ca_kabuli_chr06 | 25550043                | CC                              | AA                | 1946445990               |
| SNP_P3_75603_25550087 | NC_021165.1    | Ca_kabuli_chr06 | 25550087                | CC                              | TT                | 1946445992               |
| SNP_P3_75604_25550132 | NC_021165.1    | Ca_kabuli_chr06 | 25550132                | GG                              | AA                | 1946445993               |
| SNP_P3_75605_25552345 | NC_021165.1    | Ca_kabuli_chr06 | 25552345                | CC                              | TT                | 1946445995               |
| SNP_P3_75606_25569863 | NC_021165.1    | Ca_kabuli_chr06 | 25569863                | TT                              | CC                | 1946445997               |
| SNP_P3_75607_25569890 | NC_021165.1    | Ca_kabuli_chr06 | 25569890                | AA                              | CC                | 1946445999               |
| SNP_P3_75608_25570033 | NC_021165.1    | Ca_kabuli_chr06 | 25570033                | AA                              | GG                | 1946446001               |
| SNP_P3_75609_25570179 | NC_021165.1    | Ca_kabuli_chr06 | 25570179                | TT                              | CC                | 1946446002               |
| SNP_P3_75610_25572462 | NC_021165.1    | Ca_kabuli_chr06 | 25572462                | AA                              | GG                | 1946446004               |
| SNP_P3_75611_25572471 | NC_021165.1    | Ca_kabuli_chr06 | 25572471                | GG                              | AA                | 1946446007               |
| SNP_P3_75612_25572473 | NC_021165.1    | Ca_kabuli_chr06 | 25572473                | AA                              | TT                | 1946446009               |
| SNP_P3_75613_25581446 | NC_021165.1    | Ca_kabuli_chr06 | 25581446                | GG                              | TT                | 1946446010               |
| SNP_P3_75614_25581473 | NC_021165.1    | Ca_kabuli_chr06 | 25581473                | GG                              | AA                | 1946446012               |
| SNP_P3_75615_25586860 | NC_021165.1    | Ca_kabuli_chr06 | 25586860                | CC                              | GG                | 1946446016               |
| SNP_P3_75616_25586866 | NC_021165.1    | Ca_kabuli_chr06 | 25586866                | GG                              | TT                | 1946446018               |
| SNP_P3_75617_25587170 | NC_021165.1    | Ca_kabuli_chr06 | 25587170                | TT                              | AA                | 1946446021               |
| SNP_P3_75618_25595215 | NC_021165.1    | Ca_kabuli_chr06 | 25595215                | TT                              | CC                | 1946446024               |
| SNP_P3_75619_25595905 | NC_021165.1    | Ca_kabuli_chr06 | 25595905                | TT                              | CC                | 1946446026               |
| SNP_P3_75620_25595906 | NC_021165.1    | Ca_kabuli_chr06 | 25595906                | AA                              | GG                | 1946446029               |
| SNP_P3_75621_25609337 | NC_021165.1    | Ca_kabuli_chr06 | 25609337                | TT                              | GG                | 1946446031               |
| SNP_P3_75622_25611686 | NC_021165.1    | Ca_kabuli_chr06 | 25611686                | GG                              | AA                | 1946446033               |
| SNP_P3_75623_25613292 | NC_021165.1    | Ca_kabuli_chr06 | 25613292                | TT                              | AA                | 1946446035               |
| SNP_P3_75625_25624657 | NC_021165.1    | Ca_kabuli_chr06 | 25624657                | TT                              | AA                | 1946446036               |
| SNP_P3_75626_25624670 | NC_021165.1    | Ca_kabuli_chr06 | 25624670                | GG                              | AA                | 1946446038               |
| SNP_P3_75627_25624673 | NC_021165.1    | Ca_kabuli_chr06 | 25624673                | GG                              | AA                | 1946446039               |
| SNP_P3_75628_25625295 | NC_021165.1    | Ca_kabuli_chr06 | 25625295                | AA                              | GG                | 1946446043               |
| SNP_P3_75630_25637906 | NC_021165.1    | Ca_kabuli_chr06 | 25637906                | AA                              | GG                | 1946446046               |
| SNP_P3_75631_25637909 | NC_021165.1    | Ca_kabuli_chr06 | 25637909                | GG                              | CC                | 1946446047               |
| SNP_P3_75632_25638459 | NC_021165.1    | Ca_kabuli_chr06 | 25638459                | CC                              | TT                | 1946446049               |
| SNP_P3_75634_25639190 | NC_021165.1    | Ca_kabuli_chr06 | 25639190                | CC                              | TT                | 1946446050               |
| SNP_P3_75635_25639323 | NC_021165.1    | Ca_kabuli_chr06 | 25639323                | GG                              | AA                | 1946446053               |
| SNP_P3_75636_25639623 | NC_021165.1    | Ca_kabuli_chr06 | 25639623                | CC                              | AA                | 1946446055               |
| SNP_P3_75637_25639722 | NC_021165.1    | Ca_kabuli_chr06 | 25639722                | AA                              | CC                | 1946446057               |
| SNP_P3_75638_25639724 | NC_021165.1    | Ca_kabuli_chr06 | 25639724                | TT                              | CC                | 1946446060               |

| SNPs IDs              | Chromosome IDs | Chromosomes     | Physical positions (bp) | CDC Frontier (Reference genome) | (Pusa 256 & HPNB) | NCBI SNPdb Accession IDs |
|-----------------------|----------------|-----------------|-------------------------|---------------------------------|-------------------|--------------------------|
| SNP_P3_75639_25639732 | NC_021165.1    | Ca_kabuli_chr06 | 25639732                | GG                              | TT                | 1946446062               |
| SNP_P3_75640_25639772 | NC_021165.1    | Ca_kabuli_chr06 | 25639772                | CC                              | AA                | 1946446063               |
| SNP_P3_75641_25643992 | NC_021165.1    | Ca_kabuli_chr06 | 25643992                | GG                              | AA                | 1946446065               |
| SNP_P3_75642_25652511 | NC_021165.1    | Ca_kabuli_chr06 | 25652511                | CC                              | AA                | 1946446069               |
| SNP_P3_75643_25663257 | NC_021165.1    | Ca_kabuli_chr06 | 25663257                | GG                              | TT                | 1946446070               |
| SNP_P3_75644_25663277 | NC_021165.1    | Ca_kabuli_chr06 | 25663277                | AA                              | GG                | 1946446072               |
| SNP_P3_75645_25663331 | NC_021165.1    | Ca_kabuli_chr06 | 25663331                | TT                              | AA                | 1946446074               |
| SNP_P3_75646_25663338 | NC_021165.1    | Ca_kabuli_chr06 | 25663338                | TT                              | AA                | 1946446075               |
| SNP_P3_75648_25671405 | NC_021165.1    | Ca_kabuli_chr06 | 25671405                | TT                              | AA                | 1946446077               |
| SNP_P3_75649_25671453 | NC_021165.1    | Ca_kabuli_chr06 | 25671453                | AA                              | GG                | 1946446078               |
| SNP_P3_75650_25671783 | NC_021165.1    | Ca_kabuli_chr06 | 25671783                | AA                              | TT                | 1946446080               |
| SNP_P3_75651_25671912 | NC_021165.1    | Ca_kabuli_chr06 | 25671912                | TT                              | GG                | 1946446082               |
| SNP_P3_75652_25672063 | NC_021165.1    | Ca_kabuli_chr06 | 25672063                | AA                              | TT                | 1946446083               |
| SNP_P3_75653_25687449 | NC_021165.1    | Ca_kabuli_chr06 | 25687449                | GG                              | TT                | 1946446084               |
| SNP_P3_75654_25689448 | NC_021165.1    | Ca_kabuli_chr06 | 25689448                | TT                              | GG                | 1946446086               |
| SNP_P3_75655_25689457 | NC_021165.1    | Ca_kabuli_chr06 | 25689457                | TT                              | AA                | 1946446087               |
| SNP_P3_75656_25689760 | NC_021165.1    | Ca_kabuli_chr06 | 25689760                | GG                              | AA                | 1946446089               |
| SNP_P3_75658_25696573 | NC_021165.1    | Ca_kabuli_chr06 | 25696573                | GG                              | AA                | 1946446090               |
| SNP_P3_75659_25696574 | NC_021165.1    | Ca_kabuli_chr06 | 25696574                | TT                              | CC                | 1946446092               |
| SNP_P3_75660_25696584 | NC_021165.1    | Ca_kabuli_chr06 | 25696584                | CC                              | TT                | 1946446093               |
| SNP_P3_75661_25697054 | NC_021165.1    | Ca_kabuli_chr06 | 25697054                | CC                              | AA                | 1946446095               |
| SNP_P3_75662_25701682 | NC_021165.1    | Ca_kabuli_chr06 | 25701682                | CC                              | GG                | 1946446096               |
| SNP_P3_75663_25702029 | NC_021165.1    | Ca_kabuli_chr06 | 25702029                | AA                              | GG                | 1946446097               |
| SNP_P3_75664_25702096 | NC_021165.1    | Ca_kabuli_chr06 | 25702096                | TT                              | CC                | 1946446099               |
| SNP_P3_75665_25713250 | NC_021165.1    | Ca_kabuli_chr06 | 25713250                | AA                              | GG                | 1946446101               |
| SNP_P3_75666_25732724 | NC_021165.1    | Ca_kabuli_chr06 | 25732724                | GG                              | TT                | 1946446102               |
| SNP_P3_75667_25732744 | NC_021165.1    | Ca_kabuli_chr06 | 25732744                | AA                              | GG                | 1946446104               |
| SNP_P3_75668_25732751 | NC_021165.1    | Ca_kabuli_chr06 | 25732751                | AA                              | TT                | 1946446105               |
| SNP_P3_75669_25732752 | NC_021165.1    | Ca_kabuli_chr06 | 25732752                | AA                              | TT                | 1946446107               |
| SNP_P3_75670_25732992 | NC_021165.1    | Ca_kabuli_chr06 | 25732992                | AA                              | GG                | 1946446108               |
| SNP_P3_75671_25733010 | NC_021165.1    | Ca_kabuli_chr06 | 25733010                | TT                              | AA                | 1946446110               |
| SNP_P3_75672_25733031 | NC_021165.1    | Ca_kabuli_chr06 | 25733031                | AA                              | GG                | 1946446111               |
| SNP_P3_75673_25733584 | NC_021165.1    | Ca_kabuli_chr06 | 25733584                | TT                              | CC                | 1946446112               |
| SNP_P3_75674_25733620 | NC_021165.1    | Ca_kabuli_chr06 | 25733620                | CC                              | TT                | 1946446114               |
| SNP_P3_75675_25733627 | NC_021165.1    | Ca_kabuli_chr06 | 25733627                | GG                              | TT                | 1946446115               |
| SNP_P3_75677_25733743 | NC_021165.1    | Ca_kabuli_chr06 | 25733743                | AA                              | GG                | 1946446117               |
| SNP_P3_75678_25733745 | NC_021165.1    | Ca_kabuli_chr06 | 25733745                | GG                              | AA                | 1946446118               |
| SNP_P3_75679_25733746 | NC_021165.1    | Ca_kabuli_chr06 | 25733746                | TT                              | GG                | 1946446120               |
| SNP_P3_75680_25733920 | NC_021165.1    | Ca_kabuli_chr06 | 25733920                | GG                              | TT                | 1946446121               |
| SNP_P3_75681_25743297 | NC_021165.1    | Ca_kabuli_chr06 | 25743297                | GG                              | TT                | 1946446123               |
| SNP_P3_75682_25751760 | NC_021165.1    | Ca_kabuli_chr06 | 25751760                | AA                              | CC                | 1946446125               |
| SNP_P3_75683_25751821 | NC_021165.1    | Ca_kabuli_chr06 | 25751821                | TT                              | CC                | 1946446126               |

| SNPs IDs              | Chromosome IDs | Chromosomes     | Physical positions (bp) | CDC Frontier (Reference genome) | (Pusa 256 & HPNB) | NCBI SNPdb Accession IDs |
|-----------------------|----------------|-----------------|-------------------------|---------------------------------|-------------------|--------------------------|
| SNP_P3_75684_25751871 | NC_021165.1    | Ca_kabuli_chr06 | 25751871                | TT                              | CC                | 1946446127               |
| SNP_P3_75685_25752027 | NC_021165.1    | Ca_kabuli_chr06 | 25752027                | GG                              | AA                | 1946446129               |
| SNP_P3_75686_25752042 | NC_021165.1    | Ca_kabuli_chr06 | 25752042                | GG                              | AA                | 1946446130               |
| SNP_P3_75687_25752128 | NC_021165.1    | Ca_kabuli_chr06 | 25752128                | CC                              | TT                | 1946446132               |
| SNP_P3_75688_25752129 | NC_021165.1    | Ca_kabuli_chr06 | 25752129                | TT                              | GG                | 1946446133               |
| SNP_P3_75689_25753375 | NC_021165.1    | Ca_kabuli_chr06 | 25753375                | CC                              | TT                | 1946446135               |
| SNP_P3_75690_25754481 | NC_021165.1    | Ca_kabuli_chr06 | 25754481                | AA                              | GG                | 1946446136               |
| SNP_P3_75691_25754542 | NC_021165.1    | Ca_kabuli_chr06 | 25754542                | AA                              | GG                | 1946446137               |
| SNP_P3_75692_25754760 | NC_021165.1    | Ca_kabuli_chr06 | 25754760                | GG                              | AA                | 1946446139               |
| SNP_P3_75693_25757855 | NC_021165.1    | Ca_kabuli_chr06 | 25757855                | GG                              | AA                | 1946446140               |
| SNP_P3_75694_25757877 | NC_021165.1    | Ca_kabuli_chr06 | 25757877                | AA                              | GG                | 1946446142               |
| SNP_P3_75695_25758105 | NC_021165.1    | Ca_kabuli_chr06 | 25758105                | GG                              | AA                | 1946446143               |
| SNP_P3_75696_25758163 | NC_021165.1    | Ca_kabuli_chr06 | 25758163                | TT                              | AA                | 1946446145               |
| SNP_P3_75697_25769733 | NC_021165.1    | Ca_kabuli_chr06 | 25769733                | GG                              | TT                | 1946446147               |
| SNP_P3_75698_25773506 | NC_021165.1    | Ca_kabuli_chr06 | 25773506                | AA                              | GG                | 1946446148               |
| SNP_P3_75699_25785860 | NC_021165.1    | Ca_kabuli_chr06 | 25785860                | GG                              | TT                | 1946446149               |
| SNP_P3_75700_25786714 | NC_021165.1    | Ca_kabuli_chr06 | 25786714                | AA                              | GG                | 1946446151               |
| SNP_P3_75701_25789400 | NC_021165.1    | Ca_kabuli_chr06 | 25789400                | CC                              | TT                | 1946446152               |
| SNP_P3_75702_25789415 | NC_021165.1    | Ca_kabuli_chr06 | 25789415                | AA                              | GG                | 1946446154               |
| SNP_P3_75703_25789453 | NC_021165.1    | Ca_kabuli_chr06 | 25789453                | TT                              | GG                | 1946446155               |
| SNP_P3_75704_25789455 | NC_021165.1    | Ca_kabuli_chr06 | 25789455                | AA                              | TT                | 1946446157               |
| SNP_P3_75705_25789606 | NC_021165.1    | Ca_kabuli_chr06 | 25789606                | GG                              | TT                | 1946446158               |
| SNP_P3_75706_25789619 | NC_021165.1    | Ca_kabuli_chr06 | 25789619                | CC                              | TT                | 1946446160               |
| SNP_P3_75707_25797864 | NC_021165.1    | Ca_kabuli_chr06 | 25797864                | CC                              | GG                | 1946446161               |
| SNP_P3_75708_25833671 | NC_021165.1    | Ca_kabuli_chr06 | 25833671                | GG                              | AA                | 1946446163               |
| SNP_P3_75709_25834368 | NC_021165.1    | Ca_kabuli_chr06 | 25834368                | TT                              | GG                | 1946446164               |
| SNP_P3_75710_25834379 | NC_021165.1    | Ca_kabuli_chr06 | 25834379                | TT                              | CC                | 1946446165               |
| SNP_P3_75711_25851517 | NC_021165.1    | Ca_kabuli_chr06 | 25851517                | GG                              | AA                | 1946446167               |
| SNP_P3_75712_25867386 | NC_021165.1    | Ca_kabuli_chr06 | 25867386                | CC                              | TT                | 1946446169               |
| SNP_P3_75713_25867650 | NC_021165.1    | Ca_kabuli_chr06 | 25867650                | AA                              | GG                | 1946446170               |
| SNP_P3_75714_25867658 | NC_021165.1    | Ca_kabuli_chr06 | 25867658                | TT                              | CC                | 1946446172               |
| SNP_P3_75715_25867709 | NC_021165.1    | Ca_kabuli_chr06 | 25867709                | TT                              | GG                | 1946446173               |
| SNP_P3_75716_25867725 | NC_021165.1    | Ca_kabuli_chr06 | 25867725                | TT                              | CC                | 1946446175               |
| SNP_P3_75717_25867726 | NC_021165.1    | Ca_kabuli_chr06 | 25867726                | AA                              | GG                | 1946446176               |
| SNP_P3_75718_25867737 | NC_021165.1    | Ca_kabuli_chr06 | 25867737                | CC                              | TT                | 1946446178               |
| SNP_P3_75719_25867738 | NC_021165.1    | Ca_kabuli_chr06 | 25867738                | AA                              | GG                | 1946446179               |
| SNP_P3_75720_25867782 | NC_021165.1    | Ca_kabuli_chr06 | 25867782                | GG                              | CC                | 1946446181               |
| SNP_P3_75721_25869062 | NC_021165.1    | Ca_kabuli_chr06 | 25869062                | TT                              | GG                | 1946446182               |
| SNP_P3_75722_25869104 | NC_021165.1    | Ca_kabuli_chr06 | 25869104                | GG                              | AA                | 1946446183               |
| SNP_P3_75723_25869140 | NC_021165.1    | Ca_kabuli_chr06 | 25869140                | AA                              | CC                | 1946446185               |
| SNP_P3_75724_25869181 | NC_021165.1    | Ca_kabuli_chr06 | 25869181                | TT                              | CC                | 1946446186               |
| SNP_P3_75725_25869396 | NC_021165.1    | Ca_kabuli_chr06 | 25869396                | GG                              | CC                | 1946446188               |

| SNPs IDs              | Chromosome IDs | Chromosomes     | Physical positions (bp) | CDC Frontier (Reference genome) | (Pusa 256 & HPNB) | NCBI SNPdb Accession IDs |
|-----------------------|----------------|-----------------|-------------------------|---------------------------------|-------------------|--------------------------|
| SNP_P3_75726_25869437 | NC_021165.1    | Ca_kabuli_chr06 | 25869437                | CC                              | GG                | 1946446190               |
| SNP_P3_75727_25869441 | NC_021165.1    | Ca_kabuli_chr06 | 25869441                | TT                              | GG                | 1946446191               |
| SNP_P3_75728_25869463 | NC_021165.1    | Ca_kabuli_chr06 | 25869463                | GG                              | TT                | 1946446192               |
| SNP_P3_75729_25869497 | NC_021165.1    | Ca_kabuli_chr06 | 25869497                | CC                              | TT                | 1946446194               |
| SNP_P3_75730_25887069 | NC_021165.1    | Ca_kabuli_chr06 | 25887069                | TT                              | CC                | 1946446195               |
| SNP_P3_75731_25894425 | NC_021165.1    | Ca_kabuli_chr06 | 25894425                | CC                              | AA                | 1946446197               |
| SNP_P3_75732_25894744 | NC_021165.1    | Ca_kabuli_chr06 | 25894744                | CC                              | AA                | 1946446198               |
| SNP_P3_75733_25894748 | NC_021165.1    | Ca_kabuli_chr06 | 25894748                | TT                              | GG                | 1946446200               |
| SNP_P3_75734_25894765 | NC_021165.1    | Ca_kabuli_chr06 | 25894765                | GG                              | AA                | 1946446201               |
| SNP_P3_75735_25894795 | NC_021165.1    | Ca_kabuli_chr06 | 25894795                | AA                              | TT                | 1946446203               |
| SNP_P3_75736_25897498 | NC_021165.1    | Ca_kabuli_chr06 | 25897498                | TT                              | CC                | 1946446204               |
| SNP_P3_75737_25913844 | NC_021165.1    | Ca_kabuli_chr06 | 25913844                | TT                              | CC                | 1946446206               |
| SNP_P3_75738_25916500 | NC_021165.1    | Ca_kabuli_chr06 | 25916500                | AA                              | GG                | 1946446207               |
| SNP_P3_75739_25916504 | NC_021165.1    | Ca_kabuli_chr06 | 25916504                | TT                              | GG                | 1946446209               |
| SNP_P3_75740_25916522 | NC_021165.1    | Ca_kabuli_chr06 | 25916522                | AA                              | GG                | 1946446210               |
| SNP_P3_75741_25916531 | NC_021165.1    | Ca_kabuli_chr06 | 25916531                | TT                              | GG                | 1946446212               |
| SNP_P3_75742_25916541 | NC_021165.1    | Ca_kabuli_chr06 | 25916541                | AA                              | GG                | 1946446213               |
| SNP_P3_75743_25916552 | NC_021165.1    | Ca_kabuli_chr06 | 25916552                | TT                              | CC                | 1946446215               |
| SNP_P3_75744_25916568 | NC_021165.1    | Ca_kabuli_chr06 | 25916568                | TT                              | GG                | 1946446217               |
| SNP_P3_75745_25916587 | NC_021165.1    | Ca_kabuli_chr06 | 25916587                | GG                              | AA                | 1946446218               |
| SNP_P3_75746_25916600 | NC_021165.1    | Ca_kabuli_chr06 | 25916600                | GG                              | AA                | 1946446220               |
| SNP_P3_75747_25916624 | NC_021165.1    | Ca_kabuli_chr06 | 25916624                | AA                              | GG                | 1946446221               |
| SNP_P3_75748_25916625 | NC_021165.1    | Ca_kabuli_chr06 | 25916625                | AA                              | CC                | 1946446222               |
| SNP_P3_75749_25916630 | NC_021165.1    | Ca_kabuli_chr06 | 25916630                | CC                              | TT                | 1946446224               |
| SNP_P3_75751_25916663 | NC_021165.1    | Ca_kabuli_chr06 | 25916663                | TT                              | CC                | 1946446225               |
| SNP_P3_75752_25916902 | NC_021165.1    | Ca_kabuli_chr06 | 25916902                | AA                              | GG                | 1946446227               |
| SNP_P3_75753_25916935 | NC_021165.1    | Ca_kabuli_chr06 | 25916935                | CC                              | AA                | 1946446228               |
| SNP_P3_75754_25917007 | NC_021165.1    | Ca_kabuli_chr06 | 25917007                | GG                              | AA                | 1946446230               |
| SNP_P3_75755_25919514 | NC_021165.1    | Ca_kabuli_chr06 | 25919514                | CC                              | GG                | 1946446231               |
| SNP_P3_75756_25919812 | NC_021165.1    | Ca_kabuli_chr06 | 25919812                | TT                              | GG                | 1946446233               |
| SNP_P3_75757_25921482 | NC_021165.1    | Ca_kabuli_chr06 | 25921482                | AA                              | GG                | 1946446234               |
| SNP_P3_75758_25940934 | NC_021165.1    | Ca_kabuli_chr06 | 25940934                | CC                              | TT                | 1946446236               |
| SNP_P3_75759_25940940 | NC_021165.1    | Ca_kabuli_chr06 | 25940940                | CC                              | TT                | 1946446237               |
| SNP_P3_75760_25941032 | NC_021165.1    | Ca_kabuli_chr06 | 25941032                | AA                              | CC                | 1946446239               |
| SNP_P3_75761_25941060 | NC_021165.1    | Ca_kabuli_chr06 | 25941060                | AA                              | CC                | 1946446240               |
| SNP_P3_75762_25966973 | NC_021165.1    | Ca_kabuli_chr06 | 25966973                | CC                              | TT                | 1946446242               |
| SNP_P3_75763_25967564 | NC_021165.1    | Ca_kabuli_chr06 | 25967564                | TT                              | CC                | 1946446243               |
| SNP_P3_75764_25967573 | NC_021165.1    | Ca_kabuli_chr06 | 25967573                | TT                              | CC                | 1946446245               |
| SNP_P3_75765_25967655 | NC_021165.1    | Ca_kabuli_chr06 | 25967655                | CC                              | TT                | 1946446246               |
| SNP_P3_75766_25967668 | NC_021165.1    | Ca_kabuli_chr06 | 25967668                | TT                              | CC                | 1946446248               |
| SNP_P3_75767_25967706 | NC_021165.1    | Ca_kabuli_chr06 | 25967706                | GG                              | CC                | 1946446249               |
| SNP_P3_75768_25967713 | NC_021165.1    | Ca_kabuli_chr06 | 25967713                | CC                              | TT                | 1946446251               |

| SNPs IDs              | Chromosome IDs | Chromosomes     | Physical positions (bp) | CDC Frontier (Reference genome) | (Pusa 256 & HPNB) | NCBI SNPdb Accession IDs |
|-----------------------|----------------|-----------------|-------------------------|---------------------------------|-------------------|--------------------------|
| SNP_P3_75769_25968780 | NC_021165.1    | Ca_kabuli_chr06 | 25968780                | GG                              | AA                | 1946446252               |
| SNP_P3_75770_25968782 | NC_021165.1    | Ca_kabuli_chr06 | 25968782                | CC                              | TT                | 1946446254               |
| SNP_P3_75771_25979227 | NC_021165.1    | Ca_kabuli_chr06 | 25979227                | CC                              | TT                | 1946446256               |
| SNP_P3_75772_26022159 | NC_021165.1    | Ca_kabuli_chr06 | 26022159                | AA                              | CC                | 1946446257               |
| SNP_P3_75773_26022165 | NC_021165.1    | Ca_kabuli_chr06 | 26022165                | AA                              | GG                | 1946446258               |
| SNP_P3_75774_26027612 | NC_021165.1    | Ca_kabuli_chr06 | 26027612                | CC                              | TT                | 1946446260               |
| SNP_P3_75775_26027613 | NC_021165.1    | Ca_kabuli_chr06 | 26027613                | TT                              | CC                | 1946446261               |
| SNP_P3_75776_26027628 | NC_021165.1    | Ca_kabuli_chr06 | 26027628                | AA                              | GG                | 1946446263               |
| SNP_P3_75777_26027643 | NC_021165.1    | Ca_kabuli_chr06 | 26027643                | CC                              | AA                | 1946446264               |
| SNP_P3_75778_26027670 | NC_021165.1    | Ca_kabuli_chr06 | 26027670                | CC                              | GG                | 1946446266               |
| SNP_P3_75779_26027841 | NC_021165.1    | Ca_kabuli_chr06 | 26027841                | GG                              | CC                | 1946446267               |
| SNP_P3_75780_26030922 | NC_021165.1    | Ca_kabuli_chr06 | 26030922                | AA                              | TT                | 1946446269               |
| SNP_P3_75781_26059970 | NC_021165.1    | Ca_kabuli_chr06 | 26059970                | AA                              | TT                | 1946446270               |
| SNP_P3_75782_26060454 | NC_021165.1    | Ca_kabuli_chr06 | 26060454                | TT                              | GG                | 1946446272               |
| SNP_P3_75783_26060743 | NC_021165.1    | Ca_kabuli_chr06 | 26060743                | TT                              | GG                | 1946446273               |
| SNP_P3_75784_26065926 | NC_021165.1    | Ca_kabuli_chr06 | 26065926                | TT                              | GG                | 1946446275               |
| SNP_P3_75785_26066054 | NC_021165.1    | Ca_kabuli_chr06 | 26066054                | GG                              | AA                | 1946446276               |
| SNP_P3_75786_26066116 | NC_021165.1    | Ca_kabuli_chr06 | 26066116                | TT                              | CC                | 1946446278               |
| SNP_P3_75787_26066119 | NC_021165.1    | Ca_kabuli_chr06 | 26066119                | CC                              | AA                | 1946446279               |
| SNP_P3_75788_26066506 | NC_021165.1    | Ca_kabuli_chr06 | 26066506                | CC                              | TT                | 1946446281               |
| SNP_P3_75790_26095343 | NC_021165.1    | Ca_kabuli_chr06 | 26095343                | TT                              | CC                | 1946446282               |
| SNP_P3_75791_26095678 | NC_021165.1    | Ca_kabuli_chr06 | 26095678                | GG                              | AA                | 1946446284               |
| SNP_P3_75792_26095699 | NC_021165.1    | Ca_kabuli_chr06 | 26095699                | AA                              | GG                | 1946446285               |
| SNP_P3_75793_26123802 | NC_021165.1    | Ca_kabuli_chr06 | 26123802                | TT                              | AA                | 1946446286               |
| SNP_P3_75794_26124263 | NC_021165.1    | Ca_kabuli_chr06 | 26124263                | AA                              | CC                | 1946446288               |
| SNP_P3_75795_26131617 | NC_021165.1    | Ca_kabuli_chr06 | 26131617                | AA                              | GG                | 1946446289               |
| SNP_P3_75796_26131678 | NC_021165.1    | Ca_kabuli_chr06 | 26131678                | CC                              | TT                | 1946446291               |
| SNP_P3_75797_26131962 | NC_021165.1    | Ca_kabuli_chr06 | 26131962                | TT                              | CC                | 1946446292               |
| SNP_P3_75798_26132000 | NC_021165.1    | Ca_kabuli_chr06 | 26132000                | AA                              | TT                | 1946446294               |
| SNP_P3_75799_26132045 | NC_021165.1    | Ca_kabuli_chr06 | 26132045                | TT                              | AA                | 1946446295               |
| SNP_P3_75800_26132073 | NC_021165.1    | Ca_kabuli_chr06 | 26132073                | AA                              | GG                | 1946446296               |
| SNP_P3_75801_26132085 | NC_021165.1    | Ca_kabuli_chr06 | 26132085                | CC                              | GG                | 1946446298               |
| SNP_P3_75802_26132093 | NC_021165.1    | Ca_kabuli_chr06 | 26132093                | AA                              | GG                | 1946446300               |
| SNP_P3_75803_26135905 | NC_021165.1    | Ca_kabuli_chr06 | 26135905                | TT                              | CC                | 1946446301               |
| SNP_P3_75804_26136260 | NC_021165.1    | Ca_kabuli_chr06 | 26136260                | AA                              | GG                | 1946446303               |
| SNP_P3_75805_26140233 | NC_021165.1    | Ca_kabuli_chr06 | 26140233                | AA                              | TT                | 1946446304               |
| SNP_P3_75806_26152381 | NC_021165.1    | Ca_kabuli_chr06 | 26152381                | TT                              | GG                | 1946446306               |
| SNP_P3_75807_26159928 | NC_021165.1    | Ca_kabuli_chr06 | 26159928                | CC                              | GG                | 1946446307               |
| SNP_P3_75808_26159931 | NC_021165.1    | Ca_kabuli_chr06 | 26159931                | GG                              | AA                | 1946446309               |
| SNP_P3_75810_26170587 | NC_021165.1    | Ca_kabuli_chr06 | 26170587                | GG                              | TT                | 1946446310               |
| SNP_P3_75811_26209731 | NC_021165.1    | Ca_kabuli_chr06 | 26209731                | CC                              | TT                | 1946446311               |
| SNP_P3_75812_26215548 | NC_021165.1    | Ca_kabuli_chr06 | 26215548                | CC                              | TT                | 1946446313               |

| SNPs IDs              | Chromosome IDs | Chromosomes     | Physical positions (bp) | CDC Frontier (Reference genome) | (Pusa 256 & HPNB) | NCBI SNPdb Accession IDs |
|-----------------------|----------------|-----------------|-------------------------|---------------------------------|-------------------|--------------------------|
| SNP_P3_75813_26240103 | NC_021165.1    | Ca_kabuli_chr06 | 26240103                | CC                              | TT                | 1946446314               |
| SNP_P3_75814_26240562 | NC_021165.1    | Ca_kabuli_chr06 | 26240562                | TT                              | CC                | 1946446316               |
| SNP_P3_75815_26244243 | NC_021165.1    | Ca_kabuli_chr06 | 26244243                | TT                              | CC                | 1946446317               |
| SNP_P3_75816_26244266 | NC_021165.1    | Ca_kabuli_chr06 | 26244266                | GG                              | AA                | 1946446319               |
| SNP_P3_75817_26244267 | NC_021165.1    | Ca_kabuli_chr06 | 26244267                | GG                              | AA                | 1946446322               |
| SNP_P3_75818_26244282 | NC_021165.1    | Ca_kabuli_chr06 | 26244282                | TT                              | CC                | 1946446323               |
| SNP_P3_75819_26244306 | NC_021165.1    | Ca_kabuli_chr06 | 26244306                | CC                              | TT                | 1946446324               |
| SNP_P3_75820_26244308 | NC_021165.1    | Ca_kabuli_chr06 | 26244308                | GG                              | AA                | 1946446326               |
| SNP_P3_75821_26244315 | NC_021165.1    | Ca_kabuli_chr06 | 26244315                | AA                              | CC                | 1946446327               |
| SNP_P3_75822_26244318 | NC_021165.1    | Ca_kabuli_chr06 | 26244318                | TT                              | AA                | 1946446329               |
| SNP_P3_75823_26247924 | NC_021165.1    | Ca_kabuli_chr06 | 26247924                | GG                              | AA                | 1946446330               |
| SNP_P3_75824_26247957 | NC_021165.1    | Ca_kabuli_chr06 | 26247957                | CC                              | TT                | 1946446332               |
| SNP_P3_75825_26247969 | NC_021165.1    | Ca_kabuli_chr06 | 26247969                | CC                              | TT                | 1946446333               |
| SNP_P3_75826_26247987 | NC_021165.1    | Ca_kabuli_chr06 | 26247987                | CC                              | TT                | 1946446334               |
| SNP_P3_75827_26248015 | NC_021165.1    | Ca_kabuli_chr06 | 26248015                | AA                              | TT                | 1946446336               |
| SNP_P3_75828_26248026 | NC_021165.1    | Ca_kabuli_chr06 | 26248026                | TT                              | CC                | 1946446337               |
| SNP_P3_75829_26248041 | NC_021165.1    | Ca_kabuli_chr06 | 26248041                | TT                              | GG                | 1946446339               |
| SNP_P3_75830_26248062 | NC_021165.1    | Ca_kabuli_chr06 | 26248062                | AA                              | GG                | 1946446340               |
| SNP_P3_75831_26248237 | NC_021165.1    | Ca_kabuli_chr06 | 26248237                | GG                              | TT                | 1946446342               |
| SNP_P3_75832_26248568 | NC_021165.1    | Ca_kabuli_chr06 | 26248568                | CC                              | GG                | 1946446343               |
| SNP_P3_75833_26248607 | NC_021165.1    | Ca_kabuli_chr06 | 26248607                | TT                              | GG                | 1946446345               |
| SNP_P3_75834_26254752 | NC_021165.1    | Ca_kabuli_chr06 | 26254752                | AA                              | GG                | 1946446346               |
| SNP_P3_75835_26255885 | NC_021165.1    | Ca_kabuli_chr06 | 26255885                | TT                              | CC                | 1946446348               |
| SNP_P3_75836_26255894 | NC_021165.1    | Ca_kabuli_chr06 | 26255894                | AA                              | GG                | 1946446349               |
| SNP_P3_75837_26255907 | NC_021165.1    | Ca_kabuli_chr06 | 26255907                | CC                              | AA                | 1946446351               |
| SNP_P3_75838_26256273 | NC_021165.1    | Ca_kabuli_chr06 | 26256273                | AA                              | CC                | 1946446352               |
| SNP_P3_75839_26256507 | NC_021165.1    | Ca_kabuli_chr06 | 26256507                | CC                              | TT                | 1946446353               |
| SNP_P3_75840_26267748 | NC_021165.1    | Ca_kabuli_chr06 | 26267748                | TT                              | GG                | 1946446355               |
| SNP_P3_75841_26277580 | NC_021165.1    | Ca_kabuli_chr06 | 26277580                | CC                              | TT                | 1946446356               |
| SNP_P3_75843_26277714 | NC_021165.1    | Ca_kabuli_chr06 | 26277714                | GG                              | TT                | 1946446358               |
| SNP_P3_75844_26277723 | NC_021165.1    | Ca_kabuli_chr06 | 26277723                | CC                              | TT                | 1946446359               |
| SNP_P3_75846_26277876 | NC_021165.1    | Ca_kabuli_chr06 | 26277876                | AA                              | TT                | 1946446360               |
| SNP_P3_75847_26277892 | NC_021165.1    | Ca_kabuli_chr06 | 26277892                | CC                              | TT                | 1946446362               |
| SNP_P3_75848_26277912 | NC_021165.1    | Ca_kabuli_chr06 | 26277912                | TT                              | CC                | 1946446363               |
| SNP_P3_75849_26277924 | NC_021165.1    | Ca_kabuli_chr06 | 26277924                | CC                              | AA                | 1946446365               |
| SNP_P3_75850_26278053 | NC_021165.1    | Ca_kabuli_chr06 | 26278053                | CC                              | TT                | 1946446366               |
| SNP_P3_75851_26278101 | NC_021165.1    | Ca_kabuli_chr06 | 26278101                | AA                              | GG                | 1946446368               |
| SNP_P3_75852_26278114 | NC_021165.1    | Ca_kabuli_chr06 | 26278114                | AA                              | GG                | 1946446369               |
| SNP_P3_75853_26278238 | NC_021165.1    | Ca_kabuli_chr06 | 26278238                | TT                              | CC                | 1946446371               |
| SNP_P3_75854_26278239 | NC_021165.1    | Ca_kabuli_chr06 | 26278239                | AA                              | GG                | 1946446372               |
| SNP_P3_75855_26278254 | NC_021165.1    | Ca_kabuli_chr06 | 26278254                | CC                              | TT                | 1946446373               |
| SNP_P3_75856_26278271 | NC_021165.1    | Ca_kabuli_chr06 | 26278271                | AA                              | GG                | 1946446375               |

| SNPs IDs              | Chromosome IDs | Chromosomes     | Physical positions (bp) | CDC Frontier (Reference genome) | (Pusa 256 & HPNB) | NCBI SNPdb Accession IDs |
|-----------------------|----------------|-----------------|-------------------------|---------------------------------|-------------------|--------------------------|
| SNP_P3_75857_26278309 | NC_021165.1    | Ca_kabuli_chr06 | 26278309                | TT                              | GG                | 1946446376               |
| SNP_P3_75859_26278678 | NC_021165.1    | Ca_kabuli_chr06 | 26278678                | AA                              | GG                | 1946446378               |
| SNP_P3_75860_26283779 | NC_021165.1    | Ca_kabuli_chr06 | 26283779                | TT                              | CC                | 1946446379               |
| SNP_P3_75861_26283784 | NC_021165.1    | Ca_kabuli_chr06 | 26283784                | AA                              | GG                | 1946446381               |
| SNP_P3_75862_26286409 | NC_021165.1    | Ca_kabuli_chr06 | 26286409                | TT                              | CC                | 1946446382               |
| SNP_P3_75863_26286460 | NC_021165.1    | Ca_kabuli_chr06 | 26286460                | AA                              | GG                | 1946446384               |
| SNP_P3_75864_26286807 | NC_021165.1    | Ca_kabuli_chr06 | 26286807                | AA                              | TT                | 1946446385               |
| SNP_P3_75865_26286810 | NC_021165.1    | Ca_kabuli_chr06 | 26286810                | GG                              | AA                | 1946446387               |
| SNP_P3_75866_26286831 | NC_021165.1    | Ca_kabuli_chr06 | 26286831                | AA                              | CC                | 1946446388               |
| SNP_P3_75867_26286889 | NC_021165.1    | Ca_kabuli_chr06 | 26286889                | GG                              | TT                | 1946446390               |
| SNP_P3_75868_26286894 | NC_021165.1    | Ca_kabuli_chr06 | 26286894                | AA                              | TT                | 1946446391               |
| SNP_P3_75869_26297740 | NC_021165.1    | Ca_kabuli_chr06 | 26297740                | AA                              | GG                | 1946446392               |
| SNP_P3_75870_26297895 | NC_021165.1    | Ca_kabuli_chr06 | 26297895                | TT                              | CC                | 1946446394               |
| SNP_P3_75871_26297915 | NC_021165.1    | Ca_kabuli_chr06 | 26297915                | TT                              | CC                | 1946446395               |
| SNP_P3_75872_26298112 | NC_021165.1    | Ca_kabuli_chr06 | 26298112                | TT                              | CC                | 1946446397               |
| SNP_P3_75873_26307574 | NC_021165.1    | Ca_kabuli_chr06 | 26307574                | GG                              | AA                | 1946446398               |
| SNP_P3_75874_26309298 | NC_021165.1    | Ca_kabuli_chr06 | 26309298                | GG                              | AA                | 1946446400               |
| SNP_P3_75875_26309307 | NC_021165.1    | Ca_kabuli_chr06 | 26309307                | TT                              | CC                | 1946446401               |
| SNP_P3_75876_26309581 | NC_021165.1    | Ca_kabuli_chr06 | 26309581                | AA                              | TT                | 1946446402               |
| SNP_P3_75877_26309641 | NC_021165.1    | Ca_kabuli_chr06 | 26309641                | TT                              | CC                | 1946446404               |
| SNP_P3_75878_26309955 | NC_021165.1    | Ca_kabuli_chr06 | 26309955                | AA                              | GG                | 1946446406               |
| SNP_P3_75879_26349778 | NC_021165.1    | Ca_kabuli_chr06 | 26349778                | GG                              | AA                | 1946446407               |
| SNP_P3_75880_26349854 | NC_021165.1    | Ca_kabuli_chr06 | 26349854                | GG                              | AA                | 1946446409               |
| SNP_P3_75881_26349935 | NC_021165.1    | Ca_kabuli_chr06 | 26349935                | TT                              | AA                | 1946446410               |
| SNP_P3_75882_26350007 | NC_021165.1    | Ca_kabuli_chr06 | 26350007                | AA                              | CC                | 1946446412               |
| SNP_P3_75883_26350036 | NC_021165.1    | Ca_kabuli_chr06 | 26350036                | CC                              | GG                | 1946446413               |
| SNP_P3_75884_26350137 | NC_021165.1    | Ca_kabuli_chr06 | 26350137                | CC                              | TT                | 1946446414               |
| SNP_P3_75885_26350198 | NC_021165.1    | Ca_kabuli_chr06 | 26350198                | GG                              | AA                | 1946446416               |
| SNP_P3_75886_26353512 | NC_021165.1    | Ca_kabuli_chr06 | 26353512                | TT                              | CC                | 1946446417               |
| SNP_P3_75887_26353740 | NC_021165.1    | Ca_kabuli_chr06 | 26353740                | CC                              | GG                | 1946446419               |
| SNP_P3_75888_26354046 | NC_021165.1    | Ca_kabuli_chr06 | 26354046                | GG                              | AA                | 1946446420               |
| SNP_P3_75889_26354118 | NC_021165.1    | Ca_kabuli_chr06 | 26354118                | AA                              | GG                | 1946446422               |
| SNP_P3_75891_26363459 | NC_021165.1    | Ca_kabuli_chr06 | 26363459                | TT                              | CC                | 1946446423               |
| SNP_P3_75892_26363461 | NC_021165.1    | Ca_kabuli_chr06 | 26363461                | AA                              | TT                | 1946446424               |
| SNP_P3_75893_26374810 | NC_021165.1    | Ca_kabuli_chr06 | 26374810                | AA                              | GG                | 1946446426               |
| SNP_P3_75894_26374816 | NC_021165.1    | Ca_kabuli_chr06 | 26374816                | TT                              | CC                | 1946446428               |
| SNP_P3_75895_26374829 | NC_021165.1    | Ca_kabuli_chr06 | 26374829                | CC                              | TT                | 1946446429               |
| SNP_P3_75896_26375198 | NC_021165.1    | Ca_kabuli_chr06 | 26375198                | AA                              | GG                | 1946446431               |
| SNP_P3_75897_26378032 | NC_021165.1    | Ca_kabuli_chr06 | 26378032                | GG                              | TT                | 1946446432               |
| SNP_P3_75898_26415899 | NC_021165.1    | Ca_kabuli_chr06 | 26415899                | AA                              | GG                | 1946446434               |
| SNP_P3_75901_26438823 | NC_021165.1    | Ca_kabuli_chr06 | 26438823                | GG                              | TT                | 1946446435               |
| SNP_P3_75902_26454472 | NC_021165.1    | Ca_kabuli_chr06 | 26454472                | GG                              | AA                | 1946446437               |

| SNPs IDs              | Chromosome IDs | Chromosomes     | Physical positions (bp) | CDC Frontier (Reference genome) | (Pusa 256 & HPNB) | NCBI SNPdb Accession IDs |
|-----------------------|----------------|-----------------|-------------------------|---------------------------------|-------------------|--------------------------|
| SNP_P3_75904_26486521 | NC_021165.1    | Ca_kabuli_chr06 | 26486521                | TT                              | GG                | 1946446438               |
| SNP_P3_75905_26523138 | NC_021165.1    | Ca_kabuli_chr06 | 26523138                | AA                              | GG                | 1946446440               |
| SNP_P3_75906_26560583 | NC_021165.1    | Ca_kabuli_chr06 | 26560583                | TT                              | CC                | 1946446441               |
| SNP_P3_75907_26560600 | NC_021165.1    | Ca_kabuli_chr06 | 26560600                | AA                              | GG                | 1946446442               |
| SNP_P3_75908_26560605 | NC_021165.1    | Ca_kabuli_chr06 | 26560605                | AA                              | GG                | 1946446444               |
| SNP_P3_75909_26561013 | NC_021165.1    | Ca_kabuli_chr06 | 26561013                | GG                              | AA                | 1946446445               |
| SNP_P3_75910_26594728 | NC_021165.1    | Ca_kabuli_chr06 | 26594728                | CC                              | TT                | 1946446447               |
| SNP_P3_75911_26614647 | NC_021165.1    | Ca_kabuli_chr06 | 26614647                | CC                              | TT                | 1946446448               |
| SNP_P3_75912_26616469 | NC_021165.1    | Ca_kabuli_chr06 | 26616469                | AA                              | GG                | 1946446450               |
| SNP_P3_75913_26630133 | NC_021165.1    | Ca_kabuli_chr06 | 26630133                | AA                              | GG                | 1946446451               |
| SNP_P3_75914_26642860 | NC_021165.1    | Ca_kabuli_chr06 | 26642860                | GG                              | TT                | 1946446453               |
| SNP_P3_75915_26650224 | NC_021165.1    | Ca_kabuli_chr06 | 26650224                | GG                              | AA                | 1946446454               |
| SNP_P3_75919_26673881 | NC_021165.1    | Ca_kabuli_chr06 | 26673881                | AA                              | GG                | 1946446456               |
| SNP_P3_75920_26674045 | NC_021165.1    | Ca_kabuli_chr06 | 26674045                | AA                              | TT                | 1946446457               |
| SNP_P3_75921_26685959 | NC_021165.1    | Ca_kabuli_chr06 | 26685959                | GG                              | CC                | 1946446459               |
| SNP_P3_75922_26686077 | NC_021165.1    | Ca_kabuli_chr06 | 26686077                | AA                              | TT                | 1946446460               |
| SNP_P3_75924_26686587 | NC_021165.1    | Ca_kabuli_chr06 | 26686587                | CC                              | TT                | 1946446461               |
| SNP_P3_75925_26721786 | NC_021165.1    | Ca_kabuli_chr06 | 26721786                | GG                              | TT                | 1946446463               |
| SNP_P3_75926_26727925 | NC_021165.1    | Ca_kabuli_chr06 | 26727925                | CC                              | TT                | 1946446464               |
| SNP_P3_75927_26754861 | NC_021165.1    | Ca_kabuli_chr06 | 26754861                | TT                              | CC                | 1946446466               |
| SNP_P3_75928_26761725 | NC_021165.1    | Ca_kabuli_chr06 | 26761725                | AA                              | GG                | 1946446467               |
| SNP_P3_75929_26774281 | NC_021165.1    | Ca_kabuli_chr06 | 26774281                | TT                              | AA                | 1946446469               |
| SNP_P3_75932_26828982 | NC_021165.1    | Ca_kabuli_chr06 | 26828982                | CC                              | AA                | 1946446471               |
| SNP_P3_75933_26828987 | NC_021165.1    | Ca_kabuli_chr06 | 26828987                | TT                              | GG                | 1946446472               |
| SNP_P3_75934_26831834 | NC_021165.1    | Ca_kabuli_chr06 | 26831834                | AA                              | GG                | 1946446474               |
| SNP_P3_75935_26842169 | NC_021165.1    | Ca_kabuli_chr06 | 26842169                | AA                              | GG                | 1946446475               |
| SNP_P3_75936_26859454 | NC_021165.1    | Ca_kabuli_chr06 | 26859454                | TT                              | GG                | 1946446477               |
| SNP_P3_75937_26859457 | NC_021165.1    | Ca_kabuli_chr06 | 26859457                | AA                              | CC                | 1946446478               |
| SNP_P3_75938_26867663 | NC_021165.1    | Ca_kabuli_chr06 | 26867663                | TT                              | GG                | 1946446480               |
| SNP_P3_75940_26887899 | NC_021165.1    | Ca_kabuli_chr06 | 26887899                | GG                              | CC                | 1946446481               |
| SNP_P3_75941_26931208 | NC_021165.1    | Ca_kabuli_chr06 | 26931208                | TT                              | AA                | 1946446482               |
| SNP_P3_75942_26931771 | NC_021165.1    | Ca_kabuli_chr06 | 26931771                | CC                              | GG                | 1946446484               |
| SNP_P3_75944_26935538 | NC_021165.1    | Ca_kabuli_chr06 | 26935538                | GG                              | AA                | 1946446485               |
| SNP_P3_75945_26937699 | NC_021165.1    | Ca_kabuli_chr06 | 26937699                | CC                              | TT                | 1946446487               |
| SNP_P3_75946_26941374 | NC_021165.1    | Ca_kabuli_chr06 | 26941374                | TT                              | CC                | 1946446488               |
| SNP_P3_75947_26946222 | NC_021165.1    | Ca_kabuli_chr06 | 26946222                | CC                              | TT                | 1946446490               |
| SNP_P3_75948_26946328 | NC_021165.1    | Ca_kabuli_chr06 | 26946328                | TT                              | CC                | 1946446491               |
| SNP_P3_75949_26949873 | NC_021165.1    | Ca_kabuli_chr06 | 26949873                | AA                              | TT                | 1946446493               |
| SNP_P3_75950_26949946 | NC_021165.1    | Ca_kabuli_chr06 | 26949946                | GG                              | CC                | 1946446494               |
| SNP_P3_75951_27007705 | NC_021165.1    | Ca_kabuli_chr06 | 27007705                | TT                              | CC                | 1946446496               |
| SNP_P3_75952_27007713 | NC_021165.1    | Ca_kabuli_chr06 | 27007713                | CC                              | AA                | 1946446497               |
| SNP_P3_75953_27007721 | NC_021165.1    | Ca_kabuli_chr06 | 27007721                | GG                              | CC                | 1946446499               |



| SNPs IDs              | Chromosome IDs | Chromosomes     | Physical positions (bp) | CDC Frontier (Reference genome) | (Pusa 256 & HPNB) | NCBI SNPdb Accession IDs |
|-----------------------|----------------|-----------------|-------------------------|---------------------------------|-------------------|--------------------------|
| SNP_P3_75954_27007727 | NC_021165.1    | Ca_kabuli_chr06 | 27007727                | GG                              | TT                | 1946446500               |
| SNP_P3_75955_27008100 | NC_021165.1    | Ca_kabuli_chr06 | 27008100                | GG                              | AA                | 1946446501               |
| SNP_P3_75956_27008119 | NC_021165.1    | Ca_kabuli_chr06 | 27008119                | AA                              | GG                | 1946446503               |
| SNP_P3_75957_27008131 | NC_021165.1    | Ca_kabuli_chr06 | 27008131                | TT                              | CC                | 1946446504               |
| SNP_P3_75959_27009612 | NC_021165.1    | Ca_kabuli_chr06 | 27009612                | AA                              | GG                | 1946446506               |
| SNP_P3_75960_27021813 | NC_021165.1    | Ca_kabuli_chr06 | 27021813                | GG                              | AA                | 1946446507               |
| SNP_P3_75961_27022543 | NC_021165.1    | Ca_kabuli_chr06 | 27022543                | AA                              | GG                | 1946446509               |
| SNP_P3_75962_27027533 | NC_021165.1    | Ca_kabuli_chr06 | 27027533                | AA                              | GG                | 1946446510               |
| SNP_P3_75963_27027764 | NC_021165.1    | Ca_kabuli_chr06 | 27027764                | CC                              | TT                | 1946446512               |
| SNP_P3_75964_27039047 | NC_021165.1    | Ca_kabuli_chr06 | 27039047                | CC                              | TT                | 1946446513               |
| SNP_P3_75965_27039074 | NC_021165.1    | Ca_kabuli_chr06 | 27039074                | AA                              | GG                | 1946446514               |
| SNP_P3_75966_27039094 | NC_021165.1    | Ca_kabuli_chr06 | 27039094                | CC                              | TT                | 1946446516               |
| SNP_P3_75967_27039133 | NC_021165.1    | Ca_kabuli_chr06 | 27039133                | GG                              | AA                | 1946446518               |
| SNP_P3_75968_27039138 | NC_021165.1    | Ca_kabuli_chr06 | 27039138                | TT                              | CC                | 1946446519               |
| SNP_P3_75969_27039348 | NC_021165.1    | Ca_kabuli_chr06 | 27039348                | AA                              | TT                | 1946446521               |
| SNP_P3_75970_27039409 | NC_021165.1    | Ca_kabuli_chr06 | 27039409                | TT                              | GG                | 1946446522               |
| SNP_P3_75971_27061893 | NC_021165.1    | Ca_kabuli_chr06 | 27061893                | CC                              | TT                | 1946446524               |
| SNP_P3_75972_27067743 | NC_021165.1    | Ca_kabuli_chr06 | 27067743                | GG                              | AA                | 1946446525               |
| SNP_P3_75973_27067792 | NC_021165.1    | Ca_kabuli_chr06 | 27067792                | CC                              | TT                | 1946446527               |
| SNP_P3_75974_27073674 | NC_021165.1    | Ca_kabuli_chr06 | 27073674                | TT                              | CC                | 1946446528               |
| SNP_P3_75975_27075333 | NC_021165.1    | Ca_kabuli_chr06 | 27075333                | AA                              | GG                | 1946446530               |
| SNP_P3_75976_27099977 | NC_021165.1    | Ca_kabuli_chr06 | 27099977                | TT                              | AA                | 1946446531               |
| SNP_P3_75977_27107825 | NC_021165.1    | Ca_kabuli_chr06 | 27107825                | TT                              | CC                | 1946446532               |
| SNP_P3_75978_27108197 | NC_021165.1    | Ca_kabuli_chr06 | 27108197                | TT                              | GG                | 1946446534               |
| SNP_P3_75981_27171319 | NC_021165.1    | Ca_kabuli_chr06 | 27171319                | AA                              | TT                | 1946446535               |
| SNP_P3_75982_27172148 | NC_021165.1    | Ca_kabuli_chr06 | 27172148                | TT                              | CC                | 1946446537               |
| SNP_P3_75983_27172158 | NC_021165.1    | Ca_kabuli_chr06 | 27172158                | TT                              | CC                | 1946446539               |
| SNP_P3_75984_27184137 | NC_021165.1    | Ca_kabuli_chr06 | 27184137                | CC                              | AA                | 1946446540               |
| SNP_P3_75985_27194492 | NC_021165.1    | Ca_kabuli_chr06 | 27194492                | GG                              | AA                | 1946446541               |
| SNP_P3_75986_27195950 | NC_021165.1    | Ca_kabuli_chr06 | 27195950                | CC                              | AA                | 1946446543               |
| SNP_P3_75987_27207423 | NC_021165.1    | Ca_kabuli_chr06 | 27207423                | GG                              | AA                | 1946446544               |
| SNP_P3_75988_27262207 | NC_021165.1    | Ca_kabuli_chr06 | 27262207                | TT                              | AA                | 1946446546               |
| SNP_P3_75991_27289118 | NC_021165.1    | Ca_kabuli_chr06 | 27289118                | CC                              | GG                | 1946446547               |
| SNP_P3_75992_27306007 | NC_021165.1    | Ca_kabuli_chr06 | 27306007                | CC                              | GG                | 1946446549               |
| SNP_P3_75994_27317427 | NC_021165.1    | Ca_kabuli_chr06 | 27317427                | CC                              | TT                | 1946446550               |
| SNP_P3_75995_27317475 | NC_021165.1    | Ca_kabuli_chr06 | 27317475                | AA                              | TT                | 1946446551               |
| SNP_P3_75996_27317476 | NC_021165.1    | Ca_kabuli_chr06 | 27317476                | AA                              | TT                | 1946446553               |
| SNP_P3_75997_27318692 | NC_021165.1    | Ca_kabuli_chr06 | 27318692                | AA                              | GG                | 1946446554               |
| SNP_P3_75998_27324831 | NC_021165.1    | Ca_kabuli_chr06 | 27324831                | TT                              | CC                | 1946446556               |
| SNP_P3_76000_27357661 | NC_021165.1    | Ca_kabuli_chr06 | 27357661                | TT                              | CC                | 1946446557               |
| SNP_P3_76001_27357662 | NC_021165.1    | Ca_kabuli_chr06 | 27357662                | TT                              | GG                | 1946446559               |
| SNP_P3_76002_27357670 | NC_021165.1    | Ca_kabuli_chr06 | 27357670                | AA                              | TT                | 1946446560               |

| SNPs IDs              | Chromosome IDs | Chromosomes     | Physical positions (bp) | CDC Frontier (Reference genome) | (Pusa 256 & HPNB) | NCBI SNPdb Accession IDs |
|-----------------------|----------------|-----------------|-------------------------|---------------------------------|-------------------|--------------------------|
| SNP_P3_76003_27360223 | NC_021165.1    | Ca_kabuli_chr06 | 27360223                | AA                              | GG                | 1946446562               |
| SNP_P3_76004_27391228 | NC_021165.1    | Ca_kabuli_chr06 | 27391228                | AA                              | GG                | 1946446563               |
| SNP_P3_76005_27417573 | NC_021165.1    | Ca_kabuli_chr06 | 27417573                | GG                              | TT                | 1946446565               |
| SNP_P3_76006_27445381 | NC_021165.1    | Ca_kabuli_chr06 | 27445381                | GG                              | AA                | 1946446566               |
| SNP_P3_76009_27453980 | NC_021165.1    | Ca_kabuli_chr06 | 27453980                | TT                              | AA                | 1946446568               |
| SNP_P3_76010_27453982 | NC_021165.1    | Ca_kabuli_chr06 | 27453982                | CC                              | AA                | 1946446569               |
| SNP_P3_76011_27471436 | NC_021165.1    | Ca_kabuli_chr06 | 27471436                | GG                              | AA                | 1946446571               |
| SNP_P3_76012_27474009 | NC_021165.1    | Ca_kabuli_chr06 | 27474009                | GG                              | AA                | 1946446572               |
| SNP_P3_76013_27476338 | NC_021165.1    | Ca_kabuli_chr06 | 27476338                | GG                              | AA                | 1946446573               |
| SNP_P3_76014_27497197 | NC_021165.1    | Ca_kabuli_chr06 | 27497197                | AA                              | GG                | 1946446575               |
| SNP_P3_76015_27503870 | NC_021165.1    | Ca_kabuli_chr06 | 27503870                | TT                              | AA                | 1946446576               |
| SNP_P3_76017_27522518 | NC_021165.1    | Ca_kabuli_chr06 | 27522518                | AA                              | TT                | 1946446578               |
| SNP_P3_76018_27522520 | NC_021165.1    | Ca_kabuli_chr06 | 27522520                | TT                              | GG                | 1946446579               |
| SNP_P3_76019_27522573 | NC_021165.1    | Ca_kabuli_chr06 | 27522573                | TT                              | GG                | 1946446581               |
| SNP_P3_76020_27523195 | NC_021165.1    | Ca_kabuli_chr06 | 27523195                | GG                              | AA                | 1946446582               |
| SNP_P3_76021_27529449 | NC_021165.1    | Ca_kabuli_chr06 | 27529449                | AA                              | CC                | 1946446584               |
| SNP_P3_76022_27529450 | NC_021165.1    | Ca_kabuli_chr06 | 27529450                | TT                              | AA                | 1946446585               |
| SNP_P3_76024_27553872 | NC_021165.1    | Ca_kabuli_chr06 | 27553872                | TT                              | CC                | 1946446587               |
| SNP_P3_76025_27561995 | NC_021165.1    | Ca_kabuli_chr06 | 27561995                | AA                              | GG                | 1946446588               |
| SNP_P3_76026_27609895 | NC_021165.1    | Ca_kabuli_chr06 | 27609895                | CC                              | TT                | 1946446590               |
| SNP_P3_76027_27611823 | NC_021165.1    | Ca_kabuli_chr06 | 27611823                | GG                              | AA                | 1946446591               |
| SNP_P3_76028_27624987 | NC_021165.1    | Ca_kabuli_chr06 | 27624987                | TT                              | CC                | 1946446593               |
| SNP_P3_76029_27626460 | NC_021165.1    | Ca_kabuli_chr06 | 27626460                | GG                              | AA                | 1946446594               |
| SNP_P3_76030_27640955 | NC_021165.1    | Ca_kabuli_chr06 | 27640955                | GG                              | AA                | 1946446596               |
| SNP_P3_76031_27640961 | NC_021165.1    | Ca_kabuli_chr06 | 27640961                | AA                              | GG                | 1946446597               |
| SNP_P3_76032_27641083 | NC_021165.1    | Ca_kabuli_chr06 | 27641083                | AA                              | GG                | 1946446598               |
| SNP_P3_76033_27641091 | NC_021165.1    | Ca_kabuli_chr06 | 27641091                | CC                              | AA                | 1946446600               |
| SNP_P3_76034_27641107 | NC_021165.1    | Ca_kabuli_chr06 | 27641107                | AA                              | CC                | 1946446602               |
| SNP_P3_76035_27641141 | NC_021165.1    | Ca_kabuli_chr06 | 27641141                | GG                              | AA                | 1946446603               |
| SNP_P3_76037_27694779 | NC_021165.1    | Ca_kabuli_chr06 | 27694779                | GG                              | AA                | 1946446605               |
| SNP_P3_76038_27700847 | NC_021165.1    | Ca_kabuli_chr06 | 27700847                | CC                              | TT                | 1946446606               |
| SNP_P3_76039_27756138 | NC_021165.1    | Ca_kabuli_chr06 | 27756138                | CC                              | AA                | 1946446608               |
| SNP_P3_76040_27756449 | NC_021165.1    | Ca_kabuli_chr06 | 27756449                | TT                              | CC                | 1946446610               |
| SNP_P3_76041_27756473 | NC_021165.1    | Ca_kabuli_chr06 | 27756473                | TT                              | GG                | 1946446611               |
| SNP_P3_76042_27756484 | NC_021165.1    | Ca_kabuli_chr06 | 27756484                | TT                              | CC                | 1946446612               |
| SNP_P3_76043_27756489 | NC_021165.1    | Ca_kabuli_chr06 | 27756489                | AA                              | GG                | 1946446614               |
| SNP_P3_76044_27773683 | NC_021165.1    | Ca_kabuli_chr06 | 27773683                | AA                              | CC                | 1946446615               |
| SNP_P3_76045_27777082 | NC_021165.1    | Ca_kabuli_chr06 | 27777082                | GG                              | AA                | 1946446617               |
| SNP_P3_76046_27777083 | NC_021165.1    | Ca_kabuli_chr06 | 27777083                | CC                              | TT                | 1946446618               |
| SNP_P3_76047_27777118 | NC_021165.1    | Ca_kabuli_chr06 | 27777118                | CC                              | GG                | 1946446620               |
| SNP_P3_76048_27777329 | NC_021165.1    | Ca_kabuli_chr06 | 27777329                | CC                              | TT                | 1946446621               |
| SNP_P3_76049_27777350 | NC_021165.1    | Ca_kabuli_chr06 | 27777350                | TT                              | CC                | 1946446623               |

| SNPs IDs              | Chromosome IDs | Chromosomes     | Physical positions (bp) | CDC Frontier (Reference genome) | (Pusa 256 & HPNB) | NCBI SNPdb Accession IDs |
|-----------------------|----------------|-----------------|-------------------------|---------------------------------|-------------------|--------------------------|
| SNP_P3_76050_27778695 | NC_021165.1    | Ca_kabuli_chr06 | 27778695                | AA                              | GG                | 1946446624               |
| SNP_P3_76051_27798115 | NC_021165.1    | Ca_kabuli_chr06 | 27798115                | CC                              | AA                | 1946446626               |
| SNP_P3_76052_27814915 | NC_021165.1    | Ca_kabuli_chr06 | 27814915                | TT                              | CC                | 1946446627               |
| SNP_P3_76053_27889354 | NC_021165.1    | Ca_kabuli_chr06 | 27889354                | TT                              | CC                | 1946446629               |
| SNP_P3_76054_27902014 | NC_021165.1    | Ca_kabuli_chr06 | 27902014                | AA                              | GG                | 1946446630               |
| SNP_P3_76055_27902168 | NC_021165.1    | Ca_kabuli_chr06 | 27902168                | CC                              | TT                | 1946446632               |
| SNP_P3_76056_27902221 | NC_021165.1    | Ca_kabuli_chr06 | 27902221                | TT                              | CC                | 1946446633               |
| SNP_P3_76057_27902538 | NC_021165.1    | Ca_kabuli_chr06 | 27902538                | CC                              | AA                | 1946446635               |
| SNP_P3_76058_27902542 | NC_021165.1    | Ca_kabuli_chr06 | 27902542                | AA                              | GG                | 1946446636               |
| SNP_P3_76059_27902620 | NC_021165.1    | Ca_kabuli_chr06 | 27902620                | GG                              | AA                | 1946446638               |
| SNP_P3_76060_27910427 | NC_021165.1    | Ca_kabuli_chr06 | 27910427                | AA                              | GG                | 1946446639               |
| SNP_P3_76061_27910476 | NC_021165.1    | Ca_kabuli_chr06 | 27910476                | GG                              | TT                | 1946446641               |
| SNP_P3_76062_27910486 | NC_021165.1    | Ca_kabuli_chr06 | 27910486                | TT                              | CC                | 1946446642               |
| SNP_P3_76063_27910495 | NC_021165.1    | Ca_kabuli_chr06 | 27910495                | AA                              | TT                | 1946446643               |
| SNP_P3_76064_27910524 | NC_021165.1    | Ca_kabuli_chr06 | 27910524                | AA                              | CC                | 1946446645               |
| SNP_P3_76065_27910529 | NC_021165.1    | Ca_kabuli_chr06 | 27910529                | GG                              | TT                | 1946446646               |
| SNP_P3_76066_27910552 | NC_021165.1    | Ca_kabuli_chr06 | 27910552                | AA                              | TT                | 1946446648               |
| SNP_P3_76067_27910558 | NC_021165.1    | Ca_kabuli_chr06 | 27910558                | AA                              | GG                | 1946446649               |
| SNP_P3_76068_27910590 | NC_021165.1    | Ca_kabuli_chr06 | 27910590                | AA                              | GG                | 1946446651               |
| SNP_P3_76069_27910598 | NC_021165.1    | Ca_kabuli_chr06 | 27910598                | TT                              | AA                | 1946446653               |
| SNP_P3_76070_27910613 | NC_021165.1    | Ca_kabuli_chr06 | 27910613                | TT                              | CC                | 1946446654               |
| SNP_P3_76071_27910672 | NC_021165.1    | Ca_kabuli_chr06 | 27910672                | TT                              | GG                | 1946446655               |
| SNP_P3_76072_27910673 | NC_021165.1    | Ca_kabuli_chr06 | 27910673                | GG                              | TT                | 1946446657               |
| SNP_P3_76073_27910680 | NC_021165.1    | Ca_kabuli_chr06 | 27910680                | CC                              | TT                | 1946446658               |
| SNP_P3_76075_27910810 | NC_021165.1    | Ca_kabuli_chr06 | 27910810                | CC                              | TT                | 1946446660               |
| SNP_P3_76076_27911032 | NC_021165.1    | Ca_kabuli_chr06 | 27911032                | TT                              | CC                | 1946446661               |
| SNP_P3_76077_27917727 | NC_021165.1    | Ca_kabuli_chr06 | 27917727                | TT                              | AA                | 1946446663               |
| SNP_P3_76078_27946128 | NC_021165.1    | Ca_kabuli_chr06 | 27946128                | CC                              | GG                | 1946446664               |
| SNP_P3_76079_27951131 | NC_021165.1    | Ca_kabuli_chr06 | 27951131                | CC                              | GG                | 1946446666               |
| SNP_P3_76080_27957544 | NC_021165.1    | Ca_kabuli_chr06 | 27957544                | TT                              | CC                | 1946446667               |
| SNP_P3_76081_27961492 | NC_021165.1    | Ca_kabuli_chr06 | 27961492                | GG                              | AA                | 1946446669               |
| SNP_P3_76083_27983525 | NC_021165.1    | Ca_kabuli_chr06 | 27983525                | CC                              | GG                | 1946446670               |
| SNP_P3_76084_27983793 | NC_021165.1    | Ca_kabuli_chr06 | 27983793                | GG                              | TT                | 1946446672               |
| SNP_P3_76085_27988914 | NC_021165.1    | Ca_kabuli_chr06 | 27988914                | GG                              | AA                | 1946446673               |
| SNP_P3_76086_28004803 | NC_021165.1    | Ca_kabuli_chr06 | 28004803                | TT                              | CC                | 1946446674               |
| SNP_P3_76087_28009585 | NC_021165.1    | Ca_kabuli_chr06 | 28009585                | AA                              | TT                | 1946446676               |
| SNP_P3_76088_28010132 | NC_021165.1    | Ca_kabuli_chr06 | 28010132                | CC                              | TT                | 1946446677               |
| SNP_P3_76089_28010135 | NC_021165.1    | Ca_kabuli_chr06 | 28010135                | GG                              | AA                | 1946446679               |
| SNP_P3_76090_28017828 | NC_021165.1    | Ca_kabuli_chr06 | 28017828                | TT                              | CC                | 1946446681               |
| SNP_P3_76091_28096919 | NC_021165.1    | Ca_kabuli_chr06 | 28096919                | TT                              | CC                | 1946446682               |
| SNP_P3_76093_28105709 | NC_021165.1    | Ca_kabuli_chr06 | 28105709                | GG                              | AA                | 1946446684               |
| SNP_P3_76094_28139227 | NC_021165.1    | Ca_kabuli_chr06 | 28139227                | TT                              | CC                | 1946446685               |

| SNPs IDs              | Chromosome IDs | Chromosomes     | Physical positions (bp) | CDC Frontier (Reference genome) | (Pusa 256 & HPNB) | NCBI SNPdb Accession IDs |
|-----------------------|----------------|-----------------|-------------------------|---------------------------------|-------------------|--------------------------|
| SNP_P3_76095_28139228 | NC_021165.1    | Ca_kabuli_chr06 | 28139228                | AA                              | GG                | 1946446686               |
| SNP_P3_76096_28139244 | NC_021165.1    | Ca_kabuli_chr06 | 28139244                | CC                              | TT                | 1946446688               |
| SNP_P3_76097_28139247 | NC_021165.1    | Ca_kabuli_chr06 | 28139247                | TT                              | CC                | 1946446690               |
| SNP_P3_76098_28139262 | NC_021165.1    | Ca_kabuli_chr06 | 28139262                | TT                              | CC                | 1946446691               |
| SNP_P3_76099_28139279 | NC_021165.1    | Ca_kabuli_chr06 | 28139279                | AA                              | GG                | 1946446693               |
| SNP_P3_76100_28139302 | NC_021165.1    | Ca_kabuli_chr06 | 28139302                | AA                              | GG                | 1946446695               |
| SNP_P3_76101_28139643 | NC_021165.1    | Ca_kabuli_chr06 | 28139643                | AA                              | CC                | 1946446696               |
| SNP_P3_76102_28139648 | NC_021165.1    | Ca_kabuli_chr06 | 28139648                | TT                              | AA                | 1946446698               |
| SNP_P3_76103_28139694 | NC_021165.1    | Ca_kabuli_chr06 | 28139694                | AA                              | TT                | 1946446699               |
| SNP_P3_76104_28141785 | NC_021165.1    | Ca_kabuli_chr06 | 28141785                | TT                              | CC                | 1946446700               |
| SNP_P3_76105_28150141 | NC_021165.1    | Ca_kabuli_chr06 | 28150141                | CC                              | AA                | 1946446702               |
| SNP_P3_76106_28159260 | NC_021165.1    | Ca_kabuli_chr06 | 28159260                | AA                              | GG                | 1946446703               |
| SNP_P3_76107_28169762 | NC_021165.1    | Ca_kabuli_chr06 | 28169762                | TT                              | CC                | 1946446705               |
| SNP_P3_76108_28189242 | NC_021165.1    | Ca_kabuli_chr06 | 28189242                | CC                              | AA                | 1946446706               |
| SNP_P3_76109_28190159 | NC_021165.1    | Ca_kabuli_chr06 | 28190159                | AA                              | TT                | 1946446708               |
| SNP_P3_76111_28190987 | NC_021165.1    | Ca_kabuli_chr06 | 28190987                | TT                              | AA                | 1946446709               |
| SNP_P3_76112_28191044 | NC_021165.1    | Ca_kabuli_chr06 | 28191044                | CC                              | AA                | 1946446710               |
| SNP_P3_76113_28191069 | NC_021165.1    | Ca_kabuli_chr06 | 28191069                | AA                              | TT                | 1946446712               |
| SNP_P3_76114_28191437 | NC_021165.1    | Ca_kabuli_chr06 | 28191437                | TT                              | AA                | 1946446713               |
| SNP_P3_76115_28191672 | NC_021165.1    | Ca_kabuli_chr06 | 28191672                | CC                              | TT                | 1946446715               |
| SNP_P3_76116_28192208 | NC_021165.1    | Ca_kabuli_chr06 | 28192208                | TT                              | CC                | 1946446716               |
| SNP_P3_76117_28192404 | NC_021165.1    | Ca_kabuli_chr06 | 28192404                | CC                              | TT                | 1946446718               |
| SNP_P3_76118_28192424 | NC_021165.1    | Ca_kabuli_chr06 | 28192424                | GG                              | AA                | 1946446719               |
| SNP_P3_76121_28221781 | NC_021165.1    | Ca_kabuli_chr06 | 28221781                | AA                              | GG                | 1946446720               |
| SNP_P3_76122_28225908 | NC_021165.1    | Ca_kabuli_chr06 | 28225908                | GG                              | AA                | 1946446722               |
| SNP_P3_76123_28226457 | NC_021165.1    | Ca_kabuli_chr06 | 28226457                | CC                              | TT                | 1946446723               |
| SNP_P3_76125_28244782 | NC_021165.1    | Ca_kabuli_chr06 | 28244782                | GG                              | AA                | 1946446725               |
| SNP_P3_76126_28249373 | NC_021165.1    | Ca_kabuli_chr06 | 28249373                | CC                              | TT                | 1946446726               |
| SNP_P3_76127_28276128 | NC_021165.1    | Ca_kabuli_chr06 | 28276128                | AA                              | GG                | 1946446728               |
| SNP_P3_76128_28276134 | NC_021165.1    | Ca_kabuli_chr06 | 28276134                | GG                              | TT                | 1946446729               |
| SNP_P3_76129_28276135 | NC_021165.1    | Ca_kabuli_chr06 | 28276135                | TT                              | AA                | 1946446731               |
| SNP_P3_76130_28276136 | NC_021165.1    | Ca_kabuli_chr06 | 28276136                | AA                              | GG                | 1946446732               |
| SNP_P3_76131_28276241 | NC_021165.1    | Ca_kabuli_chr06 | 28276241                | TT                              | CC                | 1946446734               |
| SNP_P3_76132_28276544 | NC_021165.1    | Ca_kabuli_chr06 | 28276544                | TT                              | AA                | 1946446735               |
| SNP_P3_76133_28276546 | NC_021165.1    | Ca_kabuli_chr06 | 28276546                | CC                              | TT                | 1946446737               |
| SNP_P3_76134_28276589 | NC_021165.1    | Ca_kabuli_chr06 | 28276589                | AA                              | GG                | 1946446738               |
| SNP_P3_76135_28276605 | NC_021165.1    | Ca_kabuli_chr06 | 28276605                | TT                              | CC                | 1946446740               |
| SNP_P3_76136_28293618 | NC_021165.1    | Ca_kabuli_chr06 | 28293618                | CC                              | AA                | 1946446741               |
| SNP_P3_76137_28293636 | NC_021165.1    | Ca_kabuli_chr06 | 28293636                | TT                              | CC                | 1946446743               |
| SNP_P3_76138_28300895 | NC_021165.1    | Ca_kabuli_chr06 | 28300895                | AA                              | GG                | 1946446744               |
| SNP_P3_76139_28300897 | NC_021165.1    | Ca_kabuli_chr06 | 28300897                | CC                              | TT                | 1946446746               |
| SNP_P3_76140_28301410 | NC_021165.1    | Ca_kabuli_chr06 | 28301410                | GG                              | CC                | 1946446747               |

| SNPs IDs              | Chromosome IDs | Chromosomes     | Physical positions (bp) | CDC Frontier (Reference genome) | (Pusa 256 & HPNB) | NCBI SNPdb Accession IDs |
|-----------------------|----------------|-----------------|-------------------------|---------------------------------|-------------------|--------------------------|
| SNP_P3_76141_28301419 | NC_021165.1    | Ca_kabuli_chr06 | 28301419                | GG                              | AA                | 1946446748               |
| SNP_P3_76142_28305064 | NC_021165.1    | Ca_kabuli_chr06 | 28305064                | TT                              | CC                | 1946446750               |
| SNP_P3_76143_28305088 | NC_021165.1    | Ca_kabuli_chr06 | 28305088                | TT                              | GG                | 1946446752               |
| SNP_P3_76144_28305097 | NC_021165.1    | Ca_kabuli_chr06 | 28305097                | AA                              | GG                | 1946446754               |
| SNP_P3_76145_28305119 | NC_021165.1    | Ca_kabuli_chr06 | 28305119                | AA                              | GG                | 1946446755               |
| SNP_P3_76146_28305144 | NC_021165.1    | Ca_kabuli_chr06 | 28305144                | AA                              | GG                | 1946446757               |
| SNP_P3_76147_28305434 | NC_021165.1    | Ca_kabuli_chr06 | 28305434                | GG                              | CC                | 1946446758               |
| SNP_P3_76148_28305494 | NC_021165.1    | Ca_kabuli_chr06 | 28305494                | TT                              | CC                | 1946446760               |
| SNP_P3_76149_28305516 | NC_021165.1    | Ca_kabuli_chr06 | 28305516                | TT                              | AA                | 1946446761               |
| SNP_P3_76150_28308290 | NC_021165.1    | Ca_kabuli_chr06 | 28308290                | CC                              | AA                | 1946446762               |
| SNP_P3_76151_28308301 | NC_021165.1    | Ca_kabuli_chr06 | 28308301                | CC                              | AA                | 1946446764               |
| SNP_P3_76152_28308320 | NC_021165.1    | Ca_kabuli_chr06 | 28308320                | TT                              | AA                | 1946446765               |
| SNP_P3_76153_28308684 | NC_021165.1    | Ca_kabuli_chr06 | 28308684                | GG                              | CC                | 1946446767               |
| SNP_P3_76154_28323082 | NC_021165.1    | Ca_kabuli_chr06 | 28323082                | AA                              | TT                | 1946446768               |
| SNP_P3_76155_28323750 | NC_021165.1    | Ca_kabuli_chr06 | 28323750                | GG                              | TT                | 1946446770               |
| SNP_P3_76156_28323869 | NC_021165.1    | Ca_kabuli_chr06 | 28323869                | CC                              | GG                | 1946446771               |
| SNP_P3_76157_28323948 | NC_021165.1    | Ca_kabuli_chr06 | 28323948                | CC                              | TT                | 1946446773               |
| SNP_P3_76158_28323949 | NC_021165.1    | Ca_kabuli_chr06 | 28323949                | GG                              | TT                | 1946446775               |
| SNP_P3_76159_28324059 | NC_021165.1    | Ca_kabuli_chr06 | 28324059                | GG                              | AA                | 1946446776               |
| SNP_P3_76160_28324066 | NC_021165.1    | Ca_kabuli_chr06 | 28324066                | GG                              | TT                | 1946446778               |
| SNP_P3_76161_28324067 | NC_021165.1    | Ca_kabuli_chr06 | 28324067                | TT                              | AA                | 1946446779               |
| SNP_P3_76162_28324162 | NC_021165.1    | Ca_kabuli_chr06 | 28324162                | TT                              | CC                | 1946446781               |
| SNP_P3_76163_28324468 | NC_021165.1    | Ca_kabuli_chr06 | 28324468                | GG                              | AA                | 1946446782               |
| SNP_P3_76164_28324545 | NC_021165.1    | Ca_kabuli_chr06 | 28324545                | AA                              | GG                | 1946446784               |
| SNP_P3_76165_28324623 | NC_021165.1    | Ca_kabuli_chr06 | 28324623                | CC                              | TT                | 1946446785               |
| SNP_P3_76166_28324811 | NC_021165.1    | Ca_kabuli_chr06 | 28324811                | TT                              | GG                | 1946446787               |
| SNP_P3_76167_28324837 | NC_021165.1    | Ca_kabuli_chr06 | 28324837                | GG                              | TT                | 1946446788               |
| SNP_P3_76168_28324906 | NC_021165.1    | Ca_kabuli_chr06 | 28324906                | TT                              | CC                | 1946446790               |
| SNP_P3_76169_28324931 | NC_021165.1    | Ca_kabuli_chr06 | 28324931                | CC                              | TT                | 1946446791               |
| SNP_P3_76170_28325392 | NC_021165.1    | Ca_kabuli_chr06 | 28325392                | CC                              | TT                | 1946446792               |
| SNP_P3_76171_28326153 | NC_021165.1    | Ca_kabuli_chr06 | 28326153                | AA                              | GG                | 1946446794               |
| SNP_P3_76173_28327043 | NC_021165.1    | Ca_kabuli_chr06 | 28327043                | GG                              | AA                | 1946446795               |
| SNP_P3_76174_28327235 | NC_021165.1    | Ca_kabuli_chr06 | 28327235                | GG                              | AA                | 1946446797               |
| SNP_P3_76175_28327241 | NC_021165.1    | Ca_kabuli_chr06 | 28327241                | AA                              | TT                | 1946446798               |
| SNP_P3_76177_28327975 | NC_021165.1    | Ca_kabuli_chr06 | 28327975                | CC                              | TT                | 1946446800               |
| SNP_P3_76178_28328440 | NC_021165.1    | Ca_kabuli_chr06 | 28328440                | CC                              | AA                | 1946446802               |
| SNP_P3_76179_28329273 | NC_021165.1    | Ca_kabuli_chr06 | 28329273                | TT                              | AA                | 1946446803               |
| SNP_P3_76180_28330617 | NC_021165.1    | Ca_kabuli_chr06 | 28330617                | AA                              | GG                | 1946446805               |
| SNP_P3_76181_28330651 | NC_021165.1    | Ca_kabuli_chr06 | 28330651                | GG                              | AA                | 1946446806               |
| SNP_P3_76182_28330901 | NC_021165.1    | Ca_kabuli_chr06 | 28330901                | TT                              | AA                | 1946446808               |
| SNP_P3_76183_28330934 | NC_021165.1    | Ca_kabuli_chr06 | 28330934                | AA                              | GG                | 1946446809               |
| SNP_P3_76184_28331101 | NC_021165.1    | Ca_kabuli_chr06 | 28331101                | TT                              | CC                | 1946446810               |

| SNPs IDs              | Chromosome IDs | Chromosomes     | Physical positions (bp) | CDC Frontier (Reference genome) | (Pusa 256 & HPNB) | NCBI SNPdb Accession IDs |
|-----------------------|----------------|-----------------|-------------------------|---------------------------------|-------------------|--------------------------|
| SNP_P3_76185_28331109 | NC_021165.1    | Ca_kabuli_chr06 | 28331109                | CC                              | TT                | 1946446812               |
| SNP_P3_76186_28331116 | NC_021165.1    | Ca_kabuli_chr06 | 28331116                | AA                              | TT                | 1946446813               |
| SNP_P3_76187_28331136 | NC_021165.1    | Ca_kabuli_chr06 | 28331136                | TT                              | CC                | 1946446815               |
| SNP_P3_76188_28331482 | NC_021165.1    | Ca_kabuli_chr06 | 28331482                | GG                              | TT                | 1946446816               |
| SNP_P3_76189_28331483 | NC_021165.1    | Ca_kabuli_chr06 | 28331483                | AA                              | GG                | 1946446818               |
| SNP_P3_76190_28331508 | NC_021165.1    | Ca_kabuli_chr06 | 28331508                | TT                              | AA                | 1946446820               |
| SNP_P3_76191_28331797 | NC_021165.1    | Ca_kabuli_chr06 | 28331797                | GG                              | CC                | 1946446821               |
| SNP_P3_76192_28331820 | NC_021165.1    | Ca_kabuli_chr06 | 28331820                | CC                              | TT                | 1946446823               |
| SNP_P3_76193_28331830 | NC_021165.1    | Ca_kabuli_chr06 | 28331830                | CC                              | TT                | 1946446824               |
| SNP_P3_76194_28332163 | NC_021165.1    | Ca_kabuli_chr06 | 28332163                | CC                              | TT                | 1946446826               |
| SNP_P3_76195_28332198 | NC_021165.1    | Ca_kabuli_chr06 | 28332198                | TT                              | AA                | 1946446827               |
| SNP_P3_76196_28332259 | NC_021165.1    | Ca_kabuli_chr06 | 28332259                | TT                              | GG                | 1946446829               |
| SNP_P3_76197_28332269 | NC_021165.1    | Ca_kabuli_chr06 | 28332269                | AA                              | TT                | 1946446830               |
| SNP_P3_76199_28332367 | NC_021165.1    | Ca_kabuli_chr06 | 28332367                | AA                              | CC                | 1946446831               |
| SNP_P3_76200_28332422 | NC_021165.1    | Ca_kabuli_chr06 | 28332422                | TT                              | CC                | 1946446833               |
| SNP_P3_76201_28332424 | NC_021165.1    | Ca_kabuli_chr06 | 28332424                | GG                              | AA                | 1946446834               |
| SNP_P3_76202_28332447 | NC_021165.1    | Ca_kabuli_chr06 | 28332447                | TT                              | CC                | 1946446836               |
| SNP_P3_76203_28332455 | NC_021165.1    | Ca_kabuli_chr06 | 28332455                | GG                              | TT                | 1946446837               |
| SNP_P3_76205_28332469 | NC_021165.1    | Ca_kabuli_chr06 | 28332469                | CC                              | AA                | 1946446839               |
| SNP_P3_76206_28332489 | NC_021165.1    | Ca_kabuli_chr06 | 28332489                | CC                              | TT                | 1946446841               |
| SNP_P3_76207_28332550 | NC_021165.1    | Ca_kabuli_chr06 | 28332550                | AA                              | GG                | 1946446842               |
| SNP_P3_76208_28332561 | NC_021165.1    | Ca_kabuli_chr06 | 28332561                | TT                              | GG                | 1946446844               |
| SNP_P3_76210_28332621 | NC_021165.1    | Ca_kabuli_chr06 | 28332621                | TT                              | AA                | 1946446845               |
| SNP_P3_76211_28332630 | NC_021165.1    | Ca_kabuli_chr06 | 28332630                | TT                              | GG                | 1946446847               |
| SNP_P3_76212_28332647 | NC_021165.1    | Ca_kabuli_chr06 | 28332647                | CC                              | GG                | 1946446848               |
| SNP_P3_76214_28332660 | NC_021165.1    | Ca_kabuli_chr06 | 28332660                | AA                              | GG                | 1946446850               |
| SNP_P3_76215_28332705 | NC_021165.1    | Ca_kabuli_chr06 | 28332705                | TT                              | CC                | 1946446851               |
| SNP_P3_76216_28332722 | NC_021165.1    | Ca_kabuli_chr06 | 28332722                | TT                              | CC                | 1946446852               |
| SNP_P3_76217_28332726 | NC_021165.1    | Ca_kabuli_chr06 | 28332726                | TT                              | GG                | 1946446854               |
| SNP_P3_76219_28332774 | NC_021165.1    | Ca_kabuli_chr06 | 28332774                | CC                              | TT                | 1946446855               |
| SNP_P3_76220_28332786 | NC_021165.1    | Ca_kabuli_chr06 | 28332786                | GG                              | AA                | 1946446857               |
| SNP_P3_76222_28332883 | NC_021165.1    | Ca_kabuli_chr06 | 28332883                | TT                              | CC                | 1946446858               |
| SNP_P3_76223_28332935 | NC_021165.1    | Ca_kabuli_chr06 | 28332935                | GG                              | AA                | 1946446860               |
| SNP_P3_76225_28333063 | NC_021165.1    | Ca_kabuli_chr06 | 28333063                | AA                              | GG                | 1946446861               |
| SNP_P3_76226_28333177 | NC_021165.1    | Ca_kabuli_chr06 | 28333177                | AA                              | GG                | 1946446863               |
| SNP_P3_76227_28333220 | NC_021165.1    | Ca_kabuli_chr06 | 28333220                | CC                              | TT                | 1946446865               |
| SNP_P3_76228_28333282 | NC_021165.1    | Ca_kabuli_chr06 | 28333282                | CC                              | TT                | 1946446866               |
| SNP_P3_76229_28333671 | NC_021165.1    | Ca_kabuli_chr06 | 28333671                | GG                              | AA                | 1946446868               |
| SNP_P3_76230_28334226 | NC_021165.1    | Ca_kabuli_chr06 | 28334226                | TT                              | CC                | 1946446869               |
| SNP_P3_76231_28335846 | NC_021165.1    | Ca_kabuli_chr06 | 28335846                | GG                              | AA                | 1946446871               |
| SNP_P3_76232_28336773 | NC_021165.1    | Ca_kabuli_chr06 | 28336773                | CC                              | TT                | 1946446872               |
| SNP_P3_76233_28336795 | NC_021165.1    | Ca_kabuli_chr06 | 28336795                | GG                              | TT                | 1946446874               |

| SNPs IDs              | Chromosome IDs | Chromosomes     | Physical positions (bp) | CDC Frontier (Reference genome) | (Pusa 256 & HPNB) | NCBI SNPdb Accession IDs |
|-----------------------|----------------|-----------------|-------------------------|---------------------------------|-------------------|--------------------------|
| SNP_P3_76234_28336872 | NC_021165.1    | Ca_kabuli_chr06 | 28336872                | AA                              | CC                | 1946446875               |
| SNP_P3_76235_28336873 | NC_021165.1    | Ca_kabuli_chr06 | 28336873                | GG                              | AA                | 1946446877               |
| SNP_P3_76236_28336893 | NC_021165.1    | Ca_kabuli_chr06 | 28336893                | TT                              | AA                | 1946446878               |
| SNP_P3_76237_28336896 | NC_021165.1    | Ca_kabuli_chr06 | 28336896                | TT                              | AA                | 1946446880               |
| SNP_P3_76238_28336902 | NC_021165.1    | Ca_kabuli_chr06 | 28336902                | GG                              | AA                | 1946446881               |
| SNP_P3_76239_28337031 | NC_021165.1    | Ca_kabuli_chr06 | 28337031                | GG                              | AA                | 1946446883               |
| SNP_P3_76240_28337049 | NC_021165.1    | Ca_kabuli_chr06 | 28337049                | CC                              | AA                | 1946446885               |
| SNP_P3_76241_28337130 | NC_021165.1    | Ca_kabuli_chr06 | 28337130                | CC                              | AA                | 1946446886               |
| SNP_P3_76242_28337162 | NC_021165.1    | Ca_kabuli_chr06 | 28337162                | GG                              | TT                | 1946446888               |
| SNP_P3_76243_28337170 | NC_021165.1    | Ca_kabuli_chr06 | 28337170                | CC                              | GG                | 1946446889               |
| SNP_P3_76244_28337205 | NC_021165.1    | Ca_kabuli_chr06 | 28337205                | TT                              | CC                | 1946446891               |
| SNP_P3_76245_28337230 | NC_021165.1    | Ca_kabuli_chr06 | 28337230                | GG                              | AA                | 1946446892               |
| SNP_P3_76246_28337239 | NC_021165.1    | Ca_kabuli_chr06 | 28337239                | AA                              | GG                | 1946446894               |
| SNP_P3_76247_28337254 | NC_021165.1    | Ca_kabuli_chr06 | 28337254                | GG                              | TT                | 1946446895               |
| SNP_P3_76248_28337279 | NC_021165.1    | Ca_kabuli_chr06 | 28337279                | AA                              | GG                | 1946446897               |
| SNP_P3_76249_28337297 | NC_021165.1    | Ca_kabuli_chr06 | 28337297                | TT                              | GG                | 1946446898               |
| SNP_P3_76250_28337316 | NC_021165.1    | Ca_kabuli_chr06 | 28337316                | GG                              | AA                | 1946446899               |
| SNP_P3_76251_28337546 | NC_021165.1    | Ca_kabuli_chr06 | 28337546                | AA                              | GG                | 1946446901               |
| SNP_P3_76252_28337559 | NC_021165.1    | Ca_kabuli_chr06 | 28337559                | GG                              | AA                | 1946446902               |
| SNP_P3_76253_28337570 | NC_021165.1    | Ca_kabuli_chr06 | 28337570                | AA                              | GG                | 1946446904               |
| SNP_P3_76254_28342444 | NC_021165.1    | Ca_kabuli_chr06 | 28342444                | GG                              | TT                | 1946446905               |
| SNP_P3_76255_28344622 | NC_021165.1    | Ca_kabuli_chr06 | 28344622                | CC                              | AA                | 1946446907               |
| SNP_P3_76256_28347151 | NC_021165.1    | Ca_kabuli_chr06 | 28347151                | GG                              | TT                | 1946446909               |
| SNP_P3_76257_28350715 | NC_021165.1    | Ca_kabuli_chr06 | 28350715                | GG                              | AA                | 1946446910               |
| SNP_P3_76258_28350872 | NC_021165.1    | Ca_kabuli_chr06 | 28350872                | TT                              | CC                | 1946446912               |
| SNP_P3_76259_28350958 | NC_021165.1    | Ca_kabuli_chr06 | 28350958                | TT                              | CC                | 1946446913               |
| SNP_P3_76260_28350993 | NC_021165.1    | Ca_kabuli_chr06 | 28350993                | AA                              | GG                | 1946446915               |
| SNP_P3_76261_28351061 | NC_021165.1    | Ca_kabuli_chr06 | 28351061                | CC                              | AA                | 1946446916               |
| SNP_P3_76262_28351228 | NC_021165.1    | Ca_kabuli_chr06 | 28351228                | GG                              | AA                | 1946446917               |
| SNP_P3_76263_28351378 | NC_021165.1    | Ca_kabuli_chr06 | 28351378                | CC                              | TT                | 1946446919               |
| SNP_P3_76264_28353434 | NC_021165.1    | Ca_kabuli_chr06 | 28353434                | AA                              | TT                | 1946446920               |
| SNP_P3_76265_28353619 | NC_021165.1    | Ca_kabuli_chr06 | 28353619                | CC                              | TT                | 1946446922               |
| SNP_P3_76266_28354495 | NC_021165.1    | Ca_kabuli_chr06 | 28354495                | GG                              | TT                | 1946446923               |
| SNP_P3_76267_28354828 | NC_021165.1    | Ca_kabuli_chr06 | 28354828                | TT                              | CC                | 1946446925               |
| SNP_P3_76269_28354982 | NC_021165.1    | Ca_kabuli_chr06 | 28354982                | TT                              | CC                | 1946446926               |
| SNP_P3_76270_28355011 | NC_021165.1    | Ca_kabuli_chr06 | 28355011                | TT                              | CC                | 1946446928               |
| SNP_P3_76271_28355086 | NC_021165.1    | Ca_kabuli_chr06 | 28355086                | GG                              | AA                | 1946446930               |
| SNP_P3_76272_28355195 | NC_021165.1    | Ca_kabuli_chr06 | 28355195                | GG                              | TT                | 1946446931               |
| SNP_P3_76273_28355225 | NC_021165.1    | Ca_kabuli_chr06 | 28355225                | TT                              | AA                | 1946446933               |
| SNP_P3_76274_28355507 | NC_021165.1    | Ca_kabuli_chr06 | 28355507                | GG                              | AA                | 1946446935               |
| SNP_P3_76275_28355628 | NC_021165.1    | Ca_kabuli_chr06 | 28355628                | TT                              | CC                | 1946446936               |
| SNP_P3_76276_28355769 | NC_021165.1    | Ca_kabuli_chr06 | 28355769                | CC                              | TT                | 1946446938               |

| SNPs IDs              | Chromosome IDs | Chromosomes     | Physical positions (bp) | CDC Frontier (Reference genome) | (Pusa 256 & HPNB) | NCBI SNPdb Accession IDs |
|-----------------------|----------------|-----------------|-------------------------|---------------------------------|-------------------|--------------------------|
| SNP_P3_76277_28355811 | NC_021165.1    | Ca_kabuli_chr06 | 28355811                | TT                              | CC                | 1946446939               |
| SNP_P3_76278_28355814 | NC_021165.1    | Ca_kabuli_chr06 | 28355814                | GG                              | CC                | 1946446941               |
| SNP_P3_76279_28355844 | NC_021165.1    | Ca_kabuli_chr06 | 28355844                | CC                              | TT                | 1946446943               |
| SNP_P3_76280_28356046 | NC_021165.1    | Ca_kabuli_chr06 | 28356046                | AA                              | GG                | 1946446944               |
| SNP_P3_76281_28356229 | NC_021165.1    | Ca_kabuli_chr06 | 28356229                | TT                              | AA                | 1946446945               |
| SNP_P3_76282_28388227 | NC_021165.1    | Ca_kabuli_chr06 | 28388227                | CC                              | TT                | 1946446947               |
| SNP_P3_76283_28388247 | NC_021165.1    | Ca_kabuli_chr06 | 28388247                | TT                              | CC                | 1946446949               |
| SNP_P3_76284_28388327 | NC_021165.1    | Ca_kabuli_chr06 | 28388327                | TT                              | GG                | 1946446951               |
| SNP_P3_76285_28388343 | NC_021165.1    | Ca_kabuli_chr06 | 28388343                | AA                              | GG                | 1946446952               |
| SNP_P3_76286_28393859 | NC_021165.1    | Ca_kabuli_chr06 | 28393859                | TT                              | AA                | 1946446954               |
| SNP_P3_76287_28393860 | NC_021165.1    | Ca_kabuli_chr06 | 28393860                | CC                              | TT                | 1946446955               |
| SNP_P3_76288_28394270 | NC_021165.1    | Ca_kabuli_chr06 | 28394270                | TT                              | CC                | 1946446956               |
| SNP_P3_76289_28394621 | NC_021165.1    | Ca_kabuli_chr06 | 28394621                | AA                              | TT                | 1946446958               |
| SNP_P3_76290_28394639 | NC_021165.1    | Ca_kabuli_chr06 | 28394639                | TT                              | GG                | 1946446959               |
| SNP_P3_76291_28394653 | NC_021165.1    | Ca_kabuli_chr06 | 28394653                | CC                              | TT                | 1946446961               |
| SNP_P3_76292_28394701 | NC_021165.1    | Ca_kabuli_chr06 | 28394701                | TT                              | GG                | 1946446962               |
| SNP_P3_76293_28396298 | NC_021165.1    | Ca_kabuli_chr06 | 28396298                | TT                              | GG                | 1946446964               |
| SNP_P3_76294_28396312 | NC_021165.1    | Ca_kabuli_chr06 | 28396312                | TT                              | GG                | 1946446965               |
| SNP_P3_76295_28396324 | NC_021165.1    | Ca_kabuli_chr06 | 28396324                | TT                              | AA                | 1946446967               |
| SNP_P3_76296_28396339 | NC_021165.1    | Ca_kabuli_chr06 | 28396339                | TT                              | CC                | 1946446968               |
| SNP_P3_76297_28396340 | NC_021165.1    | Ca_kabuli_chr06 | 28396340                | TT                              | AA                | 1946446970               |
| SNP_P3_76299_28427077 | NC_021165.1    | Ca_kabuli_chr06 | 28427077                | AA                              | GG                | 1946446971               |
| SNP_P3_76300_28430123 | NC_021165.1    | Ca_kabuli_chr06 | 28430123                | CC                              | AA                | 1946446973               |
| SNP_P3_76301_28432937 | NC_021165.1    | Ca_kabuli_chr06 | 28432937                | AA                              | GG                | 1946446974               |
| SNP_P3_76302_28440144 | NC_021165.1    | Ca_kabuli_chr06 | 28440144                | AA                              | CC                | 1946446976               |
| SNP_P3_76303_28441963 | NC_021165.1    | Ca_kabuli_chr06 | 28441963                | CC                              | TT                | 1946446977               |
| SNP_P3_76304_28441968 | NC_021165.1    | Ca_kabuli_chr06 | 28441968                | AA                              | TT                | 1946446979               |
| SNP_P3_76305_28442088 | NC_021165.1    | Ca_kabuli_chr06 | 28442088                | TT                              | CC                | 1946446980               |
| SNP_P3_76306_28442150 | NC_021165.1    | Ca_kabuli_chr06 | 28442150                | CC                              | TT                | 1946446982               |
| SNP_P3_76307_28442157 | NC_021165.1    | Ca_kabuli_chr06 | 28442157                | CC                              | TT                | 1946446983               |
| SNP_P3_76308_28442161 | NC_021165.1    | Ca_kabuli_chr06 | 28442161                | GG                              | AA                | 1946446984               |
| SNP_P3_76309_28442162 | NC_021165.1    | Ca_kabuli_chr06 | 28442162                | AA                              | GG                | 1946446986               |
| SNP_P3_76310_28442301 | NC_021165.1    | Ca_kabuli_chr06 | 28442301                | AA                              | CC                | 1946446987               |
| SNP_P3_76311_28442360 | NC_021165.1    | Ca_kabuli_chr06 | 28442360                | AA                              | GG                | 1946446989               |
| SNP_P3_76312_28442900 | NC_021165.1    | Ca_kabuli_chr06 | 28442900                | CC                              | TT                | 1946446991               |
| SNP_P3_76313_28443119 | NC_021165.1    | Ca_kabuli_chr06 | 28443119                | TT                              | CC                | 1946446992               |
| SNP_P3_76314_28443167 | NC_021165.1    | Ca_kabuli_chr06 | 28443167                | TT                              | AA                | 1946446994               |
| SNP_P3_76315_28443182 | NC_021165.1    | Ca_kabuli_chr06 | 28443182                | GG                              | AA                | 1946446995               |
| SNP_P3_76316_28443279 | NC_021165.1    | Ca_kabuli_chr06 | 28443279                | CC                              | TT                | 1946446997               |
| SNP_P3_76318_28443368 | NC_021165.1    | Ca_kabuli_chr06 | 28443368                | GG                              | TT                | 1946446998               |
| SNP_P3_76320_28443714 | NC_021165.1    | Ca_kabuli_chr06 | 28443714                | TT                              | CC                | 1946447000               |
| SNP_P3_76321_28443917 | NC_021165.1    | Ca_kabuli_chr06 | 28443917                | AA                              | TT                | 1946447002               |



| SNPs IDs              | Chromosome IDs | Chromosomes     | Physical positions (bp) | CDC Frontier (Reference genome) | (Pusa 256 & HPNB) | NCBI SNPdb Accession IDs |
|-----------------------|----------------|-----------------|-------------------------|---------------------------------|-------------------|--------------------------|
| SNP_P3_76322_28443918 | NC_021165.1    | Ca_kabuli_chr06 | 28443918                | TT                              | AA                | 1946447003               |
| SNP_P3_76323_28444022 | NC_021165.1    | Ca_kabuli_chr06 | 28444022                | CC                              | TT                | 1946447005               |
| SNP_P3_76324_28444079 | NC_021165.1    | Ca_kabuli_chr06 | 28444079                | CC                              | GG                | 1946447006               |
| SNP_P3_76325_28444153 | NC_021165.1    | Ca_kabuli_chr06 | 28444153                | CC                              | TT                | 1946447008               |
| SNP_P3_76326_28444181 | NC_021165.1    | Ca_kabuli_chr06 | 28444181                | GG                              | CC                | 1946447009               |
| SNP_P3_76327_28444404 | NC_021165.1    | Ca_kabuli_chr06 | 28444404                | GG                              | AA                | 1946447010               |
| SNP_P3_76328_28444509 | NC_021165.1    | Ca_kabuli_chr06 | 28444509                | AA                              | GG                | 1946447012               |
| SNP_P3_76329_28444517 | NC_021165.1    | Ca_kabuli_chr06 | 28444517                | CC                              | TT                | 1946447014               |
| SNP_P3_76330_28444553 | NC_021165.1    | Ca_kabuli_chr06 | 28444553                | AA                              | GG                | 1946447015               |
| SNP_P3_76331_28444562 | NC_021165.1    | Ca_kabuli_chr06 | 28444562                | AA                              | CC                | 1946447017               |
| SNP_P3_76332_28444565 | NC_021165.1    | Ca_kabuli_chr06 | 28444565                | CC                              | TT                | 1946447018               |
| SNP_P3_76333_28445005 | NC_021165.1    | Ca_kabuli_chr06 | 28445005                | GG                              | TT                | 1946447020               |
| SNP_P3_76334_28445089 | NC_021165.1    | Ca_kabuli_chr06 | 28445089                | GG                              | TT                | 1946447021               |
| SNP_P3_76335_28449203 | NC_021165.1    | Ca_kabuli_chr06 | 28449203                | CC                              | TT                | 1946447023               |
| SNP_P3_76336_28459759 | NC_021165.1    | Ca_kabuli_chr06 | 28459759                | CC                              | TT                | 1946447024               |
| SNP_P3_76337_28484025 | NC_021165.1    | Ca_kabuli_chr06 | 28484025                | TT                              | AA                | 1946447026               |
| SNP_P3_76338_28484026 | NC_021165.1    | Ca_kabuli_chr06 | 28484026                | AA                              | TT                | 1946447027               |
| SNP_P3_76339_28496183 | NC_021165.1    | Ca_kabuli_chr06 | 28496183                | AA                              | TT                | 1946447029               |
| SNP_P3_76340_28503425 | NC_021165.1    | Ca_kabuli_chr06 | 28503425                | AA                              | CC                | 1946447030               |
| SNP_P3_76341_28503449 | NC_021165.1    | Ca_kabuli_chr06 | 28503449                | AA                              | GG                | 1946447032               |
| SNP_P3_76342_28503501 | NC_021165.1    | Ca_kabuli_chr06 | 28503501                | CC                              | TT                | 1946447034               |
| SNP_P3_76343_28503510 | NC_021165.1    | Ca_kabuli_chr06 | 28503510                | AA                              | GG                | 1946447035               |
| SNP_P3_76344_28503513 | NC_021165.1    | Ca_kabuli_chr06 | 28503513                | GG                              | TT                | 1946447037               |
| SNP_P3_76345_28503574 | NC_021165.1    | Ca_kabuli_chr06 | 28503574                | GG                              | AA                | 1946447038               |
| SNP_P3_76347_28503750 | NC_021165.1    | Ca_kabuli_chr06 | 28503750                | AA                              | GG                | 1946447040               |
| SNP_P3_76348_28505272 | NC_021165.1    | Ca_kabuli_chr06 | 28505272                | CC                              | TT                | 1946447041               |
| SNP_P3_76349_28505307 | NC_021165.1    | Ca_kabuli_chr06 | 28505307                | AA                              | GG                | 1946447043               |
| SNP_P3_76350_28505340 | NC_021165.1    | Ca_kabuli_chr06 | 28505340                | GG                              | TT                | 1946447044               |
| SNP_P3_76351_28505571 | NC_021165.1    | Ca_kabuli_chr06 | 28505571                | TT                              | CC                | 1946447046               |
| SNP_P3_76352_28505585 | NC_021165.1    | Ca_kabuli_chr06 | 28505585                | GG                              | AA                | 1946447048               |
| SNP_P3_76353_28511308 | NC_021165.1    | Ca_kabuli_chr06 | 28511308                | TT                              | GG                | 1946447049               |
| SNP_P3_76354_28511331 | NC_021165.1    | Ca_kabuli_chr06 | 28511331                | AA                              | CC                | 1946447051               |
| SNP_P3_76355_28511333 | NC_021165.1    | Ca_kabuli_chr06 | 28511333                | TT                              | AA                | 1946447052               |
| SNP_P3_76356_28511349 | NC_021165.1    | Ca_kabuli_chr06 | 28511349                | GG                              | TT                | 1946447054               |
| SNP_P3_76357_28511406 | NC_021165.1    | Ca_kabuli_chr06 | 28511406                | GG                              | AA                | 1946447056               |
| SNP_P3_76358_28511416 | NC_021165.1    | Ca_kabuli_chr06 | 28511416                | CC                              | TT                | 1946447057               |
| SNP_P3_76359_28511437 | NC_021165.1    | Ca_kabuli_chr06 | 28511437                | TT                              | CC                | 1946447059               |
| SNP_P3_76360_28511442 | NC_021165.1    | Ca_kabuli_chr06 | 28511442                | TT                              | CC                | 1946447060               |
| SNP_P3_76361_28511443 | NC_021165.1    | Ca_kabuli_chr06 | 28511443                | AA                              | GG                | 1946447062               |
| SNP_P3_76362_28511465 | NC_021165.1    | Ca_kabuli_chr06 | 28511465                | GG                              | AA                | 1946447063               |
| SNP_P3_76363_28511617 | NC_021165.1    | Ca_kabuli_chr06 | 28511617                | CC                              | TT                | 1946447065               |
| SNP_P3_76364_28512927 | NC_021165.1    | Ca_kabuli_chr06 | 28512927                | AA                              | GG                | 1946447067               |

| SNPs IDs              | Chromosome IDs | Chromosomes     | Physical positions (bp) | CDC Frontier (Reference genome) | (Pusa 256 & HPNB) | NCBI SNPdb Accession IDs |
|-----------------------|----------------|-----------------|-------------------------|---------------------------------|-------------------|--------------------------|
| SNP_P3_76365_28512931 | NC_021165.1    | Ca_kabuli_chr06 | 28512931                | CC                              | TT                | 1946447068               |
| SNP_P3_76367_28513257 | NC_021165.1    | Ca_kabuli_chr06 | 28513257                | TT                              | AA                | 1946447070               |
| SNP_P3_76368_28513487 | NC_021165.1    | Ca_kabuli_chr06 | 28513487                | GG                              | TT                | 1946447071               |
| SNP_P3_76369_28513491 | NC_021165.1    | Ca_kabuli_chr06 | 28513491                | TT                              | CC                | 1946447073               |
| SNP_P3_76371_28514150 | NC_021165.1    | Ca_kabuli_chr06 | 28514150                | CC                              | GG                | 1946447074               |
| SNP_P3_76372_28514179 | NC_021165.1    | Ca_kabuli_chr06 | 28514179                | AA                              | CC                | 1946447076               |
| SNP_P3_76374_28518347 | NC_021165.1    | Ca_kabuli_chr06 | 28518347                | GG                              | AA                | 1946447077               |
| SNP_P3_76375_28520805 | NC_021165.1    | Ca_kabuli_chr06 | 28520805                | TT                              | GG                | 1946447079               |
| SNP_P3_76377_28520904 | NC_021165.1    | Ca_kabuli_chr06 | 28520904                | TT                              | CC                | 1946447080               |
| SNP_P3_76381_28521046 | NC_021165.1    | Ca_kabuli_chr06 | 28521046                | CC                              | TT                | 1946447082               |
| SNP_P3_76383_28521107 | NC_021165.1    | Ca_kabuli_chr06 | 28521107                | TT                              | CC                | 1946447083               |
| SNP_P3_76384_28521123 | NC_021165.1    | Ca_kabuli_chr06 | 28521123                | CC                              | TT                | 1946447085               |
| SNP_P3_76385_28521222 | NC_021165.1    | Ca_kabuli_chr06 | 28521222                | AA                              | TT                | 1946447086               |
| SNP_P3_76386_28521272 | NC_021165.1    | Ca_kabuli_chr06 | 28521272                | TT                              | AA                | 1946447088               |
| SNP_P3_76387_28521312 | NC_021165.1    | Ca_kabuli_chr06 | 28521312                | GG                              | AA                | 1946447089               |
| SNP_P3_76388_28521575 | NC_021165.1    | Ca_kabuli_chr06 | 28521575                | AA                              | CC                | 1946447091               |
| SNP_P3_76389_28521576 | NC_021165.1    | Ca_kabuli_chr06 | 28521576                | AA                              | TT                | 1946447092               |
| SNP_P3_76390_28521618 | NC_021165.1    | Ca_kabuli_chr06 | 28521618                | TT                              | GG                | 1946447094               |
| SNP_P3_76391_28521713 | NC_021165.1    | Ca_kabuli_chr06 | 28521713                | TT                              | CC                | 1946447095               |
| SNP_P3_76392_28521788 | NC_021165.1    | Ca_kabuli_chr06 | 28521788                | AA                              | GG                | 1946447097               |
| SNP_P3_76393_28521825 | NC_021165.1    | Ca_kabuli_chr06 | 28521825                | AA                              | GG                | 1946447099               |
| SNP_P3_76395_28537120 | NC_021165.1    | Ca_kabuli_chr06 | 28537120                | CC                              | GG                | 1946447100               |
| SNP_P3_76396_28537166 | NC_021165.1    | Ca_kabuli_chr06 | 28537166                | AA                              | CC                | 1946447101               |
| SNP_P3_76398_28537257 | NC_021165.1    | Ca_kabuli_chr06 | 28537257                | TT                              | CC                | 1946447103               |
| SNP_P3_76399_28546529 | NC_021165.1    | Ca_kabuli_chr06 | 28546529                | CC                              | GG                | 1946447104               |
| SNP_P3_76400_28546531 | NC_021165.1    | Ca_kabuli_chr06 | 28546531                | CC                              | AA                | 1946447106               |
| SNP_P3_76401_28546967 | NC_021165.1    | Ca_kabuli_chr06 | 28546967                | GG                              | AA                | 1946447107               |
| SNP_P3_76404_28579918 | NC_021165.1    | Ca_kabuli_chr06 | 28579918                | GG                              | AA                | 1946447109               |
| SNP_P3_76405_28581280 | NC_021165.1    | Ca_kabuli_chr06 | 28581280                | AA                              | GG                | 1946447110               |
| SNP_P3_76406_28581379 | NC_021165.1    | Ca_kabuli_chr06 | 28581379                | GG                              | TT                | 1946447112               |
| SNP_P3_76408_28609625 | NC_021165.1    | Ca_kabuli_chr06 | 28609625                | TT                              | CC                | 1946447113               |
| SNP_P3_76410_28644764 | NC_021165.1    | Ca_kabuli_chr06 | 28644764                | CC                              | GG                | 1946447115               |
| SNP_P3_76411_28644775 | NC_021165.1    | Ca_kabuli_chr06 | 28644775                | AA                              | GG                | 1946447116               |
| SNP_P3_76412_28644963 | NC_021165.1    | Ca_kabuli_chr06 | 28644963                | GG                              | AA                | 1946447118               |
| SNP_P3_76413_28644977 | NC_021165.1    | Ca_kabuli_chr06 | 28644977                | AA                              | TT                | 1946447119               |
| SNP_P3_76414_28645077 | NC_021165.1    | Ca_kabuli_chr06 | 28645077                | CC                              | TT                | 1946447121               |
| SNP_P3_76415_28645082 | NC_021165.1    | Ca_kabuli_chr06 | 28645082                | CC                              | GG                | 1946447122               |
| SNP_P3_76418_28785380 | NC_021165.1    | Ca_kabuli_chr06 | 28785380                | AA                              | GG                | 1946447124               |
| SNP_P3_76419_28821556 | NC_021165.1    | Ca_kabuli_chr06 | 28821556                | AA                              | GG                | 1946447125               |
| SNP_P3_76420_28821565 | NC_021165.1    | Ca_kabuli_chr06 | 28821565                | CC                              | TT                | 1946447127               |
| SNP_P3_76421_28821601 | NC_021165.1    | Ca_kabuli_chr06 | 28821601                | GG                              | AA                | 1946447128               |
| SNP_P3_76422_28821608 | NC_021165.1    | Ca_kabuli_chr06 | 28821608                | TT                              | AA                | 1946447130               |

| SNPs IDs              | Chromosome IDs | Chromosomes     | Physical positions (bp) | CDC Frontier (Reference genome) | (Pusa 256 & HPNB) | NCBI SNPdb Accession IDs |
|-----------------------|----------------|-----------------|-------------------------|---------------------------------|-------------------|--------------------------|
| SNP_P3_76423_28821723 | NC_021165.1    | Ca_kabuli_chr06 | 28821723                | TT                              | CC                | 1946447131               |
| SNP_P3_76424_28821765 | NC_021165.1    | Ca_kabuli_chr06 | 28821765                | TT                              | CC                | 1946447133               |
| SNP_P3_76425_28821825 | NC_021165.1    | Ca_kabuli_chr06 | 28821825                | TT                              | CC                | 1946447134               |
| SNP_P3_76426_28821961 | NC_021165.1    | Ca_kabuli_chr06 | 28821961                | GG                              | AA                | 1946447135               |
| SNP_P3_76427_28821968 | NC_021165.1    | Ca_kabuli_chr06 | 28821968                | TT                              | CC                | 1946447137               |
| SNP_P3_76428_28821974 | NC_021165.1    | Ca_kabuli_chr06 | 28821974                | CC                              | TT                | 1946447138               |
| SNP_P3_76429_28821985 | NC_021165.1    | Ca_kabuli_chr06 | 28821985                | CC                              | TT                | 1946447140               |
| SNP_P3_76430_28821986 | NC_021165.1    | Ca_kabuli_chr06 | 28821986                | AA                              | GG                | 1946447142               |
| SNP_P3_76431_28822021 | NC_021165.1    | Ca_kabuli_chr06 | 28822021                | TT                              | GG                | 1946447143               |
| SNP_P3_76432_28822053 | NC_021165.1    | Ca_kabuli_chr06 | 28822053                | AA                              | CC                | 1946447145               |
| SNP_P3_76433_28822090 | NC_021165.1    | Ca_kabuli_chr06 | 28822090                | AA                              | GG                | 1946447146               |
| SNP_P3_76434_28822093 | NC_021165.1    | Ca_kabuli_chr06 | 28822093                | AA                              | GG                | 1946447148               |
| SNP_P3_76435_28822099 | NC_021165.1    | Ca_kabuli_chr06 | 28822099                | TT                              | AA                | 1946447149               |
| SNP_P3_76436_28822113 | NC_021165.1    | Ca_kabuli_chr06 | 28822113                | GG                              | AA                | 1946447150               |
| SNP_P3_76437_28822172 | NC_021165.1    | Ca_kabuli_chr06 | 28822172                | TT                              | GG                | 1946447152               |
| SNP_P3_76438_28822184 | NC_021165.1    | Ca_kabuli_chr06 | 28822184                | AA                              | GG                | 1946447154               |
| SNP_P3_76439_28822193 | NC_021165.1    | Ca_kabuli_chr06 | 28822193                | AA                              | GG                | 1946447156               |
| SNP_P3_76440_28822194 | NC_021165.1    | Ca_kabuli_chr06 | 28822194                | TT                              | CC                | 1946447157               |
| SNP_P3_76441_28822221 | NC_021165.1    | Ca_kabuli_chr06 | 28822221                | AA                              | GG                | 1946447159               |
| SNP_P3_76442_28825491 | NC_021165.1    | Ca_kabuli_chr06 | 28825491                | TT                              | AA                | 1946447160               |
| SNP_P3_76443_28826469 | NC_021165.1    | Ca_kabuli_chr06 | 28826469                | GG                              | TT                | 1946447162               |
| SNP_P3_76445_28874617 | NC_021165.1    | Ca_kabuli_chr06 | 28874617                | GG                              | AA                | 1946447163               |
| SNP_P3_76446_28878164 | NC_021165.1    | Ca_kabuli_chr06 | 28878164                | AA                              | GG                | 1946447165               |
| SNP_P3_76448_28878917 | NC_021165.1    | Ca_kabuli_chr06 | 28878917                | TT                              | CC                | 1946447166               |
| SNP_P3_76450_28911257 | NC_021165.1    | Ca_kabuli_chr06 | 28911257                | CC                              | TT                | 1946447168               |
| SNP_P3_76451_28943020 | NC_021165.1    | Ca_kabuli_chr06 | 28943020                | TT                              | CC                | 1946447169               |
| SNP_P3_76453_28968557 | NC_021165.1    | Ca_kabuli_chr06 | 28968557                | AA                              | GG                | 1946447171               |
| SNP_P3_76454_29011331 | NC_021165.1    | Ca_kabuli_chr06 | 29011331                | GG                              | TT                | 1946447172               |
| SNP_P3_76455_29046332 | NC_021165.1    | Ca_kabuli_chr06 | 29046332                | AA                              | GG                | 1946447174               |
| SNP_P3_76456_29063418 | NC_021165.1    | Ca_kabuli_chr06 | 29063418                | CC                              | AA                | 1946447175               |
| SNP_P3_76457_29063424 | NC_021165.1    | Ca_kabuli_chr06 | 29063424                | GG                              | AA                | 1946447177               |
| SNP_P3_76458_29063428 | NC_021165.1    | Ca_kabuli_chr06 | 29063428                | AA                              | GG                | 1946447178               |
| SNP_P3_76459_29063436 | NC_021165.1    | Ca_kabuli_chr06 | 29063436                | AA                              | GG                | 1946447180               |
| SNP_P3_76460_29063807 | NC_021165.1    | Ca_kabuli_chr06 | 29063807                | TT                              | CC                | 1946447182               |
| SNP_P3_76461_29070943 | NC_021165.1    | Ca_kabuli_chr06 | 29070943                | GG                              | AA                | 1946447183               |
| SNP_P3_76462_29070944 | NC_021165.1    | Ca_kabuli_chr06 | 29070944                | CC                              | TT                | 1946447184               |
| SNP_P3_76465_29139128 | NC_021165.1    | Ca_kabuli_chr06 | 29139128                | CC                              | TT                | 1946447186               |
| SNP_P3_76466_29149371 | NC_021165.1    | Ca_kabuli_chr06 | 29149371                | AA                              | GG                | 1946447187               |
| SNP_P3_76467_29151094 | NC_021165.1    | Ca_kabuli_chr06 | 29151094                | GG                              | AA                | 1946447189               |
| SNP_P3_76468_29163022 | NC_021165.1    | Ca_kabuli_chr06 | 29163022                | CC                              | GG                | 1946447190               |
| SNP_P3_76469_29177174 | NC_021165.1    | Ca_kabuli_chr06 | 29177174                | CC                              | AA                | 1946447192               |
| SNP_P3_76470_29177179 | NC_021165.1    | Ca_kabuli_chr06 | 29177179                | CC                              | TT                | 1946447193               |

| SNPs IDs              | Chromosome IDs | Chromosomes     | Physical positions (bp) | CDC Frontier (Reference genome) | (Pusa 256 & HPNB) | NCBI SNPdb Accession IDs |
|-----------------------|----------------|-----------------|-------------------------|---------------------------------|-------------------|--------------------------|
| SNP_P3_76471_29177182 | NC_021165.1    | Ca_kabuli_chr06 | 29177182                | TT                              | GG                | 1946447195               |
| SNP_P3_76472_29177617 | NC_021165.1    | Ca_kabuli_chr06 | 29177617                | AA                              | CC                | 1946447196               |
| SNP_P3_76473_29177662 | NC_021165.1    | Ca_kabuli_chr06 | 29177662                | AA                              | GG                | 1946447198               |
| SNP_P3_76474_29177666 | NC_021165.1    | Ca_kabuli_chr06 | 29177666                | AA                              | GG                | 1946447199               |
| SNP_P3_76475_29177708 | NC_021165.1    | Ca_kabuli_chr06 | 29177708                | AA                              | GG                | 1946447201               |
| SNP_P3_76476_29177726 | NC_021165.1    | Ca_kabuli_chr06 | 29177726                | AA                              | GG                | 1946447202               |
| SNP_P3_76477_29177749 | NC_021165.1    | Ca_kabuli_chr06 | 29177749                | GG                              | AA                | 1946447203               |
| SNP_P3_76478_29177772 | NC_021165.1    | Ca_kabuli_chr06 | 29177772                | TT                              | CC                | 1946447205               |
| SNP_P3_76479_29177792 | NC_021165.1    | Ca_kabuli_chr06 | 29177792                | TT                              | CC                | 1946447207               |
| SNP_P3_76480_29177795 | NC_021165.1    | Ca_kabuli_chr06 | 29177795                | GG                              | TT                | 1946447208               |
| SNP_P3_76481_29184937 | NC_021165.1    | Ca_kabuli_chr06 | 29184937                | CC                              | TT                | 1946447210               |
| SNP_P3_76482_29184943 | NC_021165.1    | Ca_kabuli_chr06 | 29184943                | TT                              | CC                | 1946447211               |
| SNP_P3_76483_29185006 | NC_021165.1    | Ca_kabuli_chr06 | 29185006                | TT                              | CC                | 1946447213               |
| SNP_P3_76484_29185012 | NC_021165.1    | Ca_kabuli_chr06 | 29185012                | GG                              | AA                | 1946447214               |
| SNP_P3_76485_29185018 | NC_021165.1    | Ca_kabuli_chr06 | 29185018                | AA                              | GG                | 1946447216               |
| SNP_P3_76486_29185028 | NC_021165.1    | Ca_kabuli_chr06 | 29185028                | TT                              | GG                | 1946447217               |
| SNP_P3_76487_29185039 | NC_021165.1    | Ca_kabuli_chr06 | 29185039                | AA                              | GG                | 1946447218               |
| SNP_P3_76488_29185060 | NC_021165.1    | Ca_kabuli_chr06 | 29185060                | AA                              | CC                | 1946447220               |
| SNP_P3_76489_29185075 | NC_021165.1    | Ca_kabuli_chr06 | 29185075                | TT                              | CC                | 1946447221               |
| SNP_P3_76490_29185099 | NC_021165.1    | Ca_kabuli_chr06 | 29185099                | GG                              | AA                | 1946447223               |
| SNP_P3_76491_29185102 | NC_021165.1    | Ca_kabuli_chr06 | 29185102                | GG                              | AA                | 1946447225               |
| SNP_P3_76492_29185197 | NC_021165.1    | Ca_kabuli_chr06 | 29185197                | AA                              | TT                | 1946447226               |
| SNP_P3_76493_29185203 | NC_021165.1    | Ca_kabuli_chr06 | 29185203                | TT                              | CC                | 1946447228               |
| SNP_P3_76494_29185206 | NC_021165.1    | Ca_kabuli_chr06 | 29185206                | GG                              | AA                | 1946447229               |
| SNP_P3_76495_29185209 | NC_021165.1    | Ca_kabuli_chr06 | 29185209                | AA                              | GG                | 1946447231               |
| SNP_P3_76496_29185224 | NC_021165.1    | Ca_kabuli_chr06 | 29185224                | TT                              | AA                | 1946447232               |
| SNP_P3_76497_29185239 | NC_021165.1    | Ca_kabuli_chr06 | 29185239                | CC                              | TT                | 1946447234               |
| SNP_P3_76498_29185240 | NC_021165.1    | Ca_kabuli_chr06 | 29185240                | CC                              | TT                | 1946447235               |
| SNP_P3_76499_29185241 | NC_021165.1    | Ca_kabuli_chr06 | 29185241                | AA                              | TT                | 1946447237               |
| SNP_P3_76500_29185257 | NC_021165.1    | Ca_kabuli_chr06 | 29185257                | TT                              | AA                | 1946447238               |
| SNP_P3_76501_29185291 | NC_021165.1    | Ca_kabuli_chr06 | 29185291                | GG                              | CC                | 1946447239               |
| SNP_P3_76502_29185292 | NC_021165.1    | Ca_kabuli_chr06 | 29185292                | CC                              | TT                | 1946447241               |
| SNP_P3_76503_29185312 | NC_021165.1    | Ca_kabuli_chr06 | 29185312                | CC                              | TT                | 1946447242               |
| SNP_P3_76505_29185315 | NC_021165.1    | Ca_kabuli_chr06 | 29185315                | CC                              | AA                | 1946447244               |
| SNP_P3_76506_29185318 | NC_021165.1    | Ca_kabuli_chr06 | 29185318                | AA                              | GG                | 1946447246               |
| SNP_P3_76507_29185332 | NC_021165.1    | Ca_kabuli_chr06 | 29185332                | AA                              | CC                | 1946447247               |
| SNP_P3_76508_29185479 | NC_021165.1    | Ca_kabuli_chr06 | 29185479                | AA                              | CC                | 1946447249               |
| SNP_P3_76509_29191424 | NC_021165.1    | Ca_kabuli_chr06 | 29191424                | TT                              | GG                | 1946447250               |
| SNP_P3_76510_29229457 | NC_021165.1    | Ca_kabuli_chr06 | 29229457                | TT                              | CC                | 1946447252               |
| SNP_P3_76512_29240034 | NC_021165.1    | Ca_kabuli_chr06 | 29240034                | GG                              | AA                | 1946447253               |
| SNP_P3_76513_29255074 | NC_021165.1    | Ca_kabuli_chr06 | 29255074                | CC                              | TT                | 1946447254               |
| SNP_P3_76514_29283571 | NC_021165.1    | Ca_kabuli_chr06 | 29283571                | GG                              | AA                | 1946447256               |

| SNPs IDs              | Chromosome IDs | Chromosomes     | Physical positions (bp) | CDC Frontier (Reference genome) | (Pusa 256 & HPNB) | NCBI SNPdb Accession IDs |
|-----------------------|----------------|-----------------|-------------------------|---------------------------------|-------------------|--------------------------|
| SNP_P3_76515_29288605 | NC_021165.1    | Ca_kabuli_chr06 | 29288605                | TT                              | CC                | 1946447257               |
| SNP_P3_76516_29288608 | NC_021165.1    | Ca_kabuli_chr06 | 29288608                | TT                              | CC                | 1946447259               |
| SNP_P3_76517_29290184 | NC_021165.1    | Ca_kabuli_chr06 | 29290184                | GG                              | AA                | 1946447260               |
| SNP_P3_76518_29290441 | NC_021165.1    | Ca_kabuli_chr06 | 29290441                | AA                              | GG                | 1946447262               |
| SNP_P3_76519_29290466 | NC_021165.1    | Ca_kabuli_chr06 | 29290466                | TT                              | GG                | 1946447263               |
| SNP_P3_76520_29290532 | NC_021165.1    | Ca_kabuli_chr06 | 29290532                | TT                              | AA                | 1946447265               |
| SNP_P3_76521_29290879 | NC_021165.1    | Ca_kabuli_chr06 | 29290879                | AA                              | GG                | 1946447267               |
| SNP_P3_76522_29292595 | NC_021165.1    | Ca_kabuli_chr06 | 29292595                | CC                              | TT                | 1946447268               |
| SNP_P3_76523_29292996 | NC_021165.1    | Ca_kabuli_chr06 | 29292996                | CC                              | GG                | 1946447270               |
| SNP_P3_76524_29306404 | NC_021165.1    | Ca_kabuli_chr06 | 29306404                | TT                              | GG                | 1946447271               |
| SNP_P3_76525_29316800 | NC_021165.1    | Ca_kabuli_chr06 | 29316800                | TT                              | GG                | 1946447273               |
| SNP_P3_76527_29416817 | NC_021165.1    | Ca_kabuli_chr06 | 29416817                | CC                              | TT                | 1946447274               |
| SNP_P3_76528_29422650 | NC_021165.1    | Ca_kabuli_chr06 | 29422650                | GG                              | AA                | 1946447275               |
| SNP_P3_76529_29435371 | NC_021165.1    | Ca_kabuli_chr06 | 29435371                | AA                              | CC                | 1946447277               |
| SNP_P3_76530_29435380 | NC_021165.1    | Ca_kabuli_chr06 | 29435380                | CC                              | TT                | 1946447278               |
| SNP_P3_76532_29488452 | NC_021165.1    | Ca_kabuli_chr06 | 29488452                | TT                              | CC                | 1946447280               |
| SNP_P3_76533_29488477 | NC_021165.1    | Ca_kabuli_chr06 | 29488477                | AA                              | GG                | 1946447281               |
| SNP_P3_76534_29488478 | NC_021165.1    | Ca_kabuli_chr06 | 29488478                | CC                              | GG                | 1946447283               |
| SNP_P3_76535_29488480 | NC_021165.1    | Ca_kabuli_chr06 | 29488480                | GG                              | TT                | 1946447285               |
| SNP_P3_76537_29488522 | NC_021165.1    | Ca_kabuli_chr06 | 29488522                | TT                              | GG                | 1946447286               |
| SNP_P3_76538_29488530 | NC_021165.1    | Ca_kabuli_chr06 | 29488530                | CC                              | AA                | 1946447288               |
| SNP_P3_76539_29488569 | NC_021165.1    | Ca_kabuli_chr06 | 29488569                | CC                              | AA                | 1946447289               |
| SNP_P3_76540_29488581 | NC_021165.1    | Ca_kabuli_chr06 | 29488581                | GG                              | AA                | 1946447291               |
| SNP_P3_76541_29488620 | NC_021165.1    | Ca_kabuli_chr06 | 29488620                | AA                              | CC                | 1946447292               |
| SNP_P3_76542_29488782 | NC_021165.1    | Ca_kabuli_chr06 | 29488782                | TT                              | CC                | 1946447294               |
| SNP_P3_76543_29492032 | NC_021165.1    | Ca_kabuli_chr06 | 29492032                | TT                              | CC                | 1946447295               |
| SNP_P3_76544_29492078 | NC_021165.1    | Ca_kabuli_chr06 | 29492078                | AA                              | GG                | 1946447297               |
| SNP_P3_76546_29492172 | NC_021165.1    | Ca_kabuli_chr06 | 29492172                | TT                              | CC                | 1946447298               |
| SNP_P3_76547_29492300 | NC_021165.1    | Ca_kabuli_chr06 | 29492300                | AA                              | CC                | 1946447299               |
| SNP_P3_76548_29492301 | NC_021165.1    | Ca_kabuli_chr06 | 29492301                | TT                              | AA                | 1946447301               |
| SNP_P3_76549_29492304 | NC_021165.1    | Ca_kabuli_chr06 | 29492304                | TT                              | AA                | 1946447303               |
| SNP_P3_76550_29492305 | NC_021165.1    | Ca_kabuli_chr06 | 29492305                | TT                              | GG                | 1946447304               |
| SNP_P3_76551_29492329 | NC_021165.1    | Ca_kabuli_chr06 | 29492329                | CC                              | TT                | 1946447306               |
| SNP_P3_76552_29492346 | NC_021165.1    | Ca_kabuli_chr06 | 29492346                | TT                              | CC                | 1946447307               |
| SNP_P3_76553_29500141 | NC_021165.1    | Ca_kabuli_chr06 | 29500141                | AA                              | GG                | 1946447309               |
| SNP_P3_76554_29500162 | NC_021165.1    | Ca_kabuli_chr06 | 29500162                | TT                              | CC                | 1946447310               |
| SNP_P3_76555_29500192 | NC_021165.1    | Ca_kabuli_chr06 | 29500192                | TT                              | CC                | 1946447311               |
| SNP_P3_76556_29500228 | NC_021165.1    | Ca_kabuli_chr06 | 29500228                | CC                              | TT                | 1946447313               |
| SNP_P3_76557_29500481 | NC_021165.1    | Ca_kabuli_chr06 | 29500481                | CC                              | TT                | 1946447314               |
| SNP_P3_76558_29500802 | NC_021165.1    | Ca_kabuli_chr06 | 29500802                | AA                              | GG                | 1946447316               |
| SNP_P3_76559_29523568 | NC_021165.1    | Ca_kabuli_chr06 | 29523568                | GG                              | AA                | 1946447317               |
| SNP_P3_76560_29523593 | NC_021165.1    | Ca_kabuli_chr06 | 29523593                | TT                              | GG                | 1946447319               |

| SNPs IDs              | Chromosome IDs | Chromosomes     | Physical positions (bp) | CDC Frontier (Reference genome) | (Pusa 256 & HPNB) | NCBI SNPdb Accession IDs |
|-----------------------|----------------|-----------------|-------------------------|---------------------------------|-------------------|--------------------------|
| SNP_P3_76561_29523595 | NC_021165.1    | Ca_kabuli_chr06 | 29523595                | AA                              | GG                | 1946447320               |
| SNP_P3_76562_29523596 | NC_021165.1    | Ca_kabuli_chr06 | 29523596                | GG                              | AA                | 1946447322               |
| SNP_P3_76564_29536077 | NC_021165.1    | Ca_kabuli_chr06 | 29536077                | AA                              | GG                | 1946447323               |
| SNP_P3_76565_29536096 | NC_021165.1    | Ca_kabuli_chr06 | 29536096                | CC                              | TT                | 1946447325               |
| SNP_P3_76566_29536193 | NC_021165.1    | Ca_kabuli_chr06 | 29536193                | CC                              | TT                | 1946447326               |
| SNP_P3_76567_29536240 | NC_021165.1    | Ca_kabuli_chr06 | 29536240                | GG                              | AA                | 1946447327               |
| SNP_P3_76568_29536251 | NC_021165.1    | Ca_kabuli_chr06 | 29536251                | CC                              | TT                | 1946447329               |
| SNP_P3_76569_29536261 | NC_021165.1    | Ca_kabuli_chr06 | 29536261                | TT                              | CC                | 1946447331               |
| SNP_P3_76570_29538191 | NC_021165.1    | Ca_kabuli_chr06 | 29538191                | CC                              | TT                | 1946447332               |
| SNP_P3_76571_29557208 | NC_021165.1    | Ca_kabuli_chr06 | 29557208                | AA                              | TT                | 1946447334               |
| SNP_P3_76572_29557490 | NC_021165.1    | Ca_kabuli_chr06 | 29557490                | TT                              | GG                | 1946447335               |
| SNP_P3_76573_29573922 | NC_021165.1    | Ca_kabuli_chr06 | 29573922                | CC                              | TT                | 1946447337               |
| SNP_P3_76574_29573940 | NC_021165.1    | Ca_kabuli_chr06 | 29573940                | TT                              | CC                | 1946447338               |
| SNP_P3_76575_29575841 | NC_021165.1    | Ca_kabuli_chr06 | 29575841                | AA                              | GG                | 1946447339               |
| SNP_P3_76576_29599537 | NC_021165.1    | Ca_kabuli_chr06 | 29599537                | GG                              | TT                | 1946447341               |
| SNP_P3_76577_29599556 | NC_021165.1    | Ca_kabuli_chr06 | 29599556                | TT                              | CC                | 1946447342               |
| SNP_P3_76578_29599560 | NC_021165.1    | Ca_kabuli_chr06 | 29599560                | CC                              | AA                | 1946447344               |
| SNP_P3_76579_29599797 | NC_021165.1    | Ca_kabuli_chr06 | 29599797                | CC                              | TT                | 1946447345               |
| SNP_P3_76580_29605747 | NC_021165.1    | Ca_kabuli_chr06 | 29605747                | GG                              | AA                | 1946447347               |
| SNP_P3_76581_29606463 | NC_021165.1    | Ca_kabuli_chr06 | 29606463                | TT                              | CC                | 1946447348               |
| SNP_P3_76582_29627618 | NC_021165.1    | Ca_kabuli_chr06 | 29627618                | CC                              | TT                | 1946447350               |
| SNP_P3_76583_29629207 | NC_021165.1    | Ca_kabuli_chr06 | 29629207                | TT                              | CC                | 1946447351               |
| SNP_P3_76584_29629800 | NC_021165.1    | Ca_kabuli_chr06 | 29629800                | TT                              | CC                | 1946447353               |
| SNP_P3_76585_29655550 | NC_021165.1    | Ca_kabuli_chr06 | 29655550                | AA                              | TT                | 1946447354               |
| SNP_P3_76586_29655557 | NC_021165.1    | Ca_kabuli_chr06 | 29655557                | AA                              | GG                | 1946447356               |
| SNP_P3_76587_29655577 | NC_021165.1    | Ca_kabuli_chr06 | 29655577                | AA                              | GG                | 1946447357               |
| SNP_P3_76588_29669062 | NC_021165.1    | Ca_kabuli_chr06 | 29669062                | CC                              | TT                | 1946447358               |
| SNP_P3_76589_29669096 | NC_021165.1    | Ca_kabuli_chr06 | 29669096                | GG                              | AA                | 1946447360               |
| SNP_P3_76590_29669152 | NC_021165.1    | Ca_kabuli_chr06 | 29669152                | AA                              | CC                | 1946447361               |
| SNP_P3_76591_29669192 | NC_021165.1    | Ca_kabuli_chr06 | 29669192                | GG                              | AA                | 1946447363               |
| SNP_P3_76592_29669216 | NC_021165.1    | Ca_kabuli_chr06 | 29669216                | CC                              | AA                | 1946447364               |
| SNP_P3_76593_29669299 | NC_021165.1    | Ca_kabuli_chr06 | 29669299                | CC                              | TT                | 1946447366               |
| SNP_P3_76595_29672934 | NC_021165.1    | Ca_kabuli_chr06 | 29672934                | TT                              | CC                | 1946447367               |
| SNP_P3_76596_29678351 | NC_021165.1    | Ca_kabuli_chr06 | 29678351                | TT                              | GG                | 1946447369               |
| SNP_P3_76598_29690671 | NC_021165.1    | Ca_kabuli_chr06 | 29690671                | GG                              | AA                | 1946447370               |
| SNP_P3_76599_29710989 | NC_021165.1    | Ca_kabuli_chr06 | 29710989                | AA                              | GG                | 1946447371               |
| SNP_P3_76600_29711060 | NC_021165.1    | Ca_kabuli_chr06 | 29711060                | AA                              | CC                | 1946447373               |
| SNP_P3_76601_29711127 | NC_021165.1    | Ca_kabuli_chr06 | 29711127                | AA                              | GG                | 1946447374               |
| SNP_P3_76602_29711627 | NC_021165.1    | Ca_kabuli_chr06 | 29711627                | CC                              | TT                | 1946447376               |
| SNP_P3_76603_29711641 | NC_021165.1    | Ca_kabuli_chr06 | 29711641                | TT                              | GG                | 1946447377               |
| SNP_P3_76604_29712995 | NC_021165.1    | Ca_kabuli_chr06 | 29712995                | CC                              | GG                | 1946447379               |
| SNP_P3_76605_29713692 | NC_021165.1    | Ca_kabuli_chr06 | 29713692                | CC                              | TT                | 1946447380               |

| SNPs IDs              | Chromosome IDs | Chromosomes     | Physical positions (bp) | CDC Frontier (Reference genome) | (Pusa 256 & HPNB) | NCBI SNPdb Accession IDs |
|-----------------------|----------------|-----------------|-------------------------|---------------------------------|-------------------|--------------------------|
| SNP_P3_76606_29715709 | NC_021165.1    | Ca_kabuli_chr06 | 29715709                | TT                              | AA                | 1946447381               |
| SNP_P3_76607_29715930 | NC_021165.1    | Ca_kabuli_chr06 | 29715930                | TT                              | GG                | 1946447383               |
| SNP_P3_76608_29715945 | NC_021165.1    | Ca_kabuli_chr06 | 29715945                | GG                              | AA                | 1946447384               |
| SNP_P3_76609_29715995 | NC_021165.1    | Ca_kabuli_chr06 | 29715995                | AA                              | CC                | 1946447386               |
| SNP_P3_76610_29716278 | NC_021165.1    | Ca_kabuli_chr06 | 29716278                | GG                              | AA                | 1946447387               |
| SNP_P3_76611_29716436 | NC_021165.1    | Ca_kabuli_chr06 | 29716436                | TT                              | CC                | 1946447389               |
| SNP_P3_76612_29716576 | NC_021165.1    | Ca_kabuli_chr06 | 29716576                | AA                              | GG                | 1946447390               |
| SNP_P3_76613_29716592 | NC_021165.1    | Ca_kabuli_chr06 | 29716592                | TT                              | AA                | 1946447392               |
| SNP_P3_76614_29724604 | NC_021165.1    | Ca_kabuli_chr06 | 29724604                | TT                              | AA                | 1946447393               |
| SNP_P3_76615_29724644 | NC_021165.1    | Ca_kabuli_chr06 | 29724644                | TT                              | CC                | 1946447394               |
| SNP_P3_76616_29724819 | NC_021165.1    | Ca_kabuli_chr06 | 29724819                | AA                              | GG                | 1946447396               |
| SNP_P3_76617_29724838 | NC_021165.1    | Ca_kabuli_chr06 | 29724838                | TT                              | CC                | 1946447397               |
| SNP_P3_76618_29724840 | NC_021165.1    | Ca_kabuli_chr06 | 29724840                | GG                              | AA                | 1946447399               |
| SNP_P3_76619_29724848 | NC_021165.1    | Ca_kabuli_chr06 | 29724848                | CC                              | TT                | 1946447400               |
| SNP_P3_76620_29724909 | NC_021165.1    | Ca_kabuli_chr06 | 29724909                | AA                              | TT                | 1946447402               |
| SNP_P3_76621_29726018 | NC_021165.1    | Ca_kabuli_chr06 | 29726018                | TT                              | CC                | 1946447403               |
| SNP_P3_76622_29726032 | NC_021165.1    | Ca_kabuli_chr06 | 29726032                | GG                              | TT                | 1946447404               |
| SNP_P3_76623_29726078 | NC_021165.1    | Ca_kabuli_chr06 | 29726078                | CC                              | TT                | 1946447406               |
| SNP_P3_76624_29747947 | NC_021165.1    | Ca_kabuli_chr06 | 29747947                | AA                              | CC                | 1946447407               |
| SNP_P3_76625_29769572 | NC_021165.1    | Ca_kabuli_chr06 | 29769572                | TT                              | AA                | 1946447409               |
| SNP_P3_76626_29784853 | NC_021165.1    | Ca_kabuli_chr06 | 29784853                | TT                              | CC                | 1946447410               |
| SNP_P3_76627_29784871 | NC_021165.1    | Ca_kabuli_chr06 | 29784871                | GG                              | TT                | 1946447412               |
| SNP_P3_76628_29784919 | NC_021165.1    | Ca_kabuli_chr06 | 29784919                | AA                              | GG                | 1946447413               |
| SNP_P3_76629_29784951 | NC_021165.1    | Ca_kabuli_chr06 | 29784951                | AA                              | GG                | 1946447414               |
| SNP_P3_76630_29785043 | NC_021165.1    | Ca_kabuli_chr06 | 29785043                | AA                              | TT                | 1946447416               |
| SNP_P3_76631_29785057 | NC_021165.1    | Ca_kabuli_chr06 | 29785057                | TT                              | GG                | 1946447417               |
| SNP_P3_76632_29785080 | NC_021165.1    | Ca_kabuli_chr06 | 29785080                | CC                              | TT                | 1946447419               |
| SNP_P3_76633_29785141 | NC_021165.1    | Ca_kabuli_chr06 | 29785141                | TT                              | GG                | 1946447420               |
| SNP_P3_76634_29785156 | NC_021165.1    | Ca_kabuli_chr06 | 29785156                | AA                              | TT                | 1946447421               |
| SNP_P3_76635_29785160 | NC_021165.1    | Ca_kabuli_chr06 | 29785160                | AA                              | GG                | 1946447423               |
| SNP_P3_76636_29785193 | NC_021165.1    | Ca_kabuli_chr06 | 29785193                | TT                              | AA                | 1946447424               |
| SNP_P3_76637_29785200 | NC_021165.1    | Ca_kabuli_chr06 | 29785200                | GG                              | AA                | 1946447426               |
| SNP_P3_76638_29792127 | NC_021165.1    | Ca_kabuli_chr06 | 29792127                | AA                              | TT                | 1946447427               |
| SNP_P3_76639_29826824 | NC_021165.1    | Ca_kabuli_chr06 | 29826824                | AA                              | GG                | 1946447429               |
| SNP_P3_76640_29826841 | NC_021165.1    | Ca_kabuli_chr06 | 29826841                | AA                              | GG                | 1946447430               |
| SNP_P3_76641_29826850 | NC_021165.1    | Ca_kabuli_chr06 | 29826850                | CC                              | TT                | 1946447432               |
| SNP_P3_76642_29826851 | NC_021165.1    | Ca_kabuli_chr06 | 29826851                | GG                              | TT                | 1946447433               |
| SNP_P3_76643_29826861 | NC_021165.1    | Ca_kabuli_chr06 | 29826861                | AA                              | GG                | 1946447435               |
| SNP_P3_76644_29827117 | NC_021165.1    | Ca_kabuli_chr06 | 29827117                | TT                              | CC                | 1946447437               |
| SNP_P3_76645_29827174 | NC_021165.1    | Ca_kabuli_chr06 | 29827174                | CC                              | GG                | 1946447439               |
| SNP_P3_76646_29827204 | NC_021165.1    | Ca_kabuli_chr06 | 29827204                | GG                              | TT                | 1946447440               |
| SNP_P3_76647_29827209 | NC_021165.1    | Ca_kabuli_chr06 | 29827209                | GG                              | AA                | 1946447442               |

| SNPs IDs              | Chromosome IDs | Chromosomes     | Physical positions (bp) | CDC Frontier (Reference genome) | (Pusa 256 & HPNB) | NCBI SNPdb Accession IDs |
|-----------------------|----------------|-----------------|-------------------------|---------------------------------|-------------------|--------------------------|
| SNP_P3_76648_29827210 | NC_021165.1    | Ca_kabuli_chr06 | 29827210                | CC                              | TT                | 1946447443               |
| SNP_P3_76649_29837162 | NC_021165.1    | Ca_kabuli_chr06 | 29837162                | CC                              | TT                | 1946447445               |
| SNP_P3_76650_29837548 | NC_021165.1    | Ca_kabuli_chr06 | 29837548                | AA                              | GG                | 1946447446               |
| SNP_P3_76651_29869749 | NC_021165.1    | Ca_kabuli_chr06 | 29869749                | TT                              | CC                | 1946447448               |
| SNP_P3_76652_29889106 | NC_021165.1    | Ca_kabuli_chr06 | 29889106                | TT                              | CC                | 1946447449               |
| SNP_P3_76653_29894023 | NC_021165.1    | Ca_kabuli_chr06 | 29894023                | TT                              | CC                | 1946447450               |
| SNP_P3_76654_29909319 | NC_021165.1    | Ca_kabuli_chr06 | 29909319                | CC                              | AA                | 1946447452               |
| SNP_P3_76655_29909323 | NC_021165.1    | Ca_kabuli_chr06 | 29909323                | AA                              | TT                | 1946447453               |
| SNP_P3_76656_29909325 | NC_021165.1    | Ca_kabuli_chr06 | 29909325                | GG                              | TT                | 1946447455               |
| SNP_P3_76657_29909405 | NC_021165.1    | Ca_kabuli_chr06 | 29909405                | TT                              | CC                | 1946447456               |
| SNP_P3_76658_29909535 | NC_021165.1    | Ca_kabuli_chr06 | 29909535                | TT                              | CC                | 1946447457               |
| SNP_P3_76659_29909631 | NC_021165.1    | Ca_kabuli_chr06 | 29909631                | AA                              | GG                | 1946447459               |
| SNP_P3_76660_29909654 | NC_021165.1    | Ca_kabuli_chr06 | 29909654                | AA                              | GG                | 1946447460               |
| SNP_P3_76661_29931562 | NC_021165.1    | Ca_kabuli_chr06 | 29931562                | CC                              | TT                | 1946447462               |
| SNP_P3_76662_29934162 | NC_021165.1    | Ca_kabuli_chr06 | 29934162                | GG                              | AA                | 1946447463               |
| SNP_P3_76663_29940794 | NC_021165.1    | Ca_kabuli_chr06 | 29940794                | TT                              | CC                | 1946447464               |
| SNP_P3_76664_29951172 | NC_021165.1    | Ca_kabuli_chr06 | 29951172                | CC                              | TT                | 1946447466               |
| SNP_P3_76667_30015260 | NC_021165.1    | Ca_kabuli_chr06 | 30015260                | AA                              | GG                | 1946447467               |
| SNP_P3_76668_30027409 | NC_021165.1    | Ca_kabuli_chr06 | 30027409                | AA                              | GG                | 1946447469               |
| SNP_P3_76671_30092138 | NC_021165.1    | Ca_kabuli_chr06 | 30092138                | GG                              | TT                | 1946447470               |
| SNP_P3_76672_30092171 | NC_021165.1    | Ca_kabuli_chr06 | 30092171                | CC                              | AA                | 1946447471               |
| SNP_P3_76673_30114635 | NC_021165.1    | Ca_kabuli_chr06 | 30114635                | TT                              | AA                | 1946447473               |
| SNP_P3_76674_30129370 | NC_021165.1    | Ca_kabuli_chr06 | 30129370                | TT                              | GG                | 1946447474               |
| SNP_P3_76675_30149738 | NC_021165.1    | Ca_kabuli_chr06 | 30149738                | GG                              | AA                | 1946447476               |
| SNP_P3_76676_30149770 | NC_021165.1    | Ca_kabuli_chr06 | 30149770                | AA                              | TT                | 1946447477               |
| SNP_P3_76677_30153784 | NC_021165.1    | Ca_kabuli_chr06 | 30153784                | TT                              | CC                | 1946447478               |
| SNP_P3_76678_30153793 | NC_021165.1    | Ca_kabuli_chr06 | 30153793                | CC                              | TT                | 1946447480               |
| SNP_P3_76679_30153796 | NC_021165.1    | Ca_kabuli_chr06 | 30153796                | CC                              | TT                | 1946447481               |
| SNP_P3_76680_30153852 | NC_021165.1    | Ca_kabuli_chr06 | 30153852                | GG                              | AA                | 1946447483               |
| SNP_P3_76681_30155934 | NC_021165.1    | Ca_kabuli_chr06 | 30155934                | GG                              | AA                | 1946447484               |
| SNP_P3_76683_30164807 | NC_021165.1    | Ca_kabuli_chr06 | 30164807                | TT                              | CC                | 1946447486               |
| SNP_P3_76684_30164815 | NC_021165.1    | Ca_kabuli_chr06 | 30164815                | GG                              | AA                | 1946447487               |
| SNP_P3_76685_30164821 | NC_021165.1    | Ca_kabuli_chr06 | 30164821                | TT                              | CC                | 1946447488               |
| SNP_P3_76686_30164991 | NC_021165.1    | Ca_kabuli_chr06 | 30164991                | AA                              | GG                | 1946447490               |
| SNP_P3_76687_30165418 | NC_021165.1    | Ca_kabuli_chr06 | 30165418                | TT                              | GG                | 1946447491               |
| SNP_P3_76688_30165442 | NC_021165.1    | Ca_kabuli_chr06 | 30165442                | AA                              | GG                | 1946447492               |
| SNP_P3_76689_30165897 | NC_021165.1    | Ca_kabuli_chr06 | 30165897                | TT                              | GG                | 1946447494               |
| SNP_P3_76690_30165916 | NC_021165.1    | Ca_kabuli_chr06 | 30165916                | CC                              | TT                | 1946447495               |
| SNP_P3_76691_30165925 | NC_021165.1    | Ca_kabuli_chr06 | 30165925                | TT                              | CC                | 1946447497               |
| SNP_P3_76692_30165929 | NC_021165.1    | Ca_kabuli_chr06 | 30165929                | TT                              | GG                | 1946447498               |
| SNP_P3_76693_30165937 | NC_021165.1    | Ca_kabuli_chr06 | 30165937                | GG                              | AA                | 1946447499               |
| SNP_P3_76694_30165985 | NC_021165.1    | Ca_kabuli_chr06 | 30165985                | CC                              | TT                | 1946447501               |



| SNPs IDs              | Chromosome IDs | Chromosomes     | Physical positions (bp) | CDC Frontier (Reference genome) | (Pusa 256 & HPNB) | NCBI SNPdb Accession IDs |
|-----------------------|----------------|-----------------|-------------------------|---------------------------------|-------------------|--------------------------|
| SNP_P3_76695_30166160 | NC_021165.1    | Ca_kabuli_chr06 | 30166160                | CC                              | TT                | 1946447502               |
| SNP_P3_76696_30166241 | NC_021165.1    | Ca_kabuli_chr06 | 30166241                | GG                              | AA                | 1946447504               |
| SNP_P3_76697_30166250 | NC_021165.1    | Ca_kabuli_chr06 | 30166250                | GG                              | AA                | 1946447505               |
| SNP_P3_76698_30166255 | NC_021165.1    | Ca_kabuli_chr06 | 30166255                | AA                              | GG                | 1946447506               |
| SNP_P3_76699_30166256 | NC_021165.1    | Ca_kabuli_chr06 | 30166256                | AA                              | GG                | 1946447508               |
| SNP_P3_76700_30167298 | NC_021165.1    | Ca_kabuli_chr06 | 30167298                | GG                              | AA                | 1946447509               |
| SNP_P3_76701_30167307 | NC_021165.1    | Ca_kabuli_chr06 | 30167307                | AA                              | GG                | 1946447511               |
| SNP_P3_76702_30167315 | NC_021165.1    | Ca_kabuli_chr06 | 30167315                | AA                              | CC                | 1946447512               |
| SNP_P3_76703_30167328 | NC_021165.1    | Ca_kabuli_chr06 | 30167328                | TT                              | CC                | 1946447513               |
| SNP_P3_76704_30167346 | NC_021165.1    | Ca_kabuli_chr06 | 30167346                | GG                              | AA                | 1946447515               |
| SNP_P3_76705_30167349 | NC_021165.1    | Ca_kabuli_chr06 | 30167349                | TT                              | CC                | 1946447516               |
| SNP_P3_76706_30167385 | NC_021165.1    | Ca_kabuli_chr06 | 30167385                | TT                              | CC                | 1946447518               |
| SNP_P3_76707_30167394 | NC_021165.1    | Ca_kabuli_chr06 | 30167394                | TT                              | CC                | 1946447519               |
| SNP_P3_76708_30170101 | NC_021165.1    | Ca_kabuli_chr06 | 30170101                | TT                              | CC                | 1946447521               |
| SNP_P3_76709_30253537 | NC_021165.1    | Ca_kabuli_chr06 | 30253537                | GG                              | AA                | 1946447522               |
| SNP_P3_76710_30255182 | NC_021165.1    | Ca_kabuli_chr06 | 30255182                | CC                              | AA                | 1946447524               |
| SNP_P3_76711_30255183 | NC_021165.1    | Ca_kabuli_chr06 | 30255183                | TT                              | AA                | 1946447525               |
| SNP_P3_76712_30256466 | NC_021165.1    | Ca_kabuli_chr06 | 30256466                | GG                              | AA                | 1946447527               |
| SNP_P3_76713_30256789 | NC_021165.1    | Ca_kabuli_chr06 | 30256789                | TT                              | CC                | 1946447528               |
| SNP_P3_76714_30256821 | NC_021165.1    | Ca_kabuli_chr06 | 30256821                | GG                              | CC                | 1946447530               |
| SNP_P3_76715_30264982 | NC_021165.1    | Ca_kabuli_chr06 | 30264982                | AA                              | CC                | 1946447531               |
| SNP_P3_76716_30265027 | NC_021165.1    | Ca_kabuli_chr06 | 30265027                | CC                              | TT                | 1946447532               |
| SNP_P3_76717_30265326 | NC_021165.1    | Ca_kabuli_chr06 | 30265326                | AA                              | TT                | 1946447534               |
| SNP_P3_76718_30341361 | NC_021165.1    | Ca_kabuli_chr06 | 30341361                | GG                              | AA                | 1946447535               |
| SNP_P3_76719_30344073 | NC_021165.1    | Ca_kabuli_chr06 | 30344073                | AA                              | GG                | 1946447537               |
| SNP_P3_76720_30344233 | NC_021165.1    | Ca_kabuli_chr06 | 30344233                | TT                              | AA                | 1946447538               |
| SNP_P3_76721_30349376 | NC_021165.1    | Ca_kabuli_chr06 | 30349376                | GG                              | TT                | 1946447540               |
| SNP_P3_76722_30360882 | NC_021165.1    | Ca_kabuli_chr06 | 30360882                | CC                              | AA                | 1946447541               |
| SNP_P3_76723_30363761 | NC_021165.1    | Ca_kabuli_chr06 | 30363761                | TT                              | CC                | 1946447543               |
| SNP_P3_76724_30367717 | NC_021165.1    | Ca_kabuli_chr06 | 30367717                | GG                              | CC                | 1946447544               |
| SNP_P3_76725_30369541 | NC_021165.1    | Ca_kabuli_chr06 | 30369541                | GG                              | TT                | 1946447545               |
| SNP_P3_76726_30383144 | NC_021165.1    | Ca_kabuli_chr06 | 30383144                | GG                              | AA                | 1946447547               |
| SNP_P3_76727_30383540 | NC_021165.1    | Ca_kabuli_chr06 | 30383540                | CC                              | TT                | 1946447548               |
| SNP_P3_76728_30399802 | NC_021165.1    | Ca_kabuli_chr06 | 30399802                | CC                              | TT                | 1946447550               |
| SNP_P3_76729_30411376 | NC_021165.1    | Ca_kabuli_chr06 | 30411376                | TT                              | GG                | 1946447551               |
| SNP_P3_76730_30413911 | NC_021165.1    | Ca_kabuli_chr06 | 30413911                | AA                              | GG                | 1946447553               |
| SNP_P3_76731_30413912 | NC_021165.1    | Ca_kabuli_chr06 | 30413912                | TT                              | GG                | 1946447554               |
| SNP_P3_76732_30419807 | NC_021165.1    | Ca_kabuli_chr06 | 30419807                | AA                              | TT                | 1946447556               |
| SNP_P3_76733_30420524 | NC_021165.1    | Ca_kabuli_chr06 | 30420524                | GG                              | AA                | 1946447557               |
| SNP_P3_76734_30443338 | NC_021165.1    | Ca_kabuli_chr06 | 30443338                | TT                              | CC                | 1946447558               |
| SNP_P3_76736_30480933 | NC_021165.1    | Ca_kabuli_chr06 | 30480933                | TT                              | AA                | 1946447560               |
| SNP_P3_76737_30499652 | NC_021165.1    | Ca_kabuli_chr06 | 30499652                | GG                              | AA                | 1946447561               |

| SNPs IDs              | Chromosome IDs | Chromosomes     | Physical positions (bp) | CDC Frontier (Reference genome) | (Pusa 256 & HPNB) | NCBI SNPdb Accession IDs |
|-----------------------|----------------|-----------------|-------------------------|---------------------------------|-------------------|--------------------------|
| SNP_P3_76738_30499682 | NC_021165.1    | Ca_kabuli_chr06 | 30499682                | CC                              | TT                | 1946447563               |
| SNP_P3_76739_30499687 | NC_021165.1    | Ca_kabuli_chr06 | 30499687                | AA                              | GG                | 1946447564               |
| SNP_P3_76740_30524550 | NC_021165.1    | Ca_kabuli_chr06 | 30524550                | TT                              | CC                | 1946447566               |
| SNP_P3_76741_30524567 | NC_021165.1    | Ca_kabuli_chr06 | 30524567                | GG                              | CC                | 1946447567               |
| SNP_P3_76744_30586756 | NC_021165.1    | Ca_kabuli_chr06 | 30586756                | AA                              | GG                | 1946447568               |
| SNP_P3_76745_30586851 | NC_021165.1    | Ca_kabuli_chr06 | 30586851                | CC                              | AA                | 1946447570               |
| SNP_P3_76746_30587869 | NC_021165.1    | Ca_kabuli_chr06 | 30587869                | AA                              | GG                | 1946447571               |
| SNP_P3_76747_30587873 | NC_021165.1    | Ca_kabuli_chr06 | 30587873                | GG                              | CC                | 1946447573               |
| SNP_P3_76748_30587874 | NC_021165.1    | Ca_kabuli_chr06 | 30587874                | CC                              | TT                | 1946447574               |
| SNP_P3_76749_30587932 | NC_021165.1    | Ca_kabuli_chr06 | 30587932                | AA                              | GG                | 1946447575               |
| SNP_P3_76750_30588174 | NC_021165.1    | Ca_kabuli_chr06 | 30588174                | AA                              | CC                | 1946447577               |
| SNP_P3_76752_30588699 | NC_021165.1    | Ca_kabuli_chr06 | 30588699                | TT                              | AA                | 1946447578               |
| SNP_P3_76753_30588710 | NC_021165.1    | Ca_kabuli_chr06 | 30588710                | GG                              | AA                | 1946447580               |
| SNP_P3_76754_30588718 | NC_021165.1    | Ca_kabuli_chr06 | 30588718                | AA                              | GG                | 1946447582               |
| SNP_P3_76757_30678651 | NC_021165.1    | Ca_kabuli_chr06 | 30678651                | CC                              | AA                | 1946447583               |
| SNP_P3_76758_30678707 | NC_021165.1    | Ca_kabuli_chr06 | 30678707                | AA                              | GG                | 1946447584               |
| SNP_P3_76759_30678729 | NC_021165.1    | Ca_kabuli_chr06 | 30678729                | CC                              | TT                | 1946447586               |
| SNP_P3_76760_30678756 | NC_021165.1    | Ca_kabuli_chr06 | 30678756                | CC                              | TT                | 1946447587               |
| SNP_P3_76762_30678877 | NC_021165.1    | Ca_kabuli_chr06 | 30678877                | GG                              | TT                | 1946447589               |
| SNP_P3_76763_30678878 | NC_021165.1    | Ca_kabuli_chr06 | 30678878                | TT                              | GG                | 1946447590               |
| SNP_P3_76764_30678891 | NC_021165.1    | Ca_kabuli_chr06 | 30678891                | TT                              | GG                | 1946447591               |
| SNP_P3_76765_30678902 | NC_021165.1    | Ca_kabuli_chr06 | 30678902                | AA                              | GG                | 1946447593               |
| SNP_P3_76766_30678990 | NC_021165.1    | Ca_kabuli_chr06 | 30678990                | AA                              | TT                | 1946447594               |
| SNP_P3_76767_30679162 | NC_021165.1    | Ca_kabuli_chr06 | 30679162                | AA                              | GG                | 1946447596               |
| SNP_P3_76768_30679163 | NC_021165.1    | Ca_kabuli_chr06 | 30679163                | TT                              | AA                | 1946447597               |
| SNP_P3_76769_30690771 | NC_021165.1    | Ca_kabuli_chr06 | 30690771                | AA                              | CC                | 1946447599               |
| SNP_P3_76770_30690831 | NC_021165.1    | Ca_kabuli_chr06 | 30690831                | GG                              | AA                | 1946447600               |
| SNP_P3_76771_30691160 | NC_021165.1    | Ca_kabuli_chr06 | 30691160                | TT                              | CC                | 1946447601               |
| SNP_P3_76772_30691162 | NC_021165.1    | Ca_kabuli_chr06 | 30691162                | GG                              | AA                | 1946447603               |
| SNP_P3_76773_30691319 | NC_021165.1    | Ca_kabuli_chr06 | 30691319                | CC                              | AA                | 1946447604               |
| SNP_P3_76776_30725397 | NC_021165.1    | Ca_kabuli_chr06 | 30725397                | TT                              | AA                | 1946447606               |
| SNP_P3_76777_30744883 | NC_021165.1    | Ca_kabuli_chr06 | 30744883                | AA                              | GG                | 1946447607               |
| SNP_P3_76778_30752297 | NC_021165.1    | Ca_kabuli_chr06 | 30752297                | AA                              | GG                | 1946447609               |
| SNP_P3_76779_30752466 | NC_021165.1    | Ca_kabuli_chr06 | 30752466                | CC                              | TT                | 1946447610               |
| SNP_P3_76780_30752474 | NC_021165.1    | Ca_kabuli_chr06 | 30752474                | AA                              | TT                | 1946447612               |
| SNP_P3_76781_30752477 | NC_021165.1    | Ca_kabuli_chr06 | 30752477                | TT                              | AA                | 1946447613               |
| SNP_P3_76782_30752498 | NC_021165.1    | Ca_kabuli_chr06 | 30752498                | GG                              | AA                | 1946447614               |
| SNP_P3_76783_30752501 | NC_021165.1    | Ca_kabuli_chr06 | 30752501                | AA                              | GG                | 1946447616               |
| SNP_P3_76784_30752599 | NC_021165.1    | Ca_kabuli_chr06 | 30752599                | AA                              | CC                | 1946447617               |
| SNP_P3_76785_30752625 | NC_021165.1    | Ca_kabuli_chr06 | 30752625                | GG                              | AA                | 1946447619               |
| SNP_P3_76786_30752647 | NC_021165.1    | Ca_kabuli_chr06 | 30752647                | AA                              | TT                | 1946447620               |
| SNP_P3_76787_30752677 | NC_021165.1    | Ca_kabuli_chr06 | 30752677                | AA                              | CC                | 1946447621               |

| SNPs IDs              | Chromosome IDs | Chromosomes     | Physical positions (bp) | CDC Frontier (Reference genome) | (Pusa 256 & HPNB) | NCBI SNPdb Accession IDs |
|-----------------------|----------------|-----------------|-------------------------|---------------------------------|-------------------|--------------------------|
| SNP_P3_76788_30752685 | NC_021165.1    | Ca_kabuli_chr06 | 30752685                | AA                              | GG                | 1946447623               |
| SNP_P3_76789_30752704 | NC_021165.1    | Ca_kabuli_chr06 | 30752704                | AA                              | GG                | 1946447624               |
| SNP_P3_76790_30752744 | NC_021165.1    | Ca_kabuli_chr06 | 30752744                | CC                              | AA                | 1946447626               |
| SNP_P3_76791_30752746 | NC_021165.1    | Ca_kabuli_chr06 | 30752746                | GG                              | AA                | 1946447627               |
| SNP_P3_76792_30752771 | NC_021165.1    | Ca_kabuli_chr06 | 30752771                | GG                              | AA                | 1946447629               |
| SNP_P3_76793_30753040 | NC_021165.1    | Ca_kabuli_chr06 | 30753040                | CC                              | AA                | 1946447630               |
| SNP_P3_76794_30753098 | NC_021165.1    | Ca_kabuli_chr06 | 30753098                | TT                              | CC                | 1946447631               |
| SNP_P3_76795_30753103 | NC_021165.1    | Ca_kabuli_chr06 | 30753103                | AA                              | GG                | 1946447633               |
| SNP_P3_76796_30753126 | NC_021165.1    | Ca_kabuli_chr06 | 30753126                | AA                              | GG                | 1946447634               |
| SNP_P3_76797_30779389 | NC_021165.1    | Ca_kabuli_chr06 | 30779389                | AA                              | GG                | 1946447636               |
| SNP_P3_76798_30822584 | NC_021165.1    | Ca_kabuli_chr06 | 30822584                | CC                              | AA                | 1946447637               |
| SNP_P3_76799_30879838 | NC_021165.1    | Ca_kabuli_chr06 | 30879838                | AA                              | GG                | 1946447639               |
| SNP_P3_76800_30900446 | NC_021165.1    | Ca_kabuli_chr06 | 30900446                | AA                              | TT                | 1946447640               |
| SNP_P3_76801_30904421 | NC_021165.1    | Ca_kabuli_chr06 | 30904421                | TT                              | CC                | 1946447642               |
| SNP_P3_76802_30934848 | NC_021165.1    | Ca_kabuli_chr06 | 30934848                | AA                              | GG                | 1946447643               |
| SNP_P3_76803_30988978 | NC_021165.1    | Ca_kabuli_chr06 | 30988978                | GG                              | CC                | 1946447644               |
| SNP_P3_76804_30988987 | NC_021165.1    | Ca_kabuli_chr06 | 30988987                | GG                              | TT                | 1946447646               |
| SNP_P3_76806_31012023 | NC_021165.1    | Ca_kabuli_chr06 | 31012023                | GG                              | CC                | 1946447647               |
| SNP_P3_76807_31033780 | NC_021165.1    | Ca_kabuli_chr06 | 31033780                | TT                              | CC                | 1946447649               |
| SNP_P3_76808_31042176 | NC_021165.1    | Ca_kabuli_chr06 | 31042176                | AA                              | GG                | 1946447650               |
| SNP_P3_76809_31065781 | NC_021165.1    | Ca_kabuli_chr06 | 31065781                | AA                              | GG                | 1946447652               |
| SNP_P3_76810_31096871 | NC_021165.1    | Ca_kabuli_chr06 | 31096871                | CC                              | AA                | 1946447653               |
| SNP_P3_76811_31096873 | NC_021165.1    | Ca_kabuli_chr06 | 31096873                | AA                              | GG                | 1946447654               |
| SNP_P3_76813_31097018 | NC_021165.1    | Ca_kabuli_chr06 | 31097018                | CC                              | TT                | 1946447656               |
| SNP_P3_76814_31097043 | NC_021165.1    | Ca_kabuli_chr06 | 31097043                | TT                              | CC                | 1946447657               |
| SNP_P3_76816_31097088 | NC_021165.1    | Ca_kabuli_chr06 | 31097088                | GG                              | TT                | 1946447659               |
| SNP_P3_76817_31097110 | NC_021165.1    | Ca_kabuli_chr06 | 31097110                | GG                              | TT                | 1946447660               |
| SNP_P3_76819_31097195 | NC_021165.1    | Ca_kabuli_chr06 | 31097195                | CC                              | GG                | 1946447661               |
| SNP_P3_76821_31097321 | NC_021165.1    | Ca_kabuli_chr06 | 31097321                | GG                              | AA                | 1946447663               |
| SNP_P3_76822_31097404 | NC_021165.1    | Ca_kabuli_chr06 | 31097404                | TT                              | AA                | 1946447664               |
| SNP_P3_76823_31097425 | NC_021165.1    | Ca_kabuli_chr06 | 31097425                | AA                              | GG                | 1946447666               |
| SNP_P3_76824_31097492 | NC_021165.1    | Ca_kabuli_chr06 | 31097492                | TT                              | CC                | 1946447668               |
| SNP_P3_76825_31097583 | NC_021165.1    | Ca_kabuli_chr06 | 31097583                | GG                              | CC                | 1946447669               |
| SNP_P3_76826_31097606 | NC_021165.1    | Ca_kabuli_chr06 | 31097606                | CC                              | TT                | 1946447670               |
| SNP_P3_76827_31097617 | NC_021165.1    | Ca_kabuli_chr06 | 31097617                | CC                              | TT                | 1946447672               |
| SNP_P3_76828_31097625 | NC_021165.1    | Ca_kabuli_chr06 | 31097625                | TT                              | GG                | 1946447673               |
| SNP_P3_76829_31097626 | NC_021165.1    | Ca_kabuli_chr06 | 31097626                | TT                              | CC                | 1946447675               |
| SNP_P3_76830_31097636 | NC_021165.1    | Ca_kabuli_chr06 | 31097636                | CC                              | TT                | 1946447676               |
| SNP_P3_76831_31097688 | NC_021165.1    | Ca_kabuli_chr06 | 31097688                | TT                              | GG                | 1946447677               |
| SNP_P3_76832_31097754 | NC_021165.1    | Ca_kabuli_chr06 | 31097754                | GG                              | AA                | 1946447679               |
| SNP_P3_76833_31099261 | NC_021165.1    | Ca_kabuli_chr06 | 31099261                | TT                              | AA                | 1946447680               |
| SNP_P3_76834_31099376 | NC_021165.1    | Ca_kabuli_chr06 | 31099376                | TT                              | AA                | 1946447682               |

| SNPs IDs              | Chromosome IDs | Chromosomes     | Physical positions (bp) | CDC Frontier (Reference genome) | (Pusa 256 & HPNB) | NCBI SNPdb Accession IDs |
|-----------------------|----------------|-----------------|-------------------------|---------------------------------|-------------------|--------------------------|
| SNP_P3_76835_31099455 | NC_021165.1    | Ca_kabuli_chr06 | 31099455                | TT                              | AA                | 1946447683               |
| SNP_P3_76837_31099556 | NC_021165.1    | Ca_kabuli_chr06 | 31099556                | CC                              | GG                | 1946447684               |
| SNP_P3_76838_31099560 | NC_021165.1    | Ca_kabuli_chr06 | 31099560                | GG                              | AA                | 1946447686               |
| SNP_P3_76839_31099590 | NC_021165.1    | Ca_kabuli_chr06 | 31099590                | TT                              | CC                | 1946447687               |
| SNP_P3_76840_31099616 | NC_021165.1    | Ca_kabuli_chr06 | 31099616                | AA                              | GG                | 1946447689               |
| SNP_P3_76841_31099641 | NC_021165.1    | Ca_kabuli_chr06 | 31099641                | TT                              | CC                | 1946447690               |
| SNP_P3_76842_31099832 | NC_021165.1    | Ca_kabuli_chr06 | 31099832                | GG                              | AA                | 1946447692               |
| SNP_P3_76843_31099857 | NC_021165.1    | Ca_kabuli_chr06 | 31099857                | TT                              | CC                | 1946447693               |
| SNP_P3_76844_31100081 | NC_021165.1    | Ca_kabuli_chr06 | 31100081                | CC                              | AA                | 1946447694               |
| SNP_P3_76845_31121569 | NC_021165.1    | Ca_kabuli_chr06 | 31121569                | GG                              | CC                | 1946447696               |
| SNP_P3_76846_31121576 | NC_021165.1    | Ca_kabuli_chr06 | 31121576                | GG                              | CC                | 1946447698               |
| SNP_P3_76847_31121762 | NC_021165.1    | Ca_kabuli_chr06 | 31121762                | TT                              | CC                | 1946447699               |
| SNP_P3_76848_31121825 | NC_021165.1    | Ca_kabuli_chr06 | 31121825                | CC                              | TT                | 1946447701               |
| SNP_P3_76849_31121996 | NC_021165.1    | Ca_kabuli_chr06 | 31121996                | AA                              | GG                | 1946447702               |
| SNP_P3_76850_31122109 | NC_021165.1    | Ca_kabuli_chr06 | 31122109                | GG                              | AA                | 1946447703               |
| SNP_P3_76851_31122178 | NC_021165.1    | Ca_kabuli_chr06 | 31122178                | TT                              | GG                | 1946447705               |
| SNP_P3_76852_31123575 | NC_021165.1    | Ca_kabuli_chr06 | 31123575                | TT                              | CC                | 1946447706               |
| SNP_P3_76853_31131495 | NC_021165.1    | Ca_kabuli_chr06 | 31131495                | GG                              | AA                | 1946447708               |
| SNP_P3_76856_31162867 | NC_021165.1    | Ca_kabuli_chr06 | 31162867                | GG                              | AA                | 1946447709               |
| SNP_P3_76857_31163108 | NC_021165.1    | Ca_kabuli_chr06 | 31163108                | AA                              | GG                | 1946447711               |
| SNP_P3_76858_31163158 | NC_021165.1    | Ca_kabuli_chr06 | 31163158                | CC                              | AA                | 1946447712               |
| SNP_P3_76860_31163855 | NC_021165.1    | Ca_kabuli_chr06 | 31163855                | TT                              | GG                | 1946447713               |
| SNP_P3_76861_31163887 | NC_021165.1    | Ca_kabuli_chr06 | 31163887                | AA                              | CC                | 1946447715               |
| SNP_P3_76862_31163922 | NC_021165.1    | Ca_kabuli_chr06 | 31163922                | GG                              | TT                | 1946447716               |
| SNP_P3_76863_31168606 | NC_021165.1    | Ca_kabuli_chr06 | 31168606                | GG                              | TT                | 1946447718               |
| SNP_P3_76864_31168674 | NC_021165.1    | Ca_kabuli_chr06 | 31168674                | TT                              | CC                | 1946447719               |
| SNP_P3_76865_31168731 | NC_021165.1    | Ca_kabuli_chr06 | 31168731                | AA                              | GG                | 1946447721               |
| SNP_P3_76866_31168835 | NC_021165.1    | Ca_kabuli_chr06 | 31168835                | TT                              | CC                | 1946447722               |
| SNP_P3_76867_31168838 | NC_021165.1    | Ca_kabuli_chr06 | 31168838                | TT                              | AA                | 1946447723               |
| SNP_P3_76868_31168875 | NC_021165.1    | Ca_kabuli_chr06 | 31168875                | CC                              | AA                | 1946447725               |
| SNP_P3_76869_31168902 | NC_021165.1    | Ca_kabuli_chr06 | 31168902                | TT                              | AA                | 1946447727               |
| SNP_P3_76870_31168932 | NC_021165.1    | Ca_kabuli_chr06 | 31168932                | GG                              | AA                | 1946447728               |
| SNP_P3_76871_31169006 | NC_021165.1    | Ca_kabuli_chr06 | 31169006                | CC                              | AA                | 1946447730               |
| SNP_P3_76872_31169044 | NC_021165.1    | Ca_kabuli_chr06 | 31169044                | AA                              | CC                | 1946447731               |
| SNP_P3_76873_31169057 | NC_021165.1    | Ca_kabuli_chr06 | 31169057                | GG                              | AA                | 1946447732               |
| SNP_P3_76874_31169088 | NC_021165.1    | Ca_kabuli_chr06 | 31169088                | GG                              | AA                | 1946447734               |
| SNP_P3_76875_31169102 | NC_021165.1    | Ca_kabuli_chr06 | 31169102                | AA                              | GG                | 1946447735               |
| SNP_P3_76876_31169161 | NC_021165.1    | Ca_kabuli_chr06 | 31169161                | AA                              | GG                | 1946447737               |
| SNP_P3_76877_31180115 | NC_021165.1    | Ca_kabuli_chr06 | 31180115                | AA                              | TT                | 1946447738               |
| SNP_P3_76878_31180129 | NC_021165.1    | Ca_kabuli_chr06 | 31180129                | GG                              | TT                | 1946447740               |
| SNP_P3_76879_31180133 | NC_021165.1    | Ca_kabuli_chr06 | 31180133                | AA                              | GG                | 1946447741               |
| SNP_P3_76880_31180499 | NC_021165.1    | Ca_kabuli_chr06 | 31180499                | TT                              | AA                | 1946447742               |

| SNPs IDs              | Chromosome IDs | Chromosomes     | Physical positions (bp) | CDC Frontier (Reference genome) | (Pusa 256 & HPNB) | NCBI SNPdb Accession IDs |
|-----------------------|----------------|-----------------|-------------------------|---------------------------------|-------------------|--------------------------|
| SNP_P3_76881_31183465 | NC_021165.1    | Ca_kabuli_chr06 | 31183465                | TT                              | CC                | 1946447744               |
| SNP_P3_76882_31184193 | NC_021165.1    | Ca_kabuli_chr06 | 31184193                | CC                              | TT                | 1946447745               |
| SNP_P3_76883_31184208 | NC_021165.1    | Ca_kabuli_chr06 | 31184208                | CC                              | GG                | 1946447746               |
| SNP_P3_76884_31184218 | NC_021165.1    | Ca_kabuli_chr06 | 31184218                | AA                              | GG                | 1946447748               |
| SNP_P3_76885_31184245 | NC_021165.1    | Ca_kabuli_chr06 | 31184245                | GG                              | AA                | 1946447749               |
| SNP_P3_76886_31184278 | NC_021165.1    | Ca_kabuli_chr06 | 31184278                | AA                              | GG                | 1946447751               |
| SNP_P3_76887_31184298 | NC_021165.1    | Ca_kabuli_chr06 | 31184298                | AA                              | CC                | 1946447752               |
| SNP_P3_76888_31187319 | NC_021165.1    | Ca_kabuli_chr06 | 31187319                | TT                              | CC                | 1946447754               |
| SNP_P3_76889_31187320 | NC_021165.1    | Ca_kabuli_chr06 | 31187320                | GG                              | AA                | 1946447756               |
| SNP_P3_76890_31187332 | NC_021165.1    | Ca_kabuli_chr06 | 31187332                | GG                              | AA                | 1946447757               |
| SNP_P3_76891_31187337 | NC_021165.1    | Ca_kabuli_chr06 | 31187337                | CC                              | TT                | 1946447759               |
| SNP_P3_76892_31187362 | NC_021165.1    | Ca_kabuli_chr06 | 31187362                | GG                              | TT                | 1946447760               |
| SNP_P3_76893_31187367 | NC_021165.1    | Ca_kabuli_chr06 | 31187367                | TT                              | AA                | 1946447761               |
| SNP_P3_76894_31187391 | NC_021165.1    | Ca_kabuli_chr06 | 31187391                | GG                              | AA                | 1946447763               |
| SNP_P3_76895_31187409 | NC_021165.1    | Ca_kabuli_chr06 | 31187409                | AA                              | GG                | 1946447764               |
| SNP_P3_76896_31187434 | NC_021165.1    | Ca_kabuli_chr06 | 31187434                | AA                              | CC                | 1946447766               |
| SNP_P3_76897_31187470 | NC_021165.1    | Ca_kabuli_chr06 | 31187470                | CC                              | GG                | 1946447767               |
| SNP_P3_76898_31195110 | NC_021165.1    | Ca_kabuli_chr06 | 31195110                | TT                              | AA                | 1946447768               |
| SNP_P3_76899_31195403 | NC_021165.1    | Ca_kabuli_chr06 | 31195403                | CC                              | TT                | 1946447770               |
| SNP_P3_76900_31195404 | NC_021165.1    | Ca_kabuli_chr06 | 31195404                | CC                              | TT                | 1946447771               |
| SNP_P3_76901_31201068 | NC_021165.1    | Ca_kabuli_chr06 | 31201068                | CC                              | TT                | 1946447773               |
| SNP_P3_76902_31201092 | NC_021165.1    | Ca_kabuli_chr06 | 31201092                | TT                              | CC                | 1946447774               |
| SNP_P3_76903_31201376 | NC_021165.1    | Ca_kabuli_chr06 | 31201376                | GG                              | CC                | 1946447775               |
| SNP_P3_76904_31201462 | NC_021165.1    | Ca_kabuli_chr06 | 31201462                | TT                              | CC                | 1946447777               |
| SNP_P3_76905_31201465 | NC_021165.1    | Ca_kabuli_chr06 | 31201465                | GG                              | AA                | 1946447778               |
| SNP_P3_76906_31211233 | NC_021165.1    | Ca_kabuli_chr06 | 31211233                | CC                              | AA                | 1946447780               |
| SNP_P3_76907_31234964 | NC_021165.1    | Ca_kabuli_chr06 | 31234964                | AA                              | TT                | 1946447781               |
| SNP_P3_76908_31261967 | NC_021165.1    | Ca_kabuli_chr06 | 31261967                | TT                              | CC                | 1946447783               |
| SNP_P3_76909_31273999 | NC_021165.1    | Ca_kabuli_chr06 | 31273999                | TT                              | CC                | 1946447784               |
| SNP_P3_76911_31293519 | NC_021165.1    | Ca_kabuli_chr06 | 31293519                | TT                              | CC                | 1946447786               |
| SNP_P3_76912_31293620 | NC_021165.1    | Ca_kabuli_chr06 | 31293620                | AA                              | GG                | 1946447787               |
| SNP_P3_76913_31293638 | NC_021165.1    | Ca_kabuli_chr06 | 31293638                | CC                              | TT                | 1946447789               |
| SNP_P3_76914_31293653 | NC_021165.1    | Ca_kabuli_chr06 | 31293653                | TT                              | AA                | 1946447791               |
| SNP_P3_76915_31293677 | NC_021165.1    | Ca_kabuli_chr06 | 31293677                | CC                              | AA                | 1946447792               |
| SNP_P3_76916_31293689 | NC_021165.1    | Ca_kabuli_chr06 | 31293689                | AA                              | TT                | 1946447794               |
| SNP_P3_76917_31293711 | NC_021165.1    | Ca_kabuli_chr06 | 31293711                | CC                              | TT                | 1946447795               |
| SNP_P3_76918_31293712 | NC_021165.1    | Ca_kabuli_chr06 | 31293712                | TT                              | CC                | 1946447797               |
| SNP_P3_76919_31293720 | NC_021165.1    | Ca_kabuli_chr06 | 31293720                | GG                              | AA                | 1946447798               |
| SNP_P3_76920_31293738 | NC_021165.1    | Ca_kabuli_chr06 | 31293738                | AA                              | GG                | 1946447800               |
| SNP_P3_76921_31293959 | NC_021165.1    | Ca_kabuli_chr06 | 31293959                | GG                              | AA                | 1946447801               |
| SNP_P3_76922_31293975 | NC_021165.1    | Ca_kabuli_chr06 | 31293975                | AA                              | CC                | 1946447803               |
| SNP_P3_76923_31294000 | NC_021165.1    | Ca_kabuli_chr06 | 31294000                | AA                              | GG                | 1946447804               |

| SNPs IDs              | Chromosome IDs | Chromosomes     | Physical positions (bp) | CDC Frontier (Reference genome) | (Pusa 256 & HPNB) | NCBI SNPdb Accession IDs |
|-----------------------|----------------|-----------------|-------------------------|---------------------------------|-------------------|--------------------------|
| SNP_P3_76924_31294014 | NC_021165.1    | Ca_kabuli_chr06 | 31294014                | AA                              | TT                | 1946447805               |
| SNP_P3_76925_31297950 | NC_021165.1    | Ca_kabuli_chr06 | 31297950                | AA                              | GG                | 1946447807               |
| SNP_P3_76926_31297956 | NC_021165.1    | Ca_kabuli_chr06 | 31297956                | AA                              | GG                | 1946447808               |
| SNP_P3_76927_31297984 | NC_021165.1    | Ca_kabuli_chr06 | 31297984                | TT                              | CC                | 1946447810               |
| SNP_P3_76929_31303233 | NC_021165.1    | Ca_kabuli_chr06 | 31303233                | CC                              | TT                | 1946447811               |
| SNP_P3_76931_31324730 | NC_021165.1    | Ca_kabuli_chr06 | 31324730                | CC                              | TT                | 1946447813               |
| SNP_P3_76932_31331862 | NC_021165.1    | Ca_kabuli_chr06 | 31331862                | AA                              | GG                | 1946447814               |
| SNP_P3_76934_31334725 | NC_021165.1    | Ca_kabuli_chr06 | 31334725                | TT                              | AA                | 1946447816               |
| SNP_P3_76935_31337797 | NC_021165.1    | Ca_kabuli_chr06 | 31337797                | CC                              | TT                | 1946447817               |
| SNP_P3_76936_31360733 | NC_021165.1    | Ca_kabuli_chr06 | 31360733                | CC                              | TT                | 1946447819               |
| SNP_P3_76937_31370847 | NC_021165.1    | Ca_kabuli_chr06 | 31370847                | TT                              | AA                | 1946447820               |
| SNP_P3_76938_31371990 | NC_021165.1    | Ca_kabuli_chr06 | 31371990                | AA                              | GG                | 1946447822               |
| SNP_P3_76939_31371999 | NC_021165.1    | Ca_kabuli_chr06 | 31371999                | CC                              | TT                | 1946447823               |
| SNP_P3_76940_31372076 | NC_021165.1    | Ca_kabuli_chr06 | 31372076                | TT                              | CC                | 1946447824               |
| SNP_P3_76941_31372266 | NC_021165.1    | Ca_kabuli_chr06 | 31372266                | TT                              | CC                | 1946447826               |
| SNP_P3_76942_31372269 | NC_021165.1    | Ca_kabuli_chr06 | 31372269                | AA                              | GG                | 1946447827               |
| SNP_P3_76943_31372299 | NC_021165.1    | Ca_kabuli_chr06 | 31372299                | AA                              | GG                | 1946447829               |
| SNP_P3_76944_31372328 | NC_021165.1    | Ca_kabuli_chr06 | 31372328                | AA                              | CC                | 1946447830               |
| SNP_P3_76945_31372336 | NC_021165.1    | Ca_kabuli_chr06 | 31372336                | TT                              | CC                | 1946447832               |
| SNP_P3_76946_31372339 | NC_021165.1    | Ca_kabuli_chr06 | 31372339                | CC                              | TT                | 1946447833               |
| SNP_P3_76947_31372348 | NC_021165.1    | Ca_kabuli_chr06 | 31372348                | AA                              | GG                | 1946447835               |
| SNP_P3_76948_31372378 | NC_021165.1    | Ca_kabuli_chr06 | 31372378                | CC                              | TT                | 1946447836               |
| SNP_P3_76949_31372398 | NC_021165.1    | Ca_kabuli_chr06 | 31372398                | AA                              | GG                | 1946447837               |
| SNP_P3_76950_31424278 | NC_021165.1    | Ca_kabuli_chr06 | 31424278                | TT                              | CC                | 1946447839               |
| SNP_P3_76951_31430765 | NC_021165.1    | Ca_kabuli_chr06 | 31430765                | AA                              | GG                | 1946447840               |
| SNP_P3_76952_31430829 | NC_021165.1    | Ca_kabuli_chr06 | 31430829                | GG                              | AA                | 1946447842               |
| SNP_P3_76953_31430929 | NC_021165.1    | Ca_kabuli_chr06 | 31430929                | GG                              | CC                | 1946447844               |
| SNP_P3_76954_31431154 | NC_021165.1    | Ca_kabuli_chr06 | 31431154                | AA                              | GG                | 1946447845               |
| SNP_P3_76955_31431219 | NC_021165.1    | Ca_kabuli_chr06 | 31431219                | GG                              | AA                | 1946447846               |
| SNP_P3_76956_31431494 | NC_021165.1    | Ca_kabuli_chr06 | 31431494                | GG                              | AA                | 1946447848               |
| SNP_P3_76957_31431515 | NC_021165.1    | Ca_kabuli_chr06 | 31431515                | AA                              | GG                | 1946447849               |
| SNP_P3_76958_31433033 | NC_021165.1    | Ca_kabuli_chr06 | 31433033                | AA                              | CC                | 1946447851               |
| SNP_P3_76959_31440446 | NC_021165.1    | Ca_kabuli_chr06 | 31440446                | AA                              | GG                | 1946447852               |
| SNP_P3_76960_31440456 | NC_021165.1    | Ca_kabuli_chr06 | 31440456                | TT                              | AA                | 1946447854               |
| SNP_P3_76961_31441491 | NC_021165.1    | Ca_kabuli_chr06 | 31441491                | CC                              | TT                | 1946447855               |
| SNP_P3_76962_31441497 | NC_021165.1    | Ca_kabuli_chr06 | 31441497                | AA                              | GG                | 1946447856               |
| SNP_P3_76964_31472224 | NC_021165.1    | Ca_kabuli_chr06 | 31472224                | AA                              | CC                | 1946447858               |
| SNP_P3_76965_31472270 | NC_021165.1    | Ca_kabuli_chr06 | 31472270                | TT                              | CC                | 1946447859               |
| SNP_P3_76966_31472543 | NC_021165.1    | Ca_kabuli_chr06 | 31472543                | TT                              | CC                | 1946447861               |
| SNP_P3_76967_31497539 | NC_021165.1    | Ca_kabuli_chr06 | 31497539                | GG                              | CC                | 1946447862               |
| SNP_P3_76968_31502632 | NC_021165.1    | Ca_kabuli_chr06 | 31502632                | TT                              | CC                | 1946447863               |
| SNP_P3_76969_31502644 | NC_021165.1    | Ca_kabuli_chr06 | 31502644                | CC                              | TT                | 1946447865               |

| SNPs IDs              | Chromosome IDs | Chromosomes     | Physical positions (bp) | CDC Frontier (Reference genome) | (Pusa 256 & HPNB) | NCBI SNPdb Accession IDs |
|-----------------------|----------------|-----------------|-------------------------|---------------------------------|-------------------|--------------------------|
| SNP_P3_76970_31507271 | NC_021165.1    | Ca_kabuli_chr06 | 31507271                | CC                              | TT                | 1946447866               |
| SNP_P3_76973_31579861 | NC_021165.1    | Ca_kabuli_chr06 | 31579861                | AA                              | TT                | 1946447868               |
| SNP_P3_76974_31579863 | NC_021165.1    | Ca_kabuli_chr06 | 31579863                | AA                              | GG                | 1946447869               |
| SNP_P3_76975_31585254 | NC_021165.1    | Ca_kabuli_chr06 | 31585254                | CC                              | AA                | 1946447871               |
| SNP_P3_76976_31604733 | NC_021165.1    | Ca_kabuli_chr06 | 31604733                | AA                              | GG                | 1946447873               |
| SNP_P3_76977_31604783 | NC_021165.1    | Ca_kabuli_chr06 | 31604783                | GG                              | AA                | 1946447874               |
| SNP_P3_76978_31604832 | NC_021165.1    | Ca_kabuli_chr06 | 31604832                | GG                              | AA                | 1946447876               |
| SNP_P3_76979_31604842 | NC_021165.1    | Ca_kabuli_chr06 | 31604842                | TT                              | AA                | 1946447877               |
| SNP_P3_76980_31604851 | NC_021165.1    | Ca_kabuli_chr06 | 31604851                | AA                              | GG                | 1946447879               |
| SNP_P3_76981_31604889 | NC_021165.1    | Ca_kabuli_chr06 | 31604889                | AA                              | GG                | 1946447880               |
| SNP_P3_76982_31604993 | NC_021165.1    | Ca_kabuli_chr06 | 31604993                | AA                              | CC                | 1946447882               |
| SNP_P3_76983_31604994 | NC_021165.1    | Ca_kabuli_chr06 | 31604994                | TT                              | AA                | 1946447883               |
| SNP_P3_76984_31614920 | NC_021165.1    | Ca_kabuli_chr06 | 31614920                | GG                              | AA                | 1946447884               |
| SNP_P3_76986_31632407 | NC_021165.1    | Ca_kabuli_chr06 | 31632407                | CC                              | TT                | 1946447886               |
| SNP_P3_76988_31685453 | NC_021165.1    | Ca_kabuli_chr06 | 31685453                | AA                              | TT                | 1946447887               |
| SNP_P3_76989_31707464 | NC_021165.1    | Ca_kabuli_chr06 | 31707464                | TT                              | AA                | 1946447889               |
| SNP_P3_76990_31708789 | NC_021165.1    | Ca_kabuli_chr06 | 31708789                | CC                              | TT                | 1946447890               |
| SNP_P3_76991_31708800 | NC_021165.1    | Ca_kabuli_chr06 | 31708800                | GG                              | TT                | 1946447892               |
| SNP_P3_76992_31710242 | NC_021165.1    | Ca_kabuli_chr06 | 31710242                | AA                              | GG                | 1946447893               |
| SNP_P3_76993_31712100 | NC_021165.1    | Ca_kabuli_chr06 | 31712100                | TT                              | CC                | 1946447895               |
| SNP_P3_76994_31712105 | NC_021165.1    | Ca_kabuli_chr06 | 31712105                | GG                              | TT                | 1946447896               |
| SNP_P3_76995_31712184 | NC_021165.1    | Ca_kabuli_chr06 | 31712184                | CC                              | TT                | 1946447898               |
| SNP_P3_76996_31712282 | NC_021165.1    | Ca_kabuli_chr06 | 31712282                | GG                              | AA                | 1946447899               |
| SNP_P3_76997_31741849 | NC_021165.1    | Ca_kabuli_chr06 | 31741849                | TT                              | GG                | 1946447901               |
| SNP_P3_76998_31741899 | NC_021165.1    | Ca_kabuli_chr06 | 31741899                | AA                              | GG                | 1946447902               |
| SNP_P3_76999_31741918 | NC_021165.1    | Ca_kabuli_chr06 | 31741918                | AA                              | CC                | 1946447904               |
| SNP_P3_77000_31741937 | NC_021165.1    | Ca_kabuli_chr06 | 31741937                | AA                              | GG                | 1946447907               |
| SNP_P3_77001_31741938 | NC_021165.1    | Ca_kabuli_chr06 | 31741938                | TT                              | CC                | 1946447910               |
| SNP_P3_77002_31742235 | NC_021165.1    | Ca_kabuli_chr06 | 31742235                | TT                              | CC                | 1946447912               |
| SNP_P3_77003_31744964 | NC_021165.1    | Ca_kabuli_chr06 | 31744964                | CC                              | TT                | 1946447914               |
| SNP_P3_77004_31750750 | NC_021165.1    | Ca_kabuli_chr06 | 31750750                | AA                              | GG                | 1946447917               |
| SNP_P3_77005_31750755 | NC_021165.1    | Ca_kabuli_chr06 | 31750755                | AA                              | CC                | 1946447918               |
| SNP_P3_77006_31753798 | NC_021165.1    | Ca_kabuli_chr06 | 31753798                | AA                              | GG                | 1946447921               |
| SNP_P3_77007_31753804 | NC_021165.1    | Ca_kabuli_chr06 | 31753804                | TT                              | CC                | 1946447923               |
| SNP_P3_77008_31753834 | NC_021165.1    | Ca_kabuli_chr06 | 31753834                | TT                              | CC                | 1946447924               |
| SNP_P3_77009_31753875 | NC_021165.1    | Ca_kabuli_chr06 | 31753875                | TT                              | GG                | 1946447925               |
| SNP_P3_77010_31754248 | NC_021165.1    | Ca_kabuli_chr06 | 31754248                | AA                              | GG                | 1946447927               |
| SNP_P3_77011_31769439 | NC_021165.1    | Ca_kabuli_chr06 | 31769439                | GG                              | TT                | 1946447928               |
| SNP_P3_77012_31772268 | NC_021165.1    | Ca_kabuli_chr06 | 31772268                | AA                              | GG                | 1946447930               |
| SNP_P3_77013_31776212 | NC_021165.1    | Ca_kabuli_chr06 | 31776212                | CC                              | TT                | 1946447931               |
| SNP_P3_77014_31784530 | NC_021165.1    | Ca_kabuli_chr06 | 31784530                | CC                              | AA                | 1946447933               |
| SNP_P3_77016_31793152 | NC_021165.1    | Ca_kabuli_chr06 | 31793152                | AA                              | GG                | 1946447934               |

| SNPs IDs              | Chromosome IDs | Chromosomes     | Physical positions (bp) | CDC Frontier (Reference genome) | (Pusa 256 & HPNB) | NCBI SNPdb Accession IDs |
|-----------------------|----------------|-----------------|-------------------------|---------------------------------|-------------------|--------------------------|
| SNP_P3_77017_31793159 | NC_021165.1    | Ca_kabuli_chr06 | 31793159                | CC                              | GG                | 1946447936               |
| SNP_P3_77018_31793175 | NC_021165.1    | Ca_kabuli_chr06 | 31793175                | AA                              | CC                | 1946447937               |
| SNP_P3_77019_31793176 | NC_021165.1    | Ca_kabuli_chr06 | 31793176                | CC                              | GG                | 1946447939               |
| SNP_P3_77020_31793194 | NC_021165.1    | Ca_kabuli_chr06 | 31793194                | AA                              | CC                | 1946447940               |
| SNP_P3_77021_31793541 | NC_021165.1    | Ca_kabuli_chr06 | 31793541                | AA                              | GG                | 1946447942               |
| SNP_P3_77022_31796901 | NC_021165.1    | Ca_kabuli_chr06 | 31796901                | CC                              | AA                | 1946447943               |
| SNP_P3_77023_31805480 | NC_021165.1    | Ca_kabuli_chr06 | 31805480                | GG                              | TT                | 1946447945               |
| SNP_P3_77024_31828551 | NC_021165.1    | Ca_kabuli_chr06 | 31828551                | AA                              | GG                | 1946447946               |
| SNP_P3_77025_31910688 | NC_021165.1    | Ca_kabuli_chr06 | 31910688                | AA                              | GG                | 1946447947               |
| SNP_P3_77026_31915085 | NC_021165.1    | Ca_kabuli_chr06 | 31915085                | GG                              | AA                | 1946447949               |
| SNP_P3_77027_31920180 | NC_021165.1    | Ca_kabuli_chr06 | 31920180                | CC                              | TT                | 1946447950               |
| SNP_P3_77028_31922008 | NC_021165.1    | Ca_kabuli_chr06 | 31922008                | CC                              | TT                | 1946447952               |
| SNP_P3_77029_31939442 | NC_021165.1    | Ca_kabuli_chr06 | 31939442                | CC                              | AA                | 1946447953               |
| SNP_P3_77030_31939447 | NC_021165.1    | Ca_kabuli_chr06 | 31939447                | CC                              | TT                | 1946447954               |
| SNP_P3_77031_31939456 | NC_021165.1    | Ca_kabuli_chr06 | 31939456                | TT                              | CC                | 1946447956               |
| SNP_P3_77032_31939465 | NC_021165.1    | Ca_kabuli_chr06 | 31939465                | GG                              | AA                | 1946447957               |
| SNP_P3_77033_31939496 | NC_021165.1    | Ca_kabuli_chr06 | 31939496                | TT                              | CC                | 1946447959               |
| SNP_P3_77034_31939513 | NC_021165.1    | Ca_kabuli_chr06 | 31939513                | GG                              | AA                | 1946447960               |
| SNP_P3_77035_31939549 | NC_021165.1    | Ca_kabuli_chr06 | 31939549                | CC                              | TT                | 1946447964               |
| SNP_P3_77036_31939555 | NC_021165.1    | Ca_kabuli_chr06 | 31939555                | CC                              | TT                | 1946447967               |
| SNP_P3_77037_31939574 | NC_021165.1    | Ca_kabuli_chr06 | 31939574                | AA                              | GG                | 1946447969               |
| SNP_P3_77038_31939594 | NC_021165.1    | Ca_kabuli_chr06 | 31939594                | GG                              | AA                | 1946447971               |
| SNP_P3_77039_31939599 | NC_021165.1    | Ca_kabuli_chr06 | 31939599                | CC                              | AA                | 1946447972               |
| SNP_P3_77040_31939626 | NC_021165.1    | Ca_kabuli_chr06 | 31939626                | AA                              | GG                | 1946447974               |
| SNP_P3_77042_31939807 | NC_021165.1    | Ca_kabuli_chr06 | 31939807                | GG                              | CC                | 1946447975               |
| SNP_P3_77043_31939816 | NC_021165.1    | Ca_kabuli_chr06 | 31939816                | AA                              | GG                | 1946447976               |
| SNP_P3_77044_31939884 | NC_021165.1    | Ca_kabuli_chr06 | 31939884                | AA                              | CC                | 1946447980               |
| SNP_P3_77045_31939920 | NC_021165.1    | Ca_kabuli_chr06 | 31939920                | AA                              | GG                | 1946447982               |
| SNP_P3_77046_31939935 | NC_021165.1    | Ca_kabuli_chr06 | 31939935                | TT                              | CC                | 1946447983               |
| SNP_P3_77047_31945607 | NC_021165.1    | Ca_kabuli_chr06 | 31945607                | CC                              | TT                | 1946447985               |
| SNP_P3_77048_31945736 | NC_021165.1    | Ca_kabuli_chr06 | 31945736                | CC                              | TT                | 1946447987               |
| SNP_P3_77050_31947252 | NC_021165.1    | Ca_kabuli_chr06 | 31947252                | CC                              | GG                | 1946447989               |
| SNP_P3_77051_31947358 | NC_021165.1    | Ca_kabuli_chr06 | 31947358                | TT                              | AA                | 1946447990               |
| SNP_P3_77052_31947423 | NC_021165.1    | Ca_kabuli_chr06 | 31947423                | CC                              | TT                | 1946447992               |
| SNP_P3_77053_31947449 | NC_021165.1    | Ca_kabuli_chr06 | 31947449                | TT                              | CC                | 1946447993               |
| SNP_P3_77054_31947452 | NC_021165.1    | Ca_kabuli_chr06 | 31947452                | TT                              | CC                | 1946447994               |
| SNP_P3_77055_31947549 | NC_021165.1    | Ca_kabuli_chr06 | 31947549                | AA                              | CC                | 1946447996               |
| SNP_P3_77056_31947617 | NC_021165.1    | Ca_kabuli_chr06 | 31947617                | TT                              | CC                | 1946447997               |
| SNP_P3_77058_31950753 | NC_021165.1    | Ca_kabuli_chr06 | 31950753                | TT                              | CC                | 1946447999               |
| SNP_P3_77059_31960513 | NC_021165.1    | Ca_kabuli_chr06 | 31960513                | GG                              | TT                | 1946448000               |
| SNP_P3_77060_31960753 | NC_021165.1    | Ca_kabuli_chr06 | 31960753                | AA                              | CC                | 1946448002               |
| SNP_P3_77061_31998203 | NC_021165.1    | Ca_kabuli_chr06 | 31998203                | TT                              | CC                | 1946448003               |



| SNPs IDs              | Chromosome IDs | Chromosomes     | Physical positions (bp) | CDC Frontier (Reference genome) | (Pusa 256 & HPNB) | NCBI SNPdb Accession IDs |
|-----------------------|----------------|-----------------|-------------------------|---------------------------------|-------------------|--------------------------|
| SNP_P3_77062_31998525 | NC_021165.1    | Ca_kabuli_chr06 | 31998525                | TT                              | GG                | 1946448004               |
| SNP_P3_77063_32015994 | NC_021165.1    | Ca_kabuli_chr06 | 32015994                | CC                              | TT                | 1946448006               |
| SNP_P3_77064_32043822 | NC_021165.1    | Ca_kabuli_chr06 | 32043822                | TT                              | CC                | 1946448008               |
| SNP_P3_77065_32050227 | NC_021165.1    | Ca_kabuli_chr06 | 32050227                | GG                              | TT                | 1946448009               |
| SNP_P3_77066_32050309 | NC_021165.1    | Ca_kabuli_chr06 | 32050309                | TT                              | AA                | 1946448011               |
| SNP_P3_77067_32059540 | NC_021165.1    | Ca_kabuli_chr06 | 32059540                | GG                              | AA                | 1946448012               |
| SNP_P3_77068_32059572 | NC_021165.1    | Ca_kabuli_chr06 | 32059572                | AA                              | TT                | 1946448014               |
| SNP_P3_77069_32059642 | NC_021165.1    | Ca_kabuli_chr06 | 32059642                | AA                              | GG                | 1946448015               |
| SNP_P3_77070_32059690 | NC_021165.1    | Ca_kabuli_chr06 | 32059690                | CC                              | AA                | 1946448017               |
| SNP_P3_77072_32124110 | NC_021165.1    | Ca_kabuli_chr06 | 32124110                | GG                              | AA                | 1946448018               |
| SNP_P3_77073_32124290 | NC_021165.1    | Ca_kabuli_chr06 | 32124290                | TT                              | CC                | 1946448019               |
| SNP_P3_77074_32124334 | NC_021165.1    | Ca_kabuli_chr06 | 32124334                | AA                              | CC                | 1946448021               |
| SNP_P3_77075_32124415 | NC_021165.1    | Ca_kabuli_chr06 | 32124415                | GG                              | CC                | 1946448022               |
| SNP_P3_77076_32124418 | NC_021165.1    | Ca_kabuli_chr06 | 32124418                | GG                              | AA                | 1946448024               |
| SNP_P3_77077_32125693 | NC_021165.1    | Ca_kabuli_chr06 | 32125693                | GG                              | AA                | 1946448025               |
| SNP_P3_77078_32125709 | NC_021165.1    | Ca_kabuli_chr06 | 32125709                | CC                              | AA                | 1946448027               |
| SNP_P3_77079_32128382 | NC_021165.1    | Ca_kabuli_chr06 | 32128382                | GG                              | AA                | 1946448028               |
| SNP_P3_77080_32129694 | NC_021165.1    | Ca_kabuli_chr06 | 32129694                | GG                              | TT                | 1946448029               |
| SNP_P3_77081_32130074 | NC_021165.1    | Ca_kabuli_chr06 | 32130074                | GG                              | TT                | 1946448031               |
| SNP_P3_77082_32130081 | NC_021165.1    | Ca_kabuli_chr06 | 32130081                | GG                              | CC                | 1946448032               |
| SNP_P3_77083_32134877 | NC_021165.1    | Ca_kabuli_chr06 | 32134877                | TT                              | AA                | 1946448034               |
| SNP_P3_77084_32194152 | NC_021165.1    | Ca_kabuli_chr06 | 32194152                | TT                              | GG                | 1946448035               |
| SNP_P3_77085_32194166 | NC_021165.1    | Ca_kabuli_chr06 | 32194166                | TT                              | CC                | 1946448037               |
| SNP_P3_77086_32194174 | NC_021165.1    | Ca_kabuli_chr06 | 32194174                | AA                              | TT                | 1946448038               |
| SNP_P3_77087_32194571 | NC_021165.1    | Ca_kabuli_chr06 | 32194571                | CC                              | AA                | 1946448040               |
| SNP_P3_77088_32194625 | NC_021165.1    | Ca_kabuli_chr06 | 32194625                | CC                              | TT                | 1946448041               |
| SNP_P3_77089_32194631 | NC_021165.1    | Ca_kabuli_chr06 | 32194631                | AA                              | GG                | 1946448043               |
| SNP_P3_77090_32194640 | NC_021165.1    | Ca_kabuli_chr06 | 32194640                | TT                              | CC                | 1946448044               |
| SNP_P3_77091_32194655 | NC_021165.1    | Ca_kabuli_chr06 | 32194655                | TT                              | AA                | 1946448046               |
| SNP_P3_77092_32194675 | NC_021165.1    | Ca_kabuli_chr06 | 32194675                | TT                              | CC                | 1946448047               |
| SNP_P3_77093_32194692 | NC_021165.1    | Ca_kabuli_chr06 | 32194692                | AA                              | GG                | 1946448049               |
| SNP_P3_77094_32194705 | NC_021165.1    | Ca_kabuli_chr06 | 32194705                | AA                              | TT                | 1946448050               |
| SNP_P3_77095_32194719 | NC_021165.1    | Ca_kabuli_chr06 | 32194719                | AA                              | TT                | 1946448052               |
| SNP_P3_77096_32194740 | NC_021165.1    | Ca_kabuli_chr06 | 32194740                | AA                              | GG                | 1946448053               |
| SNP_P3_77097_32194767 | NC_021165.1    | Ca_kabuli_chr06 | 32194767                | GG                              | AA                | 1946448054               |
| SNP_P3_77098_32194778 | NC_021165.1    | Ca_kabuli_chr06 | 32194778                | AA                              | GG                | 1946448056               |
| SNP_P3_77099_32195112 | NC_021165.1    | Ca_kabuli_chr06 | 32195112                | AA                              | TT                | 1946448057               |
| SNP_P3_77100_32195192 | NC_021165.1    | Ca_kabuli_chr06 | 32195192                | TT                              | CC                | 1946448059               |
| SNP_P3_77101_32195222 | NC_021165.1    | Ca_kabuli_chr06 | 32195222                | TT                              | CC                | 1946448060               |
| SNP_P3_77102_32197535 | NC_021165.1    | Ca_kabuli_chr06 | 32197535                | TT                              | AA                | 1946448062               |
| SNP_P3_77103_32197583 | NC_021165.1    | Ca_kabuli_chr06 | 32197583                | CC                              | TT                | 1946448063               |
| SNP_P3_77105_32217032 | NC_021165.1    | Ca_kabuli_chr06 | 32217032                | TT                              | CC                | 1946448065               |

| SNPs IDs              | Chromosome IDs | Chromosomes     | Physical positions (bp) | CDC Frontier (Reference genome) | (Pusa 256 & HPNB) | NCBI SNPdb Accession IDs |
|-----------------------|----------------|-----------------|-------------------------|---------------------------------|-------------------|--------------------------|
| SNP_P3_77106_32217172 | NC_021165.1    | Ca_kabuli_chr06 | 32217172                | TT                              | CC                | 1946448066               |
| SNP_P3_77107_32217417 | NC_021165.1    | Ca_kabuli_chr06 | 32217417                | TT                              | CC                | 1946448068               |
| SNP_P3_77108_32217518 | NC_021165.1    | Ca_kabuli_chr06 | 32217518                | TT                              | CC                | 1946448069               |
| SNP_P3_77109_32217548 | NC_021165.1    | Ca_kabuli_chr06 | 32217548                | CC                              | AA                | 1946448071               |
| SNP_P3_77110_32217576 | NC_021165.1    | Ca_kabuli_chr06 | 32217576                | TT                              | AA                | 1946448072               |
| SNP_P3_77111_32217583 | NC_021165.1    | Ca_kabuli_chr06 | 32217583                | TT                              | CC                | 1946448074               |
| SNP_P3_77112_32298953 | NC_021165.1    | Ca_kabuli_chr06 | 32298953                | TT                              | CC                | 1946448075               |
| SNP_P3_77114_32301106 | NC_021165.1    | Ca_kabuli_chr06 | 32301106                | AA                              | GG                | 1946448077               |
| SNP_P3_77115_32314808 | NC_021165.1    | Ca_kabuli_chr06 | 32314808                | AA                              | GG                | 1946448078               |
| SNP_P3_77116_32320443 | NC_021165.1    | Ca_kabuli_chr06 | 32320443                | CC                              | AA                | 1946448079               |
| SNP_P3_77118_32324561 | NC_021165.1    | Ca_kabuli_chr06 | 32324561                | AA                              | GG                | 1946448081               |
| SNP_P3_77120_32342382 | NC_021165.1    | Ca_kabuli_chr06 | 32342382                | AA                              | CC                | 1946448082               |
| SNP_P3_77121_32350654 | NC_021165.1    | Ca_kabuli_chr06 | 32350654                | AA                              | TT                | 1946448084               |
| SNP_P3_77122_32359336 | NC_021165.1    | Ca_kabuli_chr06 | 32359336                | CC                              | TT                | 1946448085               |
| SNP_P3_77123_32370463 | NC_021165.1    | Ca_kabuli_chr06 | 32370463                | GG                              | AA                | 1946448087               |
| SNP_P3_77124_32371595 | NC_021165.1    | Ca_kabuli_chr06 | 32371595                | AA                              | CC                | 1946448088               |
| SNP_P3_77125_32372459 | NC_021165.1    | Ca_kabuli_chr06 | 32372459                | TT                              | CC                | 1946448089               |
| SNP_P3_77126_32372478 | NC_021165.1    | Ca_kabuli_chr06 | 32372478                | GG                              | AA                | 1946448091               |
| SNP_P3_77127_32372700 | NC_021165.1    | Ca_kabuli_chr06 | 32372700                | TT                              | CC                | 1946448092               |
| SNP_P3_77128_32372821 | NC_021165.1    | Ca_kabuli_chr06 | 32372821                | GG                              | AA                | 1946448094               |
| SNP_P3_77130_32372844 | NC_021165.1    | Ca_kabuli_chr06 | 32372844                | AA                              | GG                | 1946448096               |
| SNP_P3_77131_32372970 | NC_021165.1    | Ca_kabuli_chr06 | 32372970                | GG                              | AA                | 1946448097               |
| SNP_P3_77133_32373087 | NC_021165.1    | Ca_kabuli_chr06 | 32373087                | GG                              | TT                | 1946448098               |
| SNP_P3_77134_32373112 | NC_021165.1    | Ca_kabuli_chr06 | 32373112                | TT                              | CC                | 1946448100               |
| SNP_P3_77135_32373180 | NC_021165.1    | Ca_kabuli_chr06 | 32373180                | CC                              | TT                | 1946448101               |
| SNP_P3_77136_32373182 | NC_021165.1    | Ca_kabuli_chr06 | 32373182                | GG                              | TT                | 1946448103               |
| SNP_P3_77137_32373281 | NC_021165.1    | Ca_kabuli_chr06 | 32373281                | CC                              | TT                | 1946448104               |
| SNP_P3_77138_32373285 | NC_021165.1    | Ca_kabuli_chr06 | 32373285                | TT                              | CC                | 1946448106               |
| SNP_P3_77139_32373304 | NC_021165.1    | Ca_kabuli_chr06 | 32373304                | TT                              | GG                | 1946448107               |
| SNP_P3_77140_32373319 | NC_021165.1    | Ca_kabuli_chr06 | 32373319                | TT                              | GG                | 1946448109               |
| SNP_P3_77141_32373387 | NC_021165.1    | Ca_kabuli_chr06 | 32373387                | GG                              | AA                | 1946448110               |
| SNP_P3_77142_32373413 | NC_021165.1    | Ca_kabuli_chr06 | 32373413                | CC                              | TT                | 1946448111               |
| SNP_P3_77143_32373427 | NC_021165.1    | Ca_kabuli_chr06 | 32373427                | GG                              | AA                | 1946448113               |
| SNP_P3_77144_32373447 | NC_021165.1    | Ca_kabuli_chr06 | 32373447                | CC                              | TT                | 1946448114               |
| SNP_P3_77147_32373652 | NC_021165.1    | Ca_kabuli_chr06 | 32373652                | AA                              | TT                | 1946448116               |
| SNP_P3_77148_32373793 | NC_021165.1    | Ca_kabuli_chr06 | 32373793                | AA                              | TT                | 1946448117               |
| SNP_P3_77149_32373801 | NC_021165.1    | Ca_kabuli_chr06 | 32373801                | AA                              | TT                | 1946448119               |
| SNP_P3_77150_32373848 | NC_021165.1    | Ca_kabuli_chr06 | 32373848                | AA                              | GG                | 1946448120               |
| SNP_P3_77151_32379839 | NC_021165.1    | Ca_kabuli_chr06 | 32379839                | CC                              | TT                | 1946448122               |
| SNP_P3_77152_32379924 | NC_021165.1    | Ca_kabuli_chr06 | 32379924                | CC                              | TT                | 1946448124               |
| SNP_P3_77153_32390373 | NC_021165.1    | Ca_kabuli_chr06 | 32390373                | AA                              | GG                | 1946448125               |
| SNP_P3_77154_32390401 | NC_021165.1    | Ca_kabuli_chr06 | 32390401                | CC                              | TT                | 1946448126               |

| SNPs IDs              | Chromosome IDs | Chromosomes     | Physical positions (bp) | CDC Frontier (Reference genome) | (Pusa 256 & HPNB) | NCBI SNPdb Accession IDs |
|-----------------------|----------------|-----------------|-------------------------|---------------------------------|-------------------|--------------------------|
| SNP_P3_77155_32390620 | NC_021165.1    | Ca_kabuli_chr06 | 32390620                | GG                              | AA                | 1946448128               |
| SNP_P3_77156_32390642 | NC_021165.1    | Ca_kabuli_chr06 | 32390642                | GG                              | AA                | 1946448129               |
| SNP_P3_77157_32390646 | NC_021165.1    | Ca_kabuli_chr06 | 32390646                | AA                              | GG                | 1946448131               |
| SNP_P3_77158_32390739 | NC_021165.1    | Ca_kabuli_chr06 | 32390739                | AA                              | GG                | 1946448132               |
| SNP_P3_77159_32391346 | NC_021165.1    | Ca_kabuli_chr06 | 32391346                | CC                              | TT                | 1946448134               |
| SNP_P3_77160_32391751 | NC_021165.1    | Ca_kabuli_chr06 | 32391751                | AA                              | CC                | 1946448135               |
| SNP_P3_77162_32391875 | NC_021165.1    | Ca_kabuli_chr06 | 32391875                | AA                              | TT                | 1946448137               |
| SNP_P3_77163_32391942 | NC_021165.1    | Ca_kabuli_chr06 | 32391942                | TT                              | CC                | 1946448138               |
| SNP_P3_77164_32392125 | NC_021165.1    | Ca_kabuli_chr06 | 32392125                | AA                              | TT                | 1946448140               |
| SNP_P3_77165_32392127 | NC_021165.1    | Ca_kabuli_chr06 | 32392127                | AA                              | GG                | 1946448141               |
| SNP_P3_77166_32392161 | NC_021165.1    | Ca_kabuli_chr06 | 32392161                | TT                              | GG                | 1946448143               |
| SNP_P3_77167_32393787 | NC_021165.1    | Ca_kabuli_chr06 | 32393787                | GG                              | CC                | 1946448144               |
| SNP_P3_77171_32406898 | NC_021165.1    | Ca_kabuli_chr06 | 32406898                | CC                              | AA                | 1946448146               |
| SNP_P3_77172_32407021 | NC_021165.1    | Ca_kabuli_chr06 | 32407021                | CC                              | TT                | 1946448147               |
| SNP_P3_77173_32435386 | NC_021165.1    | Ca_kabuli_chr06 | 32435386                | TT                              | AA                | 1946448149               |
| SNP_P3_77174_32445547 | NC_021165.1    | Ca_kabuli_chr06 | 32445547                | AA                              | GG                | 1946448150               |
| SNP_P3_77175_32466570 | NC_021165.1    | Ca_kabuli_chr06 | 32466570                | CC                              | TT                | 1946448152               |
| SNP_P3_77176_32483903 | NC_021165.1    | Ca_kabuli_chr06 | 32483903                | AA                              | GG                | 1946448153               |
| SNP_P3_77177_32484560 | NC_021165.1    | Ca_kabuli_chr06 | 32484560                | AA                              | CC                | 1946448155               |
| SNP_P3_77178_32491613 | NC_021165.1    | Ca_kabuli_chr06 | 32491613                | GG                              | AA                | 1946448156               |
| SNP_P3_77179_32508630 | NC_021165.1    | Ca_kabuli_chr06 | 32508630                | GG                              | AA                | 1946448158               |
| SNP_P3_77180_32508676 | NC_021165.1    | Ca_kabuli_chr06 | 32508676                | AA                              | CC                | 1946448159               |
| SNP_P3_77181_32508840 | NC_021165.1    | Ca_kabuli_chr06 | 32508840                | GG                              | AA                | 1946448161               |
| SNP_P3_77182_32508857 | NC_021165.1    | Ca_kabuli_chr06 | 32508857                | CC                              | TT                | 1946448162               |
| SNP_P3_77183_32508861 | NC_021165.1    | Ca_kabuli_chr06 | 32508861                | AA                              | CC                | 1946448164               |
| SNP_P3_77184_32513609 | NC_021165.1    | Ca_kabuli_chr06 | 32513609                | GG                              | AA                | 1946448165               |
| SNP_P3_77185_32513671 | NC_021165.1    | Ca_kabuli_chr06 | 32513671                | GG                              | AA                | 1946448167               |
| SNP_P3_77186_32513673 | NC_021165.1    | Ca_kabuli_chr06 | 32513673                | GG                              | AA                | 1946448168               |
| SNP_P3_77187_32513852 | NC_021165.1    | Ca_kabuli_chr06 | 32513852                | CC                              | TT                | 1946448169               |
| SNP_P3_77188_32513943 | NC_021165.1    | Ca_kabuli_chr06 | 32513943                | AA                              | CC                | 1946448171               |
| SNP_P3_77190_32519699 | NC_021165.1    | Ca_kabuli_chr06 | 32519699                | GG                              | AA                | 1946448172               |
| SNP_P3_77191_32519847 | NC_021165.1    | Ca_kabuli_chr06 | 32519847                | GG                              | AA                | 1946448174               |
| SNP_P3_77192_32520026 | NC_021165.1    | Ca_kabuli_chr06 | 32520026                | GG                              | CC                | 1946448175               |
| SNP_P3_77193_32520066 | NC_021165.1    | Ca_kabuli_chr06 | 32520066                | TT                              | CC                | 1946448177               |
| SNP_P3_77194_32520244 | NC_021165.1    | Ca_kabuli_chr06 | 32520244                | GG                              | AA                | 1946448178               |
| SNP_P3_77195_32520392 | NC_021165.1    | Ca_kabuli_chr06 | 32520392                | TT                              | CC                | 1946448180               |
| SNP_P3_77196_32520460 | NC_021165.1    | Ca_kabuli_chr06 | 32520460                | TT                              | AA                | 1946448181               |
| SNP_P3_77197_32520495 | NC_021165.1    | Ca_kabuli_chr06 | 32520495                | AA                              | CC                | 1946448183               |
| SNP_P3_77198_32520504 | NC_021165.1    | Ca_kabuli_chr06 | 32520504                | GG                              | AA                | 1946448184               |
| SNP_P3_77199_32520612 | NC_021165.1    | Ca_kabuli_chr06 | 32520612                | CC                              | GG                | 1946448186               |
| SNP_P3_77200_32520661 | NC_021165.1    | Ca_kabuli_chr06 | 32520661                | AA                              | TT                | 1946448187               |
| SNP_P3_77201_32520778 | NC_021165.1    | Ca_kabuli_chr06 | 32520778                | CC                              | TT                | 1946448189               |

| SNPs IDs              | Chromosome IDs | Chromosomes     | Physical positions (bp) | CDC Frontier (Reference genome) | (Pusa 256 & HPNB) | NCBI SNPdb Accession IDs |
|-----------------------|----------------|-----------------|-------------------------|---------------------------------|-------------------|--------------------------|
| SNP_P3_77202_32521173 | NC_021165.1    | Ca_kabuli_chr06 | 32521173                | CC                              | TT                | 1946448190               |
| SNP_P3_77204_32521631 | NC_021165.1    | Ca_kabuli_chr06 | 32521631                | TT                              | AA                | 1946448192               |
| SNP_P3_77205_32521698 | NC_021165.1    | Ca_kabuli_chr06 | 32521698                | CC                              | AA                | 1946448193               |
| SNP_P3_77206_32521765 | NC_021165.1    | Ca_kabuli_chr06 | 32521765                | GG                              | AA                | 1946448194               |
| SNP_P3_77208_32522005 | NC_021165.1    | Ca_kabuli_chr06 | 32522005                | TT                              | CC                | 1946448196               |
| SNP_P3_77210_32522363 | NC_021165.1    | Ca_kabuli_chr06 | 32522363                | GG                              | TT                | 1946448197               |
| SNP_P3_77211_32522392 | NC_021165.1    | Ca_kabuli_chr06 | 32522392                | CC                              | TT                | 1946448199               |
| SNP_P3_77212_32539335 | NC_021165.1    | Ca_kabuli_chr06 | 32539335                | TT                              | AA                | 1946448200               |
| SNP_P3_77213_32539688 | NC_021165.1    | Ca_kabuli_chr06 | 32539688                | AA                              | TT                | 1946448202               |
| SNP_P3_77214_32539690 | NC_021165.1    | Ca_kabuli_chr06 | 32539690                | TT                              | AA                | 1946448203               |
| SNP_P3_77216_32539977 | NC_021165.1    | Ca_kabuli_chr06 | 32539977                | AA                              | TT                | 1946448205               |
| SNP_P3_77217_32540048 | NC_021165.1    | Ca_kabuli_chr06 | 32540048                | TT                              | GG                | 1946448206               |
| SNP_P3_77218_32540055 | NC_021165.1    | Ca_kabuli_chr06 | 32540055                | GG                              | TT                | 1946448207               |
| SNP_P3_77219_32540088 | NC_021165.1    | Ca_kabuli_chr06 | 32540088                | AA                              | GG                | 1946448209               |
| SNP_P3_77220_32540109 | NC_021165.1    | Ca_kabuli_chr06 | 32540109                | GG                              | AA                | 1946448210               |
| SNP_P3_77221_32540112 | NC_021165.1    | Ca_kabuli_chr06 | 32540112                | TT                              | AA                | 1946448212               |
| SNP_P3_77222_32540181 | NC_021165.1    | Ca_kabuli_chr06 | 32540181                | TT                              | CC                | 1946448213               |
| SNP_P3_77224_32540298 | NC_021165.1    | Ca_kabuli_chr06 | 32540298                | AA                              | GG                | 1946448215               |
| SNP_P3_77225_32540301 | NC_021165.1    | Ca_kabuli_chr06 | 32540301                | TT                              | CC                | 1946448216               |
| SNP_P3_77226_32540313 | NC_021165.1    | Ca_kabuli_chr06 | 32540313                | TT                              | CC                | 1946448218               |
| SNP_P3_77227_32540339 | NC_021165.1    | Ca_kabuli_chr06 | 32540339                | GG                              | CC                | 1946448219               |
| SNP_P3_77228_32540372 | NC_021165.1    | Ca_kabuli_chr06 | 32540372                | CC                              | TT                | 1946448221               |
| SNP_P3_77229_32540373 | NC_021165.1    | Ca_kabuli_chr06 | 32540373                | GG                              | AA                | 1946448222               |
| SNP_P3_77231_32540525 | NC_021165.1    | Ca_kabuli_chr06 | 32540525                | AA                              | TT                | 1946448223               |
| SNP_P3_77233_32540634 | NC_021165.1    | Ca_kabuli_chr06 | 32540634                | GG                              | CC                | 1946448225               |
| SNP_P3_77234_32540649 | NC_021165.1    | Ca_kabuli_chr06 | 32540649                | TT                              | CC                | 1946448227               |
| SNP_P3_77236_32552360 | NC_021165.1    | Ca_kabuli_chr06 | 32552360                | TT                              | CC                | 1946448228               |
| SNP_P3_77237_32552390 | NC_021165.1    | Ca_kabuli_chr06 | 32552390                | TT                              | CC                | 1946448230               |
| SNP_P3_77238_32552415 | NC_021165.1    | Ca_kabuli_chr06 | 32552415                | GG                              | TT                | 1946448231               |
| SNP_P3_77239_32553002 | NC_021165.1    | Ca_kabuli_chr06 | 32553002                | CC                              | TT                | 1946448233               |
| SNP_P3_77240_32553275 | NC_021165.1    | Ca_kabuli_chr06 | 32553275                | GG                              | AA                | 1946448234               |
| SNP_P3_77241_32553400 | NC_021165.1    | Ca_kabuli_chr06 | 32553400                | TT                              | CC                | 1946448236               |
| SNP_P3_77242_32553493 | NC_021165.1    | Ca_kabuli_chr06 | 32553493                | AA                              | CC                | 1946448237               |
| SNP_P3_77243_32572028 | NC_021165.1    | Ca_kabuli_chr06 | 32572028                | AA                              | TT                | 1946448238               |
| SNP_P3_77244_32572641 | NC_021165.1    | Ca_kabuli_chr06 | 32572641                | CC                              | TT                | 1946448240               |
| SNP_P3_77245_32572731 | NC_021165.1    | Ca_kabuli_chr06 | 32572731                | TT                              | CC                | 1946448241               |
| SNP_P3_77246_32576086 | NC_021165.1    | Ca_kabuli_chr06 | 32576086                | AA                              | TT                | 1946448243               |
| SNP_P3_77247_32609283 | NC_021165.1    | Ca_kabuli_chr06 | 32609283                | AA                              | TT                | 1946448244               |
| SNP_P3_77248_32609299 | NC_021165.1    | Ca_kabuli_chr06 | 32609299                | GG                              | AA                | 1946448246               |
| SNP_P3_77249_32609323 | NC_021165.1    | Ca_kabuli_chr06 | 32609323                | AA                              | TT                | 1946448247               |
| SNP_P3_77250_32609339 | NC_021165.1    | Ca_kabuli_chr06 | 32609339                | AA                              | GG                | 1946448249               |
| SNP_P3_77251_32609448 | NC_021165.1    | Ca_kabuli_chr06 | 32609448                | TT                              | CC                | 1946448250               |

| SNPs IDs              | Chromosome IDs | Chromosomes     | Physical positions (bp) | CDC Frontier (Reference genome) | (Pusa 256 & HPNB) | NCBI SNPdb Accession IDs |
|-----------------------|----------------|-----------------|-------------------------|---------------------------------|-------------------|--------------------------|
| SNP_P3_77252_32609589 | NC_021165.1    | Ca_kabuli_chr06 | 32609589                | CC                              | GG                | 1946448252               |
| SNP_P3_77253_32609649 | NC_021165.1    | Ca_kabuli_chr06 | 32609649                | GG                              | CC                | 1946448254               |
| SNP_P3_77254_32609670 | NC_021165.1    | Ca_kabuli_chr06 | 32609670                | GG                              | AA                | 1946448255               |
| SNP_P3_77255_32609734 | NC_021165.1    | Ca_kabuli_chr06 | 32609734                | AA                              | CC                | 1946448257               |
| SNP_P3_77256_32609753 | NC_021165.1    | Ca_kabuli_chr06 | 32609753                | AA                              | GG                | 1946448258               |
| SNP_P3_77257_32609793 | NC_021165.1    | Ca_kabuli_chr06 | 32609793                | AA                              | GG                | 1946448260               |
| SNP_P3_77258_32611021 | NC_021165.1    | Ca_kabuli_chr06 | 32611021                | CC                              | AA                | 1946448261               |
| SNP_P3_77259_32611024 | NC_021165.1    | Ca_kabuli_chr06 | 32611024                | AA                              | GG                | 1946448262               |
| SNP_P3_77260_32612538 | NC_021165.1    | Ca_kabuli_chr06 | 32612538                | CC                              | TT                | 1946448264               |
| SNP_P3_77261_32612539 | NC_021165.1    | Ca_kabuli_chr06 | 32612539                | AA                              | GG                | 1946448265               |
| SNP_P3_77262_32613189 | NC_021165.1    | Ca_kabuli_chr06 | 32613189                | GG                              | AA                | 1946448267               |
| SNP_P3_77263_32615475 | NC_021165.1    | Ca_kabuli_chr06 | 32615475                | TT                              | CC                | 1946448268               |
| SNP_P3_77264_32615486 | NC_021165.1    | Ca_kabuli_chr06 | 32615486                | TT                              | CC                | 1946448270               |
| SNP_P3_77265_32615513 | NC_021165.1    | Ca_kabuli_chr06 | 32615513                | AA                              | GG                | 1946448271               |
| SNP_P3_77266_32615786 | NC_021165.1    | Ca_kabuli_chr06 | 32615786                | AA                              | GG                | 1946448273               |
| SNP_P3_77267_32615803 | NC_021165.1    | Ca_kabuli_chr06 | 32615803                | CC                              | TT                | 1946448274               |
| SNP_P3_77272_32630168 | NC_021165.1    | Ca_kabuli_chr06 | 32630168                | CC                              | TT                | 1946448276               |
| SNP_P3_77273_32630177 | NC_021165.1    | Ca_kabuli_chr06 | 32630177                | TT                              | CC                | 1946448277               |
| SNP_P3_77274_32630194 | NC_021165.1    | Ca_kabuli_chr06 | 32630194                | CC                              | TT                | 1946448278               |
| SNP_P3_77275_32630353 | NC_021165.1    | Ca_kabuli_chr06 | 32630353                | AA                              | GG                | 1946448280               |
| SNP_P3_77276_32630367 | NC_021165.1    | Ca_kabuli_chr06 | 32630367                | TT                              | CC                | 1946448282               |
| SNP_P3_77278_32630610 | NC_021165.1    | Ca_kabuli_chr06 | 32630610                | CC                              | GG                | 1946448283               |
| SNP_P3_77279_32630707 | NC_021165.1    | Ca_kabuli_chr06 | 32630707                | AA                              | GG                | 1946448285               |
| SNP_P3_77281_32666780 | NC_021165.1    | Ca_kabuli_chr06 | 32666780                | TT                              | CC                | 1946448286               |
| SNP_P3_77282_32666786 | NC_021165.1    | Ca_kabuli_chr06 | 32666786                | TT                              | CC                | 1946448288               |
| SNP_P3_77283_32670765 | NC_021165.1    | Ca_kabuli_chr06 | 32670765                | CC                              | TT                | 1946448289               |
| SNP_P3_77284_32688879 | NC_021165.1    | Ca_kabuli_chr06 | 32688879                | AA                              | CC                | 1946448290               |
| SNP_P3_77285_32688886 | NC_021165.1    | Ca_kabuli_chr06 | 32688886                | CC                              | TT                | 1946448292               |
| SNP_P3_77286_32689433 | NC_021165.1    | Ca_kabuli_chr06 | 32689433                | CC                              | AA                | 1946448293               |
| SNP_P3_77287_32689465 | NC_021165.1    | Ca_kabuli_chr06 | 32689465                | TT                              | CC                | 1946448295               |
| SNP_P3_77288_32689477 | NC_021165.1    | Ca_kabuli_chr06 | 32689477                | AA                              | GG                | 1946448296               |
| SNP_P3_77289_32698683 | NC_021165.1    | Ca_kabuli_chr06 | 32698683                | AA                              | CC                | 1946448298               |
| SNP_P3_77290_32698713 | NC_021165.1    | Ca_kabuli_chr06 | 32698713                | GG                              | TT                | 1946448299               |
| SNP_P3_77291_32711270 | NC_021165.1    | Ca_kabuli_chr06 | 32711270                | AA                              | GG                | 1946448300               |
| SNP_P3_77292_32711271 | NC_021165.1    | Ca_kabuli_chr06 | 32711271                | AA                              | CC                | 1946448302               |
| SNP_P3_77293_32730277 | NC_021165.1    | Ca_kabuli_chr06 | 32730277                | GG                              | AA                | 1946448303               |
| SNP_P3_77294_32754122 | NC_021165.1    | Ca_kabuli_chr06 | 32754122                | TT                              | GG                | 1946448305               |
| SNP_P3_77295_32763517 | NC_021165.1    | Ca_kabuli_chr06 | 32763517                | AA                              | GG                | 1946448306               |
| SNP_P3_77296_32763524 | NC_021165.1    | Ca_kabuli_chr06 | 32763524                | GG                              | AA                | 1946448308               |
| SNP_P3_77297_32766949 | NC_021165.1    | Ca_kabuli_chr06 | 32766949                | AA                              | CC                | 1946448310               |
| SNP_P3_77298_32767431 | NC_021165.1    | Ca_kabuli_chr06 | 32767431                | TT                              | CC                | 1946448311               |
| SNP_P3_77299_32780744 | NC_021165.1    | Ca_kabuli_chr06 | 32780744                | AA                              | GG                | 1946448313               |

| SNPs IDs              | Chromosome IDs | Chromosomes     | Physical positions (bp) | CDC Frontier (Reference genome) | (Pusa 256 & HPNB) | NCBI SNPdb Accession IDs |
|-----------------------|----------------|-----------------|-------------------------|---------------------------------|-------------------|--------------------------|
| SNP_P3_77300_32803457 | NC_021165.1    | Ca_kabuli_chr06 | 32803457                | GG                              | AA                | 1946448314               |
| SNP_P3_77301_32888163 | NC_021165.1    | Ca_kabuli_chr06 | 32888163                | GG                              | CC                | 1946448315               |
| SNP_P3_77303_32908661 | NC_021165.1    | Ca_kabuli_chr06 | 32908661                | CC                              | TT                | 1946448317               |
| SNP_P3_77304_32927448 | NC_021165.1    | Ca_kabuli_chr06 | 32927448                | AA                              | GG                | 1946448318               |
| SNP_P3_77305_32927470 | NC_021165.1    | Ca_kabuli_chr06 | 32927470                | AA                              | TT                | 1946448320               |
| SNP_P3_77306_32932434 | NC_021165.1    | Ca_kabuli_chr06 | 32932434                | GG                              | TT                | 1946448321               |
| SNP_P3_77307_32932436 | NC_021165.1    | Ca_kabuli_chr06 | 32932436                | GG                              | AA                | 1946448323               |
| SNP_P3_77308_32932442 | NC_021165.1    | Ca_kabuli_chr06 | 32932442                | AA                              | TT                | 1946448324               |
| SNP_P3_77309_33039751 | NC_021165.1    | Ca_kabuli_chr06 | 33039751                | CC                              | TT                | 1946448326               |
| SNP_P3_77310_33039774 | NC_021165.1    | Ca_kabuli_chr06 | 33039774                | TT                              | CC                | 1946448327               |
| SNP_P3_77311_33054887 | NC_021165.1    | Ca_kabuli_chr06 | 33054887                | GG                              | AA                | 1946448329               |
| SNP_P3_77312_33055211 | NC_021165.1    | Ca_kabuli_chr06 | 33055211                | GG                              | AA                | 1946448330               |
| SNP_P3_77313_33055378 | NC_021165.1    | Ca_kabuli_chr06 | 33055378                | TT                              | AA                | 1946448332               |
| SNP_P3_77314_33055442 | NC_021165.1    | Ca_kabuli_chr06 | 33055442                | CC                              | GG                | 1946448333               |
| SNP_P3_77315_33055492 | NC_021165.1    | Ca_kabuli_chr06 | 33055492                | AA                              | CC                | 1946448334               |
| SNP_P3_77316_33055512 | NC_021165.1    | Ca_kabuli_chr06 | 33055512                | TT                              | CC                | 1946448336               |
| SNP_P3_77317_33094128 | NC_021165.1    | Ca_kabuli_chr06 | 33094128                | TT                              | CC                | 1946448338               |
| SNP_P3_77318_33094201 | NC_021165.1    | Ca_kabuli_chr06 | 33094201                | CC                              | TT                | 1946448339               |
| SNP_P3_77319_33094227 | NC_021165.1    | Ca_kabuli_chr06 | 33094227                | GG                              | CC                | 1946448341               |
| SNP_P3_77320_33094241 | NC_021165.1    | Ca_kabuli_chr06 | 33094241                | CC                              | TT                | 1946448342               |
| SNP_P3_77321_33094249 | NC_021165.1    | Ca_kabuli_chr06 | 33094249                | TT                              | CC                | 1946448344               |
| SNP_P3_77322_33094269 | NC_021165.1    | Ca_kabuli_chr06 | 33094269                | AA                              | GG                | 1946448345               |
| SNP_P3_77323_33094293 | NC_021165.1    | Ca_kabuli_chr06 | 33094293                | CC                              | TT                | 1946448347               |
| SNP_P3_77324_33094309 | NC_021165.1    | Ca_kabuli_chr06 | 33094309                | GG                              | AA                | 1946448348               |
| SNP_P3_77325_33094315 | NC_021165.1    | Ca_kabuli_chr06 | 33094315                | AA                              | TT                | 1946448350               |
| SNP_P3_77326_33094358 | NC_021165.1    | Ca_kabuli_chr06 | 33094358                | GG                              | AA                | 1946448351               |
| SNP_P3_77327_33094384 | NC_021165.1    | Ca_kabuli_chr06 | 33094384                | TT                              | CC                | 1946448352               |
| SNP_P3_77328_33094404 | NC_021165.1    | Ca_kabuli_chr06 | 33094404                | CC                              | TT                | 1946448354               |
| SNP_P3_77329_33094436 | NC_021165.1    | Ca_kabuli_chr06 | 33094436                | AA                              | TT                | 1946448355               |
| SNP_P3_77330_33094450 | NC_021165.1    | Ca_kabuli_chr06 | 33094450                | CC                              | TT                | 1946448357               |
| SNP_P3_77331_33094502 | NC_021165.1    | Ca_kabuli_chr06 | 33094502                | TT                              | CC                | 1946448358               |
| SNP_P3_77332_33094583 | NC_021165.1    | Ca_kabuli_chr06 | 33094583                | AA                              | CC                | 1946448360               |
| SNP_P3_77333_33094590 | NC_021165.1    | Ca_kabuli_chr06 | 33094590                | CC                              | TT                | 1946448361               |
| SNP_P3_77335_33094656 | NC_021165.1    | Ca_kabuli_chr06 | 33094656                | TT                              | CC                | 1946448363               |
| SNP_P3_77337_33094876 | NC_021165.1    | Ca_kabuli_chr06 | 33094876                | GG                              | AA                | 1946448364               |
| SNP_P3_77338_33094905 | NC_021165.1    | Ca_kabuli_chr06 | 33094905                | GG                              | AA                | 1946448365               |
| SNP_P3_77339_33098307 | NC_021165.1    | Ca_kabuli_chr06 | 33098307                | TT                              | CC                | 1946448367               |
| SNP_P3_77340_33105185 | NC_021165.1    | Ca_kabuli_chr06 | 33105185                | CC                              | TT                | 1946448369               |
| SNP_P3_77341_33105188 | NC_021165.1    | Ca_kabuli_chr06 | 33105188                | TT                              | CC                | 1946448370               |
| SNP_P3_77342_33105230 | NC_021165.1    | Ca_kabuli_chr06 | 33105230                | CC                              | TT                | 1946448372               |
| SNP_P3_77343_33105246 | NC_021165.1    | Ca_kabuli_chr06 | 33105246                | GG                              | AA                | 1946448373               |
| SNP_P3_77344_33105340 | NC_021165.1    | Ca_kabuli_chr06 | 33105340                | TT                              | CC                | 1946448374               |

| SNPs IDs              | Chromosome IDs | Chromosomes     | Physical positions (bp) | CDC Frontier (Reference genome) | (Pusa 256 & HPNB) | NCBI SNPdb Accession IDs |
|-----------------------|----------------|-----------------|-------------------------|---------------------------------|-------------------|--------------------------|
| SNP_P3_77345_33105372 | NC_021165.1    | Ca_kabuli_chr06 | 33105372                | GG                              | AA                | 1946448376               |
| SNP_P3_77346_33105972 | NC_021165.1    | Ca_kabuli_chr06 | 33105972                | AA                              | GG                | 1946448377               |
| SNP_P3_77347_33106397 | NC_021165.1    | Ca_kabuli_chr06 | 33106397                | GG                              | AA                | 1946448379               |
| SNP_P3_77348_33106430 | NC_021165.1    | Ca_kabuli_chr06 | 33106430                | AA                              | GG                | 1946448380               |
| SNP_P3_77349_33106479 | NC_021165.1    | Ca_kabuli_chr06 | 33106479                | AA                              | GG                | 1946448382               |
| SNP_P3_77350_33106553 | NC_021165.1    | Ca_kabuli_chr06 | 33106553                | AA                              | GG                | 1946448383               |
| SNP_P3_77351_33106568 | NC_021165.1    | Ca_kabuli_chr06 | 33106568                | AA                              | GG                | 1946448385               |
| SNP_P3_77352_33106576 | NC_021165.1    | Ca_kabuli_chr06 | 33106576                | TT                              | CC                | 1946448386               |
| SNP_P3_77353_33106579 | NC_021165.1    | Ca_kabuli_chr06 | 33106579                | AA                              | GG                | 1946448387               |
| SNP_P3_77355_33114926 | NC_021165.1    | Ca_kabuli_chr06 | 33114926                | TT                              | GG                | 1946448389               |
| SNP_P3_77356_33126416 | NC_021165.1    | Ca_kabuli_chr06 | 33126416                | AA                              | CC                | 1946448390               |
| SNP_P3_77357_33126417 | NC_021165.1    | Ca_kabuli_chr06 | 33126417                | AA                              | GG                | 1946448392               |
| SNP_P3_77358_33177352 | NC_021165.1    | Ca_kabuli_chr06 | 33177352                | TT                              | CC                | 1946448393               |
| SNP_P3_77359_33177381 | NC_021165.1    | Ca_kabuli_chr06 | 33177381                | GG                              | AA                | 1946448395               |
| SNP_P3_77360_33177545 | NC_021165.1    | Ca_kabuli_chr06 | 33177545                | TT                              | CC                | 1946448397               |
| SNP_P3_77361_33177655 | NC_021165.1    | Ca_kabuli_chr06 | 33177655                | AA                              | GG                | 1946448398               |
| SNP_P3_77362_33177669 | NC_021165.1    | Ca_kabuli_chr06 | 33177669                | AA                              | TT                | 1946448399               |
| SNP_P3_77363_33177868 | NC_021165.1    | Ca_kabuli_chr06 | 33177868                | TT                              | CC                | 1946448401               |
| SNP_P3_77364_33177902 | NC_021165.1    | Ca_kabuli_chr06 | 33177902                | TT                              | CC                | 1946448402               |
| SNP_P3_77365_33177931 | NC_021165.1    | Ca_kabuli_chr06 | 33177931                | AA                              | GG                | 1946448404               |
| SNP_P3_77366_33177970 | NC_021165.1    | Ca_kabuli_chr06 | 33177970                | TT                              | GG                | 1946448405               |
| SNP_P3_77367_33178020 | NC_021165.1    | Ca_kabuli_chr06 | 33178020                | CC                              | TT                | 1946448407               |
| SNP_P3_77368_33183704 | NC_021165.1    | Ca_kabuli_chr06 | 33183704                | CC                              | TT                | 1946448408               |
| SNP_P3_77369_33210467 | NC_021165.1    | Ca_kabuli_chr06 | 33210467                | CC                              | AA                | 1946448410               |
| SNP_P3_77370_33210473 | NC_021165.1    | Ca_kabuli_chr06 | 33210473                | GG                              | CC                | 1946448411               |
| SNP_P3_77371_33210480 | NC_021165.1    | Ca_kabuli_chr06 | 33210480                | AA                              | CC                | 1946448412               |
| SNP_P3_77372_33210548 | NC_021165.1    | Ca_kabuli_chr06 | 33210548                | AA                              | TT                | 1946448414               |
| SNP_P3_77373_33210767 | NC_021165.1    | Ca_kabuli_chr06 | 33210767                | AA                              | GG                | 1946448415               |
| SNP_P3_77374_33210819 | NC_021165.1    | Ca_kabuli_chr06 | 33210819                | CC                              | TT                | 1946448417               |
| SNP_P3_77375_33210824 | NC_021165.1    | Ca_kabuli_chr06 | 33210824                | CC                              | AA                | 1946448418               |
| SNP_P3_77376_33210838 | NC_021165.1    | Ca_kabuli_chr06 | 33210838                | AA                              | TT                | 1946448420               |
| SNP_P3_77377_33223505 | NC_021165.1    | Ca_kabuli_chr06 | 33223505                | CC                              | AA                | 1946448421               |
| SNP_P3_77378_33223512 | NC_021165.1    | Ca_kabuli_chr06 | 33223512                | CC                              | GG                | 1946448423               |
| SNP_P3_77379_33223539 | NC_021165.1    | Ca_kabuli_chr06 | 33223539                | TT                              | CC                | 1946448424               |
| SNP_P3_77380_33228418 | NC_021165.1    | Ca_kabuli_chr06 | 33228418                | TT                              | GG                | 1946448426               |
| SNP_P3_77381_33228598 | NC_021165.1    | Ca_kabuli_chr06 | 33228598                | TT                              | AA                | 1946448427               |
| SNP_P3_77382_33228667 | NC_021165.1    | Ca_kabuli_chr06 | 33228667                | TT                              | AA                | 1946448429               |
| SNP_P3_77383_33228923 | NC_021165.1    | Ca_kabuli_chr06 | 33228923                | TT                              | GG                | 1946448430               |
| SNP_P3_77384_33228970 | NC_021165.1    | Ca_kabuli_chr06 | 33228970                | TT                              | CC                | 1946448432               |
| SNP_P3_77385_33229106 | NC_021165.1    | Ca_kabuli_chr06 | 33229106                | GG                              | TT                | 1946448433               |
| SNP_P3_77386_33229108 | NC_021165.1    | Ca_kabuli_chr06 | 33229108                | TT                              | AA                | 1946448435               |
| SNP_P3_77387_33229165 | NC_021165.1    | Ca_kabuli_chr06 | 33229165                | CC                              | AA                | 1946448436               |

| SNPs IDs              | Chromosome IDs | Chromosomes     | Physical positions (bp) | CDC Frontier (Reference genome) | (Pusa 256 & HPNB) | NCBI SNPdb Accession IDs |
|-----------------------|----------------|-----------------|-------------------------|---------------------------------|-------------------|--------------------------|
| SNP_P3_77391_33229305 | NC_021165.1    | Ca_kabuli_chr06 | 33229305                | TT                              | AA                | 1946448437               |
| SNP_P3_77393_33229398 | NC_021165.1    | Ca_kabuli_chr06 | 33229398                | AA                              | CC                | 1946448439               |
| SNP_P3_77395_33229560 | NC_021165.1    | Ca_kabuli_chr06 | 33229560                | CC                              | TT                | 1946448440               |
| SNP_P3_77396_33229652 | NC_021165.1    | Ca_kabuli_chr06 | 33229652                | TT                              | AA                | 1946448442               |
| SNP_P3_77397_33229713 | NC_021165.1    | Ca_kabuli_chr06 | 33229713                | TT                              | CC                | 1946448443               |
| SNP_P3_77398_33229723 | NC_021165.1    | Ca_kabuli_chr06 | 33229723                | TT                              | CC                | 1946448445               |
| SNP_P3_77399_33229744 | NC_021165.1    | Ca_kabuli_chr06 | 33229744                | AA                              | GG                | 1946448446               |
| SNP_P3_77400_33229776 | NC_021165.1    | Ca_kabuli_chr06 | 33229776                | AA                              | GG                | 1946448447               |
| SNP_P3_77402_33229821 | NC_021165.1    | Ca_kabuli_chr06 | 33229821                | TT                              | GG                | 1946448449               |
| SNP_P3_77404_33229889 | NC_021165.1    | Ca_kabuli_chr06 | 33229889                | TT                              | CC                | 1946448450               |
| SNP_P3_77405_33229924 | NC_021165.1    | Ca_kabuli_chr06 | 33229924                | TT                              | GG                | 1946448452               |
| SNP_P3_77406_33229930 | NC_021165.1    | Ca_kabuli_chr06 | 33229930                | TT                              | AA                | 1946448453               |
| SNP_P3_77407_33229987 | NC_021165.1    | Ca_kabuli_chr06 | 33229987                | AA                              | TT                | 1946448455               |
| SNP_P3_77408_33230001 | NC_021165.1    | Ca_kabuli_chr06 | 33230001                | TT                              | GG                | 1946448456               |
| SNP_P3_77409_33230014 | NC_021165.1    | Ca_kabuli_chr06 | 33230014                | AA                              | TT                | 1946448458               |
| SNP_P3_77410_33230084 | NC_021165.1    | Ca_kabuli_chr06 | 33230084                | GG                              | AA                | 1946448459               |
| SNP_P3_77411_33230093 | NC_021165.1    | Ca_kabuli_chr06 | 33230093                | CC                              | TT                | 1946448461               |
| SNP_P3_77412_33230113 | NC_021165.1    | Ca_kabuli_chr06 | 33230113                | AA                              | TT                | 1946448462               |
| SNP_P3_77413_33230119 | NC_021165.1    | Ca_kabuli_chr06 | 33230119                | TT                              | CC                | 1946448464               |
| SNP_P3_77414_33230313 | NC_021165.1    | Ca_kabuli_chr06 | 33230313                | TT                              | AA                | 1946448465               |
| SNP_P3_77415_33230328 | NC_021165.1    | Ca_kabuli_chr06 | 33230328                | TT                              | CC                | 1946448467               |
| SNP_P3_77416_33230334 | NC_021165.1    | Ca_kabuli_chr06 | 33230334                | AA                              | GG                | 1946448468               |
| SNP_P3_77417_33230335 | NC_021165.1    | Ca_kabuli_chr06 | 33230335                | GG                              | AA                | 1946448470               |
| SNP_P3_77418_33230346 | NC_021165.1    | Ca_kabuli_chr06 | 33230346                | CC                              | GG                | 1946448471               |
| SNP_P3_77419_33232958 | NC_021165.1    | Ca_kabuli_chr06 | 33232958                | GG                              | CC                | 1946448473               |
| SNP_P3_77420_33233555 | NC_021165.1    | Ca_kabuli_chr06 | 33233555                | TT                              | AA                | 1946448474               |
| SNP_P3_77421_33233710 | NC_021165.1    | Ca_kabuli_chr06 | 33233710                | CC                              | TT                | 1946448475               |
| SNP_P3_77422_33233716 | NC_021165.1    | Ca_kabuli_chr06 | 33233716                | TT                              | CC                | 1946448477               |
| SNP_P3_77423_33233728 | NC_021165.1    | Ca_kabuli_chr06 | 33233728                | GG                              | AA                | 1946448478               |
| SNP_P3_77424_33233768 | NC_021165.1    | Ca_kabuli_chr06 | 33233768                | CC                              | TT                | 1946448480               |
| SNP_P3_77425_33233791 | NC_021165.1    | Ca_kabuli_chr06 | 33233791                | AA                              | GG                | 1946448481               |
| SNP_P3_77426_33233859 | NC_021165.1    | Ca_kabuli_chr06 | 33233859                | TT                              | GG                | 1946448483               |
| SNP_P3_77427_33234076 | NC_021165.1    | Ca_kabuli_chr06 | 33234076                | AA                              | TT                | 1946448484               |
| SNP_P3_77428_33234297 | NC_021165.1    | Ca_kabuli_chr06 | 33234297                | CC                              | AA                | 1946448486               |
| SNP_P3_77429_33234428 | NC_021165.1    | Ca_kabuli_chr06 | 33234428                | TT                              | AA                | 1946448487               |
| SNP_P3_77430_33234444 | NC_021165.1    | Ca_kabuli_chr06 | 33234444                | TT                              | CC                | 1946448489               |
| SNP_P3_77431_33234469 | NC_021165.1    | Ca_kabuli_chr06 | 33234469                | TT                              | CC                | 1946448490               |
| SNP_P3_77432_33234543 | NC_021165.1    | Ca_kabuli_chr06 | 33234543                | TT                              | AA                | 1946448491               |
| SNP_P3_77433_33240198 | NC_021165.1    | Ca_kabuli_chr06 | 33240198                | CC                              | GG                | 1946448493               |
| SNP_P3_77435_33240324 | NC_021165.1    | Ca_kabuli_chr06 | 33240324                | TT                              | CC                | 1946448494               |
| SNP_P3_77436_33240337 | NC_021165.1    | Ca_kabuli_chr06 | 33240337                | CC                              | TT                | 1946448496               |
| SNP_P3_77437_33240364 | NC_021165.1    | Ca_kabuli_chr06 | 33240364                | CC                              | TT                | 1946448497               |



| SNPs IDs              | Chromosome IDs | Chromosomes     | Physical positions (bp) | CDC Frontier (Reference genome) | (Pusa 256 & HPNB) | NCBI SNPdb Accession IDs |
|-----------------------|----------------|-----------------|-------------------------|---------------------------------|-------------------|--------------------------|
| SNP_P3_77439_33240405 | NC_021165.1    | Ca_kabuli_chr06 | 33240405                | TT                              | GG                | 1946448499               |
| SNP_P3_77440_33240416 | NC_021165.1    | Ca_kabuli_chr06 | 33240416                | GG                              | TT                | 1946448500               |
| SNP_P3_77441_33240535 | NC_021165.1    | Ca_kabuli_chr06 | 33240535                | AA                              | CC                | 1946448502               |
| SNP_P3_77442_33240538 | NC_021165.1    | Ca_kabuli_chr06 | 33240538                | TT                              | AA                | 1946448503               |
| SNP_P3_77443_33240550 | NC_021165.1    | Ca_kabuli_chr06 | 33240550                | TT                              | CC                | 1946448505               |
| SNP_P3_77444_33240564 | NC_021165.1    | Ca_kabuli_chr06 | 33240564                | TT                              | AA                | 1946448506               |
| SNP_P3_77445_33240601 | NC_021165.1    | Ca_kabuli_chr06 | 33240601                | CC                              | TT                | 1946448508               |
| SNP_P3_77446_33240617 | NC_021165.1    | Ca_kabuli_chr06 | 33240617                | AA                              | GG                | 1946448509               |
| SNP_P3_77447_33240651 | NC_021165.1    | Ca_kabuli_chr06 | 33240651                | GG                              | AA                | 1946448510               |
| SNP_P3_77448_33240685 | NC_021165.1    | Ca_kabuli_chr06 | 33240685                | CC                              | TT                | 1946448512               |
| SNP_P3_77450_33240811 | NC_021165.1    | Ca_kabuli_chr06 | 33240811                | GG                              | CC                | 1946448514               |
| SNP_P3_77451_33240844 | NC_021165.1    | Ca_kabuli_chr06 | 33240844                | TT                              | CC                | 1946448515               |
| SNP_P3_77452_33240911 | NC_021165.1    | Ca_kabuli_chr06 | 33240911                | AA                              | GG                | 1946448517               |
| SNP_P3_77453_33240966 | NC_021165.1    | Ca_kabuli_chr06 | 33240966                | AA                              | GG                | 1946448518               |
| SNP_P3_77454_33241096 | NC_021165.1    | Ca_kabuli_chr06 | 33241096                | TT                              | GG                | 1946448520               |
| SNP_P3_77455_33241098 | NC_021165.1    | Ca_kabuli_chr06 | 33241098                | CC                              | AA                | 1946448521               |
| SNP_P3_77456_33241099 | NC_021165.1    | Ca_kabuli_chr06 | 33241099                | AA                              | TT                | 1946448523               |
| SNP_P3_77457_33241158 | NC_021165.1    | Ca_kabuli_chr06 | 33241158                | AA                              | GG                | 1946448524               |
| SNP_P3_77458_33241203 | NC_021165.1    | Ca_kabuli_chr06 | 33241203                | TT                              | AA                | 1946448526               |
| SNP_P3_77459_33241211 | NC_021165.1    | Ca_kabuli_chr06 | 33241211                | GG                              | AA                | 1946448528               |
| SNP_P3_77460_33241236 | NC_021165.1    | Ca_kabuli_chr06 | 33241236                | CC                              | AA                | 1946448530               |
| SNP_P3_77461_33241247 | NC_021165.1    | Ca_kabuli_chr06 | 33241247                | CC                              | TT                | 1946448531               |
| SNP_P3_77462_33241264 | NC_021165.1    | Ca_kabuli_chr06 | 33241264                | CC                              | TT                | 1946448532               |
| SNP_P3_77463_33241304 | NC_021165.1    | Ca_kabuli_chr06 | 33241304                | CC                              | AA                | 1946448534               |
| SNP_P3_77464_33241307 | NC_021165.1    | Ca_kabuli_chr06 | 33241307                | AA                              | CC                | 1946448535               |
| SNP_P3_77465_33243780 | NC_021165.1    | Ca_kabuli_chr06 | 33243780                | AA                              | TT                | 1946448537               |
| SNP_P3_77466_33243781 | NC_021165.1    | Ca_kabuli_chr06 | 33243781                | GG                              | AA                | 1946448538               |
| SNP_P3_77467_33283032 | NC_021165.1    | Ca_kabuli_chr06 | 33283032                | AA                              | TT                | 1946448540               |
| SNP_P3_77468_33283038 | NC_021165.1    | Ca_kabuli_chr06 | 33283038                | GG                              | TT                | 1946448541               |
| SNP_P3_77469_33283053 | NC_021165.1    | Ca_kabuli_chr06 | 33283053                | CC                              | AA                | 1946448543               |
| SNP_P3_77470_33283076 | NC_021165.1    | Ca_kabuli_chr06 | 33283076                | TT                              | CC                | 1946448544               |
| SNP_P3_77471_33283094 | NC_021165.1    | Ca_kabuli_chr06 | 33283094                | CC                              | TT                | 1946448546               |
| SNP_P3_77472_33283115 | NC_021165.1    | Ca_kabuli_chr06 | 33283115                | AA                              | TT                | 1946448547               |
| SNP_P3_77473_33283123 | NC_021165.1    | Ca_kabuli_chr06 | 33283123                | AA                              | GG                | 1946448549               |
| SNP_P3_77474_33283129 | NC_021165.1    | Ca_kabuli_chr06 | 33283129                | GG                              | AA                | 1946448550               |
| SNP_P3_77475_33283149 | NC_021165.1    | Ca_kabuli_chr06 | 33283149                | GG                              | TT                | 1946448551               |
| SNP_P3_77476_33283176 | NC_021165.1    | Ca_kabuli_chr06 | 33283176                | GG                              | AA                | 1946448553               |
| SNP_P3_77477_33283326 | NC_021165.1    | Ca_kabuli_chr06 | 33283326                | CC                              | GG                | 1946448554               |
| SNP_P3_77478_33283365 | NC_021165.1    | Ca_kabuli_chr06 | 33283365                | CC                              | TT                | 1946448556               |
| SNP_P3_77479_33283381 | NC_021165.1    | Ca_kabuli_chr06 | 33283381                | TT                              | GG                | 1946448557               |
| SNP_P3_77480_33283440 | NC_021165.1    | Ca_kabuli_chr06 | 33283440                | CC                              | TT                | 1946448559               |
| SNP_P3_77481_33284118 | NC_021165.1    | Ca_kabuli_chr06 | 33284118                | AA                              | GG                | 1946448560               |

| SNPs IDs              | Chromosome IDs | Chromosomes     | Physical positions (bp) | CDC Frontier (Reference genome) | (Pusa 256 & HPNB) | NCBI SNPdb Accession IDs |
|-----------------------|----------------|-----------------|-------------------------|---------------------------------|-------------------|--------------------------|
| SNP_P3_77482_33286809 | NC_021165.1    | Ca_kabuli_chr06 | 33286809                | AA                              | GG                | 1946448561               |
| SNP_P3_77483_33293477 | NC_021165.1    | Ca_kabuli_chr06 | 33293477                | AA                              | TT                | 1946448563               |
| SNP_P3_77484_33293521 | NC_021165.1    | Ca_kabuli_chr06 | 33293521                | GG                              | AA                | 1946448564               |
| SNP_P3_77485_33293535 | NC_021165.1    | Ca_kabuli_chr06 | 33293535                | CC                              | TT                | 1946448566               |
| SNP_P3_77486_33293560 | NC_021165.1    | Ca_kabuli_chr06 | 33293560                | CC                              | TT                | 1946448567               |
| SNP_P3_77487_33293651 | NC_021165.1    | Ca_kabuli_chr06 | 33293651                | TT                              | GG                | 1946448569               |
| SNP_P3_77488_33293679 | NC_021165.1    | Ca_kabuli_chr06 | 33293679                | GG                              | TT                | 1946448570               |
| SNP_P3_77489_33293697 | NC_021165.1    | Ca_kabuli_chr06 | 33293697                | AA                              | GG                | 1946448572               |
| SNP_P3_77490_33293737 | NC_021165.1    | Ca_kabuli_chr06 | 33293737                | GG                              | AA                | 1946448573               |
| SNP_P3_77491_33293738 | NC_021165.1    | Ca_kabuli_chr06 | 33293738                | AA                              | TT                | 1946448575               |
| SNP_P3_77492_33293792 | NC_021165.1    | Ca_kabuli_chr06 | 33293792                | AA                              | GG                | 1946448576               |
| SNP_P3_77494_33293955 | NC_021165.1    | Ca_kabuli_chr06 | 33293955                | CC                              | TT                | 1946448578               |
| SNP_P3_77495_33293957 | NC_021165.1    | Ca_kabuli_chr06 | 33293957                | TT                              | GG                | 1946448579               |
| SNP_P3_77496_33295284 | NC_021165.1    | Ca_kabuli_chr06 | 33295284                | TT                              | CC                | 1946448580               |
| SNP_P3_77497_33295296 | NC_021165.1    | Ca_kabuli_chr06 | 33295296                | AA                              | GG                | 1946448582               |
| SNP_P3_77498_33295330 | NC_021165.1    | Ca_kabuli_chr06 | 33295330                | GG                              | AA                | 1946448583               |
| SNP_P3_77499_33295478 | NC_021165.1    | Ca_kabuli_chr06 | 33295478                | TT                              | AA                | 1946448585               |
| SNP_P3_77500_33295486 | NC_021165.1    | Ca_kabuli_chr06 | 33295486                | CC                              | TT                | 1946448586               |
| SNP_P3_77501_33295551 | NC_021165.1    | Ca_kabuli_chr06 | 33295551                | GG                              | TT                | 1946448587               |
| SNP_P3_77502_33295647 | NC_021165.1    | Ca_kabuli_chr06 | 33295647                | AA                              | CC                | 1946448589               |
| SNP_P3_77503_33295662 | NC_021165.1    | Ca_kabuli_chr06 | 33295662                | GG                              | AA                | 1946448591               |
| SNP_P3_77504_33295749 | NC_021165.1    | Ca_kabuli_chr06 | 33295749                | GG                              | CC                | 1946448592               |
| SNP_P3_77505_33295771 | NC_021165.1    | Ca_kabuli_chr06 | 33295771                | GG                              | AA                | 1946448593               |
| SNP_P3_77506_33295779 | NC_021165.1    | Ca_kabuli_chr06 | 33295779                | GG                              | CC                | 1946448595               |
| SNP_P3_77507_33295842 | NC_021165.1    | Ca_kabuli_chr06 | 33295842                | GG                              | AA                | 1946448596               |
| SNP_P3_77508_33295852 | NC_021165.1    | Ca_kabuli_chr06 | 33295852                | AA                              | CC                | 1946448598               |
| SNP_P3_77509_33295936 | NC_021165.1    | Ca_kabuli_chr06 | 33295936                | CC                              | TT                | 1946448600               |
| SNP_P3_77510_33295985 | NC_021165.1    | Ca_kabuli_chr06 | 33295985                | TT                              | CC                | 1946448601               |
| SNP_P3_77511_33295998 | NC_021165.1    | Ca_kabuli_chr06 | 33295998                | TT                              | CC                | 1946448602               |
| SNP_P3_77512_33296014 | NC_021165.1    | Ca_kabuli_chr06 | 33296014                | CC                              | TT                | 1946448604               |
| SNP_P3_77513_33296017 | NC_021165.1    | Ca_kabuli_chr06 | 33296017                | AA                              | GG                | 1946448605               |
| SNP_P3_77514_33296035 | NC_021165.1    | Ca_kabuli_chr06 | 33296035                | AA                              | TT                | 1946448607               |
| SNP_P3_77515_33296053 | NC_021165.1    | Ca_kabuli_chr06 | 33296053                | TT                              | CC                | 1946448608               |
| SNP_P3_77516_33296054 | NC_021165.1    | Ca_kabuli_chr06 | 33296054                | GG                              | AA                | 1946448610               |
| SNP_P3_77517_33296060 | NC_021165.1    | Ca_kabuli_chr06 | 33296060                | AA                              | GG                | 1946448611               |
| SNP_P3_77518_33296147 | NC_021165.1    | Ca_kabuli_chr06 | 33296147                | GG                              | CC                | 1946448613               |
| SNP_P3_77519_33296174 | NC_021165.1    | Ca_kabuli_chr06 | 33296174                | GG                              | CC                | 1946448614               |
| SNP_P3_77520_33296181 | NC_021165.1    | Ca_kabuli_chr06 | 33296181                | AA                              | CC                | 1946448616               |
| SNP_P3_77521_33296248 | NC_021165.1    | Ca_kabuli_chr06 | 33296248                | AA                              | CC                | 1946448617               |
| SNP_P3_77522_33296299 | NC_021165.1    | Ca_kabuli_chr06 | 33296299                | TT                              | GG                | 1946448619               |
| SNP_P3_77523_33296606 | NC_021165.1    | Ca_kabuli_chr06 | 33296606                | AA                              | TT                | 1946448620               |
| SNP_P3_77524_33296649 | NC_021165.1    | Ca_kabuli_chr06 | 33296649                | CC                              | TT                | 1946448621               |

| SNPs IDs              | Chromosome IDs | Chromosomes     | Physical positions (bp) | CDC Frontier (Reference genome) | (Pusa 256 & HPNB) | NCBI SNPdb Accession IDs |
|-----------------------|----------------|-----------------|-------------------------|---------------------------------|-------------------|--------------------------|
| SNP_P3_77525_33296672 | NC_021165.1    | Ca_kabuli_chr06 | 33296672                | CC                              | AA                | 1946448623               |
| SNP_P3_77526_33296692 | NC_021165.1    | Ca_kabuli_chr06 | 33296692                | AA                              | GG                | 1946448624               |
| SNP_P3_77527_33296728 | NC_021165.1    | Ca_kabuli_chr06 | 33296728                | GG                              | AA                | 1946448626               |
| SNP_P3_77528_33296836 | NC_021165.1    | Ca_kabuli_chr06 | 33296836                | GG                              | AA                | 1946448628               |
| SNP_P3_77529_33296895 | NC_021165.1    | Ca_kabuli_chr06 | 33296895                | AA                              | GG                | 1946448629               |
| SNP_P3_77530_33296929 | NC_021165.1    | Ca_kabuli_chr06 | 33296929                | GG                              | AA                | 1946448631               |
| SNP_P3_77531_33296936 | NC_021165.1    | Ca_kabuli_chr06 | 33296936                | GG                              | AA                | 1946448632               |
| SNP_P3_77532_33296952 | NC_021165.1    | Ca_kabuli_chr06 | 33296952                | AA                              | GG                | 1946448634               |
| SNP_P3_77533_33297091 | NC_021165.1    | Ca_kabuli_chr06 | 33297091                | AA                              | CC                | 1946448635               |
| SNP_P3_77534_33297132 | NC_021165.1    | Ca_kabuli_chr06 | 33297132                | TT                              | CC                | 1946448637               |
| SNP_P3_77535_33297152 | NC_021165.1    | Ca_kabuli_chr06 | 33297152                | TT                              | GG                | 1946448638               |
| SNP_P3_77536_33297159 | NC_021165.1    | Ca_kabuli_chr06 | 33297159                | AA                              | GG                | 1946448640               |
| SNP_P3_77537_33297204 | NC_021165.1    | Ca_kabuli_chr06 | 33297204                | CC                              | TT                | 1946448641               |
| SNP_P3_77538_33297262 | NC_021165.1    | Ca_kabuli_chr06 | 33297262                | CC                              | AA                | 1946448643               |
| SNP_P3_77539_33297272 | NC_021165.1    | Ca_kabuli_chr06 | 33297272                | GG                              | AA                | 1946448644               |
| SNP_P3_77540_33298877 | NC_021165.1    | Ca_kabuli_chr06 | 33298877                | TT                              | AA                | 1946448646               |
| SNP_P3_77541_33298942 | NC_021165.1    | Ca_kabuli_chr06 | 33298942                | TT                              | GG                | 1946448647               |
| SNP_P3_77542_33298964 | NC_021165.1    | Ca_kabuli_chr06 | 33298964                | AA                              | CC                | 1946448649               |
| SNP_P3_77543_33299787 | NC_021165.1    | Ca_kabuli_chr06 | 33299787                | TT                              | CC                | 1946448650               |
| SNP_P3_77544_33299852 | NC_021165.1    | Ca_kabuli_chr06 | 33299852                | AA                              | TT                | 1946448652               |
| SNP_P3_77545_33300064 | NC_021165.1    | Ca_kabuli_chr06 | 33300064                | TT                              | CC                | 1946448653               |
| SNP_P3_77546_33300070 | NC_021165.1    | Ca_kabuli_chr06 | 33300070                | GG                              | TT                | 1946448655               |
| SNP_P3_77547_33300164 | NC_021165.1    | Ca_kabuli_chr06 | 33300164                | CC                              | TT                | 1946448656               |
| SNP_P3_77549_33314014 | NC_021165.1    | Ca_kabuli_chr06 | 33314014                | AA                              | GG                | 1946448658               |
| SNP_P3_77550_33314023 | NC_021165.1    | Ca_kabuli_chr06 | 33314023                | AA                              | TT                | 1946448659               |
| SNP_P3_77551_33314063 | NC_021165.1    | Ca_kabuli_chr06 | 33314063                | GG                              | AA                | 1946448661               |
| SNP_P3_77552_33314086 | NC_021165.1    | Ca_kabuli_chr06 | 33314086                | AA                              | TT                | 1946448662               |
| SNP_P3_77553_33314394 | NC_021165.1    | Ca_kabuli_chr06 | 33314394                | GG                              | AA                | 1946448664               |
| SNP_P3_77554_33314639 | NC_021165.1    | Ca_kabuli_chr06 | 33314639                | CC                              | TT                | 1946448665               |
| SNP_P3_77555_33340457 | NC_021165.1    | Ca_kabuli_chr06 | 33340457                | CC                              | TT                | 1946448667               |
| SNP_P3_77556_33340469 | NC_021165.1    | Ca_kabuli_chr06 | 33340469                | TT                              | CC                | 1946448668               |
| SNP_P3_77557_33340590 | NC_021165.1    | Ca_kabuli_chr06 | 33340590                | AA                              | TT                | 1946448670               |
| SNP_P3_77558_33340746 | NC_021165.1    | Ca_kabuli_chr06 | 33340746                | GG                              | AA                | 1946448671               |
| SNP_P3_77559_33340775 | NC_021165.1    | Ca_kabuli_chr06 | 33340775                | GG                              | TT                | 1946448673               |
| SNP_P3_77561_33340878 | NC_021165.1    | Ca_kabuli_chr06 | 33340878                | CC                              | AA                | 1946448674               |
| SNP_P3_77562_33340909 | NC_021165.1    | Ca_kabuli_chr06 | 33340909                | TT                              | CC                | 1946448676               |
| SNP_P3_77563_33340911 | NC_021165.1    | Ca_kabuli_chr06 | 33340911                | GG                              | AA                | 1946448677               |
| SNP_P3_77564_33340994 | NC_021165.1    | Ca_kabuli_chr06 | 33340994                | AA                              | GG                | 1946448678               |
| SNP_P3_77565_33341001 | NC_021165.1    | Ca_kabuli_chr06 | 33341001                | AA                              | GG                | 1946448680               |
| SNP_P3_77566_33341024 | NC_021165.1    | Ca_kabuli_chr06 | 33341024                | TT                              | CC                | 1946448681               |
| SNP_P3_77567_33341074 | NC_021165.1    | Ca_kabuli_chr06 | 33341074                | CC                              | TT                | 1946448683               |
| SNP_P3_77568_33341077 | NC_021165.1    | Ca_kabuli_chr06 | 33341077                | TT                              | CC                | 1946448684               |

| SNPs IDs              | Chromosome IDs | Chromosomes     | Physical positions (bp) | CDC Frontier (Reference genome) | (Pusa 256 & HPNB) | NCBI SNPdb Accession IDs |
|-----------------------|----------------|-----------------|-------------------------|---------------------------------|-------------------|--------------------------|
| SNP_P3_77569_33341154 | NC_021165.1    | Ca_kabuli_chr06 | 33341154                | GG                              | AA                | 1946448686               |
| SNP_P3_77570_33341161 | NC_021165.1    | Ca_kabuli_chr06 | 33341161                | CC                              | AA                | 1946448687               |
| SNP_P3_77571_33341241 | NC_021165.1    | Ca_kabuli_chr06 | 33341241                | TT                              | CC                | 1946448689               |
| SNP_P3_77572_33341336 | NC_021165.1    | Ca_kabuli_chr06 | 33341336                | GG                              | TT                | 1946448691               |
| SNP_P3_77573_33341349 | NC_021165.1    | Ca_kabuli_chr06 | 33341349                | TT                              | CC                | 1946448692               |
| SNP_P3_77574_33341363 | NC_021165.1    | Ca_kabuli_chr06 | 33341363                | GG                              | AA                | 1946448694               |
| SNP_P3_77575_33341480 | NC_021165.1    | Ca_kabuli_chr06 | 33341480                | TT                              | CC                | 1946448695               |
| SNP_P3_77576_33341619 | NC_021165.1    | Ca_kabuli_chr06 | 33341619                | TT                              | CC                | 1946448697               |
| SNP_P3_77577_33341634 | NC_021165.1    | Ca_kabuli_chr06 | 33341634                | TT                              | GG                | 1946448698               |
| SNP_P3_77578_33341723 | NC_021165.1    | Ca_kabuli_chr06 | 33341723                | TT                              | AA                | 1946448700               |
| SNP_P3_77579_33350427 | NC_021165.1    | Ca_kabuli_chr06 | 33350427                | TT                              | CC                | 1946448701               |
| SNP_P3_77580_33350430 | NC_021165.1    | Ca_kabuli_chr06 | 33350430                | CC                              | TT                | 1946448702               |
| SNP_P3_77581_33358386 | NC_021165.1    | Ca_kabuli_chr06 | 33358386                | GG                              | AA                | 1946448704               |
| SNP_P3_77582_33360050 | NC_021165.1    | Ca_kabuli_chr06 | 33360050                | AA                              | GG                | 1946448705               |
| SNP_P3_77583_33360327 | NC_021165.1    | Ca_kabuli_chr06 | 33360327                | CC                              | TT                | 1946448707               |
| SNP_P3_77584_33392258 | NC_021165.1    | Ca_kabuli_chr06 | 33392258                | AA                              | TT                | 1946448708               |
| SNP_P3_77585_33404912 | NC_021165.1    | Ca_kabuli_chr06 | 33404912                | AA                              | GG                | 1946448710               |
| SNP_P3_77586_33423333 | NC_021165.1    | Ca_kabuli_chr06 | 33423333                | GG                              | TT                | 1946448711               |
| SNP_P3_77587_33426918 | NC_021165.1    | Ca_kabuli_chr06 | 33426918                | CC                              | AA                | 1946448713               |
| SNP_P3_77588_33426920 | NC_021165.1    | Ca_kabuli_chr06 | 33426920                | TT                              | AA                | 1946448714               |
| SNP_P3_77589_33428210 | NC_021165.1    | Ca_kabuli_chr06 | 33428210                | CC                              | TT                | 1946448716               |
| SNP_P3_77590_33428266 | NC_021165.1    | Ca_kabuli_chr06 | 33428266                | CC                              | TT                | 1946448718               |
| SNP_P3_77591_33428281 | NC_021165.1    | Ca_kabuli_chr06 | 33428281                | GG                              | AA                | 1946448719               |
| SNP_P3_77592_33428291 | NC_021165.1    | Ca_kabuli_chr06 | 33428291                | GG                              | AA                | 1946448721               |
| SNP_P3_77593_33428486 | NC_021165.1    | Ca_kabuli_chr06 | 33428486                | CC                              | AA                | 1946448722               |
| SNP_P3_77594_33428545 | NC_021165.1    | Ca_kabuli_chr06 | 33428545                | CC                              | TT                | 1946448724               |
| SNP_P3_77595_33428615 | NC_021165.1    | Ca_kabuli_chr06 | 33428615                | CC                              | AA                | 1946448726               |
| SNP_P3_77597_33443824 | NC_021165.1    | Ca_kabuli_chr06 | 33443824                | AA                              | GG                | 1946448727               |
| SNP_P3_77598_33444784 | NC_021165.1    | Ca_kabuli_chr06 | 33444784                | TT                              | AA                | 1946448729               |
| SNP_P3_77599_33457860 | NC_021165.1    | Ca_kabuli_chr06 | 33457860                | GG                              | TT                | 1946448730               |
| SNP_P3_77600_33457863 | NC_021165.1    | Ca_kabuli_chr06 | 33457863                | TT                              | GG                | 1946448732               |
| SNP_P3_77601_33457876 | NC_021165.1    | Ca_kabuli_chr06 | 33457876                | GG                              | TT                | 1946448733               |
| SNP_P3_77602_33457923 | NC_021165.1    | Ca_kabuli_chr06 | 33457923                | TT                              | CC                | 1946448735               |
| SNP_P3_77603_33457937 | NC_021165.1    | Ca_kabuli_chr06 | 33457937                | CC                              | TT                | 1946448736               |
| SNP_P3_77604_33457938 | NC_021165.1    | Ca_kabuli_chr06 | 33457938                | TT                              | CC                | 1946448737               |
| SNP_P3_77605_33458027 | NC_021165.1    | Ca_kabuli_chr06 | 33458027                | TT                              | CC                | 1946448739               |
| SNP_P3_77606_33458040 | NC_021165.1    | Ca_kabuli_chr06 | 33458040                | GG                              | TT                | 1946448740               |
| SNP_P3_77607_33458072 | NC_021165.1    | Ca_kabuli_chr06 | 33458072                | CC                              | TT                | 1946448742               |
| SNP_P3_77608_33497880 | NC_021165.1    | Ca_kabuli_chr06 | 33497880                | AA                              | GG                | 1946448744               |
| SNP_P3_77609_33502728 | NC_021165.1    | Ca_kabuli_chr06 | 33502728                | TT                              | GG                | 1946448745               |
| SNP_P3_77611_33512836 | NC_021165.1    | Ca_kabuli_chr06 | 33512836                | AA                              | TT                | 1946448747               |
| SNP_P3_77612_33512837 | NC_021165.1    | Ca_kabuli_chr06 | 33512837                | TT                              | AA                | 1946448748               |

| SNPs IDs              | Chromosome IDs | Chromosomes     | Physical positions (bp) | CDC Frontier (Reference genome) | (Pusa 256 & HPNB) | NCBI SNPdb Accession IDs |
|-----------------------|----------------|-----------------|-------------------------|---------------------------------|-------------------|--------------------------|
| SNP_P3_77614_33575309 | NC_021165.1    | Ca_kabuli_chr06 | 33575309                | AA                              | TT                | 1946448750               |
| SNP_P3_77615_33588392 | NC_021165.1    | Ca_kabuli_chr06 | 33588392                | AA                              | GG                | 1946448751               |
| SNP_P3_77616_33589864 | NC_021165.1    | Ca_kabuli_chr06 | 33589864                | TT                              | AA                | 1946448753               |
| SNP_P3_77617_33612123 | NC_021165.1    | Ca_kabuli_chr06 | 33612123                | CC                              | TT                | 1946448754               |
| SNP_P3_77618_33633062 | NC_021165.1    | Ca_kabuli_chr06 | 33633062                | TT                              | CC                | 1946448756               |
| SNP_P3_77619_33633083 | NC_021165.1    | Ca_kabuli_chr06 | 33633083                | AA                              | GG                | 1946448757               |
| SNP_P3_77620_33649077 | NC_021165.1    | Ca_kabuli_chr06 | 33649077                | AA                              | CC                | 1946448759               |
| SNP_P3_77621_33651326 | NC_021165.1    | Ca_kabuli_chr06 | 33651326                | GG                              | AA                | 1946448760               |
| SNP_P3_77622_33651527 | NC_021165.1    | Ca_kabuli_chr06 | 33651527                | TT                              | CC                | 1946448762               |
| SNP_P3_77623_33661655 | NC_021165.1    | Ca_kabuli_chr06 | 33661655                | CC                              | TT                | 1946448763               |
| SNP_P3_77624_33705006 | NC_021165.1    | Ca_kabuli_chr06 | 33705006                | GG                              | TT                | 1946448765               |
| SNP_P3_77625_33709595 | NC_021165.1    | Ca_kabuli_chr06 | 33709595                | GG                              | AA                | 1946448766               |
| SNP_P3_77626_33751521 | NC_021165.1    | Ca_kabuli_chr06 | 33751521                | GG                              | AA                | 1946448768               |
| SNP_P3_77627_33787248 | NC_021165.1    | Ca_kabuli_chr06 | 33787248                | GG                              | AA                | 1946448769               |
| SNP_P3_77628_33787257 | NC_021165.1    | Ca_kabuli_chr06 | 33787257                | GG                              | AA                | 1946448771               |
| SNP_P3_77629_33831343 | NC_021165.1    | Ca_kabuli_chr06 | 33831343                | TT                              | CC                | 1946448772               |
| SNP_P3_77630_33873408 | NC_021165.1    | Ca_kabuli_chr06 | 33873408                | GG                              | TT                | 1946448774               |
| SNP_P3_77631_33877896 | NC_021165.1    | Ca_kabuli_chr06 | 33877896                | GG                              | AA                | 1946448775               |
| SNP_P3_77632_33886236 | NC_021165.1    | Ca_kabuli_chr06 | 33886236                | AA                              | CC                | 1946448777               |
| SNP_P3_77634_33886559 | NC_021165.1    | Ca_kabuli_chr06 | 33886559                | TT                              | AA                | 1946448778               |
| SNP_P3_77635_33886581 | NC_021165.1    | Ca_kabuli_chr06 | 33886581                | CC                              | AA                | 1946448780               |
| SNP_P3_77636_33925919 | NC_021165.1    | Ca_kabuli_chr06 | 33925919                | TT                              | CC                | 1946448781               |
| SNP_P3_77637_33929337 | NC_021165.1    | Ca_kabuli_chr06 | 33929337                | AA                              | TT                | 1946448783               |
| SNP_P3_77638_33937687 | NC_021165.1    | Ca_kabuli_chr06 | 33937687                | GG                              | AA                | 1946448784               |
| SNP_P3_77639_33941776 | NC_021165.1    | Ca_kabuli_chr06 | 33941776                | AA                              | GG                | 1946448785               |
| SNP_P3_77640_33941807 | NC_021165.1    | Ca_kabuli_chr06 | 33941807                | AA                              | GG                | 1946448787               |
| SNP_P3_77641_33962914 | NC_021165.1    | Ca_kabuli_chr06 | 33962914                | AA                              | GG                | 1946448788               |
| SNP_P3_77642_33969155 | NC_021165.1    | Ca_kabuli_chr06 | 33969155                | AA                              | GG                | 1946448790               |
| SNP_P3_77643_33971280 | NC_021165.1    | Ca_kabuli_chr06 | 33971280                | AA                              | GG                | 1946448791               |
| SNP_P3_77644_33974241 | NC_021165.1    | Ca_kabuli_chr06 | 33974241                | AA                              | TT                | 1946448793               |
| SNP_P3_77645_33974244 | NC_021165.1    | Ca_kabuli_chr06 | 33974244                | CC                              | AA                | 1946448794               |
| SNP_P3_77646_33986296 | NC_021165.1    | Ca_kabuli_chr06 | 33986296                | AA                              | GG                | 1946448796               |
| SNP_P3_77647_33986325 | NC_021165.1    | Ca_kabuli_chr06 | 33986325                | TT                              | CC                | 1946448797               |
| SNP_P3_77648_33988544 | NC_021165.1    | Ca_kabuli_chr06 | 33988544                | TT                              | CC                | 1946448799               |
| SNP_P3_77649_33988652 | NC_021165.1    | Ca_kabuli_chr06 | 33988652                | TT                              | CC                | 1946448801               |
| SNP_P3_77650_33988733 | NC_021165.1    | Ca_kabuli_chr06 | 33988733                | TT                              | AA                | 1946448802               |
| SNP_P3_77651_33988770 | NC_021165.1    | Ca_kabuli_chr06 | 33988770                | CC                              | AA                | 1946448803               |
| SNP_P3_77652_33988794 | NC_021165.1    | Ca_kabuli_chr06 | 33988794                | GG                              | AA                | 1946448805               |
| SNP_P3_77653_33988810 | NC_021165.1    | Ca_kabuli_chr06 | 33988810                | AA                              | TT                | 1946448806               |
| SNP_P3_77654_33988908 | NC_021165.1    | Ca_kabuli_chr06 | 33988908                | CC                              | TT                | 1946448808               |
| SNP_P3_77655_33988987 | NC_021165.1    | Ca_kabuli_chr06 | 33988987                | TT                              | AA                | 1946448809               |
| SNP_P3_77656_33989002 | NC_021165.1    | Ca_kabuli_chr06 | 33989002                | TT                              | GG                | 1946448811               |

| SNPs IDs              | Chromosome IDs | Chromosomes     | Physical positions (bp) | CDC Frontier (Reference genome) | (Pusa 256 & HPNB) | NCBI SNPdb Accession IDs |
|-----------------------|----------------|-----------------|-------------------------|---------------------------------|-------------------|--------------------------|
| SNP_P3_77657_33989015 | NC_021165.1    | Ca_kabuli_chr06 | 33989015                | GG                              | AA                | 1946448812               |
| SNP_P3_77658_33989067 | NC_021165.1    | Ca_kabuli_chr06 | 33989067                | CC                              | AA                | 1946448814               |
| SNP_P3_77659_33989076 | NC_021165.1    | Ca_kabuli_chr06 | 33989076                | CC                              | GG                | 1946448815               |
| SNP_P3_77660_33989115 | NC_021165.1    | Ca_kabuli_chr06 | 33989115                | CC                              | TT                | 1946448816               |
| SNP_P3_77661_34020837 | NC_021165.1    | Ca_kabuli_chr06 | 34020837                | TT                              | CC                | 1946448818               |
| SNP_P3_77662_34020878 | NC_021165.1    | Ca_kabuli_chr06 | 34020878                | TT                              | CC                | 1946448819               |
| SNP_P3_77663_34026681 | NC_021165.1    | Ca_kabuli_chr06 | 34026681                | TT                              | CC                | 1946448821               |
| SNP_P3_77664_34029738 | NC_021165.1    | Ca_kabuli_chr06 | 34029738                | CC                              | AA                | 1946448822               |
| SNP_P3_77665_34029746 | NC_021165.1    | Ca_kabuli_chr06 | 34029746                | TT                              | AA                | 1946448824               |
| SNP_P3_77666_34029771 | NC_021165.1    | Ca_kabuli_chr06 | 34029771                | TT                              | AA                | 1946448826               |
| SNP_P3_77667_34029812 | NC_021165.1    | Ca_kabuli_chr06 | 34029812                | TT                              | CC                | 1946448827               |
| SNP_P3_77668_34029935 | NC_021165.1    | Ca_kabuli_chr06 | 34029935                | AA                              | GG                | 1946448829               |
| SNP_P3_77669_34058616 | NC_021165.1    | Ca_kabuli_chr06 | 34058616                | GG                              | AA                | 1946448830               |
| SNP_P3_77670_34060404 | NC_021165.1    | Ca_kabuli_chr06 | 34060404                | TT                              | CC                | 1946448832               |
| SNP_P3_77671_34066446 | NC_021165.1    | Ca_kabuli_chr06 | 34066446                | AA                              | TT                | 1946448833               |
| SNP_P3_77672_34066447 | NC_021165.1    | Ca_kabuli_chr06 | 34066447                | GG                              | AA                | 1946448835               |
| SNP_P3_77673_34067765 | NC_021165.1    | Ca_kabuli_chr06 | 34067765                | CC                              | GG                | 1946448836               |
| SNP_P3_77674_34075953 | NC_021165.1    | Ca_kabuli_chr06 | 34075953                | TT                              | GG                | 1946448837               |
| SNP_P3_77675_34075957 | NC_021165.1    | Ca_kabuli_chr06 | 34075957                | AA                              | GG                | 1946448839               |
| SNP_P3_77676_34075968 | NC_021165.1    | Ca_kabuli_chr06 | 34075968                | TT                              | CC                | 1946448840               |
| SNP_P3_77677_34076633 | NC_021165.1    | Ca_kabuli_chr06 | 34076633                | GG                              | AA                | 1946448842               |
| SNP_P3_77678_34077002 | NC_021165.1    | Ca_kabuli_chr06 | 34077002                | AA                              | GG                | 1946448843               |
| SNP_P3_77679_34085209 | NC_021165.1    | Ca_kabuli_chr06 | 34085209                | CC                              | GG                | 1946448845               |
| SNP_P3_77680_34085210 | NC_021165.1    | Ca_kabuli_chr06 | 34085210                | CC                              | TT                | 1946448846               |
| SNP_P3_77681_34103189 | NC_021165.1    | Ca_kabuli_chr06 | 34103189                | GG                              | AA                | 1946448848               |
| SNP_P3_77682_34125201 | NC_021165.1    | Ca_kabuli_chr06 | 34125201                | TT                              | GG                | 1946448849               |
| SNP_P3_77683_34125283 | NC_021165.1    | Ca_kabuli_chr06 | 34125283                | GG                              | CC                | 1946448850               |
| SNP_P3_77684_34125795 | NC_021165.1    | Ca_kabuli_chr06 | 34125795                | AA                              | GG                | 1946448852               |
| SNP_P3_77685_34135502 | NC_021165.1    | Ca_kabuli_chr06 | 34135502                | TT                              | GG                | 1946448854               |
| SNP_P3_77686_34135572 | NC_021165.1    | Ca_kabuli_chr06 | 34135572                | TT                              | GG                | 1946448855               |
| SNP_P3_77687_34138299 | NC_021165.1    | Ca_kabuli_chr06 | 34138299                | TT                              | CC                | 1946448857               |
| SNP_P3_77688_34138325 | NC_021165.1    | Ca_kabuli_chr06 | 34138325                | AA                              | GG                | 1946448858               |
| SNP_P3_77689_34138330 | NC_021165.1    | Ca_kabuli_chr06 | 34138330                | CC                              | TT                | 1946448860               |
| SNP_P3_77690_34138333 | NC_021165.1    | Ca_kabuli_chr06 | 34138333                | CC                              | TT                | 1946448861               |
| SNP_P3_77691_34138334 | NC_021165.1    | Ca_kabuli_chr06 | 34138334                | AA                              | GG                | 1946448863               |
| SNP_P3_77692_34143372 | NC_021165.1    | Ca_kabuli_chr06 | 34143372                | TT                              | GG                | 1946448864               |
| SNP_P3_77693_34143663 | NC_021165.1    | Ca_kabuli_chr06 | 34143663                | TT                              | CC                | 1946448866               |
| SNP_P3_77694_34143664 | NC_021165.1    | Ca_kabuli_chr06 | 34143664                | AA                              | TT                | 1946448867               |
| SNP_P3_77695_34144576 | NC_021165.1    | Ca_kabuli_chr06 | 34144576                | GG                              | CC                | 1946448868               |
| SNP_P3_77696_34144590 | NC_021165.1    | Ca_kabuli_chr06 | 34144590                | AA                              | TT                | 1946448870               |
| SNP_P3_77697_34144594 | NC_021165.1    | Ca_kabuli_chr06 | 34144594                | CC                              | TT                | 1946448871               |
| SNP_P3_77698_34144606 | NC_021165.1    | Ca_kabuli_chr06 | 34144606                | AA                              | GG                | 1946448873               |

| SNPs IDs              | Chromosome IDs | Chromosomes     | Physical positions (bp) | CDC Frontier (Reference genome) | (Pusa 256 & HPNB) | NCBI SNPdb Accession IDs |
|-----------------------|----------------|-----------------|-------------------------|---------------------------------|-------------------|--------------------------|
| SNP_P3_77699_34144620 | NC_021165.1    | Ca_kabuli_chr06 | 34144620                | AA                              | CC                | 1946448874               |
| SNP_P3_77700_34144653 | NC_021165.1    | Ca_kabuli_chr06 | 34144653                | AA                              | TT                | 1946448876               |
| SNP_P3_77701_34144654 | NC_021165.1    | Ca_kabuli_chr06 | 34144654                | TT                              | AA                | 1946448877               |
| SNP_P3_77702_34144669 | NC_021165.1    | Ca_kabuli_chr06 | 34144669                | CC                              | GG                | 1946448879               |
| SNP_P3_77703_34145005 | NC_021165.1    | Ca_kabuli_chr06 | 34145005                | TT                              | GG                | 1946448880               |
| SNP_P3_77704_34146490 | NC_021165.1    | Ca_kabuli_chr06 | 34146490                | CC                              | TT                | 1946448882               |
| SNP_P3_77705_34146962 | NC_021165.1    | Ca_kabuli_chr06 | 34146962                | TT                              | CC                | 1946448883               |
| SNP_P3_77706_34161978 | NC_021165.1    | Ca_kabuli_chr06 | 34161978                | GG                              | AA                | 1946448885               |
| SNP_P3_77707_34161990 | NC_021165.1    | Ca_kabuli_chr06 | 34161990                | TT                              | CC                | 1946448886               |
| SNP_P3_77708_34162270 | NC_021165.1    | Ca_kabuli_chr06 | 34162270                | TT                              | AA                | 1946448888               |
| SNP_P3_77709_34162299 | NC_021165.1    | Ca_kabuli_chr06 | 34162299                | GG                              | TT                | 1946448889               |
| SNP_P3_77710_34164186 | NC_021165.1    | Ca_kabuli_chr06 | 34164186                | GG                              | AA                | 1946448890               |
| SNP_P3_77711_34164326 | NC_021165.1    | Ca_kabuli_chr06 | 34164326                | TT                              | CC                | 1946448892               |
| SNP_P3_77712_34164361 | NC_021165.1    | Ca_kabuli_chr06 | 34164361                | CC                              | TT                | 1946448893               |
| SNP_P3_77713_34164374 | NC_021165.1    | Ca_kabuli_chr06 | 34164374                | TT                              | AA                | 1946448895               |
| SNP_P3_77714_34164382 | NC_021165.1    | Ca_kabuli_chr06 | 34164382                | AA                              | TT                | 1946448896               |
| SNP_P3_77715_34164405 | NC_021165.1    | Ca_kabuli_chr06 | 34164405                | GG                              | AA                | 1946448898               |
| SNP_P3_77716_34164428 | NC_021165.1    | Ca_kabuli_chr06 | 34164428                | AA                              | TT                | 1946448899               |
| SNP_P3_77717_34164493 | NC_021165.1    | Ca_kabuli_chr06 | 34164493                | AA                              | GG                | 1946448900               |
| SNP_P3_77718_34164500 | NC_021165.1    | Ca_kabuli_chr06 | 34164500                | CC                              | AA                | 1946448902               |
| SNP_P3_77719_34164542 | NC_021165.1    | Ca_kabuli_chr06 | 34164542                | TT                              | AA                | 1946448903               |
| SNP_P3_77720_34164567 | NC_021165.1    | Ca_kabuli_chr06 | 34164567                | CC                              | AA                | 1946448905               |
| SNP_P3_77721_34164568 | NC_021165.1    | Ca_kabuli_chr06 | 34164568                | CC                              | AA                | 1946448906               |
| SNP_P3_77722_34164641 | NC_021165.1    | Ca_kabuli_chr06 | 34164641                | TT                              | GG                | 1946448907               |
| SNP_P3_77723_34164677 | NC_021165.1    | Ca_kabuli_chr06 | 34164677                | GG                              | AA                | 1946448909               |
| SNP_P3_77725_34164748 | NC_021165.1    | Ca_kabuli_chr06 | 34164748                | TT                              | CC                | 1946448911               |
| SNP_P3_77726_34164785 | NC_021165.1    | Ca_kabuli_chr06 | 34164785                | TT                              | GG                | 1946448912               |
| SNP_P3_77727_34164787 | NC_021165.1    | Ca_kabuli_chr06 | 34164787                | AA                              | GG                | 1946448913               |
| SNP_P3_77728_34164824 | NC_021165.1    | Ca_kabuli_chr06 | 34164824                | CC                              | TT                | 1946448915               |
| SNP_P3_77729_34164836 | NC_021165.1    | Ca_kabuli_chr06 | 34164836                | CC                              | AA                | 1946448916               |
| SNP_P3_77730_34164845 | NC_021165.1    | Ca_kabuli_chr06 | 34164845                | TT                              | CC                | 1946448918               |
| SNP_P3_77731_34164856 | NC_021165.1    | Ca_kabuli_chr06 | 34164856                | TT                              | AA                | 1946448919               |
| SNP_P3_77732_34164875 | NC_021165.1    | Ca_kabuli_chr06 | 34164875                | GG                              | AA                | 1946448921               |
| SNP_P3_77733_34164899 | NC_021165.1    | Ca_kabuli_chr06 | 34164899                | TT                              | AA                | 1946448922               |
| SNP_P3_77734_34164922 | NC_021165.1    | Ca_kabuli_chr06 | 34164922                | CC                              | AA                | 1946448923               |
| SNP_P3_77735_34164985 | NC_021165.1    | Ca_kabuli_chr06 | 34164985                | TT                              | CC                | 1946448925               |
| SNP_P3_77737_34190965 | NC_021165.1    | Ca_kabuli_chr06 | 34190965                | GG                              | AA                | 1946448926               |
| SNP_P3_77738_34211756 | NC_021165.1    | Ca_kabuli_chr06 | 34211756                | TT                              | CC                | 1946448928               |
| SNP_P3_77739_34211809 | NC_021165.1    | Ca_kabuli_chr06 | 34211809                | GG                              | AA                | 1946448929               |
| SNP_P3_77740_34265286 | NC_021165.1    | Ca_kabuli_chr06 | 34265286                | TT                              | CC                | 1946448931               |
| SNP_P3_77741_34265299 | NC_021165.1    | Ca_kabuli_chr06 | 34265299                | AA                              | GG                | 1946448932               |
| SNP_P3_77742_34288127 | NC_021165.1    | Ca_kabuli_chr06 | 34288127                | GG                              | TT                | 1946448934               |

| SNPs IDs              | Chromosome IDs | Chromosomes     | Physical positions (bp) | CDC Frontier (Reference genome) | (Pusa 256 & HPNB) | NCBI SNPdb Accession IDs |
|-----------------------|----------------|-----------------|-------------------------|---------------------------------|-------------------|--------------------------|
| SNP_P3_77743_34288871 | NC_021165.1    | Ca_kabuli_chr06 | 34288871                | AA                              | TT                | 1946448935               |
| SNP_P3_77744_34288873 | NC_021165.1    | Ca_kabuli_chr06 | 34288873                | GG                              | TT                | 1946448937               |
| SNP_P3_77745_34288884 | NC_021165.1    | Ca_kabuli_chr06 | 34288884                | TT                              | CC                | 1946448938               |
| SNP_P3_77746_34289797 | NC_021165.1    | Ca_kabuli_chr06 | 34289797                | TT                              | CC                | 1946448940               |
| SNP_P3_77747_34307153 | NC_021165.1    | Ca_kabuli_chr06 | 34307153                | CC                              | TT                | 1946448942               |
| SNP_P3_77748_34337927 | NC_021165.1    | Ca_kabuli_chr06 | 34337927                | GG                              | AA                | 1946448943               |
| SNP_P3_77749_34340133 | NC_021165.1    | Ca_kabuli_chr06 | 34340133                | TT                              | CC                | 1946448944               |
| SNP_P3_77750_34396196 | NC_021165.1    | Ca_kabuli_chr06 | 34396196                | GG                              | AA                | 1946448946               |
| SNP_P3_77751_34400048 | NC_021165.1    | Ca_kabuli_chr06 | 34400048                | AA                              | GG                | 1946448947               |
| SNP_P3_77752_34439378 | NC_021165.1    | Ca_kabuli_chr06 | 34439378                | GG                              | AA                | 1946448949               |
| SNP_P3_77753_34469686 | NC_021165.1    | Ca_kabuli_chr06 | 34469686                | AA                              | GG                | 1946448950               |
| SNP_P3_77754_34469695 | NC_021165.1    | Ca_kabuli_chr06 | 34469695                | CC                              | AA                | 1946448952               |
| SNP_P3_77755_34473494 | NC_021165.1    | Ca_kabuli_chr06 | 34473494                | CC                              | TT                | 1946448953               |
| SNP_P3_77756_34474786 | NC_021165.1    | Ca_kabuli_chr06 | 34474786                | AA                              | CC                | 1946448954               |
| SNP_P3_77757_34503833 | NC_021165.1    | Ca_kabuli_chr06 | 34503833                | GG                              | AA                | 1946448956               |
| SNP_P3_77758_34528851 | NC_021165.1    | Ca_kabuli_chr06 | 34528851                | AA                              | GG                | 1946448958               |
| SNP_P3_77759_34553892 | NC_021165.1    | Ca_kabuli_chr06 | 34553892                | AA                              | GG                | 1946448959               |
| SNP_P3_77760_34564381 | NC_021165.1    | Ca_kabuli_chr06 | 34564381                | AA                              | GG                | 1946448961               |
| SNP_P3_77761_34564408 | NC_021165.1    | Ca_kabuli_chr06 | 34564408                | TT                              | AA                | 1946448962               |
| SNP_P3_77762_34564592 | NC_021165.1    | Ca_kabuli_chr06 | 34564592                | AA                              | GG                | 1946448964               |
| SNP_P3_77763_34567404 | NC_021165.1    | Ca_kabuli_chr06 | 34567404                | CC                              | TT                | 1946448965               |
| SNP_P3_77764_34567840 | NC_021165.1    | Ca_kabuli_chr06 | 34567840                | AA                              | TT                | 1946448967               |
| SNP_P3_77765_34567868 | NC_021165.1    | Ca_kabuli_chr06 | 34567868                | AA                              | GG                | 1946448969               |
| SNP_P3_77766_34567915 | NC_021165.1    | Ca_kabuli_chr06 | 34567915                | TT                              | AA                | 1946448970               |
| SNP_P3_77767_34568405 | NC_021165.1    | Ca_kabuli_chr06 | 34568405                | CC                              | TT                | 1946448971               |
| SNP_P3_77768_34568411 | NC_021165.1    | Ca_kabuli_chr06 | 34568411                | AA                              | CC                | 1946448973               |
| SNP_P3_77769_34568424 | NC_021165.1    | Ca_kabuli_chr06 | 34568424                | AA                              | GG                | 1946448974               |
| SNP_P3_77770_34568840 | NC_021165.1    | Ca_kabuli_chr06 | 34568840                | TT                              | GG                | 1946448976               |
| SNP_P3_77771_34569792 | NC_021165.1    | Ca_kabuli_chr06 | 34569792                | TT                              | CC                | 1946448977               |
| SNP_P3_77772_34570076 | NC_021165.1    | Ca_kabuli_chr06 | 34570076                | TT                              | CC                | 1946448979               |
| SNP_P3_77773_34570110 | NC_021165.1    | Ca_kabuli_chr06 | 34570110                | AA                              | TT                | 1946448980               |
| SNP_P3_77775_34570354 | NC_021165.1    | Ca_kabuli_chr06 | 34570354                | GG                              | AA                | 1946448982               |
| SNP_P3_77776_34570671 | NC_021165.1    | Ca_kabuli_chr06 | 34570671                | AA                              | CC                | 1946448983               |
| SNP_P3_77777_34570856 | NC_021165.1    | Ca_kabuli_chr06 | 34570856                | AA                              | GG                | 1946448985               |
| SNP_P3_77778_34570889 | NC_021165.1    | Ca_kabuli_chr06 | 34570889                | CC                              | AA                | 1946448986               |
| SNP_P3_77779_34570890 | NC_021165.1    | Ca_kabuli_chr06 | 34570890                | GG                              | AA                | 1946448987               |
| SNP_P3_77780_34570892 | NC_021165.1    | Ca_kabuli_chr06 | 34570892                | TT                              | CC                | 1946448989               |
| SNP_P3_77781_34570908 | NC_021165.1    | Ca_kabuli_chr06 | 34570908                | CC                              | AA                | 1946448990               |
| SNP_P3_77782_34605889 | NC_021165.1    | Ca_kabuli_chr06 | 34605889                | TT                              | AA                | 1946448992               |
| SNP_P3_77783_34614925 | NC_021165.1    | Ca_kabuli_chr06 | 34614925                | TT                              | CC                | 1946448993               |
| SNP_P3_77784_34614926 | NC_021165.1    | Ca_kabuli_chr06 | 34614926                | AA                              | GG                | 1946448995               |
| SNP_P3_77785_34631104 | NC_021165.1    | Ca_kabuli_chr06 | 34631104                | AA                              | TT                | 1946448997               |



| SNPs IDs              | Chromosome IDs | Chromosomes     | Physical positions (bp) | CDC Frontier (Reference genome) | (Pusa 256 & HPNB) | NCBI SNPdb Accession IDs |
|-----------------------|----------------|-----------------|-------------------------|---------------------------------|-------------------|--------------------------|
| SNP_P3_77786_34654334 | NC_021165.1    | Ca_kabuli_chr06 | 34654334                | TT                              | GG                | 1946448998               |
| SNP_P3_77787_34658236 | NC_021165.1    | Ca_kabuli_chr06 | 34658236                | GG                              | AA                | 1946449000               |
| SNP_P3_77788_34661581 | NC_021165.1    | Ca_kabuli_chr06 | 34661581                | GG                              | TT                | 1946449001               |
| SNP_P3_77789_34665073 | NC_021165.1    | Ca_kabuli_chr06 | 34665073                | AA                              | CC                | 1946449003               |
| SNP_P3_77790_34684202 | NC_021165.1    | Ca_kabuli_chr06 | 34684202                | GG                              | AA                | 1946449004               |
| SNP_P3_77791_34684298 | NC_021165.1    | Ca_kabuli_chr06 | 34684298                | CC                              | TT                | 1946449005               |
| SNP_P3_77792_34684384 | NC_021165.1    | Ca_kabuli_chr06 | 34684384                | TT                              | CC                | 1946449007               |
| SNP_P3_77793_34684473 | NC_021165.1    | Ca_kabuli_chr06 | 34684473                | TT                              | CC                | 1946449008               |
| SNP_P3_77795_34684663 | NC_021165.1    | Ca_kabuli_chr06 | 34684663                | TT                              | AA                | 1946449010               |
| SNP_P3_77796_34684675 | NC_021165.1    | Ca_kabuli_chr06 | 34684675                | AA                              | CC                | 1946449011               |
| SNP_P3_77797_34684676 | NC_021165.1    | Ca_kabuli_chr06 | 34684676                | AA                              | TT                | 1946449013               |
| SNP_P3_77798_34684677 | NC_021165.1    | Ca_kabuli_chr06 | 34684677                | CC                              | TT                | 1946449015               |
| SNP_P3_77799_34684679 | NC_021165.1    | Ca_kabuli_chr06 | 34684679                | TT                              | GG                | 1946449016               |
| SNP_P3_77800_34684722 | NC_021165.1    | Ca_kabuli_chr06 | 34684722                | TT                              | AA                | 1946449018               |
| SNP_P3_77801_34684727 | NC_021165.1    | Ca_kabuli_chr06 | 34684727                | AA                              | TT                | 1946449019               |
| SNP_P3_77802_34692237 | NC_021165.1    | Ca_kabuli_chr06 | 34692237                | TT                              | AA                | 1946449021               |
| SNP_P3_77804_34741446 | NC_021165.1    | Ca_kabuli_chr06 | 34741446                | AA                              | GG                | 1946449022               |
| SNP_P3_77805_34749827 | NC_021165.1    | Ca_kabuli_chr06 | 34749827                | CC                              | TT                | 1946449023               |
| SNP_P3_77806_34771996 | NC_021165.1    | Ca_kabuli_chr06 | 34771996                | AA                              | GG                | 1946449025               |
| SNP_P3_77807_34796729 | NC_021165.1    | Ca_kabuli_chr06 | 34796729                | TT                              | GG                | 1946449026               |
| SNP_P3_77808_34799512 | NC_021165.1    | Ca_kabuli_chr06 | 34799512                | TT                              | GG                | 1946449028               |
| SNP_P3_77809_34799518 | NC_021165.1    | Ca_kabuli_chr06 | 34799518                | AA                              | GG                | 1946449029               |
| SNP_P3_77810_34799527 | NC_021165.1    | Ca_kabuli_chr06 | 34799527                | AA                              | GG                | 1946449031               |
| SNP_P3_77811_34799538 | NC_021165.1    | Ca_kabuli_chr06 | 34799538                | CC                              | TT                | 1946449032               |
| SNP_P3_77812_34799564 | NC_021165.1    | Ca_kabuli_chr06 | 34799564                | AA                              | GG                | 1946449034               |
| SNP_P3_77813_34799938 | NC_021165.1    | Ca_kabuli_chr06 | 34799938                | AA                              | GG                | 1946449035               |
| SNP_P3_77814_34799954 | NC_021165.1    | Ca_kabuli_chr06 | 34799954                | GG                              | AA                | 1946449037               |
| SNP_P3_77815_34809556 | NC_021165.1    | Ca_kabuli_chr06 | 34809556                | AA                              | GG                | 1946449038               |
| SNP_P3_77816_34809802 | NC_021165.1    | Ca_kabuli_chr06 | 34809802                | AA                              | TT                | 1946449040               |
| SNP_P3_77817_34809850 | NC_021165.1    | Ca_kabuli_chr06 | 34809850                | CC                              | TT                | 1946449042               |
| SNP_P3_77818_34809945 | NC_021165.1    | Ca_kabuli_chr06 | 34809945                | TT                              | GG                | 1946449043               |
| SNP_P3_77819_34810092 | NC_021165.1    | Ca_kabuli_chr06 | 34810092                | GG                              | CC                | 1946449044               |
| SNP_P3_77820_34810098 | NC_021165.1    | Ca_kabuli_chr06 | 34810098                | TT                              | CC                | 1946449046               |
| SNP_P3_77821_34810112 | NC_021165.1    | Ca_kabuli_chr06 | 34810112                | GG                              | AA                | 1946449047               |
| SNP_P3_77822_34810125 | NC_021165.1    | Ca_kabuli_chr06 | 34810125                | GG                              | TT                | 1946449049               |
| SNP_P3_77823_34810189 | NC_021165.1    | Ca_kabuli_chr06 | 34810189                | CC                              | TT                | 1946449050               |
| SNP_P3_77824_34810217 | NC_021165.1    | Ca_kabuli_chr06 | 34810217                | GG                              | CC                | 1946449052               |
| SNP_P3_77825_34810227 | NC_021165.1    | Ca_kabuli_chr06 | 34810227                | CC                              | AA                | 1946449053               |
| SNP_P3_77826_34810246 | NC_021165.1    | Ca_kabuli_chr06 | 34810246                | AA                              | GG                | 1946449055               |
| SNP_P3_77827_34810502 | NC_021165.1    | Ca_kabuli_chr06 | 34810502                | CC                              | TT                | 1946449056               |
| SNP_P3_77828_34811448 | NC_021165.1    | Ca_kabuli_chr06 | 34811448                | AA                              | GG                | 1946449057               |
| SNP_P3_77829_34814656 | NC_021165.1    | Ca_kabuli_chr06 | 34814656                | AA                              | GG                | 1946449059               |

| SNPs IDs              | Chromosome IDs | Chromosomes     | Physical positions (bp) | CDC Frontier (Reference genome) | (Pusa 256 & HPNB) | NCBI SNPdb Accession IDs |
|-----------------------|----------------|-----------------|-------------------------|---------------------------------|-------------------|--------------------------|
| SNP_P3_77830_34814693 | NC_021165.1    | Ca_kabuli_chr06 | 34814693                | TT                              | CC                | 1946449060               |
| SNP_P3_77832_34816146 | NC_021165.1    | Ca_kabuli_chr06 | 34816146                | GG                              | AA                | 1946449062               |
| SNP_P3_77833_34819287 | NC_021165.1    | Ca_kabuli_chr06 | 34819287                | TT                              | AA                | 1946449063               |
| SNP_P3_77834_34820420 | NC_021165.1    | Ca_kabuli_chr06 | 34820420                | AA                              | TT                | 1946449065               |
| SNP_P3_77835_34820421 | NC_021165.1    | Ca_kabuli_chr06 | 34820421                | CC                              | TT                | 1946449066               |
| SNP_P3_77836_34820422 | NC_021165.1    | Ca_kabuli_chr06 | 34820422                | AA                              | TT                | 1946449068               |
| SNP_P3_77837_34820424 | NC_021165.1    | Ca_kabuli_chr06 | 34820424                | TT                              | GG                | 1946449070               |
| SNP_P3_77840_34841377 | NC_021165.1    | Ca_kabuli_chr06 | 34841377                | AA                              | GG                | 1946449071               |
| SNP_P3_77841_34843624 | NC_021165.1    | Ca_kabuli_chr06 | 34843624                | CC                              | TT                | 1946449073               |
| SNP_P3_77842_34851314 | NC_021165.1    | Ca_kabuli_chr06 | 34851314                | TT                              | AA                | 1946449074               |
| SNP_P3_77843_34851322 | NC_021165.1    | Ca_kabuli_chr06 | 34851322                | TT                              | CC                | 1946449076               |
| SNP_P3_77846_34860839 | NC_021165.1    | Ca_kabuli_chr06 | 34860839                | CC                              | TT                | 1946449077               |
| SNP_P3_77847_34862527 | NC_021165.1    | Ca_kabuli_chr06 | 34862527                | GG                              | TT                | 1946449078               |
| SNP_P3_77848_34866357 | NC_021165.1    | Ca_kabuli_chr06 | 34866357                | TT                              | AA                | 1946449080               |
| SNP_P3_77849_34866397 | NC_021165.1    | Ca_kabuli_chr06 | 34866397                | GG                              | TT                | 1946449081               |
| SNP_P3_77850_34866406 | NC_021165.1    | Ca_kabuli_chr06 | 34866406                | AA                              | TT                | 1946449083               |
| SNP_P3_77851_34869402 | NC_021165.1    | Ca_kabuli_chr06 | 34869402                | GG                              | TT                | 1946449084               |
| SNP_P3_77852_34871227 | NC_021165.1    | Ca_kabuli_chr06 | 34871227                | GG                              | TT                | 1946449086               |
| SNP_P3_77853_34874846 | NC_021165.1    | Ca_kabuli_chr06 | 34874846                | TT                              | AA                | 1946449087               |
| SNP_P3_77854_34947963 | NC_021165.1    | Ca_kabuli_chr06 | 34947963                | GG                              | TT                | 1946449089               |
| SNP_P3_77855_34956453 | NC_021165.1    | Ca_kabuli_chr06 | 34956453                | AA                              | CC                | 1946449090               |
| SNP_P3_77856_34956521 | NC_021165.1    | Ca_kabuli_chr06 | 34956521                | CC                              | GG                | 1946449092               |
| SNP_P3_77857_34956554 | NC_021165.1    | Ca_kabuli_chr06 | 34956554                | AA                              | GG                | 1946449093               |
| SNP_P3_77858_34993580 | NC_021165.1    | Ca_kabuli_chr06 | 34993580                | GG                              | AA                | 1946449095               |
| SNP_P3_77859_35043371 | NC_021165.1    | Ca_kabuli_chr06 | 35043371                | GG                              | AA                | 1946449096               |
| SNP_P3_77860_35059448 | NC_021165.1    | Ca_kabuli_chr06 | 35059448                | TT                              | GG                | 1946449098               |
| SNP_P3_77861_35061859 | NC_021165.1    | Ca_kabuli_chr06 | 35061859                | CC                              | GG                | 1946449099               |
| SNP_P3_77863_35096644 | NC_021165.1    | Ca_kabuli_chr06 | 35096644                | CC                              | AA                | 1946449101               |
| SNP_P3_77864_35113806 | NC_021165.1    | Ca_kabuli_chr06 | 35113806                | AA                              | CC                | 1946449102               |
| SNP_P3_77865_35161466 | NC_021165.1    | Ca_kabuli_chr06 | 35161466                | AA                              | GG                | 1946449104               |
| SNP_P3_77866_35161519 | NC_021165.1    | Ca_kabuli_chr06 | 35161519                | AA                              | GG                | 1946449105               |
| SNP_P3_77867_35161598 | NC_021165.1    | Ca_kabuli_chr06 | 35161598                | AA                              | CC                | 1946449106               |
| SNP_P3_77868_35161619 | NC_021165.1    | Ca_kabuli_chr06 | 35161619                | AA                              | GG                | 1946449108               |
| SNP_P3_77869_35161698 | NC_021165.1    | Ca_kabuli_chr06 | 35161698                | TT                              | CC                | 1946449109               |
| SNP_P3_77870_35161771 | NC_021165.1    | Ca_kabuli_chr06 | 35161771                | TT                              | CC                | 1946449111               |
| SNP_P3_77871_35161784 | NC_021165.1    | Ca_kabuli_chr06 | 35161784                | CC                              | TT                | 1946449112               |
| SNP_P3_77872_35161789 | NC_021165.1    | Ca_kabuli_chr06 | 35161789                | AA                              | GG                | 1946449114               |
| SNP_P3_77874_35161839 | NC_021165.1    | Ca_kabuli_chr06 | 35161839                | GG                              | AA                | 1946449115               |
| SNP_P3_77875_35166408 | NC_021165.1    | Ca_kabuli_chr06 | 35166408                | GG                              | AA                | 1946449116               |
| SNP_P3_77876_35167215 | NC_021165.1    | Ca_kabuli_chr06 | 35167215                | AA                              | GG                | 1946449118               |
| SNP_P3_77877_35167530 | NC_021165.1    | Ca_kabuli_chr06 | 35167530                | AA                              | GG                | 1946449119               |
| SNP_P3_77878_35167898 | NC_021165.1    | Ca_kabuli_chr06 | 35167898                | GG                              | TT                | 1946449121               |

| SNPs IDs              | Chromosome IDs | Chromosomes     | Physical positions (bp) | CDC Frontier (Reference genome) | (Pusa 256 & HPNB) | NCBI SNPdb Accession IDs |
|-----------------------|----------------|-----------------|-------------------------|---------------------------------|-------------------|--------------------------|
| SNP_P3_77879_35168288 | NC_021165.1    | Ca_kabuli_chr06 | 35168288                | TT                              | CC                | 1946449122               |
| SNP_P3_77880_35168290 | NC_021165.1    | Ca_kabuli_chr06 | 35168290                | AA                              | GG                | 1946449124               |
| SNP_P3_77881_35168347 | NC_021165.1    | Ca_kabuli_chr06 | 35168347                | AA                              | TT                | 1946449125               |
| SNP_P3_77882_35168395 | NC_021165.1    | Ca_kabuli_chr06 | 35168395                | AA                              | GG                | 1946449126               |
| SNP_P3_77883_35168408 | NC_021165.1    | Ca_kabuli_chr06 | 35168408                | AA                              | GG                | 1946449128               |
| SNP_P3_77884_35169428 | NC_021165.1    | Ca_kabuli_chr06 | 35169428                | CC                              | AA                | 1946449130               |
| SNP_P3_77887_35206687 | NC_021165.1    | Ca_kabuli_chr06 | 35206687                | TT                              | GG                | 1946449131               |
| SNP_P3_77888_35228466 | NC_021165.1    | Ca_kabuli_chr06 | 35228466                | GG                              | TT                | 1946449133               |
| SNP_P3_77889_35228506 | NC_021165.1    | Ca_kabuli_chr06 | 35228506                | AA                              | TT                | 1946449134               |
| SNP_P3_77890_35228507 | NC_021165.1    | Ca_kabuli_chr06 | 35228507                | TT                              | GG                | 1946449135               |
| SNP_P3_77891_35228508 | NC_021165.1    | Ca_kabuli_chr06 | 35228508                | TT                              | AA                | 1946449137               |
| SNP_P3_77892_35291741 | NC_021165.1    | Ca_kabuli_chr06 | 35291741                | AA                              | GG                | 1946449138               |
| SNP_P3_77893_35301888 | NC_021165.1    | Ca_kabuli_chr06 | 35301888                | AA                              | GG                | 1946449140               |
| SNP_P3_77894_35316983 | NC_021165.1    | Ca_kabuli_chr06 | 35316983                | GG                              | AA                | 1946449141               |
| SNP_P3_77895_35322369 | NC_021165.1    | Ca_kabuli_chr06 | 35322369                | TT                              | AA                | 1946449142               |
| SNP_P3_77897_35354962 | NC_021165.1    | Ca_kabuli_chr06 | 35354962                | AA                              | GG                | 1946449144               |
| SNP_P3_77898_35354964 | NC_021165.1    | Ca_kabuli_chr06 | 35354964                | AA                              | TT                | 1946449145               |
| SNP_P3_77899_35367215 | NC_021165.1    | Ca_kabuli_chr06 | 35367215                | GG                              | TT                | 1946449147               |
| SNP_P3_77900_35371947 | NC_021165.1    | Ca_kabuli_chr06 | 35371947                | CC                              | TT                | 1946449148               |
| SNP_P3_77902_35388427 | NC_021165.1    | Ca_kabuli_chr06 | 35388427                | AA                              | TT                | 1946449149               |
| SNP_P3_77903_35389758 | NC_021165.1    | Ca_kabuli_chr06 | 35389758                | GG                              | CC                | 1946449151               |
| SNP_P3_77905_35399850 | NC_021165.1    | Ca_kabuli_chr06 | 35399850                | TT                              | GG                | 1946449152               |
| SNP_P3_77906_35401375 | NC_021165.1    | Ca_kabuli_chr06 | 35401375                | TT                              | CC                | 1946449154               |
| SNP_P3_77907_35410116 | NC_021165.1    | Ca_kabuli_chr06 | 35410116                | AA                              | GG                | 1946449155               |
| SNP_P3_77908_35417731 | NC_021165.1    | Ca_kabuli_chr06 | 35417731                | CC                              | TT                | 1946449157               |
| SNP_P3_77909_35417820 | NC_021165.1    | Ca_kabuli_chr06 | 35417820                | AA                              | GG                | 1946449158               |
| SNP_P3_77910_35417875 | NC_021165.1    | Ca_kabuli_chr06 | 35417875                | GG                              | AA                | 1946449160               |
| SNP_P3_77911_35418117 | NC_021165.1    | Ca_kabuli_chr06 | 35418117                | TT                              | GG                | 1946449161               |
| SNP_P3_77912_35418121 | NC_021165.1    | Ca_kabuli_chr06 | 35418121                | GG                              | TT                | 1946449162               |
| SNP_P3_77913_35418405 | NC_021165.1    | Ca_kabuli_chr06 | 35418405                | CC                              | TT                | 1946449164               |
| SNP_P3_77914_35418449 | NC_021165.1    | Ca_kabuli_chr06 | 35418449                | CC                              | AA                | 1946449165               |
| SNP_P3_77915_35418966 | NC_021165.1    | Ca_kabuli_chr06 | 35418966                | CC                              | TT                | 1946449167               |
| SNP_P3_77916_35419729 | NC_021165.1    | Ca_kabuli_chr06 | 35419729                | CC                              | TT                | 1946449168               |
| SNP_P3_77917_35435545 | NC_021165.1    | Ca_kabuli_chr06 | 35435545                | AA                              | TT                | 1946449170               |
| SNP_P3_77918_35461535 | NC_021165.1    | Ca_kabuli_chr06 | 35461535                | TT                              | GG                | 1946449171               |
| SNP_P3_77919_35461886 | NC_021165.1    | Ca_kabuli_chr06 | 35461886                | GG                              | CC                | 1946449173               |
| SNP_P3_77920_35466442 | NC_021165.1    | Ca_kabuli_chr06 | 35466442                | GG                              | AA                | 1946449174               |
| SNP_P3_77921_35467447 | NC_021165.1    | Ca_kabuli_chr06 | 35467447                | TT                              | AA                | 1946449176               |
| SNP_P3_77922_35470362 | NC_021165.1    | Ca_kabuli_chr06 | 35470362                | TT                              | CC                | 1946449177               |
| SNP_P3_77923_35477739 | NC_021165.1    | Ca_kabuli_chr06 | 35477739                | AA                              | CC                | 1946449178               |
| SNP_P3_77924_35482177 | NC_021165.1    | Ca_kabuli_chr06 | 35482177                | CC                              | TT                | 1946449180               |
| SNP_P3_77925_35482179 | NC_021165.1    | Ca_kabuli_chr06 | 35482179                | AA                              | TT                | 1946449181               |

| SNPs IDs              | Chromosome IDs | Chromosomes     | Physical positions (bp) | CDC Frontier (Reference genome) | (Pusa 256 & HPNB) | NCBI SNPdb Accession IDs |
|-----------------------|----------------|-----------------|-------------------------|---------------------------------|-------------------|--------------------------|
| SNP_P3_77926_35543550 | NC_021165.1    | Ca_kabuli_chr06 | 35543550                | CC                              | TT                | 1946449183               |
| SNP_P3_77927_35559451 | NC_021165.1    | Ca_kabuli_chr06 | 35559451                | GG                              | AA                | 1946449184               |
| SNP_P3_77928_35573611 | NC_021165.1    | Ca_kabuli_chr06 | 35573611                | AA                              | GG                | 1946449186               |
| SNP_P3_77929_35595179 | NC_021165.1    | Ca_kabuli_chr06 | 35595179                | TT                              | CC                | 1946449187               |
| SNP_P3_77930_35596078 | NC_021165.1    | Ca_kabuli_chr06 | 35596078                | TT                              | AA                | 1946449189               |
| SNP_P3_77931_35608403 | NC_021165.1    | Ca_kabuli_chr06 | 35608403                | CC                              | TT                | 1946449191               |
| SNP_P3_77932_35608863 | NC_021165.1    | Ca_kabuli_chr06 | 35608863                | CC                              | GG                | 1946449192               |
| SNP_P3_77933_35608895 | NC_021165.1    | Ca_kabuli_chr06 | 35608895                | TT                              | CC                | 1946449194               |
| SNP_P3_77934_35611571 | NC_021165.1    | Ca_kabuli_chr06 | 35611571                | TT                              | GG                | 1946449195               |
| SNP_P3_77935_35611573 | NC_021165.1    | Ca_kabuli_chr06 | 35611573                | TT                              | CC                | 1946449197               |
| SNP_P3_77936_35611752 | NC_021165.1    | Ca_kabuli_chr06 | 35611752                | GG                              | AA                | 1946449198               |
| SNP_P3_77939_35648300 | NC_021165.1    | Ca_kabuli_chr06 | 35648300                | CC                              | TT                | 1946449199               |
| SNP_P3_77940_35655690 | NC_021165.1    | Ca_kabuli_chr06 | 35655690                | CC                              | TT                | 1946449201               |
| SNP_P3_77942_35703404 | NC_021165.1    | Ca_kabuli_chr06 | 35703404                | AA                              | CC                | 1946449202               |
| SNP_P3_77943_35703438 | NC_021165.1    | Ca_kabuli_chr06 | 35703438                | AA                              | CC                | 1946449204               |
| SNP_P3_77944_35703442 | NC_021165.1    | Ca_kabuli_chr06 | 35703442                | AA                              | GG                | 1946449205               |
| SNP_P3_77945_35703785 | NC_021165.1    | Ca_kabuli_chr06 | 35703785                | GG                              | AA                | 1946449207               |
| SNP_P3_77946_35703815 | NC_021165.1    | Ca_kabuli_chr06 | 35703815                | TT                              | AA                | 1946449208               |
| SNP_P3_77947_35703829 | NC_021165.1    | Ca_kabuli_chr06 | 35703829                | AA                              | CC                | 1946449210               |
| SNP_P3_77948_35703834 | NC_021165.1    | Ca_kabuli_chr06 | 35703834                | AA                              | GG                | 1946449211               |
| SNP_P3_77949_35703843 | NC_021165.1    | Ca_kabuli_chr06 | 35703843                | AA                              | GG                | 1946449212               |
| SNP_P3_77950_35704567 | NC_021165.1    | Ca_kabuli_chr06 | 35704567                | AA                              | GG                | 1946449214               |
| SNP_P3_77951_35704573 | NC_021165.1    | Ca_kabuli_chr06 | 35704573                | AA                              | TT                | 1946449215               |
| SNP_P3_77952_35704609 | NC_021165.1    | Ca_kabuli_chr06 | 35704609                | AA                              | CC                | 1946449217               |
| SNP_P3_77953_35704621 | NC_021165.1    | Ca_kabuli_chr06 | 35704621                | AA                              | GG                | 1946449218               |
| SNP_P3_77954_35704873 | NC_021165.1    | Ca_kabuli_chr06 | 35704873                | AA                              | GG                | 1946449220               |
| SNP_P3_77955_35704879 | NC_021165.1    | Ca_kabuli_chr06 | 35704879                | TT                              | GG                | 1946449221               |
| SNP_P3_77956_35704894 | NC_021165.1    | Ca_kabuli_chr06 | 35704894                | AA                              | GG                | 1946449223               |
| SNP_P3_77957_35704921 | NC_021165.1    | Ca_kabuli_chr06 | 35704921                | TT                              | CC                | 1946449224               |
| SNP_P3_77958_35704942 | NC_021165.1    | Ca_kabuli_chr06 | 35704942                | AA                              | GG                | 1946449226               |
| SNP_P3_77959_35704957 | NC_021165.1    | Ca_kabuli_chr06 | 35704957                | AA                              | GG                | 1946449227               |
| SNP_P3_77960_35704979 | NC_021165.1    | Ca_kabuli_chr06 | 35704979                | TT                              | CC                | 1946449229               |
| SNP_P3_77961_35704980 | NC_021165.1    | Ca_kabuli_chr06 | 35704980                | GG                              | CC                | 1946449230               |
| SNP_P3_77962_35705011 | NC_021165.1    | Ca_kabuli_chr06 | 35705011                | CC                              | TT                | 1946449232               |
| SNP_P3_77963_35705036 | NC_021165.1    | Ca_kabuli_chr06 | 35705036                | GG                              | TT                | 1946449233               |
| SNP_P3_77964_35705047 | NC_021165.1    | Ca_kabuli_chr06 | 35705047                | TT                              | CC                | 1946449234               |
| SNP_P3_77965_35705068 | NC_021165.1    | Ca_kabuli_chr06 | 35705068                | AA                              | GG                | 1946449236               |
| SNP_P3_77966_35705072 | NC_021165.1    | Ca_kabuli_chr06 | 35705072                | TT                              | GG                | 1946449237               |
| SNP_P3_77967_35705099 | NC_021165.1    | Ca_kabuli_chr06 | 35705099                | TT                              | CC                | 1946449239               |
| SNP_P3_77968_35705128 | NC_021165.1    | Ca_kabuli_chr06 | 35705128                | TT                              | GG                | 1946449240               |
| SNP_P3_77969_35705237 | NC_021165.1    | Ca_kabuli_chr06 | 35705237                | GG                              | TT                | 1946449242               |
| SNP_P3_77970_35705241 | NC_021165.1    | Ca_kabuli_chr06 | 35705241                | TT                              | CC                | 1946449243               |

| SNPs IDs              | Chromosome IDs | Chromosomes     | Physical positions (bp) | CDC Frontier (Reference genome) | (Pusa 256 & HPNB) | NCBI SNPdb Accession IDs |
|-----------------------|----------------|-----------------|-------------------------|---------------------------------|-------------------|--------------------------|
| SNP_P3_77971_35705258 | NC_021165.1    | Ca_kabuli_chr06 | 35705258                | TT                              | GG                | 1946449245               |
| SNP_P3_77972_35705278 | NC_021165.1    | Ca_kabuli_chr06 | 35705278                | AA                              | CC                | 1946449246               |
| SNP_P3_77973_35705287 | NC_021165.1    | Ca_kabuli_chr06 | 35705287                | CC                              | TT                | 1946449247               |
| SNP_P3_77974_35705301 | NC_021165.1    | Ca_kabuli_chr06 | 35705301                | TT                              | CC                | 1946449249               |
| SNP_P3_77975_35705311 | NC_021165.1    | Ca_kabuli_chr06 | 35705311                | GG                              | TT                | 1946449250               |
| SNP_P3_77976_35705390 | NC_021165.1    | Ca_kabuli_chr06 | 35705390                | TT                              | CC                | 1946449252               |
| SNP_P3_77977_35705491 | NC_021165.1    | Ca_kabuli_chr06 | 35705491                | TT                              | CC                | 1946449254               |
| SNP_P3_77978_35705521 | NC_021165.1    | Ca_kabuli_chr06 | 35705521                | AA                              | GG                | 1946449255               |
| SNP_P3_77979_35705550 | NC_021165.1    | Ca_kabuli_chr06 | 35705550                | AA                              | GG                | 1946449257               |
| SNP_P3_77980_35705611 | NC_021165.1    | Ca_kabuli_chr06 | 35705611                | AA                              | GG                | 1946449258               |
| SNP_P3_77981_35705842 | NC_021165.1    | Ca_kabuli_chr06 | 35705842                | AA                              | TT                | 1946449259               |
| SNP_P3_77982_35705843 | NC_021165.1    | Ca_kabuli_chr06 | 35705843                | TT                              | AA                | 1946449261               |
| SNP_P3_77983_35705866 | NC_021165.1    | Ca_kabuli_chr06 | 35705866                | TT                              | GG                | 1946449262               |
| SNP_P3_77984_35705873 | NC_021165.1    | Ca_kabuli_chr06 | 35705873                | AA                              | CC                | 1946449264               |
| SNP_P3_77985_35705878 | NC_021165.1    | Ca_kabuli_chr06 | 35705878                | AA                              | GG                | 1946449265               |
| SNP_P3_77987_35770518 | NC_021165.1    | Ca_kabuli_chr06 | 35770518                | AA                              | GG                | 1946449268               |
| SNP_P3_77988_35771404 | NC_021165.1    | Ca_kabuli_chr06 | 35771404                | CC                              | AA                | 1946449269               |
| SNP_P3_77990_35771466 | NC_021165.1    | Ca_kabuli_chr06 | 35771466                | GG                              | CC                | 1946449271               |
| SNP_P3_77991_35771851 | NC_021165.1    | Ca_kabuli_chr06 | 35771851                | AA                              | GG                | 1946449272               |
| SNP_P3_77992_35802500 | NC_021165.1    | Ca_kabuli_chr06 | 35802500                | TT                              | CC                | 1946449274               |
| SNP_P3_77993_35802502 | NC_021165.1    | Ca_kabuli_chr06 | 35802502                | GG                              | AA                | 1946449275               |
| SNP_P3_77995_35803368 | NC_021165.1    | Ca_kabuli_chr06 | 35803368                | GG                              | AA                | 1946449277               |
| SNP_P3_77998_35805862 | NC_021165.1    | Ca_kabuli_chr06 | 35805862                | TT                              | CC                | 1946449278               |
| SNP_P3_77999_35809324 | NC_021165.1    | Ca_kabuli_chr06 | 35809324                | AA                              | GG                | 1946449279               |
| SNP_P3_78000_35809448 | NC_021165.1    | Ca_kabuli_chr06 | 35809448                | TT                              | AA                | 1946449281               |
| SNP_P3_78001_35809507 | NC_021165.1    | Ca_kabuli_chr06 | 35809507                | CC                              | TT                | 1946449283               |
| SNP_P3_78003_35811042 | NC_021165.1    | Ca_kabuli_chr06 | 35811042                | TT                              | CC                | 1946449284               |
| SNP_P3_78004_35811506 | NC_021165.1    | Ca_kabuli_chr06 | 35811506                | TT                              | GG                | 1946449286               |
| SNP_P3_78005_35811859 | NC_021165.1    | Ca_kabuli_chr06 | 35811859                | CC                              | TT                | 1946449287               |
| SNP_P3_78006_35812804 | NC_021165.1    | Ca_kabuli_chr06 | 35812804                | AA                              | GG                | 1946449289               |
| SNP_P3_78007_35812913 | NC_021165.1    | Ca_kabuli_chr06 | 35812913                | GG                              | TT                | 1946449290               |
| SNP_P3_78008_35812959 | NC_021165.1    | Ca_kabuli_chr06 | 35812959                | AA                              | GG                | 1946449292               |
| SNP_P3_78009_35813310 | NC_021165.1    | Ca_kabuli_chr06 | 35813310                | GG                              | AA                | 1946449293               |
| SNP_P3_78010_35813316 | NC_021165.1    | Ca_kabuli_chr06 | 35813316                | GG                              | AA                | 1946449295               |
| SNP_P3_78011_35817077 | NC_021165.1    | Ca_kabuli_chr06 | 35817077                | AA                              | CC                | 1946449296               |
| SNP_P3_78012_35818704 | NC_021165.1    | Ca_kabuli_chr06 | 35818704                | AA                              | TT                | 1946449298               |
| SNP_P3_78013_35818709 | NC_021165.1    | Ca_kabuli_chr06 | 35818709                | AA                              | GG                | 1946449299               |
| SNP_P3_78014_35819427 | NC_021165.1    | Ca_kabuli_chr06 | 35819427                | GG                              | TT                | 1946449301               |
| SNP_P3_78015_35821704 | NC_021165.1    | Ca_kabuli_chr06 | 35821704                | CC                              | TT                | 1946449302               |
| SNP_P3_78016_35822353 | NC_021165.1    | Ca_kabuli_chr06 | 35822353                | TT                              | CC                | 1946449303               |
| SNP_P3_78017_35822606 | NC_021165.1    | Ca_kabuli_chr06 | 35822606                | CC                              | TT                | 1946449305               |
| SNP_P3_78018_35822673 | NC_021165.1    | Ca_kabuli_chr06 | 35822673                | TT                              | AA                | 1946449306               |

| SNPs IDs              | Chromosome IDs | Chromosomes     | Physical positions (bp) | CDC Frontier (Reference genome) | (Pusa 256 & HPNB) | NCBI SNPdb Accession IDs |
|-----------------------|----------------|-----------------|-------------------------|---------------------------------|-------------------|--------------------------|
| SNP_P3_78019_35822674 | NC_021165.1    | Ca_kabuli_chr06 | 35822674                | GG                              | TT                | 1946449308               |
| SNP_P3_78020_35831455 | NC_021165.1    | Ca_kabuli_chr06 | 35831455                | GG                              | AA                | 1946449309               |
| SNP_P3_78021_35831518 | NC_021165.1    | Ca_kabuli_chr06 | 35831518                | TT                              | CC                | 1946449311               |
| SNP_P3_78022_35831572 | NC_021165.1    | Ca_kabuli_chr06 | 35831572                | AA                              | TT                | 1946449313               |
| SNP_P3_78023_35831590 | NC_021165.1    | Ca_kabuli_chr06 | 35831590                | AA                              | CC                | 1946449314               |
| SNP_P3_78024_35831852 | NC_021165.1    | Ca_kabuli_chr06 | 35831852                | GG                              | AA                | 1946449316               |
| SNP_P3_78025_35831885 | NC_021165.1    | Ca_kabuli_chr06 | 35831885                | GG                              | AA                | 1946449317               |
| SNP_P3_78026_35831916 | NC_021165.1    | Ca_kabuli_chr06 | 35831916                | GG                              | CC                | 1946449319               |
| SNP_P3_78027_35831924 | NC_021165.1    | Ca_kabuli_chr06 | 35831924                | AA                              | TT                | 1946449320               |
| SNP_P3_78028_35831939 | NC_021165.1    | Ca_kabuli_chr06 | 35831939                | AA                              | GG                | 1946449322               |
| SNP_P3_78029_35831976 | NC_021165.1    | Ca_kabuli_chr06 | 35831976                | TT                              | CC                | 1946449325               |
| SNP_P3_78030_35832056 | NC_021165.1    | Ca_kabuli_chr06 | 35832056                | CC                              | GG                | 1946449326               |
| SNP_P3_78031_35832075 | NC_021165.1    | Ca_kabuli_chr06 | 35832075                | AA                              | GG                | 1946449328               |
| SNP_P3_78033_35832154 | NC_021165.1    | Ca_kabuli_chr06 | 35832154                | CC                              | GG                | 1946449329               |
| SNP_P3_78034_35832193 | NC_021165.1    | Ca_kabuli_chr06 | 35832193                | AA                              | GG                | 1946449330               |
| SNP_P3_78035_35883042 | NC_021165.1    | Ca_kabuli_chr06 | 35883042                | TT                              | GG                | 1946449332               |
| SNP_P3_78036_35920661 | NC_021165.1    | Ca_kabuli_chr06 | 35920661                | GG                              | CC                | 1946449333               |
| SNP_P3_78037_35922038 | NC_021165.1    | Ca_kabuli_chr06 | 35922038                | AA                              | GG                | 1946449335               |
| SNP_P3_78038_35922140 | NC_021165.1    | Ca_kabuli_chr06 | 35922140                | AA                              | GG                | 1946449337               |
| SNP_P3_78039_35922310 | NC_021165.1    | Ca_kabuli_chr06 | 35922310                | TT                              | GG                | 1946449338               |
| SNP_P3_78040_35922311 | NC_021165.1    | Ca_kabuli_chr06 | 35922311                | TT                              | CC                | 1946449339               |
| SNP_P3_78041_35922330 | NC_021165.1    | Ca_kabuli_chr06 | 35922330                | AA                              | GG                | 1946449341               |
| SNP_P3_78042_35922358 | NC_021165.1    | Ca_kabuli_chr06 | 35922358                | AA                              | CC                | 1946449342               |
| SNP_P3_78044_35922435 | NC_021165.1    | Ca_kabuli_chr06 | 35922435                | AA                              | GG                | 1946449344               |
| SNP_P3_78045_35922450 | NC_021165.1    | Ca_kabuli_chr06 | 35922450                | AA                              | GG                | 1946449345               |
| SNP_P3_78046_35923471 | NC_021165.1    | Ca_kabuli_chr06 | 35923471                | AA                              | CC                | 1946449347               |
| SNP_P3_78047_35947816 | NC_021165.1    | Ca_kabuli_chr06 | 35947816                | CC                              | TT                | 1946449348               |
| SNP_P3_78049_35998785 | NC_021165.1    | Ca_kabuli_chr06 | 35998785                | TT                              | AA                | 1946449350               |
| SNP_P3_78050_35998985 | NC_021165.1    | Ca_kabuli_chr06 | 35998985                | GG                              | TT                | 1946449351               |
| SNP_P3_78051_35999053 | NC_021165.1    | Ca_kabuli_chr06 | 35999053                | GG                              | CC                | 1946449352               |
| SNP_P3_78052_35999509 | NC_021165.1    | Ca_kabuli_chr06 | 35999509                | GG                              | AA                | 1946449354               |
| SNP_P3_78053_36000241 | NC_021165.1    | Ca_kabuli_chr06 | 36000241                | TT                              | AA                | 1946449355               |
| SNP_P3_78054_36000742 | NC_021165.1    | Ca_kabuli_chr06 | 36000742                | CC                              | TT                | 1946449357               |
| SNP_P3_78055_36000783 | NC_021165.1    | Ca_kabuli_chr06 | 36000783                | GG                              | AA                | 1946449358               |
| SNP_P3_78056_36000791 | NC_021165.1    | Ca_kabuli_chr06 | 36000791                | GG                              | TT                | 1946449360               |
| SNP_P3_78057_36000807 | NC_021165.1    | Ca_kabuli_chr06 | 36000807                | AA                              | GG                | 1946449361               |
| SNP_P3_78058_36005814 | NC_021165.1    | Ca_kabuli_chr06 | 36005814                | AA                              | TT                | 1946449363               |
| SNP_P3_78059_36006123 | NC_021165.1    | Ca_kabuli_chr06 | 36006123                | AA                              | GG                | 1946449365               |
| SNP_P3_78060_36029894 | NC_021165.1    | Ca_kabuli_chr06 | 36029894                | AA                              | GG                | 1946449366               |
| SNP_P3_78062_36032729 | NC_021165.1    | Ca_kabuli_chr06 | 36032729                | AA                              | TT                | 1946449368               |
| SNP_P3_78063_36033100 | NC_021165.1    | Ca_kabuli_chr06 | 36033100                | CC                              | TT                | 1946449369               |
| SNP_P3_78064_36038360 | NC_021165.1    | Ca_kabuli_chr06 | 36038360                | TT                              | CC                | 1946449370               |

| SNPs IDs              | Chromosome IDs | Chromosomes     | Physical positions (bp) | CDC Frontier (Reference genome) | (Pusa 256 & HPNB) | NCBI SNPdb Accession IDs |
|-----------------------|----------------|-----------------|-------------------------|---------------------------------|-------------------|--------------------------|
| SNP_P3_78066_36039680 | NC_021165.1    | Ca_kabuli_chr06 | 36039680                | AA                              | CC                | 1946449372               |
| SNP_P3_78067_36060679 | NC_021165.1    | Ca_kabuli_chr06 | 36060679                | GG                              | AA                | 1946449373               |
| SNP_P3_78068_36062115 | NC_021165.1    | Ca_kabuli_chr06 | 36062115                | TT                              | GG                | 1946449375               |
| SNP_P3_78069_36062128 | NC_021165.1    | Ca_kabuli_chr06 | 36062128                | CC                              | TT                | 1946449376               |
| SNP_P3_78070_36062140 | NC_021165.1    | Ca_kabuli_chr06 | 36062140                | AA                              | TT                | 1946449378               |
| SNP_P3_78071_36062149 | NC_021165.1    | Ca_kabuli_chr06 | 36062149                | TT                              | CC                | 1946449379               |
| SNP_P3_78072_36067849 | NC_021165.1    | Ca_kabuli_chr06 | 36067849                | CC                              | GG                | 1946449381               |
| SNP_P3_78073_36068686 | NC_021165.1    | Ca_kabuli_chr06 | 36068686                | AA                              | GG                | 1946449382               |
| SNP_P3_78074_36070365 | NC_021165.1    | Ca_kabuli_chr06 | 36070365                | AA                              | GG                | 1946449384               |
| SNP_P3_78075_36070372 | NC_021165.1    | Ca_kabuli_chr06 | 36070372                | TT                              | CC                | 1946449385               |
| SNP_P3_78076_36070397 | NC_021165.1    | Ca_kabuli_chr06 | 36070397                | TT                              | GG                | 1946449387               |
| SNP_P3_78077_36081280 | NC_021165.1    | Ca_kabuli_chr06 | 36081280                | TT                              | AA                | 1946449388               |
| SNP_P3_78078_36083697 | NC_021165.1    | Ca_kabuli_chr06 | 36083697                | TT                              | CC                | 1946449389               |
| SNP_P3_78079_36083768 | NC_021165.1    | Ca_kabuli_chr06 | 36083768                | AA                              | TT                | 1946449391               |
| SNP_P3_78080_36083781 | NC_021165.1    | Ca_kabuli_chr06 | 36083781                | TT                              | CC                | 1946449392               |
| SNP_P3_78081_36083851 | NC_021165.1    | Ca_kabuli_chr06 | 36083851                | TT                              | GG                | 1946449394               |
| SNP_P3_78082_36083853 | NC_021165.1    | Ca_kabuli_chr06 | 36083853                | GG                              | AA                | 1946449396               |
| SNP_P3_78083_36083872 | NC_021165.1    | Ca_kabuli_chr06 | 36083872                | AA                              | GG                | 1946449397               |
| SNP_P3_78084_36083903 | NC_021165.1    | Ca_kabuli_chr06 | 36083903                | CC                              | TT                | 1946449399               |
| SNP_P3_78085_36083934 | NC_021165.1    | Ca_kabuli_chr06 | 36083934                | AA                              | GG                | 1946449400               |
| SNP_P3_78086_36085666 | NC_021165.1    | Ca_kabuli_chr06 | 36085666                | TT                              | GG                | 1946449402               |
| SNP_P3_78087_36176420 | NC_021165.1    | Ca_kabuli_chr06 | 36176420                | CC                              | AA                | 1946449403               |
| SNP_P3_78088_36221429 | NC_021165.1    | Ca_kabuli_chr06 | 36221429                | AA                              | CC                | 1946449405               |
| SNP_P3_78089_36223655 | NC_021165.1    | Ca_kabuli_chr06 | 36223655                | TT                              | CC                | 1946449406               |
| SNP_P3_78090_36235186 | NC_021165.1    | Ca_kabuli_chr06 | 36235186                | GG                              | AA                | 1946449407               |
| SNP_P3_78091_36246468 | NC_021165.1    | Ca_kabuli_chr06 | 36246468                | AA                              | GG                | 1946449409               |
| SNP_P3_78092_36246471 | NC_021165.1    | Ca_kabuli_chr06 | 36246471                | TT                              | GG                | 1946449410               |
| SNP_P3_78093_36246507 | NC_021165.1    | Ca_kabuli_chr06 | 36246507                | GG                              | AA                | 1946449412               |
| SNP_P3_78094_36246516 | NC_021165.1    | Ca_kabuli_chr06 | 36246516                | AA                              | GG                | 1946449413               |
| SNP_P3_78095_36246544 | NC_021165.1    | Ca_kabuli_chr06 | 36246544                | TT                              | CC                | 1946449415               |
| SNP_P3_78097_36296595 | NC_021165.1    | Ca_kabuli_chr06 | 36296595                | AA                              | GG                | 1946449416               |
| SNP_P3_78098_36337667 | NC_021165.1    | Ca_kabuli_chr06 | 36337667                | AA                              | GG                | 1946449418               |
| SNP_P3_78099_36347195 | NC_021165.1    | Ca_kabuli_chr06 | 36347195                | AA                              | GG                | 1946449419               |
| SNP_P3_78100_36400883 | NC_021165.1    | Ca_kabuli_chr06 | 36400883                | CC                              | GG                | 1946449421               |
| SNP_P3_78101_36400896 | NC_021165.1    | Ca_kabuli_chr06 | 36400896                | AA                              | GG                | 1946449423               |
| SNP_P3_78102_36406262 | NC_021165.1    | Ca_kabuli_chr06 | 36406262                | CC                              | TT                | 1946449424               |
| SNP_P3_78103_36406275 | NC_021165.1    | Ca_kabuli_chr06 | 36406275                | AA                              | GG                | 1946449426               |
| SNP_P3_78104_36412118 | NC_021165.1    | Ca_kabuli_chr06 | 36412118                | TT                              | CC                | 1946449427               |
| SNP_P3_78105_36412181 | NC_021165.1    | Ca_kabuli_chr06 | 36412181                | GG                              | AA                | 1946449428               |
| SNP_P3_78106_36412231 | NC_021165.1    | Ca_kabuli_chr06 | 36412231                | TT                              | CC                | 1946449430               |
| SNP_P3_78107_36412269 | NC_021165.1    | Ca_kabuli_chr06 | 36412269                | AA                              | GG                | 1946449431               |
| SNP_P3_78108_36450470 | NC_021165.1    | Ca_kabuli_chr06 | 36450470                | TT                              | CC                | 1946449433               |

| SNPs IDs              | Chromosome IDs | Chromosomes     | Physical positions (bp) | CDC Frontier (Reference genome) | (Pusa 256 & HPNB) | NCBI SNPdb Accession IDs |
|-----------------------|----------------|-----------------|-------------------------|---------------------------------|-------------------|--------------------------|
| SNP_P3_78109_36450508 | NC_021165.1    | Ca_kabuli_chr06 | 36450508                | GG                              | AA                | 1946449434               |
| SNP_P3_78110_36450821 | NC_021165.1    | Ca_kabuli_chr06 | 36450821                | AA                              | GG                | 1946449436               |
| SNP_P3_78111_36487671 | NC_021165.1    | Ca_kabuli_chr06 | 36487671                | GG                              | AA                | 1946449437               |
| SNP_P3_78112_36487675 | NC_021165.1    | Ca_kabuli_chr06 | 36487675                | AA                              | GG                | 1946449439               |
| SNP_P3_78113_36487690 | NC_021165.1    | Ca_kabuli_chr06 | 36487690                | CC                              | TT                | 1946449440               |
| SNP_P3_78114_36487986 | NC_021165.1    | Ca_kabuli_chr06 | 36487986                | CC                              | AA                | 1946449441               |
| SNP_P3_78115_36487990 | NC_021165.1    | Ca_kabuli_chr06 | 36487990                | CC                              | TT                | 1946449443               |
| SNP_P3_78116_36490723 | NC_021165.1    | Ca_kabuli_chr06 | 36490723                | AA                              | TT                | 1946449444               |
| SNP_P3_78117_36490737 | NC_021165.1    | Ca_kabuli_chr06 | 36490737                | CC                              | TT                | 1946449446               |
| SNP_P3_78118_36490911 | NC_021165.1    | Ca_kabuli_chr06 | 36490911                | CC                              | AA                | 1946449447               |
| SNP_P3_78120_36491107 | NC_021165.1    | Ca_kabuli_chr06 | 36491107                | TT                              | CC                | 1946449449               |
| SNP_P3_78121_36491192 | NC_021165.1    | Ca_kabuli_chr06 | 36491192                | TT                              | CC                | 1946449451               |
| SNP_P3_78122_36491314 | NC_021165.1    | Ca_kabuli_chr06 | 36491314                | CC                              | TT                | 1946449452               |
| SNP_P3_78123_36491329 | NC_021165.1    | Ca_kabuli_chr06 | 36491329                | CC                              | GG                | 1946449454               |
| SNP_P3_78124_36491387 | NC_021165.1    | Ca_kabuli_chr06 | 36491387                | GG                              | AA                | 1946449455               |
| SNP_P3_78125_36491468 | NC_021165.1    | Ca_kabuli_chr06 | 36491468                | AA                              | GG                | 1946449457               |
| SNP_P3_78126_36495410 | NC_021165.1    | Ca_kabuli_chr06 | 36495410                | CC                              | TT                | 1946449458               |
| SNP_P3_78127_36495416 | NC_021165.1    | Ca_kabuli_chr06 | 36495416                | GG                              | AA                | 1946449460               |
| SNP_P3_78128_36497964 | NC_021165.1    | Ca_kabuli_chr06 | 36497964                | AA                              | GG                | 1946449461               |
| SNP_P3_78129_36497965 | NC_021165.1    | Ca_kabuli_chr06 | 36497965                | CC                              | TT                | 1946449463               |
| SNP_P3_78130_36497997 | NC_021165.1    | Ca_kabuli_chr06 | 36497997                | TT                              | CC                | 1946449464               |
| SNP_P3_78131_36513043 | NC_021165.1    | Ca_kabuli_chr06 | 36513043                | AA                              | TT                | 1946449466               |
| SNP_P3_78132_36514834 | NC_021165.1    | Ca_kabuli_chr06 | 36514834                | AA                              | CC                | 1946449467               |
| SNP_P3_78133_36518026 | NC_021165.1    | Ca_kabuli_chr06 | 36518026                | CC                              | AA                | 1946449469               |
| SNP_P3_78134_36518148 | NC_021165.1    | Ca_kabuli_chr06 | 36518148                | CC                              | AA                | 1946449470               |
| SNP_P3_78135_36518463 | NC_021165.1    | Ca_kabuli_chr06 | 36518463                | TT                              | CC                | 1946449471               |
| SNP_P3_78136_36518519 | NC_021165.1    | Ca_kabuli_chr06 | 36518519                | TT                              | CC                | 1946449473               |
| SNP_P3_78137_36518544 | NC_021165.1    | Ca_kabuli_chr06 | 36518544                | TT                              | CC                | 1946449474               |
| SNP_P3_78138_36518561 | NC_021165.1    | Ca_kabuli_chr06 | 36518561                | CC                              | AA                | 1946449476               |
| SNP_P3_78139_36518565 | NC_021165.1    | Ca_kabuli_chr06 | 36518565                | AA                              | GG                | 1946449477               |
| SNP_P3_78141_36555464 | NC_021165.1    | Ca_kabuli_chr06 | 36555464                | TT                              | CC                | 1946449479               |
| SNP_P3_78143_36559548 | NC_021165.1    | Ca_kabuli_chr06 | 36559548                | CC                              | AA                | 1946449480               |
| SNP_P3_78144_36559557 | NC_021165.1    | Ca_kabuli_chr06 | 36559557                | TT                              | AA                | 1946449482               |
| SNP_P3_78145_36568501 | NC_021165.1    | Ca_kabuli_chr06 | 36568501                | TT                              | GG                | 1946449484               |
| SNP_P3_78146_36568505 | NC_021165.1    | Ca_kabuli_chr06 | 36568505                | CC                              | TT                | 1946449485               |
| SNP_P3_78147_36642572 | NC_021165.1    | Ca_kabuli_chr06 | 36642572                | AA                              | GG                | 1946449487               |
| SNP_P3_78148_36642573 | NC_021165.1    | Ca_kabuli_chr06 | 36642573                | AA                              | TT                | 1946449488               |
| SNP_P3_78149_36642574 | NC_021165.1    | Ca_kabuli_chr06 | 36642574                | AA                              | TT                | 1946449490               |
| SNP_P3_78150_36642575 | NC_021165.1    | Ca_kabuli_chr06 | 36642575                | CC                              | TT                | 1946449491               |
| SNP_P3_78151_36650956 | NC_021165.1    | Ca_kabuli_chr06 | 36650956                | AA                              | TT                | 1946449493               |
| SNP_P3_78152_36650959 | NC_021165.1    | Ca_kabuli_chr06 | 36650959                | CC                              | AA                | 1946449494               |
| SNP_P3_78153_36651991 | NC_021165.1    | Ca_kabuli_chr06 | 36651991                | CC                              | AA                | 1946449496               |



| SNPs IDs              | Chromosome IDs | Chromosomes     | Physical positions (bp) | CDC Frontier (Reference genome) | (Pusa 256 & HPNB) | NCBI SNPdb Accession IDs |
|-----------------------|----------------|-----------------|-------------------------|---------------------------------|-------------------|--------------------------|
| SNP_P3_78154_36667459 | NC_021165.1    | Ca_kabuli_chr06 | 36667459                | GG                              | AA                | 1946449497               |
| SNP_P3_78155_36671754 | NC_021165.1    | Ca_kabuli_chr06 | 36671754                | CC                              | TT                | 1946449499               |
| SNP_P3_78156_36671755 | NC_021165.1    | Ca_kabuli_chr06 | 36671755                | AA                              | GG                | 1946449500               |
| SNP_P3_78157_36687143 | NC_021165.1    | Ca_kabuli_chr06 | 36687143                | CC                              | TT                | 1946449503               |
| SNP_P3_78158_36688353 | NC_021165.1    | Ca_kabuli_chr06 | 36688353                | CC                              | AA                | 1946449504               |
| SNP_P3_78159_36705978 | NC_021165.1    | Ca_kabuli_chr06 | 36705978                | AA                              | GG                | 1946449506               |
| SNP_P3_78160_36716619 | NC_021165.1    | Ca_kabuli_chr06 | 36716619                | TT                              | AA                | 1946449507               |
| SNP_P3_78161_36716620 | NC_021165.1    | Ca_kabuli_chr06 | 36716620                | TT                              | AA                | 1946449508               |
| SNP_P3_78162_36721146 | NC_021165.1    | Ca_kabuli_chr06 | 36721146                | CC                              | TT                | 1946449510               |
| SNP_P3_78163_36721148 | NC_021165.1    | Ca_kabuli_chr06 | 36721148                | TT                              | GG                | 1946449511               |
| SNP_P3_78164_36721160 | NC_021165.1    | Ca_kabuli_chr06 | 36721160                | TT                              | CC                | 1946449513               |
| SNP_P3_78165_36721164 | NC_021165.1    | Ca_kabuli_chr06 | 36721164                | TT                              | GG                | 1946449514               |
| SNP_P3_78166_36721179 | NC_021165.1    | Ca_kabuli_chr06 | 36721179                | CC                              | TT                | 1946449516               |
| SNP_P3_78167_36721206 | NC_021165.1    | Ca_kabuli_chr06 | 36721206                | CC                              | TT                | 1946449517               |
| SNP_P3_78168_36721244 | NC_021165.1    | Ca_kabuli_chr06 | 36721244                | AA                              | GG                | 1946449519               |
| SNP_P3_78169_36722285 | NC_021165.1    | Ca_kabuli_chr06 | 36722285                | TT                              | GG                | 1946449520               |
| SNP_P3_78170_36722301 | NC_021165.1    | Ca_kabuli_chr06 | 36722301                | GG                              | AA                | 1946449521               |
| SNP_P3_78173_36722678 | NC_021165.1    | Ca_kabuli_chr06 | 36722678                | AA                              | TT                | 1946449523               |
| SNP_P3_78174_36723493 | NC_021165.1    | Ca_kabuli_chr06 | 36723493                | CC                              | TT                | 1946449524               |
| SNP_P3_78175_36733689 | NC_021165.1    | Ca_kabuli_chr06 | 36733689                | CC                              | GG                | 1946449526               |
| SNP_P3_78176_36733698 | NC_021165.1    | Ca_kabuli_chr06 | 36733698                | TT                              | GG                | 1946449527               |
| SNP_P3_78177_36771624 | NC_021165.1    | Ca_kabuli_chr06 | 36771624                | TT                              | AA                | 1946449529               |
| SNP_P3_78178_36773762 | NC_021165.1    | Ca_kabuli_chr06 | 36773762                | AA                              | GG                | 1946449530               |
| SNP_P3_78179_36773776 | NC_021165.1    | Ca_kabuli_chr06 | 36773776                | AA                              | GG                | 1946449532               |
| SNP_P3_78180_36773804 | NC_021165.1    | Ca_kabuli_chr06 | 36773804                | TT                              | GG                | 1946449533               |
| SNP_P3_78181_36774098 | NC_021165.1    | Ca_kabuli_chr06 | 36774098                | AA                              | TT                | 1946449535               |
| SNP_P3_78182_36774113 | NC_021165.1    | Ca_kabuli_chr06 | 36774113                | AA                              | GG                | 1946449536               |
| SNP_P3_78183_36783850 | NC_021165.1    | Ca_kabuli_chr06 | 36783850                | AA                              | CC                | 1946449538               |
| SNP_P3_78184_36783867 | NC_021165.1    | Ca_kabuli_chr06 | 36783867                | CC                              | AA                | 1946449539               |
| SNP_P3_78185_36783872 | NC_021165.1    | Ca_kabuli_chr06 | 36783872                | AA                              | GG                | 1946449541               |
| SNP_P3_78186_36783887 | NC_021165.1    | Ca_kabuli_chr06 | 36783887                | TT                              | CC                | 1946449542               |
| SNP_P3_78187_36783893 | NC_021165.1    | Ca_kabuli_chr06 | 36783893                | CC                              | AA                | 1946449544               |
| SNP_P3_78188_36783896 | NC_021165.1    | Ca_kabuli_chr06 | 36783896                | CC                              | TT                | 1946449545               |
| SNP_P3_78189_36783917 | NC_021165.1    | Ca_kabuli_chr06 | 36783917                | TT                              | CC                | 1946449546               |
| SNP_P3_78190_36783920 | NC_021165.1    | Ca_kabuli_chr06 | 36783920                | AA                              | CC                | 1946449548               |
| SNP_P3_78191_36783947 | NC_021165.1    | Ca_kabuli_chr06 | 36783947                | GG                              | AA                | 1946449549               |
| SNP_P3_78192_36783972 | NC_021165.1    | Ca_kabuli_chr06 | 36783972                | CC                              | TT                | 1946449551               |
| SNP_P3_78193_36784158 | NC_021165.1    | Ca_kabuli_chr06 | 36784158                | TT                              | CC                | 1946449552               |
| SNP_P3_78194_36784164 | NC_021165.1    | Ca_kabuli_chr06 | 36784164                | AA                              | GG                | 1946449554               |
| SNP_P3_78195_36784167 | NC_021165.1    | Ca_kabuli_chr06 | 36784167                | CC                              | TT                | 1946449555               |
| SNP_P3_78196_36784191 | NC_021165.1    | Ca_kabuli_chr06 | 36784191                | GG                              | TT                | 1946449556               |
| SNP_P3_78197_36784555 | NC_021165.1    | Ca_kabuli_chr06 | 36784555                | GG                              | TT                | 1946449558               |

| SNPs IDs              | Chromosome IDs | Chromosomes     | Physical positions (bp) | CDC Frontier (Reference genome) | (Pusa 256 & HPNB) | NCBI SNPdb Accession IDs |
|-----------------------|----------------|-----------------|-------------------------|---------------------------------|-------------------|--------------------------|
| SNP_P3_78198_36786105 | NC_021165.1    | Ca_kabuli_chr06 | 36786105                | AA                              | GG                | 1946449560               |
| SNP_P3_78199_36786138 | NC_021165.1    | Ca_kabuli_chr06 | 36786138                | AA                              | TT                | 1946449561               |
| SNP_P3_78200_36786160 | NC_021165.1    | Ca_kabuli_chr06 | 36786160                | TT                              | CC                | 1946449563               |
| SNP_P3_78201_36786161 | NC_021165.1    | Ca_kabuli_chr06 | 36786161                | AA                              | GG                | 1946449565               |
| SNP_P3_78202_36786173 | NC_021165.1    | Ca_kabuli_chr06 | 36786173                | CC                              | AA                | 1946449566               |
| SNP_P3_78203_36786175 | NC_021165.1    | Ca_kabuli_chr06 | 36786175                | GG                              | TT                | 1946449568               |
| SNP_P3_78204_36786212 | NC_021165.1    | Ca_kabuli_chr06 | 36786212                | AA                              | GG                | 1946449569               |
| SNP_P3_78205_36786225 | NC_021165.1    | Ca_kabuli_chr06 | 36786225                | TT                              | CC                | 1946449571               |
| SNP_P3_78206_36786263 | NC_021165.1    | Ca_kabuli_chr06 | 36786263                | CC                              | GG                | 1946449572               |
| SNP_P3_78207_36786277 | NC_021165.1    | Ca_kabuli_chr06 | 36786277                | AA                              | GG                | 1946449574               |
| SNP_P3_78208_36786318 | NC_021165.1    | Ca_kabuli_chr06 | 36786318                | TT                              | CC                | 1946449575               |
| SNP_P3_78209_36786325 | NC_021165.1    | Ca_kabuli_chr06 | 36786325                | CC                              | TT                | 1946449577               |
| SNP_P3_78210_36787603 | NC_021165.1    | Ca_kabuli_chr06 | 36787603                | TT                              | CC                | 1946449578               |
| SNP_P3_78211_36789577 | NC_021165.1    | Ca_kabuli_chr06 | 36789577                | AA                              | GG                | 1946449579               |
| SNP_P3_78212_36789594 | NC_021165.1    | Ca_kabuli_chr06 | 36789594                | AA                              | TT                | 1946449581               |
| SNP_P3_78213_36789635 | NC_021165.1    | Ca_kabuli_chr06 | 36789635                | CC                              | AA                | 1946449582               |
| SNP_P3_78214_36789720 | NC_021165.1    | Ca_kabuli_chr06 | 36789720                | TT                              | CC                | 1946449584               |
| SNP_P3_78215_36790111 | NC_021165.1    | Ca_kabuli_chr06 | 36790111                | TT                              | CC                | 1946449585               |
| SNP_P3_78216_36790123 | NC_021165.1    | Ca_kabuli_chr06 | 36790123                | TT                              | CC                | 1946449587               |
| SNP_P3_78217_36800068 | NC_021165.1    | Ca_kabuli_chr06 | 36800068                | AA                              | CC                | 1946449588               |
| SNP_P3_78218_36800124 | NC_021165.1    | Ca_kabuli_chr06 | 36800124                | AA                              | GG                | 1946449590               |
| SNP_P3_78219_36825102 | NC_021165.1    | Ca_kabuli_chr06 | 36825102                | CC                              | GG                | 1946449591               |
| SNP_P3_78220_36873546 | NC_021165.1    | Ca_kabuli_chr06 | 36873546                | TT                              | CC                | 1946449593               |
| SNP_P3_78221_36873548 | NC_021165.1    | Ca_kabuli_chr06 | 36873548                | AA                              | GG                | 1946449594               |
| SNP_P3_78222_36876611 | NC_021165.1    | Ca_kabuli_chr06 | 36876611                | GG                              | AA                | 1946449595               |
| SNP_P3_78223_36877969 | NC_021165.1    | Ca_kabuli_chr06 | 36877969                | AA                              | CC                | 1946449597               |
| SNP_P3_78224_36888831 | NC_021165.1    | Ca_kabuli_chr06 | 36888831                | AA                              | GG                | 1946449598               |
| SNP_P3_78225_36889156 | NC_021165.1    | Ca_kabuli_chr06 | 36889156                | AA                              | CC                | 1946449600               |
| SNP_P3_78226_36890716 | NC_021165.1    | Ca_kabuli_chr06 | 36890716                | TT                              | GG                | 1946449601               |
| SNP_P3_78227_36890718 | NC_021165.1    | Ca_kabuli_chr06 | 36890718                | CC                              | TT                | 1946449603               |
| SNP_P3_78228_36890734 | NC_021165.1    | Ca_kabuli_chr06 | 36890734                | AA                              | TT                | 1946449604               |
| SNP_P3_78229_36893091 | NC_021165.1    | Ca_kabuli_chr06 | 36893091                | GG                              | AA                | 1946449606               |
| SNP_P3_78230_36893113 | NC_021165.1    | Ca_kabuli_chr06 | 36893113                | CC                              | AA                | 1946449607               |
| SNP_P3_78231_36893139 | NC_021165.1    | Ca_kabuli_chr06 | 36893139                | AA                              | CC                | 1946449609               |
| SNP_P3_78232_36893140 | NC_021165.1    | Ca_kabuli_chr06 | 36893140                | CC                              | AA                | 1946449610               |
| SNP_P3_78233_36893148 | NC_021165.1    | Ca_kabuli_chr06 | 36893148                | TT                              | AA                | 1946449611               |
| SNP_P3_78234_36893210 | NC_021165.1    | Ca_kabuli_chr06 | 36893210                | TT                              | CC                | 1946449612               |
| SNP_P3_78235_36893273 | NC_021165.1    | Ca_kabuli_chr06 | 36893273                | GG                              | AA                | 1946449613               |
| SNP_P3_78236_36893286 | NC_021165.1    | Ca_kabuli_chr06 | 36893286                | TT                              | AA                | 1946449614               |
| SNP_P3_78237_36893317 | NC_021165.1    | Ca_kabuli_chr06 | 36893317                | TT                              | AA                | 1946449615               |
| SNP_P3_78238_36897471 | NC_021165.1    | Ca_kabuli_chr06 | 36897471                | GG                              | AA                | 1946449617               |
| SNP_P3_78240_36933812 | NC_021165.1    | Ca_kabuli_chr06 | 36933812                | CC                              | TT                | 1946449618               |

| SNPs IDs              | Chromosome IDs | Chromosomes     | Physical positions (bp) | CDC Frontier (Reference genome) | (Pusa 256 & HPNB) | NCBI SNPdb Accession IDs |
|-----------------------|----------------|-----------------|-------------------------|---------------------------------|-------------------|--------------------------|
| SNP_P3_78241_36956546 | NC_021165.1    | Ca_kabuli_chr06 | 36956546                | TT                              | CC                | 1946449620               |
| SNP_P3_78242_36956555 | NC_021165.1    | Ca_kabuli_chr06 | 36956555                | AA                              | TT                | 1946449621               |
| SNP_P3_78243_36956911 | NC_021165.1    | Ca_kabuli_chr06 | 36956911                | CC                              | TT                | 1946449623               |
| SNP_P3_78244_36957123 | NC_021165.1    | Ca_kabuli_chr06 | 36957123                | GG                              | AA                | 1946449624               |
| SNP_P3_78246_36991725 | NC_021165.1    | Ca_kabuli_chr06 | 36991725                | CC                              | TT                | 1946449625               |
| SNP_P3_78247_36996801 | NC_021165.1    | Ca_kabuli_chr06 | 36996801                | AA                              | CC                | 1946449627               |
| SNP_P3_78248_36996808 | NC_021165.1    | Ca_kabuli_chr06 | 36996808                | AA                              | CC                | 1946449628               |
| SNP_P3_78249_36996858 | NC_021165.1    | Ca_kabuli_chr06 | 36996858                | TT                              | CC                | 1946449630               |
| SNP_P3_78250_36997806 | NC_021165.1    | Ca_kabuli_chr06 | 36997806                | GG                              | CC                | 1946449631               |
| SNP_P3_78251_36997812 | NC_021165.1    | Ca_kabuli_chr06 | 36997812                | AA                              | GG                | 1946449633               |
| SNP_P3_78252_37001398 | NC_021165.1    | Ca_kabuli_chr06 | 37001398                | CC                              | AA                | 1946449634               |
| SNP_P3_78253_37028085 | NC_021165.1    | Ca_kabuli_chr06 | 37028085                | TT                              | GG                | 1946449635               |
| SNP_P3_78254_37028090 | NC_021165.1    | Ca_kabuli_chr06 | 37028090                | TT                              | CC                | 1946449637               |
| SNP_P3_78255_37028141 | NC_021165.1    | Ca_kabuli_chr06 | 37028141                | AA                              | GG                | 1946449638               |
| SNP_P3_78257_37045749 | NC_021165.1    | Ca_kabuli_chr06 | 37045749                | GG                              | AA                | 1946449640               |
| SNP_P3_78258_37105850 | NC_021165.1    | Ca_kabuli_chr06 | 37105850                | CC                              | AA                | 1946449641               |
| SNP_P3_78259_37147611 | NC_021165.1    | Ca_kabuli_chr06 | 37147611                | TT                              | AA                | 1946449643               |
| SNP_P3_78260_37161797 | NC_021165.1    | Ca_kabuli_chr06 | 37161797                | AA                              | GG                | 1946449644               |
| SNP_P3_78261_37170060 | NC_021165.1    | Ca_kabuli_chr06 | 37170060                | TT                              | CC                | 1946449646               |
| SNP_P3_78262_37174502 | NC_021165.1    | Ca_kabuli_chr06 | 37174502                | CC                              | GG                | 1946449647               |
| SNP_P3_78263_37174587 | NC_021165.1    | Ca_kabuli_chr06 | 37174587                | CC                              | TT                | 1946449649               |
| SNP_P3_78264_37212869 | NC_021165.1    | Ca_kabuli_chr06 | 37212869                | GG                              | AA                | 1946449650               |
| SNP_P3_78265_37213282 | NC_021165.1    | Ca_kabuli_chr06 | 37213282                | AA                              | CC                | 1946449652               |
| SNP_P3_78266_37216897 | NC_021165.1    | Ca_kabuli_chr06 | 37216897                | AA                              | GG                | 1946449653               |
| SNP_P3_78267_37221504 | NC_021165.1    | Ca_kabuli_chr06 | 37221504                | GG                              | AA                | 1946449655               |
| SNP_P3_78268_37221543 | NC_021165.1    | Ca_kabuli_chr06 | 37221543                | TT                              | CC                | 1946449656               |
| SNP_P3_78269_37221579 | NC_021165.1    | Ca_kabuli_chr06 | 37221579                | TT                              | CC                | 1946449658               |
| SNP_P3_78270_37221650 | NC_021165.1    | Ca_kabuli_chr06 | 37221650                | AA                              | GG                | 1946449659               |
| SNP_P3_78271_37221699 | NC_021165.1    | Ca_kabuli_chr06 | 37221699                | CC                              | GG                | 1946449661               |
| SNP_P3_78272_37221727 | NC_021165.1    | Ca_kabuli_chr06 | 37221727                | AA                              | GG                | 1946449662               |
| SNP_P3_78273_37221783 | NC_021165.1    | Ca_kabuli_chr06 | 37221783                | TT                              | CC                | 1946449664               |
| SNP_P3_78274_37221816 | NC_021165.1    | Ca_kabuli_chr06 | 37221816                | TT                              | CC                | 1946449665               |
| SNP_P3_78275_37221830 | NC_021165.1    | Ca_kabuli_chr06 | 37221830                | TT                              | CC                | 1946449666               |
| SNP_P3_78276_37221833 | NC_021165.1    | Ca_kabuli_chr06 | 37221833                | AA                              | GG                | 1946449668               |
| SNP_P3_78277_37221845 | NC_021165.1    | Ca_kabuli_chr06 | 37221845                | AA                              | GG                | 1946449669               |
| SNP_P3_78278_37221862 | NC_021165.1    | Ca_kabuli_chr06 | 37221862                | TT                              | CC                | 1946449671               |
| SNP_P3_78279_37221880 | NC_021165.1    | Ca_kabuli_chr06 | 37221880                | AA                              | GG                | 1946449673               |
| SNP_P3_78280_37221965 | NC_021165.1    | Ca_kabuli_chr06 | 37221965                | GG                              | AA                | 1946449674               |
| SNP_P3_78281_37221984 | NC_021165.1    | Ca_kabuli_chr06 | 37221984                | TT                              | GG                | 1946449676               |
| SNP_P3_78282_37221995 | NC_021165.1    | Ca_kabuli_chr06 | 37221995                | AA                              | GG                | 1946449677               |
| SNP_P3_78283_37222026 | NC_021165.1    | Ca_kabuli_chr06 | 37222026                | TT                              | CC                | 1946449679               |
| SNP_P3_78284_37232313 | NC_021165.1    | Ca_kabuli_chr06 | 37232313                | GG                              | TT                | 1946449680               |

| SNPs IDs              | Chromosome IDs | Chromosomes     | Physical positions (bp) | CDC Frontier (Reference genome) | (Pusa 256 & HPNB) | NCBI SNPdb Accession IDs |
|-----------------------|----------------|-----------------|-------------------------|---------------------------------|-------------------|--------------------------|
| SNP_P3_78285_37246348 | NC_021165.1    | Ca_kabuli_chr06 | 37246348                | AA                              | TT                | 1946449681               |
| SNP_P3_78287_37295574 | NC_021165.1    | Ca_kabuli_chr06 | 37295574                | GG                              | AA                | 1946449683               |
| SNP_P3_78288_37295802 | NC_021165.1    | Ca_kabuli_chr06 | 37295802                | AA                              | TT                | 1946449684               |
| SNP_P3_78290_37295808 | NC_021165.1    | Ca_kabuli_chr06 | 37295808                | CC                              | TT                | 1946449686               |
| SNP_P3_78291_37295810 | NC_021165.1    | Ca_kabuli_chr06 | 37295810                | TT                              | AA                | 1946449687               |
| SNP_P3_78292_37295811 | NC_021165.1    | Ca_kabuli_chr06 | 37295811                | AA                              | TT                | 1946449689               |
| SNP_P3_78294_37295814 | NC_021165.1    | Ca_kabuli_chr06 | 37295814                | AA                              | TT                | 1946449690               |
| SNP_P3_78295_37295815 | NC_021165.1    | Ca_kabuli_chr06 | 37295815                | AA                              | TT                | 1946449692               |
| SNP_P3_78296_37295816 | NC_021165.1    | Ca_kabuli_chr06 | 37295816                | GG                              | TT                | 1946449693               |
| SNP_P3_78297_37295904 | NC_021165.1    | Ca_kabuli_chr06 | 37295904                | AA                              | GG                | 1946449694               |
| SNP_P3_78298_37295911 | NC_021165.1    | Ca_kabuli_chr06 | 37295911                | TT                              | CC                | 1946449696               |
| SNP_P3_78299_37295927 | NC_021165.1    | Ca_kabuli_chr06 | 37295927                | AA                              | GG                | 1946449697               |
| SNP_P3_78300_37295935 | NC_021165.1    | Ca_kabuli_chr06 | 37295935                | AA                              | GG                | 1946449699               |
| SNP_P3_78301_37297433 | NC_021165.1    | Ca_kabuli_chr06 | 37297433                | AA                              | GG                | 1946449701               |
| SNP_P3_78302_37316134 | NC_021165.1    | Ca_kabuli_chr06 | 37316134                | CC                              | AA                | 1946449702               |
| SNP_P3_78303_37316388 | NC_021165.1    | Ca_kabuli_chr06 | 37316388                | AA                              | GG                | 1946449704               |
| SNP_P3_78304_37316507 | NC_021165.1    | Ca_kabuli_chr06 | 37316507                | GG                              | TT                | 1946449705               |
| SNP_P3_78305_37360211 | NC_021165.1    | Ca_kabuli_chr06 | 37360211                | CC                              | TT                | 1946449707               |
| SNP_P3_78306_37384100 | NC_021165.1    | Ca_kabuli_chr06 | 37384100                | CC                              | TT                | 1946449708               |
| SNP_P3_78308_37422748 | NC_021165.1    | Ca_kabuli_chr06 | 37422748                | CC                              | AA                | 1946449710               |
| SNP_P3_78309_37432765 | NC_021165.1    | Ca_kabuli_chr06 | 37432765                | TT                              | CC                | 1946449711               |
| SNP_P3_78310_37452986 | NC_021165.1    | Ca_kabuli_chr06 | 37452986                | GG                              | TT                | 1946449713               |
| SNP_P3_78311_37453018 | NC_021165.1    | Ca_kabuli_chr06 | 37453018                | AA                              | GG                | 1946449714               |
| SNP_P3_78312_37453019 | NC_021165.1    | Ca_kabuli_chr06 | 37453019                | GG                              | AA                | 1946449715               |
| SNP_P3_78313_37453040 | NC_021165.1    | Ca_kabuli_chr06 | 37453040                | GG                              | AA                | 1946449717               |
| SNP_P3_78314_37453071 | NC_021165.1    | Ca_kabuli_chr06 | 37453071                | CC                              | TT                | 1946449718               |
| SNP_P3_78315_37453305 | NC_021165.1    | Ca_kabuli_chr06 | 37453305                | AA                              | GG                | 1946449720               |
| SNP_P3_78316_37453340 | NC_021165.1    | Ca_kabuli_chr06 | 37453340                | TT                              | GG                | 1946449721               |
| SNP_P3_78317_37453405 | NC_021165.1    | Ca_kabuli_chr06 | 37453405                | TT                              | CC                | 1946449723               |
| SNP_P3_78318_37453436 | NC_021165.1    | Ca_kabuli_chr06 | 37453436                | TT                              | CC                | 1946449724               |
| SNP_P3_78319_37453464 | NC_021165.1    | Ca_kabuli_chr06 | 37453464                | AA                              | TT                | 1946449726               |
| SNP_P3_78320_37453472 | NC_021165.1    | Ca_kabuli_chr06 | 37453472                | TT                              | CC                | 1946449728               |
| SNP_P3_78321_37453481 | NC_021165.1    | Ca_kabuli_chr06 | 37453481                | TT                              | GG                | 1946449729               |
| SNP_P3_78322_37453492 | NC_021165.1    | Ca_kabuli_chr06 | 37453492                | CC                              | AA                | 1946449731               |
| SNP_P3_78323_37453518 | NC_021165.1    | Ca_kabuli_chr06 | 37453518                | TT                              | CC                | 1946449732               |
| SNP_P3_78324_37453667 | NC_021165.1    | Ca_kabuli_chr06 | 37453667                | TT                              | GG                | 1946449734               |
| SNP_P3_78325_37453674 | NC_021165.1    | Ca_kabuli_chr06 | 37453674                | AA                              | GG                | 1946449735               |
| SNP_P3_78326_37453704 | NC_021165.1    | Ca_kabuli_chr06 | 37453704                | AA                              | CC                | 1946449737               |
| SNP_P3_78327_37453797 | NC_021165.1    | Ca_kabuli_chr06 | 37453797                | AA                              | GG                | 1946449738               |
| SNP_P3_78328_37453827 | NC_021165.1    | Ca_kabuli_chr06 | 37453827                | AA                              | GG                | 1946449740               |
| SNP_P3_78329_37453871 | NC_021165.1    | Ca_kabuli_chr06 | 37453871                | AA                              | GG                | 1946449741               |
| SNP_P3_78330_37486564 | NC_021165.1    | Ca_kabuli_chr06 | 37486564                | TT                              | GG                | 1946449743               |

| SNPs IDs              | Chromosome IDs | Chromosomes     | Physical positions (bp) | CDC Frontier (Reference genome) | (Pusa 256 & HPNB) | NCBI SNPdb Accession IDs |
|-----------------------|----------------|-----------------|-------------------------|---------------------------------|-------------------|--------------------------|
| SNP_P3_78332_37560529 | NC_021165.1    | Ca_kabuli_chr06 | 37560529                | CC                              | TT                | 1946449744               |
| SNP_P3_78333_37560609 | NC_021165.1    | Ca_kabuli_chr06 | 37560609                | AA                              | CC                | 1946449746               |
| SNP_P3_78334_37560783 | NC_021165.1    | Ca_kabuli_chr06 | 37560783                | TT                              | CC                | 1946449747               |
| SNP_P3_78335_37560790 | NC_021165.1    | Ca_kabuli_chr06 | 37560790                | TT                              | AA                | 1946449749               |
| SNP_P3_78336_37571381 | NC_021165.1    | Ca_kabuli_chr06 | 37571381                | GG                              | AA                | 1946449750               |
| SNP_P3_78337_37571633 | NC_021165.1    | Ca_kabuli_chr06 | 37571633                | TT                              | AA                | 1946449751               |
| SNP_P3_78338_37571679 | NC_021165.1    | Ca_kabuli_chr06 | 37571679                | TT                              | CC                | 1946449753               |
| SNP_P3_78339_37576238 | NC_021165.1    | Ca_kabuli_chr06 | 37576238                | GG                              | AA                | 1946449754               |
| SNP_P3_78340_37581305 | NC_021165.1    | Ca_kabuli_chr06 | 37581305                | CC                              | AA                | 1946449756               |
| SNP_P3_78342_37609759 | NC_021165.1    | Ca_kabuli_chr06 | 37609759                | AA                              | TT                | 1946449758               |
| SNP_P3_78343_37611075 | NC_021165.1    | Ca_kabuli_chr06 | 37611075                | CC                              | TT                | 1946449759               |
| SNP_P3_78344_37613194 | NC_021165.1    | Ca_kabuli_chr06 | 37613194                | AA                              | CC                | 1946449761               |
| SNP_P3_78345_37613195 | NC_021165.1    | Ca_kabuli_chr06 | 37613195                | AA                              | GG                | 1946449762               |
| SNP_P3_78346_37613207 | NC_021165.1    | Ca_kabuli_chr06 | 37613207                | GG                              | AA                | 1946449764               |
| SNP_P3_78347_37613214 | NC_021165.1    | Ca_kabuli_chr06 | 37613214                | GG                              | AA                | 1946449765               |
| SNP_P3_78348_37628447 | NC_021165.1    | Ca_kabuli_chr06 | 37628447                | TT                              | CC                | 1946449766               |
| SNP_P3_78349_37628457 | NC_021165.1    | Ca_kabuli_chr06 | 37628457                | TT                              | CC                | 1946449768               |
| SNP_P3_78352_37632186 | NC_021165.1    | Ca_kabuli_chr06 | 37632186                | TT                              | GG                | 1946449769               |
| SNP_P3_78353_37636424 | NC_021165.1    | Ca_kabuli_chr06 | 37636424                | TT                              | CC                | 1946449771               |
| SNP_P3_78354_37636483 | NC_021165.1    | Ca_kabuli_chr06 | 37636483                | GG                              | AA                | 1946449772               |
| SNP_P3_78355_37636487 | NC_021165.1    | Ca_kabuli_chr06 | 37636487                | AA                              | GG                | 1946449774               |
| SNP_P3_78356_37636869 | NC_021165.1    | Ca_kabuli_chr06 | 37636869                | GG                              | AA                | 1946449775               |
| SNP_P3_78357_37637294 | NC_021165.1    | Ca_kabuli_chr06 | 37637294                | GG                              | TT                | 1946449777               |
| SNP_P3_78358_37639019 | NC_021165.1    | Ca_kabuli_chr06 | 37639019                | CC                              | TT                | 1946449778               |
| SNP_P3_78359_37639095 | NC_021165.1    | Ca_kabuli_chr06 | 37639095                | AA                              | CC                | 1946449780               |
| SNP_P3_78360_37639199 | NC_021165.1    | Ca_kabuli_chr06 | 37639199                | TT                              | CC                | 1946449781               |
| SNP_P3_78361_37639379 | NC_021165.1    | Ca_kabuli_chr06 | 37639379                | GG                              | AA                | 1946449783               |
| SNP_P3_78362_37639415 | NC_021165.1    | Ca_kabuli_chr06 | 37639415                | GG                              | TT                | 1946449785               |
| SNP_P3_78363_37639435 | NC_021165.1    | Ca_kabuli_chr06 | 37639435                | TT                              | CC                | 1946449786               |
| SNP_P3_78364_37639516 | NC_021165.1    | Ca_kabuli_chr06 | 37639516                | GG                              | TT                | 1946449788               |
| SNP_P3_78365_37639549 | NC_021165.1    | Ca_kabuli_chr06 | 37639549                | AA                              | GG                | 1946449789               |
| SNP_P3_78366_37639777 | NC_021165.1    | Ca_kabuli_chr06 | 37639777                | GG                              | AA                | 1946449791               |
| SNP_P3_78367_37639781 | NC_021165.1    | Ca_kabuli_chr06 | 37639781                | AA                              | GG                | 1946449792               |
| SNP_P3_78368_37657156 | NC_021165.1    | Ca_kabuli_chr06 | 37657156                | AA                              | GG                | 1946449794               |
| SNP_P3_78369_37657174 | NC_021165.1    | Ca_kabuli_chr06 | 37657174                | AA                              | CC                | 1946449795               |
| SNP_P3_78370_37657621 | NC_021165.1    | Ca_kabuli_chr06 | 37657621                | TT                              | CC                | 1946449797               |
| SNP_P3_78371_37670029 | NC_021165.1    | Ca_kabuli_chr06 | 37670029                | GG                              | AA                | 1946449798               |
| SNP_P3_78372_37670035 | NC_021165.1    | Ca_kabuli_chr06 | 37670035                | GG                              | AA                | 1946449800               |
| SNP_P3_78373_37696702 | NC_021165.1    | Ca_kabuli_chr06 | 37696702                | TT                              | CC                | 1946449801               |
| SNP_P3_78374_37698646 | NC_021165.1    | Ca_kabuli_chr06 | 37698646                | GG                              | AA                | 1946449803               |
| SNP_P3_78376_37776132 | NC_021165.1    | Ca_kabuli_chr06 | 37776132                | CC                              | AA                | 1946449804               |
| SNP_P3_78377_37800517 | NC_021165.1    | Ca_kabuli_chr06 | 37800517                | GG                              | AA                | 1946449806               |

| SNPs IDs              | Chromosome IDs | Chromosomes     | Physical positions (bp) | CDC Frontier (Reference genome) | (Pusa 256 & HPNB) | NCBI SNPdb Accession IDs |
|-----------------------|----------------|-----------------|-------------------------|---------------------------------|-------------------|--------------------------|
| SNP_P3_78378_37825250 | NC_021165.1    | Ca_kabuli_chr06 | 37825250                | TT                              | AA                | 1946449807               |
| SNP_P3_78379_37825254 | NC_021165.1    | Ca_kabuli_chr06 | 37825254                | TT                              | CC                | 1946449809               |
| SNP_P3_78380_37827486 | NC_021165.1    | Ca_kabuli_chr06 | 37827486                | AA                              | TT                | 1946449810               |
| SNP_P3_78381_37827502 | NC_021165.1    | Ca_kabuli_chr06 | 37827502                | AA                              | TT                | 1946449812               |
| SNP_P3_78382_37834872 | NC_021165.1    | Ca_kabuli_chr06 | 37834872                | CC                              | TT                | 1946449814               |
| SNP_P3_78383_37835070 | NC_021165.1    | Ca_kabuli_chr06 | 37835070                | AA                              | TT                | 1946449815               |
| SNP_P3_78384_37835071 | NC_021165.1    | Ca_kabuli_chr06 | 37835071                | TT                              | CC                | 1946449817               |
| SNP_P3_78385_37835078 | NC_021165.1    | Ca_kabuli_chr06 | 37835078                | TT                              | CC                | 1946449818               |
| SNP_P3_78386_37835316 | NC_021165.1    | Ca_kabuli_chr06 | 37835316                | TT                              | CC                | 1946449820               |
| SNP_P3_78387_37835332 | NC_021165.1    | Ca_kabuli_chr06 | 37835332                | AA                              | GG                | 1946449821               |
| SNP_P3_78388_37836482 | NC_021165.1    | Ca_kabuli_chr06 | 37836482                | TT                              | CC                | 1946449823               |
| SNP_P3_78389_37836643 | NC_021165.1    | Ca_kabuli_chr06 | 37836643                | GG                              | AA                | 1946449824               |
| SNP_P3_78390_37836683 | NC_021165.1    | Ca_kabuli_chr06 | 37836683                | AA                              | TT                | 1946449826               |
| SNP_P3_78392_37836735 | NC_021165.1    | Ca_kabuli_chr06 | 37836735                | CC                              | TT                | 1946449827               |
| SNP_P3_78393_37836911 | NC_021165.1    | Ca_kabuli_chr06 | 37836911                | GG                              | AA                | 1946449829               |
| SNP_P3_78395_37849727 | NC_021165.1    | Ca_kabuli_chr06 | 37849727                | GG                              | AA                | 1946449830               |
| SNP_P3_78396_37849802 | NC_021165.1    | Ca_kabuli_chr06 | 37849802                | AA                              | GG                | 1946449831               |
| SNP_P3_78397_37849884 | NC_021165.1    | Ca_kabuli_chr06 | 37849884                | TT                              | CC                | 1946449833               |
| SNP_P3_78398_37849988 | NC_021165.1    | Ca_kabuli_chr06 | 37849988                | CC                              | AA                | 1946449834               |
| SNP_P3_78399_37886216 | NC_021165.1    | Ca_kabuli_chr06 | 37886216                | GG                              | AA                | 1946449836               |
| SNP_P3_78400_37893650 | NC_021165.1    | Ca_kabuli_chr06 | 37893650                | AA                              | CC                | 1946449837               |
| SNP_P3_78401_37893686 | NC_021165.1    | Ca_kabuli_chr06 | 37893686                | AA                              | GG                | 1946449839               |
| SNP_P3_78403_37894142 | NC_021165.1    | Ca_kabuli_chr06 | 37894142                | GG                              | AA                | 1946449841               |
| SNP_P3_78404_37894148 | NC_021165.1    | Ca_kabuli_chr06 | 37894148                | TT                              | CC                | 1946449842               |
| SNP_P3_78405_37901771 | NC_021165.1    | Ca_kabuli_chr06 | 37901771                | TT                              | CC                | 1946449844               |
| SNP_P3_78406_37901778 | NC_021165.1    | Ca_kabuli_chr06 | 37901778                | CC                              | GG                | 1946449845               |
| SNP_P3_78407_37901800 | NC_021165.1    | Ca_kabuli_chr06 | 37901800                | TT                              | CC                | 1946449846               |
| SNP_P3_78408_37901801 | NC_021165.1    | Ca_kabuli_chr06 | 37901801                | GG                              | AA                | 1946449848               |
| SNP_P3_78409_37901811 | NC_021165.1    | Ca_kabuli_chr06 | 37901811                | GG                              | TT                | 1946449849               |
| SNP_P3_78410_37901981 | NC_021165.1    | Ca_kabuli_chr06 | 37901981                | TT                              | AA                | 1946449851               |
| SNP_P3_78411_37902051 | NC_021165.1    | Ca_kabuli_chr06 | 37902051                | CC                              | AA                | 1946449852               |
| SNP_P3_78412_37902283 | NC_021165.1    | Ca_kabuli_chr06 | 37902283                | TT                              | CC                | 1946449854               |
| SNP_P3_78413_37902301 | NC_021165.1    | Ca_kabuli_chr06 | 37902301                | GG                              | AA                | 1946449855               |
| SNP_P3_78414_37906092 | NC_021165.1    | Ca_kabuli_chr06 | 37906092                | CC                              | TT                | 1946449857               |
| SNP_P3_78415_37906093 | NC_021165.1    | Ca_kabuli_chr06 | 37906093                | AA                              | TT                | 1946449858               |
| SNP_P3_78416_37906094 | NC_021165.1    | Ca_kabuli_chr06 | 37906094                | TT                              | CC                | 1946449860               |
| SNP_P3_78417_37934640 | NC_021165.1    | Ca_kabuli_chr06 | 37934640                | AA                              | GG                | 1946449861               |
| SNP_P3_78418_37934715 | NC_021165.1    | Ca_kabuli_chr06 | 37934715                | TT                              | AA                | 1946449863               |
| SNP_P3_78419_37935183 | NC_021165.1    | Ca_kabuli_chr06 | 37935183                | CC                              | AA                | 1946449864               |
| SNP_P3_78420_37935235 | NC_021165.1    | Ca_kabuli_chr06 | 37935235                | CC                              | TT                | 1946449865               |
| SNP_P3_78421_37935242 | NC_021165.1    | Ca_kabuli_chr06 | 37935242                | GG                              | AA                | 1946449867               |
| SNP_P3_78423_37938178 | NC_021165.1    | Ca_kabuli_chr06 | 37938178                | AA                              | GG                | 1946449869               |

| SNPs IDs              | Chromosome IDs | Chromosomes     | Physical positions (bp) | CDC Frontier (Reference genome) | (Pusa 256 & HPNB) | NCBI SNPdb Accession IDs |
|-----------------------|----------------|-----------------|-------------------------|---------------------------------|-------------------|--------------------------|
| SNP_P3_78424_37938392 | NC_021165.1    | Ca_kabuli_chr06 | 37938392                | TT                              | CC                | 1946449870               |
| SNP_P3_78425_37938426 | NC_021165.1    | Ca_kabuli_chr06 | 37938426                | AA                              | CC                | 1946449872               |
| SNP_P3_78426_37938449 | NC_021165.1    | Ca_kabuli_chr06 | 37938449                | GG                              | TT                | 1946449873               |
| SNP_P3_78427_37939424 | NC_021165.1    | Ca_kabuli_chr06 | 37939424                | TT                              | AA                | 1946449875               |
| SNP_P3_78429_37966159 | NC_021165.1    | Ca_kabuli_chr06 | 37966159                | CC                              | AA                | 1946449876               |
| SNP_P3_78430_37966192 | NC_021165.1    | Ca_kabuli_chr06 | 37966192                | CC                              | AA                | 1946449878               |
| SNP_P3_78432_37972962 | NC_021165.1    | Ca_kabuli_chr06 | 37972962                | CC                              | TT                | 1946449879               |
| SNP_P3_78434_37975721 | NC_021165.1    | Ca_kabuli_chr06 | 37975721                | CC                              | TT                | 1946449881               |
| SNP_P3_78435_37975781 | NC_021165.1    | Ca_kabuli_chr06 | 37975781                | TT                              | AA                | 1946449882               |
| SNP_P3_78436_37975813 | NC_021165.1    | Ca_kabuli_chr06 | 37975813                | TT                              | CC                | 1946449884               |
| SNP_P3_78437_37975858 | NC_021165.1    | Ca_kabuli_chr06 | 37975858                | TT                              | AA                | 1946449885               |
| SNP_P3_78438_37975966 | NC_021165.1    | Ca_kabuli_chr06 | 37975966                | CC                              | AA                | 1946449887               |
| SNP_P3_78439_37975984 | NC_021165.1    | Ca_kabuli_chr06 | 37975984                | GG                              | AA                | 1946449888               |
| SNP_P3_78440_37976046 | NC_021165.1    | Ca_kabuli_chr06 | 37976046                | TT                              | GG                | 1946449889               |
| SNP_P3_78441_37976126 | NC_021165.1    | Ca_kabuli_chr06 | 37976126                | GG                              | AA                | 1946449891               |
| SNP_P3_78442_37976137 | NC_021165.1    | Ca_kabuli_chr06 | 37976137                | TT                              | AA                | 1946449892               |
| SNP_P3_78443_37976160 | NC_021165.1    | Ca_kabuli_chr06 | 37976160                | CC                              | TT                | 1946449894               |
| SNP_P3_78444_37976164 | NC_021165.1    | Ca_kabuli_chr06 | 37976164                | CC                              | TT                | 1946449896               |
| SNP_P3_78445_37976294 | NC_021165.1    | Ca_kabuli_chr06 | 37976294                | AA                              | TT                | 1946449897               |
| SNP_P3_78446_37976334 | NC_021165.1    | Ca_kabuli_chr06 | 37976334                | AA                              | GG                | 1946449898               |
| SNP_P3_78447_37977467 | NC_021165.1    | Ca_kabuli_chr06 | 37977467                | AA                              | GG                | 1946449900               |
| SNP_P3_78448_37980750 | NC_021165.1    | Ca_kabuli_chr06 | 37980750                | GG                              | AA                | 1946449901               |
| SNP_P3_78450_37981131 | NC_021165.1    | Ca_kabuli_chr06 | 37981131                | GG                              | CC                | 1946449903               |
| SNP_P3_78451_37981144 | NC_021165.1    | Ca_kabuli_chr06 | 37981144                | GG                              | TT                | 1946449904               |
| SNP_P3_78452_37981252 | NC_021165.1    | Ca_kabuli_chr06 | 37981252                | AA                              | CC                | 1946449906               |
| SNP_P3_78453_37981480 | NC_021165.1    | Ca_kabuli_chr06 | 37981480                | GG                              | AA                | 1946449907               |
| SNP_P3_78454_37981519 | NC_021165.1    | Ca_kabuli_chr06 | 37981519                | AA                              | GG                | 1946449909               |
| SNP_P3_78455_37981593 | NC_021165.1    | Ca_kabuli_chr06 | 37981593                | AA                              | GG                | 1946449910               |
| SNP_P3_78456_37981676 | NC_021165.1    | Ca_kabuli_chr06 | 37981676                | GG                              | AA                | 1946449912               |
| SNP_P3_78457_37981699 | NC_021165.1    | Ca_kabuli_chr06 | 37981699                | TT                              | CC                | 1946449913               |
| SNP_P3_78458_37981708 | NC_021165.1    | Ca_kabuli_chr06 | 37981708                | CC                              | TT                | 1946449915               |
| SNP_P3_78459_37981786 | NC_021165.1    | Ca_kabuli_chr06 | 37981786                | CC                              | TT                | 1946449916               |
| SNP_P3_78461_37981881 | NC_021165.1    | Ca_kabuli_chr06 | 37981881                | GG                              | AA                | 1946449918               |
| SNP_P3_78462_37982008 | NC_021165.1    | Ca_kabuli_chr06 | 37982008                | AA                              | CC                | 1946449919               |
| SNP_P3_78463_37982062 | NC_021165.1    | Ca_kabuli_chr06 | 37982062                | TT                              | GG                | 1946449920               |
| SNP_P3_78465_37982188 | NC_021165.1    | Ca_kabuli_chr06 | 37982188                | CC                              | AA                | 1946449922               |
| SNP_P3_78467_37993970 | NC_021165.1    | Ca_kabuli_chr06 | 37993970                | GG                              | AA                | 1946449923               |
| SNP_P3_78468_38012036 | NC_021165.1    | Ca_kabuli_chr06 | 38012036                | CC                              | TT                | 1946449925               |
| SNP_P3_78469_38012054 | NC_021165.1    | Ca_kabuli_chr06 | 38012054                | TT                              | GG                | 1946449927               |
| SNP_P3_78470_38012059 | NC_021165.1    | Ca_kabuli_chr06 | 38012059                | AA                              | TT                | 1946449928               |
| SNP_P3_78471_38012072 | NC_021165.1    | Ca_kabuli_chr06 | 38012072                | AA                              | TT                | 1946449930               |
| SNP_P3_78472_38012075 | NC_021165.1    | Ca_kabuli_chr06 | 38012075                | AA                              | GG                | 1946449931               |

| SNPs IDs              | Chromosome IDs | Chromosomes     | Physical positions (bp) | CDC Frontier (Reference genome) | (Pusa 256 & HPNB) | NCBI SNPdb Accession IDs |
|-----------------------|----------------|-----------------|-------------------------|---------------------------------|-------------------|--------------------------|
| SNP_P3_78473_38017525 | NC_021165.1    | Ca_kabuli_chr06 | 38017525                | AA                              | GG                | 1946449933               |
| SNP_P3_78474_38032611 | NC_021165.1    | Ca_kabuli_chr06 | 38032611                | CC                              | TT                | 1946449934               |
| SNP_P3_78475_38039734 | NC_021165.1    | Ca_kabuli_chr06 | 38039734                | AA                              | GG                | 1946449936               |
| SNP_P3_78476_38040284 | NC_021165.1    | Ca_kabuli_chr06 | 38040284                | AA                              | GG                | 1946449937               |
| SNP_P3_78477_38040294 | NC_021165.1    | Ca_kabuli_chr06 | 38040294                | CC                              | TT                | 1946449939               |
| SNP_P3_78478_38040347 | NC_021165.1    | Ca_kabuli_chr06 | 38040347                | CC                              | GG                | 1946449940               |
| SNP_P3_78479_38047576 | NC_021165.1    | Ca_kabuli_chr06 | 38047576                | AA                              | TT                | 1946449942               |
| SNP_P3_78480_38053739 | NC_021165.1    | Ca_kabuli_chr06 | 38053739                | GG                              | AA                | 1946449943               |
| SNP_P3_78481_38058209 | NC_021165.1    | Ca_kabuli_chr06 | 38058209                | TT                              | CC                | 1946449944               |
| SNP_P3_78482_38069913 | NC_021165.1    | Ca_kabuli_chr06 | 38069913                | TT                              | GG                | 1946449946               |
| SNP_P3_78483_38070173 | NC_021165.1    | Ca_kabuli_chr06 | 38070173                | CC                              | TT                | 1946449947               |
| SNP_P3_78484_38070177 | NC_021165.1    | Ca_kabuli_chr06 | 38070177                | GG                              | CC                | 1946449949               |
| SNP_P3_78485_38070219 | NC_021165.1    | Ca_kabuli_chr06 | 38070219                | CC                              | AA                | 1946449950               |
| SNP_P3_78486_38072135 | NC_021165.1    | Ca_kabuli_chr06 | 38072135                | TT                              | CC                | 1946449952               |
| SNP_P3_78487_38095399 | NC_021165.1    | Ca_kabuli_chr06 | 38095399                | GG                              | TT                | 1946449953               |
| SNP_P3_78488_38110899 | NC_021165.1    | Ca_kabuli_chr06 | 38110899                | TT                              | CC                | 1946449955               |
| SNP_P3_78489_38110909 | NC_021165.1    | Ca_kabuli_chr06 | 38110909                | CC                              | TT                | 1946449957               |
| SNP_P3_78490_38112838 | NC_021165.1    | Ca_kabuli_chr06 | 38112838                | AA                              | GG                | 1946449958               |
| SNP_P3_78491_38112887 | NC_021165.1    | Ca_kabuli_chr06 | 38112887                | AA                              | CC                | 1946449960               |
| SNP_P3_78492_38115483 | NC_021165.1    | Ca_kabuli_chr06 | 38115483                | CC                              | AA                | 1946449961               |
| SNP_P3_78493_38124411 | NC_021165.1    | Ca_kabuli_chr06 | 38124411                | TT                              | AA                | 1946449963               |
| SNP_P3_78494_38124418 | NC_021165.1    | Ca_kabuli_chr06 | 38124418                | CC                              | TT                | 1946449964               |
| SNP_P3_78495_38124620 | NC_021165.1    | Ca_kabuli_chr06 | 38124620                | AA                              | GG                | 1946449966               |
| SNP_P3_78496_38124653 | NC_021165.1    | Ca_kabuli_chr06 | 38124653                | AA                              | GG                | 1946449967               |
| SNP_P3_78497_38124654 | NC_021165.1    | Ca_kabuli_chr06 | 38124654                | CC                              | TT                | 1946449968               |
| SNP_P3_78498_38124660 | NC_021165.1    | Ca_kabuli_chr06 | 38124660                | AA                              | GG                | 1946449970               |
| SNP_P3_78499_38135089 | NC_021165.1    | Ca_kabuli_chr06 | 38135089                | TT                              | CC                | 1946449971               |
| SNP_P3_78500_38135203 | NC_021165.1    | Ca_kabuli_chr06 | 38135203                | AA                              | GG                | 1946449973               |
| SNP_P3_78501_38135229 | NC_021165.1    | Ca_kabuli_chr06 | 38135229                | TT                              | CC                | 1946449974               |
| SNP_P3_78502_38135341 | NC_021165.1    | Ca_kabuli_chr06 | 38135341                | AA                              | GG                | 1946449976               |
| SNP_P3_78503_38135351 | NC_021165.1    | Ca_kabuli_chr06 | 38135351                | TT                              | CC                | 1946449977               |
| SNP_P3_78504_38135383 | NC_021165.1    | Ca_kabuli_chr06 | 38135383                | TT                              | AA                | 1946449978               |
| SNP_P3_78505_38135404 | NC_021165.1    | Ca_kabuli_chr06 | 38135404                | GG                              | AA                | 1946449980               |
| SNP_P3_78506_38135421 | NC_021165.1    | Ca_kabuli_chr06 | 38135421                | CC                              | AA                | 1946449981               |
| SNP_P3_78507_38135422 | NC_021165.1    | Ca_kabuli_chr06 | 38135422                | TT                              | AA                | 1946449983               |
| SNP_P3_78508_38135425 | NC_021165.1    | Ca_kabuli_chr06 | 38135425                | AA                              | GG                | 1946449985               |
| SNP_P3_78509_38135467 | NC_021165.1    | Ca_kabuli_chr06 | 38135467                | TT                              | CC                | 1946449986               |
| SNP_P3_78510_38135483 | NC_021165.1    | Ca_kabuli_chr06 | 38135483                | TT                              | CC                | 1946449988               |
| SNP_P3_78511_38135492 | NC_021165.1    | Ca_kabuli_chr06 | 38135492                | AA                              | GG                | 1946449989               |
| SNP_P3_78512_38135506 | NC_021165.1    | Ca_kabuli_chr06 | 38135506                | AA                              | GG                | 1946449990               |
| SNP_P3_78513_38135527 | NC_021165.1    | Ca_kabuli_chr06 | 38135527                | CC                              | TT                | 1946449992               |
| SNP_P3_78514_38135538 | NC_021165.1    | Ca_kabuli_chr06 | 38135538                | CC                              | TT                | 1946449993               |



| SNPs IDs              | Chromosome IDs | Chromosomes     | Physical positions (bp) | CDC Frontier (Reference genome) | (Pusa 256 & HPNB) | NCBI SNPdb Accession IDs |
|-----------------------|----------------|-----------------|-------------------------|---------------------------------|-------------------|--------------------------|
| SNP_P3_78515_38135558 | NC_021165.1    | Ca_kabuli_chr06 | 38135558                | GG                              | AA                | 1946449995               |
| SNP_P3_78516_38142983 | NC_021165.1    | Ca_kabuli_chr06 | 38142983                | TT                              | CC                | 1946449997               |
| SNP_P3_78517_38151818 | NC_021165.1    | Ca_kabuli_chr06 | 38151818                | TT                              | GG                | 1946449999               |
| SNP_P3_78518_38151826 | NC_021165.1    | Ca_kabuli_chr06 | 38151826                | AA                              | CC                | 1946450000               |
| SNP_P3_78519_38181722 | NC_021165.1    | Ca_kabuli_chr06 | 38181722                | CC                              | TT                | 1946450002               |
| SNP_P3_78520_38181724 | NC_021165.1    | Ca_kabuli_chr06 | 38181724                | AA                              | GG                | 1946450003               |
| SNP_P3_78521_38196165 | NC_021165.1    | Ca_kabuli_chr06 | 38196165                | AA                              | CC                | 1946450004               |
| SNP_P3_78522_38196181 | NC_021165.1    | Ca_kabuli_chr06 | 38196181                | CC                              | GG                | 1946450006               |
| SNP_P3_78523_38196208 | NC_021165.1    | Ca_kabuli_chr06 | 38196208                | AA                              | TT                | 1946450007               |
| SNP_P3_78524_38196257 | NC_021165.1    | Ca_kabuli_chr06 | 38196257                | GG                              | AA                | 1946450009               |
| SNP_P3_78525_38196474 | NC_021165.1    | Ca_kabuli_chr06 | 38196474                | TT                              | CC                | 1946450010               |
| SNP_P3_78526_38196496 | NC_021165.1    | Ca_kabuli_chr06 | 38196496                | AA                              | GG                | 1946450012               |
| SNP_P3_78527_38196502 | NC_021165.1    | Ca_kabuli_chr06 | 38196502                | AA                              | TT                | 1946450013               |
| SNP_P3_78528_38196556 | NC_021165.1    | Ca_kabuli_chr06 | 38196556                | AA                              | GG                | 1946450015               |
| SNP_P3_78529_38198004 | NC_021165.1    | Ca_kabuli_chr06 | 38198004                | AA                              | GG                | 1946450016               |
| SNP_P3_78530_38198021 | NC_021165.1    | Ca_kabuli_chr06 | 38198021                | GG                              | AA                | 1946450018               |
| SNP_P3_78531_38202156 | NC_021165.1    | Ca_kabuli_chr06 | 38202156                | AA                              | GG                | 1946450019               |
| SNP_P3_78532_38202188 | NC_021165.1    | Ca_kabuli_chr06 | 38202188                | AA                              | GG                | 1946450021               |
| SNP_P3_78533_38202425 | NC_021165.1    | Ca_kabuli_chr06 | 38202425                | GG                              | AA                | 1946450022               |
| SNP_P3_78534_38202464 | NC_021165.1    | Ca_kabuli_chr06 | 38202464                | TT                              | CC                | 1946450023               |
| SNP_P3_78535_38202476 | NC_021165.1    | Ca_kabuli_chr06 | 38202476                | TT                              | CC                | 1946450025               |
| SNP_P3_78538_38232418 | NC_021165.1    | Ca_kabuli_chr06 | 38232418                | TT                              | GG                | 1946450026               |
| SNP_P3_78539_38232421 | NC_021165.1    | Ca_kabuli_chr06 | 38232421                | AA                              | GG                | 1946450028               |
| SNP_P3_78540_38237973 | NC_021165.1    | Ca_kabuli_chr06 | 38237973                | CC                              | TT                | 1946450029               |
| SNP_P3_78541_38238007 | NC_021165.1    | Ca_kabuli_chr06 | 38238007                | AA                              | CC                | 1946450031               |
| SNP_P3_78543_38258389 | NC_021165.1    | Ca_kabuli_chr06 | 38258389                | GG                              | AA                | 1946450032               |
| SNP_P3_78545_38272442 | NC_021165.1    | Ca_kabuli_chr06 | 38272442                | CC                              | TT                | 1946450034               |
| SNP_P3_78546_38296409 | NC_021165.1    | Ca_kabuli_chr06 | 38296409                | AA                              | GG                | 1946450035               |
| SNP_P3_78548_38347311 | NC_021165.1    | Ca_kabuli_chr06 | 38347311                | CC                              | TT                | 1946450037               |
| SNP_P3_78549_38378699 | NC_021165.1    | Ca_kabuli_chr06 | 38378699                | GG                              | AA                | 1946450038               |
| SNP_P3_78550_38380289 | NC_021165.1    | Ca_kabuli_chr06 | 38380289                | AA                              | GG                | 1946450040               |
| SNP_P3_78551_38382095 | NC_021165.1    | Ca_kabuli_chr06 | 38382095                | AA                              | GG                | 1946450041               |
| SNP_P3_78552_38438002 | NC_021165.1    | Ca_kabuli_chr06 | 38438002                | TT                              | CC                | 1946450043               |
| SNP_P3_78553_38453140 | NC_021165.1    | Ca_kabuli_chr06 | 38453140                | GG                              | AA                | 1946450044               |
| SNP_P3_78554_38460652 | NC_021165.1    | Ca_kabuli_chr06 | 38460652                | TT                              | CC                | 1946450046               |
| SNP_P3_78555_38460810 | NC_021165.1    | Ca_kabuli_chr06 | 38460810                | TT                              | AA                | 1946450047               |
| SNP_P3_78556_38461043 | NC_021165.1    | Ca_kabuli_chr06 | 38461043                | GG                              | AA                | 1946450049               |
| SNP_P3_78557_38461053 | NC_021165.1    | Ca_kabuli_chr06 | 38461053                | CC                              | TT                | 1946450050               |
| SNP_P3_78558_38461159 | NC_021165.1    | Ca_kabuli_chr06 | 38461159                | GG                              | TT                | 1946450051               |
| SNP_P3_78559_38472915 | NC_021165.1    | Ca_kabuli_chr06 | 38472915                | CC                              | AA                | 1946450053               |
| SNP_P3_78560_38472952 | NC_021165.1    | Ca_kabuli_chr06 | 38472952                | CC                              | TT                | 1946450054               |
| SNP_P3_78561_38473041 | NC_021165.1    | Ca_kabuli_chr06 | 38473041                | CC                              | TT                | 1946450056               |

| SNPs IDs              | Chromosome IDs | Chromosomes     | Physical positions (bp) | CDC Frontier (Reference genome) | (Pusa 256 & HPNB) | NCBI SNPdb Accession IDs |
|-----------------------|----------------|-----------------|-------------------------|---------------------------------|-------------------|--------------------------|
| SNP_P3_78562_38473045 | NC_021165.1    | Ca_kabuli_chr06 | 38473045                | GG                              | AA                | 1946450057               |
| SNP_P3_78563_38473180 | NC_021165.1    | Ca_kabuli_chr06 | 38473180                | GG                              | AA                | 1946450059               |
| SNP_P3_78564_38473191 | NC_021165.1    | Ca_kabuli_chr06 | 38473191                | GG                              | AA                | 1946450060               |
| SNP_P3_78565_38473278 | NC_021165.1    | Ca_kabuli_chr06 | 38473278                | GG                              | AA                | 1946450062               |
| SNP_P3_78566_38473280 | NC_021165.1    | Ca_kabuli_chr06 | 38473280                | TT                              | CC                | 1946450063               |
| SNP_P3_78567_38473299 | NC_021165.1    | Ca_kabuli_chr06 | 38473299                | CC                              | TT                | 1946450064               |
| SNP_P3_78568_38473401 | NC_021165.1    | Ca_kabuli_chr06 | 38473401                | TT                              | CC                | 1946450066               |
| SNP_P3_78569_38473690 | NC_021165.1    | Ca_kabuli_chr06 | 38473690                | TT                              | CC                | 1946450068               |
| SNP_P3_78570_38474564 | NC_021165.1    | Ca_kabuli_chr06 | 38474564                | TT                              | AA                | 1946450069               |
| SNP_P3_78571_38475118 | NC_021165.1    | Ca_kabuli_chr06 | 38475118                | TT                              | CC                | 1946450071               |
| SNP_P3_78572_38499726 | NC_021165.1    | Ca_kabuli_chr06 | 38499726                | AA                              | GG                | 1946450072               |
| SNP_P3_78573_38499735 | NC_021165.1    | Ca_kabuli_chr06 | 38499735                | CC                              | GG                | 1946450074               |
| SNP_P3_78574_38499778 | NC_021165.1    | Ca_kabuli_chr06 | 38499778                | CC                              | GG                | 1946450075               |
| SNP_P3_78575_38500040 | NC_021165.1    | Ca_kabuli_chr06 | 38500040                | CC                              | GG                | 1946450077               |
| SNP_P3_78576_38505799 | NC_021165.1    | Ca_kabuli_chr06 | 38505799                | CC                              | TT                | 1946450078               |
| SNP_P3_78577_38505819 | NC_021165.1    | Ca_kabuli_chr06 | 38505819                | AA                              | TT                | 1946450079               |
| SNP_P3_78578_38512489 | NC_021165.1    | Ca_kabuli_chr06 | 38512489                | CC                              | AA                | 1946450081               |
| SNP_P3_78579_38526372 | NC_021165.1    | Ca_kabuli_chr06 | 38526372                | CC                              | TT                | 1946450082               |
| SNP_P3_78580_38535021 | NC_021165.1    | Ca_kabuli_chr06 | 38535021                | AA                              | GG                | 1946450084               |
| SNP_P3_78581_38551663 | NC_021165.1    | Ca_kabuli_chr06 | 38551663                | TT                              | CC                | 1946450085               |
| SNP_P3_78583_38575380 | NC_021165.1    | Ca_kabuli_chr06 | 38575380                | TT                              | GG                | 1946450087               |
| SNP_P3_78584_38575455 | NC_021165.1    | Ca_kabuli_chr06 | 38575455                | GG                              | AA                | 1946450088               |
| SNP_P3_78585_38575464 | NC_021165.1    | Ca_kabuli_chr06 | 38575464                | CC                              | GG                | 1946450090               |
| SNP_P3_78586_38575498 | NC_021165.1    | Ca_kabuli_chr06 | 38575498                | CC                              | TT                | 1946450091               |
| SNP_P3_78587_38575531 | NC_021165.1    | Ca_kabuli_chr06 | 38575531                | GG                              | AA                | 1946450093               |
| SNP_P3_78588_38575646 | NC_021165.1    | Ca_kabuli_chr06 | 38575646                | TT                              | CC                | 1946450094               |
| SNP_P3_78589_38575673 | NC_021165.1    | Ca_kabuli_chr06 | 38575673                | GG                              | AA                | 1946450096               |
| SNP_P3_78590_38575679 | NC_021165.1    | Ca_kabuli_chr06 | 38575679                | AA                              | GG                | 1946450097               |
| SNP_P3_78591_38575745 | NC_021165.1    | Ca_kabuli_chr06 | 38575745                | GG                              | TT                | 1946450099               |
| SNP_P3_78592_38575763 | NC_021165.1    | Ca_kabuli_chr06 | 38575763                | TT                              | AA                | 1946450100               |
| SNP_P3_78593_38577918 | NC_021165.1    | Ca_kabuli_chr06 | 38577918                | AA                              | GG                | 1946450101               |
| SNP_P3_78594_38577930 | NC_021165.1    | Ca_kabuli_chr06 | 38577930                | CC                              | TT                | 1946450103               |
| SNP_P3_78595_38578204 | NC_021165.1    | Ca_kabuli_chr06 | 38578204                | AA                              | TT                | 1946450104               |
| SNP_P3_78596_38610691 | NC_021165.1    | Ca_kabuli_chr06 | 38610691                | CC                              | TT                | 1946450106               |
| SNP_P3_78598_38629289 | NC_021165.1    | Ca_kabuli_chr06 | 38629289                | CC                              | TT                | 1946450108               |
| SNP_P3_78599_38629354 | NC_021165.1    | Ca_kabuli_chr06 | 38629354                | AA                              | TT                | 1946450109               |
| SNP_P3_78600_38655991 | NC_021165.1    | Ca_kabuli_chr06 | 38655991                | TT                              | AA                | 1946450111               |
| SNP_P3_78601_38659593 | NC_021165.1    | Ca_kabuli_chr06 | 38659593                | AA                              | TT                | 1946450112               |
| SNP_P3_78602_38659999 | NC_021165.1    | Ca_kabuli_chr06 | 38659999                | TT                              | CC                | 1946450114               |
| SNP_P3_78603_38669325 | NC_021165.1    | Ca_kabuli_chr06 | 38669325                | TT                              | AA                | 1946450115               |
| SNP_P3_78604_38669585 | NC_021165.1    | Ca_kabuli_chr06 | 38669585                | AA                              | CC                | 1946450117               |
| SNP_P3_78605_38669590 | NC_021165.1    | Ca_kabuli_chr06 | 38669590                | TT                              | AA                | 1946450118               |

| SNPs IDs              | Chromosome IDs | Chromosomes     | Physical positions (bp) | CDC Frontier (Reference genome) | (Pusa 256 & HPNB) | NCBI SNPdb Accession IDs |
|-----------------------|----------------|-----------------|-------------------------|---------------------------------|-------------------|--------------------------|
| SNP_P3_78606_38669741 | NC_021165.1    | Ca_kabuli_chr06 | 38669741                | TT                              | CC                | 1946450119               |
| SNP_P3_78607_38670352 | NC_021165.1    | Ca_kabuli_chr06 | 38670352                | GG                              | AA                | 1946450121               |
| SNP_P3_78608_38670468 | NC_021165.1    | Ca_kabuli_chr06 | 38670468                | TT                              | CC                | 1946450122               |
| SNP_P3_78609_38670841 | NC_021165.1    | Ca_kabuli_chr06 | 38670841                | TT                              | CC                | 1946450124               |
| SNP_P3_78610_38670885 | NC_021165.1    | Ca_kabuli_chr06 | 38670885                | AA                              | GG                | 1946450125               |
| SNP_P3_78611_38681222 | NC_021165.1    | Ca_kabuli_chr06 | 38681222                | CC                              | TT                | 1946450127               |
| SNP_P3_78614_38705556 | NC_021165.1    | Ca_kabuli_chr06 | 38705556                | AA                              | CC                | 1946450128               |
| SNP_P3_78615_38705559 | NC_021165.1    | Ca_kabuli_chr06 | 38705559                | AA                              | GG                | 1946450130               |
| SNP_P3_78616_38705560 | NC_021165.1    | Ca_kabuli_chr06 | 38705560                | GG                              | AA                | 1946450131               |
| SNP_P3_78617_38709988 | NC_021165.1    | Ca_kabuli_chr06 | 38709988                | GG                              | AA                | 1946450133               |
| SNP_P3_78619_38717685 | NC_021165.1    | Ca_kabuli_chr06 | 38717685                | AA                              | GG                | 1946450134               |
| SNP_P3_78620_38717855 | NC_021165.1    | Ca_kabuli_chr06 | 38717855                | AA                              | GG                | 1946450136               |
| SNP_P3_78621_38717985 | NC_021165.1    | Ca_kabuli_chr06 | 38717985                | GG                              | TT                | 1946450137               |
| SNP_P3_78622_38718062 | NC_021165.1    | Ca_kabuli_chr06 | 38718062                | TT                              | CC                | 1946450139               |
| SNP_P3_78624_38746474 | NC_021165.1    | Ca_kabuli_chr06 | 38746474                | GG                              | AA                | 1946450140               |
| SNP_P3_78625_38746552 | NC_021165.1    | Ca_kabuli_chr06 | 38746552                | CC                              | TT                | 1946450141               |
| SNP_P3_78627_38750505 | NC_021165.1    | Ca_kabuli_chr06 | 38750505                | AA                              | GG                | 1946450143               |
| SNP_P3_78628_38828150 | NC_021165.1    | Ca_kabuli_chr06 | 38828150                | AA                              | TT                | 1946450144               |
| SNP_P3_78629_38828162 | NC_021165.1    | Ca_kabuli_chr06 | 38828162                | AA                              | GG                | 1946450146               |
| SNP_P3_78630_38863508 | NC_021165.1    | Ca_kabuli_chr06 | 38863508                | TT                              | CC                | 1946450148               |
| SNP_P3_78631_38863512 | NC_021165.1    | Ca_kabuli_chr06 | 38863512                | TT                              | CC                | 1946450149               |
| SNP_P3_78632_38863531 | NC_021165.1    | Ca_kabuli_chr06 | 38863531                | CC                              | TT                | 1946450151               |
| SNP_P3_78633_38863533 | NC_021165.1    | Ca_kabuli_chr06 | 38863533                | AA                              | GG                | 1946450152               |
| SNP_P3_78634_38863556 | NC_021165.1    | Ca_kabuli_chr06 | 38863556                | TT                              | CC                | 1946450154               |
| SNP_P3_78635_38863578 | NC_021165.1    | Ca_kabuli_chr06 | 38863578                | TT                              | GG                | 1946450155               |
| SNP_P3_78637_38863710 | NC_021165.1    | Ca_kabuli_chr06 | 38863710                | CC                              | TT                | 1946450157               |
| SNP_P3_78638_38863941 | NC_021165.1    | Ca_kabuli_chr06 | 38863941                | CC                              | TT                | 1946450158               |
| SNP_P3_78639_38863998 | NC_021165.1    | Ca_kabuli_chr06 | 38863998                | TT                              | CC                | 1946450160               |
| SNP_P3_78640_38864023 | NC_021165.1    | Ca_kabuli_chr06 | 38864023                | GG                              | AA                | 1946450161               |
| SNP_P3_78641_38864024 | NC_021165.1    | Ca_kabuli_chr06 | 38864024                | AA                              | TT                | 1946450162               |
| SNP_P3_78642_38864028 | NC_021165.1    | Ca_kabuli_chr06 | 38864028                | TT                              | AA                | 1946450164               |
| SNP_P3_78643_38864043 | NC_021165.1    | Ca_kabuli_chr06 | 38864043                | CC                              | TT                | 1946450165               |
| SNP_P3_78644_38864049 | NC_021165.1    | Ca_kabuli_chr06 | 38864049                | TT                              | CC                | 1946450167               |
| SNP_P3_78645_38864061 | NC_021165.1    | Ca_kabuli_chr06 | 38864061                | CC                              | TT                | 1946450168               |
| SNP_P3_78646_38865491 | NC_021165.1    | Ca_kabuli_chr06 | 38865491                | AA                              | GG                | 1946450170               |
| SNP_P3_78647_38865492 | NC_021165.1    | Ca_kabuli_chr06 | 38865492                | AA                              | GG                | 1946450171               |
| SNP_P3_78648_38865493 | NC_021165.1    | Ca_kabuli_chr06 | 38865493                | GG                              | AA                | 1946450173               |
| SNP_P3_78649_38865517 | NC_021165.1    | Ca_kabuli_chr06 | 38865517                | TT                              | CC                | 1946450174               |
| SNP_P3_78650_38865521 | NC_021165.1    | Ca_kabuli_chr06 | 38865521                | TT                              | GG                | 1946450176               |
| SNP_P3_78651_38870910 | NC_021165.1    | Ca_kabuli_chr06 | 38870910                | TT                              | GG                | 1946450177               |
| SNP_P3_78652_38871608 | NC_021165.1    | Ca_kabuli_chr06 | 38871608                | AA                              | TT                | 1946450179               |
| SNP_P3_78653_38887346 | NC_021165.1    | Ca_kabuli_chr06 | 38887346                | AA                              | GG                | 1946450180               |

| SNPs IDs              | Chromosome IDs | Chromosomes     | Physical positions (bp) | CDC Frontier (Reference genome) | (Pusa 256 & HPNB) | NCBI SNPdb Accession IDs |
|-----------------------|----------------|-----------------|-------------------------|---------------------------------|-------------------|--------------------------|
| SNP_P3_78654_38914828 | NC_021165.1    | Ca_kabuli_chr06 | 38914828                | CC                              | TT                | 1946450182               |
| SNP_P3_78655_38939075 | NC_021165.1    | Ca_kabuli_chr06 | 38939075                | GG                              | CC                | 1946450183               |
| SNP_P3_78656_38941182 | NC_021165.1    | Ca_kabuli_chr06 | 38941182                | AA                              | GG                | 1946450185               |
| SNP_P3_78657_38974788 | NC_021165.1    | Ca_kabuli_chr06 | 38974788                | TT                              | CC                | 1946450186               |
| SNP_P3_78658_39022319 | NC_021165.1    | Ca_kabuli_chr06 | 39022319                | CC                              | GG                | 1946450187               |
| SNP_P3_78659_39049308 | NC_021165.1    | Ca_kabuli_chr06 | 39049308                | GG                              | AA                | 1946450189               |
| SNP_P3_78660_39049320 | NC_021165.1    | Ca_kabuli_chr06 | 39049320                | CC                              | TT                | 1946450190               |
| SNP_P3_78661_39049360 | NC_021165.1    | Ca_kabuli_chr06 | 39049360                | TT                              | CC                | 1946450191               |
| SNP_P3_78662_39049391 | NC_021165.1    | Ca_kabuli_chr06 | 39049391                | CC                              | TT                | 1946450192               |
| SNP_P3_78663_39049418 | NC_021165.1    | Ca_kabuli_chr06 | 39049418                | AA                              | GG                | 1946450193               |
| SNP_P3_78664_39049425 | NC_021165.1    | Ca_kabuli_chr06 | 39049425                | CC                              | TT                | 1946450194               |
| SNP_P3_78665_39049469 | NC_021165.1    | Ca_kabuli_chr06 | 39049469                | CC                              | TT                | 1946450195               |
| SNP_P3_78666_39049480 | NC_021165.1    | Ca_kabuli_chr06 | 39049480                | CC                              | TT                | 1946450196               |
| SNP_P3_78667_39049574 | NC_021165.1    | Ca_kabuli_chr06 | 39049574                | AA                              | TT                | 1946450197               |
| SNP_P3_78668_39049682 | NC_021165.1    | Ca_kabuli_chr06 | 39049682                | GG                              | AA                | 1946450198               |
| SNP_P3_78669_39049687 | NC_021165.1    | Ca_kabuli_chr06 | 39049687                | CC                              | AA                | 1946450199               |
| SNP_P3_78670_39049702 | NC_021165.1    | Ca_kabuli_chr06 | 39049702                | CC                              | AA                | 1946450200               |
| SNP_P3_78671_39055564 | NC_021165.1    | Ca_kabuli_chr06 | 39055564                | AA                              | TT                | 1946450201               |
| SNP_P3_78672_39055568 | NC_021165.1    | Ca_kabuli_chr06 | 39055568                | TT                              | GG                | 1946450202               |
| SNP_P3_78673_39055594 | NC_021165.1    | Ca_kabuli_chr06 | 39055594                | TT                              | CC                | 1946450203               |
| SNP_P3_78674_39055606 | NC_021165.1    | Ca_kabuli_chr06 | 39055606                | GG                              | AA                | 1946450204               |
| SNP_P3_78675_39055974 | NC_021165.1    | Ca_kabuli_chr06 | 39055974                | AA                              | GG                | 1946450205               |
| SNP_P3_78676_39055998 | NC_021165.1    | Ca_kabuli_chr06 | 39055998                | TT                              | CC                | 1946450206               |
| SNP_P3_78677_39056031 | NC_021165.1    | Ca_kabuli_chr06 | 39056031                | AA                              | CC                | 1946450207               |
| SNP_P3_78678_39116234 | NC_021165.1    | Ca_kabuli_chr06 | 39116234                | CC                              | TT                | 1946450208               |
| SNP_P3_78680_39154343 | NC_021165.1    | Ca_kabuli_chr06 | 39154343                | AA                              | CC                | 1946450209               |
| SNP_P3_78681_39154386 | NC_021165.1    | Ca_kabuli_chr06 | 39154386                | GG                              | AA                | 1946450210               |
| SNP_P3_78682_39154545 | NC_021165.1    | Ca_kabuli_chr06 | 39154545                | TT                              | AA                | 1946450211               |
| SNP_P3_78683_39156637 | NC_021165.1    | Ca_kabuli_chr06 | 39156637                | AA                              | TT                | 1946450212               |
| SNP_P3_78684_39162741 | NC_021165.1    | Ca_kabuli_chr06 | 39162741                | AA                              | CC                | 1946450213               |
| SNP_P3_78685_39163089 | NC_021165.1    | Ca_kabuli_chr06 | 39163089                | CC                              | GG                | 1946450214               |
| SNP_P3_78686_39175913 | NC_021165.1    | Ca_kabuli_chr06 | 39175913                | AA                              | GG                | 1946450215               |
| SNP_P3_78688_39195764 | NC_021165.1    | Ca_kabuli_chr06 | 39195764                | GG                              | AA                | 1946450216               |
| SNP_P3_78689_39227535 | NC_021165.1    | Ca_kabuli_chr06 | 39227535                | GG                              | CC                | 1946450217               |
| SNP_P3_78690_39251379 | NC_021165.1    | Ca_kabuli_chr06 | 39251379                | AA                              | TT                | 1946450218               |
| SNP_P3_78691_39265680 | NC_021165.1    | Ca_kabuli_chr06 | 39265680                | CC                              | TT                | 1946450219               |
| SNP_P3_78692_39265685 | NC_021165.1    | Ca_kabuli_chr06 | 39265685                | CC                              | TT                | 1946450220               |
| SNP_P3_78693_39267687 | NC_021165.1    | Ca_kabuli_chr06 | 39267687                | CC                              | TT                | 1946450221               |
| SNP_P3_78694_39267692 | NC_021165.1    | Ca_kabuli_chr06 | 39267692                | AA                              | CC                | 1946450222               |
| SNP_P3_78695_39267742 | NC_021165.1    | Ca_kabuli_chr06 | 39267742                | GG                              | TT                | 1946450223               |
| SNP_P3_78696_39272261 | NC_021165.1    | Ca_kabuli_chr06 | 39272261                | TT                              | CC                | 1946450224               |
| SNP_P3_78697_39283809 | NC_021165.1    | Ca_kabuli_chr06 | 39283809                | AA                              | GG                | 1946450225               |

| SNPs IDs              | Chromosome IDs | Chromosomes     | Physical positions (bp) | CDC Frontier (Reference genome) | (Pusa 256 & HPNB) | NCBI SNPdb Accession IDs |
|-----------------------|----------------|-----------------|-------------------------|---------------------------------|-------------------|--------------------------|
| SNP_P3_78698_39284149 | NC_021165.1    | Ca_kabuli_chr06 | 39284149                | AA                              | GG                | 1946450226               |
| SNP_P3_78699_39284246 | NC_021165.1    | Ca_kabuli_chr06 | 39284246                | AA                              | GG                | 1946450227               |
| SNP_P3_78700_39284280 | NC_021165.1    | Ca_kabuli_chr06 | 39284280                | CC                              | TT                | 1946450228               |
| SNP_P3_78701_39327279 | NC_021165.1    | Ca_kabuli_chr06 | 39327279                | CC                              | TT                | 1946450229               |
| SNP_P3_78702_39331287 | NC_021165.1    | Ca_kabuli_chr06 | 39331287                | TT                              | CC                | 1946450230               |
| SNP_P3_78703_39331317 | NC_021165.1    | Ca_kabuli_chr06 | 39331317                | CC                              | AA                | 1946450231               |
| SNP_P3_78704_39351031 | NC_021165.1    | Ca_kabuli_chr06 | 39351031                | AA                              | GG                | 1946450232               |
| SNP_P3_78705_39446517 | NC_021165.1    | Ca_kabuli_chr06 | 39446517                | CC                              | TT                | 1946450233               |
| SNP_P3_78706_39450106 | NC_021165.1    | Ca_kabuli_chr06 | 39450106                | AA                              | GG                | 1946450234               |
| SNP_P3_78707_39456856 | NC_021165.1    | Ca_kabuli_chr06 | 39456856                | GG                              | CC                | 1946450235               |
| SNP_P3_78708_39463656 | NC_021165.1    | Ca_kabuli_chr06 | 39463656                | AA                              | GG                | 1946450236               |
| SNP_P3_78709_39463658 | NC_021165.1    | Ca_kabuli_chr06 | 39463658                | TT                              | CC                | 1946450237               |
| SNP_P3_78710_39499502 | NC_021165.1    | Ca_kabuli_chr06 | 39499502                | CC                              | TT                | 1946450238               |
| SNP_P3_78711_39499727 | NC_021165.1    | Ca_kabuli_chr06 | 39499727                | AA                              | GG                | 1946450239               |
| SNP_P3_78712_39499924 | NC_021165.1    | Ca_kabuli_chr06 | 39499924                | CC                              | TT                | 1946450240               |
| SNP_P3_78713_39499994 | NC_021165.1    | Ca_kabuli_chr06 | 39499994                | AA                              | GG                | 1946450241               |
| SNP_P3_78714_39500110 | NC_021165.1    | Ca_kabuli_chr06 | 39500110                | TT                              | AA                | 1946450242               |
| SNP_P3_78715_39500121 | NC_021165.1    | Ca_kabuli_chr06 | 39500121                | GG                              | AA                | 1946450243               |
| SNP_P3_78716_39500189 | NC_021165.1    | Ca_kabuli_chr06 | 39500189                | TT                              | CC                | 1946450244               |
| SNP_P3_78717_39500214 | NC_021165.1    | Ca_kabuli_chr06 | 39500214                | GG                              | AA                | 1946450245               |
| SNP_P3_78718_39500217 | NC_021165.1    | Ca_kabuli_chr06 | 39500217                | CC                              | TT                | 1946450246               |
| SNP_P3_78719_39514572 | NC_021165.1    | Ca_kabuli_chr06 | 39514572                | AA                              | GG                | 1946450247               |
| SNP_P3_78720_39527423 | NC_021165.1    | Ca_kabuli_chr06 | 39527423                | CC                              | TT                | 1946450248               |
| SNP_P3_78721_39531073 | NC_021165.1    | Ca_kabuli_chr06 | 39531073                | GG                              | AA                | 1946450249               |
| SNP_P3_78722_39545322 | NC_021165.1    | Ca_kabuli_chr06 | 39545322                | TT                              | CC                | 1946450250               |
| SNP_P3_78724_39590173 | NC_021165.1    | Ca_kabuli_chr06 | 39590173                | GG                              | AA                | 1946450251               |
| SNP_P3_78725_39598378 | NC_021165.1    | Ca_kabuli_chr06 | 39598378                | TT                              | CC                | 1946450252               |
| SNP_P3_78726_39618619 | NC_021165.1    | Ca_kabuli_chr06 | 39618619                | CC                              | TT                | 1946450253               |
| SNP_P3_78727_39620912 | NC_021165.1    | Ca_kabuli_chr06 | 39620912                | AA                              | GG                | 1946450254               |
| SNP_P3_78728_39679180 | NC_021165.1    | Ca_kabuli_chr06 | 39679180                | AA                              | CC                | 1946450255               |
| SNP_P3_78729_39679186 | NC_021165.1    | Ca_kabuli_chr06 | 39679186                | CC                              | TT                | 1946450256               |
| SNP_P3_78730_39689540 | NC_021165.1    | Ca_kabuli_chr06 | 39689540                | AA                              | GG                | 1946450257               |
| SNP_P3_78732_39743413 | NC_021165.1    | Ca_kabuli_chr06 | 39743413                | AA                              | TT                | 1946450258               |
| SNP_P3_78733_39743433 | NC_021165.1    | Ca_kabuli_chr06 | 39743433                | AA                              | GG                | 1946450259               |
| SNP_P3_78735_39767522 | NC_021165.1    | Ca_kabuli_chr06 | 39767522                | TT                              | GG                | 1946450260               |
| SNP_P3_78736_39775087 | NC_021165.1    | Ca_kabuli_chr06 | 39775087                | TT                              | AA                | 1946450261               |
| SNP_P3_78737_39787833 | NC_021165.1    | Ca_kabuli_chr06 | 39787833                | AA                              | GG                | 1946450262               |
| SNP_P3_78738_39790409 | NC_021165.1    | Ca_kabuli_chr06 | 39790409                | TT                              | AA                | 1946450263               |
| SNP_P3_78739_39790414 | NC_021165.1    | Ca_kabuli_chr06 | 39790414                | TT                              | CC                | 1946450264               |
| SNP_P3_78740_39790433 | NC_021165.1    | Ca_kabuli_chr06 | 39790433                | CC                              | TT                | 1946450265               |
| SNP_P3_78741_39792358 | NC_021165.1    | Ca_kabuli_chr06 | 39792358                | GG                              | AA                | 1946450266               |
| SNP_P3_78742_39792367 | NC_021165.1    | Ca_kabuli_chr06 | 39792367                | GG                              | TT                | 1946450267               |

| SNPs IDs              | Chromosome IDs | Chromosomes     | Physical positions (bp) | CDC Frontier (Reference genome) | (Pusa 256 & HPNB) | NCBI SNPdb Accession IDs |
|-----------------------|----------------|-----------------|-------------------------|---------------------------------|-------------------|--------------------------|
| SNP_P3_78743_39792449 | NC_021165.1    | Ca_kabuli_chr06 | 39792449                | GG                              | AA                | 1946450268               |
| SNP_P3_78744_39824777 | NC_021165.1    | Ca_kabuli_chr06 | 39824777                | CC                              | TT                | 1946450269               |
| SNP_P3_78745_39832711 | NC_021165.1    | Ca_kabuli_chr06 | 39832711                | GG                              | CC                | 1946450270               |
| SNP_P3_78746_39862887 | NC_021165.1    | Ca_kabuli_chr06 | 39862887                | AA                              | GG                | 1946450271               |
| SNP_P3_78748_39862965 | NC_021165.1    | Ca_kabuli_chr06 | 39862965                | GG                              | AA                | 1946450272               |
| SNP_P3_78749_39863002 | NC_021165.1    | Ca_kabuli_chr06 | 39863002                | AA                              | CC                | 1946450273               |
| SNP_P3_78750_39870281 | NC_021165.1    | Ca_kabuli_chr06 | 39870281                | CC                              | AA                | 1946450274               |
| SNP_P3_78752_39880231 | NC_021165.1    | Ca_kabuli_chr06 | 39880231                | AA                              | GG                | 1946450275               |
| SNP_P3_78753_39880259 | NC_021165.1    | Ca_kabuli_chr06 | 39880259                | TT                              | CC                | 1946450276               |
| SNP_P3_78754_39896323 | NC_021165.1    | Ca_kabuli_chr06 | 39896323                | AA                              | GG                | 1946450277               |
| SNP_P3_78755_39897362 | NC_021165.1    | Ca_kabuli_chr06 | 39897362                | CC                              | TT                | 1946450278               |
| SNP_P3_78756_39902903 | NC_021165.1    | Ca_kabuli_chr06 | 39902903                | TT                              | CC                | 1946450279               |
| SNP_P3_78757_39915772 | NC_021165.1    | Ca_kabuli_chr06 | 39915772                | CC                              | AA                | 1946450280               |
| SNP_P3_78758_39923185 | NC_021165.1    | Ca_kabuli_chr06 | 39923185                | GG                              | AA                | 1946450281               |
| SNP_P3_78759_39923479 | NC_021165.1    | Ca_kabuli_chr06 | 39923479                | GG                              | AA                | 1946450282               |
| SNP_P3_78760_39923494 | NC_021165.1    | Ca_kabuli_chr06 | 39923494                | GG                              | AA                | 1946450283               |
| SNP_P3_78762_39983496 | NC_021165.1    | Ca_kabuli_chr06 | 39983496                | CC                              | TT                | 1946450284               |
| SNP_P3_78763_40017019 | NC_021165.1    | Ca_kabuli_chr06 | 40017019                | GG                              | CC                | 1946450285               |
| SNP_P3_78764_40024171 | NC_021165.1    | Ca_kabuli_chr06 | 40024171                | GG                              | CC                | 1946450286               |
| SNP_P3_78765_40031643 | NC_021165.1    | Ca_kabuli_chr06 | 40031643                | TT                              | CC                | 1946450287               |
| SNP_P3_78766_40036217 | NC_021165.1    | Ca_kabuli_chr06 | 40036217                | GG                              | CC                | 1946450288               |
| SNP_P3_78768_40036483 | NC_021165.1    | Ca_kabuli_chr06 | 40036483                | TT                              | AA                | 1946450289               |
| SNP_P3_78769_40036489 | NC_021165.1    | Ca_kabuli_chr06 | 40036489                | AA                              | GG                | 1946450290               |
| SNP_P3_78770_40036546 | NC_021165.1    | Ca_kabuli_chr06 | 40036546                | GG                              | TT                | 1946450291               |
| SNP_P3_78771_40036563 | NC_021165.1    | Ca_kabuli_chr06 | 40036563                | GG                              | TT                | 1946450292               |
| SNP_P3_78772_40037039 | NC_021165.1    | Ca_kabuli_chr06 | 40037039                | AA                              | CC                | 1946450293               |
| SNP_P3_78773_40065543 | NC_021165.1    | Ca_kabuli_chr06 | 40065543                | AA                              | TT                | 1946450294               |
| SNP_P3_78774_40090527 | NC_021165.1    | Ca_kabuli_chr06 | 40090527                | TT                              | GG                | 1946450295               |
| SNP_P3_78775_40090531 | NC_021165.1    | Ca_kabuli_chr06 | 40090531                | AA                              | CC                | 1946450296               |
| SNP_P3_78776_40100644 | NC_021165.1    | Ca_kabuli_chr06 | 40100644                | GG                              | AA                | 1946450297               |
| SNP_P3_78777_40102491 | NC_021165.1    | Ca_kabuli_chr06 | 40102491                | AA                              | GG                | 1946450298               |
| SNP_P3_78778_40119261 | NC_021165.1    | Ca_kabuli_chr06 | 40119261                | AA                              | GG                | 1946450299               |
| SNP_P3_78779_40119617 | NC_021165.1    | Ca_kabuli_chr06 | 40119617                | TT                              | GG                | 1946450300               |
| SNP_P3_78780_40119656 | NC_021165.1    | Ca_kabuli_chr06 | 40119656                | TT                              | CC                | 1946450301               |
| SNP_P3_78781_40119712 | NC_021165.1    | Ca_kabuli_chr06 | 40119712                | TT                              | GG                | 1946450302               |
| SNP_P3_78782_40119715 | NC_021165.1    | Ca_kabuli_chr06 | 40119715                | AA                              | GG                | 1946450303               |
| SNP_P3_78783_40131929 | NC_021165.1    | Ca_kabuli_chr06 | 40131929                | GG                              | AA                | 1946450304               |
| SNP_P3_78784_40144533 | NC_021165.1    | Ca_kabuli_chr06 | 40144533                | AA                              | TT                | 1946450305               |
| SNP_P3_78785_40162771 | NC_021165.1    | Ca_kabuli_chr06 | 40162771                | GG                              | AA                | 1946450306               |
| SNP_P3_78786_40164454 | NC_021165.1    | Ca_kabuli_chr06 | 40164454                | AA                              | CC                | 1946450307               |
| SNP_P3_78787_40164488 | NC_021165.1    | Ca_kabuli_chr06 | 40164488                | AA                              | GG                | 1946450308               |
| SNP_P3_78788_40164808 | NC_021165.1    | Ca_kabuli_chr06 | 40164808                | TT                              | CC                | 1946450309               |

| SNPs IDs              | Chromosome IDs | Chromosomes     | Physical positions (bp) | CDC Frontier (Reference genome) | (Pusa 256 & HPNB) | NCBI SNPdb Accession IDs |
|-----------------------|----------------|-----------------|-------------------------|---------------------------------|-------------------|--------------------------|
| SNP_P3_78789_40175653 | NC_021165.1    | Ca_kabuli_chr06 | 40175653                | CC                              | GG                | 1946450310               |
| SNP_P3_78790_40176847 | NC_021165.1    | Ca_kabuli_chr06 | 40176847                | AA                              | TT                | 1946450311               |
| SNP_P3_78791_40183178 | NC_021165.1    | Ca_kabuli_chr06 | 40183178                | TT                              | GG                | 1946450312               |
| SNP_P3_78792_40188290 | NC_021165.1    | Ca_kabuli_chr06 | 40188290                | TT                              | CC                | 1946450313               |
| SNP_P3_78793_40188651 | NC_021165.1    | Ca_kabuli_chr06 | 40188651                | TT                              | GG                | 1946450314               |
| SNP_P3_78794_40188682 | NC_021165.1    | Ca_kabuli_chr06 | 40188682                | TT                              | CC                | 1946450315               |
| SNP_P3_78795_40189626 | NC_021165.1    | Ca_kabuli_chr06 | 40189626                | AA                              | CC                | 1946450316               |
| SNP_P3_78796_40193642 | NC_021165.1    | Ca_kabuli_chr06 | 40193642                | GG                              | AA                | 1946450317               |
| SNP_P3_78797_40199245 | NC_021165.1    | Ca_kabuli_chr06 | 40199245                | GG                              | TT                | 1946450318               |
| SNP_P3_78798_40216800 | NC_021165.1    | Ca_kabuli_chr06 | 40216800                | AA                              | GG                | 1946450319               |
| SNP_P3_78799_40220997 | NC_021165.1    | Ca_kabuli_chr06 | 40220997                | GG                              | AA                | 1946450320               |
| SNP_P3_78800_40230937 | NC_021165.1    | Ca_kabuli_chr06 | 40230937                | GG                              | TT                | 1946450321               |
| SNP_P3_78801_40249035 | NC_021165.1    | Ca_kabuli_chr06 | 40249035                | GG                              | AA                | 1946450322               |
| SNP_P3_78802_40272718 | NC_021165.1    | Ca_kabuli_chr06 | 40272718                | TT                              | GG                | 1946450323               |
| SNP_P3_78803_40294611 | NC_021165.1    | Ca_kabuli_chr06 | 40294611                | GG                              | TT                | 1946450324               |
| SNP_P3_78804_40317760 | NC_021165.1    | Ca_kabuli_chr06 | 40317760                | GG                              | AA                | 1946450325               |
| SNP_P3_78805_40323605 | NC_021165.1    | Ca_kabuli_chr06 | 40323605                | AA                              | GG                | 1946450326               |
| SNP_P3_78806_40348726 | NC_021165.1    | Ca_kabuli_chr06 | 40348726                | GG                              | AA                | 1946450327               |
| SNP_P3_78807_40361082 | NC_021165.1    | Ca_kabuli_chr06 | 40361082                | TT                              | CC                | 1946450328               |
| SNP_P3_78808_40368624 | NC_021165.1    | Ca_kabuli_chr06 | 40368624                | TT                              | CC                | 1946450329               |
| SNP_P3_78809_40388195 | NC_021165.1    | Ca_kabuli_chr06 | 40388195                | TT                              | GG                | 1946450330               |
| SNP_P3_78810_40410248 | NC_021165.1    | Ca_kabuli_chr06 | 40410248                | AA                              | GG                | 1946450331               |
| SNP_P3_78811_40417800 | NC_021165.1    | Ca_kabuli_chr06 | 40417800                | AA                              | TT                | 1946450332               |
| SNP_P3_78812_40423654 | NC_021165.1    | Ca_kabuli_chr06 | 40423654                | GG                              | AA                | 1946450333               |
| SNP_P3_78813_40429248 | NC_021165.1    | Ca_kabuli_chr06 | 40429248                | AA                              | TT                | 1946450334               |
| SNP_P3_78815_40429291 | NC_021165.1    | Ca_kabuli_chr06 | 40429291                | CC                              | TT                | 1946450335               |
| SNP_P3_78816_40429316 | NC_021165.1    | Ca_kabuli_chr06 | 40429316                | CC                              | AA                | 1946450336               |
| SNP_P3_78817_40429551 | NC_021165.1    | Ca_kabuli_chr06 | 40429551                | CC                              | TT                | 1946450337               |
| SNP_P3_78818_40429593 | NC_021165.1    | Ca_kabuli_chr06 | 40429593                | AA                              | GG                | 1946450338               |
| SNP_P3_78819_40429640 | NC_021165.1    | Ca_kabuli_chr06 | 40429640                | AA                              | GG                | 1946450339               |
| SNP_P3_78820_40445464 | NC_021165.1    | Ca_kabuli_chr06 | 40445464                | GG                              | AA                | 1946450340               |
| SNP_P3_78821_40469957 | NC_021165.1    | Ca_kabuli_chr06 | 40469957                | TT                              | CC                | 1946450341               |
| SNP_P3_78822_40473714 | NC_021165.1    | Ca_kabuli_chr06 | 40473714                | GG                              | TT                | 1946450342               |
| SNP_P3_78823_40481249 | NC_021165.1    | Ca_kabuli_chr06 | 40481249                | GG                              | TT                | 1946450343               |
| SNP_P3_78824_40481252 | NC_021165.1    | Ca_kabuli_chr06 | 40481252                | CC                              | TT                | 1946450344               |
| SNP_P3_78825_40481254 | NC_021165.1    | Ca_kabuli_chr06 | 40481254                | CC                              | TT                | 1946450345               |
| SNP_P3_78826_40481255 | NC_021165.1    | Ca_kabuli_chr06 | 40481255                | TT                              | AA                | 1946450346               |
| SNP_P3_78828_40516313 | NC_021165.1    | Ca_kabuli_chr06 | 40516313                | AA                              | CC                | 1946450347               |
| SNP_P3_78829_40520099 | NC_021165.1    | Ca_kabuli_chr06 | 40520099                | AA                              | GG                | 1946450348               |
| SNP_P3_78830_40522492 | NC_021165.1    | Ca_kabuli_chr06 | 40522492                | TT                              | GG                | 1946450349               |
| SNP_P3_78831_40522989 | NC_021165.1    | Ca_kabuli_chr06 | 40522989                | GG                              | AA                | 1946450350               |
| SNP_P3_78832_40523716 | NC_021165.1    | Ca_kabuli_chr06 | 40523716                | TT                              | CC                | 1946450351               |

| SNPs IDs              | Chromosome IDs | Chromosomes     | Physical positions (bp) | CDC Frontier (Reference genome) | (Pusa 256 & HPNB) | NCBI SNPdb Accession IDs |
|-----------------------|----------------|-----------------|-------------------------|---------------------------------|-------------------|--------------------------|
| SNP_P3_78833_40528358 | NC_021165.1    | Ca_kabuli_chr06 | 40528358                | GG                              | AA                | 1946450352               |
| SNP_P3_78835_40536554 | NC_021165.1    | Ca_kabuli_chr06 | 40536554                | AA                              | GG                | 1946450353               |
| SNP_P3_78836_40536577 | NC_021165.1    | Ca_kabuli_chr06 | 40536577                | CC                              | TT                | 1946450354               |
| SNP_P3_78837_40536640 | NC_021165.1    | Ca_kabuli_chr06 | 40536640                | CC                              | TT                | 1946450355               |
| SNP_P3_78838_40536673 | NC_021165.1    | Ca_kabuli_chr06 | 40536673                | CC                              | TT                | 1946450356               |
| SNP_P3_78839_40536893 | NC_021165.1    | Ca_kabuli_chr06 | 40536893                | AA                              | TT                | 1946450357               |
| SNP_P3_78840_40536903 | NC_021165.1    | Ca_kabuli_chr06 | 40536903                | TT                              | AA                | 1946450358               |
| SNP_P3_78841_40536951 | NC_021165.1    | Ca_kabuli_chr06 | 40536951                | GG                              | TT                | 1946450359               |
| SNP_P3_78842_40542324 | NC_021165.1    | Ca_kabuli_chr06 | 40542324                | CC                              | TT                | 1946450360               |
| SNP_P3_78843_40542334 | NC_021165.1    | Ca_kabuli_chr06 | 40542334                | TT                              | GG                | 1946450361               |
| SNP_P3_78844_40542381 | NC_021165.1    | Ca_kabuli_chr06 | 40542381                | CC                              | AA                | 1946450362               |
| SNP_P3_78845_40560506 | NC_021165.1    | Ca_kabuli_chr06 | 40560506                | CC                              | TT                | 1946450363               |
| SNP_P3_78846_40583529 | NC_021165.1    | Ca_kabuli_chr06 | 40583529                | GG                              | AA                | 1946450364               |
| SNP_P3_78847_40588894 | NC_021165.1    | Ca_kabuli_chr06 | 40588894                | AA                              | CC                | 1946450365               |
| SNP_P3_78848_40590565 | NC_021165.1    | Ca_kabuli_chr06 | 40590565                | TT                              | CC                | 1946450366               |
| SNP_P3_78849_40592712 | NC_021165.1    | Ca_kabuli_chr06 | 40592712                | TT                              | CC                | 1946450367               |
| SNP_P3_78850_40592714 | NC_021165.1    | Ca_kabuli_chr06 | 40592714                | GG                              | TT                | 1946450368               |
| SNP_P3_78851_40592977 | NC_021165.1    | Ca_kabuli_chr06 | 40592977                | CC                              | GG                | 1946450369               |
| SNP_P3_78853_40625230 | NC_021165.1    | Ca_kabuli_chr06 | 40625230                | GG                              | AA                | 1946450370               |
| SNP_P3_78854_40632871 | NC_021165.1    | Ca_kabuli_chr06 | 40632871                | GG                              | AA                | 1946450371               |
| SNP_P3_78855_40649484 | NC_021165.1    | Ca_kabuli_chr06 | 40649484                | TT                              | CC                | 1946450372               |
| SNP_P3_78856_40684471 | NC_021165.1    | Ca_kabuli_chr06 | 40684471                | AA                              | GG                | 1946450373               |
| SNP_P3_78857_40684487 | NC_021165.1    | Ca_kabuli_chr06 | 40684487                | CC                              | TT                | 1946450374               |
| SNP_P3_78858_40684526 | NC_021165.1    | Ca_kabuli_chr06 | 40684526                | CC                              | TT                | 1946450375               |
| SNP_P3_78859_40705891 | NC_021165.1    | Ca_kabuli_chr06 | 40705891                | AA                              | GG                | 1946450376               |
| SNP_P3_78860_40705953 | NC_021165.1    | Ca_kabuli_chr06 | 40705953                | GG                              | TT                | 1946450377               |
| SNP_P3_78861_40705958 | NC_021165.1    | Ca_kabuli_chr06 | 40705958                | AA                              | GG                | 1946450378               |
| SNP_P3_78862_40706373 | NC_021165.1    | Ca_kabuli_chr06 | 40706373                | CC                              | TT                | 1946450379               |
| SNP_P3_78863_40706396 | NC_021165.1    | Ca_kabuli_chr06 | 40706396                | AA                              | GG                | 1946450380               |
| SNP_P3_78864_40706435 | NC_021165.1    | Ca_kabuli_chr06 | 40706435                | GG                              | AA                | 1946450381               |
| SNP_P3_78866_40783451 | NC_021165.1    | Ca_kabuli_chr06 | 40783451                | AA                              | GG                | 1946450382               |
| SNP_P3_78867_40800355 | NC_021165.1    | Ca_kabuli_chr06 | 40800355                | AA                              | GG                | 1946450383               |
| SNP_P3_78868_40800422 | NC_021165.1    | Ca_kabuli_chr06 | 40800422                | AA                              | GG                | 1946450384               |
| SNP_P3_78869_40833421 | NC_021165.1    | Ca_kabuli_chr06 | 40833421                | GG                              | AA                | 1946450385               |
| SNP_P3_78870_40845396 | NC_021165.1    | Ca_kabuli_chr06 | 40845396                | TT                              | CC                | 1946450386               |
| SNP_P3_78871_40862379 | NC_021165.1    | Ca_kabuli_chr06 | 40862379                | TT                              | CC                | 1946450387               |
| SNP_P3_78872_40894437 | NC_021165.1    | Ca_kabuli_chr06 | 40894437                | GG                              | AA                | 1946450388               |
| SNP_P3_78873_40903664 | NC_021165.1    | Ca_kabuli_chr06 | 40903664                | AA                              | GG                | 1946450389               |
| SNP_P3_78874_40907633 | NC_021165.1    | Ca_kabuli_chr06 | 40907633                | CC                              | TT                | 1946450390               |
| SNP_P3_78875_40911836 | NC_021165.1    | Ca_kabuli_chr06 | 40911836                | TT                              | CC                | 1946450391               |
| SNP_P3_78877_40955355 | NC_021165.1    | Ca_kabuli_chr06 | 40955355                | CC                              | TT                | 1946450392               |
| SNP_P3_78878_40955711 | NC_021165.1    | Ca_kabuli_chr06 | 40955711                | AA                              | TT                | 1946450393               |



| SNPs IDs              | Chromosome IDs | Chromosomes     | Physical positions (bp) | CDC Frontier (Reference genome) | (Pusa 256 & HPNB) | NCBI SNPdb Accession IDs |
|-----------------------|----------------|-----------------|-------------------------|---------------------------------|-------------------|--------------------------|
| SNP_P3_78879_40957010 | NC_021165.1    | Ca_kabuli_chr06 | 40957010                | CC                              | GG                | 1946450394               |
| SNP_P3_78880_40964257 | NC_021165.1    | Ca_kabuli_chr06 | 40964257                | CC                              | AA                | 1946450395               |
| SNP_P3_78881_41001193 | NC_021165.1    | Ca_kabuli_chr06 | 41001193                | GG                              | AA                | 1946450396               |
| SNP_P3_78882_41001279 | NC_021165.1    | Ca_kabuli_chr06 | 41001279                | CC                              | TT                | 1946450397               |
| SNP_P3_78883_41001832 | NC_021165.1    | Ca_kabuli_chr06 | 41001832                | TT                              | CC                | 1946450398               |
| SNP_P3_78884_41030080 | NC_021165.1    | Ca_kabuli_chr06 | 41030080                | AA                              | GG                | 1946450399               |
| SNP_P3_78885_41030083 | NC_021165.1    | Ca_kabuli_chr06 | 41030083                | GG                              | CC                | 1946450400               |
| SNP_P3_78886_41030094 | NC_021165.1    | Ca_kabuli_chr06 | 41030094                | TT                              | AA                | 1946450401               |
| SNP_P3_78887_41030102 | NC_021165.1    | Ca_kabuli_chr06 | 41030102                | AA                              | GG                | 1946450402               |
| SNP_P3_78888_41060402 | NC_021165.1    | Ca_kabuli_chr06 | 41060402                | AA                              | GG                | 1946450403               |
| SNP_P3_78889_41069910 | NC_021165.1    | Ca_kabuli_chr06 | 41069910                | GG                              | AA                | 1946450404               |
| SNP_P3_78890_41069925 | NC_021165.1    | Ca_kabuli_chr06 | 41069925                | AA                              | GG                | 1946450405               |
| SNP_P3_78891_41071431 | NC_021165.1    | Ca_kabuli_chr06 | 41071431                | AA                              | GG                | 1946450406               |
| SNP_P3_78892_41093225 | NC_021165.1    | Ca_kabuli_chr06 | 41093225                | TT                              | CC                | 1946450407               |
| SNP_P3_78893_41093559 | NC_021165.1    | Ca_kabuli_chr06 | 41093559                | GG                              | AA                | 1946450408               |
| SNP_P3_78894_41093564 | NC_021165.1    | Ca_kabuli_chr06 | 41093564                | AA                              | CC                | 1946450409               |
| SNP_P3_78895_41117922 | NC_021165.1    | Ca_kabuli_chr06 | 41117922                | GG                              | TT                | 1946450410               |
| SNP_P3_78896_41117925 | NC_021165.1    | Ca_kabuli_chr06 | 41117925                | CC                              | AA                | 1946450411               |
| SNP_P3_78897_41118032 | NC_021165.1    | Ca_kabuli_chr06 | 41118032                | CC                              | AA                | 1946450412               |
| SNP_P3_78898_41118308 | NC_021165.1    | Ca_kabuli_chr06 | 41118308                | TT                              | GG                | 1946450413               |
| SNP_P3_78899_41118330 | NC_021165.1    | Ca_kabuli_chr06 | 41118330                | AA                              | GG                | 1946450414               |
| SNP_P3_78900_41118432 | NC_021165.1    | Ca_kabuli_chr06 | 41118432                | AA                              | TT                | 1946450415               |
| SNP_P3_78901_41118507 | NC_021165.1    | Ca_kabuli_chr06 | 41118507                | TT                              | CC                | 1946450416               |
| SNP_P3_78902_41118978 | NC_021165.1    | Ca_kabuli_chr06 | 41118978                | TT                              | CC                | 1946450417               |
| SNP_P3_78903_41119056 | NC_021165.1    | Ca_kabuli_chr06 | 41119056                | AA                              | GG                | 1946450418               |
| SNP_P3_78904_41119058 | NC_021165.1    | Ca_kabuli_chr06 | 41119058                | TT                              | CC                | 1946450419               |
| SNP_P3_78905_41128253 | NC_021165.1    | Ca_kabuli_chr06 | 41128253                | CC                              | TT                | 1946450420               |
| SNP_P3_78906_41128534 | NC_021165.1    | Ca_kabuli_chr06 | 41128534                | AA                              | GG                | 1946450421               |
| SNP_P3_78907_41128621 | NC_021165.1    | Ca_kabuli_chr06 | 41128621                | CC                              | TT                | 1946450422               |
| SNP_P3_78908_41128688 | NC_021165.1    | Ca_kabuli_chr06 | 41128688                | CC                              | TT                | 1946450423               |
| SNP_P3_78909_41128693 | NC_021165.1    | Ca_kabuli_chr06 | 41128693                | AA                              | GG                | 1946450424               |
| SNP_P3_78910_41128699 | NC_021165.1    | Ca_kabuli_chr06 | 41128699                | CC                              | TT                | 1946450425               |
| SNP_P3_78911_41128701 | NC_021165.1    | Ca_kabuli_chr06 | 41128701                | GG                              | AA                | 1946450426               |
| SNP_P3_78912_41128726 | NC_021165.1    | Ca_kabuli_chr06 | 41128726                | TT                              | CC                | 1946450427               |
| SNP_P3_78913_41128736 | NC_021165.1    | Ca_kabuli_chr06 | 41128736                | CC                              | TT                | 1946450428               |
| SNP_P3_78914_41131903 | NC_021165.1    | Ca_kabuli_chr06 | 41131903                | TT                              | CC                | 1946450429               |
| SNP_P3_78915_41131904 | NC_021165.1    | Ca_kabuli_chr06 | 41131904                | TT                              | CC                | 1946450430               |
| SNP_P3_78916_41131907 | NC_021165.1    | Ca_kabuli_chr06 | 41131907                | TT                              | CC                | 1946450431               |
| SNP_P3_78917_41131909 | NC_021165.1    | Ca_kabuli_chr06 | 41131909                | GG                              | CC                | 1946450432               |
| SNP_P3_78918_41131983 | NC_021165.1    | Ca_kabuli_chr06 | 41131983                | CC                              | TT                | 1946450433               |
| SNP_P3_78919_41132467 | NC_021165.1    | Ca_kabuli_chr06 | 41132467                | AA                              | TT                | 1946450434               |
| SNP_P3_78920_41132481 | NC_021165.1    | Ca_kabuli_chr06 | 41132481                | TT                              | CC                | 1946450435               |

| SNPs IDs              | Chromosome IDs | Chromosomes     | Physical positions (bp) | CDC Frontier (Reference genome) | (Pusa 256 & HPNB) | NCBI SNPdb Accession IDs |
|-----------------------|----------------|-----------------|-------------------------|---------------------------------|-------------------|--------------------------|
| SNP_P3_78921_41137285 | NC_021165.1    | Ca_kabuli_chr06 | 41137285                | TT                              | CC                | 1946450436               |
| SNP_P3_78922_41137291 | NC_021165.1    | Ca_kabuli_chr06 | 41137291                | AA                              | TT                | 1946450437               |
| SNP_P3_78923_41142146 | NC_021165.1    | Ca_kabuli_chr06 | 41142146                | CC                              | GG                | 1946450438               |
| SNP_P3_78924_41159810 | NC_021165.1    | Ca_kabuli_chr06 | 41159810                | CC                              | TT                | 1946450439               |
| SNP_P3_78925_41160108 | NC_021165.1    | Ca_kabuli_chr06 | 41160108                | CC                              | TT                | 1946450440               |
| SNP_P3_78926_41160202 | NC_021165.1    | Ca_kabuli_chr06 | 41160202                | TT                              | CC                | 1946450441               |
| SNP_P3_78927_41165413 | NC_021165.1    | Ca_kabuli_chr06 | 41165413                | CC                              | TT                | 1946450442               |
| SNP_P3_78928_41165430 | NC_021165.1    | Ca_kabuli_chr06 | 41165430                | GG                              | CC                | 1946450443               |
| SNP_P3_78929_41165468 | NC_021165.1    | Ca_kabuli_chr06 | 41165468                | CC                              | TT                | 1946450444               |
| SNP_P3_78931_41173541 | NC_021165.1    | Ca_kabuli_chr06 | 41173541                | TT                              | CC                | 1946450445               |
| SNP_P3_78932_41177592 | NC_021165.1    | Ca_kabuli_chr06 | 41177592                | TT                              | AA                | 1946450446               |
| SNP_P3_78934_41230156 | NC_021165.1    | Ca_kabuli_chr06 | 41230156                | CC                              | TT                | 1946450447               |
| SNP_P3_78935_41230418 | NC_021165.1    | Ca_kabuli_chr06 | 41230418                | TT                              | CC                | 1946450448               |
| SNP_P3_78936_41230433 | NC_021165.1    | Ca_kabuli_chr06 | 41230433                | AA                              | CC                | 1946450449               |
| SNP_P3_78937_41230434 | NC_021165.1    | Ca_kabuli_chr06 | 41230434                | TT                              | AA                | 1946450450               |
| SNP_P3_78938_41230463 | NC_021165.1    | Ca_kabuli_chr06 | 41230463                | AA                              | GG                | 1946450451               |
| SNP_P3_78939_41230486 | NC_021165.1    | Ca_kabuli_chr06 | 41230486                | GG                              | TT                | 1946450452               |
| SNP_P3_78940_41230489 | NC_021165.1    | Ca_kabuli_chr06 | 41230489                | GG                              | AA                | 1946450453               |
| SNP_P3_78941_41230594 | NC_021165.1    | Ca_kabuli_chr06 | 41230594                | AA                              | GG                | 1946450454               |
| SNP_P3_78942_41230900 | NC_021165.1    | Ca_kabuli_chr06 | 41230900                | GG                              | AA                | 1946450455               |
| SNP_P3_78945_41301667 | NC_021165.1    | Ca_kabuli_chr06 | 41301667                | CC                              | TT                | 1946450456               |
| SNP_P3_78946_41319352 | NC_021165.1    | Ca_kabuli_chr06 | 41319352                | CC                              | TT                | 1946450457               |
| SNP_P3_78947_41320749 | NC_021165.1    | Ca_kabuli_chr06 | 41320749                | AA                              | GG                | 1946450458               |
| SNP_P3_78948_41322327 | NC_021165.1    | Ca_kabuli_chr06 | 41322327                | TT                              | CC                | 1946450459               |
| SNP_P3_78949_41322556 | NC_021165.1    | Ca_kabuli_chr06 | 41322556                | GG                              | AA                | 1946450460               |
| SNP_P3_78950_41322820 | NC_021165.1    | Ca_kabuli_chr06 | 41322820                | TT                              | AA                | 1946450461               |
| SNP_P3_78951_41322822 | NC_021165.1    | Ca_kabuli_chr06 | 41322822                | CC                              | GG                | 1946450462               |
| SNP_P3_78952_41322858 | NC_021165.1    | Ca_kabuli_chr06 | 41322858                | AA                              | GG                | 1946450463               |
| SNP_P3_78953_41323870 | NC_021165.1    | Ca_kabuli_chr06 | 41323870                | TT                              | CC                | 1946450464               |
| SNP_P3_78954_41323918 | NC_021165.1    | Ca_kabuli_chr06 | 41323918                | AA                              | GG                | 1946450465               |
| SNP_P3_78955_41323934 | NC_021165.1    | Ca_kabuli_chr06 | 41323934                | AA                              | GG                | 1946450466               |
| SNP_P3_78956_41342797 | NC_021165.1    | Ca_kabuli_chr06 | 41342797                | GG                              | TT                | 1946450467               |
| SNP_P3_78957_41352183 | NC_021165.1    | Ca_kabuli_chr06 | 41352183                | AA                              | CC                | 1946450468               |
| SNP_P3_78958_41358615 | NC_021165.1    | Ca_kabuli_chr06 | 41358615                | TT                              | CC                | 1946450469               |
| SNP_P3_78959_41360694 | NC_021165.1    | Ca_kabuli_chr06 | 41360694                | CC                              | TT                | 1946450470               |
| SNP_P3_78962_41393889 | NC_021165.1    | Ca_kabuli_chr06 | 41393889                | TT                              | AA                | 1946450471               |
| SNP_P3_78963_41405706 | NC_021165.1    | Ca_kabuli_chr06 | 41405706                | AA                              | TT                | 1946450472               |
| SNP_P3_78965_41464139 | NC_021165.1    | Ca_kabuli_chr06 | 41464139                | TT                              | CC                | 1946450473               |
| SNP_P3_78966_41464177 | NC_021165.1    | Ca_kabuli_chr06 | 41464177                | AA                              | GG                | 1946450474               |
| SNP_P3_78967_41464256 | NC_021165.1    | Ca_kabuli_chr06 | 41464256                | AA                              | GG                | 1946450475               |
| SNP_P3_78969_41464303 | NC_021165.1    | Ca_kabuli_chr06 | 41464303                | TT                              | CC                | 1946450476               |
| SNP_P3_78970_41464335 | NC_021165.1    | Ca_kabuli_chr06 | 41464335                | CC                              | TT                | 1946450477               |

| SNPs IDs              | Chromosome IDs | Chromosomes     | Physical positions (bp) | CDC Frontier (Reference genome) | (Pusa 256 & HPNB) | NCBI SNPdb Accession IDs |
|-----------------------|----------------|-----------------|-------------------------|---------------------------------|-------------------|--------------------------|
| SNP_P3_78971_41464338 | NC_021165.1    | Ca_kabuli_chr06 | 41464338                | GG                              | TT                | 1946450478               |
| SNP_P3_78972_41464372 | NC_021165.1    | Ca_kabuli_chr06 | 41464372                | TT                              | CC                | 1946450479               |
| SNP_P3_78973_41464374 | NC_021165.1    | Ca_kabuli_chr06 | 41464374                | AA                              | GG                | 1946450480               |
| SNP_P3_78974_41483074 | NC_021165.1    | Ca_kabuli_chr06 | 41483074                | GG                              | AA                | 1946450481               |
| SNP_P3_78975_41550683 | NC_021165.1    | Ca_kabuli_chr06 | 41550683                | TT                              | CC                | 1946450482               |
| SNP_P3_78976_41556932 | NC_021165.1    | Ca_kabuli_chr06 | 41556932                | TT                              | CC                | 1946450483               |
| SNP_P3_78977_41573792 | NC_021165.1    | Ca_kabuli_chr06 | 41573792                | GG                              | AA                | 1946450484               |
| SNP_P3_78978_41573798 | NC_021165.1    | Ca_kabuli_chr06 | 41573798                | AA                              | GG                | 1946450485               |
| SNP_P3_78979_41573808 | NC_021165.1    | Ca_kabuli_chr06 | 41573808                | AA                              | TT                | 1946450486               |
| SNP_P3_78980_41574151 | NC_021165.1    | Ca_kabuli_chr06 | 41574151                | AA                              | GG                | 1946450487               |
| SNP_P3_78981_41574185 | NC_021165.1    | Ca_kabuli_chr06 | 41574185                | TT                              | AA                | 1946450488               |
| SNP_P3_78984_41574431 | NC_021165.1    | Ca_kabuli_chr06 | 41574431                | CC                              | AA                | 1946450489               |
| SNP_P3_78985_41574457 | NC_021165.1    | Ca_kabuli_chr06 | 41574457                | TT                              | CC                | 1946450490               |
| SNP_P3_78986_41574589 | NC_021165.1    | Ca_kabuli_chr06 | 41574589                | AA                              | TT                | 1946450491               |
| SNP_P3_78987_41574596 | NC_021165.1    | Ca_kabuli_chr06 | 41574596                | TT                              | CC                | 1946450492               |
| SNP_P3_78989_41576240 | NC_021165.1    | Ca_kabuli_chr06 | 41576240                | CC                              | TT                | 1946450493               |
| SNP_P3_78990_41603266 | NC_021165.1    | Ca_kabuli_chr06 | 41603266                | AA                              | TT                | 1946450494               |
| SNP_P3_78991_41614870 | NC_021165.1    | Ca_kabuli_chr06 | 41614870                | TT                              | CC                | 1946450495               |
| SNP_P3_78992_41615276 | NC_021165.1    | Ca_kabuli_chr06 | 41615276                | AA                              | TT                | 1946450496               |
| SNP_P3_78994_41646321 | NC_021165.1    | Ca_kabuli_chr06 | 41646321                | TT                              | CC                | 1946450497               |
| SNP_P3_78995_41654050 | NC_021165.1    | Ca_kabuli_chr06 | 41654050                | CC                              | TT                | 1946450498               |
| SNP_P3_78996_41654361 | NC_021165.1    | Ca_kabuli_chr06 | 41654361                | AA                              | GG                | 1946450499               |
| SNP_P3_78998_41654678 | NC_021165.1    | Ca_kabuli_chr06 | 41654678                | TT                              | AA                | 1946450501               |
| SNP_P3_78999_41654699 | NC_021165.1    | Ca_kabuli_chr06 | 41654699                | AA                              | TT                | 1946450503               |
| SNP_P3_79000_41654781 | NC_021165.1    | Ca_kabuli_chr06 | 41654781                | AA                              | GG                | 1946450504               |
| SNP_P3_79001_41655391 | NC_021165.1    | Ca_kabuli_chr06 | 41655391                | AA                              | CC                | 1946450505               |
| SNP_P3_79002_41655587 | NC_021165.1    | Ca_kabuli_chr06 | 41655587                | TT                              | AA                | 1946450507               |
| SNP_P3_79003_41656240 | NC_021165.1    | Ca_kabuli_chr06 | 41656240                | CC                              | TT                | 1946450508               |
| SNP_P3_79004_41656963 | NC_021165.1    | Ca_kabuli_chr06 | 41656963                | TT                              | GG                | 1946450510               |
| SNP_P3_79005_41657226 | NC_021165.1    | Ca_kabuli_chr06 | 41657226                | CC                              | TT                | 1946450511               |
| SNP_P3_79006_41658087 | NC_021165.1    | Ca_kabuli_chr06 | 41658087                | AA                              | GG                | 1946450513               |
| SNP_P3_79007_41659251 | NC_021165.1    | Ca_kabuli_chr06 | 41659251                | GG                              | AA                | 1946450514               |
| SNP_P3_79008_41659380 | NC_021165.1    | Ca_kabuli_chr06 | 41659380                | TT                              | CC                | 1946450516               |
| SNP_P3_79010_41659773 | NC_021165.1    | Ca_kabuli_chr06 | 41659773                | AA                              | GG                | 1946450517               |
| SNP_P3_79011_41660936 | NC_021165.1    | Ca_kabuli_chr06 | 41660936                | CC                              | TT                | 1946450519               |
| SNP_P3_79012_41661628 | NC_021165.1    | Ca_kabuli_chr06 | 41661628                | GG                              | TT                | 1946450520               |
| SNP_P3_79013_41661653 | NC_021165.1    | Ca_kabuli_chr06 | 41661653                | CC                              | TT                | 1946450522               |
| SNP_P3_79015_41674088 | NC_021165.1    | Ca_kabuli_chr06 | 41674088                | CC                              | TT                | 1946450523               |
| SNP_P3_79016_41674728 | NC_021165.1    | Ca_kabuli_chr06 | 41674728                | GG                              | AA                | 1946450524               |
| SNP_P3_79017_41680954 | NC_021165.1    | Ca_kabuli_chr06 | 41680954                | TT                              | CC                | 1946450526               |
| SNP_P3_79018_41681360 | NC_021165.1    | Ca_kabuli_chr06 | 41681360                | TT                              | CC                | 1946450527               |
| SNP_P3_79019_41682172 | NC_021165.1    | Ca_kabuli_chr06 | 41682172                | TT                              | CC                | 1946450529               |

| SNPs IDs              | Chromosome IDs | Chromosomes     | Physical positions (bp) | CDC Frontier (Reference genome) | (Pusa 256 & HPNB) | NCBI SNPdb Accession IDs |
|-----------------------|----------------|-----------------|-------------------------|---------------------------------|-------------------|--------------------------|
| SNP_P3_79020_41693501 | NC_021165.1    | Ca_kabuli_chr06 | 41693501                | AA                              | GG                | 1946450530               |
| SNP_P3_79021_41693992 | NC_021165.1    | Ca_kabuli_chr06 | 41693992                | GG                              | AA                | 1946450532               |
| SNP_P3_79022_41694033 | NC_021165.1    | Ca_kabuli_chr06 | 41694033                | TT                              | CC                | 1946450533               |
| SNP_P3_79023_41706510 | NC_021165.1    | Ca_kabuli_chr06 | 41706510                | GG                              | AA                | 1946450535               |
| SNP_P3_79024_41706601 | NC_021165.1    | Ca_kabuli_chr06 | 41706601                | GG                              | AA                | 1946450536               |
| SNP_P3_79025_41706640 | NC_021165.1    | Ca_kabuli_chr06 | 41706640                | TT                              | AA                | 1946450538               |
| SNP_P3_79026_41706655 | NC_021165.1    | Ca_kabuli_chr06 | 41706655                | TT                              | CC                | 1946450539               |
| SNP_P3_79027_41726147 | NC_021165.1    | Ca_kabuli_chr06 | 41726147                | AA                              | GG                | 1946450540               |
| SNP_P3_79028_41743299 | NC_021165.1    | Ca_kabuli_chr06 | 41743299                | TT                              | CC                | 1946450542               |
| SNP_P3_79029_41743300 | NC_021165.1    | Ca_kabuli_chr06 | 41743300                | AA                              | GG                | 1946450543               |
| SNP_P3_79030_41743306 | NC_021165.1    | Ca_kabuli_chr06 | 41743306                | GG                              | AA                | 1946450545               |
| SNP_P3_79031_41743311 | NC_021165.1    | Ca_kabuli_chr06 | 41743311                | AA                              | GG                | 1946450546               |
| SNP_P3_79032_41743388 | NC_021165.1    | Ca_kabuli_chr06 | 41743388                | AA                              | GG                | 1946450548               |
| SNP_P3_79033_41743574 | NC_021165.1    | Ca_kabuli_chr06 | 41743574                | TT                              | CC                | 1946450549               |
| SNP_P3_79034_41743678 | NC_021165.1    | Ca_kabuli_chr06 | 41743678                | AA                              | CC                | 1946450551               |
| SNP_P3_79035_41743714 | NC_021165.1    | Ca_kabuli_chr06 | 41743714                | CC                              | TT                | 1946450552               |
| SNP_P3_79036_41743723 | NC_021165.1    | Ca_kabuli_chr06 | 41743723                | AA                              | GG                | 1946450554               |
| SNP_P3_79037_41743744 | NC_021165.1    | Ca_kabuli_chr06 | 41743744                | TT                              | CC                | 1946450555               |
| SNP_P3_79038_41755233 | NC_021165.1    | Ca_kabuli_chr06 | 41755233                | CC                              | TT                | 1946450557               |
| SNP_P3_79039_41801433 | NC_021165.1    | Ca_kabuli_chr06 | 41801433                | TT                              | GG                | 1946450558               |
| SNP_P3_79040_41801436 | NC_021165.1    | Ca_kabuli_chr06 | 41801436                | CC                              | TT                | 1946450560               |
| SNP_P3_79041_41801503 | NC_021165.1    | Ca_kabuli_chr06 | 41801503                | CC                              | AA                | 1946450561               |
| SNP_P3_79042_41856285 | NC_021165.1    | Ca_kabuli_chr06 | 41856285                | TT                              | AA                | 1946450563               |
| SNP_P3_79043_41856308 | NC_021165.1    | Ca_kabuli_chr06 | 41856308                | CC                              | TT                | 1946450564               |
| SNP_P3_79044_41856330 | NC_021165.1    | Ca_kabuli_chr06 | 41856330                | GG                              | AA                | 1946450566               |
| SNP_P3_79045_41856348 | NC_021165.1    | Ca_kabuli_chr06 | 41856348                | CC                              | TT                | 1946450567               |
| SNP_P3_79046_41856360 | NC_021165.1    | Ca_kabuli_chr06 | 41856360                | AA                              | TT                | 1946450569               |
| SNP_P3_79047_41856366 | NC_021165.1    | Ca_kabuli_chr06 | 41856366                | TT                              | AA                | 1946450571               |
| SNP_P3_79048_41856401 | NC_021165.1    | Ca_kabuli_chr06 | 41856401                | CC                              | TT                | 1946450572               |
| SNP_P3_79049_41856421 | NC_021165.1    | Ca_kabuli_chr06 | 41856421                | CC                              | TT                | 1946450574               |
| SNP_P3_79050_41856422 | NC_021165.1    | Ca_kabuli_chr06 | 41856422                | AA                              | TT                | 1946450575               |
| SNP_P3_79051_41856465 | NC_021165.1    | Ca_kabuli_chr06 | 41856465                | AA                              | GG                | 1946450577               |
| SNP_P3_79052_41856494 | NC_021165.1    | Ca_kabuli_chr06 | 41856494                | AA                              | GG                | 1946450579               |
| SNP_P3_79053_41856690 | NC_021165.1    | Ca_kabuli_chr06 | 41856690                | TT                              | CC                | 1946450580               |
| SNP_P3_79054_41856698 | NC_021165.1    | Ca_kabuli_chr06 | 41856698                | TT                              | CC                | 1946450581               |
| SNP_P3_79055_41856781 | NC_021165.1    | Ca_kabuli_chr06 | 41856781                | CC                              | TT                | 1946450583               |
| SNP_P3_79056_41856782 | NC_021165.1    | Ca_kabuli_chr06 | 41856782                | TT                              | AA                | 1946450584               |
| SNP_P3_79057_41856833 | NC_021165.1    | Ca_kabuli_chr06 | 41856833                | TT                              | CC                | 1946450586               |
| SNP_P3_79058_41856911 | NC_021165.1    | Ca_kabuli_chr06 | 41856911                | GG                              | AA                | 1946450587               |
| SNP_P3_79059_41860519 | NC_021165.1    | Ca_kabuli_chr06 | 41860519                | TT                              | CC                | 1946450589               |
| SNP_P3_79060_41860589 | NC_021165.1    | Ca_kabuli_chr06 | 41860589                | TT                              | CC                | 1946450590               |
| SNP_P3_79061_41861176 | NC_021165.1    | Ca_kabuli_chr06 | 41861176                | AA                              | GG                | 1946450592               |

| SNPs IDs              | Chromosome IDs | Chromosomes     | Physical positions (bp) | CDC Frontier (Reference genome) | (Pusa 256 & HPNB) | NCBI SNPdb Accession IDs |
|-----------------------|----------------|-----------------|-------------------------|---------------------------------|-------------------|--------------------------|
| SNP_P3_79062_41861446 | NC_021165.1    | Ca_kabuli_chr06 | 41861446                | AA                              | GG                | 1946450593               |
| SNP_P3_79063_41861447 | NC_021165.1    | Ca_kabuli_chr06 | 41861447                | TT                              | CC                | 1946450594               |
| SNP_P3_79064_41864726 | NC_021165.1    | Ca_kabuli_chr06 | 41864726                | GG                              | AA                | 1946450596               |
| SNP_P3_79065_41866628 | NC_021165.1    | Ca_kabuli_chr06 | 41866628                | AA                              | GG                | 1946450597               |
| SNP_P3_79066_41871770 | NC_021165.1    | Ca_kabuli_chr06 | 41871770                | TT                              | CC                | 1946450599               |
| SNP_P3_79067_41873619 | NC_021165.1    | Ca_kabuli_chr06 | 41873619                | TT                              | GG                | 1946450601               |
| SNP_P3_79068_41873990 | NC_021165.1    | Ca_kabuli_chr06 | 41873990                | TT                              | AA                | 1946450602               |
| SNP_P3_79069_41874129 | NC_021165.1    | Ca_kabuli_chr06 | 41874129                | TT                              | CC                | 1946450604               |
| SNP_P3_79070_41874497 | NC_021165.1    | Ca_kabuli_chr06 | 41874497                | AA                              | GG                | 1946450605               |
| SNP_P3_79071_41874509 | NC_021165.1    | Ca_kabuli_chr06 | 41874509                | TT                              | GG                | 1946450606               |
| SNP_P3_79072_41875027 | NC_021165.1    | Ca_kabuli_chr06 | 41875027                | GG                              | TT                | 1946450608               |
| SNP_P3_79074_41884823 | NC_021165.1    | Ca_kabuli_chr06 | 41884823                | CC                              | TT                | 1946450609               |
| SNP_P3_79075_41900299 | NC_021165.1    | Ca_kabuli_chr06 | 41900299                | CC                              | TT                | 1946450611               |
| SNP_P3_79076_41940844 | NC_021165.1    | Ca_kabuli_chr06 | 41940844                | CC                              | TT                | 1946450612               |
| SNP_P3_79078_41970025 | NC_021165.1    | Ca_kabuli_chr06 | 41970025                | AA                              | GG                | 1946450614               |
| SNP_P3_79079_42002181 | NC_021165.1    | Ca_kabuli_chr06 | 42002181                | TT                              | AA                | 1946450615               |
| SNP_P3_79080_42003575 | NC_021165.1    | Ca_kabuli_chr06 | 42003575                | GG                              | AA                | 1946450616               |
| SNP_P3_79081_42011670 | NC_021165.1    | Ca_kabuli_chr06 | 42011670                | TT                              | CC                | 1946450618               |
| SNP_P3_79082_42017302 | NC_021165.1    | Ca_kabuli_chr06 | 42017302                | TT                              | CC                | 1946450619               |
| SNP_P3_79083_42020003 | NC_021165.1    | Ca_kabuli_chr06 | 42020003                | TT                              | CC                | 1946450621               |
| SNP_P3_79084_42020022 | NC_021165.1    | Ca_kabuli_chr06 | 42020022                | TT                              | AA                | 1946450623               |
| SNP_P3_79085_42020083 | NC_021165.1    | Ca_kabuli_chr06 | 42020083                | CC                              | TT                | 1946450624               |
| SNP_P3_79086_42020091 | NC_021165.1    | Ca_kabuli_chr06 | 42020091                | AA                              | GG                | 1946450626               |
| SNP_P3_79087_42020156 | NC_021165.1    | Ca_kabuli_chr06 | 42020156                | TT                              | GG                | 1946450627               |
| SNP_P3_79088_42020164 | NC_021165.1    | Ca_kabuli_chr06 | 42020164                | AA                              | TT                | 1946450628               |
| SNP_P3_79089_42020463 | NC_021165.1    | Ca_kabuli_chr06 | 42020463                | AA                              | GG                | 1946450630               |
| SNP_P3_79090_42020494 | NC_021165.1    | Ca_kabuli_chr06 | 42020494                | CC                              | GG                | 1946450631               |
| SNP_P3_79091_42020503 | NC_021165.1    | Ca_kabuli_chr06 | 42020503                | TT                              | GG                | 1946450633               |
| SNP_P3_79092_42020800 | NC_021165.1    | Ca_kabuli_chr06 | 42020800                | GG                              | AA                | 1946450634               |
| SNP_P3_79093_42033656 | NC_021165.1    | Ca_kabuli_chr06 | 42033656                | AA                              | GG                | 1946450636               |
| SNP_P3_79094_42033667 | NC_021165.1    | Ca_kabuli_chr06 | 42033667                | CC                              | AA                | 1946450637               |
| SNP_P3_79095_42033699 | NC_021165.1    | Ca_kabuli_chr06 | 42033699                | GG                              | TT                | 1946450638               |
| SNP_P3_79096_42061651 | NC_021165.1    | Ca_kabuli_chr06 | 42061651                | GG                              | AA                | 1946450640               |
| SNP_P3_79098_42079808 | NC_021165.1    | Ca_kabuli_chr06 | 42079808                | CC                              | GG                | 1946450641               |
| SNP_P3_79099_42087288 | NC_021165.1    | Ca_kabuli_chr06 | 42087288                | CC                              | AA                | 1946450643               |
| SNP_P3_79100_42087894 | NC_021165.1    | Ca_kabuli_chr06 | 42087894                | TT                              | CC                | 1946450645               |
| SNP_P3_79101_42146136 | NC_021165.1    | Ca_kabuli_chr06 | 42146136                | TT                              | CC                | 1946450646               |
| SNP_P3_79102_42146714 | NC_021165.1    | Ca_kabuli_chr06 | 42146714                | TT                              | CC                | 1946450648               |
| SNP_P3_79103_42170232 | NC_021165.1    | Ca_kabuli_chr06 | 42170232                | CC                              | TT                | 1946450649               |
| SNP_P3_79104_42172933 | NC_021165.1    | Ca_kabuli_chr06 | 42172933                | AA                              | GG                | 1946450650               |
| SNP_P3_79105_42173614 | NC_021165.1    | Ca_kabuli_chr06 | 42173614                | CC                              | TT                | 1946450652               |
| SNP_P3_79106_42177074 | NC_021165.1    | Ca_kabuli_chr06 | 42177074                | CC                              | TT                | 1946450653               |

| SNPs IDs              | Chromosome IDs | Chromosomes     | Physical positions (bp) | CDC Frontier (Reference genome) | (Pusa 256 & HPNB) | NCBI SNPdb Accession IDs |
|-----------------------|----------------|-----------------|-------------------------|---------------------------------|-------------------|--------------------------|
| SNP_P3_79107_42183008 | NC_021165.1    | Ca_kabuli_chr06 | 42183008                | AA                              | GG                | 1946450655               |
| SNP_P3_79108_42183278 | NC_021165.1    | Ca_kabuli_chr06 | 42183278                | AA                              | GG                | 1946450656               |
| SNP_P3_79109_42184465 | NC_021165.1    | Ca_kabuli_chr06 | 42184465                | GG                              | AA                | 1946450658               |
| SNP_P3_79110_42201067 | NC_021165.1    | Ca_kabuli_chr06 | 42201067                | GG                              | TT                | 1946450659               |
| SNP_P3_79111_42208622 | NC_021165.1    | Ca_kabuli_chr06 | 42208622                | GG                              | TT                | 1946450660               |
| SNP_P3_79112_42208667 | NC_021165.1    | Ca_kabuli_chr06 | 42208667                | CC                              | TT                | 1946450662               |
| SNP_P3_79113_42208684 | NC_021165.1    | Ca_kabuli_chr06 | 42208684                | GG                              | AA                | 1946450663               |
| SNP_P3_79114_42208688 | NC_021165.1    | Ca_kabuli_chr06 | 42208688                | GG                              | AA                | 1946450665               |
| SNP_P3_79115_42208691 | NC_021165.1    | Ca_kabuli_chr06 | 42208691                | TT                              | CC                | 1946450667               |
| SNP_P3_79116_42208694 | NC_021165.1    | Ca_kabuli_chr06 | 42208694                | AA                              | CC                | 1946450668               |
| SNP_P3_79117_42208712 | NC_021165.1    | Ca_kabuli_chr06 | 42208712                | GG                              | AA                | 1946450670               |
| SNP_P3_79118_42208739 | NC_021165.1    | Ca_kabuli_chr06 | 42208739                | AA                              | GG                | 1946450671               |
| SNP_P3_79119_42208775 | NC_021165.1    | Ca_kabuli_chr06 | 42208775                | CC                              | TT                | 1946450672               |
| SNP_P3_79120_42213635 | NC_021165.1    | Ca_kabuli_chr06 | 42213635                | CC                              | TT                | 1946450674               |
| SNP_P3_79121_42213995 | NC_021165.1    | Ca_kabuli_chr06 | 42213995                | CC                              | TT                | 1946450675               |
| SNP_P3_79123_42237523 | NC_021165.1    | Ca_kabuli_chr06 | 42237523                | CC                              | TT                | 1946450677               |
| SNP_P3_79124_42237603 | NC_021165.1    | Ca_kabuli_chr06 | 42237603                | AA                              | GG                | 1946450678               |
| SNP_P3_79125_42237623 | NC_021165.1    | Ca_kabuli_chr06 | 42237623                | GG                              | AA                | 1946450680               |
| SNP_P3_79126_42237776 | NC_021165.1    | Ca_kabuli_chr06 | 42237776                | TT                              | GG                | 1946450681               |
| SNP_P3_79127_42237801 | NC_021165.1    | Ca_kabuli_chr06 | 42237801                | GG                              | TT                | 1946450683               |
| SNP_P3_79128_42269588 | NC_021165.1    | Ca_kabuli_chr06 | 42269588                | TT                              | AA                | 1946450684               |
| SNP_P3_79129_42269623 | NC_021165.1    | Ca_kabuli_chr06 | 42269623                | AA                              | TT                | 1946450685               |
| SNP_P3_79130_42269624 | NC_021165.1    | Ca_kabuli_chr06 | 42269624                | TT                              | AA                | 1946450687               |
| SNP_P3_79131_42305072 | NC_021165.1    | Ca_kabuli_chr06 | 42305072                | TT                              | CC                | 1946450688               |
| SNP_P3_79132_42305079 | NC_021165.1    | Ca_kabuli_chr06 | 42305079                | GG                              | AA                | 1946450690               |
| SNP_P3_79133_42342666 | NC_021165.1    | Ca_kabuli_chr06 | 42342666                | CC                              | TT                | 1946450691               |
| SNP_P3_79134_42342733 | NC_021165.1    | Ca_kabuli_chr06 | 42342733                | TT                              | CC                | 1946450693               |
| SNP_P3_79135_42342833 | NC_021165.1    | Ca_kabuli_chr06 | 42342833                | TT                              | CC                | 1946450694               |
| SNP_P3_79136_42352810 | NC_021165.1    | Ca_kabuli_chr06 | 42352810                | AA                              | CC                | 1946450695               |
| SNP_P3_79137_42355522 | NC_021165.1    | Ca_kabuli_chr06 | 42355522                | AA                              | GG                | 1946450697               |
| SNP_P3_79138_42355560 | NC_021165.1    | Ca_kabuli_chr06 | 42355560                | CC                              | TT                | 1946450698               |
| SNP_P3_79139_42355650 | NC_021165.1    | Ca_kabuli_chr06 | 42355650                | TT                              | CC                | 1946450700               |
| SNP_P3_79140_42355651 | NC_021165.1    | Ca_kabuli_chr06 | 42355651                | GG                              | AA                | 1946450701               |
| SNP_P3_79143_42360329 | NC_021165.1    | Ca_kabuli_chr06 | 42360329                | AA                              | GG                | 1946450703               |
| SNP_P3_79144_42360541 | NC_021165.1    | Ca_kabuli_chr06 | 42360541                | TT                              | CC                | 1946450704               |
| SNP_P3_79145_42360549 | NC_021165.1    | Ca_kabuli_chr06 | 42360549                | TT                              | CC                | 1946450705               |
| SNP_P3_79147_42361258 | NC_021165.1    | Ca_kabuli_chr06 | 42361258                | GG                              | TT                | 1946450707               |
| SNP_P3_79148_42385770 | NC_021165.1    | Ca_kabuli_chr06 | 42385770                | GG                              | AA                | 1946450709               |
| SNP_P3_79149_42386216 | NC_021165.1    | Ca_kabuli_chr06 | 42386216                | TT                              | CC                | 1946450710               |
| SNP_P3_79150_42386552 | NC_021165.1    | Ca_kabuli_chr06 | 42386552                | GG                              | CC                | 1946450711               |
| SNP_P3_79152_42391854 | NC_021165.1    | Ca_kabuli_chr06 | 42391854                | GG                              | AA                | 1946450713               |
| SNP_P3_79153_42391862 | NC_021165.1    | Ca_kabuli_chr06 | 42391862                | GG                              | TT                | 1946450714               |

| SNPs IDs              | Chromosome IDs | Chromosomes     | Physical positions (bp) | CDC Frontier (Reference genome) | (Pusa 256 & HPNB) | NCBI SNPdb Accession IDs |
|-----------------------|----------------|-----------------|-------------------------|---------------------------------|-------------------|--------------------------|
| SNP_P3_79154_42396301 | NC_021165.1    | Ca_kabuli_chr06 | 42396301                | AA                              | GG                | 1946450716               |
| SNP_P3_79155_42396303 | NC_021165.1    | Ca_kabuli_chr06 | 42396303                | GG                              | AA                | 1946450717               |
| SNP_P3_79156_42396672 | NC_021165.1    | Ca_kabuli_chr06 | 42396672                | GG                              | AA                | 1946450719               |
| SNP_P3_79157_42396734 | NC_021165.1    | Ca_kabuli_chr06 | 42396734                | TT                              | GG                | 1946450720               |
| SNP_P3_79158_42396782 | NC_021165.1    | Ca_kabuli_chr06 | 42396782                | TT                              | AA                | 1946450721               |
| SNP_P3_79159_42396882 | NC_021165.1    | Ca_kabuli_chr06 | 42396882                | TT                              | GG                | 1946450723               |
| SNP_P3_79160_42397053 | NC_021165.1    | Ca_kabuli_chr06 | 42397053                | TT                              | AA                | 1946450724               |
| SNP_P3_79161_42397068 | NC_021165.1    | Ca_kabuli_chr06 | 42397068                | TT                              | AA                | 1946450726               |
| SNP_P3_79162_42397080 | NC_021165.1    | Ca_kabuli_chr06 | 42397080                | TT                              | AA                | 1946450727               |
| SNP_P3_79163_42397299 | NC_021165.1    | Ca_kabuli_chr06 | 42397299                | TT                              | CC                | 1946450729               |
| SNP_P3_79164_42397333 | NC_021165.1    | Ca_kabuli_chr06 | 42397333                | AA                              | CC                | 1946450730               |
| SNP_P3_79165_42398582 | NC_021165.1    | Ca_kabuli_chr06 | 42398582                | TT                              | CC                | 1946450732               |
| SNP_P3_79166_42398670 | NC_021165.1    | Ca_kabuli_chr06 | 42398670                | AA                              | TT                | 1946450734               |
| SNP_P3_79168_42436257 | NC_021165.1    | Ca_kabuli_chr06 | 42436257                | CC                              | AA                | 1946450735               |
| SNP_P3_79169_42444247 | NC_021165.1    | Ca_kabuli_chr06 | 42444247                | AA                              | GG                | 1946450736               |
| SNP_P3_79170_42444255 | NC_021165.1    | Ca_kabuli_chr06 | 42444255                | AA                              | GG                | 1946450738               |
| SNP_P3_79171_42444288 | NC_021165.1    | Ca_kabuli_chr06 | 42444288                | AA                              | GG                | 1946450739               |
| SNP_P3_79172_42444813 | NC_021165.1    | Ca_kabuli_chr06 | 42444813                | TT                              | CC                | 1946450741               |
| SNP_P3_79173_42445841 | NC_021165.1    | Ca_kabuli_chr06 | 42445841                | AA                              | GG                | 1946450742               |
| SNP_P3_79174_42452594 | NC_021165.1    | Ca_kabuli_chr06 | 42452594                | AA                              | GG                | 1946450744               |
| SNP_P3_79175_42459500 | NC_021165.1    | Ca_kabuli_chr06 | 42459500                | AA                              | GG                | 1946450745               |
| SNP_P3_79176_42461347 | NC_021165.1    | Ca_kabuli_chr06 | 42461347                | AA                              | TT                | 1946450746               |
| SNP_P3_79177_42461376 | NC_021165.1    | Ca_kabuli_chr06 | 42461376                | GG                              | AA                | 1946450748               |
| SNP_P3_79178_42461688 | NC_021165.1    | Ca_kabuli_chr06 | 42461688                | GG                              | TT                | 1946450749               |
| SNP_P3_79179_42461700 | NC_021165.1    | Ca_kabuli_chr06 | 42461700                | TT                              | CC                | 1946450751               |
| SNP_P3_79180_42464605 | NC_021165.1    | Ca_kabuli_chr06 | 42464605                | GG                              | AA                | 1946450752               |
| SNP_P3_79181_42464623 | NC_021165.1    | Ca_kabuli_chr06 | 42464623                | AA                              | TT                | 1946450754               |
| SNP_P3_79182_42464626 | NC_021165.1    | Ca_kabuli_chr06 | 42464626                | CC                              | TT                | 1946450756               |
| SNP_P3_79183_42464634 | NC_021165.1    | Ca_kabuli_chr06 | 42464634                | CC                              | GG                | 1946450757               |
| SNP_P3_79184_42464643 | NC_021165.1    | Ca_kabuli_chr06 | 42464643                | AA                              | GG                | 1946450758               |
| SNP_P3_79185_42464702 | NC_021165.1    | Ca_kabuli_chr06 | 42464702                | AA                              | GG                | 1946450760               |
| SNP_P3_79186_42464710 | NC_021165.1    | Ca_kabuli_chr06 | 42464710                | GG                              | AA                | 1946450761               |
| SNP_P3_79187_42464717 | NC_021165.1    | Ca_kabuli_chr06 | 42464717                | GG                              | AA                | 1946450763               |
| SNP_P3_79188_42464911 | NC_021165.1    | Ca_kabuli_chr06 | 42464911                | TT                              | AA                | 1946450764               |
| SNP_P3_79189_42464941 | NC_021165.1    | Ca_kabuli_chr06 | 42464941                | AA                              | CC                | 1946450766               |
| SNP_P3_79193_42469952 | NC_021165.1    | Ca_kabuli_chr06 | 42469952                | GG                              | TT                | 1946450767               |
| SNP_P3_79194_42470626 | NC_021165.1    | Ca_kabuli_chr06 | 42470626                | AA                              | CC                | 1946450769               |
| SNP_P3_79195_42473804 | NC_021165.1    | Ca_kabuli_chr06 | 42473804                | GG                              | AA                | 1946450770               |
| SNP_P3_79196_42473817 | NC_021165.1    | Ca_kabuli_chr06 | 42473817                | CC                              | TT                | 1946450772               |
| SNP_P3_79197_42473874 | NC_021165.1    | Ca_kabuli_chr06 | 42473874                | GG                              | AA                | 1946450773               |
| SNP_P3_79198_42473878 | NC_021165.1    | Ca_kabuli_chr06 | 42473878                | GG                              | TT                | 1946450775               |
| SNP_P3_79199_42474207 | NC_021165.1    | Ca_kabuli_chr06 | 42474207                | CC                              | AA                | 1946450776               |

| SNPs IDs              | Chromosome IDs | Chromosomes     | Physical positions (bp) | CDC Frontier (Reference genome) | (Pusa 256 & HPNB) | NCBI SNPdb Accession IDs |
|-----------------------|----------------|-----------------|-------------------------|---------------------------------|-------------------|--------------------------|
| SNP_P3_79200_42478455 | NC_021165.1    | Ca_kabuli_chr06 | 42478455                | TT                              | AA                | 1946450778               |
| SNP_P3_79201_42480958 | NC_021165.1    | Ca_kabuli_chr06 | 42480958                | AA                              | CC                | 1946450780               |
| SNP_P3_79202_42481017 | NC_021165.1    | Ca_kabuli_chr06 | 42481017                | CC                              | TT                | 1946450781               |
| SNP_P3_79203_42481073 | NC_021165.1    | Ca_kabuli_chr06 | 42481073                | CC                              | TT                | 1946450783               |
| SNP_P3_79204_42481151 | NC_021165.1    | Ca_kabuli_chr06 | 42481151                | TT                              | CC                | 1946450784               |
| SNP_P3_79205_42481155 | NC_021165.1    | Ca_kabuli_chr06 | 42481155                | GG                              | AA                | 1946450786               |
| SNP_P3_79206_42481206 | NC_021165.1    | Ca_kabuli_chr06 | 42481206                | TT                              | CC                | 1946450788               |
| SNP_P3_79207_42482637 | NC_021165.1    | Ca_kabuli_chr06 | 42482637                | AA                              | CC                | 1946450789               |
| SNP_P3_79208_42482864 | NC_021165.1    | Ca_kabuli_chr06 | 42482864                | TT                              | CC                | 1946450790               |
| SNP_P3_79209_42483022 | NC_021165.1    | Ca_kabuli_chr06 | 42483022                | TT                              | CC                | 1946450792               |
| SNP_P3_79210_42483039 | NC_021165.1    | Ca_kabuli_chr06 | 42483039                | GG                              | AA                | 1946450793               |
| SNP_P3_79211_42511595 | NC_021165.1    | Ca_kabuli_chr06 | 42511595                | TT                              | CC                | 1946450795               |
| SNP_P3_79212_42511599 | NC_021165.1    | Ca_kabuli_chr06 | 42511599                | CC                              | TT                | 1946450796               |
| SNP_P3_79213_42524812 | NC_021165.1    | Ca_kabuli_chr06 | 42524812                | AA                              | TT                | 1946450798               |
| SNP_P3_79214_42527978 | NC_021165.1    | Ca_kabuli_chr06 | 42527978                | TT                              | CC                | 1946450799               |
| SNP_P3_79216_42555674 | NC_021165.1    | Ca_kabuli_chr06 | 42555674                | CC                              | TT                | 1946450801               |
| SNP_P3_79217_42555699 | NC_021165.1    | Ca_kabuli_chr06 | 42555699                | AA                              | GG                | 1946450802               |
| SNP_P3_79218_42555716 | NC_021165.1    | Ca_kabuli_chr06 | 42555716                | GG                              | TT                | 1946450804               |
| SNP_P3_79219_42574983 | NC_021165.1    | Ca_kabuli_chr06 | 42574983                | AA                              | TT                | 1946450805               |
| SNP_P3_79220_42602042 | NC_021165.1    | Ca_kabuli_chr06 | 42602042                | GG                              | TT                | 1946450807               |
| SNP_P3_79222_42619166 | NC_021165.1    | Ca_kabuli_chr06 | 42619166                | GG                              | AA                | 1946450808               |
| SNP_P3_79223_42619172 | NC_021165.1    | Ca_kabuli_chr06 | 42619172                | GG                              | AA                | 1946450809               |
| SNP_P3_79224_42625135 | NC_021165.1    | Ca_kabuli_chr06 | 42625135                | GG                              | TT                | 1946450811               |
| SNP_P3_79225_42625154 | NC_021165.1    | Ca_kabuli_chr06 | 42625154                | GG                              | CC                | 1946450812               |
| SNP_P3_79226_42625250 | NC_021165.1    | Ca_kabuli_chr06 | 42625250                | CC                              | TT                | 1946450814               |
| SNP_P3_79227_42625323 | NC_021165.1    | Ca_kabuli_chr06 | 42625323                | TT                              | AA                | 1946450815               |
| SNP_P3_79228_42625330 | NC_021165.1    | Ca_kabuli_chr06 | 42625330                | TT                              | GG                | 1946450817               |
| SNP_P3_79229_42625493 | NC_021165.1    | Ca_kabuli_chr06 | 42625493                | TT                              | CC                | 1946450818               |
| SNP_P3_79230_42625501 | NC_021165.1    | Ca_kabuli_chr06 | 42625501                | AA                              | GG                | 1946450819               |
| SNP_P3_79231_42625524 | NC_021165.1    | Ca_kabuli_chr06 | 42625524                | GG                              | TT                | 1946450821               |
| SNP_P3_79232_42625572 | NC_021165.1    | Ca_kabuli_chr06 | 42625572                | AA                              | GG                | 1946450823               |
| SNP_P3_79233_42625621 | NC_021165.1    | Ca_kabuli_chr06 | 42625621                | AA                              | GG                | 1946450824               |
| SNP_P3_79234_42625664 | NC_021165.1    | Ca_kabuli_chr06 | 42625664                | AA                              | GG                | 1946450826               |
| SNP_P3_79235_42643186 | NC_021165.1    | Ca_kabuli_chr06 | 42643186                | TT                              | CC                | 1946450827               |
| SNP_P3_79236_42719869 | NC_021165.1    | Ca_kabuli_chr06 | 42719869                | AA                              | GG                | 1946450829               |
| SNP_P3_79237_42742901 | NC_021165.1    | Ca_kabuli_chr06 | 42742901                | GG                              | AA                | 1946450830               |
| SNP_P3_79238_42809534 | NC_021165.1    | Ca_kabuli_chr06 | 42809534                | AA                              | GG                | 1946450831               |
| SNP_P3_79239_42839859 | NC_021165.1    | Ca_kabuli_chr06 | 42839859                | TT                              | CC                | 1946450833               |
| SNP_P3_79240_42839863 | NC_021165.1    | Ca_kabuli_chr06 | 42839863                | CC                              | TT                | 1946450834               |
| SNP_P3_79241_42839945 | NC_021165.1    | Ca_kabuli_chr06 | 42839945                | CC                              | TT                | 1946450836               |
| SNP_P3_79242_42840374 | NC_021165.1    | Ca_kabuli_chr06 | 42840374                | GG                              | AA                | 1946450837               |
| SNP_P3_79243_42859876 | NC_021165.1    | Ca_kabuli_chr06 | 42859876                | AA                              | TT                | 1946450839               |



| SNPs IDs              | Chromosome IDs | Chromosomes     | Physical positions (bp) | CDC Frontier (Reference genome) | (Pusa 256 & HPNB) | NCBI SNPdb Accession IDs |
|-----------------------|----------------|-----------------|-------------------------|---------------------------------|-------------------|--------------------------|
| SNP_P3_79244_42859900 | NC_021165.1    | Ca_kabuli_chr06 | 42859900                | GG                              | CC                | 1946450840               |
| SNP_P3_79245_42899589 | NC_021165.1    | Ca_kabuli_chr06 | 42899589                | GG                              | CC                | 1946450841               |
| SNP_P3_79246_42899634 | NC_021165.1    | Ca_kabuli_chr06 | 42899634                | AA                              | GG                | 1946450843               |
| SNP_P3_79247_42907059 | NC_021165.1    | Ca_kabuli_chr06 | 42907059                | TT                              | CC                | 1946450845               |
| SNP_P3_79248_42907106 | NC_021165.1    | Ca_kabuli_chr06 | 42907106                | GG                              | AA                | 1946450846               |
| SNP_P3_79250_42907478 | NC_021165.1    | Ca_kabuli_chr06 | 42907478                | TT                              | CC                | 1946450847               |
| SNP_P3_79251_42907497 | NC_021165.1    | Ca_kabuli_chr06 | 42907497                | AA                              | GG                | 1946450849               |
| SNP_P3_79252_42907512 | NC_021165.1    | Ca_kabuli_chr06 | 42907512                | AA                              | GG                | 1946450850               |
| SNP_P3_79253_42910034 | NC_021165.1    | Ca_kabuli_chr06 | 42910034                | GG                              | AA                | 1946450852               |
| SNP_P3_79254_42910051 | NC_021165.1    | Ca_kabuli_chr06 | 42910051                | CC                              | TT                | 1946450853               |
| SNP_P3_79255_42910086 | NC_021165.1    | Ca_kabuli_chr06 | 42910086                | CC                              | TT                | 1946450854               |
| SNP_P3_79256_42913845 | NC_021165.1    | Ca_kabuli_chr06 | 42913845                | TT                              | CC                | 1946450856               |
| SNP_P3_79257_42913961 | NC_021165.1    | Ca_kabuli_chr06 | 42913961                | TT                              | CC                | 1946450857               |
| SNP_P3_79258_42935641 | NC_021165.1    | Ca_kabuli_chr06 | 42935641                | CC                              | TT                | 1946450859               |
| SNP_P3_79259_42937431 | NC_021165.1    | Ca_kabuli_chr06 | 42937431                | AA                              | TT                | 1946450860               |
| SNP_P3_79260_42937468 | NC_021165.1    | Ca_kabuli_chr06 | 42937468                | AA                              | CC                | 1946450862               |
| SNP_P3_79261_42937542 | NC_021165.1    | Ca_kabuli_chr06 | 42937542                | CC                              | AA                | 1946450863               |
| SNP_P3_79262_42937544 | NC_021165.1    | Ca_kabuli_chr06 | 42937544                | CC                              | TT                | 1946450864               |
| SNP_P3_79263_42937631 | NC_021165.1    | Ca_kabuli_chr06 | 42937631                | CC                              | TT                | 1946450866               |
| SNP_P3_79264_42938778 | NC_021165.1    | Ca_kabuli_chr06 | 42938778                | CC                              | TT                | 1946450868               |
| SNP_P3_79265_42939193 | NC_021165.1    | Ca_kabuli_chr06 | 42939193                | GG                              | AA                | 1946450869               |
| SNP_P3_79266_42939247 | NC_021165.1    | Ca_kabuli_chr06 | 42939247                | CC                              | TT                | 1946450871               |
| SNP_P3_79267_42939266 | NC_021165.1    | Ca_kabuli_chr06 | 42939266                | TT                              | GG                | 1946450872               |
| SNP_P3_79268_42939748 | NC_021165.1    | Ca_kabuli_chr06 | 42939748                | AA                              | GG                | 1946450874               |
| SNP_P3_79269_42939771 | NC_021165.1    | Ca_kabuli_chr06 | 42939771                | TT                              | CC                | 1946450875               |
| SNP_P3_79270_42939836 | NC_021165.1    | Ca_kabuli_chr06 | 42939836                | TT                              | CC                | 1946450877               |
| SNP_P3_79271_42940134 | NC_021165.1    | Ca_kabuli_chr06 | 42940134                | GG                              | CC                | 1946450878               |
| SNP_P3_79272_42940144 | NC_021165.1    | Ca_kabuli_chr06 | 42940144                | TT                              | AA                | 1946450879               |
| SNP_P3_79273_42940192 | NC_021165.1    | Ca_kabuli_chr06 | 42940192                | CC                              | AA                | 1946450881               |
| SNP_P3_79274_42940218 | NC_021165.1    | Ca_kabuli_chr06 | 42940218                | AA                              | GG                | 1946450882               |
| SNP_P3_79275_42940224 | NC_021165.1    | Ca_kabuli_chr06 | 42940224                | TT                              | CC                | 1946450884               |
| SNP_P3_79276_42940293 | NC_021165.1    | Ca_kabuli_chr06 | 42940293                | GG                              | TT                | 1946450885               |
| SNP_P3_79277_42940295 | NC_021165.1    | Ca_kabuli_chr06 | 42940295                | TT                              | GG                | 1946450887               |
| SNP_P3_79278_42940303 | NC_021165.1    | Ca_kabuli_chr06 | 42940303                | AA                              | CC                | 1946450888               |
| SNP_P3_79279_42940596 | NC_021165.1    | Ca_kabuli_chr06 | 42940596                | AA                              | GG                | 1946450890               |
| SNP_P3_79280_42944365 | NC_021165.1    | Ca_kabuli_chr06 | 42944365                | TT                              | CC                | 1946450891               |
| SNP_P3_79281_43000072 | NC_021165.1    | Ca_kabuli_chr06 | 43000072                | CC                              | AA                | 1946450893               |
| SNP_P3_79282_43005708 | NC_021165.1    | Ca_kabuli_chr06 | 43005708                | TT                              | GG                | 1946450894               |
| SNP_P3_79283_43010896 | NC_021165.1    | Ca_kabuli_chr06 | 43010896                | GG                              | AA                | 1946450895               |
| SNP_P3_79284_43011015 | NC_021165.1    | Ca_kabuli_chr06 | 43011015                | TT                              | GG                | 1946450897               |
| SNP_P3_79285_43011198 | NC_021165.1    | Ca_kabuli_chr06 | 43011198                | TT                              | AA                | 1946450898               |
| SNP_P3_79286_43012021 | NC_021165.1    | Ca_kabuli_chr06 | 43012021                | AA                              | TT                | 1946450900               |

| SNPs IDs              | Chromosome IDs | Chromosomes     | Physical positions (bp) | CDC Frontier (Reference genome) | (Pusa 256 & HPNB) | NCBI SNPdb Accession IDs |
|-----------------------|----------------|-----------------|-------------------------|---------------------------------|-------------------|--------------------------|
| SNP_P3_79287_43012049 | NC_021165.1    | Ca_kabuli_chr06 | 43012049                | CC                              | TT                | 1946450901               |
| SNP_P3_79288_43017614 | NC_021165.1    | Ca_kabuli_chr06 | 43017614                | AA                              | TT                | 1946450902               |
| SNP_P3_79289_43022097 | NC_021165.1    | Ca_kabuli_chr06 | 43022097                | CC                              | GG                | 1946450904               |
| SNP_P3_79290_43037236 | NC_021165.1    | Ca_kabuli_chr06 | 43037236                | CC                              | TT                | 1946450905               |
| SNP_P3_79291_43042261 | NC_021165.1    | Ca_kabuli_chr06 | 43042261                | GG                              | TT                | 1946450907               |
| SNP_P3_79292_43042315 | NC_021165.1    | Ca_kabuli_chr06 | 43042315                | AA                              | GG                | 1946450908               |
| SNP_P3_79293_43042323 | NC_021165.1    | Ca_kabuli_chr06 | 43042323                | GG                              | AA                | 1946450909               |
| SNP_P3_79295_43043033 | NC_021165.1    | Ca_kabuli_chr06 | 43043033                | AA                              | GG                | 1946450911               |
| SNP_P3_79296_43043060 | NC_021165.1    | Ca_kabuli_chr06 | 43043060                | AA                              | GG                | 1946450913               |
| SNP_P3_79298_43043160 | NC_021165.1    | Ca_kabuli_chr06 | 43043160                | AA                              | GG                | 1946450914               |
| SNP_P3_79299_43043275 | NC_021165.1    | Ca_kabuli_chr06 | 43043275                | AA                              | TT                | 1946450916               |
| SNP_P3_79300_43043349 | NC_021165.1    | Ca_kabuli_chr06 | 43043349                | AA                              | TT                | 1946450917               |
| SNP_P3_79301_43044783 | NC_021165.1    | Ca_kabuli_chr06 | 43044783                | AA                              | TT                | 1946450919               |
| SNP_P3_79302_43045682 | NC_021165.1    | Ca_kabuli_chr06 | 43045682                | CC                              | TT                | 1946450920               |
| SNP_P3_79303_43045713 | NC_021165.1    | Ca_kabuli_chr06 | 43045713                | CC                              | TT                | 1946450921               |
| SNP_P3_79304_43045785 | NC_021165.1    | Ca_kabuli_chr06 | 43045785                | CC                              | TT                | 1946450923               |
| SNP_P3_79305_43045823 | NC_021165.1    | Ca_kabuli_chr06 | 43045823                | GG                              | CC                | 1946450924               |
| SNP_P3_79306_43045847 | NC_021165.1    | Ca_kabuli_chr06 | 43045847                | AA                              | GG                | 1946450926               |
| SNP_P3_79307_43045964 | NC_021165.1    | Ca_kabuli_chr06 | 43045964                | TT                              | CC                | 1946450927               |
| SNP_P3_79308_43045969 | NC_021165.1    | Ca_kabuli_chr06 | 43045969                | TT                              | CC                | 1946450928               |
| SNP_P3_79309_43045975 | NC_021165.1    | Ca_kabuli_chr06 | 43045975                | GG                              | TT                | 1946450930               |
| SNP_P3_79310_43050245 | NC_021165.1    | Ca_kabuli_chr06 | 43050245                | GG                              | AA                | 1946450931               |
| SNP_P3_79311_43058087 | NC_021165.1    | Ca_kabuli_chr06 | 43058087                | AA                              | GG                | 1946450933               |
| SNP_P3_79312_43058105 | NC_021165.1    | Ca_kabuli_chr06 | 43058105                | TT                              | CC                | 1946450935               |
| SNP_P3_79313_43058130 | NC_021165.1    | Ca_kabuli_chr06 | 43058130                | CC                              | GG                | 1946450936               |
| SNP_P3_79314_43058419 | NC_021165.1    | Ca_kabuli_chr06 | 43058419                | AA                              | TT                | 1946450937               |
| SNP_P3_79315_43059011 | NC_021165.1    | Ca_kabuli_chr06 | 43059011                | AA                              | GG                | 1946450939               |
| SNP_P3_79316_43059239 | NC_021165.1    | Ca_kabuli_chr06 | 43059239                | TT                              | AA                | 1946450940               |
| SNP_P3_79317_43059374 | NC_021165.1    | Ca_kabuli_chr06 | 43059374                | AA                              | CC                | 1946450942               |
| SNP_P3_79318_43059445 | NC_021165.1    | Ca_kabuli_chr06 | 43059445                | AA                              | TT                | 1946450943               |
| SNP_P3_79319_43059956 | NC_021165.1    | Ca_kabuli_chr06 | 43059956                | AA                              | CC                | 1946450945               |
| SNP_P3_79320_43060164 | NC_021165.1    | Ca_kabuli_chr06 | 43060164                | GG                              | CC                | 1946450946               |
| SNP_P3_79321_43060189 | NC_021165.1    | Ca_kabuli_chr06 | 43060189                | GG                              | AA                | 1946450948               |
| SNP_P3_79322_43060208 | NC_021165.1    | Ca_kabuli_chr06 | 43060208                | CC                              | TT                | 1946450949               |
| SNP_P3_79323_43060372 | NC_021165.1    | Ca_kabuli_chr06 | 43060372                | CC                              | TT                | 1946450950               |
| SNP_P3_79324_43060697 | NC_021165.1    | Ca_kabuli_chr06 | 43060697                | GG                              | AA                | 1946450952               |
| SNP_P3_79325_43060709 | NC_021165.1    | Ca_kabuli_chr06 | 43060709                | CC                              | GG                | 1946450953               |
| SNP_P3_79326_43060717 | NC_021165.1    | Ca_kabuli_chr06 | 43060717                | CC                              | TT                | 1946450955               |
| SNP_P3_79327_43060833 | NC_021165.1    | Ca_kabuli_chr06 | 43060833                | TT                              | AA                | 1946450956               |
| SNP_P3_79328_43061002 | NC_021165.1    | Ca_kabuli_chr06 | 43061002                | TT                              | CC                | 1946450958               |
| SNP_P3_79329_43061251 | NC_021165.1    | Ca_kabuli_chr06 | 43061251                | CC                              | TT                | 1946450959               |
| SNP_P3_79330_43061273 | NC_021165.1    | Ca_kabuli_chr06 | 43061273                | AA                              | GG                | 1946450960               |

| SNPs IDs              | Chromosome IDs | Chromosomes     | Physical positions (bp) | CDC Frontier (Reference genome) | (Pusa 256 & HPNB) | NCBI SNPdb Accession IDs |
|-----------------------|----------------|-----------------|-------------------------|---------------------------------|-------------------|--------------------------|
| SNP_P3_79331_43064171 | NC_021165.1    | Ca_kabuli_chr06 | 43064171                | AA                              | GG                | 1946450962               |
| SNP_P3_79332_43064245 | NC_021165.1    | Ca_kabuli_chr06 | 43064245                | TT                              | AA                | 1946450964               |
| SNP_P3_79333_43064263 | NC_021165.1    | Ca_kabuli_chr06 | 43064263                | GG                              | AA                | 1946450965               |
| SNP_P3_79334_43064373 | NC_021165.1    | Ca_kabuli_chr06 | 43064373                | CC                              | AA                | 1946450966               |
| SNP_P3_79335_43064385 | NC_021165.1    | Ca_kabuli_chr06 | 43064385                | AA                              | GG                | 1946450968               |
| SNP_P3_79336_43064386 | NC_021165.1    | Ca_kabuli_chr06 | 43064386                | CC                              | AA                | 1946450969               |
| SNP_P3_79337_43064401 | NC_021165.1    | Ca_kabuli_chr06 | 43064401                | AA                              | TT                | 1946450971               |
| SNP_P3_79338_43064424 | NC_021165.1    | Ca_kabuli_chr06 | 43064424                | CC                              | TT                | 1946450972               |
| SNP_P3_79339_43064472 | NC_021165.1    | Ca_kabuli_chr06 | 43064472                | TT                              | AA                | 1946450973               |
| SNP_P3_79340_43064600 | NC_021165.1    | Ca_kabuli_chr06 | 43064600                | CC                              | GG                | 1946450975               |
| SNP_P3_79341_43065327 | NC_021165.1    | Ca_kabuli_chr06 | 43065327                | GG                              | AA                | 1946450976               |
| SNP_P3_79342_43065374 | NC_021165.1    | Ca_kabuli_chr06 | 43065374                | AA                              | CC                | 1946450978               |
| SNP_P3_79343_43070510 | NC_021165.1    | Ca_kabuli_chr06 | 43070510                | GG                              | AA                | 1946450979               |
| SNP_P3_79344_43070528 | NC_021165.1    | Ca_kabuli_chr06 | 43070528                | TT                              | AA                | 1946450980               |
| SNP_P3_79345_43070529 | NC_021165.1    | Ca_kabuli_chr06 | 43070529                | GG                              | TT                | 1946450982               |
| SNP_P3_79346_43070578 | NC_021165.1    | Ca_kabuli_chr06 | 43070578                | TT                              | CC                | 1946450983               |
| SNP_P3_79347_43072736 | NC_021165.1    | Ca_kabuli_chr06 | 43072736                | GG                              | TT                | 1946450985               |
| SNP_P3_79348_43073474 | NC_021165.1    | Ca_kabuli_chr06 | 43073474                | TT                              | AA                | 1946450987               |
| SNP_P3_79349_43076003 | NC_021165.1    | Ca_kabuli_chr06 | 43076003                | TT                              | GG                | 1946450988               |
| SNP_P3_79350_43076261 | NC_021165.1    | Ca_kabuli_chr06 | 43076261                | TT                              | GG                | 1946450990               |
| SNP_P3_79351_43076289 | NC_021165.1    | Ca_kabuli_chr06 | 43076289                | TT                              | GG                | 1946450991               |
| SNP_P3_79352_43077738 | NC_021165.1    | Ca_kabuli_chr06 | 43077738                | GG                              | AA                | 1946450992               |
| SNP_P3_79353_43081268 | NC_021165.1    | Ca_kabuli_chr06 | 43081268                | TT                              | CC                | 1946450994               |
| SNP_P3_79354_43101184 | NC_021165.1    | Ca_kabuli_chr06 | 43101184                | GG                              | CC                | 1946450995               |
| SNP_P3_79355_43101191 | NC_021165.1    | Ca_kabuli_chr06 | 43101191                | AA                              | TT                | 1946450997               |
| SNP_P3_79356_43101353 | NC_021165.1    | Ca_kabuli_chr06 | 43101353                | AA                              | TT                | 1946450998               |
| SNP_P3_79357_43101358 | NC_021165.1    | Ca_kabuli_chr06 | 43101358                | CC                              | TT                | 1946450999               |
| SNP_P3_79358_43101590 | NC_021165.1    | Ca_kabuli_chr06 | 43101590                | TT                              | AA                | 1946451001               |
| SNP_P3_79359_43101622 | NC_021165.1    | Ca_kabuli_chr06 | 43101622                | AA                              | GG                | 1946451002               |
| SNP_P3_79360_43101624 | NC_021165.1    | Ca_kabuli_chr06 | 43101624                | AA                              | GG                | 1946451004               |
| SNP_P3_79361_43101876 | NC_021165.1    | Ca_kabuli_chr06 | 43101876                | CC                              | TT                | 1946451006               |
| SNP_P3_79362_43138283 | NC_021165.1    | Ca_kabuli_chr06 | 43138283                | GG                              | TT                | 1946451007               |
| SNP_P3_79365_43144582 | NC_021165.1    | Ca_kabuli_chr06 | 43144582                | CC                              | AA                | 1946451008               |
| SNP_P3_79367_43153587 | NC_021165.1    | Ca_kabuli_chr06 | 43153587                | GG                              | AA                | 1946451010               |
| SNP_P3_79368_43154071 | NC_021165.1    | Ca_kabuli_chr06 | 43154071                | TT                              | GG                | 1946451011               |
| SNP_P3_79369_43154085 | NC_021165.1    | Ca_kabuli_chr06 | 43154085                | AA                              | GG                | 1946451013               |
| SNP_P3_79370_43154162 | NC_021165.1    | Ca_kabuli_chr06 | 43154162                | CC                              | TT                | 1946451014               |
| SNP_P3_79371_43154435 | NC_021165.1    | Ca_kabuli_chr06 | 43154435                | CC                              | TT                | 1946451016               |
| SNP_P3_79372_43156397 | NC_021165.1    | Ca_kabuli_chr06 | 43156397                | AA                              | CC                | 1946451017               |
| SNP_P3_79373_43163240 | NC_021165.1    | Ca_kabuli_chr06 | 43163240                | TT                              | AA                | 1946451019               |
| SNP_P3_79374_43163243 | NC_021165.1    | Ca_kabuli_chr06 | 43163243                | GG                              | CC                | 1946451020               |
| SNP_P3_79375_43164855 | NC_021165.1    | Ca_kabuli_chr06 | 43164855                | AA                              | GG                | 1946451021               |

| SNPs IDs              | Chromosome IDs | Chromosomes     | Physical positions (bp) | CDC Frontier (Reference genome) | (Pusa 256 & HPNB) | NCBI SNPdb Accession IDs |
|-----------------------|----------------|-----------------|-------------------------|---------------------------------|-------------------|--------------------------|
| SNP_P3_79376_43165721 | NC_021165.1    | Ca_kabuli_chr06 | 43165721                | AA                              | CC                | 1946451023               |
| SNP_P3_79377_43165903 | NC_021165.1    | Ca_kabuli_chr06 | 43165903                | AA                              | TT                | 1946451024               |
| SNP_P3_79378_43165909 | NC_021165.1    | Ca_kabuli_chr06 | 43165909                | AA                              | GG                | 1946451026               |
| SNP_P3_79379_43165910 | NC_021165.1    | Ca_kabuli_chr06 | 43165910                | TT                              | GG                | 1946451028               |
| SNP_P3_79380_43165962 | NC_021165.1    | Ca_kabuli_chr06 | 43165962                | AA                              | CC                | 1946451029               |
| SNP_P3_79381_43166006 | NC_021165.1    | Ca_kabuli_chr06 | 43166006                | GG                              | TT                | 1946451031               |
| SNP_P3_79382_43166292 | NC_021165.1    | Ca_kabuli_chr06 | 43166292                | GG                              | AA                | 1946451032               |
| SNP_P3_79383_43166369 | NC_021165.1    | Ca_kabuli_chr06 | 43166369                | CC                              | TT                | 1946451034               |
| SNP_P3_79384_43166391 | NC_021165.1    | Ca_kabuli_chr06 | 43166391                | AA                              | GG                | 1946451035               |
| SNP_P3_79385_43166413 | NC_021165.1    | Ca_kabuli_chr06 | 43166413                | AA                              | CC                | 1946451036               |
| SNP_P3_79386_43166488 | NC_021165.1    | Ca_kabuli_chr06 | 43166488                | TT                              | CC                | 1946451038               |
| SNP_P3_79387_43166561 | NC_021165.1    | Ca_kabuli_chr06 | 43166561                | CC                              | TT                | 1946451039               |
| SNP_P3_79388_43166568 | NC_021165.1    | Ca_kabuli_chr06 | 43166568                | TT                              | AA                | 1946451041               |
| SNP_P3_79389_43166604 | NC_021165.1    | Ca_kabuli_chr06 | 43166604                | AA                              | GG                | 1946451042               |
| SNP_P3_79390_43166627 | NC_021165.1    | Ca_kabuli_chr06 | 43166627                | TT                              | CC                | 1946451044               |
| SNP_P3_79391_43166628 | NC_021165.1    | Ca_kabuli_chr06 | 43166628                | AA                              | TT                | 1946451045               |
| SNP_P3_79392_43166635 | NC_021165.1    | Ca_kabuli_chr06 | 43166635                | AA                              | TT                | 1946451047               |
| SNP_P3_79393_43166657 | NC_021165.1    | Ca_kabuli_chr06 | 43166657                | AA                              | TT                | 1946451048               |
| SNP_P3_79394_43166752 | NC_021165.1    | Ca_kabuli_chr06 | 43166752                | TT                              | GG                | 1946451050               |
| SNP_P3_79395_43166760 | NC_021165.1    | Ca_kabuli_chr06 | 43166760                | CC                              | AA                | 1946451051               |
| SNP_P3_79396_43166827 | NC_021165.1    | Ca_kabuli_chr06 | 43166827                | GG                              | CC                | 1946451053               |
| SNP_P3_79397_43167104 | NC_021165.1    | Ca_kabuli_chr06 | 43167104                | AA                              | CC                | 1946451054               |
| SNP_P3_79398_43167283 | NC_021165.1    | Ca_kabuli_chr06 | 43167283                | TT                              | CC                | 1946451056               |
| SNP_P3_79399_43167304 | NC_021165.1    | Ca_kabuli_chr06 | 43167304                | CC                              | GG                | 1946451057               |
| SNP_P3_79400_43167434 | NC_021165.1    | Ca_kabuli_chr06 | 43167434                | AA                              | TT                | 1946451058               |
| SNP_P3_79401_43167504 | NC_021165.1    | Ca_kabuli_chr06 | 43167504                | TT                              | CC                | 1946451060               |
| SNP_P3_79402_43167534 | NC_021165.1    | Ca_kabuli_chr06 | 43167534                | TT                              | GG                | 1946451061               |
| SNP_P3_79403_43167552 | NC_021165.1    | Ca_kabuli_chr06 | 43167552                | AA                              | TT                | 1946451063               |
| SNP_P3_79404_43167591 | NC_021165.1    | Ca_kabuli_chr06 | 43167591                | GG                              | TT                | 1946451064               |
| SNP_P3_79405_43167601 | NC_021165.1    | Ca_kabuli_chr06 | 43167601                | AA                              | TT                | 1946451066               |
| SNP_P3_79406_43167625 | NC_021165.1    | Ca_kabuli_chr06 | 43167625                | CC                              | GG                | 1946451068               |
| SNP_P3_79407_43167631 | NC_021165.1    | Ca_kabuli_chr06 | 43167631                | CC                              | GG                | 1946451069               |
| SNP_P3_79408_43167635 | NC_021165.1    | Ca_kabuli_chr06 | 43167635                | GG                              | TT                | 1946451070               |
| SNP_P3_79409_43167663 | NC_021165.1    | Ca_kabuli_chr06 | 43167663                | GG                              | CC                | 1946451072               |
| SNP_P3_79410_43168635 | NC_021165.1    | Ca_kabuli_chr06 | 43168635                | AA                              | TT                | 1946451073               |
| SNP_P3_79411_43168704 | NC_021165.1    | Ca_kabuli_chr06 | 43168704                | CC                              | TT                | 1946451075               |
| SNP_P3_79412_43168716 | NC_021165.1    | Ca_kabuli_chr06 | 43168716                | GG                              | CC                | 1946451076               |
| SNP_P3_79413_43168742 | NC_021165.1    | Ca_kabuli_chr06 | 43168742                | GG                              | AA                | 1946451078               |
| SNP_P3_79414_43168762 | NC_021165.1    | Ca_kabuli_chr06 | 43168762                | TT                              | CC                | 1946451079               |
| SNP_P3_79415_43168763 | NC_021165.1    | Ca_kabuli_chr06 | 43168763                | TT                              | AA                | 1946451081               |
| SNP_P3_79416_43168806 | NC_021165.1    | Ca_kabuli_chr06 | 43168806                | AA                              | TT                | 1946451082               |
| SNP_P3_79417_43168832 | NC_021165.1    | Ca_kabuli_chr06 | 43168832                | GG                              | AA                | 1946451083               |

| SNPs IDs              | Chromosome IDs | Chromosomes     | Physical positions (bp) | CDC Frontier (Reference genome) | (Pusa 256 & HPNB) | NCBI SNPdb Accession IDs |
|-----------------------|----------------|-----------------|-------------------------|---------------------------------|-------------------|--------------------------|
| SNP_P3_79418_43168835 | NC_021165.1    | Ca_kabuli_chr06 | 43168835                | CC                              | GG                | 1946451085               |
| SNP_P3_79419_43168901 | NC_021165.1    | Ca_kabuli_chr06 | 43168901                | AA                              | GG                | 1946451086               |
| SNP_P3_79420_43168955 | NC_021165.1    | Ca_kabuli_chr06 | 43168955                | CC                              | TT                | 1946451088               |
| SNP_P3_79421_43168971 | NC_021165.1    | Ca_kabuli_chr06 | 43168971                | TT                              | GG                | 1946451089               |
| SNP_P3_79422_43168979 | NC_021165.1    | Ca_kabuli_chr06 | 43168979                | AA                              | GG                | 1946451091               |
| SNP_P3_79423_43169168 | NC_021165.1    | Ca_kabuli_chr06 | 43169168                | CC                              | TT                | 1946451092               |
| SNP_P3_79424_43169184 | NC_021165.1    | Ca_kabuli_chr06 | 43169184                | TT                              | CC                | 1946451094               |
| SNP_P3_79425_43169366 | NC_021165.1    | Ca_kabuli_chr06 | 43169366                | AA                              | CC                | 1946451095               |
| SNP_P3_79426_43169394 | NC_021165.1    | Ca_kabuli_chr06 | 43169394                | TT                              | CC                | 1946451097               |
| SNP_P3_79427_43170009 | NC_021165.1    | Ca_kabuli_chr06 | 43170009                | TT                              | CC                | 1946451098               |
| SNP_P3_79428_43175648 | NC_021165.1    | Ca_kabuli_chr06 | 43175648                | AA                              | GG                | 1946451099               |
| SNP_P3_79429_43176146 | NC_021165.1    | Ca_kabuli_chr06 | 43176146                | TT                              | CC                | 1946451101               |
| SNP_P3_79430_43176175 | NC_021165.1    | Ca_kabuli_chr06 | 43176175                | GG                              | AA                | 1946451102               |
| SNP_P3_79431_43176244 | NC_021165.1    | Ca_kabuli_chr06 | 43176244                | GG                              | AA                | 1946451104               |
| SNP_P3_79432_43176313 | NC_021165.1    | Ca_kabuli_chr06 | 43176313                | TT                              | CC                | 1946451105               |
| SNP_P3_79433_43685995 | NC_021165.1    | Ca_kabuli_chr06 | 43685995                | GG                              | AA                | 1946451107               |
| SNP_P3_79434_43707760 | NC_021165.1    | Ca_kabuli_chr06 | 43707760                | TT                              | CC                | 1946451108               |
| SNP_P3_79435_43707789 | NC_021165.1    | Ca_kabuli_chr06 | 43707789                | GG                              | AA                | 1946451110               |
| SNP_P3_79436_43708077 | NC_021165.1    | Ca_kabuli_chr06 | 43708077                | GG                              | AA                | 1946451111               |
| SNP_P3_79437_43708113 | NC_021165.1    | Ca_kabuli_chr06 | 43708113                | AA                              | GG                | 1946451113               |
| SNP_P3_79438_43748554 | NC_021165.1    | Ca_kabuli_chr06 | 43748554                | GG                              | AA                | 1946451114               |
| SNP_P3_79440_43792875 | NC_021165.1    | Ca_kabuli_chr06 | 43792875                | GG                              | AA                | 1946451116               |
| SNP_P3_79441_43818285 | NC_021165.1    | Ca_kabuli_chr06 | 43818285                | GG                              | AA                | 1946451117               |
| SNP_P3_79442_43842574 | NC_021165.1    | Ca_kabuli_chr06 | 43842574                | CC                              | TT                | 1946451118               |
| SNP_P3_79443_43842588 | NC_021165.1    | Ca_kabuli_chr06 | 43842588                | GG                              | AA                | 1946451120               |
| SNP_P3_79444_43842589 | NC_021165.1    | Ca_kabuli_chr06 | 43842589                | AA                              | GG                | 1946451121               |
| SNP_P3_79445_43842615 | NC_021165.1    | Ca_kabuli_chr06 | 43842615                | GG                              | CC                | 1946451123               |
| SNP_P3_79446_43842916 | NC_021165.1    | Ca_kabuli_chr06 | 43842916                | CC                              | TT                | 1946451124               |
| SNP_P3_79447_43842935 | NC_021165.1    | Ca_kabuli_chr06 | 43842935                | AA                              | GG                | 1946451126               |
| SNP_P3_79448_43842960 | NC_021165.1    | Ca_kabuli_chr06 | 43842960                | TT                              | CC                | 1946451127               |
| SNP_P3_79449_43843005 | NC_021165.1    | Ca_kabuli_chr06 | 43843005                | TT                              | CC                | 1946451129               |
| SNP_P3_79450_43843031 | NC_021165.1    | Ca_kabuli_chr06 | 43843031                | AA                              | GG                | 1946451131               |
| SNP_P3_79451_43845043 | NC_021165.1    | Ca_kabuli_chr06 | 43845043                | TT                              | AA                | 1946451132               |
| SNP_P3_79452_43845057 | NC_021165.1    | Ca_kabuli_chr06 | 43845057                | CC                              | TT                | 1946451133               |
| SNP_P3_79453_43845064 | NC_021165.1    | Ca_kabuli_chr06 | 43845064                | TT                              | CC                | 1946451135               |
| SNP_P3_79454_43845096 | NC_021165.1    | Ca_kabuli_chr06 | 43845096                | GG                              | AA                | 1946451136               |
| SNP_P3_79455_43845102 | NC_021165.1    | Ca_kabuli_chr06 | 43845102                | CC                              | TT                | 1946451138               |
| SNP_P3_79456_43845352 | NC_021165.1    | Ca_kabuli_chr06 | 43845352                | AA                              | CC                | 1946451139               |
| SNP_P3_79457_43845540 | NC_021165.1    | Ca_kabuli_chr06 | 43845540                | TT                              | CC                | 1946451141               |
| SNP_P3_79458_43845552 | NC_021165.1    | Ca_kabuli_chr06 | 43845552                | AA                              | TT                | 1946451142               |
| SNP_P3_79459_43845773 | NC_021165.1    | Ca_kabuli_chr06 | 43845773                | CC                              | GG                | 1946451144               |
| SNP_P3_79461_43847768 | NC_021165.1    | Ca_kabuli_chr06 | 43847768                | TT                              | AA                | 1946451145               |

| SNPs IDs              | Chromosome IDs | Chromosomes     | Physical positions (bp) | CDC Frontier (Reference genome) | (Pusa 256 & HPNB) | NCBI SNPdb Accession IDs |
|-----------------------|----------------|-----------------|-------------------------|---------------------------------|-------------------|--------------------------|
| SNP_P3_79462_43848830 | NC_021165.1    | Ca_kabuli_chr06 | 43848830                | AA                              | TT                | 1946451147               |
| SNP_P3_79463_43856830 | NC_021165.1    | Ca_kabuli_chr06 | 43856830                | TT                              | CC                | 1946451148               |
| SNP_P3_79464_43880973 | NC_021165.1    | Ca_kabuli_chr06 | 43880973                | CC                              | AA                | 1946451149               |
| SNP_P3_79465_43881022 | NC_021165.1    | Ca_kabuli_chr06 | 43881022                | AA                              | GG                | 1946451151               |
| SNP_P3_79466_43909153 | NC_021165.1    | Ca_kabuli_chr06 | 43909153                | TT                              | GG                | 1946451152               |
| SNP_P3_79468_43909347 | NC_021165.1    | Ca_kabuli_chr06 | 43909347                | TT                              | GG                | 1946451154               |
| SNP_P3_79469_43909404 | NC_021165.1    | Ca_kabuli_chr06 | 43909404                | AA                              | TT                | 1946451155               |
| SNP_P3_79470_43909405 | NC_021165.1    | Ca_kabuli_chr06 | 43909405                | AA                              | CC                | 1946451157               |
| SNP_P3_79471_43909406 | NC_021165.1    | Ca_kabuli_chr06 | 43909406                | CC                              | TT                | 1946451159               |
| SNP_P3_79472_43909407 | NC_021165.1    | Ca_kabuli_chr06 | 43909407                | TT                              | GG                | 1946451161               |
| SNP_P3_79473_43909413 | NC_021165.1    | Ca_kabuli_chr06 | 43909413                | GG                              | AA                | 1946451162               |
| SNP_P3_79475_43909532 | NC_021165.1    | Ca_kabuli_chr06 | 43909532                | TT                              | AA                | 1946451164               |
| SNP_P3_79476_44007094 | NC_021165.1    | Ca_kabuli_chr06 | 44007094                | GG                              | AA                | 1946451165               |
| SNP_P3_79477_44007109 | NC_021165.1    | Ca_kabuli_chr06 | 44007109                | AA                              | TT                | 1946451167               |
| SNP_P3_79478_44018707 | NC_021165.1    | Ca_kabuli_chr06 | 44018707                | TT                              | AA                | 1946451168               |
| SNP_P3_79479_44026137 | NC_021165.1    | Ca_kabuli_chr06 | 44026137                | GG                              | AA                | 1946451169               |
| SNP_P3_79482_44113540 | NC_021165.1    | Ca_kabuli_chr06 | 44113540                | CC                              | TT                | 1946451171               |
| SNP_P3_79483_44122497 | NC_021165.1    | Ca_kabuli_chr06 | 44122497                | CC                              | AA                | 1946451172               |
| SNP_P3_79484_44151942 | NC_021165.1    | Ca_kabuli_chr06 | 44151942                | TT                              | CC                | 1946451174               |
| SNP_P3_79485_44160233 | NC_021165.1    | Ca_kabuli_chr06 | 44160233                | CC                              | TT                | 1946451175               |
| SNP_P3_79486_44160559 | NC_021165.1    | Ca_kabuli_chr06 | 44160559                | CC                              | TT                | 1946451177               |
| SNP_P3_79487_44160779 | NC_021165.1    | Ca_kabuli_chr06 | 44160779                | TT                              | AA                | 1946451178               |
| SNP_P3_79488_44160827 | NC_021165.1    | Ca_kabuli_chr06 | 44160827                | TT                              | CC                | 1946451180               |
| SNP_P3_79489_44160864 | NC_021165.1    | Ca_kabuli_chr06 | 44160864                | TT                              | GG                | 1946451182               |
| SNP_P3_79490_44160887 | NC_021165.1    | Ca_kabuli_chr06 | 44160887                | GG                              | AA                | 1946451183               |
| SNP_P3_79491_44160889 | NC_021165.1    | Ca_kabuli_chr06 | 44160889                | AA                              | GG                | 1946451184               |
| SNP_P3_79492_44160902 | NC_021165.1    | Ca_kabuli_chr06 | 44160902                | CC                              | TT                | 1946451186               |
| SNP_P3_79493_44160936 | NC_021165.1    | Ca_kabuli_chr06 | 44160936                | AA                              | CC                | 1946451187               |
| SNP_P3_79494_44160962 | NC_021165.1    | Ca_kabuli_chr06 | 44160962                | TT                              | CC                | 1946451189               |
| SNP_P3_79495_44160978 | NC_021165.1    | Ca_kabuli_chr06 | 44160978                | AA                              | GG                | 1946451190               |
| SNP_P3_79496_44160983 | NC_021165.1    | Ca_kabuli_chr06 | 44160983                | AA                              | GG                | 1946451192               |
| SNP_P3_79497_44160993 | NC_021165.1    | Ca_kabuli_chr06 | 44160993                | GG                              | AA                | 1946451193               |
| SNP_P3_79498_44160996 | NC_021165.1    | Ca_kabuli_chr06 | 44160996                | AA                              | GG                | 1946451195               |
| SNP_P3_79499_44161040 | NC_021165.1    | Ca_kabuli_chr06 | 44161040                | TT                              | AA                | 1946451196               |
| SNP_P3_79500_44161042 | NC_021165.1    | Ca_kabuli_chr06 | 44161042                | GG                              | CC                | 1946451197               |
| SNP_P3_79501_44163795 | NC_021165.1    | Ca_kabuli_chr06 | 44163795                | TT                              | GG                | 1946451199               |
| SNP_P3_79502_44164268 | NC_021165.1    | Ca_kabuli_chr06 | 44164268                | TT                              | AA                | 1946451201               |
| SNP_P3_79503_44164593 | NC_021165.1    | Ca_kabuli_chr06 | 44164593                | TT                              | CC                | 1946451202               |
| SNP_P3_79504_44164609 | NC_021165.1    | Ca_kabuli_chr06 | 44164609                | AA                              | CC                | 1946451203               |
| SNP_P3_79505_44164678 | NC_021165.1    | Ca_kabuli_chr06 | 44164678                | AA                              | GG                | 1946451205               |
| SNP_P3_79506_44220579 | NC_021165.1    | Ca_kabuli_chr06 | 44220579                | AA                              | GG                | 1946451206               |
| SNP_P3_79509_44265393 | NC_021165.1    | Ca_kabuli_chr06 | 44265393                | TT                              | AA                | 1946451208               |

| SNPs IDs              | Chromosome IDs | Chromosomes     | Physical positions (bp) | CDC Frontier (Reference genome) | (Pusa 256 & HPNB) | NCBI SNPdb Accession IDs |
|-----------------------|----------------|-----------------|-------------------------|---------------------------------|-------------------|--------------------------|
| SNP_P3_79510_44265437 | NC_021165.1    | Ca_kabuli_chr06 | 44265437                | CC                              | AA                | 1946451209               |
| SNP_P3_79511_44265449 | NC_021165.1    | Ca_kabuli_chr06 | 44265449                | GG                              | AA                | 1946451210               |
| SNP_P3_79513_44267664 | NC_021165.1    | Ca_kabuli_chr06 | 44267664                | CC                              | TT                | 1946451212               |
| SNP_P3_79514_44278941 | NC_021165.1    | Ca_kabuli_chr06 | 44278941                | TT                              | CC                | 1946451213               |
| SNP_P3_79515_44278948 | NC_021165.1    | Ca_kabuli_chr06 | 44278948                | CC                              | AA                | 1946451215               |
| SNP_P3_79516_44279289 | NC_021165.1    | Ca_kabuli_chr06 | 44279289                | TT                              | CC                | 1946451217               |
| SNP_P3_79517_44280785 | NC_021165.1    | Ca_kabuli_chr06 | 44280785                | GG                              | AA                | 1946451218               |
| SNP_P3_79518_44282189 | NC_021165.1    | Ca_kabuli_chr06 | 44282189                | TT                              | CC                | 1946451220               |
| SNP_P3_79519_44293693 | NC_021165.1    | Ca_kabuli_chr06 | 44293693                | CC                              | TT                | 1946451221               |
| SNP_P3_79520_44293707 | NC_021165.1    | Ca_kabuli_chr06 | 44293707                | TT                              | AA                | 1946451222               |
| SNP_P3_79521_44293735 | NC_021165.1    | Ca_kabuli_chr06 | 44293735                | AA                              | GG                | 1946451224               |
| SNP_P3_79522_44293796 | NC_021165.1    | Ca_kabuli_chr06 | 44293796                | AA                              | GG                | 1946451225               |
| SNP_P3_79523_44294199 | NC_021165.1    | Ca_kabuli_chr06 | 44294199                | TT                              | CC                | 1946451227               |
| SNP_P3_79524_44294269 | NC_021165.1    | Ca_kabuli_chr06 | 44294269                | AA                              | GG                | 1946451228               |
| SNP_P3_79525_44294318 | NC_021165.1    | Ca_kabuli_chr06 | 44294318                | CC                              | TT                | 1946451230               |
| SNP_P3_79526_44294329 | NC_021165.1    | Ca_kabuli_chr06 | 44294329                | GG                              | AA                | 1946451231               |
| SNP_P3_79527_44294338 | NC_021165.1    | Ca_kabuli_chr06 | 44294338                | GG                              | AA                | 1946451232               |
| SNP_P3_79528_44294342 | NC_021165.1    | Ca_kabuli_chr06 | 44294342                | AA                              | GG                | 1946451234               |
| SNP_P3_79530_44301977 | NC_021165.1    | Ca_kabuli_chr06 | 44301977                | GG                              | AA                | 1946451235               |
| SNP_P3_79531_44302091 | NC_021165.1    | Ca_kabuli_chr06 | 44302091                | CC                              | TT                | 1946451237               |
| SNP_P3_79532_44302114 | NC_021165.1    | Ca_kabuli_chr06 | 44302114                | CC                              | GG                | 1946451239               |
| SNP_P3_79533_44302176 | NC_021165.1    | Ca_kabuli_chr06 | 44302176                | TT                              | GG                | 1946451240               |
| SNP_P3_79534_44302462 | NC_021165.1    | Ca_kabuli_chr06 | 44302462                | AA                              | CC                | 1946451241               |
| SNP_P3_79535_44302575 | NC_021165.1    | Ca_kabuli_chr06 | 44302575                | AA                              | TT                | 1946451243               |
| SNP_P3_79536_44302576 | NC_021165.1    | Ca_kabuli_chr06 | 44302576                | AA                              | GG                | 1946451244               |
| SNP_P3_79537_44302654 | NC_021165.1    | Ca_kabuli_chr06 | 44302654                | TT                              | GG                | 1946451246               |
| SNP_P3_79538_44302659 | NC_021165.1    | Ca_kabuli_chr06 | 44302659                | CC                              | TT                | 1946451247               |
| SNP_P3_79539_44303231 | NC_021165.1    | Ca_kabuli_chr06 | 44303231                | CC                              | AA                | 1946451249               |
| SNP_P3_79540_44303247 | NC_021165.1    | Ca_kabuli_chr06 | 44303247                | TT                              | CC                | 1946451250               |
| SNP_P3_79541_44303279 | NC_021165.1    | Ca_kabuli_chr06 | 44303279                | CC                              | TT                | 1946451252               |
| SNP_P3_79542_44303314 | NC_021165.1    | Ca_kabuli_chr06 | 44303314                | CC                              | TT                | 1946451253               |
| SNP_P3_79543_44317861 | NC_021165.1    | Ca_kabuli_chr06 | 44317861                | TT                              | CC                | 1946451255               |
| SNP_P3_79544_44330792 | NC_021165.1    | Ca_kabuli_chr06 | 44330792                | AA                              | TT                | 1946451256               |
| SNP_P3_79545_44330800 | NC_021165.1    | Ca_kabuli_chr06 | 44330800                | TT                              | GG                | 1946451258               |
| SNP_P3_79546_44330802 | NC_021165.1    | Ca_kabuli_chr06 | 44330802                | AA                              | GG                | 1946451260               |
| SNP_P3_79547_44331075 | NC_021165.1    | Ca_kabuli_chr06 | 44331075                | TT                              | CC                | 1946451261               |
| SNP_P3_79548_44331356 | NC_021165.1    | Ca_kabuli_chr06 | 44331356                | CC                              | AA                | 1946451262               |
| SNP_P3_79549_44332270 | NC_021165.1    | Ca_kabuli_chr06 | 44332270                | TT                              | CC                | 1946451264               |
| SNP_P3_79550_44351594 | NC_021165.1    | Ca_kabuli_chr06 | 44351594                | TT                              | CC                | 1946451265               |
| SNP_P3_79551_44353457 | NC_021165.1    | Ca_kabuli_chr06 | 44353457                | CC                              | GG                | 1946451267               |
| SNP_P3_79552_44353704 | NC_021165.1    | Ca_kabuli_chr06 | 44353704                | CC                              | TT                | 1946451268               |
| SNP_P3_79553_44353739 | NC_021165.1    | Ca_kabuli_chr06 | 44353739                | AA                              | CC                | 1946451270               |

| SNPs IDs              | Chromosome IDs | Chromosomes     | Physical positions (bp) | CDC Frontier (Reference genome) | (Pusa 256 & HPNB) | NCBI SNPdb Accession IDs |
|-----------------------|----------------|-----------------|-------------------------|---------------------------------|-------------------|--------------------------|
| SNP_P3_79554_44396673 | NC_021165.1    | Ca_kabuli_chr06 | 44396673                | TT                              | CC                | 1946451271               |
| SNP_P3_79555_44424559 | NC_021165.1    | Ca_kabuli_chr06 | 44424559                | AA                              | GG                | 1946451273               |
| SNP_P3_79556_44432334 | NC_021165.1    | Ca_kabuli_chr06 | 44432334                | CC                              | TT                | 1946451274               |
| SNP_P3_79557_44439330 | NC_021165.1    | Ca_kabuli_chr06 | 44439330                | GG                              | AA                | 1946451276               |
| SNP_P3_79558_44464131 | NC_021165.1    | Ca_kabuli_chr06 | 44464131                | AA                              | GG                | 1946451277               |
| SNP_P3_79559_44464134 | NC_021165.1    | Ca_kabuli_chr06 | 44464134                | AA                              | GG                | 1946451279               |
| SNP_P3_79560_44495786 | NC_021165.1    | Ca_kabuli_chr06 | 44495786                | AA                              | TT                | 1946451280               |
| SNP_P3_79561_44509501 | NC_021165.1    | Ca_kabuli_chr06 | 44509501                | TT                              | CC                | 1946451282               |
| SNP_P3_79562_44511371 | NC_021165.1    | Ca_kabuli_chr06 | 44511371                | AA                              | GG                | 1946451283               |
| SNP_P3_79563_44516407 | NC_021165.1    | Ca_kabuli_chr06 | 44516407                | AA                              | TT                | 1946451284               |
| SNP_P3_79564_44516593 | NC_021165.1    | Ca_kabuli_chr06 | 44516593                | GG                              | AA                | 1946451286               |
| SNP_P3_79565_44516672 | NC_021165.1    | Ca_kabuli_chr06 | 44516672                | GG                              | TT                | 1946451287               |
| SNP_P3_79566_44516673 | NC_021165.1    | Ca_kabuli_chr06 | 44516673                | TT                              | GG                | 1946451289               |
| SNP_P3_79567_44516751 | NC_021165.1    | Ca_kabuli_chr06 | 44516751                | CC                              | TT                | 1946451290               |
| SNP_P3_79568_44516785 | NC_021165.1    | Ca_kabuli_chr06 | 44516785                | AA                              | GG                | 1946451292               |
| SNP_P3_79569_44516789 | NC_021165.1    | Ca_kabuli_chr06 | 44516789                | GG                              | AA                | 1946451293               |
| SNP_P3_79570_44516799 | NC_021165.1    | Ca_kabuli_chr06 | 44516799                | CC                              | TT                | 1946451295               |
| SNP_P3_79571_44516806 | NC_021165.1    | Ca_kabuli_chr06 | 44516806                | CC                              | TT                | 1946451296               |
| SNP_P3_79572_44516807 | NC_021165.1    | Ca_kabuli_chr06 | 44516807                | GG                              | AA                | 1946451298               |
| SNP_P3_79573_44516814 | NC_021165.1    | Ca_kabuli_chr06 | 44516814                | TT                              | CC                | 1946451299               |
| SNP_P3_79574_44568261 | NC_021165.1    | Ca_kabuli_chr06 | 44568261                | CC                              | AA                | 1946451301               |
| SNP_P3_79575_44568271 | NC_021165.1    | Ca_kabuli_chr06 | 44568271                | GG                              | CC                | 1946451303               |
| SNP_P3_79576_44580800 | NC_021165.1    | Ca_kabuli_chr06 | 44580800                | TT                              | CC                | 1946451304               |
| SNP_P3_79577_44580845 | NC_021165.1    | Ca_kabuli_chr06 | 44580845                | TT                              | CC                | 1946451306               |
| SNP_P3_79578_44590443 | NC_021165.1    | Ca_kabuli_chr06 | 44590443                | GG                              | AA                | 1946451307               |
| SNP_P3_79579_44606529 | NC_021165.1    | Ca_kabuli_chr06 | 44606529                | GG                              | AA                | 1946451308               |
| SNP_P3_79580_44626588 | NC_021165.1    | Ca_kabuli_chr06 | 44626588                | AA                              | GG                | 1946451310               |
| SNP_P3_79581_44626599 | NC_021165.1    | Ca_kabuli_chr06 | 44626599                | TT                              | GG                | 1946451311               |
| SNP_P3_79582_44626948 | NC_021165.1    | Ca_kabuli_chr06 | 44626948                | CC                              | GG                | 1946451313               |
| SNP_P3_79583_44626950 | NC_021165.1    | Ca_kabuli_chr06 | 44626950                | AA                              | GG                | 1946451314               |
| SNP_P3_79584_44627030 | NC_021165.1    | Ca_kabuli_chr06 | 44627030                | TT                              | AA                | 1946451316               |
| SNP_P3_79585_44627076 | NC_021165.1    | Ca_kabuli_chr06 | 44627076                | AA                              | GG                | 1946451317               |
| SNP_P3_79586_44627106 | NC_021165.1    | Ca_kabuli_chr06 | 44627106                | AA                              | GG                | 1946451319               |
| SNP_P3_79587_44648174 | NC_021165.1    | Ca_kabuli_chr06 | 44648174                | TT                              | CC                | 1946451321               |
| SNP_P3_79588_44648772 | NC_021165.1    | Ca_kabuli_chr06 | 44648772                | CC                              | AA                | 1946451323               |
| SNP_P3_79589_44652273 | NC_021165.1    | Ca_kabuli_chr06 | 44652273                | CC                              | TT                | 1946451324               |
| SNP_P3_79590_44652532 | NC_021165.1    | Ca_kabuli_chr06 | 44652532                | TT                              | GG                | 1946451326               |
| SNP_P3_79591_44652811 | NC_021165.1    | Ca_kabuli_chr06 | 44652811                | AA                              | GG                | 1946451327               |
| SNP_P3_79592_44653483 | NC_021165.1    | Ca_kabuli_chr06 | 44653483                | TT                              | CC                | 1946451328               |
| SNP_P3_79593_44653584 | NC_021165.1    | Ca_kabuli_chr06 | 44653584                | TT                              | AA                | 1946451330               |
| SNP_P3_79594_44653850 | NC_021165.1    | Ca_kabuli_chr06 | 44653850                | TT                              | CC                | 1946451331               |
| SNP_P3_79595_44653872 | NC_021165.1    | Ca_kabuli_chr06 | 44653872                | GG                              | AA                | 1946451333               |



| SNPs IDs              | Chromosome IDs | Chromosomes     | Physical positions (bp) | CDC Frontier (Reference genome) | (Pusa 256 & HPNB) | NCBI SNPdb Accession IDs |
|-----------------------|----------------|-----------------|-------------------------|---------------------------------|-------------------|--------------------------|
| SNP_P3_79596_44654059 | NC_021165.1    | Ca_kabuli_chr06 | 44654059                | AA                              | TT                | 1946451334               |
| SNP_P3_79597_44654510 | NC_021165.1    | Ca_kabuli_chr06 | 44654510                | TT                              | CC                | 1946451336               |
| SNP_P3_79598_44654696 | NC_021165.1    | Ca_kabuli_chr06 | 44654696                | CC                              | TT                | 1946451337               |
| SNP_P3_79599_44678115 | NC_021165.1    | Ca_kabuli_chr06 | 44678115                | TT                              | GG                | 1946451339               |
| SNP_P3_79600_44678157 | NC_021165.1    | Ca_kabuli_chr06 | 44678157                | GG                              | AA                | 1946451340               |
| SNP_P3_79601_44678169 | NC_021165.1    | Ca_kabuli_chr06 | 44678169                | GG                              | TT                | 1946451342               |
| SNP_P3_79602_44678281 | NC_021165.1    | Ca_kabuli_chr06 | 44678281                | AA                              | TT                | 1946451343               |
| SNP_P3_79603_44678318 | NC_021165.1    | Ca_kabuli_chr06 | 44678318                | TT                              | GG                | 1946451344               |
| SNP_P3_79604_44678400 | NC_021165.1    | Ca_kabuli_chr06 | 44678400                | AA                              | TT                | 1946451346               |
| SNP_P3_79606_44678875 | NC_021165.1    | Ca_kabuli_chr06 | 44678875                | TT                              | CC                | 1946451347               |
| SNP_P3_79607_44678944 | NC_021165.1    | Ca_kabuli_chr06 | 44678944                | TT                              | CC                | 1946451349               |
| SNP_P3_79608_44680156 | NC_021165.1    | Ca_kabuli_chr06 | 44680156                | CC                              | TT                | 1946451351               |
| SNP_P3_79609_44680162 | NC_021165.1    | Ca_kabuli_chr06 | 44680162                | CC                              | TT                | 1946451352               |
| SNP_P3_79610_44681644 | NC_021165.1    | Ca_kabuli_chr06 | 44681644                | GG                              | AA                | 1946451354               |
| SNP_P3_79611_44681965 | NC_021165.1    | Ca_kabuli_chr06 | 44681965                | TT                              | AA                | 1946451355               |
| SNP_P3_79612_44681970 | NC_021165.1    | Ca_kabuli_chr06 | 44681970                | AA                              | GG                | 1946451357               |
| SNP_P3_79613_44681983 | NC_021165.1    | Ca_kabuli_chr06 | 44681983                | TT                              | CC                | 1946451358               |
| SNP_P3_79614_44682323 | NC_021165.1    | Ca_kabuli_chr06 | 44682323                | GG                              | CC                | 1946451360               |
| SNP_P3_79615_44682328 | NC_021165.1    | Ca_kabuli_chr06 | 44682328                | CC                              | AA                | 1946451361               |
| SNP_P3_79616_44682821 | NC_021165.1    | Ca_kabuli_chr06 | 44682821                | AA                              | TT                | 1946451362               |
| SNP_P3_79617_44682958 | NC_021165.1    | Ca_kabuli_chr06 | 44682958                | AA                              | GG                | 1946451364               |
| SNP_P3_79618_44700012 | NC_021165.1    | Ca_kabuli_chr06 | 44700012                | AA                              | GG                | 1946451365               |
| SNP_P3_79619_44700098 | NC_021165.1    | Ca_kabuli_chr06 | 44700098                | GG                              | AA                | 1946451367               |
| SNP_P3_79620_44700112 | NC_021165.1    | Ca_kabuli_chr06 | 44700112                | GG                              | TT                | 1946451368               |
| SNP_P3_79621_44700127 | NC_021165.1    | Ca_kabuli_chr06 | 44700127                | CC                              | TT                | 1946451370               |
| SNP_P3_79623_44706743 | NC_021165.1    | Ca_kabuli_chr06 | 44706743                | TT                              | GG                | 1946451371               |
| SNP_P3_79624_44706939 | NC_021165.1    | Ca_kabuli_chr06 | 44706939                | CC                              | TT                | 1946451373               |
| SNP_P3_79625_44707058 | NC_021165.1    | Ca_kabuli_chr06 | 44707058                | GG                              | AA                | 1946451374               |
| SNP_P3_79626_44707092 | NC_021165.1    | Ca_kabuli_chr06 | 44707092                | TT                              | CC                | 1946451376               |
| SNP_P3_79627_44707338 | NC_021165.1    | Ca_kabuli_chr06 | 44707338                | CC                              | TT                | 1946451377               |
| SNP_P3_79628_44707396 | NC_021165.1    | Ca_kabuli_chr06 | 44707396                | CC                              | TT                | 1946451379               |
| SNP_P3_79629_44707431 | NC_021165.1    | Ca_kabuli_chr06 | 44707431                | GG                              | AA                | 1946451380               |
| SNP_P3_79630_44708829 | NC_021165.1    | Ca_kabuli_chr06 | 44708829                | TT                              | AA                | 1946451382               |
| SNP_P3_79631_44708830 | NC_021165.1    | Ca_kabuli_chr06 | 44708830                | AA                              | CC                | 1946451383               |
| SNP_P3_79632_44709081 | NC_021165.1    | Ca_kabuli_chr06 | 44709081                | AA                              | CC                | 1946451385               |
| SNP_P3_79633_44709123 | NC_021165.1    | Ca_kabuli_chr06 | 44709123                | CC                              | TT                | 1946451386               |
| SNP_P3_79634_44709126 | NC_021165.1    | Ca_kabuli_chr06 | 44709126                | AA                              | GG                | 1946451388               |
| SNP_P3_79635_44709145 | NC_021165.1    | Ca_kabuli_chr06 | 44709145                | GG                              | AA                | 1946451389               |
| SNP_P3_79636_44709344 | NC_021165.1    | Ca_kabuli_chr06 | 44709344                | TT                              | GG                | 1946451391               |
| SNP_P3_79637_44709436 | NC_021165.1    | Ca_kabuli_chr06 | 44709436                | GG                              | TT                | 1946451392               |
| SNP_P3_79638_44709811 | NC_021165.1    | Ca_kabuli_chr06 | 44709811                | AA                              | CC                | 1946451394               |
| SNP_P3_79639_44709823 | NC_021165.1    | Ca_kabuli_chr06 | 44709823                | TT                              | CC                | 1946451395               |

| SNPs IDs              | Chromosome IDs | Chromosomes     | Physical positions (bp) | CDC Frontier (Reference genome) | (Pusa 256 & HPNB) | NCBI SNPdb Accession IDs |
|-----------------------|----------------|-----------------|-------------------------|---------------------------------|-------------------|--------------------------|
| SNP_P3_79640_44711166 | NC_021165.1    | Ca_kabuli_chr06 | 44711166                | GG                              | AA                | 1946451397               |
| SNP_P3_79641_44724199 | NC_021165.1    | Ca_kabuli_chr06 | 44724199                | AA                              | TT                | 1946451398               |
| SNP_P3_79642_44724590 | NC_021165.1    | Ca_kabuli_chr06 | 44724590                | AA                              | CC                | 1946451400               |
| SNP_P3_79643_44724595 | NC_021165.1    | Ca_kabuli_chr06 | 44724595                | AA                              | GG                | 1946451401               |
| SNP_P3_79644_44726760 | NC_021165.1    | Ca_kabuli_chr06 | 44726760                | CC                              | GG                | 1946451403               |
| SNP_P3_79645_44727072 | NC_021165.1    | Ca_kabuli_chr06 | 44727072                | TT                              | CC                | 1946451404               |
| SNP_P3_79646_44727114 | NC_021165.1    | Ca_kabuli_chr06 | 44727114                | AA                              | CC                | 1946451405               |
| SNP_P3_79647_44727160 | NC_021165.1    | Ca_kabuli_chr06 | 44727160                | AA                              | CC                | 1946451407               |
| SNP_P3_79648_44727170 | NC_021165.1    | Ca_kabuli_chr06 | 44727170                | TT                              | CC                | 1946451408               |
| SNP_P3_79649_44737973 | NC_021165.1    | Ca_kabuli_chr06 | 44737973                | CC                              | TT                | 1946451410               |
| SNP_P3_79650_44738091 | NC_021165.1    | Ca_kabuli_chr06 | 44738091                | AA                              | GG                | 1946451411               |
| SNP_P3_79651_44792068 | NC_021165.1    | Ca_kabuli_chr06 | 44792068                | AA                              | TT                | 1946451413               |
| SNP_P3_79652_44804482 | NC_021165.1    | Ca_kabuli_chr06 | 44804482                | AA                              | TT                | 1946451414               |
| SNP_P3_79653_44831525 | NC_021165.1    | Ca_kabuli_chr06 | 44831525                | AA                              | TT                | 1946451416               |
| SNP_P3_79654_44874902 | NC_021165.1    | Ca_kabuli_chr06 | 44874902                | TT                              | CC                | 1946451417               |
| SNP_P3_79655_44878356 | NC_021165.1    | Ca_kabuli_chr06 | 44878356                | TT                              | GG                | 1946451419               |
| SNP_P3_79656_44878406 | NC_021165.1    | Ca_kabuli_chr06 | 44878406                | TT                              | CC                | 1946451420               |
| SNP_P3_79657_44892002 | NC_021165.1    | Ca_kabuli_chr06 | 44892002                | AA                              | TT                | 1946451422               |
| SNP_P3_79658_44892003 | NC_021165.1    | Ca_kabuli_chr06 | 44892003                | AA                              | CC                | 1946451423               |
| SNP_P3_79659_44892561 | NC_021165.1    | Ca_kabuli_chr06 | 44892561                | AA                              | CC                | 1946451425               |
| SNP_P3_79660_44911248 | NC_021165.1    | Ca_kabuli_chr06 | 44911248                | AA                              | GG                | 1946451426               |
| SNP_P3_79662_44952489 | NC_021165.1    | Ca_kabuli_chr06 | 44952489                | TT                              | CC                | 1946451428               |
| SNP_P3_79663_44953637 | NC_021165.1    | Ca_kabuli_chr06 | 44953637                | TT                              | CC                | 1946451429               |
| SNP_P3_79664_44954189 | NC_021165.1    | Ca_kabuli_chr06 | 44954189                | GG                              | AA                | 1946451431               |
| SNP_P3_79665_44954190 | NC_021165.1    | Ca_kabuli_chr06 | 44954190                | GG                              | TT                | 1946451432               |
| SNP_P3_79666_44954191 | NC_021165.1    | Ca_kabuli_chr06 | 44954191                | CC                              | TT                | 1946451433               |
| SNP_P3_79667_44954211 | NC_021165.1    | Ca_kabuli_chr06 | 44954211                | AA                              | CC                | 1946451435               |
| SNP_P3_79668_44954214 | NC_021165.1    | Ca_kabuli_chr06 | 44954214                | GG                              | TT                | 1946451436               |
| SNP_P3_79669_44954219 | NC_021165.1    | Ca_kabuli_chr06 | 44954219                | CC                              | TT                | 1946451438               |
| SNP_P3_79670_44954224 | NC_021165.1    | Ca_kabuli_chr06 | 44954224                | GG                              | AA                | 1946451440               |
| SNP_P3_79671_44954265 | NC_021165.1    | Ca_kabuli_chr06 | 44954265                | GG                              | AA                | 1946451441               |
| SNP_P3_79672_44960206 | NC_021165.1    | Ca_kabuli_chr06 | 44960206                | AA                              | CC                | 1946451443               |
| SNP_P3_79673_44960243 | NC_021165.1    | Ca_kabuli_chr06 | 44960243                | GG                              | AA                | 1946451444               |
| SNP_P3_79674_44960267 | NC_021165.1    | Ca_kabuli_chr06 | 44960267                | TT                              | CC                | 1946451445               |
| SNP_P3_79675_44960282 | NC_021165.1    | Ca_kabuli_chr06 | 44960282                | GG                              | TT                | 1946451447               |
| SNP_P3_79676_44960294 | NC_021165.1    | Ca_kabuli_chr06 | 44960294                | AA                              | GG                | 1946451448               |
| SNP_P3_79677_44960297 | NC_021165.1    | Ca_kabuli_chr06 | 44960297                | CC                              | AA                | 1946451450               |
| SNP_P3_79678_44960315 | NC_021165.1    | Ca_kabuli_chr06 | 44960315                | AA                              | GG                | 1946451451               |
| SNP_P3_79679_44960405 | NC_021165.1    | Ca_kabuli_chr06 | 44960405                | GG                              | AA                | 1946451453               |
| SNP_P3_79680_44960532 | NC_021165.1    | Ca_kabuli_chr06 | 44960532                | GG                              | TT                | 1946451454               |
| SNP_P3_79681_44960537 | NC_021165.1    | Ca_kabuli_chr06 | 44960537                | AA                              | GG                | 1946451456               |
| SNP_P3_79682_44960546 | NC_021165.1    | Ca_kabuli_chr06 | 44960546                | TT                              | AA                | 1946451457               |

| SNPs IDs              | Chromosome IDs | Chromosomes     | Physical positions (bp) | CDC Frontier (Reference genome) | (Pusa 256 & HPNB) | NCBI SNPdb Accession IDs |
|-----------------------|----------------|-----------------|-------------------------|---------------------------------|-------------------|--------------------------|
| SNP_P3_79683_44960554 | NC_021165.1    | Ca_kabuli_chr06 | 44960554                | GG                              | AA                | 1946451459               |
| SNP_P3_79684_44960556 | NC_021165.1    | Ca_kabuli_chr06 | 44960556                | AA                              | GG                | 1946451461               |
| SNP_P3_79685_44960557 | NC_021165.1    | Ca_kabuli_chr06 | 44960557                | GG                              | AA                | 1946451462               |
| SNP_P3_79686_44960608 | NC_021165.1    | Ca_kabuli_chr06 | 44960608                | GG                              | AA                | 1946451464               |
| SNP_P3_79687_44970678 | NC_021165.1    | Ca_kabuli_chr06 | 44970678                | GG                              | AA                | 1946451465               |
| SNP_P3_79688_44977209 | NC_021165.1    | Ca_kabuli_chr06 | 44977209                | CC                              | TT                | 1946451466               |
| SNP_P3_79689_44977562 | NC_021165.1    | Ca_kabuli_chr06 | 44977562                | CC                              | TT                | 1946451468               |
| SNP_P3_79690_44991511 | NC_021165.1    | Ca_kabuli_chr06 | 44991511                | CC                              | TT                | 1946451469               |
| SNP_P3_79691_45018249 | NC_021165.1    | Ca_kabuli_chr06 | 45018249                | AA                              | GG                | 1946451471               |
| SNP_P3_79692_45018264 | NC_021165.1    | Ca_kabuli_chr06 | 45018264                | GG                              | AA                | 1946451472               |
| SNP_P3_79693_45018296 | NC_021165.1    | Ca_kabuli_chr06 | 45018296                | AA                              | GG                | 1946451474               |
| SNP_P3_79695_45018443 | NC_021165.1    | Ca_kabuli_chr06 | 45018443                | GG                              | TT                | 1946451475               |
| SNP_P3_79696_45018517 | NC_021165.1    | Ca_kabuli_chr06 | 45018517                | AA                              | CC                | 1946451477               |
| SNP_P3_79697_45018790 | NC_021165.1    | Ca_kabuli_chr06 | 45018790                | CC                              | TT                | 1946451478               |
| SNP_P3_79698_45018792 | NC_021165.1    | Ca_kabuli_chr06 | 45018792                | CC                              | TT                | 1946451480               |
| SNP_P3_79699_45018796 | NC_021165.1    | Ca_kabuli_chr06 | 45018796                | AA                              | CC                | 1946451481               |
| SNP_P3_79700_45018832 | NC_021165.1    | Ca_kabuli_chr06 | 45018832                | CC                              | AA                | 1946451483               |
| SNP_P3_79701_45020857 | NC_021165.1    | Ca_kabuli_chr06 | 45020857                | AA                              | GG                | 1946451484               |
| SNP_P3_79702_45020947 | NC_021165.1    | Ca_kabuli_chr06 | 45020947                | GG                              | AA                | 1946451486               |
| SNP_P3_79703_45036962 | NC_021165.1    | Ca_kabuli_chr06 | 45036962                | TT                              | AA                | 1946451487               |
| SNP_P3_79704_45041226 | NC_021165.1    | Ca_kabuli_chr06 | 45041226                | TT                              | CC                | 1946451489               |
| SNP_P3_79705_45058367 | NC_021165.1    | Ca_kabuli_chr06 | 45058367                | CC                              | TT                | 1946451490               |
| SNP_P3_79706_45083074 | NC_021165.1    | Ca_kabuli_chr06 | 45083074                | AA                              | GG                | 1946451492               |
| SNP_P3_79707_45093813 | NC_021165.1    | Ca_kabuli_chr06 | 45093813                | AA                              | CC                | 1946451493               |
| SNP_P3_79708_45093815 | NC_021165.1    | Ca_kabuli_chr06 | 45093815                | AA                              | CC                | 1946451494               |
| SNP_P3_79709_45097492 | NC_021165.1    | Ca_kabuli_chr06 | 45097492                | AA                              | GG                | 1946451496               |
| SNP_P3_79710_45135153 | NC_021165.1    | Ca_kabuli_chr06 | 45135153                | GG                              | TT                | 1946451497               |
| SNP_P3_79711_45164684 | NC_021165.1    | Ca_kabuli_chr06 | 45164684                | CC                              | TT                | 1946451499               |
| SNP_P3_79712_45164688 | NC_021165.1    | Ca_kabuli_chr06 | 45164688                | AA                              | GG                | 1946451503               |
| SNP_P3_79713_45189258 | NC_021165.1    | Ca_kabuli_chr06 | 45189258                | AA                              | CC                | 1946451505               |
| SNP_P3_79714_45194131 | NC_021165.1    | Ca_kabuli_chr06 | 45194131                | CC                              | TT                | 1946451506               |
| SNP_P3_79715_45205464 | NC_021165.1    | Ca_kabuli_chr06 | 45205464                | CC                              | TT                | 1946451508               |
| SNP_P3_79716_45234822 | NC_021165.1    | Ca_kabuli_chr06 | 45234822                | TT                              | CC                | 1946451509               |
| SNP_P3_79717_45270528 | NC_021165.1    | Ca_kabuli_chr06 | 45270528                | AA                              | GG                | 1946451511               |
| SNP_P3_79718_45274591 | NC_021165.1    | Ca_kabuli_chr06 | 45274591                | TT                              | AA                | 1946451512               |
| SNP_P3_79719_45274613 | NC_021165.1    | Ca_kabuli_chr06 | 45274613                | AA                              | GG                | 1946451514               |
| SNP_P3_79720_45274614 | NC_021165.1    | Ca_kabuli_chr06 | 45274614                | CC                              | TT                | 1946451515               |
| SNP_P3_79721_45274623 | NC_021165.1    | Ca_kabuli_chr06 | 45274623                | TT                              | CC                | 1946451517               |
| SNP_P3_79722_45274641 | NC_021165.1    | Ca_kabuli_chr06 | 45274641                | AA                              | TT                | 1946451518               |
| SNP_P3_79723_45274661 | NC_021165.1    | Ca_kabuli_chr06 | 45274661                | TT                              | AA                | 1946451520               |
| SNP_P3_79724_45274669 | NC_021165.1    | Ca_kabuli_chr06 | 45274669                | CC                              | AA                | 1946451521               |
| SNP_P3_79725_45274833 | NC_021165.1    | Ca_kabuli_chr06 | 45274833                | CC                              | TT                | 1946451523               |

| SNPs IDs              | Chromosome IDs | Chromosomes     | Physical positions (bp) | CDC Frontier (Reference genome) | (Pusa 256 & HPNB) | NCBI SNPdb Accession IDs |
|-----------------------|----------------|-----------------|-------------------------|---------------------------------|-------------------|--------------------------|
| SNP_P3_79726_45274842 | NC_021165.1    | Ca_kabuli_chr06 | 45274842                | AA                              | GG                | 1946451524               |
| SNP_P3_79727_45274848 | NC_021165.1    | Ca_kabuli_chr06 | 45274848                | TT                              | GG                | 1946451526               |
| SNP_P3_79728_45274872 | NC_021165.1    | Ca_kabuli_chr06 | 45274872                | TT                              | CC                | 1946451527               |
| SNP_P3_79729_45274884 | NC_021165.1    | Ca_kabuli_chr06 | 45274884                | CC                              | TT                | 1946451529               |
| SNP_P3_79730_45274894 | NC_021165.1    | Ca_kabuli_chr06 | 45274894                | AA                              | GG                | 1946451530               |
| SNP_P3_79731_45274902 | NC_021165.1    | Ca_kabuli_chr06 | 45274902                | TT                              | CC                | 1946451532               |
| SNP_P3_79732_45277888 | NC_021165.1    | Ca_kabuli_chr06 | 45277888                | CC                              | TT                | 1946451533               |
| SNP_P3_79733_45277896 | NC_021165.1    | Ca_kabuli_chr06 | 45277896                | GG                              | AA                | 1946451534               |
| SNP_P3_79735_45277909 | NC_021165.1    | Ca_kabuli_chr06 | 45277909                | TT                              | GG                | 1946451536               |
| SNP_P3_79737_45282702 | NC_021165.1    | Ca_kabuli_chr06 | 45282702                | TT                              | CC                | 1946451537               |
| SNP_P3_79738_45282710 | NC_021165.1    | Ca_kabuli_chr06 | 45282710                | TT                              | CC                | 1946451539               |
| SNP_P3_79739_45286356 | NC_021165.1    | Ca_kabuli_chr06 | 45286356                | AA                              | CC                | 1946451541               |
| SNP_P3_79740_45286599 | NC_021165.1    | Ca_kabuli_chr06 | 45286599                | TT                              | CC                | 1946451542               |
| SNP_P3_79741_45286601 | NC_021165.1    | Ca_kabuli_chr06 | 45286601                | GG                              | AA                | 1946451544               |
| SNP_P3_79742_45286609 | NC_021165.1    | Ca_kabuli_chr06 | 45286609                | AA                              | GG                | 1946451545               |
| SNP_P3_79743_45286952 | NC_021165.1    | Ca_kabuli_chr06 | 45286952                | CC                              | TT                | 1946451547               |
| SNP_P3_79744_45290105 | NC_021165.1    | Ca_kabuli_chr06 | 45290105                | TT                              | CC                | 1946451548               |
| SNP_P3_79745_45290210 | NC_021165.1    | Ca_kabuli_chr06 | 45290210                | AA                              | GG                | 1946451550               |
| SNP_P3_79746_45290265 | NC_021165.1    | Ca_kabuli_chr06 | 45290265                | AA                              | GG                | 1946451551               |
| SNP_P3_79748_45304815 | NC_021165.1    | Ca_kabuli_chr06 | 45304815                | GG                              | TT                | 1946451552               |
| SNP_P3_79749_45304829 | NC_021165.1    | Ca_kabuli_chr06 | 45304829                | CC                              | TT                | 1946451554               |
| SNP_P3_79750_45304832 | NC_021165.1    | Ca_kabuli_chr06 | 45304832                | TT                              | GG                | 1946451555               |
| SNP_P3_79751_45304992 | NC_021165.1    | Ca_kabuli_chr06 | 45304992                | TT                              | AA                | 1946451557               |
| SNP_P3_79752_45304997 | NC_021165.1    | Ca_kabuli_chr06 | 45304997                | AA                              | GG                | 1946451558               |
| SNP_P3_79753_45305019 | NC_021165.1    | Ca_kabuli_chr06 | 45305019                | AA                              | GG                | 1946451560               |
| SNP_P3_79754_45305222 | NC_021165.1    | Ca_kabuli_chr06 | 45305222                | AA                              | CC                | 1946451562               |
| SNP_P3_79757_45329327 | NC_021165.1    | Ca_kabuli_chr06 | 45329327                | CC                              | TT                | 1946451563               |
| SNP_P3_79758_45329473 | NC_021165.1    | Ca_kabuli_chr06 | 45329473                | GG                              | TT                | 1946451565               |
| SNP_P3_79759_45331117 | NC_021165.1    | Ca_kabuli_chr06 | 45331117                | TT                              | CC                | 1946451566               |
| SNP_P3_79761_45362361 | NC_021165.1    | Ca_kabuli_chr06 | 45362361                | GG                              | AA                | 1946451568               |
| SNP_P3_79762_45365754 | NC_021165.1    | Ca_kabuli_chr06 | 45365754                | GG                              | AA                | 1946451569               |
| SNP_P3_79763_45366277 | NC_021165.1    | Ca_kabuli_chr06 | 45366277                | GG                              | AA                | 1946451571               |
| SNP_P3_79764_45366296 | NC_021165.1    | Ca_kabuli_chr06 | 45366296                | TT                              | CC                | 1946451572               |
| SNP_P3_79765_45366300 | NC_021165.1    | Ca_kabuli_chr06 | 45366300                | AA                              | TT                | 1946451574               |
| SNP_P3_79766_45366467 | NC_021165.1    | Ca_kabuli_chr06 | 45366467                | CC                              | AA                | 1946451575               |
| SNP_P3_79767_45366468 | NC_021165.1    | Ca_kabuli_chr06 | 45366468                | TT                              | AA                | 1946451577               |
| SNP_P3_79768_45367629 | NC_021165.1    | Ca_kabuli_chr06 | 45367629                | GG                              | AA                | 1946451578               |
| SNP_P3_79769_45368246 | NC_021165.1    | Ca_kabuli_chr06 | 45368246                | GG                              | CC                | 1946451579               |
| SNP_P3_79770_45374862 | NC_021165.1    | Ca_kabuli_chr06 | 45374862                | AA                              | CC                | 1946451581               |
| SNP_P3_79771_45392324 | NC_021165.1    | Ca_kabuli_chr06 | 45392324                | CC                              | AA                | 1946451583               |
| SNP_P3_79772_45392655 | NC_021165.1    | Ca_kabuli_chr06 | 45392655                | AA                              | TT                | 1946451584               |
| SNP_P3_79774_45393220 | NC_021165.1    | Ca_kabuli_chr06 | 45393220                | CC                              | TT                | 1946451585               |

| SNPs IDs              | Chromosome IDs | Chromosomes     | Physical positions (bp) | CDC Frontier (Reference genome) | (Pusa 256 & HPNB) | NCBI SNPdb Accession IDs |
|-----------------------|----------------|-----------------|-------------------------|---------------------------------|-------------------|--------------------------|
| SNP_P3_79775_45393224 | NC_021165.1    | Ca_kabuli_chr06 | 45393224                | TT                              | AA                | 1946451587               |
| SNP_P3_79776_45401899 | NC_021165.1    | Ca_kabuli_chr06 | 45401899                | TT                              | CC                | 1946451588               |
| SNP_P3_79777_45402263 | NC_021165.1    | Ca_kabuli_chr06 | 45402263                | TT                              | CC                | 1946451590               |
| SNP_P3_79778_45402300 | NC_021165.1    | Ca_kabuli_chr06 | 45402300                | GG                              | CC                | 1946451591               |
| SNP_P3_79779_45404944 | NC_021165.1    | Ca_kabuli_chr06 | 45404944                | AA                              | GG                | 1946451593               |
| SNP_P3_79780_45404974 | NC_021165.1    | Ca_kabuli_chr06 | 45404974                | CC                              | TT                | 1946451594               |
| SNP_P3_79781_45405853 | NC_021165.1    | Ca_kabuli_chr06 | 45405853                | AA                              | TT                | 1946451596               |
| SNP_P3_79782_45405969 | NC_021165.1    | Ca_kabuli_chr06 | 45405969                | AA                              | TT                | 1946451597               |
| SNP_P3_79783_45405995 | NC_021165.1    | Ca_kabuli_chr06 | 45405995                | TT                              | GG                | 1946451599               |
| SNP_P3_79784_45406025 | NC_021165.1    | Ca_kabuli_chr06 | 45406025                | AA                              | GG                | 1946451600               |
| SNP_P3_79785_45418113 | NC_021165.1    | Ca_kabuli_chr06 | 45418113                | GG                              | TT                | 1946451602               |
| SNP_P3_79786_45418127 | NC_021165.1    | Ca_kabuli_chr06 | 45418127                | CC                              | TT                | 1946451603               |
| SNP_P3_79787_45469356 | NC_021165.1    | Ca_kabuli_chr06 | 45469356                | TT                              | CC                | 1946451604               |
| SNP_P3_79788_45469415 | NC_021165.1    | Ca_kabuli_chr06 | 45469415                | GG                              | AA                | 1946451606               |
| SNP_P3_79789_45469549 | NC_021165.1    | Ca_kabuli_chr06 | 45469549                | TT                              | CC                | 1946451608               |
| SNP_P3_79790_45469568 | NC_021165.1    | Ca_kabuli_chr06 | 45469568                | GG                              | CC                | 1946451609               |
| SNP_P3_79791_45469625 | NC_021165.1    | Ca_kabuli_chr06 | 45469625                | TT                              | CC                | 1946451611               |
| SNP_P3_79792_45469718 | NC_021165.1    | Ca_kabuli_chr06 | 45469718                | CC                              | TT                | 1946451612               |
| SNP_P3_79793_45469730 | NC_021165.1    | Ca_kabuli_chr06 | 45469730                | AA                              | GG                | 1946451613               |
| SNP_P3_79794_45469746 | NC_021165.1    | Ca_kabuli_chr06 | 45469746                | AA                              | GG                | 1946451615               |
| SNP_P3_79795_45473384 | NC_021165.1    | Ca_kabuli_chr06 | 45473384                | AA                              | GG                | 1946451616               |
| SNP_P3_79796_45473405 | NC_021165.1    | Ca_kabuli_chr06 | 45473405                | CC                              | TT                | 1946451618               |
| SNP_P3_79797_45473407 | NC_021165.1    | Ca_kabuli_chr06 | 45473407                | TT                              | CC                | 1946451619               |
| SNP_P3_79798_45473641 | NC_021165.1    | Ca_kabuli_chr06 | 45473641                | TT                              | AA                | 1946451621               |
| SNP_P3_79799_45473729 | NC_021165.1    | Ca_kabuli_chr06 | 45473729                | CC                              | TT                | 1946451622               |
| SNP_P3_79801_45488357 | NC_021165.1    | Ca_kabuli_chr06 | 45488357                | AA                              | TT                | 1946451623               |
| SNP_P3_79802_45501992 | NC_021165.1    | Ca_kabuli_chr06 | 45501992                | TT                              | CC                | 1946451625               |
| SNP_P3_79803_45509931 | NC_021165.1    | Ca_kabuli_chr06 | 45509931                | GG                              | AA                | 1946451626               |
| SNP_P3_79804_45564436 | NC_021165.1    | Ca_kabuli_chr06 | 45564436                | CC                              | TT                | 1946451628               |
| SNP_P3_79805_45565015 | NC_021165.1    | Ca_kabuli_chr06 | 45565015                | AA                              | GG                | 1946451629               |
| SNP_P3_79806_45580488 | NC_021165.1    | Ca_kabuli_chr06 | 45580488                | AA                              | GG                | 1946451631               |
| SNP_P3_79807_45585452 | NC_021165.1    | Ca_kabuli_chr06 | 45585452                | AA                              | TT                | 1946451632               |
| SNP_P3_79808_45585577 | NC_021165.1    | Ca_kabuli_chr06 | 45585577                | CC                              | TT                | 1946451635               |
| SNP_P3_79809_45585668 | NC_021165.1    | Ca_kabuli_chr06 | 45585668                | TT                              | CC                | 1946451637               |
| SNP_P3_79810_45585669 | NC_021165.1    | Ca_kabuli_chr06 | 45585669                | AA                              | GG                | 1946451638               |
| SNP_P3_79811_45599642 | NC_021165.1    | Ca_kabuli_chr06 | 45599642                | AA                              | GG                | 1946451640               |
| SNP_P3_79812_45599651 | NC_021165.1    | Ca_kabuli_chr06 | 45599651                | TT                              | GG                | 1946451642               |
| SNP_P3_79813_45599671 | NC_021165.1    | Ca_kabuli_chr06 | 45599671                | TT                              | CC                | 1946451644               |
| SNP_P3_79814_45599680 | NC_021165.1    | Ca_kabuli_chr06 | 45599680                | TT                              | CC                | 1946451646               |
| SNP_P3_79815_45599685 | NC_021165.1    | Ca_kabuli_chr06 | 45599685                | AA                              | TT                | 1946451648               |
| SNP_P3_79816_45600031 | NC_021165.1    | Ca_kabuli_chr06 | 45600031                | CC                              | TT                | 1946451650               |
| SNP_P3_79817_45600044 | NC_021165.1    | Ca_kabuli_chr06 | 45600044                | AA                              | CC                | 1946451652               |

| SNPs IDs              | Chromosome IDs | Chromosomes     | Physical positions (bp) | CDC Frontier (Reference genome) | (Pusa 256 & HPNB) | NCBI SNPdb Accession IDs |
|-----------------------|----------------|-----------------|-------------------------|---------------------------------|-------------------|--------------------------|
| SNP_P3_79818_45600071 | NC_021165.1    | Ca_kabuli_chr06 | 45600071                | AA                              | GG                | 1946451654               |
| SNP_P3_79819_45642861 | NC_021165.1    | Ca_kabuli_chr06 | 45642861                | AA                              | GG                | 1946451655               |
| SNP_P3_79820_45642876 | NC_021165.1    | Ca_kabuli_chr06 | 45642876                | TT                              | GG                | 1946451657               |
| SNP_P3_79821_45642884 | NC_021165.1    | Ca_kabuli_chr06 | 45642884                | AA                              | TT                | 1946451658               |
| SNP_P3_79822_45642928 | NC_021165.1    | Ca_kabuli_chr06 | 45642928                | GG                              | AA                | 1946451660               |
| SNP_P3_79823_45643171 | NC_021165.1    | Ca_kabuli_chr06 | 45643171                | AA                              | CC                | 1946451661               |
| SNP_P3_79824_45643318 | NC_021165.1    | Ca_kabuli_chr06 | 45643318                | CC                              | TT                | 1946451663               |
| SNP_P3_79826_45662827 | NC_021165.1    | Ca_kabuli_chr06 | 45662827                | CC                              | AA                | 1946451664               |
| SNP_P3_79827_45666898 | NC_021165.1    | Ca_kabuli_chr06 | 45666898                | CC                              | TT                | 1946451666               |
| SNP_P3_79828_45666912 | NC_021165.1    | Ca_kabuli_chr06 | 45666912                | GG                              | AA                | 1946451667               |
| SNP_P3_79829_45675866 | NC_021165.1    | Ca_kabuli_chr06 | 45675866                | AA                              | CC                | 1946451669               |
| SNP_P3_79830_45675874 | NC_021165.1    | Ca_kabuli_chr06 | 45675874                | AA                              | GG                | 1946451670               |
| SNP_P3_79832_45691886 | NC_021165.1    | Ca_kabuli_chr06 | 45691886                | CC                              | TT                | 1946451671               |
| SNP_P3_79835_45740479 | NC_021165.1    | Ca_kabuli_chr06 | 45740479                | CC                              | AA                | 1946451673               |
| SNP_P3_79836_45741912 | NC_021165.1    | Ca_kabuli_chr06 | 45741912                | TT                              | CC                | 1946451674               |
| SNP_P3_79837_45747420 | NC_021165.1    | Ca_kabuli_chr06 | 45747420                | AA                              | GG                | 1946451676               |
| SNP_P3_79839_45766234 | NC_021165.1    | Ca_kabuli_chr06 | 45766234                | TT                              | CC                | 1946451677               |
| SNP_P3_79840_45767253 | NC_021165.1    | Ca_kabuli_chr06 | 45767253                | TT                              | CC                | 1946451679               |
| SNP_P3_79841_45772236 | NC_021165.1    | Ca_kabuli_chr06 | 45772236                | AA                              | TT                | 1946451681               |
| SNP_P3_79843_45818491 | NC_021165.1    | Ca_kabuli_chr06 | 45818491                | GG                              | AA                | 1946451682               |
| SNP_P3_79844_45833948 | NC_021165.1    | Ca_kabuli_chr06 | 45833948                | CC                              | TT                | 1946451683               |
| SNP_P3_79845_45870680 | NC_021165.1    | Ca_kabuli_chr06 | 45870680                | TT                              | AA                | 1946451685               |
| SNP_P3_79848_45896263 | NC_021165.1    | Ca_kabuli_chr06 | 45896263                | TT                              | GG                | 1946451686               |
| SNP_P3_79849_45896358 | NC_021165.1    | Ca_kabuli_chr06 | 45896358                | GG                              | CC                | 1946451688               |
| SNP_P3_79850_45896661 | NC_021165.1    | Ca_kabuli_chr06 | 45896661                | AA                              | GG                | 1946451689               |
| SNP_P3_79851_45898755 | NC_021165.1    | Ca_kabuli_chr06 | 45898755                | AA                              | GG                | 1946451690               |
| SNP_P3_79852_45899087 | NC_021165.1    | Ca_kabuli_chr06 | 45899087                | TT                              | GG                | 1946451692               |
| SNP_P3_79853_45916629 | NC_021165.1    | Ca_kabuli_chr06 | 45916629                | TT                              | GG                | 1946451693               |
| SNP_P3_79854_45916630 | NC_021165.1    | Ca_kabuli_chr06 | 45916630                | AA                              | TT                | 1946451695               |
| SNP_P3_79855_45925530 | NC_021165.1    | Ca_kabuli_chr06 | 45925530                | GG                              | AA                | 1946451696               |
| SNP_P3_79856_45949194 | NC_021165.1    | Ca_kabuli_chr06 | 45949194                | GG                              | AA                | 1946451698               |
| SNP_P3_79857_45960452 | NC_021165.1    | Ca_kabuli_chr06 | 45960452                | TT                              | AA                | 1946451699               |
| SNP_P3_79858_45960454 | NC_021165.1    | Ca_kabuli_chr06 | 45960454                | TT                              | CC                | 1946451701               |
| SNP_P3_79859_45974973 | NC_021165.1    | Ca_kabuli_chr06 | 45974973                | TT                              | GG                | 1946451702               |
| SNP_P3_79860_45988834 | NC_021165.1    | Ca_kabuli_chr06 | 45988834                | AA                              | GG                | 1946451704               |
| SNP_P3_79861_45999467 | NC_021165.1    | Ca_kabuli_chr06 | 45999467                | CC                              | TT                | 1946451705               |
| SNP_P3_79862_45999485 | NC_021165.1    | Ca_kabuli_chr06 | 45999485                | TT                              | CC                | 1946451707               |
| SNP_P3_79863_45999631 | NC_021165.1    | Ca_kabuli_chr06 | 45999631                | AA                              | GG                | 1946451708               |
| SNP_P3_79864_45999636 | NC_021165.1    | Ca_kabuli_chr06 | 45999636                | AA                              | GG                | 1946451710               |
| SNP_P3_79865_45999653 | NC_021165.1    | Ca_kabuli_chr06 | 45999653                | AA                              | TT                | 1946451711               |
| SNP_P3_79866_46000155 | NC_021165.1    | Ca_kabuli_chr06 | 46000155                | CC                              | TT                | 1946451713               |
| SNP_P3_79867_46005699 | NC_021165.1    | Ca_kabuli_chr06 | 46005699                | GG                              | AA                | 1946451714               |

| SNPs IDs              | Chromosome IDs | Chromosomes     | Physical positions (bp) | CDC Frontier (Reference genome) | (Pusa 256 & HPNB) | NCBI SNPdb Accession IDs |
|-----------------------|----------------|-----------------|-------------------------|---------------------------------|-------------------|--------------------------|
| SNP_P3_79869_46015700 | NC_021165.1    | Ca_kabuli_chr06 | 46015700                | AA                              | GG                | 1946451715               |
| SNP_P3_79870_46029211 | NC_021165.1    | Ca_kabuli_chr06 | 46029211                | AA                              | CC                | 1946451717               |
| SNP_P3_79871_46031771 | NC_021165.1    | Ca_kabuli_chr06 | 46031771                | CC                              | AA                | 1946451718               |
| SNP_P3_79872_46031825 | NC_021165.1    | Ca_kabuli_chr06 | 46031825                | CC                              | AA                | 1946451720               |
| SNP_P3_79873_46031897 | NC_021165.1    | Ca_kabuli_chr06 | 46031897                | GG                              | AA                | 1946451722               |
| SNP_P3_79874_46031941 | NC_021165.1    | Ca_kabuli_chr06 | 46031941                | GG                              | AA                | 1946451723               |
| SNP_P3_79875_46035779 | NC_021165.1    | Ca_kabuli_chr06 | 46035779                | AA                              | CC                | 1946451724               |
| SNP_P3_79876_46035883 | NC_021165.1    | Ca_kabuli_chr06 | 46035883                | GG                              | AA                | 1946451726               |
| SNP_P3_79877_46036150 | NC_021165.1    | Ca_kabuli_chr06 | 46036150                | GG                              | AA                | 1946451727               |
| SNP_P3_79878_46036175 | NC_021165.1    | Ca_kabuli_chr06 | 46036175                | CC                              | TT                | 1946451729               |
| SNP_P3_79879_46044055 | NC_021165.1    | Ca_kabuli_chr06 | 46044055                | TT                              | CC                | 1946451730               |
| SNP_P3_79880_46080195 | NC_021165.1    | Ca_kabuli_chr06 | 46080195                | AA                              | GG                | 1946451731               |
| SNP_P3_79881_46080197 | NC_021165.1    | Ca_kabuli_chr06 | 46080197                | AA                              | CC                | 1946451733               |
| SNP_P3_79882_46082777 | NC_021165.1    | Ca_kabuli_chr06 | 46082777                | CC                              | TT                | 1946451734               |
| SNP_P3_79883_46093358 | NC_021165.1    | Ca_kabuli_chr06 | 46093358                | AA                              | GG                | 1946451736               |
| SNP_P3_79884_46116863 | NC_021165.1    | Ca_kabuli_chr06 | 46116863                | TT                              | CC                | 1946451737               |
| SNP_P3_79885_46116957 | NC_021165.1    | Ca_kabuli_chr06 | 46116957                | AA                              | GG                | 1946451739               |
| SNP_P3_79886_46117122 | NC_021165.1    | Ca_kabuli_chr06 | 46117122                | AA                              | GG                | 1946451740               |
| SNP_P3_79890_46152445 | NC_021165.1    | Ca_kabuli_chr06 | 46152445                | AA                              | TT                | 1946451741               |
| SNP_P3_79891_46163499 | NC_021165.1    | Ca_kabuli_chr06 | 46163499                | AA                              | CC                | 1946451743               |
| SNP_P3_79892_46163512 | NC_021165.1    | Ca_kabuli_chr06 | 46163512                | GG                              | CC                | 1946451745               |
| SNP_P3_79893_46164351 | NC_021165.1    | Ca_kabuli_chr06 | 46164351                | TT                              | GG                | 1946451746               |
| SNP_P3_79894_46164383 | NC_021165.1    | Ca_kabuli_chr06 | 46164383                | AA                              | CC                | 1946451748               |
| SNP_P3_79895_46164467 | NC_021165.1    | Ca_kabuli_chr06 | 46164467                | TT                              | AA                | 1946451749               |
| SNP_P3_79896_46164533 | NC_021165.1    | Ca_kabuli_chr06 | 46164533                | GG                              | TT                | 1946451751               |
| SNP_P3_79897_46164560 | NC_021165.1    | Ca_kabuli_chr06 | 46164560                | CC                              | GG                | 1946451752               |
| SNP_P3_79898_46164573 | NC_021165.1    | Ca_kabuli_chr06 | 46164573                | TT                              | GG                | 1946451753               |
| SNP_P3_79899_46164775 | NC_021165.1    | Ca_kabuli_chr06 | 46164775                | AA                              | CC                | 1946451755               |
| SNP_P3_79900_46164790 | NC_021165.1    | Ca_kabuli_chr06 | 46164790                | GG                              | CC                | 1946451756               |
| SNP_P3_79901_46164833 | NC_021165.1    | Ca_kabuli_chr06 | 46164833                | TT                              | AA                | 1946451758               |
| SNP_P3_79902_46164887 | NC_021165.1    | Ca_kabuli_chr06 | 46164887                | GG                              | CC                | 1946451759               |
| SNP_P3_79903_46164892 | NC_021165.1    | Ca_kabuli_chr06 | 46164892                | AA                              | CC                | 1946451761               |
| SNP_P3_79904_46180507 | NC_021165.1    | Ca_kabuli_chr06 | 46180507                | TT                              | CC                | 1946451762               |
| SNP_P3_79905_46180766 | NC_021165.1    | Ca_kabuli_chr06 | 46180766                | TT                              | CC                | 1946451763               |
| SNP_P3_79906_46181055 | NC_021165.1    | Ca_kabuli_chr06 | 46181055                | TT                              | CC                | 1946451765               |
| SNP_P3_79907_46181062 | NC_021165.1    | Ca_kabuli_chr06 | 46181062                | CC                              | TT                | 1946451767               |
| SNP_P3_79908_46188084 | NC_021165.1    | Ca_kabuli_chr06 | 46188084                | TT                              | CC                | 1946451768               |
| SNP_P3_79909_46229687 | NC_021165.1    | Ca_kabuli_chr06 | 46229687                | TT                              | CC                | 1946451769               |
| SNP_P3_79910_46239581 | NC_021165.1    | Ca_kabuli_chr06 | 46239581                | CC                              | TT                | 1946451771               |
| SNP_P3_79911_46252523 | NC_021165.1    | Ca_kabuli_chr06 | 46252523                | AA                              | TT                | 1946451772               |
| SNP_P3_79912_46280778 | NC_021165.1    | Ca_kabuli_chr06 | 46280778                | AA                              | GG                | 1946451774               |
| SNP_P3_79913_46295018 | NC_021165.1    | Ca_kabuli_chr06 | 46295018                | GG                              | AA                | 1946451775               |

| SNPs IDs              | Chromosome IDs | Chromosomes     | Physical positions (bp) | CDC Frontier (Reference genome) | (Pusa 256 & HPNB) | NCBI SNPdb Accession IDs |
|-----------------------|----------------|-----------------|-------------------------|---------------------------------|-------------------|--------------------------|
| SNP_P3_79914_46311292 | NC_021165.1    | Ca_kabuli_chr06 | 46311292                | CC                              | TT                | 1946451776               |
| SNP_P3_79916_46311695 | NC_021165.1    | Ca_kabuli_chr06 | 46311695                | GG                              | AA                | 1946451778               |
| SNP_P3_79917_46316588 | NC_021165.1    | Ca_kabuli_chr06 | 46316588                | AA                              | GG                | 1946451779               |
| SNP_P3_79918_46316589 | NC_021165.1    | Ca_kabuli_chr06 | 46316589                | GG                              | CC                | 1946451781               |
| SNP_P3_79919_46319214 | NC_021165.1    | Ca_kabuli_chr06 | 46319214                | GG                              | AA                | 1946451782               |
| SNP_P3_79920_46319263 | NC_021165.1    | Ca_kabuli_chr06 | 46319263                | GG                              | AA                | 1946451784               |
| SNP_P3_79921_46330286 | NC_021165.1    | Ca_kabuli_chr06 | 46330286                | AA                              | TT                | 1946451785               |
| SNP_P3_79922_46346119 | NC_021165.1    | Ca_kabuli_chr06 | 46346119                | TT                              | AA                | 1946451786               |
| SNP_P3_79924_46346636 | NC_021165.1    | Ca_kabuli_chr06 | 46346636                | AA                              | GG                | 1946451788               |
| SNP_P3_79925_46346656 | NC_021165.1    | Ca_kabuli_chr06 | 46346656                | CC                              | TT                | 1946451790               |
| SNP_P3_79926_46346689 | NC_021165.1    | Ca_kabuli_chr06 | 46346689                | TT                              | CC                | 1946451791               |
| SNP_P3_79927_46346854 | NC_021165.1    | Ca_kabuli_chr06 | 46346854                | TT                              | CC                | 1946451792               |
| SNP_P3_79928_46347018 | NC_021165.1    | Ca_kabuli_chr06 | 46347018                | CC                              | TT                | 1946451794               |
| SNP_P3_79929_46351997 | NC_021165.1    | Ca_kabuli_chr06 | 46351997                | AA                              | GG                | 1946451795               |
| SNP_P3_79930_46351999 | NC_021165.1    | Ca_kabuli_chr06 | 46351999                | GG                              | AA                | 1946451797               |
| SNP_P3_79931_46352003 | NC_021165.1    | Ca_kabuli_chr06 | 46352003                | AA                              | GG                | 1946451798               |
| SNP_P3_79932_46352212 | NC_021165.1    | Ca_kabuli_chr06 | 46352212                | CC                              | AA                | 1946451800               |
| SNP_P3_79933_46354332 | NC_021165.1    | Ca_kabuli_chr06 | 46354332                | AA                              | GG                | 1946451801               |
| SNP_P3_79934_46354397 | NC_021165.1    | Ca_kabuli_chr06 | 46354397                | AA                              | GG                | 1946451803               |
| SNP_P3_79935_46354481 | NC_021165.1    | Ca_kabuli_chr06 | 46354481                | AA                              | GG                | 1946451804               |
| SNP_P3_79936_46354700 | NC_021165.1    | Ca_kabuli_chr06 | 46354700                | AA                              | GG                | 1946451805               |
| SNP_P3_79937_46354850 | NC_021165.1    | Ca_kabuli_chr06 | 46354850                | CC                              | GG                | 1946451807               |
| SNP_P3_79938_46354865 | NC_021165.1    | Ca_kabuli_chr06 | 46354865                | CC                              | AA                | 1946451808               |
| SNP_P3_79939_46354886 | NC_021165.1    | Ca_kabuli_chr06 | 46354886                | TT                              | AA                | 1946451810               |
| SNP_P3_79940_46354906 | NC_021165.1    | Ca_kabuli_chr06 | 46354906                | CC                              | TT                | 1946451811               |
| SNP_P3_79941_46354930 | NC_021165.1    | Ca_kabuli_chr06 | 46354930                | TT                              | CC                | 1946451813               |
| SNP_P3_79942_46354937 | NC_021165.1    | Ca_kabuli_chr06 | 46354937                | TT                              | AA                | 1946451814               |
| SNP_P3_79943_46365987 | NC_021165.1    | Ca_kabuli_chr06 | 46365987                | TT                              | CC                | 1946451816               |
| SNP_P3_79944_46368078 | NC_021165.1    | Ca_kabuli_chr06 | 46368078                | TT                              | CC                | 1946451817               |
| SNP_P3_79945_46368873 | NC_021165.1    | Ca_kabuli_chr06 | 46368873                | AA                              | GG                | 1946451819               |
| SNP_P3_79946_46368965 | NC_021165.1    | Ca_kabuli_chr06 | 46368965                | GG                              | AA                | 1946451820               |
| SNP_P3_79947_46369091 | NC_021165.1    | Ca_kabuli_chr06 | 46369091                | GG                              | CC                | 1946451821               |
| SNP_P3_79948_46369159 | NC_021165.1    | Ca_kabuli_chr06 | 46369159                | GG                              | CC                | 1946451823               |
| SNP_P3_79949_46369221 | NC_021165.1    | Ca_kabuli_chr06 | 46369221                | AA                              | CC                | 1946451824               |
| SNP_P3_79950_46369278 | NC_021165.1    | Ca_kabuli_chr06 | 46369278                | GG                              | CC                | 1946451826               |
| SNP_P3_79951_46369314 | NC_021165.1    | Ca_kabuli_chr06 | 46369314                | TT                              | CC                | 1946451827               |
| SNP_P3_79952_46369442 | NC_021165.1    | Ca_kabuli_chr06 | 46369442                | AA                              | GG                | 1946451829               |
| SNP_P3_79953_46369509 | NC_021165.1    | Ca_kabuli_chr06 | 46369509                | AA                              | GG                | 1946451830               |
| SNP_P3_79954_46369548 | NC_021165.1    | Ca_kabuli_chr06 | 46369548                | TT                              | CC                | 1946451832               |
| SNP_P3_79955_46369584 | NC_021165.1    | Ca_kabuli_chr06 | 46369584                | AA                              | CC                | 1946451834               |
| SNP_P3_79956_46369801 | NC_021165.1    | Ca_kabuli_chr06 | 46369801                | AA                              | GG                | 1946451835               |
| SNP_P3_79957_46370642 | NC_021165.1    | Ca_kabuli_chr06 | 46370642                | GG                              | AA                | 1946451836               |



| SNPs IDs              | Chromosome IDs | Chromosomes     | Physical positions (bp) | CDC Frontier (Reference genome) | (Pusa 256 & HPNB) | NCBI SNPdb Accession IDs |
|-----------------------|----------------|-----------------|-------------------------|---------------------------------|-------------------|--------------------------|
| SNP_P3_79958_46385431 | NC_021165.1    | Ca_kabuli_chr06 | 46385431                | AA                              | GG                | 1946451838               |
| SNP_P3_79959_46385846 | NC_021165.1    | Ca_kabuli_chr06 | 46385846                | AA                              | TT                | 1946451839               |
| SNP_P3_79960_46385918 | NC_021165.1    | Ca_kabuli_chr06 | 46385918                | AA                              | TT                | 1946451841               |
| SNP_P3_79961_46385934 | NC_021165.1    | Ca_kabuli_chr06 | 46385934                | GG                              | CC                | 1946451842               |
| SNP_P3_79962_46385939 | NC_021165.1    | Ca_kabuli_chr06 | 46385939                | GG                              | AA                | 1946451843               |
| SNP_P3_79963_46386616 | NC_021165.1    | Ca_kabuli_chr06 | 46386616                | AA                              | CC                | 1946451845               |
| SNP_P3_79964_46388376 | NC_021165.1    | Ca_kabuli_chr06 | 46388376                | CC                              | AA                | 1946451846               |
| SNP_P3_79965_46388387 | NC_021165.1    | Ca_kabuli_chr06 | 46388387                | GG                              | AA                | 1946451848               |
| SNP_P3_79966_46388400 | NC_021165.1    | Ca_kabuli_chr06 | 46388400                | TT                              | AA                | 1946451849               |
| SNP_P3_79967_46388446 | NC_021165.1    | Ca_kabuli_chr06 | 46388446                | AA                              | TT                | 1946451850               |
| SNP_P3_79968_46388462 | NC_021165.1    | Ca_kabuli_chr06 | 46388462                | AA                              | CC                | 1946451852               |
| SNP_P3_79969_46388464 | NC_021165.1    | Ca_kabuli_chr06 | 46388464                | GG                              | AA                | 1946451853               |
| SNP_P3_79970_46388613 | NC_021165.1    | Ca_kabuli_chr06 | 46388613                | CC                              | TT                | 1946451855               |
| SNP_P3_79971_46390991 | NC_021165.1    | Ca_kabuli_chr06 | 46390991                | AA                              | TT                | 1946451856               |
| SNP_P3_79972_46391002 | NC_021165.1    | Ca_kabuli_chr06 | 46391002                | TT                              | AA                | 1946451858               |
| SNP_P3_79973_46391031 | NC_021165.1    | Ca_kabuli_chr06 | 46391031                | TT                              | AA                | 1946451859               |
| SNP_P3_79974_46391033 | NC_021165.1    | Ca_kabuli_chr06 | 46391033                | GG                              | AA                | 1946451861               |
| SNP_P3_79975_46391073 | NC_021165.1    | Ca_kabuli_chr06 | 46391073                | AA                              | CC                | 1946451862               |
| SNP_P3_79976_46391202 | NC_021165.1    | Ca_kabuli_chr06 | 46391202                | GG                              | TT                | 1946451863               |
| SNP_P3_79977_46391222 | NC_021165.1    | Ca_kabuli_chr06 | 46391222                | CC                              | TT                | 1946451865               |
| SNP_P3_79978_46391249 | NC_021165.1    | Ca_kabuli_chr06 | 46391249                | AA                              | TT                | 1946451866               |
| SNP_P3_79979_46391259 | NC_021165.1    | Ca_kabuli_chr06 | 46391259                | TT                              | AA                | 1946451868               |
| SNP_P3_79980_46391359 | NC_021165.1    | Ca_kabuli_chr06 | 46391359                | GG                              | AA                | 1946451869               |
| SNP_P3_79981_46391361 | NC_021165.1    | Ca_kabuli_chr06 | 46391361                | TT                              | CC                | 1946451870               |
| SNP_P3_79982_46391429 | NC_021165.1    | Ca_kabuli_chr06 | 46391429                | AA                              | GG                | 1946451872               |
| SNP_P3_79983_46391435 | NC_021165.1    | Ca_kabuli_chr06 | 46391435                | AA                              | TT                | 1946451873               |
| SNP_P3_79984_46391436 | NC_021165.1    | Ca_kabuli_chr06 | 46391436                | TT                              | CC                | 1946451875               |
| SNP_P3_79985_46391483 | NC_021165.1    | Ca_kabuli_chr06 | 46391483                | TT                              | CC                | 1946451876               |
| SNP_P3_79986_46391568 | NC_021165.1    | Ca_kabuli_chr06 | 46391568                | AA                              | GG                | 1946451878               |
| SNP_P3_79987_46391573 | NC_021165.1    | Ca_kabuli_chr06 | 46391573                | TT                              | CC                | 1946451879               |
| SNP_P3_79988_46391587 | NC_021165.1    | Ca_kabuli_chr06 | 46391587                | CC                              | AA                | 1946451881               |
| SNP_P3_79989_46391602 | NC_021165.1    | Ca_kabuli_chr06 | 46391602                | AA                              | GG                | 1946451882               |
| SNP_P3_79990_46391628 | NC_021165.1    | Ca_kabuli_chr06 | 46391628                | GG                              | TT                | 1946451884               |
| SNP_P3_79991_46391638 | NC_021165.1    | Ca_kabuli_chr06 | 46391638                | TT                              | CC                | 1946451885               |
| SNP_P3_79992_46391691 | NC_021165.1    | Ca_kabuli_chr06 | 46391691                | GG                              | AA                | 1946451886               |
| SNP_P3_79993_46391720 | NC_021165.1    | Ca_kabuli_chr06 | 46391720                | TT                              | AA                | 1946451888               |
| SNP_P3_79994_46391823 | NC_021165.1    | Ca_kabuli_chr06 | 46391823                | CC                              | TT                | 1946451889               |
| SNP_P3_79995_46391868 | NC_021165.1    | Ca_kabuli_chr06 | 46391868                | TT                              | GG                | 1946451891               |
| SNP_P3_79996_46391887 | NC_021165.1    | Ca_kabuli_chr06 | 46391887                | TT                              | CC                | 1946451892               |
| SNP_P3_79997_46391888 | NC_021165.1    | Ca_kabuli_chr06 | 46391888                | AA                              | TT                | 1946451894               |
| SNP_P3_79998_46391933 | NC_021165.1    | Ca_kabuli_chr06 | 46391933                | TT                              | CC                | 1946451895               |
| SNP_P3_79999_46391943 | NC_021165.1    | Ca_kabuli_chr06 | 46391943                | AA                              | GG                | 1946451896               |

| SNPs IDs              | Chromosome IDs | Chromosomes     | Physical positions (bp) | CDC Frontier (Reference genome) | (Pusa 256 & HPNB) | NCBI SNPdb Accession IDs |
|-----------------------|----------------|-----------------|-------------------------|---------------------------------|-------------------|--------------------------|
| SNP_P3_80000_46391960 | NC_021165.1    | Ca_kabuli_chr06 | 46391960                | TT                              | AA                | 1946451898               |
| SNP_P3_80001_46391989 | NC_021165.1    | Ca_kabuli_chr06 | 46391989                | TT                              | CC                | 1946451899               |
| SNP_P3_80002_46399691 | NC_021165.1    | Ca_kabuli_chr06 | 46399691                | TT                              | CC                | 1946451901               |
| SNP_P3_80003_46399701 | NC_021165.1    | Ca_kabuli_chr06 | 46399701                | TT                              | CC                | 1946451902               |
| SNP_P3_80004_46399725 | NC_021165.1    | Ca_kabuli_chr06 | 46399725                | AA                              | GG                | 1946451904               |
| SNP_P3_80005_46399742 | NC_021165.1    | Ca_kabuli_chr06 | 46399742                | TT                              | GG                | 1946451905               |
| SNP_P3_80007_46399871 | NC_021165.1    | Ca_kabuli_chr06 | 46399871                | AA                              | GG                | 1946451907               |
| SNP_P3_80008_46399888 | NC_021165.1    | Ca_kabuli_chr06 | 46399888                | TT                              | CC                | 1946451908               |
| SNP_P3_80009_46399925 | NC_021165.1    | Ca_kabuli_chr06 | 46399925                | CC                              | TT                | 1946451909               |
| SNP_P3_80010_46399935 | NC_021165.1    | Ca_kabuli_chr06 | 46399935                | GG                              | AA                | 1946451911               |
| SNP_P3_80011_46400113 | NC_021165.1    | Ca_kabuli_chr06 | 46400113                | CC                              | TT                | 1946451912               |
| SNP_P3_80012_46400146 | NC_021165.1    | Ca_kabuli_chr06 | 46400146                | AA                              | GG                | 1946451914               |
| SNP_P3_80013_46425229 | NC_021165.1    | Ca_kabuli_chr06 | 46425229                | AA                              | TT                | 1946451915               |
| SNP_P3_80014_46425237 | NC_021165.1    | Ca_kabuli_chr06 | 46425237                | AA                              | TT                | 1946451917               |
| SNP_P3_80015_46425242 | NC_021165.1    | Ca_kabuli_chr06 | 46425242                | GG                              | AA                | 1946451918               |
| SNP_P3_80016_46438316 | NC_021165.1    | Ca_kabuli_chr06 | 46438316                | CC                              | AA                | 1946451920               |
| SNP_P3_80017_46438327 | NC_021165.1    | Ca_kabuli_chr06 | 46438327                | GG                              | TT                | 1946451921               |
| SNP_P3_80018_46449966 | NC_021165.1    | Ca_kabuli_chr06 | 46449966                | GG                              | AA                | 1946451923               |
| SNP_P3_80019_46491787 | NC_021165.1    | Ca_kabuli_chr06 | 46491787                | AA                              | TT                | 1946451924               |
| SNP_P3_80020_46491803 | NC_021165.1    | Ca_kabuli_chr06 | 46491803                | CC                              | TT                | 1946451926               |
| SNP_P3_80021_46492137 | NC_021165.1    | Ca_kabuli_chr06 | 46492137                | AA                              | GG                | 1946451927               |
| SNP_P3_80022_46492245 | NC_021165.1    | Ca_kabuli_chr06 | 46492245                | TT                              | AA                | 1946451929               |
| SNP_P3_80023_46504037 | NC_021165.1    | Ca_kabuli_chr06 | 46504037                | GG                              | AA                | 1946451930               |
| SNP_P3_80024_46504038 | NC_021165.1    | Ca_kabuli_chr06 | 46504038                | AA                              | GG                | 1946451931               |
| SNP_P3_80025_46508683 | NC_021165.1    | Ca_kabuli_chr06 | 46508683                | GG                              | CC                | 1946451933               |
| SNP_P3_80026_46508703 | NC_021165.1    | Ca_kabuli_chr06 | 46508703                | GG                              | AA                | 1946451934               |
| SNP_P3_80027_46508774 | NC_021165.1    | Ca_kabuli_chr06 | 46508774                | CC                              | AA                | 1946451936               |
| SNP_P3_80028_46508879 | NC_021165.1    | Ca_kabuli_chr06 | 46508879                | TT                              | CC                | 1946451937               |
| SNP_P3_80029_46509358 | NC_021165.1    | Ca_kabuli_chr06 | 46509358                | GG                              | AA                | 1946451939               |
| SNP_P3_80030_46509361 | NC_021165.1    | Ca_kabuli_chr06 | 46509361                | TT                              | CC                | 1946451940               |
| SNP_P3_80031_46509362 | NC_021165.1    | Ca_kabuli_chr06 | 46509362                | CC                              | AA                | 1946451941               |
| SNP_P3_80032_46509367 | NC_021165.1    | Ca_kabuli_chr06 | 46509367                | AA                              | CC                | 1946451943               |
| SNP_P3_80034_46587393 | NC_021165.1    | Ca_kabuli_chr06 | 46587393                | AA                              | GG                | 1946451945               |
| SNP_P3_80035_46616478 | NC_021165.1    | Ca_kabuli_chr06 | 46616478                | GG                              | AA                | 1946451946               |
| SNP_P3_80036_46616871 | NC_021165.1    | Ca_kabuli_chr06 | 46616871                | TT                              | CC                | 1946451948               |
| SNP_P3_80037_46620756 | NC_021165.1    | Ca_kabuli_chr06 | 46620756                | CC                              | AA                | 1946451949               |
| SNP_P3_80038_46621153 | NC_021165.1    | Ca_kabuli_chr06 | 46621153                | TT                              | CC                | 1946451950               |
| SNP_P3_80039_46621182 | NC_021165.1    | Ca_kabuli_chr06 | 46621182                | AA                              | GG                | 1946451952               |
| SNP_P3_80040_46621613 | NC_021165.1    | Ca_kabuli_chr06 | 46621613                | TT                              | CC                | 1946451953               |
| SNP_P3_80041_46629475 | NC_021165.1    | Ca_kabuli_chr06 | 46629475                | TT                              | AA                | 1946451955               |
| SNP_P3_80042_46634513 | NC_021165.1    | Ca_kabuli_chr06 | 46634513                | TT                              | CC                | 1946451956               |
| SNP_P3_80043_46634589 | NC_021165.1    | Ca_kabuli_chr06 | 46634589                | TT                              | AA                | 1946451957               |

| SNPs IDs              | Chromosome IDs | Chromosomes     | Physical positions (bp) | CDC Frontier (Reference genome) | (Pusa 256 & HPNB) | NCBI SNPdb Accession IDs |
|-----------------------|----------------|-----------------|-------------------------|---------------------------------|-------------------|--------------------------|
| SNP_P3_80044_46634590 | NC_021165.1    | Ca_kabuli_chr06 | 46634590                | TT                              | CC                | 1946451959               |
| SNP_P3_80045_46673218 | NC_021165.1    | Ca_kabuli_chr06 | 46673218                | TT                              | AA                | 1946451960               |
| SNP_P3_80046_46675073 | NC_021165.1    | Ca_kabuli_chr06 | 46675073                | CC                              | TT                | 1946451962               |
| SNP_P3_80047_46683969 | NC_021165.1    | Ca_kabuli_chr06 | 46683969                | GG                              | AA                | 1946451963               |
| SNP_P3_80048_46690086 | NC_021165.1    | Ca_kabuli_chr06 | 46690086                | CC                              | TT                | 1946451964               |
| SNP_P3_80049_46690182 | NC_021165.1    | Ca_kabuli_chr06 | 46690182                | AA                              | GG                | 1946451966               |
| SNP_P3_80050_46690258 | NC_021165.1    | Ca_kabuli_chr06 | 46690258                | TT                              | GG                | 1946451967               |
| SNP_P3_80051_46690275 | NC_021165.1    | Ca_kabuli_chr06 | 46690275                | CC                              | TT                | 1946451969               |
| SNP_P3_80052_46690341 | NC_021165.1    | Ca_kabuli_chr06 | 46690341                | GG                              | AA                | 1946451970               |
| SNP_P3_80053_46690353 | NC_021165.1    | Ca_kabuli_chr06 | 46690353                | TT                              | CC                | 1946451971               |
| SNP_P3_80054_46690429 | NC_021165.1    | Ca_kabuli_chr06 | 46690429                | TT                              | CC                | 1946451973               |
| SNP_P3_80055_46690432 | NC_021165.1    | Ca_kabuli_chr06 | 46690432                | AA                              | GG                | 1946451975               |
| SNP_P3_80056_46690449 | NC_021165.1    | Ca_kabuli_chr06 | 46690449                | AA                              | GG                | 1946451976               |
| SNP_P3_80057_46690498 | NC_021165.1    | Ca_kabuli_chr06 | 46690498                | AA                              | GG                | 1946451977               |
| SNP_P3_80058_46690502 | NC_021165.1    | Ca_kabuli_chr06 | 46690502                | TT                              | CC                | 1946451979               |
| SNP_P3_80059_46690580 | NC_021165.1    | Ca_kabuli_chr06 | 46690580                | AA                              | CC                | 1946451980               |
| SNP_P3_80060_46690583 | NC_021165.1    | Ca_kabuli_chr06 | 46690583                | TT                              | CC                | 1946451982               |
| SNP_P3_80062_46740776 | NC_021165.1    | Ca_kabuli_chr06 | 46740776                | TT                              | AA                | 1946451983               |
| SNP_P3_80063_46772284 | NC_021165.1    | Ca_kabuli_chr06 | 46772284                | GG                              | AA                | 1946451985               |
| SNP_P3_80064_46772325 | NC_021165.1    | Ca_kabuli_chr06 | 46772325                | TT                              | GG                | 1946451987               |
| SNP_P3_80065_46772329 | NC_021165.1    | Ca_kabuli_chr06 | 46772329                | CC                              | AA                | 1946451988               |
| SNP_P3_80066_46772333 | NC_021165.1    | Ca_kabuli_chr06 | 46772333                | AA                              | GG                | 1946451990               |
| SNP_P3_80067_46772680 | NC_021165.1    | Ca_kabuli_chr06 | 46772680                | AA                              | GG                | 1946451991               |
| SNP_P3_80068_46772733 | NC_021165.1    | Ca_kabuli_chr06 | 46772733                | TT                              | GG                | 1946451993               |
| SNP_P3_80069_46772785 | NC_021165.1    | Ca_kabuli_chr06 | 46772785                | TT                              | CC                | 1946451994               |
| SNP_P3_80070_46772819 | NC_021165.1    | Ca_kabuli_chr06 | 46772819                | AA                              | TT                | 1946451996               |
| SNP_P3_80071_46772826 | NC_021165.1    | Ca_kabuli_chr06 | 46772826                | TT                              | CC                | 1946451997               |
| SNP_P3_80072_46772896 | NC_021165.1    | Ca_kabuli_chr06 | 46772896                | AA                              | GG                | 1946451998               |
| SNP_P3_80073_46772917 | NC_021165.1    | Ca_kabuli_chr06 | 46772917                | CC                              | TT                | 1946452000               |
| SNP_P3_80076_46789806 | NC_021165.1    | Ca_kabuli_chr06 | 46789806                | CC                              | TT                | 1946452001               |
| SNP_P3_80078_46789979 | NC_021165.1    | Ca_kabuli_chr06 | 46789979                | AA                              | GG                | 1946452003               |
| SNP_P3_80079_46796715 | NC_021165.1    | Ca_kabuli_chr06 | 46796715                | CC                              | AA                | 1946452004               |
| SNP_P3_80080_46797063 | NC_021165.1    | Ca_kabuli_chr06 | 46797063                | TT                              | CC                | 1946452005               |
| SNP_P3_80081_46797078 | NC_021165.1    | Ca_kabuli_chr06 | 46797078                | TT                              | CC                | 1946452007               |
| SNP_P3_80082_46797683 | NC_021165.1    | Ca_kabuli_chr06 | 46797683                | TT                              | GG                | 1946452008               |
| SNP_P3_80083_46800960 | NC_021165.1    | Ca_kabuli_chr06 | 46800960                | TT                              | CC                | 1946452010               |
| SNP_P3_80084_46803278 | NC_021165.1    | Ca_kabuli_chr06 | 46803278                | TT                              | AA                | 1946452011               |
| SNP_P3_80085_46817669 | NC_021165.1    | Ca_kabuli_chr06 | 46817669                | GG                              | AA                | 1946452012               |
| SNP_P3_80086_46819101 | NC_021165.1    | Ca_kabuli_chr06 | 46819101                | GG                              | AA                | 1946452014               |
| SNP_P3_80087_46848092 | NC_021165.1    | Ca_kabuli_chr06 | 46848092                | CC                              | TT                | 1946452016               |
| SNP_P3_80088_46848093 | NC_021165.1    | Ca_kabuli_chr06 | 46848093                | TT                              | CC                | 1946452017               |
| SNP_P3_80090_46896666 | NC_021165.1    | Ca_kabuli_chr06 | 46896666                | TT                              | GG                | 1946452018               |

| SNPs IDs              | Chromosome IDs | Chromosomes     | Physical positions (bp) | CDC Frontier (Reference genome) | (Pusa 256 & HPNB) | NCBI SNPdb Accession IDs |
|-----------------------|----------------|-----------------|-------------------------|---------------------------------|-------------------|--------------------------|
| SNP_P3_80091_46896889 | NC_021165.1    | Ca_kabuli_chr06 | 46896889                | CC                              | TT                | 1946452020               |
| SNP_P3_80092_46896903 | NC_021165.1    | Ca_kabuli_chr06 | 46896903                | CC                              | TT                | 1946452021               |
| SNP_P3_80093_46896910 | NC_021165.1    | Ca_kabuli_chr06 | 46896910                | AA                              | CC                | 1946452023               |
| SNP_P3_80094_46896934 | NC_021165.1    | Ca_kabuli_chr06 | 46896934                | CC                              | GG                | 1946452024               |
| SNP_P3_80095_46896938 | NC_021165.1    | Ca_kabuli_chr06 | 46896938                | GG                              | CC                | 1946452026               |
| SNP_P3_80096_46896958 | NC_021165.1    | Ca_kabuli_chr06 | 46896958                | CC                              | TT                | 1946452027               |
| SNP_P3_80097_46897030 | NC_021165.1    | Ca_kabuli_chr06 | 46897030                | CC                              | TT                | 1946452028               |
| SNP_P3_80098_46897044 | NC_021165.1    | Ca_kabuli_chr06 | 46897044                | CC                              | GG                | 1946452030               |
| SNP_P3_80099_46897302 | NC_021165.1    | Ca_kabuli_chr06 | 46897302                | CC                              | TT                | 1946452031               |
| SNP_P3_80100_46897710 | NC_021165.1    | Ca_kabuli_chr06 | 46897710                | AA                              | GG                | 1946452033               |
| SNP_P3_80101_46898699 | NC_021165.1    | Ca_kabuli_chr06 | 46898699                | GG                              | TT                | 1946452034               |
| SNP_P3_80102_46898828 | NC_021165.1    | Ca_kabuli_chr06 | 46898828                | CC                              | TT                | 1946452036               |
| SNP_P3_80103_46899767 | NC_021165.1    | Ca_kabuli_chr06 | 46899767                | AA                              | GG                | 1946452037               |
| SNP_P3_80104_46899880 | NC_021165.1    | Ca_kabuli_chr06 | 46899880                | AA                              | GG                | 1946452038               |
| SNP_P3_80105_46906405 | NC_021165.1    | Ca_kabuli_chr06 | 46906405                | AA                              | GG                | 1946452040               |
| SNP_P3_80106_46933111 | NC_021165.1    | Ca_kabuli_chr06 | 46933111                | CC                              | TT                | 1946452042               |
| SNP_P3_80107_46936738 | NC_021165.1    | Ca_kabuli_chr06 | 46936738                | AA                              | GG                | 1946452043               |
| SNP_P3_80108_46978259 | NC_021165.1    | Ca_kabuli_chr06 | 46978259                | AA                              | TT                | 1946452045               |
| SNP_P3_80109_46997169 | NC_021165.1    | Ca_kabuli_chr06 | 46997169                | TT                              | CC                | 1946452046               |
| SNP_P3_80110_47000830 | NC_021165.1    | Ca_kabuli_chr06 | 47000830                | AA                              | GG                | 1946452047               |
| SNP_P3_80111_47001025 | NC_021165.1    | Ca_kabuli_chr06 | 47001025                | GG                              | TT                | 1946452050               |
| SNP_P3_80113_47001105 | NC_021165.1    | Ca_kabuli_chr06 | 47001105                | TT                              | CC                | 1946452051               |
| SNP_P3_80114_47001108 | NC_021165.1    | Ca_kabuli_chr06 | 47001108                | GG                              | AA                | 1946452053               |
| SNP_P3_80115_47001120 | NC_021165.1    | Ca_kabuli_chr06 | 47001120                | CC                              | TT                | 1946452054               |
| SNP_P3_80116_47001142 | NC_021165.1    | Ca_kabuli_chr06 | 47001142                | GG                              | AA                | 1946452056               |
| SNP_P3_80117_47001164 | NC_021165.1    | Ca_kabuli_chr06 | 47001164                | GG                              | AA                | 1946452057               |
| SNP_P3_80118_47001167 | NC_021165.1    | Ca_kabuli_chr06 | 47001167                | CC                              | GG                | 1946452059               |
| SNP_P3_80120_47002291 | NC_021165.1    | Ca_kabuli_chr06 | 47002291                | GG                              | AA                | 1946452060               |
| SNP_P3_80121_47002328 | NC_021165.1    | Ca_kabuli_chr06 | 47002328                | TT                              | CC                | 1946452061               |
| SNP_P3_80122_47003980 | NC_021165.1    | Ca_kabuli_chr06 | 47003980                | AA                              | TT                | 1946452063               |
| SNP_P3_80124_47034316 | NC_021165.1    | Ca_kabuli_chr06 | 47034316                | TT                              | CC                | 1946452064               |
| SNP_P3_80125_47040893 | NC_021165.1    | Ca_kabuli_chr06 | 47040893                | AA                              | TT                | 1946452066               |
| SNP_P3_80126_47040895 | NC_021165.1    | Ca_kabuli_chr06 | 47040895                | AA                              | TT                | 1946452067               |
| SNP_P3_80127_47057861 | NC_021165.1    | Ca_kabuli_chr06 | 47057861                | TT                              | CC                | 1946452069               |
| SNP_P3_80128_47061482 | NC_021165.1    | Ca_kabuli_chr06 | 47061482                | CC                              | TT                | 1946452070               |
| SNP_P3_80129_47093709 | NC_021165.1    | Ca_kabuli_chr06 | 47093709                | GG                              | AA                | 1946452072               |
| SNP_P3_80130_47115648 | NC_021165.1    | Ca_kabuli_chr06 | 47115648                | GG                              | TT                | 1946452073               |
| SNP_P3_80131_47130531 | NC_021165.1    | Ca_kabuli_chr06 | 47130531                | TT                              | GG                | 1946452075               |
| SNP_P3_80132_47134887 | NC_021165.1    | Ca_kabuli_chr06 | 47134887                | GG                              | AA                | 1946452076               |
| SNP_P3_80133_47141301 | NC_021165.1    | Ca_kabuli_chr06 | 47141301                | CC                              | TT                | 1946452078               |
| SNP_P3_80134_47148751 | NC_021165.1    | Ca_kabuli_chr06 | 47148751                | AA                              | CC                | 1946452079               |
| SNP_P3_80136_47149041 | NC_021165.1    | Ca_kabuli_chr06 | 47149041                | TT                              | GG                | 1946452081               |

| SNPs IDs              | Chromosome IDs | Chromosomes     | Physical positions (bp) | CDC Frontier (Reference genome) | (Pusa 256 & HPNB) | NCBI SNPdb Accession IDs |
|-----------------------|----------------|-----------------|-------------------------|---------------------------------|-------------------|--------------------------|
| SNP_P3_80137_47149045 | NC_021165.1    | Ca_kabuli_chr06 | 47149045                | TT                              | AA                | 1946452082               |
| SNP_P3_80138_47149066 | NC_021165.1    | Ca_kabuli_chr06 | 47149066                | CC                              | AA                | 1946452084               |
| SNP_P3_80139_47149070 | NC_021165.1    | Ca_kabuli_chr06 | 47149070                | TT                              | CC                | 1946452085               |
| SNP_P3_80140_47149086 | NC_021165.1    | Ca_kabuli_chr06 | 47149086                | AA                              | GG                | 1946452087               |
| SNP_P3_80141_47149096 | NC_021165.1    | Ca_kabuli_chr06 | 47149096                | AA                              | CC                | 1946452089               |
| SNP_P3_80142_47149099 | NC_021165.1    | Ca_kabuli_chr06 | 47149099                | GG                              | CC                | 1946452090               |
| SNP_P3_80143_47149161 | NC_021165.1    | Ca_kabuli_chr06 | 47149161                | TT                              | CC                | 1946452092               |
| SNP_P3_80144_47149205 | NC_021165.1    | Ca_kabuli_chr06 | 47149205                | CC                              | AA                | 1946452093               |
| SNP_P3_80145_47149208 | NC_021165.1    | Ca_kabuli_chr06 | 47149208                | CC                              | TT                | 1946452095               |
| SNP_P3_80146_47149224 | NC_021165.1    | Ca_kabuli_chr06 | 47149224                | TT                              | CC                | 1946452096               |
| SNP_P3_80147_47149237 | NC_021165.1    | Ca_kabuli_chr06 | 47149237                | TT                              | AA                | 1946452098               |
| SNP_P3_80148_47151270 | NC_021165.1    | Ca_kabuli_chr06 | 47151270                | AA                              | CC                | 1946452100               |
| SNP_P3_80149_47151284 | NC_021165.1    | Ca_kabuli_chr06 | 47151284                | AA                              | GG                | 1946452101               |
| SNP_P3_80150_47151298 | NC_021165.1    | Ca_kabuli_chr06 | 47151298                | CC                              | TT                | 1946452102               |
| SNP_P3_80151_47151331 | NC_021165.1    | Ca_kabuli_chr06 | 47151331                | GG                              | AA                | 1946452104               |
| SNP_P3_80152_47151738 | NC_021165.1    | Ca_kabuli_chr06 | 47151738                | AA                              | GG                | 1946452105               |
| SNP_P3_80153_47151749 | NC_021165.1    | Ca_kabuli_chr06 | 47151749                | AA                              | GG                | 1946452107               |
| SNP_P3_80154_47160804 | NC_021165.1    | Ca_kabuli_chr06 | 47160804                | GG                              | TT                | 1946452109               |
| SNP_P3_80155_47175451 | NC_021165.1    | Ca_kabuli_chr06 | 47175451                | TT                              | AA                | 1946452110               |
| SNP_P3_80156_47207418 | NC_021165.1    | Ca_kabuli_chr06 | 47207418                | AA                              | GG                | 1946452112               |
| SNP_P3_80157_47209648 | NC_021165.1    | Ca_kabuli_chr06 | 47209648                | GG                              | CC                | 1946452113               |
| SNP_P3_80158_47209713 | NC_021165.1    | Ca_kabuli_chr06 | 47209713                | GG                              | TT                | 1946452114               |
| SNP_P3_80159_47209888 | NC_021165.1    | Ca_kabuli_chr06 | 47209888                | TT                              | CC                | 1946452116               |
| SNP_P3_80160_47209895 | NC_021165.1    | Ca_kabuli_chr06 | 47209895                | GG                              | TT                | 1946452117               |
| SNP_P3_80161_47209986 | NC_021165.1    | Ca_kabuli_chr06 | 47209986                | CC                              | TT                | 1946452119               |
| SNP_P3_80162_47210005 | NC_021165.1    | Ca_kabuli_chr06 | 47210005                | CC                              | TT                | 1946452120               |
| SNP_P3_80163_47210028 | NC_021165.1    | Ca_kabuli_chr06 | 47210028                | AA                              | GG                | 1946452122               |
| SNP_P3_80164_47226832 | NC_021165.1    | Ca_kabuli_chr06 | 47226832                | GG                              | AA                | 1946452123               |
| SNP_P3_80165_47259947 | NC_021165.1    | Ca_kabuli_chr06 | 47259947                | GG                              | AA                | 1946452125               |
| SNP_P3_80166_47259949 | NC_021165.1    | Ca_kabuli_chr06 | 47259949                | CC                              | TT                | 1946452126               |
| SNP_P3_80167_47259950 | NC_021165.1    | Ca_kabuli_chr06 | 47259950                | AA                              | GG                | 1946452128               |
| SNP_P3_80168_47259998 | NC_021165.1    | Ca_kabuli_chr06 | 47259998                | AA                              | GG                | 1946452130               |
| SNP_P3_80169_47260015 | NC_021165.1    | Ca_kabuli_chr06 | 47260015                | TT                              | CC                | 1946452131               |
| SNP_P3_80170_47260201 | NC_021165.1    | Ca_kabuli_chr06 | 47260201                | AA                              | GG                | 1946452133               |
| SNP_P3_80171_47260222 | NC_021165.1    | Ca_kabuli_chr06 | 47260222                | GG                              | AA                | 1946452134               |
| SNP_P3_80172_47260281 | NC_021165.1    | Ca_kabuli_chr06 | 47260281                | TT                              | CC                | 1946452136               |
| SNP_P3_80173_47267699 | NC_021165.1    | Ca_kabuli_chr06 | 47267699                | AA                              | GG                | 1946452137               |
| SNP_P3_80174_47267952 | NC_021165.1    | Ca_kabuli_chr06 | 47267952                | TT                              | CC                | 1946452138               |
| SNP_P3_80175_47268177 | NC_021165.1    | Ca_kabuli_chr06 | 47268177                | TT                              | AA                | 1946452140               |
| SNP_P3_80176_47268179 | NC_021165.1    | Ca_kabuli_chr06 | 47268179                | AA                              | CC                | 1946452141               |
| SNP_P3_80177_47268216 | NC_021165.1    | Ca_kabuli_chr06 | 47268216                | TT                              | GG                | 1946452143               |
| SNP_P3_80178_47268267 | NC_021165.1    | Ca_kabuli_chr06 | 47268267                | CC                              | AA                | 1946452144               |

| SNPs IDs              | Chromosome IDs | Chromosomes     | Physical positions (bp) | CDC Frontier (Reference genome) | (Pusa 256 & HPNB) | NCBI SNPdb Accession IDs |
|-----------------------|----------------|-----------------|-------------------------|---------------------------------|-------------------|--------------------------|
| SNP_P3_80179_47270458 | NC_021165.1    | Ca_kabuli_chr06 | 47270458                | CC                              | AA                | 1946452146               |
| SNP_P3_80180_47276050 | NC_021165.1    | Ca_kabuli_chr06 | 47276050                | AA                              | GG                | 1946452147               |
| SNP_P3_80181_47290692 | NC_021165.1    | Ca_kabuli_chr06 | 47290692                | GG                              | CC                | 1946452149               |
| SNP_P3_80182_47307043 | NC_021165.1    | Ca_kabuli_chr06 | 47307043                | CC                              | TT                | 1946452150               |
| SNP_P3_80183_47312017 | NC_021165.1    | Ca_kabuli_chr06 | 47312017                | TT                              | CC                | 1946452151               |
| SNP_P3_80184_47312020 | NC_021165.1    | Ca_kabuli_chr06 | 47312020                | AA                              | GG                | 1946452153               |
| SNP_P3_80185_47312050 | NC_021165.1    | Ca_kabuli_chr06 | 47312050                | GG                              | AA                | 1946452154               |
| SNP_P3_80186_47312295 | NC_021165.1    | Ca_kabuli_chr06 | 47312295                | TT                              | CC                | 1946452156               |
| SNP_P3_80187_47312537 | NC_021165.1    | Ca_kabuli_chr06 | 47312537                | CC                              | TT                | 1946452157               |
| SNP_P3_80188_47312551 | NC_021165.1    | Ca_kabuli_chr06 | 47312551                | TT                              | AA                | 1946452159               |
| SNP_P3_80189_47312562 | NC_021165.1    | Ca_kabuli_chr06 | 47312562                | AA                              | GG                | 1946452160               |
| SNP_P3_80190_47312580 | NC_021165.1    | Ca_kabuli_chr06 | 47312580                | CC                              | TT                | 1946452162               |
| SNP_P3_80191_47312595 | NC_021165.1    | Ca_kabuli_chr06 | 47312595                | CC                              | TT                | 1946452163               |
| SNP_P3_80192_47338786 | NC_021165.1    | Ca_kabuli_chr06 | 47338786                | AA                              | TT                | 1946452165               |
| SNP_P3_80194_47461204 | NC_021165.1    | Ca_kabuli_chr06 | 47461204                | CC                              | AA                | 1946452166               |
| SNP_P3_80195_47461336 | NC_021165.1    | Ca_kabuli_chr06 | 47461336                | AA                              | GG                | 1946452168               |
| SNP_P3_80196_47461834 | NC_021165.1    | Ca_kabuli_chr06 | 47461834                | AA                              | TT                | 1946452169               |
| SNP_P3_80197_47461906 | NC_021165.1    | Ca_kabuli_chr06 | 47461906                | GG                              | AA                | 1946452171               |
| SNP_P3_80198_47469363 | NC_021165.1    | Ca_kabuli_chr06 | 47469363                | TT                              | CC                | 1946452172               |
| SNP_P3_80199_47504908 | NC_021165.1    | Ca_kabuli_chr06 | 47504908                | CC                              | TT                | 1946452174               |
| SNP_P3_80200_47504911 | NC_021165.1    | Ca_kabuli_chr06 | 47504911                | GG                              | TT                | 1946452175               |
| SNP_P3_80201_47505180 | NC_021165.1    | Ca_kabuli_chr06 | 47505180                | AA                              | GG                | 1946452176               |
| SNP_P3_80202_47505999 | NC_021165.1    | Ca_kabuli_chr06 | 47505999                | TT                              | GG                | 1946452178               |
| SNP_P3_80203_47506396 | NC_021165.1    | Ca_kabuli_chr06 | 47506396                | TT                              | CC                | 1946452180               |
| SNP_P3_80204_47563102 | NC_021165.1    | Ca_kabuli_chr06 | 47563102                | AA                              | TT                | 1946452181               |
| SNP_P3_80206_47614633 | NC_021165.1    | Ca_kabuli_chr06 | 47614633                | AA                              | CC                | 1946452183               |
| SNP_P3_80207_47616872 | NC_021165.1    | Ca_kabuli_chr06 | 47616872                | AA                              | GG                | 1946452184               |
| SNP_P3_80208_47621925 | NC_021165.1    | Ca_kabuli_chr06 | 47621925                | TT                              | GG                | 1946452186               |
| SNP_P3_80209_47622022 | NC_021165.1    | Ca_kabuli_chr06 | 47622022                | GG                              | AA                | 1946452187               |
| SNP_P3_80210_47622244 | NC_021165.1    | Ca_kabuli_chr06 | 47622244                | CC                              | GG                | 1946452189               |
| SNP_P3_80211_47622264 | NC_021165.1    | Ca_kabuli_chr06 | 47622264                | AA                              | GG                | 1946452190               |
| SNP_P3_80212_47622281 | NC_021165.1    | Ca_kabuli_chr06 | 47622281                | AA                              | CC                | 1946452192               |
| SNP_P3_80213_47622282 | NC_021165.1    | Ca_kabuli_chr06 | 47622282                | AA                              | GG                | 1946452193               |
| SNP_P3_80214_47633177 | NC_021165.1    | Ca_kabuli_chr06 | 47633177                | CC                              | TT                | 1946452195               |
| SNP_P3_80215_47653928 | NC_021165.1    | Ca_kabuli_chr06 | 47653928                | AA                              | GG                | 1946452196               |
| SNP_P3_80216_47653929 | NC_021165.1    | Ca_kabuli_chr06 | 47653929                | GG                              | CC                | 1946452197               |
| SNP_P3_80217_47653939 | NC_021165.1    | Ca_kabuli_chr06 | 47653939                | AA                              | GG                | 1946452199               |
| SNP_P3_80218_47654064 | NC_021165.1    | Ca_kabuli_chr06 | 47654064                | AA                              | GG                | 1946452201               |
| SNP_P3_80219_47654090 | NC_021165.1    | Ca_kabuli_chr06 | 47654090                | CC                              | TT                | 1946452202               |
| SNP_P3_80220_47654095 | NC_021165.1    | Ca_kabuli_chr06 | 47654095                | TT                              | GG                | 1946452204               |
| SNP_P3_80221_47654152 | NC_021165.1    | Ca_kabuli_chr06 | 47654152                | CC                              | TT                | 1946452205               |
| SNP_P3_80222_47654186 | NC_021165.1    | Ca_kabuli_chr06 | 47654186                | AA                              | GG                | 1946452207               |

| SNPs IDs              | Chromosome IDs | Chromosomes     | Physical positions (bp) | CDC Frontier (Reference genome) | (Pusa 256 & HPNB) | NCBI SNPdb Accession IDs |
|-----------------------|----------------|-----------------|-------------------------|---------------------------------|-------------------|--------------------------|
| SNP_P3_80223_47654231 | NC_021165.1    | Ca_kabuli_chr06 | 47654231                | GG                              | AA                | 1946452208               |
| SNP_P3_80224_47654306 | NC_021165.1    | Ca_kabuli_chr06 | 47654306                | GG                              | CC                | 1946452210               |
| SNP_P3_80225_47654424 | NC_021165.1    | Ca_kabuli_chr06 | 47654424                | AA                              | GG                | 1946452211               |
| SNP_P3_80226_47656383 | NC_021165.1    | Ca_kabuli_chr06 | 47656383                | GG                              | AA                | 1946452213               |
| SNP_P3_80227_47656385 | NC_021165.1    | Ca_kabuli_chr06 | 47656385                | TT                              | CC                | 1946452214               |
| SNP_P3_80228_47657231 | NC_021165.1    | Ca_kabuli_chr06 | 47657231                | TT                              | AA                | 1946452215               |
| SNP_P3_80229_47675497 | NC_021165.1    | Ca_kabuli_chr06 | 47675497                | TT                              | AA                | 1946452217               |
| SNP_P3_80230_47675696 | NC_021165.1    | Ca_kabuli_chr06 | 47675696                | TT                              | GG                | 1946452218               |
| SNP_P3_80231_47675737 | NC_021165.1    | Ca_kabuli_chr06 | 47675737                | CC                              | TT                | 1946452220               |
| SNP_P3_80232_47697510 | NC_021165.1    | Ca_kabuli_chr06 | 47697510                | AA                              | GG                | 1946452222               |
| SNP_P3_80233_47697511 | NC_021165.1    | Ca_kabuli_chr06 | 47697511                | AA                              | TT                | 1946452223               |
| SNP_P3_80234_47697671 | NC_021165.1    | Ca_kabuli_chr06 | 47697671                | GG                              | AA                | 1946452224               |
| SNP_P3_80235_47697711 | NC_021165.1    | Ca_kabuli_chr06 | 47697711                | AA                              | GG                | 1946452226               |
| SNP_P3_80236_47697851 | NC_021165.1    | Ca_kabuli_chr06 | 47697851                | CC                              | GG                | 1946452227               |
| SNP_P3_80237_47697905 | NC_021165.1    | Ca_kabuli_chr06 | 47697905                | AA                              | TT                | 1946452229               |
| SNP_P3_80238_47697924 | NC_021165.1    | Ca_kabuli_chr06 | 47697924                | AA                              | CC                | 1946452230               |
| SNP_P3_80240_47698044 | NC_021165.1    | Ca_kabuli_chr06 | 47698044                | GG                              | CC                | 1946452232               |
| SNP_P3_80241_47698052 | NC_021165.1    | Ca_kabuli_chr06 | 47698052                | AA                              | GG                | 1946452233               |
| SNP_P3_80242_47698083 | NC_021165.1    | Ca_kabuli_chr06 | 47698083                | AA                              | CC                | 1946452235               |
| SNP_P3_80243_47699198 | NC_021165.1    | Ca_kabuli_chr06 | 47699198                | CC                              | TT                | 1946452236               |
| SNP_P3_80244_47699206 | NC_021165.1    | Ca_kabuli_chr06 | 47699206                | AA                              | GG                | 1946452238               |
| SNP_P3_80245_47699252 | NC_021165.1    | Ca_kabuli_chr06 | 47699252                | TT                              | CC                | 1946452239               |
| SNP_P3_80246_47699520 | NC_021165.1    | Ca_kabuli_chr06 | 47699520                | TT                              | AA                | 1946452240               |
| SNP_P3_80247_47699567 | NC_021165.1    | Ca_kabuli_chr06 | 47699567                | TT                              | AA                | 1946452242               |
| SNP_P3_80248_47699591 | NC_021165.1    | Ca_kabuli_chr06 | 47699591                | CC                              | AA                | 1946452244               |
| SNP_P3_80249_47708590 | NC_021165.1    | Ca_kabuli_chr06 | 47708590                | GG                              | CC                | 1946452245               |
| SNP_P3_80250_47708595 | NC_021165.1    | Ca_kabuli_chr06 | 47708595                | CC                              | TT                | 1946452247               |
| SNP_P3_80251_47708596 | NC_021165.1    | Ca_kabuli_chr06 | 47708596                | TT                              | GG                | 1946452248               |
| SNP_P3_80252_47708688 | NC_021165.1    | Ca_kabuli_chr06 | 47708688                | AA                              | GG                | 1946452249               |
| SNP_P3_80253_47716666 | NC_021165.1    | Ca_kabuli_chr06 | 47716666                | TT                              | CC                | 1946452251               |
| SNP_P3_80254_47716746 | NC_021165.1    | Ca_kabuli_chr06 | 47716746                | GG                              | AA                | 1946452252               |
| SNP_P3_80255_47716867 | NC_021165.1    | Ca_kabuli_chr06 | 47716867                | GG                              | AA                | 1946452254               |
| SNP_P3_80256_47716896 | NC_021165.1    | Ca_kabuli_chr06 | 47716896                | CC                              | TT                | 1946452255               |
| SNP_P3_80257_47716911 | NC_021165.1    | Ca_kabuli_chr06 | 47716911                | CC                              | TT                | 1946452257               |
| SNP_P3_80258_47716924 | NC_021165.1    | Ca_kabuli_chr06 | 47716924                | CC                              | TT                | 1946452258               |
| SNP_P3_80259_47717039 | NC_021165.1    | Ca_kabuli_chr06 | 47717039                | CC                              | GG                | 1946452260               |
| SNP_P3_80260_47717056 | NC_021165.1    | Ca_kabuli_chr06 | 47717056                | TT                              | GG                | 1946452261               |
| SNP_P3_80261_47717190 | NC_021165.1    | Ca_kabuli_chr06 | 47717190                | GG                              | AA                | 1946452263               |
| SNP_P3_80262_47721909 | NC_021165.1    | Ca_kabuli_chr06 | 47721909                | TT                              | AA                | 1946452264               |
| SNP_P3_80263_47723049 | NC_021165.1    | Ca_kabuli_chr06 | 47723049                | CC                              | AA                | 1946452266               |
| SNP_P3_80264_47723050 | NC_021165.1    | Ca_kabuli_chr06 | 47723050                | TT                              | CC                | 1946452267               |
| SNP_P3_80265_47723065 | NC_021165.1    | Ca_kabuli_chr06 | 47723065                | AA                              | GG                | 1946452268               |

| SNPs IDs              | Chromosome IDs | Chromosomes     | Physical positions (bp) | CDC Frontier (Reference genome) | (Pusa 256 & HPNB) | NCBI SNPdb Accession IDs |
|-----------------------|----------------|-----------------|-------------------------|---------------------------------|-------------------|--------------------------|
| SNP_P3_80266_47723077 | NC_021165.1    | Ca_kabuli_chr06 | 47723077                | TT                              | AA                | 1946452270               |
| SNP_P3_80267_47723251 | NC_021165.1    | Ca_kabuli_chr06 | 47723251                | CC                              | TT                | 1946452271               |
| SNP_P3_80268_47723368 | NC_021165.1    | Ca_kabuli_chr06 | 47723368                | TT                              | GG                | 1946452273               |
| SNP_P3_80269_47730169 | NC_021165.1    | Ca_kabuli_chr06 | 47730169                | CC                              | TT                | 1946452274               |
| SNP_P3_80270_47739040 | NC_021165.1    | Ca_kabuli_chr06 | 47739040                | AA                              | GG                | 1946452276               |
| SNP_P3_80272_47745764 | NC_021165.1    | Ca_kabuli_chr06 | 47745764                | TT                              | AA                | 1946452277               |
| SNP_P3_80273_47745766 | NC_021165.1    | Ca_kabuli_chr06 | 47745766                | TT                              | CC                | 1946452278               |
| SNP_P3_80274_47745853 | NC_021165.1    | Ca_kabuli_chr06 | 47745853                | AA                              | GG                | 1946452280               |
| SNP_P3_80275_47745864 | NC_021165.1    | Ca_kabuli_chr06 | 47745864                | TT                              | AA                | 1946452281               |
| SNP_P3_80276_47745887 | NC_021165.1    | Ca_kabuli_chr06 | 47745887                | CC                              | AA                | 1946452283               |
| SNP_P3_80277_47746100 | NC_021165.1    | Ca_kabuli_chr06 | 47746100                | AA                              | GG                | 1946452284               |
| SNP_P3_80278_47746127 | NC_021165.1    | Ca_kabuli_chr06 | 47746127                | AA                              | GG                | 1946452285               |
| SNP_P3_80279_47746202 | NC_021165.1    | Ca_kabuli_chr06 | 47746202                | CC                              | GG                | 1946452287               |
| SNP_P3_80280_47753623 | NC_021165.1    | Ca_kabuli_chr06 | 47753623                | TT                              | CC                | 1946452288               |
| SNP_P3_80281_47753658 | NC_021165.1    | Ca_kabuli_chr06 | 47753658                | AA                              | GG                | 1946452290               |
| SNP_P3_80282_47753688 | NC_021165.1    | Ca_kabuli_chr06 | 47753688                | CC                              | TT                | 1946452291               |
| SNP_P3_80283_47753696 | NC_021165.1    | Ca_kabuli_chr06 | 47753696                | AA                              | TT                | 1946452293               |
| SNP_P3_80284_47753701 | NC_021165.1    | Ca_kabuli_chr06 | 47753701                | TT                              | CC                | 1946452294               |
| SNP_P3_80285_47753728 | NC_021165.1    | Ca_kabuli_chr06 | 47753728                | TT                              | GG                | 1946452296               |
| SNP_P3_80286_47754029 | NC_021165.1    | Ca_kabuli_chr06 | 47754029                | CC                              | TT                | 1946452297               |
| SNP_P3_80287_47754746 | NC_021165.1    | Ca_kabuli_chr06 | 47754746                | AA                              | CC                | 1946452298               |
| SNP_P3_80288_47758794 | NC_021165.1    | Ca_kabuli_chr06 | 47758794                | TT                              | GG                | 1946452300               |
| SNP_P3_80289_47758803 | NC_021165.1    | Ca_kabuli_chr06 | 47758803                | GG                              | CC                | 1946452301               |
| SNP_P3_80290_47758812 | NC_021165.1    | Ca_kabuli_chr06 | 47758812                | AA                              | GG                | 1946452303               |
| SNP_P3_80291_47758837 | NC_021165.1    | Ca_kabuli_chr06 | 47758837                | AA                              | GG                | 1946452304               |
| SNP_P3_80292_47758874 | NC_021165.1    | Ca_kabuli_chr06 | 47758874                | AA                              | GG                | 1946452306               |
| SNP_P3_80293_47758925 | NC_021165.1    | Ca_kabuli_chr06 | 47758925                | GG                              | AA                | 1946452307               |
| SNP_P3_80294_47760800 | NC_021165.1    | Ca_kabuli_chr06 | 47760800                | GG                              | TT                | 1946452308               |
| SNP_P3_80295_47761033 | NC_021165.1    | Ca_kabuli_chr06 | 47761033                | TT                              | AA                | 1946452310               |
| SNP_P3_80296_47761044 | NC_021165.1    | Ca_kabuli_chr06 | 47761044                | CC                              | GG                | 1946452311               |
| SNP_P3_80297_47779022 | NC_021165.1    | Ca_kabuli_chr06 | 47779022                | TT                              | CC                | 1946452313               |
| SNP_P3_80298_47779071 | NC_021165.1    | Ca_kabuli_chr06 | 47779071                | GG                              | CC                | 1946452314               |
| SNP_P3_80299_47779082 | NC_021165.1    | Ca_kabuli_chr06 | 47779082                | AA                              | CC                | 1946452315               |
| SNP_P3_80300_47779290 | NC_021165.1    | Ca_kabuli_chr06 | 47779290                | CC                              | TT                | 1946452317               |
| SNP_P3_80301_47779354 | NC_021165.1    | Ca_kabuli_chr06 | 47779354                | TT                              | CC                | 1946452318               |
| SNP_P3_80302_47798969 | NC_021165.1    | Ca_kabuli_chr06 | 47798969                | CC                              | TT                | 1946452320               |
| SNP_P3_80304_47817468 | NC_021165.1    | Ca_kabuli_chr06 | 47817468                | GG                              | AA                | 1946452321               |
| SNP_P3_80305_47830320 | NC_021165.1    | Ca_kabuli_chr06 | 47830320                | CC                              | TT                | 1946452323               |
| SNP_P3_80307_47905387 | NC_021165.1    | Ca_kabuli_chr06 | 47905387                | TT                              | AA                | 1946452324               |
| SNP_P3_80308_47906100 | NC_021165.1    | Ca_kabuli_chr06 | 47906100                | AA                              | GG                | 1946452325               |
| SNP_P3_80309_47906204 | NC_021165.1    | Ca_kabuli_chr06 | 47906204                | AA                              | GG                | 1946452327               |
| SNP_P3_80310_47906227 | NC_021165.1    | Ca_kabuli_chr06 | 47906227                | AA                              | CC                | 1946452328               |



| SNPs IDs              | Chromosome IDs | Chromosomes     | Physical positions (bp) | CDC Frontier (Reference genome) | (Pusa 256 & HPNB) | NCBI SNPdb Accession IDs |
|-----------------------|----------------|-----------------|-------------------------|---------------------------------|-------------------|--------------------------|
| SNP_P3_80311_47906243 | NC_021165.1    | Ca_kabuli_chr06 | 47906243                | AA                              | CC                | 1946452330               |
| SNP_P3_80312_47906254 | NC_021165.1    | Ca_kabuli_chr06 | 47906254                | CC                              | AA                | 1946452331               |
| SNP_P3_80314_47906312 | NC_021165.1    | Ca_kabuli_chr06 | 47906312                | TT                              | CC                | 1946452332               |
| SNP_P3_80315_47906443 | NC_021165.1    | Ca_kabuli_chr06 | 47906443                | GG                              | AA                | 1946452334               |
| SNP_P3_80316_47910502 | NC_021165.1    | Ca_kabuli_chr06 | 47910502                | GG                              | AA                | 1946452335               |
| SNP_P3_80317_47910514 | NC_021165.1    | Ca_kabuli_chr06 | 47910514                | GG                              | AA                | 1946452337               |
| SNP_P3_80318_47910517 | NC_021165.1    | Ca_kabuli_chr06 | 47910517                | CC                              | TT                | 1946452338               |
| SNP_P3_80319_47910557 | NC_021165.1    | Ca_kabuli_chr06 | 47910557                | AA                              | GG                | 1946452340               |
| SNP_P3_80320_47910568 | NC_021165.1    | Ca_kabuli_chr06 | 47910568                | GG                              | AA                | 1946452341               |
| SNP_P3_80321_47910631 | NC_021165.1    | Ca_kabuli_chr06 | 47910631                | GG                              | TT                | 1946452342               |
| SNP_P3_80322_47910647 | NC_021165.1    | Ca_kabuli_chr06 | 47910647                | AA                              | GG                | 1946452344               |
| SNP_P3_80323_47946346 | NC_021165.1    | Ca_kabuli_chr06 | 47946346                | GG                              | AA                | 1946452345               |
| SNP_P3_80324_47946398 | NC_021165.1    | Ca_kabuli_chr06 | 47946398                | AA                              | GG                | 1946452347               |
| SNP_P3_80325_47947792 | NC_021165.1    | Ca_kabuli_chr06 | 47947792                | TT                              | CC                | 1946452348               |
| SNP_P3_80326_47947816 | NC_021165.1    | Ca_kabuli_chr06 | 47947816                | AA                              | GG                | 1946452349               |
| SNP_P3_80327_47947843 | NC_021165.1    | Ca_kabuli_chr06 | 47947843                | AA                              | CC                | 1946452351               |
| SNP_P3_80328_47947846 | NC_021165.1    | Ca_kabuli_chr06 | 47947846                | TT                              | CC                | 1946452352               |
| SNP_P3_80329_47947852 | NC_021165.1    | Ca_kabuli_chr06 | 47947852                | TT                              | CC                | 1946452354               |
| SNP_P3_80330_47947860 | NC_021165.1    | Ca_kabuli_chr06 | 47947860                | TT                              | GG                | 1946452355               |
| SNP_P3_80331_47947866 | NC_021165.1    | Ca_kabuli_chr06 | 47947866                | AA                              | GG                | 1946452357               |
| SNP_P3_80332_47947879 | NC_021165.1    | Ca_kabuli_chr06 | 47947879                | CC                              | TT                | 1946452358               |
| SNP_P3_80333_47947942 | NC_021165.1    | Ca_kabuli_chr06 | 47947942                | GG                              | AA                | 1946452360               |
| SNP_P3_80334_47947951 | NC_021165.1    | Ca_kabuli_chr06 | 47947951                | TT                              | CC                | 1946452361               |
| SNP_P3_80335_47947954 | NC_021165.1    | Ca_kabuli_chr06 | 47947954                | TT                              | GG                | 1946452363               |
| SNP_P3_80336_47947972 | NC_021165.1    | Ca_kabuli_chr06 | 47947972                | CC                              | AA                | 1946452364               |
| SNP_P3_80337_47948014 | NC_021165.1    | Ca_kabuli_chr06 | 47948014                | CC                              | TT                | 1946452365               |
| SNP_P3_80338_47964804 | NC_021165.1    | Ca_kabuli_chr06 | 47964804                | GG                              | AA                | 1946452367               |
| SNP_P3_80339_47978729 | NC_021165.1    | Ca_kabuli_chr06 | 47978729                | AA                              | GG                | 1946452368               |
| SNP_P3_80341_48048235 | NC_021165.1    | Ca_kabuli_chr06 | 48048235                | CC                              | TT                | 1946452370               |
| SNP_P3_80342_48051355 | NC_021165.1    | Ca_kabuli_chr06 | 48051355                | GG                              | TT                | 1946452371               |
| SNP_P3_80343_48051447 | NC_021165.1    | Ca_kabuli_chr06 | 48051447                | AA                              | GG                | 1946452373               |
| SNP_P3_80344_48051454 | NC_021165.1    | Ca_kabuli_chr06 | 48051454                | CC                              | AA                | 1946452374               |
| SNP_P3_80345_48053783 | NC_021165.1    | Ca_kabuli_chr06 | 48053783                | TT                              | CC                | 1946452375               |
| SNP_P3_80346_48053960 | NC_021165.1    | Ca_kabuli_chr06 | 48053960                | TT                              | GG                | 1946452377               |
| SNP_P3_80347_48056743 | NC_021165.1    | Ca_kabuli_chr06 | 48056743                | GG                              | AA                | 1946452378               |
| SNP_P3_80348_48057944 | NC_021165.1    | Ca_kabuli_chr06 | 48057944                | TT                              | AA                | 1946452380               |
| SNP_P3_80349_48063809 | NC_021165.1    | Ca_kabuli_chr06 | 48063809                | TT                              | CC                | 1946452381               |
| SNP_P3_80350_48064210 | NC_021165.1    | Ca_kabuli_chr06 | 48064210                | TT                              | CC                | 1946452383               |
| SNP_P3_80351_48064237 | NC_021165.1    | Ca_kabuli_chr06 | 48064237                | AA                              | GG                | 1946452384               |
| SNP_P3_80352_48064253 | NC_021165.1    | Ca_kabuli_chr06 | 48064253                | TT                              | CC                | 1946452386               |
| SNP_P3_80353_48064428 | NC_021165.1    | Ca_kabuli_chr06 | 48064428                | AA                              | CC                | 1946452387               |
| SNP_P3_80354_48064604 | NC_021165.1    | Ca_kabuli_chr06 | 48064604                | AA                              | GG                | 1946452389               |

| SNPs IDs              | Chromosome IDs | Chromosomes     | Physical positions (bp) | CDC Frontier (Reference genome) | (Pusa 256 & HPNB) | NCBI SNPdb Accession IDs |
|-----------------------|----------------|-----------------|-------------------------|---------------------------------|-------------------|--------------------------|
| SNP_P3_80355_48064668 | NC_021165.1    | Ca_kabuli_chr06 | 48064668                | CC                              | TT                | 1946452390               |
| SNP_P3_80356_48125861 | NC_021165.1    | Ca_kabuli_chr06 | 48125861                | AA                              | TT                | 1946452392               |
| SNP_P3_80357_48125888 | NC_021165.1    | Ca_kabuli_chr06 | 48125888                | AA                              | CC                | 1946452393               |
| SNP_P3_80358_48125895 | NC_021165.1    | Ca_kabuli_chr06 | 48125895                | GG                              | CC                | 1946452395               |
| SNP_P3_80359_48133381 | NC_021165.1    | Ca_kabuli_chr06 | 48133381                | GG                              | AA                | 1946452396               |
| SNP_P3_80360_48143674 | NC_021165.1    | Ca_kabuli_chr06 | 48143674                | AA                              | CC                | 1946452398               |
| SNP_P3_80361_48155479 | NC_021165.1    | Ca_kabuli_chr06 | 48155479                | AA                              | TT                | 1946452399               |
| SNP_P3_80364_48189560 | NC_021165.1    | Ca_kabuli_chr06 | 48189560                | TT                              | AA                | 1946452401               |
| SNP_P3_80365_48189588 | NC_021165.1    | Ca_kabuli_chr06 | 48189588                | GG                              | AA                | 1946452402               |
| SNP_P3_80367_48191969 | NC_021165.1    | Ca_kabuli_chr06 | 48191969                | CC                              | TT                | 1946452404               |
| SNP_P3_80368_48196657 | NC_021165.1    | Ca_kabuli_chr06 | 48196657                | TT                              | GG                | 1946452405               |
| SNP_P3_80370_48247312 | NC_021165.1    | Ca_kabuli_chr06 | 48247312                | TT                              | AA                | 1946452407               |
| SNP_P3_80371_48247437 | NC_021165.1    | Ca_kabuli_chr06 | 48247437                | GG                              | AA                | 1946452408               |
| SNP_P3_80372_48253228 | NC_021165.1    | Ca_kabuli_chr06 | 48253228                | GG                              | TT                | 1946452409               |
| SNP_P3_80373_48253755 | NC_021165.1    | Ca_kabuli_chr06 | 48253755                | CC                              | TT                | 1946452411               |
| SNP_P3_80374_48253805 | NC_021165.1    | Ca_kabuli_chr06 | 48253805                | GG                              | AA                | 1946452412               |
| SNP_P3_80375_48253885 | NC_021165.1    | Ca_kabuli_chr06 | 48253885                | CC                              | TT                | 1946452414               |
| SNP_P3_80376_48253949 | NC_021165.1    | Ca_kabuli_chr06 | 48253949                | GG                              | AA                | 1946452415               |
| SNP_P3_80377_48253974 | NC_021165.1    | Ca_kabuli_chr06 | 48253974                | GG                              | AA                | 1946452417               |
| SNP_P3_80378_48254099 | NC_021165.1    | Ca_kabuli_chr06 | 48254099                | TT                              | CC                | 1946452419               |
| SNP_P3_80379_48256788 | NC_021165.1    | Ca_kabuli_chr06 | 48256788                | GG                              | AA                | 1946452420               |
| SNP_P3_80381_48260761 | NC_021165.1    | Ca_kabuli_chr06 | 48260761                | CC                              | GG                | 1946452422               |
| SNP_P3_80383_48261153 | NC_021165.1    | Ca_kabuli_chr06 | 48261153                | TT                              | GG                | 1946452423               |
| SNP_P3_80384_48262122 | NC_021165.1    | Ca_kabuli_chr06 | 48262122                | TT                              | CC                | 1946452425               |
| SNP_P3_80385_48262333 | NC_021165.1    | Ca_kabuli_chr06 | 48262333                | TT                              | CC                | 1946452426               |
| SNP_P3_80386_48262381 | NC_021165.1    | Ca_kabuli_chr06 | 48262381                | AA                              | TT                | 1946452428               |
| SNP_P3_80387_48262643 | NC_021165.1    | Ca_kabuli_chr06 | 48262643                | AA                              | CC                | 1946452429               |
| SNP_P3_80388_48266972 | NC_021165.1    | Ca_kabuli_chr06 | 48266972                | AA                              | GG                | 1946452431               |
| SNP_P3_80389_48267213 | NC_021165.1    | Ca_kabuli_chr06 | 48267213                | TT                              | CC                | 1946452432               |
| SNP_P3_80390_48269409 | NC_021165.1    | Ca_kabuli_chr06 | 48269409                | TT                              | AA                | 1946452433               |
| SNP_P3_80391_48269483 | NC_021165.1    | Ca_kabuli_chr06 | 48269483                | AA                              | TT                | 1946452435               |
| SNP_P3_80392_48269706 | NC_021165.1    | Ca_kabuli_chr06 | 48269706                | TT                              | CC                | 1946452436               |
| SNP_P3_80393_48270262 | NC_021165.1    | Ca_kabuli_chr06 | 48270262                | CC                              | TT                | 1946452438               |
| SNP_P3_80394_48270263 | NC_021165.1    | Ca_kabuli_chr06 | 48270263                | AA                              | TT                | 1946452439               |
| SNP_P3_80395_48270267 | NC_021165.1    | Ca_kabuli_chr06 | 48270267                | GG                              | AA                | 1946452440               |
| SNP_P3_80396_48270684 | NC_021165.1    | Ca_kabuli_chr06 | 48270684                | AA                              | CC                | 1946452442               |
| SNP_P3_80397_48270752 | NC_021165.1    | Ca_kabuli_chr06 | 48270752                | AA                              | TT                | 1946452443               |
| SNP_P3_80398_48270772 | NC_021165.1    | Ca_kabuli_chr06 | 48270772                | AA                              | GG                | 1946452445               |
| SNP_P3_80399_48270807 | NC_021165.1    | Ca_kabuli_chr06 | 48270807                | CC                              | TT                | 1946452446               |
| SNP_P3_80400_48270839 | NC_021165.1    | Ca_kabuli_chr06 | 48270839                | AA                              | CC                | 1946452448               |
| SNP_P3_80401_48270866 | NC_021165.1    | Ca_kabuli_chr06 | 48270866                | AA                              | GG                | 1946452449               |
| SNP_P3_80402_48270905 | NC_021165.1    | Ca_kabuli_chr06 | 48270905                | GG                              | AA                | 1946452451               |

| SNPs IDs              | Chromosome IDs | Chromosomes     | Physical positions (bp) | CDC Frontier (Reference genome) | (Pusa 256 & HPNB) | NCBI SNPdb Accession IDs |
|-----------------------|----------------|-----------------|-------------------------|---------------------------------|-------------------|--------------------------|
| SNP_P3_80403_48270940 | NC_021165.1    | Ca_kabuli_chr06 | 48270940                | GG                              | TT                | 1946452452               |
| SNP_P3_80404_48270965 | NC_021165.1    | Ca_kabuli_chr06 | 48270965                | AA                              | GG                | 1946452454               |
| SNP_P3_80405_48270973 | NC_021165.1    | Ca_kabuli_chr06 | 48270973                | GG                              | AA                | 1946452455               |
| SNP_P3_80406_48270977 | NC_021165.1    | Ca_kabuli_chr06 | 48270977                | TT                              | CC                | 1946452457               |
| SNP_P3_80407_48271058 | NC_021165.1    | Ca_kabuli_chr06 | 48271058                | TT                              | CC                | 1946452458               |
| SNP_P3_80408_48271177 | NC_021165.1    | Ca_kabuli_chr06 | 48271177                | CC                              | TT                | 1946452460               |
| SNP_P3_80409_48271205 | NC_021165.1    | Ca_kabuli_chr06 | 48271205                | TT                              | CC                | 1946452461               |
| SNP_P3_80411_48271522 | NC_021165.1    | Ca_kabuli_chr06 | 48271522                | CC                              | TT                | 1946452463               |
| SNP_P3_80412_48271548 | NC_021165.1    | Ca_kabuli_chr06 | 48271548                | GG                              | AA                | 1946452464               |
| SNP_P3_80413_48271562 | NC_021165.1    | Ca_kabuli_chr06 | 48271562                | GG                              | AA                | 1946452466               |
| SNP_P3_80414_48271699 | NC_021165.1    | Ca_kabuli_chr06 | 48271699                | TT                              | GG                | 1946452467               |
| SNP_P3_80415_48276516 | NC_021165.1    | Ca_kabuli_chr06 | 48276516                | AA                              | CC                | 1946452469               |
| SNP_P3_80416_48276591 | NC_021165.1    | Ca_kabuli_chr06 | 48276591                | TT                              | CC                | 1946452470               |
| SNP_P3_80417_48277375 | NC_021165.1    | Ca_kabuli_chr06 | 48277375                | TT                              | CC                | 1946452472               |
| SNP_P3_80418_48277696 | NC_021165.1    | Ca_kabuli_chr06 | 48277696                | CC                              | TT                | 1946452474               |
| SNP_P3_80419_48277703 | NC_021165.1    | Ca_kabuli_chr06 | 48277703                | CC                              | AA                | 1946452475               |
| SNP_P3_80420_48277726 | NC_021165.1    | Ca_kabuli_chr06 | 48277726                | GG                              | CC                | 1946452477               |
| SNP_P3_80421_48277780 | NC_021165.1    | Ca_kabuli_chr06 | 48277780                | AA                              | TT                | 1946452478               |
| SNP_P3_80422_48278003 | NC_021165.1    | Ca_kabuli_chr06 | 48278003                | GG                              | CC                | 1946452480               |
| SNP_P3_80423_48278011 | NC_021165.1    | Ca_kabuli_chr06 | 48278011                | CC                              | AA                | 1946452481               |
| SNP_P3_80424_48278085 | NC_021165.1    | Ca_kabuli_chr06 | 48278085                | CC                              | TT                | 1946452483               |
| SNP_P3_80425_48278273 | NC_021165.1    | Ca_kabuli_chr06 | 48278273                | AA                              | GG                | 1946452484               |
| SNP_P3_80426_48278999 | NC_021165.1    | Ca_kabuli_chr06 | 48278999                | AA                              | CC                | 1946452485               |
| SNP_P3_80427_48279064 | NC_021165.1    | Ca_kabuli_chr06 | 48279064                | GG                              | AA                | 1946452487               |
| SNP_P3_80428_48279066 | NC_021165.1    | Ca_kabuli_chr06 | 48279066                | CC                              | GG                | 1946452488               |
| SNP_P3_80429_48279068 | NC_021165.1    | Ca_kabuli_chr06 | 48279068                | GG                              | TT                | 1946452490               |
| SNP_P3_80430_48279072 | NC_021165.1    | Ca_kabuli_chr06 | 48279072                | TT                              | AA                | 1946452491               |
| SNP_P3_80431_48279076 | NC_021165.1    | Ca_kabuli_chr06 | 48279076                | TT                              | CC                | 1946452493               |
| SNP_P3_80433_48279231 | NC_021165.1    | Ca_kabuli_chr06 | 48279231                | TT                              | CC                | 1946452494               |
| SNP_P3_80434_48279240 | NC_021165.1    | Ca_kabuli_chr06 | 48279240                | GG                              | TT                | 1946452495               |
| SNP_P3_80435_48279263 | NC_021165.1    | Ca_kabuli_chr06 | 48279263                | CC                              | GG                | 1946452497               |
| SNP_P3_80436_48279275 | NC_021165.1    | Ca_kabuli_chr06 | 48279275                | TT                              | CC                | 1946452498               |
| SNP_P3_80437_48279283 | NC_021165.1    | Ca_kabuli_chr06 | 48279283                | CC                              | TT                | 1946452500               |
| SNP_P3_80438_48279331 | NC_021165.1    | Ca_kabuli_chr06 | 48279331                | TT                              | GG                | 1946452501               |
| SNP_P3_80439_48279337 | NC_021165.1    | Ca_kabuli_chr06 | 48279337                | TT                              | AA                | 1946452503               |
| SNP_P3_80440_48279381 | NC_021165.1    | Ca_kabuli_chr06 | 48279381                | AA                              | CC                | 1946452504               |
| SNP_P3_80442_48279493 | NC_021165.1    | Ca_kabuli_chr06 | 48279493                | TT                              | CC                | 1946452506               |
| SNP_P3_80443_48279555 | NC_021165.1    | Ca_kabuli_chr06 | 48279555                | CC                              | TT                | 1946452507               |
| SNP_P3_80445_48279794 | NC_021165.1    | Ca_kabuli_chr06 | 48279794                | TT                              | CC                | 1946452508               |
| SNP_P3_80446_48279888 | NC_021165.1    | Ca_kabuli_chr06 | 48279888                | GG                              | CC                | 1946452510               |
| SNP_P3_80447_48279935 | NC_021165.1    | Ca_kabuli_chr06 | 48279935                | AA                              | GG                | 1946452511               |
| SNP_P3_80448_48279981 | NC_021165.1    | Ca_kabuli_chr06 | 48279981                | GG                              | AA                | 1946452513               |

| SNPs IDs              | Chromosome IDs | Chromosomes     | Physical positions (bp) | CDC Frontier (Reference genome) | (Pusa 256 & HPNB) | NCBI SNPdb Accession IDs |
|-----------------------|----------------|-----------------|-------------------------|---------------------------------|-------------------|--------------------------|
| SNP_P3_80449_48279983 | NC_021165.1    | Ca_kabuli_chr06 | 48279983                | GG                              | AA                | 1946452514               |
| SNP_P3_80450_48280047 | NC_021165.1    | Ca_kabuli_chr06 | 48280047                | TT                              | AA                | 1946452515               |
| SNP_P3_80451_48280053 | NC_021165.1    | Ca_kabuli_chr06 | 48280053                | AA                              | TT                | 1946452517               |
| SNP_P3_80453_48280117 | NC_021165.1    | Ca_kabuli_chr06 | 48280117                | CC                              | GG                | 1946452518               |
| SNP_P3_80454_48280165 | NC_021165.1    | Ca_kabuli_chr06 | 48280165                | TT                              | CC                | 1946452520               |
| SNP_P3_80455_48280182 | NC_021165.1    | Ca_kabuli_chr06 | 48280182                | CC                              | AA                | 1946452521               |
| SNP_P3_80457_48280249 | NC_021165.1    | Ca_kabuli_chr06 | 48280249                | CC                              | TT                | 1946452523               |
| SNP_P3_80459_48280329 | NC_021165.1    | Ca_kabuli_chr06 | 48280329                | GG                              | AA                | 1946452524               |
| SNP_P3_80460_48280362 | NC_021165.1    | Ca_kabuli_chr06 | 48280362                | GG                              | AA                | 1946452526               |
| SNP_P3_80461_48280368 | NC_021165.1    | Ca_kabuli_chr06 | 48280368                | TT                              | CC                | 1946452527               |
| SNP_P3_80462_48280373 | NC_021165.1    | Ca_kabuli_chr06 | 48280373                | AA                              | CC                | 1946452528               |
| SNP_P3_80463_48280417 | NC_021165.1    | Ca_kabuli_chr06 | 48280417                | AA                              | GG                | 1946452530               |
| SNP_P3_80464_48280424 | NC_021165.1    | Ca_kabuli_chr06 | 48280424                | GG                              | AA                | 1946452532               |
| SNP_P3_80465_48280445 | NC_021165.1    | Ca_kabuli_chr06 | 48280445                | AA                              | GG                | 1946452533               |
| SNP_P3_80466_48280500 | NC_021165.1    | Ca_kabuli_chr06 | 48280500                | GG                              | AA                | 1946452535               |
| SNP_P3_80468_48280595 | NC_021165.1    | Ca_kabuli_chr06 | 48280595                | AA                              | GG                | 1946452536               |
| SNP_P3_80469_48280597 | NC_021165.1    | Ca_kabuli_chr06 | 48280597                | AA                              | CC                | 1946452538               |
| SNP_P3_80470_48280612 | NC_021165.1    | Ca_kabuli_chr06 | 48280612                | AA                              | GG                | 1946452539               |
| SNP_P3_80471_48280622 | NC_021165.1    | Ca_kabuli_chr06 | 48280622                | AA                              | GG                | 1946452541               |
| SNP_P3_80472_48280713 | NC_021165.1    | Ca_kabuli_chr06 | 48280713                | AA                              | TT                | 1946452542               |
| SNP_P3_80473_48280762 | NC_021165.1    | Ca_kabuli_chr06 | 48280762                | AA                              | TT                | 1946452544               |
| SNP_P3_80475_48280837 | NC_021165.1    | Ca_kabuli_chr06 | 48280837                | AA                              | CC                | 1946452545               |
| SNP_P3_80476_48281097 | NC_021165.1    | Ca_kabuli_chr06 | 48281097                | AA                              | GG                | 1946452547               |
| SNP_P3_80477_48281161 | NC_021165.1    | Ca_kabuli_chr06 | 48281161                | CC                              | TT                | 1946452548               |
| SNP_P3_80478_48281321 | NC_021165.1    | Ca_kabuli_chr06 | 48281321                | GG                              | AA                | 1946452549               |
| SNP_P3_80479_48281357 | NC_021165.1    | Ca_kabuli_chr06 | 48281357                | TT                              | CC                | 1946452551               |
| SNP_P3_80480_48281360 | NC_021165.1    | Ca_kabuli_chr06 | 48281360                | TT                              | AA                | 1946452552               |
| SNP_P3_80481_48281410 | NC_021165.1    | Ca_kabuli_chr06 | 48281410                | CC                              | AA                | 1946452554               |
| SNP_P3_80482_48281445 | NC_021165.1    | Ca_kabuli_chr06 | 48281445                | TT                              | GG                | 1946452555               |
| SNP_P3_80483_48281508 | NC_021165.1    | Ca_kabuli_chr06 | 48281508                | AA                              | GG                | 1946452557               |
| SNP_P3_80485_48281665 | NC_021165.1    | Ca_kabuli_chr06 | 48281665                | GG                              | CC                | 1946452559               |
| SNP_P3_80486_48281668 | NC_021165.1    | Ca_kabuli_chr06 | 48281668                | CC                              | AA                | 1946452560               |
| SNP_P3_80487_48281688 | NC_021165.1    | Ca_kabuli_chr06 | 48281688                | TT                              | CC                | 1946452562               |
| SNP_P3_80488_48281804 | NC_021165.1    | Ca_kabuli_chr06 | 48281804                | AA                              | GG                | 1946452563               |
| SNP_P3_80489_48281822 | NC_021165.1    | Ca_kabuli_chr06 | 48281822                | TT                              | CC                | 1946452564               |
| SNP_P3_80490_48281893 | NC_021165.1    | Ca_kabuli_chr06 | 48281893                | GG                              | AA                | 1946452566               |
| SNP_P3_80491_48281894 | NC_021165.1    | Ca_kabuli_chr06 | 48281894                | AA                              | GG                | 1946452567               |
| SNP_P3_80492_48281911 | NC_021165.1    | Ca_kabuli_chr06 | 48281911                | GG                              | CC                | 1946452569               |
| SNP_P3_80493_48281932 | NC_021165.1    | Ca_kabuli_chr06 | 48281932                | TT                              | GG                | 1946452570               |
| SNP_P3_80494_48281951 | NC_021165.1    | Ca_kabuli_chr06 | 48281951                | AA                              | GG                | 1946452572               |
| SNP_P3_80495_48281960 | NC_021165.1    | Ca_kabuli_chr06 | 48281960                | CC                              | TT                | 1946452573               |
| SNP_P3_80496_48281964 | NC_021165.1    | Ca_kabuli_chr06 | 48281964                | GG                              | AA                | 1946452575               |

| SNPs IDs              | Chromosome IDs | Chromosomes     | Physical positions (bp) | CDC Frontier (Reference genome) | (Pusa 256 & HPNB) | NCBI SNPdb Accession IDs |
|-----------------------|----------------|-----------------|-------------------------|---------------------------------|-------------------|--------------------------|
| SNP_P3_80497_48282068 | NC_021165.1    | Ca_kabuli_chr06 | 48282068                | TT                              | AA                | 1946452576               |
| SNP_P3_80498_48297549 | NC_021165.1    | Ca_kabuli_chr06 | 48297549                | AA                              | TT                | 1946452578               |
| SNP_P3_80499_48303251 | NC_021165.1    | Ca_kabuli_chr06 | 48303251                | AA                              | CC                | 1946452579               |
| SNP_P3_80500_48311730 | NC_021165.1    | Ca_kabuli_chr06 | 48311730                | CC                              | TT                | 1946452580               |
| SNP_P3_80501_48361917 | NC_021165.1    | Ca_kabuli_chr06 | 48361917                | AA                              | GG                | 1946452582               |
| SNP_P3_80503_48386281 | NC_021165.1    | Ca_kabuli_chr06 | 48386281                | TT                              | AA                | 1946452583               |
| SNP_P3_80504_48710281 | NC_021165.1    | Ca_kabuli_chr06 | 48710281                | TT                              | CC                | 1946452585               |
| SNP_P3_80505_48710296 | NC_021165.1    | Ca_kabuli_chr06 | 48710296                | TT                              | CC                | 1946452587               |
| SNP_P3_80506_48710318 | NC_021165.1    | Ca_kabuli_chr06 | 48710318                | AA                              | GG                | 1946452588               |
| SNP_P3_80507_48710400 | NC_021165.1    | Ca_kabuli_chr06 | 48710400                | TT                              | CC                | 1946452590               |
| SNP_P3_80508_48710408 | NC_021165.1    | Ca_kabuli_chr06 | 48710408                | CC                              | TT                | 1946452591               |
| SNP_P3_80510_48710846 | NC_021165.1    | Ca_kabuli_chr06 | 48710846                | AA                              | GG                | 1946452593               |
| SNP_P3_80511_48710854 | NC_021165.1    | Ca_kabuli_chr06 | 48710854                | AA                              | GG                | 1946452594               |
| SNP_P3_80512_48710872 | NC_021165.1    | Ca_kabuli_chr06 | 48710872                | TT                              | AA                | 1946452596               |
| SNP_P3_80513_48710886 | NC_021165.1    | Ca_kabuli_chr06 | 48710886                | AA                              | GG                | 1946452597               |
| SNP_P3_80514_48710887 | NC_021165.1    | Ca_kabuli_chr06 | 48710887                | GG                              | AA                | 1946452599               |
| SNP_P3_80515_48710903 | NC_021165.1    | Ca_kabuli_chr06 | 48710903                | AA                              | GG                | 1946452600               |
| SNP_P3_80516_48710932 | NC_021165.1    | Ca_kabuli_chr06 | 48710932                | CC                              | TT                | 1946452602               |
| SNP_P3_80517_48710935 | NC_021165.1    | Ca_kabuli_chr06 | 48710935                | CC                              | TT                | 1946452603               |
| SNP_P3_80518_48725179 | NC_021165.1    | Ca_kabuli_chr06 | 48725179                | CC                              | TT                | 1946452604               |
| SNP_P3_80519_48775727 | NC_021165.1    | Ca_kabuli_chr06 | 48775727                | CC                              | TT                | 1946452606               |
| SNP_P3_80520_48788468 | NC_021165.1    | Ca_kabuli_chr06 | 48788468                | TT                              | CC                | 1946452607               |
| SNP_P3_80521_48788552 | NC_021165.1    | Ca_kabuli_chr06 | 48788552                | GG                              | AA                | 1946452609               |
| SNP_P3_80523_48788638 | NC_021165.1    | Ca_kabuli_chr06 | 48788638                | AA                              | GG                | 1946452610               |
| SNP_P3_80524_48788645 | NC_021165.1    | Ca_kabuli_chr06 | 48788645                | GG                              | AA                | 1946452612               |
| SNP_P3_80527_48792112 | NC_021165.1    | Ca_kabuli_chr06 | 48792112                | CC                              | TT                | 1946452614               |
| SNP_P3_80528_48792402 | NC_021165.1    | Ca_kabuli_chr06 | 48792402                | TT                              | CC                | 1946452615               |
| SNP_P3_80529_48792525 | NC_021165.1    | Ca_kabuli_chr06 | 48792525                | AA                              | GG                | 1946452617               |
| SNP_P3_80530_48793058 | NC_021165.1    | Ca_kabuli_chr06 | 48793058                | AA                              | TT                | 1946452618               |
| SNP_P3_80531_48793584 | NC_021165.1    | Ca_kabuli_chr06 | 48793584                | GG                              | TT                | 1946452620               |
| SNP_P3_80532_48793692 | NC_021165.1    | Ca_kabuli_chr06 | 48793692                | AA                              | CC                | 1946452621               |
| SNP_P3_80533_48846466 | NC_021165.1    | Ca_kabuli_chr06 | 48846466                | GG                              | AA                | 1946452622               |
| SNP_P3_80534_48854719 | NC_021165.1    | Ca_kabuli_chr06 | 48854719                | GG                              | AA                | 1946452624               |
| SNP_P3_80535_48878145 | NC_021165.1    | Ca_kabuli_chr06 | 48878145                | GG                              | AA                | 1946452625               |
| SNP_P3_80536_48897999 | NC_021165.1    | Ca_kabuli_chr06 | 48897999                | AA                              | CC                | 1946452627               |
| SNP_P3_80537_48898115 | NC_021165.1    | Ca_kabuli_chr06 | 48898115                | GG                              | AA                | 1946452628               |
| SNP_P3_80538_48898129 | NC_021165.1    | Ca_kabuli_chr06 | 48898129                | CC                              | AA                | 1946452630               |
| SNP_P3_80542_48906480 | NC_021165.1    | Ca_kabuli_chr06 | 48906480                | AA                              | CC                | 1946452631               |
| SNP_P3_80543_48906493 | NC_021165.1    | Ca_kabuli_chr06 | 48906493                | GG                              | CC                | 1946452633               |
| SNP_P3_80544_48912256 | NC_021165.1    | Ca_kabuli_chr06 | 48912256                | AA                              | GG                | 1946452634               |
| SNP_P3_80545_48920590 | NC_021165.1    | Ca_kabuli_chr06 | 48920590                | CC                              | TT                | 1946452636               |
| SNP_P3_80546_48923552 | NC_021165.1    | Ca_kabuli_chr06 | 48923552                | TT                              | CC                | 1946452637               |

| SNPs IDs              | Chromosome IDs | Chromosomes     | Physical positions (bp) | CDC Frontier (Reference genome) | (Pusa 256 & HPNB) | NCBI SNPdb Accession IDs |
|-----------------------|----------------|-----------------|-------------------------|---------------------------------|-------------------|--------------------------|
| SNP_P3_80547_48975117 | NC_021165.1    | Ca_kabuli_chr06 | 48975117                | CC                              | AA                | 1946452639               |
| SNP_P3_80549_49010747 | NC_021165.1    | Ca_kabuli_chr06 | 49010747                | AA                              | TT                | 1946452640               |
| SNP_P3_80550_49016472 | NC_021165.1    | Ca_kabuli_chr06 | 49016472                | TT                              | GG                | 1946452642               |
| SNP_P3_80551_49016492 | NC_021165.1    | Ca_kabuli_chr06 | 49016492                | CC                              | TT                | 1946452644               |
| SNP_P3_80552_49016495 | NC_021165.1    | Ca_kabuli_chr06 | 49016495                | CC                              | TT                | 1946452645               |
| SNP_P3_80553_49016838 | NC_021165.1    | Ca_kabuli_chr06 | 49016838                | AA                              | GG                | 1946452647               |
| SNP_P3_80554_49018419 | NC_021165.1    | Ca_kabuli_chr06 | 49018419                | CC                              | TT                | 1946452648               |
| SNP_P3_80555_49018444 | NC_021165.1    | Ca_kabuli_chr06 | 49018444                | AA                              | GG                | 1946452650               |
| SNP_P3_80556_49018454 | NC_021165.1    | Ca_kabuli_chr06 | 49018454                | GG                              | AA                | 1946452651               |
| SNP_P3_80557_49018457 | NC_021165.1    | Ca_kabuli_chr06 | 49018457                | AA                              | CC                | 1946452653               |
| SNP_P3_80558_49018894 | NC_021165.1    | Ca_kabuli_chr06 | 49018894                | CC                              | TT                | 1946452654               |
| SNP_P3_80559_49022777 | NC_021165.1    | Ca_kabuli_chr06 | 49022777                | AA                              | TT                | 1946452655               |
| SNP_P3_80560_49026331 | NC_021165.1    | Ca_kabuli_chr06 | 49026331                | AA                              | CC                | 1946452657               |
| SNP_P3_80561_49058390 | NC_021165.1    | Ca_kabuli_chr06 | 49058390                | AA                              | CC                | 1946452658               |
| SNP_P3_80562_49058653 | NC_021165.1    | Ca_kabuli_chr06 | 49058653                | AA                              | GG                | 1946452660               |
| SNP_P3_80563_49058655 | NC_021165.1    | Ca_kabuli_chr06 | 49058655                | TT                              | CC                | 1946452661               |
| SNP_P3_80564_49091425 | NC_021165.1    | Ca_kabuli_chr06 | 49091425                | TT                              | CC                | 1946452663               |
| SNP_P3_80565_49092596 | NC_021165.1    | Ca_kabuli_chr06 | 49092596                | TT                              | CC                | 1946452664               |
| SNP_P3_80566_49093645 | NC_021165.1    | Ca_kabuli_chr06 | 49093645                | AA                              | TT                | 1946452666               |
| SNP_P3_80567_49109327 | NC_021165.1    | Ca_kabuli_chr06 | 49109327                | AA                              | GG                | 1946452667               |
| SNP_P3_80568_49112187 | NC_021165.1    | Ca_kabuli_chr06 | 49112187                | TT                              | CC                | 1946452669               |
| SNP_P3_80569_49116363 | NC_021165.1    | Ca_kabuli_chr06 | 49116363                | TT                              | CC                | 1946452671               |
| SNP_P3_80570_49116417 | NC_021165.1    | Ca_kabuli_chr06 | 49116417                | CC                              | GG                | 1946452672               |
| SNP_P3_80571_49116470 | NC_021165.1    | Ca_kabuli_chr06 | 49116470                | GG                              | TT                | 1946452673               |
| SNP_P3_80573_49149851 | NC_021165.1    | Ca_kabuli_chr06 | 49149851                | CC                              | TT                | 1946452675               |
| SNP_P3_80574_49149854 | NC_021165.1    | Ca_kabuli_chr06 | 49149854                | CC                              | TT                | 1946452676               |
| SNP_P3_80575_49149877 | NC_021165.1    | Ca_kabuli_chr06 | 49149877                | TT                              | GG                | 1946452678               |
| SNP_P3_80576_49149885 | NC_021165.1    | Ca_kabuli_chr06 | 49149885                | CC                              | TT                | 1946452679               |
| SNP_P3_80577_49150189 | NC_021165.1    | Ca_kabuli_chr06 | 49150189                | TT                              | AA                | 1946452681               |
| SNP_P3_80578_49155002 | NC_021165.1    | Ca_kabuli_chr06 | 49155002                | AA                              | CC                | 1946452682               |
| SNP_P3_80580_49192632 | NC_021165.1    | Ca_kabuli_chr06 | 49192632                | GG                              | AA                | 1946452684               |
| SNP_P3_80581_49218851 | NC_021165.1    | Ca_kabuli_chr06 | 49218851                | CC                              | TT                | 1946452685               |
| SNP_P3_80582_49218869 | NC_021165.1    | Ca_kabuli_chr06 | 49218869                | GG                              | AA                | 1946452687               |
| SNP_P3_80583_49218873 | NC_021165.1    | Ca_kabuli_chr06 | 49218873                | CC                              | GG                | 1946452688               |
| SNP_P3_80584_49218874 | NC_021165.1    | Ca_kabuli_chr06 | 49218874                | AA                              | TT                | 1946452690               |
| SNP_P3_80586_49218951 | NC_021165.1    | Ca_kabuli_chr06 | 49218951                | TT                              | AA                | 1946452691               |
| SNP_P3_80587_49219126 | NC_021165.1    | Ca_kabuli_chr06 | 49219126                | GG                              | AA                | 1946452693               |
| SNP_P3_80588_49219163 | NC_021165.1    | Ca_kabuli_chr06 | 49219163                | GG                              | AA                | 1946452694               |
| SNP_P3_80589_49219299 | NC_021165.1    | Ca_kabuli_chr06 | 49219299                | AA                              | TT                | 1946452695               |
| SNP_P3_80590_49219300 | NC_021165.1    | Ca_kabuli_chr06 | 49219300                | CC                              | AA                | 1946452697               |
| SNP_P3_80591_49219423 | NC_021165.1    | Ca_kabuli_chr06 | 49219423                | AA                              | CC                | 1946452699               |
| SNP_P3_80592_49219430 | NC_021165.1    | Ca_kabuli_chr06 | 49219430                | AA                              | CC                | 1946452700               |

| SNPs IDs              | Chromosome IDs | Chromosomes     | Physical positions (bp) | CDC Frontier (Reference genome) | (Pusa 256 & HPNB) | NCBI SNPdb Accession IDs |
|-----------------------|----------------|-----------------|-------------------------|---------------------------------|-------------------|--------------------------|
| SNP_P3_80593_49219557 | NC_021165.1    | Ca_kabuli_chr06 | 49219557                | GG                              | AA                | 1946452702               |
| SNP_P3_80594_49221067 | NC_021165.1    | Ca_kabuli_chr06 | 49221067                | AA                              | GG                | 1946452703               |
| SNP_P3_80595_49221075 | NC_021165.1    | Ca_kabuli_chr06 | 49221075                | CC                              | TT                | 1946452704               |
| SNP_P3_80596_49221673 | NC_021165.1    | Ca_kabuli_chr06 | 49221673                | CC                              | TT                | 1946452706               |
| SNP_P3_80597_49221814 | NC_021165.1    | Ca_kabuli_chr06 | 49221814                | TT                              | CC                | 1946452707               |
| SNP_P3_80598_49222089 | NC_021165.1    | Ca_kabuli_chr06 | 49222089                | AA                              | TT                | 1946452709               |
| SNP_P3_80599_49222153 | NC_021165.1    | Ca_kabuli_chr06 | 49222153                | CC                              | TT                | 1946452710               |
| SNP_P3_80602_49256844 | NC_021165.1    | Ca_kabuli_chr06 | 49256844                | GG                              | CC                | 1946452712               |
| SNP_P3_80603_49256880 | NC_021165.1    | Ca_kabuli_chr06 | 49256880                | CC                              | AA                | 1946452713               |
| SNP_P3_80604_49259076 | NC_021165.1    | Ca_kabuli_chr06 | 49259076                | AA                              | GG                | 1946452715               |
| SNP_P3_80605_49259156 | NC_021165.1    | Ca_kabuli_chr06 | 49259156                | TT                              | GG                | 1946452716               |
| SNP_P3_80606_49261949 | NC_021165.1    | Ca_kabuli_chr06 | 49261949                | AA                              | GG                | 1946452717               |
| SNP_P3_80607_49262223 | NC_021165.1    | Ca_kabuli_chr06 | 49262223                | TT                              | CC                | 1946452719               |
| SNP_P3_80608_49262267 | NC_021165.1    | Ca_kabuli_chr06 | 49262267                | TT                              | CC                | 1946452720               |
| SNP_P3_80609_49263267 | NC_021165.1    | Ca_kabuli_chr06 | 49263267                | GG                              | AA                | 1946452722               |
| SNP_P3_80610_49263344 | NC_021165.1    | Ca_kabuli_chr06 | 49263344                | CC                              | AA                | 1946452723               |
| SNP_P3_80611_49264272 | NC_021165.1    | Ca_kabuli_chr06 | 49264272                | AA                              | CC                | 1946452725               |
| SNP_P3_80612_49264296 | NC_021165.1    | Ca_kabuli_chr06 | 49264296                | TT                              | GG                | 1946452726               |
| SNP_P3_80613_49264300 | NC_021165.1    | Ca_kabuli_chr06 | 49264300                | TT                              | AA                | 1946452727               |
| SNP_P3_80614_49265248 | NC_021165.1    | Ca_kabuli_chr06 | 49265248                | GG                              | AA                | 1946452729               |
| SNP_P3_80615_49267019 | NC_021165.1    | Ca_kabuli_chr06 | 49267019                | AA                              | GG                | 1946452731               |
| SNP_P3_80616_49267051 | NC_021165.1    | Ca_kabuli_chr06 | 49267051                | CC                              | TT                | 1946452732               |
| SNP_P3_80617_49267123 | NC_021165.1    | Ca_kabuli_chr06 | 49267123                | TT                              | GG                | 1946452734               |
| SNP_P3_80618_49296066 | NC_021165.1    | Ca_kabuli_chr06 | 49296066                | TT                              | CC                | 1946452735               |
| SNP_P3_80619_49318652 | NC_021165.1    | Ca_kabuli_chr06 | 49318652                | GG                              | AA                | 1946452737               |
| SNP_P3_80620_49318660 | NC_021165.1    | Ca_kabuli_chr06 | 49318660                | GG                              | AA                | 1946452738               |
| SNP_P3_80621_49318702 | NC_021165.1    | Ca_kabuli_chr06 | 49318702                | GG                              | AA                | 1946452740               |
| SNP_P3_80622_49318709 | NC_021165.1    | Ca_kabuli_chr06 | 49318709                | GG                              | AA                | 1946452741               |
| SNP_P3_80623_49319204 | NC_021165.1    | Ca_kabuli_chr06 | 49319204                | CC                              | TT                | 1946452743               |
| SNP_P3_80624_49319205 | NC_021165.1    | Ca_kabuli_chr06 | 49319205                | CC                              | TT                | 1946452744               |
| SNP_P3_80625_49324511 | NC_021165.1    | Ca_kabuli_chr06 | 49324511                | GG                              | AA                | 1946452746               |
| SNP_P3_80626_49347654 | NC_021165.1    | Ca_kabuli_chr06 | 49347654                | AA                              | GG                | 1946452747               |
| SNP_P3_80628_49377275 | NC_021165.1    | Ca_kabuli_chr06 | 49377275                | GG                              | AA                | 1946452748               |
| SNP_P3_80629_49393709 | NC_021165.1    | Ca_kabuli_chr06 | 49393709                | TT                              | CC                | 1946452750               |
| SNP_P3_80630_49436999 | NC_021165.1    | Ca_kabuli_chr06 | 49436999                | CC                              | TT                | 1946452752               |
| SNP_P3_80631_49438326 | NC_021165.1    | Ca_kabuli_chr06 | 49438326                | AA                              | GG                | 1946452753               |
| SNP_P3_80632_49438381 | NC_021165.1    | Ca_kabuli_chr06 | 49438381                | AA                              | GG                | 1946452755               |
| SNP_P3_80633_49438565 | NC_021165.1    | Ca_kabuli_chr06 | 49438565                | AA                              | GG                | 1946452756               |
| SNP_P3_80634_49441787 | NC_021165.1    | Ca_kabuli_chr06 | 49441787                | TT                              | CC                | 1946452757               |
| SNP_P3_80636_49541126 | NC_021165.1    | Ca_kabuli_chr06 | 49541126                | GG                              | AA                | 1946452759               |
| SNP_P3_80637_49567833 | NC_021165.1    | Ca_kabuli_chr06 | 49567833                | AA                              | GG                | 1946452760               |
| SNP_P3_80638_49585605 | NC_021165.1    | Ca_kabuli_chr06 | 49585605                | GG                              | AA                | 1946452762               |

| SNPs IDs              | Chromosome IDs | Chromosomes     | Physical positions (bp) | CDC Frontier (Reference genome) | (Pusa 256 & HPNB) | NCBI SNPdb Accession IDs |
|-----------------------|----------------|-----------------|-------------------------|---------------------------------|-------------------|--------------------------|
| SNP_P3_80640_49617460 | NC_021165.1    | Ca_kabuli_chr06 | 49617460                | TT                              | CC                | 1946452763               |
| SNP_P3_80641_49624100 | NC_021165.1    | Ca_kabuli_chr06 | 49624100                | AA                              | GG                | 1946452765               |
| SNP_P3_80642_49628921 | NC_021165.1    | Ca_kabuli_chr06 | 49628921                | TT                              | CC                | 1946452766               |
| SNP_P3_80643_49629118 | NC_021165.1    | Ca_kabuli_chr06 | 49629118                | AA                              | CC                | 1946452768               |
| SNP_P3_80644_49629674 | NC_021165.1    | Ca_kabuli_chr06 | 49629674                | AA                              | GG                | 1946452769               |
| SNP_P3_80645_49629991 | NC_021165.1    | Ca_kabuli_chr06 | 49629991                | AA                              | GG                | 1946452771               |
| SNP_P3_80646_49666727 | NC_021165.1    | Ca_kabuli_chr06 | 49666727                | AA                              | CC                | 1946452772               |
| SNP_P3_80647_49707175 | NC_021165.1    | Ca_kabuli_chr06 | 49707175                | GG                              | AA                | 1946452774               |
| SNP_P3_80649_49727380 | NC_021165.1    | Ca_kabuli_chr06 | 49727380                | TT                              | GG                | 1946452776               |
| SNP_P3_80650_49727392 | NC_021165.1    | Ca_kabuli_chr06 | 49727392                | TT                              | AA                | 1946452777               |
| SNP_P3_80651_49727397 | NC_021165.1    | Ca_kabuli_chr06 | 49727397                | GG                              | AA                | 1946452779               |
| SNP_P3_80652_49727412 | NC_021165.1    | Ca_kabuli_chr06 | 49727412                | GG                              | AA                | 1946452780               |
| SNP_P3_80653_49727427 | NC_021165.1    | Ca_kabuli_chr06 | 49727427                | AA                              | GG                | 1946452782               |
| SNP_P3_80654_49727442 | NC_021165.1    | Ca_kabuli_chr06 | 49727442                | TT                              | CC                | 1946452783               |
| SNP_P3_80655_49727444 | NC_021165.1    | Ca_kabuli_chr06 | 49727444                | TT                              | AA                | 1946452784               |
| SNP_P3_80656_49727445 | NC_021165.1    | Ca_kabuli_chr06 | 49727445                | AA                              | TT                | 1946452786               |
| SNP_P3_80657_49727448 | NC_021165.1    | Ca_kabuli_chr06 | 49727448                | AA                              | GG                | 1946452787               |
| SNP_P3_80658_49727452 | NC_021165.1    | Ca_kabuli_chr06 | 49727452                | TT                              | CC                | 1946452789               |
| SNP_P3_80659_49727460 | NC_021165.1    | Ca_kabuli_chr06 | 49727460                | AA                              | CC                | 1946452790               |
| SNP_P3_80660_49727541 | NC_021165.1    | Ca_kabuli_chr06 | 49727541                | TT                              | CC                | 1946452792               |
| SNP_P3_80661_49727806 | NC_021165.1    | Ca_kabuli_chr06 | 49727806                | TT                              | GG                | 1946452793               |
| SNP_P3_80662_49727809 | NC_021165.1    | Ca_kabuli_chr06 | 49727809                | TT                              | GG                | 1946452795               |
| SNP_P3_80663_49727821 | NC_021165.1    | Ca_kabuli_chr06 | 49727821                | AA                              | GG                | 1946452796               |
| SNP_P3_80664_49727857 | NC_021165.1    | Ca_kabuli_chr06 | 49727857                | CC                              | AA                | 1946452799               |
| SNP_P3_80665_49727913 | NC_021165.1    | Ca_kabuli_chr06 | 49727913                | GG                              | TT                | 1946452800               |
| SNP_P3_80666_49727920 | NC_021165.1    | Ca_kabuli_chr06 | 49727920                | AA                              | TT                | 1946452802               |
| SNP_P3_80667_49727922 | NC_021165.1    | Ca_kabuli_chr06 | 49727922                | GG                              | CC                | 1946452803               |
| SNP_P3_80668_49727928 | NC_021165.1    | Ca_kabuli_chr06 | 49727928                | AA                              | GG                | 1946452805               |
| SNP_P3_80669_49727950 | NC_021165.1    | Ca_kabuli_chr06 | 49727950                | TT                              | CC                | 1946452806               |
| SNP_P3_80670_49727962 | NC_021165.1    | Ca_kabuli_chr06 | 49727962                | GG                              | TT                | 1946452808               |
| SNP_P3_80671_49727963 | NC_021165.1    | Ca_kabuli_chr06 | 49727963                | GG                              | TT                | 1946452809               |
| SNP_P3_80672_49727968 | NC_021165.1    | Ca_kabuli_chr06 | 49727968                | AA                              | GG                | 1946452811               |
| SNP_P3_80673_49727979 | NC_021165.1    | Ca_kabuli_chr06 | 49727979                | TT                              | GG                | 1946452812               |
| SNP_P3_80674_49727993 | NC_021165.1    | Ca_kabuli_chr06 | 49727993                | TT                              | GG                | 1946452814               |
| SNP_P3_80675_49728070 | NC_021165.1    | Ca_kabuli_chr06 | 49728070                | TT                              | GG                | 1946452815               |
| SNP_P3_80676_49728150 | NC_021165.1    | Ca_kabuli_chr06 | 49728150                | AA                              | GG                | 1946452816               |
| SNP_P3_80677_49728480 | NC_021165.1    | Ca_kabuli_chr06 | 49728480                | CC                              | TT                | 1946452818               |
| SNP_P3_80678_49728496 | NC_021165.1    | Ca_kabuli_chr06 | 49728496                | GG                              | AA                | 1946452819               |
| SNP_P3_80679_49728764 | NC_021165.1    | Ca_kabuli_chr06 | 49728764                | TT                              | AA                | 1946452821               |
| SNP_P3_80680_49728765 | NC_021165.1    | Ca_kabuli_chr06 | 49728765                | TT                              | CC                | 1946452823               |
| SNP_P3_80681_49728777 | NC_021165.1    | Ca_kabuli_chr06 | 49728777                | GG                              | CC                | 1946452824               |
| SNP_P3_80683_49738033 | NC_021165.1    | Ca_kabuli_chr06 | 49738033                | TT                              | CC                | 1946452826               |



| SNPs IDs              | Chromosome IDs | Chromosomes     | Physical positions (bp) | CDC Frontier (Reference genome) | (Pusa 256 & HPNB) | NCBI SNPdb Accession IDs |
|-----------------------|----------------|-----------------|-------------------------|---------------------------------|-------------------|--------------------------|
| SNP_P3_80685_49739939 | NC_021165.1    | Ca_kabuli_chr06 | 49739939                | GG                              | AA                | 1946452827               |
| SNP_P3_80687_49766493 | NC_021165.1    | Ca_kabuli_chr06 | 49766493                | AA                              | GG                | 1946452829               |
| SNP_P3_80688_49782478 | NC_021165.1    | Ca_kabuli_chr06 | 49782478                | TT                              | AA                | 1946452830               |
| SNP_P3_80689_49790163 | NC_021165.1    | Ca_kabuli_chr06 | 49790163                | GG                              | AA                | 1946452832               |
| SNP_P3_80690_49805431 | NC_021165.1    | Ca_kabuli_chr06 | 49805431                | TT                              | AA                | 1946452833               |
| SNP_P3_80691_49805480 | NC_021165.1    | Ca_kabuli_chr06 | 49805480                | AA                              | GG                | 1946452835               |
| SNP_P3_80692_49806057 | NC_021165.1    | Ca_kabuli_chr06 | 49806057                | AA                              | GG                | 1946452836               |
| SNP_P3_80693_49806063 | NC_021165.1    | Ca_kabuli_chr06 | 49806063                | TT                              | CC                | 1946452838               |
| SNP_P3_80694_49806425 | NC_021165.1    | Ca_kabuli_chr06 | 49806425                | AA                              | GG                | 1946452839               |
| SNP_P3_80695_49807502 | NC_021165.1    | Ca_kabuli_chr06 | 49807502                | TT                              | CC                | 1946452840               |
| SNP_P3_80696_49819432 | NC_021165.1    | Ca_kabuli_chr06 | 49819432                | AA                              | GG                | 1946452842               |
| SNP_P3_80698_49862299 | NC_021165.1    | Ca_kabuli_chr06 | 49862299                | TT                              | AA                | 1946452844               |
| SNP_P3_80700_49891321 | NC_021165.1    | Ca_kabuli_chr06 | 49891321                | TT                              | CC                | 1946452845               |
| SNP_P3_80701_49897359 | NC_021165.1    | Ca_kabuli_chr06 | 49897359                | AA                              | GG                | 1946452847               |
| SNP_P3_80702_49897777 | NC_021165.1    | Ca_kabuli_chr06 | 49897777                | GG                              | AA                | 1946452848               |
| SNP_P3_80704_49934172 | NC_021165.1    | Ca_kabuli_chr06 | 49934172                | CC                              | GG                | 1946452850               |
| SNP_P3_80705_49954325 | NC_021165.1    | Ca_kabuli_chr06 | 49954325                | TT                              | CC                | 1946452851               |
| SNP_P3_80706_49988661 | NC_021165.1    | Ca_kabuli_chr06 | 49988661                | CC                              | TT                | 1946452853               |
| SNP_P3_80708_50034506 | NC_021165.1    | Ca_kabuli_chr06 | 50034506                | TT                              | CC                | 1946452854               |
| SNP_P3_80710_50051642 | NC_021165.1    | Ca_kabuli_chr06 | 50051642                | GG                              | TT                | 1946452856               |
| SNP_P3_80711_50090755 | NC_021165.1    | Ca_kabuli_chr06 | 50090755                | AA                              | TT                | 1946452857               |
| SNP_P3_80712_50135784 | NC_021165.1    | Ca_kabuli_chr06 | 50135784                | AA                              | GG                | 1946452859               |
| SNP_P3_80713_50135785 | NC_021165.1    | Ca_kabuli_chr06 | 50135785                | AA                              | CC                | 1946452860               |
| SNP_P3_80714_50153304 | NC_021165.1    | Ca_kabuli_chr06 | 50153304                | CC                              | TT                | 1946452861               |
| SNP_P3_80715_50153419 | NC_021165.1    | Ca_kabuli_chr06 | 50153419                | GG                              | AA                | 1946452863               |
| SNP_P3_80716_50155709 | NC_021165.1    | Ca_kabuli_chr06 | 50155709                | AA                              | GG                | 1946452865               |
| SNP_P3_80717_50157468 | NC_021165.1    | Ca_kabuli_chr06 | 50157468                | CC                              | TT                | 1946452867               |
| SNP_P3_80718_50162493 | NC_021165.1    | Ca_kabuli_chr06 | 50162493                | TT                              | AA                | 1946452868               |
| SNP_P3_80719_50162595 | NC_021165.1    | Ca_kabuli_chr06 | 50162595                | AA                              | GG                | 1946452870               |
| SNP_P3_80720_50162804 | NC_021165.1    | Ca_kabuli_chr06 | 50162804                | AA                              | TT                | 1946452871               |
| SNP_P3_80721_50162863 | NC_021165.1    | Ca_kabuli_chr06 | 50162863                | GG                              | AA                | 1946452872               |
| SNP_P3_80722_50162878 | NC_021165.1    | Ca_kabuli_chr06 | 50162878                | GG                              | AA                | 1946452874               |
| SNP_P3_80723_50162918 | NC_021165.1    | Ca_kabuli_chr06 | 50162918                | CC                              | TT                | 1946452875               |
| SNP_P3_80724_50162981 | NC_021165.1    | Ca_kabuli_chr06 | 50162981                | TT                              | CC                | 1946452877               |
| SNP_P3_80725_50163016 | NC_021165.1    | Ca_kabuli_chr06 | 50163016                | CC                              | TT                | 1946452878               |
| SNP_P3_80726_50163154 | NC_021165.1    | Ca_kabuli_chr06 | 50163154                | CC                              | TT                | 1946452880               |
| SNP_P3_80727_50163220 | NC_021165.1    | Ca_kabuli_chr06 | 50163220                | CC                              | TT                | 1946452881               |
| SNP_P3_80728_50163226 | NC_021165.1    | Ca_kabuli_chr06 | 50163226                | CC                              | TT                | 1946452883               |
| SNP_P3_80729_50163227 | NC_021165.1    | Ca_kabuli_chr06 | 50163227                | AA                              | GG                | 1946452885               |
| SNP_P3_80730_50163239 | NC_021165.1    | Ca_kabuli_chr06 | 50163239                | CC                              | TT                | 1946452886               |
| SNP_P3_80731_50183565 | NC_021165.1    | Ca_kabuli_chr06 | 50183565                | AA                              | GG                | 1946452888               |
| SNP_P3_80732_50185148 | NC_021165.1    | Ca_kabuli_chr06 | 50185148                | TT                              | GG                | 1946452889               |

| SNPs IDs              | Chromosome IDs | Chromosomes     | Physical positions (bp) | CDC Frontier (Reference genome) | (Pusa 256 & HPNB) | NCBI SNPdb Accession IDs |
|-----------------------|----------------|-----------------|-------------------------|---------------------------------|-------------------|--------------------------|
| SNP_P3_80733_50185195 | NC_021165.1    | Ca_kabuli_chr06 | 50185195                | AA                              | GG                | 1946452890               |
| SNP_P3_80734_50185198 | NC_021165.1    | Ca_kabuli_chr06 | 50185198                | TT                              | GG                | 1946452892               |
| SNP_P3_80735_50185229 | NC_021165.1    | Ca_kabuli_chr06 | 50185229                | AA                              | TT                | 1946452893               |
| SNP_P3_80736_50191919 | NC_021165.1    | Ca_kabuli_chr06 | 50191919                | TT                              | CC                | 1946452895               |
| SNP_P3_80737_50191926 | NC_021165.1    | Ca_kabuli_chr06 | 50191926                | CC                              | TT                | 1946452896               |
| SNP_P3_80738_50191990 | NC_021165.1    | Ca_kabuli_chr06 | 50191990                | TT                              | CC                | 1946452898               |
| SNP_P3_80739_50192261 | NC_021165.1    | Ca_kabuli_chr06 | 50192261                | TT                              | CC                | 1946452899               |
| SNP_P3_80740_50192279 | NC_021165.1    | Ca_kabuli_chr06 | 50192279                | GG                              | CC                | 1946452901               |
| SNP_P3_80741_50215307 | NC_021165.1    | Ca_kabuli_chr06 | 50215307                | TT                              | AA                | 1946452903               |
| SNP_P3_80742_50246102 | NC_021165.1    | Ca_kabuli_chr06 | 50246102                | AA                              | GG                | 1946452904               |
| SNP_P3_80744_50272749 | NC_021165.1    | Ca_kabuli_chr06 | 50272749                | TT                              | GG                | 1946452906               |
| SNP_P3_80745_50286479 | NC_021165.1    | Ca_kabuli_chr06 | 50286479                | TT                              | CC                | 1946452907               |
| SNP_P3_80746_50296327 | NC_021165.1    | Ca_kabuli_chr06 | 50296327                | TT                              | CC                | 1946452909               |
| SNP_P3_80747_50296342 | NC_021165.1    | Ca_kabuli_chr06 | 50296342                | AA                              | TT                | 1946452910               |
| SNP_P3_80748_50296357 | NC_021165.1    | Ca_kabuli_chr06 | 50296357                | AA                              | GG                | 1946452912               |
| SNP_P3_80749_50296363 | NC_021165.1    | Ca_kabuli_chr06 | 50296363                | CC                              | AA                | 1946452913               |
| SNP_P3_80750_50296387 | NC_021165.1    | Ca_kabuli_chr06 | 50296387                | GG                              | AA                | 1946452915               |
| SNP_P3_80751_50301286 | NC_021165.1    | Ca_kabuli_chr06 | 50301286                | AA                              | GG                | 1946452916               |
| SNP_P3_80752_50301302 | NC_021165.1    | Ca_kabuli_chr06 | 50301302                | TT                              | CC                | 1946452918               |
| SNP_P3_80753_50301303 | NC_021165.1    | Ca_kabuli_chr06 | 50301303                | TT                              | CC                | 1946452919               |
| SNP_P3_80754_50335786 | NC_021165.1    | Ca_kabuli_chr06 | 50335786                | GG                              | AA                | 1946452921               |
| SNP_P3_80755_50338562 | NC_021165.1    | Ca_kabuli_chr06 | 50338562                | TT                              | CC                | 1946452922               |
| SNP_P3_80756_50359713 | NC_021165.1    | Ca_kabuli_chr06 | 50359713                | GG                              | AA                | 1946452924               |
| SNP_P3_80757_50389775 | NC_021165.1    | Ca_kabuli_chr06 | 50389775                | AA                              | GG                | 1946452925               |
| SNP_P3_80758_50492809 | NC_021165.1    | Ca_kabuli_chr06 | 50492809                | CC                              | TT                | 1946452927               |
| SNP_P3_80759_50497457 | NC_021165.1    | Ca_kabuli_chr06 | 50497457                | TT                              | CC                | 1946452928               |
| SNP_P3_80760_50502832 | NC_021165.1    | Ca_kabuli_chr06 | 50502832                | TT                              | AA                | 1946452930               |
| SNP_P3_80761_50503943 | NC_021165.1    | Ca_kabuli_chr06 | 50503943                | AA                              | GG                | 1946452931               |
| SNP_P3_80762_50506580 | NC_021165.1    | Ca_kabuli_chr06 | 50506580                | TT                              | AA                | 1946452933               |
| SNP_P3_80763_50506582 | NC_021165.1    | Ca_kabuli_chr06 | 50506582                | TT                              | CC                | 1946452934               |
| SNP_P3_80766_50517122 | NC_021165.1    | Ca_kabuli_chr06 | 50517122                | AA                              | CC                | 1946452936               |
| SNP_P3_80767_50517124 | NC_021165.1    | Ca_kabuli_chr06 | 50517124                | AA                              | CC                | 1946452937               |
| SNP_P3_80768_50542686 | NC_021165.1    | Ca_kabuli_chr06 | 50542686                | TT                              | AA                | 1946452939               |
| SNP_P3_80769_50542687 | NC_021165.1    | Ca_kabuli_chr06 | 50542687                | AA                              | CC                | 1946452940               |
| SNP_P3_80770_50543160 | NC_021165.1    | Ca_kabuli_chr06 | 50543160                | AA                              | GG                | 1946452942               |
| SNP_P3_80771_50559057 | NC_021165.1    | Ca_kabuli_chr06 | 50559057                | CC                              | TT                | 1946452944               |
| SNP_P3_80772_50598401 | NC_021165.1    | Ca_kabuli_chr06 | 50598401                | AA                              | GG                | 1946452945               |
| SNP_P3_80773_50598411 | NC_021165.1    | Ca_kabuli_chr06 | 50598411                | GG                              | AA                | 1946452947               |
| SNP_P3_80774_50634071 | NC_021165.1    | Ca_kabuli_chr06 | 50634071                | GG                              | CC                | 1946452948               |
| SNP_P3_80775_50660081 | NC_021165.1    | Ca_kabuli_chr06 | 50660081                | GG                              | CC                | 1946452949               |
| SNP_P3_80777_50669459 | NC_021165.1    | Ca_kabuli_chr06 | 50669459                | AA                              | GG                | 1946452951               |
| SNP_P3_80778_50681175 | NC_021165.1    | Ca_kabuli_chr06 | 50681175                | AA                              | TT                | 1946452952               |

| SNPs IDs              | Chromosome IDs | Chromosomes     | Physical positions (bp) | CDC Frontier (Reference genome) | (Pusa 256 & HPNB) | NCBI SNPdb Accession IDs |
|-----------------------|----------------|-----------------|-------------------------|---------------------------------|-------------------|--------------------------|
| SNP_P3_80779_50681179 | NC_021165.1    | Ca_kabuli_chr06 | 50681179                | AA                              | TT                | 1946452954               |
| SNP_P3_80780_50735260 | NC_021165.1    | Ca_kabuli_chr06 | 50735260                | CC                              | GG                | 1946452955               |
| SNP_P3_80781_50794318 | NC_021165.1    | Ca_kabuli_chr06 | 50794318                | CC                              | AA                | 1946452957               |
| SNP_P3_80782_50796792 | NC_021165.1    | Ca_kabuli_chr06 | 50796792                | TT                              | CC                | 1946452958               |
| SNP_P3_80783_50796797 | NC_021165.1    | Ca_kabuli_chr06 | 50796797                | AA                              | GG                | 1946452960               |
| SNP_P3_80784_50796818 | NC_021165.1    | Ca_kabuli_chr06 | 50796818                | TT                              | CC                | 1946452961               |
| SNP_P3_80785_50796833 | NC_021165.1    | Ca_kabuli_chr06 | 50796833                | CC                              | TT                | 1946452963               |
| SNP_P3_80786_50796883 | NC_021165.1    | Ca_kabuli_chr06 | 50796883                | TT                              | CC                | 1946452964               |
| SNP_P3_80787_50797048 | NC_021165.1    | Ca_kabuli_chr06 | 50797048                | AA                              | GG                | 1946452966               |
| SNP_P3_80788_50797051 | NC_021165.1    | Ca_kabuli_chr06 | 50797051                | TT                              | GG                | 1946452967               |
| SNP_P3_80789_50797117 | NC_021165.1    | Ca_kabuli_chr06 | 50797117                | CC                              | TT                | 1946452969               |
| SNP_P3_80790_50797170 | NC_021165.1    | Ca_kabuli_chr06 | 50797170                | CC                              | TT                | 1946452970               |
| SNP_P3_80791_50797176 | NC_021165.1    | Ca_kabuli_chr06 | 50797176                | TT                              | CC                | 1946452972               |
| SNP_P3_80792_50797191 | NC_021165.1    | Ca_kabuli_chr06 | 50797191                | TT                              | GG                | 1946452973               |
| SNP_P3_80793_50797326 | NC_021165.1    | Ca_kabuli_chr06 | 50797326                | GG                              | AA                | 1946452974               |
| SNP_P3_80794_50797365 | NC_021165.1    | Ca_kabuli_chr06 | 50797365                | AA                              | GG                | 1946452976               |
| SNP_P3_80795_50797480 | NC_021165.1    | Ca_kabuli_chr06 | 50797480                | GG                              | AA                | 1946452977               |
| SNP_P3_80796_50797481 | NC_021165.1    | Ca_kabuli_chr06 | 50797481                | GG                              | AA                | 1946452979               |
| SNP_P3_80797_50797504 | NC_021165.1    | Ca_kabuli_chr06 | 50797504                | TT                              | AA                | 1946452980               |
| SNP_P3_80798_50797525 | NC_021165.1    | Ca_kabuli_chr06 | 50797525                | GG                              | AA                | 1946452982               |
| SNP_P3_80799_50797531 | NC_021165.1    | Ca_kabuli_chr06 | 50797531                | CC                              | GG                | 1946452983               |
| SNP_P3_80800_50797536 | NC_021165.1    | Ca_kabuli_chr06 | 50797536                | CC                              | AA                | 1946452985               |
| SNP_P3_80801_50797616 | NC_021165.1    | Ca_kabuli_chr06 | 50797616                | CC                              | AA                | 1946452986               |
| SNP_P3_80802_50797617 | NC_021165.1    | Ca_kabuli_chr06 | 50797617                | GG                              | TT                | 1946452988               |
| SNP_P3_80803_50797674 | NC_021165.1    | Ca_kabuli_chr06 | 50797674                | CC                              | AA                | 1946452989               |
| SNP_P3_80804_50797872 | NC_021165.1    | Ca_kabuli_chr06 | 50797872                | TT                              | CC                | 1946452991               |
| SNP_P3_80805_50797873 | NC_021165.1    | Ca_kabuli_chr06 | 50797873                | GG                              | TT                | 1946452992               |
| SNP_P3_80806_50797903 | NC_021165.1    | Ca_kabuli_chr06 | 50797903                | TT                              | AA                | 1946452994               |
| SNP_P3_80807_50798090 | NC_021165.1    | Ca_kabuli_chr06 | 50798090                | GG                              | CC                | 1946452995               |
| SNP_P3_80808_50798119 | NC_021165.1    | Ca_kabuli_chr06 | 50798119                | CC                              | TT                | 1946452997               |
| SNP_P3_80809_50798158 | NC_021165.1    | Ca_kabuli_chr06 | 50798158                | CC                              | AA                | 1946452998               |
| SNP_P3_80810_50798168 | NC_021165.1    | Ca_kabuli_chr06 | 50798168                | AA                              | GG                | 1946453000               |
| SNP_P3_80811_50798253 | NC_021165.1    | Ca_kabuli_chr06 | 50798253                | TT                              | CC                | 1946453001               |
| SNP_P3_80812_50798260 | NC_021165.1    | Ca_kabuli_chr06 | 50798260                | AA                              | GG                | 1946453003               |
| SNP_P3_80813_50798261 | NC_021165.1    | Ca_kabuli_chr06 | 50798261                | AA                              | GG                | 1946453004               |
| SNP_P3_80814_50798314 | NC_021165.1    | Ca_kabuli_chr06 | 50798314                | GG                              | CC                | 1946453006               |
| SNP_P3_80815_50798364 | NC_021165.1    | Ca_kabuli_chr06 | 50798364                | CC                              | TT                | 1946453007               |
| SNP_P3_80816_50798668 | NC_021165.1    | Ca_kabuli_chr06 | 50798668                | CC                              | GG                | 1946453009               |
| SNP_P3_80817_50798684 | NC_021165.1    | Ca_kabuli_chr06 | 50798684                | TT                              | CC                | 1946453010               |
| SNP_P3_80818_50798693 | NC_021165.1    | Ca_kabuli_chr06 | 50798693                | CC                              | AA                | 1946453012               |
| SNP_P3_80819_50799379 | NC_021165.1    | Ca_kabuli_chr06 | 50799379                | CC                              | GG                | 1946453014               |
| SNP_P3_80821_50799645 | NC_021165.1    | Ca_kabuli_chr06 | 50799645                | CC                              | AA                | 1946453015               |

| SNPs IDs              | Chromosome IDs | Chromosomes     | Physical positions (bp) | CDC Frontier (Reference genome) | (Pusa 256 & HPNB) | NCBI SNPdb Accession IDs |
|-----------------------|----------------|-----------------|-------------------------|---------------------------------|-------------------|--------------------------|
| SNP_P3_80822_50799822 | NC_021165.1    | Ca_kabuli_chr06 | 50799822                | GG                              | AA                | 1946453017               |
| SNP_P3_80823_50818104 | NC_021165.1    | Ca_kabuli_chr06 | 50818104                | AA                              | GG                | 1946453018               |
| SNP_P3_80825_50829342 | NC_021165.1    | Ca_kabuli_chr06 | 50829342                | AA                              | TT                | 1946453020               |
| SNP_P3_80826_50829351 | NC_021165.1    | Ca_kabuli_chr06 | 50829351                | TT                              | AA                | 1946453021               |
| SNP_P3_80827_50830073 | NC_021165.1    | Ca_kabuli_chr06 | 50830073                | AA                              | GG                | 1946453023               |
| SNP_P3_80828_50830444 | NC_021165.1    | Ca_kabuli_chr06 | 50830444                | TT                              | CC                | 1946453024               |
| SNP_P3_80829_50830456 | NC_021165.1    | Ca_kabuli_chr06 | 50830456                | GG                              | AA                | 1946453026               |
| SNP_P3_80830_50853682 | NC_021165.1    | Ca_kabuli_chr06 | 50853682                | TT                              | AA                | 1946453027               |
| SNP_P3_80831_50860917 | NC_021165.1    | Ca_kabuli_chr06 | 50860917                | AA                              | GG                | 1946453028               |
| SNP_P3_80832_50890379 | NC_021165.1    | Ca_kabuli_chr06 | 50890379                | TT                              | CC                | 1946453030               |
| SNP_P3_80833_50890430 | NC_021165.1    | Ca_kabuli_chr06 | 50890430                | TT                              | CC                | 1946453032               |
| SNP_P3_80835_50910783 | NC_021165.1    | Ca_kabuli_chr06 | 50910783                | AA                              | GG                | 1946453033               |
| SNP_P3_80836_50927829 | NC_021165.1    | Ca_kabuli_chr06 | 50927829                | CC                              | GG                | 1946453035               |
| SNP_P3_80837_50927839 | NC_021165.1    | Ca_kabuli_chr06 | 50927839                | AA                              | TT                | 1946453036               |
| SNP_P3_80838_50927856 | NC_021165.1    | Ca_kabuli_chr06 | 50927856                | CC                              | GG                | 1946453038               |
| SNP_P3_80839_50927884 | NC_021165.1    | Ca_kabuli_chr06 | 50927884                | CC                              | AA                | 1946453039               |
| SNP_P3_80840_50927892 | NC_021165.1    | Ca_kabuli_chr06 | 50927892                | GG                              | CC                | 1946453040               |
| SNP_P3_80841_50927893 | NC_021165.1    | Ca_kabuli_chr06 | 50927893                | GG                              | AA                | 1946453042               |
| SNP_P3_80842_50930714 | NC_021165.1    | Ca_kabuli_chr06 | 50930714                | GG                              | CC                | 1946453043               |
| SNP_P3_80843_50954419 | NC_021165.1    | Ca_kabuli_chr06 | 50954419                | AA                              | CC                | 1946453045               |
| SNP_P3_80844_50954754 | NC_021165.1    | Ca_kabuli_chr06 | 50954754                | TT                              | CC                | 1946453046               |
| SNP_P3_80845_50977086 | NC_021165.1    | Ca_kabuli_chr06 | 50977086                | CC                              | TT                | 1946453048               |
| SNP_P3_80846_50977168 | NC_021165.1    | Ca_kabuli_chr06 | 50977168                | TT                              | AA                | 1946453049               |
| SNP_P3_80847_50977263 | NC_021165.1    | Ca_kabuli_chr06 | 50977263                | AA                              | CC                | 1946453051               |
| SNP_P3_80848_50977269 | NC_021165.1    | Ca_kabuli_chr06 | 50977269                | TT                              | CC                | 1946453052               |
| SNP_P3_80849_50977340 | NC_021165.1    | Ca_kabuli_chr06 | 50977340                | CC                              | TT                | 1946453054               |
| SNP_P3_80850_50977467 | NC_021165.1    | Ca_kabuli_chr06 | 50977467                | AA                              | GG                | 1946453055               |
| SNP_P3_80851_50977528 | NC_021165.1    | Ca_kabuli_chr06 | 50977528                | AA                              | GG                | 1946453057               |
| SNP_P3_80852_50977565 | NC_021165.1    | Ca_kabuli_chr06 | 50977565                | AA                              | TT                | 1946453058               |
| SNP_P3_80853_50977566 | NC_021165.1    | Ca_kabuli_chr06 | 50977566                | AA                              | GG                | 1946453060               |
| SNP_P3_80854_50977580 | NC_021165.1    | Ca_kabuli_chr06 | 50977580                | GG                              | TT                | 1946453061               |
| SNP_P3_80855_51029972 | NC_021165.1    | Ca_kabuli_chr06 | 51029972                | TT                              | CC                | 1946453063               |
| SNP_P3_80856_51030863 | NC_021165.1    | Ca_kabuli_chr06 | 51030863                | CC                              | TT                | 1946453064               |
| SNP_P3_80857_51041992 | NC_021165.1    | Ca_kabuli_chr06 | 51041992                | CC                              | TT                | 1946453065               |
| SNP_P3_80858_51058629 | NC_021165.1    | Ca_kabuli_chr06 | 51058629                | TT                              | CC                | 1946453067               |
| SNP_P3_80859_51068284 | NC_021165.1    | Ca_kabuli_chr06 | 51068284                | TT                              | GG                | 1946453068               |
| SNP_P3_80860_51068297 | NC_021165.1    | Ca_kabuli_chr06 | 51068297                | TT                              | CC                | 1946453070               |
| SNP_P3_80861_51068299 | NC_021165.1    | Ca_kabuli_chr06 | 51068299                | CC                              | AA                | 1946453071               |
| SNP_P3_80862_51068592 | NC_021165.1    | Ca_kabuli_chr06 | 51068592                | TT                              | GG                | 1946453073               |
| SNP_P3_80863_51074777 | NC_021165.1    | Ca_kabuli_chr06 | 51074777                | CC                              | GG                | 1946453074               |
| SNP_P3_80864_51074784 | NC_021165.1    | Ca_kabuli_chr06 | 51074784                | TT                              | CC                | 1946453076               |
| SNP_P3_80865_51074803 | NC_021165.1    | Ca_kabuli_chr06 | 51074803                | GG                              | CC                | 1946453077               |

| SNPs IDs              | Chromosome IDs | Chromosomes     | Physical positions (bp) | CDC Frontier (Reference genome) | (Pusa 256 & HPNB) | NCBI SNPdb Accession IDs |
|-----------------------|----------------|-----------------|-------------------------|---------------------------------|-------------------|--------------------------|
| SNP_P3_80866_51074805 | NC_021165.1    | Ca_kabuli_chr06 | 51074805                | GG                              | TT                | 1946453079               |
| SNP_P3_80867_51080866 | NC_021165.1    | Ca_kabuli_chr06 | 51080866                | AA                              | GG                | 1946453080               |
| SNP_P3_80868_51081178 | NC_021165.1    | Ca_kabuli_chr06 | 51081178                | TT                              | GG                | 1946453082               |
| SNP_P3_80869_51081187 | NC_021165.1    | Ca_kabuli_chr06 | 51081187                | TT                              | CC                | 1946453083               |
| SNP_P3_80870_51081226 | NC_021165.1    | Ca_kabuli_chr06 | 51081226                | GG                              | AA                | 1946453085               |
| SNP_P3_80871_51081232 | NC_021165.1    | Ca_kabuli_chr06 | 51081232                | AA                              | TT                | 1946453086               |
| SNP_P3_80872_51081243 | NC_021165.1    | Ca_kabuli_chr06 | 51081243                | GG                              | AA                | 1946453088               |
| SNP_P3_80873_51082041 | NC_021165.1    | Ca_kabuli_chr06 | 51082041                | AA                              | CC                | 1946453089               |
| SNP_P3_80874_51082076 | NC_021165.1    | Ca_kabuli_chr06 | 51082076                | TT                              | GG                | 1946453091               |
| SNP_P3_80875_51088216 | NC_021165.1    | Ca_kabuli_chr06 | 51088216                | TT                              | CC                | 1946453092               |
| SNP_P3_80876_51088246 | NC_021165.1    | Ca_kabuli_chr06 | 51088246                | AA                              | GG                | 1946453094               |
| SNP_P3_80877_51088279 | NC_021165.1    | Ca_kabuli_chr06 | 51088279                | TT                              | CC                | 1946453095               |
| SNP_P3_80878_51088288 | NC_021165.1    | Ca_kabuli_chr06 | 51088288                | TT                              | GG                | 1946453097               |
| SNP_P3_80879_51088291 | NC_021165.1    | Ca_kabuli_chr06 | 51088291                | CC                              | TT                | 1946453098               |
| SNP_P3_80882_51174052 | NC_021165.1    | Ca_kabuli_chr06 | 51174052                | AA                              | GG                | 1946453100               |
| SNP_P3_80883_51174065 | NC_021165.1    | Ca_kabuli_chr06 | 51174065                | GG                              | AA                | 1946453102               |
| SNP_P3_80884_51174086 | NC_021165.1    | Ca_kabuli_chr06 | 51174086                | CC                              | TT                | 1946453103               |
| SNP_P3_80885_51175327 | NC_021165.1    | Ca_kabuli_chr06 | 51175327                | TT                              | CC                | 1946453104               |
| SNP_P3_80887_51185312 | NC_021165.1    | Ca_kabuli_chr06 | 51185312                | TT                              | CC                | 1946453105               |
| SNP_P3_80889_51205118 | NC_021165.1    | Ca_kabuli_chr06 | 51205118                | GG                              | TT                | 1946453106               |
| SNP_P3_80890_51214848 | NC_021165.1    | Ca_kabuli_chr06 | 51214848                | GG                              | AA                | 1946453107               |
| SNP_P3_80891_51219773 | NC_021165.1    | Ca_kabuli_chr06 | 51219773                | AA                              | TT                | 1946453108               |
| SNP_P3_80892_51219779 | NC_021165.1    | Ca_kabuli_chr06 | 51219779                | AA                              | GG                | 1946453109               |
| SNP_P3_80895_51220151 | NC_021165.1    | Ca_kabuli_chr06 | 51220151                | TT                              | GG                | 1946453110               |
| SNP_P3_80896_51220209 | NC_021165.1    | Ca_kabuli_chr06 | 51220209                | AA                              | GG                | 1946453112               |
| SNP_P3_80897_51220269 | NC_021165.1    | Ca_kabuli_chr06 | 51220269                | CC                              | TT                | 1946453113               |
| SNP_P3_80898_51220334 | NC_021165.1    | Ca_kabuli_chr06 | 51220334                | AA                              | GG                | 1946453115               |
| SNP_P3_80899_51224105 | NC_021165.1    | Ca_kabuli_chr06 | 51224105                | GG                              | AA                | 1946453116               |
| SNP_P3_80900_51229969 | NC_021165.1    | Ca_kabuli_chr06 | 51229969                | AA                              | GG                | 1946453118               |
| SNP_P3_80902_51291586 | NC_021165.1    | Ca_kabuli_chr06 | 51291586                | TT                              | AA                | 1946453119               |
| SNP_P3_80903_51291588 | NC_021165.1    | Ca_kabuli_chr06 | 51291588                | AA                              | TT                | 1946453121               |
| SNP_P3_80904_51291595 | NC_021165.1    | Ca_kabuli_chr06 | 51291595                | AA                              | TT                | 1946453122               |
| SNP_P3_80905_51291596 | NC_021165.1    | Ca_kabuli_chr06 | 51291596                | AA                              | TT                | 1946453124               |
| SNP_P3_80907_51321455 | NC_021165.1    | Ca_kabuli_chr06 | 51321455                | CC                              | TT                | 1946453125               |
| SNP_P3_80908_51324156 | NC_021165.1    | Ca_kabuli_chr06 | 51324156                | AA                              | CC                | 1946453127               |
| SNP_P3_80909_51360854 | NC_021165.1    | Ca_kabuli_chr06 | 51360854                | CC                              | TT                | 1946453128               |
| SNP_P3_80910_51394432 | NC_021165.1    | Ca_kabuli_chr06 | 51394432                | AA                              | CC                | 1946453130               |
| SNP_P3_80911_51397525 | NC_021165.1    | Ca_kabuli_chr06 | 51397525                | AA                              | GG                | 1946453131               |
| SNP_P3_80912_51397743 | NC_021165.1    | Ca_kabuli_chr06 | 51397743                | AA                              | CC                | 1946453133               |
| SNP_P3_80914_51435036 | NC_021165.1    | Ca_kabuli_chr06 | 51435036                | CC                              | AA                | 1946453134               |
| SNP_P3_80915_51444381 | NC_021165.1    | Ca_kabuli_chr06 | 51444381                | AA                              | GG                | 1946453136               |
| SNP_P3_80916_51444405 | NC_021165.1    | Ca_kabuli_chr06 | 51444405                | TT                              | AA                | 1946453137               |

| SNPs IDs              | Chromosome IDs | Chromosomes     | Physical positions (bp) | CDC Frontier (Reference genome) | (Pusa 256 & HPNB) | NCBI SNPdb Accession IDs |
|-----------------------|----------------|-----------------|-------------------------|---------------------------------|-------------------|--------------------------|
| SNP_P3_80917_51444434 | NC_021165.1    | Ca_kabuli_chr06 | 51444434                | AA                              | GG                | 1946453139               |
| SNP_P3_80918_51444437 | NC_021165.1    | Ca_kabuli_chr06 | 51444437                | CC                              | AA                | 1946453140               |
| SNP_P3_80919_51444474 | NC_021165.1    | Ca_kabuli_chr06 | 51444474                | TT                              | AA                | 1946453142               |
| SNP_P3_80920_51444475 | NC_021165.1    | Ca_kabuli_chr06 | 51444475                | AA                              | CC                | 1946453143               |
| SNP_P3_80921_51444577 | NC_021165.1    | Ca_kabuli_chr06 | 51444577                | CC                              | GG                | 1946453145               |
| SNP_P3_80922_51444608 | NC_021165.1    | Ca_kabuli_chr06 | 51444608                | AA                              | CC                | 1946453146               |
| SNP_P3_80923_51460944 | NC_021165.1    | Ca_kabuli_chr06 | 51460944                | AA                              | TT                | 1946453148               |
| SNP_P3_80924_51473493 | NC_021165.1    | Ca_kabuli_chr06 | 51473493                | AA                              | CC                | 1946453149               |
| SNP_P3_80925_51473495 | NC_021165.1    | Ca_kabuli_chr06 | 51473495                | AA                              | TT                | 1946453150               |
| SNP_P3_80926_51483056 | NC_021165.1    | Ca_kabuli_chr06 | 51483056                | TT                              | AA                | 1946453152               |
| SNP_P3_80927_51483065 | NC_021165.1    | Ca_kabuli_chr06 | 51483065                | GG                              | AA                | 1946453153               |
| SNP_P3_80928_51483095 | NC_021165.1    | Ca_kabuli_chr06 | 51483095                | TT                              | AA                | 1946453155               |
| SNP_P3_80930_51506612 | NC_021165.1    | Ca_kabuli_chr06 | 51506612                | AA                              | GG                | 1946453156               |
| SNP_P3_80931_51506743 | NC_021165.1    | Ca_kabuli_chr06 | 51506743                | CC                              | AA                | 1946453157               |
| SNP_P3_80932_51506777 | NC_021165.1    | Ca_kabuli_chr06 | 51506777                | TT                              | AA                | 1946453159               |
| SNP_P3_80933_51506858 | NC_021165.1    | Ca_kabuli_chr06 | 51506858                | AA                              | GG                | 1946453160               |
| SNP_P3_80935_51537047 | NC_021165.1    | Ca_kabuli_chr06 | 51537047                | TT                              | CC                | 1946453162               |
| SNP_P3_80936_51537070 | NC_021165.1    | Ca_kabuli_chr06 | 51537070                | TT                              | CC                | 1946453164               |
| SNP_P3_80937_51538293 | NC_021165.1    | Ca_kabuli_chr06 | 51538293                | TT                              | AA                | 1946453165               |
| SNP_P3_80938_51538342 | NC_021165.1    | Ca_kabuli_chr06 | 51538342                | TT                              | CC                | 1946453167               |
| SNP_P3_80939_51563747 | NC_021165.1    | Ca_kabuli_chr06 | 51563747                | TT                              | GG                | 1946453168               |
| SNP_P3_80940_51569503 | NC_021165.1    | Ca_kabuli_chr06 | 51569503                | AA                              | TT                | 1946453169               |
| SNP_P3_80941_51597455 | NC_021165.1    | Ca_kabuli_chr06 | 51597455                | AA                              | GG                | 1946453171               |
| SNP_P3_80942_51620145 | NC_021165.1    | Ca_kabuli_chr06 | 51620145                | CC                              | AA                | 1946453172               |
| SNP_P3_80943_51628350 | NC_021165.1    | Ca_kabuli_chr06 | 51628350                | GG                              | TT                | 1946453174               |
| SNP_P3_80944_51639830 | NC_021165.1    | Ca_kabuli_chr06 | 51639830                | TT                              | AA                | 1946453175               |
| SNP_P3_80945_51672042 | NC_021165.1    | Ca_kabuli_chr06 | 51672042                | CC                              | TT                | 1946453177               |
| SNP_P3_80946_51672074 | NC_021165.1    | Ca_kabuli_chr06 | 51672074                | AA                              | CC                | 1946453178               |
| SNP_P3_80947_51672766 | NC_021165.1    | Ca_kabuli_chr06 | 51672766                | AA                              | CC                | 1946453180               |
| SNP_P3_80949_51673257 | NC_021165.1    | Ca_kabuli_chr06 | 51673257                | AA                              | GG                | 1946453181               |
| SNP_P3_80950_51673439 | NC_021165.1    | Ca_kabuli_chr06 | 51673439                | AA                              | CC                | 1946453183               |
| SNP_P3_80951_51673441 | NC_021165.1    | Ca_kabuli_chr06 | 51673441                | TT                              | AA                | 1946453184               |
| SNP_P3_80952_51675181 | NC_021165.1    | Ca_kabuli_chr06 | 51675181                | TT                              | CC                | 1946453186               |
| SNP_P3_80953_51675188 | NC_021165.1    | Ca_kabuli_chr06 | 51675188                | CC                              | GG                | 1946453187               |
| SNP_P3_80954_51675231 | NC_021165.1    | Ca_kabuli_chr06 | 51675231                | CC                              | TT                | 1946453189               |
| SNP_P3_80955_51675262 | NC_021165.1    | Ca_kabuli_chr06 | 51675262                | GG                              | AA                | 1946453190               |
| SNP_P3_80956_51675264 | NC_021165.1    | Ca_kabuli_chr06 | 51675264                | GG                              | AA                | 1946453192               |
| SNP_P3_80957_51675443 | NC_021165.1    | Ca_kabuli_chr06 | 51675443                | GG                              | AA                | 1946453193               |
| SNP_P3_80958_51675444 | NC_021165.1    | Ca_kabuli_chr06 | 51675444                | AA                              | TT                | 1946453195               |
| SNP_P3_80959_51675466 | NC_021165.1    | Ca_kabuli_chr06 | 51675466                | CC                              | GG                | 1946453196               |
| SNP_P3_80960_51675473 | NC_021165.1    | Ca_kabuli_chr06 | 51675473                | GG                              | TT                | 1946453198               |
| SNP_P3_80961_51675476 | NC_021165.1    | Ca_kabuli_chr06 | 51675476                | CC                              | TT                | 1946453199               |

| SNPs IDs              | Chromosome IDs | Chromosomes     | Physical positions (bp) | CDC Frontier (Reference genome) | (Pusa 256 & HPNB) | NCBI SNPdb Accession IDs |
|-----------------------|----------------|-----------------|-------------------------|---------------------------------|-------------------|--------------------------|
| SNP_P3_80962_51675562 | NC_021165.1    | Ca_kabuli_chr06 | 51675562                | TT                              | CC                | 1946453200               |
| SNP_P3_80963_51675577 | NC_021165.1    | Ca_kabuli_chr06 | 51675577                | GG                              | AA                | 1946453202               |
| SNP_P3_80964_51677797 | NC_021165.1    | Ca_kabuli_chr06 | 51677797                | TT                              | CC                | 1946453203               |
| SNP_P3_80965_51677858 | NC_021165.1    | Ca_kabuli_chr06 | 51677858                | CC                              | TT                | 1946453205               |
| SNP_P3_80966_51677861 | NC_021165.1    | Ca_kabuli_chr06 | 51677861                | TT                              | CC                | 1946453206               |
| SNP_P3_80967_51678031 | NC_021165.1    | Ca_kabuli_chr06 | 51678031                | TT                              | CC                | 1946453208               |
| SNP_P3_80968_51678203 | NC_021165.1    | Ca_kabuli_chr06 | 51678203                | TT                              | GG                | 1946453209               |
| SNP_P3_80969_51679191 | NC_021165.1    | Ca_kabuli_chr06 | 51679191                | TT                              | CC                | 1946453211               |
| SNP_P3_80971_51737325 | NC_021165.1    | Ca_kabuli_chr06 | 51737325                | GG                              | AA                | 1946453212               |
| SNP_P3_80972_51737366 | NC_021165.1    | Ca_kabuli_chr06 | 51737366                | TT                              | CC                | 1946453214               |
| SNP_P3_80973_51737707 | NC_021165.1    | Ca_kabuli_chr06 | 51737707                | TT                              | CC                | 1946453215               |
| SNP_P3_80975_51764323 | NC_021165.1    | Ca_kabuli_chr06 | 51764323                | CC                              | AA                | 1946453217               |
| SNP_P3_80976_51766650 | NC_021165.1    | Ca_kabuli_chr06 | 51766650                | GG                              | TT                | 1946453218               |
| SNP_P3_80977_51767413 | NC_021165.1    | Ca_kabuli_chr06 | 51767413                | TT                              | GG                | 1946453219               |
| SNP_P3_80978_51767430 | NC_021165.1    | Ca_kabuli_chr06 | 51767430                | GG                              | TT                | 1946453221               |
| SNP_P3_80979_51767433 | NC_021165.1    | Ca_kabuli_chr06 | 51767433                | AA                              | GG                | 1946453222               |
| SNP_P3_80980_51767471 | NC_021165.1    | Ca_kabuli_chr06 | 51767471                | AA                              | CC                | 1946453224               |
| SNP_P3_80981_51767512 | NC_021165.1    | Ca_kabuli_chr06 | 51767512                | AA                              | CC                | 1946453225               |
| SNP_P3_80982_51767671 | NC_021165.1    | Ca_kabuli_chr06 | 51767671                | CC                              | TT                | 1946453227               |
| SNP_P3_80983_51767889 | NC_021165.1    | Ca_kabuli_chr06 | 51767889                | AA                              | GG                | 1946453228               |
| SNP_P3_80984_51767902 | NC_021165.1    | Ca_kabuli_chr06 | 51767902                | AA                              | CC                | 1946453230               |
| SNP_P3_80985_51767924 | NC_021165.1    | Ca_kabuli_chr06 | 51767924                | TT                              | GG                | 1946453231               |
| SNP_P3_80986_51767969 | NC_021165.1    | Ca_kabuli_chr06 | 51767969                | AA                              | CC                | 1946453233               |
| SNP_P3_80987_51768028 | NC_021165.1    | Ca_kabuli_chr06 | 51768028                | GG                              | AA                | 1946453234               |
| SNP_P3_80988_51768069 | NC_021165.1    | Ca_kabuli_chr06 | 51768069                | TT                              | GG                | 1946453236               |
| SNP_P3_80989_51769512 | NC_021165.1    | Ca_kabuli_chr06 | 51769512                | AA                              | CC                | 1946453237               |
| SNP_P3_80990_51770263 | NC_021165.1    | Ca_kabuli_chr06 | 51770263                | GG                              | AA                | 1946453238               |
| SNP_P3_80991_51770277 | NC_021165.1    | Ca_kabuli_chr06 | 51770277                | GG                              | AA                | 1946453240               |
| SNP_P3_80992_51770292 | NC_021165.1    | Ca_kabuli_chr06 | 51770292                | CC                              | TT                | 1946453241               |
| SNP_P3_80993_51770311 | NC_021165.1    | Ca_kabuli_chr06 | 51770311                | TT                              | CC                | 1946453243               |
| SNP_P3_80994_51770358 | NC_021165.1    | Ca_kabuli_chr06 | 51770358                | AA                              | CC                | 1946453244               |
| SNP_P3_80995_51770577 | NC_021165.1    | Ca_kabuli_chr06 | 51770577                | GG                              | AA                | 1946453245               |
| SNP_P3_80996_51771449 | NC_021165.1    | Ca_kabuli_chr06 | 51771449                | AA                              | GG                | 1946453247               |
| SNP_P3_80997_51771762 | NC_021165.1    | Ca_kabuli_chr06 | 51771762                | GG                              | AA                | 1946453248               |
| SNP_P3_80998_51771832 | NC_021165.1    | Ca_kabuli_chr06 | 51771832                | AA                              | CC                | 1946453250               |
| SNP_P3_80999_51772820 | NC_021165.1    | Ca_kabuli_chr06 | 51772820                | AA                              | GG                | 1946453251               |
| SNP_P3_81000_51772898 | NC_021165.1    | Ca_kabuli_chr06 | 51772898                | AA                              | TT                | 1946453253               |
| SNP_P3_81001_51772974 | NC_021165.1    | Ca_kabuli_chr06 | 51772974                | GG                              | AA                | 1946453254               |
| SNP_P3_81002_51773091 | NC_021165.1    | Ca_kabuli_chr06 | 51773091                | CC                              | TT                | 1946453256               |
| SNP_P3_81003_51773194 | NC_021165.1    | Ca_kabuli_chr06 | 51773194                | AA                              | GG                | 1946453257               |
| SNP_P3_81004_51775941 | NC_021165.1    | Ca_kabuli_chr06 | 51775941                | TT                              | CC                | 1946453258               |
| SNP_P3_81005_51776063 | NC_021165.1    | Ca_kabuli_chr06 | 51776063                | AA                              | TT                | 1946453260               |

| SNPs IDs              | Chromosome IDs | Chromosomes     | Physical positions (bp) | CDC Frontier (Reference genome) | (Pusa 256 & HPNB) | NCBI SNPdb Accession IDs |
|-----------------------|----------------|-----------------|-------------------------|---------------------------------|-------------------|--------------------------|
| SNP_P3_81006_51776094 | NC_021165.1    | Ca_kabuli_chr06 | 51776094                | CC                              | TT                | 1946453261               |
| SNP_P3_81008_51797586 | NC_021165.1    | Ca_kabuli_chr06 | 51797586                | CC                              | AA                | 1946453263               |
| SNP_P3_81009_51802102 | NC_021165.1    | Ca_kabuli_chr06 | 51802102                | CC                              | GG                | 1946453264               |
| SNP_P3_81010_51806309 | NC_021165.1    | Ca_kabuli_chr06 | 51806309                | AA                              | GG                | 1946453265               |
| SNP_P3_81011_51806370 | NC_021165.1    | Ca_kabuli_chr06 | 51806370                | AA                              | TT                | 1946453267               |
| SNP_P3_81012_51828469 | NC_021165.1    | Ca_kabuli_chr06 | 51828469                | CC                              | AA                | 1946453268               |
| SNP_P3_81013_51828472 | NC_021165.1    | Ca_kabuli_chr06 | 51828472                | GG                              | AA                | 1946453270               |
| SNP_P3_81014_51828475 | NC_021165.1    | Ca_kabuli_chr06 | 51828475                | AA                              | TT                | 1946453271               |
| SNP_P3_81015_51828918 | NC_021165.1    | Ca_kabuli_chr06 | 51828918                | TT                              | CC                | 1946453273               |
| SNP_P3_81016_51829013 | NC_021165.1    | Ca_kabuli_chr06 | 51829013                | AA                              | GG                | 1946453274               |
| SNP_P3_81017_51829254 | NC_021165.1    | Ca_kabuli_chr06 | 51829254                | TT                              | CC                | 1946453275               |
| SNP_P3_81018_51829323 | NC_021165.1    | Ca_kabuli_chr06 | 51829323                | TT                              | CC                | 1946453277               |
| SNP_P3_81019_51829326 | NC_021165.1    | Ca_kabuli_chr06 | 51829326                | AA                              | CC                | 1946453278               |
| SNP_P3_81020_51829332 | NC_021165.1    | Ca_kabuli_chr06 | 51829332                | GG                              | AA                | 1946453280               |
| SNP_P3_81021_51829343 | NC_021165.1    | Ca_kabuli_chr06 | 51829343                | TT                              | CC                | 1946453281               |
| SNP_P3_81022_51829401 | NC_021165.1    | Ca_kabuli_chr06 | 51829401                | TT                              | CC                | 1946453283               |
| SNP_P3_81023_51829407 | NC_021165.1    | Ca_kabuli_chr06 | 51829407                | GG                              | TT                | 1946453284               |
| SNP_P3_81024_51829445 | NC_021165.1    | Ca_kabuli_chr06 | 51829445                | AA                              | GG                | 1946453285               |
| SNP_P3_81025_51829464 | NC_021165.1    | Ca_kabuli_chr06 | 51829464                | AA                              | CC                | 1946453287               |
| SNP_P3_81026_51830284 | NC_021165.1    | Ca_kabuli_chr06 | 51830284                | CC                              | AA                | 1946453288               |
| SNP_P3_81027_51830304 | NC_021165.1    | Ca_kabuli_chr06 | 51830304                | AA                              | GG                | 1946453290               |
| SNP_P3_81028_51866093 | NC_021165.1    | Ca_kabuli_chr06 | 51866093                | TT                              | CC                | 1946453291               |
| SNP_P3_81029_51866897 | NC_021165.1    | Ca_kabuli_chr06 | 51866897                | TT                              | CC                | 1946453292               |
| SNP_P3_81030_51877832 | NC_021165.1    | Ca_kabuli_chr06 | 51877832                | CC                              | TT                | 1946453294               |
| SNP_P3_81031_51880675 | NC_021165.1    | Ca_kabuli_chr06 | 51880675                | AA                              | GG                | 1946453295               |
| SNP_P3_81032_51885965 | NC_021165.1    | Ca_kabuli_chr06 | 51885965                | TT                              | CC                | 1946453297               |
| SNP_P3_81033_51893273 | NC_021165.1    | Ca_kabuli_chr06 | 51893273                | AA                              | TT                | 1946453298               |
| SNP_P3_81034_51897468 | NC_021165.1    | Ca_kabuli_chr06 | 51897468                | AA                              | TT                | 1946453300               |
| SNP_P3_81036_51934146 | NC_021165.1    | Ca_kabuli_chr06 | 51934146                | AA                              | GG                | 1946453301               |
| SNP_P3_81037_51934154 | NC_021165.1    | Ca_kabuli_chr06 | 51934154                | GG                              | AA                | 1946453302               |
| SNP_P3_81038_51954896 | NC_021165.1    | Ca_kabuli_chr06 | 51954896                | TT                              | CC                | 1946453304               |
| SNP_P3_81039_51954904 | NC_021165.1    | Ca_kabuli_chr06 | 51954904                | GG                              | AA                | 1946453305               |
| SNP_P3_81040_51954940 | NC_021165.1    | Ca_kabuli_chr06 | 51954940                | CC                              | TT                | 1946453307               |
| SNP_P3_81041_51954942 | NC_021165.1    | Ca_kabuli_chr06 | 51954942                | AA                              | GG                | 1946453308               |
| SNP_P3_81042_51955284 | NC_021165.1    | Ca_kabuli_chr06 | 51955284                | CC                              | TT                | 1946453310               |
| SNP_P3_81043_51955311 | NC_021165.1    | Ca_kabuli_chr06 | 51955311                | TT                              | CC                | 1946453311               |
| SNP_P3_81044_51955324 | NC_021165.1    | Ca_kabuli_chr06 | 51955324                | AA                              | GG                | 1946453312               |
| SNP_P3_81046_51959514 | NC_021165.1    | Ca_kabuli_chr06 | 51959514                | AA                              | GG                | 1946453314               |
| SNP_P3_81047_51959521 | NC_021165.1    | Ca_kabuli_chr06 | 51959521                | CC                              | AA                | 1946453315               |
| SNP_P3_81048_51959746 | NC_021165.1    | Ca_kabuli_chr06 | 51959746                | AA                              | GG                | 1946453317               |
| SNP_P3_81049_51959760 | NC_021165.1    | Ca_kabuli_chr06 | 51959760                | TT                              | CC                | 1946453318               |
| SNP_P3_81050_51960019 | NC_021165.1    | Ca_kabuli_chr06 | 51960019                | TT                              | CC                | 1946453320               |



| SNPs IDs              | Chromosome IDs | Chromosomes     | Physical positions (bp) | CDC Frontier (Reference genome) | (Pusa 256 & HPNB) | NCBI SNPdb Accession IDs |
|-----------------------|----------------|-----------------|-------------------------|---------------------------------|-------------------|--------------------------|
| SNP_P3_81051_51960026 | NC_021165.1    | Ca_kabuli_chr06 | 51960026                | CC                              | GG                | 1946453321               |
| SNP_P3_81052_51960038 | NC_021165.1    | Ca_kabuli_chr06 | 51960038                | GG                              | CC                | 1946453323               |
| SNP_P3_81053_51960054 | NC_021165.1    | Ca_kabuli_chr06 | 51960054                | TT                              | CC                | 1946453324               |
| SNP_P3_81054_51960073 | NC_021165.1    | Ca_kabuli_chr06 | 51960073                | TT                              | AA                | 1946453325               |
| SNP_P3_81055_51960078 | NC_021165.1    | Ca_kabuli_chr06 | 51960078                | AA                              | CC                | 1946453327               |
| SNP_P3_81057_51978011 | NC_021165.1    | Ca_kabuli_chr06 | 51978011                | AA                              | CC                | 1946453328               |
| SNP_P3_81058_51978025 | NC_021165.1    | Ca_kabuli_chr06 | 51978025                | TT                              | AA                | 1946453330               |
| SNP_P3_81059_51978028 | NC_021165.1    | Ca_kabuli_chr06 | 51978028                | CC                              | TT                | 1946453331               |
| SNP_P3_81060_52003768 | NC_021165.1    | Ca_kabuli_chr06 | 52003768                | TT                              | AA                | 1946453333               |
| SNP_P3_81061_52009059 | NC_021165.1    | Ca_kabuli_chr06 | 52009059                | GG                              | AA                | 1946453334               |
| SNP_P3_81062_52054094 | NC_021165.1    | Ca_kabuli_chr06 | 52054094                | GG                              | TT                | 1946453335               |
| SNP_P3_81063_52065911 | NC_021165.1    | Ca_kabuli_chr06 | 52065911                | TT                              | CC                | 1946453337               |
| SNP_P3_81065_52075027 | NC_021165.1    | Ca_kabuli_chr06 | 52075027                | TT                              | AA                | 1946453338               |
| SNP_P3_81066_52075034 | NC_021165.1    | Ca_kabuli_chr06 | 52075034                | TT                              | GG                | 1946453340               |
| SNP_P3_81068_52075115 | NC_021165.1    | Ca_kabuli_chr06 | 52075115                | TT                              | CC                | 1946453341               |
| SNP_P3_81069_52075165 | NC_021165.1    | Ca_kabuli_chr06 | 52075165                | TT                              | CC                | 1946453343               |
| SNP_P3_81070_52075334 | NC_021165.1    | Ca_kabuli_chr06 | 52075334                | CC                              | TT                | 1946453344               |
| SNP_P3_81071_52086792 | NC_021165.1    | Ca_kabuli_chr06 | 52086792                | GG                              | AA                | 1946453345               |
| SNP_P3_81072_52086819 | NC_021165.1    | Ca_kabuli_chr06 | 52086819                | CC                              | AA                | 1946453347               |
| SNP_P3_81073_52087910 | NC_021165.1    | Ca_kabuli_chr06 | 52087910                | CC                              | GG                | 1946453348               |
| SNP_P3_81074_52088095 | NC_021165.1    | Ca_kabuli_chr06 | 52088095                | GG                              | CC                | 1946453350               |
| SNP_P3_81075_52088185 | NC_021165.1    | Ca_kabuli_chr06 | 52088185                | AA                              | CC                | 1946453351               |
| SNP_P3_81076_52088350 | NC_021165.1    | Ca_kabuli_chr06 | 52088350                | TT                              | CC                | 1946453353               |
| SNP_P3_81077_52088388 | NC_021165.1    | Ca_kabuli_chr06 | 52088388                | AA                              | TT                | 1946453354               |
| SNP_P3_81078_52088720 | NC_021165.1    | Ca_kabuli_chr06 | 52088720                | TT                              | GG                | 1946453356               |
| SNP_P3_81079_52088826 | NC_021165.1    | Ca_kabuli_chr06 | 52088826                | GG                              | CC                | 1946453357               |
| SNP_P3_81080_52088832 | NC_021165.1    | Ca_kabuli_chr06 | 52088832                | AA                              | GG                | 1946453358               |
| SNP_P3_81081_52088834 | NC_021165.1    | Ca_kabuli_chr06 | 52088834                | CC                              | GG                | 1946453360               |
| SNP_P3_81082_52088933 | NC_021165.1    | Ca_kabuli_chr06 | 52088933                | GG                              | TT                | 1946453361               |
| SNP_P3_81083_52088934 | NC_021165.1    | Ca_kabuli_chr06 | 52088934                | GG                              | TT                | 1946453363               |
| SNP_P3_81084_52088939 | NC_021165.1    | Ca_kabuli_chr06 | 52088939                | AA                              | CC                | 1946453364               |
| SNP_P3_81085_52088940 | NC_021165.1    | Ca_kabuli_chr06 | 52088940                | GG                              | AA                | 1946453366               |
| SNP_P3_81086_52088943 | NC_021165.1    | Ca_kabuli_chr06 | 52088943                | GG                              | CC                | 1946453367               |
| SNP_P3_81087_52088948 | NC_021165.1    | Ca_kabuli_chr06 | 52088948                | TT                              | AA                | 1946453369               |
| SNP_P3_81088_52088949 | NC_021165.1    | Ca_kabuli_chr06 | 52088949                | TT                              | GG                | 1946453370               |
| SNP_P3_81089_52088952 | NC_021165.1    | Ca_kabuli_chr06 | 52088952                | AA                              | GG                | 1946453372               |
| SNP_P3_81090_52088955 | NC_021165.1    | Ca_kabuli_chr06 | 52088955                | GG                              | CC                | 1946453373               |
| SNP_P3_81091_52089071 | NC_021165.1    | Ca_kabuli_chr06 | 52089071                | TT                              | AA                | 1946453374               |
| SNP_P3_81092_52089097 | NC_021165.1    | Ca_kabuli_chr06 | 52089097                | CC                              | GG                | 1946453376               |
| SNP_P3_81093_52089098 | NC_021165.1    | Ca_kabuli_chr06 | 52089098                | AA                              | GG                | 1946453377               |
| SNP_P3_81094_52089100 | NC_021165.1    | Ca_kabuli_chr06 | 52089100                | AA                              | CC                | 1946453379               |
| SNP_P3_81095_52089118 | NC_021165.1    | Ca_kabuli_chr06 | 52089118                | TT                              | AA                | 1946453380               |

| SNPs IDs              | Chromosome IDs | Chromosomes     | Physical positions (bp) | CDC Frontier (Reference genome) | (Pusa 256 & HPNB) | NCBI SNPdb Accession IDs |
|-----------------------|----------------|-----------------|-------------------------|---------------------------------|-------------------|--------------------------|
| SNP_P3_81096_52089121 | NC_021165.1    | Ca_kabuli_chr06 | 52089121                | TT                              | CC                | 1946453382               |
| SNP_P3_81097_52089122 | NC_021165.1    | Ca_kabuli_chr06 | 52089122                | AA                              | GG                | 1946453383               |
| SNP_P3_81098_52089152 | NC_021165.1    | Ca_kabuli_chr06 | 52089152                | TT                              | AA                | 1946453385               |
| SNP_P3_81099_52089273 | NC_021165.1    | Ca_kabuli_chr06 | 52089273                | AA                              | CC                | 1946453386               |
| SNP_P3_81100_52089316 | NC_021165.1    | Ca_kabuli_chr06 | 52089316                | AA                              | GG                | 1946453388               |
| SNP_P3_81101_52089339 | NC_021165.1    | Ca_kabuli_chr06 | 52089339                | CC                              | GG                | 1946453389               |
| SNP_P3_81102_52089344 | NC_021165.1    | Ca_kabuli_chr06 | 52089344                | CC                              | TT                | 1946453391               |
| SNP_P3_81103_52089428 | NC_021165.1    | Ca_kabuli_chr06 | 52089428                | GG                              | AA                | 1946453392               |
| SNP_P3_81104_52089448 | NC_021165.1    | Ca_kabuli_chr06 | 52089448                | TT                              | CC                | 1946453394               |
| SNP_P3_81105_52089474 | NC_021165.1    | Ca_kabuli_chr06 | 52089474                | GG                              | TT                | 1946453395               |
| SNP_P3_81107_52089605 | NC_021165.1    | Ca_kabuli_chr06 | 52089605                | AA                              | TT                | 1946453397               |
| SNP_P3_81108_52089619 | NC_021165.1    | Ca_kabuli_chr06 | 52089619                | TT                              | AA                | 1946453398               |
| SNP_P3_81109_52089647 | NC_021165.1    | Ca_kabuli_chr06 | 52089647                | AA                              | TT                | 1946453400               |
| SNP_P3_81110_52089653 | NC_021165.1    | Ca_kabuli_chr06 | 52089653                | AA                              | GG                | 1946453401               |
| SNP_P3_81111_52089711 | NC_021165.1    | Ca_kabuli_chr06 | 52089711                | TT                              | CC                | 1946453403               |
| SNP_P3_81112_52089739 | NC_021165.1    | Ca_kabuli_chr06 | 52089739                | CC                              | TT                | 1946453404               |
| SNP_P3_81113_52089757 | NC_021165.1    | Ca_kabuli_chr06 | 52089757                | TT                              | AA                | 1946453406               |
| SNP_P3_81114_52089949 | NC_021165.1    | Ca_kabuli_chr06 | 52089949                | CC                              | TT                | 1946453407               |
| SNP_P3_81115_52089963 | NC_021165.1    | Ca_kabuli_chr06 | 52089963                | GG                              | AA                | 1946453409               |
| SNP_P3_81116_52090004 | NC_021165.1    | Ca_kabuli_chr06 | 52090004                | TT                              | CC                | 1946453410               |
| SNP_P3_81117_52093467 | NC_021165.1    | Ca_kabuli_chr06 | 52093467                | CC                              | GG                | 1946453412               |
| SNP_P3_81118_52093498 | NC_021165.1    | Ca_kabuli_chr06 | 52093498                | AA                              | GG                | 1946453413               |
| SNP_P3_81119_52093552 | NC_021165.1    | Ca_kabuli_chr06 | 52093552                | CC                              | AA                | 1946453414               |
| SNP_P3_81120_52107585 | NC_021165.1    | Ca_kabuli_chr06 | 52107585                | CC                              | GG                | 1946453416               |
| SNP_P3_81121_52107598 | NC_021165.1    | Ca_kabuli_chr06 | 52107598                | CC                              | GG                | 1946453417               |
| SNP_P3_81122_52107606 | NC_021165.1    | Ca_kabuli_chr06 | 52107606                | TT                              | CC                | 1946453419               |
| SNP_P3_81123_52109005 | NC_021165.1    | Ca_kabuli_chr06 | 52109005                | CC                              | AA                | 1946453420               |
| SNP_P3_81124_52120312 | NC_021165.1    | Ca_kabuli_chr06 | 52120312                | AA                              | CC                | 1946453422               |
| SNP_P3_81125_52120327 | NC_021165.1    | Ca_kabuli_chr06 | 52120327                | AA                              | CC                | 1946453423               |
| SNP_P3_81126_52120587 | NC_021165.1    | Ca_kabuli_chr06 | 52120587                | CC                              | AA                | 1946453425               |
| SNP_P3_81127_52120739 | NC_021165.1    | Ca_kabuli_chr06 | 52120739                | AA                              | TT                | 1946453426               |
| SNP_P3_81128_52120757 | NC_021165.1    | Ca_kabuli_chr06 | 52120757                | AA                              | GG                | 1946453428               |
| SNP_P3_81129_52122024 | NC_021165.1    | Ca_kabuli_chr06 | 52122024                | CC                              | GG                | 1946453429               |
| SNP_P3_81130_52124760 | NC_021165.1    | Ca_kabuli_chr06 | 52124760                | GG                              | AA                | 1946453431               |
| SNP_P3_81131_52124783 | NC_021165.1    | Ca_kabuli_chr06 | 52124783                | TT                              | GG                | 1946453432               |
| SNP_P3_81132_52124940 | NC_021165.1    | Ca_kabuli_chr06 | 52124940                | GG                              | TT                | 1946453434               |
| SNP_P3_81133_52125392 | NC_021165.1    | Ca_kabuli_chr06 | 52125392                | TT                              | CC                | 1946453435               |
| SNP_P3_81134_52125456 | NC_021165.1    | Ca_kabuli_chr06 | 52125456                | CC                              | GG                | 1946453437               |
| SNP_P3_81135_52125614 | NC_021165.1    | Ca_kabuli_chr06 | 52125614                | CC                              | TT                | 1946453438               |
| SNP_P3_81136_52126344 | NC_021165.1    | Ca_kabuli_chr06 | 52126344                | TT                              | CC                | 1946453440               |
| SNP_P3_81137_52130141 | NC_021165.1    | Ca_kabuli_chr06 | 52130141                | AA                              | GG                | 1946453441               |
| SNP_P3_81138_52130175 | NC_021165.1    | Ca_kabuli_chr06 | 52130175                | GG                              | AA                | 1946453443               |

| SNPs IDs              | Chromosome IDs | Chromosomes     | Physical positions (bp) | CDC Frontier (Reference genome) | (Pusa 256 & HPNB) | NCBI SNPdb Accession IDs |
|-----------------------|----------------|-----------------|-------------------------|---------------------------------|-------------------|--------------------------|
| SNP_P3_81139_52138762 | NC_021165.1    | Ca_kabuli_chr06 | 52138762                | AA                              | GG                | 1946453444               |
| SNP_P3_81140_52242590 | NC_021165.1    | Ca_kabuli_chr06 | 52242590                | TT                              | CC                | 1946453446               |
| SNP_P3_81141_52243473 | NC_021165.1    | Ca_kabuli_chr06 | 52243473                | GG                              | TT                | 1946453447               |
| SNP_P3_81142_52243477 | NC_021165.1    | Ca_kabuli_chr06 | 52243477                | TT                              | AA                | 1946453448               |
| SNP_P3_81143_52243506 | NC_021165.1    | Ca_kabuli_chr06 | 52243506                | GG                              | AA                | 1946453450               |
| SNP_P3_81144_52246324 | NC_021165.1    | Ca_kabuli_chr06 | 52246324                | AA                              | GG                | 1946453451               |
| SNP_P3_81145_52251192 | NC_021165.1    | Ca_kabuli_chr06 | 52251192                | AA                              | CC                | 1946453453               |
| SNP_P3_81146_52251202 | NC_021165.1    | Ca_kabuli_chr06 | 52251202                | AA                              | GG                | 1946453454               |
| SNP_P3_81147_52251296 | NC_021165.1    | Ca_kabuli_chr06 | 52251296                | GG                              | AA                | 1946453456               |
| SNP_P3_81148_52251511 | NC_021165.1    | Ca_kabuli_chr06 | 52251511                | TT                              | AA                | 1946453457               |
| SNP_P3_81149_52267635 | NC_021165.1    | Ca_kabuli_chr06 | 52267635                | CC                              | TT                | 1946453459               |
| SNP_P3_81150_52267676 | NC_021165.1    | Ca_kabuli_chr06 | 52267676                | AA                              | GG                | 1946453460               |
| SNP_P3_81151_52267711 | NC_021165.1    | Ca_kabuli_chr06 | 52267711                | TT                              | CC                | 1946453462               |
| SNP_P3_81152_52267790 | NC_021165.1    | Ca_kabuli_chr06 | 52267790                | AA                              | GG                | 1946453463               |
| SNP_P3_81153_52267839 | NC_021165.1    | Ca_kabuli_chr06 | 52267839                | TT                              | CC                | 1946453465               |
| SNP_P3_81154_52267887 | NC_021165.1    | Ca_kabuli_chr06 | 52267887                | TT                              | GG                | 1946453466               |
| SNP_P3_81155_52268002 | NC_021165.1    | Ca_kabuli_chr06 | 52268002                | GG                              | AA                | 1946453468               |
| SNP_P3_81156_52268005 | NC_021165.1    | Ca_kabuli_chr06 | 52268005                | AA                              | TT                | 1946453469               |
| SNP_P3_81157_52269381 | NC_021165.1    | Ca_kabuli_chr06 | 52269381                | CC                              | GG                | 1946453471               |
| SNP_P3_81158_52269719 | NC_021165.1    | Ca_kabuli_chr06 | 52269719                | GG                              | TT                | 1946453472               |
| SNP_P3_81159_52284621 | NC_021165.1    | Ca_kabuli_chr06 | 52284621                | CC                              | AA                | 1946453474               |
| SNP_P3_81160_52349739 | NC_021165.1    | Ca_kabuli_chr06 | 52349739                | TT                              | GG                | 1946453475               |
| SNP_P3_81161_52372044 | NC_021165.1    | Ca_kabuli_chr06 | 52372044                | GG                              | AA                | 1946453477               |
| SNP_P3_81162_52406172 | NC_021165.1    | Ca_kabuli_chr06 | 52406172                | TT                              | CC                | 1946453478               |
| SNP_P3_81166_52462755 | NC_021165.1    | Ca_kabuli_chr06 | 52462755                | TT                              | CC                | 1946453479               |
| SNP_P3_81167_52462833 | NC_021165.1    | Ca_kabuli_chr06 | 52462833                | TT                              | GG                | 1946453481               |
| SNP_P3_81168_52462842 | NC_021165.1    | Ca_kabuli_chr06 | 52462842                | GG                              | AA                | 1946453482               |
| SNP_P3_81169_52463062 | NC_021165.1    | Ca_kabuli_chr06 | 52463062                | AA                              | GG                | 1946453484               |
| SNP_P3_81170_52463099 | NC_021165.1    | Ca_kabuli_chr06 | 52463099                | AA                              | GG                | 1946453485               |
| SNP_P3_81171_52485828 | NC_021165.1    | Ca_kabuli_chr06 | 52485828                | CC                              | TT                | 1946453487               |
| SNP_P3_81172_52486155 | NC_021165.1    | Ca_kabuli_chr06 | 52486155                | AA                              | GG                | 1946453488               |
| SNP_P3_81173_52486236 | NC_021165.1    | Ca_kabuli_chr06 | 52486236                | CC                              | TT                | 1946453490               |
| SNP_P3_81174_52486284 | NC_021165.1    | Ca_kabuli_chr06 | 52486284                | AA                              | GG                | 1946453491               |
| SNP_P3_81175_52486300 | NC_021165.1    | Ca_kabuli_chr06 | 52486300                | TT                              | CC                | 1946453493               |
| SNP_P3_81177_52529588 | NC_021165.1    | Ca_kabuli_chr06 | 52529588                | TT                              | CC                | 1946453494               |
| SNP_P3_81178_52529805 | NC_021165.1    | Ca_kabuli_chr06 | 52529805                | AA                              | GG                | 1946453496               |
| SNP_P3_81179_52529891 | NC_021165.1    | Ca_kabuli_chr06 | 52529891                | GG                              | AA                | 1946453497               |
| SNP_P3_81180_52531294 | NC_021165.1    | Ca_kabuli_chr06 | 52531294                | AA                              | TT                | 1946453498               |
| SNP_P3_81181_52531313 | NC_021165.1    | Ca_kabuli_chr06 | 52531313                | GG                              | AA                | 1946453500               |
| SNP_P3_81182_52532294 | NC_021165.1    | Ca_kabuli_chr06 | 52532294                | GG                              | AA                | 1946453501               |
| SNP_P3_81183_52532309 | NC_021165.1    | Ca_kabuli_chr06 | 52532309                | TT                              | CC                | 1946453503               |
| SNP_P3_81184_52532315 | NC_021165.1    | Ca_kabuli_chr06 | 52532315                | CC                              | TT                | 1946453504               |

| SNPs IDs              | Chromosome IDs | Chromosomes     | Physical positions (bp) | CDC Frontier (Reference genome) | (Pusa 256 & HPNB) | NCBI SNPdb Accession IDs |
|-----------------------|----------------|-----------------|-------------------------|---------------------------------|-------------------|--------------------------|
| SNP_P3_81185_52532330 | NC_021165.1    | Ca_kabuli_chr06 | 52532330                | CC                              | TT                | 1946453506               |
| SNP_P3_81186_52532340 | NC_021165.1    | Ca_kabuli_chr06 | 52532340                | TT                              | CC                | 1946453507               |
| SNP_P3_81187_52537063 | NC_021165.1    | Ca_kabuli_chr06 | 52537063                | GG                              | CC                | 1946453508               |
| SNP_P3_81188_52537425 | NC_021165.1    | Ca_kabuli_chr06 | 52537425                | TT                              | AA                | 1946453510               |
| SNP_P3_81189_52552823 | NC_021165.1    | Ca_kabuli_chr06 | 52552823                | AA                              | CC                | 1946453511               |
| SNP_P3_81190_52552842 | NC_021165.1    | Ca_kabuli_chr06 | 52552842                | TT                              | CC                | 1946453513               |
| SNP_P3_81191_52552853 | NC_021165.1    | Ca_kabuli_chr06 | 52552853                | AA                              | CC                | 1946453514               |
| SNP_P3_81192_52553135 | NC_021165.1    | Ca_kabuli_chr06 | 52553135                | CC                              | TT                | 1946453516               |
| SNP_P3_81194_52644961 | NC_021165.1    | Ca_kabuli_chr06 | 52644961                | CC                              | AA                | 1946453517               |
| SNP_P3_81197_52696623 | NC_021165.1    | Ca_kabuli_chr06 | 52696623                | TT                              | AA                | 1946453518               |
| SNP_P3_81198_52697005 | NC_021165.1    | Ca_kabuli_chr06 | 52697005                | GG                              | AA                | 1946453520               |
| SNP_P3_81199_52697062 | NC_021165.1    | Ca_kabuli_chr06 | 52697062                | AA                              | CC                | 1946453521               |
| SNP_P3_81200_52697071 | NC_021165.1    | Ca_kabuli_chr06 | 52697071                | AA                              | GG                | 1946453523               |
| SNP_P3_81201_52698441 | NC_021165.1    | Ca_kabuli_chr06 | 52698441                | GG                              | TT                | 1946453524               |
| SNP_P3_81202_52703130 | NC_021165.1    | Ca_kabuli_chr06 | 52703130                | TT                              | CC                | 1946453526               |
| SNP_P3_81203_52703168 | NC_021165.1    | Ca_kabuli_chr06 | 52703168                | GG                              | AA                | 1946453527               |
| SNP_P3_81204_52759011 | NC_021165.1    | Ca_kabuli_chr06 | 52759011                | GG                              | AA                | 1946453528               |
| SNP_P3_81205_52759013 | NC_021165.1    | Ca_kabuli_chr06 | 52759013                | CC                              | TT                | 1946453530               |
| SNP_P3_81206_52761896 | NC_021165.1    | Ca_kabuli_chr06 | 52761896                | AA                              | TT                | 1946453531               |
| SNP_P3_81207_52770240 | NC_021165.1    | Ca_kabuli_chr06 | 52770240                | GG                              | AA                | 1946453533               |
| SNP_P3_81208_52779377 | NC_021165.1    | Ca_kabuli_chr06 | 52779377                | GG                              | AA                | 1946453534               |
| SNP_P3_81209_52779397 | NC_021165.1    | Ca_kabuli_chr06 | 52779397                | GG                              | AA                | 1946453536               |
| SNP_P3_81211_52783505 | NC_021165.1    | Ca_kabuli_chr06 | 52783505                | TT                              | AA                | 1946453537               |
| SNP_P3_81212_52787935 | NC_021165.1    | Ca_kabuli_chr06 | 52787935                | GG                              | TT                | 1946453539               |
| SNP_P3_81214_52787985 | NC_021165.1    | Ca_kabuli_chr06 | 52787985                | CC                              | TT                | 1946453540               |
| SNP_P3_81216_52790881 | NC_021165.1    | Ca_kabuli_chr06 | 52790881                | CC                              | TT                | 1946453542               |
| SNP_P3_81217_52798149 | NC_021165.1    | Ca_kabuli_chr06 | 52798149                | CC                              | TT                | 1946453543               |
| SNP_P3_81218_52803432 | NC_021165.1    | Ca_kabuli_chr06 | 52803432                | CC                              | AA                | 1946453544               |
| SNP_P3_81219_52803484 | NC_021165.1    | Ca_kabuli_chr06 | 52803484                | CC                              | TT                | 1946453546               |
| SNP_P3_81220_52807118 | NC_021165.1    | Ca_kabuli_chr06 | 52807118                | AA                              | CC                | 1946453548               |
| SNP_P3_81221_52819986 | NC_021165.1    | Ca_kabuli_chr06 | 52819986                | GG                              | TT                | 1946453550               |
| SNP_P3_81222_52825624 | NC_021165.1    | Ca_kabuli_chr06 | 52825624                | GG                              | AA                | 1946453552               |
| SNP_P3_81223_52825948 | NC_021165.1    | Ca_kabuli_chr06 | 52825948                | TT                              | AA                | 1946453553               |
| SNP_P3_81224_52825969 | NC_021165.1    | Ca_kabuli_chr06 | 52825969                | CC                              | TT                | 1946453555               |
| SNP_P3_81225_52826004 | NC_021165.1    | Ca_kabuli_chr06 | 52826004                | AA                              | TT                | 1946453556               |
| SNP_P3_81226_52826032 | NC_021165.1    | Ca_kabuli_chr06 | 52826032                | AA                              | GG                | 1946453558               |
| SNP_P3_81227_52841606 | NC_021165.1    | Ca_kabuli_chr06 | 52841606                | CC                              | AA                | 1946453559               |
| SNP_P3_81228_52841810 | NC_021165.1    | Ca_kabuli_chr06 | 52841810                | CC                              | AA                | 1946453561               |
| SNP_P3_81229_52841842 | NC_021165.1    | Ca_kabuli_chr06 | 52841842                | AA                              | GG                | 1946453562               |
| SNP_P3_81230_52847348 | NC_021165.1    | Ca_kabuli_chr06 | 52847348                | GG                              | TT                | 1946453563               |
| SNP_P3_81232_52849183 | NC_021165.1    | Ca_kabuli_chr06 | 52849183                | TT                              | CC                | 1946453565               |
| SNP_P3_81235_52854012 | NC_021165.1    | Ca_kabuli_chr06 | 52854012                | CC                              | TT                | 1946453566               |

| SNPs IDs              | Chromosome IDs | Chromosomes     | Physical positions (bp) | CDC Frontier (Reference genome) | (Pusa 256 & HPNB) | NCBI SNPdb Accession IDs |
|-----------------------|----------------|-----------------|-------------------------|---------------------------------|-------------------|--------------------------|
| SNP_P3_81236_52854599 | NC_021165.1    | Ca_kabuli_chr06 | 52854599                | TT                              | GG                | 1946453568               |
| SNP_P3_81237_52855504 | NC_021165.1    | Ca_kabuli_chr06 | 52855504                | TT                              | CC                | 1946453569               |
| SNP_P3_81238_52855645 | NC_021165.1    | Ca_kabuli_chr06 | 52855645                | GG                              | AA                | 1946453571               |
| SNP_P3_81239_52855756 | NC_021165.1    | Ca_kabuli_chr06 | 52855756                | GG                              | AA                | 1946453572               |
| SNP_P3_81240_52855852 | NC_021165.1    | Ca_kabuli_chr06 | 52855852                | TT                              | AA                | 1946453573               |
| SNP_P3_81241_52855949 | NC_021165.1    | Ca_kabuli_chr06 | 52855949                | TT                              | CC                | 1946453575               |
| SNP_P3_81242_52856023 | NC_021165.1    | Ca_kabuli_chr06 | 52856023                | GG                              | AA                | 1946453576               |
| SNP_P3_81243_52856029 | NC_021165.1    | Ca_kabuli_chr06 | 52856029                | GG                              | TT                | 1946453578               |
| SNP_P3_81244_52856048 | NC_021165.1    | Ca_kabuli_chr06 | 52856048                | GG                              | AA                | 1946453579               |
| SNP_P3_81245_52857929 | NC_021165.1    | Ca_kabuli_chr06 | 52857929                | TT                              | CC                | 1946453581               |
| SNP_P3_81246_52858012 | NC_021165.1    | Ca_kabuli_chr06 | 52858012                | CC                              | TT                | 1946453582               |
| SNP_P3_81247_52858159 | NC_021165.1    | Ca_kabuli_chr06 | 52858159                | AA                              | CC                | 1946453583               |
| SNP_P3_81248_52858224 | NC_021165.1    | Ca_kabuli_chr06 | 52858224                | CC                              | TT                | 1946453585               |
| SNP_P3_81249_52858227 | NC_021165.1    | Ca_kabuli_chr06 | 52858227                | AA                              | CC                | 1946453586               |
| SNP_P3_81250_52858229 | NC_021165.1    | Ca_kabuli_chr06 | 52858229                | AA                              | CC                | 1946453588               |
| SNP_P3_81251_52858256 | NC_021165.1    | Ca_kabuli_chr06 | 52858256                | TT                              | CC                | 1946453589               |
| SNP_P3_81252_52858263 | NC_021165.1    | Ca_kabuli_chr06 | 52858263                | TT                              | AA                | 1946453591               |
| SNP_P3_81253_52858269 | NC_021165.1    | Ca_kabuli_chr06 | 52858269                | CC                              | AA                | 1946453592               |
| SNP_P3_81255_52858359 | NC_021165.1    | Ca_kabuli_chr06 | 52858359                | AA                              | GG                | 1946453593               |
| SNP_P3_81257_52858687 | NC_021165.1    | Ca_kabuli_chr06 | 52858687                | AA                              | GG                | 1946453595               |
| SNP_P3_81258_52858706 | NC_021165.1    | Ca_kabuli_chr06 | 52858706                | CC                              | TT                | 1946453596               |
| SNP_P3_81259_52858987 | NC_021165.1    | Ca_kabuli_chr06 | 52858987                | TT                              | CC                | 1946453598               |
| SNP_P3_81262_52862751 | NC_021165.1    | Ca_kabuli_chr06 | 52862751                | GG                              | TT                | 1946453599               |
| SNP_P3_81263_52863062 | NC_021165.1    | Ca_kabuli_chr06 | 52863062                | AA                              | TT                | 1946453601               |
| SNP_P3_81264_52863083 | NC_021165.1    | Ca_kabuli_chr06 | 52863083                | TT                              | CC                | 1946453603               |
| SNP_P3_81265_52863208 | NC_021165.1    | Ca_kabuli_chr06 | 52863208                | TT                              | CC                | 1946453604               |
| SNP_P3_81266_52863253 | NC_021165.1    | Ca_kabuli_chr06 | 52863253                | TT                              | GG                | 1946453606               |
| SNP_P3_81267_52868904 | NC_021165.1    | Ca_kabuli_chr06 | 52868904                | CC                              | GG                | 1946453607               |
| SNP_P3_81268_52868927 | NC_021165.1    | Ca_kabuli_chr06 | 52868927                | TT                              | AA                | 1946453608               |
| SNP_P3_81269_52868948 | NC_021165.1    | Ca_kabuli_chr06 | 52868948                | AA                              | TT                | 1946453610               |
| SNP_P3_81270_52868968 | NC_021165.1    | Ca_kabuli_chr06 | 52868968                | GG                              | AA                | 1946453611               |
| SNP_P3_81271_52868997 | NC_021165.1    | Ca_kabuli_chr06 | 52868997                | AA                              | CC                | 1946453613               |
| SNP_P3_81272_52869190 | NC_021165.1    | Ca_kabuli_chr06 | 52869190                | CC                              | TT                | 1946453614               |
| SNP_P3_81273_52869229 | NC_021165.1    | Ca_kabuli_chr06 | 52869229                | AA                              | CC                | 1946453616               |
| SNP_P3_81274_52869268 | NC_021165.1    | Ca_kabuli_chr06 | 52869268                | TT                              | CC                | 1946453617               |
| SNP_P3_81275_52869305 | NC_021165.1    | Ca_kabuli_chr06 | 52869305                | CC                              | AA                | 1946453619               |
| SNP_P3_81276_52869414 | NC_021165.1    | Ca_kabuli_chr06 | 52869414                | CC                              | AA                | 1946453620               |
| SNP_P3_81277_52869658 | NC_021165.1    | Ca_kabuli_chr06 | 52869658                | CC                              | TT                | 1946453621               |
| SNP_P3_81278_52869672 | NC_021165.1    | Ca_kabuli_chr06 | 52869672                | GG                              | TT                | 1946453623               |
| SNP_P3_81279_52869774 | NC_021165.1    | Ca_kabuli_chr06 | 52869774                | AA                              | GG                | 1946453624               |
| SNP_P3_81280_52874923 | NC_021165.1    | Ca_kabuli_chr06 | 52874923                | TT                              | CC                | 1946453626               |
| SNP_P3_81281_52874960 | NC_021165.1    | Ca_kabuli_chr06 | 52874960                | GG                              | CC                | 1946453627               |

| SNPs IDs              | Chromosome IDs | Chromosomes     | Physical positions (bp) | CDC Frontier (Reference genome) | (Pusa 256 & HPNB) | NCBI SNPdb Accession IDs |
|-----------------------|----------------|-----------------|-------------------------|---------------------------------|-------------------|--------------------------|
| SNP_P3_81282_52875272 | NC_021165.1    | Ca_kabuli_chr06 | 52875272                | TT                              | GG                | 1946453629               |
| SNP_P3_81283_52875322 | NC_021165.1    | Ca_kabuli_chr06 | 52875322                | TT                              | AA                | 1946453630               |
| SNP_P3_81284_52879551 | NC_021165.1    | Ca_kabuli_chr06 | 52879551                | GG                              | TT                | 1946453632               |
| SNP_P3_81285_52879598 | NC_021165.1    | Ca_kabuli_chr06 | 52879598                | AA                              | CC                | 1946453634               |
| SNP_P3_81286_52879922 | NC_021165.1    | Ca_kabuli_chr06 | 52879922                | GG                              | AA                | 1946453635               |
| SNP_P3_81287_52885657 | NC_021165.1    | Ca_kabuli_chr06 | 52885657                | AA                              | GG                | 1946453636               |
| SNP_P3_81288_52885741 | NC_021165.1    | Ca_kabuli_chr06 | 52885741                | AA                              | CC                | 1946453638               |
| SNP_P3_81289_52885745 | NC_021165.1    | Ca_kabuli_chr06 | 52885745                | AA                              | TT                | 1946453639               |
| SNP_P3_81290_52885767 | NC_021165.1    | Ca_kabuli_chr06 | 52885767                | GG                              | AA                | 1946453641               |
| SNP_P3_81291_52889842 | NC_021165.1    | Ca_kabuli_chr06 | 52889842                | CC                              | GG                | 1946453642               |
| SNP_P3_81293_52889942 | NC_021165.1    | Ca_kabuli_chr06 | 52889942                | CC                              | GG                | 1946453644               |
| SNP_P3_81294_52890010 | NC_021165.1    | Ca_kabuli_chr06 | 52890010                | TT                              | AA                | 1946453645               |
| SNP_P3_81295_52890054 | NC_021165.1    | Ca_kabuli_chr06 | 52890054                | TT                              | CC                | 1946453647               |
| SNP_P3_81296_52890163 | NC_021165.1    | Ca_kabuli_chr06 | 52890163                | TT                              | AA                | 1946453648               |
| SNP_P3_81297_52890166 | NC_021165.1    | Ca_kabuli_chr06 | 52890166                | GG                              | TT                | 1946453650               |
| SNP_P3_81298_52895607 | NC_021165.1    | Ca_kabuli_chr06 | 52895607                | CC                              | GG                | 1946453651               |
| SNP_P3_81299_52895619 | NC_021165.1    | Ca_kabuli_chr06 | 52895619                | GG                              | TT                | 1946453653               |
| SNP_P3_81300_52895880 | NC_021165.1    | Ca_kabuli_chr06 | 52895880                | TT                              | CC                | 1946453654               |
| SNP_P3_81301_52895884 | NC_021165.1    | Ca_kabuli_chr06 | 52895884                | GG                              | CC                | 1946453655               |
| SNP_P3_81302_52895907 | NC_021165.1    | Ca_kabuli_chr06 | 52895907                | CC                              | TT                | 1946453657               |
| SNP_P3_81303_52895926 | NC_021165.1    | Ca_kabuli_chr06 | 52895926                | TT                              | CC                | 1946453658               |
| SNP_P3_81304_52895953 | NC_021165.1    | Ca_kabuli_chr06 | 52895953                | TT                              | GG                | 1946453660               |
| SNP_P3_81305_52895971 | NC_021165.1    | Ca_kabuli_chr06 | 52895971                | TT                              | CC                | 1946453661               |
| SNP_P3_81306_52895974 | NC_021165.1    | Ca_kabuli_chr06 | 52895974                | AA                              | GG                | 1946453663               |
| SNP_P3_81307_52897557 | NC_021165.1    | Ca_kabuli_chr06 | 52897557                | CC                              | AA                | 1946453664               |
| SNP_P3_81309_52910871 | NC_021165.1    | Ca_kabuli_chr06 | 52910871                | TT                              | CC                | 1946453666               |
| SNP_P3_81310_52910872 | NC_021165.1    | Ca_kabuli_chr06 | 52910872                | CC                              | TT                | 1946453667               |
| SNP_P3_81311_52910919 | NC_021165.1    | Ca_kabuli_chr06 | 52910919                | TT                              | CC                | 1946453669               |
| SNP_P3_81312_52911217 | NC_021165.1    | Ca_kabuli_chr06 | 52911217                | CC                              | AA                | 1946453670               |
| SNP_P3_81313_52933808 | NC_021165.1    | Ca_kabuli_chr06 | 52933808                | CC                              | TT                | 1946453672               |
| SNP_P3_81314_52934152 | NC_021165.1    | Ca_kabuli_chr06 | 52934152                | GG                              | AA                | 1946453673               |
| SNP_P3_81315_52934159 | NC_021165.1    | Ca_kabuli_chr06 | 52934159                | GG                              | AA                | 1946453675               |
| SNP_P3_81317_52951982 | NC_021165.1    | Ca_kabuli_chr06 | 52951982                | TT                              | CC                | 1946453676               |
| SNP_P3_81318_52951991 | NC_021165.1    | Ca_kabuli_chr06 | 52951991                | AA                              | TT                | 1946453678               |
| SNP_P3_81319_52952008 | NC_021165.1    | Ca_kabuli_chr06 | 52952008                | CC                              | TT                | 1946453679               |
| SNP_P3_81320_52956102 | NC_021165.1    | Ca_kabuli_chr06 | 52956102                | TT                              | CC                | 1946453680               |
| SNP_P3_81321_52956171 | NC_021165.1    | Ca_kabuli_chr06 | 52956171                | AA                              | GG                | 1946453682               |
| SNP_P3_81322_52956180 | NC_021165.1    | Ca_kabuli_chr06 | 52956180                | TT                              | AA                | 1946453683               |
| SNP_P3_81323_52958944 | NC_021165.1    | Ca_kabuli_chr06 | 52958944                | AA                              | CC                | 1946453685               |
| SNP_P3_81324_52958962 | NC_021165.1    | Ca_kabuli_chr06 | 52958962                | AA                              | GG                | 1946453686               |
| SNP_P3_81325_52959434 | NC_021165.1    | Ca_kabuli_chr06 | 52959434                | AA                              | CC                | 1946453688               |
| SNP_P3_81326_52959522 | NC_021165.1    | Ca_kabuli_chr06 | 52959522                | TT                              | CC                | 1946453690               |

| SNPs IDs              | Chromosome IDs | Chromosomes     | Physical positions (bp) | CDC Frontier (Reference genome) | (Pusa 256 & HPNB) | NCBI SNPdb Accession IDs |
|-----------------------|----------------|-----------------|-------------------------|---------------------------------|-------------------|--------------------------|
| SNP_P3_81327_52959526 | NC_021165.1    | Ca_kabuli_chr06 | 52959526                | AA                              | CC                | 1946453691               |
| SNP_P3_81328_52960064 | NC_021165.1    | Ca_kabuli_chr06 | 52960064                | AA                              | TT                | 1946453693               |
| SNP_P3_81329_52960348 | NC_021165.1    | Ca_kabuli_chr06 | 52960348                | CC                              | TT                | 1946453694               |
| SNP_P3_81330_52960369 | NC_021165.1    | Ca_kabuli_chr06 | 52960369                | GG                              | CC                | 1946453696               |
| SNP_P3_81331_52960760 | NC_021165.1    | Ca_kabuli_chr06 | 52960760                | CC                              | TT                | 1946453697               |
| SNP_P3_81332_52960780 | NC_021165.1    | Ca_kabuli_chr06 | 52960780                | CC                              | AA                | 1946453699               |
| SNP_P3_81333_52960804 | NC_021165.1    | Ca_kabuli_chr06 | 52960804                | AA                              | TT                | 1946453700               |
| SNP_P3_81334_52964901 | NC_021165.1    | Ca_kabuli_chr06 | 52964901                | TT                              | CC                | 1946453702               |
| SNP_P3_81336_52999472 | NC_021165.1    | Ca_kabuli_chr06 | 52999472                | AA                              | GG                | 1946453703               |
| SNP_P3_81337_53002098 | NC_021165.1    | Ca_kabuli_chr06 | 53002098                | CC                              | GG                | 1946453705               |
| SNP_P3_81338_53005538 | NC_021165.1    | Ca_kabuli_chr06 | 53005538                | GG                              | TT                | 1946453706               |
| SNP_P3_81339_53006271 | NC_021165.1    | Ca_kabuli_chr06 | 53006271                | AA                              | GG                | 1946453708               |
| SNP_P3_81340_53010148 | NC_021165.1    | Ca_kabuli_chr06 | 53010148                | AA                              | GG                | 1946453709               |
| SNP_P3_81341_53010450 | NC_021165.1    | Ca_kabuli_chr06 | 53010450                | GG                              | AA                | 1946453710               |
| SNP_P3_81343_53011073 | NC_021165.1    | Ca_kabuli_chr06 | 53011073                | CC                              | TT                | 1946453712               |
| SNP_P3_81344_53013777 | NC_021165.1    | Ca_kabuli_chr06 | 53013777                | AA                              | CC                | 1946453713               |
| SNP_P3_81345_53039272 | NC_021165.1    | Ca_kabuli_chr06 | 53039272                | GG                              | AA                | 1946453715               |
| SNP_P3_81346_53039308 | NC_021165.1    | Ca_kabuli_chr06 | 53039308                | AA                              | CC                | 1946453717               |
| SNP_P3_81347_53045374 | NC_021165.1    | Ca_kabuli_chr06 | 53045374                | CC                              | GG                | 1946453718               |
| SNP_P3_81348_53045382 | NC_021165.1    | Ca_kabuli_chr06 | 53045382                | TT                              | GG                | 1946453720               |
| SNP_P3_81349_53045397 | NC_021165.1    | Ca_kabuli_chr06 | 53045397                | TT                              | CC                | 1946453721               |
| SNP_P3_81351_53057658 | NC_021165.1    | Ca_kabuli_chr06 | 53057658                | AA                              | GG                | 1946453722               |
| SNP_P3_81352_53057659 | NC_021165.1    | Ca_kabuli_chr06 | 53057659                | AA                              | TT                | 1946453724               |
| SNP_P3_81353_53057663 | NC_021165.1    | Ca_kabuli_chr06 | 53057663                | CC                              | GG                | 1946453725               |
| SNP_P3_81354_53057676 | NC_021165.1    | Ca_kabuli_chr06 | 53057676                | AA                              | GG                | 1946453727               |
| SNP_P3_81355_53057913 | NC_021165.1    | Ca_kabuli_chr06 | 53057913                | TT                              | CC                | 1946453728               |
| SNP_P3_81356_53057951 | NC_021165.1    | Ca_kabuli_chr06 | 53057951                | TT                              | CC                | 1946453730               |
| SNP_P3_81357_53057972 | NC_021165.1    | Ca_kabuli_chr06 | 53057972                | AA                              | GG                | 1946453731               |
| SNP_P3_81358_53057973 | NC_021165.1    | Ca_kabuli_chr06 | 53057973                | GG                              | AA                | 1946453732               |
| SNP_P3_81359_53058040 | NC_021165.1    | Ca_kabuli_chr06 | 53058040                | GG                              | CC                | 1946453734               |
| SNP_P3_81360_53058053 | NC_021165.1    | Ca_kabuli_chr06 | 53058053                | CC                              | AA                | 1946453735               |
| SNP_P3_81361_53058085 | NC_021165.1    | Ca_kabuli_chr06 | 53058085                | GG                              | TT                | 1946453737               |
| SNP_P3_81363_53070476 | NC_021165.1    | Ca_kabuli_chr06 | 53070476                | AA                              | TT                | 1946453738               |
| SNP_P3_81364_53070900 | NC_021165.1    | Ca_kabuli_chr06 | 53070900                | CC                              | TT                | 1946453739               |
| SNP_P3_81365_53070912 | NC_021165.1    | Ca_kabuli_chr06 | 53070912                | TT                              | CC                | 1946453741               |
| SNP_P3_81367_53113798 | NC_021165.1    | Ca_kabuli_chr06 | 53113798                | TT                              | CC                | 1946453742               |
| SNP_P3_81368_53126812 | NC_021165.1    | Ca_kabuli_chr06 | 53126812                | AA                              | GG                | 1946453744               |
| SNP_P3_81369_53160693 | NC_021165.1    | Ca_kabuli_chr06 | 53160693                | GG                              | AA                | 1946453746               |
| SNP_P3_81370_53214930 | NC_021165.1    | Ca_kabuli_chr06 | 53214930                | CC                              | TT                | 1946453747               |
| SNP_P3_81371_53217679 | NC_021165.1    | Ca_kabuli_chr06 | 53217679                | GG                              | CC                | 1946453749               |
| SNP_P3_81373_53219850 | NC_021165.1    | Ca_kabuli_chr06 | 53219850                | TT                              | AA                | 1946453750               |
| SNP_P3_81375_53304304 | NC_021165.1    | Ca_kabuli_chr06 | 53304304                | AA                              | TT                | 1946453752               |

| SNPs IDs              | Chromosome IDs | Chromosomes     | Physical positions (bp) | CDC Frontier (Reference genome) | (Pusa 256 & HPNB) | NCBI SNPdb Accession IDs |
|-----------------------|----------------|-----------------|-------------------------|---------------------------------|-------------------|--------------------------|
| SNP_P3_81376_53304345 | NC_021165.1    | Ca_kabuli_chr06 | 53304345                | TT                              | CC                | 1946453753               |
| SNP_P3_81377_53304459 | NC_021165.1    | Ca_kabuli_chr06 | 53304459                | TT                              | GG                | 1946453755               |
| SNP_P3_81378_53304498 | NC_021165.1    | Ca_kabuli_chr06 | 53304498                | AA                              | GG                | 1946453756               |
| SNP_P3_81379_53304583 | NC_021165.1    | Ca_kabuli_chr06 | 53304583                | AA                              | GG                | 1946453758               |
| SNP_P3_81380_53304630 | NC_021165.1    | Ca_kabuli_chr06 | 53304630                | CC                              | TT                | 1946453759               |
| SNP_P3_81381_53304644 | NC_021165.1    | Ca_kabuli_chr06 | 53304644                | GG                              | TT                | 1946453760               |
| SNP_P3_81382_53304750 | NC_021165.1    | Ca_kabuli_chr06 | 53304750                | CC                              | TT                | 1946453762               |
| SNP_P3_81383_53304760 | NC_021165.1    | Ca_kabuli_chr06 | 53304760                | TT                              | CC                | 1946453763               |
| SNP_P3_81384_53304761 | NC_021165.1    | Ca_kabuli_chr06 | 53304761                | CC                              | TT                | 1946453765               |
| SNP_P3_81385_53304803 | NC_021165.1    | Ca_kabuli_chr06 | 53304803                | AA                              | TT                | 1946453766               |
| SNP_P3_81386_53304830 | NC_021165.1    | Ca_kabuli_chr06 | 53304830                | GG                              | TT                | 1946453768               |
| SNP_P3_81387_53304900 | NC_021165.1    | Ca_kabuli_chr06 | 53304900                | CC                              | TT                | 1946453769               |
| SNP_P3_81388_53304910 | NC_021165.1    | Ca_kabuli_chr06 | 53304910                | GG                              | CC                | 1946453771               |
| SNP_P3_81389_53304942 | NC_021165.1    | Ca_kabuli_chr06 | 53304942                | TT                              | CC                | 1946453772               |
| SNP_P3_81390_53304969 | NC_021165.1    | Ca_kabuli_chr06 | 53304969                | TT                              | CC                | 1946453774               |
| SNP_P3_81391_53305040 | NC_021165.1    | Ca_kabuli_chr06 | 53305040                | AA                              | CC                | 1946453775               |
| SNP_P3_81392_53305059 | NC_021165.1    | Ca_kabuli_chr06 | 53305059                | GG                              | AA                | 1946453777               |
| SNP_P3_81393_53305064 | NC_021165.1    | Ca_kabuli_chr06 | 53305064                | CC                              | TT                | 1946453778               |
| SNP_P3_81394_53305083 | NC_021165.1    | Ca_kabuli_chr06 | 53305083                | TT                              | AA                | 1946453780               |
| SNP_P3_81395_53305092 | NC_021165.1    | Ca_kabuli_chr06 | 53305092                | AA                              | TT                | 1946453781               |
| SNP_P3_81396_53305120 | NC_021165.1    | Ca_kabuli_chr06 | 53305120                | GG                              | CC                | 1946453783               |
| SNP_P3_81397_53305256 | NC_021165.1    | Ca_kabuli_chr06 | 53305256                | GG                              | TT                | 1946453784               |
| SNP_P3_81398_53305293 | NC_021165.1    | Ca_kabuli_chr06 | 53305293                | TT                              | CC                | 1946453786               |
| SNP_P3_81399_53305304 | NC_021165.1    | Ca_kabuli_chr06 | 53305304                | GG                              | AA                | 1946453787               |
| SNP_P3_81401_53305491 | NC_021165.1    | Ca_kabuli_chr06 | 53305491                | TT                              | CC                | 1946453788               |
| SNP_P3_81402_53305503 | NC_021165.1    | Ca_kabuli_chr06 | 53305503                | TT                              | GG                | 1946453790               |
| SNP_P3_81403_53305581 | NC_021165.1    | Ca_kabuli_chr06 | 53305581                | CC                              | TT                | 1946453791               |
| SNP_P3_81404_53305597 | NC_021165.1    | Ca_kabuli_chr06 | 53305597                | TT                              | CC                | 1946453793               |
| SNP_P3_81405_53305612 | NC_021165.1    | Ca_kabuli_chr06 | 53305612                | TT                              | CC                | 1946453794               |
| SNP_P3_81406_53305711 | NC_021165.1    | Ca_kabuli_chr06 | 53305711                | AA                              | GG                | 1946453796               |
| SNP_P3_81407_53309094 | NC_021165.1    | Ca_kabuli_chr06 | 53309094                | AA                              | TT                | 1946453797               |
| SNP_P3_81408_53309204 | NC_021165.1    | Ca_kabuli_chr06 | 53309204                | AA                              | CC                | 1946453799               |
| SNP_P3_81409_53309249 | NC_021165.1    | Ca_kabuli_chr06 | 53309249                | TT                              | CC                | 1946453801               |
| SNP_P3_81410_53310289 | NC_021165.1    | Ca_kabuli_chr06 | 53310289                | TT                              | GG                | 1946453802               |
| SNP_P3_81411_53310315 | NC_021165.1    | Ca_kabuli_chr06 | 53310315                | AA                              | TT                | 1946453804               |
| SNP_P3_81412_53310359 | NC_021165.1    | Ca_kabuli_chr06 | 53310359                | GG                              | AA                | 1946453805               |
| SNP_P3_81413_53310392 | NC_021165.1    | Ca_kabuli_chr06 | 53310392                | GG                              | AA                | 1946453806               |
| SNP_P3_81414_53310468 | NC_021165.1    | Ca_kabuli_chr06 | 53310468                | GG                              | AA                | 1946453808               |
| SNP_P3_81415_53310491 | NC_021165.1    | Ca_kabuli_chr06 | 53310491                | GG                              | AA                | 1946453809               |
| SNP_P3_81416_53310648 | NC_021165.1    | Ca_kabuli_chr06 | 53310648                | TT                              | GG                | 1946453811               |
| SNP_P3_81417_53310930 | NC_021165.1    | Ca_kabuli_chr06 | 53310930                | AA                              | TT                | 1946453812               |
| SNP_P3_81418_53311167 | NC_021165.1    | Ca_kabuli_chr06 | 53311167                | GG                              | AA                | 1946453814               |



| SNPs IDs              | Chromosome IDs | Chromosomes     | Physical positions (bp) | CDC Frontier (Reference genome) | (Pusa 256 & HPNB) | NCBI SNPdb Accession IDs |
|-----------------------|----------------|-----------------|-------------------------|---------------------------------|-------------------|--------------------------|
| SNP_P3_81419_53311208 | NC_021165.1    | Ca_kabuli_chr06 | 53311208                | AA                              | TT                | 1946453815               |
| SNP_P3_81421_53312050 | NC_021165.1    | Ca_kabuli_chr06 | 53312050                | GG                              | AA                | 1946453817               |
| SNP_P3_81422_53312174 | NC_021165.1    | Ca_kabuli_chr06 | 53312174                | GG                              | CC                | 1946453818               |
| SNP_P3_81423_53312233 | NC_021165.1    | Ca_kabuli_chr06 | 53312233                | CC                              | AA                | 1946453820               |
| SNP_P3_81425_53312388 | NC_021165.1    | Ca_kabuli_chr06 | 53312388                | TT                              | CC                | 1946453824               |
| SNP_P3_81426_53312435 | NC_021165.1    | Ca_kabuli_chr06 | 53312435                | GG                              | CC                | 1946453825               |
| SNP_P3_81427_53312476 | NC_021165.1    | Ca_kabuli_chr06 | 53312476                | TT                              | AA                | 1946453826               |
| SNP_P3_81428_53312547 | NC_021165.1    | Ca_kabuli_chr06 | 53312547                | AA                              | CC                | 1946453828               |
| SNP_P3_81429_53312551 | NC_021165.1    | Ca_kabuli_chr06 | 53312551                | TT                              | AA                | 1946453829               |
| SNP_P3_81430_53312614 | NC_021165.1    | Ca_kabuli_chr06 | 53312614                | AA                              | CC                | 1946453831               |
| SNP_P3_81431_53312841 | NC_021165.1    | Ca_kabuli_chr06 | 53312841                | CC                              | AA                | 1946453832               |
| SNP_P3_81432_53312868 | NC_021165.1    | Ca_kabuli_chr06 | 53312868                | TT                              | AA                | 1946453834               |
| SNP_P3_81433_53312908 | NC_021165.1    | Ca_kabuli_chr06 | 53312908                | GG                              | AA                | 1946453835               |
| SNP_P3_81434_53312951 | NC_021165.1    | Ca_kabuli_chr06 | 53312951                | CC                              | GG                | 1946453837               |
| SNP_P3_81435_53312994 | NC_021165.1    | Ca_kabuli_chr06 | 53312994                | GG                              | CC                | 1946453838               |
| SNP_P3_81436_53314695 | NC_021165.1    | Ca_kabuli_chr06 | 53314695                | GG                              | AA                | 1946453840               |
| SNP_P3_81437_53314718 | NC_021165.1    | Ca_kabuli_chr06 | 53314718                | AA                              | CC                | 1946453841               |
| SNP_P3_81438_53314731 | NC_021165.1    | Ca_kabuli_chr06 | 53314731                | CC                              | TT                | 1946453842               |
| SNP_P3_81439_53321765 | NC_021165.1    | Ca_kabuli_chr06 | 53321765                | AA                              | CC                | 1946453844               |
| SNP_P3_81440_53343731 | NC_021165.1    | Ca_kabuli_chr06 | 53343731                | AA                              | TT                | 1946453845               |
| SNP_P3_81442_53363334 | NC_021165.1    | Ca_kabuli_chr06 | 53363334                | GG                              | TT                | 1946453847               |
| SNP_P3_81443_53363657 | NC_021165.1    | Ca_kabuli_chr06 | 53363657                | AA                              | GG                | 1946453848               |
| SNP_P3_81444_53363681 | NC_021165.1    | Ca_kabuli_chr06 | 53363681                | AA                              | CC                | 1946453850               |
| SNP_P3_81445_53363727 | NC_021165.1    | Ca_kabuli_chr06 | 53363727                | TT                              | GG                | 1946453851               |
| SNP_P3_81446_53390992 | NC_021165.1    | Ca_kabuli_chr06 | 53390992                | AA                              | GG                | 1946453853               |
| SNP_P3_81447_53411173 | NC_021165.1    | Ca_kabuli_chr06 | 53411173                | AA                              | CC                | 1946453854               |
| SNP_P3_81449_53411546 | NC_021165.1    | Ca_kabuli_chr06 | 53411546                | GG                              | TT                | 1946453856               |
| SNP_P3_81450_53413531 | NC_021165.1    | Ca_kabuli_chr06 | 53413531                | TT                              | CC                | 1946453857               |
| SNP_P3_81451_53413543 | NC_021165.1    | Ca_kabuli_chr06 | 53413543                | AA                              | GG                | 1946453859               |
| SNP_P3_81453_53414073 | NC_021165.1    | Ca_kabuli_chr06 | 53414073                | TT                              | GG                | 1946453860               |
| SNP_P3_81455_53419959 | NC_021165.1    | Ca_kabuli_chr06 | 53419959                | AA                              | TT                | 1946453861               |
| SNP_P3_81456_53487314 | NC_021165.1    | Ca_kabuli_chr06 | 53487314                | GG                              | AA                | 1946453863               |
| SNP_P3_81457_53488836 | NC_021165.1    | Ca_kabuli_chr06 | 53488836                | AA                              | GG                | 1946453864               |
| SNP_P3_81458_53493546 | NC_021165.1    | Ca_kabuli_chr06 | 53493546                | TT                              | CC                | 1946453866               |
| SNP_P3_81459_53493555 | NC_021165.1    | Ca_kabuli_chr06 | 53493555                | CC                              | AA                | 1946453867               |
| SNP_P3_81460_53493580 | NC_021165.1    | Ca_kabuli_chr06 | 53493580                | AA                              | CC                | 1946453869               |
| SNP_P3_81461_53493733 | NC_021165.1    | Ca_kabuli_chr06 | 53493733                | AA                              | CC                | 1946453870               |
| SNP_P3_81462_53522023 | NC_021165.1    | Ca_kabuli_chr06 | 53522023                | TT                              | CC                | 1946453872               |
| SNP_P3_81463_53524655 | NC_021165.1    | Ca_kabuli_chr06 | 53524655                | GG                              | AA                | 1946453873               |
| SNP_P3_81464_53531350 | NC_021165.1    | Ca_kabuli_chr06 | 53531350                | GG                              | CC                | 1946453875               |
| SNP_P3_81465_53531623 | NC_021165.1    | Ca_kabuli_chr06 | 53531623                | CC                              | AA                | 1946453876               |
| SNP_P3_81466_53547845 | NC_021165.1    | Ca_kabuli_chr06 | 53547845                | TT                              | CC                | 1946453877               |

| SNPs IDs              | Chromosome IDs | Chromosomes     | Physical positions (bp) | CDC Frontier (Reference genome) | (Pusa 256 & HPNB) | NCBI SNPdb Accession IDs |
|-----------------------|----------------|-----------------|-------------------------|---------------------------------|-------------------|--------------------------|
| SNP_P3_81468_53585323 | NC_021165.1    | Ca_kabuli_chr06 | 53585323                | AA                              | GG                | 1946453879               |
| SNP_P3_81469_53587272 | NC_021165.1    | Ca_kabuli_chr06 | 53587272                | TT                              | AA                | 1946453881               |
| SNP_P3_81470_53599299 | NC_021165.1    | Ca_kabuli_chr06 | 53599299                | CC                              | TT                | 1946453882               |
| SNP_P3_81473_53646431 | NC_021165.1    | Ca_kabuli_chr06 | 53646431                | TT                              | GG                | 1946453884               |
| SNP_P3_81474_53646432 | NC_021165.1    | Ca_kabuli_chr06 | 53646432                | GG                              | TT                | 1946453885               |
| SNP_P3_81475_53664495 | NC_021165.1    | Ca_kabuli_chr06 | 53664495                | TT                              | AA                | 1946453887               |
| SNP_P3_81476_53670483 | NC_021165.1    | Ca_kabuli_chr06 | 53670483                | TT                              | AA                | 1946453888               |
| SNP_P3_81477_53671673 | NC_021165.1    | Ca_kabuli_chr06 | 53671673                | CC                              | AA                | 1946453889               |
| SNP_P3_81479_53691467 | NC_021165.1    | Ca_kabuli_chr06 | 53691467                | TT                              | AA                | 1946453891               |
| SNP_P3_81480_53692220 | NC_021165.1    | Ca_kabuli_chr06 | 53692220                | AA                              | CC                | 1946453892               |
| SNP_P3_81481_53723223 | NC_021165.1    | Ca_kabuli_chr06 | 53723223                | AA                              | GG                | 1946453894               |
| SNP_P3_81482_53730125 | NC_021165.1    | Ca_kabuli_chr06 | 53730125                | AA                              | TT                | 1946453895               |
| SNP_P3_81483_53730484 | NC_021165.1    | Ca_kabuli_chr06 | 53730484                | GG                              | AA                | 1946453896               |
| SNP_P3_81484_53736444 | NC_021165.1    | Ca_kabuli_chr06 | 53736444                | CC                              | TT                | 1946453897               |
| SNP_P3_81485_53739129 | NC_021165.1    | Ca_kabuli_chr06 | 53739129                | GG                              | AA                | 1946453899               |
| SNP_P3_81486_53761180 | NC_021165.1    | Ca_kabuli_chr06 | 53761180                | AA                              | TT                | 1946453900               |
| SNP_P3_81487_53761184 | NC_021165.1    | Ca_kabuli_chr06 | 53761184                | GG                              | TT                | 1946453902               |
| SNP_P3_81488_53778948 | NC_021165.1    | Ca_kabuli_chr06 | 53778948                | AA                              | CC                | 1946453903               |
| SNP_P3_81489_53797720 | NC_021165.1    | Ca_kabuli_chr06 | 53797720                | TT                              | CC                | 1946453905               |
| SNP_P3_81490_53797876 | NC_021165.1    | Ca_kabuli_chr06 | 53797876                | CC                              | GG                | 1946453906               |
| SNP_P3_81491_53797942 | NC_021165.1    | Ca_kabuli_chr06 | 53797942                | AA                              | TT                | 1946453907               |
| SNP_P3_81492_53798761 | NC_021165.1    | Ca_kabuli_chr06 | 53798761                | CC                              | AA                | 1946453909               |
| SNP_P3_81494_53815021 | NC_021165.1    | Ca_kabuli_chr06 | 53815021                | AA                              | GG                | 1946453910               |
| SNP_P3_81495_53815025 | NC_021165.1    | Ca_kabuli_chr06 | 53815025                | AA                              | GG                | 1946453912               |
| SNP_P3_81496_53815108 | NC_021165.1    | Ca_kabuli_chr06 | 53815108                | CC                              | TT                | 1946453913               |
| SNP_P3_81497_53842817 | NC_021165.1    | Ca_kabuli_chr06 | 53842817                | AA                              | GG                | 1946453915               |
| SNP_P3_81498_53886743 | NC_021165.1    | Ca_kabuli_chr06 | 53886743                | GG                              | CC                | 1946453916               |
| SNP_P3_81499_53886745 | NC_021165.1    | Ca_kabuli_chr06 | 53886745                | TT                              | CC                | 1946453917               |
| SNP_P3_81501_53928170 | NC_021165.1    | Ca_kabuli_chr06 | 53928170                | CC                              | GG                | 1946453919               |
| SNP_P3_81502_53980106 | NC_021165.1    | Ca_kabuli_chr06 | 53980106                | AA                              | TT                | 1946453920               |
| SNP_P3_81503_53980154 | NC_021165.1    | Ca_kabuli_chr06 | 53980154                | CC                              | TT                | 1946453922               |
| SNP_P3_81504_53980155 | NC_021165.1    | Ca_kabuli_chr06 | 53980155                | AA                              | GG                | 1946453923               |
| SNP_P3_81505_53986487 | NC_021165.1    | Ca_kabuli_chr06 | 53986487                | TT                              | AA                | 1946453925               |
| SNP_P3_81506_53987054 | NC_021165.1    | Ca_kabuli_chr06 | 53987054                | AA                              | GG                | 1946453926               |
| SNP_P3_81507_53999411 | NC_021165.1    | Ca_kabuli_chr06 | 53999411                | GG                              | AA                | 1946453928               |
| SNP_P3_81508_54019206 | NC_021165.1    | Ca_kabuli_chr06 | 54019206                | TT                              | AA                | 1946453929               |
| SNP_P3_81509_54025796 | NC_021165.1    | Ca_kabuli_chr06 | 54025796                | CC                              | TT                | 1946453931               |
| SNP_P3_81510_54028606 | NC_021165.1    | Ca_kabuli_chr06 | 54028606                | TT                              | GG                | 1946453932               |
| SNP_P3_81511_54028611 | NC_021165.1    | Ca_kabuli_chr06 | 54028611                | TT                              | AA                | 1946453934               |
| SNP_P3_81512_54028666 | NC_021165.1    | Ca_kabuli_chr06 | 54028666                | TT                              | CC                | 1946453935               |
| SNP_P3_81513_54028884 | NC_021165.1    | Ca_kabuli_chr06 | 54028884                | AA                              | CC                | 1946453936               |
| SNP_P3_81514_54028885 | NC_021165.1    | Ca_kabuli_chr06 | 54028885                | AA                              | GG                | 1946453938               |

| SNPs IDs              | Chromosome IDs | Chromosomes     | Physical positions (bp) | CDC Frontier (Reference genome) | (Pusa 256 & HPNB) | NCBI SNPdb Accession IDs |
|-----------------------|----------------|-----------------|-------------------------|---------------------------------|-------------------|--------------------------|
| SNP_P3_81515_54028892 | NC_021165.1    | Ca_kabuli_chr06 | 54028892                | CC                              | TT                | 1946453939               |
| SNP_P3_81516_54055622 | NC_021165.1    | Ca_kabuli_chr06 | 54055622                | GG                              | CC                | 1946453941               |
| SNP_P3_81517_54067251 | NC_021165.1    | Ca_kabuli_chr06 | 54067251                | CC                              | GG                | 1946453942               |
| SNP_P3_81518_54067862 | NC_021165.1    | Ca_kabuli_chr06 | 54067862                | AA                              | GG                | 1946453944               |
| SNP_P3_81519_54067956 | NC_021165.1    | Ca_kabuli_chr06 | 54067956                | AA                              | TT                | 1946453945               |
| SNP_P3_81521_54068770 | NC_021165.1    | Ca_kabuli_chr06 | 54068770                | GG                              | TT                | 1946453947               |
| SNP_P3_81522_54068841 | NC_021165.1    | Ca_kabuli_chr06 | 54068841                | GG                              | TT                | 1946453948               |
| SNP_P3_81525_54069012 | NC_021165.1    | Ca_kabuli_chr06 | 54069012                | TT                              | CC                | 1946453950               |
| SNP_P3_81526_54069087 | NC_021165.1    | Ca_kabuli_chr06 | 54069087                | GG                              | TT                | 1946453951               |
| SNP_P3_81527_54069103 | NC_021165.1    | Ca_kabuli_chr06 | 54069103                | CC                              | TT                | 1946453953               |
| SNP_P3_81529_54069745 | NC_021165.1    | Ca_kabuli_chr06 | 54069745                | AA                              | CC                | 1946453954               |
| SNP_P3_81530_54069773 | NC_021165.1    | Ca_kabuli_chr06 | 54069773                | GG                              | AA                | 1946453956               |
| SNP_P3_81531_54069784 | NC_021165.1    | Ca_kabuli_chr06 | 54069784                | AA                              | CC                | 1946453957               |
| SNP_P3_81532_54069833 | NC_021165.1    | Ca_kabuli_chr06 | 54069833                | TT                              | CC                | 1946453959               |
| SNP_P3_81534_54069883 | NC_021165.1    | Ca_kabuli_chr06 | 54069883                | TT                              | AA                | 1946453960               |
| SNP_P3_81535_54069995 | NC_021165.1    | Ca_kabuli_chr06 | 54069995                | CC                              | TT                | 1946453962               |
| SNP_P3_81536_54070066 | NC_021165.1    | Ca_kabuli_chr06 | 54070066                | TT                              | AA                | 1946453963               |
| SNP_P3_81538_54070176 | NC_021165.1    | Ca_kabuli_chr06 | 54070176                | CC                              | GG                | 1946453964               |
| SNP_P3_81539_54070215 | NC_021165.1    | Ca_kabuli_chr06 | 54070215                | CC                              | TT                | 1946453966               |
| SNP_P3_81540_54070231 | NC_021165.1    | Ca_kabuli_chr06 | 54070231                | GG                              | AA                | 1946453968               |
| SNP_P3_81542_54070272 | NC_021165.1    | Ca_kabuli_chr06 | 54070272                | TT                              | AA                | 1946453969               |
| SNP_P3_81543_54070274 | NC_021165.1    | Ca_kabuli_chr06 | 54070274                | CC                              | TT                | 1946453971               |
| SNP_P3_81544_54070277 | NC_021165.1    | Ca_kabuli_chr06 | 54070277                | AA                              | CC                | 1946453972               |
| SNP_P3_81545_54070287 | NC_021165.1    | Ca_kabuli_chr06 | 54070287                | CC                              | TT                | 1946453974               |
| SNP_P3_81547_54102279 | NC_021165.1    | Ca_kabuli_chr06 | 54102279                | GG                              | AA                | 1946453975               |
| SNP_P3_81548_54108807 | NC_021165.1    | Ca_kabuli_chr06 | 54108807                | TT                              | CC                | 1946453977               |
| SNP_P3_81549_54117888 | NC_021165.1    | Ca_kabuli_chr06 | 54117888                | AA                              | TT                | 1946453978               |
| SNP_P3_81550_54143589 | NC_021165.1    | Ca_kabuli_chr06 | 54143589                | TT                              | CC                | 1946453980               |
| SNP_P3_81552_54143930 | NC_021165.1    | Ca_kabuli_chr06 | 54143930                | TT                              | CC                | 1946453981               |
| SNP_P3_81553_54144064 | NC_021165.1    | Ca_kabuli_chr06 | 54144064                | GG                              | AA                | 1946453982               |
| SNP_P3_81555_54144113 | NC_021165.1    | Ca_kabuli_chr06 | 54144113                | AA                              | CC                | 1946453984               |
| SNP_P3_81556_54144316 | NC_021165.1    | Ca_kabuli_chr06 | 54144316                | TT                              | CC                | 1946453985               |
| SNP_P3_81558_54144462 | NC_021165.1    | Ca_kabuli_chr06 | 54144462                | CC                              | GG                | 1946453987               |
| SNP_P3_81559_54144469 | NC_021165.1    | Ca_kabuli_chr06 | 54144469                | AA                              | TT                | 1946453988               |
| SNP_P3_81560_54144516 | NC_021165.1    | Ca_kabuli_chr06 | 54144516                | AA                              | GG                | 1946453990               |
| SNP_P3_81561_54149800 | NC_021165.1    | Ca_kabuli_chr06 | 54149800                | TT                              | CC                | 1946453991               |
| SNP_P3_81562_54150233 | NC_021165.1    | Ca_kabuli_chr06 | 54150233                | GG                              | AA                | 1946453993               |
| SNP_P3_81563_54150268 | NC_021165.1    | Ca_kabuli_chr06 | 54150268                | GG                              | AA                | 1946453994               |
| SNP_P3_81564_54150305 | NC_021165.1    | Ca_kabuli_chr06 | 54150305                | CC                              | AA                | 1946453996               |
| SNP_P3_81565_54150306 | NC_021165.1    | Ca_kabuli_chr06 | 54150306                | GG                              | TT                | 1946453997               |
| SNP_P3_81566_54151589 | NC_021165.1    | Ca_kabuli_chr06 | 54151589                | CC                              | AA                | 1946453998               |
| SNP_P3_81567_54153536 | NC_021165.1    | Ca_kabuli_chr06 | 54153536                | AA                              | GG                | 1946454000               |

| SNPs IDs              | Chromosome IDs | Chromosomes     | Physical positions (bp) | CDC Frontier (Reference genome) | (Pusa 256 & HPNB) | NCBI SNPdb Accession IDs |
|-----------------------|----------------|-----------------|-------------------------|---------------------------------|-------------------|--------------------------|
| SNP_P3_81568_54153574 | NC_021165.1    | Ca_kabuli_chr06 | 54153574                | AA                              | CC                | 1946454001               |
| SNP_P3_81569_54155606 | NC_021165.1    | Ca_kabuli_chr06 | 54155606                | AA                              | CC                | 1946454003               |
| SNP_P3_81570_54157975 | NC_021165.1    | Ca_kabuli_chr06 | 54157975                | GG                              | AA                | 1946454005               |
| SNP_P3_81571_54160348 | NC_021165.1    | Ca_kabuli_chr06 | 54160348                | CC                              | TT                | 1946454006               |
| SNP_P3_81572_54160360 | NC_021165.1    | Ca_kabuli_chr06 | 54160360                | CC                              | TT                | 1946454008               |
| SNP_P3_81573_54160398 | NC_021165.1    | Ca_kabuli_chr06 | 54160398                | GG                              | AA                | 1946454009               |
| SNP_P3_81574_54160654 | NC_021165.1    | Ca_kabuli_chr06 | 54160654                | CC                              | TT                | 1946454011               |
| SNP_P3_81575_54160684 | NC_021165.1    | Ca_kabuli_chr06 | 54160684                | TT                              | CC                | 1946454012               |
| SNP_P3_81576_54160698 | NC_021165.1    | Ca_kabuli_chr06 | 54160698                | GG                              | CC                | 1946454014               |
| SNP_P3_81579_54161054 | NC_021165.1    | Ca_kabuli_chr06 | 54161054                | GG                              | TT                | 1946454015               |
| SNP_P3_81580_54162136 | NC_021165.1    | Ca_kabuli_chr06 | 54162136                | GG                              | AA                | 1946454016               |
| SNP_P3_81581_54162693 | NC_021165.1    | Ca_kabuli_chr06 | 54162693                | TT                              | GG                | 1946454018               |
| SNP_P3_81582_54181083 | NC_021165.1    | Ca_kabuli_chr06 | 54181083                | CC                              | AA                | 1946454019               |
| SNP_P3_81584_54181352 | NC_021165.1    | Ca_kabuli_chr06 | 54181352                | GG                              | TT                | 1946454021               |
| SNP_P3_81585_54181355 | NC_021165.1    | Ca_kabuli_chr06 | 54181355                | CC                              | TT                | 1946454023               |
| SNP_P3_81588_54200102 | NC_021165.1    | Ca_kabuli_chr06 | 54200102                | GG                              | CC                | 1946454024               |
| SNP_P3_81590_54202903 | NC_021165.1    | Ca_kabuli_chr06 | 54202903                | TT                              | AA                | 1946454026               |
| SNP_P3_81592_54220849 | NC_021165.1    | Ca_kabuli_chr06 | 54220849                | AA                              | GG                | 1946454027               |
| SNP_P3_81593_54224023 | NC_021165.1    | Ca_kabuli_chr06 | 54224023                | CC                              | TT                | 1946454029               |
| SNP_P3_81594_54237032 | NC_021165.1    | Ca_kabuli_chr06 | 54237032                | TT                              | AA                | 1946454030               |
| SNP_P3_81595_54255636 | NC_021165.1    | Ca_kabuli_chr06 | 54255636                | TT                              | CC                | 1946454032               |
| SNP_P3_81596_54257195 | NC_021165.1    | Ca_kabuli_chr06 | 54257195                | TT                              | GG                | 1946454033               |
| SNP_P3_81597_54257207 | NC_021165.1    | Ca_kabuli_chr06 | 54257207                | AA                              | CC                | 1946454035               |
| SNP_P3_81598_54257212 | NC_021165.1    | Ca_kabuli_chr06 | 54257212                | AA                              | GG                | 1946454036               |
| SNP_P3_81600_54259514 | NC_021165.1    | Ca_kabuli_chr06 | 54259514                | TT                              | AA                | 1946454038               |
| SNP_P3_81601_54282777 | NC_021165.1    | Ca_kabuli_chr06 | 54282777                | GG                              | AA                | 1946454039               |
| SNP_P3_81602_54288666 | NC_021165.1    | Ca_kabuli_chr06 | 54288666                | AA                              | TT                | 1946454040               |
| SNP_P3_81604_54304396 | NC_021165.1    | Ca_kabuli_chr06 | 54304396                | GG                              | CC                | 1946454042               |
| SNP_P3_81605_54304408 | NC_021165.1    | Ca_kabuli_chr06 | 54304408                | AA                              | TT                | 1946454043               |
| SNP_P3_81606_54304581 | NC_021165.1    | Ca_kabuli_chr06 | 54304581                | CC                              | TT                | 1946454045               |
| SNP_P3_81607_54304610 | NC_021165.1    | Ca_kabuli_chr06 | 54304610                | TT                              | CC                | 1946454046               |
| SNP_P3_81608_54304625 | NC_021165.1    | Ca_kabuli_chr06 | 54304625                | TT                              | AA                | 1946454048               |
| SNP_P3_81609_54309348 | NC_021165.1    | Ca_kabuli_chr06 | 54309348                | AA                              | GG                | 1946454049               |
| SNP_P3_81610_54316348 | NC_021165.1    | Ca_kabuli_chr06 | 54316348                | AA                              | CC                | 1946454051               |
| SNP_P3_81611_54317832 | NC_021165.1    | Ca_kabuli_chr06 | 54317832                | GG                              | AA                | 1946454053               |
| SNP_P3_81612_54319003 | NC_021165.1    | Ca_kabuli_chr06 | 54319003                | TT                              | CC                | 1946454054               |
| SNP_P3_81613_54319598 | NC_021165.1    | Ca_kabuli_chr06 | 54319598                | TT                              | AA                | 1946454055               |
| SNP_P3_81614_54322687 | NC_021165.1    | Ca_kabuli_chr06 | 54322687                | TT                              | CC                | 1946454057               |
| SNP_P3_81615_54322746 | NC_021165.1    | Ca_kabuli_chr06 | 54322746                | AA                              | CC                | 1946454058               |
| SNP_P3_81616_54322940 | NC_021165.1    | Ca_kabuli_chr06 | 54322940                | CC                              | TT                | 1946454060               |
| SNP_P3_81618_54323027 | NC_021165.1    | Ca_kabuli_chr06 | 54323027                | AA                              | CC                | 1946454061               |
| SNP_P3_81619_54323034 | NC_021165.1    | Ca_kabuli_chr06 | 54323034                | GG                              | CC                | 1946454063               |

| SNPs IDs              | Chromosome IDs | Chromosomes     | Physical positions (bp) | CDC Frontier (Reference genome) | (Pusa 256 & HPNB) | NCBI SNPdb Accession IDs |
|-----------------------|----------------|-----------------|-------------------------|---------------------------------|-------------------|--------------------------|
| SNP_P3_81620_54323261 | NC_021165.1    | Ca_kabuli_chr06 | 54323261                | GG                              | TT                | 1946454064               |
| SNP_P3_81621_54323801 | NC_021165.1    | Ca_kabuli_chr06 | 54323801                | GG                              | AA                | 1946454066               |
| SNP_P3_81622_54323834 | NC_021165.1    | Ca_kabuli_chr06 | 54323834                | GG                              | AA                | 1946454067               |
| SNP_P3_81623_54324006 | NC_021165.1    | Ca_kabuli_chr06 | 54324006                | TT                              | CC                | 1946454069               |
| SNP_P3_81624_54324012 | NC_021165.1    | Ca_kabuli_chr06 | 54324012                | GG                              | AA                | 1946454070               |
| SNP_P3_81626_54329870 | NC_021165.1    | Ca_kabuli_chr06 | 54329870                | TT                              | CC                | 1946454072               |
| SNP_P3_81627_54330578 | NC_021165.1    | Ca_kabuli_chr06 | 54330578                | GG                              | CC                | 1946454073               |
| SNP_P3_81628_54330808 | NC_021165.1    | Ca_kabuli_chr06 | 54330808                | AA                              | GG                | 1946454074               |
| SNP_P3_81630_54332898 | NC_021165.1    | Ca_kabuli_chr06 | 54332898                | GG                              | CC                | 1946454076               |
| SNP_P3_81631_54333570 | NC_021165.1    | Ca_kabuli_chr06 | 54333570                | CC                              | TT                | 1946454078               |
| SNP_P3_81632_54333829 | NC_021165.1    | Ca_kabuli_chr06 | 54333829                | CC                              | TT                | 1946454079               |
| SNP_P3_81634_54339144 | NC_021165.1    | Ca_kabuli_chr06 | 54339144                | AA                              | GG                | 1946454081               |
| SNP_P3_81638_54339979 | NC_021165.1    | Ca_kabuli_chr06 | 54339979                | GG                              | AA                | 1946454082               |
| SNP_P3_81639_54340166 | NC_021165.1    | Ca_kabuli_chr06 | 54340166                | TT                              | CC                | 1946454084               |
| SNP_P3_81640_54340168 | NC_021165.1    | Ca_kabuli_chr06 | 54340168                | GG                              | AA                | 1946454085               |
| SNP_P3_81641_54340186 | NC_021165.1    | Ca_kabuli_chr06 | 54340186                | AA                              | TT                | 1946454087               |
| SNP_P3_81642_54340237 | NC_021165.1    | Ca_kabuli_chr06 | 54340237                | AA                              | TT                | 1946454088               |
| SNP_P3_81643_54340303 | NC_021165.1    | Ca_kabuli_chr06 | 54340303                | GG                              | AA                | 1946454090               |
| SNP_P3_81644_54340309 | NC_021165.1    | Ca_kabuli_chr06 | 54340309                | TT                              | CC                | 1946454091               |
| SNP_P3_81645_54340518 | NC_021165.1    | Ca_kabuli_chr06 | 54340518                | TT                              | CC                | 1946454092               |
| SNP_P3_81646_54340539 | NC_021165.1    | Ca_kabuli_chr06 | 54340539                | GG                              | AA                | 1946454094               |
| SNP_P3_81647_54340560 | NC_021165.1    | Ca_kabuli_chr06 | 54340560                | TT                              | CC                | 1946454095               |
| SNP_P3_81648_54340568 | NC_021165.1    | Ca_kabuli_chr06 | 54340568                | TT                              | CC                | 1946454097               |
| SNP_P3_81649_54340621 | NC_021165.1    | Ca_kabuli_chr06 | 54340621                | CC                              | TT                | 1946454098               |
| SNP_P3_81650_54340883 | NC_021165.1    | Ca_kabuli_chr06 | 54340883                | TT                              | CC                | 1946454100               |
| SNP_P3_81651_54341596 | NC_021165.1    | Ca_kabuli_chr06 | 54341596                | GG                              | AA                | 1946454101               |
| SNP_P3_81652_54341757 | NC_021165.1    | Ca_kabuli_chr06 | 54341757                | CC                              | TT                | 1946454103               |
| SNP_P3_81653_54341955 | NC_021165.1    | Ca_kabuli_chr06 | 54341955                | CC                              | AA                | 1946454104               |
| SNP_P3_81654_54341963 | NC_021165.1    | Ca_kabuli_chr06 | 54341963                | AA                              | GG                | 1946454106               |
| SNP_P3_81655_54341964 | NC_021165.1    | Ca_kabuli_chr06 | 54341964                | TT                              | AA                | 1946454108               |
| SNP_P3_81656_54343015 | NC_021165.1    | Ca_kabuli_chr06 | 54343015                | AA                              | GG                | 1946454109               |
| SNP_P3_81657_54343104 | NC_021165.1    | Ca_kabuli_chr06 | 54343104                | AA                              | GG                | 1946454111               |
| SNP_P3_81658_54343147 | NC_021165.1    | Ca_kabuli_chr06 | 54343147                | TT                              | CC                | 1946454112               |
| SNP_P3_81659_54344254 | NC_021165.1    | Ca_kabuli_chr06 | 54344254                | GG                              | AA                | 1946454114               |
| SNP_P3_81660_54345634 | NC_021165.1    | Ca_kabuli_chr06 | 54345634                | TT                              | AA                | 1946454115               |
| SNP_P3_81661_54346801 | NC_021165.1    | Ca_kabuli_chr06 | 54346801                | CC                              | TT                | 1946454117               |
| SNP_P3_81662_54346812 | NC_021165.1    | Ca_kabuli_chr06 | 54346812                | GG                              | AA                | 1946454118               |
| SNP_P3_81663_54349721 | NC_021165.1    | Ca_kabuli_chr06 | 54349721                | CC                              | TT                | 1946454120               |
| SNP_P3_81664_54350271 | NC_021165.1    | Ca_kabuli_chr06 | 54350271                | AA                              | CC                | 1946454121               |
| SNP_P3_81665_54352083 | NC_021165.1    | Ca_kabuli_chr06 | 54352083                | GG                              | AA                | 1946454122               |
| SNP_P3_81666_54352317 | NC_021165.1    | Ca_kabuli_chr06 | 54352317                | AA                              | TT                | 1946454124               |
| SNP_P3_81667_54352360 | NC_021165.1    | Ca_kabuli_chr06 | 54352360                | AA                              | GG                | 1946454125               |

| SNPs IDs              | Chromosome IDs | Chromosomes     | Physical positions (bp) | CDC Frontier (Reference genome) | (Pusa 256 & HPNB) | NCBI SNPdb Accession IDs |
|-----------------------|----------------|-----------------|-------------------------|---------------------------------|-------------------|--------------------------|
| SNP_P3_81668_54352388 | NC_021165.1    | Ca_kabuli_chr06 | 54352388                | GG                              | CC                | 1946454127               |
| SNP_P3_81669_54352719 | NC_021165.1    | Ca_kabuli_chr06 | 54352719                | AA                              | GG                | 1946454128               |
| SNP_P3_81670_54352730 | NC_021165.1    | Ca_kabuli_chr06 | 54352730                | CC                              | TT                | 1946454130               |
| SNP_P3_81671_54353161 | NC_021165.1    | Ca_kabuli_chr06 | 54353161                | GG                              | AA                | 1946454131               |
| SNP_P3_81672_54354063 | NC_021165.1    | Ca_kabuli_chr06 | 54354063                | TT                              | AA                | 1946454133               |
| SNP_P3_81673_54354275 | NC_021165.1    | Ca_kabuli_chr06 | 54354275                | AA                              | GG                | 1946454135               |
| SNP_P3_81675_54356403 | NC_021165.1    | Ca_kabuli_chr06 | 54356403                | CC                              | TT                | 1946454136               |
| SNP_P3_81676_54357735 | NC_021165.1    | Ca_kabuli_chr06 | 54357735                | GG                              | CC                | 1946454138               |
| SNP_P3_81677_54358309 | NC_021165.1    | Ca_kabuli_chr06 | 54358309                | CC                              | TT                | 1946454139               |
| SNP_P3_81678_54358396 | NC_021165.1    | Ca_kabuli_chr06 | 54358396                | GG                              | CC                | 1946454141               |
| SNP_P3_81679_54359011 | NC_021165.1    | Ca_kabuli_chr06 | 54359011                | TT                              | CC                | 1946454142               |
| SNP_P3_81680_54361757 | NC_021165.1    | Ca_kabuli_chr06 | 54361757                | AA                              | GG                | 1946454144               |
| SNP_P3_81681_54361807 | NC_021165.1    | Ca_kabuli_chr06 | 54361807                | AA                              | GG                | 1946454145               |
| SNP_P3_81682_54362910 | NC_021165.1    | Ca_kabuli_chr06 | 54362910                | GG                              | AA                | 1946454147               |
| SNP_P3_81683_54363691 | NC_021165.1    | Ca_kabuli_chr06 | 54363691                | AA                              | GG                | 1946454148               |
| SNP_P3_81684_54363693 | NC_021165.1    | Ca_kabuli_chr06 | 54363693                | AA                              | GG                | 1946454150               |
| SNP_P3_81685_54363697 | NC_021165.1    | Ca_kabuli_chr06 | 54363697                | CC                              | AA                | 1946454151               |
| SNP_P3_81686_54363710 | NC_021165.1    | Ca_kabuli_chr06 | 54363710                | CC                              | TT                | 1946454152               |
| SNP_P3_81687_54365710 | NC_021165.1    | Ca_kabuli_chr06 | 54365710                | CC                              | TT                | 1946454154               |
| SNP_P3_81688_54365712 | NC_021165.1    | Ca_kabuli_chr06 | 54365712                | GG                              | AA                | 1946454155               |
| SNP_P3_81689_54365721 | NC_021165.1    | Ca_kabuli_chr06 | 54365721                | GG                              | CC                | 1946454157               |
| SNP_P3_81692_54673344 | NC_021165.1    | Ca_kabuli_chr06 | 54673344                | TT                              | CC                | 1946454158               |
| SNP_P3_81694_54680700 | NC_021165.1    | Ca_kabuli_chr06 | 54680700                | CC                              | AA                | 1946454160               |
| SNP_P3_81695_54681197 | NC_021165.1    | Ca_kabuli_chr06 | 54681197                | TT                              | GG                | 1946454162               |
| SNP_P3_81696_54681206 | NC_021165.1    | Ca_kabuli_chr06 | 54681206                | AA                              | GG                | 1946454163               |
| SNP_P3_81698_54694266 | NC_021165.1    | Ca_kabuli_chr06 | 54694266                | TT                              | CC                | 1946454165               |
| SNP_P3_81701_54720538 | NC_021165.1    | Ca_kabuli_chr06 | 54720538                | AA                              | GG                | 1946454166               |
| SNP_P3_81702_54720860 | NC_021165.1    | Ca_kabuli_chr06 | 54720860                | GG                              | TT                | 1946454167               |
| SNP_P3_81703_54720866 | NC_021165.1    | Ca_kabuli_chr06 | 54720866                | AA                              | GG                | 1946454169               |
| SNP_P3_81704_54724764 | NC_021165.1    | Ca_kabuli_chr06 | 54724764                | TT                              | CC                | 1946454170               |
| SNP_P3_81705_54727418 | NC_021165.1    | Ca_kabuli_chr06 | 54727418                | TT                              | AA                | 1946454172               |
| SNP_P3_81706_54730627 | NC_021165.1    | Ca_kabuli_chr06 | 54730627                | CC                              | GG                | 1946454173               |
| SNP_P3_81707_54730905 | NC_021165.1    | Ca_kabuli_chr06 | 54730905                | AA                              | CC                | 1946454175               |
| SNP_P3_81708_54754815 | NC_021165.1    | Ca_kabuli_chr06 | 54754815                | TT                              | AA                | 1946454176               |
| SNP_P3_81710_54754859 | NC_021165.1    | Ca_kabuli_chr06 | 54754859                | AA                              | GG                | 1946454178               |
| SNP_P3_81711_54754890 | NC_021165.1    | Ca_kabuli_chr06 | 54754890                | AA                              | CC                | 1946454179               |
| SNP_P3_81712_54754922 | NC_021165.1    | Ca_kabuli_chr06 | 54754922                | GG                              | AA                | 1946454181               |
| SNP_P3_81713_54773494 | NC_021165.1    | Ca_kabuli_chr06 | 54773494                | TT                              | CC                | 1946454182               |
| SNP_P3_81714_54773526 | NC_021165.1    | Ca_kabuli_chr06 | 54773526                | TT                              | AA                | 1946454184               |
| SNP_P3_81715_54785400 | NC_021165.1    | Ca_kabuli_chr06 | 54785400                | AA                              | CC                | 1946454185               |
| SNP_P3_81716_54792784 | NC_021165.1    | Ca_kabuli_chr06 | 54792784                | TT                              | AA                | 1946454187               |
| SNP_P3_81717_54792801 | NC_021165.1    | Ca_kabuli_chr06 | 54792801                | TT                              | GG                | 1946454188               |

| SNPs IDs              | Chromosome IDs | Chromosomes     | Physical positions (bp) | CDC Frontier (Reference genome) | (Pusa 256 & HPNB) | NCBI SNPdb Accession IDs |
|-----------------------|----------------|-----------------|-------------------------|---------------------------------|-------------------|--------------------------|
| SNP_P3_81718_54792817 | NC_021165.1    | Ca_kabuli_chr06 | 54792817                | CC                              | GG                | 1946454190               |
| SNP_P3_81719_54799411 | NC_021165.1    | Ca_kabuli_chr06 | 54799411                | TT                              | CC                | 1946454192               |
| SNP_P3_81720_54800030 | NC_021165.1    | Ca_kabuli_chr06 | 54800030                | AA                              | GG                | 1946454193               |
| SNP_P3_81721_54807622 | NC_021165.1    | Ca_kabuli_chr06 | 54807622                | GG                              | AA                | 1946454194               |
| SNP_P3_81722_54827367 | NC_021165.1    | Ca_kabuli_chr06 | 54827367                | AA                              | TT                | 1946454196               |
| SNP_P3_81723_54862800 | NC_021165.1    | Ca_kabuli_chr06 | 54862800                | TT                              | AA                | 1946454197               |
| SNP_P3_81724_54862855 | NC_021165.1    | Ca_kabuli_chr06 | 54862855                | AA                              | TT                | 1946454199               |
| SNP_P3_81725_54868923 | NC_021165.1    | Ca_kabuli_chr06 | 54868923                | AA                              | GG                | 1946454200               |
| SNP_P3_81726_54869264 | NC_021165.1    | Ca_kabuli_chr06 | 54869264                | CC                              | TT                | 1946454202               |
| SNP_P3_81727_54879171 | NC_021165.1    | Ca_kabuli_chr06 | 54879171                | CC                              | AA                | 1946454203               |
| SNP_P3_81728_54880848 | NC_021165.1    | Ca_kabuli_chr06 | 54880848                | AA                              | GG                | 1946454205               |
| SNP_P3_81729_54880853 | NC_021165.1    | Ca_kabuli_chr06 | 54880853                | GG                              | AA                | 1946454206               |
| SNP_P3_81730_54880861 | NC_021165.1    | Ca_kabuli_chr06 | 54880861                | CC                              | TT                | 1946454208               |
| SNP_P3_81731_54880876 | NC_021165.1    | Ca_kabuli_chr06 | 54880876                | AA                              | CC                | 1946454209               |
| SNP_P3_81732_54884107 | NC_021165.1    | Ca_kabuli_chr06 | 54884107                | AA                              | GG                | 1946454211               |
| SNP_P3_81733_54886733 | NC_021165.1    | Ca_kabuli_chr06 | 54886733                | AA                              | GG                | 1946454212               |
| SNP_P3_81734_54886832 | NC_021165.1    | Ca_kabuli_chr06 | 54886832                | GG                              | AA                | 1946454214               |
| SNP_P3_81735_54887103 | NC_021165.1    | Ca_kabuli_chr06 | 54887103                | TT                              | CC                | 1946454215               |
| SNP_P3_81736_54887202 | NC_021165.1    | Ca_kabuli_chr06 | 54887202                | CC                              | TT                | 1946454217               |
| SNP_P3_81737_54908188 | NC_021165.1    | Ca_kabuli_chr06 | 54908188                | CC                              | TT                | 1946454218               |
| SNP_P3_81738_54932422 | NC_021165.1    | Ca_kabuli_chr06 | 54932422                | TT                              | CC                | 1946454220               |
| SNP_P3_81739_54933189 | NC_021165.1    | Ca_kabuli_chr06 | 54933189                | CC                              | TT                | 1946454221               |
| SNP_P3_81740_54933291 | NC_021165.1    | Ca_kabuli_chr06 | 54933291                | CC                              | AA                | 1946454222               |
| SNP_P3_81741_54933294 | NC_021165.1    | Ca_kabuli_chr06 | 54933294                | TT                              | CC                | 1946454224               |
| SNP_P3_81742_54933329 | NC_021165.1    | Ca_kabuli_chr06 | 54933329                | AA                              | GG                | 1946454225               |
| SNP_P3_81743_54933513 | NC_021165.1    | Ca_kabuli_chr06 | 54933513                | GG                              | TT                | 1946454227               |
| SNP_P3_81744_54933522 | NC_021165.1    | Ca_kabuli_chr06 | 54933522                | GG                              | TT                | 1946454228               |
| SNP_P3_81746_54933646 | NC_021165.1    | Ca_kabuli_chr06 | 54933646                | TT                              | AA                | 1946454230               |
| SNP_P3_81747_54934172 | NC_021165.1    | Ca_kabuli_chr06 | 54934172                | CC                              | TT                | 1946454231               |
| SNP_P3_81748_54934216 | NC_021165.1    | Ca_kabuli_chr06 | 54934216                | TT                              | CC                | 1946454233               |
| SNP_P3_81749_54934232 | NC_021165.1    | Ca_kabuli_chr06 | 54934232                | CC                              | TT                | 1946454234               |
| SNP_P3_81750_54934515 | NC_021165.1    | Ca_kabuli_chr06 | 54934515                | AA                              | GG                | 1946454236               |
| SNP_P3_81751_54934535 | NC_021165.1    | Ca_kabuli_chr06 | 54934535                | AA                              | GG                | 1946454237               |
| SNP_P3_81752_54934574 | NC_021165.1    | Ca_kabuli_chr06 | 54934574                | GG                              | TT                | 1946454239               |
| SNP_P3_81753_54934624 | NC_021165.1    | Ca_kabuli_chr06 | 54934624                | CC                              | TT                | 1946454240               |
| SNP_P3_81754_54934634 | NC_021165.1    | Ca_kabuli_chr06 | 54934634                | GG                              | AA                | 1946454242               |
| SNP_P3_81755_54934667 | NC_021165.1    | Ca_kabuli_chr06 | 54934667                | GG                              | CC                | 1946454243               |
| SNP_P3_81756_54938304 | NC_021165.1    | Ca_kabuli_chr06 | 54938304                | TT                              | CC                | 1946454245               |
| SNP_P3_81757_54938803 | NC_021165.1    | Ca_kabuli_chr06 | 54938803                | AA                              | GG                | 1946454247               |
| SNP_P3_81758_54938869 | NC_021165.1    | Ca_kabuli_chr06 | 54938869                | GG                              | AA                | 1946454248               |
| SNP_P3_81759_54938875 | NC_021165.1    | Ca_kabuli_chr06 | 54938875                | AA                              | GG                | 1946454250               |
| SNP_P3_81760_54938888 | NC_021165.1    | Ca_kabuli_chr06 | 54938888                | CC                              | TT                | 1946454251               |

| SNPs IDs              | Chromosome IDs | Chromosomes     | Physical positions (bp) | CDC Frontier (Reference genome) | (Pusa 256 & HPNB) | NCBI SNPdb Accession IDs |
|-----------------------|----------------|-----------------|-------------------------|---------------------------------|-------------------|--------------------------|
| SNP_P3_81761_54952953 | NC_021165.1    | Ca_kabuli_chr06 | 54952953                | TT                              | CC                | 1946454253               |
| SNP_P3_81762_54976772 | NC_021165.1    | Ca_kabuli_chr06 | 54976772                | CC                              | TT                | 1946454254               |
| SNP_P3_81763_55004114 | NC_021165.1    | Ca_kabuli_chr06 | 55004114                | CC                              | TT                | 1946454255               |
| SNP_P3_81764_55020060 | NC_021165.1    | Ca_kabuli_chr06 | 55020060                | TT                              | CC                | 1946454257               |
| SNP_P3_81765_55020519 | NC_021165.1    | Ca_kabuli_chr06 | 55020519                | GG                              | AA                | 1946454258               |
| SNP_P3_81766_55113130 | NC_021165.1    | Ca_kabuli_chr06 | 55113130                | AA                              | GG                | 1946454260               |
| SNP_P3_81767_55113269 | NC_021165.1    | Ca_kabuli_chr06 | 55113269                | AA                              | GG                | 1946454261               |
| SNP_P3_81768_55113283 | NC_021165.1    | Ca_kabuli_chr06 | 55113283                | TT                              | CC                | 1946454263               |
| SNP_P3_81769_55113478 | NC_021165.1    | Ca_kabuli_chr06 | 55113478                | AA                              | GG                | 1946454264               |
| SNP_P3_81770_55113511 | NC_021165.1    | Ca_kabuli_chr06 | 55113511                | GG                              | TT                | 1946454265               |
| SNP_P3_81771_55134527 | NC_021165.1    | Ca_kabuli_chr06 | 55134527                | TT                              | GG                | 1946454267               |
| SNP_P3_81772_55134946 | NC_021165.1    | Ca_kabuli_chr06 | 55134946                | CC                              | TT                | 1946454268               |
| SNP_P3_81774_55156061 | NC_021165.1    | Ca_kabuli_chr06 | 55156061                | TT                              | CC                | 1946454270               |
| SNP_P3_81775_55156102 | NC_021165.1    | Ca_kabuli_chr06 | 55156102                | GG                              | TT                | 1946454271               |
| SNP_P3_81776_55156113 | NC_021165.1    | Ca_kabuli_chr06 | 55156113                | GG                              | AA                | 1946454273               |
| SNP_P3_81777_55156117 | NC_021165.1    | Ca_kabuli_chr06 | 55156117                | GG                              | AA                | 1946454274               |
| SNP_P3_81778_55156198 | NC_021165.1    | Ca_kabuli_chr06 | 55156198                | TT                              | CC                | 1946454276               |
| SNP_P3_81779_55162570 | NC_021165.1    | Ca_kabuli_chr06 | 55162570                | AA                              | GG                | 1946454277               |
| SNP_P3_81780_55163300 | NC_021165.1    | Ca_kabuli_chr06 | 55163300                | AA                              | GG                | 1946454279               |
| SNP_P3_81781_55251077 | NC_021165.1    | Ca_kabuli_chr06 | 55251077                | TT                              | CC                | 1946454280               |
| SNP_P3_81783_55339269 | NC_021165.1    | Ca_kabuli_chr06 | 55339269                | AA                              | TT                | 1946454282               |
| SNP_P3_81784_55342477 | NC_021165.1    | Ca_kabuli_chr06 | 55342477                | CC                              | TT                | 1946454283               |
| SNP_P3_81785_55345421 | NC_021165.1    | Ca_kabuli_chr06 | 55345421                | TT                              | CC                | 1946454284               |
| SNP_P3_81786_55345450 | NC_021165.1    | Ca_kabuli_chr06 | 55345450                | AA                              | GG                | 1946454286               |
| SNP_P3_81787_55345458 | NC_021165.1    | Ca_kabuli_chr06 | 55345458                | CC                              | GG                | 1946454287               |
| SNP_P3_81788_55345495 | NC_021165.1    | Ca_kabuli_chr06 | 55345495                | AA                              | CC                | 1946454289               |
| SNP_P3_81789_55345548 | NC_021165.1    | Ca_kabuli_chr06 | 55345548                | AA                              | CC                | 1946454290               |
| SNP_P3_81790_55345578 | NC_021165.1    | Ca_kabuli_chr06 | 55345578                | AA                              | GG                | 1946454292               |
| SNP_P3_81791_55345592 | NC_021165.1    | Ca_kabuli_chr06 | 55345592                | CC                              | TT                | 1946454293               |
| SNP_P3_81792_55345593 | NC_021165.1    | Ca_kabuli_chr06 | 55345593                | CC                              | TT                | 1946454295               |
| SNP_P3_81793_55345839 | NC_021165.1    | Ca_kabuli_chr06 | 55345839                | TT                              | CC                | 1946454296               |
| SNP_P3_81794_55345851 | NC_021165.1    | Ca_kabuli_chr06 | 55345851                | TT                              | CC                | 1946454298               |
| SNP_P3_81795_55345857 | NC_021165.1    | Ca_kabuli_chr06 | 55345857                | TT                              | AA                | 1946454299               |
| SNP_P3_81796_55345913 | NC_021165.1    | Ca_kabuli_chr06 | 55345913                | TT                              | CC                | 1946454301               |
| SNP_P3_81797_55345930 | NC_021165.1    | Ca_kabuli_chr06 | 55345930                | AA                              | CC                | 1946454303               |
| SNP_P3_81798_55345999 | NC_021165.1    | Ca_kabuli_chr06 | 55345999                | AA                              | CC                | 1946454304               |
| SNP_P3_81799_55347975 | NC_021165.1    | Ca_kabuli_chr06 | 55347975                | AA                              | GG                | 1946454305               |
| SNP_P3_81800_55363680 | NC_021165.1    | Ca_kabuli_chr06 | 55363680                | AA                              | CC                | 1946454307               |
| SNP_P3_81801_55369558 | NC_021165.1    | Ca_kabuli_chr06 | 55369558                | AA                              | TT                | 1946454308               |
| SNP_P3_81802_55370134 | NC_021165.1    | Ca_kabuli_chr06 | 55370134                | AA                              | GG                | 1946454310               |
| SNP_P3_81803_55370177 | NC_021165.1    | Ca_kabuli_chr06 | 55370177                | CC                              | AA                | 1946454311               |
| SNP_P3_81804_55370183 | NC_021165.1    | Ca_kabuli_chr06 | 55370183                | GG                              | AA                | 1946454313               |



| SNPs IDs              | Chromosome IDs | Chromosomes     | Physical positions (bp) | CDC Frontier (Reference genome) | (Pusa 256 & HPNB) | NCBI SNPdb Accession IDs |
|-----------------------|----------------|-----------------|-------------------------|---------------------------------|-------------------|--------------------------|
| SNP_P3_81805_55370192 | NC_021165.1    | Ca_kabuli_chr06 | 55370192                | TT                              | GG                | 1946454314               |
| SNP_P3_81806_55370202 | NC_021165.1    | Ca_kabuli_chr06 | 55370202                | AA                              | GG                | 1946454315               |
| SNP_P3_81807_55399737 | NC_021165.1    | Ca_kabuli_chr06 | 55399737                | TT                              | AA                | 1946454317               |
| SNP_P3_81808_55399783 | NC_021165.1    | Ca_kabuli_chr06 | 55399783                | TT                              | AA                | 1946454318               |
| SNP_P3_81809_55399785 | NC_021165.1    | Ca_kabuli_chr06 | 55399785                | TT                              | AA                | 1946454320               |
| SNP_P3_81810_55399918 | NC_021165.1    | Ca_kabuli_chr06 | 55399918                | CC                              | TT                | 1946454321               |
| SNP_P3_81811_55399955 | NC_021165.1    | Ca_kabuli_chr06 | 55399955                | GG                              | AA                | 1946454322               |
| SNP_P3_81812_55400070 | NC_021165.1    | Ca_kabuli_chr06 | 55400070                | AA                              | TT                | 1946454324               |
| SNP_P3_81813_55430901 | NC_021165.1    | Ca_kabuli_chr06 | 55430901                | CC                              | AA                | 1946454325               |
| SNP_P3_81814_55430903 | NC_021165.1    | Ca_kabuli_chr06 | 55430903                | TT                              | CC                | 1946454327               |
| SNP_P3_81815_55430925 | NC_021165.1    | Ca_kabuli_chr06 | 55430925                | AA                              | CC                | 1946454329               |
| SNP_P3_81816_55431177 | NC_021165.1    | Ca_kabuli_chr06 | 55431177                | AA                              | CC                | 1946454331               |
| SNP_P3_81818_55437179 | NC_021165.1    | Ca_kabuli_chr06 | 55437179                | CC                              | TT                | 1946454332               |
| SNP_P3_81819_55444302 | NC_021165.1    | Ca_kabuli_chr06 | 55444302                | AA                              | GG                | 1946454334               |
| SNP_P3_81820_55445551 | NC_021165.1    | Ca_kabuli_chr06 | 55445551                | GG                              | TT                | 1946454335               |
| SNP_P3_81822_55445768 | NC_021165.1    | Ca_kabuli_chr06 | 55445768                | TT                              | GG                | 1946454337               |
| SNP_P3_81823_55445817 | NC_021165.1    | Ca_kabuli_chr06 | 55445817                | GG                              | AA                | 1946454338               |
| SNP_P3_81824_55446198 | NC_021165.1    | Ca_kabuli_chr06 | 55446198                | TT                              | CC                | 1946454340               |
| SNP_P3_81825_55446235 | NC_021165.1    | Ca_kabuli_chr06 | 55446235                | GG                              | AA                | 1946454341               |
| SNP_P3_81826_55446331 | NC_021165.1    | Ca_kabuli_chr06 | 55446331                | CC                              | GG                | 1946454343               |
| SNP_P3_81827_55446400 | NC_021165.1    | Ca_kabuli_chr06 | 55446400                | CC                              | AA                | 1946454344               |
| SNP_P3_81828_55451023 | NC_021165.1    | Ca_kabuli_chr06 | 55451023                | GG                              | AA                | 1946454346               |
| SNP_P3_81829_55455803 | NC_021165.1    | Ca_kabuli_chr06 | 55455803                | CC                              | GG                | 1946454347               |
| SNP_P3_81830_55455857 | NC_021165.1    | Ca_kabuli_chr06 | 55455857                | AA                              | TT                | 1946454348               |
| SNP_P3_81831_55455904 | NC_021165.1    | Ca_kabuli_chr06 | 55455904                | CC                              | TT                | 1946454350               |
| SNP_P3_81832_55455905 | NC_021165.1    | Ca_kabuli_chr06 | 55455905                | GG                              | TT                | 1946454351               |
| SNP_P3_81833_55455906 | NC_021165.1    | Ca_kabuli_chr06 | 55455906                | TT                              | GG                | 1946454353               |
| SNP_P3_81834_55500605 | NC_021165.1    | Ca_kabuli_chr06 | 55500605                | GG                              | TT                | 1946454354               |
| SNP_P3_81835_55514958 | NC_021165.1    | Ca_kabuli_chr06 | 55514958                | AA                              | GG                | 1946454355               |
| SNP_P3_81836_55514986 | NC_021165.1    | Ca_kabuli_chr06 | 55514986                | TT                              | CC                | 1946454356               |
| SNP_P3_81837_55515017 | NC_021165.1    | Ca_kabuli_chr06 | 55515017                | AA                              | TT                | 1946454357               |
| SNP_P3_81838_55515029 | NC_021165.1    | Ca_kabuli_chr06 | 55515029                | AA                              | GG                | 1946454358               |
| SNP_P3_81839_55515034 | NC_021165.1    | Ca_kabuli_chr06 | 55515034                | CC                              | TT                | 1946454359               |
| SNP_P3_81840_55529807 | NC_021165.1    | Ca_kabuli_chr06 | 55529807                | GG                              | AA                | 1946454360               |
| SNP_P3_81841_55533125 | NC_021165.1    | Ca_kabuli_chr06 | 55533125                | AA                              | GG                | 1946454361               |
| SNP_P3_81842_55547404 | NC_021165.1    | Ca_kabuli_chr06 | 55547404                | TT                              | GG                | 1946454362               |
| SNP_P3_81843_55556970 | NC_021165.1    | Ca_kabuli_chr06 | 55556970                | TT                              | CC                | 1946454363               |
| SNP_P3_81844_55557010 | NC_021165.1    | Ca_kabuli_chr06 | 55557010                | CC                              | TT                | 1946454364               |
| SNP_P3_81845_55557448 | NC_021165.1    | Ca_kabuli_chr06 | 55557448                | AA                              | GG                | 1946454365               |
| SNP_P3_81847_55607454 | NC_021165.1    | Ca_kabuli_chr06 | 55607454                | TT                              | CC                | 1946454366               |
| SNP_P3_81848_55607526 | NC_021165.1    | Ca_kabuli_chr06 | 55607526                | TT                              | CC                | 1946454368               |
| SNP_P3_81849_55607532 | NC_021165.1    | Ca_kabuli_chr06 | 55607532                | CC                              | TT                | 1946454369               |

| SNPs IDs              | Chromosome IDs | Chromosomes     | Physical positions (bp) | CDC Frontier (Reference genome) | (Pusa 256 & HPNB) | NCBI SNPdb Accession IDs |
|-----------------------|----------------|-----------------|-------------------------|---------------------------------|-------------------|--------------------------|
| SNP_P3_81850_55607798 | NC_021165.1    | Ca_kabuli_chr06 | 55607798                | GG                              | TT                | 1946454371               |
| SNP_P3_81851_55607862 | NC_021165.1    | Ca_kabuli_chr06 | 55607862                | TT                              | AA                | 1946454372               |
| SNP_P3_81852_55607866 | NC_021165.1    | Ca_kabuli_chr06 | 55607866                | TT                              | GG                | 1946454373               |
| SNP_P3_81853_55607908 | NC_021165.1    | Ca_kabuli_chr06 | 55607908                | TT                              | CC                | 1946454375               |
| SNP_P3_81854_55609276 | NC_021165.1    | Ca_kabuli_chr06 | 55609276                | CC                              | TT                | 1946454376               |
| SNP_P3_81855_55609551 | NC_021165.1    | Ca_kabuli_chr06 | 55609551                | AA                              | GG                | 1946454378               |
| SNP_P3_81856_55609694 | NC_021165.1    | Ca_kabuli_chr06 | 55609694                | CC                              | TT                | 1946454379               |
| SNP_P3_81857_55609704 | NC_021165.1    | Ca_kabuli_chr06 | 55609704                | AA                              | GG                | 1946454381               |
| SNP_P3_81858_55609767 | NC_021165.1    | Ca_kabuli_chr06 | 55609767                | CC                              | TT                | 1946454382               |
| SNP_P3_81859_55609791 | NC_021165.1    | Ca_kabuli_chr06 | 55609791                | CC                              | TT                | 1946454384               |
| SNP_P3_81860_55679615 | NC_021165.1    | Ca_kabuli_chr06 | 55679615                | GG                              | TT                | 1946454385               |
| SNP_P3_81861_55679623 | NC_021165.1    | Ca_kabuli_chr06 | 55679623                | TT                              | AA                | 1946454387               |
| SNP_P3_81862_55679929 | NC_021165.1    | Ca_kabuli_chr06 | 55679929                | TT                              | CC                | 1946454388               |
| SNP_P3_81863_55683359 | NC_021165.1    | Ca_kabuli_chr06 | 55683359                | AA                              | GG                | 1946454390               |
| SNP_P3_81864_55683362 | NC_021165.1    | Ca_kabuli_chr06 | 55683362                | AA                              | GG                | 1946454391               |
| SNP_P3_81866_55685457 | NC_021165.1    | Ca_kabuli_chr06 | 55685457                | CC                              | TT                | 1946454393               |
| SNP_P3_81867_55709491 | NC_021165.1    | Ca_kabuli_chr06 | 55709491                | CC                              | TT                | 1946454394               |
| SNP_P3_81868_55730670 | NC_021165.1    | Ca_kabuli_chr06 | 55730670                | TT                              | GG                | 1946454396               |
| SNP_P3_81869_55733460 | NC_021165.1    | Ca_kabuli_chr06 | 55733460                | TT                              | CC                | 1946454397               |
| SNP_P3_81870_55754708 | NC_021165.1    | Ca_kabuli_chr06 | 55754708                | AA                              | GG                | 1946454399               |
| SNP_P3_81871_55754715 | NC_021165.1    | Ca_kabuli_chr06 | 55754715                | AA                              | TT                | 1946454400               |
| SNP_P3_81872_55754726 | NC_021165.1    | Ca_kabuli_chr06 | 55754726                | AA                              | GG                | 1946454402               |
| SNP_P3_81873_55754732 | NC_021165.1    | Ca_kabuli_chr06 | 55754732                | TT                              | CC                | 1946454403               |
| SNP_P3_81874_55754792 | NC_021165.1    | Ca_kabuli_chr06 | 55754792                | AA                              | CC                | 1946454405               |
| SNP_P3_81875_55754795 | NC_021165.1    | Ca_kabuli_chr06 | 55754795                | AA                              | TT                | 1946454406               |
| SNP_P3_81876_55758809 | NC_021165.1    | Ca_kabuli_chr06 | 55758809                | TT                              | GG                | 1946454407               |
| SNP_P3_81877_55758810 | NC_021165.1    | Ca_kabuli_chr06 | 55758810                | TT                              | CC                | 1946454409               |
| SNP_P3_81879_55769997 | NC_021165.1    | Ca_kabuli_chr06 | 55769997                | GG                              | AA                | 1946454411               |
| SNP_P3_81880_55770887 | NC_021165.1    | Ca_kabuli_chr06 | 55770887                | TT                              | CC                | 1946454412               |
| SNP_P3_81881_55771028 | NC_021165.1    | Ca_kabuli_chr06 | 55771028                | TT                              | GG                | 1946454414               |
| SNP_P3_81882_55771091 | NC_021165.1    | Ca_kabuli_chr06 | 55771091                | AA                              | GG                | 1946454415               |
| SNP_P3_81885_55771206 | NC_021165.1    | Ca_kabuli_chr06 | 55771206                | GG                              | TT                | 1946454417               |
| SNP_P3_81886_55771600 | NC_021165.1    | Ca_kabuli_chr06 | 55771600                | AA                              | GG                | 1946454418               |
| SNP_P3_81889_55783029 | NC_021165.1    | Ca_kabuli_chr06 | 55783029                | AA                              | GG                | 1946454420               |
| SNP_P3_81890_55798079 | NC_021165.1    | Ca_kabuli_chr06 | 55798079                | AA                              | GG                | 1946454421               |
| SNP_P3_81891_55826298 | NC_021165.1    | Ca_kabuli_chr06 | 55826298                | AA                              | GG                | 1946454423               |
| SNP_P3_81892_55826329 | NC_021165.1    | Ca_kabuli_chr06 | 55826329                | TT                              | AA                | 1946454424               |
| SNP_P3_81893_55826412 | NC_021165.1    | Ca_kabuli_chr06 | 55826412                | CC                              | TT                | 1946454426               |
| SNP_P3_81894_55826428 | NC_021165.1    | Ca_kabuli_chr06 | 55826428                | CC                              | TT                | 1946454427               |
| SNP_P3_81895_55826832 | NC_021165.1    | Ca_kabuli_chr06 | 55826832                | GG                              | AA                | 1946454429               |
| SNP_P3_81896_55826845 | NC_021165.1    | Ca_kabuli_chr06 | 55826845                | GG                              | TT                | 1946454430               |
| SNP_P3_81897_55826854 | NC_021165.1    | Ca_kabuli_chr06 | 55826854                | GG                              | TT                | 1946454431               |

| SNPs IDs              | Chromosome IDs | Chromosomes     | Physical positions (bp) | CDC Frontier (Reference genome) | (Pusa 256 & HPNB) | NCBI SNPdb Accession IDs |
|-----------------------|----------------|-----------------|-------------------------|---------------------------------|-------------------|--------------------------|
| SNP_P3_81898_55826902 | NC_021165.1    | Ca_kabuli_chr06 | 55826902                | CC                              | TT                | 1946454433               |
| SNP_P3_81899_55833896 | NC_021165.1    | Ca_kabuli_chr06 | 55833896                | TT                              | CC                | 1946454434               |
| SNP_P3_81900_55833901 | NC_021165.1    | Ca_kabuli_chr06 | 55833901                | TT                              | CC                | 1946454436               |
| SNP_P3_81901_55833914 | NC_021165.1    | Ca_kabuli_chr06 | 55833914                | AA                              | TT                | 1946454438               |
| SNP_P3_81902_55834361 | NC_021165.1    | Ca_kabuli_chr06 | 55834361                | AA                              | TT                | 1946454439               |
| SNP_P3_81903_55847708 | NC_021165.1    | Ca_kabuli_chr06 | 55847708                | GG                              | AA                | 1946454441               |
| SNP_P3_81904_55868292 | NC_021165.1    | Ca_kabuli_chr06 | 55868292                | TT                              | CC                | 1946454442               |
| SNP_P3_81905_55901430 | NC_021165.1    | Ca_kabuli_chr06 | 55901430                | CC                              | AA                | 1946454444               |
| SNP_P3_81906_55901437 | NC_021165.1    | Ca_kabuli_chr06 | 55901437                | GG                              | TT                | 1946454445               |
| SNP_P3_81907_55901454 | NC_021165.1    | Ca_kabuli_chr06 | 55901454                | GG                              | AA                | 1946454447               |
| SNP_P3_81908_55918288 | NC_021165.1    | Ca_kabuli_chr06 | 55918288                | TT                              | GG                | 1946454448               |
| SNP_P3_81909_55920013 | NC_021165.1    | Ca_kabuli_chr06 | 55920013                | AA                              | GG                | 1946454450               |
| SNP_P3_81910_55920026 | NC_021165.1    | Ca_kabuli_chr06 | 55920026                | TT                              | CC                | 1946454451               |
| SNP_P3_81911_55920059 | NC_021165.1    | Ca_kabuli_chr06 | 55920059                | GG                              | TT                | 1946454453               |
| SNP_P3_81912_55920072 | NC_021165.1    | Ca_kabuli_chr06 | 55920072                | GG                              | TT                | 1946454454               |
| SNP_P3_81913_55932835 | NC_021165.1    | Ca_kabuli_chr06 | 55932835                | AA                              | CC                | 1946454456               |
| SNP_P3_81914_55944329 | NC_021165.1    | Ca_kabuli_chr06 | 55944329                | GG                              | TT                | 1946454457               |
| SNP_P3_81915_55945173 | NC_021165.1    | Ca_kabuli_chr06 | 55945173                | GG                              | AA                | 1946454458               |
| SNP_P3_81916_55945174 | NC_021165.1    | Ca_kabuli_chr06 | 55945174                | AA                              | CC                | 1946454460               |
| SNP_P3_81917_55947042 | NC_021165.1    | Ca_kabuli_chr06 | 55947042                | TT                              | CC                | 1946454461               |
| SNP_P3_81918_55973048 | NC_021165.1    | Ca_kabuli_chr06 | 55973048                | TT                              | CC                | 1946454463               |
| SNP_P3_81919_55973120 | NC_021165.1    | Ca_kabuli_chr06 | 55973120                | TT                              | GG                | 1946454465               |
| SNP_P3_81920_55981492 | NC_021165.1    | Ca_kabuli_chr06 | 55981492                | AA                              | GG                | 1946454466               |
| SNP_P3_81922_56005545 | NC_021165.1    | Ca_kabuli_chr06 | 56005545                | AA                              | GG                | 1946454467               |
| SNP_P3_81923_56040579 | NC_021165.1    | Ca_kabuli_chr06 | 56040579                | GG                              | TT                | 1946454469               |
| SNP_P3_81924_56040789 | NC_021165.1    | Ca_kabuli_chr06 | 56040789                | TT                              | CC                | 1946454470               |
| SNP_P3_81925_56046996 | NC_021165.1    | Ca_kabuli_chr06 | 56046996                | CC                              | TT                | 1946454472               |
| SNP_P3_81926_56048664 | NC_021165.1    | Ca_kabuli_chr06 | 56048664                | CC                              | TT                | 1946454473               |
| SNP_P3_81928_56074863 | NC_021165.1    | Ca_kabuli_chr06 | 56074863                | TT                              | CC                | 1946454475               |
| SNP_P3_81929_56074905 | NC_021165.1    | Ca_kabuli_chr06 | 56074905                | CC                              | TT                | 1946454476               |
| SNP_P3_81930_56075063 | NC_021165.1    | Ca_kabuli_chr06 | 56075063                | AA                              | GG                | 1946454477               |
| SNP_P3_81931_56075467 | NC_021165.1    | Ca_kabuli_chr06 | 56075467                | TT                              | GG                | 1946454479               |
| SNP_P3_81932_56075503 | NC_021165.1    | Ca_kabuli_chr06 | 56075503                | TT                              | CC                | 1946454480               |
| SNP_P3_81933_56075859 | NC_021165.1    | Ca_kabuli_chr06 | 56075859                | AA                              | TT                | 1946454482               |
| SNP_P3_81934_56075874 | NC_021165.1    | Ca_kabuli_chr06 | 56075874                | GG                              | AA                | 1946454483               |
| SNP_P3_81935_56082029 | NC_021165.1    | Ca_kabuli_chr06 | 56082029                | AA                              | TT                | 1946454485               |
| SNP_P3_81936_56087410 | NC_021165.1    | Ca_kabuli_chr06 | 56087410                | AA                              | CC                | 1946454486               |
| SNP_P3_81937_56087431 | NC_021165.1    | Ca_kabuli_chr06 | 56087431                | GG                              | AA                | 1946454488               |
| SNP_P3_81938_56087473 | NC_021165.1    | Ca_kabuli_chr06 | 56087473                | GG                              | TT                | 1946454489               |
| SNP_P3_81939_56087625 | NC_021165.1    | Ca_kabuli_chr06 | 56087625                | AA                              | GG                | 1946454491               |
| SNP_P3_81942_56087743 | NC_021165.1    | Ca_kabuli_chr06 | 56087743                | TT                              | AA                | 1946454493               |
| SNP_P3_81943_56087747 | NC_021165.1    | Ca_kabuli_chr06 | 56087747                | CC                              | TT                | 1946454494               |

| SNPs IDs              | Chromosome IDs | Chromosomes     | Physical positions (bp) | CDC Frontier (Reference genome) | (Pusa 256 & HPNB) | NCBI SNPdb Accession IDs |
|-----------------------|----------------|-----------------|-------------------------|---------------------------------|-------------------|--------------------------|
| SNP_P3_81944_56134950 | NC_021165.1    | Ca_kabuli_chr06 | 56134950                | TT                              | CC                | 1946454496               |
| SNP_P3_81945_56136086 | NC_021165.1    | Ca_kabuli_chr06 | 56136086                | AA                              | GG                | 1946454497               |
| SNP_P3_81946_56136125 | NC_021165.1    | Ca_kabuli_chr06 | 56136125                | AA                              | CC                | 1946454499               |
| SNP_P3_81947_56136130 | NC_021165.1    | Ca_kabuli_chr06 | 56136130                | AA                              | TT                | 1946454500               |
| SNP_P3_81948_56136138 | NC_021165.1    | Ca_kabuli_chr06 | 56136138                | AA                              | CC                | 1946454502               |
| SNP_P3_81949_56136239 | NC_021165.1    | Ca_kabuli_chr06 | 56136239                | AA                              | GG                | 1946454503               |
| SNP_P3_81950_56136253 | NC_021165.1    | Ca_kabuli_chr06 | 56136253                | AA                              | GG                | 1946454505               |
| SNP_P3_81951_56136517 | NC_021165.1    | Ca_kabuli_chr06 | 56136517                | TT                              | CC                | 1946454506               |
| SNP_P3_81952_56136570 | NC_021165.1    | Ca_kabuli_chr06 | 56136570                | AA                              | GG                | 1946454508               |
| SNP_P3_81953_56136621 | NC_021165.1    | Ca_kabuli_chr06 | 56136621                | TT                              | AA                | 1946454509               |
| SNP_P3_81954_56138171 | NC_021165.1    | Ca_kabuli_chr06 | 56138171                | AA                              | TT                | 1946454511               |
| SNP_P3_81955_56138194 | NC_021165.1    | Ca_kabuli_chr06 | 56138194                | GG                              | AA                | 1946454512               |
| SNP_P3_81956_56138213 | NC_021165.1    | Ca_kabuli_chr06 | 56138213                | CC                              | TT                | 1946454514               |
| SNP_P3_81957_56138314 | NC_021165.1    | Ca_kabuli_chr06 | 56138314                | GG                              | TT                | 1946454515               |
| SNP_P3_81958_56138593 | NC_021165.1    | Ca_kabuli_chr06 | 56138593                | GG                              | AA                | 1946454517               |
| SNP_P3_81959_56138641 | NC_021165.1    | Ca_kabuli_chr06 | 56138641                | CC                              | TT                | 1946454518               |
| SNP_P3_81960_56138696 | NC_021165.1    | Ca_kabuli_chr06 | 56138696                | GG                              | AA                | 1946454520               |
| SNP_P3_81961_56138719 | NC_021165.1    | Ca_kabuli_chr06 | 56138719                | TT                              | CC                | 1946454521               |
| SNP_P3_81962_56138793 | NC_021165.1    | Ca_kabuli_chr06 | 56138793                | TT                              | CC                | 1946454523               |
| SNP_P3_81963_56138816 | NC_021165.1    | Ca_kabuli_chr06 | 56138816                | TT                              | GG                | 1946454524               |
| SNP_P3_81964_56138823 | NC_021165.1    | Ca_kabuli_chr06 | 56138823                | TT                              | CC                | 1946454526               |
| SNP_P3_81965_56138883 | NC_021165.1    | Ca_kabuli_chr06 | 56138883                | GG                              | AA                | 1946454527               |
| SNP_P3_81966_56138918 | NC_021165.1    | Ca_kabuli_chr06 | 56138918                | TT                              | GG                | 1946454528               |
| SNP_P3_81967_56138924 | NC_021165.1    | Ca_kabuli_chr06 | 56138924                | GG                              | AA                | 1946454530               |
| SNP_P3_81968_56139045 | NC_021165.1    | Ca_kabuli_chr06 | 56139045                | AA                              | GG                | 1946454531               |
| SNP_P3_81970_56139152 | NC_021165.1    | Ca_kabuli_chr06 | 56139152                | AA                              | GG                | 1946454533               |
| SNP_P3_81971_56139180 | NC_021165.1    | Ca_kabuli_chr06 | 56139180                | TT                              | CC                | 1946454534               |
| SNP_P3_81972_56139211 | NC_021165.1    | Ca_kabuli_chr06 | 56139211                | TT                              | CC                | 1946454536               |
| SNP_P3_81973_56139233 | NC_021165.1    | Ca_kabuli_chr06 | 56139233                | TT                              | CC                | 1946454537               |
| SNP_P3_81974_56139303 | NC_021165.1    | Ca_kabuli_chr06 | 56139303                | AA                              | TT                | 1946454539               |
| SNP_P3_81975_56139310 | NC_021165.1    | Ca_kabuli_chr06 | 56139310                | AA                              | GG                | 1946454540               |
| SNP_P3_81976_56139342 | NC_021165.1    | Ca_kabuli_chr06 | 56139342                | TT                              | AA                | 1946454542               |
| SNP_P3_81977_56139349 | NC_021165.1    | Ca_kabuli_chr06 | 56139349                | CC                              | GG                | 1946454543               |
| SNP_P3_81978_56139376 | NC_021165.1    | Ca_kabuli_chr06 | 56139376                | CC                              | TT                | 1946454545               |
| SNP_P3_81979_56139395 | NC_021165.1    | Ca_kabuli_chr06 | 56139395                | TT                              | GG                | 1946454547               |
| SNP_P3_81980_56139456 | NC_021165.1    | Ca_kabuli_chr06 | 56139456                | AA                              | GG                | 1946454548               |
| SNP_P3_81981_56139457 | NC_021165.1    | Ca_kabuli_chr06 | 56139457                | TT                              | GG                | 1946454550               |
| SNP_P3_81982_56139459 | NC_021165.1    | Ca_kabuli_chr06 | 56139459                | TT                              | GG                | 1946454551               |
| SNP_P3_81983_56145677 | NC_021165.1    | Ca_kabuli_chr06 | 56145677                | CC                              | GG                | 1946454553               |
| SNP_P3_81984_56145681 | NC_021165.1    | Ca_kabuli_chr06 | 56145681                | CC                              | AA                | 1946454554               |
| SNP_P3_81986_56159746 | NC_021165.1    | Ca_kabuli_chr06 | 56159746                | AA                              | TT                | 1946454556               |
| SNP_P3_81987_56159748 | NC_021165.1    | Ca_kabuli_chr06 | 56159748                | TT                              | AA                | 1946454557               |

| SNPs IDs              | Chromosome IDs | Chromosomes     | Physical positions (bp) | CDC Frontier (Reference genome) | (Pusa 256 & HPNB) | NCBI SNPdb Accession IDs |
|-----------------------|----------------|-----------------|-------------------------|---------------------------------|-------------------|--------------------------|
| SNP_P3_81988_56159761 | NC_021165.1    | Ca_kabuli_chr06 | 56159761                | CC                              | TT                | 1946454559               |
| SNP_P3_81989_56159986 | NC_021165.1    | Ca_kabuli_chr06 | 56159986                | TT                              | GG                | 1946454560               |
| SNP_P3_81990_56187597 | NC_021165.1    | Ca_kabuli_chr06 | 56187597                | AA                              | TT                | 1946454562               |
| SNP_P3_81991_56187766 | NC_021165.1    | Ca_kabuli_chr06 | 56187766                | GG                              | AA                | 1946454563               |
| SNP_P3_81992_56187781 | NC_021165.1    | Ca_kabuli_chr06 | 56187781                | TT                              | CC                | 1946454565               |
| SNP_P3_81993_56187789 | NC_021165.1    | Ca_kabuli_chr06 | 56187789                | AA                              | GG                | 1946454566               |
| SNP_P3_81994_56187794 | NC_021165.1    | Ca_kabuli_chr06 | 56187794                | CC                              | GG                | 1946454568               |
| SNP_P3_81995_56192981 | NC_021165.1    | Ca_kabuli_chr06 | 56192981                | AA                              | GG                | 1946454570               |
| SNP_P3_81996_56193013 | NC_021165.1    | Ca_kabuli_chr06 | 56193013                | AA                              | GG                | 1946454571               |
| SNP_P3_81997_56193039 | NC_021165.1    | Ca_kabuli_chr06 | 56193039                | AA                              | GG                | 1946454573               |
| SNP_P3_81998_56215994 | NC_021165.1    | Ca_kabuli_chr06 | 56215994                | AA                              | CC                | 1946454574               |
| SNP_P3_81999_56232304 | NC_021165.1    | Ca_kabuli_chr06 | 56232304                | GG                              | AA                | 1946454576               |
| SNP_P3_82000_56245178 | NC_021165.1    | Ca_kabuli_chr06 | 56245178                | TT                              | CC                | 1946454577               |
| SNP_P3_82001_56290420 | NC_021165.1    | Ca_kabuli_chr06 | 56290420                | CC                              | TT                | 1946454579               |
| SNP_P3_82002_56301898 | NC_021165.1    | Ca_kabuli_chr06 | 56301898                | AA                              | GG                | 1946454580               |
| SNP_P3_82003_56303576 | NC_021165.1    | Ca_kabuli_chr06 | 56303576                | CC                              | GG                | 1946454582               |
| SNP_P3_82004_56303610 | NC_021165.1    | Ca_kabuli_chr06 | 56303610                | GG                              | AA                | 1946454583               |
| SNP_P3_82005_56304196 | NC_021165.1    | Ca_kabuli_chr06 | 56304196                | TT                              | CC                | 1946454585               |
| SNP_P3_82006_56304210 | NC_021165.1    | Ca_kabuli_chr06 | 56304210                | AA                              | TT                | 1946454586               |
| SNP_P3_82007_56304463 | NC_021165.1    | Ca_kabuli_chr06 | 56304463                | CC                              | TT                | 1946454588               |
| SNP_P3_82008_56304474 | NC_021165.1    | Ca_kabuli_chr06 | 56304474                | GG                              | AA                | 1946454589               |
| SNP_P3_82009_56304475 | NC_021165.1    | Ca_kabuli_chr06 | 56304475                | TT                              | AA                | 1946454591               |
| SNP_P3_82010_56304482 | NC_021165.1    | Ca_kabuli_chr06 | 56304482                | AA                              | TT                | 1946454592               |
| SNP_P3_82011_56304500 | NC_021165.1    | Ca_kabuli_chr06 | 56304500                | GG                              | AA                | 1946454594               |
| SNP_P3_82012_56304506 | NC_021165.1    | Ca_kabuli_chr06 | 56304506                | GG                              | AA                | 1946454595               |
| SNP_P3_82013_56304716 | NC_021165.1    | Ca_kabuli_chr06 | 56304716                | AA                              | GG                | 1946454597               |
| SNP_P3_82014_56304753 | NC_021165.1    | Ca_kabuli_chr06 | 56304753                | TT                              | CC                | 1946454599               |
| SNP_P3_82015_56304780 | NC_021165.1    | Ca_kabuli_chr06 | 56304780                | CC                              | GG                | 1946454600               |
| SNP_P3_82016_56304804 | NC_021165.1    | Ca_kabuli_chr06 | 56304804                | TT                              | CC                | 1946454602               |
| SNP_P3_82017_56304851 | NC_021165.1    | Ca_kabuli_chr06 | 56304851                | AA                              | CC                | 1946454603               |
| SNP_P3_82018_56304874 | NC_021165.1    | Ca_kabuli_chr06 | 56304874                | TT                              | AA                | 1946454605               |
| SNP_P3_82019_56304916 | NC_021165.1    | Ca_kabuli_chr06 | 56304916                | GG                              | AA                | 1946454606               |
| SNP_P3_82020_56305017 | NC_021165.1    | Ca_kabuli_chr06 | 56305017                | TT                              | CC                | 1946454607               |
| SNP_P3_82021_56305049 | NC_021165.1    | Ca_kabuli_chr06 | 56305049                | AA                              | TT                | 1946454609               |
| SNP_P3_82022_56315154 | NC_021165.1    | Ca_kabuli_chr06 | 56315154                | AA                              | TT                | 1946454610               |
| SNP_P3_82023_56315182 | NC_021165.1    | Ca_kabuli_chr06 | 56315182                | TT                              | CC                | 1946454612               |
| SNP_P3_82024_56315249 | NC_021165.1    | Ca_kabuli_chr06 | 56315249                | GG                              | AA                | 1946454613               |
| SNP_P3_82025_56315277 | NC_021165.1    | Ca_kabuli_chr06 | 56315277                | AA                              | GG                | 1946454615               |
| SNP_P3_82026_56315548 | NC_021165.1    | Ca_kabuli_chr06 | 56315548                | AA                              | GG                | 1946454616               |
| SNP_P3_82027_56315569 | NC_021165.1    | Ca_kabuli_chr06 | 56315569                | CC                              | GG                | 1946454618               |
| SNP_P3_82028_56331579 | NC_021165.1    | Ca_kabuli_chr06 | 56331579                | CC                              | TT                | 1946454619               |
| SNP_P3_82029_56337177 | NC_021165.1    | Ca_kabuli_chr06 | 56337177                | AA                              | GG                | 1946454621               |

| SNPs IDs              | Chromosome IDs | Chromosomes     | Physical positions (bp) | CDC Frontier (Reference genome) | (Pusa 256 & HPNB) | NCBI SNPdb Accession IDs |
|-----------------------|----------------|-----------------|-------------------------|---------------------------------|-------------------|--------------------------|
| SNP_P3_82030_56339983 | NC_021165.1    | Ca_kabuli_chr06 | 56339983                | AA                              | GG                | 1946454622               |
| SNP_P3_82031_56348954 | NC_021165.1    | Ca_kabuli_chr06 | 56348954                | GG                              | AA                | 1946454624               |
| SNP_P3_82032_56351180 | NC_021165.1    | Ca_kabuli_chr06 | 56351180                | AA                              | GG                | 1946454626               |
| SNP_P3_82033_56353419 | NC_021165.1    | Ca_kabuli_chr06 | 56353419                | AA                              | GG                | 1946454627               |
| SNP_P3_82034_56353420 | NC_021165.1    | Ca_kabuli_chr06 | 56353420                | CC                              | GG                | 1946454629               |
| SNP_P3_82035_56353432 | NC_021165.1    | Ca_kabuli_chr06 | 56353432                | GG                              | TT                | 1946454630               |
| SNP_P3_82036_56353819 | NC_021165.1    | Ca_kabuli_chr06 | 56353819                | AA                              | TT                | 1946454631               |
| SNP_P3_82037_56379230 | NC_021165.1    | Ca_kabuli_chr06 | 56379230                | CC                              | TT                | 1946454633               |
| SNP_P3_82038_56397942 | NC_021165.1    | Ca_kabuli_chr06 | 56397942                | TT                              | CC                | 1946454634               |
| SNP_P3_82039_56397973 | NC_021165.1    | Ca_kabuli_chr06 | 56397973                | GG                              | AA                | 1946454636               |
| SNP_P3_82040_56397986 | NC_021165.1    | Ca_kabuli_chr06 | 56397986                | TT                              | CC                | 1946454637               |
| SNP_P3_82041_56397993 | NC_021165.1    | Ca_kabuli_chr06 | 56397993                | AA                              | GG                | 1946454639               |
| SNP_P3_82042_56411859 | NC_021165.1    | Ca_kabuli_chr06 | 56411859                | TT                              | GG                | 1946454640               |
| SNP_P3_82043_56411867 | NC_021165.1    | Ca_kabuli_chr06 | 56411867                | AA                              | GG                | 1946454641               |
| SNP_P3_82044_56412242 | NC_021165.1    | Ca_kabuli_chr06 | 56412242                | GG                              | CC                | 1946454643               |
| SNP_P3_82045_56412278 | NC_021165.1    | Ca_kabuli_chr06 | 56412278                | TT                              | GG                | 1946454644               |
| SNP_P3_82047_56422650 | NC_021165.1    | Ca_kabuli_chr06 | 56422650                | CC                              | GG                | 1946454646               |
| SNP_P3_82048_56449009 | NC_021165.1    | Ca_kabuli_chr06 | 56449009                | AA                              | GG                | 1946454647               |
| SNP_P3_82049_56450558 | NC_021165.1    | Ca_kabuli_chr06 | 56450558                | AA                              | CC                | 1946454649               |
| SNP_P3_82050_56450562 | NC_021165.1    | Ca_kabuli_chr06 | 56450562                | TT                              | CC                | 1946454650               |
| SNP_P3_82051_56457907 | NC_021165.1    | Ca_kabuli_chr06 | 56457907                | TT                              | CC                | 1946454652               |
| SNP_P3_82052_56457920 | NC_021165.1    | Ca_kabuli_chr06 | 56457920                | TT                              | GG                | 1946454653               |
| SNP_P3_82053_56458288 | NC_021165.1    | Ca_kabuli_chr06 | 56458288                | GG                              | AA                | 1946454655               |
| SNP_P3_82054_56458351 | NC_021165.1    | Ca_kabuli_chr06 | 56458351                | TT                              | GG                | 1946454656               |
| SNP_P3_82056_56470971 | NC_021165.1    | Ca_kabuli_chr06 | 56470971                | AA                              | TT                | 1946454657               |
| SNP_P3_82057_56479294 | NC_021165.1    | Ca_kabuli_chr06 | 56479294                | AA                              | CC                | 1946454659               |
| SNP_P3_82058_56479312 | NC_021165.1    | Ca_kabuli_chr06 | 56479312                | GG                              | TT                | 1946454660               |
| SNP_P3_82059_56502583 | NC_021165.1    | Ca_kabuli_chr06 | 56502583                | AA                              | TT                | 1946454662               |
| SNP_P3_82060_56502686 | NC_021165.1    | Ca_kabuli_chr06 | 56502686                | CC                              | AA                | 1946454663               |
| SNP_P3_82061_56502736 | NC_021165.1    | Ca_kabuli_chr06 | 56502736                | TT                              | CC                | 1946454665               |
| SNP_P3_82062_56503529 | NC_021165.1    | Ca_kabuli_chr06 | 56503529                | CC                              | TT                | 1946454666               |
| SNP_P3_82063_56503530 | NC_021165.1    | Ca_kabuli_chr06 | 56503530                | GG                              | AA                | 1946454668               |
| SNP_P3_82064_56503557 | NC_021165.1    | Ca_kabuli_chr06 | 56503557                | GG                              | CC                | 1946454669               |
| SNP_P3_82065_56503561 | NC_021165.1    | Ca_kabuli_chr06 | 56503561                | AA                              | TT                | 1946454671               |
| SNP_P3_82066_56503580 | NC_021165.1    | Ca_kabuli_chr06 | 56503580                | AA                              | GG                | 1946454672               |
| SNP_P3_82067_56503597 | NC_021165.1    | Ca_kabuli_chr06 | 56503597                | AA                              | TT                | 1946454674               |
| SNP_P3_82068_56503600 | NC_021165.1    | Ca_kabuli_chr06 | 56503600                | GG                              | AA                | 1946454675               |
| SNP_P3_82069_56503611 | NC_021165.1    | Ca_kabuli_chr06 | 56503611                | AA                              | GG                | 1946454677               |
| SNP_P3_82070_56503616 | NC_021165.1    | Ca_kabuli_chr06 | 56503616                | GG                              | AA                | 1946454678               |
| SNP_P3_82071_56503617 | NC_021165.1    | Ca_kabuli_chr06 | 56503617                | CC                              | GG                | 1946454680               |
| SNP_P3_82072_56503657 | NC_021165.1    | Ca_kabuli_chr06 | 56503657                | CC                              | TT                | 1946454681               |
| SNP_P3_82073_56503665 | NC_021165.1    | Ca_kabuli_chr06 | 56503665                | CC                              | TT                | 1946454683               |

| SNPs IDs              | Chromosome IDs | Chromosomes     | Physical positions (bp) | CDC Frontier (Reference genome) | (Pusa 256 & HPNB) | NCBI SNPdb Accession IDs |
|-----------------------|----------------|-----------------|-------------------------|---------------------------------|-------------------|--------------------------|
| SNP_P3_82074_56503683 | NC_021165.1    | Ca_kabuli_chr06 | 56503683                | CC                              | TT                | 1946454684               |
| SNP_P3_82075_56503687 | NC_021165.1    | Ca_kabuli_chr06 | 56503687                | TT                              | CC                | 1946454686               |
| SNP_P3_82076_56503716 | NC_021165.1    | Ca_kabuli_chr06 | 56503716                | CC                              | AA                | 1946454687               |
| SNP_P3_82077_56503720 | NC_021165.1    | Ca_kabuli_chr06 | 56503720                | TT                              | GG                | 1946454689               |
| SNP_P3_82078_56503750 | NC_021165.1    | Ca_kabuli_chr06 | 56503750                | GG                              | AA                | 1946454690               |
| SNP_P3_82079_56503874 | NC_021165.1    | Ca_kabuli_chr06 | 56503874                | TT                              | AA                | 1946454691               |
| SNP_P3_82080_56503880 | NC_021165.1    | Ca_kabuli_chr06 | 56503880                | CC                              | AA                | 1946454693               |
| SNP_P3_82081_56503888 | NC_021165.1    | Ca_kabuli_chr06 | 56503888                | AA                              | CC                | 1946454694               |
| SNP_P3_82082_56503913 | NC_021165.1    | Ca_kabuli_chr06 | 56503913                | TT                              | CC                | 1946454696               |
| SNP_P3_82083_56503916 | NC_021165.1    | Ca_kabuli_chr06 | 56503916                | CC                              | TT                | 1946454697               |
| SNP_P3_82084_56503922 | NC_021165.1    | Ca_kabuli_chr06 | 56503922                | CC                              | TT                | 1946454699               |
| SNP_P3_82085_56503941 | NC_021165.1    | Ca_kabuli_chr06 | 56503941                | GG                              | AA                | 1946454700               |
| SNP_P3_82088_56504092 | NC_021165.1    | Ca_kabuli_chr06 | 56504092                | TT                              | AA                | 1946454702               |
| SNP_P3_82090_56504237 | NC_021165.1    | Ca_kabuli_chr06 | 56504237                | TT                              | CC                | 1946454703               |
| SNP_P3_82091_56504316 | NC_021165.1    | Ca_kabuli_chr06 | 56504316                | AA                              | GG                | 1946454705               |
| SNP_P3_82092_56504334 | NC_021165.1    | Ca_kabuli_chr06 | 56504334                | TT                              | GG                | 1946454706               |
| SNP_P3_82093_56504541 | NC_021165.1    | Ca_kabuli_chr06 | 56504541                | CC                              | GG                | 1946454708               |
| SNP_P3_82095_56504611 | NC_021165.1    | Ca_kabuli_chr06 | 56504611                | TT                              | AA                | 1946454709               |
| SNP_P3_82096_56504620 | NC_021165.1    | Ca_kabuli_chr06 | 56504620                | AA                              | CC                | 1946454710               |
| SNP_P3_82097_56504633 | NC_021165.1    | Ca_kabuli_chr06 | 56504633                | GG                              | AA                | 1946454712               |
| SNP_P3_82099_56504785 | NC_021165.1    | Ca_kabuli_chr06 | 56504785                | TT                              | AA                | 1946454713               |
| SNP_P3_82100_56504833 | NC_021165.1    | Ca_kabuli_chr06 | 56504833                | GG                              | TT                | 1946454715               |
| SNP_P3_82101_56505062 | NC_021165.1    | Ca_kabuli_chr06 | 56505062                | TT                              | GG                | 1946454716               |
| SNP_P3_82102_56505167 | NC_021165.1    | Ca_kabuli_chr06 | 56505167                | CC                              | TT                | 1946454718               |
| SNP_P3_82103_56505253 | NC_021165.1    | Ca_kabuli_chr06 | 56505253                | AA                              | GG                | 1946454719               |
| SNP_P3_82104_56505317 | NC_021165.1    | Ca_kabuli_chr06 | 56505317                | CC                              | TT                | 1946454721               |
| SNP_P3_82105_56505321 | NC_021165.1    | Ca_kabuli_chr06 | 56505321                | TT                              | CC                | 1946454722               |
| SNP_P3_82106_56505327 | NC_021165.1    | Ca_kabuli_chr06 | 56505327                | CC                              | AA                | 1946454723               |
| SNP_P3_82107_56505389 | NC_021165.1    | Ca_kabuli_chr06 | 56505389                | TT                              | CC                | 1946454725               |
| SNP_P3_82108_56505400 | NC_021165.1    | Ca_kabuli_chr06 | 56505400                | TT                              | AA                | 1946454726               |
| SNP_P3_82109_56505409 | NC_021165.1    | Ca_kabuli_chr06 | 56505409                | AA                              | GG                | 1946454728               |
| SNP_P3_82110_56505420 | NC_021165.1    | Ca_kabuli_chr06 | 56505420                | GG                              | CC                | 1946454729               |
| SNP_P3_82111_56505475 | NC_021165.1    | Ca_kabuli_chr06 | 56505475                | AA                              | CC                | 1946454731               |
| SNP_P3_82112_56505478 | NC_021165.1    | Ca_kabuli_chr06 | 56505478                | GG                              | AA                | 1946454733               |
| SNP_P3_82113_56505492 | NC_021165.1    | Ca_kabuli_chr06 | 56505492                | GG                              | AA                | 1946454734               |
| SNP_P3_82114_56505499 | NC_021165.1    | Ca_kabuli_chr06 | 56505499                | CC                              | GG                | 1946454735               |
| SNP_P3_82115_56505540 | NC_021165.1    | Ca_kabuli_chr06 | 56505540                | CC                              | TT                | 1946454737               |
| SNP_P3_82117_56505622 | NC_021165.1    | Ca_kabuli_chr06 | 56505622                | AA                              | CC                | 1946454738               |
| SNP_P3_82118_56505656 | NC_021165.1    | Ca_kabuli_chr06 | 56505656                | TT                              | GG                | 1946454740               |
| SNP_P3_82119_56505683 | NC_021165.1    | Ca_kabuli_chr06 | 56505683                | GG                              | AA                | 1946454741               |
| SNP_P3_82121_56506744 | NC_021165.1    | Ca_kabuli_chr06 | 56506744                | AA                              | GG                | 1946454743               |
| SNP_P3_82122_56506806 | NC_021165.1    | Ca_kabuli_chr06 | 56506806                | GG                              | AA                | 1946454744               |

| SNPs IDs              | Chromosome IDs | Chromosomes     | Physical positions (bp) | CDC Frontier genome (Reference) | (Pusa 256 & HPNB) | NCBI SNPdb Accession IDs |
|-----------------------|----------------|-----------------|-------------------------|---------------------------------|-------------------|--------------------------|
| SNP_P3_82123_56506953 | NC_021165.1    | Ca_kabuli_chr06 | 56506953                | CC                              | TT                | 1946454746               |
| SNP_P3_82124_56506985 | NC_021165.1    | Ca_kabuli_chr06 | 56506985                | TT                              | CC                | 1946454747               |
| SNP_P3_82125_56507132 | NC_021165.1    | Ca_kabuli_chr06 | 56507132                | TT                              | CC                | 1946454749               |
| SNP_P3_82126_56507160 | NC_021165.1    | Ca_kabuli_chr06 | 56507160                | AA                              | GG                | 1946454750               |
| SNP_P3_82127_56507352 | NC_021165.1    | Ca_kabuli_chr06 | 56507352                | CC                              | TT                | 1946454752               |
| SNP_P3_82128_56507373 | NC_021165.1    | Ca_kabuli_chr06 | 56507373                | CC                              | AA                | 1946454753               |
| SNP_P3_82129_56507394 | NC_021165.1    | Ca_kabuli_chr06 | 56507394                | TT                              | AA                | 1946454755               |
| SNP_P3_82131_56507463 | NC_021165.1    | Ca_kabuli_chr06 | 56507463                | CC                              | AA                | 1946454756               |
| SNP_P3_82132_56507466 | NC_021165.1    | Ca_kabuli_chr06 | 56507466                | GG                              | AA                | 1946454758               |
| SNP_P3_82133_56507487 | NC_021165.1    | Ca_kabuli_chr06 | 56507487                | TT                              | AA                | 1946454760               |
| SNP_P3_82135_56507715 | NC_021165.1    | Ca_kabuli_chr06 | 56507715                | TT                              | CC                | 1946454761               |
| SNP_P3_82137_56507746 | NC_021165.1    | Ca_kabuli_chr06 | 56507746                | TT                              | AA                | 1946454763               |
| SNP_P3_82138_56507791 | NC_021165.1    | Ca_kabuli_chr06 | 56507791                | CC                              | TT                | 1946454764               |
| SNP_P3_82140_56507803 | NC_021165.1    | Ca_kabuli_chr06 | 56507803                | GG                              | AA                | 1946454766               |
| SNP_P3_82141_56507893 | NC_021165.1    | Ca_kabuli_chr06 | 56507893                | GG                              | TT                | 1946454767               |
| SNP_P3_82142_56508135 | NC_021165.1    | Ca_kabuli_chr06 | 56508135                | GG                              | AA                | 1946454769               |
| SNP_P3_82143_56508190 | NC_021165.1    | Ca_kabuli_chr06 | 56508190                | AA                              | TT                | 1946454770               |
| SNP_P3_82144_56525260 | NC_021165.1    | Ca_kabuli_chr06 | 56525260                | GG                              | AA                | 1946454772               |
| SNP_P3_82145_56525709 | NC_021165.1    | Ca_kabuli_chr06 | 56525709                | CC                              | TT                | 1946454773               |
| SNP_P3_82146_56539051 | NC_021165.1    | Ca_kabuli_chr06 | 56539051                | CC                              | TT                | 1946454775               |
| SNP_P3_82148_56560531 | NC_021165.1    | Ca_kabuli_chr06 | 56560531                | CC                              | TT                | 1946454776               |
| SNP_P3_82150_56594715 | NC_021165.1    | Ca_kabuli_chr06 | 56594715                | AA                              | CC                | 1946454778               |
| SNP_P3_82151_56616893 | NC_021165.1    | Ca_kabuli_chr06 | 56616893                | TT                              | CC                | 1946454779               |
| SNP_P3_82152_56616927 | NC_021165.1    | Ca_kabuli_chr06 | 56616927                | TT                              | AA                | 1946454781               |
| SNP_P3_82153_56616928 | NC_021165.1    | Ca_kabuli_chr06 | 56616928                | GG                              | CC                | 1946454782               |
| SNP_P3_82154_56621648 | NC_021165.1    | Ca_kabuli_chr06 | 56621648                | CC                              | GG                | 1946454784               |
| SNP_P3_82155_56621663 | NC_021165.1    | Ca_kabuli_chr06 | 56621663                | TT                              | CC                | 1946454786               |
| SNP_P3_82156_56621693 | NC_021165.1    | Ca_kabuli_chr06 | 56621693                | AA                              | GG                | 1946454787               |
| SNP_P3_82157_56621705 | NC_021165.1    | Ca_kabuli_chr06 | 56621705                | AA                              | CC                | 1946454789               |
| SNP_P3_82158_56622097 | NC_021165.1    | Ca_kabuli_chr06 | 56622097                | CC                              | AA                | 1946454790               |
| SNP_P3_82159_56627040 | NC_021165.1    | Ca_kabuli_chr06 | 56627040                | CC                              | TT                | 1946454792               |
| SNP_P3_82161_56649951 | NC_021165.1    | Ca_kabuli_chr06 | 56649951                | GG                              | AA                | 1946454793               |
| SNP_P3_82162_56650748 | NC_021165.1    | Ca_kabuli_chr06 | 56650748                | AA                              | GG                | 1946454795               |
| SNP_P3_82163_56650758 | NC_021165.1    | Ca_kabuli_chr06 | 56650758                | GG                              | TT                | 1946454796               |
| SNP_P3_82164_56653533 | NC_021165.1    | Ca_kabuli_chr06 | 56653533                | AA                              | GG                | 1946454798               |
| SNP_P3_82165_56657699 | NC_021165.1    | Ca_kabuli_chr06 | 56657699                | CC                              | TT                | 1946454799               |
| SNP_P3_82166_56662672 | NC_021165.1    | Ca_kabuli_chr06 | 56662672                | AA                              | TT                | 1946454801               |
| SNP_P3_82167_56664191 | NC_021165.1    | Ca_kabuli_chr06 | 56664191                | AA                              | TT                | 1946454802               |
| SNP_P3_82168_56674052 | NC_021165.1    | Ca_kabuli_chr06 | 56674052                | CC                              | TT                | 1946454804               |
| SNP_P3_82169_56677230 | NC_021165.1    | Ca_kabuli_chr06 | 56677230                | GG                              | AA                | 1946454805               |
| SNP_P3_82171_56713005 | NC_021165.1    | Ca_kabuli_chr06 | 56713005                | AA                              | GG                | 1946454807               |
| SNP_P3_82172_56713316 | NC_021165.1    | Ca_kabuli_chr06 | 56713316                | TT                              | CC                | 1946454808               |



| SNPs IDs              | Chromosome IDs | Chromosomes     | Physical positions (bp) | CDC Frontier (Reference genome) | (Pusa 256 & HPNB) | NCBI SNPdb Accession IDs |
|-----------------------|----------------|-----------------|-------------------------|---------------------------------|-------------------|--------------------------|
| SNP_P3_82173_56713374 | NC_021165.1    | Ca_kabuli_chr06 | 56713374                | CC                              | TT                | 1946454810               |
| SNP_P3_82176_56728445 | NC_021165.1    | Ca_kabuli_chr06 | 56728445                | AA                              | GG                | 1946454812               |
| SNP_P3_82177_56728535 | NC_021165.1    | Ca_kabuli_chr06 | 56728535                | TT                              | AA                | 1946454813               |
| SNP_P3_82179_56728926 | NC_021165.1    | Ca_kabuli_chr06 | 56728926                | TT                              | CC                | 1946454815               |
| SNP_P3_82182_56774870 | NC_021165.1    | Ca_kabuli_chr06 | 56774870                | TT                              | GG                | 1946454816               |
| SNP_P3_82185_56853332 | NC_021165.1    | Ca_kabuli_chr06 | 56853332                | AA                              | GG                | 1946454817               |
| SNP_P3_82186_56854753 | NC_021165.1    | Ca_kabuli_chr06 | 56854753                | CC                              | TT                | 1946454819               |
| SNP_P3_82187_56866276 | NC_021165.1    | Ca_kabuli_chr06 | 56866276                | TT                              | AA                | 1946454820               |
| SNP_P3_82189_56879029 | NC_021165.1    | Ca_kabuli_chr06 | 56879029                | AA                              | GG                | 1946454822               |
| SNP_P3_82190_56887055 | NC_021165.1    | Ca_kabuli_chr06 | 56887055                | GG                              | AA                | 1946454823               |
| SNP_P3_82191_56896526 | NC_021165.1    | Ca_kabuli_chr06 | 56896526                | GG                              | AA                | 1946454825               |
| SNP_P3_82192_56904475 | NC_021165.1    | Ca_kabuli_chr06 | 56904475                | AA                              | GG                | 1946454826               |
| SNP_P3_82193_56904481 | NC_021165.1    | Ca_kabuli_chr06 | 56904481                | AA                              | GG                | 1946454828               |
| SNP_P3_82194_56904482 | NC_021165.1    | Ca_kabuli_chr06 | 56904482                | AA                              | GG                | 1946454829               |
| SNP_P3_82196_56953976 | NC_021165.1    | Ca_kabuli_chr06 | 56953976                | CC                              | TT                | 1946454830               |
| SNP_P3_82197_56955591 | NC_021165.1    | Ca_kabuli_chr06 | 56955591                | AA                              | GG                | 1946454832               |
| SNP_P3_82198_56955597 | NC_021165.1    | Ca_kabuli_chr06 | 56955597                | AA                              | CC                | 1946454833               |
| SNP_P3_82199_56955629 | NC_021165.1    | Ca_kabuli_chr06 | 56955629                | GG                              | AA                | 1946454835               |
| SNP_P3_82200_56955641 | NC_021165.1    | Ca_kabuli_chr06 | 56955641                | AA                              | TT                | 1946454836               |
| SNP_P3_82201_56956040 | NC_021165.1    | Ca_kabuli_chr06 | 56956040                | GG                              | AA                | 1946454838               |
| SNP_P3_82202_56956048 | NC_021165.1    | Ca_kabuli_chr06 | 56956048                | TT                              | CC                | 1946454840               |
| SNP_P3_82203_56956080 | NC_021165.1    | Ca_kabuli_chr06 | 56956080                | AA                              | CC                | 1946454841               |
| SNP_P3_82204_56966421 | NC_021165.1    | Ca_kabuli_chr06 | 56966421                | AA                              | CC                | 1946454842               |
| SNP_P3_82205_56997270 | NC_021165.1    | Ca_kabuli_chr06 | 56997270                | CC                              | TT                | 1946454844               |
| SNP_P3_82206_57007837 | NC_021165.1    | Ca_kabuli_chr06 | 57007837                | AA                              | GG                | 1946454845               |
| SNP_P3_82207_57034211 | NC_021165.1    | Ca_kabuli_chr06 | 57034211                | AA                              | GG                | 1946454847               |
| SNP_P3_82208_57034221 | NC_021165.1    | Ca_kabuli_chr06 | 57034221                | AA                              | GG                | 1946454848               |
| SNP_P3_82210_57042334 | NC_021165.1    | Ca_kabuli_chr06 | 57042334                | TT                              | AA                | 1946454850               |
| SNP_P3_82211_57048728 | NC_021165.1    | Ca_kabuli_chr06 | 57048728                | CC                              | TT                | 1946454851               |
| SNP_P3_82212_57059715 | NC_021165.1    | Ca_kabuli_chr06 | 57059715                | TT                              | GG                | 1946454853               |
| SNP_P3_82214_57069570 | NC_021165.1    | Ca_kabuli_chr06 | 57069570                | AA                              | TT                | 1946454854               |
| SNP_P3_82216_57084572 | NC_021165.1    | Ca_kabuli_chr06 | 57084572                | AA                              | CC                | 1946454855               |
| SNP_P3_82218_57100382 | NC_021165.1    | Ca_kabuli_chr06 | 57100382                | AA                              | GG                | 1946454857               |
| SNP_P3_82219_57100474 | NC_021165.1    | Ca_kabuli_chr06 | 57100474                | AA                              | GG                | 1946454858               |
| SNP_P3_82222_57128914 | NC_021165.1    | Ca_kabuli_chr06 | 57128914                | CC                              | GG                | 1946454860               |
| SNP_P3_82223_57136152 | NC_021165.1    | Ca_kabuli_chr06 | 57136152                | AA                              | GG                | 1946454861               |
| SNP_P3_82224_57136153 | NC_021165.1    | Ca_kabuli_chr06 | 57136153                | AA                              | CC                | 1946454863               |
| SNP_P3_82225_57136703 | NC_021165.1    | Ca_kabuli_chr06 | 57136703                | AA                              | TT                | 1946454864               |
| SNP_P3_82226_57136705 | NC_021165.1    | Ca_kabuli_chr06 | 57136705                | TT                              | AA                | 1946454866               |
| SNP_P3_82227_57136707 | NC_021165.1    | Ca_kabuli_chr06 | 57136707                | AA                              | GG                | 1946454868               |
| SNP_P3_82228_57136722 | NC_021165.1    | Ca_kabuli_chr06 | 57136722                | GG                              | CC                | 1946454869               |
| SNP_P3_82229_57136743 | NC_021165.1    | Ca_kabuli_chr06 | 57136743                | CC                              | TT                | 1946454871               |

| SNPs IDs              | Chromosome IDs | Chromosomes     | Physical positions (bp) | CDC Frontier (Reference genome) | (Pusa 256 & HPNB) | NCBI SNPdb Accession IDs |
|-----------------------|----------------|-----------------|-------------------------|---------------------------------|-------------------|--------------------------|
| SNP_P3_82230_57138536 | NC_021165.1    | Ca_kabuli_chr06 | 57138536                | TT                              | CC                | 1946454872               |
| SNP_P3_82231_57138577 | NC_021165.1    | Ca_kabuli_chr06 | 57138577                | GG                              | AA                | 1946454874               |
| SNP_P3_82232_57139415 | NC_021165.1    | Ca_kabuli_chr06 | 57139415                | TT                              | GG                | 1946454875               |
| SNP_P3_82233_57141847 | NC_021165.1    | Ca_kabuli_chr06 | 57141847                | CC                              | TT                | 1946454877               |
| SNP_P3_82234_57144114 | NC_021165.1    | Ca_kabuli_chr06 | 57144114                | GG                              | AA                | 1946454878               |
| SNP_P3_82235_57144118 | NC_021165.1    | Ca_kabuli_chr06 | 57144118                | TT                              | AA                | 1946454880               |
| SNP_P3_82236_57144221 | NC_021165.1    | Ca_kabuli_chr06 | 57144221                | TT                              | CC                | 1946454881               |
| SNP_P3_82237_57144243 | NC_021165.1    | Ca_kabuli_chr06 | 57144243                | TT                              | CC                | 1946454883               |
| SNP_P3_82239_57154441 | NC_021165.1    | Ca_kabuli_chr06 | 57154441                | CC                              | AA                | 1946454884               |
| SNP_P3_82240_57155847 | NC_021165.1    | Ca_kabuli_chr06 | 57155847                | AA                              | TT                | 1946454886               |
| SNP_P3_82242_57172869 | NC_021165.1    | Ca_kabuli_chr06 | 57172869                | GG                              | CC                | 1946454887               |
| SNP_P3_82243_57172892 | NC_021165.1    | Ca_kabuli_chr06 | 57172892                | TT                              | CC                | 1946454888               |
| SNP_P3_82244_57173435 | NC_021165.1    | Ca_kabuli_chr06 | 57173435                | GG                              | AA                | 1946454890               |
| SNP_P3_82245_57173517 | NC_021165.1    | Ca_kabuli_chr06 | 57173517                | TT                              | AA                | 1946454892               |
| SNP_P3_82246_57173520 | NC_021165.1    | Ca_kabuli_chr06 | 57173520                | CC                              | AA                | 1946454893               |
| SNP_P3_82247_57173530 | NC_021165.1    | Ca_kabuli_chr06 | 57173530                | GG                              | CC                | 1946454895               |
| SNP_P3_82248_57173535 | NC_021165.1    | Ca_kabuli_chr06 | 57173535                | CC                              | TT                | 1946454896               |
| SNP_P3_82249_57173536 | NC_021165.1    | Ca_kabuli_chr06 | 57173536                | AA                              | GG                | 1946454898               |
| SNP_P3_82250_57173556 | NC_021165.1    | Ca_kabuli_chr06 | 57173556                | GG                              | AA                | 1946454899               |
| SNP_P3_82251_57173638 | NC_021165.1    | Ca_kabuli_chr06 | 57173638                | AA                              | CC                | 1946454901               |
| SNP_P3_82252_57173648 | NC_021165.1    | Ca_kabuli_chr06 | 57173648                | CC                              | TT                | 1946454902               |
| SNP_P3_82253_57173652 | NC_021165.1    | Ca_kabuli_chr06 | 57173652                | AA                              | CC                | 1946454904               |
| SNP_P3_82254_57173657 | NC_021165.1    | Ca_kabuli_chr06 | 57173657                | AA                              | GG                | 1946454905               |
| SNP_P3_82255_57173671 | NC_021165.1    | Ca_kabuli_chr06 | 57173671                | AA                              | GG                | 1946454906               |
| SNP_P3_82256_57173684 | NC_021165.1    | Ca_kabuli_chr06 | 57173684                | AA                              | GG                | 1946454908               |
| SNP_P3_82257_57173688 | NC_021165.1    | Ca_kabuli_chr06 | 57173688                | AA                              | CC                | 1946454909               |
| SNP_P3_82258_57173695 | NC_021165.1    | Ca_kabuli_chr06 | 57173695                | AA                              | GG                | 1946454911               |
| SNP_P3_82259_57173882 | NC_021165.1    | Ca_kabuli_chr06 | 57173882                | CC                              | GG                | 1946454912               |
| SNP_P3_82260_57173945 | NC_021165.1    | Ca_kabuli_chr06 | 57173945                | CC                              | GG                | 1946454914               |
| SNP_P3_82261_57173946 | NC_021165.1    | Ca_kabuli_chr06 | 57173946                | TT                              | AA                | 1946454915               |
| SNP_P3_82262_57173979 | NC_021165.1    | Ca_kabuli_chr06 | 57173979                | TT                              | AA                | 1946454917               |
| SNP_P3_82263_57173987 | NC_021165.1    | Ca_kabuli_chr06 | 57173987                | TT                              | GG                | 1946454918               |
| SNP_P3_82264_57174087 | NC_021165.1    | Ca_kabuli_chr06 | 57174087                | TT                              | GG                | 1946454919               |
| SNP_P3_82265_57174310 | NC_021165.1    | Ca_kabuli_chr06 | 57174310                | TT                              | GG                | 1946454921               |
| SNP_P3_82266_57174350 | NC_021165.1    | Ca_kabuli_chr06 | 57174350                | AA                              | GG                | 1946454923               |
| SNP_P3_82267_57174363 | NC_021165.1    | Ca_kabuli_chr06 | 57174363                | AA                              | GG                | 1946454924               |
| SNP_P3_82268_57174368 | NC_021165.1    | Ca_kabuli_chr06 | 57174368                | GG                              | TT                | 1946454926               |
| SNP_P3_82269_57181196 | NC_021165.1    | Ca_kabuli_chr06 | 57181196                | TT                              | CC                | 1946454927               |
| SNP_P3_82270_57193051 | NC_021165.1    | Ca_kabuli_chr06 | 57193051                | TT                              | CC                | 1946454929               |
| SNP_P3_82271_57236622 | NC_021165.1    | Ca_kabuli_chr06 | 57236622                | CC                              | TT                | 1946454930               |
| SNP_P3_82272_57244578 | NC_021165.1    | Ca_kabuli_chr06 | 57244578                | TT                              | CC                | 1946454931               |
| SNP_P3_82273_57255393 | NC_021165.1    | Ca_kabuli_chr06 | 57255393                | GG                              | AA                | 1946454933               |

| SNPs IDs              | Chromosome IDs | Chromosomes     | Physical positions (bp) | CDC Frontier (Reference genome) | (Pusa 256 & HPNB) | NCBI SNPdb Accession IDs |
|-----------------------|----------------|-----------------|-------------------------|---------------------------------|-------------------|--------------------------|
| SNP_P3_82274_57255399 | NC_021165.1    | Ca_kabuli_chr06 | 57255399                | AA                              | CC                | 1946454934               |
| SNP_P3_82276_57369938 | NC_021165.1    | Ca_kabuli_chr06 | 57369938                | TT                              | AA                | 1946454936               |
| SNP_P3_82278_57425772 | NC_021165.1    | Ca_kabuli_chr06 | 57425772                | AA                              | CC                | 1946454937               |
| SNP_P3_82279_57425888 | NC_021165.1    | Ca_kabuli_chr06 | 57425888                | AA                              | CC                | 1946454939               |
| SNP_P3_82281_57460842 | NC_021165.1    | Ca_kabuli_chr06 | 57460842                | GG                              | AA                | 1946454940               |
| SNP_P3_82283_57487954 | NC_021165.1    | Ca_kabuli_chr06 | 57487954                | TT                              | CC                | 1946454942               |
| SNP_P3_82284_57488358 | NC_021165.1    | Ca_kabuli_chr06 | 57488358                | TT                              | GG                | 1946454943               |
| SNP_P3_82285_57488359 | NC_021165.1    | Ca_kabuli_chr06 | 57488359                | TT                              | CC                | 1946454945               |
| SNP_P3_82286_57488392 | NC_021165.1    | Ca_kabuli_chr06 | 57488392                | CC                              | TT                | 1946454946               |
| SNP_P3_82287_57488564 | NC_021165.1    | Ca_kabuli_chr06 | 57488564                | AA                              | CC                | 1946454948               |
| SNP_P3_82288_57488937 | NC_021165.1    | Ca_kabuli_chr06 | 57488937                | AA                              | GG                | 1946454949               |
| SNP_P3_82290_57589358 | NC_021165.1    | Ca_kabuli_chr06 | 57589358                | TT                              | CC                | 1946454951               |
| SNP_P3_82291_57593287 | NC_021165.1    | Ca_kabuli_chr06 | 57593287                | GG                              | AA                | 1946454952               |
| SNP_P3_82292_57595209 | NC_021165.1    | Ca_kabuli_chr06 | 57595209                | AA                              | GG                | 1946454954               |
| SNP_P3_82293_57600786 | NC_021165.1    | Ca_kabuli_chr06 | 57600786                | CC                              | TT                | 1946454955               |
| SNP_P3_82294_57608217 | NC_021165.1    | Ca_kabuli_chr06 | 57608217                | AA                              | TT                | 1946454957               |
| SNP_P3_82295_57608251 | NC_021165.1    | Ca_kabuli_chr06 | 57608251                | GG                              | CC                | 1946454958               |
| SNP_P3_82296_57608265 | NC_021165.1    | Ca_kabuli_chr06 | 57608265                | GG                              | AA                | 1946454960               |
| SNP_P3_82297_57608632 | NC_021165.1    | Ca_kabuli_chr06 | 57608632                | AA                              | GG                | 1946454961               |
| SNP_P3_82298_57616440 | NC_021165.1    | Ca_kabuli_chr06 | 57616440                | AA                              | GG                | 1946454963               |
| SNP_P3_82299_57641566 | NC_021165.1    | Ca_kabuli_chr06 | 57641566                | CC                              | AA                | 1946454964               |
| SNP_P3_82300_57645553 | NC_021165.1    | Ca_kabuli_chr06 | 57645553                | CC                              | TT                | 1946454965               |
| SNP_P3_82301_57646263 | NC_021165.1    | Ca_kabuli_chr06 | 57646263                | TT                              | AA                | 1946454967               |
| SNP_P3_82302_57657651 | NC_021165.1    | Ca_kabuli_chr06 | 57657651                | AA                              | CC                | 1946454968               |
| SNP_P3_82303_57670747 | NC_021165.1    | Ca_kabuli_chr06 | 57670747                | TT                              | CC                | 1946454970               |
| SNP_P3_82304_57688362 | NC_021165.1    | Ca_kabuli_chr06 | 57688362                | TT                              | GG                | 1946454972               |
| SNP_P3_82305_57697902 | NC_021165.1    | Ca_kabuli_chr06 | 57697902                | AA                              | GG                | 1946454973               |
| SNP_P3_82306_57699801 | NC_021165.1    | Ca_kabuli_chr06 | 57699801                | TT                              | CC                | 1946454975               |
| SNP_P3_82307_57702981 | NC_021165.1    | Ca_kabuli_chr06 | 57702981                | GG                              | TT                | 1946454976               |
| SNP_P3_82308_57713861 | NC_021165.1    | Ca_kabuli_chr06 | 57713861                | AA                              | TT                | 1946454978               |
| SNP_P3_82310_57720344 | NC_021165.1    | Ca_kabuli_chr06 | 57720344                | CC                              | TT                | 1946454979               |
| SNP_P3_82311_57738670 | NC_021165.1    | Ca_kabuli_chr06 | 57738670                | CC                              | TT                | 1946454981               |
| SNP_P3_82312_57738671 | NC_021165.1    | Ca_kabuli_chr06 | 57738671                | GG                              | TT                | 1946454982               |
| SNP_P3_82313_57761330 | NC_021165.1    | Ca_kabuli_chr06 | 57761330                | AA                              | TT                | 1946454984               |
| SNP_P3_82314_57795920 | NC_021165.1    | Ca_kabuli_chr06 | 57795920                | GG                              | AA                | 1946454985               |
| SNP_P3_82315_57815247 | NC_021165.1    | Ca_kabuli_chr06 | 57815247                | AA                              | TT                | 1946454987               |
| SNP_P3_82316_57883989 | NC_021165.1    | Ca_kabuli_chr06 | 57883989                | GG                              | AA                | 1946454988               |
| SNP_P3_82317_57945330 | NC_021165.1    | Ca_kabuli_chr06 | 57945330                | TT                              | AA                | 1946454990               |
| SNP_P3_82318_58017545 | NC_021165.1    | Ca_kabuli_chr06 | 58017545                | GG                              | TT                | 1946454991               |
| SNP_P3_82319_58048882 | NC_021165.1    | Ca_kabuli_chr06 | 58048882                | AA                              | TT                | 1946454993               |
| SNP_P3_82320_58048885 | NC_021165.1    | Ca_kabuli_chr06 | 58048885                | TT                              | GG                | 1946454994               |
| SNP_P3_82321_58089729 | NC_021165.1    | Ca_kabuli_chr06 | 58089729                | TT                              | CC                | 1946454995               |

| SNPs IDs              | Chromosome IDs | Chromosomes     | Physical positions (bp) | CDC Frontier (Reference genome) | (Pusa 256 & HPNB) | NCBI SNPdb Accession IDs |
|-----------------------|----------------|-----------------|-------------------------|---------------------------------|-------------------|--------------------------|
| SNP_P3_82322_58095253 | NC_021165.1    | Ca_kabuli_chr06 | 58095253                | TT                              | CC                | 1946454997               |
| SNP_P3_82323_58095431 | NC_021165.1    | Ca_kabuli_chr06 | 58095431                | AA                              | GG                | 1946454999               |
| SNP_P3_82324_58095604 | NC_021165.1    | Ca_kabuli_chr06 | 58095604                | CC                              | TT                | 1946455001               |
| SNP_P3_82325_58099894 | NC_021165.1    | Ca_kabuli_chr06 | 58099894                | TT                              | GG                | 1946455002               |
| SNP_P3_82326_58124310 | NC_021165.1    | Ca_kabuli_chr06 | 58124310                | AA                              | CC                | 1946455003               |
| SNP_P3_82327_58124332 | NC_021165.1    | Ca_kabuli_chr06 | 58124332                | TT                              | CC                | 1946455005               |
| SNP_P3_82328_58136273 | NC_021165.1    | Ca_kabuli_chr06 | 58136273                | GG                              | TT                | 1946455007               |
| SNP_P3_82329_58136296 | NC_021165.1    | Ca_kabuli_chr06 | 58136296                | CC                              | AA                | 1946455008               |
| SNP_P3_82330_58136312 | NC_021165.1    | Ca_kabuli_chr06 | 58136312                | GG                              | AA                | 1946455009               |
| SNP_P3_82331_58136315 | NC_021165.1    | Ca_kabuli_chr06 | 58136315                | TT                              | CC                | 1946455011               |
| SNP_P3_82334_58275605 | NC_021165.1    | Ca_kabuli_chr06 | 58275605                | AA                              | GG                | 1946455012               |
| SNP_P3_82336_58317423 | NC_021165.1    | Ca_kabuli_chr06 | 58317423                | TT                              | AA                | 1946455014               |
| SNP_P3_82337_58340194 | NC_021165.1    | Ca_kabuli_chr06 | 58340194                | TT                              | CC                | 1946455015               |
| SNP_P3_82338_58342972 | NC_021165.1    | Ca_kabuli_chr06 | 58342972                | AA                              | GG                | 1946455017               |
| SNP_P3_82339_58342989 | NC_021165.1    | Ca_kabuli_chr06 | 58342989                | AA                              | GG                | 1946455019               |
| SNP_P3_82340_58351058 | NC_021165.1    | Ca_kabuli_chr06 | 58351058                | TT                              | CC                | 1946455020               |
| SNP_P3_82342_58392813 | NC_021165.1    | Ca_kabuli_chr06 | 58392813                | CC                              | AA                | 1946455022               |
| SNP_P3_82343_58404842 | NC_021165.1    | Ca_kabuli_chr06 | 58404842                | AA                              | GG                | 1946455023               |
| SNP_P3_82344_58404857 | NC_021165.1    | Ca_kabuli_chr06 | 58404857                | AA                              | GG                | 1946455025               |
| SNP_P3_82345_58404892 | NC_021165.1    | Ca_kabuli_chr06 | 58404892                | TT                              | CC                | 1946455026               |
| SNP_P3_82346_58405031 | NC_021165.1    | Ca_kabuli_chr06 | 58405031                | TT                              | CC                | 1946455028               |
| SNP_P3_82348_58409388 | NC_021165.1    | Ca_kabuli_chr06 | 58409388                | AA                              | GG                | 1946455030               |
| SNP_P3_82349_58409691 | NC_021165.1    | Ca_kabuli_chr06 | 58409691                | TT                              | AA                | 1946455031               |
| SNP_P3_82350_58414538 | NC_021165.1    | Ca_kabuli_chr06 | 58414538                | TT                              | AA                | 1946455033               |
| SNP_P3_82351_58478858 | NC_021165.1    | Ca_kabuli_chr06 | 58478858                | TT                              | CC                | 1946455034               |
| SNP_P3_82352_58538185 | NC_021165.1    | Ca_kabuli_chr06 | 58538185                | CC                              | TT                | 1946455036               |
| SNP_P3_82354_58562598 | NC_021165.1    | Ca_kabuli_chr06 | 58562598                | CC                              | TT                | 1946455037               |
| SNP_P3_82356_58588040 | NC_021165.1    | Ca_kabuli_chr06 | 58588040                | AA                              | TT                | 1946455039               |
| SNP_P3_82361_58668782 | NC_021165.1    | Ca_kabuli_chr06 | 58668782                | CC                              | AA                | 1946455041               |
| SNP_P3_82363_58691110 | NC_021165.1    | Ca_kabuli_chr06 | 58691110                | TT                              | GG                | 1946455042               |
| SNP_P3_82364_58691111 | NC_021165.1    | Ca_kabuli_chr06 | 58691111                | AA                              | GG                | 1946455043               |
| SNP_P3_82367_58727781 | NC_021165.1    | Ca_kabuli_chr06 | 58727781                | GG                              | AA                | 1946455045               |
| SNP_P3_82368_58739877 | NC_021165.1    | Ca_kabuli_chr06 | 58739877                | GG                              | TT                | 1946455047               |
| SNP_P3_82369_58758384 | NC_021165.1    | Ca_kabuli_chr06 | 58758384                | GG                              | AA                | 1946455049               |
| SNP_P3_82371_58775303 | NC_021165.1    | Ca_kabuli_chr06 | 58775303                | GG                              | AA                | 1946455050               |
| SNP_P3_82372_58775304 | NC_021165.1    | Ca_kabuli_chr06 | 58775304                | AA                              | GG                | 1946455052               |
| SNP_P3_82373_58781067 | NC_021165.1    | Ca_kabuli_chr06 | 58781067                | TT                              | AA                | 1946455053               |
| SNP_P3_82374_58781072 | NC_021165.1    | Ca_kabuli_chr06 | 58781072                | AA                              | GG                | 1946455055               |
| SNP_P3_82376_58781114 | NC_021165.1    | Ca_kabuli_chr06 | 58781114                | CC                              | TT                | 1946455056               |
| SNP_P3_82377_58781128 | NC_021165.1    | Ca_kabuli_chr06 | 58781128                | TT                              | AA                | 1946455058               |
| SNP_P3_82378_58781132 | NC_021165.1    | Ca_kabuli_chr06 | 58781132                | AA                              | TT                | 1946455060               |
| SNP_P3_82380_58783420 | NC_021165.1    | Ca_kabuli_chr06 | 58783420                | AA                              | TT                | 1946455061               |

| SNPs IDs              | Chromosome IDs | Chromosomes     | Physical positions (bp) | CDC Frontier (Reference genome) | (Pusa 256 & HPNB) | NCBI SNPdb Accession IDs |
|-----------------------|----------------|-----------------|-------------------------|---------------------------------|-------------------|--------------------------|
| SNP_P3_82381_58783421 | NC_021165.1    | Ca_kabuli_chr06 | 58783421                | AA                              | TT                | 1946455063               |
| SNP_P3_82382_58783440 | NC_021165.1    | Ca_kabuli_chr06 | 58783440                | AA                              | GG                | 1946455064               |
| SNP_P3_82383_58783755 | NC_021165.1    | Ca_kabuli_chr06 | 58783755                | TT                              | AA                | 1946455066               |
| SNP_P3_82385_58785212 | NC_021165.1    | Ca_kabuli_chr06 | 58785212                | GG                              | AA                | 1946455067               |
| SNP_P3_82386_58785522 | NC_021165.1    | Ca_kabuli_chr06 | 58785522                | AA                              | TT                | 1946455069               |
| SNP_P3_82387_58785604 | NC_021165.1    | Ca_kabuli_chr06 | 58785604                | TT                              | AA                | 1946455070               |
| SNP_P3_82388_58785606 | NC_021165.1    | Ca_kabuli_chr06 | 58785606                | AA                              | TT                | 1946455072               |
| SNP_P3_82389_58786435 | NC_021165.1    | Ca_kabuli_chr06 | 58786435                | GG                              | AA                | 1946455073               |
| SNP_P3_82390_58786643 | NC_021165.1    | Ca_kabuli_chr06 | 58786643                | AA                              | GG                | 1946455074               |
| SNP_P3_82392_58787802 | NC_021165.1    | Ca_kabuli_chr06 | 58787802                | CC                              | TT                | 1946455076               |
| SNP_P3_82393_58788101 | NC_021165.1    | Ca_kabuli_chr06 | 58788101                | GG                              | AA                | 1946455078               |
| SNP_P3_82395_58789513 | NC_021165.1    | Ca_kabuli_chr06 | 58789513                | GG                              | CC                | 1946455079               |
| SNP_P3_82396_58789528 | NC_021165.1    | Ca_kabuli_chr06 | 58789528                | TT                              | CC                | 1946455081               |
| SNP_P3_82397_58790498 | NC_021165.1    | Ca_kabuli_chr06 | 58790498                | TT                              | AA                | 1946455082               |
| SNP_P3_82398_58790500 | NC_021165.1    | Ca_kabuli_chr06 | 58790500                | CC                              | AA                | 1946455084               |
| SNP_P3_82399_58792671 | NC_021165.1    | Ca_kabuli_chr06 | 58792671                | GG                              | AA                | 1946455085               |
| SNP_P3_82400_58794345 | NC_021165.1    | Ca_kabuli_chr06 | 58794345                | TT                              | CC                | 1946455087               |
| SNP_P3_82401_58794377 | NC_021165.1    | Ca_kabuli_chr06 | 58794377                | GG                              | AA                | 1946455088               |
| SNP_P3_82402_58794433 | NC_021165.1    | Ca_kabuli_chr06 | 58794433                | GG                              | AA                | 1946455090               |
| SNP_P3_82403_58794437 | NC_021165.1    | Ca_kabuli_chr06 | 58794437                | AA                              | GG                | 1946455091               |
| SNP_P3_82404_58794651 | NC_021165.1    | Ca_kabuli_chr06 | 58794651                | CC                              | AA                | 1946455093               |
| SNP_P3_82405_58794694 | NC_021165.1    | Ca_kabuli_chr06 | 58794694                | CC                              | AA                | 1946455094               |
| SNP_P3_82406_58798922 | NC_021165.1    | Ca_kabuli_chr06 | 58798922                | AA                              | GG                | 1946455096               |
| SNP_P3_82409_58801276 | NC_021165.1    | Ca_kabuli_chr06 | 58801276                | GG                              | AA                | 1946455097               |
| SNP_P3_82410_58803915 | NC_021165.1    | Ca_kabuli_chr06 | 58803915                | CC                              | TT                | 1946455099               |
| SNP_P3_82411_58803917 | NC_021165.1    | Ca_kabuli_chr06 | 58803917                | AA                              | GG                | 1946455100               |
| SNP_P3_82412_58803919 | NC_021165.1    | Ca_kabuli_chr06 | 58803919                | AA                              | GG                | 1946455102               |
| SNP_P3_82413_58804902 | NC_021165.1    | Ca_kabuli_chr06 | 58804902                | CC                              | TT                | 1946455103               |
| SNP_P3_82414_58805159 | NC_021165.1    | Ca_kabuli_chr06 | 58805159                | CC                              | TT                | 1946455105               |
| SNP_P3_82415_58806103 | NC_021165.1    | Ca_kabuli_chr06 | 58806103                | TT                              | CC                | 1946455106               |
| SNP_P3_82416_58807723 | NC_021165.1    | Ca_kabuli_chr06 | 58807723                | TT                              | CC                | 1946455108               |
| SNP_P3_82417_58807741 | NC_021165.1    | Ca_kabuli_chr06 | 58807741                | GG                              | AA                | 1946455109               |
| SNP_P3_82419_58808675 | NC_021165.1    | Ca_kabuli_chr06 | 58808675                | TT                              | CC                | 1946455111               |
| SNP_P3_82420_58811708 | NC_021165.1    | Ca_kabuli_chr06 | 58811708                | CC                              | TT                | 1946455112               |
| SNP_P3_82423_58813807 | NC_021165.1    | Ca_kabuli_chr06 | 58813807                | CC                              | GG                | 1946455114               |
| SNP_P3_82424_58813845 | NC_021165.1    | Ca_kabuli_chr06 | 58813845                | GG                              | AA                | 1946455115               |
| SNP_P3_82425_58814152 | NC_021165.1    | Ca_kabuli_chr06 | 58814152                | AA                              | GG                | 1946455117               |
| SNP_P3_82426_58814629 | NC_021165.1    | Ca_kabuli_chr06 | 58814629                | TT                              | AA                | 1946455119               |
| SNP_P3_82427_58816276 | NC_021165.1    | Ca_kabuli_chr06 | 58816276                | CC                              | TT                | 1946455120               |
| SNP_P3_82428_58819072 | NC_021165.1    | Ca_kabuli_chr06 | 58819072                | AA                              | CC                | 1946455122               |
| SNP_P3_82430_58819345 | NC_021165.1    | Ca_kabuli_chr06 | 58819345                | CC                              | TT                | 1946455123               |
| SNP_P3_82431_58819348 | NC_021165.1    | Ca_kabuli_chr06 | 58819348                | AA                              | GG                | 1946455124               |

| SNPs IDs              | Chromosome IDs | Chromosomes     | Physical positions (bp) | CDC Frontier (Reference genome) | (Pusa 256 & HPNB) | NCBI SNPdb Accession IDs |
|-----------------------|----------------|-----------------|-------------------------|---------------------------------|-------------------|--------------------------|
| SNP_P3_82433_58819500 | NC_021165.1    | Ca_kabuli_chr06 | 58819500                | TT                              | CC                | 1946455126               |
| SNP_P3_82434_58819503 | NC_021165.1    | Ca_kabuli_chr06 | 58819503                | TT                              | AA                | 1946455127               |
| SNP_P3_82435_58819527 | NC_021165.1    | Ca_kabuli_chr06 | 58819527                | TT                              | CC                | 1946455129               |
| SNP_P3_82436_58819529 | NC_021165.1    | Ca_kabuli_chr06 | 58819529                | CC                              | AA                | 1946455130               |
| SNP_P3_82437_58819772 | NC_021165.1    | Ca_kabuli_chr06 | 58819772                | CC                              | TT                | 1946455132               |
| SNP_P3_82438_58819778 | NC_021165.1    | Ca_kabuli_chr06 | 58819778                | TT                              | CC                | 1946455133               |
| SNP_P3_82439_58821364 | NC_021165.1    | Ca_kabuli_chr06 | 58821364                | GG                              | AA                | 1946455135               |
| SNP_P3_82440_58821386 | NC_021165.1    | Ca_kabuli_chr06 | 58821386                | AA                              | GG                | 1946455136               |
| SNP_P3_82441_58822936 | NC_021165.1    | Ca_kabuli_chr06 | 58822936                | GG                              | AA                | 1946455138               |
| SNP_P3_82442_58822968 | NC_021165.1    | Ca_kabuli_chr06 | 58822968                | TT                              | CC                | 1946455139               |
| SNP_P3_82443_58822988 | NC_021165.1    | Ca_kabuli_chr06 | 58822988                | CC                              | TT                | 1946455141               |
| SNP_P3_82444_58823571 | NC_021165.1    | Ca_kabuli_chr06 | 58823571                | CC                              | AA                | 1946455143               |
| SNP_P3_82445_58823642 | NC_021165.1    | Ca_kabuli_chr06 | 58823642                | AA                              | CC                | 1946455144               |
| SNP_P3_82448_58823777 | NC_021165.1    | Ca_kabuli_chr06 | 58823777                | CC                              | TT                | 1946455146               |
| SNP_P3_82449_58823813 | NC_021165.1    | Ca_kabuli_chr06 | 58823813                | CC                              | TT                | 1946455147               |
| SNP_P3_82450_58823814 | NC_021165.1    | Ca_kabuli_chr06 | 58823814                | TT                              | CC                | 1946455148               |
| SNP_P3_82452_58824144 | NC_021165.1    | Ca_kabuli_chr06 | 58824144                | CC                              | TT                | 1946455150               |
| SNP_P3_82453_58827123 | NC_021165.1    | Ca_kabuli_chr06 | 58827123                | AA                              | GG                | 1946455151               |
| SNP_P3_82455_58827206 | NC_021165.1    | Ca_kabuli_chr06 | 58827206                | AA                              | CC                | 1946455153               |
| SNP_P3_82456_58827208 | NC_021165.1    | Ca_kabuli_chr06 | 58827208                | TT                              | GG                | 1946455154               |
| SNP_P3_82457_58827243 | NC_021165.1    | Ca_kabuli_chr06 | 58827243                | CC                              | TT                | 1946455156               |
| SNP_P3_82458_58827479 | NC_021165.1    | Ca_kabuli_chr06 | 58827479                | TT                              | GG                | 1946455157               |
| SNP_P3_82459_58827482 | NC_021165.1    | Ca_kabuli_chr06 | 58827482                | AA                              | TT                | 1946455158               |
| SNP_P3_82460_58827533 | NC_021165.1    | Ca_kabuli_chr06 | 58827533                | AA                              | CC                | 1946455160               |
| SNP_P3_82461_58828906 | NC_021165.1    | Ca_kabuli_chr06 | 58828906                | CC                              | GG                | 1946455161               |
| SNP_P3_82468_58876536 | NC_021165.1    | Ca_kabuli_chr06 | 58876536                | CC                              | TT                | 1946455163               |
| SNP_P3_82469_58914916 | NC_021165.1    | Ca_kabuli_chr06 | 58914916                | GG                              | AA                | 1946455165               |
| SNP_P3_82470_58914920 | NC_021165.1    | Ca_kabuli_chr06 | 58914920                | GG                              | AA                | 1946455166               |
| SNP_P3_82471_58922664 | NC_021165.1    | Ca_kabuli_chr06 | 58922664                | CC                              | GG                | 1946455168               |
| SNP_P3_82472_58922667 | NC_021165.1    | Ca_kabuli_chr06 | 58922667                | AA                              | GG                | 1946455169               |
| SNP_P3_82473_58979368 | NC_021165.1    | Ca_kabuli_chr06 | 58979368                | AA                              | GG                | 1946455170               |
| SNP_P3_82474_58981822 | NC_021165.1    | Ca_kabuli_chr06 | 58981822                | AA                              | GG                | 1946455172               |
| SNP_P3_82475_58986558 | NC_021165.1    | Ca_kabuli_chr06 | 58986558                | GG                              | AA                | 1946455173               |
| SNP_P3_82476_58987671 | NC_021165.1    | Ca_kabuli_chr06 | 58987671                | TT                              | CC                | 1946455175               |
| SNP_P3_82477_58989914 | NC_021165.1    | Ca_kabuli_chr06 | 58989914                | GG                              | AA                | 1946455176               |
| SNP_P3_82478_58992521 | NC_021165.1    | Ca_kabuli_chr06 | 58992521                | GG                              | AA                | 1946455178               |
| SNP_P3_82480_59057312 | NC_021165.1    | Ca_kabuli_chr06 | 59057312                | GG                              | AA                | 1946455179               |
| SNP_P3_82481_59058643 | NC_021165.1    | Ca_kabuli_chr06 | 59058643                | GG                              | AA                | 1946455181               |
| SNP_P3_82482_59058650 | NC_021165.1    | Ca_kabuli_chr06 | 59058650                | CC                              | AA                | 1946455182               |
| SNP_P3_82483_59059841 | NC_021165.1    | Ca_kabuli_chr06 | 59059841                | TT                              | CC                | 1946455184               |
| SNP_P3_82484_59061331 | NC_021165.1    | Ca_kabuli_chr06 | 59061331                | AA                              | GG                | 1946455185               |
| SNP_P3_82485_59061384 | NC_021165.1    | Ca_kabuli_chr06 | 59061384                | CC                              | AA                | 1946455187               |

| SNPs IDs              | Chromosome IDs | Chromosomes     | Physical positions (bp) | CDC Frontier (Reference genome) | (Pusa 256 & HPNB) | NCBI SNPdb Accession IDs |
|-----------------------|----------------|-----------------|-------------------------|---------------------------------|-------------------|--------------------------|
| SNP_P3_82486_59061385 | NC_021165.1    | Ca_kabuli_chr06 | 59061385                | TT                              | CC                | 1946455188               |
| SNP_P3_82487_59061722 | NC_021165.1    | Ca_kabuli_chr06 | 59061722                | TT                              | CC                | 1946455190               |
| SNP_P3_82490_59068494 | NC_021165.1    | Ca_kabuli_chr06 | 59068494                | GG                              | TT                | 1946455191               |
| SNP_P3_82491_59069232 | NC_021165.1    | Ca_kabuli_chr06 | 59069232                | AA                              | GG                | 1946455193               |
| SNP_P3_82492_59069245 | NC_021165.1    | Ca_kabuli_chr06 | 59069245                | AA                              | GG                | 1946455194               |
| SNP_P3_82493_59069249 | NC_021165.1    | Ca_kabuli_chr06 | 59069249                | CC                              | TT                | 1946455196               |
| SNP_P3_82494_59069274 | NC_021165.1    | Ca_kabuli_chr06 | 59069274                | GG                              | AA                | 1946455197               |
| SNP_P3_82495_59070214 | NC_021165.1    | Ca_kabuli_chr06 | 59070214                | TT                              | GG                | 1946455198               |
| SNP_P3_82496_59071715 | NC_021165.1    | Ca_kabuli_chr06 | 59071715                | TT                              | CC                | 1946455200               |
| SNP_P3_82498_59072047 | NC_021165.1    | Ca_kabuli_chr06 | 59072047                | CC                              | TT                | 1946455201               |
| SNP_P3_82499_59072288 | NC_021165.1    | Ca_kabuli_chr06 | 59072288                | GG                              | CC                | 1946455203               |
| SNP_P3_82500_59072319 | NC_021165.1    | Ca_kabuli_chr06 | 59072319                | TT                              | CC                | 1946455204               |
| SNP_P3_82501_59072322 | NC_021165.1    | Ca_kabuli_chr06 | 59072322                | TT                              | CC                | 1946455206               |
| SNP_P3_82502_59073384 | NC_021165.1    | Ca_kabuli_chr06 | 59073384                | AA                              | GG                | 1946455207               |
| SNP_P3_82503_59073396 | NC_021165.1    | Ca_kabuli_chr06 | 59073396                | GG                              | AA                | 1946455209               |
| SNP_P3_82504_59073414 | NC_021165.1    | Ca_kabuli_chr06 | 59073414                | CC                              | TT                | 1946455210               |
| SNP_P3_82505_59073415 | NC_021165.1    | Ca_kabuli_chr06 | 59073415                | AA                              | TT                | 1946455212               |
| SNP_P3_82506_59073426 | NC_021165.1    | Ca_kabuli_chr06 | 59073426                | AA                              | GG                | 1946455213               |
| SNP_P3_82507_59073472 | NC_021165.1    | Ca_kabuli_chr06 | 59073472                | GG                              | AA                | 1946455215               |
| SNP_P3_82508_59074007 | NC_021165.1    | Ca_kabuli_chr06 | 59074007                | GG                              | AA                | 1946455216               |
| SNP_P3_82509_59074010 | NC_021165.1    | Ca_kabuli_chr06 | 59074010                | AA                              | TT                | 1946455218               |
| SNP_P3_82510_59074307 | NC_021165.1    | Ca_kabuli_chr06 | 59074307                | CC                              | AA                | 1946455219               |
| SNP_P3_82511_59074590 | NC_021165.1    | Ca_kabuli_chr06 | 59074590                | CC                              | TT                | 1946455221               |
| SNP_P3_82512_59079371 | NC_021165.1    | Ca_kabuli_chr06 | 59079371                | GG                              | AA                | 1946455222               |
| SNP_P3_82513_59080469 | NC_021165.1    | Ca_kabuli_chr06 | 59080469                | TT                              | CC                | 1946455224               |
| SNP_P3_82514_59080471 | NC_021165.1    | Ca_kabuli_chr06 | 59080471                | GG                              | AA                | 1946455225               |
| SNP_P3_82515_59081584 | NC_021165.1    | Ca_kabuli_chr06 | 59081584                | CC                              | TT                | 1946455226               |
| SNP_P3_82516_59081597 | NC_021165.1    | Ca_kabuli_chr06 | 59081597                | AA                              | GG                | 1946455228               |
| SNP_P3_82517_59081720 | NC_021165.1    | Ca_kabuli_chr06 | 59081720                | AA                              | TT                | 1946455229               |
| SNP_P3_82518_59081793 | NC_021165.1    | Ca_kabuli_chr06 | 59081793                | CC                              | AA                | 1946455231               |
| SNP_P3_82519_59082406 | NC_021165.1    | Ca_kabuli_chr06 | 59082406                | GG                              | AA                | 1946455232               |
| SNP_P3_82521_59098158 | NC_021165.1    | Ca_kabuli_chr06 | 59098158                | AA                              | GG                | 1946455234               |
| SNP_P3_82522_59099788 | NC_021165.1    | Ca_kabuli_chr06 | 59099788                | CC                              | TT                | 1946455235               |
| SNP_P3_82523_59108150 | NC_021165.1    | Ca_kabuli_chr06 | 59108150                | AA                              | GG                | 1946455237               |
| SNP_P3_82524_59133132 | NC_021165.1    | Ca_kabuli_chr06 | 59133132                | AA                              | GG                | 1946455238               |
| SNP_P3_82525_59134113 | NC_021165.1    | Ca_kabuli_chr06 | 59134113                | TT                              | CC                | 1946455240               |
| SNP_P3_82526_59141216 | NC_021165.1    | Ca_kabuli_chr06 | 59141216                | TT                              | AA                | 1946455241               |
| SNP_P3_82528_59144010 | NC_021165.1    | Ca_kabuli_chr06 | 59144010                | AA                              | TT                | 1946455243               |
| SNP_P3_82529_59148243 | NC_021165.1    | Ca_kabuli_chr06 | 59148243                | GG                              | AA                | 1946455244               |
| SNP_P3_82530_59182905 | NC_021165.1    | Ca_kabuli_chr06 | 59182905                | TT                              | CC                | 1946455246               |
| SNP_P3_82531_59189795 | NC_021165.1    | Ca_kabuli_chr06 | 59189795                | TT                              | CC                | 1946455247               |
| SNP_P3_82533_59205072 | NC_021165.1    | Ca_kabuli_chr06 | 59205072                | AA                              | GG                | 1946455248               |

| SNPs IDs              | Chromosome IDs | Chromosomes     | Physical positions (bp) | CDC Frontier (Reference genome) | (Pusa 256 & HPNB) | NCBI SNPdb Accession IDs |
|-----------------------|----------------|-----------------|-------------------------|---------------------------------|-------------------|--------------------------|
| SNP_P3_82534_59216778 | NC_021165.1    | Ca_kabuli_chr06 | 59216778                | GG                              | TT                | 1946455250               |
| SNP_P3_82535_59237530 | NC_021165.1    | Ca_kabuli_chr06 | 59237530                | GG                              | AA                | 1946455251               |
| SNP_P3_82536_59238274 | NC_021165.1    | Ca_kabuli_chr06 | 59238274                | GG                              | AA                | 1946455253               |
| SNP_P3_82537_59244363 | NC_021165.1    | Ca_kabuli_chr06 | 59244363                | CC                              | AA                | 1946455255               |
| SNP_P3_82539_59255917 | NC_021165.1    | Ca_kabuli_chr06 | 59255917                | TT                              | AA                | 1946455256               |
| SNP_P3_82540_59261448 | NC_021165.1    | Ca_kabuli_chr06 | 59261448                | AA                              | GG                | 1946455258               |
| SNP_P3_82541_59265767 | NC_021165.1    | Ca_kabuli_chr06 | 59265767                | CC                              | TT                | 1946455259               |
| SNP_P3_82543_59270719 | NC_021165.1    | Ca_kabuli_chr06 | 59270719                | AA                              | GG                | 1946455260               |
| SNP_P3_82546_59274303 | NC_021165.1    | Ca_kabuli_chr06 | 59274303                | GG                              | AA                | 1946455262               |
| SNP_P3_82547_59277491 | NC_021165.1    | Ca_kabuli_chr06 | 59277491                | GG                              | AA                | 1946455263               |
| SNP_P3_82548_59277822 | NC_021165.1    | Ca_kabuli_chr06 | 59277822                | TT                              | CC                | 1946455265               |
| SNP_P3_82549_59277955 | NC_021165.1    | Ca_kabuli_chr06 | 59277955                | CC                              | TT                | 1946455266               |
| SNP_P3_82550_59277964 | NC_021165.1    | Ca_kabuli_chr06 | 59277964                | AA                              | TT                | 1946455268               |
| SNP_P3_82551_59277998 | NC_021165.1    | Ca_kabuli_chr06 | 59277998                | AA                              | CC                | 1946455269               |
| SNP_P3_82552_59278095 | NC_021165.1    | Ca_kabuli_chr06 | 59278095                | TT                              | CC                | 1946455271               |
| SNP_P3_82553_59278150 | NC_021165.1    | Ca_kabuli_chr06 | 59278150                | CC                              | TT                | 1946455272               |
| SNP_P3_82554_59278292 | NC_021165.1    | Ca_kabuli_chr06 | 59278292                | TT                              | GG                | 1946455274               |
| SNP_P3_82555_59329441 | NC_021165.1    | Ca_kabuli_chr06 | 59329441                | AA                              | GG                | 1946455275               |
| SNP_P3_82557_59370618 | NC_021165.1    | Ca_kabuli_chr06 | 59370618                | CC                              | TT                | 1946455277               |
| SNP_P3_82561_59416445 | NC_021165.1    | Ca_kabuli_chr06 | 59416445                | AA                              | CC                | 1946455278               |
| SNP_P3_82562_59416446 | NC_021165.1    | Ca_kabuli_chr06 | 59416446                | AA                              | CC                | 1946455279               |
| SNP_P3_82563_59423619 | NC_021165.1    | Ca_kabuli_chr06 | 59423619                | CC                              | TT                | 1946455281               |
| SNP_P3_82565_59434490 | NC_021165.1    | Ca_kabuli_chr06 | 59434490                | AA                              | GG                | 1946455282               |
| SNP_P3_82566_59434536 | NC_021165.1    | Ca_kabuli_chr06 | 59434536                | TT                              | CC                | 1946455284               |
| SNP_P3_82568_59434642 | NC_021165.1    | Ca_kabuli_chr06 | 59434642                | GG                              | AA                | 1946455286               |
| SNP_P3_82569_59434920 | NC_021165.1    | Ca_kabuli_chr06 | 59434920                | TT                              | CC                | 1946455287               |
| SNP_P3_82570_59443499 | NC_021165.1    | Ca_kabuli_chr06 | 59443499                | TT                              | GG                | 1946455289               |
| SNP_P3_82571_59443512 | NC_021165.1    | Ca_kabuli_chr06 | 59443512                | AA                              | GG                | 1946455290               |
| SNP_P3_82572_59443572 | NC_021165.1    | Ca_kabuli_chr06 | 59443572                | CC                              | TT                | 1946455292               |
| SNP_P3_82574_59443796 | NC_021165.1    | Ca_kabuli_chr06 | 59443796                | TT                              | CC                | 1946455293               |
| SNP_P3_82575_59443865 | NC_021165.1    | Ca_kabuli_chr06 | 59443865                | TT                              | AA                | 1946455295               |
| SNP_P3_82576_59444298 | NC_021165.1    | Ca_kabuli_chr06 | 59444298                | GG                              | CC                | 1946455296               |
| SNP_P3_82577_59444321 | NC_021165.1    | Ca_kabuli_chr06 | 59444321                | CC                              | TT                | 1946455298               |
| SNP_P3_82578_59444324 | NC_021165.1    | Ca_kabuli_chr06 | 59444324                | TT                              | CC                | 1946455299               |
| SNP_P3_82579_59444340 | NC_021165.1    | Ca_kabuli_chr06 | 59444340                | TT                              | CC                | 1946455300               |
| SNP_P3_82580_59452489 | NC_021165.1    | Ca_kabuli_chr06 | 59452489                | TT                              | CC                | 1946455302               |
| SNP_P3_82581_59455044 | NC_021165.1    | Ca_kabuli_chr06 | 59455044                | CC                              | TT                | 1946455303               |
| SNP_P3_82582_59455045 | NC_021165.1    | Ca_kabuli_chr06 | 59455045                | AA                              | TT                | 1946455305               |
| SNP_P3_82583_59455120 | NC_021165.1    | Ca_kabuli_chr06 | 59455120                | AA                              | GG                | 1946455307               |
| SNP_P3_82584_59462402 | NC_021165.1    | Ca_kabuli_chr06 | 59462402                | GG                              | TT                | 1946455308               |
| SNP_P3_82585_59462696 | NC_021165.1    | Ca_kabuli_chr06 | 59462696                | GG                              | AA                | 1946455310               |
| SNP_P3_82586_59463181 | NC_021165.1    | Ca_kabuli_chr06 | 59463181                | AA                              | GG                | 1946455311               |



| SNPs IDs            | Chromosome IDs | Chromosomes     | Physical positions (bp) | CDC Frontier (Reference genome) | (Pusa 256 & HPNB) | NCBI SNPdb Accession IDs |
|---------------------|----------------|-----------------|-------------------------|---------------------------------|-------------------|--------------------------|
| SNP_P3_82587_375    | NC_021166.1    | Ca_kabuli_chr07 | 375                     | AA                              | GG                | 1946455313               |
| SNP_P3_82588_443    | NC_021166.1    | Ca_kabuli_chr07 | 443                     | AA                              | GG                | 1946455314               |
| SNP_P3_82589_449    | NC_021166.1    | Ca_kabuli_chr07 | 449                     | AA                              | TT                | 1946455315               |
| SNP_P3_82590_651    | NC_021166.1    | Ca_kabuli_chr07 | 651                     | GG                              | TT                | 1946455317               |
| SNP_P3_82592_70169  | NC_021166.1    | Ca_kabuli_chr07 | 70169                   | AA                              | TT                | 1946455318               |
| SNP_P3_82593_70172  | NC_021166.1    | Ca_kabuli_chr07 | 70172                   | TT                              | GG                | 1946455320               |
| SNP_P3_82595_137627 | NC_021166.1    | Ca_kabuli_chr07 | 137627                  | TT                              | AA                | 1946455321               |
| SNP_P3_82596_165596 | NC_021166.1    | Ca_kabuli_chr07 | 165596                  | CC                              | TT                | 1946455323               |
| SNP_P3_82597_173731 | NC_021166.1    | Ca_kabuli_chr07 | 173731                  | AA                              | CC                | 1946455324               |
| SNP_P3_82598_175712 | NC_021166.1    | Ca_kabuli_chr07 | 175712                  | GG                              | CC                | 1946455326               |
| SNP_P3_82599_175715 | NC_021166.1    | Ca_kabuli_chr07 | 175715                  | TT                              | CC                | 1946455327               |
| SNP_P3_82600_177403 | NC_021166.1    | Ca_kabuli_chr07 | 177403                  | TT                              | AA                | 1946455329               |
| SNP_P3_82601_180384 | NC_021166.1    | Ca_kabuli_chr07 | 180384                  | CC                              | TT                | 1946455330               |
| SNP_P3_82602_180400 | NC_021166.1    | Ca_kabuli_chr07 | 180400                  | TT                              | AA                | 1946455332               |
| SNP_P3_82604_180470 | NC_021166.1    | Ca_kabuli_chr07 | 180470                  | TT                              | AA                | 1946455333               |
| SNP_P3_82605_180542 | NC_021166.1    | Ca_kabuli_chr07 | 180542                  | CC                              | TT                | 1946455335               |
| SNP_P3_82606_180806 | NC_021166.1    | Ca_kabuli_chr07 | 180806                  | AA                              | GG                | 1946455336               |
| SNP_P3_82607_180835 | NC_021166.1    | Ca_kabuli_chr07 | 180835                  | GG                              | AA                | 1946455338               |
| SNP_P3_82608_180882 | NC_021166.1    | Ca_kabuli_chr07 | 180882                  | TT                              | CC                | 1946455339               |
| SNP_P3_82609_180910 | NC_021166.1    | Ca_kabuli_chr07 | 180910                  | AA                              | GG                | 1946455340               |
| SNP_P3_82610_193947 | NC_021166.1    | Ca_kabuli_chr07 | 193947                  | TT                              | AA                | 1946455342               |
| SNP_P3_82611_253195 | NC_021166.1    | Ca_kabuli_chr07 | 253195                  | CC                              | TT                | 1946455343               |
| SNP_P3_82612_283933 | NC_021166.1    | Ca_kabuli_chr07 | 283933                  | TT                              | CC                | 1946455345               |
| SNP_P3_82613_283935 | NC_021166.1    | Ca_kabuli_chr07 | 283935                  | TT                              | CC                | 1946455346               |
| SNP_P3_82614_326474 | NC_021166.1    | Ca_kabuli_chr07 | 326474                  | CC                              | TT                | 1946455348               |
| SNP_P3_82615_329132 | NC_021166.1    | Ca_kabuli_chr07 | 329132                  | CC                              | TT                | 1946455349               |
| SNP_P3_82617_357551 | NC_021166.1    | Ca_kabuli_chr07 | 357551                  | GG                              | AA                | 1946455350               |
| SNP_P3_82618_357556 | NC_021166.1    | Ca_kabuli_chr07 | 357556                  | TT                              | CC                | 1946455352               |
| SNP_P3_82619_357667 | NC_021166.1    | Ca_kabuli_chr07 | 357667                  | TT                              | CC                | 1946455353               |
| SNP_P3_82620_357678 | NC_021166.1    | Ca_kabuli_chr07 | 357678                  | TT                              | CC                | 1946455355               |
| SNP_P3_82621_357690 | NC_021166.1    | Ca_kabuli_chr07 | 357690                  | GG                              | AA                | 1946455356               |
| SNP_P3_82622_357764 | NC_021166.1    | Ca_kabuli_chr07 | 357764                  | TT                              | GG                | 1946455358               |
| SNP_P3_82623_357813 | NC_021166.1    | Ca_kabuli_chr07 | 357813                  | CC                              | TT                | 1946455359               |
| SNP_P3_82624_357840 | NC_021166.1    | Ca_kabuli_chr07 | 357840                  | AA                              | TT                | 1946455361               |
| SNP_P3_82625_357940 | NC_021166.1    | Ca_kabuli_chr07 | 357940                  | AA                              | GG                | 1946455362               |
| SNP_P3_82626_357949 | NC_021166.1    | Ca_kabuli_chr07 | 357949                  | TT                              | CC                | 1946455363               |
| SNP_P3_82628_362436 | NC_021166.1    | Ca_kabuli_chr07 | 362436                  | AA                              | GG                | 1946455365               |
| SNP_P3_82629_362856 | NC_021166.1    | Ca_kabuli_chr07 | 362856                  | TT                              | CC                | 1946455366               |
| SNP_P3_82630_365931 | NC_021166.1    | Ca_kabuli_chr07 | 365931                  | AA                              | GG                | 1946455368               |
| SNP_P3_82631_439051 | NC_021166.1    | Ca_kabuli_chr07 | 439051                  | CC                              | TT                | 1946455369               |
| SNP_P3_82632_444498 | NC_021166.1    | Ca_kabuli_chr07 | 444498                  | AA                              | GG                | 1946455371               |
| SNP_P3_82633_457871 | NC_021166.1    | Ca_kabuli_chr07 | 457871                  | CC                              | TT                | 1946455372               |

| SNPs IDs            | Chromosome IDs | Chromosomes     | Physical positions (bp) | CDC Frontier (Reference genome) | (Pusa 256 & HPNB) | NCBI SNPdb Accession IDs |
|---------------------|----------------|-----------------|-------------------------|---------------------------------|-------------------|--------------------------|
| SNP_P3_82634_464368 | NC_021166.1    | Ca_kabuli_chr07 | 464368                  | TT                              | AA                | 1946455373               |
| SNP_P3_82635_473794 | NC_021166.1    | Ca_kabuli_chr07 | 473794                  | GG                              | AA                | 1946455375               |
| SNP_P3_82636_479815 | NC_021166.1    | Ca_kabuli_chr07 | 479815                  | AA                              | GG                | 1946455376               |
| SNP_P3_82637_479820 | NC_021166.1    | Ca_kabuli_chr07 | 479820                  | GG                              | AA                | 1946455378               |
| SNP_P3_82638_480024 | NC_021166.1    | Ca_kabuli_chr07 | 480024                  | AA                              | GG                | 1946455379               |
| SNP_P3_82639_490051 | NC_021166.1    | Ca_kabuli_chr07 | 490051                  | TT                              | AA                | 1946455381               |
| SNP_P3_82640_496557 | NC_021166.1    | Ca_kabuli_chr07 | 496557                  | CC                              | TT                | 1946455382               |
| SNP_P3_82641_496615 | NC_021166.1    | Ca_kabuli_chr07 | 496615                  | AA                              | TT                | 1946455383               |
| SNP_P3_82642_496705 | NC_021166.1    | Ca_kabuli_chr07 | 496705                  | TT                              | CC                | 1946455385               |
| SNP_P3_82643_496944 | NC_021166.1    | Ca_kabuli_chr07 | 496944                  | AA                              | TT                | 1946455386               |
| SNP_P3_82644_496958 | NC_021166.1    | Ca_kabuli_chr07 | 496958                  | AA                              | CC                | 1946455388               |
| SNP_P3_82645_498548 | NC_021166.1    | Ca_kabuli_chr07 | 498548                  | CC                              | TT                | 1946455389               |
| SNP_P3_82646_503257 | NC_021166.1    | Ca_kabuli_chr07 | 503257                  | CC                              | TT                | 1946455391               |
| SNP_P3_82647_503277 | NC_021166.1    | Ca_kabuli_chr07 | 503277                  | CC                              | AA                | 1946455392               |
| SNP_P3_82649_521278 | NC_021166.1    | Ca_kabuli_chr07 | 521278                  | AA                              | GG                | 1946455394               |
| SNP_P3_82650_525809 | NC_021166.1    | Ca_kabuli_chr07 | 525809                  | CC                              | TT                | 1946455395               |
| SNP_P3_82651_530060 | NC_021166.1    | Ca_kabuli_chr07 | 530060                  | GG                              | TT                | 1946455397               |
| SNP_P3_82652_542577 | NC_021166.1    | Ca_kabuli_chr07 | 542577                  | CC                              | AA                | 1946455398               |
| SNP_P3_82653_550941 | NC_021166.1    | Ca_kabuli_chr07 | 550941                  | AA                              | GG                | 1946455399               |
| SNP_P3_82654_551221 | NC_021166.1    | Ca_kabuli_chr07 | 551221                  | GG                              | TT                | 1946455401               |
| SNP_P3_82655_551228 | NC_021166.1    | Ca_kabuli_chr07 | 551228                  | TT                              | CC                | 1946455402               |
| SNP_P3_82656_570669 | NC_021166.1    | Ca_kabuli_chr07 | 570669                  | AA                              | TT                | 1946455404               |
| SNP_P3_82657_570748 | NC_021166.1    | Ca_kabuli_chr07 | 570748                  | AA                              | TT                | 1946455405               |
| SNP_P3_82658_570802 | NC_021166.1    | Ca_kabuli_chr07 | 570802                  | GG                              | AA                | 1946455407               |
| SNP_P3_82660_584961 | NC_021166.1    | Ca_kabuli_chr07 | 584961                  | GG                              | AA                | 1946455408               |
| SNP_P3_82661_585024 | NC_021166.1    | Ca_kabuli_chr07 | 585024                  | TT                              | AA                | 1946455409               |
| SNP_P3_82663_585071 | NC_021166.1    | Ca_kabuli_chr07 | 585071                  | GG                              | TT                | 1946455411               |
| SNP_P3_82664_585311 | NC_021166.1    | Ca_kabuli_chr07 | 585311                  | GG                              | AA                | 1946455413               |
| SNP_P3_82665_585483 | NC_021166.1    | Ca_kabuli_chr07 | 585483                  | AA                              | GG                | 1946455414               |
| SNP_P3_82666_585500 | NC_021166.1    | Ca_kabuli_chr07 | 585500                  | CC                              | TT                | 1946455416               |
| SNP_P3_82667_585517 | NC_021166.1    | Ca_kabuli_chr07 | 585517                  | TT                              | CC                | 1946455417               |
| SNP_P3_82668_586413 | NC_021166.1    | Ca_kabuli_chr07 | 586413                  | TT                              | AA                | 1946455418               |
| SNP_P3_82669_586484 | NC_021166.1    | Ca_kabuli_chr07 | 586484                  | TT                              | GG                | 1946455420               |
| SNP_P3_82670_586487 | NC_021166.1    | Ca_kabuli_chr07 | 586487                  | CC                              | GG                | 1946455421               |
| SNP_P3_82671_586496 | NC_021166.1    | Ca_kabuli_chr07 | 586496                  | AA                              | GG                | 1946455423               |
| SNP_P3_82672_586803 | NC_021166.1    | Ca_kabuli_chr07 | 586803                  | TT                              | CC                | 1946455424               |
| SNP_P3_82673_586900 | NC_021166.1    | Ca_kabuli_chr07 | 586900                  | TT                              | GG                | 1946455426               |
| SNP_P3_82674_586925 | NC_021166.1    | Ca_kabuli_chr07 | 586925                  | AA                              | GG                | 1946455427               |
| SNP_P3_82675_586963 | NC_021166.1    | Ca_kabuli_chr07 | 586963                  | CC                              | TT                | 1946455429               |
| SNP_P3_82677_599078 | NC_021166.1    | Ca_kabuli_chr07 | 599078                  | TT                              | AA                | 1946455430               |
| SNP_P3_82678_599079 | NC_021166.1    | Ca_kabuli_chr07 | 599079                  | AA                              | TT                | 1946455432               |
| SNP_P3_82679_599200 | NC_021166.1    | Ca_kabuli_chr07 | 599200                  | GG                              | AA                | 1946455433               |

| SNPs IDs            | Chromosome IDs | Chromosomes     | Physical positions (bp) | CDC Frontier (Reference genome) | (Pusa 256 & HPNB) | NCBI SNPdb Accession IDs |
|---------------------|----------------|-----------------|-------------------------|---------------------------------|-------------------|--------------------------|
| SNP_P3_82680_599240 | NC_021166.1    | Ca_kabuli_chr07 | 599240                  | AA                              | GG                | 1946455435               |
| SNP_P3_82681_599298 | NC_021166.1    | Ca_kabuli_chr07 | 599298                  | AA                              | GG                | 1946455436               |
| SNP_P3_82682_599378 | NC_021166.1    | Ca_kabuli_chr07 | 599378                  | TT                              | CC                | 1946455438               |
| SNP_P3_82683_599426 | NC_021166.1    | Ca_kabuli_chr07 | 599426                  | AA                              | TT                | 1946455439               |
| SNP_P3_82684_599513 | NC_021166.1    | Ca_kabuli_chr07 | 599513                  | AA                              | GG                | 1946455441               |
| SNP_P3_82685_599531 | NC_021166.1    | Ca_kabuli_chr07 | 599531                  | GG                              | AA                | 1946455442               |
| SNP_P3_82686_599578 | NC_021166.1    | Ca_kabuli_chr07 | 599578                  | TT                              | CC                | 1946455444               |
| SNP_P3_82687_599600 | NC_021166.1    | Ca_kabuli_chr07 | 599600                  | CC                              | TT                | 1946455445               |
| SNP_P3_82688_599624 | NC_021166.1    | Ca_kabuli_chr07 | 599624                  | TT                              | CC                | 1946455446               |
| SNP_P3_82690_615425 | NC_021166.1    | Ca_kabuli_chr07 | 615425                  | AA                              | CC                | 1946455447               |
| SNP_P3_82691_639500 | NC_021166.1    | Ca_kabuli_chr07 | 639500                  | AA                              | CC                | 1946455448               |
| SNP_P3_82692_639607 | NC_021166.1    | Ca_kabuli_chr07 | 639607                  | AA                              | GG                | 1946455449               |
| SNP_P3_82694_760433 | NC_021166.1    | Ca_kabuli_chr07 | 760433                  | TT                              | CC                | 1946455450               |
| SNP_P3_82695_760480 | NC_021166.1    | Ca_kabuli_chr07 | 760480                  | GG                              | AA                | 1946455451               |
| SNP_P3_82696_760485 | NC_021166.1    | Ca_kabuli_chr07 | 760485                  | GG                              | TT                | 1946455452               |
| SNP_P3_82697_760488 | NC_021166.1    | Ca_kabuli_chr07 | 760488                  | TT                              | CC                | 1946455453               |
| SNP_P3_82698_760498 | NC_021166.1    | Ca_kabuli_chr07 | 760498                  | TT                              | AA                | 1946455454               |
| SNP_P3_82699_760503 | NC_021166.1    | Ca_kabuli_chr07 | 760503                  | CC                              | AA                | 1946455455               |
| SNP_P3_82700_760528 | NC_021166.1    | Ca_kabuli_chr07 | 760528                  | TT                              | CC                | 1946455456               |
| SNP_P3_82701_760533 | NC_021166.1    | Ca_kabuli_chr07 | 760533                  | CC                              | AA                | 1946455457               |
| SNP_P3_82702_760557 | NC_021166.1    | Ca_kabuli_chr07 | 760557                  | CC                              | TT                | 1946455458               |
| SNP_P3_82703_760568 | NC_021166.1    | Ca_kabuli_chr07 | 760568                  | GG                              | TT                | 1946455459               |
| SNP_P3_82704_760705 | NC_021166.1    | Ca_kabuli_chr07 | 760705                  | CC                              | GG                | 1946455460               |
| SNP_P3_82706_773353 | NC_021166.1    | Ca_kabuli_chr07 | 773353                  | TT                              | AA                | 1946455461               |
| SNP_P3_82707_773354 | NC_021166.1    | Ca_kabuli_chr07 | 773354                  | AA                              | TT                | 1946455462               |
| SNP_P3_82708_816641 | NC_021166.1    | Ca_kabuli_chr07 | 816641                  | TT                              | CC                | 1946455463               |
| SNP_P3_82709_816881 | NC_021166.1    | Ca_kabuli_chr07 | 816881                  | TT                              | AA                | 1946455464               |
| SNP_P3_82711_818977 | NC_021166.1    | Ca_kabuli_chr07 | 818977                  | CC                              | TT                | 1946455465               |
| SNP_P3_82712_819041 | NC_021166.1    | Ca_kabuli_chr07 | 819041                  | GG                              | AA                | 1946455466               |
| SNP_P3_82713_819044 | NC_021166.1    | Ca_kabuli_chr07 | 819044                  | CC                              | TT                | 1946455467               |
| SNP_P3_82714_819068 | NC_021166.1    | Ca_kabuli_chr07 | 819068                  | TT                              | CC                | 1946455468               |
| SNP_P3_82715_819073 | NC_021166.1    | Ca_kabuli_chr07 | 819073                  | TT                              | CC                | 1946455469               |
| SNP_P3_82716_819100 | NC_021166.1    | Ca_kabuli_chr07 | 819100                  | AA                              | TT                | 1946455470               |
| SNP_P3_82717_819220 | NC_021166.1    | Ca_kabuli_chr07 | 819220                  | AA                              | CC                | 1946455471               |
| SNP_P3_82718_819261 | NC_021166.1    | Ca_kabuli_chr07 | 819261                  | GG                              | AA                | 1946455472               |
| SNP_P3_82719_819270 | NC_021166.1    | Ca_kabuli_chr07 | 819270                  | TT                              | CC                | 1946455473               |
| SNP_P3_82720_819310 | NC_021166.1    | Ca_kabuli_chr07 | 819310                  | AA                              | GG                | 1946455474               |
| SNP_P3_82721_819319 | NC_021166.1    | Ca_kabuli_chr07 | 819319                  | AA                              | TT                | 1946455475               |
| SNP_P3_82722_819325 | NC_021166.1    | Ca_kabuli_chr07 | 819325                  | AA                              | CC                | 1946455476               |
| SNP_P3_82723_819332 | NC_021166.1    | Ca_kabuli_chr07 | 819332                  | CC                              | TT                | 1946455477               |
| SNP_P3_82724_819333 | NC_021166.1    | Ca_kabuli_chr07 | 819333                  | TT                              | AA                | 1946455478               |
| SNP_P3_82725_819352 | NC_021166.1    | Ca_kabuli_chr07 | 819352                  | AA                              | GG                | 1946455479               |

| SNPs IDs             | Chromosome IDs | Chromosomes     | Physical positions (bp) | CDC Frontier (Reference genome) | (Pusa 256 & HPNB) | NCBI SNPdb Accession IDs |
|----------------------|----------------|-----------------|-------------------------|---------------------------------|-------------------|--------------------------|
| SNP_P3_82726_819367  | NC_021166.1    | Ca_kabuli_chr07 | 819367                  | GG                              | AA                | 1946455480               |
| SNP_P3_82728_819513  | NC_021166.1    | Ca_kabuli_chr07 | 819513                  | TT                              | CC                | 1946455481               |
| SNP_P3_82729_819663  | NC_021166.1    | Ca_kabuli_chr07 | 819663                  | AA                              | GG                | 1946455482               |
| SNP_P3_82730_819693  | NC_021166.1    | Ca_kabuli_chr07 | 819693                  | CC                              | TT                | 1946455483               |
| SNP_P3_82731_819694  | NC_021166.1    | Ca_kabuli_chr07 | 819694                  | GG                              | TT                | 1946455484               |
| SNP_P3_82733_890497  | NC_021166.1    | Ca_kabuli_chr07 | 890497                  | AA                              | GG                | 1946455485               |
| SNP_P3_82734_905029  | NC_021166.1    | Ca_kabuli_chr07 | 905029                  | TT                              | CC                | 1946455486               |
| SNP_P3_82735_905036  | NC_021166.1    | Ca_kabuli_chr07 | 905036                  | TT                              | CC                | 1946455487               |
| SNP_P3_82736_905066  | NC_021166.1    | Ca_kabuli_chr07 | 905066                  | CC                              | GG                | 1946455488               |
| SNP_P3_82737_905084  | NC_021166.1    | Ca_kabuli_chr07 | 905084                  | CC                              | AA                | 1946455489               |
| SNP_P3_82738_905517  | NC_021166.1    | Ca_kabuli_chr07 | 905517                  | GG                              | TT                | 1946455490               |
| SNP_P3_82739_905546  | NC_021166.1    | Ca_kabuli_chr07 | 905546                  | AA                              | GG                | 1946455491               |
| SNP_P3_82740_906885  | NC_021166.1    | Ca_kabuli_chr07 | 906885                  | AA                              | TT                | 1946455492               |
| SNP_P3_82741_914690  | NC_021166.1    | Ca_kabuli_chr07 | 914690                  | GG                              | AA                | 1946455493               |
| SNP_P3_82743_975043  | NC_021166.1    | Ca_kabuli_chr07 | 975043                  | AA                              | TT                | 1946455494               |
| SNP_P3_82744_992041  | NC_021166.1    | Ca_kabuli_chr07 | 992041                  | GG                              | AA                | 1946455495               |
| SNP_P3_82745_1000745 | NC_021166.1    | Ca_kabuli_chr07 | 1000745                 | TT                              | CC                | 1946455496               |
| SNP_P3_82746_1018497 | NC_021166.1    | Ca_kabuli_chr07 | 1018497                 | AA                              | GG                | 1946455497               |
| SNP_P3_82747_1018531 | NC_021166.1    | Ca_kabuli_chr07 | 1018531                 | TT                              | CC                | 1946455498               |
| SNP_P3_82748_1018540 | NC_021166.1    | Ca_kabuli_chr07 | 1018540                 | TT                              | CC                | 1946455499               |
| SNP_P3_82749_1018557 | NC_021166.1    | Ca_kabuli_chr07 | 1018557                 | AA                              | TT                | 1946455500               |
| SNP_P3_82751_1018676 | NC_021166.1    | Ca_kabuli_chr07 | 1018676                 | AA                              | GG                | 1946455501               |
| SNP_P3_82753_1018756 | NC_021166.1    | Ca_kabuli_chr07 | 1018756                 | GG                              | AA                | 1946455502               |
| SNP_P3_82755_1018840 | NC_021166.1    | Ca_kabuli_chr07 | 1018840                 | CC                              | AA                | 1946455503               |
| SNP_P3_82756_1019099 | NC_021166.1    | Ca_kabuli_chr07 | 1019099                 | TT                              | AA                | 1946455504               |
| SNP_P3_82757_1019156 | NC_021166.1    | Ca_kabuli_chr07 | 1019156                 | AA                              | GG                | 1946455505               |
| SNP_P3_82758_1019410 | NC_021166.1    | Ca_kabuli_chr07 | 1019410                 | AA                              | GG                | 1946455506               |
| SNP_P3_82759_1019423 | NC_021166.1    | Ca_kabuli_chr07 | 1019423                 | CC                              | TT                | 1946455507               |
| SNP_P3_82760_1019455 | NC_021166.1    | Ca_kabuli_chr07 | 1019455                 | AA                              | GG                | 1946455508               |
| SNP_P3_82761_1019510 | NC_021166.1    | Ca_kabuli_chr07 | 1019510                 | AA                              | GG                | 1946455509               |
| SNP_P3_82762_1019698 | NC_021166.1    | Ca_kabuli_chr07 | 1019698                 | AA                              | GG                | 1946455510               |
| SNP_P3_82763_1019764 | NC_021166.1    | Ca_kabuli_chr07 | 1019764                 | GG                              | AA                | 1946455511               |
| SNP_P3_82765_1019808 | NC_021166.1    | Ca_kabuli_chr07 | 1019808                 | CC                              | TT                | 1946455512               |
| SNP_P3_82767_1057743 | NC_021166.1    | Ca_kabuli_chr07 | 1057743                 | AA                              | GG                | 1946455513               |
| SNP_P3_82768_1057765 | NC_021166.1    | Ca_kabuli_chr07 | 1057765                 | GG                              | AA                | 1946455514               |
| SNP_P3_82769_1092000 | NC_021166.1    | Ca_kabuli_chr07 | 1092000                 | CC                              | TT                | 1946455515               |
| SNP_P3_82770_1098992 | NC_021166.1    | Ca_kabuli_chr07 | 1098992                 | GG                              | AA                | 1946455516               |
| SNP_P3_82771_1135343 | NC_021166.1    | Ca_kabuli_chr07 | 1135343                 | CC                              | TT                | 1946455517               |
| SNP_P3_82772_1156992 | NC_021166.1    | Ca_kabuli_chr07 | 1156992                 | CC                              | TT                | 1946455518               |
| SNP_P3_82773_1207480 | NC_021166.1    | Ca_kabuli_chr07 | 1207480                 | AA                              | GG                | 1946455519               |
| SNP_P3_82774_1218285 | NC_021166.1    | Ca_kabuli_chr07 | 1218285                 | TT                              | AA                | 1946455520               |
| SNP_P3_82775_1242849 | NC_021166.1    | Ca_kabuli_chr07 | 1242849                 | CC                              | GG                | 1946455521               |

| SNPs IDs             | Chromosome IDs | Chromosomes     | Physical positions (bp) | CDC Frontier (Reference genome) | (Pusa 256 & HPNB) | NCBI SNPdb Accession IDs |
|----------------------|----------------|-----------------|-------------------------|---------------------------------|-------------------|--------------------------|
| SNP_P3_82776_1243444 | NC_021166.1    | Ca_kabuli_chr07 | 1243444                 | CC                              | TT                | 1946455522               |
| SNP_P3_82777_1244387 | NC_021166.1    | Ca_kabuli_chr07 | 1244387                 | TT                              | CC                | 1946455523               |
| SNP_P3_82778_1244943 | NC_021166.1    | Ca_kabuli_chr07 | 1244943                 | AA                              | GG                | 1946455524               |
| SNP_P3_82780_1253226 | NC_021166.1    | Ca_kabuli_chr07 | 1253226                 | AA                              | CC                | 1946455525               |
| SNP_P3_82781_1254994 | NC_021166.1    | Ca_kabuli_chr07 | 1254994                 | TT                              | AA                | 1946455526               |
| SNP_P3_82782_1255759 | NC_021166.1    | Ca_kabuli_chr07 | 1255759                 | CC                              | AA                | 1946455527               |
| SNP_P3_82783_1256389 | NC_021166.1    | Ca_kabuli_chr07 | 1256389                 | TT                              | CC                | 1946455528               |
| SNP_P3_82786_1268068 | NC_021166.1    | Ca_kabuli_chr07 | 1268068                 | GG                              | AA                | 1946455529               |
| SNP_P3_82787_1274605 | NC_021166.1    | Ca_kabuli_chr07 | 1274605                 | GG                              | AA                | 1946455530               |
| SNP_P3_82789_1287916 | NC_021166.1    | Ca_kabuli_chr07 | 1287916                 | TT                              | CC                | 1946455531               |
| SNP_P3_82790_1311667 | NC_021166.1    | Ca_kabuli_chr07 | 1311667                 | GG                              | CC                | 1946455532               |
| SNP_P3_82791_1321992 | NC_021166.1    | Ca_kabuli_chr07 | 1321992                 | AA                              | TT                | 1946455533               |
| SNP_P3_82793_1326843 | NC_021166.1    | Ca_kabuli_chr07 | 1326843                 | AA                              | GG                | 1946455534               |
| SNP_P3_82795_1342841 | NC_021166.1    | Ca_kabuli_chr07 | 1342841                 | TT                              | CC                | 1946455535               |
| SNP_P3_82796_1356036 | NC_021166.1    | Ca_kabuli_chr07 | 1356036                 | CC                              | TT                | 1946455536               |
| SNP_P3_82797_1369277 | NC_021166.1    | Ca_kabuli_chr07 | 1369277                 | TT                              | AA                | 1946455537               |
| SNP_P3_82798_1369278 | NC_021166.1    | Ca_kabuli_chr07 | 1369278                 | AA                              | TT                | 1946455538               |
| SNP_P3_82799_1418774 | NC_021166.1    | Ca_kabuli_chr07 | 1418774                 | AA                              | TT                | 1946455539               |
| SNP_P3_82801_1428178 | NC_021166.1    | Ca_kabuli_chr07 | 1428178                 | TT                              | GG                | 1946455540               |
| SNP_P3_82802_1430749 | NC_021166.1    | Ca_kabuli_chr07 | 1430749                 | CC                              | AA                | 1946455541               |
| SNP_P3_82803_1469760 | NC_021166.1    | Ca_kabuli_chr07 | 1469760                 | CC                              | TT                | 1946455542               |
| SNP_P3_82804_1490975 | NC_021166.1    | Ca_kabuli_chr07 | 1490975                 | AA                              | GG                | 1946455543               |
| SNP_P3_82805_1503846 | NC_021166.1    | Ca_kabuli_chr07 | 1503846                 | CC                              | TT                | 1946455544               |
| SNP_P3_82806_1534610 | NC_021166.1    | Ca_kabuli_chr07 | 1534610                 | AA                              | GG                | 1946455545               |
| SNP_P3_82807_1544900 | NC_021166.1    | Ca_kabuli_chr07 | 1544900                 | GG                              | AA                | 1946455546               |
| SNP_P3_82808_1559221 | NC_021166.1    | Ca_kabuli_chr07 | 1559221                 | TT                              | CC                | 1946455547               |
| SNP_P3_82809_1559222 | NC_021166.1    | Ca_kabuli_chr07 | 1559222                 | GG                              | TT                | 1946455548               |
| SNP_P3_82810_1565804 | NC_021166.1    | Ca_kabuli_chr07 | 1565804                 | CC                              | TT                | 1946455549               |
| SNP_P3_82811_1596257 | NC_021166.1    | Ca_kabuli_chr07 | 1596257                 | AA                              | GG                | 1946455550               |
| SNP_P3_82812_1607893 | NC_021166.1    | Ca_kabuli_chr07 | 1607893                 | AA                              | CC                | 1946455551               |
| SNP_P3_82813_1619667 | NC_021166.1    | Ca_kabuli_chr07 | 1619667                 | AA                              | GG                | 1946455552               |
| SNP_P3_82816_1748402 | NC_021166.1    | Ca_kabuli_chr07 | 1748402                 | TT                              | CC                | 1946455553               |
| SNP_P3_82817_1829627 | NC_021166.1    | Ca_kabuli_chr07 | 1829627                 | CC                              | TT                | 1946455554               |
| SNP_P3_82819_1858141 | NC_021166.1    | Ca_kabuli_chr07 | 1858141                 | TT                              | CC                | 1946455555               |
| SNP_P3_82825_2093688 | NC_021166.1    | Ca_kabuli_chr07 | 2093688                 | TT                              | CC                | 1946455556               |
| SNP_P3_82826_2104112 | NC_021166.1    | Ca_kabuli_chr07 | 2104112                 | CC                              | AA                | 1946455557               |
| SNP_P3_82827_2121085 | NC_021166.1    | Ca_kabuli_chr07 | 2121085                 | CC                              | TT                | 1946455558               |
| SNP_P3_82828_2126475 | NC_021166.1    | Ca_kabuli_chr07 | 2126475                 | CC                              | TT                | 1946455559               |
| SNP_P3_82831_2168252 | NC_021166.1    | Ca_kabuli_chr07 | 2168252                 | AA                              | CC                | 1946455560               |
| SNP_P3_82832_2168319 | NC_021166.1    | Ca_kabuli_chr07 | 2168319                 | AA                              | CC                | 1946455561               |
| SNP_P3_82833_2168338 | NC_021166.1    | Ca_kabuli_chr07 | 2168338                 | TT                              | CC                | 1946455562               |
| SNP_P3_82834_2168507 | NC_021166.1    | Ca_kabuli_chr07 | 2168507                 | GG                              | AA                | 1946455563               |

| SNPs IDs             | Chromosome IDs | Chromosomes     | Physical positions (bp) | CDC Frontier (Reference genome) | (Pusa 256 & HPNB) | NCBI SNPdb Accession IDs |
|----------------------|----------------|-----------------|-------------------------|---------------------------------|-------------------|--------------------------|
| SNP_P3_82835_2168538 | NC_021166.1    | Ca_kabuli_chr07 | 2168538                 | CC                              | TT                | 1946455564               |
| SNP_P3_82836_2169580 | NC_021166.1    | Ca_kabuli_chr07 | 2169580                 | CC                              | TT                | 1946455565               |
| SNP_P3_82837_2169630 | NC_021166.1    | Ca_kabuli_chr07 | 2169630                 | AA                              | GG                | 1946455566               |
| SNP_P3_82838_2169661 | NC_021166.1    | Ca_kabuli_chr07 | 2169661                 | AA                              | CC                | 1946455567               |
| SNP_P3_82839_2169860 | NC_021166.1    | Ca_kabuli_chr07 | 2169860                 | CC                              | TT                | 1946455568               |
| SNP_P3_82841_2169907 | NC_021166.1    | Ca_kabuli_chr07 | 2169907                 | GG                              | CC                | 1946455569               |
| SNP_P3_82842_2169981 | NC_021166.1    | Ca_kabuli_chr07 | 2169981                 | AA                              | CC                | 1946455570               |
| SNP_P3_82843_2170031 | NC_021166.1    | Ca_kabuli_chr07 | 2170031                 | CC                              | TT                | 1946455571               |
| SNP_P3_82844_2182089 | NC_021166.1    | Ca_kabuli_chr07 | 2182089                 | AA                              | TT                | 1946455572               |
| SNP_P3_82845_2219565 | NC_021166.1    | Ca_kabuli_chr07 | 2219565                 | CC                              | AA                | 1946455573               |
| SNP_P3_82846_2287661 | NC_021166.1    | Ca_kabuli_chr07 | 2287661                 | GG                              | TT                | 1946455574               |
| SNP_P3_82848_2304968 | NC_021166.1    | Ca_kabuli_chr07 | 2304968                 | GG                              | AA                | 1946455575               |
| SNP_P3_82849_2305748 | NC_021166.1    | Ca_kabuli_chr07 | 2305748                 | CC                              | TT                | 1946455576               |
| SNP_P3_82850_2316573 | NC_021166.1    | Ca_kabuli_chr07 | 2316573                 | TT                              | CC                | 1946455577               |
| SNP_P3_82852_2327090 | NC_021166.1    | Ca_kabuli_chr07 | 2327090                 | TT                              | AA                | 1946455578               |
| SNP_P3_82853_2327126 | NC_021166.1    | Ca_kabuli_chr07 | 2327126                 | CC                              | TT                | 1946455580               |
| SNP_P3_82854_2327154 | NC_021166.1    | Ca_kabuli_chr07 | 2327154                 | TT                              | CC                | 1946455581               |
| SNP_P3_82855_2327178 | NC_021166.1    | Ca_kabuli_chr07 | 2327178                 | CC                              | AA                | 1946455583               |
| SNP_P3_82856_2328463 | NC_021166.1    | Ca_kabuli_chr07 | 2328463                 | AA                              | CC                | 1946455584               |
| SNP_P3_82857_2349326 | NC_021166.1    | Ca_kabuli_chr07 | 2349326                 | CC                              | TT                | 1946455586               |
| SNP_P3_82859_2426591 | NC_021166.1    | Ca_kabuli_chr07 | 2426591                 | AA                              | CC                | 1946455587               |
| SNP_P3_82861_2579073 | NC_021166.1    | Ca_kabuli_chr07 | 2579073                 | AA                              | CC                | 1946455588               |
| SNP_P3_82862_2590977 | NC_021166.1    | Ca_kabuli_chr07 | 2590977                 | GG                              | AA                | 1946455590               |
| SNP_P3_82863_2595101 | NC_021166.1    | Ca_kabuli_chr07 | 2595101                 | GG                              | AA                | 1946455592               |
| SNP_P3_82864_2596215 | NC_021166.1    | Ca_kabuli_chr07 | 2596215                 | AA                              | GG                | 1946455593               |
| SNP_P3_82865_2600459 | NC_021166.1    | Ca_kabuli_chr07 | 2600459                 | TT                              | GG                | 1946455595               |
| SNP_P3_82866_2607560 | NC_021166.1    | Ca_kabuli_chr07 | 2607560                 | GG                              | AA                | 1946455596               |
| SNP_P3_82867_2610224 | NC_021166.1    | Ca_kabuli_chr07 | 2610224                 | TT                              | GG                | 1946455597               |
| SNP_P3_82868_2615366 | NC_021166.1    | Ca_kabuli_chr07 | 2615366                 | TT                              | CC                | 1946455599               |
| SNP_P3_82869_2615425 | NC_021166.1    | Ca_kabuli_chr07 | 2615425                 | GG                              | CC                | 1946455600               |
| SNP_P3_82872_2664184 | NC_021166.1    | Ca_kabuli_chr07 | 2664184                 | AA                              | TT                | 1946455602               |
| SNP_P3_82873_2675163 | NC_021166.1    | Ca_kabuli_chr07 | 2675163                 | GG                              | TT                | 1946455603               |
| SNP_P3_82875_2730597 | NC_021166.1    | Ca_kabuli_chr07 | 2730597                 | AA                              | TT                | 1946455605               |
| SNP_P3_82876_2733649 | NC_021166.1    | Ca_kabuli_chr07 | 2733649                 | TT                              | CC                | 1946455606               |
| SNP_P3_82877_2746076 | NC_021166.1    | Ca_kabuli_chr07 | 2746076                 | TT                              | GG                | 1946455607               |
| SNP_P3_82878_2766590 | NC_021166.1    | Ca_kabuli_chr07 | 2766590                 | TT                              | CC                | 1946455609               |
| SNP_P3_82879_2786522 | NC_021166.1    | Ca_kabuli_chr07 | 2786522                 | AA                              | GG                | 1946455610               |
| SNP_P3_82882_2884577 | NC_021166.1    | Ca_kabuli_chr07 | 2884577                 | GG                              | CC                | 1946455612               |
| SNP_P3_82883_2887413 | NC_021166.1    | Ca_kabuli_chr07 | 2887413                 | GG                              | CC                | 1946455613               |
| SNP_P3_82884_2900226 | NC_021166.1    | Ca_kabuli_chr07 | 2900226                 | TT                              | CC                | 1946455615               |
| SNP_P3_82886_2908632 | NC_021166.1    | Ca_kabuli_chr07 | 2908632                 | AA                              | CC                | 1946455616               |
| SNP_P3_82887_2942731 | NC_021166.1    | Ca_kabuli_chr07 | 2942731                 | TT                              | AA                | 1946455618               |

| SNPs IDs             | Chromosome IDs | Chromosomes     | Physical positions (bp) | CDC Frontier (Reference genome) | (Pusa 256 & HPNB) | NCBI SNPdb Accession IDs |
|----------------------|----------------|-----------------|-------------------------|---------------------------------|-------------------|--------------------------|
| SNP_P3_82892_3046598 | NC_021166.1    | Ca_kabuli_chr07 | 3046598                 | AA                              | CC                | 1946455619               |
| SNP_P3_82895_3054976 | NC_021166.1    | Ca_kabuli_chr07 | 3054976                 | TT                              | CC                | 1946455621               |
| SNP_P3_82897_3092543 | NC_021166.1    | Ca_kabuli_chr07 | 3092543                 | AA                              | CC                | 1946455622               |
| SNP_P3_82898_3092544 | NC_021166.1    | Ca_kabuli_chr07 | 3092544                 | CC                              | TT                | 1946455623               |
| SNP_P3_82899_3121071 | NC_021166.1    | Ca_kabuli_chr07 | 3121071                 | AA                              | GG                | 1946455625               |
| SNP_P3_82900_3121094 | NC_021166.1    | Ca_kabuli_chr07 | 3121094                 | AA                              | CC                | 1946455626               |
| SNP_P3_82901_3138969 | NC_021166.1    | Ca_kabuli_chr07 | 3138969                 | CC                              | TT                | 1946455628               |
| SNP_P3_82903_3209681 | NC_021166.1    | Ca_kabuli_chr07 | 3209681                 | AA                              | TT                | 1946455629               |
| SNP_P3_82904_3215412 | NC_021166.1    | Ca_kabuli_chr07 | 3215412                 | AA                              | TT                | 1946455631               |
| SNP_P3_82905_3230149 | NC_021166.1    | Ca_kabuli_chr07 | 3230149                 | TT                              | CC                | 1946455632               |
| SNP_P3_82906_3248285 | NC_021166.1    | Ca_kabuli_chr07 | 3248285                 | TT                              | GG                | 1946455633               |
| SNP_P3_82907_3248295 | NC_021166.1    | Ca_kabuli_chr07 | 3248295                 | AA                              | CC                | 1946455635               |
| SNP_P3_82908_3248303 | NC_021166.1    | Ca_kabuli_chr07 | 3248303                 | TT                              | CC                | 1946455636               |
| SNP_P3_82909_3248338 | NC_021166.1    | Ca_kabuli_chr07 | 3248338                 | TT                              | GG                | 1946455638               |
| SNP_P3_82910_3248343 | NC_021166.1    | Ca_kabuli_chr07 | 3248343                 | GG                              | TT                | 1946455639               |
| SNP_P3_82911_3248403 | NC_021166.1    | Ca_kabuli_chr07 | 3248403                 | AA                              | TT                | 1946455641               |
| SNP_P3_82912_3248513 | NC_021166.1    | Ca_kabuli_chr07 | 3248513                 | AA                              | TT                | 1946455642               |
| SNP_P3_82914_3262672 | NC_021166.1    | Ca_kabuli_chr07 | 3262672                 | TT                              | CC                | 1946455643               |
| SNP_P3_82916_3286890 | NC_021166.1    | Ca_kabuli_chr07 | 3286890                 | CC                              | TT                | 1946455645               |
| SNP_P3_82917_3288546 | NC_021166.1    | Ca_kabuli_chr07 | 3288546                 | TT                              | AA                | 1946455646               |
| SNP_P3_82918_3294894 | NC_021166.1    | Ca_kabuli_chr07 | 3294894                 | AA                              | CC                | 1946455648               |
| SNP_P3_82919_3313136 | NC_021166.1    | Ca_kabuli_chr07 | 3313136                 | GG                              | AA                | 1946455649               |
| SNP_P3_82920_3320098 | NC_021166.1    | Ca_kabuli_chr07 | 3320098                 | TT                              | CC                | 1946455651               |
| SNP_P3_82921_3326784 | NC_021166.1    | Ca_kabuli_chr07 | 3326784                 | TT                              | CC                | 1946455652               |
| SNP_P3_82925_3346233 | NC_021166.1    | Ca_kabuli_chr07 | 3346233                 | GG                              | AA                | 1946455653               |
| SNP_P3_82926_3366601 | NC_021166.1    | Ca_kabuli_chr07 | 3366601                 | CC                              | AA                | 1946455655               |
| SNP_P3_82928_3377747 | NC_021166.1    | Ca_kabuli_chr07 | 3377747                 | CC                              | TT                | 1946455656               |
| SNP_P3_82929_3379097 | NC_021166.1    | Ca_kabuli_chr07 | 3379097                 | GG                              | AA                | 1946455658               |
| SNP_P3_82931_3388765 | NC_021166.1    | Ca_kabuli_chr07 | 3388765                 | AA                              | GG                | 1946455659               |
| SNP_P3_82932_3391095 | NC_021166.1    | Ca_kabuli_chr07 | 3391095                 | AA                              | CC                | 1946455661               |
| SNP_P3_82933_3393184 | NC_021166.1    | Ca_kabuli_chr07 | 3393184                 | TT                              | GG                | 1946455662               |
| SNP_P3_82935_3404164 | NC_021166.1    | Ca_kabuli_chr07 | 3404164                 | GG                              | TT                | 1946455664               |
| SNP_P3_82936_3427995 | NC_021166.1    | Ca_kabuli_chr07 | 3427995                 | AA                              | CC                | 1946455665               |
| SNP_P3_82937_3427996 | NC_021166.1    | Ca_kabuli_chr07 | 3427996                 | AA                              | CC                | 1946455666               |
| SNP_P3_82938_3431242 | NC_021166.1    | Ca_kabuli_chr07 | 3431242                 | GG                              | TT                | 1946455668               |
| SNP_P3_82939_3433812 | NC_021166.1    | Ca_kabuli_chr07 | 3433812                 | CC                              | GG                | 1946455669               |
| SNP_P3_82940_3447698 | NC_021166.1    | Ca_kabuli_chr07 | 3447698                 | GG                              | CC                | 1946455671               |
| SNP_P3_82941_3447961 | NC_021166.1    | Ca_kabuli_chr07 | 3447961                 | AA                              | GG                | 1946455672               |
| SNP_P3_82942_3448446 | NC_021166.1    | Ca_kabuli_chr07 | 3448446                 | GG                              | CC                | 1946455674               |
| SNP_P3_82943_3451879 | NC_021166.1    | Ca_kabuli_chr07 | 3451879                 | AA                              | TT                | 1946455675               |
| SNP_P3_82944_3458856 | NC_021166.1    | Ca_kabuli_chr07 | 3458856                 | TT                              | CC                | 1946455677               |
| SNP_P3_82945_3495705 | NC_021166.1    | Ca_kabuli_chr07 | 3495705                 | CC                              | TT                | 1946455678               |

| SNPs IDs             | Chromosome IDs | Chromosomes     | Physical positions (bp) | CDC Frontier (Reference genome) | (Pusa 256 & HPNB) | NCBI SNPdb Accession IDs |
|----------------------|----------------|-----------------|-------------------------|---------------------------------|-------------------|--------------------------|
| SNP_P3_82946_3500950 | NC_021166.1    | Ca_kabuli_chr07 | 3500950                 | TT                              | CC                | 1946455680               |
| SNP_P3_82947_3503495 | NC_021166.1    | Ca_kabuli_chr07 | 3503495                 | CC                              | AA                | 1946455681               |
| SNP_P3_82948_3503854 | NC_021166.1    | Ca_kabuli_chr07 | 3503854                 | GG                              | TT                | 1946455683               |
| SNP_P3_82949_3503896 | NC_021166.1    | Ca_kabuli_chr07 | 3503896                 | TT                              | CC                | 1946455684               |
| SNP_P3_82950_3503915 | NC_021166.1    | Ca_kabuli_chr07 | 3503915                 | TT                              | AA                | 1946455686               |
| SNP_P3_82951_3503949 | NC_021166.1    | Ca_kabuli_chr07 | 3503949                 | GG                              | AA                | 1946455687               |
| SNP_P3_82952_3503976 | NC_021166.1    | Ca_kabuli_chr07 | 3503976                 | CC                              | AA                | 1946455689               |
| SNP_P3_82953_3504473 | NC_021166.1    | Ca_kabuli_chr07 | 3504473                 | TT                              | CC                | 1946455690               |
| SNP_P3_82954_3504847 | NC_021166.1    | Ca_kabuli_chr07 | 3504847                 | GG                              | AA                | 1946455692               |
| SNP_P3_82955_3504900 | NC_021166.1    | Ca_kabuli_chr07 | 3504900                 | GG                              | AA                | 1946455693               |
| SNP_P3_82957_3507823 | NC_021166.1    | Ca_kabuli_chr07 | 3507823                 | CC                              | TT                | 1946455695               |
| SNP_P3_82958_3508081 | NC_021166.1    | Ca_kabuli_chr07 | 3508081                 | GG                              | AA                | 1946455696               |
| SNP_P3_82959_3508135 | NC_021166.1    | Ca_kabuli_chr07 | 3508135                 | AA                              | GG                | 1946455697               |
| SNP_P3_82960_3508370 | NC_021166.1    | Ca_kabuli_chr07 | 3508370                 | AA                              | GG                | 1946455699               |
| SNP_P3_82961_3508387 | NC_021166.1    | Ca_kabuli_chr07 | 3508387                 | GG                              | AA                | 1946455701               |
| SNP_P3_82962_3508597 | NC_021166.1    | Ca_kabuli_chr07 | 3508597                 | GG                              | TT                | 1946455702               |
| SNP_P3_82963_3509064 | NC_021166.1    | Ca_kabuli_chr07 | 3509064                 | AA                              | GG                | 1946455704               |
| SNP_P3_82965_3510726 | NC_021166.1    | Ca_kabuli_chr07 | 3510726                 | GG                              | AA                | 1946455705               |
| SNP_P3_82966_3511169 | NC_021166.1    | Ca_kabuli_chr07 | 3511169                 | GG                              | AA                | 1946455707               |
| SNP_P3_82967_3511183 | NC_021166.1    | Ca_kabuli_chr07 | 3511183                 | TT                              | CC                | 1946455708               |
| SNP_P3_82968_3511771 | NC_021166.1    | Ca_kabuli_chr07 | 3511771                 | GG                              | TT                | 1946455709               |
| SNP_P3_82971_3513729 | NC_021166.1    | Ca_kabuli_chr07 | 3513729                 | GG                              | TT                | 1946455711               |
| SNP_P3_82972_3513731 | NC_021166.1    | Ca_kabuli_chr07 | 3513731                 | AA                              | TT                | 1946455712               |
| SNP_P3_82973_3513743 | NC_021166.1    | Ca_kabuli_chr07 | 3513743                 | TT                              | CC                | 1946455714               |
| SNP_P3_82974_3514492 | NC_021166.1    | Ca_kabuli_chr07 | 3514492                 | GG                              | AA                | 1946455715               |
| SNP_P3_82975_3514518 | NC_021166.1    | Ca_kabuli_chr07 | 3514518                 | TT                              | GG                | 1946455717               |
| SNP_P3_82976_3514558 | NC_021166.1    | Ca_kabuli_chr07 | 3514558                 | AA                              | GG                | 1946455718               |
| SNP_P3_82978_3515911 | NC_021166.1    | Ca_kabuli_chr07 | 3515911                 | GG                              | AA                | 1946455720               |
| SNP_P3_82979_3517356 | NC_021166.1    | Ca_kabuli_chr07 | 3517356                 | CC                              | TT                | 1946455722               |
| SNP_P3_82980_3517375 | NC_021166.1    | Ca_kabuli_chr07 | 3517375                 | TT                              | CC                | 1946455723               |
| SNP_P3_82981_3517436 | NC_021166.1    | Ca_kabuli_chr07 | 3517436                 | TT                              | CC                | 1946455725               |
| SNP_P3_82982_3517665 | NC_021166.1    | Ca_kabuli_chr07 | 3517665                 | TT                              | GG                | 1946455726               |
| SNP_P3_82983_3517738 | NC_021166.1    | Ca_kabuli_chr07 | 3517738                 | GG                              | AA                | 1946455727               |
| SNP_P3_82984_3518158 | NC_021166.1    | Ca_kabuli_chr07 | 3518158                 | TT                              | CC                | 1946455729               |
| SNP_P3_82985_3519436 | NC_021166.1    | Ca_kabuli_chr07 | 3519436                 | GG                              | AA                | 1946455731               |
| SNP_P3_82986_3519471 | NC_021166.1    | Ca_kabuli_chr07 | 3519471                 | AA                              | TT                | 1946455733               |
| SNP_P3_82987_3519701 | NC_021166.1    | Ca_kabuli_chr07 | 3519701                 | AA                              | CC                | 1946455734               |
| SNP_P3_82988_3519746 | NC_021166.1    | Ca_kabuli_chr07 | 3519746                 | AA                              | GG                | 1946455736               |
| SNP_P3_82989_3519811 | NC_021166.1    | Ca_kabuli_chr07 | 3519811                 | AA                              | GG                | 1946455737               |
| SNP_P3_82990_3519918 | NC_021166.1    | Ca_kabuli_chr07 | 3519918                 | GG                              | AA                | 1946455738               |
| SNP_P3_82991_3521517 | NC_021166.1    | Ca_kabuli_chr07 | 3521517                 | CC                              | TT                | 1946455740               |
| SNP_P3_82993_3522915 | NC_021166.1    | Ca_kabuli_chr07 | 3522915                 | AA                              | TT                | 1946455741               |



| SNPs IDs             | Chromosome IDs | Chromosomes     | Physical positions (bp) | CDC Frontier (Reference genome) | (Pusa 256 & HPNB) | NCBI SNPdb Accession IDs |
|----------------------|----------------|-----------------|-------------------------|---------------------------------|-------------------|--------------------------|
| SNP_P3_82995_3523887 | NC_021166.1    | Ca_kabuli_chr07 | 3523887                 | AA                              | GG                | 1946455743               |
| SNP_P3_82996_3526118 | NC_021166.1    | Ca_kabuli_chr07 | 3526118                 | AA                              | GG                | 1946455744               |
| SNP_P3_82997_3528270 | NC_021166.1    | Ca_kabuli_chr07 | 3528270                 | GG                              | AA                | 1946455746               |
| SNP_P3_82999_3528860 | NC_021166.1    | Ca_kabuli_chr07 | 3528860                 | TT                              | CC                | 1946455747               |
| SNP_P3_83000_3528969 | NC_021166.1    | Ca_kabuli_chr07 | 3528969                 | AA                              | GG                | 1946455749               |
| SNP_P3_83001_3529279 | NC_021166.1    | Ca_kabuli_chr07 | 3529279                 | GG                              | AA                | 1946455750               |
| SNP_P3_83002_3529492 | NC_021166.1    | Ca_kabuli_chr07 | 3529492                 | TT                              | CC                | 1946455752               |
| SNP_P3_83004_3529795 | NC_021166.1    | Ca_kabuli_chr07 | 3529795                 | GG                              | CC                | 1946455753               |
| SNP_P3_83005_3530094 | NC_021166.1    | Ca_kabuli_chr07 | 3530094                 | TT                              | AA                | 1946455755               |
| SNP_P3_83006_3531024 | NC_021166.1    | Ca_kabuli_chr07 | 3531024                 | GG                              | AA                | 1946455756               |
| SNP_P3_83007_3532094 | NC_021166.1    | Ca_kabuli_chr07 | 3532094                 | AA                              | GG                | 1946455757               |
| SNP_P3_83008_3532096 | NC_021166.1    | Ca_kabuli_chr07 | 3532096                 | AA                              | GG                | 1946455759               |
| SNP_P3_83009_3532320 | NC_021166.1    | Ca_kabuli_chr07 | 3532320                 | AA                              | CC                | 1946455760               |
| SNP_P3_83010_3533895 | NC_021166.1    | Ca_kabuli_chr07 | 3533895                 | GG                              | TT                | 1946455762               |
| SNP_P3_83011_3533901 | NC_021166.1    | Ca_kabuli_chr07 | 3533901                 | CC                              | TT                | 1946455763               |
| SNP_P3_83012_3533973 | NC_021166.1    | Ca_kabuli_chr07 | 3533973                 | CC                              | TT                | 1946455765               |
| SNP_P3_83013_3533974 | NC_021166.1    | Ca_kabuli_chr07 | 3533974                 | AA                              | TT                | 1946455766               |
| SNP_P3_83014_3533975 | NC_021166.1    | Ca_kabuli_chr07 | 3533975                 | AA                              | TT                | 1946455768               |
| SNP_P3_83015_3533982 | NC_021166.1    | Ca_kabuli_chr07 | 3533982                 | TT                              | AA                | 1946455769               |
| SNP_P3_83016_3533992 | NC_021166.1    | Ca_kabuli_chr07 | 3533992                 | GG                              | AA                | 1946455771               |
| SNP_P3_83017_3536946 | NC_021166.1    | Ca_kabuli_chr07 | 3536946                 | TT                              | CC                | 1946455772               |
| SNP_P3_83018_3538647 | NC_021166.1    | Ca_kabuli_chr07 | 3538647                 | AA                              | GG                | 1946455774               |
| SNP_P3_83019_3538653 | NC_021166.1    | Ca_kabuli_chr07 | 3538653                 | TT                              | GG                | 1946455775               |
| SNP_P3_83020_3539189 | NC_021166.1    | Ca_kabuli_chr07 | 3539189                 | CC                              | GG                | 1946455777               |
| SNP_P3_83021_3539438 | NC_021166.1    | Ca_kabuli_chr07 | 3539438                 | AA                              | GG                | 1946455778               |
| SNP_P3_83022_3539481 | NC_021166.1    | Ca_kabuli_chr07 | 3539481                 | AA                              | TT                | 1946455780               |
| SNP_P3_83023_3539489 | NC_021166.1    | Ca_kabuli_chr07 | 3539489                 | GG                              | AA                | 1946455781               |
| SNP_P3_83024_3539492 | NC_021166.1    | Ca_kabuli_chr07 | 3539492                 | GG                              | AA                | 1946455782               |
| SNP_P3_83025_3539513 | NC_021166.1    | Ca_kabuli_chr07 | 3539513                 | TT                              | CC                | 1946455784               |
| SNP_P3_83026_3539524 | NC_021166.1    | Ca_kabuli_chr07 | 3539524                 | CC                              | TT                | 1946455785               |
| SNP_P3_83027_3539575 | NC_021166.1    | Ca_kabuli_chr07 | 3539575                 | TT                              | CC                | 1946455787               |
| SNP_P3_83028_3539605 | NC_021166.1    | Ca_kabuli_chr07 | 3539605                 | AA                              | CC                | 1946455788               |
| SNP_P3_83029_3539644 | NC_021166.1    | Ca_kabuli_chr07 | 3539644                 | CC                              | AA                | 1946455790               |
| SNP_P3_83030_3539775 | NC_021166.1    | Ca_kabuli_chr07 | 3539775                 | AA                              | GG                | 1946455791               |
| SNP_P3_83031_3539778 | NC_021166.1    | Ca_kabuli_chr07 | 3539778                 | AA                              | TT                | 1946455793               |
| SNP_P3_83032_3540114 | NC_021166.1    | Ca_kabuli_chr07 | 3540114                 | GG                              | TT                | 1946455794               |
| SNP_P3_83034_3540290 | NC_021166.1    | Ca_kabuli_chr07 | 3540290                 | GG                              | TT                | 1946455795               |
| SNP_P3_83036_3540743 | NC_021166.1    | Ca_kabuli_chr07 | 3540743                 | TT                              | AA                | 1946455797               |
| SNP_P3_83037_3540766 | NC_021166.1    | Ca_kabuli_chr07 | 3540766                 | TT                              | AA                | 1946455799               |
| SNP_P3_83038_3540834 | NC_021166.1    | Ca_kabuli_chr07 | 3540834                 | CC                              | TT                | 1946455800               |
| SNP_P3_83039_3540918 | NC_021166.1    | Ca_kabuli_chr07 | 3540918                 | AA                              | CC                | 1946455802               |
| SNP_P3_83040_3542330 | NC_021166.1    | Ca_kabuli_chr07 | 3542330                 | AA                              | TT                | 1946455803               |

| SNPs IDs             | Chromosome IDs | Chromosomes     | Physical positions (bp) | CDC Frontier (Reference genome) | (Pusa 256 & HPNB) | NCBI SNPdb Accession IDs |
|----------------------|----------------|-----------------|-------------------------|---------------------------------|-------------------|--------------------------|
| SNP_P3_83041_3542393 | NC_021166.1    | Ca_kabuli_chr07 | 3542393                 | GG                              | TT                | 1946455805               |
| SNP_P3_83042_3543213 | NC_021166.1    | Ca_kabuli_chr07 | 3543213                 | AA                              | GG                | 1946455807               |
| SNP_P3_83043_3543999 | NC_021166.1    | Ca_kabuli_chr07 | 3543999                 | CC                              | TT                | 1946455808               |
| SNP_P3_83044_3544027 | NC_021166.1    | Ca_kabuli_chr07 | 3544027                 | CC                              | TT                | 1946455810               |
| SNP_P3_83046_3545462 | NC_021166.1    | Ca_kabuli_chr07 | 3545462                 | TT                              | CC                | 1946455811               |
| SNP_P3_83047_3545464 | NC_021166.1    | Ca_kabuli_chr07 | 3545464                 | CC                              | TT                | 1946455813               |
| SNP_P3_83048_3545558 | NC_021166.1    | Ca_kabuli_chr07 | 3545558                 | AA                              | GG                | 1946455814               |
| SNP_P3_83049_3545703 | NC_021166.1    | Ca_kabuli_chr07 | 3545703                 | TT                              | CC                | 1946455816               |
| SNP_P3_83050_3547057 | NC_021166.1    | Ca_kabuli_chr07 | 3547057                 | AA                              | GG                | 1946455817               |
| SNP_P3_83051_3547074 | NC_021166.1    | Ca_kabuli_chr07 | 3547074                 | GG                              | AA                | 1946455819               |
| SNP_P3_83052_3548085 | NC_021166.1    | Ca_kabuli_chr07 | 3548085                 | TT                              | CC                | 1946455820               |
| SNP_P3_83053_3548605 | NC_021166.1    | Ca_kabuli_chr07 | 3548605                 | GG                              | TT                | 1946455822               |
| SNP_P3_83054_3550546 | NC_021166.1    | Ca_kabuli_chr07 | 3550546                 | AA                              | CC                | 1946455823               |
| SNP_P3_83055_3550584 | NC_021166.1    | Ca_kabuli_chr07 | 3550584                 | CC                              | TT                | 1946455825               |
| SNP_P3_83056_3550693 | NC_021166.1    | Ca_kabuli_chr07 | 3550693                 | AA                              | CC                | 1946455826               |
| SNP_P3_83057_3551799 | NC_021166.1    | Ca_kabuli_chr07 | 3551799                 | TT                              | AA                | 1946455827               |
| SNP_P3_83058_3551824 | NC_021166.1    | Ca_kabuli_chr07 | 3551824                 | TT                              | AA                | 1946455829               |
| SNP_P3_83059_3551856 | NC_021166.1    | Ca_kabuli_chr07 | 3551856                 | CC                              | TT                | 1946455830               |
| SNP_P3_83060_3551878 | NC_021166.1    | Ca_kabuli_chr07 | 3551878                 | AA                              | TT                | 1946455832               |
| SNP_P3_83061_3551911 | NC_021166.1    | Ca_kabuli_chr07 | 3551911                 | CC                              | TT                | 1946455834               |
| SNP_P3_83063_3565061 | NC_021166.1    | Ca_kabuli_chr07 | 3565061                 | CC                              | TT                | 1946455835               |
| SNP_P3_83064_3565068 | NC_021166.1    | Ca_kabuli_chr07 | 3565068                 | AA                              | GG                | 1946455837               |
| SNP_P3_83065_3565111 | NC_021166.1    | Ca_kabuli_chr07 | 3565111                 | TT                              | CC                | 1946455838               |
| SNP_P3_83067_3566132 | NC_021166.1    | Ca_kabuli_chr07 | 3566132                 | TT                              | GG                | 1946455840               |
| SNP_P3_83069_3567427 | NC_021166.1    | Ca_kabuli_chr07 | 3567427                 | GG                              | AA                | 1946455841               |
| SNP_P3_83070_3568316 | NC_021166.1    | Ca_kabuli_chr07 | 3568316                 | GG                              | TT                | 1946455843               |
| SNP_P3_83071_3568570 | NC_021166.1    | Ca_kabuli_chr07 | 3568570                 | TT                              | CC                | 1946455844               |
| SNP_P3_83072_3572439 | NC_021166.1    | Ca_kabuli_chr07 | 3572439                 | AA                              | GG                | 1946455846               |
| SNP_P3_83073_3573434 | NC_021166.1    | Ca_kabuli_chr07 | 3573434                 | CC                              | TT                | 1946455847               |
| SNP_P3_83074_3573998 | NC_021166.1    | Ca_kabuli_chr07 | 3573998                 | CC                              | TT                | 1946455849               |
| SNP_P3_83075_3574666 | NC_021166.1    | Ca_kabuli_chr07 | 3574666                 | CC                              | AA                | 1946455850               |
| SNP_P3_83076_3576862 | NC_021166.1    | Ca_kabuli_chr07 | 3576862                 | AA                              | GG                | 1946455852               |
| SNP_P3_83077_3577144 | NC_021166.1    | Ca_kabuli_chr07 | 3577144                 | CC                              | GG                | 1946455854               |
| SNP_P3_83078_3578183 | NC_021166.1    | Ca_kabuli_chr07 | 3578183                 | GG                              | AA                | 1946455855               |
| SNP_P3_83079_3580090 | NC_021166.1    | Ca_kabuli_chr07 | 3580090                 | CC                              | TT                | 1946455856               |
| SNP_P3_83081_3582147 | NC_021166.1    | Ca_kabuli_chr07 | 3582147                 | GG                              | CC                | 1946455858               |
| SNP_P3_83082_3585644 | NC_021166.1    | Ca_kabuli_chr07 | 3585644                 | CC                              | AA                | 1946455859               |
| SNP_P3_83083_3586496 | NC_021166.1    | Ca_kabuli_chr07 | 3586496                 | GG                              | CC                | 1946455861               |
| SNP_P3_83084_3587476 | NC_021166.1    | Ca_kabuli_chr07 | 3587476                 | TT                              | GG                | 1946455862               |
| SNP_P3_83085_3588007 | NC_021166.1    | Ca_kabuli_chr07 | 3588007                 | TT                              | GG                | 1946455864               |
| SNP_P3_83086_3588119 | NC_021166.1    | Ca_kabuli_chr07 | 3588119                 | CC                              | TT                | 1946455865               |
| SNP_P3_83087_3588952 | NC_021166.1    | Ca_kabuli_chr07 | 3588952                 | AA                              | GG                | 1946455867               |

| SNPs IDs             | Chromosome IDs | Chromosomes     | Physical positions (bp) | CDC Frontier (Reference genome) | (Pusa 256 & HPNB) | NCBI SNPdb Accession IDs |
|----------------------|----------------|-----------------|-------------------------|---------------------------------|-------------------|--------------------------|
| SNP_P3_83088_3589129 | NC_021166.1    | Ca_kabuli_chr07 | 3589129                 | TT                              | CC                | 1946455868               |
| SNP_P3_83089_3590196 | NC_021166.1    | Ca_kabuli_chr07 | 3590196                 | TT                              | GG                | 1946455870               |
| SNP_P3_83090_3590268 | NC_021166.1    | Ca_kabuli_chr07 | 3590268                 | TT                              | GG                | 1946455871               |
| SNP_P3_83091_3590713 | NC_021166.1    | Ca_kabuli_chr07 | 3590713                 | AA                              | CC                | 1946455873               |
| SNP_P3_83092_3593317 | NC_021166.1    | Ca_kabuli_chr07 | 3593317                 | TT                              | CC                | 1946455874               |
| SNP_P3_83093_3593698 | NC_021166.1    | Ca_kabuli_chr07 | 3593698                 | AA                              | TT                | 1946455876               |
| SNP_P3_83095_3594282 | NC_021166.1    | Ca_kabuli_chr07 | 3594282                 | TT                              | CC                | 1946455877               |
| SNP_P3_83096_3594585 | NC_021166.1    | Ca_kabuli_chr07 | 3594585                 | AA                              | GG                | 1946455879               |
| SNP_P3_83097_3594881 | NC_021166.1    | Ca_kabuli_chr07 | 3594881                 | CC                              | GG                | 1946455880               |
| SNP_P3_83098_3595140 | NC_021166.1    | Ca_kabuli_chr07 | 3595140                 | TT                              | GG                | 1946455882               |
| SNP_P3_83099_3595165 | NC_021166.1    | Ca_kabuli_chr07 | 3595165                 | TT                              | CC                | 1946455883               |
| SNP_P3_83100_3595169 | NC_021166.1    | Ca_kabuli_chr07 | 3595169                 | GG                              | AA                | 1946455884               |
| SNP_P3_83101_3595384 | NC_021166.1    | Ca_kabuli_chr07 | 3595384                 | AA                              | TT                | 1946455886               |
| SNP_P3_83102_3595484 | NC_021166.1    | Ca_kabuli_chr07 | 3595484                 | AA                              | TT                | 1946455887               |
| SNP_P3_83103_3597172 | NC_021166.1    | Ca_kabuli_chr07 | 3597172                 | CC                              | TT                | 1946455889               |
| SNP_P3_83104_3597359 | NC_021166.1    | Ca_kabuli_chr07 | 3597359                 | GG                              | AA                | 1946455890               |
| SNP_P3_83105_3599379 | NC_021166.1    | Ca_kabuli_chr07 | 3599379                 | TT                              | CC                | 1946455892               |
| SNP_P3_83106_3599709 | NC_021166.1    | Ca_kabuli_chr07 | 3599709                 | AA                              | CC                | 1946455893               |
| SNP_P3_83107_3600005 | NC_021166.1    | Ca_kabuli_chr07 | 3600005                 | AA                              | CC                | 1946455895               |
| SNP_P3_83108_3600016 | NC_021166.1    | Ca_kabuli_chr07 | 3600016                 | TT                              | AA                | 1946455896               |
| SNP_P3_83109_3600037 | NC_021166.1    | Ca_kabuli_chr07 | 3600037                 | CC                              | GG                | 1946455898               |
| SNP_P3_83110_3600065 | NC_021166.1    | Ca_kabuli_chr07 | 3600065                 | TT                              | CC                | 1946455899               |
| SNP_P3_83112_3600160 | NC_021166.1    | Ca_kabuli_chr07 | 3600160                 | CC                              | AA                | 1946455901               |
| SNP_P3_83113_3600227 | NC_021166.1    | Ca_kabuli_chr07 | 3600227                 | AA                              | GG                | 1946455902               |
| SNP_P3_83114_3600250 | NC_021166.1    | Ca_kabuli_chr07 | 3600250                 | CC                              | TT                | 1946455904               |
| SNP_P3_83115_3600315 | NC_021166.1    | Ca_kabuli_chr07 | 3600315                 | GG                              | TT                | 1946455905               |
| SNP_P3_83116_3600352 | NC_021166.1    | Ca_kabuli_chr07 | 3600352                 | AA                              | GG                | 1946455907               |
| SNP_P3_83118_3600389 | NC_021166.1    | Ca_kabuli_chr07 | 3600389                 | GG                              | AA                | 1946455908               |
| SNP_P3_83119_3600413 | NC_021166.1    | Ca_kabuli_chr07 | 3600413                 | TT                              | CC                | 1946455910               |
| SNP_P3_83120_3600425 | NC_021166.1    | Ca_kabuli_chr07 | 3600425                 | AA                              | TT                | 1946455912               |
| SNP_P3_83121_3600462 | NC_021166.1    | Ca_kabuli_chr07 | 3600462                 | GG                              | AA                | 1946455913               |
| SNP_P3_83122_3600658 | NC_021166.1    | Ca_kabuli_chr07 | 3600658                 | TT                              | CC                | 1946455915               |
| SNP_P3_83123_3601804 | NC_021166.1    | Ca_kabuli_chr07 | 3601804                 | GG                              | AA                | 1946455916               |
| SNP_P3_83124_3601818 | NC_021166.1    | Ca_kabuli_chr07 | 3601818                 | GG                              | AA                | 1946455917               |
| SNP_P3_83125_3601870 | NC_021166.1    | Ca_kabuli_chr07 | 3601870                 | TT                              | AA                | 1946455919               |
| SNP_P3_83128_3602136 | NC_021166.1    | Ca_kabuli_chr07 | 3602136                 | AA                              | GG                | 1946455920               |
| SNP_P3_83129_3602668 | NC_021166.1    | Ca_kabuli_chr07 | 3602668                 | AA                              | CC                | 1946455922               |
| SNP_P3_83131_3603002 | NC_021166.1    | Ca_kabuli_chr07 | 3603002                 | TT                              | CC                | 1946455923               |
| SNP_P3_83132_3603039 | NC_021166.1    | Ca_kabuli_chr07 | 3603039                 | AA                              | CC                | 1946455925               |
| SNP_P3_83133_3605642 | NC_021166.1    | Ca_kabuli_chr07 | 3605642                 | AA                              | GG                | 1946455926               |
| SNP_P3_83134_3607851 | NC_021166.1    | Ca_kabuli_chr07 | 3607851                 | TT                              | GG                | 1946455928               |
| SNP_P3_83135_3607888 | NC_021166.1    | Ca_kabuli_chr07 | 3607888                 | CC                              | TT                | 1946455930               |

| SNPs IDs             | Chromosome IDs | Chromosomes     | Physical positions (bp) | CDC Frontier (Reference genome) | (Pusa 256 & HPNB) | NCBI SNPdb Accession IDs |
|----------------------|----------------|-----------------|-------------------------|---------------------------------|-------------------|--------------------------|
| SNP_P3_83136_3608131 | NC_021166.1    | Ca_kabuli_chr07 | 3608131                 | TT                              | AA                | 1946455931               |
| SNP_P3_83139_3608258 | NC_021166.1    | Ca_kabuli_chr07 | 3608258                 | GG                              | TT                | 1946455932               |
| SNP_P3_83140_3608522 | NC_021166.1    | Ca_kabuli_chr07 | 3608522                 | GG                              | CC                | 1946455934               |
| SNP_P3_83141_3608546 | NC_021166.1    | Ca_kabuli_chr07 | 3608546                 | CC                              | TT                | 1946455935               |
| SNP_P3_83142_3609509 | NC_021166.1    | Ca_kabuli_chr07 | 3609509                 | CC                              | AA                | 1946455937               |
| SNP_P3_83144_3609907 | NC_021166.1    | Ca_kabuli_chr07 | 3609907                 | CC                              | AA                | 1946455938               |
| SNP_P3_83145_3610385 | NC_021166.1    | Ca_kabuli_chr07 | 3610385                 | GG                              | AA                | 1946455940               |
| SNP_P3_83146_3610390 | NC_021166.1    | Ca_kabuli_chr07 | 3610390                 | AA                              | GG                | 1946455941               |
| SNP_P3_83147_3611942 | NC_021166.1    | Ca_kabuli_chr07 | 3611942                 | TT                              | CC                | 1946455943               |
| SNP_P3_83148_3611958 | NC_021166.1    | Ca_kabuli_chr07 | 3611958                 | GG                              | AA                | 1946455944               |
| SNP_P3_83149_3611967 | NC_021166.1    | Ca_kabuli_chr07 | 3611967                 | CC                              | TT                | 1946455945               |
| SNP_P3_83150_3611968 | NC_021166.1    | Ca_kabuli_chr07 | 3611968                 | GG                              | AA                | 1946455947               |
| SNP_P3_83151_3612205 | NC_021166.1    | Ca_kabuli_chr07 | 3612205                 | AA                              | GG                | 1946455948               |
| SNP_P3_83152_3612233 | NC_021166.1    | Ca_kabuli_chr07 | 3612233                 | GG                              | AA                | 1946455950               |
| SNP_P3_83153_3612389 | NC_021166.1    | Ca_kabuli_chr07 | 3612389                 | TT                              | CC                | 1946455951               |
| SNP_P3_83154_3612390 | NC_021166.1    | Ca_kabuli_chr07 | 3612390                 | TT                              | GG                | 1946455953               |
| SNP_P3_83156_3612954 | NC_021166.1    | Ca_kabuli_chr07 | 3612954                 | AA                              | GG                | 1946455955               |
| SNP_P3_83158_3613014 | NC_021166.1    | Ca_kabuli_chr07 | 3613014                 | GG                              | CC                | 1946455956               |
| SNP_P3_83160_3613228 | NC_021166.1    | Ca_kabuli_chr07 | 3613228                 | TT                              | GG                | 1946455957               |
| SNP_P3_83161_3613300 | NC_021166.1    | Ca_kabuli_chr07 | 3613300                 | TT                              | AA                | 1946455959               |
| SNP_P3_83162_3614155 | NC_021166.1    | Ca_kabuli_chr07 | 3614155                 | TT                              | AA                | 1946455960               |
| SNP_P3_83163_3615240 | NC_021166.1    | Ca_kabuli_chr07 | 3615240                 | AA                              | GG                | 1946455962               |
| SNP_P3_83164_3615304 | NC_021166.1    | Ca_kabuli_chr07 | 3615304                 | AA                              | CC                | 1946455963               |
| SNP_P3_83165_3615378 | NC_021166.1    | Ca_kabuli_chr07 | 3615378                 | CC                              | AA                | 1946455965               |
| SNP_P3_83166_3615574 | NC_021166.1    | Ca_kabuli_chr07 | 3615574                 | TT                              | AA                | 1946455966               |
| SNP_P3_83167_3615632 | NC_021166.1    | Ca_kabuli_chr07 | 3615632                 | AA                              | GG                | 1946455968               |
| SNP_P3_83168_3615642 | NC_021166.1    | Ca_kabuli_chr07 | 3615642                 | TT                              | CC                | 1946455969               |
| SNP_P3_83170_3615938 | NC_021166.1    | Ca_kabuli_chr07 | 3615938                 | AA                              | GG                | 1946455971               |
| SNP_P3_83171_3616061 | NC_021166.1    | Ca_kabuli_chr07 | 3616061                 | CC                              | TT                | 1946455972               |
| SNP_P3_83172_3616131 | NC_021166.1    | Ca_kabuli_chr07 | 3616131                 | CC                              | TT                | 1946455978               |
| SNP_P3_83173_3616145 | NC_021166.1    | Ca_kabuli_chr07 | 3616145                 | TT                              | GG                | 1946455979               |
| SNP_P3_83174_3616275 | NC_021166.1    | Ca_kabuli_chr07 | 3616275                 | CC                              | TT                | 1946455981               |
| SNP_P3_83175_3616415 | NC_021166.1    | Ca_kabuli_chr07 | 3616415                 | CC                              | GG                | 1946455982               |
| SNP_P3_83176_3616597 | NC_021166.1    | Ca_kabuli_chr07 | 3616597                 | AA                              | CC                | 1946455984               |
| SNP_P3_83177_3617367 | NC_021166.1    | Ca_kabuli_chr07 | 3617367                 | AA                              | TT                | 1946455985               |
| SNP_P3_83178_3618166 | NC_021166.1    | Ca_kabuli_chr07 | 3618166                 | TT                              | CC                | 1946455986               |
| SNP_P3_83179_3618170 | NC_021166.1    | Ca_kabuli_chr07 | 3618170                 | GG                              | AA                | 1946455988               |
| SNP_P3_83180_3618242 | NC_021166.1    | Ca_kabuli_chr07 | 3618242                 | TT                              | CC                | 1946455989               |
| SNP_P3_83181_3618278 | NC_021166.1    | Ca_kabuli_chr07 | 3618278                 | TT                              | CC                | 1946455991               |
| SNP_P3_83182_3618310 | NC_021166.1    | Ca_kabuli_chr07 | 3618310                 | GG                              | AA                | 1946455992               |
| SNP_P3_83183_3619919 | NC_021166.1    | Ca_kabuli_chr07 | 3619919                 | TT                              | AA                | 1946455994               |
| SNP_P3_83184_3620089 | NC_021166.1    | Ca_kabuli_chr07 | 3620089                 | GG                              | CC                | 1946455995               |

| SNPs IDs             | Chromosome IDs | Chromosomes     | Physical positions (bp) | CDC Frontier (Reference genome) | (Pusa 256 & HPNB) | NCBI SNPdb Accession IDs |
|----------------------|----------------|-----------------|-------------------------|---------------------------------|-------------------|--------------------------|
| SNP_P3_83185_3620439 | NC_021166.1    | Ca_kabuli_chr07 | 3620439                 | AA                              | TT                | 1946455997               |
| SNP_P3_83186_3620498 | NC_021166.1    | Ca_kabuli_chr07 | 3620498                 | TT                              | AA                | 1946455998               |
| SNP_P3_83187_3620513 | NC_021166.1    | Ca_kabuli_chr07 | 3620513                 | TT                              | GG                | 1946456000               |
| SNP_P3_83188_3620593 | NC_021166.1    | Ca_kabuli_chr07 | 3620593                 | AA                              | CC                | 1946456001               |
| SNP_P3_83189_3621274 | NC_021166.1    | Ca_kabuli_chr07 | 3621274                 | TT                              | CC                | 1946456002               |
| SNP_P3_83190_3621482 | NC_021166.1    | Ca_kabuli_chr07 | 3621482                 | CC                              | AA                | 1946456004               |
| SNP_P3_83191_3621529 | NC_021166.1    | Ca_kabuli_chr07 | 3621529                 | CC                              | TT                | 1946456005               |
| SNP_P3_83193_3622933 | NC_021166.1    | Ca_kabuli_chr07 | 3622933                 | CC                              | GG                | 1946456007               |
| SNP_P3_83194_3622935 | NC_021166.1    | Ca_kabuli_chr07 | 3622935                 | CC                              | AA                | 1946456008               |
| SNP_P3_83195_3623619 | NC_021166.1    | Ca_kabuli_chr07 | 3623619                 | GG                              | CC                | 1946456010               |
| SNP_P3_83196_3624237 | NC_021166.1    | Ca_kabuli_chr07 | 3624237                 | GG                              | AA                | 1946456011               |
| SNP_P3_83197_3625099 | NC_021166.1    | Ca_kabuli_chr07 | 3625099                 | CC                              | TT                | 1946456012               |
| SNP_P3_83198_3626100 | NC_021166.1    | Ca_kabuli_chr07 | 3626100                 | AA                              | GG                | 1946456014               |
| SNP_P3_83199_3626173 | NC_021166.1    | Ca_kabuli_chr07 | 3626173                 | AA                              | GG                | 1946456015               |
| SNP_P3_83200_3630394 | NC_021166.1    | Ca_kabuli_chr07 | 3630394                 | GG                              | AA                | 1946456017               |
| SNP_P3_83201_3630412 | NC_021166.1    | Ca_kabuli_chr07 | 3630412                 | TT                              | CC                | 1946456018               |
| SNP_P3_83202_3630613 | NC_021166.1    | Ca_kabuli_chr07 | 3630613                 | TT                              | CC                | 1946456020               |
| SNP_P3_83203_3630937 | NC_021166.1    | Ca_kabuli_chr07 | 3630937                 | CC                              | TT                | 1946456021               |
| SNP_P3_83204_3630972 | NC_021166.1    | Ca_kabuli_chr07 | 3630972                 | AA                              | GG                | 1946456023               |
| SNP_P3_83205_3630999 | NC_021166.1    | Ca_kabuli_chr07 | 3630999                 | AA                              | TT                | 1946456024               |
| SNP_P3_83206_3631001 | NC_021166.1    | Ca_kabuli_chr07 | 3631001                 | TT                              | AA                | 1946456025               |
| SNP_P3_83207_3631002 | NC_021166.1    | Ca_kabuli_chr07 | 3631002                 | GG                              | AA                | 1946456027               |
| SNP_P3_83208_3631051 | NC_021166.1    | Ca_kabuli_chr07 | 3631051                 | TT                              | GG                | 1946456028               |
| SNP_P3_83209_3631089 | NC_021166.1    | Ca_kabuli_chr07 | 3631089                 | GG                              | AA                | 1946456030               |
| SNP_P3_83210_3631090 | NC_021166.1    | Ca_kabuli_chr07 | 3631090                 | AA                              | TT                | 1946456031               |
| SNP_P3_83211_3631107 | NC_021166.1    | Ca_kabuli_chr07 | 3631107                 | CC                              | GG                | 1946456033               |
| SNP_P3_83212_3631945 | NC_021166.1    | Ca_kabuli_chr07 | 3631945                 | GG                              | AA                | 1946456034               |
| SNP_P3_83213_3632267 | NC_021166.1    | Ca_kabuli_chr07 | 3632267                 | CC                              | GG                | 1946456036               |
| SNP_P3_83215_3634348 | NC_021166.1    | Ca_kabuli_chr07 | 3634348                 | GG                              | AA                | 1946456037               |
| SNP_P3_83216_3634358 | NC_021166.1    | Ca_kabuli_chr07 | 3634358                 | AA                              | TT                | 1946456039               |
| SNP_P3_83217_3634361 | NC_021166.1    | Ca_kabuli_chr07 | 3634361                 | GG                              | AA                | 1946456040               |
| SNP_P3_83218_3634427 | NC_021166.1    | Ca_kabuli_chr07 | 3634427                 | GG                              | CC                | 1946456042               |
| SNP_P3_83219_3634430 | NC_021166.1    | Ca_kabuli_chr07 | 3634430                 | AA                              | TT                | 1946456043               |
| SNP_P3_83220_3634783 | NC_021166.1    | Ca_kabuli_chr07 | 3634783                 | TT                              | CC                | 1946456045               |
| SNP_P3_83221_3635713 | NC_021166.1    | Ca_kabuli_chr07 | 3635713                 | GG                              | TT                | 1946456046               |
| SNP_P3_83223_3638391 | NC_021166.1    | Ca_kabuli_chr07 | 3638391                 | TT                              | CC                | 1946456047               |
| SNP_P3_83224_3640541 | NC_021166.1    | Ca_kabuli_chr07 | 3640541                 | TT                              | AA                | 1946456049               |
| SNP_P3_83225_3641534 | NC_021166.1    | Ca_kabuli_chr07 | 3641534                 | TT                              | AA                | 1946456050               |
| SNP_P3_83226_3641542 | NC_021166.1    | Ca_kabuli_chr07 | 3641542                 | CC                              | GG                | 1946456052               |
| SNP_P3_83227_3643738 | NC_021166.1    | Ca_kabuli_chr07 | 3643738                 | CC                              | TT                | 1946456053               |
| SNP_P3_83228_3643742 | NC_021166.1    | Ca_kabuli_chr07 | 3643742                 | TT                              | AA                | 1946456054               |
| SNP_P3_83229_3645189 | NC_021166.1    | Ca_kabuli_chr07 | 3645189                 | TT                              | CC                | 1946456056               |

| SNPs IDs             | Chromosome IDs | Chromosomes     | Physical positions (bp) | CDC Frontier (Reference genome) | (Pusa 256 & HPNB) | NCBI SNPdb Accession IDs |
|----------------------|----------------|-----------------|-------------------------|---------------------------------|-------------------|--------------------------|
| SNP_P3_83230_3645198 | NC_021166.1    | Ca_kabuli_chr07 | 3645198                 | GG                              | TT                | 1946456058               |
| SNP_P3_83231_3645231 | NC_021166.1    | Ca_kabuli_chr07 | 3645231                 | CC                              | GG                | 1946456059               |
| SNP_P3_83232_3645237 | NC_021166.1    | Ca_kabuli_chr07 | 3645237                 | TT                              | GG                | 1946456061               |
| SNP_P3_83233_3646555 | NC_021166.1    | Ca_kabuli_chr07 | 3646555                 | AA                              | GG                | 1946456062               |
| SNP_P3_83234_3646863 | NC_021166.1    | Ca_kabuli_chr07 | 3646863                 | CC                              | AA                | 1946456064               |
| SNP_P3_83235_3648183 | NC_021166.1    | Ca_kabuli_chr07 | 3648183                 | TT                              | CC                | 1946456065               |
| SNP_P3_83236_3648184 | NC_021166.1    | Ca_kabuli_chr07 | 3648184                 | GG                              | AA                | 1946456066               |
| SNP_P3_83238_3649422 | NC_021166.1    | Ca_kabuli_chr07 | 3649422                 | AA                              | GG                | 1946456068               |
| SNP_P3_83239_3649596 | NC_021166.1    | Ca_kabuli_chr07 | 3649596                 | GG                              | AA                | 1946456069               |
| SNP_P3_83240_3649630 | NC_021166.1    | Ca_kabuli_chr07 | 3649630                 | CC                              | TT                | 1946456071               |
| SNP_P3_83241_3649635 | NC_021166.1    | Ca_kabuli_chr07 | 3649635                 | AA                              | TT                | 1946456072               |
| SNP_P3_83242_3650045 | NC_021166.1    | Ca_kabuli_chr07 | 3650045                 | TT                              | AA                | 1946456074               |
| SNP_P3_83244_3651592 | NC_021166.1    | Ca_kabuli_chr07 | 3651592                 | TT                              | GG                | 1946456075               |
| SNP_P3_83245_3652753 | NC_021166.1    | Ca_kabuli_chr07 | 3652753                 | GG                              | AA                | 1946456076               |
| SNP_P3_83246_3652918 | NC_021166.1    | Ca_kabuli_chr07 | 3652918                 | CC                              | TT                | 1946456078               |
| SNP_P3_83247_3654046 | NC_021166.1    | Ca_kabuli_chr07 | 3654046                 | GG                              | TT                | 1946456080               |
| SNP_P3_83249_3655278 | NC_021166.1    | Ca_kabuli_chr07 | 3655278                 | GG                              | TT                | 1946456081               |
| SNP_P3_83250_3655304 | NC_021166.1    | Ca_kabuli_chr07 | 3655304                 | TT                              | CC                | 1946456083               |
| SNP_P3_83251_3655343 | NC_021166.1    | Ca_kabuli_chr07 | 3655343                 | AA                              | TT                | 1946456084               |
| SNP_P3_83252_3658356 | NC_021166.1    | Ca_kabuli_chr07 | 3658356                 | TT                              | AA                | 1946456085               |
| SNP_P3_83253_3658432 | NC_021166.1    | Ca_kabuli_chr07 | 3658432                 | CC                              | TT                | 1946456087               |
| SNP_P3_83255_3659554 | NC_021166.1    | Ca_kabuli_chr07 | 3659554                 | AA                              | TT                | 1946456088               |
| SNP_P3_83256_3660960 | NC_021166.1    | Ca_kabuli_chr07 | 3660960                 | TT                              | CC                | 1946456090               |
| SNP_P3_83257_3661353 | NC_021166.1    | Ca_kabuli_chr07 | 3661353                 | CC                              | AA                | 1946456091               |
| SNP_P3_83259_3665915 | NC_021166.1    | Ca_kabuli_chr07 | 3665915                 | CC                              | AA                | 1946456093               |
| SNP_P3_83260_3666326 | NC_021166.1    | Ca_kabuli_chr07 | 3666326                 | CC                              | AA                | 1946456094               |
| SNP_P3_83261_3666340 | NC_021166.1    | Ca_kabuli_chr07 | 3666340                 | TT                              | AA                | 1946456095               |
| SNP_P3_83262_3667277 | NC_021166.1    | Ca_kabuli_chr07 | 3667277                 | GG                              | AA                | 1946456097               |
| SNP_P3_83263_3667533 | NC_021166.1    | Ca_kabuli_chr07 | 3667533                 | AA                              | GG                | 1946456098               |
| SNP_P3_83264_3667924 | NC_021166.1    | Ca_kabuli_chr07 | 3667924                 | AA                              | GG                | 1946456100               |
| SNP_P3_83266_3669315 | NC_021166.1    | Ca_kabuli_chr07 | 3669315                 | TT                              | CC                | 1946456101               |
| SNP_P3_83267_3669356 | NC_021166.1    | Ca_kabuli_chr07 | 3669356                 | GG                              | AA                | 1946456103               |
| SNP_P3_83268_3670084 | NC_021166.1    | Ca_kabuli_chr07 | 3670084                 | CC                              | GG                | 1946456104               |
| SNP_P3_83271_3672236 | NC_021166.1    | Ca_kabuli_chr07 | 3672236                 | GG                              | AA                | 1946456106               |
| SNP_P3_83272_3673379 | NC_021166.1    | Ca_kabuli_chr07 | 3673379                 | GG                              | AA                | 1946456107               |
| SNP_P3_83273_3674133 | NC_021166.1    | Ca_kabuli_chr07 | 3674133                 | TT                              | CC                | 1946456109               |
| SNP_P3_83274_3674154 | NC_021166.1    | Ca_kabuli_chr07 | 3674154                 | CC                              | AA                | 1946456110               |
| SNP_P3_83275_3674620 | NC_021166.1    | Ca_kabuli_chr07 | 3674620                 | AA                              | CC                | 1946456112               |
| SNP_P3_83276_3674632 | NC_021166.1    | Ca_kabuli_chr07 | 3674632                 | TT                              | GG                | 1946456113               |
| SNP_P3_83278_3675615 | NC_021166.1    | Ca_kabuli_chr07 | 3675615                 | GG                              | AA                | 1946456115               |
| SNP_P3_83279_3677067 | NC_021166.1    | Ca_kabuli_chr07 | 3677067                 | CC                              | TT                | 1946456116               |
| SNP_P3_83281_3679084 | NC_021166.1    | Ca_kabuli_chr07 | 3679084                 | GG                              | AA                | 1946456118               |

| SNPs IDs             | Chromosome IDs | Chromosomes     | Physical positions (bp) | CDC Frontier (Reference genome) | (Pusa 256 & HPNB) | NCBI SNPdb Accession IDs |
|----------------------|----------------|-----------------|-------------------------|---------------------------------|-------------------|--------------------------|
| SNP_P3_83282_3679142 | NC_021166.1    | Ca_kabuli_chr07 | 3679142                 | CC                              | TT                | 1946456119               |
| SNP_P3_83284_3679217 | NC_021166.1    | Ca_kabuli_chr07 | 3679217                 | TT                              | CC                | 1946456121               |
| SNP_P3_83285_3679286 | NC_021166.1    | Ca_kabuli_chr07 | 3679286                 | TT                              | AA                | 1946456122               |
| SNP_P3_83287_3679330 | NC_021166.1    | Ca_kabuli_chr07 | 3679330                 | CC                              | AA                | 1946456124               |
| SNP_P3_83288_3679361 | NC_021166.1    | Ca_kabuli_chr07 | 3679361                 | AA                              | GG                | 1946456125               |
| SNP_P3_83289_3679478 | NC_021166.1    | Ca_kabuli_chr07 | 3679478                 | TT                              | GG                | 1946456127               |
| SNP_P3_83290_3679491 | NC_021166.1    | Ca_kabuli_chr07 | 3679491                 | CC                              | TT                | 1946456128               |
| SNP_P3_83291_3681990 | NC_021166.1    | Ca_kabuli_chr07 | 3681990                 | GG                              | TT                | 1946456130               |
| SNP_P3_83292_3682017 | NC_021166.1    | Ca_kabuli_chr07 | 3682017                 | TT                              | CC                | 1946456131               |
| SNP_P3_83294_3683403 | NC_021166.1    | Ca_kabuli_chr07 | 3683403                 | CC                              | AA                | 1946456133               |
| SNP_P3_83295_3683423 | NC_021166.1    | Ca_kabuli_chr07 | 3683423                 | AA                              | TT                | 1946456134               |
| SNP_P3_83296_3683837 | NC_021166.1    | Ca_kabuli_chr07 | 3683837                 | GG                              | AA                | 1946456135               |
| SNP_P3_83297_3683855 | NC_021166.1    | Ca_kabuli_chr07 | 3683855                 | GG                              | AA                | 1946456137               |
| SNP_P3_83298_3687028 | NC_021166.1    | Ca_kabuli_chr07 | 3687028                 | AA                              | GG                | 1946456138               |
| SNP_P3_83299_3687294 | NC_021166.1    | Ca_kabuli_chr07 | 3687294                 | AA                              | TT                | 1946456140               |
| SNP_P3_83300_3687297 | NC_021166.1    | Ca_kabuli_chr07 | 3687297                 | AA                              | TT                | 1946456141               |
| SNP_P3_83301_3688593 | NC_021166.1    | Ca_kabuli_chr07 | 3688593                 | AA                              | GG                | 1946456143               |
| SNP_P3_83302_3688749 | NC_021166.1    | Ca_kabuli_chr07 | 3688749                 | CC                              | TT                | 1946456144               |
| SNP_P3_83304_3689520 | NC_021166.1    | Ca_kabuli_chr07 | 3689520                 | CC                              | AA                | 1946456146               |
| SNP_P3_83306_3689581 | NC_021166.1    | Ca_kabuli_chr07 | 3689581                 | CC                              | AA                | 1946456147               |
| SNP_P3_83308_3689965 | NC_021166.1    | Ca_kabuli_chr07 | 3689965                 | TT                              | GG                | 1946456148               |
| SNP_P3_83309_3690098 | NC_021166.1    | Ca_kabuli_chr07 | 3690098                 | CC                              | AA                | 1946456150               |
| SNP_P3_83310_3690114 | NC_021166.1    | Ca_kabuli_chr07 | 3690114                 | GG                              | TT                | 1946456151               |
| SNP_P3_83311_3690142 | NC_021166.1    | Ca_kabuli_chr07 | 3690142                 | TT                              | CC                | 1946456153               |
| SNP_P3_83312_3690189 | NC_021166.1    | Ca_kabuli_chr07 | 3690189                 | TT                              | CC                | 1946456154               |
| SNP_P3_83313_3690218 | NC_021166.1    | Ca_kabuli_chr07 | 3690218                 | AA                              | GG                | 1946456156               |
| SNP_P3_83314_3690236 | NC_021166.1    | Ca_kabuli_chr07 | 3690236                 | TT                              | GG                | 1946456157               |
| SNP_P3_83315_3690558 | NC_021166.1    | Ca_kabuli_chr07 | 3690558                 | GG                              | TT                | 1946456159               |
| SNP_P3_83316_3690813 | NC_021166.1    | Ca_kabuli_chr07 | 3690813                 | TT                              | CC                | 1946456160               |
| SNP_P3_83317_3690814 | NC_021166.1    | Ca_kabuli_chr07 | 3690814                 | GG                              | AA                | 1946456162               |
| SNP_P3_83318_3691425 | NC_021166.1    | Ca_kabuli_chr07 | 3691425                 | AA                              | TT                | 1946456163               |
| SNP_P3_83319_3691426 | NC_021166.1    | Ca_kabuli_chr07 | 3691426                 | TT                              | GG                | 1946456165               |
| SNP_P3_83320_3691441 | NC_021166.1    | Ca_kabuli_chr07 | 3691441                 | CC                              | TT                | 1946456166               |
| SNP_P3_83321_3691470 | NC_021166.1    | Ca_kabuli_chr07 | 3691470                 | GG                              | TT                | 1946456167               |
| SNP_P3_83322_3693860 | NC_021166.1    | Ca_kabuli_chr07 | 3693860                 | GG                              | AA                | 1946456169               |
| SNP_P3_83323_3694084 | NC_021166.1    | Ca_kabuli_chr07 | 3694084                 | TT                              | AA                | 1946456170               |
| SNP_P3_83324_3701320 | NC_021166.1    | Ca_kabuli_chr07 | 3701320                 | CC                              | AA                | 1946456172               |
| SNP_P3_83326_3721492 | NC_021166.1    | Ca_kabuli_chr07 | 3721492                 | TT                              | CC                | 1946456173               |
| SNP_P3_83327_3721866 | NC_021166.1    | Ca_kabuli_chr07 | 3721866                 | AA                              | GG                | 1946456175               |
| SNP_P3_83330_3754990 | NC_021166.1    | Ca_kabuli_chr07 | 3754990                 | TT                              | CC                | 1946456176               |
| SNP_P3_83333_3779212 | NC_021166.1    | Ca_kabuli_chr07 | 3779212                 | TT                              | AA                | 1946456178               |
| SNP_P3_83334_3779213 | NC_021166.1    | Ca_kabuli_chr07 | 3779213                 | TT                              | AA                | 1946456179               |

| SNPs IDs             | Chromosome IDs | Chromosomes     | Physical positions (bp) | CDC Frontier (Reference genome) | (Pusa 256 & HPNB) | NCBI SNPdb Accession IDs |
|----------------------|----------------|-----------------|-------------------------|---------------------------------|-------------------|--------------------------|
| SNP_P3_83336_3887275 | NC_021166.1    | Ca_kabuli_chr07 | 3887275                 | GG                              | CC                | 1946456181               |
| SNP_P3_83337_3940397 | NC_021166.1    | Ca_kabuli_chr07 | 3940397                 | GG                              | AA                | 1946456182               |
| SNP_P3_83338_3955352 | NC_021166.1    | Ca_kabuli_chr07 | 3955352                 | GG                              | AA                | 1946456183               |
| SNP_P3_83339_3960875 | NC_021166.1    | Ca_kabuli_chr07 | 3960875                 | TT                              | CC                | 1946456185               |
| SNP_P3_83341_3983299 | NC_021166.1    | Ca_kabuli_chr07 | 3983299                 | AA                              | GG                | 1946456186               |
| SNP_P3_83342_4012052 | NC_021166.1    | Ca_kabuli_chr07 | 4012052                 | AA                              | GG                | 1946456188               |
| SNP_P3_83343_4012081 | NC_021166.1    | Ca_kabuli_chr07 | 4012081                 | GG                              | CC                | 1946456189               |
| SNP_P3_83345_4026427 | NC_021166.1    | Ca_kabuli_chr07 | 4026427                 | CC                              | TT                | 1946456191               |
| SNP_P3_83346_4050024 | NC_021166.1    | Ca_kabuli_chr07 | 4050024                 | GG                              | CC                | 1946456192               |
| SNP_P3_83347_4083949 | NC_021166.1    | Ca_kabuli_chr07 | 4083949                 | AA                              | GG                | 1946456194               |
| SNP_P3_83348_4087535 | NC_021166.1    | Ca_kabuli_chr07 | 4087535                 | GG                              | AA                | 1946456195               |
| SNP_P3_83349_4091585 | NC_021166.1    | Ca_kabuli_chr07 | 4091585                 | TT                              | CC                | 1946456196               |
| SNP_P3_83350_4091955 | NC_021166.1    | Ca_kabuli_chr07 | 4091955                 | TT                              | CC                | 1946456198               |
| SNP_P3_83351_4092146 | NC_021166.1    | Ca_kabuli_chr07 | 4092146                 | AA                              | CC                | 1946456199               |
| SNP_P3_83353_4108791 | NC_021166.1    | Ca_kabuli_chr07 | 4108791                 | TT                              | AA                | 1946456201               |
| SNP_P3_83354_4108794 | NC_021166.1    | Ca_kabuli_chr07 | 4108794                 | TT                              | AA                | 1946456202               |
| SNP_P3_83355_4109085 | NC_021166.1    | Ca_kabuli_chr07 | 4109085                 | AA                              | CC                | 1946456204               |
| SNP_P3_83356_4109087 | NC_021166.1    | Ca_kabuli_chr07 | 4109087                 | AA                              | CC                | 1946456206               |
| SNP_P3_83358_4124501 | NC_021166.1    | Ca_kabuli_chr07 | 4124501                 | TT                              | CC                | 1946456207               |
| SNP_P3_83359_4127210 | NC_021166.1    | Ca_kabuli_chr07 | 4127210                 | CC                              | TT                | 1946456209               |
| SNP_P3_83360_4216857 | NC_021166.1    | Ca_kabuli_chr07 | 4216857                 | TT                              | CC                | 1946456210               |
| SNP_P3_83362_4228743 | NC_021166.1    | Ca_kabuli_chr07 | 4228743                 | AA                              | GG                | 1946456212               |
| SNP_P3_83363_4263034 | NC_021166.1    | Ca_kabuli_chr07 | 4263034                 | CC                              | TT                | 1946456213               |
| SNP_P3_83365_4266080 | NC_021166.1    | Ca_kabuli_chr07 | 4266080                 | TT                              | GG                | 1946456215               |
| SNP_P3_83366_4283375 | NC_021166.1    | Ca_kabuli_chr07 | 4283375                 | CC                              | TT                | 1946456216               |
| SNP_P3_83367_4314479 | NC_021166.1    | Ca_kabuli_chr07 | 4314479                 | TT                              | AA                | 1946456217               |
| SNP_P3_83368_4329262 | NC_021166.1    | Ca_kabuli_chr07 | 4329262                 | AA                              | GG                | 1946456219               |
| SNP_P3_83371_4387218 | NC_021166.1    | Ca_kabuli_chr07 | 4387218                 | TT                              | GG                | 1946456220               |
| SNP_P3_83372_4405158 | NC_021166.1    | Ca_kabuli_chr07 | 4405158                 | TT                              | AA                | 1946456222               |
| SNP_P3_83373_4412520 | NC_021166.1    | Ca_kabuli_chr07 | 4412520                 | CC                              | AA                | 1946456223               |
| SNP_P3_83374_4412820 | NC_021166.1    | Ca_kabuli_chr07 | 4412820                 | CC                              | TT                | 1946456225               |
| SNP_P3_83375_4412835 | NC_021166.1    | Ca_kabuli_chr07 | 4412835                 | TT                              | CC                | 1946456226               |
| SNP_P3_83376_4412883 | NC_021166.1    | Ca_kabuli_chr07 | 4412883                 | AA                              | GG                | 1946456228               |
| SNP_P3_83377_4417786 | NC_021166.1    | Ca_kabuli_chr07 | 4417786                 | AA                              | GG                | 1946456229               |
| SNP_P3_83378_4417809 | NC_021166.1    | Ca_kabuli_chr07 | 4417809                 | AA                              | GG                | 1946456231               |
| SNP_P3_83379_4417815 | NC_021166.1    | Ca_kabuli_chr07 | 4417815                 | CC                              | GG                | 1946456232               |
| SNP_P3_83380_4417819 | NC_021166.1    | Ca_kabuli_chr07 | 4417819                 | AA                              | GG                | 1946456234               |
| SNP_P3_83381_4417932 | NC_021166.1    | Ca_kabuli_chr07 | 4417932                 | GG                              | CC                | 1946456235               |
| SNP_P3_83382_4417940 | NC_021166.1    | Ca_kabuli_chr07 | 4417940                 | CC                              | TT                | 1946456237               |
| SNP_P3_83383_4418072 | NC_021166.1    | Ca_kabuli_chr07 | 4418072                 | AA                              | GG                | 1946456238               |
| SNP_P3_83384_4418083 | NC_021166.1    | Ca_kabuli_chr07 | 4418083                 | TT                              | AA                | 1946456240               |
| SNP_P3_83385_4418090 | NC_021166.1    | Ca_kabuli_chr07 | 4418090                 | AA                              | GG                | 1946456241               |



| SNPs IDs             | Chromosome IDs | Chromosomes     | Physical positions (bp) | CDC Frontier (Reference genome) | (Pusa 256 & HPNB) | NCBI SNPdb Accession IDs |
|----------------------|----------------|-----------------|-------------------------|---------------------------------|-------------------|--------------------------|
| SNP_P3_83386_4418103 | NC_021166.1    | Ca_kabuli_chr07 | 4418103                 | AA                              | CC                | 1946456243               |
| SNP_P3_83388_4419032 | NC_021166.1    | Ca_kabuli_chr07 | 4419032                 | CC                              | TT                | 1946456244               |
| SNP_P3_83389_4424544 | NC_021166.1    | Ca_kabuli_chr07 | 4424544                 | TT                              | AA                | 1946456246               |
| SNP_P3_83390_4450007 | NC_021166.1    | Ca_kabuli_chr07 | 4450007                 | GG                              | AA                | 1946456247               |
| SNP_P3_83391_4452804 | NC_021166.1    | Ca_kabuli_chr07 | 4452804                 | GG                              | AA                | 1946456249               |
| SNP_P3_83392_4501678 | NC_021166.1    | Ca_kabuli_chr07 | 4501678                 | CC                              | TT                | 1946456251               |
| SNP_P3_83393_4528800 | NC_021166.1    | Ca_kabuli_chr07 | 4528800                 | CC                              | AA                | 1946456252               |
| SNP_P3_83394_4559876 | NC_021166.1    | Ca_kabuli_chr07 | 4559876                 | TT                              | CC                | 1946456253               |
| SNP_P3_83396_4564019 | NC_021166.1    | Ca_kabuli_chr07 | 4564019                 | CC                              | TT                | 1946456255               |
| SNP_P3_83397_4573805 | NC_021166.1    | Ca_kabuli_chr07 | 4573805                 | TT                              | GG                | 1946456256               |
| SNP_P3_83398_4606218 | NC_021166.1    | Ca_kabuli_chr07 | 4606218                 | CC                              | AA                | 1946456258               |
| SNP_P3_83399_4608161 | NC_021166.1    | Ca_kabuli_chr07 | 4608161                 | TT                              | AA                | 1946456260               |
| SNP_P3_83400_4608162 | NC_021166.1    | Ca_kabuli_chr07 | 4608162                 | TT                              | GG                | 1946456261               |
| SNP_P3_83401_4610631 | NC_021166.1    | Ca_kabuli_chr07 | 4610631                 | GG                              | CC                | 1946456263               |
| SNP_P3_83402_4628236 | NC_021166.1    | Ca_kabuli_chr07 | 4628236                 | CC                              | TT                | 1946456264               |
| SNP_P3_83403_4631743 | NC_021166.1    | Ca_kabuli_chr07 | 4631743                 | TT                              | CC                | 1946456266               |
| SNP_P3_83404_4660745 | NC_021166.1    | Ca_kabuli_chr07 | 4660745                 | AA                              | GG                | 1946456267               |
| SNP_P3_83405_4664419 | NC_021166.1    | Ca_kabuli_chr07 | 4664419                 | TT                              | AA                | 1946456269               |
| SNP_P3_83408_4673980 | NC_021166.1    | Ca_kabuli_chr07 | 4673980                 | AA                              | GG                | 1946456270               |
| SNP_P3_83409_4678965 | NC_021166.1    | Ca_kabuli_chr07 | 4678965                 | TT                              | CC                | 1946456272               |
| SNP_P3_83410_4688821 | NC_021166.1    | Ca_kabuli_chr07 | 4688821                 | CC                              | TT                | 1946456273               |
| SNP_P3_83413_4711870 | NC_021166.1    | Ca_kabuli_chr07 | 4711870                 | AA                              | GG                | 1946456275               |
| SNP_P3_83415_4731345 | NC_021166.1    | Ca_kabuli_chr07 | 4731345                 | AA                              | GG                | 1946456276               |
| SNP_P3_83416_4755420 | NC_021166.1    | Ca_kabuli_chr07 | 4755420                 | CC                              | TT                | 1946456278               |
| SNP_P3_83418_4798147 | NC_021166.1    | Ca_kabuli_chr07 | 4798147                 | CC                              | TT                | 1946456279               |
| SNP_P3_83419_4823504 | NC_021166.1    | Ca_kabuli_chr07 | 4823504                 | TT                              | CC                | 1946456281               |
| SNP_P3_83420_4824547 | NC_021166.1    | Ca_kabuli_chr07 | 4824547                 | TT                              | CC                | 1946456283               |
| SNP_P3_83421_4826672 | NC_021166.1    | Ca_kabuli_chr07 | 4826672                 | TT                              | CC                | 1946456284               |
| SNP_P3_83422_4842466 | NC_021166.1    | Ca_kabuli_chr07 | 4842466                 | TT                              | CC                | 1946456286               |
| SNP_P3_83424_4858230 | NC_021166.1    | Ca_kabuli_chr07 | 4858230                 | GG                              | AA                | 1946456287               |
| SNP_P3_83426_4909640 | NC_021166.1    | Ca_kabuli_chr07 | 4909640                 | AA                              | GG                | 1946456289               |
| SNP_P3_83427_4911002 | NC_021166.1    | Ca_kabuli_chr07 | 4911002                 | CC                              | TT                | 1946456290               |
| SNP_P3_83428_4915246 | NC_021166.1    | Ca_kabuli_chr07 | 4915246                 | TT                              | GG                | 1946456292               |
| SNP_P3_83429_4924418 | NC_021166.1    | Ca_kabuli_chr07 | 4924418                 | GG                              | AA                | 1946456294               |
| SNP_P3_83430_4925338 | NC_021166.1    | Ca_kabuli_chr07 | 4925338                 | TT                              | CC                | 1946456295               |
| SNP_P3_83431_4927408 | NC_021166.1    | Ca_kabuli_chr07 | 4927408                 | AA                              | GG                | 1946456297               |
| SNP_P3_83432_4973142 | NC_021166.1    | Ca_kabuli_chr07 | 4973142                 | TT                              | CC                | 1946456298               |
| SNP_P3_83433_4976008 | NC_021166.1    | Ca_kabuli_chr07 | 4976008                 | CC                              | TT                | 1946456300               |
| SNP_P3_83434_4981587 | NC_021166.1    | Ca_kabuli_chr07 | 4981587                 | TT                              | AA                | 1946456301               |
| SNP_P3_83436_4989357 | NC_021166.1    | Ca_kabuli_chr07 | 4989357                 | TT                              | CC                | 1946456303               |
| SNP_P3_83438_4991845 | NC_021166.1    | Ca_kabuli_chr07 | 4991845                 | GG                              | AA                | 1946456304               |
| SNP_P3_83439_4994205 | NC_021166.1    | Ca_kabuli_chr07 | 4994205                 | GG                              | TT                | 1946456306               |

| SNPs IDs             | Chromosome IDs | Chromosomes     | Physical positions (bp) | CDC Frontier (Reference genome) | (Pusa 256 & HPNB) | NCBI SNPdb Accession IDs |
|----------------------|----------------|-----------------|-------------------------|---------------------------------|-------------------|--------------------------|
| SNP_P3_83441_5009451 | NC_021166.1    | Ca_kabuli_chr07 | 5009451                 | CC                              | TT                | 1946456307               |
| SNP_P3_83442_5010230 | NC_021166.1    | Ca_kabuli_chr07 | 5010230                 | AA                              | GG                | 1946456309               |
| SNP_P3_83443_5010265 | NC_021166.1    | Ca_kabuli_chr07 | 5010265                 | AA                              | GG                | 1946456310               |
| SNP_P3_83445_5017066 | NC_021166.1    | Ca_kabuli_chr07 | 5017066                 | GG                              | AA                | 1946456311               |
| SNP_P3_83446_5019429 | NC_021166.1    | Ca_kabuli_chr07 | 5019429                 | TT                              | CC                | 1946456313               |
| SNP_P3_83447_5023005 | NC_021166.1    | Ca_kabuli_chr07 | 5023005                 | TT                              | CC                | 1946456315               |
| SNP_P3_83449_5030749 | NC_021166.1    | Ca_kabuli_chr07 | 5030749                 | TT                              | GG                | 1946456316               |
| SNP_P3_83451_5032583 | NC_021166.1    | Ca_kabuli_chr07 | 5032583                 | GG                              | CC                | 1946456318               |
| SNP_P3_83452_5033033 | NC_021166.1    | Ca_kabuli_chr07 | 5033033                 | GG                              | AA                | 1946456320               |
| SNP_P3_83456_5035246 | NC_021166.1    | Ca_kabuli_chr07 | 5035246                 | TT                              | AA                | 1946456321               |
| SNP_P3_83458_5044992 | NC_021166.1    | Ca_kabuli_chr07 | 5044992                 | AA                              | GG                | 1946456323               |
| SNP_P3_83459_5045022 | NC_021166.1    | Ca_kabuli_chr07 | 5045022                 | GG                              | AA                | 1946456324               |
| SNP_P3_83460_5045047 | NC_021166.1    | Ca_kabuli_chr07 | 5045047                 | AA                              | GG                | 1946456325               |
| SNP_P3_83461_5045330 | NC_021166.1    | Ca_kabuli_chr07 | 5045330                 | CC                              | AA                | 1946456327               |
| SNP_P3_83462_5047998 | NC_021166.1    | Ca_kabuli_chr07 | 5047998                 | CC                              | AA                | 1946456328               |
| SNP_P3_83463_5050470 | NC_021166.1    | Ca_kabuli_chr07 | 5050470                 | CC                              | TT                | 1946456330               |
| SNP_P3_83464_5060035 | NC_021166.1    | Ca_kabuli_chr07 | 5060035                 | TT                              | CC                | 1946456331               |
| SNP_P3_83465_5060044 | NC_021166.1    | Ca_kabuli_chr07 | 5060044                 | AA                              | GG                | 1946456333               |
| SNP_P3_83466_5060187 | NC_021166.1    | Ca_kabuli_chr07 | 5060187                 | CC                              | TT                | 1946456334               |
| SNP_P3_83467_5067375 | NC_021166.1    | Ca_kabuli_chr07 | 5067375                 | CC                              | TT                | 1946456336               |
| SNP_P3_83468_5069306 | NC_021166.1    | Ca_kabuli_chr07 | 5069306                 | CC                              | TT                | 1946456337               |
| SNP_P3_83469_5069569 | NC_021166.1    | Ca_kabuli_chr07 | 5069569                 | TT                              | AA                | 1946456339               |
| SNP_P3_83471_5076565 | NC_021166.1    | Ca_kabuli_chr07 | 5076565                 | AA                              | TT                | 1946456341               |
| SNP_P3_83473_5081665 | NC_021166.1    | Ca_kabuli_chr07 | 5081665                 | AA                              | GG                | 1946456342               |
| SNP_P3_83474_5082445 | NC_021166.1    | Ca_kabuli_chr07 | 5082445                 | CC                              | TT                | 1946456344               |
| SNP_P3_83475_5084834 | NC_021166.1    | Ca_kabuli_chr07 | 5084834                 | TT                              | AA                | 1946456345               |
| SNP_P3_83477_5089820 | NC_021166.1    | Ca_kabuli_chr07 | 5089820                 | TT                              | CC                | 1946456347               |
| SNP_P3_83478_5091035 | NC_021166.1    | Ca_kabuli_chr07 | 5091035                 | AA                              | TT                | 1946456348               |
| SNP_P3_83479_5091918 | NC_021166.1    | Ca_kabuli_chr07 | 5091918                 | TT                              | CC                | 1946456350               |
| SNP_P3_83480_5092958 | NC_021166.1    | Ca_kabuli_chr07 | 5092958                 | GG                              | TT                | 1946456351               |
| SNP_P3_83481_5095628 | NC_021166.1    | Ca_kabuli_chr07 | 5095628                 | CC                              | TT                | 1946456353               |
| SNP_P3_83482_5099280 | NC_021166.1    | Ca_kabuli_chr07 | 5099280                 | AA                              | GG                | 1946456354               |
| SNP_P3_83483_5099617 | NC_021166.1    | Ca_kabuli_chr07 | 5099617                 | GG                              | AA                | 1946456356               |
| SNP_P3_83484_5100862 | NC_021166.1    | Ca_kabuli_chr07 | 5100862                 | AA                              | CC                | 1946456357               |
| SNP_P3_83485_5100960 | NC_021166.1    | Ca_kabuli_chr07 | 5100960                 | AA                              | CC                | 1946456359               |
| SNP_P3_83486_5107413 | NC_021166.1    | Ca_kabuli_chr07 | 5107413                 | GG                              | AA                | 1946456360               |
| SNP_P3_83487_5108744 | NC_021166.1    | Ca_kabuli_chr07 | 5108744                 | AA                              | GG                | 1946456362               |
| SNP_P3_83488_5118909 | NC_021166.1    | Ca_kabuli_chr07 | 5118909                 | AA                              | CC                | 1946456363               |
| SNP_P3_83490_5119690 | NC_021166.1    | Ca_kabuli_chr07 | 5119690                 | CC                              | TT                | 1946456365               |
| SNP_P3_83491_5121743 | NC_021166.1    | Ca_kabuli_chr07 | 5121743                 | GG                              | CC                | 1946456366               |
| SNP_P3_83492_5127763 | NC_021166.1    | Ca_kabuli_chr07 | 5127763                 | AA                              | GG                | 1946456368               |
| SNP_P3_83493_5129190 | NC_021166.1    | Ca_kabuli_chr07 | 5129190                 | TT                              | GG                | 1946456369               |

| SNPs IDs             | Chromosome IDs | Chromosomes     | Physical positions (bp) | CDC Frontier (Reference genome) | (Pusa 256 & HPNB) | NCBI SNPdb Accession IDs |
|----------------------|----------------|-----------------|-------------------------|---------------------------------|-------------------|--------------------------|
| SNP_P3_83494_5129191 | NC_021166.1    | Ca_kabuli_chr07 | 5129191                 | GG                              | AA                | 1946456371               |
| SNP_P3_83495_5132923 | NC_021166.1    | Ca_kabuli_chr07 | 5132923                 | CC                              | AA                | 1946456373               |
| SNP_P3_83496_5133119 | NC_021166.1    | Ca_kabuli_chr07 | 5133119                 | GG                              | TT                | 1946456374               |
| SNP_P3_83497_5136565 | NC_021166.1    | Ca_kabuli_chr07 | 5136565                 | AA                              | CC                | 1946456376               |
| SNP_P3_83498_5136612 | NC_021166.1    | Ca_kabuli_chr07 | 5136612                 | CC                              | TT                | 1946456378               |
| SNP_P3_83499_5137561 | NC_021166.1    | Ca_kabuli_chr07 | 5137561                 | TT                              | CC                | 1946456380               |
| SNP_P3_83500_5139264 | NC_021166.1    | Ca_kabuli_chr07 | 5139264                 | AA                              | TT                | 1946456381               |
| SNP_P3_83502_5143462 | NC_021166.1    | Ca_kabuli_chr07 | 5143462                 | AA                              | TT                | 1946456383               |
| SNP_P3_83503_5143656 | NC_021166.1    | Ca_kabuli_chr07 | 5143656                 | CC                              | TT                | 1946456385               |
| SNP_P3_83504_5143695 | NC_021166.1    | Ca_kabuli_chr07 | 5143695                 | GG                              | AA                | 1946456387               |
| SNP_P3_83505_5145803 | NC_021166.1    | Ca_kabuli_chr07 | 5145803                 | GG                              | TT                | 1946456388               |
| SNP_P3_83506_5150004 | NC_021166.1    | Ca_kabuli_chr07 | 5150004                 | GG                              | TT                | 1946456390               |
| SNP_P3_83507_5150380 | NC_021166.1    | Ca_kabuli_chr07 | 5150380                 | AA                              | GG                | 1946456392               |
| SNP_P3_83508_5155976 | NC_021166.1    | Ca_kabuli_chr07 | 5155976                 | AA                              | GG                | 1946456393               |
| SNP_P3_83509_5157436 | NC_021166.1    | Ca_kabuli_chr07 | 5157436                 | AA                              | CC                | 1946456395               |
| SNP_P3_83510_5166823 | NC_021166.1    | Ca_kabuli_chr07 | 5166823                 | CC                              | GG                | 1946456397               |
| SNP_P3_83511_5169193 | NC_021166.1    | Ca_kabuli_chr07 | 5169193                 | CC                              | TT                | 1946456399               |
| SNP_P3_83512_5169223 | NC_021166.1    | Ca_kabuli_chr07 | 5169223                 | TT                              | CC                | 1946456400               |
| SNP_P3_83513_5174198 | NC_021166.1    | Ca_kabuli_chr07 | 5174198                 | GG                              | AA                | 1946456402               |
| SNP_P3_83514_5174224 | NC_021166.1    | Ca_kabuli_chr07 | 5174224                 | GG                              | TT                | 1946456404               |
| SNP_P3_83515_5174935 | NC_021166.1    | Ca_kabuli_chr07 | 5174935                 | AA                              | GG                | 1946456406               |
| SNP_P3_83516_5176788 | NC_021166.1    | Ca_kabuli_chr07 | 5176788                 | AA                              | CC                | 1946456407               |
| SNP_P3_83517_5180329 | NC_021166.1    | Ca_kabuli_chr07 | 5180329                 | CC                              | AA                | 1946456409               |
| SNP_P3_83519_5186961 | NC_021166.1    | Ca_kabuli_chr07 | 5186961                 | TT                              | GG                | 1946456410               |
| SNP_P3_83520_5189856 | NC_021166.1    | Ca_kabuli_chr07 | 5189856                 | GG                              | AA                | 1946456412               |
| SNP_P3_83521_5193628 | NC_021166.1    | Ca_kabuli_chr07 | 5193628                 | TT                              | AA                | 1946456414               |
| SNP_P3_83522_5193634 | NC_021166.1    | Ca_kabuli_chr07 | 5193634                 | GG                              | TT                | 1946456415               |
| SNP_P3_83523_5193713 | NC_021166.1    | Ca_kabuli_chr07 | 5193713                 | CC                              | TT                | 1946456417               |
| SNP_P3_83524_5193772 | NC_021166.1    | Ca_kabuli_chr07 | 5193772                 | AA                              | TT                | 1946456418               |
| SNP_P3_83525_5193776 | NC_021166.1    | Ca_kabuli_chr07 | 5193776                 | AA                              | CC                | 1946456420               |
| SNP_P3_83526_5194619 | NC_021166.1    | Ca_kabuli_chr07 | 5194619                 | GG                              | AA                | 1946456421               |
| SNP_P3_83527_5260310 | NC_021166.1    | Ca_kabuli_chr07 | 5260310                 | AA                              | GG                | 1946456423               |
| SNP_P3_83528_5265319 | NC_021166.1    | Ca_kabuli_chr07 | 5265319                 | GG                              | AA                | 1946456424               |
| SNP_P3_83529_5266392 | NC_021166.1    | Ca_kabuli_chr07 | 5266392                 | TT                              | AA                | 1946456426               |
| SNP_P3_83530_5273381 | NC_021166.1    | Ca_kabuli_chr07 | 5273381                 | CC                              | TT                | 1946456427               |
| SNP_P3_83531_5315212 | NC_021166.1    | Ca_kabuli_chr07 | 5315212                 | TT                              | AA                | 1946456428               |
| SNP_P3_83534_5374691 | NC_021166.1    | Ca_kabuli_chr07 | 5374691                 | TT                              | CC                | 1946456431               |
| SNP_P3_83535_5375472 | NC_021166.1    | Ca_kabuli_chr07 | 5375472                 | TT                              | CC                | 1946456432               |
| SNP_P3_83537_5378374 | NC_021166.1    | Ca_kabuli_chr07 | 5378374                 | TT                              | AA                | 1946456434               |
| SNP_P3_83538_5378601 | NC_021166.1    | Ca_kabuli_chr07 | 5378601                 | CC                              | TT                | 1946456435               |
| SNP_P3_83539_5378775 | NC_021166.1    | Ca_kabuli_chr07 | 5378775                 | AA                              | GG                | 1946456437               |
| SNP_P3_83540_5381852 | NC_021166.1    | Ca_kabuli_chr07 | 5381852                 | CC                              | TT                | 1946456438               |

| SNPs IDs             | Chromosome IDs | Chromosomes     | Physical positions (bp) | CDC Frontier (Reference genome) | (Pusa 256 & HPNB) | NCBI SNPdb Accession IDs |
|----------------------|----------------|-----------------|-------------------------|---------------------------------|-------------------|--------------------------|
| SNP_P3_83541_5382063 | NC_021166.1    | Ca_kabuli_chr07 | 5382063                 | AA                              | GG                | 1946456440               |
| SNP_P3_83542_5383671 | NC_021166.1    | Ca_kabuli_chr07 | 5383671                 | GG                              | TT                | 1946456441               |
| SNP_P3_83543_5385991 | NC_021166.1    | Ca_kabuli_chr07 | 5385991                 | CC                              | AA                | 1946456443               |
| SNP_P3_83544_5386341 | NC_021166.1    | Ca_kabuli_chr07 | 5386341                 | GG                              | TT                | 1946456445               |
| SNP_P3_83545_5386912 | NC_021166.1    | Ca_kabuli_chr07 | 5386912                 | AA                              | CC                | 1946456446               |
| SNP_P3_83546_5387691 | NC_021166.1    | Ca_kabuli_chr07 | 5387691                 | GG                              | AA                | 1946456448               |
| SNP_P3_83548_5388299 | NC_021166.1    | Ca_kabuli_chr07 | 5388299                 | CC                              | TT                | 1946456449               |
| SNP_P3_83550_5388765 | NC_021166.1    | Ca_kabuli_chr07 | 5388765                 | CC                              | TT                | 1946456451               |
| SNP_P3_83551_5389039 | NC_021166.1    | Ca_kabuli_chr07 | 5389039                 | TT                              | AA                | 1946456452               |
| SNP_P3_83552_5389048 | NC_021166.1    | Ca_kabuli_chr07 | 5389048                 | CC                              | TT                | 1946456453               |
| SNP_P3_83553_5389050 | NC_021166.1    | Ca_kabuli_chr07 | 5389050                 | CC                              | AA                | 1946456455               |
| SNP_P3_83554_5389080 | NC_021166.1    | Ca_kabuli_chr07 | 5389080                 | AA                              | GG                | 1946456457               |
| SNP_P3_83555_5389887 | NC_021166.1    | Ca_kabuli_chr07 | 5389887                 | GG                              | AA                | 1946456458               |
| SNP_P3_83556_5389894 | NC_021166.1    | Ca_kabuli_chr07 | 5389894                 | CC                              | AA                | 1946456460               |
| SNP_P3_83557_5391042 | NC_021166.1    | Ca_kabuli_chr07 | 5391042                 | CC                              | TT                | 1946456461               |
| SNP_P3_83558_5391915 | NC_021166.1    | Ca_kabuli_chr07 | 5391915                 | GG                              | TT                | 1946456463               |
| SNP_P3_83559_5391921 | NC_021166.1    | Ca_kabuli_chr07 | 5391921                 | CC                              | AA                | 1946456465               |
| SNP_P3_83560_5392305 | NC_021166.1    | Ca_kabuli_chr07 | 5392305                 | GG                              | TT                | 1946456466               |
| SNP_P3_83562_5395347 | NC_021166.1    | Ca_kabuli_chr07 | 5395347                 | AA                              | CC                | 1946456468               |
| SNP_P3_83563_5395601 | NC_021166.1    | Ca_kabuli_chr07 | 5395601                 | CC                              | TT                | 1946456469               |
| SNP_P3_83564_5395625 | NC_021166.1    | Ca_kabuli_chr07 | 5395625                 | TT                              | CC                | 1946456471               |
| SNP_P3_83565_5395796 | NC_021166.1    | Ca_kabuli_chr07 | 5395796                 | CC                              | TT                | 1946456472               |
| SNP_P3_83566_5395877 | NC_021166.1    | Ca_kabuli_chr07 | 5395877                 | AA                              | TT                | 1946456474               |
| SNP_P3_83567_5396725 | NC_021166.1    | Ca_kabuli_chr07 | 5396725                 | CC                              | TT                | 1946456475               |
| SNP_P3_83569_5398453 | NC_021166.1    | Ca_kabuli_chr07 | 5398453                 | CC                              | TT                | 1946456477               |
| SNP_P3_83571_5398592 | NC_021166.1    | Ca_kabuli_chr07 | 5398592                 | CC                              | TT                | 1946456478               |
| SNP_P3_83572_5398626 | NC_021166.1    | Ca_kabuli_chr07 | 5398626                 | CC                              | GG                | 1946456479               |
| SNP_P3_83575_5401794 | NC_021166.1    | Ca_kabuli_chr07 | 5401794                 | CC                              | TT                | 1946456481               |
| SNP_P3_83576_5402409 | NC_021166.1    | Ca_kabuli_chr07 | 5402409                 | TT                              | CC                | 1946456482               |
| SNP_P3_83577_5402423 | NC_021166.1    | Ca_kabuli_chr07 | 5402423                 | TT                              | GG                | 1946456484               |
| SNP_P3_83578_5402472 | NC_021166.1    | Ca_kabuli_chr07 | 5402472                 | AA                              | GG                | 1946456486               |
| SNP_P3_83579_5403483 | NC_021166.1    | Ca_kabuli_chr07 | 5403483                 | TT                              | GG                | 1946456489               |
| SNP_P3_83580_5403484 | NC_021166.1    | Ca_kabuli_chr07 | 5403484                 | AA                              | GG                | 1946456490               |
| SNP_P3_83583_5404818 | NC_021166.1    | Ca_kabuli_chr07 | 5404818                 | TT                              | CC                | 1946456492               |
| SNP_P3_83584_5405072 | NC_021166.1    | Ca_kabuli_chr07 | 5405072                 | CC                              | GG                | 1946456493               |
| SNP_P3_83588_5406324 | NC_021166.1    | Ca_kabuli_chr07 | 5406324                 | CC                              | TT                | 1946456495               |
| SNP_P3_83590_5406363 | NC_021166.1    | Ca_kabuli_chr07 | 5406363                 | TT                              | CC                | 1946456496               |
| SNP_P3_83591_5407336 | NC_021166.1    | Ca_kabuli_chr07 | 5407336                 | TT                              | AA                | 1946456498               |
| SNP_P3_83592_5407381 | NC_021166.1    | Ca_kabuli_chr07 | 5407381                 | TT                              | CC                | 1946456499               |
| SNP_P3_83593_5407505 | NC_021166.1    | Ca_kabuli_chr07 | 5407505                 | GG                              | TT                | 1946456501               |
| SNP_P3_83595_5407549 | NC_021166.1    | Ca_kabuli_chr07 | 5407549                 | TT                              | CC                | 1946456502               |
| SNP_P3_83596_5407812 | NC_021166.1    | Ca_kabuli_chr07 | 5407812                 | CC                              | TT                | 1946456504               |

| SNPs IDs             | Chromosome IDs | Chromosomes     | Physical positions (bp) | CDC Frontier (Reference genome) | (Pusa 256 & HPNB) | NCBI SNPdb Accession IDs |
|----------------------|----------------|-----------------|-------------------------|---------------------------------|-------------------|--------------------------|
| SNP_P3_83597_5407827 | NC_021166.1    | Ca_kabuli_chr07 | 5407827                 | GG                              | AA                | 1946456505               |
| SNP_P3_83598_5407828 | NC_021166.1    | Ca_kabuli_chr07 | 5407828                 | GG                              | TT                | 1946456507               |
| SNP_P3_83599_5407874 | NC_021166.1    | Ca_kabuli_chr07 | 5407874                 | GG                              | TT                | 1946456508               |
| SNP_P3_83600_5407885 | NC_021166.1    | Ca_kabuli_chr07 | 5407885                 | GG                              | AA                | 1946456510               |
| SNP_P3_83602_5409908 | NC_021166.1    | Ca_kabuli_chr07 | 5409908                 | CC                              | GG                | 1946456511               |
| SNP_P3_83603_5409917 | NC_021166.1    | Ca_kabuli_chr07 | 5409917                 | TT                              | CC                | 1946456513               |
| SNP_P3_83604_5410015 | NC_021166.1    | Ca_kabuli_chr07 | 5410015                 | GG                              | AA                | 1946456514               |
| SNP_P3_83605_5410091 | NC_021166.1    | Ca_kabuli_chr07 | 5410091                 | CC                              | AA                | 1946456516               |
| SNP_P3_83606_5411259 | NC_021166.1    | Ca_kabuli_chr07 | 5411259                 | GG                              | TT                | 1946456517               |
| SNP_P3_83607_5411467 | NC_021166.1    | Ca_kabuli_chr07 | 5411467                 | GG                              | CC                | 1946456519               |
| SNP_P3_83608_5411482 | NC_021166.1    | Ca_kabuli_chr07 | 5411482                 | CC                              | TT                | 1946456520               |
| SNP_P3_83609_5411511 | NC_021166.1    | Ca_kabuli_chr07 | 5411511                 | GG                              | AA                | 1946456522               |
| SNP_P3_83610_5411522 | NC_021166.1    | Ca_kabuli_chr07 | 5411522                 | TT                              | CC                | 1946456523               |
| SNP_P3_83611_5411539 | NC_021166.1    | Ca_kabuli_chr07 | 5411539                 | GG                              | AA                | 1946456525               |
| SNP_P3_83612_5411582 | NC_021166.1    | Ca_kabuli_chr07 | 5411582                 | AA                              | GG                | 1946456526               |
| SNP_P3_83613_5413820 | NC_021166.1    | Ca_kabuli_chr07 | 5413820                 | AA                              | TT                | 1946456528               |
| SNP_P3_83614_5413833 | NC_021166.1    | Ca_kabuli_chr07 | 5413833                 | AA                              | TT                | 1946456529               |
| SNP_P3_83616_5415011 | NC_021166.1    | Ca_kabuli_chr07 | 5415011                 | GG                              | AA                | 1946456531               |
| SNP_P3_83617_5415045 | NC_021166.1    | Ca_kabuli_chr07 | 5415045                 | AA                              | GG                | 1946456533               |
| SNP_P3_83618_5416187 | NC_021166.1    | Ca_kabuli_chr07 | 5416187                 | GG                              | AA                | 1946456534               |
| SNP_P3_83619_5417313 | NC_021166.1    | Ca_kabuli_chr07 | 5417313                 | GG                              | AA                | 1946456536               |
| SNP_P3_83620_5417970 | NC_021166.1    | Ca_kabuli_chr07 | 5417970                 | CC                              | TT                | 1946456537               |
| SNP_P3_83622_5419916 | NC_021166.1    | Ca_kabuli_chr07 | 5419916                 | AA                              | GG                | 1946456539               |
| SNP_P3_83623_5422497 | NC_021166.1    | Ca_kabuli_chr07 | 5422497                 | AA                              | TT                | 1946456540               |
| SNP_P3_83624_5423343 | NC_021166.1    | Ca_kabuli_chr07 | 5423343                 | GG                              | TT                | 1946456542               |
| SNP_P3_83625_5423389 | NC_021166.1    | Ca_kabuli_chr07 | 5423389                 | GG                              | AA                | 1946456543               |
| SNP_P3_83626_5423659 | NC_021166.1    | Ca_kabuli_chr07 | 5423659                 | GG                              | AA                | 1946456545               |
| SNP_P3_83627_5423707 | NC_021166.1    | Ca_kabuli_chr07 | 5423707                 | TT                              | CC                | 1946456546               |
| SNP_P3_83628_5425692 | NC_021166.1    | Ca_kabuli_chr07 | 5425692                 | CC                              | TT                | 1946456548               |
| SNP_P3_83629_5425912 | NC_021166.1    | Ca_kabuli_chr07 | 5425912                 | CC                              | TT                | 1946456550               |
| SNP_P3_83630_5426548 | NC_021166.1    | Ca_kabuli_chr07 | 5426548                 | AA                              | TT                | 1946456551               |
| SNP_P3_83631_5427813 | NC_021166.1    | Ca_kabuli_chr07 | 5427813                 | AA                              | GG                | 1946456553               |
| SNP_P3_83632_5429314 | NC_021166.1    | Ca_kabuli_chr07 | 5429314                 | GG                              | TT                | 1946456554               |
| SNP_P3_83633_5429350 | NC_021166.1    | Ca_kabuli_chr07 | 5429350                 | AA                              | GG                | 1946456556               |
| SNP_P3_83635_5429547 | NC_021166.1    | Ca_kabuli_chr07 | 5429547                 | TT                              | AA                | 1946456557               |
| SNP_P3_83636_5429602 | NC_021166.1    | Ca_kabuli_chr07 | 5429602                 | AA                              | CC                | 1946456559               |
| SNP_P3_83637_5429614 | NC_021166.1    | Ca_kabuli_chr07 | 5429614                 | TT                              | CC                | 1946456560               |
| SNP_P3_83638_5429624 | NC_021166.1    | Ca_kabuli_chr07 | 5429624                 | GG                              | AA                | 1946456562               |
| SNP_P3_83639_5429626 | NC_021166.1    | Ca_kabuli_chr07 | 5429626                 | AA                              | GG                | 1946456563               |
| SNP_P3_83640_5434164 | NC_021166.1    | Ca_kabuli_chr07 | 5434164                 | AA                              | TT                | 1946456565               |
| SNP_P3_83641_5434838 | NC_021166.1    | Ca_kabuli_chr07 | 5434838                 | AA                              | GG                | 1946456566               |
| SNP_P3_83642_5435322 | NC_021166.1    | Ca_kabuli_chr07 | 5435322                 | CC                              | AA                | 1946456568               |

| SNPs IDs             | Chromosome IDs | Chromosomes     | Physical positions (bp) | CDC Frontier (Reference genome) | (Pusa 256 & HPNB) | NCBI SNPdb Accession IDs |
|----------------------|----------------|-----------------|-------------------------|---------------------------------|-------------------|--------------------------|
| SNP_P3_83643_5435577 | NC_021166.1    | Ca_kabuli_chr07 | 5435577                 | AA                              | TT                | 1946456570               |
| SNP_P3_83644_5435578 | NC_021166.1    | Ca_kabuli_chr07 | 5435578                 | AA                              | TT                | 1946456571               |
| SNP_P3_83645_5435579 | NC_021166.1    | Ca_kabuli_chr07 | 5435579                 | AA                              | TT                | 1946456573               |
| SNP_P3_83646_5435581 | NC_021166.1    | Ca_kabuli_chr07 | 5435581                 | TT                              | CC                | 1946456574               |
| SNP_P3_83647_5435907 | NC_021166.1    | Ca_kabuli_chr07 | 5435907                 | CC                              | GG                | 1946456576               |
| SNP_P3_83648_5435967 | NC_021166.1    | Ca_kabuli_chr07 | 5435967                 | GG                              | AA                | 1946456577               |
| SNP_P3_83650_5435995 | NC_021166.1    | Ca_kabuli_chr07 | 5435995                 | AA                              | TT                | 1946456579               |
| SNP_P3_83651_5436011 | NC_021166.1    | Ca_kabuli_chr07 | 5436011                 | AA                              | GG                | 1946456580               |
| SNP_P3_83652_5436418 | NC_021166.1    | Ca_kabuli_chr07 | 5436418                 | CC                              | TT                | 1946456582               |
| SNP_P3_83653_5436473 | NC_021166.1    | Ca_kabuli_chr07 | 5436473                 | TT                              | CC                | 1946456583               |
| SNP_P3_83654_5436526 | NC_021166.1    | Ca_kabuli_chr07 | 5436526                 | GG                              | AA                | 1946456585               |
| SNP_P3_83655_5436743 | NC_021166.1    | Ca_kabuli_chr07 | 5436743                 | CC                              | AA                | 1946456586               |
| SNP_P3_83656_5436784 | NC_021166.1    | Ca_kabuli_chr07 | 5436784                 | AA                              | CC                | 1946456588               |
| SNP_P3_83657_5436821 | NC_021166.1    | Ca_kabuli_chr07 | 5436821                 | CC                              | AA                | 1946456590               |
| SNP_P3_83658_5436839 | NC_021166.1    | Ca_kabuli_chr07 | 5436839                 | CC                              | AA                | 1946456591               |
| SNP_P3_83659_5438232 | NC_021166.1    | Ca_kabuli_chr07 | 5438232                 | AA                              | GG                | 1946456593               |
| SNP_P3_83660_5441708 | NC_021166.1    | Ca_kabuli_chr07 | 5441708                 | GG                              | CC                | 1946456594               |
| SNP_P3_83661_5441716 | NC_021166.1    | Ca_kabuli_chr07 | 5441716                 | TT                              | CC                | 1946456596               |
| SNP_P3_83662_5442057 | NC_021166.1    | Ca_kabuli_chr07 | 5442057                 | TT                              | CC                | 1946456597               |
| SNP_P3_83663_5442071 | NC_021166.1    | Ca_kabuli_chr07 | 5442071                 | CC                              | TT                | 1946456599               |
| SNP_P3_83664_5442360 | NC_021166.1    | Ca_kabuli_chr07 | 5442360                 | AA                              | GG                | 1946456600               |
| SNP_P3_83665_5442365 | NC_021166.1    | Ca_kabuli_chr07 | 5442365                 | CC                              | TT                | 1946456602               |
| SNP_P3_83666_5442374 | NC_021166.1    | Ca_kabuli_chr07 | 5442374                 | CC                              | TT                | 1946456603               |
| SNP_P3_83667_5442387 | NC_021166.1    | Ca_kabuli_chr07 | 5442387                 | AA                              | GG                | 1946456604               |
| SNP_P3_83668_5442923 | NC_021166.1    | Ca_kabuli_chr07 | 5442923                 | GG                              | AA                | 1946456606               |
| SNP_P3_83669_5442956 | NC_021166.1    | Ca_kabuli_chr07 | 5442956                 | CC                              | TT                | 1946456607               |
| SNP_P3_83670_5442964 | NC_021166.1    | Ca_kabuli_chr07 | 5442964                 | CC                              | GG                | 1946456609               |
| SNP_P3_83671_5442993 | NC_021166.1    | Ca_kabuli_chr07 | 5442993                 | GG                              | CC                | 1946456611               |
| SNP_P3_83672_5442998 | NC_021166.1    | Ca_kabuli_chr07 | 5442998                 | TT                              | CC                | 1946456612               |
| SNP_P3_83673_5442999 | NC_021166.1    | Ca_kabuli_chr07 | 5442999                 | CC                              | TT                | 1946456614               |
| SNP_P3_83674_5443077 | NC_021166.1    | Ca_kabuli_chr07 | 5443077                 | TT                              | CC                | 1946456615               |
| SNP_P3_83675_5443283 | NC_021166.1    | Ca_kabuli_chr07 | 5443283                 | TT                              | GG                | 1946456616               |
| SNP_P3_83676_5443286 | NC_021166.1    | Ca_kabuli_chr07 | 5443286                 | AA                              | TT                | 1946456618               |
| SNP_P3_83677_5443295 | NC_021166.1    | Ca_kabuli_chr07 | 5443295                 | AA                              | GG                | 1946456619               |
| SNP_P3_83678_5443300 | NC_021166.1    | Ca_kabuli_chr07 | 5443300                 | AA                              | GG                | 1946456621               |
| SNP_P3_83680_5443657 | NC_021166.1    | Ca_kabuli_chr07 | 5443657                 | AA                              | GG                | 1946456622               |
| SNP_P3_83682_5443854 | NC_021166.1    | Ca_kabuli_chr07 | 5443854                 | CC                              | AA                | 1946456624               |
| SNP_P3_83684_5445027 | NC_021166.1    | Ca_kabuli_chr07 | 5445027                 | GG                              | AA                | 1946456625               |
| SNP_P3_83685_5445065 | NC_021166.1    | Ca_kabuli_chr07 | 5445065                 | CC                              | TT                | 1946456627               |
| SNP_P3_83686_5445096 | NC_021166.1    | Ca_kabuli_chr07 | 5445096                 | CC                              | AA                | 1946456628               |
| SNP_P3_83687_5445208 | NC_021166.1    | Ca_kabuli_chr07 | 5445208                 | TT                              | CC                | 1946456630               |
| SNP_P3_83688_5445572 | NC_021166.1    | Ca_kabuli_chr07 | 5445572                 | CC                              | GG                | 1946456632               |

| SNPs IDs             | Chromosome IDs | Chromosomes     | Physical positions (bp) | CDC Frontier (Reference genome) | (Pusa 256 & HPNB) | NCBI SNPdb Accession IDs |
|----------------------|----------------|-----------------|-------------------------|---------------------------------|-------------------|--------------------------|
| SNP_P3_83689_5445590 | NC_021166.1    | Ca_kabuli_chr07 | 5445590                 | CC                              | TT                | 1946456633               |
| SNP_P3_83690_5447473 | NC_021166.1    | Ca_kabuli_chr07 | 5447473                 | GG                              | TT                | 1946456635               |
| SNP_P3_83691_5449547 | NC_021166.1    | Ca_kabuli_chr07 | 5449547                 | CC                              | TT                | 1946456636               |
| SNP_P3_83693_5451814 | NC_021166.1    | Ca_kabuli_chr07 | 5451814                 | CC                              | TT                | 1946456638               |
| SNP_P3_83694_5452161 | NC_021166.1    | Ca_kabuli_chr07 | 5452161                 | TT                              | CC                | 1946456639               |
| SNP_P3_83696_5452195 | NC_021166.1    | Ca_kabuli_chr07 | 5452195                 | GG                              | AA                | 1946456641               |
| SNP_P3_83697_5453494 | NC_021166.1    | Ca_kabuli_chr07 | 5453494                 | CC                              | AA                | 1946456642               |
| SNP_P3_83698_5453855 | NC_021166.1    | Ca_kabuli_chr07 | 5453855                 | TT                              | CC                | 1946456644               |
| SNP_P3_83699_5456793 | NC_021166.1    | Ca_kabuli_chr07 | 5456793                 | TT                              | AA                | 1946456645               |
| SNP_P3_83701_5459627 | NC_021166.1    | Ca_kabuli_chr07 | 5459627                 | CC                              | TT                | 1946456647               |
| SNP_P3_83703_5463069 | NC_021166.1    | Ca_kabuli_chr07 | 5463069                 | CC                              | TT                | 1946456648               |
| SNP_P3_83704_5467645 | NC_021166.1    | Ca_kabuli_chr07 | 5467645                 | GG                              | AA                | 1946456650               |
| SNP_P3_83705_5468651 | NC_021166.1    | Ca_kabuli_chr07 | 5468651                 | TT                              | GG                | 1946456651               |
| SNP_P3_83706_5468726 | NC_021166.1    | Ca_kabuli_chr07 | 5468726                 | TT                              | GG                | 1946456653               |
| SNP_P3_83707_5468765 | NC_021166.1    | Ca_kabuli_chr07 | 5468765                 | CC                              | GG                | 1946456654               |
| SNP_P3_83708_5468795 | NC_021166.1    | Ca_kabuli_chr07 | 5468795                 | CC                              | AA                | 1946456656               |
| SNP_P3_83709_5470851 | NC_021166.1    | Ca_kabuli_chr07 | 5470851                 | AA                              | TT                | 1946456657               |
| SNP_P3_83710_5471569 | NC_021166.1    | Ca_kabuli_chr07 | 5471569                 | AA                              | GG                | 1946456659               |
| SNP_P3_83711_5472482 | NC_021166.1    | Ca_kabuli_chr07 | 5472482                 | CC                              | TT                | 1946456660               |
| SNP_P3_83712_5472843 | NC_021166.1    | Ca_kabuli_chr07 | 5472843                 | CC                              | AA                | 1946456662               |
| SNP_P3_83713_5474428 | NC_021166.1    | Ca_kabuli_chr07 | 5474428                 | CC                              | TT                | 1946456663               |
| SNP_P3_83714_5474468 | NC_021166.1    | Ca_kabuli_chr07 | 5474468                 | AA                              | TT                | 1946456665               |
| SNP_P3_83715_5474783 | NC_021166.1    | Ca_kabuli_chr07 | 5474783                 | CC                              | TT                | 1946456666               |
| SNP_P3_83716_5477945 | NC_021166.1    | Ca_kabuli_chr07 | 5477945                 | AA                              | GG                | 1946456668               |
| SNP_P3_83717_5478326 | NC_021166.1    | Ca_kabuli_chr07 | 5478326                 | CC                              | TT                | 1946456670               |
| SNP_P3_83718_5478334 | NC_021166.1    | Ca_kabuli_chr07 | 5478334                 | AA                              | GG                | 1946456671               |
| SNP_P3_83720_5478976 | NC_021166.1    | Ca_kabuli_chr07 | 5478976                 | CC                              | TT                | 1946456672               |
| SNP_P3_83721_5479210 | NC_021166.1    | Ca_kabuli_chr07 | 5479210                 | GG                              | CC                | 1946456674               |
| SNP_P3_83722_5479916 | NC_021166.1    | Ca_kabuli_chr07 | 5479916                 | TT                              | CC                | 1946456675               |
| SNP_P3_83726_5482872 | NC_021166.1    | Ca_kabuli_chr07 | 5482872                 | GG                              | TT                | 1946456677               |
| SNP_P3_83727_5483545 | NC_021166.1    | Ca_kabuli_chr07 | 5483545                 | AA                              | GG                | 1946456678               |
| SNP_P3_83728_5483550 | NC_021166.1    | Ca_kabuli_chr07 | 5483550                 | TT                              | GG                | 1946456680               |
| SNP_P3_83729_5483563 | NC_021166.1    | Ca_kabuli_chr07 | 5483563                 | TT                              | CC                | 1946456681               |
| SNP_P3_83730_5483575 | NC_021166.1    | Ca_kabuli_chr07 | 5483575                 | TT                              | AA                | 1946456683               |
| SNP_P3_83731_5483902 | NC_021166.1    | Ca_kabuli_chr07 | 5483902                 | GG                              | AA                | 1946456684               |
| SNP_P3_83732_5484183 | NC_021166.1    | Ca_kabuli_chr07 | 5484183                 | AA                              | GG                | 1946456686               |
| SNP_P3_83733_5484496 | NC_021166.1    | Ca_kabuli_chr07 | 5484496                 | CC                              | AA                | 1946456687               |
| SNP_P3_83734_5484559 | NC_021166.1    | Ca_kabuli_chr07 | 5484559                 | GG                              | TT                | 1946456689               |
| SNP_P3_83736_5486335 | NC_021166.1    | Ca_kabuli_chr07 | 5486335                 | GG                              | AA                | 1946456690               |
| SNP_P3_83737_5486600 | NC_021166.1    | Ca_kabuli_chr07 | 5486600                 | AA                              | GG                | 1946456692               |
| SNP_P3_83738_5486738 | NC_021166.1    | Ca_kabuli_chr07 | 5486738                 | GG                              | AA                | 1946456694               |
| SNP_P3_83739_5486757 | NC_021166.1    | Ca_kabuli_chr07 | 5486757                 | AA                              | GG                | 1946456695               |

| SNPs IDs             | Chromosome IDs | Chromosomes     | Physical positions (bp) | CDC Frontier (Reference genome) | (Pusa 256 & HPNB) | NCBI SNPdb Accession IDs |
|----------------------|----------------|-----------------|-------------------------|---------------------------------|-------------------|--------------------------|
| SNP_P3_83740_5486760 | NC_021166.1    | Ca_kabuli_chr07 | 5486760                 | TT                              | GG                | 1946456697               |
| SNP_P3_83741_5487044 | NC_021166.1    | Ca_kabuli_chr07 | 5487044                 | CC                              | TT                | 1946456698               |
| SNP_P3_83743_5488484 | NC_021166.1    | Ca_kabuli_chr07 | 5488484                 | GG                              | AA                | 1946456700               |
| SNP_P3_83744_5488578 | NC_021166.1    | Ca_kabuli_chr07 | 5488578                 | GG                              | AA                | 1946456701               |
| SNP_P3_83745_5488590 | NC_021166.1    | Ca_kabuli_chr07 | 5488590                 | AA                              | GG                | 1946456703               |
| SNP_P3_83746_5488863 | NC_021166.1    | Ca_kabuli_chr07 | 5488863                 | GG                              | CC                | 1946456704               |
| SNP_P3_83747_5488883 | NC_021166.1    | Ca_kabuli_chr07 | 5488883                 | TT                              | CC                | 1946456706               |
| SNP_P3_83748_5488942 | NC_021166.1    | Ca_kabuli_chr07 | 5488942                 | GG                              | AA                | 1946456707               |
| SNP_P3_83750_5506116 | NC_021166.1    | Ca_kabuli_chr07 | 5506116                 | CC                              | TT                | 1946456709               |
| SNP_P3_83751_5509021 | NC_021166.1    | Ca_kabuli_chr07 | 5509021                 | CC                              | TT                | 1946456710               |
| SNP_P3_83752_5511182 | NC_021166.1    | Ca_kabuli_chr07 | 5511182                 | AA                              | TT                | 1946456712               |
| SNP_P3_83754_5513976 | NC_021166.1    | Ca_kabuli_chr07 | 5513976                 | AA                              | GG                | 1946456713               |
| SNP_P3_83755_5514148 | NC_021166.1    | Ca_kabuli_chr07 | 5514148                 | AA                              | GG                | 1946456715               |
| SNP_P3_83756_5514149 | NC_021166.1    | Ca_kabuli_chr07 | 5514149                 | GG                              | TT                | 1946456716               |
| SNP_P3_83757_5514185 | NC_021166.1    | Ca_kabuli_chr07 | 5514185                 | TT                              | GG                | 1946456718               |
| SNP_P3_83758_5514243 | NC_021166.1    | Ca_kabuli_chr07 | 5514243                 | CC                              | TT                | 1946456719               |
| SNP_P3_83759_5514256 | NC_021166.1    | Ca_kabuli_chr07 | 5514256                 | AA                              | GG                | 1946456721               |
| SNP_P3_83760_5515657 | NC_021166.1    | Ca_kabuli_chr07 | 5515657                 | GG                              | AA                | 1946456722               |
| SNP_P3_83761_5516515 | NC_021166.1    | Ca_kabuli_chr07 | 5516515                 | TT                              | AA                | 1946456724               |
| SNP_P3_83763_5517144 | NC_021166.1    | Ca_kabuli_chr07 | 5517144                 | AA                              | GG                | 1946456725               |
| SNP_P3_83764_5517409 | NC_021166.1    | Ca_kabuli_chr07 | 5517409                 | GG                              | AA                | 1946456727               |
| SNP_P3_83765_5517445 | NC_021166.1    | Ca_kabuli_chr07 | 5517445                 | GG                              | TT                | 1946456728               |
| SNP_P3_83766_5517552 | NC_021166.1    | Ca_kabuli_chr07 | 5517552                 | TT                              | CC                | 1946456730               |
| SNP_P3_83767_5517554 | NC_021166.1    | Ca_kabuli_chr07 | 5517554                 | TT                              | CC                | 1946456731               |
| SNP_P3_83768_5517585 | NC_021166.1    | Ca_kabuli_chr07 | 5517585                 | AA                              | GG                | 1946456733               |
| SNP_P3_83769_5517890 | NC_021166.1    | Ca_kabuli_chr07 | 5517890                 | GG                              | CC                | 1946456734               |
| SNP_P3_83770_5518781 | NC_021166.1    | Ca_kabuli_chr07 | 5518781                 | TT                              | CC                | 1946456736               |
| SNP_P3_83775_5526178 | NC_021166.1    | Ca_kabuli_chr07 | 5526178                 | CC                              | TT                | 1946456737               |
| SNP_P3_83776_5526242 | NC_021166.1    | Ca_kabuli_chr07 | 5526242                 | GG                              | AA                | 1946456739               |
| SNP_P3_83777_5526769 | NC_021166.1    | Ca_kabuli_chr07 | 5526769                 | CC                              | TT                | 1946456741               |
| SNP_P3_83778_5526777 | NC_021166.1    | Ca_kabuli_chr07 | 5526777                 | TT                              | CC                | 1946456742               |
| SNP_P3_83779_5527088 | NC_021166.1    | Ca_kabuli_chr07 | 5527088                 | TT                              | CC                | 1946456744               |
| SNP_P3_83780_5529191 | NC_021166.1    | Ca_kabuli_chr07 | 5529191                 | AA                              | GG                | 1946456745               |
| SNP_P3_83782_5529729 | NC_021166.1    | Ca_kabuli_chr07 | 5529729                 | AA                              | GG                | 1946456747               |
| SNP_P3_83783_5530610 | NC_021166.1    | Ca_kabuli_chr07 | 5530610                 | TT                              | AA                | 1946456748               |
| SNP_P3_83784_5532168 | NC_021166.1    | Ca_kabuli_chr07 | 5532168                 | CC                              | AA                | 1946456750               |
| SNP_P3_83786_5532922 | NC_021166.1    | Ca_kabuli_chr07 | 5532922                 | AA                              | TT                | 1946456751               |
| SNP_P3_83787_5533350 | NC_021166.1    | Ca_kabuli_chr07 | 5533350                 | CC                              | TT                | 1946456753               |
| SNP_P3_83788_5533374 | NC_021166.1    | Ca_kabuli_chr07 | 5533374                 | AA                              | TT                | 1946456754               |
| SNP_P3_83789_5533435 | NC_021166.1    | Ca_kabuli_chr07 | 5533435                 | CC                              | TT                | 1946456756               |
| SNP_P3_83790_5537851 | NC_021166.1    | Ca_kabuli_chr07 | 5537851                 | GG                              | CC                | 1946456757               |
| SNP_P3_83791_5537880 | NC_021166.1    | Ca_kabuli_chr07 | 5537880                 | GG                              | TT                | 1946456759               |



| SNPs IDs             | Chromosome IDs | Chromosomes     | Physical positions (bp) | CDC Frontier (Reference genome) | (Pusa 256 & HPNB) | NCBI SNPdb Accession IDs |
|----------------------|----------------|-----------------|-------------------------|---------------------------------|-------------------|--------------------------|
| SNP_P3_83792_5540356 | NC_021166.1    | Ca_kabuli_chr07 | 5540356                 | CC                              | GG                | 1946456760               |
| SNP_P3_83793_5540381 | NC_021166.1    | Ca_kabuli_chr07 | 5540381                 | AA                              | GG                | 1946456762               |
| SNP_P3_83795_5541062 | NC_021166.1    | Ca_kabuli_chr07 | 5541062                 | GG                              | CC                | 1946456763               |
| SNP_P3_83796_5541469 | NC_021166.1    | Ca_kabuli_chr07 | 5541469                 | GG                              | AA                | 1946456765               |
| SNP_P3_83797_5542690 | NC_021166.1    | Ca_kabuli_chr07 | 5542690                 | CC                              | TT                | 1946456766               |
| SNP_P3_83798_5543691 | NC_021166.1    | Ca_kabuli_chr07 | 5543691                 | GG                              | TT                | 1946456768               |
| SNP_P3_83799_5543692 | NC_021166.1    | Ca_kabuli_chr07 | 5543692                 | TT                              | AA                | 1946456769               |
| SNP_P3_83800_5544636 | NC_021166.1    | Ca_kabuli_chr07 | 5544636                 | TT                              | CC                | 1946456771               |
| SNP_P3_83801_5545301 | NC_021166.1    | Ca_kabuli_chr07 | 5545301                 | TT                              | CC                | 1946456772               |
| SNP_P3_83802_5545450 | NC_021166.1    | Ca_kabuli_chr07 | 5545450                 | TT                              | AA                | 1946456774               |
| SNP_P3_83804_5546667 | NC_021166.1    | Ca_kabuli_chr07 | 5546667                 | GG                              | AA                | 1946456775               |
| SNP_P3_83805_5548172 | NC_021166.1    | Ca_kabuli_chr07 | 5548172                 | TT                              | CC                | 1946456777               |
| SNP_P3_83807_5548432 | NC_021166.1    | Ca_kabuli_chr07 | 5548432                 | TT                              | CC                | 1946456778               |
| SNP_P3_83808_5548471 | NC_021166.1    | Ca_kabuli_chr07 | 5548471                 | TT                              | AA                | 1946456780               |
| SNP_P3_83809_5549026 | NC_021166.1    | Ca_kabuli_chr07 | 5549026                 | CC                              | TT                | 1946456781               |
| SNP_P3_83810_5549428 | NC_021166.1    | Ca_kabuli_chr07 | 5549428                 | CC                              | TT                | 1946456783               |
| SNP_P3_83811_5555057 | NC_021166.1    | Ca_kabuli_chr07 | 5555057                 | CC                              | AA                | 1946456784               |
| SNP_P3_83813_5555089 | NC_021166.1    | Ca_kabuli_chr07 | 5555089                 | GG                              | AA                | 1946456786               |
| SNP_P3_83814_5555109 | NC_021166.1    | Ca_kabuli_chr07 | 5555109                 | AA                              | GG                | 1946456787               |
| SNP_P3_83815_5555116 | NC_021166.1    | Ca_kabuli_chr07 | 5555116                 | TT                              | AA                | 1946456789               |
| SNP_P3_83816_5556643 | NC_021166.1    | Ca_kabuli_chr07 | 5556643                 | CC                              | TT                | 1946456790               |
| SNP_P3_83817_5556841 | NC_021166.1    | Ca_kabuli_chr07 | 5556841                 | GG                              | TT                | 1946456792               |
| SNP_P3_83818_5556842 | NC_021166.1    | Ca_kabuli_chr07 | 5556842                 | AA                              | TT                | 1946456793               |
| SNP_P3_83819_5556885 | NC_021166.1    | Ca_kabuli_chr07 | 5556885                 | CC                              | TT                | 1946456795               |
| SNP_P3_83820_5557146 | NC_021166.1    | Ca_kabuli_chr07 | 5557146                 | GG                              | AA                | 1946456796               |
| SNP_P3_83821_5557164 | NC_021166.1    | Ca_kabuli_chr07 | 5557164                 | AA                              | GG                | 1946456798               |
| SNP_P3_83822_5557188 | NC_021166.1    | Ca_kabuli_chr07 | 5557188                 | AA                              | CC                | 1946456799               |
| SNP_P3_83823_5557314 | NC_021166.1    | Ca_kabuli_chr07 | 5557314                 | AA                              | TT                | 1946456801               |
| SNP_P3_83824_5557362 | NC_021166.1    | Ca_kabuli_chr07 | 5557362                 | CC                              | AA                | 1946456802               |
| SNP_P3_83825_5557401 | NC_021166.1    | Ca_kabuli_chr07 | 5557401                 | TT                              | AA                | 1946456804               |
| SNP_P3_83826_5558303 | NC_021166.1    | Ca_kabuli_chr07 | 5558303                 | TT                              | GG                | 1946456805               |
| SNP_P3_83827_5559110 | NC_021166.1    | Ca_kabuli_chr07 | 5559110                 | CC                              | AA                | 1946456807               |
| SNP_P3_83829_5560380 | NC_021166.1    | Ca_kabuli_chr07 | 5560380                 | GG                              | AA                | 1946456808               |
| SNP_P3_83830_5560388 | NC_021166.1    | Ca_kabuli_chr07 | 5560388                 | CC                              | TT                | 1946456809               |
| SNP_P3_83831_5562180 | NC_021166.1    | Ca_kabuli_chr07 | 5562180                 | GG                              | TT                | 1946456811               |
| SNP_P3_83832_5562446 | NC_021166.1    | Ca_kabuli_chr07 | 5562446                 | GG                              | AA                | 1946456812               |
| SNP_P3_83834_5564654 | NC_021166.1    | Ca_kabuli_chr07 | 5564654                 | TT                              | CC                | 1946456814               |
| SNP_P3_83835_5565511 | NC_021166.1    | Ca_kabuli_chr07 | 5565511                 | TT                              | AA                | 1946456815               |
| SNP_P3_83836_5565689 | NC_021166.1    | Ca_kabuli_chr07 | 5565689                 | GG                              | AA                | 1946456817               |
| SNP_P3_83839_5566592 | NC_021166.1    | Ca_kabuli_chr07 | 5566592                 | GG                              | CC                | 1946456818               |
| SNP_P3_83840_5566599 | NC_021166.1    | Ca_kabuli_chr07 | 5566599                 | GG                              | AA                | 1946456820               |
| SNP_P3_83842_5567558 | NC_021166.1    | Ca_kabuli_chr07 | 5567558                 | GG                              | AA                | 1946456821               |

| SNPs IDs             | Chromosome IDs | Chromosomes     | Physical positions (bp) | CDC Frontier (Reference genome) | (Pusa 256 & HPNB) | NCBI SNPdb Accession IDs |
|----------------------|----------------|-----------------|-------------------------|---------------------------------|-------------------|--------------------------|
| SNP_P3_83843_5567872 | NC_021166.1    | Ca_kabuli_chr07 | 5567872                 | TT                              | CC                | 1946456823               |
| SNP_P3_83844_5567949 | NC_021166.1    | Ca_kabuli_chr07 | 5567949                 | GG                              | CC                | 1946456825               |
| SNP_P3_83845_5569798 | NC_021166.1    | Ca_kabuli_chr07 | 5569798                 | AA                              | GG                | 1946456826               |
| SNP_P3_83846_5569832 | NC_021166.1    | Ca_kabuli_chr07 | 5569832                 | GG                              | AA                | 1946456828               |
| SNP_P3_83848_5571946 | NC_021166.1    | Ca_kabuli_chr07 | 5571946                 | CC                              | AA                | 1946456829               |
| SNP_P3_83850_5572439 | NC_021166.1    | Ca_kabuli_chr07 | 5572439                 | TT                              | CC                | 1946456831               |
| SNP_P3_83851_5572667 | NC_021166.1    | Ca_kabuli_chr07 | 5572667                 | GG                              | CC                | 1946456832               |
| SNP_P3_83854_5573810 | NC_021166.1    | Ca_kabuli_chr07 | 5573810                 | CC                              | TT                | 1946456834               |
| SNP_P3_83856_5573831 | NC_021166.1    | Ca_kabuli_chr07 | 5573831                 | TT                              | CC                | 1946456835               |
| SNP_P3_83857_5573980 | NC_021166.1    | Ca_kabuli_chr07 | 5573980                 | CC                              | TT                | 1946456837               |
| SNP_P3_83858_5573981 | NC_021166.1    | Ca_kabuli_chr07 | 5573981                 | CC                              | GG                | 1946456838               |
| SNP_P3_83859_5574061 | NC_021166.1    | Ca_kabuli_chr07 | 5574061                 | AA                              | GG                | 1946456840               |
| SNP_P3_83860_5574076 | NC_021166.1    | Ca_kabuli_chr07 | 5574076                 | TT                              | GG                | 1946456842               |
| SNP_P3_83861_5575660 | NC_021166.1    | Ca_kabuli_chr07 | 5575660                 | GG                              | CC                | 1946456843               |
| SNP_P3_83862_5575948 | NC_021166.1    | Ca_kabuli_chr07 | 5575948                 | CC                              | AA                | 1946456845               |
| SNP_P3_83863_5575995 | NC_021166.1    | Ca_kabuli_chr07 | 5575995                 | TT                              | CC                | 1946456846               |
| SNP_P3_83864_5577091 | NC_021166.1    | Ca_kabuli_chr07 | 5577091                 | CC                              | AA                | 1946456848               |
| SNP_P3_83866_5578595 | NC_021166.1    | Ca_kabuli_chr07 | 5578595                 | AA                              | GG                | 1946456849               |
| SNP_P3_83867_5578784 | NC_021166.1    | Ca_kabuli_chr07 | 5578784                 | AA                              | GG                | 1946456851               |
| SNP_P3_83868_5579013 | NC_021166.1    | Ca_kabuli_chr07 | 5579013                 | AA                              | CC                | 1946456852               |
| SNP_P3_83869_5579652 | NC_021166.1    | Ca_kabuli_chr07 | 5579652                 | AA                              | GG                | 1946456854               |
| SNP_P3_83870_5579837 | NC_021166.1    | Ca_kabuli_chr07 | 5579837                 | AA                              | GG                | 1946456855               |
| SNP_P3_83871_5580172 | NC_021166.1    | Ca_kabuli_chr07 | 5580172                 | TT                              | CC                | 1946456856               |
| SNP_P3_83872_5580276 | NC_021166.1    | Ca_kabuli_chr07 | 5580276                 | TT                              | GG                | 1946456858               |
| SNP_P3_83873_5581968 | NC_021166.1    | Ca_kabuli_chr07 | 5581968                 | GG                              | CC                | 1946456859               |
| SNP_P3_83875_5585446 | NC_021166.1    | Ca_kabuli_chr07 | 5585446                 | GG                              | AA                | 1946456861               |
| SNP_P3_83877_5614372 | NC_021166.1    | Ca_kabuli_chr07 | 5614372                 | CC                              | TT                | 1946456863               |
| SNP_P3_83878_5625231 | NC_021166.1    | Ca_kabuli_chr07 | 5625231                 | AA                              | TT                | 1946456864               |
| SNP_P3_83879_5626057 | NC_021166.1    | Ca_kabuli_chr07 | 5626057                 | AA                              | CC                | 1946456866               |
| SNP_P3_83880_5626314 | NC_021166.1    | Ca_kabuli_chr07 | 5626314                 | AA                              | GG                | 1946456867               |
| SNP_P3_83881_5628101 | NC_021166.1    | Ca_kabuli_chr07 | 5628101                 | AA                              | TT                | 1946456869               |
| SNP_P3_83882_5628123 | NC_021166.1    | Ca_kabuli_chr07 | 5628123                 | CC                              | TT                | 1946456870               |
| SNP_P3_83883_5628132 | NC_021166.1    | Ca_kabuli_chr07 | 5628132                 | AA                              | TT                | 1946456872               |
| SNP_P3_83884_5628156 | NC_021166.1    | Ca_kabuli_chr07 | 5628156                 | AA                              | TT                | 1946456873               |
| SNP_P3_83885_5628340 | NC_021166.1    | Ca_kabuli_chr07 | 5628340                 | TT                              | GG                | 1946456874               |
| SNP_P3_83886_5628390 | NC_021166.1    | Ca_kabuli_chr07 | 5628390                 | AA                              | CC                | 1946456876               |
| SNP_P3_83888_5629464 | NC_021166.1    | Ca_kabuli_chr07 | 5629464                 | AA                              | CC                | 1946456877               |
| SNP_P3_83889_5629467 | NC_021166.1    | Ca_kabuli_chr07 | 5629467                 | AA                              | TT                | 1946456879               |
| SNP_P3_83891_5630153 | NC_021166.1    | Ca_kabuli_chr07 | 5630153                 | GG                              | CC                | 1946456881               |
| SNP_P3_83892_5630226 | NC_021166.1    | Ca_kabuli_chr07 | 5630226                 | TT                              | CC                | 1946456882               |
| SNP_P3_83893_5633053 | NC_021166.1    | Ca_kabuli_chr07 | 5633053                 | AA                              | GG                | 1946456884               |
| SNP_P3_83895_5633369 | NC_021166.1    | Ca_kabuli_chr07 | 5633369                 | AA                              | CC                | 1946456885               |

| SNPs IDs             | Chromosome IDs | Chromosomes     | Physical positions (bp) | CDC Frontier (Reference genome) | (Pusa 256 & HPNB) | NCBI SNPdb Accession IDs |
|----------------------|----------------|-----------------|-------------------------|---------------------------------|-------------------|--------------------------|
| SNP_P3_83896_5636059 | NC_021166.1    | Ca_kabuli_chr07 | 5636059                 | GG                              | AA                | 1946456886               |
| SNP_P3_83897_5648170 | NC_021166.1    | Ca_kabuli_chr07 | 5648170                 | AA                              | GG                | 1946456888               |
| SNP_P3_83898_5648227 | NC_021166.1    | Ca_kabuli_chr07 | 5648227                 | GG                              | AA                | 1946456889               |
| SNP_P3_83899_5648381 | NC_021166.1    | Ca_kabuli_chr07 | 5648381                 | GG                              | CC                | 1946456891               |
| SNP_P3_83900_5649454 | NC_021166.1    | Ca_kabuli_chr07 | 5649454                 | CC                              | TT                | 1946456892               |
| SNP_P3_83901_5649888 | NC_021166.1    | Ca_kabuli_chr07 | 5649888                 | TT                              | AA                | 1946456894               |
| SNP_P3_83902_5649934 | NC_021166.1    | Ca_kabuli_chr07 | 5649934                 | CC                              | AA                | 1946456895               |
| SNP_P3_83904_5651777 | NC_021166.1    | Ca_kabuli_chr07 | 5651777                 | AA                              | GG                | 1946456897               |
| SNP_P3_83905_5652026 | NC_021166.1    | Ca_kabuli_chr07 | 5652026                 | CC                              | GG                | 1946456898               |
| SNP_P3_83906_5652027 | NC_021166.1    | Ca_kabuli_chr07 | 5652027                 | GG                              | AA                | 1946456900               |
| SNP_P3_83907_5652030 | NC_021166.1    | Ca_kabuli_chr07 | 5652030                 | TT                              | GG                | 1946456902               |
| SNP_P3_83909_5656984 | NC_021166.1    | Ca_kabuli_chr07 | 5656984                 | AA                              | CC                | 1946456903               |
| SNP_P3_83910_5657002 | NC_021166.1    | Ca_kabuli_chr07 | 5657002                 | CC                              | TT                | 1946456905               |
| SNP_P3_83911_5657290 | NC_021166.1    | Ca_kabuli_chr07 | 5657290                 | AA                              | GG                | 1946456906               |
| SNP_P3_83913_5657803 | NC_021166.1    | Ca_kabuli_chr07 | 5657803                 | AA                              | GG                | 1946456907               |
| SNP_P3_83914_5657810 | NC_021166.1    | Ca_kabuli_chr07 | 5657810                 | CC                              | TT                | 1946456909               |
| SNP_P3_83915_5658617 | NC_021166.1    | Ca_kabuli_chr07 | 5658617                 | TT                              | AA                | 1946456910               |
| SNP_P3_83916_5659097 | NC_021166.1    | Ca_kabuli_chr07 | 5659097                 | GG                              | AA                | 1946456912               |
| SNP_P3_83918_5661345 | NC_021166.1    | Ca_kabuli_chr07 | 5661345                 | CC                              | TT                | 1946456913               |
| SNP_P3_83919_5661417 | NC_021166.1    | Ca_kabuli_chr07 | 5661417                 | GG                              | AA                | 1946456915               |
| SNP_P3_83920_5661708 | NC_021166.1    | Ca_kabuli_chr07 | 5661708                 | TT                              | GG                | 1946456916               |
| SNP_P3_83921_5661738 | NC_021166.1    | Ca_kabuli_chr07 | 5661738                 | AA                              | GG                | 1946456917               |
| SNP_P3_83922_5661927 | NC_021166.1    | Ca_kabuli_chr07 | 5661927                 | AA                              | GG                | 1946456919               |
| SNP_P3_83923_5661942 | NC_021166.1    | Ca_kabuli_chr07 | 5661942                 | CC                              | TT                | 1946456920               |
| SNP_P3_83924_5661965 | NC_021166.1    | Ca_kabuli_chr07 | 5661965                 | AA                              | CC                | 1946456922               |
| SNP_P3_83925_5662312 | NC_021166.1    | Ca_kabuli_chr07 | 5662312                 | CC                              | TT                | 1946456924               |
| SNP_P3_83926_5662370 | NC_021166.1    | Ca_kabuli_chr07 | 5662370                 | GG                              | AA                | 1946456925               |
| SNP_P3_83927_5662414 | NC_021166.1    | Ca_kabuli_chr07 | 5662414                 | CC                              | TT                | 1946456927               |
| SNP_P3_83928_5662417 | NC_021166.1    | Ca_kabuli_chr07 | 5662417                 | GG                              | CC                | 1946456928               |
| SNP_P3_83929_5662493 | NC_021166.1    | Ca_kabuli_chr07 | 5662493                 | CC                              | GG                | 1946456929               |
| SNP_P3_83930_5662535 | NC_021166.1    | Ca_kabuli_chr07 | 5662535                 | TT                              | CC                | 1946456931               |
| SNP_P3_83931_5662583 | NC_021166.1    | Ca_kabuli_chr07 | 5662583                 | AA                              | GG                | 1946456932               |
| SNP_P3_83932_5662700 | NC_021166.1    | Ca_kabuli_chr07 | 5662700                 | AA                              | GG                | 1946456934               |
| SNP_P3_83933_5662707 | NC_021166.1    | Ca_kabuli_chr07 | 5662707                 | GG                              | AA                | 1946456935               |
| SNP_P3_83934_5662822 | NC_021166.1    | Ca_kabuli_chr07 | 5662822                 | TT                              | CC                | 1946456937               |
| SNP_P3_83935_5662888 | NC_021166.1    | Ca_kabuli_chr07 | 5662888                 | CC                              | TT                | 1946456938               |
| SNP_P3_83936_5663050 | NC_021166.1    | Ca_kabuli_chr07 | 5663050                 | GG                              | TT                | 1946456940               |
| SNP_P3_83937_5663051 | NC_021166.1    | Ca_kabuli_chr07 | 5663051                 | TT                              | AA                | 1946456942               |
| SNP_P3_83939_5663271 | NC_021166.1    | Ca_kabuli_chr07 | 5663271                 | GG                              | TT                | 1946456943               |
| SNP_P3_83941_5663335 | NC_021166.1    | Ca_kabuli_chr07 | 5663335                 | CC                              | AA                | 1946456945               |
| SNP_P3_83942_5663337 | NC_021166.1    | Ca_kabuli_chr07 | 5663337                 | CC                              | AA                | 1946456946               |
| SNP_P3_83943_5663340 | NC_021166.1    | Ca_kabuli_chr07 | 5663340                 | GG                              | AA                | 1946456948               |

| SNPs IDs             | Chromosome IDs | Chromosomes     | Physical positions (bp) | CDC Frontier (Reference genome) | (Pusa 256 & HPNB) | NCBI SNPdb Accession IDs |
|----------------------|----------------|-----------------|-------------------------|---------------------------------|-------------------|--------------------------|
| SNP_P3_83944_5663384 | NC_021166.1    | Ca_kabuli_chr07 | 5663384                 | CC                              | TT                | 1946456949               |
| SNP_P3_83945_5666593 | NC_021166.1    | Ca_kabuli_chr07 | 5666593                 | AA                              | GG                | 1946456950               |
| SNP_P3_83946_5666705 | NC_021166.1    | Ca_kabuli_chr07 | 5666705                 | TT                              | CC                | 1946456952               |
| SNP_P3_83947_5666810 | NC_021166.1    | Ca_kabuli_chr07 | 5666810                 | AA                              | CC                | 1946456953               |
| SNP_P3_83948_5666894 | NC_021166.1    | Ca_kabuli_chr07 | 5666894                 | GG                              | AA                | 1946456955               |
| SNP_P3_83949_5666918 | NC_021166.1    | Ca_kabuli_chr07 | 5666918                 | TT                              | CC                | 1946456956               |
| SNP_P3_83950_5667013 | NC_021166.1    | Ca_kabuli_chr07 | 5667013                 | GG                              | AA                | 1946456958               |
| SNP_P3_83951_5667908 | NC_021166.1    | Ca_kabuli_chr07 | 5667908                 | TT                              | CC                | 1946456959               |
| SNP_P3_83952_5668730 | NC_021166.1    | Ca_kabuli_chr07 | 5668730                 | AA                              | TT                | 1946456961               |
| SNP_P3_83953_5668732 | NC_021166.1    | Ca_kabuli_chr07 | 5668732                 | TT                              | AA                | 1946456962               |
| SNP_P3_83954_5668741 | NC_021166.1    | Ca_kabuli_chr07 | 5668741                 | CC                              | AA                | 1946456964               |
| SNP_P3_83955_5668993 | NC_021166.1    | Ca_kabuli_chr07 | 5668993                 | CC                              | TT                | 1946456965               |
| SNP_P3_83956_5669004 | NC_021166.1    | Ca_kabuli_chr07 | 5669004                 | AA                              | CC                | 1946456966               |
| SNP_P3_83957_5669010 | NC_021166.1    | Ca_kabuli_chr07 | 5669010                 | TT                              | GG                | 1946456968               |
| SNP_P3_83958_5671208 | NC_021166.1    | Ca_kabuli_chr07 | 5671208                 | TT                              | GG                | 1946456969               |
| SNP_P3_83959_5671211 | NC_021166.1    | Ca_kabuli_chr07 | 5671211                 | TT                              | GG                | 1946456971               |
| SNP_P3_83960_5671214 | NC_021166.1    | Ca_kabuli_chr07 | 5671214                 | GG                              | AA                | 1946456972               |
| SNP_P3_83962_5672612 | NC_021166.1    | Ca_kabuli_chr07 | 5672612                 | AA                              | GG                | 1946456974               |
| SNP_P3_83963_5672729 | NC_021166.1    | Ca_kabuli_chr07 | 5672729                 | TT                              | GG                | 1946456975               |
| SNP_P3_83964_5672782 | NC_021166.1    | Ca_kabuli_chr07 | 5672782                 | CC                              | GG                | 1946456976               |
| SNP_P3_83965_5672923 | NC_021166.1    | Ca_kabuli_chr07 | 5672923                 | GG                              | TT                | 1946456978               |
| SNP_P3_83966_5673134 | NC_021166.1    | Ca_kabuli_chr07 | 5673134                 | CC                              | TT                | 1946456979               |
| SNP_P3_83967_5675284 | NC_021166.1    | Ca_kabuli_chr07 | 5675284                 | GG                              | CC                | 1946456981               |
| SNP_P3_83968_5675638 | NC_021166.1    | Ca_kabuli_chr07 | 5675638                 | TT                              | AA                | 1946456982               |
| SNP_P3_83969_5675670 | NC_021166.1    | Ca_kabuli_chr07 | 5675670                 | AA                              | CC                | 1946456984               |
| SNP_P3_83970_5675672 | NC_021166.1    | Ca_kabuli_chr07 | 5675672                 | AA                              | CC                | 1946456985               |
| SNP_P3_83971_5675675 | NC_021166.1    | Ca_kabuli_chr07 | 5675675                 | GG                              | TT                | 1946456987               |
| SNP_P3_83972_5675703 | NC_021166.1    | Ca_kabuli_chr07 | 5675703                 | GG                              | TT                | 1946456988               |
| SNP_P3_83973_5677389 | NC_021166.1    | Ca_kabuli_chr07 | 5677389                 | AA                              | GG                | 1946456989               |
| SNP_P3_83974_5677918 | NC_021166.1    | Ca_kabuli_chr07 | 5677918                 | GG                              | AA                | 1946456994               |
| SNP_P3_83975_5678659 | NC_021166.1    | Ca_kabuli_chr07 | 5678659                 | AA                              | GG                | 1946456995               |
| SNP_P3_83976_5682556 | NC_021166.1    | Ca_kabuli_chr07 | 5682556                 | TT                              | AA                | 1946456997               |
| SNP_P3_83977_5684762 | NC_021166.1    | Ca_kabuli_chr07 | 5684762                 | TT                              | AA                | 1946456998               |
| SNP_P3_83978_5684892 | NC_021166.1    | Ca_kabuli_chr07 | 5684892                 | GG                              | AA                | 1946456999               |
| SNP_P3_83979_5684920 | NC_021166.1    | Ca_kabuli_chr07 | 5684920                 | CC                              | TT                | 1946457001               |
| SNP_P3_83980_5685270 | NC_021166.1    | Ca_kabuli_chr07 | 5685270                 | GG                              | AA                | 1946457002               |
| SNP_P3_83982_5687021 | NC_021166.1    | Ca_kabuli_chr07 | 5687021                 | GG                              | AA                | 1946457004               |
| SNP_P3_83983_5689062 | NC_021166.1    | Ca_kabuli_chr07 | 5689062                 | TT                              | CC                | 1946457005               |
| SNP_P3_83984_5689116 | NC_021166.1    | Ca_kabuli_chr07 | 5689116                 | GG                              | AA                | 1946457007               |
| SNP_P3_83986_5689280 | NC_021166.1    | Ca_kabuli_chr07 | 5689280                 | TT                              | CC                | 1946457008               |
| SNP_P3_83988_5689391 | NC_021166.1    | Ca_kabuli_chr07 | 5689391                 | CC                              | TT                | 1946457009               |
| SNP_P3_83989_5689417 | NC_021166.1    | Ca_kabuli_chr07 | 5689417                 | CC                              | TT                | 1946457011               |

| SNPs IDs             | Chromosome IDs | Chromosomes     | Physical positions (bp) | CDC Frontier (Reference genome) | (Pusa 256 & HPNB) | NCBI SNPdb Accession IDs |
|----------------------|----------------|-----------------|-------------------------|---------------------------------|-------------------|--------------------------|
| SNP_P3_83990_5692148 | NC_021166.1    | Ca_kabuli_chr07 | 5692148                 | AA                              | GG                | 1946457012               |
| SNP_P3_83991_5693015 | NC_021166.1    | Ca_kabuli_chr07 | 5693015                 | TT                              | CC                | 1946457014               |
| SNP_P3_83992_5693750 | NC_021166.1    | Ca_kabuli_chr07 | 5693750                 | CC                              | TT                | 1946457015               |
| SNP_P3_83993_5693777 | NC_021166.1    | Ca_kabuli_chr07 | 5693777                 | GG                              | AA                | 1946457017               |
| SNP_P3_83994_5694150 | NC_021166.1    | Ca_kabuli_chr07 | 5694150                 | CC                              | TT                | 1946457018               |
| SNP_P3_83995_5694170 | NC_021166.1    | Ca_kabuli_chr07 | 5694170                 | GG                              | AA                | 1946457020               |
| SNP_P3_83997_5695339 | NC_021166.1    | Ca_kabuli_chr07 | 5695339                 | TT                              | CC                | 1946457021               |
| SNP_P3_83998_5695343 | NC_021166.1    | Ca_kabuli_chr07 | 5695343                 | CC                              | TT                | 1946457023               |
| SNP_P3_83999_5695367 | NC_021166.1    | Ca_kabuli_chr07 | 5695367                 | TT                              | CC                | 1946457025               |
| SNP_P3_84000_5695433 | NC_021166.1    | Ca_kabuli_chr07 | 5695433                 | TT                              | CC                | 1946457026               |
| SNP_P3_84001_5695452 | NC_021166.1    | Ca_kabuli_chr07 | 5695452                 | GG                              | AA                | 1946457027               |
| SNP_P3_84002_5695458 | NC_021166.1    | Ca_kabuli_chr07 | 5695458                 | AA                              | GG                | 1946457029               |
| SNP_P3_84003_5695459 | NC_021166.1    | Ca_kabuli_chr07 | 5695459                 | TT                              | CC                | 1946457031               |
| SNP_P3_84004_5695558 | NC_021166.1    | Ca_kabuli_chr07 | 5695558                 | CC                              | TT                | 1946457032               |
| SNP_P3_84006_5695583 | NC_021166.1    | Ca_kabuli_chr07 | 5695583                 | GG                              | AA                | 1946457034               |
| SNP_P3_84007_5695587 | NC_021166.1    | Ca_kabuli_chr07 | 5695587                 | GG                              | TT                | 1946457035               |
| SNP_P3_84008_5695603 | NC_021166.1    | Ca_kabuli_chr07 | 5695603                 | CC                              | TT                | 1946457037               |
| SNP_P3_84009_5695635 | NC_021166.1    | Ca_kabuli_chr07 | 5695635                 | GG                              | AA                | 1946457038               |
| SNP_P3_84010_5695638 | NC_021166.1    | Ca_kabuli_chr07 | 5695638                 | TT                              | CC                | 1946457039               |
| SNP_P3_84011_5695644 | NC_021166.1    | Ca_kabuli_chr07 | 5695644                 | AA                              | GG                | 1946457041               |
| SNP_P3_84012_5695647 | NC_021166.1    | Ca_kabuli_chr07 | 5695647                 | CC                              | TT                | 1946457042               |
| SNP_P3_84013_5695818 | NC_021166.1    | Ca_kabuli_chr07 | 5695818                 | AA                              | TT                | 1946457044               |
| SNP_P3_84014_5696119 | NC_021166.1    | Ca_kabuli_chr07 | 5696119                 | GG                              | TT                | 1946457045               |
| SNP_P3_84015_5696141 | NC_021166.1    | Ca_kabuli_chr07 | 5696141                 | CC                              | TT                | 1946457047               |
| SNP_P3_84016_5697070 | NC_021166.1    | Ca_kabuli_chr07 | 5697070                 | AA                              | GG                | 1946457048               |
| SNP_P3_84017_5697328 | NC_021166.1    | Ca_kabuli_chr07 | 5697328                 | GG                              | TT                | 1946457050               |
| SNP_P3_84018_5697330 | NC_021166.1    | Ca_kabuli_chr07 | 5697330                 | TT                              | GG                | 1946457051               |
| SNP_P3_84020_5697480 | NC_021166.1    | Ca_kabuli_chr07 | 5697480                 | TT                              | CC                | 1946457053               |
| SNP_P3_84021_5698332 | NC_021166.1    | Ca_kabuli_chr07 | 5698332                 | GG                              | CC                | 1946457055               |
| SNP_P3_84022_5699560 | NC_021166.1    | Ca_kabuli_chr07 | 5699560                 | CC                              | TT                | 1946457056               |
| SNP_P3_84023_5699855 | NC_021166.1    | Ca_kabuli_chr07 | 5699855                 | AA                              | TT                | 1946457057               |
| SNP_P3_84024_5699934 | NC_021166.1    | Ca_kabuli_chr07 | 5699934                 | GG                              | AA                | 1946457059               |
| SNP_P3_84025_5700232 | NC_021166.1    | Ca_kabuli_chr07 | 5700232                 | AA                              | GG                | 1946457060               |
| SNP_P3_84026_5700594 | NC_021166.1    | Ca_kabuli_chr07 | 5700594                 | TT                              | AA                | 1946457062               |
| SNP_P3_84028_5701709 | NC_021166.1    | Ca_kabuli_chr07 | 5701709                 | AA                              | CC                | 1946457063               |
| SNP_P3_84029_5702429 | NC_021166.1    | Ca_kabuli_chr07 | 5702429                 | TT                              | AA                | 1946457065               |
| SNP_P3_84030_5702735 | NC_021166.1    | Ca_kabuli_chr07 | 5702735                 | CC                              | TT                | 1946457066               |
| SNP_P3_84031_5703985 | NC_021166.1    | Ca_kabuli_chr07 | 5703985                 | AA                              | GG                | 1946457068               |
| SNP_P3_84032_5705661 | NC_021166.1    | Ca_kabuli_chr07 | 5705661                 | TT                              | AA                | 1946457069               |
| SNP_P3_84033_5705908 | NC_021166.1    | Ca_kabuli_chr07 | 5705908                 | AA                              | GG                | 1946457071               |
| SNP_P3_84034_5707295 | NC_021166.1    | Ca_kabuli_chr07 | 5707295                 | TT                              | GG                | 1946457072               |
| SNP_P3_84035_5707489 | NC_021166.1    | Ca_kabuli_chr07 | 5707489                 | GG                              | AA                | 1946457074               |

| SNPs IDs             | Chromosome IDs | Chromosomes     | Physical positions (bp) | CDC Frontier (Reference genome) | (Pusa 256 & HPNB) | NCBI SNPdb Accession IDs |
|----------------------|----------------|-----------------|-------------------------|---------------------------------|-------------------|--------------------------|
| SNP_P3_84036_5707520 | NC_021166.1    | Ca_kabuli_chr07 | 5707520                 | CC                              | GG                | 1946457075               |
| SNP_P3_84037_5711229 | NC_021166.1    | Ca_kabuli_chr07 | 5711229                 | CC                              | GG                | 1946457077               |
| SNP_P3_84039_5711961 | NC_021166.1    | Ca_kabuli_chr07 | 5711961                 | GG                              | TT                | 1946457078               |
| SNP_P3_84040_5711981 | NC_021166.1    | Ca_kabuli_chr07 | 5711981                 | AA                              | TT                | 1946457080               |
| SNP_P3_84041_5712030 | NC_021166.1    | Ca_kabuli_chr07 | 5712030                 | CC                              | GG                | 1946457081               |
| SNP_P3_84042_5712039 | NC_021166.1    | Ca_kabuli_chr07 | 5712039                 | CC                              | TT                | 1946457082               |
| SNP_P3_84043_5712226 | NC_021166.1    | Ca_kabuli_chr07 | 5712226                 | TT                              | CC                | 1946457084               |
| SNP_P3_84044_5712292 | NC_021166.1    | Ca_kabuli_chr07 | 5712292                 | TT                              | CC                | 1946457085               |
| SNP_P3_84045_5712448 | NC_021166.1    | Ca_kabuli_chr07 | 5712448                 | CC                              | GG                | 1946457087               |
| SNP_P3_84046_5713164 | NC_021166.1    | Ca_kabuli_chr07 | 5713164                 | AA                              | GG                | 1946457088               |
| SNP_P3_84048_5713346 | NC_021166.1    | Ca_kabuli_chr07 | 5713346                 | GG                              | CC                | 1946457090               |
| SNP_P3_84049_5713977 | NC_021166.1    | Ca_kabuli_chr07 | 5713977                 | TT                              | CC                | 1946457091               |
| SNP_P3_84050_5717058 | NC_021166.1    | Ca_kabuli_chr07 | 5717058                 | TT                              | CC                | 1946457093               |
| SNP_P3_84051_5717110 | NC_021166.1    | Ca_kabuli_chr07 | 5717110                 | AA                              | GG                | 1946457094               |
| SNP_P3_84052_5717137 | NC_021166.1    | Ca_kabuli_chr07 | 5717137                 | TT                              | CC                | 1946457095               |
| SNP_P3_84053_5717141 | NC_021166.1    | Ca_kabuli_chr07 | 5717141                 | CC                              | TT                | 1946457097               |
| SNP_P3_84054_5717158 | NC_021166.1    | Ca_kabuli_chr07 | 5717158                 | GG                              | AA                | 1946457099               |
| SNP_P3_84056_5717240 | NC_021166.1    | Ca_kabuli_chr07 | 5717240                 | CC                              | TT                | 1946457100               |
| SNP_P3_84057_5717373 | NC_021166.1    | Ca_kabuli_chr07 | 5717373                 | CC                              | AA                | 1946457102               |
| SNP_P3_84059_5717523 | NC_021166.1    | Ca_kabuli_chr07 | 5717523                 | GG                              | TT                | 1946457103               |
| SNP_P3_84060_5717655 | NC_021166.1    | Ca_kabuli_chr07 | 5717655                 | CC                              | GG                | 1946457105               |
| SNP_P3_84061_5717676 | NC_021166.1    | Ca_kabuli_chr07 | 5717676                 | GG                              | AA                | 1946457106               |
| SNP_P3_84062_5717692 | NC_021166.1    | Ca_kabuli_chr07 | 5717692                 | TT                              | CC                | 1946457108               |
| SNP_P3_84063_5718882 | NC_021166.1    | Ca_kabuli_chr07 | 5718882                 | CC                              | AA                | 1946457109               |
| SNP_P3_84065_5719640 | NC_021166.1    | Ca_kabuli_chr07 | 5719640                 | AA                              | CC                | 1946457111               |
| SNP_P3_84066_5720460 | NC_021166.1    | Ca_kabuli_chr07 | 5720460                 | GG                              | AA                | 1946457112               |
| SNP_P3_84067_5722486 | NC_021166.1    | Ca_kabuli_chr07 | 5722486                 | AA                              | GG                | 1946457114               |
| SNP_P3_84069_5723107 | NC_021166.1    | Ca_kabuli_chr07 | 5723107                 | CC                              | TT                | 1946457116               |
| SNP_P3_84070_5723447 | NC_021166.1    | Ca_kabuli_chr07 | 5723447                 | AA                              | GG                | 1946457117               |
| SNP_P3_84071_5723992 | NC_021166.1    | Ca_kabuli_chr07 | 5723992                 | CC                              | GG                | 1946457119               |
| SNP_P3_84072_5728759 | NC_021166.1    | Ca_kabuli_chr07 | 5728759                 | GG                              | AA                | 1946457120               |
| SNP_P3_84073_5728897 | NC_021166.1    | Ca_kabuli_chr07 | 5728897                 | AA                              | GG                | 1946457122               |
| SNP_P3_84074_5729160 | NC_021166.1    | Ca_kabuli_chr07 | 5729160                 | GG                              | AA                | 1946457123               |
| SNP_P3_84075_5729286 | NC_021166.1    | Ca_kabuli_chr07 | 5729286                 | TT                              | AA                | 1946457125               |
| SNP_P3_84076_5731817 | NC_021166.1    | Ca_kabuli_chr07 | 5731817                 | CC                              | GG                | 1946457126               |
| SNP_P3_84077_5734720 | NC_021166.1    | Ca_kabuli_chr07 | 5734720                 | TT                              | CC                | 1946457128               |
| SNP_P3_84078_5736145 | NC_021166.1    | Ca_kabuli_chr07 | 5736145                 | GG                              | AA                | 1946457129               |
| SNP_P3_84079_5738065 | NC_021166.1    | Ca_kabuli_chr07 | 5738065                 | GG                              | AA                | 1946457131               |
| SNP_P3_84080_5739013 | NC_021166.1    | Ca_kabuli_chr07 | 5739013                 | TT                              | CC                | 1946457132               |
| SNP_P3_84081_5741175 | NC_021166.1    | Ca_kabuli_chr07 | 5741175                 | CC                              | TT                | 1946457134               |
| SNP_P3_84082_5745152 | NC_021166.1    | Ca_kabuli_chr07 | 5745152                 | AA                              | GG                | 1946457135               |
| SNP_P3_84083_5745302 | NC_021166.1    | Ca_kabuli_chr07 | 5745302                 | TT                              | GG                | 1946457137               |

| SNPs IDs             | Chromosome IDs | Chromosomes     | Physical positions (bp) | CDC Frontier (Reference genome) | (Pusa 256 & HPNB) | NCBI SNPdb Accession IDs |
|----------------------|----------------|-----------------|-------------------------|---------------------------------|-------------------|--------------------------|
| SNP_P3_84084_5745308 | NC_021166.1    | Ca_kabuli_chr07 | 5745308                 | CC                              | TT                | 1946457139               |
| SNP_P3_84085_5745329 | NC_021166.1    | Ca_kabuli_chr07 | 5745329                 | AA                              | TT                | 1946457141               |
| SNP_P3_84086_5745442 | NC_021166.1    | Ca_kabuli_chr07 | 5745442                 | AA                              | CC                | 1946457143               |
| SNP_P3_84087_5745451 | NC_021166.1    | Ca_kabuli_chr07 | 5745451                 | GG                              | AA                | 1946457144               |
| SNP_P3_84088_5745481 | NC_021166.1    | Ca_kabuli_chr07 | 5745481                 | GG                              | TT                | 1946457146               |
| SNP_P3_84089_5745520 | NC_021166.1    | Ca_kabuli_chr07 | 5745520                 | TT                              | AA                | 1946457147               |
| SNP_P3_84090_5745538 | NC_021166.1    | Ca_kabuli_chr07 | 5745538                 | AA                              | GG                | 1946457149               |
| SNP_P3_84091_5745569 | NC_021166.1    | Ca_kabuli_chr07 | 5745569                 | CC                              | TT                | 1946457150               |
| SNP_P3_84093_5745587 | NC_021166.1    | Ca_kabuli_chr07 | 5745587                 | TT                              | CC                | 1946457152               |
| SNP_P3_84094_5745589 | NC_021166.1    | Ca_kabuli_chr07 | 5745589                 | GG                              | AA                | 1946457153               |
| SNP_P3_84095_5745594 | NC_021166.1    | Ca_kabuli_chr07 | 5745594                 | TT                              | AA                | 1946457154               |
| SNP_P3_84096_5745612 | NC_021166.1    | Ca_kabuli_chr07 | 5745612                 | AA                              | GG                | 1946457156               |
| SNP_P3_84097_5755949 | NC_021166.1    | Ca_kabuli_chr07 | 5755949                 | TT                              | GG                | 1946457157               |
| SNP_P3_84098_5756101 | NC_021166.1    | Ca_kabuli_chr07 | 5756101                 | GG                              | AA                | 1946457159               |
| SNP_P3_84099_5757339 | NC_021166.1    | Ca_kabuli_chr07 | 5757339                 | CC                              | GG                | 1946457160               |
| SNP_P3_84101_5759703 | NC_021166.1    | Ca_kabuli_chr07 | 5759703                 | TT                              | CC                | 1946457162               |
| SNP_P3_84102_5761360 | NC_021166.1    | Ca_kabuli_chr07 | 5761360                 | AA                              | CC                | 1946457163               |
| SNP_P3_84103_5763024 | NC_021166.1    | Ca_kabuli_chr07 | 5763024                 | AA                              | CC                | 1946457165               |
| SNP_P3_84104_5763308 | NC_021166.1    | Ca_kabuli_chr07 | 5763308                 | CC                              | GG                | 1946457167               |
| SNP_P3_84105_5763358 | NC_021166.1    | Ca_kabuli_chr07 | 5763358                 | AA                              | TT                | 1946457168               |
| SNP_P3_84106_5764117 | NC_021166.1    | Ca_kabuli_chr07 | 5764117                 | CC                              | TT                | 1946457170               |
| SNP_P3_84107_5764138 | NC_021166.1    | Ca_kabuli_chr07 | 5764138                 | TT                              | GG                | 1946457171               |
| SNP_P3_84108_5764141 | NC_021166.1    | Ca_kabuli_chr07 | 5764141                 | CC                              | TT                | 1946457173               |
| SNP_P3_84109_5764391 | NC_021166.1    | Ca_kabuli_chr07 | 5764391                 | AA                              | GG                | 1946457174               |
| SNP_P3_84110_5768303 | NC_021166.1    | Ca_kabuli_chr07 | 5768303                 | GG                              | AA                | 1946457176               |
| SNP_P3_84111_5768313 | NC_021166.1    | Ca_kabuli_chr07 | 5768313                 | CC                              | TT                | 1946457177               |
| SNP_P3_84112_5768533 | NC_021166.1    | Ca_kabuli_chr07 | 5768533                 | CC                              | TT                | 1946457179               |
| SNP_P3_84113_5768540 | NC_021166.1    | Ca_kabuli_chr07 | 5768540                 | AA                              | GG                | 1946457180               |
| SNP_P3_84114_5768585 | NC_021166.1    | Ca_kabuli_chr07 | 5768585                 | GG                              | AA                | 1946457181               |
| SNP_P3_84116_5770780 | NC_021166.1    | Ca_kabuli_chr07 | 5770780                 | GG                              | CC                | 1946457183               |
| SNP_P3_84117_5770975 | NC_021166.1    | Ca_kabuli_chr07 | 5770975                 | AA                              | GG                | 1946457184               |
| SNP_P3_84118_5770987 | NC_021166.1    | Ca_kabuli_chr07 | 5770987                 | TT                              | CC                | 1946457186               |
| SNP_P3_84119_5773123 | NC_021166.1    | Ca_kabuli_chr07 | 5773123                 | AA                              | GG                | 1946457188               |
| SNP_P3_84120_5773348 | NC_021166.1    | Ca_kabuli_chr07 | 5773348                 | AA                              | TT                | 1946457189               |
| SNP_P3_84121_5773703 | NC_021166.1    | Ca_kabuli_chr07 | 5773703                 | AA                              | GG                | 1946457191               |
| SNP_P3_84122_5773771 | NC_021166.1    | Ca_kabuli_chr07 | 5773771                 | GG                              | CC                | 1946457192               |
| SNP_P3_84123_5773828 | NC_021166.1    | Ca_kabuli_chr07 | 5773828                 | TT                              | CC                | 1946457194               |
| SNP_P3_84124_5774082 | NC_021166.1    | Ca_kabuli_chr07 | 5774082                 | CC                              | TT                | 1946457195               |
| SNP_P3_84128_5779051 | NC_021166.1    | Ca_kabuli_chr07 | 5779051                 | AA                              | CC                | 1946457197               |
| SNP_P3_84129_5779307 | NC_021166.1    | Ca_kabuli_chr07 | 5779307                 | GG                              | AA                | 1946457199               |
| SNP_P3_84130_5779321 | NC_021166.1    | Ca_kabuli_chr07 | 5779321                 | GG                              | TT                | 1946457201               |
| SNP_P3_84131_5779365 | NC_021166.1    | Ca_kabuli_chr07 | 5779365                 | GG                              | AA                | 1946457202               |

| SNPs IDs             | Chromosome IDs | Chromosomes     | Physical positions (bp) | CDC Frontier (Reference genome) | (Pusa 256 & HPNB) | NCBI SNPdb Accession IDs |
|----------------------|----------------|-----------------|-------------------------|---------------------------------|-------------------|--------------------------|
| SNP_P3_84132_5779507 | NC_021166.1    | Ca_kabuli_chr07 | 5779507                 | GG                              | TT                | 1946457204               |
| SNP_P3_84133_5779988 | NC_021166.1    | Ca_kabuli_chr07 | 5779988                 | TT                              | CC                | 1946457205               |
| SNP_P3_84134_5780405 | NC_021166.1    | Ca_kabuli_chr07 | 5780405                 | GG                              | TT                | 1946457207               |
| SNP_P3_84135_5781176 | NC_021166.1    | Ca_kabuli_chr07 | 5781176                 | GG                              | CC                | 1946457208               |
| SNP_P3_84136_5781179 | NC_021166.1    | Ca_kabuli_chr07 | 5781179                 | TT                              | AA                | 1946457210               |
| SNP_P3_84138_5781601 | NC_021166.1    | Ca_kabuli_chr07 | 5781601                 | TT                              | CC                | 1946457211               |
| SNP_P3_84139_5781622 | NC_021166.1    | Ca_kabuli_chr07 | 5781622                 | TT                              | CC                | 1946457213               |
| SNP_P3_84140_5783000 | NC_021166.1    | Ca_kabuli_chr07 | 5783000                 | TT                              | CC                | 1946457214               |
| SNP_P3_84141_5784239 | NC_021166.1    | Ca_kabuli_chr07 | 5784239                 | GG                              | AA                | 1946457216               |
| SNP_P3_84142_5784489 | NC_021166.1    | Ca_kabuli_chr07 | 5784489                 | AA                              | GG                | 1946457217               |
| SNP_P3_84143_5784567 | NC_021166.1    | Ca_kabuli_chr07 | 5784567                 | AA                              | GG                | 1946457219               |
| SNP_P3_84144_5784861 | NC_021166.1    | Ca_kabuli_chr07 | 5784861                 | TT                              | CC                | 1946457220               |
| SNP_P3_84145_5784885 | NC_021166.1    | Ca_kabuli_chr07 | 5784885                 | GG                              | AA                | 1946457222               |
| SNP_P3_84146_5784992 | NC_021166.1    | Ca_kabuli_chr07 | 5784992                 | CC                              | GG                | 1946457223               |
| SNP_P3_84149_5787042 | NC_021166.1    | Ca_kabuli_chr07 | 5787042                 | GG                              | CC                | 1946457225               |
| SNP_P3_84151_5787067 | NC_021166.1    | Ca_kabuli_chr07 | 5787067                 | AA                              | GG                | 1946457226               |
| SNP_P3_84152_5787087 | NC_021166.1    | Ca_kabuli_chr07 | 5787087                 | AA                              | GG                | 1946457228               |
| SNP_P3_84153_5787188 | NC_021166.1    | Ca_kabuli_chr07 | 5787188                 | AA                              | CC                | 1946457229               |
| SNP_P3_84154_5787448 | NC_021166.1    | Ca_kabuli_chr07 | 5787448                 | AA                              | GG                | 1946457231               |
| SNP_P3_84155_5787860 | NC_021166.1    | Ca_kabuli_chr07 | 5787860                 | AA                              | CC                | 1946457232               |
| SNP_P3_84157_5789354 | NC_021166.1    | Ca_kabuli_chr07 | 5789354                 | AA                              | TT                | 1946457234               |
| SNP_P3_84159_5790901 | NC_021166.1    | Ca_kabuli_chr07 | 5790901                 | AA                              | TT                | 1946457235               |
| SNP_P3_84160_5791113 | NC_021166.1    | Ca_kabuli_chr07 | 5791113                 | TT                              | AA                | 1946457237               |
| SNP_P3_84162_5791485 | NC_021166.1    | Ca_kabuli_chr07 | 5791485                 | CC                              | TT                | 1946457238               |
| SNP_P3_84163_5791649 | NC_021166.1    | Ca_kabuli_chr07 | 5791649                 | AA                              | GG                | 1946457240               |
| SNP_P3_84165_5792990 | NC_021166.1    | Ca_kabuli_chr07 | 5792990                 | AA                              | GG                | 1946457241               |
| SNP_P3_84166_5793135 | NC_021166.1    | Ca_kabuli_chr07 | 5793135                 | GG                              | AA                | 1946457243               |
| SNP_P3_84167_5794361 | NC_021166.1    | Ca_kabuli_chr07 | 5794361                 | AA                              | GG                | 1946457244               |
| SNP_P3_84168_5798670 | NC_021166.1    | Ca_kabuli_chr07 | 5798670                 | GG                              | AA                | 1946457246               |
| SNP_P3_84170_5798987 | NC_021166.1    | Ca_kabuli_chr07 | 5798987                 | TT                              | AA                | 1946457247               |
| SNP_P3_84172_5800395 | NC_021166.1    | Ca_kabuli_chr07 | 5800395                 | CC                              | TT                | 1946457249               |
| SNP_P3_84173_5800535 | NC_021166.1    | Ca_kabuli_chr07 | 5800535                 | AA                              | GG                | 1946457250               |
| SNP_P3_84174_5800539 | NC_021166.1    | Ca_kabuli_chr07 | 5800539                 | CC                              | GG                | 1946457252               |
| SNP_P3_84175_5800548 | NC_021166.1    | Ca_kabuli_chr07 | 5800548                 | AA                              | GG                | 1946457253               |
| SNP_P3_84178_5802269 | NC_021166.1    | Ca_kabuli_chr07 | 5802269                 | GG                              | AA                | 1946457255               |
| SNP_P3_84179_5802425 | NC_021166.1    | Ca_kabuli_chr07 | 5802425                 | AA                              | TT                | 1946457256               |
| SNP_P3_84180_5802726 | NC_021166.1    | Ca_kabuli_chr07 | 5802726                 | GG                              | AA                | 1946457258               |
| SNP_P3_84181_5803735 | NC_021166.1    | Ca_kabuli_chr07 | 5803735                 | TT                              | AA                | 1946457259               |
| SNP_P3_84182_5805029 | NC_021166.1    | Ca_kabuli_chr07 | 5805029                 | AA                              | GG                | 1946457261               |
| SNP_P3_84183_5805030 | NC_021166.1    | Ca_kabuli_chr07 | 5805030                 | GG                              | AA                | 1946457262               |
| SNP_P3_84184_5809098 | NC_021166.1    | Ca_kabuli_chr07 | 5809098                 | TT                              | CC                | 1946457264               |
| SNP_P3_84185_5809506 | NC_021166.1    | Ca_kabuli_chr07 | 5809506                 | TT                              | AA                | 1946457265               |



| SNPs IDs             | Chromosome IDs | Chromosomes     | Physical positions (bp) | CDC Frontier (Reference genome) | (Pusa 256 & HPNB) | NCBI SNPdb Accession IDs |
|----------------------|----------------|-----------------|-------------------------|---------------------------------|-------------------|--------------------------|
| SNP_P3_84186_5809513 | NC_021166.1    | Ca_kabuli_chr07 | 5809513                 | TT                              | AA                | 1946457267               |
| SNP_P3_84187_5810222 | NC_021166.1    | Ca_kabuli_chr07 | 5810222                 | GG                              | CC                | 1946457268               |
| SNP_P3_84188_5811143 | NC_021166.1    | Ca_kabuli_chr07 | 5811143                 | GG                              | TT                | 1946457270               |
| SNP_P3_84189_5811165 | NC_021166.1    | Ca_kabuli_chr07 | 5811165                 | AA                              | CC                | 1946457271               |
| SNP_P3_84190_5813208 | NC_021166.1    | Ca_kabuli_chr07 | 5813208                 | CC                              | GG                | 1946457272               |
| SNP_P3_84191_5814040 | NC_021166.1    | Ca_kabuli_chr07 | 5814040                 | AA                              | GG                | 1946457273               |
| SNP_P3_84192_5814048 | NC_021166.1    | Ca_kabuli_chr07 | 5814048                 | AA                              | GG                | 1946457274               |
| SNP_P3_84193_5817391 | NC_021166.1    | Ca_kabuli_chr07 | 5817391                 | AA                              | TT                | 1946457275               |
| SNP_P3_84194_5817393 | NC_021166.1    | Ca_kabuli_chr07 | 5817393                 | AA                              | CC                | 1946457276               |
| SNP_P3_84195_5817633 | NC_021166.1    | Ca_kabuli_chr07 | 5817633                 | GG                              | AA                | 1946457277               |
| SNP_P3_84196_5817692 | NC_021166.1    | Ca_kabuli_chr07 | 5817692                 | CC                              | GG                | 1946457279               |
| SNP_P3_84197_5817697 | NC_021166.1    | Ca_kabuli_chr07 | 5817697                 | AA                              | GG                | 1946457280               |
| SNP_P3_84198_5817714 | NC_021166.1    | Ca_kabuli_chr07 | 5817714                 | CC                              | TT                | 1946457282               |
| SNP_P3_84199_5817761 | NC_021166.1    | Ca_kabuli_chr07 | 5817761                 | CC                              | TT                | 1946457283               |
| SNP_P3_84200_5817780 | NC_021166.1    | Ca_kabuli_chr07 | 5817780                 | CC                              | TT                | 1946457285               |
| SNP_P3_84201_5817804 | NC_021166.1    | Ca_kabuli_chr07 | 5817804                 | AA                              | GG                | 1946457286               |
| SNP_P3_84202_5817820 | NC_021166.1    | Ca_kabuli_chr07 | 5817820                 | AA                              | GG                | 1946457288               |
| SNP_P3_84203_5818391 | NC_021166.1    | Ca_kabuli_chr07 | 5818391                 | AA                              | GG                | 1946457289               |
| SNP_P3_84204_5818407 | NC_021166.1    | Ca_kabuli_chr07 | 5818407                 | GG                              | CC                | 1946457290               |
| SNP_P3_84205_5818416 | NC_021166.1    | Ca_kabuli_chr07 | 5818416                 | TT                              | CC                | 1946457291               |
| SNP_P3_84206_5818450 | NC_021166.1    | Ca_kabuli_chr07 | 5818450                 | GG                              | AA                | 1946457292               |
| SNP_P3_84207_5819662 | NC_021166.1    | Ca_kabuli_chr07 | 5819662                 | TT                              | CC                | 1946457293               |
| SNP_P3_84208_5819678 | NC_021166.1    | Ca_kabuli_chr07 | 5819678                 | GG                              | AA                | 1946457294               |
| SNP_P3_84209_5820180 | NC_021166.1    | Ca_kabuli_chr07 | 5820180                 | CC                              | TT                | 1946457295               |
| SNP_P3_84210_5820201 | NC_021166.1    | Ca_kabuli_chr07 | 5820201                 | GG                              | AA                | 1946457297               |
| SNP_P3_84211_5820203 | NC_021166.1    | Ca_kabuli_chr07 | 5820203                 | TT                              | CC                | 1946457298               |
| SNP_P3_84212_5820738 | NC_021166.1    | Ca_kabuli_chr07 | 5820738                 | GG                              | CC                | 1946457300               |
| SNP_P3_84213_5821923 | NC_021166.1    | Ca_kabuli_chr07 | 5821923                 | AA                              | CC                | 1946457301               |
| SNP_P3_84214_5822257 | NC_021166.1    | Ca_kabuli_chr07 | 5822257                 | TT                              | AA                | 1946457303               |
| SNP_P3_84215_5822346 | NC_021166.1    | Ca_kabuli_chr07 | 5822346                 | TT                              | GG                | 1946457304               |
| SNP_P3_84216_5823848 | NC_021166.1    | Ca_kabuli_chr07 | 5823848                 | GG                              | TT                | 1946457306               |
| SNP_P3_84217_5824102 | NC_021166.1    | Ca_kabuli_chr07 | 5824102                 | TT                              | CC                | 1946457307               |
| SNP_P3_84218_5824267 | NC_021166.1    | Ca_kabuli_chr07 | 5824267                 | AA                              | GG                | 1946457309               |
| SNP_P3_84219_5824280 | NC_021166.1    | Ca_kabuli_chr07 | 5824280                 | TT                              | CC                | 1946457310               |
| SNP_P3_84220_5824289 | NC_021166.1    | Ca_kabuli_chr07 | 5824289                 | CC                              | TT                | 1946457312               |
| SNP_P3_84221_5824316 | NC_021166.1    | Ca_kabuli_chr07 | 5824316                 | AA                              | GG                | 1946457313               |
| SNP_P3_84222_5824323 | NC_021166.1    | Ca_kabuli_chr07 | 5824323                 | TT                              | AA                | 1946457315               |
| SNP_P3_84223_5824324 | NC_021166.1    | Ca_kabuli_chr07 | 5824324                 | AA                              | GG                | 1946457316               |
| SNP_P3_84224_5824328 | NC_021166.1    | Ca_kabuli_chr07 | 5824328                 | CC                              | TT                | 1946457318               |
| SNP_P3_84225_5825737 | NC_021166.1    | Ca_kabuli_chr07 | 5825737                 | TT                              | AA                | 1946457319               |
| SNP_P3_84226_5826814 | NC_021166.1    | Ca_kabuli_chr07 | 5826814                 | AA                              | TT                | 1946457321               |
| SNP_P3_84227_5827537 | NC_021166.1    | Ca_kabuli_chr07 | 5827537                 | GG                              | AA                | 1946457322               |

| SNPs IDs             | Chromosome IDs | Chromosomes     | Physical positions (bp) | CDC Frontier (Reference genome) | (Pusa 256 & HPNB) | NCBI SNPdb Accession IDs |
|----------------------|----------------|-----------------|-------------------------|---------------------------------|-------------------|--------------------------|
| SNP_P3_84228_5827729 | NC_021166.1    | Ca_kabuli_chr07 | 5827729                 | AA                              | TT                | 1946457324               |
| SNP_P3_84230_5827752 | NC_021166.1    | Ca_kabuli_chr07 | 5827752                 | AA                              | TT                | 1946457325               |
| SNP_P3_84231_5827780 | NC_021166.1    | Ca_kabuli_chr07 | 5827780                 | AA                              | GG                | 1946457326               |
| SNP_P3_84232_5827806 | NC_021166.1    | Ca_kabuli_chr07 | 5827806                 | GG                              | AA                | 1946457328               |
| SNP_P3_84233_5827807 | NC_021166.1    | Ca_kabuli_chr07 | 5827807                 | TT                              | CC                | 1946457330               |
| SNP_P3_84234_5827859 | NC_021166.1    | Ca_kabuli_chr07 | 5827859                 | TT                              | CC                | 1946457331               |
| SNP_P3_84235_5827967 | NC_021166.1    | Ca_kabuli_chr07 | 5827967                 | TT                              | CC                | 1946457333               |
| SNP_P3_84236_5828022 | NC_021166.1    | Ca_kabuli_chr07 | 5828022                 | TT                              | CC                | 1946457334               |
| SNP_P3_84237_5828025 | NC_021166.1    | Ca_kabuli_chr07 | 5828025                 | CC                              | TT                | 1946457336               |
| SNP_P3_84238_5828027 | NC_021166.1    | Ca_kabuli_chr07 | 5828027                 | AA                              | TT                | 1946457337               |
| SNP_P3_84239_5828040 | NC_021166.1    | Ca_kabuli_chr07 | 5828040                 | TT                              | CC                | 1946457339               |
| SNP_P3_84240_5828045 | NC_021166.1    | Ca_kabuli_chr07 | 5828045                 | CC                              | TT                | 1946457340               |
| SNP_P3_84241_5828200 | NC_021166.1    | Ca_kabuli_chr07 | 5828200                 | AA                              | TT                | 1946457342               |
| SNP_P3_84242_5828245 | NC_021166.1    | Ca_kabuli_chr07 | 5828245                 | CC                              | AA                | 1946457343               |
| SNP_P3_84243_5828324 | NC_021166.1    | Ca_kabuli_chr07 | 5828324                 | CC                              | TT                | 1946457345               |
| SNP_P3_84244_5830611 | NC_021166.1    | Ca_kabuli_chr07 | 5830611                 | TT                              | CC                | 1946457346               |
| SNP_P3_84245_5830621 | NC_021166.1    | Ca_kabuli_chr07 | 5830621                 | TT                              | CC                | 1946457348               |
| SNP_P3_84246_5830673 | NC_021166.1    | Ca_kabuli_chr07 | 5830673                 | TT                              | CC                | 1946457349               |
| SNP_P3_84247_5831005 | NC_021166.1    | Ca_kabuli_chr07 | 5831005                 | CC                              | TT                | 1946457351               |
| SNP_P3_84248_5831016 | NC_021166.1    | Ca_kabuli_chr07 | 5831016                 | CC                              | TT                | 1946457352               |
| SNP_P3_84249_5832398 | NC_021166.1    | Ca_kabuli_chr07 | 5832398                 | CC                              | TT                | 1946457354               |
| SNP_P3_84250_5832741 | NC_021166.1    | Ca_kabuli_chr07 | 5832741                 | TT                              | CC                | 1946457355               |
| SNP_P3_84251_5833070 | NC_021166.1    | Ca_kabuli_chr07 | 5833070                 | AA                              | TT                | 1946457357               |
| SNP_P3_84252_5833761 | NC_021166.1    | Ca_kabuli_chr07 | 5833761                 | AA                              | TT                | 1946457358               |
| SNP_P3_84253_5833811 | NC_021166.1    | Ca_kabuli_chr07 | 5833811                 | TT                              | CC                | 1946457360               |
| SNP_P3_84254_5834024 | NC_021166.1    | Ca_kabuli_chr07 | 5834024                 | CC                              | TT                | 1946457361               |
| SNP_P3_84256_5836184 | NC_021166.1    | Ca_kabuli_chr07 | 5836184                 | CC                              | TT                | 1946457363               |
| SNP_P3_84258_5836421 | NC_021166.1    | Ca_kabuli_chr07 | 5836421                 | AA                              | TT                | 1946457364               |
| SNP_P3_84259_5836787 | NC_021166.1    | Ca_kabuli_chr07 | 5836787                 | CC                              | AA                | 1946457365               |
| SNP_P3_84260_5836796 | NC_021166.1    | Ca_kabuli_chr07 | 5836796                 | CC                              | GG                | 1946457367               |
| SNP_P3_84261_5836819 | NC_021166.1    | Ca_kabuli_chr07 | 5836819                 | CC                              | TT                | 1946457369               |
| SNP_P3_84262_5836849 | NC_021166.1    | Ca_kabuli_chr07 | 5836849                 | GG                              | AA                | 1946457370               |
| SNP_P3_84263_5836997 | NC_021166.1    | Ca_kabuli_chr07 | 5836997                 | GG                              | TT                | 1946457372               |
| SNP_P3_84264_5838085 | NC_021166.1    | Ca_kabuli_chr07 | 5838085                 | TT                              | AA                | 1946457373               |
| SNP_P3_84265_5838151 | NC_021166.1    | Ca_kabuli_chr07 | 5838151                 | CC                              | TT                | 1946457375               |
| SNP_P3_84266_5838347 | NC_021166.1    | Ca_kabuli_chr07 | 5838347                 | AA                              | TT                | 1946457376               |
| SNP_P3_84267_5838349 | NC_021166.1    | Ca_kabuli_chr07 | 5838349                 | TT                              | AA                | 1946457378               |
| SNP_P3_84268_5838917 | NC_021166.1    | Ca_kabuli_chr07 | 5838917                 | TT                              | CC                | 1946457379               |
| SNP_P3_84269_5839190 | NC_021166.1    | Ca_kabuli_chr07 | 5839190                 | AA                              | GG                | 1946457381               |
| SNP_P3_84270_5841649 | NC_021166.1    | Ca_kabuli_chr07 | 5841649                 | TT                              | GG                | 1946457382               |
| SNP_P3_84271_5841650 | NC_021166.1    | Ca_kabuli_chr07 | 5841650                 | TT                              | CC                | 1946457384               |
| SNP_P3_84272_5841763 | NC_021166.1    | Ca_kabuli_chr07 | 5841763                 | TT                              | CC                | 1946457385               |

| SNPs IDs             | Chromosome IDs | Chromosomes     | Physical positions (bp) | CDC Frontier (Reference genome) | (Pusa 256 & HPNB) | NCBI SNPdb Accession IDs |
|----------------------|----------------|-----------------|-------------------------|---------------------------------|-------------------|--------------------------|
| SNP_P3_84273_5841830 | NC_021166.1    | Ca_kabuli_chr07 | 5841830                 | TT                              | GG                | 1946457387               |
| SNP_P3_84276_5842703 | NC_021166.1    | Ca_kabuli_chr07 | 5842703                 | CC                              | TT                | 1946457388               |
| SNP_P3_84277_5842726 | NC_021166.1    | Ca_kabuli_chr07 | 5842726                 | TT                              | CC                | 1946457390               |
| SNP_P3_84278_5842730 | NC_021166.1    | Ca_kabuli_chr07 | 5842730                 | CC                              | GG                | 1946457391               |
| SNP_P3_84279_5842781 | NC_021166.1    | Ca_kabuli_chr07 | 5842781                 | AA                              | CC                | 1946457393               |
| SNP_P3_84280_5842819 | NC_021166.1    | Ca_kabuli_chr07 | 5842819                 | GG                              | TT                | 1946457394               |
| SNP_P3_84281_5842823 | NC_021166.1    | Ca_kabuli_chr07 | 5842823                 | GG                              | AA                | 1946457396               |
| SNP_P3_84282_5842909 | NC_021166.1    | Ca_kabuli_chr07 | 5842909                 | AA                              | CC                | 1946457397               |
| SNP_P3_84283_5843140 | NC_021166.1    | Ca_kabuli_chr07 | 5843140                 | CC                              | TT                | 1946457399               |
| SNP_P3_84284_5843231 | NC_021166.1    | Ca_kabuli_chr07 | 5843231                 | GG                              | AA                | 1946457400               |
| SNP_P3_84286_5843849 | NC_021166.1    | Ca_kabuli_chr07 | 5843849                 | TT                              | AA                | 1946457402               |
| SNP_P3_84287_5843911 | NC_021166.1    | Ca_kabuli_chr07 | 5843911                 | TT                              | AA                | 1946457403               |
| SNP_P3_84288_5843968 | NC_021166.1    | Ca_kabuli_chr07 | 5843968                 | CC                              | TT                | 1946457405               |
| SNP_P3_84289_5844256 | NC_021166.1    | Ca_kabuli_chr07 | 5844256                 | AA                              | GG                | 1946457406               |
| SNP_P3_84290_5844261 | NC_021166.1    | Ca_kabuli_chr07 | 5844261                 | TT                              | CC                | 1946457408               |
| SNP_P3_84291_5844267 | NC_021166.1    | Ca_kabuli_chr07 | 5844267                 | CC                              | AA                | 1946457409               |
| SNP_P3_84292_5844273 | NC_021166.1    | Ca_kabuli_chr07 | 5844273                 | AA                              | CC                | 1946457411               |
| SNP_P3_84293_5844310 | NC_021166.1    | Ca_kabuli_chr07 | 5844310                 | GG                              | AA                | 1946457412               |
| SNP_P3_84294_5849016 | NC_021166.1    | Ca_kabuli_chr07 | 5849016                 | TT                              | GG                | 1946457414               |
| SNP_P3_84295_5849058 | NC_021166.1    | Ca_kabuli_chr07 | 5849058                 | CC                              | TT                | 1946457415               |
| SNP_P3_84296_5849227 | NC_021166.1    | Ca_kabuli_chr07 | 5849227                 | GG                              | AA                | 1946457417               |
| SNP_P3_84298_5851985 | NC_021166.1    | Ca_kabuli_chr07 | 5851985                 | TT                              | AA                | 1946457418               |
| SNP_P3_84299_5852297 | NC_021166.1    | Ca_kabuli_chr07 | 5852297                 | AA                              | GG                | 1946457420               |
| SNP_P3_84300_5852377 | NC_021166.1    | Ca_kabuli_chr07 | 5852377                 | TT                              | CC                | 1946457421               |
| SNP_P3_84301_5852913 | NC_021166.1    | Ca_kabuli_chr07 | 5852913                 | TT                              | GG                | 1946457423               |
| SNP_P3_84302_5853254 | NC_021166.1    | Ca_kabuli_chr07 | 5853254                 | CC                              | GG                | 1946457425               |
| SNP_P3_84303_5857073 | NC_021166.1    | Ca_kabuli_chr07 | 5857073                 | AA                              | GG                | 1946457426               |
| SNP_P3_84304_5857236 | NC_021166.1    | Ca_kabuli_chr07 | 5857236                 | GG                              | AA                | 1946457428               |
| SNP_P3_84306_5857348 | NC_021166.1    | Ca_kabuli_chr07 | 5857348                 | GG                              | TT                | 1946457429               |
| SNP_P3_84307_5857801 | NC_021166.1    | Ca_kabuli_chr07 | 5857801                 | GG                              | CC                | 1946457430               |
| SNP_P3_84308_5858004 | NC_021166.1    | Ca_kabuli_chr07 | 5858004                 | TT                              | AA                | 1946457432               |
| SNP_P3_84309_5858057 | NC_021166.1    | Ca_kabuli_chr07 | 5858057                 | CC                              | TT                | 1946457433               |
| SNP_P3_84310_5858301 | NC_021166.1    | Ca_kabuli_chr07 | 5858301                 | TT                              | AA                | 1946457435               |
| SNP_P3_84311_5858309 | NC_021166.1    | Ca_kabuli_chr07 | 5858309                 | CC                              | GG                | 1946457436               |
| SNP_P3_84312_5858345 | NC_021166.1    | Ca_kabuli_chr07 | 5858345                 | AA                              | GG                | 1946457438               |
| SNP_P3_84313_5858368 | NC_021166.1    | Ca_kabuli_chr07 | 5858368                 | TT                              | AA                | 1946457439               |
| SNP_P3_84314_5858387 | NC_021166.1    | Ca_kabuli_chr07 | 5858387                 | AA                              | GG                | 1946457440               |
| SNP_P3_84316_5858426 | NC_021166.1    | Ca_kabuli_chr07 | 5858426                 | TT                              | CC                | 1946457442               |
| SNP_P3_84317_5859523 | NC_021166.1    | Ca_kabuli_chr07 | 5859523                 | GG                              | TT                | 1946457444               |
| SNP_P3_84318_5859725 | NC_021166.1    | Ca_kabuli_chr07 | 5859725                 | AA                              | CC                | 1946457445               |
| SNP_P3_84319_5860139 | NC_021166.1    | Ca_kabuli_chr07 | 5860139                 | TT                              | CC                | 1946457447               |
| SNP_P3_84320_5860148 | NC_021166.1    | Ca_kabuli_chr07 | 5860148                 | GG                              | AA                | 1946457448               |

| SNPs IDs             | Chromosome IDs | Chromosomes     | Physical positions (bp) | CDC Frontier (Reference genome) | (Pusa 256 & HPNB) | NCBI SNPdb Accession IDs |
|----------------------|----------------|-----------------|-------------------------|---------------------------------|-------------------|--------------------------|
| SNP_P3_84321_5860311 | NC_021166.1    | Ca_kabuli_chr07 | 5860311                 | GG                              | AA                | 1946457450               |
| SNP_P3_84322_5860318 | NC_021166.1    | Ca_kabuli_chr07 | 5860318                 | CC                              | TT                | 1946457451               |
| SNP_P3_84323_5860323 | NC_021166.1    | Ca_kabuli_chr07 | 5860323                 | TT                              | CC                | 1946457453               |
| SNP_P3_84325_5861434 | NC_021166.1    | Ca_kabuli_chr07 | 5861434                 | CC                              | TT                | 1946457454               |
| SNP_P3_84326_5861506 | NC_021166.1    | Ca_kabuli_chr07 | 5861506                 | CC                              | AA                | 1946457456               |
| SNP_P3_84328_5865215 | NC_021166.1    | Ca_kabuli_chr07 | 5865215                 | TT                              | GG                | 1946457457               |
| SNP_P3_84330_5865270 | NC_021166.1    | Ca_kabuli_chr07 | 5865270                 | TT                              | GG                | 1946457459               |
| SNP_P3_84331_5865548 | NC_021166.1    | Ca_kabuli_chr07 | 5865548                 | AA                              | CC                | 1946457460               |
| SNP_P3_84332_5865626 | NC_021166.1    | Ca_kabuli_chr07 | 5865626                 | CC                              | TT                | 1946457462               |
| SNP_P3_84334_5868726 | NC_021166.1    | Ca_kabuli_chr07 | 5868726                 | AA                              | TT                | 1946457463               |
| SNP_P3_84335_5868737 | NC_021166.1    | Ca_kabuli_chr07 | 5868737                 | AA                              | CC                | 1946457465               |
| SNP_P3_84336_5869444 | NC_021166.1    | Ca_kabuli_chr07 | 5869444                 | AA                              | TT                | 1946457466               |
| SNP_P3_84337_5869445 | NC_021166.1    | Ca_kabuli_chr07 | 5869445                 | TT                              | GG                | 1946457468               |
| SNP_P3_84338_5869459 | NC_021166.1    | Ca_kabuli_chr07 | 5869459                 | AA                              | GG                | 1946457469               |
| SNP_P3_84339_5869512 | NC_021166.1    | Ca_kabuli_chr07 | 5869512                 | GG                              | AA                | 1946457471               |
| SNP_P3_84340_5869550 | NC_021166.1    | Ca_kabuli_chr07 | 5869550                 | AA                              | GG                | 1946457472               |
| SNP_P3_84341_5869561 | NC_021166.1    | Ca_kabuli_chr07 | 5869561                 | GG                              | CC                | 1946457474               |
| SNP_P3_84342_5869587 | NC_021166.1    | Ca_kabuli_chr07 | 5869587                 | TT                              | CC                | 1946457475               |
| SNP_P3_84343_5869621 | NC_021166.1    | Ca_kabuli_chr07 | 5869621                 | CC                              | TT                | 1946457477               |
| SNP_P3_84344_5869623 | NC_021166.1    | Ca_kabuli_chr07 | 5869623                 | TT                              | CC                | 1946457478               |
| SNP_P3_84345_5869632 | NC_021166.1    | Ca_kabuli_chr07 | 5869632                 | TT                              | CC                | 1946457480               |
| SNP_P3_84346_5869641 | NC_021166.1    | Ca_kabuli_chr07 | 5869641                 | AA                              | GG                | 1946457482               |
| SNP_P3_84347_5869647 | NC_021166.1    | Ca_kabuli_chr07 | 5869647                 | TT                              | CC                | 1946457483               |
| SNP_P3_84348_5869657 | NC_021166.1    | Ca_kabuli_chr07 | 5869657                 | AA                              | GG                | 1946457485               |
| SNP_P3_84349_5869692 | NC_021166.1    | Ca_kabuli_chr07 | 5869692                 | AA                              | TT                | 1946457486               |
| SNP_P3_84350_5870095 | NC_021166.1    | Ca_kabuli_chr07 | 5870095                 | TT                              | CC                | 1946457490               |
| SNP_P3_84351_5870129 | NC_021166.1    | Ca_kabuli_chr07 | 5870129                 | CC                              | TT                | 1946457491               |
| SNP_P3_84352_5870148 | NC_021166.1    | Ca_kabuli_chr07 | 5870148                 | TT                              | CC                | 1946457493               |
| SNP_P3_84353_5870150 | NC_021166.1    | Ca_kabuli_chr07 | 5870150                 | GG                              | TT                | 1946457494               |
| SNP_P3_84354_5871088 | NC_021166.1    | Ca_kabuli_chr07 | 5871088                 | TT                              | GG                | 1946457496               |
| SNP_P3_84355_5872363 | NC_021166.1    | Ca_kabuli_chr07 | 5872363                 | TT                              | AA                | 1946457497               |
| SNP_P3_84356_5872376 | NC_021166.1    | Ca_kabuli_chr07 | 5872376                 | AA                              | TT                | 1946457499               |
| SNP_P3_84357_5872380 | NC_021166.1    | Ca_kabuli_chr07 | 5872380                 | TT                              | CC                | 1946457500               |
| SNP_P3_84358_5872721 | NC_021166.1    | Ca_kabuli_chr07 | 5872721                 | CC                              | TT                | 1946457502               |
| SNP_P3_84359_5872872 | NC_021166.1    | Ca_kabuli_chr07 | 5872872                 | GG                              | AA                | 1946457503               |
| SNP_P3_84360_5872882 | NC_021166.1    | Ca_kabuli_chr07 | 5872882                 | AA                              | CC                | 1946457505               |
| SNP_P3_84361_5872895 | NC_021166.1    | Ca_kabuli_chr07 | 5872895                 | GG                              | AA                | 1946457506               |
| SNP_P3_84362_5872941 | NC_021166.1    | Ca_kabuli_chr07 | 5872941                 | CC                              | TT                | 1946457508               |
| SNP_P3_84364_5873153 | NC_021166.1    | Ca_kabuli_chr07 | 5873153                 | TT                              | CC                | 1946457509               |
| SNP_P3_84365_5873189 | NC_021166.1    | Ca_kabuli_chr07 | 5873189                 | GG                              | CC                | 1946457511               |
| SNP_P3_84366_5873199 | NC_021166.1    | Ca_kabuli_chr07 | 5873199                 | AA                              | GG                | 1946457512               |
| SNP_P3_84367_5873216 | NC_021166.1    | Ca_kabuli_chr07 | 5873216                 | GG                              | AA                | 1946457514               |

| SNPs IDs             | Chromosome IDs | Chromosomes     | Physical positions (bp) | CDC Frontier (Reference genome) | (Pusa 256 & HPNB) | NCBI SNPdb Accession IDs |
|----------------------|----------------|-----------------|-------------------------|---------------------------------|-------------------|--------------------------|
| SNP_P3_84368_5873448 | NC_021166.1    | Ca_kabuli_chr07 | 5873448                 | GG                              | AA                | 1946457516               |
| SNP_P3_84369_5873454 | NC_021166.1    | Ca_kabuli_chr07 | 5873454                 | AA                              | GG                | 1946457517               |
| SNP_P3_84370_5873474 | NC_021166.1    | Ca_kabuli_chr07 | 5873474                 | TT                              | GG                | 1946457519               |
| SNP_P3_84371_5873475 | NC_021166.1    | Ca_kabuli_chr07 | 5873475                 | GG                              | AA                | 1946457520               |
| SNP_P3_84372_5873488 | NC_021166.1    | Ca_kabuli_chr07 | 5873488                 | TT                              | CC                | 1946457522               |
| SNP_P3_84373_5874236 | NC_021166.1    | Ca_kabuli_chr07 | 5874236                 | CC                              | GG                | 1946457523               |
| SNP_P3_84375_5874389 | NC_021166.1    | Ca_kabuli_chr07 | 5874389                 | AA                              | TT                | 1946457525               |
| SNP_P3_84377_5874408 | NC_021166.1    | Ca_kabuli_chr07 | 5874408                 | CC                              | TT                | 1946457526               |
| SNP_P3_84378_5874522 | NC_021166.1    | Ca_kabuli_chr07 | 5874522                 | AA                              | CC                | 1946457528               |
| SNP_P3_84379_5874532 | NC_021166.1    | Ca_kabuli_chr07 | 5874532                 | CC                              | AA                | 1946457529               |
| SNP_P3_84380_5874554 | NC_021166.1    | Ca_kabuli_chr07 | 5874554                 | CC                              | TT                | 1946457531               |
| SNP_P3_84381_5874847 | NC_021166.1    | Ca_kabuli_chr07 | 5874847                 | TT                              | CC                | 1946457532               |
| SNP_P3_84382_5875001 | NC_021166.1    | Ca_kabuli_chr07 | 5875001                 | AA                              | TT                | 1946457534               |
| SNP_P3_84383_5875004 | NC_021166.1    | Ca_kabuli_chr07 | 5875004                 | CC                              | GG                | 1946457536               |
| SNP_P3_84384_5875012 | NC_021166.1    | Ca_kabuli_chr07 | 5875012                 | AA                              | GG                | 1946457537               |
| SNP_P3_84386_5878099 | NC_021166.1    | Ca_kabuli_chr07 | 5878099                 | TT                              | AA                | 1946457539               |
| SNP_P3_84387_5878102 | NC_021166.1    | Ca_kabuli_chr07 | 5878102                 | TT                              | CC                | 1946457540               |
| SNP_P3_84388_5878136 | NC_021166.1    | Ca_kabuli_chr07 | 5878136                 | TT                              | AA                | 1946457541               |
| SNP_P3_84389_5878141 | NC_021166.1    | Ca_kabuli_chr07 | 5878141                 | CC                              | TT                | 1946457543               |
| SNP_P3_84390_5878142 | NC_021166.1    | Ca_kabuli_chr07 | 5878142                 | AA                              | GG                | 1946457544               |
| SNP_P3_84392_5879906 | NC_021166.1    | Ca_kabuli_chr07 | 5879906                 | CC                              | GG                | 1946457546               |
| SNP_P3_84393_5880309 | NC_021166.1    | Ca_kabuli_chr07 | 5880309                 | CC                              | TT                | 1946457547               |
| SNP_P3_84394_5881392 | NC_021166.1    | Ca_kabuli_chr07 | 5881392                 | AA                              | GG                | 1946457549               |
| SNP_P3_84395_5881576 | NC_021166.1    | Ca_kabuli_chr07 | 5881576                 | CC                              | GG                | 1946457550               |
| SNP_P3_84396_5881589 | NC_021166.1    | Ca_kabuli_chr07 | 5881589                 | GG                              | AA                | 1946457552               |
| SNP_P3_84397_5883173 | NC_021166.1    | Ca_kabuli_chr07 | 5883173                 | TT                              | AA                | 1946457553               |
| SNP_P3_84399_5883991 | NC_021166.1    | Ca_kabuli_chr07 | 5883991                 | AA                              | GG                | 1946457554               |
| SNP_P3_84400_5884062 | NC_021166.1    | Ca_kabuli_chr07 | 5884062                 | AA                              | GG                | 1946457556               |
| SNP_P3_84401_5884193 | NC_021166.1    | Ca_kabuli_chr07 | 5884193                 | TT                              | AA                | 1946457558               |
| SNP_P3_84403_5884478 | NC_021166.1    | Ca_kabuli_chr07 | 5884478                 | TT                              | GG                | 1946457559               |
| SNP_P3_84405_5884725 | NC_021166.1    | Ca_kabuli_chr07 | 5884725                 | AA                              | GG                | 1946457561               |
| SNP_P3_84407_5886038 | NC_021166.1    | Ca_kabuli_chr07 | 5886038                 | TT                              | AA                | 1946457562               |
| SNP_P3_84408_5886048 | NC_021166.1    | Ca_kabuli_chr07 | 5886048                 | AA                              | TT                | 1946457564               |
| SNP_P3_84409_5886055 | NC_021166.1    | Ca_kabuli_chr07 | 5886055                 | AA                              | TT                | 1946457565               |
| SNP_P3_84411_5886692 | NC_021166.1    | Ca_kabuli_chr07 | 5886692                 | AA                              | TT                | 1946457567               |
| SNP_P3_84412_5886760 | NC_021166.1    | Ca_kabuli_chr07 | 5886760                 | TT                              | CC                | 1946457568               |
| SNP_P3_84413_5886781 | NC_021166.1    | Ca_kabuli_chr07 | 5886781                 | TT                              | CC                | 1946457570               |
| SNP_P3_84414_5886815 | NC_021166.1    | Ca_kabuli_chr07 | 5886815                 | AA                              | GG                | 1946457571               |
| SNP_P3_84415_5887011 | NC_021166.1    | Ca_kabuli_chr07 | 5887011                 | AA                              | TT                | 1946457572               |
| SNP_P3_84416_5888105 | NC_021166.1    | Ca_kabuli_chr07 | 5888105                 | AA                              | CC                | 1946457574               |
| SNP_P3_84417_5889405 | NC_021166.1    | Ca_kabuli_chr07 | 5889405                 | TT                              | GG                | 1946457575               |
| SNP_P3_84418_5889426 | NC_021166.1    | Ca_kabuli_chr07 | 5889426                 | TT                              | CC                | 1946457578               |

| SNPs IDs             | Chromosome IDs | Chromosomes     | Physical positions (bp) | CDC Frontier (Reference genome) | (Pusa 256 & HPNB) | NCBI SNPdb Accession IDs |
|----------------------|----------------|-----------------|-------------------------|---------------------------------|-------------------|--------------------------|
| SNP_P3_84419_5889486 | NC_021166.1    | Ca_kabuli_chr07 | 5889486                 | TT                              | CC                | 1946457579               |
| SNP_P3_84420_5889706 | NC_021166.1    | Ca_kabuli_chr07 | 5889706                 | AA                              | GG                | 1946457581               |
| SNP_P3_84421_5889742 | NC_021166.1    | Ca_kabuli_chr07 | 5889742                 | TT                              | CC                | 1946457582               |
| SNP_P3_84422_5889770 | NC_021166.1    | Ca_kabuli_chr07 | 5889770                 | TT                              | AA                | 1946457584               |
| SNP_P3_84423_5889805 | NC_021166.1    | Ca_kabuli_chr07 | 5889805                 | TT                              | CC                | 1946457585               |
| SNP_P3_84424_5890074 | NC_021166.1    | Ca_kabuli_chr07 | 5890074                 | TT                              | AA                | 1946457587               |
| SNP_P3_84425_5890611 | NC_021166.1    | Ca_kabuli_chr07 | 5890611                 | TT                              | AA                | 1946457588               |
| SNP_P3_84427_5890986 | NC_021166.1    | Ca_kabuli_chr07 | 5890986                 | AA                              | GG                | 1946457590               |
| SNP_P3_84428_5890998 | NC_021166.1    | Ca_kabuli_chr07 | 5890998                 | CC                              | AA                | 1946457591               |
| SNP_P3_84429_5894384 | NC_021166.1    | Ca_kabuli_chr07 | 5894384                 | GG                              | TT                | 1946457593               |
| SNP_P3_84430_5894385 | NC_021166.1    | Ca_kabuli_chr07 | 5894385                 | CC                              | TT                | 1946457594               |
| SNP_P3_84431_5894405 | NC_021166.1    | Ca_kabuli_chr07 | 5894405                 | CC                              | TT                | 1946457596               |
| SNP_P3_84433_5894515 | NC_021166.1    | Ca_kabuli_chr07 | 5894515                 | TT                              | CC                | 1946457598               |
| SNP_P3_84434_5894840 | NC_021166.1    | Ca_kabuli_chr07 | 5894840                 | TT                              | CC                | 1946457599               |
| SNP_P3_84435_5895141 | NC_021166.1    | Ca_kabuli_chr07 | 5895141                 | AA                              | GG                | 1946457600               |
| SNP_P3_84436_5896900 | NC_021166.1    | Ca_kabuli_chr07 | 5896900                 | TT                              | AA                | 1946457602               |
| SNP_P3_84437_5896923 | NC_021166.1    | Ca_kabuli_chr07 | 5896923                 | CC                              | TT                | 1946457603               |
| SNP_P3_84438_5896925 | NC_021166.1    | Ca_kabuli_chr07 | 5896925                 | CC                              | AA                | 1946457605               |
| SNP_P3_84440_5899676 | NC_021166.1    | Ca_kabuli_chr07 | 5899676                 | CC                              | GG                | 1946457606               |
| SNP_P3_84441_5899978 | NC_021166.1    | Ca_kabuli_chr07 | 5899978                 | AA                              | GG                | 1946457608               |
| SNP_P3_84442_5899982 | NC_021166.1    | Ca_kabuli_chr07 | 5899982                 | AA                              | GG                | 1946457609               |
| SNP_P3_84443_5900195 | NC_021166.1    | Ca_kabuli_chr07 | 5900195                 | AA                              | GG                | 1946457611               |
| SNP_P3_84445_5900691 | NC_021166.1    | Ca_kabuli_chr07 | 5900691                 | GG                              | AA                | 1946457612               |
| SNP_P3_84446_5901945 | NC_021166.1    | Ca_kabuli_chr07 | 5901945                 | AA                              | GG                | 1946457614               |
| SNP_P3_84447_5902676 | NC_021166.1    | Ca_kabuli_chr07 | 5902676                 | AA                              | TT                | 1946457615               |
| SNP_P3_84448_5902697 | NC_021166.1    | Ca_kabuli_chr07 | 5902697                 | TT                              | AA                | 1946457617               |
| SNP_P3_84450_5904165 | NC_021166.1    | Ca_kabuli_chr07 | 5904165                 | CC                              | TT                | 1946457619               |
| SNP_P3_84451_5904169 | NC_021166.1    | Ca_kabuli_chr07 | 5904169                 | AA                              | GG                | 1946457620               |
| SNP_P3_84452_5904276 | NC_021166.1    | Ca_kabuli_chr07 | 5904276                 | GG                              | TT                | 1946457622               |
| SNP_P3_84453_5904280 | NC_021166.1    | Ca_kabuli_chr07 | 5904280                 | GG                              | AA                | 1946457623               |
| SNP_P3_84455_5907459 | NC_021166.1    | Ca_kabuli_chr07 | 5907459                 | TT                              | CC                | 1946457625               |
| SNP_P3_84456_5907464 | NC_021166.1    | Ca_kabuli_chr07 | 5907464                 | AA                              | GG                | 1946457626               |
| SNP_P3_84457_5907654 | NC_021166.1    | Ca_kabuli_chr07 | 5907654                 | AA                              | CC                | 1946457628               |
| SNP_P3_84458_5908997 | NC_021166.1    | Ca_kabuli_chr07 | 5908997                 | TT                              | GG                | 1946457629               |
| SNP_P3_84459_5909000 | NC_021166.1    | Ca_kabuli_chr07 | 5909000                 | GG                              | TT                | 1946457631               |
| SNP_P3_84461_5909039 | NC_021166.1    | Ca_kabuli_chr07 | 5909039                 | CC                              | TT                | 1946457632               |
| SNP_P3_84462_5909040 | NC_021166.1    | Ca_kabuli_chr07 | 5909040                 | TT                              | AA                | 1946457634               |
| SNP_P3_84463_5909050 | NC_021166.1    | Ca_kabuli_chr07 | 5909050                 | GG                              | AA                | 1946457635               |
| SNP_P3_84464_5909340 | NC_021166.1    | Ca_kabuli_chr07 | 5909340                 | TT                              | AA                | 1946457637               |
| SNP_P3_84465_5909842 | NC_021166.1    | Ca_kabuli_chr07 | 5909842                 | CC                              | AA                | 1946457638               |
| SNP_P3_84466_5909889 | NC_021166.1    | Ca_kabuli_chr07 | 5909889                 | CC                              | GG                | 1946457640               |
| SNP_P3_84467_5910175 | NC_021166.1    | Ca_kabuli_chr07 | 5910175                 | AA                              | CC                | 1946457641               |

| SNPs IDs             | Chromosome IDs | Chromosomes     | Physical positions (bp) | CDC Frontier (Reference genome) | (Pusa 256 & HPNB) | NCBI SNPdb Accession IDs |
|----------------------|----------------|-----------------|-------------------------|---------------------------------|-------------------|--------------------------|
| SNP_P3_84468_5911496 | NC_021166.1    | Ca_kabuli_chr07 | 5911496                 | CC                              | AA                | 1946457643               |
| SNP_P3_84469_5914040 | NC_021166.1    | Ca_kabuli_chr07 | 5914040                 | TT                              | CC                | 1946457644               |
| SNP_P3_84470_5914283 | NC_021166.1    | Ca_kabuli_chr07 | 5914283                 | AA                              | GG                | 1946457646               |
| SNP_P3_84471_5914326 | NC_021166.1    | Ca_kabuli_chr07 | 5914326                 | AA                              | GG                | 1946457647               |
| SNP_P3_84472_5914329 | NC_021166.1    | Ca_kabuli_chr07 | 5914329                 | AA                              | GG                | 1946457649               |
| SNP_P3_84473_5914779 | NC_021166.1    | Ca_kabuli_chr07 | 5914779                 | GG                              | AA                | 1946457650               |
| SNP_P3_84474_5914781 | NC_021166.1    | Ca_kabuli_chr07 | 5914781                 | GG                              | TT                | 1946457652               |
| SNP_P3_84475_5914783 | NC_021166.1    | Ca_kabuli_chr07 | 5914783                 | TT                              | GG                | 1946457653               |
| SNP_P3_84476_5914796 | NC_021166.1    | Ca_kabuli_chr07 | 5914796                 | TT                              | GG                | 1946457655               |
| SNP_P3_84477_5914804 | NC_021166.1    | Ca_kabuli_chr07 | 5914804                 | TT                              | CC                | 1946457656               |
| SNP_P3_84478_5915071 | NC_021166.1    | Ca_kabuli_chr07 | 5915071                 | CC                              | TT                | 1946457658               |
| SNP_P3_84479_5915300 | NC_021166.1    | Ca_kabuli_chr07 | 5915300                 | GG                              | TT                | 1946457660               |
| SNP_P3_84480_5915308 | NC_021166.1    | Ca_kabuli_chr07 | 5915308                 | GG                              | AA                | 1946457661               |
| SNP_P3_84481_5915323 | NC_021166.1    | Ca_kabuli_chr07 | 5915323                 | GG                              | CC                | 1946457663               |
| SNP_P3_84482_5915330 | NC_021166.1    | Ca_kabuli_chr07 | 5915330                 | TT                              | GG                | 1946457664               |
| SNP_P3_84483_5915476 | NC_021166.1    | Ca_kabuli_chr07 | 5915476                 | AA                              | GG                | 1946457666               |
| SNP_P3_84484_5915484 | NC_021166.1    | Ca_kabuli_chr07 | 5915484                 | GG                              | AA                | 1946457667               |
| SNP_P3_84486_5915768 | NC_021166.1    | Ca_kabuli_chr07 | 5915768                 | CC                              | AA                | 1946457669               |
| SNP_P3_84487_5915783 | NC_021166.1    | Ca_kabuli_chr07 | 5915783                 | GG                              | CC                | 1946457670               |
| SNP_P3_84488_5915786 | NC_021166.1    | Ca_kabuli_chr07 | 5915786                 | GG                              | AA                | 1946457672               |
| SNP_P3_84489_5917537 | NC_021166.1    | Ca_kabuli_chr07 | 5917537                 | TT                              | AA                | 1946457673               |
| SNP_P3_84490_5917575 | NC_021166.1    | Ca_kabuli_chr07 | 5917575                 | AA                              | GG                | 1946457675               |
| SNP_P3_84491_5917583 | NC_021166.1    | Ca_kabuli_chr07 | 5917583                 | TT                              | CC                | 1946457676               |
| SNP_P3_84492_5917701 | NC_021166.1    | Ca_kabuli_chr07 | 5917701                 | AA                              | GG                | 1946457678               |
| SNP_P3_84493_5917724 | NC_021166.1    | Ca_kabuli_chr07 | 5917724                 | AA                              | GG                | 1946457679               |
| SNP_P3_84494_5918429 | NC_021166.1    | Ca_kabuli_chr07 | 5918429                 | GG                              | AA                | 1946457681               |
| SNP_P3_84495_5919518 | NC_021166.1    | Ca_kabuli_chr07 | 5919518                 | TT                              | AA                | 1946457682               |
| SNP_P3_84496_5931092 | NC_021166.1    | Ca_kabuli_chr07 | 5931092                 | TT                              | CC                | 1946457684               |
| SNP_P3_84497_5931243 | NC_021166.1    | Ca_kabuli_chr07 | 5931243                 | AA                              | CC                | 1946457685               |
| SNP_P3_84498_5931252 | NC_021166.1    | Ca_kabuli_chr07 | 5931252                 | CC                              | GG                | 1946457687               |
| SNP_P3_84501_5935998 | NC_021166.1    | Ca_kabuli_chr07 | 5935998                 | AA                              | GG                | 1946457688               |
| SNP_P3_84502_5936000 | NC_021166.1    | Ca_kabuli_chr07 | 5936000                 | GG                              | TT                | 1946457690               |
| SNP_P3_84503_5936032 | NC_021166.1    | Ca_kabuli_chr07 | 5936032                 | TT                              | CC                | 1946457691               |
| SNP_P3_84504_5936050 | NC_021166.1    | Ca_kabuli_chr07 | 5936050                 | TT                              | AA                | 1946457693               |
| SNP_P3_84506_5936328 | NC_021166.1    | Ca_kabuli_chr07 | 5936328                 | TT                              | CC                | 1946457694               |
| SNP_P3_84508_5937052 | NC_021166.1    | Ca_kabuli_chr07 | 5937052                 | AA                              | CC                | 1946457696               |
| SNP_P3_84509_5937073 | NC_021166.1    | Ca_kabuli_chr07 | 5937073                 | CC                              | TT                | 1946457697               |
| SNP_P3_84510_5937075 | NC_021166.1    | Ca_kabuli_chr07 | 5937075                 | AA                              | GG                | 1946457699               |
| SNP_P3_84511_5937078 | NC_021166.1    | Ca_kabuli_chr07 | 5937078                 | CC                              | TT                | 1946457701               |
| SNP_P3_84512_5937134 | NC_021166.1    | Ca_kabuli_chr07 | 5937134                 | TT                              | CC                | 1946457702               |
| SNP_P3_84513_5937140 | NC_021166.1    | Ca_kabuli_chr07 | 5937140                 | AA                              | CC                | 1946457704               |
| SNP_P3_84514_5938323 | NC_021166.1    | Ca_kabuli_chr07 | 5938323                 | CC                              | AA                | 1946457705               |

| SNPs IDs             | Chromosome IDs | Chromosomes     | Physical positions (bp) | CDC Frontier (Reference genome) | (Pusa 256 & HPNB) | NCBI SNPdb Accession IDs |
|----------------------|----------------|-----------------|-------------------------|---------------------------------|-------------------|--------------------------|
| SNP_P3_84515_5938600 | NC_021166.1    | Ca_kabuli_chr07 | 5938600                 | AA                              | GG                | 1946457707               |
| SNP_P3_84516_5938605 | NC_021166.1    | Ca_kabuli_chr07 | 5938605                 | GG                              | AA                | 1946457708               |
| SNP_P3_84517_5940907 | NC_021166.1    | Ca_kabuli_chr07 | 5940907                 | TT                              | GG                | 1946457710               |
| SNP_P3_84519_5942139 | NC_021166.1    | Ca_kabuli_chr07 | 5942139                 | TT                              | AA                | 1946457711               |
| SNP_P3_84520_5942198 | NC_021166.1    | Ca_kabuli_chr07 | 5942198                 | CC                              | TT                | 1946457713               |
| SNP_P3_84521_5942361 | NC_021166.1    | Ca_kabuli_chr07 | 5942361                 | TT                              | CC                | 1946457714               |
| SNP_P3_84522_5942418 | NC_021166.1    | Ca_kabuli_chr07 | 5942418                 | TT                              | CC                | 1946457716               |
| SNP_P3_84524_5944125 | NC_021166.1    | Ca_kabuli_chr07 | 5944125                 | GG                              | TT                | 1946457718               |
| SNP_P3_84525_5944461 | NC_021166.1    | Ca_kabuli_chr07 | 5944461                 | CC                              | TT                | 1946457719               |
| SNP_P3_84526_5944715 | NC_021166.1    | Ca_kabuli_chr07 | 5944715                 | CC                              | TT                | 1946457721               |
| SNP_P3_84528_5944772 | NC_021166.1    | Ca_kabuli_chr07 | 5944772                 | TT                              | CC                | 1946457722               |
| SNP_P3_84529_5945649 | NC_021166.1    | Ca_kabuli_chr07 | 5945649                 | TT                              | CC                | 1946457724               |
| SNP_P3_84531_5949285 | NC_021166.1    | Ca_kabuli_chr07 | 5949285                 | AA                              | GG                | 1946457725               |
| SNP_P3_84532_5949307 | NC_021166.1    | Ca_kabuli_chr07 | 5949307                 | CC                              | AA                | 1946457727               |
| SNP_P3_84534_5950834 | NC_021166.1    | Ca_kabuli_chr07 | 5950834                 | AA                              | TT                | 1946457728               |
| SNP_P3_84536_5950925 | NC_021166.1    | Ca_kabuli_chr07 | 5950925                 | AA                              | GG                | 1946457729               |
| SNP_P3_84537_5951972 | NC_021166.1    | Ca_kabuli_chr07 | 5951972                 | TT                              | GG                | 1946457731               |
| SNP_P3_84538_5952436 | NC_021166.1    | Ca_kabuli_chr07 | 5952436                 | AA                              | GG                | 1946457732               |
| SNP_P3_84539_5952445 | NC_021166.1    | Ca_kabuli_chr07 | 5952445                 | TT                              | GG                | 1946457734               |
| SNP_P3_84540_5952456 | NC_021166.1    | Ca_kabuli_chr07 | 5952456                 | TT                              | CC                | 1946457735               |
| SNP_P3_84541_5952474 | NC_021166.1    | Ca_kabuli_chr07 | 5952474                 | CC                              | TT                | 1946457737               |
| SNP_P3_84542_5952482 | NC_021166.1    | Ca_kabuli_chr07 | 5952482                 | GG                              | CC                | 1946457739               |
| SNP_P3_84543_5952484 | NC_021166.1    | Ca_kabuli_chr07 | 5952484                 | AA                              | GG                | 1946457740               |
| SNP_P3_84544_5952538 | NC_021166.1    | Ca_kabuli_chr07 | 5952538                 | GG                              | AA                | 1946457742               |
| SNP_P3_84545_5952571 | NC_021166.1    | Ca_kabuli_chr07 | 5952571                 | CC                              | TT                | 1946457743               |
| SNP_P3_84546_5952579 | NC_021166.1    | Ca_kabuli_chr07 | 5952579                 | CC                              | TT                | 1946457745               |
| SNP_P3_84547_5952631 | NC_021166.1    | Ca_kabuli_chr07 | 5952631                 | GG                              | AA                | 1946457746               |
| SNP_P3_84551_5953828 | NC_021166.1    | Ca_kabuli_chr07 | 5953828                 | TT                              | GG                | 1946457747               |
| SNP_P3_84552_5954831 | NC_021166.1    | Ca_kabuli_chr07 | 5954831                 | TT                              | GG                | 1946457749               |
| SNP_P3_84553_5955635 | NC_021166.1    | Ca_kabuli_chr07 | 5955635                 | TT                              | CC                | 1946457750               |
| SNP_P3_84554_5955654 | NC_021166.1    | Ca_kabuli_chr07 | 5955654                 | TT                              | CC                | 1946457752               |
| SNP_P3_84555_5955660 | NC_021166.1    | Ca_kabuli_chr07 | 5955660                 | GG                              | AA                | 1946457753               |
| SNP_P3_84556_5956317 | NC_021166.1    | Ca_kabuli_chr07 | 5956317                 | CC                              | GG                | 1946457755               |
| SNP_P3_84557_5956400 | NC_021166.1    | Ca_kabuli_chr07 | 5956400                 | AA                              | TT                | 1946457757               |
| SNP_P3_84558_5956444 | NC_021166.1    | Ca_kabuli_chr07 | 5956444                 | TT                              | CC                | 1946457758               |
| SNP_P3_84559_5957193 | NC_021166.1    | Ca_kabuli_chr07 | 5957193                 | CC                              | AA                | 1946457760               |
| SNP_P3_84561_5958944 | NC_021166.1    | Ca_kabuli_chr07 | 5958944                 | GG                              | AA                | 1946457761               |
| SNP_P3_84562_5960035 | NC_021166.1    | Ca_kabuli_chr07 | 5960035                 | CC                              | AA                | 1946457763               |
| SNP_P3_84563_5960041 | NC_021166.1    | Ca_kabuli_chr07 | 5960041                 | CC                              | TT                | 1946457764               |
| SNP_P3_84564_5960120 | NC_021166.1    | Ca_kabuli_chr07 | 5960120                 | TT                              | CC                | 1946457766               |
| SNP_P3_84565_5960126 | NC_021166.1    | Ca_kabuli_chr07 | 5960126                 | TT                              | CC                | 1946457767               |
| SNP_P3_84566_5960144 | NC_021166.1    | Ca_kabuli_chr07 | 5960144                 | GG                              | CC                | 1946457769               |



| SNPs IDs             | Chromosome IDs | Chromosomes     | Physical positions (bp) | CDC Frontier (Reference genome) | (Pusa 256 & HPNB) | NCBI SNPdb Accession IDs |
|----------------------|----------------|-----------------|-------------------------|---------------------------------|-------------------|--------------------------|
| SNP_P3_84567_5960152 | NC_021166.1    | Ca_kabuli_chr07 | 5960152                 | TT                              | CC                | 1946457770               |
| SNP_P3_84568_5960334 | NC_021166.1    | Ca_kabuli_chr07 | 5960334                 | AA                              | GG                | 1946457772               |
| SNP_P3_84569_5960368 | NC_021166.1    | Ca_kabuli_chr07 | 5960368                 | CC                              | TT                | 1946457773               |
| SNP_P3_84570_5960379 | NC_021166.1    | Ca_kabuli_chr07 | 5960379                 | CC                              | TT                | 1946457775               |
| SNP_P3_84571_5960393 | NC_021166.1    | Ca_kabuli_chr07 | 5960393                 | CC                              | TT                | 1946457776               |
| SNP_P3_84572_5960719 | NC_021166.1    | Ca_kabuli_chr07 | 5960719                 | AA                              | GG                | 1946457778               |
| SNP_P3_84573_5962043 | NC_021166.1    | Ca_kabuli_chr07 | 5962043                 | GG                              | CC                | 1946457779               |
| SNP_P3_84574_5962789 | NC_021166.1    | Ca_kabuli_chr07 | 5962789                 | AA                              | GG                | 1946457781               |
| SNP_P3_84575_5973451 | NC_021166.1    | Ca_kabuli_chr07 | 5973451                 | GG                              | AA                | 1946457782               |
| SNP_P3_84577_5975387 | NC_021166.1    | Ca_kabuli_chr07 | 5975387                 | GG                              | AA                | 1946457784               |
| SNP_P3_84578_5975492 | NC_021166.1    | Ca_kabuli_chr07 | 5975492                 | GG                              | AA                | 1946457785               |
| SNP_P3_84579_5976864 | NC_021166.1    | Ca_kabuli_chr07 | 5976864                 | AA                              | GG                | 1946457787               |
| SNP_P3_84580_5976936 | NC_021166.1    | Ca_kabuli_chr07 | 5976936                 | AA                              | GG                | 1946457788               |
| SNP_P3_84581_5977296 | NC_021166.1    | Ca_kabuli_chr07 | 5977296                 | AA                              | GG                | 1946457790               |
| SNP_P3_84582_5977316 | NC_021166.1    | Ca_kabuli_chr07 | 5977316                 | CC                              | TT                | 1946457791               |
| SNP_P3_84583_5977327 | NC_021166.1    | Ca_kabuli_chr07 | 5977327                 | GG                              | AA                | 1946457793               |
| SNP_P3_84584_5977424 | NC_021166.1    | Ca_kabuli_chr07 | 5977424                 | GG                              | AA                | 1946457794               |
| SNP_P3_84585_5977489 | NC_021166.1    | Ca_kabuli_chr07 | 5977489                 | CC                              | TT                | 1946457796               |
| SNP_P3_84586_5977500 | NC_021166.1    | Ca_kabuli_chr07 | 5977500                 | CC                              | AA                | 1946457797               |
| SNP_P3_84587_5978889 | NC_021166.1    | Ca_kabuli_chr07 | 5978889                 | TT                              | GG                | 1946457799               |
| SNP_P3_84589_5979273 | NC_021166.1    | Ca_kabuli_chr07 | 5979273                 | CC                              | AA                | 1946457800               |
| SNP_P3_84591_5980213 | NC_021166.1    | Ca_kabuli_chr07 | 5980213                 | AA                              | GG                | 1946457802               |
| SNP_P3_84592_5980232 | NC_021166.1    | Ca_kabuli_chr07 | 5980232                 | CC                              | GG                | 1946457803               |
| SNP_P3_84593_5980482 | NC_021166.1    | Ca_kabuli_chr07 | 5980482                 | CC                              | AA                | 1946457805               |
| SNP_P3_84594_5980579 | NC_021166.1    | Ca_kabuli_chr07 | 5980579                 | GG                              | TT                | 1946457806               |
| SNP_P3_84595_5981898 | NC_021166.1    | Ca_kabuli_chr07 | 5981898                 | CC                              | TT                | 1946457808               |
| SNP_P3_84597_5982184 | NC_021166.1    | Ca_kabuli_chr07 | 5982184                 | GG                              | AA                | 1946457810               |
| SNP_P3_84598_5983847 | NC_021166.1    | Ca_kabuli_chr07 | 5983847                 | GG                              | AA                | 1946457811               |
| SNP_P3_84599_5984079 | NC_021166.1    | Ca_kabuli_chr07 | 5984079                 | AA                              | GG                | 1946457813               |
| SNP_P3_84600_5984537 | NC_021166.1    | Ca_kabuli_chr07 | 5984537                 | TT                              | AA                | 1946457814               |
| SNP_P3_84601_5986945 | NC_021166.1    | Ca_kabuli_chr07 | 5986945                 | AA                              | TT                | 1946457816               |
| SNP_P3_84602_5987322 | NC_021166.1    | Ca_kabuli_chr07 | 5987322                 | CC                              | TT                | 1946457817               |
| SNP_P3_84603_5987333 | NC_021166.1    | Ca_kabuli_chr07 | 5987333                 | TT                              | GG                | 1946457819               |
| SNP_P3_84604_5987366 | NC_021166.1    | Ca_kabuli_chr07 | 5987366                 | TT                              | AA                | 1946457820               |
| SNP_P3_84605_5989138 | NC_021166.1    | Ca_kabuli_chr07 | 5989138                 | AA                              | GG                | 1946457822               |
| SNP_P3_84606_5989143 | NC_021166.1    | Ca_kabuli_chr07 | 5989143                 | CC                              | TT                | 1946457823               |
| SNP_P3_84607_5991110 | NC_021166.1    | Ca_kabuli_chr07 | 5991110                 | AA                              | GG                | 1946457825               |
| SNP_P3_84608_5994279 | NC_021166.1    | Ca_kabuli_chr07 | 5994279                 | GG                              | AA                | 1946457826               |
| SNP_P3_84609_5994542 | NC_021166.1    | Ca_kabuli_chr07 | 5994542                 | AA                              | GG                | 1946457828               |
| SNP_P3_84610_5994543 | NC_021166.1    | Ca_kabuli_chr07 | 5994543                 | AA                              | GG                | 1946457829               |
| SNP_P3_84611_5995646 | NC_021166.1    | Ca_kabuli_chr07 | 5995646                 | TT                              | GG                | 1946457831               |
| SNP_P3_84612_5995710 | NC_021166.1    | Ca_kabuli_chr07 | 5995710                 | CC                              | TT                | 1946457832               |

| SNPs IDs             | Chromosome IDs | Chromosomes     | Physical positions (bp) | CDC Frontier (Reference genome) | (Pusa 256 & HPNB) | NCBI SNPdb Accession IDs |
|----------------------|----------------|-----------------|-------------------------|---------------------------------|-------------------|--------------------------|
| SNP_P3_84613_5997237 | NC_021166.1    | Ca_kabuli_chr07 | 5997237                 | CC                              | AA                | 1946457834               |
| SNP_P3_84614_5997298 | NC_021166.1    | Ca_kabuli_chr07 | 5997298                 | TT                              | CC                | 1946457835               |
| SNP_P3_84615_5997478 | NC_021166.1    | Ca_kabuli_chr07 | 5997478                 | AA                              | GG                | 1946457837               |
| SNP_P3_84617_5997887 | NC_021166.1    | Ca_kabuli_chr07 | 5997887                 | CC                              | TT                | 1946457838               |
| SNP_P3_84618_5997907 | NC_021166.1    | Ca_kabuli_chr07 | 5997907                 | TT                              | CC                | 1946457840               |
| SNP_P3_84619_5998128 | NC_021166.1    | Ca_kabuli_chr07 | 5998128                 | GG                              | AA                | 1946457841               |
| SNP_P3_84620_5998335 | NC_021166.1    | Ca_kabuli_chr07 | 5998335                 | GG                              | AA                | 1946457843               |
| SNP_P3_84621_5998419 | NC_021166.1    | Ca_kabuli_chr07 | 5998419                 | CC                              | AA                | 1946457845               |
| SNP_P3_84622_5998625 | NC_021166.1    | Ca_kabuli_chr07 | 5998625                 | TT                              | CC                | 1946457847               |
| SNP_P3_84623_5998659 | NC_021166.1    | Ca_kabuli_chr07 | 5998659                 | AA                              | GG                | 1946457848               |
| SNP_P3_84624_5998673 | NC_021166.1    | Ca_kabuli_chr07 | 5998673                 | TT                              | CC                | 1946457850               |
| SNP_P3_84625_5998707 | NC_021166.1    | Ca_kabuli_chr07 | 5998707                 | AA                              | GG                | 1946457851               |
| SNP_P3_84626_5998714 | NC_021166.1    | Ca_kabuli_chr07 | 5998714                 | TT                              | AA                | 1946457853               |
| SNP_P3_84627_5998726 | NC_021166.1    | Ca_kabuli_chr07 | 5998726                 | TT                              | CC                | 1946457854               |
| SNP_P3_84628_5998952 | NC_021166.1    | Ca_kabuli_chr07 | 5998952                 | TT                              | CC                | 1946457856               |
| SNP_P3_84629_6000428 | NC_021166.1    | Ca_kabuli_chr07 | 6000428                 | GG                              | AA                | 1946457857               |
| SNP_P3_84630_6000496 | NC_021166.1    | Ca_kabuli_chr07 | 6000496                 | TT                              | CC                | 1946457859               |
| SNP_P3_84631_6001113 | NC_021166.1    | Ca_kabuli_chr07 | 6001113                 | CC                              | AA                | 1946457860               |
| SNP_P3_84632_6001917 | NC_021166.1    | Ca_kabuli_chr07 | 6001917                 | GG                              | AA                | 1946457862               |
| SNP_P3_84633_6002126 | NC_021166.1    | Ca_kabuli_chr07 | 6002126                 | CC                              | TT                | 1946457864               |
| SNP_P3_84634_6002624 | NC_021166.1    | Ca_kabuli_chr07 | 6002624                 | CC                              | GG                | 1946457865               |
| SNP_P3_84636_6002893 | NC_021166.1    | Ca_kabuli_chr07 | 6002893                 | TT                              | CC                | 1946457867               |
| SNP_P3_84637_6006167 | NC_021166.1    | Ca_kabuli_chr07 | 6006167                 | AA                              | GG                | 1946457868               |
| SNP_P3_84638_6006398 | NC_021166.1    | Ca_kabuli_chr07 | 6006398                 | TT                              | CC                | 1946457870               |
| SNP_P3_84640_6006890 | NC_021166.1    | Ca_kabuli_chr07 | 6006890                 | AA                              | CC                | 1946457871               |
| SNP_P3_84641_6007018 | NC_021166.1    | Ca_kabuli_chr07 | 6007018                 | TT                              | CC                | 1946457873               |
| SNP_P3_84642_6007237 | NC_021166.1    | Ca_kabuli_chr07 | 6007237                 | TT                              | CC                | 1946457874               |
| SNP_P3_84644_6007315 | NC_021166.1    | Ca_kabuli_chr07 | 6007315                 | GG                              | TT                | 1946457876               |
| SNP_P3_84645_6008953 | NC_021166.1    | Ca_kabuli_chr07 | 6008953                 | CC                              | AA                | 1946457877               |
| SNP_P3_84646_6009247 | NC_021166.1    | Ca_kabuli_chr07 | 6009247                 | TT                              | GG                | 1946457879               |
| SNP_P3_84647_6009671 | NC_021166.1    | Ca_kabuli_chr07 | 6009671                 | AA                              | TT                | 1946457880               |
| SNP_P3_84648_6012363 | NC_021166.1    | Ca_kabuli_chr07 | 6012363                 | TT                              | AA                | 1946457882               |
| SNP_P3_84649_6013127 | NC_021166.1    | Ca_kabuli_chr07 | 6013127                 | AA                              | CC                | 1946457883               |
| SNP_P3_84650_6013132 | NC_021166.1    | Ca_kabuli_chr07 | 6013132                 | AA                              | CC                | 1946457885               |
| SNP_P3_84651_6013694 | NC_021166.1    | Ca_kabuli_chr07 | 6013694                 | AA                              | TT                | 1946457886               |
| SNP_P3_84652_6013759 | NC_021166.1    | Ca_kabuli_chr07 | 6013759                 | AA                              | GG                | 1946457888               |
| SNP_P3_84653_6013766 | NC_021166.1    | Ca_kabuli_chr07 | 6013766                 | TT                              | CC                | 1946457889               |
| SNP_P3_84654_6015324 | NC_021166.1    | Ca_kabuli_chr07 | 6015324                 | AA                              | GG                | 1946457891               |
| SNP_P3_84655_6015478 | NC_021166.1    | Ca_kabuli_chr07 | 6015478                 | CC                              | TT                | 1946457892               |
| SNP_P3_84656_6015503 | NC_021166.1    | Ca_kabuli_chr07 | 6015503                 | CC                              | TT                | 1946457894               |
| SNP_P3_84657_6015737 | NC_021166.1    | Ca_kabuli_chr07 | 6015737                 | AA                              | GG                | 1946457895               |
| SNP_P3_84658_6017113 | NC_021166.1    | Ca_kabuli_chr07 | 6017113                 | TT                              | CC                | 1946457897               |

| SNPs IDs             | Chromosome IDs | Chromosomes     | Physical positions (bp) | CDC Frontier (Reference genome) | (Pusa 256 & HPNB) | NCBI SNPdb Accession IDs |
|----------------------|----------------|-----------------|-------------------------|---------------------------------|-------------------|--------------------------|
| SNP_P3_84659_6017123 | NC_021166.1    | Ca_kabuli_chr07 | 6017123                 | TT                              | CC                | 1946457898               |
| SNP_P3_84660_6017165 | NC_021166.1    | Ca_kabuli_chr07 | 6017165                 | GG                              | AA                | 1946457900               |
| SNP_P3_84662_6017323 | NC_021166.1    | Ca_kabuli_chr07 | 6017323                 | CC                              | TT                | 1946457901               |
| SNP_P3_84663_6017353 | NC_021166.1    | Ca_kabuli_chr07 | 6017353                 | AA                              | TT                | 1946457903               |
| SNP_P3_84664_6017354 | NC_021166.1    | Ca_kabuli_chr07 | 6017354                 | GG                              | TT                | 1946457904               |
| SNP_P3_84665_6017392 | NC_021166.1    | Ca_kabuli_chr07 | 6017392                 | AA                              | TT                | 1946457906               |
| SNP_P3_84666_6017396 | NC_021166.1    | Ca_kabuli_chr07 | 6017396                 | TT                              | GG                | 1946457907               |
| SNP_P3_84667_6017557 | NC_021166.1    | Ca_kabuli_chr07 | 6017557                 | CC                              | TT                | 1946457909               |
| SNP_P3_84669_6017721 | NC_021166.1    | Ca_kabuli_chr07 | 6017721                 | CC                              | TT                | 1946457910               |
| SNP_P3_84670_6018225 | NC_021166.1    | Ca_kabuli_chr07 | 6018225                 | GG                              | TT                | 1946457912               |
| SNP_P3_84672_6018283 | NC_021166.1    | Ca_kabuli_chr07 | 6018283                 | AA                              | GG                | 1946457913               |
| SNP_P3_84673_6020598 | NC_021166.1    | Ca_kabuli_chr07 | 6020598                 | CC                              | AA                | 1946457915               |
| SNP_P3_84674_6020601 | NC_021166.1    | Ca_kabuli_chr07 | 6020601                 | GG                              | AA                | 1946457916               |
| SNP_P3_84675_6020609 | NC_021166.1    | Ca_kabuli_chr07 | 6020609                 | GG                              | AA                | 1946457918               |
| SNP_P3_84676_6020722 | NC_021166.1    | Ca_kabuli_chr07 | 6020722                 | AA                              | CC                | 1946457919               |
| SNP_P3_84678_6021223 | NC_021166.1    | Ca_kabuli_chr07 | 6021223                 | CC                              | TT                | 1946457921               |
| SNP_P3_84681_6022005 | NC_021166.1    | Ca_kabuli_chr07 | 6022005                 | AA                              | GG                | 1946457922               |
| SNP_P3_84682_6022018 | NC_021166.1    | Ca_kabuli_chr07 | 6022018                 | AA                              | GG                | 1946457924               |
| SNP_P3_84683_6022154 | NC_021166.1    | Ca_kabuli_chr07 | 6022154                 | GG                              | AA                | 1946457926               |
| SNP_P3_84684_6022181 | NC_021166.1    | Ca_kabuli_chr07 | 6022181                 | CC                              | TT                | 1946457927               |
| SNP_P3_84685_6022262 | NC_021166.1    | Ca_kabuli_chr07 | 6022262                 | GG                              | AA                | 1946457929               |
| SNP_P3_84686_6022282 | NC_021166.1    | Ca_kabuli_chr07 | 6022282                 | TT                              | CC                | 1946457930               |
| SNP_P3_84687_6023723 | NC_021166.1    | Ca_kabuli_chr07 | 6023723                 | CC                              | TT                | 1946457932               |
| SNP_P3_84688_6024652 | NC_021166.1    | Ca_kabuli_chr07 | 6024652                 | AA                              | GG                | 1946457933               |
| SNP_P3_84689_6024972 | NC_021166.1    | Ca_kabuli_chr07 | 6024972                 | TT                              | GG                | 1946457935               |
| SNP_P3_84690_6024976 | NC_021166.1    | Ca_kabuli_chr07 | 6024976                 | AA                              | CC                | 1946457936               |
| SNP_P3_84691_6025092 | NC_021166.1    | Ca_kabuli_chr07 | 6025092                 | TT                              | CC                | 1946457938               |
| SNP_P3_84692_6028640 | NC_021166.1    | Ca_kabuli_chr07 | 6028640                 | CC                              | AA                | 1946457939               |
| SNP_P3_84693_6028962 | NC_021166.1    | Ca_kabuli_chr07 | 6028962                 | TT                              | GG                | 1946457941               |
| SNP_P3_84694_6028994 | NC_021166.1    | Ca_kabuli_chr07 | 6028994                 | CC                              | AA                | 1946457942               |
| SNP_P3_84695_6029141 | NC_021166.1    | Ca_kabuli_chr07 | 6029141                 | TT                              | GG                | 1946457944               |
| SNP_P3_84696_6030561 | NC_021166.1    | Ca_kabuli_chr07 | 6030561                 | TT                              | CC                | 1946457946               |
| SNP_P3_84697_6031110 | NC_021166.1    | Ca_kabuli_chr07 | 6031110                 | GG                              | CC                | 1946457947               |
| SNP_P3_84698_6032204 | NC_021166.1    | Ca_kabuli_chr07 | 6032204                 | GG                              | AA                | 1946457949               |
| SNP_P3_84699_6032242 | NC_021166.1    | Ca_kabuli_chr07 | 6032242                 | TT                              | AA                | 1946457950               |
| SNP_P3_84700_6032247 | NC_021166.1    | Ca_kabuli_chr07 | 6032247                 | AA                              | GG                | 1946457951               |
| SNP_P3_84701_6032252 | NC_021166.1    | Ca_kabuli_chr07 | 6032252                 | TT                              | CC                | 1946457953               |
| SNP_P3_84702_6032264 | NC_021166.1    | Ca_kabuli_chr07 | 6032264                 | CC                              | TT                | 1946457954               |
| SNP_P3_84703_6032267 | NC_021166.1    | Ca_kabuli_chr07 | 6032267                 | TT                              | CC                | 1946457956               |
| SNP_P3_84704_6032395 | NC_021166.1    | Ca_kabuli_chr07 | 6032395                 | TT                              | CC                | 1946457957               |
| SNP_P3_84705_6032764 | NC_021166.1    | Ca_kabuli_chr07 | 6032764                 | AA                              | GG                | 1946457959               |
| SNP_P3_84706_6033034 | NC_021166.1    | Ca_kabuli_chr07 | 6033034                 | TT                              | GG                | 1946457960               |

| SNPs IDs             | Chromosome IDs | Chromosomes     | Physical positions (bp) | CDC Frontier (Reference genome) | (Pusa 256 & HPNB) | NCBI SNPdb Accession IDs |
|----------------------|----------------|-----------------|-------------------------|---------------------------------|-------------------|--------------------------|
| SNP_P3_84707_6033058 | NC_021166.1    | Ca_kabuli_chr07 | 6033058                 | CC                              | TT                | 1946457962               |
| SNP_P3_84708_6033067 | NC_021166.1    | Ca_kabuli_chr07 | 6033067                 | CC                              | GG                | 1946457963               |
| SNP_P3_84709_6033068 | NC_021166.1    | Ca_kabuli_chr07 | 6033068                 | TT                              | GG                | 1946457965               |
| SNP_P3_84710_6034093 | NC_021166.1    | Ca_kabuli_chr07 | 6034093                 | CC                              | TT                | 1946457967               |
| SNP_P3_84711_6034105 | NC_021166.1    | Ca_kabuli_chr07 | 6034105                 | AA                              | TT                | 1946457968               |
| SNP_P3_84712_6034119 | NC_021166.1    | Ca_kabuli_chr07 | 6034119                 | AA                              | GG                | 1946457970               |
| SNP_P3_84713_6034121 | NC_021166.1    | Ca_kabuli_chr07 | 6034121                 | CC                              | GG                | 1946457971               |
| SNP_P3_84714_6034160 | NC_021166.1    | Ca_kabuli_chr07 | 6034160                 | TT                              | CC                | 1946457973               |
| SNP_P3_84715_6034164 | NC_021166.1    | Ca_kabuli_chr07 | 6034164                 | AA                              | TT                | 1946457974               |
| SNP_P3_84716_6034174 | NC_021166.1    | Ca_kabuli_chr07 | 6034174                 | TT                              | GG                | 1946457976               |
| SNP_P3_84717_6034177 | NC_021166.1    | Ca_kabuli_chr07 | 6034177                 | AA                              | GG                | 1946457977               |
| SNP_P3_84718_6034563 | NC_021166.1    | Ca_kabuli_chr07 | 6034563                 | GG                              | TT                | 1946457979               |
| SNP_P3_84719_6034582 | NC_021166.1    | Ca_kabuli_chr07 | 6034582                 | GG                              | AA                | 1946457980               |
| SNP_P3_84720_6034926 | NC_021166.1    | Ca_kabuli_chr07 | 6034926                 | AA                              | GG                | 1946457982               |
| SNP_P3_84721_6035265 | NC_021166.1    | Ca_kabuli_chr07 | 6035265                 | GG                              | AA                | 1946457983               |
| SNP_P3_84722_6036378 | NC_021166.1    | Ca_kabuli_chr07 | 6036378                 | AA                              | TT                | 1946457985               |
| SNP_P3_84723_6036395 | NC_021166.1    | Ca_kabuli_chr07 | 6036395                 | CC                              | AA                | 1946457987               |
| SNP_P3_84724_6037043 | NC_021166.1    | Ca_kabuli_chr07 | 6037043                 | GG                              | AA                | 1946457988               |
| SNP_P3_84725_6037444 | NC_021166.1    | Ca_kabuli_chr07 | 6037444                 | TT                              | AA                | 1946457990               |
| SNP_P3_84726_6037614 | NC_021166.1    | Ca_kabuli_chr07 | 6037614                 | TT                              | CC                | 1946457991               |
| SNP_P3_84727_6037676 | NC_021166.1    | Ca_kabuli_chr07 | 6037676                 | TT                              | AA                | 1946457993               |
| SNP_P3_84728_6038950 | NC_021166.1    | Ca_kabuli_chr07 | 6038950                 | AA                              | TT                | 1946457994               |
| SNP_P3_84729_6039093 | NC_021166.1    | Ca_kabuli_chr07 | 6039093                 | TT                              | GG                | 1946457996               |
| SNP_P3_84730_6039100 | NC_021166.1    | Ca_kabuli_chr07 | 6039100                 | TT                              | CC                | 1946457999               |
| SNP_P3_84731_6039281 | NC_021166.1    | Ca_kabuli_chr07 | 6039281                 | AA                              | TT                | 1946458000               |
| SNP_P3_84732_6040498 | NC_021166.1    | Ca_kabuli_chr07 | 6040498                 | CC                              | TT                | 1946458002               |
| SNP_P3_84733_6040728 | NC_021166.1    | Ca_kabuli_chr07 | 6040728                 | GG                              | AA                | 1946458003               |
| SNP_P3_84734_6040910 | NC_021166.1    | Ca_kabuli_chr07 | 6040910                 | GG                              | AA                | 1946458005               |
| SNP_P3_84735_6040981 | NC_021166.1    | Ca_kabuli_chr07 | 6040981                 | TT                              | CC                | 1946458007               |
| SNP_P3_84736_6043937 | NC_021166.1    | Ca_kabuli_chr07 | 6043937                 | GG                              | AA                | 1946458008               |
| SNP_P3_84737_6044663 | NC_021166.1    | Ca_kabuli_chr07 | 6044663                 | CC                              | TT                | 1946458010               |
| SNP_P3_84738_6045490 | NC_021166.1    | Ca_kabuli_chr07 | 6045490                 | AA                              | TT                | 1946458011               |
| SNP_P3_84740_6046688 | NC_021166.1    | Ca_kabuli_chr07 | 6046688                 | CC                              | TT                | 1946458013               |
| SNP_P3_84742_6047297 | NC_021166.1    | Ca_kabuli_chr07 | 6047297                 | AA                              | CC                | 1946458014               |
| SNP_P3_84743_6047299 | NC_021166.1    | Ca_kabuli_chr07 | 6047299                 | TT                              | CC                | 1946458016               |
| SNP_P3_84745_6049339 | NC_021166.1    | Ca_kabuli_chr07 | 6049339                 | CC                              | AA                | 1946458018               |
| SNP_P3_84747_6049656 | NC_021166.1    | Ca_kabuli_chr07 | 6049656                 | AA                              | TT                | 1946458019               |
| SNP_P3_84749_6049886 | NC_021166.1    | Ca_kabuli_chr07 | 6049886                 | AA                              | GG                | 1946458020               |
| SNP_P3_84751_6049945 | NC_021166.1    | Ca_kabuli_chr07 | 6049945                 | AA                              | CC                | 1946458022               |
| SNP_P3_84752_6052475 | NC_021166.1    | Ca_kabuli_chr07 | 6052475                 | AA                              | CC                | 1946458023               |
| SNP_P3_84754_6055950 | NC_021166.1    | Ca_kabuli_chr07 | 6055950                 | TT                              | GG                | 1946458025               |
| SNP_P3_84755_6055994 | NC_021166.1    | Ca_kabuli_chr07 | 6055994                 | GG                              | AA                | 1946458026               |

| SNPs IDs             | Chromosome IDs | Chromosomes     | Physical positions (bp) | CDC Frontier (Reference genome) | (Pusa 256 & HPNB) | NCBI SNPdb Accession IDs |
|----------------------|----------------|-----------------|-------------------------|---------------------------------|-------------------|--------------------------|
| SNP_P3_84757_6057439 | NC_021166.1    | Ca_kabuli_chr07 | 6057439                 | TT                              | GG                | 1946458028               |
| SNP_P3_84758_6057445 | NC_021166.1    | Ca_kabuli_chr07 | 6057445                 | AA                              | CC                | 1946458029               |
| SNP_P3_84759_6057834 | NC_021166.1    | Ca_kabuli_chr07 | 6057834                 | AA                              | CC                | 1946458030               |
| SNP_P3_84760_6057873 | NC_021166.1    | Ca_kabuli_chr07 | 6057873                 | TT                              | GG                | 1946458032               |
| SNP_P3_84761_6057921 | NC_021166.1    | Ca_kabuli_chr07 | 6057921                 | AA                              | GG                | 1946458033               |
| SNP_P3_84762_6058347 | NC_021166.1    | Ca_kabuli_chr07 | 6058347                 | TT                              | AA                | 1946458035               |
| SNP_P3_84763_6059002 | NC_021166.1    | Ca_kabuli_chr07 | 6059002                 | CC                              | GG                | 1946458036               |
| SNP_P3_84764_6060518 | NC_021166.1    | Ca_kabuli_chr07 | 6060518                 | TT                              | CC                | 1946458038               |
| SNP_P3_84765_6060693 | NC_021166.1    | Ca_kabuli_chr07 | 6060693                 | TT                              | GG                | 1946458039               |
| SNP_P3_84767_6060905 | NC_021166.1    | Ca_kabuli_chr07 | 6060905                 | AA                              | CC                | 1946458041               |
| SNP_P3_84769_6060963 | NC_021166.1    | Ca_kabuli_chr07 | 6060963                 | TT                              | CC                | 1946458042               |
| SNP_P3_84770_6061115 | NC_021166.1    | Ca_kabuli_chr07 | 6061115                 | AA                              | TT                | 1946458044               |
| SNP_P3_84771_6061126 | NC_021166.1    | Ca_kabuli_chr07 | 6061126                 | TT                              | CC                | 1946458045               |
| SNP_P3_84772_6061410 | NC_021166.1    | Ca_kabuli_chr07 | 6061410                 | GG                              | AA                | 1946458047               |
| SNP_P3_84773_6061855 | NC_021166.1    | Ca_kabuli_chr07 | 6061855                 | CC                              | AA                | 1946458048               |
| SNP_P3_84774_6062151 | NC_021166.1    | Ca_kabuli_chr07 | 6062151                 | GG                              | TT                | 1946458050               |
| SNP_P3_84776_6062971 | NC_021166.1    | Ca_kabuli_chr07 | 6062971                 | TT                              | AA                | 1946458051               |
| SNP_P3_84777_6062994 | NC_021166.1    | Ca_kabuli_chr07 | 6062994                 | AA                              | TT                | 1946458053               |
| SNP_P3_84778_6063018 | NC_021166.1    | Ca_kabuli_chr07 | 6063018                 | AA                              | GG                | 1946458054               |
| SNP_P3_84779_6063046 | NC_021166.1    | Ca_kabuli_chr07 | 6063046                 | CC                              | TT                | 1946458056               |
| SNP_P3_84780_6063284 | NC_021166.1    | Ca_kabuli_chr07 | 6063284                 | TT                              | CC                | 1946458057               |
| SNP_P3_84781_6063503 | NC_021166.1    | Ca_kabuli_chr07 | 6063503                 | CC                              | TT                | 1946458059               |
| SNP_P3_84783_6063532 | NC_021166.1    | Ca_kabuli_chr07 | 6063532                 | CC                              | TT                | 1946458061               |
| SNP_P3_84784_6063819 | NC_021166.1    | Ca_kabuli_chr07 | 6063819                 | GG                              | AA                | 1946458062               |
| SNP_P3_84786_6064722 | NC_021166.1    | Ca_kabuli_chr07 | 6064722                 | GG                              | AA                | 1946458064               |
| SNP_P3_84787_6064956 | NC_021166.1    | Ca_kabuli_chr07 | 6064956                 | CC                              | GG                | 1946458065               |
| SNP_P3_84788_6064982 | NC_021166.1    | Ca_kabuli_chr07 | 6064982                 | TT                              | CC                | 1946458067               |
| SNP_P3_84789_6064985 | NC_021166.1    | Ca_kabuli_chr07 | 6064985                 | GG                              | TT                | 1946458068               |
| SNP_P3_84790_6064986 | NC_021166.1    | Ca_kabuli_chr07 | 6064986                 | TT                              | CC                | 1946458070               |
| SNP_P3_84791_6065009 | NC_021166.1    | Ca_kabuli_chr07 | 6065009                 | TT                              | CC                | 1946458071               |
| SNP_P3_84792_6065023 | NC_021166.1    | Ca_kabuli_chr07 | 6065023                 | CC                              | TT                | 1946458073               |
| SNP_P3_84793_6065043 | NC_021166.1    | Ca_kabuli_chr07 | 6065043                 | AA                              | CC                | 1946458074               |
| SNP_P3_84796_6065915 | NC_021166.1    | Ca_kabuli_chr07 | 6065915                 | TT                              | CC                | 1946458076               |
| SNP_P3_84797_6065924 | NC_021166.1    | Ca_kabuli_chr07 | 6065924                 | GG                              | AA                | 1946458077               |
| SNP_P3_84798_6067051 | NC_021166.1    | Ca_kabuli_chr07 | 6067051                 | TT                              | CC                | 1946458079               |
| SNP_P3_84799_6067228 | NC_021166.1    | Ca_kabuli_chr07 | 6067228                 | CC                              | GG                | 1946458080               |
| SNP_P3_84800_6067535 | NC_021166.1    | Ca_kabuli_chr07 | 6067535                 | TT                              | CC                | 1946458082               |
| SNP_P3_84802_6067876 | NC_021166.1    | Ca_kabuli_chr07 | 6067876                 | GG                              | AA                | 1946458083               |
| SNP_P3_84803_6070536 | NC_021166.1    | Ca_kabuli_chr07 | 6070536                 | GG                              | AA                | 1946458085               |
| SNP_P3_84804_6070572 | NC_021166.1    | Ca_kabuli_chr07 | 6070572                 | CC                              | TT                | 1946458086               |
| SNP_P3_84805_6078219 | NC_021166.1    | Ca_kabuli_chr07 | 6078219                 | TT                              | CC                | 1946458088               |
| SNP_P3_84806_6078622 | NC_021166.1    | Ca_kabuli_chr07 | 6078622                 | AA                              | GG                | 1946458089               |

| SNPs IDs             | Chromosome IDs | Chromosomes     | Physical positions (bp) | CDC Frontier (Reference genome) | (Pusa 256 & HPNB) | NCBI SNPdb Accession IDs |
|----------------------|----------------|-----------------|-------------------------|---------------------------------|-------------------|--------------------------|
| SNP_P3_84807_6078701 | NC_021166.1    | Ca_kabuli_chr07 | 6078701                 | GG                              | AA                | 1946458091               |
| SNP_P3_84808_6078951 | NC_021166.1    | Ca_kabuli_chr07 | 6078951                 | AA                              | GG                | 1946458092               |
| SNP_P3_84809_6078964 | NC_021166.1    | Ca_kabuli_chr07 | 6078964                 | CC                              | TT                | 1946458094               |
| SNP_P3_84810_6078965 | NC_021166.1    | Ca_kabuli_chr07 | 6078965                 | CC                              | GG                | 1946458095               |
| SNP_P3_84811_6079933 | NC_021166.1    | Ca_kabuli_chr07 | 6079933                 | AA                              | GG                | 1946458097               |
| SNP_P3_84812_6080276 | NC_021166.1    | Ca_kabuli_chr07 | 6080276                 | GG                              | AA                | 1946458099               |
| SNP_P3_84815_6080946 | NC_021166.1    | Ca_kabuli_chr07 | 6080946                 | TT                              | AA                | 1946458100               |
| SNP_P3_84817_6081504 | NC_021166.1    | Ca_kabuli_chr07 | 6081504                 | GG                              | AA                | 1946458101               |
| SNP_P3_84819_6082783 | NC_021166.1    | Ca_kabuli_chr07 | 6082783                 | GG                              | AA                | 1946458103               |
| SNP_P3_84821_6083237 | NC_021166.1    | Ca_kabuli_chr07 | 6083237                 | AA                              | CC                | 1946458104               |
| SNP_P3_84822_6083292 | NC_021166.1    | Ca_kabuli_chr07 | 6083292                 | TT                              | AA                | 1946458106               |
| SNP_P3_84824_6083879 | NC_021166.1    | Ca_kabuli_chr07 | 6083879                 | AA                              | GG                | 1946458107               |
| SNP_P3_84825_6083912 | NC_021166.1    | Ca_kabuli_chr07 | 6083912                 | TT                              | GG                | 1946458109               |
| SNP_P3_84826_6084232 | NC_021166.1    | Ca_kabuli_chr07 | 6084232                 | GG                              | AA                | 1946458110               |
| SNP_P3_84828_6084508 | NC_021166.1    | Ca_kabuli_chr07 | 6084508                 | GG                              | TT                | 1946458112               |
| SNP_P3_84831_6087459 | NC_021166.1    | Ca_kabuli_chr07 | 6087459                 | TT                              | CC                | 1946458113               |
| SNP_P3_84833_6087845 | NC_021166.1    | Ca_kabuli_chr07 | 6087845                 | AA                              | GG                | 1946458115               |
| SNP_P3_84834_6088237 | NC_021166.1    | Ca_kabuli_chr07 | 6088237                 | TT                              | CC                | 1946458116               |
| SNP_P3_84835_6088477 | NC_021166.1    | Ca_kabuli_chr07 | 6088477                 | AA                              | CC                | 1946458118               |
| SNP_P3_84837_6089284 | NC_021166.1    | Ca_kabuli_chr07 | 6089284                 | CC                              | TT                | 1946458119               |
| SNP_P3_84838_6090653 | NC_021166.1    | Ca_kabuli_chr07 | 6090653                 | GG                              | TT                | 1946458121               |
| SNP_P3_84839_6091301 | NC_021166.1    | Ca_kabuli_chr07 | 6091301                 | AA                              | GG                | 1946458122               |
| SNP_P3_84840_6091312 | NC_021166.1    | Ca_kabuli_chr07 | 6091312                 | GG                              | AA                | 1946458124               |
| SNP_P3_84841_6094100 | NC_021166.1    | Ca_kabuli_chr07 | 6094100                 | AA                              | GG                | 1946458125               |
| SNP_P3_84842_6094143 | NC_021166.1    | Ca_kabuli_chr07 | 6094143                 | CC                              | TT                | 1946458127               |
| SNP_P3_84843_6094346 | NC_021166.1    | Ca_kabuli_chr07 | 6094346                 | CC                              | TT                | 1946458128               |
| SNP_P3_84844_6095283 | NC_021166.1    | Ca_kabuli_chr07 | 6095283                 | AA                              | CC                | 1946458130               |
| SNP_P3_84845_6096413 | NC_021166.1    | Ca_kabuli_chr07 | 6096413                 | CC                              | TT                | 1946458131               |
| SNP_P3_84846_6097007 | NC_021166.1    | Ca_kabuli_chr07 | 6097007                 | CC                              | TT                | 1946458133               |
| SNP_P3_84848_6097058 | NC_021166.1    | Ca_kabuli_chr07 | 6097058                 | AA                              | CC                | 1946458134               |
| SNP_P3_84850_6097281 | NC_021166.1    | Ca_kabuli_chr07 | 6097281                 | TT                              | CC                | 1946458136               |
| SNP_P3_84851_6101023 | NC_021166.1    | Ca_kabuli_chr07 | 6101023                 | AA                              | CC                | 1946458137               |
| SNP_P3_84852_6101961 | NC_021166.1    | Ca_kabuli_chr07 | 6101961                 | TT                              | CC                | 1946458139               |
| SNP_P3_84853_6102217 | NC_021166.1    | Ca_kabuli_chr07 | 6102217                 | GG                              | AA                | 1946458140               |
| SNP_P3_84854_6102254 | NC_021166.1    | Ca_kabuli_chr07 | 6102254                 | TT                              | CC                | 1946458142               |
| SNP_P3_84855_6102256 | NC_021166.1    | Ca_kabuli_chr07 | 6102256                 | TT                              | CC                | 1946458143               |
| SNP_P3_84856_6102408 | NC_021166.1    | Ca_kabuli_chr07 | 6102408                 | GG                              | AA                | 1946458144               |
| SNP_P3_84857_6102437 | NC_021166.1    | Ca_kabuli_chr07 | 6102437                 | TT                              | CC                | 1946458145               |
| SNP_P3_84859_6102640 | NC_021166.1    | Ca_kabuli_chr07 | 6102640                 | TT                              | CC                | 1946458146               |
| SNP_P3_84860_6104304 | NC_021166.1    | Ca_kabuli_chr07 | 6104304                 | GG                              | AA                | 1946458147               |
| SNP_P3_84861_6104715 | NC_021166.1    | Ca_kabuli_chr07 | 6104715                 | CC                              | AA                | 1946458148               |
| SNP_P3_84862_6104741 | NC_021166.1    | Ca_kabuli_chr07 | 6104741                 | GG                              | TT                | 1946458150               |

| SNPs IDs             | Chromosome IDs | Chromosomes     | Physical positions (bp) | CDC Frontier (Reference genome) | (Pusa 256 & HPNB) | NCBI SNPdb Accession IDs |
|----------------------|----------------|-----------------|-------------------------|---------------------------------|-------------------|--------------------------|
| SNP_P3_84863_6104918 | NC_021166.1    | Ca_kabuli_chr07 | 6104918                 | CC                              | TT                | 1946458151               |
| SNP_P3_84864_6105426 | NC_021166.1    | Ca_kabuli_chr07 | 6105426                 | AA                              | TT                | 1946458153               |
| SNP_P3_84865_6107080 | NC_021166.1    | Ca_kabuli_chr07 | 6107080                 | AA                              | GG                | 1946458155               |
| SNP_P3_84866_6107082 | NC_021166.1    | Ca_kabuli_chr07 | 6107082                 | CC                              | TT                | 1946458156               |
| SNP_P3_84867_6107103 | NC_021166.1    | Ca_kabuli_chr07 | 6107103                 | CC                              | TT                | 1946458158               |
| SNP_P3_84869_6107330 | NC_021166.1    | Ca_kabuli_chr07 | 6107330                 | CC                              | TT                | 1946458159               |
| SNP_P3_84871_6107450 | NC_021166.1    | Ca_kabuli_chr07 | 6107450                 | TT                              | AA                | 1946458161               |
| SNP_P3_84872_6107573 | NC_021166.1    | Ca_kabuli_chr07 | 6107573                 | TT                              | CC                | 1946458162               |
| SNP_P3_84874_6107665 | NC_021166.1    | Ca_kabuli_chr07 | 6107665                 | CC                              | TT                | 1946458164               |
| SNP_P3_84875_6107784 | NC_021166.1    | Ca_kabuli_chr07 | 6107784                 | TT                              | AA                | 1946458165               |
| SNP_P3_84877_6112929 | NC_021166.1    | Ca_kabuli_chr07 | 6112929                 | AA                              | GG                | 1946458166               |
| SNP_P3_84878_6112979 | NC_021166.1    | Ca_kabuli_chr07 | 6112979                 | TT                              | GG                | 1946458167               |
| SNP_P3_84879_6114858 | NC_021166.1    | Ca_kabuli_chr07 | 6114858                 | TT                              | GG                | 1946458168               |
| SNP_P3_84882_6118350 | NC_021166.1    | Ca_kabuli_chr07 | 6118350                 | TT                              | AA                | 1946458169               |
| SNP_P3_84883_6118619 | NC_021166.1    | Ca_kabuli_chr07 | 6118619                 | CC                              | GG                | 1946458170               |
| SNP_P3_84885_6118833 | NC_021166.1    | Ca_kabuli_chr07 | 6118833                 | GG                              | AA                | 1946458171               |
| SNP_P3_84886_6118870 | NC_021166.1    | Ca_kabuli_chr07 | 6118870                 | GG                              | AA                | 1946458173               |
| SNP_P3_84887_6118899 | NC_021166.1    | Ca_kabuli_chr07 | 6118899                 | TT                              | CC                | 1946458174               |
| SNP_P3_84888_6118907 | NC_021166.1    | Ca_kabuli_chr07 | 6118907                 | CC                              | TT                | 1946458175               |
| SNP_P3_84889_6118923 | NC_021166.1    | Ca_kabuli_chr07 | 6118923                 | GG                              | AA                | 1946458177               |
| SNP_P3_84890_6118930 | NC_021166.1    | Ca_kabuli_chr07 | 6118930                 | TT                              | CC                | 1946458178               |
| SNP_P3_84891_6118931 | NC_021166.1    | Ca_kabuli_chr07 | 6118931                 | CC                              | TT                | 1946458180               |
| SNP_P3_84892_6119087 | NC_021166.1    | Ca_kabuli_chr07 | 6119087                 | CC                              | TT                | 1946458181               |
| SNP_P3_84893_6119267 | NC_021166.1    | Ca_kabuli_chr07 | 6119267                 | CC                              | TT                | 1946458183               |
| SNP_P3_84895_6119374 | NC_021166.1    | Ca_kabuli_chr07 | 6119374                 | AA                              | CC                | 1946458184               |
| SNP_P3_84896_6119476 | NC_021166.1    | Ca_kabuli_chr07 | 6119476                 | AA                              | TT                | 1946458186               |
| SNP_P3_84897_6120602 | NC_021166.1    | Ca_kabuli_chr07 | 6120602                 | AA                              | GG                | 1946458188               |
| SNP_P3_84898_6120902 | NC_021166.1    | Ca_kabuli_chr07 | 6120902                 | TT                              | AA                | 1946458189               |
| SNP_P3_84899_6121039 | NC_021166.1    | Ca_kabuli_chr07 | 6121039                 | TT                              | AA                | 1946458191               |
| SNP_P3_84901_6121186 | NC_021166.1    | Ca_kabuli_chr07 | 6121186                 | TT                              | CC                | 1946458192               |
| SNP_P3_84902_6121263 | NC_021166.1    | Ca_kabuli_chr07 | 6121263                 | CC                              | TT                | 1946458193               |
| SNP_P3_84903_6121372 | NC_021166.1    | Ca_kabuli_chr07 | 6121372                 | GG                              | AA                | 1946458195               |
| SNP_P3_84905_6122340 | NC_021166.1    | Ca_kabuli_chr07 | 6122340                 | AA                              | TT                | 1946458196               |
| SNP_P3_84906_6122365 | NC_021166.1    | Ca_kabuli_chr07 | 6122365                 | AA                              | GG                | 1946458198               |
| SNP_P3_84907_6122392 | NC_021166.1    | Ca_kabuli_chr07 | 6122392                 | GG                              | CC                | 1946458199               |
| SNP_P3_84908_6122641 | NC_021166.1    | Ca_kabuli_chr07 | 6122641                 | CC                              | AA                | 1946458201               |
| SNP_P3_84909_6122690 | NC_021166.1    | Ca_kabuli_chr07 | 6122690                 | GG                              | CC                | 1946458202               |
| SNP_P3_84910_6122691 | NC_021166.1    | Ca_kabuli_chr07 | 6122691                 | AA                              | CC                | 1946458204               |
| SNP_P3_84911_6122695 | NC_021166.1    | Ca_kabuli_chr07 | 6122695                 | AA                              | GG                | 1946458205               |
| SNP_P3_84913_6123014 | NC_021166.1    | Ca_kabuli_chr07 | 6123014                 | TT                              | CC                | 1946458207               |
| SNP_P3_84914_6123732 | NC_021166.1    | Ca_kabuli_chr07 | 6123732                 | CC                              | TT                | 1946458209               |
| SNP_P3_84915_6123844 | NC_021166.1    | Ca_kabuli_chr07 | 6123844                 | CC                              | TT                | 1946458210               |

| SNPs IDs             | Chromosome IDs | Chromosomes     | Physical positions (bp) | CDC Frontier (Reference genome) | (Pusa 256 & HPNB) | NCBI SNPdb Accession IDs |
|----------------------|----------------|-----------------|-------------------------|---------------------------------|-------------------|--------------------------|
| SNP_P3_84918_6126308 | NC_021166.1    | Ca_kabuli_chr07 | 6126308                 | AA                              | GG                | 1946458211               |
| SNP_P3_84919_6126333 | NC_021166.1    | Ca_kabuli_chr07 | 6126333                 | TT                              | AA                | 1946458213               |
| SNP_P3_84922_6126469 | NC_021166.1    | Ca_kabuli_chr07 | 6126469                 | AA                              | GG                | 1946458214               |
| SNP_P3_84924_6126614 | NC_021166.1    | Ca_kabuli_chr07 | 6126614                 | CC                              | AA                | 1946458216               |
| SNP_P3_84925_6126751 | NC_021166.1    | Ca_kabuli_chr07 | 6126751                 | AA                              | GG                | 1946458217               |
| SNP_P3_84926_6126771 | NC_021166.1    | Ca_kabuli_chr07 | 6126771                 | CC                              | AA                | 1946458219               |
| SNP_P3_84928_6126831 | NC_021166.1    | Ca_kabuli_chr07 | 6126831                 | CC                              | TT                | 1946458220               |
| SNP_P3_84929_6126843 | NC_021166.1    | Ca_kabuli_chr07 | 6126843                 | TT                              | AA                | 1946458222               |
| SNP_P3_84930_6127667 | NC_021166.1    | Ca_kabuli_chr07 | 6127667                 | AA                              | GG                | 1946458223               |
| SNP_P3_84931_6130059 | NC_021166.1    | Ca_kabuli_chr07 | 6130059                 | AA                              | TT                | 1946458225               |
| SNP_P3_84933_6135379 | NC_021166.1    | Ca_kabuli_chr07 | 6135379                 | CC                              | AA                | 1946458226               |
| SNP_P3_84934_6135594 | NC_021166.1    | Ca_kabuli_chr07 | 6135594                 | TT                              | AA                | 1946458228               |
| SNP_P3_84936_6141057 | NC_021166.1    | Ca_kabuli_chr07 | 6141057                 | TT                              | AA                | 1946458229               |
| SNP_P3_84938_6141556 | NC_021166.1    | Ca_kabuli_chr07 | 6141556                 | GG                              | AA                | 1946458231               |
| SNP_P3_84939_6141640 | NC_021166.1    | Ca_kabuli_chr07 | 6141640                 | TT                              | CC                | 1946458233               |
| SNP_P3_84940_6142967 | NC_021166.1    | Ca_kabuli_chr07 | 6142967                 | GG                              | AA                | 1946458234               |
| SNP_P3_84941_6142971 | NC_021166.1    | Ca_kabuli_chr07 | 6142971                 | GG                              | TT                | 1946458235               |
| SNP_P3_84943_6143400 | NC_021166.1    | Ca_kabuli_chr07 | 6143400                 | AA                              | GG                | 1946458237               |
| SNP_P3_84944_6144075 | NC_021166.1    | Ca_kabuli_chr07 | 6144075                 | AA                              | GG                | 1946458238               |
| SNP_P3_84945_6144123 | NC_021166.1    | Ca_kabuli_chr07 | 6144123                 | GG                              | AA                | 1946458240               |
| SNP_P3_84946_6144928 | NC_021166.1    | Ca_kabuli_chr07 | 6144928                 | TT                              | CC                | 1946458241               |
| SNP_P3_84947_6145792 | NC_021166.1    | Ca_kabuli_chr07 | 6145792                 | TT                              | CC                | 1946458243               |
| SNP_P3_84948_6145795 | NC_021166.1    | Ca_kabuli_chr07 | 6145795                 | AA                              | GG                | 1946458245               |
| SNP_P3_84951_6148574 | NC_021166.1    | Ca_kabuli_chr07 | 6148574                 | CC                              | GG                | 1946458246               |
| SNP_P3_84952_6150981 | NC_021166.1    | Ca_kabuli_chr07 | 6150981                 | AA                              | GG                | 1946458248               |
| SNP_P3_84953_6151014 | NC_021166.1    | Ca_kabuli_chr07 | 6151014                 | TT                              | CC                | 1946458249               |
| SNP_P3_84954_6151015 | NC_021166.1    | Ca_kabuli_chr07 | 6151015                 | CC                              | TT                | 1946458251               |
| SNP_P3_84955_6151287 | NC_021166.1    | Ca_kabuli_chr07 | 6151287                 | GG                              | AA                | 1946458252               |
| SNP_P3_84957_6152328 | NC_021166.1    | Ca_kabuli_chr07 | 6152328                 | AA                              | GG                | 1946458254               |
| SNP_P3_84958_6153969 | NC_021166.1    | Ca_kabuli_chr07 | 6153969                 | TT                              | AA                | 1946458255               |
| SNP_P3_84959_6154815 | NC_021166.1    | Ca_kabuli_chr07 | 6154815                 | GG                              | AA                | 1946458257               |
| SNP_P3_84960_6154817 | NC_021166.1    | Ca_kabuli_chr07 | 6154817                 | GG                              | AA                | 1946458258               |
| SNP_P3_84961_6156792 | NC_021166.1    | Ca_kabuli_chr07 | 6156792                 | AA                              | TT                | 1946458259               |
| SNP_P3_84962_6156793 | NC_021166.1    | Ca_kabuli_chr07 | 6156793                 | TT                              | AA                | 1946458261               |
| SNP_P3_84963_6156990 | NC_021166.1    | Ca_kabuli_chr07 | 6156990                 | AA                              | CC                | 1946458262               |
| SNP_P3_84964_6157051 | NC_021166.1    | Ca_kabuli_chr07 | 6157051                 | CC                              | AA                | 1946458264               |
| SNP_P3_84965_6157058 | NC_021166.1    | Ca_kabuli_chr07 | 6157058                 | CC                              | TT                | 1946458266               |
| SNP_P3_84966_6157106 | NC_021166.1    | Ca_kabuli_chr07 | 6157106                 | AA                              | CC                | 1946458267               |
| SNP_P3_84967_6157119 | NC_021166.1    | Ca_kabuli_chr07 | 6157119                 | CC                              | GG                | 1946458268               |
| SNP_P3_84968_6157123 | NC_021166.1    | Ca_kabuli_chr07 | 6157123                 | GG                              | TT                | 1946458270               |
| SNP_P3_84969_6157145 | NC_021166.1    | Ca_kabuli_chr07 | 6157145                 | TT                              | CC                | 1946458271               |
| SNP_P3_84970_6157168 | NC_021166.1    | Ca_kabuli_chr07 | 6157168                 | CC                              | AA                | 1946458273               |



| SNPs IDs             | Chromosome IDs | Chromosomes     | Physical positions (bp) | CDC Frontier (Reference genome) | (Pusa 256 & HPNB) | NCBI SNPdb Accession IDs |
|----------------------|----------------|-----------------|-------------------------|---------------------------------|-------------------|--------------------------|
| SNP_P3_84971_6157276 | NC_021166.1    | Ca_kabuli_chr07 | 6157276                 | AA                              | GG                | 1946458274               |
| SNP_P3_84972_6157311 | NC_021166.1    | Ca_kabuli_chr07 | 6157311                 | CC                              | AA                | 1946458276               |
| SNP_P3_84973_6157317 | NC_021166.1    | Ca_kabuli_chr07 | 6157317                 | GG                              | CC                | 1946458277               |
| SNP_P3_84974_6157324 | NC_021166.1    | Ca_kabuli_chr07 | 6157324                 | CC                              | TT                | 1946458279               |
| SNP_P3_84975_6157333 | NC_021166.1    | Ca_kabuli_chr07 | 6157333                 | TT                              | GG                | 1946458281               |
| SNP_P3_84976_6157335 | NC_021166.1    | Ca_kabuli_chr07 | 6157335                 | GG                              | AA                | 1946458283               |
| SNP_P3_84977_6158023 | NC_021166.1    | Ca_kabuli_chr07 | 6158023                 | GG                              | AA                | 1946458284               |
| SNP_P3_84978_6158142 | NC_021166.1    | Ca_kabuli_chr07 | 6158142                 | TT                              | CC                | 1946458285               |
| SNP_P3_84979_6158145 | NC_021166.1    | Ca_kabuli_chr07 | 6158145                 | TT                              | AA                | 1946458287               |
| SNP_P3_84980_6158146 | NC_021166.1    | Ca_kabuli_chr07 | 6158146                 | GG                              | CC                | 1946458288               |
| SNP_P3_84981_6158160 | NC_021166.1    | Ca_kabuli_chr07 | 6158160                 | TT                              | AA                | 1946458290               |
| SNP_P3_84982_6158162 | NC_021166.1    | Ca_kabuli_chr07 | 6158162                 | AA                              | GG                | 1946458291               |
| SNP_P3_84983_6158170 | NC_021166.1    | Ca_kabuli_chr07 | 6158170                 | GG                              | CC                | 1946458293               |
| SNP_P3_84984_6158184 | NC_021166.1    | Ca_kabuli_chr07 | 6158184                 | CC                              | TT                | 1946458294               |
| SNP_P3_84985_6158203 | NC_021166.1    | Ca_kabuli_chr07 | 6158203                 | AA                              | TT                | 1946458296               |
| SNP_P3_84986_6158363 | NC_021166.1    | Ca_kabuli_chr07 | 6158363                 | GG                              | AA                | 1946458297               |
| SNP_P3_84987_6158415 | NC_021166.1    | Ca_kabuli_chr07 | 6158415                 | TT                              | CC                | 1946458298               |
| SNP_P3_84988_6159804 | NC_021166.1    | Ca_kabuli_chr07 | 6159804                 | GG                              | AA                | 1946458300               |
| SNP_P3_84989_6159810 | NC_021166.1    | Ca_kabuli_chr07 | 6159810                 | TT                              | CC                | 1946458302               |
| SNP_P3_84990_6159825 | NC_021166.1    | Ca_kabuli_chr07 | 6159825                 | AA                              | CC                | 1946458303               |
| SNP_P3_84991_6160438 | NC_021166.1    | Ca_kabuli_chr07 | 6160438                 | TT                              | AA                | 1946458305               |
| SNP_P3_84992_6160604 | NC_021166.1    | Ca_kabuli_chr07 | 6160604                 | AA                              | CC                | 1946458306               |
| SNP_P3_84993_6160700 | NC_021166.1    | Ca_kabuli_chr07 | 6160700                 | AA                              | CC                | 1946458307               |
| SNP_P3_84994_6161052 | NC_021166.1    | Ca_kabuli_chr07 | 6161052                 | TT                              | CC                | 1946458309               |
| SNP_P3_84995_6161055 | NC_021166.1    | Ca_kabuli_chr07 | 6161055                 | TT                              | CC                | 1946458310               |
| SNP_P3_84997_6162913 | NC_021166.1    | Ca_kabuli_chr07 | 6162913                 | CC                              | AA                | 1946458312               |
| SNP_P3_84998_6163111 | NC_021166.1    | Ca_kabuli_chr07 | 6163111                 | TT                              | AA                | 1946458313               |
| SNP_P3_84999_6163335 | NC_021166.1    | Ca_kabuli_chr07 | 6163335                 | GG                              | TT                | 1946458315               |
| SNP_P3_85000_6163361 | NC_021166.1    | Ca_kabuli_chr07 | 6163361                 | CC                              | TT                | 1946458316               |
| SNP_P3_85001_6163929 | NC_021166.1    | Ca_kabuli_chr07 | 6163929                 | CC                              | GG                | 1946458318               |
| SNP_P3_85002_6164454 | NC_021166.1    | Ca_kabuli_chr07 | 6164454                 | CC                              | TT                | 1946458319               |
| SNP_P3_85003_6164502 | NC_021166.1    | Ca_kabuli_chr07 | 6164502                 | CC                              | GG                | 1946458321               |
| SNP_P3_85004_6165667 | NC_021166.1    | Ca_kabuli_chr07 | 6165667                 | TT                              | CC                | 1946458323               |
| SNP_P3_85005_6165708 | NC_021166.1    | Ca_kabuli_chr07 | 6165708                 | GG                              | AA                | 1946458324               |
| SNP_P3_85006_6166008 | NC_021166.1    | Ca_kabuli_chr07 | 6166008                 | AA                              | CC                | 1946458325               |
| SNP_P3_85008_6166075 | NC_021166.1    | Ca_kabuli_chr07 | 6166075                 | GG                              | AA                | 1946458327               |
| SNP_P3_85009_6176432 | NC_021166.1    | Ca_kabuli_chr07 | 6176432                 | TT                              | CC                | 1946458328               |
| SNP_P3_85010_6177502 | NC_021166.1    | Ca_kabuli_chr07 | 6177502                 | GG                              | AA                | 1946458330               |
| SNP_P3_85011_6178877 | NC_021166.1    | Ca_kabuli_chr07 | 6178877                 | TT                              | CC                | 1946458331               |
| SNP_P3_85012_6180737 | NC_021166.1    | Ca_kabuli_chr07 | 6180737                 | AA                              | TT                | 1946458333               |
| SNP_P3_85013_6188280 | NC_021166.1    | Ca_kabuli_chr07 | 6188280                 | CC                              | AA                | 1946458334               |
| SNP_P3_85014_6202421 | NC_021166.1    | Ca_kabuli_chr07 | 6202421                 | AA                              | GG                | 1946458336               |

| SNPs IDs             | Chromosome IDs | Chromosomes     | Physical positions (bp) | CDC Frontier (Reference genome) | (Pusa 256 & HPNB) | NCBI SNPdb Accession IDs |
|----------------------|----------------|-----------------|-------------------------|---------------------------------|-------------------|--------------------------|
| SNP_P3_85017_6271541 | NC_021166.1    | Ca_kabuli_chr07 | 6271541                 | AA                              | GG                | 1946458337               |
| SNP_P3_85018_6276839 | NC_021166.1    | Ca_kabuli_chr07 | 6276839                 | CC                              | TT                | 1946458339               |
| SNP_P3_85019_6279285 | NC_021166.1    | Ca_kabuli_chr07 | 6279285                 | AA                              | GG                | 1946458340               |
| SNP_P3_85020_6295248 | NC_021166.1    | Ca_kabuli_chr07 | 6295248                 | GG                              | AA                | 1946458342               |
| SNP_P3_85021_6297797 | NC_021166.1    | Ca_kabuli_chr07 | 6297797                 | AA                              | TT                | 1946458343               |
| SNP_P3_85022_6298953 | NC_021166.1    | Ca_kabuli_chr07 | 6298953                 | TT                              | GG                | 1946458345               |
| SNP_P3_85023_6355511 | NC_021166.1    | Ca_kabuli_chr07 | 6355511                 | GG                              | CC                | 1946458346               |
| SNP_P3_85024_6355825 | NC_021166.1    | Ca_kabuli_chr07 | 6355825                 | AA                              | CC                | 1946458348               |
| SNP_P3_85025_6371171 | NC_021166.1    | Ca_kabuli_chr07 | 6371171                 | GG                              | CC                | 1946458349               |
| SNP_P3_85026_6373672 | NC_021166.1    | Ca_kabuli_chr07 | 6373672                 | CC                              | TT                | 1946458351               |
| SNP_P3_85027_6405207 | NC_021166.1    | Ca_kabuli_chr07 | 6405207                 | TT                              | AA                | 1946458352               |
| SNP_P3_85028_6435046 | NC_021166.1    | Ca_kabuli_chr07 | 6435046                 | TT                              | AA                | 1946458354               |
| SNP_P3_85029_6435047 | NC_021166.1    | Ca_kabuli_chr07 | 6435047                 | TT                              | AA                | 1946458355               |
| SNP_P3_85031_6487058 | NC_021166.1    | Ca_kabuli_chr07 | 6487058                 | TT                              | AA                | 1946458357               |
| SNP_P3_85032_6523730 | NC_021166.1    | Ca_kabuli_chr07 | 6523730                 | TT                              | CC                | 1946458358               |
| SNP_P3_85033_6560188 | NC_021166.1    | Ca_kabuli_chr07 | 6560188                 | AA                              | TT                | 1946458360               |
| SNP_P3_85034_6601735 | NC_021166.1    | Ca_kabuli_chr07 | 6601735                 | CC                              | TT                | 1946458361               |
| SNP_P3_85035_6610050 | NC_021166.1    | Ca_kabuli_chr07 | 6610050                 | GG                              | TT                | 1946458363               |
| SNP_P3_85037_6629061 | NC_021166.1    | Ca_kabuli_chr07 | 6629061                 | TT                              | CC                | 1946458364               |
| SNP_P3_85038_6629077 | NC_021166.1    | Ca_kabuli_chr07 | 6629077                 | CC                              | TT                | 1946458366               |
| SNP_P3_85039_6629117 | NC_021166.1    | Ca_kabuli_chr07 | 6629117                 | TT                              | CC                | 1946458367               |
| SNP_P3_85040_6629188 | NC_021166.1    | Ca_kabuli_chr07 | 6629188                 | TT                              | CC                | 1946458369               |
| SNP_P3_85047_6756070 | NC_021166.1    | Ca_kabuli_chr07 | 6756070                 | GG                              | AA                | 1946458370               |
| SNP_P3_85048_6776838 | NC_021166.1    | Ca_kabuli_chr07 | 6776838                 | CC                              | TT                | 1946458372               |
| SNP_P3_85049_6776840 | NC_021166.1    | Ca_kabuli_chr07 | 6776840                 | GG                              | AA                | 1946458373               |
| SNP_P3_85050_6781117 | NC_021166.1    | Ca_kabuli_chr07 | 6781117                 | TT                              | GG                | 1946458374               |
| SNP_P3_85052_6806932 | NC_021166.1    | Ca_kabuli_chr07 | 6806932                 | AA                              | CC                | 1946458376               |
| SNP_P3_85054_6818753 | NC_021166.1    | Ca_kabuli_chr07 | 6818753                 | CC                              | TT                | 1946458377               |
| SNP_P3_85055_6832606 | NC_021166.1    | Ca_kabuli_chr07 | 6832606                 | GG                              | AA                | 1946458379               |
| SNP_P3_85059_6855448 | NC_021166.1    | Ca_kabuli_chr07 | 6855448                 | AA                              | GG                | 1946458381               |
| SNP_P3_85061_6883142 | NC_021166.1    | Ca_kabuli_chr07 | 6883142                 | AA                              | TT                | 1946458382               |
| SNP_P3_85062_6885653 | NC_021166.1    | Ca_kabuli_chr07 | 6885653                 | AA                              | GG                | 1946458384               |
| SNP_P3_85064_6918299 | NC_021166.1    | Ca_kabuli_chr07 | 6918299                 | TT                              | AA                | 1946458385               |
| SNP_P3_85065_6918583 | NC_021166.1    | Ca_kabuli_chr07 | 6918583                 | GG                              | TT                | 1946458387               |
| SNP_P3_85069_6937693 | NC_021166.1    | Ca_kabuli_chr07 | 6937693                 | CC                              | TT                | 1946458388               |
| SNP_P3_85070_6966063 | NC_021166.1    | Ca_kabuli_chr07 | 6966063                 | CC                              | TT                | 1946458390               |
| SNP_P3_85072_6987271 | NC_021166.1    | Ca_kabuli_chr07 | 6987271                 | AA                              | TT                | 1946458391               |
| SNP_P3_85073_7002026 | NC_021166.1    | Ca_kabuli_chr07 | 7002026                 | AA                              | CC                | 1946458393               |
| SNP_P3_85075_7078789 | NC_021166.1    | Ca_kabuli_chr07 | 7078789                 | AA                              | GG                | 1946458394               |
| SNP_P3_85076_7078842 | NC_021166.1    | Ca_kabuli_chr07 | 7078842                 | CC                              | TT                | 1946458396               |
| SNP_P3_85077_7078925 | NC_021166.1    | Ca_kabuli_chr07 | 7078925                 | TT                              | CC                | 1946458397               |
| SNP_P3_85078_7078984 | NC_021166.1    | Ca_kabuli_chr07 | 7078984                 | AA                              | GG                | 1946458399               |

| SNPs IDs             | Chromosome IDs | Chromosomes     | Physical positions (bp) | CDC Frontier (Reference genome) | (Pusa 256 & HPNB) | NCBI SNPdb Accession IDs |
|----------------------|----------------|-----------------|-------------------------|---------------------------------|-------------------|--------------------------|
| SNP_P3_85079_7079026 | NC_021166.1    | Ca_kabuli_chr07 | 7079026                 | GG                              | TT                | 1946458401               |
| SNP_P3_85080_7081726 | NC_021166.1    | Ca_kabuli_chr07 | 7081726                 | GG                              | AA                | 1946458402               |
| SNP_P3_85081_7094590 | NC_021166.1    | Ca_kabuli_chr07 | 7094590                 | TT                              | GG                | 1946458403               |
| SNP_P3_85082_7097120 | NC_021166.1    | Ca_kabuli_chr07 | 7097120                 | TT                              | CC                | 1946458405               |
| SNP_P3_85084_7144520 | NC_021166.1    | Ca_kabuli_chr07 | 7144520                 | GG                              | AA                | 1946458406               |
| SNP_P3_85085_7151436 | NC_021166.1    | Ca_kabuli_chr07 | 7151436                 | AA                              | GG                | 1946458408               |
| SNP_P3_85087_7224378 | NC_021166.1    | Ca_kabuli_chr07 | 7224378                 | TT                              | CC                | 1946458409               |
| SNP_P3_85088_7240253 | NC_021166.1    | Ca_kabuli_chr07 | 7240253                 | GG                              | AA                | 1946458411               |
| SNP_P3_85089_7252122 | NC_021166.1    | Ca_kabuli_chr07 | 7252122                 | AA                              | CC                | 1946458412               |
| SNP_P3_85090_7252123 | NC_021166.1    | Ca_kabuli_chr07 | 7252123                 | CC                              | AA                | 1946458414               |
| SNP_P3_85092_7264254 | NC_021166.1    | Ca_kabuli_chr07 | 7264254                 | GG                              | TT                | 1946458415               |
| SNP_P3_85093_7270501 | NC_021166.1    | Ca_kabuli_chr07 | 7270501                 | GG                              | TT                | 1946458417               |
| SNP_P3_85095_7284945 | NC_021166.1    | Ca_kabuli_chr07 | 7284945                 | GG                              | TT                | 1946458419               |
| SNP_P3_85097_7300877 | NC_021166.1    | Ca_kabuli_chr07 | 7300877                 | AA                              | GG                | 1946458420               |
| SNP_P3_85101_7412587 | NC_021166.1    | Ca_kabuli_chr07 | 7412587                 | AA                              | GG                | 1946458422               |
| SNP_P3_85103_7460084 | NC_021166.1    | Ca_kabuli_chr07 | 7460084                 | TT                              | GG                | 1946458423               |
| SNP_P3_85104_7460085 | NC_021166.1    | Ca_kabuli_chr07 | 7460085                 | TT                              | AA                | 1946458425               |
| SNP_P3_85105_7462028 | NC_021166.1    | Ca_kabuli_chr07 | 7462028                 | TT                              | AA                | 1946458426               |
| SNP_P3_85106_7481739 | NC_021166.1    | Ca_kabuli_chr07 | 7481739                 | AA                              | GG                | 1946458428               |
| SNP_P3_85107_7492203 | NC_021166.1    | Ca_kabuli_chr07 | 7492203                 | TT                              | AA                | 1946458429               |
| SNP_P3_85109_7532236 | NC_021166.1    | Ca_kabuli_chr07 | 7532236                 | CC                              | TT                | 1946458431               |
| SNP_P3_85112_7608939 | NC_021166.1    | Ca_kabuli_chr07 | 7608939                 | GG                              | CC                | 1946458432               |
| SNP_P3_85113_7609077 | NC_021166.1    | Ca_kabuli_chr07 | 7609077                 | AA                              | CC                | 1946458434               |
| SNP_P3_85114_7613835 | NC_021166.1    | Ca_kabuli_chr07 | 7613835                 | CC                              | TT                | 1946458435               |
| SNP_P3_85115_7637903 | NC_021166.1    | Ca_kabuli_chr07 | 7637903                 | AA                              | GG                | 1946458437               |
| SNP_P3_85116_7682080 | NC_021166.1    | Ca_kabuli_chr07 | 7682080                 | CC                              | TT                | 1946458439               |
| SNP_P3_85117_7683309 | NC_021166.1    | Ca_kabuli_chr07 | 7683309                 | TT                              | CC                | 1946458440               |
| SNP_P3_85118_7700642 | NC_021166.1    | Ca_kabuli_chr07 | 7700642                 | AA                              | GG                | 1946458442               |
| SNP_P3_85119_7737501 | NC_021166.1    | Ca_kabuli_chr07 | 7737501                 | GG                              | AA                | 1946458443               |
| SNP_P3_85120_7737645 | NC_021166.1    | Ca_kabuli_chr07 | 7737645                 | GG                              | AA                | 1946458445               |
| SNP_P3_85121_7737855 | NC_021166.1    | Ca_kabuli_chr07 | 7737855                 | TT                              | CC                | 1946458446               |
| SNP_P3_85122_7737899 | NC_021166.1    | Ca_kabuli_chr07 | 7737899                 | CC                              | TT                | 1946458448               |
| SNP_P3_85123_7737942 | NC_021166.1    | Ca_kabuli_chr07 | 7737942                 | AA                              | TT                | 1946458449               |
| SNP_P3_85125_7738089 | NC_021166.1    | Ca_kabuli_chr07 | 7738089                 | GG                              | AA                | 1946458451               |
| SNP_P3_85127_7738245 | NC_021166.1    | Ca_kabuli_chr07 | 7738245                 | AA                              | GG                | 1946458453               |
| SNP_P3_85128_7738483 | NC_021166.1    | Ca_kabuli_chr07 | 7738483                 | AA                              | GG                | 1946458454               |
| SNP_P3_85129_7738508 | NC_021166.1    | Ca_kabuli_chr07 | 7738508                 | AA                              | GG                | 1946458456               |
| SNP_P3_85131_7738695 | NC_021166.1    | Ca_kabuli_chr07 | 7738695                 | TT                              | GG                | 1946458457               |
| SNP_P3_85132_7738708 | NC_021166.1    | Ca_kabuli_chr07 | 7738708                 | AA                              | GG                | 1946458459               |
| SNP_P3_85133_7738854 | NC_021166.1    | Ca_kabuli_chr07 | 7738854                 | GG                              | AA                | 1946458460               |
| SNP_P3_85134_7738920 | NC_021166.1    | Ca_kabuli_chr07 | 7738920                 | AA                              | GG                | 1946458462               |
| SNP_P3_85135_7738970 | NC_021166.1    | Ca_kabuli_chr07 | 7738970                 | AA                              | GG                | 1946458463               |

| SNPs IDs             | Chromosome IDs | Chromosomes     | Physical positions (bp) | CDC Frontier (Reference genome) | (Pusa 256 & HPNB) | NCBI SNPdb Accession IDs |
|----------------------|----------------|-----------------|-------------------------|---------------------------------|-------------------|--------------------------|
| SNP_P3_85136_7738985 | NC_021166.1    | Ca_kabuli_chr07 | 7738985                 | AA                              | GG                | 1946458464               |
| SNP_P3_85137_7738991 | NC_021166.1    | Ca_kabuli_chr07 | 7738991                 | TT                              | CC                | 1946458466               |
| SNP_P3_85138_7738998 | NC_021166.1    | Ca_kabuli_chr07 | 7738998                 | GG                              | TT                | 1946458467               |
| SNP_P3_85139_7739000 | NC_021166.1    | Ca_kabuli_chr07 | 7739000                 | CC                              | TT                | 1946458469               |
| SNP_P3_85140_7739021 | NC_021166.1    | Ca_kabuli_chr07 | 7739021                 | TT                              | CC                | 1946458471               |
| SNP_P3_85141_7739056 | NC_021166.1    | Ca_kabuli_chr07 | 7739056                 | CC                              | TT                | 1946458472               |
| SNP_P3_85142_7739078 | NC_021166.1    | Ca_kabuli_chr07 | 7739078                 | AA                              | CC                | 1946458474               |
| SNP_P3_85143_7739157 | NC_021166.1    | Ca_kabuli_chr07 | 7739157                 | TT                              | CC                | 1946458475               |
| SNP_P3_85144_7739270 | NC_021166.1    | Ca_kabuli_chr07 | 7739270                 | CC                              | TT                | 1946458477               |
| SNP_P3_85145_7739284 | NC_021166.1    | Ca_kabuli_chr07 | 7739284                 | CC                              | TT                | 1946458478               |
| SNP_P3_85146_7750744 | NC_021166.1    | Ca_kabuli_chr07 | 7750744                 | TT                              | GG                | 1946458479               |
| SNP_P3_85147_7751791 | NC_021166.1    | Ca_kabuli_chr07 | 7751791                 | TT                              | CC                | 1946458481               |
| SNP_P3_85148_7751857 | NC_021166.1    | Ca_kabuli_chr07 | 7751857                 | CC                              | AA                | 1946458482               |
| SNP_P3_85150_7752030 | NC_021166.1    | Ca_kabuli_chr07 | 7752030                 | AA                              | TT                | 1946458484               |
| SNP_P3_85151_7752033 | NC_021166.1    | Ca_kabuli_chr07 | 7752033                 | TT                              | AA                | 1946458485               |
| SNP_P3_85152_7752280 | NC_021166.1    | Ca_kabuli_chr07 | 7752280                 | TT                              | CC                | 1946458487               |
| SNP_P3_85154_7756455 | NC_021166.1    | Ca_kabuli_chr07 | 7756455                 | CC                              | TT                | 1946458488               |
| SNP_P3_85157_7776491 | NC_021166.1    | Ca_kabuli_chr07 | 7776491                 | TT                              | CC                | 1946458490               |
| SNP_P3_85158_7776766 | NC_021166.1    | Ca_kabuli_chr07 | 7776766                 | CC                              | AA                | 1946458492               |
| SNP_P3_85159_7776837 | NC_021166.1    | Ca_kabuli_chr07 | 7776837                 | AA                              | GG                | 1946458493               |
| SNP_P3_85160_7777314 | NC_021166.1    | Ca_kabuli_chr07 | 7777314                 | TT                              | CC                | 1946458495               |
| SNP_P3_85161_7777333 | NC_021166.1    | Ca_kabuli_chr07 | 7777333                 | CC                              | TT                | 1946458496               |
| SNP_P3_85162_7781961 | NC_021166.1    | Ca_kabuli_chr07 | 7781961                 | TT                              | CC                | 1946458498               |
| SNP_P3_85163_7810573 | NC_021166.1    | Ca_kabuli_chr07 | 7810573                 | AA                              | TT                | 1946458499               |
| SNP_P3_85165_7851898 | NC_021166.1    | Ca_kabuli_chr07 | 7851898                 | TT                              | AA                | 1946458501               |
| SNP_P3_85167_7898391 | NC_021166.1    | Ca_kabuli_chr07 | 7898391                 | AA                              | GG                | 1946458502               |
| SNP_P3_85170_7965264 | NC_021166.1    | Ca_kabuli_chr07 | 7965264                 | AA                              | GG                | 1946458504               |
| SNP_P3_85171_7974426 | NC_021166.1    | Ca_kabuli_chr07 | 7974426                 | GG                              | CC                | 1946458505               |
| SNP_P3_85172_7998303 | NC_021166.1    | Ca_kabuli_chr07 | 7998303                 | AA                              | GG                | 1946458506               |
| SNP_P3_85173_7998701 | NC_021166.1    | Ca_kabuli_chr07 | 7998701                 | GG                              | AA                | 1946458508               |
| SNP_P3_85176_8147944 | NC_021166.1    | Ca_kabuli_chr07 | 8147944                 | TT                              | AA                | 1946458510               |
| SNP_P3_85177_8148038 | NC_021166.1    | Ca_kabuli_chr07 | 8148038                 | AA                              | GG                | 1946458511               |
| SNP_P3_85180_8154701 | NC_021166.1    | Ca_kabuli_chr07 | 8154701                 | GG                              | AA                | 1946458513               |
| SNP_P3_85181_8162044 | NC_021166.1    | Ca_kabuli_chr07 | 8162044                 | GG                              | AA                | 1946458514               |
| SNP_P3_85185_8193007 | NC_021166.1    | Ca_kabuli_chr07 | 8193007                 | AA                              | TT                | 1946458516               |
| SNP_P3_85186_8193470 | NC_021166.1    | Ca_kabuli_chr07 | 8193470                 | GG                              | CC                | 1946458517               |
| SNP_P3_85187_8221600 | NC_021166.1    | Ca_kabuli_chr07 | 8221600                 | GG                              | TT                | 1946458519               |
| SNP_P3_85190_8313412 | NC_021166.1    | Ca_kabuli_chr07 | 8313412                 | TT                              | AA                | 1946458520               |
| SNP_P3_85191_8336810 | NC_021166.1    | Ca_kabuli_chr07 | 8336810                 | AA                              | TT                | 1946458522               |
| SNP_P3_85192_8336811 | NC_021166.1    | Ca_kabuli_chr07 | 8336811                 | AA                              | CC                | 1946458524               |
| SNP_P3_85193_8348638 | NC_021166.1    | Ca_kabuli_chr07 | 8348638                 | AA                              | TT                | 1946458525               |
| SNP_P3_85198_8522290 | NC_021166.1    | Ca_kabuli_chr07 | 8522290                 | CC                              | TT                | 1946458527               |

| SNPs IDs             | Chromosome IDs | Chromosomes     | Physical positions (bp) | CDC Frontier (Reference genome) | (Pusa 256 & HPNB) | NCBI SNPdb Accession IDs |
|----------------------|----------------|-----------------|-------------------------|---------------------------------|-------------------|--------------------------|
| SNP_P3_85199_8522509 | NC_021166.1    | Ca_kabuli_chr07 | 8522509                 | GG                              | AA                | 1946458528               |
| SNP_P3_85200_8522524 | NC_021166.1    | Ca_kabuli_chr07 | 8522524                 | CC                              | TT                | 1946458530               |
| SNP_P3_85201_8522538 | NC_021166.1    | Ca_kabuli_chr07 | 8522538                 | GG                              | TT                | 1946458532               |
| SNP_P3_85202_8522548 | NC_021166.1    | Ca_kabuli_chr07 | 8522548                 | GG                              | AA                | 1946458533               |
| SNP_P3_85203_8522562 | NC_021166.1    | Ca_kabuli_chr07 | 8522562                 | AA                              | GG                | 1946458534               |
| SNP_P3_85204_8539458 | NC_021166.1    | Ca_kabuli_chr07 | 8539458                 | TT                              | CC                | 1946458536               |
| SNP_P3_85205_8540019 | NC_021166.1    | Ca_kabuli_chr07 | 8540019                 | AA                              | CC                | 1946458537               |
| SNP_P3_85209_8581250 | NC_021166.1    | Ca_kabuli_chr07 | 8581250                 | GG                              | AA                | 1946458539               |
| SNP_P3_85211_8609730 | NC_021166.1    | Ca_kabuli_chr07 | 8609730                 | TT                              | AA                | 1946458540               |
| SNP_P3_85212_8613467 | NC_021166.1    | Ca_kabuli_chr07 | 8613467                 | TT                              | AA                | 1946458542               |
| SNP_P3_85214_8644723 | NC_021166.1    | Ca_kabuli_chr07 | 8644723                 | TT                              | CC                | 1946458543               |
| SNP_P3_85215_8644785 | NC_021166.1    | Ca_kabuli_chr07 | 8644785                 | GG                              | AA                | 1946458545               |
| SNP_P3_85216_8674247 | NC_021166.1    | Ca_kabuli_chr07 | 8674247                 | GG                              | AA                | 1946458546               |
| SNP_P3_85218_8719061 | NC_021166.1    | Ca_kabuli_chr07 | 8719061                 | AA                              | GG                | 1946458548               |
| SNP_P3_85219_8723297 | NC_021166.1    | Ca_kabuli_chr07 | 8723297                 | TT                              | CC                | 1946458549               |
| SNP_P3_85221_8763247 | NC_021166.1    | Ca_kabuli_chr07 | 8763247                 | AA                              | GG                | 1946458551               |
| SNP_P3_85223_8780511 | NC_021166.1    | Ca_kabuli_chr07 | 8780511                 | AA                              | GG                | 1946458552               |
| SNP_P3_85224_8780516 | NC_021166.1    | Ca_kabuli_chr07 | 8780516                 | TT                              | AA                | 1946458554               |
| SNP_P3_85225_8780519 | NC_021166.1    | Ca_kabuli_chr07 | 8780519                 | TT                              | GG                | 1946458555               |
| SNP_P3_85226_8812131 | NC_021166.1    | Ca_kabuli_chr07 | 8812131                 | CC                              | TT                | 1946458557               |
| SNP_P3_85228_8832920 | NC_021166.1    | Ca_kabuli_chr07 | 8832920                 | AA                              | TT                | 1946458558               |
| SNP_P3_85229_8832947 | NC_021166.1    | Ca_kabuli_chr07 | 8832947                 | AA                              | GG                | 1946458560               |
| SNP_P3_85230_8835783 | NC_021166.1    | Ca_kabuli_chr07 | 8835783                 | CC                              | TT                | 1946458561               |
| SNP_P3_85231_8851451 | NC_021166.1    | Ca_kabuli_chr07 | 8851451                 | AA                              | TT                | 1946458563               |
| SNP_P3_85232_8864710 | NC_021166.1    | Ca_kabuli_chr07 | 8864710                 | AA                              | TT                | 1946458564               |
| SNP_P3_85236_8988833 | NC_021166.1    | Ca_kabuli_chr07 | 8988833                 | AA                              | GG                | 1946458566               |
| SNP_P3_85237_9013348 | NC_021166.1    | Ca_kabuli_chr07 | 9013348                 | TT                              | GG                | 1946458567               |
| SNP_P3_85240_9056988 | NC_021166.1    | Ca_kabuli_chr07 | 9056988                 | AA                              | GG                | 1946458568               |
| SNP_P3_85241_9056990 | NC_021166.1    | Ca_kabuli_chr07 | 9056990                 | TT                              | GG                | 1946458570               |
| SNP_P3_85242_9057496 | NC_021166.1    | Ca_kabuli_chr07 | 9057496                 | CC                              | TT                | 1946458571               |
| SNP_P3_85247_9160524 | NC_021166.1    | Ca_kabuli_chr07 | 9160524                 | AA                              | GG                | 1946458573               |
| SNP_P3_85249_9180447 | NC_021166.1    | Ca_kabuli_chr07 | 9180447                 | TT                              | CC                | 1946458574               |
| SNP_P3_85250_9180550 | NC_021166.1    | Ca_kabuli_chr07 | 9180550                 | AA                              | GG                | 1946458576               |
| SNP_P3_85251_9180650 | NC_021166.1    | Ca_kabuli_chr07 | 9180650                 | GG                              | AA                | 1946458578               |
| SNP_P3_85252_9180839 | NC_021166.1    | Ca_kabuli_chr07 | 9180839                 | GG                              | AA                | 1946458579               |
| SNP_P3_85254_9181568 | NC_021166.1    | Ca_kabuli_chr07 | 9181568                 | GG                              | AA                | 1946458581               |
| SNP_P3_85256_9181880 | NC_021166.1    | Ca_kabuli_chr07 | 9181880                 | AA                              | TT                | 1946458582               |
| SNP_P3_85257_9182567 | NC_021166.1    | Ca_kabuli_chr07 | 9182567                 | GG                              | AA                | 1946458584               |
| SNP_P3_85259_9182913 | NC_021166.1    | Ca_kabuli_chr07 | 9182913                 | GG                              | AA                | 1946458585               |
| SNP_P3_85260_9183167 | NC_021166.1    | Ca_kabuli_chr07 | 9183167                 | TT                              | GG                | 1946458587               |
| SNP_P3_85261_9203155 | NC_021166.1    | Ca_kabuli_chr07 | 9203155                 | TT                              | CC                | 1946458588               |
| SNP_P3_85263_9203192 | NC_021166.1    | Ca_kabuli_chr07 | 9203192                 | GG                              | AA                | 1946458589               |

| SNPs IDs             | Chromosome IDs | Chromosomes     | Physical positions (bp) | CDC Frontier (Reference genome) | (Pusa 256 & HPNB) | NCBI SNPdb Accession IDs |
|----------------------|----------------|-----------------|-------------------------|---------------------------------|-------------------|--------------------------|
| SNP_P3_85264_9203466 | NC_021166.1    | Ca_kabuli_chr07 | 9203466                 | TT                              | GG                | 1946458591               |
| SNP_P3_85265_9203766 | NC_021166.1    | Ca_kabuli_chr07 | 9203766                 | CC                              | AA                | 1946458592               |
| SNP_P3_85266_9216436 | NC_021166.1    | Ca_kabuli_chr07 | 9216436                 | AA                              | CC                | 1946458594               |
| SNP_P3_85267_9217248 | NC_021166.1    | Ca_kabuli_chr07 | 9217248                 | TT                              | GG                | 1946458595               |
| SNP_P3_85268_9220952 | NC_021166.1    | Ca_kabuli_chr07 | 9220952                 | GG                              | AA                | 1946458597               |
| SNP_P3_85269_9226701 | NC_021166.1    | Ca_kabuli_chr07 | 9226701                 | AA                              | GG                | 1946458598               |
| SNP_P3_85270_9240291 | NC_021166.1    | Ca_kabuli_chr07 | 9240291                 | CC                              | TT                | 1946458600               |
| SNP_P3_85272_9240368 | NC_021166.1    | Ca_kabuli_chr07 | 9240368                 | GG                              | AA                | 1946458601               |
| SNP_P3_85273_9240397 | NC_021166.1    | Ca_kabuli_chr07 | 9240397                 | GG                              | TT                | 1946458603               |
| SNP_P3_85274_9240408 | NC_021166.1    | Ca_kabuli_chr07 | 9240408                 | CC                              | TT                | 1946458604               |
| SNP_P3_85275_9255116 | NC_021166.1    | Ca_kabuli_chr07 | 9255116                 | GG                              | CC                | 1946458606               |
| SNP_P3_85276_9255117 | NC_021166.1    | Ca_kabuli_chr07 | 9255117                 | TT                              | AA                | 1946458607               |
| SNP_P3_85278_9256289 | NC_021166.1    | Ca_kabuli_chr07 | 9256289                 | TT                              | CC                | 1946458608               |
| SNP_P3_85279_9261489 | NC_021166.1    | Ca_kabuli_chr07 | 9261489                 | TT                              | AA                | 1946458610               |
| SNP_P3_85280_9269668 | NC_021166.1    | Ca_kabuli_chr07 | 9269668                 | GG                              | AA                | 1946458611               |
| SNP_P3_85281_9269742 | NC_021166.1    | Ca_kabuli_chr07 | 9269742                 | CC                              | TT                | 1946458613               |
| SNP_P3_85282_9269914 | NC_021166.1    | Ca_kabuli_chr07 | 9269914                 | CC                              | TT                | 1946458614               |
| SNP_P3_85283_9269959 | NC_021166.1    | Ca_kabuli_chr07 | 9269959                 | GG                              | TT                | 1946458616               |
| SNP_P3_85284_9277856 | NC_021166.1    | Ca_kabuli_chr07 | 9277856                 | TT                              | AA                | 1946458617               |
| SNP_P3_85286_9290682 | NC_021166.1    | Ca_kabuli_chr07 | 9290682                 | GG                              | AA                | 1946458618               |
| SNP_P3_85289_9339930 | NC_021166.1    | Ca_kabuli_chr07 | 9339930                 | AA                              | CC                | 1946458620               |
| SNP_P3_85290_9339945 | NC_021166.1    | Ca_kabuli_chr07 | 9339945                 | GG                              | AA                | 1946458622               |
| SNP_P3_85291_9340267 | NC_021166.1    | Ca_kabuli_chr07 | 9340267                 | GG                              | AA                | 1946458623               |
| SNP_P3_85292_9340276 | NC_021166.1    | Ca_kabuli_chr07 | 9340276                 | CC                              | TT                | 1946458625               |
| SNP_P3_85293_9340323 | NC_021166.1    | Ca_kabuli_chr07 | 9340323                 | TT                              | AA                | 1946458626               |
| SNP_P3_85294_9340357 | NC_021166.1    | Ca_kabuli_chr07 | 9340357                 | AA                              | CC                | 1946458627               |
| SNP_P3_85295_9340642 | NC_021166.1    | Ca_kabuli_chr07 | 9340642                 | GG                              | AA                | 1946458629               |
| SNP_P3_85296_9340653 | NC_021166.1    | Ca_kabuli_chr07 | 9340653                 | TT                              | AA                | 1946458630               |
| SNP_P3_85297_9340743 | NC_021166.1    | Ca_kabuli_chr07 | 9340743                 | TT                              | CC                | 1946458632               |
| SNP_P3_85298_9358125 | NC_021166.1    | Ca_kabuli_chr07 | 9358125                 | CC                              | TT                | 1946458633               |
| SNP_P3_85299_9369225 | NC_021166.1    | Ca_kabuli_chr07 | 9369225                 | CC                              | TT                | 1946458635               |
| SNP_P3_85300_9379786 | NC_021166.1    | Ca_kabuli_chr07 | 9379786                 | TT                              | CC                | 1946458636               |
| SNP_P3_85302_9401166 | NC_021166.1    | Ca_kabuli_chr07 | 9401166                 | TT                              | AA                | 1946458637               |
| SNP_P3_85303_9401169 | NC_021166.1    | Ca_kabuli_chr07 | 9401169                 | CC                              | TT                | 1946458639               |
| SNP_P3_85304_9402421 | NC_021166.1    | Ca_kabuli_chr07 | 9402421                 | GG                              | TT                | 1946458640               |
| SNP_P3_85306_9425581 | NC_021166.1    | Ca_kabuli_chr07 | 9425581                 | TT                              | CC                | 1946458642               |
| SNP_P3_85307_9436330 | NC_021166.1    | Ca_kabuli_chr07 | 9436330                 | AA                              | GG                | 1946458644               |
| SNP_P3_85308_9466769 | NC_021166.1    | Ca_kabuli_chr07 | 9466769                 | AA                              | GG                | 1946458645               |
| SNP_P3_85309_9469574 | NC_021166.1    | Ca_kabuli_chr07 | 9469574                 | AA                              | GG                | 1946458647               |
| SNP_P3_85310_9474546 | NC_021166.1    | Ca_kabuli_chr07 | 9474546                 | TT                              | CC                | 1946458648               |
| SNP_P3_85311_9485870 | NC_021166.1    | Ca_kabuli_chr07 | 9485870                 | CC                              | TT                | 1946458650               |
| SNP_P3_85312_9501645 | NC_021166.1    | Ca_kabuli_chr07 | 9501645                 | TT                              | AA                | 1946458651               |

| SNPs IDs              | Chromosome IDs | Chromosomes     | Physical positions (bp) | CDC Frontier (Reference genome) | (Pusa 256 & HPNB) | NCBI SNPdb Accession IDs |
|-----------------------|----------------|-----------------|-------------------------|---------------------------------|-------------------|--------------------------|
| SNP_P3_85313_9512045  | NC_021166.1    | Ca_kabuli_chr07 | 9512045                 | GG                              | AA                | 1946458652               |
| SNP_P3_85314_9518767  | NC_021166.1    | Ca_kabuli_chr07 | 9518767                 | CC                              | AA                | 1946458654               |
| SNP_P3_85315_9531200  | NC_021166.1    | Ca_kabuli_chr07 | 9531200                 | CC                              | TT                | 1946458655               |
| SNP_P3_85317_9560215  | NC_021166.1    | Ca_kabuli_chr07 | 9560215                 | AA                              | GG                | 1946458657               |
| SNP_P3_85320_9589652  | NC_021166.1    | Ca_kabuli_chr07 | 9589652                 | GG                              | AA                | 1946458658               |
| SNP_P3_85321_9648311  | NC_021166.1    | Ca_kabuli_chr07 | 9648311                 | TT                              | CC                | 1946458660               |
| SNP_P3_85322_9657590  | NC_021166.1    | Ca_kabuli_chr07 | 9657590                 | TT                              | AA                | 1946458661               |
| SNP_P3_85323_9657653  | NC_021166.1    | Ca_kabuli_chr07 | 9657653                 | AA                              | TT                | 1946458662               |
| SNP_P3_85324_9680395  | NC_021166.1    | Ca_kabuli_chr07 | 9680395                 | TT                              | CC                | 1946458664               |
| SNP_P3_85326_9714408  | NC_021166.1    | Ca_kabuli_chr07 | 9714408                 | CC                              | AA                | 1946458666               |
| SNP_P3_85328_9737244  | NC_021166.1    | Ca_kabuli_chr07 | 9737244                 | TT                              | GG                | 1946458667               |
| SNP_P3_85330_9763309  | NC_021166.1    | Ca_kabuli_chr07 | 9763309                 | GG                              | AA                | 1946458668               |
| SNP_P3_85331_9766227  | NC_021166.1    | Ca_kabuli_chr07 | 9766227                 | CC                              | TT                | 1946458670               |
| SNP_P3_85332_9774219  | NC_021166.1    | Ca_kabuli_chr07 | 9774219                 | TT                              | CC                | 1946458671               |
| SNP_P3_85333_9774737  | NC_021166.1    | Ca_kabuli_chr07 | 9774737                 | AA                              | GG                | 1946458673               |
| SNP_P3_85334_9802541  | NC_021166.1    | Ca_kabuli_chr07 | 9802541                 | TT                              | CC                | 1946458674               |
| SNP_P3_85335_9802551  | NC_021166.1    | Ca_kabuli_chr07 | 9802551                 | TT                              | CC                | 1946458675               |
| SNP_P3_85336_9802587  | NC_021166.1    | Ca_kabuli_chr07 | 9802587                 | AA                              | GG                | 1946458677               |
| SNP_P3_85337_9802628  | NC_021166.1    | Ca_kabuli_chr07 | 9802628                 | TT                              | CC                | 1946458678               |
| SNP_P3_85338_9802804  | NC_021166.1    | Ca_kabuli_chr07 | 9802804                 | CC                              | TT                | 1946458680               |
| SNP_P3_85339_9802849  | NC_021166.1    | Ca_kabuli_chr07 | 9802849                 | TT                              | GG                | 1946458681               |
| SNP_P3_85340_9815349  | NC_021166.1    | Ca_kabuli_chr07 | 9815349                 | CC                              | TT                | 1946458683               |
| SNP_P3_85343_9860495  | NC_021166.1    | Ca_kabuli_chr07 | 9860495                 | AA                              | GG                | 1946458684               |
| SNP_P3_85344_9880123  | NC_021166.1    | Ca_kabuli_chr07 | 9880123                 | TT                              | AA                | 1946458686               |
| SNP_P3_85345_9914944  | NC_021166.1    | Ca_kabuli_chr07 | 9914944                 | AA                              | GG                | 1946458687               |
| SNP_P3_85346_9951931  | NC_021166.1    | Ca_kabuli_chr07 | 9951931                 | AA                              | GG                | 1946458689               |
| SNP_P3_85347_9954642  | NC_021166.1    | Ca_kabuli_chr07 | 9954642                 | AA                              | GG                | 1946458690               |
| SNP_P3_85350_9997311  | NC_021166.1    | Ca_kabuli_chr07 | 9997311                 | GG                              | AA                | 1946458692               |
| SNP_P3_85351_9997330  | NC_021166.1    | Ca_kabuli_chr07 | 9997330                 | TT                              | CC                | 1946458693               |
| SNP_P3_85352_9997332  | NC_021166.1    | Ca_kabuli_chr07 | 9997332                 | CC                              | TT                | 1946458695               |
| SNP_P3_85353_9997352  | NC_021166.1    | Ca_kabuli_chr07 | 9997352                 | TT                              | CC                | 1946458696               |
| SNP_P3_85354_9997385  | NC_021166.1    | Ca_kabuli_chr07 | 9997385                 | TT                              | CC                | 1946458697               |
| SNP_P3_85355_9997503  | NC_021166.1    | Ca_kabuli_chr07 | 9997503                 | CC                              | TT                | 1946458699               |
| SNP_P3_85357_10112938 | NC_021166.1    | Ca_kabuli_chr07 | 10112938                | CC                              | AA                | 1946458700               |
| SNP_P3_85359_10126867 | NC_021166.1    | Ca_kabuli_chr07 | 10126867                | CC                              | TT                | 1946458702               |
| SNP_P3_85360_10134667 | NC_021166.1    | Ca_kabuli_chr07 | 10134667                | TT                              | AA                | 1946458703               |
| SNP_P3_85361_10139894 | NC_021166.1    | Ca_kabuli_chr07 | 10139894                | GG                              | AA                | 1946458705               |
| SNP_P3_85362_10139898 | NC_021166.1    | Ca_kabuli_chr07 | 10139898                | AA                              | GG                | 1946458707               |
| SNP_P3_85363_10139899 | NC_021166.1    | Ca_kabuli_chr07 | 10139899                | TT                              | CC                | 1946458708               |
| SNP_P3_85364_10139992 | NC_021166.1    | Ca_kabuli_chr07 | 10139992                | CC                              | TT                | 1946458710               |
| SNP_P3_85365_10186355 | NC_021166.1    | Ca_kabuli_chr07 | 10186355                | TT                              | GG                | 1946458711               |
| SNP_P3_85366_10187625 | NC_021166.1    | Ca_kabuli_chr07 | 10187625                | AA                              | TT                | 1946458713               |

| SNPs IDs              | Chromosome IDs | Chromosomes     | Physical positions (bp) | CDC Frontier (Reference genome) | (Pusa 256 & HPNB) | NCBI SNPdb Accession IDs |
|-----------------------|----------------|-----------------|-------------------------|---------------------------------|-------------------|--------------------------|
| SNP_P3_85367_10187675 | NC_021166.1    | Ca_kabuli_chr07 | 10187675                | TT                              | AA                | 1946458715               |
| SNP_P3_85370_10236243 | NC_021166.1    | Ca_kabuli_chr07 | 10236243                | CC                              | TT                | 1946458716               |
| SNP_P3_85371_10236278 | NC_021166.1    | Ca_kabuli_chr07 | 10236278                | TT                              | GG                | 1946458718               |
| SNP_P3_85372_10238310 | NC_021166.1    | Ca_kabuli_chr07 | 10238310                | CC                              | TT                | 1946458719               |
| SNP_P3_85373_10238318 | NC_021166.1    | Ca_kabuli_chr07 | 10238318                | AA                              | GG                | 1946458721               |
| SNP_P3_85377_10242617 | NC_021166.1    | Ca_kabuli_chr07 | 10242617                | AA                              | TT                | 1946458722               |
| SNP_P3_85379_10248820 | NC_021166.1    | Ca_kabuli_chr07 | 10248820                | AA                              | CC                | 1946458724               |
| SNP_P3_85380_10248821 | NC_021166.1    | Ca_kabuli_chr07 | 10248821                | AA                              | GG                | 1946458726               |
| SNP_P3_85381_10263169 | NC_021166.1    | Ca_kabuli_chr07 | 10263169                | CC                              | TT                | 1946458727               |
| SNP_P3_85382_10271236 | NC_021166.1    | Ca_kabuli_chr07 | 10271236                | AA                              | GG                | 1946458729               |
| SNP_P3_85384_10293519 | NC_021166.1    | Ca_kabuli_chr07 | 10293519                | CC                              | AA                | 1946458730               |
| SNP_P3_85386_10323670 | NC_021166.1    | Ca_kabuli_chr07 | 10323670                | TT                              | GG                | 1946458732               |
| SNP_P3_85389_10359560 | NC_021166.1    | Ca_kabuli_chr07 | 10359560                | TT                              | CC                | 1946458733               |
| SNP_P3_85390_10362579 | NC_021166.1    | Ca_kabuli_chr07 | 10362579                | TT                              | CC                | 1946458734               |
| SNP_P3_85391_10362581 | NC_021166.1    | Ca_kabuli_chr07 | 10362581                | TT                              | AA                | 1946458735               |
| SNP_P3_85392_10362613 | NC_021166.1    | Ca_kabuli_chr07 | 10362613                | GG                              | TT                | 1946458736               |
| SNP_P3_85394_10398194 | NC_021166.1    | Ca_kabuli_chr07 | 10398194                | TT                              | CC                | 1946458737               |
| SNP_P3_85398_10448487 | NC_021166.1    | Ca_kabuli_chr07 | 10448487                | AA                              | GG                | 1946458738               |
| SNP_P3_85399_10532258 | NC_021166.1    | Ca_kabuli_chr07 | 10532258                | GG                              | AA                | 1946458740               |
| SNP_P3_85400_10535708 | NC_021166.1    | Ca_kabuli_chr07 | 10535708                | TT                              | CC                | 1946458741               |
| SNP_P3_85401_10535721 | NC_021166.1    | Ca_kabuli_chr07 | 10535721                | AA                              | GG                | 1946458743               |
| SNP_P3_85402_10535725 | NC_021166.1    | Ca_kabuli_chr07 | 10535725                | TT                              | CC                | 1946458744               |
| SNP_P3_85403_10535728 | NC_021166.1    | Ca_kabuli_chr07 | 10535728                | GG                              | AA                | 1946458746               |
| SNP_P3_85404_10535788 | NC_021166.1    | Ca_kabuli_chr07 | 10535788                | AA                              | GG                | 1946458747               |
| SNP_P3_85405_10535805 | NC_021166.1    | Ca_kabuli_chr07 | 10535805                | GG                              | AA                | 1946458749               |
| SNP_P3_85406_10535813 | NC_021166.1    | Ca_kabuli_chr07 | 10535813                | TT                              | AA                | 1946458750               |
| SNP_P3_85407_10535845 | NC_021166.1    | Ca_kabuli_chr07 | 10535845                | GG                              | AA                | 1946458752               |
| SNP_P3_85408_10535878 | NC_021166.1    | Ca_kabuli_chr07 | 10535878                | TT                              | GG                | 1946458753               |
| SNP_P3_85409_10536033 | NC_021166.1    | Ca_kabuli_chr07 | 10536033                | TT                              | CC                | 1946458754               |
| SNP_P3_85410_10536192 | NC_021166.1    | Ca_kabuli_chr07 | 10536192                | CC                              | TT                | 1946458756               |
| SNP_P3_85411_10536209 | NC_021166.1    | Ca_kabuli_chr07 | 10536209                | GG                              | AA                | 1946458757               |
| SNP_P3_85412_10536223 | NC_021166.1    | Ca_kabuli_chr07 | 10536223                | GG                              | AA                | 1946458759               |
| SNP_P3_85413_10536233 | NC_021166.1    | Ca_kabuli_chr07 | 10536233                | GG                              | AA                | 1946458760               |
| SNP_P3_85414_10538852 | NC_021166.1    | Ca_kabuli_chr07 | 10538852                | CC                              | TT                | 1946458762               |
| SNP_P3_85415_10539532 | NC_021166.1    | Ca_kabuli_chr07 | 10539532                | GG                              | AA                | 1946458764               |
| SNP_P3_85416_10542050 | NC_021166.1    | Ca_kabuli_chr07 | 10542050                | TT                              | AA                | 1946458765               |
| SNP_P3_85418_10584729 | NC_021166.1    | Ca_kabuli_chr07 | 10584729                | TT                              | GG                | 1946458766               |
| SNP_P3_85419_10590305 | NC_021166.1    | Ca_kabuli_chr07 | 10590305                | TT                              | CC                | 1946458768               |
| SNP_P3_85420_10592089 | NC_021166.1    | Ca_kabuli_chr07 | 10592089                | CC                              | TT                | 1946458769               |
| SNP_P3_85422_10592283 | NC_021166.1    | Ca_kabuli_chr07 | 10592283                | AA                              | CC                | 1946458771               |
| SNP_P3_85423_10592299 | NC_021166.1    | Ca_kabuli_chr07 | 10592299                | TT                              | AA                | 1946458772               |
| SNP_P3_85424_10592589 | NC_021166.1    | Ca_kabuli_chr07 | 10592589                | TT                              | CC                | 1946458774               |



| SNPs IDs              | Chromosome IDs | Chromosomes     | Physical positions (bp) | CDC Frontier (Reference genome) | (Pusa 256 & HPNB) | NCBI SNPdb Accession IDs |
|-----------------------|----------------|-----------------|-------------------------|---------------------------------|-------------------|--------------------------|
| SNP_P3_85425_10592620 | NC_021166.1    | Ca_kabuli_chr07 | 10592620                | TT                              | CC                | 1946458775               |
| SNP_P3_85426_10616669 | NC_021166.1    | Ca_kabuli_chr07 | 10616669                | AA                              | TT                | 1946458777               |
| SNP_P3_85427_10621989 | NC_021166.1    | Ca_kabuli_chr07 | 10621989                | AA                              | GG                | 1946458778               |
| SNP_P3_85428_10633517 | NC_021166.1    | Ca_kabuli_chr07 | 10633517                | CC                              | TT                | 1946458779               |
| SNP_P3_85429_10655826 | NC_021166.1    | Ca_kabuli_chr07 | 10655826                | TT                              | AA                | 1946458781               |
| SNP_P3_85430_10664481 | NC_021166.1    | Ca_kabuli_chr07 | 10664481                | AA                              | GG                | 1946458783               |
| SNP_P3_85433_10729155 | NC_021166.1    | Ca_kabuli_chr07 | 10729155                | CC                              | AA                | 1946458784               |
| SNP_P3_85434_10730782 | NC_021166.1    | Ca_kabuli_chr07 | 10730782                | TT                              | CC                | 1946458786               |
| SNP_P3_85436_10751435 | NC_021166.1    | Ca_kabuli_chr07 | 10751435                | GG                              | CC                | 1946458787               |
| SNP_P3_85438_10790695 | NC_021166.1    | Ca_kabuli_chr07 | 10790695                | TT                              | CC                | 1946458789               |
| SNP_P3_85439_10792935 | NC_021166.1    | Ca_kabuli_chr07 | 10792935                | AA                              | GG                | 1946458790               |
| SNP_P3_85440_10793781 | NC_021166.1    | Ca_kabuli_chr07 | 10793781                | GG                              | AA                | 1946458792               |
| SNP_P3_85441_10794585 | NC_021166.1    | Ca_kabuli_chr07 | 10794585                | AA                              | CC                | 1946458793               |
| SNP_P3_85442_10798230 | NC_021166.1    | Ca_kabuli_chr07 | 10798230                | GG                              | AA                | 1946458794               |
| SNP_P3_85443_10813680 | NC_021166.1    | Ca_kabuli_chr07 | 10813680                | GG                              | AA                | 1946458796               |
| SNP_P3_85445_10822211 | NC_021166.1    | Ca_kabuli_chr07 | 10822211                | TT                              | CC                | 1946458797               |
| SNP_P3_85446_10827036 | NC_021166.1    | Ca_kabuli_chr07 | 10827036                | CC                              | TT                | 1946458799               |
| SNP_P3_85447_10830555 | NC_021166.1    | Ca_kabuli_chr07 | 10830555                | GG                              | AA                | 1946458800               |
| SNP_P3_85448_10837562 | NC_021166.1    | Ca_kabuli_chr07 | 10837562                | AA                              | TT                | 1946458802               |
| SNP_P3_85450_10844061 | NC_021166.1    | Ca_kabuli_chr07 | 10844061                | TT                              | CC                | 1946458804               |
| SNP_P3_85453_10865768 | NC_021166.1    | Ca_kabuli_chr07 | 10865768                | CC                              | TT                | 1946458805               |
| SNP_P3_85455_10869300 | NC_021166.1    | Ca_kabuli_chr07 | 10869300                | GG                              | AA                | 1946458807               |
| SNP_P3_85456_10889242 | NC_021166.1    | Ca_kabuli_chr07 | 10889242                | TT                              | CC                | 1946458808               |
| SNP_P3_85457_10902119 | NC_021166.1    | Ca_kabuli_chr07 | 10902119                | TT                              | CC                | 1946458810               |
| SNP_P3_85458_10902344 | NC_021166.1    | Ca_kabuli_chr07 | 10902344                | GG                              | CC                | 1946458811               |
| SNP_P3_85460_10925435 | NC_021166.1    | Ca_kabuli_chr07 | 10925435                | CC                              | TT                | 1946458813               |
| SNP_P3_85461_10928320 | NC_021166.1    | Ca_kabuli_chr07 | 10928320                | GG                              | AA                | 1946458814               |
| SNP_P3_85462_10931301 | NC_021166.1    | Ca_kabuli_chr07 | 10931301                | GG                              | AA                | 1946458816               |
| SNP_P3_85463_10944328 | NC_021166.1    | Ca_kabuli_chr07 | 10944328                | GG                              | AA                | 1946458817               |
| SNP_P3_85464_10954513 | NC_021166.1    | Ca_kabuli_chr07 | 10954513                | TT                              | CC                | 1946458818               |
| SNP_P3_85465_10954540 | NC_021166.1    | Ca_kabuli_chr07 | 10954540                | CC                              | TT                | 1946458820               |
| SNP_P3_85466_10954893 | NC_021166.1    | Ca_kabuli_chr07 | 10954893                | AA                              | CC                | 1946458822               |
| SNP_P3_85467_10954932 | NC_021166.1    | Ca_kabuli_chr07 | 10954932                | TT                              | GG                | 1946458823               |
| SNP_P3_85468_10961291 | NC_021166.1    | Ca_kabuli_chr07 | 10961291                | TT                              | CC                | 1946458825               |
| SNP_P3_85469_10961345 | NC_021166.1    | Ca_kabuli_chr07 | 10961345                | TT                              | CC                | 1946458826               |
| SNP_P3_85470_10961399 | NC_021166.1    | Ca_kabuli_chr07 | 10961399                | GG                              | AA                | 1946458828               |
| SNP_P3_85471_10961510 | NC_021166.1    | Ca_kabuli_chr07 | 10961510                | TT                              | CC                | 1946458829               |
| SNP_P3_85472_10961546 | NC_021166.1    | Ca_kabuli_chr07 | 10961546                | GG                              | AA                | 1946458831               |
| SNP_P3_85473_10961551 | NC_021166.1    | Ca_kabuli_chr07 | 10961551                | AA                              | GG                | 1946458832               |
| SNP_P3_85474_10961558 | NC_021166.1    | Ca_kabuli_chr07 | 10961558                | AA                              | GG                | 1946458834               |
| SNP_P3_85475_10961570 | NC_021166.1    | Ca_kabuli_chr07 | 10961570                | TT                              | CC                | 1946458835               |
| SNP_P3_85476_10961602 | NC_021166.1    | Ca_kabuli_chr07 | 10961602                | CC                              | TT                | 1946458837               |

| SNPs IDs              | Chromosome IDs | Chromosomes     | Physical positions (bp) | CDC Frontier (Reference genome) | (Pusa 256 & HPNB) | NCBI SNPdb Accession IDs |
|-----------------------|----------------|-----------------|-------------------------|---------------------------------|-------------------|--------------------------|
| SNP_P3_85477_10961644 | NC_021166.1    | Ca_kabuli_chr07 | 10961644                | TT                              | GG                | 1946458838               |
| SNP_P3_85478_10966398 | NC_021166.1    | Ca_kabuli_chr07 | 10966398                | GG                              | TT                | 1946458840               |
| SNP_P3_85480_11002759 | NC_021166.1    | Ca_kabuli_chr07 | 11002759                | AA                              | CC                | 1946458841               |
| SNP_P3_85482_11007670 | NC_021166.1    | Ca_kabuli_chr07 | 11007670                | GG                              | AA                | 1946458843               |
| SNP_P3_85483_11025538 | NC_021166.1    | Ca_kabuli_chr07 | 11025538                | GG                              | AA                | 1946458844               |
| SNP_P3_85484_11044463 | NC_021166.1    | Ca_kabuli_chr07 | 11044463                | AA                              | GG                | 1946458846               |
| SNP_P3_85485_11053713 | NC_021166.1    | Ca_kabuli_chr07 | 11053713                | TT                              | AA                | 1946458847               |
| SNP_P3_85486_11053714 | NC_021166.1    | Ca_kabuli_chr07 | 11053714                | TT                              | GG                | 1946458849               |
| SNP_P3_85491_11094257 | NC_021166.1    | Ca_kabuli_chr07 | 11094257                | AA                              | GG                | 1946458850               |
| SNP_P3_85492_11111025 | NC_021166.1    | Ca_kabuli_chr07 | 11111025                | AA                              | TT                | 1946458852               |
| SNP_P3_85493_11128676 | NC_021166.1    | Ca_kabuli_chr07 | 11128676                | CC                              | TT                | 1946458853               |
| SNP_P3_85494_11145149 | NC_021166.1    | Ca_kabuli_chr07 | 11145149                | GG                              | AA                | 1946458855               |
| SNP_P3_85495_11185612 | NC_021166.1    | Ca_kabuli_chr07 | 11185612                | AA                              | GG                | 1946458856               |
| SNP_P3_85496_11265591 | NC_021166.1    | Ca_kabuli_chr07 | 11265591                | TT                              | CC                | 1946458858               |
| SNP_P3_85497_11276561 | NC_021166.1    | Ca_kabuli_chr07 | 11276561                | TT                              | CC                | 1946458859               |
| SNP_P3_85498_11302541 | NC_021166.1    | Ca_kabuli_chr07 | 11302541                | TT                              | CC                | 1946458861               |
| SNP_P3_85499_11305184 | NC_021166.1    | Ca_kabuli_chr07 | 11305184                | GG                              | AA                | 1946458862               |
| SNP_P3_85500_11327469 | NC_021166.1    | Ca_kabuli_chr07 | 11327469                | AA                              | GG                | 1946458864               |
| SNP_P3_85501_11327472 | NC_021166.1    | Ca_kabuli_chr07 | 11327472                | TT                              | AA                | 1946458865               |
| SNP_P3_85503_11348621 | NC_021166.1    | Ca_kabuli_chr07 | 11348621                | AA                              | TT                | 1946458867               |
| SNP_P3_85504_11360947 | NC_021166.1    | Ca_kabuli_chr07 | 11360947                | GG                              | AA                | 1946458868               |
| SNP_P3_85507_11402211 | NC_021166.1    | Ca_kabuli_chr07 | 11402211                | AA                              | GG                | 1946458870               |
| SNP_P3_85509_11488262 | NC_021166.1    | Ca_kabuli_chr07 | 11488262                | TT                              | CC                | 1946458871               |
| SNP_P3_85511_11516991 | NC_021166.1    | Ca_kabuli_chr07 | 11516991                | AA                              | GG                | 1946458873               |
| SNP_P3_85512_11529429 | NC_021166.1    | Ca_kabuli_chr07 | 11529429                | GG                              | AA                | 1946458874               |
| SNP_P3_85513_11534451 | NC_021166.1    | Ca_kabuli_chr07 | 11534451                | TT                              | GG                | 1946458876               |
| SNP_P3_85514_11534452 | NC_021166.1    | Ca_kabuli_chr07 | 11534452                | TT                              | CC                | 1946458877               |
| SNP_P3_85515_11534731 | NC_021166.1    | Ca_kabuli_chr07 | 11534731                | CC                              | TT                | 1946458879               |
| SNP_P3_85516_11544135 | NC_021166.1    | Ca_kabuli_chr07 | 11544135                | CC                              | TT                | 1946458880               |
| SNP_P3_85517_11549164 | NC_021166.1    | Ca_kabuli_chr07 | 11549164                | TT                              | AA                | 1946458882               |
| SNP_P3_85518_11549167 | NC_021166.1    | Ca_kabuli_chr07 | 11549167                | TT                              | CC                | 1946458883               |
| SNP_P3_85519_11551328 | NC_021166.1    | Ca_kabuli_chr07 | 11551328                | AA                              | TT                | 1946458885               |
| SNP_P3_85520_11551331 | NC_021166.1    | Ca_kabuli_chr07 | 11551331                | TT                              | CC                | 1946458886               |
| SNP_P3_85521_11557163 | NC_021166.1    | Ca_kabuli_chr07 | 11557163                | CC                              | TT                | 1946458888               |
| SNP_P3_85522_11557189 | NC_021166.1    | Ca_kabuli_chr07 | 11557189                | GG                              | CC                | 1946458889               |
| SNP_P3_85523_11557191 | NC_021166.1    | Ca_kabuli_chr07 | 11557191                | GG                              | CC                | 1946458891               |
| SNP_P3_85525_11606130 | NC_021166.1    | Ca_kabuli_chr07 | 11606130                | AA                              | GG                | 1946458892               |
| SNP_P3_85527_11626873 | NC_021166.1    | Ca_kabuli_chr07 | 11626873                | GG                              | TT                | 1946458894               |
| SNP_P3_85528_11626892 | NC_021166.1    | Ca_kabuli_chr07 | 11626892                | GG                              | AA                | 1946458895               |
| SNP_P3_85529_11637124 | NC_021166.1    | Ca_kabuli_chr07 | 11637124                | GG                              | CC                | 1946458897               |
| SNP_P3_85531_11649703 | NC_021166.1    | Ca_kabuli_chr07 | 11649703                | GG                              | CC                | 1946458898               |
| SNP_P3_85534_11679090 | NC_021166.1    | Ca_kabuli_chr07 | 11679090                | TT                              | CC                | 1946458900               |

| SNPs IDs              | Chromosome IDs | Chromosomes     | Physical positions (bp) | CDC Frontier (Reference genome) | (Pusa 256 & HPNB) | NCBI SNPdb Accession IDs |
|-----------------------|----------------|-----------------|-------------------------|---------------------------------|-------------------|--------------------------|
| SNP_P3_85535_11680585 | NC_021166.1    | Ca_kabuli_chr07 | 11680585                | CC                              | TT                | 1946458901               |
| SNP_P3_85536_11682674 | NC_021166.1    | Ca_kabuli_chr07 | 11682674                | GG                              | AA                | 1946458903               |
| SNP_P3_85538_11697451 | NC_021166.1    | Ca_kabuli_chr07 | 11697451                | GG                              | TT                | 1946458905               |
| SNP_P3_85540_11698027 | NC_021166.1    | Ca_kabuli_chr07 | 11698027                | TT                              | CC                | 1946458906               |
| SNP_P3_85541_11699399 | NC_021166.1    | Ca_kabuli_chr07 | 11699399                | AA                              | GG                | 1946458907               |
| SNP_P3_85542_11699407 | NC_021166.1    | Ca_kabuli_chr07 | 11699407                | TT                              | GG                | 1946458909               |
| SNP_P3_85543_11707848 | NC_021166.1    | Ca_kabuli_chr07 | 11707848                | GG                              | CC                | 1946458910               |
| SNP_P3_85545_11731560 | NC_021166.1    | Ca_kabuli_chr07 | 11731560                | GG                              | AA                | 1946458912               |
| SNP_P3_85546_11737752 | NC_021166.1    | Ca_kabuli_chr07 | 11737752                | AA                              | GG                | 1946458913               |
| SNP_P3_85547_11738130 | NC_021166.1    | Ca_kabuli_chr07 | 11738130                | CC                              | TT                | 1946458915               |
| SNP_P3_85548_11747097 | NC_021166.1    | Ca_kabuli_chr07 | 11747097                | CC                              | TT                | 1946458916               |
| SNP_P3_85551_11756139 | NC_021166.1    | Ca_kabuli_chr07 | 11756139                | CC                              | AA                | 1946458918               |
| SNP_P3_85552_11809744 | NC_021166.1    | Ca_kabuli_chr07 | 11809744                | GG                              | AA                | 1946458919               |
| SNP_P3_85553_11828067 | NC_021166.1    | Ca_kabuli_chr07 | 11828067                | GG                              | AA                | 1946458920               |
| SNP_P3_85555_11835666 | NC_021166.1    | Ca_kabuli_chr07 | 11835666                | TT                              | AA                | 1946458922               |
| SNP_P3_85557_11870668 | NC_021166.1    | Ca_kabuli_chr07 | 11870668                | CC                              | TT                | 1946458923               |
| SNP_P3_85558_11873832 | NC_021166.1    | Ca_kabuli_chr07 | 11873832                | CC                              | TT                | 1946458925               |
| SNP_P3_85559_11901018 | NC_021166.1    | Ca_kabuli_chr07 | 11901018                | TT                              | GG                | 1946458926               |
| SNP_P3_85560_11901020 | NC_021166.1    | Ca_kabuli_chr07 | 11901020                | AA                              | CC                | 1946458928               |
| SNP_P3_85561_11901770 | NC_021166.1    | Ca_kabuli_chr07 | 11901770                | AA                              | TT                | 1946458929               |
| SNP_P3_85562_11901771 | NC_021166.1    | Ca_kabuli_chr07 | 11901771                | AA                              | TT                | 1946458931               |
| SNP_P3_85563_11916637 | NC_021166.1    | Ca_kabuli_chr07 | 11916637                | AA                              | TT                | 1946458932               |
| SNP_P3_85565_11953310 | NC_021166.1    | Ca_kabuli_chr07 | 11953310                | AA                              | GG                | 1946458934               |
| SNP_P3_85566_11954487 | NC_021166.1    | Ca_kabuli_chr07 | 11954487                | CC                              | TT                | 1946458935               |
| SNP_P3_85567_11967553 | NC_021166.1    | Ca_kabuli_chr07 | 11967553                | GG                              | AA                | 1946458937               |
| SNP_P3_85569_12009385 | NC_021166.1    | Ca_kabuli_chr07 | 12009385                | CC                              | TT                | 1946458938               |
| SNP_P3_85570_12025599 | NC_021166.1    | Ca_kabuli_chr07 | 12025599                | CC                              | TT                | 1946458940               |
| SNP_P3_85571_12084898 | NC_021166.1    | Ca_kabuli_chr07 | 12084898                | GG                              | AA                | 1946458941               |
| SNP_P3_85572_12124109 | NC_021166.1    | Ca_kabuli_chr07 | 12124109                | CC                              | TT                | 1946458943               |
| SNP_P3_85573_12155733 | NC_021166.1    | Ca_kabuli_chr07 | 12155733                | CC                              | AA                | 1946458944               |
| SNP_P3_85574_12165408 | NC_021166.1    | Ca_kabuli_chr07 | 12165408                | TT                              | CC                | 1946458946               |
| SNP_P3_85576_12215919 | NC_021166.1    | Ca_kabuli_chr07 | 12215919                | TT                              | CC                | 1946458948               |
| SNP_P3_85577_12231024 | NC_021166.1    | Ca_kabuli_chr07 | 12231024                | AA                              | TT                | 1946458949               |
| SNP_P3_85578_12274577 | NC_021166.1    | Ca_kabuli_chr07 | 12274577                | CC                              | TT                | 1946458950               |
| SNP_P3_85579_12290089 | NC_021166.1    | Ca_kabuli_chr07 | 12290089                | CC                              | TT                | 1946458952               |
| SNP_P3_85581_12291604 | NC_021166.1    | Ca_kabuli_chr07 | 12291604                | CC                              | GG                | 1946458953               |
| SNP_P3_85582_12359384 | NC_021166.1    | Ca_kabuli_chr07 | 12359384                | TT                              | AA                | 1946458955               |
| SNP_P3_85583_12359391 | NC_021166.1    | Ca_kabuli_chr07 | 12359391                | AA                              | TT                | 1946458956               |
| SNP_P3_85584_12359410 | NC_021166.1    | Ca_kabuli_chr07 | 12359410                | TT                              | AA                | 1946458958               |
| SNP_P3_85587_12381761 | NC_021166.1    | Ca_kabuli_chr07 | 12381761                | TT                              | CC                | 1946458959               |
| SNP_P3_85588_12396471 | NC_021166.1    | Ca_kabuli_chr07 | 12396471                | AA                              | TT                | 1946458961               |
| SNP_P3_85590_12442568 | NC_021166.1    | Ca_kabuli_chr07 | 12442568                | GG                              | AA                | 1946458962               |

| SNPs IDs              | Chromosome IDs | Chromosomes     | Physical positions (bp) | CDC Frontier (Reference genome) | (Pusa 256 & HPNB) | NCBI SNPdb Accession IDs |
|-----------------------|----------------|-----------------|-------------------------|---------------------------------|-------------------|--------------------------|
| SNP_P3_85592_12452692 | NC_021166.1    | Ca_kabuli_chr07 | 12452692                | AA                              | TT                | 1946458964               |
| SNP_P3_85593_12460714 | NC_021166.1    | Ca_kabuli_chr07 | 12460714                | CC                              | TT                | 1946458965               |
| SNP_P3_85596_12483270 | NC_021166.1    | Ca_kabuli_chr07 | 12483270                | TT                              | CC                | 1946458967               |
| SNP_P3_85597_12483449 | NC_021166.1    | Ca_kabuli_chr07 | 12483449                | CC                              | TT                | 1946458968               |
| SNP_P3_85598_12500404 | NC_021166.1    | Ca_kabuli_chr07 | 12500404                | CC                              | AA                | 1946458970               |
| SNP_P3_85599_12509561 | NC_021166.1    | Ca_kabuli_chr07 | 12509561                | AA                              | CC                | 1946458971               |
| SNP_P3_85600_12514636 | NC_021166.1    | Ca_kabuli_chr07 | 12514636                | GG                              | AA                | 1946458973               |
| SNP_P3_85601_12514656 | NC_021166.1    | Ca_kabuli_chr07 | 12514656                | AA                              | GG                | 1946458974               |
| SNP_P3_85602_12514657 | NC_021166.1    | Ca_kabuli_chr07 | 12514657                | TT                              | CC                | 1946458976               |
| SNP_P3_85603_12514675 | NC_021166.1    | Ca_kabuli_chr07 | 12514675                | CC                              | TT                | 1946458977               |
| SNP_P3_85606_12540025 | NC_021166.1    | Ca_kabuli_chr07 | 12540025                | AA                              | GG                | 1946458979               |
| SNP_P3_85607_12540152 | NC_021166.1    | Ca_kabuli_chr07 | 12540152                | TT                              | CC                | 1946458980               |
| SNP_P3_85608_12570414 | NC_021166.1    | Ca_kabuli_chr07 | 12570414                | CC                              | TT                | 1946458982               |
| SNP_P3_85609_12576060 | NC_021166.1    | Ca_kabuli_chr07 | 12576060                | CC                              | TT                | 1946458983               |
| SNP_P3_85610_12576088 | NC_021166.1    | Ca_kabuli_chr07 | 12576088                | TT                              | GG                | 1946458985               |
| SNP_P3_85611_12599606 | NC_021166.1    | Ca_kabuli_chr07 | 12599606                | TT                              | GG                | 1946458987               |
| SNP_P3_85613_12611642 | NC_021166.1    | Ca_kabuli_chr07 | 12611642                | GG                              | AA                | 1946458988               |
| SNP_P3_85614_12611705 | NC_021166.1    | Ca_kabuli_chr07 | 12611705                | GG                              | TT                | 1946458990               |
| SNP_P3_85615_12612045 | NC_021166.1    | Ca_kabuli_chr07 | 12612045                | TT                              | CC                | 1946458991               |
| SNP_P3_85616_12612086 | NC_021166.1    | Ca_kabuli_chr07 | 12612086                | AA                              | TT                | 1946458993               |
| SNP_P3_85617_12645719 | NC_021166.1    | Ca_kabuli_chr07 | 12645719                | TT                              | CC                | 1946458994               |
| SNP_P3_85618_12667106 | NC_021166.1    | Ca_kabuli_chr07 | 12667106                | AA                              | TT                | 1946458996               |
| SNP_P3_85619_12673387 | NC_021166.1    | Ca_kabuli_chr07 | 12673387                | TT                              | CC                | 1946458997               |
| SNP_P3_85620_12673390 | NC_021166.1    | Ca_kabuli_chr07 | 12673390                | CC                              | TT                | 1946458999               |
| SNP_P3_85621_12688160 | NC_021166.1    | Ca_kabuli_chr07 | 12688160                | TT                              | GG                | 1946459000               |
| SNP_P3_85623_12691572 | NC_021166.1    | Ca_kabuli_chr07 | 12691572                | TT                              | CC                | 1946459002               |
| SNP_P3_85624_12695579 | NC_021166.1    | Ca_kabuli_chr07 | 12695579                | CC                              | TT                | 1946459003               |
| SNP_P3_85625_12706468 | NC_021166.1    | Ca_kabuli_chr07 | 12706468                | GG                              | AA                | 1946459005               |
| SNP_P3_85626_12719878 | NC_021166.1    | Ca_kabuli_chr07 | 12719878                | CC                              | TT                | 1946459006               |
| SNP_P3_85627_12727763 | NC_021166.1    | Ca_kabuli_chr07 | 12727763                | TT                              | AA                | 1946459008               |
| SNP_P3_85628_12733369 | NC_021166.1    | Ca_kabuli_chr07 | 12733369                | CC                              | TT                | 1946459009               |
| SNP_P3_85630_12748436 | NC_021166.1    | Ca_kabuli_chr07 | 12748436                | AA                              | GG                | 1946459011               |
| SNP_P3_85631_12758509 | NC_021166.1    | Ca_kabuli_chr07 | 12758509                | GG                              | AA                | 1946459012               |
| SNP_P3_85633_12776654 | NC_021166.1    | Ca_kabuli_chr07 | 12776654                | GG                              | TT                | 1946459014               |
| SNP_P3_85634_12788701 | NC_021166.1    | Ca_kabuli_chr07 | 12788701                | TT                              | AA                | 1946459015               |
| SNP_P3_85635_12797859 | NC_021166.1    | Ca_kabuli_chr07 | 12797859                | TT                              | GG                | 1946459017               |
| SNP_P3_85637_12817302 | NC_021166.1    | Ca_kabuli_chr07 | 12817302                | AA                              | TT                | 1946459018               |
| SNP_P3_85638_12827541 | NC_021166.1    | Ca_kabuli_chr07 | 12827541                | AA                              | GG                | 1946459020               |
| SNP_P3_85639_12843747 | NC_021166.1    | Ca_kabuli_chr07 | 12843747                | AA                              | TT                | 1946459021               |
| SNP_P3_85641_12853075 | NC_021166.1    | Ca_kabuli_chr07 | 12853075                | AA                              | GG                | 1946459023               |
| SNP_P3_85643_12857900 | NC_021166.1    | Ca_kabuli_chr07 | 12857900                | TT                              | CC                | 1946459024               |
| SNP_P3_85644_12866270 | NC_021166.1    | Ca_kabuli_chr07 | 12866270                | CC                              | TT                | 1946459026               |

| SNPs IDs              | Chromosome IDs | Chromosomes     | Physical positions (bp) | CDC Frontier (Reference genome) | (Pusa 256 & HPNB) | NCBI SNPdb Accession IDs |
|-----------------------|----------------|-----------------|-------------------------|---------------------------------|-------------------|--------------------------|
| SNP_P3_85645_12873822 | NC_021166.1    | Ca_kabuli_chr07 | 12873822                | AA                              | CC                | 1946459027               |
| SNP_P3_85646_12890883 | NC_021166.1    | Ca_kabuli_chr07 | 12890883                | AA                              | GG                | 1946459029               |
| SNP_P3_85647_12896939 | NC_021166.1    | Ca_kabuli_chr07 | 12896939                | TT                              | CC                | 1946459030               |
| SNP_P3_85648_12925774 | NC_021166.1    | Ca_kabuli_chr07 | 12925774                | GG                              | AA                | 1946459032               |
| SNP_P3_85649_13008964 | NC_021166.1    | Ca_kabuli_chr07 | 13008964                | AA                              | GG                | 1946459033               |
| SNP_P3_85651_13053150 | NC_021166.1    | Ca_kabuli_chr07 | 13053150                | GG                              | CC                | 1946459035               |
| SNP_P3_85652_13056875 | NC_021166.1    | Ca_kabuli_chr07 | 13056875                | CC                              | TT                | 1946459036               |
| SNP_P3_85653_13064977 | NC_021166.1    | Ca_kabuli_chr07 | 13064977                | GG                              | AA                | 1946459037               |
| SNP_P3_85654_13065266 | NC_021166.1    | Ca_kabuli_chr07 | 13065266                | GG                              | CC                | 1946459039               |
| SNP_P3_85655_13110990 | NC_021166.1    | Ca_kabuli_chr07 | 13110990                | GG                              | AA                | 1946459040               |
| SNP_P3_85656_13111008 | NC_021166.1    | Ca_kabuli_chr07 | 13111008                | TT                              | CC                | 1946459042               |
| SNP_P3_85657_13111058 | NC_021166.1    | Ca_kabuli_chr07 | 13111058                | CC                              | GG                | 1946459043               |
| SNP_P3_85658_13111085 | NC_021166.1    | Ca_kabuli_chr07 | 13111085                | AA                              | GG                | 1946459045               |
| SNP_P3_85659_13111441 | NC_021166.1    | Ca_kabuli_chr07 | 13111441                | GG                              | CC                | 1946459046               |
| SNP_P3_85660_13116391 | NC_021166.1    | Ca_kabuli_chr07 | 13116391                | AA                              | CC                | 1946459048               |
| SNP_P3_85661_13141067 | NC_021166.1    | Ca_kabuli_chr07 | 13141067                | GG                              | CC                | 1946459049               |
| SNP_P3_85662_13141978 | NC_021166.1    | Ca_kabuli_chr07 | 13141978                | CC                              | TT                | 1946459051               |
| SNP_P3_85663_13142424 | NC_021166.1    | Ca_kabuli_chr07 | 13142424                | AA                              | CC                | 1946459052               |
| SNP_P3_85664_13172070 | NC_021166.1    | Ca_kabuli_chr07 | 13172070                | CC                              | TT                | 1946459053               |
| SNP_P3_85665_13185380 | NC_021166.1    | Ca_kabuli_chr07 | 13185380                | AA                              | CC                | 1946459055               |
| SNP_P3_85666_13210437 | NC_021166.1    | Ca_kabuli_chr07 | 13210437                | TT                              | AA                | 1946459056               |
| SNP_P3_85667_13228454 | NC_021166.1    | Ca_kabuli_chr07 | 13228454                | CC                              | TT                | 1946459058               |
| SNP_P3_85668_13254766 | NC_021166.1    | Ca_kabuli_chr07 | 13254766                | CC                              | AA                | 1946459059               |
| SNP_P3_85669_13282571 | NC_021166.1    | Ca_kabuli_chr07 | 13282571                | TT                              | CC                | 1946459061               |
| SNP_P3_85670_13292213 | NC_021166.1    | Ca_kabuli_chr07 | 13292213                | CC                              | TT                | 1946459062               |
| SNP_P3_85671_13292394 | NC_021166.1    | Ca_kabuli_chr07 | 13292394                | AA                              | TT                | 1946459064               |
| SNP_P3_85672_13292404 | NC_021166.1    | Ca_kabuli_chr07 | 13292404                | TT                              | CC                | 1946459065               |
| SNP_P3_85674_13348774 | NC_021166.1    | Ca_kabuli_chr07 | 13348774                | TT                              | AA                | 1946459067               |
| SNP_P3_85675_13354988 | NC_021166.1    | Ca_kabuli_chr07 | 13354988                | AA                              | GG                | 1946459068               |
| SNP_P3_85676_13354990 | NC_021166.1    | Ca_kabuli_chr07 | 13354990                | AA                              | TT                | 1946459070               |
| SNP_P3_85677_13363500 | NC_021166.1    | Ca_kabuli_chr07 | 13363500                | AA                              | TT                | 1946459071               |
| SNP_P3_85678_13368015 | NC_021166.1    | Ca_kabuli_chr07 | 13368015                | GG                              | AA                | 1946459073               |
| SNP_P3_85679_13384732 | NC_021166.1    | Ca_kabuli_chr07 | 13384732                | GG                              | AA                | 1946459074               |
| SNP_P3_85680_13413444 | NC_021166.1    | Ca_kabuli_chr07 | 13413444                | AA                              | GG                | 1946459075               |
| SNP_P3_85681_13415278 | NC_021166.1    | Ca_kabuli_chr07 | 13415278                | GG                              | AA                | 1946459077               |
| SNP_P3_85682_13432845 | NC_021166.1    | Ca_kabuli_chr07 | 13432845                | AA                              | GG                | 1946459078               |
| SNP_P3_85684_13454882 | NC_021166.1    | Ca_kabuli_chr07 | 13454882                | GG                              | CC                | 1946459080               |
| SNP_P3_85685_13471474 | NC_021166.1    | Ca_kabuli_chr07 | 13471474                | CC                              | TT                | 1946459081               |
| SNP_P3_85686_13473792 | NC_021166.1    | Ca_kabuli_chr07 | 13473792                | TT                              | CC                | 1946459083               |
| SNP_P3_85687_13474074 | NC_021166.1    | Ca_kabuli_chr07 | 13474074                | AA                              | GG                | 1946459084               |
| SNP_P3_85688_13476405 | NC_021166.1    | Ca_kabuli_chr07 | 13476405                | GG                              | AA                | 1946459085               |
| SNP_P3_85689_13476409 | NC_021166.1    | Ca_kabuli_chr07 | 13476409                | AA                              | GG                | 1946459086               |

| SNPs IDs              | Chromosome IDs | Chromosomes     | Physical positions (bp) | CDC Frontier (Reference genome) | (Pusa 256 & HPNB) | NCBI SNPdb Accession IDs |
|-----------------------|----------------|-----------------|-------------------------|---------------------------------|-------------------|--------------------------|
| SNP_P3_85690_13476451 | NC_021166.1    | Ca_kabuli_chr07 | 13476451                | GG                              | TT                | 1946459087               |
| SNP_P3_85691_13476454 | NC_021166.1    | Ca_kabuli_chr07 | 13476454                | TT                              | GG                | 1946459088               |
| SNP_P3_85692_13476551 | NC_021166.1    | Ca_kabuli_chr07 | 13476551                | TT                              | GG                | 1946459089               |
| SNP_P3_85693_13476679 | NC_021166.1    | Ca_kabuli_chr07 | 13476679                | GG                              | CC                | 1946459090               |
| SNP_P3_85694_13476689 | NC_021166.1    | Ca_kabuli_chr07 | 13476689                | AA                              | GG                | 1946459091               |
| SNP_P3_85695_13476725 | NC_021166.1    | Ca_kabuli_chr07 | 13476725                | AA                              | GG                | 1946459092               |
| SNP_P3_85696_13476745 | NC_021166.1    | Ca_kabuli_chr07 | 13476745                | CC                              | AA                | 1946459093               |
| SNP_P3_85697_13476762 | NC_021166.1    | Ca_kabuli_chr07 | 13476762                | CC                              | TT                | 1946459094               |
| SNP_P3_85698_13476820 | NC_021166.1    | Ca_kabuli_chr07 | 13476820                | AA                              | CC                | 1946459095               |
| SNP_P3_85699_13476839 | NC_021166.1    | Ca_kabuli_chr07 | 13476839                | AA                              | GG                | 1946459096               |
| SNP_P3_85700_13485409 | NC_021166.1    | Ca_kabuli_chr07 | 13485409                | TT                              | AA                | 1946459097               |
| SNP_P3_85701_13485411 | NC_021166.1    | Ca_kabuli_chr07 | 13485411                | TT                              | CC                | 1946459098               |
| SNP_P3_85702_13494827 | NC_021166.1    | Ca_kabuli_chr07 | 13494827                | AA                              | CC                | 1946459099               |
| SNP_P3_85703_13501493 | NC_021166.1    | Ca_kabuli_chr07 | 13501493                | CC                              | AA                | 1946459100               |
| SNP_P3_85704_13514074 | NC_021166.1    | Ca_kabuli_chr07 | 13514074                | TT                              | CC                | 1946459101               |
| SNP_P3_85705_13519194 | NC_021166.1    | Ca_kabuli_chr07 | 13519194                | TT                              | GG                | 1946459102               |
| SNP_P3_85706_13533020 | NC_021166.1    | Ca_kabuli_chr07 | 13533020                | TT                              | AA                | 1946459103               |
| SNP_P3_85707_13533021 | NC_021166.1    | Ca_kabuli_chr07 | 13533021                | AA                              | TT                | 1946459104               |
| SNP_P3_85708_13533248 | NC_021166.1    | Ca_kabuli_chr07 | 13533248                | AA                              | GG                | 1946459105               |
| SNP_P3_85709_13533556 | NC_021166.1    | Ca_kabuli_chr07 | 13533556                | AA                              | TT                | 1946459106               |
| SNP_P3_85710_13542782 | NC_021166.1    | Ca_kabuli_chr07 | 13542782                | TT                              | CC                | 1946459107               |
| SNP_P3_85711_13551467 | NC_021166.1    | Ca_kabuli_chr07 | 13551467                | CC                              | TT                | 1946459108               |
| SNP_P3_85713_13558955 | NC_021166.1    | Ca_kabuli_chr07 | 13558955                | GG                              | AA                | 1946459109               |
| SNP_P3_85714_13559134 | NC_021166.1    | Ca_kabuli_chr07 | 13559134                | TT                              | CC                | 1946459110               |
| SNP_P3_85715_13559164 | NC_021166.1    | Ca_kabuli_chr07 | 13559164                | TT                              | CC                | 1946459111               |
| SNP_P3_85716_13567440 | NC_021166.1    | Ca_kabuli_chr07 | 13567440                | AA                              | TT                | 1946459112               |
| SNP_P3_85717_13573126 | NC_021166.1    | Ca_kabuli_chr07 | 13573126                | AA                              | GG                | 1946459113               |
| SNP_P3_85718_13573419 | NC_021166.1    | Ca_kabuli_chr07 | 13573419                | AA                              | GG                | 1946459114               |
| SNP_P3_85720_13610022 | NC_021166.1    | Ca_kabuli_chr07 | 13610022                | CC                              | GG                | 1946459115               |
| SNP_P3_85721_13618375 | NC_021166.1    | Ca_kabuli_chr07 | 13618375                | TT                              | AA                | 1946459116               |
| SNP_P3_85722_13628229 | NC_021166.1    | Ca_kabuli_chr07 | 13628229                | AA                              | TT                | 1946459117               |
| SNP_P3_85723_13631052 | NC_021166.1    | Ca_kabuli_chr07 | 13631052                | TT                              | CC                | 1946459118               |
| SNP_P3_85724_13631068 | NC_021166.1    | Ca_kabuli_chr07 | 13631068                | CC                              | GG                | 1946459119               |
| SNP_P3_85725_13631076 | NC_021166.1    | Ca_kabuli_chr07 | 13631076                | TT                              | AA                | 1946459120               |
| SNP_P3_85726_13631483 | NC_021166.1    | Ca_kabuli_chr07 | 13631483                | AA                              | CC                | 1946459121               |
| SNP_P3_85727_13631729 | NC_021166.1    | Ca_kabuli_chr07 | 13631729                | GG                              | AA                | 1946459122               |
| SNP_P3_85728_13647794 | NC_021166.1    | Ca_kabuli_chr07 | 13647794                | AA                              | GG                | 1946459123               |
| SNP_P3_85730_13692760 | NC_021166.1    | Ca_kabuli_chr07 | 13692760                | GG                              | AA                | 1946459124               |
| SNP_P3_85731_13695790 | NC_021166.1    | Ca_kabuli_chr07 | 13695790                | TT                              | AA                | 1946459125               |
| SNP_P3_85732_13700552 | NC_021166.1    | Ca_kabuli_chr07 | 13700552                | AA                              | CC                | 1946459126               |
| SNP_P3_85733_13700952 | NC_021166.1    | Ca_kabuli_chr07 | 13700952                | TT                              | AA                | 1946459127               |
| SNP_P3_85734_13701512 | NC_021166.1    | Ca_kabuli_chr07 | 13701512                | TT                              | CC                | 1946459128               |

| SNPs IDs              | Chromosome IDs | Chromosomes     | Physical positions (bp) | CDC Frontier (Reference genome) | (Pusa 256 & HPNB) | NCBI SNPdb Accession IDs |
|-----------------------|----------------|-----------------|-------------------------|---------------------------------|-------------------|--------------------------|
| SNP_P3_85736_13712656 | NC_021166.1    | Ca_kabuli_chr07 | 13712656                | CC                              | TT                | 1946459129               |
| SNP_P3_85737_13721778 | NC_021166.1    | Ca_kabuli_chr07 | 13721778                | CC                              | GG                | 1946459130               |
| SNP_P3_85738_13763095 | NC_021166.1    | Ca_kabuli_chr07 | 13763095                | GG                              | AA                | 1946459131               |
| SNP_P3_85740_13823669 | NC_021166.1    | Ca_kabuli_chr07 | 13823669                | GG                              | AA                | 1946459132               |
| SNP_P3_85741_13823683 | NC_021166.1    | Ca_kabuli_chr07 | 13823683                | CC                              | TT                | 1946459133               |
| SNP_P3_85742_13823686 | NC_021166.1    | Ca_kabuli_chr07 | 13823686                | AA                              | GG                | 1946459134               |
| SNP_P3_85744_13838163 | NC_021166.1    | Ca_kabuli_chr07 | 13838163                | TT                              | CC                | 1946459135               |
| SNP_P3_85745_13843601 | NC_021166.1    | Ca_kabuli_chr07 | 13843601                | CC                              | TT                | 1946459136               |
| SNP_P3_85746_13852947 | NC_021166.1    | Ca_kabuli_chr07 | 13852947                | TT                              | GG                | 1946459137               |
| SNP_P3_85747_13868180 | NC_021166.1    | Ca_kabuli_chr07 | 13868180                | AA                              | GG                | 1946459138               |
| SNP_P3_85748_13871461 | NC_021166.1    | Ca_kabuli_chr07 | 13871461                | AA                              | TT                | 1946459139               |
| SNP_P3_85751_13995161 | NC_021166.1    | Ca_kabuli_chr07 | 13995161                | GG                              | AA                | 1946459140               |
| SNP_P3_85753_14012607 | NC_021166.1    | Ca_kabuli_chr07 | 14012607                | CC                              | AA                | 1946459141               |
| SNP_P3_85754_14026845 | NC_021166.1    | Ca_kabuli_chr07 | 14026845                | TT                              | GG                | 1946459142               |
| SNP_P3_85756_14061928 | NC_021166.1    | Ca_kabuli_chr07 | 14061928                | GG                              | AA                | 1946459143               |
| SNP_P3_85758_14065211 | NC_021166.1    | Ca_kabuli_chr07 | 14065211                | AA                              | TT                | 1946459144               |
| SNP_P3_85759_14065295 | NC_021166.1    | Ca_kabuli_chr07 | 14065295                | CC                              | TT                | 1946459145               |
| SNP_P3_85760_14071479 | NC_021166.1    | Ca_kabuli_chr07 | 14071479                | TT                              | AA                | 1946459146               |
| SNP_P3_85761_14071991 | NC_021166.1    | Ca_kabuli_chr07 | 14071991                | CC                              | TT                | 1946459147               |
| SNP_P3_85762_14072211 | NC_021166.1    | Ca_kabuli_chr07 | 14072211                | CC                              | AA                | 1946459148               |
| SNP_P3_85763_14072742 | NC_021166.1    | Ca_kabuli_chr07 | 14072742                | AA                              | GG                | 1946459149               |
| SNP_P3_85764_14073197 | NC_021166.1    | Ca_kabuli_chr07 | 14073197                | TT                              | GG                | 1946459150               |
| SNP_P3_85766_14081225 | NC_021166.1    | Ca_kabuli_chr07 | 14081225                | CC                              | TT                | 1946459151               |
| SNP_P3_85767_14081273 | NC_021166.1    | Ca_kabuli_chr07 | 14081273                | AA                              | GG                | 1946459152               |
| SNP_P3_85768_14081550 | NC_021166.1    | Ca_kabuli_chr07 | 14081550                | AA                              | GG                | 1946459153               |
| SNP_P3_85769_14083307 | NC_021166.1    | Ca_kabuli_chr07 | 14083307                | CC                              | TT                | 1946459154               |
| SNP_P3_85770_14083319 | NC_021166.1    | Ca_kabuli_chr07 | 14083319                | TT                              | CC                | 1946459155               |
| SNP_P3_85771_14083369 | NC_021166.1    | Ca_kabuli_chr07 | 14083369                | TT                              | CC                | 1946459156               |
| SNP_P3_85772_14083388 | NC_021166.1    | Ca_kabuli_chr07 | 14083388                | TT                              | AA                | 1946459157               |
| SNP_P3_85773_14083389 | NC_021166.1    | Ca_kabuli_chr07 | 14083389                | AA                              | CC                | 1946459158               |
| SNP_P3_85774_14083843 | NC_021166.1    | Ca_kabuli_chr07 | 14083843                | AA                              | GG                | 1946459159               |
| SNP_P3_85775_14091393 | NC_021166.1    | Ca_kabuli_chr07 | 14091393                | TT                              | GG                | 1946459160               |
| SNP_P3_85776_14091426 | NC_021166.1    | Ca_kabuli_chr07 | 14091426                | AA                              | CC                | 1946459161               |
| SNP_P3_85777_14094725 | NC_021166.1    | Ca_kabuli_chr07 | 14094725                | AA                              | GG                | 1946459162               |
| SNP_P3_85778_14094779 | NC_021166.1    | Ca_kabuli_chr07 | 14094779                | AA                              | CC                | 1946459163               |
| SNP_P3_85779_14138444 | NC_021166.1    | Ca_kabuli_chr07 | 14138444                | TT                              | CC                | 1946459164               |
| SNP_P3_85780_14140631 | NC_021166.1    | Ca_kabuli_chr07 | 14140631                | TT                              | CC                | 1946459165               |
| SNP_P3_85782_14194095 | NC_021166.1    | Ca_kabuli_chr07 | 14194095                | TT                              | CC                | 1946459166               |
| SNP_P3_85784_14217358 | NC_021166.1    | Ca_kabuli_chr07 | 14217358                | AA                              | CC                | 1946459167               |
| SNP_P3_85785_14225895 | NC_021166.1    | Ca_kabuli_chr07 | 14225895                | AA                              | GG                | 1946459168               |
| SNP_P3_85788_14241215 | NC_021166.1    | Ca_kabuli_chr07 | 14241215                | TT                              | CC                | 1946459169               |
| SNP_P3_85790_14270911 | NC_021166.1    | Ca_kabuli_chr07 | 14270911                | GG                              | AA                | 1946459170               |

| SNPs IDs              | Chromosome IDs | Chromosomes     | Physical positions (bp) | CDC Frontier (Reference genome) | (Pusa 256 & HPNB) | NCBI SNPdb Accession IDs |
|-----------------------|----------------|-----------------|-------------------------|---------------------------------|-------------------|--------------------------|
| SNP_P3_85791_14272502 | NC_021166.1    | Ca_kabuli_chr07 | 14272502                | AA                              | GG                | 1946459171               |
| SNP_P3_85792_14288985 | NC_021166.1    | Ca_kabuli_chr07 | 14288985                | CC                              | TT                | 1946459172               |
| SNP_P3_85793_14299150 | NC_021166.1    | Ca_kabuli_chr07 | 14299150                | GG                              | TT                | 1946459173               |
| SNP_P3_85794_14299639 | NC_021166.1    | Ca_kabuli_chr07 | 14299639                | AA                              | GG                | 1946459174               |
| SNP_P3_85797_14350747 | NC_021166.1    | Ca_kabuli_chr07 | 14350747                | GG                              | TT                | 1946459175               |
| SNP_P3_85798_14369772 | NC_021166.1    | Ca_kabuli_chr07 | 14369772                | TT                              | AA                | 1946459176               |
| SNP_P3_85799_14369995 | NC_021166.1    | Ca_kabuli_chr07 | 14369995                | CC                              | TT                | 1946459177               |
| SNP_P3_85800_14370003 | NC_021166.1    | Ca_kabuli_chr07 | 14370003                | TT                              | CC                | 1946459178               |
| SNP_P3_85801_14370038 | NC_021166.1    | Ca_kabuli_chr07 | 14370038                | CC                              | TT                | 1946459179               |
| SNP_P3_85802_14370990 | NC_021166.1    | Ca_kabuli_chr07 | 14370990                | CC                              | TT                | 1946459180               |
| SNP_P3_85803_14383264 | NC_021166.1    | Ca_kabuli_chr07 | 14383264                | AA                              | CC                | 1946459181               |
| SNP_P3_85804_14392871 | NC_021166.1    | Ca_kabuli_chr07 | 14392871                | CC                              | TT                | 1946459182               |
| SNP_P3_85805_14393081 | NC_021166.1    | Ca_kabuli_chr07 | 14393081                | CC                              | TT                | 1946459183               |
| SNP_P3_85806_14393089 | NC_021166.1    | Ca_kabuli_chr07 | 14393089                | GG                              | AA                | 1946459184               |
| SNP_P3_85807_14396669 | NC_021166.1    | Ca_kabuli_chr07 | 14396669                | AA                              | TT                | 1946459185               |
| SNP_P3_85808_14396672 | NC_021166.1    | Ca_kabuli_chr07 | 14396672                | TT                              | CC                | 1946459186               |
| SNP_P3_85809_14396684 | NC_021166.1    | Ca_kabuli_chr07 | 14396684                | TT                              | CC                | 1946459187               |
| SNP_P3_85811_14426063 | NC_021166.1    | Ca_kabuli_chr07 | 14426063                | AA                              | GG                | 1946459188               |
| SNP_P3_85813_14449415 | NC_021166.1    | Ca_kabuli_chr07 | 14449415                | CC                              | AA                | 1946459189               |
| SNP_P3_85814_14468295 | NC_021166.1    | Ca_kabuli_chr07 | 14468295                | CC                              | TT                | 1946459190               |
| SNP_P3_85816_14483058 | NC_021166.1    | Ca_kabuli_chr07 | 14483058                | TT                              | CC                | 1946459192               |
| SNP_P3_85817_14483512 | NC_021166.1    | Ca_kabuli_chr07 | 14483512                | AA                              | GG                | 1946459193               |
| SNP_P3_85818_14483513 | NC_021166.1    | Ca_kabuli_chr07 | 14483513                | TT                              | CC                | 1946459194               |
| SNP_P3_85819_14497340 | NC_021166.1    | Ca_kabuli_chr07 | 14497340                | CC                              | TT                | 1946459195               |
| SNP_P3_85820_14497365 | NC_021166.1    | Ca_kabuli_chr07 | 14497365                | GG                              | AA                | 1946459196               |
| SNP_P3_85821_14498420 | NC_021166.1    | Ca_kabuli_chr07 | 14498420                | GG                              | AA                | 1946459197               |
| SNP_P3_85822_14498968 | NC_021166.1    | Ca_kabuli_chr07 | 14498968                | GG                              | AA                | 1946459198               |
| SNP_P3_85823_14499777 | NC_021166.1    | Ca_kabuli_chr07 | 14499777                | TT                              | AA                | 1946459199               |
| SNP_P3_85824_14499800 | NC_021166.1    | Ca_kabuli_chr07 | 14499800                | AA                              | TT                | 1946459200               |
| SNP_P3_85825_14499850 | NC_021166.1    | Ca_kabuli_chr07 | 14499850                | AA                              | TT                | 1946459201               |
| SNP_P3_85826_14539016 | NC_021166.1    | Ca_kabuli_chr07 | 14539016                | CC                              | TT                | 1946459202               |
| SNP_P3_85827_14545388 | NC_021166.1    | Ca_kabuli_chr07 | 14545388                | TT                              | GG                | 1946459203               |
| SNP_P3_85828_14568949 | NC_021166.1    | Ca_kabuli_chr07 | 14568949                | CC                              | GG                | 1946459204               |
| SNP_P3_85829_14582649 | NC_021166.1    | Ca_kabuli_chr07 | 14582649                | TT                              | GG                | 1946459205               |
| SNP_P3_85830_14585851 | NC_021166.1    | Ca_kabuli_chr07 | 14585851                | CC                              | AA                | 1946459206               |
| SNP_P3_85832_14669174 | NC_021166.1    | Ca_kabuli_chr07 | 14669174                | TT                              | CC                | 1946459207               |
| SNP_P3_85833_14669190 | NC_021166.1    | Ca_kabuli_chr07 | 14669190                | TT                              | GG                | 1946459208               |
| SNP_P3_85834_14679228 | NC_021166.1    | Ca_kabuli_chr07 | 14679228                | GG                              | AA                | 1946459209               |
| SNP_P3_85835_14688907 | NC_021166.1    | Ca_kabuli_chr07 | 14688907                | TT                              | GG                | 1946459210               |
| SNP_P3_85837_14697966 | NC_021166.1    | Ca_kabuli_chr07 | 14697966                | CC                              | AA                | 1946459212               |
| SNP_P3_85838_14728021 | NC_021166.1    | Ca_kabuli_chr07 | 14728021                | CC                              | TT                | 1946459213               |
| SNP_P3_85839_14750706 | NC_021166.1    | Ca_kabuli_chr07 | 14750706                | AA                              | GG                | 1946459215               |



| SNPs IDs              | Chromosome IDs | Chromosomes     | Physical positions (bp) | CDC Frontier (Reference genome) | (Pusa 256 & HPNB) | NCBI SNPdb Accession IDs |
|-----------------------|----------------|-----------------|-------------------------|---------------------------------|-------------------|--------------------------|
| SNP_P3_85841_14766828 | NC_021166.1    | Ca_kabuli_chr07 | 14766828                | CC                              | TT                | 1946459216               |
| SNP_P3_85842_14784055 | NC_021166.1    | Ca_kabuli_chr07 | 14784055                | GG                              | AA                | 1946459218               |
| SNP_P3_85843_14792737 | NC_021166.1    | Ca_kabuli_chr07 | 14792737                | CC                              | TT                | 1946459219               |
| SNP_P3_85844_14803143 | NC_021166.1    | Ca_kabuli_chr07 | 14803143                | AA                              | GG                | 1946459221               |
| SNP_P3_85845_14806758 | NC_021166.1    | Ca_kabuli_chr07 | 14806758                | AA                              | GG                | 1946459222               |
| SNP_P3_85846_14806767 | NC_021166.1    | Ca_kabuli_chr07 | 14806767                | CC                              | TT                | 1946459224               |
| SNP_P3_85847_14806792 | NC_021166.1    | Ca_kabuli_chr07 | 14806792                | GG                              | TT                | 1946459225               |
| SNP_P3_85848_14811699 | NC_021166.1    | Ca_kabuli_chr07 | 14811699                | AA                              | GG                | 1946459227               |
| SNP_P3_85849_14811732 | NC_021166.1    | Ca_kabuli_chr07 | 14811732                | TT                              | CC                | 1946459228               |
| SNP_P3_85850_14816408 | NC_021166.1    | Ca_kabuli_chr07 | 14816408                | AA                              | TT                | 1946459230               |
| SNP_P3_85851_14831474 | NC_021166.1    | Ca_kabuli_chr07 | 14831474                | TT                              | CC                | 1946459231               |
| SNP_P3_85852_14831484 | NC_021166.1    | Ca_kabuli_chr07 | 14831484                | CC                              | TT                | 1946459232               |
| SNP_P3_85853_14832041 | NC_021166.1    | Ca_kabuli_chr07 | 14832041                | CC                              | TT                | 1946459234               |
| SNP_P3_85854_14871087 | NC_021166.1    | Ca_kabuli_chr07 | 14871087                | GG                              | AA                | 1946459235               |
| SNP_P3_85855_14882333 | NC_021166.1    | Ca_kabuli_chr07 | 14882333                | GG                              | AA                | 1946459237               |
| SNP_P3_85856_14887000 | NC_021166.1    | Ca_kabuli_chr07 | 14887000                | TT                              | GG                | 1946459239               |
| SNP_P3_85857_14887002 | NC_021166.1    | Ca_kabuli_chr07 | 14887002                | TT                              | CC                | 1946459240               |
| SNP_P3_85858_14892307 | NC_021166.1    | Ca_kabuli_chr07 | 14892307                | CC                              | GG                | 1946459241               |
| SNP_P3_85861_14913007 | NC_021166.1    | Ca_kabuli_chr07 | 14913007                | CC                              | AA                | 1946459243               |
| SNP_P3_85863_14953281 | NC_021166.1    | Ca_kabuli_chr07 | 14953281                | CC                              | TT                | 1946459244               |
| SNP_P3_85864_14958373 | NC_021166.1    | Ca_kabuli_chr07 | 14958373                | TT                              | AA                | 1946459246               |
| SNP_P3_85865_14959427 | NC_021166.1    | Ca_kabuli_chr07 | 14959427                | GG                              | AA                | 1946459247               |
| SNP_P3_85866_14980843 | NC_021166.1    | Ca_kabuli_chr07 | 14980843                | GG                              | AA                | 1946459249               |
| SNP_P3_85867_14988950 | NC_021166.1    | Ca_kabuli_chr07 | 14988950                | AA                              | GG                | 1946459250               |
| SNP_P3_85869_15016401 | NC_021166.1    | Ca_kabuli_chr07 | 15016401                | CC                              | TT                | 1946459251               |
| SNP_P3_85870_15031527 | NC_021166.1    | Ca_kabuli_chr07 | 15031527                | AA                              | TT                | 1946459253               |
| SNP_P3_85871_15031572 | NC_021166.1    | Ca_kabuli_chr07 | 15031572                | TT                              | AA                | 1946459254               |
| SNP_P3_85872_15037519 | NC_021166.1    | Ca_kabuli_chr07 | 15037519                | GG                              | AA                | 1946459256               |
| SNP_P3_85873_15037628 | NC_021166.1    | Ca_kabuli_chr07 | 15037628                | AA                              | GG                | 1946459257               |
| SNP_P3_85874_15037796 | NC_021166.1    | Ca_kabuli_chr07 | 15037796                | AA                              | CC                | 1946459259               |
| SNP_P3_85875_15037814 | NC_021166.1    | Ca_kabuli_chr07 | 15037814                | AA                              | GG                | 1946459261               |
| SNP_P3_85876_15037821 | NC_021166.1    | Ca_kabuli_chr07 | 15037821                | CC                              | TT                | 1946459262               |
| SNP_P3_85877_15037952 | NC_021166.1    | Ca_kabuli_chr07 | 15037952                | AA                              | CC                | 1946459264               |
| SNP_P3_85878_15055957 | NC_021166.1    | Ca_kabuli_chr07 | 15055957                | GG                              | AA                | 1946459265               |
| SNP_P3_85879_15060408 | NC_021166.1    | Ca_kabuli_chr07 | 15060408                | GG                              | AA                | 1946459266               |
| SNP_P3_85880_15061790 | NC_021166.1    | Ca_kabuli_chr07 | 15061790                | GG                              | AA                | 1946459268               |
| SNP_P3_85881_15071515 | NC_021166.1    | Ca_kabuli_chr07 | 15071515                | AA                              | GG                | 1946459269               |
| SNP_P3_85882_15071533 | NC_021166.1    | Ca_kabuli_chr07 | 15071533                | AA                              | GG                | 1946459271               |
| SNP_P3_85883_15071730 | NC_021166.1    | Ca_kabuli_chr07 | 15071730                | TT                              | GG                | 1946459272               |
| SNP_P3_85884_15071751 | NC_021166.1    | Ca_kabuli_chr07 | 15071751                | CC                              | TT                | 1946459274               |
| SNP_P3_85886_15079843 | NC_021166.1    | Ca_kabuli_chr07 | 15079843                | CC                              | TT                | 1946459275               |
| SNP_P3_85888_15092169 | NC_021166.1    | Ca_kabuli_chr07 | 15092169                | TT                              | CC                | 1946459277               |

| SNPs IDs              | Chromosome IDs | Chromosomes     | Physical positions (bp) | CDC Frontier (Reference genome) | (Pusa 256 & HPNB) | NCBI SNPdb Accession IDs |
|-----------------------|----------------|-----------------|-------------------------|---------------------------------|-------------------|--------------------------|
| SNP_P3_85889_15112272 | NC_021166.1    | Ca_kabuli_chr07 | 15112272                | GG                              | AA                | 1946459278               |
| SNP_P3_85890_15116975 | NC_021166.1    | Ca_kabuli_chr07 | 15116975                | CC                              | GG                | 1946459280               |
| SNP_P3_85892_15227056 | NC_021166.1    | Ca_kabuli_chr07 | 15227056                | CC                              | TT                | 1946459281               |
| SNP_P3_85893_15241040 | NC_021166.1    | Ca_kabuli_chr07 | 15241040                | AA                              | GG                | 1946459283               |
| SNP_P3_85894_15245946 | NC_021166.1    | Ca_kabuli_chr07 | 15245946                | AA                              | GG                | 1946459284               |
| SNP_P3_85895_15258892 | NC_021166.1    | Ca_kabuli_chr07 | 15258892                | GG                              | AA                | 1946459286               |
| SNP_P3_85896_15263322 | NC_021166.1    | Ca_kabuli_chr07 | 15263322                | TT                              | AA                | 1946459287               |
| SNP_P3_85897_15265873 | NC_021166.1    | Ca_kabuli_chr07 | 15265873                | TT                              | GG                | 1946459289               |
| SNP_P3_85898_15278316 | NC_021166.1    | Ca_kabuli_chr07 | 15278316                | GG                              | AA                | 1946459290               |
| SNP_P3_85899_15278334 | NC_021166.1    | Ca_kabuli_chr07 | 15278334                | CC                              | TT                | 1946459292               |
| SNP_P3_85900_15278355 | NC_021166.1    | Ca_kabuli_chr07 | 15278355                | AA                              | GG                | 1946459293               |
| SNP_P3_85901_15278397 | NC_021166.1    | Ca_kabuli_chr07 | 15278397                | AA                              | GG                | 1946459294               |
| SNP_P3_85902_15278407 | NC_021166.1    | Ca_kabuli_chr07 | 15278407                | GG                              | TT                | 1946459296               |
| SNP_P3_85903_15280934 | NC_021166.1    | Ca_kabuli_chr07 | 15280934                | CC                              | AA                | 1946459297               |
| SNP_P3_85904_15303019 | NC_021166.1    | Ca_kabuli_chr07 | 15303019                | GG                              | AA                | 1946459299               |
| SNP_P3_85905_15303058 | NC_021166.1    | Ca_kabuli_chr07 | 15303058                | TT                              | CC                | 1946459300               |
| SNP_P3_85906_15303466 | NC_021166.1    | Ca_kabuli_chr07 | 15303466                | CC                              | TT                | 1946459302               |
| SNP_P3_85907_15303485 | NC_021166.1    | Ca_kabuli_chr07 | 15303485                | GG                              | AA                | 1946459303               |
| SNP_P3_85908_15305126 | NC_021166.1    | Ca_kabuli_chr07 | 15305126                | AA                              | GG                | 1946459305               |
| SNP_P3_85909_15305188 | NC_021166.1    | Ca_kabuli_chr07 | 15305188                | CC                              | TT                | 1946459306               |
| SNP_P3_85910_15305202 | NC_021166.1    | Ca_kabuli_chr07 | 15305202                | CC                              | TT                | 1946459307               |
| SNP_P3_85911_15305213 | NC_021166.1    | Ca_kabuli_chr07 | 15305213                | CC                              | AA                | 1946459309               |
| SNP_P3_85912_15316602 | NC_021166.1    | Ca_kabuli_chr07 | 15316602                | CC                              | TT                | 1946459311               |
| SNP_P3_85913_15318828 | NC_021166.1    | Ca_kabuli_chr07 | 15318828                | CC                              | GG                | 1946459312               |
| SNP_P3_85914_15325338 | NC_021166.1    | Ca_kabuli_chr07 | 15325338                | AA                              | GG                | 1946459314               |
| SNP_P3_85915_15325358 | NC_021166.1    | Ca_kabuli_chr07 | 15325358                | TT                              | CC                | 1946459315               |
| SNP_P3_85916_15325389 | NC_021166.1    | Ca_kabuli_chr07 | 15325389                | AA                              | GG                | 1946459317               |
| SNP_P3_85917_15325394 | NC_021166.1    | Ca_kabuli_chr07 | 15325394                | AA                              | TT                | 1946459318               |
| SNP_P3_85918_15325568 | NC_021166.1    | Ca_kabuli_chr07 | 15325568                | AA                              | GG                | 1946459320               |
| SNP_P3_85919_15325847 | NC_021166.1    | Ca_kabuli_chr07 | 15325847                | CC                              | TT                | 1946459321               |
| SNP_P3_85920_15325858 | NC_021166.1    | Ca_kabuli_chr07 | 15325858                | GG                              | AA                | 1946459322               |
| SNP_P3_85922_15325907 | NC_021166.1    | Ca_kabuli_chr07 | 15325907                | CC                              | TT                | 1946459324               |
| SNP_P3_85923_15325909 | NC_021166.1    | Ca_kabuli_chr07 | 15325909                | TT                              | GG                | 1946459325               |
| SNP_P3_85924_15325913 | NC_021166.1    | Ca_kabuli_chr07 | 15325913                | AA                              | GG                | 1946459327               |
| SNP_P3_85925_15325918 | NC_021166.1    | Ca_kabuli_chr07 | 15325918                | AA                              | GG                | 1946459328               |
| SNP_P3_85926_15325921 | NC_021166.1    | Ca_kabuli_chr07 | 15325921                | AA                              | GG                | 1946459330               |
| SNP_P3_85927_15325933 | NC_021166.1    | Ca_kabuli_chr07 | 15325933                | TT                              | CC                | 1946459331               |
| SNP_P3_85928_15325942 | NC_021166.1    | Ca_kabuli_chr07 | 15325942                | CC                              | AA                | 1946459333               |
| SNP_P3_85929_15331391 | NC_021166.1    | Ca_kabuli_chr07 | 15331391                | GG                              | TT                | 1946459334               |
| SNP_P3_85930_15335366 | NC_021166.1    | Ca_kabuli_chr07 | 15335366                | AA                              | GG                | 1946459336               |
| SNP_P3_85931_15340834 | NC_021166.1    | Ca_kabuli_chr07 | 15340834                | AA                              | GG                | 1946459337               |
| SNP_P3_85932_15375045 | NC_021166.1    | Ca_kabuli_chr07 | 15375045                | TT                              | CC                | 1946459338               |

| SNPs IDs              | Chromosome IDs | Chromosomes     | Physical positions (bp) | CDC Frontier (Reference genome) | (Pusa 256 & HPNB) | NCBI SNPdb Accession IDs |
|-----------------------|----------------|-----------------|-------------------------|---------------------------------|-------------------|--------------------------|
| SNP_P3_85933_15391091 | NC_021166.1    | Ca_kabuli_chr07 | 15391091                | AA                              | TT                | 1946459340               |
| SNP_P3_85934_15392798 | NC_021166.1    | Ca_kabuli_chr07 | 15392798                | CC                              | TT                | 1946459341               |
| SNP_P3_85937_15424342 | NC_021166.1    | Ca_kabuli_chr07 | 15424342                | AA                              | GG                | 1946459343               |
| SNP_P3_85938_15425146 | NC_021166.1    | Ca_kabuli_chr07 | 15425146                | AA                              | CC                | 1946459344               |
| SNP_P3_85939_15425478 | NC_021166.1    | Ca_kabuli_chr07 | 15425478                | TT                              | CC                | 1946459346               |
| SNP_P3_85940_15425567 | NC_021166.1    | Ca_kabuli_chr07 | 15425567                | TT                              | GG                | 1946459347               |
| SNP_P3_85941_15425586 | NC_021166.1    | Ca_kabuli_chr07 | 15425586                | AA                              | GG                | 1946459349               |
| SNP_P3_85942_15425601 | NC_021166.1    | Ca_kabuli_chr07 | 15425601                | AA                              | GG                | 1946459350               |
| SNP_P3_85943_15425619 | NC_021166.1    | Ca_kabuli_chr07 | 15425619                | AA                              | GG                | 1946459351               |
| SNP_P3_85944_15427106 | NC_021166.1    | Ca_kabuli_chr07 | 15427106                | TT                              | CC                | 1946459353               |
| SNP_P3_85946_15488424 | NC_021166.1    | Ca_kabuli_chr07 | 15488424                | GG                              | AA                | 1946459354               |
| SNP_P3_85947_15488426 | NC_021166.1    | Ca_kabuli_chr07 | 15488426                | CC                              | TT                | 1946459356               |
| SNP_P3_85948_15488445 | NC_021166.1    | Ca_kabuli_chr07 | 15488445                | GG                              | AA                | 1946459357               |
| SNP_P3_85950_15515868 | NC_021166.1    | Ca_kabuli_chr07 | 15515868                | TT                              | GG                | 1946459359               |
| SNP_P3_85951_15520942 | NC_021166.1    | Ca_kabuli_chr07 | 15520942                | TT                              | CC                | 1946459360               |
| SNP_P3_85952_15520962 | NC_021166.1    | Ca_kabuli_chr07 | 15520962                | TT                              | GG                | 1946459362               |
| SNP_P3_85953_15521031 | NC_021166.1    | Ca_kabuli_chr07 | 15521031                | AA                              | GG                | 1946459363               |
| SNP_P3_85954_15521058 | NC_021166.1    | Ca_kabuli_chr07 | 15521058                | AA                              | CC                | 1946459365               |
| SNP_P3_85955_15521137 | NC_021166.1    | Ca_kabuli_chr07 | 15521137                | CC                              | TT                | 1946459366               |
| SNP_P3_85956_15521155 | NC_021166.1    | Ca_kabuli_chr07 | 15521155                | TT                              | CC                | 1946459367               |
| SNP_P3_85957_15521191 | NC_021166.1    | Ca_kabuli_chr07 | 15521191                | TT                              | CC                | 1946459369               |
| SNP_P3_85958_15521198 | NC_021166.1    | Ca_kabuli_chr07 | 15521198                | GG                              | CC                | 1946459370               |
| SNP_P3_85959_15521208 | NC_021166.1    | Ca_kabuli_chr07 | 15521208                | TT                              | CC                | 1946459372               |
| SNP_P3_85960_15521224 | NC_021166.1    | Ca_kabuli_chr07 | 15521224                | AA                              | GG                | 1946459373               |
| SNP_P3_85961_15545107 | NC_021166.1    | Ca_kabuli_chr07 | 15545107                | AA                              | CC                | 1946459374               |
| SNP_P3_85962_15548546 | NC_021166.1    | Ca_kabuli_chr07 | 15548546                | CC                              | TT                | 1946459376               |
| SNP_P3_85963_15549384 | NC_021166.1    | Ca_kabuli_chr07 | 15549384                | GG                              | AA                | 1946459377               |
| SNP_P3_85965_15580193 | NC_021166.1    | Ca_kabuli_chr07 | 15580193                | TT                              | CC                | 1946459379               |
| SNP_P3_85966_15580454 | NC_021166.1    | Ca_kabuli_chr07 | 15580454                | AA                              | GG                | 1946459380               |
| SNP_P3_85967_15580549 | NC_021166.1    | Ca_kabuli_chr07 | 15580549                | TT                              | CC                | 1946459382               |
| SNP_P3_85968_15580571 | NC_021166.1    | Ca_kabuli_chr07 | 15580571                | GG                              | TT                | 1946459384               |
| SNP_P3_85969_15613420 | NC_021166.1    | Ca_kabuli_chr07 | 15613420                | TT                              | CC                | 1946459385               |
| SNP_P3_85970_15644497 | NC_021166.1    | Ca_kabuli_chr07 | 15644497                | TT                              | GG                | 1946459387               |
| SNP_P3_85971_15644502 | NC_021166.1    | Ca_kabuli_chr07 | 15644502                | TT                              | GG                | 1946459388               |
| SNP_P3_85972_15646092 | NC_021166.1    | Ca_kabuli_chr07 | 15646092                | CC                              | TT                | 1946459389               |
| SNP_P3_85973_15648773 | NC_021166.1    | Ca_kabuli_chr07 | 15648773                | AA                              | TT                | 1946459391               |
| SNP_P3_85975_15697207 | NC_021166.1    | Ca_kabuli_chr07 | 15697207                | AA                              | CC                | 1946459392               |
| SNP_P3_85976_15697223 | NC_021166.1    | Ca_kabuli_chr07 | 15697223                | CC                              | GG                | 1946459394               |
| SNP_P3_85977_15697229 | NC_021166.1    | Ca_kabuli_chr07 | 15697229                | TT                              | GG                | 1946459395               |
| SNP_P3_85978_15721206 | NC_021166.1    | Ca_kabuli_chr07 | 15721206                | CC                              | AA                | 1946459396               |
| SNP_P3_85979_15721215 | NC_021166.1    | Ca_kabuli_chr07 | 15721215                | CC                              | GG                | 1946459398               |
| SNP_P3_85980_15723640 | NC_021166.1    | Ca_kabuli_chr07 | 15723640                | GG                              | TT                | 1946459399               |

| SNPs IDs              | Chromosome IDs | Chromosomes     | Physical positions (bp) | CDC Frontier (Reference genome) | (Pusa 256 & HPNB) | NCBI SNPdb Accession IDs |
|-----------------------|----------------|-----------------|-------------------------|---------------------------------|-------------------|--------------------------|
| SNP_P3_85982_15758319 | NC_021166.1    | Ca_kabuli_chr07 | 15758319                | GG                              | AA                | 1946459401               |
| SNP_P3_85983_15769131 | NC_021166.1    | Ca_kabuli_chr07 | 15769131                | GG                              | AA                | 1946459402               |
| SNP_P3_85984_15769244 | NC_021166.1    | Ca_kabuli_chr07 | 15769244                | GG                              | TT                | 1946459404               |
| SNP_P3_85986_15789884 | NC_021166.1    | Ca_kabuli_chr07 | 15789884                | GG                              | AA                | 1946459405               |
| SNP_P3_85987_15828080 | NC_021166.1    | Ca_kabuli_chr07 | 15828080                | AA                              | CC                | 1946459406               |
| SNP_P3_85988_15841195 | NC_021166.1    | Ca_kabuli_chr07 | 15841195                | CC                              | GG                | 1946459408               |
| SNP_P3_85989_15841293 | NC_021166.1    | Ca_kabuli_chr07 | 15841293                | TT                              | CC                | 1946459409               |
| SNP_P3_85991_15841372 | NC_021166.1    | Ca_kabuli_chr07 | 15841372                | CC                              | GG                | 1946459411               |
| SNP_P3_85993_15841442 | NC_021166.1    | Ca_kabuli_chr07 | 15841442                | TT                              | AA                | 1946459413               |
| SNP_P3_85994_15841514 | NC_021166.1    | Ca_kabuli_chr07 | 15841514                | CC                              | TT                | 1946459414               |
| SNP_P3_85995_15842562 | NC_021166.1    | Ca_kabuli_chr07 | 15842562                | TT                              | AA                | 1946459416               |
| SNP_P3_85996_15873812 | NC_021166.1    | Ca_kabuli_chr07 | 15873812                | TT                              | CC                | 1946459417               |
| SNP_P3_85997_15877130 | NC_021166.1    | Ca_kabuli_chr07 | 15877130                | CC                              | TT                | 1946459418               |
| SNP_P3_85998_15878261 | NC_021166.1    | Ca_kabuli_chr07 | 15878261                | CC                              | AA                | 1946459420               |
| SNP_P3_85999_15878937 | NC_021166.1    | Ca_kabuli_chr07 | 15878937                | GG                              | AA                | 1946459421               |
| SNP_P3_86000_15896962 | NC_021166.1    | Ca_kabuli_chr07 | 15896962                | AA                              | TT                | 1946459423               |
| SNP_P3_86001_15896977 | NC_021166.1    | Ca_kabuli_chr07 | 15896977                | TT                              | AA                | 1946459424               |
| SNP_P3_86002_15899760 | NC_021166.1    | Ca_kabuli_chr07 | 15899760                | TT                              | CC                | 1946459426               |
| SNP_P3_86003_15903598 | NC_021166.1    | Ca_kabuli_chr07 | 15903598                | AA                              | GG                | 1946459427               |
| SNP_P3_86004_15903615 | NC_021166.1    | Ca_kabuli_chr07 | 15903615                | AA                              | GG                | 1946459429               |
| SNP_P3_86005_15918813 | NC_021166.1    | Ca_kabuli_chr07 | 15918813                | CC                              | TT                | 1946459431               |
| SNP_P3_86006_15936530 | NC_021166.1    | Ca_kabuli_chr07 | 15936530                | AA                              | TT                | 1946459433               |
| SNP_P3_86007_15936540 | NC_021166.1    | Ca_kabuli_chr07 | 15936540                | AA                              | TT                | 1946459434               |
| SNP_P3_86008_15969507 | NC_021166.1    | Ca_kabuli_chr07 | 15969507                | AA                              | GG                | 1946459436               |
| SNP_P3_86009_15969929 | NC_021166.1    | Ca_kabuli_chr07 | 15969929                | CC                              | TT                | 1946459437               |
| SNP_P3_86011_16020773 | NC_021166.1    | Ca_kabuli_chr07 | 16020773                | TT                              | AA                | 1946459438               |
| SNP_P3_86012_16031376 | NC_021166.1    | Ca_kabuli_chr07 | 16031376                | AA                              | GG                | 1946459440               |
| SNP_P3_86013_16031378 | NC_021166.1    | Ca_kabuli_chr07 | 16031378                | TT                              | CC                | 1946459441               |
| SNP_P3_86016_16077885 | NC_021166.1    | Ca_kabuli_chr07 | 16077885                | CC                              | AA                | 1946459443               |
| SNP_P3_86017_16080616 | NC_021166.1    | Ca_kabuli_chr07 | 16080616                | TT                              | CC                | 1946459444               |
| SNP_P3_86018_16080778 | NC_021166.1    | Ca_kabuli_chr07 | 16080778                | AA                              | CC                | 1946459445               |
| SNP_P3_86019_16080874 | NC_021166.1    | Ca_kabuli_chr07 | 16080874                | GG                              | TT                | 1946459447               |
| SNP_P3_86020_16082044 | NC_021166.1    | Ca_kabuli_chr07 | 16082044                | AA                              | GG                | 1946459448               |
| SNP_P3_86021_16082159 | NC_021166.1    | Ca_kabuli_chr07 | 16082159                | AA                              | GG                | 1946459450               |
| SNP_P3_86022_16082201 | NC_021166.1    | Ca_kabuli_chr07 | 16082201                | CC                              | GG                | 1946459451               |
| SNP_P3_86023_16082243 | NC_021166.1    | Ca_kabuli_chr07 | 16082243                | AA                              | GG                | 1946459453               |
| SNP_P3_86024_16082251 | NC_021166.1    | Ca_kabuli_chr07 | 16082251                | TT                              | CC                | 1946459454               |
| SNP_P3_86025_16082345 | NC_021166.1    | Ca_kabuli_chr07 | 16082345                | GG                              | AA                | 1946459456               |
| SNP_P3_86026_16093823 | NC_021166.1    | Ca_kabuli_chr07 | 16093823                | TT                              | CC                | 1946459457               |
| SNP_P3_86027_16098554 | NC_021166.1    | Ca_kabuli_chr07 | 16098554                | AA                              | GG                | 1946459459               |
| SNP_P3_86028_16099764 | NC_021166.1    | Ca_kabuli_chr07 | 16099764                | TT                              | CC                | 1946459460               |
| SNP_P3_86029_16099766 | NC_021166.1    | Ca_kabuli_chr07 | 16099766                | AA                              | GG                | 1946459461               |

| SNPs IDs              | Chromosome IDs | Chromosomes     | Physical positions (bp) | CDC Frontier (Reference genome) | (Pusa 256 & HPNB) | NCBI SNPdb Accession IDs |
|-----------------------|----------------|-----------------|-------------------------|---------------------------------|-------------------|--------------------------|
| SNP_P3_86032_16183775 | NC_021166.1    | Ca_kabuli_chr07 | 16183775                | CC                              | TT                | 1946459463               |
| SNP_P3_86033_16183792 | NC_021166.1    | Ca_kabuli_chr07 | 16183792                | AA                              | GG                | 1946459464               |
| SNP_P3_86036_16204730 | NC_021166.1    | Ca_kabuli_chr07 | 16204730                | CC                              | TT                | 1946459466               |
| SNP_P3_86037_16210348 | NC_021166.1    | Ca_kabuli_chr07 | 16210348                | GG                              | CC                | 1946459467               |
| SNP_P3_86038_16225483 | NC_021166.1    | Ca_kabuli_chr07 | 16225483                | AA                              | TT                | 1946459469               |
| SNP_P3_86039_16236849 | NC_021166.1    | Ca_kabuli_chr07 | 16236849                | GG                              | AA                | 1946459470               |
| SNP_P3_86040_16238410 | NC_021166.1    | Ca_kabuli_chr07 | 16238410                | CC                              | AA                | 1946459471               |
| SNP_P3_86044_16269718 | NC_021166.1    | Ca_kabuli_chr07 | 16269718                | AA                              | CC                | 1946459473               |
| SNP_P3_86045_16274244 | NC_021166.1    | Ca_kabuli_chr07 | 16274244                | AA                              | CC                | 1946459474               |
| SNP_P3_86046_16290382 | NC_021166.1    | Ca_kabuli_chr07 | 16290382                | CC                              | TT                | 1946459476               |
| SNP_P3_86048_16298428 | NC_021166.1    | Ca_kabuli_chr07 | 16298428                | AA                              | GG                | 1946459477               |
| SNP_P3_86049_16319994 | NC_021166.1    | Ca_kabuli_chr07 | 16319994                | GG                              | AA                | 1946459479               |
| SNP_P3_86050_16320012 | NC_021166.1    | Ca_kabuli_chr07 | 16320012                | GG                              | AA                | 1946459481               |
| SNP_P3_86052_16351709 | NC_021166.1    | Ca_kabuli_chr07 | 16351709                | TT                              | CC                | 1946459482               |
| SNP_P3_86053_16361536 | NC_021166.1    | Ca_kabuli_chr07 | 16361536                | GG                              | AA                | 1946459483               |
| SNP_P3_86054_16366463 | NC_021166.1    | Ca_kabuli_chr07 | 16366463                | CC                              | TT                | 1946459485               |
| SNP_P3_86055_16367662 | NC_021166.1    | Ca_kabuli_chr07 | 16367662                | TT                              | AA                | 1946459486               |
| SNP_P3_86057_16376773 | NC_021166.1    | Ca_kabuli_chr07 | 16376773                | GG                              | CC                | 1946459488               |
| SNP_P3_86058_16378225 | NC_021166.1    | Ca_kabuli_chr07 | 16378225                | TT                              | AA                | 1946459489               |
| SNP_P3_86059_16379031 | NC_021166.1    | Ca_kabuli_chr07 | 16379031                | AA                              | GG                | 1946459491               |
| SNP_P3_86060_16397284 | NC_021166.1    | Ca_kabuli_chr07 | 16397284                | TT                              | CC                | 1946459492               |
| SNP_P3_86061_16404923 | NC_021166.1    | Ca_kabuli_chr07 | 16404923                | AA                              | TT                | 1946459493               |
| SNP_P3_86062_16429556 | NC_021166.1    | Ca_kabuli_chr07 | 16429556                | GG                              | AA                | 1946459495               |
| SNP_P3_86064_16445242 | NC_021166.1    | Ca_kabuli_chr07 | 16445242                | CC                              | TT                | 1946459496               |
| SNP_P3_86065_16448483 | NC_021166.1    | Ca_kabuli_chr07 | 16448483                | TT                              | CC                | 1946459498               |
| SNP_P3_86067_16475464 | NC_021166.1    | Ca_kabuli_chr07 | 16475464                | AA                              | TT                | 1946459499               |
| SNP_P3_86068_16475465 | NC_021166.1    | Ca_kabuli_chr07 | 16475465                | AA                              | GG                | 1946459501               |
| SNP_P3_86069_16475792 | NC_021166.1    | Ca_kabuli_chr07 | 16475792                | TT                              | CC                | 1946459502               |
| SNP_P3_86070_16503335 | NC_021166.1    | Ca_kabuli_chr07 | 16503335                | AA                              | CC                | 1946459504               |
| SNP_P3_86071_16518286 | NC_021166.1    | Ca_kabuli_chr07 | 16518286                | AA                              | TT                | 1946459505               |
| SNP_P3_86072_16523096 | NC_021166.1    | Ca_kabuli_chr07 | 16523096                | CC                              | TT                | 1946459507               |
| SNP_P3_86073_16523151 | NC_021166.1    | Ca_kabuli_chr07 | 16523151                | GG                              | AA                | 1946459508               |
| SNP_P3_86074_16523435 | NC_021166.1    | Ca_kabuli_chr07 | 16523435                | GG                              | TT                | 1946459510               |
| SNP_P3_86075_16523508 | NC_021166.1    | Ca_kabuli_chr07 | 16523508                | CC                              | TT                | 1946459511               |
| SNP_P3_86076_16524080 | NC_021166.1    | Ca_kabuli_chr07 | 16524080                | CC                              | TT                | 1946459513               |
| SNP_P3_86077_16524160 | NC_021166.1    | Ca_kabuli_chr07 | 16524160                | CC                              | TT                | 1946459514               |
| SNP_P3_86078_16524165 | NC_021166.1    | Ca_kabuli_chr07 | 16524165                | AA                              | GG                | 1946459515               |
| SNP_P3_86079_16524254 | NC_021166.1    | Ca_kabuli_chr07 | 16524254                | GG                              | TT                | 1946459517               |
| SNP_P3_86080_16524366 | NC_021166.1    | Ca_kabuli_chr07 | 16524366                | GG                              | TT                | 1946459518               |
| SNP_P3_86081_16524383 | NC_021166.1    | Ca_kabuli_chr07 | 16524383                | AA                              | GG                | 1946459520               |
| SNP_P3_86082_16524388 | NC_021166.1    | Ca_kabuli_chr07 | 16524388                | TT                              | GG                | 1946459521               |
| SNP_P3_86083_16524489 | NC_021166.1    | Ca_kabuli_chr07 | 16524489                | GG                              | AA                | 1946459523               |

| SNPs IDs              | Chromosome IDs | Chromosomes     | Physical positions (bp) | CDC Frontier (Reference genome) | (Pusa 256 & HPNB) | NCBI SNPdb Accession IDs |
|-----------------------|----------------|-----------------|-------------------------|---------------------------------|-------------------|--------------------------|
| SNP_P3_86084_16525600 | NC_021166.1    | Ca_kabuli_chr07 | 16525600                | GG                              | CC                | 1946459525               |
| SNP_P3_86086_16540394 | NC_021166.1    | Ca_kabuli_chr07 | 16540394                | CC                              | TT                | 1946459526               |
| SNP_P3_86087_16540399 | NC_021166.1    | Ca_kabuli_chr07 | 16540399                | CC                              | TT                | 1946459528               |
| SNP_P3_86088_16543791 | NC_021166.1    | Ca_kabuli_chr07 | 16543791                | AA                              | GG                | 1946459529               |
| SNP_P3_86089_16544151 | NC_021166.1    | Ca_kabuli_chr07 | 16544151                | CC                              | TT                | 1946459530               |
| SNP_P3_86090_16544264 | NC_021166.1    | Ca_kabuli_chr07 | 16544264                | GG                              | AA                | 1946459532               |
| SNP_P3_86091_16548696 | NC_021166.1    | Ca_kabuli_chr07 | 16548696                | GG                              | AA                | 1946459533               |
| SNP_P3_86092_16548750 | NC_021166.1    | Ca_kabuli_chr07 | 16548750                | GG                              | CC                | 1946459535               |
| SNP_P3_86093_16548766 | NC_021166.1    | Ca_kabuli_chr07 | 16548766                | GG                              | AA                | 1946459536               |
| SNP_P3_86094_16548768 | NC_021166.1    | Ca_kabuli_chr07 | 16548768                | AA                              | GG                | 1946459537               |
| SNP_P3_86095_16548780 | NC_021166.1    | Ca_kabuli_chr07 | 16548780                | AA                              | GG                | 1946459539               |
| SNP_P3_86096_16548783 | NC_021166.1    | Ca_kabuli_chr07 | 16548783                | GG                              | AA                | 1946459540               |
| SNP_P3_86097_16557692 | NC_021166.1    | Ca_kabuli_chr07 | 16557692                | GG                              | AA                | 1946459542               |
| SNP_P3_86098_16564310 | NC_021166.1    | Ca_kabuli_chr07 | 16564310                | GG                              | AA                | 1946459543               |
| SNP_P3_86099_16568702 | NC_021166.1    | Ca_kabuli_chr07 | 16568702                | GG                              | AA                | 1946459545               |
| SNP_P3_86100_16607778 | NC_021166.1    | Ca_kabuli_chr07 | 16607778                | TT                              | CC                | 1946459546               |
| SNP_P3_86101_16630785 | NC_021166.1    | Ca_kabuli_chr07 | 16630785                | TT                              | CC                | 1946459548               |
| SNP_P3_86102_16651401 | NC_021166.1    | Ca_kabuli_chr07 | 16651401                | AA                              | CC                | 1946459549               |
| SNP_P3_86103_16668731 | NC_021166.1    | Ca_kabuli_chr07 | 16668731                | CC                              | TT                | 1946459551               |
| SNP_P3_86104_16677140 | NC_021166.1    | Ca_kabuli_chr07 | 16677140                | TT                              | CC                | 1946459552               |
| SNP_P3_86106_16700006 | NC_021166.1    | Ca_kabuli_chr07 | 16700006                | TT                              | CC                | 1946459554               |
| SNP_P3_86107_16710255 | NC_021166.1    | Ca_kabuli_chr07 | 16710255                | TT                              | GG                | 1946459555               |
| SNP_P3_86109_16728794 | NC_021166.1    | Ca_kabuli_chr07 | 16728794                | GG                              | TT                | 1946459556               |
| SNP_P3_86110_16751005 | NC_021166.1    | Ca_kabuli_chr07 | 16751005                | AA                              | TT                | 1946459558               |
| SNP_P3_86111_16769266 | NC_021166.1    | Ca_kabuli_chr07 | 16769266                | AA                              | GG                | 1946459559               |
| SNP_P3_86112_16832105 | NC_021166.1    | Ca_kabuli_chr07 | 16832105                | GG                              | AA                | 1946459561               |
| SNP_P3_86113_16840472 | NC_021166.1    | Ca_kabuli_chr07 | 16840472                | GG                              | TT                | 1946459562               |
| SNP_P3_86114_16841083 | NC_021166.1    | Ca_kabuli_chr07 | 16841083                | CC                              | TT                | 1946459564               |
| SNP_P3_86115_16890035 | NC_021166.1    | Ca_kabuli_chr07 | 16890035                | GG                              | CC                | 1946459565               |
| SNP_P3_86116_16890071 | NC_021166.1    | Ca_kabuli_chr07 | 16890071                | GG                              | CC                | 1946459566               |
| SNP_P3_86117_16890120 | NC_021166.1    | Ca_kabuli_chr07 | 16890120                | CC                              | TT                | 1946459568               |
| SNP_P3_86118_16890145 | NC_021166.1    | Ca_kabuli_chr07 | 16890145                | TT                              | CC                | 1946459569               |
| SNP_P3_86119_16890495 | NC_021166.1    | Ca_kabuli_chr07 | 16890495                | CC                              | GG                | 1946459571               |
| SNP_P3_86120_16895275 | NC_021166.1    | Ca_kabuli_chr07 | 16895275                | TT                              | GG                | 1946459572               |
| SNP_P3_86121_16895464 | NC_021166.1    | Ca_kabuli_chr07 | 16895464                | CC                              | TT                | 1946459574               |
| SNP_P3_86122_16895522 | NC_021166.1    | Ca_kabuli_chr07 | 16895522                | TT                              | CC                | 1946459575               |
| SNP_P3_86123_16895523 | NC_021166.1    | Ca_kabuli_chr07 | 16895523                | AA                              | GG                | 1946459576               |
| SNP_P3_86124_16895528 | NC_021166.1    | Ca_kabuli_chr07 | 16895528                | GG                              | CC                | 1946459578               |
| SNP_P3_86125_16895539 | NC_021166.1    | Ca_kabuli_chr07 | 16895539                | AA                              | GG                | 1946459579               |
| SNP_P3_86126_16895914 | NC_021166.1    | Ca_kabuli_chr07 | 16895914                | TT                              | CC                | 1946459581               |
| SNP_P3_86127_16895961 | NC_021166.1    | Ca_kabuli_chr07 | 16895961                | AA                              | GG                | 1946459582               |
| SNP_P3_86129_16925310 | NC_021166.1    | Ca_kabuli_chr07 | 16925310                | TT                              | CC                | 1946459583               |

| SNPs IDs              | Chromosome IDs | Chromosomes     | Physical positions (bp) | CDC Frontier (Reference genome) | (Pusa 256 & HPNB) | NCBI SNPdb Accession IDs |
|-----------------------|----------------|-----------------|-------------------------|---------------------------------|-------------------|--------------------------|
| SNP_P3_86130_16939881 | NC_021166.1    | Ca_kabuli_chr07 | 16939881                | GG                              | AA                | 1946459585               |
| SNP_P3_86131_16939934 | NC_021166.1    | Ca_kabuli_chr07 | 16939934                | AA                              | GG                | 1946459586               |
| SNP_P3_86132_16939954 | NC_021166.1    | Ca_kabuli_chr07 | 16939954                | TT                              | CC                | 1946459588               |
| SNP_P3_86133_16940265 | NC_021166.1    | Ca_kabuli_chr07 | 16940265                | CC                              | TT                | 1946459589               |
| SNP_P3_86134_16940378 | NC_021166.1    | Ca_kabuli_chr07 | 16940378                | CC                              | TT                | 1946459591               |
| SNP_P3_86135_16941496 | NC_021166.1    | Ca_kabuli_chr07 | 16941496                | CC                              | TT                | 1946459592               |
| SNP_P3_86136_16941505 | NC_021166.1    | Ca_kabuli_chr07 | 16941505                | TT                              | CC                | 1946459593               |
| SNP_P3_86137_16941555 | NC_021166.1    | Ca_kabuli_chr07 | 16941555                | AA                              | CC                | 1946459595               |
| SNP_P3_86138_16941559 | NC_021166.1    | Ca_kabuli_chr07 | 16941559                | GG                              | CC                | 1946459596               |
| SNP_P3_86140_16941733 | NC_021166.1    | Ca_kabuli_chr07 | 16941733                | AA                              | GG                | 1946459598               |
| SNP_P3_86141_16941742 | NC_021166.1    | Ca_kabuli_chr07 | 16941742                | TT                              | GG                | 1946459599               |
| SNP_P3_86142_16941767 | NC_021166.1    | Ca_kabuli_chr07 | 16941767                | AA                              | CC                | 1946459601               |
| SNP_P3_86143_16941842 | NC_021166.1    | Ca_kabuli_chr07 | 16941842                | AA                              | GG                | 1946459602               |
| SNP_P3_86144_16942067 | NC_021166.1    | Ca_kabuli_chr07 | 16942067                | AA                              | CC                | 1946459604               |
| SNP_P3_86146_16972812 | NC_021166.1    | Ca_kabuli_chr07 | 16972812                | TT                              | CC                | 1946459605               |
| SNP_P3_86147_16982108 | NC_021166.1    | Ca_kabuli_chr07 | 16982108                | CC                              | AA                | 1946459607               |
| SNP_P3_86148_16983575 | NC_021166.1    | Ca_kabuli_chr07 | 16983575                | GG                              | AA                | 1946459608               |
| SNP_P3_86149_16990299 | NC_021166.1    | Ca_kabuli_chr07 | 16990299                | CC                              | TT                | 1946459609               |
| SNP_P3_86151_17004728 | NC_021166.1    | Ca_kabuli_chr07 | 17004728                | GG                              | CC                | 1946459611               |
| SNP_P3_86152_17006620 | NC_021166.1    | Ca_kabuli_chr07 | 17006620                | CC                              | TT                | 1946459612               |
| SNP_P3_86154_17028959 | NC_021166.1    | Ca_kabuli_chr07 | 17028959                | TT                              | AA                | 1946459614               |
| SNP_P3_86155_17028975 | NC_021166.1    | Ca_kabuli_chr07 | 17028975                | GG                              | AA                | 1946459615               |
| SNP_P3_86156_17066676 | NC_021166.1    | Ca_kabuli_chr07 | 17066676                | AA                              | GG                | 1946459617               |
| SNP_P3_86157_17072513 | NC_021166.1    | Ca_kabuli_chr07 | 17072513                | GG                              | AA                | 1946459618               |
| SNP_P3_86159_17097814 | NC_021166.1    | Ca_kabuli_chr07 | 17097814                | GG                              | TT                | 1946459620               |
| SNP_P3_86160_17114203 | NC_021166.1    | Ca_kabuli_chr07 | 17114203                | TT                              | AA                | 1946459621               |
| SNP_P3_86162_17120611 | NC_021166.1    | Ca_kabuli_chr07 | 17120611                | TT                              | CC                | 1946459622               |
| SNP_P3_86163_17133012 | NC_021166.1    | Ca_kabuli_chr07 | 17133012                | AA                              | TT                | 1946459624               |
| SNP_P3_86166_17191382 | NC_021166.1    | Ca_kabuli_chr07 | 17191382                | GG                              | AA                | 1946459626               |
| SNP_P3_86167_17203637 | NC_021166.1    | Ca_kabuli_chr07 | 17203637                | TT                              | CC                | 1946459627               |
| SNP_P3_86168_17203647 | NC_021166.1    | Ca_kabuli_chr07 | 17203647                | AA                              | CC                | 1946459628               |
| SNP_P3_86169_17203774 | NC_021166.1    | Ca_kabuli_chr07 | 17203774                | GG                              | CC                | 1946459630               |
| SNP_P3_86170_17207120 | NC_021166.1    | Ca_kabuli_chr07 | 17207120                | CC                              | AA                | 1946459631               |
| SNP_P3_86171_17207355 | NC_021166.1    | Ca_kabuli_chr07 | 17207355                | GG                              | TT                | 1946459633               |
| SNP_P3_86172_17211740 | NC_021166.1    | Ca_kabuli_chr07 | 17211740                | AA                              | GG                | 1946459634               |
| SNP_P3_86173_17213279 | NC_021166.1    | Ca_kabuli_chr07 | 17213279                | AA                              | TT                | 1946459636               |
| SNP_P3_86174_17219458 | NC_021166.1    | Ca_kabuli_chr07 | 17219458                | TT                              | AA                | 1946459637               |
| SNP_P3_86175_17219460 | NC_021166.1    | Ca_kabuli_chr07 | 17219460                | TT                              | AA                | 1946459638               |
| SNP_P3_86176_17219468 | NC_021166.1    | Ca_kabuli_chr07 | 17219468                | TT                              | CC                | 1946459640               |
| SNP_P3_86177_17220013 | NC_021166.1    | Ca_kabuli_chr07 | 17220013                | AA                              | CC                | 1946459641               |
| SNP_P3_86178_17269265 | NC_021166.1    | Ca_kabuli_chr07 | 17269265                | CC                              | TT                | 1946459643               |
| SNP_P3_86179_17269308 | NC_021166.1    | Ca_kabuli_chr07 | 17269308                | AA                              | CC                | 1946459644               |

| SNPs IDs              | Chromosome IDs | Chromosomes     | Physical positions (bp) | CDC Frontier (Reference genome) | (Pusa 256 & HPNB) | NCBI SNPdb Accession IDs |
|-----------------------|----------------|-----------------|-------------------------|---------------------------------|-------------------|--------------------------|
| SNP_P3_86180_17269357 | NC_021166.1    | Ca_kabuli_chr07 | 17269357                | GG                              | CC                | 1946459646               |
| SNP_P3_86181_17269541 | NC_021166.1    | Ca_kabuli_chr07 | 17269541                | GG                              | AA                | 1946459647               |
| SNP_P3_86182_17269603 | NC_021166.1    | Ca_kabuli_chr07 | 17269603                | AA                              | GG                | 1946459649               |
| SNP_P3_86183_17269620 | NC_021166.1    | Ca_kabuli_chr07 | 17269620                | AA                              | GG                | 1946459650               |
| SNP_P3_86184_17283240 | NC_021166.1    | Ca_kabuli_chr07 | 17283240                | AA                              | CC                | 1946459652               |
| SNP_P3_86185_17344436 | NC_021166.1    | Ca_kabuli_chr07 | 17344436                | GG                              | AA                | 1946459654               |
| SNP_P3_86186_17353156 | NC_021166.1    | Ca_kabuli_chr07 | 17353156                | CC                              | TT                | 1946459655               |
| SNP_P3_86187_17353167 | NC_021166.1    | Ca_kabuli_chr07 | 17353167                | TT                              | GG                | 1946459657               |
| SNP_P3_86188_17372125 | NC_021166.1    | Ca_kabuli_chr07 | 17372125                | TT                              | AA                | 1946459658               |
| SNP_P3_86189_17372144 | NC_021166.1    | Ca_kabuli_chr07 | 17372144                | GG                              | AA                | 1946459660               |
| SNP_P3_86190_17372147 | NC_021166.1    | Ca_kabuli_chr07 | 17372147                | TT                              | CC                | 1946459661               |
| SNP_P3_86191_17374519 | NC_021166.1    | Ca_kabuli_chr07 | 17374519                | CC                              | TT                | 1946459663               |
| SNP_P3_86192_17374585 | NC_021166.1    | Ca_kabuli_chr07 | 17374585                | CC                              | AA                | 1946459664               |
| SNP_P3_86194_17395669 | NC_021166.1    | Ca_kabuli_chr07 | 17395669                | GG                              | TT                | 1946459665               |
| SNP_P3_86195_17412063 | NC_021166.1    | Ca_kabuli_chr07 | 17412063                | TT                              | AA                | 1946459667               |
| SNP_P3_86196_17434708 | NC_021166.1    | Ca_kabuli_chr07 | 17434708                | TT                              | AA                | 1946459669               |
| SNP_P3_86197_17437957 | NC_021166.1    | Ca_kabuli_chr07 | 17437957                | TT                              | CC                | 1946459670               |
| SNP_P3_86198_17451892 | NC_021166.1    | Ca_kabuli_chr07 | 17451892                | CC                              | TT                | 1946459672               |
| SNP_P3_86199_17488732 | NC_021166.1    | Ca_kabuli_chr07 | 17488732                | AA                              | TT                | 1946459673               |
| SNP_P3_86200_17495995 | NC_021166.1    | Ca_kabuli_chr07 | 17495995                | GG                              | AA                | 1946459675               |
| SNP_P3_86201_17498211 | NC_021166.1    | Ca_kabuli_chr07 | 17498211                | AA                              | TT                | 1946459676               |
| SNP_P3_86202_17512900 | NC_021166.1    | Ca_kabuli_chr07 | 17512900                | CC                              | TT                | 1946459677               |
| SNP_P3_86203_17523195 | NC_021166.1    | Ca_kabuli_chr07 | 17523195                | TT                              | CC                | 1946459679               |
| SNP_P3_86204_17528218 | NC_021166.1    | Ca_kabuli_chr07 | 17528218                | TT                              | CC                | 1946459680               |
| SNP_P3_86205_17544601 | NC_021166.1    | Ca_kabuli_chr07 | 17544601                | AA                              | TT                | 1946459682               |
| SNP_P3_86206_17544602 | NC_021166.1    | Ca_kabuli_chr07 | 17544602                | TT                              | AA                | 1946459683               |
| SNP_P3_86208_17564611 | NC_021166.1    | Ca_kabuli_chr07 | 17564611                | TT                              | CC                | 1946459685               |
| SNP_P3_86209_17596128 | NC_021166.1    | Ca_kabuli_chr07 | 17596128                | GG                              | AA                | 1946459686               |
| SNP_P3_86211_17622889 | NC_021166.1    | Ca_kabuli_chr07 | 17622889                | GG                              | AA                | 1946459687               |
| SNP_P3_86212_17638991 | NC_021166.1    | Ca_kabuli_chr07 | 17638991                | TT                              | CC                | 1946459689               |
| SNP_P3_86213_17676582 | NC_021166.1    | Ca_kabuli_chr07 | 17676582                | CC                              | TT                | 1946459691               |
| SNP_P3_86214_17707178 | NC_021166.1    | Ca_kabuli_chr07 | 17707178                | AA                              | GG                | 1946459692               |
| SNP_P3_86215_17732013 | NC_021166.1    | Ca_kabuli_chr07 | 17732013                | GG                              | AA                | 1946459694               |
| SNP_P3_86216_17744126 | NC_021166.1    | Ca_kabuli_chr07 | 17744126                | TT                              | AA                | 1946459695               |
| SNP_P3_86217_17746554 | NC_021166.1    | Ca_kabuli_chr07 | 17746554                | GG                              | AA                | 1946459697               |
| SNP_P3_86218_17812989 | NC_021166.1    | Ca_kabuli_chr07 | 17812989                | AA                              | TT                | 1946459698               |
| SNP_P3_86219_17819018 | NC_021166.1    | Ca_kabuli_chr07 | 17819018                | AA                              | CC                | 1946459700               |
| SNP_P3_86220_17829178 | NC_021166.1    | Ca_kabuli_chr07 | 17829178                | TT                              | GG                | 1946459701               |
| SNP_P3_86221_17829223 | NC_021166.1    | Ca_kabuli_chr07 | 17829223                | AA                              | GG                | 1946459703               |
| SNP_P3_86222_17829512 | NC_021166.1    | Ca_kabuli_chr07 | 17829512                | GG                              | CC                | 1946459704               |
| SNP_P3_86223_17829522 | NC_021166.1    | Ca_kabuli_chr07 | 17829522                | TT                              | CC                | 1946459705               |
| SNP_P3_86224_17833283 | NC_021166.1    | Ca_kabuli_chr07 | 17833283                | AA                              | CC                | 1946459707               |



| SNPs IDs              | Chromosome IDs | Chromosomes     | Physical positions (bp) | CDC Frontier (Reference genome) | (Pusa 256 & HPNB) | NCBI SNPdb Accession IDs |
|-----------------------|----------------|-----------------|-------------------------|---------------------------------|-------------------|--------------------------|
| SNP_P3_86225_17833284 | NC_021166.1    | Ca_kabuli_chr07 | 17833284                | AA                              | GG                | 1946459708               |
| SNP_P3_86226_17833285 | NC_021166.1    | Ca_kabuli_chr07 | 17833285                | CC                              | TT                | 1946459710               |
| SNP_P3_86227_17833304 | NC_021166.1    | Ca_kabuli_chr07 | 17833304                | GG                              | AA                | 1946459712               |
| SNP_P3_86228_17848043 | NC_021166.1    | Ca_kabuli_chr07 | 17848043                | GG                              | AA                | 1946459713               |
| SNP_P3_86229_17858807 | NC_021166.1    | Ca_kabuli_chr07 | 17858807                | GG                              | AA                | 1946459715               |
| SNP_P3_86230_17864421 | NC_021166.1    | Ca_kabuli_chr07 | 17864421                | CC                              | TT                | 1946459716               |
| SNP_P3_86231_17864616 | NC_021166.1    | Ca_kabuli_chr07 | 17864616                | AA                              | CC                | 1946459718               |
| SNP_P3_86232_17865745 | NC_021166.1    | Ca_kabuli_chr07 | 17865745                | GG                              | CC                | 1946459719               |
| SNP_P3_86233_17866725 | NC_021166.1    | Ca_kabuli_chr07 | 17866725                | GG                              | CC                | 1946459721               |
| SNP_P3_86234_17869124 | NC_021166.1    | Ca_kabuli_chr07 | 17869124                | CC                              | AA                | 1946459722               |
| SNP_P3_86235_17869125 | NC_021166.1    | Ca_kabuli_chr07 | 17869125                | AA                              | GG                | 1946459724               |
| SNP_P3_86236_17869145 | NC_021166.1    | Ca_kabuli_chr07 | 17869145                | CC                              | TT                | 1946459725               |
| SNP_P3_86237_17869189 | NC_021166.1    | Ca_kabuli_chr07 | 17869189                | TT                              | CC                | 1946459727               |
| SNP_P3_86238_17875009 | NC_021166.1    | Ca_kabuli_chr07 | 17875009                | TT                              | CC                | 1946459728               |
| SNP_P3_86239_17875104 | NC_021166.1    | Ca_kabuli_chr07 | 17875104                | GG                              | CC                | 1946459730               |
| SNP_P3_86240_17875325 | NC_021166.1    | Ca_kabuli_chr07 | 17875325                | AA                              | GG                | 1946459731               |
| SNP_P3_86241_17875331 | NC_021166.1    | Ca_kabuli_chr07 | 17875331                | AA                              | GG                | 1946459733               |
| SNP_P3_86242_17879959 | NC_021166.1    | Ca_kabuli_chr07 | 17879959                | GG                              | CC                | 1946459734               |
| SNP_P3_86243_17879998 | NC_021166.1    | Ca_kabuli_chr07 | 17879998                | AA                              | GG                | 1946459736               |
| SNP_P3_86244_17880108 | NC_021166.1    | Ca_kabuli_chr07 | 17880108                | AA                              | TT                | 1946459737               |
| SNP_P3_86245_17880121 | NC_021166.1    | Ca_kabuli_chr07 | 17880121                | CC                              | GG                | 1946459739               |
| SNP_P3_86246_17880234 | NC_021166.1    | Ca_kabuli_chr07 | 17880234                | TT                              | CC                | 1946459740               |
| SNP_P3_86247_17880237 | NC_021166.1    | Ca_kabuli_chr07 | 17880237                | GG                              | AA                | 1946459742               |
| SNP_P3_86248_17880298 | NC_021166.1    | Ca_kabuli_chr07 | 17880298                | AA                              | GG                | 1946459743               |
| SNP_P3_86249_17880679 | NC_021166.1    | Ca_kabuli_chr07 | 17880679                | AA                              | GG                | 1946459745               |
| SNP_P3_86250_17893528 | NC_021166.1    | Ca_kabuli_chr07 | 17893528                | GG                              | AA                | 1946459746               |
| SNP_P3_86251_17897529 | NC_021166.1    | Ca_kabuli_chr07 | 17897529                | CC                              | TT                | 1946459748               |
| SNP_P3_86252_17897597 | NC_021166.1    | Ca_kabuli_chr07 | 17897597                | CC                              | AA                | 1946459749               |
| SNP_P3_86253_17897917 | NC_021166.1    | Ca_kabuli_chr07 | 17897917                | TT                              | CC                | 1946459751               |
| SNP_P3_86254_17902084 | NC_021166.1    | Ca_kabuli_chr07 | 17902084                | AA                              | CC                | 1946459752               |
| SNP_P3_86255_17922175 | NC_021166.1    | Ca_kabuli_chr07 | 17922175                | CC                              | TT                | 1946459754               |
| SNP_P3_86256_17922254 | NC_021166.1    | Ca_kabuli_chr07 | 17922254                | AA                              | GG                | 1946459755               |
| SNP_P3_86257_17922262 | NC_021166.1    | Ca_kabuli_chr07 | 17922262                | GG                              | CC                | 1946459757               |
| SNP_P3_86258_17922296 | NC_021166.1    | Ca_kabuli_chr07 | 17922296                | AA                              | CC                | 1946459758               |
| SNP_P3_86259_17922561 | NC_021166.1    | Ca_kabuli_chr07 | 17922561                | AA                              | GG                | 1946459760               |
| SNP_P3_86260_17922608 | NC_021166.1    | Ca_kabuli_chr07 | 17922608                | AA                              | GG                | 1946459761               |
| SNP_P3_86262_17922736 | NC_021166.1    | Ca_kabuli_chr07 | 17922736                | CC                              | AA                | 1946459763               |
| SNP_P3_86263_17922796 | NC_021166.1    | Ca_kabuli_chr07 | 17922796                | GG                              | AA                | 1946459764               |
| SNP_P3_86264_17923012 | NC_021166.1    | Ca_kabuli_chr07 | 17923012                | GG                              | AA                | 1946459766               |
| SNP_P3_86265_17923085 | NC_021166.1    | Ca_kabuli_chr07 | 17923085                | TT                              | GG                | 1946459767               |
| SNP_P3_86266_17923138 | NC_021166.1    | Ca_kabuli_chr07 | 17923138                | CC                              | TT                | 1946459769               |
| SNP_P3_86267_17923143 | NC_021166.1    | Ca_kabuli_chr07 | 17923143                | AA                              | TT                | 1946459770               |

| SNPs IDs              | Chromosome IDs | Chromosomes     | Physical positions (bp) | CDC Frontier (Reference genome) | (Pusa 256 & HPNB) | NCBI SNPdb Accession IDs |
|-----------------------|----------------|-----------------|-------------------------|---------------------------------|-------------------|--------------------------|
| SNP_P3_86268_17923158 | NC_021166.1    | Ca_kabuli_chr07 | 17923158                | CC                              | TT                | 1946459771               |
| SNP_P3_86269_17923204 | NC_021166.1    | Ca_kabuli_chr07 | 17923204                | GG                              | AA                | 1946459773               |
| SNP_P3_86270_17923830 | NC_021166.1    | Ca_kabuli_chr07 | 17923830                | CC                              | TT                | 1946459775               |
| SNP_P3_86271_17923839 | NC_021166.1    | Ca_kabuli_chr07 | 17923839                | GG                              | AA                | 1946459776               |
| SNP_P3_86272_17923860 | NC_021166.1    | Ca_kabuli_chr07 | 17923860                | GG                              | TT                | 1946459778               |
| SNP_P3_86273_17947704 | NC_021166.1    | Ca_kabuli_chr07 | 17947704                | AA                              | GG                | 1946459779               |
| SNP_P3_86274_17948158 | NC_021166.1    | Ca_kabuli_chr07 | 17948158                | AA                              | TT                | 1946459781               |
| SNP_P3_86276_17983745 | NC_021166.1    | Ca_kabuli_chr07 | 17983745                | CC                              | GG                | 1946459782               |
| SNP_P3_86277_17986857 | NC_021166.1    | Ca_kabuli_chr07 | 17986857                | CC                              | TT                | 1946459784               |
| SNP_P3_86278_17987806 | NC_021166.1    | Ca_kabuli_chr07 | 17987806                | TT                              | CC                | 1946459785               |
| SNP_P3_86279_17997471 | NC_021166.1    | Ca_kabuli_chr07 | 17997471                | GG                              | AA                | 1946459786               |
| SNP_P3_86280_18001389 | NC_021166.1    | Ca_kabuli_chr07 | 18001389                | TT                              | AA                | 1946459788               |
| SNP_P3_86281_18001640 | NC_021166.1    | Ca_kabuli_chr07 | 18001640                | CC                              | AA                | 1946459789               |
| SNP_P3_86282_18006930 | NC_021166.1    | Ca_kabuli_chr07 | 18006930                | TT                              | CC                | 1946459791               |
| SNP_P3_86283_18007004 | NC_021166.1    | Ca_kabuli_chr07 | 18007004                | AA                              | TT                | 1946459792               |
| SNP_P3_86284_18007182 | NC_021166.1    | Ca_kabuli_chr07 | 18007182                | GG                              | AA                | 1946459794               |
| SNP_P3_86285_18007184 | NC_021166.1    | Ca_kabuli_chr07 | 18007184                | GG                              | TT                | 1946459795               |
| SNP_P3_86286_18007185 | NC_021166.1    | Ca_kabuli_chr07 | 18007185                | TT                              | AA                | 1946459797               |
| SNP_P3_86288_18007302 | NC_021166.1    | Ca_kabuli_chr07 | 18007302                | AA                              | GG                | 1946459798               |
| SNP_P3_86289_18007376 | NC_021166.1    | Ca_kabuli_chr07 | 18007376                | CC                              | TT                | 1946459800               |
| SNP_P3_86290_18007387 | NC_021166.1    | Ca_kabuli_chr07 | 18007387                | GG                              | TT                | 1946459801               |
| SNP_P3_86291_18007408 | NC_021166.1    | Ca_kabuli_chr07 | 18007408                | TT                              | CC                | 1946459803               |
| SNP_P3_86292_18007484 | NC_021166.1    | Ca_kabuli_chr07 | 18007484                | AA                              | GG                | 1946459804               |
| SNP_P3_86293_18007509 | NC_021166.1    | Ca_kabuli_chr07 | 18007509                | GG                              | AA                | 1946459806               |
| SNP_P3_86294_18007525 | NC_021166.1    | Ca_kabuli_chr07 | 18007525                | TT                              | CC                | 1946459807               |
| SNP_P3_86295_18007537 | NC_021166.1    | Ca_kabuli_chr07 | 18007537                | TT                              | CC                | 1946459809               |
| SNP_P3_86297_18007798 | NC_021166.1    | Ca_kabuli_chr07 | 18007798                | CC                              | TT                | 1946459810               |
| SNP_P3_86298_18007900 | NC_021166.1    | Ca_kabuli_chr07 | 18007900                | AA                              | GG                | 1946459812               |
| SNP_P3_86300_18007952 | NC_021166.1    | Ca_kabuli_chr07 | 18007952                | GG                              | TT                | 1946459813               |
| SNP_P3_86301_18024864 | NC_021166.1    | Ca_kabuli_chr07 | 18024864                | AA                              | CC                | 1946459815               |
| SNP_P3_86302_18024889 | NC_021166.1    | Ca_kabuli_chr07 | 18024889                | TT                              | CC                | 1946459816               |
| SNP_P3_86303_18038540 | NC_021166.1    | Ca_kabuli_chr07 | 18038540                | GG                              | TT                | 1946459818               |
| SNP_P3_86305_18038552 | NC_021166.1    | Ca_kabuli_chr07 | 18038552                | CC                              | GG                | 1946459819               |
| SNP_P3_86306_18039732 | NC_021166.1    | Ca_kabuli_chr07 | 18039732                | AA                              | TT                | 1946459821               |
| SNP_P3_86307_18045415 | NC_021166.1    | Ca_kabuli_chr07 | 18045415                | TT                              | GG                | 1946459822               |
| SNP_P3_86308_18050007 | NC_021166.1    | Ca_kabuli_chr07 | 18050007                | GG                              | AA                | 1946459824               |
| SNP_P3_86309_18050036 | NC_021166.1    | Ca_kabuli_chr07 | 18050036                | CC                              | TT                | 1946459825               |
| SNP_P3_86310_18050211 | NC_021166.1    | Ca_kabuli_chr07 | 18050211                | TT                              | GG                | 1946459827               |
| SNP_P3_86311_18062875 | NC_021166.1    | Ca_kabuli_chr07 | 18062875                | AA                              | GG                | 1946459828               |
| SNP_P3_86312_18064855 | NC_021166.1    | Ca_kabuli_chr07 | 18064855                | TT                              | AA                | 1946459830               |
| SNP_P3_86313_18070984 | NC_021166.1    | Ca_kabuli_chr07 | 18070984                | TT                              | GG                | 1946459831               |
| SNP_P3_86314_18070993 | NC_021166.1    | Ca_kabuli_chr07 | 18070993                | AA                              | TT                | 1946459833               |

| SNPs IDs              | Chromosome IDs | Chromosomes     | Physical positions (bp) | CDC Frontier (Reference genome) | (Pusa 256 & HPNB) | NCBI SNPdb Accession IDs |
|-----------------------|----------------|-----------------|-------------------------|---------------------------------|-------------------|--------------------------|
| SNP_P3_86315_18070997 | NC_021166.1    | Ca_kabuli_chr07 | 18070997                | GG                              | TT                | 1946459834               |
| SNP_P3_86316_18071005 | NC_021166.1    | Ca_kabuli_chr07 | 18071005                | GG                              | TT                | 1946459836               |
| SNP_P3_86317_18071028 | NC_021166.1    | Ca_kabuli_chr07 | 18071028                | AA                              | GG                | 1946459838               |
| SNP_P3_86318_18071159 | NC_021166.1    | Ca_kabuli_chr07 | 18071159                | AA                              | TT                | 1946459839               |
| SNP_P3_86319_18071165 | NC_021166.1    | Ca_kabuli_chr07 | 18071165                | GG                              | CC                | 1946459841               |
| SNP_P3_86320_18071188 | NC_021166.1    | Ca_kabuli_chr07 | 18071188                | TT                              | CC                | 1946459843               |
| SNP_P3_86321_18071197 | NC_021166.1    | Ca_kabuli_chr07 | 18071197                | TT                              | CC                | 1946459844               |
| SNP_P3_86322_18071204 | NC_021166.1    | Ca_kabuli_chr07 | 18071204                | AA                              | TT                | 1946459846               |
| SNP_P3_86323_18071216 | NC_021166.1    | Ca_kabuli_chr07 | 18071216                | AA                              | TT                | 1946459847               |
| SNP_P3_86324_18071401 | NC_021166.1    | Ca_kabuli_chr07 | 18071401                | CC                              | AA                | 1946459849               |
| SNP_P3_86325_18084750 | NC_021166.1    | Ca_kabuli_chr07 | 18084750                | CC                              | TT                | 1946459850               |
| SNP_P3_86326_18085020 | NC_021166.1    | Ca_kabuli_chr07 | 18085020                | CC                              | TT                | 1946459852               |
| SNP_P3_86328_18088218 | NC_021166.1    | Ca_kabuli_chr07 | 18088218                | TT                              | AA                | 1946459853               |
| SNP_P3_86329_18110103 | NC_021166.1    | Ca_kabuli_chr07 | 18110103                | AA                              | GG                | 1946459855               |
| SNP_P3_86330_18110111 | NC_021166.1    | Ca_kabuli_chr07 | 18110111                | TT                              | CC                | 1946459856               |
| SNP_P3_86331_18110130 | NC_021166.1    | Ca_kabuli_chr07 | 18110130                | AA                              | GG                | 1946459858               |
| SNP_P3_86332_18110142 | NC_021166.1    | Ca_kabuli_chr07 | 18110142                | GG                              | AA                | 1946459859               |
| SNP_P3_86333_18114622 | NC_021166.1    | Ca_kabuli_chr07 | 18114622                | AA                              | GG                | 1946459861               |
| SNP_P3_86336_18122812 | NC_021166.1    | Ca_kabuli_chr07 | 18122812                | CC                              | TT                | 1946459862               |
| SNP_P3_86337_18125869 | NC_021166.1    | Ca_kabuli_chr07 | 18125869                | AA                              | GG                | 1946459864               |
| SNP_P3_86338_18125921 | NC_021166.1    | Ca_kabuli_chr07 | 18125921                | CC                              | TT                | 1946459866               |
| SNP_P3_86341_18148615 | NC_021166.1    | Ca_kabuli_chr07 | 18148615                | AA                              | CC                | 1946459867               |
| SNP_P3_86342_18188377 | NC_021166.1    | Ca_kabuli_chr07 | 18188377                | GG                              | AA                | 1946459869               |
| SNP_P3_86343_18188378 | NC_021166.1    | Ca_kabuli_chr07 | 18188378                | GG                              | TT                | 1946459870               |
| SNP_P3_86345_18188451 | NC_021166.1    | Ca_kabuli_chr07 | 18188451                | AA                              | TT                | 1946459872               |
| SNP_P3_86346_18188855 | NC_021166.1    | Ca_kabuli_chr07 | 18188855                | GG                              | AA                | 1946459873               |
| SNP_P3_86347_18198990 | NC_021166.1    | Ca_kabuli_chr07 | 18198990                | GG                              | AA                | 1946459874               |
| SNP_P3_86348_18198998 | NC_021166.1    | Ca_kabuli_chr07 | 18198998                | GG                              | TT                | 1946459876               |
| SNP_P3_86349_18199007 | NC_021166.1    | Ca_kabuli_chr07 | 18199007                | GG                              | TT                | 1946459877               |
| SNP_P3_86350_18199059 | NC_021166.1    | Ca_kabuli_chr07 | 18199059                | GG                              | AA                | 1946459879               |
| SNP_P3_86351_18199084 | NC_021166.1    | Ca_kabuli_chr07 | 18199084                | TT                              | CC                | 1946459880               |
| SNP_P3_86352_18199086 | NC_021166.1    | Ca_kabuli_chr07 | 18199086                | AA                              | TT                | 1946459882               |
| SNP_P3_86354_18199484 | NC_021166.1    | Ca_kabuli_chr07 | 18199484                | GG                              | AA                | 1946459883               |
| SNP_P3_86355_18199485 | NC_021166.1    | Ca_kabuli_chr07 | 18199485                | GG                              | AA                | 1946459885               |
| SNP_P3_86356_18199523 | NC_021166.1    | Ca_kabuli_chr07 | 18199523                | GG                              | AA                | 1946459887               |
| SNP_P3_86357_18199524 | NC_021166.1    | Ca_kabuli_chr07 | 18199524                | TT                              | GG                | 1946459888               |
| SNP_P3_86358_18199539 | NC_021166.1    | Ca_kabuli_chr07 | 18199539                | TT                              | AA                | 1946459889               |
| SNP_P3_86359_18211303 | NC_021166.1    | Ca_kabuli_chr07 | 18211303                | GG                              | AA                | 1946459891               |
| SNP_P3_86360_18211555 | NC_021166.1    | Ca_kabuli_chr07 | 18211555                | TT                              | GG                | 1946459892               |
| SNP_P3_86361_18215145 | NC_021166.1    | Ca_kabuli_chr07 | 18215145                | TT                              | AA                | 1946459894               |
| SNP_P3_86362_18218380 | NC_021166.1    | Ca_kabuli_chr07 | 18218380                | AA                              | GG                | 1946459895               |
| SNP_P3_86364_18234962 | NC_021166.1    | Ca_kabuli_chr07 | 18234962                | CC                              | TT                | 1946459897               |

| SNPs IDs              | Chromosome IDs | Chromosomes     | Physical positions (bp) | CDC Frontier (Reference genome) | (Pusa 256 & HPNB) | NCBI SNPdb Accession IDs |
|-----------------------|----------------|-----------------|-------------------------|---------------------------------|-------------------|--------------------------|
| SNP_P3_86365_18261068 | NC_021166.1    | Ca_kabuli_chr07 | 18261068                | TT                              | CC                | 1946459898               |
| SNP_P3_86366_18282177 | NC_021166.1    | Ca_kabuli_chr07 | 18282177                | TT                              | CC                | 1946459900               |
| SNP_P3_86367_18290069 | NC_021166.1    | Ca_kabuli_chr07 | 18290069                | GG                              | AA                | 1946459901               |
| SNP_P3_86368_18297098 | NC_021166.1    | Ca_kabuli_chr07 | 18297098                | TT                              | AA                | 1946459903               |
| SNP_P3_86369_18298672 | NC_021166.1    | Ca_kabuli_chr07 | 18298672                | CC                              | TT                | 1946459904               |
| SNP_P3_86370_18316726 | NC_021166.1    | Ca_kabuli_chr07 | 18316726                | CC                              | GG                | 1946459906               |
| SNP_P3_86371_18316727 | NC_021166.1    | Ca_kabuli_chr07 | 18316727                | AA                              | GG                | 1946459907               |
| SNP_P3_86372_18328300 | NC_021166.1    | Ca_kabuli_chr07 | 18328300                | GG                              | AA                | 1946459909               |
| SNP_P3_86373_18328343 | NC_021166.1    | Ca_kabuli_chr07 | 18328343                | AA                              | CC                | 1946459910               |
| SNP_P3_86374_18332792 | NC_021166.1    | Ca_kabuli_chr07 | 18332792                | CC                              | AA                | 1946459912               |
| SNP_P3_86375_18332816 | NC_021166.1    | Ca_kabuli_chr07 | 18332816                | CC                              | TT                | 1946459913               |
| SNP_P3_86376_18332822 | NC_021166.1    | Ca_kabuli_chr07 | 18332822                | CC                              | TT                | 1946459915               |
| SNP_P3_86377_18332824 | NC_021166.1    | Ca_kabuli_chr07 | 18332824                | GG                              | AA                | 1946459916               |
| SNP_P3_86378_18332825 | NC_021166.1    | Ca_kabuli_chr07 | 18332825                | CC                              | TT                | 1946459918               |
| SNP_P3_86380_18332831 | NC_021166.1    | Ca_kabuli_chr07 | 18332831                | TT                              | CC                | 1946459919               |
| SNP_P3_86381_18332869 | NC_021166.1    | Ca_kabuli_chr07 | 18332869                | CC                              | TT                | 1946459921               |
| SNP_P3_86382_18332915 | NC_021166.1    | Ca_kabuli_chr07 | 18332915                | GG                              | AA                | 1946459922               |
| SNP_P3_86383_18332974 | NC_021166.1    | Ca_kabuli_chr07 | 18332974                | CC                              | TT                | 1946459924               |
| SNP_P3_86384_18333209 | NC_021166.1    | Ca_kabuli_chr07 | 18333209                | CC                              | TT                | 1946459925               |
| SNP_P3_86386_18337640 | NC_021166.1    | Ca_kabuli_chr07 | 18337640                | AA                              | GG                | 1946459927               |
| SNP_P3_86387_18337653 | NC_021166.1    | Ca_kabuli_chr07 | 18337653                | AA                              | GG                | 1946459929               |
| SNP_P3_86388_18338653 | NC_021166.1    | Ca_kabuli_chr07 | 18338653                | CC                              | TT                | 1946459931               |
| SNP_P3_86390_18362532 | NC_021166.1    | Ca_kabuli_chr07 | 18362532                | CC                              | TT                | 1946459933               |
| SNP_P3_86391_18363284 | NC_021166.1    | Ca_kabuli_chr07 | 18363284                | GG                              | AA                | 1946459934               |
| SNP_P3_86392_18363569 | NC_021166.1    | Ca_kabuli_chr07 | 18363569                | TT                              | CC                | 1946459935               |
| SNP_P3_86393_18363589 | NC_021166.1    | Ca_kabuli_chr07 | 18363589                | GG                              | AA                | 1946459937               |
| SNP_P3_86394_18363622 | NC_021166.1    | Ca_kabuli_chr07 | 18363622                | AA                              | GG                | 1946459939               |
| SNP_P3_86395_18403508 | NC_021166.1    | Ca_kabuli_chr07 | 18403508                | TT                              | CC                | 1946459940               |
| SNP_P3_86396_18408754 | NC_021166.1    | Ca_kabuli_chr07 | 18408754                | GG                              | AA                | 1946459941               |
| SNP_P3_86397_18408758 | NC_021166.1    | Ca_kabuli_chr07 | 18408758                | CC                              | TT                | 1946459943               |
| SNP_P3_86398_18409517 | NC_021166.1    | Ca_kabuli_chr07 | 18409517                | AA                              | GG                | 1946459944               |
| SNP_P3_86399_18409890 | NC_021166.1    | Ca_kabuli_chr07 | 18409890                | AA                              | GG                | 1946459946               |
| SNP_P3_86400_18421013 | NC_021166.1    | Ca_kabuli_chr07 | 18421013                | CC                              | TT                | 1946459948               |
| SNP_P3_86402_18459289 | NC_021166.1    | Ca_kabuli_chr07 | 18459289                | TT                              | GG                | 1946459949               |
| SNP_P3_86403_18486450 | NC_021166.1    | Ca_kabuli_chr07 | 18486450                | GG                              | AA                | 1946459951               |
| SNP_P3_86404_18490096 | NC_021166.1    | Ca_kabuli_chr07 | 18490096                | TT                              | CC                | 1946459952               |
| SNP_P3_86405_18497271 | NC_021166.1    | Ca_kabuli_chr07 | 18497271                | GG                              | CC                | 1946459954               |
| SNP_P3_86406_18498504 | NC_021166.1    | Ca_kabuli_chr07 | 18498504                | TT                              | CC                | 1946459955               |
| SNP_P3_86407_18500126 | NC_021166.1    | Ca_kabuli_chr07 | 18500126                | CC                              | TT                | 1946459957               |
| SNP_P3_86408_18516089 | NC_021166.1    | Ca_kabuli_chr07 | 18516089                | AA                              | TT                | 1946459958               |
| SNP_P3_86409_18539501 | NC_021166.1    | Ca_kabuli_chr07 | 18539501                | CC                              | TT                | 1946459960               |
| SNP_P3_86410_18539507 | NC_021166.1    | Ca_kabuli_chr07 | 18539507                | CC                              | TT                | 1946459961               |

| SNPs IDs              | Chromosome IDs | Chromosomes     | Physical positions (bp) | CDC Frontier (Reference genome) | (Pusa 256 & HPNB) | NCBI SNPdb Accession IDs |
|-----------------------|----------------|-----------------|-------------------------|---------------------------------|-------------------|--------------------------|
| SNP_P3_86411_18539567 | NC_021166.1    | Ca_kabuli_chr07 | 18539567                | CC                              | TT                | 1946459963               |
| SNP_P3_86412_18539568 | NC_021166.1    | Ca_kabuli_chr07 | 18539568                | TT                              | CC                | 1946459964               |
| SNP_P3_86413_18539621 | NC_021166.1    | Ca_kabuli_chr07 | 18539621                | AA                              | GG                | 1946459966               |
| SNP_P3_86414_18539674 | NC_021166.1    | Ca_kabuli_chr07 | 18539674                | GG                              | TT                | 1946459967               |
| SNP_P3_86415_18539689 | NC_021166.1    | Ca_kabuli_chr07 | 18539689                | AA                              | GG                | 1946459968               |
| SNP_P3_86416_18539713 | NC_021166.1    | Ca_kabuli_chr07 | 18539713                | TT                              | CC                | 1946459970               |
| SNP_P3_86417_18540122 | NC_021166.1    | Ca_kabuli_chr07 | 18540122                | AA                              | GG                | 1946459972               |
| SNP_P3_86418_18541208 | NC_021166.1    | Ca_kabuli_chr07 | 18541208                | GG                              | AA                | 1946459973               |
| SNP_P3_86419_18546293 | NC_021166.1    | Ca_kabuli_chr07 | 18546293                | TT                              | GG                | 1946459975               |
| SNP_P3_86420_18575352 | NC_021166.1    | Ca_kabuli_chr07 | 18575352                | TT                              | GG                | 1946459976               |
| SNP_P3_86421_18575359 | NC_021166.1    | Ca_kabuli_chr07 | 18575359                | GG                              | CC                | 1946459978               |
| SNP_P3_86422_18587495 | NC_021166.1    | Ca_kabuli_chr07 | 18587495                | TT                              | GG                | 1946459979               |
| SNP_P3_86423_18587510 | NC_021166.1    | Ca_kabuli_chr07 | 18587510                | TT                              | CC                | 1946459981               |
| SNP_P3_86424_18587524 | NC_021166.1    | Ca_kabuli_chr07 | 18587524                | CC                              | TT                | 1946459982               |
| SNP_P3_86425_18587533 | NC_021166.1    | Ca_kabuli_chr07 | 18587533                | TT                              | CC                | 1946459984               |
| SNP_P3_86426_18587546 | NC_021166.1    | Ca_kabuli_chr07 | 18587546                | AA                              | TT                | 1946459985               |
| SNP_P3_86427_18587563 | NC_021166.1    | Ca_kabuli_chr07 | 18587563                | TT                              | CC                | 1946459986               |
| SNP_P3_86428_18587603 | NC_021166.1    | Ca_kabuli_chr07 | 18587603                | CC                              | TT                | 1946459988               |
| SNP_P3_86429_18587607 | NC_021166.1    | Ca_kabuli_chr07 | 18587607                | CC                              | TT                | 1946459989               |
| SNP_P3_86431_18587706 | NC_021166.1    | Ca_kabuli_chr07 | 18587706                | GG                              | AA                | 1946459991               |
| SNP_P3_86432_18587760 | NC_021166.1    | Ca_kabuli_chr07 | 18587760                | AA                              | GG                | 1946459992               |
| SNP_P3_86433_18587763 | NC_021166.1    | Ca_kabuli_chr07 | 18587763                | TT                              | CC                | 1946459994               |
| SNP_P3_86434_18587764 | NC_021166.1    | Ca_kabuli_chr07 | 18587764                | GG                              | CC                | 1946459996               |
| SNP_P3_86435_18587772 | NC_021166.1    | Ca_kabuli_chr07 | 18587772                | AA                              | GG                | 1946459997               |
| SNP_P3_86436_18587853 | NC_021166.1    | Ca_kabuli_chr07 | 18587853                | GG                              | AA                | 1946459999               |
| SNP_P3_86438_18588046 | NC_021166.1    | Ca_kabuli_chr07 | 18588046                | GG                              | TT                | 1946460000               |
| SNP_P3_86439_18588091 | NC_021166.1    | Ca_kabuli_chr07 | 18588091                | AA                              | GG                | 1946460002               |
| SNP_P3_86440_18588134 | NC_021166.1    | Ca_kabuli_chr07 | 18588134                | TT                              | CC                | 1946460003               |
| SNP_P3_86441_18588184 | NC_021166.1    | Ca_kabuli_chr07 | 18588184                | AA                              | TT                | 1946460005               |
| SNP_P3_86442_18588221 | NC_021166.1    | Ca_kabuli_chr07 | 18588221                | AA                              | TT                | 1946460006               |
| SNP_P3_86444_18588341 | NC_021166.1    | Ca_kabuli_chr07 | 18588341                | TT                              | AA                | 1946460008               |
| SNP_P3_86445_18588411 | NC_021166.1    | Ca_kabuli_chr07 | 18588411                | TT                              | AA                | 1946460009               |
| SNP_P3_86446_18588443 | NC_021166.1    | Ca_kabuli_chr07 | 18588443                | CC                              | AA                | 1946460011               |
| SNP_P3_86447_18588451 | NC_021166.1    | Ca_kabuli_chr07 | 18588451                | TT                              | CC                | 1946460012               |
| SNP_P3_86448_18588488 | NC_021166.1    | Ca_kabuli_chr07 | 18588488                | AA                              | CC                | 1946460014               |
| SNP_P3_86449_18588599 | NC_021166.1    | Ca_kabuli_chr07 | 18588599                | TT                              | CC                | 1946460015               |
| SNP_P3_86450_18588642 | NC_021166.1    | Ca_kabuli_chr07 | 18588642                | TT                              | CC                | 1946460017               |
| SNP_P3_86452_18588743 | NC_021166.1    | Ca_kabuli_chr07 | 18588743                | CC                              | TT                | 1946460018               |
| SNP_P3_86453_18588753 | NC_021166.1    | Ca_kabuli_chr07 | 18588753                | TT                              | CC                | 1946460020               |
| SNP_P3_86454_18588761 | NC_021166.1    | Ca_kabuli_chr07 | 18588761                | TT                              | CC                | 1946460021               |
| SNP_P3_86455_18588812 | NC_021166.1    | Ca_kabuli_chr07 | 18588812                | CC                              | AA                | 1946460023               |
| SNP_P3_86456_18589037 | NC_021166.1    | Ca_kabuli_chr07 | 18589037                | AA                              | CC                | 1946460024               |

| SNPs IDs              | Chromosome IDs | Chromosomes     | Physical positions (bp) | CDC Frontier (Reference genome) | (Pusa 256 & HPNB) | NCBI SNPdb Accession IDs |
|-----------------------|----------------|-----------------|-------------------------|---------------------------------|-------------------|--------------------------|
| SNP_P3_86457_18589473 | NC_021166.1    | Ca_kabuli_chr07 | 18589473                | TT                              | CC                | 1946460026               |
| SNP_P3_86458_18589474 | NC_021166.1    | Ca_kabuli_chr07 | 18589474                | AA                              | CC                | 1946460027               |
| SNP_P3_86459_18589489 | NC_021166.1    | Ca_kabuli_chr07 | 18589489                | TT                              | AA                | 1946460029               |
| SNP_P3_86460_18589491 | NC_021166.1    | Ca_kabuli_chr07 | 18589491                | CC                              | TT                | 1946460030               |
| SNP_P3_86461_18589762 | NC_021166.1    | Ca_kabuli_chr07 | 18589762                | AA                              | GG                | 1946460032               |
| SNP_P3_86462_18589764 | NC_021166.1    | Ca_kabuli_chr07 | 18589764                | GG                              | AA                | 1946460034               |
| SNP_P3_86463_18589787 | NC_021166.1    | Ca_kabuli_chr07 | 18589787                | TT                              | CC                | 1946460035               |
| SNP_P3_86464_18589809 | NC_021166.1    | Ca_kabuli_chr07 | 18589809                | AA                              | TT                | 1946460037               |
| SNP_P3_86465_18589838 | NC_021166.1    | Ca_kabuli_chr07 | 18589838                | GG                              | AA                | 1946460038               |
| SNP_P3_86466_18589912 | NC_021166.1    | Ca_kabuli_chr07 | 18589912                | AA                              | GG                | 1946460040               |
| SNP_P3_86467_18611305 | NC_021166.1    | Ca_kabuli_chr07 | 18611305                | AA                              | CC                | 1946460041               |
| SNP_P3_86468_18618938 | NC_021166.1    | Ca_kabuli_chr07 | 18618938                | GG                              | AA                | 1946460043               |
| SNP_P3_86469_18666367 | NC_021166.1    | Ca_kabuli_chr07 | 18666367                | TT                              | AA                | 1946460044               |
| SNP_P3_86470_18676348 | NC_021166.1    | Ca_kabuli_chr07 | 18676348                | AA                              | CC                | 1946460046               |
| SNP_P3_86471_18693584 | NC_021166.1    | Ca_kabuli_chr07 | 18693584                | TT                              | CC                | 1946460047               |
| SNP_P3_86472_18739595 | NC_021166.1    | Ca_kabuli_chr07 | 18739595                | GG                              | AA                | 1946460049               |
| SNP_P3_86473_18739723 | NC_021166.1    | Ca_kabuli_chr07 | 18739723                | AA                              | TT                | 1946460050               |
| SNP_P3_86474_18739740 | NC_021166.1    | Ca_kabuli_chr07 | 18739740                | GG                              | AA                | 1946460051               |
| SNP_P3_86475_18740453 | NC_021166.1    | Ca_kabuli_chr07 | 18740453                | TT                              | CC                | 1946460053               |
| SNP_P3_86476_18741312 | NC_021166.1    | Ca_kabuli_chr07 | 18741312                | CC                              | TT                | 1946460055               |
| SNP_P3_86477_18757031 | NC_021166.1    | Ca_kabuli_chr07 | 18757031                | CC                              | TT                | 1946460056               |
| SNP_P3_86478_18765173 | NC_021166.1    | Ca_kabuli_chr07 | 18765173                | CC                              | TT                | 1946460057               |
| SNP_P3_86479_18765186 | NC_021166.1    | Ca_kabuli_chr07 | 18765186                | GG                              | AA                | 1946460059               |
| SNP_P3_86480_18765696 | NC_021166.1    | Ca_kabuli_chr07 | 18765696                | TT                              | CC                | 1946460060               |
| SNP_P3_86482_18792254 | NC_021166.1    | Ca_kabuli_chr07 | 18792254                | TT                              | CC                | 1946460062               |
| SNP_P3_86483_18797561 | NC_021166.1    | Ca_kabuli_chr07 | 18797561                | CC                              | TT                | 1946460063               |
| SNP_P3_86485_18838991 | NC_021166.1    | Ca_kabuli_chr07 | 18838991                | AA                              | GG                | 1946460065               |
| SNP_P3_86486_18845898 | NC_021166.1    | Ca_kabuli_chr07 | 18845898                | GG                              | AA                | 1946460066               |
| SNP_P3_86487_18851964 | NC_021166.1    | Ca_kabuli_chr07 | 18851964                | AA                              | GG                | 1946460068               |
| SNP_P3_86488_18872509 | NC_021166.1    | Ca_kabuli_chr07 | 18872509                | TT                              | AA                | 1946460069               |
| SNP_P3_86489_18899783 | NC_021166.1    | Ca_kabuli_chr07 | 18899783                | GG                              | AA                | 1946460071               |
| SNP_P3_86490_18905009 | NC_021166.1    | Ca_kabuli_chr07 | 18905009                | GG                              | TT                | 1946460072               |
| SNP_P3_86491_18914602 | NC_021166.1    | Ca_kabuli_chr07 | 18914602                | AA                              | GG                | 1946460074               |
| SNP_P3_86493_18917160 | NC_021166.1    | Ca_kabuli_chr07 | 18917160                | CC                              | TT                | 1946460075               |
| SNP_P3_86494_18917196 | NC_021166.1    | Ca_kabuli_chr07 | 18917196                | AA                              | TT                | 1946460077               |
| SNP_P3_86495_18917197 | NC_021166.1    | Ca_kabuli_chr07 | 18917197                | CC                              | GG                | 1946460078               |
| SNP_P3_86496_18917198 | NC_021166.1    | Ca_kabuli_chr07 | 18917198                | GG                              | AA                | 1946460080               |
| SNP_P3_86497_18918110 | NC_021166.1    | Ca_kabuli_chr07 | 18918110                | GG                              | AA                | 1946460081               |
| SNP_P3_86498_18918339 | NC_021166.1    | Ca_kabuli_chr07 | 18918339                | AA                              | TT                | 1946460083               |
| SNP_P3_86499_18918706 | NC_021166.1    | Ca_kabuli_chr07 | 18918706                | AA                              | GG                | 1946460084               |
| SNP_P3_86500_18918708 | NC_021166.1    | Ca_kabuli_chr07 | 18918708                | TT                              | CC                | 1946460086               |
| SNP_P3_86501_18919394 | NC_021166.1    | Ca_kabuli_chr07 | 18919394                | TT                              | CC                | 1946460088               |

| SNPs IDs              | Chromosome IDs | Chromosomes     | Physical positions (bp) | CDC Frontier (Reference genome) | (Pusa 256 & HPNB) | NCBI SNPdb Accession IDs |
|-----------------------|----------------|-----------------|-------------------------|---------------------------------|-------------------|--------------------------|
| SNP_P3_86502_18930855 | NC_021166.1    | Ca_kabuli_chr07 | 18930855                | CC                              | TT                | 1946460089               |
| SNP_P3_86503_18930931 | NC_021166.1    | Ca_kabuli_chr07 | 18930931                | AA                              | GG                | 1946460091               |
| SNP_P3_86504_18931275 | NC_021166.1    | Ca_kabuli_chr07 | 18931275                | TT                              | CC                | 1946460093               |
| SNP_P3_86505_18933029 | NC_021166.1    | Ca_kabuli_chr07 | 18933029                | GG                              | TT                | 1946460094               |
| SNP_P3_86506_18933037 | NC_021166.1    | Ca_kabuli_chr07 | 18933037                | AA                              | GG                | 1946460096               |
| SNP_P3_86507_18933049 | NC_021166.1    | Ca_kabuli_chr07 | 18933049                | AA                              | GG                | 1946460097               |
| SNP_P3_86508_18933240 | NC_021166.1    | Ca_kabuli_chr07 | 18933240                | TT                              | CC                | 1946460099               |
| SNP_P3_86509_18934159 | NC_021166.1    | Ca_kabuli_chr07 | 18934159                | GG                              | AA                | 1946460100               |
| SNP_P3_86510_18934931 | NC_021166.1    | Ca_kabuli_chr07 | 18934931                | GG                              | AA                | 1946460102               |
| SNP_P3_86511_18935480 | NC_021166.1    | Ca_kabuli_chr07 | 18935480                | AA                              | TT                | 1946460103               |
| SNP_P3_86512_18935486 | NC_021166.1    | Ca_kabuli_chr07 | 18935486                | TT                              | AA                | 1946460105               |
| SNP_P3_86513_18938162 | NC_021166.1    | Ca_kabuli_chr07 | 18938162                | GG                              | TT                | 1946460106               |
| SNP_P3_86514_18938170 | NC_021166.1    | Ca_kabuli_chr07 | 18938170                | AA                              | TT                | 1946460108               |
| SNP_P3_86516_18956210 | NC_021166.1    | Ca_kabuli_chr07 | 18956210                | AA                              | TT                | 1946460110               |
| SNP_P3_86517_18974796 | NC_021166.1    | Ca_kabuli_chr07 | 18974796                | GG                              | AA                | 1946460111               |
| SNP_P3_86518_18982757 | NC_021166.1    | Ca_kabuli_chr07 | 18982757                | TT                              | CC                | 1946460113               |
| SNP_P3_86519_18984905 | NC_021166.1    | Ca_kabuli_chr07 | 18984905                | TT                              | GG                | 1946460114               |
| SNP_P3_86521_19015583 | NC_021166.1    | Ca_kabuli_chr07 | 19015583                | CC                              | TT                | 1946460115               |
| SNP_P3_86522_19015599 | NC_021166.1    | Ca_kabuli_chr07 | 19015599                | TT                              | AA                | 1946460117               |
| SNP_P3_86523_19015605 | NC_021166.1    | Ca_kabuli_chr07 | 19015605                | AA                              | GG                | 1946460118               |
| SNP_P3_86524_19015614 | NC_021166.1    | Ca_kabuli_chr07 | 19015614                | CC                              | AA                | 1946460120               |
| SNP_P3_86525_19015627 | NC_021166.1    | Ca_kabuli_chr07 | 19015627                | GG                              | TT                | 1946460121               |
| SNP_P3_86526_19015659 | NC_021166.1    | Ca_kabuli_chr07 | 19015659                | AA                              | CC                | 1946460123               |
| SNP_P3_86527_19061453 | NC_021166.1    | Ca_kabuli_chr07 | 19061453                | GG                              | AA                | 1946460124               |
| SNP_P3_86528_19083950 | NC_021166.1    | Ca_kabuli_chr07 | 19083950                | GG                              | AA                | 1946460126               |
| SNP_P3_86529_19091963 | NC_021166.1    | Ca_kabuli_chr07 | 19091963                | TT                              | CC                | 1946460127               |
| SNP_P3_86531_19101503 | NC_021166.1    | Ca_kabuli_chr07 | 19101503                | CC                              | TT                | 1946460129               |
| SNP_P3_86532_19112790 | NC_021166.1    | Ca_kabuli_chr07 | 19112790                | GG                              | AA                | 1946460131               |
| SNP_P3_86533_19126658 | NC_021166.1    | Ca_kabuli_chr07 | 19126658                | CC                              | TT                | 1946460132               |
| SNP_P3_86534_19126760 | NC_021166.1    | Ca_kabuli_chr07 | 19126760                | CC                              | TT                | 1946460134               |
| SNP_P3_86535_19126833 | NC_021166.1    | Ca_kabuli_chr07 | 19126833                | TT                              | CC                | 1946460135               |
| SNP_P3_86536_19126878 | NC_021166.1    | Ca_kabuli_chr07 | 19126878                | GG                              | AA                | 1946460137               |
| SNP_P3_86537_19133894 | NC_021166.1    | Ca_kabuli_chr07 | 19133894                | TT                              | CC                | 1946460138               |
| SNP_P3_86538_19151070 | NC_021166.1    | Ca_kabuli_chr07 | 19151070                | TT                              | CC                | 1946460140               |
| SNP_P3_86539_19185027 | NC_021166.1    | Ca_kabuli_chr07 | 19185027                | CC                              | AA                | 1946460141               |
| SNP_P3_86540_19186674 | NC_021166.1    | Ca_kabuli_chr07 | 19186674                | AA                              | TT                | 1946460142               |
| SNP_P3_86541_19202196 | NC_021166.1    | Ca_kabuli_chr07 | 19202196                | CC                              | AA                | 1946460144               |
| SNP_P3_86542_19210336 | NC_021166.1    | Ca_kabuli_chr07 | 19210336                | AA                              | GG                | 1946460145               |
| SNP_P3_86546_19267933 | NC_021166.1    | Ca_kabuli_chr07 | 19267933                | GG                              | TT                | 1946460147               |
| SNP_P3_86547_19289322 | NC_021166.1    | Ca_kabuli_chr07 | 19289322                | GG                              | AA                | 1946460148               |
| SNP_P3_86548_19290686 | NC_021166.1    | Ca_kabuli_chr07 | 19290686                | AA                              | TT                | 1946460150               |
| SNP_P3_86549_19296559 | NC_021166.1    | Ca_kabuli_chr07 | 19296559                | CC                              | GG                | 1946460151               |

| SNPs IDs              | Chromosome IDs | Chromosomes     | Physical positions | CDC Frontier (Reference genome) | (Pusa 256 & HPNB) | NCBI SNPdb Accession IDs |
|-----------------------|----------------|-----------------|--------------------|---------------------------------|-------------------|--------------------------|
| SNP_P3_86550_19300021 | NC_021166.1    | Ca_kabuli_chr07 | 19300021           | CC                              | TT                | 1946460153               |
| SNP_P3_86552_19325247 | NC_021166.1    | Ca_kabuli_chr07 | 19325247           | CC                              | TT                | 1946460154               |
| SNP_P3_86553_19358575 | NC_021166.1    | Ca_kabuli_chr07 | 19358575           | GG                              | TT                | 1946460156               |
| SNP_P3_86554_19359938 | NC_021166.1    | Ca_kabuli_chr07 | 19359938           | AA                              | GG                | 1946460157               |
| SNP_P3_86556_19359983 | NC_021166.1    | Ca_kabuli_chr07 | 19359983           | TT                              | CC                | 1946460159               |
| SNP_P3_86557_19360020 | NC_021166.1    | Ca_kabuli_chr07 | 19360020           | AA                              | GG                | 1946460160               |
| SNP_P3_86558_19360048 | NC_021166.1    | Ca_kabuli_chr07 | 19360048           | TT                              | CC                | 1946460162               |
| SNP_P3_86559_19360049 | NC_021166.1    | Ca_kabuli_chr07 | 19360049           | GG                              | AA                | 1946460163               |
| SNP_P3_86560_19360291 | NC_021166.1    | Ca_kabuli_chr07 | 19360291           | AA                              | GG                | 1946460164               |
| SNP_P3_86561_19360296 | NC_021166.1    | Ca_kabuli_chr07 | 19360296           | GG                              | AA                | 1946460166               |
| SNP_P3_86562_19360316 | NC_021166.1    | Ca_kabuli_chr07 | 19360316           | CC                              | TT                | 1946460167               |
| SNP_P3_86563_19360339 | NC_021166.1    | Ca_kabuli_chr07 | 19360339           | AA                              | CC                | 1946460168               |
| SNP_P3_86564_19360720 | NC_021166.1    | Ca_kabuli_chr07 | 19360720           | GG                              | TT                | 1946460170               |
| SNP_P3_86565_19397187 | NC_021166.1    | Ca_kabuli_chr07 | 19397187           | CC                              | TT                | 1946460171               |
| SNP_P3_86567_19440256 | NC_021166.1    | Ca_kabuli_chr07 | 19440256           | CC                              | TT                | 1946460173               |
| SNP_P3_86568_19451133 | NC_021166.1    | Ca_kabuli_chr07 | 19451133           | CC                              | TT                | 1946460174               |
| SNP_P3_86570_19456811 | NC_021166.1    | Ca_kabuli_chr07 | 19456811           | TT                              | CC                | 1946460176               |
| SNP_P3_86572_19467030 | NC_021166.1    | Ca_kabuli_chr07 | 19467030           | TT                              | CC                | 1946460178               |
| SNP_P3_86573_19510905 | NC_021166.1    | Ca_kabuli_chr07 | 19510905           | AA                              | CC                | 1946460179               |
| SNP_P3_86574_19510966 | NC_021166.1    | Ca_kabuli_chr07 | 19510966           | TT                              | GG                | 1946460180               |
| SNP_P3_86575_19511032 | NC_021166.1    | Ca_kabuli_chr07 | 19511032           | AA                              | GG                | 1946460182               |
| SNP_P3_86576_19511327 | NC_021166.1    | Ca_kabuli_chr07 | 19511327           | TT                              | CC                | 1946460183               |
| SNP_P3_86577_19511334 | NC_021166.1    | Ca_kabuli_chr07 | 19511334           | AA                              | CC                | 1946460185               |
| SNP_P3_86578_19511421 | NC_021166.1    | Ca_kabuli_chr07 | 19511421           | TT                              | CC                | 1946460186               |
| SNP_P3_86579_19516713 | NC_021166.1    | Ca_kabuli_chr07 | 19516713           | GG                              | TT                | 1946460188               |
| SNP_P3_86580_19517031 | NC_021166.1    | Ca_kabuli_chr07 | 19517031           | TT                              | CC                | 1946460189               |
| SNP_P3_86581_19517059 | NC_021166.1    | Ca_kabuli_chr07 | 19517059           | AA                              | GG                | 1946460190               |
| SNP_P3_86582_19517076 | NC_021166.1    | Ca_kabuli_chr07 | 19517076           | AA                              | CC                | 1946460192               |
| SNP_P3_86583_19517105 | NC_021166.1    | Ca_kabuli_chr07 | 19517105           | CC                              | AA                | 1946460193               |
| SNP_P3_86584_19524579 | NC_021166.1    | Ca_kabuli_chr07 | 19524579           | GG                              | CC                | 1946460195               |
| SNP_P3_86586_19534441 | NC_021166.1    | Ca_kabuli_chr07 | 19534441           | GG                              | TT                | 1946460196               |
| SNP_P3_86587_19541849 | NC_021166.1    | Ca_kabuli_chr07 | 19541849           | CC                              | TT                | 1946460198               |
| SNP_P3_86588_19553948 | NC_021166.1    | Ca_kabuli_chr07 | 19553948           | GG                              | AA                | 1946460199               |
| SNP_P3_86589_19573264 | NC_021166.1    | Ca_kabuli_chr07 | 19573264           | TT                              | GG                | 1946460201               |
| SNP_P3_86590_19582528 | NC_021166.1    | Ca_kabuli_chr07 | 19582528           | TT                              | AA                | 1946460202               |
| SNP_P3_86591_19582542 | NC_021166.1    | Ca_kabuli_chr07 | 19582542           | TT                              | CC                | 1946460203               |
| SNP_P3_86593_19583079 | NC_021166.1    | Ca_kabuli_chr07 | 19583079           | GG                              | CC                | 1946460205               |
| SNP_P3_86594_19583917 | NC_021166.1    | Ca_kabuli_chr07 | 19583917           | TT                              | CC                | 1946460206               |
| SNP_P3_86595_19584564 | NC_021166.1    | Ca_kabuli_chr07 | 19584564           | CC                              | TT                | 1946460208               |
| SNP_P3_86596_19584566 | NC_021166.1    | Ca_kabuli_chr07 | 19584566           | CC                              | TT                | 1946460209               |
| SNP_P3_86597_19584595 | NC_021166.1    | Ca_kabuli_chr07 | 19584595           | TT                              | AA                | 1946460211               |
| SNP_P3_86598_19584596 | NC_021166.1    | Ca_kabuli_chr07 | 19584596           | TT                              | CC                | 1946460212               |



| SNPs IDs              | Chromosome IDs | Chromosomes     | Physical positions (bp) | CDC Frontier (Reference genome) | (Pusa 256 & HPNB) | NCBI SNPdb Accession IDs |
|-----------------------|----------------|-----------------|-------------------------|---------------------------------|-------------------|--------------------------|
| SNP_P3_86599_19584613 | NC_021166.1    | Ca_kabuli_chr07 | 19584613                | AA                              | GG                | 1946460214               |
| SNP_P3_86600_19584619 | NC_021166.1    | Ca_kabuli_chr07 | 19584619                | AA                              | GG                | 1946460215               |
| SNP_P3_86601_19584623 | NC_021166.1    | Ca_kabuli_chr07 | 19584623                | AA                              | CC                | 1946460217               |
| SNP_P3_86602_19584628 | NC_021166.1    | Ca_kabuli_chr07 | 19584628                | AA                              | GG                | 1946460218               |
| SNP_P3_86603_19584632 | NC_021166.1    | Ca_kabuli_chr07 | 19584632                | TT                              | GG                | 1946460220               |
| SNP_P3_86604_19584633 | NC_021166.1    | Ca_kabuli_chr07 | 19584633                | AA                              | TT                | 1946460221               |
| SNP_P3_86605_19584679 | NC_021166.1    | Ca_kabuli_chr07 | 19584679                | AA                              | TT                | 1946460223               |
| SNP_P3_86606_19584680 | NC_021166.1    | Ca_kabuli_chr07 | 19584680                | GG                              | AA                | 1946460225               |
| SNP_P3_86607_19584726 | NC_021166.1    | Ca_kabuli_chr07 | 19584726                | AA                              | TT                | 1946460226               |
| SNP_P3_86611_19613251 | NC_021166.1    | Ca_kabuli_chr07 | 19613251                | AA                              | TT                | 1946460227               |
| SNP_P3_86612_19625491 | NC_021166.1    | Ca_kabuli_chr07 | 19625491                | TT                              | CC                | 1946460229               |
| SNP_P3_86613_19629558 | NC_021166.1    | Ca_kabuli_chr07 | 19629558                | AA                              | GG                | 1946460230               |
| SNP_P3_86614_19629576 | NC_021166.1    | Ca_kabuli_chr07 | 19629576                | AA                              | GG                | 1946460232               |
| SNP_P3_86615_19646854 | NC_021166.1    | Ca_kabuli_chr07 | 19646854                | TT                              | GG                | 1946460233               |
| SNP_P3_86616_19673232 | NC_021166.1    | Ca_kabuli_chr07 | 19673232                | GG                              | AA                | 1946460234               |
| SNP_P3_86617_19675376 | NC_021166.1    | Ca_kabuli_chr07 | 19675376                | TT                              | CC                | 1946460236               |
| SNP_P3_86618_19687365 | NC_021166.1    | Ca_kabuli_chr07 | 19687365                | TT                              | AA                | 1946460237               |
| SNP_P3_86619_19693178 | NC_021166.1    | Ca_kabuli_chr07 | 19693178                | TT                              | GG                | 1946460238               |
| SNP_P3_86621_19696220 | NC_021166.1    | Ca_kabuli_chr07 | 19696220                | GG                              | CC                | 1946460240               |
| SNP_P3_86622_19696221 | NC_021166.1    | Ca_kabuli_chr07 | 19696221                | AA                              | CC                | 1946460241               |
| SNP_P3_86623_19704412 | NC_021166.1    | Ca_kabuli_chr07 | 19704412                | CC                              | TT                | 1946460243               |
| SNP_P3_86624_19716661 | NC_021166.1    | Ca_kabuli_chr07 | 19716661                | CC                              | TT                | 1946460245               |
| SNP_P3_86626_19726033 | NC_021166.1    | Ca_kabuli_chr07 | 19726033                | AA                              | GG                | 1946460246               |
| SNP_P3_86627_19726074 | NC_021166.1    | Ca_kabuli_chr07 | 19726074                | CC                              | TT                | 1946460248               |
| SNP_P3_86628_19726076 | NC_021166.1    | Ca_kabuli_chr07 | 19726076                | CC                              | AA                | 1946460249               |
| SNP_P3_86629_19731427 | NC_021166.1    | Ca_kabuli_chr07 | 19731427                | GG                              | AA                | 1946460250               |
| SNP_P3_86630_19731438 | NC_021166.1    | Ca_kabuli_chr07 | 19731438                | TT                              | CC                | 1946460252               |
| SNP_P3_86631_19731448 | NC_021166.1    | Ca_kabuli_chr07 | 19731448                | CC                              | TT                | 1946460253               |
| SNP_P3_86632_19731699 | NC_021166.1    | Ca_kabuli_chr07 | 19731699                | AA                              | GG                | 1946460255               |
| SNP_P3_86634_19731767 | NC_021166.1    | Ca_kabuli_chr07 | 19731767                | GG                              | AA                | 1946460256               |
| SNP_P3_86635_19731846 | NC_021166.1    | Ca_kabuli_chr07 | 19731846                | TT                              | CC                | 1946460258               |
| SNP_P3_86636_19732025 | NC_021166.1    | Ca_kabuli_chr07 | 19732025                | GG                              | AA                | 1946460259               |
| SNP_P3_86637_19732045 | NC_021166.1    | Ca_kabuli_chr07 | 19732045                | CC                              | GG                | 1946460261               |
| SNP_P3_86638_19732089 | NC_021166.1    | Ca_kabuli_chr07 | 19732089                | TT                              | CC                | 1946460262               |
| SNP_P3_86639_19732117 | NC_021166.1    | Ca_kabuli_chr07 | 19732117                | TT                              | CC                | 1946460264               |
| SNP_P3_86640_19732168 | NC_021166.1    | Ca_kabuli_chr07 | 19732168                | GG                              | AA                | 1946460265               |
| SNP_P3_86641_19732228 | NC_021166.1    | Ca_kabuli_chr07 | 19732228                | AA                              | GG                | 1946460267               |
| SNP_P3_86642_19732376 | NC_021166.1    | Ca_kabuli_chr07 | 19732376                | AA                              | CC                | 1946460268               |
| SNP_P3_86643_19750228 | NC_021166.1    | Ca_kabuli_chr07 | 19750228                | AA                              | CC                | 1946460270               |
| SNP_P3_86644_19761229 | NC_021166.1    | Ca_kabuli_chr07 | 19761229                | TT                              | CC                | 1946460271               |
| SNP_P3_86645_19765406 | NC_021166.1    | Ca_kabuli_chr07 | 19765406                | GG                              | AA                | 1946460273               |
| SNP_P3_86648_19786603 | NC_021166.1    | Ca_kabuli_chr07 | 19786603                | CC                              | AA                | 1946460274               |

| SNPs IDs              | Chromosome IDs | Chromosomes     | Physical positions (bp) | CDC Frontier (Reference genome) | (Pusa 256 & HPNB) | NCBI SNPdb Accession IDs |
|-----------------------|----------------|-----------------|-------------------------|---------------------------------|-------------------|--------------------------|
| SNP_P3_86649_19786609 | NC_021166.1    | Ca_kabuli_chr07 | 19786609                | AA                              | TT                | 1946460275               |
| SNP_P3_86650_19786645 | NC_021166.1    | Ca_kabuli_chr07 | 19786645                | CC                              | AA                | 1946460277               |
| SNP_P3_86651_19786668 | NC_021166.1    | Ca_kabuli_chr07 | 19786668                | TT                              | CC                | 1946460278               |
| SNP_P3_86652_19810622 | NC_021166.1    | Ca_kabuli_chr07 | 19810622                | AA                              | TT                | 1946460280               |
| SNP_P3_86653_19823250 | NC_021166.1    | Ca_kabuli_chr07 | 19823250                | TT                              | CC                | 1946460281               |
| SNP_P3_86654_19823562 | NC_021166.1    | Ca_kabuli_chr07 | 19823562                | GG                              | TT                | 1946460283               |
| SNP_P3_86655_19829621 | NC_021166.1    | Ca_kabuli_chr07 | 19829621                | TT                              | CC                | 1946460284               |
| SNP_P3_86656_19830253 | NC_021166.1    | Ca_kabuli_chr07 | 19830253                | AA                              | GG                | 1946460286               |
| SNP_P3_86658_19857570 | NC_021166.1    | Ca_kabuli_chr07 | 19857570                | CC                              | AA                | 1946460287               |
| SNP_P3_86661_19860572 | NC_021166.1    | Ca_kabuli_chr07 | 19860572                | GG                              | AA                | 1946460289               |
| SNP_P3_86662_19860604 | NC_021166.1    | Ca_kabuli_chr07 | 19860604                | TT                              | AA                | 1946460290               |
| SNP_P3_86663_19860614 | NC_021166.1    | Ca_kabuli_chr07 | 19860614                | CC                              | TT                | 1946460292               |
| SNP_P3_86664_19860627 | NC_021166.1    | Ca_kabuli_chr07 | 19860627                | CC                              | TT                | 1946460293               |
| SNP_P3_86665_19860830 | NC_021166.1    | Ca_kabuli_chr07 | 19860830                | CC                              | TT                | 1946460295               |
| SNP_P3_86666_19860852 | NC_021166.1    | Ca_kabuli_chr07 | 19860852                | TT                              | CC                | 1946460296               |
| SNP_P3_86667_19860872 | NC_021166.1    | Ca_kabuli_chr07 | 19860872                | CC                              | AA                | 1946460297               |
| SNP_P3_86668_19860885 | NC_021166.1    | Ca_kabuli_chr07 | 19860885                | CC                              | AA                | 1946460299               |
| SNP_P3_86669_19860886 | NC_021166.1    | Ca_kabuli_chr07 | 19860886                | GG                              | AA                | 1946460300               |
| SNP_P3_86670_19865475 | NC_021166.1    | Ca_kabuli_chr07 | 19865475                | GG                              | AA                | 1946460302               |
| SNP_P3_86671_19866874 | NC_021166.1    | Ca_kabuli_chr07 | 19866874                | AA                              | TT                | 1946460303               |
| SNP_P3_86672_19866891 | NC_021166.1    | Ca_kabuli_chr07 | 19866891                | TT                              | CC                | 1946460305               |
| SNP_P3_86673_19873854 | NC_021166.1    | Ca_kabuli_chr07 | 19873854                | GG                              | AA                | 1946460307               |
| SNP_P3_86674_19886275 | NC_021166.1    | Ca_kabuli_chr07 | 19886275                | AA                              | GG                | 1946460308               |
| SNP_P3_86675_19889509 | NC_021166.1    | Ca_kabuli_chr07 | 19889509                | CC                              | TT                | 1946460309               |
| SNP_P3_86676_19904150 | NC_021166.1    | Ca_kabuli_chr07 | 19904150                | CC                              | TT                | 1946460311               |
| SNP_P3_86677_19904151 | NC_021166.1    | Ca_kabuli_chr07 | 19904151                | GG                              | AA                | 1946460312               |
| SNP_P3_86678_19904579 | NC_021166.1    | Ca_kabuli_chr07 | 19904579                | AA                              | GG                | 1946460314               |
| SNP_P3_86679_19921107 | NC_021166.1    | Ca_kabuli_chr07 | 19921107                | AA                              | CC                | 1946460315               |
| SNP_P3_86680_19921108 | NC_021166.1    | Ca_kabuli_chr07 | 19921108                | TT                              | CC                | 1946460317               |
| SNP_P3_86681_19922459 | NC_021166.1    | Ca_kabuli_chr07 | 19922459                | AA                              | GG                | 1946460318               |
| SNP_P3_86682_19945653 | NC_021166.1    | Ca_kabuli_chr07 | 19945653                | TT                              | CC                | 1946460320               |
| SNP_P3_86684_19977319 | NC_021166.1    | Ca_kabuli_chr07 | 19977319                | AA                              | GG                | 1946460321               |
| SNP_P3_86685_19977357 | NC_021166.1    | Ca_kabuli_chr07 | 19977357                | TT                              | CC                | 1946460322               |
| SNP_P3_86686_19977516 | NC_021166.1    | Ca_kabuli_chr07 | 19977516                | AA                              | GG                | 1946460323               |
| SNP_P3_86687_19977803 | NC_021166.1    | Ca_kabuli_chr07 | 19977803                | AA                              | GG                | 1946460324               |
| SNP_P3_86689_19993540 | NC_021166.1    | Ca_kabuli_chr07 | 19993540                | GG                              | AA                | 1946460325               |
| SNP_P3_86690_20016750 | NC_021166.1    | Ca_kabuli_chr07 | 20016750                | TT                              | CC                | 1946460326               |
| SNP_P3_86691_20029192 | NC_021166.1    | Ca_kabuli_chr07 | 20029192                | GG                              | AA                | 1946460327               |
| SNP_P3_86692_20029222 | NC_021166.1    | Ca_kabuli_chr07 | 20029222                | AA                              | GG                | 1946460328               |
| SNP_P3_86693_20032827 | NC_021166.1    | Ca_kabuli_chr07 | 20032827                | TT                              | AA                | 1946460329               |
| SNP_P3_86694_20032934 | NC_021166.1    | Ca_kabuli_chr07 | 20032934                | TT                              | CC                | 1946460330               |
| SNP_P3_86695_20033162 | NC_021166.1    | Ca_kabuli_chr07 | 20033162                | AA                              | GG                | 1946460331               |

| SNPs IDs              | Chromosome IDs | Chromosomes     | Physical positions (bp) | CDC Frontier (Reference genome) | (Pusa 256 & HPNB) | NCBI SNPdb Accession IDs |
|-----------------------|----------------|-----------------|-------------------------|---------------------------------|-------------------|--------------------------|
| SNP_P3_86696_20034968 | NC_021166.1    | Ca_kabuli_chr07 | 20034968                | CC                              | TT                | 1946460332               |
| SNP_P3_86697_20035540 | NC_021166.1    | Ca_kabuli_chr07 | 20035540                | GG                              | AA                | 1946460333               |
| SNP_P3_86698_20035640 | NC_021166.1    | Ca_kabuli_chr07 | 20035640                | AA                              | GG                | 1946460334               |
| SNP_P3_86699_20052404 | NC_021166.1    | Ca_kabuli_chr07 | 20052404                | CC                              | AA                | 1946460335               |
| SNP_P3_86700_20059894 | NC_021166.1    | Ca_kabuli_chr07 | 20059894                | GG                              | AA                | 1946460336               |
| SNP_P3_86702_20060126 | NC_021166.1    | Ca_kabuli_chr07 | 20060126                | AA                              | GG                | 1946460337               |
| SNP_P3_86703_20060186 | NC_021166.1    | Ca_kabuli_chr07 | 20060186                | CC                              | AA                | 1946460338               |
| SNP_P3_86704_20060227 | NC_021166.1    | Ca_kabuli_chr07 | 20060227                | CC                              | TT                | 1946460339               |
| SNP_P3_86705_20060431 | NC_021166.1    | Ca_kabuli_chr07 | 20060431                | AA                              | TT                | 1946460340               |
| SNP_P3_86706_20060484 | NC_021166.1    | Ca_kabuli_chr07 | 20060484                | GG                              | AA                | 1946460341               |
| SNP_P3_86707_20063251 | NC_021166.1    | Ca_kabuli_chr07 | 20063251                | CC                              | AA                | 1946460342               |
| SNP_P3_86708_20074036 | NC_021166.1    | Ca_kabuli_chr07 | 20074036                | AA                              | CC                | 1946460343               |
| SNP_P3_86709_20077992 | NC_021166.1    | Ca_kabuli_chr07 | 20077992                | GG                              | CC                | 1946460344               |
| SNP_P3_86710_20078378 | NC_021166.1    | Ca_kabuli_chr07 | 20078378                | TT                              | CC                | 1946460345               |
| SNP_P3_86711_20078442 | NC_021166.1    | Ca_kabuli_chr07 | 20078442                | GG                              | AA                | 1946460346               |
| SNP_P3_86712_20079466 | NC_021166.1    | Ca_kabuli_chr07 | 20079466                | TT                              | CC                | 1946460347               |
| SNP_P3_86713_20079479 | NC_021166.1    | Ca_kabuli_chr07 | 20079479                | TT                              | CC                | 1946460348               |
| SNP_P3_86715_20132472 | NC_021166.1    | Ca_kabuli_chr07 | 20132472                | TT                              | CC                | 1946460349               |
| SNP_P3_86716_20132498 | NC_021166.1    | Ca_kabuli_chr07 | 20132498                | AA                              | GG                | 1946460350               |
| SNP_P3_86717_20133458 | NC_021166.1    | Ca_kabuli_chr07 | 20133458                | GG                              | TT                | 1946460351               |
| SNP_P3_86718_20172194 | NC_021166.1    | Ca_kabuli_chr07 | 20172194                | TT                              | AA                | 1946460352               |
| SNP_P3_86719_20172199 | NC_021166.1    | Ca_kabuli_chr07 | 20172199                | TT                              | CC                | 1946460353               |
| SNP_P3_86720_20172527 | NC_021166.1    | Ca_kabuli_chr07 | 20172527                | AA                              | GG                | 1946460354               |
| SNP_P3_86721_20172548 | NC_021166.1    | Ca_kabuli_chr07 | 20172548                | CC                              | TT                | 1946460355               |
| SNP_P3_86722_20172574 | NC_021166.1    | Ca_kabuli_chr07 | 20172574                | TT                              | GG                | 1946460356               |
| SNP_P3_86723_20172583 | NC_021166.1    | Ca_kabuli_chr07 | 20172583                | AA                              | GG                | 1946460357               |
| SNP_P3_86724_20187638 | NC_021166.1    | Ca_kabuli_chr07 | 20187638                | CC                              | TT                | 1946460358               |
| SNP_P3_86725_20194613 | NC_021166.1    | Ca_kabuli_chr07 | 20194613                | TT                              | CC                | 1946460359               |
| SNP_P3_86726_20210753 | NC_021166.1    | Ca_kabuli_chr07 | 20210753                | GG                              | AA                | 1946460360               |
| SNP_P3_86727_20217374 | NC_021166.1    | Ca_kabuli_chr07 | 20217374                | AA                              | CC                | 1946460361               |
| SNP_P3_86728_20217384 | NC_021166.1    | Ca_kabuli_chr07 | 20217384                | TT                              | CC                | 1946460362               |
| SNP_P3_86729_20217423 | NC_021166.1    | Ca_kabuli_chr07 | 20217423                | AA                              | GG                | 1946460363               |
| SNP_P3_86730_20217434 | NC_021166.1    | Ca_kabuli_chr07 | 20217434                | TT                              | AA                | 1946460364               |
| SNP_P3_86731_20217491 | NC_021166.1    | Ca_kabuli_chr07 | 20217491                | AA                              | GG                | 1946460365               |
| SNP_P3_86732_20217532 | NC_021166.1    | Ca_kabuli_chr07 | 20217532                | CC                              | GG                | 1946460366               |
| SNP_P3_86733_20217588 | NC_021166.1    | Ca_kabuli_chr07 | 20217588                | AA                              | GG                | 1946460367               |
| SNP_P3_86734_20217748 | NC_021166.1    | Ca_kabuli_chr07 | 20217748                | AA                              | TT                | 1946460368               |
| SNP_P3_86735_20217749 | NC_021166.1    | Ca_kabuli_chr07 | 20217749                | TT                              | GG                | 1946460369               |
| SNP_P3_86736_20217776 | NC_021166.1    | Ca_kabuli_chr07 | 20217776                | GG                              | AA                | 1946460370               |
| SNP_P3_86738_20217828 | NC_021166.1    | Ca_kabuli_chr07 | 20217828                | AA                              | TT                | 1946460371               |
| SNP_P3_86739_20217865 | NC_021166.1    | Ca_kabuli_chr07 | 20217865                | GG                              | AA                | 1946460372               |
| SNP_P3_86740_20217901 | NC_021166.1    | Ca_kabuli_chr07 | 20217901                | TT                              | CC                | 1946460373               |

| SNPs IDs              | Chromosome IDs | Chromosomes     | Physical positions (bp) | CDC Frontier (Reference genome) | (Pusa 256 & HPNB) | NCBI SNPdb Accession IDs |
|-----------------------|----------------|-----------------|-------------------------|---------------------------------|-------------------|--------------------------|
| SNP_P3_86741_20251950 | NC_021166.1    | Ca_kabuli_chr07 | 20251950                | TT                              | GG                | 1946460374               |
| SNP_P3_86742_20251970 | NC_021166.1    | Ca_kabuli_chr07 | 20251970                | GG                              | AA                | 1946460375               |
| SNP_P3_86744_20252334 | NC_021166.1    | Ca_kabuli_chr07 | 20252334                | TT                              | AA                | 1946460376               |
| SNP_P3_86746_20252613 | NC_021166.1    | Ca_kabuli_chr07 | 20252613                | AA                              | GG                | 1946460377               |
| SNP_P3_86748_20321678 | NC_021166.1    | Ca_kabuli_chr07 | 20321678                | CC                              | AA                | 1946460378               |
| SNP_P3_86750_20331829 | NC_021166.1    | Ca_kabuli_chr07 | 20331829                | CC                              | AA                | 1946460379               |
| SNP_P3_86751_20358954 | NC_021166.1    | Ca_kabuli_chr07 | 20358954                | TT                              | CC                | 1946460380               |
| SNP_P3_86752_20363205 | NC_021166.1    | Ca_kabuli_chr07 | 20363205                | TT                              | CC                | 1946460381               |
| SNP_P3_86753_20406078 | NC_021166.1    | Ca_kabuli_chr07 | 20406078                | AA                              | CC                | 1946460382               |
| SNP_P3_86754_20438499 | NC_021166.1    | Ca_kabuli_chr07 | 20438499                | CC                              | TT                | 1946460383               |
| SNP_P3_86755_20441402 | NC_021166.1    | Ca_kabuli_chr07 | 20441402                | CC                              | TT                | 1946460384               |
| SNP_P3_86756_20441731 | NC_021166.1    | Ca_kabuli_chr07 | 20441731                | AA                              | GG                | 1946460385               |
| SNP_P3_86757_20441775 | NC_021166.1    | Ca_kabuli_chr07 | 20441775                | CC                              | TT                | 1946460387               |
| SNP_P3_86758_20441870 | NC_021166.1    | Ca_kabuli_chr07 | 20441870                | GG                              | TT                | 1946460388               |
| SNP_P3_86759_20450270 | NC_021166.1    | Ca_kabuli_chr07 | 20450270                | GG                              | AA                | 1946460390               |
| SNP_P3_86760_20450274 | NC_021166.1    | Ca_kabuli_chr07 | 20450274                | AA                              | GG                | 1946460391               |
| SNP_P3_86761_20450275 | NC_021166.1    | Ca_kabuli_chr07 | 20450275                | CC                              | TT                | 1946460393               |
| SNP_P3_86763_20450586 | NC_021166.1    | Ca_kabuli_chr07 | 20450586                | TT                              | AA                | 1946460394               |
| SNP_P3_86764_20450645 | NC_021166.1    | Ca_kabuli_chr07 | 20450645                | CC                              | AA                | 1946460395               |
| SNP_P3_86766_20450880 | NC_021166.1    | Ca_kabuli_chr07 | 20450880                | AA                              | TT                | 1946460397               |
| SNP_P3_86767_20450908 | NC_021166.1    | Ca_kabuli_chr07 | 20450908                | AA                              | GG                | 1946460398               |
| SNP_P3_86770_20451441 | NC_021166.1    | Ca_kabuli_chr07 | 20451441                | TT                              | CC                | 1946460400               |
| SNP_P3_86771_20451963 | NC_021166.1    | Ca_kabuli_chr07 | 20451963                | TT                              | GG                | 1946460401               |
| SNP_P3_86772_20454316 | NC_021166.1    | Ca_kabuli_chr07 | 20454316                | AA                              | CC                | 1946460403               |
| SNP_P3_86773_20454320 | NC_021166.1    | Ca_kabuli_chr07 | 20454320                | AA                              | TT                | 1946460404               |
| SNP_P3_86774_20455895 | NC_021166.1    | Ca_kabuli_chr07 | 20455895                | GG                              | CC                | 1946460406               |
| SNP_P3_86777_20458155 | NC_021166.1    | Ca_kabuli_chr07 | 20458155                | TT                              | CC                | 1946460407               |
| SNP_P3_86778_20458307 | NC_021166.1    | Ca_kabuli_chr07 | 20458307                | TT                              | CC                | 1946460409               |
| SNP_P3_86780_20463073 | NC_021166.1    | Ca_kabuli_chr07 | 20463073                | TT                              | AA                | 1946460410               |
| SNP_P3_86781_20463136 | NC_021166.1    | Ca_kabuli_chr07 | 20463136                | CC                              | AA                | 1946460411               |
| SNP_P3_86782_20463137 | NC_021166.1    | Ca_kabuli_chr07 | 20463137                | TT                              | AA                | 1946460413               |
| SNP_P3_86783_20463198 | NC_021166.1    | Ca_kabuli_chr07 | 20463198                | CC                              | TT                | 1946460414               |
| SNP_P3_86784_20463294 | NC_021166.1    | Ca_kabuli_chr07 | 20463294                | CC                              | TT                | 1946460416               |
| SNP_P3_86785_20463313 | NC_021166.1    | Ca_kabuli_chr07 | 20463313                | GG                              | TT                | 1946460417               |
| SNP_P3_86786_20463315 | NC_021166.1    | Ca_kabuli_chr07 | 20463315                | TT                              | CC                | 1946460419               |
| SNP_P3_86787_20463398 | NC_021166.1    | Ca_kabuli_chr07 | 20463398                | AA                              | GG                | 1946460420               |
| SNP_P3_86788_20463456 | NC_021166.1    | Ca_kabuli_chr07 | 20463456                | TT                              | GG                | 1946460422               |
| SNP_P3_86789_20463608 | NC_021166.1    | Ca_kabuli_chr07 | 20463608                | CC                              | GG                | 1946460423               |
| SNP_P3_86790_20463810 | NC_021166.1    | Ca_kabuli_chr07 | 20463810                | CC                              | TT                | 1946460425               |
| SNP_P3_86792_20463950 | NC_021166.1    | Ca_kabuli_chr07 | 20463950                | AA                              | GG                | 1946460426               |
| SNP_P3_86793_20464013 | NC_021166.1    | Ca_kabuli_chr07 | 20464013                | GG                              | AA                | 1946460428               |
| SNP_P3_86794_20464228 | NC_021166.1    | Ca_kabuli_chr07 | 20464228                | AA                              | TT                | 1946460429               |

| SNPs IDs              | Chromosome IDs | Chromosomes     | Physical positions (bp) | CDC Frontier (Reference genome) | (Pusa 256 & HPNB) | NCBI SNPdb Accession IDs |
|-----------------------|----------------|-----------------|-------------------------|---------------------------------|-------------------|--------------------------|
| SNP_P3_86795_20475319 | NC_021166.1    | Ca_kabuli_chr07 | 20475319                | AA                              | GG                | 1946460431               |
| SNP_P3_86796_20475383 | NC_021166.1    | Ca_kabuli_chr07 | 20475383                | AA                              | CC                | 1946460432               |
| SNP_P3_86797_20475410 | NC_021166.1    | Ca_kabuli_chr07 | 20475410                | GG                              | AA                | 1946460434               |
| SNP_P3_86798_20475442 | NC_021166.1    | Ca_kabuli_chr07 | 20475442                | AA                              | CC                | 1946460435               |
| SNP_P3_86799_20475731 | NC_021166.1    | Ca_kabuli_chr07 | 20475731                | CC                              | TT                | 1946460437               |
| SNP_P3_86800_20476776 | NC_021166.1    | Ca_kabuli_chr07 | 20476776                | TT                              | CC                | 1946460438               |
| SNP_P3_86801_20479785 | NC_021166.1    | Ca_kabuli_chr07 | 20479785                | TT                              | CC                | 1946460440               |
| SNP_P3_86802_20480473 | NC_021166.1    | Ca_kabuli_chr07 | 20480473                | AA                              | TT                | 1946460441               |
| SNP_P3_86804_20480594 | NC_021166.1    | Ca_kabuli_chr07 | 20480594                | AA                              | CC                | 1946460442               |
| SNP_P3_86805_20480689 | NC_021166.1    | Ca_kabuli_chr07 | 20480689                | TT                              | CC                | 1946460444               |
| SNP_P3_86806_20481891 | NC_021166.1    | Ca_kabuli_chr07 | 20481891                | AA                              | GG                | 1946460445               |
| SNP_P3_86807_20482038 | NC_021166.1    | Ca_kabuli_chr07 | 20482038                | CC                              | TT                | 1946460447               |
| SNP_P3_86808_20482068 | NC_021166.1    | Ca_kabuli_chr07 | 20482068                | TT                              | CC                | 1946460449               |
| SNP_P3_86809_20482076 | NC_021166.1    | Ca_kabuli_chr07 | 20482076                | GG                              | TT                | 1946460450               |
| SNP_P3_86810_20482201 | NC_021166.1    | Ca_kabuli_chr07 | 20482201                | TT                              | CC                | 1946460451               |
| SNP_P3_86811_20482203 | NC_021166.1    | Ca_kabuli_chr07 | 20482203                | CC                              | TT                | 1946460453               |
| SNP_P3_86812_20482213 | NC_021166.1    | Ca_kabuli_chr07 | 20482213                | AA                              | TT                | 1946460454               |
| SNP_P3_86813_20482229 | NC_021166.1    | Ca_kabuli_chr07 | 20482229                | CC                              | TT                | 1946460456               |
| SNP_P3_86814_20482261 | NC_021166.1    | Ca_kabuli_chr07 | 20482261                | GG                              | AA                | 1946460457               |
| SNP_P3_86815_20482518 | NC_021166.1    | Ca_kabuli_chr07 | 20482518                | AA                              | GG                | 1946460459               |
| SNP_P3_86817_20483731 | NC_021166.1    | Ca_kabuli_chr07 | 20483731                | AA                              | GG                | 1946460460               |
| SNP_P3_86818_20483928 | NC_021166.1    | Ca_kabuli_chr07 | 20483928                | CC                              | GG                | 1946460462               |
| SNP_P3_86819_20483929 | NC_021166.1    | Ca_kabuli_chr07 | 20483929                | TT                              | GG                | 1946460463               |
| SNP_P3_86820_20485171 | NC_021166.1    | Ca_kabuli_chr07 | 20485171                | GG                              | TT                | 1946460465               |
| SNP_P3_86821_20485512 | NC_021166.1    | Ca_kabuli_chr07 | 20485512                | GG                              | AA                | 1946460466               |
| SNP_P3_86824_20489152 | NC_021166.1    | Ca_kabuli_chr07 | 20489152                | CC                              | TT                | 1946460468               |
| SNP_P3_86827_20493100 | NC_021166.1    | Ca_kabuli_chr07 | 20493100                | AA                              | GG                | 1946460469               |
| SNP_P3_86828_20493111 | NC_021166.1    | Ca_kabuli_chr07 | 20493111                | AA                              | GG                | 1946460470               |
| SNP_P3_86829_20493132 | NC_021166.1    | Ca_kabuli_chr07 | 20493132                | TT                              | GG                | 1946460472               |
| SNP_P3_86830_20493160 | NC_021166.1    | Ca_kabuli_chr07 | 20493160                | CC                              | TT                | 1946460473               |
| SNP_P3_86831_20493285 | NC_021166.1    | Ca_kabuli_chr07 | 20493285                | CC                              | TT                | 1946460475               |
| SNP_P3_86833_20494316 | NC_021166.1    | Ca_kabuli_chr07 | 20494316                | CC                              | TT                | 1946460476               |
| SNP_P3_86835_20494410 | NC_021166.1    | Ca_kabuli_chr07 | 20494410                | CC                              | TT                | 1946460478               |
| SNP_P3_86836_20494609 | NC_021166.1    | Ca_kabuli_chr07 | 20494609                | TT                              | CC                | 1946460480               |
| SNP_P3_86837_20494612 | NC_021166.1    | Ca_kabuli_chr07 | 20494612                | GG                              | AA                | 1946460481               |
| SNP_P3_86839_20495317 | NC_021166.1    | Ca_kabuli_chr07 | 20495317                | GG                              | AA                | 1946460482               |
| SNP_P3_86840_20495329 | NC_021166.1    | Ca_kabuli_chr07 | 20495329                | AA                              | GG                | 1946460484               |
| SNP_P3_86841_20495376 | NC_021166.1    | Ca_kabuli_chr07 | 20495376                | CC                              | TT                | 1946460485               |
| SNP_P3_86842_20496739 | NC_021166.1    | Ca_kabuli_chr07 | 20496739                | GG                              | CC                | 1946460487               |
| SNP_P3_86844_20500706 | NC_021166.1    | Ca_kabuli_chr07 | 20500706                | AA                              | GG                | 1946460488               |
| SNP_P3_86845_20500754 | NC_021166.1    | Ca_kabuli_chr07 | 20500754                | AA                              | GG                | 1946460490               |
| SNP_P3_86846_20500755 | NC_021166.1    | Ca_kabuli_chr07 | 20500755                | TT                              | CC                | 1946460491               |

| SNPs IDs              | Chromosome IDs | Chromosomes     | Physical positions (bp) | CDC Frontier (Reference genome) | (Pusa 256 & HPNB) | NCBI SNPdb Accession IDs |
|-----------------------|----------------|-----------------|-------------------------|---------------------------------|-------------------|--------------------------|
| SNP_P3_86847_20500794 | NC_021166.1    | Ca_kabuli_chr07 | 20500794                | CC                              | GG                | 1946460492               |
| SNP_P3_86848_20500795 | NC_021166.1    | Ca_kabuli_chr07 | 20500795                | TT                              | CC                | 1946460494               |
| SNP_P3_86849_20503171 | NC_021166.1    | Ca_kabuli_chr07 | 20503171                | AA                              | GG                | 1946460495               |
| SNP_P3_86851_20503208 | NC_021166.1    | Ca_kabuli_chr07 | 20503208                | AA                              | GG                | 1946460497               |
| SNP_P3_86852_20503340 | NC_021166.1    | Ca_kabuli_chr07 | 20503340                | CC                              | AA                | 1946460498               |
| SNP_P3_86854_20503552 | NC_021166.1    | Ca_kabuli_chr07 | 20503552                | TT                              | CC                | 1946460500               |
| SNP_P3_86855_20503600 | NC_021166.1    | Ca_kabuli_chr07 | 20503600                | GG                              | AA                | 1946460501               |
| SNP_P3_86856_20503667 | NC_021166.1    | Ca_kabuli_chr07 | 20503667                | TT                              | AA                | 1946460503               |
| SNP_P3_86860_20506171 | NC_021166.1    | Ca_kabuli_chr07 | 20506171                | AA                              | CC                | 1946460504               |
| SNP_P3_86861_20506286 | NC_021166.1    | Ca_kabuli_chr07 | 20506286                | CC                              | TT                | 1946460506               |
| SNP_P3_86862_20506656 | NC_021166.1    | Ca_kabuli_chr07 | 20506656                | AA                              | TT                | 1946460507               |
| SNP_P3_86863_20506664 | NC_021166.1    | Ca_kabuli_chr07 | 20506664                | TT                              | AA                | 1946460509               |
| SNP_P3_86864_20506724 | NC_021166.1    | Ca_kabuli_chr07 | 20506724                | TT                              | GG                | 1946460510               |
| SNP_P3_86865_20508835 | NC_021166.1    | Ca_kabuli_chr07 | 20508835                | CC                              | TT                | 1946460512               |
| SNP_P3_86866_20510195 | NC_021166.1    | Ca_kabuli_chr07 | 20510195                | AA                              | CC                | 1946460513               |
| SNP_P3_86868_20517119 | NC_021166.1    | Ca_kabuli_chr07 | 20517119                | TT                              | CC                | 1946460515               |
| SNP_P3_86870_20519789 | NC_021166.1    | Ca_kabuli_chr07 | 20519789                | AA                              | GG                | 1946460516               |
| SNP_P3_86871_20520151 | NC_021166.1    | Ca_kabuli_chr07 | 20520151                | TT                              | CC                | 1946460518               |
| SNP_P3_86872_20520911 | NC_021166.1    | Ca_kabuli_chr07 | 20520911                | AA                              | CC                | 1946460519               |
| SNP_P3_86873_20522303 | NC_021166.1    | Ca_kabuli_chr07 | 20522303                | AA                              | GG                | 1946460521               |
| SNP_P3_86874_20523797 | NC_021166.1    | Ca_kabuli_chr07 | 20523797                | TT                              | CC                | 1946460522               |
| SNP_P3_86875_20524073 | NC_021166.1    | Ca_kabuli_chr07 | 20524073                | GG                              | TT                | 1946460524               |
| SNP_P3_86876_20524546 | NC_021166.1    | Ca_kabuli_chr07 | 20524546                | GG                              | AA                | 1946460525               |
| SNP_P3_86877_20524547 | NC_021166.1    | Ca_kabuli_chr07 | 20524547                | TT                              | AA                | 1946460526               |
| SNP_P3_86878_20524874 | NC_021166.1    | Ca_kabuli_chr07 | 20524874                | GG                              | AA                | 1946460528               |
| SNP_P3_86879_20524920 | NC_021166.1    | Ca_kabuli_chr07 | 20524920                | AA                              | GG                | 1946460529               |
| SNP_P3_86880_20526653 | NC_021166.1    | Ca_kabuli_chr07 | 20526653                | AA                              | GG                | 1946460531               |
| SNP_P3_86881_20528961 | NC_021166.1    | Ca_kabuli_chr07 | 20528961                | AA                              | GG                | 1946460532               |
| SNP_P3_86882_20529180 | NC_021166.1    | Ca_kabuli_chr07 | 20529180                | CC                              | AA                | 1946460534               |
| SNP_P3_86883_20529196 | NC_021166.1    | Ca_kabuli_chr07 | 20529196                | CC                              | AA                | 1946460535               |
| SNP_P3_86885_20532343 | NC_021166.1    | Ca_kabuli_chr07 | 20532343                | GG                              | TT                | 1946460537               |
| SNP_P3_86886_20532401 | NC_021166.1    | Ca_kabuli_chr07 | 20532401                | GG                              | AA                | 1946460538               |
| SNP_P3_86887_20532476 | NC_021166.1    | Ca_kabuli_chr07 | 20532476                | TT                              | CC                | 1946460540               |
| SNP_P3_86889_20533519 | NC_021166.1    | Ca_kabuli_chr07 | 20533519                | GG                              | TT                | 1946460541               |
| SNP_P3_86890_20533548 | NC_021166.1    | Ca_kabuli_chr07 | 20533548                | AA                              | TT                | 1946460543               |
| SNP_P3_86892_20534365 | NC_021166.1    | Ca_kabuli_chr07 | 20534365                | TT                              | CC                | 1946460544               |
| SNP_P3_86893_20534786 | NC_021166.1    | Ca_kabuli_chr07 | 20534786                | GG                              | CC                | 1946460546               |
| SNP_P3_86894_20534978 | NC_021166.1    | Ca_kabuli_chr07 | 20534978                | CC                              | AA                | 1946460547               |
| SNP_P3_86895_20535227 | NC_021166.1    | Ca_kabuli_chr07 | 20535227                | GG                              | AA                | 1946460549               |
| SNP_P3_86897_20538813 | NC_021166.1    | Ca_kabuli_chr07 | 20538813                | GG                              | AA                | 1946460550               |
| SNP_P3_86898_20538966 | NC_021166.1    | Ca_kabuli_chr07 | 20538966                | CC                              | TT                | 1946460552               |
| SNP_P3_86900_20539241 | NC_021166.1    | Ca_kabuli_chr07 | 20539241                | CC                              | AA                | 1946460553               |

| SNPs IDs              | Chromosome IDs | Chromosomes     | Physical positions (bp) | CDC Frontier (Reference genome) | (Pusa 256 & HPNB) | NCBI SNPdb Accession IDs |
|-----------------------|----------------|-----------------|-------------------------|---------------------------------|-------------------|--------------------------|
| SNP_P3_86901_20539290 | NC_021166.1    | Ca_kabuli_chr07 | 20539290                | TT                              | CC                | 1946460554               |
| SNP_P3_86902_20540570 | NC_021166.1    | Ca_kabuli_chr07 | 20540570                | AA                              | TT                | 1946460556               |
| SNP_P3_86903_20540780 | NC_021166.1    | Ca_kabuli_chr07 | 20540780                | CC                              | TT                | 1946460557               |
| SNP_P3_86904_20540791 | NC_021166.1    | Ca_kabuli_chr07 | 20540791                | GG                              | AA                | 1946460559               |
| SNP_P3_86905_20543378 | NC_021166.1    | Ca_kabuli_chr07 | 20543378                | TT                              | GG                | 1946460561               |
| SNP_P3_86906_20544515 | NC_021166.1    | Ca_kabuli_chr07 | 20544515                | AA                              | GG                | 1946460562               |
| SNP_P3_86907_20544536 | NC_021166.1    | Ca_kabuli_chr07 | 20544536                | AA                              | GG                | 1946460564               |
| SNP_P3_86908_20545134 | NC_021166.1    | Ca_kabuli_chr07 | 20545134                | TT                              | CC                | 1946460565               |
| SNP_P3_86909_20547025 | NC_021166.1    | Ca_kabuli_chr07 | 20547025                | CC                              | TT                | 1946460566               |
| SNP_P3_86910_20547038 | NC_021166.1    | Ca_kabuli_chr07 | 20547038                | GG                              | AA                | 1946460568               |
| SNP_P3_86911_20547062 | NC_021166.1    | Ca_kabuli_chr07 | 20547062                | AA                              | TT                | 1946460569               |
| SNP_P3_86912_20549565 | NC_021166.1    | Ca_kabuli_chr07 | 20549565                | CC                              | GG                | 1946460571               |
| SNP_P3_86913_20549574 | NC_021166.1    | Ca_kabuli_chr07 | 20549574                | AA                              | TT                | 1946460572               |
| SNP_P3_86914_20552372 | NC_021166.1    | Ca_kabuli_chr07 | 20552372                | AA                              | GG                | 1946460574               |
| SNP_P3_86915_20552785 | NC_021166.1    | Ca_kabuli_chr07 | 20552785                | CC                              | AA                | 1946460575               |
| SNP_P3_86917_20553148 | NC_021166.1    | Ca_kabuli_chr07 | 20553148                | AA                              | GG                | 1946460576               |
| SNP_P3_86918_20553344 | NC_021166.1    | Ca_kabuli_chr07 | 20553344                | CC                              | TT                | 1946460578               |
| SNP_P3_86919_20553552 | NC_021166.1    | Ca_kabuli_chr07 | 20553552                | CC                              | AA                | 1946460579               |
| SNP_P3_86920_20553584 | NC_021166.1    | Ca_kabuli_chr07 | 20553584                | TT                              | GG                | 1946460581               |
| SNP_P3_86922_20555580 | NC_021166.1    | Ca_kabuli_chr07 | 20555580                | GG                              | AA                | 1946460583               |
| SNP_P3_86924_20555904 | NC_021166.1    | Ca_kabuli_chr07 | 20555904                | AA                              | CC                | 1946460584               |
| SNP_P3_86925_20556067 | NC_021166.1    | Ca_kabuli_chr07 | 20556067                | AA                              | TT                | 1946460586               |
| SNP_P3_86927_20556994 | NC_021166.1    | Ca_kabuli_chr07 | 20556994                | GG                              | AA                | 1946460587               |
| SNP_P3_86928_20557003 | NC_021166.1    | Ca_kabuli_chr07 | 20557003                | TT                              | CC                | 1946460589               |
| SNP_P3_86929_20559080 | NC_021166.1    | Ca_kabuli_chr07 | 20559080                | GG                              | AA                | 1946460590               |
| SNP_P3_86930_20559099 | NC_021166.1    | Ca_kabuli_chr07 | 20559099                | AA                              | GG                | 1946460591               |
| SNP_P3_86931_20559775 | NC_021166.1    | Ca_kabuli_chr07 | 20559775                | TT                              | AA                | 1946460593               |
| SNP_P3_86932_20559813 | NC_021166.1    | Ca_kabuli_chr07 | 20559813                | AA                              | CC                | 1946460594               |
| SNP_P3_86933_20559846 | NC_021166.1    | Ca_kabuli_chr07 | 20559846                | TT                              | CC                | 1946460596               |
| SNP_P3_86934_20559886 | NC_021166.1    | Ca_kabuli_chr07 | 20559886                | GG                              | AA                | 1946460597               |
| SNP_P3_86935_20559935 | NC_021166.1    | Ca_kabuli_chr07 | 20559935                | GG                              | TT                | 1946460599               |
| SNP_P3_86936_20559943 | NC_021166.1    | Ca_kabuli_chr07 | 20559943                | CC                              | TT                | 1946460600               |
| SNP_P3_86937_20559950 | NC_021166.1    | Ca_kabuli_chr07 | 20559950                | TT                              | AA                | 1946460602               |
| SNP_P3_86938_20559976 | NC_021166.1    | Ca_kabuli_chr07 | 20559976                | AA                              | GG                | 1946460603               |
| SNP_P3_86939_20560019 | NC_021166.1    | Ca_kabuli_chr07 | 20560019                | CC                              | TT                | 1946460605               |
| SNP_P3_86941_20560243 | NC_021166.1    | Ca_kabuli_chr07 | 20560243                | GG                              | AA                | 1946460606               |
| SNP_P3_86942_20560270 | NC_021166.1    | Ca_kabuli_chr07 | 20560270                | TT                              | CC                | 1946460608               |
| SNP_P3_86943_20560333 | NC_021166.1    | Ca_kabuli_chr07 | 20560333                | TT                              | AA                | 1946460609               |
| SNP_P3_86944_20560350 | NC_021166.1    | Ca_kabuli_chr07 | 20560350                | GG                              | AA                | 1946460611               |
| SNP_P3_86945_20560385 | NC_021166.1    | Ca_kabuli_chr07 | 20560385                | CC                              | AA                | 1946460613               |
| SNP_P3_86946_20562311 | NC_021166.1    | Ca_kabuli_chr07 | 20562311                | AA                              | GG                | 1946460615               |
| SNP_P3_86947_20563931 | NC_021166.1    | Ca_kabuli_chr07 | 20563931                | GG                              | AA                | 1946460616               |

| SNPs IDs              | Chromosome IDs | Chromosomes     | Physical positions (bp) | CDC Frontier (Reference genome) | (Pusa 256 & HPNB) | NCBI SNPdb Accession IDs |
|-----------------------|----------------|-----------------|-------------------------|---------------------------------|-------------------|--------------------------|
| SNP_P3_86948_20563982 | NC_021166.1    | Ca_kabuli_chr07 | 20563982                | GG                              | AA                | 1946460618               |
| SNP_P3_86949_20564024 | NC_021166.1    | Ca_kabuli_chr07 | 20564024                | GG                              | AA                | 1946460619               |
| SNP_P3_86950_20564266 | NC_021166.1    | Ca_kabuli_chr07 | 20564266                | GG                              | AA                | 1946460621               |
| SNP_P3_86951_20564269 | NC_021166.1    | Ca_kabuli_chr07 | 20564269                | CC                              | TT                | 1946460622               |
| SNP_P3_86952_20564297 | NC_021166.1    | Ca_kabuli_chr07 | 20564297                | AA                              | GG                | 1946460624               |
| SNP_P3_86953_20564423 | NC_021166.1    | Ca_kabuli_chr07 | 20564423                | GG                              | AA                | 1946460625               |
| SNP_P3_86954_20564765 | NC_021166.1    | Ca_kabuli_chr07 | 20564765                | TT                              | CC                | 1946460626               |
| SNP_P3_86955_20564825 | NC_021166.1    | Ca_kabuli_chr07 | 20564825                | GG                              | TT                | 1946460628               |
| SNP_P3_86956_20564874 | NC_021166.1    | Ca_kabuli_chr07 | 20564874                | CC                              | TT                | 1946460629               |
| SNP_P3_86957_20564968 | NC_021166.1    | Ca_kabuli_chr07 | 20564968                | GG                              | CC                | 1946460631               |
| SNP_P3_86958_20565067 | NC_021166.1    | Ca_kabuli_chr07 | 20565067                | TT                              | CC                | 1946460632               |
| SNP_P3_86959_20565310 | NC_021166.1    | Ca_kabuli_chr07 | 20565310                | GG                              | TT                | 1946460634               |
| SNP_P3_86960_20566034 | NC_021166.1    | Ca_kabuli_chr07 | 20566034                | AA                              | TT                | 1946460635               |
| SNP_P3_86963_20566434 | NC_021166.1    | Ca_kabuli_chr07 | 20566434                | TT                              | CC                | 1946460637               |
| SNP_P3_86964_20566435 | NC_021166.1    | Ca_kabuli_chr07 | 20566435                | TT                              | CC                | 1946460638               |
| SNP_P3_86965_20566441 | NC_021166.1    | Ca_kabuli_chr07 | 20566441                | TT                              | AA                | 1946460640               |
| SNP_P3_86968_20568154 | NC_021166.1    | Ca_kabuli_chr07 | 20568154                | CC                              | TT                | 1946460641               |
| SNP_P3_86969_20568224 | NC_021166.1    | Ca_kabuli_chr07 | 20568224                | GG                              | AA                | 1946460643               |
| SNP_P3_86971_20568375 | NC_021166.1    | Ca_kabuli_chr07 | 20568375                | AA                              | GG                | 1946460644               |
| SNP_P3_86972_20568655 | NC_021166.1    | Ca_kabuli_chr07 | 20568655                | CC                              | TT                | 1946460646               |
| SNP_P3_86975_20571215 | NC_021166.1    | Ca_kabuli_chr07 | 20571215                | AA                              | GG                | 1946460647               |
| SNP_P3_86976_20572586 | NC_021166.1    | Ca_kabuli_chr07 | 20572586                | TT                              | CC                | 1946460649               |
| SNP_P3_86979_20575128 | NC_021166.1    | Ca_kabuli_chr07 | 20575128                | GG                              | AA                | 1946460650               |
| SNP_P3_86980_20575380 | NC_021166.1    | Ca_kabuli_chr07 | 20575380                | GG                              | AA                | 1946460652               |
| SNP_P3_86981_20575389 | NC_021166.1    | Ca_kabuli_chr07 | 20575389                | GG                              | AA                | 1946460654               |
| SNP_P3_86982_20575397 | NC_021166.1    | Ca_kabuli_chr07 | 20575397                | AA                              | CC                | 1946460655               |
| SNP_P3_86983_20575464 | NC_021166.1    | Ca_kabuli_chr07 | 20575464                | TT                              | GG                | 1946460657               |
| SNP_P3_86985_20575493 | NC_021166.1    | Ca_kabuli_chr07 | 20575493                | AA                              | GG                | 1946460658               |
| SNP_P3_86987_20576084 | NC_021166.1    | Ca_kabuli_chr07 | 20576084                | GG                              | AA                | 1946460660               |
| SNP_P3_86988_20576669 | NC_021166.1    | Ca_kabuli_chr07 | 20576669                | GG                              | CC                | 1946460661               |
| SNP_P3_86989_20577961 | NC_021166.1    | Ca_kabuli_chr07 | 20577961                | TT                              | AA                | 1946460663               |
| SNP_P3_86990_20578166 | NC_021166.1    | Ca_kabuli_chr07 | 20578166                | AA                              | TT                | 1946460665               |
| SNP_P3_86991_20578245 | NC_021166.1    | Ca_kabuli_chr07 | 20578245                | AA                              | GG                | 1946460666               |
| SNP_P3_86992_20578372 | NC_021166.1    | Ca_kabuli_chr07 | 20578372                | CC                              | TT                | 1946460668               |
| SNP_P3_86993_20578393 | NC_021166.1    | Ca_kabuli_chr07 | 20578393                | AA                              | CC                | 1946460669               |
| SNP_P3_86994_20578424 | NC_021166.1    | Ca_kabuli_chr07 | 20578424                | GG                              | AA                | 1946460671               |
| SNP_P3_86995_20578436 | NC_021166.1    | Ca_kabuli_chr07 | 20578436                | TT                              | CC                | 1946460672               |
| SNP_P3_86996_20578450 | NC_021166.1    | Ca_kabuli_chr07 | 20578450                | AA                              | GG                | 1946460674               |
| SNP_P3_86997_20578465 | NC_021166.1    | Ca_kabuli_chr07 | 20578465                | AA                              | GG                | 1946460675               |
| SNP_P3_86998_20578476 | NC_021166.1    | Ca_kabuli_chr07 | 20578476                | CC                              | GG                | 1946460677               |
| SNP_P3_86999_20578485 | NC_021166.1    | Ca_kabuli_chr07 | 20578485                | CC                              | TT                | 1946460678               |
| SNP_P3_87000_20593723 | NC_021166.1    | Ca_kabuli_chr07 | 20593723                | GG                              | TT                | 1946460680               |



| SNPs IDs              | Chromosome IDs | Chromosomes     | Physical positions (bp) | CDC Frontier (Reference genome) | (Pusa 256 & HPNB) | NCBI SNPdb Accession IDs |
|-----------------------|----------------|-----------------|-------------------------|---------------------------------|-------------------|--------------------------|
| SNP_P3_87002_20599796 | NC_021166.1    | Ca_kabuli_chr07 | 20599796                | TT                              | CC                | 1946460681               |
| SNP_P3_87004_20600018 | NC_021166.1    | Ca_kabuli_chr07 | 20600018                | GG                              | AA                | 1946460683               |
| SNP_P3_87005_20600958 | NC_021166.1    | Ca_kabuli_chr07 | 20600958                | CC                              | TT                | 1946460684               |
| SNP_P3_87006_20600983 | NC_021166.1    | Ca_kabuli_chr07 | 20600983                | GG                              | AA                | 1946460686               |
| SNP_P3_87008_20603589 | NC_021166.1    | Ca_kabuli_chr07 | 20603589                | GG                              | TT                | 1946460687               |
| SNP_P3_87009_20603591 | NC_021166.1    | Ca_kabuli_chr07 | 20603591                | CC                              | GG                | 1946460689               |
| SNP_P3_87010_20606634 | NC_021166.1    | Ca_kabuli_chr07 | 20606634                | CC                              | TT                | 1946460690               |
| SNP_P3_87011_20607799 | NC_021166.1    | Ca_kabuli_chr07 | 20607799                | CC                              | TT                | 1946460692               |
| SNP_P3_87012_20609112 | NC_021166.1    | Ca_kabuli_chr07 | 20609112                | AA                              | GG                | 1946460693               |
| SNP_P3_87013_20610549 | NC_021166.1    | Ca_kabuli_chr07 | 20610549                | TT                              | AA                | 1946460695               |
| SNP_P3_87014_20610738 | NC_021166.1    | Ca_kabuli_chr07 | 20610738                | TT                              | AA                | 1946460696               |
| SNP_P3_87015_20611091 | NC_021166.1    | Ca_kabuli_chr07 | 20611091                | GG                              | AA                | 1946460697               |
| SNP_P3_87016_20612515 | NC_021166.1    | Ca_kabuli_chr07 | 20612515                | GG                              | AA                | 1946460699               |
| SNP_P3_87017_20613718 | NC_021166.1    | Ca_kabuli_chr07 | 20613718                | CC                              | TT                | 1946460700               |
| SNP_P3_87018_20614116 | NC_021166.1    | Ca_kabuli_chr07 | 20614116                | GG                              | AA                | 1946460702               |
| SNP_P3_87020_20614750 | NC_021166.1    | Ca_kabuli_chr07 | 20614750                | CC                              | TT                | 1946460703               |
| SNP_P3_87021_20615180 | NC_021166.1    | Ca_kabuli_chr07 | 20615180                | AA                              | CC                | 1946460705               |
| SNP_P3_87022_20616709 | NC_021166.1    | Ca_kabuli_chr07 | 20616709                | TT                              | CC                | 1946460706               |
| SNP_P3_87023_20617084 | NC_021166.1    | Ca_kabuli_chr07 | 20617084                | CC                              | TT                | 1946460708               |
| SNP_P3_87024_20617107 | NC_021166.1    | Ca_kabuli_chr07 | 20617107                | AA                              | GG                | 1946460709               |
| SNP_P3_87025_20617116 | NC_021166.1    | Ca_kabuli_chr07 | 20617116                | TT                              | AA                | 1946460711               |
| SNP_P3_87026_20617121 | NC_021166.1    | Ca_kabuli_chr07 | 20617121                | TT                              | CC                | 1946460712               |
| SNP_P3_87027_20617144 | NC_021166.1    | Ca_kabuli_chr07 | 20617144                | TT                              | CC                | 1946460713               |
| SNP_P3_87028_20617280 | NC_021166.1    | Ca_kabuli_chr07 | 20617280                | TT                              | GG                | 1946460715               |
| SNP_P3_87029_20617324 | NC_021166.1    | Ca_kabuli_chr07 | 20617324                | AA                              | GG                | 1946460716               |
| SNP_P3_87030_20617446 | NC_021166.1    | Ca_kabuli_chr07 | 20617446                | CC                              | TT                | 1946460718               |
| SNP_P3_87031_20617458 | NC_021166.1    | Ca_kabuli_chr07 | 20617458                | TT                              | CC                | 1946460719               |
| SNP_P3_87032_20617460 | NC_021166.1    | Ca_kabuli_chr07 | 20617460                | TT                              | CC                | 1946460721               |
| SNP_P3_87033_20617658 | NC_021166.1    | Ca_kabuli_chr07 | 20617658                | AA                              | GG                | 1946460722               |
| SNP_P3_87034_20617670 | NC_021166.1    | Ca_kabuli_chr07 | 20617670                | TT                              | CC                | 1946460724               |
| SNP_P3_87035_20617701 | NC_021166.1    | Ca_kabuli_chr07 | 20617701                | GG                              | AA                | 1946460725               |
| SNP_P3_87037_20617930 | NC_021166.1    | Ca_kabuli_chr07 | 20617930                | TT                              | GG                | 1946460726               |
| SNP_P3_87039_20619593 | NC_021166.1    | Ca_kabuli_chr07 | 20619593                | AA                              | GG                | 1946460728               |
| SNP_P3_87042_20623734 | NC_021166.1    | Ca_kabuli_chr07 | 20623734                | GG                              | AA                | 1946460730               |
| SNP_P3_87043_20626261 | NC_021166.1    | Ca_kabuli_chr07 | 20626261                | GG                              | AA                | 1946460731               |
| SNP_P3_87045_20627037 | NC_021166.1    | Ca_kabuli_chr07 | 20627037                | GG                              | AA                | 1946460733               |
| SNP_P3_87046_20629701 | NC_021166.1    | Ca_kabuli_chr07 | 20629701                | GG                              | AA                | 1946460734               |
| SNP_P3_87048_20631947 | NC_021166.1    | Ca_kabuli_chr07 | 20631947                | CC                              | AA                | 1946460736               |
| SNP_P3_87049_20640858 | NC_021166.1    | Ca_kabuli_chr07 | 20640858                | TT                              | GG                | 1946460737               |
| SNP_P3_87050_20643322 | NC_021166.1    | Ca_kabuli_chr07 | 20643322                | TT                              | CC                | 1946460739               |
| SNP_P3_87051_20654066 | NC_021166.1    | Ca_kabuli_chr07 | 20654066                | AA                              | GG                | 1946460740               |
| SNP_P3_87052_20654328 | NC_021166.1    | Ca_kabuli_chr07 | 20654328                | AA                              | GG                | 1946460742               |

| SNPs IDs              | Chromosome IDs | Chromosomes     | Physical positions (bp) | CDC Frontier (Reference genome) | (Pusa 256 & HPNB) | NCBI SNPdb Accession IDs |
|-----------------------|----------------|-----------------|-------------------------|---------------------------------|-------------------|--------------------------|
| SNP_P3_87053_20654371 | NC_021166.1    | Ca_kabuli_chr07 | 20654371                | GG                              | AA                | 1946460743               |
| SNP_P3_87054_20654372 | NC_021166.1    | Ca_kabuli_chr07 | 20654372                | GG                              | AA                | 1946460744               |
| SNP_P3_87055_20654448 | NC_021166.1    | Ca_kabuli_chr07 | 20654448                | CC                              | TT                | 1946460746               |
| SNP_P3_87056_20654449 | NC_021166.1    | Ca_kabuli_chr07 | 20654449                | TT                              | CC                | 1946460747               |
| SNP_P3_87057_20898104 | NC_021166.1    | Ca_kabuli_chr07 | 20898104                | CC                              | TT                | 1946460749               |
| SNP_P3_87058_20910178 | NC_021166.1    | Ca_kabuli_chr07 | 20910178                | GG                              | AA                | 1946460751               |
| SNP_P3_87059_20910239 | NC_021166.1    | Ca_kabuli_chr07 | 20910239                | GG                              | AA                | 1946460752               |
| SNP_P3_87060_20911341 | NC_021166.1    | Ca_kabuli_chr07 | 20911341                | GG                              | AA                | 1946460754               |
| SNP_P3_87061_20911355 | NC_021166.1    | Ca_kabuli_chr07 | 20911355                | AA                              | CC                | 1946460755               |
| SNP_P3_87062_20911365 | NC_021166.1    | Ca_kabuli_chr07 | 20911365                | TT                              | CC                | 1946460757               |
| SNP_P3_87063_20911372 | NC_021166.1    | Ca_kabuli_chr07 | 20911372                | TT                              | CC                | 1946460758               |
| SNP_P3_87064_20911391 | NC_021166.1    | Ca_kabuli_chr07 | 20911391                | CC                              | TT                | 1946460760               |
| SNP_P3_87065_20911420 | NC_021166.1    | Ca_kabuli_chr07 | 20911420                | CC                              | TT                | 1946460761               |
| SNP_P3_87066_20926095 | NC_021166.1    | Ca_kabuli_chr07 | 20926095                | GG                              | CC                | 1946460762               |
| SNP_P3_87067_20931898 | NC_021166.1    | Ca_kabuli_chr07 | 20931898                | AA                              | GG                | 1946460764               |
| SNP_P3_87068_20933871 | NC_021166.1    | Ca_kabuli_chr07 | 20933871                | CC                              | TT                | 1946460765               |
| SNP_P3_87069_20934785 | NC_021166.1    | Ca_kabuli_chr07 | 20934785                | TT                              | GG                | 1946460767               |
| SNP_P3_87071_20934890 | NC_021166.1    | Ca_kabuli_chr07 | 20934890                | TT                              | CC                | 1946460768               |
| SNP_P3_87072_20934900 | NC_021166.1    | Ca_kabuli_chr07 | 20934900                | TT                              | CC                | 1946460770               |
| SNP_P3_87073_20935186 | NC_021166.1    | Ca_kabuli_chr07 | 20935186                | TT                              | AA                | 1946460771               |
| SNP_P3_87074_20935245 | NC_021166.1    | Ca_kabuli_chr07 | 20935245                | TT                              | GG                | 1946460773               |
| SNP_P3_87076_20948065 | NC_021166.1    | Ca_kabuli_chr07 | 20948065                | TT                              | CC                | 1946460774               |
| SNP_P3_87077_20969199 | NC_021166.1    | Ca_kabuli_chr07 | 20969199                | TT                              | CC                | 1946460776               |
| SNP_P3_87078_20971126 | NC_021166.1    | Ca_kabuli_chr07 | 20971126                | GG                              | AA                | 1946460777               |
| SNP_P3_87079_20979446 | NC_021166.1    | Ca_kabuli_chr07 | 20979446                | TT                              | AA                | 1946460779               |
| SNP_P3_87080_20980446 | NC_021166.1    | Ca_kabuli_chr07 | 20980446                | GG                              | AA                | 1946460780               |
| SNP_P3_87081_20984898 | NC_021166.1    | Ca_kabuli_chr07 | 20984898                | AA                              | GG                | 1946460782               |
| SNP_P3_87082_20984902 | NC_021166.1    | Ca_kabuli_chr07 | 20984902                | AA                              | GG                | 1946460783               |
| SNP_P3_87083_20985405 | NC_021166.1    | Ca_kabuli_chr07 | 20985405                | AA                              | GG                | 1946460784               |
| SNP_P3_87084_20985406 | NC_021166.1    | Ca_kabuli_chr07 | 20985406                | GG                              | AA                | 1946460786               |
| SNP_P3_87085_20985426 | NC_021166.1    | Ca_kabuli_chr07 | 20985426                | GG                              | AA                | 1946460787               |
| SNP_P3_87086_20985430 | NC_021166.1    | Ca_kabuli_chr07 | 20985430                | CC                              | TT                | 1946460789               |
| SNP_P3_87087_20985582 | NC_021166.1    | Ca_kabuli_chr07 | 20985582                | TT                              | CC                | 1946460790               |
| SNP_P3_87088_20985726 | NC_021166.1    | Ca_kabuli_chr07 | 20985726                | GG                              | TT                | 1946460792               |
| SNP_P3_87089_20985872 | NC_021166.1    | Ca_kabuli_chr07 | 20985872                | CC                              | GG                | 1946460794               |
| SNP_P3_87090_20985893 | NC_021166.1    | Ca_kabuli_chr07 | 20985893                | AA                              | GG                | 1946460795               |
| SNP_P3_87091_20985906 | NC_021166.1    | Ca_kabuli_chr07 | 20985906                | AA                              | GG                | 1946460796               |
| SNP_P3_87092_20985921 | NC_021166.1    | Ca_kabuli_chr07 | 20985921                | CC                              | TT                | 1946460798               |
| SNP_P3_87093_20997360 | NC_021166.1    | Ca_kabuli_chr07 | 20997360                | TT                              | CC                | 1946460799               |
| SNP_P3_87094_21000333 | NC_021166.1    | Ca_kabuli_chr07 | 21000333                | TT                              | CC                | 1946460801               |
| SNP_P3_87095_21000340 | NC_021166.1    | Ca_kabuli_chr07 | 21000340                | AA                              | TT                | 1946460802               |
| SNP_P3_87096_21000362 | NC_021166.1    | Ca_kabuli_chr07 | 21000362                | TT                              | CC                | 1946460804               |

| SNPs IDs              | Chromosome IDs | Chromosomes     | Physical positions (bp) | CDC Frontier (Reference genome) | (Pusa 256 & HPNB) | NCBI SNPdb Accession IDs |
|-----------------------|----------------|-----------------|-------------------------|---------------------------------|-------------------|--------------------------|
| SNP_P3_87097_21000364 | NC_021166.1    | Ca_kabuli_chr07 | 21000364                | GG                              | AA                | 1946460805               |
| SNP_P3_87098_21000415 | NC_021166.1    | Ca_kabuli_chr07 | 21000415                | GG                              | AA                | 1946460807               |
| SNP_P3_87099_21000468 | NC_021166.1    | Ca_kabuli_chr07 | 21000468                | AA                              | GG                | 1946460808               |
| SNP_P3_87100_21000491 | NC_021166.1    | Ca_kabuli_chr07 | 21000491                | TT                              | CC                | 1946460810               |
| SNP_P3_87101_21000504 | NC_021166.1    | Ca_kabuli_chr07 | 21000504                | TT                              | CC                | 1946460811               |
| SNP_P3_87102_21000518 | NC_021166.1    | Ca_kabuli_chr07 | 21000518                | AA                              | GG                | 1946460813               |
| SNP_P3_87103_21000670 | NC_021166.1    | Ca_kabuli_chr07 | 21000670                | TT                              | CC                | 1946460814               |
| SNP_P3_87104_21000755 | NC_021166.1    | Ca_kabuli_chr07 | 21000755                | TT                              | GG                | 1946460816               |
| SNP_P3_87105_21000848 | NC_021166.1    | Ca_kabuli_chr07 | 21000848                | TT                              | CC                | 1946460817               |
| SNP_P3_87106_21003117 | NC_021166.1    | Ca_kabuli_chr07 | 21003117                | CC                              | AA                | 1946460819               |
| SNP_P3_87107_21012592 | NC_021166.1    | Ca_kabuli_chr07 | 21012592                | TT                              | GG                | 1946460820               |
| SNP_P3_87108_21012610 | NC_021166.1    | Ca_kabuli_chr07 | 21012610                | CC                              | TT                | 1946460822               |
| SNP_P3_87110_21041826 | NC_021166.1    | Ca_kabuli_chr07 | 21041826                | GG                              | AA                | 1946460823               |
| SNP_P3_87111_21042231 | NC_021166.1    | Ca_kabuli_chr07 | 21042231                | AA                              | GG                | 1946460825               |
| SNP_P3_87112_21069271 | NC_021166.1    | Ca_kabuli_chr07 | 21069271                | GG                              | TT                | 1946460826               |
| SNP_P3_87113_21078694 | NC_021166.1    | Ca_kabuli_chr07 | 21078694                | TT                              | GG                | 1946460828               |
| SNP_P3_87115_21099419 | NC_021166.1    | Ca_kabuli_chr07 | 21099419                | TT                              | GG                | 1946460830               |
| SNP_P3_87116_21099422 | NC_021166.1    | Ca_kabuli_chr07 | 21099422                | CC                              | TT                | 1946460831               |
| SNP_P3_87117_21099434 | NC_021166.1    | Ca_kabuli_chr07 | 21099434                | AA                              | CC                | 1946460833               |
| SNP_P3_87118_21099443 | NC_021166.1    | Ca_kabuli_chr07 | 21099443                | GG                              | AA                | 1946460834               |
| SNP_P3_87119_21099449 | NC_021166.1    | Ca_kabuli_chr07 | 21099449                | AA                              | GG                | 1946460836               |
| SNP_P3_87120_21099468 | NC_021166.1    | Ca_kabuli_chr07 | 21099468                | GG                              | CC                | 1946460837               |
| SNP_P3_87121_21099495 | NC_021166.1    | Ca_kabuli_chr07 | 21099495                | TT                              | AA                | 1946460839               |
| SNP_P3_87122_21099497 | NC_021166.1    | Ca_kabuli_chr07 | 21099497                | TT                              | CC                | 1946460840               |
| SNP_P3_87123_21099505 | NC_021166.1    | Ca_kabuli_chr07 | 21099505                | AA                              | CC                | 1946460842               |
| SNP_P3_87124_21099591 | NC_021166.1    | Ca_kabuli_chr07 | 21099591                | AA                              | GG                | 1946460844               |
| SNP_P3_87125_21099614 | NC_021166.1    | Ca_kabuli_chr07 | 21099614                | GG                              | AA                | 1946460845               |
| SNP_P3_87126_21099650 | NC_021166.1    | Ca_kabuli_chr07 | 21099650                | TT                              | CC                | 1946460847               |
| SNP_P3_87127_21099683 | NC_021166.1    | Ca_kabuli_chr07 | 21099683                | CC                              | TT                | 1946460848               |
| SNP_P3_87129_21101034 | NC_021166.1    | Ca_kabuli_chr07 | 21101034                | AA                              | GG                | 1946460850               |
| SNP_P3_87130_21103257 | NC_021166.1    | Ca_kabuli_chr07 | 21103257                | TT                              | CC                | 1946460851               |
| SNP_P3_87132_21103362 | NC_021166.1    | Ca_kabuli_chr07 | 21103362                | TT                              | AA                | 1946460853               |
| SNP_P3_87133_21104850 | NC_021166.1    | Ca_kabuli_chr07 | 21104850                | TT                              | GG                | 1946460854               |
| SNP_P3_87135_21115139 | NC_021166.1    | Ca_kabuli_chr07 | 21115139                | CC                              | AA                | 1946460856               |
| SNP_P3_87136_21115200 | NC_021166.1    | Ca_kabuli_chr07 | 21115200                | CC                              | TT                | 1946460857               |
| SNP_P3_87137_21187889 | NC_021166.1    | Ca_kabuli_chr07 | 21187889                | AA                              | TT                | 1946460859               |
| SNP_P3_87139_21217403 | NC_021166.1    | Ca_kabuli_chr07 | 21217403                | TT                              | CC                | 1946460861               |
| SNP_P3_87143_21257608 | NC_021166.1    | Ca_kabuli_chr07 | 21257608                | TT                              | CC                | 1946460862               |
| SNP_P3_87144_21257668 | NC_021166.1    | Ca_kabuli_chr07 | 21257668                | GG                              | AA                | 1946460864               |
| SNP_P3_87145_21257723 | NC_021166.1    | Ca_kabuli_chr07 | 21257723                | AA                              | GG                | 1946460865               |
| SNP_P3_87146_21257724 | NC_021166.1    | Ca_kabuli_chr07 | 21257724                | TT                              | CC                | 1946460867               |
| SNP_P3_87147_21257740 | NC_021166.1    | Ca_kabuli_chr07 | 21257740                | CC                              | AA                | 1946460868               |

| SNPs IDs              | Chromosome IDs | Chromosomes     | Physical positions (bp) | CDC Frontier (Reference genome) | (Pusa 256 & HPNB) | NCBI SNPdb Accession IDs |
|-----------------------|----------------|-----------------|-------------------------|---------------------------------|-------------------|--------------------------|
| SNP_P3_87148_21257853 | NC_021166.1    | Ca_kabuli_chr07 | 21257853                | AA                              | GG                | 1946460870               |
| SNP_P3_87149_21289812 | NC_021166.1    | Ca_kabuli_chr07 | 21289812                | CC                              | AA                | 1946460871               |
| SNP_P3_87150_21307327 | NC_021166.1    | Ca_kabuli_chr07 | 21307327                | GG                              | CC                | 1946460873               |
| SNP_P3_87151_21349821 | NC_021166.1    | Ca_kabuli_chr07 | 21349821                | CC                              | TT                | 1946460874               |
| SNP_P3_87152_21363753 | NC_021166.1    | Ca_kabuli_chr07 | 21363753                | CC                              | AA                | 1946460876               |
| SNP_P3_87155_21429683 | NC_021166.1    | Ca_kabuli_chr07 | 21429683                | AA                              | GG                | 1946460877               |
| SNP_P3_87156_21430035 | NC_021166.1    | Ca_kabuli_chr07 | 21430035                | CC                              | TT                | 1946460879               |
| SNP_P3_87158_21465151 | NC_021166.1    | Ca_kabuli_chr07 | 21465151                | CC                              | AA                | 1946460880               |
| SNP_P3_87159_21473950 | NC_021166.1    | Ca_kabuli_chr07 | 21473950                | CC                              | TT                | 1946460882               |
| SNP_P3_87160_21508443 | NC_021166.1    | Ca_kabuli_chr07 | 21508443                | TT                              | CC                | 1946460883               |
| SNP_P3_87161_21510487 | NC_021166.1    | Ca_kabuli_chr07 | 21510487                | TT                              | AA                | 1946460885               |
| SNP_P3_87162_21530053 | NC_021166.1    | Ca_kabuli_chr07 | 21530053                | CC                              | GG                | 1946460886               |
| SNP_P3_87163_21558385 | NC_021166.1    | Ca_kabuli_chr07 | 21558385                | AA                              | GG                | 1946460888               |
| SNP_P3_87164_21562218 | NC_021166.1    | Ca_kabuli_chr07 | 21562218                | AA                              | TT                | 1946460889               |
| SNP_P3_87165_21597687 | NC_021166.1    | Ca_kabuli_chr07 | 21597687                | AA                              | GG                | 1946460891               |
| SNP_P3_87166_21623811 | NC_021166.1    | Ca_kabuli_chr07 | 21623811                | TT                              | CC                | 1946460892               |
| SNP_P3_87167_21644342 | NC_021166.1    | Ca_kabuli_chr07 | 21644342                | AA                              | GG                | 1946460894               |
| SNP_P3_87168_21658942 | NC_021166.1    | Ca_kabuli_chr07 | 21658942                | AA                              | TT                | 1946460895               |
| SNP_P3_87169_21666450 | NC_021166.1    | Ca_kabuli_chr07 | 21666450                | GG                              | AA                | 1946460897               |
| SNP_P3_87170_21666682 | NC_021166.1    | Ca_kabuli_chr07 | 21666682                | TT                              | CC                | 1946460899               |
| SNP_P3_87171_21666903 | NC_021166.1    | Ca_kabuli_chr07 | 21666903                | AA                              | CC                | 1946460900               |
| SNP_P3_87172_21666949 | NC_021166.1    | Ca_kabuli_chr07 | 21666949                | CC                              | TT                | 1946460902               |
| SNP_P3_87173_21670542 | NC_021166.1    | Ca_kabuli_chr07 | 21670542                | CC                              | TT                | 1946460903               |
| SNP_P3_87174_21670785 | NC_021166.1    | Ca_kabuli_chr07 | 21670785                | AA                              | TT                | 1946460904               |
| SNP_P3_87177_21674109 | NC_021166.1    | Ca_kabuli_chr07 | 21674109                | TT                              | GG                | 1946460906               |
| SNP_P3_87178_21674134 | NC_021166.1    | Ca_kabuli_chr07 | 21674134                | GG                              | AA                | 1946460907               |
| SNP_P3_87179_21674821 | NC_021166.1    | Ca_kabuli_chr07 | 21674821                | TT                              | AA                | 1946460909               |
| SNP_P3_87180_21674829 | NC_021166.1    | Ca_kabuli_chr07 | 21674829                | CC                              | TT                | 1946460910               |
| SNP_P3_87181_21674884 | NC_021166.1    | Ca_kabuli_chr07 | 21674884                | GG                              | AA                | 1946460912               |
| SNP_P3_87182_21675093 | NC_021166.1    | Ca_kabuli_chr07 | 21675093                | AA                              | GG                | 1946460913               |
| SNP_P3_87183_21675097 | NC_021166.1    | Ca_kabuli_chr07 | 21675097                | AA                              | CC                | 1946460915               |
| SNP_P3_87184_21675098 | NC_021166.1    | Ca_kabuli_chr07 | 21675098                | CC                              | AA                | 1946460916               |
| SNP_P3_87186_21675381 | NC_021166.1    | Ca_kabuli_chr07 | 21675381                | AA                              | TT                | 1946460918               |
| SNP_P3_87187_21675491 | NC_021166.1    | Ca_kabuli_chr07 | 21675491                | TT                              | CC                | 1946460920               |
| SNP_P3_87188_21677943 | NC_021166.1    | Ca_kabuli_chr07 | 21677943                | AA                              | CC                | 1946460921               |
| SNP_P3_87190_21678996 | NC_021166.1    | Ca_kabuli_chr07 | 21678996                | CC                              | TT                | 1946460923               |
| SNP_P3_87191_21679823 | NC_021166.1    | Ca_kabuli_chr07 | 21679823                | TT                              | AA                | 1946460924               |
| SNP_P3_87192_21679841 | NC_021166.1    | Ca_kabuli_chr07 | 21679841                | GG                              | TT                | 1946460926               |
| SNP_P3_87193_21679847 | NC_021166.1    | Ca_kabuli_chr07 | 21679847                | GG                              | AA                | 1946460927               |
| SNP_P3_87194_21679984 | NC_021166.1    | Ca_kabuli_chr07 | 21679984                | GG                              | AA                | 1946460929               |
| SNP_P3_87195_21680123 | NC_021166.1    | Ca_kabuli_chr07 | 21680123                | CC                              | TT                | 1946460930               |
| SNP_P3_87196_21680130 | NC_021166.1    | Ca_kabuli_chr07 | 21680130                | AA                              | GG                | 1946460932               |

| SNPs IDs              | Chromosome IDs | Chromosomes     | Physical positions (bp) | CDC Frontier (Reference genome) | (Pusa 256 & HPNB) | NCBI SNPdb Accession IDs |
|-----------------------|----------------|-----------------|-------------------------|---------------------------------|-------------------|--------------------------|
| SNP_P3_87197_21680194 | NC_021166.1    | Ca_kabuli_chr07 | 21680194                | CC                              | TT                | 1946460933               |
| SNP_P3_87198_21680289 | NC_021166.1    | Ca_kabuli_chr07 | 21680289                | GG                              | AA                | 1946460935               |
| SNP_P3_87199_21681018 | NC_021166.1    | Ca_kabuli_chr07 | 21681018                | GG                              | AA                | 1946460936               |
| SNP_P3_87200_21681195 | NC_021166.1    | Ca_kabuli_chr07 | 21681195                | GG                              | AA                | 1946460938               |
| SNP_P3_87201_21681323 | NC_021166.1    | Ca_kabuli_chr07 | 21681323                | AA                              | GG                | 1946460940               |
| SNP_P3_87202_21681446 | NC_021166.1    | Ca_kabuli_chr07 | 21681446                | AA                              | GG                | 1946460941               |
| SNP_P3_87203_21681466 | NC_021166.1    | Ca_kabuli_chr07 | 21681466                | TT                              | CC                | 1946460943               |
| SNP_P3_87204_21681488 | NC_021166.1    | Ca_kabuli_chr07 | 21681488                | AA                              | GG                | 1946460944               |
| SNP_P3_87205_21681507 | NC_021166.1    | Ca_kabuli_chr07 | 21681507                | AA                              | GG                | 1946460946               |
| SNP_P3_87206_21681509 | NC_021166.1    | Ca_kabuli_chr07 | 21681509                | AA                              | GG                | 1946460947               |
| SNP_P3_87207_21681544 | NC_021166.1    | Ca_kabuli_chr07 | 21681544                | CC                              | TT                | 1946460949               |
| SNP_P3_87208_21681699 | NC_021166.1    | Ca_kabuli_chr07 | 21681699                | TT                              | CC                | 1946460950               |
| SNP_P3_87209_21681726 | NC_021166.1    | Ca_kabuli_chr07 | 21681726                | CC                              | TT                | 1946460952               |
| SNP_P3_87210_21681769 | NC_021166.1    | Ca_kabuli_chr07 | 21681769                | CC                              | TT                | 1946460953               |
| SNP_P3_87211_21681779 | NC_021166.1    | Ca_kabuli_chr07 | 21681779                | GG                              | AA                | 1946460955               |
| SNP_P3_87212_21681782 | NC_021166.1    | Ca_kabuli_chr07 | 21681782                | GG                              | AA                | 1946460956               |
| SNP_P3_87213_21681819 | NC_021166.1    | Ca_kabuli_chr07 | 21681819                | CC                              | TT                | 1946460958               |
| SNP_P3_87214_21681916 | NC_021166.1    | Ca_kabuli_chr07 | 21681916                | CC                              | TT                | 1946460960               |
| SNP_P3_87215_21681937 | NC_021166.1    | Ca_kabuli_chr07 | 21681937                | GG                              | AA                | 1946460961               |
| SNP_P3_87216_21682238 | NC_021166.1    | Ca_kabuli_chr07 | 21682238                | CC                              | TT                | 1946460963               |
| SNP_P3_87217_21682244 | NC_021166.1    | Ca_kabuli_chr07 | 21682244                | TT                              | CC                | 1946460964               |
| SNP_P3_87218_21682563 | NC_021166.1    | Ca_kabuli_chr07 | 21682563                | CC                              | TT                | 1946460965               |
| SNP_P3_87219_21682646 | NC_021166.1    | Ca_kabuli_chr07 | 21682646                | GG                              | TT                | 1946460967               |
| SNP_P3_87220_21682888 | NC_021166.1    | Ca_kabuli_chr07 | 21682888                | GG                              | AA                | 1946460968               |
| SNP_P3_87221_21683620 | NC_021166.1    | Ca_kabuli_chr07 | 21683620                | GG                              | TT                | 1946460970               |
| SNP_P3_87222_21684632 | NC_021166.1    | Ca_kabuli_chr07 | 21684632                | CC                              | TT                | 1946460971               |
| SNP_P3_87223_21684701 | NC_021166.1    | Ca_kabuli_chr07 | 21684701                | TT                              | CC                | 1946460973               |
| SNP_P3_87224_21684966 | NC_021166.1    | Ca_kabuli_chr07 | 21684966                | CC                              | AA                | 1946460975               |
| SNP_P3_87226_21686729 | NC_021166.1    | Ca_kabuli_chr07 | 21686729                | GG                              | AA                | 1946460976               |
| SNP_P3_87228_21688110 | NC_021166.1    | Ca_kabuli_chr07 | 21688110                | AA                              | GG                | 1946460978               |
| SNP_P3_87230_21728099 | NC_021166.1    | Ca_kabuli_chr07 | 21728099                | CC                              | AA                | 1946460979               |
| SNP_P3_87231_21728240 | NC_021166.1    | Ca_kabuli_chr07 | 21728240                | GG                              | CC                | 1946460981               |
| SNP_P3_87232_21728256 | NC_021166.1    | Ca_kabuli_chr07 | 21728256                | GG                              | AA                | 1946460982               |
| SNP_P3_87233_21728259 | NC_021166.1    | Ca_kabuli_chr07 | 21728259                | GG                              | AA                | 1946460984               |
| SNP_P3_87234_21728301 | NC_021166.1    | Ca_kabuli_chr07 | 21728301                | CC                              | GG                | 1946460985               |
| SNP_P3_87235_21728328 | NC_021166.1    | Ca_kabuli_chr07 | 21728328                | TT                              | CC                | 1946460987               |
| SNP_P3_87236_21728332 | NC_021166.1    | Ca_kabuli_chr07 | 21728332                | AA                              | GG                | 1946460988               |
| SNP_P3_87237_21728372 | NC_021166.1    | Ca_kabuli_chr07 | 21728372                | AA                              | GG                | 1946460990               |
| SNP_P3_87239_21728437 | NC_021166.1    | Ca_kabuli_chr07 | 21728437                | AA                              | CC                | 1946460991               |
| SNP_P3_87240_21728439 | NC_021166.1    | Ca_kabuli_chr07 | 21728439                | CC                              | TT                | 1946460993               |
| SNP_P3_87241_21728485 | NC_021166.1    | Ca_kabuli_chr07 | 21728485                | TT                              | CC                | 1946460994               |
| SNP_P3_87242_21728486 | NC_021166.1    | Ca_kabuli_chr07 | 21728486                | GG                              | AA                | 1946460995               |

| SNPs IDs              | Chromosome IDs | Chromosomes     | Physical positions (bp) | CDC Frontier (Reference genome) | (Pusa 256 & HPNB) | NCBI SNPdb Accession IDs |
|-----------------------|----------------|-----------------|-------------------------|---------------------------------|-------------------|--------------------------|
| SNP_P3_87243_21728570 | NC_021166.1    | Ca_kabuli_chr07 | 21728570                | TT                              | GG                | 1946460997               |
| SNP_P3_87244_21728581 | NC_021166.1    | Ca_kabuli_chr07 | 21728581                | GG                              | AA                | 1946460999               |
| SNP_P3_87245_21728613 | NC_021166.1    | Ca_kabuli_chr07 | 21728613                | GG                              | TT                | 1946461000               |
| SNP_P3_87246_21728638 | NC_021166.1    | Ca_kabuli_chr07 | 21728638                | GG                              | AA                | 1946461002               |
| SNP_P3_87247_21728728 | NC_021166.1    | Ca_kabuli_chr07 | 21728728                | TT                              | CC                | 1946461003               |
| SNP_P3_87248_21728731 | NC_021166.1    | Ca_kabuli_chr07 | 21728731                | GG                              | AA                | 1946461005               |
| SNP_P3_87249_21728821 | NC_021166.1    | Ca_kabuli_chr07 | 21728821                | AA                              | CC                | 1946461006               |
| SNP_P3_87250_21728904 | NC_021166.1    | Ca_kabuli_chr07 | 21728904                | CC                              | GG                | 1946461007               |
| SNP_P3_87251_21728928 | NC_021166.1    | Ca_kabuli_chr07 | 21728928                | CC                              | TT                | 1946461009               |
| SNP_P3_87252_21728935 | NC_021166.1    | Ca_kabuli_chr07 | 21728935                | GG                              | AA                | 1946461010               |
| SNP_P3_87253_21728966 | NC_021166.1    | Ca_kabuli_chr07 | 21728966                | TT                              | CC                | 1946461012               |
| SNP_P3_87255_21729239 | NC_021166.1    | Ca_kabuli_chr07 | 21729239                | AA                              | GG                | 1946461013               |
| SNP_P3_87257_21729493 | NC_021166.1    | Ca_kabuli_chr07 | 21729493                | TT                              | AA                | 1946461015               |
| SNP_P3_87258_21729580 | NC_021166.1    | Ca_kabuli_chr07 | 21729580                | AA                              | TT                | 1946461017               |
| SNP_P3_87259_21729657 | NC_021166.1    | Ca_kabuli_chr07 | 21729657                | TT                              | AA                | 1946461018               |
| SNP_P3_87260_21729819 | NC_021166.1    | Ca_kabuli_chr07 | 21729819                | AA                              | GG                | 1946461020               |
| SNP_P3_87261_21729872 | NC_021166.1    | Ca_kabuli_chr07 | 21729872                | AA                              | CC                | 1946461021               |
| SNP_P3_87262_21730106 | NC_021166.1    | Ca_kabuli_chr07 | 21730106                | CC                              | GG                | 1946461023               |
| SNP_P3_87263_21730144 | NC_021166.1    | Ca_kabuli_chr07 | 21730144                | CC                              | TT                | 1946461024               |
| SNP_P3_87264_21730147 | NC_021166.1    | Ca_kabuli_chr07 | 21730147                | TT                              | CC                | 1946461026               |
| SNP_P3_87265_21730540 | NC_021166.1    | Ca_kabuli_chr07 | 21730540                | GG                              | TT                | 1946461027               |
| SNP_P3_87266_21730605 | NC_021166.1    | Ca_kabuli_chr07 | 21730605                | TT                              | CC                | 1946461029               |
| SNP_P3_87267_21730608 | NC_021166.1    | Ca_kabuli_chr07 | 21730608                | CC                              | GG                | 1946461030               |
| SNP_P3_87268_21730619 | NC_021166.1    | Ca_kabuli_chr07 | 21730619                | CC                              | TT                | 1946461032               |
| SNP_P3_87269_21730625 | NC_021166.1    | Ca_kabuli_chr07 | 21730625                | TT                              | GG                | 1946461033               |
| SNP_P3_87270_21730669 | NC_021166.1    | Ca_kabuli_chr07 | 21730669                | TT                              | CC                | 1946461034               |
| SNP_P3_87271_21730757 | NC_021166.1    | Ca_kabuli_chr07 | 21730757                | CC                              | AA                | 1946461035               |
| SNP_P3_87272_21730794 | NC_021166.1    | Ca_kabuli_chr07 | 21730794                | TT                              | CC                | 1946461036               |
| SNP_P3_87273_21730842 | NC_021166.1    | Ca_kabuli_chr07 | 21730842                | AA                              | TT                | 1946461037               |
| SNP_P3_87274_21730845 | NC_021166.1    | Ca_kabuli_chr07 | 21730845                | AA                              | TT                | 1946461038               |
| SNP_P3_87275_21730868 | NC_021166.1    | Ca_kabuli_chr07 | 21730868                | CC                              | AA                | 1946461039               |
| SNP_P3_87276_21730900 | NC_021166.1    | Ca_kabuli_chr07 | 21730900                | CC                              | TT                | 1946461040               |
| SNP_P3_87277_21730905 | NC_021166.1    | Ca_kabuli_chr07 | 21730905                | TT                              | CC                | 1946461041               |
| SNP_P3_87278_21730915 | NC_021166.1    | Ca_kabuli_chr07 | 21730915                | GG                              | AA                | 1946461042               |
| SNP_P3_87279_21731046 | NC_021166.1    | Ca_kabuli_chr07 | 21731046                | AA                              | GG                | 1946461044               |
| SNP_P3_87280_21731118 | NC_021166.1    | Ca_kabuli_chr07 | 21731118                | GG                              | TT                | 1946461045               |
| SNP_P3_87282_21731209 | NC_021166.1    | Ca_kabuli_chr07 | 21731209                | AA                              | CC                | 1946461047               |
| SNP_P3_87283_21731263 | NC_021166.1    | Ca_kabuli_chr07 | 21731263                | TT                              | CC                | 1946461048               |
| SNP_P3_87284_21731266 | NC_021166.1    | Ca_kabuli_chr07 | 21731266                | AA                              | TT                | 1946461050               |
| SNP_P3_87285_21731338 | NC_021166.1    | Ca_kabuli_chr07 | 21731338                | TT                              | CC                | 1946461051               |
| SNP_P3_87286_21731395 | NC_021166.1    | Ca_kabuli_chr07 | 21731395                | TT                              | CC                | 1946461053               |
| SNP_P3_87287_21731428 | NC_021166.1    | Ca_kabuli_chr07 | 21731428                | TT                              | AA                | 1946461055               |

| SNPs IDs              | Chromosome IDs | Chromosomes     | Physical positions (bp) | CDC Frontier (Reference genome) | (Pusa 256 & HPNB) | NCBI SNPdb Accession IDs |
|-----------------------|----------------|-----------------|-------------------------|---------------------------------|-------------------|--------------------------|
| SNP_P3_87288_21731558 | NC_021166.1    | Ca_kabuli_chr07 | 21731558                | CC                              | TT                | 1946461056               |
| SNP_P3_87289_21732430 | NC_021166.1    | Ca_kabuli_chr07 | 21732430                | GG                              | CC                | 1946461058               |
| SNP_P3_87290_21733667 | NC_021166.1    | Ca_kabuli_chr07 | 21733667                | CC                              | TT                | 1946461059               |
| SNP_P3_87292_21743385 | NC_021166.1    | Ca_kabuli_chr07 | 21743385                | TT                              | AA                | 1946461061               |
| SNP_P3_87293_21743393 | NC_021166.1    | Ca_kabuli_chr07 | 21743393                | TT                              | CC                | 1946461062               |
| SNP_P3_87294_21743428 | NC_021166.1    | Ca_kabuli_chr07 | 21743428                | GG                              | CC                | 1946461064               |
| SNP_P3_87295_21743431 | NC_021166.1    | Ca_kabuli_chr07 | 21743431                | TT                              | GG                | 1946461065               |
| SNP_P3_87296_21743435 | NC_021166.1    | Ca_kabuli_chr07 | 21743435                | TT                              | AA                | 1946461066               |
| SNP_P3_87298_21743592 | NC_021166.1    | Ca_kabuli_chr07 | 21743592                | TT                              | GG                | 1946461068               |
| SNP_P3_87300_21743638 | NC_021166.1    | Ca_kabuli_chr07 | 21743638                | TT                              | CC                | 1946461069               |
| SNP_P3_87301_21743676 | NC_021166.1    | Ca_kabuli_chr07 | 21743676                | GG                              | AA                | 1946461071               |
| SNP_P3_87302_21743731 | NC_021166.1    | Ca_kabuli_chr07 | 21743731                | TT                              | CC                | 1946461072               |
| SNP_P3_87303_21743739 | NC_021166.1    | Ca_kabuli_chr07 | 21743739                | TT                              | CC                | 1946461074               |
| SNP_P3_87304_21743840 | NC_021166.1    | Ca_kabuli_chr07 | 21743840                | CC                              | AA                | 1946461075               |
| SNP_P3_87305_21743841 | NC_021166.1    | Ca_kabuli_chr07 | 21743841                | TT                              | GG                | 1946461076               |
| SNP_P3_87306_21743843 | NC_021166.1    | Ca_kabuli_chr07 | 21743843                | GG                              | AA                | 1946461078               |
| SNP_P3_87307_21743845 | NC_021166.1    | Ca_kabuli_chr07 | 21743845                | TT                              | GG                | 1946461079               |
| SNP_P3_87308_21743929 | NC_021166.1    | Ca_kabuli_chr07 | 21743929                | AA                              | GG                | 1946461081               |
| SNP_P3_87310_21744003 | NC_021166.1    | Ca_kabuli_chr07 | 21744003                | AA                              | CC                | 1946461082               |
| SNP_P3_87312_21744273 | NC_021166.1    | Ca_kabuli_chr07 | 21744273                | CC                              | TT                | 1946461084               |
| SNP_P3_87313_21744355 | NC_021166.1    | Ca_kabuli_chr07 | 21744355                | GG                              | AA                | 1946461085               |
| SNP_P3_87314_21744514 | NC_021166.1    | Ca_kabuli_chr07 | 21744514                | TT                              | CC                | 1946461087               |
| SNP_P3_87315_21744821 | NC_021166.1    | Ca_kabuli_chr07 | 21744821                | AA                              | GG                | 1946461089               |
| SNP_P3_87316_21744856 | NC_021166.1    | Ca_kabuli_chr07 | 21744856                | GG                              | AA                | 1946461090               |
| SNP_P3_87318_21745657 | NC_021166.1    | Ca_kabuli_chr07 | 21745657                | GG                              | AA                | 1946461092               |
| SNP_P3_87319_21746578 | NC_021166.1    | Ca_kabuli_chr07 | 21746578                | CC                              | TT                | 1946461093               |
| SNP_P3_87320_21746594 | NC_021166.1    | Ca_kabuli_chr07 | 21746594                | CC                              | TT                | 1946461095               |
| SNP_P3_87321_21746643 | NC_021166.1    | Ca_kabuli_chr07 | 21746643                | CC                              | TT                | 1946461096               |
| SNP_P3_87322_21746651 | NC_021166.1    | Ca_kabuli_chr07 | 21746651                | GG                              | AA                | 1946461097               |
| SNP_P3_87323_21749665 | NC_021166.1    | Ca_kabuli_chr07 | 21749665                | GG                              | CC                | 1946461099               |
| SNP_P3_87324_21749685 | NC_021166.1    | Ca_kabuli_chr07 | 21749685                | TT                              | CC                | 1946461100               |
| SNP_P3_87325_21749686 | NC_021166.1    | Ca_kabuli_chr07 | 21749686                | TT                              | CC                | 1946461102               |
| SNP_P3_87328_21750525 | NC_021166.1    | Ca_kabuli_chr07 | 21750525                | GG                              | AA                | 1946461103               |
| SNP_P3_87329_21751146 | NC_021166.1    | Ca_kabuli_chr07 | 21751146                | TT                              | CC                | 1946461104               |
| SNP_P3_87331_21755555 | NC_021166.1    | Ca_kabuli_chr07 | 21755555                | CC                              | TT                | 1946461106               |
| SNP_P3_87332_21755566 | NC_021166.1    | Ca_kabuli_chr07 | 21755566                | TT                              | AA                | 1946461108               |
| SNP_P3_87333_21756471 | NC_021166.1    | Ca_kabuli_chr07 | 21756471                | CC                              | TT                | 1946461109               |
| SNP_P3_87334_21766124 | NC_021166.1    | Ca_kabuli_chr07 | 21766124                | CC                              | TT                | 1946461110               |
| SNP_P3_87335_21766130 | NC_021166.1    | Ca_kabuli_chr07 | 21766130                | GG                              | AA                | 1946461112               |
| SNP_P3_87336_21766144 | NC_021166.1    | Ca_kabuli_chr07 | 21766144                | CC                              | TT                | 1946461113               |
| SNP_P3_87337_21766268 | NC_021166.1    | Ca_kabuli_chr07 | 21766268                | AA                              | CC                | 1946461115               |
| SNP_P3_87338_21766368 | NC_021166.1    | Ca_kabuli_chr07 | 21766368                | AA                              | GG                | 1946461116               |

| SNPs IDs              | Chromosome IDs | Chromosomes     | Physical positions (bp) | CDC Frontier (Reference genome) | (Pusa 256 & HPNB) | NCBI SNPdb Accession IDs |
|-----------------------|----------------|-----------------|-------------------------|---------------------------------|-------------------|--------------------------|
| SNP_P3_87339_21766406 | NC_021166.1    | Ca_kabuli_chr07 | 21766406                | TT                              | CC                | 1946461118               |
| SNP_P3_87340_21766436 | NC_021166.1    | Ca_kabuli_chr07 | 21766436                | TT                              | GG                | 1946461119               |
| SNP_P3_87341_21766439 | NC_021166.1    | Ca_kabuli_chr07 | 21766439                | CC                              | TT                | 1946461120               |
| SNP_P3_87342_21775307 | NC_021166.1    | Ca_kabuli_chr07 | 21775307                | GG                              | AA                | 1946461122               |
| SNP_P3_87343_21784541 | NC_021166.1    | Ca_kabuli_chr07 | 21784541                | GG                              | AA                | 1946461123               |
| SNP_P3_87345_21796641 | NC_021166.1    | Ca_kabuli_chr07 | 21796641                | AA                              | GG                | 1946461125               |
| SNP_P3_87346_21818459 | NC_021166.1    | Ca_kabuli_chr07 | 21818459                | TT                              | CC                | 1946461126               |
| SNP_P3_87347_21818483 | NC_021166.1    | Ca_kabuli_chr07 | 21818483                | TT                              | GG                | 1946461127               |
| SNP_P3_87349_21818653 | NC_021166.1    | Ca_kabuli_chr07 | 21818653                | AA                              | TT                | 1946461129               |
| SNP_P3_87350_21818654 | NC_021166.1    | Ca_kabuli_chr07 | 21818654                | TT                              | AA                | 1946461131               |
| SNP_P3_87351_21818665 | NC_021166.1    | Ca_kabuli_chr07 | 21818665                | CC                              | AA                | 1946461132               |
| SNP_P3_87352_21822716 | NC_021166.1    | Ca_kabuli_chr07 | 21822716                | AA                              | TT                | 1946461134               |
| SNP_P3_87353_21822939 | NC_021166.1    | Ca_kabuli_chr07 | 21822939                | GG                              | AA                | 1946461135               |
| SNP_P3_87354_21824511 | NC_021166.1    | Ca_kabuli_chr07 | 21824511                | TT                              | CC                | 1946461136               |
| SNP_P3_87355_21829279 | NC_021166.1    | Ca_kabuli_chr07 | 21829279                | CC                              | TT                | 1946461138               |
| SNP_P3_87356_21835118 | NC_021166.1    | Ca_kabuli_chr07 | 21835118                | TT                              | CC                | 1946461139               |
| SNP_P3_87357_21844399 | NC_021166.1    | Ca_kabuli_chr07 | 21844399                | AA                              | GG                | 1946461141               |
| SNP_P3_87358_21853642 | NC_021166.1    | Ca_kabuli_chr07 | 21853642                | GG                              | CC                | 1946461142               |
| SNP_P3_87359_21855310 | NC_021166.1    | Ca_kabuli_chr07 | 21855310                | TT                              | AA                | 1946461144               |
| SNP_P3_87360_21856168 | NC_021166.1    | Ca_kabuli_chr07 | 21856168                | TT                              | CC                | 1946461145               |
| SNP_P3_87361_21856739 | NC_021166.1    | Ca_kabuli_chr07 | 21856739                | GG                              | AA                | 1946461146               |
| SNP_P3_87362_21888060 | NC_021166.1    | Ca_kabuli_chr07 | 21888060                | TT                              | AA                | 1946461148               |
| SNP_P3_87363_21935416 | NC_021166.1    | Ca_kabuli_chr07 | 21935416                | CC                              | TT                | 1946461149               |
| SNP_P3_87364_21935477 | NC_021166.1    | Ca_kabuli_chr07 | 21935477                | CC                              | TT                | 1946461151               |
| SNP_P3_87365_21949806 | NC_021166.1    | Ca_kabuli_chr07 | 21949806                | GG                              | AA                | 1946461153               |
| SNP_P3_87367_21955129 | NC_021166.1    | Ca_kabuli_chr07 | 21955129                | AA                              | GG                | 1946461154               |
| SNP_P3_87368_21955158 | NC_021166.1    | Ca_kabuli_chr07 | 21955158                | GG                              | AA                | 1946461156               |
| SNP_P3_87369_21955543 | NC_021166.1    | Ca_kabuli_chr07 | 21955543                | CC                              | TT                | 1946461157               |
| SNP_P3_87370_21974492 | NC_021166.1    | Ca_kabuli_chr07 | 21974492                | GG                              | TT                | 1946461158               |
| SNP_P3_87372_21986581 | NC_021166.1    | Ca_kabuli_chr07 | 21986581                | TT                              | GG                | 1946461160               |
| SNP_P3_87373_21994249 | NC_021166.1    | Ca_kabuli_chr07 | 21994249                | AA                              | GG                | 1946461161               |
| SNP_P3_87374_21994636 | NC_021166.1    | Ca_kabuli_chr07 | 21994636                | TT                              | GG                | 1946461163               |
| SNP_P3_87375_21994650 | NC_021166.1    | Ca_kabuli_chr07 | 21994650                | TT                              | CC                | 1946461164               |
| SNP_P3_87376_22017490 | NC_021166.1    | Ca_kabuli_chr07 | 22017490                | CC                              | TT                | 1946461166               |
| SNP_P3_87377_22027566 | NC_021166.1    | Ca_kabuli_chr07 | 22027566                | TT                              | AA                | 1946461167               |
| SNP_P3_87378_22027615 | NC_021166.1    | Ca_kabuli_chr07 | 22027615                | TT                              | CC                | 1946461169               |
| SNP_P3_87380_22034889 | NC_021166.1    | Ca_kabuli_chr07 | 22034889                | TT                              | GG                | 1946461170               |
| SNP_P3_87381_22034999 | NC_021166.1    | Ca_kabuli_chr07 | 22034999                | CC                              | TT                | 1946461172               |
| SNP_P3_87382_22035553 | NC_021166.1    | Ca_kabuli_chr07 | 22035553                | AA                              | GG                | 1946461174               |
| SNP_P3_87383_22035657 | NC_021166.1    | Ca_kabuli_chr07 | 22035657                | AA                              | GG                | 1946461175               |
| SNP_P3_87384_22036213 | NC_021166.1    | Ca_kabuli_chr07 | 22036213                | GG                              | AA                | 1946461177               |
| SNP_P3_87386_22036380 | NC_021166.1    | Ca_kabuli_chr07 | 22036380                | GG                              | AA                | 1946461178               |



| SNPs IDs              | Chromosome IDs | Chromosomes     | Physical positions (bp) | CDC Frontier (Reference genome) | (Pusa 256 & HPNB) | NCBI SNPdb Accession IDs |
|-----------------------|----------------|-----------------|-------------------------|---------------------------------|-------------------|--------------------------|
| SNP_P3_87387_22037366 | NC_021166.1    | Ca_kabuli_chr07 | 22037366                | CC                              | TT                | 1946461179               |
| SNP_P3_87389_22038167 | NC_021166.1    | Ca_kabuli_chr07 | 22038167                | AA                              | CC                | 1946461181               |
| SNP_P3_87390_22038776 | NC_021166.1    | Ca_kabuli_chr07 | 22038776                | AA                              | GG                | 1946461182               |
| SNP_P3_87392_22039682 | NC_021166.1    | Ca_kabuli_chr07 | 22039682                | TT                              | CC                | 1946461184               |
| SNP_P3_87393_22040905 | NC_021166.1    | Ca_kabuli_chr07 | 22040905                | GG                              | AA                | 1946461185               |
| SNP_P3_87394_22042181 | NC_021166.1    | Ca_kabuli_chr07 | 22042181                | TT                              | GG                | 1946461187               |
| SNP_P3_87395_22042916 | NC_021166.1    | Ca_kabuli_chr07 | 22042916                | CC                              | AA                | 1946461188               |
| SNP_P3_87397_22044990 | NC_021166.1    | Ca_kabuli_chr07 | 22044990                | CC                              | AA                | 1946461190               |
| SNP_P3_87399_22046351 | NC_021166.1    | Ca_kabuli_chr07 | 22046351                | CC                              | TT                | 1946461191               |
| SNP_P3_87400_22046592 | NC_021166.1    | Ca_kabuli_chr07 | 22046592                | CC                              | TT                | 1946461193               |
| SNP_P3_87404_22047792 | NC_021166.1    | Ca_kabuli_chr07 | 22047792                | TT                              | GG                | 1946461194               |
| SNP_P3_87405_22048306 | NC_021166.1    | Ca_kabuli_chr07 | 22048306                | CC                              | TT                | 1946461196               |
| SNP_P3_87406_22048847 | NC_021166.1    | Ca_kabuli_chr07 | 22048847                | AA                              | GG                | 1946461197               |
| SNP_P3_87407_22049336 | NC_021166.1    | Ca_kabuli_chr07 | 22049336                | AA                              | TT                | 1946461199               |
| SNP_P3_87408_22049920 | NC_021166.1    | Ca_kabuli_chr07 | 22049920                | TT                              | GG                | 1946461200               |
| SNP_P3_87409_22058011 | NC_021166.1    | Ca_kabuli_chr07 | 22058011                | TT                              | AA                | 1946461201               |
| SNP_P3_87410_22058012 | NC_021166.1    | Ca_kabuli_chr07 | 22058012                | TT                              | AA                | 1946461203               |
| SNP_P3_87411_22069260 | NC_021166.1    | Ca_kabuli_chr07 | 22069260                | AA                              | CC                | 1946461204               |
| SNP_P3_87412_22084347 | NC_021166.1    | Ca_kabuli_chr07 | 22084347                | GG                              | TT                | 1946461206               |
| SNP_P3_87415_22126059 | NC_021166.1    | Ca_kabuli_chr07 | 22126059                | CC                              | GG                | 1946461207               |
| SNP_P3_87416_22133204 | NC_021166.1    | Ca_kabuli_chr07 | 22133204                | TT                              | CC                | 1946461209               |
| SNP_P3_87417_22144789 | NC_021166.1    | Ca_kabuli_chr07 | 22144789                | CC                              | AA                | 1946461210               |
| SNP_P3_87418_22146357 | NC_021166.1    | Ca_kabuli_chr07 | 22146357                | CC                              | AA                | 1946461212               |
| SNP_P3_87419_22146422 | NC_021166.1    | Ca_kabuli_chr07 | 22146422                | GG                              | AA                | 1946461213               |
| SNP_P3_87420_22146698 | NC_021166.1    | Ca_kabuli_chr07 | 22146698                | CC                              | TT                | 1946461215               |
| SNP_P3_87422_22146740 | NC_021166.1    | Ca_kabuli_chr07 | 22146740                | AA                              | GG                | 1946461216               |
| SNP_P3_87424_22174055 | NC_021166.1    | Ca_kabuli_chr07 | 22174055                | GG                              | CC                | 1946461218               |
| SNP_P3_87425_22174122 | NC_021166.1    | Ca_kabuli_chr07 | 22174122                | GG                              | AA                | 1946461219               |
| SNP_P3_87426_22174379 | NC_021166.1    | Ca_kabuli_chr07 | 22174379                | TT                              | CC                | 1946461221               |
| SNP_P3_87427_22186373 | NC_021166.1    | Ca_kabuli_chr07 | 22186373                | GG                              | AA                | 1946461222               |
| SNP_P3_87428_22186383 | NC_021166.1    | Ca_kabuli_chr07 | 22186383                | AA                              | CC                | 1946461224               |
| SNP_P3_87429_22186387 | NC_021166.1    | Ca_kabuli_chr07 | 22186387                | CC                              | AA                | 1946461225               |
| SNP_P3_87430_22186440 | NC_021166.1    | Ca_kabuli_chr07 | 22186440                | GG                              | AA                | 1946461227               |
| SNP_P3_87431_22187034 | NC_021166.1    | Ca_kabuli_chr07 | 22187034                | CC                              | AA                | 1946461228               |
| SNP_P3_87432_22206712 | NC_021166.1    | Ca_kabuli_chr07 | 22206712                | AA                              | GG                | 1946461230               |
| SNP_P3_87433_22229635 | NC_021166.1    | Ca_kabuli_chr07 | 22229635                | CC                              | TT                | 1946461231               |
| SNP_P3_87434_22271986 | NC_021166.1    | Ca_kabuli_chr07 | 22271986                | TT                              | AA                | 1946461233               |
| SNP_P3_87435_22272099 | NC_021166.1    | Ca_kabuli_chr07 | 22272099                | AA                              | CC                | 1946461234               |
| SNP_P3_87436_22321181 | NC_021166.1    | Ca_kabuli_chr07 | 22321181                | AA                              | GG                | 1946461236               |
| SNP_P3_87437_22327200 | NC_021166.1    | Ca_kabuli_chr07 | 22327200                | AA                              | GG                | 1946461238               |
| SNP_P3_87438_22327210 | NC_021166.1    | Ca_kabuli_chr07 | 22327210                | CC                              | TT                | 1946461239               |
| SNP_P3_87439_22327215 | NC_021166.1    | Ca_kabuli_chr07 | 22327215                | TT                              | CC                | 1946461241               |

| SNPs IDs              | Chromosome IDs | Chromosomes     | Physical positions (bp) | CDC Frontier (Reference genome) | (Pusa 256 & HPNB) | NCBI SNPdb Accession IDs |
|-----------------------|----------------|-----------------|-------------------------|---------------------------------|-------------------|--------------------------|
| SNP_P3_87440_22327264 | NC_021166.1    | Ca_kabuli_chr07 | 22327264                | GG                              | CC                | 1946461242               |
| SNP_P3_87442_22327632 | NC_021166.1    | Ca_kabuli_chr07 | 22327632                | CC                              | AA                | 1946461243               |
| SNP_P3_87443_22328013 | NC_021166.1    | Ca_kabuli_chr07 | 22328013                | AA                              | GG                | 1946461245               |
| SNP_P3_87444_22330680 | NC_021166.1    | Ca_kabuli_chr07 | 22330680                | GG                              | CC                | 1946461246               |
| SNP_P3_87445_22330997 | NC_021166.1    | Ca_kabuli_chr07 | 22330997                | GG                              | AA                | 1946461248               |
| SNP_P3_87446_22331017 | NC_021166.1    | Ca_kabuli_chr07 | 22331017                | GG                              | AA                | 1946461249               |
| SNP_P3_87447_22331062 | NC_021166.1    | Ca_kabuli_chr07 | 22331062                | TT                              | GG                | 1946461251               |
| SNP_P3_87448_22339619 | NC_021166.1    | Ca_kabuli_chr07 | 22339619                | GG                              | AA                | 1946461252               |
| SNP_P3_87449_22340977 | NC_021166.1    | Ca_kabuli_chr07 | 22340977                | AA                              | GG                | 1946461254               |
| SNP_P3_87450_22340984 | NC_021166.1    | Ca_kabuli_chr07 | 22340984                | AA                              | GG                | 1946461255               |
| SNP_P3_87451_22341024 | NC_021166.1    | Ca_kabuli_chr07 | 22341024                | GG                              | TT                | 1946461257               |
| SNP_P3_87452_22341026 | NC_021166.1    | Ca_kabuli_chr07 | 22341026                | AA                              | GG                | 1946461258               |
| SNP_P3_87453_22341029 | NC_021166.1    | Ca_kabuli_chr07 | 22341029                | CC                              | TT                | 1946461260               |
| SNP_P3_87454_22349027 | NC_021166.1    | Ca_kabuli_chr07 | 22349027                | CC                              | TT                | 1946461261               |
| SNP_P3_87455_22350273 | NC_021166.1    | Ca_kabuli_chr07 | 22350273                | TT                              | CC                | 1946461263               |
| SNP_P3_87456_22350288 | NC_021166.1    | Ca_kabuli_chr07 | 22350288                | GG                              | AA                | 1946461264               |
| SNP_P3_87457_22350370 | NC_021166.1    | Ca_kabuli_chr07 | 22350370                | AA                              | GG                | 1946461266               |
| SNP_P3_87458_22354410 | NC_021166.1    | Ca_kabuli_chr07 | 22354410                | AA                              | GG                | 1946461267               |
| SNP_P3_87461_22380548 | NC_021166.1    | Ca_kabuli_chr07 | 22380548                | CC                              | AA                | 1946461269               |
| SNP_P3_87463_22413016 | NC_021166.1    | Ca_kabuli_chr07 | 22413016                | TT                              | GG                | 1946461270               |
| SNP_P3_87464_22438988 | NC_021166.1    | Ca_kabuli_chr07 | 22438988                | AA                              | GG                | 1946461272               |
| SNP_P3_87467_22456181 | NC_021166.1    | Ca_kabuli_chr07 | 22456181                | TT                              | GG                | 1946461273               |
| SNP_P3_87468_22456581 | NC_021166.1    | Ca_kabuli_chr07 | 22456581                | TT                              | CC                | 1946461274               |
| SNP_P3_87470_22458848 | NC_021166.1    | Ca_kabuli_chr07 | 22458848                | CC                              | TT                | 1946461275               |
| SNP_P3_87471_22472165 | NC_021166.1    | Ca_kabuli_chr07 | 22472165                | GG                              | AA                | 1946461276               |
| SNP_P3_87472_22497353 | NC_021166.1    | Ca_kabuli_chr07 | 22497353                | TT                              | CC                | 1946461277               |
| SNP_P3_87474_22527751 | NC_021166.1    | Ca_kabuli_chr07 | 22527751                | GG                              | AA                | 1946461278               |
| SNP_P3_87475_22533011 | NC_021166.1    | Ca_kabuli_chr07 | 22533011                | AA                              | GG                | 1946461279               |
| SNP_P3_87476_22533026 | NC_021166.1    | Ca_kabuli_chr07 | 22533026                | AA                              | GG                | 1946461280               |
| SNP_P3_87477_22534347 | NC_021166.1    | Ca_kabuli_chr07 | 22534347                | GG                              | AA                | 1946461282               |
| SNP_P3_87478_22549829 | NC_021166.1    | Ca_kabuli_chr07 | 22549829                | TT                              | CC                | 1946461283               |
| SNP_P3_87479_22564829 | NC_021166.1    | Ca_kabuli_chr07 | 22564829                | AA                              | TT                | 1946461285               |
| SNP_P3_87480_22564852 | NC_021166.1    | Ca_kabuli_chr07 | 22564852                | TT                              | GG                | 1946461286               |
| SNP_P3_87481_22565175 | NC_021166.1    | Ca_kabuli_chr07 | 22565175                | GG                              | AA                | 1946461287               |
| SNP_P3_87482_22565198 | NC_021166.1    | Ca_kabuli_chr07 | 22565198                | AA                              | TT                | 1946461289               |
| SNP_P3_87485_22587551 | NC_021166.1    | Ca_kabuli_chr07 | 22587551                | CC                              | AA                | 1946461290               |
| SNP_P3_87486_22597486 | NC_021166.1    | Ca_kabuli_chr07 | 22597486                | AA                              | GG                | 1946461292               |
| SNP_P3_87487_22597672 | NC_021166.1    | Ca_kabuli_chr07 | 22597672                | TT                              | AA                | 1946461293               |
| SNP_P3_87488_22597677 | NC_021166.1    | Ca_kabuli_chr07 | 22597677                | CC                              | AA                | 1946461295               |
| SNP_P3_87489_22598081 | NC_021166.1    | Ca_kabuli_chr07 | 22598081                | TT                              | CC                | 1946461296               |
| SNP_P3_87490_22598128 | NC_021166.1    | Ca_kabuli_chr07 | 22598128                | CC                              | TT                | 1946461298               |
| SNP_P3_87491_22598137 | NC_021166.1    | Ca_kabuli_chr07 | 22598137                | AA                              | GG                | 1946461299               |

| SNPs IDs              | Chromosome IDs | Chromosomes     | Physical positions (bp) | CDC Frontier (Reference genome) | (Pusa 256 & HPNB) | NCBI SNPdb Accession IDs |
|-----------------------|----------------|-----------------|-------------------------|---------------------------------|-------------------|--------------------------|
| SNP_P3_87493_22664292 | NC_021166.1    | Ca_kabuli_chr07 | 22664292                | AA                              | GG                | 1946461301               |
| SNP_P3_87495_22678095 | NC_021166.1    | Ca_kabuli_chr07 | 22678095                | TT                              | CC                | 1946461303               |
| SNP_P3_87497_22700524 | NC_021166.1    | Ca_kabuli_chr07 | 22700524                | CC                              | TT                | 1946461304               |
| SNP_P3_87498_22700532 | NC_021166.1    | Ca_kabuli_chr07 | 22700532                | AA                              | CC                | 1946461306               |
| SNP_P3_87499_22700549 | NC_021166.1    | Ca_kabuli_chr07 | 22700549                | CC                              | TT                | 1946461307               |
| SNP_P3_87500_22700837 | NC_021166.1    | Ca_kabuli_chr07 | 22700837                | GG                              | AA                | 1946461309               |
| SNP_P3_87501_22700880 | NC_021166.1    | Ca_kabuli_chr07 | 22700880                | GG                              | AA                | 1946461310               |
| SNP_P3_87502_22700892 | NC_021166.1    | Ca_kabuli_chr07 | 22700892                | AA                              | CC                | 1946461312               |
| SNP_P3_87503_22700896 | NC_021166.1    | Ca_kabuli_chr07 | 22700896                | AA                              | GG                | 1946461313               |
| SNP_P3_87504_22700898 | NC_021166.1    | Ca_kabuli_chr07 | 22700898                | AA                              | GG                | 1946461316               |
| SNP_P3_87505_22700903 | NC_021166.1    | Ca_kabuli_chr07 | 22700903                | CC                              | TT                | 1946461317               |
| SNP_P3_87506_22712787 | NC_021166.1    | Ca_kabuli_chr07 | 22712787                | AA                              | GG                | 1946461318               |
| SNP_P3_87507_22718942 | NC_021166.1    | Ca_kabuli_chr07 | 22718942                | CC                              | AA                | 1946461319               |
| SNP_P3_87508_22728209 | NC_021166.1    | Ca_kabuli_chr07 | 22728209                | TT                              | CC                | 1946461320               |
| SNP_P3_87509_22742213 | NC_021166.1    | Ca_kabuli_chr07 | 22742213                | AA                              | TT                | 1946461321               |
| SNP_P3_87510_22742433 | NC_021166.1    | Ca_kabuli_chr07 | 22742433                | TT                              | CC                | 1946461323               |
| SNP_P3_87511_22742511 | NC_021166.1    | Ca_kabuli_chr07 | 22742511                | AA                              | GG                | 1946461324               |
| SNP_P3_87513_22745142 | NC_021166.1    | Ca_kabuli_chr07 | 22745142                | TT                              | AA                | 1946461326               |
| SNP_P3_87514_22753944 | NC_021166.1    | Ca_kabuli_chr07 | 22753944                | AA                              | GG                | 1946461327               |
| SNP_P3_87515_22796241 | NC_021166.1    | Ca_kabuli_chr07 | 22796241                | AA                              | GG                | 1946461329               |
| SNP_P3_87516_22803745 | NC_021166.1    | Ca_kabuli_chr07 | 22803745                | GG                              | AA                | 1946461330               |
| SNP_P3_87517_22803878 | NC_021166.1    | Ca_kabuli_chr07 | 22803878                | GG                              | TT                | 1946461331               |
| SNP_P3_87518_22803913 | NC_021166.1    | Ca_kabuli_chr07 | 22803913                | AA                              | GG                | 1946461333               |
| SNP_P3_87519_22803926 | NC_021166.1    | Ca_kabuli_chr07 | 22803926                | CC                              | TT                | 1946461334               |
| SNP_P3_87520_22817425 | NC_021166.1    | Ca_kabuli_chr07 | 22817425                | AA                              | GG                | 1946461336               |
| SNP_P3_87521_22861333 | NC_021166.1    | Ca_kabuli_chr07 | 22861333                | TT                              | GG                | 1946461337               |
| SNP_P3_87522_22863835 | NC_021166.1    | Ca_kabuli_chr07 | 22863835                | CC                              | TT                | 1946461339               |
| SNP_P3_87524_22864210 | NC_021166.1    | Ca_kabuli_chr07 | 22864210                | GG                              | CC                | 1946461341               |
| SNP_P3_87525_22864273 | NC_021166.1    | Ca_kabuli_chr07 | 22864273                | TT                              | CC                | 1946461342               |
| SNP_P3_87526_22864289 | NC_021166.1    | Ca_kabuli_chr07 | 22864289                | CC                              | TT                | 1946461343               |
| SNP_P3_87527_22864330 | NC_021166.1    | Ca_kabuli_chr07 | 22864330                | GG                              | AA                | 1946461345               |
| SNP_P3_87528_22885728 | NC_021166.1    | Ca_kabuli_chr07 | 22885728                | CC                              | TT                | 1946461346               |
| SNP_P3_87529_22886153 | NC_021166.1    | Ca_kabuli_chr07 | 22886153                | TT                              | CC                | 1946461348               |
| SNP_P3_87530_22886197 | NC_021166.1    | Ca_kabuli_chr07 | 22886197                | AA                              | GG                | 1946461349               |
| SNP_P3_87531_22886198 | NC_021166.1    | Ca_kabuli_chr07 | 22886198                | TT                              | CC                | 1946461351               |
| SNP_P3_87532_22894489 | NC_021166.1    | Ca_kabuli_chr07 | 22894489                | GG                              | AA                | 1946461352               |
| SNP_P3_87535_22912885 | NC_021166.1    | Ca_kabuli_chr07 | 22912885                | CC                              | TT                | 1946461354               |
| SNP_P3_87536_22921680 | NC_021166.1    | Ca_kabuli_chr07 | 22921680                | CC                              | AA                | 1946461355               |
| SNP_P3_87537_22922025 | NC_021166.1    | Ca_kabuli_chr07 | 22922025                | AA                              | GG                | 1946461357               |
| SNP_P3_87538_22922128 | NC_021166.1    | Ca_kabuli_chr07 | 22922128                | GG                              | TT                | 1946461359               |
| SNP_P3_87539_22927159 | NC_021166.1    | Ca_kabuli_chr07 | 22927159                | TT                              | CC                | 1946461360               |
| SNP_P3_87540_22931923 | NC_021166.1    | Ca_kabuli_chr07 | 22931923                | CC                              | AA                | 1946461362               |

| SNPs IDs              | Chromosome IDs | Chromosomes     | Physical positions (bp) | CDC Frontier (Reference genome) | (Pusa 256 & HPNB) | NCBI SNPdb Accession IDs |
|-----------------------|----------------|-----------------|-------------------------|---------------------------------|-------------------|--------------------------|
| SNP_P3_87541_22941408 | NC_021166.1    | Ca_kabuli_chr07 | 22941408                | TT                              | CC                | 1946461363               |
| SNP_P3_87543_22947030 | NC_021166.1    | Ca_kabuli_chr07 | 22947030                | TT                              | CC                | 1946461365               |
| SNP_P3_87544_22953449 | NC_021166.1    | Ca_kabuli_chr07 | 22953449                | AA                              | TT                | 1946461366               |
| SNP_P3_87546_22961659 | NC_021166.1    | Ca_kabuli_chr07 | 22961659                | AA                              | GG                | 1946461367               |
| SNP_P3_87547_22962057 | NC_021166.1    | Ca_kabuli_chr07 | 22962057                | TT                              | AA                | 1946461369               |
| SNP_P3_87548_22964630 | NC_021166.1    | Ca_kabuli_chr07 | 22964630                | AA                              | TT                | 1946461370               |
| SNP_P3_87549_22969438 | NC_021166.1    | Ca_kabuli_chr07 | 22969438                | CC                              | TT                | 1946461372               |
| SNP_P3_87550_22969875 | NC_021166.1    | Ca_kabuli_chr07 | 22969875                | TT                              | CC                | 1946461373               |
| SNP_P3_87551_22969878 | NC_021166.1    | Ca_kabuli_chr07 | 22969878                | GG                              | TT                | 1946461375               |
| SNP_P3_87553_22969944 | NC_021166.1    | Ca_kabuli_chr07 | 22969944                | AA                              | GG                | 1946461377               |
| SNP_P3_87554_22977974 | NC_021166.1    | Ca_kabuli_chr07 | 22977974                | GG                              | CC                | 1946461378               |
| SNP_P3_87555_22980318 | NC_021166.1    | Ca_kabuli_chr07 | 22980318                | CC                              | TT                | 1946461380               |
| SNP_P3_87556_22992416 | NC_021166.1    | Ca_kabuli_chr07 | 22992416                | AA                              | CC                | 1946461381               |
| SNP_P3_87557_22992474 | NC_021166.1    | Ca_kabuli_chr07 | 22992474                | AA                              | GG                | 1946461383               |
| SNP_P3_87558_22992492 | NC_021166.1    | Ca_kabuli_chr07 | 22992492                | GG                              | AA                | 1946461384               |
| SNP_P3_87559_22992561 | NC_021166.1    | Ca_kabuli_chr07 | 22992561                | CC                              | TT                | 1946461386               |
| SNP_P3_87560_22992570 | NC_021166.1    | Ca_kabuli_chr07 | 22992570                | TT                              | GG                | 1946461387               |
| SNP_P3_87561_22992625 | NC_021166.1    | Ca_kabuli_chr07 | 22992625                | AA                              | GG                | 1946461389               |
| SNP_P3_87562_22992700 | NC_021166.1    | Ca_kabuli_chr07 | 22992700                | AA                              | TT                | 1946461390               |
| SNP_P3_87563_22992765 | NC_021166.1    | Ca_kabuli_chr07 | 22992765                | CC                              | TT                | 1946461392               |
| SNP_P3_87564_22992802 | NC_021166.1    | Ca_kabuli_chr07 | 22992802                | AA                              | CC                | 1946461393               |
| SNP_P3_87565_22992867 | NC_021166.1    | Ca_kabuli_chr07 | 22992867                | TT                              | CC                | 1946461395               |
| SNP_P3_87566_22992878 | NC_021166.1    | Ca_kabuli_chr07 | 22992878                | AA                              | GG                | 1946461396               |
| SNP_P3_87567_22992915 | NC_021166.1    | Ca_kabuli_chr07 | 22992915                | CC                              | TT                | 1946461398               |
| SNP_P3_87568_22992985 | NC_021166.1    | Ca_kabuli_chr07 | 22992985                | CC                              | AA                | 1946461399               |
| SNP_P3_87569_22992999 | NC_021166.1    | Ca_kabuli_chr07 | 22992999                | CC                              | TT                | 1946461401               |
| SNP_P3_87570_22994062 | NC_021166.1    | Ca_kabuli_chr07 | 22994062                | AA                              | CC                | 1946461402               |
| SNP_P3_87571_22995772 | NC_021166.1    | Ca_kabuli_chr07 | 22995772                | AA                              | GG                | 1946461404               |
| SNP_P3_87572_22995814 | NC_021166.1    | Ca_kabuli_chr07 | 22995814                | CC                              | TT                | 1946461405               |
| SNP_P3_87573_22995926 | NC_021166.1    | Ca_kabuli_chr07 | 22995926                | TT                              | CC                | 1946461407               |
| SNP_P3_87574_23009017 | NC_021166.1    | Ca_kabuli_chr07 | 23009017                | CC                              | TT                | 1946461408               |
| SNP_P3_87575_23037533 | NC_021166.1    | Ca_kabuli_chr07 | 23037533                | CC                              | TT                | 1946461410               |
| SNP_P3_87576_23037742 | NC_021166.1    | Ca_kabuli_chr07 | 23037742                | TT                              | AA                | 1946461411               |
| SNP_P3_87577_23037743 | NC_021166.1    | Ca_kabuli_chr07 | 23037743                | TT                              | AA                | 1946461413               |
| SNP_P3_87578_23037778 | NC_021166.1    | Ca_kabuli_chr07 | 23037778                | AA                              | GG                | 1946461414               |
| SNP_P3_87579_23037780 | NC_021166.1    | Ca_kabuli_chr07 | 23037780                | AA                              | GG                | 1946461416               |
| SNP_P3_87580_23037800 | NC_021166.1    | Ca_kabuli_chr07 | 23037800                | GG                              | AA                | 1946461417               |
| SNP_P3_87581_23037996 | NC_021166.1    | Ca_kabuli_chr07 | 23037996                | TT                              | GG                | 1946461419               |
| SNP_P3_87582_23038063 | NC_021166.1    | Ca_kabuli_chr07 | 23038063                | GG                              | AA                | 1946461420               |
| SNP_P3_87583_23038213 | NC_021166.1    | Ca_kabuli_chr07 | 23038213                | GG                              | AA                | 1946461422               |
| SNP_P3_87584_23038305 | NC_021166.1    | Ca_kabuli_chr07 | 23038305                | CC                              | AA                | 1946461423               |
| SNP_P3_87585_23038312 | NC_021166.1    | Ca_kabuli_chr07 | 23038312                | TT                              | CC                | 1946461425               |

| SNPs IDs              | Chromosome IDs | Chromosomes     | Physical positions (bp) | CDC Frontier (Reference genome) | (Pusa 256 & HPNB) | NCBI SNPdb Accession IDs |
|-----------------------|----------------|-----------------|-------------------------|---------------------------------|-------------------|--------------------------|
| SNP_P3_87586_23038380 | NC_021166.1    | Ca_kabuli_chr07 | 23038380                | AA                              | GG                | 1946461426               |
| SNP_P3_87587_23038537 | NC_021166.1    | Ca_kabuli_chr07 | 23038537                | AA                              | TT                | 1946461428               |
| SNP_P3_87588_23040601 | NC_021166.1    | Ca_kabuli_chr07 | 23040601                | TT                              | CC                | 1946461429               |
| SNP_P3_87589_23041075 | NC_021166.1    | Ca_kabuli_chr07 | 23041075                | TT                              | GG                | 1946461431               |
| SNP_P3_87590_23049052 | NC_021166.1    | Ca_kabuli_chr07 | 23049052                | AA                              | CC                | 1946461432               |
| SNP_P3_87592_23078685 | NC_021166.1    | Ca_kabuli_chr07 | 23078685                | AA                              | GG                | 1946461434               |
| SNP_P3_87593_23085664 | NC_021166.1    | Ca_kabuli_chr07 | 23085664                | GG                              | AA                | 1946461435               |
| SNP_P3_87594_23126448 | NC_021166.1    | Ca_kabuli_chr07 | 23126448                | CC                              | TT                | 1946461437               |
| SNP_P3_87595_23127613 | NC_021166.1    | Ca_kabuli_chr07 | 23127613                | GG                              | AA                | 1946461438               |
| SNP_P3_87596_23163580 | NC_021166.1    | Ca_kabuli_chr07 | 23163580                | CC                              | TT                | 1946461440               |
| SNP_P3_87599_23191690 | NC_021166.1    | Ca_kabuli_chr07 | 23191690                | TT                              | GG                | 1946461441               |
| SNP_P3_87600_23193340 | NC_021166.1    | Ca_kabuli_chr07 | 23193340                | AA                              | GG                | 1946461443               |
| SNP_P3_87601_23193385 | NC_021166.1    | Ca_kabuli_chr07 | 23193385                | TT                              | AA                | 1946461444               |
| SNP_P3_87602_23193557 | NC_021166.1    | Ca_kabuli_chr07 | 23193557                | CC                              | TT                | 1946461446               |
| SNP_P3_87603_23193576 | NC_021166.1    | Ca_kabuli_chr07 | 23193576                | AA                              | GG                | 1946461447               |
| SNP_P3_87604_23193577 | NC_021166.1    | Ca_kabuli_chr07 | 23193577                | TT                              | CC                | 1946461449               |
| SNP_P3_87605_23193594 | NC_021166.1    | Ca_kabuli_chr07 | 23193594                | TT                              | CC                | 1946461450               |
| SNP_P3_87606_23193619 | NC_021166.1    | Ca_kabuli_chr07 | 23193619                | TT                              | GG                | 1946461452               |
| SNP_P3_87607_23204493 | NC_021166.1    | Ca_kabuli_chr07 | 23204493                | TT                              | CC                | 1946461453               |
| SNP_P3_87608_23230420 | NC_021166.1    | Ca_kabuli_chr07 | 23230420                | TT                              | GG                | 1946461455               |
| SNP_P3_87609_23230433 | NC_021166.1    | Ca_kabuli_chr07 | 23230433                | GG                              | AA                | 1946461456               |
| SNP_P3_87610_23231171 | NC_021166.1    | Ca_kabuli_chr07 | 23231171                | CC                              | TT                | 1946461458               |
| SNP_P3_87611_23241247 | NC_021166.1    | Ca_kabuli_chr07 | 23241247                | AA                              | CC                | 1946461459               |
| SNP_P3_87612_23241335 | NC_021166.1    | Ca_kabuli_chr07 | 23241335                | GG                              | AA                | 1946461461               |
| SNP_P3_87613_23241701 | NC_021166.1    | Ca_kabuli_chr07 | 23241701                | AA                              | CC                | 1946461462               |
| SNP_P3_87614_23246774 | NC_021166.1    | Ca_kabuli_chr07 | 23246774                | TT                              | CC                | 1946461464               |
| SNP_P3_87615_23247163 | NC_021166.1    | Ca_kabuli_chr07 | 23247163                | GG                              | AA                | 1946461465               |
| SNP_P3_87616_23247180 | NC_021166.1    | Ca_kabuli_chr07 | 23247180                | CC                              | TT                | 1946461467               |
| SNP_P3_87617_23248266 | NC_021166.1    | Ca_kabuli_chr07 | 23248266                | CC                              | TT                | 1946461468               |
| SNP_P3_87618_23248279 | NC_021166.1    | Ca_kabuli_chr07 | 23248279                | AA                              | GG                | 1946461469               |
| SNP_P3_87619_23255221 | NC_021166.1    | Ca_kabuli_chr07 | 23255221                | GG                              | AA                | 1946461471               |
| SNP_P3_87621_23279208 | NC_021166.1    | Ca_kabuli_chr07 | 23279208                | AA                              | TT                | 1946461472               |
| SNP_P3_87622_23279498 | NC_021166.1    | Ca_kabuli_chr07 | 23279498                | GG                              | AA                | 1946461474               |
| SNP_P3_87623_23279617 | NC_021166.1    | Ca_kabuli_chr07 | 23279617                | AA                              | GG                | 1946461475               |
| SNP_P3_87624_23282713 | NC_021166.1    | Ca_kabuli_chr07 | 23282713                | AA                              | GG                | 1946461477               |
| SNP_P3_87625_23284936 | NC_021166.1    | Ca_kabuli_chr07 | 23284936                | TT                              | CC                | 1946461478               |
| SNP_P3_87626_23285097 | NC_021166.1    | Ca_kabuli_chr07 | 23285097                | AA                              | TT                | 1946461480               |
| SNP_P3_87627_23285391 | NC_021166.1    | Ca_kabuli_chr07 | 23285391                | CC                              | GG                | 1946461481               |
| SNP_P3_87628_23285474 | NC_021166.1    | Ca_kabuli_chr07 | 23285474                | AA                              | CC                | 1946461483               |
| SNP_P3_87629_23296232 | NC_021166.1    | Ca_kabuli_chr07 | 23296232                | AA                              | GG                | 1946461484               |
| SNP_P3_87630_23342375 | NC_021166.1    | Ca_kabuli_chr07 | 23342375                | TT                              | GG                | 1946461486               |
| SNP_P3_87631_23348098 | NC_021166.1    | Ca_kabuli_chr07 | 23348098                | AA                              | GG                | 1946461487               |

| SNPs IDs              | Chromosome IDs | Chromosomes     | Physical positions (bp) | CDC Frontier (Reference genome) | (Pusa 256 & HPNB) | NCBI SNPdb Accession IDs |
|-----------------------|----------------|-----------------|-------------------------|---------------------------------|-------------------|--------------------------|
| SNP_P3_87632_23361630 | NC_021166.1    | Ca_kabuli_chr07 | 23361630                | GG                              | AA                | 1946461489               |
| SNP_P3_87633_23361677 | NC_021166.1    | Ca_kabuli_chr07 | 23361677                | GG                              | AA                | 1946461490               |
| SNP_P3_87634_23361706 | NC_021166.1    | Ca_kabuli_chr07 | 23361706                | CC                              | GG                | 1946461492               |
| SNP_P3_87635_23447825 | NC_021166.1    | Ca_kabuli_chr07 | 23447825                | CC                              | TT                | 1946461493               |
| SNP_P3_87638_23565168 | NC_021166.1    | Ca_kabuli_chr07 | 23565168                | TT                              | CC                | 1946461495               |
| SNP_P3_87640_23609782 | NC_021166.1    | Ca_kabuli_chr07 | 23609782                | GG                              | AA                | 1946461496               |
| SNP_P3_87641_23627458 | NC_021166.1    | Ca_kabuli_chr07 | 23627458                | AA                              | GG                | 1946461498               |
| SNP_P3_87642_23627473 | NC_021166.1    | Ca_kabuli_chr07 | 23627473                | AA                              | GG                | 1946461499               |
| SNP_P3_87643_23627488 | NC_021166.1    | Ca_kabuli_chr07 | 23627488                | AA                              | CC                | 1946461501               |
| SNP_P3_87646_23656788 | NC_021166.1    | Ca_kabuli_chr07 | 23656788                | TT                              | CC                | 1946461502               |
| SNP_P3_87647_23657144 | NC_021166.1    | Ca_kabuli_chr07 | 23657144                | GG                              | AA                | 1946461504               |
| SNP_P3_87648_23657164 | NC_021166.1    | Ca_kabuli_chr07 | 23657164                | CC                              | GG                | 1946461505               |
| SNP_P3_87649_23657176 | NC_021166.1    | Ca_kabuli_chr07 | 23657176                | AA                              | TT                | 1946461507               |
| SNP_P3_87650_23657252 | NC_021166.1    | Ca_kabuli_chr07 | 23657252                | GG                              | TT                | 1946461508               |
| SNP_P3_87651_23657255 | NC_021166.1    | Ca_kabuli_chr07 | 23657255                | GG                              | AA                | 1946461509               |
| SNP_P3_87652_23658567 | NC_021166.1    | Ca_kabuli_chr07 | 23658567                | AA                              | TT                | 1946461511               |
| SNP_P3_87653_23658570 | NC_021166.1    | Ca_kabuli_chr07 | 23658570                | AA                              | TT                | 1946461512               |
| SNP_P3_87654_23658571 | NC_021166.1    | Ca_kabuli_chr07 | 23658571                | TT                              | CC                | 1946461514               |
| SNP_P3_87655_23658590 | NC_021166.1    | Ca_kabuli_chr07 | 23658590                | GG                              | AA                | 1946461515               |
| SNP_P3_87656_23659720 | NC_021166.1    | Ca_kabuli_chr07 | 23659720                | AA                              | CC                | 1946461516               |
| SNP_P3_87657_23661573 | NC_021166.1    | Ca_kabuli_chr07 | 23661573                | AA                              | CC                | 1946461518               |
| SNP_P3_87658_23661579 | NC_021166.1    | Ca_kabuli_chr07 | 23661579                | AA                              | GG                | 1946461520               |
| SNP_P3_87659_23666431 | NC_021166.1    | Ca_kabuli_chr07 | 23666431                | AA                              | TT                | 1946461521               |
| SNP_P3_87660_23666495 | NC_021166.1    | Ca_kabuli_chr07 | 23666495                | CC                              | TT                | 1946461523               |
| SNP_P3_87663_23667863 | NC_021166.1    | Ca_kabuli_chr07 | 23667863                | CC                              | TT                | 1946461524               |
| SNP_P3_87664_23667867 | NC_021166.1    | Ca_kabuli_chr07 | 23667867                | AA                              | GG                | 1946461526               |
| SNP_P3_87665_23667882 | NC_021166.1    | Ca_kabuli_chr07 | 23667882                | CC                              | TT                | 1946461527               |
| SNP_P3_87666_23670170 | NC_021166.1    | Ca_kabuli_chr07 | 23670170                | TT                              | CC                | 1946461528               |
| SNP_P3_87667_23670196 | NC_021166.1    | Ca_kabuli_chr07 | 23670196                | CC                              | TT                | 1946461530               |
| SNP_P3_87668_23670250 | NC_021166.1    | Ca_kabuli_chr07 | 23670250                | GG                              | AA                | 1946461531               |
| SNP_P3_87670_23686395 | NC_021166.1    | Ca_kabuli_chr07 | 23686395                | AA                              | GG                | 1946461533               |
| SNP_P3_87672_23690890 | NC_021166.1    | Ca_kabuli_chr07 | 23690890                | AA                              | TT                | 1946461534               |
| SNP_P3_87673_23691041 | NC_021166.1    | Ca_kabuli_chr07 | 23691041                | AA                              | GG                | 1946461536               |
| SNP_P3_87674_23700398 | NC_021166.1    | Ca_kabuli_chr07 | 23700398                | TT                              | GG                | 1946461537               |
| SNP_P3_87676_23704515 | NC_021166.1    | Ca_kabuli_chr07 | 23704515                | CC                              | TT                | 1946461539               |
| SNP_P3_87677_23707932 | NC_021166.1    | Ca_kabuli_chr07 | 23707932                | GG                              | AA                | 1946461540               |
| SNP_P3_87678_23707935 | NC_021166.1    | Ca_kabuli_chr07 | 23707935                | AA                              | CC                | 1946461542               |
| SNP_P3_87679_23707981 | NC_021166.1    | Ca_kabuli_chr07 | 23707981                | AA                              | GG                | 1946461543               |
| SNP_P3_87680_23722914 | NC_021166.1    | Ca_kabuli_chr07 | 23722914                | GG                              | AA                | 1946461545               |
| SNP_P3_87682_23751486 | NC_021166.1    | Ca_kabuli_chr07 | 23751486                | GG                              | AA                | 1946461546               |
| SNP_P3_87684_23766530 | NC_021166.1    | Ca_kabuli_chr07 | 23766530                | GG                              | CC                | 1946461547               |
| SNP_P3_87685_23766879 | NC_021166.1    | Ca_kabuli_chr07 | 23766879                | AA                              | GG                | 1946461549               |

| SNPs IDs              | Chromosome IDs | Chromosomes     | Physical positions (bp) | CDC Frontier (Reference genome) | (Pusa 256 & HPNB) | NCBI SNPdb Accession IDs |
|-----------------------|----------------|-----------------|-------------------------|---------------------------------|-------------------|--------------------------|
| SNP_P3_87687_23804174 | NC_021166.1    | Ca_kabuli_chr07 | 23804174                | CC                              | TT                | 1946461550               |
| SNP_P3_87689_23807157 | NC_021166.1    | Ca_kabuli_chr07 | 23807157                | AA                              | GG                | 1946461552               |
| SNP_P3_87690_23807168 | NC_021166.1    | Ca_kabuli_chr07 | 23807168                | AA                              | GG                | 1946461553               |
| SNP_P3_87691_23807184 | NC_021166.1    | Ca_kabuli_chr07 | 23807184                | CC                              | TT                | 1946461555               |
| SNP_P3_87692_23807328 | NC_021166.1    | Ca_kabuli_chr07 | 23807328                | TT                              | AA                | 1946461556               |
| SNP_P3_87693_23807367 | NC_021166.1    | Ca_kabuli_chr07 | 23807367                | AA                              | TT                | 1946461558               |
| SNP_P3_87694_23807396 | NC_021166.1    | Ca_kabuli_chr07 | 23807396                | AA                              | GG                | 1946461559               |
| SNP_P3_87695_23807402 | NC_021166.1    | Ca_kabuli_chr07 | 23807402                | CC                              | TT                | 1946461561               |
| SNP_P3_87696_23807410 | NC_021166.1    | Ca_kabuli_chr07 | 23807410                | AA                              | GG                | 1946461562               |
| SNP_P3_87697_23807450 | NC_021166.1    | Ca_kabuli_chr07 | 23807450                | AA                              | TT                | 1946461563               |
| SNP_P3_87699_23808121 | NC_021166.1    | Ca_kabuli_chr07 | 23808121                | CC                              | TT                | 1946461565               |
| SNP_P3_87700_23811810 | NC_021166.1    | Ca_kabuli_chr07 | 23811810                | GG                              | TT                | 1946461566               |
| SNP_P3_87701_23812180 | NC_021166.1    | Ca_kabuli_chr07 | 23812180                | TT                              | GG                | 1946461568               |
| SNP_P3_87702_23812205 | NC_021166.1    | Ca_kabuli_chr07 | 23812205                | CC                              | TT                | 1946461569               |
| SNP_P3_87703_23812206 | NC_021166.1    | Ca_kabuli_chr07 | 23812206                | AA                              | CC                | 1946461571               |
| SNP_P3_87704_23812239 | NC_021166.1    | Ca_kabuli_chr07 | 23812239                | TT                              | CC                | 1946461572               |
| SNP_P3_87705_23812243 | NC_021166.1    | Ca_kabuli_chr07 | 23812243                | AA                              | GG                | 1946461574               |
| SNP_P3_87706_23812503 | NC_021166.1    | Ca_kabuli_chr07 | 23812503                | GG                              | AA                | 1946461575               |
| SNP_P3_87707_23814206 | NC_021166.1    | Ca_kabuli_chr07 | 23814206                | TT                              | CC                | 1946461577               |
| SNP_P3_87708_23826428 | NC_021166.1    | Ca_kabuli_chr07 | 23826428                | GG                              | AA                | 1946461578               |
| SNP_P3_87709_23835697 | NC_021166.1    | Ca_kabuli_chr07 | 23835697                | AA                              | GG                | 1946461579               |
| SNP_P3_87710_23839556 | NC_021166.1    | Ca_kabuli_chr07 | 23839556                | AA                              | TT                | 1946461581               |
| SNP_P3_87711_23839562 | NC_021166.1    | Ca_kabuli_chr07 | 23839562                | CC                              | TT                | 1946461582               |
| SNP_P3_87712_23839580 | NC_021166.1    | Ca_kabuli_chr07 | 23839580                | TT                              | CC                | 1946461584               |
| SNP_P3_87713_23839589 | NC_021166.1    | Ca_kabuli_chr07 | 23839589                | AA                              | CC                | 1946461585               |
| SNP_P3_87714_23839602 | NC_021166.1    | Ca_kabuli_chr07 | 23839602                | AA                              | CC                | 1946461587               |
| SNP_P3_87715_23849927 | NC_021166.1    | Ca_kabuli_chr07 | 23849927                | CC                              | TT                | 1946461588               |
| SNP_P3_87717_23850914 | NC_021166.1    | Ca_kabuli_chr07 | 23850914                | TT                              | AA                | 1946461589               |
| SNP_P3_87718_23850938 | NC_021166.1    | Ca_kabuli_chr07 | 23850938                | GG                              | CC                | 1946461591               |
| SNP_P3_87719_23863226 | NC_021166.1    | Ca_kabuli_chr07 | 23863226                | TT                              | CC                | 1946461592               |
| SNP_P3_87720_23879151 | NC_021166.1    | Ca_kabuli_chr07 | 23879151                | GG                              | TT                | 1946461594               |
| SNP_P3_87721_23879214 | NC_021166.1    | Ca_kabuli_chr07 | 23879214                | TT                              | AA                | 1946461595               |
| SNP_P3_87722_23879372 | NC_021166.1    | Ca_kabuli_chr07 | 23879372                | GG                              | TT                | 1946461597               |
| SNP_P3_87723_23879380 | NC_021166.1    | Ca_kabuli_chr07 | 23879380                | CC                              | TT                | 1946461598               |
| SNP_P3_87724_23879436 | NC_021166.1    | Ca_kabuli_chr07 | 23879436                | CC                              | AA                | 1946461600               |
| SNP_P3_87725_23879451 | NC_021166.1    | Ca_kabuli_chr07 | 23879451                | TT                              | AA                | 1946461601               |
| SNP_P3_87726_23879455 | NC_021166.1    | Ca_kabuli_chr07 | 23879455                | TT                              | CC                | 1946461603               |
| SNP_P3_87727_23879477 | NC_021166.1    | Ca_kabuli_chr07 | 23879477                | CC                              | TT                | 1946461604               |
| SNP_P3_87728_23879482 | NC_021166.1    | Ca_kabuli_chr07 | 23879482                | TT                              | AA                | 1946461606               |
| SNP_P3_87729_23879513 | NC_021166.1    | Ca_kabuli_chr07 | 23879513                | AA                              | TT                | 1946461607               |
| SNP_P3_87730_23879530 | NC_021166.1    | Ca_kabuli_chr07 | 23879530                | AA                              | CC                | 1946461608               |
| SNP_P3_87731_23879531 | NC_021166.1    | Ca_kabuli_chr07 | 23879531                | CC                              | AA                | 1946461610               |

| SNPs IDs              | Chromosome IDs | Chromosomes     | Physical positions (bp) | CDC Frontier (Reference genome) | (Pusa 256 & HPNB) | NCBI SNPdb Accession IDs |
|-----------------------|----------------|-----------------|-------------------------|---------------------------------|-------------------|--------------------------|
| SNP_P3_87732_23879576 | NC_021166.1    | Ca_kabuli_chr07 | 23879576                | GG                              | CC                | 1946461611               |
| SNP_P3_87734_23879684 | NC_021166.1    | Ca_kabuli_chr07 | 23879684                | GG                              | AA                | 1946461613               |
| SNP_P3_87735_23879685 | NC_021166.1    | Ca_kabuli_chr07 | 23879685                | CC                              | AA                | 1946461614               |
| SNP_P3_87736_23879690 | NC_021166.1    | Ca_kabuli_chr07 | 23879690                | GG                              | AA                | 1946461615               |
| SNP_P3_87737_23879728 | NC_021166.1    | Ca_kabuli_chr07 | 23879728                | AA                              | GG                | 1946461617               |
| SNP_P3_87738_23882801 | NC_021166.1    | Ca_kabuli_chr07 | 23882801                | AA                              | GG                | 1946461618               |
| SNP_P3_87740_23894186 | NC_021166.1    | Ca_kabuli_chr07 | 23894186                | GG                              | AA                | 1946461620               |
| SNP_P3_87741_23902081 | NC_021166.1    | Ca_kabuli_chr07 | 23902081                | TT                              | CC                | 1946461621               |
| SNP_P3_87742_23902427 | NC_021166.1    | Ca_kabuli_chr07 | 23902427                | AA                              | GG                | 1946461623               |
| SNP_P3_87743_23902457 | NC_021166.1    | Ca_kabuli_chr07 | 23902457                | GG                              | TT                | 1946461624               |
| SNP_P3_87744_23902464 | NC_021166.1    | Ca_kabuli_chr07 | 23902464                | TT                              | CC                | 1946461626               |
| SNP_P3_87745_23903545 | NC_021166.1    | Ca_kabuli_chr07 | 23903545                | GG                              | AA                | 1946461627               |
| SNP_P3_87747_23906624 | NC_021166.1    | Ca_kabuli_chr07 | 23906624                | CC                              | TT                | 1946461629               |
| SNP_P3_87748_23906656 | NC_021166.1    | Ca_kabuli_chr07 | 23906656                | TT                              | CC                | 1946461630               |
| SNP_P3_87749_23907246 | NC_021166.1    | Ca_kabuli_chr07 | 23907246                | GG                              | TT                | 1946461631               |
| SNP_P3_87751_23907497 | NC_021166.1    | Ca_kabuli_chr07 | 23907497                | TT                              | GG                | 1946461633               |
| SNP_P3_87753_23915138 | NC_021166.1    | Ca_kabuli_chr07 | 23915138                | TT                              | CC                | 1946461634               |
| SNP_P3_87754_23915142 | NC_021166.1    | Ca_kabuli_chr07 | 23915142                | CC                              | AA                | 1946461636               |
| SNP_P3_87755_23917858 | NC_021166.1    | Ca_kabuli_chr07 | 23917858                | GG                              | TT                | 1946461637               |
| SNP_P3_87756_23931560 | NC_021166.1    | Ca_kabuli_chr07 | 23931560                | TT                              | AA                | 1946461638               |
| SNP_P3_87758_23977116 | NC_021166.1    | Ca_kabuli_chr07 | 23977116                | GG                              | AA                | 1946461640               |
| SNP_P3_87759_23990490 | NC_021166.1    | Ca_kabuli_chr07 | 23990490                | GG                              | AA                | 1946461641               |
| SNP_P3_87760_23997039 | NC_021166.1    | Ca_kabuli_chr07 | 23997039                | AA                              | GG                | 1946461643               |
| SNP_P3_87761_23997044 | NC_021166.1    | Ca_kabuli_chr07 | 23997044                | AA                              | GG                | 1946461644               |
| SNP_P3_87762_23997064 | NC_021166.1    | Ca_kabuli_chr07 | 23997064                | CC                              | TT                | 1946461646               |
| SNP_P3_87763_23997075 | NC_021166.1    | Ca_kabuli_chr07 | 23997075                | AA                              | CC                | 1946461647               |
| SNP_P3_87764_24000826 | NC_021166.1    | Ca_kabuli_chr07 | 24000826                | GG                              | AA                | 1946461649               |
| SNP_P3_87765_24000856 | NC_021166.1    | Ca_kabuli_chr07 | 24000856                | CC                              | TT                | 1946461650               |
| SNP_P3_87766_24001315 | NC_021166.1    | Ca_kabuli_chr07 | 24001315                | AA                              | GG                | 1946461652               |
| SNP_P3_87767_24001324 | NC_021166.1    | Ca_kabuli_chr07 | 24001324                | TT                              | GG                | 1946461653               |
| SNP_P3_87768_24001338 | NC_021166.1    | Ca_kabuli_chr07 | 24001338                | CC                              | TT                | 1946461655               |
| SNP_P3_87769_24001343 | NC_021166.1    | Ca_kabuli_chr07 | 24001343                | TT                              | CC                | 1946461656               |
| SNP_P3_87770_24001346 | NC_021166.1    | Ca_kabuli_chr07 | 24001346                | TT                              | CC                | 1946461658               |
| SNP_P3_87771_24016647 | NC_021166.1    | Ca_kabuli_chr07 | 24016647                | CC                              | TT                | 1946461659               |
| SNP_P3_87773_24027849 | NC_021166.1    | Ca_kabuli_chr07 | 24027849                | AA                              | GG                | 1946461660               |
| SNP_P3_87775_24035561 | NC_021166.1    | Ca_kabuli_chr07 | 24035561                | GG                              | CC                | 1946461661               |
| SNP_P3_87776_24037605 | NC_021166.1    | Ca_kabuli_chr07 | 24037605                | TT                              | CC                | 1946461662               |
| SNP_P3_87777_24081314 | NC_021166.1    | Ca_kabuli_chr07 | 24081314                | GG                              | AA                | 1946461663               |
| SNP_P3_87779_24098257 | NC_021166.1    | Ca_kabuli_chr07 | 24098257                | TT                              | CC                | 1946461664               |
| SNP_P3_87780_24098572 | NC_021166.1    | Ca_kabuli_chr07 | 24098572                | TT                              | CC                | 1946461665               |
| SNP_P3_87781_24099371 | NC_021166.1    | Ca_kabuli_chr07 | 24099371                | AA                              | TT                | 1946461666               |
| SNP_P3_87782_24099417 | NC_021166.1    | Ca_kabuli_chr07 | 24099417                | GG                              | CC                | 1946461667               |



| SNPs IDs              | Chromosome IDs | Chromosomes     | Physical positions (bp) | CDC Frontier (Reference genome) | (Pusa 256 & HPNB) | NCBI SNPdb Accession IDs |
|-----------------------|----------------|-----------------|-------------------------|---------------------------------|-------------------|--------------------------|
| SNP_P3_87783_24100778 | NC_021166.1    | Ca_kabuli_chr07 | 24100778                | TT                              | CC                | 1946461668               |
| SNP_P3_87784_24125293 | NC_021166.1    | Ca_kabuli_chr07 | 24125293                | TT                              | CC                | 1946461669               |
| SNP_P3_87785_24129128 | NC_021166.1    | Ca_kabuli_chr07 | 24129128                | TT                              | AA                | 1946461670               |
| SNP_P3_87786_24130541 | NC_021166.1    | Ca_kabuli_chr07 | 24130541                | GG                              | TT                | 1946461672               |
| SNP_P3_87787_24162090 | NC_021166.1    | Ca_kabuli_chr07 | 24162090                | TT                              | AA                | 1946461674               |
| SNP_P3_87789_24189186 | NC_021166.1    | Ca_kabuli_chr07 | 24189186                | CC                              | GG                | 1946461675               |
| SNP_P3_87790_24191347 | NC_021166.1    | Ca_kabuli_chr07 | 24191347                | TT                              | AA                | 1946461676               |
| SNP_P3_87792_24209910 | NC_021166.1    | Ca_kabuli_chr07 | 24209910                | GG                              | AA                | 1946461678               |
| SNP_P3_87793_24209925 | NC_021166.1    | Ca_kabuli_chr07 | 24209925                | TT                              | GG                | 1946461679               |
| SNP_P3_87794_24209927 | NC_021166.1    | Ca_kabuli_chr07 | 24209927                | AA                              | GG                | 1946461681               |
| SNP_P3_87795_24215025 | NC_021166.1    | Ca_kabuli_chr07 | 24215025                | CC                              | TT                | 1946461682               |
| SNP_P3_87796_24258576 | NC_021166.1    | Ca_kabuli_chr07 | 24258576                | CC                              | AA                | 1946461684               |
| SNP_P3_87797_24258659 | NC_021166.1    | Ca_kabuli_chr07 | 24258659                | AA                              | CC                | 1946461685               |
| SNP_P3_87798_24259494 | NC_021166.1    | Ca_kabuli_chr07 | 24259494                | GG                              | AA                | 1946461687               |
| SNP_P3_87799_24260137 | NC_021166.1    | Ca_kabuli_chr07 | 24260137                | TT                              | GG                | 1946461688               |
| SNP_P3_87800_24260172 | NC_021166.1    | Ca_kabuli_chr07 | 24260172                | CC                              | AA                | 1946461689               |
| SNP_P3_87801_24260634 | NC_021166.1    | Ca_kabuli_chr07 | 24260634                | GG                              | AA                | 1946461691               |
| SNP_P3_87802_24260639 | NC_021166.1    | Ca_kabuli_chr07 | 24260639                | GG                              | AA                | 1946461692               |
| SNP_P3_87803_24260649 | NC_021166.1    | Ca_kabuli_chr07 | 24260649                | AA                              | GG                | 1946461694               |
| SNP_P3_87804_24260657 | NC_021166.1    | Ca_kabuli_chr07 | 24260657                | TT                              | AA                | 1946461695               |
| SNP_P3_87805_24260681 | NC_021166.1    | Ca_kabuli_chr07 | 24260681                | CC                              | AA                | 1946461697               |
| SNP_P3_87806_24284079 | NC_021166.1    | Ca_kabuli_chr07 | 24284079                | TT                              | AA                | 1946461698               |
| SNP_P3_87807_24284718 | NC_021166.1    | Ca_kabuli_chr07 | 24284718                | TT                              | AA                | 1946461700               |
| SNP_P3_87808_24285014 | NC_021166.1    | Ca_kabuli_chr07 | 24285014                | CC                              | TT                | 1946461702               |
| SNP_P3_87809_24285050 | NC_021166.1    | Ca_kabuli_chr07 | 24285050                | AA                              | GG                | 1946461703               |
| SNP_P3_87810_24285077 | NC_021166.1    | Ca_kabuli_chr07 | 24285077                | TT                              | CC                | 1946461704               |
| SNP_P3_87811_24285081 | NC_021166.1    | Ca_kabuli_chr07 | 24285081                | CC                              | GG                | 1946461706               |
| SNP_P3_87812_24286261 | NC_021166.1    | Ca_kabuli_chr07 | 24286261                | TT                              | CC                | 1946461707               |
| SNP_P3_87813_24286470 | NC_021166.1    | Ca_kabuli_chr07 | 24286470                | CC                              | TT                | 1946461709               |
| SNP_P3_87814_24290701 | NC_021166.1    | Ca_kabuli_chr07 | 24290701                | CC                              | TT                | 1946461710               |
| SNP_P3_87815_24290888 | NC_021166.1    | Ca_kabuli_chr07 | 24290888                | GG                              | CC                | 1946461712               |
| SNP_P3_87816_24290906 | NC_021166.1    | Ca_kabuli_chr07 | 24290906                | CC                              | TT                | 1946461713               |
| SNP_P3_87817_24290913 | NC_021166.1    | Ca_kabuli_chr07 | 24290913                | TT                              | CC                | 1946461715               |
| SNP_P3_87818_24290915 | NC_021166.1    | Ca_kabuli_chr07 | 24290915                | GG                              | AA                | 1946461716               |
| SNP_P3_87819_24290974 | NC_021166.1    | Ca_kabuli_chr07 | 24290974                | CC                              | TT                | 1946461718               |
| SNP_P3_87820_24329192 | NC_021166.1    | Ca_kabuli_chr07 | 24329192                | AA                              | CC                | 1946461719               |
| SNP_P3_87821_24329203 | NC_021166.1    | Ca_kabuli_chr07 | 24329203                | AA                              | CC                | 1946461721               |
| SNP_P3_87822_24329249 | NC_021166.1    | Ca_kabuli_chr07 | 24329249                | AA                              | GG                | 1946461722               |
| SNP_P3_87823_24329586 | NC_021166.1    | Ca_kabuli_chr07 | 24329586                | GG                              | AA                | 1946461723               |
| SNP_P3_87824_24329591 | NC_021166.1    | Ca_kabuli_chr07 | 24329591                | AA                              | GG                | 1946461725               |
| SNP_P3_87825_24335312 | NC_021166.1    | Ca_kabuli_chr07 | 24335312                | TT                              | GG                | 1946461727               |
| SNP_P3_87826_24335360 | NC_021166.1    | Ca_kabuli_chr07 | 24335360                | GG                              | AA                | 1946461728               |

| SNPs IDs              | Chromosome IDs | Chromosomes     | Physical positions (bp) | CDC Frontier (Reference genome) | (Pusa 256 & HPNB) | NCBI SNPdb Accession IDs |
|-----------------------|----------------|-----------------|-------------------------|---------------------------------|-------------------|--------------------------|
| SNP_P3_87827_24338115 | NC_021166.1    | Ca_kabuli_chr07 | 24338115                | CC                              | TT                | 1946461730               |
| SNP_P3_87828_24338131 | NC_021166.1    | Ca_kabuli_chr07 | 24338131                | CC                              | TT                | 1946461731               |
| SNP_P3_87829_24338183 | NC_021166.1    | Ca_kabuli_chr07 | 24338183                | CC                              | TT                | 1946461732               |
| SNP_P3_87830_24345906 | NC_021166.1    | Ca_kabuli_chr07 | 24345906                | CC                              | TT                | 1946461734               |
| SNP_P3_87832_24347987 | NC_021166.1    | Ca_kabuli_chr07 | 24347987                | AA                              | GG                | 1946461735               |
| SNP_P3_87833_24348004 | NC_021166.1    | Ca_kabuli_chr07 | 24348004                | GG                              | TT                | 1946461737               |
| SNP_P3_87834_24348047 | NC_021166.1    | Ca_kabuli_chr07 | 24348047                | GG                              | AA                | 1946461738               |
| SNP_P3_87835_24348159 | NC_021166.1    | Ca_kabuli_chr07 | 24348159                | TT                              | CC                | 1946461740               |
| SNP_P3_87836_24348315 | NC_021166.1    | Ca_kabuli_chr07 | 24348315                | CC                              | TT                | 1946461741               |
| SNP_P3_87837_24348348 | NC_021166.1    | Ca_kabuli_chr07 | 24348348                | AA                              | GG                | 1946461743               |
| SNP_P3_87839_24348384 | NC_021166.1    | Ca_kabuli_chr07 | 24348384                | TT                              | CC                | 1946461744               |
| SNP_P3_87840_24348439 | NC_021166.1    | Ca_kabuli_chr07 | 24348439                | AA                              | GG                | 1946461746               |
| SNP_P3_87842_24348544 | NC_021166.1    | Ca_kabuli_chr07 | 24348544                | CC                              | TT                | 1946461747               |
| SNP_P3_87843_24348563 | NC_021166.1    | Ca_kabuli_chr07 | 24348563                | GG                              | AA                | 1946461749               |
| SNP_P3_87844_24348627 | NC_021166.1    | Ca_kabuli_chr07 | 24348627                | CC                              | TT                | 1946461750               |
| SNP_P3_87845_24348657 | NC_021166.1    | Ca_kabuli_chr07 | 24348657                | AA                              | TT                | 1946461751               |
| SNP_P3_87846_24348728 | NC_021166.1    | Ca_kabuli_chr07 | 24348728                | CC                              | TT                | 1946461753               |
| SNP_P3_87847_24348753 | NC_021166.1    | Ca_kabuli_chr07 | 24348753                | TT                              | GG                | 1946461755               |
| SNP_P3_87848_24348786 | NC_021166.1    | Ca_kabuli_chr07 | 24348786                | GG                              | AA                | 1946461756               |
| SNP_P3_87849_24360437 | NC_021166.1    | Ca_kabuli_chr07 | 24360437                | GG                              | AA                | 1946461758               |
| SNP_P3_87850_24360482 | NC_021166.1    | Ca_kabuli_chr07 | 24360482                | GG                              | AA                | 1946461759               |
| SNP_P3_87851_24363825 | NC_021166.1    | Ca_kabuli_chr07 | 24363825                | TT                              | CC                | 1946461761               |
| SNP_P3_87852_24363947 | NC_021166.1    | Ca_kabuli_chr07 | 24363947                | CC                              | AA                | 1946461762               |
| SNP_P3_87853_24365838 | NC_021166.1    | Ca_kabuli_chr07 | 24365838                | TT                              | AA                | 1946461764               |
| SNP_P3_87854_24365851 | NC_021166.1    | Ca_kabuli_chr07 | 24365851                | GG                              | AA                | 1946461765               |
| SNP_P3_87855_24365880 | NC_021166.1    | Ca_kabuli_chr07 | 24365880                | AA                              | GG                | 1946461767               |
| SNP_P3_87856_24365906 | NC_021166.1    | Ca_kabuli_chr07 | 24365906                | CC                              | TT                | 1946461768               |
| SNP_P3_87857_24365928 | NC_021166.1    | Ca_kabuli_chr07 | 24365928                | GG                              | AA                | 1946461769               |
| SNP_P3_87858_24365969 | NC_021166.1    | Ca_kabuli_chr07 | 24365969                | TT                              | GG                | 1946461771               |
| SNP_P3_87859_24365970 | NC_021166.1    | Ca_kabuli_chr07 | 24365970                | TT                              | GG                | 1946461772               |
| SNP_P3_87861_24366144 | NC_021166.1    | Ca_kabuli_chr07 | 24366144                | TT                              | AA                | 1946461774               |
| SNP_P3_87862_24366351 | NC_021166.1    | Ca_kabuli_chr07 | 24366351                | CC                              | TT                | 1946461775               |
| SNP_P3_87863_24366397 | NC_021166.1    | Ca_kabuli_chr07 | 24366397                | CC                              | TT                | 1946461777               |
| SNP_P3_87864_24398436 | NC_021166.1    | Ca_kabuli_chr07 | 24398436                | CC                              | TT                | 1946461778               |
| SNP_P3_87865_24398870 | NC_021166.1    | Ca_kabuli_chr07 | 24398870                | TT                              | AA                | 1946461780               |
| SNP_P3_87866_24399051 | NC_021166.1    | Ca_kabuli_chr07 | 24399051                | AA                              | GG                | 1946461781               |
| SNP_P3_87867_24407565 | NC_021166.1    | Ca_kabuli_chr07 | 24407565                | GG                              | AA                | 1946461783               |
| SNP_P3_87868_24408991 | NC_021166.1    | Ca_kabuli_chr07 | 24408991                | TT                              | CC                | 1946461784               |
| SNP_P3_87869_24420621 | NC_021166.1    | Ca_kabuli_chr07 | 24420621                | TT                              | GG                | 1946461786               |
| SNP_P3_87871_24436536 | NC_021166.1    | Ca_kabuli_chr07 | 24436536                | TT                              | GG                | 1946461787               |
| SNP_P3_87872_24454650 | NC_021166.1    | Ca_kabuli_chr07 | 24454650                | GG                              | TT                | 1946461789               |
| SNP_P3_87873_24454901 | NC_021166.1    | Ca_kabuli_chr07 | 24454901                | GG                              | AA                | 1946461790               |

| SNPs IDs              | Chromosome IDs | Chromosomes     | Physical positions (bp) | CDC Frontier (Reference genome) | (Pusa 256 & HPNB) | NCBI SNPdb Accession IDs |
|-----------------------|----------------|-----------------|-------------------------|---------------------------------|-------------------|--------------------------|
| SNP_P3_87874_24454999 | NC_021166.1    | Ca_kabuli_chr07 | 24454999                | TT                              | GG                | 1946461792               |
| SNP_P3_87875_24456676 | NC_021166.1    | Ca_kabuli_chr07 | 24456676                | CC                              | TT                | 1946461793               |
| SNP_P3_87876_24456688 | NC_021166.1    | Ca_kabuli_chr07 | 24456688                | TT                              | AA                | 1946461794               |
| SNP_P3_87877_24456690 | NC_021166.1    | Ca_kabuli_chr07 | 24456690                | AA                              | GG                | 1946461796               |
| SNP_P3_87878_24456758 | NC_021166.1    | Ca_kabuli_chr07 | 24456758                | AA                              | CC                | 1946461797               |
| SNP_P3_87879_24457051 | NC_021166.1    | Ca_kabuli_chr07 | 24457051                | TT                              | CC                | 1946461799               |
| SNP_P3_87880_24457095 | NC_021166.1    | Ca_kabuli_chr07 | 24457095                | TT                              | CC                | 1946461800               |
| SNP_P3_87881_24457164 | NC_021166.1    | Ca_kabuli_chr07 | 24457164                | AA                              | CC                | 1946461802               |
| SNP_P3_87882_24458257 | NC_021166.1    | Ca_kabuli_chr07 | 24458257                | AA                              | GG                | 1946461803               |
| SNP_P3_87883_24462471 | NC_021166.1    | Ca_kabuli_chr07 | 24462471                | GG                              | AA                | 1946461805               |
| SNP_P3_87884_24467422 | NC_021166.1    | Ca_kabuli_chr07 | 24467422                | TT                              | CC                | 1946461806               |
| SNP_P3_87885_24485195 | NC_021166.1    | Ca_kabuli_chr07 | 24485195                | TT                              | CC                | 1946461808               |
| SNP_P3_87886_24485201 | NC_021166.1    | Ca_kabuli_chr07 | 24485201                | TT                              | CC                | 1946461809               |
| SNP_P3_87887_24485232 | NC_021166.1    | Ca_kabuli_chr07 | 24485232                | AA                              | TT                | 1946461811               |
| SNP_P3_87889_24485296 | NC_021166.1    | Ca_kabuli_chr07 | 24485296                | CC                              | TT                | 1946461812               |
| SNP_P3_87890_24485388 | NC_021166.1    | Ca_kabuli_chr07 | 24485388                | CC                              | TT                | 1946461814               |
| SNP_P3_87891_24485448 | NC_021166.1    | Ca_kabuli_chr07 | 24485448                | CC                              | AA                | 1946461815               |
| SNP_P3_87892_24485635 | NC_021166.1    | Ca_kabuli_chr07 | 24485635                | CC                              | GG                | 1946461817               |
| SNP_P3_87893_24485737 | NC_021166.1    | Ca_kabuli_chr07 | 24485737                | CC                              | AA                | 1946461818               |
| SNP_P3_87894_24485766 | NC_021166.1    | Ca_kabuli_chr07 | 24485766                | GG                              | CC                | 1946461820               |
| SNP_P3_87895_24485879 | NC_021166.1    | Ca_kabuli_chr07 | 24485879                | AA                              | TT                | 1946461821               |
| SNP_P3_87896_24485890 | NC_021166.1    | Ca_kabuli_chr07 | 24485890                | AA                              | CC                | 1946461823               |
| SNP_P3_87897_24486013 | NC_021166.1    | Ca_kabuli_chr07 | 24486013                | TT                              | GG                | 1946461824               |
| SNP_P3_87898_24486155 | NC_021166.1    | Ca_kabuli_chr07 | 24486155                | CC                              | TT                | 1946461825               |
| SNP_P3_87899_24486156 | NC_021166.1    | Ca_kabuli_chr07 | 24486156                | CC                              | TT                | 1946461827               |
| SNP_P3_87900_24486227 | NC_021166.1    | Ca_kabuli_chr07 | 24486227                | AA                              | GG                | 1946461828               |
| SNP_P3_87901_24486229 | NC_021166.1    | Ca_kabuli_chr07 | 24486229                | AA                              | GG                | 1946461830               |
| SNP_P3_87902_24487314 | NC_021166.1    | Ca_kabuli_chr07 | 24487314                | TT                              | CC                | 1946461831               |
| SNP_P3_87903_24487344 | NC_021166.1    | Ca_kabuli_chr07 | 24487344                | TT                              | CC                | 1946461833               |
| SNP_P3_87904_24488070 | NC_021166.1    | Ca_kabuli_chr07 | 24488070                | AA                              | GG                | 1946461834               |
| SNP_P3_87905_24492789 | NC_021166.1    | Ca_kabuli_chr07 | 24492789                | GG                              | AA                | 1946461836               |
| SNP_P3_87906_24492833 | NC_021166.1    | Ca_kabuli_chr07 | 24492833                | GG                              | CC                | 1946461838               |
| SNP_P3_87907_24493091 | NC_021166.1    | Ca_kabuli_chr07 | 24493091                | TT                              | AA                | 1946461839               |
| SNP_P3_87908_24493229 | NC_021166.1    | Ca_kabuli_chr07 | 24493229                | GG                              | AA                | 1946461841               |
| SNP_P3_87909_24493421 | NC_021166.1    | Ca_kabuli_chr07 | 24493421                | AA                              | TT                | 1946461842               |
| SNP_P3_87910_24493437 | NC_021166.1    | Ca_kabuli_chr07 | 24493437                | GG                              | CC                | 1946461844               |
| SNP_P3_87911_24493460 | NC_021166.1    | Ca_kabuli_chr07 | 24493460                | AA                              | TT                | 1946461845               |
| SNP_P3_87912_24493576 | NC_021166.1    | Ca_kabuli_chr07 | 24493576                | CC                              | AA                | 1946461847               |
| SNP_P3_87913_24494137 | NC_021166.1    | Ca_kabuli_chr07 | 24494137                | CC                              | TT                | 1946461848               |
| SNP_P3_87914_24494331 | NC_021166.1    | Ca_kabuli_chr07 | 24494331                | AA                              | CC                | 1946461850               |
| SNP_P3_87915_24494491 | NC_021166.1    | Ca_kabuli_chr07 | 24494491                | CC                              | TT                | 1946461851               |
| SNP_P3_87916_24494498 | NC_021166.1    | Ca_kabuli_chr07 | 24494498                | AA                              | CC                | 1946461853               |

| SNPs IDs              | Chromosome IDs | Chromosomes     | Physical positions (bp) | CDC Frontier (Reference genome) | (Pusa 256 & HPNB) | NCBI SNPdb Accession IDs |
|-----------------------|----------------|-----------------|-------------------------|---------------------------------|-------------------|--------------------------|
| SNP_P3_87917_24494714 | NC_021166.1    | Ca_kabuli_chr07 | 24494714                | CC                              | TT                | 1946461854               |
| SNP_P3_87918_24494715 | NC_021166.1    | Ca_kabuli_chr07 | 24494715                | TT                              | CC                | 1946461855               |
| SNP_P3_87919_24494831 | NC_021166.1    | Ca_kabuli_chr07 | 24494831                | TT                              | CC                | 1946461857               |
| SNP_P3_87921_24495121 | NC_021166.1    | Ca_kabuli_chr07 | 24495121                | AA                              | CC                | 1946461858               |
| SNP_P3_87922_24495864 | NC_021166.1    | Ca_kabuli_chr07 | 24495864                | CC                              | TT                | 1946461860               |
| SNP_P3_87923_24495920 | NC_021166.1    | Ca_kabuli_chr07 | 24495920                | CC                              | TT                | 1946461861               |
| SNP_P3_87924_24496292 | NC_021166.1    | Ca_kabuli_chr07 | 24496292                | AA                              | GG                | 1946461863               |
| SNP_P3_87925_24496524 | NC_021166.1    | Ca_kabuli_chr07 | 24496524                | TT                              | AA                | 1946461865               |
| SNP_P3_87926_24496618 | NC_021166.1    | Ca_kabuli_chr07 | 24496618                | GG                              | AA                | 1946461866               |
| SNP_P3_87927_24496712 | NC_021166.1    | Ca_kabuli_chr07 | 24496712                | CC                              | TT                | 1946461868               |
| SNP_P3_87928_24501847 | NC_021166.1    | Ca_kabuli_chr07 | 24501847                | GG                              | AA                | 1946461869               |
| SNP_P3_87929_24502013 | NC_021166.1    | Ca_kabuli_chr07 | 24502013                | GG                              | AA                | 1946461871               |
| SNP_P3_87930_24502190 | NC_021166.1    | Ca_kabuli_chr07 | 24502190                | CC                              | TT                | 1946461872               |
| SNP_P3_87931_24502193 | NC_021166.1    | Ca_kabuli_chr07 | 24502193                | GG                              | AA                | 1946461874               |
| SNP_P3_87932_24502258 | NC_021166.1    | Ca_kabuli_chr07 | 24502258                | GG                              | CC                | 1946461875               |
| SNP_P3_87934_24502298 | NC_021166.1    | Ca_kabuli_chr07 | 24502298                | CC                              | AA                | 1946461877               |
| SNP_P3_87935_24503296 | NC_021166.1    | Ca_kabuli_chr07 | 24503296                | CC                              | TT                | 1946461878               |
| SNP_P3_87936_24503372 | NC_021166.1    | Ca_kabuli_chr07 | 24503372                | GG                              | AA                | 1946461880               |
| SNP_P3_87937_24503833 | NC_021166.1    | Ca_kabuli_chr07 | 24503833                | GG                              | AA                | 1946461881               |
| SNP_P3_87938_24504110 | NC_021166.1    | Ca_kabuli_chr07 | 24504110                | TT                              | CC                | 1946461883               |
| SNP_P3_87939_24504212 | NC_021166.1    | Ca_kabuli_chr07 | 24504212                | GG                              | CC                | 1946461884               |
| SNP_P3_87940_24504220 | NC_021166.1    | Ca_kabuli_chr07 | 24504220                | CC                              | TT                | 1946461886               |
| SNP_P3_87941_24505226 | NC_021166.1    | Ca_kabuli_chr07 | 24505226                | TT                              | CC                | 1946461887               |
| SNP_P3_87942_24505403 | NC_021166.1    | Ca_kabuli_chr07 | 24505403                | GG                              | AA                | 1946461889               |
| SNP_P3_87943_24525455 | NC_021166.1    | Ca_kabuli_chr07 | 24525455                | GG                              | TT                | 1946461890               |
| SNP_P3_87944_24525481 | NC_021166.1    | Ca_kabuli_chr07 | 24525481                | CC                              | AA                | 1946461892               |
| SNP_P3_87945_24525484 | NC_021166.1    | Ca_kabuli_chr07 | 24525484                | GG                              | AA                | 1946461893               |
| SNP_P3_87946_24525755 | NC_021166.1    | Ca_kabuli_chr07 | 24525755                | TT                              | CC                | 1946461894               |
| SNP_P3_87947_24526087 | NC_021166.1    | Ca_kabuli_chr07 | 24526087                | AA                              | GG                | 1946461896               |
| SNP_P3_87948_24526108 | NC_021166.1    | Ca_kabuli_chr07 | 24526108                | GG                              | TT                | 1946461897               |
| SNP_P3_87949_24526131 | NC_021166.1    | Ca_kabuli_chr07 | 24526131                | AA                              | GG                | 1946461899               |
| SNP_P3_87950_24526145 | NC_021166.1    | Ca_kabuli_chr07 | 24526145                | AA                              | GG                | 1946461900               |
| SNP_P3_87951_24536887 | NC_021166.1    | Ca_kabuli_chr07 | 24536887                | TT                              | CC                | 1946461902               |
| SNP_P3_87952_24550955 | NC_021166.1    | Ca_kabuli_chr07 | 24550955                | CC                              | GG                | 1946461903               |
| SNP_P3_87953_24556525 | NC_021166.1    | Ca_kabuli_chr07 | 24556525                | AA                              | TT                | 1946461905               |
| SNP_P3_87954_24556593 | NC_021166.1    | Ca_kabuli_chr07 | 24556593                | GG                              | AA                | 1946461906               |
| SNP_P3_87956_24593872 | NC_021166.1    | Ca_kabuli_chr07 | 24593872                | AA                              | TT                | 1946461908               |
| SNP_P3_87957_24601622 | NC_021166.1    | Ca_kabuli_chr07 | 24601622                | AA                              | TT                | 1946461909               |
| SNP_P3_87958_24601641 | NC_021166.1    | Ca_kabuli_chr07 | 24601641                | TT                              | GG                | 1946461911               |
| SNP_P3_87959_24602193 | NC_021166.1    | Ca_kabuli_chr07 | 24602193                | AA                              | CC                | 1946461912               |
| SNP_P3_87960_24607578 | NC_021166.1    | Ca_kabuli_chr07 | 24607578                | AA                              | CC                | 1946461914               |
| SNP_P3_87961_24616362 | NC_021166.1    | Ca_kabuli_chr07 | 24616362                | GG                              | AA                | 1946461915               |

| SNPs IDs              | Chromosome IDs | Chromosomes     | Physical positions (bp) | CDC Frontier (Reference genome) | (Pusa 256 & HPNB) | NCBI SNPdb Accession IDs |
|-----------------------|----------------|-----------------|-------------------------|---------------------------------|-------------------|--------------------------|
| SNP_P3_87962_24616529 | NC_021166.1    | Ca_kabuli_chr07 | 24616529                | AA                              | GG                | 1946461917               |
| SNP_P3_87963_24616856 | NC_021166.1    | Ca_kabuli_chr07 | 24616856                | AA                              | TT                | 1946461918               |
| SNP_P3_87964_24616857 | NC_021166.1    | Ca_kabuli_chr07 | 24616857                | AA                              | GG                | 1946461920               |
| SNP_P3_87965_24625830 | NC_021166.1    | Ca_kabuli_chr07 | 24625830                | TT                              | CC                | 1946461921               |
| SNP_P3_87966_24625899 | NC_021166.1    | Ca_kabuli_chr07 | 24625899                | TT                              | AA                | 1946461923               |
| SNP_P3_87967_24626499 | NC_021166.1    | Ca_kabuli_chr07 | 24626499                | CC                              | TT                | 1946461924               |
| SNP_P3_87968_24652597 | NC_021166.1    | Ca_kabuli_chr07 | 24652597                | GG                              | TT                | 1946461926               |
| SNP_P3_87969_24679770 | NC_021166.1    | Ca_kabuli_chr07 | 24679770                | GG                              | AA                | 1946461927               |
| SNP_P3_87970_24681756 | NC_021166.1    | Ca_kabuli_chr07 | 24681756                | AA                              | GG                | 1946461928               |
| SNP_P3_87971_24700531 | NC_021166.1    | Ca_kabuli_chr07 | 24700531                | GG                              | AA                | 1946461930               |
| SNP_P3_87972_24700539 | NC_021166.1    | Ca_kabuli_chr07 | 24700539                | GG                              | AA                | 1946461931               |
| SNP_P3_87973_24700567 | NC_021166.1    | Ca_kabuli_chr07 | 24700567                | GG                              | AA                | 1946461933               |
| SNP_P3_87974_24700752 | NC_021166.1    | Ca_kabuli_chr07 | 24700752                | AA                              | GG                | 1946461935               |
| SNP_P3_87975_24701000 | NC_021166.1    | Ca_kabuli_chr07 | 24701000                | TT                              | AA                | 1946461936               |
| SNP_P3_87976_24710113 | NC_021166.1    | Ca_kabuli_chr07 | 24710113                | TT                              | CC                | 1946461938               |
| SNP_P3_87977_24710120 | NC_021166.1    | Ca_kabuli_chr07 | 24710120                | GG                              | TT                | 1946461939               |
| SNP_P3_87978_24710236 | NC_021166.1    | Ca_kabuli_chr07 | 24710236                | TT                              | CC                | 1946461940               |
| SNP_P3_87979_24710541 | NC_021166.1    | Ca_kabuli_chr07 | 24710541                | CC                              | TT                | 1946461942               |
| SNP_P3_87980_24710585 | NC_021166.1    | Ca_kabuli_chr07 | 24710585                | AA                              | GG                | 1946461943               |
| SNP_P3_87981_24721830 | NC_021166.1    | Ca_kabuli_chr07 | 24721830                | TT                              | CC                | 1946461945               |
| SNP_P3_87982_24725635 | NC_021166.1    | Ca_kabuli_chr07 | 24725635                | GG                              | TT                | 1946461946               |
| SNP_P3_87983_24742738 | NC_021166.1    | Ca_kabuli_chr07 | 24742738                | TT                              | CC                | 1946461948               |
| SNP_P3_87984_24750392 | NC_021166.1    | Ca_kabuli_chr07 | 24750392                | TT                              | AA                | 1946461949               |
| SNP_P3_87985_24750633 | NC_021166.1    | Ca_kabuli_chr07 | 24750633                | TT                              | GG                | 1946461951               |
| SNP_P3_87986_24750635 | NC_021166.1    | Ca_kabuli_chr07 | 24750635                | TT                              | CC                | 1946461952               |
| SNP_P3_87987_24750649 | NC_021166.1    | Ca_kabuli_chr07 | 24750649                | AA                              | GG                | 1946461954               |
| SNP_P3_87988_24751381 | NC_021166.1    | Ca_kabuli_chr07 | 24751381                | TT                              | CC                | 1946461955               |
| SNP_P3_87989_24761942 | NC_021166.1    | Ca_kabuli_chr07 | 24761942                | CC                              | TT                | 1946461957               |
| SNP_P3_87990_24772252 | NC_021166.1    | Ca_kabuli_chr07 | 24772252                | AA                              | GG                | 1946461958               |
| SNP_P3_87993_24800507 | NC_021166.1    | Ca_kabuli_chr07 | 24800507                | TT                              | AA                | 1946461960               |
| SNP_P3_87994_24808499 | NC_021166.1    | Ca_kabuli_chr07 | 24808499                | CC                              | TT                | 1946461961               |
| SNP_P3_87995_24808514 | NC_021166.1    | Ca_kabuli_chr07 | 24808514                | GG                              | AA                | 1946461963               |
| SNP_P3_87996_24808536 | NC_021166.1    | Ca_kabuli_chr07 | 24808536                | CC                              | TT                | 1946461964               |
| SNP_P3_87997_24809649 | NC_021166.1    | Ca_kabuli_chr07 | 24809649                | TT                              | CC                | 1946461966               |
| SNP_P3_87998_24829442 | NC_021166.1    | Ca_kabuli_chr07 | 24829442                | TT                              | GG                | 1946461967               |
| SNP_P3_87999_24845487 | NC_021166.1    | Ca_kabuli_chr07 | 24845487                | GG                              | AA                | 1946461969               |
| SNP_P3_88000_24845514 | NC_021166.1    | Ca_kabuli_chr07 | 24845514                | AA                              | TT                | 1946461970               |
| SNP_P3_88001_24845560 | NC_021166.1    | Ca_kabuli_chr07 | 24845560                | GG                              | TT                | 1946461972               |
| SNP_P3_88003_24845874 | NC_021166.1    | Ca_kabuli_chr07 | 24845874                | GG                              | CC                | 1946461973               |
| SNP_P3_88004_24851023 | NC_021166.1    | Ca_kabuli_chr07 | 24851023                | TT                              | AA                | 1946461975               |
| SNP_P3_88005_24851261 | NC_021166.1    | Ca_kabuli_chr07 | 24851261                | TT                              | CC                | 1946461976               |
| SNP_P3_88006_24851322 | NC_021166.1    | Ca_kabuli_chr07 | 24851322                | TT                              | CC                | 1946461978               |

| SNPs IDs              | Chromosome IDs | Chromosomes     | Physical positions (bp) | CDC Frontier (Reference genome) | (Pusa 256 & HPNB) | NCBI SNPdb Accession IDs |
|-----------------------|----------------|-----------------|-------------------------|---------------------------------|-------------------|--------------------------|
| SNP_P3_88007_24851326 | NC_021166.1    | Ca_kabuli_chr07 | 24851326                | GG                              | AA                | 1946461979               |
| SNP_P3_88008_24854127 | NC_021166.1    | Ca_kabuli_chr07 | 24854127                | GG                              | AA                | 1946461980               |
| SNP_P3_88009_24856931 | NC_021166.1    | Ca_kabuli_chr07 | 24856931                | TT                              | GG                | 1946461982               |
| SNP_P3_88010_24856932 | NC_021166.1    | Ca_kabuli_chr07 | 24856932                | CC                              | AA                | 1946461984               |
| SNP_P3_88011_24864695 | NC_021166.1    | Ca_kabuli_chr07 | 24864695                | AA                              | CC                | 1946461985               |
| SNP_P3_88012_24870102 | NC_021166.1    | Ca_kabuli_chr07 | 24870102                | AA                              | GG                | 1946461987               |
| SNP_P3_88013_24870111 | NC_021166.1    | Ca_kabuli_chr07 | 24870111                | GG                              | AA                | 1946461988               |
| SNP_P3_88014_24883123 | NC_021166.1    | Ca_kabuli_chr07 | 24883123                | CC                              | TT                | 1946461990               |
| SNP_P3_88015_24884496 | NC_021166.1    | Ca_kabuli_chr07 | 24884496                | TT                              | CC                | 1946461991               |
| SNP_P3_88016_24935218 | NC_021166.1    | Ca_kabuli_chr07 | 24935218                | AA                              | GG                | 1946461993               |
| SNP_P3_88017_24937292 | NC_021166.1    | Ca_kabuli_chr07 | 24937292                | AA                              | GG                | 1946461994               |
| SNP_P3_88018_24948386 | NC_021166.1    | Ca_kabuli_chr07 | 24948386                | AA                              | GG                | 1946461995               |
| SNP_P3_88019_24991047 | NC_021166.1    | Ca_kabuli_chr07 | 24991047                | CC                              | TT                | 1946461997               |
| SNP_P3_88020_24992269 | NC_021166.1    | Ca_kabuli_chr07 | 24992269                | AA                              | GG                | 1946461998               |
| SNP_P3_88021_24992277 | NC_021166.1    | Ca_kabuli_chr07 | 24992277                | AA                              | GG                | 1946462000               |
| SNP_P3_88022_24992306 | NC_021166.1    | Ca_kabuli_chr07 | 24992306                | TT                              | AA                | 1946462001               |
| SNP_P3_88023_24992338 | NC_021166.1    | Ca_kabuli_chr07 | 24992338                | GG                              | AA                | 1946462003               |
| SNP_P3_88024_25018287 | NC_021166.1    | Ca_kabuli_chr07 | 25018287                | TT                              | GG                | 1946462004               |
| SNP_P3_88025_25025813 | NC_021166.1    | Ca_kabuli_chr07 | 25025813                | GG                              | AA                | 1946462005               |
| SNP_P3_88026_25025824 | NC_021166.1    | Ca_kabuli_chr07 | 25025824                | AA                              | CC                | 1946462007               |
| SNP_P3_88027_25025834 | NC_021166.1    | Ca_kabuli_chr07 | 25025834                | GG                              | AA                | 1946462008               |
| SNP_P3_88028_25025895 | NC_021166.1    | Ca_kabuli_chr07 | 25025895                | AA                              | TT                | 1946462010               |
| SNP_P3_88029_25029835 | NC_021166.1    | Ca_kabuli_chr07 | 25029835                | TT                              | CC                | 1946462012               |
| SNP_P3_88030_25030534 | NC_021166.1    | Ca_kabuli_chr07 | 25030534                | TT                              | CC                | 1946462013               |
| SNP_P3_88031_25030545 | NC_021166.1    | Ca_kabuli_chr07 | 25030545                | CC                              | TT                | 1946462014               |
| SNP_P3_88032_25030701 | NC_021166.1    | Ca_kabuli_chr07 | 25030701                | GG                              | AA                | 1946462016               |
| SNP_P3_88033_25030914 | NC_021166.1    | Ca_kabuli_chr07 | 25030914                | TT                              | CC                | 1946462017               |
| SNP_P3_88034_25030915 | NC_021166.1    | Ca_kabuli_chr07 | 25030915                | CC                              | TT                | 1946462019               |
| SNP_P3_88035_25031000 | NC_021166.1    | Ca_kabuli_chr07 | 25031000                | AA                              | GG                | 1946462020               |
| SNP_P3_88036_25031257 | NC_021166.1    | Ca_kabuli_chr07 | 25031257                | AA                              | TT                | 1946462022               |
| SNP_P3_88037_25031269 | NC_021166.1    | Ca_kabuli_chr07 | 25031269                | AA                              | CC                | 1946462023               |
| SNP_P3_88038_25031719 | NC_021166.1    | Ca_kabuli_chr07 | 25031719                | AA                              | GG                | 1946462024               |
| SNP_P3_88039_25031752 | NC_021166.1    | Ca_kabuli_chr07 | 25031752                | AA                              | GG                | 1946462026               |
| SNP_P3_88040_25052916 | NC_021166.1    | Ca_kabuli_chr07 | 25052916                | GG                              | AA                | 1946462027               |
| SNP_P3_88041_25058649 | NC_021166.1    | Ca_kabuli_chr07 | 25058649                | AA                              | CC                | 1946462029               |
| SNP_P3_88042_25058662 | NC_021166.1    | Ca_kabuli_chr07 | 25058662                | TT                              | GG                | 1946462030               |
| SNP_P3_88043_25058680 | NC_021166.1    | Ca_kabuli_chr07 | 25058680                | TT                              | GG                | 1946462031               |
| SNP_P3_88045_25078565 | NC_021166.1    | Ca_kabuli_chr07 | 25078565                | AA                              | TT                | 1946462033               |
| SNP_P3_88046_25078586 | NC_021166.1    | Ca_kabuli_chr07 | 25078586                | AA                              | GG                | 1946462035               |
| SNP_P3_88047_25078600 | NC_021166.1    | Ca_kabuli_chr07 | 25078600                | AA                              | TT                | 1946462036               |
| SNP_P3_88048_25078936 | NC_021166.1    | Ca_kabuli_chr07 | 25078936                | CC                              | TT                | 1946462038               |
| SNP_P3_88049_25079794 | NC_021166.1    | Ca_kabuli_chr07 | 25079794                | CC                              | TT                | 1946462039               |

| SNPs IDs              | Chromosome IDs | Chromosomes     | Physical positions (bp) | CDC Frontier (Reference genome) | (Pusa 256 & HPNB) | NCBI SNPdb Accession IDs |
|-----------------------|----------------|-----------------|-------------------------|---------------------------------|-------------------|--------------------------|
| SNP_P3_88050_25080158 | NC_021166.1    | Ca_kabuli_chr07 | 25080158                | AA                              | GG                | 1946462040               |
| SNP_P3_88051_25080178 | NC_021166.1    | Ca_kabuli_chr07 | 25080178                | AA                              | TT                | 1946462042               |
| SNP_P3_88052_25080181 | NC_021166.1    | Ca_kabuli_chr07 | 25080181                | TT                              | AA                | 1946462043               |
| SNP_P3_88053_25080193 | NC_021166.1    | Ca_kabuli_chr07 | 25080193                | GG                              | TT                | 1946462046               |
| SNP_P3_88054_25091696 | NC_021166.1    | Ca_kabuli_chr07 | 25091696                | TT                              | GG                | 1946462047               |
| SNP_P3_88055_25104655 | NC_021166.1    | Ca_kabuli_chr07 | 25104655                | GG                              | AA                | 1946462048               |
| SNP_P3_88056_25105060 | NC_021166.1    | Ca_kabuli_chr07 | 25105060                | AA                              | GG                | 1946462050               |
| SNP_P3_88057_25105094 | NC_021166.1    | Ca_kabuli_chr07 | 25105094                | TT                              | CC                | 1946462051               |
| SNP_P3_88058_25105100 | NC_021166.1    | Ca_kabuli_chr07 | 25105100                | CC                              | AA                | 1946462053               |
| SNP_P3_88059_25105153 | NC_021166.1    | Ca_kabuli_chr07 | 25105153                | GG                              | AA                | 1946462054               |
| SNP_P3_88060_25105321 | NC_021166.1    | Ca_kabuli_chr07 | 25105321                | CC                              | TT                | 1946462056               |
| SNP_P3_88062_25114734 | NC_021166.1    | Ca_kabuli_chr07 | 25114734                | CC                              | TT                | 1946462057               |
| SNP_P3_88063_25118828 | NC_021166.1    | Ca_kabuli_chr07 | 25118828                | TT                              | CC                | 1946462059               |
| SNP_P3_88064_25118841 | NC_021166.1    | Ca_kabuli_chr07 | 25118841                | TT                              | CC                | 1946462060               |
| SNP_P3_88065_25118861 | NC_021166.1    | Ca_kabuli_chr07 | 25118861                | AA                              | GG                | 1946462062               |
| SNP_P3_88066_25120390 | NC_021166.1    | Ca_kabuli_chr07 | 25120390                | GG                              | TT                | 1946462063               |
| SNP_P3_88067_25127915 | NC_021166.1    | Ca_kabuli_chr07 | 25127915                | GG                              | AA                | 1946462065               |
| SNP_P3_88068_25128006 | NC_021166.1    | Ca_kabuli_chr07 | 25128006                | GG                              | CC                | 1946462066               |
| SNP_P3_88069_25128019 | NC_021166.1    | Ca_kabuli_chr07 | 25128019                | AA                              | TT                | 1946462067               |
| SNP_P3_88070_25128350 | NC_021166.1    | Ca_kabuli_chr07 | 25128350                | TT                              | GG                | 1946462069               |
| SNP_P3_88071_25128387 | NC_021166.1    | Ca_kabuli_chr07 | 25128387                | TT                              | CC                | 1946462070               |
| SNP_P3_88072_25128418 | NC_021166.1    | Ca_kabuli_chr07 | 25128418                | AA                              | TT                | 1946462072               |
| SNP_P3_88073_25128458 | NC_021166.1    | Ca_kabuli_chr07 | 25128458                | GG                              | TT                | 1946462073               |
| SNP_P3_88074_25129425 | NC_021166.1    | Ca_kabuli_chr07 | 25129425                | AA                              | GG                | 1946462075               |
| SNP_P3_88076_25144302 | NC_021166.1    | Ca_kabuli_chr07 | 25144302                | AA                              | GG                | 1946462076               |
| SNP_P3_88077_25146208 | NC_021166.1    | Ca_kabuli_chr07 | 25146208                | TT                              | GG                | 1946462078               |
| SNP_P3_88078_25151338 | NC_021166.1    | Ca_kabuli_chr07 | 25151338                | TT                              | AA                | 1946462080               |
| SNP_P3_88079_25151347 | NC_021166.1    | Ca_kabuli_chr07 | 25151347                | GG                              | AA                | 1946462081               |
| SNP_P3_88081_25167744 | NC_021166.1    | Ca_kabuli_chr07 | 25167744                | CC                              | GG                | 1946462082               |
| SNP_P3_88082_25206093 | NC_021166.1    | Ca_kabuli_chr07 | 25206093                | AA                              | GG                | 1946462084               |
| SNP_P3_88083_25206440 | NC_021166.1    | Ca_kabuli_chr07 | 25206440                | AA                              | GG                | 1946462085               |
| SNP_P3_88084_25206666 | NC_021166.1    | Ca_kabuli_chr07 | 25206666                | TT                              | CC                | 1946462087               |
| SNP_P3_88085_25207052 | NC_021166.1    | Ca_kabuli_chr07 | 25207052                | TT                              | CC                | 1946462088               |
| SNP_P3_88086_25207328 | NC_021166.1    | Ca_kabuli_chr07 | 25207328                | GG                              | AA                | 1946462090               |
| SNP_P3_88087_25213563 | NC_021166.1    | Ca_kabuli_chr07 | 25213563                | GG                              | AA                | 1946462091               |
| SNP_P3_88088_25218181 | NC_021166.1    | Ca_kabuli_chr07 | 25218181                | AA                              | GG                | 1946462093               |
| SNP_P3_88089_25218201 | NC_021166.1    | Ca_kabuli_chr07 | 25218201                | CC                              | GG                | 1946462094               |
| SNP_P3_88090_25219198 | NC_021166.1    | Ca_kabuli_chr07 | 25219198                | TT                              | AA                | 1946462096               |
| SNP_P3_88091_25219455 | NC_021166.1    | Ca_kabuli_chr07 | 25219455                | GG                              | AA                | 1946462097               |
| SNP_P3_88092_25220446 | NC_021166.1    | Ca_kabuli_chr07 | 25220446                | AA                              | GG                | 1946462098               |
| SNP_P3_88093_25237772 | NC_021166.1    | Ca_kabuli_chr07 | 25237772                | GG                              | CC                | 1946462100               |
| SNP_P3_88094_25277267 | NC_021166.1    | Ca_kabuli_chr07 | 25277267                | TT                              | CC                | 1946462102               |

| SNPs IDs              | Chromosome IDs | Chromosomes     | Physical positions (bp) | CDC Frontier (Reference genome) | (Pusa 256 & HPNB) | NCBI SNPdb Accession IDs |
|-----------------------|----------------|-----------------|-------------------------|---------------------------------|-------------------|--------------------------|
| SNP_P3_88095_25278182 | NC_021166.1    | Ca_kabuli_chr07 | 25278182                | TT                              | GG                | 1946462103               |
| SNP_P3_88096_25278207 | NC_021166.1    | Ca_kabuli_chr07 | 25278207                | GG                              | TT                | 1946462105               |
| SNP_P3_88097_25278216 | NC_021166.1    | Ca_kabuli_chr07 | 25278216                | CC                              | AA                | 1946462106               |
| SNP_P3_88098_25278437 | NC_021166.1    | Ca_kabuli_chr07 | 25278437                | AA                              | GG                | 1946462108               |
| SNP_P3_88099_25278440 | NC_021166.1    | Ca_kabuli_chr07 | 25278440                | TT                              | AA                | 1946462109               |
| SNP_P3_88100_25278446 | NC_021166.1    | Ca_kabuli_chr07 | 25278446                | TT                              | GG                | 1946462111               |
| SNP_P3_88101_25278492 | NC_021166.1    | Ca_kabuli_chr07 | 25278492                | CC                              | AA                | 1946462112               |
| SNP_P3_88102_25278567 | NC_021166.1    | Ca_kabuli_chr07 | 25278567                | CC                              | TT                | 1946462113               |
| SNP_P3_88103_25278724 | NC_021166.1    | Ca_kabuli_chr07 | 25278724                | GG                              | TT                | 1946462115               |
| SNP_P3_88104_25278745 | NC_021166.1    | Ca_kabuli_chr07 | 25278745                | TT                              | CC                | 1946462116               |
| SNP_P3_88105_25278845 | NC_021166.1    | Ca_kabuli_chr07 | 25278845                | CC                              | TT                | 1946462118               |
| SNP_P3_88106_25282385 | NC_021166.1    | Ca_kabuli_chr07 | 25282385                | CC                              | TT                | 1946462119               |
| SNP_P3_88107_25295783 | NC_021166.1    | Ca_kabuli_chr07 | 25295783                | AA                              | GG                | 1946462121               |
| SNP_P3_88108_25295856 | NC_021166.1    | Ca_kabuli_chr07 | 25295856                | CC                              | TT                | 1946462123               |
| SNP_P3_88109_25296446 | NC_021166.1    | Ca_kabuli_chr07 | 25296446                | AA                              | CC                | 1946462124               |
| SNP_P3_88111_25305399 | NC_021166.1    | Ca_kabuli_chr07 | 25305399                | AA                              | CC                | 1946462126               |
| SNP_P3_88112_25312554 | NC_021166.1    | Ca_kabuli_chr07 | 25312554                | TT                              | CC                | 1946462127               |
| SNP_P3_88113_25317635 | NC_021166.1    | Ca_kabuli_chr07 | 25317635                | AA                              | CC                | 1946462128               |
| SNP_P3_88115_25344371 | NC_021166.1    | Ca_kabuli_chr07 | 25344371                | CC                              | AA                | 1946462130               |
| SNP_P3_88116_25346088 | NC_021166.1    | Ca_kabuli_chr07 | 25346088                | GG                              | TT                | 1946462131               |
| SNP_P3_88117_25354384 | NC_021166.1    | Ca_kabuli_chr07 | 25354384                | AA                              | GG                | 1946462133               |
| SNP_P3_88118_25362858 | NC_021166.1    | Ca_kabuli_chr07 | 25362858                | GG                              | AA                | 1946462134               |
| SNP_P3_88119_25365999 | NC_021166.1    | Ca_kabuli_chr07 | 25365999                | AA                              | TT                | 1946462136               |
| SNP_P3_88120_25373152 | NC_021166.1    | Ca_kabuli_chr07 | 25373152                | GG                              | AA                | 1946462137               |
| SNP_P3_88121_25379157 | NC_021166.1    | Ca_kabuli_chr07 | 25379157                | AA                              | TT                | 1946462139               |
| SNP_P3_88122_25398479 | NC_021166.1    | Ca_kabuli_chr07 | 25398479                | CC                              | GG                | 1946462140               |
| SNP_P3_88123_25403097 | NC_021166.1    | Ca_kabuli_chr07 | 25403097                | TT                              | CC                | 1946462142               |
| SNP_P3_88124_25411757 | NC_021166.1    | Ca_kabuli_chr07 | 25411757                | AA                              | GG                | 1946462144               |
| SNP_P3_88125_25411828 | NC_021166.1    | Ca_kabuli_chr07 | 25411828                | TT                              | CC                | 1946462145               |
| SNP_P3_88126_25418271 | NC_021166.1    | Ca_kabuli_chr07 | 25418271                | AA                              | GG                | 1946462147               |
| SNP_P3_88127_25418785 | NC_021166.1    | Ca_kabuli_chr07 | 25418785                | GG                              | TT                | 1946462148               |
| SNP_P3_88128_25427175 | NC_021166.1    | Ca_kabuli_chr07 | 25427175                | GG                              | AA                | 1946462149               |
| SNP_P3_88129_25427196 | NC_021166.1    | Ca_kabuli_chr07 | 25427196                | GG                              | AA                | 1946462151               |
| SNP_P3_88130_25427208 | NC_021166.1    | Ca_kabuli_chr07 | 25427208                | CC                              | TT                | 1946462152               |
| SNP_P3_88131_25427218 | NC_021166.1    | Ca_kabuli_chr07 | 25427218                | GG                              | AA                | 1946462154               |
| SNP_P3_88132_25427236 | NC_021166.1    | Ca_kabuli_chr07 | 25427236                | GG                              | AA                | 1946462155               |
| SNP_P3_88133_25427248 | NC_021166.1    | Ca_kabuli_chr07 | 25427248                | GG                              | AA                | 1946462157               |
| SNP_P3_88135_25437981 | NC_021166.1    | Ca_kabuli_chr07 | 25437981                | TT                              | CC                | 1946462158               |
| SNP_P3_88136_25438220 | NC_021166.1    | Ca_kabuli_chr07 | 25438220                | TT                              | CC                | 1946462160               |
| SNP_P3_88137_25438501 | NC_021166.1    | Ca_kabuli_chr07 | 25438501                | TT                              | GG                | 1946462161               |
| SNP_P3_88138_25438502 | NC_021166.1    | Ca_kabuli_chr07 | 25438502                | GG                              | AA                | 1946462163               |
| SNP_P3_88139_25438506 | NC_021166.1    | Ca_kabuli_chr07 | 25438506                | TT                              | AA                | 1946462164               |



| SNPs IDs              | Chromosome IDs | Chromosomes     | Physical positions (bp) | CDC Frontier (Reference genome) | (Pusa 256 & HPNB) | NCBI SNPdb Accession IDs |
|-----------------------|----------------|-----------------|-------------------------|---------------------------------|-------------------|--------------------------|
| SNP_P3_88140_25448826 | NC_021166.1    | Ca_kabuli_chr07 | 25448826                | AA                              | GG                | 1946462165               |
| SNP_P3_88141_25451001 | NC_021166.1    | Ca_kabuli_chr07 | 25451001                | GG                              | AA                | 1946462167               |
| SNP_P3_88142_25462328 | NC_021166.1    | Ca_kabuli_chr07 | 25462328                | TT                              | CC                | 1946462168               |
| SNP_P3_88143_25465197 | NC_021166.1    | Ca_kabuli_chr07 | 25465197                | AA                              | GG                | 1946462170               |
| SNP_P3_88144_25467251 | NC_021166.1    | Ca_kabuli_chr07 | 25467251                | AA                              | CC                | 1946462171               |
| SNP_P3_88145_25467253 | NC_021166.1    | Ca_kabuli_chr07 | 25467253                | CC                              | AA                | 1946462173               |
| SNP_P3_88146_25467303 | NC_021166.1    | Ca_kabuli_chr07 | 25467303                | AA                              | CC                | 1946462174               |
| SNP_P3_88147_25467360 | NC_021166.1    | Ca_kabuli_chr07 | 25467360                | TT                              | GG                | 1946462176               |
| SNP_P3_88148_25477153 | NC_021166.1    | Ca_kabuli_chr07 | 25477153                | CC                              | GG                | 1946462177               |
| SNP_P3_88150_25489488 | NC_021166.1    | Ca_kabuli_chr07 | 25489488                | TT                              | CC                | 1946462179               |
| SNP_P3_88151_25491145 | NC_021166.1    | Ca_kabuli_chr07 | 25491145                | GG                              | TT                | 1946462180               |
| SNP_P3_88152_25493198 | NC_021166.1    | Ca_kabuli_chr07 | 25493198                | TT                              | AA                | 1946462182               |
| SNP_P3_88153_25495002 | NC_021166.1    | Ca_kabuli_chr07 | 25495002                | TT                              | AA                | 1946462183               |
| SNP_P3_88154_25509175 | NC_021166.1    | Ca_kabuli_chr07 | 25509175                | TT                              | CC                | 1946462185               |
| SNP_P3_88155_25509241 | NC_021166.1    | Ca_kabuli_chr07 | 25509241                | AA                              | GG                | 1946462186               |
| SNP_P3_88156_25509290 | NC_021166.1    | Ca_kabuli_chr07 | 25509290                | AA                              | GG                | 1946462188               |
| SNP_P3_88157_25509298 | NC_021166.1    | Ca_kabuli_chr07 | 25509298                | AA                              | TT                | 1946462189               |
| SNP_P3_88158_25509307 | NC_021166.1    | Ca_kabuli_chr07 | 25509307                | TT                              | CC                | 1946462190               |
| SNP_P3_88159_25509802 | NC_021166.1    | Ca_kabuli_chr07 | 25509802                | AA                              | CC                | 1946462192               |
| SNP_P3_88160_25522590 | NC_021166.1    | Ca_kabuli_chr07 | 25522590                | AA                              | GG                | 1946462194               |
| SNP_P3_88161_25530389 | NC_021166.1    | Ca_kabuli_chr07 | 25530389                | AA                              | TT                | 1946462195               |
| SNP_P3_88162_25538347 | NC_021166.1    | Ca_kabuli_chr07 | 25538347                | AA                              | GG                | 1946462197               |
| SNP_P3_88163_25538348 | NC_021166.1    | Ca_kabuli_chr07 | 25538348                | TT                              | AA                | 1946462198               |
| SNP_P3_88164_25539560 | NC_021166.1    | Ca_kabuli_chr07 | 25539560                | AA                              | GG                | 1946462200               |
| SNP_P3_88165_25539595 | NC_021166.1    | Ca_kabuli_chr07 | 25539595                | GG                              | TT                | 1946462201               |
| SNP_P3_88166_25539642 | NC_021166.1    | Ca_kabuli_chr07 | 25539642                | GG                              | AA                | 1946462203               |
| SNP_P3_88167_25539986 | NC_021166.1    | Ca_kabuli_chr07 | 25539986                | AA                              | GG                | 1946462204               |
| SNP_P3_88169_25540325 | NC_021166.1    | Ca_kabuli_chr07 | 25540325                | TT                              | AA                | 1946462205               |
| SNP_P3_88171_25570144 | NC_021166.1    | Ca_kabuli_chr07 | 25570144                | CC                              | TT                | 1946462207               |
| SNP_P3_88173_25617939 | NC_021166.1    | Ca_kabuli_chr07 | 25617939                | TT                              | CC                | 1946462208               |
| SNP_P3_88175_25626902 | NC_021166.1    | Ca_kabuli_chr07 | 25626902                | AA                              | GG                | 1946462210               |
| SNP_P3_88176_25642660 | NC_021166.1    | Ca_kabuli_chr07 | 25642660                | GG                              | AA                | 1946462211               |
| SNP_P3_88178_25665843 | NC_021166.1    | Ca_kabuli_chr07 | 25665843                | GG                              | AA                | 1946462213               |
| SNP_P3_88179_25665885 | NC_021166.1    | Ca_kabuli_chr07 | 25665885                | CC                              | TT                | 1946462214               |
| SNP_P3_88180_25677750 | NC_021166.1    | Ca_kabuli_chr07 | 25677750                | GG                              | AA                | 1946462216               |
| SNP_P3_88181_25694573 | NC_021166.1    | Ca_kabuli_chr07 | 25694573                | CC                              | TT                | 1946462217               |
| SNP_P3_88182_25696693 | NC_021166.1    | Ca_kabuli_chr07 | 25696693                | CC                              | AA                | 1946462219               |
| SNP_P3_88183_25706911 | NC_021166.1    | Ca_kabuli_chr07 | 25706911                | GG                              | AA                | 1946462220               |
| SNP_P3_88184_25722261 | NC_021166.1    | Ca_kabuli_chr07 | 25722261                | TT                              | CC                | 1946462222               |
| SNP_P3_88185_25723028 | NC_021166.1    | Ca_kabuli_chr07 | 25723028                | AA                              | TT                | 1946462223               |
| SNP_P3_88187_25735595 | NC_021166.1    | Ca_kabuli_chr07 | 25735595                | TT                              | CC                | 1946462225               |
| SNP_P3_88188_25773353 | NC_021166.1    | Ca_kabuli_chr07 | 25773353                | TT                              | CC                | 1946462226               |

| SNPs IDs              | Chromosome IDs | Chromosomes     | Physical positions (bp) | CDC Frontier (Reference genome) | (Pusa 256 & HPNB) | NCBI SNPdb Accession IDs |
|-----------------------|----------------|-----------------|-------------------------|---------------------------------|-------------------|--------------------------|
| SNP_P3_88189_25774367 | NC_021166.1    | Ca_kabuli_chr07 | 25774367                | GG                              | AA                | 1946462228               |
| SNP_P3_88190_25774740 | NC_021166.1    | Ca_kabuli_chr07 | 25774740                | AA                              | GG                | 1946462229               |
| SNP_P3_88191_25774828 | NC_021166.1    | Ca_kabuli_chr07 | 25774828                | TT                              | CC                | 1946462231               |
| SNP_P3_88192_25786520 | NC_021166.1    | Ca_kabuli_chr07 | 25786520                | AA                              | GG                | 1946462232               |
| SNP_P3_88193_25810785 | NC_021166.1    | Ca_kabuli_chr07 | 25810785                | CC                              | TT                | 1946462234               |
| SNP_P3_88194_25827830 | NC_021166.1    | Ca_kabuli_chr07 | 25827830                | AA                              | GG                | 1946462235               |
| SNP_P3_88195_25827840 | NC_021166.1    | Ca_kabuli_chr07 | 25827840                | GG                              | AA                | 1946462237               |
| SNP_P3_88196_25833163 | NC_021166.1    | Ca_kabuli_chr07 | 25833163                | TT                              | CC                | 1946462238               |
| SNP_P3_88197_25833182 | NC_021166.1    | Ca_kabuli_chr07 | 25833182                | TT                              | CC                | 1946462240               |
| SNP_P3_88198_25833204 | NC_021166.1    | Ca_kabuli_chr07 | 25833204                | GG                              | TT                | 1946462241               |
| SNP_P3_88199_25833341 | NC_021166.1    | Ca_kabuli_chr07 | 25833341                | CC                              | TT                | 1946462243               |
| SNP_P3_88200_25833385 | NC_021166.1    | Ca_kabuli_chr07 | 25833385                | TT                              | CC                | 1946462244               |
| SNP_P3_88201_25833389 | NC_021166.1    | Ca_kabuli_chr07 | 25833389                | CC                              | TT                | 1946462246               |
| SNP_P3_88202_25833393 | NC_021166.1    | Ca_kabuli_chr07 | 25833393                | CC                              | AA                | 1946462247               |
| SNP_P3_88203_25833789 | NC_021166.1    | Ca_kabuli_chr07 | 25833789                | TT                              | GG                | 1946462248               |
| SNP_P3_88204_25834027 | NC_021166.1    | Ca_kabuli_chr07 | 25834027                | GG                              | AA                | 1946462250               |
| SNP_P3_88205_25834050 | NC_021166.1    | Ca_kabuli_chr07 | 25834050                | CC                              | TT                | 1946462251               |
| SNP_P3_88206_25834090 | NC_021166.1    | Ca_kabuli_chr07 | 25834090                | GG                              | AA                | 1946462253               |
| SNP_P3_88207_25834199 | NC_021166.1    | Ca_kabuli_chr07 | 25834199                | CC                              | TT                | 1946462254               |
| SNP_P3_88208_25834413 | NC_021166.1    | Ca_kabuli_chr07 | 25834413                | AA                              | TT                | 1946462256               |
| SNP_P3_88209_25834604 | NC_021166.1    | Ca_kabuli_chr07 | 25834604                | CC                              | TT                | 1946462257               |
| SNP_P3_88210_25834781 | NC_021166.1    | Ca_kabuli_chr07 | 25834781                | GG                              | AA                | 1946462259               |
| SNP_P3_88212_25862052 | NC_021166.1    | Ca_kabuli_chr07 | 25862052                | GG                              | AA                | 1946462260               |
| SNP_P3_88213_25862117 | NC_021166.1    | Ca_kabuli_chr07 | 25862117                | TT                              | CC                | 1946462262               |
| SNP_P3_88214_25862137 | NC_021166.1    | Ca_kabuli_chr07 | 25862137                | AA                              | CC                | 1946462263               |
| SNP_P3_88215_25862216 | NC_021166.1    | Ca_kabuli_chr07 | 25862216                | AA                              | TT                | 1946462265               |
| SNP_P3_88216_25862531 | NC_021166.1    | Ca_kabuli_chr07 | 25862531                | AA                              | GG                | 1946462266               |
| SNP_P3_88217_25862534 | NC_021166.1    | Ca_kabuli_chr07 | 25862534                | CC                              | GG                | 1946462268               |
| SNP_P3_88218_25862577 | NC_021166.1    | Ca_kabuli_chr07 | 25862577                | TT                              | GG                | 1946462269               |
| SNP_P3_88219_25863086 | NC_021166.1    | Ca_kabuli_chr07 | 25863086                | TT                              | CC                | 1946462271               |
| SNP_P3_88220_25863321 | NC_021166.1    | Ca_kabuli_chr07 | 25863321                | CC                              | TT                | 1946462272               |
| SNP_P3_88221_25871997 | NC_021166.1    | Ca_kabuli_chr07 | 25871997                | AA                              | TT                | 1946462274               |
| SNP_P3_88222_25872075 | NC_021166.1    | Ca_kabuli_chr07 | 25872075                | GG                              | AA                | 1946462275               |
| SNP_P3_88223_25872279 | NC_021166.1    | Ca_kabuli_chr07 | 25872279                | GG                              | AA                | 1946462277               |
| SNP_P3_88224_25891043 | NC_021166.1    | Ca_kabuli_chr07 | 25891043                | GG                              | TT                | 1946462278               |
| SNP_P3_88225_25892283 | NC_021166.1    | Ca_kabuli_chr07 | 25892283                | CC                              | TT                | 1946462279               |
| SNP_P3_88226_25899884 | NC_021166.1    | Ca_kabuli_chr07 | 25899884                | TT                              | CC                | 1946462281               |
| SNP_P3_88227_25904911 | NC_021166.1    | Ca_kabuli_chr07 | 25904911                | TT                              | CC                | 1946462282               |
| SNP_P3_88228_25905335 | NC_021166.1    | Ca_kabuli_chr07 | 25905335                | GG                              | AA                | 1946462284               |
| SNP_P3_88229_25905382 | NC_021166.1    | Ca_kabuli_chr07 | 25905382                | TT                              | CC                | 1946462285               |
| SNP_P3_88230_25905686 | NC_021166.1    | Ca_kabuli_chr07 | 25905686                | AA                              | GG                | 1946462287               |
| SNP_P3_88231_25905692 | NC_021166.1    | Ca_kabuli_chr07 | 25905692                | TT                              | GG                | 1946462288               |

| SNPs IDs              | Chromosome IDs | Chromosomes     | Physical positions (bp) | CDC Frontier (Reference genome) | (Pusa 256 & HPNB) | NCBI SNPdb Accession IDs |
|-----------------------|----------------|-----------------|-------------------------|---------------------------------|-------------------|--------------------------|
| SNP_P3_88232_25905922 | NC_021166.1    | Ca_kabuli_chr07 | 25905922                | AA                              | GG                | 1946462290               |
| SNP_P3_88233_25906057 | NC_021166.1    | Ca_kabuli_chr07 | 25906057                | AA                              | CC                | 1946462291               |
| SNP_P3_88234_25911418 | NC_021166.1    | Ca_kabuli_chr07 | 25911418                | TT                              | CC                | 1946462292               |
| SNP_P3_88235_25919379 | NC_021166.1    | Ca_kabuli_chr07 | 25919379                | GG                              | TT                | 1946462294               |
| SNP_P3_88236_25919418 | NC_021166.1    | Ca_kabuli_chr07 | 25919418                | AA                              | TT                | 1946462295               |
| SNP_P3_88237_25924757 | NC_021166.1    | Ca_kabuli_chr07 | 25924757                | GG                              | CC                | 1946462297               |
| SNP_P3_88238_25928073 | NC_021166.1    | Ca_kabuli_chr07 | 25928073                | TT                              | CC                | 1946462298               |
| SNP_P3_88239_25960172 | NC_021166.1    | Ca_kabuli_chr07 | 25960172                | GG                              | AA                | 1946462300               |
| SNP_P3_88240_25990551 | NC_021166.1    | Ca_kabuli_chr07 | 25990551                | AA                              | TT                | 1946462301               |
| SNP_P3_88241_25990561 | NC_021166.1    | Ca_kabuli_chr07 | 25990561                | AA                              | GG                | 1946462303               |
| SNP_P3_88242_25990884 | NC_021166.1    | Ca_kabuli_chr07 | 25990884                | GG                              | AA                | 1946462304               |
| SNP_P3_88243_26001395 | NC_021166.1    | Ca_kabuli_chr07 | 26001395                | GG                              | AA                | 1946462306               |
| SNP_P3_88244_26001454 | NC_021166.1    | Ca_kabuli_chr07 | 26001454                | TT                              | AA                | 1946462307               |
| SNP_P3_88245_26001890 | NC_021166.1    | Ca_kabuli_chr07 | 26001890                | CC                              | GG                | 1946462308               |
| SNP_P3_88246_26003962 | NC_021166.1    | Ca_kabuli_chr07 | 26003962                | TT                              | GG                | 1946462310               |
| SNP_P3_88247_26013176 | NC_021166.1    | Ca_kabuli_chr07 | 26013176                | TT                              | GG                | 1946462311               |
| SNP_P3_88248_26020972 | NC_021166.1    | Ca_kabuli_chr07 | 26020972                | AA                              | GG                | 1946462313               |
| SNP_P3_88249_26028080 | NC_021166.1    | Ca_kabuli_chr07 | 26028080                | TT                              | GG                | 1946462314               |
| SNP_P3_88250_26028091 | NC_021166.1    | Ca_kabuli_chr07 | 26028091                | GG                              | AA                | 1946462316               |
| SNP_P3_88251_26029738 | NC_021166.1    | Ca_kabuli_chr07 | 26029738                | AA                              | TT                | 1946462317               |
| SNP_P3_88252_26030961 | NC_021166.1    | Ca_kabuli_chr07 | 26030961                | AA                              | CC                | 1946462319               |
| SNP_P3_88253_26033394 | NC_021166.1    | Ca_kabuli_chr07 | 26033394                | AA                              | CC                | 1946462320               |
| SNP_P3_88255_26035509 | NC_021166.1    | Ca_kabuli_chr07 | 26035509                | TT                              | GG                | 1946462322               |
| SNP_P3_88256_26037718 | NC_021166.1    | Ca_kabuli_chr07 | 26037718                | AA                              | GG                | 1946462324               |
| SNP_P3_88257_26037731 | NC_021166.1    | Ca_kabuli_chr07 | 26037731                | CC                              | TT                | 1946462325               |
| SNP_P3_88258_26038029 | NC_021166.1    | Ca_kabuli_chr07 | 26038029                | TT                              | CC                | 1946462327               |
| SNP_P3_88261_26093994 | NC_021166.1    | Ca_kabuli_chr07 | 26093994                | AA                              | CC                | 1946462328               |
| SNP_P3_88263_26155225 | NC_021166.1    | Ca_kabuli_chr07 | 26155225                | CC                              | TT                | 1946462330               |
| SNP_P3_88264_26155226 | NC_021166.1    | Ca_kabuli_chr07 | 26155226                | CC                              | AA                | 1946462331               |
| SNP_P3_88265_26160170 | NC_021166.1    | Ca_kabuli_chr07 | 26160170                | CC                              | GG                | 1946462333               |
| SNP_P3_88267_26160203 | NC_021166.1    | Ca_kabuli_chr07 | 26160203                | CC                              | GG                | 1946462334               |
| SNP_P3_88268_26160404 | NC_021166.1    | Ca_kabuli_chr07 | 26160404                | CC                              | AA                | 1946462336               |
| SNP_P3_88269_26160479 | NC_021166.1    | Ca_kabuli_chr07 | 26160479                | CC                              | TT                | 1946462337               |
| SNP_P3_88270_26160486 | NC_021166.1    | Ca_kabuli_chr07 | 26160486                | AA                              | GG                | 1946462338               |
| SNP_P3_88271_26160491 | NC_021166.1    | Ca_kabuli_chr07 | 26160491                | CC                              | TT                | 1946462340               |
| SNP_P3_88272_26160508 | NC_021166.1    | Ca_kabuli_chr07 | 26160508                | AA                              | GG                | 1946462342               |
| SNP_P3_88273_26160524 | NC_021166.1    | Ca_kabuli_chr07 | 26160524                | AA                              | GG                | 1946462343               |
| SNP_P3_88274_26160563 | NC_021166.1    | Ca_kabuli_chr07 | 26160563                | TT                              | CC                | 1946462345               |
| SNP_P3_88275_26160566 | NC_021166.1    | Ca_kabuli_chr07 | 26160566                | CC                              | TT                | 1946462346               |
| SNP_P3_88276_26160579 | NC_021166.1    | Ca_kabuli_chr07 | 26160579                | TT                              | AA                | 1946462348               |
| SNP_P3_88277_26160889 | NC_021166.1    | Ca_kabuli_chr07 | 26160889                | GG                              | TT                | 1946462349               |
| SNP_P3_88278_26161808 | NC_021166.1    | Ca_kabuli_chr07 | 26161808                | GG                              | AA                | 1946462351               |

| SNPs IDs              | Chromosome IDs | Chromosomes     | Physical positions (bp) | CDC Frontier (Reference genome) | (Pusa 256 & HPNB) | NCBI SNPdb Accession IDs |
|-----------------------|----------------|-----------------|-------------------------|---------------------------------|-------------------|--------------------------|
| SNP_P3_88279_26161967 | NC_021166.1    | Ca_kabuli_chr07 | 26161967                | CC                              | TT                | 1946462352               |
| SNP_P3_88280_26162108 | NC_021166.1    | Ca_kabuli_chr07 | 26162108                | TT                              | AA                | 1946462353               |
| SNP_P3_88281_26162109 | NC_021166.1    | Ca_kabuli_chr07 | 26162109                | GG                              | CC                | 1946462355               |
| SNP_P3_88282_26162297 | NC_021166.1    | Ca_kabuli_chr07 | 26162297                | AA                              | GG                | 1946462356               |
| SNP_P3_88283_26168509 | NC_021166.1    | Ca_kabuli_chr07 | 26168509                | AA                              | GG                | 1946462358               |
| SNP_P3_88284_26168514 | NC_021166.1    | Ca_kabuli_chr07 | 26168514                | CC                              | AA                | 1946462359               |
| SNP_P3_88285_26170664 | NC_021166.1    | Ca_kabuli_chr07 | 26170664                | CC                              | TT                | 1946462361               |
| SNP_P3_88286_26170696 | NC_021166.1    | Ca_kabuli_chr07 | 26170696                | CC                              | AA                | 1946462363               |
| SNP_P3_88287_26171147 | NC_021166.1    | Ca_kabuli_chr07 | 26171147                | AA                              | CC                | 1946462364               |
| SNP_P3_88289_26171594 | NC_021166.1    | Ca_kabuli_chr07 | 26171594                | AA                              | CC                | 1946462366               |
| SNP_P3_88290_26177011 | NC_021166.1    | Ca_kabuli_chr07 | 26177011                | TT                              | CC                | 1946462367               |
| SNP_P3_88291_26177014 | NC_021166.1    | Ca_kabuli_chr07 | 26177014                | TT                              | AA                | 1946462369               |
| SNP_P3_88292_26177031 | NC_021166.1    | Ca_kabuli_chr07 | 26177031                | GG                              | AA                | 1946462370               |
| SNP_P3_88293_26177359 | NC_021166.1    | Ca_kabuli_chr07 | 26177359                | TT                              | CC                | 1946462371               |
| SNP_P3_88294_26177410 | NC_021166.1    | Ca_kabuli_chr07 | 26177410                | GG                              | TT                | 1946462373               |
| SNP_P3_88295_26177478 | NC_021166.1    | Ca_kabuli_chr07 | 26177478                | CC                              | TT                | 1946462374               |
| SNP_P3_88296_26177549 | NC_021166.1    | Ca_kabuli_chr07 | 26177549                | TT                              | CC                | 1946462376               |
| SNP_P3_88297_26177662 | NC_021166.1    | Ca_kabuli_chr07 | 26177662                | TT                              | CC                | 1946462377               |
| SNP_P3_88298_26177802 | NC_021166.1    | Ca_kabuli_chr07 | 26177802                | AA                              | GG                | 1946462379               |
| SNP_P3_88299_26177835 | NC_021166.1    | Ca_kabuli_chr07 | 26177835                | GG                              | TT                | 1946462380               |
| SNP_P3_88300_26177841 | NC_021166.1    | Ca_kabuli_chr07 | 26177841                | GG                              | AA                | 1946462382               |
| SNP_P3_88301_26177896 | NC_021166.1    | Ca_kabuli_chr07 | 26177896                | AA                              | GG                | 1946462383               |
| SNP_P3_88302_26179690 | NC_021166.1    | Ca_kabuli_chr07 | 26179690                | GG                              | TT                | 1946462385               |
| SNP_P3_88303_26179710 | NC_021166.1    | Ca_kabuli_chr07 | 26179710                | GG                              | TT                | 1946462386               |
| SNP_P3_88304_26181654 | NC_021166.1    | Ca_kabuli_chr07 | 26181654                | AA                              | GG                | 1946462387               |
| SNP_P3_88305_26181672 | NC_021166.1    | Ca_kabuli_chr07 | 26181672                | AA                              | GG                | 1946462389               |
| SNP_P3_88306_26181684 | NC_021166.1    | Ca_kabuli_chr07 | 26181684                | CC                              | AA                | 1946462390               |
| SNP_P3_88307_26181687 | NC_021166.1    | Ca_kabuli_chr07 | 26181687                | CC                              | TT                | 1946462392               |
| SNP_P3_88308_26181732 | NC_021166.1    | Ca_kabuli_chr07 | 26181732                | GG                              | AA                | 1946462393               |
| SNP_P3_88309_26181735 | NC_021166.1    | Ca_kabuli_chr07 | 26181735                | CC                              | TT                | 1946462395               |
| SNP_P3_88310_26182015 | NC_021166.1    | Ca_kabuli_chr07 | 26182015                | TT                              | CC                | 1946462396               |
| SNP_P3_88311_26182023 | NC_021166.1    | Ca_kabuli_chr07 | 26182023                | GG                              | AA                | 1946462398               |
| SNP_P3_88312_26182079 | NC_021166.1    | Ca_kabuli_chr07 | 26182079                | AA                              | GG                | 1946462399               |
| SNP_P3_88313_26183132 | NC_021166.1    | Ca_kabuli_chr07 | 26183132                | GG                              | AA                | 1946462401               |
| SNP_P3_88314_26188287 | NC_021166.1    | Ca_kabuli_chr07 | 26188287                | CC                              | TT                | 1946462402               |
| SNP_P3_88315_26190966 | NC_021166.1    | Ca_kabuli_chr07 | 26190966                | GG                              | AA                | 1946462404               |
| SNP_P3_88316_26196605 | NC_021166.1    | Ca_kabuli_chr07 | 26196605                | TT                              | GG                | 1946462405               |
| SNP_P3_88317_26198276 | NC_021166.1    | Ca_kabuli_chr07 | 26198276                | TT                              | AA                | 1946462406               |
| SNP_P3_88318_26198277 | NC_021166.1    | Ca_kabuli_chr07 | 26198277                | TT                              | AA                | 1946462408               |
| SNP_P3_88319_26204208 | NC_021166.1    | Ca_kabuli_chr07 | 26204208                | AA                              | TT                | 1946462409               |
| SNP_P3_88320_26218453 | NC_021166.1    | Ca_kabuli_chr07 | 26218453                | GG                              | AA                | 1946462411               |
| SNP_P3_88321_26218527 | NC_021166.1    | Ca_kabuli_chr07 | 26218527                | CC                              | TT                | 1946462412               |

| SNPs IDs              | Chromosome IDs | Chromosomes     | Physical positions (bp) | CDC Frontier (Reference genome) | (Pusa 256 & HPNB) | NCBI SNPdb Accession IDs |
|-----------------------|----------------|-----------------|-------------------------|---------------------------------|-------------------|--------------------------|
| SNP_P3_88322_26218731 | NC_021166.1    | Ca_kabuli_chr07 | 26218731                | CC                              | AA                | 1946462414               |
| SNP_P3_88323_26218746 | NC_021166.1    | Ca_kabuli_chr07 | 26218746                | CC                              | GG                | 1946462415               |
| SNP_P3_88324_26219927 | NC_021166.1    | Ca_kabuli_chr07 | 26219927                | AA                              | CC                | 1946462417               |
| SNP_P3_88325_26220217 | NC_021166.1    | Ca_kabuli_chr07 | 26220217                | AA                              | TT                | 1946462418               |
| SNP_P3_88326_26220257 | NC_021166.1    | Ca_kabuli_chr07 | 26220257                | GG                              | AA                | 1946462420               |
| SNP_P3_88327_26220552 | NC_021166.1    | Ca_kabuli_chr07 | 26220552                | TT                              | CC                | 1946462421               |
| SNP_P3_88328_26220952 | NC_021166.1    | Ca_kabuli_chr07 | 26220952                | GG                              | AA                | 1946462423               |
| SNP_P3_88329_26221444 | NC_021166.1    | Ca_kabuli_chr07 | 26221444                | AA                              | CC                | 1946462424               |
| SNP_P3_88330_26221582 | NC_021166.1    | Ca_kabuli_chr07 | 26221582                | CC                              | AA                | 1946462426               |
| SNP_P3_88332_26221892 | NC_021166.1    | Ca_kabuli_chr07 | 26221892                | AA                              | CC                | 1946462427               |
| SNP_P3_88333_26221901 | NC_021166.1    | Ca_kabuli_chr07 | 26221901                | CC                              | AA                | 1946462428               |
| SNP_P3_88334_26223411 | NC_021166.1    | Ca_kabuli_chr07 | 26223411                | TT                              | CC                | 1946462430               |
| SNP_P3_88335_26223479 | NC_021166.1    | Ca_kabuli_chr07 | 26223479                | AA                              | GG                | 1946462431               |
| SNP_P3_88336_26223755 | NC_021166.1    | Ca_kabuli_chr07 | 26223755                | GG                              | AA                | 1946462433               |
| SNP_P3_88337_26223931 | NC_021166.1    | Ca_kabuli_chr07 | 26223931                | AA                              | CC                | 1946462434               |
| SNP_P3_88338_26224008 | NC_021166.1    | Ca_kabuli_chr07 | 26224008                | GG                              | TT                | 1946462436               |
| SNP_P3_88339_26224061 | NC_021166.1    | Ca_kabuli_chr07 | 26224061                | CC                              | TT                | 1946462438               |
| SNP_P3_88340_26224664 | NC_021166.1    | Ca_kabuli_chr07 | 26224664                | AA                              | GG                | 1946462439               |
| SNP_P3_88341_26224815 | NC_021166.1    | Ca_kabuli_chr07 | 26224815                | AA                              | TT                | 1946462441               |
| SNP_P3_88342_26225610 | NC_021166.1    | Ca_kabuli_chr07 | 26225610                | AA                              | CC                | 1946462442               |
| SNP_P3_88343_26226146 | NC_021166.1    | Ca_kabuli_chr07 | 26226146                | GG                              | CC                | 1946462444               |
| SNP_P3_88344_26226400 | NC_021166.1    | Ca_kabuli_chr07 | 26226400                | AA                              | CC                | 1946462445               |
| SNP_P3_88345_26226779 | NC_021166.1    | Ca_kabuli_chr07 | 26226779                | CC                              | TT                | 1946462446               |
| SNP_P3_88346_26227566 | NC_021166.1    | Ca_kabuli_chr07 | 26227566                | CC                              | TT                | 1946462448               |
| SNP_P3_88347_26228010 | NC_021166.1    | Ca_kabuli_chr07 | 26228010                | AA                              | CC                | 1946462449               |
| SNP_P3_88348_26228014 | NC_021166.1    | Ca_kabuli_chr07 | 26228014                | GG                              | AA                | 1946462451               |
| SNP_P3_88350_26228664 | NC_021166.1    | Ca_kabuli_chr07 | 26228664                | CC                              | TT                | 1946462452               |
| SNP_P3_88351_26228984 | NC_021166.1    | Ca_kabuli_chr07 | 26228984                | GG                              | TT                | 1946462453               |
| SNP_P3_88352_26229429 | NC_021166.1    | Ca_kabuli_chr07 | 26229429                | CC                              | TT                | 1946462455               |
| SNP_P3_88353_26229459 | NC_021166.1    | Ca_kabuli_chr07 | 26229459                | TT                              | GG                | 1946462456               |
| SNP_P3_88354_26229510 | NC_021166.1    | Ca_kabuli_chr07 | 26229510                | GG                              | AA                | 1946462458               |
| SNP_P3_88355_26229614 | NC_021166.1    | Ca_kabuli_chr07 | 26229614                | GG                              | AA                | 1946462459               |
| SNP_P3_88356_26229793 | NC_021166.1    | Ca_kabuli_chr07 | 26229793                | CC                              | TT                | 1946462461               |
| SNP_P3_88357_26229799 | NC_021166.1    | Ca_kabuli_chr07 | 26229799                | AA                              | GG                | 1946462462               |
| SNP_P3_88358_26229817 | NC_021166.1    | Ca_kabuli_chr07 | 26229817                | AA                              | CC                | 1946462464               |
| SNP_P3_88359_26230811 | NC_021166.1    | Ca_kabuli_chr07 | 26230811                | TT                              | CC                | 1946462465               |
| SNP_P3_88360_26230922 | NC_021166.1    | Ca_kabuli_chr07 | 26230922                | GG                              | AA                | 1946462467               |
| SNP_P3_88361_26231717 | NC_021166.1    | Ca_kabuli_chr07 | 26231717                | CC                              | TT                | 1946462468               |
| SNP_P3_88362_26232059 | NC_021166.1    | Ca_kabuli_chr07 | 26232059                | TT                              | AA                | 1946462470               |
| SNP_P3_88363_26232248 | NC_021166.1    | Ca_kabuli_chr07 | 26232248                | TT                              | AA                | 1946462472               |
| SNP_P3_88364_26232464 | NC_021166.1    | Ca_kabuli_chr07 | 26232464                | AA                              | CC                | 1946462473               |
| SNP_P3_88365_26232640 | NC_021166.1    | Ca_kabuli_chr07 | 26232640                | AA                              | GG                | 1946462474               |

| SNPs IDs              | Chromosome IDs | Chromosomes     | Physical positions (bp) | CDC Frontier (Reference genome) | (Pusa 256 & HPNB) | NCBI SNPdb Accession IDs |
|-----------------------|----------------|-----------------|-------------------------|---------------------------------|-------------------|--------------------------|
| SNP_P3_88366_26232919 | NC_021166.1    | Ca_kabuli_chr07 | 26232919                | AA                              | TT                | 1946462476               |
| SNP_P3_88367_26234078 | NC_021166.1    | Ca_kabuli_chr07 | 26234078                | GG                              | TT                | 1946462477               |
| SNP_P3_88368_26234109 | NC_021166.1    | Ca_kabuli_chr07 | 26234109                | AA                              | CC                | 1946462479               |
| SNP_P3_88369_26234682 | NC_021166.1    | Ca_kabuli_chr07 | 26234682                | CC                              | TT                | 1946462480               |
| SNP_P3_88370_26234774 | NC_021166.1    | Ca_kabuli_chr07 | 26234774                | CC                              | TT                | 1946462482               |
| SNP_P3_88371_26235069 | NC_021166.1    | Ca_kabuli_chr07 | 26235069                | TT                              | CC                | 1946462483               |
| SNP_P3_88373_26235896 | NC_021166.1    | Ca_kabuli_chr07 | 26235896                | AA                              | GG                | 1946462484               |
| SNP_P3_88374_26236167 | NC_021166.1    | Ca_kabuli_chr07 | 26236167                | GG                              | TT                | 1946462486               |
| SNP_P3_88375_26236327 | NC_021166.1    | Ca_kabuli_chr07 | 26236327                | GG                              | AA                | 1946462487               |
| SNP_P3_88376_26236362 | NC_021166.1    | Ca_kabuli_chr07 | 26236362                | TT                              | AA                | 1946462489               |
| SNP_P3_88377_26236447 | NC_021166.1    | Ca_kabuli_chr07 | 26236447                | AA                              | CC                | 1946462490               |
| SNP_P3_88378_26237245 | NC_021166.1    | Ca_kabuli_chr07 | 26237245                | CC                              | TT                | 1946462492               |
| SNP_P3_88379_26237262 | NC_021166.1    | Ca_kabuli_chr07 | 26237262                | GG                              | AA                | 1946462493               |
| SNP_P3_88380_26237312 | NC_021166.1    | Ca_kabuli_chr07 | 26237312                | GG                              | TT                | 1946462495               |
| SNP_P3_88381_26237567 | NC_021166.1    | Ca_kabuli_chr07 | 26237567                | CC                              | AA                | 1946462496               |
| SNP_P3_88382_26237697 | NC_021166.1    | Ca_kabuli_chr07 | 26237697                | TT                              | AA                | 1946462498               |
| SNP_P3_88383_26238151 | NC_021166.1    | Ca_kabuli_chr07 | 26238151                | CC                              | TT                | 1946462499               |
| SNP_P3_88384_26238516 | NC_021166.1    | Ca_kabuli_chr07 | 26238516                | TT                              | CC                | 1946462500               |
| SNP_P3_88385_26239336 | NC_021166.1    | Ca_kabuli_chr07 | 26239336                | GG                              | AA                | 1946462502               |
| SNP_P3_88386_26240179 | NC_021166.1    | Ca_kabuli_chr07 | 26240179                | AA                              | GG                | 1946462503               |
| SNP_P3_88388_26240587 | NC_021166.1    | Ca_kabuli_chr07 | 26240587                | TT                              | CC                | 1946462505               |
| SNP_P3_88389_26240588 | NC_021166.1    | Ca_kabuli_chr07 | 26240588                | GG                              | AA                | 1946462506               |
| SNP_P3_88390_26240589 | NC_021166.1    | Ca_kabuli_chr07 | 26240589                | AA                              | TT                | 1946462508               |
| SNP_P3_88391_26240592 | NC_021166.1    | Ca_kabuli_chr07 | 26240592                | AA                              | TT                | 1946462509               |
| SNP_P3_88392_26240695 | NC_021166.1    | Ca_kabuli_chr07 | 26240695                | TT                              | AA                | 1946462510               |
| SNP_P3_88393_26245030 | NC_021166.1    | Ca_kabuli_chr07 | 26245030                | AA                              | CC                | 1946462512               |
| SNP_P3_88394_26245432 | NC_021166.1    | Ca_kabuli_chr07 | 26245432                | CC                              | AA                | 1946462514               |
| SNP_P3_88395_26245715 | NC_021166.1    | Ca_kabuli_chr07 | 26245715                | AA                              | GG                | 1946462515               |
| SNP_P3_88396_26248225 | NC_021166.1    | Ca_kabuli_chr07 | 26248225                | GG                              | AA                | 1946462517               |
| SNP_P3_88398_26248468 | NC_021166.1    | Ca_kabuli_chr07 | 26248468                | GG                              | CC                | 1946462518               |
| SNP_P3_88399_26248622 | NC_021166.1    | Ca_kabuli_chr07 | 26248622                | AA                              | GG                | 1946462520               |
| SNP_P3_88400_26259873 | NC_021166.1    | Ca_kabuli_chr07 | 26259873                | GG                              | AA                | 1946462521               |
| SNP_P3_88401_26260112 | NC_021166.1    | Ca_kabuli_chr07 | 26260112                | GG                              | AA                | 1946462523               |
| SNP_P3_88402_26260372 | NC_021166.1    | Ca_kabuli_chr07 | 26260372                | CC                              | TT                | 1946462524               |
| SNP_P3_88403_26260952 | NC_021166.1    | Ca_kabuli_chr07 | 26260952                | TT                              | AA                | 1946462526               |
| SNP_P3_88404_26261404 | NC_021166.1    | Ca_kabuli_chr07 | 26261404                | GG                              | AA                | 1946462527               |
| SNP_P3_88405_26262453 | NC_021166.1    | Ca_kabuli_chr07 | 26262453                | TT                              | AA                | 1946462529               |
| SNP_P3_88406_26263500 | NC_021166.1    | Ca_kabuli_chr07 | 26263500                | AA                              | GG                | 1946462530               |
| SNP_P3_88407_26263664 | NC_021166.1    | Ca_kabuli_chr07 | 26263664                | GG                              | AA                | 1946462531               |
| SNP_P3_88408_26264028 | NC_021166.1    | Ca_kabuli_chr07 | 26264028                | GG                              | AA                | 1946462533               |
| SNP_P3_88409_26264506 | NC_021166.1    | Ca_kabuli_chr07 | 26264506                | CC                              | TT                | 1946462535               |
| SNP_P3_88410_26264697 | NC_021166.1    | Ca_kabuli_chr07 | 26264697                | GG                              | TT                | 1946462536               |

| SNPs IDs              | Chromosome IDs | Chromosomes     | Physical positions (bp) | CDC Frontier (Reference genome) | (Pusa 256 & HPNB) | NCBI SNPdb Accession IDs |
|-----------------------|----------------|-----------------|-------------------------|---------------------------------|-------------------|--------------------------|
| SNP_P3_88411_26265483 | NC_021166.1    | Ca_kabuli_chr07 | 26265483                | GG                              | AA                | 1946462538               |
| SNP_P3_88412_26266063 | NC_021166.1    | Ca_kabuli_chr07 | 26266063                | TT                              | CC                | 1946462539               |
| SNP_P3_88413_26266678 | NC_021166.1    | Ca_kabuli_chr07 | 26266678                | TT                              | CC                | 1946462540               |
| SNP_P3_88414_26267033 | NC_021166.1    | Ca_kabuli_chr07 | 26267033                | AA                              | GG                | 1946462542               |
| SNP_P3_88415_26268053 | NC_021166.1    | Ca_kabuli_chr07 | 26268053                | TT                              | CC                | 1946462543               |
| SNP_P3_88416_26268529 | NC_021166.1    | Ca_kabuli_chr07 | 26268529                | AA                              | GG                | 1946462545               |
| SNP_P3_88417_26269623 | NC_021166.1    | Ca_kabuli_chr07 | 26269623                | AA                              | GG                | 1946462546               |
| SNP_P3_88418_26269716 | NC_021166.1    | Ca_kabuli_chr07 | 26269716                | CC                              | TT                | 1946462548               |
| SNP_P3_88419_26269949 | NC_021166.1    | Ca_kabuli_chr07 | 26269949                | CC                              | AA                | 1946462549               |
| SNP_P3_88420_26269978 | NC_021166.1    | Ca_kabuli_chr07 | 26269978                | AA                              | GG                | 1946462551               |
| SNP_P3_88421_26269997 | NC_021166.1    | Ca_kabuli_chr07 | 26269997                | AA                              | TT                | 1946462552               |
| SNP_P3_88422_26270000 | NC_021166.1    | Ca_kabuli_chr07 | 26270000                | TT                              | AA                | 1946462553               |
| SNP_P3_88423_26271232 | NC_021166.1    | Ca_kabuli_chr07 | 26271232                | CC                              | TT                | 1946462555               |
| SNP_P3_88424_26271493 | NC_021166.1    | Ca_kabuli_chr07 | 26271493                | GG                              | AA                | 1946462556               |
| SNP_P3_88425_26273136 | NC_021166.1    | Ca_kabuli_chr07 | 26273136                | AA                              | GG                | 1946462558               |
| SNP_P3_88426_26273220 | NC_021166.1    | Ca_kabuli_chr07 | 26273220                | TT                              | AA                | 1946462560               |
| SNP_P3_88427_26273242 | NC_021166.1    | Ca_kabuli_chr07 | 26273242                | TT                              | AA                | 1946462561               |
| SNP_P3_88428_26273247 | NC_021166.1    | Ca_kabuli_chr07 | 26273247                | AA                              | CC                | 1946462563               |
| SNP_P3_88429_26273256 | NC_021166.1    | Ca_kabuli_chr07 | 26273256                | TT                              | AA                | 1946462564               |
| SNP_P3_88430_26273257 | NC_021166.1    | Ca_kabuli_chr07 | 26273257                | TT                              | GG                | 1946462566               |
| SNP_P3_88431_26277650 | NC_021166.1    | Ca_kabuli_chr07 | 26277650                | GG                              | TT                | 1946462567               |
| SNP_P3_88432_26277672 | NC_021166.1    | Ca_kabuli_chr07 | 26277672                | GG                              | AA                | 1946462569               |
| SNP_P3_88433_26278777 | NC_021166.1    | Ca_kabuli_chr07 | 26278777                | CC                              | TT                | 1946462570               |
| SNP_P3_88434_26300398 | NC_021166.1    | Ca_kabuli_chr07 | 26300398                | TT                              | AA                | 1946462571               |
| SNP_P3_88435_26300838 | NC_021166.1    | Ca_kabuli_chr07 | 26300838                | CC                              | TT                | 1946462573               |
| SNP_P3_88436_26306701 | NC_021166.1    | Ca_kabuli_chr07 | 26306701                | AA                              | GG                | 1946462574               |
| SNP_P3_88437_26311649 | NC_021166.1    | Ca_kabuli_chr07 | 26311649                | GG                              | AA                | 1946462576               |
| SNP_P3_88438_26315456 | NC_021166.1    | Ca_kabuli_chr07 | 26315456                | CC                              | TT                | 1946462577               |
| SNP_P3_88439_26315481 | NC_021166.1    | Ca_kabuli_chr07 | 26315481                | TT                              | CC                | 1946462578               |
| SNP_P3_88440_26325927 | NC_021166.1    | Ca_kabuli_chr07 | 26325927                | AA                              | TT                | 1946462580               |
| SNP_P3_88441_26325960 | NC_021166.1    | Ca_kabuli_chr07 | 26325960                | TT                              | CC                | 1946462582               |
| SNP_P3_88442_26326710 | NC_021166.1    | Ca_kabuli_chr07 | 26326710                | AA                              | CC                | 1946462583               |
| SNP_P3_88443_26330491 | NC_021166.1    | Ca_kabuli_chr07 | 26330491                | CC                              | GG                | 1946462585               |
| SNP_P3_88444_26341851 | NC_021166.1    | Ca_kabuli_chr07 | 26341851                | GG                              | TT                | 1946462586               |
| SNP_P3_88445_26346585 | NC_021166.1    | Ca_kabuli_chr07 | 26346585                | GG                              | AA                | 1946462588               |
| SNP_P3_88446_26375816 | NC_021166.1    | Ca_kabuli_chr07 | 26375816                | TT                              | CC                | 1946462589               |
| SNP_P3_88447_26376213 | NC_021166.1    | Ca_kabuli_chr07 | 26376213                | CC                              | GG                | 1946462590               |
| SNP_P3_88448_26380656 | NC_021166.1    | Ca_kabuli_chr07 | 26380656                | CC                              | GG                | 1946462592               |
| SNP_P3_88449_26413274 | NC_021166.1    | Ca_kabuli_chr07 | 26413274                | GG                              | TT                | 1946462593               |
| SNP_P3_88450_26420812 | NC_021166.1    | Ca_kabuli_chr07 | 26420812                | GG                              | CC                | 1946462595               |
| SNP_P3_88452_26432576 | NC_021166.1    | Ca_kabuli_chr07 | 26432576                | AA                              | TT                | 1946462596               |
| SNP_P3_88453_26432792 | NC_021166.1    | Ca_kabuli_chr07 | 26432792                | GG                              | AA                | 1946462598               |

| SNPs IDs              | Chromosome IDs | Chromosomes     | Physical positions (bp) | CDC Frontier (Reference genome) | (Pusa 256 & HPNB) | NCBI SNPdb Accession IDs |
|-----------------------|----------------|-----------------|-------------------------|---------------------------------|-------------------|--------------------------|
| SNP_P3_88454_26436566 | NC_021166.1    | Ca_kabuli_chr07 | 26436566                | AA                              | TT                | 1946462599               |
| SNP_P3_88455_26436578 | NC_021166.1    | Ca_kabuli_chr07 | 26436578                | CC                              | AA                | 1946462601               |
| SNP_P3_88456_26436629 | NC_021166.1    | Ca_kabuli_chr07 | 26436629                | TT                              | GG                | 1946462603               |
| SNP_P3_88457_26450221 | NC_021166.1    | Ca_kabuli_chr07 | 26450221                | GG                              | TT                | 1946462604               |
| SNP_P3_88458_26450405 | NC_021166.1    | Ca_kabuli_chr07 | 26450405                | TT                              | GG                | 1946462606               |
| SNP_P3_88459_26450423 | NC_021166.1    | Ca_kabuli_chr07 | 26450423                | GG                              | TT                | 1946462607               |
| SNP_P3_88460_26450444 | NC_021166.1    | Ca_kabuli_chr07 | 26450444                | AA                              | GG                | 1946462608               |
| SNP_P3_88461_26450489 | NC_021166.1    | Ca_kabuli_chr07 | 26450489                | AA                              | GG                | 1946462610               |
| SNP_P3_88462_26450533 | NC_021166.1    | Ca_kabuli_chr07 | 26450533                | TT                              | CC                | 1946462611               |
| SNP_P3_88463_26450608 | NC_021166.1    | Ca_kabuli_chr07 | 26450608                | GG                              | AA                | 1946462613               |
| SNP_P3_88464_26450628 | NC_021166.1    | Ca_kabuli_chr07 | 26450628                | TT                              | CC                | 1946462614               |
| SNP_P3_88466_26476644 | NC_021166.1    | Ca_kabuli_chr07 | 26476644                | CC                              | TT                | 1946462616               |
| SNP_P3_88467_26478292 | NC_021166.1    | Ca_kabuli_chr07 | 26478292                | AA                              | TT                | 1946462617               |
| SNP_P3_88468_26478307 | NC_021166.1    | Ca_kabuli_chr07 | 26478307                | GG                              | AA                | 1946462619               |
| SNP_P3_88469_26478353 | NC_021166.1    | Ca_kabuli_chr07 | 26478353                | AA                              | GG                | 1946462620               |
| SNP_P3_88470_26482035 | NC_021166.1    | Ca_kabuli_chr07 | 26482035                | GG                              | AA                | 1946462622               |
| SNP_P3_88471_26482069 | NC_021166.1    | Ca_kabuli_chr07 | 26482069                | TT                              | CC                | 1946462623               |
| SNP_P3_88472_26482887 | NC_021166.1    | Ca_kabuli_chr07 | 26482887                | AA                              | GG                | 1946462625               |
| SNP_P3_88473_26528103 | NC_021166.1    | Ca_kabuli_chr07 | 26528103                | CC                              | TT                | 1946462626               |
| SNP_P3_88474_26535304 | NC_021166.1    | Ca_kabuli_chr07 | 26535304                | GG                              | AA                | 1946462628               |
| SNP_P3_88475_26548688 | NC_021166.1    | Ca_kabuli_chr07 | 26548688                | GG                              | AA                | 1946462629               |
| SNP_P3_88478_26584942 | NC_021166.1    | Ca_kabuli_chr07 | 26584942                | TT                              | AA                | 1946462631               |
| SNP_P3_88479_26586846 | NC_021166.1    | Ca_kabuli_chr07 | 26586846                | AA                              | GG                | 1946462632               |
| SNP_P3_88480_26586856 | NC_021166.1    | Ca_kabuli_chr07 | 26586856                | CC                              | TT                | 1946462634               |
| SNP_P3_88481_26586883 | NC_021166.1    | Ca_kabuli_chr07 | 26586883                | AA                              | GG                | 1946462635               |
| SNP_P3_88482_26587155 | NC_021166.1    | Ca_kabuli_chr07 | 26587155                | CC                              | TT                | 1946462637               |
| SNP_P3_88483_26587237 | NC_021166.1    | Ca_kabuli_chr07 | 26587237                | CC                              | TT                | 1946462638               |
| SNP_P3_88485_26624253 | NC_021166.1    | Ca_kabuli_chr07 | 26624253                | TT                              | AA                | 1946462640               |
| SNP_P3_88486_26635424 | NC_021166.1    | Ca_kabuli_chr07 | 26635424                | AA                              | GG                | 1946462641               |
| SNP_P3_88487_26636343 | NC_021166.1    | Ca_kabuli_chr07 | 26636343                | AA                              | CC                | 1946462643               |
| SNP_P3_88488_26639514 | NC_021166.1    | Ca_kabuli_chr07 | 26639514                | GG                              | AA                | 1946462644               |
| SNP_P3_88489_26639523 | NC_021166.1    | Ca_kabuli_chr07 | 26639523                | CC                              | TT                | 1946462646               |
| SNP_P3_88490_26639524 | NC_021166.1    | Ca_kabuli_chr07 | 26639524                | AA                              | GG                | 1946462647               |
| SNP_P3_88491_26639534 | NC_021166.1    | Ca_kabuli_chr07 | 26639534                | CC                              | TT                | 1946462649               |
| SNP_P3_88492_26642493 | NC_021166.1    | Ca_kabuli_chr07 | 26642493                | CC                              | GG                | 1946462650               |
| SNP_P3_88493_26642514 | NC_021166.1    | Ca_kabuli_chr07 | 26642514                | GG                              | CC                | 1946462652               |
| SNP_P3_88494_26655423 | NC_021166.1    | Ca_kabuli_chr07 | 26655423                | GG                              | AA                | 1946462653               |
| SNP_P3_88496_26672053 | NC_021166.1    | Ca_kabuli_chr07 | 26672053                | CC                              | TT                | 1946462655               |
| SNP_P3_88497_26676821 | NC_021166.1    | Ca_kabuli_chr07 | 26676821                | TT                              | CC                | 1946462656               |
| SNP_P3_88499_26691932 | NC_021166.1    | Ca_kabuli_chr07 | 26691932                | TT                              | AA                | 1946462658               |
| SNP_P3_88500_26691936 | NC_021166.1    | Ca_kabuli_chr07 | 26691936                | TT                              | CC                | 1946462659               |
| SNP_P3_88501_26694588 | NC_021166.1    | Ca_kabuli_chr07 | 26694588                | TT                              | CC                | 1946462661               |



| SNPs IDs              | Chromosome IDs | Chromosomes     | Physical positions (bp) | CDC Frontier (Reference genome) | (Pusa 256 & HPNB) | NCBI SNPdb Accession IDs |
|-----------------------|----------------|-----------------|-------------------------|---------------------------------|-------------------|--------------------------|
| SNP_P3_88503_26694825 | NC_021166.1    | Ca_kabuli_chr07 | 26694825                | CC                              | AA                | 1946462662               |
| SNP_P3_88504_26694829 | NC_021166.1    | Ca_kabuli_chr07 | 26694829                | TT                              | CC                | 1946462664               |
| SNP_P3_88505_26694863 | NC_021166.1    | Ca_kabuli_chr07 | 26694863                | AA                              | CC                | 1946462665               |
| SNP_P3_88506_26695291 | NC_021166.1    | Ca_kabuli_chr07 | 26695291                | TT                              | CC                | 1946462667               |
| SNP_P3_88507_26695924 | NC_021166.1    | Ca_kabuli_chr07 | 26695924                | TT                              | CC                | 1946462668               |
| SNP_P3_88509_26698579 | NC_021166.1    | Ca_kabuli_chr07 | 26698579                | TT                              | CC                | 1946462670               |
| SNP_P3_88510_26698614 | NC_021166.1    | Ca_kabuli_chr07 | 26698614                | CC                              | AA                | 1946462671               |
| SNP_P3_88511_26698623 | NC_021166.1    | Ca_kabuli_chr07 | 26698623                | TT                              | CC                | 1946462673               |
| SNP_P3_88512_26698682 | NC_021166.1    | Ca_kabuli_chr07 | 26698682                | AA                              | GG                | 1946462674               |
| SNP_P3_88513_26699275 | NC_021166.1    | Ca_kabuli_chr07 | 26699275                | AA                              | GG                | 1946462676               |
| SNP_P3_88514_26699289 | NC_021166.1    | Ca_kabuli_chr07 | 26699289                | AA                              | GG                | 1946462677               |
| SNP_P3_88515_26699344 | NC_021166.1    | Ca_kabuli_chr07 | 26699344                | CC                              | GG                | 1946462679               |
| SNP_P3_88516_26699346 | NC_021166.1    | Ca_kabuli_chr07 | 26699346                | AA                              | GG                | 1946462680               |
| SNP_P3_88517_26699366 | NC_021166.1    | Ca_kabuli_chr07 | 26699366                | AA                              | GG                | 1946462682               |
| SNP_P3_88518_26699415 | NC_021166.1    | Ca_kabuli_chr07 | 26699415                | CC                              | TT                | 1946462683               |
| SNP_P3_88519_26699765 | NC_021166.1    | Ca_kabuli_chr07 | 26699765                | TT                              | CC                | 1946462685               |
| SNP_P3_88520_26699787 | NC_021166.1    | Ca_kabuli_chr07 | 26699787                | AA                              | GG                | 1946462686               |
| SNP_P3_88521_26699890 | NC_021166.1    | Ca_kabuli_chr07 | 26699890                | TT                              | CC                | 1946462688               |
| SNP_P3_88522_26699899 | NC_021166.1    | Ca_kabuli_chr07 | 26699899                | TT                              | CC                | 1946462689               |
| SNP_P3_88524_26699927 | NC_021166.1    | Ca_kabuli_chr07 | 26699927                | GG                              | CC                | 1946462691               |
| SNP_P3_88525_26699943 | NC_021166.1    | Ca_kabuli_chr07 | 26699943                | AA                              | GG                | 1946462692               |
| SNP_P3_88526_26700038 | NC_021166.1    | Ca_kabuli_chr07 | 26700038                | TT                              | AA                | 1946462693               |
| SNP_P3_88527_26700316 | NC_021166.1    | Ca_kabuli_chr07 | 26700316                | AA                              | GG                | 1946462695               |
| SNP_P3_88528_26700368 | NC_021166.1    | Ca_kabuli_chr07 | 26700368                | CC                              | GG                | 1946462696               |
| SNP_P3_88529_26700373 | NC_021166.1    | Ca_kabuli_chr07 | 26700373                | TT                              | CC                | 1946462698               |
| SNP_P3_88530_26700382 | NC_021166.1    | Ca_kabuli_chr07 | 26700382                | TT                              | CC                | 1946462699               |
| SNP_P3_88531_26700395 | NC_021166.1    | Ca_kabuli_chr07 | 26700395                | AA                              | GG                | 1946462700               |
| SNP_P3_88532_26700412 | NC_021166.1    | Ca_kabuli_chr07 | 26700412                | AA                              | GG                | 1946462702               |
| SNP_P3_88533_26700803 | NC_021166.1    | Ca_kabuli_chr07 | 26700803                | TT                              | GG                | 1946462703               |
| SNP_P3_88534_26700836 | NC_021166.1    | Ca_kabuli_chr07 | 26700836                | CC                              | TT                | 1946462705               |
| SNP_P3_88535_26700838 | NC_021166.1    | Ca_kabuli_chr07 | 26700838                | AA                              | TT                | 1946462706               |
| SNP_P3_88536_26700879 | NC_021166.1    | Ca_kabuli_chr07 | 26700879                | TT                              | CC                | 1946462708               |
| SNP_P3_88537_26700892 | NC_021166.1    | Ca_kabuli_chr07 | 26700892                | CC                              | GG                | 1946462709               |
| SNP_P3_88538_26700953 | NC_021166.1    | Ca_kabuli_chr07 | 26700953                | AA                              | GG                | 1946462711               |
| SNP_P3_88539_26700955 | NC_021166.1    | Ca_kabuli_chr07 | 26700955                | TT                              | AA                | 1946462713               |
| SNP_P3_88540_26700969 | NC_021166.1    | Ca_kabuli_chr07 | 26700969                | TT                              | CC                | 1946462714               |
| SNP_P3_88542_26701344 | NC_021166.1    | Ca_kabuli_chr07 | 26701344                | TT                              | CC                | 1946462716               |
| SNP_P3_88543_26701396 | NC_021166.1    | Ca_kabuli_chr07 | 26701396                | GG                              | CC                | 1946462717               |
| SNP_P3_88544_26701489 | NC_021166.1    | Ca_kabuli_chr07 | 26701489                | CC                              | AA                | 1946462719               |
| SNP_P3_88546_26701540 | NC_021166.1    | Ca_kabuli_chr07 | 26701540                | AA                              | CC                | 1946462720               |
| SNP_P3_88547_26701579 | NC_021166.1    | Ca_kabuli_chr07 | 26701579                | GG                              | CC                | 1946462722               |
| SNP_P3_88548_26701606 | NC_021166.1    | Ca_kabuli_chr07 | 26701606                | GG                              | AA                | 1946462723               |

| SNPs IDs              | Chromosome IDs | Chromosomes     | Physical positions (bp) | CDC Frontier (Reference genome) | (Pusa 256 & HPNB) | NCBI SNPdb Accession IDs |
|-----------------------|----------------|-----------------|-------------------------|---------------------------------|-------------------|--------------------------|
| SNP_P3_88549_26701705 | NC_021166.1    | Ca_kabuli_chr07 | 26701705                | AA                              | GG                | 1946462725               |
| SNP_P3_88550_26701734 | NC_021166.1    | Ca_kabuli_chr07 | 26701734                | CC                              | TT                | 1946462726               |
| SNP_P3_88551_26701749 | NC_021166.1    | Ca_kabuli_chr07 | 26701749                | CC                              | TT                | 1946462728               |
| SNP_P3_88552_26702154 | NC_021166.1    | Ca_kabuli_chr07 | 26702154                | GG                              | AA                | 1946462729               |
| SNP_P3_88553_26702198 | NC_021166.1    | Ca_kabuli_chr07 | 26702198                | TT                              | CC                | 1946462731               |
| SNP_P3_88554_26702215 | NC_021166.1    | Ca_kabuli_chr07 | 26702215                | GG                              | CC                | 1946462732               |
| SNP_P3_88555_26702313 | NC_021166.1    | Ca_kabuli_chr07 | 26702313                | TT                              | CC                | 1946462734               |
| SNP_P3_88556_26702829 | NC_021166.1    | Ca_kabuli_chr07 | 26702829                | CC                              | TT                | 1946462735               |
| SNP_P3_88557_26702861 | NC_021166.1    | Ca_kabuli_chr07 | 26702861                | AA                              | GG                | 1946462737               |
| SNP_P3_88558_26702914 | NC_021166.1    | Ca_kabuli_chr07 | 26702914                | AA                              | CC                | 1946462738               |
| SNP_P3_88559_26702922 | NC_021166.1    | Ca_kabuli_chr07 | 26702922                | AA                              | CC                | 1946462740               |
| SNP_P3_88560_26714595 | NC_021166.1    | Ca_kabuli_chr07 | 26714595                | CC                              | TT                | 1946462741               |
| SNP_P3_88561_26716948 | NC_021166.1    | Ca_kabuli_chr07 | 26716948                | AA                              | CC                | 1946462743               |
| SNP_P3_88562_26717804 | NC_021166.1    | Ca_kabuli_chr07 | 26717804                | CC                              | TT                | 1946462744               |
| SNP_P3_88563_26717813 | NC_021166.1    | Ca_kabuli_chr07 | 26717813                | CC                              | TT                | 1946462746               |
| SNP_P3_88564_26718831 | NC_021166.1    | Ca_kabuli_chr07 | 26718831                | TT                              | CC                | 1946462747               |
| SNP_P3_88565_26718860 | NC_021166.1    | Ca_kabuli_chr07 | 26718860                | TT                              | CC                | 1946462749               |
| SNP_P3_88566_26718868 | NC_021166.1    | Ca_kabuli_chr07 | 26718868                | AA                              | TT                | 1946462750               |
| SNP_P3_88567_26718871 | NC_021166.1    | Ca_kabuli_chr07 | 26718871                | GG                              | AA                | 1946462752               |
| SNP_P3_88568_26719698 | NC_021166.1    | Ca_kabuli_chr07 | 26719698                | TT                              | GG                | 1946462753               |
| SNP_P3_88569_26720995 | NC_021166.1    | Ca_kabuli_chr07 | 26720995                | AA                              | GG                | 1946462755               |
| SNP_P3_88570_26721343 | NC_021166.1    | Ca_kabuli_chr07 | 26721343                | GG                              | AA                | 1946462757               |
| SNP_P3_88571_26722381 | NC_021166.1    | Ca_kabuli_chr07 | 26722381                | GG                              | TT                | 1946462758               |
| SNP_P3_88572_26730382 | NC_021166.1    | Ca_kabuli_chr07 | 26730382                | GG                              | AA                | 1946462760               |
| SNP_P3_88573_26730408 | NC_021166.1    | Ca_kabuli_chr07 | 26730408                | GG                              | AA                | 1946462761               |
| SNP_P3_88574_26730430 | NC_021166.1    | Ca_kabuli_chr07 | 26730430                | TT                              | CC                | 1946462763               |
| SNP_P3_88575_26730534 | NC_021166.1    | Ca_kabuli_chr07 | 26730534                | AA                              | GG                | 1946462764               |
| SNP_P3_88576_26731235 | NC_021166.1    | Ca_kabuli_chr07 | 26731235                | TT                              | CC                | 1946462766               |
| SNP_P3_88577_26731288 | NC_021166.1    | Ca_kabuli_chr07 | 26731288                | AA                              | CC                | 1946462767               |
| SNP_P3_88578_26731673 | NC_021166.1    | Ca_kabuli_chr07 | 26731673                | TT                              | CC                | 1946462769               |
| SNP_P3_88579_26738701 | NC_021166.1    | Ca_kabuli_chr07 | 26738701                | TT                              | AA                | 1946462770               |
| SNP_P3_88581_26754795 | NC_021166.1    | Ca_kabuli_chr07 | 26754795                | TT                              | CC                | 1946462772               |
| SNP_P3_88582_26754803 | NC_021166.1    | Ca_kabuli_chr07 | 26754803                | AA                              | GG                | 1946462773               |
| SNP_P3_88583_26758043 | NC_021166.1    | Ca_kabuli_chr07 | 26758043                | CC                              | AA                | 1946462775               |
| SNP_P3_88584_26758052 | NC_021166.1    | Ca_kabuli_chr07 | 26758052                | GG                              | AA                | 1946462777               |
| SNP_P3_88585_26758075 | NC_021166.1    | Ca_kabuli_chr07 | 26758075                | GG                              | AA                | 1946462778               |
| SNP_P3_88586_26758107 | NC_021166.1    | Ca_kabuli_chr07 | 26758107                | AA                              | GG                | 1946462780               |
| SNP_P3_88587_26758780 | NC_021166.1    | Ca_kabuli_chr07 | 26758780                | AA                              | GG                | 1946462781               |
| SNP_P3_88588_26758788 | NC_021166.1    | Ca_kabuli_chr07 | 26758788                | AA                              | TT                | 1946462783               |
| SNP_P3_88589_26799074 | NC_021166.1    | Ca_kabuli_chr07 | 26799074                | CC                              | TT                | 1946462784               |
| SNP_P3_88590_26799087 | NC_021166.1    | Ca_kabuli_chr07 | 26799087                | GG                              | TT                | 1946462786               |
| SNP_P3_88591_26799117 | NC_021166.1    | Ca_kabuli_chr07 | 26799117                | CC                              | TT                | 1946462787               |

| SNPs IDs              | Chromosome IDs | Chromosomes     | Physical positions (bp) | CDC Frontier (Reference genome) | (Pusa 256 & HPNB) | NCBI SNPdb Accession IDs |
|-----------------------|----------------|-----------------|-------------------------|---------------------------------|-------------------|--------------------------|
| SNP_P3_88592_26799133 | NC_021166.1    | Ca_kabuli_chr07 | 26799133                | GG                              | AA                | 1946462790               |
| SNP_P3_88594_26799396 | NC_021166.1    | Ca_kabuli_chr07 | 26799396                | TT                              | AA                | 1946462791               |
| SNP_P3_88595_26799400 | NC_021166.1    | Ca_kabuli_chr07 | 26799400                | GG                              | AA                | 1946462793               |
| SNP_P3_88596_26799430 | NC_021166.1    | Ca_kabuli_chr07 | 26799430                | TT                              | AA                | 1946462794               |
| SNP_P3_88597_26799435 | NC_021166.1    | Ca_kabuli_chr07 | 26799435                | GG                              | AA                | 1946462796               |
| SNP_P3_88598_26799466 | NC_021166.1    | Ca_kabuli_chr07 | 26799466                | GG                              | AA                | 1946462797               |
| SNP_P3_88599_26799468 | NC_021166.1    | Ca_kabuli_chr07 | 26799468                | AA                              | CC                | 1946462799               |
| SNP_P3_88600_26799493 | NC_021166.1    | Ca_kabuli_chr07 | 26799493                | AA                              | GG                | 1946462800               |
| SNP_P3_88601_26799517 | NC_021166.1    | Ca_kabuli_chr07 | 26799517                | GG                              | TT                | 1946462801               |
| SNP_P3_88602_26812187 | NC_021166.1    | Ca_kabuli_chr07 | 26812187                | TT                              | CC                | 1946462803               |
| SNP_P3_88603_26818929 | NC_021166.1    | Ca_kabuli_chr07 | 26818929                | TT                              | CC                | 1946462804               |
| SNP_P3_88605_26834244 | NC_021166.1    | Ca_kabuli_chr07 | 26834244                | TT                              | CC                | 1946462806               |
| SNP_P3_88608_26868198 | NC_021166.1    | Ca_kabuli_chr07 | 26868198                | AA                              | CC                | 1946462807               |
| SNP_P3_88610_26959154 | NC_021166.1    | Ca_kabuli_chr07 | 26959154                | TT                              | CC                | 1946462809               |
| SNP_P3_88611_26981489 | NC_021166.1    | Ca_kabuli_chr07 | 26981489                | TT                              | GG                | 1946462810               |
| SNP_P3_88613_26994485 | NC_021166.1    | Ca_kabuli_chr07 | 26994485                | AA                              | TT                | 1946462812               |
| SNP_P3_88614_27004806 | NC_021166.1    | Ca_kabuli_chr07 | 27004806                | AA                              | GG                | 1946462813               |
| SNP_P3_88616_27009709 | NC_021166.1    | Ca_kabuli_chr07 | 27009709                | AA                              | GG                | 1946462815               |
| SNP_P3_88617_27009735 | NC_021166.1    | Ca_kabuli_chr07 | 27009735                | GG                              | AA                | 1946462816               |
| SNP_P3_88618_27009743 | NC_021166.1    | Ca_kabuli_chr07 | 27009743                | TT                              | CC                | 1946462818               |
| SNP_P3_88619_27010310 | NC_021166.1    | Ca_kabuli_chr07 | 27010310                | AA                              | GG                | 1946462819               |
| SNP_P3_88620_27015633 | NC_021166.1    | Ca_kabuli_chr07 | 27015633                | TT                              | AA                | 1946462821               |
| SNP_P3_88622_27043158 | NC_021166.1    | Ca_kabuli_chr07 | 27043158                | TT                              | GG                | 1946462822               |
| SNP_P3_88623_27043641 | NC_021166.1    | Ca_kabuli_chr07 | 27043641                | AA                              | GG                | 1946462824               |
| SNP_P3_88624_27070100 | NC_021166.1    | Ca_kabuli_chr07 | 27070100                | CC                              | TT                | 1946462826               |
| SNP_P3_88625_27070162 | NC_021166.1    | Ca_kabuli_chr07 | 27070162                | GG                              | AA                | 1946462827               |
| SNP_P3_88626_27070179 | NC_021166.1    | Ca_kabuli_chr07 | 27070179                | AA                              | TT                | 1946462829               |
| SNP_P3_88627_27070190 | NC_021166.1    | Ca_kabuli_chr07 | 27070190                | GG                              | TT                | 1946462830               |
| SNP_P3_88628_27070495 | NC_021166.1    | Ca_kabuli_chr07 | 27070495                | GG                              | AA                | 1946462832               |
| SNP_P3_88629_27070503 | NC_021166.1    | Ca_kabuli_chr07 | 27070503                | AA                              | GG                | 1946462833               |
| SNP_P3_88630_27072958 | NC_021166.1    | Ca_kabuli_chr07 | 27072958                | TT                              | AA                | 1946462835               |
| SNP_P3_88631_27080402 | NC_021166.1    | Ca_kabuli_chr07 | 27080402                | GG                              | AA                | 1946462836               |
| SNP_P3_88633_27115400 | NC_021166.1    | Ca_kabuli_chr07 | 27115400                | CC                              | TT                | 1946462838               |
| SNP_P3_88635_27141208 | NC_021166.1    | Ca_kabuli_chr07 | 27141208                | AA                              | TT                | 1946462839               |
| SNP_P3_88636_27141234 | NC_021166.1    | Ca_kabuli_chr07 | 27141234                | TT                              | GG                | 1946462841               |
| SNP_P3_88637_27143195 | NC_021166.1    | Ca_kabuli_chr07 | 27143195                | CC                              | GG                | 1946462842               |
| SNP_P3_88638_27169142 | NC_021166.1    | Ca_kabuli_chr07 | 27169142                | GG                              | AA                | 1946462844               |
| SNP_P3_88639_27170704 | NC_021166.1    | Ca_kabuli_chr07 | 27170704                | AA                              | TT                | 1946462846               |
| SNP_P3_88640_27174424 | NC_021166.1    | Ca_kabuli_chr07 | 27174424                | AA                              | GG                | 1946462847               |
| SNP_P3_88641_27184113 | NC_021166.1    | Ca_kabuli_chr07 | 27184113                | GG                              | TT                | 1946462849               |
| SNP_P3_88642_27185059 | NC_021166.1    | Ca_kabuli_chr07 | 27185059                | AA                              | TT                | 1946462850               |
| SNP_P3_88643_27187485 | NC_021166.1    | Ca_kabuli_chr07 | 27187485                | GG                              | AA                | 1946462851               |

| SNPs IDs              | Chromosome IDs | Chromosomes     | Physical positions (bp) | CDC Frontier (Reference genome) | (Pusa 256 & HPNB) | NCBI SNPdb Accession IDs |
|-----------------------|----------------|-----------------|-------------------------|---------------------------------|-------------------|--------------------------|
| SNP_P3_88644_27187494 | NC_021166.1    | Ca_kabuli_chr07 | 27187494                | CC                              | GG                | 1946462853               |
| SNP_P3_88645_27187678 | NC_021166.1    | Ca_kabuli_chr07 | 27187678                | GG                              | TT                | 1946462854               |
| SNP_P3_88646_27190462 | NC_021166.1    | Ca_kabuli_chr07 | 27190462                | TT                              | CC                | 1946462856               |
| SNP_P3_88647_27190634 | NC_021166.1    | Ca_kabuli_chr07 | 27190634                | AA                              | CC                | 1946462857               |
| SNP_P3_88648_27216180 | NC_021166.1    | Ca_kabuli_chr07 | 27216180                | CC                              | TT                | 1946462859               |
| SNP_P3_88649_27233658 | NC_021166.1    | Ca_kabuli_chr07 | 27233658                | AA                              | CC                | 1946462860               |
| SNP_P3_88650_27257498 | NC_021166.1    | Ca_kabuli_chr07 | 27257498                | AA                              | TT                | 1946462862               |
| SNP_P3_88652_27332298 | NC_021166.1    | Ca_kabuli_chr07 | 27332298                | TT                              | CC                | 1946462863               |
| SNP_P3_88653_27332329 | NC_021166.1    | Ca_kabuli_chr07 | 27332329                | AA                              | TT                | 1946462865               |
| SNP_P3_88654_27332393 | NC_021166.1    | Ca_kabuli_chr07 | 27332393                | AA                              | GG                | 1946462867               |
| SNP_P3_88655_27332425 | NC_021166.1    | Ca_kabuli_chr07 | 27332425                | AA                              | GG                | 1946462868               |
| SNP_P3_88656_27332612 | NC_021166.1    | Ca_kabuli_chr07 | 27332612                | TT                              | GG                | 1946462870               |
| SNP_P3_88657_27332622 | NC_021166.1    | Ca_kabuli_chr07 | 27332622                | AA                              | GG                | 1946462871               |
| SNP_P3_88658_27332640 | NC_021166.1    | Ca_kabuli_chr07 | 27332640                | GG                              | CC                | 1946462873               |
| SNP_P3_88659_27332655 | NC_021166.1    | Ca_kabuli_chr07 | 27332655                | TT                              | CC                | 1946462874               |
| SNP_P3_88660_27341204 | NC_021166.1    | Ca_kabuli_chr07 | 27341204                | GG                              | AA                | 1946462876               |
| SNP_P3_88662_27341388 | NC_021166.1    | Ca_kabuli_chr07 | 27341388                | AA                              | GG                | 1946462877               |
| SNP_P3_88663_27341391 | NC_021166.1    | Ca_kabuli_chr07 | 27341391                | TT                              | AA                | 1946462878               |
| SNP_P3_88665_27359469 | NC_021166.1    | Ca_kabuli_chr07 | 27359469                | AA                              | GG                | 1946462880               |
| SNP_P3_88666_27359540 | NC_021166.1    | Ca_kabuli_chr07 | 27359540                | TT                              | CC                | 1946462881               |
| SNP_P3_88667_27361060 | NC_021166.1    | Ca_kabuli_chr07 | 27361060                | GG                              | TT                | 1946462883               |
| SNP_P3_88668_27361081 | NC_021166.1    | Ca_kabuli_chr07 | 27361081                | GG                              | TT                | 1946462884               |
| SNP_P3_88669_27365271 | NC_021166.1    | Ca_kabuli_chr07 | 27365271                | GG                              | AA                | 1946462886               |
| SNP_P3_88670_27386576 | NC_021166.1    | Ca_kabuli_chr07 | 27386576                | TT                              | CC                | 1946462888               |
| SNP_P3_88671_27386580 | NC_021166.1    | Ca_kabuli_chr07 | 27386580                | TT                              | CC                | 1946462889               |
| SNP_P3_88672_27393847 | NC_021166.1    | Ca_kabuli_chr07 | 27393847                | CC                              | TT                | 1946462891               |
| SNP_P3_88673_27393855 | NC_021166.1    | Ca_kabuli_chr07 | 27393855                | AA                              | GG                | 1946462892               |
| SNP_P3_88674_27397471 | NC_021166.1    | Ca_kabuli_chr07 | 27397471                | TT                              | CC                | 1946462894               |
| SNP_P3_88676_27413706 | NC_021166.1    | Ca_kabuli_chr07 | 27413706                | AA                              | GG                | 1946462895               |
| SNP_P3_88677_27434087 | NC_021166.1    | Ca_kabuli_chr07 | 27434087                | TT                              | AA                | 1946462897               |
| SNP_P3_88678_27441563 | NC_021166.1    | Ca_kabuli_chr07 | 27441563                | TT                              | GG                | 1946462898               |
| SNP_P3_88679_27462065 | NC_021166.1    | Ca_kabuli_chr07 | 27462065                | GG                              | TT                | 1946462900               |
| SNP_P3_88680_27462072 | NC_021166.1    | Ca_kabuli_chr07 | 27462072                | CC                              | TT                | 1946462901               |
| SNP_P3_88681_27487926 | NC_021166.1    | Ca_kabuli_chr07 | 27487926                | CC                              | TT                | 1946462903               |
| SNP_P3_88682_27488209 | NC_021166.1    | Ca_kabuli_chr07 | 27488209                | TT                              | AA                | 1946462904               |
| SNP_P3_88683_27488260 | NC_021166.1    | Ca_kabuli_chr07 | 27488260                | TT                              | GG                | 1946462906               |
| SNP_P3_88684_27494066 | NC_021166.1    | Ca_kabuli_chr07 | 27494066                | CC                              | GG                | 1946462908               |
| SNP_P3_88685_27501559 | NC_021166.1    | Ca_kabuli_chr07 | 27501559                | TT                              | GG                | 1946462909               |
| SNP_P3_88686_27501707 | NC_021166.1    | Ca_kabuli_chr07 | 27501707                | GG                              | AA                | 1946462911               |
| SNP_P3_88687_27501725 | NC_021166.1    | Ca_kabuli_chr07 | 27501725                | AA                              | GG                | 1946462912               |
| SNP_P3_88688_27521090 | NC_021166.1    | Ca_kabuli_chr07 | 27521090                | TT                              | CC                | 1946462914               |
| SNP_P3_88689_27521186 | NC_021166.1    | Ca_kabuli_chr07 | 27521186                | TT                              | AA                | 1946462915               |

| SNPs IDs              | Chromosome IDs | Chromosomes     | Physical positions (bp) | CDC Frontier (Reference genome) | (Pusa 256 & HPNB) | NCBI SNPdb Accession IDs |
|-----------------------|----------------|-----------------|-------------------------|---------------------------------|-------------------|--------------------------|
| SNP_P3_88690_27521215 | NC_021166.1    | Ca_kabuli_chr07 | 27521215                | CC                              | TT                | 1946462917               |
| SNP_P3_88692_27525301 | NC_021166.1    | Ca_kabuli_chr07 | 27525301                | AA                              | GG                | 1946462918               |
| SNP_P3_88694_27536306 | NC_021166.1    | Ca_kabuli_chr07 | 27536306                | GG                              | AA                | 1946462919               |
| SNP_P3_88695_27545881 | NC_021166.1    | Ca_kabuli_chr07 | 27545881                | CC                              | AA                | 1946462921               |
| SNP_P3_88696_27549264 | NC_021166.1    | Ca_kabuli_chr07 | 27549264                | CC                              | TT                | 1946462922               |
| SNP_P3_88697_27597691 | NC_021166.1    | Ca_kabuli_chr07 | 27597691                | AA                              | TT                | 1946462924               |
| SNP_P3_88698_27601191 | NC_021166.1    | Ca_kabuli_chr07 | 27601191                | AA                              | CC                | 1946462926               |
| SNP_P3_88699_27602429 | NC_021166.1    | Ca_kabuli_chr07 | 27602429                | TT                              | CC                | 1946462927               |
| SNP_P3_88700_27602935 | NC_021166.1    | Ca_kabuli_chr07 | 27602935                | AA                              | TT                | 1946462928               |
| SNP_P3_88701_27628420 | NC_021166.1    | Ca_kabuli_chr07 | 27628420                | GG                              | AA                | 1946462930               |
| SNP_P3_88702_27639694 | NC_021166.1    | Ca_kabuli_chr07 | 27639694                | GG                              | AA                | 1946462931               |
| SNP_P3_88703_27641716 | NC_021166.1    | Ca_kabuli_chr07 | 27641716                | AA                              | GG                | 1946462933               |
| SNP_P3_88705_27662402 | NC_021166.1    | Ca_kabuli_chr07 | 27662402                | CC                              | TT                | 1946462934               |
| SNP_P3_88706_27681752 | NC_021166.1    | Ca_kabuli_chr07 | 27681752                | TT                              | AA                | 1946462936               |
| SNP_P3_88707_27683310 | NC_021166.1    | Ca_kabuli_chr07 | 27683310                | CC                              | GG                | 1946462937               |
| SNP_P3_88708_27709318 | NC_021166.1    | Ca_kabuli_chr07 | 27709318                | GG                              | AA                | 1946462939               |
| SNP_P3_88709_27731292 | NC_021166.1    | Ca_kabuli_chr07 | 27731292                | GG                              | AA                | 1946462940               |
| SNP_P3_88710_27761658 | NC_021166.1    | Ca_kabuli_chr07 | 27761658                | GG                              | AA                | 1946462942               |
| SNP_P3_88712_27761815 | NC_021166.1    | Ca_kabuli_chr07 | 27761815                | AA                              | GG                | 1946462943               |
| SNP_P3_88714_27767842 | NC_021166.1    | Ca_kabuli_chr07 | 27767842                | GG                              | AA                | 1946462945               |
| SNP_P3_88716_27791060 | NC_021166.1    | Ca_kabuli_chr07 | 27791060                | AA                              | CC                | 1946462946               |
| SNP_P3_88717_27812323 | NC_021166.1    | Ca_kabuli_chr07 | 27812323                | CC                              | TT                | 1946462948               |
| SNP_P3_88719_27822632 | NC_021166.1    | Ca_kabuli_chr07 | 27822632                | TT                              | GG                | 1946462949               |
| SNP_P3_88720_27822813 | NC_021166.1    | Ca_kabuli_chr07 | 27822813                | CC                              | GG                | 1946462951               |
| SNP_P3_88721_27828946 | NC_021166.1    | Ca_kabuli_chr07 | 27828946                | TT                              | AA                | 1946462952               |
| SNP_P3_88722_27840777 | NC_021166.1    | Ca_kabuli_chr07 | 27840777                | TT                              | GG                | 1946462954               |
| SNP_P3_88723_27844094 | NC_021166.1    | Ca_kabuli_chr07 | 27844094                | CC                              | TT                | 1946462955               |
| SNP_P3_88724_27850454 | NC_021166.1    | Ca_kabuli_chr07 | 27850454                | AA                              | GG                | 1946462956               |
| SNP_P3_88725_27880205 | NC_021166.1    | Ca_kabuli_chr07 | 27880205                | AA                              | GG                | 1946462958               |
| SNP_P3_88726_27880504 | NC_021166.1    | Ca_kabuli_chr07 | 27880504                | TT                              | CC                | 1946462959               |
| SNP_P3_88727_27880505 | NC_021166.1    | Ca_kabuli_chr07 | 27880505                | AA                              | GG                | 1946462961               |
| SNP_P3_88728_27883329 | NC_021166.1    | Ca_kabuli_chr07 | 27883329                | AA                              | GG                | 1946462962               |
| SNP_P3_88729_27896027 | NC_021166.1    | Ca_kabuli_chr07 | 27896027                | TT                              | CC                | 1946462964               |
| SNP_P3_88731_27903053 | NC_021166.1    | Ca_kabuli_chr07 | 27903053                | TT                              | CC                | 1946462965               |
| SNP_P3_88733_27925660 | NC_021166.1    | Ca_kabuli_chr07 | 27925660                | CC                              | TT                | 1946462967               |
| SNP_P3_88734_27939643 | NC_021166.1    | Ca_kabuli_chr07 | 27939643                | TT                              | CC                | 1946462968               |
| SNP_P3_88735_27939690 | NC_021166.1    | Ca_kabuli_chr07 | 27939690                | TT                              | CC                | 1946462970               |
| SNP_P3_88736_27939724 | NC_021166.1    | Ca_kabuli_chr07 | 27939724                | AA                              | GG                | 1946462971               |
| SNP_P3_88737_27939761 | NC_021166.1    | Ca_kabuli_chr07 | 27939761                | AA                              | GG                | 1946462973               |
| SNP_P3_88738_27939768 | NC_021166.1    | Ca_kabuli_chr07 | 27939768                | CC                              | AA                | 1946462974               |
| SNP_P3_88739_27939771 | NC_021166.1    | Ca_kabuli_chr07 | 27939771                | CC                              | TT                | 1946462976               |
| SNP_P3_88740_27939856 | NC_021166.1    | Ca_kabuli_chr07 | 27939856                | AA                              | GG                | 1946462977               |

| SNPs IDs              | Chromosome IDs | Chromosomes     | Physical positions (bp) | CDC Frontier (Reference genome) | (Pusa 256 & HPNB) | NCBI SNPdb Accession IDs |
|-----------------------|----------------|-----------------|-------------------------|---------------------------------|-------------------|--------------------------|
| SNP_P3_88741_27939863 | NC_021166.1    | Ca_kabuli_chr07 | 27939863                | TT                              | GG                | 1946462979               |
| SNP_P3_88742_27939875 | NC_021166.1    | Ca_kabuli_chr07 | 27939875                | AA                              | TT                | 1946462980               |
| SNP_P3_88743_27940056 | NC_021166.1    | Ca_kabuli_chr07 | 27940056                | AA                              | GG                | 1946462982               |
| SNP_P3_88744_27940229 | NC_021166.1    | Ca_kabuli_chr07 | 27940229                | GG                              | CC                | 1946462983               |
| SNP_P3_88745_27945331 | NC_021166.1    | Ca_kabuli_chr07 | 27945331                | TT                              | AA                | 1946462985               |
| SNP_P3_88746_27976184 | NC_021166.1    | Ca_kabuli_chr07 | 27976184                | GG                              | AA                | 1946462986               |
| SNP_P3_88747_27977757 | NC_021166.1    | Ca_kabuli_chr07 | 27977757                | AA                              | GG                | 1946462988               |
| SNP_P3_88748_27977763 | NC_021166.1    | Ca_kabuli_chr07 | 27977763                | GG                              | TT                | 1946462989               |
| SNP_P3_88749_27977890 | NC_021166.1    | Ca_kabuli_chr07 | 27977890                | TT                              | CC                | 1946462991               |
| SNP_P3_88750_27978277 | NC_021166.1    | Ca_kabuli_chr07 | 27978277                | TT                              | GG                | 1946462993               |
| SNP_P3_88751_27978295 | NC_021166.1    | Ca_kabuli_chr07 | 27978295                | CC                              | AA                | 1946462994               |
| SNP_P3_88752_27979606 | NC_021166.1    | Ca_kabuli_chr07 | 27979606                | CC                              | TT                | 1946462996               |
| SNP_P3_88753_27984649 | NC_021166.1    | Ca_kabuli_chr07 | 27984649                | GG                              | TT                | 1946462997               |
| SNP_P3_88754_28018744 | NC_021166.1    | Ca_kabuli_chr07 | 28018744                | TT                              | CC                | 1946462999               |
| SNP_P3_88755_28030353 | NC_021166.1    | Ca_kabuli_chr07 | 28030353                | TT                              | CC                | 1946463000               |
| SNP_P3_88757_28037470 | NC_021166.1    | Ca_kabuli_chr07 | 28037470                | GG                              | AA                | 1946463002               |
| SNP_P3_88758_28043305 | NC_021166.1    | Ca_kabuli_chr07 | 28043305                | CC                              | TT                | 1946463003               |
| SNP_P3_88759_28045592 | NC_021166.1    | Ca_kabuli_chr07 | 28045592                | AA                              | TT                | 1946463005               |
| SNP_P3_88760_28048234 | NC_021166.1    | Ca_kabuli_chr07 | 28048234                | TT                              | CC                | 1946463006               |
| SNP_P3_88761_28048240 | NC_021166.1    | Ca_kabuli_chr07 | 28048240                | CC                              | TT                | 1946463008               |
| SNP_P3_88762_28048241 | NC_021166.1    | Ca_kabuli_chr07 | 28048241                | GG                              | AA                | 1946463009               |
| SNP_P3_88763_28048274 | NC_021166.1    | Ca_kabuli_chr07 | 28048274                | CC                              | TT                | 1946463011               |
| SNP_P3_88764_28048304 | NC_021166.1    | Ca_kabuli_chr07 | 28048304                | GG                              | CC                | 1946463012               |
| SNP_P3_88765_28070982 | NC_021166.1    | Ca_kabuli_chr07 | 28070982                | TT                              | AA                | 1946463014               |
| SNP_P3_88766_28075046 | NC_021166.1    | Ca_kabuli_chr07 | 28075046                | TT                              | CC                | 1946463015               |
| SNP_P3_88767_28075047 | NC_021166.1    | Ca_kabuli_chr07 | 28075047                | TT                              | GG                | 1946463017               |
| SNP_P3_88768_28075106 | NC_021166.1    | Ca_kabuli_chr07 | 28075106                | GG                              | TT                | 1946463018               |
| SNP_P3_88769_28075293 | NC_021166.1    | Ca_kabuli_chr07 | 28075293                | CC                              | TT                | 1946463020               |
| SNP_P3_88770_28075305 | NC_021166.1    | Ca_kabuli_chr07 | 28075305                | GG                              | AA                | 1946463021               |
| SNP_P3_88771_28075328 | NC_021166.1    | Ca_kabuli_chr07 | 28075328                | AA                              | GG                | 1946463023               |
| SNP_P3_88772_28075355 | NC_021166.1    | Ca_kabuli_chr07 | 28075355                | GG                              | AA                | 1946463024               |
| SNP_P3_88773_28075368 | NC_021166.1    | Ca_kabuli_chr07 | 28075368                | TT                              | CC                | 1946463026               |
| SNP_P3_88774_28075370 | NC_021166.1    | Ca_kabuli_chr07 | 28075370                | AA                              | GG                | 1946463027               |
| SNP_P3_88775_28075382 | NC_021166.1    | Ca_kabuli_chr07 | 28075382                | AA                              | GG                | 1946463029               |
| SNP_P3_88776_28075418 | NC_021166.1    | Ca_kabuli_chr07 | 28075418                | CC                              | GG                | 1946463030               |
| SNP_P3_88777_28075438 | NC_021166.1    | Ca_kabuli_chr07 | 28075438                | AA                              | GG                | 1946463031               |
| SNP_P3_88778_28075441 | NC_021166.1    | Ca_kabuli_chr07 | 28075441                | AA                              | TT                | 1946463033               |
| SNP_P3_88779_28075463 | NC_021166.1    | Ca_kabuli_chr07 | 28075463                | AA                              | GG                | 1946463035               |
| SNP_P3_88780_28075469 | NC_021166.1    | Ca_kabuli_chr07 | 28075469                | CC                              | TT                | 1946463036               |
| SNP_P3_88781_28080572 | NC_021166.1    | Ca_kabuli_chr07 | 28080572                | AA                              | GG                | 1946463038               |
| SNP_P3_88782_28084951 | NC_021166.1    | Ca_kabuli_chr07 | 28084951                | TT                              | AA                | 1946463039               |
| SNP_P3_88783_28089276 | NC_021166.1    | Ca_kabuli_chr07 | 28089276                | CC                              | AA                | 1946463040               |

| SNPs IDs              | Chromosome IDs | Chromosomes     | Physical positions (bp) | CDC Frontier (Reference genome) | (Pusa 256 & HPNB) | NCBI SNPdb Accession IDs |
|-----------------------|----------------|-----------------|-------------------------|---------------------------------|-------------------|--------------------------|
| SNP_P3_88785_28093725 | NC_021166.1    | Ca_kabuli_chr07 | 28093725                | CC                              | TT                | 1946463042               |
| SNP_P3_88786_28094014 | NC_021166.1    | Ca_kabuli_chr07 | 28094014                | CC                              | AA                | 1946463043               |
| SNP_P3_88787_28094204 | NC_021166.1    | Ca_kabuli_chr07 | 28094204                | TT                              | CC                | 1946463045               |
| SNP_P3_88788_28094213 | NC_021166.1    | Ca_kabuli_chr07 | 28094213                | GG                              | AA                | 1946463046               |
| SNP_P3_88789_28094305 | NC_021166.1    | Ca_kabuli_chr07 | 28094305                | TT                              | AA                | 1946463048               |
| SNP_P3_88790_28094346 | NC_021166.1    | Ca_kabuli_chr07 | 28094346                | CC                              | TT                | 1946463049               |
| SNP_P3_88792_28113248 | NC_021166.1    | Ca_kabuli_chr07 | 28113248                | CC                              | AA                | 1946463051               |
| SNP_P3_88793_28113256 | NC_021166.1    | Ca_kabuli_chr07 | 28113256                | TT                              | CC                | 1946463052               |
| SNP_P3_88794_28113262 | NC_021166.1    | Ca_kabuli_chr07 | 28113262                | CC                              | AA                | 1946463054               |
| SNP_P3_88795_28113266 | NC_021166.1    | Ca_kabuli_chr07 | 28113266                | AA                              | TT                | 1946463055               |
| SNP_P3_88796_28113271 | NC_021166.1    | Ca_kabuli_chr07 | 28113271                | CC                              | TT                | 1946463057               |
| SNP_P3_88797_28113301 | NC_021166.1    | Ca_kabuli_chr07 | 28113301                | GG                              | AA                | 1946463058               |
| SNP_P3_88798_28113302 | NC_021166.1    | Ca_kabuli_chr07 | 28113302                | GG                              | AA                | 1946463060               |
| SNP_P3_88799_28115278 | NC_021166.1    | Ca_kabuli_chr07 | 28115278                | AA                              | GG                | 1946463061               |
| SNP_P3_88800_28115345 | NC_021166.1    | Ca_kabuli_chr07 | 28115345                | CC                              | TT                | 1946463063               |
| SNP_P3_88801_28119258 | NC_021166.1    | Ca_kabuli_chr07 | 28119258                | AA                              | TT                | 1946463064               |
| SNP_P3_88802_28119615 | NC_021166.1    | Ca_kabuli_chr07 | 28119615                | TT                              | CC                | 1946463066               |
| SNP_P3_88803_28120018 | NC_021166.1    | Ca_kabuli_chr07 | 28120018                | AA                              | CC                | 1946463067               |
| SNP_P3_88805_28137253 | NC_021166.1    | Ca_kabuli_chr07 | 28137253                | TT                              | CC                | 1946463068               |
| SNP_P3_88806_28137369 | NC_021166.1    | Ca_kabuli_chr07 | 28137369                | GG                              | AA                | 1946463070               |
| SNP_P3_88807_28137664 | NC_021166.1    | Ca_kabuli_chr07 | 28137664                | TT                              | AA                | 1946463071               |
| SNP_P3_88809_28139307 | NC_021166.1    | Ca_kabuli_chr07 | 28139307                | CC                              | TT                | 1946463073               |
| SNP_P3_88810_28164000 | NC_021166.1    | Ca_kabuli_chr07 | 28164000                | GG                              | AA                | 1946463074               |
| SNP_P3_88811_28164055 | NC_021166.1    | Ca_kabuli_chr07 | 28164055                | GG                              | AA                | 1946463076               |
| SNP_P3_88812_28182605 | NC_021166.1    | Ca_kabuli_chr07 | 28182605                | AA                              | GG                | 1946463077               |
| SNP_P3_88813_28185145 | NC_021166.1    | Ca_kabuli_chr07 | 28185145                | GG                              | TT                | 1946463078               |
| SNP_P3_88815_28189788 | NC_021166.1    | Ca_kabuli_chr07 | 28189788                | AA                              | GG                | 1946463080               |
| SNP_P3_88816_28189874 | NC_021166.1    | Ca_kabuli_chr07 | 28189874                | AA                              | CC                | 1946463081               |
| SNP_P3_88817_28189913 | NC_021166.1    | Ca_kabuli_chr07 | 28189913                | TT                              | GG                | 1946463083               |
| SNP_P3_88818_28190095 | NC_021166.1    | Ca_kabuli_chr07 | 28190095                | AA                              | TT                | 1946463087               |
| SNP_P3_88819_28190186 | NC_021166.1    | Ca_kabuli_chr07 | 28190186                | AA                              | CC                | 1946463088               |
| SNP_P3_88821_28190228 | NC_021166.1    | Ca_kabuli_chr07 | 28190228                | TT                              | CC                | 1946463090               |
| SNP_P3_88822_28190277 | NC_021166.1    | Ca_kabuli_chr07 | 28190277                | CC                              | AA                | 1946463091               |
| SNP_P3_88823_28190304 | NC_021166.1    | Ca_kabuli_chr07 | 28190304                | TT                              | GG                | 1946463092               |
| SNP_P3_88824_28199505 | NC_021166.1    | Ca_kabuli_chr07 | 28199505                | TT                              | AA                | 1946463094               |
| SNP_P3_88825_28219636 | NC_021166.1    | Ca_kabuli_chr07 | 28219636                | GG                              | AA                | 1946463095               |
| SNP_P3_88826_28219639 | NC_021166.1    | Ca_kabuli_chr07 | 28219639                | GG                              | AA                | 1946463097               |
| SNP_P3_88827_28220351 | NC_021166.1    | Ca_kabuli_chr07 | 28220351                | CC                              | TT                | 1946463098               |
| SNP_P3_88828_28234910 | NC_021166.1    | Ca_kabuli_chr07 | 28234910                | AA                              | TT                | 1946463100               |
| SNP_P3_88829_28234928 | NC_021166.1    | Ca_kabuli_chr07 | 28234928                | GG                              | TT                | 1946463101               |
| SNP_P3_88830_28240415 | NC_021166.1    | Ca_kabuli_chr07 | 28240415                | CC                              | TT                | 1946463103               |
| SNP_P3_88831_28240421 | NC_021166.1    | Ca_kabuli_chr07 | 28240421                | CC                              | TT                | 1946463104               |

| SNPs IDs              | Chromosome IDs | Chromosomes     | Physical positions (bp) | CDC Frontier (Reference genome) | (Pusa 256 & HPNB) | NCBI SNPdb Accession IDs |
|-----------------------|----------------|-----------------|-------------------------|---------------------------------|-------------------|--------------------------|
| SNP_P3_88832_28240422 | NC_021166.1    | Ca_kabuli_chr07 | 28240422                | AA                              | GG                | 1946463106               |
| SNP_P3_88833_28240484 | NC_021166.1    | Ca_kabuli_chr07 | 28240484                | AA                              | CC                | 1946463107               |
| SNP_P3_88834_28240490 | NC_021166.1    | Ca_kabuli_chr07 | 28240490                | AA                              | GG                | 1946463108               |
| SNP_P3_88835_28240501 | NC_021166.1    | Ca_kabuli_chr07 | 28240501                | GG                              | TT                | 1946463110               |
| SNP_P3_88836_28240517 | NC_021166.1    | Ca_kabuli_chr07 | 28240517                | AA                              | GG                | 1946463111               |
| SNP_P3_88837_28240540 | NC_021166.1    | Ca_kabuli_chr07 | 28240540                | TT                              | AA                | 1946463113               |
| SNP_P3_88838_28240545 | NC_021166.1    | Ca_kabuli_chr07 | 28240545                | CC                              | AA                | 1946463114               |
| SNP_P3_88839_28240603 | NC_021166.1    | Ca_kabuli_chr07 | 28240603                | GG                              | TT                | 1946463116               |
| SNP_P3_88840_28240611 | NC_021166.1    | Ca_kabuli_chr07 | 28240611                | TT                              | CC                | 1946463117               |
| SNP_P3_88841_28240620 | NC_021166.1    | Ca_kabuli_chr07 | 28240620                | AA                              | GG                | 1946463119               |
| SNP_P3_88842_28240794 | NC_021166.1    | Ca_kabuli_chr07 | 28240794                | GG                              | CC                | 1946463120               |
| SNP_P3_88843_28240810 | NC_021166.1    | Ca_kabuli_chr07 | 28240810                | TT                              | GG                | 1946463122               |
| SNP_P3_88844_28240834 | NC_021166.1    | Ca_kabuli_chr07 | 28240834                | TT                              | CC                | 1946463123               |
| SNP_P3_88845_28243718 | NC_021166.1    | Ca_kabuli_chr07 | 28243718                | TT                              | CC                | 1946463124               |
| SNP_P3_88846_28246009 | NC_021166.1    | Ca_kabuli_chr07 | 28246009                | AA                              | TT                | 1946463126               |
| SNP_P3_88847_28246091 | NC_021166.1    | Ca_kabuli_chr07 | 28246091                | CC                              | TT                | 1946463127               |
| SNP_P3_88849_28317214 | NC_021166.1    | Ca_kabuli_chr07 | 28317214                | CC                              | TT                | 1946463129               |
| SNP_P3_88850_28323189 | NC_021166.1    | Ca_kabuli_chr07 | 28323189                | GG                              | AA                | 1946463130               |
| SNP_P3_88851_28324273 | NC_021166.1    | Ca_kabuli_chr07 | 28324273                | GG                              | AA                | 1946463132               |
| SNP_P3_88852_28324551 | NC_021166.1    | Ca_kabuli_chr07 | 28324551                | CC                              | GG                | 1946463133               |
| SNP_P3_88853_28335039 | NC_021166.1    | Ca_kabuli_chr07 | 28335039                | CC                              | TT                | 1946463135               |
| SNP_P3_88854_28336461 | NC_021166.1    | Ca_kabuli_chr07 | 28336461                | AA                              | GG                | 1946463136               |
| SNP_P3_88855_28352872 | NC_021166.1    | Ca_kabuli_chr07 | 28352872                | TT                              | CC                | 1946463138               |
| SNP_P3_88858_28375725 | NC_021166.1    | Ca_kabuli_chr07 | 28375725                | TT                              | CC                | 1946463139               |
| SNP_P3_88860_28385519 | NC_021166.1    | Ca_kabuli_chr07 | 28385519                | AA                              | GG                | 1946463141               |
| SNP_P3_88861_28387885 | NC_021166.1    | Ca_kabuli_chr07 | 28387885                | GG                              | TT                | 1946463142               |
| SNP_P3_88862_28390673 | NC_021166.1    | Ca_kabuli_chr07 | 28390673                | TT                              | CC                | 1946463144               |
| SNP_P3_88867_28464434 | NC_021166.1    | Ca_kabuli_chr07 | 28464434                | CC                              | AA                | 1946463145               |
| SNP_P3_88868_28486280 | NC_021166.1    | Ca_kabuli_chr07 | 28486280                | TT                              | CC                | 1946463147               |
| SNP_P3_88869_28487808 | NC_021166.1    | Ca_kabuli_chr07 | 28487808                | GG                              | AA                | 1946463148               |
| SNP_P3_88870_28502511 | NC_021166.1    | Ca_kabuli_chr07 | 28502511                | GG                              | TT                | 1946463150               |
| SNP_P3_88871_28502624 | NC_021166.1    | Ca_kabuli_chr07 | 28502624                | AA                              | TT                | 1946463151               |
| SNP_P3_88872_28529061 | NC_021166.1    | Ca_kabuli_chr07 | 28529061                | GG                              | AA                | 1946463153               |
| SNP_P3_88873_28529062 | NC_021166.1    | Ca_kabuli_chr07 | 28529062                | AA                              | TT                | 1946463154               |
| SNP_P3_88875_28529866 | NC_021166.1    | Ca_kabuli_chr07 | 28529866                | AA                              | CC                | 1946463156               |
| SNP_P3_88876_28547056 | NC_021166.1    | Ca_kabuli_chr07 | 28547056                | CC                              | TT                | 1946463157               |
| SNP_P3_88877_28555649 | NC_021166.1    | Ca_kabuli_chr07 | 28555649                | TT                              | CC                | 1946463159               |
| SNP_P3_88878_28556895 | NC_021166.1    | Ca_kabuli_chr07 | 28556895                | CC                              | TT                | 1946463160               |
| SNP_P3_88879_28556902 | NC_021166.1    | Ca_kabuli_chr07 | 28556902                | AA                              | CC                | 1946463162               |
| SNP_P3_88880_28556933 | NC_021166.1    | Ca_kabuli_chr07 | 28556933                | AA                              | TT                | 1946463163               |
| SNP_P3_88881_28556974 | NC_021166.1    | Ca_kabuli_chr07 | 28556974                | TT                              | CC                | 1946463164               |
| SNP_P3_88882_28557139 | NC_021166.1    | Ca_kabuli_chr07 | 28557139                | CC                              | TT                | 1946463166               |



| SNPs IDs              | Chromosome IDs | Chromosomes     | Physical positions (bp) | CDC Frontier (Reference genome) | (Pusa 256 & HPNB) | NCBI SNPdb Accession IDs |
|-----------------------|----------------|-----------------|-------------------------|---------------------------------|-------------------|--------------------------|
| SNP_P3_88883_28557203 | NC_021166.1    | Ca_kabuli_chr07 | 28557203                | GG                              | AA                | 1946463167               |
| SNP_P3_88885_28557249 | NC_021166.1    | Ca_kabuli_chr07 | 28557249                | GG                              | TT                | 1946463169               |
| SNP_P3_88886_28557447 | NC_021166.1    | Ca_kabuli_chr07 | 28557447                | TT                              | AA                | 1946463171               |
| SNP_P3_88887_28558043 | NC_021166.1    | Ca_kabuli_chr07 | 28558043                | AA                              | CC                | 1946463172               |
| SNP_P3_88888_28561207 | NC_021166.1    | Ca_kabuli_chr07 | 28561207                | TT                              | CC                | 1946463173               |
| SNP_P3_88889_28561217 | NC_021166.1    | Ca_kabuli_chr07 | 28561217                | GG                              | TT                | 1946463175               |
| SNP_P3_88890_28561226 | NC_021166.1    | Ca_kabuli_chr07 | 28561226                | TT                              | AA                | 1946463176               |
| SNP_P3_88891_28561271 | NC_021166.1    | Ca_kabuli_chr07 | 28561271                | TT                              | CC                | 1946463178               |
| SNP_P3_88892_28561308 | NC_021166.1    | Ca_kabuli_chr07 | 28561308                | GG                              | CC                | 1946463179               |
| SNP_P3_88893_28561376 | NC_021166.1    | Ca_kabuli_chr07 | 28561376                | GG                              | CC                | 1946463181               |
| SNP_P3_88894_28561399 | NC_021166.1    | Ca_kabuli_chr07 | 28561399                | GG                              | AA                | 1946463182               |
| SNP_P3_88895_28561428 | NC_021166.1    | Ca_kabuli_chr07 | 28561428                | TT                              | CC                | 1946463183               |
| SNP_P3_88896_28561445 | NC_021166.1    | Ca_kabuli_chr07 | 28561445                | AA                              | GG                | 1946463185               |
| SNP_P3_88899_28589780 | NC_021166.1    | Ca_kabuli_chr07 | 28589780                | AA                              | GG                | 1946463186               |
| SNP_P3_88900_28591551 | NC_021166.1    | Ca_kabuli_chr07 | 28591551                | CC                              | TT                | 1946463188               |
| SNP_P3_88902_28619530 | NC_021166.1    | Ca_kabuli_chr07 | 28619530                | TT                              | GG                | 1946463189               |
| SNP_P3_88903_28619534 | NC_021166.1    | Ca_kabuli_chr07 | 28619534                | TT                              | CC                | 1946463191               |
| SNP_P3_88904_28640072 | NC_021166.1    | Ca_kabuli_chr07 | 28640072                | AA                              | TT                | 1946463192               |
| SNP_P3_88905_28640075 | NC_021166.1    | Ca_kabuli_chr07 | 28640075                | AA                              | TT                | 1946463194               |
| SNP_P3_88906_28643211 | NC_021166.1    | Ca_kabuli_chr07 | 28643211                | AA                              | GG                | 1946463195               |
| SNP_P3_88907_28652673 | NC_021166.1    | Ca_kabuli_chr07 | 28652673                | CC                              | TT                | 1946463197               |
| SNP_P3_88908_28665134 | NC_021166.1    | Ca_kabuli_chr07 | 28665134                | TT                              | AA                | 1946463198               |
| SNP_P3_88909_28696510 | NC_021166.1    | Ca_kabuli_chr07 | 28696510                | AA                              | GG                | 1946463200               |
| SNP_P3_88911_28702221 | NC_021166.1    | Ca_kabuli_chr07 | 28702221                | GG                              | AA                | 1946463201               |
| SNP_P3_88912_28702239 | NC_021166.1    | Ca_kabuli_chr07 | 28702239                | TT                              | CC                | 1946463203               |
| SNP_P3_88913_28702322 | NC_021166.1    | Ca_kabuli_chr07 | 28702322                | TT                              | CC                | 1946463204               |
| SNP_P3_88914_28702492 | NC_021166.1    | Ca_kabuli_chr07 | 28702492                | CC                              | TT                | 1946463206               |
| SNP_P3_88915_28702561 | NC_021166.1    | Ca_kabuli_chr07 | 28702561                | AA                              | CC                | 1946463207               |
| SNP_P3_88916_28702615 | NC_021166.1    | Ca_kabuli_chr07 | 28702615                | TT                              | CC                | 1946463209               |
| SNP_P3_88918_28703571 | NC_021166.1    | Ca_kabuli_chr07 | 28703571                | CC                              | AA                | 1946463210               |
| SNP_P3_88919_28705945 | NC_021166.1    | Ca_kabuli_chr07 | 28705945                | TT                              | CC                | 1946463211               |
| SNP_P3_88921_28707198 | NC_021166.1    | Ca_kabuli_chr07 | 28707198                | CC                              | AA                | 1946463213               |
| SNP_P3_88922_28707297 | NC_021166.1    | Ca_kabuli_chr07 | 28707297                | TT                              | CC                | 1946463214               |
| SNP_P3_88923_28707299 | NC_021166.1    | Ca_kabuli_chr07 | 28707299                | GG                              | AA                | 1946463216               |
| SNP_P3_88924_28707301 | NC_021166.1    | Ca_kabuli_chr07 | 28707301                | AA                              | TT                | 1946463217               |
| SNP_P3_88925_28707302 | NC_021166.1    | Ca_kabuli_chr07 | 28707302                | GG                              | TT                | 1946463219               |
| SNP_P3_88926_28707394 | NC_021166.1    | Ca_kabuli_chr07 | 28707394                | TT                              | CC                | 1946463220               |
| SNP_P3_88928_28707467 | NC_021166.1    | Ca_kabuli_chr07 | 28707467                | AA                              | GG                | 1946463222               |
| SNP_P3_88929_28707595 | NC_021166.1    | Ca_kabuli_chr07 | 28707595                | CC                              | TT                | 1946463223               |
| SNP_P3_88930_28707751 | NC_021166.1    | Ca_kabuli_chr07 | 28707751                | AA                              | GG                | 1946463225               |
| SNP_P3_88931_28875858 | NC_021166.1    | Ca_kabuli_chr07 | 28875858                | TT                              | AA                | 1946463226               |
| SNP_P3_88932_28875900 | NC_021166.1    | Ca_kabuli_chr07 | 28875900                | TT                              | CC                | 1946463227               |

| SNPs IDs              | Chromosome IDs | Chromosomes     | Physical positions (bp) | CDC Frontier (Reference genome) | (Pusa 256 & HPNB) | NCBI SNPdb Accession IDs |
|-----------------------|----------------|-----------------|-------------------------|---------------------------------|-------------------|--------------------------|
| SNP_P3_88933_28876231 | NC_021166.1    | Ca_kabuli_chr07 | 28876231                | CC                              | AA                | 1946463229               |
| SNP_P3_88934_28883573 | NC_021166.1    | Ca_kabuli_chr07 | 28883573                | GG                              | AA                | 1946463230               |
| SNP_P3_88935_28883586 | NC_021166.1    | Ca_kabuli_chr07 | 28883586                | GG                              | AA                | 1946463232               |
| SNP_P3_88936_28888162 | NC_021166.1    | Ca_kabuli_chr07 | 28888162                | GG                              | TT                | 1946463233               |
| SNP_P3_88937_28888169 | NC_021166.1    | Ca_kabuli_chr07 | 28888169                | GG                              | AA                | 1946463235               |
| SNP_P3_88939_28891814 | NC_021166.1    | Ca_kabuli_chr07 | 28891814                | GG                              | AA                | 1946463236               |
| SNP_P3_88940_28891922 | NC_021166.1    | Ca_kabuli_chr07 | 28891922                | AA                              | CC                | 1946463237               |
| SNP_P3_88941_28905296 | NC_021166.1    | Ca_kabuli_chr07 | 28905296                | GG                              | AA                | 1946463239               |
| SNP_P3_88942_28909411 | NC_021166.1    | Ca_kabuli_chr07 | 28909411                | AA                              | GG                | 1946463240               |
| SNP_P3_88943_28909523 | NC_021166.1    | Ca_kabuli_chr07 | 28909523                | GG                              | AA                | 1946463242               |
| SNP_P3_88944_29013803 | NC_021166.1    | Ca_kabuli_chr07 | 29013803                | CC                              | AA                | 1946463243               |
| SNP_P3_88945_29013830 | NC_021166.1    | Ca_kabuli_chr07 | 29013830                | AA                              | GG                | 1946463244               |
| SNP_P3_88946_29067322 | NC_021166.1    | Ca_kabuli_chr07 | 29067322                | TT                              | AA                | 1946463246               |
| SNP_P3_88948_29081499 | NC_021166.1    | Ca_kabuli_chr07 | 29081499                | CC                              | TT                | 1946463248               |
| SNP_P3_88949_29097587 | NC_021166.1    | Ca_kabuli_chr07 | 29097587                | AA                              | GG                | 1946463249               |
| SNP_P3_88951_29140158 | NC_021166.1    | Ca_kabuli_chr07 | 29140158                | CC                              | TT                | 1946463250               |
| SNP_P3_88952_29155835 | NC_021166.1    | Ca_kabuli_chr07 | 29155835                | AA                              | TT                | 1946463252               |
| SNP_P3_88953_29161206 | NC_021166.1    | Ca_kabuli_chr07 | 29161206                | TT                              | GG                | 1946463253               |
| SNP_P3_88954_29196781 | NC_021166.1    | Ca_kabuli_chr07 | 29196781                | CC                              | TT                | 1946463255               |
| SNP_P3_88955_29205237 | NC_021166.1    | Ca_kabuli_chr07 | 29205237                | TT                              | CC                | 1946463256               |
| SNP_P3_88956_29205240 | NC_021166.1    | Ca_kabuli_chr07 | 29205240                | GG                              | AA                | 1946463258               |
| SNP_P3_88957_29206135 | NC_021166.1    | Ca_kabuli_chr07 | 29206135                | CC                              | TT                | 1946463259               |
| SNP_P3_88958_29211452 | NC_021166.1    | Ca_kabuli_chr07 | 29211452                | TT                              | AA                | 1946463261               |
| SNP_P3_88959_29212023 | NC_021166.1    | Ca_kabuli_chr07 | 29212023                | AA                              | TT                | 1946463262               |
| SNP_P3_88960_29212025 | NC_021166.1    | Ca_kabuli_chr07 | 29212025                | CC                              | AA                | 1946463263               |
| SNP_P3_88961_29212026 | NC_021166.1    | Ca_kabuli_chr07 | 29212026                | AA                              | TT                | 1946463265               |
| SNP_P3_88962_29212027 | NC_021166.1    | Ca_kabuli_chr07 | 29212027                | GG                              | TT                | 1946463267               |
| SNP_P3_88963_29212028 | NC_021166.1    | Ca_kabuli_chr07 | 29212028                | GG                              | CC                | 1946463268               |
| SNP_P3_88964_29215831 | NC_021166.1    | Ca_kabuli_chr07 | 29215831                | CC                              | GG                | 1946463270               |
| SNP_P3_88966_29215880 | NC_021166.1    | Ca_kabuli_chr07 | 29215880                | AA                              | TT                | 1946463271               |
| SNP_P3_88968_29264102 | NC_021166.1    | Ca_kabuli_chr07 | 29264102                | TT                              | AA                | 1946463272               |
| SNP_P3_88969_29278382 | NC_021166.1    | Ca_kabuli_chr07 | 29278382                | TT                              | AA                | 1946463274               |
| SNP_P3_88971_29293159 | NC_021166.1    | Ca_kabuli_chr07 | 29293159                | AA                              | GG                | 1946463275               |
| SNP_P3_88972_29294255 | NC_021166.1    | Ca_kabuli_chr07 | 29294255                | AA                              | TT                | 1946463277               |
| SNP_P3_88975_29350806 | NC_021166.1    | Ca_kabuli_chr07 | 29350806                | TT                              | CC                | 1946463278               |
| SNP_P3_88976_29395382 | NC_021166.1    | Ca_kabuli_chr07 | 29395382                | AA                              | GG                | 1946463280               |
| SNP_P3_88977_29395476 | NC_021166.1    | Ca_kabuli_chr07 | 29395476                | TT                              | GG                | 1946463281               |
| SNP_P3_88978_29395515 | NC_021166.1    | Ca_kabuli_chr07 | 29395515                | AA                              | GG                | 1946463283               |
| SNP_P3_88980_29416464 | NC_021166.1    | Ca_kabuli_chr07 | 29416464                | AA                              | GG                | 1946463284               |
| SNP_P3_88982_29416577 | NC_021166.1    | Ca_kabuli_chr07 | 29416577                | TT                              | CC                | 1946463286               |
| SNP_P3_88983_29416714 | NC_021166.1    | Ca_kabuli_chr07 | 29416714                | AA                              | GG                | 1946463287               |
| SNP_P3_88985_29416892 | NC_021166.1    | Ca_kabuli_chr07 | 29416892                | GG                              | AA                | 1946463289               |

| SNPs IDs              | Chromosome IDs | Chromosomes     | Physical positions (bp) | CDC Frontier (Reference genome) | (Pusa 256 & HPNB) | NCBI SNPdb Accession IDs |
|-----------------------|----------------|-----------------|-------------------------|---------------------------------|-------------------|--------------------------|
| SNP_P3_88986_29416893 | NC_021166.1    | Ca_kabuli_chr07 | 29416893                | GG                              | AA                | 1946463290               |
| SNP_P3_88987_29417404 | NC_021166.1    | Ca_kabuli_chr07 | 29417404                | TT                              | CC                | 1946463292               |
| SNP_P3_88988_29417586 | NC_021166.1    | Ca_kabuli_chr07 | 29417586                | TT                              | AA                | 1946463293               |
| SNP_P3_88989_29417645 | NC_021166.1    | Ca_kabuli_chr07 | 29417645                | AA                              | GG                | 1946463295               |
| SNP_P3_88990_29417693 | NC_021166.1    | Ca_kabuli_chr07 | 29417693                | GG                              | CC                | 1946463296               |
| SNP_P3_88991_29417759 | NC_021166.1    | Ca_kabuli_chr07 | 29417759                | AA                              | CC                | 1946463297               |
| SNP_P3_88993_29417970 | NC_021166.1    | Ca_kabuli_chr07 | 29417970                | GG                              | AA                | 1946463299               |
| SNP_P3_88995_29418307 | NC_021166.1    | Ca_kabuli_chr07 | 29418307                | TT                              | CC                | 1946463300               |
| SNP_P3_88996_29419198 | NC_021166.1    | Ca_kabuli_chr07 | 29419198                | CC                              | AA                | 1946463302               |
| SNP_P3_88997_29422403 | NC_021166.1    | Ca_kabuli_chr07 | 29422403                | AA                              | GG                | 1946463303               |
| SNP_P3_88998_29422431 | NC_021166.1    | Ca_kabuli_chr07 | 29422431                | CC                              | TT                | 1946463305               |
| SNP_P3_88999_29422969 | NC_021166.1    | Ca_kabuli_chr07 | 29422969                | AA                              | GG                | 1946463306               |
| SNP_P3_89000_29428389 | NC_021166.1    | Ca_kabuli_chr07 | 29428389                | GG                              | AA                | 1946463308               |
| SNP_P3_89001_29433171 | NC_021166.1    | Ca_kabuli_chr07 | 29433171                | GG                              | CC                | 1946463310               |
| SNP_P3_89002_29433179 | NC_021166.1    | Ca_kabuli_chr07 | 29433179                | CC                              | TT                | 1946463311               |
| SNP_P3_89003_29433206 | NC_021166.1    | Ca_kabuli_chr07 | 29433206                | TT                              | CC                | 1946463312               |
| SNP_P3_89004_29433354 | NC_021166.1    | Ca_kabuli_chr07 | 29433354                | TT                              | CC                | 1946463314               |
| SNP_P3_89005_29433372 | NC_021166.1    | Ca_kabuli_chr07 | 29433372                | CC                              | TT                | 1946463315               |
| SNP_P3_89006_29433448 | NC_021166.1    | Ca_kabuli_chr07 | 29433448                | TT                              | AA                | 1946463317               |
| SNP_P3_89008_29433574 | NC_021166.1    | Ca_kabuli_chr07 | 29433574                | GG                              | AA                | 1946463318               |
| SNP_P3_89009_29433644 | NC_021166.1    | Ca_kabuli_chr07 | 29433644                | CC                              | GG                | 1946463320               |
| SNP_P3_89010_29433667 | NC_021166.1    | Ca_kabuli_chr07 | 29433667                | AA                              | TT                | 1946463321               |
| SNP_P3_89011_29433738 | NC_021166.1    | Ca_kabuli_chr07 | 29433738                | CC                              | TT                | 1946463322               |
| SNP_P3_89013_29461236 | NC_021166.1    | Ca_kabuli_chr07 | 29461236                | CC                              | TT                | 1946463324               |
| SNP_P3_89014_29461297 | NC_021166.1    | Ca_kabuli_chr07 | 29461297                | AA                              | CC                | 1946463325               |
| SNP_P3_89015_29461319 | NC_021166.1    | Ca_kabuli_chr07 | 29461319                | TT                              | AA                | 1946463327               |
| SNP_P3_89016_29461587 | NC_021166.1    | Ca_kabuli_chr07 | 29461587                | AA                              | GG                | 1946463329               |
| SNP_P3_89017_29461607 | NC_021166.1    | Ca_kabuli_chr07 | 29461607                | TT                              | GG                | 1946463330               |
| SNP_P3_89019_29473474 | NC_021166.1    | Ca_kabuli_chr07 | 29473474                | CC                              | TT                | 1946463332               |
| SNP_P3_89021_29477901 | NC_021166.1    | Ca_kabuli_chr07 | 29477901                | AA                              | CC                | 1946463333               |
| SNP_P3_89022_29504812 | NC_021166.1    | Ca_kabuli_chr07 | 29504812                | CC                              | TT                | 1946463335               |
| SNP_P3_89023_29504824 | NC_021166.1    | Ca_kabuli_chr07 | 29504824                | TT                              | CC                | 1946463336               |
| SNP_P3_89024_29504889 | NC_021166.1    | Ca_kabuli_chr07 | 29504889                | TT                              | AA                | 1946463337               |
| SNP_P3_89025_29504966 | NC_021166.1    | Ca_kabuli_chr07 | 29504966                | CC                              | GG                | 1946463339               |
| SNP_P3_89026_29505293 | NC_021166.1    | Ca_kabuli_chr07 | 29505293                | AA                              | GG                | 1946463340               |
| SNP_P3_89027_29507851 | NC_021166.1    | Ca_kabuli_chr07 | 29507851                | CC                              | AA                | 1946463342               |
| SNP_P3_89028_29507853 | NC_021166.1    | Ca_kabuli_chr07 | 29507853                | GG                              | AA                | 1946463343               |
| SNP_P3_89029_29547429 | NC_021166.1    | Ca_kabuli_chr07 | 29547429                | CC                              | TT                | 1946463345               |
| SNP_P3_89031_29547840 | NC_021166.1    | Ca_kabuli_chr07 | 29547840                | GG                              | AA                | 1946463346               |
| SNP_P3_89032_29547858 | NC_021166.1    | Ca_kabuli_chr07 | 29547858                | CC                              | GG                | 1946463348               |
| SNP_P3_89033_29564162 | NC_021166.1    | Ca_kabuli_chr07 | 29564162                | CC                              | TT                | 1946463349               |
| SNP_P3_89034_29583666 | NC_021166.1    | Ca_kabuli_chr07 | 29583666                | AA                              | CC                | 1946463351               |

| SNPs IDs              | Chromosome IDs | Chromosomes     | Physical positions (bp) | CDC Frontier (Reference genome) | (Pusa 256 & HPNB) | NCBI SNPdb Accession IDs |
|-----------------------|----------------|-----------------|-------------------------|---------------------------------|-------------------|--------------------------|
| SNP_P3_89036_29605369 | NC_021166.1    | Ca_kabuli_chr07 | 29605369                | AA                              | TT                | 1946463352               |
| SNP_P3_89037_29605734 | NC_021166.1    | Ca_kabuli_chr07 | 29605734                | TT                              | AA                | 1946463354               |
| SNP_P3_89039_29610159 | NC_021166.1    | Ca_kabuli_chr07 | 29610159                | TT                              | CC                | 1946463355               |
| SNP_P3_89040_29610180 | NC_021166.1    | Ca_kabuli_chr07 | 29610180                | CC                              | TT                | 1946463357               |
| SNP_P3_89041_29610298 | NC_021166.1    | Ca_kabuli_chr07 | 29610298                | TT                              | CC                | 1946463358               |
| SNP_P3_89042_29658089 | NC_021166.1    | Ca_kabuli_chr07 | 29658089                | GG                              | AA                | 1946463359               |
| SNP_P3_89044_29695025 | NC_021166.1    | Ca_kabuli_chr07 | 29695025                | TT                              | CC                | 1946463361               |
| SNP_P3_89045_29743428 | NC_021166.1    | Ca_kabuli_chr07 | 29743428                | CC                              | TT                | 1946463362               |
| SNP_P3_89046_29753839 | NC_021166.1    | Ca_kabuli_chr07 | 29753839                | TT                              | CC                | 1946463364               |
| SNP_P3_89048_29790248 | NC_021166.1    | Ca_kabuli_chr07 | 29790248                | AA                              | TT                | 1946463365               |
| SNP_P3_89049_29811130 | NC_021166.1    | Ca_kabuli_chr07 | 29811130                | CC                              | TT                | 1946463367               |
| SNP_P3_89050_29855703 | NC_021166.1    | Ca_kabuli_chr07 | 29855703                | TT                              | GG                | 1946463368               |
| SNP_P3_89051_29877400 | NC_021166.1    | Ca_kabuli_chr07 | 29877400                | GG                              | AA                | 1946463369               |
| SNP_P3_89053_29907236 | NC_021166.1    | Ca_kabuli_chr07 | 29907236                | TT                              | CC                | 1946463371               |
| SNP_P3_89054_29908766 | NC_021166.1    | Ca_kabuli_chr07 | 29908766                | GG                              | AA                | 1946463373               |
| SNP_P3_89055_29929724 | NC_021166.1    | Ca_kabuli_chr07 | 29929724                | TT                              | CC                | 1946463374               |
| SNP_P3_89056_29929735 | NC_021166.1    | Ca_kabuli_chr07 | 29929735                | CC                              | TT                | 1946463376               |
| SNP_P3_89057_29929953 | NC_021166.1    | Ca_kabuli_chr07 | 29929953                | AA                              | GG                | 1946463377               |
| SNP_P3_89058_29930053 | NC_021166.1    | Ca_kabuli_chr07 | 29930053                | GG                              | AA                | 1946463378               |
| SNP_P3_89059_29940193 | NC_021166.1    | Ca_kabuli_chr07 | 29940193                | TT                              | CC                | 1946463380               |
| SNP_P3_89060_29962120 | NC_021166.1    | Ca_kabuli_chr07 | 29962120                | GG                              | AA                | 1946463381               |
| SNP_P3_89062_29995760 | NC_021166.1    | Ca_kabuli_chr07 | 29995760                | TT                              | CC                | 1946463383               |
| SNP_P3_89064_29996280 | NC_021166.1    | Ca_kabuli_chr07 | 29996280                | GG                              | AA                | 1946463384               |
| SNP_P3_89065_29996304 | NC_021166.1    | Ca_kabuli_chr07 | 29996304                | AA                              | CC                | 1946463386               |
| SNP_P3_89066_29996331 | NC_021166.1    | Ca_kabuli_chr07 | 29996331                | CC                              | TT                | 1946463387               |
| SNP_P3_89067_29996608 | NC_021166.1    | Ca_kabuli_chr07 | 29996608                | AA                              | GG                | 1946463389               |
| SNP_P3_89068_29996623 | NC_021166.1    | Ca_kabuli_chr07 | 29996623                | AA                              | GG                | 1946463390               |
| SNP_P3_89069_29996624 | NC_021166.1    | Ca_kabuli_chr07 | 29996624                | AA                              | CC                | 1946463391               |
| SNP_P3_89070_29997971 | NC_021166.1    | Ca_kabuli_chr07 | 29997971                | TT                              | AA                | 1946463393               |
| SNP_P3_89071_29999748 | NC_021166.1    | Ca_kabuli_chr07 | 29999748                | AA                              | TT                | 1946463395               |
| SNP_P3_89072_29999786 | NC_021166.1    | Ca_kabuli_chr07 | 29999786                | GG                              | AA                | 1946463396               |
| SNP_P3_89073_29999828 | NC_021166.1    | Ca_kabuli_chr07 | 29999828                | TT                              | CC                | 1946463397               |
| SNP_P3_89074_29999869 | NC_021166.1    | Ca_kabuli_chr07 | 29999869                | GG                              | AA                | 1946463399               |
| SNP_P3_89075_29999873 | NC_021166.1    | Ca_kabuli_chr07 | 29999873                | GG                              | AA                | 1946463400               |
| SNP_P3_89076_30000045 | NC_021166.1    | Ca_kabuli_chr07 | 30000045                | GG                              | AA                | 1946463402               |
| SNP_P3_89077_30001343 | NC_021166.1    | Ca_kabuli_chr07 | 30001343                | GG                              | AA                | 1946463403               |
| SNP_P3_89078_30001617 | NC_021166.1    | Ca_kabuli_chr07 | 30001617                | TT                              | CC                | 1946463405               |
| SNP_P3_89079_30001639 | NC_021166.1    | Ca_kabuli_chr07 | 30001639                | CC                              | AA                | 1946463406               |
| SNP_P3_89080_30001696 | NC_021166.1    | Ca_kabuli_chr07 | 30001696                | CC                              | AA                | 1946463407               |
| SNP_P3_89082_30001989 | NC_021166.1    | Ca_kabuli_chr07 | 30001989                | GG                              | TT                | 1946463409               |
| SNP_P3_89083_30002879 | NC_021166.1    | Ca_kabuli_chr07 | 30002879                | GG                              | CC                | 1946463410               |
| SNP_P3_89084_30002911 | NC_021166.1    | Ca_kabuli_chr07 | 30002911                | TT                              | AA                | 1946463412               |

| SNPs IDs              | Chromosome IDs | Chromosomes     | Physical positions (bp) | CDC Frontier (Reference genome) | (Pusa 256 & HPNB) | NCBI SNPdb Accession IDs |
|-----------------------|----------------|-----------------|-------------------------|---------------------------------|-------------------|--------------------------|
| SNP_P3_89085_30002950 | NC_021166.1    | Ca_kabuli_chr07 | 30002950                | TT                              | AA                | 1946463413               |
| SNP_P3_89086_30003081 | NC_021166.1    | Ca_kabuli_chr07 | 30003081                | TT                              | CC                | 1946463415               |
| SNP_P3_89087_30006413 | NC_021166.1    | Ca_kabuli_chr07 | 30006413                | AA                              | TT                | 1946463416               |
| SNP_P3_89088_30006887 | NC_021166.1    | Ca_kabuli_chr07 | 30006887                | AA                              | CC                | 1946463418               |
| SNP_P3_89089_30008915 | NC_021166.1    | Ca_kabuli_chr07 | 30008915                | TT                              | CC                | 1946463421               |
| SNP_P3_89090_30008919 | NC_021166.1    | Ca_kabuli_chr07 | 30008919                | GG                              | AA                | 1946463422               |
| SNP_P3_89091_30008932 | NC_021166.1    | Ca_kabuli_chr07 | 30008932                | CC                              | GG                | 1946463423               |
| SNP_P3_89093_30011172 | NC_021166.1    | Ca_kabuli_chr07 | 30011172                | CC                              | TT                | 1946463425               |
| SNP_P3_89094_30011174 | NC_021166.1    | Ca_kabuli_chr07 | 30011174                | CC                              | TT                | 1946463426               |
| SNP_P3_89096_30011236 | NC_021166.1    | Ca_kabuli_chr07 | 30011236                | TT                              | GG                | 1946463428               |
| SNP_P3_89097_30011269 | NC_021166.1    | Ca_kabuli_chr07 | 30011269                | CC                              | TT                | 1946463429               |
| SNP_P3_89098_30011293 | NC_021166.1    | Ca_kabuli_chr07 | 30011293                | CC                              | TT                | 1946463431               |
| SNP_P3_89100_30011578 | NC_021166.1    | Ca_kabuli_chr07 | 30011578                | GG                              | AA                | 1946463432               |
| SNP_P3_89102_30013469 | NC_021166.1    | Ca_kabuli_chr07 | 30013469                | TT                              | AA                | 1946463433               |
| SNP_P3_89103_30013477 | NC_021166.1    | Ca_kabuli_chr07 | 30013477                | TT                              | AA                | 1946463435               |
| SNP_P3_89104_30013639 | NC_021166.1    | Ca_kabuli_chr07 | 30013639                | CC                              | TT                | 1946463436               |
| SNP_P3_89105_30013645 | NC_021166.1    | Ca_kabuli_chr07 | 30013645                | TT                              | CC                | 1946463438               |
| SNP_P3_89106_30013653 | NC_021166.1    | Ca_kabuli_chr07 | 30013653                | TT                              | CC                | 1946463439               |
| SNP_P3_89107_30013876 | NC_021166.1    | Ca_kabuli_chr07 | 30013876                | CC                              | GG                | 1946463441               |
| SNP_P3_89108_30014676 | NC_021166.1    | Ca_kabuli_chr07 | 30014676                | CC                              | AA                | 1946463442               |
| SNP_P3_89109_30015160 | NC_021166.1    | Ca_kabuli_chr07 | 30015160                | TT                              | CC                | 1946463444               |
| SNP_P3_89110_30015164 | NC_021166.1    | Ca_kabuli_chr07 | 30015164                | CC                              | TT                | 1946463445               |
| SNP_P3_89113_30016739 | NC_021166.1    | Ca_kabuli_chr07 | 30016739                | TT                              | CC                | 1946463447               |
| SNP_P3_89115_30017773 | NC_021166.1    | Ca_kabuli_chr07 | 30017773                | CC                              | TT                | 1946463448               |
| SNP_P3_89116_30019651 | NC_021166.1    | Ca_kabuli_chr07 | 30019651                | TT                              | GG                | 1946463449               |
| SNP_P3_89117_30019696 | NC_021166.1    | Ca_kabuli_chr07 | 30019696                | AA                              | GG                | 1946463451               |
| SNP_P3_89118_30019705 | NC_021166.1    | Ca_kabuli_chr07 | 30019705                | TT                              | AA                | 1946463452               |
| SNP_P3_89120_30020072 | NC_021166.1    | Ca_kabuli_chr07 | 30020072                | GG                              | AA                | 1946463454               |
| SNP_P3_89121_30020248 | NC_021166.1    | Ca_kabuli_chr07 | 30020248                | CC                              | TT                | 1946463455               |
| SNP_P3_89123_30020551 | NC_021166.1    | Ca_kabuli_chr07 | 30020551                | TT                              | CC                | 1946463457               |
| SNP_P3_89124_30020628 | NC_021166.1    | Ca_kabuli_chr07 | 30020628                | TT                              | CC                | 1946463458               |
| SNP_P3_89125_30022816 | NC_021166.1    | Ca_kabuli_chr07 | 30022816                | TT                              | CC                | 1946463460               |
| SNP_P3_89126_30023510 | NC_021166.1    | Ca_kabuli_chr07 | 30023510                | AA                              | TT                | 1946463461               |
| SNP_P3_89127_30023527 | NC_021166.1    | Ca_kabuli_chr07 | 30023527                | CC                              | TT                | 1946463463               |
| SNP_P3_89128_30023577 | NC_021166.1    | Ca_kabuli_chr07 | 30023577                | TT                              | CC                | 1946463464               |
| SNP_P3_89129_30023636 | NC_021166.1    | Ca_kabuli_chr07 | 30023636                | AA                              | TT                | 1946463466               |
| SNP_P3_89131_30024853 | NC_021166.1    | Ca_kabuli_chr07 | 30024853                | GG                              | AA                | 1946463467               |
| SNP_P3_89132_30026017 | NC_021166.1    | Ca_kabuli_chr07 | 30026017                | TT                              | CC                | 1946463469               |
| SNP_P3_89134_30027617 | NC_021166.1    | Ca_kabuli_chr07 | 30027617                | AA                              | TT                | 1946463470               |
| SNP_P3_89135_30028394 | NC_021166.1    | Ca_kabuli_chr07 | 30028394                | AA                              | GG                | 1946463472               |
| SNP_P3_89136_30028399 | NC_021166.1    | Ca_kabuli_chr07 | 30028399                | CC                              | AA                | 1946463473               |
| SNP_P3_89137_30028446 | NC_021166.1    | Ca_kabuli_chr07 | 30028446                | AA                              | TT                | 1946463475               |

| SNPs IDs              | Chromosome IDs | Chromosomes     | Physical positions (bp) | CDC Frontier (Reference genome) | (Pusa 256 & HPNB) | NCBI SNPdb Accession IDs |
|-----------------------|----------------|-----------------|-------------------------|---------------------------------|-------------------|--------------------------|
| SNP_P3_89138_30029590 | NC_021166.1    | Ca_kabuli_chr07 | 30029590                | TT                              | CC                | 1946463476               |
| SNP_P3_89139_30030310 | NC_021166.1    | Ca_kabuli_chr07 | 30030310                | AA                              | GG                | 1946463478               |
| SNP_P3_89140_30030474 | NC_021166.1    | Ca_kabuli_chr07 | 30030474                | TT                              | GG                | 1946463479               |
| SNP_P3_89141_30030476 | NC_021166.1    | Ca_kabuli_chr07 | 30030476                | CC                              | GG                | 1946463481               |
| SNP_P3_89142_30030781 | NC_021166.1    | Ca_kabuli_chr07 | 30030781                | AA                              | CC                | 1946463482               |
| SNP_P3_89143_30030827 | NC_021166.1    | Ca_kabuli_chr07 | 30030827                | GG                              | AA                | 1946463484               |
| SNP_P3_89144_30034926 | NC_021166.1    | Ca_kabuli_chr07 | 30034926                | AA                              | GG                | 1946463485               |
| SNP_P3_89145_30035726 | NC_021166.1    | Ca_kabuli_chr07 | 30035726                | CC                              | TT                | 1946463487               |
| SNP_P3_89146_30035913 | NC_021166.1    | Ca_kabuli_chr07 | 30035913                | AA                              | GG                | 1946463488               |
| SNP_P3_89147_30035967 | NC_021166.1    | Ca_kabuli_chr07 | 30035967                | CC                              | AA                | 1946463490               |
| SNP_P3_89148_30035976 | NC_021166.1    | Ca_kabuli_chr07 | 30035976                | GG                              | AA                | 1946463492               |
| SNP_P3_89150_30036222 | NC_021166.1    | Ca_kabuli_chr07 | 30036222                | AA                              | GG                | 1946463494               |
| SNP_P3_89151_30038184 | NC_021166.1    | Ca_kabuli_chr07 | 30038184                | CC                              | TT                | 1946463495               |
| SNP_P3_89152_30038216 | NC_021166.1    | Ca_kabuli_chr07 | 30038216                | CC                              | TT                | 1946463497               |
| SNP_P3_89153_30038497 | NC_021166.1    | Ca_kabuli_chr07 | 30038497                | TT                              | CC                | 1946463499               |
| SNP_P3_89154_30038558 | NC_021166.1    | Ca_kabuli_chr07 | 30038558                | CC                              | TT                | 1946463500               |
| SNP_P3_89156_30039543 | NC_021166.1    | Ca_kabuli_chr07 | 30039543                | CC                              | TT                | 1946463502               |
| SNP_P3_89157_30041523 | NC_021166.1    | Ca_kabuli_chr07 | 30041523                | AA                              | GG                | 1946463503               |
| SNP_P3_89158_30041810 | NC_021166.1    | Ca_kabuli_chr07 | 30041810                | TT                              | GG                | 1946463505               |
| SNP_P3_89159_30041881 | NC_021166.1    | Ca_kabuli_chr07 | 30041881                | AA                              | GG                | 1946463506               |
| SNP_P3_89160_30041910 | NC_021166.1    | Ca_kabuli_chr07 | 30041910                | TT                              | CC                | 1946463507               |
| SNP_P3_89161_30042121 | NC_021166.1    | Ca_kabuli_chr07 | 30042121                | TT                              | CC                | 1946463508               |
| SNP_P3_89162_30042133 | NC_021166.1    | Ca_kabuli_chr07 | 30042133                | AA                              | GG                | 1946463509               |
| SNP_P3_89163_30042445 | NC_021166.1    | Ca_kabuli_chr07 | 30042445                | GG                              | AA                | 1946463510               |
| SNP_P3_89164_30042553 | NC_021166.1    | Ca_kabuli_chr07 | 30042553                | AA                              | GG                | 1946463511               |
| SNP_P3_89165_30042569 | NC_021166.1    | Ca_kabuli_chr07 | 30042569                | GG                              | CC                | 1946463512               |
| SNP_P3_89166_30042578 | NC_021166.1    | Ca_kabuli_chr07 | 30042578                | GG                              | AA                | 1946463513               |
| SNP_P3_89168_30042875 | NC_021166.1    | Ca_kabuli_chr07 | 30042875                | TT                              | CC                | 1946463514               |
| SNP_P3_89169_30042891 | NC_021166.1    | Ca_kabuli_chr07 | 30042891                | AA                              | GG                | 1946463515               |
| SNP_P3_89171_30043099 | NC_021166.1    | Ca_kabuli_chr07 | 30043099                | CC                              | TT                | 1946463516               |
| SNP_P3_89172_30043108 | NC_021166.1    | Ca_kabuli_chr07 | 30043108                | AA                              | CC                | 1946463517               |
| SNP_P3_89173_30043112 | NC_021166.1    | Ca_kabuli_chr07 | 30043112                | AA                              | GG                | 1946463518               |
| SNP_P3_89174_30043435 | NC_021166.1    | Ca_kabuli_chr07 | 30043435                | TT                              | AA                | 1946463519               |
| SNP_P3_89175_30043475 | NC_021166.1    | Ca_kabuli_chr07 | 30043475                | AA                              | TT                | 1946463520               |
| SNP_P3_89176_30043907 | NC_021166.1    | Ca_kabuli_chr07 | 30043907                | CC                              | TT                | 1946463521               |
| SNP_P3_89177_30043911 | NC_021166.1    | Ca_kabuli_chr07 | 30043911                | AA                              | GG                | 1946463522               |
| SNP_P3_89178_30043985 | NC_021166.1    | Ca_kabuli_chr07 | 30043985                | TT                              | AA                | 1946463523               |
| SNP_P3_89179_30044573 | NC_021166.1    | Ca_kabuli_chr07 | 30044573                | CC                              | TT                | 1946463524               |
| SNP_P3_89180_30044632 | NC_021166.1    | Ca_kabuli_chr07 | 30044632                | AA                              | CC                | 1946463525               |
| SNP_P3_89181_30044649 | NC_021166.1    | Ca_kabuli_chr07 | 30044649                | CC                              | AA                | 1946463526               |
| SNP_P3_89182_30044675 | NC_021166.1    | Ca_kabuli_chr07 | 30044675                | TT                              | AA                | 1946463527               |
| SNP_P3_89183_30044750 | NC_021166.1    | Ca_kabuli_chr07 | 30044750                | GG                              | AA                | 1946463528               |

| SNPs IDs              | Chromosome IDs | Chromosomes     | Physical positions (bp) | CDC Frontier (Reference genome) | (Pusa 256 & HPNB) | NCBI SNPdb Accession IDs |
|-----------------------|----------------|-----------------|-------------------------|---------------------------------|-------------------|--------------------------|
| SNP_P3_89184_30044757 | NC_021166.1    | Ca_kabuli_chr07 | 30044757                | GG                              | AA                | 1946463529               |
| SNP_P3_89185_30044800 | NC_021166.1    | Ca_kabuli_chr07 | 30044800                | AA                              | GG                | 1946463530               |
| SNP_P3_89186_30044873 | NC_021166.1    | Ca_kabuli_chr07 | 30044873                | CC                              | GG                | 1946463531               |
| SNP_P3_89187_30044888 | NC_021166.1    | Ca_kabuli_chr07 | 30044888                | TT                              | CC                | 1946463532               |
| SNP_P3_89188_30044911 | NC_021166.1    | Ca_kabuli_chr07 | 30044911                | GG                              | CC                | 1946463533               |
| SNP_P3_89189_30044961 | NC_021166.1    | Ca_kabuli_chr07 | 30044961                | GG                              | AA                | 1946463534               |
| SNP_P3_89190_30045353 | NC_021166.1    | Ca_kabuli_chr07 | 30045353                | CC                              | AA                | 1946463536               |
| SNP_P3_89191_30045362 | NC_021166.1    | Ca_kabuli_chr07 | 30045362                | TT                              | CC                | 1946463537               |
| SNP_P3_89192_30045687 | NC_021166.1    | Ca_kabuli_chr07 | 30045687                | CC                              | TT                | 1946463538               |
| SNP_P3_89193_30045713 | NC_021166.1    | Ca_kabuli_chr07 | 30045713                | TT                              | CC                | 1946463539               |
| SNP_P3_89194_30046243 | NC_021166.1    | Ca_kabuli_chr07 | 30046243                | TT                              | CC                | 1946463540               |
| SNP_P3_89195_30046255 | NC_021166.1    | Ca_kabuli_chr07 | 30046255                | CC                              | AA                | 1946463541               |
| SNP_P3_89196_30046283 | NC_021166.1    | Ca_kabuli_chr07 | 30046283                | AA                              | GG                | 1946463542               |
| SNP_P3_89197_30046457 | NC_021166.1    | Ca_kabuli_chr07 | 30046457                | TT                              | GG                | 1946463543               |
| SNP_P3_89198_30046469 | NC_021166.1    | Ca_kabuli_chr07 | 30046469                | AA                              | GG                | 1946463544               |
| SNP_P3_89199_30046482 | NC_021166.1    | Ca_kabuli_chr07 | 30046482                | GG                              | AA                | 1946463545               |
| SNP_P3_89200_30046496 | NC_021166.1    | Ca_kabuli_chr07 | 30046496                | AA                              | GG                | 1946463546               |
| SNP_P3_89201_30046524 | NC_021166.1    | Ca_kabuli_chr07 | 30046524                | AA                              | CC                | 1946463547               |
| SNP_P3_89202_30046632 | NC_021166.1    | Ca_kabuli_chr07 | 30046632                | GG                              | AA                | 1946463548               |
| SNP_P3_89203_30046637 | NC_021166.1    | Ca_kabuli_chr07 | 30046637                | CC                              | TT                | 1946463549               |
| SNP_P3_89205_30046723 | NC_021166.1    | Ca_kabuli_chr07 | 30046723                | CC                              | GG                | 1946463550               |
| SNP_P3_89206_30047395 | NC_021166.1    | Ca_kabuli_chr07 | 30047395                | GG                              | CC                | 1946463551               |
| SNP_P3_89207_30047592 | NC_021166.1    | Ca_kabuli_chr07 | 30047592                | TT                              | CC                | 1946463552               |
| SNP_P3_89208_30047718 | NC_021166.1    | Ca_kabuli_chr07 | 30047718                | CC                              | TT                | 1946463553               |
| SNP_P3_89209_30047719 | NC_021166.1    | Ca_kabuli_chr07 | 30047719                | GG                              | AA                | 1946463554               |
| SNP_P3_89211_30047816 | NC_021166.1    | Ca_kabuli_chr07 | 30047816                | GG                              | AA                | 1946463555               |
| SNP_P3_89212_30047883 | NC_021166.1    | Ca_kabuli_chr07 | 30047883                | AA                              | GG                | 1946463556               |
| SNP_P3_89213_30049875 | NC_021166.1    | Ca_kabuli_chr07 | 30049875                | AA                              | GG                | 1946463557               |
| SNP_P3_89214_30049876 | NC_021166.1    | Ca_kabuli_chr07 | 30049876                | TT                              | CC                | 1946463558               |
| SNP_P3_89215_30050998 | NC_021166.1    | Ca_kabuli_chr07 | 30050998                | AA                              | TT                | 1946463559               |
| SNP_P3_89216_30051061 | NC_021166.1    | Ca_kabuli_chr07 | 30051061                | AA                              | GG                | 1946463560               |
| SNP_P3_89217_30051115 | NC_021166.1    | Ca_kabuli_chr07 | 30051115                | AA                              | TT                | 1946463561               |
| SNP_P3_89218_30051320 | NC_021166.1    | Ca_kabuli_chr07 | 30051320                | CC                              | TT                | 1946463562               |
| SNP_P3_89219_30051475 | NC_021166.1    | Ca_kabuli_chr07 | 30051475                | AA                              | CC                | 1946463563               |
| SNP_P3_89220_30052403 | NC_021166.1    | Ca_kabuli_chr07 | 30052403                | AA                              | CC                | 1946463564               |
| SNP_P3_89221_30052745 | NC_021166.1    | Ca_kabuli_chr07 | 30052745                | GG                              | AA                | 1946463565               |
| SNP_P3_89222_30052787 | NC_021166.1    | Ca_kabuli_chr07 | 30052787                | TT                              | AA                | 1946463566               |
| SNP_P3_89223_30052863 | NC_021166.1    | Ca_kabuli_chr07 | 30052863                | TT                              | CC                | 1946463567               |
| SNP_P3_89225_30054006 | NC_021166.1    | Ca_kabuli_chr07 | 30054006                | GG                              | AA                | 1946463568               |
| SNP_P3_89226_30056648 | NC_021166.1    | Ca_kabuli_chr07 | 30056648                | TT                              | AA                | 1946463569               |
| SNP_P3_89227_30056932 | NC_021166.1    | Ca_kabuli_chr07 | 30056932                | TT                              | AA                | 1946463570               |
| SNP_P3_89228_30056962 | NC_021166.1    | Ca_kabuli_chr07 | 30056962                | AA                              | GG                | 1946463571               |

| SNPs IDs              | Chromosome IDs | Chromosomes     | Physical positions (bp) | CDC Frontier (Reference genome) | (Pusa 256 & HPNB) | NCBI SNPdb Accession IDs |
|-----------------------|----------------|-----------------|-------------------------|---------------------------------|-------------------|--------------------------|
| SNP_P3_89229_30056992 | NC_021166.1    | Ca_kabuli_chr07 | 30056992                | TT                              | CC                | 1946463572               |
| SNP_P3_89231_30057846 | NC_021166.1    | Ca_kabuli_chr07 | 30057846                | TT                              | CC                | 1946463573               |
| SNP_P3_89232_30057887 | NC_021166.1    | Ca_kabuli_chr07 | 30057887                | GG                              | CC                | 1946463574               |
| SNP_P3_89233_30057898 | NC_021166.1    | Ca_kabuli_chr07 | 30057898                | AA                              | CC                | 1946463575               |
| SNP_P3_89234_30057909 | NC_021166.1    | Ca_kabuli_chr07 | 30057909                | TT                              | CC                | 1946463576               |
| SNP_P3_89235_30057912 | NC_021166.1    | Ca_kabuli_chr07 | 30057912                | GG                              | TT                | 1946463577               |
| SNP_P3_89236_30058203 | NC_021166.1    | Ca_kabuli_chr07 | 30058203                | CC                              | TT                | 1946463578               |
| SNP_P3_89237_30058286 | NC_021166.1    | Ca_kabuli_chr07 | 30058286                | GG                              | TT                | 1946463579               |
| SNP_P3_89238_30058331 | NC_021166.1    | Ca_kabuli_chr07 | 30058331                | GG                              | TT                | 1946463580               |
| SNP_P3_89239_30058434 | NC_021166.1    | Ca_kabuli_chr07 | 30058434                | GG                              | AA                | 1946463581               |
| SNP_P3_89240_30058751 | NC_021166.1    | Ca_kabuli_chr07 | 30058751                | GG                              | AA                | 1946463582               |
| SNP_P3_89241_30058798 | NC_021166.1    | Ca_kabuli_chr07 | 30058798                | TT                              | CC                | 1946463583               |
| SNP_P3_89242_30059136 | NC_021166.1    | Ca_kabuli_chr07 | 30059136                | TT                              | AA                | 1946463584               |
| SNP_P3_89243_30059142 | NC_021166.1    | Ca_kabuli_chr07 | 30059142                | TT                              | GG                | 1946463585               |
| SNP_P3_89245_30059178 | NC_021166.1    | Ca_kabuli_chr07 | 30059178                | AA                              | GG                | 1946463586               |
| SNP_P3_89249_30059434 | NC_021166.1    | Ca_kabuli_chr07 | 30059434                | CC                              | TT                | 1946463587               |
| SNP_P3_89250_30060602 | NC_021166.1    | Ca_kabuli_chr07 | 30060602                | AA                              | TT                | 1946463588               |
| SNP_P3_89251_30060653 | NC_021166.1    | Ca_kabuli_chr07 | 30060653                | TT                              | CC                | 1946463589               |
| SNP_P3_89252_30063206 | NC_021166.1    | Ca_kabuli_chr07 | 30063206                | GG                              | AA                | 1946463590               |
| SNP_P3_89253_30063442 | NC_021166.1    | Ca_kabuli_chr07 | 30063442                | AA                              | GG                | 1946463591               |
| SNP_P3_89254_30068120 | NC_021166.1    | Ca_kabuli_chr07 | 30068120                | GG                              | AA                | 1946463592               |
| SNP_P3_89255_30068149 | NC_021166.1    | Ca_kabuli_chr07 | 30068149                | AA                              | GG                | 1946463593               |
| SNP_P3_89256_30068838 | NC_021166.1    | Ca_kabuli_chr07 | 30068838                | CC                              | GG                | 1946463594               |
| SNP_P3_89257_30069030 | NC_021166.1    | Ca_kabuli_chr07 | 30069030                | GG                              | CC                | 1946463595               |
| SNP_P3_89258_30069057 | NC_021166.1    | Ca_kabuli_chr07 | 30069057                | AA                              | TT                | 1946463596               |
| SNP_P3_89259_30069163 | NC_021166.1    | Ca_kabuli_chr07 | 30069163                | CC                              | AA                | 1946463597               |
| SNP_P3_89260_30069354 | NC_021166.1    | Ca_kabuli_chr07 | 30069354                | AA                              | TT                | 1946463598               |
| SNP_P3_89261_30069395 | NC_021166.1    | Ca_kabuli_chr07 | 30069395                | TT                              | AA                | 1946463599               |
| SNP_P3_89262_30069549 | NC_021166.1    | Ca_kabuli_chr07 | 30069549                | AA                              | GG                | 1946463600               |
| SNP_P3_89263_30069555 | NC_021166.1    | Ca_kabuli_chr07 | 30069555                | AA                              | GG                | 1946463601               |
| SNP_P3_89264_30069590 | NC_021166.1    | Ca_kabuli_chr07 | 30069590                | AA                              | GG                | 1946463602               |
| SNP_P3_89265_30069628 | NC_021166.1    | Ca_kabuli_chr07 | 30069628                | AA                              | CC                | 1946463603               |
| SNP_P3_89266_30069631 | NC_021166.1    | Ca_kabuli_chr07 | 30069631                | AA                              | CC                | 1946463604               |
| SNP_P3_89267_30069668 | NC_021166.1    | Ca_kabuli_chr07 | 30069668                | CC                              | AA                | 1946463605               |
| SNP_P3_89268_30069850 | NC_021166.1    | Ca_kabuli_chr07 | 30069850                | TT                              | AA                | 1946463606               |
| SNP_P3_89269_30069857 | NC_021166.1    | Ca_kabuli_chr07 | 30069857                | GG                              | TT                | 1946463607               |
| SNP_P3_89270_30070501 | NC_021166.1    | Ca_kabuli_chr07 | 30070501                | TT                              | AA                | 1946463608               |
| SNP_P3_89271_30070531 | NC_021166.1    | Ca_kabuli_chr07 | 30070531                | TT                              | AA                | 1946463609               |
| SNP_P3_89273_30071619 | NC_021166.1    | Ca_kabuli_chr07 | 30071619                | GG                              | AA                | 1946463610               |
| SNP_P3_89274_30071662 | NC_021166.1    | Ca_kabuli_chr07 | 30071662                | TT                              | CC                | 1946463611               |
| SNP_P3_89276_30072062 | NC_021166.1    | Ca_kabuli_chr07 | 30072062                | CC                              | TT                | 1946463612               |
| SNP_P3_89277_30072259 | NC_021166.1    | Ca_kabuli_chr07 | 30072259                | TT                              | CC                | 1946463613               |



| SNPs IDs              | Chromosome IDs | Chromosomes     | Physical positions (bp) | CDC Frontier (Reference genome) | (Pusa 256 & HPNB) | NCBI SNPdb Accession IDs |
|-----------------------|----------------|-----------------|-------------------------|---------------------------------|-------------------|--------------------------|
| SNP_P3_89279_30072942 | NC_021166.1    | Ca_kabuli_chr07 | 30072942                | CC                              | AA                | 1946463614               |
| SNP_P3_89280_30073244 | NC_021166.1    | Ca_kabuli_chr07 | 30073244                | GG                              | AA                | 1946463615               |
| SNP_P3_89281_30073245 | NC_021166.1    | Ca_kabuli_chr07 | 30073245                | AA                              | GG                | 1946463616               |
| SNP_P3_89282_30073266 | NC_021166.1    | Ca_kabuli_chr07 | 30073266                | GG                              | AA                | 1946463617               |
| SNP_P3_89283_30073384 | NC_021166.1    | Ca_kabuli_chr07 | 30073384                | CC                              | GG                | 1946463618               |
| SNP_P3_89284_30073578 | NC_021166.1    | Ca_kabuli_chr07 | 30073578                | AA                              | TT                | 1946463619               |
| SNP_P3_89285_30073579 | NC_021166.1    | Ca_kabuli_chr07 | 30073579                | AA                              | TT                | 1946463620               |
| SNP_P3_89286_30073585 | NC_021166.1    | Ca_kabuli_chr07 | 30073585                | TT                              | AA                | 1946463621               |
| SNP_P3_89287_30073587 | NC_021166.1    | Ca_kabuli_chr07 | 30073587                | AA                              | TT                | 1946463622               |
| SNP_P3_89289_30073977 | NC_021166.1    | Ca_kabuli_chr07 | 30073977                | GG                              | AA                | 1946463623               |
| SNP_P3_89290_30074068 | NC_021166.1    | Ca_kabuli_chr07 | 30074068                | GG                              | AA                | 1946463624               |
| SNP_P3_89291_30074359 | NC_021166.1    | Ca_kabuli_chr07 | 30074359                | AA                              | CC                | 1946463625               |
| SNP_P3_89292_30075754 | NC_021166.1    | Ca_kabuli_chr07 | 30075754                | GG                              | AA                | 1946463626               |
| SNP_P3_89293_30075809 | NC_021166.1    | Ca_kabuli_chr07 | 30075809                | GG                              | AA                | 1946463627               |
| SNP_P3_89294_30075812 | NC_021166.1    | Ca_kabuli_chr07 | 30075812                | CC                              | AA                | 1946463628               |
| SNP_P3_89295_30075823 | NC_021166.1    | Ca_kabuli_chr07 | 30075823                | CC                              | GG                | 1946463629               |
| SNP_P3_89296_30075840 | NC_021166.1    | Ca_kabuli_chr07 | 30075840                | AA                              | TT                | 1946463630               |
| SNP_P3_89297_30075846 | NC_021166.1    | Ca_kabuli_chr07 | 30075846                | TT                              | CC                | 1946463631               |
| SNP_P3_89298_30077383 | NC_021166.1    | Ca_kabuli_chr07 | 30077383                | TT                              | CC                | 1946463632               |
| SNP_P3_89300_30079559 | NC_021166.1    | Ca_kabuli_chr07 | 30079559                | AA                              | CC                | 1946463633               |
| SNP_P3_89301_30080648 | NC_021166.1    | Ca_kabuli_chr07 | 30080648                | AA                              | GG                | 1946463634               |
| SNP_P3_89302_30080713 | NC_021166.1    | Ca_kabuli_chr07 | 30080713                | TT                              | CC                | 1946463635               |
| SNP_P3_89303_30081601 | NC_021166.1    | Ca_kabuli_chr07 | 30081601                | GG                              | AA                | 1946463636               |
| SNP_P3_89304_30082188 | NC_021166.1    | Ca_kabuli_chr07 | 30082188                | TT                              | CC                | 1946463637               |
| SNP_P3_89305_30082409 | NC_021166.1    | Ca_kabuli_chr07 | 30082409                | AA                              | GG                | 1946463638               |
| SNP_P3_89306_30082470 | NC_021166.1    | Ca_kabuli_chr07 | 30082470                | GG                              | AA                | 1946463639               |
| SNP_P3_89307_30082481 | NC_021166.1    | Ca_kabuli_chr07 | 30082481                | GG                              | AA                | 1946463640               |
| SNP_P3_89308_30082643 | NC_021166.1    | Ca_kabuli_chr07 | 30082643                | CC                              | AA                | 1946463641               |
| SNP_P3_89309_30082804 | NC_021166.1    | Ca_kabuli_chr07 | 30082804                | TT                              | CC                | 1946463642               |
| SNP_P3_89310_30082880 | NC_021166.1    | Ca_kabuli_chr07 | 30082880                | AA                              | GG                | 1946463643               |
| SNP_P3_89311_30082888 | NC_021166.1    | Ca_kabuli_chr07 | 30082888                | TT                              | GG                | 1946463644               |
| SNP_P3_89312_30083040 | NC_021166.1    | Ca_kabuli_chr07 | 30083040                | AA                              | TT                | 1946463645               |
| SNP_P3_89313_30083097 | NC_021166.1    | Ca_kabuli_chr07 | 30083097                | AA                              | GG                | 1946463646               |
| SNP_P3_89314_30083110 | NC_021166.1    | Ca_kabuli_chr07 | 30083110                | CC                              | TT                | 1946463647               |
| SNP_P3_89315_30083297 | NC_021166.1    | Ca_kabuli_chr07 | 30083297                | CC                              | TT                | 1946463648               |
| SNP_P3_89316_30083344 | NC_021166.1    | Ca_kabuli_chr07 | 30083344                | CC                              | TT                | 1946463649               |
| SNP_P3_89317_30088490 | NC_021166.1    | Ca_kabuli_chr07 | 30088490                | CC                              | TT                | 1946463650               |
| SNP_P3_89318_30088687 | NC_021166.1    | Ca_kabuli_chr07 | 30088687                | GG                              | AA                | 1946463651               |
| SNP_P3_89319_30088713 | NC_021166.1    | Ca_kabuli_chr07 | 30088713                | GG                              | CC                | 1946463652               |
| SNP_P3_89320_30088731 | NC_021166.1    | Ca_kabuli_chr07 | 30088731                | GG                              | AA                | 1946463653               |
| SNP_P3_89321_30088839 | NC_021166.1    | Ca_kabuli_chr07 | 30088839                | AA                              | GG                | 1946463654               |
| SNP_P3_89322_30088908 | NC_021166.1    | Ca_kabuli_chr07 | 30088908                | CC                              | AA                | 1946463655               |

| SNPs IDs              | Chromosome IDs | Chromosomes     | Physical positions (bp) | CDC Frontier (Reference genome) | (Pusa 256 & HPNB) | NCBI SNPdb Accession IDs |
|-----------------------|----------------|-----------------|-------------------------|---------------------------------|-------------------|--------------------------|
| SNP_P3_89323_30089059 | NC_021166.1    | Ca_kabuli_chr07 | 30089059                | TT                              | GG                | 1946463656               |
| SNP_P3_89324_30089103 | NC_021166.1    | Ca_kabuli_chr07 | 30089103                | CC                              | TT                | 1946463657               |
| SNP_P3_89325_30090593 | NC_021166.1    | Ca_kabuli_chr07 | 30090593                | CC                              | TT                | 1946463658               |
| SNP_P3_89326_30090624 | NC_021166.1    | Ca_kabuli_chr07 | 30090624                | GG                              | AA                | 1946463659               |
| SNP_P3_89327_30090629 | NC_021166.1    | Ca_kabuli_chr07 | 30090629                | GG                              | AA                | 1946463660               |
| SNP_P3_89328_30090776 | NC_021166.1    | Ca_kabuli_chr07 | 30090776                | AA                              | GG                | 1946463661               |
| SNP_P3_89329_30090777 | NC_021166.1    | Ca_kabuli_chr07 | 30090777                | CC                              | TT                | 1946463662               |
| SNP_P3_89330_30090849 | NC_021166.1    | Ca_kabuli_chr07 | 30090849                | CC                              | GG                | 1946463663               |
| SNP_P3_89331_30090884 | NC_021166.1    | Ca_kabuli_chr07 | 30090884                | CC                              | TT                | 1946463664               |
| SNP_P3_89332_30090918 | NC_021166.1    | Ca_kabuli_chr07 | 30090918                | TT                              | CC                | 1946463665               |
| SNP_P3_89333_30091002 | NC_021166.1    | Ca_kabuli_chr07 | 30091002                | TT                              | CC                | 1946463666               |
| SNP_P3_89334_30091013 | NC_021166.1    | Ca_kabuli_chr07 | 30091013                | TT                              | CC                | 1946463667               |
| SNP_P3_89335_30091022 | NC_021166.1    | Ca_kabuli_chr07 | 30091022                | CC                              | AA                | 1946463668               |
| SNP_P3_89336_30091074 | NC_021166.1    | Ca_kabuli_chr07 | 30091074                | GG                              | AA                | 1946463669               |
| SNP_P3_89337_30091083 | NC_021166.1    | Ca_kabuli_chr07 | 30091083                | CC                              | TT                | 1946463670               |
| SNP_P3_89338_30091118 | NC_021166.1    | Ca_kabuli_chr07 | 30091118                | TT                              | AA                | 1946463671               |
| SNP_P3_89339_30091144 | NC_021166.1    | Ca_kabuli_chr07 | 30091144                | CC                              | AA                | 1946463672               |
| SNP_P3_89340_30091208 | NC_021166.1    | Ca_kabuli_chr07 | 30091208                | TT                              | AA                | 1946463673               |
| SNP_P3_89341_30091209 | NC_021166.1    | Ca_kabuli_chr07 | 30091209                | GG                              | TT                | 1946463674               |
| SNP_P3_89342_30091211 | NC_021166.1    | Ca_kabuli_chr07 | 30091211                | AA                              | GG                | 1946463675               |
| SNP_P3_89343_30091216 | NC_021166.1    | Ca_kabuli_chr07 | 30091216                | AA                              | TT                | 1946463676               |
| SNP_P3_89344_30091451 | NC_021166.1    | Ca_kabuli_chr07 | 30091451                | AA                              | GG                | 1946463677               |
| SNP_P3_89345_30091504 | NC_021166.1    | Ca_kabuli_chr07 | 30091504                | AA                              | TT                | 1946463678               |
| SNP_P3_89346_30091550 | NC_021166.1    | Ca_kabuli_chr07 | 30091550                | TT                              | CC                | 1946463679               |
| SNP_P3_89347_30091551 | NC_021166.1    | Ca_kabuli_chr07 | 30091551                | GG                              | CC                | 1946463680               |
| SNP_P3_89348_30093230 | NC_021166.1    | Ca_kabuli_chr07 | 30093230                | GG                              | CC                | 1946463681               |
| SNP_P3_89349_30093270 | NC_021166.1    | Ca_kabuli_chr07 | 30093270                | GG                              | AA                | 1946463682               |
| SNP_P3_89350_30093280 | NC_021166.1    | Ca_kabuli_chr07 | 30093280                | AA                              | CC                | 1946463683               |
| SNP_P3_89351_30093507 | NC_021166.1    | Ca_kabuli_chr07 | 30093507                | GG                              | AA                | 1946463684               |
| SNP_P3_89352_30093591 | NC_021166.1    | Ca_kabuli_chr07 | 30093591                | TT                              | CC                | 1946463685               |
| SNP_P3_89353_30093861 | NC_021166.1    | Ca_kabuli_chr07 | 30093861                | TT                              | CC                | 1946463686               |
| SNP_P3_89354_30093866 | NC_021166.1    | Ca_kabuli_chr07 | 30093866                | AA                              | GG                | 1946463687               |
| SNP_P3_89355_30093887 | NC_021166.1    | Ca_kabuli_chr07 | 30093887                | GG                              | CC                | 1946463688               |
| SNP_P3_89356_30093930 | NC_021166.1    | Ca_kabuli_chr07 | 30093930                | TT                              | CC                | 1946463689               |
| SNP_P3_89357_30093952 | NC_021166.1    | Ca_kabuli_chr07 | 30093952                | GG                              | AA                | 1946463690               |
| SNP_P3_89358_30094013 | NC_021166.1    | Ca_kabuli_chr07 | 30094013                | TT                              | CC                | 1946463691               |
| SNP_P3_89359_30094015 | NC_021166.1    | Ca_kabuli_chr07 | 30094015                | GG                              | AA                | 1946463692               |
| SNP_P3_89360_30094051 | NC_021166.1    | Ca_kabuli_chr07 | 30094051                | AA                              | GG                | 1946463693               |
| SNP_P3_89361_30094065 | NC_021166.1    | Ca_kabuli_chr07 | 30094065                | CC                              | GG                | 1946463694               |
| SNP_P3_89362_30094067 | NC_021166.1    | Ca_kabuli_chr07 | 30094067                | GG                              | AA                | 1946463695               |
| SNP_P3_89364_30096384 | NC_021166.1    | Ca_kabuli_chr07 | 30096384                | GG                              | CC                | 1946463696               |
| SNP_P3_89365_30096401 | NC_021166.1    | Ca_kabuli_chr07 | 30096401                | AA                              | TT                | 1946463697               |

| SNPs IDs              | Chromosome IDs | Chromosomes     | Physical positions (bp) | CDC Frontier (Reference genome) | (Pusa 256 & HPNB) | NCBI SNPdb Accession IDs |
|-----------------------|----------------|-----------------|-------------------------|---------------------------------|-------------------|--------------------------|
| SNP_P3_89366_30096403 | NC_021166.1    | Ca_kabuli_chr07 | 30096403                | CC                              | TT                | 1946463698               |
| SNP_P3_89367_30096420 | NC_021166.1    | Ca_kabuli_chr07 | 30096420                | AA                              | GG                | 1946463699               |
| SNP_P3_89368_30096780 | NC_021166.1    | Ca_kabuli_chr07 | 30096780                | AA                              | GG                | 1946463700               |
| SNP_P3_89369_30096882 | NC_021166.1    | Ca_kabuli_chr07 | 30096882                | CC                              | TT                | 1946463701               |
| SNP_P3_89370_30097333 | NC_021166.1    | Ca_kabuli_chr07 | 30097333                | GG                              | TT                | 1946463702               |
| SNP_P3_89372_30097393 | NC_021166.1    | Ca_kabuli_chr07 | 30097393                | TT                              | AA                | 1946463703               |
| SNP_P3_89373_30097809 | NC_021166.1    | Ca_kabuli_chr07 | 30097809                | CC                              | AA                | 1946463704               |
| SNP_P3_89375_30098103 | NC_021166.1    | Ca_kabuli_chr07 | 30098103                | CC                              | TT                | 1946463705               |
| SNP_P3_89376_30098245 | NC_021166.1    | Ca_kabuli_chr07 | 30098245                | AA                              | GG                | 1946463706               |
| SNP_P3_89377_30098401 | NC_021166.1    | Ca_kabuli_chr07 | 30098401                | CC                              | TT                | 1946463707               |
| SNP_P3_89378_30098425 | NC_021166.1    | Ca_kabuli_chr07 | 30098425                | CC                              | AA                | 1946463708               |
| SNP_P3_89379_30098457 | NC_021166.1    | Ca_kabuli_chr07 | 30098457                | CC                              | TT                | 1946463709               |
| SNP_P3_89380_30098532 | NC_021166.1    | Ca_kabuli_chr07 | 30098532                | TT                              | CC                | 1946463710               |
| SNP_P3_89381_30098592 | NC_021166.1    | Ca_kabuli_chr07 | 30098592                | GG                              | AA                | 1946463711               |
| SNP_P3_89382_30098627 | NC_021166.1    | Ca_kabuli_chr07 | 30098627                | TT                              | GG                | 1946463712               |
| SNP_P3_89383_30098741 | NC_021166.1    | Ca_kabuli_chr07 | 30098741                | AA                              | GG                | 1946463713               |
| SNP_P3_89384_30098844 | NC_021166.1    | Ca_kabuli_chr07 | 30098844                | TT                              | GG                | 1946463714               |
| SNP_P3_89385_30098861 | NC_021166.1    | Ca_kabuli_chr07 | 30098861                | GG                              | AA                | 1946463715               |
| SNP_P3_89387_30099440 | NC_021166.1    | Ca_kabuli_chr07 | 30099440                | AA                              | GG                | 1946463716               |
| SNP_P3_89388_30099442 | NC_021166.1    | Ca_kabuli_chr07 | 30099442                | GG                              | TT                | 1946463717               |
| SNP_P3_89389_30099488 | NC_021166.1    | Ca_kabuli_chr07 | 30099488                | GG                              | AA                | 1946463718               |
| SNP_P3_89390_30100310 | NC_021166.1    | Ca_kabuli_chr07 | 30100310                | CC                              | TT                | 1946463719               |
| SNP_P3_89391_30100315 | NC_021166.1    | Ca_kabuli_chr07 | 30100315                | CC                              | TT                | 1946463720               |
| SNP_P3_89392_30100591 | NC_021166.1    | Ca_kabuli_chr07 | 30100591                | AA                              | GG                | 1946463721               |
| SNP_P3_89393_30100839 | NC_021166.1    | Ca_kabuli_chr07 | 30100839                | TT                              | GG                | 1946463722               |
| SNP_P3_89394_30100852 | NC_021166.1    | Ca_kabuli_chr07 | 30100852                | GG                              | CC                | 1946463723               |
| SNP_P3_89395_30100881 | NC_021166.1    | Ca_kabuli_chr07 | 30100881                | TT                              | CC                | 1946463724               |
| SNP_P3_89396_30101087 | NC_021166.1    | Ca_kabuli_chr07 | 30101087                | GG                              | AA                | 1946463725               |
| SNP_P3_89397_30101088 | NC_021166.1    | Ca_kabuli_chr07 | 30101088                | AA                              | GG                | 1946463726               |
| SNP_P3_89398_30101100 | NC_021166.1    | Ca_kabuli_chr07 | 30101100                | AA                              | GG                | 1946463727               |
| SNP_P3_89399_30101110 | NC_021166.1    | Ca_kabuli_chr07 | 30101110                | CC                              | TT                | 1946463728               |
| SNP_P3_89400_30101120 | NC_021166.1    | Ca_kabuli_chr07 | 30101120                | AA                              | GG                | 1946463729               |
| SNP_P3_89401_30101121 | NC_021166.1    | Ca_kabuli_chr07 | 30101121                | TT                              | CC                | 1946463730               |
| SNP_P3_89402_30101148 | NC_021166.1    | Ca_kabuli_chr07 | 30101148                | TT                              | AA                | 1946463731               |
| SNP_P3_89403_30101199 | NC_021166.1    | Ca_kabuli_chr07 | 30101199                | AA                              | GG                | 1946463732               |
| SNP_P3_89404_30101949 | NC_021166.1    | Ca_kabuli_chr07 | 30101949                | AA                              | TT                | 1946463733               |
| SNP_P3_89405_30102256 | NC_021166.1    | Ca_kabuli_chr07 | 30102256                | CC                              | GG                | 1946463734               |
| SNP_P3_89407_30102549 | NC_021166.1    | Ca_kabuli_chr07 | 30102549                | TT                              | CC                | 1946463735               |
| SNP_P3_89409_30102947 | NC_021166.1    | Ca_kabuli_chr07 | 30102947                | GG                              | AA                | 1946463736               |
| SNP_P3_89410_30102956 | NC_021166.1    | Ca_kabuli_chr07 | 30102956                | TT                              | AA                | 1946463737               |
| SNP_P3_89411_30103107 | NC_021166.1    | Ca_kabuli_chr07 | 30103107                | TT                              | CC                | 1946463738               |
| SNP_P3_89412_30103195 | NC_021166.1    | Ca_kabuli_chr07 | 30103195                | AA                              | TT                | 1946463739               |

| SNPs IDs              | Chromosome IDs | Chromosomes     | Physical positions (bp) | CDC Frontier (Reference genome) | (Pusa 256 & HPNB) | NCBI SNPdb Accession IDs |
|-----------------------|----------------|-----------------|-------------------------|---------------------------------|-------------------|--------------------------|
| SNP_P3_89413_30103340 | NC_021166.1    | Ca_kabuli_chr07 | 30103340                | TT                              | CC                | 1946463740               |
| SNP_P3_89414_30103361 | NC_021166.1    | Ca_kabuli_chr07 | 30103361                | GG                              | AA                | 1946463741               |
| SNP_P3_89415_30103382 | NC_021166.1    | Ca_kabuli_chr07 | 30103382                | TT                              | CC                | 1946463742               |
| SNP_P3_89416_30103553 | NC_021166.1    | Ca_kabuli_chr07 | 30103553                | AA                              | TT                | 1946463743               |
| SNP_P3_89417_30103561 | NC_021166.1    | Ca_kabuli_chr07 | 30103561                | CC                              | AA                | 1946463744               |
| SNP_P3_89420_30108634 | NC_021166.1    | Ca_kabuli_chr07 | 30108634                | TT                              | AA                | 1946463745               |
| SNP_P3_89421_30108717 | NC_021166.1    | Ca_kabuli_chr07 | 30108717                | CC                              | TT                | 1946463746               |
| SNP_P3_89422_30110890 | NC_021166.1    | Ca_kabuli_chr07 | 30110890                | GG                              | CC                | 1946463747               |
| SNP_P3_89423_30112429 | NC_021166.1    | Ca_kabuli_chr07 | 30112429                | AA                              | GG                | 1946463748               |
| SNP_P3_89424_30112478 | NC_021166.1    | Ca_kabuli_chr07 | 30112478                | AA                              | GG                | 1946463749               |
| SNP_P3_89425_30112979 | NC_021166.1    | Ca_kabuli_chr07 | 30112979                | AA                              | GG                | 1946463750               |
| SNP_P3_89426_30113174 | NC_021166.1    | Ca_kabuli_chr07 | 30113174                | GG                              | TT                | 1946463751               |
| SNP_P3_89427_30114895 | NC_021166.1    | Ca_kabuli_chr07 | 30114895                | TT                              | CC                | 1946463752               |
| SNP_P3_89428_30116291 | NC_021166.1    | Ca_kabuli_chr07 | 30116291                | GG                              | AA                | 1946463753               |
| SNP_P3_89429_30116492 | NC_021166.1    | Ca_kabuli_chr07 | 30116492                | GG                              | AA                | 1946463754               |
| SNP_P3_89430_30117254 | NC_021166.1    | Ca_kabuli_chr07 | 30117254                | TT                              | CC                | 1946463755               |
| SNP_P3_89431_30125939 | NC_021166.1    | Ca_kabuli_chr07 | 30125939                | AA                              | CC                | 1946463756               |
| SNP_P3_89432_30125982 | NC_021166.1    | Ca_kabuli_chr07 | 30125982                | GG                              | AA                | 1946463757               |
| SNP_P3_89434_30130001 | NC_021166.1    | Ca_kabuli_chr07 | 30130001                | GG                              | TT                | 1946463758               |
| SNP_P3_89436_30130322 | NC_021166.1    | Ca_kabuli_chr07 | 30130322                | CC                              | TT                | 1946463759               |
| SNP_P3_89437_30130324 | NC_021166.1    | Ca_kabuli_chr07 | 30130324                | TT                              | CC                | 1946463760               |
| SNP_P3_89439_30130366 | NC_021166.1    | Ca_kabuli_chr07 | 30130366                | GG                              | AA                | 1946463761               |
| SNP_P3_89440_30130532 | NC_021166.1    | Ca_kabuli_chr07 | 30130532                | TT                              | CC                | 1946463762               |
| SNP_P3_89441_30130655 | NC_021166.1    | Ca_kabuli_chr07 | 30130655                | GG                              | AA                | 1946463763               |
| SNP_P3_89442_30130661 | NC_021166.1    | Ca_kabuli_chr07 | 30130661                | AA                              | GG                | 1946463764               |
| SNP_P3_89443_30131044 | NC_021166.1    | Ca_kabuli_chr07 | 30131044                | TT                              | CC                | 1946463765               |
| SNP_P3_89444_30131048 | NC_021166.1    | Ca_kabuli_chr07 | 30131048                | AA                              | CC                | 1946463766               |
| SNP_P3_89445_30131059 | NC_021166.1    | Ca_kabuli_chr07 | 30131059                | TT                              | CC                | 1946463767               |
| SNP_P3_89446_30131246 | NC_021166.1    | Ca_kabuli_chr07 | 30131246                | AA                              | CC                | 1946463768               |
| SNP_P3_89447_30131268 | NC_021166.1    | Ca_kabuli_chr07 | 30131268                | TT                              | CC                | 1946463769               |
| SNP_P3_89450_30131689 | NC_021166.1    | Ca_kabuli_chr07 | 30131689                | GG                              | AA                | 1946463770               |
| SNP_P3_89451_30132329 | NC_021166.1    | Ca_kabuli_chr07 | 30132329                | GG                              | CC                | 1946463771               |
| SNP_P3_89453_30132650 | NC_021166.1    | Ca_kabuli_chr07 | 30132650                | AA                              | GG                | 1946463772               |
| SNP_P3_89454_30132723 | NC_021166.1    | Ca_kabuli_chr07 | 30132723                | AA                              | CC                | 1946463773               |
| SNP_P3_89455_30132899 | NC_021166.1    | Ca_kabuli_chr07 | 30132899                | TT                              | GG                | 1946463774               |
| SNP_P3_89456_30132985 | NC_021166.1    | Ca_kabuli_chr07 | 30132985                | AA                              | TT                | 1946463775               |
| SNP_P3_89457_30132990 | NC_021166.1    | Ca_kabuli_chr07 | 30132990                | GG                              | CC                | 1946463776               |
| SNP_P3_89458_30133158 | NC_021166.1    | Ca_kabuli_chr07 | 30133158                | TT                              | CC                | 1946463777               |
| SNP_P3_89459_30133211 | NC_021166.1    | Ca_kabuli_chr07 | 30133211                | AA                              | CC                | 1946463778               |
| SNP_P3_89460_30133316 | NC_021166.1    | Ca_kabuli_chr07 | 30133316                | AA                              | TT                | 1946463779               |
| SNP_P3_89461_30133373 | NC_021166.1    | Ca_kabuli_chr07 | 30133373                | GG                              | TT                | 1946463780               |
| SNP_P3_89462_30133538 | NC_021166.1    | Ca_kabuli_chr07 | 30133538                | AA                              | TT                | 1946463781               |

| SNPs IDs              | Chromosome IDs | Chromosomes     | Physical positions (bp) | CDC Frontier (Reference genome) | (Pusa 256 & HPNB) | NCBI SNPdb Accession IDs |
|-----------------------|----------------|-----------------|-------------------------|---------------------------------|-------------------|--------------------------|
| SNP_P3_89463_30134192 | NC_021166.1    | Ca_kabuli_chr07 | 30134192                | TT                              | AA                | 1946463782               |
| SNP_P3_89464_30135747 | NC_021166.1    | Ca_kabuli_chr07 | 30135747                | AA                              | GG                | 1946463783               |
| SNP_P3_89465_30138251 | NC_021166.1    | Ca_kabuli_chr07 | 30138251                | AA                              | GG                | 1946463784               |
| SNP_P3_89466_30138565 | NC_021166.1    | Ca_kabuli_chr07 | 30138565                | GG                              | AA                | 1946463785               |
| SNP_P3_89467_30139341 | NC_021166.1    | Ca_kabuli_chr07 | 30139341                | GG                              | AA                | 1946463786               |
| SNP_P3_89468_30140386 | NC_021166.1    | Ca_kabuli_chr07 | 30140386                | TT                              | CC                | 1946463787               |
| SNP_P3_89469_30140406 | NC_021166.1    | Ca_kabuli_chr07 | 30140406                | TT                              | CC                | 1946463788               |
| SNP_P3_89470_30140605 | NC_021166.1    | Ca_kabuli_chr07 | 30140605                | AA                              | TT                | 1946463789               |
| SNP_P3_89471_30144145 | NC_021166.1    | Ca_kabuli_chr07 | 30144145                | TT                              | CC                | 1946463790               |
| SNP_P3_89472_30146938 | NC_021166.1    | Ca_kabuli_chr07 | 30146938                | CC                              | TT                | 1946463791               |
| SNP_P3_89473_30146994 | NC_021166.1    | Ca_kabuli_chr07 | 30146994                | CC                              | TT                | 1946463792               |
| SNP_P3_89474_30147031 | NC_021166.1    | Ca_kabuli_chr07 | 30147031                | GG                              | AA                | 1946463793               |
| SNP_P3_89475_30147056 | NC_021166.1    | Ca_kabuli_chr07 | 30147056                | GG                              | TT                | 1946463794               |
| SNP_P3_89476_30148943 | NC_021166.1    | Ca_kabuli_chr07 | 30148943                | TT                              | CC                | 1946463795               |
| SNP_P3_89477_30148946 | NC_021166.1    | Ca_kabuli_chr07 | 30148946                | GG                              | TT                | 1946463796               |
| SNP_P3_89478_30148967 | NC_021166.1    | Ca_kabuli_chr07 | 30148967                | TT                              | CC                | 1946463797               |
| SNP_P3_89479_30153413 | NC_021166.1    | Ca_kabuli_chr07 | 30153413                | GG                              | CC                | 1946463798               |
| SNP_P3_89480_30153557 | NC_021166.1    | Ca_kabuli_chr07 | 30153557                | CC                              | TT                | 1946463799               |
| SNP_P3_89482_30154312 | NC_021166.1    | Ca_kabuli_chr07 | 30154312                | TT                              | GG                | 1946463800               |
| SNP_P3_89483_30154314 | NC_021166.1    | Ca_kabuli_chr07 | 30154314                | GG                              | TT                | 1946463801               |
| SNP_P3_89484_30155798 | NC_021166.1    | Ca_kabuli_chr07 | 30155798                | AA                              | CC                | 1946463802               |
| SNP_P3_89485_30155842 | NC_021166.1    | Ca_kabuli_chr07 | 30155842                | AA                              | GG                | 1946463803               |
| SNP_P3_89486_30156455 | NC_021166.1    | Ca_kabuli_chr07 | 30156455                | GG                              | AA                | 1946463804               |
| SNP_P3_89487_30157194 | NC_021166.1    | Ca_kabuli_chr07 | 30157194                | TT                              | CC                | 1946463805               |
| SNP_P3_89488_30157366 | NC_021166.1    | Ca_kabuli_chr07 | 30157366                | CC                              | TT                | 1946463807               |
| SNP_P3_89489_30158821 | NC_021166.1    | Ca_kabuli_chr07 | 30158821                | AA                              | CC                | 1946463808               |
| SNP_P3_89491_30159648 | NC_021166.1    | Ca_kabuli_chr07 | 30159648                | GG                              | AA                | 1946463810               |
| SNP_P3_89492_30160536 | NC_021166.1    | Ca_kabuli_chr07 | 30160536                | GG                              | AA                | 1946463811               |
| SNP_P3_89493_30160542 | NC_021166.1    | Ca_kabuli_chr07 | 30160542                | TT                              | CC                | 1946463812               |
| SNP_P3_89494_30161316 | NC_021166.1    | Ca_kabuli_chr07 | 30161316                | AA                              | GG                | 1946463814               |
| SNP_P3_89496_30161530 | NC_021166.1    | Ca_kabuli_chr07 | 30161530                | GG                              | AA                | 1946463815               |
| SNP_P3_89497_30161543 | NC_021166.1    | Ca_kabuli_chr07 | 30161543                | AA                              | CC                | 1946463817               |
| SNP_P3_89500_30161803 | NC_021166.1    | Ca_kabuli_chr07 | 30161803                | AA                              | TT                | 1946463818               |
| SNP_P3_89502_30162058 | NC_021166.1    | Ca_kabuli_chr07 | 30162058                | AA                              | TT                | 1946463820               |
| SNP_P3_89504_30168857 | NC_021166.1    | Ca_kabuli_chr07 | 30168857                | AA                              | TT                | 1946463821               |
| SNP_P3_89505_30187488 | NC_021166.1    | Ca_kabuli_chr07 | 30187488                | CC                              | TT                | 1946463823               |
| SNP_P3_89506_30187571 | NC_021166.1    | Ca_kabuli_chr07 | 30187571                | AA                              | TT                | 1946463824               |
| SNP_P3_89507_30187788 | NC_021166.1    | Ca_kabuli_chr07 | 30187788                | AA                              | TT                | 1946463826               |
| SNP_P3_89508_30187810 | NC_021166.1    | Ca_kabuli_chr07 | 30187810                | CC                              | AA                | 1946463827               |
| SNP_P3_89509_30187827 | NC_021166.1    | Ca_kabuli_chr07 | 30187827                | GG                              | AA                | 1946463828               |
| SNP_P3_89510_30189401 | NC_021166.1    | Ca_kabuli_chr07 | 30189401                | GG                              | CC                | 1946463830               |
| SNP_P3_89511_30190576 | NC_021166.1    | Ca_kabuli_chr07 | 30190576                | GG                              | AA                | 1946463831               |

| SNPs IDs              | Chromosome IDs | Chromosomes     | Physical positions (bp) | CDC Frontier (Reference genome) | (Pusa 256 & HPNB) | NCBI SNPdb Accession IDs |
|-----------------------|----------------|-----------------|-------------------------|---------------------------------|-------------------|--------------------------|
| SNP_P3_89513_30191026 | NC_021166.1    | Ca_kabuli_chr07 | 30191026                | GG                              | TT                | 1946463833               |
| SNP_P3_89515_30191719 | NC_021166.1    | Ca_kabuli_chr07 | 30191719                | TT                              | GG                | 1946463834               |
| SNP_P3_89516_30192478 | NC_021166.1    | Ca_kabuli_chr07 | 30192478                | CC                              | TT                | 1946463836               |
| SNP_P3_89518_30196990 | NC_021166.1    | Ca_kabuli_chr07 | 30196990                | TT                              | CC                | 1946463837               |
| SNP_P3_89519_30197365 | NC_021166.1    | Ca_kabuli_chr07 | 30197365                | AA                              | TT                | 1946463839               |
| SNP_P3_89520_30201517 | NC_021166.1    | Ca_kabuli_chr07 | 30201517                | GG                              | TT                | 1946463840               |
| SNP_P3_89521_30201539 | NC_021166.1    | Ca_kabuli_chr07 | 30201539                | TT                              | AA                | 1946463842               |
| SNP_P3_89523_30201756 | NC_021166.1    | Ca_kabuli_chr07 | 30201756                | AA                              | CC                | 1946463843               |
| SNP_P3_89524_30203542 | NC_021166.1    | Ca_kabuli_chr07 | 30203542                | TT                              | CC                | 1946463845               |
| SNP_P3_89525_30204082 | NC_021166.1    | Ca_kabuli_chr07 | 30204082                | GG                              | AA                | 1946463846               |
| SNP_P3_89527_30205488 | NC_021166.1    | Ca_kabuli_chr07 | 30205488                | CC                              | TT                | 1946463848               |
| SNP_P3_89528_30206454 | NC_021166.1    | Ca_kabuli_chr07 | 30206454                | GG                              | AA                | 1946463849               |
| SNP_P3_89529_30206466 | NC_021166.1    | Ca_kabuli_chr07 | 30206466                | GG                              | AA                | 1946463851               |
| SNP_P3_89530_30206811 | NC_021166.1    | Ca_kabuli_chr07 | 30206811                | GG                              | CC                | 1946463852               |
| SNP_P3_89531_30206935 | NC_021166.1    | Ca_kabuli_chr07 | 30206935                | TT                              | CC                | 1946463854               |
| SNP_P3_89532_30207185 | NC_021166.1    | Ca_kabuli_chr07 | 30207185                | CC                              | GG                | 1946463855               |
| SNP_P3_89533_30207246 | NC_021166.1    | Ca_kabuli_chr07 | 30207246                | AA                              | GG                | 1946463856               |
| SNP_P3_89534_30207267 | NC_021166.1    | Ca_kabuli_chr07 | 30207267                | TT                              | CC                | 1946463858               |
| SNP_P3_89535_30207633 | NC_021166.1    | Ca_kabuli_chr07 | 30207633                | TT                              | GG                | 1946463859               |
| SNP_P3_89536_30207798 | NC_021166.1    | Ca_kabuli_chr07 | 30207798                | AA                              | TT                | 1946463861               |
| SNP_P3_89537_30207849 | NC_021166.1    | Ca_kabuli_chr07 | 30207849                | GG                              | TT                | 1946463862               |
| SNP_P3_89538_30207937 | NC_021166.1    | Ca_kabuli_chr07 | 30207937                | TT                              | AA                | 1946463864               |
| SNP_P3_89539_30207941 | NC_021166.1    | Ca_kabuli_chr07 | 30207941                | TT                              | AA                | 1946463865               |
| SNP_P3_89540_30207961 | NC_021166.1    | Ca_kabuli_chr07 | 30207961                | GG                              | AA                | 1946463867               |
| SNP_P3_89541_30207981 | NC_021166.1    | Ca_kabuli_chr07 | 30207981                | AA                              | CC                | 1946463868               |
| SNP_P3_89542_30207992 | NC_021166.1    | Ca_kabuli_chr07 | 30207992                | GG                              | CC                | 1946463870               |
| SNP_P3_89543_30208010 | NC_021166.1    | Ca_kabuli_chr07 | 30208010                | AA                              | CC                | 1946463871               |
| SNP_P3_89544_30208018 | NC_021166.1    | Ca_kabuli_chr07 | 30208018                | TT                              | CC                | 1946463873               |
| SNP_P3_89545_30208029 | NC_021166.1    | Ca_kabuli_chr07 | 30208029                | AA                              | GG                | 1946463874               |
| SNP_P3_89546_30208075 | NC_021166.1    | Ca_kabuli_chr07 | 30208075                | CC                              | TT                | 1946463875               |
| SNP_P3_89547_30208090 | NC_021166.1    | Ca_kabuli_chr07 | 30208090                | CC                              | TT                | 1946463877               |
| SNP_P3_89548_30208123 | NC_021166.1    | Ca_kabuli_chr07 | 30208123                | AA                              | CC                | 1946463878               |
| SNP_P3_89549_30208132 | NC_021166.1    | Ca_kabuli_chr07 | 30208132                | AA                              | GG                | 1946463880               |
| SNP_P3_89550_30208139 | NC_021166.1    | Ca_kabuli_chr07 | 30208139                | GG                              | TT                | 1946463881               |
| SNP_P3_89551_30208157 | NC_021166.1    | Ca_kabuli_chr07 | 30208157                | TT                              | CC                | 1946463883               |
| SNP_P3_89553_30208185 | NC_021166.1    | Ca_kabuli_chr07 | 30208185                | GG                              | CC                | 1946463884               |
| SNP_P3_89554_30208193 | NC_021166.1    | Ca_kabuli_chr07 | 30208193                | GG                              | CC                | 1946463885               |
| SNP_P3_89555_30208204 | NC_021166.1    | Ca_kabuli_chr07 | 30208204                | TT                              | AA                | 1946463887               |
| SNP_P3_89556_30208214 | NC_021166.1    | Ca_kabuli_chr07 | 30208214                | GG                              | AA                | 1946463888               |
| SNP_P3_89557_30208223 | NC_021166.1    | Ca_kabuli_chr07 | 30208223                | AA                              | GG                | 1946463890               |
| SNP_P3_89558_30208257 | NC_021166.1    | Ca_kabuli_chr07 | 30208257                | AA                              | TT                | 1946463891               |
| SNP_P3_89559_30208272 | NC_021166.1    | Ca_kabuli_chr07 | 30208272                | AA                              | CC                | 1946463893               |

| SNPs IDs              | Chromosome IDs | Chromosomes     | Physical positions (bp) | CDC Frontier (Reference genome) | (Pusa 256 & HPNB) | NCBI SNPdb Accession IDs |
|-----------------------|----------------|-----------------|-------------------------|---------------------------------|-------------------|--------------------------|
| SNP_P3_89561_30208313 | NC_021166.1    | Ca_kabuli_chr07 | 30208313                | TT                              | CC                | 1946463894               |
| SNP_P3_89562_30208318 | NC_021166.1    | Ca_kabuli_chr07 | 30208318                | AA                              | GG                | 1946463895               |
| SNP_P3_89563_30208334 | NC_021166.1    | Ca_kabuli_chr07 | 30208334                | CC                              | TT                | 1946463897               |
| SNP_P3_89564_30208362 | NC_021166.1    | Ca_kabuli_chr07 | 30208362                | CC                              | TT                | 1946463898               |
| SNP_P3_89565_30208429 | NC_021166.1    | Ca_kabuli_chr07 | 30208429                | TT                              | GG                | 1946463900               |
| SNP_P3_89566_30208448 | NC_021166.1    | Ca_kabuli_chr07 | 30208448                | AA                              | GG                | 1946463901               |
| SNP_P3_89567_30208536 | NC_021166.1    | Ca_kabuli_chr07 | 30208536                | TT                              | CC                | 1946463902               |
| SNP_P3_89568_30208549 | NC_021166.1    | Ca_kabuli_chr07 | 30208549                | AA                              | CC                | 1946463904               |
| SNP_P3_89569_30208695 | NC_021166.1    | Ca_kabuli_chr07 | 30208695                | TT                              | CC                | 1946463905               |
| SNP_P3_89570_30208747 | NC_021166.1    | Ca_kabuli_chr07 | 30208747                | TT                              | GG                | 1946463907               |
| SNP_P3_89572_30216159 | NC_021166.1    | Ca_kabuli_chr07 | 30216159                | AA                              | TT                | 1946463908               |
| SNP_P3_89573_30216167 | NC_021166.1    | Ca_kabuli_chr07 | 30216167                | CC                              | TT                | 1946463910               |
| SNP_P3_89574_30216688 | NC_021166.1    | Ca_kabuli_chr07 | 30216688                | AA                              | GG                | 1946463911               |
| SNP_P3_89575_30216734 | NC_021166.1    | Ca_kabuli_chr07 | 30216734                | TT                              | AA                | 1946463912               |
| SNP_P3_89576_30216848 | NC_021166.1    | Ca_kabuli_chr07 | 30216848                | AA                              | GG                | 1946463914               |
| SNP_P3_89577_30218115 | NC_021166.1    | Ca_kabuli_chr07 | 30218115                | TT                              | CC                | 1946463915               |
| SNP_P3_89578_30218497 | NC_021166.1    | Ca_kabuli_chr07 | 30218497                | CC                              | TT                | 1946463917               |
| SNP_P3_89580_30219092 | NC_021166.1    | Ca_kabuli_chr07 | 30219092                | GG                              | AA                | 1946463918               |
| SNP_P3_89581_30219239 | NC_021166.1    | Ca_kabuli_chr07 | 30219239                | GG                              | AA                | 1946463920               |
| SNP_P3_89582_30219671 | NC_021166.1    | Ca_kabuli_chr07 | 30219671                | TT                              | GG                | 1946463921               |
| SNP_P3_89583_30219974 | NC_021166.1    | Ca_kabuli_chr07 | 30219974                | GG                              | AA                | 1946463922               |
| SNP_P3_89584_30219989 | NC_021166.1    | Ca_kabuli_chr07 | 30219989                | AA                              | CC                | 1946463924               |
| SNP_P3_89586_30220025 | NC_021166.1    | Ca_kabuli_chr07 | 30220025                | TT                              | CC                | 1946463925               |
| SNP_P3_89587_30220054 | NC_021166.1    | Ca_kabuli_chr07 | 30220054                | TT                              | CC                | 1946463927               |
| SNP_P3_89588_30220350 | NC_021166.1    | Ca_kabuli_chr07 | 30220350                | CC                              | TT                | 1946463928               |
| SNP_P3_89589_30220403 | NC_021166.1    | Ca_kabuli_chr07 | 30220403                | TT                              | CC                | 1946463930               |
| SNP_P3_89591_30221782 | NC_021166.1    | Ca_kabuli_chr07 | 30221782                | TT                              | GG                | 1946463931               |
| SNP_P3_89592_30221803 | NC_021166.1    | Ca_kabuli_chr07 | 30221803                | GG                              | TT                | 1946463932               |
| SNP_P3_89593_30226254 | NC_021166.1    | Ca_kabuli_chr07 | 30226254                | TT                              | CC                | 1946463934               |
| SNP_P3_89594_30226474 | NC_021166.1    | Ca_kabuli_chr07 | 30226474                | TT                              | GG                | 1946463935               |
| SNP_P3_89596_30230280 | NC_021166.1    | Ca_kabuli_chr07 | 30230280                | CC                              | AA                | 1946463937               |
| SNP_P3_89597_30230295 | NC_021166.1    | Ca_kabuli_chr07 | 30230295                | GG                              | AA                | 1946463938               |
| SNP_P3_89598_30230531 | NC_021166.1    | Ca_kabuli_chr07 | 30230531                | GG                              | AA                | 1946463940               |
| SNP_P3_89599_30234230 | NC_021166.1    | Ca_kabuli_chr07 | 30234230                | TT                              | GG                | 1946463941               |
| SNP_P3_89600_30235254 | NC_021166.1    | Ca_kabuli_chr07 | 30235254                | GG                              | AA                | 1946463942               |
| SNP_P3_89601_30235312 | NC_021166.1    | Ca_kabuli_chr07 | 30235312                | AA                              | GG                | 1946463944               |
| SNP_P3_89602_30235641 | NC_021166.1    | Ca_kabuli_chr07 | 30235641                | TT                              | AA                | 1946463945               |
| SNP_P3_89603_30235642 | NC_021166.1    | Ca_kabuli_chr07 | 30235642                | AA                              | TT                | 1946463947               |
| SNP_P3_89604_30235661 | NC_021166.1    | Ca_kabuli_chr07 | 30235661                | CC                              | TT                | 1946463948               |
| SNP_P3_89606_30244404 | NC_021166.1    | Ca_kabuli_chr07 | 30244404                | CC                              | TT                | 1946463949               |
| SNP_P3_89607_30244709 | NC_021166.1    | Ca_kabuli_chr07 | 30244709                | TT                              | CC                | 1946463951               |
| SNP_P3_89610_30265093 | NC_021166.1    | Ca_kabuli_chr07 | 30265093                | TT                              | CC                | 1946463952               |

| SNPs IDs              | Chromosome IDs | Chromosomes     | Physical positions (bp) | CDC Frontier (Reference genome) | (Pusa 256 & HPNB) | NCBI SNPdb Accession IDs |
|-----------------------|----------------|-----------------|-------------------------|---------------------------------|-------------------|--------------------------|
| SNP_P3_89611_30322352 | NC_021166.1    | Ca_kabuli_chr07 | 30322352                | CC                              | TT                | 1946463954               |
| SNP_P3_89612_30330387 | NC_021166.1    | Ca_kabuli_chr07 | 30330387                | AA                              | TT                | 1946463955               |
| SNP_P3_89613_30345677 | NC_021166.1    | Ca_kabuli_chr07 | 30345677                | CC                              | GG                | 1946463957               |
| SNP_P3_89614_30357651 | NC_021166.1    | Ca_kabuli_chr07 | 30357651                | AA                              | GG                | 1946463958               |
| SNP_P3_89616_30414645 | NC_021166.1    | Ca_kabuli_chr07 | 30414645                | GG                              | AA                | 1946463960               |
| SNP_P3_89617_30414768 | NC_021166.1    | Ca_kabuli_chr07 | 30414768                | AA                              | GG                | 1946463961               |
| SNP_P3_89618_30414769 | NC_021166.1    | Ca_kabuli_chr07 | 30414769                | GG                              | AA                | 1946463963               |
| SNP_P3_89619_30414780 | NC_021166.1    | Ca_kabuli_chr07 | 30414780                | TT                              | AA                | 1946463964               |
| SNP_P3_89620_30414809 | NC_021166.1    | Ca_kabuli_chr07 | 30414809                | GG                              | TT                | 1946463965               |
| SNP_P3_89621_30414815 | NC_021166.1    | Ca_kabuli_chr07 | 30414815                | CC                              | TT                | 1946463967               |
| SNP_P3_89622_30414818 | NC_021166.1    | Ca_kabuli_chr07 | 30414818                | AA                              | GG                | 1946463968               |
| SNP_P3_89623_30414863 | NC_021166.1    | Ca_kabuli_chr07 | 30414863                | AA                              | GG                | 1946463970               |
| SNP_P3_89624_30414867 | NC_021166.1    | Ca_kabuli_chr07 | 30414867                | TT                              | CC                | 1946463971               |
| SNP_P3_89625_30414886 | NC_021166.1    | Ca_kabuli_chr07 | 30414886                | AA                              | GG                | 1946463973               |
| SNP_P3_89626_30414911 | NC_021166.1    | Ca_kabuli_chr07 | 30414911                | TT                              | CC                | 1946463974               |
| SNP_P3_89627_30414914 | NC_021166.1    | Ca_kabuli_chr07 | 30414914                | GG                              | TT                | 1946463976               |
| SNP_P3_89628_30415061 | NC_021166.1    | Ca_kabuli_chr07 | 30415061                | AA                              | GG                | 1946463977               |
| SNP_P3_89629_30415132 | NC_021166.1    | Ca_kabuli_chr07 | 30415132                | AA                              | GG                | 1946463978               |
| SNP_P3_89630_30415187 | NC_021166.1    | Ca_kabuli_chr07 | 30415187                | TT                              | CC                | 1946463980               |
| SNP_P3_89632_30415206 | NC_021166.1    | Ca_kabuli_chr07 | 30415206                | CC                              | AA                | 1946463981               |
| SNP_P3_89633_30415315 | NC_021166.1    | Ca_kabuli_chr07 | 30415315                | TT                              | CC                | 1946463983               |
| SNP_P3_89634_30415321 | NC_021166.1    | Ca_kabuli_chr07 | 30415321                | CC                              | TT                | 1946463984               |
| SNP_P3_89635_30415327 | NC_021166.1    | Ca_kabuli_chr07 | 30415327                | TT                              | GG                | 1946463986               |
| SNP_P3_89636_30415350 | NC_021166.1    | Ca_kabuli_chr07 | 30415350                | TT                              | AA                | 1946463987               |
| SNP_P3_89638_30415408 | NC_021166.1    | Ca_kabuli_chr07 | 30415408                | TT                              | CC                | 1946463989               |
| SNP_P3_89639_30415435 | NC_021166.1    | Ca_kabuli_chr07 | 30415435                | CC                              | TT                | 1946463990               |
| SNP_P3_89640_30415436 | NC_021166.1    | Ca_kabuli_chr07 | 30415436                | TT                              | CC                | 1946463992               |
| SNP_P3_89641_30415437 | NC_021166.1    | Ca_kabuli_chr07 | 30415437                | AA                              | GG                | 1946463993               |
| SNP_P3_89642_30415444 | NC_021166.1    | Ca_kabuli_chr07 | 30415444                | CC                              | TT                | 1946463995               |
| SNP_P3_89643_30415449 | NC_021166.1    | Ca_kabuli_chr07 | 30415449                | GG                              | AA                | 1946463996               |
| SNP_P3_89645_30415643 | NC_021166.1    | Ca_kabuli_chr07 | 30415643                | TT                              | CC                | 1946463998               |
| SNP_P3_89646_30415734 | NC_021166.1    | Ca_kabuli_chr07 | 30415734                | GG                              | TT                | 1946463999               |
| SNP_P3_89647_30415760 | NC_021166.1    | Ca_kabuli_chr07 | 30415760                | TT                              | CC                | 1946464001               |
| SNP_P3_89648_30415767 | NC_021166.1    | Ca_kabuli_chr07 | 30415767                | GG                              | AA                | 1946464002               |
| SNP_P3_89649_30419748 | NC_021166.1    | Ca_kabuli_chr07 | 30419748                | CC                              | TT                | 1946464004               |
| SNP_P3_89650_30421430 | NC_021166.1    | Ca_kabuli_chr07 | 30421430                | AA                              | CC                | 1946464005               |
| SNP_P3_89651_30422872 | NC_021166.1    | Ca_kabuli_chr07 | 30422872                | CC                              | TT                | 1946464007               |
| SNP_P3_89652_30424122 | NC_021166.1    | Ca_kabuli_chr07 | 30424122                | AA                              | GG                | 1946464008               |
| SNP_P3_89654_30424266 | NC_021166.1    | Ca_kabuli_chr07 | 30424266                | AA                              | TT                | 1946464009               |
| SNP_P3_89655_30426685 | NC_021166.1    | Ca_kabuli_chr07 | 30426685                | TT                              | CC                | 1946464011               |
| SNP_P3_89656_30617045 | NC_021166.1    | Ca_kabuli_chr07 | 30617045                | AA                              | GG                | 1946464012               |
| SNP_P3_89657_30617439 | NC_021166.1    | Ca_kabuli_chr07 | 30617439                | AA                              | CC                | 1946464014               |



| SNPs IDs              | Chromosome IDs | Chromosomes     | Physical positions (bp) | CDC Frontier (Reference genome) | (Pusa 256 & HPNB) | NCBI SNPdb Accession IDs |
|-----------------------|----------------|-----------------|-------------------------|---------------------------------|-------------------|--------------------------|
| SNP_P3_89658_30617443 | NC_021166.1    | Ca_kabuli_chr07 | 30617443                | TT                              | CC                | 1946464015               |
| SNP_P3_89659_30617822 | NC_021166.1    | Ca_kabuli_chr07 | 30617822                | GG                              | AA                | 1946464017               |
| SNP_P3_89660_30626918 | NC_021166.1    | Ca_kabuli_chr07 | 30626918                | AA                              | GG                | 1946464018               |
| SNP_P3_89661_30626943 | NC_021166.1    | Ca_kabuli_chr07 | 30626943                | AA                              | TT                | 1946464019               |
| SNP_P3_89662_30627095 | NC_021166.1    | Ca_kabuli_chr07 | 30627095                | TT                              | CC                | 1946464021               |
| SNP_P3_89663_30627155 | NC_021166.1    | Ca_kabuli_chr07 | 30627155                | CC                              | AA                | 1946464022               |
| SNP_P3_89664_30642291 | NC_021166.1    | Ca_kabuli_chr07 | 30642291                | AA                              | GG                | 1946464024               |
| SNP_P3_89665_30642534 | NC_021166.1    | Ca_kabuli_chr07 | 30642534                | CC                              | AA                | 1946464025               |
| SNP_P3_89666_30661830 | NC_021166.1    | Ca_kabuli_chr07 | 30661830                | AA                              | CC                | 1946464027               |
| SNP_P3_89667_30661920 | NC_021166.1    | Ca_kabuli_chr07 | 30661920                | GG                              | AA                | 1946464028               |
| SNP_P3_89670_30720823 | NC_021166.1    | Ca_kabuli_chr07 | 30720823                | GG                              | AA                | 1946464029               |
| SNP_P3_89671_30720825 | NC_021166.1    | Ca_kabuli_chr07 | 30720825                | TT                              | CC                | 1946464031               |
| SNP_P3_89672_30721008 | NC_021166.1    | Ca_kabuli_chr07 | 30721008                | GG                              | AA                | 1946464032               |
| SNP_P3_89673_30721052 | NC_021166.1    | Ca_kabuli_chr07 | 30721052                | TT                              | GG                | 1946464034               |
| SNP_P3_89675_30749636 | NC_021166.1    | Ca_kabuli_chr07 | 30749636                | AA                              | TT                | 1946464035               |
| SNP_P3_89676_30749637 | NC_021166.1    | Ca_kabuli_chr07 | 30749637                | AA                              | TT                | 1946464037               |
| SNP_P3_89677_30752262 | NC_021166.1    | Ca_kabuli_chr07 | 30752262                | CC                              | TT                | 1946464038               |
| SNP_P3_89678_30757876 | NC_021166.1    | Ca_kabuli_chr07 | 30757876                | AA                              | GG                | 1946464039               |
| SNP_P3_89679_30757888 | NC_021166.1    | Ca_kabuli_chr07 | 30757888                | AA                              | CC                | 1946464041               |
| SNP_P3_89680_30776090 | NC_021166.1    | Ca_kabuli_chr07 | 30776090                | GG                              | TT                | 1946464042               |
| SNP_P3_89681_30776108 | NC_021166.1    | Ca_kabuli_chr07 | 30776108                | TT                              | GG                | 1946464044               |
| SNP_P3_89682_30776115 | NC_021166.1    | Ca_kabuli_chr07 | 30776115                | CC                              | TT                | 1946464045               |
| SNP_P3_89683_30776128 | NC_021166.1    | Ca_kabuli_chr07 | 30776128                | GG                              | AA                | 1946464047               |
| SNP_P3_89684_30776479 | NC_021166.1    | Ca_kabuli_chr07 | 30776479                | GG                              | AA                | 1946464048               |
| SNP_P3_89685_30776499 | NC_021166.1    | Ca_kabuli_chr07 | 30776499                | AA                              | CC                | 1946464049               |
| SNP_P3_89687_30789751 | NC_021166.1    | Ca_kabuli_chr07 | 30789751                | AA                              | GG                | 1946464051               |
| SNP_P3_89688_30789755 | NC_021166.1    | Ca_kabuli_chr07 | 30789755                | GG                              | CC                | 1946464052               |
| SNP_P3_89689_30798278 | NC_021166.1    | Ca_kabuli_chr07 | 30798278                | TT                              | AA                | 1946464054               |
| SNP_P3_89690_30798293 | NC_021166.1    | Ca_kabuli_chr07 | 30798293                | TT                              | CC                | 1946464055               |
| SNP_P3_89691_30845598 | NC_021166.1    | Ca_kabuli_chr07 | 30845598                | AA                              | TT                | 1946464057               |
| SNP_P3_89692_30845600 | NC_021166.1    | Ca_kabuli_chr07 | 30845600                | TT                              | AA                | 1946464058               |
| SNP_P3_89693_30849345 | NC_021166.1    | Ca_kabuli_chr07 | 30849345                | AA                              | TT                | 1946464059               |
| SNP_P3_89695_30874315 | NC_021166.1    | Ca_kabuli_chr07 | 30874315                | CC                              | TT                | 1946464061               |
| SNP_P3_89696_30874326 | NC_021166.1    | Ca_kabuli_chr07 | 30874326                | CC                              | TT                | 1946464062               |
| SNP_P3_89697_30874335 | NC_021166.1    | Ca_kabuli_chr07 | 30874335                | GG                              | AA                | 1946464064               |
| SNP_P3_89698_30874372 | NC_021166.1    | Ca_kabuli_chr07 | 30874372                | AA                              | GG                | 1946464065               |
| SNP_P3_89699_30874410 | NC_021166.1    | Ca_kabuli_chr07 | 30874410                | AA                              | GG                | 1946464067               |
| SNP_P3_89700_30874458 | NC_021166.1    | Ca_kabuli_chr07 | 30874458                | AA                              | GG                | 1946464068               |
| SNP_P3_89701_30874652 | NC_021166.1    | Ca_kabuli_chr07 | 30874652                | GG                              | AA                | 1946464069               |
| SNP_P3_89702_30874725 | NC_021166.1    | Ca_kabuli_chr07 | 30874725                | GG                              | AA                | 1946464071               |
| SNP_P3_89703_30874745 | NC_021166.1    | Ca_kabuli_chr07 | 30874745                | GG                              | AA                | 1946464072               |
| SNP_P3_89704_30874888 | NC_021166.1    | Ca_kabuli_chr07 | 30874888                | TT                              | CC                | 1946464074               |

| SNPs IDs              | Chromosome IDs | Chromosomes     | Physical positions (bp) | CDC Frontier (Reference genome) | (Pusa 256 & HPNB) | NCBI SNPdb Accession IDs |
|-----------------------|----------------|-----------------|-------------------------|---------------------------------|-------------------|--------------------------|
| SNP_P3_89705_30880968 | NC_021166.1    | Ca_kabuli_chr07 | 30880968                | AA                              | GG                | 1946464075               |
| SNP_P3_89706_30881545 | NC_021166.1    | Ca_kabuli_chr07 | 30881545                | GG                              | AA                | 1946464077               |
| SNP_P3_89707_30881566 | NC_021166.1    | Ca_kabuli_chr07 | 30881566                | AA                              | TT                | 1946464078               |
| SNP_P3_89708_30909461 | NC_021166.1    | Ca_kabuli_chr07 | 30909461                | AA                              | GG                | 1946464079               |
| SNP_P3_89709_30921500 | NC_021166.1    | Ca_kabuli_chr07 | 30921500                | GG                              | TT                | 1946464081               |
| SNP_P3_89710_30929976 | NC_021166.1    | Ca_kabuli_chr07 | 30929976                | TT                              | CC                | 1946464082               |
| SNP_P3_89711_30930479 | NC_021166.1    | Ca_kabuli_chr07 | 30930479                | CC                              | TT                | 1946464084               |
| SNP_P3_89712_30930489 | NC_021166.1    | Ca_kabuli_chr07 | 30930489                | CC                              | TT                | 1946464085               |
| SNP_P3_89713_30930524 | NC_021166.1    | Ca_kabuli_chr07 | 30930524                | GG                              | AA                | 1946464087               |
| SNP_P3_89714_30930561 | NC_021166.1    | Ca_kabuli_chr07 | 30930561                | TT                              | AA                | 1946464088               |
| SNP_P3_89715_30930689 | NC_021166.1    | Ca_kabuli_chr07 | 30930689                | GG                              | CC                | 1946464090               |
| SNP_P3_89716_30930711 | NC_021166.1    | Ca_kabuli_chr07 | 30930711                | TT                              | GG                | 1946464091               |
| SNP_P3_89717_30930779 | NC_021166.1    | Ca_kabuli_chr07 | 30930779                | GG                              | TT                | 1946464093               |
| SNP_P3_89718_30930834 | NC_021166.1    | Ca_kabuli_chr07 | 30930834                | CC                              | TT                | 1946464094               |
| SNP_P3_89719_30930844 | NC_021166.1    | Ca_kabuli_chr07 | 30930844                | TT                              | CC                | 1946464095               |
| SNP_P3_89720_30930847 | NC_021166.1    | Ca_kabuli_chr07 | 30930847                | GG                              | AA                | 1946464097               |
| SNP_P3_89721_30930848 | NC_021166.1    | Ca_kabuli_chr07 | 30930848                | CC                              | TT                | 1946464098               |
| SNP_P3_89722_30930878 | NC_021166.1    | Ca_kabuli_chr07 | 30930878                | CC                              | GG                | 1946464100               |
| SNP_P3_89723_30930899 | NC_021166.1    | Ca_kabuli_chr07 | 30930899                | GG                              | AA                | 1946464101               |
| SNP_P3_89724_30933505 | NC_021166.1    | Ca_kabuli_chr07 | 30933505                | AA                              | GG                | 1946464103               |
| SNP_P3_89725_30942452 | NC_021166.1    | Ca_kabuli_chr07 | 30942452                | GG                              | AA                | 1946464104               |
| SNP_P3_89726_30966130 | NC_021166.1    | Ca_kabuli_chr07 | 30966130                | AA                              | GG                | 1946464106               |
| SNP_P3_89727_30966513 | NC_021166.1    | Ca_kabuli_chr07 | 30966513                | GG                              | AA                | 1946464107               |
| SNP_P3_89730_30981774 | NC_021166.1    | Ca_kabuli_chr07 | 30981774                | TT                              | CC                | 1946464109               |
| SNP_P3_89731_30991299 | NC_021166.1    | Ca_kabuli_chr07 | 30991299                | GG                              | TT                | 1946464110               |
| SNP_P3_89732_30993044 | NC_021166.1    | Ca_kabuli_chr07 | 30993044                | CC                              | TT                | 1946464111               |
| SNP_P3_89733_30993275 | NC_021166.1    | Ca_kabuli_chr07 | 30993275                | AA                              | GG                | 1946464113               |
| SNP_P3_89734_30993294 | NC_021166.1    | Ca_kabuli_chr07 | 30993294                | CC                              | AA                | 1946464114               |
| SNP_P3_89735_30999265 | NC_021166.1    | Ca_kabuli_chr07 | 30999265                | CC                              | TT                | 1946464116               |
| SNP_P3_89736_30999279 | NC_021166.1    | Ca_kabuli_chr07 | 30999279                | GG                              | AA                | 1946464117               |
| SNP_P3_89737_30999317 | NC_021166.1    | Ca_kabuli_chr07 | 30999317                | AA                              | GG                | 1946464118               |
| SNP_P3_89738_30999322 | NC_021166.1    | Ca_kabuli_chr07 | 30999322                | GG                              | AA                | 1946464120               |
| SNP_P3_89739_30999506 | NC_021166.1    | Ca_kabuli_chr07 | 30999506                | AA                              | GG                | 1946464121               |
| SNP_P3_89740_30999565 | NC_021166.1    | Ca_kabuli_chr07 | 30999565                | GG                              | CC                | 1946464123               |
| SNP_P3_89741_30999587 | NC_021166.1    | Ca_kabuli_chr07 | 30999587                | CC                              | TT                | 1946464124               |
| SNP_P3_89742_31000732 | NC_021166.1    | Ca_kabuli_chr07 | 31000732                | GG                              | AA                | 1946464126               |
| SNP_P3_89743_31000744 | NC_021166.1    | Ca_kabuli_chr07 | 31000744                | TT                              | CC                | 1946464127               |
| SNP_P3_89744_31000748 | NC_021166.1    | Ca_kabuli_chr07 | 31000748                | TT                              | AA                | 1946464128               |
| SNP_P3_89745_31000750 | NC_021166.1    | Ca_kabuli_chr07 | 31000750                | AA                              | GG                | 1946464130               |
| SNP_P3_89746_31000783 | NC_021166.1    | Ca_kabuli_chr07 | 31000783                | GG                              | TT                | 1946464131               |
| SNP_P3_89747_31000784 | NC_021166.1    | Ca_kabuli_chr07 | 31000784                | GG                              | TT                | 1946464133               |
| SNP_P3_89748_31006799 | NC_021166.1    | Ca_kabuli_chr07 | 31006799                | AA                              | TT                | 1946464134               |

| SNPs IDs              | Chromosome IDs | Chromosomes     | Physical positions (bp) | CDC Frontier (Reference genome) | (Pusa 256 & HPNB) | NCBI SNPdb Accession IDs |
|-----------------------|----------------|-----------------|-------------------------|---------------------------------|-------------------|--------------------------|
| SNP_P3_89749_31006814 | NC_021166.1    | Ca_kabuli_chr07 | 31006814                | AA                              | CC                | 1946464136               |
| SNP_P3_89750_31006826 | NC_021166.1    | Ca_kabuli_chr07 | 31006826                | GG                              | AA                | 1946464137               |
| SNP_P3_89751_31021497 | NC_021166.1    | Ca_kabuli_chr07 | 31021497                | GG                              | AA                | 1946464138               |
| SNP_P3_89752_31047219 | NC_021166.1    | Ca_kabuli_chr07 | 31047219                | CC                              | TT                | 1946464140               |
| SNP_P3_89753_31047268 | NC_021166.1    | Ca_kabuli_chr07 | 31047268                | CC                              | TT                | 1946464141               |
| SNP_P3_89754_31047312 | NC_021166.1    | Ca_kabuli_chr07 | 31047312                | CC                              | AA                | 1946464143               |
| SNP_P3_89755_31047314 | NC_021166.1    | Ca_kabuli_chr07 | 31047314                | AA                              | TT                | 1946464144               |
| SNP_P3_89756_31047392 | NC_021166.1    | Ca_kabuli_chr07 | 31047392                | TT                              | AA                | 1946464146               |
| SNP_P3_89757_31047862 | NC_021166.1    | Ca_kabuli_chr07 | 31047862                | CC                              | TT                | 1946464147               |
| SNP_P3_89758_31047911 | NC_021166.1    | Ca_kabuli_chr07 | 31047911                | CC                              | TT                | 1946464148               |
| SNP_P3_89759_31048712 | NC_021166.1    | Ca_kabuli_chr07 | 31048712                | AA                              | GG                | 1946464150               |
| SNP_P3_89760_31057932 | NC_021166.1    | Ca_kabuli_chr07 | 31057932                | CC                              | AA                | 1946464151               |
| SNP_P3_89761_31060316 | NC_021166.1    | Ca_kabuli_chr07 | 31060316                | AA                              | CC                | 1946464153               |
| SNP_P3_89762_31070230 | NC_021166.1    | Ca_kabuli_chr07 | 31070230                | AA                              | TT                | 1946464154               |
| SNP_P3_89763_31073467 | NC_021166.1    | Ca_kabuli_chr07 | 31073467                | AA                              | CC                | 1946464156               |
| SNP_P3_89764_31073482 | NC_021166.1    | Ca_kabuli_chr07 | 31073482                | TT                              | CC                | 1946464157               |
| SNP_P3_89765_31073832 | NC_021166.1    | Ca_kabuli_chr07 | 31073832                | CC                              | TT                | 1946464159               |
| SNP_P3_89766_31074170 | NC_021166.1    | Ca_kabuli_chr07 | 31074170                | AA                              | GG                | 1946464160               |
| SNP_P3_89767_31074176 | NC_021166.1    | Ca_kabuli_chr07 | 31074176                | AA                              | GG                | 1946464162               |
| SNP_P3_89768_31074195 | NC_021166.1    | Ca_kabuli_chr07 | 31074195                | CC                              | TT                | 1946464163               |
| SNP_P3_89769_31074202 | NC_021166.1    | Ca_kabuli_chr07 | 31074202                | AA                              | GG                | 1946464165               |
| SNP_P3_89770_31074242 | NC_021166.1    | Ca_kabuli_chr07 | 31074242                | TT                              | CC                | 1946464166               |
| SNP_P3_89771_31074371 | NC_021166.1    | Ca_kabuli_chr07 | 31074371                | TT                              | CC                | 1946464168               |
| SNP_P3_89772_31074426 | NC_021166.1    | Ca_kabuli_chr07 | 31074426                | AA                              | GG                | 1946464169               |
| SNP_P3_89773_31074441 | NC_021166.1    | Ca_kabuli_chr07 | 31074441                | TT                              | CC                | 1946464170               |
| SNP_P3_89774_31074463 | NC_021166.1    | Ca_kabuli_chr07 | 31074463                | TT                              | GG                | 1946464172               |
| SNP_P3_89775_31074472 | NC_021166.1    | Ca_kabuli_chr07 | 31074472                | CC                              | TT                | 1946464174               |
| SNP_P3_89776_31074495 | NC_021166.1    | Ca_kabuli_chr07 | 31074495                | TT                              | CC                | 1946464175               |
| SNP_P3_89777_31074771 | NC_021166.1    | Ca_kabuli_chr07 | 31074771                | TT                              | CC                | 1946464177               |
| SNP_P3_89778_31074877 | NC_021166.1    | Ca_kabuli_chr07 | 31074877                | CC                              | TT                | 1946464179               |
| SNP_P3_89779_31074889 | NC_021166.1    | Ca_kabuli_chr07 | 31074889                | TT                              | CC                | 1946464180               |
| SNP_P3_89780_31074896 | NC_021166.1    | Ca_kabuli_chr07 | 31074896                | AA                              | GG                | 1946464182               |
| SNP_P3_89781_31074936 | NC_021166.1    | Ca_kabuli_chr07 | 31074936                | TT                              | AA                | 1946464184               |
| SNP_P3_89782_31075140 | NC_021166.1    | Ca_kabuli_chr07 | 31075140                | CC                              | TT                | 1946464185               |
| SNP_P3_89783_31076260 | NC_021166.1    | Ca_kabuli_chr07 | 31076260                | AA                              | TT                | 1946464186               |
| SNP_P3_89784_31076538 | NC_021166.1    | Ca_kabuli_chr07 | 31076538                | CC                              | TT                | 1946464188               |
| SNP_P3_89785_31078526 | NC_021166.1    | Ca_kabuli_chr07 | 31078526                | GG                              | AA                | 1946464189               |
| SNP_P3_89787_31094043 | NC_021166.1    | Ca_kabuli_chr07 | 31094043                | TT                              | GG                | 1946464191               |
| SNP_P3_89788_31111125 | NC_021166.1    | Ca_kabuli_chr07 | 31111125                | GG                              | AA                | 1946464194               |
| SNP_P3_89789_31111546 | NC_021166.1    | Ca_kabuli_chr07 | 31111546                | GG                              | AA                | 1946464195               |
| SNP_P3_89790_31111624 | NC_021166.1    | Ca_kabuli_chr07 | 31111624                | AA                              | CC                | 1946464197               |
| SNP_P3_89791_31111705 | NC_021166.1    | Ca_kabuli_chr07 | 31111705                | GG                              | AA                | 1946464198               |

| SNPs IDs              | Chromosome IDs | Chromosomes     | Physical positions (bp) | CDC Frontier (Reference genome) | (Pusa 256 & HPNB) | NCBI SNPdb Accession IDs |
|-----------------------|----------------|-----------------|-------------------------|---------------------------------|-------------------|--------------------------|
| SNP_P3_89792_31111839 | NC_021166.1    | Ca_kabuli_chr07 | 31111839                | AA                              | GG                | 1946464200               |
| SNP_P3_89793_31111875 | NC_021166.1    | Ca_kabuli_chr07 | 31111875                | AA                              | TT                | 1946464201               |
| SNP_P3_89794_31111876 | NC_021166.1    | Ca_kabuli_chr07 | 31111876                | AA                              | TT                | 1946464203               |
| SNP_P3_89795_31111898 | NC_021166.1    | Ca_kabuli_chr07 | 31111898                | CC                              | TT                | 1946464204               |
| SNP_P3_89796_31111913 | NC_021166.1    | Ca_kabuli_chr07 | 31111913                | GG                              | TT                | 1946464206               |
| SNP_P3_89797_31111937 | NC_021166.1    | Ca_kabuli_chr07 | 31111937                | CC                              | TT                | 1946464207               |
| SNP_P3_89798_31112256 | NC_021166.1    | Ca_kabuli_chr07 | 31112256                | AA                              | TT                | 1946464209               |
| SNP_P3_89799_31112388 | NC_021166.1    | Ca_kabuli_chr07 | 31112388                | CC                              | AA                | 1946464210               |
| SNP_P3_89800_31112426 | NC_021166.1    | Ca_kabuli_chr07 | 31112426                | AA                              | CC                | 1946464212               |
| SNP_P3_89802_31112497 | NC_021166.1    | Ca_kabuli_chr07 | 31112497                | GG                              | TT                | 1946464213               |
| SNP_P3_89803_31112514 | NC_021166.1    | Ca_kabuli_chr07 | 31112514                | GG                              | AA                | 1946464215               |
| SNP_P3_89804_31134451 | NC_021166.1    | Ca_kabuli_chr07 | 31134451                | AA                              | GG                | 1946464216               |
| SNP_P3_89805_31139837 | NC_021166.1    | Ca_kabuli_chr07 | 31139837                | TT                              | AA                | 1946464218               |
| SNP_P3_89806_31143010 | NC_021166.1    | Ca_kabuli_chr07 | 31143010                | CC                              | TT                | 1946464219               |
| SNP_P3_89808_31185406 | NC_021166.1    | Ca_kabuli_chr07 | 31185406                | CC                              | TT                | 1946464221               |
| SNP_P3_89809_31185445 | NC_021166.1    | Ca_kabuli_chr07 | 31185445                | CC                              | TT                | 1946464222               |
| SNP_P3_89810_31185461 | NC_021166.1    | Ca_kabuli_chr07 | 31185461                | GG                              | AA                | 1946464224               |
| SNP_P3_89812_31185872 | NC_021166.1    | Ca_kabuli_chr07 | 31185872                | GG                              | AA                | 1946464225               |
| SNP_P3_89813_31186038 | NC_021166.1    | Ca_kabuli_chr07 | 31186038                | GG                              | TT                | 1946464227               |
| SNP_P3_89814_31186050 | NC_021166.1    | Ca_kabuli_chr07 | 31186050                | AA                              | CC                | 1946464228               |
| SNP_P3_89815_31186578 | NC_021166.1    | Ca_kabuli_chr07 | 31186578                | TT                              | GG                | 1946464230               |
| SNP_P3_89816_31186586 | NC_021166.1    | Ca_kabuli_chr07 | 31186586                | TT                              | GG                | 1946464231               |
| SNP_P3_89817_31189503 | NC_021166.1    | Ca_kabuli_chr07 | 31189503                | AA                              | GG                | 1946464233               |
| SNP_P3_89818_31189542 | NC_021166.1    | Ca_kabuli_chr07 | 31189542                | TT                              | CC                | 1946464234               |
| SNP_P3_89819_31195009 | NC_021166.1    | Ca_kabuli_chr07 | 31195009                | CC                              | TT                | 1946464236               |
| SNP_P3_89820_31196196 | NC_021166.1    | Ca_kabuli_chr07 | 31196196                | GG                              | AA                | 1946464237               |
| SNP_P3_89821_31196226 | NC_021166.1    | Ca_kabuli_chr07 | 31196226                | CC                              | TT                | 1946464239               |
| SNP_P3_89822_31196249 | NC_021166.1    | Ca_kabuli_chr07 | 31196249                | TT                              | AA                | 1946464240               |
| SNP_P3_89823_31196361 | NC_021166.1    | Ca_kabuli_chr07 | 31196361                | TT                              | CC                | 1946464242               |
| SNP_P3_89824_31196386 | NC_021166.1    | Ca_kabuli_chr07 | 31196386                | AA                              | TT                | 1946464243               |
| SNP_P3_89825_31196537 | NC_021166.1    | Ca_kabuli_chr07 | 31196537                | TT                              | CC                | 1946464245               |
| SNP_P3_89827_31196664 | NC_021166.1    | Ca_kabuli_chr07 | 31196664                | TT                              | CC                | 1946464246               |
| SNP_P3_89828_31197476 | NC_021166.1    | Ca_kabuli_chr07 | 31197476                | CC                              | TT                | 1946464248               |
| SNP_P3_89829_31197497 | NC_021166.1    | Ca_kabuli_chr07 | 31197497                | CC                              | AA                | 1946464249               |
| SNP_P3_89830_31197506 | NC_021166.1    | Ca_kabuli_chr07 | 31197506                | CC                              | AA                | 1946464250               |
| SNP_P3_89832_31197819 | NC_021166.1    | Ca_kabuli_chr07 | 31197819                | GG                              | CC                | 1946464252               |
| SNP_P3_89833_31199053 | NC_021166.1    | Ca_kabuli_chr07 | 31199053                | TT                              | AA                | 1946464253               |
| SNP_P3_89835_31201190 | NC_021166.1    | Ca_kabuli_chr07 | 31201190                | CC                              | AA                | 1946464255               |
| SNP_P3_89836_31201501 | NC_021166.1    | Ca_kabuli_chr07 | 31201501                | TT                              | GG                | 1946464256               |
| SNP_P3_89837_31201561 | NC_021166.1    | Ca_kabuli_chr07 | 31201561                | AA                              | GG                | 1946464258               |
| SNP_P3_89838_31201566 | NC_021166.1    | Ca_kabuli_chr07 | 31201566                | GG                              | AA                | 1946464259               |
| SNP_P3_89840_31201811 | NC_021166.1    | Ca_kabuli_chr07 | 31201811                | GG                              | AA                | 1946464261               |

| SNPs IDs              | Chromosome IDs | Chromosomes     | Physical positions (bp) | CDC Frontier (Reference genome) | (Pusa 256 & HPNB) | NCBI SNPdb Accession IDs |
|-----------------------|----------------|-----------------|-------------------------|---------------------------------|-------------------|--------------------------|
| SNP_P3_89841_31201830 | NC_021166.1    | Ca_kabuli_chr07 | 31201830                | AA                              | GG                | 1946464262               |
| SNP_P3_89842_31202558 | NC_021166.1    | Ca_kabuli_chr07 | 31202558                | AA                              | GG                | 1946464264               |
| SNP_P3_89843_31203423 | NC_021166.1    | Ca_kabuli_chr07 | 31203423                | TT                              | AA                | 1946464265               |
| SNP_P3_89844_31203828 | NC_021166.1    | Ca_kabuli_chr07 | 31203828                | AA                              | GG                | 1946464267               |
| SNP_P3_89845_31204276 | NC_021166.1    | Ca_kabuli_chr07 | 31204276                | CC                              | TT                | 1946464268               |
| SNP_P3_89846_31204314 | NC_021166.1    | Ca_kabuli_chr07 | 31204314                | GG                              | TT                | 1946464270               |
| SNP_P3_89847_31204849 | NC_021166.1    | Ca_kabuli_chr07 | 31204849                | AA                              | GG                | 1946464271               |
| SNP_P3_89848_31204904 | NC_021166.1    | Ca_kabuli_chr07 | 31204904                | GG                              | AA                | 1946464273               |
| SNP_P3_89849_31205952 | NC_021166.1    | Ca_kabuli_chr07 | 31205952                | AA                              | GG                | 1946464274               |
| SNP_P3_89850_31206388 | NC_021166.1    | Ca_kabuli_chr07 | 31206388                | AA                              | CC                | 1946464276               |
| SNP_P3_89851_31206610 | NC_021166.1    | Ca_kabuli_chr07 | 31206610                | CC                              | TT                | 1946464277               |
| SNP_P3_89852_31206626 | NC_021166.1    | Ca_kabuli_chr07 | 31206626                | TT                              | CC                | 1946464279               |
| SNP_P3_89853_31206638 | NC_021166.1    | Ca_kabuli_chr07 | 31206638                | AA                              | GG                | 1946464280               |
| SNP_P3_89854_31207225 | NC_021166.1    | Ca_kabuli_chr07 | 31207225                | CC                              | TT                | 1946464282               |
| SNP_P3_89856_31207576 | NC_021166.1    | Ca_kabuli_chr07 | 31207576                | AA                              | CC                | 1946464283               |
| SNP_P3_89857_31209004 | NC_021166.1    | Ca_kabuli_chr07 | 31209004                | AA                              | CC                | 1946464284               |
| SNP_P3_89858_31209306 | NC_021166.1    | Ca_kabuli_chr07 | 31209306                | AA                              | CC                | 1946464286               |
| SNP_P3_89859_31209375 | NC_021166.1    | Ca_kabuli_chr07 | 31209375                | AA                              | TT                | 1946464287               |
| SNP_P3_89860_31209477 | NC_021166.1    | Ca_kabuli_chr07 | 31209477                | AA                              | TT                | 1946464289               |
| SNP_P3_89861_31210680 | NC_021166.1    | Ca_kabuli_chr07 | 31210680                | AA                              | GG                | 1946464290               |
| SNP_P3_89862_31210704 | NC_021166.1    | Ca_kabuli_chr07 | 31210704                | CC                              | TT                | 1946464292               |
| SNP_P3_89863_31210711 | NC_021166.1    | Ca_kabuli_chr07 | 31210711                | TT                              | CC                | 1946464293               |
| SNP_P3_89864_31210900 | NC_021166.1    | Ca_kabuli_chr07 | 31210900                | CC                              | TT                | 1946464295               |
| SNP_P3_89865_31210914 | NC_021166.1    | Ca_kabuli_chr07 | 31210914                | CC                              | TT                | 1946464296               |
| SNP_P3_89866_31210915 | NC_021166.1    | Ca_kabuli_chr07 | 31210915                | CC                              | TT                | 1946464298               |
| SNP_P3_89867_31210921 | NC_021166.1    | Ca_kabuli_chr07 | 31210921                | GG                              | AA                | 1946464299               |
| SNP_P3_89869_31211226 | NC_021166.1    | Ca_kabuli_chr07 | 31211226                | TT                              | CC                | 1946464301               |
| SNP_P3_89870_31211290 | NC_021166.1    | Ca_kabuli_chr07 | 31211290                | TT                              | AA                | 1946464302               |
| SNP_P3_89871_31211321 | NC_021166.1    | Ca_kabuli_chr07 | 31211321                | TT                              | CC                | 1946464304               |
| SNP_P3_89872_31211352 | NC_021166.1    | Ca_kabuli_chr07 | 31211352                | AA                              | GG                | 1946464305               |
| SNP_P3_89873_31211366 | NC_021166.1    | Ca_kabuli_chr07 | 31211366                | AA                              | GG                | 1946464307               |
| SNP_P3_89874_31211391 | NC_021166.1    | Ca_kabuli_chr07 | 31211391                | AA                              | GG                | 1946464308               |
| SNP_P3_89875_31211410 | NC_021166.1    | Ca_kabuli_chr07 | 31211410                | GG                              | TT                | 1946464310               |
| SNP_P3_89876_31217131 | NC_021166.1    | Ca_kabuli_chr07 | 31217131                | AA                              | GG                | 1946464311               |
| SNP_P3_89877_31217303 | NC_021166.1    | Ca_kabuli_chr07 | 31217303                | CC                              | GG                | 1946464313               |
| SNP_P3_89880_31217577 | NC_021166.1    | Ca_kabuli_chr07 | 31217577                | GG                              | TT                | 1946464314               |
| SNP_P3_89881_31218600 | NC_021166.1    | Ca_kabuli_chr07 | 31218600                | AA                              | GG                | 1946464315               |
| SNP_P3_89882_31219557 | NC_021166.1    | Ca_kabuli_chr07 | 31219557                | TT                              | CC                | 1946464317               |
| SNP_P3_89883_31219562 | NC_021166.1    | Ca_kabuli_chr07 | 31219562                | AA                              | TT                | 1946464318               |
| SNP_P3_89884_31219602 | NC_021166.1    | Ca_kabuli_chr07 | 31219602                | TT                              | CC                | 1946464320               |
| SNP_P3_89885_31219605 | NC_021166.1    | Ca_kabuli_chr07 | 31219605                | CC                              | AA                | 1946464321               |
| SNP_P3_89886_31219747 | NC_021166.1    | Ca_kabuli_chr07 | 31219747                | AA                              | GG                | 1946464323               |

| SNPs IDs              | Chromosome IDs | Chromosomes     | Physical positions (bp) | CDC Frontier (Reference genome) | (Pusa 256 & HPNB) | NCBI SNPdb Accession IDs |
|-----------------------|----------------|-----------------|-------------------------|---------------------------------|-------------------|--------------------------|
| SNP_P3_89887_31219870 | NC_021166.1    | Ca_kabuli_chr07 | 31219870                | AA                              | TT                | 1946464324               |
| SNP_P3_89889_31220135 | NC_021166.1    | Ca_kabuli_chr07 | 31220135                | AA                              | GG                | 1946464326               |
| SNP_P3_89891_31220508 | NC_021166.1    | Ca_kabuli_chr07 | 31220508                | TT                              | CC                | 1946464327               |
| SNP_P3_89892_31220637 | NC_021166.1    | Ca_kabuli_chr07 | 31220637                | GG                              | CC                | 1946464329               |
| SNP_P3_89893_31220792 | NC_021166.1    | Ca_kabuli_chr07 | 31220792                | GG                              | AA                | 1946464330               |
| SNP_P3_89894_31220824 | NC_021166.1    | Ca_kabuli_chr07 | 31220824                | AA                              | TT                | 1946464332               |
| SNP_P3_89895_31220825 | NC_021166.1    | Ca_kabuli_chr07 | 31220825                | AA                              | GG                | 1946464333               |
| SNP_P3_89896_31221093 | NC_021166.1    | Ca_kabuli_chr07 | 31221093                | AA                              | CC                | 1946464334               |
| SNP_P3_89897_31221103 | NC_021166.1    | Ca_kabuli_chr07 | 31221103                | CC                              | GG                | 1946464336               |
| SNP_P3_89898_31221408 | NC_021166.1    | Ca_kabuli_chr07 | 31221408                | AA                              | TT                | 1946464337               |
| SNP_P3_89899_31221434 | NC_021166.1    | Ca_kabuli_chr07 | 31221434                | TT                              | CC                | 1946464339               |
| SNP_P3_89900_31221611 | NC_021166.1    | Ca_kabuli_chr07 | 31221611                | TT                              | AA                | 1946464340               |
| SNP_P3_89901_31221747 | NC_021166.1    | Ca_kabuli_chr07 | 31221747                | CC                              | TT                | 1946464342               |
| SNP_P3_89902_31224528 | NC_021166.1    | Ca_kabuli_chr07 | 31224528                | GG                              | AA                | 1946464343               |
| SNP_P3_89903_31224932 | NC_021166.1    | Ca_kabuli_chr07 | 31224932                | TT                              | GG                | 1946464345               |
| SNP_P3_89904_31224962 | NC_021166.1    | Ca_kabuli_chr07 | 31224962                | AA                              | GG                | 1946464346               |
| SNP_P3_89905_31225044 | NC_021166.1    | Ca_kabuli_chr07 | 31225044                | GG                              | CC                | 1946464348               |
| SNP_P3_89906_31225098 | NC_021166.1    | Ca_kabuli_chr07 | 31225098                | GG                              | CC                | 1946464349               |
| SNP_P3_89908_31225997 | NC_021166.1    | Ca_kabuli_chr07 | 31225997                | TT                              | CC                | 1946464350               |
| SNP_P3_89909_31228409 | NC_021166.1    | Ca_kabuli_chr07 | 31228409                | CC                              | TT                | 1946464352               |
| SNP_P3_89910_31228419 | NC_021166.1    | Ca_kabuli_chr07 | 31228419                | GG                              | AA                | 1946464353               |
| SNP_P3_89911_31228422 | NC_021166.1    | Ca_kabuli_chr07 | 31228422                | CC                              | TT                | 1946464355               |
| SNP_P3_89912_31228457 | NC_021166.1    | Ca_kabuli_chr07 | 31228457                | AA                              | CC                | 1946464356               |
| SNP_P3_89913_31228460 | NC_021166.1    | Ca_kabuli_chr07 | 31228460                | TT                              | CC                | 1946464358               |
| SNP_P3_89914_31228474 | NC_021166.1    | Ca_kabuli_chr07 | 31228474                | TT                              | AA                | 1946464359               |
| SNP_P3_89915_31228475 | NC_021166.1    | Ca_kabuli_chr07 | 31228475                | AA                              | CC                | 1946464361               |
| SNP_P3_89916_31228569 | NC_021166.1    | Ca_kabuli_chr07 | 31228569                | TT                              | CC                | 1946464362               |
| SNP_P3_89917_31228712 | NC_021166.1    | Ca_kabuli_chr07 | 31228712                | TT                              | CC                | 1946464364               |
| SNP_P3_89918_31230295 | NC_021166.1    | Ca_kabuli_chr07 | 31230295                | GG                              | TT                | 1946464365               |
| SNP_P3_89921_31234268 | NC_021166.1    | Ca_kabuli_chr07 | 31234268                | AA                              | GG                | 1946464367               |
| SNP_P3_89922_31235553 | NC_021166.1    | Ca_kabuli_chr07 | 31235553                | AA                              | GG                | 1946464368               |
| SNP_P3_89923_31235974 | NC_021166.1    | Ca_kabuli_chr07 | 31235974                | CC                              | GG                | 1946464370               |
| SNP_P3_89924_31236218 | NC_021166.1    | Ca_kabuli_chr07 | 31236218                | AA                              | GG                | 1946464371               |
| SNP_P3_89925_31236229 | NC_021166.1    | Ca_kabuli_chr07 | 31236229                | GG                              | TT                | 1946464373               |
| SNP_P3_89926_31236235 | NC_021166.1    | Ca_kabuli_chr07 | 31236235                | TT                              | GG                | 1946464374               |
| SNP_P3_89927_31236997 | NC_021166.1    | Ca_kabuli_chr07 | 31236997                | GG                              | AA                | 1946464376               |
| SNP_P3_89928_31237088 | NC_021166.1    | Ca_kabuli_chr07 | 31237088                | GG                              | AA                | 1946464377               |
| SNP_P3_89929_31237839 | NC_021166.1    | Ca_kabuli_chr07 | 31237839                | GG                              | TT                | 1946464379               |
| SNP_P3_89930_31238193 | NC_021166.1    | Ca_kabuli_chr07 | 31238193                | AA                              | GG                | 1946464380               |
| SNP_P3_89931_31240077 | NC_021166.1    | Ca_kabuli_chr07 | 31240077                | TT                              | CC                | 1946464382               |
| SNP_P3_89933_31246619 | NC_021166.1    | Ca_kabuli_chr07 | 31246619                | TT                              | CC                | 1946464383               |
| SNP_P3_89934_31246627 | NC_021166.1    | Ca_kabuli_chr07 | 31246627                | GG                              | CC                | 1946464385               |

| SNPs IDs              | Chromosome IDs | Chromosomes     | Physical positions (bp) | CDC Frontier (Reference genome) | (Pusa 256 & HPNB) | NCBI SNPdb Accession IDs |
|-----------------------|----------------|-----------------|-------------------------|---------------------------------|-------------------|--------------------------|
| SNP_P3_89935_31246636 | NC_021166.1    | Ca_kabuli_chr07 | 31246636                | GG                              | AA                | 1946464386               |
| SNP_P3_89936_31248077 | NC_021166.1    | Ca_kabuli_chr07 | 31248077                | CC                              | GG                | 1946464388               |
| SNP_P3_89937_31248750 | NC_021166.1    | Ca_kabuli_chr07 | 31248750                | TT                              | AA                | 1946464389               |
| SNP_P3_89938_31248761 | NC_021166.1    | Ca_kabuli_chr07 | 31248761                | AA                              | CC                | 1946464391               |
| SNP_P3_89939_31250718 | NC_021166.1    | Ca_kabuli_chr07 | 31250718                | GG                              | CC                | 1946464392               |
| SNP_P3_89940_31252716 | NC_021166.1    | Ca_kabuli_chr07 | 31252716                | AA                              | TT                | 1946464394               |
| SNP_P3_89941_31252718 | NC_021166.1    | Ca_kabuli_chr07 | 31252718                | TT                              | AA                | 1946464395               |
| SNP_P3_89942_31252721 | NC_021166.1    | Ca_kabuli_chr07 | 31252721                | AA                              | TT                | 1946464397               |
| SNP_P3_89943_31252733 | NC_021166.1    | Ca_kabuli_chr07 | 31252733                | TT                              | CC                | 1946464398               |
| SNP_P3_89947_31269470 | NC_021166.1    | Ca_kabuli_chr07 | 31269470                | TT                              | CC                | 1946464400               |
| SNP_P3_89948_31269796 | NC_021166.1    | Ca_kabuli_chr07 | 31269796                | TT                              | AA                | 1946464401               |
| SNP_P3_89949_31276670 | NC_021166.1    | Ca_kabuli_chr07 | 31276670                | AA                              | GG                | 1946464403               |
| SNP_P3_89951_31309852 | NC_021166.1    | Ca_kabuli_chr07 | 31309852                | CC                              | TT                | 1946464404               |
| SNP_P3_89952_31309885 | NC_021166.1    | Ca_kabuli_chr07 | 31309885                | GG                              | AA                | 1946464406               |
| SNP_P3_89953_31329775 | NC_021166.1    | Ca_kabuli_chr07 | 31329775                | AA                              | GG                | 1946464407               |
| SNP_P3_89955_31341664 | NC_021166.1    | Ca_kabuli_chr07 | 31341664                | GG                              | CC                | 1946464408               |
| SNP_P3_89956_31341665 | NC_021166.1    | Ca_kabuli_chr07 | 31341665                | GG                              | AA                | 1946464410               |
| SNP_P3_89957_31374272 | NC_021166.1    | Ca_kabuli_chr07 | 31374272                | CC                              | TT                | 1946464411               |
| SNP_P3_89958_31376224 | NC_021166.1    | Ca_kabuli_chr07 | 31376224                | CC                              | AA                | 1946464413               |
| SNP_P3_89960_31389929 | NC_021166.1    | Ca_kabuli_chr07 | 31389929                | GG                              | AA                | 1946464414               |
| SNP_P3_89961_31391612 | NC_021166.1    | Ca_kabuli_chr07 | 31391612                | AA                              | GG                | 1946464416               |
| SNP_P3_89964_31422132 | NC_021166.1    | Ca_kabuli_chr07 | 31422132                | AA                              | TT                | 1946464417               |
| SNP_P3_89966_31474333 | NC_021166.1    | Ca_kabuli_chr07 | 31474333                | GG                              | AA                | 1946464419               |
| SNP_P3_89969_31555706 | NC_021166.1    | Ca_kabuli_chr07 | 31555706                | AA                              | GG                | 1946464420               |
| SNP_P3_89970_31568564 | NC_021166.1    | Ca_kabuli_chr07 | 31568564                | GG                              | TT                | 1946464422               |
| SNP_P3_89971_31582240 | NC_021166.1    | Ca_kabuli_chr07 | 31582240                | TT                              | AA                | 1946464423               |
| SNP_P3_89972_31609750 | NC_021166.1    | Ca_kabuli_chr07 | 31609750                | TT                              | AA                | 1946464425               |
| SNP_P3_89973_31611686 | NC_021166.1    | Ca_kabuli_chr07 | 31611686                | GG                              | TT                | 1946464426               |
| SNP_P3_89975_31652658 | NC_021166.1    | Ca_kabuli_chr07 | 31652658                | TT                              | GG                | 1946464428               |
| SNP_P3_89976_31654447 | NC_021166.1    | Ca_kabuli_chr07 | 31654447                | AA                              | GG                | 1946464429               |
| SNP_P3_89977_31683131 | NC_021166.1    | Ca_kabuli_chr07 | 31683131                | CC                              | AA                | 1946464431               |
| SNP_P3_89978_31685386 | NC_021166.1    | Ca_kabuli_chr07 | 31685386                | AA                              | TT                | 1946464432               |
| SNP_P3_89979_31714965 | NC_021166.1    | Ca_kabuli_chr07 | 31714965                | TT                              | CC                | 1946464434               |
| SNP_P3_89980_31736304 | NC_021166.1    | Ca_kabuli_chr07 | 31736304                | AA                              | TT                | 1946464435               |
| SNP_P3_89981_31745600 | NC_021166.1    | Ca_kabuli_chr07 | 31745600                | GG                              | AA                | 1946464437               |
| SNP_P3_89982_31745713 | NC_021166.1    | Ca_kabuli_chr07 | 31745713                | AA                              | GG                | 1946464438               |
| SNP_P3_89984_31789079 | NC_021166.1    | Ca_kabuli_chr07 | 31789079                | AA                              | GG                | 1946464440               |
| SNP_P3_89985_31791509 | NC_021166.1    | Ca_kabuli_chr07 | 31791509                | CC                              | TT                | 1946464441               |
| SNP_P3_89987_31860361 | NC_021166.1    | Ca_kabuli_chr07 | 31860361                | GG                              | AA                | 1946464443               |
| SNP_P3_89989_31862847 | NC_021166.1    | Ca_kabuli_chr07 | 31862847                | AA                              | CC                | 1946464444               |
| SNP_P3_89990_31862850 | NC_021166.1    | Ca_kabuli_chr07 | 31862850                | TT                              | CC                | 1946464445               |
| SNP_P3_89992_31949104 | NC_021166.1    | Ca_kabuli_chr07 | 31949104                | GG                              | AA                | 1946464447               |

| SNPs IDs              | Chromosome IDs | Chromosomes     | Physical positions (bp) | CDC Frontier (Reference genome) | (Pusa 256 & HPNB) | NCBI SNPdb Accession IDs |
|-----------------------|----------------|-----------------|-------------------------|---------------------------------|-------------------|--------------------------|
| SNP_P3_89993_31957785 | NC_021166.1    | Ca_kabuli_chr07 | 31957785                | AA                              | GG                | 1946464448               |
| SNP_P3_89995_31985154 | NC_021166.1    | Ca_kabuli_chr07 | 31985154                | AA                              | GG                | 1946464450               |
| SNP_P3_89996_32017052 | NC_021166.1    | Ca_kabuli_chr07 | 32017052                | CC                              | TT                | 1946464451               |
| SNP_P3_89997_32034445 | NC_021166.1    | Ca_kabuli_chr07 | 32034445                | AA                              | TT                | 1946464453               |
| SNP_P3_89998_32034791 | NC_021166.1    | Ca_kabuli_chr07 | 32034791                | TT                              | CC                | 1946464454               |
| SNP_P3_89999_32101812 | NC_021166.1    | Ca_kabuli_chr07 | 32101812                | TT                              | AA                | 1946464456               |
| SNP_P3_90000_32101838 | NC_021166.1    | Ca_kabuli_chr07 | 32101838                | CC                              | AA                | 1946464457               |
| SNP_P3_90001_32102178 | NC_021166.1    | Ca_kabuli_chr07 | 32102178                | AA                              | GG                | 1946464459               |
| SNP_P3_90002_32102470 | NC_021166.1    | Ca_kabuli_chr07 | 32102470                | TT                              | CC                | 1946464460               |
| SNP_P3_90003_32102496 | NC_021166.1    | Ca_kabuli_chr07 | 32102496                | GG                              | TT                | 1946464462               |
| SNP_P3_90004_32102743 | NC_021166.1    | Ca_kabuli_chr07 | 32102743                | CC                              | GG                | 1946464463               |
| SNP_P3_90006_32114383 | NC_021166.1    | Ca_kabuli_chr07 | 32114383                | AA                              | TT                | 1946464465               |
| SNP_P3_90007_32114620 | NC_021166.1    | Ca_kabuli_chr07 | 32114620                | GG                              | AA                | 1946464466               |
| SNP_P3_90008_32137901 | NC_021166.1    | Ca_kabuli_chr07 | 32137901                | GG                              | TT                | 1946464468               |
| SNP_P3_90009_32137915 | NC_021166.1    | Ca_kabuli_chr07 | 32137915                | CC                              | TT                | 1946464469               |
| SNP_P3_90010_32137923 | NC_021166.1    | Ca_kabuli_chr07 | 32137923                | AA                              | GG                | 1946464471               |
| SNP_P3_90011_32137935 | NC_021166.1    | Ca_kabuli_chr07 | 32137935                | GG                              | TT                | 1946464472               |
| SNP_P3_90012_32286219 | NC_021166.1    | Ca_kabuli_chr07 | 32286219                | AA                              | GG                | 1946464474               |
| SNP_P3_90013_32286222 | NC_021166.1    | Ca_kabuli_chr07 | 32286222                | TT                              | GG                | 1946464475               |
| SNP_P3_90015_32355222 | NC_021166.1    | Ca_kabuli_chr07 | 32355222                | CC                              | AA                | 1946464477               |
| SNP_P3_90016_32355227 | NC_021166.1    | Ca_kabuli_chr07 | 32355227                | AA                              | CC                | 1946464478               |
| SNP_P3_90017_32357344 | NC_021166.1    | Ca_kabuli_chr07 | 32357344                | TT                              | CC                | 1946464480               |
| SNP_P3_90018_32357380 | NC_021166.1    | Ca_kabuli_chr07 | 32357380                | GG                              | AA                | 1946464481               |
| SNP_P3_90019_32357400 | NC_021166.1    | Ca_kabuli_chr07 | 32357400                | CC                              | TT                | 1946464482               |
| SNP_P3_90020_32357402 | NC_021166.1    | Ca_kabuli_chr07 | 32357402                | GG                              | CC                | 1946464484               |
| SNP_P3_90021_32357419 | NC_021166.1    | Ca_kabuli_chr07 | 32357419                | GG                              | CC                | 1946464485               |
| SNP_P3_90022_32357440 | NC_021166.1    | Ca_kabuli_chr07 | 32357440                | TT                              | CC                | 1946464487               |
| SNP_P3_90023_32357672 | NC_021166.1    | Ca_kabuli_chr07 | 32357672                | TT                              | GG                | 1946464488               |
| SNP_P3_90024_32357684 | NC_021166.1    | Ca_kabuli_chr07 | 32357684                | CC                              | AA                | 1946464490               |
| SNP_P3_90025_32357857 | NC_021166.1    | Ca_kabuli_chr07 | 32357857                | AA                              | GG                | 1946464491               |
| SNP_P3_90026_32358072 | NC_021166.1    | Ca_kabuli_chr07 | 32358072                | TT                              | CC                | 1946464493               |
| SNP_P3_90027_32358143 | NC_021166.1    | Ca_kabuli_chr07 | 32358143                | GG                              | AA                | 1946464494               |
| SNP_P3_90029_32358254 | NC_021166.1    | Ca_kabuli_chr07 | 32358254                | AA                              | GG                | 1946464496               |
| SNP_P3_90030_32358488 | NC_021166.1    | Ca_kabuli_chr07 | 32358488                | TT                              | CC                | 1946464497               |
| SNP_P3_90031_32359451 | NC_021166.1    | Ca_kabuli_chr07 | 32359451                | GG                              | AA                | 1946464499               |
| SNP_P3_90032_32359491 | NC_021166.1    | Ca_kabuli_chr07 | 32359491                | TT                              | CC                | 1946464501               |
| SNP_P3_90033_32359497 | NC_021166.1    | Ca_kabuli_chr07 | 32359497                | GG                              | AA                | 1946464502               |
| SNP_P3_90034_32359512 | NC_021166.1    | Ca_kabuli_chr07 | 32359512                | CC                              | TT                | 1946464504               |
| SNP_P3_90035_32359521 | NC_021166.1    | Ca_kabuli_chr07 | 32359521                | CC                              | TT                | 1946464505               |
| SNP_P3_90036_32359542 | NC_021166.1    | Ca_kabuli_chr07 | 32359542                | TT                              | AA                | 1946464507               |
| SNP_P3_90041_32487649 | NC_021166.1    | Ca_kabuli_chr07 | 32487649                | CC                              | AA                | 1946464508               |
| SNP_P3_90042_32489295 | NC_021166.1    | Ca_kabuli_chr07 | 32489295                | CC                              | TT                | 1946464509               |



| SNPs IDs              | Chromosome IDs | Chromosomes     | Physical positions (bp) | CDC Frontier (Reference genome) | (Pusa 256 & HPNB) | NCBI SNPdb Accession IDs |
|-----------------------|----------------|-----------------|-------------------------|---------------------------------|-------------------|--------------------------|
| SNP_P3_90043_32490897 | NC_021166.1    | Ca_kabuli_chr07 | 32490897                | CC                              | TT                | 1946464511               |
| SNP_P3_90044_32513344 | NC_021166.1    | Ca_kabuli_chr07 | 32513344                | GG                              | AA                | 1946464512               |
| SNP_P3_90045_32515131 | NC_021166.1    | Ca_kabuli_chr07 | 32515131                | CC                              | GG                | 1946464514               |
| SNP_P3_90046_32532423 | NC_021166.1    | Ca_kabuli_chr07 | 32532423                | GG                              | AA                | 1946464515               |
| SNP_P3_90047_32555691 | NC_021166.1    | Ca_kabuli_chr07 | 32555691                | GG                              | TT                | 1946464517               |
| SNP_P3_90048_32555844 | NC_021166.1    | Ca_kabuli_chr07 | 32555844                | CC                              | TT                | 1946464518               |
| SNP_P3_90049_32555863 | NC_021166.1    | Ca_kabuli_chr07 | 32555863                | AA                              | GG                | 1946464520               |
| SNP_P3_90050_32555864 | NC_021166.1    | Ca_kabuli_chr07 | 32555864                | CC                              | TT                | 1946464521               |
| SNP_P3_90051_32568362 | NC_021166.1    | Ca_kabuli_chr07 | 32568362                | AA                              | GG                | 1946464523               |
| SNP_P3_90052_32568387 | NC_021166.1    | Ca_kabuli_chr07 | 32568387                | GG                              | AA                | 1946464524               |
| SNP_P3_90053_32570063 | NC_021166.1    | Ca_kabuli_chr07 | 32570063                | GG                              | CC                | 1946464526               |
| SNP_P3_90054_32570378 | NC_021166.1    | Ca_kabuli_chr07 | 32570378                | TT                              | AA                | 1946464527               |
| SNP_P3_90055_32572319 | NC_021166.1    | Ca_kabuli_chr07 | 32572319                | CC                              | TT                | 1946464529               |
| SNP_P3_90056_32578821 | NC_021166.1    | Ca_kabuli_chr07 | 32578821                | AA                              | GG                | 1946464530               |
| SNP_P3_90057_32578830 | NC_021166.1    | Ca_kabuli_chr07 | 32578830                | TT                              | CC                | 1946464532               |
| SNP_P3_90058_32578832 | NC_021166.1    | Ca_kabuli_chr07 | 32578832                | CC                              | AA                | 1946464533               |
| SNP_P3_90059_32578844 | NC_021166.1    | Ca_kabuli_chr07 | 32578844                | CC                              | GG                | 1946464535               |
| SNP_P3_90060_32579214 | NC_021166.1    | Ca_kabuli_chr07 | 32579214                | AA                              | GG                | 1946464536               |
| SNP_P3_90061_32596357 | NC_021166.1    | Ca_kabuli_chr07 | 32596357                | TT                              | AA                | 1946464538               |
| SNP_P3_90062_32601184 | NC_021166.1    | Ca_kabuli_chr07 | 32601184                | CC                              | TT                | 1946464539               |
| SNP_P3_90063_32601322 | NC_021166.1    | Ca_kabuli_chr07 | 32601322                | GG                              | CC                | 1946464541               |
| SNP_P3_90065_32601528 | NC_021166.1    | Ca_kabuli_chr07 | 32601528                | GG                              | CC                | 1946464542               |
| SNP_P3_90066_32601682 | NC_021166.1    | Ca_kabuli_chr07 | 32601682                | GG                              | AA                | 1946464544               |
| SNP_P3_90067_32601688 | NC_021166.1    | Ca_kabuli_chr07 | 32601688                | GG                              | AA                | 1946464545               |
| SNP_P3_90068_32601717 | NC_021166.1    | Ca_kabuli_chr07 | 32601717                | AA                              | GG                | 1946464547               |
| SNP_P3_90069_32601727 | NC_021166.1    | Ca_kabuli_chr07 | 32601727                | AA                              | GG                | 1946464548               |
| SNP_P3_90070_32602086 | NC_021166.1    | Ca_kabuli_chr07 | 32602086                | CC                              | TT                | 1946464550               |
| SNP_P3_90073_32613889 | NC_021166.1    | Ca_kabuli_chr07 | 32613889                | TT                              | AA                | 1946464551               |
| SNP_P3_90074_32613892 | NC_021166.1    | Ca_kabuli_chr07 | 32613892                | GG                              | AA                | 1946464553               |
| SNP_P3_90075_32613945 | NC_021166.1    | Ca_kabuli_chr07 | 32613945                | AA                              | GG                | 1946464554               |
| SNP_P3_90076_32613965 | NC_021166.1    | Ca_kabuli_chr07 | 32613965                | TT                              | CC                | 1946464556               |
| SNP_P3_90077_32614128 | NC_021166.1    | Ca_kabuli_chr07 | 32614128                | TT                              | GG                | 1946464557               |
| SNP_P3_90078_32614132 | NC_021166.1    | Ca_kabuli_chr07 | 32614132                | AA                              | GG                | 1946464559               |
| SNP_P3_90079_32614135 | NC_021166.1    | Ca_kabuli_chr07 | 32614135                | CC                              | TT                | 1946464560               |
| SNP_P3_90080_32614153 | NC_021166.1    | Ca_kabuli_chr07 | 32614153                | TT                              | AA                | 1946464562               |
| SNP_P3_90081_32614174 | NC_021166.1    | Ca_kabuli_chr07 | 32614174                | CC                              | AA                | 1946464563               |
| SNP_P3_90082_32614263 | NC_021166.1    | Ca_kabuli_chr07 | 32614263                | GG                              | TT                | 1946464565               |
| SNP_P3_90083_32614415 | NC_021166.1    | Ca_kabuli_chr07 | 32614415                | TT                              | CC                | 1946464566               |
| SNP_P3_90084_32614460 | NC_021166.1    | Ca_kabuli_chr07 | 32614460                | TT                              | CC                | 1946464568               |
| SNP_P3_90085_32619369 | NC_021166.1    | Ca_kabuli_chr07 | 32619369                | TT                              | AA                | 1946464569               |
| SNP_P3_90086_32631073 | NC_021166.1    | Ca_kabuli_chr07 | 32631073                | TT                              | CC                | 1946464571               |
| SNP_P3_90087_32632415 | NC_021166.1    | Ca_kabuli_chr07 | 32632415                | GG                              | AA                | 1946464572               |

| SNPs IDs              | Chromosome IDs | Chromosomes     | Physical positions (bp) | CDC Frontier (Reference genome) | (Pusa 256 & HPNB) | NCBI SNPdb Accession IDs |
|-----------------------|----------------|-----------------|-------------------------|---------------------------------|-------------------|--------------------------|
| SNP_P3_90088_32632959 | NC_021166.1    | Ca_kabuli_chr07 | 32632959                | TT                              | GG                | 1946464574               |
| SNP_P3_90089_32633865 | NC_021166.1    | Ca_kabuli_chr07 | 32633865                | GG                              | CC                | 1946464575               |
| SNP_P3_90090_32634038 | NC_021166.1    | Ca_kabuli_chr07 | 32634038                | AA                              | TT                | 1946464577               |
| SNP_P3_90091_32635134 | NC_021166.1    | Ca_kabuli_chr07 | 32635134                | CC                              | TT                | 1946464578               |
| SNP_P3_90092_32635356 | NC_021166.1    | Ca_kabuli_chr07 | 32635356                | GG                              | TT                | 1946464579               |
| SNP_P3_90093_32635668 | NC_021166.1    | Ca_kabuli_chr07 | 32635668                | AA                              | TT                | 1946464581               |
| SNP_P3_90095_32635829 | NC_021166.1    | Ca_kabuli_chr07 | 32635829                | AA                              | CC                | 1946464582               |
| SNP_P3_90096_32635848 | NC_021166.1    | Ca_kabuli_chr07 | 32635848                | GG                              | TT                | 1946464584               |
| SNP_P3_90097_32636223 | NC_021166.1    | Ca_kabuli_chr07 | 32636223                | TT                              | AA                | 1946464585               |
| SNP_P3_90098_32636988 | NC_021166.1    | Ca_kabuli_chr07 | 32636988                | CC                              | AA                | 1946464587               |
| SNP_P3_90099_32638645 | NC_021166.1    | Ca_kabuli_chr07 | 32638645                | TT                              | AA                | 1946464588               |
| SNP_P3_90100_32649346 | NC_021166.1    | Ca_kabuli_chr07 | 32649346                | CC                              | TT                | 1946464590               |
| SNP_P3_90102_32649733 | NC_021166.1    | Ca_kabuli_chr07 | 32649733                | GG                              | AA                | 1946464591               |
| SNP_P3_90104_32654139 | NC_021166.1    | Ca_kabuli_chr07 | 32654139                | AA                              | CC                | 1946464593               |
| SNP_P3_90105_32654357 | NC_021166.1    | Ca_kabuli_chr07 | 32654357                | AA                              | TT                | 1946464594               |
| SNP_P3_90106_32654825 | NC_021166.1    | Ca_kabuli_chr07 | 32654825                | GG                              | AA                | 1946464596               |
| SNP_P3_90109_32666364 | NC_021166.1    | Ca_kabuli_chr07 | 32666364                | GG                              | AA                | 1946464597               |
| SNP_P3_90110_32666370 | NC_021166.1    | Ca_kabuli_chr07 | 32666370                | AA                              | CC                | 1946464599               |
| SNP_P3_90111_32666372 | NC_021166.1    | Ca_kabuli_chr07 | 32666372                | GG                              | AA                | 1946464600               |
| SNP_P3_90112_32666414 | NC_021166.1    | Ca_kabuli_chr07 | 32666414                | GG                              | AA                | 1946464602               |
| SNP_P3_90113_32671458 | NC_021166.1    | Ca_kabuli_chr07 | 32671458                | TT                              | CC                | 1946464603               |
| SNP_P3_90114_32677036 | NC_021166.1    | Ca_kabuli_chr07 | 32677036                | AA                              | CC                | 1946464604               |
| SNP_P3_90115_32685553 | NC_021166.1    | Ca_kabuli_chr07 | 32685553                | TT                              | CC                | 1946464606               |
| SNP_P3_90116_32687765 | NC_021166.1    | Ca_kabuli_chr07 | 32687765                | TT                              | CC                | 1946464607               |
| SNP_P3_90117_32692609 | NC_021166.1    | Ca_kabuli_chr07 | 32692609                | AA                              | GG                | 1946464609               |
| SNP_P3_90118_32694996 | NC_021166.1    | Ca_kabuli_chr07 | 32694996                | AA                              | GG                | 1946464610               |
| SNP_P3_90119_32695189 | NC_021166.1    | Ca_kabuli_chr07 | 32695189                | CC                              | AA                | 1946464612               |
| SNP_P3_90120_32770360 | NC_021166.1    | Ca_kabuli_chr07 | 32770360                | TT                              | CC                | 1946464613               |
| SNP_P3_90121_32774517 | NC_021166.1    | Ca_kabuli_chr07 | 32774517                | TT                              | AA                | 1946464615               |
| SNP_P3_90122_32775666 | NC_021166.1    | Ca_kabuli_chr07 | 32775666                | AA                              | GG                | 1946464616               |
| SNP_P3_90124_32780596 | NC_021166.1    | Ca_kabuli_chr07 | 32780596                | TT                              | GG                | 1946464618               |
| SNP_P3_90125_32813452 | NC_021166.1    | Ca_kabuli_chr07 | 32813452                | GG                              | CC                | 1946464619               |
| SNP_P3_90126_32820610 | NC_021166.1    | Ca_kabuli_chr07 | 32820610                | CC                              | AA                | 1946464621               |
| SNP_P3_90128_32836007 | NC_021166.1    | Ca_kabuli_chr07 | 32836007                | TT                              | GG                | 1946464622               |
| SNP_P3_90129_32838307 | NC_021166.1    | Ca_kabuli_chr07 | 32838307                | AA                              | TT                | 1946464624               |
| SNP_P3_90130_32845796 | NC_021166.1    | Ca_kabuli_chr07 | 32845796                | TT                              | AA                | 1946464625               |
| SNP_P3_90131_32848525 | NC_021166.1    | Ca_kabuli_chr07 | 32848525                | GG                              | AA                | 1946464627               |
| SNP_P3_90132_32860521 | NC_021166.1    | Ca_kabuli_chr07 | 32860521                | TT                              | CC                | 1946464628               |
| SNP_P3_90133_32896776 | NC_021166.1    | Ca_kabuli_chr07 | 32896776                | GG                              | AA                | 1946464630               |
| SNP_P3_90134_32906721 | NC_021166.1    | Ca_kabuli_chr07 | 32906721                | AA                              | TT                | 1946464631               |
| SNP_P3_90136_32946256 | NC_021166.1    | Ca_kabuli_chr07 | 32946256                | AA                              | GG                | 1946464633               |
| SNP_P3_90137_32966574 | NC_021166.1    | Ca_kabuli_chr07 | 32966574                | GG                              | TT                | 1946464634               |

| SNPs IDs              | Chromosome IDs | Chromosomes     | Physical positions (bp) | CDC Frontier (Reference genome) | (Pusa 256 & HPNB) | NCBI SNPdb Accession IDs |
|-----------------------|----------------|-----------------|-------------------------|---------------------------------|-------------------|--------------------------|
| SNP_P3_90138_32967274 | NC_021166.1    | Ca_kabuli_chr07 | 32967274                | TT                              | CC                | 1946464636               |
| SNP_P3_90139_32974415 | NC_021166.1    | Ca_kabuli_chr07 | 32974415                | AA                              | GG                | 1946464637               |
| SNP_P3_90140_32976848 | NC_021166.1    | Ca_kabuli_chr07 | 32976848                | AA                              | GG                | 1946464639               |
| SNP_P3_90141_33017461 | NC_021166.1    | Ca_kabuli_chr07 | 33017461                | GG                              | AA                | 1946464640               |
| SNP_P3_90142_33049345 | NC_021166.1    | Ca_kabuli_chr07 | 33049345                | AA                              | CC                | 1946464641               |
| SNP_P3_90143_33050336 | NC_021166.1    | Ca_kabuli_chr07 | 33050336                | AA                              | GG                | 1946464643               |
| SNP_P3_90144_33050339 | NC_021166.1    | Ca_kabuli_chr07 | 33050339                | TT                              | CC                | 1946464644               |
| SNP_P3_90145_33050349 | NC_021166.1    | Ca_kabuli_chr07 | 33050349                | CC                              | TT                | 1946464646               |
| SNP_P3_90146_33050354 | NC_021166.1    | Ca_kabuli_chr07 | 33050354                | GG                              | CC                | 1946464647               |
| SNP_P3_90147_33050423 | NC_021166.1    | Ca_kabuli_chr07 | 33050423                | GG                              | AA                | 1946464649               |
| SNP_P3_90148_33050502 | NC_021166.1    | Ca_kabuli_chr07 | 33050502                | AA                              | TT                | 1946464650               |
| SNP_P3_90149_33050707 | NC_021166.1    | Ca_kabuli_chr07 | 33050707                | AA                              | GG                | 1946464652               |
| SNP_P3_90150_33050731 | NC_021166.1    | Ca_kabuli_chr07 | 33050731                | CC                              | TT                | 1946464653               |
| SNP_P3_90151_33053919 | NC_021166.1    | Ca_kabuli_chr07 | 33053919                | AA                              | CC                | 1946464655               |
| SNP_P3_90152_33054543 | NC_021166.1    | Ca_kabuli_chr07 | 33054543                | TT                              | CC                | 1946464656               |
| SNP_P3_90153_33054594 | NC_021166.1    | Ca_kabuli_chr07 | 33054594                | TT                              | CC                | 1946464657               |
| SNP_P3_90154_33054789 | NC_021166.1    | Ca_kabuli_chr07 | 33054789                | AA                              | CC                | 1946464659               |
| SNP_P3_90155_33055372 | NC_021166.1    | Ca_kabuli_chr07 | 33055372                | TT                              | CC                | 1946464660               |
| SNP_P3_90156_33055850 | NC_021166.1    | Ca_kabuli_chr07 | 33055850                | GG                              | TT                | 1946464662               |
| SNP_P3_90157_33055861 | NC_021166.1    | Ca_kabuli_chr07 | 33055861                | TT                              | CC                | 1946464663               |
| SNP_P3_90158_33056217 | NC_021166.1    | Ca_kabuli_chr07 | 33056217                | AA                              | CC                | 1946464665               |
| SNP_P3_90159_33056230 | NC_021166.1    | Ca_kabuli_chr07 | 33056230                | CC                              | TT                | 1946464666               |
| SNP_P3_90160_33056385 | NC_021166.1    | Ca_kabuli_chr07 | 33056385                | TT                              | CC                | 1946464668               |
| SNP_P3_90161_33056541 | NC_021166.1    | Ca_kabuli_chr07 | 33056541                | CC                              | TT                | 1946464669               |
| SNP_P3_90162_33056545 | NC_021166.1    | Ca_kabuli_chr07 | 33056545                | GG                              | AA                | 1946464671               |
| SNP_P3_90163_33056614 | NC_021166.1    | Ca_kabuli_chr07 | 33056614                | TT                              | CC                | 1946464672               |
| SNP_P3_90164_33056678 | NC_021166.1    | Ca_kabuli_chr07 | 33056678                | CC                              | TT                | 1946464674               |
| SNP_P3_90165_33059402 | NC_021166.1    | Ca_kabuli_chr07 | 33059402                | TT                              | CC                | 1946464675               |
| SNP_P3_90166_33059410 | NC_021166.1    | Ca_kabuli_chr07 | 33059410                | AA                              | GG                | 1946464677               |
| SNP_P3_90167_33059563 | NC_021166.1    | Ca_kabuli_chr07 | 33059563                | CC                              | AA                | 1946464678               |
| SNP_P3_90168_33059574 | NC_021166.1    | Ca_kabuli_chr07 | 33059574                | CC                              | AA                | 1946464680               |
| SNP_P3_90169_33059619 | NC_021166.1    | Ca_kabuli_chr07 | 33059619                | CC                              | AA                | 1946464681               |
| SNP_P3_90170_33059829 | NC_021166.1    | Ca_kabuli_chr07 | 33059829                | GG                              | AA                | 1946464683               |
| SNP_P3_90171_33059857 | NC_021166.1    | Ca_kabuli_chr07 | 33059857                | TT                              | AA                | 1946464684               |
| SNP_P3_90172_33061485 | NC_021166.1    | Ca_kabuli_chr07 | 33061485                | AA                              | GG                | 1946464686               |
| SNP_P3_90173_33061651 | NC_021166.1    | Ca_kabuli_chr07 | 33061651                | AA                              | TT                | 1946464687               |
| SNP_P3_90174_33064533 | NC_021166.1    | Ca_kabuli_chr07 | 33064533                | GG                              | AA                | 1946464689               |
| SNP_P3_90175_33064536 | NC_021166.1    | Ca_kabuli_chr07 | 33064536                | TT                              | AA                | 1946464690               |
| SNP_P3_90176_33065135 | NC_021166.1    | Ca_kabuli_chr07 | 33065135                | AA                              | GG                | 1946464692               |
| SNP_P3_90177_33065169 | NC_021166.1    | Ca_kabuli_chr07 | 33065169                | TT                              | CC                | 1946464693               |
| SNP_P3_90178_33065172 | NC_021166.1    | Ca_kabuli_chr07 | 33065172                | GG                              | AA                | 1946464695               |
| SNP_P3_90179_33065186 | NC_021166.1    | Ca_kabuli_chr07 | 33065186                | AA                              | TT                | 1946464696               |

| SNPs IDs              | Chromosome IDs | Chromosomes     | Physical positions (bp) | CDC Frontier (Reference genome) | (Pusa 256 & HPNB) | NCBI SNPdb Accession IDs |
|-----------------------|----------------|-----------------|-------------------------|---------------------------------|-------------------|--------------------------|
| SNP_P3_90180_33066059 | NC_021166.1    | Ca_kabuli_chr07 | 33066059                | TT                              | CC                | 1946464698               |
| SNP_P3_90181_33066108 | NC_021166.1    | Ca_kabuli_chr07 | 33066108                | CC                              | TT                | 1946464699               |
| SNP_P3_90182_33066193 | NC_021166.1    | Ca_kabuli_chr07 | 33066193                | TT                              | AA                | 1946464700               |
| SNP_P3_90183_33066961 | NC_021166.1    | Ca_kabuli_chr07 | 33066961                | CC                              | TT                | 1946464703               |
| SNP_P3_90184_33067470 | NC_021166.1    | Ca_kabuli_chr07 | 33067470                | AA                              | GG                | 1946464705               |
| SNP_P3_90185_33067511 | NC_021166.1    | Ca_kabuli_chr07 | 33067511                | GG                              | AA                | 1946464706               |
| SNP_P3_90186_33067545 | NC_021166.1    | Ca_kabuli_chr07 | 33067545                | GG                              | AA                | 1946464708               |
| SNP_P3_90187_33067879 | NC_021166.1    | Ca_kabuli_chr07 | 33067879                | AA                              | CC                | 1946464709               |
| SNP_P3_90188_33068074 | NC_021166.1    | Ca_kabuli_chr07 | 33068074                | CC                              | GG                | 1946464711               |
| SNP_P3_90189_33068101 | NC_021166.1    | Ca_kabuli_chr07 | 33068101                | CC                              | TT                | 1946464712               |
| SNP_P3_90190_33068236 | NC_021166.1    | Ca_kabuli_chr07 | 33068236                | AA                              | GG                | 1946464714               |
| SNP_P3_90192_33068816 | NC_021166.1    | Ca_kabuli_chr07 | 33068816                | TT                              | CC                | 1946464715               |
| SNP_P3_90194_33069278 | NC_021166.1    | Ca_kabuli_chr07 | 33069278                | CC                              | TT                | 1946464717               |
| SNP_P3_90196_33071062 | NC_021166.1    | Ca_kabuli_chr07 | 33071062                | AA                              | CC                | 1946464718               |
| SNP_P3_90197_33072000 | NC_021166.1    | Ca_kabuli_chr07 | 33072000                | TT                              | GG                | 1946464720               |
| SNP_P3_90198_33072259 | NC_021166.1    | Ca_kabuli_chr07 | 33072259                | GG                              | AA                | 1946464721               |
| SNP_P3_90199_33072640 | NC_021166.1    | Ca_kabuli_chr07 | 33072640                | GG                              | AA                | 1946464723               |
| SNP_P3_90200_33073104 | NC_021166.1    | Ca_kabuli_chr07 | 33073104                | TT                              | CC                | 1946464724               |
| SNP_P3_90201_33073113 | NC_021166.1    | Ca_kabuli_chr07 | 33073113                | GG                              | AA                | 1946464726               |
| SNP_P3_90202_33073292 | NC_021166.1    | Ca_kabuli_chr07 | 33073292                | TT                              | AA                | 1946464727               |
| SNP_P3_90203_33073335 | NC_021166.1    | Ca_kabuli_chr07 | 33073335                | CC                              | GG                | 1946464729               |
| SNP_P3_90204_33073550 | NC_021166.1    | Ca_kabuli_chr07 | 33073550                | CC                              | TT                | 1946464730               |
| SNP_P3_90205_33073597 | NC_021166.1    | Ca_kabuli_chr07 | 33073597                | TT                              | CC                | 1946464732               |
| SNP_P3_90206_33073601 | NC_021166.1    | Ca_kabuli_chr07 | 33073601                | TT                              | CC                | 1946464733               |
| SNP_P3_90207_33073670 | NC_021166.1    | Ca_kabuli_chr07 | 33073670                | AA                              | GG                | 1946464735               |
| SNP_P3_90208_33075442 | NC_021166.1    | Ca_kabuli_chr07 | 33075442                | GG                              | AA                | 1946464736               |
| SNP_P3_90209_33097358 | NC_021166.1    | Ca_kabuli_chr07 | 33097358                | AA                              | GG                | 1946464738               |
| SNP_P3_90210_33102240 | NC_021166.1    | Ca_kabuli_chr07 | 33102240                | TT                              | GG                | 1946464739               |
| SNP_P3_90212_33107463 | NC_021166.1    | Ca_kabuli_chr07 | 33107463                | TT                              | CC                | 1946464741               |
| SNP_P3_90213_33107498 | NC_021166.1    | Ca_kabuli_chr07 | 33107498                | CC                              | TT                | 1946464742               |
| SNP_P3_90215_33109526 | NC_021166.1    | Ca_kabuli_chr07 | 33109526                | AA                              | TT                | 1946464744               |
| SNP_P3_90216_33109527 | NC_021166.1    | Ca_kabuli_chr07 | 33109527                | AA                              | TT                | 1946464745               |
| SNP_P3_90217_33109701 | NC_021166.1    | Ca_kabuli_chr07 | 33109701                | TT                              | AA                | 1946464747               |
| SNP_P3_90218_33112123 | NC_021166.1    | Ca_kabuli_chr07 | 33112123                | AA                              | GG                | 1946464748               |
| SNP_P3_90219_33113673 | NC_021166.1    | Ca_kabuli_chr07 | 33113673                | AA                              | CC                | 1946464750               |
| SNP_P3_90220_33114950 | NC_021166.1    | Ca_kabuli_chr07 | 33114950                | GG                              | TT                | 1946464751               |
| SNP_P3_90221_33115162 | NC_021166.1    | Ca_kabuli_chr07 | 33115162                | AA                              | CC                | 1946464753               |
| SNP_P3_90222_33117340 | NC_021166.1    | Ca_kabuli_chr07 | 33117340                | TT                              | GG                | 1946464754               |
| SNP_P3_90223_33117342 | NC_021166.1    | Ca_kabuli_chr07 | 33117342                | TT                              | CC                | 1946464755               |
| SNP_P3_90224_33119605 | NC_021166.1    | Ca_kabuli_chr07 | 33119605                | AA                              | GG                | 1946464757               |
| SNP_P3_90225_33119611 | NC_021166.1    | Ca_kabuli_chr07 | 33119611                | GG                              | TT                | 1946464758               |
| SNP_P3_90226_33119885 | NC_021166.1    | Ca_kabuli_chr07 | 33119885                | GG                              | AA                | 1946464760               |

| SNPs IDs              | Chromosome IDs | Chromosomes     | Physical positions (bp) | CDC Frontier (Reference genome) | (Pusa 256 & HPNB) | NCBI SNPdb Accession IDs |
|-----------------------|----------------|-----------------|-------------------------|---------------------------------|-------------------|--------------------------|
| SNP_P3_90227_33123584 | NC_021166.1    | Ca_kabuli_chr07 | 33123584                | GG                              | TT                | 1946464761               |
| SNP_P3_90228_33123767 | NC_021166.1    | Ca_kabuli_chr07 | 33123767                | GG                              | AA                | 1946464762               |
| SNP_P3_90229_33123778 | NC_021166.1    | Ca_kabuli_chr07 | 33123778                | TT                              | CC                | 1946464764               |
| SNP_P3_90230_33123784 | NC_021166.1    | Ca_kabuli_chr07 | 33123784                | CC                              | AA                | 1946464765               |
| SNP_P3_90231_33123824 | NC_021166.1    | Ca_kabuli_chr07 | 33123824                | AA                              | GG                | 1946464767               |
| SNP_P3_90233_33124064 | NC_021166.1    | Ca_kabuli_chr07 | 33124064                | TT                              | CC                | 1946464768               |
| SNP_P3_90234_33134083 | NC_021166.1    | Ca_kabuli_chr07 | 33134083                | CC                              | AA                | 1946464770               |
| SNP_P3_90235_33134716 | NC_021166.1    | Ca_kabuli_chr07 | 33134716                | AA                              | TT                | 1946464771               |
| SNP_P3_90237_33134764 | NC_021166.1    | Ca_kabuli_chr07 | 33134764                | CC                              | TT                | 1946464773               |
| SNP_P3_90238_33135203 | NC_021166.1    | Ca_kabuli_chr07 | 33135203                | TT                              | CC                | 1946464774               |
| SNP_P3_90239_33135210 | NC_021166.1    | Ca_kabuli_chr07 | 33135210                | AA                              | TT                | 1946464775               |
| SNP_P3_90240_33135545 | NC_021166.1    | Ca_kabuli_chr07 | 33135545                | GG                              | CC                | 1946464777               |
| SNP_P3_90241_33135766 | NC_021166.1    | Ca_kabuli_chr07 | 33135766                | AA                              | CC                | 1946464778               |
| SNP_P3_90242_33135800 | NC_021166.1    | Ca_kabuli_chr07 | 33135800                | AA                              | CC                | 1946464780               |
| SNP_P3_90243_33136079 | NC_021166.1    | Ca_kabuli_chr07 | 33136079                | GG                              | AA                | 1946464781               |
| SNP_P3_90244_33136088 | NC_021166.1    | Ca_kabuli_chr07 | 33136088                | TT                              | CC                | 1946464782               |
| SNP_P3_90245_33136098 | NC_021166.1    | Ca_kabuli_chr07 | 33136098                | CC                              | TT                | 1946464784               |
| SNP_P3_90246_33137518 | NC_021166.1    | Ca_kabuli_chr07 | 33137518                | CC                              | GG                | 1946464785               |
| SNP_P3_90247_33137952 | NC_021166.1    | Ca_kabuli_chr07 | 33137952                | TT                              | CC                | 1946464787               |
| SNP_P3_90248_33138190 | NC_021166.1    | Ca_kabuli_chr07 | 33138190                | AA                              | GG                | 1946464788               |
| SNP_P3_90249_33138239 | NC_021166.1    | Ca_kabuli_chr07 | 33138239                | CC                              | TT                | 1946464790               |
| SNP_P3_90250_33138348 | NC_021166.1    | Ca_kabuli_chr07 | 33138348                | TT                              | GG                | 1946464791               |
| SNP_P3_90251_33138369 | NC_021166.1    | Ca_kabuli_chr07 | 33138369                | TT                              | AA                | 1946464793               |
| SNP_P3_90253_33141226 | NC_021166.1    | Ca_kabuli_chr07 | 33141226                | AA                              | GG                | 1946464794               |
| SNP_P3_90254_33141234 | NC_021166.1    | Ca_kabuli_chr07 | 33141234                | AA                              | GG                | 1946464795               |
| SNP_P3_90255_33143114 | NC_021166.1    | Ca_kabuli_chr07 | 33143114                | TT                              | CC                | 1946464797               |
| SNP_P3_90256_33144335 | NC_021166.1    | Ca_kabuli_chr07 | 33144335                | TT                              | CC                | 1946464798               |
| SNP_P3_90257_33144344 | NC_021166.1    | Ca_kabuli_chr07 | 33144344                | AA                              | GG                | 1946464800               |
| SNP_P3_90258_33144374 | NC_021166.1    | Ca_kabuli_chr07 | 33144374                | AA                              | GG                | 1946464801               |
| SNP_P3_90259_33144395 | NC_021166.1    | Ca_kabuli_chr07 | 33144395                | CC                              | TT                | 1946464803               |
| SNP_P3_90260_33144585 | NC_021166.1    | Ca_kabuli_chr07 | 33144585                | AA                              | GG                | 1946464804               |
| SNP_P3_90261_33144760 | NC_021166.1    | Ca_kabuli_chr07 | 33144760                | AA                              | GG                | 1946464805               |
| SNP_P3_90262_33145181 | NC_021166.1    | Ca_kabuli_chr07 | 33145181                | AA                              | GG                | 1946464807               |
| SNP_P3_90263_33146225 | NC_021166.1    | Ca_kabuli_chr07 | 33146225                | TT                              | CC                | 1946464808               |
| SNP_P3_90264_33146281 | NC_021166.1    | Ca_kabuli_chr07 | 33146281                | CC                              | TT                | 1946464810               |
| SNP_P3_90265_33146284 | NC_021166.1    | Ca_kabuli_chr07 | 33146284                | AA                              | GG                | 1946464811               |
| SNP_P3_90266_33146317 | NC_021166.1    | Ca_kabuli_chr07 | 33146317                | AA                              | TT                | 1946464812               |
| SNP_P3_90267_33146574 | NC_021166.1    | Ca_kabuli_chr07 | 33146574                | TT                              | AA                | 1946464814               |
| SNP_P3_90268_33146583 | NC_021166.1    | Ca_kabuli_chr07 | 33146583                | CC                              | AA                | 1946464815               |
| SNP_P3_90269_33146592 | NC_021166.1    | Ca_kabuli_chr07 | 33146592                | AA                              | GG                | 1946464817               |
| SNP_P3_90270_33146641 | NC_021166.1    | Ca_kabuli_chr07 | 33146641                | CC                              | AA                | 1946464818               |
| SNP_P3_90271_33147215 | NC_021166.1    | Ca_kabuli_chr07 | 33147215                | AA                              | GG                | 1946464819               |

| SNPs IDs              | Chromosome IDs | Chromosomes     | Physical positions (bp) | CDC Frontier (Reference genome) | (Pusa 256 & HPNB) | NCBI SNPdb Accession IDs |
|-----------------------|----------------|-----------------|-------------------------|---------------------------------|-------------------|--------------------------|
| SNP_P3_90272_33147436 | NC_021166.1    | Ca_kabuli_chr07 | 33147436                | TT                              | CC                | 1946464821               |
| SNP_P3_90273_33147506 | NC_021166.1    | Ca_kabuli_chr07 | 33147506                | GG                              | AA                | 1946464822               |
| SNP_P3_90274_33149291 | NC_021166.1    | Ca_kabuli_chr07 | 33149291                | CC                              | TT                | 1946464824               |
| SNP_P3_90275_33149732 | NC_021166.1    | Ca_kabuli_chr07 | 33149732                | CC                              | TT                | 1946464825               |
| SNP_P3_90276_33149747 | NC_021166.1    | Ca_kabuli_chr07 | 33149747                | GG                              | AA                | 1946464827               |
| SNP_P3_90277_33149763 | NC_021166.1    | Ca_kabuli_chr07 | 33149763                | AA                              | GG                | 1946464828               |
| SNP_P3_90279_33149778 | NC_021166.1    | Ca_kabuli_chr07 | 33149778                | TT                              | CC                | 1946464830               |
| SNP_P3_90280_33150081 | NC_021166.1    | Ca_kabuli_chr07 | 33150081                | TT                              | CC                | 1946464831               |
| SNP_P3_90281_33151088 | NC_021166.1    | Ca_kabuli_chr07 | 33151088                | AA                              | GG                | 1946464832               |
| SNP_P3_90282_33152136 | NC_021166.1    | Ca_kabuli_chr07 | 33152136                | CC                              | AA                | 1946464834               |
| SNP_P3_90283_33152139 | NC_021166.1    | Ca_kabuli_chr07 | 33152139                | TT                              | AA                | 1946464835               |
| SNP_P3_90284_33152143 | NC_021166.1    | Ca_kabuli_chr07 | 33152143                | CC                              | TT                | 1946464837               |
| SNP_P3_90285_33152196 | NC_021166.1    | Ca_kabuli_chr07 | 33152196                | AA                              | GG                | 1946464838               |
| SNP_P3_90286_33152212 | NC_021166.1    | Ca_kabuli_chr07 | 33152212                | AA                              | GG                | 1946464840               |
| SNP_P3_90287_33152241 | NC_021166.1    | Ca_kabuli_chr07 | 33152241                | AA                              | TT                | 1946464841               |
| SNP_P3_90288_33152570 | NC_021166.1    | Ca_kabuli_chr07 | 33152570                | CC                              | AA                | 1946464842               |
| SNP_P3_90289_33152603 | NC_021166.1    | Ca_kabuli_chr07 | 33152603                | GG                              | AA                | 1946464844               |
| SNP_P3_90290_33153029 | NC_021166.1    | Ca_kabuli_chr07 | 33153029                | AA                              | GG                | 1946464845               |
| SNP_P3_90291_33153561 | NC_021166.1    | Ca_kabuli_chr07 | 33153561                | TT                              | CC                | 1946464847               |
| SNP_P3_90292_33153575 | NC_021166.1    | Ca_kabuli_chr07 | 33153575                | AA                              | GG                | 1946464848               |
| SNP_P3_90293_33153639 | NC_021166.1    | Ca_kabuli_chr07 | 33153639                | CC                              | TT                | 1946464850               |
| SNP_P3_90294_33153641 | NC_021166.1    | Ca_kabuli_chr07 | 33153641                | TT                              | CC                | 1946464851               |
| SNP_P3_90295_33153643 | NC_021166.1    | Ca_kabuli_chr07 | 33153643                | TT                              | AA                | 1946464853               |
| SNP_P3_90296_33153650 | NC_021166.1    | Ca_kabuli_chr07 | 33153650                | GG                              | AA                | 1946464854               |
| SNP_P3_90297_33153688 | NC_021166.1    | Ca_kabuli_chr07 | 33153688                | AA                              | GG                | 1946464855               |
| SNP_P3_90298_33153693 | NC_021166.1    | Ca_kabuli_chr07 | 33153693                | TT                              | CC                | 1946464857               |
| SNP_P3_90299_33153701 | NC_021166.1    | Ca_kabuli_chr07 | 33153701                | CC                              | TT                | 1946464858               |
| SNP_P3_90300_33156270 | NC_021166.1    | Ca_kabuli_chr07 | 33156270                | AA                              | TT                | 1946464860               |
| SNP_P3_90301_33156277 | NC_021166.1    | Ca_kabuli_chr07 | 33156277                | AA                              | GG                | 1946464861               |
| SNP_P3_90302_33157038 | NC_021166.1    | Ca_kabuli_chr07 | 33157038                | GG                              | CC                | 1946464863               |
| SNP_P3_90303_33157356 | NC_021166.1    | Ca_kabuli_chr07 | 33157356                | CC                              | GG                | 1946464864               |
| SNP_P3_90304_33157396 | NC_021166.1    | Ca_kabuli_chr07 | 33157396                | TT                              | CC                | 1946464866               |
| SNP_P3_90305_33158578 | NC_021166.1    | Ca_kabuli_chr07 | 33158578                | AA                              | GG                | 1946464867               |
| SNP_P3_90306_33159855 | NC_021166.1    | Ca_kabuli_chr07 | 33159855                | GG                              | AA                | 1946464869               |
| SNP_P3_90307_33159877 | NC_021166.1    | Ca_kabuli_chr07 | 33159877                | CC                              | AA                | 1946464870               |
| SNP_P3_90308_33160620 | NC_021166.1    | Ca_kabuli_chr07 | 33160620                | CC                              | GG                | 1946464872               |
| SNP_P3_90309_33160799 | NC_021166.1    | Ca_kabuli_chr07 | 33160799                | CC                              | AA                | 1946464873               |
| SNP_P3_90310_33160825 | NC_021166.1    | Ca_kabuli_chr07 | 33160825                | CC                              | TT                | 1946464875               |
| SNP_P3_90311_33160836 | NC_021166.1    | Ca_kabuli_chr07 | 33160836                | TT                              | GG                | 1946464876               |
| SNP_P3_90312_33160850 | NC_021166.1    | Ca_kabuli_chr07 | 33160850                | TT                              | AA                | 1946464878               |
| SNP_P3_90313_33160851 | NC_021166.1    | Ca_kabuli_chr07 | 33160851                | CC                              | AA                | 1946464879               |
| SNP_P3_90314_33160852 | NC_021166.1    | Ca_kabuli_chr07 | 33160852                | AA                              | GG                | 1946464880               |

| SNPs IDs              | Chromosome IDs | Chromosomes     | Physical positions (bp) | CDC Frontier (Reference genome) | (Pusa 256 & HPNB) | NCBI SNPdb Accession IDs |
|-----------------------|----------------|-----------------|-------------------------|---------------------------------|-------------------|--------------------------|
| SNP_P3_90315_33160906 | NC_021166.1    | Ca_kabuli_chr07 | 33160906                | GG                              | AA                | 1946464882               |
| SNP_P3_90316_33161030 | NC_021166.1    | Ca_kabuli_chr07 | 33161030                | CC                              | AA                | 1946464883               |
| SNP_P3_90317_33161152 | NC_021166.1    | Ca_kabuli_chr07 | 33161152                | GG                              | AA                | 1946464885               |
| SNP_P3_90318_33162206 | NC_021166.1    | Ca_kabuli_chr07 | 33162206                | AA                              | GG                | 1946464886               |
| SNP_P3_90319_33162217 | NC_021166.1    | Ca_kabuli_chr07 | 33162217                | AA                              | GG                | 1946464888               |
| SNP_P3_90320_33162228 | NC_021166.1    | Ca_kabuli_chr07 | 33162228                | TT                              | CC                | 1946464889               |
| SNP_P3_90321_33164838 | NC_021166.1    | Ca_kabuli_chr07 | 33164838                | CC                              | GG                | 1946464891               |
| SNP_P3_90322_33165330 | NC_021166.1    | Ca_kabuli_chr07 | 33165330                | GG                              | AA                | 1946464892               |
| SNP_P3_90323_33167253 | NC_021166.1    | Ca_kabuli_chr07 | 33167253                | AA                              | GG                | 1946464894               |
| SNP_P3_90324_33167258 | NC_021166.1    | Ca_kabuli_chr07 | 33167258                | GG                              | AA                | 1946464895               |
| SNP_P3_90325_33167683 | NC_021166.1    | Ca_kabuli_chr07 | 33167683                | GG                              | AA                | 1946464896               |
| SNP_P3_90326_33174178 | NC_021166.1    | Ca_kabuli_chr07 | 33174178                | CC                              | TT                | 1946464898               |
| SNP_P3_90327_33175041 | NC_021166.1    | Ca_kabuli_chr07 | 33175041                | AA                              | CC                | 1946464899               |
| SNP_P3_90329_33175133 | NC_021166.1    | Ca_kabuli_chr07 | 33175133                | TT                              | CC                | 1946464901               |
| SNP_P3_90330_33175833 | NC_021166.1    | Ca_kabuli_chr07 | 33175833                | CC                              | TT                | 1946464902               |
| SNP_P3_90331_33176147 | NC_021166.1    | Ca_kabuli_chr07 | 33176147                | AA                              | GG                | 1946464904               |
| SNP_P3_90332_33180894 | NC_021166.1    | Ca_kabuli_chr07 | 33180894                | AA                              | GG                | 1946464905               |
| SNP_P3_90333_33180901 | NC_021166.1    | Ca_kabuli_chr07 | 33180901                | AA                              | GG                | 1946464906               |
| SNP_P3_90334_33181662 | NC_021166.1    | Ca_kabuli_chr07 | 33181662                | AA                              | CC                | 1946464908               |
| SNP_P3_90336_33181919 | NC_021166.1    | Ca_kabuli_chr07 | 33181919                | CC                              | AA                | 1946464909               |
| SNP_P3_90338_33183734 | NC_021166.1    | Ca_kabuli_chr07 | 33183734                | GG                              | AA                | 1946464911               |
| SNP_P3_90339_33185767 | NC_021166.1    | Ca_kabuli_chr07 | 33185767                | CC                              | TT                | 1946464912               |
| SNP_P3_90340_33185770 | NC_021166.1    | Ca_kabuli_chr07 | 33185770                | AA                              | GG                | 1946464914               |
| SNP_P3_90341_33186465 | NC_021166.1    | Ca_kabuli_chr07 | 33186465                | GG                              | AA                | 1946464915               |
| SNP_P3_90342_33186767 | NC_021166.1    | Ca_kabuli_chr07 | 33186767                | GG                              | CC                | 1946464917               |
| SNP_P3_90343_33187826 | NC_021166.1    | Ca_kabuli_chr07 | 33187826                | CC                              | TT                | 1946464918               |
| SNP_P3_90344_33188074 | NC_021166.1    | Ca_kabuli_chr07 | 33188074                | CC                              | GG                | 1946464919               |
| SNP_P3_90345_33188196 | NC_021166.1    | Ca_kabuli_chr07 | 33188196                | GG                              | AA                | 1946464921               |
| SNP_P3_90346_33188243 | NC_021166.1    | Ca_kabuli_chr07 | 33188243                | CC                              | TT                | 1946464922               |
| SNP_P3_90347_33188263 | NC_021166.1    | Ca_kabuli_chr07 | 33188263                | GG                              | TT                | 1946464924               |
| SNP_P3_90348_33188437 | NC_021166.1    | Ca_kabuli_chr07 | 33188437                | AA                              | TT                | 1946464925               |
| SNP_P3_90349_33188445 | NC_021166.1    | Ca_kabuli_chr07 | 33188445                | AA                              | GG                | 1946464927               |
| SNP_P3_90350_33188790 | NC_021166.1    | Ca_kabuli_chr07 | 33188790                | TT                              | GG                | 1946464928               |
| SNP_P3_90351_33188973 | NC_021166.1    | Ca_kabuli_chr07 | 33188973                | AA                              | GG                | 1946464929               |
| SNP_P3_90352_33188976 | NC_021166.1    | Ca_kabuli_chr07 | 33188976                | TT                              | GG                | 1946464931               |
| SNP_P3_90353_33188993 | NC_021166.1    | Ca_kabuli_chr07 | 33188993                | GG                              | AA                | 1946464932               |
| SNP_P3_90354_33189010 | NC_021166.1    | Ca_kabuli_chr07 | 33189010                | GG                              | AA                | 1946464934               |
| SNP_P3_90355_33189055 | NC_021166.1    | Ca_kabuli_chr07 | 33189055                | GG                              | AA                | 1946464935               |
| SNP_P3_90356_33189083 | NC_021166.1    | Ca_kabuli_chr07 | 33189083                | AA                              | GG                | 1946464936               |
| SNP_P3_90357_33189114 | NC_021166.1    | Ca_kabuli_chr07 | 33189114                | AA                              | TT                | 1946464938               |
| SNP_P3_90359_33189541 | NC_021166.1    | Ca_kabuli_chr07 | 33189541                | AA                              | GG                | 1946464939               |
| SNP_P3_90361_33190860 | NC_021166.1    | Ca_kabuli_chr07 | 33190860                | AA                              | TT                | 1946464941               |

| SNPs IDs              | Chromosome IDs | Chromosomes     | Physical positions (bp) | CDC Frontier (Reference genome) | (Pusa 256 & HPNB) | NCBI SNPdb Accession IDs |
|-----------------------|----------------|-----------------|-------------------------|---------------------------------|-------------------|--------------------------|
| SNP_P3_90362_33190861 | NC_021166.1    | Ca_kabuli_chr07 | 33190861                | TT                              | AA                | 1946464942               |
| SNP_P3_90363_33190910 | NC_021166.1    | Ca_kabuli_chr07 | 33190910                | AA                              | TT                | 1946464944               |
| SNP_P3_90364_33190942 | NC_021166.1    | Ca_kabuli_chr07 | 33190942                | CC                              | TT                | 1946464945               |
| SNP_P3_90365_33191518 | NC_021166.1    | Ca_kabuli_chr07 | 33191518                | AA                              | GG                | 1946464947               |
| SNP_P3_90366_33191524 | NC_021166.1    | Ca_kabuli_chr07 | 33191524                | TT                              | GG                | 1946464948               |
| SNP_P3_90367_33191709 | NC_021166.1    | Ca_kabuli_chr07 | 33191709                | GG                              | AA                | 1946464949               |
| SNP_P3_90368_33191743 | NC_021166.1    | Ca_kabuli_chr07 | 33191743                | GG                              | TT                | 1946464951               |
| SNP_P3_90369_33191769 | NC_021166.1    | Ca_kabuli_chr07 | 33191769                | GG                              | CC                | 1946464952               |
| SNP_P3_90370_33191793 | NC_021166.1    | Ca_kabuli_chr07 | 33191793                | CC                              | TT                | 1946464954               |
| SNP_P3_90371_33192122 | NC_021166.1    | Ca_kabuli_chr07 | 33192122                | TT                              | CC                | 1946464955               |
| SNP_P3_90372_33193857 | NC_021166.1    | Ca_kabuli_chr07 | 33193857                | AA                              | GG                | 1946464956               |
| SNP_P3_90373_33193962 | NC_021166.1    | Ca_kabuli_chr07 | 33193962                | CC                              | TT                | 1946464958               |
| SNP_P3_90375_33194164 | NC_021166.1    | Ca_kabuli_chr07 | 33194164                | CC                              | TT                | 1946464959               |
| SNP_P3_90376_33194583 | NC_021166.1    | Ca_kabuli_chr07 | 33194583                | TT                              | CC                | 1946464961               |
| SNP_P3_90378_33195514 | NC_021166.1    | Ca_kabuli_chr07 | 33195514                | GG                              | AA                | 1946464962               |
| SNP_P3_90379_33195529 | NC_021166.1    | Ca_kabuli_chr07 | 33195529                | AA                              | GG                | 1946464964               |
| SNP_P3_90380_33195884 | NC_021166.1    | Ca_kabuli_chr07 | 33195884                | GG                              | AA                | 1946464965               |
| SNP_P3_90381_33197465 | NC_021166.1    | Ca_kabuli_chr07 | 33197465                | AA                              | GG                | 1946464966               |
| SNP_P3_90382_33197475 | NC_021166.1    | Ca_kabuli_chr07 | 33197475                | CC                              | TT                | 1946464968               |
| SNP_P3_90383_33208806 | NC_021166.1    | Ca_kabuli_chr07 | 33208806                | AA                              | GG                | 1946464969               |
| SNP_P3_90384_33209350 | NC_021166.1    | Ca_kabuli_chr07 | 33209350                | TT                              | CC                | 1946464971               |
| SNP_P3_90385_33209591 | NC_021166.1    | Ca_kabuli_chr07 | 33209591                | GG                              | CC                | 1946464972               |
| SNP_P3_90386_33209618 | NC_021166.1    | Ca_kabuli_chr07 | 33209618                | GG                              | TT                | 1946464974               |
| SNP_P3_90387_33209700 | NC_021166.1    | Ca_kabuli_chr07 | 33209700                | TT                              | CC                | 1946464975               |
| SNP_P3_90388_33209719 | NC_021166.1    | Ca_kabuli_chr07 | 33209719                | CC                              | AA                | 1946464976               |
| SNP_P3_90389_33209793 | NC_021166.1    | Ca_kabuli_chr07 | 33209793                | AA                              | TT                | 1946464978               |
| SNP_P3_90390_33209806 | NC_021166.1    | Ca_kabuli_chr07 | 33209806                | TT                              | AA                | 1946464979               |
| SNP_P3_90391_33209988 | NC_021166.1    | Ca_kabuli_chr07 | 33209988                | TT                              | CC                | 1946464981               |
| SNP_P3_90392_33210033 | NC_021166.1    | Ca_kabuli_chr07 | 33210033                | GG                              | AA                | 1946464982               |
| SNP_P3_90393_33210051 | NC_021166.1    | Ca_kabuli_chr07 | 33210051                | CC                              | TT                | 1946464985               |
| SNP_P3_90394_33210752 | NC_021166.1    | Ca_kabuli_chr07 | 33210752                | GG                              | AA                | 1946464986               |
| SNP_P3_90395_33211315 | NC_021166.1    | Ca_kabuli_chr07 | 33211315                | TT                              | CC                | 1946464987               |
| SNP_P3_90397_33212930 | NC_021166.1    | Ca_kabuli_chr07 | 33212930                | AA                              | GG                | 1946464989               |
| SNP_P3_90398_33212958 | NC_021166.1    | Ca_kabuli_chr07 | 33212958                | GG                              | AA                | 1946464990               |
| SNP_P3_90399_33213124 | NC_021166.1    | Ca_kabuli_chr07 | 33213124                | AA                              | GG                | 1946464992               |
| SNP_P3_90400_33213161 | NC_021166.1    | Ca_kabuli_chr07 | 33213161                | TT                              | CC                | 1946464993               |
| SNP_P3_90401_33213489 | NC_021166.1    | Ca_kabuli_chr07 | 33213489                | CC                              | TT                | 1946464995               |
| SNP_P3_90402_33213619 | NC_021166.1    | Ca_kabuli_chr07 | 33213619                | AA                              | TT                | 1946464996               |
| SNP_P3_90404_33213702 | NC_021166.1    | Ca_kabuli_chr07 | 33213702                | TT                              | CC                | 1946464998               |
| SNP_P3_90405_33213704 | NC_021166.1    | Ca_kabuli_chr07 | 33213704                | GG                              | AA                | 1946464999               |
| SNP_P3_90407_33213793 | NC_021166.1    | Ca_kabuli_chr07 | 33213793                | AA                              | GG                | 1946465001               |
| SNP_P3_90408_33213798 | NC_021166.1    | Ca_kabuli_chr07 | 33213798                | CC                              | TT                | 1946465002               |



| SNPs IDs              | Chromosome IDs | Chromosomes     | Physical positions (bp) | CDC Frontier (Reference genome) | (Pusa 256 & HPNB) | NCBI SNPdb Accession IDs |
|-----------------------|----------------|-----------------|-------------------------|---------------------------------|-------------------|--------------------------|
| SNP_P3_90410_33213958 | NC_021166.1    | Ca_kabuli_chr07 | 33213958                | GG                              | TT                | 1946465004               |
| SNP_P3_90411_33213978 | NC_021166.1    | Ca_kabuli_chr07 | 33213978                | TT                              | AA                | 1946465005               |
| SNP_P3_90412_33213994 | NC_021166.1    | Ca_kabuli_chr07 | 33213994                | AA                              | CC                | 1946465006               |
| SNP_P3_90413_33214005 | NC_021166.1    | Ca_kabuli_chr07 | 33214005                | AA                              | GG                | 1946465008               |
| SNP_P3_90414_33214013 | NC_021166.1    | Ca_kabuli_chr07 | 33214013                | GG                              | TT                | 1946465009               |
| SNP_P3_90415_33214133 | NC_021166.1    | Ca_kabuli_chr07 | 33214133                | GG                              | AA                | 1946465011               |
| SNP_P3_90416_33215095 | NC_021166.1    | Ca_kabuli_chr07 | 33215095                | AA                              | TT                | 1946465012               |
| SNP_P3_90417_33216262 | NC_021166.1    | Ca_kabuli_chr07 | 33216262                | AA                              | TT                | 1946465014               |
| SNP_P3_90418_33216377 | NC_021166.1    | Ca_kabuli_chr07 | 33216377                | AA                              | GG                | 1946465015               |
| SNP_P3_90419_33216513 | NC_021166.1    | Ca_kabuli_chr07 | 33216513                | GG                              | AA                | 1946465017               |
| SNP_P3_90420_33216557 | NC_021166.1    | Ca_kabuli_chr07 | 33216557                | TT                              | CC                | 1946465018               |
| SNP_P3_90421_33217595 | NC_021166.1    | Ca_kabuli_chr07 | 33217595                | GG                              | CC                | 1946465020               |
| SNP_P3_90422_33217612 | NC_021166.1    | Ca_kabuli_chr07 | 33217612                | AA                              | TT                | 1946465021               |
| SNP_P3_90423_33217660 | NC_021166.1    | Ca_kabuli_chr07 | 33217660                | GG                              | TT                | 1946465023               |
| SNP_P3_90424_33217706 | NC_021166.1    | Ca_kabuli_chr07 | 33217706                | CC                              | AA                | 1946465024               |
| SNP_P3_90425_33218045 | NC_021166.1    | Ca_kabuli_chr07 | 33218045                | GG                              | AA                | 1946465026               |
| SNP_P3_90426_33219087 | NC_021166.1    | Ca_kabuli_chr07 | 33219087                | TT                              | AA                | 1946465027               |
| SNP_P3_90429_33220093 | NC_021166.1    | Ca_kabuli_chr07 | 33220093                | TT                              | GG                | 1946465029               |
| SNP_P3_90431_33221267 | NC_021166.1    | Ca_kabuli_chr07 | 33221267                | TT                              | CC                | 1946465030               |
| SNP_P3_90432_33221295 | NC_021166.1    | Ca_kabuli_chr07 | 33221295                | GG                              | TT                | 1946465032               |
| SNP_P3_90433_33221570 | NC_021166.1    | Ca_kabuli_chr07 | 33221570                | AA                              | TT                | 1946465033               |
| SNP_P3_90434_33221909 | NC_021166.1    | Ca_kabuli_chr07 | 33221909                | AA                              | GG                | 1946465035               |
| SNP_P3_90435_33222938 | NC_021166.1    | Ca_kabuli_chr07 | 33222938                | GG                              | AA                | 1946465036               |
| SNP_P3_90436_33223328 | NC_021166.1    | Ca_kabuli_chr07 | 33223328                | CC                              | TT                | 1946465038               |
| SNP_P3_90437_33223532 | NC_021166.1    | Ca_kabuli_chr07 | 33223532                | CC                              | TT                | 1946465039               |
| SNP_P3_90438_33223537 | NC_021166.1    | Ca_kabuli_chr07 | 33223537                | GG                              | TT                | 1946465041               |
| SNP_P3_90440_33227185 | NC_021166.1    | Ca_kabuli_chr07 | 33227185                | CC                              | TT                | 1946465042               |
| SNP_P3_90442_33227555 | NC_021166.1    | Ca_kabuli_chr07 | 33227555                | GG                              | TT                | 1946465044               |
| SNP_P3_90443_33227641 | NC_021166.1    | Ca_kabuli_chr07 | 33227641                | GG                              | AA                | 1946465046               |
| SNP_P3_90444_33229424 | NC_021166.1    | Ca_kabuli_chr07 | 33229424                | AA                              | TT                | 1946465047               |
| SNP_P3_90445_33229431 | NC_021166.1    | Ca_kabuli_chr07 | 33229431                | AA                              | TT                | 1946465049               |
| SNP_P3_90446_33229486 | NC_021166.1    | Ca_kabuli_chr07 | 33229486                | TT                              | CC                | 1946465050               |
| SNP_P3_90447_33229566 | NC_021166.1    | Ca_kabuli_chr07 | 33229566                | AA                              | CC                | 1946465052               |
| SNP_P3_90448_33230049 | NC_021166.1    | Ca_kabuli_chr07 | 33230049                | GG                              | AA                | 1946465053               |
| SNP_P3_90449_33230096 | NC_021166.1    | Ca_kabuli_chr07 | 33230096                | AA                              | GG                | 1946465055               |
| SNP_P3_90450_33230122 | NC_021166.1    | Ca_kabuli_chr07 | 33230122                | TT                              | CC                | 1946465056               |
| SNP_P3_90452_33230449 | NC_021166.1    | Ca_kabuli_chr07 | 33230449                | GG                              | CC                | 1946465058               |
| SNP_P3_90453_33230582 | NC_021166.1    | Ca_kabuli_chr07 | 33230582                | TT                              | AA                | 1946465059               |
| SNP_P3_90455_33230602 | NC_021166.1    | Ca_kabuli_chr07 | 33230602                | AA                              | TT                | 1946465061               |
| SNP_P3_90456_33230603 | NC_021166.1    | Ca_kabuli_chr07 | 33230603                | TT                              | AA                | 1946465062               |
| SNP_P3_90457_33230605 | NC_021166.1    | Ca_kabuli_chr07 | 33230605                | AA                              | TT                | 1946465064               |
| SNP_P3_90458_33230683 | NC_021166.1    | Ca_kabuli_chr07 | 33230683                | TT                              | CC                | 1946465065               |

| SNPs IDs              | Chromosome IDs | Chromosomes     | Physical positions (bp) | CDC Frontier (Reference genome) | (Pusa 256 & HPNB) | NCBI SNPdb Accession IDs |
|-----------------------|----------------|-----------------|-------------------------|---------------------------------|-------------------|--------------------------|
| SNP_P3_90459_33230687 | NC_021166.1    | Ca_kabuli_chr07 | 33230687                | GG                              | AA                | 1946465067               |
| SNP_P3_90460_33230907 | NC_021166.1    | Ca_kabuli_chr07 | 33230907                | GG                              | AA                | 1946465068               |
| SNP_P3_90461_33230955 | NC_021166.1    | Ca_kabuli_chr07 | 33230955                | AA                              | GG                | 1946465070               |
| SNP_P3_90463_33232527 | NC_021166.1    | Ca_kabuli_chr07 | 33232527                | GG                              | AA                | 1946465071               |
| SNP_P3_90464_33232565 | NC_021166.1    | Ca_kabuli_chr07 | 33232565                | AA                              | TT                | 1946465073               |
| SNP_P3_90465_33232708 | NC_021166.1    | Ca_kabuli_chr07 | 33232708                | AA                              | TT                | 1946465074               |
| SNP_P3_90466_33233579 | NC_021166.1    | Ca_kabuli_chr07 | 33233579                | CC                              | TT                | 1946465076               |
| SNP_P3_90467_33233582 | NC_021166.1    | Ca_kabuli_chr07 | 33233582                | CC                              | AA                | 1946465077               |
| SNP_P3_90468_33233593 | NC_021166.1    | Ca_kabuli_chr07 | 33233593                | CC                              | TT                | 1946465079               |
| SNP_P3_90469_33234231 | NC_021166.1    | Ca_kabuli_chr07 | 33234231                | TT                              | CC                | 1946465080               |
| SNP_P3_90470_33234320 | NC_021166.1    | Ca_kabuli_chr07 | 33234320                | CC                              | AA                | 1946465082               |
| SNP_P3_90471_33234370 | NC_021166.1    | Ca_kabuli_chr07 | 33234370                | TT                              | GG                | 1946465083               |
| SNP_P3_90472_33234549 | NC_021166.1    | Ca_kabuli_chr07 | 33234549                | GG                              | AA                | 1946465085               |
| SNP_P3_90473_33234616 | NC_021166.1    | Ca_kabuli_chr07 | 33234616                | AA                              | GG                | 1946465086               |
| SNP_P3_90474_33234940 | NC_021166.1    | Ca_kabuli_chr07 | 33234940                | TT                              | CC                | 1946465087               |
| SNP_P3_90475_33234949 | NC_021166.1    | Ca_kabuli_chr07 | 33234949                | TT                              | CC                | 1946465089               |
| SNP_P3_90476_33234952 | NC_021166.1    | Ca_kabuli_chr07 | 33234952                | CC                              | TT                | 1946465090               |
| SNP_P3_90477_33234978 | NC_021166.1    | Ca_kabuli_chr07 | 33234978                | GG                              | AA                | 1946465092               |
| SNP_P3_90478_33234988 | NC_021166.1    | Ca_kabuli_chr07 | 33234988                | AA                              | GG                | 1946465093               |
| SNP_P3_90479_33235296 | NC_021166.1    | Ca_kabuli_chr07 | 33235296                | TT                              | AA                | 1946465095               |
| SNP_P3_90480_33236125 | NC_021166.1    | Ca_kabuli_chr07 | 33236125                | AA                              | GG                | 1946465096               |
| SNP_P3_90481_33236465 | NC_021166.1    | Ca_kabuli_chr07 | 33236465                | TT                              | AA                | 1946465098               |
| SNP_P3_90482_33237009 | NC_021166.1    | Ca_kabuli_chr07 | 33237009                | TT                              | CC                | 1946465099               |
| SNP_P3_90483_33237077 | NC_021166.1    | Ca_kabuli_chr07 | 33237077                | GG                              | TT                | 1946465101               |
| SNP_P3_90484_33237254 | NC_021166.1    | Ca_kabuli_chr07 | 33237254                | TT                              | CC                | 1946465102               |
| SNP_P3_90485_33237260 | NC_021166.1    | Ca_kabuli_chr07 | 33237260                | CC                              | AA                | 1946465104               |
| SNP_P3_90486_33237267 | NC_021166.1    | Ca_kabuli_chr07 | 33237267                | GG                              | AA                | 1946465105               |
| SNP_P3_90487_33237289 | NC_021166.1    | Ca_kabuli_chr07 | 33237289                | GG                              | AA                | 1946465107               |
| SNP_P3_90488_33237300 | NC_021166.1    | Ca_kabuli_chr07 | 33237300                | CC                              | TT                | 1946465108               |
| SNP_P3_90489_33237334 | NC_021166.1    | Ca_kabuli_chr07 | 33237334                | GG                              | CC                | 1946465109               |
| SNP_P3_90490_33237353 | NC_021166.1    | Ca_kabuli_chr07 | 33237353                | TT                              | GG                | 1946465111               |
| SNP_P3_90492_33237665 | NC_021166.1    | Ca_kabuli_chr07 | 33237665                | CC                              | TT                | 1946465112               |
| SNP_P3_90493_33237930 | NC_021166.1    | Ca_kabuli_chr07 | 33237930                | TT                              | AA                | 1946465114               |
| SNP_P3_90494_33238126 | NC_021166.1    | Ca_kabuli_chr07 | 33238126                | AA                              | CC                | 1946465115               |
| SNP_P3_90495_33238264 | NC_021166.1    | Ca_kabuli_chr07 | 33238264                | AA                              | TT                | 1946465117               |
| SNP_P3_90496_33238345 | NC_021166.1    | Ca_kabuli_chr07 | 33238345                | TT                              | AA                | 1946465118               |
| SNP_P3_90498_33239915 | NC_021166.1    | Ca_kabuli_chr07 | 33239915                | GG                              | AA                | 1946465120               |
| SNP_P3_90499_33240582 | NC_021166.1    | Ca_kabuli_chr07 | 33240582                | TT                              | CC                | 1946465121               |
| SNP_P3_90500_33240835 | NC_021166.1    | Ca_kabuli_chr07 | 33240835                | AA                              | GG                | 1946465123               |
| SNP_P3_90501_33240944 | NC_021166.1    | Ca_kabuli_chr07 | 33240944                | GG                              | CC                | 1946465124               |
| SNP_P3_90502_33240980 | NC_021166.1    | Ca_kabuli_chr07 | 33240980                | CC                              | TT                | 1946465126               |
| SNP_P3_90503_33241367 | NC_021166.1    | Ca_kabuli_chr07 | 33241367                | TT                              | CC                | 1946465127               |

| SNPs IDs              | Chromosome IDs | Chromosomes     | Physical positions (bp) | CDC Frontier (Reference genome) | (Pusa 256 & HPNB) | NCBI SNPdb Accession IDs |
|-----------------------|----------------|-----------------|-------------------------|---------------------------------|-------------------|--------------------------|
| SNP_P3_90504_33241518 | NC_021166.1    | Ca_kabuli_chr07 | 33241518                | TT                              | CC                | 1946465129               |
| SNP_P3_90506_33241945 | NC_021166.1    | Ca_kabuli_chr07 | 33241945                | TT                              | CC                | 1946465130               |
| SNP_P3_90507_33243934 | NC_021166.1    | Ca_kabuli_chr07 | 33243934                | GG                              | CC                | 1946465132               |
| SNP_P3_90509_33244055 | NC_021166.1    | Ca_kabuli_chr07 | 33244055                | TT                              | GG                | 1946465133               |
| SNP_P3_90510_33244191 | NC_021166.1    | Ca_kabuli_chr07 | 33244191                | AA                              | GG                | 1946465135               |
| SNP_P3_90511_33244766 | NC_021166.1    | Ca_kabuli_chr07 | 33244766                | CC                              | AA                | 1946465136               |
| SNP_P3_90512_33244836 | NC_021166.1    | Ca_kabuli_chr07 | 33244836                | CC                              | TT                | 1946465138               |
| SNP_P3_90513_33244840 | NC_021166.1    | Ca_kabuli_chr07 | 33244840                | CC                              | AA                | 1946465139               |
| SNP_P3_90514_33245161 | NC_021166.1    | Ca_kabuli_chr07 | 33245161                | AA                              | GG                | 1946465141               |
| SNP_P3_90515_33245195 | NC_021166.1    | Ca_kabuli_chr07 | 33245195                | TT                              | CC                | 1946465142               |
| SNP_P3_90516_33245733 | NC_021166.1    | Ca_kabuli_chr07 | 33245733                | TT                              | CC                | 1946465143               |
| SNP_P3_90517_33245742 | NC_021166.1    | Ca_kabuli_chr07 | 33245742                | CC                              | TT                | 1946465145               |
| SNP_P3_90518_33245746 | NC_021166.1    | Ca_kabuli_chr07 | 33245746                | TT                              | CC                | 1946465146               |
| SNP_P3_90519_33245793 | NC_021166.1    | Ca_kabuli_chr07 | 33245793                | AA                              | GG                | 1946465148               |
| SNP_P3_90520_33245942 | NC_021166.1    | Ca_kabuli_chr07 | 33245942                | GG                              | TT                | 1946465149               |
| SNP_P3_90521_33245973 | NC_021166.1    | Ca_kabuli_chr07 | 33245973                | CC                              | TT                | 1946465151               |
| SNP_P3_90523_33247362 | NC_021166.1    | Ca_kabuli_chr07 | 33247362                | AA                              | GG                | 1946465152               |
| SNP_P3_90524_33248616 | NC_021166.1    | Ca_kabuli_chr07 | 33248616                | TT                              | GG                | 1946465153               |
| SNP_P3_90525_33248628 | NC_021166.1    | Ca_kabuli_chr07 | 33248628                | GG                              | TT                | 1946465155               |
| SNP_P3_90526_33248638 | NC_021166.1    | Ca_kabuli_chr07 | 33248638                | AA                              | GG                | 1946465156               |
| SNP_P3_90527_33249925 | NC_021166.1    | Ca_kabuli_chr07 | 33249925                | AA                              | GG                | 1946465158               |
| SNP_P3_90528_33252530 | NC_021166.1    | Ca_kabuli_chr07 | 33252530                | AA                              | GG                | 1946465159               |
| SNP_P3_90529_33252592 | NC_021166.1    | Ca_kabuli_chr07 | 33252592                | TT                              | GG                | 1946465161               |
| SNP_P3_90531_33253555 | NC_021166.1    | Ca_kabuli_chr07 | 33253555                | AA                              | GG                | 1946465162               |
| SNP_P3_90532_33253701 | NC_021166.1    | Ca_kabuli_chr07 | 33253701                | CC                              | AA                | 1946465164               |
| SNP_P3_90533_33253814 | NC_021166.1    | Ca_kabuli_chr07 | 33253814                | CC                              | TT                | 1946465165               |
| SNP_P3_90535_33254446 | NC_021166.1    | Ca_kabuli_chr07 | 33254446                | AA                              | CC                | 1946465167               |
| SNP_P3_90536_33255149 | NC_021166.1    | Ca_kabuli_chr07 | 33255149                | TT                              | CC                | 1946465168               |
| SNP_P3_90537_33255175 | NC_021166.1    | Ca_kabuli_chr07 | 33255175                | GG                              | TT                | 1946465170               |
| SNP_P3_90538_33255179 | NC_021166.1    | Ca_kabuli_chr07 | 33255179                | GG                              | AA                | 1946465171               |
| SNP_P3_90539_33256360 | NC_021166.1    | Ca_kabuli_chr07 | 33256360                | AA                              | GG                | 1946465172               |
| SNP_P3_90540_33256392 | NC_021166.1    | Ca_kabuli_chr07 | 33256392                | CC                              | TT                | 1946465174               |
| SNP_P3_90541_33256393 | NC_021166.1    | Ca_kabuli_chr07 | 33256393                | GG                              | AA                | 1946465175               |
| SNP_P3_90542_33256529 | NC_021166.1    | Ca_kabuli_chr07 | 33256529                | TT                              | CC                | 1946465177               |
| SNP_P3_90543_33256600 | NC_021166.1    | Ca_kabuli_chr07 | 33256600                | TT                              | GG                | 1946465178               |
| SNP_P3_90544_33256799 | NC_021166.1    | Ca_kabuli_chr07 | 33256799                | GG                              | TT                | 1946465180               |
| SNP_P3_90545_33256880 | NC_021166.1    | Ca_kabuli_chr07 | 33256880                | GG                              | AA                | 1946465181               |
| SNP_P3_90546_33256892 | NC_021166.1    | Ca_kabuli_chr07 | 33256892                | AA                              | GG                | 1946465183               |
| SNP_P3_90547_33257480 | NC_021166.1    | Ca_kabuli_chr07 | 33257480                | CC                              | GG                | 1946465184               |
| SNP_P3_90548_33266260 | NC_021166.1    | Ca_kabuli_chr07 | 33266260                | GG                              | AA                | 1946465186               |
| SNP_P3_90549_33266913 | NC_021166.1    | Ca_kabuli_chr07 | 33266913                | CC                              | AA                | 1946465187               |
| SNP_P3_90551_33267836 | NC_021166.1    | Ca_kabuli_chr07 | 33267836                | TT                              | CC                | 1946465189               |

| SNPs IDs              | Chromosome IDs | Chromosomes     | Physical positions (bp) | CDC Frontier (Reference genome) | (Pusa 256 & HPNB) | NCBI SNPdb Accession IDs |
|-----------------------|----------------|-----------------|-------------------------|---------------------------------|-------------------|--------------------------|
| SNP_P3_90552_33267974 | NC_021166.1    | Ca_kabuli_chr07 | 33267974                | TT                              | AA                | 1946465191               |
| SNP_P3_90553_33267978 | NC_021166.1    | Ca_kabuli_chr07 | 33267978                | CC                              | TT                | 1946465192               |
| SNP_P3_90554_33267994 | NC_021166.1    | Ca_kabuli_chr07 | 33267994                | AA                              | TT                | 1946465193               |
| SNP_P3_90555_33268745 | NC_021166.1    | Ca_kabuli_chr07 | 33268745                | AA                              | GG                | 1946465195               |
| SNP_P3_90556_33268785 | NC_021166.1    | Ca_kabuli_chr07 | 33268785                | GG                              | AA                | 1946465196               |
| SNP_P3_90557_33268803 | NC_021166.1    | Ca_kabuli_chr07 | 33268803                | TT                              | CC                | 1946465198               |
| SNP_P3_90559_33270054 | NC_021166.1    | Ca_kabuli_chr07 | 33270054                | AA                              | GG                | 1946465199               |
| SNP_P3_90560_33270899 | NC_021166.1    | Ca_kabuli_chr07 | 33270899                | AA                              | CC                | 1946465201               |
| SNP_P3_90562_33273556 | NC_021166.1    | Ca_kabuli_chr07 | 33273556                | CC                              | AA                | 1946465202               |
| SNP_P3_90563_33277287 | NC_021166.1    | Ca_kabuli_chr07 | 33277287                | CC                              | GG                | 1946465203               |
| SNP_P3_90564_33277685 | NC_021166.1    | Ca_kabuli_chr07 | 33277685                | TT                              | AA                | 1946465205               |
| SNP_P3_90565_33277942 | NC_021166.1    | Ca_kabuli_chr07 | 33277942                | TT                              | CC                | 1946465206               |
| SNP_P3_90567_33278642 | NC_021166.1    | Ca_kabuli_chr07 | 33278642                | AA                              | CC                | 1946465208               |
| SNP_P3_90568_33283711 | NC_021166.1    | Ca_kabuli_chr07 | 33283711                | GG                              | TT                | 1946465209               |
| SNP_P3_90570_33286872 | NC_021166.1    | Ca_kabuli_chr07 | 33286872                | TT                              | CC                | 1946465211               |
| SNP_P3_90571_33286923 | NC_021166.1    | Ca_kabuli_chr07 | 33286923                | GG                              | AA                | 1946465212               |
| SNP_P3_90572_33286980 | NC_021166.1    | Ca_kabuli_chr07 | 33286980                | AA                              | GG                | 1946465214               |
| SNP_P3_90573_33287011 | NC_021166.1    | Ca_kabuli_chr07 | 33287011                | TT                              | CC                | 1946465215               |
| SNP_P3_90574_33287081 | NC_021166.1    | Ca_kabuli_chr07 | 33287081                | GG                              | AA                | 1946465216               |
| SNP_P3_90575_33287083 | NC_021166.1    | Ca_kabuli_chr07 | 33287083                | TT                              | CC                | 1946465218               |
| SNP_P3_90576_33287276 | NC_021166.1    | Ca_kabuli_chr07 | 33287276                | GG                              | AA                | 1946465219               |
| SNP_P3_90577_33287444 | NC_021166.1    | Ca_kabuli_chr07 | 33287444                | GG                              | TT                | 1946465221               |
| SNP_P3_90578_33287461 | NC_021166.1    | Ca_kabuli_chr07 | 33287461                | AA                              | TT                | 1946465222               |
| SNP_P3_90579_33287501 | NC_021166.1    | Ca_kabuli_chr07 | 33287501                | TT                              | CC                | 1946465224               |
| SNP_P3_90580_33287505 | NC_021166.1    | Ca_kabuli_chr07 | 33287505                | AA                              | TT                | 1946465225               |
| SNP_P3_90581_33287538 | NC_021166.1    | Ca_kabuli_chr07 | 33287538                | CC                              | TT                | 1946465227               |
| SNP_P3_90582_33287742 | NC_021166.1    | Ca_kabuli_chr07 | 33287742                | CC                              | TT                | 1946465228               |
| SNP_P3_90583_33287773 | NC_021166.1    | Ca_kabuli_chr07 | 33287773                | TT                              | AA                | 1946465230               |
| SNP_P3_90584_33287790 | NC_021166.1    | Ca_kabuli_chr07 | 33287790                | AA                              | GG                | 1946465231               |
| SNP_P3_90585_33288487 | NC_021166.1    | Ca_kabuli_chr07 | 33288487                | AA                              | CC                | 1946465232               |
| SNP_P3_90586_33288903 | NC_021166.1    | Ca_kabuli_chr07 | 33288903                | CC                              | TT                | 1946465234               |
| SNP_P3_90587_33288924 | NC_021166.1    | Ca_kabuli_chr07 | 33288924                | CC                              | AA                | 1946465235               |
| SNP_P3_90588_33289156 | NC_021166.1    | Ca_kabuli_chr07 | 33289156                | AA                              | CC                | 1946465237               |
| SNP_P3_90589_33289197 | NC_021166.1    | Ca_kabuli_chr07 | 33289197                | CC                              | TT                | 1946465238               |
| SNP_P3_90590_33289395 | NC_021166.1    | Ca_kabuli_chr07 | 33289395                | AA                              | GG                | 1946465240               |
| SNP_P3_90591_33289698 | NC_021166.1    | Ca_kabuli_chr07 | 33289698                | AA                              | GG                | 1946465241               |
| SNP_P3_90592_33289705 | NC_021166.1    | Ca_kabuli_chr07 | 33289705                | GG                              | AA                | 1946465243               |
| SNP_P3_90593_33289735 | NC_021166.1    | Ca_kabuli_chr07 | 33289735                | AA                              | GG                | 1946465244               |
| SNP_P3_90594_33291071 | NC_021166.1    | Ca_kabuli_chr07 | 33291071                | AA                              | CC                | 1946465246               |
| SNP_P3_90595_33291082 | NC_021166.1    | Ca_kabuli_chr07 | 33291082                | GG                              | AA                | 1946465247               |
| SNP_P3_90596_33293038 | NC_021166.1    | Ca_kabuli_chr07 | 33293038                | CC                              | TT                | 1946465248               |
| SNP_P3_90597_33293081 | NC_021166.1    | Ca_kabuli_chr07 | 33293081                | TT                              | GG                | 1946465250               |

| SNPs IDs              | Chromosome IDs | Chromosomes     | Physical positions (bp) | CDC Frontier (Reference genome) | (Pusa 256 & HPNB) | NCBI SNPdb Accession IDs |
|-----------------------|----------------|-----------------|-------------------------|---------------------------------|-------------------|--------------------------|
| SNP_P3_90598_33293105 | NC_021166.1    | Ca_kabuli_chr07 | 33293105                | AA                              | GG                | 1946465251               |
| SNP_P3_90599_33293112 | NC_021166.1    | Ca_kabuli_chr07 | 33293112                | GG                              | AA                | 1946465253               |
| SNP_P3_90600_33293407 | NC_021166.1    | Ca_kabuli_chr07 | 33293407                | CC                              | TT                | 1946465254               |
| SNP_P3_90601_33293460 | NC_021166.1    | Ca_kabuli_chr07 | 33293460                | TT                              | GG                | 1946465256               |
| SNP_P3_90602_33293467 | NC_021166.1    | Ca_kabuli_chr07 | 33293467                | CC                              | TT                | 1946465257               |
| SNP_P3_90603_33296153 | NC_021166.1    | Ca_kabuli_chr07 | 33296153                | CC                              | TT                | 1946465259               |
| SNP_P3_90604_33297261 | NC_021166.1    | Ca_kabuli_chr07 | 33297261                | AA                              | GG                | 1946465260               |
| SNP_P3_90605_33297267 | NC_021166.1    | Ca_kabuli_chr07 | 33297267                | AA                              | TT                | 1946465262               |
| SNP_P3_90606_33298508 | NC_021166.1    | Ca_kabuli_chr07 | 33298508                | AA                              | GG                | 1946465263               |
| SNP_P3_90607_33299836 | NC_021166.1    | Ca_kabuli_chr07 | 33299836                | AA                              | GG                | 1946465265               |
| SNP_P3_90608_33299848 | NC_021166.1    | Ca_kabuli_chr07 | 33299848                | CC                              | TT                | 1946465266               |
| SNP_P3_90609_33302273 | NC_021166.1    | Ca_kabuli_chr07 | 33302273                | TT                              | AA                | 1946465267               |
| SNP_P3_90610_33302312 | NC_021166.1    | Ca_kabuli_chr07 | 33302312                | TT                              | GG                | 1946465269               |
| SNP_P3_90611_33306296 | NC_021166.1    | Ca_kabuli_chr07 | 33306296                | TT                              | CC                | 1946465270               |
| SNP_P3_90612_33307320 | NC_021166.1    | Ca_kabuli_chr07 | 33307320                | CC                              | TT                | 1946465272               |
| SNP_P3_90613_33307589 | NC_021166.1    | Ca_kabuli_chr07 | 33307589                | TT                              | CC                | 1946465273               |
| SNP_P3_90614_33307603 | NC_021166.1    | Ca_kabuli_chr07 | 33307603                | AA                              | TT                | 1946465275               |
| SNP_P3_90615_33308029 | NC_021166.1    | Ca_kabuli_chr07 | 33308029                | GG                              | TT                | 1946465276               |
| SNP_P3_90616_33308044 | NC_021166.1    | Ca_kabuli_chr07 | 33308044                | CC                              | TT                | 1946465278               |
| SNP_P3_90617_33309202 | NC_021166.1    | Ca_kabuli_chr07 | 33309202                | CC                              | TT                | 1946465279               |
| SNP_P3_90618_33309205 | NC_021166.1    | Ca_kabuli_chr07 | 33309205                | TT                              | CC                | 1946465280               |
| SNP_P3_90619_33309226 | NC_021166.1    | Ca_kabuli_chr07 | 33309226                | TT                              | AA                | 1946465282               |
| SNP_P3_90620_33309245 | NC_021166.1    | Ca_kabuli_chr07 | 33309245                | CC                              | AA                | 1946465283               |
| SNP_P3_90621_33320340 | NC_021166.1    | Ca_kabuli_chr07 | 33320340                | AA                              | GG                | 1946465285               |
| SNP_P3_90622_33320346 | NC_021166.1    | Ca_kabuli_chr07 | 33320346                | TT                              | AA                | 1946465286               |
| SNP_P3_90623_33320448 | NC_021166.1    | Ca_kabuli_chr07 | 33320448                | CC                              | TT                | 1946465288               |
| SNP_P3_90624_33320453 | NC_021166.1    | Ca_kabuli_chr07 | 33320453                | AA                              | GG                | 1946465289               |
| SNP_P3_90625_33320464 | NC_021166.1    | Ca_kabuli_chr07 | 33320464                | CC                              | AA                | 1946465291               |
| SNP_P3_90626_33320465 | NC_021166.1    | Ca_kabuli_chr07 | 33320465                | TT                              | CC                | 1946465292               |
| SNP_P3_90627_33325911 | NC_021166.1    | Ca_kabuli_chr07 | 33325911                | TT                              | CC                | 1946465293               |
| SNP_P3_90628_33325913 | NC_021166.1    | Ca_kabuli_chr07 | 33325913                | AA                              | GG                | 1946465295               |
| SNP_P3_90629_33325977 | NC_021166.1    | Ca_kabuli_chr07 | 33325977                | GG                              | AA                | 1946465296               |
| SNP_P3_90630_33326311 | NC_021166.1    | Ca_kabuli_chr07 | 33326311                | CC                              | GG                | 1946465298               |
| SNP_P3_90632_33326362 | NC_021166.1    | Ca_kabuli_chr07 | 33326362                | AA                              | GG                | 1946465299               |
| SNP_P3_90633_33326364 | NC_021166.1    | Ca_kabuli_chr07 | 33326364                | CC                              | AA                | 1946465300               |
| SNP_P3_90634_33326797 | NC_021166.1    | Ca_kabuli_chr07 | 33326797                | GG                              | AA                | 1946465302               |
| SNP_P3_90635_33326820 | NC_021166.1    | Ca_kabuli_chr07 | 33326820                | CC                              | TT                | 1946465303               |
| SNP_P3_90636_33326970 | NC_021166.1    | Ca_kabuli_chr07 | 33326970                | AA                              | GG                | 1946465305               |
| SNP_P3_90637_33327213 | NC_021166.1    | Ca_kabuli_chr07 | 33327213                | TT                              | AA                | 1946465306               |
| SNP_P3_90639_33327313 | NC_021166.1    | Ca_kabuli_chr07 | 33327313                | GG                              | AA                | 1946465307               |
| SNP_P3_90640_33327551 | NC_021166.1    | Ca_kabuli_chr07 | 33327551                | TT                              | GG                | 1946465309               |
| SNP_P3_90641_33327581 | NC_021166.1    | Ca_kabuli_chr07 | 33327581                | AA                              | CC                | 1946465310               |

| SNPs IDs              | Chromosome IDs | Chromosomes     | Physical positions (bp) | CDC Frontier (Reference genome) | (Pusa 256 & HPNB) | NCBI SNPdb Accession IDs |
|-----------------------|----------------|-----------------|-------------------------|---------------------------------|-------------------|--------------------------|
| SNP_P3_90644_33328571 | NC_021166.1    | Ca_kabuli_chr07 | 33328571                | GG                              | AA                | 1946465312               |
| SNP_P3_90645_33328576 | NC_021166.1    | Ca_kabuli_chr07 | 33328576                | AA                              | GG                | 1946465313               |
| SNP_P3_90646_33328592 | NC_021166.1    | Ca_kabuli_chr07 | 33328592                | CC                              | TT                | 1946465314               |
| SNP_P3_90647_33328604 | NC_021166.1    | Ca_kabuli_chr07 | 33328604                | CC                              | TT                | 1946465316               |
| SNP_P3_90648_33329689 | NC_021166.1    | Ca_kabuli_chr07 | 33329689                | AA                              | CC                | 1946465317               |
| SNP_P3_90649_33329706 | NC_021166.1    | Ca_kabuli_chr07 | 33329706                | TT                              | CC                | 1946465319               |
| SNP_P3_90650_33329708 | NC_021166.1    | Ca_kabuli_chr07 | 33329708                | AA                              | GG                | 1946465320               |
| SNP_P3_90651_33329709 | NC_021166.1    | Ca_kabuli_chr07 | 33329709                | TT                              | GG                | 1946465321               |
| SNP_P3_90654_33332125 | NC_021166.1    | Ca_kabuli_chr07 | 33332125                | GG                              | AA                | 1946465323               |
| SNP_P3_90655_33334155 | NC_021166.1    | Ca_kabuli_chr07 | 33334155                | GG                              | CC                | 1946465324               |
| SNP_P3_90656_33334236 | NC_021166.1    | Ca_kabuli_chr07 | 33334236                | TT                              | CC                | 1946465326               |
| SNP_P3_90658_33335179 | NC_021166.1    | Ca_kabuli_chr07 | 33335179                | GG                              | AA                | 1946465327               |
| SNP_P3_90659_33335353 | NC_021166.1    | Ca_kabuli_chr07 | 33335353                | TT                              | GG                | 1946465329               |
| SNP_P3_90660_33335688 | NC_021166.1    | Ca_kabuli_chr07 | 33335688                | CC                              | TT                | 1946465330               |
| SNP_P3_90661_33336139 | NC_021166.1    | Ca_kabuli_chr07 | 33336139                | CC                              | TT                | 1946465331               |
| SNP_P3_90664_33336464 | NC_021166.1    | Ca_kabuli_chr07 | 33336464                | GG                              | AA                | 1946465333               |
| SNP_P3_90665_33336494 | NC_021166.1    | Ca_kabuli_chr07 | 33336494                | CC                              | TT                | 1946465334               |
| SNP_P3_90666_33336605 | NC_021166.1    | Ca_kabuli_chr07 | 33336605                | GG                              | AA                | 1946465336               |
| SNP_P3_90667_33337093 | NC_021166.1    | Ca_kabuli_chr07 | 33337093                | CC                              | TT                | 1946465337               |
| SNP_P3_90668_33337105 | NC_021166.1    | Ca_kabuli_chr07 | 33337105                | TT                              | CC                | 1946465339               |
| SNP_P3_90669_33337107 | NC_021166.1    | Ca_kabuli_chr07 | 33337107                | TT                              | CC                | 1946465340               |
| SNP_P3_90670_33337118 | NC_021166.1    | Ca_kabuli_chr07 | 33337118                | AA                              | GG                | 1946465342               |
| SNP_P3_90671_33338359 | NC_021166.1    | Ca_kabuli_chr07 | 33338359                | TT                              | GG                | 1946465343               |
| SNP_P3_90672_33338385 | NC_021166.1    | Ca_kabuli_chr07 | 33338385                | TT                              | AA                | 1946465344               |
| SNP_P3_90673_33338390 | NC_021166.1    | Ca_kabuli_chr07 | 33338390                | CC                              | GG                | 1946465346               |
| SNP_P3_90674_33338405 | NC_021166.1    | Ca_kabuli_chr07 | 33338405                | AA                              | GG                | 1946465347               |
| SNP_P3_90675_33338477 | NC_021166.1    | Ca_kabuli_chr07 | 33338477                | AA                              | GG                | 1946465349               |
| SNP_P3_90676_33338501 | NC_021166.1    | Ca_kabuli_chr07 | 33338501                | CC                              | TT                | 1946465350               |
| SNP_P3_90677_33338982 | NC_021166.1    | Ca_kabuli_chr07 | 33338982                | CC                              | GG                | 1946465352               |
| SNP_P3_90678_33340981 | NC_021166.1    | Ca_kabuli_chr07 | 33340981                | CC                              | TT                | 1946465353               |
| SNP_P3_90679_33341290 | NC_021166.1    | Ca_kabuli_chr07 | 33341290                | GG                              | AA                | 1946465354               |
| SNP_P3_90680_33344348 | NC_021166.1    | Ca_kabuli_chr07 | 33344348                | GG                              | AA                | 1946465356               |
| SNP_P3_90681_33344640 | NC_021166.1    | Ca_kabuli_chr07 | 33344640                | TT                              | CC                | 1946465357               |
| SNP_P3_90682_33345355 | NC_021166.1    | Ca_kabuli_chr07 | 33345355                | CC                              | TT                | 1946465359               |
| SNP_P3_90683_33345380 | NC_021166.1    | Ca_kabuli_chr07 | 33345380                | GG                              | AA                | 1946465360               |
| SNP_P3_90684_33345603 | NC_021166.1    | Ca_kabuli_chr07 | 33345603                | TT                              | AA                | 1946465361               |
| SNP_P3_90685_33345862 | NC_021166.1    | Ca_kabuli_chr07 | 33345862                | AA                              | GG                | 1946465363               |
| SNP_P3_90686_33349219 | NC_021166.1    | Ca_kabuli_chr07 | 33349219                | GG                              | AA                | 1946465364               |
| SNP_P3_90687_33349230 | NC_021166.1    | Ca_kabuli_chr07 | 33349230                | TT                              | GG                | 1946465366               |
| SNP_P3_90688_33349299 | NC_021166.1    | Ca_kabuli_chr07 | 33349299                | GG                              | TT                | 1946465367               |
| SNP_P3_90689_33349798 | NC_021166.1    | Ca_kabuli_chr07 | 33349798                | AA                              | GG                | 1946465368               |
| SNP_P3_90690_33349870 | NC_021166.1    | Ca_kabuli_chr07 | 33349870                | CC                              | AA                | 1946465370               |

| SNPs IDs              | Chromosome IDs | Chromosomes     | Physical positions (bp) | CDC Frontier (Reference genome) | (Pusa 256 & HPNB) | NCBI SNPdb Accession IDs |
|-----------------------|----------------|-----------------|-------------------------|---------------------------------|-------------------|--------------------------|
| SNP_P3_90692_33350183 | NC_021166.1    | Ca_kabuli_chr07 | 33350183                | CC                              | GG                | 1946465371               |
| SNP_P3_90693_33351317 | NC_021166.1    | Ca_kabuli_chr07 | 33351317                | AA                              | GG                | 1946465373               |
| SNP_P3_90694_33351437 | NC_021166.1    | Ca_kabuli_chr07 | 33351437                | TT                              | CC                | 1946465374               |
| SNP_P3_90696_33351892 | NC_021166.1    | Ca_kabuli_chr07 | 33351892                | TT                              | CC                | 1946465375               |
| SNP_P3_90697_33355619 | NC_021166.1    | Ca_kabuli_chr07 | 33355619                | GG                              | AA                | 1946465377               |
| SNP_P3_90698_33356049 | NC_021166.1    | Ca_kabuli_chr07 | 33356049                | AA                              | GG                | 1946465378               |
| SNP_P3_90699_33356734 | NC_021166.1    | Ca_kabuli_chr07 | 33356734                | TT                              | AA                | 1946465380               |
| SNP_P3_90700_33358155 | NC_021166.1    | Ca_kabuli_chr07 | 33358155                | TT                              | CC                | 1946465381               |
| SNP_P3_90701_33359534 | NC_021166.1    | Ca_kabuli_chr07 | 33359534                | AA                              | CC                | 1946465383               |
| SNP_P3_90702_33360959 | NC_021166.1    | Ca_kabuli_chr07 | 33360959                | CC                              | TT                | 1946465384               |
| SNP_P3_90703_33361024 | NC_021166.1    | Ca_kabuli_chr07 | 33361024                | AA                              | GG                | 1946465385               |
| SNP_P3_90704_33361084 | NC_021166.1    | Ca_kabuli_chr07 | 33361084                | GG                              | AA                | 1946465387               |
| SNP_P3_90705_33361102 | NC_021166.1    | Ca_kabuli_chr07 | 33361102                | CC                              | TT                | 1946465388               |
| SNP_P3_90706_33361262 | NC_021166.1    | Ca_kabuli_chr07 | 33361262                | CC                              | TT                | 1946465390               |
| SNP_P3_90707_33364477 | NC_021166.1    | Ca_kabuli_chr07 | 33364477                | AA                              | CC                | 1946465391               |
| SNP_P3_90708_33364488 | NC_021166.1    | Ca_kabuli_chr07 | 33364488                | TT                              | CC                | 1946465392               |
| SNP_P3_90709_33365533 | NC_021166.1    | Ca_kabuli_chr07 | 33365533                | AA                              | GG                | 1946465393               |
| SNP_P3_90711_33366617 | NC_021166.1    | Ca_kabuli_chr07 | 33366617                | TT                              | AA                | 1946465394               |
| SNP_P3_90712_33367220 | NC_021166.1    | Ca_kabuli_chr07 | 33367220                | AA                              | CC                | 1946465395               |
| SNP_P3_90713_33367222 | NC_021166.1    | Ca_kabuli_chr07 | 33367222                | AA                              | GG                | 1946465396               |
| SNP_P3_90714_33367487 | NC_021166.1    | Ca_kabuli_chr07 | 33367487                | CC                              | TT                | 1946465397               |
| SNP_P3_90715_33367536 | NC_021166.1    | Ca_kabuli_chr07 | 33367536                | AA                              | CC                | 1946465398               |
| SNP_P3_90716_33367755 | NC_021166.1    | Ca_kabuli_chr07 | 33367755                | GG                              | AA                | 1946465399               |
| SNP_P3_90717_33367778 | NC_021166.1    | Ca_kabuli_chr07 | 33367778                | GG                              | TT                | 1946465400               |
| SNP_P3_90718_33367836 | NC_021166.1    | Ca_kabuli_chr07 | 33367836                | TT                              | CC                | 1946465401               |
| SNP_P3_90719_33367893 | NC_021166.1    | Ca_kabuli_chr07 | 33367893                | TT                              | CC                | 1946465402               |
| SNP_P3_90720_33367900 | NC_021166.1    | Ca_kabuli_chr07 | 33367900                | TT                              | AA                | 1946465403               |
| SNP_P3_90721_33367926 | NC_021166.1    | Ca_kabuli_chr07 | 33367926                | AA                              | TT                | 1946465404               |
| SNP_P3_90722_33368076 | NC_021166.1    | Ca_kabuli_chr07 | 33368076                | AA                              | GG                | 1946465405               |
| SNP_P3_90723_33368095 | NC_021166.1    | Ca_kabuli_chr07 | 33368095                | CC                              | TT                | 1946465406               |
| SNP_P3_90725_33370550 | NC_021166.1    | Ca_kabuli_chr07 | 33370550                | TT                              | CC                | 1946465407               |
| SNP_P3_90726_33370797 | NC_021166.1    | Ca_kabuli_chr07 | 33370797                | AA                              | GG                | 1946465408               |
| SNP_P3_90727_33370815 | NC_021166.1    | Ca_kabuli_chr07 | 33370815                | CC                              | TT                | 1946465409               |
| SNP_P3_90728_33371243 | NC_021166.1    | Ca_kabuli_chr07 | 33371243                | TT                              | CC                | 1946465410               |
| SNP_P3_90729_33371414 | NC_021166.1    | Ca_kabuli_chr07 | 33371414                | AA                              | GG                | 1946465411               |
| SNP_P3_90731_33372969 | NC_021166.1    | Ca_kabuli_chr07 | 33372969                | CC                              | TT                | 1946465412               |
| SNP_P3_90732_33373010 | NC_021166.1    | Ca_kabuli_chr07 | 33373010                | GG                              | AA                | 1946465413               |
| SNP_P3_90733_33374796 | NC_021166.1    | Ca_kabuli_chr07 | 33374796                | TT                              | CC                | 1946465414               |
| SNP_P3_90734_33375078 | NC_021166.1    | Ca_kabuli_chr07 | 33375078                | CC                              | TT                | 1946465415               |
| SNP_P3_90735_33376293 | NC_021166.1    | Ca_kabuli_chr07 | 33376293                | GG                              | AA                | 1946465416               |
| SNP_P3_90736_33378008 | NC_021166.1    | Ca_kabuli_chr07 | 33378008                | GG                              | AA                | 1946465417               |
| SNP_P3_90737_33378152 | NC_021166.1    | Ca_kabuli_chr07 | 33378152                | GG                              | TT                | 1946465418               |

| SNPs IDs              | Chromosome IDs | Chromosomes     | Physical positions (bp) | CDC Frontier (Reference genome) | (Pusa 256 & HPNB) | NCBI SNPdb Accession IDs |
|-----------------------|----------------|-----------------|-------------------------|---------------------------------|-------------------|--------------------------|
| SNP_P3_90738_33379369 | NC_021166.1    | Ca_kabuli_chr07 | 33379369                | GG                              | AA                | 1946465419               |
| SNP_P3_90739_33380720 | NC_021166.1    | Ca_kabuli_chr07 | 33380720                | GG                              | AA                | 1946465420               |
| SNP_P3_90740_33381739 | NC_021166.1    | Ca_kabuli_chr07 | 33381739                | AA                              | GG                | 1946465421               |
| SNP_P3_90741_33381742 | NC_021166.1    | Ca_kabuli_chr07 | 33381742                | TT                              | AA                | 1946465422               |
| SNP_P3_90742_33381749 | NC_021166.1    | Ca_kabuli_chr07 | 33381749                | TT                              | GG                | 1946465423               |
| SNP_P3_90743_33382298 | NC_021166.1    | Ca_kabuli_chr07 | 33382298                | GG                              | TT                | 1946465424               |
| SNP_P3_90744_33382992 | NC_021166.1    | Ca_kabuli_chr07 | 33382992                | TT                              | GG                | 1946465425               |
| SNP_P3_90745_33383054 | NC_021166.1    | Ca_kabuli_chr07 | 33383054                | AA                              | CC                | 1946465426               |
| SNP_P3_90746_33383064 | NC_021166.1    | Ca_kabuli_chr07 | 33383064                | GG                              | AA                | 1946465427               |
| SNP_P3_90747_33383519 | NC_021166.1    | Ca_kabuli_chr07 | 33383519                | TT                              | CC                | 1946465428               |
| SNP_P3_90748_33383812 | NC_021166.1    | Ca_kabuli_chr07 | 33383812                | CC                              | TT                | 1946465429               |
| SNP_P3_90749_33383864 | NC_021166.1    | Ca_kabuli_chr07 | 33383864                | AA                              | GG                | 1946465430               |
| SNP_P3_90750_33384140 | NC_021166.1    | Ca_kabuli_chr07 | 33384140                | GG                              | AA                | 1946465431               |
| SNP_P3_90751_33384157 | NC_021166.1    | Ca_kabuli_chr07 | 33384157                | GG                              | TT                | 1946465432               |
| SNP_P3_90752_33384302 | NC_021166.1    | Ca_kabuli_chr07 | 33384302                | TT                              | GG                | 1946465433               |
| SNP_P3_90753_33384305 | NC_021166.1    | Ca_kabuli_chr07 | 33384305                | CC                              | AA                | 1946465434               |
| SNP_P3_90754_33384321 | NC_021166.1    | Ca_kabuli_chr07 | 33384321                | AA                              | GG                | 1946465435               |
| SNP_P3_90755_33384349 | NC_021166.1    | Ca_kabuli_chr07 | 33384349                | AA                              | GG                | 1946465436               |
| SNP_P3_90757_33385022 | NC_021166.1    | Ca_kabuli_chr07 | 33385022                | GG                              | AA                | 1946465437               |
| SNP_P3_90758_33385052 | NC_021166.1    | Ca_kabuli_chr07 | 33385052                | AA                              | GG                | 1946465438               |
| SNP_P3_90760_33385210 | NC_021166.1    | Ca_kabuli_chr07 | 33385210                | TT                              | GG                | 1946465439               |
| SNP_P3_90761_33385285 | NC_021166.1    | Ca_kabuli_chr07 | 33385285                | TT                              | CC                | 1946465440               |
| SNP_P3_90763_33387406 | NC_021166.1    | Ca_kabuli_chr07 | 33387406                | TT                              | CC                | 1946465441               |
| SNP_P3_90764_33389099 | NC_021166.1    | Ca_kabuli_chr07 | 33389099                | AA                              | GG                | 1946465442               |
| SNP_P3_90765_33394259 | NC_021166.1    | Ca_kabuli_chr07 | 33394259                | TT                              | CC                | 1946465443               |
| SNP_P3_90766_33401855 | NC_021166.1    | Ca_kabuli_chr07 | 33401855                | TT                              | AA                | 1946465444               |
| SNP_P3_90767_33404457 | NC_021166.1    | Ca_kabuli_chr07 | 33404457                | TT                              | CC                | 1946465445               |
| SNP_P3_90768_33404525 | NC_021166.1    | Ca_kabuli_chr07 | 33404525                | GG                              | AA                | 1946465446               |
| SNP_P3_90769_33405842 | NC_021166.1    | Ca_kabuli_chr07 | 33405842                | GG                              | AA                | 1946465447               |
| SNP_P3_90770_33405851 | NC_021166.1    | Ca_kabuli_chr07 | 33405851                | CC                              | AA                | 1946465448               |
| SNP_P3_90771_33405866 | NC_021166.1    | Ca_kabuli_chr07 | 33405866                | AA                              | CC                | 1946465449               |
| SNP_P3_90772_33406929 | NC_021166.1    | Ca_kabuli_chr07 | 33406929                | TT                              | AA                | 1946465450               |
| SNP_P3_90773_33408209 | NC_021166.1    | Ca_kabuli_chr07 | 33408209                | TT                              | CC                | 1946465451               |
| SNP_P3_90774_33409029 | NC_021166.1    | Ca_kabuli_chr07 | 33409029                | AA                              | GG                | 1946465452               |
| SNP_P3_90775_33409223 | NC_021166.1    | Ca_kabuli_chr07 | 33409223                | CC                              | TT                | 1946465453               |
| SNP_P3_90777_33410402 | NC_021166.1    | Ca_kabuli_chr07 | 33410402                | CC                              | TT                | 1946465454               |
| SNP_P3_90778_33411355 | NC_021166.1    | Ca_kabuli_chr07 | 33411355                | GG                              | TT                | 1946465455               |
| SNP_P3_90779_33412353 | NC_021166.1    | Ca_kabuli_chr07 | 33412353                | GG                              | AA                | 1946465456               |
| SNP_P3_90780_33412562 | NC_021166.1    | Ca_kabuli_chr07 | 33412562                | TT                              | CC                | 1946465457               |
| SNP_P3_90781_33412578 | NC_021166.1    | Ca_kabuli_chr07 | 33412578                | CC                              | TT                | 1946465458               |
| SNP_P3_90782_33412598 | NC_021166.1    | Ca_kabuli_chr07 | 33412598                | TT                              | CC                | 1946465459               |
| SNP_P3_90783_33412772 | NC_021166.1    | Ca_kabuli_chr07 | 33412772                | AA                              | TT                | 1946465460               |



| SNPs IDs              | Chromosome IDs | Chromosomes     | Physical positions (bp) | CDC Frontier (Reference genome) | (Pusa 256 & HPNB) | NCBI SNPdb Accession IDs |
|-----------------------|----------------|-----------------|-------------------------|---------------------------------|-------------------|--------------------------|
| SNP_P3_90784_33412811 | NC_021166.1    | Ca_kabuli_chr07 | 33412811                | GG                              | AA                | 1946465461               |
| SNP_P3_90788_33413566 | NC_021166.1    | Ca_kabuli_chr07 | 33413566                | AA                              | GG                | 1946465462               |
| SNP_P3_90789_33413568 | NC_021166.1    | Ca_kabuli_chr07 | 33413568                | AA                              | TT                | 1946465463               |
| SNP_P3_90790_33413599 | NC_021166.1    | Ca_kabuli_chr07 | 33413599                | CC                              | AA                | 1946465464               |
| SNP_P3_90791_33413632 | NC_021166.1    | Ca_kabuli_chr07 | 33413632                | CC                              | TT                | 1946465465               |
| SNP_P3_90792_33413990 | NC_021166.1    | Ca_kabuli_chr07 | 33413990                | AA                              | TT                | 1946465466               |
| SNP_P3_90793_33414233 | NC_021166.1    | Ca_kabuli_chr07 | 33414233                | AA                              | GG                | 1946465467               |
| SNP_P3_90794_33414603 | NC_021166.1    | Ca_kabuli_chr07 | 33414603                | TT                              | GG                | 1946465468               |
| SNP_P3_90795_33414611 | NC_021166.1    | Ca_kabuli_chr07 | 33414611                | GG                              | AA                | 1946465469               |
| SNP_P3_90796_33414646 | NC_021166.1    | Ca_kabuli_chr07 | 33414646                | CC                              | TT                | 1946465470               |
| SNP_P3_90798_33415783 | NC_021166.1    | Ca_kabuli_chr07 | 33415783                | AA                              | GG                | 1946465471               |
| SNP_P3_90800_33418018 | NC_021166.1    | Ca_kabuli_chr07 | 33418018                | AA                              | GG                | 1946465472               |
| SNP_P3_90801_33418040 | NC_021166.1    | Ca_kabuli_chr07 | 33418040                | GG                              | AA                | 1946465473               |
| SNP_P3_90802_33418082 | NC_021166.1    | Ca_kabuli_chr07 | 33418082                | CC                              | AA                | 1946465474               |
| SNP_P3_90803_33418145 | NC_021166.1    | Ca_kabuli_chr07 | 33418145                | GG                              | AA                | 1946465475               |
| SNP_P3_90804_33418396 | NC_021166.1    | Ca_kabuli_chr07 | 33418396                | GG                              | CC                | 1946465476               |
| SNP_P3_90805_33418652 | NC_021166.1    | Ca_kabuli_chr07 | 33418652                | GG                              | TT                | 1946465477               |
| SNP_P3_90806_33419922 | NC_021166.1    | Ca_kabuli_chr07 | 33419922                | CC                              | AA                | 1946465478               |
| SNP_P3_90807_33419942 | NC_021166.1    | Ca_kabuli_chr07 | 33419942                | TT                              | CC                | 1946465479               |
| SNP_P3_90808_33419962 | NC_021166.1    | Ca_kabuli_chr07 | 33419962                | CC                              | GG                | 1946465480               |
| SNP_P3_90809_33420317 | NC_021166.1    | Ca_kabuli_chr07 | 33420317                | AA                              | CC                | 1946465481               |
| SNP_P3_90812_33421269 | NC_021166.1    | Ca_kabuli_chr07 | 33421269                | TT                              | AA                | 1946465482               |
| SNP_P3_90813_33421364 | NC_021166.1    | Ca_kabuli_chr07 | 33421364                | AA                              | GG                | 1946465483               |
| SNP_P3_90815_33423247 | NC_021166.1    | Ca_kabuli_chr07 | 33423247                | AA                              | CC                | 1946465484               |
| SNP_P3_90818_33425581 | NC_021166.1    | Ca_kabuli_chr07 | 33425581                | AA                              | CC                | 1946465485               |
| SNP_P3_90819_33426028 | NC_021166.1    | Ca_kabuli_chr07 | 33426028                | AA                              | TT                | 1946465486               |
| SNP_P3_90820_33426369 | NC_021166.1    | Ca_kabuli_chr07 | 33426369                | CC                              | TT                | 1946465487               |
| SNP_P3_90821_33427789 | NC_021166.1    | Ca_kabuli_chr07 | 33427789                | CC                              | TT                | 1946465488               |
| SNP_P3_90822_33428591 | NC_021166.1    | Ca_kabuli_chr07 | 33428591                | CC                              | GG                | 1946465489               |
| SNP_P3_90823_33431071 | NC_021166.1    | Ca_kabuli_chr07 | 33431071                | GG                              | CC                | 1946465490               |
| SNP_P3_90824_33431079 | NC_021166.1    | Ca_kabuli_chr07 | 33431079                | CC                              | TT                | 1946465491               |
| SNP_P3_90825_33442637 | NC_021166.1    | Ca_kabuli_chr07 | 33442637                | CC                              | TT                | 1946465492               |
| SNP_P3_90826_33442648 | NC_021166.1    | Ca_kabuli_chr07 | 33442648                | CC                              | AA                | 1946465493               |
| SNP_P3_90828_33442889 | NC_021166.1    | Ca_kabuli_chr07 | 33442889                | AA                              | GG                | 1946465494               |
| SNP_P3_90829_33443189 | NC_021166.1    | Ca_kabuli_chr07 | 33443189                | TT                              | CC                | 1946465495               |
| SNP_P3_90830_33449439 | NC_021166.1    | Ca_kabuli_chr07 | 33449439                | GG                              | AA                | 1946465496               |
| SNP_P3_90831_33449912 | NC_021166.1    | Ca_kabuli_chr07 | 33449912                | CC                              | TT                | 1946465497               |
| SNP_P3_90832_33452854 | NC_021166.1    | Ca_kabuli_chr07 | 33452854                | CC                              | TT                | 1946465498               |
| SNP_P3_90833_33453110 | NC_021166.1    | Ca_kabuli_chr07 | 33453110                | AA                              | GG                | 1946465499               |
| SNP_P3_90834_33453702 | NC_021166.1    | Ca_kabuli_chr07 | 33453702                | TT                              | GG                | 1946465500               |
| SNP_P3_90835_33454394 | NC_021166.1    | Ca_kabuli_chr07 | 33454394                | AA                              | TT                | 1946465501               |
| SNP_P3_90836_33457494 | NC_021166.1    | Ca_kabuli_chr07 | 33457494                | CC                              | TT                | 1946465502               |

| SNPs IDs              | Chromosome IDs | Chromosomes     | Physical positions (bp) | CDC Frontier (Reference genome) | (Pusa 256 & HPNB) | NCBI SNPdb Accession IDs |
|-----------------------|----------------|-----------------|-------------------------|---------------------------------|-------------------|--------------------------|
| SNP_P3_90837_33457932 | NC_021166.1    | Ca_kabuli_chr07 | 33457932                | TT                              | CC                | 1946465503               |
| SNP_P3_90838_33457989 | NC_021166.1    | Ca_kabuli_chr07 | 33457989                | CC                              | AA                | 1946465504               |
| SNP_P3_90839_33457995 | NC_021166.1    | Ca_kabuli_chr07 | 33457995                | CC                              | TT                | 1946465505               |
| SNP_P3_90840_33461080 | NC_021166.1    | Ca_kabuli_chr07 | 33461080                | GG                              | AA                | 1946465506               |
| SNP_P3_90841_33463300 | NC_021166.1    | Ca_kabuli_chr07 | 33463300                | GG                              | CC                | 1946465507               |
| SNP_P3_90842_33463705 | NC_021166.1    | Ca_kabuli_chr07 | 33463705                | TT                              | CC                | 1946465508               |
| SNP_P3_90843_33466613 | NC_021166.1    | Ca_kabuli_chr07 | 33466613                | AA                              | GG                | 1946465509               |
| SNP_P3_90846_33467926 | NC_021166.1    | Ca_kabuli_chr07 | 33467926                | GG                              | TT                | 1946465510               |
| SNP_P3_90847_33469548 | NC_021166.1    | Ca_kabuli_chr07 | 33469548                | GG                              | AA                | 1946465511               |
| SNP_P3_90848_33474104 | NC_021166.1    | Ca_kabuli_chr07 | 33474104                | GG                              | AA                | 1946465512               |
| SNP_P3_90849_33474105 | NC_021166.1    | Ca_kabuli_chr07 | 33474105                | CC                              | TT                | 1946465513               |
| SNP_P3_90850_33476343 | NC_021166.1    | Ca_kabuli_chr07 | 33476343                | CC                              | TT                | 1946465514               |
| SNP_P3_90851_33478099 | NC_021166.1    | Ca_kabuli_chr07 | 33478099                | TT                              | CC                | 1946465515               |
| SNP_P3_90852_33478405 | NC_021166.1    | Ca_kabuli_chr07 | 33478405                | GG                              | AA                | 1946465516               |
| SNP_P3_90853_33478666 | NC_021166.1    | Ca_kabuli_chr07 | 33478666                | AA                              | CC                | 1946465517               |
| SNP_P3_90854_33478676 | NC_021166.1    | Ca_kabuli_chr07 | 33478676                | TT                              | GG                | 1946465518               |
| SNP_P3_90855_33478681 | NC_021166.1    | Ca_kabuli_chr07 | 33478681                | AA                              | GG                | 1946465519               |
| SNP_P3_90856_33478714 | NC_021166.1    | Ca_kabuli_chr07 | 33478714                | AA                              | GG                | 1946465520               |
| SNP_P3_90857_33479653 | NC_021166.1    | Ca_kabuli_chr07 | 33479653                | TT                              | GG                | 1946465521               |
| SNP_P3_90858_33479849 | NC_021166.1    | Ca_kabuli_chr07 | 33479849                | TT                              | CC                | 1946465522               |
| SNP_P3_90859_33479877 | NC_021166.1    | Ca_kabuli_chr07 | 33479877                | TT                              | CC                | 1946465523               |
| SNP_P3_90860_33479880 | NC_021166.1    | Ca_kabuli_chr07 | 33479880                | CC                              | GG                | 1946465524               |
| SNP_P3_90861_33482091 | NC_021166.1    | Ca_kabuli_chr07 | 33482091                | AA                              | GG                | 1946465525               |
| SNP_P3_90862_33483564 | NC_021166.1    | Ca_kabuli_chr07 | 33483564                | AA                              | CC                | 1946465526               |
| SNP_P3_90863_33483567 | NC_021166.1    | Ca_kabuli_chr07 | 33483567                | AA                              | GG                | 1946465527               |
| SNP_P3_90866_33489799 | NC_021166.1    | Ca_kabuli_chr07 | 33489799                | CC                              | TT                | 1946465528               |
| SNP_P3_90867_33490529 | NC_021166.1    | Ca_kabuli_chr07 | 33490529                | TT                              | CC                | 1946465529               |
| SNP_P3_90868_33517536 | NC_021166.1    | Ca_kabuli_chr07 | 33517536                | AA                              | CC                | 1946465530               |
| SNP_P3_90869_33517570 | NC_021166.1    | Ca_kabuli_chr07 | 33517570                | TT                              | CC                | 1946465531               |
| SNP_P3_90870_33517593 | NC_021166.1    | Ca_kabuli_chr07 | 33517593                | AA                              | TT                | 1946465532               |
| SNP_P3_90871_33517646 | NC_021166.1    | Ca_kabuli_chr07 | 33517646                | GG                              | AA                | 1946465533               |
| SNP_P3_90872_33517702 | NC_021166.1    | Ca_kabuli_chr07 | 33517702                | GG                              | AA                | 1946465534               |
| SNP_P3_90873_33520819 | NC_021166.1    | Ca_kabuli_chr07 | 33520819                | CC                              | TT                | 1946465535               |
| SNP_P3_90874_33520932 | NC_021166.1    | Ca_kabuli_chr07 | 33520932                | GG                              | AA                | 1946465536               |
| SNP_P3_90875_33521058 | NC_021166.1    | Ca_kabuli_chr07 | 33521058                | CC                              | AA                | 1946465537               |
| SNP_P3_90876_33521062 | NC_021166.1    | Ca_kabuli_chr07 | 33521062                | TT                              | CC                | 1946465538               |
| SNP_P3_90877_33521128 | NC_021166.1    | Ca_kabuli_chr07 | 33521128                | AA                              | GG                | 1946465539               |
| SNP_P3_90878_33521159 | NC_021166.1    | Ca_kabuli_chr07 | 33521159                | GG                              | CC                | 1946465540               |
| SNP_P3_90879_33521166 | NC_021166.1    | Ca_kabuli_chr07 | 33521166                | TT                              | AA                | 1946465541               |
| SNP_P3_90883_33521440 | NC_021166.1    | Ca_kabuli_chr07 | 33521440                | GG                              | TT                | 1946465542               |
| SNP_P3_90884_33521951 | NC_021166.1    | Ca_kabuli_chr07 | 33521951                | AA                              | GG                | 1946465543               |
| SNP_P3_90885_33522583 | NC_021166.1    | Ca_kabuli_chr07 | 33522583                | GG                              | AA                | 1946465544               |

| SNPs IDs              | Chromosome IDs | Chromosomes     | Physical positions (bp) | CDC Frontier (Reference genome) | (Pusa 256 & HPNB) | NCBI SNPdb Accession IDs |
|-----------------------|----------------|-----------------|-------------------------|---------------------------------|-------------------|--------------------------|
| SNP_P3_90886_33522587 | NC_021166.1    | Ca_kabuli_chr07 | 33522587                | CC                              | TT                | 1946465545               |
| SNP_P3_90887_33522600 | NC_021166.1    | Ca_kabuli_chr07 | 33522600                | CC                              | TT                | 1946465546               |
| SNP_P3_90888_33522636 | NC_021166.1    | Ca_kabuli_chr07 | 33522636                | CC                              | TT                | 1946465547               |
| SNP_P3_90889_33522877 | NC_021166.1    | Ca_kabuli_chr07 | 33522877                | TT                              | CC                | 1946465548               |
| SNP_P3_90890_33524142 | NC_021166.1    | Ca_kabuli_chr07 | 33524142                | AA                              | GG                | 1946465549               |
| SNP_P3_90891_33524157 | NC_021166.1    | Ca_kabuli_chr07 | 33524157                | GG                              | CC                | 1946465550               |
| SNP_P3_90892_33524166 | NC_021166.1    | Ca_kabuli_chr07 | 33524166                | GG                              | AA                | 1946465551               |
| SNP_P3_90893_33524184 | NC_021166.1    | Ca_kabuli_chr07 | 33524184                | AA                              | GG                | 1946465552               |
| SNP_P3_90894_33524187 | NC_021166.1    | Ca_kabuli_chr07 | 33524187                | CC                              | TT                | 1946465553               |
| SNP_P3_90895_33524208 | NC_021166.1    | Ca_kabuli_chr07 | 33524208                | AA                              | TT                | 1946465554               |
| SNP_P3_90896_33526559 | NC_021166.1    | Ca_kabuli_chr07 | 33526559                | TT                              | AA                | 1946465555               |
| SNP_P3_90897_33526566 | NC_021166.1    | Ca_kabuli_chr07 | 33526566                | CC                              | AA                | 1946465556               |
| SNP_P3_90898_33526895 | NC_021166.1    | Ca_kabuli_chr07 | 33526895                | GG                              | AA                | 1946465557               |
| SNP_P3_90899_33526903 | NC_021166.1    | Ca_kabuli_chr07 | 33526903                | CC                              | AA                | 1946465558               |
| SNP_P3_90901_33526963 | NC_021166.1    | Ca_kabuli_chr07 | 33526963                | AA                              | GG                | 1946465559               |
| SNP_P3_90904_33531979 | NC_021166.1    | Ca_kabuli_chr07 | 33531979                | GG                              | TT                | 1946465560               |
| SNP_P3_90905_33532407 | NC_021166.1    | Ca_kabuli_chr07 | 33532407                | AA                              | GG                | 1946465561               |
| SNP_P3_90907_33533907 | NC_021166.1    | Ca_kabuli_chr07 | 33533907                | AA                              | TT                | 1946465562               |
| SNP_P3_90909_33534400 | NC_021166.1    | Ca_kabuli_chr07 | 33534400                | TT                              | AA                | 1946465563               |
| SNP_P3_90910_33534402 | NC_021166.1    | Ca_kabuli_chr07 | 33534402                | TT                              | CC                | 1946465564               |
| SNP_P3_90911_33534661 | NC_021166.1    | Ca_kabuli_chr07 | 33534661                | CC                              | TT                | 1946465565               |
| SNP_P3_90913_33535588 | NC_021166.1    | Ca_kabuli_chr07 | 33535588                | TT                              | AA                | 1946465566               |
| SNP_P3_90914_33535593 | NC_021166.1    | Ca_kabuli_chr07 | 33535593                | CC                              | TT                | 1946465567               |
| SNP_P3_90916_33535923 | NC_021166.1    | Ca_kabuli_chr07 | 33535923                | AA                              | TT                | 1946465568               |
| SNP_P3_90917_33537087 | NC_021166.1    | Ca_kabuli_chr07 | 33537087                | TT                              | CC                | 1946465569               |
| SNP_P3_90918_33537105 | NC_021166.1    | Ca_kabuli_chr07 | 33537105                | CC                              | TT                | 1946465570               |
| SNP_P3_90919_33538991 | NC_021166.1    | Ca_kabuli_chr07 | 33538991                | TT                              | AA                | 1946465571               |
| SNP_P3_90922_33539158 | NC_021166.1    | Ca_kabuli_chr07 | 33539158                | AA                              | GG                | 1946465572               |
| SNP_P3_90924_33540921 | NC_021166.1    | Ca_kabuli_chr07 | 33540921                | AA                              | GG                | 1946465573               |
| SNP_P3_90925_33540926 | NC_021166.1    | Ca_kabuli_chr07 | 33540926                | CC                              | TT                | 1946465574               |
| SNP_P3_90926_33542086 | NC_021166.1    | Ca_kabuli_chr07 | 33542086                | CC                              | TT                | 1946465575               |
| SNP_P3_90927_33545370 | NC_021166.1    | Ca_kabuli_chr07 | 33545370                | TT                              | GG                | 1946465576               |
| SNP_P3_90928_33545373 | NC_021166.1    | Ca_kabuli_chr07 | 33545373                | GG                              | AA                | 1946465577               |
| SNP_P3_90929_33545384 | NC_021166.1    | Ca_kabuli_chr07 | 33545384                | TT                              | CC                | 1946465578               |
| SNP_P3_90930_33545414 | NC_021166.1    | Ca_kabuli_chr07 | 33545414                | AA                              | GG                | 1946465579               |
| SNP_P3_90931_33545683 | NC_021166.1    | Ca_kabuli_chr07 | 33545683                | AA                              | GG                | 1946465580               |
| SNP_P3_90932_33545686 | NC_021166.1    | Ca_kabuli_chr07 | 33545686                | CC                              | AA                | 1946465581               |
| SNP_P3_90933_33545751 | NC_021166.1    | Ca_kabuli_chr07 | 33545751                | TT                              | CC                | 1946465582               |
| SNP_P3_90934_33545752 | NC_021166.1    | Ca_kabuli_chr07 | 33545752                | AA                              | CC                | 1946465583               |
| SNP_P3_90935_33545788 | NC_021166.1    | Ca_kabuli_chr07 | 33545788                | TT                              | AA                | 1946465584               |
| SNP_P3_90936_33545792 | NC_021166.1    | Ca_kabuli_chr07 | 33545792                | CC                              | TT                | 1946465585               |
| SNP_P3_90937_33545809 | NC_021166.1    | Ca_kabuli_chr07 | 33545809                | GG                              | TT                | 1946465586               |

| SNPs IDs              | Chromosome IDs | Chromosomes     | Physical positions (bp) | CDC Frontier (Reference genome) | (Pusa 256 & HPNB) | NCBI SNPdb Accession IDs |
|-----------------------|----------------|-----------------|-------------------------|---------------------------------|-------------------|--------------------------|
| SNP_P3_90938_33554301 | NC_021166.1    | Ca_kabuli_chr07 | 33554301                | AA                              | CC                | 1946465587               |
| SNP_P3_90939_33554345 | NC_021166.1    | Ca_kabuli_chr07 | 33554345                | TT                              | AA                | 1946465588               |
| SNP_P3_90941_33556673 | NC_021166.1    | Ca_kabuli_chr07 | 33556673                | TT                              | GG                | 1946465589               |
| SNP_P3_90942_33556674 | NC_021166.1    | Ca_kabuli_chr07 | 33556674                | CC                              | AA                | 1946465590               |
| SNP_P3_90943_33556688 | NC_021166.1    | Ca_kabuli_chr07 | 33556688                | GG                              | AA                | 1946465591               |
| SNP_P3_90944_33556802 | NC_021166.1    | Ca_kabuli_chr07 | 33556802                | AA                              | TT                | 1946465592               |
| SNP_P3_90945_33556904 | NC_021166.1    | Ca_kabuli_chr07 | 33556904                | AA                              | GG                | 1946465593               |
| SNP_P3_90946_33556927 | NC_021166.1    | Ca_kabuli_chr07 | 33556927                | TT                              | CC                | 1946465594               |
| SNP_P3_90948_33557896 | NC_021166.1    | Ca_kabuli_chr07 | 33557896                | AA                              | GG                | 1946465595               |
| SNP_P3_90949_33558441 | NC_021166.1    | Ca_kabuli_chr07 | 33558441                | CC                              | TT                | 1946465596               |
| SNP_P3_90951_33558484 | NC_021166.1    | Ca_kabuli_chr07 | 33558484                | TT                              | CC                | 1946465597               |
| SNP_P3_90953_33558695 | NC_021166.1    | Ca_kabuli_chr07 | 33558695                | CC                              | TT                | 1946465598               |
| SNP_P3_90954_33558697 | NC_021166.1    | Ca_kabuli_chr07 | 33558697                | GG                              | AA                | 1946465599               |
| SNP_P3_90955_33559641 | NC_021166.1    | Ca_kabuli_chr07 | 33559641                | AA                              | GG                | 1946465600               |
| SNP_P3_90956_33559717 | NC_021166.1    | Ca_kabuli_chr07 | 33559717                | TT                              | CC                | 1946465601               |
| SNP_P3_90957_33559729 | NC_021166.1    | Ca_kabuli_chr07 | 33559729                | CC                              | TT                | 1946465602               |
| SNP_P3_90958_33559736 | NC_021166.1    | Ca_kabuli_chr07 | 33559736                | AA                              | GG                | 1946465603               |
| SNP_P3_90959_33559763 | NC_021166.1    | Ca_kabuli_chr07 | 33559763                | TT                              | GG                | 1946465604               |
| SNP_P3_90960_33559781 | NC_021166.1    | Ca_kabuli_chr07 | 33559781                | TT                              | CC                | 1946465605               |
| SNP_P3_90961_33559939 | NC_021166.1    | Ca_kabuli_chr07 | 33559939                | GG                              | TT                | 1946465606               |
| SNP_P3_90962_33560054 | NC_021166.1    | Ca_kabuli_chr07 | 33560054                | AA                              | GG                | 1946465607               |
| SNP_P3_90963_33560078 | NC_021166.1    | Ca_kabuli_chr07 | 33560078                | TT                              | CC                | 1946465608               |
| SNP_P3_90964_33560313 | NC_021166.1    | Ca_kabuli_chr07 | 33560313                | TT                              | GG                | 1946465609               |
| SNP_P3_90968_33562177 | NC_021166.1    | Ca_kabuli_chr07 | 33562177                | CC                              | TT                | 1946465610               |
| SNP_P3_90970_33562563 | NC_021166.1    | Ca_kabuli_chr07 | 33562563                | CC                              | GG                | 1946465611               |
| SNP_P3_90971_33562895 | NC_021166.1    | Ca_kabuli_chr07 | 33562895                | AA                              | GG                | 1946465612               |
| SNP_P3_90972_33562904 | NC_021166.1    | Ca_kabuli_chr07 | 33562904                | AA                              | CC                | 1946465613               |
| SNP_P3_90973_33563382 | NC_021166.1    | Ca_kabuli_chr07 | 33563382                | TT                              | CC                | 1946465614               |
| SNP_P3_90974_33563529 | NC_021166.1    | Ca_kabuli_chr07 | 33563529                | TT                              | CC                | 1946465615               |
| SNP_P3_90975_33563963 | NC_021166.1    | Ca_kabuli_chr07 | 33563963                | TT                              | CC                | 1946465616               |
| SNP_P3_90976_33564034 | NC_021166.1    | Ca_kabuli_chr07 | 33564034                | AA                              | GG                | 1946465617               |
| SNP_P3_90977_33564103 | NC_021166.1    | Ca_kabuli_chr07 | 33564103                | TT                              | AA                | 1946465618               |
| SNP_P3_90978_33564110 | NC_021166.1    | Ca_kabuli_chr07 | 33564110                | TT                              | AA                | 1946465619               |
| SNP_P3_90979_33564118 | NC_021166.1    | Ca_kabuli_chr07 | 33564118                | TT                              | CC                | 1946465620               |
| SNP_P3_90980_33564121 | NC_021166.1    | Ca_kabuli_chr07 | 33564121                | AA                              | GG                | 1946465621               |
| SNP_P3_90981_33564158 | NC_021166.1    | Ca_kabuli_chr07 | 33564158                | AA                              | GG                | 1946465622               |
| SNP_P3_90982_33564166 | NC_021166.1    | Ca_kabuli_chr07 | 33564166                | GG                              | CC                | 1946465623               |
| SNP_P3_90983_33564168 | NC_021166.1    | Ca_kabuli_chr07 | 33564168                | AA                              | TT                | 1946465624               |
| SNP_P3_90984_33564188 | NC_021166.1    | Ca_kabuli_chr07 | 33564188                | GG                              | AA                | 1946465625               |
| SNP_P3_90985_33564945 | NC_021166.1    | Ca_kabuli_chr07 | 33564945                | CC                              | AA                | 1946465626               |
| SNP_P3_90986_33564952 | NC_021166.1    | Ca_kabuli_chr07 | 33564952                | GG                              | AA                | 1946465627               |
| SNP_P3_90988_33565013 | NC_021166.1    | Ca_kabuli_chr07 | 33565013                | AA                              | TT                | 1946465628               |

| SNPs IDs              | Chromosome IDs | Chromosomes     | Physical positions (bp) | CDC Frontier (Reference genome) | (Pusa 256 & HPNB) | NCBI SNPdb Accession IDs |
|-----------------------|----------------|-----------------|-------------------------|---------------------------------|-------------------|--------------------------|
| SNP_P3_90989_33565223 | NC_021166.1    | Ca_kabuli_chr07 | 33565223                | CC                              | AA                | 1946465629               |
| SNP_P3_90990_33565236 | NC_021166.1    | Ca_kabuli_chr07 | 33565236                | TT                              | CC                | 1946465630               |
| SNP_P3_90991_33566658 | NC_021166.1    | Ca_kabuli_chr07 | 33566658                | CC                              | AA                | 1946465631               |
| SNP_P3_90992_33566700 | NC_021166.1    | Ca_kabuli_chr07 | 33566700                | CC                              | AA                | 1946465632               |
| SNP_P3_90993_33566719 | NC_021166.1    | Ca_kabuli_chr07 | 33566719                | GG                              | TT                | 1946465633               |
| SNP_P3_90995_33566899 | NC_021166.1    | Ca_kabuli_chr07 | 33566899                | TT                              | AA                | 1946465634               |
| SNP_P3_90996_33566927 | NC_021166.1    | Ca_kabuli_chr07 | 33566927                | AA                              | TT                | 1946465635               |
| SNP_P3_90998_33568660 | NC_021166.1    | Ca_kabuli_chr07 | 33568660                | CC                              | TT                | 1946465636               |
| SNP_P3_90999_33572488 | NC_021166.1    | Ca_kabuli_chr07 | 33572488                | CC                              | GG                | 1946465637               |
| SNP_P3_91000_33574579 | NC_021166.1    | Ca_kabuli_chr07 | 33574579                | AA                              | GG                | 1946465638               |
| SNP_P3_91001_33574583 | NC_021166.1    | Ca_kabuli_chr07 | 33574583                | AA                              | TT                | 1946465639               |
| SNP_P3_91002_33574596 | NC_021166.1    | Ca_kabuli_chr07 | 33574596                | GG                              | AA                | 1946465640               |
| SNP_P3_91003_33574630 | NC_021166.1    | Ca_kabuli_chr07 | 33574630                | AA                              | GG                | 1946465641               |
| SNP_P3_91004_33574664 | NC_021166.1    | Ca_kabuli_chr07 | 33574664                | CC                              | AA                | 1946465642               |
| SNP_P3_91005_33574667 | NC_021166.1    | Ca_kabuli_chr07 | 33574667                | CC                              | AA                | 1946465643               |
| SNP_P3_91006_33574938 | NC_021166.1    | Ca_kabuli_chr07 | 33574938                | TT                              | AA                | 1946465644               |
| SNP_P3_91007_33574992 | NC_021166.1    | Ca_kabuli_chr07 | 33574992                | CC                              | TT                | 1946465645               |
| SNP_P3_91009_33575039 | NC_021166.1    | Ca_kabuli_chr07 | 33575039                | CC                              | GG                | 1946465646               |
| SNP_P3_91010_33575070 | NC_021166.1    | Ca_kabuli_chr07 | 33575070                | CC                              | TT                | 1946465647               |
| SNP_P3_91011_33575074 | NC_021166.1    | Ca_kabuli_chr07 | 33575074                | GG                              | AA                | 1946465649               |
| SNP_P3_91013_33575297 | NC_021166.1    | Ca_kabuli_chr07 | 33575297                | GG                              | CC                | 1946465650               |
| SNP_P3_91014_33575760 | NC_021166.1    | Ca_kabuli_chr07 | 33575760                | TT                              | CC                | 1946465651               |
| SNP_P3_91015_33575761 | NC_021166.1    | Ca_kabuli_chr07 | 33575761                | GG                              | AA                | 1946465652               |
| SNP_P3_91017_33576306 | NC_021166.1    | Ca_kabuli_chr07 | 33576306                | TT                              | CC                | 1946465653               |
| SNP_P3_91018_33576391 | NC_021166.1    | Ca_kabuli_chr07 | 33576391                | GG                              | CC                | 1946465654               |
| SNP_P3_91019_33576786 | NC_021166.1    | Ca_kabuli_chr07 | 33576786                | CC                              | TT                | 1946465655               |
| SNP_P3_91020_33579893 | NC_021166.1    | Ca_kabuli_chr07 | 33579893                | TT                              | CC                | 1946465656               |
| SNP_P3_91021_33579910 | NC_021166.1    | Ca_kabuli_chr07 | 33579910                | AA                              | GG                | 1946465657               |
| SNP_P3_91022_33579950 | NC_021166.1    | Ca_kabuli_chr07 | 33579950                | AA                              | CC                | 1946465658               |
| SNP_P3_91023_33580054 | NC_021166.1    | Ca_kabuli_chr07 | 33580054                | GG                              | CC                | 1946465659               |
| SNP_P3_91024_33580066 | NC_021166.1    | Ca_kabuli_chr07 | 33580066                | GG                              | AA                | 1946465660               |
| SNP_P3_91025_33580227 | NC_021166.1    | Ca_kabuli_chr07 | 33580227                | CC                              | TT                | 1946465661               |
| SNP_P3_91026_33581046 | NC_021166.1    | Ca_kabuli_chr07 | 33581046                | GG                              | AA                | 1946465662               |
| SNP_P3_91027_33581060 | NC_021166.1    | Ca_kabuli_chr07 | 33581060                | CC                              | AA                | 1946465663               |
| SNP_P3_91028_33581216 | NC_021166.1    | Ca_kabuli_chr07 | 33581216                | GG                              | AA                | 1946465664               |
| SNP_P3_91030_33582044 | NC_021166.1    | Ca_kabuli_chr07 | 33582044                | GG                              | AA                | 1946465665               |
| SNP_P3_91031_33583202 | NC_021166.1    | Ca_kabuli_chr07 | 33583202                | CC                              | TT                | 1946465666               |
| SNP_P3_91032_33583265 | NC_021166.1    | Ca_kabuli_chr07 | 33583265                | GG                              | AA                | 1946465667               |
| SNP_P3_91033_33585439 | NC_021166.1    | Ca_kabuli_chr07 | 33585439                | GG                              | AA                | 1946465668               |
| SNP_P3_91034_33585444 | NC_021166.1    | Ca_kabuli_chr07 | 33585444                | CC                              | GG                | 1946465669               |
| SNP_P3_91035_33586799 | NC_021166.1    | Ca_kabuli_chr07 | 33586799                | AA                              | GG                | 1946465670               |
| SNP_P3_91036_33586828 | NC_021166.1    | Ca_kabuli_chr07 | 33586828                | AA                              | TT                | 1946465671               |

| SNPs IDs              | Chromosome IDs | Chromosomes     | Physical positions (bp) | CDC Frontier (Reference genome) | (Pusa 256 & HPNB) | NCBI SNPdb Accession IDs |
|-----------------------|----------------|-----------------|-------------------------|---------------------------------|-------------------|--------------------------|
| SNP_P3_91037_33592303 | NC_021166.1    | Ca_kabuli_chr07 | 33592303                | TT                              | AA                | 1946465672               |
| SNP_P3_91038_33594231 | NC_021166.1    | Ca_kabuli_chr07 | 33594231                | GG                              | AA                | 1946465673               |
| SNP_P3_91039_33594493 | NC_021166.1    | Ca_kabuli_chr07 | 33594493                | TT                              | AA                | 1946465674               |
| SNP_P3_91040_33594500 | NC_021166.1    | Ca_kabuli_chr07 | 33594500                | GG                              | TT                | 1946465675               |
| SNP_P3_91041_33596509 | NC_021166.1    | Ca_kabuli_chr07 | 33596509                | TT                              | CC                | 1946465676               |
| SNP_P3_91042_33596688 | NC_021166.1    | Ca_kabuli_chr07 | 33596688                | TT                              | AA                | 1946465677               |
| SNP_P3_91043_33596785 | NC_021166.1    | Ca_kabuli_chr07 | 33596785                | AA                              | GG                | 1946465678               |
| SNP_P3_91044_33596792 | NC_021166.1    | Ca_kabuli_chr07 | 33596792                | CC                              | AA                | 1946465679               |
| SNP_P3_91045_33596933 | NC_021166.1    | Ca_kabuli_chr07 | 33596933                | TT                              | AA                | 1946465680               |
| SNP_P3_91046_33597282 | NC_021166.1    | Ca_kabuli_chr07 | 33597282                | TT                              | AA                | 1946465681               |
| SNP_P3_91049_33597778 | NC_021166.1    | Ca_kabuli_chr07 | 33597778                | AA                              | TT                | 1946465682               |
| SNP_P3_91050_33602656 | NC_021166.1    | Ca_kabuli_chr07 | 33602656                | GG                              | CC                | 1946465683               |
| SNP_P3_91051_33604606 | NC_021166.1    | Ca_kabuli_chr07 | 33604606                | AA                              | CC                | 1946465684               |
| SNP_P3_91052_33604609 | NC_021166.1    | Ca_kabuli_chr07 | 33604609                | TT                              | CC                | 1946465685               |
| SNP_P3_91053_33605367 | NC_021166.1    | Ca_kabuli_chr07 | 33605367                | CC                              | TT                | 1946465686               |
| SNP_P3_91054_33605611 | NC_021166.1    | Ca_kabuli_chr07 | 33605611                | AA                              | CC                | 1946465687               |
| SNP_P3_91055_33605646 | NC_021166.1    | Ca_kabuli_chr07 | 33605646                | AA                              | TT                | 1946465688               |
| SNP_P3_91056_33605981 | NC_021166.1    | Ca_kabuli_chr07 | 33605981                | AA                              | CC                | 1946465689               |
| SNP_P3_91057_33607466 | NC_021166.1    | Ca_kabuli_chr07 | 33607466                | TT                              | AA                | 1946465690               |
| SNP_P3_91058_33607474 | NC_021166.1    | Ca_kabuli_chr07 | 33607474                | TT                              | AA                | 1946465691               |
| SNP_P3_91059_33612222 | NC_021166.1    | Ca_kabuli_chr07 | 33612222                | TT                              | AA                | 1946465692               |
| SNP_P3_91060_33612990 | NC_021166.1    | Ca_kabuli_chr07 | 33612990                | AA                              | GG                | 1946465693               |
| SNP_P3_91061_33613328 | NC_021166.1    | Ca_kabuli_chr07 | 33613328                | AA                              | GG                | 1946465694               |
| SNP_P3_91062_33613401 | NC_021166.1    | Ca_kabuli_chr07 | 33613401                | CC                              | TT                | 1946465695               |
| SNP_P3_91063_33613404 | NC_021166.1    | Ca_kabuli_chr07 | 33613404                | GG                              | CC                | 1946465696               |
| SNP_P3_91064_33613405 | NC_021166.1    | Ca_kabuli_chr07 | 33613405                | CC                              | GG                | 1946465697               |
| SNP_P3_91065_33614431 | NC_021166.1    | Ca_kabuli_chr07 | 33614431                | CC                              | AA                | 1946465698               |
| SNP_P3_91066_33614481 | NC_021166.1    | Ca_kabuli_chr07 | 33614481                | AA                              | GG                | 1946465699               |
| SNP_P3_91067_33620571 | NC_021166.1    | Ca_kabuli_chr07 | 33620571                | GG                              | TT                | 1946465700               |
| SNP_P3_91068_33624207 | NC_021166.1    | Ca_kabuli_chr07 | 33624207                | TT                              | GG                | 1946465701               |
| SNP_P3_91069_33624227 | NC_021166.1    | Ca_kabuli_chr07 | 33624227                | CC                              | TT                | 1946465702               |
| SNP_P3_91070_33624249 | NC_021166.1    | Ca_kabuli_chr07 | 33624249                | AA                              | GG                | 1946465703               |
| SNP_P3_91071_33624254 | NC_021166.1    | Ca_kabuli_chr07 | 33624254                | TT                              | CC                | 1946465704               |
| SNP_P3_91072_33624736 | NC_021166.1    | Ca_kabuli_chr07 | 33624736                | TT                              | AA                | 1946465705               |
| SNP_P3_91073_33624774 | NC_021166.1    | Ca_kabuli_chr07 | 33624774                | CC                              | TT                | 1946465707               |
| SNP_P3_91074_33626072 | NC_021166.1    | Ca_kabuli_chr07 | 33626072                | AA                              | TT                | 1946465708               |
| SNP_P3_91075_33626132 | NC_021166.1    | Ca_kabuli_chr07 | 33626132                | GG                              | AA                | 1946465710               |
| SNP_P3_91076_33626148 | NC_021166.1    | Ca_kabuli_chr07 | 33626148                | GG                              | AA                | 1946465711               |
| SNP_P3_91077_33626501 | NC_021166.1    | Ca_kabuli_chr07 | 33626501                | AA                              | GG                | 1946465713               |
| SNP_P3_91078_33626527 | NC_021166.1    | Ca_kabuli_chr07 | 33626527                | CC                              | TT                | 1946465714               |
| SNP_P3_91080_33627994 | NC_021166.1    | Ca_kabuli_chr07 | 33627994                | GG                              | TT                | 1946465716               |
| SNP_P3_91081_33631123 | NC_021166.1    | Ca_kabuli_chr07 | 33631123                | CC                              | TT                | 1946465717               |

| SNPs IDs              | Chromosome IDs | Chromosomes     | Physical positions (bp) | CDC Frontier (Reference genome) | (Pusa 256 & HPNB) | NCBI SNPdb Accession IDs |
|-----------------------|----------------|-----------------|-------------------------|---------------------------------|-------------------|--------------------------|
| SNP_P3_91082_33631155 | NC_021166.1    | Ca_kabuli_chr07 | 33631155                | TT                              | CC                | 1946465718               |
| SNP_P3_91083_33631160 | NC_021166.1    | Ca_kabuli_chr07 | 33631160                | CC                              | TT                | 1946465720               |
| SNP_P3_91084_33633193 | NC_021166.1    | Ca_kabuli_chr07 | 33633193                | CC                              | TT                | 1946465721               |
| SNP_P3_91087_33633530 | NC_021166.1    | Ca_kabuli_chr07 | 33633530                | AA                              | GG                | 1946465723               |
| SNP_P3_91088_33633794 | NC_021166.1    | Ca_kabuli_chr07 | 33633794                | GG                              | CC                | 1946465724               |
| SNP_P3_91090_33633859 | NC_021166.1    | Ca_kabuli_chr07 | 33633859                | GG                              | AA                | 1946465726               |
| SNP_P3_91092_33638261 | NC_021166.1    | Ca_kabuli_chr07 | 33638261                | GG                              | AA                | 1946465727               |
| SNP_P3_91093_33638541 | NC_021166.1    | Ca_kabuli_chr07 | 33638541                | AA                              | TT                | 1946465728               |
| SNP_P3_91095_33638589 | NC_021166.1    | Ca_kabuli_chr07 | 33638589                | AA                              | GG                | 1946465730               |
| SNP_P3_91096_33638611 | NC_021166.1    | Ca_kabuli_chr07 | 33638611                | AA                              | GG                | 1946465731               |
| SNP_P3_91097_33638629 | NC_021166.1    | Ca_kabuli_chr07 | 33638629                | TT                              | CC                | 1946465733               |
| SNP_P3_91098_33638634 | NC_021166.1    | Ca_kabuli_chr07 | 33638634                | TT                              | CC                | 1946465734               |
| SNP_P3_91099_33638644 | NC_021166.1    | Ca_kabuli_chr07 | 33638644                | GG                              | TT                | 1946465736               |
| SNP_P3_91101_33639359 | NC_021166.1    | Ca_kabuli_chr07 | 33639359                | GG                              | AA                | 1946465737               |
| SNP_P3_91103_33640019 | NC_021166.1    | Ca_kabuli_chr07 | 33640019                | AA                              | TT                | 1946465738               |
| SNP_P3_91106_33640340 | NC_021166.1    | Ca_kabuli_chr07 | 33640340                | AA                              | TT                | 1946465740               |
| SNP_P3_91108_33641560 | NC_021166.1    | Ca_kabuli_chr07 | 33641560                | CC                              | GG                | 1946465741               |
| SNP_P3_91111_33642823 | NC_021166.1    | Ca_kabuli_chr07 | 33642823                | GG                              | AA                | 1946465743               |
| SNP_P3_91112_33642965 | NC_021166.1    | Ca_kabuli_chr07 | 33642965                | GG                              | AA                | 1946465744               |
| SNP_P3_91113_33643131 | NC_021166.1    | Ca_kabuli_chr07 | 33643131                | AA                              | GG                | 1946465746               |
| SNP_P3_91115_33644373 | NC_021166.1    | Ca_kabuli_chr07 | 33644373                | AA                              | GG                | 1946465747               |
| SNP_P3_91116_33646988 | NC_021166.1    | Ca_kabuli_chr07 | 33646988                | TT                              | AA                | 1946465748               |
| SNP_P3_91117_33647278 | NC_021166.1    | Ca_kabuli_chr07 | 33647278                | CC                              | TT                | 1946465750               |
| SNP_P3_91118_33647538 | NC_021166.1    | Ca_kabuli_chr07 | 33647538                | CC                              | AA                | 1946465751               |
| SNP_P3_91119_33648387 | NC_021166.1    | Ca_kabuli_chr07 | 33648387                | AA                              | GG                | 1946465753               |
| SNP_P3_91121_33648438 | NC_021166.1    | Ca_kabuli_chr07 | 33648438                | GG                              | AA                | 1946465754               |
| SNP_P3_91122_33648512 | NC_021166.1    | Ca_kabuli_chr07 | 33648512                | AA                              | GG                | 1946465756               |
| SNP_P3_91124_33649199 | NC_021166.1    | Ca_kabuli_chr07 | 33649199                | CC                              | AA                | 1946465757               |
| SNP_P3_91125_33649702 | NC_021166.1    | Ca_kabuli_chr07 | 33649702                | AA                              | CC                | 1946465758               |
| SNP_P3_91126_33649744 | NC_021166.1    | Ca_kabuli_chr07 | 33649744                | TT                              | CC                | 1946465760               |
| SNP_P3_91127_33649745 | NC_021166.1    | Ca_kabuli_chr07 | 33649745                | TT                              | AA                | 1946465761               |
| SNP_P3_91128_33649746 | NC_021166.1    | Ca_kabuli_chr07 | 33649746                | TT                              | AA                | 1946465763               |
| SNP_P3_91129_33649757 | NC_021166.1    | Ca_kabuli_chr07 | 33649757                | CC                              | TT                | 1946465764               |
| SNP_P3_91130_33650229 | NC_021166.1    | Ca_kabuli_chr07 | 33650229                | CC                              | AA                | 1946465766               |
| SNP_P3_91131_33650508 | NC_021166.1    | Ca_kabuli_chr07 | 33650508                | AA                              | GG                | 1946465767               |
| SNP_P3_91132_33650616 | NC_021166.1    | Ca_kabuli_chr07 | 33650616                | AA                              | CC                | 1946465769               |
| SNP_P3_91133_33650627 | NC_021166.1    | Ca_kabuli_chr07 | 33650627                | TT                              | CC                | 1946465770               |
| SNP_P3_91134_33650631 | NC_021166.1    | Ca_kabuli_chr07 | 33650631                | CC                              | AA                | 1946465772               |
| SNP_P3_91135_33650843 | NC_021166.1    | Ca_kabuli_chr07 | 33650843                | AA                              | GG                | 1946465773               |
| SNP_P3_91136_33651498 | NC_021166.1    | Ca_kabuli_chr07 | 33651498                | GG                              | AA                | 1946465774               |
| SNP_P3_91137_33651593 | NC_021166.1    | Ca_kabuli_chr07 | 33651593                | AA                              | GG                | 1946465776               |
| SNP_P3_91138_33652028 | NC_021166.1    | Ca_kabuli_chr07 | 33652028                | CC                              | TT                | 1946465777               |

| SNPs IDs              | Chromosome IDs | Chromosomes     | Physical positions (bp) | CDC Frontier (Reference genome) | (Pusa 256 & HPNB) | NCBI SNPdb Accession IDs |
|-----------------------|----------------|-----------------|-------------------------|---------------------------------|-------------------|--------------------------|
| SNP_P3_91139_33652074 | NC_021166.1    | Ca_kabuli_chr07 | 33652074                | GG                              | TT                | 1946465779               |
| SNP_P3_91140_33652616 | NC_021166.1    | Ca_kabuli_chr07 | 33652616                | CC                              | TT                | 1946465780               |
| SNP_P3_91141_33653571 | NC_021166.1    | Ca_kabuli_chr07 | 33653571                | TT                              | GG                | 1946465782               |
| SNP_P3_91143_33653665 | NC_021166.1    | Ca_kabuli_chr07 | 33653665                | AA                              | GG                | 1946465783               |
| SNP_P3_91144_33653676 | NC_021166.1    | Ca_kabuli_chr07 | 33653676                | GG                              | AA                | 1946465784               |
| SNP_P3_91145_33654981 | NC_021166.1    | Ca_kabuli_chr07 | 33654981                | GG                              | AA                | 1946465786               |
| SNP_P3_91146_33655029 | NC_021166.1    | Ca_kabuli_chr07 | 33655029                | CC                              | TT                | 1946465787               |
| SNP_P3_91147_33655422 | NC_021166.1    | Ca_kabuli_chr07 | 33655422                | AA                              | TT                | 1946465789               |
| SNP_P3_91148_33655662 | NC_021166.1    | Ca_kabuli_chr07 | 33655662                | TT                              | CC                | 1946465790               |
| SNP_P3_91149_33655681 | NC_021166.1    | Ca_kabuli_chr07 | 33655681                | TT                              | AA                | 1946465792               |
| SNP_P3_91150_33655777 | NC_021166.1    | Ca_kabuli_chr07 | 33655777                | GG                              | AA                | 1946465793               |
| SNP_P3_91151_33657802 | NC_021166.1    | Ca_kabuli_chr07 | 33657802                | TT                              | CC                | 1946465794               |
| SNP_P3_91152_33657846 | NC_021166.1    | Ca_kabuli_chr07 | 33657846                | TT                              | CC                | 1946465796               |
| SNP_P3_91153_33657854 | NC_021166.1    | Ca_kabuli_chr07 | 33657854                | AA                              | TT                | 1946465797               |
| SNP_P3_91154_33657859 | NC_021166.1    | Ca_kabuli_chr07 | 33657859                | GG                              | AA                | 1946465799               |
| SNP_P3_91155_33657967 | NC_021166.1    | Ca_kabuli_chr07 | 33657967                | GG                              | AA                | 1946465800               |
| SNP_P3_91156_33658031 | NC_021166.1    | Ca_kabuli_chr07 | 33658031                | AA                              | GG                | 1946465802               |
| SNP_P3_91157_33658032 | NC_021166.1    | Ca_kabuli_chr07 | 33658032                | TT                              | CC                | 1946465803               |
| SNP_P3_91158_33659043 | NC_021166.1    | Ca_kabuli_chr07 | 33659043                | GG                              | CC                | 1946465804               |
| SNP_P3_91159_33659097 | NC_021166.1    | Ca_kabuli_chr07 | 33659097                | AA                              | GG                | 1946465806               |
| SNP_P3_91160_33659156 | NC_021166.1    | Ca_kabuli_chr07 | 33659156                | CC                              | TT                | 1946465807               |
| SNP_P3_91161_33659383 | NC_021166.1    | Ca_kabuli_chr07 | 33659383                | CC                              | GG                | 1946465809               |
| SNP_P3_91162_33659399 | NC_021166.1    | Ca_kabuli_chr07 | 33659399                | CC                              | AA                | 1946465810               |
| SNP_P3_91164_33659676 | NC_021166.1    | Ca_kabuli_chr07 | 33659676                | GG                              | TT                | 1946465812               |
| SNP_P3_91165_33659780 | NC_021166.1    | Ca_kabuli_chr07 | 33659780                | AA                              | TT                | 1946465813               |
| SNP_P3_91166_33659895 | NC_021166.1    | Ca_kabuli_chr07 | 33659895                | TT                              | CC                | 1946465815               |
| SNP_P3_91167_33659906 | NC_021166.1    | Ca_kabuli_chr07 | 33659906                | AA                              | CC                | 1946465816               |
| SNP_P3_91168_33659918 | NC_021166.1    | Ca_kabuli_chr07 | 33659918                | AA                              | CC                | 1946465817               |
| SNP_P3_91169_33660045 | NC_021166.1    | Ca_kabuli_chr07 | 33660045                | GG                              | AA                | 1946465819               |
| SNP_P3_91170_33660069 | NC_021166.1    | Ca_kabuli_chr07 | 33660069                | AA                              | GG                | 1946465820               |
| SNP_P3_91171_33660086 | NC_021166.1    | Ca_kabuli_chr07 | 33660086                | TT                              | CC                | 1946465822               |
| SNP_P3_91172_33660096 | NC_021166.1    | Ca_kabuli_chr07 | 33660096                | CC                              | AA                | 1946465823               |
| SNP_P3_91173_33660122 | NC_021166.1    | Ca_kabuli_chr07 | 33660122                | AA                              | CC                | 1946465824               |
| SNP_P3_91174_33660126 | NC_021166.1    | Ca_kabuli_chr07 | 33660126                | AA                              | GG                | 1946465826               |
| SNP_P3_91176_33660648 | NC_021166.1    | Ca_kabuli_chr07 | 33660648                | TT                              | AA                | 1946465827               |
| SNP_P3_91177_33660677 | NC_021166.1    | Ca_kabuli_chr07 | 33660677                | GG                              | TT                | 1946465829               |
| SNP_P3_91179_33662185 | NC_021166.1    | Ca_kabuli_chr07 | 33662185                | CC                              | GG                | 1946465830               |
| SNP_P3_91180_33662212 | NC_021166.1    | Ca_kabuli_chr07 | 33662212                | CC                              | TT                | 1946465831               |
| SNP_P3_91181_33662339 | NC_021166.1    | Ca_kabuli_chr07 | 33662339                | AA                              | GG                | 1946465833               |
| SNP_P3_91182_33663020 | NC_021166.1    | Ca_kabuli_chr07 | 33663020                | CC                              | TT                | 1946465834               |
| SNP_P3_91183_33663560 | NC_021166.1    | Ca_kabuli_chr07 | 33663560                | GG                              | TT                | 1946465836               |
| SNP_P3_91185_33666538 | NC_021166.1    | Ca_kabuli_chr07 | 33666538                | GG                              | AA                | 1946465837               |



| SNPs IDs              | Chromosome IDs | Chromosomes     | Physical positions (bp) | CDC Frontier (Reference genome) | (Pusa 256 & HPNB) | NCBI SNPdb Accession IDs |
|-----------------------|----------------|-----------------|-------------------------|---------------------------------|-------------------|--------------------------|
| SNP_P3_91186_33666804 | NC_021166.1    | Ca_kabuli_chr07 | 33666804                | CC                              | TT                | 1946465838               |
| SNP_P3_91187_33666819 | NC_021166.1    | Ca_kabuli_chr07 | 33666819                | TT                              | CC                | 1946465840               |
| SNP_P3_91188_33670291 | NC_021166.1    | Ca_kabuli_chr07 | 33670291                | TT                              | AA                | 1946465841               |
| SNP_P3_91190_33670485 | NC_021166.1    | Ca_kabuli_chr07 | 33670485                | CC                              | TT                | 1946465843               |
| SNP_P3_91191_33670569 | NC_021166.1    | Ca_kabuli_chr07 | 33670569                | TT                              | CC                | 1946465844               |
| SNP_P3_91192_33670571 | NC_021166.1    | Ca_kabuli_chr07 | 33670571                | TT                              | GG                | 1946465846               |
| SNP_P3_91193_33670641 | NC_021166.1    | Ca_kabuli_chr07 | 33670641                | CC                              | TT                | 1946465847               |
| SNP_P3_91194_33670781 | NC_021166.1    | Ca_kabuli_chr07 | 33670781                | AA                              | GG                | 1946465849               |
| SNP_P3_91195_33670800 | NC_021166.1    | Ca_kabuli_chr07 | 33670800                | TT                              | CC                | 1946465850               |
| SNP_P3_91196_33670801 | NC_021166.1    | Ca_kabuli_chr07 | 33670801                | TT                              | CC                | 1946465852               |
| SNP_P3_91197_33670846 | NC_021166.1    | Ca_kabuli_chr07 | 33670846                | AA                              | CC                | 1946465853               |
| SNP_P3_91198_33670850 | NC_021166.1    | Ca_kabuli_chr07 | 33670850                | AA                              | GG                | 1946465854               |
| SNP_P3_91199_33670916 | NC_021166.1    | Ca_kabuli_chr07 | 33670916                | AA                              | GG                | 1946465856               |
| SNP_P3_91200_33670936 | NC_021166.1    | Ca_kabuli_chr07 | 33670936                | GG                              | CC                | 1946465857               |
| SNP_P3_91201_33673985 | NC_021166.1    | Ca_kabuli_chr07 | 33673985                | TT                              | CC                | 1946465859               |
| SNP_P3_91203_33683312 | NC_021166.1    | Ca_kabuli_chr07 | 33683312                | AA                              | GG                | 1946465860               |
| SNP_P3_91204_33683323 | NC_021166.1    | Ca_kabuli_chr07 | 33683323                | AA                              | CC                | 1946465862               |
| SNP_P3_91205_33683334 | NC_021166.1    | Ca_kabuli_chr07 | 33683334                | TT                              | GG                | 1946465863               |
| SNP_P3_91207_33698238 | NC_021166.1    | Ca_kabuli_chr07 | 33698238                | AA                              | CC                | 1946465865               |
| SNP_P3_91208_33698458 | NC_021166.1    | Ca_kabuli_chr07 | 33698458                | AA                              | CC                | 1946465866               |
| SNP_P3_91209_33698464 | NC_021166.1    | Ca_kabuli_chr07 | 33698464                | AA                              | GG                | 1946465868               |
| SNP_P3_91210_33698541 | NC_021166.1    | Ca_kabuli_chr07 | 33698541                | AA                              | TT                | 1946465869               |
| SNP_P3_91211_33698632 | NC_021166.1    | Ca_kabuli_chr07 | 33698632                | CC                              | TT                | 1946465871               |
| SNP_P3_91212_33699625 | NC_021166.1    | Ca_kabuli_chr07 | 33699625                | TT                              | CC                | 1946465872               |
| SNP_P3_91213_33700660 | NC_021166.1    | Ca_kabuli_chr07 | 33700660                | CC                              | TT                | 1946465874               |
| SNP_P3_91214_33700834 | NC_021166.1    | Ca_kabuli_chr07 | 33700834                | CC                              | TT                | 1946465875               |
| SNP_P3_91215_33700859 | NC_021166.1    | Ca_kabuli_chr07 | 33700859                | AA                              | TT                | 1946465877               |
| SNP_P3_91216_33700911 | NC_021166.1    | Ca_kabuli_chr07 | 33700911                | CC                              | TT                | 1946465878               |
| SNP_P3_91217_33700955 | NC_021166.1    | Ca_kabuli_chr07 | 33700955                | CC                              | TT                | 1946465880               |
| SNP_P3_91218_33700994 | NC_021166.1    | Ca_kabuli_chr07 | 33700994                | CC                              | TT                | 1946465881               |
| SNP_P3_91219_33701181 | NC_021166.1    | Ca_kabuli_chr07 | 33701181                | AA                              | GG                | 1946465882               |
| SNP_P3_91220_33701461 | NC_021166.1    | Ca_kabuli_chr07 | 33701461                | TT                              | CC                | 1946465884               |
| SNP_P3_91221_33706124 | NC_021166.1    | Ca_kabuli_chr07 | 33706124                | CC                              | GG                | 1946465885               |
| SNP_P3_91222_33706171 | NC_021166.1    | Ca_kabuli_chr07 | 33706171                | TT                              | AA                | 1946465887               |
| SNP_P3_91223_33706186 | NC_021166.1    | Ca_kabuli_chr07 | 33706186                | AA                              | CC                | 1946465888               |
| SNP_P3_91224_33706256 | NC_021166.1    | Ca_kabuli_chr07 | 33706256                | CC                              | TT                | 1946465889               |
| SNP_P3_91226_33706695 | NC_021166.1    | Ca_kabuli_chr07 | 33706695                | GG                              | TT                | 1946465891               |
| SNP_P3_91227_33706934 | NC_021166.1    | Ca_kabuli_chr07 | 33706934                | CC                              | TT                | 1946465892               |
| SNP_P3_91228_33706983 | NC_021166.1    | Ca_kabuli_chr07 | 33706983                | CC                              | GG                | 1946465894               |
| SNP_P3_91229_33706998 | NC_021166.1    | Ca_kabuli_chr07 | 33706998                | CC                              | TT                | 1946465896               |
| SNP_P3_91230_33707010 | NC_021166.1    | Ca_kabuli_chr07 | 33707010                | TT                              | CC                | 1946465897               |
| SNP_P3_91231_33707083 | NC_021166.1    | Ca_kabuli_chr07 | 33707083                | GG                              | AA                | 1946465898               |

| SNPs IDs              | Chromosome IDs | Chromosomes     | Physical positions (bp) | CDC Frontier (Reference genome) | (Pusa 256 & HPNB) | NCBI SNPdb Accession IDs |
|-----------------------|----------------|-----------------|-------------------------|---------------------------------|-------------------|--------------------------|
| SNP_P3_91232_33707094 | NC_021166.1    | Ca_kabuli_chr07 | 33707094                | TT                              | CC                | 1946465900               |
| SNP_P3_91233_33707406 | NC_021166.1    | Ca_kabuli_chr07 | 33707406                | AA                              | TT                | 1946465901               |
| SNP_P3_91234_33707805 | NC_021166.1    | Ca_kabuli_chr07 | 33707805                | CC                              | GG                | 1946465903               |
| SNP_P3_91235_33709608 | NC_021166.1    | Ca_kabuli_chr07 | 33709608                | GG                              | AA                | 1946465904               |
| SNP_P3_91236_33709629 | NC_021166.1    | Ca_kabuli_chr07 | 33709629                | CC                              | AA                | 1946465906               |
| SNP_P3_91237_33709645 | NC_021166.1    | Ca_kabuli_chr07 | 33709645                | TT                              | AA                | 1946465907               |
| SNP_P3_91238_33713739 | NC_021166.1    | Ca_kabuli_chr07 | 33713739                | TT                              | GG                | 1946465908               |
| SNP_P3_91239_33714139 | NC_021166.1    | Ca_kabuli_chr07 | 33714139                | TT                              | CC                | 1946465910               |
| SNP_P3_91240_33714606 | NC_021166.1    | Ca_kabuli_chr07 | 33714606                | CC                              | AA                | 1946465911               |
| SNP_P3_91241_33714922 | NC_021166.1    | Ca_kabuli_chr07 | 33714922                | CC                              | TT                | 1946465913               |
| SNP_P3_91242_33714936 | NC_021166.1    | Ca_kabuli_chr07 | 33714936                | TT                              | AA                | 1946465914               |
| SNP_P3_91243_33715003 | NC_021166.1    | Ca_kabuli_chr07 | 33715003                | AA                              | TT                | 1946465916               |
| SNP_P3_91244_33715260 | NC_021166.1    | Ca_kabuli_chr07 | 33715260                | GG                              | TT                | 1946465917               |
| SNP_P3_91245_33716502 | NC_021166.1    | Ca_kabuli_chr07 | 33716502                | GG                              | TT                | 1946465918               |
| SNP_P3_91246_33716526 | NC_021166.1    | Ca_kabuli_chr07 | 33716526                | CC                              | TT                | 1946465920               |
| SNP_P3_91247_33716528 | NC_021166.1    | Ca_kabuli_chr07 | 33716528                | TT                              | CC                | 1946465921               |
| SNP_P3_91248_33716537 | NC_021166.1    | Ca_kabuli_chr07 | 33716537                | TT                              | CC                | 1946465923               |
| SNP_P3_91249_33719249 | NC_021166.1    | Ca_kabuli_chr07 | 33719249                | AA                              | GG                | 1946465924               |
| SNP_P3_91250_33719284 | NC_021166.1    | Ca_kabuli_chr07 | 33719284                | TT                              | CC                | 1946465926               |
| SNP_P3_91251_33719337 | NC_021166.1    | Ca_kabuli_chr07 | 33719337                | CC                              | TT                | 1946465927               |
| SNP_P3_91253_33719738 | NC_021166.1    | Ca_kabuli_chr07 | 33719738                | TT                              | CC                | 1946465928               |
| SNP_P3_91254_33720107 | NC_021166.1    | Ca_kabuli_chr07 | 33720107                | GG                              | AA                | 1946465930               |
| SNP_P3_91255_33720414 | NC_021166.1    | Ca_kabuli_chr07 | 33720414                | CC                              | TT                | 1946465932               |
| SNP_P3_91256_33720422 | NC_021166.1    | Ca_kabuli_chr07 | 33720422                | GG                              | AA                | 1946465933               |
| SNP_P3_91257_33720423 | NC_021166.1    | Ca_kabuli_chr07 | 33720423                | AA                              | GG                | 1946465935               |
| SNP_P3_91258_33721059 | NC_021166.1    | Ca_kabuli_chr07 | 33721059                | GG                              | TT                | 1946465936               |
| SNP_P3_91260_33722826 | NC_021166.1    | Ca_kabuli_chr07 | 33722826                | TT                              | AA                | 1946465937               |
| SNP_P3_91261_33722981 | NC_021166.1    | Ca_kabuli_chr07 | 33722981                | CC                              | AA                | 1946465939               |
| SNP_P3_91262_33722986 | NC_021166.1    | Ca_kabuli_chr07 | 33722986                | GG                              | CC                | 1946465940               |
| SNP_P3_91263_33722990 | NC_021166.1    | Ca_kabuli_chr07 | 33722990                | TT                              | CC                | 1946465942               |
| SNP_P3_91264_33722991 | NC_021166.1    | Ca_kabuli_chr07 | 33722991                | TT                              | AA                | 1946465943               |
| SNP_P3_91265_33723193 | NC_021166.1    | Ca_kabuli_chr07 | 33723193                | GG                              | AA                | 1946465944               |
| SNP_P3_91266_33723222 | NC_021166.1    | Ca_kabuli_chr07 | 33723222                | CC                              | TT                | 1946465946               |
| SNP_P3_91267_33723243 | NC_021166.1    | Ca_kabuli_chr07 | 33723243                | TT                              | CC                | 1946465947               |
| SNP_P3_91268_33723280 | NC_021166.1    | Ca_kabuli_chr07 | 33723280                | AA                              | CC                | 1946465949               |
| SNP_P3_91269_33723288 | NC_021166.1    | Ca_kabuli_chr07 | 33723288                | AA                              | GG                | 1946465950               |
| SNP_P3_91270_33723330 | NC_021166.1    | Ca_kabuli_chr07 | 33723330                | TT                              | CC                | 1946465952               |
| SNP_P3_91271_33723331 | NC_021166.1    | Ca_kabuli_chr07 | 33723331                | TT                              | CC                | 1946465953               |
| SNP_P3_91272_33724157 | NC_021166.1    | Ca_kabuli_chr07 | 33724157                | GG                              | AA                | 1946465954               |
| SNP_P3_91273_33724176 | NC_021166.1    | Ca_kabuli_chr07 | 33724176                | TT                              | GG                | 1946465956               |
| SNP_P3_91274_33724386 | NC_021166.1    | Ca_kabuli_chr07 | 33724386                | AA                              | CC                | 1946465957               |
| SNP_P3_91276_33724592 | NC_021166.1    | Ca_kabuli_chr07 | 33724592                | AA                              | TT                | 1946465959               |

| SNPs IDs              | Chromosome IDs | Chromosomes     | Physical positions (bp) | CDC Frontier (Reference genome) | (Pusa 256 & HPNB) | NCBI SNPdb Accession IDs |
|-----------------------|----------------|-----------------|-------------------------|---------------------------------|-------------------|--------------------------|
| SNP_P3_91278_33724696 | NC_021166.1    | Ca_kabuli_chr07 | 33724696                | TT                              | AA                | 1946465960               |
| SNP_P3_91279_33726499 | NC_021166.1    | Ca_kabuli_chr07 | 33726499                | AA                              | GG                | 1946465961               |
| SNP_P3_91280_33727097 | NC_021166.1    | Ca_kabuli_chr07 | 33727097                | CC                              | TT                | 1946465963               |
| SNP_P3_91281_33727112 | NC_021166.1    | Ca_kabuli_chr07 | 33727112                | AA                              | TT                | 1946465964               |
| SNP_P3_91282_33728336 | NC_021166.1    | Ca_kabuli_chr07 | 33728336                | CC                              | TT                | 1946465965               |
| SNP_P3_91283_33728355 | NC_021166.1    | Ca_kabuli_chr07 | 33728355                | TT                              | AA                | 1946465966               |
| SNP_P3_91284_33728681 | NC_021166.1    | Ca_kabuli_chr07 | 33728681                | TT                              | AA                | 1946465967               |
| SNP_P3_91285_33728683 | NC_021166.1    | Ca_kabuli_chr07 | 33728683                | GG                              | TT                | 1946465968               |
| SNP_P3_91286_33728699 | NC_021166.1    | Ca_kabuli_chr07 | 33728699                | CC                              | TT                | 1946465969               |
| SNP_P3_91287_33730179 | NC_021166.1    | Ca_kabuli_chr07 | 33730179                | TT                              | CC                | 1946465971               |
| SNP_P3_91288_33730217 | NC_021166.1    | Ca_kabuli_chr07 | 33730217                | GG                              | TT                | 1946465972               |
| SNP_P3_91289_33730221 | NC_021166.1    | Ca_kabuli_chr07 | 33730221                | AA                              | TT                | 1946465974               |
| SNP_P3_91290_33730526 | NC_021166.1    | Ca_kabuli_chr07 | 33730526                | CC                              | TT                | 1946465975               |
| SNP_P3_91291_33731236 | NC_021166.1    | Ca_kabuli_chr07 | 33731236                | GG                              | AA                | 1946465976               |
| SNP_P3_91294_33733753 | NC_021166.1    | Ca_kabuli_chr07 | 33733753                | AA                              | CC                | 1946465978               |
| SNP_P3_91296_33734028 | NC_021166.1    | Ca_kabuli_chr07 | 33734028                | TT                              | CC                | 1946465979               |
| SNP_P3_91299_33741986 | NC_021166.1    | Ca_kabuli_chr07 | 33741986                | CC                              | TT                | 1946465981               |
| SNP_P3_91300_33743324 | NC_021166.1    | Ca_kabuli_chr07 | 33743324                | TT                              | GG                | 1946465982               |
| SNP_P3_91301_33744237 | NC_021166.1    | Ca_kabuli_chr07 | 33744237                | CC                              | TT                | 1946465984               |
| SNP_P3_91302_33744521 | NC_021166.1    | Ca_kabuli_chr07 | 33744521                | GG                              | CC                | 1946465985               |
| SNP_P3_91304_33745601 | NC_021166.1    | Ca_kabuli_chr07 | 33745601                | GG                              | AA                | 1946465986               |
| SNP_P3_91306_33745693 | NC_021166.1    | Ca_kabuli_chr07 | 33745693                | GG                              | AA                | 1946465988               |
| SNP_P3_91308_33746592 | NC_021166.1    | Ca_kabuli_chr07 | 33746592                | GG                              | TT                | 1946465989               |
| SNP_P3_91312_33749787 | NC_021166.1    | Ca_kabuli_chr07 | 33749787                | TT                              | CC                | 1946465991               |
| SNP_P3_91313_33749799 | NC_021166.1    | Ca_kabuli_chr07 | 33749799                | CC                              | TT                | 1946465992               |
| SNP_P3_91314_33750773 | NC_021166.1    | Ca_kabuli_chr07 | 33750773                | AA                              | TT                | 1946465994               |
| SNP_P3_91315_33750846 | NC_021166.1    | Ca_kabuli_chr07 | 33750846                | CC                              | AA                | 1946465995               |
| SNP_P3_91316_33752438 | NC_021166.1    | Ca_kabuli_chr07 | 33752438                | AA                              | GG                | 1946465996               |
| SNP_P3_91317_33753809 | NC_021166.1    | Ca_kabuli_chr07 | 33753809                | CC                              | GG                | 1946465998               |
| SNP_P3_91319_33753917 | NC_021166.1    | Ca_kabuli_chr07 | 33753917                | AA                              | GG                | 1946465999               |
| SNP_P3_91320_33754013 | NC_021166.1    | Ca_kabuli_chr07 | 33754013                | TT                              | CC                | 1946466001               |
| SNP_P3_91321_33754609 | NC_021166.1    | Ca_kabuli_chr07 | 33754609                | AA                              | TT                | 1946466002               |
| SNP_P3_91322_33754610 | NC_021166.1    | Ca_kabuli_chr07 | 33754610                | TT                              | AA                | 1946466004               |
| SNP_P3_91323_33754641 | NC_021166.1    | Ca_kabuli_chr07 | 33754641                | CC                              | TT                | 1946466005               |
| SNP_P3_91324_33754935 | NC_021166.1    | Ca_kabuli_chr07 | 33754935                | AA                              | GG                | 1946466006               |
| SNP_P3_91325_33756409 | NC_021166.1    | Ca_kabuli_chr07 | 33756409                | AA                              | GG                | 1946466008               |
| SNP_P3_91326_33757084 | NC_021166.1    | Ca_kabuli_chr07 | 33757084                | CC                              | TT                | 1946466009               |
| SNP_P3_91327_33757376 | NC_021166.1    | Ca_kabuli_chr07 | 33757376                | CC                              | AA                | 1946466011               |
| SNP_P3_91328_33758618 | NC_021166.1    | Ca_kabuli_chr07 | 33758618                | GG                              | AA                | 1946466012               |
| SNP_P3_91329_33758978 | NC_021166.1    | Ca_kabuli_chr07 | 33758978                | CC                              | TT                | 1946466014               |
| SNP_P3_91330_33759270 | NC_021166.1    | Ca_kabuli_chr07 | 33759270                | CC                              | GG                | 1946466015               |
| SNP_P3_91331_33761388 | NC_021166.1    | Ca_kabuli_chr07 | 33761388                | CC                              | TT                | 1946466016               |

| SNPs IDs              | Chromosome IDs | Chromosomes     | Physical positions (bp) | CDC Frontier (Reference genome) | (Pusa 256 & HPNB) | NCBI SNPdb Accession IDs |
|-----------------------|----------------|-----------------|-------------------------|---------------------------------|-------------------|--------------------------|
| SNP_P3_91332_33761390 | NC_021166.1    | Ca_kabuli_chr07 | 33761390                | TT                              | CC                | 1946466018               |
| SNP_P3_91333_33761397 | NC_021166.1    | Ca_kabuli_chr07 | 33761397                | GG                              | CC                | 1946466019               |
| SNP_P3_91334_33761462 | NC_021166.1    | Ca_kabuli_chr07 | 33761462                | TT                              | AA                | 1946466021               |
| SNP_P3_91335_33761755 | NC_021166.1    | Ca_kabuli_chr07 | 33761755                | GG                              | AA                | 1946466022               |
| SNP_P3_91336_33761764 | NC_021166.1    | Ca_kabuli_chr07 | 33761764                | CC                              | TT                | 1946466024               |
| SNP_P3_91337_33761839 | NC_021166.1    | Ca_kabuli_chr07 | 33761839                | AA                              | GG                | 1946466025               |
| SNP_P3_91338_33761887 | NC_021166.1    | Ca_kabuli_chr07 | 33761887                | AA                              | GG                | 1946466026               |
| SNP_P3_91339_33763278 | NC_021166.1    | Ca_kabuli_chr07 | 33763278                | AA                              | GG                | 1946466028               |
| SNP_P3_91340_33763290 | NC_021166.1    | Ca_kabuli_chr07 | 33763290                | AA                              | GG                | 1946466029               |
| SNP_P3_91341_33763296 | NC_021166.1    | Ca_kabuli_chr07 | 33763296                | AA                              | GG                | 1946466031               |
| SNP_P3_91342_33763308 | NC_021166.1    | Ca_kabuli_chr07 | 33763308                | GG                              | AA                | 1946466032               |
| SNP_P3_91343_33765487 | NC_021166.1    | Ca_kabuli_chr07 | 33765487                | TT                              | AA                | 1946466033               |
| SNP_P3_91344_33765497 | NC_021166.1    | Ca_kabuli_chr07 | 33765497                | AA                              | GG                | 1946466035               |
| SNP_P3_91345_33765510 | NC_021166.1    | Ca_kabuli_chr07 | 33765510                | TT                              | AA                | 1946466036               |
| SNP_P3_91346_33765673 | NC_021166.1    | Ca_kabuli_chr07 | 33765673                | AA                              | GG                | 1946466038               |
| SNP_P3_91348_33766145 | NC_021166.1    | Ca_kabuli_chr07 | 33766145                | GG                              | AA                | 1946466039               |
| SNP_P3_91349_33766152 | NC_021166.1    | Ca_kabuli_chr07 | 33766152                | AA                              | GG                | 1946466041               |
| SNP_P3_91350_33766154 | NC_021166.1    | Ca_kabuli_chr07 | 33766154                | GG                              | TT                | 1946466042               |
| SNP_P3_91351_33766191 | NC_021166.1    | Ca_kabuli_chr07 | 33766191                | GG                              | TT                | 1946466044               |
| SNP_P3_91352_33766201 | NC_021166.1    | Ca_kabuli_chr07 | 33766201                | TT                              | CC                | 1946466045               |
| SNP_P3_91353_33766221 | NC_021166.1    | Ca_kabuli_chr07 | 33766221                | TT                              | CC                | 1946466047               |
| SNP_P3_91354_33766225 | NC_021166.1    | Ca_kabuli_chr07 | 33766225                | GG                              | AA                | 1946466048               |
| SNP_P3_91355_33766230 | NC_021166.1    | Ca_kabuli_chr07 | 33766230                | AA                              | GG                | 1946466049               |
| SNP_P3_91356_33766253 | NC_021166.1    | Ca_kabuli_chr07 | 33766253                | GG                              | AA                | 1946466051               |
| SNP_P3_91357_33766264 | NC_021166.1    | Ca_kabuli_chr07 | 33766264                | GG                              | TT                | 1946466052               |
| SNP_P3_91358_33766270 | NC_021166.1    | Ca_kabuli_chr07 | 33766270                | TT                              | CC                | 1946466054               |
| SNP_P3_91359_33766275 | NC_021166.1    | Ca_kabuli_chr07 | 33766275                | AA                              | GG                | 1946466055               |
| SNP_P3_91360_33766300 | NC_021166.1    | Ca_kabuli_chr07 | 33766300                | AA                              | TT                | 1946466057               |
| SNP_P3_91362_33766705 | NC_021166.1    | Ca_kabuli_chr07 | 33766705                | GG                              | AA                | 1946466058               |
| SNP_P3_91363_33768020 | NC_021166.1    | Ca_kabuli_chr07 | 33768020                | AA                              | GG                | 1946466059               |
| SNP_P3_91364_33768021 | NC_021166.1    | Ca_kabuli_chr07 | 33768021                | CC                              | AA                | 1946466061               |
| SNP_P3_91366_33768390 | NC_021166.1    | Ca_kabuli_chr07 | 33768390                | GG                              | AA                | 1946466062               |
| SNP_P3_91367_33768679 | NC_021166.1    | Ca_kabuli_chr07 | 33768679                | CC                              | AA                | 1946466064               |
| SNP_P3_91368_33768833 | NC_021166.1    | Ca_kabuli_chr07 | 33768833                | CC                              | TT                | 1946466065               |
| SNP_P3_91369_33768934 | NC_021166.1    | Ca_kabuli_chr07 | 33768934                | AA                              | CC                | 1946466067               |
| SNP_P3_91371_33769238 | NC_021166.1    | Ca_kabuli_chr07 | 33769238                | AA                              | GG                | 1946466068               |
| SNP_P3_91372_33769373 | NC_021166.1    | Ca_kabuli_chr07 | 33769373                | AA                              | TT                | 1946466070               |
| SNP_P3_91373_33769392 | NC_021166.1    | Ca_kabuli_chr07 | 33769392                | TT                              | CC                | 1946466071               |
| SNP_P3_91374_33771060 | NC_021166.1    | Ca_kabuli_chr07 | 33771060                | AA                              | TT                | 1946466072               |
| SNP_P3_91375_33771343 | NC_021166.1    | Ca_kabuli_chr07 | 33771343                | GG                              | AA                | 1946466074               |
| SNP_P3_91377_33772942 | NC_021166.1    | Ca_kabuli_chr07 | 33772942                | CC                              | TT                | 1946466075               |
| SNP_P3_91378_33772962 | NC_021166.1    | Ca_kabuli_chr07 | 33772962                | TT                              | AA                | 1946466077               |

| SNPs IDs              | Chromosome IDs | Chromosomes     | Physical positions (bp) | CDC Frontier (Reference genome) | (Pusa 256 & HPNB) | NCBI SNPdb Accession IDs |
|-----------------------|----------------|-----------------|-------------------------|---------------------------------|-------------------|--------------------------|
| SNP_P3_91379_33773046 | NC_021166.1    | Ca_kabuli_chr07 | 33773046                | TT                              | CC                | 1946466078               |
| SNP_P3_91380_33773056 | NC_021166.1    | Ca_kabuli_chr07 | 33773056                | AA                              | GG                | 1946466079               |
| SNP_P3_91381_33774176 | NC_021166.1    | Ca_kabuli_chr07 | 33774176                | TT                              | CC                | 1946466081               |
| SNP_P3_91383_33776014 | NC_021166.1    | Ca_kabuli_chr07 | 33776014                | AA                              | GG                | 1946466082               |
| SNP_P3_91384_33776020 | NC_021166.1    | Ca_kabuli_chr07 | 33776020                | AA                              | GG                | 1946466084               |
| SNP_P3_91385_33776404 | NC_021166.1    | Ca_kabuli_chr07 | 33776404                | CC                              | TT                | 1946466085               |
| SNP_P3_91386_33776743 | NC_021166.1    | Ca_kabuli_chr07 | 33776743                | TT                              | AA                | 1946466089               |
| SNP_P3_91388_33779023 | NC_021166.1    | Ca_kabuli_chr07 | 33779023                | CC                              | GG                | 1946466091               |
| SNP_P3_91389_33779186 | NC_021166.1    | Ca_kabuli_chr07 | 33779186                | CC                              | TT                | 1946466092               |
| SNP_P3_91390_33779360 | NC_021166.1    | Ca_kabuli_chr07 | 33779360                | CC                              | GG                | 1946466093               |
| SNP_P3_91391_33779986 | NC_021166.1    | Ca_kabuli_chr07 | 33779986                | AA                              | TT                | 1946466095               |
| SNP_P3_91392_33780004 | NC_021166.1    | Ca_kabuli_chr07 | 33780004                | AA                              | CC                | 1946466096               |
| SNP_P3_91393_33781535 | NC_021166.1    | Ca_kabuli_chr07 | 33781535                | AA                              | TT                | 1946466098               |
| SNP_P3_91394_33781625 | NC_021166.1    | Ca_kabuli_chr07 | 33781625                | TT                              | CC                | 1946466099               |
| SNP_P3_91395_33781636 | NC_021166.1    | Ca_kabuli_chr07 | 33781636                | AA                              | TT                | 1946466101               |
| SNP_P3_91397_33781755 | NC_021166.1    | Ca_kabuli_chr07 | 33781755                | AA                              | TT                | 1946466102               |
| SNP_P3_91398_33781809 | NC_021166.1    | Ca_kabuli_chr07 | 33781809                | AA                              | TT                | 1946466103               |
| SNP_P3_91399_33781834 | NC_021166.1    | Ca_kabuli_chr07 | 33781834                | TT                              | CC                | 1946466105               |
| SNP_P3_91401_33783121 | NC_021166.1    | Ca_kabuli_chr07 | 33783121                | GG                              | TT                | 1946466106               |
| SNP_P3_91402_33783962 | NC_021166.1    | Ca_kabuli_chr07 | 33783962                | AA                              | GG                | 1946466108               |
| SNP_P3_91403_33786479 | NC_021166.1    | Ca_kabuli_chr07 | 33786479                | GG                              | AA                | 1946466109               |
| SNP_P3_91404_33786761 | NC_021166.1    | Ca_kabuli_chr07 | 33786761                | GG                              | CC                | 1946466111               |
| SNP_P3_91407_33786946 | NC_021166.1    | Ca_kabuli_chr07 | 33786946                | TT                              | CC                | 1946466112               |
| SNP_P3_91408_33787394 | NC_021166.1    | Ca_kabuli_chr07 | 33787394                | GG                              | AA                | 1946466113               |
| SNP_P3_91409_33789547 | NC_021166.1    | Ca_kabuli_chr07 | 33789547                | CC                              | GG                | 1946466115               |
| SNP_P3_91410_33792064 | NC_021166.1    | Ca_kabuli_chr07 | 33792064                | CC                              | AA                | 1946466116               |
| SNP_P3_91411_33792141 | NC_021166.1    | Ca_kabuli_chr07 | 33792141                | CC                              | TT                | 1946466118               |
| SNP_P3_91413_33793272 | NC_021166.1    | Ca_kabuli_chr07 | 33793272                | AA                              | TT                | 1946466119               |
| SNP_P3_91414_33793904 | NC_021166.1    | Ca_kabuli_chr07 | 33793904                | TT                              | CC                | 1946466121               |
| SNP_P3_91415_33793946 | NC_021166.1    | Ca_kabuli_chr07 | 33793946                | GG                              | AA                | 1946466122               |
| SNP_P3_91417_33795561 | NC_021166.1    | Ca_kabuli_chr07 | 33795561                | CC                              | GG                | 1946466124               |
| SNP_P3_91421_33796492 | NC_021166.1    | Ca_kabuli_chr07 | 33796492                | TT                              | AA                | 1946466125               |
| SNP_P3_91422_33796668 | NC_021166.1    | Ca_kabuli_chr07 | 33796668                | CC                              | TT                | 1946466127               |
| SNP_P3_91423_33796671 | NC_021166.1    | Ca_kabuli_chr07 | 33796671                | GG                              | AA                | 1946466128               |
| SNP_P3_91424_33796689 | NC_021166.1    | Ca_kabuli_chr07 | 33796689                | GG                              | AA                | 1946466129               |
| SNP_P3_91425_33796722 | NC_021166.1    | Ca_kabuli_chr07 | 33796722                | GG                              | AA                | 1946466131               |
| SNP_P3_91426_33797405 | NC_021166.1    | Ca_kabuli_chr07 | 33797405                | CC                              | AA                | 1946466132               |
| SNP_P3_91427_33797418 | NC_021166.1    | Ca_kabuli_chr07 | 33797418                | TT                              | AA                | 1946466134               |
| SNP_P3_91428_33797422 | NC_021166.1    | Ca_kabuli_chr07 | 33797422                | AA                              | GG                | 1946466135               |
| SNP_P3_91430_33799368 | NC_021166.1    | Ca_kabuli_chr07 | 33799368                | TT                              | CC                | 1946466137               |
| SNP_P3_91431_33799381 | NC_021166.1    | Ca_kabuli_chr07 | 33799381                | GG                              | CC                | 1946466138               |
| SNP_P3_91432_33800655 | NC_021166.1    | Ca_kabuli_chr07 | 33800655                | TT                              | GG                | 1946466140               |

| SNPs IDs              | Chromosome IDs | Chromosomes     | Physical positions (bp) | CDC Frontier (Reference genome) | (Pusa 256 & HPNB) | NCBI SNPdb Accession IDs |
|-----------------------|----------------|-----------------|-------------------------|---------------------------------|-------------------|--------------------------|
| SNP_P3_91433_33800917 | NC_021166.1    | Ca_kabuli_chr07 | 33800917                | TT                              | GG                | 1946466141               |
| SNP_P3_91434_33800959 | NC_021166.1    | Ca_kabuli_chr07 | 33800959                | CC                              | TT                | 1946466143               |
| SNP_P3_91435_33802118 | NC_021166.1    | Ca_kabuli_chr07 | 33802118                | CC                              | TT                | 1946466144               |
| SNP_P3_91436_33802312 | NC_021166.1    | Ca_kabuli_chr07 | 33802312                | AA                              | GG                | 1946466146               |
| SNP_P3_91437_33802313 | NC_021166.1    | Ca_kabuli_chr07 | 33802313                | TT                              | AA                | 1946466147               |
| SNP_P3_91439_33803297 | NC_021166.1    | Ca_kabuli_chr07 | 33803297                | TT                              | AA                | 1946466149               |
| SNP_P3_91440_33803310 | NC_021166.1    | Ca_kabuli_chr07 | 33803310                | TT                              | AA                | 1946466150               |
| SNP_P3_91442_33803484 | NC_021166.1    | Ca_kabuli_chr07 | 33803484                | CC                              | TT                | 1946466152               |
| SNP_P3_91443_33803760 | NC_021166.1    | Ca_kabuli_chr07 | 33803760                | TT                              | CC                | 1946466153               |
| SNP_P3_91444_33803784 | NC_021166.1    | Ca_kabuli_chr07 | 33803784                | GG                              | CC                | 1946466154               |
| SNP_P3_91446_33804944 | NC_021166.1    | Ca_kabuli_chr07 | 33804944                | TT                              | CC                | 1946466156               |
| SNP_P3_91447_33805336 | NC_021166.1    | Ca_kabuli_chr07 | 33805336                | AA                              | GG                | 1946466157               |
| SNP_P3_91448_33805342 | NC_021166.1    | Ca_kabuli_chr07 | 33805342                | AA                              | GG                | 1946466159               |
| SNP_P3_91449_33805375 | NC_021166.1    | Ca_kabuli_chr07 | 33805375                | AA                              | GG                | 1946466161               |
| SNP_P3_91450_33805477 | NC_021166.1    | Ca_kabuli_chr07 | 33805477                | AA                              | GG                | 1946466162               |
| SNP_P3_91451_33805483 | NC_021166.1    | Ca_kabuli_chr07 | 33805483                | AA                              | TT                | 1946466163               |
| SNP_P3_91452_33805485 | NC_021166.1    | Ca_kabuli_chr07 | 33805485                | GG                              | AA                | 1946466165               |
| SNP_P3_91453_33805502 | NC_021166.1    | Ca_kabuli_chr07 | 33805502                | GG                              | AA                | 1946466166               |
| SNP_P3_91454_33805512 | NC_021166.1    | Ca_kabuli_chr07 | 33805512                | TT                              | GG                | 1946466168               |
| SNP_P3_91455_33805550 | NC_021166.1    | Ca_kabuli_chr07 | 33805550                | AA                              | TT                | 1946466169               |
| SNP_P3_91456_33805551 | NC_021166.1    | Ca_kabuli_chr07 | 33805551                | AA                              | CC                | 1946466171               |
| SNP_P3_91457_33805552 | NC_021166.1    | Ca_kabuli_chr07 | 33805552                | AA                              | GG                | 1946466172               |
| SNP_P3_91458_33805569 | NC_021166.1    | Ca_kabuli_chr07 | 33805569                | CC                              | TT                | 1946466173               |
| SNP_P3_91460_33805734 | NC_021166.1    | Ca_kabuli_chr07 | 33805734                | GG                              | AA                | 1946466175               |
| SNP_P3_91461_33805750 | NC_021166.1    | Ca_kabuli_chr07 | 33805750                | AA                              | GG                | 1946466176               |
| SNP_P3_91462_33805756 | NC_021166.1    | Ca_kabuli_chr07 | 33805756                | GG                              | AA                | 1946466178               |
| SNP_P3_91464_33806967 | NC_021166.1    | Ca_kabuli_chr07 | 33806967                | CC                              | TT                | 1946466180               |
| SNP_P3_91465_33806971 | NC_021166.1    | Ca_kabuli_chr07 | 33806971                | CC                              | TT                | 1946466181               |
| SNP_P3_91466_33807193 | NC_021166.1    | Ca_kabuli_chr07 | 33807193                | TT                              | CC                | 1946466182               |
| SNP_P3_91467_33807220 | NC_021166.1    | Ca_kabuli_chr07 | 33807220                | AA                              | GG                | 1946466184               |
| SNP_P3_91469_33807340 | NC_021166.1    | Ca_kabuli_chr07 | 33807340                | GG                              | AA                | 1946466185               |
| SNP_P3_91470_33807371 | NC_021166.1    | Ca_kabuli_chr07 | 33807371                | CC                              | TT                | 1946466187               |
| SNP_P3_91471_33807374 | NC_021166.1    | Ca_kabuli_chr07 | 33807374                | CC                              | AA                | 1946466188               |
| SNP_P3_91472_33807383 | NC_021166.1    | Ca_kabuli_chr07 | 33807383                | CC                              | TT                | 1946466190               |
| SNP_P3_91473_33807398 | NC_021166.1    | Ca_kabuli_chr07 | 33807398                | AA                              | GG                | 1946466191               |
| SNP_P3_91474_33807413 | NC_021166.1    | Ca_kabuli_chr07 | 33807413                | CC                              | TT                | 1946466192               |
| SNP_P3_91475_33807729 | NC_021166.1    | Ca_kabuli_chr07 | 33807729                | AA                              | CC                | 1946466194               |
| SNP_P3_91476_33807792 | NC_021166.1    | Ca_kabuli_chr07 | 33807792                | GG                              | AA                | 1946466195               |
| SNP_P3_91477_33808147 | NC_021166.1    | Ca_kabuli_chr07 | 33808147                | AA                              | TT                | 1946466197               |
| SNP_P3_91478_33808520 | NC_021166.1    | Ca_kabuli_chr07 | 33808520                | CC                              | TT                | 1946466198               |
| SNP_P3_91479_33808988 | NC_021166.1    | Ca_kabuli_chr07 | 33808988                | GG                              | AA                | 1946466200               |
| SNP_P3_91480_33809055 | NC_021166.1    | Ca_kabuli_chr07 | 33809055                | AA                              | TT                | 1946466201               |

| SNPs IDs              | Chromosome IDs | Chromosomes     | Physical positions (bp) | CDC Frontier (Reference genome) | (Pusa 256 & HPNB) | NCBI SNPdb Accession IDs |
|-----------------------|----------------|-----------------|-------------------------|---------------------------------|-------------------|--------------------------|
| SNP_P3_91481_33809157 | NC_021166.1    | Ca_kabuli_chr07 | 33809157                | AA                              | GG                | 1946466203               |
| SNP_P3_91482_33809255 | NC_021166.1    | Ca_kabuli_chr07 | 33809255                | TT                              | CC                | 1946466204               |
| SNP_P3_91483_33809336 | NC_021166.1    | Ca_kabuli_chr07 | 33809336                | CC                              | TT                | 1946466205               |
| SNP_P3_91484_33809361 | NC_021166.1    | Ca_kabuli_chr07 | 33809361                | TT                              | AA                | 1946466207               |
| SNP_P3_91485_33809560 | NC_021166.1    | Ca_kabuli_chr07 | 33809560                | AA                              | GG                | 1946466208               |
| SNP_P3_91486_33809673 | NC_021166.1    | Ca_kabuli_chr07 | 33809673                | CC                              | TT                | 1946466210               |
| SNP_P3_91487_33812503 | NC_021166.1    | Ca_kabuli_chr07 | 33812503                | GG                              | AA                | 1946466211               |
| SNP_P3_91488_33812853 | NC_021166.1    | Ca_kabuli_chr07 | 33812853                | CC                              | AA                | 1946466213               |
| SNP_P3_91489_33815544 | NC_021166.1    | Ca_kabuli_chr07 | 33815544                | AA                              | GG                | 1946466214               |
| SNP_P3_91491_33815731 | NC_021166.1    | Ca_kabuli_chr07 | 33815731                | GG                              | TT                | 1946466216               |
| SNP_P3_91493_33815806 | NC_021166.1    | Ca_kabuli_chr07 | 33815806                | GG                              | AA                | 1946466217               |
| SNP_P3_91494_33816902 | NC_021166.1    | Ca_kabuli_chr07 | 33816902                | TT                              | CC                | 1946466218               |
| SNP_P3_91495_33817193 | NC_021166.1    | Ca_kabuli_chr07 | 33817193                | CC                              | TT                | 1946466220               |
| SNP_P3_91496_33817205 | NC_021166.1    | Ca_kabuli_chr07 | 33817205                | TT                              | CC                | 1946466221               |
| SNP_P3_91497_33819495 | NC_021166.1    | Ca_kabuli_chr07 | 33819495                | AA                              | CC                | 1946466223               |
| SNP_P3_91498_33819750 | NC_021166.1    | Ca_kabuli_chr07 | 33819750                | CC                              | TT                | 1946466224               |
| SNP_P3_91499_33819763 | NC_021166.1    | Ca_kabuli_chr07 | 33819763                | AA                              | GG                | 1946466226               |
| SNP_P3_91500_33819816 | NC_021166.1    | Ca_kabuli_chr07 | 33819816                | CC                              | GG                | 1946466227               |
| SNP_P3_91503_33820469 | NC_021166.1    | Ca_kabuli_chr07 | 33820469                | CC                              | AA                | 1946466228               |
| SNP_P3_91504_33820899 | NC_021166.1    | Ca_kabuli_chr07 | 33820899                | CC                              | TT                | 1946466230               |
| SNP_P3_91505_33821189 | NC_021166.1    | Ca_kabuli_chr07 | 33821189                | AA                              | GG                | 1946466231               |
| SNP_P3_91506_33821212 | NC_021166.1    | Ca_kabuli_chr07 | 33821212                | CC                              | GG                | 1946466233               |
| SNP_P3_91507_33821214 | NC_021166.1    | Ca_kabuli_chr07 | 33821214                | GG                              | AA                | 1946466234               |
| SNP_P3_91508_33821252 | NC_021166.1    | Ca_kabuli_chr07 | 33821252                | GG                              | TT                | 1946466236               |
| SNP_P3_91509_33821288 | NC_021166.1    | Ca_kabuli_chr07 | 33821288                | TT                              | CC                | 1946466237               |
| SNP_P3_91511_33821678 | NC_021166.1    | Ca_kabuli_chr07 | 33821678                | AA                              | GG                | 1946466238               |
| SNP_P3_91512_33821690 | NC_021166.1    | Ca_kabuli_chr07 | 33821690                | CC                              | AA                | 1946466240               |
| SNP_P3_91513_33821693 | NC_021166.1    | Ca_kabuli_chr07 | 33821693                | TT                              | AA                | 1946466241               |
| SNP_P3_91514_33821969 | NC_021166.1    | Ca_kabuli_chr07 | 33821969                | TT                              | CC                | 1946466243               |
| SNP_P3_91516_33823281 | NC_021166.1    | Ca_kabuli_chr07 | 33823281                | TT                              | GG                | 1946466244               |
| SNP_P3_91519_33824808 | NC_021166.1    | Ca_kabuli_chr07 | 33824808                | GG                              | AA                | 1946466246               |
| SNP_P3_91521_33826237 | NC_021166.1    | Ca_kabuli_chr07 | 33826237                | GG                              | AA                | 1946466247               |
| SNP_P3_91522_33826485 | NC_021166.1    | Ca_kabuli_chr07 | 33826485                | TT                              | AA                | 1946466248               |
| SNP_P3_91523_33826556 | NC_021166.1    | Ca_kabuli_chr07 | 33826556                | AA                              | TT                | 1946466250               |
| SNP_P3_91524_33834641 | NC_021166.1    | Ca_kabuli_chr07 | 33834641                | AA                              | GG                | 1946466251               |
| SNP_P3_91525_33834697 | NC_021166.1    | Ca_kabuli_chr07 | 33834697                | TT                              | AA                | 1946466253               |
| SNP_P3_91527_33834955 | NC_021166.1    | Ca_kabuli_chr07 | 33834955                | TT                              | CC                | 1946466254               |
| SNP_P3_91528_33835856 | NC_021166.1    | Ca_kabuli_chr07 | 33835856                | GG                              | AA                | 1946466255               |
| SNP_P3_91529_33836864 | NC_021166.1    | Ca_kabuli_chr07 | 33836864                | AA                              | TT                | 1946466257               |
| SNP_P3_91530_33838466 | NC_021166.1    | Ca_kabuli_chr07 | 33838466                | GG                              | TT                | 1946466258               |
| SNP_P3_91531_33838611 | NC_021166.1    | Ca_kabuli_chr07 | 33838611                | AA                              | GG                | 1946466260               |
| SNP_P3_91532_33839229 | NC_021166.1    | Ca_kabuli_chr07 | 33839229                | AA                              | GG                | 1946466261               |

| SNPs IDs              | Chromosome IDs | Chromosomes     | Physical positions (bp) | CDC Frontier (Reference genome) | (Pusa 256 & HPNB) | NCBI SNPdb Accession IDs |
|-----------------------|----------------|-----------------|-------------------------|---------------------------------|-------------------|--------------------------|
| SNP_P3_91534_33839260 | NC_021166.1    | Ca_kabuli_chr07 | 33839260                | GG                              | TT                | 1946466263               |
| SNP_P3_91535_33839266 | NC_021166.1    | Ca_kabuli_chr07 | 33839266                | TT                              | CC                | 1946466264               |
| SNP_P3_91536_33839324 | NC_021166.1    | Ca_kabuli_chr07 | 33839324                | AA                              | TT                | 1946466265               |
| SNP_P3_91537_33839867 | NC_021166.1    | Ca_kabuli_chr07 | 33839867                | TT                              | AA                | 1946466267               |
| SNP_P3_91538_33839868 | NC_021166.1    | Ca_kabuli_chr07 | 33839868                | GG                              | AA                | 1946466268               |
| SNP_P3_91539_33839907 | NC_021166.1    | Ca_kabuli_chr07 | 33839907                | TT                              | CC                | 1946466270               |
| SNP_P3_91540_33839908 | NC_021166.1    | Ca_kabuli_chr07 | 33839908                | CC                              | TT                | 1946466271               |
| SNP_P3_91541_33839930 | NC_021166.1    | Ca_kabuli_chr07 | 33839930                | TT                              | CC                | 1946466273               |
| SNP_P3_91542_33839943 | NC_021166.1    | Ca_kabuli_chr07 | 33839943                | TT                              | AA                | 1946466274               |
| SNP_P3_91543_33840155 | NC_021166.1    | Ca_kabuli_chr07 | 33840155                | AA                              | GG                | 1946466276               |
| SNP_P3_91544_33840239 | NC_021166.1    | Ca_kabuli_chr07 | 33840239                | GG                              | AA                | 1946466277               |
| SNP_P3_91545_33841999 | NC_021166.1    | Ca_kabuli_chr07 | 33841999                | TT                              | CC                | 1946466279               |
| SNP_P3_91546_33842005 | NC_021166.1    | Ca_kabuli_chr07 | 33842005                | TT                              | AA                | 1946466280               |
| SNP_P3_91547_33842098 | NC_021166.1    | Ca_kabuli_chr07 | 33842098                | TT                              | AA                | 1946466282               |
| SNP_P3_91548_33842992 | NC_021166.1    | Ca_kabuli_chr07 | 33842992                | TT                              | CC                | 1946466283               |
| SNP_P3_91549_33842998 | NC_021166.1    | Ca_kabuli_chr07 | 33842998                | AA                              | GG                | 1946466285               |
| SNP_P3_91550_33843064 | NC_021166.1    | Ca_kabuli_chr07 | 33843064                | TT                              | GG                | 1946466286               |
| SNP_P3_91551_33843299 | NC_021166.1    | Ca_kabuli_chr07 | 33843299                | AA                              | GG                | 1946466287               |
| SNP_P3_91554_33846974 | NC_021166.1    | Ca_kabuli_chr07 | 33846974                | GG                              | AA                | 1946466289               |
| SNP_P3_91555_33848385 | NC_021166.1    | Ca_kabuli_chr07 | 33848385                | TT                              | CC                | 1946466290               |
| SNP_P3_91556_33848779 | NC_021166.1    | Ca_kabuli_chr07 | 33848779                | CC                              | TT                | 1946466292               |
| SNP_P3_91557_33848785 | NC_021166.1    | Ca_kabuli_chr07 | 33848785                | CC                              | TT                | 1946466293               |
| SNP_P3_91558_33848790 | NC_021166.1    | Ca_kabuli_chr07 | 33848790                | AA                              | CC                | 1946466295               |
| SNP_P3_91559_33848830 | NC_021166.1    | Ca_kabuli_chr07 | 33848830                | AA                              | GG                | 1946466296               |
| SNP_P3_91560_33848851 | NC_021166.1    | Ca_kabuli_chr07 | 33848851                | GG                              | AA                | 1946466298               |
| SNP_P3_91562_33850667 | NC_021166.1    | Ca_kabuli_chr07 | 33850667                | CC                              | TT                | 1946466299               |
| SNP_P3_91563_33850707 | NC_021166.1    | Ca_kabuli_chr07 | 33850707                | AA                              | GG                | 1946466301               |
| SNP_P3_91564_33850727 | NC_021166.1    | Ca_kabuli_chr07 | 33850727                | AA                              | CC                | 1946466302               |
| SNP_P3_91565_33850729 | NC_021166.1    | Ca_kabuli_chr07 | 33850729                | AA                              | GG                | 1946466304               |
| SNP_P3_91566_33850736 | NC_021166.1    | Ca_kabuli_chr07 | 33850736                | TT                              | CC                | 1946466305               |
| SNP_P3_91567_33851033 | NC_021166.1    | Ca_kabuli_chr07 | 33851033                | TT                              | GG                | 1946466307               |
| SNP_P3_91568_33851638 | NC_021166.1    | Ca_kabuli_chr07 | 33851638                | AA                              | CC                | 1946466308               |
| SNP_P3_91569_33851672 | NC_021166.1    | Ca_kabuli_chr07 | 33851672                | CC                              | TT                | 1946466310               |
| SNP_P3_91570_33851923 | NC_021166.1    | Ca_kabuli_chr07 | 33851923                | AA                              | GG                | 1946466311               |
| SNP_P3_91573_33852615 | NC_021166.1    | Ca_kabuli_chr07 | 33852615                | TT                              | CC                | 1946466313               |
| SNP_P3_91576_33852999 | NC_021166.1    | Ca_kabuli_chr07 | 33852999                | GG                              | AA                | 1946466314               |
| SNP_P3_91577_33855314 | NC_021166.1    | Ca_kabuli_chr07 | 33855314                | TT                              | CC                | 1946466316               |
| SNP_P3_91582_33855936 | NC_021166.1    | Ca_kabuli_chr07 | 33855936                | CC                              | TT                | 1946466317               |
| SNP_P3_91584_33856105 | NC_021166.1    | Ca_kabuli_chr07 | 33856105                | AA                              | TT                | 1946466319               |
| SNP_P3_91585_33856116 | NC_021166.1    | Ca_kabuli_chr07 | 33856116                | TT                              | AA                | 1946466320               |
| SNP_P3_91586_33856898 | NC_021166.1    | Ca_kabuli_chr07 | 33856898                | CC                              | AA                | 1946466322               |
| SNP_P3_91587_33856919 | NC_021166.1    | Ca_kabuli_chr07 | 33856919                | AA                              | GG                | 1946466323               |



| SNPs IDs              | Chromosome IDs | Chromosomes     | Physical positions (bp) | CDC Frontier (Reference genome) | (Pusa 256 & HPNB) | NCBI SNPdb Accession IDs |
|-----------------------|----------------|-----------------|-------------------------|---------------------------------|-------------------|--------------------------|
| SNP_P3_91590_33857421 | NC_021166.1    | Ca_kabuli_chr07 | 33857421                | AA                              | CC                | 1946466325               |
| SNP_P3_91592_33857626 | NC_021166.1    | Ca_kabuli_chr07 | 33857626                | AA                              | GG                | 1946466326               |
| SNP_P3_91593_33857643 | NC_021166.1    | Ca_kabuli_chr07 | 33857643                | AA                              | GG                | 1946466328               |
| SNP_P3_91594_33857695 | NC_021166.1    | Ca_kabuli_chr07 | 33857695                | GG                              | AA                | 1946466329               |
| SNP_P3_91595_33859100 | NC_021166.1    | Ca_kabuli_chr07 | 33859100                | GG                              | AA                | 1946466331               |
| SNP_P3_91596_33859733 | NC_021166.1    | Ca_kabuli_chr07 | 33859733                | AA                              | GG                | 1946466332               |
| SNP_P3_91597_33859795 | NC_021166.1    | Ca_kabuli_chr07 | 33859795                | CC                              | GG                | 1946466334               |
| SNP_P3_91598_33859879 | NC_021166.1    | Ca_kabuli_chr07 | 33859879                | TT                              | CC                | 1946466335               |
| SNP_P3_91599_33861440 | NC_021166.1    | Ca_kabuli_chr07 | 33861440                | CC                              | TT                | 1946466336               |
| SNP_P3_91600_33862254 | NC_021166.1    | Ca_kabuli_chr07 | 33862254                | GG                              | AA                | 1946466338               |
| SNP_P3_91601_33862695 | NC_021166.1    | Ca_kabuli_chr07 | 33862695                | TT                              | AA                | 1946466339               |
| SNP_P3_91602_33862846 | NC_021166.1    | Ca_kabuli_chr07 | 33862846                | GG                              | CC                | 1946466341               |
| SNP_P3_91603_33862896 | NC_021166.1    | Ca_kabuli_chr07 | 33862896                | CC                              | TT                | 1946466342               |
| SNP_P3_91605_33864913 | NC_021166.1    | Ca_kabuli_chr07 | 33864913                | AA                              | GG                | 1946466344               |
| SNP_P3_91606_33864975 | NC_021166.1    | Ca_kabuli_chr07 | 33864975                | AA                              | GG                | 1946466345               |
| SNP_P3_91607_33866102 | NC_021166.1    | Ca_kabuli_chr07 | 33866102                | GG                              | AA                | 1946466347               |
| SNP_P3_91608_33866587 | NC_021166.1    | Ca_kabuli_chr07 | 33866587                | CC                              | TT                | 1946466348               |
| SNP_P3_91609_33866897 | NC_021166.1    | Ca_kabuli_chr07 | 33866897                | CC                              | GG                | 1946466350               |
| SNP_P3_91610_33866943 | NC_021166.1    | Ca_kabuli_chr07 | 33866943                | TT                              | GG                | 1946466351               |
| SNP_P3_91611_33867334 | NC_021166.1    | Ca_kabuli_chr07 | 33867334                | TT                              | CC                | 1946466353               |
| SNP_P3_91612_33869117 | NC_021166.1    | Ca_kabuli_chr07 | 33869117                | CC                              | TT                | 1946466354               |
| SNP_P3_91613_33871165 | NC_021166.1    | Ca_kabuli_chr07 | 33871165                | AA                              | GG                | 1946466356               |
| SNP_P3_91614_33871696 | NC_021166.1    | Ca_kabuli_chr07 | 33871696                | GG                              | AA                | 1946466357               |
| SNP_P3_91615_33872577 | NC_021166.1    | Ca_kabuli_chr07 | 33872577                | CC                              | TT                | 1946466358               |
| SNP_P3_91616_33873500 | NC_021166.1    | Ca_kabuli_chr07 | 33873500                | AA                              | TT                | 1946466360               |
| SNP_P3_91617_33873559 | NC_021166.1    | Ca_kabuli_chr07 | 33873559                | TT                              | CC                | 1946466361               |
| SNP_P3_91618_33873586 | NC_021166.1    | Ca_kabuli_chr07 | 33873586                | CC                              | TT                | 1946466363               |
| SNP_P3_91619_33873924 | NC_021166.1    | Ca_kabuli_chr07 | 33873924                | GG                              | TT                | 1946466364               |
| SNP_P3_91620_33874264 | NC_021166.1    | Ca_kabuli_chr07 | 33874264                | TT                              | AA                | 1946466366               |
| SNP_P3_91621_33874384 | NC_021166.1    | Ca_kabuli_chr07 | 33874384                | AA                              | CC                | 1946466367               |
| SNP_P3_91622_33875140 | NC_021166.1    | Ca_kabuli_chr07 | 33875140                | AA                              | TT                | 1946466368               |
| SNP_P3_91623_33875147 | NC_021166.1    | Ca_kabuli_chr07 | 33875147                | GG                              | AA                | 1946466370               |
| SNP_P3_91624_33875166 | NC_021166.1    | Ca_kabuli_chr07 | 33875166                | GG                              | TT                | 1946466372               |
| SNP_P3_91625_33875924 | NC_021166.1    | Ca_kabuli_chr07 | 33875924                | GG                              | TT                | 1946466373               |
| SNP_P3_91626_33876967 | NC_021166.1    | Ca_kabuli_chr07 | 33876967                | AA                              | TT                | 1946466375               |
| SNP_P3_91629_33879428 | NC_021166.1    | Ca_kabuli_chr07 | 33879428                | CC                              | TT                | 1946466376               |
| SNP_P3_91630_33879731 | NC_021166.1    | Ca_kabuli_chr07 | 33879731                | CC                              | TT                | 1946466378               |
| SNP_P3_91631_33880483 | NC_021166.1    | Ca_kabuli_chr07 | 33880483                | AA                              | TT                | 1946466379               |
| SNP_P3_91632_33880519 | NC_021166.1    | Ca_kabuli_chr07 | 33880519                | CC                              | TT                | 1946466381               |
| SNP_P3_91633_33880526 | NC_021166.1    | Ca_kabuli_chr07 | 33880526                | GG                              | TT                | 1946466382               |
| SNP_P3_91638_33880802 | NC_021166.1    | Ca_kabuli_chr07 | 33880802                | AA                              | GG                | 1946466384               |
| SNP_P3_91639_33880829 | NC_021166.1    | Ca_kabuli_chr07 | 33880829                | TT                              | CC                | 1946466385               |

| SNPs IDs              | Chromosome IDs | Chromosomes     | Physical positions (bp) | CDC Frontier (Reference genome) | (Pusa 256 & HPNB) | NCBI SNPdb Accession IDs |
|-----------------------|----------------|-----------------|-------------------------|---------------------------------|-------------------|--------------------------|
| SNP_P3_91640_33880831 | NC_021166.1    | Ca_kabuli_chr07 | 33880831                | GG                              | AA                | 1946466387               |
| SNP_P3_91641_33880849 | NC_021166.1    | Ca_kabuli_chr07 | 33880849                | TT                              | AA                | 1946466388               |
| SNP_P3_91642_33880874 | NC_021166.1    | Ca_kabuli_chr07 | 33880874                | CC                              | AA                | 1946466389               |
| SNP_P3_91643_33880875 | NC_021166.1    | Ca_kabuli_chr07 | 33880875                | GG                              | TT                | 1946466391               |
| SNP_P3_91644_33880878 | NC_021166.1    | Ca_kabuli_chr07 | 33880878                | GG                              | AA                | 1946466393               |
| SNP_P3_91645_33880898 | NC_021166.1    | Ca_kabuli_chr07 | 33880898                | GG                              | AA                | 1946466395               |
| SNP_P3_91647_33881490 | NC_021166.1    | Ca_kabuli_chr07 | 33881490                | CC                              | TT                | 1946466396               |
| SNP_P3_91648_33881508 | NC_021166.1    | Ca_kabuli_chr07 | 33881508                | CC                              | AA                | 1946466398               |
| SNP_P3_91649_33881800 | NC_021166.1    | Ca_kabuli_chr07 | 33881800                | TT                              | GG                | 1946466399               |
| SNP_P3_91651_33885577 | NC_021166.1    | Ca_kabuli_chr07 | 33885577                | TT                              | CC                | 1946466401               |
| SNP_P3_91652_33885583 | NC_021166.1    | Ca_kabuli_chr07 | 33885583                | GG                              | TT                | 1946466402               |
| SNP_P3_91653_33885672 | NC_021166.1    | Ca_kabuli_chr07 | 33885672                | AA                              | GG                | 1946466404               |
| SNP_P3_91654_33885959 | NC_021166.1    | Ca_kabuli_chr07 | 33885959                | AA                              | CC                | 1946466405               |
| SNP_P3_91655_33885991 | NC_021166.1    | Ca_kabuli_chr07 | 33885991                | AA                              | GG                | 1946466407               |
| SNP_P3_91656_33886098 | NC_021166.1    | Ca_kabuli_chr07 | 33886098                | CC                              | TT                | 1946466408               |
| SNP_P3_91657_33886131 | NC_021166.1    | Ca_kabuli_chr07 | 33886131                | CC                              | TT                | 1946466410               |
| SNP_P3_91658_33887864 | NC_021166.1    | Ca_kabuli_chr07 | 33887864                | TT                              | GG                | 1946466411               |
| SNP_P3_91659_33887946 | NC_021166.1    | Ca_kabuli_chr07 | 33887946                | AA                              | CC                | 1946466413               |
| SNP_P3_91660_33888313 | NC_021166.1    | Ca_kabuli_chr07 | 33888313                | AA                              | GG                | 1946466414               |
| SNP_P3_91661_33888499 | NC_021166.1    | Ca_kabuli_chr07 | 33888499                | CC                              | TT                | 1946466416               |
| SNP_P3_91662_33888514 | NC_021166.1    | Ca_kabuli_chr07 | 33888514                | CC                              | TT                | 1946466417               |
| SNP_P3_91663_33888579 | NC_021166.1    | Ca_kabuli_chr07 | 33888579                | TT                              | CC                | 1946466419               |
| SNP_P3_91664_33888665 | NC_021166.1    | Ca_kabuli_chr07 | 33888665                | AA                              | TT                | 1946466420               |
| SNP_P3_91665_33890710 | NC_021166.1    | Ca_kabuli_chr07 | 33890710                | GG                              | AA                | 1946466421               |
| SNP_P3_91666_33890769 | NC_021166.1    | Ca_kabuli_chr07 | 33890769                | TT                              | AA                | 1946466423               |
| SNP_P3_91667_33891013 | NC_021166.1    | Ca_kabuli_chr07 | 33891013                | CC                              | TT                | 1946466424               |
| SNP_P3_91668_33891901 | NC_021166.1    | Ca_kabuli_chr07 | 33891901                | TT                              | AA                | 1946466426               |
| SNP_P3_91669_33893593 | NC_021166.1    | Ca_kabuli_chr07 | 33893593                | GG                              | TT                | 1946466427               |
| SNP_P3_91670_33893731 | NC_021166.1    | Ca_kabuli_chr07 | 33893731                | AA                              | CC                | 1946466429               |
| SNP_P3_91674_33899915 | NC_021166.1    | Ca_kabuli_chr07 | 33899915                | TT                              | AA                | 1946466431               |
| SNP_P3_91675_33899940 | NC_021166.1    | Ca_kabuli_chr07 | 33899940                | TT                              | CC                | 1946466432               |
| SNP_P3_91676_33900001 | NC_021166.1    | Ca_kabuli_chr07 | 33900001                | AA                              | TT                | 1946466433               |
| SNP_P3_91677_33902443 | NC_021166.1    | Ca_kabuli_chr07 | 33902443                | CC                              | TT                | 1946466435               |
| SNP_P3_91678_33902652 | NC_021166.1    | Ca_kabuli_chr07 | 33902652                | TT                              | GG                | 1946466436               |
| SNP_P3_91679_33902672 | NC_021166.1    | Ca_kabuli_chr07 | 33902672                | GG                              | AA                | 1946466438               |
| SNP_P3_91680_33902681 | NC_021166.1    | Ca_kabuli_chr07 | 33902681                | CC                              | TT                | 1946466439               |
| SNP_P3_91681_33905411 | NC_021166.1    | Ca_kabuli_chr07 | 33905411                | AA                              | CC                | 1946466441               |
| SNP_P3_91682_33905653 | NC_021166.1    | Ca_kabuli_chr07 | 33905653                | TT                              | CC                | 1946466442               |
| SNP_P3_91683_33905704 | NC_021166.1    | Ca_kabuli_chr07 | 33905704                | TT                              | CC                | 1946466444               |
| SNP_P3_91684_33905713 | NC_021166.1    | Ca_kabuli_chr07 | 33905713                | AA                              | GG                | 1946466445               |
| SNP_P3_91685_33905726 | NC_021166.1    | Ca_kabuli_chr07 | 33905726                | AA                              | GG                | 1946466447               |
| SNP_P3_91687_33913728 | NC_021166.1    | Ca_kabuli_chr07 | 33913728                | CC                              | TT                | 1946466448               |

| SNPs IDs              | Chromosome IDs | Chromosomes     | Physical positions (bp) | CDC Frontier (Reference genome) | (Pusa 256 & HPNB) | NCBI SNPdb Accession IDs |
|-----------------------|----------------|-----------------|-------------------------|---------------------------------|-------------------|--------------------------|
| SNP_P3_91689_33937279 | NC_021166.1    | Ca_kabuli_chr07 | 33937279                | AA                              | CC                | 1946466450               |
| SNP_P3_91690_33937347 | NC_021166.1    | Ca_kabuli_chr07 | 33937347                | GG                              | AA                | 1946466451               |
| SNP_P3_91691_33961662 | NC_021166.1    | Ca_kabuli_chr07 | 33961662                | GG                              | AA                | 1946466453               |
| SNP_P3_91692_33980822 | NC_021166.1    | Ca_kabuli_chr07 | 33980822                | AA                              | GG                | 1946466454               |
| SNP_P3_91693_33983201 | NC_021166.1    | Ca_kabuli_chr07 | 33983201                | AA                              | GG                | 1946466456               |
| SNP_P3_91694_34002768 | NC_021166.1    | Ca_kabuli_chr07 | 34002768                | TT                              | CC                | 1946466457               |
| SNP_P3_91695_34002775 | NC_021166.1    | Ca_kabuli_chr07 | 34002775                | GG                              | AA                | 1946466458               |
| SNP_P3_91697_34035265 | NC_021166.1    | Ca_kabuli_chr07 | 34035265                | TT                              | AA                | 1946466460               |
| SNP_P3_91698_34036690 | NC_021166.1    | Ca_kabuli_chr07 | 34036690                | GG                              | TT                | 1946466461               |
| SNP_P3_91700_34080324 | NC_021166.1    | Ca_kabuli_chr07 | 34080324                | TT                              | GG                | 1946466463               |
| SNP_P3_91701_34080431 | NC_021166.1    | Ca_kabuli_chr07 | 34080431                | GG                              | AA                | 1946466464               |
| SNP_P3_91703_34080690 | NC_021166.1    | Ca_kabuli_chr07 | 34080690                | TT                              | CC                | 1946466466               |
| SNP_P3_91704_34080701 | NC_021166.1    | Ca_kabuli_chr07 | 34080701                | CC                              | TT                | 1946466467               |
| SNP_P3_91705_34080882 | NC_021166.1    | Ca_kabuli_chr07 | 34080882                | CC                              | TT                | 1946466469               |
| SNP_P3_91706_34080943 | NC_021166.1    | Ca_kabuli_chr07 | 34080943                | TT                              | CC                | 1946466470               |
| SNP_P3_91707_34085027 | NC_021166.1    | Ca_kabuli_chr07 | 34085027                | GG                              | TT                | 1946466472               |
| SNP_P3_91708_34085289 | NC_021166.1    | Ca_kabuli_chr07 | 34085289                | CC                              | TT                | 1946466473               |
| SNP_P3_91709_34085351 | NC_021166.1    | Ca_kabuli_chr07 | 34085351                | GG                              | TT                | 1946466475               |
| SNP_P3_91710_34085369 | NC_021166.1    | Ca_kabuli_chr07 | 34085369                | CC                              | TT                | 1946466476               |
| SNP_P3_91711_34085379 | NC_021166.1    | Ca_kabuli_chr07 | 34085379                | CC                              | AA                | 1946466478               |
| SNP_P3_91712_34085412 | NC_021166.1    | Ca_kabuli_chr07 | 34085412                | AA                              | TT                | 1946466479               |
| SNP_P3_91713_34087361 | NC_021166.1    | Ca_kabuli_chr07 | 34087361                | AA                              | TT                | 1946466481               |
| SNP_P3_91714_34087575 | NC_021166.1    | Ca_kabuli_chr07 | 34087575                | CC                              | GG                | 1946466482               |
| SNP_P3_91715_34087796 | NC_021166.1    | Ca_kabuli_chr07 | 34087796                | TT                              | GG                | 1946466484               |
| SNP_P3_91717_34108317 | NC_021166.1    | Ca_kabuli_chr07 | 34108317                | TT                              | AA                | 1946466485               |
| SNP_P3_91719_34108597 | NC_021166.1    | Ca_kabuli_chr07 | 34108597                | CC                              | TT                | 1946466487               |
| SNP_P3_91720_34109041 | NC_021166.1    | Ca_kabuli_chr07 | 34109041                | TT                              | CC                | 1946466488               |
| SNP_P3_91721_34109092 | NC_021166.1    | Ca_kabuli_chr07 | 34109092                | GG                              | AA                | 1946466489               |
| SNP_P3_91722_34109093 | NC_021166.1    | Ca_kabuli_chr07 | 34109093                | AA                              | GG                | 1946466491               |
| SNP_P3_91724_34114164 | NC_021166.1    | Ca_kabuli_chr07 | 34114164                | GG                              | TT                | 1946466492               |
| SNP_P3_91725_34114174 | NC_021166.1    | Ca_kabuli_chr07 | 34114174                | AA                              | GG                | 1946466494               |
| SNP_P3_91726_34114918 | NC_021166.1    | Ca_kabuli_chr07 | 34114918                | CC                              | GG                | 1946466495               |
| SNP_P3_91727_34114941 | NC_021166.1    | Ca_kabuli_chr07 | 34114941                | GG                              | AA                | 1946466497               |
| SNP_P3_91729_34117118 | NC_021166.1    | Ca_kabuli_chr07 | 34117118                | CC                              | GG                | 1946466498               |
| SNP_P3_91730_34117182 | NC_021166.1    | Ca_kabuli_chr07 | 34117182                | CC                              | AA                | 1946466500               |
| SNP_P3_91731_34117481 | NC_021166.1    | Ca_kabuli_chr07 | 34117481                | TT                              | GG                | 1946466501               |
| SNP_P3_91732_34117517 | NC_021166.1    | Ca_kabuli_chr07 | 34117517                | AA                              | GG                | 1946466503               |
| SNP_P3_91733_34119525 | NC_021166.1    | Ca_kabuli_chr07 | 34119525                | AA                              | GG                | 1946466504               |
| SNP_P3_91734_34119529 | NC_021166.1    | Ca_kabuli_chr07 | 34119529                | TT                              | CC                | 1946466506               |
| SNP_P3_91735_34119549 | NC_021166.1    | Ca_kabuli_chr07 | 34119549                | CC                              | TT                | 1946466507               |
| SNP_P3_91736_34119563 | NC_021166.1    | Ca_kabuli_chr07 | 34119563                | AA                              | GG                | 1946466508               |
| SNP_P3_91737_34119843 | NC_021166.1    | Ca_kabuli_chr07 | 34119843                | CC                              | AA                | 1946466510               |

| SNPs IDs              | Chromosome IDs | Chromosomes     | Physical positions (bp) | CDC Frontier (Reference genome) | (Pusa 256 & HPNB) | NCBI SNPdb Accession IDs |
|-----------------------|----------------|-----------------|-------------------------|---------------------------------|-------------------|--------------------------|
| SNP_P3_91738_34119848 | NC_021166.1    | Ca_kabuli_chr07 | 34119848                | AA                              | GG                | 1946466511               |
| SNP_P3_91739_34119877 | NC_021166.1    | Ca_kabuli_chr07 | 34119877                | TT                              | GG                | 1946466513               |
| SNP_P3_91740_34119893 | NC_021166.1    | Ca_kabuli_chr07 | 34119893                | AA                              | GG                | 1946466514               |
| SNP_P3_91741_34135750 | NC_021166.1    | Ca_kabuli_chr07 | 34135750                | TT                              | AA                | 1946466516               |
| SNP_P3_91742_34138326 | NC_021166.1    | Ca_kabuli_chr07 | 34138326                | TT                              | AA                | 1946466517               |
| SNP_P3_91743_34140306 | NC_021166.1    | Ca_kabuli_chr07 | 34140306                | GG                              | TT                | 1946466519               |
| SNP_P3_91744_34141215 | NC_021166.1    | Ca_kabuli_chr07 | 34141215                | GG                              | AA                | 1946466520               |
| SNP_P3_91745_34141216 | NC_021166.1    | Ca_kabuli_chr07 | 34141216                | AA                              | GG                | 1946466521               |
| SNP_P3_91747_34141248 | NC_021166.1    | Ca_kabuli_chr07 | 34141248                | GG                              | AA                | 1946466523               |
| SNP_P3_91748_34141258 | NC_021166.1    | Ca_kabuli_chr07 | 34141258                | GG                              | AA                | 1946466524               |
| SNP_P3_91749_34142213 | NC_021166.1    | Ca_kabuli_chr07 | 34142213                | AA                              | GG                | 1946466526               |
| SNP_P3_91750_34142629 | NC_021166.1    | Ca_kabuli_chr07 | 34142629                | TT                              | GG                | 1946466527               |
| SNP_P3_91751_34142670 | NC_021166.1    | Ca_kabuli_chr07 | 34142670                | AA                              | GG                | 1946466529               |
| SNP_P3_91752_34142686 | NC_021166.1    | Ca_kabuli_chr07 | 34142686                | GG                              | AA                | 1946466530               |
| SNP_P3_91753_34142692 | NC_021166.1    | Ca_kabuli_chr07 | 34142692                | AA                              | TT                | 1946466532               |
| SNP_P3_91755_34144691 | NC_021166.1    | Ca_kabuli_chr07 | 34144691                | TT                              | GG                | 1946466533               |
| SNP_P3_91757_34144817 | NC_021166.1    | Ca_kabuli_chr07 | 34144817                | CC                              | TT                | 1946466535               |
| SNP_P3_91758_34145045 | NC_021166.1    | Ca_kabuli_chr07 | 34145045                | TT                              | CC                | 1946466536               |
| SNP_P3_91759_34146528 | NC_021166.1    | Ca_kabuli_chr07 | 34146528                | GG                              | AA                | 1946466538               |
| SNP_P3_91760_34146724 | NC_021166.1    | Ca_kabuli_chr07 | 34146724                | GG                              | AA                | 1946466539               |
| SNP_P3_91761_34148725 | NC_021166.1    | Ca_kabuli_chr07 | 34148725                | TT                              | AA                | 1946466541               |
| SNP_P3_91762_34148887 | NC_021166.1    | Ca_kabuli_chr07 | 34148887                | CC                              | GG                | 1946466542               |
| SNP_P3_91763_34148922 | NC_021166.1    | Ca_kabuli_chr07 | 34148922                | AA                              | GG                | 1946466544               |
| SNP_P3_91764_34149020 | NC_021166.1    | Ca_kabuli_chr07 | 34149020                | CC                              | TT                | 1946466545               |
| SNP_P3_91765_34149040 | NC_021166.1    | Ca_kabuli_chr07 | 34149040                | AA                              | GG                | 1946466547               |
| SNP_P3_91766_34149775 | NC_021166.1    | Ca_kabuli_chr07 | 34149775                | GG                              | AA                | 1946466548               |
| SNP_P3_91767_34149838 | NC_021166.1    | Ca_kabuli_chr07 | 34149838                | TT                              | CC                | 1946466550               |
| SNP_P3_91768_34149986 | NC_021166.1    | Ca_kabuli_chr07 | 34149986                | TT                              | AA                | 1946466551               |
| SNP_P3_91770_34157331 | NC_021166.1    | Ca_kabuli_chr07 | 34157331                | GG                              | AA                | 1946466552               |
| SNP_P3_91771_34157641 | NC_021166.1    | Ca_kabuli_chr07 | 34157641                | GG                              | AA                | 1946466554               |
| SNP_P3_91773_34157970 | NC_021166.1    | Ca_kabuli_chr07 | 34157970                | AA                              | TT                | 1946466555               |
| SNP_P3_91774_34158294 | NC_021166.1    | Ca_kabuli_chr07 | 34158294                | CC                              | AA                | 1946466557               |
| SNP_P3_91775_34158342 | NC_021166.1    | Ca_kabuli_chr07 | 34158342                | AA                              | CC                | 1946466558               |
| SNP_P3_91776_34158374 | NC_021166.1    | Ca_kabuli_chr07 | 34158374                | TT                              | CC                | 1946466560               |
| SNP_P3_91777_34158391 | NC_021166.1    | Ca_kabuli_chr07 | 34158391                | TT                              | CC                | 1946466561               |
| SNP_P3_91778_34158412 | NC_021166.1    | Ca_kabuli_chr07 | 34158412                | TT                              | CC                | 1946466563               |
| SNP_P3_91779_34158434 | NC_021166.1    | Ca_kabuli_chr07 | 34158434                | AA                              | CC                | 1946466564               |
| SNP_P3_91780_34158467 | NC_021166.1    | Ca_kabuli_chr07 | 34158467                | AA                              | GG                | 1946466566               |
| SNP_P3_91781_34158520 | NC_021166.1    | Ca_kabuli_chr07 | 34158520                | AA                              | GG                | 1946466567               |
| SNP_P3_91782_34158521 | NC_021166.1    | Ca_kabuli_chr07 | 34158521                | AA                              | CC                | 1946466569               |
| SNP_P3_91783_34158554 | NC_021166.1    | Ca_kabuli_chr07 | 34158554                | AA                              | TT                | 1946466570               |
| SNP_P3_91784_34158694 | NC_021166.1    | Ca_kabuli_chr07 | 34158694                | CC                              | TT                | 1946466572               |

| SNPs IDs              | Chromosome IDs | Chromosomes     | Physical positions (bp) | CDC Frontier (Reference genome) | (Pusa 256 & HPNB) | NCBI SNPdb Accession IDs |
|-----------------------|----------------|-----------------|-------------------------|---------------------------------|-------------------|--------------------------|
| SNP_P3_91785_34158721 | NC_021166.1    | Ca_kabuli_chr07 | 34158721                | AA                              | GG                | 1946466573               |
| SNP_P3_91786_34158753 | NC_021166.1    | Ca_kabuli_chr07 | 34158753                | TT                              | GG                | 1946466575               |
| SNP_P3_91787_34158808 | NC_021166.1    | Ca_kabuli_chr07 | 34158808                | CC                              | TT                | 1946466576               |
| SNP_P3_91788_34158811 | NC_021166.1    | Ca_kabuli_chr07 | 34158811                | GG                              | AA                | 1946466578               |
| SNP_P3_91789_34158828 | NC_021166.1    | Ca_kabuli_chr07 | 34158828                | TT                              | CC                | 1946466579               |
| SNP_P3_91790_34158884 | NC_021166.1    | Ca_kabuli_chr07 | 34158884                | GG                              | AA                | 1946466581               |
| SNP_P3_91791_34158885 | NC_021166.1    | Ca_kabuli_chr07 | 34158885                | AA                              | GG                | 1946466582               |
| SNP_P3_91792_34159133 | NC_021166.1    | Ca_kabuli_chr07 | 34159133                | CC                              | GG                | 1946466584               |
| SNP_P3_91793_34159159 | NC_021166.1    | Ca_kabuli_chr07 | 34159159                | TT                              | CC                | 1946466585               |
| SNP_P3_91794_34159238 | NC_021166.1    | Ca_kabuli_chr07 | 34159238                | AA                              | GG                | 1946466587               |
| SNP_P3_91795_34159252 | NC_021166.1    | Ca_kabuli_chr07 | 34159252                | CC                              | AA                | 1946466588               |
| SNP_P3_91796_34160576 | NC_021166.1    | Ca_kabuli_chr07 | 34160576                | TT                              | GG                | 1946466589               |
| SNP_P3_91797_34160635 | NC_021166.1    | Ca_kabuli_chr07 | 34160635                | CC                              | AA                | 1946466591               |
| SNP_P3_91798_34160674 | NC_021166.1    | Ca_kabuli_chr07 | 34160674                | AA                              | CC                | 1946466592               |
| SNP_P3_91799_34160693 | NC_021166.1    | Ca_kabuli_chr07 | 34160693                | CC                              | TT                | 1946466594               |
| SNP_P3_91800_34160697 | NC_021166.1    | Ca_kabuli_chr07 | 34160697                | GG                              | TT                | 1946466595               |
| SNP_P3_91801_34160914 | NC_021166.1    | Ca_kabuli_chr07 | 34160914                | AA                              | GG                | 1946466597               |
| SNP_P3_91802_34160940 | NC_021166.1    | Ca_kabuli_chr07 | 34160940                | AA                              | CC                | 1946466598               |
| SNP_P3_91803_34160941 | NC_021166.1    | Ca_kabuli_chr07 | 34160941                | AA                              | GG                | 1946466600               |
| SNP_P3_91804_34161026 | NC_021166.1    | Ca_kabuli_chr07 | 34161026                | TT                              | GG                | 1946466601               |
| SNP_P3_91805_34161034 | NC_021166.1    | Ca_kabuli_chr07 | 34161034                | TT                              | GG                | 1946466603               |
| SNP_P3_91806_34161038 | NC_021166.1    | Ca_kabuli_chr07 | 34161038                | GG                              | AA                | 1946466604               |
| SNP_P3_91807_34161082 | NC_021166.1    | Ca_kabuli_chr07 | 34161082                | TT                              | CC                | 1946466606               |
| SNP_P3_91808_34161103 | NC_021166.1    | Ca_kabuli_chr07 | 34161103                | AA                              | TT                | 1946466607               |
| SNP_P3_91809_34161120 | NC_021166.1    | Ca_kabuli_chr07 | 34161120                | TT                              | CC                | 1946466609               |
| SNP_P3_91810_34161138 | NC_021166.1    | Ca_kabuli_chr07 | 34161138                | TT                              | CC                | 1946466610               |
| SNP_P3_91811_34161164 | NC_021166.1    | Ca_kabuli_chr07 | 34161164                | TT                              | CC                | 1946466612               |
| SNP_P3_91812_34161166 | NC_021166.1    | Ca_kabuli_chr07 | 34161166                | AA                              | GG                | 1946466613               |
| SNP_P3_91813_34161167 | NC_021166.1    | Ca_kabuli_chr07 | 34161167                | AA                              | TT                | 1946466615               |
| SNP_P3_91814_34161242 | NC_021166.1    | Ca_kabuli_chr07 | 34161242                | CC                              | GG                | 1946466616               |
| SNP_P3_91815_34161325 | NC_021166.1    | Ca_kabuli_chr07 | 34161325                | GG                              | AA                | 1946466617               |
| SNP_P3_91816_34164372 | NC_021166.1    | Ca_kabuli_chr07 | 34164372                | CC                              | TT                | 1946466619               |
| SNP_P3_91819_34166218 | NC_021166.1    | Ca_kabuli_chr07 | 34166218                | CC                              | GG                | 1946466620               |
| SNP_P3_91821_34167894 | NC_021166.1    | Ca_kabuli_chr07 | 34167894                | GG                              | AA                | 1946466622               |
| SNP_P3_91822_34168098 | NC_021166.1    | Ca_kabuli_chr07 | 34168098                | CC                              | TT                | 1946466623               |
| SNP_P3_91823_34168139 | NC_021166.1    | Ca_kabuli_chr07 | 34168139                | GG                              | AA                | 1946466625               |
| SNP_P3_91824_34168289 | NC_021166.1    | Ca_kabuli_chr07 | 34168289                | AA                              | GG                | 1946466626               |
| SNP_P3_91825_34168335 | NC_021166.1    | Ca_kabuli_chr07 | 34168335                | CC                              | TT                | 1946466628               |
| SNP_P3_91826_34168811 | NC_021166.1    | Ca_kabuli_chr07 | 34168811                | TT                              | CC                | 1946466629               |
| SNP_P3_91827_34168889 | NC_021166.1    | Ca_kabuli_chr07 | 34168889                | CC                              | TT                | 1946466630               |
| SNP_P3_91828_34169224 | NC_021166.1    | Ca_kabuli_chr07 | 34169224                | TT                              | CC                | 1946466632               |
| SNP_P3_91829_34169565 | NC_021166.1    | Ca_kabuli_chr07 | 34169565                | GG                              | TT                | 1946466633               |

| SNPs IDs              | Chromosome IDs | Chromosomes     | Physical positions (bp) | CDC Frontier (Reference genome) | (Pusa 256 & HPNB) | NCBI SNPdb Accession IDs |
|-----------------------|----------------|-----------------|-------------------------|---------------------------------|-------------------|--------------------------|
| SNP_P3_91830_34169722 | NC_021166.1    | Ca_kabuli_chr07 | 34169722                | CC                              | AA                | 1946466635               |
| SNP_P3_91831_34171525 | NC_021166.1    | Ca_kabuli_chr07 | 34171525                | CC                              | TT                | 1946466636               |
| SNP_P3_91833_34172095 | NC_021166.1    | Ca_kabuli_chr07 | 34172095                | AA                              | TT                | 1946466638               |
| SNP_P3_91834_34173214 | NC_021166.1    | Ca_kabuli_chr07 | 34173214                | CC                              | TT                | 1946466639               |
| SNP_P3_91835_34173506 | NC_021166.1    | Ca_kabuli_chr07 | 34173506                | AA                              | GG                | 1946466641               |
| SNP_P3_91837_34173561 | NC_021166.1    | Ca_kabuli_chr07 | 34173561                | CC                              | AA                | 1946466642               |
| SNP_P3_91838_34173577 | NC_021166.1    | Ca_kabuli_chr07 | 34173577                | TT                              | CC                | 1946466644               |
| SNP_P3_91839_34173581 | NC_021166.1    | Ca_kabuli_chr07 | 34173581                | AA                              | CC                | 1946466645               |
| SNP_P3_91840_34173745 | NC_021166.1    | Ca_kabuli_chr07 | 34173745                | GG                              | AA                | 1946466647               |
| SNP_P3_91841_34173763 | NC_021166.1    | Ca_kabuli_chr07 | 34173763                | TT                              | CC                | 1946466648               |
| SNP_P3_91842_34173768 | NC_021166.1    | Ca_kabuli_chr07 | 34173768                | AA                              | TT                | 1946466650               |
| SNP_P3_91843_34173780 | NC_021166.1    | Ca_kabuli_chr07 | 34173780                | TT                              | AA                | 1946466651               |
| SNP_P3_91844_34173807 | NC_021166.1    | Ca_kabuli_chr07 | 34173807                | CC                              | TT                | 1946466652               |
| SNP_P3_91845_34173859 | NC_021166.1    | Ca_kabuli_chr07 | 34173859                | CC                              | TT                | 1946466654               |
| SNP_P3_91846_34173876 | NC_021166.1    | Ca_kabuli_chr07 | 34173876                | GG                              | AA                | 1946466655               |
| SNP_P3_91847_34173881 | NC_021166.1    | Ca_kabuli_chr07 | 34173881                | TT                              | CC                | 1946466657               |
| SNP_P3_91848_34173882 | NC_021166.1    | Ca_kabuli_chr07 | 34173882                | AA                              | CC                | 1946466658               |
| SNP_P3_91849_34173929 | NC_021166.1    | Ca_kabuli_chr07 | 34173929                | AA                              | CC                | 1946466660               |
| SNP_P3_91850_34173991 | NC_021166.1    | Ca_kabuli_chr07 | 34173991                | AA                              | TT                | 1946466661               |
| SNP_P3_91851_34173992 | NC_021166.1    | Ca_kabuli_chr07 | 34173992                | CC                              | AA                | 1946466663               |
| SNP_P3_91852_34174000 | NC_021166.1    | Ca_kabuli_chr07 | 34174000                | CC                              | TT                | 1946466664               |
| SNP_P3_91853_34174064 | NC_021166.1    | Ca_kabuli_chr07 | 34174064                | TT                              | CC                | 1946466666               |
| SNP_P3_91855_34174153 | NC_021166.1    | Ca_kabuli_chr07 | 34174153                | CC                              | TT                | 1946466667               |
| SNP_P3_91856_34174251 | NC_021166.1    | Ca_kabuli_chr07 | 34174251                | GG                              | AA                | 1946466669               |
| SNP_P3_91857_34174261 | NC_021166.1    | Ca_kabuli_chr07 | 34174261                | GG                              | TT                | 1946466670               |
| SNP_P3_91858_34175999 | NC_021166.1    | Ca_kabuli_chr07 | 34175999                | GG                              | TT                | 1946466672               |
| SNP_P3_91859_34176056 | NC_021166.1    | Ca_kabuli_chr07 | 34176056                | GG                              | AA                | 1946466673               |
| SNP_P3_91860_34176369 | NC_021166.1    | Ca_kabuli_chr07 | 34176369                | TT                              | AA                | 1946466675               |
| SNP_P3_91861_34176385 | NC_021166.1    | Ca_kabuli_chr07 | 34176385                | TT                              | CC                | 1946466676               |
| SNP_P3_91862_34176418 | NC_021166.1    | Ca_kabuli_chr07 | 34176418                | TT                              | CC                | 1946466678               |
| SNP_P3_91863_34176598 | NC_021166.1    | Ca_kabuli_chr07 | 34176598                | CC                              | TT                | 1946466679               |
| SNP_P3_91864_34176858 | NC_021166.1    | Ca_kabuli_chr07 | 34176858                | TT                              | GG                | 1946466681               |
| SNP_P3_91865_34176863 | NC_021166.1    | Ca_kabuli_chr07 | 34176863                | CC                              | TT                | 1946466682               |
| SNP_P3_91866_34176875 | NC_021166.1    | Ca_kabuli_chr07 | 34176875                | AA                              | GG                | 1946466683               |
| SNP_P3_91867_34176879 | NC_021166.1    | Ca_kabuli_chr07 | 34176879                | GG                              | TT                | 1946466685               |
| SNP_P3_91868_34176889 | NC_021166.1    | Ca_kabuli_chr07 | 34176889                | GG                              | AA                | 1946466686               |
| SNP_P3_91869_34176909 | NC_021166.1    | Ca_kabuli_chr07 | 34176909                | AA                              | GG                | 1946466688               |
| SNP_P3_91870_34176917 | NC_021166.1    | Ca_kabuli_chr07 | 34176917                | AA                              | GG                | 1946466689               |
| SNP_P3_91871_34176934 | NC_021166.1    | Ca_kabuli_chr07 | 34176934                | GG                              | TT                | 1946466691               |
| SNP_P3_91872_34177167 | NC_021166.1    | Ca_kabuli_chr07 | 34177167                | AA                              | GG                | 1946466692               |
| SNP_P3_91873_34177183 | NC_021166.1    | Ca_kabuli_chr07 | 34177183                | GG                              | AA                | 1946466694               |
| SNP_P3_91874_34177516 | NC_021166.1    | Ca_kabuli_chr07 | 34177516                | AA                              | GG                | 1946466695               |

| SNPs IDs              | Chromosome IDs | Chromosomes     | Physical positions (bp) | CDC Frontier (Reference genome) | (Pusa 256 & HPNB) | NCBI SNPdb Accession IDs |
|-----------------------|----------------|-----------------|-------------------------|---------------------------------|-------------------|--------------------------|
| SNP_P3_91877_34179791 | NC_021166.1    | Ca_kabuli_chr07 | 34179791                | AA                              | GG                | 1946466697               |
| SNP_P3_91878_34180768 | NC_021166.1    | Ca_kabuli_chr07 | 34180768                | CC                              | TT                | 1946466698               |
| SNP_P3_91879_34182514 | NC_021166.1    | Ca_kabuli_chr07 | 34182514                | AA                              | TT                | 1946466700               |
| SNP_P3_91880_34182996 | NC_021166.1    | Ca_kabuli_chr07 | 34182996                | GG                              | AA                | 1946466701               |
| SNP_P3_91881_34183011 | NC_021166.1    | Ca_kabuli_chr07 | 34183011                | TT                              | CC                | 1946466702               |
| SNP_P3_91882_34183024 | NC_021166.1    | Ca_kabuli_chr07 | 34183024                | AA                              | GG                | 1946466704               |
| SNP_P3_91883_34183047 | NC_021166.1    | Ca_kabuli_chr07 | 34183047                | TT                              | CC                | 1946466705               |
| SNP_P3_91884_34183061 | NC_021166.1    | Ca_kabuli_chr07 | 34183061                | AA                              | GG                | 1946466707               |
| SNP_P3_91885_34183358 | NC_021166.1    | Ca_kabuli_chr07 | 34183358                | GG                              | AA                | 1946466708               |
| SNP_P3_91886_34183544 | NC_021166.1    | Ca_kabuli_chr07 | 34183544                | GG                              | AA                | 1946466710               |
| SNP_P3_91887_34184624 | NC_021166.1    | Ca_kabuli_chr07 | 34184624                | GG                              | AA                | 1946466711               |
| SNP_P3_91888_34184639 | NC_021166.1    | Ca_kabuli_chr07 | 34184639                | TT                              | CC                | 1946466713               |
| SNP_P3_91889_34185022 | NC_021166.1    | Ca_kabuli_chr07 | 34185022                | GG                              | AA                | 1946466714               |
| SNP_P3_91890_34185237 | NC_021166.1    | Ca_kabuli_chr07 | 34185237                | CC                              | TT                | 1946466716               |
| SNP_P3_91891_34185404 | NC_021166.1    | Ca_kabuli_chr07 | 34185404                | CC                              | TT                | 1946466717               |
| SNP_P3_91892_34186934 | NC_021166.1    | Ca_kabuli_chr07 | 34186934                | GG                              | CC                | 1946466719               |
| SNP_P3_91895_34190586 | NC_021166.1    | Ca_kabuli_chr07 | 34190586                | CC                              | GG                | 1946466720               |
| SNP_P3_91896_34190607 | NC_021166.1    | Ca_kabuli_chr07 | 34190607                | CC                              | GG                | 1946466722               |
| SNP_P3_91897_34191414 | NC_021166.1    | Ca_kabuli_chr07 | 34191414                | CC                              | GG                | 1946466723               |
| SNP_P3_91898_34192494 | NC_021166.1    | Ca_kabuli_chr07 | 34192494                | CC                              | TT                | 1946466725               |
| SNP_P3_91899_34192832 | NC_021166.1    | Ca_kabuli_chr07 | 34192832                | TT                              | GG                | 1946466726               |
| SNP_P3_91900_34193710 | NC_021166.1    | Ca_kabuli_chr07 | 34193710                | CC                              | TT                | 1946466727               |
| SNP_P3_91902_34195676 | NC_021166.1    | Ca_kabuli_chr07 | 34195676                | CC                              | GG                | 1946466729               |
| SNP_P3_91905_34195813 | NC_021166.1    | Ca_kabuli_chr07 | 34195813                | TT                              | CC                | 1946466730               |
| SNP_P3_91906_34196003 | NC_021166.1    | Ca_kabuli_chr07 | 34196003                | AA                              | TT                | 1946466732               |
| SNP_P3_91907_34196065 | NC_021166.1    | Ca_kabuli_chr07 | 34196065                | TT                              | AA                | 1946466733               |
| SNP_P3_91909_34196466 | NC_021166.1    | Ca_kabuli_chr07 | 34196466                | TT                              | CC                | 1946466735               |
| SNP_P3_91910_34196726 | NC_021166.1    | Ca_kabuli_chr07 | 34196726                | AA                              | GG                | 1946466736               |
| SNP_P3_91912_34199529 | NC_021166.1    | Ca_kabuli_chr07 | 34199529                | CC                              | AA                | 1946466738               |
| SNP_P3_91913_34200071 | NC_021166.1    | Ca_kabuli_chr07 | 34200071                | CC                              | AA                | 1946466739               |
| SNP_P3_91914_34200391 | NC_021166.1    | Ca_kabuli_chr07 | 34200391                | AA                              | GG                | 1946466741               |
| SNP_P3_91915_34202325 | NC_021166.1    | Ca_kabuli_chr07 | 34202325                | CC                              | TT                | 1946466742               |
| SNP_P3_91919_34203706 | NC_021166.1    | Ca_kabuli_chr07 | 34203706                | AA                              | TT                | 1946466744               |
| SNP_P3_91920_34203727 | NC_021166.1    | Ca_kabuli_chr07 | 34203727                | AA                              | TT                | 1946466745               |
| SNP_P3_91922_34204786 | NC_021166.1    | Ca_kabuli_chr07 | 34204786                | AA                              | GG                | 1946466746               |
| SNP_P3_91923_34204790 | NC_021166.1    | Ca_kabuli_chr07 | 34204790                | CC                              | GG                | 1946466748               |
| SNP_P3_91925_34205488 | NC_021166.1    | Ca_kabuli_chr07 | 34205488                | GG                              | AA                | 1946466749               |
| SNP_P3_91926_34208028 | NC_021166.1    | Ca_kabuli_chr07 | 34208028                | CC                              | TT                | 1946466751               |
| SNP_P3_91927_34208510 | NC_021166.1    | Ca_kabuli_chr07 | 34208510                | TT                              | CC                | 1946466752               |
| SNP_P3_91928_34208798 | NC_021166.1    | Ca_kabuli_chr07 | 34208798                | AA                              | GG                | 1946466754               |
| SNP_P3_91929_34209887 | NC_021166.1    | Ca_kabuli_chr07 | 34209887                | CC                              | TT                | 1946466755               |
| SNP_P3_91930_34211769 | NC_021166.1    | Ca_kabuli_chr07 | 34211769                | TT                              | CC                | 1946466757               |

| SNPs IDs              | Chromosome IDs | Chromosomes     | Physical positions (bp) | CDC Frontier (Reference genome) | (Pusa 256 & HPNB) | NCBI SNPdb Accession IDs |
|-----------------------|----------------|-----------------|-------------------------|---------------------------------|-------------------|--------------------------|
| SNP_P3_91931_34212940 | NC_021166.1    | Ca_kabuli_chr07 | 34212940                | GG                              | AA                | 1946466758               |
| SNP_P3_91932_34213712 | NC_021166.1    | Ca_kabuli_chr07 | 34213712                | TT                              | CC                | 1946466760               |
| SNP_P3_91934_34214028 | NC_021166.1    | Ca_kabuli_chr07 | 34214028                | TT                              | GG                | 1946466761               |
| SNP_P3_91935_34214041 | NC_021166.1    | Ca_kabuli_chr07 | 34214041                | AA                              | GG                | 1946466763               |
| SNP_P3_91936_34214047 | NC_021166.1    | Ca_kabuli_chr07 | 34214047                | GG                              | AA                | 1946466764               |
| SNP_P3_91937_34215952 | NC_021166.1    | Ca_kabuli_chr07 | 34215952                | TT                              | CC                | 1946466765               |
| SNP_P3_91939_34217365 | NC_021166.1    | Ca_kabuli_chr07 | 34217365                | CC                              | TT                | 1946466767               |
| SNP_P3_91940_34217571 | NC_021166.1    | Ca_kabuli_chr07 | 34217571                | AA                              | CC                | 1946466768               |
| SNP_P3_91942_34218423 | NC_021166.1    | Ca_kabuli_chr07 | 34218423                | TT                              | CC                | 1946466770               |
| SNP_P3_91943_34221528 | NC_021166.1    | Ca_kabuli_chr07 | 34221528                | TT                              | CC                | 1946466771               |
| SNP_P3_91947_34224621 | NC_021166.1    | Ca_kabuli_chr07 | 34224621                | AA                              | TT                | 1946466773               |
| SNP_P3_91948_34226247 | NC_021166.1    | Ca_kabuli_chr07 | 34226247                | GG                              | CC                | 1946466774               |
| SNP_P3_91949_34226252 | NC_021166.1    | Ca_kabuli_chr07 | 34226252                | AA                              | TT                | 1946466776               |
| SNP_P3_91950_34226463 | NC_021166.1    | Ca_kabuli_chr07 | 34226463                | GG                              | CC                | 1946466777               |
| SNP_P3_91952_34226776 | NC_021166.1    | Ca_kabuli_chr07 | 34226776                | CC                              | TT                | 1946466779               |
| SNP_P3_91954_34227219 | NC_021166.1    | Ca_kabuli_chr07 | 34227219                | TT                              | GG                | 1946466780               |
| SNP_P3_91955_34227271 | NC_021166.1    | Ca_kabuli_chr07 | 34227271                | GG                              | AA                | 1946466782               |
| SNP_P3_91957_34229852 | NC_021166.1    | Ca_kabuli_chr07 | 34229852                | TT                              | CC                | 1946466783               |
| SNP_P3_91958_34229925 | NC_021166.1    | Ca_kabuli_chr07 | 34229925                | CC                              | AA                | 1946466785               |
| SNP_P3_91959_34230050 | NC_021166.1    | Ca_kabuli_chr07 | 34230050                | CC                              | TT                | 1946466786               |
| SNP_P3_91960_34230383 | NC_021166.1    | Ca_kabuli_chr07 | 34230383                | GG                              | TT                | 1946466788               |
| SNP_P3_91961_34230821 | NC_021166.1    | Ca_kabuli_chr07 | 34230821                | CC                              | TT                | 1946466789               |
| SNP_P3_91962_34230837 | NC_021166.1    | Ca_kabuli_chr07 | 34230837                | AA                              | GG                | 1946466791               |
| SNP_P3_91963_34231116 | NC_021166.1    | Ca_kabuli_chr07 | 34231116                | AA                              | GG                | 1946466792               |
| SNP_P3_91964_34232654 | NC_021166.1    | Ca_kabuli_chr07 | 34232654                | CC                              | GG                | 1946466794               |
| SNP_P3_91965_34233339 | NC_021166.1    | Ca_kabuli_chr07 | 34233339                | TT                              | CC                | 1946466795               |
| SNP_P3_91966_34235012 | NC_021166.1    | Ca_kabuli_chr07 | 34235012                | TT                              | CC                | 1946466797               |
| SNP_P3_91967_34235815 | NC_021166.1    | Ca_kabuli_chr07 | 34235815                | GG                              | AA                | 1946466798               |
| SNP_P3_91968_34237121 | NC_021166.1    | Ca_kabuli_chr07 | 34237121                | AA                              | GG                | 1946466800               |
| SNP_P3_91971_34237832 | NC_021166.1    | Ca_kabuli_chr07 | 34237832                | AA                              | TT                | 1946466801               |
| SNP_P3_91972_34237863 | NC_021166.1    | Ca_kabuli_chr07 | 34237863                | TT                              | CC                | 1946466803               |
| SNP_P3_91973_34237891 | NC_021166.1    | Ca_kabuli_chr07 | 34237891                | TT                              | AA                | 1946466804               |
| SNP_P3_91974_34238201 | NC_021166.1    | Ca_kabuli_chr07 | 34238201                | CC                              | AA                | 1946466806               |
| SNP_P3_91975_34238231 | NC_021166.1    | Ca_kabuli_chr07 | 34238231                | TT                              | AA                | 1946466807               |
| SNP_P3_91977_34238288 | NC_021166.1    | Ca_kabuli_chr07 | 34238288                | TT                              | CC                | 1946466808               |
| SNP_P3_91979_34238457 | NC_021166.1    | Ca_kabuli_chr07 | 34238457                | GG                              | AA                | 1946466810               |
| SNP_P3_91981_34238550 | NC_021166.1    | Ca_kabuli_chr07 | 34238550                | AA                              | GG                | 1946466811               |
| SNP_P3_91983_34239906 | NC_021166.1    | Ca_kabuli_chr07 | 34239906                | CC                              | TT                | 1946466813               |
| SNP_P3_91984_34240138 | NC_021166.1    | Ca_kabuli_chr07 | 34240138                | CC                              | TT                | 1946466814               |
| SNP_P3_91985_34240646 | NC_021166.1    | Ca_kabuli_chr07 | 34240646                | AA                              | GG                | 1946466816               |
| SNP_P3_91986_34240727 | NC_021166.1    | Ca_kabuli_chr07 | 34240727                | AA                              | CC                | 1946466817               |
| SNP_P3_91987_34241024 | NC_021166.1    | Ca_kabuli_chr07 | 34241024                | TT                              | CC                | 1946466819               |



| SNPs IDs              | Chromosome IDs | Chromosomes     | Physical positions (bp) | CDC Frontier (Reference genome) | (Pusa 256 & HPNB) | NCBI SNPdb Accession IDs |
|-----------------------|----------------|-----------------|-------------------------|---------------------------------|-------------------|--------------------------|
| SNP_P3_91988_34241394 | NC_021166.1    | Ca_kabuli_chr07 | 34241394                | AA                              | CC                | 1946466820               |
| SNP_P3_91989_34241620 | NC_021166.1    | Ca_kabuli_chr07 | 34241620                | AA                              | CC                | 1946466822               |
| SNP_P3_91990_34241674 | NC_021166.1    | Ca_kabuli_chr07 | 34241674                | TT                              | AA                | 1946466823               |
| SNP_P3_91991_34241675 | NC_021166.1    | Ca_kabuli_chr07 | 34241675                | TT                              | AA                | 1946466825               |
| SNP_P3_91992_34242228 | NC_021166.1    | Ca_kabuli_chr07 | 34242228                | CC                              | TT                | 1946466826               |
| SNP_P3_91993_34242446 | NC_021166.1    | Ca_kabuli_chr07 | 34242446                | TT                              | CC                | 1946466828               |
| SNP_P3_91994_34242985 | NC_021166.1    | Ca_kabuli_chr07 | 34242985                | TT                              | CC                | 1946466829               |
| SNP_P3_91995_34243005 | NC_021166.1    | Ca_kabuli_chr07 | 34243005                | GG                              | AA                | 1946466831               |
| SNP_P3_91996_34243177 | NC_021166.1    | Ca_kabuli_chr07 | 34243177                | TT                              | GG                | 1946466832               |
| SNP_P3_91997_34243191 | NC_021166.1    | Ca_kabuli_chr07 | 34243191                | AA                              | GG                | 1946466834               |
| SNP_P3_91998_34243203 | NC_021166.1    | Ca_kabuli_chr07 | 34243203                | GG                              | CC                | 1946466835               |
| SNP_P3_91999_34245726 | NC_021166.1    | Ca_kabuli_chr07 | 34245726                | TT                              | AA                | 1946466836               |
| SNP_P3_92000_34245821 | NC_021166.1    | Ca_kabuli_chr07 | 34245821                | TT                              | GG                | 1946466838               |
| SNP_P3_92001_34246474 | NC_021166.1    | Ca_kabuli_chr07 | 34246474                | TT                              | CC                | 1946466839               |
| SNP_P3_92002_34246491 | NC_021166.1    | Ca_kabuli_chr07 | 34246491                | AA                              | GG                | 1946466841               |
| SNP_P3_92003_34246545 | NC_021166.1    | Ca_kabuli_chr07 | 34246545                | CC                              | AA                | 1946466842               |
| SNP_P3_92004_34248187 | NC_021166.1    | Ca_kabuli_chr07 | 34248187                | TT                              | CC                | 1946466844               |
| SNP_P3_92005_34248307 | NC_021166.1    | Ca_kabuli_chr07 | 34248307                | TT                              | AA                | 1946466845               |
| SNP_P3_92006_34248437 | NC_021166.1    | Ca_kabuli_chr07 | 34248437                | TT                              | CC                | 1946466847               |
| SNP_P3_92007_34249078 | NC_021166.1    | Ca_kabuli_chr07 | 34249078                | AA                              | GG                | 1946466848               |
| SNP_P3_92008_34250309 | NC_021166.1    | Ca_kabuli_chr07 | 34250309                | GG                              | AA                | 1946466850               |
| SNP_P3_92009_34250318 | NC_021166.1    | Ca_kabuli_chr07 | 34250318                | GG                              | AA                | 1946466851               |
| SNP_P3_92010_34250767 | NC_021166.1    | Ca_kabuli_chr07 | 34250767                | AA                              | GG                | 1946466853               |
| SNP_P3_92011_34251544 | NC_021166.1    | Ca_kabuli_chr07 | 34251544                | TT                              | CC                | 1946466854               |
| SNP_P3_92012_34251677 | NC_021166.1    | Ca_kabuli_chr07 | 34251677                | GG                              | AA                | 1946466856               |
| SNP_P3_92014_34252010 | NC_021166.1    | Ca_kabuli_chr07 | 34252010                | CC                              | GG                | 1946466857               |
| SNP_P3_92015_34252034 | NC_021166.1    | Ca_kabuli_chr07 | 34252034                | AA                              | GG                | 1946466859               |
| SNP_P3_92016_34254955 | NC_021166.1    | Ca_kabuli_chr07 | 34254955                | GG                              | AA                | 1946466860               |
| SNP_P3_92017_34255375 | NC_021166.1    | Ca_kabuli_chr07 | 34255375                | CC                              | TT                | 1946466862               |
| SNP_P3_92018_34255745 | NC_021166.1    | Ca_kabuli_chr07 | 34255745                | TT                              | CC                | 1946466863               |
| SNP_P3_92019_34256820 | NC_021166.1    | Ca_kabuli_chr07 | 34256820                | CC                              | TT                | 1946466865               |
| SNP_P3_92020_34256822 | NC_021166.1    | Ca_kabuli_chr07 | 34256822                | CC                              | TT                | 1946466866               |
| SNP_P3_92021_34257156 | NC_021166.1    | Ca_kabuli_chr07 | 34257156                | AA                              | GG                | 1946466868               |
| SNP_P3_92022_34257247 | NC_021166.1    | Ca_kabuli_chr07 | 34257247                | AA                              | GG                | 1946466869               |
| SNP_P3_92023_34257248 | NC_021166.1    | Ca_kabuli_chr07 | 34257248                | AA                              | GG                | 1946466870               |
| SNP_P3_92024_34258078 | NC_021166.1    | Ca_kabuli_chr07 | 34258078                | CC                              | TT                | 1946466872               |
| SNP_P3_92025_34258888 | NC_021166.1    | Ca_kabuli_chr07 | 34258888                | TT                              | AA                | 1946466873               |
| SNP_P3_92026_34259489 | NC_021166.1    | Ca_kabuli_chr07 | 34259489                | CC                              | TT                | 1946466875               |
| SNP_P3_92027_34259750 | NC_021166.1    | Ca_kabuli_chr07 | 34259750                | AA                              | TT                | 1946466876               |
| SNP_P3_92028_34260338 | NC_021166.1    | Ca_kabuli_chr07 | 34260338                | AA                              | GG                | 1946466878               |
| SNP_P3_92029_34260370 | NC_021166.1    | Ca_kabuli_chr07 | 34260370                | AA                              | GG                | 1946466879               |
| SNP_P3_92030_34260640 | NC_021166.1    | Ca_kabuli_chr07 | 34260640                | TT                              | GG                | 1946466881               |

| SNPs IDs              | Chromosome IDs | Chromosomes     | Physical positions (bp) | CDC Frontier (Reference genome) | (Pusa 256 & HPNB) | NCBI SNPdb Accession IDs |
|-----------------------|----------------|-----------------|-------------------------|---------------------------------|-------------------|--------------------------|
| SNP_P3_92031_34261794 | NC_021166.1    | Ca_kabuli_chr07 | 34261794                | TT                              | GG                | 1946466882               |
| SNP_P3_92032_34263486 | NC_021166.1    | Ca_kabuli_chr07 | 34263486                | GG                              | AA                | 1946466884               |
| SNP_P3_92033_34265531 | NC_021166.1    | Ca_kabuli_chr07 | 34265531                | GG                              | AA                | 1946466885               |
| SNP_P3_92034_34265788 | NC_021166.1    | Ca_kabuli_chr07 | 34265788                | CC                              | TT                | 1946466887               |
| SNP_P3_92035_34265850 | NC_021166.1    | Ca_kabuli_chr07 | 34265850                | GG                              | TT                | 1946466888               |
| SNP_P3_92036_34265965 | NC_021166.1    | Ca_kabuli_chr07 | 34265965                | TT                              | CC                | 1946466890               |
| SNP_P3_92037_34265966 | NC_021166.1    | Ca_kabuli_chr07 | 34265966                | TT                              | GG                | 1946466891               |
| SNP_P3_92038_34267572 | NC_021166.1    | Ca_kabuli_chr07 | 34267572                | AA                              | GG                | 1946466892               |
| SNP_P3_92039_34267628 | NC_021166.1    | Ca_kabuli_chr07 | 34267628                | AA                              | TT                | 1946466894               |
| SNP_P3_92040_34267870 | NC_021166.1    | Ca_kabuli_chr07 | 34267870                | CC                              | TT                | 1946466895               |
| SNP_P3_92041_34267876 | NC_021166.1    | Ca_kabuli_chr07 | 34267876                | GG                              | AA                | 1946466897               |
| SNP_P3_92042_34267936 | NC_021166.1    | Ca_kabuli_chr07 | 34267936                | GG                              | AA                | 1946466898               |
| SNP_P3_92043_34268955 | NC_021166.1    | Ca_kabuli_chr07 | 34268955                | TT                              | CC                | 1946466900               |
| SNP_P3_92044_34276147 | NC_021166.1    | Ca_kabuli_chr07 | 34276147                | CC                              | TT                | 1946466901               |
| SNP_P3_92045_34276166 | NC_021166.1    | Ca_kabuli_chr07 | 34276166                | AA                              | GG                | 1946466903               |
| SNP_P3_92046_34276187 | NC_021166.1    | Ca_kabuli_chr07 | 34276187                | TT                              | CC                | 1946466904               |
| SNP_P3_92047_34277010 | NC_021166.1    | Ca_kabuli_chr07 | 34277010                | GG                              | AA                | 1946466906               |
| SNP_P3_92048_34277014 | NC_021166.1    | Ca_kabuli_chr07 | 34277014                | TT                              | GG                | 1946466907               |
| SNP_P3_92049_34277604 | NC_021166.1    | Ca_kabuli_chr07 | 34277604                | CC                              | TT                | 1946466909               |
| SNP_P3_92050_34277639 | NC_021166.1    | Ca_kabuli_chr07 | 34277639                | AA                              | GG                | 1946466910               |
| SNP_P3_92051_34277676 | NC_021166.1    | Ca_kabuli_chr07 | 34277676                | AA                              | GG                | 1946466911               |
| SNP_P3_92052_34277950 | NC_021166.1    | Ca_kabuli_chr07 | 34277950                | TT                              | CC                | 1946466913               |
| SNP_P3_92053_34277961 | NC_021166.1    | Ca_kabuli_chr07 | 34277961                | CC                              | TT                | 1946466914               |
| SNP_P3_92054_34278030 | NC_021166.1    | Ca_kabuli_chr07 | 34278030                | AA                              | GG                | 1946466916               |
| SNP_P3_92056_34278143 | NC_021166.1    | Ca_kabuli_chr07 | 34278143                | TT                              | CC                | 1946466917               |
| SNP_P3_92057_34278198 | NC_021166.1    | Ca_kabuli_chr07 | 34278198                | AA                              | GG                | 1946466919               |
| SNP_P3_92059_34278382 | NC_021166.1    | Ca_kabuli_chr07 | 34278382                | TT                              | AA                | 1946466920               |
| SNP_P3_92060_34278390 | NC_021166.1    | Ca_kabuli_chr07 | 34278390                | AA                              | GG                | 1946466922               |
| SNP_P3_92065_34279357 | NC_021166.1    | Ca_kabuli_chr07 | 34279357                | TT                              | GG                | 1946466923               |
| SNP_P3_92066_34279907 | NC_021166.1    | Ca_kabuli_chr07 | 34279907                | CC                              | AA                | 1946466925               |
| SNP_P3_92068_34281507 | NC_021166.1    | Ca_kabuli_chr07 | 34281507                | TT                              | CC                | 1946466926               |
| SNP_P3_92069_34281515 | NC_021166.1    | Ca_kabuli_chr07 | 34281515                | TT                              | CC                | 1946466928               |
| SNP_P3_92070_34281988 | NC_021166.1    | Ca_kabuli_chr07 | 34281988                | CC                              | TT                | 1946466929               |
| SNP_P3_92071_34282001 | NC_021166.1    | Ca_kabuli_chr07 | 34282001                | GG                              | AA                | 1946466931               |
| SNP_P3_92072_34282293 | NC_021166.1    | Ca_kabuli_chr07 | 34282293                | GG                              | TT                | 1946466932               |
| SNP_P3_92074_34283545 | NC_021166.1    | Ca_kabuli_chr07 | 34283545                | CC                              | AA                | 1946466934               |
| SNP_P3_92076_34283877 | NC_021166.1    | Ca_kabuli_chr07 | 34283877                | TT                              | CC                | 1946466935               |
| SNP_P3_92077_34285790 | NC_021166.1    | Ca_kabuli_chr07 | 34285790                | CC                              | TT                | 1946466936               |
| SNP_P3_92078_34285800 | NC_021166.1    | Ca_kabuli_chr07 | 34285800                | CC                              | TT                | 1946466938               |
| SNP_P3_92079_34285819 | NC_021166.1    | Ca_kabuli_chr07 | 34285819                | AA                              | TT                | 1946466939               |
| SNP_P3_92080_34285826 | NC_021166.1    | Ca_kabuli_chr07 | 34285826                | AA                              | TT                | 1946466941               |
| SNP_P3_92082_34285880 | NC_021166.1    | Ca_kabuli_chr07 | 34285880                | CC                              | AA                | 1946466942               |

| SNPs IDs              | Chromosome IDs | Chromosomes     | Physical positions (bp) | CDC Frontier (Reference genome) | (Pusa 256 & HPNB) | NCBI SNPdb Accession IDs |
|-----------------------|----------------|-----------------|-------------------------|---------------------------------|-------------------|--------------------------|
| SNP_P3_92084_34286344 | NC_021166.1    | Ca_kabuli_chr07 | 34286344                | TT                              | GG                | 1946466944               |
| SNP_P3_92085_34287698 | NC_021166.1    | Ca_kabuli_chr07 | 34287698                | GG                              | CC                | 1946466945               |
| SNP_P3_92086_34287699 | NC_021166.1    | Ca_kabuli_chr07 | 34287699                | GG                              | AA                | 1946466947               |
| SNP_P3_92087_34287980 | NC_021166.1    | Ca_kabuli_chr07 | 34287980                | AA                              | TT                | 1946466948               |
| SNP_P3_92088_34287990 | NC_021166.1    | Ca_kabuli_chr07 | 34287990                | AA                              | TT                | 1946466950               |
| SNP_P3_92089_34288186 | NC_021166.1    | Ca_kabuli_chr07 | 34288186                | CC                              | TT                | 1946466951               |
| SNP_P3_92090_34288260 | NC_021166.1    | Ca_kabuli_chr07 | 34288260                | AA                              | GG                | 1946466952               |
| SNP_P3_92091_34288266 | NC_021166.1    | Ca_kabuli_chr07 | 34288266                | GG                              | AA                | 1946466954               |
| SNP_P3_92092_34289736 | NC_021166.1    | Ca_kabuli_chr07 | 34289736                | TT                              | GG                | 1946466955               |
| SNP_P3_92093_34289945 | NC_021166.1    | Ca_kabuli_chr07 | 34289945                | AA                              | GG                | 1946466957               |
| SNP_P3_92094_34290106 | NC_021166.1    | Ca_kabuli_chr07 | 34290106                | GG                              | AA                | 1946466958               |
| SNP_P3_92096_34290252 | NC_021166.1    | Ca_kabuli_chr07 | 34290252                | GG                              | AA                | 1946466960               |
| SNP_P3_92097_34291790 | NC_021166.1    | Ca_kabuli_chr07 | 34291790                | TT                              | CC                | 1946466961               |
| SNP_P3_92098_34292669 | NC_021166.1    | Ca_kabuli_chr07 | 34292669                | GG                              | AA                | 1946466963               |
| SNP_P3_92099_34293008 | NC_021166.1    | Ca_kabuli_chr07 | 34293008                | GG                              | AA                | 1946466964               |
| SNP_P3_92100_34295117 | NC_021166.1    | Ca_kabuli_chr07 | 34295117                | AA                              | TT                | 1946466966               |
| SNP_P3_92103_34296540 | NC_021166.1    | Ca_kabuli_chr07 | 34296540                | AA                              | TT                | 1946466967               |
| SNP_P3_92104_34296549 | NC_021166.1    | Ca_kabuli_chr07 | 34296549                | AA                              | GG                | 1946466969               |
| SNP_P3_92105_34296558 | NC_021166.1    | Ca_kabuli_chr07 | 34296558                | GG                              | AA                | 1946466970               |
| SNP_P3_92106_34298270 | NC_021166.1    | Ca_kabuli_chr07 | 34298270                | AA                              | GG                | 1946466972               |
| SNP_P3_92107_34299538 | NC_021166.1    | Ca_kabuli_chr07 | 34299538                | TT                              | CC                | 1946466973               |
| SNP_P3_92108_34299601 | NC_021166.1    | Ca_kabuli_chr07 | 34299601                | GG                              | AA                | 1946466975               |
| SNP_P3_92109_34299678 | NC_021166.1    | Ca_kabuli_chr07 | 34299678                | TT                              | CC                | 1946466976               |
| SNP_P3_92110_34299690 | NC_021166.1    | Ca_kabuli_chr07 | 34299690                | AA                              | GG                | 1946466977               |
| SNP_P3_92111_34299877 | NC_021166.1    | Ca_kabuli_chr07 | 34299877                | AA                              | CC                | 1946466979               |
| SNP_P3_92112_34300232 | NC_021166.1    | Ca_kabuli_chr07 | 34300232                | GG                              | AA                | 1946466980               |
| SNP_P3_92113_34300258 | NC_021166.1    | Ca_kabuli_chr07 | 34300258                | TT                              | AA                | 1946466982               |
| SNP_P3_92114_34300515 | NC_021166.1    | Ca_kabuli_chr07 | 34300515                | AA                              | TT                | 1946466983               |
| SNP_P3_92115_34300544 | NC_021166.1    | Ca_kabuli_chr07 | 34300544                | AA                              | GG                | 1946466985               |
| SNP_P3_92116_34300743 | NC_021166.1    | Ca_kabuli_chr07 | 34300743                | CC                              | AA                | 1946466986               |
| SNP_P3_92117_34300744 | NC_021166.1    | Ca_kabuli_chr07 | 34300744                | AA                              | TT                | 1946466988               |
| SNP_P3_92118_34302389 | NC_021166.1    | Ca_kabuli_chr07 | 34302389                | GG                              | AA                | 1946466989               |
| SNP_P3_92119_34302559 | NC_021166.1    | Ca_kabuli_chr07 | 34302559                | CC                              | TT                | 1946466990               |
| SNP_P3_92120_34302865 | NC_021166.1    | Ca_kabuli_chr07 | 34302865                | GG                              | CC                | 1946466992               |
| SNP_P3_92121_34303772 | NC_021166.1    | Ca_kabuli_chr07 | 34303772                | AA                              | GG                | 1946466993               |
| SNP_P3_92122_34303773 | NC_021166.1    | Ca_kabuli_chr07 | 34303773                | CC                              | TT                | 1946466995               |
| SNP_P3_92123_34303780 | NC_021166.1    | Ca_kabuli_chr07 | 34303780                | GG                              | TT                | 1946466996               |
| SNP_P3_92124_34303790 | NC_021166.1    | Ca_kabuli_chr07 | 34303790                | GG                              | AA                | 1946466998               |
| SNP_P3_92125_34303794 | NC_021166.1    | Ca_kabuli_chr07 | 34303794                | CC                              | TT                | 1946466999               |
| SNP_P3_92126_34303816 | NC_021166.1    | Ca_kabuli_chr07 | 34303816                | AA                              | GG                | 1946467000               |
| SNP_P3_92127_34304063 | NC_021166.1    | Ca_kabuli_chr07 | 34304063                | GG                              | AA                | 1946467002               |
| SNP_P3_92128_34304097 | NC_021166.1    | Ca_kabuli_chr07 | 34304097                | TT                              | AA                | 1946467003               |

| SNPs IDs              | Chromosome IDs | Chromosomes     | Physical positions (bp) | CDC Frontier (Reference genome) | (Pusa 256 & HPNB) | NCBI SNPdb Accession IDs |
|-----------------------|----------------|-----------------|-------------------------|---------------------------------|-------------------|--------------------------|
| SNP_P3_92129_34305711 | NC_021166.1    | Ca_kabuli_chr07 | 34305711                | GG                              | CC                | 1946467005               |
| SNP_P3_92130_34306055 | NC_021166.1    | Ca_kabuli_chr07 | 34306055                | AA                              | CC                | 1946467006               |
| SNP_P3_92131_34306902 | NC_021166.1    | Ca_kabuli_chr07 | 34306902                | GG                              | AA                | 1946467008               |
| SNP_P3_92132_34306968 | NC_021166.1    | Ca_kabuli_chr07 | 34306968                | TT                              | GG                | 1946467009               |
| SNP_P3_92133_34307070 | NC_021166.1    | Ca_kabuli_chr07 | 34307070                | AA                              | CC                | 1946467010               |
| SNP_P3_92134_34307145 | NC_021166.1    | Ca_kabuli_chr07 | 34307145                | GG                              | CC                | 1946467012               |
| SNP_P3_92135_34307275 | NC_021166.1    | Ca_kabuli_chr07 | 34307275                | GG                              | AA                | 1946467013               |
| SNP_P3_92136_34307296 | NC_021166.1    | Ca_kabuli_chr07 | 34307296                | GG                              | AA                | 1946467015               |
| SNP_P3_92137_34307316 | NC_021166.1    | Ca_kabuli_chr07 | 34307316                | GG                              | AA                | 1946467016               |
| SNP_P3_92138_34307347 | NC_021166.1    | Ca_kabuli_chr07 | 34307347                | AA                              | GG                | 1946467018               |
| SNP_P3_92139_34307741 | NC_021166.1    | Ca_kabuli_chr07 | 34307741                | CC                              | TT                | 1946467019               |
| SNP_P3_92140_34308673 | NC_021166.1    | Ca_kabuli_chr07 | 34308673                | GG                              | TT                | 1946467020               |
| SNP_P3_92141_34308675 | NC_021166.1    | Ca_kabuli_chr07 | 34308675                | GG                              | CC                | 1946467022               |
| SNP_P3_92142_34308685 | NC_021166.1    | Ca_kabuli_chr07 | 34308685                | TT                              | AA                | 1946467023               |
| SNP_P3_92143_34308714 | NC_021166.1    | Ca_kabuli_chr07 | 34308714                | CC                              | TT                | 1946467025               |
| SNP_P3_92144_34308725 | NC_021166.1    | Ca_kabuli_chr07 | 34308725                | TT                              | GG                | 1946467026               |
| SNP_P3_92145_34308730 | NC_021166.1    | Ca_kabuli_chr07 | 34308730                | TT                              | GG                | 1946467028               |
| SNP_P3_92146_34309252 | NC_021166.1    | Ca_kabuli_chr07 | 34309252                | AA                              | TT                | 1946467029               |
| SNP_P3_92147_34309375 | NC_021166.1    | Ca_kabuli_chr07 | 34309375                | CC                              | TT                | 1946467030               |
| SNP_P3_92148_34309387 | NC_021166.1    | Ca_kabuli_chr07 | 34309387                | TT                              | CC                | 1946467032               |
| SNP_P3_92149_34309389 | NC_021166.1    | Ca_kabuli_chr07 | 34309389                | AA                              | GG                | 1946467033               |
| SNP_P3_92150_34309437 | NC_021166.1    | Ca_kabuli_chr07 | 34309437                | CC                              | TT                | 1946467035               |
| SNP_P3_92151_34309492 | NC_021166.1    | Ca_kabuli_chr07 | 34309492                | TT                              | CC                | 1946467036               |
| SNP_P3_92152_34309559 | NC_021166.1    | Ca_kabuli_chr07 | 34309559                | GG                              | TT                | 1946467037               |
| SNP_P3_92155_34309757 | NC_021166.1    | Ca_kabuli_chr07 | 34309757                | TT                              | AA                | 1946467039               |
| SNP_P3_92156_34309758 | NC_021166.1    | Ca_kabuli_chr07 | 34309758                | TT                              | AA                | 1946467040               |
| SNP_P3_92158_34311211 | NC_021166.1    | Ca_kabuli_chr07 | 34311211                | TT                              | CC                | 1946467042               |
| SNP_P3_92159_34311216 | NC_021166.1    | Ca_kabuli_chr07 | 34311216                | TT                              | CC                | 1946467043               |
| SNP_P3_92160_34311217 | NC_021166.1    | Ca_kabuli_chr07 | 34311217                | AA                              | TT                | 1946467044               |
| SNP_P3_92161_34311234 | NC_021166.1    | Ca_kabuli_chr07 | 34311234                | CC                              | TT                | 1946467046               |
| SNP_P3_92162_34311453 | NC_021166.1    | Ca_kabuli_chr07 | 34311453                | TT                              | CC                | 1946467047               |
| SNP_P3_92165_34311592 | NC_021166.1    | Ca_kabuli_chr07 | 34311592                | CC                              | GG                | 1946467049               |
| SNP_P3_92166_34311717 | NC_021166.1    | Ca_kabuli_chr07 | 34311717                | CC                              | TT                | 1946467050               |
| SNP_P3_92167_34311750 | NC_021166.1    | Ca_kabuli_chr07 | 34311750                | GG                              | AA                | 1946467052               |
| SNP_P3_92168_34311756 | NC_021166.1    | Ca_kabuli_chr07 | 34311756                | GG                              | AA                | 1946467053               |
| SNP_P3_92169_34311787 | NC_021166.1    | Ca_kabuli_chr07 | 34311787                | GG                              | AA                | 1946467054               |
| SNP_P3_92170_34311790 | NC_021166.1    | Ca_kabuli_chr07 | 34311790                | TT                              | CC                | 1946467056               |
| SNP_P3_92171_34311807 | NC_021166.1    | Ca_kabuli_chr07 | 34311807                | AA                              | GG                | 1946467057               |
| SNP_P3_92172_34311824 | NC_021166.1    | Ca_kabuli_chr07 | 34311824                | GG                              | AA                | 1946467059               |
| SNP_P3_92173_34311953 | NC_021166.1    | Ca_kabuli_chr07 | 34311953                | CC                              | TT                | 1946467060               |
| SNP_P3_92174_34312060 | NC_021166.1    | Ca_kabuli_chr07 | 34312060                | AA                              | GG                | 1946467061               |
| SNP_P3_92175_34312092 | NC_021166.1    | Ca_kabuli_chr07 | 34312092                | AA                              | GG                | 1946467063               |

| SNPs IDs              | Chromosome IDs | Chromosomes     | Physical positions (bp) | CDC Frontier (Reference genome) | (Pusa 256 & HPNB) | NCBI SNPdb Accession IDs |
|-----------------------|----------------|-----------------|-------------------------|---------------------------------|-------------------|--------------------------|
| SNP_P3_92180_34312710 | NC_021166.1    | Ca_kabuli_chr07 | 34312710                | CC                              | TT                | 1946467064               |
| SNP_P3_92181_34313116 | NC_021166.1    | Ca_kabuli_chr07 | 34313116                | TT                              | CC                | 1946467066               |
| SNP_P3_92183_34313344 | NC_021166.1    | Ca_kabuli_chr07 | 34313344                | AA                              | GG                | 1946467067               |
| SNP_P3_92184_34314091 | NC_021166.1    | Ca_kabuli_chr07 | 34314091                | CC                              | AA                | 1946467069               |
| SNP_P3_92185_34314158 | NC_021166.1    | Ca_kabuli_chr07 | 34314158                | CC                              | TT                | 1946467070               |
| SNP_P3_92186_34314756 | NC_021166.1    | Ca_kabuli_chr07 | 34314756                | GG                              | AA                | 1946467071               |
| SNP_P3_92187_34314761 | NC_021166.1    | Ca_kabuli_chr07 | 34314761                | TT                              | CC                | 1946467073               |
| SNP_P3_92188_34314773 | NC_021166.1    | Ca_kabuli_chr07 | 34314773                | CC                              | TT                | 1946467074               |
| SNP_P3_92189_34314787 | NC_021166.1    | Ca_kabuli_chr07 | 34314787                | GG                              | AA                | 1946467076               |
| SNP_P3_92191_34315585 | NC_021166.1    | Ca_kabuli_chr07 | 34315585                | TT                              | AA                | 1946467077               |
| SNP_P3_92192_34315616 | NC_021166.1    | Ca_kabuli_chr07 | 34315616                | TT                              | CC                | 1946467078               |
| SNP_P3_92193_34315635 | NC_021166.1    | Ca_kabuli_chr07 | 34315635                | AA                              | TT                | 1946467080               |
| SNP_P3_92194_34315842 | NC_021166.1    | Ca_kabuli_chr07 | 34315842                | AA                              | GG                | 1946467081               |
| SNP_P3_92195_34315950 | NC_021166.1    | Ca_kabuli_chr07 | 34315950                | CC                              | TT                | 1946467083               |
| SNP_P3_92197_34316195 | NC_021166.1    | Ca_kabuli_chr07 | 34316195                | TT                              | CC                | 1946467084               |
| SNP_P3_92198_34316400 | NC_021166.1    | Ca_kabuli_chr07 | 34316400                | TT                              | CC                | 1946467086               |
| SNP_P3_92200_34316627 | NC_021166.1    | Ca_kabuli_chr07 | 34316627                | CC                              | GG                | 1946467087               |
| SNP_P3_92201_34316629 | NC_021166.1    | Ca_kabuli_chr07 | 34316629                | GG                              | AA                | 1946467088               |
| SNP_P3_92202_34316642 | NC_021166.1    | Ca_kabuli_chr07 | 34316642                | AA                              | TT                | 1946467090               |
| SNP_P3_92203_34317000 | NC_021166.1    | Ca_kabuli_chr07 | 34317000                | AA                              | CC                | 1946467091               |
| SNP_P3_92204_34317010 | NC_021166.1    | Ca_kabuli_chr07 | 34317010                | GG                              | AA                | 1946467093               |
| SNP_P3_92205_34317157 | NC_021166.1    | Ca_kabuli_chr07 | 34317157                | CC                              | TT                | 1946467094               |
| SNP_P3_92206_34317175 | NC_021166.1    | Ca_kabuli_chr07 | 34317175                | CC                              | AA                | 1946467095               |
| SNP_P3_92207_34317212 | NC_021166.1    | Ca_kabuli_chr07 | 34317212                | TT                              | CC                | 1946467097               |
| SNP_P3_92208_34317213 | NC_021166.1    | Ca_kabuli_chr07 | 34317213                | TT                              | AA                | 1946467098               |
| SNP_P3_92210_34317420 | NC_021166.1    | Ca_kabuli_chr07 | 34317420                | GG                              | AA                | 1946467100               |
| SNP_P3_92212_34317611 | NC_021166.1    | Ca_kabuli_chr07 | 34317611                | CC                              | AA                | 1946467101               |
| SNP_P3_92213_34318324 | NC_021166.1    | Ca_kabuli_chr07 | 34318324                | GG                              | AA                | 1946467103               |
| SNP_P3_92215_34318376 | NC_021166.1    | Ca_kabuli_chr07 | 34318376                | AA                              | GG                | 1946467104               |
| SNP_P3_92216_34318441 | NC_021166.1    | Ca_kabuli_chr07 | 34318441                | CC                              | GG                | 1946467105               |
| SNP_P3_92217_34318574 | NC_021166.1    | Ca_kabuli_chr07 | 34318574                | CC                              | TT                | 1946467107               |
| SNP_P3_92219_34320127 | NC_021166.1    | Ca_kabuli_chr07 | 34320127                | CC                              | AA                | 1946467108               |
| SNP_P3_92221_34320534 | NC_021166.1    | Ca_kabuli_chr07 | 34320534                | TT                              | AA                | 1946467110               |
| SNP_P3_92222_34320538 | NC_021166.1    | Ca_kabuli_chr07 | 34320538                | TT                              | CC                | 1946467111               |
| SNP_P3_92224_34321265 | NC_021166.1    | Ca_kabuli_chr07 | 34321265                | TT                              | GG                | 1946467112               |
| SNP_P3_92225_34321578 | NC_021166.1    | Ca_kabuli_chr07 | 34321578                | GG                              | CC                | 1946467114               |
| SNP_P3_92227_34321811 | NC_021166.1    | Ca_kabuli_chr07 | 34321811                | GG                              | AA                | 1946467115               |
| SNP_P3_92229_34323682 | NC_021166.1    | Ca_kabuli_chr07 | 34323682                | AA                              | GG                | 1946467117               |
| SNP_P3_92230_34323866 | NC_021166.1    | Ca_kabuli_chr07 | 34323866                | GG                              | TT                | 1946467118               |
| SNP_P3_92231_34324138 | NC_021166.1    | Ca_kabuli_chr07 | 34324138                | AA                              | GG                | 1946467119               |
| SNP_P3_92232_34324147 | NC_021166.1    | Ca_kabuli_chr07 | 34324147                | AA                              | TT                | 1946467121               |
| SNP_P3_92233_34324324 | NC_021166.1    | Ca_kabuli_chr07 | 34324324                | AA                              | GG                | 1946467122               |

| SNPs IDs              | Chromosome IDs | Chromosomes     | Physical positions (bp) | CDC Frontier (Reference genome) | (Pusa 256 & HPNB) | NCBI SNPdb Accession IDs |
|-----------------------|----------------|-----------------|-------------------------|---------------------------------|-------------------|--------------------------|
| SNP_P3_92234_34324823 | NC_021166.1    | Ca_kabuli_chr07 | 34324823                | CC                              | TT                | 1946467124               |
| SNP_P3_92235_34328745 | NC_021166.1    | Ca_kabuli_chr07 | 34328745                | TT                              | CC                | 1946467125               |
| SNP_P3_92236_34328757 | NC_021166.1    | Ca_kabuli_chr07 | 34328757                | AA                              | GG                | 1946467127               |
| SNP_P3_92238_34329355 | NC_021166.1    | Ca_kabuli_chr07 | 34329355                | GG                              | AA                | 1946467128               |
| SNP_P3_92239_34329377 | NC_021166.1    | Ca_kabuli_chr07 | 34329377                | GG                              | TT                | 1946467130               |
| SNP_P3_92240_34329426 | NC_021166.1    | Ca_kabuli_chr07 | 34329426                | TT                              | CC                | 1946467131               |
| SNP_P3_92241_34329443 | NC_021166.1    | Ca_kabuli_chr07 | 34329443                | TT                              | CC                | 1946467132               |
| SNP_P3_92242_34329610 | NC_021166.1    | Ca_kabuli_chr07 | 34329610                | AA                              | CC                | 1946467134               |
| SNP_P3_92243_34329639 | NC_021166.1    | Ca_kabuli_chr07 | 34329639                | GG                              | TT                | 1946467135               |
| SNP_P3_92244_34329743 | NC_021166.1    | Ca_kabuli_chr07 | 34329743                | GG                              | AA                | 1946467137               |
| SNP_P3_92245_34329747 | NC_021166.1    | Ca_kabuli_chr07 | 34329747                | GG                              | AA                | 1946467138               |
| SNP_P3_92246_34329752 | NC_021166.1    | Ca_kabuli_chr07 | 34329752                | AA                              | CC                | 1946467140               |
| SNP_P3_92247_34329937 | NC_021166.1    | Ca_kabuli_chr07 | 34329937                | TT                              | GG                | 1946467141               |
| SNP_P3_92248_34329942 | NC_021166.1    | Ca_kabuli_chr07 | 34329942                | CC                              | TT                | 1946467143               |
| SNP_P3_92249_34329953 | NC_021166.1    | Ca_kabuli_chr07 | 34329953                | AA                              | GG                | 1946467144               |
| SNP_P3_92251_34331168 | NC_021166.1    | Ca_kabuli_chr07 | 34331168                | GG                              | AA                | 1946467146               |
| SNP_P3_92252_34331220 | NC_021166.1    | Ca_kabuli_chr07 | 34331220                | GG                              | TT                | 1946467147               |
| SNP_P3_92253_34331420 | NC_021166.1    | Ca_kabuli_chr07 | 34331420                | TT                              | CC                | 1946467149               |
| SNP_P3_92254_34331425 | NC_021166.1    | Ca_kabuli_chr07 | 34331425                | TT                              | CC                | 1946467150               |
| SNP_P3_92255_34331427 | NC_021166.1    | Ca_kabuli_chr07 | 34331427                | GG                              | AA                | 1946467152               |
| SNP_P3_92256_34331432 | NC_021166.1    | Ca_kabuli_chr07 | 34331432                | TT                              | CC                | 1946467153               |
| SNP_P3_92257_34331466 | NC_021166.1    | Ca_kabuli_chr07 | 34331466                | AA                              | GG                | 1946467155               |
| SNP_P3_92258_34331511 | NC_021166.1    | Ca_kabuli_chr07 | 34331511                | TT                              | GG                | 1946467156               |
| SNP_P3_92260_34332174 | NC_021166.1    | Ca_kabuli_chr07 | 34332174                | CC                              | TT                | 1946467159               |
| SNP_P3_92261_34334429 | NC_021166.1    | Ca_kabuli_chr07 | 34334429                | TT                              | CC                | 1946467160               |
| SNP_P3_92262_34334445 | NC_021166.1    | Ca_kabuli_chr07 | 34334445                | TT                              | CC                | 1946467161               |
| SNP_P3_92263_34334449 | NC_021166.1    | Ca_kabuli_chr07 | 34334449                | GG                              | TT                | 1946467163               |
| SNP_P3_92264_34334720 | NC_021166.1    | Ca_kabuli_chr07 | 34334720                | GG                              | CC                | 1946467164               |
| SNP_P3_92265_34334756 | NC_021166.1    | Ca_kabuli_chr07 | 34334756                | GG                              | CC                | 1946467166               |
| SNP_P3_92267_34335111 | NC_021166.1    | Ca_kabuli_chr07 | 34335111                | CC                              | TT                | 1946467167               |
| SNP_P3_92268_34335506 | NC_021166.1    | Ca_kabuli_chr07 | 34335506                | TT                              | GG                | 1946467169               |
| SNP_P3_92269_34335551 | NC_021166.1    | Ca_kabuli_chr07 | 34335551                | GG                              | AA                | 1946467171               |
| SNP_P3_92270_34335561 | NC_021166.1    | Ca_kabuli_chr07 | 34335561                | AA                              | CC                | 1946467172               |
| SNP_P3_92271_34335566 | NC_021166.1    | Ca_kabuli_chr07 | 34335566                | GG                              | AA                | 1946467174               |
| SNP_P3_92272_34335880 | NC_021166.1    | Ca_kabuli_chr07 | 34335880                | TT                              | CC                | 1946467175               |
| SNP_P3_92274_34336053 | NC_021166.1    | Ca_kabuli_chr07 | 34336053                | AA                              | GG                | 1946467177               |
| SNP_P3_92275_34336075 | NC_021166.1    | Ca_kabuli_chr07 | 34336075                | AA                              | TT                | 1946467178               |
| SNP_P3_92277_34336368 | NC_021166.1    | Ca_kabuli_chr07 | 34336368                | TT                              | CC                | 1946467180               |
| SNP_P3_92278_34336385 | NC_021166.1    | Ca_kabuli_chr07 | 34336385                | AA                              | GG                | 1946467181               |
| SNP_P3_92279_34337335 | NC_021166.1    | Ca_kabuli_chr07 | 34337335                | TT                              | CC                | 1946467183               |
| SNP_P3_92280_34337491 | NC_021166.1    | Ca_kabuli_chr07 | 34337491                | GG                              | AA                | 1946467184               |
| SNP_P3_92281_34337524 | NC_021166.1    | Ca_kabuli_chr07 | 34337524                | AA                              | GG                | 1946467185               |

| SNPs IDs              | Chromosome IDs | Chromosomes     | Physical positions (bp) | CDC Frontier (Reference genome) | (Pusa 256 & HPNB) | NCBI SNPdb Accession IDs |
|-----------------------|----------------|-----------------|-------------------------|---------------------------------|-------------------|--------------------------|
| SNP_P3_92282_34337538 | NC_021166.1    | Ca_kabuli_chr07 | 34337538                | TT                              | AA                | 1946467187               |
| SNP_P3_92283_34337657 | NC_021166.1    | Ca_kabuli_chr07 | 34337657                | GG                              | TT                | 1946467188               |
| SNP_P3_92284_34337693 | NC_021166.1    | Ca_kabuli_chr07 | 34337693                | GG                              | AA                | 1946467190               |
| SNP_P3_92285_34337901 | NC_021166.1    | Ca_kabuli_chr07 | 34337901                | TT                              | CC                | 1946467191               |
| SNP_P3_92286_34337929 | NC_021166.1    | Ca_kabuli_chr07 | 34337929                | AA                              | GG                | 1946467193               |
| SNP_P3_92287_34337930 | NC_021166.1    | Ca_kabuli_chr07 | 34337930                | GG                              | AA                | 1946467194               |
| SNP_P3_92288_34337995 | NC_021166.1    | Ca_kabuli_chr07 | 34337995                | TT                              | CC                | 1946467195               |
| SNP_P3_92289_34338385 | NC_021166.1    | Ca_kabuli_chr07 | 34338385                | AA                              | GG                | 1946467197               |
| SNP_P3_92291_34341740 | NC_021166.1    | Ca_kabuli_chr07 | 34341740                | AA                              | GG                | 1946467198               |
| SNP_P3_92292_34341852 | NC_021166.1    | Ca_kabuli_chr07 | 34341852                | TT                              | CC                | 1946467200               |
| SNP_P3_92293_34342001 | NC_021166.1    | Ca_kabuli_chr07 | 34342001                | CC                              | TT                | 1946467201               |
| SNP_P3_92294_34342017 | NC_021166.1    | Ca_kabuli_chr07 | 34342017                | AA                              | GG                | 1946467203               |
| SNP_P3_92295_34342018 | NC_021166.1    | Ca_kabuli_chr07 | 34342018                | GG                              | TT                | 1946467204               |
| SNP_P3_92296_34342021 | NC_021166.1    | Ca_kabuli_chr07 | 34342021                | AA                              | GG                | 1946467205               |
| SNP_P3_92297_34342022 | NC_021166.1    | Ca_kabuli_chr07 | 34342022                | TT                              | CC                | 1946467207               |
| SNP_P3_92298_34342205 | NC_021166.1    | Ca_kabuli_chr07 | 34342205                | TT                              | GG                | 1946467208               |
| SNP_P3_92299_34342212 | NC_021166.1    | Ca_kabuli_chr07 | 34342212                | GG                              | AA                | 1946467210               |
| SNP_P3_92301_34345230 | NC_021166.1    | Ca_kabuli_chr07 | 34345230                | TT                              | CC                | 1946467211               |
| SNP_P3_92302_34345231 | NC_021166.1    | Ca_kabuli_chr07 | 34345231                | GG                              | AA                | 1946467213               |
| SNP_P3_92303_34345430 | NC_021166.1    | Ca_kabuli_chr07 | 34345430                | TT                              | CC                | 1946467214               |
| SNP_P3_92304_34347638 | NC_021166.1    | Ca_kabuli_chr07 | 34347638                | AA                              | GG                | 1946467215               |
| SNP_P3_92306_34347836 | NC_021166.1    | Ca_kabuli_chr07 | 34347836                | AA                              | CC                | 1946467217               |
| SNP_P3_92307_34347837 | NC_021166.1    | Ca_kabuli_chr07 | 34347837                | CC                              | TT                | 1946467218               |
| SNP_P3_92308_34348053 | NC_021166.1    | Ca_kabuli_chr07 | 34348053                | AA                              | GG                | 1946467220               |
| SNP_P3_92309_34348573 | NC_021166.1    | Ca_kabuli_chr07 | 34348573                | CC                              | TT                | 1946467221               |
| SNP_P3_92310_34348714 | NC_021166.1    | Ca_kabuli_chr07 | 34348714                | GG                              | CC                | 1946467223               |
| SNP_P3_92311_34348869 | NC_021166.1    | Ca_kabuli_chr07 | 34348869                | AA                              | GG                | 1946467224               |
| SNP_P3_92312_34348908 | NC_021166.1    | Ca_kabuli_chr07 | 34348908                | CC                              | TT                | 1946467225               |
| SNP_P3_92315_34349016 | NC_021166.1    | Ca_kabuli_chr07 | 34349016                | GG                              | AA                | 1946467227               |
| SNP_P3_92316_34349770 | NC_021166.1    | Ca_kabuli_chr07 | 34349770                | CC                              | GG                | 1946467228               |
| SNP_P3_92317_34350168 | NC_021166.1    | Ca_kabuli_chr07 | 34350168                | AA                              | GG                | 1946467230               |
| SNP_P3_92319_34350408 | NC_021166.1    | Ca_kabuli_chr07 | 34350408                | CC                              | AA                | 1946467231               |
| SNP_P3_92320_34350459 | NC_021166.1    | Ca_kabuli_chr07 | 34350459                | GG                              | AA                | 1946467233               |
| SNP_P3_92321_34350547 | NC_021166.1    | Ca_kabuli_chr07 | 34350547                | GG                              | AA                | 1946467234               |
| SNP_P3_92322_34350597 | NC_021166.1    | Ca_kabuli_chr07 | 34350597                | GG                              | AA                | 1946467235               |
| SNP_P3_92323_34350600 | NC_021166.1    | Ca_kabuli_chr07 | 34350600                | TT                              | AA                | 1946467237               |
| SNP_P3_92324_34350632 | NC_021166.1    | Ca_kabuli_chr07 | 34350632                | TT                              | AA                | 1946467238               |
| SNP_P3_92325_34350780 | NC_021166.1    | Ca_kabuli_chr07 | 34350780                | AA                              | GG                | 1946467240               |
| SNP_P3_92326_34350801 | NC_021166.1    | Ca_kabuli_chr07 | 34350801                | CC                              | GG                | 1946467241               |
| SNP_P3_92327_34351705 | NC_021166.1    | Ca_kabuli_chr07 | 34351705                | AA                              | GG                | 1946467243               |
| SNP_P3_92329_34351743 | NC_021166.1    | Ca_kabuli_chr07 | 34351743                | TT                              | CC                | 1946467244               |
| SNP_P3_92330_34362890 | NC_021166.1    | Ca_kabuli_chr07 | 34362890                | TT                              | CC                | 1946467245               |

| SNPs IDs              | Chromosome IDs | Chromosomes     | Physical positions (bp) | CDC Frontier (Reference genome) | (Pusa 256 & HPNB) | NCBI SNPdb Accession IDs |
|-----------------------|----------------|-----------------|-------------------------|---------------------------------|-------------------|--------------------------|
| SNP_P3_92331_34362917 | NC_021166.1    | Ca_kabuli_chr07 | 34362917                | AA                              | GG                | 1946467247               |
| SNP_P3_92332_34363204 | NC_021166.1    | Ca_kabuli_chr07 | 34363204                | TT                              | CC                | 1946467248               |
| SNP_P3_92333_34365720 | NC_021166.1    | Ca_kabuli_chr07 | 34365720                | CC                              | GG                | 1946467250               |
| SNP_P3_92334_34369004 | NC_021166.1    | Ca_kabuli_chr07 | 34369004                | TT                              | AA                | 1946467251               |
| SNP_P3_92335_34369038 | NC_021166.1    | Ca_kabuli_chr07 | 34369038                | TT                              | CC                | 1946467253               |
| SNP_P3_92336_34369390 | NC_021166.1    | Ca_kabuli_chr07 | 34369390                | AA                              | GG                | 1946467254               |
| SNP_P3_92337_34369452 | NC_021166.1    | Ca_kabuli_chr07 | 34369452                | TT                              | CC                | 1946467256               |
| SNP_P3_92338_34369464 | NC_021166.1    | Ca_kabuli_chr07 | 34369464                | GG                              | TT                | 1946467257               |
| SNP_P3_92339_34369632 | NC_021166.1    | Ca_kabuli_chr07 | 34369632                | GG                              | AA                | 1946467259               |
| SNP_P3_92340_34369720 | NC_021166.1    | Ca_kabuli_chr07 | 34369720                | CC                              | TT                | 1946467260               |
| SNP_P3_92341_34369731 | NC_021166.1    | Ca_kabuli_chr07 | 34369731                | GG                              | AA                | 1946467262               |
| SNP_P3_92342_34369741 | NC_021166.1    | Ca_kabuli_chr07 | 34369741                | CC                              | TT                | 1946467263               |
| SNP_P3_92343_34369767 | NC_021166.1    | Ca_kabuli_chr07 | 34369767                | GG                              | AA                | 1946467264               |
| SNP_P3_92344_34370020 | NC_021166.1    | Ca_kabuli_chr07 | 34370020                | TT                              | CC                | 1946467266               |
| SNP_P3_92345_34370091 | NC_021166.1    | Ca_kabuli_chr07 | 34370091                | CC                              | AA                | 1946467267               |
| SNP_P3_92346_34370107 | NC_021166.1    | Ca_kabuli_chr07 | 34370107                | TT                              | CC                | 1946467269               |
| SNP_P3_92347_34370112 | NC_021166.1    | Ca_kabuli_chr07 | 34370112                | AA                              | GG                | 1946467270               |
| SNP_P3_92348_34370177 | NC_021166.1    | Ca_kabuli_chr07 | 34370177                | GG                              | CC                | 1946467272               |
| SNP_P3_92350_34370470 | NC_021166.1    | Ca_kabuli_chr07 | 34370470                | GG                              | AA                | 1946467273               |
| SNP_P3_92351_34370503 | NC_021166.1    | Ca_kabuli_chr07 | 34370503                | TT                              | CC                | 1946467275               |
| SNP_P3_92352_34370952 | NC_021166.1    | Ca_kabuli_chr07 | 34370952                | CC                              | GG                | 1946467277               |
| SNP_P3_92354_34376955 | NC_021166.1    | Ca_kabuli_chr07 | 34376955                | AA                              | GG                | 1946467278               |
| SNP_P3_92355_34378755 | NC_021166.1    | Ca_kabuli_chr07 | 34378755                | CC                              | TT                | 1946467280               |
| SNP_P3_92356_34378768 | NC_021166.1    | Ca_kabuli_chr07 | 34378768                | AA                              | GG                | 1946467281               |
| SNP_P3_92357_34380209 | NC_021166.1    | Ca_kabuli_chr07 | 34380209                | TT                              | GG                | 1946467282               |
| SNP_P3_92358_34380583 | NC_021166.1    | Ca_kabuli_chr07 | 34380583                | AA                              | GG                | 1946467284               |
| SNP_P3_92360_34384009 | NC_021166.1    | Ca_kabuli_chr07 | 34384009                | TT                              | CC                | 1946467285               |
| SNP_P3_92361_34384021 | NC_021166.1    | Ca_kabuli_chr07 | 34384021                | GG                              | AA                | 1946467287               |
| SNP_P3_92362_34384346 | NC_021166.1    | Ca_kabuli_chr07 | 34384346                | TT                              | CC                | 1946467288               |
| SNP_P3_92363_34384739 | NC_021166.1    | Ca_kabuli_chr07 | 34384739                | AA                              | GG                | 1946467290               |
| SNP_P3_92364_34385430 | NC_021166.1    | Ca_kabuli_chr07 | 34385430                | CC                              | GG                | 1946467291               |
| SNP_P3_92365_34385450 | NC_021166.1    | Ca_kabuli_chr07 | 34385450                | TT                              | AA                | 1946467293               |
| SNP_P3_92366_34385815 | NC_021166.1    | Ca_kabuli_chr07 | 34385815                | CC                              | GG                | 1946467294               |
| SNP_P3_92367_34386849 | NC_021166.1    | Ca_kabuli_chr07 | 34386849                | CC                              | TT                | 1946467295               |
| SNP_P3_92368_34387366 | NC_021166.1    | Ca_kabuli_chr07 | 34387366                | AA                              | CC                | 1946467297               |
| SNP_P3_92369_34387406 | NC_021166.1    | Ca_kabuli_chr07 | 34387406                | TT                              | CC                | 1946467298               |
| SNP_P3_92370_34387413 | NC_021166.1    | Ca_kabuli_chr07 | 34387413                | CC                              | TT                | 1946467300               |
| SNP_P3_92371_34388111 | NC_021166.1    | Ca_kabuli_chr07 | 34388111                | GG                              | AA                | 1946467301               |
| SNP_P3_92372_34388131 | NC_021166.1    | Ca_kabuli_chr07 | 34388131                | AA                              | CC                | 1946467303               |
| SNP_P3_92373_34388249 | NC_021166.1    | Ca_kabuli_chr07 | 34388249                | TT                              | CC                | 1946467304               |
| SNP_P3_92374_34388427 | NC_021166.1    | Ca_kabuli_chr07 | 34388427                | GG                              | AA                | 1946467306               |
| SNP_P3_92375_34388503 | NC_021166.1    | Ca_kabuli_chr07 | 34388503                | AA                              | GG                | 1946467307               |



| SNPs IDs              | Chromosome IDs | Chromosomes     | Physical positions (bp) | CDC Frontier (Reference genome) | (Pusa 256 & HPNB) | NCBI SNPdb Accession IDs |
|-----------------------|----------------|-----------------|-------------------------|---------------------------------|-------------------|--------------------------|
| SNP_P3_92376_34392090 | NC_021166.1    | Ca_kabuli_chr07 | 34392090                | TT                              | GG                | 1946467309               |
| SNP_P3_92378_34392114 | NC_021166.1    | Ca_kabuli_chr07 | 34392114                | TT                              | CC                | 1946467310               |
| SNP_P3_92379_34392378 | NC_021166.1    | Ca_kabuli_chr07 | 34392378                | AA                              | CC                | 1946467311               |
| SNP_P3_92380_34394303 | NC_021166.1    | Ca_kabuli_chr07 | 34394303                | GG                              | AA                | 1946467313               |
| SNP_P3_92382_34394664 | NC_021166.1    | Ca_kabuli_chr07 | 34394664                | AA                              | GG                | 1946467314               |
| SNP_P3_92383_34394692 | NC_021166.1    | Ca_kabuli_chr07 | 34394692                | GG                              | AA                | 1946467316               |
| SNP_P3_92384_34395453 | NC_021166.1    | Ca_kabuli_chr07 | 34395453                | AA                              | GG                | 1946467317               |
| SNP_P3_92386_34396345 | NC_021166.1    | Ca_kabuli_chr07 | 34396345                | GG                              | CC                | 1946467318               |
| SNP_P3_92388_34396817 | NC_021166.1    | Ca_kabuli_chr07 | 34396817                | TT                              | CC                | 1946467320               |
| SNP_P3_92391_34397411 | NC_021166.1    | Ca_kabuli_chr07 | 34397411                | CC                              | TT                | 1946467321               |
| SNP_P3_92393_34397446 | NC_021166.1    | Ca_kabuli_chr07 | 34397446                | AA                              | GG                | 1946467323               |
| SNP_P3_92394_34399965 | NC_021166.1    | Ca_kabuli_chr07 | 34399965                | CC                              | AA                | 1946467324               |
| SNP_P3_92395_34407619 | NC_021166.1    | Ca_kabuli_chr07 | 34407619                | CC                              | GG                | 1946467326               |
| SNP_P3_92396_34407836 | NC_021166.1    | Ca_kabuli_chr07 | 34407836                | AA                              | GG                | 1946467327               |
| SNP_P3_92398_34408228 | NC_021166.1    | Ca_kabuli_chr07 | 34408228                | TT                              | GG                | 1946467328               |
| SNP_P3_92399_34408486 | NC_021166.1    | Ca_kabuli_chr07 | 34408486                | CC                              | GG                | 1946467330               |
| SNP_P3_92400_34408929 | NC_021166.1    | Ca_kabuli_chr07 | 34408929                | AA                              | CC                | 1946467331               |
| SNP_P3_92402_34412118 | NC_021166.1    | Ca_kabuli_chr07 | 34412118                | AA                              | GG                | 1946467332               |
| SNP_P3_92403_34412328 | NC_021166.1    | Ca_kabuli_chr07 | 34412328                | AA                              | CC                | 1946467334               |
| SNP_P3_92404_34412333 | NC_021166.1    | Ca_kabuli_chr07 | 34412333                | GG                              | AA                | 1946467335               |
| SNP_P3_92405_34412334 | NC_021166.1    | Ca_kabuli_chr07 | 34412334                | CC                              | TT                | 1946467337               |
| SNP_P3_92407_34412407 | NC_021166.1    | Ca_kabuli_chr07 | 34412407                | GG                              | AA                | 1946467338               |
| SNP_P3_92408_34414205 | NC_021166.1    | Ca_kabuli_chr07 | 34414205                | CC                              | GG                | 1946467340               |
| SNP_P3_92409_34426122 | NC_021166.1    | Ca_kabuli_chr07 | 34426122                | AA                              | TT                | 1946467341               |
| SNP_P3_92410_34426123 | NC_021166.1    | Ca_kabuli_chr07 | 34426123                | TT                              | CC                | 1946467343               |
| SNP_P3_92411_34446533 | NC_021166.1    | Ca_kabuli_chr07 | 34446533                | TT                              | CC                | 1946467344               |
| SNP_P3_92412_34451446 | NC_021166.1    | Ca_kabuli_chr07 | 34451446                | AA                              | CC                | 1946467345               |
| SNP_P3_92414_34484378 | NC_021166.1    | Ca_kabuli_chr07 | 34484378                | TT                              | CC                | 1946467347               |
| SNP_P3_92415_34484386 | NC_021166.1    | Ca_kabuli_chr07 | 34484386                | TT                              | AA                | 1946467348               |
| SNP_P3_92416_34487460 | NC_021166.1    | Ca_kabuli_chr07 | 34487460                | GG                              | TT                | 1946467350               |
| SNP_P3_92417_34504108 | NC_021166.1    | Ca_kabuli_chr07 | 34504108                | CC                              | TT                | 1946467351               |
| SNP_P3_92419_34522905 | NC_021166.1    | Ca_kabuli_chr07 | 34522905                | AA                              | TT                | 1946467353               |
| SNP_P3_92420_34531687 | NC_021166.1    | Ca_kabuli_chr07 | 34531687                | GG                              | AA                | 1946467354               |
| SNP_P3_92421_34553152 | NC_021166.1    | Ca_kabuli_chr07 | 34553152                | AA                              | TT                | 1946467356               |
| SNP_P3_92422_34560444 | NC_021166.1    | Ca_kabuli_chr07 | 34560444                | CC                              | TT                | 1946467357               |
| SNP_P3_92424_34583536 | NC_021166.1    | Ca_kabuli_chr07 | 34583536                | CC                              | TT                | 1946467359               |
| SNP_P3_92425_34586744 | NC_021166.1    | Ca_kabuli_chr07 | 34586744                | GG                              | TT                | 1946467360               |
| SNP_P3_92428_34660437 | NC_021166.1    | Ca_kabuli_chr07 | 34660437                | GG                              | CC                | 1946467361               |
| SNP_P3_92429_34660487 | NC_021166.1    | Ca_kabuli_chr07 | 34660487                | TT                              | CC                | 1946467363               |
| SNP_P3_92430_34660769 | NC_021166.1    | Ca_kabuli_chr07 | 34660769                | AA                              | GG                | 1946467364               |
| SNP_P3_92431_34660798 | NC_021166.1    | Ca_kabuli_chr07 | 34660798                | TT                              | CC                | 1946467366               |
| SNP_P3_92432_34661699 | NC_021166.1    | Ca_kabuli_chr07 | 34661699                | GG                              | AA                | 1946467367               |

| SNPs IDs              | Chromosome IDs | Chromosomes     | Physical positions (bp) | CDC Frontier (Reference genome) | (Pusa 256 & HPNB) | NCBI SNPdb Accession IDs |
|-----------------------|----------------|-----------------|-------------------------|---------------------------------|-------------------|--------------------------|
| SNP_P3_92435_34674229 | NC_021166.1    | Ca_kabuli_chr07 | 34674229                | TT                              | CC                | 1946467369               |
| SNP_P3_92436_34707203 | NC_021166.1    | Ca_kabuli_chr07 | 34707203                | GG                              | AA                | 1946467370               |
| SNP_P3_92438_34732069 | NC_021166.1    | Ca_kabuli_chr07 | 34732069                | TT                              | CC                | 1946467372               |
| SNP_P3_92440_34788738 | NC_021166.1    | Ca_kabuli_chr07 | 34788738                | AA                              | GG                | 1946467373               |
| SNP_P3_92441_34788746 | NC_021166.1    | Ca_kabuli_chr07 | 34788746                | AA                              | TT                | 1946467375               |
| SNP_P3_92442_34792760 | NC_021166.1    | Ca_kabuli_chr07 | 34792760                | AA                              | CC                | 1946467376               |
| SNP_P3_92443_34792770 | NC_021166.1    | Ca_kabuli_chr07 | 34792770                | TT                              | AA                | 1946467378               |
| SNP_P3_92444_34792795 | NC_021166.1    | Ca_kabuli_chr07 | 34792795                | GG                              | AA                | 1946467379               |
| SNP_P3_92445_34792796 | NC_021166.1    | Ca_kabuli_chr07 | 34792796                | TT                              | CC                | 1946467380               |
| SNP_P3_92446_34792969 | NC_021166.1    | Ca_kabuli_chr07 | 34792969                | GG                              | TT                | 1946467382               |
| SNP_P3_92447_34793051 | NC_021166.1    | Ca_kabuli_chr07 | 34793051                | AA                              | TT                | 1946467383               |
| SNP_P3_92448_34793054 | NC_021166.1    | Ca_kabuli_chr07 | 34793054                | GG                              | AA                | 1946467385               |
| SNP_P3_92449_34793092 | NC_021166.1    | Ca_kabuli_chr07 | 34793092                | TT                              | CC                | 1946467386               |
| SNP_P3_92451_34805027 | NC_021166.1    | Ca_kabuli_chr07 | 34805027                | TT                              | CC                | 1946467388               |
| SNP_P3_92452_34805046 | NC_021166.1    | Ca_kabuli_chr07 | 34805046                | AA                              | GG                | 1946467389               |
| SNP_P3_92453_34805089 | NC_021166.1    | Ca_kabuli_chr07 | 34805089                | AA                              | GG                | 1946467391               |
| SNP_P3_92454_34805104 | NC_021166.1    | Ca_kabuli_chr07 | 34805104                | AA                              | GG                | 1946467392               |
| SNP_P3_92455_34807692 | NC_021166.1    | Ca_kabuli_chr07 | 34807692                | TT                              | CC                | 1946467393               |
| SNP_P3_92456_34808007 | NC_021166.1    | Ca_kabuli_chr07 | 34808007                | AA                              | TT                | 1946467395               |
| SNP_P3_92457_34808008 | NC_021166.1    | Ca_kabuli_chr07 | 34808008                | TT                              | AA                | 1946467396               |
| SNP_P3_92458_34855322 | NC_021166.1    | Ca_kabuli_chr07 | 34855322                | GG                              | AA                | 1946467398               |
| SNP_P3_92459_34874905 | NC_021166.1    | Ca_kabuli_chr07 | 34874905                | AA                              | GG                | 1946467399               |
| SNP_P3_92460_34890907 | NC_021166.1    | Ca_kabuli_chr07 | 34890907                | TT                              | CC                | 1946467401               |
| SNP_P3_92461_34890911 | NC_021166.1    | Ca_kabuli_chr07 | 34890911                | TT                              | GG                | 1946467402               |
| SNP_P3_92463_34959172 | NC_021166.1    | Ca_kabuli_chr07 | 34959172                | GG                              | AA                | 1946467404               |
| SNP_P3_92464_34989693 | NC_021166.1    | Ca_kabuli_chr07 | 34989693                | TT                              | CC                | 1946467405               |
| SNP_P3_92465_35006335 | NC_021166.1    | Ca_kabuli_chr07 | 35006335                | AA                              | GG                | 1946467407               |
| SNP_P3_92466_35007043 | NC_021166.1    | Ca_kabuli_chr07 | 35007043                | TT                              | CC                | 1946467408               |
| SNP_P3_92467_35032315 | NC_021166.1    | Ca_kabuli_chr07 | 35032315                | GG                              | AA                | 1946467413               |
| SNP_P3_92468_35041646 | NC_021166.1    | Ca_kabuli_chr07 | 35041646                | TT                              | CC                | 1946467415               |
| SNP_P3_92470_35053355 | NC_021166.1    | Ca_kabuli_chr07 | 35053355                | TT                              | CC                | 1946467416               |
| SNP_P3_92471_35059359 | NC_021166.1    | Ca_kabuli_chr07 | 35059359                | GG                              | AA                | 1946467418               |
| SNP_P3_92473_35065949 | NC_021166.1    | Ca_kabuli_chr07 | 35065949                | TT                              | GG                | 1946467422               |
| SNP_P3_92474_35080328 | NC_021166.1    | Ca_kabuli_chr07 | 35080328                | TT                              | AA                | 1946467424               |
| SNP_P3_92475_35087334 | NC_021166.1    | Ca_kabuli_chr07 | 35087334                | GG                              | CC                | 1946467425               |
| SNP_P3_92476_35095903 | NC_021166.1    | Ca_kabuli_chr07 | 35095903                | CC                              | TT                | 1946467427               |
| SNP_P3_92477_35106787 | NC_021166.1    | Ca_kabuli_chr07 | 35106787                | GG                              | AA                | 1946467428               |
| SNP_P3_92478_35106812 | NC_021166.1    | Ca_kabuli_chr07 | 35106812                | CC                              | GG                | 1946467429               |
| SNP_P3_92479_35107280 | NC_021166.1    | Ca_kabuli_chr07 | 35107280                | GG                              | TT                | 1946467431               |
| SNP_P3_92481_35109099 | NC_021166.1    | Ca_kabuli_chr07 | 35109099                | AA                              | GG                | 1946467432               |
| SNP_P3_92483_35109622 | NC_021166.1    | Ca_kabuli_chr07 | 35109622                | CC                              | TT                | 1946467434               |
| SNP_P3_92484_35109886 | NC_021166.1    | Ca_kabuli_chr07 | 35109886                | TT                              | CC                | 1946467435               |

| SNPs IDs              | Chromosome IDs | Chromosomes     | Physical positions (bp) | CDC Frontier (Reference genome) | (Pusa 256 & HPNB) | NCBI SNPdb Accession IDs |
|-----------------------|----------------|-----------------|-------------------------|---------------------------------|-------------------|--------------------------|
| SNP_P3_92486_35110128 | NC_021166.1    | Ca_kabuli_chr07 | 35110128                | AA                              | TT                | 1946467437               |
| SNP_P3_92487_35115167 | NC_021166.1    | Ca_kabuli_chr07 | 35115167                | GG                              | AA                | 1946467438               |
| SNP_P3_92488_35116156 | NC_021166.1    | Ca_kabuli_chr07 | 35116156                | TT                              | CC                | 1946467440               |
| SNP_P3_92489_35116167 | NC_021166.1    | Ca_kabuli_chr07 | 35116167                | CC                              | TT                | 1946467441               |
| SNP_P3_92490_35116168 | NC_021166.1    | Ca_kabuli_chr07 | 35116168                | CC                              | GG                | 1946467443               |
| SNP_P3_92491_35116174 | NC_021166.1    | Ca_kabuli_chr07 | 35116174                | CC                              | GG                | 1946467444               |
| SNP_P3_92492_35116177 | NC_021166.1    | Ca_kabuli_chr07 | 35116177                | AA                              | CC                | 1946467446               |
| SNP_P3_92493_35117518 | NC_021166.1    | Ca_kabuli_chr07 | 35117518                | TT                              | CC                | 1946467447               |
| SNP_P3_92494_35118685 | NC_021166.1    | Ca_kabuli_chr07 | 35118685                | GG                              | AA                | 1946467449               |
| SNP_P3_92495_35119723 | NC_021166.1    | Ca_kabuli_chr07 | 35119723                | TT                              | CC                | 1946467450               |
| SNP_P3_92496_35119942 | NC_021166.1    | Ca_kabuli_chr07 | 35119942                | CC                              | AA                | 1946467452               |
| SNP_P3_92497_35121146 | NC_021166.1    | Ca_kabuli_chr07 | 35121146                | TT                              | AA                | 1946467453               |
| SNP_P3_92498_35122030 | NC_021166.1    | Ca_kabuli_chr07 | 35122030                | AA                              | GG                | 1946467455               |
| SNP_P3_92499_35126829 | NC_021166.1    | Ca_kabuli_chr07 | 35126829                | TT                              | CC                | 1946467456               |
| SNP_P3_92500_35126832 | NC_021166.1    | Ca_kabuli_chr07 | 35126832                | GG                              | TT                | 1946467458               |
| SNP_P3_92501_35126833 | NC_021166.1    | Ca_kabuli_chr07 | 35126833                | GG                              | AA                | 1946467459               |
| SNP_P3_92502_35130466 | NC_021166.1    | Ca_kabuli_chr07 | 35130466                | GG                              | AA                | 1946467461               |
| SNP_P3_92503_35131404 | NC_021166.1    | Ca_kabuli_chr07 | 35131404                | AA                              | TT                | 1946467462               |
| SNP_P3_92505_35133742 | NC_021166.1    | Ca_kabuli_chr07 | 35133742                | AA                              | GG                | 1946467464               |
| SNP_P3_92506_35133936 | NC_021166.1    | Ca_kabuli_chr07 | 35133936                | AA                              | GG                | 1946467465               |
| SNP_P3_92507_35134101 | NC_021166.1    | Ca_kabuli_chr07 | 35134101                | AA                              | CC                | 1946467467               |
| SNP_P3_92509_35137706 | NC_021166.1    | Ca_kabuli_chr07 | 35137706                | AA                              | GG                | 1946467468               |
| SNP_P3_92510_35138554 | NC_021166.1    | Ca_kabuli_chr07 | 35138554                | GG                              | CC                | 1946467470               |
| SNP_P3_92511_35139683 | NC_021166.1    | Ca_kabuli_chr07 | 35139683                | CC                              | AA                | 1946467471               |
| SNP_P3_92513_35139887 | NC_021166.1    | Ca_kabuli_chr07 | 35139887                | TT                              | CC                | 1946467473               |
| SNP_P3_92515_35141148 | NC_021166.1    | Ca_kabuli_chr07 | 35141148                | TT                              | AA                | 1946467474               |
| SNP_P3_92517_35143726 | NC_021166.1    | Ca_kabuli_chr07 | 35143726                | AA                              | GG                | 1946467476               |
| SNP_P3_92518_35143728 | NC_021166.1    | Ca_kabuli_chr07 | 35143728                | AA                              | GG                | 1946467477               |
| SNP_P3_92519_35143730 | NC_021166.1    | Ca_kabuli_chr07 | 35143730                | AA                              | GG                | 1946467478               |
| SNP_P3_92520_35144138 | NC_021166.1    | Ca_kabuli_chr07 | 35144138                | GG                              | AA                | 1946467480               |
| SNP_P3_92521_35144494 | NC_021166.1    | Ca_kabuli_chr07 | 35144494                | CC                              | TT                | 1946467481               |
| SNP_P3_92522_35144682 | NC_021166.1    | Ca_kabuli_chr07 | 35144682                | CC                              | TT                | 1946467483               |
| SNP_P3_92523_35145829 | NC_021166.1    | Ca_kabuli_chr07 | 35145829                | CC                              | TT                | 1946467484               |
| SNP_P3_92524_35146104 | NC_021166.1    | Ca_kabuli_chr07 | 35146104                | TT                              | CC                | 1946467486               |
| SNP_P3_92525_35146255 | NC_021166.1    | Ca_kabuli_chr07 | 35146255                | TT                              | AA                | 1946467487               |
| SNP_P3_92526_35146267 | NC_021166.1    | Ca_kabuli_chr07 | 35146267                | TT                              | CC                | 1946467489               |
| SNP_P3_92527_35146268 | NC_021166.1    | Ca_kabuli_chr07 | 35146268                | GG                              | AA                | 1946467490               |
| SNP_P3_92528_35146284 | NC_021166.1    | Ca_kabuli_chr07 | 35146284                | AA                              | GG                | 1946467492               |
| SNP_P3_92529_35146301 | NC_021166.1    | Ca_kabuli_chr07 | 35146301                | CC                              | TT                | 1946467493               |
| SNP_P3_92530_35147393 | NC_021166.1    | Ca_kabuli_chr07 | 35147393                | GG                              | TT                | 1946467495               |
| SNP_P3_92531_35147409 | NC_021166.1    | Ca_kabuli_chr07 | 35147409                | AA                              | TT                | 1946467496               |
| SNP_P3_92532_35148198 | NC_021166.1    | Ca_kabuli_chr07 | 35148198                | GG                              | AA                | 1946467498               |

| SNPs IDs              | Chromosome IDs | Chromosomes     | Physical positions (bp) | CDC Frontier (Reference genome) | (Pusa 256 & HPNB) | NCBI SNPdb Accession IDs |
|-----------------------|----------------|-----------------|-------------------------|---------------------------------|-------------------|--------------------------|
| SNP_P3_92533_35148307 | NC_021166.1    | Ca_kabuli_chr07 | 35148307                | AA                              | GG                | 1946467499               |
| SNP_P3_92534_35148726 | NC_021166.1    | Ca_kabuli_chr07 | 35148726                | CC                              | GG                | 1946467501               |
| SNP_P3_92535_35148744 | NC_021166.1    | Ca_kabuli_chr07 | 35148744                | TT                              | CC                | 1946467502               |
| SNP_P3_92536_35148777 | NC_021166.1    | Ca_kabuli_chr07 | 35148777                | CC                              | TT                | 1946467503               |
| SNP_P3_92537_35148778 | NC_021166.1    | Ca_kabuli_chr07 | 35148778                | AA                              | GG                | 1946467505               |
| SNP_P3_92538_35150227 | NC_021166.1    | Ca_kabuli_chr07 | 35150227                | TT                              | CC                | 1946467506               |
| SNP_P3_92539_35152011 | NC_021166.1    | Ca_kabuli_chr07 | 35152011                | CC                              | TT                | 1946467508               |
| SNP_P3_92540_35152985 | NC_021166.1    | Ca_kabuli_chr07 | 35152985                | CC                              | TT                | 1946467509               |
| SNP_P3_92541_35153342 | NC_021166.1    | Ca_kabuli_chr07 | 35153342                | CC                              | TT                | 1946467511               |
| SNP_P3_92542_35153364 | NC_021166.1    | Ca_kabuli_chr07 | 35153364                | AA                              | GG                | 1946467512               |
| SNP_P3_92543_35153393 | NC_021166.1    | Ca_kabuli_chr07 | 35153393                | CC                              | TT                | 1946467514               |
| SNP_P3_92544_35153608 | NC_021166.1    | Ca_kabuli_chr07 | 35153608                | GG                              | AA                | 1946467515               |
| SNP_P3_92545_35153682 | NC_021166.1    | Ca_kabuli_chr07 | 35153682                | TT                              | CC                | 1946467517               |
| SNP_P3_92546_35153724 | NC_021166.1    | Ca_kabuli_chr07 | 35153724                | AA                              | CC                | 1946467518               |
| SNP_P3_92547_35153725 | NC_021166.1    | Ca_kabuli_chr07 | 35153725                | GG                              | AA                | 1946467520               |
| SNP_P3_92548_35153773 | NC_021166.1    | Ca_kabuli_chr07 | 35153773                | AA                              | TT                | 1946467521               |
| SNP_P3_92549_35153885 | NC_021166.1    | Ca_kabuli_chr07 | 35153885                | GG                              | AA                | 1946467523               |
| SNP_P3_92550_35153905 | NC_021166.1    | Ca_kabuli_chr07 | 35153905                | CC                              | AA                | 1946467524               |
| SNP_P3_92551_35154022 | NC_021166.1    | Ca_kabuli_chr07 | 35154022                | CC                              | TT                | 1946467526               |
| SNP_P3_92552_35154425 | NC_021166.1    | Ca_kabuli_chr07 | 35154425                | TT                              | CC                | 1946467527               |
| SNP_P3_92553_35154440 | NC_021166.1    | Ca_kabuli_chr07 | 35154440                | CC                              | GG                | 1946467529               |
| SNP_P3_92554_35155021 | NC_021166.1    | Ca_kabuli_chr07 | 35155021                | GG                              | AA                | 1946467530               |
| SNP_P3_92555_35156057 | NC_021166.1    | Ca_kabuli_chr07 | 35156057                | AA                              | TT                | 1946467531               |
| SNP_P3_92556_35156186 | NC_021166.1    | Ca_kabuli_chr07 | 35156186                | AA                              | GG                | 1946467533               |
| SNP_P3_92557_35156246 | NC_021166.1    | Ca_kabuli_chr07 | 35156246                | AA                              | TT                | 1946467534               |
| SNP_P3_92559_35156374 | NC_021166.1    | Ca_kabuli_chr07 | 35156374                | AA                              | TT                | 1946467536               |
| SNP_P3_92560_35166268 | NC_021166.1    | Ca_kabuli_chr07 | 35166268                | AA                              | GG                | 1946467537               |
| SNP_P3_92561_35166275 | NC_021166.1    | Ca_kabuli_chr07 | 35166275                | AA                              | GG                | 1946467539               |
| SNP_P3_92562_35166301 | NC_021166.1    | Ca_kabuli_chr07 | 35166301                | GG                              | AA                | 1946467540               |
| SNP_P3_92564_35166700 | NC_021166.1    | Ca_kabuli_chr07 | 35166700                | TT                              | CC                | 1946467542               |
| SNP_P3_92567_35167103 | NC_021166.1    | Ca_kabuli_chr07 | 35167103                | CC                              | AA                | 1946467543               |
| SNP_P3_92568_35167154 | NC_021166.1    | Ca_kabuli_chr07 | 35167154                | GG                              | AA                | 1946467545               |
| SNP_P3_92569_35170123 | NC_021166.1    | Ca_kabuli_chr07 | 35170123                | AA                              | TT                | 1946467546               |
| SNP_P3_92571_35170336 | NC_021166.1    | Ca_kabuli_chr07 | 35170336                | GG                              | AA                | 1946467548               |
| SNP_P3_92573_35174761 | NC_021166.1    | Ca_kabuli_chr07 | 35174761                | AA                              | CC                | 1946467549               |
| SNP_P3_92575_35177524 | NC_021166.1    | Ca_kabuli_chr07 | 35177524                | CC                              | AA                | 1946467551               |
| SNP_P3_92576_35177525 | NC_021166.1    | Ca_kabuli_chr07 | 35177525                | AA                              | CC                | 1946467552               |
| SNP_P3_92579_35178113 | NC_021166.1    | Ca_kabuli_chr07 | 35178113                | CC                              | TT                | 1946467554               |
| SNP_P3_92580_35178319 | NC_021166.1    | Ca_kabuli_chr07 | 35178319                | GG                              | AA                | 1946467555               |
| SNP_P3_92582_35178649 | NC_021166.1    | Ca_kabuli_chr07 | 35178649                | CC                              | AA                | 1946467557               |
| SNP_P3_92583_35178989 | NC_021166.1    | Ca_kabuli_chr07 | 35178989                | TT                              | AA                | 1946467558               |
| SNP_P3_92584_35181884 | NC_021166.1    | Ca_kabuli_chr07 | 35181884                | AA                              | GG                | 1946467560               |

| SNPs IDs              | Chromosome IDs | Chromosomes     | Physical positions (bp) | CDC Frontier (Reference genome) | (Pusa 256 & HPNB) | NCBI SNPdb Accession IDs |
|-----------------------|----------------|-----------------|-------------------------|---------------------------------|-------------------|--------------------------|
| SNP_P3_92585_35183894 | NC_021166.1    | Ca_kabuli_chr07 | 35183894                | GG                              | TT                | 1946467561               |
| SNP_P3_92586_35184024 | NC_021166.1    | Ca_kabuli_chr07 | 35184024                | CC                              | GG                | 1946467563               |
| SNP_P3_92587_35184200 | NC_021166.1    | Ca_kabuli_chr07 | 35184200                | AA                              | TT                | 1946467564               |
| SNP_P3_92588_35184223 | NC_021166.1    | Ca_kabuli_chr07 | 35184223                | TT                              | AA                | 1946467565               |
| SNP_P3_92589_35184234 | NC_021166.1    | Ca_kabuli_chr07 | 35184234                | TT                              | AA                | 1946467567               |
| SNP_P3_92590_35184288 | NC_021166.1    | Ca_kabuli_chr07 | 35184288                | TT                              | GG                | 1946467568               |
| SNP_P3_92591_35185068 | NC_021166.1    | Ca_kabuli_chr07 | 35185068                | TT                              | CC                | 1946467570               |
| SNP_P3_92592_35185377 | NC_021166.1    | Ca_kabuli_chr07 | 35185377                | CC                              | TT                | 1946467571               |
| SNP_P3_92593_35185380 | NC_021166.1    | Ca_kabuli_chr07 | 35185380                | TT                              | CC                | 1946467573               |
| SNP_P3_92594_35185392 | NC_021166.1    | Ca_kabuli_chr07 | 35185392                | TT                              | CC                | 1946467574               |
| SNP_P3_92595_35186214 | NC_021166.1    | Ca_kabuli_chr07 | 35186214                | GG                              | AA                | 1946467576               |
| SNP_P3_92596_35186486 | NC_021166.1    | Ca_kabuli_chr07 | 35186486                | AA                              | TT                | 1946467577               |
| SNP_P3_92597_35186537 | NC_021166.1    | Ca_kabuli_chr07 | 35186537                | AA                              | GG                | 1946467579               |
| SNP_P3_92598_35186653 | NC_021166.1    | Ca_kabuli_chr07 | 35186653                | AA                              | CC                | 1946467580               |
| SNP_P3_92599_35186697 | NC_021166.1    | Ca_kabuli_chr07 | 35186697                | AA                              | GG                | 1946467582               |
| SNP_P3_92600_35186705 | NC_021166.1    | Ca_kabuli_chr07 | 35186705                | CC                              | AA                | 1946467583               |
| SNP_P3_92601_35186741 | NC_021166.1    | Ca_kabuli_chr07 | 35186741                | GG                              | TT                | 1946467585               |
| SNP_P3_92602_35189407 | NC_021166.1    | Ca_kabuli_chr07 | 35189407                | CC                              | AA                | 1946467586               |
| SNP_P3_92603_35189998 | NC_021166.1    | Ca_kabuli_chr07 | 35189998                | GG                              | TT                | 1946467588               |
| SNP_P3_92604_35190028 | NC_021166.1    | Ca_kabuli_chr07 | 35190028                | TT                              | CC                | 1946467589               |
| SNP_P3_92605_35190039 | NC_021166.1    | Ca_kabuli_chr07 | 35190039                | AA                              | GG                | 1946467590               |
| SNP_P3_92607_35192357 | NC_021166.1    | Ca_kabuli_chr07 | 35192357                | TT                              | CC                | 1946467592               |
| SNP_P3_92609_35192417 | NC_021166.1    | Ca_kabuli_chr07 | 35192417                | GG                              | AA                | 1946467593               |
| SNP_P3_92610_35192424 | NC_021166.1    | Ca_kabuli_chr07 | 35192424                | TT                              | CC                | 1946467595               |
| SNP_P3_92611_35204632 | NC_021166.1    | Ca_kabuli_chr07 | 35204632                | GG                              | TT                | 1946467596               |
| SNP_P3_92612_35205146 | NC_021166.1    | Ca_kabuli_chr07 | 35205146                | CC                              | AA                | 1946467598               |
| SNP_P3_92613_35205150 | NC_021166.1    | Ca_kabuli_chr07 | 35205150                | GG                              | AA                | 1946467599               |
| SNP_P3_92615_35207795 | NC_021166.1    | Ca_kabuli_chr07 | 35207795                | CC                              | TT                | 1946467601               |
| SNP_P3_92616_35207796 | NC_021166.1    | Ca_kabuli_chr07 | 35207796                | TT                              | CC                | 1946467602               |
| SNP_P3_92617_35207852 | NC_021166.1    | Ca_kabuli_chr07 | 35207852                | GG                              | CC                | 1946467604               |
| SNP_P3_92618_35208995 | NC_021166.1    | Ca_kabuli_chr07 | 35208995                | GG                              | AA                | 1946467605               |
| SNP_P3_92619_35209019 | NC_021166.1    | Ca_kabuli_chr07 | 35209019                | GG                              | AA                | 1946467607               |
| SNP_P3_92620_35209020 | NC_021166.1    | Ca_kabuli_chr07 | 35209020                | CC                              | AA                | 1946467608               |
| SNP_P3_92621_35209029 | NC_021166.1    | Ca_kabuli_chr07 | 35209029                | AA                              | GG                | 1946467610               |
| SNP_P3_92622_35209039 | NC_021166.1    | Ca_kabuli_chr07 | 35209039                | CC                              | GG                | 1946467611               |
| SNP_P3_92623_35209186 | NC_021166.1    | Ca_kabuli_chr07 | 35209186                | GG                              | AA                | 1946467613               |
| SNP_P3_92624_35209427 | NC_021166.1    | Ca_kabuli_chr07 | 35209427                | AA                              | GG                | 1946467614               |
| SNP_P3_92626_35210763 | NC_021166.1    | Ca_kabuli_chr07 | 35210763                | TT                              | CC                | 1946467616               |
| SNP_P3_92627_35211082 | NC_021166.1    | Ca_kabuli_chr07 | 35211082                | AA                              | GG                | 1946467617               |
| SNP_P3_92628_35211086 | NC_021166.1    | Ca_kabuli_chr07 | 35211086                | AA                              | GG                | 1946467619               |
| SNP_P3_92629_35211120 | NC_021166.1    | Ca_kabuli_chr07 | 35211120                | CC                              | TT                | 1946467620               |
| SNP_P3_92630_35211129 | NC_021166.1    | Ca_kabuli_chr07 | 35211129                | GG                              | AA                | 1946467622               |

| SNPs IDs              | Chromosome IDs | Chromosomes     | Physical positions (bp) | CDC Frontier (Reference genome) | (Pusa 256 & HPNB) | NCBI SNPdb Accession IDs |
|-----------------------|----------------|-----------------|-------------------------|---------------------------------|-------------------|--------------------------|
| SNP_P3_92631_35211182 | NC_021166.1    | Ca_kabuli_chr07 | 35211182                | AA                              | TT                | 1946467623               |
| SNP_P3_92632_35211189 | NC_021166.1    | Ca_kabuli_chr07 | 35211189                | GG                              | CC                | 1946467624               |
| SNP_P3_92633_35211431 | NC_021166.1    | Ca_kabuli_chr07 | 35211431                | CC                              | TT                | 1946467626               |
| SNP_P3_92634_35211904 | NC_021166.1    | Ca_kabuli_chr07 | 35211904                | CC                              | TT                | 1946467627               |
| SNP_P3_92635_35211910 | NC_021166.1    | Ca_kabuli_chr07 | 35211910                | GG                              | TT                | 1946467629               |
| SNP_P3_92636_35212124 | NC_021166.1    | Ca_kabuli_chr07 | 35212124                | CC                              | TT                | 1946467630               |
| SNP_P3_92637_35212125 | NC_021166.1    | Ca_kabuli_chr07 | 35212125                | TT                              | AA                | 1946467632               |
| SNP_P3_92638_35212148 | NC_021166.1    | Ca_kabuli_chr07 | 35212148                | GG                              | AA                | 1946467633               |
| SNP_P3_92639_35212956 | NC_021166.1    | Ca_kabuli_chr07 | 35212956                | AA                              | TT                | 1946467635               |
| SNP_P3_92640_35212964 | NC_021166.1    | Ca_kabuli_chr07 | 35212964                | CC                              | GG                | 1946467636               |
| SNP_P3_92641_35212984 | NC_021166.1    | Ca_kabuli_chr07 | 35212984                | GG                              | AA                | 1946467638               |
| SNP_P3_92642_35212991 | NC_021166.1    | Ca_kabuli_chr07 | 35212991                | AA                              | GG                | 1946467639               |
| SNP_P3_92643_35213061 | NC_021166.1    | Ca_kabuli_chr07 | 35213061                | TT                              | CC                | 1946467641               |
| SNP_P3_92644_35213278 | NC_021166.1    | Ca_kabuli_chr07 | 35213278                | CC                              | TT                | 1946467642               |
| SNP_P3_92645_35213477 | NC_021166.1    | Ca_kabuli_chr07 | 35213477                | CC                              | TT                | 1946467644               |
| SNP_P3_92646_35213487 | NC_021166.1    | Ca_kabuli_chr07 | 35213487                | TT                              | CC                | 1946467645               |
| SNP_P3_92647_35213498 | NC_021166.1    | Ca_kabuli_chr07 | 35213498                | CC                              | TT                | 1946467647               |
| SNP_P3_92648_35213957 | NC_021166.1    | Ca_kabuli_chr07 | 35213957                | TT                              | CC                | 1946467648               |
| SNP_P3_92649_35214212 | NC_021166.1    | Ca_kabuli_chr07 | 35214212                | CC                              | TT                | 1946467650               |
| SNP_P3_92650_35215486 | NC_021166.1    | Ca_kabuli_chr07 | 35215486                | TT                              | GG                | 1946467651               |
| SNP_P3_92651_35215512 | NC_021166.1    | Ca_kabuli_chr07 | 35215512                | TT                              | AA                | 1946467653               |
| SNP_P3_92652_35215517 | NC_021166.1    | Ca_kabuli_chr07 | 35215517                | GG                              | AA                | 1946467654               |
| SNP_P3_92653_35217515 | NC_021166.1    | Ca_kabuli_chr07 | 35217515                | TT                              | CC                | 1946467656               |
| SNP_P3_92654_35217551 | NC_021166.1    | Ca_kabuli_chr07 | 35217551                | GG                              | CC                | 1946467657               |
| SNP_P3_92655_35217749 | NC_021166.1    | Ca_kabuli_chr07 | 35217749                | GG                              | AA                | 1946467659               |
| SNP_P3_92656_35217809 | NC_021166.1    | Ca_kabuli_chr07 | 35217809                | AA                              | GG                | 1946467660               |
| SNP_P3_92659_35218085 | NC_021166.1    | Ca_kabuli_chr07 | 35218085                | CC                              | GG                | 1946467661               |
| SNP_P3_92660_35219982 | NC_021166.1    | Ca_kabuli_chr07 | 35219982                | CC                              | AA                | 1946467663               |
| SNP_P3_92661_35220005 | NC_021166.1    | Ca_kabuli_chr07 | 35220005                | GG                              | TT                | 1946467664               |
| SNP_P3_92662_35220011 | NC_021166.1    | Ca_kabuli_chr07 | 35220011                | AA                              | GG                | 1946467666               |
| SNP_P3_92663_35220053 | NC_021166.1    | Ca_kabuli_chr07 | 35220053                | GG                              | AA                | 1946467667               |
| SNP_P3_92664_35220348 | NC_021166.1    | Ca_kabuli_chr07 | 35220348                | GG                              | AA                | 1946467669               |
| SNP_P3_92665_35222426 | NC_021166.1    | Ca_kabuli_chr07 | 35222426                | TT                              | GG                | 1946467670               |
| SNP_P3_92666_35222592 | NC_021166.1    | Ca_kabuli_chr07 | 35222592                | AA                              | TT                | 1946467672               |
| SNP_P3_92667_35222727 | NC_021166.1    | Ca_kabuli_chr07 | 35222727                | AA                              | GG                | 1946467673               |
| SNP_P3_92668_35222784 | NC_021166.1    | Ca_kabuli_chr07 | 35222784                | AA                              | GG                | 1946467675               |
| SNP_P3_92669_35222785 | NC_021166.1    | Ca_kabuli_chr07 | 35222785                | CC                              | TT                | 1946467676               |
| SNP_P3_92671_35225616 | NC_021166.1    | Ca_kabuli_chr07 | 35225616                | CC                              | TT                | 1946467678               |
| SNP_P3_92673_35225700 | NC_021166.1    | Ca_kabuli_chr07 | 35225700                | CC                              | TT                | 1946467679               |
| SNP_P3_92674_35225712 | NC_021166.1    | Ca_kabuli_chr07 | 35225712                | TT                              | AA                | 1946467680               |
| SNP_P3_92675_35226061 | NC_021166.1    | Ca_kabuli_chr07 | 35226061                | GG                              | TT                | 1946467682               |
| SNP_P3_92677_35227529 | NC_021166.1    | Ca_kabuli_chr07 | 35227529                | TT                              | GG                | 1946467683               |

| SNPs IDs              | Chromosome IDs | Chromosomes     | Physical positions (bp) | CDC Frontier (Reference genome) | (Pusa 256 & HPNB) | NCBI SNPdb Accession IDs |
|-----------------------|----------------|-----------------|-------------------------|---------------------------------|-------------------|--------------------------|
| SNP_P3_92678_35227556 | NC_021166.1    | Ca_kabuli_chr07 | 35227556                | GG                              | CC                | 1946467685               |
| SNP_P3_92679_35227585 | NC_021166.1    | Ca_kabuli_chr07 | 35227585                | GG                              | CC                | 1946467686               |
| SNP_P3_92680_35228505 | NC_021166.1    | Ca_kabuli_chr07 | 35228505                | TT                              | CC                | 1946467688               |
| SNP_P3_92681_35229300 | NC_021166.1    | Ca_kabuli_chr07 | 35229300                | AA                              | GG                | 1946467689               |
| SNP_P3_92682_35229498 | NC_021166.1    | Ca_kabuli_chr07 | 35229498                | GG                              | CC                | 1946467691               |
| SNP_P3_92683_35229597 | NC_021166.1    | Ca_kabuli_chr07 | 35229597                | TT                              | CC                | 1946467692               |
| SNP_P3_92684_35229690 | NC_021166.1    | Ca_kabuli_chr07 | 35229690                | TT                              | AA                | 1946467694               |
| SNP_P3_92688_35232076 | NC_021166.1    | Ca_kabuli_chr07 | 35232076                | GG                              | TT                | 1946467695               |
| SNP_P3_92689_35232218 | NC_021166.1    | Ca_kabuli_chr07 | 35232218                | TT                              | AA                | 1946467697               |
| SNP_P3_92690_35232232 | NC_021166.1    | Ca_kabuli_chr07 | 35232232                | AA                              | TT                | 1946467698               |
| SNP_P3_92691_35232700 | NC_021166.1    | Ca_kabuli_chr07 | 35232700                | GG                              | AA                | 1946467700               |
| SNP_P3_92692_35232904 | NC_021166.1    | Ca_kabuli_chr07 | 35232904                | CC                              | AA                | 1946467701               |
| SNP_P3_92693_35233012 | NC_021166.1    | Ca_kabuli_chr07 | 35233012                | TT                              | GG                | 1946467703               |
| SNP_P3_92694_35234563 | NC_021166.1    | Ca_kabuli_chr07 | 35234563                | AA                              | GG                | 1946467704               |
| SNP_P3_92695_35234818 | NC_021166.1    | Ca_kabuli_chr07 | 35234818                | GG                              | TT                | 1946467706               |
| SNP_P3_92696_35235964 | NC_021166.1    | Ca_kabuli_chr07 | 35235964                | CC                              | TT                | 1946467707               |
| SNP_P3_92697_35236383 | NC_021166.1    | Ca_kabuli_chr07 | 35236383                | CC                              | TT                | 1946467709               |
| SNP_P3_92698_35237233 | NC_021166.1    | Ca_kabuli_chr07 | 35237233                | TT                              | CC                | 1946467710               |
| SNP_P3_92699_35238493 | NC_021166.1    | Ca_kabuli_chr07 | 35238493                | GG                              | TT                | 1946467712               |
| SNP_P3_92700_35238592 | NC_021166.1    | Ca_kabuli_chr07 | 35238592                | TT                              | CC                | 1946467713               |
| SNP_P3_92701_35238639 | NC_021166.1    | Ca_kabuli_chr07 | 35238639                | TT                              | CC                | 1946467714               |
| SNP_P3_92702_35240096 | NC_021166.1    | Ca_kabuli_chr07 | 35240096                | CC                              | AA                | 1946467715               |
| SNP_P3_92703_35242183 | NC_021166.1    | Ca_kabuli_chr07 | 35242183                | TT                              | CC                | 1946467716               |
| SNP_P3_92704_35256361 | NC_021166.1    | Ca_kabuli_chr07 | 35256361                | GG                              | AA                | 1946467717               |
| SNP_P3_92705_35256362 | NC_021166.1    | Ca_kabuli_chr07 | 35256362                | AA                              | TT                | 1946467718               |
| SNP_P3_92706_35256388 | NC_021166.1    | Ca_kabuli_chr07 | 35256388                | AA                              | TT                | 1946467719               |
| SNP_P3_92708_35257131 | NC_021166.1    | Ca_kabuli_chr07 | 35257131                | TT                              | GG                | 1946467720               |
| SNP_P3_92709_35257145 | NC_021166.1    | Ca_kabuli_chr07 | 35257145                | GG                              | CC                | 1946467721               |
| SNP_P3_92710_35257212 | NC_021166.1    | Ca_kabuli_chr07 | 35257212                | TT                              | GG                | 1946467722               |
| SNP_P3_92711_35257511 | NC_021166.1    | Ca_kabuli_chr07 | 35257511                | CC                              | GG                | 1946467724               |
| SNP_P3_92712_35257675 | NC_021166.1    | Ca_kabuli_chr07 | 35257675                | AA                              | GG                | 1946467725               |
| SNP_P3_92713_35258610 | NC_021166.1    | Ca_kabuli_chr07 | 35258610                | TT                              | AA                | 1946467727               |
| SNP_P3_92714_35258667 | NC_021166.1    | Ca_kabuli_chr07 | 35258667                | GG                              | TT                | 1946467728               |
| SNP_P3_92716_35260414 | NC_021166.1    | Ca_kabuli_chr07 | 35260414                | CC                              | GG                | 1946467730               |
| SNP_P3_92717_35262442 | NC_021166.1    | Ca_kabuli_chr07 | 35262442                | AA                              | TT                | 1946467731               |
| SNP_P3_92718_35262827 | NC_021166.1    | Ca_kabuli_chr07 | 35262827                | AA                              | GG                | 1946467733               |
| SNP_P3_92719_35262835 | NC_021166.1    | Ca_kabuli_chr07 | 35262835                | GG                              | AA                | 1946467734               |
| SNP_P3_92720_35263065 | NC_021166.1    | Ca_kabuli_chr07 | 35263065                | GG                              | AA                | 1946467736               |
| SNP_P3_92721_35263308 | NC_021166.1    | Ca_kabuli_chr07 | 35263308                | GG                              | AA                | 1946467737               |
| SNP_P3_92722_35263422 | NC_021166.1    | Ca_kabuli_chr07 | 35263422                | CC                              | TT                | 1946467739               |
| SNP_P3_92723_35263678 | NC_021166.1    | Ca_kabuli_chr07 | 35263678                | TT                              | GG                | 1946467740               |
| SNP_P3_92724_35263711 | NC_021166.1    | Ca_kabuli_chr07 | 35263711                | AA                              | TT                | 1946467742               |

| SNPs IDs              | Chromosome IDs | Chromosomes     | Physical positions (bp) | CDC Frontier (Reference genome) | (Pusa 256 & HPNB) | NCBI SNPdb Accession IDs |
|-----------------------|----------------|-----------------|-------------------------|---------------------------------|-------------------|--------------------------|
| SNP_P3_92725_35263712 | NC_021166.1    | Ca_kabuli_chr07 | 35263712                | GG                              | TT                | 1946467743               |
| SNP_P3_92726_35263736 | NC_021166.1    | Ca_kabuli_chr07 | 35263736                | CC                              | GG                | 1946467745               |
| SNP_P3_92727_35263916 | NC_021166.1    | Ca_kabuli_chr07 | 35263916                | CC                              | AA                | 1946467746               |
| SNP_P3_92728_35264276 | NC_021166.1    | Ca_kabuli_chr07 | 35264276                | TT                              | AA                | 1946467748               |
| SNP_P3_92729_35264320 | NC_021166.1    | Ca_kabuli_chr07 | 35264320                | AA                              | GG                | 1946467749               |
| SNP_P3_92730_35272277 | NC_021166.1    | Ca_kabuli_chr07 | 35272277                | GG                              | AA                | 1946467751               |
| SNP_P3_92731_35272610 | NC_021166.1    | Ca_kabuli_chr07 | 35272610                | GG                              | AA                | 1946467752               |
| SNP_P3_92732_35273685 | NC_021166.1    | Ca_kabuli_chr07 | 35273685                | GG                              | AA                | 1946467753               |
| SNP_P3_92734_35273710 | NC_021166.1    | Ca_kabuli_chr07 | 35273710                | GG                              | AA                | 1946467755               |
| SNP_P3_92735_35273983 | NC_021166.1    | Ca_kabuli_chr07 | 35273983                | GG                              | AA                | 1946467756               |
| SNP_P3_92736_35274680 | NC_021166.1    | Ca_kabuli_chr07 | 35274680                | GG                              | AA                | 1946467758               |
| SNP_P3_92738_35276934 | NC_021166.1    | Ca_kabuli_chr07 | 35276934                | AA                              | GG                | 1946467759               |
| SNP_P3_92739_35277233 | NC_021166.1    | Ca_kabuli_chr07 | 35277233                | AA                              | GG                | 1946467761               |
| SNP_P3_92740_35278065 | NC_021166.1    | Ca_kabuli_chr07 | 35278065                | CC                              | AA                | 1946467762               |
| SNP_P3_92741_35278840 | NC_021166.1    | Ca_kabuli_chr07 | 35278840                | TT                              | CC                | 1946467764               |
| SNP_P3_92742_35279145 | NC_021166.1    | Ca_kabuli_chr07 | 35279145                | CC                              | TT                | 1946467765               |
| SNP_P3_92743_35279374 | NC_021166.1    | Ca_kabuli_chr07 | 35279374                | AA                              | GG                | 1946467767               |
| SNP_P3_92744_35279480 | NC_021166.1    | Ca_kabuli_chr07 | 35279480                | AA                              | GG                | 1946467768               |
| SNP_P3_92745_35279507 | NC_021166.1    | Ca_kabuli_chr07 | 35279507                | TT                              | CC                | 1946467770               |
| SNP_P3_92746_35279790 | NC_021166.1    | Ca_kabuli_chr07 | 35279790                | CC                              | TT                | 1946467771               |
| SNP_P3_92747_35279861 | NC_021166.1    | Ca_kabuli_chr07 | 35279861                | CC                              | AA                | 1946467772               |
| SNP_P3_92748_35279878 | NC_021166.1    | Ca_kabuli_chr07 | 35279878                | CC                              | TT                | 1946467774               |
| SNP_P3_92749_35280018 | NC_021166.1    | Ca_kabuli_chr07 | 35280018                | AA                              | CC                | 1946467776               |
| SNP_P3_92750_35280031 | NC_021166.1    | Ca_kabuli_chr07 | 35280031                | CC                              | AA                | 1946467777               |
| SNP_P3_92751_35280167 | NC_021166.1    | Ca_kabuli_chr07 | 35280167                | AA                              | GG                | 1946467779               |
| SNP_P3_92752_35282449 | NC_021166.1    | Ca_kabuli_chr07 | 35282449                | GG                              | AA                | 1946467780               |
| SNP_P3_92754_35282831 | NC_021166.1    | Ca_kabuli_chr07 | 35282831                | TT                              | GG                | 1946467782               |
| SNP_P3_92755_35282864 | NC_021166.1    | Ca_kabuli_chr07 | 35282864                | AA                              | GG                | 1946467783               |
| SNP_P3_92756_35283429 | NC_021166.1    | Ca_kabuli_chr07 | 35283429                | GG                              | AA                | 1946467785               |
| SNP_P3_92757_35283698 | NC_021166.1    | Ca_kabuli_chr07 | 35283698                | CC                              | GG                | 1946467786               |
| SNP_P3_92758_35284497 | NC_021166.1    | Ca_kabuli_chr07 | 35284497                | GG                              | AA                | 1946467788               |
| SNP_P3_92759_35285131 | NC_021166.1    | Ca_kabuli_chr07 | 35285131                | AA                              | GG                | 1946467789               |
| SNP_P3_92760_35285356 | NC_021166.1    | Ca_kabuli_chr07 | 35285356                | TT                              | CC                | 1946467790               |
| SNP_P3_92761_35285363 | NC_021166.1    | Ca_kabuli_chr07 | 35285363                | CC                              | AA                | 1946467792               |
| SNP_P3_92762_35285465 | NC_021166.1    | Ca_kabuli_chr07 | 35285465                | AA                              | CC                | 1946467793               |
| SNP_P3_92763_35285741 | NC_021166.1    | Ca_kabuli_chr07 | 35285741                | CC                              | GG                | 1946467795               |
| SNP_P3_92764_35286051 | NC_021166.1    | Ca_kabuli_chr07 | 35286051                | TT                              | CC                | 1946467796               |
| SNP_P3_92765_35286071 | NC_021166.1    | Ca_kabuli_chr07 | 35286071                | TT                              | AA                | 1946467798               |
| SNP_P3_92766_35287389 | NC_021166.1    | Ca_kabuli_chr07 | 35287389                | GG                              | AA                | 1946467799               |
| SNP_P3_92767_35287489 | NC_021166.1    | Ca_kabuli_chr07 | 35287489                | AA                              | GG                | 1946467801               |
| SNP_P3_92768_35288751 | NC_021166.1    | Ca_kabuli_chr07 | 35288751                | AA                              | GG                | 1946467802               |
| SNP_P3_92769_35290735 | NC_021166.1    | Ca_kabuli_chr07 | 35290735                | CC                              | TT                | 1946467804               |



| SNPs IDs              | Chromosome IDs | Chromosomes     | Physical positions (bp) | CDC Frontier (Reference genome) | (Pusa 256 & HPNB) | NCBI SNPdb Accession IDs |
|-----------------------|----------------|-----------------|-------------------------|---------------------------------|-------------------|--------------------------|
| SNP_P3_92770_35292197 | NC_021166.1    | Ca_kabuli_chr07 | 35292197                | TT                              | GG                | 1946467805               |
| SNP_P3_92771_35292361 | NC_021166.1    | Ca_kabuli_chr07 | 35292361                | TT                              | AA                | 1946467807               |
| SNP_P3_92772_35292366 | NC_021166.1    | Ca_kabuli_chr07 | 35292366                | CC                              | TT                | 1946467808               |
| SNP_P3_92773_35292469 | NC_021166.1    | Ca_kabuli_chr07 | 35292469                | AA                              | GG                | 1946467810               |
| SNP_P3_92775_35293444 | NC_021166.1    | Ca_kabuli_chr07 | 35293444                | TT                              | CC                | 1946467811               |
| SNP_P3_92777_35295210 | NC_021166.1    | Ca_kabuli_chr07 | 35295210                | TT                              | CC                | 1946467813               |
| SNP_P3_92778_35295250 | NC_021166.1    | Ca_kabuli_chr07 | 35295250                | AA                              | TT                | 1946467814               |
| SNP_P3_92779_35295251 | NC_021166.1    | Ca_kabuli_chr07 | 35295251                | GG                              | AA                | 1946467816               |
| SNP_P3_92780_35295404 | NC_021166.1    | Ca_kabuli_chr07 | 35295404                | TT                              | CC                | 1946467817               |
| SNP_P3_92781_35296763 | NC_021166.1    | Ca_kabuli_chr07 | 35296763                | CC                              | TT                | 1946467819               |
| SNP_P3_92782_35296848 | NC_021166.1    | Ca_kabuli_chr07 | 35296848                | TT                              | CC                | 1946467820               |
| SNP_P3_92783_35296975 | NC_021166.1    | Ca_kabuli_chr07 | 35296975                | CC                              | TT                | 1946467822               |
| SNP_P3_92785_35299814 | NC_021166.1    | Ca_kabuli_chr07 | 35299814                | TT                              | CC                | 1946467823               |
| SNP_P3_92786_35301382 | NC_021166.1    | Ca_kabuli_chr07 | 35301382                | GG                              | AA                | 1946467825               |
| SNP_P3_92787_35301617 | NC_021166.1    | Ca_kabuli_chr07 | 35301617                | TT                              | CC                | 1946467826               |
| SNP_P3_92788_35302341 | NC_021166.1    | Ca_kabuli_chr07 | 35302341                | TT                              | CC                | 1946467828               |
| SNP_P3_92790_35303809 | NC_021166.1    | Ca_kabuli_chr07 | 35303809                | AA                              | CC                | 1946467829               |
| SNP_P3_92791_35305410 | NC_021166.1    | Ca_kabuli_chr07 | 35305410                | GG                              | AA                | 1946467831               |
| SNP_P3_92792_35305677 | NC_021166.1    | Ca_kabuli_chr07 | 35305677                | CC                              | TT                | 1946467832               |
| SNP_P3_92793_35305696 | NC_021166.1    | Ca_kabuli_chr07 | 35305696                | GG                              | AA                | 1946467834               |
| SNP_P3_92794_35305699 | NC_021166.1    | Ca_kabuli_chr07 | 35305699                | TT                              | AA                | 1946467835               |
| SNP_P3_92796_35307484 | NC_021166.1    | Ca_kabuli_chr07 | 35307484                | TT                              | AA                | 1946467837               |
| SNP_P3_92797_35307508 | NC_021166.1    | Ca_kabuli_chr07 | 35307508                | AA                              | CC                | 1946467838               |
| SNP_P3_92798_35307528 | NC_021166.1    | Ca_kabuli_chr07 | 35307528                | CC                              | TT                | 1946467840               |
| SNP_P3_92799_35307563 | NC_021166.1    | Ca_kabuli_chr07 | 35307563                | CC                              | TT                | 1946467841               |
| SNP_P3_92800_35308749 | NC_021166.1    | Ca_kabuli_chr07 | 35308749                | TT                              | CC                | 1946467843               |
| SNP_P3_92801_35310102 | NC_021166.1    | Ca_kabuli_chr07 | 35310102                | AA                              | TT                | 1946467844               |
| SNP_P3_92802_35310287 | NC_021166.1    | Ca_kabuli_chr07 | 35310287                | GG                              | CC                | 1946467845               |
| SNP_P3_92803_35310291 | NC_021166.1    | Ca_kabuli_chr07 | 35310291                | AA                              | GG                | 1946467847               |
| SNP_P3_92804_35310300 | NC_021166.1    | Ca_kabuli_chr07 | 35310300                | AA                              | GG                | 1946467848               |
| SNP_P3_92805_35310307 | NC_021166.1    | Ca_kabuli_chr07 | 35310307                | TT                              | CC                | 1946467850               |
| SNP_P3_92806_35311755 | NC_021166.1    | Ca_kabuli_chr07 | 35311755                | AA                              | TT                | 1946467851               |
| SNP_P3_92807_35312002 | NC_021166.1    | Ca_kabuli_chr07 | 35312002                | TT                              | AA                | 1946467853               |
| SNP_P3_92808_35312011 | NC_021166.1    | Ca_kabuli_chr07 | 35312011                | AA                              | GG                | 1946467854               |
| SNP_P3_92809_35312353 | NC_021166.1    | Ca_kabuli_chr07 | 35312353                | CC                              | TT                | 1946467856               |
| SNP_P3_92810_35312371 | NC_021166.1    | Ca_kabuli_chr07 | 35312371                | GG                              | AA                | 1946467857               |
| SNP_P3_92811_35312408 | NC_021166.1    | Ca_kabuli_chr07 | 35312408                | GG                              | AA                | 1946467859               |
| SNP_P3_92812_35312606 | NC_021166.1    | Ca_kabuli_chr07 | 35312606                | TT                              | AA                | 1946467860               |
| SNP_P3_92813_35312648 | NC_021166.1    | Ca_kabuli_chr07 | 35312648                | AA                              | GG                | 1946467862               |
| SNP_P3_92814_35312701 | NC_021166.1    | Ca_kabuli_chr07 | 35312701                | TT                              | CC                | 1946467863               |
| SNP_P3_92815_35312894 | NC_021166.1    | Ca_kabuli_chr07 | 35312894                | CC                              | AA                | 1946467865               |
| SNP_P3_92816_35312994 | NC_021166.1    | Ca_kabuli_chr07 | 35312994                | TT                              | CC                | 1946467866               |

| SNPs IDs              | Chromosome IDs | Chromosomes     | Physical positions (bp) | CDC Frontier (Reference genome) | (Pusa 256 & HPNB) | NCBI SNPdb Accession IDs |
|-----------------------|----------------|-----------------|-------------------------|---------------------------------|-------------------|--------------------------|
| SNP_P3_92817_35313046 | NC_021166.1    | Ca_kabuli_chr07 | 35313046                | CC                              | TT                | 1946467868               |
| SNP_P3_92818_35313064 | NC_021166.1    | Ca_kabuli_chr07 | 35313064                | AA                              | GG                | 1946467869               |
| SNP_P3_92819_35313073 | NC_021166.1    | Ca_kabuli_chr07 | 35313073                | CC                              | AA                | 1946467871               |
| SNP_P3_92820_35313083 | NC_021166.1    | Ca_kabuli_chr07 | 35313083                | TT                              | CC                | 1946467872               |
| SNP_P3_92821_35313203 | NC_021166.1    | Ca_kabuli_chr07 | 35313203                | GG                              | TT                | 1946467873               |
| SNP_P3_92822_35313280 | NC_021166.1    | Ca_kabuli_chr07 | 35313280                | CC                              | TT                | 1946467875               |
| SNP_P3_92823_35313313 | NC_021166.1    | Ca_kabuli_chr07 | 35313313                | AA                              | GG                | 1946467876               |
| SNP_P3_92825_35313657 | NC_021166.1    | Ca_kabuli_chr07 | 35313657                | CC                              | TT                | 1946467878               |
| SNP_P3_92826_35313691 | NC_021166.1    | Ca_kabuli_chr07 | 35313691                | AA                              | CC                | 1946467879               |
| SNP_P3_92827_35313830 | NC_021166.1    | Ca_kabuli_chr07 | 35313830                | AA                              | TT                | 1946467881               |
| SNP_P3_92828_35313836 | NC_021166.1    | Ca_kabuli_chr07 | 35313836                | TT                              | CC                | 1946467882               |
| SNP_P3_92829_35313839 | NC_021166.1    | Ca_kabuli_chr07 | 35313839                | TT                              | GG                | 1946467884               |
| SNP_P3_92830_35313872 | NC_021166.1    | Ca_kabuli_chr07 | 35313872                | GG                              | TT                | 1946467885               |
| SNP_P3_92831_35314366 | NC_021166.1    | Ca_kabuli_chr07 | 35314366                | GG                              | AA                | 1946467887               |
| SNP_P3_92832_35314622 | NC_021166.1    | Ca_kabuli_chr07 | 35314622                | CC                              | AA                | 1946467888               |
| SNP_P3_92833_35314628 | NC_021166.1    | Ca_kabuli_chr07 | 35314628                | GG                              | AA                | 1946467890               |
| SNP_P3_92834_35314640 | NC_021166.1    | Ca_kabuli_chr07 | 35314640                | AA                              | CC                | 1946467891               |
| SNP_P3_92835_35314672 | NC_021166.1    | Ca_kabuli_chr07 | 35314672                | CC                              | TT                | 1946467893               |
| SNP_P3_92836_35314676 | NC_021166.1    | Ca_kabuli_chr07 | 35314676                | TT                              | CC                | 1946467895               |
| SNP_P3_92838_35315472 | NC_021166.1    | Ca_kabuli_chr07 | 35315472                | CC                              | TT                | 1946467897               |
| SNP_P3_92839_35315564 | NC_021166.1    | Ca_kabuli_chr07 | 35315564                | CC                              | TT                | 1946467898               |
| SNP_P3_92840_35315827 | NC_021166.1    | Ca_kabuli_chr07 | 35315827                | CC                              | TT                | 1946467900               |
| SNP_P3_92841_35316152 | NC_021166.1    | Ca_kabuli_chr07 | 35316152                | TT                              | CC                | 1946467901               |
| SNP_P3_92845_35317678 | NC_021166.1    | Ca_kabuli_chr07 | 35317678                | TT                              | CC                | 1946467903               |
| SNP_P3_92846_35317680 | NC_021166.1    | Ca_kabuli_chr07 | 35317680                | AA                              | GG                | 1946467904               |
| SNP_P3_92847_35319145 | NC_021166.1    | Ca_kabuli_chr07 | 35319145                | TT                              | CC                | 1946467906               |
| SNP_P3_92848_35319151 | NC_021166.1    | Ca_kabuli_chr07 | 35319151                | GG                              | AA                | 1946467907               |
| SNP_P3_92851_35322956 | NC_021166.1    | Ca_kabuli_chr07 | 35322956                | CC                              | TT                | 1946467909               |
| SNP_P3_92852_35322961 | NC_021166.1    | Ca_kabuli_chr07 | 35322961                | CC                              | AA                | 1946467910               |
| SNP_P3_92853_35323333 | NC_021166.1    | Ca_kabuli_chr07 | 35323333                | TT                              | AA                | 1946467912               |
| SNP_P3_92854_35323709 | NC_021166.1    | Ca_kabuli_chr07 | 35323709                | GG                              | AA                | 1946467913               |
| SNP_P3_92855_35323908 | NC_021166.1    | Ca_kabuli_chr07 | 35323908                | TT                              | AA                | 1946467915               |
| SNP_P3_92856_35324207 | NC_021166.1    | Ca_kabuli_chr07 | 35324207                | GG                              | AA                | 1946467916               |
| SNP_P3_92857_35324681 | NC_021166.1    | Ca_kabuli_chr07 | 35324681                | GG                              | AA                | 1946467918               |
| SNP_P3_92858_35327589 | NC_021166.1    | Ca_kabuli_chr07 | 35327589                | GG                              | AA                | 1946467919               |
| SNP_P3_92859_35327911 | NC_021166.1    | Ca_kabuli_chr07 | 35327911                | TT                              | CC                | 1946467921               |
| SNP_P3_92860_35328713 | NC_021166.1    | Ca_kabuli_chr07 | 35328713                | GG                              | AA                | 1946467922               |
| SNP_P3_92861_35329002 | NC_021166.1    | Ca_kabuli_chr07 | 35329002                | GG                              | AA                | 1946467923               |
| SNP_P3_92862_35329917 | NC_021166.1    | Ca_kabuli_chr07 | 35329917                | CC                              | GG                | 1946467925               |
| SNP_P3_92863_35329936 | NC_021166.1    | Ca_kabuli_chr07 | 35329936                | CC                              | TT                | 1946467926               |
| SNP_P3_92865_35330085 | NC_021166.1    | Ca_kabuli_chr07 | 35330085                | GG                              | TT                | 1946467928               |
| SNP_P3_92866_35330117 | NC_021166.1    | Ca_kabuli_chr07 | 35330117                | CC                              | TT                | 1946467929               |

| SNPs IDs              | Chromosome IDs | Chromosomes     | Physical positions (bp) | CDC Frontier (Reference genome) | (Pusa 256 & HPNB) | NCBI SNPdb Accession IDs |
|-----------------------|----------------|-----------------|-------------------------|---------------------------------|-------------------|--------------------------|
| SNP_P3_92867_35330288 | NC_021166.1    | Ca_kabuli_chr07 | 35330288                | GG                              | TT                | 1946467931               |
| SNP_P3_92868_35330400 | NC_021166.1    | Ca_kabuli_chr07 | 35330400                | AA                              | GG                | 1946467932               |
| SNP_P3_92869_35330402 | NC_021166.1    | Ca_kabuli_chr07 | 35330402                | CC                              | TT                | 1946467934               |
| SNP_P3_92871_35331811 | NC_021166.1    | Ca_kabuli_chr07 | 35331811                | TT                              | AA                | 1946467935               |
| SNP_P3_92873_35332690 | NC_021166.1    | Ca_kabuli_chr07 | 35332690                | TT                              | CC                | 1946467937               |
| SNP_P3_92874_35332717 | NC_021166.1    | Ca_kabuli_chr07 | 35332717                | TT                              | GG                | 1946467939               |
| SNP_P3_92875_35332940 | NC_021166.1    | Ca_kabuli_chr07 | 35332940                | GG                              | TT                | 1946467940               |
| SNP_P3_92877_35333371 | NC_021166.1    | Ca_kabuli_chr07 | 35333371                | CC                              | AA                | 1946467941               |
| SNP_P3_92879_35335737 | NC_021166.1    | Ca_kabuli_chr07 | 35335737                | TT                              | CC                | 1946467943               |
| SNP_P3_92880_35336475 | NC_021166.1    | Ca_kabuli_chr07 | 35336475                | TT                              | CC                | 1946467944               |
| SNP_P3_92882_35337970 | NC_021166.1    | Ca_kabuli_chr07 | 35337970                | AA                              | TT                | 1946467946               |
| SNP_P3_92883_35337997 | NC_021166.1    | Ca_kabuli_chr07 | 35337997                | AA                              | TT                | 1946467947               |
| SNP_P3_92884_35338330 | NC_021166.1    | Ca_kabuli_chr07 | 35338330                | TT                              | CC                | 1946467949               |
| SNP_P3_92885_35339414 | NC_021166.1    | Ca_kabuli_chr07 | 35339414                | CC                              | TT                | 1946467950               |
| SNP_P3_92886_35339480 | NC_021166.1    | Ca_kabuli_chr07 | 35339480                | TT                              | CC                | 1946467951               |
| SNP_P3_92887_35339484 | NC_021166.1    | Ca_kabuli_chr07 | 35339484                | AA                              | GG                | 1946467953               |
| SNP_P3_92888_35340282 | NC_021166.1    | Ca_kabuli_chr07 | 35340282                | AA                              | TT                | 1946467954               |
| SNP_P3_92889_35340402 | NC_021166.1    | Ca_kabuli_chr07 | 35340402                | AA                              | GG                | 1946467956               |
| SNP_P3_92890_35340607 | NC_021166.1    | Ca_kabuli_chr07 | 35340607                | TT                              | CC                | 1946467957               |
| SNP_P3_92891_35342783 | NC_021166.1    | Ca_kabuli_chr07 | 35342783                | AA                              | GG                | 1946467959               |
| SNP_P3_92892_35344411 | NC_021166.1    | Ca_kabuli_chr07 | 35344411                | CC                              | TT                | 1946467960               |
| SNP_P3_92894_35344607 | NC_021166.1    | Ca_kabuli_chr07 | 35344607                | AA                              | GG                | 1946467962               |
| SNP_P3_92895_35344783 | NC_021166.1    | Ca_kabuli_chr07 | 35344783                | AA                              | GG                | 1946467963               |
| SNP_P3_92896_35344817 | NC_021166.1    | Ca_kabuli_chr07 | 35344817                | AA                              | CC                | 1946467964               |
| SNP_P3_92897_35346012 | NC_021166.1    | Ca_kabuli_chr07 | 35346012                | CC                              | TT                | 1946467966               |
| SNP_P3_92898_35346235 | NC_021166.1    | Ca_kabuli_chr07 | 35346235                | CC                              | AA                | 1946467967               |
| SNP_P3_92899_35346516 | NC_021166.1    | Ca_kabuli_chr07 | 35346516                | TT                              | GG                | 1946467969               |
| SNP_P3_92900_35348409 | NC_021166.1    | Ca_kabuli_chr07 | 35348409                | TT                              | AA                | 1946467970               |
| SNP_P3_92901_35348450 | NC_021166.1    | Ca_kabuli_chr07 | 35348450                | CC                              | GG                | 1946467972               |
| SNP_P3_92902_35348993 | NC_021166.1    | Ca_kabuli_chr07 | 35348993                | AA                              | GG                | 1946467973               |
| SNP_P3_92903_35349698 | NC_021166.1    | Ca_kabuli_chr07 | 35349698                | CC                              | TT                | 1946467974               |
| SNP_P3_92904_35349722 | NC_021166.1    | Ca_kabuli_chr07 | 35349722                | CC                              | AA                | 1946467976               |
| SNP_P3_92905_35349812 | NC_021166.1    | Ca_kabuli_chr07 | 35349812                | GG                              | CC                | 1946467977               |
| SNP_P3_92906_35350644 | NC_021166.1    | Ca_kabuli_chr07 | 35350644                | AA                              | GG                | 1946467979               |
| SNP_P3_92907_35350646 | NC_021166.1    | Ca_kabuli_chr07 | 35350646                | GG                              | AA                | 1946467980               |
| SNP_P3_92908_35350658 | NC_021166.1    | Ca_kabuli_chr07 | 35350658                | TT                              | CC                | 1946467982               |
| SNP_P3_92910_35350981 | NC_021166.1    | Ca_kabuli_chr07 | 35350981                | TT                              | AA                | 1946467983               |
| SNP_P3_92913_35357203 | NC_021166.1    | Ca_kabuli_chr07 | 35357203                | AA                              | GG                | 1946467985               |
| SNP_P3_92914_35357248 | NC_021166.1    | Ca_kabuli_chr07 | 35357248                | CC                              | TT                | 1946467986               |
| SNP_P3_92915_35357269 | NC_021166.1    | Ca_kabuli_chr07 | 35357269                | AA                              | GG                | 1946467987               |
| SNP_P3_92916_35357279 | NC_021166.1    | Ca_kabuli_chr07 | 35357279                | AA                              | TT                | 1946467989               |
| SNP_P3_92917_35357289 | NC_021166.1    | Ca_kabuli_chr07 | 35357289                | CC                              | TT                | 1946467990               |

| SNPs IDs              | Chromosome IDs | Chromosomes     | Physical positions (bp) | CDC Frontier (Reference genome) | (Pusa 256 & HPNB) | NCBI SNPdb Accession IDs |
|-----------------------|----------------|-----------------|-------------------------|---------------------------------|-------------------|--------------------------|
| SNP_P3_92918_35357424 | NC_021166.1    | Ca_kabuli_chr07 | 35357424                | AA                              | GG                | 1946467992               |
| SNP_P3_92919_35357436 | NC_021166.1    | Ca_kabuli_chr07 | 35357436                | AA                              | GG                | 1946467993               |
| SNP_P3_92920_35357437 | NC_021166.1    | Ca_kabuli_chr07 | 35357437                | TT                              | GG                | 1946467995               |
| SNP_P3_92921_35357450 | NC_021166.1    | Ca_kabuli_chr07 | 35357450                | AA                              | CC                | 1946467996               |
| SNP_P3_92922_35357460 | NC_021166.1    | Ca_kabuli_chr07 | 35357460                | TT                              | AA                | 1946467998               |
| SNP_P3_92923_35357477 | NC_021166.1    | Ca_kabuli_chr07 | 35357477                | AA                              | GG                | 1946467999               |
| SNP_P3_92924_35357478 | NC_021166.1    | Ca_kabuli_chr07 | 35357478                | AA                              | GG                | 1946468001               |
| SNP_P3_92925_35357496 | NC_021166.1    | Ca_kabuli_chr07 | 35357496                | GG                              | CC                | 1946468002               |
| SNP_P3_92927_35357501 | NC_021166.1    | Ca_kabuli_chr07 | 35357501                | TT                              | GG                | 1946468004               |
| SNP_P3_92928_35357516 | NC_021166.1    | Ca_kabuli_chr07 | 35357516                | CC                              | TT                | 1946468005               |
| SNP_P3_92929_35357519 | NC_021166.1    | Ca_kabuli_chr07 | 35357519                | TT                              | CC                | 1946468007               |
| SNP_P3_92930_35357730 | NC_021166.1    | Ca_kabuli_chr07 | 35357730                | AA                              | GG                | 1946468008               |
| SNP_P3_92932_35360971 | NC_021166.1    | Ca_kabuli_chr07 | 35360971                | TT                              | GG                | 1946468010               |
| SNP_P3_92933_35361233 | NC_021166.1    | Ca_kabuli_chr07 | 35361233                | TT                              | CC                | 1946468011               |
| SNP_P3_92934_35361234 | NC_021166.1    | Ca_kabuli_chr07 | 35361234                | CC                              | TT                | 1946468013               |
| SNP_P3_92935_35361253 | NC_021166.1    | Ca_kabuli_chr07 | 35361253                | AA                              | GG                | 1946468014               |
| SNP_P3_92936_35361350 | NC_021166.1    | Ca_kabuli_chr07 | 35361350                | AA                              | GG                | 1946468016               |
| SNP_P3_92937_35361357 | NC_021166.1    | Ca_kabuli_chr07 | 35361357                | TT                              | CC                | 1946468017               |
| SNP_P3_92938_35361376 | NC_021166.1    | Ca_kabuli_chr07 | 35361376                | TT                              | CC                | 1946468019               |
| SNP_P3_92939_35361378 | NC_021166.1    | Ca_kabuli_chr07 | 35361378                | GG                              | AA                | 1946468020               |
| SNP_P3_92940_35361397 | NC_021166.1    | Ca_kabuli_chr07 | 35361397                | GG                              | AA                | 1946468021               |
| SNP_P3_92943_35365100 | NC_021166.1    | Ca_kabuli_chr07 | 35365100                | CC                              | TT                | 1946468023               |
| SNP_P3_92944_35365194 | NC_021166.1    | Ca_kabuli_chr07 | 35365194                | AA                              | TT                | 1946468024               |
| SNP_P3_92945_35365242 | NC_021166.1    | Ca_kabuli_chr07 | 35365242                | TT                              | AA                | 1946468026               |
| SNP_P3_92946_35365245 | NC_021166.1    | Ca_kabuli_chr07 | 35365245                | AA                              | GG                | 1946468027               |
| SNP_P3_92947_35365253 | NC_021166.1    | Ca_kabuli_chr07 | 35365253                | TT                              | CC                | 1946468029               |
| SNP_P3_92948_35365279 | NC_021166.1    | Ca_kabuli_chr07 | 35365279                | TT                              | CC                | 1946468030               |
| SNP_P3_92949_35365288 | NC_021166.1    | Ca_kabuli_chr07 | 35365288                | AA                              | TT                | 1946468032               |
| SNP_P3_92950_35365308 | NC_021166.1    | Ca_kabuli_chr07 | 35365308                | TT                              | CC                | 1946468033               |
| SNP_P3_92951_35365336 | NC_021166.1    | Ca_kabuli_chr07 | 35365336                | GG                              | AA                | 1946468035               |
| SNP_P3_92952_35365346 | NC_021166.1    | Ca_kabuli_chr07 | 35365346                | GG                              | AA                | 1946468036               |
| SNP_P3_92953_35365554 | NC_021166.1    | Ca_kabuli_chr07 | 35365554                | AA                              | GG                | 1946468038               |
| SNP_P3_92954_35365555 | NC_021166.1    | Ca_kabuli_chr07 | 35365555                | TT                              | CC                | 1946468039               |
| SNP_P3_92955_35365764 | NC_021166.1    | Ca_kabuli_chr07 | 35365764                | AA                              | GG                | 1946468041               |
| SNP_P3_92956_35365835 | NC_021166.1    | Ca_kabuli_chr07 | 35365835                | GG                              | AA                | 1946468042               |
| SNP_P3_92957_35369122 | NC_021166.1    | Ca_kabuli_chr07 | 35369122                | GG                              | AA                | 1946468044               |
| SNP_P3_92958_35369131 | NC_021166.1    | Ca_kabuli_chr07 | 35369131                | TT                              | AA                | 1946468045               |
| SNP_P3_92960_35369427 | NC_021166.1    | Ca_kabuli_chr07 | 35369427                | AA                              | GG                | 1946468047               |
| SNP_P3_92961_35369442 | NC_021166.1    | Ca_kabuli_chr07 | 35369442                | AA                              | GG                | 1946468048               |
| SNP_P3_92962_35369775 | NC_021166.1    | Ca_kabuli_chr07 | 35369775                | CC                              | AA                | 1946468050               |
| SNP_P3_92963_35369974 | NC_021166.1    | Ca_kabuli_chr07 | 35369974                | TT                              | CC                | 1946468051               |
| SNP_P3_92965_35370262 | NC_021166.1    | Ca_kabuli_chr07 | 35370262                | CC                              | AA                | 1946468053               |

| SNPs IDs              | Chromosome IDs | Chromosomes     | Physical positions (bp) | CDC Frontier (Reference genome) | (Pusa 256 & HPNB) | NCBI SNPdb Accession IDs |
|-----------------------|----------------|-----------------|-------------------------|---------------------------------|-------------------|--------------------------|
| SNP_P3_92966_35370275 | NC_021166.1    | Ca_kabuli_chr07 | 35370275                | TT                              | CC                | 1946468054               |
| SNP_P3_92968_35370304 | NC_021166.1    | Ca_kabuli_chr07 | 35370304                | TT                              | AA                | 1946468056               |
| SNP_P3_92969_35373344 | NC_021166.1    | Ca_kabuli_chr07 | 35373344                | GG                              | AA                | 1946468057               |
| SNP_P3_92970_35373685 | NC_021166.1    | Ca_kabuli_chr07 | 35373685                | GG                              | AA                | 1946468059               |
| SNP_P3_92971_35375136 | NC_021166.1    | Ca_kabuli_chr07 | 35375136                | AA                              | GG                | 1946468060               |
| SNP_P3_92972_35375923 | NC_021166.1    | Ca_kabuli_chr07 | 35375923                | CC                              | AA                | 1946468062               |
| SNP_P3_92975_35377831 | NC_021166.1    | Ca_kabuli_chr07 | 35377831                | TT                              | GG                | 1946468063               |
| SNP_P3_92977_35379003 | NC_021166.1    | Ca_kabuli_chr07 | 35379003                | GG                              | AA                | 1946468065               |
| SNP_P3_92978_35379007 | NC_021166.1    | Ca_kabuli_chr07 | 35379007                | GG                              | AA                | 1946468066               |
| SNP_P3_92979_35379024 | NC_021166.1    | Ca_kabuli_chr07 | 35379024                | CC                              | TT                | 1946468068               |
| SNP_P3_92980_35379060 | NC_021166.1    | Ca_kabuli_chr07 | 35379060                | CC                              | AA                | 1946468069               |
| SNP_P3_92981_35379674 | NC_021166.1    | Ca_kabuli_chr07 | 35379674                | TT                              | AA                | 1946468071               |
| SNP_P3_92983_35380003 | NC_021166.1    | Ca_kabuli_chr07 | 35380003                | CC                              | TT                | 1946468072               |
| SNP_P3_92984_35380068 | NC_021166.1    | Ca_kabuli_chr07 | 35380068                | CC                              | TT                | 1946468074               |
| SNP_P3_92985_35380369 | NC_021166.1    | Ca_kabuli_chr07 | 35380369                | CC                              | TT                | 1946468075               |
| SNP_P3_92986_35380386 | NC_021166.1    | Ca_kabuli_chr07 | 35380386                | AA                              | GG                | 1946468077               |
| SNP_P3_92987_35380387 | NC_021166.1    | Ca_kabuli_chr07 | 35380387                | GG                              | AA                | 1946468078               |
| SNP_P3_92989_35380418 | NC_021166.1    | Ca_kabuli_chr07 | 35380418                | GG                              | AA                | 1946468080               |
| SNP_P3_92990_35380696 | NC_021166.1    | Ca_kabuli_chr07 | 35380696                | GG                              | AA                | 1946468081               |
| SNP_P3_92991_35380711 | NC_021166.1    | Ca_kabuli_chr07 | 35380711                | TT                              | AA                | 1946468083               |
| SNP_P3_92992_35380718 | NC_021166.1    | Ca_kabuli_chr07 | 35380718                | TT                              | CC                | 1946468084               |
| SNP_P3_92993_35380729 | NC_021166.1    | Ca_kabuli_chr07 | 35380729                | TT                              | GG                | 1946468086               |
| SNP_P3_92994_35380740 | NC_021166.1    | Ca_kabuli_chr07 | 35380740                | AA                              | GG                | 1946468087               |
| SNP_P3_92995_35382033 | NC_021166.1    | Ca_kabuli_chr07 | 35382033                | GG                              | AA                | 1946468089               |
| SNP_P3_92996_35382059 | NC_021166.1    | Ca_kabuli_chr07 | 35382059                | TT                              | GG                | 1946468090               |
| SNP_P3_92999_35382685 | NC_021166.1    | Ca_kabuli_chr07 | 35382685                | AA                              | CC                | 1946468091               |
| SNP_P3_93000_35382686 | NC_021166.1    | Ca_kabuli_chr07 | 35382686                | CC                              | GG                | 1946468093               |
| SNP_P3_93001_35382695 | NC_021166.1    | Ca_kabuli_chr07 | 35382695                | AA                              | GG                | 1946468094               |
| SNP_P3_93002_35382836 | NC_021166.1    | Ca_kabuli_chr07 | 35382836                | AA                              | GG                | 1946468096               |
| SNP_P3_93003_35382914 | NC_021166.1    | Ca_kabuli_chr07 | 35382914                | TT                              | GG                | 1946468097               |
| SNP_P3_93004_35382946 | NC_021166.1    | Ca_kabuli_chr07 | 35382946                | TT                              | GG                | 1946468099               |
| SNP_P3_93005_35383100 | NC_021166.1    | Ca_kabuli_chr07 | 35383100                | AA                              | GG                | 1946468100               |
| SNP_P3_93006_35383136 | NC_021166.1    | Ca_kabuli_chr07 | 35383136                | CC                              | TT                | 1946468102               |
| SNP_P3_93007_35384226 | NC_021166.1    | Ca_kabuli_chr07 | 35384226                | CC                              | AA                | 1946468103               |
| SNP_P3_93008_35384844 | NC_021166.1    | Ca_kabuli_chr07 | 35384844                | AA                              | GG                | 1946468105               |
| SNP_P3_93009_35386140 | NC_021166.1    | Ca_kabuli_chr07 | 35386140                | AA                              | GG                | 1946468106               |
| SNP_P3_93010_35387313 | NC_021166.1    | Ca_kabuli_chr07 | 35387313                | TT                              | AA                | 1946468107               |
| SNP_P3_93013_35391981 | NC_021166.1    | Ca_kabuli_chr07 | 35391981                | CC                              | TT                | 1946468109               |
| SNP_P3_93014_35392173 | NC_021166.1    | Ca_kabuli_chr07 | 35392173                | TT                              | CC                | 1946468110               |
| SNP_P3_93015_35392212 | NC_021166.1    | Ca_kabuli_chr07 | 35392212                | CC                              | GG                | 1946468112               |
| SNP_P3_93016_35406974 | NC_021166.1    | Ca_kabuli_chr07 | 35406974                | GG                              | AA                | 1946468113               |
| SNP_P3_93017_35406976 | NC_021166.1    | Ca_kabuli_chr07 | 35406976                | AA                              | CC                | 1946468115               |

| SNPs IDs              | Chromosome IDs | Chromosomes     | Physical positions (bp) | CDC Frontier (Reference genome) | (Pusa 256 & HPNB) | NCBI SNPdb Accession IDs |
|-----------------------|----------------|-----------------|-------------------------|---------------------------------|-------------------|--------------------------|
| SNP_P3_93018_35407521 | NC_021166.1    | Ca_kabuli_chr07 | 35407521                | AA                              | GG                | 1946468116               |
| SNP_P3_93019_35414318 | NC_021166.1    | Ca_kabuli_chr07 | 35414318                | TT                              | AA                | 1946468118               |
| SNP_P3_93020_35418411 | NC_021166.1    | Ca_kabuli_chr07 | 35418411                | GG                              | AA                | 1946468119               |
| SNP_P3_93021_35423243 | NC_021166.1    | Ca_kabuli_chr07 | 35423243                | CC                              | TT                | 1946468121               |
| SNP_P3_93023_35428995 | NC_021166.1    | Ca_kabuli_chr07 | 35428995                | GG                              | AA                | 1946468122               |
| SNP_P3_93024_35431661 | NC_021166.1    | Ca_kabuli_chr07 | 35431661                | TT                              | CC                | 1946468123               |
| SNP_P3_93025_35454384 | NC_021166.1    | Ca_kabuli_chr07 | 35454384                | TT                              | CC                | 1946468125               |
| SNP_P3_93026_35461922 | NC_021166.1    | Ca_kabuli_chr07 | 35461922                | TT                              | CC                | 1946468126               |
| SNP_P3_93027_35461977 | NC_021166.1    | Ca_kabuli_chr07 | 35461977                | TT                              | CC                | 1946468128               |
| SNP_P3_93028_35461983 | NC_021166.1    | Ca_kabuli_chr07 | 35461983                | AA                              | GG                | 1946468129               |
| SNP_P3_93029_35461993 | NC_021166.1    | Ca_kabuli_chr07 | 35461993                | AA                              | TT                | 1946468131               |
| SNP_P3_93030_35462035 | NC_021166.1    | Ca_kabuli_chr07 | 35462035                | AA                              | CC                | 1946468132               |
| SNP_P3_93031_35462077 | NC_021166.1    | Ca_kabuli_chr07 | 35462077                | TT                              | CC                | 1946468134               |
| SNP_P3_93032_35462103 | NC_021166.1    | Ca_kabuli_chr07 | 35462103                | CC                              | AA                | 1946468135               |
| SNP_P3_93034_35463597 | NC_021166.1    | Ca_kabuli_chr07 | 35463597                | TT                              | CC                | 1946468137               |
| SNP_P3_93035_35463623 | NC_021166.1    | Ca_kabuli_chr07 | 35463623                | TT                              | CC                | 1946468138               |
| SNP_P3_93036_35463651 | NC_021166.1    | Ca_kabuli_chr07 | 35463651                | TT                              | CC                | 1946468140               |
| SNP_P3_93037_35463699 | NC_021166.1    | Ca_kabuli_chr07 | 35463699                | TT                              | GG                | 1946468141               |
| SNP_P3_93038_35463907 | NC_021166.1    | Ca_kabuli_chr07 | 35463907                | AA                              | GG                | 1946468143               |
| SNP_P3_93039_35463953 | NC_021166.1    | Ca_kabuli_chr07 | 35463953                | TT                              | CC                | 1946468144               |
| SNP_P3_93040_35463979 | NC_021166.1    | Ca_kabuli_chr07 | 35463979                | AA                              | GG                | 1946468146               |
| SNP_P3_93041_35480143 | NC_021166.1    | Ca_kabuli_chr07 | 35480143                | TT                              | CC                | 1946468147               |
| SNP_P3_93042_35480239 | NC_021166.1    | Ca_kabuli_chr07 | 35480239                | TT                              | CC                | 1946468149               |
| SNP_P3_93043_35480292 | NC_021166.1    | Ca_kabuli_chr07 | 35480292                | CC                              | AA                | 1946468150               |
| SNP_P3_93044_35480325 | NC_021166.1    | Ca_kabuli_chr07 | 35480325                | AA                              | CC                | 1946468152               |
| SNP_P3_93045_35480375 | NC_021166.1    | Ca_kabuli_chr07 | 35480375                | CC                              | TT                | 1946468153               |
| SNP_P3_93046_35480393 | NC_021166.1    | Ca_kabuli_chr07 | 35480393                | AA                              | CC                | 1946468155               |
| SNP_P3_93047_35480402 | NC_021166.1    | Ca_kabuli_chr07 | 35480402                | AA                              | GG                | 1946468156               |
| SNP_P3_93048_35480442 | NC_021166.1    | Ca_kabuli_chr07 | 35480442                | AA                              | CC                | 1946468157               |
| SNP_P3_93049_35480462 | NC_021166.1    | Ca_kabuli_chr07 | 35480462                | CC                              | TT                | 1946468159               |
| SNP_P3_93050_35480555 | NC_021166.1    | Ca_kabuli_chr07 | 35480555                | TT                              | CC                | 1946468160               |
| SNP_P3_93051_35481300 | NC_021166.1    | Ca_kabuli_chr07 | 35481300                | AA                              | TT                | 1946468162               |
| SNP_P3_93052_35481301 | NC_021166.1    | Ca_kabuli_chr07 | 35481301                | TT                              | GG                | 1946468163               |
| SNP_P3_93053_35481337 | NC_021166.1    | Ca_kabuli_chr07 | 35481337                | CC                              | TT                | 1946468165               |
| SNP_P3_93055_35481469 | NC_021166.1    | Ca_kabuli_chr07 | 35481469                | CC                              | TT                | 1946468166               |
| SNP_P3_93056_35481622 | NC_021166.1    | Ca_kabuli_chr07 | 35481622                | AA                              | CC                | 1946468168               |
| SNP_P3_93057_35481683 | NC_021166.1    | Ca_kabuli_chr07 | 35481683                | AA                              | CC                | 1946468169               |
| SNP_P3_93058_35481686 | NC_021166.1    | Ca_kabuli_chr07 | 35481686                | GG                              | AA                | 1946468171               |
| SNP_P3_93059_35481740 | NC_021166.1    | Ca_kabuli_chr07 | 35481740                | TT                              | CC                | 1946468172               |
| SNP_P3_93060_35481758 | NC_021166.1    | Ca_kabuli_chr07 | 35481758                | CC                              | AA                | 1946468174               |
| SNP_P3_93061_35481808 | NC_021166.1    | Ca_kabuli_chr07 | 35481808                | TT                              | CC                | 1946468175               |
| SNP_P3_93062_35485088 | NC_021166.1    | Ca_kabuli_chr07 | 35485088                | CC                              | TT                | 1946468177               |

| SNPs IDs              | Chromosome IDs | Chromosomes     | Physical positions (bp) | CDC Frontier (Reference genome) | (Pusa 256 & HPNB) | NCBI SNPdb Accession IDs |
|-----------------------|----------------|-----------------|-------------------------|---------------------------------|-------------------|--------------------------|
| SNP_P3_93064_35498375 | NC_021166.1    | Ca_kabuli_chr07 | 35498375                | AA                              | GG                | 1946468178               |
| SNP_P3_93065_35498383 | NC_021166.1    | Ca_kabuli_chr07 | 35498383                | AA                              | CC                | 1946468180               |
| SNP_P3_93066_35501017 | NC_021166.1    | Ca_kabuli_chr07 | 35501017                | CC                              | AA                | 1946468181               |
| SNP_P3_93067_35501050 | NC_021166.1    | Ca_kabuli_chr07 | 35501050                | GG                              | AA                | 1946468183               |
| SNP_P3_93068_35501063 | NC_021166.1    | Ca_kabuli_chr07 | 35501063                | GG                              | AA                | 1946468184               |
| SNP_P3_93069_35501364 | NC_021166.1    | Ca_kabuli_chr07 | 35501364                | AA                              | GG                | 1946468186               |
| SNP_P3_93070_35501408 | NC_021166.1    | Ca_kabuli_chr07 | 35501408                | TT                              | CC                | 1946468187               |
| SNP_P3_93071_35501473 | NC_021166.1    | Ca_kabuli_chr07 | 35501473                | CC                              | TT                | 1946468189               |
| SNP_P3_93072_35501498 | NC_021166.1    | Ca_kabuli_chr07 | 35501498                | AA                              | CC                | 1946468190               |
| SNP_P3_93073_35501542 | NC_021166.1    | Ca_kabuli_chr07 | 35501542                | TT                              | CC                | 1946468192               |
| SNP_P3_93074_35501582 | NC_021166.1    | Ca_kabuli_chr07 | 35501582                | AA                              | GG                | 1946468193               |
| SNP_P3_93075_35501630 | NC_021166.1    | Ca_kabuli_chr07 | 35501630                | AA                              | GG                | 1946468195               |
| SNP_P3_93076_35502189 | NC_021166.1    | Ca_kabuli_chr07 | 35502189                | TT                              | AA                | 1946468196               |
| SNP_P3_93077_35558961 | NC_021166.1    | Ca_kabuli_chr07 | 35558961                | AA                              | GG                | 1946468197               |
| SNP_P3_93080_35607395 | NC_021166.1    | Ca_kabuli_chr07 | 35607395                | TT                              | CC                | 1946468199               |
| SNP_P3_93081_35615051 | NC_021166.1    | Ca_kabuli_chr07 | 35615051                | TT                              | CC                | 1946468200               |
| SNP_P3_93082_35619285 | NC_021166.1    | Ca_kabuli_chr07 | 35619285                | AA                              | GG                | 1946468202               |
| SNP_P3_93083_35641371 | NC_021166.1    | Ca_kabuli_chr07 | 35641371                | AA                              | TT                | 1946468203               |
| SNP_P3_93084_35641372 | NC_021166.1    | Ca_kabuli_chr07 | 35641372                | AA                              | GG                | 1946468205               |
| SNP_P3_93087_35677116 | NC_021166.1    | Ca_kabuli_chr07 | 35677116                | GG                              | AA                | 1946468206               |
| SNP_P3_93088_35680170 | NC_021166.1    | Ca_kabuli_chr07 | 35680170                | GG                              | AA                | 1946468208               |
| SNP_P3_93089_35687699 | NC_021166.1    | Ca_kabuli_chr07 | 35687699                | TT                              | CC                | 1946468209               |
| SNP_P3_93090_35694459 | NC_021166.1    | Ca_kabuli_chr07 | 35694459                | GG                              | TT                | 1946468211               |
| SNP_P3_93091_35752968 | NC_021166.1    | Ca_kabuli_chr07 | 35752968                | TT                              | CC                | 1946468212               |
| SNP_P3_93092_35752972 | NC_021166.1    | Ca_kabuli_chr07 | 35752972                | CC                              | TT                | 1946468214               |
| SNP_P3_93093_35753004 | NC_021166.1    | Ca_kabuli_chr07 | 35753004                | AA                              | GG                | 1946468215               |
| SNP_P3_93094_35786295 | NC_021166.1    | Ca_kabuli_chr07 | 35786295                | TT                              | CC                | 1946468217               |
| SNP_P3_93097_35787556 | NC_021166.1    | Ca_kabuli_chr07 | 35787556                | GG                              | AA                | 1946468218               |
| SNP_P3_93098_35787626 | NC_021166.1    | Ca_kabuli_chr07 | 35787626                | GG                              | CC                | 1946468219               |
| SNP_P3_93099_35788300 | NC_021166.1    | Ca_kabuli_chr07 | 35788300                | CC                              | AA                | 1946468221               |
| SNP_P3_93100_35794061 | NC_021166.1    | Ca_kabuli_chr07 | 35794061                | GG                              | AA                | 1946468222               |
| SNP_P3_93101_35795770 | NC_021166.1    | Ca_kabuli_chr07 | 35795770                | CC                              | TT                | 1946468224               |
| SNP_P3_93102_35856434 | NC_021166.1    | Ca_kabuli_chr07 | 35856434                | CC                              | TT                | 1946468225               |
| SNP_P3_93103_35864074 | NC_021166.1    | Ca_kabuli_chr07 | 35864074                | TT                              | CC                | 1946468227               |
| SNP_P3_93105_35884591 | NC_021166.1    | Ca_kabuli_chr07 | 35884591                | TT                              | CC                | 1946468228               |
| SNP_P3_93106_35884617 | NC_021166.1    | Ca_kabuli_chr07 | 35884617                | TT                              | AA                | 1946468230               |
| SNP_P3_93108_35895086 | NC_021166.1    | Ca_kabuli_chr07 | 35895086                | TT                              | AA                | 1946468231               |
| SNP_P3_93109_35909527 | NC_021166.1    | Ca_kabuli_chr07 | 35909527                | AA                              | GG                | 1946468233               |
| SNP_P3_93110_35915698 | NC_021166.1    | Ca_kabuli_chr07 | 35915698                | CC                              | TT                | 1946468234               |
| SNP_P3_93111_35917644 | NC_021166.1    | Ca_kabuli_chr07 | 35917644                | GG                              | TT                | 1946468236               |
| SNP_P3_93112_35923390 | NC_021166.1    | Ca_kabuli_chr07 | 35923390                | TT                              | AA                | 1946468237               |
| SNP_P3_93113_35939301 | NC_021166.1    | Ca_kabuli_chr07 | 35939301                | CC                              | TT                | 1946468238               |

| SNPs IDs              | Chromosome IDs | Chromosomes     | Physical positions (bp) | CDC Frontier (Reference genome) | (Pusa 256 & HPNB) | NCBI SNPdb Accession IDs |
|-----------------------|----------------|-----------------|-------------------------|---------------------------------|-------------------|--------------------------|
| SNP_P3_93115_35950977 | NC_021166.1    | Ca_kabuli_chr07 | 35950977                | TT                              | GG                | 1946468240               |
| SNP_P3_93116_35959878 | NC_021166.1    | Ca_kabuli_chr07 | 35959878                | GG                              | AA                | 1946468241               |
| SNP_P3_93117_35959982 | NC_021166.1    | Ca_kabuli_chr07 | 35959982                | CC                              | GG                | 1946468243               |
| SNP_P3_93120_35973709 | NC_021166.1    | Ca_kabuli_chr07 | 35973709                | AA                              | GG                | 1946468244               |
| SNP_P3_93121_35977405 | NC_021166.1    | Ca_kabuli_chr07 | 35977405                | TT                              | CC                | 1946468246               |
| SNP_P3_93123_35979228 | NC_021166.1    | Ca_kabuli_chr07 | 35979228                | GG                              | TT                | 1946468247               |
| SNP_P3_93124_35979286 | NC_021166.1    | Ca_kabuli_chr07 | 35979286                | CC                              | GG                | 1946468249               |
| SNP_P3_93125_35979643 | NC_021166.1    | Ca_kabuli_chr07 | 35979643                | GG                              | AA                | 1946468250               |
| SNP_P3_93126_35979649 | NC_021166.1    | Ca_kabuli_chr07 | 35979649                | AA                              | GG                | 1946468252               |
| SNP_P3_93127_36010367 | NC_021166.1    | Ca_kabuli_chr07 | 36010367                | TT                              | AA                | 1946468253               |
| SNP_P3_93128_36018090 | NC_021166.1    | Ca_kabuli_chr07 | 36018090                | TT                              | GG                | 1946468255               |
| SNP_P3_93129_36031940 | NC_021166.1    | Ca_kabuli_chr07 | 36031940                | AA                              | GG                | 1946468256               |
| SNP_P3_93131_36059738 | NC_021166.1    | Ca_kabuli_chr07 | 36059738                | CC                              | TT                | 1946468258               |
| SNP_P3_93132_36060923 | NC_021166.1    | Ca_kabuli_chr07 | 36060923                | AA                              | CC                | 1946468259               |
| SNP_P3_93133_36061421 | NC_021166.1    | Ca_kabuli_chr07 | 36061421                | TT                              | CC                | 1946468260               |
| SNP_P3_93134_36104059 | NC_021166.1    | Ca_kabuli_chr07 | 36104059                | TT                              | CC                | 1946468262               |
| SNP_P3_93136_36131899 | NC_021166.1    | Ca_kabuli_chr07 | 36131899                | AA                              | GG                | 1946468263               |
| SNP_P3_93137_36133028 | NC_021166.1    | Ca_kabuli_chr07 | 36133028                | TT                              | CC                | 1946468265               |
| SNP_P3_93138_36133131 | NC_021166.1    | Ca_kabuli_chr07 | 36133131                | AA                              | CC                | 1946468266               |
| SNP_P3_93139_36133189 | NC_021166.1    | Ca_kabuli_chr07 | 36133189                | TT                              | CC                | 1946468268               |
| SNP_P3_93140_36133216 | NC_021166.1    | Ca_kabuli_chr07 | 36133216                | CC                              | TT                | 1946468269               |
| SNP_P3_93141_36133272 | NC_021166.1    | Ca_kabuli_chr07 | 36133272                | AA                              | GG                | 1946468271               |
| SNP_P3_93142_36133293 | NC_021166.1    | Ca_kabuli_chr07 | 36133293                | CC                              | AA                | 1946468272               |
| SNP_P3_93143_36144677 | NC_021166.1    | Ca_kabuli_chr07 | 36144677                | CC                              | TT                | 1946468274               |
| SNP_P3_93144_36157858 | NC_021166.1    | Ca_kabuli_chr07 | 36157858                | TT                              | AA                | 1946468275               |
| SNP_P3_93145_36159134 | NC_021166.1    | Ca_kabuli_chr07 | 36159134                | GG                              | CC                | 1946468277               |
| SNP_P3_93146_36201292 | NC_021166.1    | Ca_kabuli_chr07 | 36201292                | CC                              | GG                | 1946468278               |
| SNP_P3_93147_36205778 | NC_021166.1    | Ca_kabuli_chr07 | 36205778                | TT                              | CC                | 1946468279               |
| SNP_P3_93149_36281859 | NC_021166.1    | Ca_kabuli_chr07 | 36281859                | AA                              | GG                | 1946468281               |
| SNP_P3_93150_36282700 | NC_021166.1    | Ca_kabuli_chr07 | 36282700                | GG                              | AA                | 1946468282               |
| SNP_P3_93151_36291869 | NC_021166.1    | Ca_kabuli_chr07 | 36291869                | CC                              | TT                | 1946468284               |
| SNP_P3_93153_36375785 | NC_021166.1    | Ca_kabuli_chr07 | 36375785                | AA                              | GG                | 1946468285               |
| SNP_P3_93154_36375830 | NC_021166.1    | Ca_kabuli_chr07 | 36375830                | AA                              | GG                | 1946468287               |
| SNP_P3_93155_36375840 | NC_021166.1    | Ca_kabuli_chr07 | 36375840                | AA                              | TT                | 1946468288               |
| SNP_P3_93156_36375875 | NC_021166.1    | Ca_kabuli_chr07 | 36375875                | TT                              | CC                | 1946468290               |
| SNP_P3_93157_36376007 | NC_021166.1    | Ca_kabuli_chr07 | 36376007                | CC                              | TT                | 1946468291               |
| SNP_P3_93158_36383983 | NC_021166.1    | Ca_kabuli_chr07 | 36383983                | GG                              | TT                | 1946468293               |
| SNP_P3_93159_36388389 | NC_021166.1    | Ca_kabuli_chr07 | 36388389                | CC                              | TT                | 1946468294               |
| SNP_P3_93160_36407384 | NC_021166.1    | Ca_kabuli_chr07 | 36407384                | AA                              | GG                | 1946468296               |
| SNP_P3_93161_36407390 | NC_021166.1    | Ca_kabuli_chr07 | 36407390                | AA                              | TT                | 1946468297               |
| SNP_P3_93162_36436267 | NC_021166.1    | Ca_kabuli_chr07 | 36436267                | TT                              | CC                | 1946468298               |
| SNP_P3_93164_36453429 | NC_021166.1    | Ca_kabuli_chr07 | 36453429                | AA                              | GG                | 1946468300               |



| SNPs IDs              | Chromosome IDs | Chromosomes     | Physical positions (bp) | CDC Frontier (Reference genome) | (Pusa 256 & HPNB) | NCBI SNPdb Accession IDs |
|-----------------------|----------------|-----------------|-------------------------|---------------------------------|-------------------|--------------------------|
| SNP_P3_93165_36454827 | NC_021166.1    | Ca_kabuli_chr07 | 36454827                | AA                              | GG                | 1946468301               |
| SNP_P3_93166_36468328 | NC_021166.1    | Ca_kabuli_chr07 | 36468328                | AA                              | GG                | 1946468303               |
| SNP_P3_93167_36524468 | NC_021166.1    | Ca_kabuli_chr07 | 36524468                | CC                              | TT                | 1946468304               |
| SNP_P3_93168_36524923 | NC_021166.1    | Ca_kabuli_chr07 | 36524923                | GG                              | CC                | 1946468306               |
| SNP_P3_93169_36524978 | NC_021166.1    | Ca_kabuli_chr07 | 36524978                | TT                              | CC                | 1946468307               |
| SNP_P3_93170_36525220 | NC_021166.1    | Ca_kabuli_chr07 | 36525220                | GG                              | AA                | 1946468309               |
| SNP_P3_93171_36525369 | NC_021166.1    | Ca_kabuli_chr07 | 36525369                | AA                              | GG                | 1946468310               |
| SNP_P3_93172_36525383 | NC_021166.1    | Ca_kabuli_chr07 | 36525383                | TT                              | CC                | 1946468312               |
| SNP_P3_93173_36525861 | NC_021166.1    | Ca_kabuli_chr07 | 36525861                | TT                              | CC                | 1946468313               |
| SNP_P3_93174_36527687 | NC_021166.1    | Ca_kabuli_chr07 | 36527687                | AA                              | CC                | 1946468315               |
| SNP_P3_93175_36532457 | NC_021166.1    | Ca_kabuli_chr07 | 36532457                | TT                              | CC                | 1946468316               |
| SNP_P3_93177_36580921 | NC_021166.1    | Ca_kabuli_chr07 | 36580921                | AA                              | GG                | 1946468318               |
| SNP_P3_93178_36589188 | NC_021166.1    | Ca_kabuli_chr07 | 36589188                | TT                              | CC                | 1946468319               |
| SNP_P3_93180_36650585 | NC_021166.1    | Ca_kabuli_chr07 | 36650585                | TT                              | CC                | 1946468321               |
| SNP_P3_93181_36650957 | NC_021166.1    | Ca_kabuli_chr07 | 36650957                | TT                              | CC                | 1946468322               |
| SNP_P3_93182_36650980 | NC_021166.1    | Ca_kabuli_chr07 | 36650980                | AA                              | TT                | 1946468323               |
| SNP_P3_93183_36663303 | NC_021166.1    | Ca_kabuli_chr07 | 36663303                | TT                              | CC                | 1946468325               |
| SNP_P3_93184_36663608 | NC_021166.1    | Ca_kabuli_chr07 | 36663608                | AA                              | CC                | 1946468326               |
| SNP_P3_93185_36663617 | NC_021166.1    | Ca_kabuli_chr07 | 36663617                | CC                              | TT                | 1946468328               |
| SNP_P3_93187_36667650 | NC_021166.1    | Ca_kabuli_chr07 | 36667650                | TT                              | AA                | 1946468329               |
| SNP_P3_93188_36680667 | NC_021166.1    | Ca_kabuli_chr07 | 36680667                | AA                              | CC                | 1946468331               |
| SNP_P3_93189_36683858 | NC_021166.1    | Ca_kabuli_chr07 | 36683858                | AA                              | GG                | 1946468332               |
| SNP_P3_93190_36699607 | NC_021166.1    | Ca_kabuli_chr07 | 36699607                | TT                              | CC                | 1946468334               |
| SNP_P3_93191_36699611 | NC_021166.1    | Ca_kabuli_chr07 | 36699611                | CC                              | AA                | 1946468335               |
| SNP_P3_93192_36699613 | NC_021166.1    | Ca_kabuli_chr07 | 36699613                | GG                              | AA                | 1946468337               |
| SNP_P3_93193_36699663 | NC_021166.1    | Ca_kabuli_chr07 | 36699663                | AA                              | GG                | 1946468338               |
| SNP_P3_93194_36699678 | NC_021166.1    | Ca_kabuli_chr07 | 36699678                | CC                              | AA                | 1946468340               |
| SNP_P3_93195_36699943 | NC_021166.1    | Ca_kabuli_chr07 | 36699943                | GG                              | TT                | 1946468341               |
| SNP_P3_93197_36750162 | NC_021166.1    | Ca_kabuli_chr07 | 36750162                | AA                              | GG                | 1946468343               |
| SNP_P3_93198_36750228 | NC_021166.1    | Ca_kabuli_chr07 | 36750228                | GG                              | AA                | 1946468344               |
| SNP_P3_93199_36750531 | NC_021166.1    | Ca_kabuli_chr07 | 36750531                | AA                              | CC                | 1946468346               |
| SNP_P3_93200_36750599 | NC_021166.1    | Ca_kabuli_chr07 | 36750599                | CC                              | TT                | 1946468347               |
| SNP_P3_93201_36750604 | NC_021166.1    | Ca_kabuli_chr07 | 36750604                | CC                              | TT                | 1946468349               |
| SNP_P3_93203_36789791 | NC_021166.1    | Ca_kabuli_chr07 | 36789791                | CC                              | TT                | 1946468350               |
| SNP_P3_93204_36790075 | NC_021166.1    | Ca_kabuli_chr07 | 36790075                | TT                              | CC                | 1946468352               |
| SNP_P3_93205_36797601 | NC_021166.1    | Ca_kabuli_chr07 | 36797601                | CC                              | TT                | 1946468353               |
| SNP_P3_93208_36853032 | NC_021166.1    | Ca_kabuli_chr07 | 36853032                | TT                              | AA                | 1946468355               |
| SNP_P3_93209_36906719 | NC_021166.1    | Ca_kabuli_chr07 | 36906719                | TT                              | CC                | 1946468356               |
| SNP_P3_93210_36906753 | NC_021166.1    | Ca_kabuli_chr07 | 36906753                | AA                              | GG                | 1946468358               |
| SNP_P3_93211_36906778 | NC_021166.1    | Ca_kabuli_chr07 | 36906778                | GG                              | AA                | 1946468359               |
| SNP_P3_93212_36906878 | NC_021166.1    | Ca_kabuli_chr07 | 36906878                | TT                              | CC                | 1946468361               |
| SNP_P3_93213_36907253 | NC_021166.1    | Ca_kabuli_chr07 | 36907253                | AA                              | GG                | 1946468362               |

| SNPs IDs              | Chromosome IDs | Chromosomes     | Physical positions (bp) | CDC Frontier (Reference genome) | (Pusa 256 & HPNB) | NCBI SNPdb Accession IDs |
|-----------------------|----------------|-----------------|-------------------------|---------------------------------|-------------------|--------------------------|
| SNP_P3_93214_36927948 | NC_021166.1    | Ca_kabuli_chr07 | 36927948                | GG                              | AA                | 1946468364               |
| SNP_P3_93215_36941608 | NC_021166.1    | Ca_kabuli_chr07 | 36941608                | AA                              | TT                | 1946468366               |
| SNP_P3_93216_36951389 | NC_021166.1    | Ca_kabuli_chr07 | 36951389                | TT                              | AA                | 1946468367               |
| SNP_P3_93217_36998277 | NC_021166.1    | Ca_kabuli_chr07 | 36998277                | GG                              | AA                | 1946468369               |
| SNP_P3_93218_36998824 | NC_021166.1    | Ca_kabuli_chr07 | 36998824                | GG                              | AA                | 1946468370               |
| SNP_P3_93220_37013150 | NC_021166.1    | Ca_kabuli_chr07 | 37013150                | TT                              | CC                | 1946468371               |
| SNP_P3_93222_37013153 | NC_021166.1    | Ca_kabuli_chr07 | 37013153                | AA                              | GG                | 1946468373               |
| SNP_P3_93223_37013166 | NC_021166.1    | Ca_kabuli_chr07 | 37013166                | AA                              | GG                | 1946468374               |
| SNP_P3_93224_37013193 | NC_021166.1    | Ca_kabuli_chr07 | 37013193                | TT                              | GG                | 1946468376               |
| SNP_P3_93225_37013512 | NC_021166.1    | Ca_kabuli_chr07 | 37013512                | GG                              | AA                | 1946468377               |
| SNP_P3_93226_37013536 | NC_021166.1    | Ca_kabuli_chr07 | 37013536                | TT                              | AA                | 1946468379               |
| SNP_P3_93227_37022635 | NC_021166.1    | Ca_kabuli_chr07 | 37022635                | CC                              | AA                | 1946468380               |
| SNP_P3_93230_37112343 | NC_021166.1    | Ca_kabuli_chr07 | 37112343                | GG                              | AA                | 1946468382               |
| SNP_P3_93231_37112645 | NC_021166.1    | Ca_kabuli_chr07 | 37112645                | AA                              | GG                | 1946468383               |
| SNP_P3_93233_37162949 | NC_021166.1    | Ca_kabuli_chr07 | 37162949                | AA                              | GG                | 1946468385               |
| SNP_P3_93237_37179788 | NC_021166.1    | Ca_kabuli_chr07 | 37179788                | CC                              | AA                | 1946468386               |
| SNP_P3_93238_37207982 | NC_021166.1    | Ca_kabuli_chr07 | 37207982                | GG                              | TT                | 1946468388               |
| SNP_P3_93239_37212326 | NC_021166.1    | Ca_kabuli_chr07 | 37212326                | GG                              | AA                | 1946468389               |
| SNP_P3_93240_37213050 | NC_021166.1    | Ca_kabuli_chr07 | 37213050                | TT                              | CC                | 1946468391               |
| SNP_P3_93241_37213105 | NC_021166.1    | Ca_kabuli_chr07 | 37213105                | AA                              | GG                | 1946468392               |
| SNP_P3_93242_37213363 | NC_021166.1    | Ca_kabuli_chr07 | 37213363                | AA                              | GG                | 1946468393               |
| SNP_P3_93243_37226064 | NC_021166.1    | Ca_kabuli_chr07 | 37226064                | GG                              | AA                | 1946468395               |
| SNP_P3_93244_37226409 | NC_021166.1    | Ca_kabuli_chr07 | 37226409                | TT                              | AA                | 1946468396               |
| SNP_P3_93245_37226410 | NC_021166.1    | Ca_kabuli_chr07 | 37226410                | CC                              | AA                | 1946468398               |
| SNP_P3_93246_37226412 | NC_021166.1    | Ca_kabuli_chr07 | 37226412                | TT                              | CC                | 1946468399               |
| SNP_P3_93247_37230442 | NC_021166.1    | Ca_kabuli_chr07 | 37230442                | TT                              | GG                | 1946468401               |
| SNP_P3_93248_37235890 | NC_021166.1    | Ca_kabuli_chr07 | 37235890                | GG                              | TT                | 1946468402               |
| SNP_P3_93249_37236197 | NC_021166.1    | Ca_kabuli_chr07 | 37236197                | CC                              | TT                | 1946468404               |
| SNP_P3_93250_37236223 | NC_021166.1    | Ca_kabuli_chr07 | 37236223                | GG                              | AA                | 1946468405               |
| SNP_P3_93251_37236243 | NC_021166.1    | Ca_kabuli_chr07 | 37236243                | TT                              | CC                | 1946468407               |
| SNP_P3_93252_37236290 | NC_021166.1    | Ca_kabuli_chr07 | 37236290                | AA                              | GG                | 1946468408               |
| SNP_P3_93253_37243740 | NC_021166.1    | Ca_kabuli_chr07 | 37243740                | AA                              | GG                | 1946468410               |
| SNP_P3_93254_37247832 | NC_021166.1    | Ca_kabuli_chr07 | 37247832                | AA                              | TT                | 1946468411               |
| SNP_P3_93255_37247838 | NC_021166.1    | Ca_kabuli_chr07 | 37247838                | CC                              | AA                | 1946468412               |
| SNP_P3_93256_37248229 | NC_021166.1    | Ca_kabuli_chr07 | 37248229                | TT                              | AA                | 1946468414               |
| SNP_P3_93257_37249683 | NC_021166.1    | Ca_kabuli_chr07 | 37249683                | AA                              | GG                | 1946468415               |
| SNP_P3_93258_37255373 | NC_021166.1    | Ca_kabuli_chr07 | 37255373                | AA                              | GG                | 1946468417               |
| SNP_P3_93259_37255474 | NC_021166.1    | Ca_kabuli_chr07 | 37255474                | CC                              | TT                | 1946468418               |
| SNP_P3_93260_37262688 | NC_021166.1    | Ca_kabuli_chr07 | 37262688                | TT                              | GG                | 1946468420               |
| SNP_P3_93261_37267890 | NC_021166.1    | Ca_kabuli_chr07 | 37267890                | TT                              | AA                | 1946468421               |
| SNP_P3_93262_37267919 | NC_021166.1    | Ca_kabuli_chr07 | 37267919                | TT                              | AA                | 1946468423               |
| SNP_P3_93263_37268216 | NC_021166.1    | Ca_kabuli_chr07 | 37268216                | TT                              | AA                | 1946468424               |

| SNPs IDs              | Chromosome IDs | Chromosomes     | Physical positions (bp) | CDC Frontier (Reference genome) | (Pusa 256 & HPNB) | NCBI SNPdb Accession IDs |
|-----------------------|----------------|-----------------|-------------------------|---------------------------------|-------------------|--------------------------|
| SNP_P3_93264_37270002 | NC_021166.1    | Ca_kabuli_chr07 | 37270002                | GG                              | AA                | 1946468426               |
| SNP_P3_93265_37270051 | NC_021166.1    | Ca_kabuli_chr07 | 37270051                | AA                              | CC                | 1946468427               |
| SNP_P3_93266_37277229 | NC_021166.1    | Ca_kabuli_chr07 | 37277229                | TT                              | CC                | 1946468429               |
| SNP_P3_93267_37277285 | NC_021166.1    | Ca_kabuli_chr07 | 37277285                | AA                              | TT                | 1946468430               |
| SNP_P3_93268_37277635 | NC_021166.1    | Ca_kabuli_chr07 | 37277635                | GG                              | CC                | 1946468431               |
| SNP_P3_93269_37282115 | NC_021166.1    | Ca_kabuli_chr07 | 37282115                | TT                              | CC                | 1946468433               |
| SNP_P3_93270_37282148 | NC_021166.1    | Ca_kabuli_chr07 | 37282148                | AA                              | GG                | 1946468434               |
| SNP_P3_93271_37282567 | NC_021166.1    | Ca_kabuli_chr07 | 37282567                | GG                              | TT                | 1946468436               |
| SNP_P3_93272_37282586 | NC_021166.1    | Ca_kabuli_chr07 | 37282586                | AA                              | TT                | 1946468437               |
| SNP_P3_93273_37282701 | NC_021166.1    | Ca_kabuli_chr07 | 37282701                | GG                              | TT                | 1946468439               |
| SNP_P3_93274_37292275 | NC_021166.1    | Ca_kabuli_chr07 | 37292275                | AA                              | TT                | 1946468440               |
| SNP_P3_93275_37292301 | NC_021166.1    | Ca_kabuli_chr07 | 37292301                | AA                              | GG                | 1946468442               |
| SNP_P3_93276_37292376 | NC_021166.1    | Ca_kabuli_chr07 | 37292376                | AA                              | GG                | 1946468443               |
| SNP_P3_93277_37292380 | NC_021166.1    | Ca_kabuli_chr07 | 37292380                | CC                              | TT                | 1946468445               |
| SNP_P3_93278_37292523 | NC_021166.1    | Ca_kabuli_chr07 | 37292523                | GG                              | AA                | 1946468446               |
| SNP_P3_93279_37292550 | NC_021166.1    | Ca_kabuli_chr07 | 37292550                | AA                              | TT                | 1946468448               |
| SNP_P3_93280_37292595 | NC_021166.1    | Ca_kabuli_chr07 | 37292595                | TT                              | CC                | 1946468449               |
| SNP_P3_93281_37292610 | NC_021166.1    | Ca_kabuli_chr07 | 37292610                | GG                              | TT                | 1946468451               |
| SNP_P3_93282_37292634 | NC_021166.1    | Ca_kabuli_chr07 | 37292634                | TT                              | GG                | 1946468452               |
| SNP_P3_93283_37292645 | NC_021166.1    | Ca_kabuli_chr07 | 37292645                | TT                              | AA                | 1946468453               |
| SNP_P3_93284_37292662 | NC_021166.1    | Ca_kabuli_chr07 | 37292662                | CC                              | AA                | 1946468455               |
| SNP_P3_93285_37292667 | NC_021166.1    | Ca_kabuli_chr07 | 37292667                | TT                              | AA                | 1946468456               |
| SNP_P3_93286_37292690 | NC_021166.1    | Ca_kabuli_chr07 | 37292690                | TT                              | GG                | 1946468458               |
| SNP_P3_93287_37294691 | NC_021166.1    | Ca_kabuli_chr07 | 37294691                | AA                              | GG                | 1946468459               |
| SNP_P3_93288_37296881 | NC_021166.1    | Ca_kabuli_chr07 | 37296881                | AA                              | CC                | 1946468461               |
| SNP_P3_93289_37312405 | NC_021166.1    | Ca_kabuli_chr07 | 37312405                | GG                              | CC                | 1946468462               |
| SNP_P3_93290_37315291 | NC_021166.1    | Ca_kabuli_chr07 | 37315291                | CC                              | TT                | 1946468464               |
| SNP_P3_93291_37315366 | NC_021166.1    | Ca_kabuli_chr07 | 37315366                | AA                              | GG                | 1946468465               |
| SNP_P3_93292_37315955 | NC_021166.1    | Ca_kabuli_chr07 | 37315955                | TT                              | CC                | 1946468467               |
| SNP_P3_93293_37315978 | NC_021166.1    | Ca_kabuli_chr07 | 37315978                | TT                              | CC                | 1946468468               |
| SNP_P3_93294_37316032 | NC_021166.1    | Ca_kabuli_chr07 | 37316032                | TT                              | CC                | 1946468470               |
| SNP_P3_93295_37316041 | NC_021166.1    | Ca_kabuli_chr07 | 37316041                | AA                              | GG                | 1946468471               |
| SNP_P3_93296_37316049 | NC_021166.1    | Ca_kabuli_chr07 | 37316049                | AA                              | GG                | 1946468472               |
| SNP_P3_93297_37316052 | NC_021166.1    | Ca_kabuli_chr07 | 37316052                | TT                              | GG                | 1946468474               |
| SNP_P3_93298_37316499 | NC_021166.1    | Ca_kabuli_chr07 | 37316499                | AA                              | GG                | 1946468475               |
| SNP_P3_93299_37323189 | NC_021166.1    | Ca_kabuli_chr07 | 37323189                | GG                              | AA                | 1946468477               |
| SNP_P3_93300_37325296 | NC_021166.1    | Ca_kabuli_chr07 | 37325296                | AA                              | GG                | 1946468478               |
| SNP_P3_93301_37325323 | NC_021166.1    | Ca_kabuli_chr07 | 37325323                | AA                              | GG                | 1946468480               |
| SNP_P3_93302_37336397 | NC_021166.1    | Ca_kabuli_chr07 | 37336397                | TT                              | CC                | 1946468481               |
| SNP_P3_93303_37336406 | NC_021166.1    | Ca_kabuli_chr07 | 37336406                | TT                              | CC                | 1946468483               |
| SNP_P3_93304_37336418 | NC_021166.1    | Ca_kabuli_chr07 | 37336418                | GG                              | TT                | 1946468484               |
| SNP_P3_93305_37336432 | NC_021166.1    | Ca_kabuli_chr07 | 37336432                | CC                              | TT                | 1946468486               |

| SNPs IDs              | Chromosome IDs | Chromosomes     | Physical positions (bp) | CDC Frontier (Reference genome) | (Pusa 256 & HPNB) | NCBI SNPdb Accession IDs |
|-----------------------|----------------|-----------------|-------------------------|---------------------------------|-------------------|--------------------------|
| SNP_P3_93306_37346533 | NC_021166.1    | Ca_kabuli_chr07 | 37346533                | TT                              | CC                | 1946468487               |
| SNP_P3_93307_37346549 | NC_021166.1    | Ca_kabuli_chr07 | 37346549                | TT                              | GG                | 1946468489               |
| SNP_P3_93308_37350204 | NC_021166.1    | Ca_kabuli_chr07 | 37350204                | GG                              | AA                | 1946468490               |
| SNP_P3_93309_37350221 | NC_021166.1    | Ca_kabuli_chr07 | 37350221                | AA                              | GG                | 1946468492               |
| SNP_P3_93310_37350239 | NC_021166.1    | Ca_kabuli_chr07 | 37350239                | CC                              | TT                | 1946468493               |
| SNP_P3_93311_37352317 | NC_021166.1    | Ca_kabuli_chr07 | 37352317                | TT                              | AA                | 1946468495               |
| SNP_P3_93312_37367159 | NC_021166.1    | Ca_kabuli_chr07 | 37367159                | TT                              | AA                | 1946468496               |
| SNP_P3_93313_37367174 | NC_021166.1    | Ca_kabuli_chr07 | 37367174                | CC                              | TT                | 1946468498               |
| SNP_P3_93314_37367176 | NC_021166.1    | Ca_kabuli_chr07 | 37367176                | AA                              | GG                | 1946468499               |
| SNP_P3_93315_37367193 | NC_021166.1    | Ca_kabuli_chr07 | 37367193                | TT                              | GG                | 1946468501               |
| SNP_P3_93316_37367207 | NC_021166.1    | Ca_kabuli_chr07 | 37367207                | AA                              | CC                | 1946468502               |
| SNP_P3_93317_37367222 | NC_021166.1    | Ca_kabuli_chr07 | 37367222                | CC                              | TT                | 1946468504               |
| SNP_P3_93318_37370017 | NC_021166.1    | Ca_kabuli_chr07 | 37370017                | TT                              | CC                | 1946468505               |
| SNP_P3_93319_37370080 | NC_021166.1    | Ca_kabuli_chr07 | 37370080                | AA                              | TT                | 1946468507               |
| SNP_P3_93320_37370103 | NC_021166.1    | Ca_kabuli_chr07 | 37370103                | GG                              | TT                | 1946468508               |
| SNP_P3_93321_37370333 | NC_021166.1    | Ca_kabuli_chr07 | 37370333                | GG                              | TT                | 1946468510               |
| SNP_P3_93322_37370531 | NC_021166.1    | Ca_kabuli_chr07 | 37370531                | GG                              | AA                | 1946468511               |
| SNP_P3_93323_37372023 | NC_021166.1    | Ca_kabuli_chr07 | 37372023                | GG                              | TT                | 1946468512               |
| SNP_P3_93324_37372080 | NC_021166.1    | Ca_kabuli_chr07 | 37372080                | CC                              | TT                | 1946468514               |
| SNP_P3_93325_37372128 | NC_021166.1    | Ca_kabuli_chr07 | 37372128                | GG                              | TT                | 1946468515               |
| SNP_P3_93326_37372158 | NC_021166.1    | Ca_kabuli_chr07 | 37372158                | AA                              | TT                | 1946468517               |
| SNP_P3_93327_37372387 | NC_021166.1    | Ca_kabuli_chr07 | 37372387                | CC                              | TT                | 1946468518               |
| SNP_P3_93328_37372540 | NC_021166.1    | Ca_kabuli_chr07 | 37372540                | CC                              | TT                | 1946468520               |
| SNP_P3_93329_37372955 | NC_021166.1    | Ca_kabuli_chr07 | 37372955                | TT                              | CC                | 1946468521               |
| SNP_P3_93330_37372971 | NC_021166.1    | Ca_kabuli_chr07 | 37372971                | CC                              | TT                | 1946468522               |
| SNP_P3_93331_37374030 | NC_021166.1    | Ca_kabuli_chr07 | 37374030                | CC                              | AA                | 1946468524               |
| SNP_P3_93332_37374036 | NC_021166.1    | Ca_kabuli_chr07 | 37374036                | GG                              | AA                | 1946468525               |
| SNP_P3_93333_37374227 | NC_021166.1    | Ca_kabuli_chr07 | 37374227                | TT                              | GG                | 1946468527               |
| SNP_P3_93334_37374243 | NC_021166.1    | Ca_kabuli_chr07 | 37374243                | TT                              | GG                | 1946468528               |
| SNP_P3_93335_37374257 | NC_021166.1    | Ca_kabuli_chr07 | 37374257                | AA                              | GG                | 1946468530               |
| SNP_P3_93336_37374269 | NC_021166.1    | Ca_kabuli_chr07 | 37374269                | TT                              | CC                | 1946468531               |
| SNP_P3_93337_37383365 | NC_021166.1    | Ca_kabuli_chr07 | 37383365                | CC                              | TT                | 1946468533               |
| SNP_P3_93338_37383366 | NC_021166.1    | Ca_kabuli_chr07 | 37383366                | GG                              | TT                | 1946468534               |
| SNP_P3_93339_37383377 | NC_021166.1    | Ca_kabuli_chr07 | 37383377                | GG                              | TT                | 1946468536               |
| SNP_P3_93340_37383406 | NC_021166.1    | Ca_kabuli_chr07 | 37383406                | CC                              | TT                | 1946468537               |
| SNP_P3_93341_37383678 | NC_021166.1    | Ca_kabuli_chr07 | 37383678                | CC                              | TT                | 1946468539               |
| SNP_P3_93342_37383686 | NC_021166.1    | Ca_kabuli_chr07 | 37383686                | AA                              | CC                | 1946468540               |
| SNP_P3_93343_37383687 | NC_021166.1    | Ca_kabuli_chr07 | 37383687                | TT                              | AA                | 1946468542               |
| SNP_P3_93344_37383722 | NC_021166.1    | Ca_kabuli_chr07 | 37383722                | AA                              | GG                | 1946468543               |
| SNP_P3_93345_37383731 | NC_021166.1    | Ca_kabuli_chr07 | 37383731                | TT                              | GG                | 1946468545               |
| SNP_P3_93346_37387420 | NC_021166.1    | Ca_kabuli_chr07 | 37387420                | GG                              | CC                | 1946468546               |
| SNP_P3_93347_37387435 | NC_021166.1    | Ca_kabuli_chr07 | 37387435                | CC                              | TT                | 1946468548               |

| SNPs IDs              | Chromosome IDs | Chromosomes     | Physical positions (bp) | CDC Frontier (Reference genome) | (Pusa 256 & HPNB) | NCBI SNPdb Accession IDs |
|-----------------------|----------------|-----------------|-------------------------|---------------------------------|-------------------|--------------------------|
| SNP_P3_93348_37393169 | NC_021166.1    | Ca_kabuli_chr07 | 37393169                | GG                              | TT                | 1946468549               |
| SNP_P3_93349_37401624 | NC_021166.1    | Ca_kabuli_chr07 | 37401624                | AA                              | GG                | 1946468551               |
| SNP_P3_93350_37401634 | NC_021166.1    | Ca_kabuli_chr07 | 37401634                | AA                              | TT                | 1946468552               |
| SNP_P3_93351_37401685 | NC_021166.1    | Ca_kabuli_chr07 | 37401685                | AA                              | CC                | 1946468553               |
| SNP_P3_93352_37402043 | NC_021166.1    | Ca_kabuli_chr07 | 37402043                | CC                              | TT                | 1946468555               |
| SNP_P3_93353_37417291 | NC_021166.1    | Ca_kabuli_chr07 | 37417291                | AA                              | TT                | 1946468556               |
| SNP_P3_93354_37417556 | NC_021166.1    | Ca_kabuli_chr07 | 37417556                | TT                              | GG                | 1946468558               |
| SNP_P3_93355_37427163 | NC_021166.1    | Ca_kabuli_chr07 | 37427163                | AA                              | TT                | 1946468559               |
| SNP_P3_93356_37427175 | NC_021166.1    | Ca_kabuli_chr07 | 37427175                | TT                              | GG                | 1946468561               |
| SNP_P3_93357_37427177 | NC_021166.1    | Ca_kabuli_chr07 | 37427177                | TT                              | CC                | 1946468562               |
| SNP_P3_93358_37427182 | NC_021166.1    | Ca_kabuli_chr07 | 37427182                | TT                              | GG                | 1946468564               |
| SNP_P3_93359_37427189 | NC_021166.1    | Ca_kabuli_chr07 | 37427189                | CC                              | AA                | 1946468565               |
| SNP_P3_93360_37427197 | NC_021166.1    | Ca_kabuli_chr07 | 37427197                | TT                              | CC                | 1946468567               |
| SNP_P3_93361_37427204 | NC_021166.1    | Ca_kabuli_chr07 | 37427204                | TT                              | AA                | 1946468568               |
| SNP_P3_93362_37427583 | NC_021166.1    | Ca_kabuli_chr07 | 37427583                | AA                              | CC                | 1946468570               |
| SNP_P3_93363_37427608 | NC_021166.1    | Ca_kabuli_chr07 | 37427608                | TT                              | CC                | 1946468571               |
| SNP_P3_93364_37427847 | NC_021166.1    | Ca_kabuli_chr07 | 37427847                | AA                              | CC                | 1946468573               |
| SNP_P3_93365_37437152 | NC_021166.1    | Ca_kabuli_chr07 | 37437152                | GG                              | AA                | 1946468574               |
| SNP_P3_93366_37437486 | NC_021166.1    | Ca_kabuli_chr07 | 37437486                | TT                              | AA                | 1946468576               |
| SNP_P3_93367_37437572 | NC_021166.1    | Ca_kabuli_chr07 | 37437572                | TT                              | GG                | 1946468577               |
| SNP_P3_93368_37437747 | NC_021166.1    | Ca_kabuli_chr07 | 37437747                | TT                              | GG                | 1946468578               |
| SNP_P3_93369_37438046 | NC_021166.1    | Ca_kabuli_chr07 | 37438046                | CC                              | GG                | 1946468580               |
| SNP_P3_93370_37438065 | NC_021166.1    | Ca_kabuli_chr07 | 37438065                | AA                              | TT                | 1946468581               |
| SNP_P3_93371_37453251 | NC_021166.1    | Ca_kabuli_chr07 | 37453251                | AA                              | CC                | 1946468583               |
| SNP_P3_93372_37453600 | NC_021166.1    | Ca_kabuli_chr07 | 37453600                | TT                              | AA                | 1946468584               |
| SNP_P3_93373_37453623 | NC_021166.1    | Ca_kabuli_chr07 | 37453623                | TT                              | GG                | 1946468586               |
| SNP_P3_93374_37455168 | NC_021166.1    | Ca_kabuli_chr07 | 37455168                | TT                              | CC                | 1946468587               |
| SNP_P3_93375_37479171 | NC_021166.1    | Ca_kabuli_chr07 | 37479171                | CC                              | TT                | 1946468589               |
| SNP_P3_93376_37479236 | NC_021166.1    | Ca_kabuli_chr07 | 37479236                | AA                              | CC                | 1946468590               |
| SNP_P3_93377_37479267 | NC_021166.1    | Ca_kabuli_chr07 | 37479267                | GG                              | AA                | 1946468592               |
| SNP_P3_93378_37479291 | NC_021166.1    | Ca_kabuli_chr07 | 37479291                | TT                              | CC                | 1946468593               |
| SNP_P3_93379_37479294 | NC_021166.1    | Ca_kabuli_chr07 | 37479294                | GG                              | AA                | 1946468594               |
| SNP_P3_93380_37479300 | NC_021166.1    | Ca_kabuli_chr07 | 37479300                | GG                              | AA                | 1946468596               |
| SNP_P3_93381_37479550 | NC_021166.1    | Ca_kabuli_chr07 | 37479550                | TT                              | CC                | 1946468597               |
| SNP_P3_93382_37479551 | NC_021166.1    | Ca_kabuli_chr07 | 37479551                | GG                              | CC                | 1946468599               |
| SNP_P3_93383_37479589 | NC_021166.1    | Ca_kabuli_chr07 | 37479589                | GG                              | AA                | 1946468600               |
| SNP_P3_93384_37479683 | NC_021166.1    | Ca_kabuli_chr07 | 37479683                | AA                              | GG                | 1946468602               |
| SNP_P3_93385_37479690 | NC_021166.1    | Ca_kabuli_chr07 | 37479690                | TT                              | CC                | 1946468603               |
| SNP_P3_93386_37479738 | NC_021166.1    | Ca_kabuli_chr07 | 37479738                | AA                              | TT                | 1946468605               |
| SNP_P3_93387_37479760 | NC_021166.1    | Ca_kabuli_chr07 | 37479760                | CC                              | TT                | 1946468606               |
| SNP_P3_93388_37479764 | NC_021166.1    | Ca_kabuli_chr07 | 37479764                | TT                              | CC                | 1946468608               |
| SNP_P3_93389_37482641 | NC_021166.1    | Ca_kabuli_chr07 | 37482641                | GG                              | TT                | 1946468609               |

| SNPs IDs              | Chromosome IDs | Chromosomes     | Physical positions (bp) | CDC Frontier (Reference genome) | (Pusa 256 & HPNB) | NCBI SNPdb Accession IDs |
|-----------------------|----------------|-----------------|-------------------------|---------------------------------|-------------------|--------------------------|
| SNP_P3_93390_37491198 | NC_021166.1    | Ca_kabuli_chr07 | 37491198                | CC                              | TT                | 1946468610               |
| SNP_P3_93391_37496554 | NC_021166.1    | Ca_kabuli_chr07 | 37496554                | CC                              | TT                | 1946468612               |
| SNP_P3_93392_37496600 | NC_021166.1    | Ca_kabuli_chr07 | 37496600                | GG                              | AA                | 1946468613               |
| SNP_P3_93393_37496616 | NC_021166.1    | Ca_kabuli_chr07 | 37496616                | TT                              | CC                | 1946468615               |
| SNP_P3_93394_37496656 | NC_021166.1    | Ca_kabuli_chr07 | 37496656                | CC                              | TT                | 1946468616               |
| SNP_P3_93395_37496665 | NC_021166.1    | Ca_kabuli_chr07 | 37496665                | AA                              | GG                | 1946468618               |
| SNP_P3_93396_37496696 | NC_021166.1    | Ca_kabuli_chr07 | 37496696                | AA                              | GG                | 1946468619               |
| SNP_P3_93397_37496771 | NC_021166.1    | Ca_kabuli_chr07 | 37496771                | CC                              | TT                | 1946468621               |
| SNP_P3_93398_37496908 | NC_021166.1    | Ca_kabuli_chr07 | 37496908                | AA                              | CC                | 1946468622               |
| SNP_P3_93399_37497044 | NC_021166.1    | Ca_kabuli_chr07 | 37497044                | AA                              | GG                | 1946468623               |
| SNP_P3_93400_37497585 | NC_021166.1    | Ca_kabuli_chr07 | 37497585                | CC                              | GG                | 1946468625               |
| SNP_P3_93401_37497912 | NC_021166.1    | Ca_kabuli_chr07 | 37497912                | TT                              | CC                | 1946468626               |
| SNP_P3_93402_37497933 | NC_021166.1    | Ca_kabuli_chr07 | 37497933                | GG                              | AA                | 1946468628               |
| SNP_P3_93403_37498072 | NC_021166.1    | Ca_kabuli_chr07 | 37498072                | GG                              | AA                | 1946468629               |
| SNP_P3_93404_37498084 | NC_021166.1    | Ca_kabuli_chr07 | 37498084                | TT                              | AA                | 1946468631               |
| SNP_P3_93405_37498357 | NC_021166.1    | Ca_kabuli_chr07 | 37498357                | GG                              | AA                | 1946468632               |
| SNP_P3_93406_37498373 | NC_021166.1    | Ca_kabuli_chr07 | 37498373                | GG                              | AA                | 1946468634               |
| SNP_P3_93407_37502364 | NC_021166.1    | Ca_kabuli_chr07 | 37502364                | GG                              | AA                | 1946468635               |
| SNP_P3_93408_37502380 | NC_021166.1    | Ca_kabuli_chr07 | 37502380                | GG                              | AA                | 1946468636               |
| SNP_P3_93409_37502387 | NC_021166.1    | Ca_kabuli_chr07 | 37502387                | GG                              | AA                | 1946468638               |
| SNP_P3_93410_37502753 | NC_021166.1    | Ca_kabuli_chr07 | 37502753                | TT                              | CC                | 1946468639               |
| SNP_P3_93411_37502798 | NC_021166.1    | Ca_kabuli_chr07 | 37502798                | AA                              | CC                | 1946468641               |
| SNP_P3_93412_37502811 | NC_021166.1    | Ca_kabuli_chr07 | 37502811                | TT                              | AA                | 1946468642               |
| SNP_P3_93413_37502829 | NC_021166.1    | Ca_kabuli_chr07 | 37502829                | TT                              | CC                | 1946468644               |
| SNP_P3_93414_37502832 | NC_021166.1    | Ca_kabuli_chr07 | 37502832                | TT                              | GG                | 1946468645               |
| SNP_P3_93415_37502848 | NC_021166.1    | Ca_kabuli_chr07 | 37502848                | GG                              | AA                | 1946468647               |
| SNP_P3_93416_37502862 | NC_021166.1    | Ca_kabuli_chr07 | 37502862                | GG                              | AA                | 1946468648               |
| SNP_P3_93417_37504410 | NC_021166.1    | Ca_kabuli_chr07 | 37504410                | GG                              | AA                | 1946468650               |
| SNP_P3_93418_37506801 | NC_021166.1    | Ca_kabuli_chr07 | 37506801                | GG                              | AA                | 1946468651               |
| SNP_P3_93419_37506882 | NC_021166.1    | Ca_kabuli_chr07 | 37506882                | TT                              | CC                | 1946468653               |
| SNP_P3_93420_37510931 | NC_021166.1    | Ca_kabuli_chr07 | 37510931                | TT                              | CC                | 1946468654               |
| SNP_P3_93421_37511678 | NC_021166.1    | Ca_kabuli_chr07 | 37511678                | TT                              | CC                | 1946468656               |
| SNP_P3_93422_37513557 | NC_021166.1    | Ca_kabuli_chr07 | 37513557                | CC                              | TT                | 1946468657               |
| SNP_P3_93423_37516040 | NC_021166.1    | Ca_kabuli_chr07 | 37516040                | AA                              | GG                | 1946468659               |
| SNP_P3_93424_37519213 | NC_021166.1    | Ca_kabuli_chr07 | 37519213                | TT                              | CC                | 1946468660               |
| SNP_P3_93425_37519802 | NC_021166.1    | Ca_kabuli_chr07 | 37519802                | GG                              | CC                | 1946468662               |
| SNP_P3_93427_37520397 | NC_021166.1    | Ca_kabuli_chr07 | 37520397                | CC                              | TT                | 1946468664               |
| SNP_P3_93428_37520639 | NC_021166.1    | Ca_kabuli_chr07 | 37520639                | CC                              | TT                | 1946468665               |
| SNP_P3_93429_37529840 | NC_021166.1    | Ca_kabuli_chr07 | 37529840                | GG                              | AA                | 1946468667               |
| SNP_P3_93430_37530372 | NC_021166.1    | Ca_kabuli_chr07 | 37530372                | TT                              | CC                | 1946468668               |
| SNP_P3_93431_37533108 | NC_021166.1    | Ca_kabuli_chr07 | 37533108                | CC                              | TT                | 1946468670               |
| SNP_P3_93432_37533180 | NC_021166.1    | Ca_kabuli_chr07 | 37533180                | GG                              | AA                | 1946468671               |

| SNPs IDs              | Chromosome IDs | Chromosomes     | Physical positions (bp) | CDC Frontier (Reference genome) | (Pusa 256 & HPNB) | NCBI SNPdb Accession IDs |
|-----------------------|----------------|-----------------|-------------------------|---------------------------------|-------------------|--------------------------|
| SNP_P3_93433_37538063 | NC_021166.1    | Ca_kabuli_chr07 | 37538063                | GG                              | TT                | 1946468672               |
| SNP_P3_93435_37538306 | NC_021166.1    | Ca_kabuli_chr07 | 37538306                | AA                              | GG                | 1946468674               |
| SNP_P3_93436_37538328 | NC_021166.1    | Ca_kabuli_chr07 | 37538328                | AA                              | CC                | 1946468675               |
| SNP_P3_93437_37540026 | NC_021166.1    | Ca_kabuli_chr07 | 37540026                | GG                              | AA                | 1946468677               |
| SNP_P3_93438_37540793 | NC_021166.1    | Ca_kabuli_chr07 | 37540793                | GG                              | AA                | 1946468678               |
| SNP_P3_93439_37540807 | NC_021166.1    | Ca_kabuli_chr07 | 37540807                | TT                              | AA                | 1946468680               |
| SNP_P3_93440_37541024 | NC_021166.1    | Ca_kabuli_chr07 | 37541024                | TT                              | GG                | 1946468681               |
| SNP_P3_93441_37547042 | NC_021166.1    | Ca_kabuli_chr07 | 37547042                | CC                              | TT                | 1946468683               |
| SNP_P3_93442_37547121 | NC_021166.1    | Ca_kabuli_chr07 | 37547121                | CC                              | AA                | 1946468684               |
| SNP_P3_93443_37547201 | NC_021166.1    | Ca_kabuli_chr07 | 37547201                | AA                              | TT                | 1946468686               |
| SNP_P3_93444_37547374 | NC_021166.1    | Ca_kabuli_chr07 | 37547374                | AA                              | CC                | 1946468687               |
| SNP_P3_93445_37548820 | NC_021166.1    | Ca_kabuli_chr07 | 37548820                | TT                              | GG                | 1946468688               |
| SNP_P3_93446_37549415 | NC_021166.1    | Ca_kabuli_chr07 | 37549415                | CC                              | TT                | 1946468690               |
| SNP_P3_93447_37551514 | NC_021166.1    | Ca_kabuli_chr07 | 37551514                | GG                              | AA                | 1946468691               |
| SNP_P3_93448_37551517 | NC_021166.1    | Ca_kabuli_chr07 | 37551517                | GG                              | AA                | 1946468693               |
| SNP_P3_93449_37551528 | NC_021166.1    | Ca_kabuli_chr07 | 37551528                | CC                              | TT                | 1946468694               |
| SNP_P3_93450_37551641 | NC_021166.1    | Ca_kabuli_chr07 | 37551641                | CC                              | TT                | 1946468696               |
| SNP_P3_93451_37551711 | NC_021166.1    | Ca_kabuli_chr07 | 37551711                | GG                              | AA                | 1946468697               |
| SNP_P3_93452_37551984 | NC_021166.1    | Ca_kabuli_chr07 | 37551984                | TT                              | CC                | 1946468699               |
| SNP_P3_93454_37556921 | NC_021166.1    | Ca_kabuli_chr07 | 37556921                | CC                              | TT                | 1946468700               |
| SNP_P3_93455_37556926 | NC_021166.1    | Ca_kabuli_chr07 | 37556926                | GG                              | AA                | 1946468702               |
| SNP_P3_93456_37560083 | NC_021166.1    | Ca_kabuli_chr07 | 37560083                | AA                              | TT                | 1946468703               |
| SNP_P3_93457_37562382 | NC_021166.1    | Ca_kabuli_chr07 | 37562382                | GG                              | CC                | 1946468705               |
| SNP_P3_93458_37562723 | NC_021166.1    | Ca_kabuli_chr07 | 37562723                | CC                              | TT                | 1946468706               |
| SNP_P3_93459_37564290 | NC_021166.1    | Ca_kabuli_chr07 | 37564290                | GG                              | AA                | 1946468708               |
| SNP_P3_93460_37564584 | NC_021166.1    | Ca_kabuli_chr07 | 37564584                | CC                              | TT                | 1946468709               |
| SNP_P3_93461_37565048 | NC_021166.1    | Ca_kabuli_chr07 | 37565048                | AA                              | GG                | 1946468711               |
| SNP_P3_93462_37565534 | NC_021166.1    | Ca_kabuli_chr07 | 37565534                | GG                              | AA                | 1946468712               |
| SNP_P3_93463_37565711 | NC_021166.1    | Ca_kabuli_chr07 | 37565711                | AA                              | CC                | 1946468713               |
| SNP_P3_93464_37565806 | NC_021166.1    | Ca_kabuli_chr07 | 37565806                | TT                              | CC                | 1946468715               |
| SNP_P3_93465_37565819 | NC_021166.1    | Ca_kabuli_chr07 | 37565819                | CC                              | GG                | 1946468716               |
| SNP_P3_93466_37565916 | NC_021166.1    | Ca_kabuli_chr07 | 37565916                | TT                              | CC                | 1946468718               |
| SNP_P3_93467_37565917 | NC_021166.1    | Ca_kabuli_chr07 | 37565917                | GG                              | AA                | 1946468719               |
| SNP_P3_93468_37566004 | NC_021166.1    | Ca_kabuli_chr07 | 37566004                | GG                              | TT                | 1946468721               |
| SNP_P3_93469_37567754 | NC_021166.1    | Ca_kabuli_chr07 | 37567754                | GG                              | AA                | 1946468722               |
| SNP_P3_93472_37568766 | NC_021166.1    | Ca_kabuli_chr07 | 37568766                | GG                              | AA                | 1946468724               |
| SNP_P3_93474_37570071 | NC_021166.1    | Ca_kabuli_chr07 | 37570071                | AA                              | GG                | 1946468725               |
| SNP_P3_93475_37570556 | NC_021166.1    | Ca_kabuli_chr07 | 37570556                | CC                              | TT                | 1946468726               |
| SNP_P3_93476_37572488 | NC_021166.1    | Ca_kabuli_chr07 | 37572488                | GG                              | AA                | 1946468728               |
| SNP_P3_93477_37574387 | NC_021166.1    | Ca_kabuli_chr07 | 37574387                | AA                              | GG                | 1946468729               |
| SNP_P3_93478_37574389 | NC_021166.1    | Ca_kabuli_chr07 | 37574389                | GG                              | AA                | 1946468731               |
| SNP_P3_93479_37576590 | NC_021166.1    | Ca_kabuli_chr07 | 37576590                | AA                              | GG                | 1946468732               |

| SNPs IDs              | Chromosome IDs | Chromosomes     | Physical positions (bp) | CDC Frontier (Reference genome) | (Pusa 256 & HPNB) | NCBI SNPdb Accession IDs |
|-----------------------|----------------|-----------------|-------------------------|---------------------------------|-------------------|--------------------------|
| SNP_P3_93480_37580214 | NC_021166.1    | Ca_kabuli_chr07 | 37580214                | TT                              | AA                | 1946468734               |
| SNP_P3_93481_37585970 | NC_021166.1    | Ca_kabuli_chr07 | 37585970                | GG                              | AA                | 1946468735               |
| SNP_P3_93482_37585976 | NC_021166.1    | Ca_kabuli_chr07 | 37585976                | AA                              | GG                | 1946468737               |
| SNP_P3_93483_37586009 | NC_021166.1    | Ca_kabuli_chr07 | 37586009                | GG                              | AA                | 1946468738               |
| SNP_P3_93485_37586997 | NC_021166.1    | Ca_kabuli_chr07 | 37586997                | TT                              | CC                | 1946468740               |
| SNP_P3_93486_37588993 | NC_021166.1    | Ca_kabuli_chr07 | 37588993                | AA                              | TT                | 1946468741               |
| SNP_P3_93487_37592460 | NC_021166.1    | Ca_kabuli_chr07 | 37592460                | AA                              | CC                | 1946468743               |
| SNP_P3_93490_37595787 | NC_021166.1    | Ca_kabuli_chr07 | 37595787                | AA                              | TT                | 1946468744               |
| SNP_P3_93491_37595829 | NC_021166.1    | Ca_kabuli_chr07 | 37595829                | GG                              | AA                | 1946468746               |
| SNP_P3_93492_37597043 | NC_021166.1    | Ca_kabuli_chr07 | 37597043                | TT                              | AA                | 1946468747               |
| SNP_P3_93493_37597122 | NC_021166.1    | Ca_kabuli_chr07 | 37597122                | AA                              | GG                | 1946468749               |
| SNP_P3_93494_37614570 | NC_021166.1    | Ca_kabuli_chr07 | 37614570                | AA                              | GG                | 1946468750               |
| SNP_P3_93495_37614899 | NC_021166.1    | Ca_kabuli_chr07 | 37614899                | GG                              | CC                | 1946468751               |
| SNP_P3_93496_37615039 | NC_021166.1    | Ca_kabuli_chr07 | 37615039                | GG                              | AA                | 1946468753               |
| SNP_P3_93497_37615073 | NC_021166.1    | Ca_kabuli_chr07 | 37615073                | AA                              | CC                | 1946468754               |
| SNP_P3_93498_37615193 | NC_021166.1    | Ca_kabuli_chr07 | 37615193                | CC                              | AA                | 1946468756               |
| SNP_P3_93499_37615200 | NC_021166.1    | Ca_kabuli_chr07 | 37615200                | TT                              | CC                | 1946468757               |
| SNP_P3_93500_37615336 | NC_021166.1    | Ca_kabuli_chr07 | 37615336                | AA                              | GG                | 1946468759               |
| SNP_P3_93501_37615440 | NC_021166.1    | Ca_kabuli_chr07 | 37615440                | CC                              | TT                | 1946468760               |
| SNP_P3_93502_37615441 | NC_021166.1    | Ca_kabuli_chr07 | 37615441                | GG                              | AA                | 1946468762               |
| SNP_P3_93503_37615573 | NC_021166.1    | Ca_kabuli_chr07 | 37615573                | GG                              | AA                | 1946468763               |
| SNP_P3_93504_37616093 | NC_021166.1    | Ca_kabuli_chr07 | 37616093                | TT                              | CC                | 1946468765               |
| SNP_P3_93505_37616478 | NC_021166.1    | Ca_kabuli_chr07 | 37616478                | CC                              | AA                | 1946468766               |
| SNP_P3_93506_37622097 | NC_021166.1    | Ca_kabuli_chr07 | 37622097                | TT                              | CC                | 1946468768               |
| SNP_P3_93507_37622163 | NC_021166.1    | Ca_kabuli_chr07 | 37622163                | TT                              | CC                | 1946468769               |
| SNP_P3_93508_37622207 | NC_021166.1    | Ca_kabuli_chr07 | 37622207                | CC                              | TT                | 1946468771               |
| SNP_P3_93510_37622226 | NC_021166.1    | Ca_kabuli_chr07 | 37622226                | AA                              | GG                | 1946468772               |
| SNP_P3_93511_37622247 | NC_021166.1    | Ca_kabuli_chr07 | 37622247                | AA                              | TT                | 1946468774               |
| SNP_P3_93512_37622256 | NC_021166.1    | Ca_kabuli_chr07 | 37622256                | AA                              | GG                | 1946468775               |
| SNP_P3_93513_37622427 | NC_021166.1    | Ca_kabuli_chr07 | 37622427                | CC                              | AA                | 1946468777               |
| SNP_P3_93514_37622438 | NC_021166.1    | Ca_kabuli_chr07 | 37622438                | TT                              | CC                | 1946468778               |
| SNP_P3_93515_37622482 | NC_021166.1    | Ca_kabuli_chr07 | 37622482                | TT                              | CC                | 1946468780               |
| SNP_P3_93516_37622513 | NC_021166.1    | Ca_kabuli_chr07 | 37622513                | CC                              | TT                | 1946468781               |
| SNP_P3_93517_37622563 | NC_021166.1    | Ca_kabuli_chr07 | 37622563                | TT                              | CC                | 1946468783               |
| SNP_P3_93518_37622572 | NC_021166.1    | Ca_kabuli_chr07 | 37622572                | GG                              | AA                | 1946468784               |
| SNP_P3_93519_37622582 | NC_021166.1    | Ca_kabuli_chr07 | 37622582                | GG                              | AA                | 1946468785               |
| SNP_P3_93520_37622618 | NC_021166.1    | Ca_kabuli_chr07 | 37622618                | TT                              | CC                | 1946468787               |
| SNP_P3_93521_37622658 | NC_021166.1    | Ca_kabuli_chr07 | 37622658                | TT                              | CC                | 1946468788               |
| SNP_P3_93522_37622660 | NC_021166.1    | Ca_kabuli_chr07 | 37622660                | GG                              | AA                | 1946468790               |
| SNP_P3_93523_37622661 | NC_021166.1    | Ca_kabuli_chr07 | 37622661                | CC                              | TT                | 1946468791               |
| SNP_P3_93524_37622705 | NC_021166.1    | Ca_kabuli_chr07 | 37622705                | TT                              | CC                | 1946468793               |
| SNP_P3_93525_37622722 | NC_021166.1    | Ca_kabuli_chr07 | 37622722                | GG                              | CC                | 1946468794               |



| SNPs IDs              | Chromosome IDs | Chromosomes     | Physical positions (bp) | CDC Frontier (Reference genome) | (Pusa 256 & HPNB) | NCBI SNPdb Accession IDs |
|-----------------------|----------------|-----------------|-------------------------|---------------------------------|-------------------|--------------------------|
| SNP_P3_93526_37622737 | NC_021166.1    | Ca_kabuli_chr07 | 37622737                | AA                              | GG                | 1946468796               |
| SNP_P3_93527_37622860 | NC_021166.1    | Ca_kabuli_chr07 | 37622860                | AA                              | TT                | 1946468797               |
| SNP_P3_93528_37622906 | NC_021166.1    | Ca_kabuli_chr07 | 37622906                | TT                              | GG                | 1946468799               |
| SNP_P3_93529_37623004 | NC_021166.1    | Ca_kabuli_chr07 | 37623004                | AA                              | GG                | 1946468800               |
| SNP_P3_93530_37623108 | NC_021166.1    | Ca_kabuli_chr07 | 37623108                | CC                              | TT                | 1946468801               |
| SNP_P3_93531_37626260 | NC_021166.1    | Ca_kabuli_chr07 | 37626260                | AA                              | GG                | 1946468803               |
| SNP_P3_93532_37626275 | NC_021166.1    | Ca_kabuli_chr07 | 37626275                | GG                              | AA                | 1946468804               |
| SNP_P3_93533_37626287 | NC_021166.1    | Ca_kabuli_chr07 | 37626287                | TT                              | CC                | 1946468806               |
| SNP_P3_93534_37626455 | NC_021166.1    | Ca_kabuli_chr07 | 37626455                | AA                              | GG                | 1946468807               |
| SNP_P3_93535_37626518 | NC_021166.1    | Ca_kabuli_chr07 | 37626518                | TT                              | CC                | 1946468809               |
| SNP_P3_93536_37626534 | NC_021166.1    | Ca_kabuli_chr07 | 37626534                | TT                              | CC                | 1946468810               |
| SNP_P3_93537_37626538 | NC_021166.1    | Ca_kabuli_chr07 | 37626538                | CC                              | TT                | 1946468812               |
| SNP_P3_93538_37626601 | NC_021166.1    | Ca_kabuli_chr07 | 37626601                | TT                              | CC                | 1946468813               |
| SNP_P3_93539_37626628 | NC_021166.1    | Ca_kabuli_chr07 | 37626628                | GG                              | AA                | 1946468815               |
| SNP_P3_93540_37626631 | NC_021166.1    | Ca_kabuli_chr07 | 37626631                | GG                              | AA                | 1946468816               |
| SNP_P3_93541_37626640 | NC_021166.1    | Ca_kabuli_chr07 | 37626640                | AA                              | TT                | 1946468818               |
| SNP_P3_93542_37626660 | NC_021166.1    | Ca_kabuli_chr07 | 37626660                | GG                              | TT                | 1946468819               |
| SNP_P3_93543_37626666 | NC_021166.1    | Ca_kabuli_chr07 | 37626666                | CC                              | TT                | 1946468821               |
| SNP_P3_93544_37626687 | NC_021166.1    | Ca_kabuli_chr07 | 37626687                | AA                              | GG                | 1946468822               |
| SNP_P3_93545_37626695 | NC_021166.1    | Ca_kabuli_chr07 | 37626695                | GG                              | CC                | 1946468824               |
| SNP_P3_93546_37626701 | NC_021166.1    | Ca_kabuli_chr07 | 37626701                | AA                              | GG                | 1946468825               |
| SNP_P3_93547_37626712 | NC_021166.1    | Ca_kabuli_chr07 | 37626712                | CC                              | TT                | 1946468827               |
| SNP_P3_93548_37626802 | NC_021166.1    | Ca_kabuli_chr07 | 37626802                | AA                              | GG                | 1946468828               |
| SNP_P3_93549_37626805 | NC_021166.1    | Ca_kabuli_chr07 | 37626805                | AA                              | GG                | 1946468830               |
| SNP_P3_93550_37626809 | NC_021166.1    | Ca_kabuli_chr07 | 37626809                | TT                              | AA                | 1946468831               |
| SNP_P3_93551_37626827 | NC_021166.1    | Ca_kabuli_chr07 | 37626827                | GG                              | AA                | 1946468833               |
| SNP_P3_93552_37638070 | NC_021166.1    | Ca_kabuli_chr07 | 37638070                | AA                              | CC                | 1946468834               |
| SNP_P3_93553_37638071 | NC_021166.1    | Ca_kabuli_chr07 | 37638071                | GG                              | AA                | 1946468836               |
| SNP_P3_93554_37639439 | NC_021166.1    | Ca_kabuli_chr07 | 37639439                | TT                              | CC                | 1946468838               |
| SNP_P3_93555_37648094 | NC_021166.1    | Ca_kabuli_chr07 | 37648094                | GG                              | AA                | 1946468839               |
| SNP_P3_93559_37667166 | NC_021166.1    | Ca_kabuli_chr07 | 37667166                | AA                              | GG                | 1946468841               |
| SNP_P3_93560_37667366 | NC_021166.1    | Ca_kabuli_chr07 | 37667366                | GG                              | AA                | 1946468842               |
| SNP_P3_93562_37667370 | NC_021166.1    | Ca_kabuli_chr07 | 37667370                | AA                              | GG                | 1946468844               |
| SNP_P3_93564_37698584 | NC_021166.1    | Ca_kabuli_chr07 | 37698584                | AA                              | GG                | 1946468845               |
| SNP_P3_93565_37703043 | NC_021166.1    | Ca_kabuli_chr07 | 37703043                | CC                              | TT                | 1946468847               |
| SNP_P3_93566_37703064 | NC_021166.1    | Ca_kabuli_chr07 | 37703064                | TT                              | CC                | 1946468848               |
| SNP_P3_93567_37707912 | NC_021166.1    | Ca_kabuli_chr07 | 37707912                | AA                              | GG                | 1946468850               |
| SNP_P3_93568_37707944 | NC_021166.1    | Ca_kabuli_chr07 | 37707944                | CC                              | TT                | 1946468851               |
| SNP_P3_93569_37708523 | NC_021166.1    | Ca_kabuli_chr07 | 37708523                | AA                              | GG                | 1946468852               |
| SNP_P3_93570_37710043 | NC_021166.1    | Ca_kabuli_chr07 | 37710043                | GG                              | AA                | 1946468854               |
| SNP_P3_93571_37710088 | NC_021166.1    | Ca_kabuli_chr07 | 37710088                | GG                              | AA                | 1946468855               |
| SNP_P3_93572_37711595 | NC_021166.1    | Ca_kabuli_chr07 | 37711595                | CC                              | TT                | 1946468857               |

| SNPs IDs              | Chromosome IDs | Chromosomes     | Physical positions (bp) | CDC Frontier (Reference genome) | (Pusa 256 & HPNB) | NCBI SNPdb Accession IDs |
|-----------------------|----------------|-----------------|-------------------------|---------------------------------|-------------------|--------------------------|
| SNP_P3_93573_37711596 | NC_021166.1    | Ca_kabuli_chr07 | 37711596                | GG                              | AA                | 1946468858               |
| SNP_P3_93574_37711721 | NC_021166.1    | Ca_kabuli_chr07 | 37711721                | CC                              | AA                | 1946468860               |
| SNP_P3_93575_37711767 | NC_021166.1    | Ca_kabuli_chr07 | 37711767                | GG                              | AA                | 1946468861               |
| SNP_P3_93576_37724206 | NC_021166.1    | Ca_kabuli_chr07 | 37724206                | GG                              | CC                | 1946468863               |
| SNP_P3_93578_37772382 | NC_021166.1    | Ca_kabuli_chr07 | 37772382                | TT                              | GG                | 1946468864               |
| SNP_P3_93579_37797754 | NC_021166.1    | Ca_kabuli_chr07 | 37797754                | CC                              | TT                | 1946468866               |
| SNP_P3_93580_37798796 | NC_021166.1    | Ca_kabuli_chr07 | 37798796                | GG                              | TT                | 1946468867               |
| SNP_P3_93581_37798945 | NC_021166.1    | Ca_kabuli_chr07 | 37798945                | GG                              | AA                | 1946468869               |
| SNP_P3_93582_37798958 | NC_021166.1    | Ca_kabuli_chr07 | 37798958                | AA                              | TT                | 1946468870               |
| SNP_P3_93583_37799016 | NC_021166.1    | Ca_kabuli_chr07 | 37799016                | GG                              | AA                | 1946468872               |
| SNP_P3_93584_37799310 | NC_021166.1    | Ca_kabuli_chr07 | 37799310                | GG                              | AA                | 1946468873               |
| SNP_P3_93585_37814853 | NC_021166.1    | Ca_kabuli_chr07 | 37814853                | CC                              | AA                | 1946468875               |
| SNP_P3_93586_37818134 | NC_021166.1    | Ca_kabuli_chr07 | 37818134                | TT                              | CC                | 1946468876               |
| SNP_P3_93587_37819504 | NC_021166.1    | Ca_kabuli_chr07 | 37819504                | TT                              | GG                | 1946468878               |
| SNP_P3_93588_37824395 | NC_021166.1    | Ca_kabuli_chr07 | 37824395                | CC                              | AA                | 1946468879               |
| SNP_P3_93589_37824588 | NC_021166.1    | Ca_kabuli_chr07 | 37824588                | GG                              | AA                | 1946468881               |
| SNP_P3_93590_37824612 | NC_021166.1    | Ca_kabuli_chr07 | 37824612                | TT                              | AA                | 1946468882               |
| SNP_P3_93591_37824770 | NC_021166.1    | Ca_kabuli_chr07 | 37824770                | GG                              | AA                | 1946468884               |
| SNP_P3_93592_37824915 | NC_021166.1    | Ca_kabuli_chr07 | 37824915                | AA                              | GG                | 1946468886               |
| SNP_P3_93593_37827240 | NC_021166.1    | Ca_kabuli_chr07 | 37827240                | TT                              | CC                | 1946468887               |
| SNP_P3_93594_37840287 | NC_021166.1    | Ca_kabuli_chr07 | 37840287                | AA                              | CC                | 1946468889               |
| SNP_P3_93595_37849767 | NC_021166.1    | Ca_kabuli_chr07 | 37849767                | AA                              | CC                | 1946468890               |
| SNP_P3_93596_37849812 | NC_021166.1    | Ca_kabuli_chr07 | 37849812                | AA                              | GG                | 1946468892               |
| SNP_P3_93597_37849841 | NC_021166.1    | Ca_kabuli_chr07 | 37849841                | AA                              | CC                | 1946468893               |
| SNP_P3_93598_37849909 | NC_021166.1    | Ca_kabuli_chr07 | 37849909                | TT                              | AA                | 1946468895               |
| SNP_P3_93599_37849951 | NC_021166.1    | Ca_kabuli_chr07 | 37849951                | AA                              | GG                | 1946468896               |
| SNP_P3_93600_37850116 | NC_021166.1    | Ca_kabuli_chr07 | 37850116                | TT                              | GG                | 1946468898               |
| SNP_P3_93601_37850276 | NC_021166.1    | Ca_kabuli_chr07 | 37850276                | AA                              | GG                | 1946468899               |
| SNP_P3_93602_37850290 | NC_021166.1    | Ca_kabuli_chr07 | 37850290                | TT                              | AA                | 1946468901               |
| SNP_P3_93603_37856874 | NC_021166.1    | Ca_kabuli_chr07 | 37856874                | TT                              | CC                | 1946468902               |
| SNP_P3_93604_37856877 | NC_021166.1    | Ca_kabuli_chr07 | 37856877                | GG                              | CC                | 1946468904               |
| SNP_P3_93605_37856907 | NC_021166.1    | Ca_kabuli_chr07 | 37856907                | GG                              | TT                | 1946468905               |
| SNP_P3_93606_37856920 | NC_021166.1    | Ca_kabuli_chr07 | 37856920                | AA                              | GG                | 1946468907               |
| SNP_P3_93607_37856932 | NC_021166.1    | Ca_kabuli_chr07 | 37856932                | GG                              | TT                | 1946468908               |
| SNP_P3_93608_37856984 | NC_021166.1    | Ca_kabuli_chr07 | 37856984                | TT                              | GG                | 1946468910               |
| SNP_P3_93609_37857210 | NC_021166.1    | Ca_kabuli_chr07 | 37857210                | TT                              | CC                | 1946468911               |
| SNP_P3_93610_37857256 | NC_021166.1    | Ca_kabuli_chr07 | 37857256                | CC                              | AA                | 1946468913               |
| SNP_P3_93611_37857338 | NC_021166.1    | Ca_kabuli_chr07 | 37857338                | GG                              | CC                | 1946468914               |
| SNP_P3_93612_37878313 | NC_021166.1    | Ca_kabuli_chr07 | 37878313                | TT                              | AA                | 1946468916               |
| SNP_P3_93613_37879906 | NC_021166.1    | Ca_kabuli_chr07 | 37879906                | TT                              | CC                | 1946468918               |
| SNP_P3_93614_37879936 | NC_021166.1    | Ca_kabuli_chr07 | 37879936                | TT                              | CC                | 1946468919               |
| SNP_P3_93615_37879943 | NC_021166.1    | Ca_kabuli_chr07 | 37879943                | AA                              | GG                | 1946468921               |

| SNPs IDs              | Chromosome IDs | Chromosomes     | Physical positions (bp) | CDC Frontier (Reference genome) | (Pusa 256 & HPNB) | NCBI SNPdb Accession IDs |
|-----------------------|----------------|-----------------|-------------------------|---------------------------------|-------------------|--------------------------|
| SNP_P3_93616_37894654 | NC_021166.1    | Ca_kabuli_chr07 | 37894654                | TT                              | AA                | 1946468922               |
| SNP_P3_93617_37904694 | NC_021166.1    | Ca_kabuli_chr07 | 37904694                | CC                              | GG                | 1946468924               |
| SNP_P3_93618_37904906 | NC_021166.1    | Ca_kabuli_chr07 | 37904906                | TT                              | GG                | 1946468925               |
| SNP_P3_93619_37904974 | NC_021166.1    | Ca_kabuli_chr07 | 37904974                | CC                              | TT                | 1946468927               |
| SNP_P3_93620_37909893 | NC_021166.1    | Ca_kabuli_chr07 | 37909893                | GG                              | AA                | 1946468928               |
| SNP_P3_93621_37914279 | NC_021166.1    | Ca_kabuli_chr07 | 37914279                | GG                              | TT                | 1946468930               |
| SNP_P3_93622_37915064 | NC_021166.1    | Ca_kabuli_chr07 | 37915064                | AA                              | GG                | 1946468931               |
| SNP_P3_93623_37915240 | NC_021166.1    | Ca_kabuli_chr07 | 37915240                | TT                              | CC                | 1946468933               |
| SNP_P3_93624_37915401 | NC_021166.1    | Ca_kabuli_chr07 | 37915401                | TT                              | GG                | 1946468935               |
| SNP_P3_93625_37927687 | NC_021166.1    | Ca_kabuli_chr07 | 37927687                | CC                              | TT                | 1946468936               |
| SNP_P3_93626_37928575 | NC_021166.1    | Ca_kabuli_chr07 | 37928575                | GG                              | AA                | 1946468938               |
| SNP_P3_93628_37947808 | NC_021166.1    | Ca_kabuli_chr07 | 37947808                | GG                              | AA                | 1946468939               |
| SNP_P3_93629_37948156 | NC_021166.1    | Ca_kabuli_chr07 | 37948156                | TT                              | GG                | 1946468941               |
| SNP_P3_93630_37951000 | NC_021166.1    | Ca_kabuli_chr07 | 37951000                | TT                              | CC                | 1946468942               |
| SNP_P3_93633_37972343 | NC_021166.1    | Ca_kabuli_chr07 | 37972343                | CC                              | TT                | 1946468944               |
| SNP_P3_93634_37988333 | NC_021166.1    | Ca_kabuli_chr07 | 37988333                | CC                              | AA                | 1946468946               |
| SNP_P3_93635_37988349 | NC_021166.1    | Ca_kabuli_chr07 | 37988349                | AA                              | GG                | 1946468947               |
| SNP_P3_93636_37988375 | NC_021166.1    | Ca_kabuli_chr07 | 37988375                | CC                              | TT                | 1946468949               |
| SNP_P3_93637_37988623 | NC_021166.1    | Ca_kabuli_chr07 | 37988623                | GG                              | AA                | 1946468950               |
| SNP_P3_93638_37992728 | NC_021166.1    | Ca_kabuli_chr07 | 37992728                | TT                              | AA                | 1946468952               |
| SNP_P3_93639_37992765 | NC_021166.1    | Ca_kabuli_chr07 | 37992765                | TT                              | CC                | 1946468953               |
| SNP_P3_93640_37992823 | NC_021166.1    | Ca_kabuli_chr07 | 37992823                | CC                              | TT                | 1946468955               |
| SNP_P3_93641_37992834 | NC_021166.1    | Ca_kabuli_chr07 | 37992834                | TT                              | AA                | 1946468956               |
| SNP_P3_93642_37993092 | NC_021166.1    | Ca_kabuli_chr07 | 37993092                | GG                              | AA                | 1946468958               |
| SNP_P3_93643_37993146 | NC_021166.1    | Ca_kabuli_chr07 | 37993146                | AA                              | GG                | 1946468959               |
| SNP_P3_93644_37993288 | NC_021166.1    | Ca_kabuli_chr07 | 37993288                | TT                              | CC                | 1946468961               |
| SNP_P3_93645_37993360 | NC_021166.1    | Ca_kabuli_chr07 | 37993360                | AA                              | TT                | 1946468962               |
| SNP_P3_93646_38014858 | NC_021166.1    | Ca_kabuli_chr07 | 38014858                | CC                              | TT                | 1946468964               |
| SNP_P3_93648_38046590 | NC_021166.1    | Ca_kabuli_chr07 | 38046590                | CC                              | AA                | 1946468966               |
| SNP_P3_93649_38059989 | NC_021166.1    | Ca_kabuli_chr07 | 38059989                | GG                              | AA                | 1946468967               |
| SNP_P3_93650_38060008 | NC_021166.1    | Ca_kabuli_chr07 | 38060008                | GG                              | AA                | 1946468969               |
| SNP_P3_93651_38061364 | NC_021166.1    | Ca_kabuli_chr07 | 38061364                | TT                              | CC                | 1946468970               |
| SNP_P3_93652_38064645 | NC_021166.1    | Ca_kabuli_chr07 | 38064645                | CC                              | TT                | 1946468972               |
| SNP_P3_93653_38069092 | NC_021166.1    | Ca_kabuli_chr07 | 38069092                | AA                              | GG                | 1946468974               |
| SNP_P3_93654_38072481 | NC_021166.1    | Ca_kabuli_chr07 | 38072481                | GG                              | AA                | 1946468975               |
| SNP_P3_93655_38072495 | NC_021166.1    | Ca_kabuli_chr07 | 38072495                | TT                              | AA                | 1946468977               |
| SNP_P3_93657_38096559 | NC_021166.1    | Ca_kabuli_chr07 | 38096559                | AA                              | GG                | 1946468978               |
| SNP_P3_93658_38104638 | NC_021166.1    | Ca_kabuli_chr07 | 38104638                | AA                              | CC                | 1946468980               |
| SNP_P3_93659_38107150 | NC_021166.1    | Ca_kabuli_chr07 | 38107150                | GG                              | TT                | 1946468981               |
| SNP_P3_93660_38107237 | NC_021166.1    | Ca_kabuli_chr07 | 38107237                | AA                              | TT                | 1946468983               |
| SNP_P3_93661_38107449 | NC_021166.1    | Ca_kabuli_chr07 | 38107449                | AA                              | TT                | 1946468985               |
| SNP_P3_93662_38107468 | NC_021166.1    | Ca_kabuli_chr07 | 38107468                | CC                              | TT                | 1946468986               |

| SNPs IDs              | Chromosome IDs | Chromosomes     | Physical positions (bp) | CDC Frontier (Reference genome) | (Pusa 256 & HPNB) | NCBI SNPdb Accession IDs |
|-----------------------|----------------|-----------------|-------------------------|---------------------------------|-------------------|--------------------------|
| SNP_P3_93663_38107470 | NC_021166.1    | Ca_kabuli_chr07 | 38107470                | AA                              | GG                | 1946468988               |
| SNP_P3_93664_38115917 | NC_021166.1    | Ca_kabuli_chr07 | 38115917                | TT                              | GG                | 1946468989               |
| SNP_P3_93665_38118024 | NC_021166.1    | Ca_kabuli_chr07 | 38118024                | GG                              | AA                | 1946468991               |
| SNP_P3_93666_38119124 | NC_021166.1    | Ca_kabuli_chr07 | 38119124                | GG                              | TT                | 1946468992               |
| SNP_P3_93668_38130308 | NC_021166.1    | Ca_kabuli_chr07 | 38130308                | CC                              | TT                | 1946468994               |
| SNP_P3_93669_38143361 | NC_021166.1    | Ca_kabuli_chr07 | 38143361                | GG                              | AA                | 1946468995               |
| SNP_P3_93670_38143452 | NC_021166.1    | Ca_kabuli_chr07 | 38143452                | AA                              | GG                | 1946468997               |
| SNP_P3_93671_38159469 | NC_021166.1    | Ca_kabuli_chr07 | 38159469                | GG                              | AA                | 1946468998               |
| SNP_P3_93672_38165908 | NC_021166.1    | Ca_kabuli_chr07 | 38165908                | GG                              | TT                | 1946469000               |
| SNP_P3_93673_38165921 | NC_021166.1    | Ca_kabuli_chr07 | 38165921                | CC                              | TT                | 1946469001               |
| SNP_P3_93674_38165990 | NC_021166.1    | Ca_kabuli_chr07 | 38165990                | GG                              | TT                | 1946469003               |
| SNP_P3_93675_38166166 | NC_021166.1    | Ca_kabuli_chr07 | 38166166                | CC                              | TT                | 1946469004               |
| SNP_P3_93676_38166241 | NC_021166.1    | Ca_kabuli_chr07 | 38166241                | TT                              | CC                | 1946469006               |
| SNP_P3_93677_38166391 | NC_021166.1    | Ca_kabuli_chr07 | 38166391                | TT                              | CC                | 1946469007               |
| SNP_P3_93678_38182881 | NC_021166.1    | Ca_kabuli_chr07 | 38182881                | TT                              | CC                | 1946469009               |
| SNP_P3_93679_38193606 | NC_021166.1    | Ca_kabuli_chr07 | 38193606                | GG                              | TT                | 1946469011               |
| SNP_P3_93680_38232698 | NC_021166.1    | Ca_kabuli_chr07 | 38232698                | TT                              | CC                | 1946469012               |
| SNP_P3_93681_38232706 | NC_021166.1    | Ca_kabuli_chr07 | 38232706                | AA                              | GG                | 1946469014               |
| SNP_P3_93682_38232719 | NC_021166.1    | Ca_kabuli_chr07 | 38232719                | GG                              | CC                | 1946469015               |
| SNP_P3_93683_38232733 | NC_021166.1    | Ca_kabuli_chr07 | 38232733                | AA                              | CC                | 1946469017               |
| SNP_P3_93684_38232866 | NC_021166.1    | Ca_kabuli_chr07 | 38232866                | AA                              | GG                | 1946469018               |
| SNP_P3_93685_38233093 | NC_021166.1    | Ca_kabuli_chr07 | 38233093                | AA                              | GG                | 1946469020               |
| SNP_P3_93686_38233130 | NC_021166.1    | Ca_kabuli_chr07 | 38233130                | GG                              | AA                | 1946469021               |
| SNP_P3_93687_38233363 | NC_021166.1    | Ca_kabuli_chr07 | 38233363                | AA                              | GG                | 1946469023               |
| SNP_P3_93688_38252151 | NC_021166.1    | Ca_kabuli_chr07 | 38252151                | TT                              | CC                | 1946469024               |
| SNP_P3_93689_38252687 | NC_021166.1    | Ca_kabuli_chr07 | 38252687                | CC                              | TT                | 1946469026               |
| SNP_P3_93691_38263273 | NC_021166.1    | Ca_kabuli_chr07 | 38263273                | AA                              | GG                | 1946469028               |
| SNP_P3_93692_38264390 | NC_021166.1    | Ca_kabuli_chr07 | 38264390                | GG                              | AA                | 1946469029               |
| SNP_P3_93694_38287945 | NC_021166.1    | Ca_kabuli_chr07 | 38287945                | AA                              | GG                | 1946469031               |
| SNP_P3_93695_38290042 | NC_021166.1    | Ca_kabuli_chr07 | 38290042                | AA                              | GG                | 1946469032               |
| SNP_P3_93697_38293695 | NC_021166.1    | Ca_kabuli_chr07 | 38293695                | TT                              | GG                | 1946469034               |
| SNP_P3_93698_38293696 | NC_021166.1    | Ca_kabuli_chr07 | 38293696                | AA                              | GG                | 1946469035               |
| SNP_P3_93699_38296098 | NC_021166.1    | Ca_kabuli_chr07 | 38296098                | CC                              | TT                | 1946469037               |
| SNP_P3_93700_38296115 | NC_021166.1    | Ca_kabuli_chr07 | 38296115                | AA                              | TT                | 1946469038               |
| SNP_P3_93701_38296123 | NC_021166.1    | Ca_kabuli_chr07 | 38296123                | TT                              | AA                | 1946469040               |
| SNP_P3_93702_38296283 | NC_021166.1    | Ca_kabuli_chr07 | 38296283                | GG                              | AA                | 1946469041               |
| SNP_P3_93703_38296309 | NC_021166.1    | Ca_kabuli_chr07 | 38296309                | CC                              | TT                | 1946469043               |
| SNP_P3_93704_38296419 | NC_021166.1    | Ca_kabuli_chr07 | 38296419                | CC                              | AA                | 1946469045               |
| SNP_P3_93705_38296456 | NC_021166.1    | Ca_kabuli_chr07 | 38296456                | CC                              | GG                | 1946469046               |
| SNP_P3_93706_38296461 | NC_021166.1    | Ca_kabuli_chr07 | 38296461                | AA                              | TT                | 1946469048               |
| SNP_P3_93707_38296469 | NC_021166.1    | Ca_kabuli_chr07 | 38296469                | AA                              | GG                | 1946469049               |
| SNP_P3_93708_38297970 | NC_021166.1    | Ca_kabuli_chr07 | 38297970                | TT                              | GG                | 1946469051               |

| SNPs IDs              | Chromosome IDs | Chromosomes     | Physical positions (bp) | CDC Frontier (Reference genome) | (Pusa 256 & HPNB) | NCBI SNPdb Accession IDs |
|-----------------------|----------------|-----------------|-------------------------|---------------------------------|-------------------|--------------------------|
| SNP_P3_93709_38298000 | NC_021166.1    | Ca_kabuli_chr07 | 38298000                | CC                              | TT                | 1946469053               |
| SNP_P3_93710_38298303 | NC_021166.1    | Ca_kabuli_chr07 | 38298303                | TT                              | CC                | 1946469054               |
| SNP_P3_93711_38298499 | NC_021166.1    | Ca_kabuli_chr07 | 38298499                | GG                              | AA                | 1946469056               |
| SNP_P3_93712_38298558 | NC_021166.1    | Ca_kabuli_chr07 | 38298558                | GG                              | AA                | 1946469057               |
| SNP_P3_93713_38298587 | NC_021166.1    | Ca_kabuli_chr07 | 38298587                | CC                              | TT                | 1946469059               |
| SNP_P3_93715_38298589 | NC_021166.1    | Ca_kabuli_chr07 | 38298589                | AA                              | CC                | 1946469060               |
| SNP_P3_93716_38298591 | NC_021166.1    | Ca_kabuli_chr07 | 38298591                | CC                              | TT                | 1946469062               |
| SNP_P3_93718_38298624 | NC_021166.1    | Ca_kabuli_chr07 | 38298624                | GG                              | AA                | 1946469063               |
| SNP_P3_93719_38298632 | NC_021166.1    | Ca_kabuli_chr07 | 38298632                | TT                              | AA                | 1946469065               |
| SNP_P3_93720_38298769 | NC_021166.1    | Ca_kabuli_chr07 | 38298769                | CC                              | AA                | 1946469066               |
| SNP_P3_93721_38298776 | NC_021166.1    | Ca_kabuli_chr07 | 38298776                | TT                              | GG                | 1946469068               |
| SNP_P3_93722_38298784 | NC_021166.1    | Ca_kabuli_chr07 | 38298784                | AA                              | GG                | 1946469069               |
| SNP_P3_93723_38298793 | NC_021166.1    | Ca_kabuli_chr07 | 38298793                | GG                              | AA                | 1946469071               |
| SNP_P3_93724_38298829 | NC_021166.1    | Ca_kabuli_chr07 | 38298829                | AA                              | GG                | 1946469072               |
| SNP_P3_93725_38298854 | NC_021166.1    | Ca_kabuli_chr07 | 38298854                | TT                              | GG                | 1946469074               |
| SNP_P3_93726_38298916 | NC_021166.1    | Ca_kabuli_chr07 | 38298916                | CC                              | TT                | 1946469075               |
| SNP_P3_93727_38298919 | NC_021166.1    | Ca_kabuli_chr07 | 38298919                | TT                              | AA                | 1946469077               |
| SNP_P3_93728_38301620 | NC_021166.1    | Ca_kabuli_chr07 | 38301620                | TT                              | CC                | 1946469078               |
| SNP_P3_93729_38301701 | NC_021166.1    | Ca_kabuli_chr07 | 38301701                | TT                              | GG                | 1946469080               |
| SNP_P3_93730_38331823 | NC_021166.1    | Ca_kabuli_chr07 | 38331823                | TT                              | AA                | 1946469081               |
| SNP_P3_93731_38354491 | NC_021166.1    | Ca_kabuli_chr07 | 38354491                | AA                              | TT                | 1946469083               |
| SNP_P3_93732_38354514 | NC_021166.1    | Ca_kabuli_chr07 | 38354514                | TT                              | CC                | 1946469084               |
| SNP_P3_93733_38357032 | NC_021166.1    | Ca_kabuli_chr07 | 38357032                | GG                              | TT                | 1946469086               |
| SNP_P3_93734_38377019 | NC_021166.1    | Ca_kabuli_chr07 | 38377019                | CC                              | TT                | 1946469088               |
| SNP_P3_93735_38399208 | NC_021166.1    | Ca_kabuli_chr07 | 38399208                | GG                              | CC                | 1946469089               |
| SNP_P3_93736_38399233 | NC_021166.1    | Ca_kabuli_chr07 | 38399233                | CC                              | TT                | 1946469091               |
| SNP_P3_93737_38399584 | NC_021166.1    | Ca_kabuli_chr07 | 38399584                | TT                              | GG                | 1946469092               |
| SNP_P3_93738_38399858 | NC_021166.1    | Ca_kabuli_chr07 | 38399858                | CC                              | TT                | 1946469094               |
| SNP_P3_93739_38399875 | NC_021166.1    | Ca_kabuli_chr07 | 38399875                | GG                              | AA                | 1946469095               |
| SNP_P3_93740_38399879 | NC_021166.1    | Ca_kabuli_chr07 | 38399879                | TT                              | CC                | 1946469097               |
| SNP_P3_93741_38416487 | NC_021166.1    | Ca_kabuli_chr07 | 38416487                | AA                              | GG                | 1946469098               |
| SNP_P3_93742_38421111 | NC_021166.1    | Ca_kabuli_chr07 | 38421111                | CC                              | TT                | 1946469100               |
| SNP_P3_93743_38436135 | NC_021166.1    | Ca_kabuli_chr07 | 38436135                | TT                              | AA                | 1946469103               |
| SNP_P3_93744_38440592 | NC_021166.1    | Ca_kabuli_chr07 | 38440592                | CC                              | TT                | 1946469104               |
| SNP_P3_93745_38454776 | NC_021166.1    | Ca_kabuli_chr07 | 38454776                | CC                              | TT                | 1946469106               |
| SNP_P3_93746_38454861 | NC_021166.1    | Ca_kabuli_chr07 | 38454861                | AA                              | GG                | 1946469107               |
| SNP_P3_93747_38457014 | NC_021166.1    | Ca_kabuli_chr07 | 38457014                | AA                              | GG                | 1946469109               |
| SNP_P3_93748_38457021 | NC_021166.1    | Ca_kabuli_chr07 | 38457021                | AA                              | GG                | 1946469110               |
| SNP_P3_93749_38457051 | NC_021166.1    | Ca_kabuli_chr07 | 38457051                | CC                              | GG                | 1946469112               |
| SNP_P3_93751_38459654 | NC_021166.1    | Ca_kabuli_chr07 | 38459654                | AA                              | GG                | 1946469113               |
| SNP_P3_93752_38478321 | NC_021166.1    | Ca_kabuli_chr07 | 38478321                | GG                              | AA                | 1946469115               |
| SNP_P3_93753_38478340 | NC_021166.1    | Ca_kabuli_chr07 | 38478340                | TT                              | AA                | 1946469116               |

| SNPs IDs              | Chromosome IDs | Chromosomes     | Physical positions (bp) | CDC Frontier (Reference genome) | (Pusa 256 & HPNB) | NCBI SNPdb Accession IDs |
|-----------------------|----------------|-----------------|-------------------------|---------------------------------|-------------------|--------------------------|
| SNP_P3_93754_38478343 | NC_021166.1    | Ca_kabuli_chr07 | 38478343                | TT                              | GG                | 1946469117               |
| SNP_P3_93755_38478363 | NC_021166.1    | Ca_kabuli_chr07 | 38478363                | AA                              | GG                | 1946469119               |
| SNP_P3_93756_38478365 | NC_021166.1    | Ca_kabuli_chr07 | 38478365                | CC                              | TT                | 1946469120               |
| SNP_P3_93757_38478374 | NC_021166.1    | Ca_kabuli_chr07 | 38478374                | AA                              | CC                | 1946469122               |
| SNP_P3_93758_38478375 | NC_021166.1    | Ca_kabuli_chr07 | 38478375                | AA                              | TT                | 1946469123               |
| SNP_P3_93759_38500501 | NC_021166.1    | Ca_kabuli_chr07 | 38500501                | AA                              | GG                | 1946469125               |
| SNP_P3_93760_38505689 | NC_021166.1    | Ca_kabuli_chr07 | 38505689                | TT                              | GG                | 1946469126               |
| SNP_P3_93761_38506316 | NC_021166.1    | Ca_kabuli_chr07 | 38506316                | CC                              | TT                | 1946469127               |
| SNP_P3_93763_38509762 | NC_021166.1    | Ca_kabuli_chr07 | 38509762                | TT                              | CC                | 1946469129               |
| SNP_P3_93764_38514155 | NC_021166.1    | Ca_kabuli_chr07 | 38514155                | AA                              | TT                | 1946469130               |
| SNP_P3_93765_38613368 | NC_021166.1    | Ca_kabuli_chr07 | 38613368                | AA                              | GG                | 1946469132               |
| SNP_P3_93766_38613391 | NC_021166.1    | Ca_kabuli_chr07 | 38613391                | AA                              | GG                | 1946469133               |
| SNP_P3_93767_38613468 | NC_021166.1    | Ca_kabuli_chr07 | 38613468                | AA                              | CC                | 1946469135               |
| SNP_P3_93768_38613680 | NC_021166.1    | Ca_kabuli_chr07 | 38613680                | TT                              | GG                | 1946469137               |
| SNP_P3_93769_38623000 | NC_021166.1    | Ca_kabuli_chr07 | 38623000                | AA                              | TT                | 1946469138               |
| SNP_P3_93770_38623194 | NC_021166.1    | Ca_kabuli_chr07 | 38623194                | GG                              | CC                | 1946469140               |
| SNP_P3_93771_38632469 | NC_021166.1    | Ca_kabuli_chr07 | 38632469                | TT                              | GG                | 1946469141               |
| SNP_P3_93772_38638714 | NC_021166.1    | Ca_kabuli_chr07 | 38638714                | GG                              | AA                | 1946469143               |
| SNP_P3_93773_38647500 | NC_021166.1    | Ca_kabuli_chr07 | 38647500                | CC                              | TT                | 1946469144               |
| SNP_P3_93774_38647505 | NC_021166.1    | Ca_kabuli_chr07 | 38647505                | GG                              | AA                | 1946469146               |
| SNP_P3_93776_38677661 | NC_021166.1    | Ca_kabuli_chr07 | 38677661                | AA                              | GG                | 1946469147               |
| SNP_P3_93777_38688558 | NC_021166.1    | Ca_kabuli_chr07 | 38688558                | CC                              | TT                | 1946469149               |
| SNP_P3_93778_38705429 | NC_021166.1    | Ca_kabuli_chr07 | 38705429                | GG                              | AA                | 1946469150               |
| SNP_P3_93779_38716031 | NC_021166.1    | Ca_kabuli_chr07 | 38716031                | TT                              | CC                | 1946469152               |
| SNP_P3_93781_38721381 | NC_021166.1    | Ca_kabuli_chr07 | 38721381                | CC                              | TT                | 1946469153               |
| SNP_P3_93782_38740827 | NC_021166.1    | Ca_kabuli_chr07 | 38740827                | GG                              | AA                | 1946469155               |
| SNP_P3_93783_38742163 | NC_021166.1    | Ca_kabuli_chr07 | 38742163                | GG                              | AA                | 1946469156               |
| SNP_P3_93786_38756934 | NC_021166.1    | Ca_kabuli_chr07 | 38756934                | GG                              | AA                | 1946469158               |
| SNP_P3_93788_38766125 | NC_021166.1    | Ca_kabuli_chr07 | 38766125                | CC                              | GG                | 1946469160               |
| SNP_P3_93789_38792662 | NC_021166.1    | Ca_kabuli_chr07 | 38792662                | AA                              | GG                | 1946469161               |
| SNP_P3_93790_38792687 | NC_021166.1    | Ca_kabuli_chr07 | 38792687                | AA                              | GG                | 1946469163               |
| SNP_P3_93793_38809233 | NC_021166.1    | Ca_kabuli_chr07 | 38809233                | AA                              | GG                | 1946469164               |
| SNP_P3_93794_38810853 | NC_021166.1    | Ca_kabuli_chr07 | 38810853                | GG                              | AA                | 1946469166               |
| SNP_P3_93795_38819776 | NC_021166.1    | Ca_kabuli_chr07 | 38819776                | GG                              | TT                | 1946469167               |
| SNP_P3_93796_38830905 | NC_021166.1    | Ca_kabuli_chr07 | 38830905                | AA                              | TT                | 1946469169               |
| SNP_P3_93798_38856953 | NC_021166.1    | Ca_kabuli_chr07 | 38856953                | TT                              | CC                | 1946469170               |
| SNP_P3_93799_38861874 | NC_021166.1    | Ca_kabuli_chr07 | 38861874                | AA                              | CC                | 1946469172               |
| SNP_P3_93800_38861881 | NC_021166.1    | Ca_kabuli_chr07 | 38861881                | TT                              | CC                | 1946469173               |
| SNP_P3_93801_38866181 | NC_021166.1    | Ca_kabuli_chr07 | 38866181                | TT                              | AA                | 1946469175               |
| SNP_P3_93802_38866563 | NC_021166.1    | Ca_kabuli_chr07 | 38866563                | AA                              | GG                | 1946469177               |
| SNP_P3_93803_38869306 | NC_021166.1    | Ca_kabuli_chr07 | 38869306                | CC                              | AA                | 1946469178               |
| SNP_P3_93804_38876614 | NC_021166.1    | Ca_kabuli_chr07 | 38876614                | AA                              | TT                | 1946469180               |

| SNPs IDs              | Chromosome IDs | Chromosomes     | Physical positions (bp) | CDC Frontier (Reference genome) | (Pusa 256 & HPNB) | NCBI SNPdb Accession IDs |
|-----------------------|----------------|-----------------|-------------------------|---------------------------------|-------------------|--------------------------|
| SNP_P3_93805_38878772 | NC_021166.1    | Ca_kabuli_chr07 | 38878772                | TT                              | AA                | 1946469181               |
| SNP_P3_93806_38882652 | NC_021166.1    | Ca_kabuli_chr07 | 38882652                | TT                              | CC                | 1946469183               |
| SNP_P3_93807_38882678 | NC_021166.1    | Ca_kabuli_chr07 | 38882678                | GG                              | AA                | 1946469184               |
| SNP_P3_93808_38882738 | NC_021166.1    | Ca_kabuli_chr07 | 38882738                | GG                              | AA                | 1946469186               |
| SNP_P3_93809_38882767 | NC_021166.1    | Ca_kabuli_chr07 | 38882767                | GG                              | AA                | 1946469187               |
| SNP_P3_93810_38883008 | NC_021166.1    | Ca_kabuli_chr07 | 38883008                | CC                              | TT                | 1946469189               |
| SNP_P3_93811_38889420 | NC_021166.1    | Ca_kabuli_chr07 | 38889420                | TT                              | CC                | 1946469190               |
| SNP_P3_93812_38899116 | NC_021166.1    | Ca_kabuli_chr07 | 38899116                | GG                              | AA                | 1946469192               |
| SNP_P3_93813_38899259 | NC_021166.1    | Ca_kabuli_chr07 | 38899259                | TT                              | CC                | 1946469193               |
| SNP_P3_93814_38899353 | NC_021166.1    | Ca_kabuli_chr07 | 38899353                | TT                              | CC                | 1946469195               |
| SNP_P3_93816_38899378 | NC_021166.1    | Ca_kabuli_chr07 | 38899378                | TT                              | CC                | 1946469196               |
| SNP_P3_93817_38899663 | NC_021166.1    | Ca_kabuli_chr07 | 38899663                | CC                              | TT                | 1946469198               |
| SNP_P3_93818_38903523 | NC_021166.1    | Ca_kabuli_chr07 | 38903523                | CC                              | GG                | 1946469200               |
| SNP_P3_93819_38903546 | NC_021166.1    | Ca_kabuli_chr07 | 38903546                | TT                              | GG                | 1946469201               |
| SNP_P3_93821_38974658 | NC_021166.1    | Ca_kabuli_chr07 | 38974658                | CC                              | TT                | 1946469203               |
| SNP_P3_93822_38974660 | NC_021166.1    | Ca_kabuli_chr07 | 38974660                | TT                              | CC                | 1946469204               |
| SNP_P3_93823_38974769 | NC_021166.1    | Ca_kabuli_chr07 | 38974769                | TT                              | CC                | 1946469206               |
| SNP_P3_93824_38974998 | NC_021166.1    | Ca_kabuli_chr07 | 38974998                | AA                              | GG                | 1946469207               |
| SNP_P3_93825_38980632 | NC_021166.1    | Ca_kabuli_chr07 | 38980632                | GG                              | TT                | 1946469209               |
| SNP_P3_93826_38980648 | NC_021166.1    | Ca_kabuli_chr07 | 38980648                | CC                              | TT                | 1946469210               |
| SNP_P3_93827_38980870 | NC_021166.1    | Ca_kabuli_chr07 | 38980870                | GG                              | AA                | 1946469212               |
| SNP_P3_93828_38983466 | NC_021166.1    | Ca_kabuli_chr07 | 38983466                | GG                              | AA                | 1946469214               |
| SNP_P3_93829_38983500 | NC_021166.1    | Ca_kabuli_chr07 | 38983500                | CC                              | TT                | 1946469215               |
| SNP_P3_93830_38983549 | NC_021166.1    | Ca_kabuli_chr07 | 38983549                | AA                              | GG                | 1946469217               |
| SNP_P3_93831_38983863 | NC_021166.1    | Ca_kabuli_chr07 | 38983863                | AA                              | GG                | 1946469219               |
| SNP_P3_93832_38990969 | NC_021166.1    | Ca_kabuli_chr07 | 38990969                | TT                              | GG                | 1946469220               |
| SNP_P3_93833_38991187 | NC_021166.1    | Ca_kabuli_chr07 | 38991187                | AA                              | TT                | 1946469222               |
| SNP_P3_93834_38991210 | NC_021166.1    | Ca_kabuli_chr07 | 38991210                | CC                              | AA                | 1946469223               |
| SNP_P3_93835_38991215 | NC_021166.1    | Ca_kabuli_chr07 | 38991215                | GG                              | TT                | 1946469225               |
| SNP_P3_93836_38991261 | NC_021166.1    | Ca_kabuli_chr07 | 38991261                | GG                              | AA                | 1946469226               |
| SNP_P3_93837_38991505 | NC_021166.1    | Ca_kabuli_chr07 | 38991505                | GG                              | AA                | 1946469228               |
| SNP_P3_93838_38993341 | NC_021166.1    | Ca_kabuli_chr07 | 38993341                | CC                              | AA                | 1946469229               |
| SNP_P3_93839_38993492 | NC_021166.1    | Ca_kabuli_chr07 | 38993492                | CC                              | TT                | 1946469231               |
| SNP_P3_93840_38999737 | NC_021166.1    | Ca_kabuli_chr07 | 38999737                | GG                              | AA                | 1946469232               |
| SNP_P3_93841_39003999 | NC_021166.1    | Ca_kabuli_chr07 | 39003999                | TT                              | CC                | 1946469234               |
| SNP_P3_93842_39005226 | NC_021166.1    | Ca_kabuli_chr07 | 39005226                | AA                              | CC                | 1946469235               |
| SNP_P3_93843_39029638 | NC_021166.1    | Ca_kabuli_chr07 | 39029638                | AA                              | GG                | 1946469237               |
| SNP_P3_93844_39029639 | NC_021166.1    | Ca_kabuli_chr07 | 39029639                | CC                              | TT                | 1946469239               |
| SNP_P3_93846_39037126 | NC_021166.1    | Ca_kabuli_chr07 | 39037126                | AA                              | GG                | 1946469240               |
| SNP_P3_93847_39041196 | NC_021166.1    | Ca_kabuli_chr07 | 39041196                | AA                              | CC                | 1946469242               |
| SNP_P3_93848_39048120 | NC_021166.1    | Ca_kabuli_chr07 | 39048120                | AA                              | GG                | 1946469243               |
| SNP_P3_93849_39051772 | NC_021166.1    | Ca_kabuli_chr07 | 39051772                | GG                              | AA                | 1946469245               |

| SNPs IDs              | Chromosome IDs | Chromosomes     | Physical positions (bp) | CDC Frontier (Reference genome) | (Pusa 256 & HPNB) | NCBI SNPdb Accession IDs |
|-----------------------|----------------|-----------------|-------------------------|---------------------------------|-------------------|--------------------------|
| SNP_P3_93850_39055305 | NC_021166.1    | Ca_kabuli_chr07 | 39055305                | AA                              | CC                | 1946469246               |
| SNP_P3_93851_39055354 | NC_021166.1    | Ca_kabuli_chr07 | 39055354                | AA                              | GG                | 1946469248               |
| SNP_P3_93852_39055400 | NC_021166.1    | Ca_kabuli_chr07 | 39055400                | AA                              | GG                | 1946469249               |
| SNP_P3_93853_39055411 | NC_021166.1    | Ca_kabuli_chr07 | 39055411                | AA                              | TT                | 1946469251               |
| SNP_P3_93854_39055420 | NC_021166.1    | Ca_kabuli_chr07 | 39055420                | AA                              | CC                | 1946469252               |
| SNP_P3_93855_39074429 | NC_021166.1    | Ca_kabuli_chr07 | 39074429                | AA                              | CC                | 1946469254               |
| SNP_P3_93856_39105263 | NC_021166.1    | Ca_kabuli_chr07 | 39105263                | AA                              | GG                | 1946469255               |
| SNP_P3_93858_39112582 | NC_021166.1    | Ca_kabuli_chr07 | 39112582                | TT                              | GG                | 1946469257               |
| SNP_P3_93859_39143015 | NC_021166.1    | Ca_kabuli_chr07 | 39143015                | AA                              | TT                | 1946469258               |
| SNP_P3_93860_39146504 | NC_021166.1    | Ca_kabuli_chr07 | 39146504                | TT                              | CC                | 1946469260               |
| SNP_P3_93861_39146505 | NC_021166.1    | Ca_kabuli_chr07 | 39146505                | TT                              | AA                | 1946469261               |
| SNP_P3_93862_39146506 | NC_021166.1    | Ca_kabuli_chr07 | 39146506                | TT                              | GG                | 1946469263               |
| SNP_P3_93863_39149477 | NC_021166.1    | Ca_kabuli_chr07 | 39149477                | AA                              | GG                | 1946469264               |
| SNP_P3_93864_39149491 | NC_021166.1    | Ca_kabuli_chr07 | 39149491                | TT                              | CC                | 1946469266               |
| SNP_P3_93865_39149781 | NC_021166.1    | Ca_kabuli_chr07 | 39149781                | TT                              | GG                | 1946469267               |
| SNP_P3_93866_39149790 | NC_021166.1    | Ca_kabuli_chr07 | 39149790                | GG                              | TT                | 1946469269               |
| SNP_P3_93867_39149796 | NC_021166.1    | Ca_kabuli_chr07 | 39149796                | AA                              | TT                | 1946469270               |
| SNP_P3_93869_39177065 | NC_021166.1    | Ca_kabuli_chr07 | 39177065                | CC                              | TT                | 1946469272               |
| SNP_P3_93870_39255645 | NC_021166.1    | Ca_kabuli_chr07 | 39255645                | GG                              | TT                | 1946469274               |
| SNP_P3_93871_39259788 | NC_021166.1    | Ca_kabuli_chr07 | 39259788                | CC                              | TT                | 1946469275               |
| SNP_P3_93872_39312855 | NC_021166.1    | Ca_kabuli_chr07 | 39312855                | TT                              | GG                | 1946469277               |
| SNP_P3_93873_39329300 | NC_021166.1    | Ca_kabuli_chr07 | 39329300                | CC                              | AA                | 1946469278               |
| SNP_P3_93874_39370887 | NC_021166.1    | Ca_kabuli_chr07 | 39370887                | AA                              | GG                | 1946469280               |
| SNP_P3_93875_39371557 | NC_021166.1    | Ca_kabuli_chr07 | 39371557                | GG                              | AA                | 1946469281               |
| SNP_P3_93876_39371577 | NC_021166.1    | Ca_kabuli_chr07 | 39371577                | AA                              | GG                | 1946469283               |
| SNP_P3_93878_39406423 | NC_021166.1    | Ca_kabuli_chr07 | 39406423                | CC                              | GG                | 1946469284               |
| SNP_P3_93879_39410416 | NC_021166.1    | Ca_kabuli_chr07 | 39410416                | TT                              | AA                | 1946469286               |
| SNP_P3_93880_39425625 | NC_021166.1    | Ca_kabuli_chr07 | 39425625                | AA                              | TT                | 1946469287               |
| SNP_P3_93881_39432025 | NC_021166.1    | Ca_kabuli_chr07 | 39432025                | TT                              | GG                | 1946469288               |
| SNP_P3_93883_39457096 | NC_021166.1    | Ca_kabuli_chr07 | 39457096                | TT                              | GG                | 1946469290               |
| SNP_P3_93884_39457129 | NC_021166.1    | Ca_kabuli_chr07 | 39457129                | TT                              | CC                | 1946469291               |
| SNP_P3_93885_39459800 | NC_021166.1    | Ca_kabuli_chr07 | 39459800                | GG                              | TT                | 1946469293               |
| SNP_P3_93890_39554618 | NC_021166.1    | Ca_kabuli_chr07 | 39554618                | GG                              | TT                | 1946469294               |
| SNP_P3_93891_39554949 | NC_021166.1    | Ca_kabuli_chr07 | 39554949                | TT                              | GG                | 1946469296               |
| SNP_P3_93892_39554992 | NC_021166.1    | Ca_kabuli_chr07 | 39554992                | TT                              | CC                | 1946469297               |
| SNP_P3_93893_39555061 | NC_021166.1    | Ca_kabuli_chr07 | 39555061                | AA                              | GG                | 1946469299               |
| SNP_P3_93895_39571195 | NC_021166.1    | Ca_kabuli_chr07 | 39571195                | AA                              | GG                | 1946469300               |
| SNP_P3_93896_39575533 | NC_021166.1    | Ca_kabuli_chr07 | 39575533                | GG                              | AA                | 1946469302               |
| SNP_P3_93897_39577619 | NC_021166.1    | Ca_kabuli_chr07 | 39577619                | CC                              | AA                | 1946469303               |
| SNP_P3_93899_39621606 | NC_021166.1    | Ca_kabuli_chr07 | 39621606                | TT                              | CC                | 1946469305               |
| SNP_P3_93900_39621787 | NC_021166.1    | Ca_kabuli_chr07 | 39621787                | AA                              | GG                | 1946469306               |
| SNP_P3_93901_39630382 | NC_021166.1    | Ca_kabuli_chr07 | 39630382                | GG                              | AA                | 1946469308               |



| SNPs IDs              | Chromosome IDs | Chromosomes     | Physical positions (bp) | CDC Frontier (Reference genome) | (Pusa 256 & HPNB) | NCBI SNPdb Accession IDs |
|-----------------------|----------------|-----------------|-------------------------|---------------------------------|-------------------|--------------------------|
| SNP_P3_93902_39630607 | NC_021166.1    | Ca_kabuli_chr07 | 39630607                | AA                              | TT                | 1946469309               |
| SNP_P3_93903_39630635 | NC_021166.1    | Ca_kabuli_chr07 | 39630635                | CC                              | GG                | 1946469311               |
| SNP_P3_93904_39630666 | NC_021166.1    | Ca_kabuli_chr07 | 39630666                | GG                              | AA                | 1946469312               |
| SNP_P3_93905_39630671 | NC_021166.1    | Ca_kabuli_chr07 | 39630671                | AA                              | TT                | 1946469314               |
| SNP_P3_93906_39630696 | NC_021166.1    | Ca_kabuli_chr07 | 39630696                | GG                              | AA                | 1946469315               |
| SNP_P3_93907_39630716 | NC_021166.1    | Ca_kabuli_chr07 | 39630716                | TT                              | GG                | 1946469317               |
| SNP_P3_93908_39630756 | NC_021166.1    | Ca_kabuli_chr07 | 39630756                | AA                              | GG                | 1946469318               |
| SNP_P3_93909_39630757 | NC_021166.1    | Ca_kabuli_chr07 | 39630757                | GG                              | AA                | 1946469320               |
| SNP_P3_93910_39630786 | NC_021166.1    | Ca_kabuli_chr07 | 39630786                | TT                              | CC                | 1946469321               |
| SNP_P3_93911_39633846 | NC_021166.1    | Ca_kabuli_chr07 | 39633846                | AA                              | GG                | 1946469323               |
| SNP_P3_93912_39639367 | NC_021166.1    | Ca_kabuli_chr07 | 39639367                | GG                              | TT                | 1946469324               |
| SNP_P3_93913_39639574 | NC_021166.1    | Ca_kabuli_chr07 | 39639574                | TT                              | AA                | 1946469326               |
| SNP_P3_93914_39639598 | NC_021166.1    | Ca_kabuli_chr07 | 39639598                | GG                              | AA                | 1946469327               |
| SNP_P3_93916_39639662 | NC_021166.1    | Ca_kabuli_chr07 | 39639662                | AA                              | CC                | 1946469329               |
| SNP_P3_93917_39687830 | NC_021166.1    | Ca_kabuli_chr07 | 39687830                | TT                              | CC                | 1946469330               |
| SNP_P3_93918_39742374 | NC_021166.1    | Ca_kabuli_chr07 | 39742374                | AA                              | CC                | 1946469332               |
| SNP_P3_93920_39743340 | NC_021166.1    | Ca_kabuli_chr07 | 39743340                | GG                              | TT                | 1946469333               |
| SNP_P3_93922_39757549 | NC_021166.1    | Ca_kabuli_chr07 | 39757549                | AA                              | GG                | 1946469335               |
| SNP_P3_93924_39777409 | NC_021166.1    | Ca_kabuli_chr07 | 39777409                | AA                              | TT                | 1946469336               |
| SNP_P3_93925_39794569 | NC_021166.1    | Ca_kabuli_chr07 | 39794569                | AA                              | CC                | 1946469338               |
| SNP_P3_93926_39820416 | NC_021166.1    | Ca_kabuli_chr07 | 39820416                | GG                              | AA                | 1946469340               |
| SNP_P3_93927_39820486 | NC_021166.1    | Ca_kabuli_chr07 | 39820486                | TT                              | AA                | 1946469341               |
| SNP_P3_93928_39829268 | NC_021166.1    | Ca_kabuli_chr07 | 39829268                | CC                              | TT                | 1946469343               |
| SNP_P3_93929_39829293 | NC_021166.1    | Ca_kabuli_chr07 | 39829293                | AA                              | GG                | 1946469344               |
| SNP_P3_93930_39829484 | NC_021166.1    | Ca_kabuli_chr07 | 39829484                | TT                              | CC                | 1946469346               |
| SNP_P3_93931_39829493 | NC_021166.1    | Ca_kabuli_chr07 | 39829493                | GG                              | AA                | 1946469348               |
| SNP_P3_93932_39829623 | NC_021166.1    | Ca_kabuli_chr07 | 39829623                | GG                              | AA                | 1946469349               |
| SNP_P3_93933_39829645 | NC_021166.1    | Ca_kabuli_chr07 | 39829645                | GG                              | TT                | 1946469351               |
| SNP_P3_93934_39829679 | NC_021166.1    | Ca_kabuli_chr07 | 39829679                | AA                              | GG                | 1946469352               |
| SNP_P3_93935_39829698 | NC_021166.1    | Ca_kabuli_chr07 | 39829698                | AA                              | GG                | 1946469354               |
| SNP_P3_93936_39829751 | NC_021166.1    | Ca_kabuli_chr07 | 39829751                | GG                              | CC                | 1946469355               |
| SNP_P3_93937_39829922 | NC_021166.1    | Ca_kabuli_chr07 | 39829922                | CC                              | AA                | 1946469357               |
| SNP_P3_93938_39830287 | NC_021166.1    | Ca_kabuli_chr07 | 39830287                | GG                              | CC                | 1946469358               |
| SNP_P3_93939_39830641 | NC_021166.1    | Ca_kabuli_chr07 | 39830641                | CC                              | TT                | 1946469360               |
| SNP_P3_93940_39830708 | NC_021166.1    | Ca_kabuli_chr07 | 39830708                | CC                              | TT                | 1946469361               |
| SNP_P3_93941_39830729 | NC_021166.1    | Ca_kabuli_chr07 | 39830729                | GG                              | AA                | 1946469363               |
| SNP_P3_93942_39832427 | NC_021166.1    | Ca_kabuli_chr07 | 39832427                | AA                              | TT                | 1946469364               |
| SNP_P3_93943_39844485 | NC_021166.1    | Ca_kabuli_chr07 | 39844485                | AA                              | GG                | 1946469367               |
| SNP_P3_93944_39844505 | NC_021166.1    | Ca_kabuli_chr07 | 39844505                | CC                              | TT                | 1946469369               |
| SNP_P3_93945_39844531 | NC_021166.1    | Ca_kabuli_chr07 | 39844531                | TT                              | GG                | 1946469370               |
| SNP_P3_93946_39844558 | NC_021166.1    | Ca_kabuli_chr07 | 39844558                | CC                              | AA                | 1946469372               |
| SNP_P3_93947_39844568 | NC_021166.1    | Ca_kabuli_chr07 | 39844568                | GG                              | TT                | 1946469373               |

| SNPs IDs              | Chromosome IDs | Chromosomes     | Physical positions (bp) | CDC Frontier (Reference genome) | (Pusa 256 & HPNB) | NCBI SNPdb Accession IDs |
|-----------------------|----------------|-----------------|-------------------------|---------------------------------|-------------------|--------------------------|
| SNP_P3_93948_39844578 | NC_021166.1    | Ca_kabuli_chr07 | 39844578                | AA                              | CC                | 1946469375               |
| SNP_P3_93949_39844608 | NC_021166.1    | Ca_kabuli_chr07 | 39844608                | TT                              | CC                | 1946469376               |
| SNP_P3_93950_39844627 | NC_021166.1    | Ca_kabuli_chr07 | 39844627                | CC                              | TT                | 1946469380               |
| SNP_P3_93951_39844866 | NC_021166.1    | Ca_kabuli_chr07 | 39844866                | TT                              | CC                | 1946469381               |
| SNP_P3_93952_39845008 | NC_021166.1    | Ca_kabuli_chr07 | 39845008                | AA                              | TT                | 1946469383               |
| SNP_P3_93953_39847577 | NC_021166.1    | Ca_kabuli_chr07 | 39847577                | GG                              | AA                | 1946469384               |
| SNP_P3_93954_39847587 | NC_021166.1    | Ca_kabuli_chr07 | 39847587                | TT                              | CC                | 1946469386               |
| SNP_P3_93955_39847657 | NC_021166.1    | Ca_kabuli_chr07 | 39847657                | AA                              | TT                | 1946469387               |
| SNP_P3_93956_39847954 | NC_021166.1    | Ca_kabuli_chr07 | 39847954                | AA                              | GG                | 1946469389               |
| SNP_P3_93957_39848087 | NC_021166.1    | Ca_kabuli_chr07 | 39848087                | TT                              | GG                | 1946469390               |
| SNP_P3_93958_39848096 | NC_021166.1    | Ca_kabuli_chr07 | 39848096                | TT                              | GG                | 1946469392               |
| SNP_P3_93959_39850009 | NC_021166.1    | Ca_kabuli_chr07 | 39850009                | AA                              | GG                | 1946469393               |
| SNP_P3_93960_39850048 | NC_021166.1    | Ca_kabuli_chr07 | 39850048                | AA                              | GG                | 1946469395               |
| SNP_P3_93961_39850324 | NC_021166.1    | Ca_kabuli_chr07 | 39850324                | GG                              | AA                | 1946469397               |
| SNP_P3_93962_39850363 | NC_021166.1    | Ca_kabuli_chr07 | 39850363                | TT                              | AA                | 1946469398               |
| SNP_P3_93963_39850486 | NC_021166.1    | Ca_kabuli_chr07 | 39850486                | CC                              | AA                | 1946469400               |
| SNP_P3_93964_39850587 | NC_021166.1    | Ca_kabuli_chr07 | 39850587                | GG                              | AA                | 1946469401               |
| SNP_P3_93965_39850630 | NC_021166.1    | Ca_kabuli_chr07 | 39850630                | AA                              | GG                | 1946469402               |
| SNP_P3_93966_39850746 | NC_021166.1    | Ca_kabuli_chr07 | 39850746                | CC                              | TT                | 1946469404               |
| SNP_P3_93967_39850872 | NC_021166.1    | Ca_kabuli_chr07 | 39850872                | TT                              | GG                | 1946469405               |
| SNP_P3_93968_39850942 | NC_021166.1    | Ca_kabuli_chr07 | 39850942                | TT                              | CC                | 1946469407               |
| SNP_P3_93969_39850951 | NC_021166.1    | Ca_kabuli_chr07 | 39850951                | AA                              | GG                | 1946469408               |
| SNP_P3_93970_39851001 | NC_021166.1    | Ca_kabuli_chr07 | 39851001                | TT                              | CC                | 1946469410               |
| SNP_P3_93971_39851041 | NC_021166.1    | Ca_kabuli_chr07 | 39851041                | TT                              | CC                | 1946469411               |
| SNP_P3_93973_39855017 | NC_021166.1    | Ca_kabuli_chr07 | 39855017                | GG                              | AA                | 1946469413               |
| SNP_P3_93974_39863919 | NC_021166.1    | Ca_kabuli_chr07 | 39863919                | TT                              | CC                | 1946469415               |
| SNP_P3_93975_39877892 | NC_021166.1    | Ca_kabuli_chr07 | 39877892                | GG                              | AA                | 1946469416               |
| SNP_P3_93976_39897754 | NC_021166.1    | Ca_kabuli_chr07 | 39897754                | CC                              | TT                | 1946469418               |
| SNP_P3_93977_39901988 | NC_021166.1    | Ca_kabuli_chr07 | 39901988                | CC                              | TT                | 1946469419               |
| SNP_P3_93978_39902293 | NC_021166.1    | Ca_kabuli_chr07 | 39902293                | GG                              | TT                | 1946469421               |
| SNP_P3_93979_39902508 | NC_021166.1    | Ca_kabuli_chr07 | 39902508                | TT                              | CC                | 1946469422               |
| SNP_P3_93980_39909185 | NC_021166.1    | Ca_kabuli_chr07 | 39909185                | AA                              | GG                | 1946469424               |
| SNP_P3_93981_39909191 | NC_021166.1    | Ca_kabuli_chr07 | 39909191                | TT                              | CC                | 1946469425               |
| SNP_P3_93982_39909245 | NC_021166.1    | Ca_kabuli_chr07 | 39909245                | GG                              | TT                | 1946469427               |
| SNP_P3_93983_39934458 | NC_021166.1    | Ca_kabuli_chr07 | 39934458                | AA                              | GG                | 1946469428               |
| SNP_P3_93984_39934640 | NC_021166.1    | Ca_kabuli_chr07 | 39934640                | AA                              | CC                | 1946469430               |
| SNP_P3_93985_39934656 | NC_021166.1    | Ca_kabuli_chr07 | 39934656                | TT                              | CC                | 1946469431               |
| SNP_P3_93986_39934667 | NC_021166.1    | Ca_kabuli_chr07 | 39934667                | AA                              | GG                | 1946469433               |
| SNP_P3_93987_39934685 | NC_021166.1    | Ca_kabuli_chr07 | 39934685                | TT                              | GG                | 1946469434               |
| SNP_P3_93988_39949690 | NC_021166.1    | Ca_kabuli_chr07 | 39949690                | TT                              | CC                | 1946469436               |
| SNP_P3_93989_39954434 | NC_021166.1    | Ca_kabuli_chr07 | 39954434                | CC                              | TT                | 1946469437               |
| SNP_P3_93990_39982292 | NC_021166.1    | Ca_kabuli_chr07 | 39982292                | CC                              | TT                | 1946469439               |

| SNPs IDs              | Chromosome IDs | Chromosomes     | Physical positions (bp) | CDC Frontier (Reference genome) | (Pusa 256 & HPNB) | NCBI SNPdb Accession IDs |
|-----------------------|----------------|-----------------|-------------------------|---------------------------------|-------------------|--------------------------|
| SNP_P3_93991_39983722 | NC_021166.1    | Ca_kabuli_chr07 | 39983722                | CC                              | AA                | 1946469440               |
| SNP_P3_93992_39998370 | NC_021166.1    | Ca_kabuli_chr07 | 39998370                | TT                              | CC                | 1946469442               |
| SNP_P3_93993_40010373 | NC_021166.1    | Ca_kabuli_chr07 | 40010373                | GG                              | AA                | 1946469443               |
| SNP_P3_93994_40010416 | NC_021166.1    | Ca_kabuli_chr07 | 40010416                | AA                              | GG                | 1946469445               |
| SNP_P3_93995_40011611 | NC_021166.1    | Ca_kabuli_chr07 | 40011611                | TT                              | AA                | 1946469446               |
| SNP_P3_93996_40011621 | NC_021166.1    | Ca_kabuli_chr07 | 40011621                | TT                              | CC                | 1946469448               |
| SNP_P3_93997_40013676 | NC_021166.1    | Ca_kabuli_chr07 | 40013676                | GG                              | TT                | 1946469450               |
| SNP_P3_93998_40013837 | NC_021166.1    | Ca_kabuli_chr07 | 40013837                | AA                              | CC                | 1946469451               |
| SNP_P3_93999_40013897 | NC_021166.1    | Ca_kabuli_chr07 | 40013897                | CC                              | AA                | 1946469453               |
| SNP_P3_94000_40014263 | NC_021166.1    | Ca_kabuli_chr07 | 40014263                | TT                              | CC                | 1946469454               |
| SNP_P3_94001_40014268 | NC_021166.1    | Ca_kabuli_chr07 | 40014268                | CC                              | TT                | 1946469456               |
| SNP_P3_94002_40036157 | NC_021166.1    | Ca_kabuli_chr07 | 40036157                | CC                              | AA                | 1946469457               |
| SNP_P3_94003_40045301 | NC_021166.1    | Ca_kabuli_chr07 | 40045301                | TT                              | GG                | 1946469459               |
| SNP_P3_94004_40048821 | NC_021166.1    | Ca_kabuli_chr07 | 40048821                | AA                              | CC                | 1946469460               |
| SNP_P3_94005_40048872 | NC_021166.1    | Ca_kabuli_chr07 | 40048872                | AA                              | TT                | 1946469462               |
| SNP_P3_94006_40048887 | NC_021166.1    | Ca_kabuli_chr07 | 40048887                | TT                              | CC                | 1946469463               |
| SNP_P3_94007_40049024 | NC_021166.1    | Ca_kabuli_chr07 | 40049024                | TT                              | CC                | 1946469465               |
| SNP_P3_94008_40049066 | NC_021166.1    | Ca_kabuli_chr07 | 40049066                | TT                              | AA                | 1946469466               |
| SNP_P3_94009_40049138 | NC_021166.1    | Ca_kabuli_chr07 | 40049138                | TT                              | CC                | 1946469468               |
| SNP_P3_94010_40049179 | NC_021166.1    | Ca_kabuli_chr07 | 40049179                | TT                              | CC                | 1946469469               |
| SNP_P3_94011_40049580 | NC_021166.1    | Ca_kabuli_chr07 | 40049580                | CC                              | GG                | 1946469471               |
| SNP_P3_94012_40049596 | NC_021166.1    | Ca_kabuli_chr07 | 40049596                | AA                              | CC                | 1946469472               |
| SNP_P3_94013_40049662 | NC_021166.1    | Ca_kabuli_chr07 | 40049662                | TT                              | CC                | 1946469474               |
| SNP_P3_94014_40049697 | NC_021166.1    | Ca_kabuli_chr07 | 40049697                | GG                              | AA                | 1946469475               |
| SNP_P3_94015_40049707 | NC_021166.1    | Ca_kabuli_chr07 | 40049707                | AA                              | GG                | 1946469477               |
| SNP_P3_94016_40049900 | NC_021166.1    | Ca_kabuli_chr07 | 40049900                | AA                              | GG                | 1946469478               |
| SNP_P3_94017_40049907 | NC_021166.1    | Ca_kabuli_chr07 | 40049907                | AA                              | GG                | 1946469479               |
| SNP_P3_94018_40049909 | NC_021166.1    | Ca_kabuli_chr07 | 40049909                | AA                              | GG                | 1946469481               |
| SNP_P3_94019_40049965 | NC_021166.1    | Ca_kabuli_chr07 | 40049965                | AA                              | GG                | 1946469482               |
| SNP_P3_94020_40050007 | NC_021166.1    | Ca_kabuli_chr07 | 40050007                | TT                              | GG                | 1946469484               |
| SNP_P3_94021_40061877 | NC_021166.1    | Ca_kabuli_chr07 | 40061877                | GG                              | AA                | 1946469485               |
| SNP_P3_94022_40075169 | NC_021166.1    | Ca_kabuli_chr07 | 40075169                | TT                              | AA                | 1946469487               |
| SNP_P3_94023_40086996 | NC_021166.1    | Ca_kabuli_chr07 | 40086996                | AA                              | TT                | 1946469488               |
| SNP_P3_94024_40086997 | NC_021166.1    | Ca_kabuli_chr07 | 40086997                | TT                              | GG                | 1946469490               |
| SNP_P3_94025_40087001 | NC_021166.1    | Ca_kabuli_chr07 | 40087001                | TT                              | CC                | 1946469492               |
| SNP_P3_94026_40087107 | NC_021166.1    | Ca_kabuli_chr07 | 40087107                | CC                              | TT                | 1946469493               |
| SNP_P3_94027_40087122 | NC_021166.1    | Ca_kabuli_chr07 | 40087122                | CC                              | AA                | 1946469495               |
| SNP_P3_94028_40087179 | NC_021166.1    | Ca_kabuli_chr07 | 40087179                | TT                              | AA                | 1946469496               |
| SNP_P3_94029_40087196 | NC_021166.1    | Ca_kabuli_chr07 | 40087196                | AA                              | GG                | 1946469498               |
| SNP_P3_94030_40088496 | NC_021166.1    | Ca_kabuli_chr07 | 40088496                | AA                              | GG                | 1946469499               |
| SNP_P3_94031_40089680 | NC_021166.1    | Ca_kabuli_chr07 | 40089680                | TT                              | CC                | 1946469501               |
| SNP_P3_94032_40089717 | NC_021166.1    | Ca_kabuli_chr07 | 40089717                | TT                              | CC                | 1946469502               |

| SNPs IDs              | Chromosome IDs | Chromosomes     | Physical positions (bp) | CDC Frontier (Reference genome) | (Pusa 256 & HPNB) | NCBI SNPdb Accession IDs |
|-----------------------|----------------|-----------------|-------------------------|---------------------------------|-------------------|--------------------------|
| SNP_P3_94033_40089852 | NC_021166.1    | Ca_kabuli_chr07 | 40089852                | CC                              | TT                | 1946469504               |
| SNP_P3_94034_40089862 | NC_021166.1    | Ca_kabuli_chr07 | 40089862                | GG                              | TT                | 1946469505               |
| SNP_P3_94035_40090005 | NC_021166.1    | Ca_kabuli_chr07 | 40090005                | GG                              | CC                | 1946469507               |
| SNP_P3_94036_40090150 | NC_021166.1    | Ca_kabuli_chr07 | 40090150                | AA                              | CC                | 1946469508               |
| SNP_P3_94037_40090179 | NC_021166.1    | Ca_kabuli_chr07 | 40090179                | GG                              | AA                | 1946469510               |
| SNP_P3_94038_40090183 | NC_021166.1    | Ca_kabuli_chr07 | 40090183                | GG                              | CC                | 1946469511               |
| SNP_P3_94039_40090208 | NC_021166.1    | Ca_kabuli_chr07 | 40090208                | TT                              | CC                | 1946469513               |
| SNP_P3_94040_40090222 | NC_021166.1    | Ca_kabuli_chr07 | 40090222                | AA                              | TT                | 1946469515               |
| SNP_P3_94041_40111168 | NC_021166.1    | Ca_kabuli_chr07 | 40111168                | GG                              | CC                | 1946469516               |
| SNP_P3_94042_40118888 | NC_021166.1    | Ca_kabuli_chr07 | 40118888                | AA                              | GG                | 1946469518               |
| SNP_P3_94043_40118891 | NC_021166.1    | Ca_kabuli_chr07 | 40118891                | AA                              | GG                | 1946469519               |
| SNP_P3_94044_40118915 | NC_021166.1    | Ca_kabuli_chr07 | 40118915                | GG                              | TT                | 1946469520               |
| SNP_P3_94045_40141223 | NC_021166.1    | Ca_kabuli_chr07 | 40141223                | TT                              | CC                | 1946469522               |
| SNP_P3_94046_40142859 | NC_021166.1    | Ca_kabuli_chr07 | 40142859                | CC                              | AA                | 1946469523               |
| SNP_P3_94047_40143076 | NC_021166.1    | Ca_kabuli_chr07 | 40143076                | GG                              | AA                | 1946469525               |
| SNP_P3_94048_40143125 | NC_021166.1    | Ca_kabuli_chr07 | 40143125                | GG                              | AA                | 1946469527               |
| SNP_P3_94049_40154883 | NC_021166.1    | Ca_kabuli_chr07 | 40154883                | CC                              | GG                | 1946469528               |
| SNP_P3_94052_40194035 | NC_021166.1    | Ca_kabuli_chr07 | 40194035                | AA                              | GG                | 1946469530               |
| SNP_P3_94053_40208219 | NC_021166.1    | Ca_kabuli_chr07 | 40208219                | TT                              | CC                | 1946469531               |
| SNP_P3_94054_40209862 | NC_021166.1    | Ca_kabuli_chr07 | 40209862                | AA                              | CC                | 1946469533               |
| SNP_P3_94056_40230160 | NC_021166.1    | Ca_kabuli_chr07 | 40230160                | CC                              | AA                | 1946469534               |
| SNP_P3_94057_40230963 | NC_021166.1    | Ca_kabuli_chr07 | 40230963                | GG                              | AA                | 1946469536               |
| SNP_P3_94058_40230973 | NC_021166.1    | Ca_kabuli_chr07 | 40230973                | GG                              | AA                | 1946469537               |
| SNP_P3_94059_40311614 | NC_021166.1    | Ca_kabuli_chr07 | 40311614                | TT                              | CC                | 1946469539               |
| SNP_P3_94061_40339345 | NC_021166.1    | Ca_kabuli_chr07 | 40339345                | CC                              | TT                | 1946469541               |
| SNP_P3_94062_40345796 | NC_021166.1    | Ca_kabuli_chr07 | 40345796                | TT                              | AA                | 1946469542               |
| SNP_P3_94063_40357838 | NC_021166.1    | Ca_kabuli_chr07 | 40357838                | CC                              | TT                | 1946469544               |
| SNP_P3_94064_40373661 | NC_021166.1    | Ca_kabuli_chr07 | 40373661                | TT                              | GG                | 1946469545               |
| SNP_P3_94065_40376025 | NC_021166.1    | Ca_kabuli_chr07 | 40376025                | AA                              | GG                | 1946469546               |
| SNP_P3_94066_40429662 | NC_021166.1    | Ca_kabuli_chr07 | 40429662                | GG                              | AA                | 1946469548               |
| SNP_P3_94067_40429663 | NC_021166.1    | Ca_kabuli_chr07 | 40429663                | AA                              | GG                | 1946469549               |
| SNP_P3_94068_40429671 | NC_021166.1    | Ca_kabuli_chr07 | 40429671                | AA                              | GG                | 1946469551               |
| SNP_P3_94069_40429672 | NC_021166.1    | Ca_kabuli_chr07 | 40429672                | GG                              | AA                | 1946469552               |
| SNP_P3_94070_40429682 | NC_021166.1    | Ca_kabuli_chr07 | 40429682                | CC                              | TT                | 1946469554               |
| SNP_P3_94071_40429796 | NC_021166.1    | Ca_kabuli_chr07 | 40429796                | AA                              | GG                | 1946469555               |
| SNP_P3_94072_40429798 | NC_021166.1    | Ca_kabuli_chr07 | 40429798                | AA                              | CC                | 1946469557               |
| SNP_P3_94073_40429870 | NC_021166.1    | Ca_kabuli_chr07 | 40429870                | CC                              | GG                | 1946469559               |
| SNP_P3_94074_40430046 | NC_021166.1    | Ca_kabuli_chr07 | 40430046                | CC                              | AA                | 1946469560               |
| SNP_P3_94075_40430085 | NC_021166.1    | Ca_kabuli_chr07 | 40430085                | AA                              | CC                | 1946469562               |
| SNP_P3_94076_40430109 | NC_021166.1    | Ca_kabuli_chr07 | 40430109                | GG                              | AA                | 1946469563               |
| SNP_P3_94077_40430110 | NC_021166.1    | Ca_kabuli_chr07 | 40430110                | AA                              | GG                | 1946469565               |
| SNP_P3_94079_40430182 | NC_021166.1    | Ca_kabuli_chr07 | 40430182                | TT                              | GG                | 1946469566               |

| SNPs IDs              | Chromosome IDs | Chromosomes     | Physical positions (bp) | CDC Frontier (Reference genome) | (Pusa 256 & HPNB) | NCBI SNPdb Accession IDs |
|-----------------------|----------------|-----------------|-------------------------|---------------------------------|-------------------|--------------------------|
| SNP_P3_94080_40430183 | NC_021166.1    | Ca_kabuli_chr07 | 40430183                | TT                              | CC                | 1946469568               |
| SNP_P3_94081_40430299 | NC_021166.1    | Ca_kabuli_chr07 | 40430299                | GG                              | AA                | 1946469569               |
| SNP_P3_94082_40433243 | NC_021166.1    | Ca_kabuli_chr07 | 40433243                | AA                              | GG                | 1946469571               |
| SNP_P3_94083_40438461 | NC_021166.1    | Ca_kabuli_chr07 | 40438461                | AA                              | GG                | 1946469573               |
| SNP_P3_94084_40469785 | NC_021166.1    | Ca_kabuli_chr07 | 40469785                | GG                              | AA                | 1946469574               |
| SNP_P3_94085_40474106 | NC_021166.1    | Ca_kabuli_chr07 | 40474106                | AA                              | GG                | 1946469576               |
| SNP_P3_94086_40474107 | NC_021166.1    | Ca_kabuli_chr07 | 40474107                | AA                              | TT                | 1946469577               |
| SNP_P3_94087_40474108 | NC_021166.1    | Ca_kabuli_chr07 | 40474108                | AA                              | TT                | 1946469579               |
| SNP_P3_94088_40474121 | NC_021166.1    | Ca_kabuli_chr07 | 40474121                | TT                              | CC                | 1946469580               |
| SNP_P3_94089_40474122 | NC_021166.1    | Ca_kabuli_chr07 | 40474122                | GG                              | AA                | 1946469582               |
| SNP_P3_94090_40474129 | NC_021166.1    | Ca_kabuli_chr07 | 40474129                | GG                              | AA                | 1946469583               |
| SNP_P3_94091_40474249 | NC_021166.1    | Ca_kabuli_chr07 | 40474249                | TT                              | CC                | 1946469585               |
| SNP_P3_94092_40474281 | NC_021166.1    | Ca_kabuli_chr07 | 40474281                | CC                              | GG                | 1946469586               |
| SNP_P3_94093_40477039 | NC_021166.1    | Ca_kabuli_chr07 | 40477039                | TT                              | CC                | 1946469588               |
| SNP_P3_94094_40482862 | NC_021166.1    | Ca_kabuli_chr07 | 40482862                | TT                              | CC                | 1946469590               |
| SNP_P3_94095_40484387 | NC_021166.1    | Ca_kabuli_chr07 | 40484387                | GG                              | TT                | 1946469591               |
| SNP_P3_94096_40489992 | NC_021166.1    | Ca_kabuli_chr07 | 40489992                | CC                              | AA                | 1946469593               |
| SNP_P3_94097_40522035 | NC_021166.1    | Ca_kabuli_chr07 | 40522035                | AA                              | CC                | 1946469594               |
| SNP_P3_94098_40522080 | NC_021166.1    | Ca_kabuli_chr07 | 40522080                | TT                              | CC                | 1946469596               |
| SNP_P3_94099_40524538 | NC_021166.1    | Ca_kabuli_chr07 | 40524538                | AA                              | GG                | 1946469597               |
| SNP_P3_94100_40524552 | NC_021166.1    | Ca_kabuli_chr07 | 40524552                | TT                              | CC                | 1946469599               |
| SNP_P3_94101_40524810 | NC_021166.1    | Ca_kabuli_chr07 | 40524810                | AA                              | GG                | 1946469600               |
| SNP_P3_94102_40555097 | NC_021166.1    | Ca_kabuli_chr07 | 40555097                | TT                              | CC                | 1946469601               |
| SNP_P3_94103_40555183 | NC_021166.1    | Ca_kabuli_chr07 | 40555183                | TT                              | CC                | 1946469603               |
| SNP_P3_94104_40555188 | NC_021166.1    | Ca_kabuli_chr07 | 40555188                | AA                              | GG                | 1946469604               |
| SNP_P3_94105_40555213 | NC_021166.1    | Ca_kabuli_chr07 | 40555213                | GG                              | AA                | 1946469606               |
| SNP_P3_94106_40555219 | NC_021166.1    | Ca_kabuli_chr07 | 40555219                | AA                              | TT                | 1946469607               |
| SNP_P3_94107_40555322 | NC_021166.1    | Ca_kabuli_chr07 | 40555322                | TT                              | CC                | 1946469609               |
| SNP_P3_94108_40555345 | NC_021166.1    | Ca_kabuli_chr07 | 40555345                | GG                              | TT                | 1946469610               |
| SNP_P3_94109_40555542 | NC_021166.1    | Ca_kabuli_chr07 | 40555542                | TT                              | CC                | 1946469612               |
| SNP_P3_94110_40555580 | NC_021166.1    | Ca_kabuli_chr07 | 40555580                | CC                              | TT                | 1946469614               |
| SNP_P3_94111_40555614 | NC_021166.1    | Ca_kabuli_chr07 | 40555614                | CC                              | AA                | 1946469615               |
| SNP_P3_94112_40555641 | NC_021166.1    | Ca_kabuli_chr07 | 40555641                | TT                              | CC                | 1946469617               |
| SNP_P3_94113_40555686 | NC_021166.1    | Ca_kabuli_chr07 | 40555686                | TT                              | GG                | 1946469618               |
| SNP_P3_94114_40570840 | NC_021166.1    | Ca_kabuli_chr07 | 40570840                | CC                              | TT                | 1946469620               |
| SNP_P3_94115_40573452 | NC_021166.1    | Ca_kabuli_chr07 | 40573452                | AA                              | GG                | 1946469622               |
| SNP_P3_94116_40589201 | NC_021166.1    | Ca_kabuli_chr07 | 40589201                | CC                              | TT                | 1946469623               |
| SNP_P3_94117_40589607 | NC_021166.1    | Ca_kabuli_chr07 | 40589607                | TT                              | CC                | 1946469625               |
| SNP_P3_94118_40589620 | NC_021166.1    | Ca_kabuli_chr07 | 40589620                | CC                              | TT                | 1946469626               |
| SNP_P3_94119_40589642 | NC_021166.1    | Ca_kabuli_chr07 | 40589642                | TT                              | CC                | 1946469628               |
| SNP_P3_94120_40589649 | NC_021166.1    | Ca_kabuli_chr07 | 40589649                | AA                              | TT                | 1946469629               |
| SNP_P3_94121_40589673 | NC_021166.1    | Ca_kabuli_chr07 | 40589673                | GG                              | AA                | 1946469631               |

| SNPs IDs              | Chromosome IDs | Chromosomes     | Physical positions (bp) | CDC Frontier (Reference genome) | (Pusa 256 & HPNB) | NCBI SNPdb Accession IDs |
|-----------------------|----------------|-----------------|-------------------------|---------------------------------|-------------------|--------------------------|
| SNP_P3_94122_40589712 | NC_021166.1    | Ca_kabuli_chr07 | 40589712                | CC                              | GG                | 1946469633               |
| SNP_P3_94123_40589733 | NC_021166.1    | Ca_kabuli_chr07 | 40589733                | AA                              | TT                | 1946469634               |
| SNP_P3_94124_40589760 | NC_021166.1    | Ca_kabuli_chr07 | 40589760                | CC                              | AA                | 1946469636               |
| SNP_P3_94125_40589903 | NC_021166.1    | Ca_kabuli_chr07 | 40589903                | AA                              | CC                | 1946469637               |
| SNP_P3_94126_40589912 | NC_021166.1    | Ca_kabuli_chr07 | 40589912                | AA                              | CC                | 1946469639               |
| SNP_P3_94127_40589935 | NC_021166.1    | Ca_kabuli_chr07 | 40589935                | TT                              | CC                | 1946469640               |
| SNP_P3_94128_40589950 | NC_021166.1    | Ca_kabuli_chr07 | 40589950                | GG                              | TT                | 1946469642               |
| SNP_P3_94129_40589951 | NC_021166.1    | Ca_kabuli_chr07 | 40589951                | CC                              | AA                | 1946469644               |
| SNP_P3_94130_40589985 | NC_021166.1    | Ca_kabuli_chr07 | 40589985                | TT                              | AA                | 1946469645               |
| SNP_P3_94131_40590049 | NC_021166.1    | Ca_kabuli_chr07 | 40590049                | TT                              | GG                | 1946469647               |
| SNP_P3_94132_40590093 | NC_021166.1    | Ca_kabuli_chr07 | 40590093                | AA                              | GG                | 1946469648               |
| SNP_P3_94133_40590103 | NC_021166.1    | Ca_kabuli_chr07 | 40590103                | CC                              | TT                | 1946469650               |
| SNP_P3_94134_40590104 | NC_021166.1    | Ca_kabuli_chr07 | 40590104                | GG                              | CC                | 1946469651               |
| SNP_P3_94135_40598506 | NC_021166.1    | Ca_kabuli_chr07 | 40598506                | GG                              | AA                | 1946469653               |
| SNP_P3_94136_40610094 | NC_021166.1    | Ca_kabuli_chr07 | 40610094                | TT                              | AA                | 1946469654               |
| SNP_P3_94137_40639458 | NC_021166.1    | Ca_kabuli_chr07 | 40639458                | GG                              | CC                | 1946469656               |
| SNP_P3_94139_40656352 | NC_021166.1    | Ca_kabuli_chr07 | 40656352                | GG                              | CC                | 1946469657               |
| SNP_P3_94140_40659392 | NC_021166.1    | Ca_kabuli_chr07 | 40659392                | AA                              | GG                | 1946469659               |
| SNP_P3_94141_40659455 | NC_021166.1    | Ca_kabuli_chr07 | 40659455                | AA                              | TT                | 1946469660               |
| SNP_P3_94142_40659459 | NC_021166.1    | Ca_kabuli_chr07 | 40659459                | AA                              | GG                | 1946469662               |
| SNP_P3_94143_40659698 | NC_021166.1    | Ca_kabuli_chr07 | 40659698                | AA                              | TT                | 1946469663               |
| SNP_P3_94144_40659728 | NC_021166.1    | Ca_kabuli_chr07 | 40659728                | TT                              | GG                | 1946469665               |
| SNP_P3_94145_40659787 | NC_021166.1    | Ca_kabuli_chr07 | 40659787                | CC                              | TT                | 1946469666               |
| SNP_P3_94146_40662151 | NC_021166.1    | Ca_kabuli_chr07 | 40662151                | TT                              | CC                | 1946469668               |
| SNP_P3_94147_40703510 | NC_021166.1    | Ca_kabuli_chr07 | 40703510                | GG                              | AA                | 1946469669               |
| SNP_P3_94149_40742125 | NC_021166.1    | Ca_kabuli_chr07 | 40742125                | GG                              | AA                | 1946469671               |
| SNP_P3_94150_40748361 | NC_021166.1    | Ca_kabuli_chr07 | 40748361                | AA                              | GG                | 1946469672               |
| SNP_P3_94151_40748364 | NC_021166.1    | Ca_kabuli_chr07 | 40748364                | AA                              | GG                | 1946469674               |
| SNP_P3_94152_40748673 | NC_021166.1    | Ca_kabuli_chr07 | 40748673                | AA                              | TT                | 1946469675               |
| SNP_P3_94153_40748781 | NC_021166.1    | Ca_kabuli_chr07 | 40748781                | TT                              | GG                | 1946469677               |
| SNP_P3_94154_40761984 | NC_021166.1    | Ca_kabuli_chr07 | 40761984                | AA                              | GG                | 1946469678               |
| SNP_P3_94157_40768770 | NC_021166.1    | Ca_kabuli_chr07 | 40768770                | GG                              | AA                | 1946469680               |
| SNP_P3_94158_40768803 | NC_021166.1    | Ca_kabuli_chr07 | 40768803                | CC                              | TT                | 1946469681               |
| SNP_P3_94159_40768860 | NC_021166.1    | Ca_kabuli_chr07 | 40768860                | GG                              | AA                | 1946469683               |
| SNP_P3_94160_40769167 | NC_021166.1    | Ca_kabuli_chr07 | 40769167                | CC                              | AA                | 1946469685               |
| SNP_P3_94161_40783712 | NC_021166.1    | Ca_kabuli_chr07 | 40783712                | TT                              | AA                | 1946469686               |
| SNP_P3_94162_40786448 | NC_021166.1    | Ca_kabuli_chr07 | 40786448                | TT                              | AA                | 1946469688               |
| SNP_P3_94163_40796417 | NC_021166.1    | Ca_kabuli_chr07 | 40796417                | CC                              | GG                | 1946469689               |
| SNP_P3_94165_40851452 | NC_021166.1    | Ca_kabuli_chr07 | 40851452                | AA                              | GG                | 1946469691               |
| SNP_P3_94166_40887021 | NC_021166.1    | Ca_kabuli_chr07 | 40887021                | AA                              | GG                | 1946469692               |
| SNP_P3_94167_40887319 | NC_021166.1    | Ca_kabuli_chr07 | 40887319                | TT                              | CC                | 1946469694               |
| SNP_P3_94168_40887353 | NC_021166.1    | Ca_kabuli_chr07 | 40887353                | TT                              | CC                | 1946469695               |

| SNPs IDs              | Chromosome IDs | Chromosomes     | Physical positions (bp) | CDC Frontier (Reference genome) | (Pusa 256 & HPNB) | NCBI SNPdb Accession IDs |
|-----------------------|----------------|-----------------|-------------------------|---------------------------------|-------------------|--------------------------|
| SNP_P3_94169_40888258 | NC_021166.1    | Ca_kabuli_chr07 | 40888258                | TT                              | CC                | 1946469697               |
| SNP_P3_94170_40897740 | NC_021166.1    | Ca_kabuli_chr07 | 40897740                | AA                              | GG                | 1946469698               |
| SNP_P3_94172_40941856 | NC_021166.1    | Ca_kabuli_chr07 | 40941856                | TT                              | CC                | 1946469700               |
| SNP_P3_94173_40948801 | NC_021166.1    | Ca_kabuli_chr07 | 40948801                | GG                              | AA                | 1946469702               |
| SNP_P3_94174_40948802 | NC_021166.1    | Ca_kabuli_chr07 | 40948802                | TT                              | GG                | 1946469703               |
| SNP_P3_94175_40962454 | NC_021166.1    | Ca_kabuli_chr07 | 40962454                | GG                              | AA                | 1946469705               |
| SNP_P3_94176_40962548 | NC_021166.1    | Ca_kabuli_chr07 | 40962548                | GG                              | AA                | 1946469706               |
| SNP_P3_94177_40963878 | NC_021166.1    | Ca_kabuli_chr07 | 40963878                | CC                              | TT                | 1946469708               |
| SNP_P3_94179_40969502 | NC_021166.1    | Ca_kabuli_chr07 | 40969502                | CC                              | TT                | 1946469709               |
| SNP_P3_94180_40973862 | NC_021166.1    | Ca_kabuli_chr07 | 40973862                | TT                              | CC                | 1946469711               |
| SNP_P3_94181_40978498 | NC_021166.1    | Ca_kabuli_chr07 | 40978498                | TT                              | AA                | 1946469712               |
| SNP_P3_94182_40978509 | NC_021166.1    | Ca_kabuli_chr07 | 40978509                | GG                              | TT                | 1946469714               |
| SNP_P3_94183_40978512 | NC_021166.1    | Ca_kabuli_chr07 | 40978512                | TT                              | AA                | 1946469715               |
| SNP_P3_94184_40978541 | NC_021166.1    | Ca_kabuli_chr07 | 40978541                | AA                              | TT                | 1946469717               |
| SNP_P3_94185_40978568 | NC_021166.1    | Ca_kabuli_chr07 | 40978568                | TT                              | CC                | 1946469719               |
| SNP_P3_94186_40978635 | NC_021166.1    | Ca_kabuli_chr07 | 40978635                | CC                              | TT                | 1946469721               |
| SNP_P3_94187_40978652 | NC_021166.1    | Ca_kabuli_chr07 | 40978652                | CC                              | TT                | 1946469722               |
| SNP_P3_94188_40978653 | NC_021166.1    | Ca_kabuli_chr07 | 40978653                | GG                              | AA                | 1946469724               |
| SNP_P3_94189_40978663 | NC_021166.1    | Ca_kabuli_chr07 | 40978663                | TT                              | CC                | 1946469725               |
| SNP_P3_94190_40978666 | NC_021166.1    | Ca_kabuli_chr07 | 40978666                | AA                              | GG                | 1946469727               |
| SNP_P3_94191_40978670 | NC_021166.1    | Ca_kabuli_chr07 | 40978670                | CC                              | GG                | 1946469729               |
| SNP_P3_94192_40978689 | NC_021166.1    | Ca_kabuli_chr07 | 40978689                | TT                              | CC                | 1946469730               |
| SNP_P3_94193_40978692 | NC_021166.1    | Ca_kabuli_chr07 | 40978692                | TT                              | CC                | 1946469732               |
| SNP_P3_94194_40982837 | NC_021166.1    | Ca_kabuli_chr07 | 40982837                | CC                              | TT                | 1946469733               |
| SNP_P3_94195_40984998 | NC_021166.1    | Ca_kabuli_chr07 | 40984998                | CC                              | TT                | 1946469735               |
| SNP_P3_94197_40985058 | NC_021166.1    | Ca_kabuli_chr07 | 40985058                | AA                              | TT                | 1946469736               |
| SNP_P3_94198_40985074 | NC_021166.1    | Ca_kabuli_chr07 | 40985074                | CC                              | AA                | 1946469738               |
| SNP_P3_94199_40985089 | NC_021166.1    | Ca_kabuli_chr07 | 40985089                | CC                              | TT                | 1946469739               |
| SNP_P3_94200_40985097 | NC_021166.1    | Ca_kabuli_chr07 | 40985097                | GG                              | AA                | 1946469741               |
| SNP_P3_94201_40985100 | NC_021166.1    | Ca_kabuli_chr07 | 40985100                | CC                              | TT                | 1946469743               |
| SNP_P3_94202_40985109 | NC_021166.1    | Ca_kabuli_chr07 | 40985109                | CC                              | GG                | 1946469744               |
| SNP_P3_94203_40985117 | NC_021166.1    | Ca_kabuli_chr07 | 40985117                | AA                              | TT                | 1946469746               |
| SNP_P3_94204_40985319 | NC_021166.1    | Ca_kabuli_chr07 | 40985319                | GG                              | AA                | 1946469747               |
| SNP_P3_94205_40986757 | NC_021166.1    | Ca_kabuli_chr07 | 40986757                | AA                              | TT                | 1946469749               |
| SNP_P3_94206_40986759 | NC_021166.1    | Ca_kabuli_chr07 | 40986759                | TT                              | AA                | 1946469750               |
| SNP_P3_94207_40986765 | NC_021166.1    | Ca_kabuli_chr07 | 40986765                | AA                              | TT                | 1946469752               |
| SNP_P3_94208_40986768 | NC_021166.1    | Ca_kabuli_chr07 | 40986768                | TT                              | AA                | 1946469754               |
| SNP_P3_94209_40986781 | NC_021166.1    | Ca_kabuli_chr07 | 40986781                | AA                              | TT                | 1946469755               |
| SNP_P3_94210_40986787 | NC_021166.1    | Ca_kabuli_chr07 | 40986787                | TT                              | AA                | 1946469757               |
| SNP_P3_94211_40986794 | NC_021166.1    | Ca_kabuli_chr07 | 40986794                | AA                              | TT                | 1946469758               |
| SNP_P3_94212_40990622 | NC_021166.1    | Ca_kabuli_chr07 | 40990622                | GG                              | CC                | 1946469760               |
| SNP_P3_94213_40990636 | NC_021166.1    | Ca_kabuli_chr07 | 40990636                | TT                              | GG                | 1946469761               |

| SNPs IDs              | Chromosome IDs | Chromosomes     | Physical positions (bp) | CDC Frontier (Reference genome) | (Pusa 256 & HPNB) | NCBI SNPdb Accession IDs |
|-----------------------|----------------|-----------------|-------------------------|---------------------------------|-------------------|--------------------------|
| SNP_P3_94214_40990645 | NC_021166.1    | Ca_kabuli_chr07 | 40990645                | GG                              | AA                | 1946469763               |
| SNP_P3_94215_40990684 | NC_021166.1    | Ca_kabuli_chr07 | 40990684                | CC                              | AA                | 1946469765               |
| SNP_P3_94216_40990852 | NC_021166.1    | Ca_kabuli_chr07 | 40990852                | TT                              | CC                | 1946469766               |
| SNP_P3_94217_40990853 | NC_021166.1    | Ca_kabuli_chr07 | 40990853                | GG                              | AA                | 1946469768               |
| SNP_P3_94218_40990867 | NC_021166.1    | Ca_kabuli_chr07 | 40990867                | GG                              | TT                | 1946469769               |
| SNP_P3_94219_40990890 | NC_021166.1    | Ca_kabuli_chr07 | 40990890                | GG                              | AA                | 1946469771               |
| SNP_P3_94220_40990917 | NC_021166.1    | Ca_kabuli_chr07 | 40990917                | AA                              | GG                | 1946469772               |
| SNP_P3_94221_40990919 | NC_021166.1    | Ca_kabuli_chr07 | 40990919                | AA                              | GG                | 1946469774               |
| SNP_P3_94222_40990950 | NC_021166.1    | Ca_kabuli_chr07 | 40990950                | CC                              | TT                | 1946469775               |
| SNP_P3_94223_40990959 | NC_021166.1    | Ca_kabuli_chr07 | 40990959                | CC                              | AA                | 1946469777               |
| SNP_P3_94224_40990964 | NC_021166.1    | Ca_kabuli_chr07 | 40990964                | TT                              | CC                | 1946469778               |
| SNP_P3_94225_40991183 | NC_021166.1    | Ca_kabuli_chr07 | 40991183                | TT                              | AA                | 1946469780               |
| SNP_P3_94226_40991184 | NC_021166.1    | Ca_kabuli_chr07 | 40991184                | CC                              | TT                | 1946469781               |
| SNP_P3_94227_40991196 | NC_021166.1    | Ca_kabuli_chr07 | 40991196                | TT                              | AA                | 1946469783               |
| SNP_P3_94229_41008436 | NC_021166.1    | Ca_kabuli_chr07 | 41008436                | AA                              | GG                | 1946469784               |
| SNP_P3_94230_41008458 | NC_021166.1    | Ca_kabuli_chr07 | 41008458                | TT                              | GG                | 1946469786               |
| SNP_P3_94231_41008493 | NC_021166.1    | Ca_kabuli_chr07 | 41008493                | TT                              | AA                | 1946469787               |
| SNP_P3_94232_41008546 | NC_021166.1    | Ca_kabuli_chr07 | 41008546                | CC                              | TT                | 1946469789               |
| SNP_P3_94233_41008565 | NC_021166.1    | Ca_kabuli_chr07 | 41008565                | AA                              | GG                | 1946469790               |
| SNP_P3_94234_41008607 | NC_021166.1    | Ca_kabuli_chr07 | 41008607                | CC                              | GG                | 1946469792               |
| SNP_P3_94235_41008692 | NC_021166.1    | Ca_kabuli_chr07 | 41008692                | GG                              | AA                | 1946469793               |
| SNP_P3_94236_41008705 | NC_021166.1    | Ca_kabuli_chr07 | 41008705                | AA                              | GG                | 1946469795               |
| SNP_P3_94237_41008762 | NC_021166.1    | Ca_kabuli_chr07 | 41008762                | GG                              | TT                | 1946469796               |
| SNP_P3_94239_41008824 | NC_021166.1    | Ca_kabuli_chr07 | 41008824                | AA                              | CC                | 1946469798               |
| SNP_P3_94240_41008833 | NC_021166.1    | Ca_kabuli_chr07 | 41008833                | GG                              | AA                | 1946469799               |
| SNP_P3_94241_41008839 | NC_021166.1    | Ca_kabuli_chr07 | 41008839                | CC                              | TT                | 1946469801               |
| SNP_P3_94242_41008846 | NC_021166.1    | Ca_kabuli_chr07 | 41008846                | GG                              | AA                | 1946469803               |
| SNP_P3_94243_41008877 | NC_021166.1    | Ca_kabuli_chr07 | 41008877                | TT                              | AA                | 1946469804               |
| SNP_P3_94244_41008915 | NC_021166.1    | Ca_kabuli_chr07 | 41008915                | AA                              | GG                | 1946469806               |
| SNP_P3_94245_41008944 | NC_021166.1    | Ca_kabuli_chr07 | 41008944                | TT                              | CC                | 1946469807               |
| SNP_P3_94246_41009240 | NC_021166.1    | Ca_kabuli_chr07 | 41009240                | CC                              | GG                | 1946469809               |
| SNP_P3_94247_41009243 | NC_021166.1    | Ca_kabuli_chr07 | 41009243                | AA                              | TT                | 1946469810               |
| SNP_P3_94248_41009249 | NC_021166.1    | Ca_kabuli_chr07 | 41009249                | AA                              | TT                | 1946469812               |
| SNP_P3_94249_41009304 | NC_021166.1    | Ca_kabuli_chr07 | 41009304                | AA                              | CC                | 1946469814               |
| SNP_P3_94250_41009399 | NC_021166.1    | Ca_kabuli_chr07 | 41009399                | AA                              | TT                | 1946469815               |
| SNP_P3_94252_41009987 | NC_021166.1    | Ca_kabuli_chr07 | 41009987                | GG                              | AA                | 1946469817               |
| SNP_P3_94253_41010116 | NC_021166.1    | Ca_kabuli_chr07 | 41010116                | GG                              | AA                | 1946469818               |
| SNP_P3_94255_41010247 | NC_021166.1    | Ca_kabuli_chr07 | 41010247                | TT                              | AA                | 1946469820               |
| SNP_P3_94256_41010343 | NC_021166.1    | Ca_kabuli_chr07 | 41010343                | TT                              | AA                | 1946469821               |
| SNP_P3_94258_41027465 | NC_021166.1    | Ca_kabuli_chr07 | 41027465                | AA                              | TT                | 1946469823               |
| SNP_P3_94259_41027537 | NC_021166.1    | Ca_kabuli_chr07 | 41027537                | GG                              | AA                | 1946469824               |
| SNP_P3_94261_41027587 | NC_021166.1    | Ca_kabuli_chr07 | 41027587                | CC                              | GG                | 1946469826               |



| SNPs IDs              | Chromosome IDs | Chromosomes     | Physical positions (bp) | CDC Frontier (Reference genome) | (Pusa 256 & HPNB) | NCBI SNPdb Accession IDs |
|-----------------------|----------------|-----------------|-------------------------|---------------------------------|-------------------|--------------------------|
| SNP_P3_94262_41027790 | NC_021166.1    | Ca_kabuli_chr07 | 41027790                | AA                              | CC                | 1946469827               |
| SNP_P3_94263_41027830 | NC_021166.1    | Ca_kabuli_chr07 | 41027830                | CC                              | GG                | 1946469829               |
| SNP_P3_94264_41027861 | NC_021166.1    | Ca_kabuli_chr07 | 41027861                | AA                              | GG                | 1946469831               |
| SNP_P3_94265_41027893 | NC_021166.1    | Ca_kabuli_chr07 | 41027893                | TT                              | AA                | 1946469832               |
| SNP_P3_94266_41027957 | NC_021166.1    | Ca_kabuli_chr07 | 41027957                | TT                              | GG                | 1946469834               |
| SNP_P3_94267_41052427 | NC_021166.1    | Ca_kabuli_chr07 | 41052427                | CC                              | GG                | 1946469835               |
| SNP_P3_94268_41067453 | NC_021166.1    | Ca_kabuli_chr07 | 41067453                | GG                              | TT                | 1946469837               |
| SNP_P3_94269_41071629 | NC_021166.1    | Ca_kabuli_chr07 | 41071629                | CC                              | TT                | 1946469838               |
| SNP_P3_94270_41073180 | NC_021166.1    | Ca_kabuli_chr07 | 41073180                | TT                              | CC                | 1946469840               |
| SNP_P3_94271_41079497 | NC_021166.1    | Ca_kabuli_chr07 | 41079497                | CC                              | TT                | 1946469841               |
| SNP_P3_94272_41083194 | NC_021166.1    | Ca_kabuli_chr07 | 41083194                | GG                              | AA                | 1946469843               |
| SNP_P3_94273_41094373 | NC_021166.1    | Ca_kabuli_chr07 | 41094373                | GG                              | AA                | 1946469845               |
| SNP_P3_94274_41097448 | NC_021166.1    | Ca_kabuli_chr07 | 41097448                | TT                              | CC                | 1946469846               |
| SNP_P3_94275_41106744 | NC_021166.1    | Ca_kabuli_chr07 | 41106744                | TT                              | AA                | 1946469848               |
| SNP_P3_94276_41106768 | NC_021166.1    | Ca_kabuli_chr07 | 41106768                | AA                              | GG                | 1946469849               |
| SNP_P3_94277_41110994 | NC_021166.1    | Ca_kabuli_chr07 | 41110994                | TT                              | CC                | 1946469851               |
| SNP_P3_94278_41110995 | NC_021166.1    | Ca_kabuli_chr07 | 41110995                | TT                              | AA                | 1946469852               |
| SNP_P3_94279_41111023 | NC_021166.1    | Ca_kabuli_chr07 | 41111023                | GG                              | AA                | 1946469854               |
| SNP_P3_94280_41118747 | NC_021166.1    | Ca_kabuli_chr07 | 41118747                | GG                              | AA                | 1946469856               |
| SNP_P3_94281_41118762 | NC_021166.1    | Ca_kabuli_chr07 | 41118762                | CC                              | GG                | 1946469857               |
| SNP_P3_94282_41129614 | NC_021166.1    | Ca_kabuli_chr07 | 41129614                | AA                              | GG                | 1946469859               |
| SNP_P3_94283_41131511 | NC_021166.1    | Ca_kabuli_chr07 | 41131511                | CC                              | AA                | 1946469860               |
| SNP_P3_94284_41167886 | NC_021166.1    | Ca_kabuli_chr07 | 41167886                | CC                              | TT                | 1946469862               |
| SNP_P3_94285_41167896 | NC_021166.1    | Ca_kabuli_chr07 | 41167896                | GG                              | AA                | 1946469863               |
| SNP_P3_94286_41167901 | NC_021166.1    | Ca_kabuli_chr07 | 41167901                | GG                              | AA                | 1946469865               |
| SNP_P3_94287_41167907 | NC_021166.1    | Ca_kabuli_chr07 | 41167907                | TT                              | GG                | 1946469866               |
| SNP_P3_94288_41167913 | NC_021166.1    | Ca_kabuli_chr07 | 41167913                | AA                              | CC                | 1946469868               |
| SNP_P3_94289_41167934 | NC_021166.1    | Ca_kabuli_chr07 | 41167934                | GG                              | AA                | 1946469869               |
| SNP_P3_94290_41167952 | NC_021166.1    | Ca_kabuli_chr07 | 41167952                | AA                              | GG                | 1946469871               |
| SNP_P3_94291_41168269 | NC_021166.1    | Ca_kabuli_chr07 | 41168269                | GG                              | TT                | 1946469872               |
| SNP_P3_94292_41168333 | NC_021166.1    | Ca_kabuli_chr07 | 41168333                | TT                              | AA                | 1946469874               |
| SNP_P3_94294_41170113 | NC_021166.1    | Ca_kabuli_chr07 | 41170113                | GG                              | CC                | 1946469875               |
| SNP_P3_94295_41170121 | NC_021166.1    | Ca_kabuli_chr07 | 41170121                | TT                              | AA                | 1946469877               |
| SNP_P3_94296_41170143 | NC_021166.1    | Ca_kabuli_chr07 | 41170143                | AA                              | GG                | 1946469879               |
| SNP_P3_94297_41170170 | NC_021166.1    | Ca_kabuli_chr07 | 41170170                | GG                              | AA                | 1946469880               |
| SNP_P3_94298_41170275 | NC_021166.1    | Ca_kabuli_chr07 | 41170275                | CC                              | GG                | 1946469882               |
| SNP_P3_94299_41170311 | NC_021166.1    | Ca_kabuli_chr07 | 41170311                | CC                              | AA                | 1946469883               |
| SNP_P3_94300_41170466 | NC_021166.1    | Ca_kabuli_chr07 | 41170466                | AA                              | TT                | 1946469885               |
| SNP_P3_94301_41170474 | NC_021166.1    | Ca_kabuli_chr07 | 41170474                | GG                              | CC                | 1946469886               |
| SNP_P3_94302_41185113 | NC_021166.1    | Ca_kabuli_chr07 | 41185113                | AA                              | GG                | 1946469888               |
| SNP_P3_94303_41190058 | NC_021166.1    | Ca_kabuli_chr07 | 41190058                | AA                              | GG                | 1946469889               |
| SNP_P3_94304_41190064 | NC_021166.1    | Ca_kabuli_chr07 | 41190064                | AA                              | GG                | 1946469891               |

| SNPs IDs              | Chromosome IDs | Chromosomes     | Physical positions (bp) | CDC Frontier (Reference genome) | (Pusa 256 & HPNB) | NCBI SNPdb Accession IDs |
|-----------------------|----------------|-----------------|-------------------------|---------------------------------|-------------------|--------------------------|
| SNP_P3_94305_41190092 | NC_021166.1    | Ca_kabuli_chr07 | 41190092                | GG                              | AA                | 1946469892               |
| SNP_P3_94306_41190107 | NC_021166.1    | Ca_kabuli_chr07 | 41190107                | GG                              | AA                | 1946469894               |
| SNP_P3_94307_41190113 | NC_021166.1    | Ca_kabuli_chr07 | 41190113                | AA                              | GG                | 1946469896               |
| SNP_P3_94308_41200763 | NC_021166.1    | Ca_kabuli_chr07 | 41200763                | TT                              | AA                | 1946469897               |
| SNP_P3_94309_41208466 | NC_021166.1    | Ca_kabuli_chr07 | 41208466                | AA                              | CC                | 1946469899               |
| SNP_P3_94310_41208472 | NC_021166.1    | Ca_kabuli_chr07 | 41208472                | TT                              | CC                | 1946469900               |
| SNP_P3_94311_41213067 | NC_021166.1    | Ca_kabuli_chr07 | 41213067                | GG                              | CC                | 1946469902               |
| SNP_P3_94312_41215435 | NC_021166.1    | Ca_kabuli_chr07 | 41215435                | AA                              | CC                | 1946469903               |
| SNP_P3_94313_41215484 | NC_021166.1    | Ca_kabuli_chr07 | 41215484                | TT                              | AA                | 1946469905               |
| SNP_P3_94314_41215591 | NC_021166.1    | Ca_kabuli_chr07 | 41215591                | TT                              | CC                | 1946469906               |
| SNP_P3_94315_41215604 | NC_021166.1    | Ca_kabuli_chr07 | 41215604                | GG                              | AA                | 1946469908               |
| SNP_P3_94316_41231908 | NC_021166.1    | Ca_kabuli_chr07 | 41231908                | CC                              | TT                | 1946469910               |
| SNP_P3_94317_41232002 | NC_021166.1    | Ca_kabuli_chr07 | 41232002                | AA                              | TT                | 1946469911               |
| SNP_P3_94318_41232035 | NC_021166.1    | Ca_kabuli_chr07 | 41232035                | AA                              | TT                | 1946469913               |
| SNP_P3_94319_41232036 | NC_021166.1    | Ca_kabuli_chr07 | 41232036                | AA                              | TT                | 1946469914               |
| SNP_P3_94320_41239000 | NC_021166.1    | Ca_kabuli_chr07 | 41239000                | GG                              | TT                | 1946469916               |
| SNP_P3_94321_41239078 | NC_021166.1    | Ca_kabuli_chr07 | 41239078                | CC                              | TT                | 1946469918               |
| SNP_P3_94322_41239084 | NC_021166.1    | Ca_kabuli_chr07 | 41239084                | TT                              | CC                | 1946469919               |
| SNP_P3_94323_41239241 | NC_021166.1    | Ca_kabuli_chr07 | 41239241                | AA                              | GG                | 1946469921               |
| SNP_P3_94324_41239244 | NC_021166.1    | Ca_kabuli_chr07 | 41239244                | AA                              | GG                | 1946469922               |
| SNP_P3_94325_41239248 | NC_021166.1    | Ca_kabuli_chr07 | 41239248                | TT                              | CC                | 1946469924               |
| SNP_P3_94326_41239292 | NC_021166.1    | Ca_kabuli_chr07 | 41239292                | AA                              | GG                | 1946469925               |
| SNP_P3_94327_41239315 | NC_021166.1    | Ca_kabuli_chr07 | 41239315                | TT                              | AA                | 1946469927               |
| SNP_P3_94328_41239326 | NC_021166.1    | Ca_kabuli_chr07 | 41239326                | TT                              | CC                | 1946469928               |
| SNP_P3_94329_41239344 | NC_021166.1    | Ca_kabuli_chr07 | 41239344                | TT                              | CC                | 1946469930               |
| SNP_P3_94330_41239648 | NC_021166.1    | Ca_kabuli_chr07 | 41239648                | CC                              | AA                | 1946469931               |
| SNP_P3_94331_41241233 | NC_021166.1    | Ca_kabuli_chr07 | 41241233                | AA                              | CC                | 1946469933               |
| SNP_P3_94332_41241239 | NC_021166.1    | Ca_kabuli_chr07 | 41241239                | TT                              | GG                | 1946469934               |
| SNP_P3_94333_41241255 | NC_021166.1    | Ca_kabuli_chr07 | 41241255                | AA                              | GG                | 1946469936               |
| SNP_P3_94334_41241260 | NC_021166.1    | Ca_kabuli_chr07 | 41241260                | AA                              | CC                | 1946469937               |
| SNP_P3_94336_41250738 | NC_021166.1    | Ca_kabuli_chr07 | 41250738                | AA                              | TT                | 1946469939               |
| SNP_P3_94337_41250764 | NC_021166.1    | Ca_kabuli_chr07 | 41250764                | GG                              | TT                | 1946469940               |
| SNP_P3_94338_41250850 | NC_021166.1    | Ca_kabuli_chr07 | 41250850                | AA                              | TT                | 1946469942               |
| SNP_P3_94339_41250856 | NC_021166.1    | Ca_kabuli_chr07 | 41250856                | AA                              | CC                | 1946469943               |
| SNP_P3_94341_41250944 | NC_021166.1    | Ca_kabuli_chr07 | 41250944                | TT                              | CC                | 1946469945               |
| SNP_P3_94342_41250968 | NC_021166.1    | Ca_kabuli_chr07 | 41250968                | CC                              | GG                | 1946469946               |
| SNP_P3_94343_41251003 | NC_021166.1    | Ca_kabuli_chr07 | 41251003                | GG                              | TT                | 1946469948               |
| SNP_P3_94344_41251009 | NC_021166.1    | Ca_kabuli_chr07 | 41251009                | CC                              | GG                | 1946469949               |
| SNP_P3_94345_41251026 | NC_021166.1    | Ca_kabuli_chr07 | 41251026                | GG                              | AA                | 1946469951               |
| SNP_P3_94346_41251044 | NC_021166.1    | Ca_kabuli_chr07 | 41251044                | AA                              | TT                | 1946469953               |
| SNP_P3_94347_41251132 | NC_021166.1    | Ca_kabuli_chr07 | 41251132                | GG                              | CC                | 1946469954               |
| SNP_P3_94348_41251135 | NC_021166.1    | Ca_kabuli_chr07 | 41251135                | CC                              | TT                | 1946469956               |

| SNPs IDs              | Chromosome IDs | Chromosomes     | Physical positions (bp) | CDC Frontier (Reference genome) | (Pusa 256 & HPNB) | NCBI SNPdb Accession IDs |
|-----------------------|----------------|-----------------|-------------------------|---------------------------------|-------------------|--------------------------|
| SNP_P3_94349_41251136 | NC_021166.1    | Ca_kabuli_chr07 | 41251136                | CC                              | AA                | 1946469957               |
| SNP_P3_94350_41251146 | NC_021166.1    | Ca_kabuli_chr07 | 41251146                | GG                              | AA                | 1946469959               |
| SNP_P3_94351_41251151 | NC_021166.1    | Ca_kabuli_chr07 | 41251151                | CC                              | GG                | 1946469960               |
| SNP_P3_94352_41251166 | NC_021166.1    | Ca_kabuli_chr07 | 41251166                | CC                              | AA                | 1946469962               |
| SNP_P3_94353_41251168 | NC_021166.1    | Ca_kabuli_chr07 | 41251168                | AA                              | TT                | 1946469963               |
| SNP_P3_94354_41251237 | NC_021166.1    | Ca_kabuli_chr07 | 41251237                | AA                              | TT                | 1946469965               |
| SNP_P3_94355_41251242 | NC_021166.1    | Ca_kabuli_chr07 | 41251242                | CC                              | TT                | 1946469967               |
| SNP_P3_94357_41251296 | NC_021166.1    | Ca_kabuli_chr07 | 41251296                | CC                              | AA                | 1946469968               |
| SNP_P3_94358_41251316 | NC_021166.1    | Ca_kabuli_chr07 | 41251316                | TT                              | AA                | 1946469970               |
| SNP_P3_94359_41251325 | NC_021166.1    | Ca_kabuli_chr07 | 41251325                | AA                              | GG                | 1946469971               |
| SNP_P3_94360_41251349 | NC_021166.1    | Ca_kabuli_chr07 | 41251349                | CC                              | AA                | 1946469973               |
| SNP_P3_94361_41251402 | NC_021166.1    | Ca_kabuli_chr07 | 41251402                | TT                              | CC                | 1946469974               |
| SNP_P3_94362_41251406 | NC_021166.1    | Ca_kabuli_chr07 | 41251406                | TT                              | GG                | 1946469976               |
| SNP_P3_94363_41251418 | NC_021166.1    | Ca_kabuli_chr07 | 41251418                | CC                              | GG                | 1946469977               |
| SNP_P3_94364_41251528 | NC_021166.1    | Ca_kabuli_chr07 | 41251528                | GG                              | AA                | 1946469979               |
| SNP_P3_94365_41251594 | NC_021166.1    | Ca_kabuli_chr07 | 41251594                | AA                              | GG                | 1946469980               |
| SNP_P3_94366_41251673 | NC_021166.1    | Ca_kabuli_chr07 | 41251673                | AA                              | GG                | 1946469982               |
| SNP_P3_94367_41251684 | NC_021166.1    | Ca_kabuli_chr07 | 41251684                | GG                              | AA                | 1946469983               |
| SNP_P3_94368_41251756 | NC_021166.1    | Ca_kabuli_chr07 | 41251756                | CC                              | TT                | 1946469985               |
| SNP_P3_94369_41251855 | NC_021166.1    | Ca_kabuli_chr07 | 41251855                | CC                              | AA                | 1946469986               |
| SNP_P3_94370_41251856 | NC_021166.1    | Ca_kabuli_chr07 | 41251856                | AA                              | GG                | 1946469988               |
| SNP_P3_94371_41251857 | NC_021166.1    | Ca_kabuli_chr07 | 41251857                | GG                              | AA                | 1946469989               |
| SNP_P3_94372_41251889 | NC_021166.1    | Ca_kabuli_chr07 | 41251889                | TT                              | CC                | 1946469991               |
| SNP_P3_94373_41251938 | NC_021166.1    | Ca_kabuli_chr07 | 41251938                | GG                              | AA                | 1946469992               |
| SNP_P3_94374_41251987 | NC_021166.1    | Ca_kabuli_chr07 | 41251987                | CC                              | TT                | 1946469993               |
| SNP_P3_94375_41252030 | NC_021166.1    | Ca_kabuli_chr07 | 41252030                | CC                              | GG                | 1946469995               |
| SNP_P3_94376_41252046 | NC_021166.1    | Ca_kabuli_chr07 | 41252046                | TT                              | CC                | 1946469997               |
| SNP_P3_94377_41252052 | NC_021166.1    | Ca_kabuli_chr07 | 41252052                | GG                              | AA                | 1946469998               |
| SNP_P3_94378_41252113 | NC_021166.1    | Ca_kabuli_chr07 | 41252113                | GG                              | CC                | 1946470000               |
| SNP_P3_94379_41252136 | NC_021166.1    | Ca_kabuli_chr07 | 41252136                | CC                              | TT                | 1946470001               |
| SNP_P3_94380_41252138 | NC_021166.1    | Ca_kabuli_chr07 | 41252138                | CC                              | TT                | 1946470003               |
| SNP_P3_94381_41252185 | NC_021166.1    | Ca_kabuli_chr07 | 41252185                | AA                              | CC                | 1946470004               |
| SNP_P3_94382_41252210 | NC_021166.1    | Ca_kabuli_chr07 | 41252210                | TT                              | CC                | 1946470006               |
| SNP_P3_94383_41252221 | NC_021166.1    | Ca_kabuli_chr07 | 41252221                | TT                              | GG                | 1946470007               |
| SNP_P3_94384_41252242 | NC_021166.1    | Ca_kabuli_chr07 | 41252242                | CC                              | TT                | 1946470009               |
| SNP_P3_94385_41252245 | NC_021166.1    | Ca_kabuli_chr07 | 41252245                | GG                              | AA                | 1946470010               |
| SNP_P3_94387_41252636 | NC_021166.1    | Ca_kabuli_chr07 | 41252636                | CC                              | TT                | 1946470012               |
| SNP_P3_94388_41282709 | NC_021166.1    | Ca_kabuli_chr07 | 41282709                | TT                              | CC                | 1946470013               |
| SNP_P3_94389_41282755 | NC_021166.1    | Ca_kabuli_chr07 | 41282755                | GG                              | AA                | 1946470015               |
| SNP_P3_94390_41282889 | NC_021166.1    | Ca_kabuli_chr07 | 41282889                | CC                              | TT                | 1946470017               |
| SNP_P3_94391_41282937 | NC_021166.1    | Ca_kabuli_chr07 | 41282937                | TT                              | GG                | 1946470018               |
| SNP_P3_94392_41282942 | NC_021166.1    | Ca_kabuli_chr07 | 41282942                | TT                              | CC                | 1946470020               |

| SNPs IDs              | Chromosome IDs | Chromosomes     | Physical positions (bp) | CDC Frontier (Reference genome) | (Pusa 256 & HPNB) | NCBI SNPdb Accession IDs |
|-----------------------|----------------|-----------------|-------------------------|---------------------------------|-------------------|--------------------------|
| SNP_P3_94393_41283405 | NC_021166.1    | Ca_kabuli_chr07 | 41283405                | TT                              | CC                | 1946470021               |
| SNP_P3_94395_41297024 | NC_021166.1    | Ca_kabuli_chr07 | 41297024                | TT                              | CC                | 1946470023               |
| SNP_P3_94396_41309428 | NC_021166.1    | Ca_kabuli_chr07 | 41309428                | GG                              | AA                | 1946470024               |
| SNP_P3_94397_41309461 | NC_021166.1    | Ca_kabuli_chr07 | 41309461                | TT                              | CC                | 1946470026               |
| SNP_P3_94398_41309477 | NC_021166.1    | Ca_kabuli_chr07 | 41309477                | CC                              | TT                | 1946470028               |
| SNP_P3_94399_41309544 | NC_021166.1    | Ca_kabuli_chr07 | 41309544                | TT                              | AA                | 1946470029               |
| SNP_P3_94400_41322197 | NC_021166.1    | Ca_kabuli_chr07 | 41322197                | GG                              | AA                | 1946470031               |
| SNP_P3_94401_41322221 | NC_021166.1    | Ca_kabuli_chr07 | 41322221                | GG                              | AA                | 1946470032               |
| SNP_P3_94402_41322572 | NC_021166.1    | Ca_kabuli_chr07 | 41322572                | TT                              | CC                | 1946470034               |
| SNP_P3_94403_41322978 | NC_021166.1    | Ca_kabuli_chr07 | 41322978                | AA                              | TT                | 1946470035               |
| SNP_P3_94404_41322985 | NC_021166.1    | Ca_kabuli_chr07 | 41322985                | GG                              | AA                | 1946470037               |
| SNP_P3_94405_41323041 | NC_021166.1    | Ca_kabuli_chr07 | 41323041                | CC                              | TT                | 1946470038               |
| SNP_P3_94406_41323058 | NC_021166.1    | Ca_kabuli_chr07 | 41323058                | CC                              | TT                | 1946470040               |
| SNP_P3_94407_41338963 | NC_021166.1    | Ca_kabuli_chr07 | 41338963                | AA                              | CC                | 1946470041               |
| SNP_P3_94408_41341791 | NC_021166.1    | Ca_kabuli_chr07 | 41341791                | CC                              | TT                | 1946470043               |
| SNP_P3_94409_41353944 | NC_021166.1    | Ca_kabuli_chr07 | 41353944                | TT                              | CC                | 1946470045               |
| SNP_P3_94410_41358886 | NC_021166.1    | Ca_kabuli_chr07 | 41358886                | CC                              | TT                | 1946470047               |
| SNP_P3_94411_41371831 | NC_021166.1    | Ca_kabuli_chr07 | 41371831                | CC                              | TT                | 1946470048               |
| SNP_P3_94412_41372309 | NC_021166.1    | Ca_kabuli_chr07 | 41372309                | GG                              | AA                | 1946470050               |
| SNP_P3_94413_41386769 | NC_021166.1    | Ca_kabuli_chr07 | 41386769                | TT                              | GG                | 1946470051               |
| SNP_P3_94414_41410915 | NC_021166.1    | Ca_kabuli_chr07 | 41410915                | CC                              | TT                | 1946470053               |
| SNP_P3_94415_41413839 | NC_021166.1    | Ca_kabuli_chr07 | 41413839                | CC                              | TT                | 1946470054               |
| SNP_P3_94416_41413971 | NC_021166.1    | Ca_kabuli_chr07 | 41413971                | AA                              | GG                | 1946470056               |
| SNP_P3_94417_41413974 | NC_021166.1    | Ca_kabuli_chr07 | 41413974                | GG                              | CC                | 1946470059               |
| SNP_P3_94418_41427871 | NC_021166.1    | Ca_kabuli_chr07 | 41427871                | AA                              | GG                | 1946470060               |
| SNP_P3_94419_41427942 | NC_021166.1    | Ca_kabuli_chr07 | 41427942                | TT                              | GG                | 1946470062               |
| SNP_P3_94420_41427963 | NC_021166.1    | Ca_kabuli_chr07 | 41427963                | AA                              | GG                | 1946470063               |
| SNP_P3_94421_41428121 | NC_021166.1    | Ca_kabuli_chr07 | 41428121                | TT                              | CC                | 1946470065               |
| SNP_P3_94422_41428146 | NC_021166.1    | Ca_kabuli_chr07 | 41428146                | GG                              | TT                | 1946470066               |
| SNP_P3_94423_41428255 | NC_021166.1    | Ca_kabuli_chr07 | 41428255                | CC                              | TT                | 1946470068               |
| SNP_P3_94424_41428801 | NC_021166.1    | Ca_kabuli_chr07 | 41428801                | AA                              | GG                | 1946470069               |
| SNP_P3_94425_41429037 | NC_021166.1    | Ca_kabuli_chr07 | 41429037                | CC                              | TT                | 1946470071               |
| SNP_P3_94427_41429182 | NC_021166.1    | Ca_kabuli_chr07 | 41429182                | CC                              | TT                | 1946470072               |
| SNP_P3_94428_41429222 | NC_021166.1    | Ca_kabuli_chr07 | 41429222                | CC                              | AA                | 1946470074               |
| SNP_P3_94429_41429237 | NC_021166.1    | Ca_kabuli_chr07 | 41429237                | AA                              | GG                | 1946470076               |
| SNP_P3_94431_41439418 | NC_021166.1    | Ca_kabuli_chr07 | 41439418                | AA                              | CC                | 1946470077               |
| SNP_P3_94433_41441073 | NC_021166.1    | Ca_kabuli_chr07 | 41441073                | GG                              | AA                | 1946470079               |
| SNP_P3_94434_41445693 | NC_021166.1    | Ca_kabuli_chr07 | 41445693                | CC                              | TT                | 1946470080               |
| SNP_P3_94435_41462611 | NC_021166.1    | Ca_kabuli_chr07 | 41462611                | AA                              | GG                | 1946470082               |
| SNP_P3_94436_41462624 | NC_021166.1    | Ca_kabuli_chr07 | 41462624                | AA                              | GG                | 1946470083               |
| SNP_P3_94438_41498123 | NC_021166.1    | Ca_kabuli_chr07 | 41498123                | CC                              | AA                | 1946470085               |
| SNP_P3_94439_41498163 | NC_021166.1    | Ca_kabuli_chr07 | 41498163                | CC                              | AA                | 1946470086               |

| SNPs IDs              | Chromosome IDs | Chromosomes     | Physical positions (bp) | CDC Frontier (Reference genome) | (Pusa 256 & HPNB) | NCBI SNPdb Accession IDs |
|-----------------------|----------------|-----------------|-------------------------|---------------------------------|-------------------|--------------------------|
| SNP_P3_94440_41498663 | NC_021166.1    | Ca_kabuli_chr07 | 41498663                | TT                              | GG                | 1946470088               |
| SNP_P3_94441_41515930 | NC_021166.1    | Ca_kabuli_chr07 | 41515930                | AA                              | TT                | 1946470090               |
| SNP_P3_94443_41558342 | NC_021166.1    | Ca_kabuli_chr07 | 41558342                | CC                              | GG                | 1946470091               |
| SNP_P3_94444_41558350 | NC_021166.1    | Ca_kabuli_chr07 | 41558350                | AA                              | GG                | 1946470093               |
| SNP_P3_94446_41564581 | NC_021166.1    | Ca_kabuli_chr07 | 41564581                | GG                              | AA                | 1946470094               |
| SNP_P3_94447_41578423 | NC_021166.1    | Ca_kabuli_chr07 | 41578423                | AA                              | GG                | 1946470096               |
| SNP_P3_94448_41588479 | NC_021166.1    | Ca_kabuli_chr07 | 41588479                | TT                              | CC                | 1946470097               |
| SNP_P3_94449_41611896 | NC_021166.1    | Ca_kabuli_chr07 | 41611896                | AA                              | CC                | 1946470099               |
| SNP_P3_94450_41612288 | NC_021166.1    | Ca_kabuli_chr07 | 41612288                | AA                              | GG                | 1946470100               |
| SNP_P3_94451_41612299 | NC_021166.1    | Ca_kabuli_chr07 | 41612299                | TT                              | GG                | 1946470102               |
| SNP_P3_94452_41612377 | NC_021166.1    | Ca_kabuli_chr07 | 41612377                | AA                              | GG                | 1946470103               |
| SNP_P3_94453_41612673 | NC_021166.1    | Ca_kabuli_chr07 | 41612673                | TT                              | AA                | 1946470104               |
| SNP_P3_94454_41612715 | NC_021166.1    | Ca_kabuli_chr07 | 41612715                | GG                              | AA                | 1946470106               |
| SNP_P3_94455_41612745 | NC_021166.1    | Ca_kabuli_chr07 | 41612745                | GG                              | AA                | 1946470107               |
| SNP_P3_94456_41612760 | NC_021166.1    | Ca_kabuli_chr07 | 41612760                | TT                              | CC                | 1946470109               |
| SNP_P3_94457_41644635 | NC_021166.1    | Ca_kabuli_chr07 | 41644635                | AA                              | GG                | 1946470110               |
| SNP_P3_94459_41659708 | NC_021166.1    | Ca_kabuli_chr07 | 41659708                | TT                              | CC                | 1946470112               |
| SNP_P3_94460_41693628 | NC_021166.1    | Ca_kabuli_chr07 | 41693628                | AA                              | GG                | 1946470113               |
| SNP_P3_94461_41696271 | NC_021166.1    | Ca_kabuli_chr07 | 41696271                | AA                              | GG                | 1946470115               |
| SNP_P3_94462_41703750 | NC_021166.1    | Ca_kabuli_chr07 | 41703750                | TT                              | AA                | 1946470116               |
| SNP_P3_94463_41703759 | NC_021166.1    | Ca_kabuli_chr07 | 41703759                | GG                              | CC                | 1946470118               |
| SNP_P3_94464_41724298 | NC_021166.1    | Ca_kabuli_chr07 | 41724298                | AA                              | GG                | 1946470119               |
| SNP_P3_94465_41724339 | NC_021166.1    | Ca_kabuli_chr07 | 41724339                | GG                              | AA                | 1946470121               |
| SNP_P3_94466_41725017 | NC_021166.1    | Ca_kabuli_chr07 | 41725017                | GG                              | TT                | 1946470122               |
| SNP_P3_94467_41731883 | NC_021166.1    | Ca_kabuli_chr07 | 41731883                | CC                              | TT                | 1946470124               |
| SNP_P3_94468_41735517 | NC_021166.1    | Ca_kabuli_chr07 | 41735517                | AA                              | CC                | 1946470125               |
| SNP_P3_94469_41735596 | NC_021166.1    | Ca_kabuli_chr07 | 41735596                | TT                              | CC                | 1946470126               |
| SNP_P3_94470_41735597 | NC_021166.1    | Ca_kabuli_chr07 | 41735597                | TT                              | CC                | 1946470128               |
| SNP_P3_94471_41735833 | NC_021166.1    | Ca_kabuli_chr07 | 41735833                | TT                              | CC                | 1946470129               |
| SNP_P3_94472_41735840 | NC_021166.1    | Ca_kabuli_chr07 | 41735840                | AA                              | CC                | 1946470131               |
| SNP_P3_94473_41735880 | NC_021166.1    | Ca_kabuli_chr07 | 41735880                | CC                              | GG                | 1946470132               |
| SNP_P3_94474_41735886 | NC_021166.1    | Ca_kabuli_chr07 | 41735886                | TT                              | GG                | 1946470134               |
| SNP_P3_94475_41735893 | NC_021166.1    | Ca_kabuli_chr07 | 41735893                | GG                              | AA                | 1946470135               |
| SNP_P3_94476_41750960 | NC_021166.1    | Ca_kabuli_chr07 | 41750960                | AA                              | CC                | 1946470137               |
| SNP_P3_94477_41750961 | NC_021166.1    | Ca_kabuli_chr07 | 41750961                | TT                              | CC                | 1946470139               |
| SNP_P3_94479_41806321 | NC_021166.1    | Ca_kabuli_chr07 | 41806321                | TT                              | GG                | 1946470140               |
| SNP_P3_94480_41806330 | NC_021166.1    | Ca_kabuli_chr07 | 41806330                | TT                              | GG                | 1946470141               |
| SNP_P3_94481_41806348 | NC_021166.1    | Ca_kabuli_chr07 | 41806348                | CC                              | TT                | 1946470143               |
| SNP_P3_94483_41810277 | NC_021166.1    | Ca_kabuli_chr07 | 41810277                | GG                              | AA                | 1946470144               |
| SNP_P3_94484_41840214 | NC_021166.1    | Ca_kabuli_chr07 | 41840214                | CC                              | TT                | 1946470146               |
| SNP_P3_94485_41842110 | NC_021166.1    | Ca_kabuli_chr07 | 41842110                | CC                              | AA                | 1946470147               |
| SNP_P3_94486_41845093 | NC_021166.1    | Ca_kabuli_chr07 | 41845093                | TT                              | CC                | 1946470149               |

| SNPs IDs              | Chromosome IDs | Chromosomes     | Physical positions (bp) | CDC Frontier (Reference genome) | (Pusa 256 & HPNB) | NCBI SNPdb Accession IDs |
|-----------------------|----------------|-----------------|-------------------------|---------------------------------|-------------------|--------------------------|
| SNP_P3_94487_41876785 | NC_021166.1    | Ca_kabuli_chr07 | 41876785                | AA                              | GG                | 1946470150               |
| SNP_P3_94488_41889245 | NC_021166.1    | Ca_kabuli_chr07 | 41889245                | AA                              | GG                | 1946470152               |
| SNP_P3_94489_41906844 | NC_021166.1    | Ca_kabuli_chr07 | 41906844                | TT                              | CC                | 1946470153               |
| SNP_P3_94490_41911297 | NC_021166.1    | Ca_kabuli_chr07 | 41911297                | AA                              | GG                | 1946470155               |
| SNP_P3_94491_41916324 | NC_021166.1    | Ca_kabuli_chr07 | 41916324                | CC                              | TT                | 1946470157               |
| SNP_P3_94493_41925043 | NC_021166.1    | Ca_kabuli_chr07 | 41925043                | GG                              | AA                | 1946470158               |
| SNP_P3_94494_41948621 | NC_021166.1    | Ca_kabuli_chr07 | 41948621                | AA                              | GG                | 1946470159               |
| SNP_P3_94495_41954396 | NC_021166.1    | Ca_kabuli_chr07 | 41954396                | TT                              | CC                | 1946470161               |
| SNP_P3_94497_41958285 | NC_021166.1    | Ca_kabuli_chr07 | 41958285                | AA                              | GG                | 1946470162               |
| SNP_P3_94498_41959567 | NC_021166.1    | Ca_kabuli_chr07 | 41959567                | AA                              | CC                | 1946470164               |
| SNP_P3_94499_41983793 | NC_021166.1    | Ca_kabuli_chr07 | 41983793                | TT                              | CC                | 1946470165               |
| SNP_P3_94500_41985780 | NC_021166.1    | Ca_kabuli_chr07 | 41985780                | GG                              | TT                | 1946470167               |
| SNP_P3_94501_41986061 | NC_021166.1    | Ca_kabuli_chr07 | 41986061                | GG                              | TT                | 1946470169               |
| SNP_P3_94502_41986062 | NC_021166.1    | Ca_kabuli_chr07 | 41986062                | AA                              | GG                | 1946470170               |
| SNP_P3_94503_42005400 | NC_021166.1    | Ca_kabuli_chr07 | 42005400                | TT                              | GG                | 1946470172               |
| SNP_P3_94504_42005831 | NC_021166.1    | Ca_kabuli_chr07 | 42005831                | TT                              | CC                | 1946470173               |
| SNP_P3_94505_42006119 | NC_021166.1    | Ca_kabuli_chr07 | 42006119                | CC                              | AA                | 1946470175               |
| SNP_P3_94506_42006169 | NC_021166.1    | Ca_kabuli_chr07 | 42006169                | AA                              | GG                | 1946470176               |
| SNP_P3_94507_42006196 | NC_021166.1    | Ca_kabuli_chr07 | 42006196                | GG                              | AA                | 1946470178               |
| SNP_P3_94508_42072381 | NC_021166.1    | Ca_kabuli_chr07 | 42072381                | TT                              | GG                | 1946470179               |
| SNP_P3_94509_42092632 | NC_021166.1    | Ca_kabuli_chr07 | 42092632                | AA                              | GG                | 1946470181               |
| SNP_P3_94510_42092652 | NC_021166.1    | Ca_kabuli_chr07 | 42092652                | GG                              | CC                | 1946470183               |
| SNP_P3_94511_42092700 | NC_021166.1    | Ca_kabuli_chr07 | 42092700                | CC                              | TT                | 1946470184               |
| SNP_P3_94512_42092701 | NC_021166.1    | Ca_kabuli_chr07 | 42092701                | AA                              | GG                | 1946470186               |
| SNP_P3_94513_42092708 | NC_021166.1    | Ca_kabuli_chr07 | 42092708                | CC                              | TT                | 1946470187               |
| SNP_P3_94514_42092733 | NC_021166.1    | Ca_kabuli_chr07 | 42092733                | AA                              | CC                | 1946470189               |
| SNP_P3_94515_42093590 | NC_021166.1    | Ca_kabuli_chr07 | 42093590                | AA                              | CC                | 1946470190               |
| SNP_P3_94516_42093605 | NC_021166.1    | Ca_kabuli_chr07 | 42093605                | TT                              | CC                | 1946470191               |
| SNP_P3_94517_42093611 | NC_021166.1    | Ca_kabuli_chr07 | 42093611                | TT                              | CC                | 1946470193               |
| SNP_P3_94518_42093635 | NC_021166.1    | Ca_kabuli_chr07 | 42093635                | TT                              | CC                | 1946470194               |
| SNP_P3_94519_42093639 | NC_021166.1    | Ca_kabuli_chr07 | 42093639                | CC                              | GG                | 1946470196               |
| SNP_P3_94520_42093650 | NC_021166.1    | Ca_kabuli_chr07 | 42093650                | TT                              | AA                | 1946470198               |
| SNP_P3_94521_42093662 | NC_021166.1    | Ca_kabuli_chr07 | 42093662                | TT                              | CC                | 1946470199               |
| SNP_P3_94522_42093668 | NC_021166.1    | Ca_kabuli_chr07 | 42093668                | CC                              | AA                | 1946470201               |
| SNP_P3_94523_42093677 | NC_021166.1    | Ca_kabuli_chr07 | 42093677                | GG                              | CC                | 1946470202               |
| SNP_P3_94524_42093679 | NC_021166.1    | Ca_kabuli_chr07 | 42093679                | GG                              | CC                | 1946470204               |
| SNP_P3_94526_42137732 | NC_021166.1    | Ca_kabuli_chr07 | 42137732                | AA                              | GG                | 1946470205               |
| SNP_P3_94527_42137746 | NC_021166.1    | Ca_kabuli_chr07 | 42137746                | CC                              | GG                | 1946470207               |
| SNP_P3_94528_42205952 | NC_021166.1    | Ca_kabuli_chr07 | 42205952                | CC                              | TT                | 1946470208               |
| SNP_P3_94529_42206023 | NC_021166.1    | Ca_kabuli_chr07 | 42206023                | AA                              | GG                | 1946470210               |
| SNP_P3_94530_42206854 | NC_021166.1    | Ca_kabuli_chr07 | 42206854                | TT                              | CC                | 1946470211               |
| SNP_P3_94531_42211680 | NC_021166.1    | Ca_kabuli_chr07 | 42211680                | TT                              | AA                | 1946470213               |

| SNPs IDs              | Chromosome IDs | Chromosomes     | Physical positions (bp) | CDC Frontier (Reference genome) | (Pusa 256 & HPNB) | NCBI SNPdb Accession IDs |
|-----------------------|----------------|-----------------|-------------------------|---------------------------------|-------------------|--------------------------|
| SNP_P3_94532_42215266 | NC_021166.1    | Ca_kabuli_chr07 | 42215266                | AA                              | TT                | 1946470215               |
| SNP_P3_94534_42302063 | NC_021166.1    | Ca_kabuli_chr07 | 42302063                | TT                              | AA                | 1946470216               |
| SNP_P3_94535_42307198 | NC_021166.1    | Ca_kabuli_chr07 | 42307198                | CC                              | GG                | 1946470218               |
| SNP_P3_94536_42307564 | NC_021166.1    | Ca_kabuli_chr07 | 42307564                | GG                              | AA                | 1946470219               |
| SNP_P3_94537_42307691 | NC_021166.1    | Ca_kabuli_chr07 | 42307691                | TT                              | GG                | 1946470221               |
| SNP_P3_94539_42321417 | NC_021166.1    | Ca_kabuli_chr07 | 42321417                | TT                              | GG                | 1946470222               |
| SNP_P3_94540_42321848 | NC_021166.1    | Ca_kabuli_chr07 | 42321848                | TT                              | AA                | 1946470224               |
| SNP_P3_94541_42323931 | NC_021166.1    | Ca_kabuli_chr07 | 42323931                | CC                              | GG                | 1946470225               |
| SNP_P3_94542_42331158 | NC_021166.1    | Ca_kabuli_chr07 | 42331158                | TT                              | AA                | 1946470227               |
| SNP_P3_94543_42342799 | NC_021166.1    | Ca_kabuli_chr07 | 42342799                | GG                              | AA                | 1946470229               |
| SNP_P3_94544_42342820 | NC_021166.1    | Ca_kabuli_chr07 | 42342820                | AA                              | GG                | 1946470230               |
| SNP_P3_94545_42344727 | NC_021166.1    | Ca_kabuli_chr07 | 42344727                | AA                              | CC                | 1946470232               |
| SNP_P3_94546_42344765 | NC_021166.1    | Ca_kabuli_chr07 | 42344765                | AA                              | GG                | 1946470233               |
| SNP_P3_94547_42344801 | NC_021166.1    | Ca_kabuli_chr07 | 42344801                | AA                              | GG                | 1946470235               |
| SNP_P3_94548_42344815 | NC_021166.1    | Ca_kabuli_chr07 | 42344815                | TT                              | CC                | 1946470236               |
| SNP_P3_94549_42344960 | NC_021166.1    | Ca_kabuli_chr07 | 42344960                | GG                              | TT                | 1946470238               |
| SNP_P3_94550_42345039 | NC_021166.1    | Ca_kabuli_chr07 | 42345039                | TT                              | AA                | 1946470239               |
| SNP_P3_94551_42345084 | NC_021166.1    | Ca_kabuli_chr07 | 42345084                | AA                              | TT                | 1946470241               |
| SNP_P3_94552_42345086 | NC_021166.1    | Ca_kabuli_chr07 | 42345086                | GG                              | AA                | 1946470242               |
| SNP_P3_94553_42350150 | NC_021166.1    | Ca_kabuli_chr07 | 42350150                | TT                              | CC                | 1946470244               |
| SNP_P3_94554_42352144 | NC_021166.1    | Ca_kabuli_chr07 | 42352144                | CC                              | GG                | 1946470246               |
| SNP_P3_94555_42352201 | NC_021166.1    | Ca_kabuli_chr07 | 42352201                | AA                              | CC                | 1946470247               |
| SNP_P3_94556_42356316 | NC_021166.1    | Ca_kabuli_chr07 | 42356316                | CC                              | TT                | 1946470249               |
| SNP_P3_94557_42356367 | NC_021166.1    | Ca_kabuli_chr07 | 42356367                | AA                              | GG                | 1946470250               |
| SNP_P3_94558_42356374 | NC_021166.1    | Ca_kabuli_chr07 | 42356374                | AA                              | GG                | 1946470252               |
| SNP_P3_94559_42356403 | NC_021166.1    | Ca_kabuli_chr07 | 42356403                | TT                              | CC                | 1946470253               |
| SNP_P3_94560_42356413 | NC_021166.1    | Ca_kabuli_chr07 | 42356413                | GG                              | CC                | 1946470255               |
| SNP_P3_94561_42356427 | NC_021166.1    | Ca_kabuli_chr07 | 42356427                | GG                              | TT                | 1946470256               |
| SNP_P3_94563_42356445 | NC_021166.1    | Ca_kabuli_chr07 | 42356445                | GG                              | AA                | 1946470258               |
| SNP_P3_94564_42356705 | NC_021166.1    | Ca_kabuli_chr07 | 42356705                | GG                              | CC                | 1946470259               |
| SNP_P3_94565_42356728 | NC_021166.1    | Ca_kabuli_chr07 | 42356728                | TT                              | CC                | 1946470261               |
| SNP_P3_94566_42356743 | NC_021166.1    | Ca_kabuli_chr07 | 42356743                | TT                              | CC                | 1946470262               |
| SNP_P3_94567_42356758 | NC_021166.1    | Ca_kabuli_chr07 | 42356758                | CC                              | TT                | 1946470264               |
| SNP_P3_94568_42357046 | NC_021166.1    | Ca_kabuli_chr07 | 42357046                | AA                              | GG                | 1946470265               |
| SNP_P3_94569_42357055 | NC_021166.1    | Ca_kabuli_chr07 | 42357055                | GG                              | AA                | 1946470266               |
| SNP_P3_94570_42357087 | NC_021166.1    | Ca_kabuli_chr07 | 42357087                | GG                              | AA                | 1946470268               |
| SNP_P3_94571_42358193 | NC_021166.1    | Ca_kabuli_chr07 | 42358193                | TT                              | GG                | 1946470269               |
| SNP_P3_94572_42358220 | NC_021166.1    | Ca_kabuli_chr07 | 42358220                | GG                              | TT                | 1946470271               |
| SNP_P3_94573_42358280 | NC_021166.1    | Ca_kabuli_chr07 | 42358280                | AA                              | GG                | 1946470273               |
| SNP_P3_94574_42358339 | NC_021166.1    | Ca_kabuli_chr07 | 42358339                | AA                              | GG                | 1946470274               |
| SNP_P3_94576_42358366 | NC_021166.1    | Ca_kabuli_chr07 | 42358366                | AA                              | GG                | 1946470276               |
| SNP_P3_94577_42358593 | NC_021166.1    | Ca_kabuli_chr07 | 42358593                | GG                              | AA                | 1946470277               |

| SNPs IDs              | Chromosome IDs | Chromosomes     | Physical positions (bp) | CDC Frontier (Reference genome) | (Pusa 256 & HPNB) | NCBI SNPdb Accession IDs |
|-----------------------|----------------|-----------------|-------------------------|---------------------------------|-------------------|--------------------------|
| SNP_P3_94578_42358842 | NC_021166.1    | Ca_kabuli_chr07 | 42358842                | TT                              | CC                | 1946470279               |
| SNP_P3_94580_42384580 | NC_021166.1    | Ca_kabuli_chr07 | 42384580                | TT                              | CC                | 1946470280               |
| SNP_P3_94581_42384635 | NC_021166.1    | Ca_kabuli_chr07 | 42384635                | TT                              | AA                | 1946470282               |
| SNP_P3_94583_42385007 | NC_021166.1    | Ca_kabuli_chr07 | 42385007                | CC                              | AA                | 1946470283               |
| SNP_P3_94584_42385073 | NC_021166.1    | Ca_kabuli_chr07 | 42385073                | AA                              | GG                | 1946470285               |
| SNP_P3_94585_42392972 | NC_021166.1    | Ca_kabuli_chr07 | 42392972                | GG                              | AA                | 1946470286               |
| SNP_P3_94586_42393046 | NC_021166.1    | Ca_kabuli_chr07 | 42393046                | AA                              | TT                | 1946470288               |
| SNP_P3_94587_42393054 | NC_021166.1    | Ca_kabuli_chr07 | 42393054                | TT                              | AA                | 1946470289               |
| SNP_P3_94588_42393066 | NC_021166.1    | Ca_kabuli_chr07 | 42393066                | GG                              | TT                | 1946470291               |
| SNP_P3_94589_42393069 | NC_021166.1    | Ca_kabuli_chr07 | 42393069                | TT                              | AA                | 1946470292               |
| SNP_P3_94590_42393111 | NC_021166.1    | Ca_kabuli_chr07 | 42393111                | TT                              | CC                | 1946470294               |
| SNP_P3_94591_42393133 | NC_021166.1    | Ca_kabuli_chr07 | 42393133                | GG                              | AA                | 1946470295               |
| SNP_P3_94592_42393162 | NC_021166.1    | Ca_kabuli_chr07 | 42393162                | TT                              | AA                | 1946470297               |
| SNP_P3_94593_42393186 | NC_021166.1    | Ca_kabuli_chr07 | 42393186                | GG                              | CC                | 1946470298               |
| SNP_P3_94594_42393193 | NC_021166.1    | Ca_kabuli_chr07 | 42393193                | AA                              | GG                | 1946470300               |
| SNP_P3_94595_42396425 | NC_021166.1    | Ca_kabuli_chr07 | 42396425                | AA                              | TT                | 1946470302               |
| SNP_P3_94596_42396536 | NC_021166.1    | Ca_kabuli_chr07 | 42396536                | CC                              | TT                | 1946470303               |
| SNP_P3_94597_42397700 | NC_021166.1    | Ca_kabuli_chr07 | 42397700                | GG                              | AA                | 1946470305               |
| SNP_P3_94598_42397747 | NC_021166.1    | Ca_kabuli_chr07 | 42397747                | TT                              | CC                | 1946470306               |
| SNP_P3_94599_42397783 | NC_021166.1    | Ca_kabuli_chr07 | 42397783                | GG                              | AA                | 1946470308               |
| SNP_P3_94600_42399175 | NC_021166.1    | Ca_kabuli_chr07 | 42399175                | AA                              | GG                | 1946470309               |
| SNP_P3_94601_42399185 | NC_021166.1    | Ca_kabuli_chr07 | 42399185                | TT                              | GG                | 1946470311               |
| SNP_P3_94602_42399197 | NC_021166.1    | Ca_kabuli_chr07 | 42399197                | AA                              | GG                | 1946470312               |
| SNP_P3_94603_42399227 | NC_021166.1    | Ca_kabuli_chr07 | 42399227                | GG                              | AA                | 1946470314               |
| SNP_P3_94604_42399249 | NC_021166.1    | Ca_kabuli_chr07 | 42399249                | GG                              | AA                | 1946470315               |
| SNP_P3_94605_42399486 | NC_021166.1    | Ca_kabuli_chr07 | 42399486                | GG                              | AA                | 1946470317               |
| SNP_P3_94606_42399500 | NC_021166.1    | Ca_kabuli_chr07 | 42399500                | TT                              | CC                | 1946470318               |
| SNP_P3_94607_42404629 | NC_021166.1    | Ca_kabuli_chr07 | 42404629                | TT                              | CC                | 1946470320               |
| SNP_P3_94609_42409305 | NC_021166.1    | Ca_kabuli_chr07 | 42409305                | GG                              | TT                | 1946470321               |
| SNP_P3_94610_42410667 | NC_021166.1    | Ca_kabuli_chr07 | 42410667                | TT                              | CC                | 1946470323               |
| SNP_P3_94611_42421444 | NC_021166.1    | Ca_kabuli_chr07 | 42421444                | TT                              | CC                | 1946470324               |
| SNP_P3_94612_42421455 | NC_021166.1    | Ca_kabuli_chr07 | 42421455                | CC                              | TT                | 1946470326               |
| SNP_P3_94613_42421512 | NC_021166.1    | Ca_kabuli_chr07 | 42421512                | TT                              | GG                | 1946470327               |
| SNP_P3_94614_42424337 | NC_021166.1    | Ca_kabuli_chr07 | 42424337                | TT                              | CC                | 1946470328               |
| SNP_P3_94615_42424357 | NC_021166.1    | Ca_kabuli_chr07 | 42424357                | CC                              | TT                | 1946470330               |
| SNP_P3_94616_42425525 | NC_021166.1    | Ca_kabuli_chr07 | 42425525                | TT                              | AA                | 1946470331               |
| SNP_P3_94617_42427832 | NC_021166.1    | Ca_kabuli_chr07 | 42427832                | TT                              | CC                | 1946470333               |
| SNP_P3_94618_42428106 | NC_021166.1    | Ca_kabuli_chr07 | 42428106                | TT                              | GG                | 1946470334               |
| SNP_P3_94619_42428125 | NC_021166.1    | Ca_kabuli_chr07 | 42428125                | GG                              | AA                | 1946470336               |
| SNP_P3_94620_42441634 | NC_021166.1    | Ca_kabuli_chr07 | 42441634                | AA                              | CC                | 1946470337               |
| SNP_P3_94621_42458474 | NC_021166.1    | Ca_kabuli_chr07 | 42458474                | GG                              | AA                | 1946470339               |
| SNP_P3_94622_42458486 | NC_021166.1    | Ca_kabuli_chr07 | 42458486                | AA                              | GG                | 1946470340               |



| SNPs IDs              | Chromosome IDs | Chromosomes     | Physical positions (bp) | CDC Frontier (Reference genome) | (Pusa 256 & HPNB) | NCBI SNPdb Accession IDs |
|-----------------------|----------------|-----------------|-------------------------|---------------------------------|-------------------|--------------------------|
| SNP_P3_94623_42458705 | NC_021166.1    | Ca_kabuli_chr07 | 42458705                | CC                              | AA                | 1946470342               |
| SNP_P3_94625_42459608 | NC_021166.1    | Ca_kabuli_chr07 | 42459608                | TT                              | CC                | 1946470343               |
| SNP_P3_94626_42459709 | NC_021166.1    | Ca_kabuli_chr07 | 42459709                | AA                              | CC                | 1946470345               |
| SNP_P3_94627_42459735 | NC_021166.1    | Ca_kabuli_chr07 | 42459735                | TT                              | GG                | 1946470346               |
| SNP_P3_94628_42459736 | NC_021166.1    | Ca_kabuli_chr07 | 42459736                | AA                              | GG                | 1946470348               |
| SNP_P3_94629_42459762 | NC_021166.1    | Ca_kabuli_chr07 | 42459762                | AA                              | GG                | 1946470349               |
| SNP_P3_94630_42459775 | NC_021166.1    | Ca_kabuli_chr07 | 42459775                | TT                              | AA                | 1946470350               |
| SNP_P3_94631_42459781 | NC_021166.1    | Ca_kabuli_chr07 | 42459781                | GG                              | AA                | 1946470352               |
| SNP_P3_94632_42459879 | NC_021166.1    | Ca_kabuli_chr07 | 42459879                | CC                              | TT                | 1946470353               |
| SNP_P3_94633_42461292 | NC_021166.1    | Ca_kabuli_chr07 | 42461292                | TT                              | CC                | 1946470355               |
| SNP_P3_94634_42461293 | NC_021166.1    | Ca_kabuli_chr07 | 42461293                | GG                              | AA                | 1946470356               |
| SNP_P3_94635_42461748 | NC_021166.1    | Ca_kabuli_chr07 | 42461748                | CC                              | GG                | 1946470358               |
| SNP_P3_94637_42465806 | NC_021166.1    | Ca_kabuli_chr07 | 42465806                | GG                              | AA                | 1946470359               |
| SNP_P3_94638_42465839 | NC_021166.1    | Ca_kabuli_chr07 | 42465839                | TT                              | CC                | 1946470361               |
| SNP_P3_94639_42467747 | NC_021166.1    | Ca_kabuli_chr07 | 42467747                | AA                              | GG                | 1946470362               |
| SNP_P3_94640_42467772 | NC_021166.1    | Ca_kabuli_chr07 | 42467772                | AA                              | GG                | 1946470364               |
| SNP_P3_94641_42467787 | NC_021166.1    | Ca_kabuli_chr07 | 42467787                | AA                              | GG                | 1946470365               |
| SNP_P3_94642_42472808 | NC_021166.1    | Ca_kabuli_chr07 | 42472808                | GG                              | TT                | 1946470367               |
| SNP_P3_94643_42472964 | NC_021166.1    | Ca_kabuli_chr07 | 42472964                | TT                              | CC                | 1946470368               |
| SNP_P3_94644_42473067 | NC_021166.1    | Ca_kabuli_chr07 | 42473067                | TT                              | GG                | 1946470370               |
| SNP_P3_94645_42473191 | NC_021166.1    | Ca_kabuli_chr07 | 42473191                | TT                              | GG                | 1946470371               |
| SNP_P3_94646_42473231 | NC_021166.1    | Ca_kabuli_chr07 | 42473231                | GG                              | TT                | 1946470373               |
| SNP_P3_94647_42473442 | NC_021166.1    | Ca_kabuli_chr07 | 42473442                | TT                              | CC                | 1946470375               |
| SNP_P3_94648_42473528 | NC_021166.1    | Ca_kabuli_chr07 | 42473528                | TT                              | GG                | 1946470376               |
| SNP_P3_94649_42473536 | NC_021166.1    | Ca_kabuli_chr07 | 42473536                | TT                              | CC                | 1946470378               |
| SNP_P3_94650_42473602 | NC_021166.1    | Ca_kabuli_chr07 | 42473602                | CC                              | GG                | 1946470379               |
| SNP_P3_94651_42473776 | NC_021166.1    | Ca_kabuli_chr07 | 42473776                | TT                              | CC                | 1946470381               |
| SNP_P3_94652_42473864 | NC_021166.1    | Ca_kabuli_chr07 | 42473864                | CC                              | TT                | 1946470382               |
| SNP_P3_94653_42473865 | NC_021166.1    | Ca_kabuli_chr07 | 42473865                | AA                              | GG                | 1946470384               |
| SNP_P3_94654_42474661 | NC_021166.1    | Ca_kabuli_chr07 | 42474661                | GG                              | CC                | 1946470385               |
| SNP_P3_94655_42474701 | NC_021166.1    | Ca_kabuli_chr07 | 42474701                | CC                              | TT                | 1946470387               |
| SNP_P3_94656_42474939 | NC_021166.1    | Ca_kabuli_chr07 | 42474939                | TT                              | AA                | 1946470389               |
| SNP_P3_94657_42474957 | NC_021166.1    | Ca_kabuli_chr07 | 42474957                | AA                              | GG                | 1946470390               |
| SNP_P3_94658_42474960 | NC_021166.1    | Ca_kabuli_chr07 | 42474960                | AA                              | TT                | 1946470392               |
| SNP_P3_94659_42475009 | NC_021166.1    | Ca_kabuli_chr07 | 42475009                | AA                              | TT                | 1946470393               |
| SNP_P3_94660_42475018 | NC_021166.1    | Ca_kabuli_chr07 | 42475018                | TT                              | AA                | 1946470395               |
| SNP_P3_94661_42475246 | NC_021166.1    | Ca_kabuli_chr07 | 42475246                | TT                              | CC                | 1946470397               |
| SNP_P3_94662_42475278 | NC_021166.1    | Ca_kabuli_chr07 | 42475278                | TT                              | CC                | 1946470398               |
| SNP_P3_94663_42475361 | NC_021166.1    | Ca_kabuli_chr07 | 42475361                | GG                              | CC                | 1946470400               |
| SNP_P3_94664_42475373 | NC_021166.1    | Ca_kabuli_chr07 | 42475373                | GG                              | AA                | 1946470401               |
| SNP_P3_94665_42475390 | NC_021166.1    | Ca_kabuli_chr07 | 42475390                | TT                              | AA                | 1946470403               |
| SNP_P3_94666_42475442 | NC_021166.1    | Ca_kabuli_chr07 | 42475442                | GG                              | AA                | 1946470405               |

| SNPs IDs              | Chromosome IDs | Chromosomes     | Physical positions (bp) | CDC Frontier (Reference genome) | (Pusa 256 & HPNB) | NCBI SNPdb Accession IDs |
|-----------------------|----------------|-----------------|-------------------------|---------------------------------|-------------------|--------------------------|
| SNP_P3_94667_42475444 | NC_021166.1    | Ca_kabuli_chr07 | 42475444                | AA                              | TT                | 1946470406               |
| SNP_P3_94668_42475471 | NC_021166.1    | Ca_kabuli_chr07 | 42475471                | CC                              | TT                | 1946470408               |
| SNP_P3_94669_42475472 | NC_021166.1    | Ca_kabuli_chr07 | 42475472                | TT                              | CC                | 1946470409               |
| SNP_P3_94670_42475537 | NC_021166.1    | Ca_kabuli_chr07 | 42475537                | CC                              | TT                | 1946470411               |
| SNP_P3_94671_42475571 | NC_021166.1    | Ca_kabuli_chr07 | 42475571                | CC                              | GG                | 1946470412               |
| SNP_P3_94672_42475589 | NC_021166.1    | Ca_kabuli_chr07 | 42475589                | TT                              | CC                | 1946470414               |
| SNP_P3_94673_42475693 | NC_021166.1    | Ca_kabuli_chr07 | 42475693                | AA                              | GG                | 1946470416               |
| SNP_P3_94674_42475738 | NC_021166.1    | Ca_kabuli_chr07 | 42475738                | GG                              | TT                | 1946470417               |
| SNP_P3_94675_42475747 | NC_021166.1    | Ca_kabuli_chr07 | 42475747                | TT                              | CC                | 1946470419               |
| SNP_P3_94676_42475750 | NC_021166.1    | Ca_kabuli_chr07 | 42475750                | TT                              | GG                | 1946470420               |
| SNP_P3_94677_42475773 | NC_021166.1    | Ca_kabuli_chr07 | 42475773                | TT                              | AA                | 1946470422               |
| SNP_P3_94678_42475776 | NC_021166.1    | Ca_kabuli_chr07 | 42475776                | CC                              | GG                | 1946470423               |
| SNP_P3_94679_42475824 | NC_021166.1    | Ca_kabuli_chr07 | 42475824                | AA                              | TT                | 1946470425               |
| SNP_P3_94680_42475831 | NC_021166.1    | Ca_kabuli_chr07 | 42475831                | GG                              | AA                | 1946470427               |
| SNP_P3_94681_42475832 | NC_021166.1    | Ca_kabuli_chr07 | 42475832                | TT                              | AA                | 1946470428               |
| SNP_P3_94682_42475863 | NC_021166.1    | Ca_kabuli_chr07 | 42475863                | CC                              | AA                | 1946470430               |
| SNP_P3_94683_42475887 | NC_021166.1    | Ca_kabuli_chr07 | 42475887                | GG                              | AA                | 1946470431               |
| SNP_P3_94684_42475889 | NC_021166.1    | Ca_kabuli_chr07 | 42475889                | CC                              | AA                | 1946470433               |
| SNP_P3_94685_42475891 | NC_021166.1    | Ca_kabuli_chr07 | 42475891                | AA                              | GG                | 1946470434               |
| SNP_P3_94686_42475934 | NC_021166.1    | Ca_kabuli_chr07 | 42475934                | CC                              | GG                | 1946470436               |
| SNP_P3_94687_42475975 | NC_021166.1    | Ca_kabuli_chr07 | 42475975                | CC                              | GG                | 1946470437               |
| SNP_P3_94688_42475988 | NC_021166.1    | Ca_kabuli_chr07 | 42475988                | GG                              | AA                | 1946470439               |
| SNP_P3_94689_42476051 | NC_021166.1    | Ca_kabuli_chr07 | 42476051                | TT                              | GG                | 1946470440               |
| SNP_P3_94690_42476153 | NC_021166.1    | Ca_kabuli_chr07 | 42476153                | CC                              | TT                | 1946470442               |
| SNP_P3_94691_42476155 | NC_021166.1    | Ca_kabuli_chr07 | 42476155                | GG                              | TT                | 1946470444               |
| SNP_P3_94692_42476198 | NC_021166.1    | Ca_kabuli_chr07 | 42476198                | CC                              | TT                | 1946470445               |
| SNP_P3_94693_42476201 | NC_021166.1    | Ca_kabuli_chr07 | 42476201                | GG                              | AA                | 1946470447               |
| SNP_P3_94694_42476217 | NC_021166.1    | Ca_kabuli_chr07 | 42476217                | CC                              | TT                | 1946470448               |
| SNP_P3_94695_42476238 | NC_021166.1    | Ca_kabuli_chr07 | 42476238                | AA                              | GG                | 1946470450               |
| SNP_P3_94696_42476252 | NC_021166.1    | Ca_kabuli_chr07 | 42476252                | GG                              | CC                | 1946470451               |
| SNP_P3_94697_42476319 | NC_021166.1    | Ca_kabuli_chr07 | 42476319                | TT                              | AA                | 1946470453               |
| SNP_P3_94698_42480045 | NC_021166.1    | Ca_kabuli_chr07 | 42480045                | TT                              | CC                | 1946470454               |
| SNP_P3_94699_42497703 | NC_021166.1    | Ca_kabuli_chr07 | 42497703                | GG                              | AA                | 1946470456               |
| SNP_P3_94700_42497723 | NC_021166.1    | Ca_kabuli_chr07 | 42497723                | GG                              | AA                | 1946470457               |
| SNP_P3_94701_42503322 | NC_021166.1    | Ca_kabuli_chr07 | 42503322                | CC                              | TT                | 1946470459               |
| SNP_P3_94702_42529104 | NC_021166.1    | Ca_kabuli_chr07 | 42529104                | GG                              | AA                | 1946470460               |
| SNP_P3_94703_42529134 | NC_021166.1    | Ca_kabuli_chr07 | 42529134                | TT                              | AA                | 1946470462               |
| SNP_P3_94704_42529383 | NC_021166.1    | Ca_kabuli_chr07 | 42529383                | TT                              | CC                | 1946470464               |
| SNP_P3_94705_42529888 | NC_021166.1    | Ca_kabuli_chr07 | 42529888                | TT                              | GG                | 1946470465               |
| SNP_P3_94706_42529919 | NC_021166.1    | Ca_kabuli_chr07 | 42529919                | TT                              | AA                | 1946470467               |
| SNP_P3_94707_42531864 | NC_021166.1    | Ca_kabuli_chr07 | 42531864                | AA                              | CC                | 1946470468               |
| SNP_P3_94708_42531882 | NC_021166.1    | Ca_kabuli_chr07 | 42531882                | AA                              | TT                | 1946470470               |

| SNPs IDs              | Chromosome IDs | Chromosomes     | Physical positions (bp) | CDC Frontier (Reference genome) | (Pusa 256 & HPNB) | NCBI SNPdb Accession IDs |
|-----------------------|----------------|-----------------|-------------------------|---------------------------------|-------------------|--------------------------|
| SNP_P3_94709_42531899 | NC_021166.1    | Ca_kabuli_chr07 | 42531899                | GG                              | AA                | 1946470471               |
| SNP_P3_94710_42531900 | NC_021166.1    | Ca_kabuli_chr07 | 42531900                | AA                              | CC                | 1946470473               |
| SNP_P3_94711_42532156 | NC_021166.1    | Ca_kabuli_chr07 | 42532156                | GG                              | AA                | 1946470474               |
| SNP_P3_94712_42532176 | NC_021166.1    | Ca_kabuli_chr07 | 42532176                | GG                              | AA                | 1946470476               |
| SNP_P3_94713_42532188 | NC_021166.1    | Ca_kabuli_chr07 | 42532188                | CC                              | TT                | 1946470477               |
| SNP_P3_94714_42532190 | NC_021166.1    | Ca_kabuli_chr07 | 42532190                | GG                              | AA                | 1946470479               |
| SNP_P3_94715_42532215 | NC_021166.1    | Ca_kabuli_chr07 | 42532215                | CC                              | GG                | 1946470480               |
| SNP_P3_94716_42532228 | NC_021166.1    | Ca_kabuli_chr07 | 42532228                | GG                              | AA                | 1946470482               |
| SNP_P3_94717_42541282 | NC_021166.1    | Ca_kabuli_chr07 | 42541282                | TT                              | AA                | 1946470483               |
| SNP_P3_94718_42541290 | NC_021166.1    | Ca_kabuli_chr07 | 42541290                | TT                              | AA                | 1946470485               |
| SNP_P3_94719_42541372 | NC_021166.1    | Ca_kabuli_chr07 | 42541372                | AA                              | GG                | 1946470487               |
| SNP_P3_94720_42557892 | NC_021166.1    | Ca_kabuli_chr07 | 42557892                | AA                              | CC                | 1946470488               |
| SNP_P3_94721_42557903 | NC_021166.1    | Ca_kabuli_chr07 | 42557903                | TT                              | GG                | 1946470490               |
| SNP_P3_94722_42558104 | NC_021166.1    | Ca_kabuli_chr07 | 42558104                | AA                              | TT                | 1946470491               |
| SNP_P3_94723_42558144 | NC_021166.1    | Ca_kabuli_chr07 | 42558144                | TT                              | GG                | 1946470493               |
| SNP_P3_94724_42558164 | NC_021166.1    | Ca_kabuli_chr07 | 42558164                | CC                              | TT                | 1946470494               |
| SNP_P3_94725_42558177 | NC_021166.1    | Ca_kabuli_chr07 | 42558177                | GG                              | CC                | 1946470496               |
| SNP_P3_94726_42558203 | NC_021166.1    | Ca_kabuli_chr07 | 42558203                | TT                              | GG                | 1946470497               |
| SNP_P3_94727_42558220 | NC_021166.1    | Ca_kabuli_chr07 | 42558220                | GG                              | AA                | 1946470499               |
| SNP_P3_94728_42558244 | NC_021166.1    | Ca_kabuli_chr07 | 42558244                | CC                              | TT                | 1946470500               |
| SNP_P3_94729_42558256 | NC_021166.1    | Ca_kabuli_chr07 | 42558256                | GG                              | AA                | 1946470502               |
| SNP_P3_94730_42563988 | NC_021166.1    | Ca_kabuli_chr07 | 42563988                | CC                              | TT                | 1946470503               |
| SNP_P3_94733_42582897 | NC_021166.1    | Ca_kabuli_chr07 | 42582897                | GG                              | AA                | 1946470505               |
| SNP_P3_94734_42583234 | NC_021166.1    | Ca_kabuli_chr07 | 42583234                | CC                              | TT                | 1946470507               |
| SNP_P3_94735_42583237 | NC_021166.1    | Ca_kabuli_chr07 | 42583237                | GG                              | CC                | 1946470508               |
| SNP_P3_94736_42583319 | NC_021166.1    | Ca_kabuli_chr07 | 42583319                | CC                              | TT                | 1946470510               |
| SNP_P3_94737_42583322 | NC_021166.1    | Ca_kabuli_chr07 | 42583322                | AA                              | TT                | 1946470511               |
| SNP_P3_94738_42589454 | NC_021166.1    | Ca_kabuli_chr07 | 42589454                | GG                              | TT                | 1946470513               |
| SNP_P3_94739_42589474 | NC_021166.1    | Ca_kabuli_chr07 | 42589474                | CC                              | TT                | 1946470514               |
| SNP_P3_94740_42607243 | NC_021166.1    | Ca_kabuli_chr07 | 42607243                | TT                              | GG                | 1946470516               |
| SNP_P3_94741_42640168 | NC_021166.1    | Ca_kabuli_chr07 | 42640168                | AA                              | GG                | 1946470517               |
| SNP_P3_94742_42640169 | NC_021166.1    | Ca_kabuli_chr07 | 42640169                | AA                              | CC                | 1946470519               |
| SNP_P3_94743_42651825 | NC_021166.1    | Ca_kabuli_chr07 | 42651825                | GG                              | AA                | 1946470520               |
| SNP_P3_94744_42659920 | NC_021166.1    | Ca_kabuli_chr07 | 42659920                | AA                              | CC                | 1946470522               |
| SNP_P3_94745_42691213 | NC_021166.1    | Ca_kabuli_chr07 | 42691213                | TT                              | CC                | 1946470524               |
| SNP_P3_94747_42742784 | NC_021166.1    | Ca_kabuli_chr07 | 42742784                | CC                              | TT                | 1946470525               |
| SNP_P3_94748_42742787 | NC_021166.1    | Ca_kabuli_chr07 | 42742787                | TT                              | CC                | 1946470527               |
| SNP_P3_94749_42744025 | NC_021166.1    | Ca_kabuli_chr07 | 42744025                | AA                              | TT                | 1946470528               |
| SNP_P3_94750_42746594 | NC_021166.1    | Ca_kabuli_chr07 | 42746594                | AA                              | CC                | 1946470530               |
| SNP_P3_94751_42746616 | NC_021166.1    | Ca_kabuli_chr07 | 42746616                | TT                              | GG                | 1946470531               |
| SNP_P3_94752_42746633 | NC_021166.1    | Ca_kabuli_chr07 | 42746633                | CC                              | TT                | 1946470533               |
| SNP_P3_94753_42746652 | NC_021166.1    | Ca_kabuli_chr07 | 42746652                | GG                              | AA                | 1946470534               |

| SNPs IDs              | Chromosome IDs | Chromosomes     | Physical positions (bp) | CDC Frontier (Reference genome) | (Pusa 256 & HPNB) | NCBI SNPdb Accession IDs |
|-----------------------|----------------|-----------------|-------------------------|---------------------------------|-------------------|--------------------------|
| SNP_P3_94754_42746663 | NC_021166.1    | Ca_kabuli_chr07 | 42746663                | GG                              | AA                | 1946470536               |
| SNP_P3_94755_42746720 | NC_021166.1    | Ca_kabuli_chr07 | 42746720                | TT                              | CC                | 1946470537               |
| SNP_P3_94756_42746918 | NC_021166.1    | Ca_kabuli_chr07 | 42746918                | TT                              | CC                | 1946470539               |
| SNP_P3_94757_42746979 | NC_021166.1    | Ca_kabuli_chr07 | 42746979                | GG                              | TT                | 1946470540               |
| SNP_P3_94758_42746993 | NC_021166.1    | Ca_kabuli_chr07 | 42746993                | TT                              | CC                | 1946470542               |
| SNP_P3_94759_42747059 | NC_021166.1    | Ca_kabuli_chr07 | 42747059                | GG                              | TT                | 1946470543               |
| SNP_P3_94760_42747075 | NC_021166.1    | Ca_kabuli_chr07 | 42747075                | AA                              | GG                | 1946470545               |
| SNP_P3_94762_42749714 | NC_021166.1    | Ca_kabuli_chr07 | 42749714                | TT                              | AA                | 1946470546               |
| SNP_P3_94763_42749720 | NC_021166.1    | Ca_kabuli_chr07 | 42749720                | TT                              | AA                | 1946470548               |
| SNP_P3_94766_42778468 | NC_021166.1    | Ca_kabuli_chr07 | 42778468                | CC                              | TT                | 1946470549               |
| SNP_P3_94767_42779249 | NC_021166.1    | Ca_kabuli_chr07 | 42779249                | CC                              | TT                | 1946470551               |
| SNP_P3_94768_42779287 | NC_021166.1    | Ca_kabuli_chr07 | 42779287                | TT                              | AA                | 1946470552               |
| SNP_P3_94769_42781453 | NC_021166.1    | Ca_kabuli_chr07 | 42781453                | TT                              | CC                | 1946470554               |
| SNP_P3_94770_42832397 | NC_021166.1    | Ca_kabuli_chr07 | 42832397                | CC                              | TT                | 1946470555               |
| SNP_P3_94771_42832433 | NC_021166.1    | Ca_kabuli_chr07 | 42832433                | CC                              | TT                | 1946470557               |
| SNP_P3_94772_42832435 | NC_021166.1    | Ca_kabuli_chr07 | 42832435                | TT                              | GG                | 1946470558               |
| SNP_P3_94773_42832449 | NC_021166.1    | Ca_kabuli_chr07 | 42832449                | GG                              | AA                | 1946470560               |
| SNP_P3_94774_42832481 | NC_021166.1    | Ca_kabuli_chr07 | 42832481                | GG                              | TT                | 1946470561               |
| SNP_P3_94776_42833041 | NC_021166.1    | Ca_kabuli_chr07 | 42833041                | CC                              | TT                | 1946470563               |
| SNP_P3_94777_42833078 | NC_021166.1    | Ca_kabuli_chr07 | 42833078                | CC                              | TT                | 1946470565               |
| SNP_P3_94778_42833080 | NC_021166.1    | Ca_kabuli_chr07 | 42833080                | TT                              | GG                | 1946470566               |
| SNP_P3_94779_42833169 | NC_021166.1    | Ca_kabuli_chr07 | 42833169                | TT                              | AA                | 1946470568               |
| SNP_P3_94780_42833697 | NC_021166.1    | Ca_kabuli_chr07 | 42833697                | TT                              | CC                | 1946470569               |
| SNP_P3_94781_42833820 | NC_021166.1    | Ca_kabuli_chr07 | 42833820                | GG                              | AA                | 1946470571               |
| SNP_P3_94782_42837269 | NC_021166.1    | Ca_kabuli_chr07 | 42837269                | AA                              | TT                | 1946470572               |
| SNP_P3_94783_42838446 | NC_021166.1    | Ca_kabuli_chr07 | 42838446                | CC                              | TT                | 1946470574               |
| SNP_P3_94784_42838473 | NC_021166.1    | Ca_kabuli_chr07 | 42838473                | CC                              | AA                | 1946470575               |
| SNP_P3_94785_42847270 | NC_021166.1    | Ca_kabuli_chr07 | 42847270                | GG                              | CC                | 1946470577               |
| SNP_P3_94786_42847285 | NC_021166.1    | Ca_kabuli_chr07 | 42847285                | GG                              | CC                | 1946470578               |
| SNP_P3_94787_42847295 | NC_021166.1    | Ca_kabuli_chr07 | 42847295                | AA                              | CC                | 1946470580               |
| SNP_P3_94788_42847319 | NC_021166.1    | Ca_kabuli_chr07 | 42847319                | GG                              | AA                | 1946470582               |
| SNP_P3_94789_42848296 | NC_021166.1    | Ca_kabuli_chr07 | 42848296                | AA                              | TT                | 1946470583               |
| SNP_P3_94790_42848506 | NC_021166.1    | Ca_kabuli_chr07 | 42848506                | TT                              | CC                | 1946470585               |
| SNP_P3_94791_42848595 | NC_021166.1    | Ca_kabuli_chr07 | 42848595                | TT                              | AA                | 1946470586               |
| SNP_P3_94792_42848607 | NC_021166.1    | Ca_kabuli_chr07 | 42848607                | CC                              | TT                | 1946470588               |
| SNP_P3_94793_42848610 | NC_021166.1    | Ca_kabuli_chr07 | 42848610                | TT                              | CC                | 1946470590               |
| SNP_P3_94795_42869738 | NC_021166.1    | Ca_kabuli_chr07 | 42869738                | TT                              | CC                | 1946470591               |
| SNP_P3_94796_42898608 | NC_021166.1    | Ca_kabuli_chr07 | 42898608                | CC                              | AA                | 1946470593               |
| SNP_P3_94797_42898628 | NC_021166.1    | Ca_kabuli_chr07 | 42898628                | AA                              | CC                | 1946470594               |
| SNP_P3_94798_42898643 | NC_021166.1    | Ca_kabuli_chr07 | 42898643                | CC                              | AA                | 1946470596               |
| SNP_P3_94799_42898652 | NC_021166.1    | Ca_kabuli_chr07 | 42898652                | CC                              | TT                | 1946470597               |
| SNP_P3_94800_42901796 | NC_021166.1    | Ca_kabuli_chr07 | 42901796                | AA                              | GG                | 1946470599               |

| SNPs IDs              | Chromosome IDs | Chromosomes     | Physical positions (bp) | CDC Frontier (Reference genome) | (Pusa 256 & HPNB) | NCBI SNPdb Accession IDs |
|-----------------------|----------------|-----------------|-------------------------|---------------------------------|-------------------|--------------------------|
| SNP_P3_94801_42901811 | NC_021166.1    | Ca_kabuli_chr07 | 42901811                | TT                              | CC                | 1946470601               |
| SNP_P3_94802_42915851 | NC_021166.1    | Ca_kabuli_chr07 | 42915851                | GG                              | AA                | 1946470602               |
| SNP_P3_94803_42918431 | NC_021166.1    | Ca_kabuli_chr07 | 42918431                | CC                              | TT                | 1946470603               |
| SNP_P3_94804_42918632 | NC_021166.1    | Ca_kabuli_chr07 | 42918632                | AA                              | GG                | 1946470605               |
| SNP_P3_94806_42923141 | NC_021166.1    | Ca_kabuli_chr07 | 42923141                | AA                              | GG                | 1946470606               |
| SNP_P3_94808_42926459 | NC_021166.1    | Ca_kabuli_chr07 | 42926459                | AA                              | TT                | 1946470608               |
| SNP_P3_94809_42930907 | NC_021166.1    | Ca_kabuli_chr07 | 42930907                | GG                              | AA                | 1946470609               |
| SNP_P3_94810_42931056 | NC_021166.1    | Ca_kabuli_chr07 | 42931056                | AA                              | TT                | 1946470611               |
| SNP_P3_94812_42931473 | NC_021166.1    | Ca_kabuli_chr07 | 42931473                | TT                              | CC                | 1946470612               |
| SNP_P3_94815_42978680 | NC_021166.1    | Ca_kabuli_chr07 | 42978680                | CC                              | TT                | 1946470614               |
| SNP_P3_94817_43015572 | NC_021166.1    | Ca_kabuli_chr07 | 43015572                | TT                              | CC                | 1946470615               |
| SNP_P3_94818_43015894 | NC_021166.1    | Ca_kabuli_chr07 | 43015894                | TT                              | CC                | 1946470617               |
| SNP_P3_94819_43015969 | NC_021166.1    | Ca_kabuli_chr07 | 43015969                | TT                              | CC                | 1946470618               |
| SNP_P3_94820_43016076 | NC_021166.1    | Ca_kabuli_chr07 | 43016076                | AA                              | GG                | 1946470620               |
| SNP_P3_94821_43017237 | NC_021166.1    | Ca_kabuli_chr07 | 43017237                | TT                              | GG                | 1946470621               |
| SNP_P3_94822_43017297 | NC_021166.1    | Ca_kabuli_chr07 | 43017297                | TT                              | GG                | 1946470622               |
| SNP_P3_94823_43028635 | NC_021166.1    | Ca_kabuli_chr07 | 43028635                | AA                              | GG                | 1946470624               |
| SNP_P3_94824_43032421 | NC_021166.1    | Ca_kabuli_chr07 | 43032421                | GG                              | AA                | 1946470625               |
| SNP_P3_94825_43077321 | NC_021166.1    | Ca_kabuli_chr07 | 43077321                | CC                              | AA                | 1946470627               |
| SNP_P3_94826_43144041 | NC_021166.1    | Ca_kabuli_chr07 | 43144041                | GG                              | TT                | 1946470628               |
| SNP_P3_94827_43169635 | NC_021166.1    | Ca_kabuli_chr07 | 43169635                | TT                              | AA                | 1946470630               |
| SNP_P3_94828_43169653 | NC_021166.1    | Ca_kabuli_chr07 | 43169653                | CC                              | AA                | 1946470631               |
| SNP_P3_94829_43208225 | NC_021166.1    | Ca_kabuli_chr07 | 43208225                | CC                              | TT                | 1946470633               |
| SNP_P3_94830_43208347 | NC_021166.1    | Ca_kabuli_chr07 | 43208347                | CC                              | AA                | 1946470634               |
| SNP_P3_94832_43209304 | NC_021166.1    | Ca_kabuli_chr07 | 43209304                | TT                              | CC                | 1946470636               |
| SNP_P3_94833_43209690 | NC_021166.1    | Ca_kabuli_chr07 | 43209690                | CC                              | TT                | 1946470637               |
| SNP_P3_94834_43210166 | NC_021166.1    | Ca_kabuli_chr07 | 43210166                | AA                              | CC                | 1946470639               |
| SNP_P3_94835_43210597 | NC_021166.1    | Ca_kabuli_chr07 | 43210597                | AA                              | GG                | 1946470640               |
| SNP_P3_94836_43210967 | NC_021166.1    | Ca_kabuli_chr07 | 43210967                | CC                              | TT                | 1946470642               |
| SNP_P3_94837_43211146 | NC_021166.1    | Ca_kabuli_chr07 | 43211146                | GG                              | TT                | 1946470643               |
| SNP_P3_94838_43222543 | NC_021166.1    | Ca_kabuli_chr07 | 43222543                | GG                              | AA                | 1946470645               |
| SNP_P3_94839_43240936 | NC_021166.1    | Ca_kabuli_chr07 | 43240936                | TT                              | AA                | 1946470646               |
| SNP_P3_94840_43243779 | NC_021166.1    | Ca_kabuli_chr07 | 43243779                | CC                              | AA                | 1946470648               |
| SNP_P3_94841_43248006 | NC_021166.1    | Ca_kabuli_chr07 | 43248006                | GG                              | TT                | 1946470649               |
| SNP_P3_94842_43248277 | NC_021166.1    | Ca_kabuli_chr07 | 43248277                | GG                              | AA                | 1946470651               |
| SNP_P3_94843_43248285 | NC_021166.1    | Ca_kabuli_chr07 | 43248285                | AA                              | CC                | 1946470652               |
| SNP_P3_94845_43262340 | NC_021166.1    | Ca_kabuli_chr07 | 43262340                | TT                              | AA                | 1946470654               |
| SNP_P3_94846_43262351 | NC_021166.1    | Ca_kabuli_chr07 | 43262351                | GG                              | TT                | 1946470655               |
| SNP_P3_94847_43269509 | NC_021166.1    | Ca_kabuli_chr07 | 43269509                | GG                              | AA                | 1946470657               |
| SNP_P3_94848_43269655 | NC_021166.1    | Ca_kabuli_chr07 | 43269655                | TT                              | GG                | 1946470658               |
| SNP_P3_94849_43269687 | NC_021166.1    | Ca_kabuli_chr07 | 43269687                | TT                              | CC                | 1946470660               |
| SNP_P3_94850_43269694 | NC_021166.1    | Ca_kabuli_chr07 | 43269694                | AA                              | CC                | 1946470661               |

| SNPs IDs              | Chromosome IDs | Chromosomes     | Physical positions (bp) | CDC Frontier (Reference genome) | (Pusa 256 & HPNB) | NCBI SNPdb Accession IDs |
|-----------------------|----------------|-----------------|-------------------------|---------------------------------|-------------------|--------------------------|
| SNP_P3_94851_43269698 | NC_021166.1    | Ca_kabuli_chr07 | 43269698                | AA                              | TT                | 1946470663               |
| SNP_P3_94852_43269700 | NC_021166.1    | Ca_kabuli_chr07 | 43269700                | AA                              | CC                | 1946470664               |
| SNP_P3_94854_43289195 | NC_021166.1    | Ca_kabuli_chr07 | 43289195                | TT                              | AA                | 1946470666               |
| SNP_P3_94855_43290737 | NC_021166.1    | Ca_kabuli_chr07 | 43290737                | GG                              | AA                | 1946470667               |
| SNP_P3_94856_43290757 | NC_021166.1    | Ca_kabuli_chr07 | 43290757                | TT                              | CC                | 1946470669               |
| SNP_P3_94857_43325400 | NC_021166.1    | Ca_kabuli_chr07 | 43325400                | AA                              | GG                | 1946470670               |
| SNP_P3_94858_43325402 | NC_021166.1    | Ca_kabuli_chr07 | 43325402                | AA                              | GG                | 1946470672               |
| SNP_P3_94859_43325438 | NC_021166.1    | Ca_kabuli_chr07 | 43325438                | AA                              | GG                | 1946470673               |
| SNP_P3_94860_43325710 | NC_021166.1    | Ca_kabuli_chr07 | 43325710                | AA                              | GG                | 1946470675               |
| SNP_P3_94861_43325718 | NC_021166.1    | Ca_kabuli_chr07 | 43325718                | CC                              | TT                | 1946470676               |
| SNP_P3_94862_43325720 | NC_021166.1    | Ca_kabuli_chr07 | 43325720                | GG                              | AA                | 1946470678               |
| SNP_P3_94863_43325809 | NC_021166.1    | Ca_kabuli_chr07 | 43325809                | GG                              | CC                | 1946470680               |
| SNP_P3_94864_43338179 | NC_021166.1    | Ca_kabuli_chr07 | 43338179                | GG                              | AA                | 1946470681               |
| SNP_P3_94866_43375617 | NC_021166.1    | Ca_kabuli_chr07 | 43375617                | GG                              | AA                | 1946470683               |
| SNP_P3_94867_43375635 | NC_021166.1    | Ca_kabuli_chr07 | 43375635                | CC                              | TT                | 1946470684               |
| SNP_P3_94868_43375641 | NC_021166.1    | Ca_kabuli_chr07 | 43375641                | AA                              | TT                | 1946470686               |
| SNP_P3_94869_43375644 | NC_021166.1    | Ca_kabuli_chr07 | 43375644                | CC                              | TT                | 1946470687               |
| SNP_P3_94870_43376308 | NC_021166.1    | Ca_kabuli_chr07 | 43376308                | GG                              | AA                | 1946470689               |
| SNP_P3_94871_43381021 | NC_021166.1    | Ca_kabuli_chr07 | 43381021                | CC                              | AA                | 1946470690               |
| SNP_P3_94872_43391689 | NC_021166.1    | Ca_kabuli_chr07 | 43391689                | GG                              | TT                | 1946470692               |
| SNP_P3_94873_43391693 | NC_021166.1    | Ca_kabuli_chr07 | 43391693                | GG                              | TT                | 1946470693               |
| SNP_P3_94874_43413237 | NC_021166.1    | Ca_kabuli_chr07 | 43413237                | CC                              | TT                | 1946470695               |
| SNP_P3_94876_43435069 | NC_021166.1    | Ca_kabuli_chr07 | 43435069                | AA                              | GG                | 1946470696               |
| SNP_P3_94877_43435124 | NC_021166.1    | Ca_kabuli_chr07 | 43435124                | AA                              | GG                | 1946470698               |
| SNP_P3_94878_43435125 | NC_021166.1    | Ca_kabuli_chr07 | 43435125                | GG                              | CC                | 1946470699               |
| SNP_P3_94879_43435127 | NC_021166.1    | Ca_kabuli_chr07 | 43435127                | AA                              | GG                | 1946470701               |
| SNP_P3_94880_43435132 | NC_021166.1    | Ca_kabuli_chr07 | 43435132                | AA                              | TT                | 1946470703               |
| SNP_P3_94881_43435139 | NC_021166.1    | Ca_kabuli_chr07 | 43435139                | AA                              | GG                | 1946470704               |
| SNP_P3_94882_43449031 | NC_021166.1    | Ca_kabuli_chr07 | 43449031                | CC                              | TT                | 1946470706               |
| SNP_P3_94883_43449083 | NC_021166.1    | Ca_kabuli_chr07 | 43449083                | CC                              | AA                | 1946470707               |
| SNP_P3_94884_43449090 | NC_021166.1    | Ca_kabuli_chr07 | 43449090                | GG                              | AA                | 1946470709               |
| SNP_P3_94885_43449100 | NC_021166.1    | Ca_kabuli_chr07 | 43449100                | CC                              | TT                | 1946470710               |
| SNP_P3_94886_43483233 | NC_021166.1    | Ca_kabuli_chr07 | 43483233                | TT                              | GG                | 1946470712               |
| SNP_P3_94887_43485017 | NC_021166.1    | Ca_kabuli_chr07 | 43485017                | GG                              | AA                | 1946470713               |
| SNP_P3_94888_43497119 | NC_021166.1    | Ca_kabuli_chr07 | 43497119                | CC                              | AA                | 1946470715               |
| SNP_P3_94889_43499959 | NC_021166.1    | Ca_kabuli_chr07 | 43499959                | CC                              | GG                | 1946470716               |
| SNP_P3_94890_43504495 | NC_021166.1    | Ca_kabuli_chr07 | 43504495                | CC                              | GG                | 1946470718               |
| SNP_P3_94891_43504626 | NC_021166.1    | Ca_kabuli_chr07 | 43504626                | TT                              | CC                | 1946470719               |
| SNP_P3_94892_43504911 | NC_021166.1    | Ca_kabuli_chr07 | 43504911                | TT                              | CC                | 1946470721               |
| SNP_P3_94893_43504946 | NC_021166.1    | Ca_kabuli_chr07 | 43504946                | AA                              | GG                | 1946470722               |
| SNP_P3_94894_43512865 | NC_021166.1    | Ca_kabuli_chr07 | 43512865                | TT                              | GG                | 1946470724               |
| SNP_P3_94895_43530384 | NC_021166.1    | Ca_kabuli_chr07 | 43530384                | GG                              | AA                | 1946470726               |

| SNPs IDs              | Chromosome IDs | Chromosomes     | Physical positions (bp) | CDC Frontier (Reference genome) | (Pusa 256 & HPNB) | NCBI SNPdb Accession IDs |
|-----------------------|----------------|-----------------|-------------------------|---------------------------------|-------------------|--------------------------|
| SNP_P3_94896_43530546 | NC_021166.1    | Ca_kabuli_chr07 | 43530546                | GG                              | AA                | 1946470728               |
| SNP_P3_94898_43542961 | NC_021166.1    | Ca_kabuli_chr07 | 43542961                | AA                              | GG                | 1946470729               |
| SNP_P3_94899_43566417 | NC_021166.1    | Ca_kabuli_chr07 | 43566417                | AA                              | GG                | 1946470731               |
| SNP_P3_94900_43566421 | NC_021166.1    | Ca_kabuli_chr07 | 43566421                | AA                              | CC                | 1946470732               |
| SNP_P3_94901_43566794 | NC_021166.1    | Ca_kabuli_chr07 | 43566794                | GG                              | AA                | 1946470734               |
| SNP_P3_94902_43572791 | NC_021166.1    | Ca_kabuli_chr07 | 43572791                | CC                              | AA                | 1946470736               |
| SNP_P3_94903_43606874 | NC_021166.1    | Ca_kabuli_chr07 | 43606874                | AA                              | CC                | 1946470737               |
| SNP_P3_94904_43608008 | NC_021166.1    | Ca_kabuli_chr07 | 43608008                | AA                              | TT                | 1946470739               |
| SNP_P3_94905_43608010 | NC_021166.1    | Ca_kabuli_chr07 | 43608010                | TT                              | AA                | 1946470740               |
| SNP_P3_94906_43608011 | NC_021166.1    | Ca_kabuli_chr07 | 43608011                | TT                              | AA                | 1946470742               |
| SNP_P3_94907_43608012 | NC_021166.1    | Ca_kabuli_chr07 | 43608012                | CC                              | TT                | 1946470743               |
| SNP_P3_94908_43617907 | NC_021166.1    | Ca_kabuli_chr07 | 43617907                | AA                              | GG                | 1946470745               |
| SNP_P3_94909_43617940 | NC_021166.1    | Ca_kabuli_chr07 | 43617940                | AA                              | GG                | 1946470747               |
| SNP_P3_94910_43617953 | NC_021166.1    | Ca_kabuli_chr07 | 43617953                | TT                              | GG                | 1946470748               |
| SNP_P3_94911_43624913 | NC_021166.1    | Ca_kabuli_chr07 | 43624913                | AA                              | TT                | 1946470751               |
| SNP_P3_94912_43625228 | NC_021166.1    | Ca_kabuli_chr07 | 43625228                | AA                              | GG                | 1946470752               |
| SNP_P3_94913_43627652 | NC_021166.1    | Ca_kabuli_chr07 | 43627652                | GG                              | CC                | 1946470754               |
| SNP_P3_94914_43633847 | NC_021166.1    | Ca_kabuli_chr07 | 43633847                | TT                              | CC                | 1946470756               |
| SNP_P3_94915_43633849 | NC_021166.1    | Ca_kabuli_chr07 | 43633849                | AA                              | GG                | 1946470757               |
| SNP_P3_94916_43633859 | NC_021166.1    | Ca_kabuli_chr07 | 43633859                | GG                              | AA                | 1946470759               |
| SNP_P3_94917_43636987 | NC_021166.1    | Ca_kabuli_chr07 | 43636987                | AA                              | GG                | 1946470760               |
| SNP_P3_94918_43654590 | NC_021166.1    | Ca_kabuli_chr07 | 43654590                | AA                              | GG                | 1946470762               |
| SNP_P3_94919_43678204 | NC_021166.1    | Ca_kabuli_chr07 | 43678204                | AA                              | GG                | 1946470764               |
| SNP_P3_94920_43685580 | NC_021166.1    | Ca_kabuli_chr07 | 43685580                | TT                              | GG                | 1946470765               |
| SNP_P3_94921_43685600 | NC_021166.1    | Ca_kabuli_chr07 | 43685600                | TT                              | GG                | 1946470767               |
| SNP_P3_94922_43685610 | NC_021166.1    | Ca_kabuli_chr07 | 43685610                | GG                              | AA                | 1946470768               |
| SNP_P3_94923_43685892 | NC_021166.1    | Ca_kabuli_chr07 | 43685892                | TT                              | CC                | 1946470770               |
| SNP_P3_94924_43692097 | NC_021166.1    | Ca_kabuli_chr07 | 43692097                | AA                              | TT                | 1946470771               |
| SNP_P3_94925_43692124 | NC_021166.1    | Ca_kabuli_chr07 | 43692124                | AA                              | GG                | 1946470773               |
| SNP_P3_94926_43693049 | NC_021166.1    | Ca_kabuli_chr07 | 43693049                | GG                              | AA                | 1946470775               |
| SNP_P3_94927_43693154 | NC_021166.1    | Ca_kabuli_chr07 | 43693154                | GG                              | AA                | 1946470776               |
| SNP_P3_94928_43693175 | NC_021166.1    | Ca_kabuli_chr07 | 43693175                | GG                              | AA                | 1946470778               |
| SNP_P3_94929_43693181 | NC_021166.1    | Ca_kabuli_chr07 | 43693181                | GG                              | CC                | 1946470779               |
| SNP_P3_94930_43693243 | NC_021166.1    | Ca_kabuli_chr07 | 43693243                | CC                              | AA                | 1946470781               |
| SNP_P3_94931_43702833 | NC_021166.1    | Ca_kabuli_chr07 | 43702833                | TT                              | GG                | 1946470783               |
| SNP_P3_94932_43704188 | NC_021166.1    | Ca_kabuli_chr07 | 43704188                | CC                              | GG                | 1946470784               |
| SNP_P3_94933_43704192 | NC_021166.1    | Ca_kabuli_chr07 | 43704192                | GG                              | AA                | 1946470786               |
| SNP_P3_94934_43704195 | NC_021166.1    | Ca_kabuli_chr07 | 43704195                | CC                              | GG                | 1946470787               |
| SNP_P3_94935_43704233 | NC_021166.1    | Ca_kabuli_chr07 | 43704233                | CC                              | TT                | 1946470789               |
| SNP_P3_94936_43705021 | NC_021166.1    | Ca_kabuli_chr07 | 43705021                | CC                              | TT                | 1946470790               |
| SNP_P3_94937_43705065 | NC_021166.1    | Ca_kabuli_chr07 | 43705065                | TT                              | CC                | 1946470792               |
| SNP_P3_94938_43705135 | NC_021166.1    | Ca_kabuli_chr07 | 43705135                | CC                              | AA                | 1946470794               |

| SNPs IDs              | Chromosome IDs | Chromosomes     | Physical positions (bp) | CDC Frontier (Reference genome) | (Pusa 256 & HPNB) | NCBI SNPdb Accession IDs |
|-----------------------|----------------|-----------------|-------------------------|---------------------------------|-------------------|--------------------------|
| SNP_P3_94939_43705431 | NC_021166.1    | Ca_kabuli_chr07 | 43705431                | CC                              | TT                | 1946470795               |
| SNP_P3_94940_43705465 | NC_021166.1    | Ca_kabuli_chr07 | 43705465                | CC                              | TT                | 1946470797               |
| SNP_P3_94941_43705467 | NC_021166.1    | Ca_kabuli_chr07 | 43705467                | CC                              | TT                | 1946470798               |
| SNP_P3_94942_43715279 | NC_021166.1    | Ca_kabuli_chr07 | 43715279                | TT                              | CC                | 1946470800               |
| SNP_P3_94943_43715793 | NC_021166.1    | Ca_kabuli_chr07 | 43715793                | AA                              | TT                | 1946470801               |
| SNP_P3_94944_43736102 | NC_021166.1    | Ca_kabuli_chr07 | 43736102                | AA                              | TT                | 1946470803               |
| SNP_P3_94945_43736168 | NC_021166.1    | Ca_kabuli_chr07 | 43736168                | CC                              | TT                | 1946470805               |
| SNP_P3_94946_43736173 | NC_021166.1    | Ca_kabuli_chr07 | 43736173                | TT                              | CC                | 1946470806               |
| SNP_P3_94947_43736175 | NC_021166.1    | Ca_kabuli_chr07 | 43736175                | GG                              | AA                | 1946470808               |
| SNP_P3_94948_43736219 | NC_021166.1    | Ca_kabuli_chr07 | 43736219                | GG                              | AA                | 1946470809               |
| SNP_P3_94949_43737525 | NC_021166.1    | Ca_kabuli_chr07 | 43737525                | AA                              | CC                | 1946470811               |
| SNP_P3_94950_43737731 | NC_021166.1    | Ca_kabuli_chr07 | 43737731                | AA                              | GG                | 1946470812               |
| SNP_P3_94951_43737770 | NC_021166.1    | Ca_kabuli_chr07 | 43737770                | AA                              | GG                | 1946470814               |
| SNP_P3_94953_43748287 | NC_021166.1    | Ca_kabuli_chr07 | 43748287                | GG                              | AA                | 1946470816               |
| SNP_P3_94954_43771759 | NC_021166.1    | Ca_kabuli_chr07 | 43771759                | TT                              | GG                | 1946470817               |
| SNP_P3_94955_43780659 | NC_021166.1    | Ca_kabuli_chr07 | 43780659                | AA                              | GG                | 1946470819               |
| SNP_P3_94956_43780902 | NC_021166.1    | Ca_kabuli_chr07 | 43780902                | AA                              | GG                | 1946470820               |
| SNP_P3_94957_43780934 | NC_021166.1    | Ca_kabuli_chr07 | 43780934                | CC                              | TT                | 1946470822               |
| SNP_P3_94958_43781677 | NC_021166.1    | Ca_kabuli_chr07 | 43781677                | CC                              | GG                | 1946470823               |
| SNP_P3_94959_43781686 | NC_021166.1    | Ca_kabuli_chr07 | 43781686                | AA                              | GG                | 1946470825               |
| SNP_P3_94960_43786611 | NC_021166.1    | Ca_kabuli_chr07 | 43786611                | TT                              | CC                | 1946470826               |
| SNP_P3_94961_43786637 | NC_021166.1    | Ca_kabuli_chr07 | 43786637                | TT                              | AA                | 1946470828               |
| SNP_P3_94962_43786760 | NC_021166.1    | Ca_kabuli_chr07 | 43786760                | AA                              | GG                | 1946470830               |
| SNP_P3_94963_43786802 | NC_021166.1    | Ca_kabuli_chr07 | 43786802                | AA                              | GG                | 1946470831               |
| SNP_P3_94964_43786808 | NC_021166.1    | Ca_kabuli_chr07 | 43786808                | GG                              | TT                | 1946470833               |
| SNP_P3_94965_43786889 | NC_021166.1    | Ca_kabuli_chr07 | 43786889                | AA                              | GG                | 1946470834               |
| SNP_P3_94966_43786910 | NC_021166.1    | Ca_kabuli_chr07 | 43786910                | AA                              | GG                | 1946470836               |
| SNP_P3_94969_43811508 | NC_021166.1    | Ca_kabuli_chr07 | 43811508                | CC                              | AA                | 1946470837               |
| SNP_P3_94970_43811521 | NC_021166.1    | Ca_kabuli_chr07 | 43811521                | CC                              | AA                | 1946470839               |
| SNP_P3_94971_43811587 | NC_021166.1    | Ca_kabuli_chr07 | 43811587                | AA                              | GG                | 1946470841               |
| SNP_P3_94972_43815501 | NC_021166.1    | Ca_kabuli_chr07 | 43815501                | GG                              | AA                | 1946470842               |
| SNP_P3_94973_43816159 | NC_021166.1    | Ca_kabuli_chr07 | 43816159                | AA                              | GG                | 1946470844               |
| SNP_P3_94974_43838576 | NC_021166.1    | Ca_kabuli_chr07 | 43838576                | AA                              | TT                | 1946470845               |
| SNP_P3_94975_43838679 | NC_021166.1    | Ca_kabuli_chr07 | 43838679                | AA                              | GG                | 1946470847               |
| SNP_P3_94976_43840170 | NC_021166.1    | Ca_kabuli_chr07 | 43840170                | AA                              | TT                | 1946470849               |
| SNP_P3_94977_43840377 | NC_021166.1    | Ca_kabuli_chr07 | 43840377                | CC                              | TT                | 1946470850               |
| SNP_P3_94978_43840417 | NC_021166.1    | Ca_kabuli_chr07 | 43840417                | GG                              | TT                | 1946470852               |
| SNP_P3_94979_43840433 | NC_021166.1    | Ca_kabuli_chr07 | 43840433                | GG                              | AA                | 1946470853               |
| SNP_P3_94980_43840437 | NC_021166.1    | Ca_kabuli_chr07 | 43840437                | GG                              | TT                | 1946470855               |
| SNP_P3_94981_43840461 | NC_021166.1    | Ca_kabuli_chr07 | 43840461                | AA                              | GG                | 1946470857               |
| SNP_P3_94982_43840536 | NC_021166.1    | Ca_kabuli_chr07 | 43840536                | TT                              | CC                | 1946470858               |
| SNP_P3_94983_43840569 | NC_021166.1    | Ca_kabuli_chr07 | 43840569                | AA                              | GG                | 1946470860               |



| SNPs IDs              | Chromosome IDs | Chromosomes     | Physical positions (bp) | CDC Frontier (Reference genome) | (Pusa 256 & HPNB) | NCBI SNPdb Accession IDs |
|-----------------------|----------------|-----------------|-------------------------|---------------------------------|-------------------|--------------------------|
| SNP_P3_94984_43853469 | NC_021166.1    | Ca_kabuli_chr07 | 43853469                | TT                              | CC                | 1946470861               |
| SNP_P3_94985_43859696 | NC_021166.1    | Ca_kabuli_chr07 | 43859696                | CC                              | TT                | 1946470863               |
| SNP_P3_94986_43861149 | NC_021166.1    | Ca_kabuli_chr07 | 43861149                | TT                              | GG                | 1946470864               |
| SNP_P3_94987_43900400 | NC_021166.1    | Ca_kabuli_chr07 | 43900400                | CC                              | AA                | 1946470866               |
| SNP_P3_94988_43905864 | NC_021166.1    | Ca_kabuli_chr07 | 43905864                | TT                              | GG                | 1946470868               |
| SNP_P3_94989_43922181 | NC_021166.1    | Ca_kabuli_chr07 | 43922181                | CC                              | TT                | 1946470869               |
| SNP_P3_94990_43923443 | NC_021166.1    | Ca_kabuli_chr07 | 43923443                | TT                              | CC                | 1946470871               |
| SNP_P3_94991_43952051 | NC_021166.1    | Ca_kabuli_chr07 | 43952051                | TT                              | CC                | 1946470872               |
| SNP_P3_94992_43960947 | NC_021166.1    | Ca_kabuli_chr07 | 43960947                | CC                              | TT                | 1946470874               |
| SNP_P3_94993_43965385 | NC_021166.1    | Ca_kabuli_chr07 | 43965385                | CC                              | TT                | 1946470875               |
| SNP_P3_94994_43971712 | NC_021166.1    | Ca_kabuli_chr07 | 43971712                | TT                              | CC                | 1946470877               |
| SNP_P3_94995_43975226 | NC_021166.1    | Ca_kabuli_chr07 | 43975226                | TT                              | AA                | 1946470878               |
| SNP_P3_94996_43979377 | NC_021166.1    | Ca_kabuli_chr07 | 43979377                | GG                              | CC                | 1946470880               |
| SNP_P3_94997_43993554 | NC_021166.1    | Ca_kabuli_chr07 | 43993554                | AA                              | GG                | 1946470881               |
| SNP_P3_94998_43993877 | NC_021166.1    | Ca_kabuli_chr07 | 43993877                | CC                              | GG                | 1946470883               |
| SNP_P3_94999_43993895 | NC_021166.1    | Ca_kabuli_chr07 | 43993895                | GG                              | TT                | 1946470884               |
| SNP_P3_95000_43999915 | NC_021166.1    | Ca_kabuli_chr07 | 43999915                | CC                              | TT                | 1946470886               |
| SNP_P3_95001_44001103 | NC_021166.1    | Ca_kabuli_chr07 | 44001103                | AA                              | GG                | 1946470887               |
| SNP_P3_95002_44001118 | NC_021166.1    | Ca_kabuli_chr07 | 44001118                | CC                              | TT                | 1946470889               |
| SNP_P3_95003_44001188 | NC_021166.1    | Ca_kabuli_chr07 | 44001188                | GG                              | AA                | 1946470890               |
| SNP_P3_95005_44001256 | NC_021166.1    | Ca_kabuli_chr07 | 44001256                | CC                              | TT                | 1946470892               |
| SNP_P3_95006_44001270 | NC_021166.1    | Ca_kabuli_chr07 | 44001270                | GG                              | TT                | 1946470893               |
| SNP_P3_95007_44001301 | NC_021166.1    | Ca_kabuli_chr07 | 44001301                | TT                              | AA                | 1946470895               |
| SNP_P3_95008_44001326 | NC_021166.1    | Ca_kabuli_chr07 | 44001326                | TT                              | CC                | 1946470897               |
| SNP_P3_95009_44001370 | NC_021166.1    | Ca_kabuli_chr07 | 44001370                | TT                              | CC                | 1946470898               |
| SNP_P3_95010_44001417 | NC_021166.1    | Ca_kabuli_chr07 | 44001417                | CC                              | AA                | 1946470900               |
| SNP_P3_95011_44001427 | NC_021166.1    | Ca_kabuli_chr07 | 44001427                | GG                              | AA                | 1946470901               |
| SNP_P3_95012_44001431 | NC_021166.1    | Ca_kabuli_chr07 | 44001431                | CC                              | TT                | 1946470903               |
| SNP_P3_95014_44001626 | NC_021166.1    | Ca_kabuli_chr07 | 44001626                | AA                              | TT                | 1946470905               |
| SNP_P3_95015_44001968 | NC_021166.1    | Ca_kabuli_chr07 | 44001968                | GG                              | AA                | 1946470906               |
| SNP_P3_95016_44002223 | NC_021166.1    | Ca_kabuli_chr07 | 44002223                | TT                              | AA                | 1946470908               |
| SNP_P3_95017_44002291 | NC_021166.1    | Ca_kabuli_chr07 | 44002291                | AA                              | CC                | 1946470909               |
| SNP_P3_95018_44002344 | NC_021166.1    | Ca_kabuli_chr07 | 44002344                | CC                              | AA                | 1946470911               |
| SNP_P3_95020_44022557 | NC_021166.1    | Ca_kabuli_chr07 | 44022557                | CC                              | TT                | 1946470913               |
| SNP_P3_95022_44023376 | NC_021166.1    | Ca_kabuli_chr07 | 44023376                | AA                              | TT                | 1946470914               |
| SNP_P3_95023_44034792 | NC_021166.1    | Ca_kabuli_chr07 | 44034792                | CC                              | TT                | 1946470916               |
| SNP_P3_95024_44057022 | NC_021166.1    | Ca_kabuli_chr07 | 44057022                | GG                              | AA                | 1946470917               |
| SNP_P3_95025_44076016 | NC_021166.1    | Ca_kabuli_chr07 | 44076016                | CC                              | AA                | 1946470919               |
| SNP_P3_95026_44083775 | NC_021166.1    | Ca_kabuli_chr07 | 44083775                | AA                              | CC                | 1946470921               |
| SNP_P3_95027_44084168 | NC_021166.1    | Ca_kabuli_chr07 | 44084168                | CC                              | TT                | 1946470922               |
| SNP_P3_95029_44088064 | NC_021166.1    | Ca_kabuli_chr07 | 44088064                | TT                              | GG                | 1946470924               |
| SNP_P3_95030_44104625 | NC_021166.1    | Ca_kabuli_chr07 | 44104625                | GG                              | CC                | 1946470925               |

| SNPs IDs              | Chromosome IDs | Chromosomes     | Physical positions (bp) | CDC Frontier (Reference genome) | (Pusa 256 & HPNB) | NCBI SNPdb Accession IDs |
|-----------------------|----------------|-----------------|-------------------------|---------------------------------|-------------------|--------------------------|
| SNP_P3_95031_44114061 | NC_021166.1    | Ca_kabuli_chr07 | 44114061                | AA                              | GG                | 1946470927               |
| SNP_P3_95032_44114069 | NC_021166.1    | Ca_kabuli_chr07 | 44114069                | AA                              | GG                | 1946470928               |
| SNP_P3_95033_44114072 | NC_021166.1    | Ca_kabuli_chr07 | 44114072                | AA                              | TT                | 1946470930               |
| SNP_P3_95034_44114074 | NC_021166.1    | Ca_kabuli_chr07 | 44114074                | TT                              | CC                | 1946470931               |
| SNP_P3_95035_44114254 | NC_021166.1    | Ca_kabuli_chr07 | 44114254                | GG                              | AA                | 1946470933               |
| SNP_P3_95036_44125395 | NC_021166.1    | Ca_kabuli_chr07 | 44125395                | AA                              | CC                | 1946470934               |
| SNP_P3_95037_44145301 | NC_021166.1    | Ca_kabuli_chr07 | 44145301                | CC                              | TT                | 1946470936               |
| SNP_P3_95038_44149904 | NC_021166.1    | Ca_kabuli_chr07 | 44149904                | AA                              | TT                | 1946470937               |
| SNP_P3_95039_44149913 | NC_021166.1    | Ca_kabuli_chr07 | 44149913                | GG                              | AA                | 1946470939               |
| SNP_P3_95040_44150066 | NC_021166.1    | Ca_kabuli_chr07 | 44150066                | GG                              | AA                | 1946470940               |
| SNP_P3_95043_44150903 | NC_021166.1    | Ca_kabuli_chr07 | 44150903                | AA                              | TT                | 1946470942               |
| SNP_P3_95045_44172766 | NC_021166.1    | Ca_kabuli_chr07 | 44172766                | TT                              | CC                | 1946470944               |
| SNP_P3_95046_44186806 | NC_021166.1    | Ca_kabuli_chr07 | 44186806                | GG                              | TT                | 1946470945               |
| SNP_P3_95047_44186809 | NC_021166.1    | Ca_kabuli_chr07 | 44186809                | TT                              | GG                | 1946470947               |
| SNP_P3_95048_44186829 | NC_021166.1    | Ca_kabuli_chr07 | 44186829                | GG                              | AA                | 1946470948               |
| SNP_P3_95050_44213826 | NC_021166.1    | Ca_kabuli_chr07 | 44213826                | AA                              | GG                | 1946470950               |
| SNP_P3_95051_44213889 | NC_021166.1    | Ca_kabuli_chr07 | 44213889                | AA                              | TT                | 1946470951               |
| SNP_P3_95052_44213940 | NC_021166.1    | Ca_kabuli_chr07 | 44213940                | GG                              | AA                | 1946470953               |
| SNP_P3_95053_44214117 | NC_021166.1    | Ca_kabuli_chr07 | 44214117                | AA                              | GG                | 1946470954               |
| SNP_P3_95054_44214125 | NC_021166.1    | Ca_kabuli_chr07 | 44214125                | AA                              | GG                | 1946470956               |
| SNP_P3_95055_44214199 | NC_021166.1    | Ca_kabuli_chr07 | 44214199                | TT                              | AA                | 1946470958               |
| SNP_P3_95056_44214294 | NC_021166.1    | Ca_kabuli_chr07 | 44214294                | CC                              | AA                | 1946470959               |
| SNP_P3_95057_44214308 | NC_021166.1    | Ca_kabuli_chr07 | 44214308                | TT                              | CC                | 1946470961               |
| SNP_P3_95058_44214450 | NC_021166.1    | Ca_kabuli_chr07 | 44214450                | AA                              | GG                | 1946470962               |
| SNP_P3_95059_44214492 | NC_021166.1    | Ca_kabuli_chr07 | 44214492                | TT                              | CC                | 1946470964               |
| SNP_P3_95060_44217172 | NC_021166.1    | Ca_kabuli_chr07 | 44217172                | AA                              | TT                | 1946470965               |
| SNP_P3_95061_44229006 | NC_021166.1    | Ca_kabuli_chr07 | 44229006                | GG                              | AA                | 1946470967               |
| SNP_P3_95062_44241760 | NC_021166.1    | Ca_kabuli_chr07 | 44241760                | TT                              | AA                | 1946470968               |
| SNP_P3_95064_44301281 | NC_021166.1    | Ca_kabuli_chr07 | 44301281                | TT                              | CC                | 1946470970               |
| SNP_P3_95065_44301449 | NC_021166.1    | Ca_kabuli_chr07 | 44301449                | GG                              | AA                | 1946470971               |
| SNP_P3_95066_44322209 | NC_021166.1    | Ca_kabuli_chr07 | 44322209                | AA                              | CC                | 1946470973               |
| SNP_P3_95067_44322227 | NC_021166.1    | Ca_kabuli_chr07 | 44322227                | TT                              | AA                | 1946470974               |
| SNP_P3_95068_44322237 | NC_021166.1    | Ca_kabuli_chr07 | 44322237                | AA                              | TT                | 1946470976               |
| SNP_P3_95069_44322251 | NC_021166.1    | Ca_kabuli_chr07 | 44322251                | GG                              | TT                | 1946470978               |
| SNP_P3_95070_44360670 | NC_021166.1    | Ca_kabuli_chr07 | 44360670                | CC                              | TT                | 1946470979               |
| SNP_P3_95073_44395922 | NC_021166.1    | Ca_kabuli_chr07 | 44395922                | AA                              | CC                | 1946470981               |
| SNP_P3_95074_44395967 | NC_021166.1    | Ca_kabuli_chr07 | 44395967                | AA                              | GG                | 1946470982               |
| SNP_P3_95075_44395975 | NC_021166.1    | Ca_kabuli_chr07 | 44395975                | GG                              | AA                | 1946470984               |
| SNP_P3_95076_44396011 | NC_021166.1    | Ca_kabuli_chr07 | 44396011                | TT                              | CC                | 1946470986               |
| SNP_P3_95077_44396026 | NC_021166.1    | Ca_kabuli_chr07 | 44396026                | AA                              | GG                | 1946470987               |
| SNP_P3_95078_44396043 | NC_021166.1    | Ca_kabuli_chr07 | 44396043                | CC                              | TT                | 1946470989               |
| SNP_P3_95079_44396151 | NC_021166.1    | Ca_kabuli_chr07 | 44396151                | AA                              | GG                | 1946470990               |

| SNPs IDs              | Chromosome IDs | Chromosomes     | Physical positions (bp) | CDC Frontier (Reference genome) | (Pusa 256 & HPNB) | NCBI SNPdb Accession IDs |
|-----------------------|----------------|-----------------|-------------------------|---------------------------------|-------------------|--------------------------|
| SNP_P3_95080_44396158 | NC_021166.1    | Ca_kabuli_chr07 | 44396158                | TT                              | CC                | 1946470992               |
| SNP_P3_95081_44396353 | NC_021166.1    | Ca_kabuli_chr07 | 44396353                | CC                              | TT                | 1946470993               |
| SNP_P3_95082_44396359 | NC_021166.1    | Ca_kabuli_chr07 | 44396359                | AA                              | GG                | 1946470995               |
| SNP_P3_95083_44396425 | NC_021166.1    | Ca_kabuli_chr07 | 44396425                | AA                              | CC                | 1946470996               |
| SNP_P3_95085_44396493 | NC_021166.1    | Ca_kabuli_chr07 | 44396493                | AA                              | GG                | 1946470998               |
| SNP_P3_95086_44396516 | NC_021166.1    | Ca_kabuli_chr07 | 44396516                | GG                              | AA                | 1946470999               |
| SNP_P3_95088_44404665 | NC_021166.1    | Ca_kabuli_chr07 | 44404665                | AA                              | GG                | 1946471001               |
| SNP_P3_95089_44404721 | NC_021166.1    | Ca_kabuli_chr07 | 44404721                | TT                              | CC                | 1946471002               |
| SNP_P3_95090_44408185 | NC_021166.1    | Ca_kabuli_chr07 | 44408185                | CC                              | TT                | 1946471004               |
| SNP_P3_95091_44408334 | NC_021166.1    | Ca_kabuli_chr07 | 44408334                | CC                              | TT                | 1946471005               |
| SNP_P3_95093_44425579 | NC_021166.1    | Ca_kabuli_chr07 | 44425579                | TT                              | CC                | 1946471007               |
| SNP_P3_95094_44432463 | NC_021166.1    | Ca_kabuli_chr07 | 44432463                | AA                              | CC                | 1946471008               |
| SNP_P3_95095_44432468 | NC_021166.1    | Ca_kabuli_chr07 | 44432468                | AA                              | CC                | 1946471010               |
| SNP_P3_95096_44440007 | NC_021166.1    | Ca_kabuli_chr07 | 44440007                | GG                              | AA                | 1946471011               |
| SNP_P3_95097_44440501 | NC_021166.1    | Ca_kabuli_chr07 | 44440501                | GG                              | TT                | 1946471013               |
| SNP_P3_95098_44440724 | NC_021166.1    | Ca_kabuli_chr07 | 44440724                | AA                              | GG                | 1946471014               |
| SNP_P3_95099_44441043 | NC_021166.1    | Ca_kabuli_chr07 | 44441043                | GG                              | AA                | 1946471016               |
| SNP_P3_95100_44442476 | NC_021166.1    | Ca_kabuli_chr07 | 44442476                | CC                              | TT                | 1946471017               |
| SNP_P3_95101_44442504 | NC_021166.1    | Ca_kabuli_chr07 | 44442504                | AA                              | GG                | 1946471019               |
| SNP_P3_95102_44442506 | NC_021166.1    | Ca_kabuli_chr07 | 44442506                | AA                              | TT                | 1946471020               |
| SNP_P3_95103_44442509 | NC_021166.1    | Ca_kabuli_chr07 | 44442509                | GG                              | AA                | 1946471022               |
| SNP_P3_95104_44442538 | NC_021166.1    | Ca_kabuli_chr07 | 44442538                | AA                              | GG                | 1946471023               |
| SNP_P3_95105_44442558 | NC_021166.1    | Ca_kabuli_chr07 | 44442558                | GG                              | AA                | 1946471025               |
| SNP_P3_95106_44442866 | NC_021166.1    | Ca_kabuli_chr07 | 44442866                | AA                              | TT                | 1946471026               |
| SNP_P3_95107_44448046 | NC_021166.1    | Ca_kabuli_chr07 | 44448046                | AA                              | GG                | 1946471028               |
| SNP_P3_95108_44448066 | NC_021166.1    | Ca_kabuli_chr07 | 44448066                | AA                              | CC                | 1946471029               |
| SNP_P3_95109_44448135 | NC_021166.1    | Ca_kabuli_chr07 | 44448135                | CC                              | TT                | 1946471031               |
| SNP_P3_95110_44448139 | NC_021166.1    | Ca_kabuli_chr07 | 44448139                | AA                              | TT                | 1946471032               |
| SNP_P3_95111_44448411 | NC_021166.1    | Ca_kabuli_chr07 | 44448411                | AA                              | CC                | 1946471034               |
| SNP_P3_95112_44448417 | NC_021166.1    | Ca_kabuli_chr07 | 44448417                | TT                              | CC                | 1946471036               |
| SNP_P3_95113_44458054 | NC_021166.1    | Ca_kabuli_chr07 | 44458054                | GG                              | AA                | 1946471037               |
| SNP_P3_95114_44459674 | NC_021166.1    | Ca_kabuli_chr07 | 44459674                | TT                              | CC                | 1946471039               |
| SNP_P3_95116_44477082 | NC_021166.1    | Ca_kabuli_chr07 | 44477082                | AA                              | GG                | 1946471040               |
| SNP_P3_95117_44477098 | NC_021166.1    | Ca_kabuli_chr07 | 44477098                | GG                              | AA                | 1946471042               |
| SNP_P3_95118_44477449 | NC_021166.1    | Ca_kabuli_chr07 | 44477449                | GG                              | AA                | 1946471043               |
| SNP_P3_95119_44477472 | NC_021166.1    | Ca_kabuli_chr07 | 44477472                | TT                              | AA                | 1946471045               |
| SNP_P3_95120_44477485 | NC_021166.1    | Ca_kabuli_chr07 | 44477485                | TT                              | CC                | 1946471046               |
| SNP_P3_95121_44497609 | NC_021166.1    | Ca_kabuli_chr07 | 44497609                | GG                              | AA                | 1946471048               |
| SNP_P3_95122_44508894 | NC_021166.1    | Ca_kabuli_chr07 | 44508894                | TT                              | CC                | 1946471050               |
| SNP_P3_95123_44508909 | NC_021166.1    | Ca_kabuli_chr07 | 44508909                | GG                              | TT                | 1946471051               |
| SNP_P3_95124_44523029 | NC_021166.1    | Ca_kabuli_chr07 | 44523029                | GG                              | AA                | 1946471053               |
| SNP_P3_95125_44533164 | NC_021166.1    | Ca_kabuli_chr07 | 44533164                | GG                              | AA                | 1946471054               |

| SNPs IDs              | Chromosome IDs | Chromosomes     | Physical positions (bp) | CDC Frontier (Reference genome) | (Pusa 256 & HPNB) | NCBI SNPdb Accession IDs |
|-----------------------|----------------|-----------------|-------------------------|---------------------------------|-------------------|--------------------------|
| SNP_P3_95126_44542710 | NC_021166.1    | Ca_kabuli_chr07 | 44542710                | CC                              | AA                | 1946471056               |
| SNP_P3_95127_44542984 | NC_021166.1    | Ca_kabuli_chr07 | 44542984                | CC                              | TT                | 1946471057               |
| SNP_P3_95128_44542989 | NC_021166.1    | Ca_kabuli_chr07 | 44542989                | AA                              | GG                | 1946471059               |
| SNP_P3_95129_44543017 | NC_021166.1    | Ca_kabuli_chr07 | 44543017                | CC                              | GG                | 1946471060               |
| SNP_P3_95130_44543578 | NC_021166.1    | Ca_kabuli_chr07 | 44543578                | CC                              | AA                | 1946471062               |
| SNP_P3_95132_44543995 | NC_021166.1    | Ca_kabuli_chr07 | 44543995                | TT                              | GG                | 1946471063               |
| SNP_P3_95134_44544501 | NC_021166.1    | Ca_kabuli_chr07 | 44544501                | GG                              | AA                | 1946471065               |
| SNP_P3_95135_44549153 | NC_021166.1    | Ca_kabuli_chr07 | 44549153                | TT                              | CC                | 1946471066               |
| SNP_P3_95136_44565077 | NC_021166.1    | Ca_kabuli_chr07 | 44565077                | TT                              | CC                | 1946471068               |
| SNP_P3_95137_44565094 | NC_021166.1    | Ca_kabuli_chr07 | 44565094                | TT                              | GG                | 1946471069               |
| SNP_P3_95138_44569244 | NC_021166.1    | Ca_kabuli_chr07 | 44569244                | AA                              | GG                | 1946471071               |
| SNP_P3_95139_44569270 | NC_021166.1    | Ca_kabuli_chr07 | 44569270                | TT                              | GG                | 1946471072               |
| SNP_P3_95140_44569284 | NC_021166.1    | Ca_kabuli_chr07 | 44569284                | TT                              | CC                | 1946471074               |
| SNP_P3_95141_44569765 | NC_021166.1    | Ca_kabuli_chr07 | 44569765                | AA                              | TT                | 1946471076               |
| SNP_P3_95142_44569774 | NC_021166.1    | Ca_kabuli_chr07 | 44569774                | TT                              | CC                | 1946471077               |
| SNP_P3_95143_44571282 | NC_021166.1    | Ca_kabuli_chr07 | 44571282                | CC                              | TT                | 1946471079               |
| SNP_P3_95144_44571598 | NC_021166.1    | Ca_kabuli_chr07 | 44571598                | CC                              | AA                | 1946471080               |
| SNP_P3_95145_44611514 | NC_021166.1    | Ca_kabuli_chr07 | 44611514                | AA                              | GG                | 1946471082               |
| SNP_P3_95148_44657146 | NC_021166.1    | Ca_kabuli_chr07 | 44657146                | GG                              | AA                | 1946471083               |
| SNP_P3_95150_44668225 | NC_021166.1    | Ca_kabuli_chr07 | 44668225                | GG                              | AA                | 1946471085               |
| SNP_P3_95151_44715556 | NC_021166.1    | Ca_kabuli_chr07 | 44715556                | GG                              | AA                | 1946471086               |
| SNP_P3_95152_44717173 | NC_021166.1    | Ca_kabuli_chr07 | 44717173                | TT                              | CC                | 1946471088               |
| SNP_P3_95153_44720974 | NC_021166.1    | Ca_kabuli_chr07 | 44720974                | AA                              | CC                | 1946471089               |
| SNP_P3_95155_44730392 | NC_021166.1    | Ca_kabuli_chr07 | 44730392                | TT                              | CC                | 1946471091               |
| SNP_P3_95156_44740410 | NC_021166.1    | Ca_kabuli_chr07 | 44740410                | CC                              | TT                | 1946471093               |
| SNP_P3_95158_44789871 | NC_021166.1    | Ca_kabuli_chr07 | 44789871                | TT                              | CC                | 1946471094               |
| SNP_P3_95160_44796461 | NC_021166.1    | Ca_kabuli_chr07 | 44796461                | CC                              | GG                | 1946471096               |
| SNP_P3_95161_44799672 | NC_021166.1    | Ca_kabuli_chr07 | 44799672                | CC                              | TT                | 1946471097               |
| SNP_P3_95162_44799684 | NC_021166.1    | Ca_kabuli_chr07 | 44799684                | TT                              | CC                | 1946471099               |
| SNP_P3_95163_44799699 | NC_021166.1    | Ca_kabuli_chr07 | 44799699                | CC                              | AA                | 1946471100               |
| SNP_P3_95165_44821257 | NC_021166.1    | Ca_kabuli_chr07 | 44821257                | GG                              | AA                | 1946471102               |
| SNP_P3_95166_44821747 | NC_021166.1    | Ca_kabuli_chr07 | 44821747                | GG                              | TT                | 1946471103               |
| SNP_P3_95167_44822404 | NC_021166.1    | Ca_kabuli_chr07 | 44822404                | AA                              | TT                | 1946471105               |
| SNP_P3_95168_44822656 | NC_021166.1    | Ca_kabuli_chr07 | 44822656                | CC                              | AA                | 1946471106               |
| SNP_P3_95169_44822659 | NC_021166.1    | Ca_kabuli_chr07 | 44822659                | AA                              | GG                | 1946471108               |
| SNP_P3_95170_44822679 | NC_021166.1    | Ca_kabuli_chr07 | 44822679                | AA                              | CC                | 1946471109               |
| SNP_P3_95171_44822702 | NC_021166.1    | Ca_kabuli_chr07 | 44822702                | TT                              | CC                | 1946471111               |
| SNP_P3_95172_44825089 | NC_021166.1    | Ca_kabuli_chr07 | 44825089                | GG                              | AA                | 1946471113               |
| SNP_P3_95173_44830215 | NC_021166.1    | Ca_kabuli_chr07 | 44830215                | TT                              | AA                | 1946471114               |
| SNP_P3_95174_44830231 | NC_021166.1    | Ca_kabuli_chr07 | 44830231                | AA                              | GG                | 1946471116               |
| SNP_P3_95175_44830234 | NC_021166.1    | Ca_kabuli_chr07 | 44830234                | GG                              | AA                | 1946471117               |
| SNP_P3_95176_44830235 | NC_021166.1    | Ca_kabuli_chr07 | 44830235                | CC                              | TT                | 1946471119               |

| SNPs IDs              | Chromosome IDs | Chromosomes     | Physical positions (bp) | CDC Frontier (Reference genome) | (Pusa 256 & HPNB) | NCBI SNPdb Accession IDs |
|-----------------------|----------------|-----------------|-------------------------|---------------------------------|-------------------|--------------------------|
| SNP_P3_95177_44830240 | NC_021166.1    | Ca_kabuli_chr07 | 44830240                | GG                              | AA                | 1946471120               |
| SNP_P3_95178_44830245 | NC_021166.1    | Ca_kabuli_chr07 | 44830245                | TT                              | CC                | 1946471122               |
| SNP_P3_95179_44832889 | NC_021166.1    | Ca_kabuli_chr07 | 44832889                | CC                              | TT                | 1946471123               |
| SNP_P3_95180_44832943 | NC_021166.1    | Ca_kabuli_chr07 | 44832943                | TT                              | CC                | 1946471125               |
| SNP_P3_95181_44833006 | NC_021166.1    | Ca_kabuli_chr07 | 44833006                | GG                              | TT                | 1946471126               |
| SNP_P3_95182_44833660 | NC_021166.1    | Ca_kabuli_chr07 | 44833660                | AA                              | CC                | 1946471128               |
| SNP_P3_95183_44833680 | NC_021166.1    | Ca_kabuli_chr07 | 44833680                | GG                              | AA                | 1946471129               |
| SNP_P3_95184_44874060 | NC_021166.1    | Ca_kabuli_chr07 | 44874060                | GG                              | AA                | 1946471131               |
| SNP_P3_95186_44895723 | NC_021166.1    | Ca_kabuli_chr07 | 44895723                | GG                              | AA                | 1946471132               |
| SNP_P3_95188_44913538 | NC_021166.1    | Ca_kabuli_chr07 | 44913538                | AA                              | GG                | 1946471134               |
| SNP_P3_95189_44913549 | NC_021166.1    | Ca_kabuli_chr07 | 44913549                | TT                              | CC                | 1946471135               |
| SNP_P3_95190_44913551 | NC_021166.1    | Ca_kabuli_chr07 | 44913551                | GG                              | AA                | 1946471137               |
| SNP_P3_95191_44917488 | NC_021166.1    | Ca_kabuli_chr07 | 44917488                | TT                              | AA                | 1946471139               |
| SNP_P3_95192_44925528 | NC_021166.1    | Ca_kabuli_chr07 | 44925528                | AA                              | GG                | 1946471140               |
| SNP_P3_95193_44925529 | NC_021166.1    | Ca_kabuli_chr07 | 44925529                | TT                              | CC                | 1946471142               |
| SNP_P3_95194_44925536 | NC_021166.1    | Ca_kabuli_chr07 | 44925536                | CC                              | AA                | 1946471143               |
| SNP_P3_95195_44925546 | NC_021166.1    | Ca_kabuli_chr07 | 44925546                | CC                              | TT                | 1946471145               |
| SNP_P3_95196_44929004 | NC_021166.1    | Ca_kabuli_chr07 | 44929004                | TT                              | AA                | 1946471146               |
| SNP_P3_95197_44947664 | NC_021166.1    | Ca_kabuli_chr07 | 44947664                | AA                              | GG                | 1946471148               |
| SNP_P3_95198_44960545 | NC_021166.1    | Ca_kabuli_chr07 | 44960545                | GG                              | AA                | 1946471150               |
| SNP_P3_95199_44962897 | NC_021166.1    | Ca_kabuli_chr07 | 44962897                | TT                              | GG                | 1946471151               |
| SNP_P3_95201_44977182 | NC_021166.1    | Ca_kabuli_chr07 | 44977182                | TT                              | AA                | 1946471153               |
| SNP_P3_95202_44977183 | NC_021166.1    | Ca_kabuli_chr07 | 44977183                | CC                              | AA                | 1946471154               |
| SNP_P3_95203_44977205 | NC_021166.1    | Ca_kabuli_chr07 | 44977205                | TT                              | AA                | 1946471156               |
| SNP_P3_95204_44977215 | NC_021166.1    | Ca_kabuli_chr07 | 44977215                | TT                              | CC                | 1946471157               |
| SNP_P3_95205_44977234 | NC_021166.1    | Ca_kabuli_chr07 | 44977234                | GG                              | AA                | 1946471159               |
| SNP_P3_95206_44977238 | NC_021166.1    | Ca_kabuli_chr07 | 44977238                | AA                              | GG                | 1946471161               |
| SNP_P3_95208_45044059 | NC_021166.1    | Ca_kabuli_chr07 | 45044059                | GG                              | AA                | 1946471162               |
| SNP_P3_95209_45044158 | NC_021166.1    | Ca_kabuli_chr07 | 45044158                | CC                              | TT                | 1946471164               |
| SNP_P3_95210_45044164 | NC_021166.1    | Ca_kabuli_chr07 | 45044164                | GG                              | CC                | 1946471166               |
| SNP_P3_95211_45044246 | NC_021166.1    | Ca_kabuli_chr07 | 45044246                | AA                              | GG                | 1946471167               |
| SNP_P3_95212_45044467 | NC_021166.1    | Ca_kabuli_chr07 | 45044467                | CC                              | TT                | 1946471169               |
| SNP_P3_95213_45044468 | NC_021166.1    | Ca_kabuli_chr07 | 45044468                | TT                              | CC                | 1946471171               |
| SNP_P3_95214_45044478 | NC_021166.1    | Ca_kabuli_chr07 | 45044478                | AA                              | GG                | 1946471172               |
| SNP_P3_95215_45044481 | NC_021166.1    | Ca_kabuli_chr07 | 45044481                | TT                              | GG                | 1946471174               |
| SNP_P3_95216_45044520 | NC_021166.1    | Ca_kabuli_chr07 | 45044520                | AA                              | GG                | 1946471176               |
| SNP_P3_95217_45044538 | NC_021166.1    | Ca_kabuli_chr07 | 45044538                | AA                              | GG                | 1946471177               |
| SNP_P3_95218_45044561 | NC_021166.1    | Ca_kabuli_chr07 | 45044561                | GG                              | AA                | 1946471179               |
| SNP_P3_95219_45044569 | NC_021166.1    | Ca_kabuli_chr07 | 45044569                | CC                              | TT                | 1946471180               |
| SNP_P3_95220_45044625 | NC_021166.1    | Ca_kabuli_chr07 | 45044625                | TT                              | CC                | 1946471182               |
| SNP_P3_95221_45047790 | NC_021166.1    | Ca_kabuli_chr07 | 45047790                | AA                              | GG                | 1946471183               |
| SNP_P3_95222_45047801 | NC_021166.1    | Ca_kabuli_chr07 | 45047801                | AA                              | GG                | 1946471185               |

| SNPs IDs              | Chromosome IDs | Chromosomes     | Physical positions (bp) | CDC Frontier (Reference genome) | (Pusa 256 & HPNB) | NCBI SNPdb Accession IDs |
|-----------------------|----------------|-----------------|-------------------------|---------------------------------|-------------------|--------------------------|
| SNP_P3_95223_45050952 | NC_021166.1    | Ca_kabuli_chr07 | 45050952                | AA                              | GG                | 1946471187               |
| SNP_P3_95224_45088016 | NC_021166.1    | Ca_kabuli_chr07 | 45088016                | CC                              | AA                | 1946471188               |
| SNP_P3_95226_45089336 | NC_021166.1    | Ca_kabuli_chr07 | 45089336                | GG                              | AA                | 1946471190               |
| SNP_P3_95227_45091372 | NC_021166.1    | Ca_kabuli_chr07 | 45091372                | CC                              | TT                | 1946471191               |
| SNP_P3_95228_45093773 | NC_021166.1    | Ca_kabuli_chr07 | 45093773                | GG                              | AA                | 1946471193               |
| SNP_P3_95229_45113284 | NC_021166.1    | Ca_kabuli_chr07 | 45113284                | AA                              | TT                | 1946471194               |
| SNP_P3_95230_45113311 | NC_021166.1    | Ca_kabuli_chr07 | 45113311                | TT                              | CC                | 1946471196               |
| SNP_P3_95231_45113313 | NC_021166.1    | Ca_kabuli_chr07 | 45113313                | AA                              | GG                | 1946471197               |
| SNP_P3_95232_45113341 | NC_021166.1    | Ca_kabuli_chr07 | 45113341                | AA                              | GG                | 1946471199               |
| SNP_P3_95233_45113447 | NC_021166.1    | Ca_kabuli_chr07 | 45113447                | AA                              | GG                | 1946471200               |
| SNP_P3_95234_45113457 | NC_021166.1    | Ca_kabuli_chr07 | 45113457                | AA                              | CC                | 1946471202               |
| SNP_P3_95235_45124831 | NC_021166.1    | Ca_kabuli_chr07 | 45124831                | AA                              | GG                | 1946471203               |
| SNP_P3_95236_45124874 | NC_021166.1    | Ca_kabuli_chr07 | 45124874                | AA                              | TT                | 1946471205               |
| SNP_P3_95237_45124888 | NC_021166.1    | Ca_kabuli_chr07 | 45124888                | TT                              | CC                | 1946471207               |
| SNP_P3_95238_45124893 | NC_021166.1    | Ca_kabuli_chr07 | 45124893                | TT                              | GG                | 1946471208               |
| SNP_P3_95239_45129108 | NC_021166.1    | Ca_kabuli_chr07 | 45129108                | TT                              | CC                | 1946471210               |
| SNP_P3_95240_45132001 | NC_021166.1    | Ca_kabuli_chr07 | 45132001                | TT                              | GG                | 1946471211               |
| SNP_P3_95241_45132002 | NC_021166.1    | Ca_kabuli_chr07 | 45132002                | TT                              | AA                | 1946471213               |
| SNP_P3_95242_45149500 | NC_021166.1    | Ca_kabuli_chr07 | 45149500                | AA                              | TT                | 1946471214               |
| SNP_P3_95243_45149648 | NC_021166.1    | Ca_kabuli_chr07 | 45149648                | TT                              | CC                | 1946471215               |
| SNP_P3_95244_45149736 | NC_021166.1    | Ca_kabuli_chr07 | 45149736                | AA                              | GG                | 1946471217               |
| SNP_P3_95245_45149790 | NC_021166.1    | Ca_kabuli_chr07 | 45149790                | TT                              | AA                | 1946471218               |
| SNP_P3_95246_45149989 | NC_021166.1    | Ca_kabuli_chr07 | 45149989                | CC                              | TT                | 1946471220               |
| SNP_P3_95247_45150900 | NC_021166.1    | Ca_kabuli_chr07 | 45150900                | AA                              | GG                | 1946471221               |
| SNP_P3_95248_45150915 | NC_021166.1    | Ca_kabuli_chr07 | 45150915                | TT                              | AA                | 1946471223               |
| SNP_P3_95249_45150928 | NC_021166.1    | Ca_kabuli_chr07 | 45150928                | AA                              | GG                | 1946471224               |
| SNP_P3_95250_45151007 | NC_021166.1    | Ca_kabuli_chr07 | 45151007                | TT                              | CC                | 1946471226               |
| SNP_P3_95251_45151167 | NC_021166.1    | Ca_kabuli_chr07 | 45151167                | CC                              | GG                | 1946471227               |
| SNP_P3_95252_45151201 | NC_021166.1    | Ca_kabuli_chr07 | 45151201                | AA                              | CC                | 1946471229               |
| SNP_P3_95253_45151257 | NC_021166.1    | Ca_kabuli_chr07 | 45151257                | AA                              | GG                | 1946471230               |
| SNP_P3_95254_45151314 | NC_021166.1    | Ca_kabuli_chr07 | 45151314                | TT                              | CC                | 1946471232               |
| SNP_P3_95255_45151494 | NC_021166.1    | Ca_kabuli_chr07 | 45151494                | TT                              | CC                | 1946471234               |
| SNP_P3_95256_45151523 | NC_021166.1    | Ca_kabuli_chr07 | 45151523                | CC                              | TT                | 1946471235               |
| SNP_P3_95257_45159579 | NC_021166.1    | Ca_kabuli_chr07 | 45159579                | AA                              | TT                | 1946471237               |
| SNP_P3_95258_45161552 | NC_021166.1    | Ca_kabuli_chr07 | 45161552                | GG                              | AA                | 1946471238               |
| SNP_P3_95259_45162592 | NC_021166.1    | Ca_kabuli_chr07 | 45162592                | TT                              | CC                | 1946471240               |
| SNP_P3_95260_45169409 | NC_021166.1    | Ca_kabuli_chr07 | 45169409                | GG                              | AA                | 1946471241               |
| SNP_P3_95261_45169595 | NC_021166.1    | Ca_kabuli_chr07 | 45169595                | TT                              | AA                | 1946471243               |
| SNP_P3_95262_45169598 | NC_021166.1    | Ca_kabuli_chr07 | 45169598                | AA                              | GG                | 1946471244               |
| SNP_P3_95264_45169882 | NC_021166.1    | Ca_kabuli_chr07 | 45169882                | CC                              | TT                | 1946471246               |
| SNP_P3_95265_45169907 | NC_021166.1    | Ca_kabuli_chr07 | 45169907                | GG                              | AA                | 1946471247               |
| SNP_P3_95267_45170508 | NC_021166.1    | Ca_kabuli_chr07 | 45170508                | CC                              | AA                | 1946471249               |

| SNPs IDs              | Chromosome IDs | Chromosomes     | Physical positions (bp) | CDC Frontier (Reference genome) | (Pusa 256 & HPNB) | NCBI SNPdb Accession IDs |
|-----------------------|----------------|-----------------|-------------------------|---------------------------------|-------------------|--------------------------|
| SNP_P3_95269_45171045 | NC_021166.1    | Ca_kabuli_chr07 | 45171045                | CC                              | AA                | 1946471250               |
| SNP_P3_95270_45172210 | NC_021166.1    | Ca_kabuli_chr07 | 45172210                | CC                              | TT                | 1946471252               |
| SNP_P3_95271_45172212 | NC_021166.1    | Ca_kabuli_chr07 | 45172212                | GG                              | TT                | 1946471253               |
| SNP_P3_95272_45177996 | NC_021166.1    | Ca_kabuli_chr07 | 45177996                | TT                              | AA                | 1946471255               |
| SNP_P3_95273_45178040 | NC_021166.1    | Ca_kabuli_chr07 | 45178040                | CC                              | TT                | 1946471256               |
| SNP_P3_95274_45178048 | NC_021166.1    | Ca_kabuli_chr07 | 45178048                | AA                              | TT                | 1946471258               |
| SNP_P3_95275_45178096 | NC_021166.1    | Ca_kabuli_chr07 | 45178096                | TT                              | AA                | 1946471259               |
| SNP_P3_95276_45178108 | NC_021166.1    | Ca_kabuli_chr07 | 45178108                | CC                              | TT                | 1946471261               |
| SNP_P3_95277_45178510 | NC_021166.1    | Ca_kabuli_chr07 | 45178510                | TT                              | CC                | 1946471263               |
| SNP_P3_95278_45178534 | NC_021166.1    | Ca_kabuli_chr07 | 45178534                | GG                              | AA                | 1946471264               |
| SNP_P3_95279_45178963 | NC_021166.1    | Ca_kabuli_chr07 | 45178963                | GG                              | AA                | 1946471266               |
| SNP_P3_95280_45179010 | NC_021166.1    | Ca_kabuli_chr07 | 45179010                | TT                              | AA                | 1946471267               |
| SNP_P3_95281_45179049 | NC_021166.1    | Ca_kabuli_chr07 | 45179049                | CC                              | AA                | 1946471269               |
| SNP_P3_95282_45179224 | NC_021166.1    | Ca_kabuli_chr07 | 45179224                | AA                              | GG                | 1946471270               |
| SNP_P3_95283_45179264 | NC_021166.1    | Ca_kabuli_chr07 | 45179264                | GG                              | AA                | 1946471272               |
| SNP_P3_95284_45179427 | NC_021166.1    | Ca_kabuli_chr07 | 45179427                | AA                              | TT                | 1946471273               |
| SNP_P3_95285_45179441 | NC_021166.1    | Ca_kabuli_chr07 | 45179441                | TT                              | CC                | 1946471275               |
| SNP_P3_95286_45179494 | NC_021166.1    | Ca_kabuli_chr07 | 45179494                | TT                              | GG                | 1946471277               |
| SNP_P3_95287_45206435 | NC_021166.1    | Ca_kabuli_chr07 | 45206435                | TT                              | CC                | 1946471278               |
| SNP_P3_95288_45206436 | NC_021166.1    | Ca_kabuli_chr07 | 45206436                | TT                              | CC                | 1946471280               |
| SNP_P3_95292_45219022 | NC_021166.1    | Ca_kabuli_chr07 | 45219022                | CC                              | AA                | 1946471282               |
| SNP_P3_95293_45219826 | NC_021166.1    | Ca_kabuli_chr07 | 45219826                | GG                              | AA                | 1946471283               |
| SNP_P3_95295_45235356 | NC_021166.1    | Ca_kabuli_chr07 | 45235356                | GG                              | AA                | 1946471285               |
| SNP_P3_95296_45239190 | NC_021166.1    | Ca_kabuli_chr07 | 45239190                | TT                              | AA                | 1946471286               |
| SNP_P3_95297_45239191 | NC_021166.1    | Ca_kabuli_chr07 | 45239191                | TT                              | AA                | 1946471288               |
| SNP_P3_95298_45239383 | NC_021166.1    | Ca_kabuli_chr07 | 45239383                | CC                              | TT                | 1946471289               |
| SNP_P3_95300_45299120 | NC_021166.1    | Ca_kabuli_chr07 | 45299120                | TT                              | GG                | 1946471291               |
| SNP_P3_95301_45322487 | NC_021166.1    | Ca_kabuli_chr07 | 45322487                | TT                              | CC                | 1946471292               |
| SNP_P3_95303_45352180 | NC_021166.1    | Ca_kabuli_chr07 | 45352180                | TT                              | CC                | 1946471294               |
| SNP_P3_95304_45364494 | NC_021166.1    | Ca_kabuli_chr07 | 45364494                | GG                              | AA                | 1946471296               |
| SNP_P3_95305_45371489 | NC_021166.1    | Ca_kabuli_chr07 | 45371489                | AA                              | GG                | 1946471297               |
| SNP_P3_95306_45376598 | NC_021166.1    | Ca_kabuli_chr07 | 45376598                | AA                              | CC                | 1946471299               |
| SNP_P3_95307_45376637 | NC_021166.1    | Ca_kabuli_chr07 | 45376637                | AA                              | GG                | 1946471300               |
| SNP_P3_95308_45378299 | NC_021166.1    | Ca_kabuli_chr07 | 45378299                | TT                              | CC                | 1946471302               |
| SNP_P3_95309_45378307 | NC_021166.1    | Ca_kabuli_chr07 | 45378307                | GG                              | AA                | 1946471303               |
| SNP_P3_95310_45378318 | NC_021166.1    | Ca_kabuli_chr07 | 45378318                | CC                              | AA                | 1946471304               |
| SNP_P3_95311_45378326 | NC_021166.1    | Ca_kabuli_chr07 | 45378326                | TT                              | CC                | 1946471306               |
| SNP_P3_95312_45378377 | NC_021166.1    | Ca_kabuli_chr07 | 45378377                | CC                              | TT                | 1946471307               |
| SNP_P3_95313_45378380 | NC_021166.1    | Ca_kabuli_chr07 | 45378380                | AA                              | CC                | 1946471309               |
| SNP_P3_95314_45378779 | NC_021166.1    | Ca_kabuli_chr07 | 45378779                | AA                              | CC                | 1946471310               |
| SNP_P3_95315_45383400 | NC_021166.1    | Ca_kabuli_chr07 | 45383400                | TT                              | AA                | 1946471312               |
| SNP_P3_95316_45383550 | NC_021166.1    | Ca_kabuli_chr07 | 45383550                | TT                              | AA                | 1946471313               |

| SNPs IDs              | Chromosome IDs | Chromosomes     | Physical positions (bp) | CDC Frontier (Reference genome) | (Pusa 256 & HPNB) | NCBI SNPdb Accession IDs |
|-----------------------|----------------|-----------------|-------------------------|---------------------------------|-------------------|--------------------------|
| SNP_P3_95317_45383551 | NC_021166.1    | Ca_kabuli_chr07 | 45383551                | GG                              | TT                | 1946471315               |
| SNP_P3_95318_45383582 | NC_021166.1    | Ca_kabuli_chr07 | 45383582                | TT                              | AA                | 1946471316               |
| SNP_P3_95319_45383926 | NC_021166.1    | Ca_kabuli_chr07 | 45383926                | GG                              | AA                | 1946471318               |
| SNP_P3_95320_45386260 | NC_021166.1    | Ca_kabuli_chr07 | 45386260                | TT                              | CC                | 1946471319               |
| SNP_P3_95321_45386484 | NC_021166.1    | Ca_kabuli_chr07 | 45386484                | AA                              | GG                | 1946471321               |
| SNP_P3_95322_45386487 | NC_021166.1    | Ca_kabuli_chr07 | 45386487                | GG                              | CC                | 1946471322               |
| SNP_P3_95323_45388841 | NC_021166.1    | Ca_kabuli_chr07 | 45388841                | CC                              | TT                | 1946471324               |
| SNP_P3_95324_45389477 | NC_021166.1    | Ca_kabuli_chr07 | 45389477                | GG                              | AA                | 1946471325               |
| SNP_P3_95325_45391224 | NC_021166.1    | Ca_kabuli_chr07 | 45391224                | AA                              | GG                | 1946471327               |
| SNP_P3_95326_45391242 | NC_021166.1    | Ca_kabuli_chr07 | 45391242                | GG                              | AA                | 1946471328               |
| SNP_P3_95327_45391299 | NC_021166.1    | Ca_kabuli_chr07 | 45391299                | AA                              | GG                | 1946471330               |
| SNP_P3_95328_45391404 | NC_021166.1    | Ca_kabuli_chr07 | 45391404                | TT                              | CC                | 1946471331               |
| SNP_P3_95329_45391545 | NC_021166.1    | Ca_kabuli_chr07 | 45391545                | AA                              | GG                | 1946471333               |
| SNP_P3_95330_45391598 | NC_021166.1    | Ca_kabuli_chr07 | 45391598                | GG                              | TT                | 1946471334               |
| SNP_P3_95331_45391605 | NC_021166.1    | Ca_kabuli_chr07 | 45391605                | AA                              | TT                | 1946471336               |
| SNP_P3_95332_45400202 | NC_021166.1    | Ca_kabuli_chr07 | 45400202                | TT                              | GG                | 1946471337               |
| SNP_P3_95334_45409332 | NC_021166.1    | Ca_kabuli_chr07 | 45409332                | CC                              | AA                | 1946471339               |
| SNP_P3_95335_45436633 | NC_021166.1    | Ca_kabuli_chr07 | 45436633                | TT                              | CC                | 1946471340               |
| SNP_P3_95336_45439849 | NC_021166.1    | Ca_kabuli_chr07 | 45439849                | AA                              | GG                | 1946471342               |
| SNP_P3_95337_45439962 | NC_021166.1    | Ca_kabuli_chr07 | 45439962                | CC                              | TT                | 1946471343               |
| SNP_P3_95338_45439995 | NC_021166.1    | Ca_kabuli_chr07 | 45439995                | GG                              | AA                | 1946471345               |
| SNP_P3_95339_45440005 | NC_021166.1    | Ca_kabuli_chr07 | 45440005                | AA                              | CC                | 1946471346               |
| SNP_P3_95340_45440043 | NC_021166.1    | Ca_kabuli_chr07 | 45440043                | GG                              | TT                | 1946471348               |
| SNP_P3_95341_45440046 | NC_021166.1    | Ca_kabuli_chr07 | 45440046                | AA                              | GG                | 1946471349               |
| SNP_P3_95342_45440061 | NC_021166.1    | Ca_kabuli_chr07 | 45440061                | CC                              | AA                | 1946471351               |
| SNP_P3_95343_45440067 | NC_021166.1    | Ca_kabuli_chr07 | 45440067                | TT                              | AA                | 1946471353               |
| SNP_P3_95344_45440070 | NC_021166.1    | Ca_kabuli_chr07 | 45440070                | TT                              | CC                | 1946471354               |
| SNP_P3_95345_45440073 | NC_021166.1    | Ca_kabuli_chr07 | 45440073                | CC                              | TT                | 1946471356               |
| SNP_P3_95346_45440077 | NC_021166.1    | Ca_kabuli_chr07 | 45440077                | CC                              | TT                | 1946471357               |
| SNP_P3_95347_45443533 | NC_021166.1    | Ca_kabuli_chr07 | 45443533                | AA                              | CC                | 1946471359               |
| SNP_P3_95348_45446300 | NC_021166.1    | Ca_kabuli_chr07 | 45446300                | CC                              | TT                | 1946471360               |
| SNP_P3_95349_45447100 | NC_021166.1    | Ca_kabuli_chr07 | 45447100                | AA                              | GG                | 1946471362               |
| SNP_P3_95350_45447122 | NC_021166.1    | Ca_kabuli_chr07 | 45447122                | GG                              | AA                | 1946471363               |
| SNP_P3_95351_45448217 | NC_021166.1    | Ca_kabuli_chr07 | 45448217                | GG                              | TT                | 1946471365               |
| SNP_P3_95352_45458218 | NC_021166.1    | Ca_kabuli_chr07 | 45458218                | TT                              | AA                | 1946471366               |
| SNP_P3_95354_45497726 | NC_021166.1    | Ca_kabuli_chr07 | 45497726                | GG                              | AA                | 1946471368               |
| SNP_P3_95355_45498678 | NC_021166.1    | Ca_kabuli_chr07 | 45498678                | TT                              | GG                | 1946471370               |
| SNP_P3_95357_45520481 | NC_021166.1    | Ca_kabuli_chr07 | 45520481                | CC                              | AA                | 1946471371               |
| SNP_P3_95359_45529671 | NC_021166.1    | Ca_kabuli_chr07 | 45529671                | TT                              | CC                | 1946471373               |
| SNP_P3_95360_45539243 | NC_021166.1    | Ca_kabuli_chr07 | 45539243                | AA                              | CC                | 1946471374               |
| SNP_P3_95361_45539365 | NC_021166.1    | Ca_kabuli_chr07 | 45539365                | AA                              | GG                | 1946471376               |
| SNP_P3_95362_45539399 | NC_021166.1    | Ca_kabuli_chr07 | 45539399                | TT                              | CC                | 1946471377               |



| SNPs IDs              | Chromosome IDs | Chromosomes     | Physical positions (bp) | CDC Frontier (Reference genome) | (Pusa 256 & HPNB) | NCBI SNPdb Accession IDs |
|-----------------------|----------------|-----------------|-------------------------|---------------------------------|-------------------|--------------------------|
| SNP_P3_95363_45539549 | NC_021166.1    | Ca_kabuli_chr07 | 45539549                | AA                              | CC                | 1946471379               |
| SNP_P3_95364_45539691 | NC_021166.1    | Ca_kabuli_chr07 | 45539691                | AA                              | TT                | 1946471380               |
| SNP_P3_95365_45539757 | NC_021166.1    | Ca_kabuli_chr07 | 45539757                | TT                              | CC                | 1946471382               |
| SNP_P3_95366_45539870 | NC_021166.1    | Ca_kabuli_chr07 | 45539870                | CC                              | TT                | 1946471383               |
| SNP_P3_95367_45540436 | NC_021166.1    | Ca_kabuli_chr07 | 45540436                | GG                              | CC                | 1946471385               |
| SNP_P3_95368_45540507 | NC_021166.1    | Ca_kabuli_chr07 | 45540507                | TT                              | CC                | 1946471387               |
| SNP_P3_95369_45541470 | NC_021166.1    | Ca_kabuli_chr07 | 45541470                | TT                              | AA                | 1946471388               |
| SNP_P3_95370_45541471 | NC_021166.1    | Ca_kabuli_chr07 | 45541471                | TT                              | GG                | 1946471390               |
| SNP_P3_95371_45541472 | NC_021166.1    | Ca_kabuli_chr07 | 45541472                | GG                              | TT                | 1946471391               |
| SNP_P3_95373_45603259 | NC_021166.1    | Ca_kabuli_chr07 | 45603259                | GG                              | AA                | 1946471393               |
| SNP_P3_95374_45613740 | NC_021166.1    | Ca_kabuli_chr07 | 45613740                | AA                              | GG                | 1946471394               |
| SNP_P3_95375_45634261 | NC_021166.1    | Ca_kabuli_chr07 | 45634261                | AA                              | GG                | 1946471396               |
| SNP_P3_95376_45634331 | NC_021166.1    | Ca_kabuli_chr07 | 45634331                | CC                              | TT                | 1946471397               |
| SNP_P3_95377_45634332 | NC_021166.1    | Ca_kabuli_chr07 | 45634332                | TT                              | CC                | 1946471399               |
| SNP_P3_95378_45634342 | NC_021166.1    | Ca_kabuli_chr07 | 45634342                | AA                              | TT                | 1946471401               |
| SNP_P3_95379_45634344 | NC_021166.1    | Ca_kabuli_chr07 | 45634344                | CC                              | TT                | 1946471402               |
| SNP_P3_95380_45634345 | NC_021166.1    | Ca_kabuli_chr07 | 45634345                | AA                              | GG                | 1946471404               |
| SNP_P3_95381_45634520 | NC_021166.1    | Ca_kabuli_chr07 | 45634520                | AA                              | CC                | 1946471406               |
| SNP_P3_95382_45651577 | NC_021166.1    | Ca_kabuli_chr07 | 45651577                | AA                              | TT                | 1946471408               |
| SNP_P3_95383_45658299 | NC_021166.1    | Ca_kabuli_chr07 | 45658299                | TT                              | CC                | 1946471410               |
| SNP_P3_95384_45658358 | NC_021166.1    | Ca_kabuli_chr07 | 45658358                | GG                              | AA                | 1946471411               |
| SNP_P3_95385_45663777 | NC_021166.1    | Ca_kabuli_chr07 | 45663777                | TT                              | CC                | 1946471413               |
| SNP_P3_95386_45668398 | NC_021166.1    | Ca_kabuli_chr07 | 45668398                | GG                              | AA                | 1946471414               |
| SNP_P3_95387_45668810 | NC_021166.1    | Ca_kabuli_chr07 | 45668810                | AA                              | GG                | 1946471416               |
| SNP_P3_95388_45678582 | NC_021166.1    | Ca_kabuli_chr07 | 45678582                | CC                              | TT                | 1946471418               |
| SNP_P3_95390_45687815 | NC_021166.1    | Ca_kabuli_chr07 | 45687815                | TT                              | CC                | 1946471420               |
| SNP_P3_95391_45696292 | NC_021166.1    | Ca_kabuli_chr07 | 45696292                | TT                              | CC                | 1946471421               |
| SNP_P3_95393_45729589 | NC_021166.1    | Ca_kabuli_chr07 | 45729589                | AA                              | CC                | 1946471423               |
| SNP_P3_95394_45729593 | NC_021166.1    | Ca_kabuli_chr07 | 45729593                | AA                              | GG                | 1946471425               |
| SNP_P3_95395_45729604 | NC_021166.1    | Ca_kabuli_chr07 | 45729604                | TT                              | AA                | 1946471426               |
| SNP_P3_95396_45738166 | NC_021166.1    | Ca_kabuli_chr07 | 45738166                | AA                              | CC                | 1946471428               |
| SNP_P3_95398_45788815 | NC_021166.1    | Ca_kabuli_chr07 | 45788815                | CC                              | TT                | 1946471429               |
| SNP_P3_95399_45800924 | NC_021166.1    | Ca_kabuli_chr07 | 45800924                | GG                              | AA                | 1946471431               |
| SNP_P3_95400_45802454 | NC_021166.1    | Ca_kabuli_chr07 | 45802454                | AA                              | GG                | 1946471434               |
| SNP_P3_95402_45832003 | NC_021166.1    | Ca_kabuli_chr07 | 45832003                | GG                              | AA                | 1946471435               |
| SNP_P3_95403_45840436 | NC_021166.1    | Ca_kabuli_chr07 | 45840436                | CC                              | AA                | 1946471437               |
| SNP_P3_95404_45855053 | NC_021166.1    | Ca_kabuli_chr07 | 45855053                | AA                              | GG                | 1946471438               |
| SNP_P3_95405_45855828 | NC_021166.1    | Ca_kabuli_chr07 | 45855828                | GG                              | AA                | 1946471440               |
| SNP_P3_95406_45857022 | NC_021166.1    | Ca_kabuli_chr07 | 45857022                | TT                              | AA                | 1946471441               |
| SNP_P3_95407_45857024 | NC_021166.1    | Ca_kabuli_chr07 | 45857024                | TT                              | AA                | 1946471443               |
| SNP_P3_95408_45857047 | NC_021166.1    | Ca_kabuli_chr07 | 45857047                | TT                              | AA                | 1946471444               |
| SNP_P3_95410_45857100 | NC_021166.1    | Ca_kabuli_chr07 | 45857100                | CC                              | TT                | 1946471446               |

| SNPs IDs              | Chromosome IDs | Chromosomes     | Physical positions (bp) | CDC Frontier (Reference genome) | (Pusa 256 & HPNB) | NCBI SNPdb Accession IDs |
|-----------------------|----------------|-----------------|-------------------------|---------------------------------|-------------------|--------------------------|
| SNP_P3_95411_45857104 | NC_021166.1    | Ca_kabuli_chr07 | 45857104                | GG                              | AA                | 1946471448               |
| SNP_P3_95412_45857429 | NC_021166.1    | Ca_kabuli_chr07 | 45857429                | TT                              | CC                | 1946471449               |
| SNP_P3_95413_45864344 | NC_021166.1    | Ca_kabuli_chr07 | 45864344                | AA                              | TT                | 1946471451               |
| SNP_P3_95414_45894512 | NC_021166.1    | Ca_kabuli_chr07 | 45894512                | TT                              | CC                | 1946471452               |
| SNP_P3_95416_45925339 | NC_021166.1    | Ca_kabuli_chr07 | 45925339                | GG                              | AA                | 1946471454               |
| SNP_P3_95417_45925356 | NC_021166.1    | Ca_kabuli_chr07 | 45925356                | AA                              | CC                | 1946471456               |
| SNP_P3_95418_45925360 | NC_021166.1    | Ca_kabuli_chr07 | 45925360                | TT                              | CC                | 1946471457               |
| SNP_P3_95419_45925453 | NC_021166.1    | Ca_kabuli_chr07 | 45925453                | AA                              | CC                | 1946471459               |
| SNP_P3_95420_45925471 | NC_021166.1    | Ca_kabuli_chr07 | 45925471                | CC                              | TT                | 1946471460               |
| SNP_P3_95421_45925490 | NC_021166.1    | Ca_kabuli_chr07 | 45925490                | TT                              | GG                | 1946471462               |
| SNP_P3_95422_45925516 | NC_021166.1    | Ca_kabuli_chr07 | 45925516                | TT                              | CC                | 1946471464               |
| SNP_P3_95423_45925519 | NC_021166.1    | Ca_kabuli_chr07 | 45925519                | TT                              | CC                | 1946471465               |
| SNP_P3_95425_45925534 | NC_021166.1    | Ca_kabuli_chr07 | 45925534                | TT                              | CC                | 1946471467               |
| SNP_P3_95426_45925564 | NC_021166.1    | Ca_kabuli_chr07 | 45925564                | CC                              | TT                | 1946471469               |
| SNP_P3_95427_45925573 | NC_021166.1    | Ca_kabuli_chr07 | 45925573                | GG                              | AA                | 1946471470               |
| SNP_P3_95428_45925588 | NC_021166.1    | Ca_kabuli_chr07 | 45925588                | TT                              | AA                | 1946471472               |
| SNP_P3_95429_45925603 | NC_021166.1    | Ca_kabuli_chr07 | 45925603                | TT                              | CC                | 1946471473               |
| SNP_P3_95430_45925612 | NC_021166.1    | Ca_kabuli_chr07 | 45925612                | TT                              | CC                | 1946471475               |
| SNP_P3_95431_45925631 | NC_021166.1    | Ca_kabuli_chr07 | 45925631                | GG                              | CC                | 1946471476               |
| SNP_P3_95432_45925639 | NC_021166.1    | Ca_kabuli_chr07 | 45925639                | AA                              | GG                | 1946471478               |
| SNP_P3_95433_45925642 | NC_021166.1    | Ca_kabuli_chr07 | 45925642                | TT                              | CC                | 1946471479               |
| SNP_P3_95434_45925656 | NC_021166.1    | Ca_kabuli_chr07 | 45925656                | TT                              | AA                | 1946471481               |
| SNP_P3_95435_45925723 | NC_021166.1    | Ca_kabuli_chr07 | 45925723                | AA                              | CC                | 1946471482               |
| SNP_P3_95436_45925809 | NC_021166.1    | Ca_kabuli_chr07 | 45925809                | CC                              | TT                | 1946471483               |
| SNP_P3_95437_45925813 | NC_021166.1    | Ca_kabuli_chr07 | 45925813                | AA                              | TT                | 1946471485               |
| SNP_P3_95438_45925866 | NC_021166.1    | Ca_kabuli_chr07 | 45925866                | GG                              | AA                | 1946471486               |
| SNP_P3_95439_45925899 | NC_021166.1    | Ca_kabuli_chr07 | 45925899                | AA                              | GG                | 1946471488               |
| SNP_P3_95440_45925914 | NC_021166.1    | Ca_kabuli_chr07 | 45925914                | TT                              | CC                | 1946471489               |
| SNP_P3_95441_45925929 | NC_021166.1    | Ca_kabuli_chr07 | 45925929                | CC                              | TT                | 1946471491               |
| SNP_P3_95442_45925950 | NC_021166.1    | Ca_kabuli_chr07 | 45925950                | AA                              | GG                | 1946471492               |
| SNP_P3_95443_45925962 | NC_021166.1    | Ca_kabuli_chr07 | 45925962                | CC                              | TT                | 1946471494               |
| SNP_P3_95444_45925986 | NC_021166.1    | Ca_kabuli_chr07 | 45925986                | CC                              | TT                | 1946471496               |
| SNP_P3_95445_45926002 | NC_021166.1    | Ca_kabuli_chr07 | 45926002                | GG                              | AA                | 1946471497               |
| SNP_P3_95446_45927423 | NC_021166.1    | Ca_kabuli_chr07 | 45927423                | GG                              | AA                | 1946471499               |
| SNP_P3_95447_45927495 | NC_021166.1    | Ca_kabuli_chr07 | 45927495                | AA                              | GG                | 1946471501               |
| SNP_P3_95448_45927501 | NC_021166.1    | Ca_kabuli_chr07 | 45927501                | CC                              | TT                | 1946471502               |
| SNP_P3_95449_45927621 | NC_021166.1    | Ca_kabuli_chr07 | 45927621                | CC                              | AA                | 1946471504               |
| SNP_P3_95450_45927848 | NC_021166.1    | Ca_kabuli_chr07 | 45927848                | TT                              | CC                | 1946471505               |
| SNP_P3_95451_45927882 | NC_021166.1    | Ca_kabuli_chr07 | 45927882                | GG                              | AA                | 1946471507               |
| SNP_P3_95452_45927884 | NC_021166.1    | Ca_kabuli_chr07 | 45927884                | GG                              | CC                | 1946471508               |
| SNP_P3_95453_45927902 | NC_021166.1    | Ca_kabuli_chr07 | 45927902                | GG                              | AA                | 1946471510               |
| SNP_P3_95454_45927930 | NC_021166.1    | Ca_kabuli_chr07 | 45927930                | TT                              | CC                | 1946471511               |

| SNPs IDs              | Chromosome IDs | Chromosomes     | Physical positions (bp) | CDC Frontier (Reference genome) | (Pusa 256 & HPNB) | NCBI SNPdb Accession IDs |
|-----------------------|----------------|-----------------|-------------------------|---------------------------------|-------------------|--------------------------|
| SNP_P3_95455_45927954 | NC_021166.1    | Ca_kabuli_chr07 | 45927954                | AA                              | GG                | 1946471513               |
| SNP_P3_95456_45927975 | NC_021166.1    | Ca_kabuli_chr07 | 45927975                | CC                              | TT                | 1946471515               |
| SNP_P3_95457_45927984 | NC_021166.1    | Ca_kabuli_chr07 | 45927984                | CC                              | TT                | 1946471516               |
| SNP_P3_95458_45928017 | NC_021166.1    | Ca_kabuli_chr07 | 45928017                | TT                              | CC                | 1946471518               |
| SNP_P3_95459_45928053 | NC_021166.1    | Ca_kabuli_chr07 | 45928053                | TT                              | CC                | 1946471519               |
| SNP_P3_95460_45933596 | NC_021166.1    | Ca_kabuli_chr07 | 45933596                | AA                              | GG                | 1946471521               |
| SNP_P3_95461_45954863 | NC_021166.1    | Ca_kabuli_chr07 | 45954863                | AA                              | CC                | 1946471522               |
| SNP_P3_95462_45991233 | NC_021166.1    | Ca_kabuli_chr07 | 45991233                | GG                              | TT                | 1946471524               |
| SNP_P3_95463_45991472 | NC_021166.1    | Ca_kabuli_chr07 | 45991472                | CC                              | TT                | 1946471526               |
| SNP_P3_95464_45991731 | NC_021166.1    | Ca_kabuli_chr07 | 45991731                | GG                              | AA                | 1946471527               |
| SNP_P3_95465_45993614 | NC_021166.1    | Ca_kabuli_chr07 | 45993614                | CC                              | TT                | 1946471529               |
| SNP_P3_95466_45993627 | NC_021166.1    | Ca_kabuli_chr07 | 45993627                | CC                              | GG                | 1946471530               |
| SNP_P3_95467_46006768 | NC_021166.1    | Ca_kabuli_chr07 | 46006768                | CC                              | TT                | 1946471532               |
| SNP_P3_95468_46023840 | NC_021166.1    | Ca_kabuli_chr07 | 46023840                | CC                              | TT                | 1946471533               |
| SNP_P3_95469_46025147 | NC_021166.1    | Ca_kabuli_chr07 | 46025147                | TT                              | CC                | 1946471535               |
| SNP_P3_95470_46025168 | NC_021166.1    | Ca_kabuli_chr07 | 46025168                | GG                              | AA                | 1946471536               |
| SNP_P3_95471_46025779 | NC_021166.1    | Ca_kabuli_chr07 | 46025779                | GG                              | AA                | 1946471538               |
| SNP_P3_95472_46030736 | NC_021166.1    | Ca_kabuli_chr07 | 46030736                | TT                              | CC                | 1946471540               |
| SNP_P3_95473_46092772 | NC_021166.1    | Ca_kabuli_chr07 | 46092772                | AA                              | GG                | 1946471541               |
| SNP_P3_95474_46093132 | NC_021166.1    | Ca_kabuli_chr07 | 46093132                | TT                              | CC                | 1946471543               |
| SNP_P3_95475_46093144 | NC_021166.1    | Ca_kabuli_chr07 | 46093144                | AA                              | CC                | 1946471544               |
| SNP_P3_95476_46095976 | NC_021166.1    | Ca_kabuli_chr07 | 46095976                | TT                              | CC                | 1946471546               |
| SNP_P3_95478_46105893 | NC_021166.1    | Ca_kabuli_chr07 | 46105893                | TT                              | AA                | 1946471548               |
| SNP_P3_95479_46121322 | NC_021166.1    | Ca_kabuli_chr07 | 46121322                | AA                              | TT                | 1946471549               |
| SNP_P3_95480_46121327 | NC_021166.1    | Ca_kabuli_chr07 | 46121327                | TT                              | CC                | 1946471551               |
| SNP_P3_95481_46123910 | NC_021166.1    | Ca_kabuli_chr07 | 46123910                | AA                              | GG                | 1946471552               |
| SNP_P3_95482_46123980 | NC_021166.1    | Ca_kabuli_chr07 | 46123980                | AA                              | GG                | 1946471554               |
| SNP_P3_95483_46123987 | NC_021166.1    | Ca_kabuli_chr07 | 46123987                | TT                              | CC                | 1946471555               |
| SNP_P3_95484_46123988 | NC_021166.1    | Ca_kabuli_chr07 | 46123988                | TT                              | CC                | 1946471557               |
| SNP_P3_95485_46124033 | NC_021166.1    | Ca_kabuli_chr07 | 46124033                | AA                              | CC                | 1946471558               |
| SNP_P3_95486_46124046 | NC_021166.1    | Ca_kabuli_chr07 | 46124046                | AA                              | GG                | 1946471560               |
| SNP_P3_95487_46124047 | NC_021166.1    | Ca_kabuli_chr07 | 46124047                | TT                              | GG                | 1946471562               |
| SNP_P3_95488_46126389 | NC_021166.1    | Ca_kabuli_chr07 | 46126389                | GG                              | CC                | 1946471563               |
| SNP_P3_95489_46126672 | NC_021166.1    | Ca_kabuli_chr07 | 46126672                | AA                              | GG                | 1946471565               |
| SNP_P3_95490_46127826 | NC_021166.1    | Ca_kabuli_chr07 | 46127826                | GG                              | AA                | 1946471566               |
| SNP_P3_95491_46127878 | NC_021166.1    | Ca_kabuli_chr07 | 46127878                | AA                              | GG                | 1946471568               |
| SNP_P3_95492_46127882 | NC_021166.1    | Ca_kabuli_chr07 | 46127882                | AA                              | GG                | 1946471569               |
| SNP_P3_95493_46127939 | NC_021166.1    | Ca_kabuli_chr07 | 46127939                | TT                              | GG                | 1946471571               |
| SNP_P3_95494_46127971 | NC_021166.1    | Ca_kabuli_chr07 | 46127971                | CC                              | TT                | 1946471573               |
| SNP_P3_95495_46128101 | NC_021166.1    | Ca_kabuli_chr07 | 46128101                | AA                              | GG                | 1946471574               |
| SNP_P3_95496_46128116 | NC_021166.1    | Ca_kabuli_chr07 | 46128116                | CC                              | TT                | 1946471576               |
| SNP_P3_95497_46132200 | NC_021166.1    | Ca_kabuli_chr07 | 46132200                | TT                              | CC                | 1946471577               |

| SNPs IDs              | Chromosome IDs | Chromosomes     | Physical positions (bp) | CDC Frontier (Reference genome) | (Pusa 256 & HPNB) | NCBI SNPdb Accession IDs |
|-----------------------|----------------|-----------------|-------------------------|---------------------------------|-------------------|--------------------------|
| SNP_P3_95498_46132203 | NC_021166.1    | Ca_kabuli_chr07 | 46132203                | AA                              | TT                | 1946471579               |
| SNP_P3_95499_46132548 | NC_021166.1    | Ca_kabuli_chr07 | 46132548                | AA                              | CC                | 1946471580               |
| SNP_P3_95500_46132588 | NC_021166.1    | Ca_kabuli_chr07 | 46132588                | GG                              | AA                | 1946471582               |
| SNP_P3_95501_46132603 | NC_021166.1    | Ca_kabuli_chr07 | 46132603                | TT                              | AA                | 1946471583               |
| SNP_P3_95502_46132617 | NC_021166.1    | Ca_kabuli_chr07 | 46132617                | AA                              | GG                | 1946471585               |
| SNP_P3_95503_46132645 | NC_021166.1    | Ca_kabuli_chr07 | 46132645                | CC                              | TT                | 1946471587               |
| SNP_P3_95504_46132666 | NC_021166.1    | Ca_kabuli_chr07 | 46132666                | AA                              | GG                | 1946471588               |
| SNP_P3_95505_46132671 | NC_021166.1    | Ca_kabuli_chr07 | 46132671                | CC                              | TT                | 1946471590               |
| SNP_P3_95506_46178498 | NC_021166.1    | Ca_kabuli_chr07 | 46178498                | AA                              | GG                | 1946471591               |
| SNP_P3_95507_46178595 | NC_021166.1    | Ca_kabuli_chr07 | 46178595                | TT                              | CC                | 1946471593               |
| SNP_P3_95508_46178613 | NC_021166.1    | Ca_kabuli_chr07 | 46178613                | AA                              | GG                | 1946471594               |
| SNP_P3_95509_46178628 | NC_021166.1    | Ca_kabuli_chr07 | 46178628                | TT                              | CC                | 1946471596               |
| SNP_P3_95510_46178658 | NC_021166.1    | Ca_kabuli_chr07 | 46178658                | CC                              | TT                | 1946471597               |
| SNP_P3_95511_46178863 | NC_021166.1    | Ca_kabuli_chr07 | 46178863                | CC                              | TT                | 1946471599               |
| SNP_P3_95512_46178917 | NC_021166.1    | Ca_kabuli_chr07 | 46178917                | CC                              | TT                | 1946471601               |
| SNP_P3_95513_46178924 | NC_021166.1    | Ca_kabuli_chr07 | 46178924                | CC                              | TT                | 1946471602               |
| SNP_P3_95514_46178956 | NC_021166.1    | Ca_kabuli_chr07 | 46178956                | GG                              | AA                | 1946471604               |
| SNP_P3_95515_46185493 | NC_021166.1    | Ca_kabuli_chr07 | 46185493                | CC                              | AA                | 1946471606               |
| SNP_P3_95516_46185499 | NC_021166.1    | Ca_kabuli_chr07 | 46185499                | CC                              | AA                | 1946471607               |
| SNP_P3_95517_46185500 | NC_021166.1    | Ca_kabuli_chr07 | 46185500                | AA                              | GG                | 1946471609               |
| SNP_P3_95518_46185508 | NC_021166.1    | Ca_kabuli_chr07 | 46185508                | TT                              | CC                | 1946471610               |
| SNP_P3_95519_46185626 | NC_021166.1    | Ca_kabuli_chr07 | 46185626                | GG                              | AA                | 1946471612               |
| SNP_P3_95520_46185671 | NC_021166.1    | Ca_kabuli_chr07 | 46185671                | TT                              | CC                | 1946471613               |
| SNP_P3_95521_46214762 | NC_021166.1    | Ca_kabuli_chr07 | 46214762                | CC                              | TT                | 1946471615               |
| SNP_P3_95522_46217006 | NC_021166.1    | Ca_kabuli_chr07 | 46217006                | CC                              | AA                | 1946471616               |
| SNP_P3_95523_46227929 | NC_021166.1    | Ca_kabuli_chr07 | 46227929                | CC                              | GG                | 1946471618               |
| SNP_P3_95524_46239737 | NC_021166.1    | Ca_kabuli_chr07 | 46239737                | AA                              | CC                | 1946471619               |
| SNP_P3_95526_46250185 | NC_021166.1    | Ca_kabuli_chr07 | 46250185                | TT                              | CC                | 1946471621               |
| SNP_P3_95528_46250320 | NC_021166.1    | Ca_kabuli_chr07 | 46250320                | AA                              | GG                | 1946471622               |
| SNP_P3_95529_46250467 | NC_021166.1    | Ca_kabuli_chr07 | 46250467                | GG                              | AA                | 1946471624               |
| SNP_P3_95530_46250577 | NC_021166.1    | Ca_kabuli_chr07 | 46250577                | CC                              | TT                | 1946471625               |
| SNP_P3_95531_46250665 | NC_021166.1    | Ca_kabuli_chr07 | 46250665                | CC                              | TT                | 1946471627               |
| SNP_P3_95532_46276553 | NC_021166.1    | Ca_kabuli_chr07 | 46276553                | TT                              | CC                | 1946471629               |
| SNP_P3_95533_46276911 | NC_021166.1    | Ca_kabuli_chr07 | 46276911                | GG                              | AA                | 1946471630               |
| SNP_P3_95534_46279735 | NC_021166.1    | Ca_kabuli_chr07 | 46279735                | TT                              | CC                | 1946471632               |
| SNP_P3_95535_46279740 | NC_021166.1    | Ca_kabuli_chr07 | 46279740                | GG                              | AA                | 1946471633               |
| SNP_P3_95536_46279769 | NC_021166.1    | Ca_kabuli_chr07 | 46279769                | TT                              | CC                | 1946471635               |
| SNP_P3_95537_46282383 | NC_021166.1    | Ca_kabuli_chr07 | 46282383                | AA                              | GG                | 1946471637               |
| SNP_P3_95538_46299980 | NC_021166.1    | Ca_kabuli_chr07 | 46299980                | GG                              | AA                | 1946471638               |
| SNP_P3_95539_46302478 | NC_021166.1    | Ca_kabuli_chr07 | 46302478                | TT                              | GG                | 1946471640               |
| SNP_P3_95540_46331645 | NC_021166.1    | Ca_kabuli_chr07 | 46331645                | TT                              | CC                | 1946471641               |
| SNP_P3_95541_46331824 | NC_021166.1    | Ca_kabuli_chr07 | 46331824                | CC                              | AA                | 1946471643               |

| SNPs IDs              | Chromosome IDs | Chromosomes     | Physical positions (bp) | CDC Frontier (Reference genome) | (Pusa 256 & HPNB) | NCBI SNPdb Accession IDs |
|-----------------------|----------------|-----------------|-------------------------|---------------------------------|-------------------|--------------------------|
| SNP_P3_95542_46331873 | NC_021166.1    | Ca_kabuli_chr07 | 46331873                | TT                              | AA                | 1946471645               |
| SNP_P3_95543_46331883 | NC_021166.1    | Ca_kabuli_chr07 | 46331883                | TT                              | CC                | 1946471646               |
| SNP_P3_95544_46332056 | NC_021166.1    | Ca_kabuli_chr07 | 46332056                | CC                              | TT                | 1946471648               |
| SNP_P3_95545_46332073 | NC_021166.1    | Ca_kabuli_chr07 | 46332073                | AA                              | CC                | 1946471649               |
| SNP_P3_95546_46332210 | NC_021166.1    | Ca_kabuli_chr07 | 46332210                | AA                              | TT                | 1946471651               |
| SNP_P3_95547_46332234 | NC_021166.1    | Ca_kabuli_chr07 | 46332234                | TT                              | CC                | 1946471652               |
| SNP_P3_95548_46332271 | NC_021166.1    | Ca_kabuli_chr07 | 46332271                | GG                              | AA                | 1946471654               |
| SNP_P3_95550_46332343 | NC_021166.1    | Ca_kabuli_chr07 | 46332343                | TT                              | AA                | 1946471655               |
| SNP_P3_95551_46332375 | NC_021166.1    | Ca_kabuli_chr07 | 46332375                | TT                              | AA                | 1946471657               |
| SNP_P3_95552_46332442 | NC_021166.1    | Ca_kabuli_chr07 | 46332442                | CC                              | TT                | 1946471658               |
| SNP_P3_95553_46332470 | NC_021166.1    | Ca_kabuli_chr07 | 46332470                | AA                              | TT                | 1946471660               |
| SNP_P3_95554_46332473 | NC_021166.1    | Ca_kabuli_chr07 | 46332473                | TT                              | AA                | 1946471661               |
| SNP_P3_95555_46332552 | NC_021166.1    | Ca_kabuli_chr07 | 46332552                | CC                              | TT                | 1946471663               |
| SNP_P3_95556_46332554 | NC_021166.1    | Ca_kabuli_chr07 | 46332554                | AA                              | GG                | 1946471665               |
| SNP_P3_95557_46332692 | NC_021166.1    | Ca_kabuli_chr07 | 46332692                | GG                              | AA                | 1946471666               |
| SNP_P3_95558_46332694 | NC_021166.1    | Ca_kabuli_chr07 | 46332694                | TT                              | CC                | 1946471668               |
| SNP_P3_95560_46344658 | NC_021166.1    | Ca_kabuli_chr07 | 46344658                | AA                              | CC                | 1946471669               |
| SNP_P3_95562_46361177 | NC_021166.1    | Ca_kabuli_chr07 | 46361177                | CC                              | TT                | 1946471670               |
| SNP_P3_95563_46361211 | NC_021166.1    | Ca_kabuli_chr07 | 46361211                | AA                              | GG                | 1946471672               |
| SNP_P3_95564_46363482 | NC_021166.1    | Ca_kabuli_chr07 | 46363482                | CC                              | TT                | 1946471673               |
| SNP_P3_95565_46366670 | NC_021166.1    | Ca_kabuli_chr07 | 46366670                | CC                              | AA                | 1946471675               |
| SNP_P3_95566_46367691 | NC_021166.1    | Ca_kabuli_chr07 | 46367691                | AA                              | CC                | 1946471676               |
| SNP_P3_95567_46367708 | NC_021166.1    | Ca_kabuli_chr07 | 46367708                | AA                              | TT                | 1946471678               |
| SNP_P3_95568_46382672 | NC_021166.1    | Ca_kabuli_chr07 | 46382672                | TT                              | AA                | 1946471680               |
| SNP_P3_95569_46385690 | NC_021166.1    | Ca_kabuli_chr07 | 46385690                | CC                              | AA                | 1946471681               |
| SNP_P3_95570_46385695 | NC_021166.1    | Ca_kabuli_chr07 | 46385695                | TT                              | CC                | 1946471682               |
| SNP_P3_95571_46385702 | NC_021166.1    | Ca_kabuli_chr07 | 46385702                | TT                              | AA                | 1946471684               |
| SNP_P3_95572_46387267 | NC_021166.1    | Ca_kabuli_chr07 | 46387267                | CC                              | TT                | 1946471685               |
| SNP_P3_95573_46387273 | NC_021166.1    | Ca_kabuli_chr07 | 46387273                | AA                              | GG                | 1946471687               |
| SNP_P3_95574_46391461 | NC_021166.1    | Ca_kabuli_chr07 | 46391461                | TT                              | AA                | 1946471688               |
| SNP_P3_95575_46403635 | NC_021166.1    | Ca_kabuli_chr07 | 46403635                | AA                              | TT                | 1946471690               |
| SNP_P3_95576_46403640 | NC_021166.1    | Ca_kabuli_chr07 | 46403640                | CC                              | TT                | 1946471692               |
| SNP_P3_95577_46416534 | NC_021166.1    | Ca_kabuli_chr07 | 46416534                | GG                              | AA                | 1946471693               |
| SNP_P3_95578_46416981 | NC_021166.1    | Ca_kabuli_chr07 | 46416981                | GG                              | AA                | 1946471695               |
| SNP_P3_95579_46418099 | NC_021166.1    | Ca_kabuli_chr07 | 46418099                | GG                              | AA                | 1946471696               |
| SNP_P3_95580_46418105 | NC_021166.1    | Ca_kabuli_chr07 | 46418105                | GG                              | AA                | 1946471698               |
| SNP_P3_95581_46419232 | NC_021166.1    | Ca_kabuli_chr07 | 46419232                | GG                              | AA                | 1946471699               |
| SNP_P3_95582_46419987 | NC_021166.1    | Ca_kabuli_chr07 | 46419987                | GG                              | TT                | 1946471701               |
| SNP_P3_95583_46424187 | NC_021166.1    | Ca_kabuli_chr07 | 46424187                | AA                              | CC                | 1946471703               |
| SNP_P3_95584_46444856 | NC_021166.1    | Ca_kabuli_chr07 | 46444856                | AA                              | TT                | 1946471704               |
| SNP_P3_95585_46444857 | NC_021166.1    | Ca_kabuli_chr07 | 46444857                | TT                              | AA                | 1946471706               |
| SNP_P3_95586_46453790 | NC_021166.1    | Ca_kabuli_chr07 | 46453790                | GG                              | AA                | 1946471707               |

| SNPs IDs              | Chromosome IDs | Chromosomes     | Physical positions (bp) | CDC Frontier (Reference genome) | (Pusa 256 & HPNB) | NCBI SNPdb Accession IDs |
|-----------------------|----------------|-----------------|-------------------------|---------------------------------|-------------------|--------------------------|
| SNP_P3_95587_46478835 | NC_021166.1    | Ca_kabuli_chr07 | 46478835                | GG                              | TT                | 1946471709               |
| SNP_P3_95588_46478932 | NC_021166.1    | Ca_kabuli_chr07 | 46478932                | CC                              | AA                | 1946471710               |
| SNP_P3_95589_46479493 | NC_021166.1    | Ca_kabuli_chr07 | 46479493                | CC                              | TT                | 1946471712               |
| SNP_P3_95591_46484785 | NC_021166.1    | Ca_kabuli_chr07 | 46484785                | CC                              | TT                | 1946471713               |
| SNP_P3_95592_46488380 | NC_021166.1    | Ca_kabuli_chr07 | 46488380                | GG                              | AA                | 1946471715               |
| SNP_P3_95593_46491709 | NC_021166.1    | Ca_kabuli_chr07 | 46491709                | TT                              | CC                | 1946471717               |
| SNP_P3_95594_46491710 | NC_021166.1    | Ca_kabuli_chr07 | 46491710                | GG                              | AA                | 1946471718               |
| SNP_P3_95595_46491727 | NC_021166.1    | Ca_kabuli_chr07 | 46491727                | AA                              | GG                | 1946471720               |
| SNP_P3_95596_46491734 | NC_021166.1    | Ca_kabuli_chr07 | 46491734                | CC                              | TT                | 1946471721               |
| SNP_P3_95597_46491735 | NC_021166.1    | Ca_kabuli_chr07 | 46491735                | AA                              | GG                | 1946471723               |
| SNP_P3_95598_46491744 | NC_021166.1    | Ca_kabuli_chr07 | 46491744                | AA                              | GG                | 1946471725               |
| SNP_P3_95599_46491750 | NC_021166.1    | Ca_kabuli_chr07 | 46491750                | GG                              | AA                | 1946471727               |
| SNP_P3_95600_46500908 | NC_021166.1    | Ca_kabuli_chr07 | 46500908                | AA                              | GG                | 1946471728               |
| SNP_P3_95601_46500909 | NC_021166.1    | Ca_kabuli_chr07 | 46500909                | GG                              | AA                | 1946471730               |
| SNP_P3_95602_46505455 | NC_021166.1    | Ca_kabuli_chr07 | 46505455                | AA                              | CC                | 1946471732               |
| SNP_P3_95603_46505499 | NC_021166.1    | Ca_kabuli_chr07 | 46505499                | GG                              | TT                | 1946471733               |
| SNP_P3_95604_46505538 | NC_021166.1    | Ca_kabuli_chr07 | 46505538                | CC                              | AA                | 1946471735               |
| SNP_P3_95605_46505608 | NC_021166.1    | Ca_kabuli_chr07 | 46505608                | GG                              | TT                | 1946471736               |
| SNP_P3_95606_46505609 | NC_021166.1    | Ca_kabuli_chr07 | 46505609                | TT                              | GG                | 1946471738               |
| SNP_P3_95608_46527402 | NC_021166.1    | Ca_kabuli_chr07 | 46527402                | AA                              | CC                | 1946471739               |
| SNP_P3_95609_46537107 | NC_021166.1    | Ca_kabuli_chr07 | 46537107                | GG                              | AA                | 1946471741               |
| SNP_P3_95610_46537112 | NC_021166.1    | Ca_kabuli_chr07 | 46537112                | CC                              | AA                | 1946471742               |
| SNP_P3_95611_46537728 | NC_021166.1    | Ca_kabuli_chr07 | 46537728                | AA                              | TT                | 1946471744               |
| SNP_P3_95612_46566223 | NC_021166.1    | Ca_kabuli_chr07 | 46566223                | AA                              | TT                | 1946471745               |
| SNP_P3_95613_46566808 | NC_021166.1    | Ca_kabuli_chr07 | 46566808                | AA                              | TT                | 1946471747               |
| SNP_P3_95614_46569958 | NC_021166.1    | Ca_kabuli_chr07 | 46569958                | CC                              | AA                | 1946471748               |
| SNP_P3_95615_46569969 | NC_021166.1    | Ca_kabuli_chr07 | 46569969                | AA                              | CC                | 1946471750               |
| SNP_P3_95616_46570006 | NC_021166.1    | Ca_kabuli_chr07 | 46570006                | AA                              | GG                | 1946471751               |
| SNP_P3_95617_46570251 | NC_021166.1    | Ca_kabuli_chr07 | 46570251                | CC                              | TT                | 1946471753               |
| SNP_P3_95618_46570390 | NC_021166.1    | Ca_kabuli_chr07 | 46570390                | CC                              | TT                | 1946471754               |
| SNP_P3_95620_46581178 | NC_021166.1    | Ca_kabuli_chr07 | 46581178                | AA                              | TT                | 1946471756               |
| SNP_P3_95621_46584740 | NC_021166.1    | Ca_kabuli_chr07 | 46584740                | GG                              | AA                | 1946471757               |
| SNP_P3_95622_46585067 | NC_021166.1    | Ca_kabuli_chr07 | 46585067                | CC                              | AA                | 1946471759               |
| SNP_P3_95623_46585767 | NC_021166.1    | Ca_kabuli_chr07 | 46585767                | GG                              | CC                | 1946471760               |
| SNP_P3_95624_46593295 | NC_021166.1    | Ca_kabuli_chr07 | 46593295                | AA                              | TT                | 1946471762               |
| SNP_P3_95625_46593508 | NC_021166.1    | Ca_kabuli_chr07 | 46593508                | TT                              | AA                | 1946471763               |
| SNP_P3_95626_46593660 | NC_021166.1    | Ca_kabuli_chr07 | 46593660                | CC                              | AA                | 1946471765               |
| SNP_P3_95627_46593667 | NC_021166.1    | Ca_kabuli_chr07 | 46593667                | CC                              | GG                | 1946471766               |
| SNP_P3_95629_46599577 | NC_021166.1    | Ca_kabuli_chr07 | 46599577                | AA                              | CC                | 1946471768               |
| SNP_P3_95630_46606903 | NC_021166.1    | Ca_kabuli_chr07 | 46606903                | TT                              | CC                | 1946471769               |
| SNP_P3_95631_46607310 | NC_021166.1    | Ca_kabuli_chr07 | 46607310                | TT                              | GG                | 1946471771               |
| SNP_P3_95632_46609569 | NC_021166.1    | Ca_kabuli_chr07 | 46609569                | GG                              | TT                | 1946471772               |

| SNPs IDs              | Chromosome IDs | Chromosomes     | Physical positions (bp) | CDC Frontier (Reference genome) | (Pusa 256 & HPNB) | NCBI SNPdb Accession IDs |
|-----------------------|----------------|-----------------|-------------------------|---------------------------------|-------------------|--------------------------|
| SNP_P3_95633_46631911 | NC_021166.1    | Ca_kabuli_chr07 | 46631911                | GG                              | AA                | 1946471774               |
| SNP_P3_95635_46659693 | NC_021166.1    | Ca_kabuli_chr07 | 46659693                | CC                              | TT                | 1946471775               |
| SNP_P3_95636_46659726 | NC_021166.1    | Ca_kabuli_chr07 | 46659726                | AA                              | TT                | 1946471776               |
| SNP_P3_95637_46667401 | NC_021166.1    | Ca_kabuli_chr07 | 46667401                | TT                              | CC                | 1946471778               |
| SNP_P3_95638_46667407 | NC_021166.1    | Ca_kabuli_chr07 | 46667407                | CC                              | AA                | 1946471779               |
| SNP_P3_95639_46667416 | NC_021166.1    | Ca_kabuli_chr07 | 46667416                | CC                              | AA                | 1946471781               |
| SNP_P3_95640_46667425 | NC_021166.1    | Ca_kabuli_chr07 | 46667425                | TT                              | AA                | 1946471782               |
| SNP_P3_95641_46675325 | NC_021166.1    | Ca_kabuli_chr07 | 46675325                | CC                              | GG                | 1946471784               |
| SNP_P3_95642_46707773 | NC_021166.1    | Ca_kabuli_chr07 | 46707773                | GG                              | AA                | 1946471785               |
| SNP_P3_95644_46735111 | NC_021166.1    | Ca_kabuli_chr07 | 46735111                | AA                              | GG                | 1946471787               |
| SNP_P3_95645_46754558 | NC_021166.1    | Ca_kabuli_chr07 | 46754558                | AA                              | GG                | 1946471788               |
| SNP_P3_95646_46777843 | NC_021166.1    | Ca_kabuli_chr07 | 46777843                | CC                              | TT                | 1946471789               |
| SNP_P3_95647_46787293 | NC_021166.1    | Ca_kabuli_chr07 | 46787293                | GG                              | CC                | 1946471791               |
| SNP_P3_95649_46794342 | NC_021166.1    | Ca_kabuli_chr07 | 46794342                | CC                              | TT                | 1946471792               |
| SNP_P3_95650_46814347 | NC_021166.1    | Ca_kabuli_chr07 | 46814347                | AA                              | TT                | 1946471794               |
| SNP_P3_95651_46820451 | NC_021166.1    | Ca_kabuli_chr07 | 46820451                | GG                              | AA                | 1946471795               |
| SNP_P3_95653_46844018 | NC_021166.1    | Ca_kabuli_chr07 | 46844018                | GG                              | AA                | 1946471797               |
| SNP_P3_95654_46844811 | NC_021166.1    | Ca_kabuli_chr07 | 46844811                | CC                              | TT                | 1946471798               |
| SNP_P3_95655_46885895 | NC_021166.1    | Ca_kabuli_chr07 | 46885895                | AA                              | TT                | 1946471800               |
| SNP_P3_95656_46885896 | NC_021166.1    | Ca_kabuli_chr07 | 46885896                | AA                              | CC                | 1946471801               |
| SNP_P3_95657_46885911 | NC_021166.1    | Ca_kabuli_chr07 | 46885911                | TT                              | CC                | 1946471803               |
| SNP_P3_95658_46885912 | NC_021166.1    | Ca_kabuli_chr07 | 46885912                | TT                              | CC                | 1946471804               |
| SNP_P3_95659_46885931 | NC_021166.1    | Ca_kabuli_chr07 | 46885931                | GG                              | CC                | 1946471806               |
| SNP_P3_95660_46886007 | NC_021166.1    | Ca_kabuli_chr07 | 46886007                | TT                              | GG                | 1946471807               |
| SNP_P3_95661_46886062 | NC_021166.1    | Ca_kabuli_chr07 | 46886062                | CC                              | AA                | 1946471809               |
| SNP_P3_95662_46886304 | NC_021166.1    | Ca_kabuli_chr07 | 46886304                | AA                              | TT                | 1946471810               |
| SNP_P3_95664_46886470 | NC_021166.1    | Ca_kabuli_chr07 | 46886470                | GG                              | TT                | 1946471812               |
| SNP_P3_95665_46919510 | NC_021166.1    | Ca_kabuli_chr07 | 46919510                | AA                              | GG                | 1946471813               |
| SNP_P3_95666_46928462 | NC_021166.1    | Ca_kabuli_chr07 | 46928462                | CC                              | TT                | 1946471815               |
| SNP_P3_95667_46930307 | NC_021166.1    | Ca_kabuli_chr07 | 46930307                | TT                              | AA                | 1946471817               |
| SNP_P3_95668_46947071 | NC_021166.1    | Ca_kabuli_chr07 | 46947071                | CC                              | TT                | 1946471818               |
| SNP_P3_95669_46960491 | NC_021166.1    | Ca_kabuli_chr07 | 46960491                | GG                              | AA                | 1946471820               |
| SNP_P3_95670_46960516 | NC_021166.1    | Ca_kabuli_chr07 | 46960516                | TT                              | CC                | 1946471821               |
| SNP_P3_95671_46960543 | NC_021166.1    | Ca_kabuli_chr07 | 46960543                | CC                              | TT                | 1946471823               |
| SNP_P3_95672_46967780 | NC_021166.1    | Ca_kabuli_chr07 | 46967780                | CC                              | GG                | 1946471824               |
| SNP_P3_95673_46969314 | NC_021166.1    | Ca_kabuli_chr07 | 46969314                | GG                              | CC                | 1946471826               |
| SNP_P3_95674_46985126 | NC_021166.1    | Ca_kabuli_chr07 | 46985126                | GG                              | AA                | 1946471827               |
| SNP_P3_95675_46990884 | NC_021166.1    | Ca_kabuli_chr07 | 46990884                | TT                              | CC                | 1946471829               |
| SNP_P3_95676_47014570 | NC_021166.1    | Ca_kabuli_chr07 | 47014570                | AA                              | CC                | 1946471830               |
| SNP_P3_95677_47014586 | NC_021166.1    | Ca_kabuli_chr07 | 47014586                | TT                              | CC                | 1946471832               |
| SNP_P3_95678_47014587 | NC_021166.1    | Ca_kabuli_chr07 | 47014587                | GG                              | AA                | 1946471833               |
| SNP_P3_95679_47015203 | NC_021166.1    | Ca_kabuli_chr07 | 47015203                | TT                              | CC                | 1946471835               |

| SNPs IDs              | Chromosome IDs | Chromosomes     | Physical positions (bp) | CDC Frontier (Reference genome) | (Pusa 256 & HPNB) | NCBI SNPdb Accession IDs |
|-----------------------|----------------|-----------------|-------------------------|---------------------------------|-------------------|--------------------------|
| SNP_P3_95680_47025574 | NC_021166.1    | Ca_kabuli_chr07 | 47025574                | AA                              | CC                | 1946471836               |
| SNP_P3_95681_47031802 | NC_021166.1    | Ca_kabuli_chr07 | 47031802                | AA                              | GG                | 1946471838               |
| SNP_P3_95682_47068168 | NC_021166.1    | Ca_kabuli_chr07 | 47068168                | AA                              | TT                | 1946471839               |
| SNP_P3_95683_47083006 | NC_021166.1    | Ca_kabuli_chr07 | 47083006                | AA                              | GG                | 1946471841               |
| SNP_P3_95684_47083022 | NC_021166.1    | Ca_kabuli_chr07 | 47083022                | AA                              | GG                | 1946471842               |
| SNP_P3_95685_47083035 | NC_021166.1    | Ca_kabuli_chr07 | 47083035                | GG                              | AA                | 1946471844               |
| SNP_P3_95686_47083036 | NC_021166.1    | Ca_kabuli_chr07 | 47083036                | TT                              | AA                | 1946471845               |
| SNP_P3_95687_47083037 | NC_021166.1    | Ca_kabuli_chr07 | 47083037                | GG                              | AA                | 1946471847               |
| SNP_P3_95688_47083053 | NC_021166.1    | Ca_kabuli_chr07 | 47083053                | TT                              | CC                | 1946471848               |
| SNP_P3_95689_47083086 | NC_021166.1    | Ca_kabuli_chr07 | 47083086                | CC                              | TT                | 1946471850               |
| SNP_P3_95690_47083092 | NC_021166.1    | Ca_kabuli_chr07 | 47083092                | GG                              | AA                | 1946471851               |
| SNP_P3_95691_47083108 | NC_021166.1    | Ca_kabuli_chr07 | 47083108                | AA                              | GG                | 1946471853               |
| SNP_P3_95692_47083180 | NC_021166.1    | Ca_kabuli_chr07 | 47083180                | TT                              | CC                | 1946471854               |
| SNP_P3_95693_47083390 | NC_021166.1    | Ca_kabuli_chr07 | 47083390                | GG                              | CC                | 1946471856               |
| SNP_P3_95694_47083487 | NC_021166.1    | Ca_kabuli_chr07 | 47083487                | CC                              | TT                | 1946471857               |
| SNP_P3_95695_47084957 | NC_021166.1    | Ca_kabuli_chr07 | 47084957                | GG                              | AA                | 1946471859               |
| SNP_P3_95696_47084966 | NC_021166.1    | Ca_kabuli_chr07 | 47084966                | TT                              | AA                | 1946471860               |
| SNP_P3_95697_47084975 | NC_021166.1    | Ca_kabuli_chr07 | 47084975                | TT                              | CC                | 1946471862               |
| SNP_P3_95698_47084978 | NC_021166.1    | Ca_kabuli_chr07 | 47084978                | AA                              | GG                | 1946471863               |
| SNP_P3_95699_47093349 | NC_021166.1    | Ca_kabuli_chr07 | 47093349                | GG                              | AA                | 1946471865               |
| SNP_P3_95700_47093437 | NC_021166.1    | Ca_kabuli_chr07 | 47093437                | TT                              | GG                | 1946471866               |
| SNP_P3_95701_47093495 | NC_021166.1    | Ca_kabuli_chr07 | 47093495                | CC                              | TT                | 1946471868               |
| SNP_P3_95702_47093534 | NC_021166.1    | Ca_kabuli_chr07 | 47093534                | GG                              | AA                | 1946471869               |
| SNP_P3_95703_47093536 | NC_021166.1    | Ca_kabuli_chr07 | 47093536                | TT                              | AA                | 1946471871               |
| SNP_P3_95704_47093632 | NC_021166.1    | Ca_kabuli_chr07 | 47093632                | GG                              | AA                | 1946471873               |
| SNP_P3_95705_47093668 | NC_021166.1    | Ca_kabuli_chr07 | 47093668                | GG                              | CC                | 1946471874               |
| SNP_P3_95706_47093786 | NC_021166.1    | Ca_kabuli_chr07 | 47093786                | TT                              | CC                | 1946471876               |
| SNP_P3_95707_47093816 | NC_021166.1    | Ca_kabuli_chr07 | 47093816                | TT                              | CC                | 1946471877               |
| SNP_P3_95708_47093866 | NC_021166.1    | Ca_kabuli_chr07 | 47093866                | TT                              | CC                | 1946471879               |
| SNP_P3_95709_47093868 | NC_021166.1    | Ca_kabuli_chr07 | 47093868                | GG                              | CC                | 1946471880               |
| SNP_P3_95710_47093886 | NC_021166.1    | Ca_kabuli_chr07 | 47093886                | AA                              | TT                | 1946471882               |
| SNP_P3_95711_47102757 | NC_021166.1    | Ca_kabuli_chr07 | 47102757                | AA                              | GG                | 1946471883               |
| SNP_P3_95712_47108242 | NC_021166.1    | Ca_kabuli_chr07 | 47108242                | GG                              | TT                | 1946471885               |
| SNP_P3_95713_47108305 | NC_021166.1    | Ca_kabuli_chr07 | 47108305                | TT                              | CC                | 1946471888               |
| SNP_P3_95714_47108311 | NC_021166.1    | Ca_kabuli_chr07 | 47108311                | TT                              | CC                | 1946471889               |
| SNP_P3_95715_47108344 | NC_021166.1    | Ca_kabuli_chr07 | 47108344                | AA                              | GG                | 1946471891               |
| SNP_P3_95716_47108347 | NC_021166.1    | Ca_kabuli_chr07 | 47108347                | CC                              | TT                | 1946471892               |
| SNP_P3_95717_47108380 | NC_021166.1    | Ca_kabuli_chr07 | 47108380                | GG                              | AA                | 1946471894               |
| SNP_P3_95718_47108405 | NC_021166.1    | Ca_kabuli_chr07 | 47108405                | TT                              | GG                | 1946471895               |
| SNP_P3_95719_47108413 | NC_021166.1    | Ca_kabuli_chr07 | 47108413                | TT                              | CC                | 1946471897               |
| SNP_P3_95720_47108685 | NC_021166.1    | Ca_kabuli_chr07 | 47108685                | GG                              | CC                | 1946471898               |
| SNP_P3_95721_47108722 | NC_021166.1    | Ca_kabuli_chr07 | 47108722                | TT                              | CC                | 1946471900               |



| SNPs IDs              | Chromosome IDs | Chromosomes     | Physical positions (bp) | CDC Frontier (Reference genome) | (Pusa 256 & HPNB) | NCBI SNPdb Accession IDs |
|-----------------------|----------------|-----------------|-------------------------|---------------------------------|-------------------|--------------------------|
| SNP_P3_95722_47122008 | NC_021166.1    | Ca_kabuli_chr07 | 47122008                | AA                              | GG                | 1946471901               |
| SNP_P3_95723_47122040 | NC_021166.1    | Ca_kabuli_chr07 | 47122040                | AA                              | GG                | 1946471902               |
| SNP_P3_95724_47124239 | NC_021166.1    | Ca_kabuli_chr07 | 47124239                | AA                              | GG                | 1946471904               |
| SNP_P3_95725_47145960 | NC_021166.1    | Ca_kabuli_chr07 | 47145960                | TT                              | CC                | 1946471905               |
| SNP_P3_95726_47150054 | NC_021166.1    | Ca_kabuli_chr07 | 47150054                | TT                              | AA                | 1946471907               |
| SNP_P3_95728_47155527 | NC_021166.1    | Ca_kabuli_chr07 | 47155527                | AA                              | GG                | 1946471908               |
| SNP_P3_95729_47180292 | NC_021166.1    | Ca_kabuli_chr07 | 47180292                | GG                              | TT                | 1946471910               |
| SNP_P3_95730_47180344 | NC_021166.1    | Ca_kabuli_chr07 | 47180344                | TT                              | GG                | 1946471911               |
| SNP_P3_95731_47182335 | NC_021166.1    | Ca_kabuli_chr07 | 47182335                | AA                              | TT                | 1946471913               |
| SNP_P3_95732_47182340 | NC_021166.1    | Ca_kabuli_chr07 | 47182340                | AA                              | GG                | 1946471914               |
| SNP_P3_95733_47182414 | NC_021166.1    | Ca_kabuli_chr07 | 47182414                | AA                              | GG                | 1946471916               |
| SNP_P3_95734_47182431 | NC_021166.1    | Ca_kabuli_chr07 | 47182431                | AA                              | TT                | 1946471917               |
| SNP_P3_95735_47182464 | NC_021166.1    | Ca_kabuli_chr07 | 47182464                | AA                              | GG                | 1946471919               |
| SNP_P3_95736_47182888 | NC_021166.1    | Ca_kabuli_chr07 | 47182888                | GG                              | AA                | 1946471920               |
| SNP_P3_95737_47182894 | NC_021166.1    | Ca_kabuli_chr07 | 47182894                | GG                              | TT                | 1946471922               |
| SNP_P3_95738_47182926 | NC_021166.1    | Ca_kabuli_chr07 | 47182926                | TT                              | GG                | 1946471923               |
| SNP_P3_95739_47186785 | NC_021166.1    | Ca_kabuli_chr07 | 47186785                | AA                              | GG                | 1946471925               |
| SNP_P3_95740_47196401 | NC_021166.1    | Ca_kabuli_chr07 | 47196401                | AA                              | TT                | 1946471926               |
| SNP_P3_95741_47211704 | NC_021166.1    | Ca_kabuli_chr07 | 47211704                | TT                              | AA                | 1946471928               |
| SNP_P3_95742_47211727 | NC_021166.1    | Ca_kabuli_chr07 | 47211727                | TT                              | AA                | 1946471929               |
| SNP_P3_95744_47256282 | NC_021166.1    | Ca_kabuli_chr07 | 47256282                | TT                              | CC                | 1946471931               |
| SNP_P3_95745_47256294 | NC_021166.1    | Ca_kabuli_chr07 | 47256294                | TT                              | CC                | 1946471932               |
| SNP_P3_95746_47256297 | NC_021166.1    | Ca_kabuli_chr07 | 47256297                | AA                              | GG                | 1946471934               |
| SNP_P3_95748_47256497 | NC_021166.1    | Ca_kabuli_chr07 | 47256497                | TT                              | CC                | 1946471935               |
| SNP_P3_95749_47256559 | NC_021166.1    | Ca_kabuli_chr07 | 47256559                | TT                              | AA                | 1946471937               |
| SNP_P3_95750_47257930 | NC_021166.1    | Ca_kabuli_chr07 | 47257930                | TT                              | GG                | 1946471938               |
| SNP_P3_95751_47281178 | NC_021166.1    | Ca_kabuli_chr07 | 47281178                | TT                              | CC                | 1946471940               |
| SNP_P3_95752_47281183 | NC_021166.1    | Ca_kabuli_chr07 | 47281183                | TT                              | CC                | 1946471941               |
| SNP_P3_95753_47282739 | NC_021166.1    | Ca_kabuli_chr07 | 47282739                | AA                              | TT                | 1946471943               |
| SNP_P3_95754_47282953 | NC_021166.1    | Ca_kabuli_chr07 | 47282953                | GG                              | AA                | 1946471944               |
| SNP_P3_95755_47283514 | NC_021166.1    | Ca_kabuli_chr07 | 47283514                | TT                              | CC                | 1946471946               |
| SNP_P3_95756_47283571 | NC_021166.1    | Ca_kabuli_chr07 | 47283571                | GG                              | AA                | 1946471947               |
| SNP_P3_95757_47283671 | NC_021166.1    | Ca_kabuli_chr07 | 47283671                | GG                              | TT                | 1946471948               |
| SNP_P3_95758_47283794 | NC_021166.1    | Ca_kabuli_chr07 | 47283794                | TT                              | CC                | 1946471950               |
| SNP_P3_95759_47283990 | NC_021166.1    | Ca_kabuli_chr07 | 47283990                | TT                              | CC                | 1946471951               |
| SNP_P3_95760_47284072 | NC_021166.1    | Ca_kabuli_chr07 | 47284072                | CC                              | AA                | 1946471953               |
| SNP_P3_95761_47284323 | NC_021166.1    | Ca_kabuli_chr07 | 47284323                | AA                              | CC                | 1946471954               |
| SNP_P3_95762_47284816 | NC_021166.1    | Ca_kabuli_chr07 | 47284816                | CC                              | TT                | 1946471956               |
| SNP_P3_95764_47289704 | NC_021166.1    | Ca_kabuli_chr07 | 47289704                | AA                              | TT                | 1946471957               |
| SNP_P3_95765_47291369 | NC_021166.1    | Ca_kabuli_chr07 | 47291369                | GG                              | AA                | 1946471959               |
| SNP_P3_95766_47291412 | NC_021166.1    | Ca_kabuli_chr07 | 47291412                | GG                              | AA                | 1946471960               |
| SNP_P3_95767_47291677 | NC_021166.1    | Ca_kabuli_chr07 | 47291677                | TT                              | CC                | 1946471962               |

| SNPs IDs              | Chromosome IDs | Chromosomes     | Physical positions (bp) | CDC Frontier (Reference genome) | (Pusa 256 & HPNB) | NCBI SNPdb Accession IDs |
|-----------------------|----------------|-----------------|-------------------------|---------------------------------|-------------------|--------------------------|
| SNP_P3_95768_47295047 | NC_021166.1    | Ca_kabuli_chr07 | 47295047                | AA                              | GG                | 1946471963               |
| SNP_P3_95769_47295083 | NC_021166.1    | Ca_kabuli_chr07 | 47295083                | CC                              | TT                | 1946471965               |
| SNP_P3_95770_47295143 | NC_021166.1    | Ca_kabuli_chr07 | 47295143                | CC                              | GG                | 1946471966               |
| SNP_P3_95771_47295155 | NC_021166.1    | Ca_kabuli_chr07 | 47295155                | TT                              | CC                | 1946471967               |
| SNP_P3_95772_47295400 | NC_021166.1    | Ca_kabuli_chr07 | 47295400                | TT                              | AA                | 1946471969               |
| SNP_P3_95773_47295404 | NC_021166.1    | Ca_kabuli_chr07 | 47295404                | TT                              | AA                | 1946471970               |
| SNP_P3_95774_47295452 | NC_021166.1    | Ca_kabuli_chr07 | 47295452                | GG                              | AA                | 1946471972               |
| SNP_P3_95775_47299824 | NC_021166.1    | Ca_kabuli_chr07 | 47299824                | AA                              | TT                | 1946471973               |
| SNP_P3_95776_47299863 | NC_021166.1    | Ca_kabuli_chr07 | 47299863                | AA                              | CC                | 1946471975               |
| SNP_P3_95777_47306016 | NC_021166.1    | Ca_kabuli_chr07 | 47306016                | CC                              | TT                | 1946471976               |
| SNP_P3_95778_47324945 | NC_021166.1    | Ca_kabuli_chr07 | 47324945                | AA                              | GG                | 1946471978               |
| SNP_P3_95779_47324975 | NC_021166.1    | Ca_kabuli_chr07 | 47324975                | AA                              | TT                | 1946471979               |
| SNP_P3_95780_47325109 | NC_021166.1    | Ca_kabuli_chr07 | 47325109                | GG                              | CC                | 1946471981               |
| SNP_P3_95781_47325153 | NC_021166.1    | Ca_kabuli_chr07 | 47325153                | GG                              | CC                | 1946471982               |
| SNP_P3_95782_47325273 | NC_021166.1    | Ca_kabuli_chr07 | 47325273                | AA                              | GG                | 1946471984               |
| SNP_P3_95783_47325355 | NC_021166.1    | Ca_kabuli_chr07 | 47325355                | AA                              | GG                | 1946471985               |
| SNP_P3_95784_47327082 | NC_021166.1    | Ca_kabuli_chr07 | 47327082                | TT                              | CC                | 1946471987               |
| SNP_P3_95785_47327120 | NC_021166.1    | Ca_kabuli_chr07 | 47327120                | GG                              | TT                | 1946471988               |
| SNP_P3_95786_47327265 | NC_021166.1    | Ca_kabuli_chr07 | 47327265                | TT                              | GG                | 1946471990               |
| SNP_P3_95787_47327305 | NC_021166.1    | Ca_kabuli_chr07 | 47327305                | CC                              | TT                | 1946471991               |
| SNP_P3_95788_47327399 | NC_021166.1    | Ca_kabuli_chr07 | 47327399                | GG                              | TT                | 1946471993               |
| SNP_P3_95789_47327581 | NC_021166.1    | Ca_kabuli_chr07 | 47327581                | CC                              | AA                | 1946471994               |
| SNP_P3_95790_47327698 | NC_021166.1    | Ca_kabuli_chr07 | 47327698                | GG                              | AA                | 1946471996               |
| SNP_P3_95791_47327707 | NC_021166.1    | Ca_kabuli_chr07 | 47327707                | GG                              | TT                | 1946471997               |
| SNP_P3_95792_47327765 | NC_021166.1    | Ca_kabuli_chr07 | 47327765                | TT                              | CC                | 1946471999               |
| SNP_P3_95793_47327815 | NC_021166.1    | Ca_kabuli_chr07 | 47327815                | TT                              | AA                | 1946472000               |
| SNP_P3_95794_47327867 | NC_021166.1    | Ca_kabuli_chr07 | 47327867                | GG                              | AA                | 1946472002               |
| SNP_P3_95795_47335120 | NC_021166.1    | Ca_kabuli_chr07 | 47335120                | AA                              | GG                | 1946472003               |
| SNP_P3_95796_47335178 | NC_021166.1    | Ca_kabuli_chr07 | 47335178                | CC                              | TT                | 1946472004               |
| SNP_P3_95797_47335180 | NC_021166.1    | Ca_kabuli_chr07 | 47335180                | CC                              | GG                | 1946472006               |
| SNP_P3_95798_47335210 | NC_021166.1    | Ca_kabuli_chr07 | 47335210                | AA                              | GG                | 1946472007               |
| SNP_P3_95799_47343329 | NC_021166.1    | Ca_kabuli_chr07 | 47343329                | AA                              | GG                | 1946472009               |
| SNP_P3_95800_47343364 | NC_021166.1    | Ca_kabuli_chr07 | 47343364                | CC                              | TT                | 1946472010               |
| SNP_P3_95801_47343365 | NC_021166.1    | Ca_kabuli_chr07 | 47343365                | AA                              | GG                | 1946472012               |
| SNP_P3_95802_47346762 | NC_021166.1    | Ca_kabuli_chr07 | 47346762                | CC                              | TT                | 1946472013               |
| SNP_P3_95803_47346794 | NC_021166.1    | Ca_kabuli_chr07 | 47346794                | CC                              | GG                | 1946472015               |
| SNP_P3_95804_47362164 | NC_021166.1    | Ca_kabuli_chr07 | 47362164                | AA                              | GG                | 1946472016               |
| SNP_P3_95806_47367715 | NC_021166.1    | Ca_kabuli_chr07 | 47367715                | TT                              | AA                | 1946472018               |
| SNP_P3_95807_47367716 | NC_021166.1    | Ca_kabuli_chr07 | 47367716                | TT                              | AA                | 1946472019               |
| SNP_P3_95808_47367735 | NC_021166.1    | Ca_kabuli_chr07 | 47367735                | AA                              | GG                | 1946472021               |
| SNP_P3_95809_47370271 | NC_021166.1    | Ca_kabuli_chr07 | 47370271                | AA                              | GG                | 1946472022               |
| SNP_P3_95810_47384569 | NC_021166.1    | Ca_kabuli_chr07 | 47384569                | CC                              | TT                | 1946472024               |

| SNPs IDs              | Chromosome IDs | Chromosomes     | Physical positions (bp) | CDC Frontier (Reference genome) | (Pusa 256 & HPNB) | NCBI SNPdb Accession IDs |
|-----------------------|----------------|-----------------|-------------------------|---------------------------------|-------------------|--------------------------|
| SNP_P3_95812_47394115 | NC_021166.1    | Ca_kabuli_chr07 | 47394115                | AA                              | GG                | 1946472025               |
| SNP_P3_95813_47394145 | NC_021166.1    | Ca_kabuli_chr07 | 47394145                | GG                              | AA                | 1946472027               |
| SNP_P3_95814_47414940 | NC_021166.1    | Ca_kabuli_chr07 | 47414940                | TT                              | AA                | 1946472028               |
| SNP_P3_95815_47441732 | NC_021166.1    | Ca_kabuli_chr07 | 47441732                | TT                              | CC                | 1946472030               |
| SNP_P3_95816_47454139 | NC_021166.1    | Ca_kabuli_chr07 | 47454139                | GG                              | TT                | 1946472031               |
| SNP_P3_95817_47463702 | NC_021166.1    | Ca_kabuli_chr07 | 47463702                | GG                              | AA                | 1946472033               |
| SNP_P3_95818_47483689 | NC_021166.1    | Ca_kabuli_chr07 | 47483689                | TT                              | CC                | 1946472034               |
| SNP_P3_95819_47484933 | NC_021166.1    | Ca_kabuli_chr07 | 47484933                | CC                              | TT                | 1946472036               |
| SNP_P3_95820_47492908 | NC_021166.1    | Ca_kabuli_chr07 | 47492908                | TT                              | CC                | 1946472037               |
| SNP_P3_95821_47495297 | NC_021166.1    | Ca_kabuli_chr07 | 47495297                | AA                              | TT                | 1946472039               |
| SNP_P3_95822_47504265 | NC_021166.1    | Ca_kabuli_chr07 | 47504265                | AA                              | GG                | 1946472040               |
| SNP_P3_95823_47504564 | NC_021166.1    | Ca_kabuli_chr07 | 47504564                | TT                              | CC                | 1946472042               |
| SNP_P3_95824_47504607 | NC_021166.1    | Ca_kabuli_chr07 | 47504607                | AA                              | GG                | 1946472043               |
| SNP_P3_95825_47504632 | NC_021166.1    | Ca_kabuli_chr07 | 47504632                | AA                              | GG                | 1946472045               |
| SNP_P3_95826_47505634 | NC_021166.1    | Ca_kabuli_chr07 | 47505634                | GG                              | AA                | 1946472047               |
| SNP_P3_95827_47506007 | NC_021166.1    | Ca_kabuli_chr07 | 47506007                | TT                              | CC                | 1946472048               |
| SNP_P3_95828_47506028 | NC_021166.1    | Ca_kabuli_chr07 | 47506028                | CC                              | TT                | 1946472050               |
| SNP_P3_95829_47506029 | NC_021166.1    | Ca_kabuli_chr07 | 47506029                | AA                              | GG                | 1946472051               |
| SNP_P3_95830_47506037 | NC_021166.1    | Ca_kabuli_chr07 | 47506037                | AA                              | TT                | 1946472053               |
| SNP_P3_95832_47506079 | NC_021166.1    | Ca_kabuli_chr07 | 47506079                | GG                              | AA                | 1946472054               |
| SNP_P3_95833_47506097 | NC_021166.1    | Ca_kabuli_chr07 | 47506097                | TT                              | CC                | 1946472055               |
| SNP_P3_95834_47509046 | NC_021166.1    | Ca_kabuli_chr07 | 47509046                | CC                              | GG                | 1946472057               |
| SNP_P3_95835_47529326 | NC_021166.1    | Ca_kabuli_chr07 | 47529326                | CC                              | TT                | 1946472058               |
| SNP_P3_95836_47529328 | NC_021166.1    | Ca_kabuli_chr07 | 47529328                | GG                              | AA                | 1946472060               |
| SNP_P3_95837_47542311 | NC_021166.1    | Ca_kabuli_chr07 | 47542311                | GG                              | AA                | 1946472061               |
| SNP_P3_95838_47547649 | NC_021166.1    | Ca_kabuli_chr07 | 47547649                | AA                              | GG                | 1946472063               |
| SNP_P3_95841_47570242 | NC_021166.1    | Ca_kabuli_chr07 | 47570242                | TT                              | GG                | 1946472064               |
| SNP_P3_95842_47570259 | NC_021166.1    | Ca_kabuli_chr07 | 47570259                | GG                              | AA                | 1946472066               |
| SNP_P3_95843_47577551 | NC_021166.1    | Ca_kabuli_chr07 | 47577551                | GG                              | TT                | 1946472067               |
| SNP_P3_95844_47577560 | NC_021166.1    | Ca_kabuli_chr07 | 47577560                | CC                              | TT                | 1946472069               |
| SNP_P3_95845_47577569 | NC_021166.1    | Ca_kabuli_chr07 | 47577569                | GG                              | AA                | 1946472070               |
| SNP_P3_95846_47577615 | NC_021166.1    | Ca_kabuli_chr07 | 47577615                | CC                              | AA                | 1946472071               |
| SNP_P3_95847_47601007 | NC_021166.1    | Ca_kabuli_chr07 | 47601007                | TT                              | AA                | 1946472073               |
| SNP_P3_95848_47604449 | NC_021166.1    | Ca_kabuli_chr07 | 47604449                | TT                              | CC                | 1946472074               |
| SNP_P3_95849_47604626 | NC_021166.1    | Ca_kabuli_chr07 | 47604626                | TT                              | GG                | 1946472076               |
| SNP_P3_95850_47604678 | NC_021166.1    | Ca_kabuli_chr07 | 47604678                | AA                              | GG                | 1946472077               |
| SNP_P3_95851_47604703 | NC_021166.1    | Ca_kabuli_chr07 | 47604703                | AA                              | GG                | 1946472079               |
| SNP_P3_95852_47604772 | NC_021166.1    | Ca_kabuli_chr07 | 47604772                | TT                              | CC                | 1946472080               |
| SNP_P3_95853_47605196 | NC_021166.1    | Ca_kabuli_chr07 | 47605196                | AA                              | TT                | 1946472082               |
| SNP_P3_95854_47605302 | NC_021166.1    | Ca_kabuli_chr07 | 47605302                | CC                              | TT                | 1946472083               |
| SNP_P3_95855_47605662 | NC_021166.1    | Ca_kabuli_chr07 | 47605662                | AA                              | GG                | 1946472085               |
| SNP_P3_95857_47638415 | NC_021166.1    | Ca_kabuli_chr07 | 47638415                | GG                              | AA                | 1946472086               |

| SNPs IDs              | Chromosome IDs | Chromosomes     | Physical positions (bp) | CDC Frontier (Reference genome) | (Pusa 256 & HPNB) | NCBI SNPdb Accession IDs |
|-----------------------|----------------|-----------------|-------------------------|---------------------------------|-------------------|--------------------------|
| SNP_P3_95859_47652725 | NC_021166.1    | Ca_kabuli_chr07 | 47652725                | TT                              | AA                | 1946472088               |
| SNP_P3_95860_47657126 | NC_021166.1    | Ca_kabuli_chr07 | 47657126                | GG                              | AA                | 1946472089               |
| SNP_P3_95861_47659664 | NC_021166.1    | Ca_kabuli_chr07 | 47659664                | CC                              | TT                | 1946472091               |
| SNP_P3_95862_47689912 | NC_021166.1    | Ca_kabuli_chr07 | 47689912                | AA                              | GG                | 1946472092               |
| SNP_P3_95864_47714436 | NC_021166.1    | Ca_kabuli_chr07 | 47714436                | TT                              | CC                | 1946472094               |
| SNP_P3_95865_47714814 | NC_021166.1    | Ca_kabuli_chr07 | 47714814                | TT                              | GG                | 1946472095               |
| SNP_P3_95866_47714862 | NC_021166.1    | Ca_kabuli_chr07 | 47714862                | AA                              | GG                | 1946472096               |
| SNP_P3_95867_47714877 | NC_021166.1    | Ca_kabuli_chr07 | 47714877                | TT                              | GG                | 1946472098               |
| SNP_P3_95868_47715060 | NC_021166.1    | Ca_kabuli_chr07 | 47715060                | AA                              | CC                | 1946472099               |
| SNP_P3_95869_47715235 | NC_021166.1    | Ca_kabuli_chr07 | 47715235                | AA                              | GG                | 1946472101               |
| SNP_P3_95870_47715338 | NC_021166.1    | Ca_kabuli_chr07 | 47715338                | CC                              | GG                | 1946472102               |
| SNP_P3_95871_47715365 | NC_021166.1    | Ca_kabuli_chr07 | 47715365                | AA                              | TT                | 1946472104               |
| SNP_P3_95872_47715413 | NC_021166.1    | Ca_kabuli_chr07 | 47715413                | AA                              | CC                | 1946472105               |
| SNP_P3_95873_47715572 | NC_021166.1    | Ca_kabuli_chr07 | 47715572                | GG                              | CC                | 1946472107               |
| SNP_P3_95874_47715601 | NC_021166.1    | Ca_kabuli_chr07 | 47715601                | AA                              | GG                | 1946472108               |
| SNP_P3_95875_47715636 | NC_021166.1    | Ca_kabuli_chr07 | 47715636                | TT                              | GG                | 1946472110               |
| SNP_P3_95876_47717555 | NC_021166.1    | Ca_kabuli_chr07 | 47717555                | GG                              | CC                | 1946472111               |
| SNP_P3_95877_47718267 | NC_021166.1    | Ca_kabuli_chr07 | 47718267                | AA                              | GG                | 1946472113               |
| SNP_P3_95878_47718330 | NC_021166.1    | Ca_kabuli_chr07 | 47718330                | AA                              | GG                | 1946472114               |
| SNP_P3_95879_47718345 | NC_021166.1    | Ca_kabuli_chr07 | 47718345                | TT                              | AA                | 1946472116               |
| SNP_P3_95880_47718346 | NC_021166.1    | Ca_kabuli_chr07 | 47718346                | TT                              | CC                | 1946472117               |
| SNP_P3_95881_47718396 | NC_021166.1    | Ca_kabuli_chr07 | 47718396                | GG                              | AA                | 1946472118               |
| SNP_P3_95882_47718416 | NC_021166.1    | Ca_kabuli_chr07 | 47718416                | AA                              | CC                | 1946472120               |
| SNP_P3_95883_47718441 | NC_021166.1    | Ca_kabuli_chr07 | 47718441                | AA                              | GG                | 1946472121               |
| SNP_P3_95884_47718471 | NC_021166.1    | Ca_kabuli_chr07 | 47718471                | TT                              | CC                | 1946472123               |
| SNP_P3_95885_47728805 | NC_021166.1    | Ca_kabuli_chr07 | 47728805                | GG                              | AA                | 1946472124               |
| SNP_P3_95886_47747447 | NC_021166.1    | Ca_kabuli_chr07 | 47747447                | GG                              | TT                | 1946472126               |
| SNP_P3_95887_47747751 | NC_021166.1    | Ca_kabuli_chr07 | 47747751                | GG                              | AA                | 1946472127               |
| SNP_P3_95888_47772319 | NC_021166.1    | Ca_kabuli_chr07 | 47772319                | AA                              | GG                | 1946472129               |
| SNP_P3_95889_47772358 | NC_021166.1    | Ca_kabuli_chr07 | 47772358                | AA                              | GG                | 1946472130               |
| SNP_P3_95890_47772359 | NC_021166.1    | Ca_kabuli_chr07 | 47772359                | CC                              | GG                | 1946472132               |
| SNP_P3_95891_47772759 | NC_021166.1    | Ca_kabuli_chr07 | 47772759                | CC                              | TT                | 1946472133               |
| SNP_P3_95892_47772794 | NC_021166.1    | Ca_kabuli_chr07 | 47772794                | AA                              | TT                | 1946472134               |
| SNP_P3_95893_47779487 | NC_021166.1    | Ca_kabuli_chr07 | 47779487                | GG                              | AA                | 1946472136               |
| SNP_P3_95894_47780141 | NC_021166.1    | Ca_kabuli_chr07 | 47780141                | GG                              | TT                | 1946472137               |
| SNP_P3_95895_47792010 | NC_021166.1    | Ca_kabuli_chr07 | 47792010                | AA                              | CC                | 1946472139               |
| SNP_P3_95896_47792642 | NC_021166.1    | Ca_kabuli_chr07 | 47792642                | GG                              | AA                | 1946472140               |
| SNP_P3_95899_47837747 | NC_021166.1    | Ca_kabuli_chr07 | 47837747                | CC                              | GG                | 1946472142               |
| SNP_P3_95901_47853102 | NC_021166.1    | Ca_kabuli_chr07 | 47853102                | GG                              | AA                | 1946472143               |
| SNP_P3_95902_47857293 | NC_021166.1    | Ca_kabuli_chr07 | 47857293                | TT                              | CC                | 1946472145               |
| SNP_P3_95903_47857300 | NC_021166.1    | Ca_kabuli_chr07 | 47857300                | AA                              | GG                | 1946472146               |
| SNP_P3_95904_47857378 | NC_021166.1    | Ca_kabuli_chr07 | 47857378                | GG                              | AA                | 1946472148               |

| SNPs IDs              | Chromosome IDs | Chromosomes     | Physical positions (bp) | CDC Frontier (Reference genome) | (Pusa 256 & HPNB) | NCBI SNPdb Accession IDs |
|-----------------------|----------------|-----------------|-------------------------|---------------------------------|-------------------|--------------------------|
| SNP_P3_95905_47857394 | NC_021166.1    | Ca_kabuli_chr07 | 47857394                | GG                              | TT                | 1946472149               |
| SNP_P3_95906_47858893 | NC_021166.1    | Ca_kabuli_chr07 | 47858893                | TT                              | CC                | 1946472151               |
| SNP_P3_95908_47865102 | NC_021166.1    | Ca_kabuli_chr07 | 47865102                | AA                              | GG                | 1946472152               |
| SNP_P3_95909_47865117 | NC_021166.1    | Ca_kabuli_chr07 | 47865117                | CC                              | AA                | 1946472153               |
| SNP_P3_95910_47865369 | NC_021166.1    | Ca_kabuli_chr07 | 47865369                | TT                              | GG                | 1946472156               |
| SNP_P3_95911_47865510 | NC_021166.1    | Ca_kabuli_chr07 | 47865510                | CC                              | GG                | 1946472157               |
| SNP_P3_95912_47865912 | NC_021166.1    | Ca_kabuli_chr07 | 47865912                | TT                              | CC                | 1946472159               |
| SNP_P3_95913_47865920 | NC_021166.1    | Ca_kabuli_chr07 | 47865920                | AA                              | GG                | 1946472160               |
| SNP_P3_95914_47865935 | NC_021166.1    | Ca_kabuli_chr07 | 47865935                | AA                              | GG                | 1946472162               |
| SNP_P3_95915_47865937 | NC_021166.1    | Ca_kabuli_chr07 | 47865937                | TT                              | GG                | 1946472163               |
| SNP_P3_95916_47885411 | NC_021166.1    | Ca_kabuli_chr07 | 47885411                | TT                              | AA                | 1946472165               |
| SNP_P3_95917_47893890 | NC_021166.1    | Ca_kabuli_chr07 | 47893890                | GG                              | CC                | 1946472166               |
| SNP_P3_95918_47895891 | NC_021166.1    | Ca_kabuli_chr07 | 47895891                | AA                              | GG                | 1946472168               |
| SNP_P3_95919_47909440 | NC_021166.1    | Ca_kabuli_chr07 | 47909440                | AA                              | GG                | 1946472169               |
| SNP_P3_95920_47909452 | NC_021166.1    | Ca_kabuli_chr07 | 47909452                | TT                              | CC                | 1946472171               |
| SNP_P3_95921_47909466 | NC_021166.1    | Ca_kabuli_chr07 | 47909466                | CC                              | TT                | 1946472172               |
| SNP_P3_95922_47909468 | NC_021166.1    | Ca_kabuli_chr07 | 47909468                | AA                              | GG                | 1946472174               |
| SNP_P3_95923_47909472 | NC_021166.1    | Ca_kabuli_chr07 | 47909472                | TT                              | CC                | 1946472175               |
| SNP_P3_95924_47909568 | NC_021166.1    | Ca_kabuli_chr07 | 47909568                | CC                              | TT                | 1946472176               |
| SNP_P3_95925_47909611 | NC_021166.1    | Ca_kabuli_chr07 | 47909611                | CC                              | TT                | 1946472178               |
| SNP_P3_95926_47909614 | NC_021166.1    | Ca_kabuli_chr07 | 47909614                | AA                              | GG                | 1946472179               |
| SNP_P3_95927_47909638 | NC_021166.1    | Ca_kabuli_chr07 | 47909638                | AA                              | GG                | 1946472181               |
| SNP_P3_95928_47909668 | NC_021166.1    | Ca_kabuli_chr07 | 47909668                | CC                              | TT                | 1946472182               |
| SNP_P3_95929_47910018 | NC_021166.1    | Ca_kabuli_chr07 | 47910018                | TT                              | CC                | 1946472184               |
| SNP_P3_95930_47910024 | NC_021166.1    | Ca_kabuli_chr07 | 47910024                | GG                              | AA                | 1946472185               |
| SNP_P3_95931_47912101 | NC_021166.1    | Ca_kabuli_chr07 | 47912101                | AA                              | GG                | 1946472187               |
| SNP_P3_95932_47923657 | NC_021166.1    | Ca_kabuli_chr07 | 47923657                | TT                              | AA                | 1946472188               |
| SNP_P3_95933_47926299 | NC_021166.1    | Ca_kabuli_chr07 | 47926299                | TT                              | CC                | 1946472190               |
| SNP_P3_95934_47928075 | NC_021166.1    | Ca_kabuli_chr07 | 47928075                | AA                              | TT                | 1946472191               |
| SNP_P3_95935_47942078 | NC_021166.1    | Ca_kabuli_chr07 | 47942078                | CC                              | TT                | 1946472193               |
| SNP_P3_95936_47942098 | NC_021166.1    | Ca_kabuli_chr07 | 47942098                | AA                              | GG                | 1946472194               |
| SNP_P3_95937_47942102 | NC_021166.1    | Ca_kabuli_chr07 | 47942102                | GG                              | AA                | 1946472196               |
| SNP_P3_95938_47942113 | NC_021166.1    | Ca_kabuli_chr07 | 47942113                | GG                              | AA                | 1946472197               |
| SNP_P3_95939_47942363 | NC_021166.1    | Ca_kabuli_chr07 | 47942363                | AA                              | GG                | 1946472199               |
| SNP_P3_95940_47942508 | NC_021166.1    | Ca_kabuli_chr07 | 47942508                | TT                              | CC                | 1946472200               |
| SNP_P3_95941_47957975 | NC_021166.1    | Ca_kabuli_chr07 | 47957975                | AA                              | GG                | 1946472202               |
| SNP_P3_95942_47959285 | NC_021166.1    | Ca_kabuli_chr07 | 47959285                | TT                              | CC                | 1946472203               |
| SNP_P3_95943_47959292 | NC_021166.1    | Ca_kabuli_chr07 | 47959292                | TT                              | AA                | 1946472205               |
| SNP_P3_95944_47959307 | NC_021166.1    | Ca_kabuli_chr07 | 47959307                | CC                              | GG                | 1946472206               |
| SNP_P3_95945_47959310 | NC_021166.1    | Ca_kabuli_chr07 | 47959310                | TT                              | CC                | 1946472207               |
| SNP_P3_95946_47959323 | NC_021166.1    | Ca_kabuli_chr07 | 47959323                | CC                              | TT                | 1946472209               |
| SNP_P3_95947_47959470 | NC_021166.1    | Ca_kabuli_chr07 | 47959470                | CC                              | TT                | 1946472210               |

| SNPs IDs              | Chromosome IDs | Chromosomes     | Physical positions (bp) | CDC Frontier (Reference genome) | (Pusa 256 & HPNB) | NCBI SNPdb Accession IDs |
|-----------------------|----------------|-----------------|-------------------------|---------------------------------|-------------------|--------------------------|
| SNP_P3_95948_47959477 | NC_021166.1    | Ca_kabuli_chr07 | 47959477                | AA                              | TT                | 1946472212               |
| SNP_P3_95949_47959492 | NC_021166.1    | Ca_kabuli_chr07 | 47959492                | GG                              | CC                | 1946472213               |
| SNP_P3_95950_47959494 | NC_021166.1    | Ca_kabuli_chr07 | 47959494                | TT                              | GG                | 1946472215               |
| SNP_P3_95951_47959495 | NC_021166.1    | Ca_kabuli_chr07 | 47959495                | CC                              | TT                | 1946472217               |
| SNP_P3_95952_47959508 | NC_021166.1    | Ca_kabuli_chr07 | 47959508                | TT                              | CC                | 1946472218               |
| SNP_P3_95954_47982624 | NC_021166.1    | Ca_kabuli_chr07 | 47982624                | AA                              | TT                | 1946472220               |
| SNP_P3_95955_47990710 | NC_021166.1    | Ca_kabuli_chr07 | 47990710                | AA                              | TT                | 1946472221               |
| SNP_P3_95956_48024220 | NC_021166.1    | Ca_kabuli_chr07 | 48024220                | CC                              | TT                | 1946472223               |
| SNP_P3_95957_48024230 | NC_021166.1    | Ca_kabuli_chr07 | 48024230                | TT                              | CC                | 1946472224               |
| SNP_P3_95958_48035668 | NC_021166.1    | Ca_kabuli_chr07 | 48035668                | AA                              | GG                | 1946472226               |
| SNP_P3_95959_48035698 | NC_021166.1    | Ca_kabuli_chr07 | 48035698                | TT                              | CC                | 1946472227               |
| SNP_P3_95960_48035727 | NC_021166.1    | Ca_kabuli_chr07 | 48035727                | CC                              | TT                | 1946472228               |
| SNP_P3_95963_48069393 | NC_021166.1    | Ca_kabuli_chr07 | 48069393                | TT                              | AA                | 1946472230               |
| SNP_P3_95965_48086710 | NC_021166.1    | Ca_kabuli_chr07 | 48086710                | AA                              | CC                | 1946472231               |
| SNP_P3_95966_48086761 | NC_021166.1    | Ca_kabuli_chr07 | 48086761                | TT                              | CC                | 1946472233               |
| SNP_P3_95967_48089090 | NC_021166.1    | Ca_kabuli_chr07 | 48089090                | AA                              | TT                | 1946472234               |
| SNP_P3_95968_48098101 | NC_021166.1    | Ca_kabuli_chr07 | 48098101                | TT                              | GG                | 1946472236               |
| SNP_P3_95969_48113090 | NC_021166.1    | Ca_kabuli_chr07 | 48113090                | CC                              | TT                | 1946472237               |
| SNP_P3_95970_48113372 | NC_021166.1    | Ca_kabuli_chr07 | 48113372                | TT                              | GG                | 1946472239               |
| SNP_P3_95972_48141453 | NC_021166.1    | Ca_kabuli_chr07 | 48141453                | AA                              | TT                | 1946472240               |
| SNP_P3_95973_48141483 | NC_021166.1    | Ca_kabuli_chr07 | 48141483                | GG                              | AA                | 1946472242               |
| SNP_P3_95974_48141508 | NC_021166.1    | Ca_kabuli_chr07 | 48141508                | TT                              | AA                | 1946472243               |
| SNP_P3_95976_48145009 | NC_021166.1    | Ca_kabuli_chr07 | 48145009                | GG                              | AA                | 1946472245               |
| SNP_P3_95977_48145043 | NC_021166.1    | Ca_kabuli_chr07 | 48145043                | GG                              | CC                | 1946472246               |
| SNP_P3_95978_48145082 | NC_021166.1    | Ca_kabuli_chr07 | 48145082                | AA                              | GG                | 1946472248               |
| SNP_P3_95979_48145139 | NC_021166.1    | Ca_kabuli_chr07 | 48145139                | TT                              | CC                | 1946472249               |
| SNP_P3_95980_48145146 | NC_021166.1    | Ca_kabuli_chr07 | 48145146                | AA                              | GG                | 1946472251               |
| SNP_P3_95981_48181274 | NC_021166.1    | Ca_kabuli_chr07 | 48181274                | AA                              | CC                | 1946472252               |
| SNP_P3_95982_48181418 | NC_021166.1    | Ca_kabuli_chr07 | 48181418                | GG                              | TT                | 1946472254               |
| SNP_P3_95983_48181446 | NC_021166.1    | Ca_kabuli_chr07 | 48181446                | TT                              | AA                | 1946472255               |
| SNP_P3_95984_48183245 | NC_021166.1    | Ca_kabuli_chr07 | 48183245                | TT                              | AA                | 1946472257               |
| SNP_P3_95985_48186840 | NC_021166.1    | Ca_kabuli_chr07 | 48186840                | GG                              | AA                | 1946472258               |
| SNP_P3_95986_48188632 | NC_021166.1    | Ca_kabuli_chr07 | 48188632                | TT                              | CC                | 1946472260               |
| SNP_P3_95987_48193114 | NC_021166.1    | Ca_kabuli_chr07 | 48193114                | AA                              | TT                | 1946472261               |
| SNP_P3_95988_48193154 | NC_021166.1    | Ca_kabuli_chr07 | 48193154                | GG                              | AA                | 1946472263               |
| SNP_P3_95991_48244964 | NC_021166.1    | Ca_kabuli_chr07 | 48244964                | TT                              | CC                | 1946472264               |
| SNP_P3_95992_48244967 | NC_021166.1    | Ca_kabuli_chr07 | 48244967                | TT                              | CC                | 1946472266               |
| SNP_P3_95993_48246040 | NC_021166.1    | Ca_kabuli_chr07 | 48246040                | CC                              | TT                | 1946472267               |
| SNP_P3_95994_48246061 | NC_021166.1    | Ca_kabuli_chr07 | 48246061                | CC                              | TT                | 1946472268               |
| SNP_P3_95995_48246077 | NC_021166.1    | Ca_kabuli_chr07 | 48246077                | CC                              | AA                | 1946472269               |
| SNP_P3_95996_48246106 | NC_021166.1    | Ca_kabuli_chr07 | 48246106                | CC                              | TT                | 1946472270               |
| SNP_P3_95997_48246118 | NC_021166.1    | Ca_kabuli_chr07 | 48246118                | TT                              | CC                | 1946472272               |

| SNPs IDs              | Chromosome IDs | Chromosomes     | Physical positions (bp) | CDC Frontier (Reference genome) | (Pusa 256 & HPNB) | NCBI SNPdb Accession IDs |
|-----------------------|----------------|-----------------|-------------------------|---------------------------------|-------------------|--------------------------|
| SNP_P3_95998_48246119 | NC_021166.1    | Ca_kabuli_chr07 | 48246119                | AA                              | GG                | 1946472273               |
| SNP_P3_95999_48246126 | NC_021166.1    | Ca_kabuli_chr07 | 48246126                | TT                              | CC                | 1946472275               |
| SNP_P3_96000_48246183 | NC_021166.1    | Ca_kabuli_chr07 | 48246183                | CC                              | TT                | 1946472276               |
| SNP_P3_96001_48246230 | NC_021166.1    | Ca_kabuli_chr07 | 48246230                | GG                              | AA                | 1946472278               |
| SNP_P3_96002_48246268 | NC_021166.1    | Ca_kabuli_chr07 | 48246268                | GG                              | AA                | 1946472279               |
| SNP_P3_96003_48246269 | NC_021166.1    | Ca_kabuli_chr07 | 48246269                | TT                              | CC                | 1946472281               |
| SNP_P3_96004_48246271 | NC_021166.1    | Ca_kabuli_chr07 | 48246271                | GG                              | AA                | 1946472282               |
| SNP_P3_96005_48246297 | NC_021166.1    | Ca_kabuli_chr07 | 48246297                | TT                              | CC                | 1946472284               |
| SNP_P3_96006_48246382 | NC_021166.1    | Ca_kabuli_chr07 | 48246382                | TT                              | CC                | 1946472285               |
| SNP_P3_96007_48246416 | NC_021166.1    | Ca_kabuli_chr07 | 48246416                | AA                              | GG                | 1946472286               |
| SNP_P3_96008_48246441 | NC_021166.1    | Ca_kabuli_chr07 | 48246441                | TT                              | CC                | 1946472288               |
| SNP_P3_96009_48246496 | NC_021166.1    | Ca_kabuli_chr07 | 48246496                | TT                              | CC                | 1946472289               |
| SNP_P3_96010_48246515 | NC_021166.1    | Ca_kabuli_chr07 | 48246515                | GG                              | AA                | 1946472291               |
| SNP_P3_96011_48246591 | NC_021166.1    | Ca_kabuli_chr07 | 48246591                | AA                              | CC                | 1946472292               |
| SNP_P3_96012_48246604 | NC_021166.1    | Ca_kabuli_chr07 | 48246604                | CC                              | TT                | 1946472294               |
| SNP_P3_96013_48246612 | NC_021166.1    | Ca_kabuli_chr07 | 48246612                | TT                              | AA                | 1946472295               |
| SNP_P3_96014_48246613 | NC_021166.1    | Ca_kabuli_chr07 | 48246613                | CC                              | TT                | 1946472297               |
| SNP_P3_96015_48272274 | NC_021166.1    | Ca_kabuli_chr07 | 48272274                | CC                              | TT                | 1946472298               |
| SNP_P3_96016_48272626 | NC_021166.1    | Ca_kabuli_chr07 | 48272626                | CC                              | GG                | 1946472300               |
| SNP_P3_96017_48277323 | NC_021166.1    | Ca_kabuli_chr07 | 48277323                | AA                              | GG                | 1946472301               |
| SNP_P3_96018_48311568 | NC_021166.1    | Ca_kabuli_chr07 | 48311568                | CC                              | TT                | 1946472303               |
| SNP_P3_96019_48311570 | NC_021166.1    | Ca_kabuli_chr07 | 48311570                | AA                              | GG                | 1946472304               |
| SNP_P3_96020_48311590 | NC_021166.1    | Ca_kabuli_chr07 | 48311590                | AA                              | GG                | 1946472306               |
| SNP_P3_96021_48311711 | NC_021166.1    | Ca_kabuli_chr07 | 48311711                | GG                              | AA                | 1946472307               |
| SNP_P3_96022_48311787 | NC_021166.1    | Ca_kabuli_chr07 | 48311787                | AA                              | GG                | 1946472309               |
| SNP_P3_96023_48311825 | NC_021166.1    | Ca_kabuli_chr07 | 48311825                | AA                              | CC                | 1946472310               |
| SNP_P3_96024_48311836 | NC_021166.1    | Ca_kabuli_chr07 | 48311836                | AA                              | TT                | 1946472311               |
| SNP_P3_96025_48311838 | NC_021166.1    | Ca_kabuli_chr07 | 48311838                | AA                              | TT                | 1946472313               |
| SNP_P3_96026_48312038 | NC_021166.1    | Ca_kabuli_chr07 | 48312038                | AA                              | GG                | 1946472314               |
| SNP_P3_96027_48312060 | NC_021166.1    | Ca_kabuli_chr07 | 48312060                | GG                              | TT                | 1946472316               |
| SNP_P3_96028_48312062 | NC_021166.1    | Ca_kabuli_chr07 | 48312062                | TT                              | GG                | 1946472317               |
| SNP_P3_96029_48312134 | NC_021166.1    | Ca_kabuli_chr07 | 48312134                | TT                              | CC                | 1946472319               |
| SNP_P3_96030_48312514 | NC_021166.1    | Ca_kabuli_chr07 | 48312514                | AA                              | GG                | 1946472320               |
| SNP_P3_96031_48312532 | NC_021166.1    | Ca_kabuli_chr07 | 48312532                | TT                              | GG                | 1946472322               |
| SNP_P3_96033_48312576 | NC_021166.1    | Ca_kabuli_chr07 | 48312576                | TT                              | CC                | 1946472323               |
| SNP_P3_96034_48312601 | NC_021166.1    | Ca_kabuli_chr07 | 48312601                | AA                              | GG                | 1946472325               |
| SNP_P3_96036_48312742 | NC_021166.1    | Ca_kabuli_chr07 | 48312742                | AA                              | GG                | 1946472326               |
| SNP_P3_96037_48312966 | NC_021166.1    | Ca_kabuli_chr07 | 48312966                | CC                              | AA                | 1946472328               |
| SNP_P3_96038_48312994 | NC_021166.1    | Ca_kabuli_chr07 | 48312994                | CC                              | AA                | 1946472329               |
| SNP_P3_96039_48313066 | NC_021166.1    | Ca_kabuli_chr07 | 48313066                | GG                              | AA                | 1946472331               |
| SNP_P3_96040_48328377 | NC_021166.1    | Ca_kabuli_chr07 | 48328377                | GG                              | AA                | 1946472332               |
| SNP_P3_96042_48329845 | NC_021166.1    | Ca_kabuli_chr07 | 48329845                | GG                              | AA                | 1946472334               |

| SNPs IDs              | Chromosome IDs | Chromosomes     | Physical positions (bp) | CDC Frontier (Reference genome) | (Pusa 256 & HPNB) | NCBI SNPdb Accession IDs |
|-----------------------|----------------|-----------------|-------------------------|---------------------------------|-------------------|--------------------------|
| SNP_P3_96043_48329876 | NC_021166.1    | Ca_kabuli_chr07 | 48329876                | GG                              | AA                | 1946472335               |
| SNP_P3_96044_48329894 | NC_021166.1    | Ca_kabuli_chr07 | 48329894                | AA                              | GG                | 1946472337               |
| SNP_P3_96045_48329954 | NC_021166.1    | Ca_kabuli_chr07 | 48329954                | TT                              | CC                | 1946472338               |
| SNP_P3_96046_48329955 | NC_021166.1    | Ca_kabuli_chr07 | 48329955                | AA                              | GG                | 1946472340               |
| SNP_P3_96047_48329961 | NC_021166.1    | Ca_kabuli_chr07 | 48329961                | AA                              | CC                | 1946472341               |
| SNP_P3_96048_48329964 | NC_021166.1    | Ca_kabuli_chr07 | 48329964                | TT                              | CC                | 1946472343               |
| SNP_P3_96049_48329970 | NC_021166.1    | Ca_kabuli_chr07 | 48329970                | GG                              | TT                | 1946472344               |
| SNP_P3_96050_48329982 | NC_021166.1    | Ca_kabuli_chr07 | 48329982                | CC                              | TT                | 1946472346               |
| SNP_P3_96051_48330012 | NC_021166.1    | Ca_kabuli_chr07 | 48330012                | AA                              | TT                | 1946472347               |
| SNP_P3_96052_48330102 | NC_021166.1    | Ca_kabuli_chr07 | 48330102                | AA                              | GG                | 1946472349               |
| SNP_P3_96053_48337208 | NC_021166.1    | Ca_kabuli_chr07 | 48337208                | TT                              | CC                | 1946472350               |
| SNP_P3_96054_48337456 | NC_021166.1    | Ca_kabuli_chr07 | 48337456                | CC                              | TT                | 1946472351               |
| SNP_P3_96055_48337486 | NC_021166.1    | Ca_kabuli_chr07 | 48337486                | TT                              | CC                | 1946472353               |
| SNP_P3_96056_48337547 | NC_021166.1    | Ca_kabuli_chr07 | 48337547                | GG                              | AA                | 1946472354               |
| SNP_P3_96057_48337551 | NC_021166.1    | Ca_kabuli_chr07 | 48337551                | TT                              | AA                | 1946472356               |
| SNP_P3_96058_48366129 | NC_021166.1    | Ca_kabuli_chr07 | 48366129                | TT                              | CC                | 1946472357               |
| SNP_P3_96059_48366157 | NC_021166.1    | Ca_kabuli_chr07 | 48366157                | AA                              | CC                | 1946472359               |
| SNP_P3_96060_48366427 | NC_021166.1    | Ca_kabuli_chr07 | 48366427                | AA                              | TT                | 1946472360               |
| SNP_P3_96061_48387527 | NC_021166.1    | Ca_kabuli_chr07 | 48387527                | GG                              | AA                | 1946472362               |
| SNP_P3_96062_48392132 | NC_021166.1    | Ca_kabuli_chr07 | 48392132                | AA                              | CC                | 1946472363               |
| SNP_P3_96063_48392226 | NC_021166.1    | Ca_kabuli_chr07 | 48392226                | TT                              | CC                | 1946472365               |
| SNP_P3_96064_48392311 | NC_021166.1    | Ca_kabuli_chr07 | 48392311                | TT                              | CC                | 1946472366               |
| SNP_P3_96065_48392323 | NC_021166.1    | Ca_kabuli_chr07 | 48392323                | AA                              | GG                | 1946472368               |
| SNP_P3_96066_48392362 | NC_021166.1    | Ca_kabuli_chr07 | 48392362                | GG                              | TT                | 1946472369               |
| SNP_P3_96067_48392409 | NC_021166.1    | Ca_kabuli_chr07 | 48392409                | CC                              | TT                | 1946472371               |
| SNP_P3_96068_48392490 | NC_021166.1    | Ca_kabuli_chr07 | 48392490                | CC                              | TT                | 1946472372               |
| SNP_P3_96069_48392610 | NC_021166.1    | Ca_kabuli_chr07 | 48392610                | CC                              | AA                | 1946472374               |
| SNP_P3_96070_48392612 | NC_021166.1    | Ca_kabuli_chr07 | 48392612                | AA                              | CC                | 1946472375               |
| SNP_P3_96072_48392699 | NC_021166.1    | Ca_kabuli_chr07 | 48392699                | TT                              | AA                | 1946472377               |
| SNP_P3_96073_48392741 | NC_021166.1    | Ca_kabuli_chr07 | 48392741                | GG                              | CC                | 1946472378               |
| SNP_P3_96074_48392915 | NC_021166.1    | Ca_kabuli_chr07 | 48392915                | AA                              | GG                | 1946472380               |
| SNP_P3_96075_48392923 | NC_021166.1    | Ca_kabuli_chr07 | 48392923                | TT                              | AA                | 1946472381               |
| SNP_P3_96076_48400486 | NC_021166.1    | Ca_kabuli_chr07 | 48400486                | AA                              | GG                | 1946472382               |
| SNP_P3_96077_48400498 | NC_021166.1    | Ca_kabuli_chr07 | 48400498                | CC                              | AA                | 1946472384               |
| SNP_P3_96078_48400511 | NC_021166.1    | Ca_kabuli_chr07 | 48400511                | AA                              | GG                | 1946472386               |
| SNP_P3_96079_48400642 | NC_021166.1    | Ca_kabuli_chr07 | 48400642                | TT                              | CC                | 1946472387               |
| SNP_P3_96080_48400656 | NC_021166.1    | Ca_kabuli_chr07 | 48400656                | TT                              | CC                | 1946472388               |
| SNP_P3_96081_48408481 | NC_021166.1    | Ca_kabuli_chr07 | 48408481                | TT                              | GG                | 1946472390               |
| SNP_P3_96082_48422190 | NC_021166.1    | Ca_kabuli_chr07 | 48422190                | CC                              | TT                | 1946472391               |
| SNP_P3_96083_48425886 | NC_021166.1    | Ca_kabuli_chr07 | 48425886                | TT                              | GG                | 1946472393               |
| SNP_P3_96084_48426547 | NC_021166.1    | Ca_kabuli_chr07 | 48426547                | GG                              | CC                | 1946472394               |
| SNP_P3_96085_48426560 | NC_021166.1    | Ca_kabuli_chr07 | 48426560                | AA                              | GG                | 1946472396               |



| SNPs IDs              | Chromosome IDs | Chromosomes     | Physical positions (bp) | CDC Frontier (Reference genome) | (Pusa 256 & HPNB) | NCBI SNPdb Accession IDs |
|-----------------------|----------------|-----------------|-------------------------|---------------------------------|-------------------|--------------------------|
| SNP_P3_96086_48426755 | NC_021166.1    | Ca_kabuli_chr07 | 48426755                | GG                              | TT                | 1946472397               |
| SNP_P3_96088_48429184 | NC_021166.1    | Ca_kabuli_chr07 | 48429184                | TT                              | AA                | 1946472399               |
| SNP_P3_96089_48429186 | NC_021166.1    | Ca_kabuli_chr07 | 48429186                | GG                              | AA                | 1946472400               |
| SNP_P3_96090_48429450 | NC_021166.1    | Ca_kabuli_chr07 | 48429450                | CC                              | AA                | 1946472402               |
| SNP_P3_96091_48429629 | NC_021166.1    | Ca_kabuli_chr07 | 48429629                | GG                              | AA                | 1946472403               |
| SNP_P3_96092_48436553 | NC_021166.1    | Ca_kabuli_chr07 | 48436553                | AA                              | GG                | 1946472405               |
| SNP_P3_96093_48436907 | NC_021166.1    | Ca_kabuli_chr07 | 48436907                | TT                              | AA                | 1946472406               |
| SNP_P3_96095_48491888 | NC_021166.1    | Ca_kabuli_chr07 | 48491888                | CC                              | TT                | 1946472408               |
| SNP_P3_96096_48491889 | NC_021166.1    | Ca_kabuli_chr07 | 48491889                | CC                              | TT                | 1946472409               |
| SNP_P3_96097_48497314 | NC_021166.1    | Ca_kabuli_chr07 | 48497314                | CC                              | TT                | 1946472411               |
| SNP_P3_96098_48497359 | NC_021166.1    | Ca_kabuli_chr07 | 48497359                | CC                              | TT                | 1946472412               |
| SNP_P3_96099_48498166 | NC_021166.1    | Ca_kabuli_chr07 | 48498166                | CC                              | TT                | 1946472414               |
| SNP_P3_96101_48535881 | NC_021166.1    | Ca_kabuli_chr07 | 48535881                | AA                              | CC                | 1946472415               |
| SNP_P3_96102_48535958 | NC_021166.1    | Ca_kabuli_chr07 | 48535958                | AA                              | GG                | 1946472416               |
| SNP_P3_96103_48536174 | NC_021166.1    | Ca_kabuli_chr07 | 48536174                | GG                              | CC                | 1946472418               |
| SNP_P3_96104_48536177 | NC_021166.1    | Ca_kabuli_chr07 | 48536177                | AA                              | GG                | 1946472419               |
| SNP_P3_96106_48547070 | NC_021166.1    | Ca_kabuli_chr07 | 48547070                | GG                              | AA                | 1946472421               |
| SNP_P3_96107_48548003 | NC_021166.1    | Ca_kabuli_chr07 | 48548003                | AA                              | TT                | 1946472422               |
| SNP_P3_96108_48548006 | NC_021166.1    | Ca_kabuli_chr07 | 48548006                | AA                              | GG                | 1946472424               |
| SNP_P3_96109_48611308 | NC_021166.1    | Ca_kabuli_chr07 | 48611308                | TT                              | CC                | 1946472425               |
| SNP_P3_96110_48611317 | NC_021166.1    | Ca_kabuli_chr07 | 48611317                | GG                              | AA                | 1946472427               |
| SNP_P3_96111_48611464 | NC_021166.1    | Ca_kabuli_chr07 | 48611464                | TT                              | AA                | 1946472428               |
| SNP_P3_96112_48611515 | NC_021166.1    | Ca_kabuli_chr07 | 48611515                | CC                              | TT                | 1946472430               |
| SNP_P3_96113_48611542 | NC_021166.1    | Ca_kabuli_chr07 | 48611542                | TT                              | CC                | 1946472431               |
| SNP_P3_96114_48612016 | NC_021166.1    | Ca_kabuli_chr07 | 48612016                | CC                              | TT                | 1946472433               |
| SNP_P3_96115_48612209 | NC_021166.1    | Ca_kabuli_chr07 | 48612209                | AA                              | GG                | 1946472434               |
| SNP_P3_96116_48612212 | NC_021166.1    | Ca_kabuli_chr07 | 48612212                | TT                              | CC                | 1946472436               |
| SNP_P3_96117_48612251 | NC_021166.1    | Ca_kabuli_chr07 | 48612251                | CC                              | TT                | 1946472437               |
| SNP_P3_96118_48662678 | NC_021166.1    | Ca_kabuli_chr07 | 48662678                | AA                              | GG                | 1946472439               |
| SNP_P3_96119_48677532 | NC_021166.1    | Ca_kabuli_chr07 | 48677532                | TT                              | CC                | 1946472440               |
| SNP_P3_96120_48677539 | NC_021166.1    | Ca_kabuli_chr07 | 48677539                | TT                              | GG                | 1946472442               |
| SNP_P3_96121_48677542 | NC_021166.1    | Ca_kabuli_chr07 | 48677542                | AA                              | GG                | 1946472443               |
| SNP_P3_96122_48677560 | NC_021166.1    | Ca_kabuli_chr07 | 48677560                | GG                              | AA                | 1946472444               |
| SNP_P3_96123_48677574 | NC_021166.1    | Ca_kabuli_chr07 | 48677574                | AA                              | TT                | 1946472446               |
| SNP_P3_96124_48677584 | NC_021166.1    | Ca_kabuli_chr07 | 48677584                | AA                              | GG                | 1946472447               |
| SNP_P3_96125_48677595 | NC_021166.1    | Ca_kabuli_chr07 | 48677595                | GG                              | AA                | 1946472449               |
| SNP_P3_96126_48678149 | NC_021166.1    | Ca_kabuli_chr07 | 48678149                | GG                              | TT                | 1946472450               |
| SNP_P3_96127_48678153 | NC_021166.1    | Ca_kabuli_chr07 | 48678153                | CC                              | TT                | 1946472452               |
| SNP_P3_96128_48678170 | NC_021166.1    | Ca_kabuli_chr07 | 48678170                | AA                              | GG                | 1946472453               |
| SNP_P3_96129_48678186 | NC_021166.1    | Ca_kabuli_chr07 | 48678186                | CC                              | TT                | 1946472455               |
| SNP_P3_96130_48678272 | NC_021166.1    | Ca_kabuli_chr07 | 48678272                | CC                              | AA                | 1946472456               |
| SNP_P3_96131_48678279 | NC_021166.1    | Ca_kabuli_chr07 | 48678279                | AA                              | CC                | 1946472458               |

| SNPs IDs              | Chromosome IDs | Chromosomes     | Physical positions (bp) | CDC Frontier (Reference genome) | (Pusa 256 & HPNB) | NCBI SNPdb Accession IDs |
|-----------------------|----------------|-----------------|-------------------------|---------------------------------|-------------------|--------------------------|
| SNP_P3_96132_48678289 | NC_021166.1    | Ca_kabuli_chr07 | 48678289                | AA                              | GG                | 1946472459               |
| SNP_P3_96133_48678296 | NC_021166.1    | Ca_kabuli_chr07 | 48678296                | TT                              | CC                | 1946472461               |
| SNP_P3_96134_48678607 | NC_021166.1    | Ca_kabuli_chr07 | 48678607                | AA                              | GG                | 1946472462               |
| SNP_P3_96135_48703776 | NC_021166.1    | Ca_kabuli_chr07 | 48703776                | CC                              | TT                | 1946472464               |
| SNP_P3_96136_48708688 | NC_021166.1    | Ca_kabuli_chr07 | 48708688                | TT                              | AA                | 1946472465               |
| SNP_P3_96137_48708689 | NC_021166.1    | Ca_kabuli_chr07 | 48708689                | TT                              | AA                | 1946472467               |
| SNP_P3_96138_48708695 | NC_021166.1    | Ca_kabuli_chr07 | 48708695                | TT                              | AA                | 1946472468               |
| SNP_P3_96139_48723310 | NC_021166.1    | Ca_kabuli_chr07 | 48723310                | AA                              | TT                | 1946472470               |
| SNP_P3_96140_48723354 | NC_021166.1    | Ca_kabuli_chr07 | 48723354                | AA                              | CC                | 1946472471               |
| SNP_P3_96141_48741091 | NC_021166.1    | Ca_kabuli_chr07 | 48741091                | CC                              | TT                | 1946472472               |
| SNP_P3_96143_48785109 | NC_021166.1    | Ca_kabuli_chr07 | 48785109                | CC                              | TT                | 1946472474               |
| SNP_P3_96144_48788157 | NC_021166.1    | Ca_kabuli_chr07 | 48788157                | CC                              | AA                | 1946472475               |
| SNP_P3_96145_48788311 | NC_021166.1    | Ca_kabuli_chr07 | 48788311                | AA                              | CC                | 1946472477               |
| SNP_P3_96146_48788363 | NC_021166.1    | Ca_kabuli_chr07 | 48788363                | GG                              | TT                | 1946472478               |
| SNP_P3_96147_48788367 | NC_021166.1    | Ca_kabuli_chr07 | 48788367                | GG                              | AA                | 1946472480               |
| SNP_P3_96148_48805165 | NC_021166.1    | Ca_kabuli_chr07 | 48805165                | AA                              | CC                | 1946472481               |
| SNP_P3_96149_48805240 | NC_021166.1    | Ca_kabuli_chr07 | 48805240                | GG                              | TT                | 1946472482               |
| SNP_P3_96150_48805254 | NC_021166.1    | Ca_kabuli_chr07 | 48805254                | GG                              | AA                | 1946472484               |
| SNP_P3_96151_48805286 | NC_021166.1    | Ca_kabuli_chr07 | 48805286                | TT                              | AA                | 1946472485               |
| SNP_P3_96152_48805298 | NC_021166.1    | Ca_kabuli_chr07 | 48805298                | AA                              | CC                | 1946472487               |
| SNP_P3_96153_48812987 | NC_021166.1    | Ca_kabuli_chr07 | 48812987                | AA                              | GG                | 1946472488               |
| SNP_P3_96155_48814121 | NC_021166.1    | Ca_kabuli_chr07 | 48814121                | AA                              | GG                | 1946472490               |
| SNP_P3_96156_48814261 | NC_021166.1    | Ca_kabuli_chr07 | 48814261                | TT                              | CC                | 1946472491               |
| SNP_P3_96157_48816284 | NC_021166.1    | Ca_kabuli_chr07 | 48816284                | TT                              | AA                | 1946472493               |
| SNP_P3_96158_48823073 | NC_021166.1    | Ca_kabuli_chr07 | 48823073                | CC                              | AA                | 1946472494               |
| SNP_P3_96159_48826601 | NC_021166.1    | Ca_kabuli_chr07 | 48826601                | AA                              | GG                | 1946472496               |
| SNP_P3_96160_48826605 | NC_021166.1    | Ca_kabuli_chr07 | 48826605                | CC                              | TT                | 1946472497               |
| SNP_P3_96161_48844866 | NC_021166.1    | Ca_kabuli_chr07 | 48844866                | AA                              | CC                | 1946472498               |
| SNP_P3_96162_48852250 | NC_021166.1    | Ca_kabuli_chr07 | 48852250                | CC                              | TT                | 1946472500               |
| SNP_P3_96163_48852290 | NC_021166.1    | Ca_kabuli_chr07 | 48852290                | GG                              | AA                | 1946472501               |
| SNP_P3_96164_48859120 | NC_021166.1    | Ca_kabuli_chr07 | 48859120                | AA                              | TT                | 1946472503               |
| SNP_P3_96165_48860999 | NC_021166.1    | Ca_kabuli_chr07 | 48860999                | TT                              | CC                | 1946472504               |
| SNP_P3_96166_48871999 | NC_021166.1    | Ca_kabuli_chr07 | 48871999                | TT                              | GG                | 1946472506               |
| SNP_P3_96167_48872074 | NC_021166.1    | Ca_kabuli_chr07 | 48872074                | AA                              | CC                | 1946472507               |
| SNP_P3_96168_48872337 | NC_021166.1    | Ca_kabuli_chr07 | 48872337                | TT                              | CC                | 1946472508               |
| SNP_P3_96169_48872359 | NC_021166.1    | Ca_kabuli_chr07 | 48872359                | CC                              | TT                | 1946472510               |
| SNP_P3_96170_48872381 | NC_021166.1    | Ca_kabuli_chr07 | 48872381                | AA                              | GG                | 1946472511               |
| SNP_P3_96171_48872421 | NC_021166.1    | Ca_kabuli_chr07 | 48872421                | AA                              | GG                | 1946472513               |
| SNP_P3_96172_48872502 | NC_021166.1    | Ca_kabuli_chr07 | 48872502                | GG                              | AA                | 1946472514               |
| SNP_P3_96173_48872609 | NC_021166.1    | Ca_kabuli_chr07 | 48872609                | GG                              | AA                | 1946472516               |
| SNP_P3_96174_48872610 | NC_021166.1    | Ca_kabuli_chr07 | 48872610                | AA                              | TT                | 1946472517               |
| SNP_P3_96175_48872667 | NC_021166.1    | Ca_kabuli_chr07 | 48872667                | GG                              | AA                | 1946472519               |

| SNPs IDs              | Chromosome IDs | Chromosomes     | Physical positions (bp) | CDC Frontier (Reference genome) | (Pusa 256 & HPNB) | NCBI SNPdb Accession IDs |
|-----------------------|----------------|-----------------|-------------------------|---------------------------------|-------------------|--------------------------|
| SNP_P3_96176_48877154 | NC_021166.1    | Ca_kabuli_chr07 | 48877154                | CC                              | TT                | 1946472520               |
| SNP_P3_96177_48879234 | NC_021166.1    | Ca_kabuli_chr07 | 48879234                | TT                              | AA                | 1946472522               |
| SNP_P3_96178_48879280 | NC_021166.1    | Ca_kabuli_chr07 | 48879280                | AA                              | GG                | 1946472523               |
| SNP_P3_96179_48879410 | NC_021166.1    | Ca_kabuli_chr07 | 48879410                | CC                              | GG                | 1946472524               |
| SNP_P3_96180_48879445 | NC_021166.1    | Ca_kabuli_chr07 | 48879445                | GG                              | AA                | 1946472526               |
| SNP_P3_96181_48879470 | NC_021166.1    | Ca_kabuli_chr07 | 48879470                | AA                              | GG                | 1946472527               |
| SNP_P3_96182_48882191 | NC_021166.1    | Ca_kabuli_chr07 | 48882191                | AA                              | GG                | 1946472529               |
| SNP_P3_96183_48894685 | NC_021166.1    | Ca_kabuli_chr07 | 48894685                | AA                              | GG                | 1946472530               |
| SNP_P3_96184_48918654 | NC_021166.1    | Ca_kabuli_chr07 | 48918654                | TT                              | GG                | 1946472532               |
| SNP_P3_96185_48918656 | NC_021166.1    | Ca_kabuli_chr07 | 48918656                | GG                              | AA                | 1946472533               |
| SNP_P3_96186_48930238 | NC_021166.1    | Ca_kabuli_chr07 | 48930238                | AA                              | TT                | 1946472534               |
| SNP_P3_96187_48933322 | NC_021166.1    | Ca_kabuli_chr07 | 48933322                | CC                              | TT                | 1946472536               |
| SNP_P3_96188_48933383 | NC_021166.1    | Ca_kabuli_chr07 | 48933383                | GG                              | TT                | 1946472537               |
| SNP_P3_96189_48933411 | NC_021166.1    | Ca_kabuli_chr07 | 48933411                | AA                              | CC                | 1946472539               |
| SNP_P3_96190_48933823 | NC_021166.1    | Ca_kabuli_chr07 | 48933823                | GG                              | AA                | 1946472540               |
| SNP_P3_96191_48942657 | NC_021166.1    | Ca_kabuli_chr07 | 48942657                | CC                              | TT                | 1946472542               |
| SNP_P3_96192_48943942 | NC_021166.1    | Ca_kabuli_chr07 | 48943942                | CC                              | AA                | 1946472543               |
| SNP_P3_96193_48943988 | NC_021166.1    | Ca_kabuli_chr07 | 48943988                | CC                              | AA                | 1946472545               |
| SNP_P3_96194_48946549 | NC_021166.1    | Ca_kabuli_chr07 | 48946549                | CC                              | TT                | 1946472546               |
| SNP_P3_96195_2747     | NC_021167.1    | Ca_kabuli_chr08 | 2747                    | TT                              | CC                | 1946472548               |
| SNP_P3_96196_2816     | NC_021167.1    | Ca_kabuli_chr08 | 2816                    | AA                              | CC                | 1946472549               |
| SNP_P3_96197_2830     | NC_021167.1    | Ca_kabuli_chr08 | 2830                    | AA                              | GG                | 1946472551               |
| SNP_P3_96198_12826    | NC_021167.1    | Ca_kabuli_chr08 | 12826                   | AA                              | GG                | 1946472552               |
| SNP_P3_96199_13264    | NC_021167.1    | Ca_kabuli_chr08 | 13264                   | TT                              | CC                | 1946472554               |
| SNP_P3_96200_13796    | NC_021167.1    | Ca_kabuli_chr08 | 13796                   | CC                              | TT                | 1946472555               |
| SNP_P3_96202_15530    | NC_021167.1    | Ca_kabuli_chr08 | 15530                   | AA                              | TT                | 1946472556               |
| SNP_P3_96203_15541    | NC_021167.1    | Ca_kabuli_chr08 | 15541                   | CC                              | GG                | 1946472558               |
| SNP_P3_96204_15586    | NC_021167.1    | Ca_kabuli_chr08 | 15586                   | AA                              | TT                | 1946472559               |
| SNP_P3_96205_15774    | NC_021167.1    | Ca_kabuli_chr08 | 15774                   | AA                              | GG                | 1946472561               |
| SNP_P3_96206_15921    | NC_021167.1    | Ca_kabuli_chr08 | 15921                   | AA                              | GG                | 1946472562               |
| SNP_P3_96207_15940    | NC_021167.1    | Ca_kabuli_chr08 | 15940                   | GG                              | AA                | 1946472564               |
| SNP_P3_96208_15958    | NC_021167.1    | Ca_kabuli_chr08 | 15958                   | CC                              | TT                | 1946472566               |
| SNP_P3_96210_16049    | NC_021167.1    | Ca_kabuli_chr08 | 16049                   | CC                              | AA                | 1946472567               |
| SNP_P3_96211_16293    | NC_021167.1    | Ca_kabuli_chr08 | 16293                   | CC                              | TT                | 1946472568               |
| SNP_P3_96212_16747    | NC_021167.1    | Ca_kabuli_chr08 | 16747                   | CC                              | GG                | 1946472570               |
| SNP_P3_96213_17476    | NC_021167.1    | Ca_kabuli_chr08 | 17476                   | TT                              | CC                | 1946472571               |
| SNP_P3_96214_17770    | NC_021167.1    | Ca_kabuli_chr08 | 17770                   | AA                              | GG                | 1946472573               |
| SNP_P3_96215_17812    | NC_021167.1    | Ca_kabuli_chr08 | 17812                   | TT                              | GG                | 1946472574               |
| SNP_P3_96216_17961    | NC_021167.1    | Ca_kabuli_chr08 | 17961                   | AA                              | CC                | 1946472576               |
| SNP_P3_96217_18055    | NC_021167.1    | Ca_kabuli_chr08 | 18055                   | AA                              | CC                | 1946472577               |
| SNP_P3_96218_18201    | NC_021167.1    | Ca_kabuli_chr08 | 18201                   | GG                              | AA                | 1946472579               |
| SNP_P3_96219_18205    | NC_021167.1    | Ca_kabuli_chr08 | 18205                   | TT                              | CC                | 1946472580               |

| SNPs IDs            | Chromosome IDs | Chromosomes     | Physical positions (bp) | CDC Frontier (Reference genome) | (Pusa 256 & HPNB) | NCBI SNPdb Accession IDs |
|---------------------|----------------|-----------------|-------------------------|---------------------------------|-------------------|--------------------------|
| SNP_P3_96220_18256  | NC_021167.1    | Ca_kabuli_chr08 | 18256                   | TT                              | CC                | 1946472581               |
| SNP_P3_96221_18261  | NC_021167.1    | Ca_kabuli_chr08 | 18261                   | GG                              | AA                | 1946472583               |
| SNP_P3_96223_18521  | NC_021167.1    | Ca_kabuli_chr08 | 18521                   | AA                              | GG                | 1946472584               |
| SNP_P3_96225_21250  | NC_021167.1    | Ca_kabuli_chr08 | 21250                   | CC                              | AA                | 1946472586               |
| SNP_P3_96226_21356  | NC_021167.1    | Ca_kabuli_chr08 | 21356                   | AA                              | GG                | 1946472587               |
| SNP_P3_96227_21530  | NC_021167.1    | Ca_kabuli_chr08 | 21530                   | GG                              | AA                | 1946472589               |
| SNP_P3_96229_37460  | NC_021167.1    | Ca_kabuli_chr08 | 37460                   | AA                              | GG                | 1946472590               |
| SNP_P3_96230_45517  | NC_021167.1    | Ca_kabuli_chr08 | 45517                   | TT                              | GG                | 1946472591               |
| SNP_P3_96231_45519  | NC_021167.1    | Ca_kabuli_chr08 | 45519                   | TT                              | AA                | 1946472593               |
| SNP_P3_96233_47640  | NC_021167.1    | Ca_kabuli_chr08 | 47640                   | CC                              | TT                | 1946472595               |
| SNP_P3_96234_90724  | NC_021167.1    | Ca_kabuli_chr08 | 90724                   | GG                              | AA                | 1946472596               |
| SNP_P3_96235_92347  | NC_021167.1    | Ca_kabuli_chr08 | 92347                   | AA                              | GG                | 1946472597               |
| SNP_P3_96236_92349  | NC_021167.1    | Ca_kabuli_chr08 | 92349                   | AA                              | GG                | 1946472599               |
| SNP_P3_96237_103924 | NC_021167.1    | Ca_kabuli_chr08 | 103924                  | CC                              | TT                | 1946472600               |
| SNP_P3_96239_112091 | NC_021167.1    | Ca_kabuli_chr08 | 112091                  | CC                              | AA                | 1946472602               |
| SNP_P3_96240_155195 | NC_021167.1    | Ca_kabuli_chr08 | 155195                  | GG                              | AA                | 1946472603               |
| SNP_P3_96241_155383 | NC_021167.1    | Ca_kabuli_chr08 | 155383                  | GG                              | AA                | 1946472605               |
| SNP_P3_96243_187431 | NC_021167.1    | Ca_kabuli_chr08 | 187431                  | GG                              | AA                | 1946472606               |
| SNP_P3_96244_187904 | NC_021167.1    | Ca_kabuli_chr08 | 187904                  | GG                              | AA                | 1946472608               |
| SNP_P3_96245_187926 | NC_021167.1    | Ca_kabuli_chr08 | 187926                  | CC                              | TT                | 1946472609               |
| SNP_P3_96246_191214 | NC_021167.1    | Ca_kabuli_chr08 | 191214                  | CC                              | AA                | 1946472611               |
| SNP_P3_96247_193858 | NC_021167.1    | Ca_kabuli_chr08 | 193858                  | AA                              | GG                | 1946472612               |
| SNP_P3_96248_193908 | NC_021167.1    | Ca_kabuli_chr08 | 193908                  | AA                              | GG                | 1946472614               |
| SNP_P3_96249_193959 | NC_021167.1    | Ca_kabuli_chr08 | 193959                  | AA                              | GG                | 1946472615               |
| SNP_P3_96250_194130 | NC_021167.1    | Ca_kabuli_chr08 | 194130                  | AA                              | GG                | 1946472616               |
| SNP_P3_96251_200021 | NC_021167.1    | Ca_kabuli_chr08 | 200021                  | CC                              | TT                | 1946472618               |
| SNP_P3_96252_200036 | NC_021167.1    | Ca_kabuli_chr08 | 200036                  | GG                              | CC                | 1946472620               |
| SNP_P3_96253_203996 | NC_021167.1    | Ca_kabuli_chr08 | 203996                  | GG                              | CC                | 1946472621               |
| SNP_P3_96254_256385 | NC_021167.1    | Ca_kabuli_chr08 | 256385                  | AA                              | GG                | 1946472623               |
| SNP_P3_96255_287411 | NC_021167.1    | Ca_kabuli_chr08 | 287411                  | AA                              | TT                | 1946472624               |
| SNP_P3_96256_316251 | NC_021167.1    | Ca_kabuli_chr08 | 316251                  | AA                              | TT                | 1946472625               |
| SNP_P3_96258_325107 | NC_021167.1    | Ca_kabuli_chr08 | 325107                  | TT                              | AA                | 1946472627               |
| SNP_P3_96259_331038 | NC_021167.1    | Ca_kabuli_chr08 | 331038                  | AA                              | CC                | 1946472628               |
| SNP_P3_96260_331056 | NC_021167.1    | Ca_kabuli_chr08 | 331056                  | AA                              | GG                | 1946472630               |
| SNP_P3_96261_331198 | NC_021167.1    | Ca_kabuli_chr08 | 331198                  | GG                              | AA                | 1946472631               |
| SNP_P3_96262_355937 | NC_021167.1    | Ca_kabuli_chr08 | 355937                  | TT                              | CC                | 1946472633               |
| SNP_P3_96263_357091 | NC_021167.1    | Ca_kabuli_chr08 | 357091                  | AA                              | CC                | 1946472634               |
| SNP_P3_96264_381755 | NC_021167.1    | Ca_kabuli_chr08 | 381755                  | CC                              | TT                | 1946472636               |
| SNP_P3_96265_390211 | NC_021167.1    | Ca_kabuli_chr08 | 390211                  | AA                              | TT                | 1946472637               |
| SNP_P3_96266_390212 | NC_021167.1    | Ca_kabuli_chr08 | 390212                  | TT                              | GG                | 1946472639               |
| SNP_P3_96268_415095 | NC_021167.1    | Ca_kabuli_chr08 | 415095                  | CC                              | TT                | 1946472640               |
| SNP_P3_96269_427780 | NC_021167.1    | Ca_kabuli_chr08 | 427780                  | GG                              | AA                | 1946472642               |

| SNPs IDs             | Chromosome IDs | Chromosomes     | Physical positions (bp) | CDC Frontier (Reference genome) | (Pusa 256 & HPNB) | NCBI SNPdb Accession IDs |
|----------------------|----------------|-----------------|-------------------------|---------------------------------|-------------------|--------------------------|
| SNP_P3_96270_439432  | NC_021167.1    | Ca_kabuli_chr08 | 439432                  | GG                              | AA                | 1946472643               |
| SNP_P3_96271_446258  | NC_021167.1    | Ca_kabuli_chr08 | 446258                  | CC                              | TT                | 1946472645               |
| SNP_P3_96273_494479  | NC_021167.1    | Ca_kabuli_chr08 | 494479                  | CC                              | AA                | 1946472646               |
| SNP_P3_96274_520301  | NC_021167.1    | Ca_kabuli_chr08 | 520301                  | AA                              | GG                | 1946472648               |
| SNP_P3_96275_520302  | NC_021167.1    | Ca_kabuli_chr08 | 520302                  | AA                              | GG                | 1946472649               |
| SNP_P3_96276_532105  | NC_021167.1    | Ca_kabuli_chr08 | 532105                  | CC                              | GG                | 1946472650               |
| SNP_P3_96277_535646  | NC_021167.1    | Ca_kabuli_chr08 | 535646                  | AA                              | CC                | 1946472652               |
| SNP_P3_96278_559741  | NC_021167.1    | Ca_kabuli_chr08 | 559741                  | CC                              | GG                | 1946472653               |
| SNP_P3_96283_673893  | NC_021167.1    | Ca_kabuli_chr08 | 673893                  | AA                              | CC                | 1946472655               |
| SNP_P3_96285_760731  | NC_021167.1    | Ca_kabuli_chr08 | 760731                  | CC                              | TT                | 1946472656               |
| SNP_P3_96286_790010  | NC_021167.1    | Ca_kabuli_chr08 | 790010                  | AA                              | GG                | 1946472658               |
| SNP_P3_96288_805218  | NC_021167.1    | Ca_kabuli_chr08 | 805218                  | TT                              | GG                | 1946472659               |
| SNP_P3_96291_815709  | NC_021167.1    | Ca_kabuli_chr08 | 815709                  | TT                              | GG                | 1946472661               |
| SNP_P3_96292_866958  | NC_021167.1    | Ca_kabuli_chr08 | 866958                  | AA                              | CC                | 1946472662               |
| SNP_P3_96294_906287  | NC_021167.1    | Ca_kabuli_chr08 | 906287                  | AA                              | CC                | 1946472663               |
| SNP_P3_96296_920310  | NC_021167.1    | Ca_kabuli_chr08 | 920310                  | TT                              | GG                | 1946472665               |
| SNP_P3_96297_938109  | NC_021167.1    | Ca_kabuli_chr08 | 938109                  | AA                              | TT                | 1946472666               |
| SNP_P3_96298_938115  | NC_021167.1    | Ca_kabuli_chr08 | 938115                  | GG                              | TT                | 1946472668               |
| SNP_P3_96299_938139  | NC_021167.1    | Ca_kabuli_chr08 | 938139                  | CC                              | TT                | 1946472669               |
| SNP_P3_96300_938944  | NC_021167.1    | Ca_kabuli_chr08 | 938944                  | TT                              | CC                | 1946472670               |
| SNP_P3_96301_941336  | NC_021167.1    | Ca_kabuli_chr08 | 941336                  | TT                              | GG                | 1946472672               |
| SNP_P3_96302_957212  | NC_021167.1    | Ca_kabuli_chr08 | 957212                  | AA                              | TT                | 1946472673               |
| SNP_P3_96303_957215  | NC_021167.1    | Ca_kabuli_chr08 | 957215                  | GG                              | AA                | 1946472675               |
| SNP_P3_96304_957221  | NC_021167.1    | Ca_kabuli_chr08 | 957221                  | TT                              | CC                | 1946472676               |
| SNP_P3_96306_957462  | NC_021167.1    | Ca_kabuli_chr08 | 957462                  | CC                              | TT                | 1946472678               |
| SNP_P3_96307_957486  | NC_021167.1    | Ca_kabuli_chr08 | 957486                  | TT                              | AA                | 1946472679               |
| SNP_P3_96308_957495  | NC_021167.1    | Ca_kabuli_chr08 | 957495                  | CC                              | TT                | 1946472681               |
| SNP_P3_96309_1005978 | NC_021167.1    | Ca_kabuli_chr08 | 1005978                 | GG                              | AA                | 1946472682               |
| SNP_P3_96310_1045322 | NC_021167.1    | Ca_kabuli_chr08 | 1045322                 | GG                              | CC                | 1946472683               |
| SNP_P3_96311_1065396 | NC_021167.1    | Ca_kabuli_chr08 | 1065396                 | AA                              | GG                | 1946472685               |
| SNP_P3_96313_1081350 | NC_021167.1    | Ca_kabuli_chr08 | 1081350                 | GG                              | AA                | 1946472686               |
| SNP_P3_96314_1085102 | NC_021167.1    | Ca_kabuli_chr08 | 1085102                 | CC                              | TT                | 1946472688               |
| SNP_P3_96315_1106764 | NC_021167.1    | Ca_kabuli_chr08 | 1106764                 | TT                              | AA                | 1946472689               |
| SNP_P3_96316_1106766 | NC_021167.1    | Ca_kabuli_chr08 | 1106766                 | AA                              | CC                | 1946472691               |
| SNP_P3_96317_1107106 | NC_021167.1    | Ca_kabuli_chr08 | 1107106                 | AA                              | TT                | 1946472692               |
| SNP_P3_96318_1107108 | NC_021167.1    | Ca_kabuli_chr08 | 1107108                 | AA                              | TT                | 1946472694               |
| SNP_P3_96321_1205613 | NC_021167.1    | Ca_kabuli_chr08 | 1205613                 | CC                              | TT                | 1946472695               |
| SNP_P3_96322_1210896 | NC_021167.1    | Ca_kabuli_chr08 | 1210896                 | TT                              | CC                | 1946472697               |
| SNP_P3_96323_1243945 | NC_021167.1    | Ca_kabuli_chr08 | 1243945                 | CC                              | TT                | 1946472698               |
| SNP_P3_96324_1244745 | NC_021167.1    | Ca_kabuli_chr08 | 1244745                 | TT                              | CC                | 1946472699               |
| SNP_P3_96325_1263985 | NC_021167.1    | Ca_kabuli_chr08 | 1263985                 | CC                              | TT                | 1946472701               |
| SNP_P3_96326_1282097 | NC_021167.1    | Ca_kabuli_chr08 | 1282097                 | TT                              | GG                | 1946472702               |

| SNPs IDs             | Chromosome IDs | Chromosomes     | Physical positions (bp) | CDC Frontier (Reference genome) | (Pusa 256 & HPNB) | NCBI SNPdb Accession IDs |
|----------------------|----------------|-----------------|-------------------------|---------------------------------|-------------------|--------------------------|
| SNP_P3_96329_1353602 | NC_021167.1    | Ca_kabuli_chr08 | 1353602                 | TT                              | CC                | 1946472704               |
| SNP_P3_96330_1353612 | NC_021167.1    | Ca_kabuli_chr08 | 1353612                 | AA                              | GG                | 1946472705               |
| SNP_P3_96332_1393441 | NC_021167.1    | Ca_kabuli_chr08 | 1393441                 | AA                              | CC                | 1946472707               |
| SNP_P3_96333_1396928 | NC_021167.1    | Ca_kabuli_chr08 | 1396928                 | GG                              | AA                | 1946472708               |
| SNP_P3_96334_1398767 | NC_021167.1    | Ca_kabuli_chr08 | 1398767                 | TT                              | AA                | 1946472709               |
| SNP_P3_96335_1405215 | NC_021167.1    | Ca_kabuli_chr08 | 1405215                 | CC                              | TT                | 1946472711               |
| SNP_P3_96336_1430819 | NC_021167.1    | Ca_kabuli_chr08 | 1430819                 | AA                              | CC                | 1946472712               |
| SNP_P3_96337_1430822 | NC_021167.1    | Ca_kabuli_chr08 | 1430822                 | AA                              | TT                | 1946472714               |
| SNP_P3_96339_1439580 | NC_021167.1    | Ca_kabuli_chr08 | 1439580                 | CC                              | AA                | 1946472715               |
| SNP_P3_96340_1444587 | NC_021167.1    | Ca_kabuli_chr08 | 1444587                 | AA                              | TT                | 1946472717               |
| SNP_P3_96344_1494056 | NC_021167.1    | Ca_kabuli_chr08 | 1494056                 | GG                              | AA                | 1946472718               |
| SNP_P3_96345_1500184 | NC_021167.1    | Ca_kabuli_chr08 | 1500184                 | CC                              | TT                | 1946472719               |
| SNP_P3_96347_1526327 | NC_021167.1    | Ca_kabuli_chr08 | 1526327                 | TT                              | AA                | 1946472721               |
| SNP_P3_96348_1548822 | NC_021167.1    | Ca_kabuli_chr08 | 1548822                 | AA                              | GG                | 1946472722               |
| SNP_P3_96349_1576425 | NC_021167.1    | Ca_kabuli_chr08 | 1576425                 | TT                              | AA                | 1946472723               |
| SNP_P3_96350_1590040 | NC_021167.1    | Ca_kabuli_chr08 | 1590040                 | CC                              | AA                | 1946472724               |
| SNP_P3_96351_1590069 | NC_021167.1    | Ca_kabuli_chr08 | 1590069                 | GG                              | TT                | 1946472725               |
| SNP_P3_96352_1606152 | NC_021167.1    | Ca_kabuli_chr08 | 1606152                 | TT                              | CC                | 1946472726               |
| SNP_P3_96353_1615234 | NC_021167.1    | Ca_kabuli_chr08 | 1615234                 | AA                              | GG                | 1946472727               |
| SNP_P3_96354_1616744 | NC_021167.1    | Ca_kabuli_chr08 | 1616744                 | TT                              | CC                | 1946472728               |
| SNP_P3_96355_1618046 | NC_021167.1    | Ca_kabuli_chr08 | 1618046                 | AA                              | CC                | 1946472729               |
| SNP_P3_96357_1678196 | NC_021167.1    | Ca_kabuli_chr08 | 1678196                 | TT                              | AA                | 1946472730               |
| SNP_P3_96359_1699965 | NC_021167.1    | Ca_kabuli_chr08 | 1699965                 | CC                              | TT                | 1946472732               |
| SNP_P3_96360_1699974 | NC_021167.1    | Ca_kabuli_chr08 | 1699974                 | CC                              | GG                | 1946472733               |
| SNP_P3_96361_1733189 | NC_021167.1    | Ca_kabuli_chr08 | 1733189                 | AA                              | TT                | 1946472735               |
| SNP_P3_96363_1779543 | NC_021167.1    | Ca_kabuli_chr08 | 1779543                 | GG                              | TT                | 1946472736               |
| SNP_P3_96364_1779546 | NC_021167.1    | Ca_kabuli_chr08 | 1779546                 | AA                              | GG                | 1946472738               |
| SNP_P3_96365_1817995 | NC_021167.1    | Ca_kabuli_chr08 | 1817995                 | CC                              | AA                | 1946472739               |
| SNP_P3_96366_1824210 | NC_021167.1    | Ca_kabuli_chr08 | 1824210                 | AA                              | GG                | 1946472741               |
| SNP_P3_96369_1863599 | NC_021167.1    | Ca_kabuli_chr08 | 1863599                 | CC                              | TT                | 1946472742               |
| SNP_P3_96370_1863675 | NC_021167.1    | Ca_kabuli_chr08 | 1863675                 | CC                              | TT                | 1946472743               |
| SNP_P3_96371_1863707 | NC_021167.1    | Ca_kabuli_chr08 | 1863707                 | GG                              | AA                | 1946472745               |
| SNP_P3_96372_1863803 | NC_021167.1    | Ca_kabuli_chr08 | 1863803                 | CC                              | AA                | 1946472746               |
| SNP_P3_96373_1864342 | NC_021167.1    | Ca_kabuli_chr08 | 1864342                 | TT                              | CC                | 1946472748               |
| SNP_P3_96374_1864346 | NC_021167.1    | Ca_kabuli_chr08 | 1864346                 | TT                              | CC                | 1946472749               |
| SNP_P3_96375_1864392 | NC_021167.1    | Ca_kabuli_chr08 | 1864392                 | TT                              | CC                | 1946472751               |
| SNP_P3_96376_1864426 | NC_021167.1    | Ca_kabuli_chr08 | 1864426                 | AA                              | GG                | 1946472752               |
| SNP_P3_96379_1888309 | NC_021167.1    | Ca_kabuli_chr08 | 1888309                 | GG                              | AA                | 1946472753               |
| SNP_P3_96380_1917855 | NC_021167.1    | Ca_kabuli_chr08 | 1917855                 | TT                              | AA                | 1946472755               |
| SNP_P3_96381_1963226 | NC_021167.1    | Ca_kabuli_chr08 | 1963226                 | CC                              | TT                | 1946472756               |
| SNP_P3_96382_2030373 | NC_021167.1    | Ca_kabuli_chr08 | 2030373                 | CC                              | AA                | 1946472758               |
| SNP_P3_96383_2032348 | NC_021167.1    | Ca_kabuli_chr08 | 2032348                 | GG                              | CC                | 1946472759               |

| SNPs IDs             | Chromosome IDs | Chromosomes     | Physical positions (bp) | CDC Frontier (Reference genome) | (Pusa 256 & HPNB) | NCBI SNPdb Accession IDs |
|----------------------|----------------|-----------------|-------------------------|---------------------------------|-------------------|--------------------------|
| SNP_P3_96384_2032644 | NC_021167.1    | Ca_kabuli_chr08 | 2032644                 | CC                              | TT                | 1946472761               |
| SNP_P3_96385_2032703 | NC_021167.1    | Ca_kabuli_chr08 | 2032703                 | TT                              | CC                | 1946472762               |
| SNP_P3_96386_2033107 | NC_021167.1    | Ca_kabuli_chr08 | 2033107                 | CC                              | TT                | 1946472763               |
| SNP_P3_96387_2033544 | NC_021167.1    | Ca_kabuli_chr08 | 2033544                 | TT                              | CC                | 1946472765               |
| SNP_P3_96388_2033676 | NC_021167.1    | Ca_kabuli_chr08 | 2033676                 | CC                              | TT                | 1946472766               |
| SNP_P3_96389_2033699 | NC_021167.1    | Ca_kabuli_chr08 | 2033699                 | GG                              | AA                | 1946472768               |
| SNP_P3_96390_2057423 | NC_021167.1    | Ca_kabuli_chr08 | 2057423                 | TT                              | CC                | 1946472769               |
| SNP_P3_96391_2120180 | NC_021167.1    | Ca_kabuli_chr08 | 2120180                 | GG                              | AA                | 1946472771               |
| SNP_P3_96392_2148868 | NC_021167.1    | Ca_kabuli_chr08 | 2148868                 | TT                              | GG                | 1946472772               |
| SNP_P3_96393_2148869 | NC_021167.1    | Ca_kabuli_chr08 | 2148869                 | TT                              | GG                | 1946472774               |
| SNP_P3_96394_2157762 | NC_021167.1    | Ca_kabuli_chr08 | 2157762                 | TT                              | AA                | 1946472775               |
| SNP_P3_96395_2160573 | NC_021167.1    | Ca_kabuli_chr08 | 2160573                 | CC                              | TT                | 1946472777               |
| SNP_P3_96396_2160664 | NC_021167.1    | Ca_kabuli_chr08 | 2160664                 | AA                              | TT                | 1946472778               |
| SNP_P3_96397_2197949 | NC_021167.1    | Ca_kabuli_chr08 | 2197949                 | TT                              | CC                | 1946472779               |
| SNP_P3_96398_2228423 | NC_021167.1    | Ca_kabuli_chr08 | 2228423                 | GG                              | TT                | 1946472781               |
| SNP_P3_96399_2259597 | NC_021167.1    | Ca_kabuli_chr08 | 2259597                 | GG                              | AA                | 1946472782               |
| SNP_P3_96400_2260233 | NC_021167.1    | Ca_kabuli_chr08 | 2260233                 | GG                              | TT                | 1946472784               |
| SNP_P3_96404_2320725 | NC_021167.1    | Ca_kabuli_chr08 | 2320725                 | TT                              | AA                | 1946472785               |
| SNP_P3_96406_2345833 | NC_021167.1    | Ca_kabuli_chr08 | 2345833                 | TT                              | AA                | 1946472787               |
| SNP_P3_96407_2345897 | NC_021167.1    | Ca_kabuli_chr08 | 2345897                 | TT                              | CC                | 1946472788               |
| SNP_P3_96408_2346056 | NC_021167.1    | Ca_kabuli_chr08 | 2346056                 | TT                              | AA                | 1946472790               |
| SNP_P3_96409_2346089 | NC_021167.1    | Ca_kabuli_chr08 | 2346089                 | TT                              | GG                | 1946472791               |
| SNP_P3_96410_2346123 | NC_021167.1    | Ca_kabuli_chr08 | 2346123                 | TT                              | GG                | 1946472792               |
| SNP_P3_96411_2346149 | NC_021167.1    | Ca_kabuli_chr08 | 2346149                 | CC                              | TT                | 1946472794               |
| SNP_P3_96412_2346363 | NC_021167.1    | Ca_kabuli_chr08 | 2346363                 | CC                              | GG                | 1946472795               |
| SNP_P3_96413_2346371 | NC_021167.1    | Ca_kabuli_chr08 | 2346371                 | TT                              | CC                | 1946472797               |
| SNP_P3_96414_2346429 | NC_021167.1    | Ca_kabuli_chr08 | 2346429                 | TT                              | GG                | 1946472798               |
| SNP_P3_96415_2354260 | NC_021167.1    | Ca_kabuli_chr08 | 2354260                 | GG                              | TT                | 1946472800               |
| SNP_P3_96416_2394298 | NC_021167.1    | Ca_kabuli_chr08 | 2394298                 | CC                              | AA                | 1946472801               |
| SNP_P3_96417_2394822 | NC_021167.1    | Ca_kabuli_chr08 | 2394822                 | TT                              | AA                | 1946472802               |
| SNP_P3_96418_2406867 | NC_021167.1    | Ca_kabuli_chr08 | 2406867                 | CC                              | TT                | 1946472804               |
| SNP_P3_96420_2427122 | NC_021167.1    | Ca_kabuli_chr08 | 2427122                 | AA                              | GG                | 1946472805               |
| SNP_P3_96421_2427127 | NC_021167.1    | Ca_kabuli_chr08 | 2427127                 | GG                              | TT                | 1946472807               |
| SNP_P3_96422_2431063 | NC_021167.1    | Ca_kabuli_chr08 | 2431063                 | CC                              | TT                | 1946472808               |
| SNP_P3_96423_2442201 | NC_021167.1    | Ca_kabuli_chr08 | 2442201                 | GG                              | CC                | 1946472809               |
| SNP_P3_96424_2445737 | NC_021167.1    | Ca_kabuli_chr08 | 2445737                 | TT                              | GG                | 1946472811               |
| SNP_P3_96425_2445739 | NC_021167.1    | Ca_kabuli_chr08 | 2445739                 | TT                              | GG                | 1946472812               |
| SNP_P3_96426_2475504 | NC_021167.1    | Ca_kabuli_chr08 | 2475504                 | GG                              | TT                | 1946472814               |
| SNP_P3_96427_2475505 | NC_021167.1    | Ca_kabuli_chr08 | 2475505                 | AA                              | TT                | 1946472815               |
| SNP_P3_96429_2479847 | NC_021167.1    | Ca_kabuli_chr08 | 2479847                 | AA                              | CC                | 1946472817               |
| SNP_P3_96430_2479904 | NC_021167.1    | Ca_kabuli_chr08 | 2479904                 | TT                              | AA                | 1946472818               |
| SNP_P3_96431_2479906 | NC_021167.1    | Ca_kabuli_chr08 | 2479906                 | AA                              | TT                | 1946472820               |

| SNPs IDs             | Chromosome IDs | Chromosomes     | Physical positions (bp) | CDC Frontier (Reference genome) | (Pusa 256 & HPNB) | NCBI SNPdb Accession IDs |
|----------------------|----------------|-----------------|-------------------------|---------------------------------|-------------------|--------------------------|
| SNP_P3_96433_2490650 | NC_021167.1    | Ca_kabuli_chr08 | 2490650                 | TT                              | CC                | 1946472821               |
| SNP_P3_96434_2498806 | NC_021167.1    | Ca_kabuli_chr08 | 2498806                 | CC                              | TT                | 1946472822               |
| SNP_P3_96435_2506140 | NC_021167.1    | Ca_kabuli_chr08 | 2506140                 | GG                              | AA                | 1946472824               |
| SNP_P3_96436_2506172 | NC_021167.1    | Ca_kabuli_chr08 | 2506172                 | AA                              | CC                | 1946472825               |
| SNP_P3_96437_2506425 | NC_021167.1    | Ca_kabuli_chr08 | 2506425                 | CC                              | AA                | 1946472827               |
| SNP_P3_96440_2525422 | NC_021167.1    | Ca_kabuli_chr08 | 2525422                 | AA                              | GG                | 1946472828               |
| SNP_P3_96441_2552175 | NC_021167.1    | Ca_kabuli_chr08 | 2552175                 | TT                              | CC                | 1946472829               |
| SNP_P3_96442_2552184 | NC_021167.1    | Ca_kabuli_chr08 | 2552184                 | AA                              | GG                | 1946472831               |
| SNP_P3_96443_2607086 | NC_021167.1    | Ca_kabuli_chr08 | 2607086                 | CC                              | TT                | 1946472832               |
| SNP_P3_96444_2608854 | NC_021167.1    | Ca_kabuli_chr08 | 2608854                 | GG                              | AA                | 1946472834               |
| SNP_P3_96445_2725945 | NC_021167.1    | Ca_kabuli_chr08 | 2725945                 | AA                              | GG                | 1946472835               |
| SNP_P3_96446_2735849 | NC_021167.1    | Ca_kabuli_chr08 | 2735849                 | TT                              | CC                | 1946472836               |
| SNP_P3_96447_2737955 | NC_021167.1    | Ca_kabuli_chr08 | 2737955                 | TT                              | CC                | 1946472838               |
| SNP_P3_96448_2737958 | NC_021167.1    | Ca_kabuli_chr08 | 2737958                 | TT                              | CC                | 1946472839               |
| SNP_P3_96450_2806779 | NC_021167.1    | Ca_kabuli_chr08 | 2806779                 | AA                              | TT                | 1946472841               |
| SNP_P3_96452_2890383 | NC_021167.1    | Ca_kabuli_chr08 | 2890383                 | CC                              | AA                | 1946472842               |
| SNP_P3_96453_2995661 | NC_021167.1    | Ca_kabuli_chr08 | 2995661                 | CC                              | AA                | 1946472844               |
| SNP_P3_96454_3026882 | NC_021167.1    | Ca_kabuli_chr08 | 3026882                 | TT                              | AA                | 1946472845               |
| SNP_P3_96455_3035455 | NC_021167.1    | Ca_kabuli_chr08 | 3035455                 | TT                              | AA                | 1946472846               |
| SNP_P3_96458_3128361 | NC_021167.1    | Ca_kabuli_chr08 | 3128361                 | CC                              | TT                | 1946472848               |
| SNP_P3_96459_3135136 | NC_021167.1    | Ca_kabuli_chr08 | 3135136                 | TT                              | GG                | 1946472849               |
| SNP_P3_96460_3180616 | NC_021167.1    | Ca_kabuli_chr08 | 3180616                 | AA                              | CC                | 1946472851               |
| SNP_P3_96462_3192266 | NC_021167.1    | Ca_kabuli_chr08 | 3192266                 | TT                              | GG                | 1946472852               |
| SNP_P3_96463_3201942 | NC_021167.1    | Ca_kabuli_chr08 | 3201942                 | TT                              | CC                | 1946472854               |
| SNP_P3_96464_3201954 | NC_021167.1    | Ca_kabuli_chr08 | 3201954                 | AA                              | TT                | 1946472855               |
| SNP_P3_96465_3201957 | NC_021167.1    | Ca_kabuli_chr08 | 3201957                 | TT                              | AA                | 1946472857               |
| SNP_P3_96466_3255879 | NC_021167.1    | Ca_kabuli_chr08 | 3255879                 | CC                              | TT                | 1946472858               |
| SNP_P3_96469_3266257 | NC_021167.1    | Ca_kabuli_chr08 | 3266257                 | GG                              | AA                | 1946472859               |
| SNP_P3_96470_3267423 | NC_021167.1    | Ca_kabuli_chr08 | 3267423                 | CC                              | TT                | 1946472861               |
| SNP_P3_96471_3307601 | NC_021167.1    | Ca_kabuli_chr08 | 3307601                 | AA                              | CC                | 1946472862               |
| SNP_P3_96472_3307603 | NC_021167.1    | Ca_kabuli_chr08 | 3307603                 | AA                              | CC                | 1946472864               |
| SNP_P3_96474_3330140 | NC_021167.1    | Ca_kabuli_chr08 | 3330140                 | AA                              | TT                | 1946472865               |
| SNP_P3_96475_3330227 | NC_021167.1    | Ca_kabuli_chr08 | 3330227                 | TT                              | AA                | 1946472867               |
| SNP_P3_96476_3335074 | NC_021167.1    | Ca_kabuli_chr08 | 3335074                 | TT                              | CC                | 1946472868               |
| SNP_P3_96477_3335083 | NC_021167.1    | Ca_kabuli_chr08 | 3335083                 | TT                              | GG                | 1946472870               |
| SNP_P3_96478_3335343 | NC_021167.1    | Ca_kabuli_chr08 | 3335343                 | GG                              | AA                | 1946472871               |
| SNP_P3_96479_3338438 | NC_021167.1    | Ca_kabuli_chr08 | 3338438                 | GG                              | CC                | 1946472872               |
| SNP_P3_96481_3362870 | NC_021167.1    | Ca_kabuli_chr08 | 3362870                 | AA                              | TT                | 1946472874               |
| SNP_P3_96483_3418679 | NC_021167.1    | Ca_kabuli_chr08 | 3418679                 | CC                              | TT                | 1946472875               |
| SNP_P3_96485_3491596 | NC_021167.1    | Ca_kabuli_chr08 | 3491596                 | AA                              | CC                | 1946472877               |
| SNP_P3_96486_3491970 | NC_021167.1    | Ca_kabuli_chr08 | 3491970                 | TT                              | CC                | 1946472878               |
| SNP_P3_96487_3495394 | NC_021167.1    | Ca_kabuli_chr08 | 3495394                 | AA                              | GG                | 1946472880               |



| SNPs IDs             | Chromosome IDs | Chromosomes     | Physical positions (bp) | CDC Frontier (Reference genome) | (Pusa 256 & HPNB) | NCBI SNPdb Accession IDs |
|----------------------|----------------|-----------------|-------------------------|---------------------------------|-------------------|--------------------------|
| SNP_P3_96488_3499287 | NC_021167.1    | Ca_kabuli_chr08 | 3499287                 | CC                              | TT                | 1946472881               |
| SNP_P3_96489_3534793 | NC_021167.1    | Ca_kabuli_chr08 | 3534793                 | GG                              | AA                | 1946472883               |
| SNP_P3_96490_3545657 | NC_021167.1    | Ca_kabuli_chr08 | 3545657                 | TT                              | CC                | 1946472884               |
| SNP_P3_96491_3545661 | NC_021167.1    | Ca_kabuli_chr08 | 3545661                 | GG                              | CC                | 1946472886               |
| SNP_P3_96492_3545848 | NC_021167.1    | Ca_kabuli_chr08 | 3545848                 | TT                              | GG                | 1946472887               |
| SNP_P3_96493_3586972 | NC_021167.1    | Ca_kabuli_chr08 | 3586972                 | AA                              | GG                | 1946472888               |
| SNP_P3_96495_3588355 | NC_021167.1    | Ca_kabuli_chr08 | 3588355                 | TT                              | CC                | 1946472890               |
| SNP_P3_96496_3588374 | NC_021167.1    | Ca_kabuli_chr08 | 3588374                 | AA                              | GG                | 1946472891               |
| SNP_P3_96497_3588382 | NC_021167.1    | Ca_kabuli_chr08 | 3588382                 | AA                              | GG                | 1946472893               |
| SNP_P3_96498_3592065 | NC_021167.1    | Ca_kabuli_chr08 | 3592065                 | AA                              | GG                | 1946472895               |
| SNP_P3_96499_3592066 | NC_021167.1    | Ca_kabuli_chr08 | 3592066                 | AA                              | GG                | 1946472897               |
| SNP_P3_96500_3592089 | NC_021167.1    | Ca_kabuli_chr08 | 3592089                 | AA                              | TT                | 1946472898               |
| SNP_P3_96501_3639513 | NC_021167.1    | Ca_kabuli_chr08 | 3639513                 | CC                              | TT                | 1946472900               |
| SNP_P3_96502_3669431 | NC_021167.1    | Ca_kabuli_chr08 | 3669431                 | TT                              | CC                | 1946472901               |
| SNP_P3_96503_3673487 | NC_021167.1    | Ca_kabuli_chr08 | 3673487                 | TT                              | CC                | 1946472903               |
| SNP_P3_96504_3673489 | NC_021167.1    | Ca_kabuli_chr08 | 3673489                 | AA                              | GG                | 1946472904               |
| SNP_P3_96505_3673499 | NC_021167.1    | Ca_kabuli_chr08 | 3673499                 | AA                              | CC                | 1946472905               |
| SNP_P3_96506_3673571 | NC_021167.1    | Ca_kabuli_chr08 | 3673571                 | AA                              | CC                | 1946472907               |
| SNP_P3_96507_3673586 | NC_021167.1    | Ca_kabuli_chr08 | 3673586                 | TT                              | CC                | 1946472908               |
| SNP_P3_96508_3676327 | NC_021167.1    | Ca_kabuli_chr08 | 3676327                 | CC                              | TT                | 1946472910               |
| SNP_P3_96509_3719810 | NC_021167.1    | Ca_kabuli_chr08 | 3719810                 | AA                              | GG                | 1946472912               |
| SNP_P3_96511_3763173 | NC_021167.1    | Ca_kabuli_chr08 | 3763173                 | AA                              | CC                | 1946472913               |
| SNP_P3_96513_3777781 | NC_021167.1    | Ca_kabuli_chr08 | 3777781                 | TT                              | AA                | 1946472915               |
| SNP_P3_96515_3809247 | NC_021167.1    | Ca_kabuli_chr08 | 3809247                 | TT                              | CC                | 1946472916               |
| SNP_P3_96517_3838270 | NC_021167.1    | Ca_kabuli_chr08 | 3838270                 | TT                              | GG                | 1946472918               |
| SNP_P3_96518_3838306 | NC_021167.1    | Ca_kabuli_chr08 | 3838306                 | AA                              | GG                | 1946472919               |
| SNP_P3_96519_3852097 | NC_021167.1    | Ca_kabuli_chr08 | 3852097                 | GG                              | CC                | 1946472921               |
| SNP_P3_96520_3871418 | NC_021167.1    | Ca_kabuli_chr08 | 3871418                 | TT                              | CC                | 1946472922               |
| SNP_P3_96521_3896792 | NC_021167.1    | Ca_kabuli_chr08 | 3896792                 | AA                              | TT                | 1946472924               |
| SNP_P3_96522_3897021 | NC_021167.1    | Ca_kabuli_chr08 | 3897021                 | TT                              | AA                | 1946472925               |
| SNP_P3_96523_3897024 | NC_021167.1    | Ca_kabuli_chr08 | 3897024                 | AA                              | CC                | 1946472927               |
| SNP_P3_96524_3916685 | NC_021167.1    | Ca_kabuli_chr08 | 3916685                 | AA                              | TT                | 1946472928               |
| SNP_P3_96525_3935728 | NC_021167.1    | Ca_kabuli_chr08 | 3935728                 | TT                              | CC                | 1946472930               |
| SNP_P3_96526_3947097 | NC_021167.1    | Ca_kabuli_chr08 | 3947097                 | AA                              | GG                | 1946472931               |
| SNP_P3_96527_3947102 | NC_021167.1    | Ca_kabuli_chr08 | 3947102                 | AA                              | GG                | 1946472933               |
| SNP_P3_96528_3948846 | NC_021167.1    | Ca_kabuli_chr08 | 3948846                 | CC                              | TT                | 1946472934               |
| SNP_P3_96529_3953590 | NC_021167.1    | Ca_kabuli_chr08 | 3953590                 | GG                              | AA                | 1946472936               |
| SNP_P3_96530_3964201 | NC_021167.1    | Ca_kabuli_chr08 | 3964201                 | TT                              | AA                | 1946472937               |
| SNP_P3_96531_3972130 | NC_021167.1    | Ca_kabuli_chr08 | 3972130                 | AA                              | TT                | 1946472939               |
| SNP_P3_96534_4012185 | NC_021167.1    | Ca_kabuli_chr08 | 4012185                 | GG                              | AA                | 1946472940               |
| SNP_P3_96535_4018355 | NC_021167.1    | Ca_kabuli_chr08 | 4018355                 | TT                              | CC                | 1946472941               |
| SNP_P3_96537_4061738 | NC_021167.1    | Ca_kabuli_chr08 | 4061738                 | TT                              | CC                | 1946472943               |

| SNPs IDs             | Chromosome IDs | Chromosomes     | Physical positions (bp) | CDC Frontier (Reference genome) | (Pusa 256 & HPNB) | NCBI SNPdb Accession IDs |
|----------------------|----------------|-----------------|-------------------------|---------------------------------|-------------------|--------------------------|
| SNP_P3_96540_4076915 | NC_021167.1    | Ca_kabuli_chr08 | 4076915                 | TT                              | GG                | 1946472944               |
| SNP_P3_96542_4091323 | NC_021167.1    | Ca_kabuli_chr08 | 4091323                 | GG                              | CC                | 1946472946               |
| SNP_P3_96544_4111843 | NC_021167.1    | Ca_kabuli_chr08 | 4111843                 | CC                              | TT                | 1946472947               |
| SNP_P3_96546_4140056 | NC_021167.1    | Ca_kabuli_chr08 | 4140056                 | AA                              | GG                | 1946472949               |
| SNP_P3_96547_4151934 | NC_021167.1    | Ca_kabuli_chr08 | 4151934                 | TT                              | GG                | 1946472950               |
| SNP_P3_96550_4214749 | NC_021167.1    | Ca_kabuli_chr08 | 4214749                 | AA                              | GG                | 1946472952               |
| SNP_P3_96551_4216460 | NC_021167.1    | Ca_kabuli_chr08 | 4216460                 | CC                              | TT                | 1946472953               |
| SNP_P3_96553_4235453 | NC_021167.1    | Ca_kabuli_chr08 | 4235453                 | GG                              | AA                | 1946472955               |
| SNP_P3_96555_4274697 | NC_021167.1    | Ca_kabuli_chr08 | 4274697                 | CC                              | GG                | 1946472956               |
| SNP_P3_96556_4281196 | NC_021167.1    | Ca_kabuli_chr08 | 4281196                 | CC                              | TT                | 1946472957               |
| SNP_P3_96557_4292643 | NC_021167.1    | Ca_kabuli_chr08 | 4292643                 | TT                              | CC                | 1946472959               |
| SNP_P3_96558_4292719 | NC_021167.1    | Ca_kabuli_chr08 | 4292719                 | TT                              | AA                | 1946472960               |
| SNP_P3_96559_4314822 | NC_021167.1    | Ca_kabuli_chr08 | 4314822                 | GG                              | AA                | 1946472962               |
| SNP_P3_96560_4317020 | NC_021167.1    | Ca_kabuli_chr08 | 4317020                 | CC                              | TT                | 1946472963               |
| SNP_P3_96561_4320609 | NC_021167.1    | Ca_kabuli_chr08 | 4320609                 | GG                              | AA                | 1946472965               |
| SNP_P3_96562_4339820 | NC_021167.1    | Ca_kabuli_chr08 | 4339820                 | AA                              | CC                | 1946472966               |
| SNP_P3_96566_4399956 | NC_021167.1    | Ca_kabuli_chr08 | 4399956                 | TT                              | AA                | 1946472968               |
| SNP_P3_96567_4403125 | NC_021167.1    | Ca_kabuli_chr08 | 4403125                 | TT                              | CC                | 1946472969               |
| SNP_P3_96570_4427433 | NC_021167.1    | Ca_kabuli_chr08 | 4427433                 | TT                              | CC                | 1946472971               |
| SNP_P3_96571_4451264 | NC_021167.1    | Ca_kabuli_chr08 | 4451264                 | AA                              | GG                | 1946472972               |
| SNP_P3_96572_4481697 | NC_021167.1    | Ca_kabuli_chr08 | 4481697                 | AA                              | GG                | 1946472974               |
| SNP_P3_96573_4487593 | NC_021167.1    | Ca_kabuli_chr08 | 4487593                 | CC                              | TT                | 1946472975               |
| SNP_P3_96574_4489660 | NC_021167.1    | Ca_kabuli_chr08 | 4489660                 | AA                              | CC                | 1946472977               |
| SNP_P3_96576_4534522 | NC_021167.1    | Ca_kabuli_chr08 | 4534522                 | GG                              | TT                | 1946472978               |
| SNP_P3_96577_4538992 | NC_021167.1    | Ca_kabuli_chr08 | 4538992                 | CC                              | TT                | 1946472980               |
| SNP_P3_96578_4539016 | NC_021167.1    | Ca_kabuli_chr08 | 4539016                 | CC                              | GG                | 1946472981               |
| SNP_P3_96579_4575252 | NC_021167.1    | Ca_kabuli_chr08 | 4575252                 | GG                              | TT                | 1946472982               |
| SNP_P3_96580_4583975 | NC_021167.1    | Ca_kabuli_chr08 | 4583975                 | TT                              | CC                | 1946472984               |
| SNP_P3_96581_4586121 | NC_021167.1    | Ca_kabuli_chr08 | 4586121                 | AA                              | TT                | 1946472985               |
| SNP_P3_96583_4683256 | NC_021167.1    | Ca_kabuli_chr08 | 4683256                 | GG                              | AA                | 1946472987               |
| SNP_P3_96585_4683725 | NC_021167.1    | Ca_kabuli_chr08 | 4683725                 | AA                              | CC                | 1946472988               |
| SNP_P3_96587_4758788 | NC_021167.1    | Ca_kabuli_chr08 | 4758788                 | CC                              | TT                | 1946472990               |
| SNP_P3_96588_4799555 | NC_021167.1    | Ca_kabuli_chr08 | 4799555                 | GG                              | AA                | 1946472991               |
| SNP_P3_96591_4836414 | NC_021167.1    | Ca_kabuli_chr08 | 4836414                 | AA                              | CC                | 1946472993               |
| SNP_P3_96592_4841537 | NC_021167.1    | Ca_kabuli_chr08 | 4841537                 | CC                              | TT                | 1946472994               |
| SNP_P3_96593_4854245 | NC_021167.1    | Ca_kabuli_chr08 | 4854245                 | GG                              | AA                | 1946472996               |
| SNP_P3_96595_4896015 | NC_021167.1    | Ca_kabuli_chr08 | 4896015                 | GG                              | CC                | 1946472997               |
| SNP_P3_96596_4901700 | NC_021167.1    | Ca_kabuli_chr08 | 4901700                 | GG                              | AA                | 1946472998               |
| SNP_P3_96597_4901909 | NC_021167.1    | Ca_kabuli_chr08 | 4901909                 | CC                              | AA                | 1946473000               |
| SNP_P3_96602_4981875 | NC_021167.1    | Ca_kabuli_chr08 | 4981875                 | AA                              | TT                | 1946473001               |
| SNP_P3_96603_4981884 | NC_021167.1    | Ca_kabuli_chr08 | 4981884                 | GG                              | AA                | 1946473003               |
| SNP_P3_96604_4983876 | NC_021167.1    | Ca_kabuli_chr08 | 4983876                 | TT                              | CC                | 1946473004               |

| SNPs IDs             | Chromosome IDs | Chromosomes     | Physical positions (bp) | CDC Frontier (Reference genome) | (Pusa 256 & HPNB) | NCBI SNPdb Accession IDs |
|----------------------|----------------|-----------------|-------------------------|---------------------------------|-------------------|--------------------------|
| SNP_P3_96610_5063665 | NC_021167.1    | Ca_kabuli_chr08 | 5063665                 | AA                              | GG                | 1946473006               |
| SNP_P3_96611_5069471 | NC_021167.1    | Ca_kabuli_chr08 | 5069471                 | CC                              | TT                | 1946473007               |
| SNP_P3_96612_5069746 | NC_021167.1    | Ca_kabuli_chr08 | 5069746                 | TT                              | CC                | 1946473009               |
| SNP_P3_96613_5069841 | NC_021167.1    | Ca_kabuli_chr08 | 5069841                 | GG                              | AA                | 1946473010               |
| SNP_P3_96614_5069915 | NC_021167.1    | Ca_kabuli_chr08 | 5069915                 | TT                              | GG                | 1946473012               |
| SNP_P3_96615_5069959 | NC_021167.1    | Ca_kabuli_chr08 | 5069959                 | GG                              | TT                | 1946473013               |
| SNP_P3_96616_5069965 | NC_021167.1    | Ca_kabuli_chr08 | 5069965                 | TT                              | CC                | 1946473014               |
| SNP_P3_96617_5069979 | NC_021167.1    | Ca_kabuli_chr08 | 5069979                 | AA                              | CC                | 1946473016               |
| SNP_P3_96618_5070006 | NC_021167.1    | Ca_kabuli_chr08 | 5070006                 | CC                              | TT                | 1946473017               |
| SNP_P3_96619_5070019 | NC_021167.1    | Ca_kabuli_chr08 | 5070019                 | CC                              | AA                | 1946473019               |
| SNP_P3_96620_5070033 | NC_021167.1    | Ca_kabuli_chr08 | 5070033                 | GG                              | TT                | 1946473020               |
| SNP_P3_96621_5070040 | NC_021167.1    | Ca_kabuli_chr08 | 5070040                 | AA                              | CC                | 1946473022               |
| SNP_P3_96622_5070047 | NC_021167.1    | Ca_kabuli_chr08 | 5070047                 | CC                              | AA                | 1946473023               |
| SNP_P3_96623_5070048 | NC_021167.1    | Ca_kabuli_chr08 | 5070048                 | AA                              | GG                | 1946473025               |
| SNP_P3_96624_5070453 | NC_021167.1    | Ca_kabuli_chr08 | 5070453                 | TT                              | CC                | 1946473026               |
| SNP_P3_96625_5075027 | NC_021167.1    | Ca_kabuli_chr08 | 5075027                 | CC                              | TT                | 1946473028               |
| SNP_P3_96627_5088382 | NC_021167.1    | Ca_kabuli_chr08 | 5088382                 | AA                              | CC                | 1946473029               |
| SNP_P3_96628_5088588 | NC_021167.1    | Ca_kabuli_chr08 | 5088588                 | AA                              | CC                | 1946473031               |
| SNP_P3_96629_5088635 | NC_021167.1    | Ca_kabuli_chr08 | 5088635                 | GG                              | AA                | 1946473032               |
| SNP_P3_96630_5088818 | NC_021167.1    | Ca_kabuli_chr08 | 5088818                 | CC                              | TT                | 1946473034               |
| SNP_P3_96631_5089202 | NC_021167.1    | Ca_kabuli_chr08 | 5089202                 | AA                              | GG                | 1946473035               |
| SNP_P3_96632_5089275 | NC_021167.1    | Ca_kabuli_chr08 | 5089275                 | AA                              | CC                | 1946473037               |
| SNP_P3_96634_5089501 | NC_021167.1    | Ca_kabuli_chr08 | 5089501                 | TT                              | GG                | 1946473038               |
| SNP_P3_96635_5094699 | NC_021167.1    | Ca_kabuli_chr08 | 5094699                 | AA                              | GG                | 1946473040               |
| SNP_P3_96636_5100544 | NC_021167.1    | Ca_kabuli_chr08 | 5100544                 | AA                              | GG                | 1946473041               |
| SNP_P3_96637_5130343 | NC_021167.1    | Ca_kabuli_chr08 | 5130343                 | GG                              | AA                | 1946473043               |
| SNP_P3_96638_5130368 | NC_021167.1    | Ca_kabuli_chr08 | 5130368                 | CC                              | AA                | 1946473044               |
| SNP_P3_96639_5131770 | NC_021167.1    | Ca_kabuli_chr08 | 5131770                 | AA                              | TT                | 1946473046               |
| SNP_P3_96640_5166666 | NC_021167.1    | Ca_kabuli_chr08 | 5166666                 | TT                              | CC                | 1946473047               |
| SNP_P3_96641_5167964 | NC_021167.1    | Ca_kabuli_chr08 | 5167964                 | TT                              | CC                | 1946473049               |
| SNP_P3_96642_5170793 | NC_021167.1    | Ca_kabuli_chr08 | 5170793                 | AA                              | CC                | 1946473050               |
| SNP_P3_96643_5178538 | NC_021167.1    | Ca_kabuli_chr08 | 5178538                 | AA                              | GG                | 1946473052               |
| SNP_P3_96644_5187997 | NC_021167.1    | Ca_kabuli_chr08 | 5187997                 | AA                              | TT                | 1946473054               |
| SNP_P3_96645_5208145 | NC_021167.1    | Ca_kabuli_chr08 | 5208145                 | AA                              | CC                | 1946473055               |
| SNP_P3_96646_5217981 | NC_021167.1    | Ca_kabuli_chr08 | 5217981                 | AA                              | GG                | 1946473057               |
| SNP_P3_96647_5220934 | NC_021167.1    | Ca_kabuli_chr08 | 5220934                 | GG                              | TT                | 1946473058               |
| SNP_P3_96648_5220947 | NC_021167.1    | Ca_kabuli_chr08 | 5220947                 | CC                              | AA                | 1946473060               |
| SNP_P3_96649_5221650 | NC_021167.1    | Ca_kabuli_chr08 | 5221650                 | CC                              | GG                | 1946473061               |
| SNP_P3_96650_5221737 | NC_021167.1    | Ca_kabuli_chr08 | 5221737                 | TT                              | CC                | 1946473063               |
| SNP_P3_96651_5221813 | NC_021167.1    | Ca_kabuli_chr08 | 5221813                 | AA                              | GG                | 1946473064               |
| SNP_P3_96652_5221833 | NC_021167.1    | Ca_kabuli_chr08 | 5221833                 | AA                              | CC                | 1946473066               |
| SNP_P3_96653_5221864 | NC_021167.1    | Ca_kabuli_chr08 | 5221864                 | CC                              | TT                | 1946473067               |

| SNPs IDs             | Chromosome IDs | Chromosomes     | Physical positions (bp) | CDC Frontier (Reference genome) | (Pusa 256 & HPNB) | NCBI SNPdb Accession IDs |
|----------------------|----------------|-----------------|-------------------------|---------------------------------|-------------------|--------------------------|
| SNP_P3_96654_5221873 | NC_021167.1    | Ca_kabuli_chr08 | 5221873                 | CC                              | TT                | 1946473069               |
| SNP_P3_96655_5221952 | NC_021167.1    | Ca_kabuli_chr08 | 5221952                 | GG                              | TT                | 1946473070               |
| SNP_P3_96656_5222080 | NC_021167.1    | Ca_kabuli_chr08 | 5222080                 | GG                              | AA                | 1946473072               |
| SNP_P3_96657_5222111 | NC_021167.1    | Ca_kabuli_chr08 | 5222111                 | CC                              | TT                | 1946473073               |
| SNP_P3_96659_5269145 | NC_021167.1    | Ca_kabuli_chr08 | 5269145                 | CC                              | AA                | 1946473075               |
| SNP_P3_96660_5269208 | NC_021167.1    | Ca_kabuli_chr08 | 5269208                 | AA                              | TT                | 1946473076               |
| SNP_P3_96661_5269309 | NC_021167.1    | Ca_kabuli_chr08 | 5269309                 | TT                              | CC                | 1946473078               |
| SNP_P3_96662_5269355 | NC_021167.1    | Ca_kabuli_chr08 | 5269355                 | TT                              | GG                | 1946473079               |
| SNP_P3_96663_5269394 | NC_021167.1    | Ca_kabuli_chr08 | 5269394                 | TT                              | AA                | 1946473081               |
| SNP_P3_96664_5269412 | NC_021167.1    | Ca_kabuli_chr08 | 5269412                 | CC                              | AA                | 1946473082               |
| SNP_P3_96665_5269440 | NC_021167.1    | Ca_kabuli_chr08 | 5269440                 | TT                              | CC                | 1946473084               |
| SNP_P3_96666_5271017 | NC_021167.1    | Ca_kabuli_chr08 | 5271017                 | CC                              | TT                | 1946473085               |
| SNP_P3_96667_5298696 | NC_021167.1    | Ca_kabuli_chr08 | 5298696                 | AA                              | GG                | 1946473087               |
| SNP_P3_96668_5298754 | NC_021167.1    | Ca_kabuli_chr08 | 5298754                 | GG                              | AA                | 1946473088               |
| SNP_P3_96669_5298765 | NC_021167.1    | Ca_kabuli_chr08 | 5298765                 | AA                              | GG                | 1946473089               |
| SNP_P3_96670_5299048 | NC_021167.1    | Ca_kabuli_chr08 | 5299048                 | TT                              | CC                | 1946473091               |
| SNP_P3_96671_5299080 | NC_021167.1    | Ca_kabuli_chr08 | 5299080                 | TT                              | CC                | 1946473092               |
| SNP_P3_96672_5299095 | NC_021167.1    | Ca_kabuli_chr08 | 5299095                 | CC                              | GG                | 1946473094               |
| SNP_P3_96673_5301995 | NC_021167.1    | Ca_kabuli_chr08 | 5301995                 | CC                              | GG                | 1946473095               |
| SNP_P3_96674_5303748 | NC_021167.1    | Ca_kabuli_chr08 | 5303748                 | GG                              | AA                | 1946473097               |
| SNP_P3_96675_5319853 | NC_021167.1    | Ca_kabuli_chr08 | 5319853                 | GG                              | AA                | 1946473098               |
| SNP_P3_96677_5356578 | NC_021167.1    | Ca_kabuli_chr08 | 5356578                 | AA                              | TT                | 1946473100               |
| SNP_P3_96681_5381045 | NC_021167.1    | Ca_kabuli_chr08 | 5381045                 | CC                              | TT                | 1946473101               |
| SNP_P3_96683_5404761 | NC_021167.1    | Ca_kabuli_chr08 | 5404761                 | GG                              | AA                | 1946473103               |
| SNP_P3_96684_5421914 | NC_021167.1    | Ca_kabuli_chr08 | 5421914                 | CC                              | TT                | 1946473104               |
| SNP_P3_96686_5449272 | NC_021167.1    | Ca_kabuli_chr08 | 5449272                 | AA                              | TT                | 1946473105               |
| SNP_P3_96687_5460961 | NC_021167.1    | Ca_kabuli_chr08 | 5460961                 | AA                              | TT                | 1946473107               |
| SNP_P3_96689_5514081 | NC_021167.1    | Ca_kabuli_chr08 | 5514081                 | AA                              | TT                | 1946473108               |
| SNP_P3_96690_5525196 | NC_021167.1    | Ca_kabuli_chr08 | 5525196                 | CC                              | TT                | 1946473110               |
| SNP_P3_96691_5578425 | NC_021167.1    | Ca_kabuli_chr08 | 5578425                 | AA                              | TT                | 1946473111               |
| SNP_P3_96692_5578988 | NC_021167.1    | Ca_kabuli_chr08 | 5578988                 | CC                              | TT                | 1946473113               |
| SNP_P3_96693_5580513 | NC_021167.1    | Ca_kabuli_chr08 | 5580513                 | AA                              | TT                | 1946473114               |
| SNP_P3_96697_5679310 | NC_021167.1    | Ca_kabuli_chr08 | 5679310                 | TT                              | CC                | 1946473116               |
| SNP_P3_96698_5679803 | NC_021167.1    | Ca_kabuli_chr08 | 5679803                 | TT                              | CC                | 1946473117               |
| SNP_P3_96699_5718967 | NC_021167.1    | Ca_kabuli_chr08 | 5718967                 | AA                              | TT                | 1946473119               |
| SNP_P3_96700_5719139 | NC_021167.1    | Ca_kabuli_chr08 | 5719139                 | CC                              | TT                | 1946473120               |
| SNP_P3_96701_5719176 | NC_021167.1    | Ca_kabuli_chr08 | 5719176                 | GG                              | AA                | 1946473122               |
| SNP_P3_96702_5719181 | NC_021167.1    | Ca_kabuli_chr08 | 5719181                 | TT                              | GG                | 1946473123               |
| SNP_P3_96703_5719191 | NC_021167.1    | Ca_kabuli_chr08 | 5719191                 | CC                              | TT                | 1946473125               |
| SNP_P3_96704_5719194 | NC_021167.1    | Ca_kabuli_chr08 | 5719194                 | TT                              | GG                | 1946473126               |
| SNP_P3_96705_5719252 | NC_021167.1    | Ca_kabuli_chr08 | 5719252                 | GG                              | AA                | 1946473128               |
| SNP_P3_96706_5719296 | NC_021167.1    | Ca_kabuli_chr08 | 5719296                 | GG                              | TT                | 1946473129               |

| SNPs IDs             | Chromosome IDs | Chromosomes     | Physical positions (bp) | CDC Frontier (Reference genome) | (Pusa 256 & HPNB) | NCBI SNPdb Accession IDs |
|----------------------|----------------|-----------------|-------------------------|---------------------------------|-------------------|--------------------------|
| SNP_P3_96707_5719338 | NC_021167.1    | Ca_kabuli_chr08 | 5719338                 | AA                              | GG                | 1946473131               |
| SNP_P3_96708_5719380 | NC_021167.1    | Ca_kabuli_chr08 | 5719380                 | TT                              | CC                | 1946473132               |
| SNP_P3_96709_5719399 | NC_021167.1    | Ca_kabuli_chr08 | 5719399                 | AA                              | GG                | 1946473134               |
| SNP_P3_96710_5719434 | NC_021167.1    | Ca_kabuli_chr08 | 5719434                 | CC                              | TT                | 1946473135               |
| SNP_P3_96711_5719461 | NC_021167.1    | Ca_kabuli_chr08 | 5719461                 | TT                              | GG                | 1946473137               |
| SNP_P3_96712_5719625 | NC_021167.1    | Ca_kabuli_chr08 | 5719625                 | CC                              | GG                | 1946473138               |
| SNP_P3_96713_5719697 | NC_021167.1    | Ca_kabuli_chr08 | 5719697                 | GG                              | AA                | 1946473142               |
| SNP_P3_96714_5719702 | NC_021167.1    | Ca_kabuli_chr08 | 5719702                 | CC                              | TT                | 1946473143               |
| SNP_P3_96715_5719724 | NC_021167.1    | Ca_kabuli_chr08 | 5719724                 | CC                              | TT                | 1946473145               |
| SNP_P3_96716_5719767 | NC_021167.1    | Ca_kabuli_chr08 | 5719767                 | AA                              | CC                | 1946473146               |
| SNP_P3_96717_5719777 | NC_021167.1    | Ca_kabuli_chr08 | 5719777                 | AA                              | TT                | 1946473148               |
| SNP_P3_96718_5719783 | NC_021167.1    | Ca_kabuli_chr08 | 5719783                 | TT                              | CC                | 1946473149               |
| SNP_P3_96719_5719784 | NC_021167.1    | Ca_kabuli_chr08 | 5719784                 | AA                              | TT                | 1946473151               |
| SNP_P3_96720_5719785 | NC_021167.1    | Ca_kabuli_chr08 | 5719785                 | AA                              | GG                | 1946473152               |
| SNP_P3_96722_5719978 | NC_021167.1    | Ca_kabuli_chr08 | 5719978                 | GG                              | CC                | 1946473154               |
| SNP_P3_96723_5719981 | NC_021167.1    | Ca_kabuli_chr08 | 5719981                 | GG                              | AA                | 1946473155               |
| SNP_P3_96724_5720033 | NC_021167.1    | Ca_kabuli_chr08 | 5720033                 | CC                              | TT                | 1946473157               |
| SNP_P3_96725_5720037 | NC_021167.1    | Ca_kabuli_chr08 | 5720037                 | CC                              | TT                | 1946473158               |
| SNP_P3_96726_5720092 | NC_021167.1    | Ca_kabuli_chr08 | 5720092                 | AA                              | GG                | 1946473160               |
| SNP_P3_96727_5720101 | NC_021167.1    | Ca_kabuli_chr08 | 5720101                 | GG                              | AA                | 1946473161               |
| SNP_P3_96728_5720118 | NC_021167.1    | Ca_kabuli_chr08 | 5720118                 | TT                              | AA                | 1946473162               |
| SNP_P3_96729_5720123 | NC_021167.1    | Ca_kabuli_chr08 | 5720123                 | CC                              | TT                | 1946473164               |
| SNP_P3_96730_5720149 | NC_021167.1    | Ca_kabuli_chr08 | 5720149                 | CC                              | TT                | 1946473165               |
| SNP_P3_96732_5724683 | NC_021167.1    | Ca_kabuli_chr08 | 5724683                 | TT                              | AA                | 1946473167               |
| SNP_P3_96733_5733085 | NC_021167.1    | Ca_kabuli_chr08 | 5733085                 | GG                              | AA                | 1946473168               |
| SNP_P3_96735_5749985 | NC_021167.1    | Ca_kabuli_chr08 | 5749985                 | AA                              | TT                | 1946473170               |
| SNP_P3_96736_5779449 | NC_021167.1    | Ca_kabuli_chr08 | 5779449                 | TT                              | GG                | 1946473171               |
| SNP_P3_96737_5779450 | NC_021167.1    | Ca_kabuli_chr08 | 5779450                 | TT                              | CC                | 1946473173               |
| SNP_P3_96738_5802826 | NC_021167.1    | Ca_kabuli_chr08 | 5802826                 | CC                              | TT                | 1946473174               |
| SNP_P3_96739_5879022 | NC_021167.1    | Ca_kabuli_chr08 | 5879022                 | GG                              | AA                | 1946473176               |
| SNP_P3_96740_5879126 | NC_021167.1    | Ca_kabuli_chr08 | 5879126                 | AA                              | GG                | 1946473177               |
| SNP_P3_96742_6010667 | NC_021167.1    | Ca_kabuli_chr08 | 6010667                 | CC                              | TT                | 1946473179               |
| SNP_P3_96743_6024662 | NC_021167.1    | Ca_kabuli_chr08 | 6024662                 | AA                              | GG                | 1946473180               |
| SNP_P3_96744_6052326 | NC_021167.1    | Ca_kabuli_chr08 | 6052326                 | CC                              | AA                | 1946473182               |
| SNP_P3_96745_6055705 | NC_021167.1    | Ca_kabuli_chr08 | 6055705                 | CC                              | TT                | 1946473183               |
| SNP_P3_96746_6055895 | NC_021167.1    | Ca_kabuli_chr08 | 6055895                 | TT                              | CC                | 1946473185               |
| SNP_P3_96747_6055966 | NC_021167.1    | Ca_kabuli_chr08 | 6055966                 | CC                              | TT                | 1946473186               |
| SNP_P3_96748_6056125 | NC_021167.1    | Ca_kabuli_chr08 | 6056125                 | CC                              | TT                | 1946473188               |
| SNP_P3_96749_6056393 | NC_021167.1    | Ca_kabuli_chr08 | 6056393                 | CC                              | TT                | 1946473189               |
| SNP_P3_96750_6056415 | NC_021167.1    | Ca_kabuli_chr08 | 6056415                 | AA                              | GG                | 1946473190               |
| SNP_P3_96751_6056427 | NC_021167.1    | Ca_kabuli_chr08 | 6056427                 | TT                              | GG                | 1946473192               |
| SNP_P3_96752_6056450 | NC_021167.1    | Ca_kabuli_chr08 | 6056450                 | AA                              | GG                | 1946473193               |

| SNPs IDs             | Chromosome IDs | Chromosomes     | Physical positions (bp) | CDC Frontier (Reference genome) | (Pusa 256 & HPNB) | NCBI SNPdb Accession IDs |
|----------------------|----------------|-----------------|-------------------------|---------------------------------|-------------------|--------------------------|
| SNP_P3_96753_6056487 | NC_021167.1    | Ca_kabuli_chr08 | 6056487                 | TT                              | CC                | 1946473195               |
| SNP_P3_96754_6056496 | NC_021167.1    | Ca_kabuli_chr08 | 6056496                 | TT                              | CC                | 1946473196               |
| SNP_P3_96756_6056654 | NC_021167.1    | Ca_kabuli_chr08 | 6056654                 | TT                              | CC                | 1946473198               |
| SNP_P3_96757_6066992 | NC_021167.1    | Ca_kabuli_chr08 | 6066992                 | GG                              | TT                | 1946473199               |
| SNP_P3_96758_6072416 | NC_021167.1    | Ca_kabuli_chr08 | 6072416                 | GG                              | AA                | 1946473201               |
| SNP_P3_96759_6076002 | NC_021167.1    | Ca_kabuli_chr08 | 6076002                 | CC                              | AA                | 1946473202               |
| SNP_P3_96760_6078432 | NC_021167.1    | Ca_kabuli_chr08 | 6078432                 | TT                              | GG                | 1946473204               |
| SNP_P3_96761_6078662 | NC_021167.1    | Ca_kabuli_chr08 | 6078662                 | GG                              | AA                | 1946473205               |
| SNP_P3_96762_6078699 | NC_021167.1    | Ca_kabuli_chr08 | 6078699                 | AA                              | TT                | 1946473207               |
| SNP_P3_96763_6082364 | NC_021167.1    | Ca_kabuli_chr08 | 6082364                 | GG                              | AA                | 1946473208               |
| SNP_P3_96764_6086814 | NC_021167.1    | Ca_kabuli_chr08 | 6086814                 | GG                              | AA                | 1946473210               |
| SNP_P3_96765_6086830 | NC_021167.1    | Ca_kabuli_chr08 | 6086830                 | AA                              | GG                | 1946473211               |
| SNP_P3_96766_6086857 | NC_021167.1    | Ca_kabuli_chr08 | 6086857                 | CC                              | AA                | 1946473213               |
| SNP_P3_96767_6086865 | NC_021167.1    | Ca_kabuli_chr08 | 6086865                 | CC                              | GG                | 1946473214               |
| SNP_P3_96768_6086867 | NC_021167.1    | Ca_kabuli_chr08 | 6086867                 | GG                              | AA                | 1946473216               |
| SNP_P3_96769_6086921 | NC_021167.1    | Ca_kabuli_chr08 | 6086921                 | AA                              | GG                | 1946473217               |
| SNP_P3_96770_6086942 | NC_021167.1    | Ca_kabuli_chr08 | 6086942                 | AA                              | GG                | 1946473219               |
| SNP_P3_96771_6087236 | NC_021167.1    | Ca_kabuli_chr08 | 6087236                 | CC                              | TT                | 1946473220               |
| SNP_P3_96772_6087520 | NC_021167.1    | Ca_kabuli_chr08 | 6087520                 | CC                              | TT                | 1946473222               |
| SNP_P3_96773_6087577 | NC_021167.1    | Ca_kabuli_chr08 | 6087577                 | AA                              | TT                | 1946473223               |
| SNP_P3_96774_6087639 | NC_021167.1    | Ca_kabuli_chr08 | 6087639                 | TT                              | AA                | 1946473225               |
| SNP_P3_96775_6087664 | NC_021167.1    | Ca_kabuli_chr08 | 6087664                 | AA                              | GG                | 1946473226               |
| SNP_P3_96776_6087967 | NC_021167.1    | Ca_kabuli_chr08 | 6087967                 | TT                              | GG                | 1946473227               |
| SNP_P3_96777_6094768 | NC_021167.1    | Ca_kabuli_chr08 | 6094768                 | AA                              | GG                | 1946473229               |
| SNP_P3_96778_6098399 | NC_021167.1    | Ca_kabuli_chr08 | 6098399                 | AA                              | CC                | 1946473230               |
| SNP_P3_96779_6098400 | NC_021167.1    | Ca_kabuli_chr08 | 6098400                 | AA                              | CC                | 1946473232               |
| SNP_P3_96780_6115668 | NC_021167.1    | Ca_kabuli_chr08 | 6115668                 | TT                              | CC                | 1946473233               |
| SNP_P3_96783_6128984 | NC_021167.1    | Ca_kabuli_chr08 | 6128984                 | AA                              | GG                | 1946473235               |
| SNP_P3_96784_6129313 | NC_021167.1    | Ca_kabuli_chr08 | 6129313                 | TT                              | AA                | 1946473236               |
| SNP_P3_96785_6129318 | NC_021167.1    | Ca_kabuli_chr08 | 6129318                 | TT                              | CC                | 1946473238               |
| SNP_P3_96786_6129406 | NC_021167.1    | Ca_kabuli_chr08 | 6129406                 | AA                              | GG                | 1946473239               |
| SNP_P3_96789_6138167 | NC_021167.1    | Ca_kabuli_chr08 | 6138167                 | TT                              | AA                | 1946473241               |
| SNP_P3_96792_6198505 | NC_021167.1    | Ca_kabuli_chr08 | 6198505                 | CC                              | TT                | 1946473242               |
| SNP_P3_96793_6231443 | NC_021167.1    | Ca_kabuli_chr08 | 6231443                 | AA                              | GG                | 1946473244               |
| SNP_P3_96794_6231448 | NC_021167.1    | Ca_kabuli_chr08 | 6231448                 | AA                              | CC                | 1946473245               |
| SNP_P3_96795_6231677 | NC_021167.1    | Ca_kabuli_chr08 | 6231677                 | CC                              | TT                | 1946473247               |
| SNP_P3_96796_6231729 | NC_021167.1    | Ca_kabuli_chr08 | 6231729                 | CC                              | TT                | 1946473248               |
| SNP_P3_96797_6261733 | NC_021167.1    | Ca_kabuli_chr08 | 6261733                 | GG                              | AA                | 1946473250               |
| SNP_P3_96798_6291724 | NC_021167.1    | Ca_kabuli_chr08 | 6291724                 | TT                              | CC                | 1946473251               |
| SNP_P3_96799_6292364 | NC_021167.1    | Ca_kabuli_chr08 | 6292364                 | CC                              | TT                | 1946473253               |
| SNP_P3_96800_6300750 | NC_021167.1    | Ca_kabuli_chr08 | 6300750                 | CC                              | TT                | 1946473254               |
| SNP_P3_96801_6301111 | NC_021167.1    | Ca_kabuli_chr08 | 6301111                 | GG                              | AA                | 1946473256               |

| SNPs IDs             | Chromosome IDs | Chromosomes     | Physical positions (bp) | CDC Frontier genome (Reference) | (Pusa 256 & HPNB) | NCBI SNPdb Accession IDs |
|----------------------|----------------|-----------------|-------------------------|---------------------------------|-------------------|--------------------------|
| SNP_P3_96802_6301121 | NC_021167.1    | Ca_kabuli_chr08 | 6301121                 | AA                              | GG                | 1946473257               |
| SNP_P3_96803_6301413 | NC_021167.1    | Ca_kabuli_chr08 | 6301413                 | GG                              | TT                | 1946473259               |
| SNP_P3_96804_6301499 | NC_021167.1    | Ca_kabuli_chr08 | 6301499                 | CC                              | TT                | 1946473260               |
| SNP_P3_96805_6307062 | NC_021167.1    | Ca_kabuli_chr08 | 6307062                 | GG                              | AA                | 1946473262               |
| SNP_P3_96807_6307197 | NC_021167.1    | Ca_kabuli_chr08 | 6307197                 | CC                              | TT                | 1946473263               |
| SNP_P3_96808_6307211 | NC_021167.1    | Ca_kabuli_chr08 | 6307211                 | TT                              | AA                | 1946473265               |
| SNP_P3_96809_6307283 | NC_021167.1    | Ca_kabuli_chr08 | 6307283                 | TT                              | CC                | 1946473266               |
| SNP_P3_96810_6307402 | NC_021167.1    | Ca_kabuli_chr08 | 6307402                 | TT                              | AA                | 1946473268               |
| SNP_P3_96811_6307426 | NC_021167.1    | Ca_kabuli_chr08 | 6307426                 | TT                              | CC                | 1946473269               |
| SNP_P3_96812_6307460 | NC_021167.1    | Ca_kabuli_chr08 | 6307460                 | GG                              | AA                | 1946473271               |
| SNP_P3_96814_6309116 | NC_021167.1    | Ca_kabuli_chr08 | 6309116                 | AA                              | CC                | 1946473272               |
| SNP_P3_96816_6330284 | NC_021167.1    | Ca_kabuli_chr08 | 6330284                 | GG                              | AA                | 1946473274               |
| SNP_P3_96817_6330288 | NC_021167.1    | Ca_kabuli_chr08 | 6330288                 | CC                              | TT                | 1946473275               |
| SNP_P3_96818_6343421 | NC_021167.1    | Ca_kabuli_chr08 | 6343421                 | GG                              | AA                | 1946473277               |
| SNP_P3_96819_6344126 | NC_021167.1    | Ca_kabuli_chr08 | 6344126                 | GG                              | AA                | 1946473278               |
| SNP_P3_96820_6346133 | NC_021167.1    | Ca_kabuli_chr08 | 6346133                 | GG                              | AA                | 1946473280               |
| SNP_P3_96821_6347632 | NC_021167.1    | Ca_kabuli_chr08 | 6347632                 | TT                              | CC                | 1946473281               |
| SNP_P3_96822_6370525 | NC_021167.1    | Ca_kabuli_chr08 | 6370525                 | GG                              | AA                | 1946473283               |
| SNP_P3_96823_6382498 | NC_021167.1    | Ca_kabuli_chr08 | 6382498                 | CC                              | TT                | 1946473284               |
| SNP_P3_96824_6382536 | NC_021167.1    | Ca_kabuli_chr08 | 6382536                 | CC                              | TT                | 1946473286               |
| SNP_P3_96825_6383421 | NC_021167.1    | Ca_kabuli_chr08 | 6383421                 | GG                              | AA                | 1946473287               |
| SNP_P3_96827_6420342 | NC_021167.1    | Ca_kabuli_chr08 | 6420342                 | CC                              | AA                | 1946473289               |
| SNP_P3_96828_6449642 | NC_021167.1    | Ca_kabuli_chr08 | 6449642                 | CC                              | AA                | 1946473290               |
| SNP_P3_96829_6449643 | NC_021167.1    | Ca_kabuli_chr08 | 6449643                 | GG                              | AA                | 1946473292               |
| SNP_P3_96830_6449653 | NC_021167.1    | Ca_kabuli_chr08 | 6449653                 | CC                              | TT                | 1946473293               |
| SNP_P3_96831_6449875 | NC_021167.1    | Ca_kabuli_chr08 | 6449875                 | TT                              | CC                | 1946473295               |
| SNP_P3_96832_6449884 | NC_021167.1    | Ca_kabuli_chr08 | 6449884                 | AA                              | CC                | 1946473296               |
| SNP_P3_96834_6466093 | NC_021167.1    | Ca_kabuli_chr08 | 6466093                 | AA                              | TT                | 1946473298               |
| SNP_P3_96835_6471103 | NC_021167.1    | Ca_kabuli_chr08 | 6471103                 | GG                              | AA                | 1946473299               |
| SNP_P3_96836_6491796 | NC_021167.1    | Ca_kabuli_chr08 | 6491796                 | TT                              | CC                | 1946473301               |
| SNP_P3_96837_6491801 | NC_021167.1    | Ca_kabuli_chr08 | 6491801                 | CC                              | TT                | 1946473302               |
| SNP_P3_96839_6492087 | NC_021167.1    | Ca_kabuli_chr08 | 6492087                 | TT                              | GG                | 1946473304               |
| SNP_P3_96840_6492381 | NC_021167.1    | Ca_kabuli_chr08 | 6492381                 | CC                              | TT                | 1946473306               |
| SNP_P3_96842_6492558 | NC_021167.1    | Ca_kabuli_chr08 | 6492558                 | TT                              | AA                | 1946473307               |
| SNP_P3_96844_6492640 | NC_021167.1    | Ca_kabuli_chr08 | 6492640                 | CC                              | TT                | 1946473309               |
| SNP_P3_96845_6492679 | NC_021167.1    | Ca_kabuli_chr08 | 6492679                 | CC                              | TT                | 1946473310               |
| SNP_P3_96846_6492771 | NC_021167.1    | Ca_kabuli_chr08 | 6492771                 | AA                              | GG                | 1946473312               |
| SNP_P3_96847_6492900 | NC_021167.1    | Ca_kabuli_chr08 | 6492900                 | GG                              | AA                | 1946473313               |
| SNP_P3_96848_6492902 | NC_021167.1    | Ca_kabuli_chr08 | 6492902                 | AA                              | TT                | 1946473314               |
| SNP_P3_96849_6492934 | NC_021167.1    | Ca_kabuli_chr08 | 6492934                 | AA                              | CC                | 1946473316               |
| SNP_P3_96850_6493025 | NC_021167.1    | Ca_kabuli_chr08 | 6493025                 | AA                              | GG                | 1946473317               |
| SNP_P3_96851_6493146 | NC_021167.1    | Ca_kabuli_chr08 | 6493146                 | TT                              | AA                | 1946473319               |

| SNPs IDs             | Chromosome IDs | Chromosomes     | Physical positions (bp) | CDC Frontier (Reference genome) | (Pusa 256 & HPNB) | NCBI SNPdb Accession IDs |
|----------------------|----------------|-----------------|-------------------------|---------------------------------|-------------------|--------------------------|
| SNP_P3_96852_6493207 | NC_021167.1    | Ca_kabuli_chr08 | 6493207                 | CC                              | TT                | 1946473320               |
| SNP_P3_96853_6493236 | NC_021167.1    | Ca_kabuli_chr08 | 6493236                 | CC                              | AA                | 1946473322               |
| SNP_P3_96854_6493272 | NC_021167.1    | Ca_kabuli_chr08 | 6493272                 | CC                              | TT                | 1946473323               |
| SNP_P3_96855_6493303 | NC_021167.1    | Ca_kabuli_chr08 | 6493303                 | AA                              | GG                | 1946473325               |
| SNP_P3_96856_6493307 | NC_021167.1    | Ca_kabuli_chr08 | 6493307                 | AA                              | TT                | 1946473326               |
| SNP_P3_96858_6530834 | NC_021167.1    | Ca_kabuli_chr08 | 6530834                 | CC                              | TT                | 1946473328               |
| SNP_P3_96859_6545733 | NC_021167.1    | Ca_kabuli_chr08 | 6545733                 | TT                              | CC                | 1946473329               |
| SNP_P3_96861_6606990 | NC_021167.1    | Ca_kabuli_chr08 | 6606990                 | CC                              | GG                | 1946473331               |
| SNP_P3_96862_6621402 | NC_021167.1    | Ca_kabuli_chr08 | 6621402                 | GG                              | AA                | 1946473332               |
| SNP_P3_96863_6643065 | NC_021167.1    | Ca_kabuli_chr08 | 6643065                 | GG                              | TT                | 1946473334               |
| SNP_P3_96864_6647699 | NC_021167.1    | Ca_kabuli_chr08 | 6647699                 | CC                              | TT                | 1946473335               |
| SNP_P3_96865_6650319 | NC_021167.1    | Ca_kabuli_chr08 | 6650319                 | TT                              | CC                | 1946473337               |
| SNP_P3_96866_6675560 | NC_021167.1    | Ca_kabuli_chr08 | 6675560                 | CC                              | TT                | 1946473338               |
| SNP_P3_96867_6710937 | NC_021167.1    | Ca_kabuli_chr08 | 6710937                 | AA                              | TT                | 1946473340               |
| SNP_P3_96868_6735234 | NC_021167.1    | Ca_kabuli_chr08 | 6735234                 | TT                              | AA                | 1946473341               |
| SNP_P3_96869_6744279 | NC_021167.1    | Ca_kabuli_chr08 | 6744279                 | TT                              | AA                | 1946473343               |
| SNP_P3_96871_6765459 | NC_021167.1    | Ca_kabuli_chr08 | 6765459                 | GG                              | AA                | 1946473344               |
| SNP_P3_96873_6788947 | NC_021167.1    | Ca_kabuli_chr08 | 6788947                 | GG                              | CC                | 1946473346               |
| SNP_P3_96874_6792072 | NC_021167.1    | Ca_kabuli_chr08 | 6792072                 | TT                              | GG                | 1946473347               |
| SNP_P3_96875_6792628 | NC_021167.1    | Ca_kabuli_chr08 | 6792628                 | CC                              | TT                | 1946473349               |
| SNP_P3_96876_6792947 | NC_021167.1    | Ca_kabuli_chr08 | 6792947                 | AA                              | GG                | 1946473350               |
| SNP_P3_96877_6802846 | NC_021167.1    | Ca_kabuli_chr08 | 6802846                 | AA                              | GG                | 1946473351               |
| SNP_P3_96878_6816103 | NC_021167.1    | Ca_kabuli_chr08 | 6816103                 | CC                              | TT                | 1946473353               |
| SNP_P3_96879_6818011 | NC_021167.1    | Ca_kabuli_chr08 | 6818011                 | GG                              | AA                | 1946473354               |
| SNP_P3_96880_6833228 | NC_021167.1    | Ca_kabuli_chr08 | 6833228                 | AA                              | TT                | 1946473356               |
| SNP_P3_96881_6866746 | NC_021167.1    | Ca_kabuli_chr08 | 6866746                 | CC                              | TT                | 1946473357               |
| SNP_P3_96882_6866767 | NC_021167.1    | Ca_kabuli_chr08 | 6866767                 | TT                              | AA                | 1946473358               |
| SNP_P3_96883_6878488 | NC_021167.1    | Ca_kabuli_chr08 | 6878488                 | TT                              | CC                | 1946473360               |
| SNP_P3_96885_6889141 | NC_021167.1    | Ca_kabuli_chr08 | 6889141                 | GG                              | AA                | 1946473361               |
| SNP_P3_96886_6890786 | NC_021167.1    | Ca_kabuli_chr08 | 6890786                 | AA                              | GG                | 1946473363               |
| SNP_P3_96887_6897848 | NC_021167.1    | Ca_kabuli_chr08 | 6897848                 | TT                              | AA                | 1946473364               |
| SNP_P3_96888_6919897 | NC_021167.1    | Ca_kabuli_chr08 | 6919897                 | CC                              | AA                | 1946473366               |
| SNP_P3_96889_6924761 | NC_021167.1    | Ca_kabuli_chr08 | 6924761                 | CC                              | TT                | 1946473367               |
| SNP_P3_96890_6927430 | NC_021167.1    | Ca_kabuli_chr08 | 6927430                 | AA                              | TT                | 1946473368               |
| SNP_P3_96891_6930391 | NC_021167.1    | Ca_kabuli_chr08 | 6930391                 | TT                              | AA                | 1946473370               |
| SNP_P3_96892_6934882 | NC_021167.1    | Ca_kabuli_chr08 | 6934882                 | CC                              | TT                | 1946473371               |
| SNP_P3_96894_6978326 | NC_021167.1    | Ca_kabuli_chr08 | 6978326                 | GG                              | AA                | 1946473373               |
| SNP_P3_96895_6984477 | NC_021167.1    | Ca_kabuli_chr08 | 6984477                 | AA                              | TT                | 1946473374               |
| SNP_P3_96897_7024634 | NC_021167.1    | Ca_kabuli_chr08 | 7024634                 | AA                              | TT                | 1946473376               |
| SNP_P3_96898_7129623 | NC_021167.1    | Ca_kabuli_chr08 | 7129623                 | AA                              | GG                | 1946473377               |
| SNP_P3_96899_7129626 | NC_021167.1    | Ca_kabuli_chr08 | 7129626                 | TT                              | GG                | 1946473379               |
| SNP_P3_96900_7133395 | NC_021167.1    | Ca_kabuli_chr08 | 7133395                 | TT                              | CC                | 1946473380               |



| SNPs IDs             | Chromosome IDs | Chromosomes     | Physical positions (bp) | CDC Frontier (Reference genome) | (Pusa 256 & HPNB) | NCBI SNPdb Accession IDs |
|----------------------|----------------|-----------------|-------------------------|---------------------------------|-------------------|--------------------------|
| SNP_P3_96901_7133396 | NC_021167.1    | Ca_kabuli_chr08 | 7133396                 | GG                              | AA                | 1946473382               |
| SNP_P3_96902_7133653 | NC_021167.1    | Ca_kabuli_chr08 | 7133653                 | TT                              | AA                | 1946473383               |
| SNP_P3_96903_7133686 | NC_021167.1    | Ca_kabuli_chr08 | 7133686                 | AA                              | GG                | 1946473385               |
| SNP_P3_96904_7143803 | NC_021167.1    | Ca_kabuli_chr08 | 7143803                 | TT                              | GG                | 1946473386               |
| SNP_P3_96905_7144186 | NC_021167.1    | Ca_kabuli_chr08 | 7144186                 | GG                              | TT                | 1946473388               |
| SNP_P3_96906_7156048 | NC_021167.1    | Ca_kabuli_chr08 | 7156048                 | AA                              | GG                | 1946473389               |
| SNP_P3_96908_7221696 | NC_021167.1    | Ca_kabuli_chr08 | 7221696                 | TT                              | CC                | 1946473391               |
| SNP_P3_96909_7221698 | NC_021167.1    | Ca_kabuli_chr08 | 7221698                 | AA                              | CC                | 1946473392               |
| SNP_P3_96911_7285367 | NC_021167.1    | Ca_kabuli_chr08 | 7285367                 | AA                              | GG                | 1946473394               |
| SNP_P3_96913_7344052 | NC_021167.1    | Ca_kabuli_chr08 | 7344052                 | CC                              | AA                | 1946473395               |
| SNP_P3_96914_7361828 | NC_021167.1    | Ca_kabuli_chr08 | 7361828                 | CC                              | TT                | 1946473397               |
| SNP_P3_96915_7368904 | NC_021167.1    | Ca_kabuli_chr08 | 7368904                 | TT                              | CC                | 1946473398               |
| SNP_P3_96916_7368906 | NC_021167.1    | Ca_kabuli_chr08 | 7368906                 | TT                              | AA                | 1946473399               |
| SNP_P3_96917_7368933 | NC_021167.1    | Ca_kabuli_chr08 | 7368933                 | AA                              | GG                | 1946473401               |
| SNP_P3_96918_7401987 | NC_021167.1    | Ca_kabuli_chr08 | 7401987                 | CC                              | TT                | 1946473402               |
| SNP_P3_96919_7448964 | NC_021167.1    | Ca_kabuli_chr08 | 7448964                 | AA                              | GG                | 1946473404               |
| SNP_P3_96920_7471414 | NC_021167.1    | Ca_kabuli_chr08 | 7471414                 | TT                              | AA                | 1946473405               |
| SNP_P3_96921_7563385 | NC_021167.1    | Ca_kabuli_chr08 | 7563385                 | GG                              | TT                | 1946473407               |
| SNP_P3_96922_7563621 | NC_021167.1    | Ca_kabuli_chr08 | 7563621                 | TT                              | AA                | 1946473408               |
| SNP_P3_96923_7563641 | NC_021167.1    | Ca_kabuli_chr08 | 7563641                 | CC                              | GG                | 1946473410               |
| SNP_P3_96924_7563696 | NC_021167.1    | Ca_kabuli_chr08 | 7563696                 | AA                              | GG                | 1946473411               |
| SNP_P3_96925_7563737 | NC_021167.1    | Ca_kabuli_chr08 | 7563737                 | AA                              | GG                | 1946473413               |
| SNP_P3_96927_7564511 | NC_021167.1    | Ca_kabuli_chr08 | 7564511                 | GG                              | TT                | 1946473414               |
| SNP_P3_96928_7597117 | NC_021167.1    | Ca_kabuli_chr08 | 7597117                 | GG                              | AA                | 1946473416               |
| SNP_P3_96929_7607299 | NC_021167.1    | Ca_kabuli_chr08 | 7607299                 | TT                              | GG                | 1946473417               |
| SNP_P3_96930_7635681 | NC_021167.1    | Ca_kabuli_chr08 | 7635681                 | GG                              | TT                | 1946473419               |
| SNP_P3_96931_7651509 | NC_021167.1    | Ca_kabuli_chr08 | 7651509                 | TT                              | AA                | 1946473420               |
| SNP_P3_96932_7651535 | NC_021167.1    | Ca_kabuli_chr08 | 7651535                 | TT                              | GG                | 1946473421               |
| SNP_P3_96933_7651651 | NC_021167.1    | Ca_kabuli_chr08 | 7651651                 | AA                              | TT                | 1946473423               |
| SNP_P3_96934_7651679 | NC_021167.1    | Ca_kabuli_chr08 | 7651679                 | GG                              | AA                | 1946473424               |
| SNP_P3_96935_7666300 | NC_021167.1    | Ca_kabuli_chr08 | 7666300                 | CC                              | GG                | 1946473426               |
| SNP_P3_96937_7691912 | NC_021167.1    | Ca_kabuli_chr08 | 7691912                 | TT                              | CC                | 1946473427               |
| SNP_P3_96938_7703770 | NC_021167.1    | Ca_kabuli_chr08 | 7703770                 | AA                              | GG                | 1946473429               |
| SNP_P3_96939_7741486 | NC_021167.1    | Ca_kabuli_chr08 | 7741486                 | GG                              | AA                | 1946473430               |
| SNP_P3_96940_7761679 | NC_021167.1    | Ca_kabuli_chr08 | 7761679                 | GG                              | TT                | 1946473432               |
| SNP_P3_96941_7775331 | NC_021167.1    | Ca_kabuli_chr08 | 7775331                 | AA                              | TT                | 1946473433               |
| SNP_P3_96942_7775641 | NC_021167.1    | Ca_kabuli_chr08 | 7775641                 | TT                              | CC                | 1946473435               |
| SNP_P3_96943_7775663 | NC_021167.1    | Ca_kabuli_chr08 | 7775663                 | GG                              | AA                | 1946473436               |
| SNP_P3_96944_7775667 | NC_021167.1    | Ca_kabuli_chr08 | 7775667                 | CC                              | TT                | 1946473437               |
| SNP_P3_96945_7775693 | NC_021167.1    | Ca_kabuli_chr08 | 7775693                 | CC                              | TT                | 1946473439               |
| SNP_P3_96946_7775708 | NC_021167.1    | Ca_kabuli_chr08 | 7775708                 | CC                              | TT                | 1946473440               |
| SNP_P3_96947_7775720 | NC_021167.1    | Ca_kabuli_chr08 | 7775720                 | GG                              | AA                | 1946473442               |

| SNPs IDs             | Chromosome IDs | Chromosomes     | Physical positions (bp) | CDC Frontier (Reference genome) | (Pusa 256 & HPNB) | NCBI SNPdb Accession IDs |
|----------------------|----------------|-----------------|-------------------------|---------------------------------|-------------------|--------------------------|
| SNP_P3_96948_7775860 | NC_021167.1    | Ca_kabuli_chr08 | 7775860                 | TT                              | AA                | 1946473443               |
| SNP_P3_96949_7775861 | NC_021167.1    | Ca_kabuli_chr08 | 7775861                 | GG                              | CC                | 1946473445               |
| SNP_P3_96950_7775908 | NC_021167.1    | Ca_kabuli_chr08 | 7775908                 | TT                              | GG                | 1946473446               |
| SNP_P3_96951_7776014 | NC_021167.1    | Ca_kabuli_chr08 | 7776014                 | GG                              | TT                | 1946473448               |
| SNP_P3_96952_7776018 | NC_021167.1    | Ca_kabuli_chr08 | 7776018                 | CC                              | TT                | 1946473449               |
| SNP_P3_96953_7776130 | NC_021167.1    | Ca_kabuli_chr08 | 7776130                 | TT                              | AA                | 1946473451               |
| SNP_P3_96954_7777195 | NC_021167.1    | Ca_kabuli_chr08 | 7777195                 | TT                              | CC                | 1946473452               |
| SNP_P3_96955_7777312 | NC_021167.1    | Ca_kabuli_chr08 | 7777312                 | AA                              | CC                | 1946473454               |
| SNP_P3_96956_7777469 | NC_021167.1    | Ca_kabuli_chr08 | 7777469                 | TT                              | GG                | 1946473455               |
| SNP_P3_96958_7777497 | NC_021167.1    | Ca_kabuli_chr08 | 7777497                 | AA                              | TT                | 1946473456               |
| SNP_P3_96959_7777547 | NC_021167.1    | Ca_kabuli_chr08 | 7777547                 | GG                              | TT                | 1946473458               |
| SNP_P3_96960_7777575 | NC_021167.1    | Ca_kabuli_chr08 | 7777575                 | GG                              | AA                | 1946473459               |
| SNP_P3_96961_7777641 | NC_021167.1    | Ca_kabuli_chr08 | 7777641                 | AA                              | CC                | 1946473461               |
| SNP_P3_96963_7777741 | NC_021167.1    | Ca_kabuli_chr08 | 7777741                 | GG                              | CC                | 1946473462               |
| SNP_P3_96964_7777749 | NC_021167.1    | Ca_kabuli_chr08 | 7777749                 | GG                              | CC                | 1946473464               |
| SNP_P3_96965_7778075 | NC_021167.1    | Ca_kabuli_chr08 | 7778075                 | CC                              | TT                | 1946473465               |
| SNP_P3_96966_7802467 | NC_021167.1    | Ca_kabuli_chr08 | 7802467                 | CC                              | TT                | 1946473467               |
| SNP_P3_96967_7802500 | NC_021167.1    | Ca_kabuli_chr08 | 7802500                 | TT                              | CC                | 1946473468               |
| SNP_P3_96968_7802517 | NC_021167.1    | Ca_kabuli_chr08 | 7802517                 | TT                              | CC                | 1946473470               |
| SNP_P3_96969_7802902 | NC_021167.1    | Ca_kabuli_chr08 | 7802902                 | CC                              | TT                | 1946473471               |
| SNP_P3_96970_7802913 | NC_021167.1    | Ca_kabuli_chr08 | 7802913                 | AA                              | CC                | 1946473473               |
| SNP_P3_96971_7802951 | NC_021167.1    | Ca_kabuli_chr08 | 7802951                 | AA                              | GG                | 1946473474               |
| SNP_P3_96972_7851778 | NC_021167.1    | Ca_kabuli_chr08 | 7851778                 | TT                              | CC                | 1946473475               |
| SNP_P3_96973_7881254 | NC_021167.1    | Ca_kabuli_chr08 | 7881254                 | TT                              | CC                | 1946473477               |
| SNP_P3_96974_7884027 | NC_021167.1    | Ca_kabuli_chr08 | 7884027                 | GG                              | AA                | 1946473478               |
| SNP_P3_96975_7895833 | NC_021167.1    | Ca_kabuli_chr08 | 7895833                 | TT                              | CC                | 1946473480               |
| SNP_P3_96976_7895893 | NC_021167.1    | Ca_kabuli_chr08 | 7895893                 | GG                              | AA                | 1946473481               |
| SNP_P3_96977_7895991 | NC_021167.1    | Ca_kabuli_chr08 | 7895991                 | GG                              | AA                | 1946473483               |
| SNP_P3_96978_7895999 | NC_021167.1    | Ca_kabuli_chr08 | 7895999                 | AA                              | TT                | 1946473484               |
| SNP_P3_96979_7896042 | NC_021167.1    | Ca_kabuli_chr08 | 7896042                 | GG                              | AA                | 1946473486               |
| SNP_P3_96980_7896046 | NC_021167.1    | Ca_kabuli_chr08 | 7896046                 | GG                              | TT                | 1946473487               |
| SNP_P3_96981_7896049 | NC_021167.1    | Ca_kabuli_chr08 | 7896049                 | AA                              | GG                | 1946473489               |
| SNP_P3_96982_7896112 | NC_021167.1    | Ca_kabuli_chr08 | 7896112                 | TT                              | CC                | 1946473490               |
| SNP_P3_96983_7896293 | NC_021167.1    | Ca_kabuli_chr08 | 7896293                 | CC                              | TT                | 1946473492               |
| SNP_P3_96984_7896312 | NC_021167.1    | Ca_kabuli_chr08 | 7896312                 | TT                              | CC                | 1946473493               |
| SNP_P3_96985_7896320 | NC_021167.1    | Ca_kabuli_chr08 | 7896320                 | AA                              | GG                | 1946473494               |
| SNP_P3_96986_7896332 | NC_021167.1    | Ca_kabuli_chr08 | 7896332                 | GG                              | AA                | 1946473496               |
| SNP_P3_96988_7896415 | NC_021167.1    | Ca_kabuli_chr08 | 7896415                 | TT                              | CC                | 1946473497               |
| SNP_P3_96989_7896435 | NC_021167.1    | Ca_kabuli_chr08 | 7896435                 | GG                              | AA                | 1946473499               |
| SNP_P3_96990_7896493 | NC_021167.1    | Ca_kabuli_chr08 | 7896493                 | CC                              | TT                | 1946473500               |
| SNP_P3_96991_7896534 | NC_021167.1    | Ca_kabuli_chr08 | 7896534                 | TT                              | GG                | 1946473502               |
| SNP_P3_96992_7896561 | NC_021167.1    | Ca_kabuli_chr08 | 7896561                 | CC                              | AA                | 1946473503               |

| SNPs IDs             | Chromosome IDs | Chromosomes     | Physical positions (bp) | CDC Frontier (Reference genome) | (Pusa 256 & HPNB) | NCBI SNPdb Accession IDs |
|----------------------|----------------|-----------------|-------------------------|---------------------------------|-------------------|--------------------------|
| SNP_P3_96993_7896598 | NC_021167.1    | Ca_kabuli_chr08 | 7896598                 | AA                              | CC                | 1946473505               |
| SNP_P3_96994_7896605 | NC_021167.1    | Ca_kabuli_chr08 | 7896605                 | GG                              | AA                | 1946473506               |
| SNP_P3_96995_7896958 | NC_021167.1    | Ca_kabuli_chr08 | 7896958                 | GG                              | AA                | 1946473508               |
| SNP_P3_96997_7913688 | NC_021167.1    | Ca_kabuli_chr08 | 7913688                 | AA                              | TT                | 1946473509               |
| SNP_P3_96998_7913793 | NC_021167.1    | Ca_kabuli_chr08 | 7913793                 | GG                              | AA                | 1946473511               |
| SNP_P3_96999_7913842 | NC_021167.1    | Ca_kabuli_chr08 | 7913842                 | CC                              | AA                | 1946473512               |
| SNP_P3_97001_7926135 | NC_021167.1    | Ca_kabuli_chr08 | 7926135                 | AA                              | GG                | 1946473513               |
| SNP_P3_97002_7927164 | NC_021167.1    | Ca_kabuli_chr08 | 7927164                 | TT                              | CC                | 1946473515               |
| SNP_P3_97003_7927198 | NC_021167.1    | Ca_kabuli_chr08 | 7927198                 | AA                              | CC                | 1946473516               |
| SNP_P3_97004_7927213 | NC_021167.1    | Ca_kabuli_chr08 | 7927213                 | GG                              | AA                | 1946473518               |
| SNP_P3_97006_7927527 | NC_021167.1    | Ca_kabuli_chr08 | 7927527                 | AA                              | GG                | 1946473519               |
| SNP_P3_97008_7927631 | NC_021167.1    | Ca_kabuli_chr08 | 7927631                 | GG                              | AA                | 1946473521               |
| SNP_P3_97010_7927695 | NC_021167.1    | Ca_kabuli_chr08 | 7927695                 | CC                              | GG                | 1946473522               |
| SNP_P3_97011_7936051 | NC_021167.1    | Ca_kabuli_chr08 | 7936051                 | CC                              | TT                | 1946473524               |
| SNP_P3_97012_7937601 | NC_021167.1    | Ca_kabuli_chr08 | 7937601                 | GG                              | TT                | 1946473525               |
| SNP_P3_97013_7937621 | NC_021167.1    | Ca_kabuli_chr08 | 7937621                 | AA                              | GG                | 1946473527               |
| SNP_P3_97014_7937636 | NC_021167.1    | Ca_kabuli_chr08 | 7937636                 | AA                              | CC                | 1946473528               |
| SNP_P3_97015_7937655 | NC_021167.1    | Ca_kabuli_chr08 | 7937655                 | TT                              | CC                | 1946473530               |
| SNP_P3_97016_7937704 | NC_021167.1    | Ca_kabuli_chr08 | 7937704                 | GG                              | AA                | 1946473531               |
| SNP_P3_97017_7937708 | NC_021167.1    | Ca_kabuli_chr08 | 7937708                 | AA                              | CC                | 1946473533               |
| SNP_P3_97018_7937727 | NC_021167.1    | Ca_kabuli_chr08 | 7937727                 | CC                              | GG                | 1946473534               |
| SNP_P3_97019_7937748 | NC_021167.1    | Ca_kabuli_chr08 | 7937748                 | CC                              | TT                | 1946473536               |
| SNP_P3_97020_7937763 | NC_021167.1    | Ca_kabuli_chr08 | 7937763                 | AA                              | TT                | 1946473537               |
| SNP_P3_97021_7937771 | NC_021167.1    | Ca_kabuli_chr08 | 7937771                 | TT                              | CC                | 1946473539               |
| SNP_P3_97022_7937774 | NC_021167.1    | Ca_kabuli_chr08 | 7937774                 | AA                              | GG                | 1946473540               |
| SNP_P3_97023_7937828 | NC_021167.1    | Ca_kabuli_chr08 | 7937828                 | GG                              | AA                | 1946473542               |
| SNP_P3_97024_7937847 | NC_021167.1    | Ca_kabuli_chr08 | 7937847                 | TT                              | CC                | 1946473543               |
| SNP_P3_97025_7937881 | NC_021167.1    | Ca_kabuli_chr08 | 7937881                 | GG                              | AA                | 1946473545               |
| SNP_P3_97026_7937891 | NC_021167.1    | Ca_kabuli_chr08 | 7937891                 | AA                              | CC                | 1946473546               |
| SNP_P3_97027_7937907 | NC_021167.1    | Ca_kabuli_chr08 | 7937907                 | GG                              | AA                | 1946473547               |
| SNP_P3_97028_7937908 | NC_021167.1    | Ca_kabuli_chr08 | 7937908                 | TT                              | AA                | 1946473549               |
| SNP_P3_97029_7937924 | NC_021167.1    | Ca_kabuli_chr08 | 7937924                 | GG                              | CC                | 1946473550               |
| SNP_P3_97030_7937952 | NC_021167.1    | Ca_kabuli_chr08 | 7937952                 | AA                              | GG                | 1946473552               |
| SNP_P3_97031_7938027 | NC_021167.1    | Ca_kabuli_chr08 | 7938027                 | AA                              | GG                | 1946473553               |
| SNP_P3_97032_7938028 | NC_021167.1    | Ca_kabuli_chr08 | 7938028                 | AA                              | TT                | 1946473555               |
| SNP_P3_97033_7938076 | NC_021167.1    | Ca_kabuli_chr08 | 7938076                 | CC                              | TT                | 1946473556               |
| SNP_P3_97035_7938126 | NC_021167.1    | Ca_kabuli_chr08 | 7938126                 | AA                              | GG                | 1946473558               |
| SNP_P3_97036_7938199 | NC_021167.1    | Ca_kabuli_chr08 | 7938199                 | AA                              | TT                | 1946473559               |
| SNP_P3_97038_7939508 | NC_021167.1    | Ca_kabuli_chr08 | 7939508                 | AA                              | GG                | 1946473561               |
| SNP_P3_97039_7943721 | NC_021167.1    | Ca_kabuli_chr08 | 7943721                 | AA                              | CC                | 1946473562               |
| SNP_P3_97040_7943988 | NC_021167.1    | Ca_kabuli_chr08 | 7943988                 | CC                              | AA                | 1946473564               |
| SNP_P3_97041_7944145 | NC_021167.1    | Ca_kabuli_chr08 | 7944145                 | AA                              | GG                | 1946473565               |

| SNPs IDs             | Chromosome IDs | Chromosomes     | Physical positions (bp) | CDC Frontier (Reference genome) | (Pusa 256 & HPNB) | NCBI SNPdb Accession IDs |
|----------------------|----------------|-----------------|-------------------------|---------------------------------|-------------------|--------------------------|
| SNP_P3_97042_7944316 | NC_021167.1    | Ca_kabuli_chr08 | 7944316                 | CC                              | TT                | 1946473567               |
| SNP_P3_97043_7946941 | NC_021167.1    | Ca_kabuli_chr08 | 7946941                 | TT                              | CC                | 1946473568               |
| SNP_P3_97044_7947748 | NC_021167.1    | Ca_kabuli_chr08 | 7947748                 | AA                              | GG                | 1946473569               |
| SNP_P3_97045_7947754 | NC_021167.1    | Ca_kabuli_chr08 | 7947754                 | CC                              | TT                | 1946473571               |
| SNP_P3_97047_7947835 | NC_021167.1    | Ca_kabuli_chr08 | 7947835                 | AA                              | GG                | 1946473572               |
| SNP_P3_97048_7947910 | NC_021167.1    | Ca_kabuli_chr08 | 7947910                 | TT                              | AA                | 1946473574               |
| SNP_P3_97049_7948046 | NC_021167.1    | Ca_kabuli_chr08 | 7948046                 | TT                              | AA                | 1946473575               |
| SNP_P3_97050_7948050 | NC_021167.1    | Ca_kabuli_chr08 | 7948050                 | TT                              | AA                | 1946473577               |
| SNP_P3_97051_7948133 | NC_021167.1    | Ca_kabuli_chr08 | 7948133                 | AA                              | GG                | 1946473578               |
| SNP_P3_97053_7948257 | NC_021167.1    | Ca_kabuli_chr08 | 7948257                 | GG                              | TT                | 1946473579               |
| SNP_P3_97054_7950162 | NC_021167.1    | Ca_kabuli_chr08 | 7950162                 | TT                              | AA                | 1946473580               |
| SNP_P3_97056_7950205 | NC_021167.1    | Ca_kabuli_chr08 | 7950205                 | GG                              | TT                | 1946473581               |
| SNP_P3_97057_7950232 | NC_021167.1    | Ca_kabuli_chr08 | 7950232                 | AA                              | GG                | 1946473582               |
| SNP_P3_97058_7950248 | NC_021167.1    | Ca_kabuli_chr08 | 7950248                 | TT                              | AA                | 1946473583               |
| SNP_P3_97059_7950275 | NC_021167.1    | Ca_kabuli_chr08 | 7950275                 | TT                              | GG                | 1946473584               |
| SNP_P3_97060_7950287 | NC_021167.1    | Ca_kabuli_chr08 | 7950287                 | TT                              | CC                | 1946473585               |
| SNP_P3_97061_7950313 | NC_021167.1    | Ca_kabuli_chr08 | 7950313                 | AA                              | CC                | 1946473586               |
| SNP_P3_97062_7950332 | NC_021167.1    | Ca_kabuli_chr08 | 7950332                 | AA                              | GG                | 1946473587               |
| SNP_P3_97063_7950494 | NC_021167.1    | Ca_kabuli_chr08 | 7950494                 | GG                              | CC                | 1946473588               |
| SNP_P3_97064_7950502 | NC_021167.1    | Ca_kabuli_chr08 | 7950502                 | CC                              | GG                | 1946473589               |
| SNP_P3_97066_7950594 | NC_021167.1    | Ca_kabuli_chr08 | 7950594                 | CC                              | TT                | 1946473591               |
| SNP_P3_97067_7950727 | NC_021167.1    | Ca_kabuli_chr08 | 7950727                 | CC                              | TT                | 1946473592               |
| SNP_P3_97068_7950782 | NC_021167.1    | Ca_kabuli_chr08 | 7950782                 | AA                              | TT                | 1946473593               |
| SNP_P3_97069_7950785 | NC_021167.1    | Ca_kabuli_chr08 | 7950785                 | AA                              | GG                | 1946473595               |
| SNP_P3_97071_7950866 | NC_021167.1    | Ca_kabuli_chr08 | 7950866                 | TT                              | CC                | 1946473596               |
| SNP_P3_97072_7951061 | NC_021167.1    | Ca_kabuli_chr08 | 7951061                 | CC                              | AA                | 1946473598               |
| SNP_P3_97073_7951166 | NC_021167.1    | Ca_kabuli_chr08 | 7951166                 | TT                              | CC                | 1946473600               |
| SNP_P3_97074_7951190 | NC_021167.1    | Ca_kabuli_chr08 | 7951190                 | AA                              | GG                | 1946473601               |
| SNP_P3_97075_7951383 | NC_021167.1    | Ca_kabuli_chr08 | 7951383                 | TT                              | CC                | 1946473603               |
| SNP_P3_97076_7951394 | NC_021167.1    | Ca_kabuli_chr08 | 7951394                 | AA                              | GG                | 1946473604               |
| SNP_P3_97077_7951399 | NC_021167.1    | Ca_kabuli_chr08 | 7951399                 | CC                              | TT                | 1946473606               |
| SNP_P3_97078_7951514 | NC_021167.1    | Ca_kabuli_chr08 | 7951514                 | CC                              | GG                | 1946473607               |
| SNP_P3_97079_7951523 | NC_021167.1    | Ca_kabuli_chr08 | 7951523                 | CC                              | TT                | 1946473609               |
| SNP_P3_97080_7951591 | NC_021167.1    | Ca_kabuli_chr08 | 7951591                 | TT                              | GG                | 1946473610               |
| SNP_P3_97081_7951658 | NC_021167.1    | Ca_kabuli_chr08 | 7951658                 | TT                              | CC                | 1946473612               |
| SNP_P3_97082_7951735 | NC_021167.1    | Ca_kabuli_chr08 | 7951735                 | TT                              | CC                | 1946473613               |
| SNP_P3_97083_7951815 | NC_021167.1    | Ca_kabuli_chr08 | 7951815                 | TT                              | CC                | 1946473615               |
| SNP_P3_97084_7951823 | NC_021167.1    | Ca_kabuli_chr08 | 7951823                 | AA                              | CC                | 1946473616               |
| SNP_P3_97085_7951878 | NC_021167.1    | Ca_kabuli_chr08 | 7951878                 | AA                              | TT                | 1946473618               |
| SNP_P3_97087_7952016 | NC_021167.1    | Ca_kabuli_chr08 | 7952016                 | CC                              | TT                | 1946473619               |
| SNP_P3_97088_7952042 | NC_021167.1    | Ca_kabuli_chr08 | 7952042                 | AA                              | GG                | 1946473621               |
| SNP_P3_97089_7952123 | NC_021167.1    | Ca_kabuli_chr08 | 7952123                 | TT                              | CC                | 1946473622               |

| SNPs IDs             | Chromosome IDs | Chromosomes     | Physical positions (bp) | CDC Frontier (Reference genome) | (Pusa 256 & HPNB) | NCBI SNPdb Accession IDs |
|----------------------|----------------|-----------------|-------------------------|---------------------------------|-------------------|--------------------------|
| SNP_P3_97090_7952131 | NC_021167.1    | Ca_kabuli_chr08 | 7952131                 | GG                              | AA                | 1946473624               |
| SNP_P3_97091_7952340 | NC_021167.1    | Ca_kabuli_chr08 | 7952340                 | TT                              | GG                | 1946473625               |
| SNP_P3_97092_7952434 | NC_021167.1    | Ca_kabuli_chr08 | 7952434                 | AA                              | CC                | 1946473626               |
| SNP_P3_97093_7952546 | NC_021167.1    | Ca_kabuli_chr08 | 7952546                 | GG                              | CC                | 1946473628               |
| SNP_P3_97095_7952633 | NC_021167.1    | Ca_kabuli_chr08 | 7952633                 | TT                              | CC                | 1946473629               |
| SNP_P3_97096_7952636 | NC_021167.1    | Ca_kabuli_chr08 | 7952636                 | AA                              | GG                | 1946473631               |
| SNP_P3_97097_7952665 | NC_021167.1    | Ca_kabuli_chr08 | 7952665                 | GG                              | CC                | 1946473632               |
| SNP_P3_97098_7952737 | NC_021167.1    | Ca_kabuli_chr08 | 7952737                 | CC                              | AA                | 1946473634               |
| SNP_P3_97099_7952773 | NC_021167.1    | Ca_kabuli_chr08 | 7952773                 | GG                              | CC                | 1946473635               |
| SNP_P3_97100_7952810 | NC_021167.1    | Ca_kabuli_chr08 | 7952810                 | AA                              | TT                | 1946473637               |
| SNP_P3_97101_7952822 | NC_021167.1    | Ca_kabuli_chr08 | 7952822                 | AA                              | GG                | 1946473638               |
| SNP_P3_97102_7952831 | NC_021167.1    | Ca_kabuli_chr08 | 7952831                 | AA                              | TT                | 1946473639               |
| SNP_P3_97103_7952837 | NC_021167.1    | Ca_kabuli_chr08 | 7952837                 | GG                              | CC                | 1946473641               |
| SNP_P3_97104_7952840 | NC_021167.1    | Ca_kabuli_chr08 | 7952840                 | CC                              | AA                | 1946473642               |
| SNP_P3_97105_7952860 | NC_021167.1    | Ca_kabuli_chr08 | 7952860                 | AA                              | TT                | 1946473645               |
| SNP_P3_97106_7952924 | NC_021167.1    | Ca_kabuli_chr08 | 7952924                 | GG                              | AA                | 1946473646               |
| SNP_P3_97107_7953020 | NC_021167.1    | Ca_kabuli_chr08 | 7953020                 | TT                              | CC                | 1946473648               |
| SNP_P3_97108_7953024 | NC_021167.1    | Ca_kabuli_chr08 | 7953024                 | AA                              | GG                | 1946473649               |
| SNP_P3_97109_7953046 | NC_021167.1    | Ca_kabuli_chr08 | 7953046                 | GG                              | AA                | 1946473650               |
| SNP_P3_97111_7953116 | NC_021167.1    | Ca_kabuli_chr08 | 7953116                 | CC                              | TT                | 1946473652               |
| SNP_P3_97112_7953157 | NC_021167.1    | Ca_kabuli_chr08 | 7953157                 | GG                              | AA                | 1946473653               |
| SNP_P3_97113_7953268 | NC_021167.1    | Ca_kabuli_chr08 | 7953268                 | CC                              | TT                | 1946473655               |
| SNP_P3_97114_7953276 | NC_021167.1    | Ca_kabuli_chr08 | 7953276                 | CC                              | TT                | 1946473656               |
| SNP_P3_97115_7953297 | NC_021167.1    | Ca_kabuli_chr08 | 7953297                 | AA                              | GG                | 1946473658               |
| SNP_P3_97116_7953338 | NC_021167.1    | Ca_kabuli_chr08 | 7953338                 | GG                              | AA                | 1946473659               |
| SNP_P3_97117_7953416 | NC_021167.1    | Ca_kabuli_chr08 | 7953416                 | AA                              | GG                | 1946473661               |
| SNP_P3_97118_7953455 | NC_021167.1    | Ca_kabuli_chr08 | 7953455                 | CC                              | TT                | 1946473662               |
| SNP_P3_97119_7953508 | NC_021167.1    | Ca_kabuli_chr08 | 7953508                 | CC                              | TT                | 1946473663               |
| SNP_P3_97120_7953581 | NC_021167.1    | Ca_kabuli_chr08 | 7953581                 | AA                              | GG                | 1946473665               |
| SNP_P3_97121_7953649 | NC_021167.1    | Ca_kabuli_chr08 | 7953649                 | GG                              | CC                | 1946473666               |
| SNP_P3_97122_7953677 | NC_021167.1    | Ca_kabuli_chr08 | 7953677                 | AA                              | GG                | 1946473668               |
| SNP_P3_97123_7953711 | NC_021167.1    | Ca_kabuli_chr08 | 7953711                 | GG                              | AA                | 1946473669               |
| SNP_P3_97124_7953724 | NC_021167.1    | Ca_kabuli_chr08 | 7953724                 | GG                              | TT                | 1946473671               |
| SNP_P3_97125_7953778 | NC_021167.1    | Ca_kabuli_chr08 | 7953778                 | CC                              | TT                | 1946473672               |
| SNP_P3_97127_7953856 | NC_021167.1    | Ca_kabuli_chr08 | 7953856                 | CC                              | AA                | 1946473674               |
| SNP_P3_97128_7953902 | NC_021167.1    | Ca_kabuli_chr08 | 7953902                 | GG                              | AA                | 1946473675               |
| SNP_P3_97129_7953932 | NC_021167.1    | Ca_kabuli_chr08 | 7953932                 | TT                              | CC                | 1946473676               |
| SNP_P3_97130_7953989 | NC_021167.1    | Ca_kabuli_chr08 | 7953989                 | TT                              | CC                | 1946473678               |
| SNP_P3_97131_7953998 | NC_021167.1    | Ca_kabuli_chr08 | 7953998                 | CC                              | TT                | 1946473679               |
| SNP_P3_97132_7954075 | NC_021167.1    | Ca_kabuli_chr08 | 7954075                 | GG                              | TT                | 1946473681               |
| SNP_P3_97133_7954166 | NC_021167.1    | Ca_kabuli_chr08 | 7954166                 | CC                              | TT                | 1946473682               |
| SNP_P3_97134_7954194 | NC_021167.1    | Ca_kabuli_chr08 | 7954194                 | AA                              | CC                | 1946473684               |

| SNPs IDs             | Chromosome IDs | Chromosomes     | Physical positions (bp) | CDC Frontier (Reference genome) | (Pusa 256 & HPNB) | NCBI SNPdb Accession IDs |
|----------------------|----------------|-----------------|-------------------------|---------------------------------|-------------------|--------------------------|
| SNP_P3_97135_7954379 | NC_021167.1    | Ca_kabuli_chr08 | 7954379                 | AA                              | GG                | 1946473685               |
| SNP_P3_97137_7954405 | NC_021167.1    | Ca_kabuli_chr08 | 7954405                 | AA                              | GG                | 1946473687               |
| SNP_P3_97138_7954416 | NC_021167.1    | Ca_kabuli_chr08 | 7954416                 | GG                              | AA                | 1946473688               |
| SNP_P3_97140_7954476 | NC_021167.1    | Ca_kabuli_chr08 | 7954476                 | AA                              | TT                | 1946473689               |
| SNP_P3_97141_7954490 | NC_021167.1    | Ca_kabuli_chr08 | 7954490                 | CC                              | TT                | 1946473691               |
| SNP_P3_97143_7954529 | NC_021167.1    | Ca_kabuli_chr08 | 7954529                 | TT                              | CC                | 1946473692               |
| SNP_P3_97144_7954533 | NC_021167.1    | Ca_kabuli_chr08 | 7954533                 | TT                              | CC                | 1946473694               |
| SNP_P3_97145_7954572 | NC_021167.1    | Ca_kabuli_chr08 | 7954572                 | AA                              | CC                | 1946473695               |
| SNP_P3_97146_7954617 | NC_021167.1    | Ca_kabuli_chr08 | 7954617                 | AA                              | CC                | 1946473697               |
| SNP_P3_97147_7954648 | NC_021167.1    | Ca_kabuli_chr08 | 7954648                 | AA                              | GG                | 1946473698               |
| SNP_P3_97148_7954689 | NC_021167.1    | Ca_kabuli_chr08 | 7954689                 | AA                              | TT                | 1946473700               |
| SNP_P3_97149_7954706 | NC_021167.1    | Ca_kabuli_chr08 | 7954706                 | GG                              | TT                | 1946473701               |
| SNP_P3_97150_7954718 | NC_021167.1    | Ca_kabuli_chr08 | 7954718                 | TT                              | AA                | 1946473703               |
| SNP_P3_97151_7954745 | NC_021167.1    | Ca_kabuli_chr08 | 7954745                 | GG                              | CC                | 1946473704               |
| SNP_P3_97152_7954803 | NC_021167.1    | Ca_kabuli_chr08 | 7954803                 | CC                              | TT                | 1946473705               |
| SNP_P3_97153_7954805 | NC_021167.1    | Ca_kabuli_chr08 | 7954805                 | AA                              | TT                | 1946473707               |
| SNP_P3_97154_7954824 | NC_021167.1    | Ca_kabuli_chr08 | 7954824                 | AA                              | GG                | 1946473708               |
| SNP_P3_97155_7954855 | NC_021167.1    | Ca_kabuli_chr08 | 7954855                 | TT                              | CC                | 1946473710               |
| SNP_P3_97156_7954873 | NC_021167.1    | Ca_kabuli_chr08 | 7954873                 | CC                              | GG                | 1946473711               |
| SNP_P3_97157_7954880 | NC_021167.1    | Ca_kabuli_chr08 | 7954880                 | CC                              | TT                | 1946473713               |
| SNP_P3_97158_7954938 | NC_021167.1    | Ca_kabuli_chr08 | 7954938                 | CC                              | AA                | 1946473714               |
| SNP_P3_97159_7954998 | NC_021167.1    | Ca_kabuli_chr08 | 7954998                 | TT                              | CC                | 1946473716               |
| SNP_P3_97160_7955037 | NC_021167.1    | Ca_kabuli_chr08 | 7955037                 | GG                              | AA                | 1946473717               |
| SNP_P3_97161_7955041 | NC_021167.1    | Ca_kabuli_chr08 | 7955041                 | GG                              | TT                | 1946473719               |
| SNP_P3_97162_7955075 | NC_021167.1    | Ca_kabuli_chr08 | 7955075                 | AA                              | GG                | 1946473720               |
| SNP_P3_97163_7955340 | NC_021167.1    | Ca_kabuli_chr08 | 7955340                 | AA                              | TT                | 1946473722               |
| SNP_P3_97164_7955370 | NC_021167.1    | Ca_kabuli_chr08 | 7955370                 | CC                              | AA                | 1946473723               |
| SNP_P3_97165_7955457 | NC_021167.1    | Ca_kabuli_chr08 | 7955457                 | TT                              | AA                | 1946473724               |
| SNP_P3_97166_7955493 | NC_021167.1    | Ca_kabuli_chr08 | 7955493                 | GG                              | AA                | 1946473726               |
| SNP_P3_97168_7955550 | NC_021167.1    | Ca_kabuli_chr08 | 7955550                 | AA                              | CC                | 1946473727               |
| SNP_P3_97169_7955556 | NC_021167.1    | Ca_kabuli_chr08 | 7955556                 | TT                              | CC                | 1946473729               |
| SNP_P3_97170_7955596 | NC_021167.1    | Ca_kabuli_chr08 | 7955596                 | AA                              | GG                | 1946473730               |
| SNP_P3_97171_7955732 | NC_021167.1    | Ca_kabuli_chr08 | 7955732                 | CC                              | TT                | 1946473732               |
| SNP_P3_97172_7955741 | NC_021167.1    | Ca_kabuli_chr08 | 7955741                 | AA                              | CC                | 1946473733               |
| SNP_P3_97173_7955759 | NC_021167.1    | Ca_kabuli_chr08 | 7955759                 | CC                              | TT                | 1946473735               |
| SNP_P3_97174_7955882 | NC_021167.1    | Ca_kabuli_chr08 | 7955882                 | AA                              | GG                | 1946473736               |
| SNP_P3_97175_7956011 | NC_021167.1    | Ca_kabuli_chr08 | 7956011                 | AA                              | GG                | 1946473738               |
| SNP_P3_97177_7956189 | NC_021167.1    | Ca_kabuli_chr08 | 7956189                 | GG                              | TT                | 1946473739               |
| SNP_P3_97178_7956217 | NC_021167.1    | Ca_kabuli_chr08 | 7956217                 | TT                              | CC                | 1946473740               |
| SNP_P3_97179_7956263 | NC_021167.1    | Ca_kabuli_chr08 | 7956263                 | CC                              | TT                | 1946473742               |
| SNP_P3_97180_7956289 | NC_021167.1    | Ca_kabuli_chr08 | 7956289                 | TT                              | CC                | 1946473743               |
| SNP_P3_97181_7956337 | NC_021167.1    | Ca_kabuli_chr08 | 7956337                 | CC                              | TT                | 1946473745               |

| SNPs IDs             | Chromosome IDs | Chromosomes     | Physical positions (bp) | CDC Frontier (Reference genome) | (Pusa 256 & HPNB) | NCBI SNPdb Accession IDs |
|----------------------|----------------|-----------------|-------------------------|---------------------------------|-------------------|--------------------------|
| SNP_P3_97183_7969856 | NC_021167.1    | Ca_kabuli_chr08 | 7969856                 | AA                              | GG                | 1946473746               |
| SNP_P3_97184_7971519 | NC_021167.1    | Ca_kabuli_chr08 | 7971519                 | CC                              | TT                | 1946473748               |
| SNP_P3_97185_7992496 | NC_021167.1    | Ca_kabuli_chr08 | 7992496                 | GG                              | CC                | 1946473749               |
| SNP_P3_97187_7994187 | NC_021167.1    | Ca_kabuli_chr08 | 7994187                 | TT                              | CC                | 1946473751               |
| SNP_P3_97188_7997292 | NC_021167.1    | Ca_kabuli_chr08 | 7997292                 | TT                              | CC                | 1946473752               |
| SNP_P3_97190_8016542 | NC_021167.1    | Ca_kabuli_chr08 | 8016542                 | CC                              | TT                | 1946473754               |
| SNP_P3_97191_8017249 | NC_021167.1    | Ca_kabuli_chr08 | 8017249                 | GG                              | AA                | 1946473755               |
| SNP_P3_97192_8017452 | NC_021167.1    | Ca_kabuli_chr08 | 8017452                 | TT                              | GG                | 1946473756               |
| SNP_P3_97193_8017477 | NC_021167.1    | Ca_kabuli_chr08 | 8017477                 | GG                              | TT                | 1946473758               |
| SNP_P3_97194_8017481 | NC_021167.1    | Ca_kabuli_chr08 | 8017481                 | GG                              | AA                | 1946473759               |
| SNP_P3_97195_8017500 | NC_021167.1    | Ca_kabuli_chr08 | 8017500                 | TT                              | CC                | 1946473761               |
| SNP_P3_97196_8017501 | NC_021167.1    | Ca_kabuli_chr08 | 8017501                 | GG                              | AA                | 1946473762               |
| SNP_P3_97199_8053847 | NC_021167.1    | Ca_kabuli_chr08 | 8053847                 | AA                              | GG                | 1946473764               |
| SNP_P3_97200_8055201 | NC_021167.1    | Ca_kabuli_chr08 | 8055201                 | GG                              | AA                | 1946473765               |
| SNP_P3_97202_8062762 | NC_021167.1    | Ca_kabuli_chr08 | 8062762                 | CC                              | TT                | 1946473767               |
| SNP_P3_97204_8066107 | NC_021167.1    | Ca_kabuli_chr08 | 8066107                 | TT                              | CC                | 1946473768               |
| SNP_P3_97205_8066108 | NC_021167.1    | Ca_kabuli_chr08 | 8066108                 | CC                              | TT                | 1946473770               |
| SNP_P3_97206_8067583 | NC_021167.1    | Ca_kabuli_chr08 | 8067583                 | TT                              | AA                | 1946473771               |
| SNP_P3_97207_8069665 | NC_021167.1    | Ca_kabuli_chr08 | 8069665                 | AA                              | GG                | 1946473773               |
| SNP_P3_97208_8074300 | NC_021167.1    | Ca_kabuli_chr08 | 8074300                 | AA                              | GG                | 1946473774               |
| SNP_P3_97209_8074306 | NC_021167.1    | Ca_kabuli_chr08 | 8074306                 | GG                              | CC                | 1946473776               |
| SNP_P3_97210_8074313 | NC_021167.1    | Ca_kabuli_chr08 | 8074313                 | TT                              | CC                | 1946473777               |
| SNP_P3_97211_8074334 | NC_021167.1    | Ca_kabuli_chr08 | 8074334                 | CC                              | TT                | 1946473778               |
| SNP_P3_97212_8074570 | NC_021167.1    | Ca_kabuli_chr08 | 8074570                 | CC                              | TT                | 1946473780               |
| SNP_P3_97213_8074695 | NC_021167.1    | Ca_kabuli_chr08 | 8074695                 | GG                              | TT                | 1946473781               |
| SNP_P3_97214_8074702 | NC_021167.1    | Ca_kabuli_chr08 | 8074702                 | AA                              | TT                | 1946473783               |
| SNP_P3_97215_8074704 | NC_021167.1    | Ca_kabuli_chr08 | 8074704                 | CC                              | AA                | 1946473784               |
| SNP_P3_97216_8074711 | NC_021167.1    | Ca_kabuli_chr08 | 8074711                 | TT                              | CC                | 1946473786               |
| SNP_P3_97217_8074717 | NC_021167.1    | Ca_kabuli_chr08 | 8074717                 | GG                              | TT                | 1946473787               |
| SNP_P3_97218_8074724 | NC_021167.1    | Ca_kabuli_chr08 | 8074724                 | TT                              | CC                | 1946473788               |
| SNP_P3_97219_8074731 | NC_021167.1    | Ca_kabuli_chr08 | 8074731                 | AA                              | GG                | 1946473790               |
| SNP_P3_97220_8074745 | NC_021167.1    | Ca_kabuli_chr08 | 8074745                 | GG                              | AA                | 1946473791               |
| SNP_P3_97221_8074783 | NC_021167.1    | Ca_kabuli_chr08 | 8074783                 | GG                              | AA                | 1946473793               |
| SNP_P3_97222_8074788 | NC_021167.1    | Ca_kabuli_chr08 | 8074788                 | AA                              | GG                | 1946473794               |
| SNP_P3_97223_8074791 | NC_021167.1    | Ca_kabuli_chr08 | 8074791                 | CC                              | TT                | 1946473795               |
| SNP_P3_97224_8074836 | NC_021167.1    | Ca_kabuli_chr08 | 8074836                 | CC                              | AA                | 1946473797               |
| SNP_P3_97225_8074866 | NC_021167.1    | Ca_kabuli_chr08 | 8074866                 | TT                              | AA                | 1946473798               |
| SNP_P3_97226_8074892 | NC_021167.1    | Ca_kabuli_chr08 | 8074892                 | TT                              | AA                | 1946473800               |
| SNP_P3_97227_8074894 | NC_021167.1    | Ca_kabuli_chr08 | 8074894                 | TT                              | AA                | 1946473801               |
| SNP_P3_97228_8075318 | NC_021167.1    | Ca_kabuli_chr08 | 8075318                 | TT                              | CC                | 1946473803               |
| SNP_P3_97229_8075561 | NC_021167.1    | Ca_kabuli_chr08 | 8075561                 | TT                              | CC                | 1946473804               |
| SNP_P3_97230_8075590 | NC_021167.1    | Ca_kabuli_chr08 | 8075590                 | GG                              | TT                | 1946473805               |

| SNPs IDs             | Chromosome IDs | Chromosomes     | Physical positions (bp) | CDC Frontier (Reference genome) | (Pusa 256 & HPNB) | NCBI SNPdb Accession IDs |
|----------------------|----------------|-----------------|-------------------------|---------------------------------|-------------------|--------------------------|
| SNP_P3_97231_8075593 | NC_021167.1    | Ca_kabuli_chr08 | 8075593                 | CC                              | AA                | 1946473807               |
| SNP_P3_97233_8075975 | NC_021167.1    | Ca_kabuli_chr08 | 8075975                 | GG                              | AA                | 1946473808               |
| SNP_P3_97235_8076089 | NC_021167.1    | Ca_kabuli_chr08 | 8076089                 | TT                              | CC                | 1946473810               |
| SNP_P3_97236_8076291 | NC_021167.1    | Ca_kabuli_chr08 | 8076291                 | CC                              | TT                | 1946473811               |
| SNP_P3_97237_8076323 | NC_021167.1    | Ca_kabuli_chr08 | 8076323                 | AA                              | GG                | 1946473813               |
| SNP_P3_97238_8084435 | NC_021167.1    | Ca_kabuli_chr08 | 8084435                 | CC                              | AA                | 1946473814               |
| SNP_P3_97239_8084447 | NC_021167.1    | Ca_kabuli_chr08 | 8084447                 | AA                              | GG                | 1946473815               |
| SNP_P3_97240_8084487 | NC_021167.1    | Ca_kabuli_chr08 | 8084487                 | AA                              | TT                | 1946473817               |
| SNP_P3_97241_8084567 | NC_021167.1    | Ca_kabuli_chr08 | 8084567                 | GG                              | CC                | 1946473818               |
| SNP_P3_97242_8084586 | NC_021167.1    | Ca_kabuli_chr08 | 8084586                 | TT                              | CC                | 1946473820               |
| SNP_P3_97243_8084592 | NC_021167.1    | Ca_kabuli_chr08 | 8084592                 | GG                              | AA                | 1946473821               |
| SNP_P3_97244_8084632 | NC_021167.1    | Ca_kabuli_chr08 | 8084632                 | CC                              | AA                | 1946473822               |
| SNP_P3_97246_8084735 | NC_021167.1    | Ca_kabuli_chr08 | 8084735                 | AA                              | GG                | 1946473824               |
| SNP_P3_97247_8084747 | NC_021167.1    | Ca_kabuli_chr08 | 8084747                 | AA                              | GG                | 1946473825               |
| SNP_P3_97248_8084755 | NC_021167.1    | Ca_kabuli_chr08 | 8084755                 | GG                              | TT                | 1946473827               |
| SNP_P3_97249_8084758 | NC_021167.1    | Ca_kabuli_chr08 | 8084758                 | CC                              | AA                | 1946473828               |
| SNP_P3_97250_8086050 | NC_021167.1    | Ca_kabuli_chr08 | 8086050                 | AA                              | TT                | 1946473830               |
| SNP_P3_97251_8132902 | NC_021167.1    | Ca_kabuli_chr08 | 8132902                 | TT                              | CC                | 1946473831               |
| SNP_P3_97252_8136485 | NC_021167.1    | Ca_kabuli_chr08 | 8136485                 | AA                              | TT                | 1946473832               |
| SNP_P3_97255_8197307 | NC_021167.1    | Ca_kabuli_chr08 | 8197307                 | GG                              | AA                | 1946473834               |
| SNP_P3_97256_8213476 | NC_021167.1    | Ca_kabuli_chr08 | 8213476                 | CC                              | TT                | 1946473835               |
| SNP_P3_97257_8237383 | NC_021167.1    | Ca_kabuli_chr08 | 8237383                 | AA                              | CC                | 1946473837               |
| SNP_P3_97259_8247689 | NC_021167.1    | Ca_kabuli_chr08 | 8247689                 | AA                              | GG                | 1946473838               |
| SNP_P3_97260_8249883 | NC_021167.1    | Ca_kabuli_chr08 | 8249883                 | TT                              | CC                | 1946473840               |
| SNP_P3_97261_8254575 | NC_021167.1    | Ca_kabuli_chr08 | 8254575                 | AA                              | GG                | 1946473841               |
| SNP_P3_97262_8254596 | NC_021167.1    | Ca_kabuli_chr08 | 8254596                 | AA                              | GG                | 1946473843               |
| SNP_P3_97263_8254601 | NC_021167.1    | Ca_kabuli_chr08 | 8254601                 | GG                              | AA                | 1946473844               |
| SNP_P3_97264_8254706 | NC_021167.1    | Ca_kabuli_chr08 | 8254706                 | AA                              | GG                | 1946473846               |
| SNP_P3_97265_8254712 | NC_021167.1    | Ca_kabuli_chr08 | 8254712                 | AA                              | GG                | 1946473847               |
| SNP_P3_97266_8254751 | NC_021167.1    | Ca_kabuli_chr08 | 8254751                 | TT                              | GG                | 1946473848               |
| SNP_P3_97267_8254891 | NC_021167.1    | Ca_kabuli_chr08 | 8254891                 | AA                              | GG                | 1946473850               |
| SNP_P3_97268_8254908 | NC_021167.1    | Ca_kabuli_chr08 | 8254908                 | AA                              | CC                | 1946473851               |
| SNP_P3_97269_8254954 | NC_021167.1    | Ca_kabuli_chr08 | 8254954                 | CC                              | GG                | 1946473853               |
| SNP_P3_97270_8255062 | NC_021167.1    | Ca_kabuli_chr08 | 8255062                 | AA                              | TT                | 1946473854               |
| SNP_P3_97271_8258672 | NC_021167.1    | Ca_kabuli_chr08 | 8258672                 | GG                              | AA                | 1946473855               |
| SNP_P3_97272_8258907 | NC_021167.1    | Ca_kabuli_chr08 | 8258907                 | CC                              | TT                | 1946473857               |
| SNP_P3_97273_8272709 | NC_021167.1    | Ca_kabuli_chr08 | 8272709                 | GG                              | CC                | 1946473858               |
| SNP_P3_97274_8272755 | NC_021167.1    | Ca_kabuli_chr08 | 8272755                 | CC                              | TT                | 1946473860               |
| SNP_P3_97275_8272866 | NC_021167.1    | Ca_kabuli_chr08 | 8272866                 | AA                              | GG                | 1946473861               |
| SNP_P3_97276_8272934 | NC_021167.1    | Ca_kabuli_chr08 | 8272934                 | CC                              | TT                | 1946473863               |
| SNP_P3_97277_8272973 | NC_021167.1    | Ca_kabuli_chr08 | 8272973                 | GG                              | TT                | 1946473864               |
| SNP_P3_97278_8273057 | NC_021167.1    | Ca_kabuli_chr08 | 8273057                 | TT                              | AA                | 1946473866               |



| SNPs IDs             | Chromosome IDs | Chromosomes     | Physical positions (bp) | CDC Frontier (Reference genome) | (Pusa 256 & HPNB) | NCBI SNPdb Accession IDs |
|----------------------|----------------|-----------------|-------------------------|---------------------------------|-------------------|--------------------------|
| SNP_P3_97279_8273075 | NC_021167.1    | Ca_kabuli_chr08 | 8273075                 | TT                              | CC                | 1946473867               |
| SNP_P3_97281_8273168 | NC_021167.1    | Ca_kabuli_chr08 | 8273168                 | CC                              | TT                | 1946473868               |
| SNP_P3_97282_8273188 | NC_021167.1    | Ca_kabuli_chr08 | 8273188                 | GG                              | CC                | 1946473870               |
| SNP_P3_97283_8273194 | NC_021167.1    | Ca_kabuli_chr08 | 8273194                 | AA                              | GG                | 1946473871               |
| SNP_P3_97284_8273247 | NC_021167.1    | Ca_kabuli_chr08 | 8273247                 | CC                              | AA                | 1946473873               |
| SNP_P3_97285_8277292 | NC_021167.1    | Ca_kabuli_chr08 | 8277292                 | CC                              | TT                | 1946473874               |
| SNP_P3_97286_8277401 | NC_021167.1    | Ca_kabuli_chr08 | 8277401                 | AA                              | GG                | 1946473876               |
| SNP_P3_97287_8277441 | NC_021167.1    | Ca_kabuli_chr08 | 8277441                 | TT                              | CC                | 1946473877               |
| SNP_P3_97288_8277643 | NC_021167.1    | Ca_kabuli_chr08 | 8277643                 | TT                              | GG                | 1946473879               |
| SNP_P3_97289_8277696 | NC_021167.1    | Ca_kabuli_chr08 | 8277696                 | AA                              | GG                | 1946473880               |
| SNP_P3_97290_8289060 | NC_021167.1    | Ca_kabuli_chr08 | 8289060                 | TT                              | CC                | 1946473882               |
| SNP_P3_97291_8289174 | NC_021167.1    | Ca_kabuli_chr08 | 8289174                 | GG                              | CC                | 1946473883               |
| SNP_P3_97293_8315027 | NC_021167.1    | Ca_kabuli_chr08 | 8315027                 | GG                              | AA                | 1946473884               |
| SNP_P3_97295_8358502 | NC_021167.1    | Ca_kabuli_chr08 | 8358502                 | AA                              | TT                | 1946473886               |
| SNP_P3_97296_8361426 | NC_021167.1    | Ca_kabuli_chr08 | 8361426                 | AA                              | TT                | 1946473887               |
| SNP_P3_97297_8384774 | NC_021167.1    | Ca_kabuli_chr08 | 8384774                 | GG                              | AA                | 1946473889               |
| SNP_P3_97298_8395535 | NC_021167.1    | Ca_kabuli_chr08 | 8395535                 | AA                              | CC                | 1946473890               |
| SNP_P3_97299_8395568 | NC_021167.1    | Ca_kabuli_chr08 | 8395568                 | AA                              | TT                | 1946473892               |
| SNP_P3_97300_8395604 | NC_021167.1    | Ca_kabuli_chr08 | 8395604                 | TT                              | CC                | 1946473893               |
| SNP_P3_97301_8395657 | NC_021167.1    | Ca_kabuli_chr08 | 8395657                 | TT                              | GG                | 1946473895               |
| SNP_P3_97302_8395668 | NC_021167.1    | Ca_kabuli_chr08 | 8395668                 | AA                              | CC                | 1946473896               |
| SNP_P3_97303_8395669 | NC_021167.1    | Ca_kabuli_chr08 | 8395669                 | TT                              | CC                | 1946473898               |
| SNP_P3_97304_8395682 | NC_021167.1    | Ca_kabuli_chr08 | 8395682                 | GG                              | AA                | 1946473899               |
| SNP_P3_97305_8395991 | NC_021167.1    | Ca_kabuli_chr08 | 8395991                 | AA                              | TT                | 1946473901               |
| SNP_P3_97306_8396241 | NC_021167.1    | Ca_kabuli_chr08 | 8396241                 | TT                              | CC                | 1946473902               |
| SNP_P3_97307_8398088 | NC_021167.1    | Ca_kabuli_chr08 | 8398088                 | GG                              | TT                | 1946473904               |
| SNP_P3_97308_8398225 | NC_021167.1    | Ca_kabuli_chr08 | 8398225                 | TT                              | AA                | 1946473905               |
| SNP_P3_97309_8398387 | NC_021167.1    | Ca_kabuli_chr08 | 8398387                 | CC                              | TT                | 1946473907               |
| SNP_P3_97310_8398608 | NC_021167.1    | Ca_kabuli_chr08 | 8398608                 | TT                              | CC                | 1946473908               |
| SNP_P3_97311_8401306 | NC_021167.1    | Ca_kabuli_chr08 | 8401306                 | TT                              | AA                | 1946473909               |
| SNP_P3_97312_8401394 | NC_021167.1    | Ca_kabuli_chr08 | 8401394                 | CC                              | TT                | 1946473911               |
| SNP_P3_97313_8401431 | NC_021167.1    | Ca_kabuli_chr08 | 8401431                 | GG                              | AA                | 1946473912               |
| SNP_P3_97314_8428093 | NC_021167.1    | Ca_kabuli_chr08 | 8428093                 | AA                              | TT                | 1946473914               |
| SNP_P3_97315_8428857 | NC_021167.1    | Ca_kabuli_chr08 | 8428857                 | GG                              | CC                | 1946473915               |
| SNP_P3_97318_8474876 | NC_021167.1    | Ca_kabuli_chr08 | 8474876                 | TT                              | CC                | 1946473917               |
| SNP_P3_97319_8475652 | NC_021167.1    | Ca_kabuli_chr08 | 8475652                 | GG                              | AA                | 1946473918               |
| SNP_P3_97320_8475653 | NC_021167.1    | Ca_kabuli_chr08 | 8475653                 | CC                              | TT                | 1946473920               |
| SNP_P3_97321_8489919 | NC_021167.1    | Ca_kabuli_chr08 | 8489919                 | TT                              | CC                | 1946473921               |
| SNP_P3_97323_8497639 | NC_021167.1    | Ca_kabuli_chr08 | 8497639                 | AA                              | TT                | 1946473923               |
| SNP_P3_97324_8497640 | NC_021167.1    | Ca_kabuli_chr08 | 8497640                 | AA                              | TT                | 1946473925               |
| SNP_P3_97325_8506208 | NC_021167.1    | Ca_kabuli_chr08 | 8506208                 | CC                              | TT                | 1946473926               |
| SNP_P3_97326_8509340 | NC_021167.1    | Ca_kabuli_chr08 | 8509340                 | AA                              | GG                | 1946473928               |

| SNPs IDs             | Chromosome IDs | Chromosomes     | Physical positions (bp) | CDC Frontier (Reference genome) | (Pusa 256 & HPNB) | NCBI SNPdb Accession IDs |
|----------------------|----------------|-----------------|-------------------------|---------------------------------|-------------------|--------------------------|
| SNP_P3_97327_8517134 | NC_021167.1    | Ca_kabuli_chr08 | 8517134                 | AA                              | GG                | 1946473929               |
| SNP_P3_97328_8546657 | NC_021167.1    | Ca_kabuli_chr08 | 8546657                 | AA                              | GG                | 1946473930               |
| SNP_P3_97329_8563104 | NC_021167.1    | Ca_kabuli_chr08 | 8563104                 | CC                              | AA                | 1946473932               |
| SNP_P3_97330_8569589 | NC_021167.1    | Ca_kabuli_chr08 | 8569589                 | AA                              | GG                | 1946473933               |
| SNP_P3_97331_8569595 | NC_021167.1    | Ca_kabuli_chr08 | 8569595                 | TT                              | GG                | 1946473935               |
| SNP_P3_97332_8569612 | NC_021167.1    | Ca_kabuli_chr08 | 8569612                 | TT                              | GG                | 1946473936               |
| SNP_P3_97333_8574306 | NC_021167.1    | Ca_kabuli_chr08 | 8574306                 | AA                              | TT                | 1946473938               |
| SNP_P3_97334_8577643 | NC_021167.1    | Ca_kabuli_chr08 | 8577643                 | GG                              | AA                | 1946473939               |
| SNP_P3_97335_8577655 | NC_021167.1    | Ca_kabuli_chr08 | 8577655                 | AA                              | GG                | 1946473941               |
| SNP_P3_97336_8577666 | NC_021167.1    | Ca_kabuli_chr08 | 8577666                 | AA                              | GG                | 1946473943               |
| SNP_P3_97337_8577730 | NC_021167.1    | Ca_kabuli_chr08 | 8577730                 | GG                              | AA                | 1946473944               |
| SNP_P3_97338_8577760 | NC_021167.1    | Ca_kabuli_chr08 | 8577760                 | AA                              | GG                | 1946473946               |
| SNP_P3_97339_8595793 | NC_021167.1    | Ca_kabuli_chr08 | 8595793                 | AA                              | GG                | 1946473947               |
| SNP_P3_97340_8602885 | NC_021167.1    | Ca_kabuli_chr08 | 8602885                 | AA                              | CC                | 1946473949               |
| SNP_P3_97341_8605867 | NC_021167.1    | Ca_kabuli_chr08 | 8605867                 | AA                              | CC                | 1946473950               |
| SNP_P3_97342_8616375 | NC_021167.1    | Ca_kabuli_chr08 | 8616375                 | AA                              | GG                | 1946473952               |
| SNP_P3_97343_8616448 | NC_021167.1    | Ca_kabuli_chr08 | 8616448                 | GG                              | AA                | 1946473953               |
| SNP_P3_97344_8616608 | NC_021167.1    | Ca_kabuli_chr08 | 8616608                 | AA                              | GG                | 1946473955               |
| SNP_P3_97345_8616784 | NC_021167.1    | Ca_kabuli_chr08 | 8616784                 | TT                              | CC                | 1946473956               |
| SNP_P3_97346_8622838 | NC_021167.1    | Ca_kabuli_chr08 | 8622838                 | GG                              | AA                | 1946473958               |
| SNP_P3_97347_8623160 | NC_021167.1    | Ca_kabuli_chr08 | 8623160                 | TT                              | CC                | 1946473959               |
| SNP_P3_97352_8624641 | NC_021167.1    | Ca_kabuli_chr08 | 8624641                 | AA                              | GG                | 1946473961               |
| SNP_P3_97353_8624646 | NC_021167.1    | Ca_kabuli_chr08 | 8624646                 | TT                              | AA                | 1946473962               |
| SNP_P3_97354_8624779 | NC_021167.1    | Ca_kabuli_chr08 | 8624779                 | GG                              | TT                | 1946473964               |
| SNP_P3_97355_8626317 | NC_021167.1    | Ca_kabuli_chr08 | 8626317                 | TT                              | CC                | 1946473965               |
| SNP_P3_97357_8649794 | NC_021167.1    | Ca_kabuli_chr08 | 8649794                 | AA                              | GG                | 1946473967               |
| SNP_P3_97358_8651702 | NC_021167.1    | Ca_kabuli_chr08 | 8651702                 | AA                              | GG                | 1946473968               |
| SNP_P3_97359_8660156 | NC_021167.1    | Ca_kabuli_chr08 | 8660156                 | TT                              | AA                | 1946473969               |
| SNP_P3_97360_8662945 | NC_021167.1    | Ca_kabuli_chr08 | 8662945                 | GG                              | TT                | 1946473971               |
| SNP_P3_97361_8667341 | NC_021167.1    | Ca_kabuli_chr08 | 8667341                 | CC                              | TT                | 1946473972               |
| SNP_P3_97362_8676959 | NC_021167.1    | Ca_kabuli_chr08 | 8676959                 | AA                              | GG                | 1946473974               |
| SNP_P3_97363_8680292 | NC_021167.1    | Ca_kabuli_chr08 | 8680292                 | AA                              | CC                | 1946473975               |
| SNP_P3_97364_8684189 | NC_021167.1    | Ca_kabuli_chr08 | 8684189                 | AA                              | GG                | 1946473977               |
| SNP_P3_97365_8690082 | NC_021167.1    | Ca_kabuli_chr08 | 8690082                 | TT                              | CC                | 1946473978               |
| SNP_P3_97366_8691350 | NC_021167.1    | Ca_kabuli_chr08 | 8691350                 | CC                              | TT                | 1946473980               |
| SNP_P3_97368_8695055 | NC_021167.1    | Ca_kabuli_chr08 | 8695055                 | TT                              | AA                | 1946473981               |
| SNP_P3_97369_8701904 | NC_021167.1    | Ca_kabuli_chr08 | 8701904                 | AA                              | TT                | 1946473983               |
| SNP_P3_97370_8701905 | NC_021167.1    | Ca_kabuli_chr08 | 8701905                 | AA                              | TT                | 1946473984               |
| SNP_P3_97373_8720464 | NC_021167.1    | Ca_kabuli_chr08 | 8720464                 | AA                              | CC                | 1946473986               |
| SNP_P3_97374_8722979 | NC_021167.1    | Ca_kabuli_chr08 | 8722979                 | CC                              | TT                | 1946473987               |
| SNP_P3_97376_8745123 | NC_021167.1    | Ca_kabuli_chr08 | 8745123                 | GG                              | TT                | 1946473988               |
| SNP_P3_97377_8764360 | NC_021167.1    | Ca_kabuli_chr08 | 8764360                 | CC                              | AA                | 1946473990               |

| SNPs IDs             | Chromosome IDs | Chromosomes     | Physical positions (bp) | CDC Frontier (Reference genome) | (Pusa 256 & HPNB) | NCBI SNPdb Accession IDs |
|----------------------|----------------|-----------------|-------------------------|---------------------------------|-------------------|--------------------------|
| SNP_P3_97379_8771951 | NC_021167.1    | Ca_kabuli_chr08 | 8771951                 | TT                              | GG                | 1946473992               |
| SNP_P3_97380_8773850 | NC_021167.1    | Ca_kabuli_chr08 | 8773850                 | AA                              | GG                | 1946473993               |
| SNP_P3_97381_8773979 | NC_021167.1    | Ca_kabuli_chr08 | 8773979                 | GG                              | TT                | 1946473995               |
| SNP_P3_97382_8773994 | NC_021167.1    | Ca_kabuli_chr08 | 8773994                 | AA                              | GG                | 1946473996               |
| SNP_P3_97383_8774033 | NC_021167.1    | Ca_kabuli_chr08 | 8774033                 | AA                              | TT                | 1946473998               |
| SNP_P3_97385_8774227 | NC_021167.1    | Ca_kabuli_chr08 | 8774227                 | TT                              | AA                | 1946473999               |
| SNP_P3_97386_8774313 | NC_021167.1    | Ca_kabuli_chr08 | 8774313                 | CC                              | TT                | 1946474001               |
| SNP_P3_97388_8774386 | NC_021167.1    | Ca_kabuli_chr08 | 8774386                 | GG                              | AA                | 1946474002               |
| SNP_P3_97390_8787756 | NC_021167.1    | Ca_kabuli_chr08 | 8787756                 | GG                              | AA                | 1946474004               |
| SNP_P3_97391_8826450 | NC_021167.1    | Ca_kabuli_chr08 | 8826450                 | GG                              | TT                | 1946474005               |
| SNP_P3_97392_8832553 | NC_021167.1    | Ca_kabuli_chr08 | 8832553                 | GG                              | AA                | 1946474006               |
| SNP_P3_97393_8837201 | NC_021167.1    | Ca_kabuli_chr08 | 8837201                 | AA                              | GG                | 1946474008               |
| SNP_P3_97395_8839789 | NC_021167.1    | Ca_kabuli_chr08 | 8839789                 | AA                              | TT                | 1946474009               |
| SNP_P3_97396_8843120 | NC_021167.1    | Ca_kabuli_chr08 | 8843120                 | TT                              | GG                | 1946474011               |
| SNP_P3_97397_8844254 | NC_021167.1    | Ca_kabuli_chr08 | 8844254                 | GG                              | AA                | 1946474012               |
| SNP_P3_97398_8844739 | NC_021167.1    | Ca_kabuli_chr08 | 8844739                 | AA                              | TT                | 1946474014               |
| SNP_P3_97399_8844766 | NC_021167.1    | Ca_kabuli_chr08 | 8844766                 | GG                              | AA                | 1946474015               |
| SNP_P3_97400_8844788 | NC_021167.1    | Ca_kabuli_chr08 | 8844788                 | TT                              | CC                | 1946474017               |
| SNP_P3_97401_8844965 | NC_021167.1    | Ca_kabuli_chr08 | 8844965                 | AA                              | GG                | 1946474018               |
| SNP_P3_97402_8845215 | NC_021167.1    | Ca_kabuli_chr08 | 8845215                 | AA                              | GG                | 1946474020               |
| SNP_P3_97403_8845247 | NC_021167.1    | Ca_kabuli_chr08 | 8845247                 | TT                              | CC                | 1946474021               |
| SNP_P3_97405_8847417 | NC_021167.1    | Ca_kabuli_chr08 | 8847417                 | TT                              | AA                | 1946474023               |
| SNP_P3_97406_8847835 | NC_021167.1    | Ca_kabuli_chr08 | 8847835                 | GG                              | AA                | 1946474024               |
| SNP_P3_97407_8847849 | NC_021167.1    | Ca_kabuli_chr08 | 8847849                 | GG                              | AA                | 1946474026               |
| SNP_P3_97409_8851558 | NC_021167.1    | Ca_kabuli_chr08 | 8851558                 | CC                              | TT                | 1946474027               |
| SNP_P3_97410_8851564 | NC_021167.1    | Ca_kabuli_chr08 | 8851564                 | AA                              | GG                | 1946474028               |
| SNP_P3_97411_8851583 | NC_021167.1    | Ca_kabuli_chr08 | 8851583                 | CC                              | TT                | 1946474030               |
| SNP_P3_97412_8851904 | NC_021167.1    | Ca_kabuli_chr08 | 8851904                 | TT                              | CC                | 1946474032               |
| SNP_P3_97413_8851930 | NC_021167.1    | Ca_kabuli_chr08 | 8851930                 | GG                              | AA                | 1946474033               |
| SNP_P3_97414_8853201 | NC_021167.1    | Ca_kabuli_chr08 | 8853201                 | CC                              | AA                | 1946474034               |
| SNP_P3_97416_8854409 | NC_021167.1    | Ca_kabuli_chr08 | 8854409                 | CC                              | TT                | 1946474036               |
| SNP_P3_97418_8854481 | NC_021167.1    | Ca_kabuli_chr08 | 8854481                 | TT                              | CC                | 1946474037               |
| SNP_P3_97420_8855405 | NC_021167.1    | Ca_kabuli_chr08 | 8855405                 | AA                              | CC                | 1946474039               |
| SNP_P3_97421_8855414 | NC_021167.1    | Ca_kabuli_chr08 | 8855414                 | CC                              | AA                | 1946474040               |
| SNP_P3_97422_8855895 | NC_021167.1    | Ca_kabuli_chr08 | 8855895                 | CC                              | TT                | 1946474042               |
| SNP_P3_97424_8858078 | NC_021167.1    | Ca_kabuli_chr08 | 8858078                 | GG                              | TT                | 1946474043               |
| SNP_P3_97425_8858378 | NC_021167.1    | Ca_kabuli_chr08 | 8858378                 | AA                              | GG                | 1946474045               |
| SNP_P3_97426_8858389 | NC_021167.1    | Ca_kabuli_chr08 | 8858389                 | GG                              | TT                | 1946474046               |
| SNP_P3_97427_8858755 | NC_021167.1    | Ca_kabuli_chr08 | 8858755                 | AA                              | CC                | 1946474048               |
| SNP_P3_97428_8858799 | NC_021167.1    | Ca_kabuli_chr08 | 8858799                 | GG                              | AA                | 1946474049               |
| SNP_P3_97429_8858811 | NC_021167.1    | Ca_kabuli_chr08 | 8858811                 | TT                              | AA                | 1946474051               |
| SNP_P3_97431_8859083 | NC_021167.1    | Ca_kabuli_chr08 | 8859083                 | GG                              | AA                | 1946474052               |

| SNPs IDs             | Chromosome IDs | Chromosomes     | Physical positions (bp) | CDC Frontier (Reference genome) | (Pusa 256 & HPNB) | NCBI SNPdb Accession IDs |
|----------------------|----------------|-----------------|-------------------------|---------------------------------|-------------------|--------------------------|
| SNP_P3_97432_8859084 | NC_021167.1    | Ca_kabuli_chr08 | 8859084                 | CC                              | AA                | 1946474054               |
| SNP_P3_97433_8859086 | NC_021167.1    | Ca_kabuli_chr08 | 8859086                 | AA                              | CC                | 1946474055               |
| SNP_P3_97434_8859087 | NC_021167.1    | Ca_kabuli_chr08 | 8859087                 | TT                              | CC                | 1946474056               |
| SNP_P3_97435_8859097 | NC_021167.1    | Ca_kabuli_chr08 | 8859097                 | TT                              | AA                | 1946474058               |
| SNP_P3_97436_8860080 | NC_021167.1    | Ca_kabuli_chr08 | 8860080                 | CC                              | GG                | 1946474059               |
| SNP_P3_97438_8862492 | NC_021167.1    | Ca_kabuli_chr08 | 8862492                 | TT                              | CC                | 1946474061               |
| SNP_P3_97439_8862633 | NC_021167.1    | Ca_kabuli_chr08 | 8862633                 | AA                              | GG                | 1946474062               |
| SNP_P3_97440_8862668 | NC_021167.1    | Ca_kabuli_chr08 | 8862668                 | TT                              | AA                | 1946474064               |
| SNP_P3_97441_8862741 | NC_021167.1    | Ca_kabuli_chr08 | 8862741                 | GG                              | TT                | 1946474065               |
| SNP_P3_97442_8862746 | NC_021167.1    | Ca_kabuli_chr08 | 8862746                 | AA                              | GG                | 1946474067               |
| SNP_P3_97443_8862756 | NC_021167.1    | Ca_kabuli_chr08 | 8862756                 | GG                              | TT                | 1946474068               |
| SNP_P3_97444_8862759 | NC_021167.1    | Ca_kabuli_chr08 | 8862759                 | TT                              | GG                | 1946474070               |
| SNP_P3_97445_8862811 | NC_021167.1    | Ca_kabuli_chr08 | 8862811                 | AA                              | GG                | 1946474071               |
| SNP_P3_97447_8862917 | NC_021167.1    | Ca_kabuli_chr08 | 8862917                 | AA                              | GG                | 1946474072               |
| SNP_P3_97448_8863088 | NC_021167.1    | Ca_kabuli_chr08 | 8863088                 | GG                              | CC                | 1946474074               |
| SNP_P3_97450_8867713 | NC_021167.1    | Ca_kabuli_chr08 | 8867713                 | TT                              | CC                | 1946474075               |
| SNP_P3_97451_8867723 | NC_021167.1    | Ca_kabuli_chr08 | 8867723                 | CC                              | TT                | 1946474077               |
| SNP_P3_97452_8867804 | NC_021167.1    | Ca_kabuli_chr08 | 8867804                 | CC                              | TT                | 1946474078               |
| SNP_P3_97453_8868094 | NC_021167.1    | Ca_kabuli_chr08 | 8868094                 | AA                              | GG                | 1946474080               |
| SNP_P3_97455_8868362 | NC_021167.1    | Ca_kabuli_chr08 | 8868362                 | AA                              | TT                | 1946474081               |
| SNP_P3_97456_8868591 | NC_021167.1    | Ca_kabuli_chr08 | 8868591                 | TT                              | AA                | 1946474083               |
| SNP_P3_97457_8868704 | NC_021167.1    | Ca_kabuli_chr08 | 8868704                 | GG                              | AA                | 1946474084               |
| SNP_P3_97459_8868977 | NC_021167.1    | Ca_kabuli_chr08 | 8868977                 | CC                              | TT                | 1946474085               |
| SNP_P3_97460_8868978 | NC_021167.1    | Ca_kabuli_chr08 | 8868978                 | AA                              | CC                | 1946474087               |
| SNP_P3_97461_8868996 | NC_021167.1    | Ca_kabuli_chr08 | 8868996                 | CC                              | TT                | 1946474088               |
| SNP_P3_97462_8868999 | NC_021167.1    | Ca_kabuli_chr08 | 8868999                 | GG                              | AA                | 1946474090               |
| SNP_P3_97463_8869300 | NC_021167.1    | Ca_kabuli_chr08 | 8869300                 | AA                              | GG                | 1946474091               |
| SNP_P3_97464_8869314 | NC_021167.1    | Ca_kabuli_chr08 | 8869314                 | AA                              | GG                | 1946474093               |
| SNP_P3_97465_8869326 | NC_021167.1    | Ca_kabuli_chr08 | 8869326                 | CC                              | TT                | 1946474094               |
| SNP_P3_97466_8870640 | NC_021167.1    | Ca_kabuli_chr08 | 8870640                 | CC                              | TT                | 1946474096               |
| SNP_P3_97467_8870856 | NC_021167.1    | Ca_kabuli_chr08 | 8870856                 | TT                              | AA                | 1946474097               |
| SNP_P3_97469_8872293 | NC_021167.1    | Ca_kabuli_chr08 | 8872293                 | GG                              | AA                | 1946474098               |
| SNP_P3_97471_8872351 | NC_021167.1    | Ca_kabuli_chr08 | 8872351                 | TT                              | GG                | 1946474100               |
| SNP_P3_97472_8874788 | NC_021167.1    | Ca_kabuli_chr08 | 8874788                 | AA                              | GG                | 1946474101               |
| SNP_P3_97473_8874791 | NC_021167.1    | Ca_kabuli_chr08 | 8874791                 | TT                              | GG                | 1946474103               |
| SNP_P3_97474_8874795 | NC_021167.1    | Ca_kabuli_chr08 | 8874795                 | CC                              | TT                | 1946474104               |
| SNP_P3_97475_8875085 | NC_021167.1    | Ca_kabuli_chr08 | 8875085                 | AA                              | TT                | 1946474106               |
| SNP_P3_97476_8875639 | NC_021167.1    | Ca_kabuli_chr08 | 8875639                 | AA                              | GG                | 1946474107               |
| SNP_P3_97477_8875657 | NC_021167.1    | Ca_kabuli_chr08 | 8875657                 | AA                              | GG                | 1946474109               |
| SNP_P3_97478_8875714 | NC_021167.1    | Ca_kabuli_chr08 | 8875714                 | AA                              | GG                | 1946474110               |
| SNP_P3_97481_8876216 | NC_021167.1    | Ca_kabuli_chr08 | 8876216                 | AA                              | TT                | 1946474112               |
| SNP_P3_97482_8876228 | NC_021167.1    | Ca_kabuli_chr08 | 8876228                 | TT                              | CC                | 1946474113               |

| SNPs IDs             | Chromosome IDs | Chromosomes     | Physical positions (bp) | CDC Frontier (Reference genome) | (Pusa 256 & HPNB) | NCBI SNPdb Accession IDs |
|----------------------|----------------|-----------------|-------------------------|---------------------------------|-------------------|--------------------------|
| SNP_P3_97485_8878159 | NC_021167.1    | Ca_kabuli_chr08 | 8878159                 | AA                              | GG                | 1946474114               |
| SNP_P3_97486_8878183 | NC_021167.1    | Ca_kabuli_chr08 | 8878183                 | AA                              | GG                | 1946474116               |
| SNP_P3_97487_8878219 | NC_021167.1    | Ca_kabuli_chr08 | 8878219                 | TT                              | GG                | 1946474117               |
| SNP_P3_97488_8878832 | NC_021167.1    | Ca_kabuli_chr08 | 8878832                 | GG                              | AA                | 1946474119               |
| SNP_P3_97489_8878838 | NC_021167.1    | Ca_kabuli_chr08 | 8878838                 | CC                              | GG                | 1946474120               |
| SNP_P3_97490_8878940 | NC_021167.1    | Ca_kabuli_chr08 | 8878940                 | CC                              | TT                | 1946474122               |
| SNP_P3_97491_8878963 | NC_021167.1    | Ca_kabuli_chr08 | 8878963                 | TT                              | CC                | 1946474123               |
| SNP_P3_97492_8878970 | NC_021167.1    | Ca_kabuli_chr08 | 8878970                 | AA                              | GG                | 1946474125               |
| SNP_P3_97493_8878974 | NC_021167.1    | Ca_kabuli_chr08 | 8878974                 | CC                              | AA                | 1946474126               |
| SNP_P3_97494_8879115 | NC_021167.1    | Ca_kabuli_chr08 | 8879115                 | GG                              | AA                | 1946474128               |
| SNP_P3_97495_8880475 | NC_021167.1    | Ca_kabuli_chr08 | 8880475                 | TT                              | CC                | 1946474129               |
| SNP_P3_97496_8880515 | NC_021167.1    | Ca_kabuli_chr08 | 8880515                 | GG                              | TT                | 1946474131               |
| SNP_P3_97497_8880561 | NC_021167.1    | Ca_kabuli_chr08 | 8880561                 | AA                              | TT                | 1946474132               |
| SNP_P3_97500_8883571 | NC_021167.1    | Ca_kabuli_chr08 | 8883571                 | TT                              | CC                | 1946474134               |
| SNP_P3_97501_8884185 | NC_021167.1    | Ca_kabuli_chr08 | 8884185                 | TT                              | CC                | 1946474135               |
| SNP_P3_97502_8884251 | NC_021167.1    | Ca_kabuli_chr08 | 8884251                 | TT                              | CC                | 1946474137               |
| SNP_P3_97503_8884374 | NC_021167.1    | Ca_kabuli_chr08 | 8884374                 | GG                              | AA                | 1946474138               |
| SNP_P3_97504_8885369 | NC_021167.1    | Ca_kabuli_chr08 | 8885369                 | TT                              | GG                | 1946474140               |
| SNP_P3_97505_8885575 | NC_021167.1    | Ca_kabuli_chr08 | 8885575                 | AA                              | GG                | 1946474141               |
| SNP_P3_97506_8886016 | NC_021167.1    | Ca_kabuli_chr08 | 8886016                 | TT                              | CC                | 1946474143               |
| SNP_P3_97507_8886213 | NC_021167.1    | Ca_kabuli_chr08 | 8886213                 | CC                              | TT                | 1946474144               |
| SNP_P3_97508_8886398 | NC_021167.1    | Ca_kabuli_chr08 | 8886398                 | TT                              | CC                | 1946474146               |
| SNP_P3_97511_8887794 | NC_021167.1    | Ca_kabuli_chr08 | 8887794                 | AA                              | TT                | 1946474147               |
| SNP_P3_97512_8888029 | NC_021167.1    | Ca_kabuli_chr08 | 8888029                 | TT                              | CC                | 1946474149               |
| SNP_P3_97513_8888070 | NC_021167.1    | Ca_kabuli_chr08 | 8888070                 | AA                              | GG                | 1946474150               |
| SNP_P3_97514_8888076 | NC_021167.1    | Ca_kabuli_chr08 | 8888076                 | AA                              | TT                | 1946474152               |
| SNP_P3_97516_8894587 | NC_021167.1    | Ca_kabuli_chr08 | 8894587                 | GG                              | TT                | 1946474153               |
| SNP_P3_97517_8894799 | NC_021167.1    | Ca_kabuli_chr08 | 8894799                 | CC                              | AA                | 1946474155               |
| SNP_P3_97519_8895224 | NC_021167.1    | Ca_kabuli_chr08 | 8895224                 | TT                              | CC                | 1946474156               |
| SNP_P3_97520_8897304 | NC_021167.1    | Ca_kabuli_chr08 | 8897304                 | GG                              | CC                | 1946474157               |
| SNP_P3_97521_8897666 | NC_021167.1    | Ca_kabuli_chr08 | 8897666                 | TT                              | GG                | 1946474159               |
| SNP_P3_97523_8900262 | NC_021167.1    | Ca_kabuli_chr08 | 8900262                 | AA                              | GG                | 1946474160               |
| SNP_P3_97525_8900859 | NC_021167.1    | Ca_kabuli_chr08 | 8900859                 | AA                              | TT                | 1946474162               |
| SNP_P3_97526_8901793 | NC_021167.1    | Ca_kabuli_chr08 | 8901793                 | CC                              | TT                | 1946474163               |
| SNP_P3_97527_8902062 | NC_021167.1    | Ca_kabuli_chr08 | 8902062                 | AA                              | GG                | 1946474165               |
| SNP_P3_97528_8902133 | NC_021167.1    | Ca_kabuli_chr08 | 8902133                 | CC                              | TT                | 1946474166               |
| SNP_P3_97529_8902304 | NC_021167.1    | Ca_kabuli_chr08 | 8902304                 | TT                              | CC                | 1946474168               |
| SNP_P3_97530_8902432 | NC_021167.1    | Ca_kabuli_chr08 | 8902432                 | CC                              | TT                | 1946474169               |
| SNP_P3_97531_8902453 | NC_021167.1    | Ca_kabuli_chr08 | 8902453                 | GG                              | AA                | 1946474170               |
| SNP_P3_97532_8902646 | NC_021167.1    | Ca_kabuli_chr08 | 8902646                 | CC                              | TT                | 1946474172               |
| SNP_P3_97533_8902718 | NC_021167.1    | Ca_kabuli_chr08 | 8902718                 | CC                              | AA                | 1946474173               |
| SNP_P3_97534_8903255 | NC_021167.1    | Ca_kabuli_chr08 | 8903255                 | GG                              | AA                | 1946474175               |

| SNPs IDs             | Chromosome IDs | Chromosomes     | Physical positions (bp) | CDC Frontier (Reference genome) | (Pusa 256 & HPNB) | NCBI SNPdb Accession IDs |
|----------------------|----------------|-----------------|-------------------------|---------------------------------|-------------------|--------------------------|
| SNP_P3_97535_8903662 | NC_021167.1    | Ca_kabuli_chr08 | 8903662                 | CC                              | TT                | 1946474176               |
| SNP_P3_97536_8904786 | NC_021167.1    | Ca_kabuli_chr08 | 8904786                 | AA                              | CC                | 1946474178               |
| SNP_P3_97537_8906514 | NC_021167.1    | Ca_kabuli_chr08 | 8906514                 | CC                              | AA                | 1946474179               |
| SNP_P3_97538_8906817 | NC_021167.1    | Ca_kabuli_chr08 | 8906817                 | CC                              | GG                | 1946474181               |
| SNP_P3_97539_8907140 | NC_021167.1    | Ca_kabuli_chr08 | 8907140                 | TT                              | AA                | 1946474182               |
| SNP_P3_97540_8907141 | NC_021167.1    | Ca_kabuli_chr08 | 8907141                 | CC                              | TT                | 1946474184               |
| SNP_P3_97542_8907184 | NC_021167.1    | Ca_kabuli_chr08 | 8907184                 | CC                              | TT                | 1946474185               |
| SNP_P3_97543_8907322 | NC_021167.1    | Ca_kabuli_chr08 | 8907322                 | GG                              | AA                | 1946474187               |
| SNP_P3_97544_8907594 | NC_021167.1    | Ca_kabuli_chr08 | 8907594                 | GG                              | AA                | 1946474188               |
| SNP_P3_97546_8908525 | NC_021167.1    | Ca_kabuli_chr08 | 8908525                 | TT                              | CC                | 1946474190               |
| SNP_P3_97547_8908529 | NC_021167.1    | Ca_kabuli_chr08 | 8908529                 | TT                              | CC                | 1946474191               |
| SNP_P3_97548_8908535 | NC_021167.1    | Ca_kabuli_chr08 | 8908535                 | CC                              | TT                | 1946474192               |
| SNP_P3_97549_8908539 | NC_021167.1    | Ca_kabuli_chr08 | 8908539                 | TT                              | GG                | 1946474194               |
| SNP_P3_97550_8909241 | NC_021167.1    | Ca_kabuli_chr08 | 8909241                 | TT                              | AA                | 1946474195               |
| SNP_P3_97551_8912245 | NC_021167.1    | Ca_kabuli_chr08 | 8912245                 | CC                              | TT                | 1946474197               |
| SNP_P3_97552_8913136 | NC_021167.1    | Ca_kabuli_chr08 | 8913136                 | CC                              | TT                | 1946474198               |
| SNP_P3_97553_8915516 | NC_021167.1    | Ca_kabuli_chr08 | 8915516                 | CC                              | TT                | 1946474200               |
| SNP_P3_97554_8915548 | NC_021167.1    | Ca_kabuli_chr08 | 8915548                 | AA                              | GG                | 1946474201               |
| SNP_P3_97555_8915554 | NC_021167.1    | Ca_kabuli_chr08 | 8915554                 | GG                              | AA                | 1946474202               |
| SNP_P3_97556_8916363 | NC_021167.1    | Ca_kabuli_chr08 | 8916363                 | AA                              | TT                | 1946474204               |
| SNP_P3_97557_8916839 | NC_021167.1    | Ca_kabuli_chr08 | 8916839                 | TT                              | AA                | 1946474205               |
| SNP_P3_97558_8919849 | NC_021167.1    | Ca_kabuli_chr08 | 8919849                 | TT                              | GG                | 1946474207               |
| SNP_P3_97559_8919896 | NC_021167.1    | Ca_kabuli_chr08 | 8919896                 | CC                              | AA                | 1946474208               |
| SNP_P3_97561_8922278 | NC_021167.1    | Ca_kabuli_chr08 | 8922278                 | AA                              | GG                | 1946474210               |
| SNP_P3_97562_8922474 | NC_021167.1    | Ca_kabuli_chr08 | 8922474                 | AA                              | GG                | 1946474211               |
| SNP_P3_97564_8923730 | NC_021167.1    | Ca_kabuli_chr08 | 8923730                 | GG                              | AA                | 1946474213               |
| SNP_P3_97565_8924101 | NC_021167.1    | Ca_kabuli_chr08 | 8924101                 | TT                              | CC                | 1946474214               |
| SNP_P3_97566_8924196 | NC_021167.1    | Ca_kabuli_chr08 | 8924196                 | AA                              | GG                | 1946474216               |
| SNP_P3_97567_8924608 | NC_021167.1    | Ca_kabuli_chr08 | 8924608                 | TT                              | AA                | 1946474217               |
| SNP_P3_97568_8925087 | NC_021167.1    | Ca_kabuli_chr08 | 8925087                 | CC                              | TT                | 1946474219               |
| SNP_P3_97569_8925304 | NC_021167.1    | Ca_kabuli_chr08 | 8925304                 | AA                              | GG                | 1946474220               |
| SNP_P3_97570_8925557 | NC_021167.1    | Ca_kabuli_chr08 | 8925557                 | CC                              | TT                | 1946474222               |
| SNP_P3_97571_8930637 | NC_021167.1    | Ca_kabuli_chr08 | 8930637                 | TT                              | CC                | 1946474223               |
| SNP_P3_97572_8930725 | NC_021167.1    | Ca_kabuli_chr08 | 8930725                 | TT                              | CC                | 1946474225               |
| SNP_P3_97573_8934922 | NC_021167.1    | Ca_kabuli_chr08 | 8934922                 | AA                              | TT                | 1946474226               |
| SNP_P3_97574_8935340 | NC_021167.1    | Ca_kabuli_chr08 | 8935340                 | AA                              | GG                | 1946474228               |
| SNP_P3_97575_8935650 | NC_021167.1    | Ca_kabuli_chr08 | 8935650                 | GG                              | AA                | 1946474229               |
| SNP_P3_97576_8937959 | NC_021167.1    | Ca_kabuli_chr08 | 8937959                 | TT                              | CC                | 1946474231               |
| SNP_P3_97577_8937975 | NC_021167.1    | Ca_kabuli_chr08 | 8937975                 | AA                              | GG                | 1946474232               |
| SNP_P3_97578_8937988 | NC_021167.1    | Ca_kabuli_chr08 | 8937988                 | AA                              | GG                | 1946474234               |
| SNP_P3_97580_8939491 | NC_021167.1    | Ca_kabuli_chr08 | 8939491                 | TT                              | CC                | 1946474235               |
| SNP_P3_97581_8939787 | NC_021167.1    | Ca_kabuli_chr08 | 8939787                 | AA                              | GG                | 1946474236               |

| SNPs IDs             | Chromosome IDs | Chromosomes     | Physical positions (bp) | CDC Frontier (Reference genome) | (Pusa 256 & HPNB) | NCBI SNPdb Accession IDs |
|----------------------|----------------|-----------------|-------------------------|---------------------------------|-------------------|--------------------------|
| SNP_P3_97582_8940113 | NC_021167.1    | Ca_kabuli_chr08 | 8940113                 | TT                              | CC                | 1946474238               |
| SNP_P3_97584_8940280 | NC_021167.1    | Ca_kabuli_chr08 | 8940280                 | GG                              | AA                | 1946474239               |
| SNP_P3_97586_8941956 | NC_021167.1    | Ca_kabuli_chr08 | 8941956                 | AA                              | TT                | 1946474241               |
| SNP_P3_97588_8943258 | NC_021167.1    | Ca_kabuli_chr08 | 8943258                 | TT                              | AA                | 1946474242               |
| SNP_P3_97589_8943474 | NC_021167.1    | Ca_kabuli_chr08 | 8943474                 | AA                              | GG                | 1946474244               |
| SNP_P3_97590_8943538 | NC_021167.1    | Ca_kabuli_chr08 | 8943538                 | GG                              | AA                | 1946474245               |
| SNP_P3_97591_8943556 | NC_021167.1    | Ca_kabuli_chr08 | 8943556                 | AA                              | GG                | 1946474247               |
| SNP_P3_97592_8950193 | NC_021167.1    | Ca_kabuli_chr08 | 8950193                 | AA                              | GG                | 1946474248               |
| SNP_P3_97594_8955582 | NC_021167.1    | Ca_kabuli_chr08 | 8955582                 | GG                              | AA                | 1946474250               |
| SNP_P3_97596_8956554 | NC_021167.1    | Ca_kabuli_chr08 | 8956554                 | GG                              | AA                | 1946474251               |
| SNP_P3_97599_8956658 | NC_021167.1    | Ca_kabuli_chr08 | 8956658                 | GG                              | AA                | 1946474252               |
| SNP_P3_97600_8960771 | NC_021167.1    | Ca_kabuli_chr08 | 8960771                 | CC                              | AA                | 1946474254               |
| SNP_P3_97601_8961112 | NC_021167.1    | Ca_kabuli_chr08 | 8961112                 | TT                              | CC                | 1946474255               |
| SNP_P3_97602_8961404 | NC_021167.1    | Ca_kabuli_chr08 | 8961404                 | AA                              | GG                | 1946474257               |
| SNP_P3_97603_8961434 | NC_021167.1    | Ca_kabuli_chr08 | 8961434                 | AA                              | CC                | 1946474258               |
| SNP_P3_97604_8961448 | NC_021167.1    | Ca_kabuli_chr08 | 8961448                 | TT                              | CC                | 1946474260               |
| SNP_P3_97605_8961650 | NC_021167.1    | Ca_kabuli_chr08 | 8961650                 | TT                              | CC                | 1946474261               |
| SNP_P3_97606_8962952 | NC_021167.1    | Ca_kabuli_chr08 | 8962952                 | TT                              | GG                | 1946474262               |
| SNP_P3_97607_8964139 | NC_021167.1    | Ca_kabuli_chr08 | 8964139                 | TT                              | AA                | 1946474264               |
| SNP_P3_97608_8964636 | NC_021167.1    | Ca_kabuli_chr08 | 8964636                 | TT                              | CC                | 1946474265               |
| SNP_P3_97609_8964651 | NC_021167.1    | Ca_kabuli_chr08 | 8964651                 | TT                              | CC                | 1946474267               |
| SNP_P3_97610_8966460 | NC_021167.1    | Ca_kabuli_chr08 | 8966460                 | GG                              | AA                | 1946474268               |
| SNP_P3_97612_8967879 | NC_021167.1    | Ca_kabuli_chr08 | 8967879                 | TT                              | CC                | 1946474270               |
| SNP_P3_97613_8967890 | NC_021167.1    | Ca_kabuli_chr08 | 8967890                 | TT                              | CC                | 1946474271               |
| SNP_P3_97614_8968002 | NC_021167.1    | Ca_kabuli_chr08 | 8968002                 | TT                              | CC                | 1946474273               |
| SNP_P3_97615_8968019 | NC_021167.1    | Ca_kabuli_chr08 | 8968019                 | GG                              | AA                | 1946474274               |
| SNP_P3_97616_8968033 | NC_021167.1    | Ca_kabuli_chr08 | 8968033                 | CC                              | AA                | 1946474276               |
| SNP_P3_97617_8968151 | NC_021167.1    | Ca_kabuli_chr08 | 8968151                 | GG                              | AA                | 1946474277               |
| SNP_P3_97618_8968170 | NC_021167.1    | Ca_kabuli_chr08 | 8968170                 | CC                              | TT                | 1946474279               |
| SNP_P3_97619_8968185 | NC_021167.1    | Ca_kabuli_chr08 | 8968185                 | GG                              | TT                | 1946474280               |
| SNP_P3_97620_8968197 | NC_021167.1    | Ca_kabuli_chr08 | 8968197                 | AA                              | GG                | 1946474282               |
| SNP_P3_97621_8968213 | NC_021167.1    | Ca_kabuli_chr08 | 8968213                 | GG                              | AA                | 1946474283               |
| SNP_P3_97622_8968227 | NC_021167.1    | Ca_kabuli_chr08 | 8968227                 | TT                              | CC                | 1946474285               |
| SNP_P3_97623_8968260 | NC_021167.1    | Ca_kabuli_chr08 | 8968260                 | AA                              | CC                | 1946474286               |
| SNP_P3_97625_8968521 | NC_021167.1    | Ca_kabuli_chr08 | 8968521                 | AA                              | GG                | 1946474288               |
| SNP_P3_97626_8968561 | NC_021167.1    | Ca_kabuli_chr08 | 8968561                 | AA                              | GG                | 1946474289               |
| SNP_P3_97627_8968647 | NC_021167.1    | Ca_kabuli_chr08 | 8968647                 | GG                              | AA                | 1946474291               |
| SNP_P3_97628_8969104 | NC_021167.1    | Ca_kabuli_chr08 | 8969104                 | AA                              | GG                | 1946474292               |
| SNP_P3_97629_8969109 | NC_021167.1    | Ca_kabuli_chr08 | 8969109                 | CC                              | TT                | 1946474294               |
| SNP_P3_97630_8969156 | NC_021167.1    | Ca_kabuli_chr08 | 8969156                 | GG                              | CC                | 1946474295               |
| SNP_P3_97631_8969165 | NC_021167.1    | Ca_kabuli_chr08 | 8969165                 | CC                              | AA                | 1946474297               |
| SNP_P3_97632_8969321 | NC_021167.1    | Ca_kabuli_chr08 | 8969321                 | AA                              | GG                | 1946474298               |

| SNPs IDs             | Chromosome IDs | Chromosomes     | Physical positions (bp) | CDC Frontier (Reference genome) | (Pusa 256 & HPNB) | NCBI SNPdb Accession IDs |
|----------------------|----------------|-----------------|-------------------------|---------------------------------|-------------------|--------------------------|
| SNP_P3_97634_8969373 | NC_021167.1    | Ca_kabuli_chr08 | 8969373                 | TT                              | CC                | 1946474300               |
| SNP_P3_97635_8969390 | NC_021167.1    | Ca_kabuli_chr08 | 8969390                 | CC                              | TT                | 1946474301               |
| SNP_P3_97636_8969393 | NC_021167.1    | Ca_kabuli_chr08 | 8969393                 | CC                              | AA                | 1946474303               |
| SNP_P3_97637_8969404 | NC_021167.1    | Ca_kabuli_chr08 | 8969404                 | GG                              | AA                | 1946474304               |
| SNP_P3_97638_8969577 | NC_021167.1    | Ca_kabuli_chr08 | 8969577                 | TT                              | CC                | 1946474306               |
| SNP_P3_97639_8969584 | NC_021167.1    | Ca_kabuli_chr08 | 8969584                 | AA                              | GG                | 1946474307               |
| SNP_P3_97640_8969595 | NC_021167.1    | Ca_kabuli_chr08 | 8969595                 | TT                              | CC                | 1946474309               |
| SNP_P3_97641_8969649 | NC_021167.1    | Ca_kabuli_chr08 | 8969649                 | GG                              | AA                | 1946474310               |
| SNP_P3_97642_8969662 | NC_021167.1    | Ca_kabuli_chr08 | 8969662                 | AA                              | GG                | 1946474312               |
| SNP_P3_97643_8969727 | NC_021167.1    | Ca_kabuli_chr08 | 8969727                 | GG                              | AA                | 1946474313               |
| SNP_P3_97644_8969728 | NC_021167.1    | Ca_kabuli_chr08 | 8969728                 | TT                              | AA                | 1946474314               |
| SNP_P3_97645_8969729 | NC_021167.1    | Ca_kabuli_chr08 | 8969729                 | TT                              | AA                | 1946474316               |
| SNP_P3_97646_8969768 | NC_021167.1    | Ca_kabuli_chr08 | 8969768                 | AA                              | GG                | 1946474317               |
| SNP_P3_97647_8969904 | NC_021167.1    | Ca_kabuli_chr08 | 8969904                 | TT                              | CC                | 1946474319               |
| SNP_P3_97648_8969973 | NC_021167.1    | Ca_kabuli_chr08 | 8969973                 | TT                              | CC                | 1946474320               |
| SNP_P3_97649_8969977 | NC_021167.1    | Ca_kabuli_chr08 | 8969977                 | AA                              | TT                | 1946474322               |
| SNP_P3_97650_8969982 | NC_021167.1    | Ca_kabuli_chr08 | 8969982                 | GG                              | AA                | 1946474323               |
| SNP_P3_97651_8970202 | NC_021167.1    | Ca_kabuli_chr08 | 8970202                 | AA                              | GG                | 1946474325               |
| SNP_P3_97652_8970218 | NC_021167.1    | Ca_kabuli_chr08 | 8970218                 | GG                              | TT                | 1946474326               |
| SNP_P3_97653_8970414 | NC_021167.1    | Ca_kabuli_chr08 | 8970414                 | CC                              | TT                | 1946474328               |
| SNP_P3_97654_8972337 | NC_021167.1    | Ca_kabuli_chr08 | 8972337                 | CC                              | TT                | 1946474329               |
| SNP_P3_97655_8972350 | NC_021167.1    | Ca_kabuli_chr08 | 8972350                 | AA                              | CC                | 1946474331               |
| SNP_P3_97657_8972384 | NC_021167.1    | Ca_kabuli_chr08 | 8972384                 | AA                              | CC                | 1946474332               |
| SNP_P3_97660_8973146 | NC_021167.1    | Ca_kabuli_chr08 | 8973146                 | AA                              | GG                | 1946474334               |
| SNP_P3_97661_8973147 | NC_021167.1    | Ca_kabuli_chr08 | 8973147                 | GG                              | AA                | 1946474335               |
| SNP_P3_97662_8974273 | NC_021167.1    | Ca_kabuli_chr08 | 8974273                 | TT                              | CC                | 1946474337               |
| SNP_P3_97663_8974744 | NC_021167.1    | Ca_kabuli_chr08 | 8974744                 | TT                              | GG                | 1946474338               |
| SNP_P3_97664_8974745 | NC_021167.1    | Ca_kabuli_chr08 | 8974745                 | TT                              | AA                | 1946474340               |
| SNP_P3_97665_8974751 | NC_021167.1    | Ca_kabuli_chr08 | 8974751                 | AA                              | TT                | 1946474341               |
| SNP_P3_97666_8974762 | NC_021167.1    | Ca_kabuli_chr08 | 8974762                 | GG                              | AA                | 1946474343               |
| SNP_P3_97667_8974769 | NC_021167.1    | Ca_kabuli_chr08 | 8974769                 | AA                              | GG                | 1946474344               |
| SNP_P3_97668_8979311 | NC_021167.1    | Ca_kabuli_chr08 | 8979311                 | CC                              | TT                | 1946474346               |
| SNP_P3_97669_8979468 | NC_021167.1    | Ca_kabuli_chr08 | 8979468                 | GG                              | AA                | 1946474347               |
| SNP_P3_97670_8979488 | NC_021167.1    | Ca_kabuli_chr08 | 8979488                 | TT                              | CC                | 1946474349               |
| SNP_P3_97671_8979498 | NC_021167.1    | Ca_kabuli_chr08 | 8979498                 | TT                              | CC                | 1946474350               |
| SNP_P3_97672_8979565 | NC_021167.1    | Ca_kabuli_chr08 | 8979565                 | AA                              | GG                | 1946474352               |
| SNP_P3_97673_8979607 | NC_021167.1    | Ca_kabuli_chr08 | 8979607                 | AA                              | GG                | 1946474353               |
| SNP_P3_97674_8979614 | NC_021167.1    | Ca_kabuli_chr08 | 8979614                 | AA                              | GG                | 1946474355               |
| SNP_P3_97675_8979818 | NC_021167.1    | Ca_kabuli_chr08 | 8979818                 | TT                              | AA                | 1946474356               |
| SNP_P3_97676_8979831 | NC_021167.1    | Ca_kabuli_chr08 | 8979831                 | TT                              | GG                | 1946474358               |
| SNP_P3_97677_8979845 | NC_021167.1    | Ca_kabuli_chr08 | 8979845                 | TT                              | CC                | 1946474359               |
| SNP_P3_97679_8980563 | NC_021167.1    | Ca_kabuli_chr08 | 8980563                 | TT                              | AA                | 1946474361               |



| SNPs IDs             | Chromosome IDs | Chromosomes     | Physical positions (bp) | CDC Frontier (Reference genome) | (Pusa 256 & HPNB) | NCBI SNPdb Accession IDs |
|----------------------|----------------|-----------------|-------------------------|---------------------------------|-------------------|--------------------------|
| SNP_P3_97680_8980569 | NC_021167.1    | Ca_kabuli_chr08 | 8980569                 | CC                              | TT                | 1946474362               |
| SNP_P3_97681_8980709 | NC_021167.1    | Ca_kabuli_chr08 | 8980709                 | TT                              | GG                | 1946474364               |
| SNP_P3_97682_8980711 | NC_021167.1    | Ca_kabuli_chr08 | 8980711                 | TT                              | AA                | 1946474365               |
| SNP_P3_97683_8980720 | NC_021167.1    | Ca_kabuli_chr08 | 8980720                 | AA                              | GG                | 1946474367               |
| SNP_P3_97684_8980759 | NC_021167.1    | Ca_kabuli_chr08 | 8980759                 | GG                              | AA                | 1946474368               |
| SNP_P3_97685_8980803 | NC_021167.1    | Ca_kabuli_chr08 | 8980803                 | CC                              | TT                | 1946474370               |
| SNP_P3_97686_8980805 | NC_021167.1    | Ca_kabuli_chr08 | 8980805                 | TT                              | CC                | 1946474371               |
| SNP_P3_97687_8980808 | NC_021167.1    | Ca_kabuli_chr08 | 8980808                 | CC                              | TT                | 1946474373               |
| SNP_P3_97688_8980824 | NC_021167.1    | Ca_kabuli_chr08 | 8980824                 | TT                              | CC                | 1946474374               |
| SNP_P3_97689_8980844 | NC_021167.1    | Ca_kabuli_chr08 | 8980844                 | TT                              | CC                | 1946474376               |
| SNP_P3_97690_8981873 | NC_021167.1    | Ca_kabuli_chr08 | 8981873                 | AA                              | GG                | 1946474377               |
| SNP_P3_97691_8982026 | NC_021167.1    | Ca_kabuli_chr08 | 8982026                 | AA                              | GG                | 1946474379               |
| SNP_P3_97692_8982065 | NC_021167.1    | Ca_kabuli_chr08 | 8982065                 | TT                              | CC                | 1946474380               |
| SNP_P3_97693_8982073 | NC_021167.1    | Ca_kabuli_chr08 | 8982073                 | TT                              | CC                | 1946474382               |
| SNP_P3_97694_8982088 | NC_021167.1    | Ca_kabuli_chr08 | 8982088                 | CC                              | TT                | 1946474383               |
| SNP_P3_97695_8982098 | NC_021167.1    | Ca_kabuli_chr08 | 8982098                 | CC                              | TT                | 1946474385               |
| SNP_P3_97696_8982099 | NC_021167.1    | Ca_kabuli_chr08 | 8982099                 | GG                              | TT                | 1946474386               |
| SNP_P3_97697_8982251 | NC_021167.1    | Ca_kabuli_chr08 | 8982251                 | TT                              | AA                | 1946474388               |
| SNP_P3_97698_8982738 | NC_021167.1    | Ca_kabuli_chr08 | 8982738                 | TT                              | CC                | 1946474389               |
| SNP_P3_97699_8982783 | NC_021167.1    | Ca_kabuli_chr08 | 8982783                 | AA                              | TT                | 1946474391               |
| SNP_P3_97700_8994247 | NC_021167.1    | Ca_kabuli_chr08 | 8994247                 | CC                              | TT                | 1946474392               |
| SNP_P3_97701_8994413 | NC_021167.1    | Ca_kabuli_chr08 | 8994413                 | CC                              | TT                | 1946474394               |
| SNP_P3_97702_8994446 | NC_021167.1    | Ca_kabuli_chr08 | 8994446                 | CC                              | TT                | 1946474395               |
| SNP_P3_97703_8994455 | NC_021167.1    | Ca_kabuli_chr08 | 8994455                 | TT                              | GG                | 1946474397               |
| SNP_P3_97704_8994459 | NC_021167.1    | Ca_kabuli_chr08 | 8994459                 | TT                              | CC                | 1946474398               |
| SNP_P3_97705_8994465 | NC_021167.1    | Ca_kabuli_chr08 | 8994465                 | AA                              | TT                | 1946474400               |
| SNP_P3_97707_8994527 | NC_021167.1    | Ca_kabuli_chr08 | 8994527                 | AA                              | CC                | 1946474401               |
| SNP_P3_97708_8994547 | NC_021167.1    | Ca_kabuli_chr08 | 8994547                 | AA                              | GG                | 1946474403               |
| SNP_P3_97709_8994560 | NC_021167.1    | Ca_kabuli_chr08 | 8994560                 | TT                              | AA                | 1946474405               |
| SNP_P3_97710_8994563 | NC_021167.1    | Ca_kabuli_chr08 | 8994563                 | GG                              | CC                | 1946474407               |
| SNP_P3_97711_8994587 | NC_021167.1    | Ca_kabuli_chr08 | 8994587                 | TT                              | CC                | 1946474408               |
| SNP_P3_97712_8994619 | NC_021167.1    | Ca_kabuli_chr08 | 8994619                 | TT                              | CC                | 1946474410               |
| SNP_P3_97713_8994719 | NC_021167.1    | Ca_kabuli_chr08 | 8994719                 | GG                              | AA                | 1946474411               |
| SNP_P3_97714_8995661 | NC_021167.1    | Ca_kabuli_chr08 | 8995661                 | AA                              | GG                | 1946474413               |
| SNP_P3_97717_8995703 | NC_021167.1    | Ca_kabuli_chr08 | 8995703                 | CC                              | GG                | 1946474414               |
| SNP_P3_97718_8997370 | NC_021167.1    | Ca_kabuli_chr08 | 8997370                 | TT                              | GG                | 1946474416               |
| SNP_P3_97721_8998073 | NC_021167.1    | Ca_kabuli_chr08 | 8998073                 | TT                              | GG                | 1946474417               |
| SNP_P3_97722_8998316 | NC_021167.1    | Ca_kabuli_chr08 | 8998316                 | GG                              | AA                | 1946474419               |
| SNP_P3_97723_8998339 | NC_021167.1    | Ca_kabuli_chr08 | 8998339                 | CC                              | TT                | 1946474420               |
| SNP_P3_97724_8998381 | NC_021167.1    | Ca_kabuli_chr08 | 8998381                 | GG                              | CC                | 1946474422               |
| SNP_P3_97725_8998384 | NC_021167.1    | Ca_kabuli_chr08 | 8998384                 | AA                              | TT                | 1946474424               |
| SNP_P3_97726_8998400 | NC_021167.1    | Ca_kabuli_chr08 | 8998400                 | TT                              | CC                | 1946474425               |

| SNPs IDs             | Chromosome IDs | Chromosomes     | Physical positions (bp) | CDC Frontier (Reference genome) | (Pusa 256 & HPNB) | NCBI SNPdb Accession IDs |
|----------------------|----------------|-----------------|-------------------------|---------------------------------|-------------------|--------------------------|
| SNP_P3_97727_8998405 | NC_021167.1    | Ca_kabuli_chr08 | 8998405                 | GG                              | AA                | 1946474426               |
| SNP_P3_97728_8999852 | NC_021167.1    | Ca_kabuli_chr08 | 8999852                 | CC                              | GG                | 1946474428               |
| SNP_P3_97729_8999858 | NC_021167.1    | Ca_kabuli_chr08 | 8999858                 | CC                              | TT                | 1946474429               |
| SNP_P3_97730_8999859 | NC_021167.1    | Ca_kabuli_chr08 | 8999859                 | TT                              | CC                | 1946474431               |
| SNP_P3_97731_8999866 | NC_021167.1    | Ca_kabuli_chr08 | 8999866                 | GG                              | AA                | 1946474432               |
| SNP_P3_97732_8999870 | NC_021167.1    | Ca_kabuli_chr08 | 8999870                 | CC                              | AA                | 1946474434               |
| SNP_P3_97733_8999874 | NC_021167.1    | Ca_kabuli_chr08 | 8999874                 | CC                              | TT                | 1946474435               |
| SNP_P3_97734_8999885 | NC_021167.1    | Ca_kabuli_chr08 | 8999885                 | CC                              | TT                | 1946474437               |
| SNP_P3_97735_8999887 | NC_021167.1    | Ca_kabuli_chr08 | 8999887                 | AA                              | GG                | 1946474438               |
| SNP_P3_97736_9000285 | NC_021167.1    | Ca_kabuli_chr08 | 9000285                 | TT                              | AA                | 1946474440               |
| SNP_P3_97738_9000929 | NC_021167.1    | Ca_kabuli_chr08 | 9000929                 | TT                              | CC                | 1946474441               |
| SNP_P3_97740_9004222 | NC_021167.1    | Ca_kabuli_chr08 | 9004222                 | AA                              | GG                | 1946474443               |
| SNP_P3_97741_9004240 | NC_021167.1    | Ca_kabuli_chr08 | 9004240                 | CC                              | TT                | 1946474444               |
| SNP_P3_97742_9004286 | NC_021167.1    | Ca_kabuli_chr08 | 9004286                 | TT                              | AA                | 1946474446               |
| SNP_P3_97743_9019676 | NC_021167.1    | Ca_kabuli_chr08 | 9019676                 | TT                              | GG                | 1946474447               |
| SNP_P3_97744_9020451 | NC_021167.1    | Ca_kabuli_chr08 | 9020451                 | CC                              | TT                | 1946474449               |
| SNP_P3_97747_9077892 | NC_021167.1    | Ca_kabuli_chr08 | 9077892                 | AA                              | GG                | 1946474450               |
| SNP_P3_97748_9077900 | NC_021167.1    | Ca_kabuli_chr08 | 9077900                 | TT                              | GG                | 1946474452               |
| SNP_P3_97749_9077911 | NC_021167.1    | Ca_kabuli_chr08 | 9077911                 | GG                              | CC                | 1946474453               |
| SNP_P3_97750_9077913 | NC_021167.1    | Ca_kabuli_chr08 | 9077913                 | TT                              | CC                | 1946474455               |
| SNP_P3_97751_9077939 | NC_021167.1    | Ca_kabuli_chr08 | 9077939                 | GG                              | AA                | 1946474456               |
| SNP_P3_97753_9077963 | NC_021167.1    | Ca_kabuli_chr08 | 9077963                 | AA                              | TT                | 1946474458               |
| SNP_P3_97754_9079121 | NC_021167.1    | Ca_kabuli_chr08 | 9079121                 | TT                              | GG                | 1946474459               |
| SNP_P3_97756_9079983 | NC_021167.1    | Ca_kabuli_chr08 | 9079983                 | GG                              | CC                | 1946474461               |
| SNP_P3_97757_9081068 | NC_021167.1    | Ca_kabuli_chr08 | 9081068                 | TT                              | AA                | 1946474462               |
| SNP_P3_97758_9086895 | NC_021167.1    | Ca_kabuli_chr08 | 9086895                 | TT                              | CC                | 1946474464               |
| SNP_P3_97759_9086940 | NC_021167.1    | Ca_kabuli_chr08 | 9086940                 | AA                              | TT                | 1946474465               |
| SNP_P3_97760_9087098 | NC_021167.1    | Ca_kabuli_chr08 | 9087098                 | GG                              | CC                | 1946474467               |
| SNP_P3_97761_9087280 | NC_021167.1    | Ca_kabuli_chr08 | 9087280                 | GG                              | CC                | 1946474468               |
| SNP_P3_97763_9089313 | NC_021167.1    | Ca_kabuli_chr08 | 9089313                 | AA                              | CC                | 1946474470               |
| SNP_P3_97764_9093242 | NC_021167.1    | Ca_kabuli_chr08 | 9093242                 | GG                              | AA                | 1946474471               |
| SNP_P3_97765_9093271 | NC_021167.1    | Ca_kabuli_chr08 | 9093271                 | CC                              | TT                | 1946474473               |
| SNP_P3_97766_9097646 | NC_021167.1    | Ca_kabuli_chr08 | 9097646                 | CC                              | GG                | 1946474475               |
| SNP_P3_97768_9098025 | NC_021167.1    | Ca_kabuli_chr08 | 9098025                 | CC                              | TT                | 1946474476               |
| SNP_P3_97769_9098042 | NC_021167.1    | Ca_kabuli_chr08 | 9098042                 | AA                              | TT                | 1946474478               |
| SNP_P3_97770_9098050 | NC_021167.1    | Ca_kabuli_chr08 | 9098050                 | GG                              | AA                | 1946474479               |
| SNP_P3_97771_9098231 | NC_021167.1    | Ca_kabuli_chr08 | 9098231                 | AA                              | GG                | 1946474481               |
| SNP_P3_97772_9098310 | NC_021167.1    | Ca_kabuli_chr08 | 9098310                 | AA                              | GG                | 1946474482               |
| SNP_P3_97773_9098327 | NC_021167.1    | Ca_kabuli_chr08 | 9098327                 | AA                              | GG                | 1946474484               |
| SNP_P3_97775_9098790 | NC_021167.1    | Ca_kabuli_chr08 | 9098790                 | TT                              | CC                | 1946474485               |
| SNP_P3_97776_9098953 | NC_021167.1    | Ca_kabuli_chr08 | 9098953                 | TT                              | CC                | 1946474487               |
| SNP_P3_97778_9103087 | NC_021167.1    | Ca_kabuli_chr08 | 9103087                 | GG                              | AA                | 1946474489               |

| SNPs IDs             | Chromosome IDs | Chromosomes     | Physical positions (bp) | CDC Frontier (Reference genome) | (Pusa 256 & HPNB) | NCBI SNPdb Accession IDs |
|----------------------|----------------|-----------------|-------------------------|---------------------------------|-------------------|--------------------------|
| SNP_P3_97779_9103697 | NC_021167.1    | Ca_kabuli_chr08 | 9103697                 | GG                              | AA                | 1946474490               |
| SNP_P3_97780_9103978 | NC_021167.1    | Ca_kabuli_chr08 | 9103978                 | CC                              | AA                | 1946474491               |
| SNP_P3_97781_9104317 | NC_021167.1    | Ca_kabuli_chr08 | 9104317                 | TT                              | CC                | 1946474493               |
| SNP_P3_97782_9104361 | NC_021167.1    | Ca_kabuli_chr08 | 9104361                 | AA                              | TT                | 1946474494               |
| SNP_P3_97783_9104370 | NC_021167.1    | Ca_kabuli_chr08 | 9104370                 | CC                              | AA                | 1946474496               |
| SNP_P3_97784_9104380 | NC_021167.1    | Ca_kabuli_chr08 | 9104380                 | GG                              | TT                | 1946474497               |
| SNP_P3_97785_9104402 | NC_021167.1    | Ca_kabuli_chr08 | 9104402                 | AA                              | GG                | 1946474499               |
| SNP_P3_97786_9104518 | NC_021167.1    | Ca_kabuli_chr08 | 9104518                 | AA                              | GG                | 1946474501               |
| SNP_P3_97790_9104811 | NC_021167.1    | Ca_kabuli_chr08 | 9104811                 | AA                              | GG                | 1946474502               |
| SNP_P3_97791_9104858 | NC_021167.1    | Ca_kabuli_chr08 | 9104858                 | TT                              | CC                | 1946474504               |
| SNP_P3_97792_9104874 | NC_021167.1    | Ca_kabuli_chr08 | 9104874                 | AA                              | TT                | 1946474505               |
| SNP_P3_97793_9105266 | NC_021167.1    | Ca_kabuli_chr08 | 9105266                 | CC                              | AA                | 1946474507               |
| SNP_P3_97794_9105462 | NC_021167.1    | Ca_kabuli_chr08 | 9105462                 | GG                              | AA                | 1946474508               |
| SNP_P3_97795_9108147 | NC_021167.1    | Ca_kabuli_chr08 | 9108147                 | GG                              | AA                | 1946474510               |
| SNP_P3_97799_9110535 | NC_021167.1    | Ca_kabuli_chr08 | 9110535                 | GG                              | AA                | 1946474511               |
| SNP_P3_97800_9111109 | NC_021167.1    | Ca_kabuli_chr08 | 9111109                 | AA                              | TT                | 1946474513               |
| SNP_P3_97801_9111110 | NC_021167.1    | Ca_kabuli_chr08 | 9111110                 | AA                              | TT                | 1946474514               |
| SNP_P3_97802_9111111 | NC_021167.1    | Ca_kabuli_chr08 | 9111111                 | AA                              | TT                | 1946474516               |
| SNP_P3_97803_9112274 | NC_021167.1    | Ca_kabuli_chr08 | 9112274                 | AA                              | GG                | 1946474517               |
| SNP_P3_97804_9113146 | NC_021167.1    | Ca_kabuli_chr08 | 9113146                 | GG                              | TT                | 1946474519               |
| SNP_P3_97805_9113338 | NC_021167.1    | Ca_kabuli_chr08 | 9113338                 | CC                              | AA                | 1946474520               |
| SNP_P3_97806_9114559 | NC_021167.1    | Ca_kabuli_chr08 | 9114559                 | CC                              | AA                | 1946474522               |
| SNP_P3_97807_9116123 | NC_021167.1    | Ca_kabuli_chr08 | 9116123                 | CC                              | GG                | 1946474523               |
| SNP_P3_97808_9117115 | NC_021167.1    | Ca_kabuli_chr08 | 9117115                 | GG                              | AA                | 1946474525               |
| SNP_P3_97809_9117528 | NC_021167.1    | Ca_kabuli_chr08 | 9117528                 | AA                              | GG                | 1946474526               |
| SNP_P3_97811_9120436 | NC_021167.1    | Ca_kabuli_chr08 | 9120436                 | AA                              | GG                | 1946474528               |
| SNP_P3_97812_9120446 | NC_021167.1    | Ca_kabuli_chr08 | 9120446                 | AA                              | TT                | 1946474529               |
| SNP_P3_97813_9120617 | NC_021167.1    | Ca_kabuli_chr08 | 9120617                 | CC                              | TT                | 1946474531               |
| SNP_P3_97814_9120855 | NC_021167.1    | Ca_kabuli_chr08 | 9120855                 | CC                              | AA                | 1946474533               |
| SNP_P3_97815_9120890 | NC_021167.1    | Ca_kabuli_chr08 | 9120890                 | TT                              | AA                | 1946474534               |
| SNP_P3_97816_9120941 | NC_021167.1    | Ca_kabuli_chr08 | 9120941                 | GG                              | AA                | 1946474535               |
| SNP_P3_97817_9120994 | NC_021167.1    | Ca_kabuli_chr08 | 9120994                 | AA                              | TT                | 1946474537               |
| SNP_P3_97818_9121280 | NC_021167.1    | Ca_kabuli_chr08 | 9121280                 | GG                              | CC                | 1946474538               |
| SNP_P3_97819_9121338 | NC_021167.1    | Ca_kabuli_chr08 | 9121338                 | GG                              | AA                | 1946474540               |
| SNP_P3_97820_9121350 | NC_021167.1    | Ca_kabuli_chr08 | 9121350                 | CC                              | GG                | 1946474541               |
| SNP_P3_97823_9121958 | NC_021167.1    | Ca_kabuli_chr08 | 9121958                 | TT                              | CC                | 1946474543               |
| SNP_P3_97824_9121960 | NC_021167.1    | Ca_kabuli_chr08 | 9121960                 | TT                              | CC                | 1946474544               |
| SNP_P3_97825_9122000 | NC_021167.1    | Ca_kabuli_chr08 | 9122000                 | TT                              | CC                | 1946474546               |
| SNP_P3_97826_9122467 | NC_021167.1    | Ca_kabuli_chr08 | 9122467                 | AA                              | CC                | 1946474547               |
| SNP_P3_97827_9122636 | NC_021167.1    | Ca_kabuli_chr08 | 9122636                 | AA                              | CC                | 1946474549               |
| SNP_P3_97828_9122645 | NC_021167.1    | Ca_kabuli_chr08 | 9122645                 | GG                              | AA                | 1946474550               |
| SNP_P3_97829_9122653 | NC_021167.1    | Ca_kabuli_chr08 | 9122653                 | AA                              | TT                | 1946474552               |

| SNPs IDs             | Chromosome IDs | Chromosomes     | Physical positions (bp) | CDC Frontier (Reference genome) | (Pusa 256 & HPNB) | NCBI SNPdb Accession IDs |
|----------------------|----------------|-----------------|-------------------------|---------------------------------|-------------------|--------------------------|
| SNP_P3_97830_9122664 | NC_021167.1    | Ca_kabuli_chr08 | 9122664                 | AA                              | GG                | 1946474553               |
| SNP_P3_97831_9122909 | NC_021167.1    | Ca_kabuli_chr08 | 9122909                 | AA                              | GG                | 1946474555               |
| SNP_P3_97832_9124483 | NC_021167.1    | Ca_kabuli_chr08 | 9124483                 | TT                              | CC                | 1946474556               |
| SNP_P3_97833_9125267 | NC_021167.1    | Ca_kabuli_chr08 | 9125267                 | AA                              | TT                | 1946474558               |
| SNP_P3_97834_9125611 | NC_021167.1    | Ca_kabuli_chr08 | 9125611                 | CC                              | TT                | 1946474559               |
| SNP_P3_97836_9127466 | NC_021167.1    | Ca_kabuli_chr08 | 9127466                 | TT                              | CC                | 1946474561               |
| SNP_P3_97837_9127548 | NC_021167.1    | Ca_kabuli_chr08 | 9127548                 | TT                              | CC                | 1946474562               |
| SNP_P3_97838_9127551 | NC_021167.1    | Ca_kabuli_chr08 | 9127551                 | GG                              | AA                | 1946474564               |
| SNP_P3_97839_9127567 | NC_021167.1    | Ca_kabuli_chr08 | 9127567                 | CC                              | GG                | 1946474565               |
| SNP_P3_97840_9127620 | NC_021167.1    | Ca_kabuli_chr08 | 9127620                 | GG                              | AA                | 1946474567               |
| SNP_P3_97842_9129343 | NC_021167.1    | Ca_kabuli_chr08 | 9129343                 | CC                              | GG                | 1946474568               |
| SNP_P3_97843_9131382 | NC_021167.1    | Ca_kabuli_chr08 | 9131382                 | GG                              | TT                | 1946474570               |
| SNP_P3_97844_9131415 | NC_021167.1    | Ca_kabuli_chr08 | 9131415                 | CC                              | TT                | 1946474571               |
| SNP_P3_97846_9131691 | NC_021167.1    | Ca_kabuli_chr08 | 9131691                 | GG                              | AA                | 1946474573               |
| SNP_P3_97847_9131765 | NC_021167.1    | Ca_kabuli_chr08 | 9131765                 | CC                              | TT                | 1946474574               |
| SNP_P3_97848_9131806 | NC_021167.1    | Ca_kabuli_chr08 | 9131806                 | CC                              | AA                | 1946474576               |
| SNP_P3_97849_9134785 | NC_021167.1    | Ca_kabuli_chr08 | 9134785                 | GG                              | AA                | 1946474577               |
| SNP_P3_97850_9134798 | NC_021167.1    | Ca_kabuli_chr08 | 9134798                 | TT                              | AA                | 1946474579               |
| SNP_P3_97852_9134899 | NC_021167.1    | Ca_kabuli_chr08 | 9134899                 | CC                              | TT                | 1946474580               |
| SNP_P3_97853_9135101 | NC_021167.1    | Ca_kabuli_chr08 | 9135101                 | AA                              | CC                | 1946474582               |
| SNP_P3_97854_9135135 | NC_021167.1    | Ca_kabuli_chr08 | 9135135                 | AA                              | GG                | 1946474583               |
| SNP_P3_97855_9135136 | NC_021167.1    | Ca_kabuli_chr08 | 9135136                 | AA                              | TT                | 1946474585               |
| SNP_P3_97856_9135152 | NC_021167.1    | Ca_kabuli_chr08 | 9135152                 | AA                              | GG                | 1946474586               |
| SNP_P3_97857_9135217 | NC_021167.1    | Ca_kabuli_chr08 | 9135217                 | GG                              | AA                | 1946474588               |
| SNP_P3_97858_9135222 | NC_021167.1    | Ca_kabuli_chr08 | 9135222                 | GG                              | AA                | 1946474589               |
| SNP_P3_97859_9135449 | NC_021167.1    | Ca_kabuli_chr08 | 9135449                 | AA                              | TT                | 1946474591               |
| SNP_P3_97860_9135472 | NC_021167.1    | Ca_kabuli_chr08 | 9135472                 | AA                              | TT                | 1946474592               |
| SNP_P3_97861_9135473 | NC_021167.1    | Ca_kabuli_chr08 | 9135473                 | AA                              | GG                | 1946474594               |
| SNP_P3_97862_9135541 | NC_021167.1    | Ca_kabuli_chr08 | 9135541                 | GG                              | AA                | 1946474595               |
| SNP_P3_97864_9136259 | NC_021167.1    | Ca_kabuli_chr08 | 9136259                 | CC                              | TT                | 1946474597               |
| SNP_P3_97865_9136957 | NC_021167.1    | Ca_kabuli_chr08 | 9136957                 | TT                              | CC                | 1946474598               |
| SNP_P3_97866_9136970 | NC_021167.1    | Ca_kabuli_chr08 | 9136970                 | CC                              | TT                | 1946474600               |
| SNP_P3_97867_9136972 | NC_021167.1    | Ca_kabuli_chr08 | 9136972                 | GG                              | AA                | 1946474601               |
| SNP_P3_97868_9137853 | NC_021167.1    | Ca_kabuli_chr08 | 9137853                 | GG                              | AA                | 1946474603               |
| SNP_P3_97869_9137879 | NC_021167.1    | Ca_kabuli_chr08 | 9137879                 | CC                              | AA                | 1946474604               |
| SNP_P3_97870_9139239 | NC_021167.1    | Ca_kabuli_chr08 | 9139239                 | AA                              | GG                | 1946474606               |
| SNP_P3_97871_9146697 | NC_021167.1    | Ca_kabuli_chr08 | 9146697                 | AA                              | GG                | 1946474607               |
| SNP_P3_97872_9146954 | NC_021167.1    | Ca_kabuli_chr08 | 9146954                 | AA                              | GG                | 1946474609               |
| SNP_P3_97873_9149460 | NC_021167.1    | Ca_kabuli_chr08 | 9149460                 | CC                              | GG                | 1946474610               |
| SNP_P3_97874_9149609 | NC_021167.1    | Ca_kabuli_chr08 | 9149609                 | GG                              | TT                | 1946474612               |
| SNP_P3_97875_9149683 | NC_021167.1    | Ca_kabuli_chr08 | 9149683                 | GG                              | AA                | 1946474613               |
| SNP_P3_97876_9149710 | NC_021167.1    | Ca_kabuli_chr08 | 9149710                 | AA                              | TT                | 1946474615               |

| SNPs IDs             | Chromosome IDs | Chromosomes     | Physical positions (bp) | CDC Frontier (Reference genome) | (Pusa 256 & HPNB) | NCBI SNPdb Accession IDs |
|----------------------|----------------|-----------------|-------------------------|---------------------------------|-------------------|--------------------------|
| SNP_P3_97878_9149717 | NC_021167.1    | Ca_kabuli_chr08 | 9149717                 | TT                              | CC                | 1946474617               |
| SNP_P3_97879_9149751 | NC_021167.1    | Ca_kabuli_chr08 | 9149751                 | GG                              | CC                | 1946474618               |
| SNP_P3_97880_9153670 | NC_021167.1    | Ca_kabuli_chr08 | 9153670                 | AA                              | CC                | 1946474620               |
| SNP_P3_97882_9153734 | NC_021167.1    | Ca_kabuli_chr08 | 9153734                 | CC                              | TT                | 1946474621               |
| SNP_P3_97883_9153738 | NC_021167.1    | Ca_kabuli_chr08 | 9153738                 | AA                              | CC                | 1946474623               |
| SNP_P3_97884_9153739 | NC_021167.1    | Ca_kabuli_chr08 | 9153739                 | CC                              | TT                | 1946474624               |
| SNP_P3_97885_9153771 | NC_021167.1    | Ca_kabuli_chr08 | 9153771                 | AA                              | GG                | 1946474626               |
| SNP_P3_97886_9153783 | NC_021167.1    | Ca_kabuli_chr08 | 9153783                 | GG                              | AA                | 1946474627               |
| SNP_P3_97887_9154199 | NC_021167.1    | Ca_kabuli_chr08 | 9154199                 | TT                              | AA                | 1946474629               |
| SNP_P3_97888_9154219 | NC_021167.1    | Ca_kabuli_chr08 | 9154219                 | CC                              | TT                | 1946474630               |
| SNP_P3_97889_9154221 | NC_021167.1    | Ca_kabuli_chr08 | 9154221                 | AA                              | GG                | 1946474632               |
| SNP_P3_97891_9154264 | NC_021167.1    | Ca_kabuli_chr08 | 9154264                 | CC                              | TT                | 1946474633               |
| SNP_P3_97892_9154372 | NC_021167.1    | Ca_kabuli_chr08 | 9154372                 | TT                              | CC                | 1946474635               |
| SNP_P3_97893_9154432 | NC_021167.1    | Ca_kabuli_chr08 | 9154432                 | CC                              | TT                | 1946474636               |
| SNP_P3_97895_9154636 | NC_021167.1    | Ca_kabuli_chr08 | 9154636                 | CC                              | AA                | 1946474637               |
| SNP_P3_97896_9154640 | NC_021167.1    | Ca_kabuli_chr08 | 9154640                 | TT                              | CC                | 1946474639               |
| SNP_P3_97897_9154655 | NC_021167.1    | Ca_kabuli_chr08 | 9154655                 | GG                              | AA                | 1946474640               |
| SNP_P3_97898_9154729 | NC_021167.1    | Ca_kabuli_chr08 | 9154729                 | CC                              | TT                | 1946474642               |
| SNP_P3_97899_9155013 | NC_021167.1    | Ca_kabuli_chr08 | 9155013                 | TT                              | AA                | 1946474644               |
| SNP_P3_97900_9155030 | NC_021167.1    | Ca_kabuli_chr08 | 9155030                 | AA                              | GG                | 1946474645               |
| SNP_P3_97901_9155054 | NC_021167.1    | Ca_kabuli_chr08 | 9155054                 | AA                              | GG                | 1946474646               |
| SNP_P3_97902_9156950 | NC_021167.1    | Ca_kabuli_chr08 | 9156950                 | GG                              | CC                | 1946474648               |
| SNP_P3_97903_9157677 | NC_021167.1    | Ca_kabuli_chr08 | 9157677                 | TT                              | CC                | 1946474649               |
| SNP_P3_97904_9157702 | NC_021167.1    | Ca_kabuli_chr08 | 9157702                 | TT                              | AA                | 1946474651               |
| SNP_P3_97905_9157862 | NC_021167.1    | Ca_kabuli_chr08 | 9157862                 | CC                              | TT                | 1946474652               |
| SNP_P3_97906_9157995 | NC_021167.1    | Ca_kabuli_chr08 | 9157995                 | CC                              | GG                | 1946474654               |
| SNP_P3_97907_9158407 | NC_021167.1    | Ca_kabuli_chr08 | 9158407                 | GG                              | TT                | 1946474655               |
| SNP_P3_97908_9158418 | NC_021167.1    | Ca_kabuli_chr08 | 9158418                 | CC                              | TT                | 1946474657               |
| SNP_P3_97910_9158589 | NC_021167.1    | Ca_kabuli_chr08 | 9158589                 | CC                              | GG                | 1946474658               |
| SNP_P3_97912_9168876 | NC_021167.1    | Ca_kabuli_chr08 | 9168876                 | CC                              | AA                | 1946474660               |
| SNP_P3_97913_9170474 | NC_021167.1    | Ca_kabuli_chr08 | 9170474                 | AA                              | TT                | 1946474663               |
| SNP_P3_97914_9170505 | NC_021167.1    | Ca_kabuli_chr08 | 9170505                 | TT                              | AA                | 1946474665               |
| SNP_P3_97915_9170840 | NC_021167.1    | Ca_kabuli_chr08 | 9170840                 | CC                              | AA                | 1946474666               |
| SNP_P3_97916_9172566 | NC_021167.1    | Ca_kabuli_chr08 | 9172566                 | AA                              | GG                | 1946474668               |
| SNP_P3_97919_9183817 | NC_021167.1    | Ca_kabuli_chr08 | 9183817                 | TT                              | CC                | 1946474669               |
| SNP_P3_97921_9184740 | NC_021167.1    | Ca_kabuli_chr08 | 9184740                 | TT                              | CC                | 1946474671               |
| SNP_P3_97922_9184803 | NC_021167.1    | Ca_kabuli_chr08 | 9184803                 | AA                              | TT                | 1946474672               |
| SNP_P3_97923_9184819 | NC_021167.1    | Ca_kabuli_chr08 | 9184819                 | GG                              | CC                | 1946474674               |
| SNP_P3_97924_9185018 | NC_021167.1    | Ca_kabuli_chr08 | 9185018                 | AA                              | TT                | 1946474675               |
| SNP_P3_97925_9185071 | NC_021167.1    | Ca_kabuli_chr08 | 9185071                 | GG                              | AA                | 1946474677               |
| SNP_P3_97926_9189444 | NC_021167.1    | Ca_kabuli_chr08 | 9189444                 | GG                              | AA                | 1946474678               |
| SNP_P3_97928_9189622 | NC_021167.1    | Ca_kabuli_chr08 | 9189622                 | TT                              | GG                | 1946474680               |

| SNPs IDs             | Chromosome IDs | Chromosomes     | Physical positions (bp) | CDC Frontier (Reference genome) | (Pusa 256 & HPNB) | NCBI SNPdb Accession IDs |
|----------------------|----------------|-----------------|-------------------------|---------------------------------|-------------------|--------------------------|
| SNP_P3_97929_9189675 | NC_021167.1    | Ca_kabuli_chr08 | 9189675                 | CC                              | AA                | 1946474681               |
| SNP_P3_97930_9189741 | NC_021167.1    | Ca_kabuli_chr08 | 9189741                 | TT                              | CC                | 1946474683               |
| SNP_P3_97931_9194742 | NC_021167.1    | Ca_kabuli_chr08 | 9194742                 | GG                              | TT                | 1946474684               |
| SNP_P3_97932_9195648 | NC_021167.1    | Ca_kabuli_chr08 | 9195648                 | AA                              | TT                | 1946474686               |
| SNP_P3_97933_9197105 | NC_021167.1    | Ca_kabuli_chr08 | 9197105                 | CC                              | AA                | 1946474687               |
| SNP_P3_97934_9198939 | NC_021167.1    | Ca_kabuli_chr08 | 9198939                 | AA                              | GG                | 1946474689               |
| SNP_P3_97935_9199321 | NC_021167.1    | Ca_kabuli_chr08 | 9199321                 | GG                              | AA                | 1946474690               |
| SNP_P3_97936_9200190 | NC_021167.1    | Ca_kabuli_chr08 | 9200190                 | GG                              | AA                | 1946474692               |
| SNP_P3_97938_9201667 | NC_021167.1    | Ca_kabuli_chr08 | 9201667                 | AA                              | TT                | 1946474693               |
| SNP_P3_97940_9201746 | NC_021167.1    | Ca_kabuli_chr08 | 9201746                 | AA                              | CC                | 1946474695               |
| SNP_P3_97941_9201890 | NC_021167.1    | Ca_kabuli_chr08 | 9201890                 | TT                              | AA                | 1946474696               |
| SNP_P3_97942_9202000 | NC_021167.1    | Ca_kabuli_chr08 | 9202000                 | GG                              | CC                | 1946474698               |
| SNP_P3_97943_9207135 | NC_021167.1    | Ca_kabuli_chr08 | 9207135                 | TT                              | GG                | 1946474699               |
| SNP_P3_97944_9207378 | NC_021167.1    | Ca_kabuli_chr08 | 9207378                 | AA                              | GG                | 1946474701               |
| SNP_P3_97945_9207379 | NC_021167.1    | Ca_kabuli_chr08 | 9207379                 | GG                              | AA                | 1946474702               |
| SNP_P3_97946_9207420 | NC_021167.1    | Ca_kabuli_chr08 | 9207420                 | GG                              | AA                | 1946474704               |
| SNP_P3_97947_9207692 | NC_021167.1    | Ca_kabuli_chr08 | 9207692                 | TT                              | CC                | 1946474705               |
| SNP_P3_97948_9208324 | NC_021167.1    | Ca_kabuli_chr08 | 9208324                 | GG                              | AA                | 1946474707               |
| SNP_P3_97949_9208338 | NC_021167.1    | Ca_kabuli_chr08 | 9208338                 | AA                              | CC                | 1946474708               |
| SNP_P3_97950_9208350 | NC_021167.1    | Ca_kabuli_chr08 | 9208350                 | GG                              | AA                | 1946474710               |
| SNP_P3_97951_9208380 | NC_021167.1    | Ca_kabuli_chr08 | 9208380                 | AA                              | GG                | 1946474711               |
| SNP_P3_97953_9208540 | NC_021167.1    | Ca_kabuli_chr08 | 9208540                 | AA                              | GG                | 1946474713               |
| SNP_P3_97954_9212030 | NC_021167.1    | Ca_kabuli_chr08 | 9212030                 | AA                              | GG                | 1946474714               |
| SNP_P3_97955_9212033 | NC_021167.1    | Ca_kabuli_chr08 | 9212033                 | CC                              | TT                | 1946474716               |
| SNP_P3_97956_9213463 | NC_021167.1    | Ca_kabuli_chr08 | 9213463                 | TT                              | AA                | 1946474717               |
| SNP_P3_97957_9213977 | NC_021167.1    | Ca_kabuli_chr08 | 9213977                 | GG                              | AA                | 1946474719               |
| SNP_P3_97958_9213989 | NC_021167.1    | Ca_kabuli_chr08 | 9213989                 | TT                              | CC                | 1946474720               |
| SNP_P3_97960_9214236 | NC_021167.1    | Ca_kabuli_chr08 | 9214236                 | CC                              | TT                | 1946474721               |
| SNP_P3_97961_9214255 | NC_021167.1    | Ca_kabuli_chr08 | 9214255                 | CC                              | TT                | 1946474723               |
| SNP_P3_97962_9214283 | NC_021167.1    | Ca_kabuli_chr08 | 9214283                 | TT                              | GG                | 1946474724               |
| SNP_P3_97963_9214466 | NC_021167.1    | Ca_kabuli_chr08 | 9214466                 | CC                              | AA                | 1946474726               |
| SNP_P3_97964_9214482 | NC_021167.1    | Ca_kabuli_chr08 | 9214482                 | CC                              | TT                | 1946474727               |
| SNP_P3_97965_9215208 | NC_021167.1    | Ca_kabuli_chr08 | 9215208                 | CC                              | TT                | 1946474729               |
| SNP_P3_97966_9215216 | NC_021167.1    | Ca_kabuli_chr08 | 9215216                 | TT                              | CC                | 1946474730               |
| SNP_P3_97967_9216325 | NC_021167.1    | Ca_kabuli_chr08 | 9216325                 | TT                              | CC                | 1946474732               |
| SNP_P3_97968_9216663 | NC_021167.1    | Ca_kabuli_chr08 | 9216663                 | AA                              | GG                | 1946474733               |
| SNP_P3_97969_9216671 | NC_021167.1    | Ca_kabuli_chr08 | 9216671                 | AA                              | GG                | 1946474735               |
| SNP_P3_97970_9217261 | NC_021167.1    | Ca_kabuli_chr08 | 9217261                 | AA                              | CC                | 1946474736               |
| SNP_P3_97971_9217473 | NC_021167.1    | Ca_kabuli_chr08 | 9217473                 | CC                              | AA                | 1946474738               |
| SNP_P3_97974_9218280 | NC_021167.1    | Ca_kabuli_chr08 | 9218280                 | CC                              | TT                | 1946474739               |
| SNP_P3_97975_9221526 | NC_021167.1    | Ca_kabuli_chr08 | 9221526                 | TT                              | AA                | 1946474741               |
| SNP_P3_97976_9221539 | NC_021167.1    | Ca_kabuli_chr08 | 9221539                 | AA                              | GG                | 1946474742               |

| SNPs IDs             | Chromosome IDs | Chromosomes     | Physical positions (bp) | CDC Frontier (Reference genome) | (Pusa 256 & HPNB) | NCBI SNPdb Accession IDs |
|----------------------|----------------|-----------------|-------------------------|---------------------------------|-------------------|--------------------------|
| SNP_P3_97977_9234057 | NC_021167.1    | Ca_kabuli_chr08 | 9234057                 | AA                              | TT                | 1946474743               |
| SNP_P3_97978_9234236 | NC_021167.1    | Ca_kabuli_chr08 | 9234236                 | TT                              | AA                | 1946474745               |
| SNP_P3_97979_9234261 | NC_021167.1    | Ca_kabuli_chr08 | 9234261                 | AA                              | CC                | 1946474746               |
| SNP_P3_97980_9255439 | NC_021167.1    | Ca_kabuli_chr08 | 9255439                 | GG                              | TT                | 1946474748               |
| SNP_P3_97981_9265765 | NC_021167.1    | Ca_kabuli_chr08 | 9265765                 | GG                              | AA                | 1946474749               |
| SNP_P3_97982_9268581 | NC_021167.1    | Ca_kabuli_chr08 | 9268581                 | AA                              | CC                | 1946474751               |
| SNP_P3_97983_9268608 | NC_021167.1    | Ca_kabuli_chr08 | 9268608                 | CC                              | TT                | 1946474752               |
| SNP_P3_97984_9273778 | NC_021167.1    | Ca_kabuli_chr08 | 9273778                 | AA                              | CC                | 1946474754               |
| SNP_P3_97985_9274098 | NC_021167.1    | Ca_kabuli_chr08 | 9274098                 | CC                              | TT                | 1946474755               |
| SNP_P3_97986_9274139 | NC_021167.1    | Ca_kabuli_chr08 | 9274139                 | TT                              | CC                | 1946474757               |
| SNP_P3_97987_9274183 | NC_021167.1    | Ca_kabuli_chr08 | 9274183                 | TT                              | CC                | 1946474758               |
| SNP_P3_97988_9274348 | NC_021167.1    | Ca_kabuli_chr08 | 9274348                 | AA                              | CC                | 1946474760               |
| SNP_P3_97989_9274390 | NC_021167.1    | Ca_kabuli_chr08 | 9274390                 | AA                              | CC                | 1946474761               |
| SNP_P3_97990_9274395 | NC_021167.1    | Ca_kabuli_chr08 | 9274395                 | AA                              | TT                | 1946474763               |
| SNP_P3_97991_9274396 | NC_021167.1    | Ca_kabuli_chr08 | 9274396                 | TT                              | CC                | 1946474764               |
| SNP_P3_97992_9274398 | NC_021167.1    | Ca_kabuli_chr08 | 9274398                 | CC                              | TT                | 1946474765               |
| SNP_P3_97993_9274399 | NC_021167.1    | Ca_kabuli_chr08 | 9274399                 | TT                              | AA                | 1946474767               |
| SNP_P3_97994_9274401 | NC_021167.1    | Ca_kabuli_chr08 | 9274401                 | CC                              | GG                | 1946474768               |
| SNP_P3_97995_9274402 | NC_021167.1    | Ca_kabuli_chr08 | 9274402                 | AA                              | TT                | 1946474770               |
| SNP_P3_97996_9274404 | NC_021167.1    | Ca_kabuli_chr08 | 9274404                 | CC                              | TT                | 1946474771               |
| SNP_P3_97997_9277023 | NC_021167.1    | Ca_kabuli_chr08 | 9277023                 | GG                              | AA                | 1946474773               |
| SNP_P3_97999_9310541 | NC_021167.1    | Ca_kabuli_chr08 | 9310541                 | CC                              | TT                | 1946474774               |
| SNP_P3_98001_9324064 | NC_021167.1    | Ca_kabuli_chr08 | 9324064                 | CC                              | TT                | 1946474776               |
| SNP_P3_98002_9324074 | NC_021167.1    | Ca_kabuli_chr08 | 9324074                 | CC                              | TT                | 1946474777               |
| SNP_P3_98003_9324097 | NC_021167.1    | Ca_kabuli_chr08 | 9324097                 | TT                              | CC                | 1946474778               |
| SNP_P3_98004_9324099 | NC_021167.1    | Ca_kabuli_chr08 | 9324099                 | CC                              | AA                | 1946474780               |
| SNP_P3_98005_9324274 | NC_021167.1    | Ca_kabuli_chr08 | 9324274                 | AA                              | GG                | 1946474781               |
| SNP_P3_98006_9324337 | NC_021167.1    | Ca_kabuli_chr08 | 9324337                 | CC                              | TT                | 1946474783               |
| SNP_P3_98007_9334796 | NC_021167.1    | Ca_kabuli_chr08 | 9334796                 | TT                              | AA                | 1946474784               |
| SNP_P3_98008_9335298 | NC_021167.1    | Ca_kabuli_chr08 | 9335298                 | AA                              | TT                | 1946474786               |
| SNP_P3_98009_9354645 | NC_021167.1    | Ca_kabuli_chr08 | 9354645                 | GG                              | AA                | 1946474787               |
| SNP_P3_98012_9357763 | NC_021167.1    | Ca_kabuli_chr08 | 9357763                 | CC                              | TT                | 1946474789               |
| SNP_P3_98013_9363966 | NC_021167.1    | Ca_kabuli_chr08 | 9363966                 | CC                              | TT                | 1946474790               |
| SNP_P3_98014_9363967 | NC_021167.1    | Ca_kabuli_chr08 | 9363967                 | AA                              | GG                | 1946474792               |
| SNP_P3_98016_9364107 | NC_021167.1    | Ca_kabuli_chr08 | 9364107                 | AA                              | GG                | 1946474793               |
| SNP_P3_98017_9364294 | NC_021167.1    | Ca_kabuli_chr08 | 9364294                 | AA                              | CC                | 1946474795               |
| SNP_P3_98018_9364298 | NC_021167.1    | Ca_kabuli_chr08 | 9364298                 | CC                              | GG                | 1946474796               |
| SNP_P3_98020_9364512 | NC_021167.1    | Ca_kabuli_chr08 | 9364512                 | AA                              | CC                | 1946474798               |
| SNP_P3_98022_9364587 | NC_021167.1    | Ca_kabuli_chr08 | 9364587                 | TT                              | CC                | 1946474799               |
| SNP_P3_98023_9364596 | NC_021167.1    | Ca_kabuli_chr08 | 9364596                 | AA                              | GG                | 1946474801               |
| SNP_P3_98024_9364597 | NC_021167.1    | Ca_kabuli_chr08 | 9364597                 | TT                              | AA                | 1946474802               |
| SNP_P3_98025_9364620 | NC_021167.1    | Ca_kabuli_chr08 | 9364620                 | TT                              | GG                | 1946474803               |

| SNPs IDs             | Chromosome IDs | Chromosomes     | Physical positions (bp) | CDC Frontier (Reference genome) | (Pusa 256 & HPNB) | NCBI SNPdb Accession IDs |
|----------------------|----------------|-----------------|-------------------------|---------------------------------|-------------------|--------------------------|
| SNP_P3_98026_9367712 | NC_021167.1    | Ca_kabuli_chr08 | 9367712                 | TT                              | CC                | 1946474805               |
| SNP_P3_98027_9371012 | NC_021167.1    | Ca_kabuli_chr08 | 9371012                 | AA                              | GG                | 1946474806               |
| SNP_P3_98028_9373376 | NC_021167.1    | Ca_kabuli_chr08 | 9373376                 | AA                              | CC                | 1946474808               |
| SNP_P3_98029_9373441 | NC_021167.1    | Ca_kabuli_chr08 | 9373441                 | TT                              | CC                | 1946474809               |
| SNP_P3_98030_9373725 | NC_021167.1    | Ca_kabuli_chr08 | 9373725                 | GG                              | TT                | 1946474811               |
| SNP_P3_98031_9375640 | NC_021167.1    | Ca_kabuli_chr08 | 9375640                 | AA                              | CC                | 1946474812               |
| SNP_P3_98032_9377241 | NC_021167.1    | Ca_kabuli_chr08 | 9377241                 | TT                              | AA                | 1946474814               |
| SNP_P3_98033_9378157 | NC_021167.1    | Ca_kabuli_chr08 | 9378157                 | CC                              | TT                | 1946474815               |
| SNP_P3_98034_9379046 | NC_021167.1    | Ca_kabuli_chr08 | 9379046                 | TT                              | CC                | 1946474816               |
| SNP_P3_98035_9379077 | NC_021167.1    | Ca_kabuli_chr08 | 9379077                 | TT                              | CC                | 1946474818               |
| SNP_P3_98036_9379080 | NC_021167.1    | Ca_kabuli_chr08 | 9379080                 | GG                              | AA                | 1946474819               |
| SNP_P3_98037_9379085 | NC_021167.1    | Ca_kabuli_chr08 | 9379085                 | AA                              | GG                | 1946474821               |
| SNP_P3_98038_9379275 | NC_021167.1    | Ca_kabuli_chr08 | 9379275                 | CC                              | AA                | 1946474822               |
| SNP_P3_98039_9379467 | NC_021167.1    | Ca_kabuli_chr08 | 9379467                 | AA                              | GG                | 1946474824               |
| SNP_P3_98040_9379468 | NC_021167.1    | Ca_kabuli_chr08 | 9379468                 | GG                              | AA                | 1946474825               |
| SNP_P3_98041_9379578 | NC_021167.1    | Ca_kabuli_chr08 | 9379578                 | GG                              | TT                | 1946474827               |
| SNP_P3_98042_9379634 | NC_021167.1    | Ca_kabuli_chr08 | 9379634                 | CC                              | AA                | 1946474828               |
| SNP_P3_98043_9380115 | NC_021167.1    | Ca_kabuli_chr08 | 9380115                 | AA                              | GG                | 1946474830               |
| SNP_P3_98044_9387303 | NC_021167.1    | Ca_kabuli_chr08 | 9387303                 | CC                              | TT                | 1946474831               |
| SNP_P3_98045_9389818 | NC_021167.1    | Ca_kabuli_chr08 | 9389818                 | CC                              | TT                | 1946474833               |
| SNP_P3_98046_9392853 | NC_021167.1    | Ca_kabuli_chr08 | 9392853                 | CC                              | TT                | 1946474834               |
| SNP_P3_98047_9393063 | NC_021167.1    | Ca_kabuli_chr08 | 9393063                 | CC                              | TT                | 1946474836               |
| SNP_P3_98048_9393082 | NC_021167.1    | Ca_kabuli_chr08 | 9393082                 | AA                              | GG                | 1946474837               |
| SNP_P3_98049_9393671 | NC_021167.1    | Ca_kabuli_chr08 | 9393671                 | GG                              | CC                | 1946474839               |
| SNP_P3_98050_9397189 | NC_021167.1    | Ca_kabuli_chr08 | 9397189                 | CC                              | TT                | 1946474840               |
| SNP_P3_98051_9397773 | NC_021167.1    | Ca_kabuli_chr08 | 9397773                 | CC                              | GG                | 1946474841               |
| SNP_P3_98053_9399405 | NC_021167.1    | Ca_kabuli_chr08 | 9399405                 | GG                              | AA                | 1946474843               |
| SNP_P3_98054_9402075 | NC_021167.1    | Ca_kabuli_chr08 | 9402075                 | CC                              | GG                | 1946474844               |
| SNP_P3_98055_9402408 | NC_021167.1    | Ca_kabuli_chr08 | 9402408                 | TT                              | CC                | 1946474846               |
| SNP_P3_98057_9403642 | NC_021167.1    | Ca_kabuli_chr08 | 9403642                 | AA                              | TT                | 1946474848               |
| SNP_P3_98059_9403986 | NC_021167.1    | Ca_kabuli_chr08 | 9403986                 | TT                              | CC                | 1946474849               |
| SNP_P3_98060_9405631 | NC_021167.1    | Ca_kabuli_chr08 | 9405631                 | TT                              | AA                | 1946474851               |
| SNP_P3_98061_9405653 | NC_021167.1    | Ca_kabuli_chr08 | 9405653                 | TT                              | AA                | 1946474852               |
| SNP_P3_98062_9407099 | NC_021167.1    | Ca_kabuli_chr08 | 9407099                 | TT                              | CC                | 1946474854               |
| SNP_P3_98063_9407232 | NC_021167.1    | Ca_kabuli_chr08 | 9407232                 | GG                              | TT                | 1946474855               |
| SNP_P3_98064_9407320 | NC_021167.1    | Ca_kabuli_chr08 | 9407320                 | AA                              | TT                | 1946474857               |
| SNP_P3_98065_9416622 | NC_021167.1    | Ca_kabuli_chr08 | 9416622                 | AA                              | CC                | 1946474858               |
| SNP_P3_98066_9950362 | NC_021167.1    | Ca_kabuli_chr08 | 9950362                 | AA                              | GG                | 1946474860               |
| SNP_P3_98067_9950803 | NC_021167.1    | Ca_kabuli_chr08 | 9950803                 | CC                              | TT                | 1946474861               |
| SNP_P3_98068_9950828 | NC_021167.1    | Ca_kabuli_chr08 | 9950828                 | TT                              | AA                | 1946474862               |
| SNP_P3_98070_9950954 | NC_021167.1    | Ca_kabuli_chr08 | 9950954                 | TT                              | CC                | 1946474864               |
| SNP_P3_98071_9951643 | NC_021167.1    | Ca_kabuli_chr08 | 9951643                 | GG                              | AA                | 1946474865               |



| SNPs IDs             | Chromosome IDs | Chromosomes     | Physical positions (bp) | CDC Frontier (Reference genome) | (Pusa 256 & HPNB) | NCBI SNPdb Accession IDs |
|----------------------|----------------|-----------------|-------------------------|---------------------------------|-------------------|--------------------------|
| SNP_P3_98072_9951664 | NC_021167.1    | Ca_kabuli_chr08 | 9951664                 | GG                              | TT                | 1946474867               |
| SNP_P3_98074_9953395 | NC_021167.1    | Ca_kabuli_chr08 | 9953395                 | CC                              | AA                | 1946474868               |
| SNP_P3_98076_9957133 | NC_021167.1    | Ca_kabuli_chr08 | 9957133                 | CC                              | AA                | 1946474870               |
| SNP_P3_98077_9957165 | NC_021167.1    | Ca_kabuli_chr08 | 9957165                 | CC                              | TT                | 1946474871               |
| SNP_P3_98078_9957573 | NC_021167.1    | Ca_kabuli_chr08 | 9957573                 | GG                              | TT                | 1946474873               |
| SNP_P3_98079_9957574 | NC_021167.1    | Ca_kabuli_chr08 | 9957574                 | TT                              | AA                | 1946474874               |
| SNP_P3_98080_9957675 | NC_021167.1    | Ca_kabuli_chr08 | 9957675                 | CC                              | TT                | 1946474876               |
| SNP_P3_98081_9957717 | NC_021167.1    | Ca_kabuli_chr08 | 9957717                 | GG                              | AA                | 1946474877               |
| SNP_P3_98082_9958331 | NC_021167.1    | Ca_kabuli_chr08 | 9958331                 | AA                              | GG                | 1946474879               |
| SNP_P3_98083_9958631 | NC_021167.1    | Ca_kabuli_chr08 | 9958631                 | AA                              | CC                | 1946474880               |
| SNP_P3_98084_9958859 | NC_021167.1    | Ca_kabuli_chr08 | 9958859                 | GG                              | AA                | 1946474882               |
| SNP_P3_98085_9959002 | NC_021167.1    | Ca_kabuli_chr08 | 9959002                 | CC                              | TT                | 1946474883               |
| SNP_P3_98086_9959035 | NC_021167.1    | Ca_kabuli_chr08 | 9959035                 | AA                              | CC                | 1946474885               |
| SNP_P3_98087_9959121 | NC_021167.1    | Ca_kabuli_chr08 | 9959121                 | TT                              | GG                | 1946474886               |
| SNP_P3_98088_9959695 | NC_021167.1    | Ca_kabuli_chr08 | 9959695                 | AA                              | TT                | 1946474888               |
| SNP_P3_98089_9959696 | NC_021167.1    | Ca_kabuli_chr08 | 9959696                 | CC                              | TT                | 1946474889               |
| SNP_P3_98090_9959809 | NC_021167.1    | Ca_kabuli_chr08 | 9959809                 | CC                              | TT                | 1946474891               |
| SNP_P3_98091_9959943 | NC_021167.1    | Ca_kabuli_chr08 | 9959943                 | GG                              | AA                | 1946474892               |
| SNP_P3_98092_9959949 | NC_021167.1    | Ca_kabuli_chr08 | 9959949                 | AA                              | GG                | 1946474894               |
| SNP_P3_98093_9959951 | NC_021167.1    | Ca_kabuli_chr08 | 9959951                 | TT                              | CC                | 1946474895               |
| SNP_P3_98096_9960326 | NC_021167.1    | Ca_kabuli_chr08 | 9960326                 | GG                              | AA                | 1946474897               |
| SNP_P3_98097_9960472 | NC_021167.1    | Ca_kabuli_chr08 | 9960472                 | CC                              | TT                | 1946474898               |
| SNP_P3_98098_9960475 | NC_021167.1    | Ca_kabuli_chr08 | 9960475                 | TT                              | GG                | 1946474899               |
| SNP_P3_98099_9960495 | NC_021167.1    | Ca_kabuli_chr08 | 9960495                 | AA                              | TT                | 1946474901               |
| SNP_P3_98100_9960506 | NC_021167.1    | Ca_kabuli_chr08 | 9960506                 | AA                              | TT                | 1946474902               |
| SNP_P3_98101_9960511 | NC_021167.1    | Ca_kabuli_chr08 | 9960511                 | AA                              | CC                | 1946474904               |
| SNP_P3_98102_9960573 | NC_021167.1    | Ca_kabuli_chr08 | 9960573                 | AA                              | GG                | 1946474906               |
| SNP_P3_98103_9964459 | NC_021167.1    | Ca_kabuli_chr08 | 9964459                 | GG                              | AA                | 1946474907               |
| SNP_P3_98104_9964599 | NC_021167.1    | Ca_kabuli_chr08 | 9964599                 | AA                              | TT                | 1946474909               |
| SNP_P3_98105_9964677 | NC_021167.1    | Ca_kabuli_chr08 | 9964677                 | TT                              | CC                | 1946474910               |
| SNP_P3_98106_9964722 | NC_021167.1    | Ca_kabuli_chr08 | 9964722                 | GG                              | AA                | 1946474912               |
| SNP_P3_98107_9964726 | NC_021167.1    | Ca_kabuli_chr08 | 9964726                 | CC                              | TT                | 1946474913               |
| SNP_P3_98108_9969160 | NC_021167.1    | Ca_kabuli_chr08 | 9969160                 | AA                              | TT                | 1946474915               |
| SNP_P3_98109_9969170 | NC_021167.1    | Ca_kabuli_chr08 | 9969170                 | CC                              | GG                | 1946474916               |
| SNP_P3_98110_9969171 | NC_021167.1    | Ca_kabuli_chr08 | 9969171                 | TT                              | CC                | 1946474918               |
| SNP_P3_98111_9969212 | NC_021167.1    | Ca_kabuli_chr08 | 9969212                 | CC                              | TT                | 1946474919               |
| SNP_P3_98112_9969426 | NC_021167.1    | Ca_kabuli_chr08 | 9969426                 | GG                              | AA                | 1946474921               |
| SNP_P3_98113_9971267 | NC_021167.1    | Ca_kabuli_chr08 | 9971267                 | AA                              | CC                | 1946474922               |
| SNP_P3_98114_9972126 | NC_021167.1    | Ca_kabuli_chr08 | 9972126                 | TT                              | AA                | 1946474924               |
| SNP_P3_98115_9974279 | NC_021167.1    | Ca_kabuli_chr08 | 9974279                 | CC                              | TT                | 1946474925               |
| SNP_P3_98116_9974315 | NC_021167.1    | Ca_kabuli_chr08 | 9974315                 | CC                              | TT                | 1946474926               |
| SNP_P3_98117_9974323 | NC_021167.1    | Ca_kabuli_chr08 | 9974323                 | AA                              | CC                | 1946474928               |

| SNPs IDs              | Chromosome IDs | Chromosomes     | Physical positions (bp) | CDC Frontier (Reference genome) | (Pusa 256 & HPNB) | NCBI SNPdb Accession IDs |
|-----------------------|----------------|-----------------|-------------------------|---------------------------------|-------------------|--------------------------|
| SNP_P3_98118_9974325  | NC_021167.1    | Ca_kabuli_chr08 | 9974325                 | AA                              | CC                | 1946474929               |
| SNP_P3_98119_9974326  | NC_021167.1    | Ca_kabuli_chr08 | 9974326                 | GG                              | AA                | 1946474931               |
| SNP_P3_98120_9974417  | NC_021167.1    | Ca_kabuli_chr08 | 9974417                 | AA                              | TT                | 1946474932               |
| SNP_P3_98121_9974601  | NC_021167.1    | Ca_kabuli_chr08 | 9974601                 | CC                              | TT                | 1946474934               |
| SNP_P3_98122_9974624  | NC_021167.1    | Ca_kabuli_chr08 | 9974624                 | TT                              | CC                | 1946474935               |
| SNP_P3_98123_9974654  | NC_021167.1    | Ca_kabuli_chr08 | 9974654                 | CC                              | AA                | 1946474937               |
| SNP_P3_98124_9974718  | NC_021167.1    | Ca_kabuli_chr08 | 9974718                 | AA                              | GG                | 1946474938               |
| SNP_P3_98125_9974764  | NC_021167.1    | Ca_kabuli_chr08 | 9974764                 | GG                              | TT                | 1946474940               |
| SNP_P3_98126_9974766  | NC_021167.1    | Ca_kabuli_chr08 | 9974766                 | GG                              | AA                | 1946474941               |
| SNP_P3_98127_9974772  | NC_021167.1    | Ca_kabuli_chr08 | 9974772                 | AA                              | CC                | 1946474943               |
| SNP_P3_98128_9975099  | NC_021167.1    | Ca_kabuli_chr08 | 9975099                 | AA                              | GG                | 1946474944               |
| SNP_P3_98129_9975110  | NC_021167.1    | Ca_kabuli_chr08 | 9975110                 | TT                              | CC                | 1946474946               |
| SNP_P3_98130_9975467  | NC_021167.1    | Ca_kabuli_chr08 | 9975467                 | AA                              | TT                | 1946474947               |
| SNP_P3_98131_9998104  | NC_021167.1    | Ca_kabuli_chr08 | 9998104                 | AA                              | GG                | 1946474949               |
| SNP_P3_98132_10023279 | NC_021167.1    | Ca_kabuli_chr08 | 10023279                | AA                              | GG                | 1946474950               |
| SNP_P3_98133_10023295 | NC_021167.1    | Ca_kabuli_chr08 | 10023295                | AA                              | GG                | 1946474952               |
| SNP_P3_98134_10023302 | NC_021167.1    | Ca_kabuli_chr08 | 10023302                | TT                              | CC                | 1946474953               |
| SNP_P3_98136_10023306 | NC_021167.1    | Ca_kabuli_chr08 | 10023306                | TT                              | CC                | 1946474955               |
| SNP_P3_98138_10061285 | NC_021167.1    | Ca_kabuli_chr08 | 10061285                | GG                              | AA                | 1946474956               |
| SNP_P3_98139_10063615 | NC_021167.1    | Ca_kabuli_chr08 | 10063615                | CC                              | TT                | 1946474957               |
| SNP_P3_98140_10064478 | NC_021167.1    | Ca_kabuli_chr08 | 10064478                | AA                              | GG                | 1946474959               |
| SNP_P3_98141_10064810 | NC_021167.1    | Ca_kabuli_chr08 | 10064810                | TT                              | CC                | 1946474960               |
| SNP_P3_98142_10064878 | NC_021167.1    | Ca_kabuli_chr08 | 10064878                | AA                              | GG                | 1946474962               |
| SNP_P3_98143_10069102 | NC_021167.1    | Ca_kabuli_chr08 | 10069102                | AA                              | TT                | 1946474963               |
| SNP_P3_98145_10084019 | NC_021167.1    | Ca_kabuli_chr08 | 10084019                | AA                              | TT                | 1946474965               |
| SNP_P3_98149_10152177 | NC_021167.1    | Ca_kabuli_chr08 | 10152177                | TT                              | GG                | 1946474966               |
| SNP_P3_98151_10217358 | NC_021167.1    | Ca_kabuli_chr08 | 10217358                | AA                              | GG                | 1946474968               |
| SNP_P3_98152_10217367 | NC_021167.1    | Ca_kabuli_chr08 | 10217367                | AA                              | GG                | 1946474969               |
| SNP_P3_98153_10217407 | NC_021167.1    | Ca_kabuli_chr08 | 10217407                | GG                              | TT                | 1946474971               |
| SNP_P3_98154_10217410 | NC_021167.1    | Ca_kabuli_chr08 | 10217410                | CC                              | TT                | 1946474972               |
| SNP_P3_98155_10225085 | NC_021167.1    | Ca_kabuli_chr08 | 10225085                | CC                              | TT                | 1946474974               |
| SNP_P3_98156_10247946 | NC_021167.1    | Ca_kabuli_chr08 | 10247946                | AA                              | TT                | 1946474975               |
| SNP_P3_98159_10350257 | NC_021167.1    | Ca_kabuli_chr08 | 10350257                | TT                              | AA                | 1946474977               |
| SNP_P3_98160_10356097 | NC_021167.1    | Ca_kabuli_chr08 | 10356097                | GG                              | AA                | 1946474978               |
| SNP_P3_98161_10356101 | NC_021167.1    | Ca_kabuli_chr08 | 10356101                | TT                              | CC                | 1946474980               |
| SNP_P3_98162_10356170 | NC_021167.1    | Ca_kabuli_chr08 | 10356170                | AA                              | GG                | 1946474981               |
| SNP_P3_98163_10356255 | NC_021167.1    | Ca_kabuli_chr08 | 10356255                | CC                              | TT                | 1946474983               |
| SNP_P3_98164_10356291 | NC_021167.1    | Ca_kabuli_chr08 | 10356291                | AA                              | GG                | 1946474984               |
| SNP_P3_98166_10357277 | NC_021167.1    | Ca_kabuli_chr08 | 10357277                | GG                              | AA                | 1946474986               |
| SNP_P3_98167_10357298 | NC_021167.1    | Ca_kabuli_chr08 | 10357298                | GG                              | AA                | 1946474987               |
| SNP_P3_98168_10362494 | NC_021167.1    | Ca_kabuli_chr08 | 10362494                | CC                              | AA                | 1946474988               |
| SNP_P3_98169_10363394 | NC_021167.1    | Ca_kabuli_chr08 | 10363394                | GG                              | AA                | 1946474990               |

| SNPs IDs              | Chromosome IDs | Chromosomes     | Physical positions (bp) | CDC Frontier (Reference genome) | (Pusa 256 & HPNB) | NCBI SNPdb Accession IDs |
|-----------------------|----------------|-----------------|-------------------------|---------------------------------|-------------------|--------------------------|
| SNP_P3_98170_10363410 | NC_021167.1    | Ca_kabuli_chr08 | 10363410                | GG                              | AA                | 1946474991               |
| SNP_P3_98171_10363499 | NC_021167.1    | Ca_kabuli_chr08 | 10363499                | AA                              | TT                | 1946474993               |
| SNP_P3_98172_10363532 | NC_021167.1    | Ca_kabuli_chr08 | 10363532                | AA                              | GG                | 1946474994               |
| SNP_P3_98173_10363823 | NC_021167.1    | Ca_kabuli_chr08 | 10363823                | AA                              | CC                | 1946474996               |
| SNP_P3_98174_10363903 | NC_021167.1    | Ca_kabuli_chr08 | 10363903                | TT                              | GG                | 1946474997               |
| SNP_P3_98175_10363923 | NC_021167.1    | Ca_kabuli_chr08 | 10363923                | GG                              | CC                | 1946474999               |
| SNP_P3_98176_10363924 | NC_021167.1    | Ca_kabuli_chr08 | 10363924                | GG                              | AA                | 1946475000               |
| SNP_P3_98177_10363948 | NC_021167.1    | Ca_kabuli_chr08 | 10363948                | AA                              | TT                | 1946475002               |
| SNP_P3_98178_10363984 | NC_021167.1    | Ca_kabuli_chr08 | 10363984                | AA                              | GG                | 1946475003               |
| SNP_P3_98179_10364122 | NC_021167.1    | Ca_kabuli_chr08 | 10364122                | GG                              | AA                | 1946475005               |
| SNP_P3_98180_10364269 | NC_021167.1    | Ca_kabuli_chr08 | 10364269                | TT                              | GG                | 1946475006               |
| SNP_P3_98181_10364276 | NC_021167.1    | Ca_kabuli_chr08 | 10364276                | TT                              | CC                | 1946475008               |
| SNP_P3_98182_10364411 | NC_021167.1    | Ca_kabuli_chr08 | 10364411                | GG                              | AA                | 1946475009               |
| SNP_P3_98183_10364556 | NC_021167.1    | Ca_kabuli_chr08 | 10364556                | CC                              | TT                | 1946475011               |
| SNP_P3_98184_10365789 | NC_021167.1    | Ca_kabuli_chr08 | 10365789                | GG                              | AA                | 1946475012               |
| SNP_P3_98185_10365889 | NC_021167.1    | Ca_kabuli_chr08 | 10365889                | TT                              | AA                | 1946475013               |
| SNP_P3_98186_10365922 | NC_021167.1    | Ca_kabuli_chr08 | 10365922                | GG                              | CC                | 1946475015               |
| SNP_P3_98187_10366334 | NC_021167.1    | Ca_kabuli_chr08 | 10366334                | AA                              | GG                | 1946475016               |
| SNP_P3_98188_10366385 | NC_021167.1    | Ca_kabuli_chr08 | 10366385                | AA                              | TT                | 1946475018               |
| SNP_P3_98189_10366387 | NC_021167.1    | Ca_kabuli_chr08 | 10366387                | CC                              | TT                | 1946475019               |
| SNP_P3_98190_10366476 | NC_021167.1    | Ca_kabuli_chr08 | 10366476                | GG                              | CC                | 1946475021               |
| SNP_P3_98191_10366486 | NC_021167.1    | Ca_kabuli_chr08 | 10366486                | AA                              | GG                | 1946475022               |
| SNP_P3_98193_10366760 | NC_021167.1    | Ca_kabuli_chr08 | 10366760                | GG                              | TT                | 1946475024               |
| SNP_P3_98195_10366874 | NC_021167.1    | Ca_kabuli_chr08 | 10366874                | TT                              | CC                | 1946475025               |
| SNP_P3_98196_10366880 | NC_021167.1    | Ca_kabuli_chr08 | 10366880                | TT                              | CC                | 1946475027               |
| SNP_P3_98197_10366912 | NC_021167.1    | Ca_kabuli_chr08 | 10366912                | CC                              | AA                | 1946475028               |
| SNP_P3_98198_10366921 | NC_021167.1    | Ca_kabuli_chr08 | 10366921                | CC                              | TT                | 1946475030               |
| SNP_P3_98199_10366974 | NC_021167.1    | Ca_kabuli_chr08 | 10366974                | AA                              | GG                | 1946475031               |
| SNP_P3_98200_10366984 | NC_021167.1    | Ca_kabuli_chr08 | 10366984                | AA                              | GG                | 1946475033               |
| SNP_P3_98201_10367281 | NC_021167.1    | Ca_kabuli_chr08 | 10367281                | TT                              | CC                | 1946475034               |
| SNP_P3_98202_10367387 | NC_021167.1    | Ca_kabuli_chr08 | 10367387                | GG                              | TT                | 1946475036               |
| SNP_P3_98203_10367521 | NC_021167.1    | Ca_kabuli_chr08 | 10367521                | GG                              | AA                | 1946475037               |
| SNP_P3_98204_10367594 | NC_021167.1    | Ca_kabuli_chr08 | 10367594                | CC                              | TT                | 1946475039               |
| SNP_P3_98205_10373894 | NC_021167.1    | Ca_kabuli_chr08 | 10373894                | CC                              | AA                | 1946475040               |
| SNP_P3_98206_10373908 | NC_021167.1    | Ca_kabuli_chr08 | 10373908                | CC                              | TT                | 1946475042               |
| SNP_P3_98207_10373924 | NC_021167.1    | Ca_kabuli_chr08 | 10373924                | GG                              | AA                | 1946475043               |
| SNP_P3_98208_10373927 | NC_021167.1    | Ca_kabuli_chr08 | 10373927                | TT                              | CC                | 1946475045               |
| SNP_P3_98209_10374229 | NC_021167.1    | Ca_kabuli_chr08 | 10374229                | TT                              | CC                | 1946475046               |
| SNP_P3_98210_10374319 | NC_021167.1    | Ca_kabuli_chr08 | 10374319                | CC                              | TT                | 1946475048               |
| SNP_P3_98211_10374825 | NC_021167.1    | Ca_kabuli_chr08 | 10374825                | AA                              | GG                | 1946475049               |
| SNP_P3_98212_10374959 | NC_021167.1    | Ca_kabuli_chr08 | 10374959                | TT                              | CC                | 1946475051               |
| SNP_P3_98213_10374988 | NC_021167.1    | Ca_kabuli_chr08 | 10374988                | TT                              | GG                | 1946475052               |

| SNPs IDs              | Chromosome IDs | Chromosomes     | Physical positions (bp) | CDC Frontier (Reference genome) | (Pusa 256 & HPNB) | NCBI SNPdb Accession IDs |
|-----------------------|----------------|-----------------|-------------------------|---------------------------------|-------------------|--------------------------|
| SNP_P3_98214_10375081 | NC_021167.1    | Ca_kabuli_chr08 | 10375081                | TT                              | CC                | 1946475054               |
| SNP_P3_98215_10375101 | NC_021167.1    | Ca_kabuli_chr08 | 10375101                | TT                              | CC                | 1946475055               |
| SNP_P3_98216_10375316 | NC_021167.1    | Ca_kabuli_chr08 | 10375316                | GG                              | AA                | 1946475057               |
| SNP_P3_98217_10375449 | NC_021167.1    | Ca_kabuli_chr08 | 10375449                | GG                              | TT                | 1946475058               |
| SNP_P3_98218_10375504 | NC_021167.1    | Ca_kabuli_chr08 | 10375504                | CC                              | AA                | 1946475060               |
| SNP_P3_98219_10375520 | NC_021167.1    | Ca_kabuli_chr08 | 10375520                | AA                              | GG                | 1946475061               |
| SNP_P3_98220_10375545 | NC_021167.1    | Ca_kabuli_chr08 | 10375545                | AA                              | TT                | 1946475063               |
| SNP_P3_98221_10375554 | NC_021167.1    | Ca_kabuli_chr08 | 10375554                | AA                              | TT                | 1946475064               |
| SNP_P3_98222_10375568 | NC_021167.1    | Ca_kabuli_chr08 | 10375568                | CC                              | TT                | 1946475066               |
| SNP_P3_98224_10375602 | NC_021167.1    | Ca_kabuli_chr08 | 10375602                | AA                              | GG                | 1946475067               |
| SNP_P3_98225_10375652 | NC_021167.1    | Ca_kabuli_chr08 | 10375652                | AA                              | TT                | 1946475068               |
| SNP_P3_98226_10375654 | NC_021167.1    | Ca_kabuli_chr08 | 10375654                | TT                              | CC                | 1946475070               |
| SNP_P3_98227_10375679 | NC_021167.1    | Ca_kabuli_chr08 | 10375679                | TT                              | CC                | 1946475071               |
| SNP_P3_98228_10375682 | NC_021167.1    | Ca_kabuli_chr08 | 10375682                | CC                              | GG                | 1946475073               |
| SNP_P3_98229_10375686 | NC_021167.1    | Ca_kabuli_chr08 | 10375686                | AA                              | GG                | 1946475074               |
| SNP_P3_98230_10375690 | NC_021167.1    | Ca_kabuli_chr08 | 10375690                | CC                              | TT                | 1946475076               |
| SNP_P3_98231_10375734 | NC_021167.1    | Ca_kabuli_chr08 | 10375734                | TT                              | AA                | 1946475077               |
| SNP_P3_98232_10375752 | NC_021167.1    | Ca_kabuli_chr08 | 10375752                | CC                              | TT                | 1946475079               |
| SNP_P3_98233_10375805 | NC_021167.1    | Ca_kabuli_chr08 | 10375805                | GG                              | AA                | 1946475080               |
| SNP_P3_98234_10375832 | NC_021167.1    | Ca_kabuli_chr08 | 10375832                | GG                              | AA                | 1946475082               |
| SNP_P3_98235_10375858 | NC_021167.1    | Ca_kabuli_chr08 | 10375858                | TT                              | CC                | 1946475083               |
| SNP_P3_98236_10375910 | NC_021167.1    | Ca_kabuli_chr08 | 10375910                | TT                              | CC                | 1946475084               |
| SNP_P3_98237_10376028 | NC_021167.1    | Ca_kabuli_chr08 | 10376028                | AA                              | GG                | 1946475086               |
| SNP_P3_98238_10376030 | NC_021167.1    | Ca_kabuli_chr08 | 10376030                | AA                              | GG                | 1946475087               |
| SNP_P3_98239_10376057 | NC_021167.1    | Ca_kabuli_chr08 | 10376057                | GG                              | AA                | 1946475089               |
| SNP_P3_98240_10376116 | NC_021167.1    | Ca_kabuli_chr08 | 10376116                | AA                              | GG                | 1946475090               |
| SNP_P3_98241_10376121 | NC_021167.1    | Ca_kabuli_chr08 | 10376121                | CC                              | TT                | 1946475092               |
| SNP_P3_98242_10376145 | NC_021167.1    | Ca_kabuli_chr08 | 10376145                | AA                              | GG                | 1946475093               |
| SNP_P3_98243_10376175 | NC_021167.1    | Ca_kabuli_chr08 | 10376175                | AA                              | CC                | 1946475095               |
| SNP_P3_98244_10376461 | NC_021167.1    | Ca_kabuli_chr08 | 10376461                | CC                              | AA                | 1946475096               |
| SNP_P3_98245_10376490 | NC_021167.1    | Ca_kabuli_chr08 | 10376490                | TT                              | CC                | 1946475098               |
| SNP_P3_98246_10376568 | NC_021167.1    | Ca_kabuli_chr08 | 10376568                | TT                              | CC                | 1946475099               |
| SNP_P3_98247_10376672 | NC_021167.1    | Ca_kabuli_chr08 | 10376672                | GG                              | AA                | 1946475101               |
| SNP_P3_98248_10376680 | NC_021167.1    | Ca_kabuli_chr08 | 10376680                | AA                              | TT                | 1946475102               |
| SNP_P3_98249_10378478 | NC_021167.1    | Ca_kabuli_chr08 | 10378478                | CC                              | TT                | 1946475104               |
| SNP_P3_98250_10378514 | NC_021167.1    | Ca_kabuli_chr08 | 10378514                | GG                              | AA                | 1946475105               |
| SNP_P3_98251_10378517 | NC_021167.1    | Ca_kabuli_chr08 | 10378517                | GG                              | AA                | 1946475107               |
| SNP_P3_98252_10378558 | NC_021167.1    | Ca_kabuli_chr08 | 10378558                | CC                              | AA                | 1946475108               |
| SNP_P3_98253_10378561 | NC_021167.1    | Ca_kabuli_chr08 | 10378561                | CC                              | TT                | 1946475109               |
| SNP_P3_98254_10378649 | NC_021167.1    | Ca_kabuli_chr08 | 10378649                | AA                              | GG                | 1946475111               |
| SNP_P3_98255_10378883 | NC_021167.1    | Ca_kabuli_chr08 | 10378883                | GG                              | AA                | 1946475112               |
| SNP_P3_98256_10378969 | NC_021167.1    | Ca_kabuli_chr08 | 10378969                | AA                              | TT                | 1946475114               |

| SNPs IDs              | Chromosome IDs | Chromosomes     | Physical positions (bp) | CDC Frontier (Reference genome) | (Pusa 256 & HPNB) | NCBI SNPdb Accession IDs |
|-----------------------|----------------|-----------------|-------------------------|---------------------------------|-------------------|--------------------------|
| SNP_P3_98257_10380434 | NC_021167.1    | Ca_kabuli_chr08 | 10380434                | TT                              | CC                | 1946475115               |
| SNP_P3_98258_10380490 | NC_021167.1    | Ca_kabuli_chr08 | 10380490                | CC                              | TT                | 1946475117               |
| SNP_P3_98259_10380595 | NC_021167.1    | Ca_kabuli_chr08 | 10380595                | AA                              | GG                | 1946475118               |
| SNP_P3_98260_10380756 | NC_021167.1    | Ca_kabuli_chr08 | 10380756                | AA                              | GG                | 1946475120               |
| SNP_P3_98261_10380779 | NC_021167.1    | Ca_kabuli_chr08 | 10380779                | AA                              | CC                | 1946475121               |
| SNP_P3_98262_10380785 | NC_021167.1    | Ca_kabuli_chr08 | 10380785                | AA                              | GG                | 1946475123               |
| SNP_P3_98263_10380803 | NC_021167.1    | Ca_kabuli_chr08 | 10380803                | GG                              | AA                | 1946475124               |
| SNP_P3_98264_10380836 | NC_021167.1    | Ca_kabuli_chr08 | 10380836                | CC                              | TT                | 1946475126               |
| SNP_P3_98265_10380864 | NC_021167.1    | Ca_kabuli_chr08 | 10380864                | AA                              | CC                | 1946475127               |
| SNP_P3_98266_10380901 | NC_021167.1    | Ca_kabuli_chr08 | 10380901                | GG                              | AA                | 1946475129               |
| SNP_P3_98267_10380925 | NC_021167.1    | Ca_kabuli_chr08 | 10380925                | CC                              | TT                | 1946475130               |
| SNP_P3_98268_10380968 | NC_021167.1    | Ca_kabuli_chr08 | 10380968                | GG                              | AA                | 1946475131               |
| SNP_P3_98269_10381105 | NC_021167.1    | Ca_kabuli_chr08 | 10381105                | TT                              | CC                | 1946475133               |
| SNP_P3_98270_10381169 | NC_021167.1    | Ca_kabuli_chr08 | 10381169                | AA                              | GG                | 1946475134               |
| SNP_P3_98271_10381175 | NC_021167.1    | Ca_kabuli_chr08 | 10381175                | TT                              | GG                | 1946475136               |
| SNP_P3_98272_10381189 | NC_021167.1    | Ca_kabuli_chr08 | 10381189                | TT                              | CC                | 1946475137               |
| SNP_P3_98273_10381216 | NC_021167.1    | Ca_kabuli_chr08 | 10381216                | GG                              | AA                | 1946475139               |
| SNP_P3_98274_10381234 | NC_021167.1    | Ca_kabuli_chr08 | 10381234                | TT                              | CC                | 1946475140               |
| SNP_P3_98275_10381256 | NC_021167.1    | Ca_kabuli_chr08 | 10381256                | TT                              | CC                | 1946475142               |
| SNP_P3_98276_10381288 | NC_021167.1    | Ca_kabuli_chr08 | 10381288                | TT                              | GG                | 1946475143               |
| SNP_P3_98277_10381307 | NC_021167.1    | Ca_kabuli_chr08 | 10381307                | CC                              | AA                | 1946475145               |
| SNP_P3_98278_10381453 | NC_021167.1    | Ca_kabuli_chr08 | 10381453                | CC                              | TT                | 1946475147               |
| SNP_P3_98279_10381473 | NC_021167.1    | Ca_kabuli_chr08 | 10381473                | TT                              | CC                | 1946475149               |
| SNP_P3_98280_10381502 | NC_021167.1    | Ca_kabuli_chr08 | 10381502                | GG                              | AA                | 1946475150               |
| SNP_P3_98281_10381522 | NC_021167.1    | Ca_kabuli_chr08 | 10381522                | AA                              | CC                | 1946475152               |
| SNP_P3_98283_10381706 | NC_021167.1    | Ca_kabuli_chr08 | 10381706                | AA                              | GG                | 1946475153               |
| SNP_P3_98284_10381708 | NC_021167.1    | Ca_kabuli_chr08 | 10381708                | GG                              | AA                | 1946475155               |
| SNP_P3_98285_10381782 | NC_021167.1    | Ca_kabuli_chr08 | 10381782                | CC                              | TT                | 1946475156               |
| SNP_P3_98286_10386287 | NC_021167.1    | Ca_kabuli_chr08 | 10386287                | TT                              | CC                | 1946475158               |
| SNP_P3_98287_10386304 | NC_021167.1    | Ca_kabuli_chr08 | 10386304                | CC                              | TT                | 1946475159               |
| SNP_P3_98288_10386950 | NC_021167.1    | Ca_kabuli_chr08 | 10386950                | TT                              | GG                | 1946475161               |
| SNP_P3_98289_10386962 | NC_021167.1    | Ca_kabuli_chr08 | 10386962                | AA                              | CC                | 1946475162               |
| SNP_P3_98290_10386964 | NC_021167.1    | Ca_kabuli_chr08 | 10386964                | AA                              | TT                | 1946475164               |
| SNP_P3_98291_10387025 | NC_021167.1    | Ca_kabuli_chr08 | 10387025                | TT                              | CC                | 1946475165               |
| SNP_P3_98292_10387074 | NC_021167.1    | Ca_kabuli_chr08 | 10387074                | AA                              | GG                | 1946475167               |
| SNP_P3_98293_10387189 | NC_021167.1    | Ca_kabuli_chr08 | 10387189                | TT                              | AA                | 1946475169               |
| SNP_P3_98294_10387233 | NC_021167.1    | Ca_kabuli_chr08 | 10387233                | TT                              | CC                | 1946475170               |
| SNP_P3_98295_10387236 | NC_021167.1    | Ca_kabuli_chr08 | 10387236                | TT                              | GG                | 1946475172               |
| SNP_P3_98296_10387238 | NC_021167.1    | Ca_kabuli_chr08 | 10387238                | TT                              | AA                | 1946475173               |
| SNP_P3_98297_10387267 | NC_021167.1    | Ca_kabuli_chr08 | 10387267                | AA                              | GG                | 1946475175               |
| SNP_P3_98298_10387292 | NC_021167.1    | Ca_kabuli_chr08 | 10387292                | GG                              | TT                | 1946475176               |
| SNP_P3_98299_10387321 | NC_021167.1    | Ca_kabuli_chr08 | 10387321                | TT                              | GG                | 1946475178               |

| SNPs IDs              | Chromosome IDs | Chromosomes     | Physical positions (bp) | CDC Frontier (Reference genome) | (Pusa 256 & HPNB) | NCBI SNPdb Accession IDs |
|-----------------------|----------------|-----------------|-------------------------|---------------------------------|-------------------|--------------------------|
| SNP_P3_98300_10387409 | NC_021167.1    | Ca_kabuli_chr08 | 10387409                | AA                              | CC                | 1946475180               |
| SNP_P3_98301_10387436 | NC_021167.1    | Ca_kabuli_chr08 | 10387436                | TT                              | GG                | 1946475181               |
| SNP_P3_98302_10387454 | NC_021167.1    | Ca_kabuli_chr08 | 10387454                | AA                              | GG                | 1946475182               |
| SNP_P3_98303_10387630 | NC_021167.1    | Ca_kabuli_chr08 | 10387630                | GG                              | AA                | 1946475184               |
| SNP_P3_98304_10387693 | NC_021167.1    | Ca_kabuli_chr08 | 10387693                | CC                              | TT                | 1946475185               |
| SNP_P3_98305_10387698 | NC_021167.1    | Ca_kabuli_chr08 | 10387698                | AA                              | TT                | 1946475187               |
| SNP_P3_98306_10387738 | NC_021167.1    | Ca_kabuli_chr08 | 10387738                | GG                              | CC                | 1946475188               |
| SNP_P3_98307_10394957 | NC_021167.1    | Ca_kabuli_chr08 | 10394957                | AA                              | TT                | 1946475190               |
| SNP_P3_98308_10400586 | NC_021167.1    | Ca_kabuli_chr08 | 10400586                | TT                              | CC                | 1946475191               |
| SNP_P3_98310_10412284 | NC_021167.1    | Ca_kabuli_chr08 | 10412284                | GG                              | AA                | 1946475193               |
| SNP_P3_98311_10412347 | NC_021167.1    | Ca_kabuli_chr08 | 10412347                | CC                              | TT                | 1946475194               |
| SNP_P3_98313_10412632 | NC_021167.1    | Ca_kabuli_chr08 | 10412632                | GG                              | TT                | 1946475196               |
| SNP_P3_98314_10412651 | NC_021167.1    | Ca_kabuli_chr08 | 10412651                | AA                              | TT                | 1946475198               |
| SNP_P3_98315_10419129 | NC_021167.1    | Ca_kabuli_chr08 | 10419129                | CC                              | TT                | 1946475199               |
| SNP_P3_98316_10420078 | NC_021167.1    | Ca_kabuli_chr08 | 10420078                | TT                              | CC                | 1946475201               |
| SNP_P3_98317_10428461 | NC_021167.1    | Ca_kabuli_chr08 | 10428461                | GG                              | AA                | 1946475203               |
| SNP_P3_98318_10442089 | NC_021167.1    | Ca_kabuli_chr08 | 10442089                | TT                              | CC                | 1946475204               |
| SNP_P3_98319_10450858 | NC_021167.1    | Ca_kabuli_chr08 | 10450858                | AA                              | TT                | 1946475206               |
| SNP_P3_98321_10503210 | NC_021167.1    | Ca_kabuli_chr08 | 10503210                | GG                              | CC                | 1946475207               |
| SNP_P3_98322_10509107 | NC_021167.1    | Ca_kabuli_chr08 | 10509107                | CC                              | TT                | 1946475208               |
| SNP_P3_98323_10509130 | NC_021167.1    | Ca_kabuli_chr08 | 10509130                | AA                              | CC                | 1946475210               |
| SNP_P3_98324_10509134 | NC_021167.1    | Ca_kabuli_chr08 | 10509134                | CC                              | TT                | 1946475211               |
| SNP_P3_98325_10509137 | NC_021167.1    | Ca_kabuli_chr08 | 10509137                | TT                              | AA                | 1946475213               |
| SNP_P3_98326_10509186 | NC_021167.1    | Ca_kabuli_chr08 | 10509186                | CC                              | GG                | 1946475214               |
| SNP_P3_98327_10509191 | NC_021167.1    | Ca_kabuli_chr08 | 10509191                | TT                              | CC                | 1946475216               |
| SNP_P3_98328_10509198 | NC_021167.1    | Ca_kabuli_chr08 | 10509198                | TT                              | CC                | 1946475217               |
| SNP_P3_98329_10509582 | NC_021167.1    | Ca_kabuli_chr08 | 10509582                | GG                              | AA                | 1946475219               |
| SNP_P3_98330_10575678 | NC_021167.1    | Ca_kabuli_chr08 | 10575678                | TT                              | CC                | 1946475220               |
| SNP_P3_98331_10575785 | NC_021167.1    | Ca_kabuli_chr08 | 10575785                | GG                              | AA                | 1946475222               |
| SNP_P3_98332_10575801 | NC_021167.1    | Ca_kabuli_chr08 | 10575801                | GG                              | AA                | 1946475224               |
| SNP_P3_98333_10578200 | NC_021167.1    | Ca_kabuli_chr08 | 10578200                | AA                              | GG                | 1946475225               |
| SNP_P3_98334_10578209 | NC_021167.1    | Ca_kabuli_chr08 | 10578209                | TT                              | GG                | 1946475227               |
| SNP_P3_98335_10589752 | NC_021167.1    | Ca_kabuli_chr08 | 10589752                | CC                              | TT                | 1946475228               |
| SNP_P3_98336_10589808 | NC_021167.1    | Ca_kabuli_chr08 | 10589808                | GG                              | AA                | 1946475230               |
| SNP_P3_98337_10590011 | NC_021167.1    | Ca_kabuli_chr08 | 10590011                | CC                              | GG                | 1946475231               |
| SNP_P3_98338_10590020 | NC_021167.1    | Ca_kabuli_chr08 | 10590020                | TT                              | CC                | 1946475233               |
| SNP_P3_98339_10590065 | NC_021167.1    | Ca_kabuli_chr08 | 10590065                | GG                              | CC                | 1946475234               |
| SNP_P3_98341_10590230 | NC_021167.1    | Ca_kabuli_chr08 | 10590230                | AA                              | TT                | 1946475236               |
| SNP_P3_98342_10590404 | NC_021167.1    | Ca_kabuli_chr08 | 10590404                | TT                              | AA                | 1946475237               |
| SNP_P3_98343_10590416 | NC_021167.1    | Ca_kabuli_chr08 | 10590416                | GG                              | AA                | 1946475239               |
| SNP_P3_98344_10590452 | NC_021167.1    | Ca_kabuli_chr08 | 10590452                | CC                              | TT                | 1946475240               |
| SNP_P3_98345_10590629 | NC_021167.1    | Ca_kabuli_chr08 | 10590629                | AA                              | CC                | 1946475242               |

| SNPs IDs              | Chromosome IDs | Chromosomes     | Physical positions (bp) | CDC Frontier (Reference genome) | (Pusa 256 & HPNB) | NCBI SNPdb Accession IDs |
|-----------------------|----------------|-----------------|-------------------------|---------------------------------|-------------------|--------------------------|
| SNP_P3_98346_10590693 | NC_021167.1    | Ca_kabuli_chr08 | 10590693                | GG                              | AA                | 1946475244               |
| SNP_P3_98347_10590721 | NC_021167.1    | Ca_kabuli_chr08 | 10590721                | CC                              | GG                | 1946475245               |
| SNP_P3_98348_10590752 | NC_021167.1    | Ca_kabuli_chr08 | 10590752                | CC                              | AA                | 1946475247               |
| SNP_P3_98349_10590884 | NC_021167.1    | Ca_kabuli_chr08 | 10590884                | CC                              | TT                | 1946475248               |
| SNP_P3_98350_10591047 | NC_021167.1    | Ca_kabuli_chr08 | 10591047                | GG                              | TT                | 1946475250               |
| SNP_P3_98351_10591054 | NC_021167.1    | Ca_kabuli_chr08 | 10591054                | CC                              | AA                | 1946475251               |
| SNP_P3_98352_10591060 | NC_021167.1    | Ca_kabuli_chr08 | 10591060                | TT                              | CC                | 1946475253               |
| SNP_P3_98353_10591062 | NC_021167.1    | Ca_kabuli_chr08 | 10591062                | CC                              | AA                | 1946475254               |
| SNP_P3_98354_10591075 | NC_021167.1    | Ca_kabuli_chr08 | 10591075                | GG                              | AA                | 1946475256               |
| SNP_P3_98355_10591102 | NC_021167.1    | Ca_kabuli_chr08 | 10591102                | TT                              | AA                | 1946475258               |
| SNP_P3_98357_10591148 | NC_021167.1    | Ca_kabuli_chr08 | 10591148                | GG                              | TT                | 1946475259               |
| SNP_P3_98358_10591281 | NC_021167.1    | Ca_kabuli_chr08 | 10591281                | AA                              | GG                | 1946475261               |
| SNP_P3_98359_10591282 | NC_021167.1    | Ca_kabuli_chr08 | 10591282                | CC                              | AA                | 1946475263               |
| SNP_P3_98360_10591284 | NC_021167.1    | Ca_kabuli_chr08 | 10591284                | CC                              | TT                | 1946475264               |
| SNP_P3_98361_10591288 | NC_021167.1    | Ca_kabuli_chr08 | 10591288                | AA                              | TT                | 1946475266               |
| SNP_P3_98362_10591289 | NC_021167.1    | Ca_kabuli_chr08 | 10591289                | CC                              | TT                | 1946475268               |
| SNP_P3_98363_10591291 | NC_021167.1    | Ca_kabuli_chr08 | 10591291                | TT                              | CC                | 1946475269               |
| SNP_P3_98364_10591315 | NC_021167.1    | Ca_kabuli_chr08 | 10591315                | TT                              | CC                | 1946475271               |
| SNP_P3_98365_10591331 | NC_021167.1    | Ca_kabuli_chr08 | 10591331                | AA                              | GG                | 1946475272               |
| SNP_P3_98366_10591334 | NC_021167.1    | Ca_kabuli_chr08 | 10591334                | CC                              | GG                | 1946475274               |
| SNP_P3_98367_10591339 | NC_021167.1    | Ca_kabuli_chr08 | 10591339                | CC                              | AA                | 1946475275               |
| SNP_P3_98368_10591355 | NC_021167.1    | Ca_kabuli_chr08 | 10591355                | GG                              | AA                | 1946475277               |
| SNP_P3_98369_10591363 | NC_021167.1    | Ca_kabuli_chr08 | 10591363                | CC                              | TT                | 1946475279               |
| SNP_P3_98370_10591463 | NC_021167.1    | Ca_kabuli_chr08 | 10591463                | GG                              | AA                | 1946475280               |
| SNP_P3_98371_10591529 | NC_021167.1    | Ca_kabuli_chr08 | 10591529                | TT                              | AA                | 1946475282               |
| SNP_P3_98372_10591560 | NC_021167.1    | Ca_kabuli_chr08 | 10591560                | TT                              | CC                | 1946475283               |
| SNP_P3_98373_10606847 | NC_021167.1    | Ca_kabuli_chr08 | 10606847                | GG                              | CC                | 1946475285               |
| SNP_P3_98374_10612439 | NC_021167.1    | Ca_kabuli_chr08 | 10612439                | AA                              | CC                | 1946475286               |
| SNP_P3_98375_10612502 | NC_021167.1    | Ca_kabuli_chr08 | 10612502                | TT                              | CC                | 1946475288               |
| SNP_P3_98376_10612771 | NC_021167.1    | Ca_kabuli_chr08 | 10612771                | GG                              | AA                | 1946475289               |
| SNP_P3_98377_10612789 | NC_021167.1    | Ca_kabuli_chr08 | 10612789                | AA                              | GG                | 1946475291               |
| SNP_P3_98379_10613119 | NC_021167.1    | Ca_kabuli_chr08 | 10613119                | AA                              | GG                | 1946475293               |
| SNP_P3_98380_10631954 | NC_021167.1    | Ca_kabuli_chr08 | 10631954                | AA                              | GG                | 1946475294               |
| SNP_P3_98382_10631962 | NC_021167.1    | Ca_kabuli_chr08 | 10631962                | GG                              | TT                | 1946475296               |
| SNP_P3_98383_10631987 | NC_021167.1    | Ca_kabuli_chr08 | 10631987                | CC                              | TT                | 1946475297               |
| SNP_P3_98384_10631996 | NC_021167.1    | Ca_kabuli_chr08 | 10631996                | GG                              | AA                | 1946475299               |
| SNP_P3_98385_10632001 | NC_021167.1    | Ca_kabuli_chr08 | 10632001                | GG                              | AA                | 1946475300               |
| SNP_P3_98386_10632004 | NC_021167.1    | Ca_kabuli_chr08 | 10632004                | GG                              | AA                | 1946475302               |
| SNP_P3_98387_10632006 | NC_021167.1    | Ca_kabuli_chr08 | 10632006                | CC                              | TT                | 1946475303               |
| SNP_P3_98389_10645712 | NC_021167.1    | Ca_kabuli_chr08 | 10645712                | CC                              | TT                | 1946475305               |
| SNP_P3_98390_10645835 | NC_021167.1    | Ca_kabuli_chr08 | 10645835                | AA                              | TT                | 1946475306               |
| SNP_P3_98391_10646025 | NC_021167.1    | Ca_kabuli_chr08 | 10646025                | TT                              | CC                | 1946475308               |

| SNPs IDs              | Chromosome IDs | Chromosomes     | Physical positions (bp) | CDC Frontier (Reference genome) | (Pusa 256 & HPNB) | NCBI SNPdb Accession IDs |
|-----------------------|----------------|-----------------|-------------------------|---------------------------------|-------------------|--------------------------|
| SNP_P3_98392_10646065 | NC_021167.1    | Ca_kabuli_chr08 | 10646065                | GG                              | AA                | 1946475310               |
| SNP_P3_98393_10646076 | NC_021167.1    | Ca_kabuli_chr08 | 10646076                | GG                              | AA                | 1946475311               |
| SNP_P3_98394_10646201 | NC_021167.1    | Ca_kabuli_chr08 | 10646201                | CC                              | GG                | 1946475313               |
| SNP_P3_98396_10686627 | NC_021167.1    | Ca_kabuli_chr08 | 10686627                | GG                              | AA                | 1946475314               |
| SNP_P3_98397_10697423 | NC_021167.1    | Ca_kabuli_chr08 | 10697423                | AA                              | CC                | 1946475316               |
| SNP_P3_98398_10697617 | NC_021167.1    | Ca_kabuli_chr08 | 10697617                | CC                              | TT                | 1946475317               |
| SNP_P3_98399_10697666 | NC_021167.1    | Ca_kabuli_chr08 | 10697666                | AA                              | GG                | 1946475319               |
| SNP_P3_98400_10699035 | NC_021167.1    | Ca_kabuli_chr08 | 10699035                | AA                              | TT                | 1946475320               |
| SNP_P3_98401_10699317 | NC_021167.1    | Ca_kabuli_chr08 | 10699317                | CC                              | GG                | 1946475322               |
| SNP_P3_98402_10699341 | NC_021167.1    | Ca_kabuli_chr08 | 10699341                | TT                              | CC                | 1946475323               |
| SNP_P3_98403_10699353 | NC_021167.1    | Ca_kabuli_chr08 | 10699353                | AA                              | CC                | 1946475325               |
| SNP_P3_98404_10699360 | NC_021167.1    | Ca_kabuli_chr08 | 10699360                | CC                              | TT                | 1946475326               |
| SNP_P3_98405_10701317 | NC_021167.1    | Ca_kabuli_chr08 | 10701317                | TT                              | CC                | 1946475328               |
| SNP_P3_98406_10701361 | NC_021167.1    | Ca_kabuli_chr08 | 10701361                | AA                              | CC                | 1946475329               |
| SNP_P3_98407_10701397 | NC_021167.1    | Ca_kabuli_chr08 | 10701397                | AA                              | CC                | 1946475331               |
| SNP_P3_98408_10701411 | NC_021167.1    | Ca_kabuli_chr08 | 10701411                | GG                              | AA                | 1946475332               |
| SNP_P3_98409_10701414 | NC_021167.1    | Ca_kabuli_chr08 | 10701414                | CC                              | TT                | 1946475334               |
| SNP_P3_98410_10701438 | NC_021167.1    | Ca_kabuli_chr08 | 10701438                | AA                              | GG                | 1946475336               |
| SNP_P3_98411_10701470 | NC_021167.1    | Ca_kabuli_chr08 | 10701470                | AA                              | GG                | 1946475337               |
| SNP_P3_98412_10701523 | NC_021167.1    | Ca_kabuli_chr08 | 10701523                | AA                              | TT                | 1946475338               |
| SNP_P3_98413_10701537 | NC_021167.1    | Ca_kabuli_chr08 | 10701537                | CC                              | AA                | 1946475340               |
| SNP_P3_98414_10701556 | NC_021167.1    | Ca_kabuli_chr08 | 10701556                | CC                              | AA                | 1946475342               |
| SNP_P3_98415_10701580 | NC_021167.1    | Ca_kabuli_chr08 | 10701580                | AA                              | TT                | 1946475343               |
| SNP_P3_98416_10701601 | NC_021167.1    | Ca_kabuli_chr08 | 10701601                | CC                              | TT                | 1946475345               |
| SNP_P3_98417_10701611 | NC_021167.1    | Ca_kabuli_chr08 | 10701611                | AA                              | GG                | 1946475346               |
| SNP_P3_98418_10701702 | NC_021167.1    | Ca_kabuli_chr08 | 10701702                | GG                              | AA                | 1946475348               |
| SNP_P3_98419_10701719 | NC_021167.1    | Ca_kabuli_chr08 | 10701719                | AA                              | GG                | 1946475349               |
| SNP_P3_98420_10701745 | NC_021167.1    | Ca_kabuli_chr08 | 10701745                | CC                              | GG                | 1946475351               |
| SNP_P3_98421_10701763 | NC_021167.1    | Ca_kabuli_chr08 | 10701763                | TT                              | AA                | 1946475352               |
| SNP_P3_98422_10701815 | NC_021167.1    | Ca_kabuli_chr08 | 10701815                | CC                              | TT                | 1946475354               |
| SNP_P3_98423_10701915 | NC_021167.1    | Ca_kabuli_chr08 | 10701915                | CC                              | TT                | 1946475355               |
| SNP_P3_98424_10701925 | NC_021167.1    | Ca_kabuli_chr08 | 10701925                | GG                              | AA                | 1946475357               |
| SNP_P3_98426_10728066 | NC_021167.1    | Ca_kabuli_chr08 | 10728066                | CC                              | AA                | 1946475358               |
| SNP_P3_98427_10731032 | NC_021167.1    | Ca_kabuli_chr08 | 10731032                | GG                              | AA                | 1946475360               |
| SNP_P3_98428_10734994 | NC_021167.1    | Ca_kabuli_chr08 | 10734994                | CC                              | TT                | 1946475362               |
| SNP_P3_98429_10762434 | NC_021167.1    | Ca_kabuli_chr08 | 10762434                | GG                              | AA                | 1946475363               |
| SNP_P3_98430_10762466 | NC_021167.1    | Ca_kabuli_chr08 | 10762466                | AA                              | GG                | 1946475365               |
| SNP_P3_98432_10809401 | NC_021167.1    | Ca_kabuli_chr08 | 10809401                | AA                              | TT                | 1946475366               |
| SNP_P3_98433_10825619 | NC_021167.1    | Ca_kabuli_chr08 | 10825619                | AA                              | CC                | 1946475368               |
| SNP_P3_98434_10827800 | NC_021167.1    | Ca_kabuli_chr08 | 10827800                | CC                              | TT                | 1946475369               |
| SNP_P3_98435_10897425 | NC_021167.1    | Ca_kabuli_chr08 | 10897425                | TT                              | CC                | 1946475371               |
| SNP_P3_98436_10897451 | NC_021167.1    | Ca_kabuli_chr08 | 10897451                | GG                              | AA                | 1946475372               |



| SNPs IDs              | Chromosome IDs | Chromosomes     | Physical positions (bp) | CDC Frontier (Reference genome) | (Pusa 256 & HPNB) | NCBI SNPdb Accession IDs |
|-----------------------|----------------|-----------------|-------------------------|---------------------------------|-------------------|--------------------------|
| SNP_P3_98437_10905114 | NC_021167.1    | Ca_kabuli_chr08 | 10905114                | CC                              | AA                | 1946475374               |
| SNP_P3_98438_10915585 | NC_021167.1    | Ca_kabuli_chr08 | 10915585                | AA                              | TT                | 1946475375               |
| SNP_P3_98439_10915594 | NC_021167.1    | Ca_kabuli_chr08 | 10915594                | CC                              | AA                | 1946475377               |
| SNP_P3_98441_10917924 | NC_021167.1    | Ca_kabuli_chr08 | 10917924                | TT                              | CC                | 1946475378               |
| SNP_P3_98442_10917931 | NC_021167.1    | Ca_kabuli_chr08 | 10917931                | AA                              | TT                | 1946475380               |
| SNP_P3_98443_10917934 | NC_021167.1    | Ca_kabuli_chr08 | 10917934                | TT                              | GG                | 1946475382               |
| SNP_P3_98444_10921665 | NC_021167.1    | Ca_kabuli_chr08 | 10921665                | CC                              | TT                | 1946475383               |
| SNP_P3_98445_10921670 | NC_021167.1    | Ca_kabuli_chr08 | 10921670                | CC                              | AA                | 1946475385               |
| SNP_P3_98446_10930076 | NC_021167.1    | Ca_kabuli_chr08 | 10930076                | GG                              | AA                | 1946475386               |
| SNP_P3_98447_10931903 | NC_021167.1    | Ca_kabuli_chr08 | 10931903                | CC                              | AA                | 1946475388               |
| SNP_P3_98448_10931930 | NC_021167.1    | Ca_kabuli_chr08 | 10931930                | CC                              | TT                | 1946475389               |
| SNP_P3_98449_10932334 | NC_021167.1    | Ca_kabuli_chr08 | 10932334                | AA                              | CC                | 1946475391               |
| SNP_P3_98451_10944114 | NC_021167.1    | Ca_kabuli_chr08 | 10944114                | CC                              | TT                | 1946475392               |
| SNP_P3_98452_10950630 | NC_021167.1    | Ca_kabuli_chr08 | 10950630                | GG                              | AA                | 1946475394               |
| SNP_P3_98453_10955200 | NC_021167.1    | Ca_kabuli_chr08 | 10955200                | GG                              | CC                | 1946475395               |
| SNP_P3_98454_10959970 | NC_021167.1    | Ca_kabuli_chr08 | 10959970                | TT                              | CC                | 1946475397               |
| SNP_P3_98455_10960190 | NC_021167.1    | Ca_kabuli_chr08 | 10960190                | GG                              | AA                | 1946475398               |
| SNP_P3_98457_10970479 | NC_021167.1    | Ca_kabuli_chr08 | 10970479                | TT                              | CC                | 1946475400               |
| SNP_P3_98458_10970855 | NC_021167.1    | Ca_kabuli_chr08 | 10970855                | AA                              | GG                | 1946475402               |
| SNP_P3_98459_10973352 | NC_021167.1    | Ca_kabuli_chr08 | 10973352                | AA                              | GG                | 1946475403               |
| SNP_P3_98460_10973662 | NC_021167.1    | Ca_kabuli_chr08 | 10973662                | TT                              | CC                | 1946475405               |
| SNP_P3_98461_10974025 | NC_021167.1    | Ca_kabuli_chr08 | 10974025                | TT                              | CC                | 1946475406               |
| SNP_P3_98462_11008626 | NC_021167.1    | Ca_kabuli_chr08 | 11008626                | AA                              | TT                | 1946475408               |
| SNP_P3_98463_11009110 | NC_021167.1    | Ca_kabuli_chr08 | 11009110                | GG                              | AA                | 1946475409               |
| SNP_P3_98464_11011592 | NC_021167.1    | Ca_kabuli_chr08 | 11011592                | CC                              | TT                | 1946475411               |
| SNP_P3_98465_11014556 | NC_021167.1    | Ca_kabuli_chr08 | 11014556                | GG                              | AA                | 1946475412               |
| SNP_P3_98466_11015154 | NC_021167.1    | Ca_kabuli_chr08 | 11015154                | AA                              | GG                | 1946475414               |
| SNP_P3_98467_11015159 | NC_021167.1    | Ca_kabuli_chr08 | 11015159                | AA                              | TT                | 1946475415               |
| SNP_P3_98468_11015176 | NC_021167.1    | Ca_kabuli_chr08 | 11015176                | TT                              | GG                | 1946475417               |
| SNP_P3_98469_11015195 | NC_021167.1    | Ca_kabuli_chr08 | 11015195                | GG                              | AA                | 1946475418               |
| SNP_P3_98470_11015471 | NC_021167.1    | Ca_kabuli_chr08 | 11015471                | CC                              | GG                | 1946475419               |
| SNP_P3_98471_11015550 | NC_021167.1    | Ca_kabuli_chr08 | 11015550                | AA                              | CC                | 1946475421               |
| SNP_P3_98472_11016238 | NC_021167.1    | Ca_kabuli_chr08 | 11016238                | AA                              | TT                | 1946475422               |
| SNP_P3_98473_11059311 | NC_021167.1    | Ca_kabuli_chr08 | 11059311                | GG                              | CC                | 1946475424               |
| SNP_P3_98475_11063093 | NC_021167.1    | Ca_kabuli_chr08 | 11063093                | TT                              | AA                | 1946475425               |
| SNP_P3_98476_11066318 | NC_021167.1    | Ca_kabuli_chr08 | 11066318                | GG                              | AA                | 1946475427               |
| SNP_P3_98477_11070723 | NC_021167.1    | Ca_kabuli_chr08 | 11070723                | TT                              | CC                | 1946475428               |
| SNP_P3_98478_11070732 | NC_021167.1    | Ca_kabuli_chr08 | 11070732                | CC                              | TT                | 1946475430               |
| SNP_P3_98480_11071163 | NC_021167.1    | Ca_kabuli_chr08 | 11071163                | GG                              | AA                | 1946475431               |
| SNP_P3_98482_11072703 | NC_021167.1    | Ca_kabuli_chr08 | 11072703                | AA                              | GG                | 1946475433               |
| SNP_P3_98483_11072728 | NC_021167.1    | Ca_kabuli_chr08 | 11072728                | CC                              | AA                | 1946475434               |
| SNP_P3_98484_11073029 | NC_021167.1    | Ca_kabuli_chr08 | 11073029                | AA                              | TT                | 1946475436               |

| SNPs IDs              | Chromosome IDs | Chromosomes     | Physical positions (bp) | CDC Frontier (Reference genome) | (Pusa 256 & HPNB) | NCBI SNPdb Accession IDs |
|-----------------------|----------------|-----------------|-------------------------|---------------------------------|-------------------|--------------------------|
| SNP_P3_98485_11073046 | NC_021167.1    | Ca_kabuli_chr08 | 11073046                | CC                              | GG                | 1946475437               |
| SNP_P3_98486_11073099 | NC_021167.1    | Ca_kabuli_chr08 | 11073099                | GG                              | CC                | 1946475439               |
| SNP_P3_98488_11076341 | NC_021167.1    | Ca_kabuli_chr08 | 11076341                | AA                              | CC                | 1946475440               |
| SNP_P3_98489_11077570 | NC_021167.1    | Ca_kabuli_chr08 | 11077570                | GG                              | AA                | 1946475442               |
| SNP_P3_98491_11079293 | NC_021167.1    | Ca_kabuli_chr08 | 11079293                | AA                              | TT                | 1946475443               |
| SNP_P3_98492_11079549 | NC_021167.1    | Ca_kabuli_chr08 | 11079549                | AA                              | GG                | 1946475445               |
| SNP_P3_98494_11083762 | NC_021167.1    | Ca_kabuli_chr08 | 11083762                | TT                              | AA                | 1946475446               |
| SNP_P3_98497_11087622 | NC_021167.1    | Ca_kabuli_chr08 | 11087622                | AA                              | GG                | 1946475448               |
| SNP_P3_98498_11089913 | NC_021167.1    | Ca_kabuli_chr08 | 11089913                | AA                              | GG                | 1946475449               |
| SNP_P3_98499_11090518 | NC_021167.1    | Ca_kabuli_chr08 | 11090518                | CC                              | AA                | 1946475451               |
| SNP_P3_98500_11090531 | NC_021167.1    | Ca_kabuli_chr08 | 11090531                | CC                              | TT                | 1946475452               |
| SNP_P3_98501_11090545 | NC_021167.1    | Ca_kabuli_chr08 | 11090545                | CC                              | TT                | 1946475454               |
| SNP_P3_98502_11090562 | NC_021167.1    | Ca_kabuli_chr08 | 11090562                | TT                              | CC                | 1946475455               |
| SNP_P3_98503_11091514 | NC_021167.1    | Ca_kabuli_chr08 | 11091514                | AA                              | TT                | 1946475457               |
| SNP_P3_98505_11091882 | NC_021167.1    | Ca_kabuli_chr08 | 11091882                | TT                              | AA                | 1946475458               |
| SNP_P3_98506_11099110 | NC_021167.1    | Ca_kabuli_chr08 | 11099110                | CC                              | TT                | 1946475460               |
| SNP_P3_98507_11099120 | NC_021167.1    | Ca_kabuli_chr08 | 11099120                | CC                              | TT                | 1946475462               |
| SNP_P3_98508_11101727 | NC_021167.1    | Ca_kabuli_chr08 | 11101727                | AA                              | GG                | 1946475463               |
| SNP_P3_98509_11101847 | NC_021167.1    | Ca_kabuli_chr08 | 11101847                | TT                              | CC                | 1946475465               |
| SNP_P3_98510_11102013 | NC_021167.1    | Ca_kabuli_chr08 | 11102013                | CC                              | TT                | 1946475466               |
| SNP_P3_98511_11102020 | NC_021167.1    | Ca_kabuli_chr08 | 11102020                | CC                              | AA                | 1946475468               |
| SNP_P3_98512_11102260 | NC_021167.1    | Ca_kabuli_chr08 | 11102260                | GG                              | AA                | 1946475469               |
| SNP_P3_98515_11108507 | NC_021167.1    | Ca_kabuli_chr08 | 11108507                | CC                              | TT                | 1946475471               |
| SNP_P3_98516_11109358 | NC_021167.1    | Ca_kabuli_chr08 | 11109358                | AA                              | TT                | 1946475472               |
| SNP_P3_98518_11113190 | NC_021167.1    | Ca_kabuli_chr08 | 11113190                | GG                              | CC                | 1946475474               |
| SNP_P3_98519_11113485 | NC_021167.1    | Ca_kabuli_chr08 | 11113485                | CC                              | TT                | 1946475475               |
| SNP_P3_98520_11113551 | NC_021167.1    | Ca_kabuli_chr08 | 11113551                | AA                              | GG                | 1946475477               |
| SNP_P3_98521_11113607 | NC_021167.1    | Ca_kabuli_chr08 | 11113607                | GG                              | CC                | 1946475479               |
| SNP_P3_98523_11113972 | NC_021167.1    | Ca_kabuli_chr08 | 11113972                | TT                              | CC                | 1946475480               |
| SNP_P3_98524_11113984 | NC_021167.1    | Ca_kabuli_chr08 | 11113984                | TT                              | CC                | 1946475482               |
| SNP_P3_98525_11114009 | NC_021167.1    | Ca_kabuli_chr08 | 11114009                | CC                              | TT                | 1946475483               |
| SNP_P3_98526_11114010 | NC_021167.1    | Ca_kabuli_chr08 | 11114010                | TT                              | CC                | 1946475485               |
| SNP_P3_98528_11116701 | NC_021167.1    | Ca_kabuli_chr08 | 11116701                | AA                              | GG                | 1946475486               |
| SNP_P3_98530_11124971 | NC_021167.1    | Ca_kabuli_chr08 | 11124971                | AA                              | GG                | 1946475488               |
| SNP_P3_98531_11127500 | NC_021167.1    | Ca_kabuli_chr08 | 11127500                | CC                              | TT                | 1946475489               |
| SNP_P3_98532_11132094 | NC_021167.1    | Ca_kabuli_chr08 | 11132094                | AA                              | CC                | 1946475491               |
| SNP_P3_98533_11132120 | NC_021167.1    | Ca_kabuli_chr08 | 11132120                | TT                              | AA                | 1946475493               |
| SNP_P3_98534_11132359 | NC_021167.1    | Ca_kabuli_chr08 | 11132359                | CC                              | AA                | 1946475494               |
| SNP_P3_98535_11132398 | NC_021167.1    | Ca_kabuli_chr08 | 11132398                | GG                              | AA                | 1946475496               |
| SNP_P3_98536_11132546 | NC_021167.1    | Ca_kabuli_chr08 | 11132546                | GG                              | AA                | 1946475497               |
| SNP_P3_98537_11132736 | NC_021167.1    | Ca_kabuli_chr08 | 11132736                | AA                              | TT                | 1946475499               |
| SNP_P3_98538_11132766 | NC_021167.1    | Ca_kabuli_chr08 | 11132766                | TT                              | CC                | 1946475500               |

| SNPs IDs              | Chromosome IDs | Chromosomes     | Physical positions (bp) | CDC Frontier (Reference genome) | (Pusa 256 & HPNB) | NCBI SNPdb Accession IDs |
|-----------------------|----------------|-----------------|-------------------------|---------------------------------|-------------------|--------------------------|
| SNP_P3_98539_11133206 | NC_021167.1    | Ca_kabuli_chr08 | 11133206                | GG                              | AA                | 1946475502               |
| SNP_P3_98540_11133398 | NC_021167.1    | Ca_kabuli_chr08 | 11133398                | TT                              | CC                | 1946475504               |
| SNP_P3_98541_11134746 | NC_021167.1    | Ca_kabuli_chr08 | 11134746                | GG                              | AA                | 1946475505               |
| SNP_P3_98543_11141721 | NC_021167.1    | Ca_kabuli_chr08 | 11141721                | TT                              | CC                | 1946475507               |
| SNP_P3_98544_11143258 | NC_021167.1    | Ca_kabuli_chr08 | 11143258                | CC                              | AA                | 1946475508               |
| SNP_P3_98545_11143541 | NC_021167.1    | Ca_kabuli_chr08 | 11143541                | CC                              | TT                | 1946475510               |
| SNP_P3_98546_11143902 | NC_021167.1    | Ca_kabuli_chr08 | 11143902                | GG                              | AA                | 1946475511               |
| SNP_P3_98547_11143959 | NC_021167.1    | Ca_kabuli_chr08 | 11143959                | AA                              | GG                | 1946475513               |
| SNP_P3_98548_11143996 | NC_021167.1    | Ca_kabuli_chr08 | 11143996                | AA                              | GG                | 1946475514               |
| SNP_P3_98549_11144005 | NC_021167.1    | Ca_kabuli_chr08 | 11144005                | GG                              | AA                | 1946475516               |
| SNP_P3_98550_11144269 | NC_021167.1    | Ca_kabuli_chr08 | 11144269                | TT                              | CC                | 1946475518               |
| SNP_P3_98553_11144773 | NC_021167.1    | Ca_kabuli_chr08 | 11144773                | GG                              | AA                | 1946475519               |
| SNP_P3_98554_11144874 | NC_021167.1    | Ca_kabuli_chr08 | 11144874                | GG                              | TT                | 1946475521               |
| SNP_P3_98555_11144943 | NC_021167.1    | Ca_kabuli_chr08 | 11144943                | GG                              | AA                | 1946475522               |
| SNP_P3_98556_11144944 | NC_021167.1    | Ca_kabuli_chr08 | 11144944                | GG                              | AA                | 1946475524               |
| SNP_P3_98557_11145681 | NC_021167.1    | Ca_kabuli_chr08 | 11145681                | CC                              | TT                | 1946475525               |
| SNP_P3_98559_11145871 | NC_021167.1    | Ca_kabuli_chr08 | 11145871                | CC                              | AA                | 1946475527               |
| SNP_P3_98560_11145921 | NC_021167.1    | Ca_kabuli_chr08 | 11145921                | AA                              | GG                | 1946475528               |
| SNP_P3_98561_11146172 | NC_021167.1    | Ca_kabuli_chr08 | 11146172                | CC                              | GG                | 1946475530               |
| SNP_P3_98564_11146576 | NC_021167.1    | Ca_kabuli_chr08 | 11146576                | CC                              | TT                | 1946475534               |
| SNP_P3_98565_11146612 | NC_021167.1    | Ca_kabuli_chr08 | 11146612                | CC                              | TT                | 1946475535               |
| SNP_P3_98566_11146679 | NC_021167.1    | Ca_kabuli_chr08 | 11146679                | TT                              | AA                | 1946475537               |
| SNP_P3_98568_11146812 | NC_021167.1    | Ca_kabuli_chr08 | 11146812                | CC                              | TT                | 1946475539               |
| SNP_P3_98569_11147104 | NC_021167.1    | Ca_kabuli_chr08 | 11147104                | AA                              | GG                | 1946475540               |
| SNP_P3_98571_11149142 | NC_021167.1    | Ca_kabuli_chr08 | 11149142                | AA                              | GG                | 1946475542               |
| SNP_P3_98572_11151651 | NC_021167.1    | Ca_kabuli_chr08 | 11151651                | GG                              | TT                | 1946475543               |
| SNP_P3_98573_11151656 | NC_021167.1    | Ca_kabuli_chr08 | 11151656                | CC                              | TT                | 1946475545               |
| SNP_P3_98575_11152081 | NC_021167.1    | Ca_kabuli_chr08 | 11152081                | AA                              | GG                | 1946475547               |
| SNP_P3_98576_11152398 | NC_021167.1    | Ca_kabuli_chr08 | 11152398                | TT                              | CC                | 1946475548               |
| SNP_P3_98577_11153182 | NC_021167.1    | Ca_kabuli_chr08 | 11153182                | GG                              | AA                | 1946475550               |
| SNP_P3_98578_11153370 | NC_021167.1    | Ca_kabuli_chr08 | 11153370                | AA                              | GG                | 1946475551               |
| SNP_P3_98579_11153733 | NC_021167.1    | Ca_kabuli_chr08 | 11153733                | AA                              | CC                | 1946475553               |
| SNP_P3_98581_11154936 | NC_021167.1    | Ca_kabuli_chr08 | 11154936                | TT                              | GG                | 1946475554               |
| SNP_P3_98582_11155097 | NC_021167.1    | Ca_kabuli_chr08 | 11155097                | GG                              | AA                | 1946475556               |
| SNP_P3_98583_11156869 | NC_021167.1    | Ca_kabuli_chr08 | 11156869                | TT                              | CC                | 1946475557               |
| SNP_P3_98584_11157649 | NC_021167.1    | Ca_kabuli_chr08 | 11157649                | GG                              | AA                | 1946475559               |
| SNP_P3_98586_11157955 | NC_021167.1    | Ca_kabuli_chr08 | 11157955                | TT                              | CC                | 1946475561               |
| SNP_P3_98587_11158208 | NC_021167.1    | Ca_kabuli_chr08 | 11158208                | TT                              | CC                | 1946475562               |
| SNP_P3_98588_11158347 | NC_021167.1    | Ca_kabuli_chr08 | 11158347                | GG                              | AA                | 1946475564               |
| SNP_P3_98589_11158532 | NC_021167.1    | Ca_kabuli_chr08 | 11158532                | TT                              | CC                | 1946475565               |
| SNP_P3_98590_11158552 | NC_021167.1    | Ca_kabuli_chr08 | 11158552                | CC                              | AA                | 1946475567               |
| SNP_P3_98591_11158832 | NC_021167.1    | Ca_kabuli_chr08 | 11158832                | GG                              | TT                | 1946475568               |

| SNPs IDs              | Chromosome IDs | Chromosomes     | Physical positions (bp) | CDC Frontier (Reference genome) | (Pusa 256 & HPNB) | NCBI SNPdb Accession IDs |
|-----------------------|----------------|-----------------|-------------------------|---------------------------------|-------------------|--------------------------|
| SNP_P3_98592_11159017 | NC_021167.1    | Ca_kabuli_chr08 | 11159017                | GG                              | AA                | 1946475570               |
| SNP_P3_98593_11159279 | NC_021167.1    | Ca_kabuli_chr08 | 11159279                | GG                              | TT                | 1946475571               |
| SNP_P3_98594_11160381 | NC_021167.1    | Ca_kabuli_chr08 | 11160381                | CC                              | TT                | 1946475573               |
| SNP_P3_98595_11162038 | NC_021167.1    | Ca_kabuli_chr08 | 11162038                | GG                              | AA                | 1946475574               |
| SNP_P3_98596_11164777 | NC_021167.1    | Ca_kabuli_chr08 | 11164777                | CC                              | TT                | 1946475576               |
| SNP_P3_98597_11164783 | NC_021167.1    | Ca_kabuli_chr08 | 11164783                | CC                              | AA                | 1946475577               |
| SNP_P3_98598_11164841 | NC_021167.1    | Ca_kabuli_chr08 | 11164841                | CC                              | TT                | 1946475579               |
| SNP_P3_98599_11165343 | NC_021167.1    | Ca_kabuli_chr08 | 11165343                | TT                              | CC                | 1946475581               |
| SNP_P3_98600_11166979 | NC_021167.1    | Ca_kabuli_chr08 | 11166979                | TT                              | CC                | 1946475582               |
| SNP_P3_98601_11167470 | NC_021167.1    | Ca_kabuli_chr08 | 11167470                | TT                              | CC                | 1946475584               |
| SNP_P3_98602_11167997 | NC_021167.1    | Ca_kabuli_chr08 | 11167997                | CC                              | AA                | 1946475585               |
| SNP_P3_98604_11168880 | NC_021167.1    | Ca_kabuli_chr08 | 11168880                | CC                              | TT                | 1946475587               |
| SNP_P3_98605_11168904 | NC_021167.1    | Ca_kabuli_chr08 | 11168904                | CC                              | GG                | 1946475588               |
| SNP_P3_98606_11168930 | NC_021167.1    | Ca_kabuli_chr08 | 11168930                | AA                              | GG                | 1946475590               |
| SNP_P3_98607_11168931 | NC_021167.1    | Ca_kabuli_chr08 | 11168931                | GG                              | AA                | 1946475591               |
| SNP_P3_98608_11168949 | NC_021167.1    | Ca_kabuli_chr08 | 11168949                | TT                              | AA                | 1946475593               |
| SNP_P3_98609_11168962 | NC_021167.1    | Ca_kabuli_chr08 | 11168962                | AA                              | GG                | 1946475594               |
| SNP_P3_98610_11169132 | NC_021167.1    | Ca_kabuli_chr08 | 11169132                | TT                              | CC                | 1946475596               |
| SNP_P3_98611_11169151 | NC_021167.1    | Ca_kabuli_chr08 | 11169151                | GG                              | CC                | 1946475597               |
| SNP_P3_98612_11169198 | NC_021167.1    | Ca_kabuli_chr08 | 11169198                | GG                              | AA                | 1946475599               |
| SNP_P3_98613_11169206 | NC_021167.1    | Ca_kabuli_chr08 | 11169206                | GG                              | AA                | 1946475600               |
| SNP_P3_98614_11169337 | NC_021167.1    | Ca_kabuli_chr08 | 11169337                | CC                              | GG                | 1946475602               |
| SNP_P3_98615_11169344 | NC_021167.1    | Ca_kabuli_chr08 | 11169344                | CC                              | AA                | 1946475604               |
| SNP_P3_98616_11169346 | NC_021167.1    | Ca_kabuli_chr08 | 11169346                | AA                              | GG                | 1946475605               |
| SNP_P3_98617_11172746 | NC_021167.1    | Ca_kabuli_chr08 | 11172746                | GG                              | AA                | 1946475607               |
| SNP_P3_98618_11173601 | NC_021167.1    | Ca_kabuli_chr08 | 11173601                | CC                              | TT                | 1946475608               |
| SNP_P3_98619_11174000 | NC_021167.1    | Ca_kabuli_chr08 | 11174000                | CC                              | AA                | 1946475610               |
| SNP_P3_98620_11174193 | NC_021167.1    | Ca_kabuli_chr08 | 11174193                | AA                              | TT                | 1946475611               |
| SNP_P3_98621_11174669 | NC_021167.1    | Ca_kabuli_chr08 | 11174669                | TT                              | CC                | 1946475613               |
| SNP_P3_98622_11176082 | NC_021167.1    | Ca_kabuli_chr08 | 11176082                | AA                              | TT                | 1946475614               |
| SNP_P3_98624_11180842 | NC_021167.1    | Ca_kabuli_chr08 | 11180842                | GG                              | AA                | 1946475616               |
| SNP_P3_98625_11180956 | NC_021167.1    | Ca_kabuli_chr08 | 11180956                | CC                              | AA                | 1946475618               |
| SNP_P3_98626_11184586 | NC_021167.1    | Ca_kabuli_chr08 | 11184586                | CC                              | TT                | 1946475619               |
| SNP_P3_98627_11184786 | NC_021167.1    | Ca_kabuli_chr08 | 11184786                | GG                              | AA                | 1946475621               |
| SNP_P3_98628_11185043 | NC_021167.1    | Ca_kabuli_chr08 | 11185043                | AA                              | CC                | 1946475622               |
| SNP_P3_98629_11185077 | NC_021167.1    | Ca_kabuli_chr08 | 11185077                | CC                              | AA                | 1946475624               |
| SNP_P3_98630_11185320 | NC_021167.1    | Ca_kabuli_chr08 | 11185320                | GG                              | CC                | 1946475625               |
| SNP_P3_98631_11185831 | NC_021167.1    | Ca_kabuli_chr08 | 11185831                | GG                              | AA                | 1946475627               |
| SNP_P3_98633_11186501 | NC_021167.1    | Ca_kabuli_chr08 | 11186501                | AA                              | GG                | 1946475628               |
| SNP_P3_98634_11186706 | NC_021167.1    | Ca_kabuli_chr08 | 11186706                | AA                              | TT                | 1946475630               |
| SNP_P3_98635_11186810 | NC_021167.1    | Ca_kabuli_chr08 | 11186810                | AA                              | CC                | 1946475631               |
| SNP_P3_98636_11188913 | NC_021167.1    | Ca_kabuli_chr08 | 11188913                | GG                              | TT                | 1946475633               |

| SNPs IDs              | Chromosome IDs | Chromosomes     | Physical positions (bp) | CDC Frontier (Reference genome) | (Pusa 256 & HPNB) | NCBI SNPdb Accession IDs |
|-----------------------|----------------|-----------------|-------------------------|---------------------------------|-------------------|--------------------------|
| SNP_P3_98637_11191968 | NC_021167.1    | Ca_kabuli_chr08 | 11191968                | AA                              | TT                | 1946475634               |
| SNP_P3_98639_11193394 | NC_021167.1    | Ca_kabuli_chr08 | 11193394                | AA                              | TT                | 1946475636               |
| SNP_P3_98640_11194201 | NC_021167.1    | Ca_kabuli_chr08 | 11194201                | TT                              | AA                | 1946475637               |
| SNP_P3_98642_11246881 | NC_021167.1    | Ca_kabuli_chr08 | 11246881                | AA                              | TT                | 1946475639               |
| SNP_P3_98643_11248404 | NC_021167.1    | Ca_kabuli_chr08 | 11248404                | AA                              | TT                | 1946475640               |
| SNP_P3_98646_11297360 | NC_021167.1    | Ca_kabuli_chr08 | 11297360                | CC                              | TT                | 1946475642               |
| SNP_P3_98647_11300197 | NC_021167.1    | Ca_kabuli_chr08 | 11300197                | GG                              | AA                | 1946475644               |
| SNP_P3_98648_11302211 | NC_021167.1    | Ca_kabuli_chr08 | 11302211                | GG                              | TT                | 1946475645               |
| SNP_P3_98649_11314333 | NC_021167.1    | Ca_kabuli_chr08 | 11314333                | TT                              | CC                | 1946475647               |
| SNP_P3_98650_11317735 | NC_021167.1    | Ca_kabuli_chr08 | 11317735                | CC                              | TT                | 1946475648               |
| SNP_P3_98651_11340332 | NC_021167.1    | Ca_kabuli_chr08 | 11340332                | CC                              | TT                | 1946475650               |
| SNP_P3_98652_11342511 | NC_021167.1    | Ca_kabuli_chr08 | 11342511                | TT                              | CC                | 1946475651               |
| SNP_P3_98654_11359909 | NC_021167.1    | Ca_kabuli_chr08 | 11359909                | CC                              | GG                | 1946475653               |
| SNP_P3_98655_11360082 | NC_021167.1    | Ca_kabuli_chr08 | 11360082                | TT                              | CC                | 1946475654               |
| SNP_P3_98656_11360084 | NC_021167.1    | Ca_kabuli_chr08 | 11360084                | AA                              | CC                | 1946475656               |
| SNP_P3_98657_11360110 | NC_021167.1    | Ca_kabuli_chr08 | 11360110                | TT                              | CC                | 1946475658               |
| SNP_P3_98658_11360112 | NC_021167.1    | Ca_kabuli_chr08 | 11360112                | CC                              | TT                | 1946475661               |
| SNP_P3_98659_11360123 | NC_021167.1    | Ca_kabuli_chr08 | 11360123                | AA                              | CC                | 1946475662               |
| SNP_P3_98660_11369633 | NC_021167.1    | Ca_kabuli_chr08 | 11369633                | AA                              | GG                | 1946475664               |
| SNP_P3_98661_11393197 | NC_021167.1    | Ca_kabuli_chr08 | 11393197                | CC                              | TT                | 1946475665               |
| SNP_P3_98662_11393205 | NC_021167.1    | Ca_kabuli_chr08 | 11393205                | GG                              | TT                | 1946475667               |
| SNP_P3_98663_11393227 | NC_021167.1    | Ca_kabuli_chr08 | 11393227                | GG                              | TT                | 1946475668               |
| SNP_P3_98664_11393239 | NC_021167.1    | Ca_kabuli_chr08 | 11393239                | AA                              | GG                | 1946475670               |
| SNP_P3_98665_11415434 | NC_021167.1    | Ca_kabuli_chr08 | 11415434                | GG                              | TT                | 1946475671               |
| SNP_P3_98666_11415488 | NC_021167.1    | Ca_kabuli_chr08 | 11415488                | TT                              | CC                | 1946475673               |
| SNP_P3_98667_11415518 | NC_021167.1    | Ca_kabuli_chr08 | 11415518                | AA                              | GG                | 1946475674               |
| SNP_P3_98668_11415552 | NC_021167.1    | Ca_kabuli_chr08 | 11415552                | AA                              | GG                | 1946475676               |
| SNP_P3_98669_11415554 | NC_021167.1    | Ca_kabuli_chr08 | 11415554                | GG                              | AA                | 1946475677               |
| SNP_P3_98670_11422483 | NC_021167.1    | Ca_kabuli_chr08 | 11422483                | CC                              | AA                | 1946475679               |
| SNP_P3_98671_11422491 | NC_021167.1    | Ca_kabuli_chr08 | 11422491                | TT                              | GG                | 1946475680               |
| SNP_P3_98672_11422533 | NC_021167.1    | Ca_kabuli_chr08 | 11422533                | AA                              | TT                | 1946475682               |
| SNP_P3_98673_11422569 | NC_021167.1    | Ca_kabuli_chr08 | 11422569                | GG                              | AA                | 1946475683               |
| SNP_P3_98674_11422581 | NC_021167.1    | Ca_kabuli_chr08 | 11422581                | AA                              | CC                | 1946475685               |
| SNP_P3_98675_11422612 | NC_021167.1    | Ca_kabuli_chr08 | 11422612                | GG                              | AA                | 1946475686               |
| SNP_P3_98676_11422847 | NC_021167.1    | Ca_kabuli_chr08 | 11422847                | TT                              | AA                | 1946475688               |
| SNP_P3_98677_11423096 | NC_021167.1    | Ca_kabuli_chr08 | 11423096                | GG                              | TT                | 1946475689               |
| SNP_P3_98678_11423098 | NC_021167.1    | Ca_kabuli_chr08 | 11423098                | TT                              | GG                | 1946475691               |
| SNP_P3_98679_11442612 | NC_021167.1    | Ca_kabuli_chr08 | 11442612                | AA                              | GG                | 1946475692               |
| SNP_P3_98680_11442898 | NC_021167.1    | Ca_kabuli_chr08 | 11442898                | TT                              | AA                | 1946475694               |
| SNP_P3_98681_11443351 | NC_021167.1    | Ca_kabuli_chr08 | 11443351                | CC                              | TT                | 1946475695               |
| SNP_P3_98682_11443365 | NC_021167.1    | Ca_kabuli_chr08 | 11443365                | CC                              | TT                | 1946475697               |
| SNP_P3_98683_11447964 | NC_021167.1    | Ca_kabuli_chr08 | 11447964                | CC                              | TT                | 1946475698               |

| SNPs IDs              | Chromosome IDs | Chromosomes     | Physical positions (bp) | CDC Frontier (Reference genome) | (Pusa 256 & HPNB) | NCBI SNPdb Accession IDs |
|-----------------------|----------------|-----------------|-------------------------|---------------------------------|-------------------|--------------------------|
| SNP_P3_98684_11448838 | NC_021167.1    | Ca_kabuli_chr08 | 11448838                | AA                              | GG                | 1946475700               |
| SNP_P3_98685_11448882 | NC_021167.1    | Ca_kabuli_chr08 | 11448882                | AA                              | CC                | 1946475701               |
| SNP_P3_98686_11449025 | NC_021167.1    | Ca_kabuli_chr08 | 11449025                | AA                              | CC                | 1946475703               |
| SNP_P3_98687_11449049 | NC_021167.1    | Ca_kabuli_chr08 | 11449049                | TT                              | GG                | 1946475704               |
| SNP_P3_98688_11449175 | NC_021167.1    | Ca_kabuli_chr08 | 11449175                | TT                              | GG                | 1946475706               |
| SNP_P3_98689_11449182 | NC_021167.1    | Ca_kabuli_chr08 | 11449182                | AA                              | GG                | 1946475707               |
| SNP_P3_98690_11449277 | NC_021167.1    | Ca_kabuli_chr08 | 11449277                | AA                              | GG                | 1946475709               |
| SNP_P3_98691_11449290 | NC_021167.1    | Ca_kabuli_chr08 | 11449290                | AA                              | GG                | 1946475710               |
| SNP_P3_98692_11449296 | NC_021167.1    | Ca_kabuli_chr08 | 11449296                | GG                              | AA                | 1946475712               |
| SNP_P3_98693_11449500 | NC_021167.1    | Ca_kabuli_chr08 | 11449500                | TT                              | AA                | 1946475713               |
| SNP_P3_98694_11449507 | NC_021167.1    | Ca_kabuli_chr08 | 11449507                | TT                              | CC                | 1946475715               |
| SNP_P3_98695_11449550 | NC_021167.1    | Ca_kabuli_chr08 | 11449550                | TT                              | AA                | 1946475717               |
| SNP_P3_98696_11449710 | NC_021167.1    | Ca_kabuli_chr08 | 11449710                | AA                              | CC                | 1946475718               |
| SNP_P3_98697_11449742 | NC_021167.1    | Ca_kabuli_chr08 | 11449742                | TT                              | CC                | 1946475720               |
| SNP_P3_98698_11449875 | NC_021167.1    | Ca_kabuli_chr08 | 11449875                | TT                              | AA                | 1946475721               |
| SNP_P3_98699_11449901 | NC_021167.1    | Ca_kabuli_chr08 | 11449901                | GG                              | AA                | 1946475723               |
| SNP_P3_98700_11450163 | NC_021167.1    | Ca_kabuli_chr08 | 11450163                | TT                              | GG                | 1946475724               |
| SNP_P3_98701_11450192 | NC_021167.1    | Ca_kabuli_chr08 | 11450192                | TT                              | AA                | 1946475726               |
| SNP_P3_98702_11450210 | NC_021167.1    | Ca_kabuli_chr08 | 11450210                | TT                              | CC                | 1946475727               |
| SNP_P3_98703_11458419 | NC_021167.1    | Ca_kabuli_chr08 | 11458419                | AA                              | TT                | 1946475728               |
| SNP_P3_98704_11458422 | NC_021167.1    | Ca_kabuli_chr08 | 11458422                | TT                              | CC                | 1946475730               |
| SNP_P3_98705_11458446 | NC_021167.1    | Ca_kabuli_chr08 | 11458446                | CC                              | AA                | 1946475731               |
| SNP_P3_98706_11458679 | NC_021167.1    | Ca_kabuli_chr08 | 11458679                | TT                              | CC                | 1946475733               |
| SNP_P3_98707_11463337 | NC_021167.1    | Ca_kabuli_chr08 | 11463337                | TT                              | CC                | 1946475734               |
| SNP_P3_98708_11463503 | NC_021167.1    | Ca_kabuli_chr08 | 11463503                | GG                              | AA                | 1946475736               |
| SNP_P3_98709_11466154 | NC_021167.1    | Ca_kabuli_chr08 | 11466154                | CC                              | GG                | 1946475738               |
| SNP_P3_98710_11489488 | NC_021167.1    | Ca_kabuli_chr08 | 11489488                | TT                              | CC                | 1946475739               |
| SNP_P3_98711_11489491 | NC_021167.1    | Ca_kabuli_chr08 | 11489491                | GG                              | AA                | 1946475741               |
| SNP_P3_98713_11523118 | NC_021167.1    | Ca_kabuli_chr08 | 11523118                | TT                              | GG                | 1946475742               |
| SNP_P3_98714_11523166 | NC_021167.1    | Ca_kabuli_chr08 | 11523166                | TT                              | AA                | 1946475744               |
| SNP_P3_98715_11523489 | NC_021167.1    | Ca_kabuli_chr08 | 11523489                | AA                              | GG                | 1946475745               |
| SNP_P3_98716_11528288 | NC_021167.1    | Ca_kabuli_chr08 | 11528288                | GG                              | AA                | 1946475747               |
| SNP_P3_98717_11530316 | NC_021167.1    | Ca_kabuli_chr08 | 11530316                | GG                              | TT                | 1946475748               |
| SNP_P3_98721_11545479 | NC_021167.1    | Ca_kabuli_chr08 | 11545479                | TT                              | AA                | 1946475750               |
| SNP_P3_98723_11567098 | NC_021167.1    | Ca_kabuli_chr08 | 11567098                | TT                              | AA                | 1946475751               |
| SNP_P3_98724_11603810 | NC_021167.1    | Ca_kabuli_chr08 | 11603810                | CC                              | TT                | 1946475753               |
| SNP_P3_98725_11603897 | NC_021167.1    | Ca_kabuli_chr08 | 11603897                | GG                              | TT                | 1946475755               |
| SNP_P3_98726_11604014 | NC_021167.1    | Ca_kabuli_chr08 | 11604014                | CC                              | TT                | 1946475756               |
| SNP_P3_98727_11604028 | NC_021167.1    | Ca_kabuli_chr08 | 11604028                | GG                              | TT                | 1946475758               |
| SNP_P3_98728_11604106 | NC_021167.1    | Ca_kabuli_chr08 | 11604106                | CC                              | TT                | 1946475759               |
| SNP_P3_98729_11604157 | NC_021167.1    | Ca_kabuli_chr08 | 11604157                | AA                              | GG                | 1946475761               |
| SNP_P3_98730_11604167 | NC_021167.1    | Ca_kabuli_chr08 | 11604167                | TT                              | AA                | 1946475762               |

| SNPs IDs              | Chromosome IDs | Chromosomes     | Physical positions (bp) | CDC Frontier (Reference genome) | (Pusa 256 & HPNB) | NCBI SNPdb Accession IDs |
|-----------------------|----------------|-----------------|-------------------------|---------------------------------|-------------------|--------------------------|
| SNP_P3_98731_11604985 | NC_021167.1    | Ca_kabuli_chr08 | 11604985                | TT                              | CC                | 1946475764               |
| SNP_P3_98732_11605010 | NC_021167.1    | Ca_kabuli_chr08 | 11605010                | CC                              | TT                | 1946475765               |
| SNP_P3_98733_11605172 | NC_021167.1    | Ca_kabuli_chr08 | 11605172                | TT                              | AA                | 1946475767               |
| SNP_P3_98734_11605190 | NC_021167.1    | Ca_kabuli_chr08 | 11605190                | GG                              | CC                | 1946475768               |
| SNP_P3_98735_11605201 | NC_021167.1    | Ca_kabuli_chr08 | 11605201                | CC                              | TT                | 1946475770               |
| SNP_P3_98736_11605202 | NC_021167.1    | Ca_kabuli_chr08 | 11605202                | TT                              | GG                | 1946475772               |
| SNP_P3_98737_11605213 | NC_021167.1    | Ca_kabuli_chr08 | 11605213                | TT                              | AA                | 1946475773               |
| SNP_P3_98738_11605246 | NC_021167.1    | Ca_kabuli_chr08 | 11605246                | TT                              | GG                | 1946475775               |
| SNP_P3_98739_11605247 | NC_021167.1    | Ca_kabuli_chr08 | 11605247                | AA                              | TT                | 1946475776               |
| SNP_P3_98740_11605311 | NC_021167.1    | Ca_kabuli_chr08 | 11605311                | GG                              | TT                | 1946475778               |
| SNP_P3_98741_11605315 | NC_021167.1    | Ca_kabuli_chr08 | 11605315                | AA                              | TT                | 1946475779               |
| SNP_P3_98742_11605316 | NC_021167.1    | Ca_kabuli_chr08 | 11605316                | GG                              | AA                | 1946475781               |
| SNP_P3_98744_11665384 | NC_021167.1    | Ca_kabuli_chr08 | 11665384                | TT                              | GG                | 1946475782               |
| SNP_P3_98745_11690923 | NC_021167.1    | Ca_kabuli_chr08 | 11690923                | CC                              | TT                | 1946475784               |
| SNP_P3_98746_11730909 | NC_021167.1    | Ca_kabuli_chr08 | 11730909                | CC                              | GG                | 1946475785               |
| SNP_P3_98747_11757371 | NC_021167.1    | Ca_kabuli_chr08 | 11757371                | AA                              | GG                | 1946475787               |
| SNP_P3_98748_11762610 | NC_021167.1    | Ca_kabuli_chr08 | 11762610                | CC                              | TT                | 1946475788               |
| SNP_P3_98750_11770042 | NC_021167.1    | Ca_kabuli_chr08 | 11770042                | TT                              | GG                | 1946475790               |
| SNP_P3_98751_11770045 | NC_021167.1    | Ca_kabuli_chr08 | 11770045                | AA                              | GG                | 1946475791               |
| SNP_P3_98752_11778000 | NC_021167.1    | Ca_kabuli_chr08 | 11778000                | TT                              | CC                | 1946475793               |
| SNP_P3_98753_11808079 | NC_021167.1    | Ca_kabuli_chr08 | 11808079                | TT                              | CC                | 1946475794               |
| SNP_P3_98754_11921918 | NC_021167.1    | Ca_kabuli_chr08 | 11921918                | TT                              | CC                | 1946475796               |
| SNP_P3_98755_11927219 | NC_021167.1    | Ca_kabuli_chr08 | 11927219                | TT                              | CC                | 1946475797               |
| SNP_P3_98756_11933279 | NC_021167.1    | Ca_kabuli_chr08 | 11933279                | GG                              | TT                | 1946475799               |
| SNP_P3_98757_11933285 | NC_021167.1    | Ca_kabuli_chr08 | 11933285                | GG                              | AA                | 1946475800               |
| SNP_P3_98760_11969024 | NC_021167.1    | Ca_kabuli_chr08 | 11969024                | CC                              | AA                | 1946475802               |
| SNP_P3_98761_11969036 | NC_021167.1    | Ca_kabuli_chr08 | 11969036                | CC                              | AA                | 1946475803               |
| SNP_P3_98762_11969073 | NC_021167.1    | Ca_kabuli_chr08 | 11969073                | TT                              | AA                | 1946475805               |
| SNP_P3_98763_11969091 | NC_021167.1    | Ca_kabuli_chr08 | 11969091                | AA                              | GG                | 1946475806               |
| SNP_P3_98764_11969201 | NC_021167.1    | Ca_kabuli_chr08 | 11969201                | TT                              | CC                | 1946475808               |
| SNP_P3_98766_11975592 | NC_021167.1    | Ca_kabuli_chr08 | 11975592                | AA                              | GG                | 1946475809               |
| SNP_P3_98768_11975718 | NC_021167.1    | Ca_kabuli_chr08 | 11975718                | CC                              | GG                | 1946475811               |
| SNP_P3_98769_11975784 | NC_021167.1    | Ca_kabuli_chr08 | 11975784                | AA                              | TT                | 1946475812               |
| SNP_P3_98770_11975895 | NC_021167.1    | Ca_kabuli_chr08 | 11975895                | AA                              | GG                | 1946475813               |
| SNP_P3_98771_11976024 | NC_021167.1    | Ca_kabuli_chr08 | 11976024                | GG                              | AA                | 1946475815               |
| SNP_P3_98773_11976129 | NC_021167.1    | Ca_kabuli_chr08 | 11976129                | GG                              | CC                | 1946475816               |
| SNP_P3_98774_11976159 | NC_021167.1    | Ca_kabuli_chr08 | 11976159                | AA                              | GG                | 1946475818               |
| SNP_P3_98775_11976169 | NC_021167.1    | Ca_kabuli_chr08 | 11976169                | AA                              | GG                | 1946475819               |
| SNP_P3_98776_11976329 | NC_021167.1    | Ca_kabuli_chr08 | 11976329                | AA                              | GG                | 1946475821               |
| SNP_P3_98777_11976379 | NC_021167.1    | Ca_kabuli_chr08 | 11976379                | CC                              | TT                | 1946475822               |
| SNP_P3_98778_11976543 | NC_021167.1    | Ca_kabuli_chr08 | 11976543                | CC                              | TT                | 1946475824               |
| SNP_P3_98779_11976580 | NC_021167.1    | Ca_kabuli_chr08 | 11976580                | CC                              | TT                | 1946475825               |

| SNPs IDs              | Chromosome IDs | Chromosomes     | Physical positions (bp) | CDC Frontier (Reference genome) | (Pusa 256 & HPNB) | NCBI SNPdb Accession IDs |
|-----------------------|----------------|-----------------|-------------------------|---------------------------------|-------------------|--------------------------|
| SNP_P3_98781_11976878 | NC_021167.1    | Ca_kabuli_chr08 | 11976878                | CC                              | TT                | 1946475827               |
| SNP_P3_98782_11979474 | NC_021167.1    | Ca_kabuli_chr08 | 11979474                | GG                              | AA                | 1946475828               |
| SNP_P3_98783_11979726 | NC_021167.1    | Ca_kabuli_chr08 | 11979726                | AA                              | GG                | 1946475830               |
| SNP_P3_98784_11979746 | NC_021167.1    | Ca_kabuli_chr08 | 11979746                | TT                              | GG                | 1946475831               |
| SNP_P3_98785_11979747 | NC_021167.1    | Ca_kabuli_chr08 | 11979747                | GG                              | TT                | 1946475832               |
| SNP_P3_98786_11979764 | NC_021167.1    | Ca_kabuli_chr08 | 11979764                | TT                              | CC                | 1946475834               |
| SNP_P3_98787_11979781 | NC_021167.1    | Ca_kabuli_chr08 | 11979781                | AA                              | TT                | 1946475835               |
| SNP_P3_98788_11979785 | NC_021167.1    | Ca_kabuli_chr08 | 11979785                | GG                              | AA                | 1946475837               |
| SNP_P3_98789_11986056 | NC_021167.1    | Ca_kabuli_chr08 | 11986056                | GG                              | AA                | 1946475838               |
| SNP_P3_98790_11992934 | NC_021167.1    | Ca_kabuli_chr08 | 11992934                | TT                              | CC                | 1946475840               |
| SNP_P3_98791_11992956 | NC_021167.1    | Ca_kabuli_chr08 | 11992956                | GG                              | AA                | 1946475841               |
| SNP_P3_98792_11993264 | NC_021167.1    | Ca_kabuli_chr08 | 11993264                | GG                              | AA                | 1946475843               |
| SNP_P3_98793_11993277 | NC_021167.1    | Ca_kabuli_chr08 | 11993277                | TT                              | AA                | 1946475844               |
| SNP_P3_98795_12007255 | NC_021167.1    | Ca_kabuli_chr08 | 12007255                | GG                              | AA                | 1946475847               |
| SNP_P3_98796_12007271 | NC_021167.1    | Ca_kabuli_chr08 | 12007271                | AA                              | GG                | 1946475848               |
| SNP_P3_98798_12021832 | NC_021167.1    | Ca_kabuli_chr08 | 12021832                | AA                              | GG                | 1946475850               |
| SNP_P3_98799_12027521 | NC_021167.1    | Ca_kabuli_chr08 | 12027521                | GG                              | AA                | 1946475851               |
| SNP_P3_98800_12030894 | NC_021167.1    | Ca_kabuli_chr08 | 12030894                | AA                              | GG                | 1946475853               |
| SNP_P3_98801_12048188 | NC_021167.1    | Ca_kabuli_chr08 | 12048188                | TT                              | CC                | 1946475854               |
| SNP_P3_98802_12048205 | NC_021167.1    | Ca_kabuli_chr08 | 12048205                | TT                              | CC                | 1946475856               |
| SNP_P3_98805_12048558 | NC_021167.1    | Ca_kabuli_chr08 | 12048558                | CC                              | TT                | 1946475857               |
| SNP_P3_98806_12048590 | NC_021167.1    | Ca_kabuli_chr08 | 12048590                | AA                              | GG                | 1946475858               |
| SNP_P3_98807_12048776 | NC_021167.1    | Ca_kabuli_chr08 | 12048776                | CC                              | AA                | 1946475860               |
| SNP_P3_98808_12048782 | NC_021167.1    | Ca_kabuli_chr08 | 12048782                | TT                              | CC                | 1946475861               |
| SNP_P3_98809_12048821 | NC_021167.1    | Ca_kabuli_chr08 | 12048821                | AA                              | GG                | 1946475863               |
| SNP_P3_98810_12056286 | NC_021167.1    | Ca_kabuli_chr08 | 12056286                | AA                              | GG                | 1946475864               |
| SNP_P3_98811_12056430 | NC_021167.1    | Ca_kabuli_chr08 | 12056430                | TT                              | AA                | 1946475866               |
| SNP_P3_98812_12056567 | NC_021167.1    | Ca_kabuli_chr08 | 12056567                | GG                              | TT                | 1946475867               |
| SNP_P3_98813_12056696 | NC_021167.1    | Ca_kabuli_chr08 | 12056696                | AA                              | TT                | 1946475869               |
| SNP_P3_98814_12062307 | NC_021167.1    | Ca_kabuli_chr08 | 12062307                | TT                              | CC                | 1946475870               |
| SNP_P3_98815_12070536 | NC_021167.1    | Ca_kabuli_chr08 | 12070536                | GG                              | TT                | 1946475872               |
| SNP_P3_98817_12081846 | NC_021167.1    | Ca_kabuli_chr08 | 12081846                | AA                              | TT                | 1946475873               |
| SNP_P3_98818_12081847 | NC_021167.1    | Ca_kabuli_chr08 | 12081847                | AA                              | TT                | 1946475875               |
| SNP_P3_98819_12081869 | NC_021167.1    | Ca_kabuli_chr08 | 12081869                | AA                              | TT                | 1946475876               |
| SNP_P3_98820_12082228 | NC_021167.1    | Ca_kabuli_chr08 | 12082228                | TT                              | GG                | 1946475878               |
| SNP_P3_98821_12083936 | NC_021167.1    | Ca_kabuli_chr08 | 12083936                | TT                              | CC                | 1946475879               |
| SNP_P3_98822_12083937 | NC_021167.1    | Ca_kabuli_chr08 | 12083937                | AA                              | CC                | 1946475881               |
| SNP_P3_98823_12802343 | NC_021167.1    | Ca_kabuli_chr08 | 12802343                | CC                              | GG                | 1946475882               |
| SNP_P3_98824_12804254 | NC_021167.1    | Ca_kabuli_chr08 | 12804254                | AA                              | TT                | 1946475884               |
| SNP_P3_98825_12814099 | NC_021167.1    | Ca_kabuli_chr08 | 12814099                | TT                              | CC                | 1946475885               |
| SNP_P3_98826_12818192 | NC_021167.1    | Ca_kabuli_chr08 | 12818192                | CC                              | TT                | 1946475887               |
| SNP_P3_98827_12818311 | NC_021167.1    | Ca_kabuli_chr08 | 12818311                | AA                              | TT                | 1946475888               |



| SNPs IDs              | Chromosome IDs | Chromosomes     | Physical positions (bp) | CDC Frontier (Reference genome) | (Pusa 256 & HPNB) | NCBI SNPdb Accession IDs |
|-----------------------|----------------|-----------------|-------------------------|---------------------------------|-------------------|--------------------------|
| SNP_P3_98828_12818384 | NC_021167.1    | Ca_kabuli_chr08 | 12818384                | CC                              | TT                | 1946475890               |
| SNP_P3_98829_12818385 | NC_021167.1    | Ca_kabuli_chr08 | 12818385                | TT                              | GG                | 1946475891               |
| SNP_P3_98830_12840649 | NC_021167.1    | Ca_kabuli_chr08 | 12840649                | GG                              | AA                | 1946475893               |
| SNP_P3_98831_12840650 | NC_021167.1    | Ca_kabuli_chr08 | 12840650                | CC                              | AA                | 1946475894               |
| SNP_P3_98832_12840692 | NC_021167.1    | Ca_kabuli_chr08 | 12840692                | CC                              | TT                | 1946475896               |
| SNP_P3_98833_12843784 | NC_021167.1    | Ca_kabuli_chr08 | 12843784                | CC                              | TT                | 1946475897               |
| SNP_P3_98834_12843914 | NC_021167.1    | Ca_kabuli_chr08 | 12843914                | TT                              | CC                | 1946475899               |
| SNP_P3_98835_12844214 | NC_021167.1    | Ca_kabuli_chr08 | 12844214                | TT                              | CC                | 1946475900               |
| SNP_P3_98836_12844308 | NC_021167.1    | Ca_kabuli_chr08 | 12844308                | GG                              | AA                | 1946475902               |
| SNP_P3_98837_12871893 | NC_021167.1    | Ca_kabuli_chr08 | 12871893                | GG                              | TT                | 1946475903               |
| SNP_P3_98839_12964162 | NC_021167.1    | Ca_kabuli_chr08 | 12964162                | TT                              | CC                | 1946475905               |
| SNP_P3_98840_12966357 | NC_021167.1    | Ca_kabuli_chr08 | 12966357                | CC                              | GG                | 1946475907               |
| SNP_P3_98841_12966399 | NC_021167.1    | Ca_kabuli_chr08 | 12966399                | TT                              | CC                | 1946475908               |
| SNP_P3_98842_12978727 | NC_021167.1    | Ca_kabuli_chr08 | 12978727                | GG                              | TT                | 1946475910               |
| SNP_P3_98843_12978736 | NC_021167.1    | Ca_kabuli_chr08 | 12978736                | CC                              | TT                | 1946475911               |
| SNP_P3_98844_12978760 | NC_021167.1    | Ca_kabuli_chr08 | 12978760                | AA                              | GG                | 1946475913               |
| SNP_P3_98845_12978931 | NC_021167.1    | Ca_kabuli_chr08 | 12978931                | AA                              | GG                | 1946475914               |
| SNP_P3_98846_12978958 | NC_021167.1    | Ca_kabuli_chr08 | 12978958                | CC                              | AA                | 1946475916               |
| SNP_P3_98849_12979086 | NC_021167.1    | Ca_kabuli_chr08 | 12979086                | CC                              | GG                | 1946475917               |
| SNP_P3_98850_12979106 | NC_021167.1    | Ca_kabuli_chr08 | 12979106                | AA                              | TT                | 1946475919               |
| SNP_P3_98851_12979119 | NC_021167.1    | Ca_kabuli_chr08 | 12979119                | CC                              | AA                | 1946475920               |
| SNP_P3_98852_12979161 | NC_021167.1    | Ca_kabuli_chr08 | 12979161                | CC                              | TT                | 1946475922               |
| SNP_P3_98853_12979166 | NC_021167.1    | Ca_kabuli_chr08 | 12979166                | AA                              | GG                | 1946475923               |
| SNP_P3_98854_12979204 | NC_021167.1    | Ca_kabuli_chr08 | 12979204                | TT                              | CC                | 1946475925               |
| SNP_P3_98855_12979252 | NC_021167.1    | Ca_kabuli_chr08 | 12979252                | AA                              | TT                | 1946475926               |
| SNP_P3_98856_12979296 | NC_021167.1    | Ca_kabuli_chr08 | 12979296                | TT                              | GG                | 1946475928               |
| SNP_P3_98857_12979338 | NC_021167.1    | Ca_kabuli_chr08 | 12979338                | AA                              | GG                | 1946475929               |
| SNP_P3_98858_12979367 | NC_021167.1    | Ca_kabuli_chr08 | 12979367                | TT                              | CC                | 1946475931               |
| SNP_P3_98859_12979513 | NC_021167.1    | Ca_kabuli_chr08 | 12979513                | AA                              | GG                | 1946475932               |
| SNP_P3_98860_12979573 | NC_021167.1    | Ca_kabuli_chr08 | 12979573                | CC                              | GG                | 1946475934               |
| SNP_P3_98861_12979615 | NC_021167.1    | Ca_kabuli_chr08 | 12979615                | TT                              | GG                | 1946475935               |
| SNP_P3_98862_12979772 | NC_021167.1    | Ca_kabuli_chr08 | 12979772                | TT                              | CC                | 1946475937               |
| SNP_P3_98863_12979826 | NC_021167.1    | Ca_kabuli_chr08 | 12979826                | TT                              | GG                | 1946475938               |
| SNP_P3_98864_12979882 | NC_021167.1    | Ca_kabuli_chr08 | 12979882                | TT                              | CC                | 1946475939               |
| SNP_P3_98865_12979947 | NC_021167.1    | Ca_kabuli_chr08 | 12979947                | GG                              | AA                | 1946475941               |
| SNP_P3_98866_12980029 | NC_021167.1    | Ca_kabuli_chr08 | 12980029                | AA                              | GG                | 1946475942               |
| SNP_P3_98867_12980036 | NC_021167.1    | Ca_kabuli_chr08 | 12980036                | AA                              | GG                | 1946475944               |
| SNP_P3_98868_12980043 | NC_021167.1    | Ca_kabuli_chr08 | 12980043                | AA                              | CC                | 1946475945               |
| SNP_P3_98869_12980388 | NC_021167.1    | Ca_kabuli_chr08 | 12980388                | GG                              | TT                | 1946475947               |
| SNP_P3_98870_12980396 | NC_021167.1    | Ca_kabuli_chr08 | 12980396                | TT                              | CC                | 1946475948               |
| SNP_P3_98871_12980632 | NC_021167.1    | Ca_kabuli_chr08 | 12980632                | GG                              | CC                | 1946475950               |
| SNP_P3_98872_12980656 | NC_021167.1    | Ca_kabuli_chr08 | 12980656                | TT                              | CC                | 1946475952               |

| SNPs IDs              | Chromosome IDs | Chromosomes     | Physical positions (bp) | CDC Frontier (Reference genome) | (Pusa 256 & HPNB) | NCBI SNPdb Accession IDs |
|-----------------------|----------------|-----------------|-------------------------|---------------------------------|-------------------|--------------------------|
| SNP_P3_98873_12980711 | NC_021167.1    | Ca_kabuli_chr08 | 12980711                | CC                              | TT                | 1946475953               |
| SNP_P3_98874_12980927 | NC_021167.1    | Ca_kabuli_chr08 | 12980927                | CC                              | TT                | 1946475955               |
| SNP_P3_98875_12983429 | NC_021167.1    | Ca_kabuli_chr08 | 12983429                | CC                              | TT                | 1946475956               |
| SNP_P3_98876_12983450 | NC_021167.1    | Ca_kabuli_chr08 | 12983450                | CC                              | TT                | 1946475958               |
| SNP_P3_98878_12983506 | NC_021167.1    | Ca_kabuli_chr08 | 12983506                | AA                              | CC                | 1946475959               |
| SNP_P3_98879_12983529 | NC_021167.1    | Ca_kabuli_chr08 | 12983529                | AA                              | GG                | 1946475961               |
| SNP_P3_98880_12983626 | NC_021167.1    | Ca_kabuli_chr08 | 12983626                | TT                              | CC                | 1946475962               |
| SNP_P3_98881_12983705 | NC_021167.1    | Ca_kabuli_chr08 | 12983705                | AA                              | GG                | 1946475964               |
| SNP_P3_98882_12983740 | NC_021167.1    | Ca_kabuli_chr08 | 12983740                | TT                              | AA                | 1946475965               |
| SNP_P3_98883_12983803 | NC_021167.1    | Ca_kabuli_chr08 | 12983803                | CC                              | TT                | 1946475967               |
| SNP_P3_98884_12983854 | NC_021167.1    | Ca_kabuli_chr08 | 12983854                | CC                              | AA                | 1946475968               |
| SNP_P3_98885_12983884 | NC_021167.1    | Ca_kabuli_chr08 | 12983884                | CC                              | TT                | 1946475970               |
| SNP_P3_98887_12984089 | NC_021167.1    | Ca_kabuli_chr08 | 12984089                | CC                              | AA                | 1946475971               |
| SNP_P3_98888_12984090 | NC_021167.1    | Ca_kabuli_chr08 | 12984090                | AA                              | CC                | 1946475973               |
| SNP_P3_98890_12984113 | NC_021167.1    | Ca_kabuli_chr08 | 12984113                | AA                              | TT                | 1946475974               |
| SNP_P3_98891_12984150 | NC_021167.1    | Ca_kabuli_chr08 | 12984150                | TT                              | CC                | 1946475975               |
| SNP_P3_98892_12984201 | NC_021167.1    | Ca_kabuli_chr08 | 12984201                | CC                              | TT                | 1946475977               |
| SNP_P3_98893_12984238 | NC_021167.1    | Ca_kabuli_chr08 | 12984238                | AA                              | GG                | 1946475978               |
| SNP_P3_98894_12984293 | NC_021167.1    | Ca_kabuli_chr08 | 12984293                | AA                              | GG                | 1946475980               |
| SNP_P3_98895_12984320 | NC_021167.1    | Ca_kabuli_chr08 | 12984320                | TT                              | AA                | 1946475981               |
| SNP_P3_98896_12984359 | NC_021167.1    | Ca_kabuli_chr08 | 12984359                | AA                              | GG                | 1946475983               |
| SNP_P3_98897_12984375 | NC_021167.1    | Ca_kabuli_chr08 | 12984375                | TT                              | CC                | 1946475985               |
| SNP_P3_98898_12984390 | NC_021167.1    | Ca_kabuli_chr08 | 12984390                | TT                              | CC                | 1946475986               |
| SNP_P3_98899_12984562 | NC_021167.1    | Ca_kabuli_chr08 | 12984562                | CC                              | TT                | 1946475988               |
| SNP_P3_98900_12984651 | NC_021167.1    | Ca_kabuli_chr08 | 12984651                | AA                              | GG                | 1946475989               |
| SNP_P3_98901_12984734 | NC_021167.1    | Ca_kabuli_chr08 | 12984734                | AA                              | TT                | 1946475990               |
| SNP_P3_98902_12984782 | NC_021167.1    | Ca_kabuli_chr08 | 12984782                | TT                              | CC                | 1946475992               |
| SNP_P3_98903_12984791 | NC_021167.1    | Ca_kabuli_chr08 | 12984791                | CC                              | GG                | 1946475993               |
| SNP_P3_98904_12984886 | NC_021167.1    | Ca_kabuli_chr08 | 12984886                | CC                              | TT                | 1946475995               |
| SNP_P3_98905_12984943 | NC_021167.1    | Ca_kabuli_chr08 | 12984943                | GG                              | AA                | 1946475996               |
| SNP_P3_98906_12984953 | NC_021167.1    | Ca_kabuli_chr08 | 12984953                | CC                              | TT                | 1946475998               |
| SNP_P3_98907_12984971 | NC_021167.1    | Ca_kabuli_chr08 | 12984971                | AA                              | GG                | 1946475999               |
| SNP_P3_98908_12984994 | NC_021167.1    | Ca_kabuli_chr08 | 12984994                | GG                              | CC                | 1946476000               |
| SNP_P3_98909_12985038 | NC_021167.1    | Ca_kabuli_chr08 | 12985038                | AA                              | CC                | 1946476002               |
| SNP_P3_98910_12985058 | NC_021167.1    | Ca_kabuli_chr08 | 12985058                | TT                              | CC                | 1946476003               |
| SNP_P3_98911_12985109 | NC_021167.1    | Ca_kabuli_chr08 | 12985109                | TT                              | AA                | 1946476005               |
| SNP_P3_98912_12985116 | NC_021167.1    | Ca_kabuli_chr08 | 12985116                | AA                              | GG                | 1946476006               |
| SNP_P3_98913_12985121 | NC_021167.1    | Ca_kabuli_chr08 | 12985121                | TT                              | CC                | 1946476008               |
| SNP_P3_98914_12985151 | NC_021167.1    | Ca_kabuli_chr08 | 12985151                | AA                              | CC                | 1946476009               |
| SNP_P3_98915_12985289 | NC_021167.1    | Ca_kabuli_chr08 | 12985289                | GG                              | CC                | 1946476011               |
| SNP_P3_98916_12985340 | NC_021167.1    | Ca_kabuli_chr08 | 12985340                | TT                              | CC                | 1946476012               |
| SNP_P3_98917_12985350 | NC_021167.1    | Ca_kabuli_chr08 | 12985350                | AA                              | GG                | 1946476014               |

| SNPs IDs              | Chromosome IDs | Chromosomes     | Physical positions (bp) | CDC Frontier (Reference genome) | (Pusa 256 & HPNB) | NCBI SNPdb Accession IDs |
|-----------------------|----------------|-----------------|-------------------------|---------------------------------|-------------------|--------------------------|
| SNP_P3_98918_12985586 | NC_021167.1    | Ca_kabuli_chr08 | 12985586                | GG                              | AA                | 1946476015               |
| SNP_P3_98919_12985601 | NC_021167.1    | Ca_kabuli_chr08 | 12985601                | AA                              | GG                | 1946476017               |
| SNP_P3_98920_12985618 | NC_021167.1    | Ca_kabuli_chr08 | 12985618                | CC                              | TT                | 1946476018               |
| SNP_P3_98921_12985661 | NC_021167.1    | Ca_kabuli_chr08 | 12985661                | CC                              | TT                | 1946476019               |
| SNP_P3_98922_12985762 | NC_021167.1    | Ca_kabuli_chr08 | 12985762                | AA                              | GG                | 1946476021               |
| SNP_P3_98923_12985918 | NC_021167.1    | Ca_kabuli_chr08 | 12985918                | AA                              | GG                | 1946476023               |
| SNP_P3_98924_12986964 | NC_021167.1    | Ca_kabuli_chr08 | 12986964                | AA                              | CC                | 1946476024               |
| SNP_P3_98925_12986988 | NC_021167.1    | Ca_kabuli_chr08 | 12986988                | CC                              | TT                | 1946476026               |
| SNP_P3_98926_12987030 | NC_021167.1    | Ca_kabuli_chr08 | 12987030                | AA                              | CC                | 1946476027               |
| SNP_P3_98927_12987115 | NC_021167.1    | Ca_kabuli_chr08 | 12987115                | CC                              | AA                | 1946476029               |
| SNP_P3_98928_12987145 | NC_021167.1    | Ca_kabuli_chr08 | 12987145                | GG                              | AA                | 1946476030               |
| SNP_P3_98929_12987197 | NC_021167.1    | Ca_kabuli_chr08 | 12987197                | CC                              | TT                | 1946476032               |
| SNP_P3_98930_12987250 | NC_021167.1    | Ca_kabuli_chr08 | 12987250                | GG                              | TT                | 1946476033               |
| SNP_P3_98931_12987314 | NC_021167.1    | Ca_kabuli_chr08 | 12987314                | TT                              | GG                | 1946476035               |
| SNP_P3_98932_12987355 | NC_021167.1    | Ca_kabuli_chr08 | 12987355                | TT                              | CC                | 1946476036               |
| SNP_P3_98933_12987382 | NC_021167.1    | Ca_kabuli_chr08 | 12987382                | CC                              | TT                | 1946476038               |
| SNP_P3_98934_12987420 | NC_021167.1    | Ca_kabuli_chr08 | 12987420                | CC                              | TT                | 1946476039               |
| SNP_P3_98935_12987435 | NC_021167.1    | Ca_kabuli_chr08 | 12987435                | GG                              | AA                | 1946476041               |
| SNP_P3_98936_12987580 | NC_021167.1    | Ca_kabuli_chr08 | 12987580                | GG                              | CC                | 1946476042               |
| SNP_P3_98937_12987587 | NC_021167.1    | Ca_kabuli_chr08 | 12987587                | GG                              | AA                | 1946476044               |
| SNP_P3_98938_12987628 | NC_021167.1    | Ca_kabuli_chr08 | 12987628                | TT                              | AA                | 1946476046               |
| SNP_P3_98939_12987713 | NC_021167.1    | Ca_kabuli_chr08 | 12987713                | GG                              | AA                | 1946476048               |
| SNP_P3_98940_12987737 | NC_021167.1    | Ca_kabuli_chr08 | 12987737                | CC                              | TT                | 1946476049               |
| SNP_P3_98941_12987754 | NC_021167.1    | Ca_kabuli_chr08 | 12987754                | AA                              | GG                | 1946476051               |
| SNP_P3_98942_12987760 | NC_021167.1    | Ca_kabuli_chr08 | 12987760                | CC                              | TT                | 1946476052               |
| SNP_P3_98943_12987768 | NC_021167.1    | Ca_kabuli_chr08 | 12987768                | GG                              | TT                | 1946476054               |
| SNP_P3_98944_12987779 | NC_021167.1    | Ca_kabuli_chr08 | 12987779                | AA                              | GG                | 1946476055               |
| SNP_P3_98945_12987812 | NC_021167.1    | Ca_kabuli_chr08 | 12987812                | TT                              | CC                | 1946476057               |
| SNP_P3_98946_12987902 | NC_021167.1    | Ca_kabuli_chr08 | 12987902                | CC                              | TT                | 1946476058               |
| SNP_P3_98947_12987950 | NC_021167.1    | Ca_kabuli_chr08 | 12987950                | TT                              | CC                | 1946476060               |
| SNP_P3_98948_12987954 | NC_021167.1    | Ca_kabuli_chr08 | 12987954                | TT                              | AA                | 1946476062               |
| SNP_P3_98949_12988004 | NC_021167.1    | Ca_kabuli_chr08 | 12988004                | TT                              | GG                | 1946476063               |
| SNP_P3_98950_12988071 | NC_021167.1    | Ca_kabuli_chr08 | 12988071                | GG                              | TT                | 1946476065               |
| SNP_P3_98951_12988095 | NC_021167.1    | Ca_kabuli_chr08 | 12988095                | AA                              | GG                | 1946476066               |
| SNP_P3_98952_12988115 | NC_021167.1    | Ca_kabuli_chr08 | 12988115                | AA                              | GG                | 1946476068               |
| SNP_P3_98953_12988135 | NC_021167.1    | Ca_kabuli_chr08 | 12988135                | TT                              | GG                | 1946476069               |
| SNP_P3_98954_12988200 | NC_021167.1    | Ca_kabuli_chr08 | 12988200                | CC                              | TT                | 1946476071               |
| SNP_P3_98955_12988271 | NC_021167.1    | Ca_kabuli_chr08 | 12988271                | AA                              | TT                | 1946476072               |
| SNP_P3_98956_12988422 | NC_021167.1    | Ca_kabuli_chr08 | 12988422                | TT                              | CC                | 1946476074               |
| SNP_P3_98957_12988499 | NC_021167.1    | Ca_kabuli_chr08 | 12988499                | TT                              | GG                | 1946476075               |
| SNP_P3_98958_12988543 | NC_021167.1    | Ca_kabuli_chr08 | 12988543                | AA                              | TT                | 1946476077               |
| SNP_P3_98960_12988665 | NC_021167.1    | Ca_kabuli_chr08 | 12988665                | CC                              | TT                | 1946476078               |

| SNPs IDs              | Chromosome IDs | Chromosomes     | Physical positions (bp) | CDC Frontier (Reference genome) | (Pusa 256 & HPNB) | NCBI SNPdb Accession IDs |
|-----------------------|----------------|-----------------|-------------------------|---------------------------------|-------------------|--------------------------|
| SNP_P3_98961_12988824 | NC_021167.1    | Ca_kabuli_chr08 | 12988824                | CC                              | AA                | 1946476080               |
| SNP_P3_98962_12988844 | NC_021167.1    | Ca_kabuli_chr08 | 12988844                | GG                              | AA                | 1946476082               |
| SNP_P3_98963_12988960 | NC_021167.1    | Ca_kabuli_chr08 | 12988960                | AA                              | CC                | 1946476083               |
| SNP_P3_98964_12988987 | NC_021167.1    | Ca_kabuli_chr08 | 12988987                | GG                              | CC                | 1946476085               |
| SNP_P3_98965_12989033 | NC_021167.1    | Ca_kabuli_chr08 | 12989033                | CC                              | TT                | 1946476086               |
| SNP_P3_98966_12989035 | NC_021167.1    | Ca_kabuli_chr08 | 12989035                | AA                              | GG                | 1946476088               |
| SNP_P3_98967_12989064 | NC_021167.1    | Ca_kabuli_chr08 | 12989064                | CC                              | GG                | 1946476089               |
| SNP_P3_98968_12989102 | NC_021167.1    | Ca_kabuli_chr08 | 12989102                | AA                              | GG                | 1946476091               |
| SNP_P3_98969_12989143 | NC_021167.1    | Ca_kabuli_chr08 | 12989143                | CC                              | TT                | 1946476092               |
| SNP_P3_98970_12989172 | NC_021167.1    | Ca_kabuli_chr08 | 12989172                | AA                              | GG                | 1946476094               |
| SNP_P3_98971_12989221 | NC_021167.1    | Ca_kabuli_chr08 | 12989221                | TT                              | AA                | 1946476095               |
| SNP_P3_98972_12989252 | NC_021167.1    | Ca_kabuli_chr08 | 12989252                | TT                              | AA                | 1946476097               |
| SNP_P3_98973_12989285 | NC_021167.1    | Ca_kabuli_chr08 | 12989285                | GG                              | AA                | 1946476098               |
| SNP_P3_98974_12989403 | NC_021167.1    | Ca_kabuli_chr08 | 12989403                | TT                              | CC                | 1946476100               |
| SNP_P3_98975_12989412 | NC_021167.1    | Ca_kabuli_chr08 | 12989412                | AA                              | GG                | 1946476102               |
| SNP_P3_98976_12989811 | NC_021167.1    | Ca_kabuli_chr08 | 12989811                | GG                              | AA                | 1946476103               |
| SNP_P3_98977_12989855 | NC_021167.1    | Ca_kabuli_chr08 | 12989855                | AA                              | GG                | 1946476105               |
| SNP_P3_98979_12990058 | NC_021167.1    | Ca_kabuli_chr08 | 12990058                | CC                              | GG                | 1946476106               |
| SNP_P3_98980_12996678 | NC_021167.1    | Ca_kabuli_chr08 | 12996678                | CC                              | TT                | 1946476108               |
| SNP_P3_98981_12998586 | NC_021167.1    | Ca_kabuli_chr08 | 12998586                | CC                              | AA                | 1946476109               |
| SNP_P3_98982_12998626 | NC_021167.1    | Ca_kabuli_chr08 | 12998626                | TT                              | CC                | 1946476111               |
| SNP_P3_98983_12998696 | NC_021167.1    | Ca_kabuli_chr08 | 12998696                | TT                              | AA                | 1946476112               |
| SNP_P3_98985_12998764 | NC_021167.1    | Ca_kabuli_chr08 | 12998764                | AA                              | CC                | 1946476114               |
| SNP_P3_98986_12998942 | NC_021167.1    | Ca_kabuli_chr08 | 12998942                | CC                              | TT                | 1946476115               |
| SNP_P3_98987_12998948 | NC_021167.1    | Ca_kabuli_chr08 | 12998948                | GG                              | AA                | 1946476117               |
| SNP_P3_98988_12998952 | NC_021167.1    | Ca_kabuli_chr08 | 12998952                | TT                              | CC                | 1946476118               |
| SNP_P3_98989_12998960 | NC_021167.1    | Ca_kabuli_chr08 | 12998960                | TT                              | CC                | 1946476120               |
| SNP_P3_98990_12999017 | NC_021167.1    | Ca_kabuli_chr08 | 12999017                | CC                              | TT                | 1946476121               |
| SNP_P3_98991_12999101 | NC_021167.1    | Ca_kabuli_chr08 | 12999101                | AA                              | GG                | 1946476123               |
| SNP_P3_98992_12999858 | NC_021167.1    | Ca_kabuli_chr08 | 12999858                | AA                              | TT                | 1946476124               |
| SNP_P3_98993_13000251 | NC_021167.1    | Ca_kabuli_chr08 | 13000251                | CC                              | AA                | 1946476126               |
| SNP_P3_98994_13001350 | NC_021167.1    | Ca_kabuli_chr08 | 13001350                | TT                              | CC                | 1946476128               |
| SNP_P3_98995_13001359 | NC_021167.1    | Ca_kabuli_chr08 | 13001359                | AA                              | GG                | 1946476129               |
| SNP_P3_98996_13005198 | NC_021167.1    | Ca_kabuli_chr08 | 13005198                | AA                              | GG                | 1946476131               |
| SNP_P3_98997_13005200 | NC_021167.1    | Ca_kabuli_chr08 | 13005200                | AA                              | GG                | 1946476132               |
| SNP_P3_98998_13005269 | NC_021167.1    | Ca_kabuli_chr08 | 13005269                | AA                              | GG                | 1946476134               |
| SNP_P3_98999_13005310 | NC_021167.1    | Ca_kabuli_chr08 | 13005310                | TT                              | AA                | 1946476135               |
| SNP_P3_99000_13005311 | NC_021167.1    | Ca_kabuli_chr08 | 13005311                | AA                              | GG                | 1946476137               |
| SNP_P3_99001_13005315 | NC_021167.1    | Ca_kabuli_chr08 | 13005315                | CC                              | TT                | 1946476138               |
| SNP_P3_99002_13005552 | NC_021167.1    | Ca_kabuli_chr08 | 13005552                | CC                              | GG                | 1946476140               |
| SNP_P3_99004_13009398 | NC_021167.1    | Ca_kabuli_chr08 | 13009398                | CC                              | GG                | 1946476141               |
| SNP_P3_99005_13009422 | NC_021167.1    | Ca_kabuli_chr08 | 13009422                | TT                              | CC                | 1946476143               |

| SNPs IDs              | Chromosome IDs | Chromosomes     | Physical positions (bp) | CDC Frontier (Reference genome) | (Pusa 256 & HPNB) | NCBI SNPdb Accession IDs |
|-----------------------|----------------|-----------------|-------------------------|---------------------------------|-------------------|--------------------------|
| SNP_P3_99006_13009477 | NC_021167.1    | Ca_kabuli_chr08 | 13009477                | TT                              | CC                | 1946476144               |
| SNP_P3_99007_13009495 | NC_021167.1    | Ca_kabuli_chr08 | 13009495                | CC                              | TT                | 1946476146               |
| SNP_P3_99008_13009553 | NC_021167.1    | Ca_kabuli_chr08 | 13009553                | TT                              | CC                | 1946476148               |
| SNP_P3_99009_13009588 | NC_021167.1    | Ca_kabuli_chr08 | 13009588                | GG                              | CC                | 1946476149               |
| SNP_P3_99010_13009603 | NC_021167.1    | Ca_kabuli_chr08 | 13009603                | GG                              | AA                | 1946476151               |
| SNP_P3_99011_13010816 | NC_021167.1    | Ca_kabuli_chr08 | 13010816                | GG                              | AA                | 1946476152               |
| SNP_P3_99012_13012674 | NC_021167.1    | Ca_kabuli_chr08 | 13012674                | TT                              | AA                | 1946476154               |
| SNP_P3_99013_13041031 | NC_021167.1    | Ca_kabuli_chr08 | 13041031                | CC                              | TT                | 1946476155               |
| SNP_P3_99014_13076963 | NC_021167.1    | Ca_kabuli_chr08 | 13076963                | CC                              | TT                | 1946476157               |
| SNP_P3_99015_13077985 | NC_021167.1    | Ca_kabuli_chr08 | 13077985                | AA                              | CC                | 1946476158               |
| SNP_P3_99016_13081348 | NC_021167.1    | Ca_kabuli_chr08 | 13081348                | TT                              | GG                | 1946476160               |
| SNP_P3_99017_13083324 | NC_021167.1    | Ca_kabuli_chr08 | 13083324                | GG                              | AA                | 1946476161               |
| SNP_P3_99018_13083394 | NC_021167.1    | Ca_kabuli_chr08 | 13083394                | TT                              | CC                | 1946476163               |
| SNP_P3_99019_13083658 | NC_021167.1    | Ca_kabuli_chr08 | 13083658                | AA                              | GG                | 1946476164               |
| SNP_P3_99020_13083739 | NC_021167.1    | Ca_kabuli_chr08 | 13083739                | CC                              | TT                | 1946476166               |
| SNP_P3_99021_13101309 | NC_021167.1    | Ca_kabuli_chr08 | 13101309                | GG                              | CC                | 1946476167               |
| SNP_P3_99022_13101413 | NC_021167.1    | Ca_kabuli_chr08 | 13101413                | AA                              | GG                | 1946476169               |
| SNP_P3_99023_13101503 | NC_021167.1    | Ca_kabuli_chr08 | 13101503                | AA                              | TT                | 1946476170               |
| SNP_P3_99024_13101518 | NC_021167.1    | Ca_kabuli_chr08 | 13101518                | TT                              | CC                | 1946476172               |
| SNP_P3_99025_13103619 | NC_021167.1    | Ca_kabuli_chr08 | 13103619                | AA                              | GG                | 1946476174               |
| SNP_P3_99026_13103627 | NC_021167.1    | Ca_kabuli_chr08 | 13103627                | CC                              | TT                | 1946476175               |
| SNP_P3_99027_13103630 | NC_021167.1    | Ca_kabuli_chr08 | 13103630                | AA                              | GG                | 1946476177               |
| SNP_P3_99028_13103664 | NC_021167.1    | Ca_kabuli_chr08 | 13103664                | AA                              | GG                | 1946476178               |
| SNP_P3_99029_13103673 | NC_021167.1    | Ca_kabuli_chr08 | 13103673                | CC                              | TT                | 1946476180               |
| SNP_P3_99030_13103688 | NC_021167.1    | Ca_kabuli_chr08 | 13103688                | CC                              | TT                | 1946476181               |
| SNP_P3_99031_13103691 | NC_021167.1    | Ca_kabuli_chr08 | 13103691                | GG                              | AA                | 1946476183               |
| SNP_P3_99032_13103694 | NC_021167.1    | Ca_kabuli_chr08 | 13103694                | GG                              | AA                | 1946476184               |
| SNP_P3_99033_13106880 | NC_021167.1    | Ca_kabuli_chr08 | 13106880                | GG                              | TT                | 1946476186               |
| SNP_P3_99034_13144817 | NC_021167.1    | Ca_kabuli_chr08 | 13144817                | GG                              | AA                | 1946476187               |
| SNP_P3_99035_13186775 | NC_021167.1    | Ca_kabuli_chr08 | 13186775                | CC                              | GG                | 1946476189               |
| SNP_P3_99037_13204303 | NC_021167.1    | Ca_kabuli_chr08 | 13204303                | AA                              | GG                | 1946476190               |
| SNP_P3_99038_13228518 | NC_021167.1    | Ca_kabuli_chr08 | 13228518                | AA                              | TT                | 1946476192               |
| SNP_P3_99039_13275216 | NC_021167.1    | Ca_kabuli_chr08 | 13275216                | CC                              | AA                | 1946476194               |
| SNP_P3_99040_13279747 | NC_021167.1    | Ca_kabuli_chr08 | 13279747                | GG                              | TT                | 1946476195               |
| SNP_P3_99041_13297394 | NC_021167.1    | Ca_kabuli_chr08 | 13297394                | CC                              | GG                | 1946476197               |
| SNP_P3_99042_13297414 | NC_021167.1    | Ca_kabuli_chr08 | 13297414                | AA                              | GG                | 1946476198               |
| SNP_P3_99043_13297435 | NC_021167.1    | Ca_kabuli_chr08 | 13297435                | TT                              | GG                | 1946476200               |
| SNP_P3_99044_13297436 | NC_021167.1    | Ca_kabuli_chr08 | 13297436                | TT                              | CC                | 1946476201               |
| SNP_P3_99045_13297749 | NC_021167.1    | Ca_kabuli_chr08 | 13297749                | AA                              | CC                | 1946476203               |
| SNP_P3_99046_13297895 | NC_021167.1    | Ca_kabuli_chr08 | 13297895                | GG                              | CC                | 1946476205               |
| SNP_P3_99047_13297916 | NC_021167.1    | Ca_kabuli_chr08 | 13297916                | TT                              | GG                | 1946476206               |
| SNP_P3_99049_13298036 | NC_021167.1    | Ca_kabuli_chr08 | 13298036                | TT                              | CC                | 1946476208               |

| SNPs IDs              | Chromosome IDs | Chromosomes     | Physical positions (bp) | CDC Frontier (Reference genome) | (Pusa 256 & HPNB) | NCBI SNPdb Accession IDs |
|-----------------------|----------------|-----------------|-------------------------|---------------------------------|-------------------|--------------------------|
| SNP_P3_99050_13298042 | NC_021167.1    | Ca_kabuli_chr08 | 13298042                | GG                              | CC                | 1946476209               |
| SNP_P3_99051_13298057 | NC_021167.1    | Ca_kabuli_chr08 | 13298057                | GG                              | AA                | 1946476211               |
| SNP_P3_99052_13298200 | NC_021167.1    | Ca_kabuli_chr08 | 13298200                | AA                              | TT                | 1946476213               |
| SNP_P3_99053_13298206 | NC_021167.1    | Ca_kabuli_chr08 | 13298206                | TT                              | AA                | 1946476214               |
| SNP_P3_99055_13299032 | NC_021167.1    | Ca_kabuli_chr08 | 13299032                | GG                              | AA                | 1946476216               |
| SNP_P3_99056_13299077 | NC_021167.1    | Ca_kabuli_chr08 | 13299077                | TT                              | GG                | 1946476217               |
| SNP_P3_99057_13299094 | NC_021167.1    | Ca_kabuli_chr08 | 13299094                | AA                              | CC                | 1946476219               |
| SNP_P3_99059_13308756 | NC_021167.1    | Ca_kabuli_chr08 | 13308756                | TT                              | GG                | 1946476220               |
| SNP_P3_99060_13311065 | NC_021167.1    | Ca_kabuli_chr08 | 13311065                | AA                              | CC                | 1946476222               |
| SNP_P3_99061_13311095 | NC_021167.1    | Ca_kabuli_chr08 | 13311095                | GG                              | CC                | 1946476223               |
| SNP_P3_99062_13311103 | NC_021167.1    | Ca_kabuli_chr08 | 13311103                | CC                              | TT                | 1946476225               |
| SNP_P3_99063_13312863 | NC_021167.1    | Ca_kabuli_chr08 | 13312863                | CC                              | TT                | 1946476226               |
| SNP_P3_99064_13312912 | NC_021167.1    | Ca_kabuli_chr08 | 13312912                | AA                              | CC                | 1946476228               |
| SNP_P3_99065_13312913 | NC_021167.1    | Ca_kabuli_chr08 | 13312913                | TT                              | AA                | 1946476229               |
| SNP_P3_99066_13312930 | NC_021167.1    | Ca_kabuli_chr08 | 13312930                | CC                              | TT                | 1946476231               |
| SNP_P3_99067_13329136 | NC_021167.1    | Ca_kabuli_chr08 | 13329136                | TT                              | GG                | 1946476232               |
| SNP_P3_99068_13329151 | NC_021167.1    | Ca_kabuli_chr08 | 13329151                | TT                              | CC                | 1946476234               |
| SNP_P3_99069_13329256 | NC_021167.1    | Ca_kabuli_chr08 | 13329256                | TT                              | CC                | 1946476235               |
| SNP_P3_99070_13329419 | NC_021167.1    | Ca_kabuli_chr08 | 13329419                | CC                              | TT                | 1946476237               |
| SNP_P3_99071_13329432 | NC_021167.1    | Ca_kabuli_chr08 | 13329432                | AA                              | GG                | 1946476239               |
| SNP_P3_99072_13329457 | NC_021167.1    | Ca_kabuli_chr08 | 13329457                | CC                              | TT                | 1946476240               |
| SNP_P3_99073_13330504 | NC_021167.1    | Ca_kabuli_chr08 | 13330504                | GG                              | AA                | 1946476242               |
| SNP_P3_99074_13330533 | NC_021167.1    | Ca_kabuli_chr08 | 13330533                | CC                              | TT                | 1946476243               |
| SNP_P3_99077_13369128 | NC_021167.1    | Ca_kabuli_chr08 | 13369128                | AA                              | GG                | 1946476245               |
| SNP_P3_99078_13369166 | NC_021167.1    | Ca_kabuli_chr08 | 13369166                | GG                              | CC                | 1946476246               |
| SNP_P3_99079_13369258 | NC_021167.1    | Ca_kabuli_chr08 | 13369258                | AA                              | GG                | 1946476248               |
| SNP_P3_99080_13369390 | NC_021167.1    | Ca_kabuli_chr08 | 13369390                | AA                              | GG                | 1946476249               |
| SNP_P3_99081_13369447 | NC_021167.1    | Ca_kabuli_chr08 | 13369447                | AA                              | GG                | 1946476251               |
| SNP_P3_99082_13369831 | NC_021167.1    | Ca_kabuli_chr08 | 13369831                | AA                              | GG                | 1946476252               |
| SNP_P3_99083_13392416 | NC_021167.1    | Ca_kabuli_chr08 | 13392416                | GG                              | AA                | 1946476254               |
| SNP_P3_99084_13460332 | NC_021167.1    | Ca_kabuli_chr08 | 13460332                | GG                              | CC                | 1946476255               |
| SNP_P3_99085_13475448 | NC_021167.1    | Ca_kabuli_chr08 | 13475448                | TT                              | AA                | 1946476257               |
| SNP_P3_99086_13475493 | NC_021167.1    | Ca_kabuli_chr08 | 13475493                | TT                              | GG                | 1946476258               |
| SNP_P3_99087_13475509 | NC_021167.1    | Ca_kabuli_chr08 | 13475509                | GG                              | AA                | 1946476260               |
| SNP_P3_99088_13475510 | NC_021167.1    | Ca_kabuli_chr08 | 13475510                | TT                              | CC                | 1946476261               |
| SNP_P3_99089_13475513 | NC_021167.1    | Ca_kabuli_chr08 | 13475513                | TT                              | AA                | 1946476262               |
| SNP_P3_99090_13475548 | NC_021167.1    | Ca_kabuli_chr08 | 13475548                | TT                              | AA                | 1946476264               |
| SNP_P3_99091_13475564 | NC_021167.1    | Ca_kabuli_chr08 | 13475564                | AA                              | GG                | 1946476265               |
| SNP_P3_99092_13475571 | NC_021167.1    | Ca_kabuli_chr08 | 13475571                | AA                              | GG                | 1946476267               |
| SNP_P3_99093_13475602 | NC_021167.1    | Ca_kabuli_chr08 | 13475602                | TT                              | AA                | 1946476268               |
| SNP_P3_99095_13478679 | NC_021167.1    | Ca_kabuli_chr08 | 13478679                | TT                              | CC                | 1946476270               |
| SNP_P3_99096_13702171 | NC_021167.1    | Ca_kabuli_chr08 | 13702171                | TT                              | CC                | 1946476271               |

| SNPs IDs              | Chromosome IDs | Chromosomes     | Physical positions (bp) | CDC Frontier (Reference genome) | (Pusa 256 & HPNB) | NCBI SNPdb Accession IDs |
|-----------------------|----------------|-----------------|-------------------------|---------------------------------|-------------------|--------------------------|
| SNP_P3_99097_13702272 | NC_021167.1    | Ca_kabuli_chr08 | 13702272                | CC                              | AA                | 1946476272               |
| SNP_P3_99098_13702509 | NC_021167.1    | Ca_kabuli_chr08 | 13702509                | TT                              | CC                | 1946476274               |
| SNP_P3_99100_13702608 | NC_021167.1    | Ca_kabuli_chr08 | 13702608                | GG                              | AA                | 1946476275               |
| SNP_P3_99101_13707711 | NC_021167.1    | Ca_kabuli_chr08 | 13707711                | AA                              | TT                | 1946476277               |
| SNP_P3_99102_13714445 | NC_021167.1    | Ca_kabuli_chr08 | 13714445                | AA                              | CC                | 1946476278               |
| SNP_P3_99103_13717683 | NC_021167.1    | Ca_kabuli_chr08 | 13717683                | GG                              | AA                | 1946476280               |
| SNP_P3_99104_13719264 | NC_021167.1    | Ca_kabuli_chr08 | 13719264                | GG                              | TT                | 1946476281               |
| SNP_P3_99105_13723896 | NC_021167.1    | Ca_kabuli_chr08 | 13723896                | AA                              | GG                | 1946476282               |
| SNP_P3_99106_13727072 | NC_021167.1    | Ca_kabuli_chr08 | 13727072                | AA                              | GG                | 1946476284               |
| SNP_P3_99107_13727123 | NC_021167.1    | Ca_kabuli_chr08 | 13727123                | TT                              | GG                | 1946476285               |
| SNP_P3_99108_13727435 | NC_021167.1    | Ca_kabuli_chr08 | 13727435                | CC                              | GG                | 1946476287               |
| SNP_P3_99109_13727711 | NC_021167.1    | Ca_kabuli_chr08 | 13727711                | CC                              | TT                | 1946476288               |
| SNP_P3_99110_13727713 | NC_021167.1    | Ca_kabuli_chr08 | 13727713                | AA                              | GG                | 1946476290               |
| SNP_P3_99111_13727719 | NC_021167.1    | Ca_kabuli_chr08 | 13727719                | TT                              | CC                | 1946476291               |
| SNP_P3_99112_13727751 | NC_021167.1    | Ca_kabuli_chr08 | 13727751                | TT                              | CC                | 1946476292               |
| SNP_P3_99113_13727782 | NC_021167.1    | Ca_kabuli_chr08 | 13727782                | AA                              | GG                | 1946476294               |
| SNP_P3_99114_13727788 | NC_021167.1    | Ca_kabuli_chr08 | 13727788                | AA                              | GG                | 1946476295               |
| SNP_P3_99115_13727794 | NC_021167.1    | Ca_kabuli_chr08 | 13727794                | CC                              | TT                | 1946476297               |
| SNP_P3_99116_13727953 | NC_021167.1    | Ca_kabuli_chr08 | 13727953                | AA                              | GG                | 1946476298               |
| SNP_P3_99117_13728017 | NC_021167.1    | Ca_kabuli_chr08 | 13728017                | AA                              | GG                | 1946476299               |
| SNP_P3_99118_13728022 | NC_021167.1    | Ca_kabuli_chr08 | 13728022                | AA                              | GG                | 1946476301               |
| SNP_P3_99119_13728161 | NC_021167.1    | Ca_kabuli_chr08 | 13728161                | AA                              | GG                | 1946476302               |
| SNP_P3_99120_13728174 | NC_021167.1    | Ca_kabuli_chr08 | 13728174                | AA                              | GG                | 1946476304               |
| SNP_P3_99121_13728204 | NC_021167.1    | Ca_kabuli_chr08 | 13728204                | CC                              | TT                | 1946476305               |
| SNP_P3_99122_13728276 | NC_021167.1    | Ca_kabuli_chr08 | 13728276                | CC                              | TT                | 1946476307               |
| SNP_P3_99123_13728285 | NC_021167.1    | Ca_kabuli_chr08 | 13728285                | TT                              | CC                | 1946476308               |
| SNP_P3_99124_13728303 | NC_021167.1    | Ca_kabuli_chr08 | 13728303                | GG                              | AA                | 1946476309               |
| SNP_P3_99125_13728348 | NC_021167.1    | Ca_kabuli_chr08 | 13728348                | CC                              | TT                | 1946476311               |
| SNP_P3_99126_13728351 | NC_021167.1    | Ca_kabuli_chr08 | 13728351                | AA                              | GG                | 1946476312               |
| SNP_P3_99127_13736583 | NC_021167.1    | Ca_kabuli_chr08 | 13736583                | GG                              | AA                | 1946476314               |
| SNP_P3_99128_13738153 | NC_021167.1    | Ca_kabuli_chr08 | 13738153                | TT                              | CC                | 1946476315               |
| SNP_P3_99129_13738335 | NC_021167.1    | Ca_kabuli_chr08 | 13738335                | GG                              | TT                | 1946476317               |
| SNP_P3_99130_13738336 | NC_021167.1    | Ca_kabuli_chr08 | 13738336                | AA                              | GG                | 1946476318               |
| SNP_P3_99131_13738375 | NC_021167.1    | Ca_kabuli_chr08 | 13738375                | TT                              | GG                | 1946476319               |
| SNP_P3_99132_13749894 | NC_021167.1    | Ca_kabuli_chr08 | 13749894                | GG                              | AA                | 1946476321               |
| SNP_P3_99133_13750018 | NC_021167.1    | Ca_kabuli_chr08 | 13750018                | AA                              | TT                | 1946476322               |
| SNP_P3_99134_13750262 | NC_021167.1    | Ca_kabuli_chr08 | 13750262                | TT                              | CC                | 1946476324               |
| SNP_P3_99135_13750280 | NC_021167.1    | Ca_kabuli_chr08 | 13750280                | TT                              | CC                | 1946476325               |
| SNP_P3_99136_13750328 | NC_021167.1    | Ca_kabuli_chr08 | 13750328                | CC                              | TT                | 1946476327               |
| SNP_P3_99137_13750339 | NC_021167.1    | Ca_kabuli_chr08 | 13750339                | CC                              | GG                | 1946476328               |
| SNP_P3_99138_13750352 | NC_021167.1    | Ca_kabuli_chr08 | 13750352                | TT                              | AA                | 1946476330               |
| SNP_P3_99139_13750384 | NC_021167.1    | Ca_kabuli_chr08 | 13750384                | CC                              | TT                | 1946476331               |

| SNPs IDs              | Chromosome IDs | Chromosomes     | Physical positions (bp) | CDC Frontier (Reference genome) | (Pusa 256 & HPNB) | NCBI SNPdb Accession IDs |
|-----------------------|----------------|-----------------|-------------------------|---------------------------------|-------------------|--------------------------|
| SNP_P3_99140_13750404 | NC_021167.1    | Ca_kabuli_chr08 | 13750404                | AA                              | GG                | 1946476333               |
| SNP_P3_99141_13750599 | NC_021167.1    | Ca_kabuli_chr08 | 13750599                | TT                              | CC                | 1946476335               |
| SNP_P3_99142_13750694 | NC_021167.1    | Ca_kabuli_chr08 | 13750694                | GG                              | CC                | 1946476336               |
| SNP_P3_99143_13754678 | NC_021167.1    | Ca_kabuli_chr08 | 13754678                | GG                              | AA                | 1946476338               |
| SNP_P3_99145_13758316 | NC_021167.1    | Ca_kabuli_chr08 | 13758316                | GG                              | AA                | 1946476339               |
| SNP_P3_99146_13758320 | NC_021167.1    | Ca_kabuli_chr08 | 13758320                | CC                              | GG                | 1946476341               |
| SNP_P3_99147_13758737 | NC_021167.1    | Ca_kabuli_chr08 | 13758737                | TT                              | CC                | 1946476342               |
| SNP_P3_99148_13763228 | NC_021167.1    | Ca_kabuli_chr08 | 13763228                | TT                              | CC                | 1946476344               |
| SNP_P3_99149_13771555 | NC_021167.1    | Ca_kabuli_chr08 | 13771555                | CC                              | TT                | 1946476345               |
| SNP_P3_99150_13771704 | NC_021167.1    | Ca_kabuli_chr08 | 13771704                | TT                              | GG                | 1946476347               |
| SNP_P3_99151_13776484 | NC_021167.1    | Ca_kabuli_chr08 | 13776484                | AA                              | GG                | 1946476348               |
| SNP_P3_99152_13776497 | NC_021167.1    | Ca_kabuli_chr08 | 13776497                | CC                              | TT                | 1946476350               |
| SNP_P3_99153_13776506 | NC_021167.1    | Ca_kabuli_chr08 | 13776506                | TT                              | CC                | 1946476352               |
| SNP_P3_99154_13776526 | NC_021167.1    | Ca_kabuli_chr08 | 13776526                | CC                              | TT                | 1946476353               |
| SNP_P3_99155_13776558 | NC_021167.1    | Ca_kabuli_chr08 | 13776558                | CC                              | AA                | 1946476355               |
| SNP_P3_99157_13799609 | NC_021167.1    | Ca_kabuli_chr08 | 13799609                | CC                              | TT                | 1946476356               |
| SNP_P3_99158_13799686 | NC_021167.1    | Ca_kabuli_chr08 | 13799686                | CC                              | TT                | 1946476358               |
| SNP_P3_99159_13799753 | NC_021167.1    | Ca_kabuli_chr08 | 13799753                | GG                              | AA                | 1946476359               |
| SNP_P3_99161_13799865 | NC_021167.1    | Ca_kabuli_chr08 | 13799865                | CC                              | AA                | 1946476361               |
| SNP_P3_99162_13799873 | NC_021167.1    | Ca_kabuli_chr08 | 13799873                | AA                              | CC                | 1946476362               |
| SNP_P3_99163_13799882 | NC_021167.1    | Ca_kabuli_chr08 | 13799882                | TT                              | CC                | 1946476364               |
| SNP_P3_99164_13799894 | NC_021167.1    | Ca_kabuli_chr08 | 13799894                | TT                              | CC                | 1946476365               |
| SNP_P3_99165_13799921 | NC_021167.1    | Ca_kabuli_chr08 | 13799921                | AA                              | GG                | 1946476367               |
| SNP_P3_99166_13800048 | NC_021167.1    | Ca_kabuli_chr08 | 13800048                | AA                              | CC                | 1946476368               |
| SNP_P3_99167_13800049 | NC_021167.1    | Ca_kabuli_chr08 | 13800049                | CC                              | TT                | 1946476370               |
| SNP_P3_99168_13800059 | NC_021167.1    | Ca_kabuli_chr08 | 13800059                | CC                              | TT                | 1946476371               |
| SNP_P3_99169_13800095 | NC_021167.1    | Ca_kabuli_chr08 | 13800095                | AA                              | GG                | 1946476373               |
| SNP_P3_99170_13802133 | NC_021167.1    | Ca_kabuli_chr08 | 13802133                | TT                              | AA                | 1946476375               |
| SNP_P3_99171_13802136 | NC_021167.1    | Ca_kabuli_chr08 | 13802136                | TT                              | CC                | 1946476376               |
| SNP_P3_99172_13802474 | NC_021167.1    | Ca_kabuli_chr08 | 13802474                | CC                              | TT                | 1946476378               |
| SNP_P3_99173_13802510 | NC_021167.1    | Ca_kabuli_chr08 | 13802510                | TT                              | AA                | 1946476379               |
| SNP_P3_99174_13802521 | NC_021167.1    | Ca_kabuli_chr08 | 13802521                | AA                              | GG                | 1946476381               |
| SNP_P3_99175_13802618 | NC_021167.1    | Ca_kabuli_chr08 | 13802618                | CC                              | TT                | 1946476382               |
| SNP_P3_99176_13813386 | NC_021167.1    | Ca_kabuli_chr08 | 13813386                | GG                              | AA                | 1946476384               |
| SNP_P3_99177_13813471 | NC_021167.1    | Ca_kabuli_chr08 | 13813471                | GG                              | AA                | 1946476385               |
| SNP_P3_99178_13813683 | NC_021167.1    | Ca_kabuli_chr08 | 13813683                | TT                              | AA                | 1946476387               |
| SNP_P3_99179_13813715 | NC_021167.1    | Ca_kabuli_chr08 | 13813715                | CC                              | TT                | 1946476388               |
| SNP_P3_99180_13813849 | NC_021167.1    | Ca_kabuli_chr08 | 13813849                | AA                              | TT                | 1946476390               |
| SNP_P3_99181_13813887 | NC_021167.1    | Ca_kabuli_chr08 | 13813887                | AA                              | GG                | 1946476391               |
| SNP_P3_99182_13813888 | NC_021167.1    | Ca_kabuli_chr08 | 13813888                | GG                              | AA                | 1946476393               |
| SNP_P3_99183_13813908 | NC_021167.1    | Ca_kabuli_chr08 | 13813908                | CC                              | TT                | 1946476394               |
| SNP_P3_99184_13814048 | NC_021167.1    | Ca_kabuli_chr08 | 13814048                | AA                              | GG                | 1946476396               |



| SNPs IDs              | Chromosome IDs | Chromosomes     | Physical positions (bp) | CDC Frontier (Reference genome) | (Pusa 256 & HPNB) | NCBI SNPdb Accession IDs |
|-----------------------|----------------|-----------------|-------------------------|---------------------------------|-------------------|--------------------------|
| SNP_P3_99185_13814376 | NC_021167.1    | Ca_kabuli_chr08 | 13814376                | CC                              | GG                | 1946476397               |
| SNP_P3_99186_13814857 | NC_021167.1    | Ca_kabuli_chr08 | 13814857                | AA                              | GG                | 1946476399               |
| SNP_P3_99187_13814878 | NC_021167.1    | Ca_kabuli_chr08 | 13814878                | CC                              | TT                | 1946476400               |
| SNP_P3_99189_13815128 | NC_021167.1    | Ca_kabuli_chr08 | 13815128                | AA                              | GG                | 1946476402               |
| SNP_P3_99190_13815137 | NC_021167.1    | Ca_kabuli_chr08 | 13815137                | CC                              | TT                | 1946476403               |
| SNP_P3_99191_13815150 | NC_021167.1    | Ca_kabuli_chr08 | 13815150                | CC                              | GG                | 1946476405               |
| SNP_P3_99192_13815171 | NC_021167.1    | Ca_kabuli_chr08 | 13815171                | AA                              | TT                | 1946476406               |
| SNP_P3_99193_13815198 | NC_021167.1    | Ca_kabuli_chr08 | 13815198                | GG                              | AA                | 1946476408               |
| SNP_P3_99194_13815204 | NC_021167.1    | Ca_kabuli_chr08 | 13815204                | CC                              | GG                | 1946476409               |
| SNP_P3_99195_13815322 | NC_021167.1    | Ca_kabuli_chr08 | 13815322                | CC                              | AA                | 1946476411               |
| SNP_P3_99196_13815406 | NC_021167.1    | Ca_kabuli_chr08 | 13815406                | CC                              | AA                | 1946476412               |
| SNP_P3_99197_13815469 | NC_021167.1    | Ca_kabuli_chr08 | 13815469                | TT                              | CC                | 1946476414               |
| SNP_P3_99198_13815479 | NC_021167.1    | Ca_kabuli_chr08 | 13815479                | AA                              | CC                | 1946476416               |
| SNP_P3_99199_13815524 | NC_021167.1    | Ca_kabuli_chr08 | 13815524                | TT                              | AA                | 1946476417               |
| SNP_P3_99200_13815530 | NC_021167.1    | Ca_kabuli_chr08 | 13815530                | GG                              | AA                | 1946476419               |
| SNP_P3_99201_13815533 | NC_021167.1    | Ca_kabuli_chr08 | 13815533                | TT                              | AA                | 1946476420               |
| SNP_P3_99202_13815590 | NC_021167.1    | Ca_kabuli_chr08 | 13815590                | AA                              | GG                | 1946476422               |
| SNP_P3_99203_13815710 | NC_021167.1    | Ca_kabuli_chr08 | 13815710                | AA                              | GG                | 1946476423               |
| SNP_P3_99204_13815788 | NC_021167.1    | Ca_kabuli_chr08 | 13815788                | TT                              | CC                | 1946476425               |
| SNP_P3_99205_13817357 | NC_021167.1    | Ca_kabuli_chr08 | 13817357                | GG                              | AA                | 1946476426               |
| SNP_P3_99206_13821674 | NC_021167.1    | Ca_kabuli_chr08 | 13821674                | TT                              | CC                | 1946476428               |
| SNP_P3_99207_13821691 | NC_021167.1    | Ca_kabuli_chr08 | 13821691                | AA                              | GG                | 1946476430               |
| SNP_P3_99208_13821711 | NC_021167.1    | Ca_kabuli_chr08 | 13821711                | TT                              | CC                | 1946476431               |
| SNP_P3_99209_13821720 | NC_021167.1    | Ca_kabuli_chr08 | 13821720                | TT                              | AA                | 1946476433               |
| SNP_P3_99210_13821871 | NC_021167.1    | Ca_kabuli_chr08 | 13821871                | CC                              | TT                | 1946476434               |
| SNP_P3_99211_13821899 | NC_021167.1    | Ca_kabuli_chr08 | 13821899                | GG                              | AA                | 1946476436               |
| SNP_P3_99212_13821906 | NC_021167.1    | Ca_kabuli_chr08 | 13821906                | AA                              | TT                | 1946476438               |
| SNP_P3_99213_13833753 | NC_021167.1    | Ca_kabuli_chr08 | 13833753                | CC                              | TT                | 1946476439               |
| SNP_P3_99214_13833784 | NC_021167.1    | Ca_kabuli_chr08 | 13833784                | GG                              | AA                | 1946476441               |
| SNP_P3_99215_13833790 | NC_021167.1    | Ca_kabuli_chr08 | 13833790                | CC                              | AA                | 1946476442               |
| SNP_P3_99216_13844827 | NC_021167.1    | Ca_kabuli_chr08 | 13844827                | TT                              | CC                | 1946476444               |
| SNP_P3_99217_13844832 | NC_021167.1    | Ca_kabuli_chr08 | 13844832                | TT                              | AA                | 1946476445               |
| SNP_P3_99220_13866974 | NC_021167.1    | Ca_kabuli_chr08 | 13866974                | AA                              | GG                | 1946476447               |
| SNP_P3_99221_13874838 | NC_021167.1    | Ca_kabuli_chr08 | 13874838                | GG                              | AA                | 1946476448               |
| SNP_P3_99222_13902415 | NC_021167.1    | Ca_kabuli_chr08 | 13902415                | CC                              | GG                | 1946476450               |
| SNP_P3_99223_13902682 | NC_021167.1    | Ca_kabuli_chr08 | 13902682                | GG                              | AA                | 1946476451               |
| SNP_P3_99224_13902724 | NC_021167.1    | Ca_kabuli_chr08 | 13902724                | TT                              | AA                | 1946476453               |
| SNP_P3_99225_13926216 | NC_021167.1    | Ca_kabuli_chr08 | 13926216                | GG                              | TT                | 1946476454               |
| SNP_P3_99226_13947974 | NC_021167.1    | Ca_kabuli_chr08 | 13947974                | CC                              | GG                | 1946476456               |
| SNP_P3_99227_13971884 | NC_021167.1    | Ca_kabuli_chr08 | 13971884                | AA                              | GG                | 1946476457               |
| SNP_P3_99228_13980185 | NC_021167.1    | Ca_kabuli_chr08 | 13980185                | AA                              | GG                | 1946476459               |
| SNP_P3_99229_13993491 | NC_021167.1    | Ca_kabuli_chr08 | 13993491                | TT                              | CC                | 1946476461               |

| SNPs IDs              | Chromosome IDs | Chromosomes     | Physical positions (bp) | CDC Frontier (Reference genome) | (Pusa 256 & HPNB) | NCBI SNPdb Accession IDs |
|-----------------------|----------------|-----------------|-------------------------|---------------------------------|-------------------|--------------------------|
| SNP_P3_99230_13993507 | NC_021167.1    | Ca_kabuli_chr08 | 13993507                | GG                              | TT                | 1946476462               |
| SNP_P3_99231_13993529 | NC_021167.1    | Ca_kabuli_chr08 | 13993529                | GG                              | AA                | 1946476464               |
| SNP_P3_99232_13993554 | NC_021167.1    | Ca_kabuli_chr08 | 13993554                | TT                              | CC                | 1946476465               |
| SNP_P3_99233_13993565 | NC_021167.1    | Ca_kabuli_chr08 | 13993565                | AA                              | GG                | 1946476467               |
| SNP_P3_99234_13993589 | NC_021167.1    | Ca_kabuli_chr08 | 13993589                | GG                              | CC                | 1946476468               |
| SNP_P3_99236_13993641 | NC_021167.1    | Ca_kabuli_chr08 | 13993641                | CC                              | TT                | 1946476470               |
| SNP_P3_99237_13993667 | NC_021167.1    | Ca_kabuli_chr08 | 13993667                | CC                              | TT                | 1946476472               |
| SNP_P3_99238_13993680 | NC_021167.1    | Ca_kabuli_chr08 | 13993680                | AA                              | TT                | 1946476473               |
| SNP_P3_99239_13993696 | NC_021167.1    | Ca_kabuli_chr08 | 13993696                | CC                              | TT                | 1946476475               |
| SNP_P3_99240_13993703 | NC_021167.1    | Ca_kabuli_chr08 | 13993703                | GG                              | AA                | 1946476476               |
| SNP_P3_99241_13993725 | NC_021167.1    | Ca_kabuli_chr08 | 13993725                | GG                              | CC                | 1946476478               |
| SNP_P3_99242_13993768 | NC_021167.1    | Ca_kabuli_chr08 | 13993768                | CC                              | TT                | 1946476479               |
| SNP_P3_99243_13993847 | NC_021167.1    | Ca_kabuli_chr08 | 13993847                | TT                              | CC                | 1946476481               |
| SNP_P3_99244_13993868 | NC_021167.1    | Ca_kabuli_chr08 | 13993868                | CC                              | AA                | 1946476483               |
| SNP_P3_99246_13993976 | NC_021167.1    | Ca_kabuli_chr08 | 13993976                | TT                              | CC                | 1946476484               |
| SNP_P3_99247_13993985 | NC_021167.1    | Ca_kabuli_chr08 | 13993985                | TT                              | CC                | 1946476486               |
| SNP_P3_99248_13993995 | NC_021167.1    | Ca_kabuli_chr08 | 13993995                | AA                              | TT                | 1946476488               |
| SNP_P3_99249_13996264 | NC_021167.1    | Ca_kabuli_chr08 | 13996264                | AA                              | GG                | 1946476490               |
| SNP_P3_99250_14017347 | NC_021167.1    | Ca_kabuli_chr08 | 14017347                | CC                              | GG                | 1946476491               |
| SNP_P3_99251_14022351 | NC_021167.1    | Ca_kabuli_chr08 | 14022351                | CC                              | TT                | 1946476493               |
| SNP_P3_99252_14035127 | NC_021167.1    | Ca_kabuli_chr08 | 14035127                | TT                              | AA                | 1946476494               |
| SNP_P3_99253_14035159 | NC_021167.1    | Ca_kabuli_chr08 | 14035159                | AA                              | TT                | 1946476496               |
| SNP_P3_99254_14035161 | NC_021167.1    | Ca_kabuli_chr08 | 14035161                | TT                              | AA                | 1946476497               |
| SNP_P3_99255_14035454 | NC_021167.1    | Ca_kabuli_chr08 | 14035454                | TT                              | CC                | 1946476499               |
| SNP_P3_99257_14035568 | NC_021167.1    | Ca_kabuli_chr08 | 14035568                | AA                              | GG                | 1946476500               |
| SNP_P3_99258_14035662 | NC_021167.1    | Ca_kabuli_chr08 | 14035662                | CC                              | GG                | 1946476502               |
| SNP_P3_99259_14035779 | NC_021167.1    | Ca_kabuli_chr08 | 14035779                | CC                              | TT                | 1946476503               |
| SNP_P3_99260_14035827 | NC_021167.1    | Ca_kabuli_chr08 | 14035827                | AA                              | GG                | 1946476505               |
| SNP_P3_99261_14035831 | NC_021167.1    | Ca_kabuli_chr08 | 14035831                | GG                              | AA                | 1946476506               |
| SNP_P3_99263_14063775 | NC_021167.1    | Ca_kabuli_chr08 | 14063775                | CC                              | TT                | 1946476508               |
| SNP_P3_99264_14063813 | NC_021167.1    | Ca_kabuli_chr08 | 14063813                | AA                              | GG                | 1946476509               |
| SNP_P3_99265_14063891 | NC_021167.1    | Ca_kabuli_chr08 | 14063891                | AA                              | CC                | 1946476511               |
| SNP_P3_99266_14063960 | NC_021167.1    | Ca_kabuli_chr08 | 14063960                | GG                              | CC                | 1946476512               |
| SNP_P3_99267_14063984 | NC_021167.1    | Ca_kabuli_chr08 | 14063984                | CC                              | TT                | 1946476514               |
| SNP_P3_99269_14064120 | NC_021167.1    | Ca_kabuli_chr08 | 14064120                | TT                              | AA                | 1946476515               |
| SNP_P3_99270_14064150 | NC_021167.1    | Ca_kabuli_chr08 | 14064150                | GG                              | CC                | 1946476517               |
| SNP_P3_99271_14064292 | NC_021167.1    | Ca_kabuli_chr08 | 14064292                | AA                              | GG                | 1946476518               |
| SNP_P3_99272_14064302 | NC_021167.1    | Ca_kabuli_chr08 | 14064302                | TT                              | AA                | 1946476520               |
| SNP_P3_99273_14064325 | NC_021167.1    | Ca_kabuli_chr08 | 14064325                | TT                              | AA                | 1946476521               |
| SNP_P3_99274_14064362 | NC_021167.1    | Ca_kabuli_chr08 | 14064362                | CC                              | AA                | 1946476523               |
| SNP_P3_99275_14064374 | NC_021167.1    | Ca_kabuli_chr08 | 14064374                | CC                              | GG                | 1946476524               |
| SNP_P3_99276_14066725 | NC_021167.1    | Ca_kabuli_chr08 | 14066725                | TT                              | CC                | 1946476526               |

| SNPs IDs              | Chromosome IDs | Chromosomes     | Physical positions (bp) | CDC Frontier (Reference genome) | (Pusa 256 & HPNB) | NCBI SNPdb Accession IDs |
|-----------------------|----------------|-----------------|-------------------------|---------------------------------|-------------------|--------------------------|
| SNP_P3_99277_14066773 | NC_021167.1    | Ca_kabuli_chr08 | 14066773                | AA                              | GG                | 1946476528               |
| SNP_P3_99278_14066809 | NC_021167.1    | Ca_kabuli_chr08 | 14066809                | AA                              | TT                | 1946476529               |
| SNP_P3_99279_14068643 | NC_021167.1    | Ca_kabuli_chr08 | 14068643                | TT                              | CC                | 1946476531               |
| SNP_P3_99280_14068972 | NC_021167.1    | Ca_kabuli_chr08 | 14068972                | CC                              | TT                | 1946476532               |
| SNP_P3_99281_14072694 | NC_021167.1    | Ca_kabuli_chr08 | 14072694                | CC                              | TT                | 1946476534               |
| SNP_P3_99282_14072724 | NC_021167.1    | Ca_kabuli_chr08 | 14072724                | AA                              | TT                | 1946476535               |
| SNP_P3_99283_14072726 | NC_021167.1    | Ca_kabuli_chr08 | 14072726                | CC                              | TT                | 1946476537               |
| SNP_P3_99284_14072737 | NC_021167.1    | Ca_kabuli_chr08 | 14072737                | CC                              | TT                | 1946476538               |
| SNP_P3_99285_14072739 | NC_021167.1    | Ca_kabuli_chr08 | 14072739                | AA                              | GG                | 1946476540               |
| SNP_P3_99286_14072763 | NC_021167.1    | Ca_kabuli_chr08 | 14072763                | TT                              | CC                | 1946476541               |
| SNP_P3_99287_14072791 | NC_021167.1    | Ca_kabuli_chr08 | 14072791                | CC                              | AA                | 1946476543               |
| SNP_P3_99289_14072802 | NC_021167.1    | Ca_kabuli_chr08 | 14072802                | AA                              | GG                | 1946476544               |
| SNP_P3_99290_14072810 | NC_021167.1    | Ca_kabuli_chr08 | 14072810                | CC                              | TT                | 1946476546               |
| SNP_P3_99291_14072875 | NC_021167.1    | Ca_kabuli_chr08 | 14072875                | CC                              | TT                | 1946476547               |
| SNP_P3_99292_14072936 | NC_021167.1    | Ca_kabuli_chr08 | 14072936                | CC                              | TT                | 1946476549               |
| SNP_P3_99293_14072937 | NC_021167.1    | Ca_kabuli_chr08 | 14072937                | GG                              | AA                | 1946476551               |
| SNP_P3_99294_14072949 | NC_021167.1    | Ca_kabuli_chr08 | 14072949                | CC                              | GG                | 1946476552               |
| SNP_P3_99295_14073036 | NC_021167.1    | Ca_kabuli_chr08 | 14073036                | CC                              | GG                | 1946476554               |
| SNP_P3_99296_14073455 | NC_021167.1    | Ca_kabuli_chr08 | 14073455                | TT                              | CC                | 1946476555               |
| SNP_P3_99297_14073462 | NC_021167.1    | Ca_kabuli_chr08 | 14073462                | CC                              | TT                | 1946476557               |
| SNP_P3_99298_14073621 | NC_021167.1    | Ca_kabuli_chr08 | 14073621                | TT                              | CC                | 1946476558               |
| SNP_P3_99299_14073756 | NC_021167.1    | Ca_kabuli_chr08 | 14073756                | AA                              | CC                | 1946476561               |
| SNP_P3_99300_14074217 | NC_021167.1    | Ca_kabuli_chr08 | 14074217                | AA                              | TT                | 1946476562               |
| SNP_P3_99301_14074253 | NC_021167.1    | Ca_kabuli_chr08 | 14074253                | CC                              | TT                | 1946476564               |
| SNP_P3_99303_14074313 | NC_021167.1    | Ca_kabuli_chr08 | 14074313                | CC                              | GG                | 1946476565               |
| SNP_P3_99304_14074391 | NC_021167.1    | Ca_kabuli_chr08 | 14074391                | TT                              | CC                | 1946476567               |
| SNP_P3_99305_14074410 | NC_021167.1    | Ca_kabuli_chr08 | 14074410                | AA                              | GG                | 1946476568               |
| SNP_P3_99306_14074533 | NC_021167.1    | Ca_kabuli_chr08 | 14074533                | GG                              | TT                | 1946476570               |
| SNP_P3_99307_14074566 | NC_021167.1    | Ca_kabuli_chr08 | 14074566                | CC                              | GG                | 1946476571               |
| SNP_P3_99308_14074624 | NC_021167.1    | Ca_kabuli_chr08 | 14074624                | GG                              | TT                | 1946476572               |
| SNP_P3_99309_14074643 | NC_021167.1    | Ca_kabuli_chr08 | 14074643                | GG                              | CC                | 1946476574               |
| SNP_P3_99310_14076621 | NC_021167.1    | Ca_kabuli_chr08 | 14076621                | CC                              | AA                | 1946476575               |
| SNP_P3_99311_14076698 | NC_021167.1    | Ca_kabuli_chr08 | 14076698                | TT                              | GG                | 1946476577               |
| SNP_P3_99312_14076699 | NC_021167.1    | Ca_kabuli_chr08 | 14076699                | GG                              | AA                | 1946476578               |
| SNP_P3_99313_14076817 | NC_021167.1    | Ca_kabuli_chr08 | 14076817                | GG                              | TT                | 1946476580               |
| SNP_P3_99315_14076993 | NC_021167.1    | Ca_kabuli_chr08 | 14076993                | AA                              | CC                | 1946476581               |
| SNP_P3_99316_14076994 | NC_021167.1    | Ca_kabuli_chr08 | 14076994                | GG                              | AA                | 1946476583               |
| SNP_P3_99318_14077208 | NC_021167.1    | Ca_kabuli_chr08 | 14077208                | TT                              | CC                | 1946476584               |
| SNP_P3_99321_14077679 | NC_021167.1    | Ca_kabuli_chr08 | 14077679                | GG                              | AA                | 1946476585               |
| SNP_P3_99322_14093411 | NC_021167.1    | Ca_kabuli_chr08 | 14093411                | CC                              | AA                | 1946476587               |
| SNP_P3_99323_14093677 | NC_021167.1    | Ca_kabuli_chr08 | 14093677                | AA                              | TT                | 1946476588               |
| SNP_P3_99324_14094744 | NC_021167.1    | Ca_kabuli_chr08 | 14094744                | GG                              | AA                | 1946476590               |

| SNPs IDs              | Chromosome IDs | Chromosomes     | Physical positions (bp) | CDC Frontier (Reference genome) | (Pusa 256 & HPNB) | NCBI SNPdb Accession IDs |
|-----------------------|----------------|-----------------|-------------------------|---------------------------------|-------------------|--------------------------|
| SNP_P3_99325_14097271 | NC_021167.1    | Ca_kabuli_chr08 | 14097271                | AA                              | GG                | 1946476591               |
| SNP_P3_99326_14098127 | NC_021167.1    | Ca_kabuli_chr08 | 14098127                | AA                              | GG                | 1946476593               |
| SNP_P3_99327_14106335 | NC_021167.1    | Ca_kabuli_chr08 | 14106335                | GG                              | AA                | 1946476594               |
| SNP_P3_99328_14107206 | NC_021167.1    | Ca_kabuli_chr08 | 14107206                | CC                              | TT                | 1946476596               |
| SNP_P3_99329_14107786 | NC_021167.1    | Ca_kabuli_chr08 | 14107786                | AA                              | CC                | 1946476597               |
| SNP_P3_99330_14108588 | NC_021167.1    | Ca_kabuli_chr08 | 14108588                | TT                              | CC                | 1946476598               |
| SNP_P3_99332_14111516 | NC_021167.1    | Ca_kabuli_chr08 | 14111516                | TT                              | AA                | 1946476600               |
| SNP_P3_99333_14111574 | NC_021167.1    | Ca_kabuli_chr08 | 14111574                | CC                              | TT                | 1946476601               |
| SNP_P3_99335_14112014 | NC_021167.1    | Ca_kabuli_chr08 | 14112014                | TT                              | GG                | 1946476603               |
| SNP_P3_99336_14112061 | NC_021167.1    | Ca_kabuli_chr08 | 14112061                | CC                              | GG                | 1946476604               |
| SNP_P3_99337_14112062 | NC_021167.1    | Ca_kabuli_chr08 | 14112062                | AA                              | GG                | 1946476606               |
| SNP_P3_99338_14112302 | NC_021167.1    | Ca_kabuli_chr08 | 14112302                | GG                              | AA                | 1946476607               |
| SNP_P3_99339_14112916 | NC_021167.1    | Ca_kabuli_chr08 | 14112916                | GG                              | AA                | 1946476609               |
| SNP_P3_99341_14113731 | NC_021167.1    | Ca_kabuli_chr08 | 14113731                | GG                              | TT                | 1946476610               |
| SNP_P3_99343_14119352 | NC_021167.1    | Ca_kabuli_chr08 | 14119352                | GG                              | AA                | 1946476612               |
| SNP_P3_99344_14119419 | NC_021167.1    | Ca_kabuli_chr08 | 14119419                | AA                              | CC                | 1946476613               |
| SNP_P3_99345_14119695 | NC_021167.1    | Ca_kabuli_chr08 | 14119695                | TT                              | AA                | 1946476615               |
| SNP_P3_99346_14119708 | NC_021167.1    | Ca_kabuli_chr08 | 14119708                | GG                              | AA                | 1946476616               |
| SNP_P3_99348_14120939 | NC_021167.1    | Ca_kabuli_chr08 | 14120939                | GG                              | TT                | 1946476618               |
| SNP_P3_99349_14121119 | NC_021167.1    | Ca_kabuli_chr08 | 14121119                | GG                              | AA                | 1946476619               |
| SNP_P3_99350_14121179 | NC_021167.1    | Ca_kabuli_chr08 | 14121179                | CC                              | GG                | 1946476621               |
| SNP_P3_99352_14121376 | NC_021167.1    | Ca_kabuli_chr08 | 14121376                | GG                              | AA                | 1946476622               |
| SNP_P3_99353_14121458 | NC_021167.1    | Ca_kabuli_chr08 | 14121458                | TT                              | CC                | 1946476623               |
| SNP_P3_99354_14121478 | NC_021167.1    | Ca_kabuli_chr08 | 14121478                | CC                              | TT                | 1946476625               |
| SNP_P3_99355_14121492 | NC_021167.1    | Ca_kabuli_chr08 | 14121492                | AA                              | GG                | 1946476626               |
| SNP_P3_99356_14121503 | NC_021167.1    | Ca_kabuli_chr08 | 14121503                | TT                              | AA                | 1946476628               |
| SNP_P3_99357_14122545 | NC_021167.1    | Ca_kabuli_chr08 | 14122545                | TT                              | CC                | 1946476629               |
| SNP_P3_99359_14122570 | NC_021167.1    | Ca_kabuli_chr08 | 14122570                | CC                              | TT                | 1946476631               |
| SNP_P3_99360_14124084 | NC_021167.1    | Ca_kabuli_chr08 | 14124084                | AA                              | TT                | 1946476632               |
| SNP_P3_99361_14124121 | NC_021167.1    | Ca_kabuli_chr08 | 14124121                | CC                              | AA                | 1946476633               |
| SNP_P3_99363_14124482 | NC_021167.1    | Ca_kabuli_chr08 | 14124482                | GG                              | AA                | 1946476635               |
| SNP_P3_99364_14124927 | NC_021167.1    | Ca_kabuli_chr08 | 14124927                | GG                              | CC                | 1946476636               |
| SNP_P3_99365_14126828 | NC_021167.1    | Ca_kabuli_chr08 | 14126828                | AA                              | TT                | 1946476638               |
| SNP_P3_99366_14127975 | NC_021167.1    | Ca_kabuli_chr08 | 14127975                | GG                              | AA                | 1946476639               |
| SNP_P3_99367_14128462 | NC_021167.1    | Ca_kabuli_chr08 | 14128462                | CC                              | TT                | 1946476641               |
| SNP_P3_99368_14128476 | NC_021167.1    | Ca_kabuli_chr08 | 14128476                | TT                              | CC                | 1946476642               |
| SNP_P3_99370_14128791 | NC_021167.1    | Ca_kabuli_chr08 | 14128791                | GG                              | TT                | 1946476644               |
| SNP_P3_99371_14129557 | NC_021167.1    | Ca_kabuli_chr08 | 14129557                | TT                              | CC                | 1946476645               |
| SNP_P3_99372_14129560 | NC_021167.1    | Ca_kabuli_chr08 | 14129560                | AA                              | TT                | 1946476647               |
| SNP_P3_99373_14130167 | NC_021167.1    | Ca_kabuli_chr08 | 14130167                | TT                              | AA                | 1946476648               |
| SNP_P3_99374_14130547 | NC_021167.1    | Ca_kabuli_chr08 | 14130547                | CC                              | AA                | 1946476650               |
| SNP_P3_99375_14130562 | NC_021167.1    | Ca_kabuli_chr08 | 14130562                | AA                              | CC                | 1946476651               |

| SNPs IDs              | Chromosome IDs | Chromosomes     | Physical positions (bp) | CDC Frontier (Reference genome) | (Pusa 256 & HPNB) | NCBI SNPdb Accession IDs |
|-----------------------|----------------|-----------------|-------------------------|---------------------------------|-------------------|--------------------------|
| SNP_P3_99376_14130950 | NC_021167.1    | Ca_kabuli_chr08 | 14130950                | AA                              | GG                | 1946476653               |
| SNP_P3_99377_14130985 | NC_021167.1    | Ca_kabuli_chr08 | 14130985                | AA                              | TT                | 1946476654               |
| SNP_P3_99378_14131578 | NC_021167.1    | Ca_kabuli_chr08 | 14131578                | CC                              | TT                | 1946476656               |
| SNP_P3_99379_14132309 | NC_021167.1    | Ca_kabuli_chr08 | 14132309                | GG                              | AA                | 1946476657               |
| SNP_P3_99380_14132509 | NC_021167.1    | Ca_kabuli_chr08 | 14132509                | CC                              | TT                | 1946476658               |
| SNP_P3_99381_14132655 | NC_021167.1    | Ca_kabuli_chr08 | 14132655                | TT                              | CC                | 1946476660               |
| SNP_P3_99382_14138207 | NC_021167.1    | Ca_kabuli_chr08 | 14138207                | CC                              | AA                | 1946476662               |
| SNP_P3_99383_14139846 | NC_021167.1    | Ca_kabuli_chr08 | 14139846                | CC                              | TT                | 1946476663               |
| SNP_P3_99384_14139886 | NC_021167.1    | Ca_kabuli_chr08 | 14139886                | TT                              | AA                | 1946476665               |
| SNP_P3_99385_14139906 | NC_021167.1    | Ca_kabuli_chr08 | 14139906                | CC                              | TT                | 1946476666               |
| SNP_P3_99386_14139921 | NC_021167.1    | Ca_kabuli_chr08 | 14139921                | AA                              | GG                | 1946476667               |
| SNP_P3_99387_14140792 | NC_021167.1    | Ca_kabuli_chr08 | 14140792                | GG                              | AA                | 1946476669               |
| SNP_P3_99388_14142468 | NC_021167.1    | Ca_kabuli_chr08 | 14142468                | CC                              | TT                | 1946476670               |
| SNP_P3_99389_14143080 | NC_021167.1    | Ca_kabuli_chr08 | 14143080                | GG                              | AA                | 1946476672               |
| SNP_P3_99392_14149572 | NC_021167.1    | Ca_kabuli_chr08 | 14149572                | TT                              | GG                | 1946476673               |
| SNP_P3_99393_14151151 | NC_021167.1    | Ca_kabuli_chr08 | 14151151                | CC                              | GG                | 1946476675               |
| SNP_P3_99394_14157431 | NC_021167.1    | Ca_kabuli_chr08 | 14157431                | GG                              | AA                | 1946476677               |
| SNP_P3_99396_14157730 | NC_021167.1    | Ca_kabuli_chr08 | 14157730                | TT                              | CC                | 1946476678               |
| SNP_P3_99397_14161006 | NC_021167.1    | Ca_kabuli_chr08 | 14161006                | TT                              | CC                | 1946476680               |
| SNP_P3_99398_14161339 | NC_021167.1    | Ca_kabuli_chr08 | 14161339                | AA                              | TT                | 1946476681               |
| SNP_P3_99399_14161816 | NC_021167.1    | Ca_kabuli_chr08 | 14161816                | AA                              | GG                | 1946476683               |
| SNP_P3_99401_14163269 | NC_021167.1    | Ca_kabuli_chr08 | 14163269                | TT                              | AA                | 1946476684               |
| SNP_P3_99402_14163279 | NC_021167.1    | Ca_kabuli_chr08 | 14163279                | AA                              | TT                | 1946476686               |
| SNP_P3_99403_14163497 | NC_021167.1    | Ca_kabuli_chr08 | 14163497                | GG                              | AA                | 1946476687               |
| SNP_P3_99404_14164778 | NC_021167.1    | Ca_kabuli_chr08 | 14164778                | CC                              | TT                | 1946476689               |
| SNP_P3_99405_14164784 | NC_021167.1    | Ca_kabuli_chr08 | 14164784                | CC                              | TT                | 1946476690               |
| SNP_P3_99406_14164787 | NC_021167.1    | Ca_kabuli_chr08 | 14164787                | CC                              | TT                | 1946476691               |
| SNP_P3_99407_14164788 | NC_021167.1    | Ca_kabuli_chr08 | 14164788                | AA                              | TT                | 1946476693               |
| SNP_P3_99408_14165596 | NC_021167.1    | Ca_kabuli_chr08 | 14165596                | GG                              | TT                | 1946476694               |
| SNP_P3_99409_14167469 | NC_021167.1    | Ca_kabuli_chr08 | 14167469                | GG                              | TT                | 1946476696               |
| SNP_P3_99410_14169390 | NC_021167.1    | Ca_kabuli_chr08 | 14169390                | AA                              | CC                | 1946476698               |
| SNP_P3_99411_14169824 | NC_021167.1    | Ca_kabuli_chr08 | 14169824                | GG                              | AA                | 1946476699               |
| SNP_P3_99414_14169885 | NC_021167.1    | Ca_kabuli_chr08 | 14169885                | CC                              | GG                | 1946476701               |
| SNP_P3_99415_14169892 | NC_021167.1    | Ca_kabuli_chr08 | 14169892                | TT                              | CC                | 1946476702               |
| SNP_P3_99416_14170425 | NC_021167.1    | Ca_kabuli_chr08 | 14170425                | CC                              | TT                | 1946476704               |
| SNP_P3_99417_14170512 | NC_021167.1    | Ca_kabuli_chr08 | 14170512                | AA                              | GG                | 1946476705               |
| SNP_P3_99418_14176984 | NC_021167.1    | Ca_kabuli_chr08 | 14176984                | TT                              | CC                | 1946476707               |
| SNP_P3_99419_14182944 | NC_021167.1    | Ca_kabuli_chr08 | 14182944                | AA                              | TT                | 1946476708               |
| SNP_P3_99420_14182946 | NC_021167.1    | Ca_kabuli_chr08 | 14182946                | AA                              | GG                | 1946476710               |
| SNP_P3_99422_14183434 | NC_021167.1    | Ca_kabuli_chr08 | 14183434                | AA                              | CC                | 1946476711               |
| SNP_P3_99423_14183515 | NC_021167.1    | Ca_kabuli_chr08 | 14183515                | CC                              | TT                | 1946476713               |
| SNP_P3_99424_14183534 | NC_021167.1    | Ca_kabuli_chr08 | 14183534                | AA                              | GG                | 1946476714               |

| SNPs IDs              | Chromosome IDs | Chromosomes     | Physical positions (bp) | CDC Frontier (Reference genome) | (Pusa 256 & HPNB) | NCBI SNPdb Accession IDs |
|-----------------------|----------------|-----------------|-------------------------|---------------------------------|-------------------|--------------------------|
| SNP_P3_99425_14183552 | NC_021167.1    | Ca_kabuli_chr08 | 14183552                | AA                              | GG                | 1946476716               |
| SNP_P3_99427_14183807 | NC_021167.1    | Ca_kabuli_chr08 | 14183807                | AA                              | GG                | 1946476717               |
| SNP_P3_99428_14188007 | NC_021167.1    | Ca_kabuli_chr08 | 14188007                | GG                              | AA                | 1946476719               |
| SNP_P3_99430_14189998 | NC_021167.1    | Ca_kabuli_chr08 | 14189998                | CC                              | TT                | 1946476720               |
| SNP_P3_99431_14190704 | NC_021167.1    | Ca_kabuli_chr08 | 14190704                | TT                              | AA                | 1946476722               |
| SNP_P3_99432_14191448 | NC_021167.1    | Ca_kabuli_chr08 | 14191448                | CC                              | TT                | 1946476723               |
| SNP_P3_99433_14191473 | NC_021167.1    | Ca_kabuli_chr08 | 14191473                | TT                              | CC                | 1946476725               |
| SNP_P3_99434_14191520 | NC_021167.1    | Ca_kabuli_chr08 | 14191520                | AA                              | GG                | 1946476726               |
| SNP_P3_99435_14191524 | NC_021167.1    | Ca_kabuli_chr08 | 14191524                | TT                              | CC                | 1946476728               |
| SNP_P3_99436_14203379 | NC_021167.1    | Ca_kabuli_chr08 | 14203379                | AA                              | TT                | 1946476729               |
| SNP_P3_99437_14203383 | NC_021167.1    | Ca_kabuli_chr08 | 14203383                | TT                              | CC                | 1946476731               |
| SNP_P3_99438_14209191 | NC_021167.1    | Ca_kabuli_chr08 | 14209191                | CC                              | TT                | 1946476732               |
| SNP_P3_99439_14209520 | NC_021167.1    | Ca_kabuli_chr08 | 14209520                | TT                              | CC                | 1946476734               |
| SNP_P3_99440_14209826 | NC_021167.1    | Ca_kabuli_chr08 | 14209826                | TT                              | GG                | 1946476735               |
| SNP_P3_99441_14209917 | NC_021167.1    | Ca_kabuli_chr08 | 14209917                | AA                              | CC                | 1946476737               |
| SNP_P3_99442_14213130 | NC_021167.1    | Ca_kabuli_chr08 | 14213130                | AA                              | CC                | 1946476739               |
| SNP_P3_99443_14218036 | NC_021167.1    | Ca_kabuli_chr08 | 14218036                | AA                              | CC                | 1946476740               |
| SNP_P3_99444_14218037 | NC_021167.1    | Ca_kabuli_chr08 | 14218037                | AA                              | TT                | 1946476742               |
| SNP_P3_99445_14218038 | NC_021167.1    | Ca_kabuli_chr08 | 14218038                | AA                              | TT                | 1946476743               |
| SNP_P3_99446_14218039 | NC_021167.1    | Ca_kabuli_chr08 | 14218039                | AA                              | TT                | 1946476745               |
| SNP_P3_99447_14218043 | NC_021167.1    | Ca_kabuli_chr08 | 14218043                | CC                              | TT                | 1946476746               |
| SNP_P3_99448_14218092 | NC_021167.1    | Ca_kabuli_chr08 | 14218092                | TT                              | CC                | 1946476748               |
| SNP_P3_99450_14218264 | NC_021167.1    | Ca_kabuli_chr08 | 14218264                | GG                              | AA                | 1946476749               |
| SNP_P3_99451_14218377 | NC_021167.1    | Ca_kabuli_chr08 | 14218377                | GG                              | TT                | 1946476751               |
| SNP_P3_99452_14218505 | NC_021167.1    | Ca_kabuli_chr08 | 14218505                | TT                              | AA                | 1946476752               |
| SNP_P3_99453_14218534 | NC_021167.1    | Ca_kabuli_chr08 | 14218534                | TT                              | CC                | 1946476754               |
| SNP_P3_99454_14218625 | NC_021167.1    | Ca_kabuli_chr08 | 14218625                | GG                              | TT                | 1946476755               |
| SNP_P3_99455_14218704 | NC_021167.1    | Ca_kabuli_chr08 | 14218704                | TT                              | AA                | 1946476757               |
| SNP_P3_99456_14218804 | NC_021167.1    | Ca_kabuli_chr08 | 14218804                | AA                              | GG                | 1946476758               |
| SNP_P3_99457_14218807 | NC_021167.1    | Ca_kabuli_chr08 | 14218807                | CC                              | TT                | 1946476759               |
| SNP_P3_99458_14218858 | NC_021167.1    | Ca_kabuli_chr08 | 14218858                | GG                              | AA                | 1946476761               |
| SNP_P3_99459_14218881 | NC_021167.1    | Ca_kabuli_chr08 | 14218881                | TT                              | CC                | 1946476762               |
| SNP_P3_99460_14222295 | NC_021167.1    | Ca_kabuli_chr08 | 14222295                | AA                              | TT                | 1946476764               |
| SNP_P3_99461_14222742 | NC_021167.1    | Ca_kabuli_chr08 | 14222742                | GG                              | AA                | 1946476765               |
| SNP_P3_99462_14222786 | NC_021167.1    | Ca_kabuli_chr08 | 14222786                | CC                              | GG                | 1946476767               |
| SNP_P3_99464_14222856 | NC_021167.1    | Ca_kabuli_chr08 | 14222856                | AA                              | GG                | 1946476768               |
| SNP_P3_99465_14222862 | NC_021167.1    | Ca_kabuli_chr08 | 14222862                | CC                              | TT                | 1946476770               |
| SNP_P3_99466_14223246 | NC_021167.1    | Ca_kabuli_chr08 | 14223246                | AA                              | GG                | 1946476771               |
| SNP_P3_99467_14224093 | NC_021167.1    | Ca_kabuli_chr08 | 14224093                | TT                              | CC                | 1946476773               |
| SNP_P3_99468_14224774 | NC_021167.1    | Ca_kabuli_chr08 | 14224774                | TT                              | AA                | 1946476774               |
| SNP_P3_99469_14238824 | NC_021167.1    | Ca_kabuli_chr08 | 14238824                | TT                              | AA                | 1946476776               |
| SNP_P3_99471_14239374 | NC_021167.1    | Ca_kabuli_chr08 | 14239374                | TT                              | CC                | 1946476777               |

| SNPs IDs              | Chromosome IDs | Chromosomes     | Physical positions (bp) | CDC Frontier (Reference genome) | (Pusa 256 & HPNB) | NCBI SNPdb Accession IDs |
|-----------------------|----------------|-----------------|-------------------------|---------------------------------|-------------------|--------------------------|
| SNP_P3_99472_14239406 | NC_021167.1    | Ca_kabuli_chr08 | 14239406                | TT                              | CC                | 1946476779               |
| SNP_P3_99473_14239430 | NC_021167.1    | Ca_kabuli_chr08 | 14239430                | TT                              | AA                | 1946476780               |
| SNP_P3_99474_14244269 | NC_021167.1    | Ca_kabuli_chr08 | 14244269                | TT                              | CC                | 1946476782               |
| SNP_P3_99476_14244535 | NC_021167.1    | Ca_kabuli_chr08 | 14244535                | GG                              | AA                | 1946476783               |
| SNP_P3_99478_14246003 | NC_021167.1    | Ca_kabuli_chr08 | 14246003                | TT                              | CC                | 1946476785               |
| SNP_P3_99479_14246009 | NC_021167.1    | Ca_kabuli_chr08 | 14246009                | CC                              | TT                | 1946476786               |
| SNP_P3_99480_14247934 | NC_021167.1    | Ca_kabuli_chr08 | 14247934                | GG                              | TT                | 1946476788               |
| SNP_P3_99481_14248570 | NC_021167.1    | Ca_kabuli_chr08 | 14248570                | TT                              | AA                | 1946476789               |
| SNP_P3_99482_14248571 | NC_021167.1    | Ca_kabuli_chr08 | 14248571                | GG                              | AA                | 1946476791               |
| SNP_P3_99483_14248979 | NC_021167.1    | Ca_kabuli_chr08 | 14248979                | TT                              | CC                | 1946476792               |
| SNP_P3_99484_14251395 | NC_021167.1    | Ca_kabuli_chr08 | 14251395                | TT                              | CC                | 1946476794               |
| SNP_P3_99485_14251787 | NC_021167.1    | Ca_kabuli_chr08 | 14251787                | GG                              | AA                | 1946476795               |
| SNP_P3_99486_14251797 | NC_021167.1    | Ca_kabuli_chr08 | 14251797                | GG                              | CC                | 1946476797               |
| SNP_P3_99487_14252339 | NC_021167.1    | Ca_kabuli_chr08 | 14252339                | AA                              | CC                | 1946476799               |
| SNP_P3_99488_14252346 | NC_021167.1    | Ca_kabuli_chr08 | 14252346                | TT                              | AA                | 1946476800               |
| SNP_P3_99490_14252521 | NC_021167.1    | Ca_kabuli_chr08 | 14252521                | GG                              | TT                | 1946476802               |
| SNP_P3_99492_14252589 | NC_021167.1    | Ca_kabuli_chr08 | 14252589                | CC                              | GG                | 1946476803               |
| SNP_P3_99493_14252960 | NC_021167.1    | Ca_kabuli_chr08 | 14252960                | AA                              | GG                | 1946476805               |
| SNP_P3_99494_14253160 | NC_021167.1    | Ca_kabuli_chr08 | 14253160                | GG                              | AA                | 1946476806               |
| SNP_P3_99495_14253656 | NC_021167.1    | Ca_kabuli_chr08 | 14253656                | GG                              | TT                | 1946476808               |
| SNP_P3_99496_14254580 | NC_021167.1    | Ca_kabuli_chr08 | 14254580                | AA                              | GG                | 1946476809               |
| SNP_P3_99497_14254986 | NC_021167.1    | Ca_kabuli_chr08 | 14254986                | AA                              | GG                | 1946476811               |
| SNP_P3_99498_14255021 | NC_021167.1    | Ca_kabuli_chr08 | 14255021                | AA                              | TT                | 1946476812               |
| SNP_P3_99499_14255536 | NC_021167.1    | Ca_kabuli_chr08 | 14255536                | AA                              | CC                | 1946476814               |
| SNP_P3_99500_14255719 | NC_021167.1    | Ca_kabuli_chr08 | 14255719                | CC                              | TT                | 1946476815               |
| SNP_P3_99501_14255868 | NC_021167.1    | Ca_kabuli_chr08 | 14255868                | CC                              | AA                | 1946476817               |
| SNP_P3_99502_14256199 | NC_021167.1    | Ca_kabuli_chr08 | 14256199                | AA                              | GG                | 1946476818               |
| SNP_P3_99503_14256665 | NC_021167.1    | Ca_kabuli_chr08 | 14256665                | AA                              | CC                | 1946476820               |
| SNP_P3_99505_14256894 | NC_021167.1    | Ca_kabuli_chr08 | 14256894                | AA                              | CC                | 1946476821               |
| SNP_P3_99507_14257223 | NC_021167.1    | Ca_kabuli_chr08 | 14257223                | AA                              | GG                | 1946476823               |
| SNP_P3_99508_14257232 | NC_021167.1    | Ca_kabuli_chr08 | 14257232                | TT                              | AA                | 1946476824               |
| SNP_P3_99509_14257243 | NC_021167.1    | Ca_kabuli_chr08 | 14257243                | CC                              | TT                | 1946476826               |
| SNP_P3_99511_14259218 | NC_021167.1    | Ca_kabuli_chr08 | 14259218                | TT                              | AA                | 1946476828               |
| SNP_P3_99512_14259233 | NC_021167.1    | Ca_kabuli_chr08 | 14259233                | CC                              | GG                | 1946476829               |
| SNP_P3_99513_14260980 | NC_021167.1    | Ca_kabuli_chr08 | 14260980                | AA                              | CC                | 1946476831               |
| SNP_P3_99515_14264457 | NC_021167.1    | Ca_kabuli_chr08 | 14264457                | GG                              | CC                | 1946476832               |
| SNP_P3_99516_14264460 | NC_021167.1    | Ca_kabuli_chr08 | 14264460                | TT                              | CC                | 1946476834               |
| SNP_P3_99518_14264518 | NC_021167.1    | Ca_kabuli_chr08 | 14264518                | TT                              | AA                | 1946476835               |
| SNP_P3_99520_14264880 | NC_021167.1    | Ca_kabuli_chr08 | 14264880                | GG                              | AA                | 1946476837               |
| SNP_P3_99521_14264908 | NC_021167.1    | Ca_kabuli_chr08 | 14264908                | GG                              | AA                | 1946476839               |
| SNP_P3_99524_14268659 | NC_021167.1    | Ca_kabuli_chr08 | 14268659                | CC                              | TT                | 1946476840               |
| SNP_P3_99525_14268666 | NC_021167.1    | Ca_kabuli_chr08 | 14268666                | TT                              | AA                | 1946476842               |

| SNPs IDs              | Chromosome IDs | Chromosomes     | Physical positions (bp) | CDC Frontier (Reference genome) | (Pusa 256 & HPNB) | NCBI SNPdb Accession IDs |
|-----------------------|----------------|-----------------|-------------------------|---------------------------------|-------------------|--------------------------|
| SNP_P3_99526_14268898 | NC_021167.1    | Ca_kabuli_chr08 | 14268898                | TT                              | CC                | 1946476843               |
| SNP_P3_99527_14270413 | NC_021167.1    | Ca_kabuli_chr08 | 14270413                | TT                              | CC                | 1946476845               |
| SNP_P3_99528_14281965 | NC_021167.1    | Ca_kabuli_chr08 | 14281965                | GG                              | AA                | 1946476846               |
| SNP_P3_99529_14285056 | NC_021167.1    | Ca_kabuli_chr08 | 14285056                | TT                              | CC                | 1946476848               |
| SNP_P3_99530_14285112 | NC_021167.1    | Ca_kabuli_chr08 | 14285112                | AA                              | GG                | 1946476849               |
| SNP_P3_99531_14286044 | NC_021167.1    | Ca_kabuli_chr08 | 14286044                | AA                              | GG                | 1946476851               |
| SNP_P3_99532_14287913 | NC_021167.1    | Ca_kabuli_chr08 | 14287913                | GG                              | TT                | 1946476852               |
| SNP_P3_99534_14289338 | NC_021167.1    | Ca_kabuli_chr08 | 14289338                | AA                              | CC                | 1946476854               |
| SNP_P3_99535_14289341 | NC_021167.1    | Ca_kabuli_chr08 | 14289341                | GG                              | CC                | 1946476855               |
| SNP_P3_99536_14289565 | NC_021167.1    | Ca_kabuli_chr08 | 14289565                | GG                              | AA                | 1946476857               |
| SNP_P3_99538_14289778 | NC_021167.1    | Ca_kabuli_chr08 | 14289778                | AA                              | GG                | 1946476858               |
| SNP_P3_99540_14290588 | NC_021167.1    | Ca_kabuli_chr08 | 14290588                | AA                              | GG                | 1946476860               |
| SNP_P3_99544_14292056 | NC_021167.1    | Ca_kabuli_chr08 | 14292056                | GG                              | AA                | 1946476861               |
| SNP_P3_99545_14292267 | NC_021167.1    | Ca_kabuli_chr08 | 14292267                | GG                              | TT                | 1946476863               |
| SNP_P3_99547_14292346 | NC_021167.1    | Ca_kabuli_chr08 | 14292346                | CC                              | TT                | 1946476864               |
| SNP_P3_99548_14295771 | NC_021167.1    | Ca_kabuli_chr08 | 14295771                | TT                              | CC                | 1946476866               |
| SNP_P3_99549_14302917 | NC_021167.1    | Ca_kabuli_chr08 | 14302917                | TT                              | CC                | 1946476867               |
| SNP_P3_99550_14302918 | NC_021167.1    | Ca_kabuli_chr08 | 14302918                | GG                              | AA                | 1946476869               |
| SNP_P3_99551_14302939 | NC_021167.1    | Ca_kabuli_chr08 | 14302939                | CC                              | TT                | 1946476870               |
| SNP_P3_99552_14302947 | NC_021167.1    | Ca_kabuli_chr08 | 14302947                | TT                              | AA                | 1946476872               |
| SNP_P3_99553_14303007 | NC_021167.1    | Ca_kabuli_chr08 | 14303007                | CC                              | TT                | 1946476873               |
| SNP_P3_99554_14303305 | NC_021167.1    | Ca_kabuli_chr08 | 14303305                | TT                              | GG                | 1946476875               |
| SNP_P3_99555_14303478 | NC_021167.1    | Ca_kabuli_chr08 | 14303478                | AA                              | GG                | 1946476876               |
| SNP_P3_99557_14305846 | NC_021167.1    | Ca_kabuli_chr08 | 14305846                | TT                              | CC                | 1946476878               |
| SNP_P3_99558_14306060 | NC_021167.1    | Ca_kabuli_chr08 | 14306060                | CC                              | TT                | 1946476879               |
| SNP_P3_99559_14306770 | NC_021167.1    | Ca_kabuli_chr08 | 14306770                | AA                              | TT                | 1946476881               |
| SNP_P3_99562_14307283 | NC_021167.1    | Ca_kabuli_chr08 | 14307283                | GG                              | AA                | 1946476882               |
| SNP_P3_99564_14307937 | NC_021167.1    | Ca_kabuli_chr08 | 14307937                | AA                              | GG                | 1946476884               |
| SNP_P3_99565_14308271 | NC_021167.1    | Ca_kabuli_chr08 | 14308271                | GG                              | AA                | 1946476885               |
| SNP_P3_99566_14310997 | NC_021167.1    | Ca_kabuli_chr08 | 14310997                | CC                              | TT                | 1946476887               |
| SNP_P3_99571_14319808 | NC_021167.1    | Ca_kabuli_chr08 | 14319808                | GG                              | AA                | 1946476888               |
| SNP_P3_99572_14319887 | NC_021167.1    | Ca_kabuli_chr08 | 14319887                | AA                              | GG                | 1946476890               |
| SNP_P3_99573_14319904 | NC_021167.1    | Ca_kabuli_chr08 | 14319904                | TT                              | GG                | 1946476891               |
| SNP_P3_99575_14321523 | NC_021167.1    | Ca_kabuli_chr08 | 14321523                | GG                              | CC                | 1946476892               |
| SNP_P3_99576_14321599 | NC_021167.1    | Ca_kabuli_chr08 | 14321599                | AA                              | TT                | 1946476894               |
| SNP_P3_99578_14330882 | NC_021167.1    | Ca_kabuli_chr08 | 14330882                | GG                              | AA                | 1946476896               |
| SNP_P3_99579_14330936 | NC_021167.1    | Ca_kabuli_chr08 | 14330936                | AA                              | GG                | 1946476897               |
| SNP_P3_99580_14330945 | NC_021167.1    | Ca_kabuli_chr08 | 14330945                | TT                              | CC                | 1946476899               |
| SNP_P3_99581_14330949 | NC_021167.1    | Ca_kabuli_chr08 | 14330949                | TT                              | CC                | 1946476900               |
| SNP_P3_99582_14331128 | NC_021167.1    | Ca_kabuli_chr08 | 14331128                | AA                              | GG                | 1946476902               |
| SNP_P3_99583_14331166 | NC_021167.1    | Ca_kabuli_chr08 | 14331166                | GG                              | AA                | 1946476903               |
| SNP_P3_99584_14331809 | NC_021167.1    | Ca_kabuli_chr08 | 14331809                | AA                              | GG                | 1946476905               |



| SNPs IDs              | Chromosome IDs | Chromosomes     | Physical positions (bp) | CDC Frontier (Reference genome) | (Pusa 256 & HPNB) | NCBI SNPdb Accession IDs |
|-----------------------|----------------|-----------------|-------------------------|---------------------------------|-------------------|--------------------------|
| SNP_P3_99585_14331827 | NC_021167.1    | Ca_kabuli_chr08 | 14331827                | TT                              | CC                | 1946476906               |
| SNP_P3_99586_14332765 | NC_021167.1    | Ca_kabuli_chr08 | 14332765                | AA                              | TT                | 1946476908               |
| SNP_P3_99587_14332771 | NC_021167.1    | Ca_kabuli_chr08 | 14332771                | AA                              | GG                | 1946476909               |
| SNP_P3_99588_14333593 | NC_021167.1    | Ca_kabuli_chr08 | 14333593                | CC                              | AA                | 1946476911               |
| SNP_P3_99589_14333594 | NC_021167.1    | Ca_kabuli_chr08 | 14333594                | AA                              | TT                | 1946476912               |
| SNP_P3_99590_14333603 | NC_021167.1    | Ca_kabuli_chr08 | 14333603                | TT                              | CC                | 1946476914               |
| SNP_P3_99591_14334438 | NC_021167.1    | Ca_kabuli_chr08 | 14334438                | GG                              | AA                | 1946476915               |
| SNP_P3_99594_14334712 | NC_021167.1    | Ca_kabuli_chr08 | 14334712                | AA                              | TT                | 1946476917               |
| SNP_P3_99595_14337856 | NC_021167.1    | Ca_kabuli_chr08 | 14337856                | AA                              | GG                | 1946476918               |
| SNP_P3_99596_14337864 | NC_021167.1    | Ca_kabuli_chr08 | 14337864                | AA                              | GG                | 1946476920               |
| SNP_P3_99597_14338115 | NC_021167.1    | Ca_kabuli_chr08 | 14338115                | CC                              | TT                | 1946476921               |
| SNP_P3_99599_14340804 | NC_021167.1    | Ca_kabuli_chr08 | 14340804                | GG                              | AA                | 1946476923               |
| SNP_P3_99600_14340828 | NC_021167.1    | Ca_kabuli_chr08 | 14340828                | TT                              | GG                | 1946476925               |
| SNP_P3_99601_14341671 | NC_021167.1    | Ca_kabuli_chr08 | 14341671                | GG                              | CC                | 1946476926               |
| SNP_P3_99602_14341690 | NC_021167.1    | Ca_kabuli_chr08 | 14341690                | TT                              | AA                | 1946476927               |
| SNP_P3_99603_14342004 | NC_021167.1    | Ca_kabuli_chr08 | 14342004                | CC                              | AA                | 1946476929               |
| SNP_P3_99604_14342054 | NC_021167.1    | Ca_kabuli_chr08 | 14342054                | GG                              | CC                | 1946476930               |
| SNP_P3_99605_14342055 | NC_021167.1    | Ca_kabuli_chr08 | 14342055                | GG                              | AA                | 1946476932               |
| SNP_P3_99606_14342061 | NC_021167.1    | Ca_kabuli_chr08 | 14342061                | TT                              | CC                | 1946476933               |
| SNP_P3_99607_14342290 | NC_021167.1    | Ca_kabuli_chr08 | 14342290                | GG                              | AA                | 1946476935               |
| SNP_P3_99608_14342328 | NC_021167.1    | Ca_kabuli_chr08 | 14342328                | CC                              | AA                | 1946476936               |
| SNP_P3_99609_14342348 | NC_021167.1    | Ca_kabuli_chr08 | 14342348                | CC                              | TT                | 1946476937               |
| SNP_P3_99610_14343670 | NC_021167.1    | Ca_kabuli_chr08 | 14343670                | GG                              | AA                | 1946476939               |
| SNP_P3_99612_14347644 | NC_021167.1    | Ca_kabuli_chr08 | 14347644                | CC                              | AA                | 1946476940               |
| SNP_P3_99613_14347932 | NC_021167.1    | Ca_kabuli_chr08 | 14347932                | CC                              | TT                | 1946476942               |
| SNP_P3_99614_14347979 | NC_021167.1    | Ca_kabuli_chr08 | 14347979                | AA                              | CC                | 1946476943               |
| SNP_P3_99616_14349160 | NC_021167.1    | Ca_kabuli_chr08 | 14349160                | AA                              | TT                | 1946476945               |
| SNP_P3_99617_14349163 | NC_021167.1    | Ca_kabuli_chr08 | 14349163                | AA                              | GG                | 1946476946               |
| SNP_P3_99618_14351197 | NC_021167.1    | Ca_kabuli_chr08 | 14351197                | CC                              | TT                | 1946476947               |
| SNP_P3_99619_14351501 | NC_021167.1    | Ca_kabuli_chr08 | 14351501                | AA                              | GG                | 1946476949               |
| SNP_P3_99620_14351534 | NC_021167.1    | Ca_kabuli_chr08 | 14351534                | GG                              | AA                | 1946476950               |
| SNP_P3_99621_14353869 | NC_021167.1    | Ca_kabuli_chr08 | 14353869                | AA                              | CC                | 1946476952               |
| SNP_P3_99622_14354083 | NC_021167.1    | Ca_kabuli_chr08 | 14354083                | AA                              | CC                | 1946476953               |
| SNP_P3_99623_14354138 | NC_021167.1    | Ca_kabuli_chr08 | 14354138                | CC                              | GG                | 1946476955               |
| SNP_P3_99624_14355071 | NC_021167.1    | Ca_kabuli_chr08 | 14355071                | TT                              | CC                | 1946476956               |
| SNP_P3_99625_14356486 | NC_021167.1    | Ca_kabuli_chr08 | 14356486                | CC                              | GG                | 1946476957               |
| SNP_P3_99627_14359237 | NC_021167.1    | Ca_kabuli_chr08 | 14359237                | AA                              | GG                | 1946476959               |
| SNP_P3_99628_14359253 | NC_021167.1    | Ca_kabuli_chr08 | 14359253                | TT                              | CC                | 1946476960               |
| SNP_P3_99629_14359392 | NC_021167.1    | Ca_kabuli_chr08 | 14359392                | CC                              | TT                | 1946476962               |
| SNP_P3_99630_14359951 | NC_021167.1    | Ca_kabuli_chr08 | 14359951                | GG                              | AA                | 1946476963               |
| SNP_P3_99631_14362382 | NC_021167.1    | Ca_kabuli_chr08 | 14362382                | CC                              | TT                | 1946476965               |
| SNP_P3_99632_14362682 | NC_021167.1    | Ca_kabuli_chr08 | 14362682                | TT                              | AA                | 1946476966               |

| SNPs IDs              | Chromosome IDs | Chromosomes     | Physical positions (bp) | CDC Frontier (Reference genome) | (Pusa 256 & HPNB) | NCBI SNPdb Accession IDs |
|-----------------------|----------------|-----------------|-------------------------|---------------------------------|-------------------|--------------------------|
| SNP_P3_99633_14364603 | NC_021167.1    | Ca_kabuli_chr08 | 14364603                | CC                              | GG                | 1946476968               |
| SNP_P3_99634_14364684 | NC_021167.1    | Ca_kabuli_chr08 | 14364684                | GG                              | CC                | 1946476969               |
| SNP_P3_99636_14364896 | NC_021167.1    | Ca_kabuli_chr08 | 14364896                | GG                              | CC                | 1946476971               |
| SNP_P3_99637_14364907 | NC_021167.1    | Ca_kabuli_chr08 | 14364907                | TT                              | CC                | 1946476972               |
| SNP_P3_99639_14366150 | NC_021167.1    | Ca_kabuli_chr08 | 14366150                | GG                              | AA                | 1946476974               |
| SNP_P3_99643_14369949 | NC_021167.1    | Ca_kabuli_chr08 | 14369949                | TT                              | CC                | 1946476975               |
| SNP_P3_99644_14370176 | NC_021167.1    | Ca_kabuli_chr08 | 14370176                | CC                              | TT                | 1946476977               |
| SNP_P3_99645_14370251 | NC_021167.1    | Ca_kabuli_chr08 | 14370251                | GG                              | AA                | 1946476978               |
| SNP_P3_99646_14370410 | NC_021167.1    | Ca_kabuli_chr08 | 14370410                | TT                              | AA                | 1946476980               |
| SNP_P3_99647_14370412 | NC_021167.1    | Ca_kabuli_chr08 | 14370412                | GG                              | TT                | 1946476981               |
| SNP_P3_99649_14370587 | NC_021167.1    | Ca_kabuli_chr08 | 14370587                | AA                              | GG                | 1946476983               |
| SNP_P3_99650_14370634 | NC_021167.1    | Ca_kabuli_chr08 | 14370634                | AA                              | GG                | 1946476985               |
| SNP_P3_99651_14370638 | NC_021167.1    | Ca_kabuli_chr08 | 14370638                | TT                              | CC                | 1946476986               |
| SNP_P3_99652_14370786 | NC_021167.1    | Ca_kabuli_chr08 | 14370786                | CC                              | TT                | 1946476988               |
| SNP_P3_99653_14370791 | NC_021167.1    | Ca_kabuli_chr08 | 14370791                | AA                              | GG                | 1946476989               |
| SNP_P3_99654_14370811 | NC_021167.1    | Ca_kabuli_chr08 | 14370811                | TT                              | AA                | 1946476990               |
| SNP_P3_99655_14370818 | NC_021167.1    | Ca_kabuli_chr08 | 14370818                | CC                              | TT                | 1946476992               |
| SNP_P3_99656_14370819 | NC_021167.1    | Ca_kabuli_chr08 | 14370819                | GG                              | TT                | 1946476993               |
| SNP_P3_99657_14370827 | NC_021167.1    | Ca_kabuli_chr08 | 14370827                | CC                              | TT                | 1946476995               |
| SNP_P3_99658_14370834 | NC_021167.1    | Ca_kabuli_chr08 | 14370834                | TT                              | CC                | 1946476996               |
| SNP_P3_99659_14370836 | NC_021167.1    | Ca_kabuli_chr08 | 14370836                | TT                              | CC                | 1946476998               |
| SNP_P3_99660_14370839 | NC_021167.1    | Ca_kabuli_chr08 | 14370839                | AA                              | TT                | 1946476999               |
| SNP_P3_99661_14370864 | NC_021167.1    | Ca_kabuli_chr08 | 14370864                | GG                              | AA                | 1946477000               |
| SNP_P3_99662_14370896 | NC_021167.1    | Ca_kabuli_chr08 | 14370896                | CC                              | TT                | 1946477002               |
| SNP_P3_99663_14370898 | NC_021167.1    | Ca_kabuli_chr08 | 14370898                | GG                              | AA                | 1946477003               |
| SNP_P3_99664_14370906 | NC_021167.1    | Ca_kabuli_chr08 | 14370906                | TT                              | CC                | 1946477004               |
| SNP_P3_99665_14370928 | NC_021167.1    | Ca_kabuli_chr08 | 14370928                | AA                              | CC                | 1946477005               |
| SNP_P3_99666_14370933 | NC_021167.1    | Ca_kabuli_chr08 | 14370933                | GG                              | TT                | 1946477006               |
| SNP_P3_99667_14370935 | NC_021167.1    | Ca_kabuli_chr08 | 14370935                | GG                              | AA                | 1946477007               |
| SNP_P3_99670_14403562 | NC_021167.1    | Ca_kabuli_chr08 | 14403562                | TT                              | AA                | 1946477008               |
| SNP_P3_99674_14413129 | NC_021167.1    | Ca_kabuli_chr08 | 14413129                | CC                              | TT                | 1946477009               |
| SNP_P3_99675_14427828 | NC_021167.1    | Ca_kabuli_chr08 | 14427828                | AA                              | GG                | 1946477010               |
| SNP_P3_99676_14437565 | NC_021167.1    | Ca_kabuli_chr08 | 14437565                | TT                              | GG                | 1946477011               |
| SNP_P3_99677_14437567 | NC_021167.1    | Ca_kabuli_chr08 | 14437567                | TT                              | GG                | 1946477012               |
| SNP_P3_99679_14444024 | NC_021167.1    | Ca_kabuli_chr08 | 14444024                | GG                              | AA                | 1946477013               |
| SNP_P3_99680_14505700 | NC_021167.1    | Ca_kabuli_chr08 | 14505700                | AA                              | CC                | 1946477014               |
| SNP_P3_99681_14562864 | NC_021167.1    | Ca_kabuli_chr08 | 14562864                | CC                              | AA                | 1946477015               |
| SNP_P3_99682_14563288 | NC_021167.1    | Ca_kabuli_chr08 | 14563288                | CC                              | GG                | 1946477016               |
| SNP_P3_99683_14563298 | NC_021167.1    | Ca_kabuli_chr08 | 14563298                | CC                              | TT                | 1946477017               |
| SNP_P3_99684_14563695 | NC_021167.1    | Ca_kabuli_chr08 | 14563695                | AA                              | CC                | 1946477018               |
| SNP_P3_99685_14568216 | NC_021167.1    | Ca_kabuli_chr08 | 14568216                | AA                              | GG                | 1946477019               |
| SNP_P3_99686_14568250 | NC_021167.1    | Ca_kabuli_chr08 | 14568250                | AA                              | GG                | 1946477020               |

| SNPs IDs              | Chromosome IDs | Chromosomes     | Physical positions (bp) | CDC Frontier (Reference genome) | (Pusa 256 & HPNB) | NCBI SNPdb Accession IDs |
|-----------------------|----------------|-----------------|-------------------------|---------------------------------|-------------------|--------------------------|
| SNP_P3_99688_14569038 | NC_021167.1    | Ca_kabuli_chr08 | 14569038                | GG                              | TT                | 1946477021               |
| SNP_P3_99691_14575235 | NC_021167.1    | Ca_kabuli_chr08 | 14575235                | GG                              | TT                | 1946477022               |
| SNP_P3_99692_14576325 | NC_021167.1    | Ca_kabuli_chr08 | 14576325                | CC                              | TT                | 1946477023               |
| SNP_P3_99693_14576391 | NC_021167.1    | Ca_kabuli_chr08 | 14576391                | GG                              | AA                | 1946477024               |
| SNP_P3_99694_14576500 | NC_021167.1    | Ca_kabuli_chr08 | 14576500                | GG                              | AA                | 1946477025               |
| SNP_P3_99695_14576502 | NC_021167.1    | Ca_kabuli_chr08 | 14576502                | AA                              | GG                | 1946477026               |
| SNP_P3_99696_14576535 | NC_021167.1    | Ca_kabuli_chr08 | 14576535                | CC                              | TT                | 1946477027               |
| SNP_P3_99697_14576573 | NC_021167.1    | Ca_kabuli_chr08 | 14576573                | TT                              | AA                | 1946477028               |
| SNP_P3_99699_14576905 | NC_021167.1    | Ca_kabuli_chr08 | 14576905                | AA                              | GG                | 1946477029               |
| SNP_P3_99700_14577792 | NC_021167.1    | Ca_kabuli_chr08 | 14577792                | AA                              | TT                | 1946477030               |
| SNP_P3_99701_14577824 | NC_021167.1    | Ca_kabuli_chr08 | 14577824                | TT                              | AA                | 1946477031               |
| SNP_P3_99702_14577838 | NC_021167.1    | Ca_kabuli_chr08 | 14577838                | CC                              | TT                | 1946477032               |
| SNP_P3_99703_14578105 | NC_021167.1    | Ca_kabuli_chr08 | 14578105                | GG                              | AA                | 1946477033               |
| SNP_P3_99705_14578703 | NC_021167.1    | Ca_kabuli_chr08 | 14578703                | CC                              | TT                | 1946477035               |
| SNP_P3_99706_14579537 | NC_021167.1    | Ca_kabuli_chr08 | 14579537                | AA                              | CC                | 1946477036               |
| SNP_P3_99707_14581746 | NC_021167.1    | Ca_kabuli_chr08 | 14581746                | TT                              | GG                | 1946477038               |
| SNP_P3_99708_14582623 | NC_021167.1    | Ca_kabuli_chr08 | 14582623                | AA                              | GG                | 1946477040               |
| SNP_P3_99709_14583614 | NC_021167.1    | Ca_kabuli_chr08 | 14583614                | TT                              | GG                | 1946477041               |
| SNP_P3_99710_14583630 | NC_021167.1    | Ca_kabuli_chr08 | 14583630                | GG                              | AA                | 1946477043               |
| SNP_P3_99711_14583899 | NC_021167.1    | Ca_kabuli_chr08 | 14583899                | AA                              | GG                | 1946477045               |
| SNP_P3_99712_14583938 | NC_021167.1    | Ca_kabuli_chr08 | 14583938                | TT                              | CC                | 1946477046               |
| SNP_P3_99714_14584007 | NC_021167.1    | Ca_kabuli_chr08 | 14584007                | TT                              | CC                | 1946477048               |
| SNP_P3_99715_14584021 | NC_021167.1    | Ca_kabuli_chr08 | 14584021                | TT                              | CC                | 1946477049               |
| SNP_P3_99716_14584029 | NC_021167.1    | Ca_kabuli_chr08 | 14584029                | GG                              | CC                | 1946477051               |
| SNP_P3_99717_14584061 | NC_021167.1    | Ca_kabuli_chr08 | 14584061                | TT                              | CC                | 1946477052               |
| SNP_P3_99718_14584080 | NC_021167.1    | Ca_kabuli_chr08 | 14584080                | AA                              | GG                | 1946477054               |
| SNP_P3_99719_14584089 | NC_021167.1    | Ca_kabuli_chr08 | 14584089                | CC                              | TT                | 1946477055               |
| SNP_P3_99720_14584097 | NC_021167.1    | Ca_kabuli_chr08 | 14584097                | TT                              | CC                | 1946477057               |
| SNP_P3_99721_14584100 | NC_021167.1    | Ca_kabuli_chr08 | 14584100                | CC                              | TT                | 1946477059               |
| SNP_P3_99724_14586833 | NC_021167.1    | Ca_kabuli_chr08 | 14586833                | GG                              | TT                | 1946477060               |
| SNP_P3_99726_14587248 | NC_021167.1    | Ca_kabuli_chr08 | 14587248                | TT                              | CC                | 1946477062               |
| SNP_P3_99727_14587930 | NC_021167.1    | Ca_kabuli_chr08 | 14587930                | CC                              | TT                | 1946477063               |
| SNP_P3_99728_14588037 | NC_021167.1    | Ca_kabuli_chr08 | 14588037                | AA                              | GG                | 1946477065               |
| SNP_P3_99729_14588061 | NC_021167.1    | Ca_kabuli_chr08 | 14588061                | TT                              | AA                | 1946477066               |
| SNP_P3_99730_14589459 | NC_021167.1    | Ca_kabuli_chr08 | 14589459                | CC                              | TT                | 1946477068               |
| SNP_P3_99731_14589460 | NC_021167.1    | Ca_kabuli_chr08 | 14589460                | AA                              | GG                | 1946477069               |
| SNP_P3_99732_14591214 | NC_021167.1    | Ca_kabuli_chr08 | 14591214                | AA                              | GG                | 1946477071               |
| SNP_P3_99733_14591229 | NC_021167.1    | Ca_kabuli_chr08 | 14591229                | TT                              | GG                | 1946477072               |
| SNP_P3_99734_14592637 | NC_021167.1    | Ca_kabuli_chr08 | 14592637                | TT                              | AA                | 1946477074               |
| SNP_P3_99735_14592931 | NC_021167.1    | Ca_kabuli_chr08 | 14592931                | TT                              | GG                | 1946477075               |
| SNP_P3_99737_14601426 | NC_021167.1    | Ca_kabuli_chr08 | 14601426                | TT                              | GG                | 1946477077               |
| SNP_P3_99738_14601544 | NC_021167.1    | Ca_kabuli_chr08 | 14601544                | AA                              | CC                | 1946477078               |

| SNPs IDs              | Chromosome IDs | Chromosomes     | Physical positions (bp) | CDC Frontier (Reference genome) | (Pusa 256 & HPNB) | NCBI SNPdb Accession IDs |
|-----------------------|----------------|-----------------|-------------------------|---------------------------------|-------------------|--------------------------|
| SNP_P3_99739_14601577 | NC_021167.1    | Ca_kabuli_chr08 | 14601577                | GG                              | TT                | 1946477080               |
| SNP_P3_99740_14601581 | NC_021167.1    | Ca_kabuli_chr08 | 14601581                | AA                              | TT                | 1946477082               |
| SNP_P3_99742_14601621 | NC_021167.1    | Ca_kabuli_chr08 | 14601621                | TT                              | CC                | 1946477083               |
| SNP_P3_99743_14601644 | NC_021167.1    | Ca_kabuli_chr08 | 14601644                | GG                              | AA                | 1946477085               |
| SNP_P3_99744_14601693 | NC_021167.1    | Ca_kabuli_chr08 | 14601693                | TT                              | CC                | 1946477086               |
| SNP_P3_99745_14601817 | NC_021167.1    | Ca_kabuli_chr08 | 14601817                | TT                              | GG                | 1946477088               |
| SNP_P3_99746_14601820 | NC_021167.1    | Ca_kabuli_chr08 | 14601820                | CC                              | TT                | 1946477089               |
| SNP_P3_99748_14602717 | NC_021167.1    | Ca_kabuli_chr08 | 14602717                | CC                              | TT                | 1946477091               |
| SNP_P3_99749_14602730 | NC_021167.1    | Ca_kabuli_chr08 | 14602730                | AA                              | CC                | 1946477092               |
| SNP_P3_99752_14603050 | NC_021167.1    | Ca_kabuli_chr08 | 14603050                | TT                              | CC                | 1946477094               |
| SNP_P3_99753_14604546 | NC_021167.1    | Ca_kabuli_chr08 | 14604546                | AA                              | TT                | 1946477095               |
| SNP_P3_99754_14604552 | NC_021167.1    | Ca_kabuli_chr08 | 14604552                | AA                              | CC                | 1946477097               |
| SNP_P3_99755_14604585 | NC_021167.1    | Ca_kabuli_chr08 | 14604585                | TT                              | GG                | 1946477098               |
| SNP_P3_99756_14604612 | NC_021167.1    | Ca_kabuli_chr08 | 14604612                | CC                              | TT                | 1946477100               |
| SNP_P3_99757_14604614 | NC_021167.1    | Ca_kabuli_chr08 | 14604614                | CC                              | TT                | 1946477101               |
| SNP_P3_99758_14604763 | NC_021167.1    | Ca_kabuli_chr08 | 14604763                | CC                              | TT                | 1946477103               |
| SNP_P3_99759_14604771 | NC_021167.1    | Ca_kabuli_chr08 | 14604771                | GG                              | TT                | 1946477104               |
| SNP_P3_99760_14605675 | NC_021167.1    | Ca_kabuli_chr08 | 14605675                | AA                              | GG                | 1946477106               |
| SNP_P3_99761_14607913 | NC_021167.1    | Ca_kabuli_chr08 | 14607913                | CC                              | TT                | 1946477107               |
| SNP_P3_99762_14607916 | NC_021167.1    | Ca_kabuli_chr08 | 14607916                | GG                              | TT                | 1946477109               |
| SNP_P3_99763_14607939 | NC_021167.1    | Ca_kabuli_chr08 | 14607939                | AA                              | GG                | 1946477110               |
| SNP_P3_99764_14607969 | NC_021167.1    | Ca_kabuli_chr08 | 14607969                | TT                              | GG                | 1946477112               |
| SNP_P3_99765_14607975 | NC_021167.1    | Ca_kabuli_chr08 | 14607975                | AA                              | GG                | 1946477113               |
| SNP_P3_99766_14607991 | NC_021167.1    | Ca_kabuli_chr08 | 14607991                | GG                              | AA                | 1946477115               |
| SNP_P3_99767_14608006 | NC_021167.1    | Ca_kabuli_chr08 | 14608006                | AA                              | CC                | 1946477116               |
| SNP_P3_99768_14608019 | NC_021167.1    | Ca_kabuli_chr08 | 14608019                | AA                              | GG                | 1946477118               |
| SNP_P3_99769_14608021 | NC_021167.1    | Ca_kabuli_chr08 | 14608021                | GG                              | TT                | 1946477119               |
| SNP_P3_99770_14608056 | NC_021167.1    | Ca_kabuli_chr08 | 14608056                | CC                              | TT                | 1946477121               |
| SNP_P3_99771_14609182 | NC_021167.1    | Ca_kabuli_chr08 | 14609182                | AA                              | CC                | 1946477122               |
| SNP_P3_99772_14609184 | NC_021167.1    | Ca_kabuli_chr08 | 14609184                | CC                              | TT                | 1946477124               |
| SNP_P3_99773_14609201 | NC_021167.1    | Ca_kabuli_chr08 | 14609201                | AA                              | GG                | 1946477125               |
| SNP_P3_99774_14609295 | NC_021167.1    | Ca_kabuli_chr08 | 14609295                | CC                              | GG                | 1946477127               |
| SNP_P3_99776_14609898 | NC_021167.1    | Ca_kabuli_chr08 | 14609898                | AA                              | TT                | 1946477129               |
| SNP_P3_99777_14609899 | NC_021167.1    | Ca_kabuli_chr08 | 14609899                | AA                              | TT                | 1946477130               |
| SNP_P3_99778_14609900 | NC_021167.1    | Ca_kabuli_chr08 | 14609900                | AA                              | TT                | 1946477132               |
| SNP_P3_99779_14609901 | NC_021167.1    | Ca_kabuli_chr08 | 14609901                | AA                              | TT                | 1946477133               |
| SNP_P3_99780_14610203 | NC_021167.1    | Ca_kabuli_chr08 | 14610203                | GG                              | AA                | 1946477135               |
| SNP_P3_99781_14610356 | NC_021167.1    | Ca_kabuli_chr08 | 14610356                | TT                              | CC                | 1946477136               |
| SNP_P3_99783_14610995 | NC_021167.1    | Ca_kabuli_chr08 | 14610995                | GG                              | CC                | 1946477138               |
| SNP_P3_99784_14612145 | NC_021167.1    | Ca_kabuli_chr08 | 14612145                | AA                              | TT                | 1946477139               |
| SNP_P3_99785_14613086 | NC_021167.1    | Ca_kabuli_chr08 | 14613086                | GG                              | AA                | 1946477141               |
| SNP_P3_99786_14614494 | NC_021167.1    | Ca_kabuli_chr08 | 14614494                | GG                              | AA                | 1946477142               |

| SNPs IDs              | Chromosome IDs | Chromosomes     | Physical positions (bp) | CDC Frontier (Reference genome) | (Pusa 256 & HPNB) | NCBI SNPdb Accession IDs |
|-----------------------|----------------|-----------------|-------------------------|---------------------------------|-------------------|--------------------------|
| SNP_P3_99787_14614764 | NC_021167.1    | Ca_kabuli_chr08 | 14614764                | TT                              | CC                | 1946477144               |
| SNP_P3_99788_14615058 | NC_021167.1    | Ca_kabuli_chr08 | 14615058                | TT                              | CC                | 1946477146               |
| SNP_P3_99789_14615566 | NC_021167.1    | Ca_kabuli_chr08 | 14615566                | AA                              | GG                | 1946477147               |
| SNP_P3_99790_14615704 | NC_021167.1    | Ca_kabuli_chr08 | 14615704                | GG                              | AA                | 1946477149               |
| SNP_P3_99791_14615962 | NC_021167.1    | Ca_kabuli_chr08 | 14615962                | TT                              | GG                | 1946477150               |
| SNP_P3_99793_14616442 | NC_021167.1    | Ca_kabuli_chr08 | 14616442                | TT                              | CC                | 1946477152               |
| SNP_P3_99794_14616479 | NC_021167.1    | Ca_kabuli_chr08 | 14616479                | GG                              | TT                | 1946477153               |
| SNP_P3_99795_14617369 | NC_021167.1    | Ca_kabuli_chr08 | 14617369                | GG                              | AA                | 1946477155               |
| SNP_P3_99796_14617382 | NC_021167.1    | Ca_kabuli_chr08 | 14617382                | CC                              | GG                | 1946477156               |
| SNP_P3_99797_14619355 | NC_021167.1    | Ca_kabuli_chr08 | 14619355                | GG                              | AA                | 1946477158               |
| SNP_P3_99798_14621133 | NC_021167.1    | Ca_kabuli_chr08 | 14621133                | TT                              | AA                | 1946477159               |
| SNP_P3_99799_14621338 | NC_021167.1    | Ca_kabuli_chr08 | 14621338                | AA                              | GG                | 1946477161               |
| SNP_P3_99800_14623592 | NC_021167.1    | Ca_kabuli_chr08 | 14623592                | AA                              | CC                | 1946477162               |
| SNP_P3_99803_14626236 | NC_021167.1    | Ca_kabuli_chr08 | 14626236                | CC                              | TT                | 1946477164               |
| SNP_P3_99804_14629130 | NC_021167.1    | Ca_kabuli_chr08 | 14629130                | AA                              | GG                | 1946477165               |
| SNP_P3_99805_14629493 | NC_021167.1    | Ca_kabuli_chr08 | 14629493                | TT                              | GG                | 1946477167               |
| SNP_P3_99806_14629508 | NC_021167.1    | Ca_kabuli_chr08 | 14629508                | GG                              | AA                | 1946477168               |
| SNP_P3_99807_14629522 | NC_021167.1    | Ca_kabuli_chr08 | 14629522                | TT                              | AA                | 1946477170               |
| SNP_P3_99809_14630631 | NC_021167.1    | Ca_kabuli_chr08 | 14630631                | CC                              | TT                | 1946477171               |
| SNP_P3_99810_14630647 | NC_021167.1    | Ca_kabuli_chr08 | 14630647                | GG                              | AA                | 1946477173               |
| SNP_P3_99811_14631060 | NC_021167.1    | Ca_kabuli_chr08 | 14631060                | CC                              | TT                | 1946477175               |
| SNP_P3_99812_14631108 | NC_021167.1    | Ca_kabuli_chr08 | 14631108                | CC                              | TT                | 1946477176               |
| SNP_P3_99814_14637901 | NC_021167.1    | Ca_kabuli_chr08 | 14637901                | GG                              | AA                | 1946477178               |
| SNP_P3_99816_14642691 | NC_021167.1    | Ca_kabuli_chr08 | 14642691                | CC                              | TT                | 1946477179               |
| SNP_P3_99818_14643991 | NC_021167.1    | Ca_kabuli_chr08 | 14643991                | AA                              | CC                | 1946477181               |
| SNP_P3_99820_14644268 | NC_021167.1    | Ca_kabuli_chr08 | 14644268                | GG                              | AA                | 1946477182               |
| SNP_P3_99821_14644296 | NC_021167.1    | Ca_kabuli_chr08 | 14644296                | GG                              | AA                | 1946477184               |
| SNP_P3_99822_14644304 | NC_021167.1    | Ca_kabuli_chr08 | 14644304                | CC                              | TT                | 1946477185               |
| SNP_P3_99823_14644350 | NC_021167.1    | Ca_kabuli_chr08 | 14644350                | GG                              | AA                | 1946477187               |
| SNP_P3_99824_14644520 | NC_021167.1    | Ca_kabuli_chr08 | 14644520                | AA                              | TT                | 1946477188               |
| SNP_P3_99825_14645056 | NC_021167.1    | Ca_kabuli_chr08 | 14645056                | TT                              | CC                | 1946477190               |
| SNP_P3_99826_14645221 | NC_021167.1    | Ca_kabuli_chr08 | 14645221                | GG                              | AA                | 1946477191               |
| SNP_P3_99827_14645238 | NC_021167.1    | Ca_kabuli_chr08 | 14645238                | GG                              | AA                | 1946477193               |
| SNP_P3_99829_14646111 | NC_021167.1    | Ca_kabuli_chr08 | 14646111                | CC                              | GG                | 1946477194               |
| SNP_P3_99830_14646329 | NC_021167.1    | Ca_kabuli_chr08 | 14646329                | GG                              | AA                | 1946477196               |
| SNP_P3_99831_14646353 | NC_021167.1    | Ca_kabuli_chr08 | 14646353                | AA                              | TT                | 1946477198               |
| SNP_P3_99832_14646391 | NC_021167.1    | Ca_kabuli_chr08 | 14646391                | AA                              | TT                | 1946477199               |
| SNP_P3_99833_14646423 | NC_021167.1    | Ca_kabuli_chr08 | 14646423                | AA                              | CC                | 1946477201               |
| SNP_P3_99834_14646485 | NC_021167.1    | Ca_kabuli_chr08 | 14646485                | AA                              | CC                | 1946477202               |
| SNP_P3_99835_14647135 | NC_021167.1    | Ca_kabuli_chr08 | 14647135                | CC                              | TT                | 1946477204               |
| SNP_P3_99837_14647182 | NC_021167.1    | Ca_kabuli_chr08 | 14647182                | CC                              | TT                | 1946477205               |
| SNP_P3_99838_14647186 | NC_021167.1    | Ca_kabuli_chr08 | 14647186                | GG                              | AA                | 1946477207               |

| SNPs IDs              | Chromosome IDs | Chromosomes     | Physical positions (bp) | CDC Frontier (Reference genome) | (Pusa 256 & HPNB) | NCBI SNPdb Accession IDs |
|-----------------------|----------------|-----------------|-------------------------|---------------------------------|-------------------|--------------------------|
| SNP_P3_99839_14647257 | NC_021167.1    | Ca_kabuli_chr08 | 14647257                | CC                              | TT                | 1946477208               |
| SNP_P3_99840_14648074 | NC_021167.1    | Ca_kabuli_chr08 | 14648074                | TT                              | CC                | 1946477210               |
| SNP_P3_99841_14649591 | NC_021167.1    | Ca_kabuli_chr08 | 14649591                | CC                              | AA                | 1946477211               |
| SNP_P3_99842_14649605 | NC_021167.1    | Ca_kabuli_chr08 | 14649605                | TT                              | GG                | 1946477213               |
| SNP_P3_99843_14650330 | NC_021167.1    | Ca_kabuli_chr08 | 14650330                | GG                              | AA                | 1946477214               |
| SNP_P3_99844_14650376 | NC_021167.1    | Ca_kabuli_chr08 | 14650376                | AA                              | TT                | 1946477216               |
| SNP_P3_99845_14650416 | NC_021167.1    | Ca_kabuli_chr08 | 14650416                | AA                              | TT                | 1946477217               |
| SNP_P3_99846_14650738 | NC_021167.1    | Ca_kabuli_chr08 | 14650738                | CC                              | AA                | 1946477219               |
| SNP_P3_99847_14655017 | NC_021167.1    | Ca_kabuli_chr08 | 14655017                | AA                              | GG                | 1946477220               |
| SNP_P3_99848_14655019 | NC_021167.1    | Ca_kabuli_chr08 | 14655019                | AA                              | GG                | 1946477222               |
| SNP_P3_99850_14655043 | NC_021167.1    | Ca_kabuli_chr08 | 14655043                | CC                              | AA                | 1946477223               |
| SNP_P3_99852_14656594 | NC_021167.1    | Ca_kabuli_chr08 | 14656594                | CC                              | GG                | 1946477225               |
| SNP_P3_99854_14657401 | NC_021167.1    | Ca_kabuli_chr08 | 14657401                | CC                              | TT                | 1946477226               |
| SNP_P3_99855_14657404 | NC_021167.1    | Ca_kabuli_chr08 | 14657404                | AA                              | TT                | 1946477228               |
| SNP_P3_99856_14658367 | NC_021167.1    | Ca_kabuli_chr08 | 14658367                | GG                              | AA                | 1946477229               |
| SNP_P3_99857_14659483 | NC_021167.1    | Ca_kabuli_chr08 | 14659483                | AA                              | GG                | 1946477231               |
| SNP_P3_99858_14659762 | NC_021167.1    | Ca_kabuli_chr08 | 14659762                | TT                              | CC                | 1946477232               |
| SNP_P3_99859_14659763 | NC_021167.1    | Ca_kabuli_chr08 | 14659763                | GG                              | CC                | 1946477234               |
| SNP_P3_99860_14659775 | NC_021167.1    | Ca_kabuli_chr08 | 14659775                | TT                              | CC                | 1946477235               |
| SNP_P3_99861_14659788 | NC_021167.1    | Ca_kabuli_chr08 | 14659788                | AA                              | TT                | 1946477237               |
| SNP_P3_99862_14659798 | NC_021167.1    | Ca_kabuli_chr08 | 14659798                | CC                              | TT                | 1946477238               |
| SNP_P3_99863_14659848 | NC_021167.1    | Ca_kabuli_chr08 | 14659848                | CC                              | TT                | 1946477240               |
| SNP_P3_99864_14659850 | NC_021167.1    | Ca_kabuli_chr08 | 14659850                | TT                              | CC                | 1946477241               |
| SNP_P3_99865_14659878 | NC_021167.1    | Ca_kabuli_chr08 | 14659878                | AA                              | TT                | 1946477243               |
| SNP_P3_99866_14659882 | NC_021167.1    | Ca_kabuli_chr08 | 14659882                | GG                              | TT                | 1946477245               |
| SNP_P3_99867_14660062 | NC_021167.1    | Ca_kabuli_chr08 | 14660062                | GG                              | AA                | 1946477246               |
| SNP_P3_99868_14660931 | NC_021167.1    | Ca_kabuli_chr08 | 14660931                | AA                              | TT                | 1946477248               |
| SNP_P3_99872_14662382 | NC_021167.1    | Ca_kabuli_chr08 | 14662382                | AA                              | TT                | 1946477249               |
| SNP_P3_99874_14665144 | NC_021167.1    | Ca_kabuli_chr08 | 14665144                | GG                              | AA                | 1946477251               |
| SNP_P3_99875_14665188 | NC_021167.1    | Ca_kabuli_chr08 | 14665188                | AA                              | TT                | 1946477252               |
| SNP_P3_99876_14665189 | NC_021167.1    | Ca_kabuli_chr08 | 14665189                | AA                              | TT                | 1946477253               |
| SNP_P3_99877_14665247 | NC_021167.1    | Ca_kabuli_chr08 | 14665247                | TT                              | CC                | 1946477255               |
| SNP_P3_99878_14666563 | NC_021167.1    | Ca_kabuli_chr08 | 14666563                | CC                              | TT                | 1946477256               |
| SNP_P3_99879_14666807 | NC_021167.1    | Ca_kabuli_chr08 | 14666807                | TT                              | CC                | 1946477258               |
| SNP_P3_99880_14666816 | NC_021167.1    | Ca_kabuli_chr08 | 14666816                | TT                              | CC                | 1946477259               |
| SNP_P3_99882_14667675 | NC_021167.1    | Ca_kabuli_chr08 | 14667675                | AA                              | GG                | 1946477261               |
| SNP_P3_99883_14667893 | NC_021167.1    | Ca_kabuli_chr08 | 14667893                | AA                              | GG                | 1946477262               |
| SNP_P3_99884_14668135 | NC_021167.1    | Ca_kabuli_chr08 | 14668135                | TT                              | AA                | 1946477264               |
| SNP_P3_99885_14668144 | NC_021167.1    | Ca_kabuli_chr08 | 14668144                | GG                              | AA                | 1946477265               |
| SNP_P3_99886_14668153 | NC_021167.1    | Ca_kabuli_chr08 | 14668153                | CC                              | GG                | 1946477268               |
| SNP_P3_99888_14668226 | NC_021167.1    | Ca_kabuli_chr08 | 14668226                | CC                              | GG                | 1946477269               |
| SNP_P3_99889_14668256 | NC_021167.1    | Ca_kabuli_chr08 | 14668256                | CC                              | TT                | 1946477271               |

| SNPs IDs              | Chromosome IDs | Chromosomes     | Physical positions (bp) | CDC Frontier (Reference genome) | (Pusa 256 & HPNB) | NCBI SNPdb Accession IDs |
|-----------------------|----------------|-----------------|-------------------------|---------------------------------|-------------------|--------------------------|
| SNP_P3_99890_14668264 | NC_021167.1    | Ca_kabuli_chr08 | 14668264                | AA                              | CC                | 1946477272               |
| SNP_P3_99891_14668269 | NC_021167.1    | Ca_kabuli_chr08 | 14668269                | GG                              | TT                | 1946477274               |
| SNP_P3_99892_14668288 | NC_021167.1    | Ca_kabuli_chr08 | 14668288                | GG                              | AA                | 1946477275               |
| SNP_P3_99893_14668400 | NC_021167.1    | Ca_kabuli_chr08 | 14668400                | CC                              | AA                | 1946477277               |
| SNP_P3_99894_14668416 | NC_021167.1    | Ca_kabuli_chr08 | 14668416                | AA                              | GG                | 1946477278               |
| SNP_P3_99895_14668465 | NC_021167.1    | Ca_kabuli_chr08 | 14668465                | GG                              | TT                | 1946477280               |
| SNP_P3_99896_14668466 | NC_021167.1    | Ca_kabuli_chr08 | 14668466                | GG                              | AA                | 1946477281               |
| SNP_P3_99897_14668469 | NC_021167.1    | Ca_kabuli_chr08 | 14668469                | CC                              | TT                | 1946477283               |
| SNP_P3_99898_14668473 | NC_021167.1    | Ca_kabuli_chr08 | 14668473                | TT                              | AA                | 1946477284               |
| SNP_P3_99899_14668505 | NC_021167.1    | Ca_kabuli_chr08 | 14668505                | AA                              | CC                | 1946477286               |
| SNP_P3_99900_14668568 | NC_021167.1    | Ca_kabuli_chr08 | 14668568                | AA                              | GG                | 1946477287               |
| SNP_P3_99901_14668578 | NC_021167.1    | Ca_kabuli_chr08 | 14668578                | TT                              | AA                | 1946477289               |
| SNP_P3_99902_14668645 | NC_021167.1    | Ca_kabuli_chr08 | 14668645                | AA                              | GG                | 1946477290               |
| SNP_P3_99903_14668724 | NC_021167.1    | Ca_kabuli_chr08 | 14668724                | CC                              | AA                | 1946477292               |
| SNP_P3_99905_14668777 | NC_021167.1    | Ca_kabuli_chr08 | 14668777                | TT                              | CC                | 1946477293               |
| SNP_P3_99906_14668888 | NC_021167.1    | Ca_kabuli_chr08 | 14668888                | CC                              | TT                | 1946477295               |
| SNP_P3_99908_14668924 | NC_021167.1    | Ca_kabuli_chr08 | 14668924                | CC                              | TT                | 1946477296               |
| SNP_P3_99910_14669376 | NC_021167.1    | Ca_kabuli_chr08 | 14669376                | CC                              | TT                | 1946477298               |
| SNP_P3_99911_14669381 | NC_021167.1    | Ca_kabuli_chr08 | 14669381                | CC                              | AA                | 1946477299               |
| SNP_P3_99913_14670762 | NC_021167.1    | Ca_kabuli_chr08 | 14670762                | AA                              | TT                | 1946477301               |
| SNP_P3_99915_14671414 | NC_021167.1    | Ca_kabuli_chr08 | 14671414                | TT                              | AA                | 1946477303               |
| SNP_P3_99917_14671496 | NC_021167.1    | Ca_kabuli_chr08 | 14671496                | GG                              | AA                | 1946477304               |
| SNP_P3_99918_14671581 | NC_021167.1    | Ca_kabuli_chr08 | 14671581                | TT                              | GG                | 1946477306               |
| SNP_P3_99919_14673648 | NC_021167.1    | Ca_kabuli_chr08 | 14673648                | GG                              | AA                | 1946477307               |
| SNP_P3_99920_14673896 | NC_021167.1    | Ca_kabuli_chr08 | 14673896                | TT                              | CC                | 1946477309               |
| SNP_P3_99921_14675341 | NC_021167.1    | Ca_kabuli_chr08 | 14675341                | TT                              | CC                | 1946477310               |
| SNP_P3_99923_14677436 | NC_021167.1    | Ca_kabuli_chr08 | 14677436                | CC                              | TT                | 1946477312               |
| SNP_P3_99924_14677718 | NC_021167.1    | Ca_kabuli_chr08 | 14677718                | GG                              | AA                | 1946477313               |
| SNP_P3_99925_14677725 | NC_021167.1    | Ca_kabuli_chr08 | 14677725                | CC                              | TT                | 1946477315               |
| SNP_P3_99926_14677742 | NC_021167.1    | Ca_kabuli_chr08 | 14677742                | AA                              | GG                | 1946477316               |
| SNP_P3_99927_14677759 | NC_021167.1    | Ca_kabuli_chr08 | 14677759                | CC                              | TT                | 1946477318               |
| SNP_P3_99928_14680523 | NC_021167.1    | Ca_kabuli_chr08 | 14680523                | TT                              | CC                | 1946477320               |
| SNP_P3_99929_14680547 | NC_021167.1    | Ca_kabuli_chr08 | 14680547                | GG                              | AA                | 1946477321               |
| SNP_P3_99932_14686335 | NC_021167.1    | Ca_kabuli_chr08 | 14686335                | AA                              | CC                | 1946477323               |
| SNP_P3_99933_14687684 | NC_021167.1    | Ca_kabuli_chr08 | 14687684                | TT                              | AA                | 1946477324               |
| SNP_P3_99934_14687858 | NC_021167.1    | Ca_kabuli_chr08 | 14687858                | TT                              | AA                | 1946477326               |
| SNP_P3_99935_14691171 | NC_021167.1    | Ca_kabuli_chr08 | 14691171                | TT                              | AA                | 1946477327               |
| SNP_P3_99937_14692001 | NC_021167.1    | Ca_kabuli_chr08 | 14692001                | CC                              | TT                | 1946477329               |
| SNP_P3_99938_14692022 | NC_021167.1    | Ca_kabuli_chr08 | 14692022                | CC                              | GG                | 1946477330               |
| SNP_P3_99939_14692263 | NC_021167.1    | Ca_kabuli_chr08 | 14692263                | GG                              | TT                | 1946477332               |
| SNP_P3_99941_14692350 | NC_021167.1    | Ca_kabuli_chr08 | 14692350                | CC                              | GG                | 1946477333               |
| SNP_P3_99942_14692352 | NC_021167.1    | Ca_kabuli_chr08 | 14692352                | TT                              | CC                | 1946477335               |

| SNPs IDs              | Chromosome IDs | Chromosomes     | Physical positions (bp) | CDC Frontier (Reference genome) | (Pusa 256 & HPNB) | NCBI SNPdb Accession IDs |
|-----------------------|----------------|-----------------|-------------------------|---------------------------------|-------------------|--------------------------|
| SNP_P3_99943_14692363 | NC_021167.1    | Ca_kabuli_chr08 | 14692363                | CC                              | TT                | 1946477337               |
| SNP_P3_99944_14692370 | NC_021167.1    | Ca_kabuli_chr08 | 14692370                | TT                              | GG                | 1946477338               |
| SNP_P3_99945_14692371 | NC_021167.1    | Ca_kabuli_chr08 | 14692371                | GG                              | AA                | 1946477340               |
| SNP_P3_99946_14692438 | NC_021167.1    | Ca_kabuli_chr08 | 14692438                | CC                              | TT                | 1946477341               |
| SNP_P3_99947_14698896 | NC_021167.1    | Ca_kabuli_chr08 | 14698896                | GG                              | TT                | 1946477343               |
| SNP_P3_99948_14699588 | NC_021167.1    | Ca_kabuli_chr08 | 14699588                | GG                              | TT                | 1946477345               |
| SNP_P3_99949_14699705 | NC_021167.1    | Ca_kabuli_chr08 | 14699705                | AA                              | GG                | 1946477346               |
| SNP_P3_99950_14700359 | NC_021167.1    | Ca_kabuli_chr08 | 14700359                | CC                              | TT                | 1946477348               |
| SNP_P3_99951_14700409 | NC_021167.1    | Ca_kabuli_chr08 | 14700409                | GG                              | AA                | 1946477349               |
| SNP_P3_99952_14700435 | NC_021167.1    | Ca_kabuli_chr08 | 14700435                | TT                              | CC                | 1946477351               |
| SNP_P3_99953_14700549 | NC_021167.1    | Ca_kabuli_chr08 | 14700549                | AA                              | CC                | 1946477352               |
| SNP_P3_99955_14700847 | NC_021167.1    | Ca_kabuli_chr08 | 14700847                | GG                              | AA                | 1946477354               |
| SNP_P3_99956_14700848 | NC_021167.1    | Ca_kabuli_chr08 | 14700848                | CC                              | TT                | 1946477355               |
| SNP_P3_99957_14705196 | NC_021167.1    | Ca_kabuli_chr08 | 14705196                | CC                              | TT                | 1946477357               |
| SNP_P3_99959_14705640 | NC_021167.1    | Ca_kabuli_chr08 | 14705640                | TT                              | AA                | 1946477358               |
| SNP_P3_99960_14705785 | NC_021167.1    | Ca_kabuli_chr08 | 14705785                | GG                              | AA                | 1946477360               |
| SNP_P3_99961_14706997 | NC_021167.1    | Ca_kabuli_chr08 | 14706997                | TT                              | CC                | 1946477361               |
| SNP_P3_99962_14707287 | NC_021167.1    | Ca_kabuli_chr08 | 14707287                | CC                              | TT                | 1946477363               |
| SNP_P3_99963_14707750 | NC_021167.1    | Ca_kabuli_chr08 | 14707750                | TT                              | GG                | 1946477364               |
| SNP_P3_99964_14707756 | NC_021167.1    | Ca_kabuli_chr08 | 14707756                | GG                              | AA                | 1946477366               |
| SNP_P3_99965_14707982 | NC_021167.1    | Ca_kabuli_chr08 | 14707982                | TT                              | GG                | 1946477367               |
| SNP_P3_99966_14708239 | NC_021167.1    | Ca_kabuli_chr08 | 14708239                | TT                              | CC                | 1946477369               |
| SNP_P3_99967_14708451 | NC_021167.1    | Ca_kabuli_chr08 | 14708451                | CC                              | TT                | 1946477370               |
| SNP_P3_99968_14709110 | NC_021167.1    | Ca_kabuli_chr08 | 14709110                | GG                              | AA                | 1946477372               |
| SNP_P3_99970_14711329 | NC_021167.1    | Ca_kabuli_chr08 | 14711329                | CC                              | AA                | 1946477373               |
| SNP_P3_99971_14713093 | NC_021167.1    | Ca_kabuli_chr08 | 14713093                | GG                              | TT                | 1946477375               |
| SNP_P3_99972_14713474 | NC_021167.1    | Ca_kabuli_chr08 | 14713474                | GG                              | AA                | 1946477376               |
| SNP_P3_99973_14714326 | NC_021167.1    | Ca_kabuli_chr08 | 14714326                | GG                              | AA                | 1946477378               |
| SNP_P3_99974_14716390 | NC_021167.1    | Ca_kabuli_chr08 | 14716390                | AA                              | TT                | 1946477379               |
| SNP_P3_99976_14718084 | NC_021167.1    | Ca_kabuli_chr08 | 14718084                | TT                              | AA                | 1946477381               |
| SNP_P3_99977_14720217 | NC_021167.1    | Ca_kabuli_chr08 | 14720217                | CC                              | AA                | 1946477382               |
| SNP_P3_99978_14720599 | NC_021167.1    | Ca_kabuli_chr08 | 14720599                | TT                              | AA                | 1946477384               |
| SNP_P3_99979_14720612 | NC_021167.1    | Ca_kabuli_chr08 | 14720612                | GG                              | AA                | 1946477385               |
| SNP_P3_99980_14720670 | NC_021167.1    | Ca_kabuli_chr08 | 14720670                | CC                              | TT                | 1946477387               |
| SNP_P3_99981_14721193 | NC_021167.1    | Ca_kabuli_chr08 | 14721193                | TT                              | CC                | 1946477388               |
| SNP_P3_99982_14721199 | NC_021167.1    | Ca_kabuli_chr08 | 14721199                | TT                              | CC                | 1946477390               |
| SNP_P3_99983_14721518 | NC_021167.1    | Ca_kabuli_chr08 | 14721518                | CC                              | TT                | 1946477391               |
| SNP_P3_99984_14721744 | NC_021167.1    | Ca_kabuli_chr08 | 14721744                | TT                              | AA                | 1946477393               |
| SNP_P3_99985_14721798 | NC_021167.1    | Ca_kabuli_chr08 | 14721798                | AA                              | CC                | 1946477394               |
| SNP_P3_99986_14722077 | NC_021167.1    | Ca_kabuli_chr08 | 14722077                | TT                              | CC                | 1946477396               |
| SNP_P3_99987_14722171 | NC_021167.1    | Ca_kabuli_chr08 | 14722171                | CC                              | TT                | 1946477397               |
| SNP_P3_99988_14722204 | NC_021167.1    | Ca_kabuli_chr08 | 14722204                | TT                              | AA                | 1946477399               |



| SNPs IDs               | Chromosome IDs | Chromosomes     | Physical positions (bp) | CDC Frontier (Reference genome) | (Pusa 256 & HPNB) | NCBI SNPdb Accession IDs |
|------------------------|----------------|-----------------|-------------------------|---------------------------------|-------------------|--------------------------|
| SNP_P3_99989_14722242  | NC_021167.1    | Ca_kabuli_chr08 | 14722242                | CC                              | TT                | 1946477400               |
| SNP_P3_99990_14722868  | NC_021167.1    | Ca_kabuli_chr08 | 14722868                | CC                              | GG                | 1946477402               |
| SNP_P3_99991_14723003  | NC_021167.1    | Ca_kabuli_chr08 | 14723003                | TT                              | AA                | 1946477403               |
| SNP_P3_99992_14723025  | NC_021167.1    | Ca_kabuli_chr08 | 14723025                | TT                              | AA                | 1946477405               |
| SNP_P3_99993_14723066  | NC_021167.1    | Ca_kabuli_chr08 | 14723066                | TT                              | AA                | 1946477406               |
| SNP_P3_99994_14723084  | NC_021167.1    | Ca_kabuli_chr08 | 14723084                | CC                              | GG                | 1946477408               |
| SNP_P3_99995_14724986  | NC_021167.1    | Ca_kabuli_chr08 | 14724986                | CC                              | GG                | 1946477409               |
| SNP_P3_99997_14725672  | NC_021167.1    | Ca_kabuli_chr08 | 14725672                | AA                              | GG                | 1946477411               |
| SNP_P3_99999_14727526  | NC_021167.1    | Ca_kabuli_chr08 | 14727526                | AA                              | GG                | 1946477412               |
| SNP_P3_100001_14727786 | NC_021167.1    | Ca_kabuli_chr08 | 14727786                | GG                              | TT                | 1946477414               |
| SNP_P3_100003_14727859 | NC_021167.1    | Ca_kabuli_chr08 | 14727859                | AA                              | GG                | 1946477432               |
| SNP_P3_100004_14727942 | NC_021167.1    | Ca_kabuli_chr08 | 14727942                | AA                              | GG                | 1946477433               |
| SNP_P3_100005_14728104 | NC_021167.1    | Ca_kabuli_chr08 | 14728104                | CC                              | TT                | 1946477435               |
| SNP_P3_100006_14728342 | NC_021167.1    | Ca_kabuli_chr08 | 14728342                | TT                              | AA                | 1946477436               |
| SNP_P3_100007_14729778 | NC_021167.1    | Ca_kabuli_chr08 | 14729778                | TT                              | CC                | 1946477438               |
| SNP_P3_100008_14730226 | NC_021167.1    | Ca_kabuli_chr08 | 14730226                | CC                              | TT                | 1946477439               |
| SNP_P3_100009_14730234 | NC_021167.1    | Ca_kabuli_chr08 | 14730234                | AA                              | GG                | 1946477441               |
| SNP_P3_100010_14730308 | NC_021167.1    | Ca_kabuli_chr08 | 14730308                | CC                              | TT                | 1946477443               |
| SNP_P3_100011_14730318 | NC_021167.1    | Ca_kabuli_chr08 | 14730318                | AA                              | TT                | 1946477444               |
| SNP_P3_100012_14730322 | NC_021167.1    | Ca_kabuli_chr08 | 14730322                | AA                              | TT                | 1946477446               |
| SNP_P3_100013_14730780 | NC_021167.1    | Ca_kabuli_chr08 | 14730780                | GG                              | CC                | 1946477447               |
| SNP_P3_100014_14730801 | NC_021167.1    | Ca_kabuli_chr08 | 14730801                | AA                              | TT                | 1946477449               |
| SNP_P3_100015_14731405 | NC_021167.1    | Ca_kabuli_chr08 | 14731405                | GG                              | AA                | 1946477450               |
| SNP_P3_100016_14731760 | NC_021167.1    | Ca_kabuli_chr08 | 14731760                | CC                              | TT                | 1946477452               |
| SNP_P3_100017_14731761 | NC_021167.1    | Ca_kabuli_chr08 | 14731761                | CC                              | TT                | 1946477453               |
| SNP_P3_100018_14731803 | NC_021167.1    | Ca_kabuli_chr08 | 14731803                | CC                              | TT                | 1946477455               |
| SNP_P3_100019_14731827 | NC_021167.1    | Ca_kabuli_chr08 | 14731827                | GG                              | CC                | 1946477456               |
| SNP_P3_100020_14732178 | NC_021167.1    | Ca_kabuli_chr08 | 14732178                | TT                              | CC                | 1946477458               |
| SNP_P3_100021_14733030 | NC_021167.1    | Ca_kabuli_chr08 | 14733030                | GG                              | AA                | 1946477459               |
| SNP_P3_100023_14734187 | NC_021167.1    | Ca_kabuli_chr08 | 14734187                | AA                              | TT                | 1946477461               |
| SNP_P3_100024_14734831 | NC_021167.1    | Ca_kabuli_chr08 | 14734831                | CC                              | TT                | 1946477462               |
| SNP_P3_100026_14736756 | NC_021167.1    | Ca_kabuli_chr08 | 14736756                | TT                              | CC                | 1946477464               |
| SNP_P3_100027_14736774 | NC_021167.1    | Ca_kabuli_chr08 | 14736774                | TT                              | CC                | 1946477465               |
| SNP_P3_100028_14737200 | NC_021167.1    | Ca_kabuli_chr08 | 14737200                | CC                              | GG                | 1946477467               |
| SNP_P3_100029_14737201 | NC_021167.1    | Ca_kabuli_chr08 | 14737201                | AA                              | TT                | 1946477468               |
| SNP_P3_100030_14737343 | NC_021167.1    | Ca_kabuli_chr08 | 14737343                | CC                              | TT                | 1946477470               |
| SNP_P3_100031_14737388 | NC_021167.1    | Ca_kabuli_chr08 | 14737388                | GG                              | TT                | 1946477471               |
| SNP_P3_100033_14737515 | NC_021167.1    | Ca_kabuli_chr08 | 14737515                | GG                              | AA                | 1946477473               |
| SNP_P3_100034_14737993 | NC_021167.1    | Ca_kabuli_chr08 | 14737993                | AA                              | GG                | 1946477474               |
| SNP_P3_100035_14738187 | NC_021167.1    | Ca_kabuli_chr08 | 14738187                | GG                              | AA                | 1946477476               |
| SNP_P3_100036_14738556 | NC_021167.1    | Ca_kabuli_chr08 | 14738556                | GG                              | AA                | 1946477477               |
| SNP_P3_100037_14741922 | NC_021167.1    | Ca_kabuli_chr08 | 14741922                | TT                              | CC                | 1946477479               |

| SNPs IDs               | Chromosome IDs | Chromosomes     | Physical positions (bp) | CDC Frontier (Reference genome) | (Pusa 256 & HPNB) | NCBI SNPdb Accession IDs |
|------------------------|----------------|-----------------|-------------------------|---------------------------------|-------------------|--------------------------|
| SNP_P3_100038_14741945 | NC_021167.1    | Ca_kabuli_chr08 | 14741945                | TT                              | CC                | 1946477480               |
| SNP_P3_100039_14743246 | NC_021167.1    | Ca_kabuli_chr08 | 14743246                | GG                              | TT                | 1946477482               |
| SNP_P3_100040_14743275 | NC_021167.1    | Ca_kabuli_chr08 | 14743275                | GG                              | AA                | 1946477483               |
| SNP_P3_100041_14746128 | NC_021167.1    | Ca_kabuli_chr08 | 14746128                | GG                              | TT                | 1946477485               |
| SNP_P3_100042_14746424 | NC_021167.1    | Ca_kabuli_chr08 | 14746424                | GG                              | TT                | 1946477486               |
| SNP_P3_100044_14746501 | NC_021167.1    | Ca_kabuli_chr08 | 14746501                | CC                              | AA                | 1946477488               |
| SNP_P3_100045_14746808 | NC_021167.1    | Ca_kabuli_chr08 | 14746808                | GG                              | TT                | 1946477490               |
| SNP_P3_100046_14746820 | NC_021167.1    | Ca_kabuli_chr08 | 14746820                | AA                              | TT                | 1946477491               |
| SNP_P3_100047_14746821 | NC_021167.1    | Ca_kabuli_chr08 | 14746821                | CC                              | TT                | 1946477493               |
| SNP_P3_100048_14748082 | NC_021167.1    | Ca_kabuli_chr08 | 14748082                | CC                              | AA                | 1946477494               |
| SNP_P3_100049_14749355 | NC_021167.1    | Ca_kabuli_chr08 | 14749355                | GG                              | TT                | 1946477496               |
| SNP_P3_100050_14749412 | NC_021167.1    | Ca_kabuli_chr08 | 14749412                | AA                              | TT                | 1946477497               |
| SNP_P3_100051_14749605 | NC_021167.1    | Ca_kabuli_chr08 | 14749605                | GG                              | AA                | 1946477499               |
| SNP_P3_100052_14749817 | NC_021167.1    | Ca_kabuli_chr08 | 14749817                | AA                              | GG                | 1946477500               |
| SNP_P3_100053_14749987 | NC_021167.1    | Ca_kabuli_chr08 | 14749987                | AA                              | TT                | 1946477506               |
| SNP_P3_100054_14750250 | NC_021167.1    | Ca_kabuli_chr08 | 14750250                | AA                              | TT                | 1946477508               |
| SNP_P3_100056_14750917 | NC_021167.1    | Ca_kabuli_chr08 | 14750917                | GG                              | AA                | 1946477509               |
| SNP_P3_100057_14750928 | NC_021167.1    | Ca_kabuli_chr08 | 14750928                | TT                              | AA                | 1946477510               |
| SNP_P3_100058_14750940 | NC_021167.1    | Ca_kabuli_chr08 | 14750940                | AA                              | GG                | 1946477512               |
| SNP_P3_100060_14751150 | NC_021167.1    | Ca_kabuli_chr08 | 14751150                | CC                              | TT                | 1946477513               |
| SNP_P3_100061_14751468 | NC_021167.1    | Ca_kabuli_chr08 | 14751468                | AA                              | GG                | 1946477515               |
| SNP_P3_100063_14751534 | NC_021167.1    | Ca_kabuli_chr08 | 14751534                | GG                              | TT                | 1946477516               |
| SNP_P3_100064_14751537 | NC_021167.1    | Ca_kabuli_chr08 | 14751537                | CC                              | AA                | 1946477518               |
| SNP_P3_100065_14751573 | NC_021167.1    | Ca_kabuli_chr08 | 14751573                | CC                              | TT                | 1946477519               |
| SNP_P3_100067_14752911 | NC_021167.1    | Ca_kabuli_chr08 | 14752911                | CC                              | TT                | 1946477525               |
| SNP_P3_100068_14752923 | NC_021167.1    | Ca_kabuli_chr08 | 14752923                | GG                              | AA                | 1946477527               |
| SNP_P3_100069_14752939 | NC_021167.1    | Ca_kabuli_chr08 | 14752939                | AA                              | TT                | 1946477528               |
| SNP_P3_100070_14753224 | NC_021167.1    | Ca_kabuli_chr08 | 14753224                | TT                              | GG                | 1946477530               |
| SNP_P3_100071_14753542 | NC_021167.1    | Ca_kabuli_chr08 | 14753542                | GG                              | TT                | 1946477531               |
| SNP_P3_100072_14753843 | NC_021167.1    | Ca_kabuli_chr08 | 14753843                | GG                              | AA                | 1946477533               |
| SNP_P3_100073_14754101 | NC_021167.1    | Ca_kabuli_chr08 | 14754101                | CC                              | TT                | 1946477534               |
| SNP_P3_100074_14755745 | NC_021167.1    | Ca_kabuli_chr08 | 14755745                | CC                              | TT                | 1946477536               |
| SNP_P3_100075_14755770 | NC_021167.1    | Ca_kabuli_chr08 | 14755770                | AA                              | GG                | 1946477537               |
| SNP_P3_100076_14755824 | NC_021167.1    | Ca_kabuli_chr08 | 14755824                | AA                              | TT                | 1946477539               |
| SNP_P3_100077_14755898 | NC_021167.1    | Ca_kabuli_chr08 | 14755898                | GG                              | CC                | 1946477540               |
| SNP_P3_100078_14756004 | NC_021167.1    | Ca_kabuli_chr08 | 14756004                | AA                              | GG                | 1946477541               |
| SNP_P3_100079_14756065 | NC_021167.1    | Ca_kabuli_chr08 | 14756065                | GG                              | TT                | 1946477543               |
| SNP_P3_100080_14756113 | NC_021167.1    | Ca_kabuli_chr08 | 14756113                | GG                              | AA                | 1946477545               |
| SNP_P3_100081_14756114 | NC_021167.1    | Ca_kabuli_chr08 | 14756114                | TT                              | GG                | 1946477546               |
| SNP_P3_100082_14756610 | NC_021167.1    | Ca_kabuli_chr08 | 14756610                | AA                              | GG                | 1946477547               |
| SNP_P3_100083_14756674 | NC_021167.1    | Ca_kabuli_chr08 | 14756674                | CC                              | AA                | 1946477549               |
| SNP_P3_100084_14756702 | NC_021167.1    | Ca_kabuli_chr08 | 14756702                | TT                              | GG                | 1946477550               |

| SNPs IDs               | Chromosome IDs | Chromosomes     | Physical positions (bp) | CDC Frontier (Reference genome) | (Pusa 256 & HPNB) | NCBI SNPdb Accession IDs |
|------------------------|----------------|-----------------|-------------------------|---------------------------------|-------------------|--------------------------|
| SNP_P3_100085_14756721 | NC_021167.1    | Ca_kabuli_chr08 | 14756721                | TT                              | AA                | 1946477552               |
| SNP_P3_100086_14756831 | NC_021167.1    | Ca_kabuli_chr08 | 14756831                | CC                              | AA                | 1946477553               |
| SNP_P3_100088_14757042 | NC_021167.1    | Ca_kabuli_chr08 | 14757042                | CC                              | GG                | 1946477555               |
| SNP_P3_100089_14757070 | NC_021167.1    | Ca_kabuli_chr08 | 14757070                | AA                              | TT                | 1946477556               |
| SNP_P3_100090_14757086 | NC_021167.1    | Ca_kabuli_chr08 | 14757086                | GG                              | AA                | 1946477558               |
| SNP_P3_100091_14757170 | NC_021167.1    | Ca_kabuli_chr08 | 14757170                | GG                              | AA                | 1946477559               |
| SNP_P3_100093_14757417 | NC_021167.1    | Ca_kabuli_chr08 | 14757417                | GG                              | AA                | 1946477561               |
| SNP_P3_100094_14757491 | NC_021167.1    | Ca_kabuli_chr08 | 14757491                | AA                              | TT                | 1946477562               |
| SNP_P3_100095_14757649 | NC_021167.1    | Ca_kabuli_chr08 | 14757649                | CC                              | AA                | 1946477564               |
| SNP_P3_100097_14759686 | NC_021167.1    | Ca_kabuli_chr08 | 14759686                | TT                              | CC                | 1946477565               |
| SNP_P3_100098_14760479 | NC_021167.1    | Ca_kabuli_chr08 | 14760479                | GG                              | CC                | 1946477567               |
| SNP_P3_100099_14760802 | NC_021167.1    | Ca_kabuli_chr08 | 14760802                | GG                              | AA                | 1946477569               |
| SNP_P3_100100_14762057 | NC_021167.1    | Ca_kabuli_chr08 | 14762057                | AA                              | TT                | 1946477570               |
| SNP_P3_100101_14763988 | NC_021167.1    | Ca_kabuli_chr08 | 14763988                | GG                              | AA                | 1946477572               |
| SNP_P3_100102_14763989 | NC_021167.1    | Ca_kabuli_chr08 | 14763989                | GG                              | AA                | 1946477573               |
| SNP_P3_100103_14764098 | NC_021167.1    | Ca_kabuli_chr08 | 14764098                | CC                              | TT                | 1946477575               |
| SNP_P3_100104_14764110 | NC_021167.1    | Ca_kabuli_chr08 | 14764110                | GG                              | AA                | 1946477576               |
| SNP_P3_100105_14764133 | NC_021167.1    | Ca_kabuli_chr08 | 14764133                | AA                              | CC                | 1946477578               |
| SNP_P3_100106_14764168 | NC_021167.1    | Ca_kabuli_chr08 | 14764168                | GG                              | AA                | 1946477579               |
| SNP_P3_100107_14764171 | NC_021167.1    | Ca_kabuli_chr08 | 14764171                | GG                              | AA                | 1946477581               |
| SNP_P3_100108_14764181 | NC_021167.1    | Ca_kabuli_chr08 | 14764181                | AA                              | GG                | 1946477582               |
| SNP_P3_100109_14764183 | NC_021167.1    | Ca_kabuli_chr08 | 14764183                | TT                              | AA                | 1946477583               |
| SNP_P3_100110_14764195 | NC_021167.1    | Ca_kabuli_chr08 | 14764195                | TT                              | AA                | 1946477585               |
| SNP_P3_100111_14764216 | NC_021167.1    | Ca_kabuli_chr08 | 14764216                | TT                              | CC                | 1946477586               |
| SNP_P3_100114_14764493 | NC_021167.1    | Ca_kabuli_chr08 | 14764493                | CC                              | TT                | 1946477588               |
| SNP_P3_100116_14768376 | NC_021167.1    | Ca_kabuli_chr08 | 14768376                | CC                              | TT                | 1946477589               |
| SNP_P3_100119_14770897 | NC_021167.1    | Ca_kabuli_chr08 | 14770897                | GG                              | AA                | 1946477591               |
| SNP_P3_100120_14772136 | NC_021167.1    | Ca_kabuli_chr08 | 14772136                | GG                              | TT                | 1946477592               |
| SNP_P3_100121_14772178 | NC_021167.1    | Ca_kabuli_chr08 | 14772178                | CC                              | TT                | 1946477594               |
| SNP_P3_100122_14773312 | NC_021167.1    | Ca_kabuli_chr08 | 14773312                | AA                              | CC                | 1946477595               |
| SNP_P3_100123_14773313 | NC_021167.1    | Ca_kabuli_chr08 | 14773313                | TT                              | CC                | 1946477597               |
| SNP_P3_100125_14774414 | NC_021167.1    | Ca_kabuli_chr08 | 14774414                | AA                              | CC                | 1946477599               |
| SNP_P3_100126_14774417 | NC_021167.1    | Ca_kabuli_chr08 | 14774417                | TT                              | AA                | 1946477600               |
| SNP_P3_100127_14774503 | NC_021167.1    | Ca_kabuli_chr08 | 14774503                | TT                              | CC                | 1946477602               |
| SNP_P3_100129_14775678 | NC_021167.1    | Ca_kabuli_chr08 | 14775678                | AA                              | GG                | 1946477603               |
| SNP_P3_100132_14776740 | NC_021167.1    | Ca_kabuli_chr08 | 14776740                | GG                              | AA                | 1946477605               |
| SNP_P3_100134_14777552 | NC_021167.1    | Ca_kabuli_chr08 | 14777552                | CC                              | TT                | 1946477606               |
| SNP_P3_100135_14777577 | NC_021167.1    | Ca_kabuli_chr08 | 14777577                | AA                              | CC                | 1946477608               |
| SNP_P3_100136_14777588 | NC_021167.1    | Ca_kabuli_chr08 | 14777588                | AA                              | CC                | 1946477609               |
| SNP_P3_100137_14778192 | NC_021167.1    | Ca_kabuli_chr08 | 14778192                | GG                              | TT                | 1946477611               |
| SNP_P3_100138_14778234 | NC_021167.1    | Ca_kabuli_chr08 | 14778234                | CC                              | TT                | 1946477612               |
| SNP_P3_100139_14778377 | NC_021167.1    | Ca_kabuli_chr08 | 14778377                | CC                              | TT                | 1946477614               |

| SNPs IDs               | Chromosome IDs | Chromosomes     | Physical positions (bp) | CDC Frontier (Reference genome) | (Pusa 256 & HPNB) | NCBI SNPdb Accession IDs |
|------------------------|----------------|-----------------|-------------------------|---------------------------------|-------------------|--------------------------|
| SNP_P3_100140_14778407 | NC_021167.1    | Ca_kabuli_chr08 | 14778407                | TT                              | CC                | 1946477615               |
| SNP_P3_100141_14778434 | NC_021167.1    | Ca_kabuli_chr08 | 14778434                | TT                              | CC                | 1946477617               |
| SNP_P3_100143_14778524 | NC_021167.1    | Ca_kabuli_chr08 | 14778524                | TT                              | CC                | 1946477618               |
| SNP_P3_100145_14779124 | NC_021167.1    | Ca_kabuli_chr08 | 14779124                | TT                              | CC                | 1946477620               |
| SNP_P3_100146_14779160 | NC_021167.1    | Ca_kabuli_chr08 | 14779160                | AA                              | GG                | 1946477621               |
| SNP_P3_100147_14779181 | NC_021167.1    | Ca_kabuli_chr08 | 14779181                | TT                              | CC                | 1946477623               |
| SNP_P3_100148_14779250 | NC_021167.1    | Ca_kabuli_chr08 | 14779250                | CC                              | TT                | 1946477625               |
| SNP_P3_100149_14780266 | NC_021167.1    | Ca_kabuli_chr08 | 14780266                | TT                              | CC                | 1946477626               |
| SNP_P3_100150_14780277 | NC_021167.1    | Ca_kabuli_chr08 | 14780277                | GG                              | CC                | 1946477628               |
| SNP_P3_100151_14780500 | NC_021167.1    | Ca_kabuli_chr08 | 14780500                | AA                              | TT                | 1946477629               |
| SNP_P3_100153_14780571 | NC_021167.1    | Ca_kabuli_chr08 | 14780571                | AA                              | GG                | 1946477631               |
| SNP_P3_100154_14780578 | NC_021167.1    | Ca_kabuli_chr08 | 14780578                | TT                              | AA                | 1946477632               |
| SNP_P3_100155_14781264 | NC_021167.1    | Ca_kabuli_chr08 | 14781264                | TT                              | AA                | 1946477633               |
| SNP_P3_100156_14781265 | NC_021167.1    | Ca_kabuli_chr08 | 14781265                | AA                              | TT                | 1946477635               |
| SNP_P3_100157_14781696 | NC_021167.1    | Ca_kabuli_chr08 | 14781696                | GG                              | AA                | 1946477636               |
| SNP_P3_100158_14781705 | NC_021167.1    | Ca_kabuli_chr08 | 14781705                | TT                              | CC                | 1946477638               |
| SNP_P3_100159_14781709 | NC_021167.1    | Ca_kabuli_chr08 | 14781709                | AA                              | TT                | 1946477639               |
| SNP_P3_100160_14781718 | NC_021167.1    | Ca_kabuli_chr08 | 14781718                | AA                              | GG                | 1946477641               |
| SNP_P3_100161_14781719 | NC_021167.1    | Ca_kabuli_chr08 | 14781719                | AA                              | GG                | 1946477642               |
| SNP_P3_100162_14782632 | NC_021167.1    | Ca_kabuli_chr08 | 14782632                | TT                              | AA                | 1946477644               |
| SNP_P3_100163_14782643 | NC_021167.1    | Ca_kabuli_chr08 | 14782643                | AA                              | TT                | 1946477645               |
| SNP_P3_100164_14782644 | NC_021167.1    | Ca_kabuli_chr08 | 14782644                | AA                              | TT                | 1946477647               |
| SNP_P3_100165_14782654 | NC_021167.1    | Ca_kabuli_chr08 | 14782654                | CC                              | TT                | 1946477648               |
| SNP_P3_100166_14782678 | NC_021167.1    | Ca_kabuli_chr08 | 14782678                | AA                              | TT                | 1946477650               |
| SNP_P3_100168_14783036 | NC_021167.1    | Ca_kabuli_chr08 | 14783036                | AA                              | GG                | 1946477651               |
| SNP_P3_100169_14783083 | NC_021167.1    | Ca_kabuli_chr08 | 14783083                | GG                              | TT                | 1946477653               |
| SNP_P3_100170_14783094 | NC_021167.1    | Ca_kabuli_chr08 | 14783094                | GG                              | AA                | 1946477654               |
| SNP_P3_100171_14784527 | NC_021167.1    | Ca_kabuli_chr08 | 14784527                | CC                              | TT                | 1946477656               |
| SNP_P3_100172_14784830 | NC_021167.1    | Ca_kabuli_chr08 | 14784830                | CC                              | AA                | 1946477657               |
| SNP_P3_100173_14785293 | NC_021167.1    | Ca_kabuli_chr08 | 14785293                | GG                              | AA                | 1946477659               |
| SNP_P3_100174_14785305 | NC_021167.1    | Ca_kabuli_chr08 | 14785305                | GG                              | AA                | 1946477660               |
| SNP_P3_100175_14788591 | NC_021167.1    | Ca_kabuli_chr08 | 14788591                | CC                              | TT                | 1946477662               |
| SNP_P3_100176_14792155 | NC_021167.1    | Ca_kabuli_chr08 | 14792155                | TT                              | AA                | 1946477664               |
| SNP_P3_100177_14793598 | NC_021167.1    | Ca_kabuli_chr08 | 14793598                | AA                              | GG                | 1946477665               |
| SNP_P3_100178_14793758 | NC_021167.1    | Ca_kabuli_chr08 | 14793758                | CC                              | AA                | 1946477667               |
| SNP_P3_100181_14795317 | NC_021167.1    | Ca_kabuli_chr08 | 14795317                | AA                              | GG                | 1946477669               |
| SNP_P3_100182_14796329 | NC_021167.1    | Ca_kabuli_chr08 | 14796329                | AA                              | GG                | 1946477670               |
| SNP_P3_100183_14797583 | NC_021167.1    | Ca_kabuli_chr08 | 14797583                | CC                              | AA                | 1946477672               |
| SNP_P3_100185_14799005 | NC_021167.1    | Ca_kabuli_chr08 | 14799005                | CC                              | TT                | 1946477673               |
| SNP_P3_100186_14799008 | NC_021167.1    | Ca_kabuli_chr08 | 14799008                | TT                              | CC                | 1946477675               |
| SNP_P3_100187_14799132 | NC_021167.1    | Ca_kabuli_chr08 | 14799132                | GG                              | AA                | 1946477676               |
| SNP_P3_100188_14799810 | NC_021167.1    | Ca_kabuli_chr08 | 14799810                | GG                              | AA                | 1946477678               |

| SNPs IDs               | Chromosome IDs | Chromosomes     | Physical positions (bp) | CDC Frontier (Reference genome) | (Pusa 256 & HPNB) | NCBI SNPdb Accession IDs |
|------------------------|----------------|-----------------|-------------------------|---------------------------------|-------------------|--------------------------|
| SNP_P3_100189_14799819 | NC_021167.1    | Ca_kabuli_chr08 | 14799819                | GG                              | AA                | 1946477679               |
| SNP_P3_100190_14803153 | NC_021167.1    | Ca_kabuli_chr08 | 14803153                | CC                              | TT                | 1946477681               |
| SNP_P3_100191_14803570 | NC_021167.1    | Ca_kabuli_chr08 | 14803570                | TT                              | CC                | 1946477682               |
| SNP_P3_100192_14803607 | NC_021167.1    | Ca_kabuli_chr08 | 14803607                | GG                              | AA                | 1946477684               |
| SNP_P3_100193_14803624 | NC_021167.1    | Ca_kabuli_chr08 | 14803624                | TT                              | GG                | 1946477685               |
| SNP_P3_100194_14803643 | NC_021167.1    | Ca_kabuli_chr08 | 14803643                | TT                              | AA                | 1946477687               |
| SNP_P3_100195_14803701 | NC_021167.1    | Ca_kabuli_chr08 | 14803701                | CC                              | GG                | 1946477688               |
| SNP_P3_100196_14805302 | NC_021167.1    | Ca_kabuli_chr08 | 14805302                | TT                              | CC                | 1946477690               |
| SNP_P3_100197_14806800 | NC_021167.1    | Ca_kabuli_chr08 | 14806800                | AA                              | GG                | 1946477691               |
| SNP_P3_100198_14806972 | NC_021167.1    | Ca_kabuli_chr08 | 14806972                | CC                              | TT                | 1946477693               |
| SNP_P3_100199_14807030 | NC_021167.1    | Ca_kabuli_chr08 | 14807030                | CC                              | AA                | 1946477694               |
| SNP_P3_100200_14807058 | NC_021167.1    | Ca_kabuli_chr08 | 14807058                | GG                              | AA                | 1946477696               |
| SNP_P3_100201_14807081 | NC_021167.1    | Ca_kabuli_chr08 | 14807081                | TT                              | CC                | 1946477697               |
| SNP_P3_100202_14808193 | NC_021167.1    | Ca_kabuli_chr08 | 14808193                | CC                              | AA                | 1946477699               |
| SNP_P3_100203_14808220 | NC_021167.1    | Ca_kabuli_chr08 | 14808220                | AA                              | TT                | 1946477700               |
| SNP_P3_100204_14808240 | NC_021167.1    | Ca_kabuli_chr08 | 14808240                | AA                              | GG                | 1946477702               |
| SNP_P3_100205_14808264 | NC_021167.1    | Ca_kabuli_chr08 | 14808264                | AA                              | TT                | 1946477703               |
| SNP_P3_100206_14808552 | NC_021167.1    | Ca_kabuli_chr08 | 14808552                | GG                              | AA                | 1946477705               |
| SNP_P3_100207_14809791 | NC_021167.1    | Ca_kabuli_chr08 | 14809791                | TT                              | GG                | 1946477706               |
| SNP_P3_100208_14812272 | NC_021167.1    | Ca_kabuli_chr08 | 14812272                | AA                              | TT                | 1946477708               |
| SNP_P3_100209_14812281 | NC_021167.1    | Ca_kabuli_chr08 | 14812281                | AA                              | GG                | 1946477709               |
| SNP_P3_100210_14812293 | NC_021167.1    | Ca_kabuli_chr08 | 14812293                | GG                              | AA                | 1946477711               |
| SNP_P3_100211_14812302 | NC_021167.1    | Ca_kabuli_chr08 | 14812302                | AA                              | GG                | 1946477713               |
| SNP_P3_100212_14812306 | NC_021167.1    | Ca_kabuli_chr08 | 14812306                | CC                              | TT                | 1946477714               |
| SNP_P3_100214_14814368 | NC_021167.1    | Ca_kabuli_chr08 | 14814368                | CC                              | TT                | 1946477716               |
| SNP_P3_100216_14814641 | NC_021167.1    | Ca_kabuli_chr08 | 14814641                | AA                              | GG                | 1946477717               |
| SNP_P3_100217_14814647 | NC_021167.1    | Ca_kabuli_chr08 | 14814647                | CC                              | TT                | 1946477719               |
| SNP_P3_100218_14818199 | NC_021167.1    | Ca_kabuli_chr08 | 14818199                | TT                              | CC                | 1946477720               |
| SNP_P3_100219_14818279 | NC_021167.1    | Ca_kabuli_chr08 | 14818279                | AA                              | TT                | 1946477722               |
| SNP_P3_100220_14818287 | NC_021167.1    | Ca_kabuli_chr08 | 14818287                | TT                              | CC                | 1946477723               |
| SNP_P3_100221_14818292 | NC_021167.1    | Ca_kabuli_chr08 | 14818292                | AA                              | TT                | 1946477725               |
| SNP_P3_100222_14818460 | NC_021167.1    | Ca_kabuli_chr08 | 14818460                | TT                              | AA                | 1946477728               |
| SNP_P3_100223_14819703 | NC_021167.1    | Ca_kabuli_chr08 | 14819703                | TT                              | CC                | 1946477731               |
| SNP_P3_100224_14820499 | NC_021167.1    | Ca_kabuli_chr08 | 14820499                | GG                              | TT                | 1946477734               |
| SNP_P3_100225_14820554 | NC_021167.1    | Ca_kabuli_chr08 | 14820554                | TT                              | CC                | 1946477736               |
| SNP_P3_100226_14820575 | NC_021167.1    | Ca_kabuli_chr08 | 14820575                | CC                              | AA                | 1946477739               |
| SNP_P3_100227_14820591 | NC_021167.1    | Ca_kabuli_chr08 | 14820591                | GG                              | AA                | 1946477740               |
| SNP_P3_100228_14820617 | NC_021167.1    | Ca_kabuli_chr08 | 14820617                | GG                              | TT                | 1946477742               |
| SNP_P3_100229_14820619 | NC_021167.1    | Ca_kabuli_chr08 | 14820619                | TT                              | CC                | 1946477744               |
| SNP_P3_100230_14821160 | NC_021167.1    | Ca_kabuli_chr08 | 14821160                | GG                              | AA                | 1946477745               |
| SNP_P3_100231_14821255 | NC_021167.1    | Ca_kabuli_chr08 | 14821255                | CC                              | AA                | 1946477747               |
| SNP_P3_100233_14821536 | NC_021167.1    | Ca_kabuli_chr08 | 14821536                | CC                              | GG                | 1946477748               |

| SNPs IDs               | Chromosome IDs | Chromosomes     | Physical positions (bp) | CDC Frontier (Reference genome) | (Pusa 256 & HPNB) | NCBI SNPdb Accession IDs |
|------------------------|----------------|-----------------|-------------------------|---------------------------------|-------------------|--------------------------|
| SNP_P3_100234_14821538 | NC_021167.1    | Ca_kabuli_chr08 | 14821538                | TT                              | CC                | 1946477750               |
| SNP_P3_100235_14821553 | NC_021167.1    | Ca_kabuli_chr08 | 14821553                | TT                              | CC                | 1946477751               |
| SNP_P3_100236_14823076 | NC_021167.1    | Ca_kabuli_chr08 | 14823076                | AA                              | GG                | 1946477753               |
| SNP_P3_100237_14823637 | NC_021167.1    | Ca_kabuli_chr08 | 14823637                | AA                              | GG                | 1946477757               |
| SNP_P3_100238_14823684 | NC_021167.1    | Ca_kabuli_chr08 | 14823684                | GG                              | AA                | 1946477759               |
| SNP_P3_100239_14823700 | NC_021167.1    | Ca_kabuli_chr08 | 14823700                | TT                              | CC                | 1946477762               |
| SNP_P3_100240_14823715 | NC_021167.1    | Ca_kabuli_chr08 | 14823715                | AA                              | GG                | 1946477764               |
| SNP_P3_100241_14848462 | NC_021167.1    | Ca_kabuli_chr08 | 14848462                | TT                              | AA                | 1946477766               |
| SNP_P3_100242_14859304 | NC_021167.1    | Ca_kabuli_chr08 | 14859304                | CC                              | TT                | 1946477768               |
| SNP_P3_100243_14871974 | NC_021167.1    | Ca_kabuli_chr08 | 14871974                | TT                              | CC                | 1946477769               |
| SNP_P3_100244_14879628 | NC_021167.1    | Ca_kabuli_chr08 | 14879628                | TT                              | GG                | 1946477770               |
| SNP_P3_100245_14879629 | NC_021167.1    | Ca_kabuli_chr08 | 14879629                | TT                              | CC                | 1946477771               |
| SNP_P3_100247_14908726 | NC_021167.1    | Ca_kabuli_chr08 | 14908726                | TT                              | AA                | 1946477772               |
| SNP_P3_100249_14923012 | NC_021167.1    | Ca_kabuli_chr08 | 14923012                | TT                              | CC                | 1946477773               |
| SNP_P3_100251_14941368 | NC_021167.1    | Ca_kabuli_chr08 | 14941368                | TT                              | CC                | 1946477774               |
| SNP_P3_100252_14950871 | NC_021167.1    | Ca_kabuli_chr08 | 14950871                | CC                              | TT                | 1946477776               |
| SNP_P3_100253_14997791 | NC_021167.1    | Ca_kabuli_chr08 | 14997791                | AA                              | TT                | 1946477778               |
| SNP_P3_100254_15004798 | NC_021167.1    | Ca_kabuli_chr08 | 15004798                | AA                              | GG                | 1946477779               |
| SNP_P3_100255_15011601 | NC_021167.1    | Ca_kabuli_chr08 | 15011601                | AA                              | GG                | 1946477781               |
| SNP_P3_100257_15023864 | NC_021167.1    | Ca_kabuli_chr08 | 15023864                | GG                              | AA                | 1946477782               |
| SNP_P3_100258_15047859 | NC_021167.1    | Ca_kabuli_chr08 | 15047859                | AA                              | TT                | 1946477784               |
| SNP_P3_100260_15052119 | NC_021167.1    | Ca_kabuli_chr08 | 15052119                | TT                              | CC                | 1946477785               |
| SNP_P3_100261_15052701 | NC_021167.1    | Ca_kabuli_chr08 | 15052701                | TT                              | CC                | 1946477787               |
| SNP_P3_100262_15053169 | NC_021167.1    | Ca_kabuli_chr08 | 15053169                | TT                              | GG                | 1946477789               |
| SNP_P3_100264_15063584 | NC_021167.1    | Ca_kabuli_chr08 | 15063584                | TT                              | CC                | 1946477790               |
| SNP_P3_100265_15064933 | NC_021167.1    | Ca_kabuli_chr08 | 15064933                | TT                              | AA                | 1946477792               |
| SNP_P3_100266_15075877 | NC_021167.1    | Ca_kabuli_chr08 | 15075877                | AA                              | CC                | 1946477794               |
| SNP_P3_100267_15089018 | NC_021167.1    | Ca_kabuli_chr08 | 15089018                | GG                              | AA                | 1946477796               |
| SNP_P3_100268_15093148 | NC_021167.1    | Ca_kabuli_chr08 | 15093148                | AA                              | GG                | 1946477797               |
| SNP_P3_100269_15117832 | NC_021167.1    | Ca_kabuli_chr08 | 15117832                | GG                              | TT                | 1946477799               |
| SNP_P3_100270_15156203 | NC_021167.1    | Ca_kabuli_chr08 | 15156203                | TT                              | GG                | 1946477800               |
| SNP_P3_100271_15156319 | NC_021167.1    | Ca_kabuli_chr08 | 15156319                | GG                              | AA                | 1946477802               |
| SNP_P3_100273_15162474 | NC_021167.1    | Ca_kabuli_chr08 | 15162474                | TT                              | GG                | 1946477804               |
| SNP_P3_100274_15162815 | NC_021167.1    | Ca_kabuli_chr08 | 15162815                | GG                              | TT                | 1946477805               |
| SNP_P3_100276_15198422 | NC_021167.1    | Ca_kabuli_chr08 | 15198422                | AA                              | GG                | 1946477807               |
| SNP_P3_100277_15198611 | NC_021167.1    | Ca_kabuli_chr08 | 15198611                | GG                              | TT                | 1946477808               |
| SNP_P3_100278_15213061 | NC_021167.1    | Ca_kabuli_chr08 | 15213061                | TT                              | AA                | 1946477810               |
| SNP_P3_100279_15266554 | NC_021167.1    | Ca_kabuli_chr08 | 15266554                | GG                              | CC                | 1946477812               |
| SNP_P3_100280_15266718 | NC_021167.1    | Ca_kabuli_chr08 | 15266718                | TT                              | CC                | 1946477813               |
| SNP_P3_100282_15269425 | NC_021167.1    | Ca_kabuli_chr08 | 15269425                | CC                              | TT                | 1946477815               |
| SNP_P3_100283_15294310 | NC_021167.1    | Ca_kabuli_chr08 | 15294310                | GG                              | AA                | 1946477816               |
| SNP_P3_100285_15295039 | NC_021167.1    | Ca_kabuli_chr08 | 15295039                | AA                              | TT                | 1946477818               |

| SNPs IDs               | Chromosome IDs | Chromosomes     | Physical positions (bp) | CDC Frontier (Reference genome) | (Pusa 256 & HPNB) | NCBI SNPdb Accession IDs |
|------------------------|----------------|-----------------|-------------------------|---------------------------------|-------------------|--------------------------|
| SNP_P3_100286_15313750 | NC_021167.1    | Ca_kabuli_chr08 | 15313750                | GG                              | AA                | 1946477819               |
| SNP_P3_100287_15313843 | NC_021167.1    | Ca_kabuli_chr08 | 15313843                | CC                              | TT                | 1946477821               |
| SNP_P3_100288_15313849 | NC_021167.1    | Ca_kabuli_chr08 | 15313849                | CC                              | TT                | 1946477822               |
| SNP_P3_100289_15313888 | NC_021167.1    | Ca_kabuli_chr08 | 15313888                | CC                              | TT                | 1946477824               |
| SNP_P3_100290_15313894 | NC_021167.1    | Ca_kabuli_chr08 | 15313894                | CC                              | TT                | 1946477825               |
| SNP_P3_100291_15313912 | NC_021167.1    | Ca_kabuli_chr08 | 15313912                | TT                              | CC                | 1946477827               |
| SNP_P3_100293_15314157 | NC_021167.1    | Ca_kabuli_chr08 | 15314157                | CC                              | TT                | 1946477829               |
| SNP_P3_100294_15314175 | NC_021167.1    | Ca_kabuli_chr08 | 15314175                | AA                              | GG                | 1946477830               |
| SNP_P3_100295_15314185 | NC_021167.1    | Ca_kabuli_chr08 | 15314185                | AA                              | CC                | 1946477832               |
| SNP_P3_100296_15314199 | NC_021167.1    | Ca_kabuli_chr08 | 15314199                | TT                              | CC                | 1946477833               |
| SNP_P3_100297_15314249 | NC_021167.1    | Ca_kabuli_chr08 | 15314249                | GG                              | AA                | 1946477835               |
| SNP_P3_100298_15314322 | NC_021167.1    | Ca_kabuli_chr08 | 15314322                | TT                              | GG                | 1946477836               |
| SNP_P3_100299_15314343 | NC_021167.1    | Ca_kabuli_chr08 | 15314343                | GG                              | AA                | 1946477838               |
| SNP_P3_100300_15318167 | NC_021167.1    | Ca_kabuli_chr08 | 15318167                | TT                              | CC                | 1946477839               |
| SNP_P3_100301_15318210 | NC_021167.1    | Ca_kabuli_chr08 | 15318210                | TT                              | CC                | 1946477841               |
| SNP_P3_100302_15342248 | NC_021167.1    | Ca_kabuli_chr08 | 15342248                | AA                              | TT                | 1946477842               |
| SNP_P3_100303_15346814 | NC_021167.1    | Ca_kabuli_chr08 | 15346814                | GG                              | TT                | 1946477844               |
| SNP_P3_100304_15348586 | NC_021167.1    | Ca_kabuli_chr08 | 15348586                | CC                              | GG                | 1946477845               |
| SNP_P3_100305_15348918 | NC_021167.1    | Ca_kabuli_chr08 | 15348918                | GG                              | AA                | 1946477847               |
| SNP_P3_100306_15349031 | NC_021167.1    | Ca_kabuli_chr08 | 15349031                | TT                              | CC                | 1946477849               |
| SNP_P3_100307_15349056 | NC_021167.1    | Ca_kabuli_chr08 | 15349056                | TT                              | GG                | 1946477850               |
| SNP_P3_100308_15349080 | NC_021167.1    | Ca_kabuli_chr08 | 15349080                | AA                              | GG                | 1946477852               |
| SNP_P3_100309_15349123 | NC_021167.1    | Ca_kabuli_chr08 | 15349123                | AA                              | GG                | 1946477853               |
| SNP_P3_100310_15349141 | NC_021167.1    | Ca_kabuli_chr08 | 15349141                | GG                              | AA                | 1946477855               |
| SNP_P3_100311_15393885 | NC_021167.1    | Ca_kabuli_chr08 | 15393885                | GG                              | CC                | 1946477856               |
| SNP_P3_100313_15426645 | NC_021167.1    | Ca_kabuli_chr08 | 15426645                | CC                              | TT                | 1946477858               |
| SNP_P3_100314_15428137 | NC_021167.1    | Ca_kabuli_chr08 | 15428137                | AA                              | GG                | 1946477859               |
| SNP_P3_100316_15445373 | NC_021167.1    | Ca_kabuli_chr08 | 15445373                | CC                              | TT                | 1946477861               |
| SNP_P3_100317_15450700 | NC_021167.1    | Ca_kabuli_chr08 | 15450700                | GG                              | AA                | 1946477863               |
| SNP_P3_100318_15471621 | NC_021167.1    | Ca_kabuli_chr08 | 15471621                | TT                              | CC                | 1946477864               |
| SNP_P3_100320_15506095 | NC_021167.1    | Ca_kabuli_chr08 | 15506095                | AA                              | CC                | 1946477866               |
| SNP_P3_100322_15527988 | NC_021167.1    | Ca_kabuli_chr08 | 15527988                | AA                              | TT                | 1946477867               |
| SNP_P3_100323_15576984 | NC_021167.1    | Ca_kabuli_chr08 | 15576984                | AA                              | GG                | 1946477869               |
| SNP_P3_100324_15577101 | NC_021167.1    | Ca_kabuli_chr08 | 15577101                | AA                              | TT                | 1946477871               |
| SNP_P3_100325_15577292 | NC_021167.1    | Ca_kabuli_chr08 | 15577292                | AA                              | CC                | 1946477872               |
| SNP_P3_100328_15577907 | NC_021167.1    | Ca_kabuli_chr08 | 15577907                | TT                              | CC                | 1946477874               |
| SNP_P3_100329_15579015 | NC_021167.1    | Ca_kabuli_chr08 | 15579015                | AA                              | TT                | 1946477875               |
| SNP_P3_100330_15579728 | NC_021167.1    | Ca_kabuli_chr08 | 15579728                | AA                              | GG                | 1946477877               |
| SNP_P3_100331_15579799 | NC_021167.1    | Ca_kabuli_chr08 | 15579799                | GG                              | AA                | 1946477878               |
| SNP_P3_100333_15580638 | NC_021167.1    | Ca_kabuli_chr08 | 15580638                | AA                              | GG                | 1946477880               |
| SNP_P3_100334_15580665 | NC_021167.1    | Ca_kabuli_chr08 | 15580665                | TT                              | CC                | 1946477881               |
| SNP_P3_100336_15602326 | NC_021167.1    | Ca_kabuli_chr08 | 15602326                | AA                              | GG                | 1946477883               |

| SNPs IDs               | Chromosome IDs | Chromosomes     | Physical positions (bp) | CDC Frontier (Reference genome) | (Pusa 256 & HPNB) | NCBI SNPdb Accession IDs |
|------------------------|----------------|-----------------|-------------------------|---------------------------------|-------------------|--------------------------|
| SNP_P3_100337_15612879 | NC_021167.1    | Ca_kabuli_chr08 | 15612879                | TT                              | CC                | 1946477884               |
| SNP_P3_100338_15635450 | NC_021167.1    | Ca_kabuli_chr08 | 15635450                | CC                              | GG                | 1946477886               |
| SNP_P3_100339_15635472 | NC_021167.1    | Ca_kabuli_chr08 | 15635472                | CC                              | TT                | 1946477887               |
| SNP_P3_100340_15635519 | NC_021167.1    | Ca_kabuli_chr08 | 15635519                | AA                              | TT                | 1946477889               |
| SNP_P3_100341_15640058 | NC_021167.1    | Ca_kabuli_chr08 | 15640058                | TT                              | AA                | 1946477890               |
| SNP_P3_100342_15640329 | NC_021167.1    | Ca_kabuli_chr08 | 15640329                | AA                              | GG                | 1946477892               |
| SNP_P3_100343_15640353 | NC_021167.1    | Ca_kabuli_chr08 | 15640353                | AA                              | GG                | 1946477893               |
| SNP_P3_100344_15640376 | NC_021167.1    | Ca_kabuli_chr08 | 15640376                | TT                              | CC                | 1946477894               |
| SNP_P3_100345_15648642 | NC_021167.1    | Ca_kabuli_chr08 | 15648642                | CC                              | AA                | 1946477896               |
| SNP_P3_100346_15657850 | NC_021167.1    | Ca_kabuli_chr08 | 15657850                | CC                              | TT                | 1946477897               |
| SNP_P3_100347_15666924 | NC_021167.1    | Ca_kabuli_chr08 | 15666924                | TT                              | AA                | 1946477900               |
| SNP_P3_100349_15682052 | NC_021167.1    | Ca_kabuli_chr08 | 15682052                | CC                              | GG                | 1946477901               |
| SNP_P3_100350_15682135 | NC_021167.1    | Ca_kabuli_chr08 | 15682135                | TT                              | CC                | 1946477903               |
| SNP_P3_100351_15683482 | NC_021167.1    | Ca_kabuli_chr08 | 15683482                | AA                              | CC                | 1946477904               |
| SNP_P3_100352_15684918 | NC_021167.1    | Ca_kabuli_chr08 | 15684918                | CC                              | GG                | 1946477906               |
| SNP_P3_100354_15685083 | NC_021167.1    | Ca_kabuli_chr08 | 15685083                | TT                              | CC                | 1946477907               |
| SNP_P3_100355_15685156 | NC_021167.1    | Ca_kabuli_chr08 | 15685156                | AA                              | GG                | 1946477909               |
| SNP_P3_100357_15685308 | NC_021167.1    | Ca_kabuli_chr08 | 15685308                | TT                              | CC                | 1946477911               |
| SNP_P3_100359_15685414 | NC_021167.1    | Ca_kabuli_chr08 | 15685414                | CC                              | TT                | 1946477912               |
| SNP_P3_100361_15685663 | NC_021167.1    | Ca_kabuli_chr08 | 15685663                | TT                              | CC                | 1946477913               |
| SNP_P3_100362_15685773 | NC_021167.1    | Ca_kabuli_chr08 | 15685773                | AA                              | GG                | 1946477915               |
| SNP_P3_100365_15685922 | NC_021167.1    | Ca_kabuli_chr08 | 15685922                | GG                              | CC                | 1946477917               |
| SNP_P3_100366_15685957 | NC_021167.1    | Ca_kabuli_chr08 | 15685957                | AA                              | GG                | 1946477918               |
| SNP_P3_100367_15685998 | NC_021167.1    | Ca_kabuli_chr08 | 15685998                | AA                              | GG                | 1946477919               |
| SNP_P3_100368_15685999 | NC_021167.1    | Ca_kabuli_chr08 | 15685999                | AA                              | TT                | 1946477921               |
| SNP_P3_100369_15686000 | NC_021167.1    | Ca_kabuli_chr08 | 15686000                | GG                              | CC                | 1946477922               |
| SNP_P3_100370_15686004 | NC_021167.1    | Ca_kabuli_chr08 | 15686004                | AA                              | TT                | 1946477924               |
| SNP_P3_100371_15686009 | NC_021167.1    | Ca_kabuli_chr08 | 15686009                | AA                              | TT                | 1946477925               |
| SNP_P3_100372_15686010 | NC_021167.1    | Ca_kabuli_chr08 | 15686010                | AA                              | CC                | 1946477927               |
| SNP_P3_100373_15686011 | NC_021167.1    | Ca_kabuli_chr08 | 15686011                | AA                              | CC                | 1946477928               |
| SNP_P3_100374_15686012 | NC_021167.1    | Ca_kabuli_chr08 | 15686012                | CC                              | AA                | 1946477930               |
| SNP_P3_100375_15686013 | NC_021167.1    | Ca_kabuli_chr08 | 15686013                | TT                              | AA                | 1946477931               |
| SNP_P3_100376_15688206 | NC_021167.1    | Ca_kabuli_chr08 | 15688206                | AA                              | TT                | 1946477933               |
| SNP_P3_100377_15689022 | NC_021167.1    | Ca_kabuli_chr08 | 15689022                | CC                              | TT                | 1946477934               |
| SNP_P3_100378_15689034 | NC_021167.1    | Ca_kabuli_chr08 | 15689034                | CC                              | TT                | 1946477936               |
| SNP_P3_100379_15689137 | NC_021167.1    | Ca_kabuli_chr08 | 15689137                | AA                              | TT                | 1946477937               |
| SNP_P3_100380_15689376 | NC_021167.1    | Ca_kabuli_chr08 | 15689376                | CC                              | TT                | 1946477939               |
| SNP_P3_100381_15689673 | NC_021167.1    | Ca_kabuli_chr08 | 15689673                | AA                              | CC                | 1946477940               |
| SNP_P3_100382_15689741 | NC_021167.1    | Ca_kabuli_chr08 | 15689741                | GG                              | AA                | 1946477942               |
| SNP_P3_100383_15689756 | NC_021167.1    | Ca_kabuli_chr08 | 15689756                | AA                              | GG                | 1946477944               |
| SNP_P3_100384_15691466 | NC_021167.1    | Ca_kabuli_chr08 | 15691466                | AA                              | GG                | 1946477945               |
| SNP_P3_100385_15691700 | NC_021167.1    | Ca_kabuli_chr08 | 15691700                | GG                              | AA                | 1946477947               |



| SNPs IDs               | Chromosome IDs | Chromosomes     | Physical positions (bp) | CDC Frontier (Reference genome) | (Pusa 256 & HPNB) | NCBI SNPdb Accession IDs |
|------------------------|----------------|-----------------|-------------------------|---------------------------------|-------------------|--------------------------|
| SNP_P3_100386_15692070 | NC_021167.1    | Ca_kabuli_chr08 | 15692070                | GG                              | AA                | 1946477948               |
| SNP_P3_100387_15692243 | NC_021167.1    | Ca_kabuli_chr08 | 15692243                | GG                              | AA                | 1946477950               |
| SNP_P3_100388_15693803 | NC_021167.1    | Ca_kabuli_chr08 | 15693803                | TT                              | CC                | 1946477951               |
| SNP_P3_100390_15730989 | NC_021167.1    | Ca_kabuli_chr08 | 15730989                | AA                              | GG                | 1946477953               |
| SNP_P3_100391_15732069 | NC_021167.1    | Ca_kabuli_chr08 | 15732069                | TT                              | AA                | 1946477954               |
| SNP_P3_100392_15734588 | NC_021167.1    | Ca_kabuli_chr08 | 15734588                | AA                              | CC                | 1946477956               |
| SNP_P3_100394_15755594 | NC_021167.1    | Ca_kabuli_chr08 | 15755594                | AA                              | GG                | 1946477957               |
| SNP_P3_100395_15768151 | NC_021167.1    | Ca_kabuli_chr08 | 15768151                | AA                              | GG                | 1946477958               |
| SNP_P3_100396_15768160 | NC_021167.1    | Ca_kabuli_chr08 | 15768160                | AA                              | GG                | 1946477960               |
| SNP_P3_100397_15778713 | NC_021167.1    | Ca_kabuli_chr08 | 15778713                | CC                              | AA                | 1946477961               |
| SNP_P3_100398_15787240 | NC_021167.1    | Ca_kabuli_chr08 | 15787240                | TT                              | CC                | 1946477963               |
| SNP_P3_100399_15787261 | NC_021167.1    | Ca_kabuli_chr08 | 15787261                | GG                              | TT                | 1946477964               |
| SNP_P3_100400_15787264 | NC_021167.1    | Ca_kabuli_chr08 | 15787264                | TT                              | CC                | 1946477966               |
| SNP_P3_100401_15787290 | NC_021167.1    | Ca_kabuli_chr08 | 15787290                | CC                              | TT                | 1946477967               |
| SNP_P3_100404_15789746 | NC_021167.1    | Ca_kabuli_chr08 | 15789746                | AA                              | GG                | 1946477969               |
| SNP_P3_100405_15790970 | NC_021167.1    | Ca_kabuli_chr08 | 15790970                | CC                              | TT                | 1946477970               |
| SNP_P3_100406_15795834 | NC_021167.1    | Ca_kabuli_chr08 | 15795834                | TT                              | CC                | 1946477972               |
| SNP_P3_100407_15797555 | NC_021167.1    | Ca_kabuli_chr08 | 15797555                | CC                              | GG                | 1946477973               |
| SNP_P3_100408_15802597 | NC_021167.1    | Ca_kabuli_chr08 | 15802597                | TT                              | CC                | 1946477975               |
| SNP_P3_100409_15802689 | NC_021167.1    | Ca_kabuli_chr08 | 15802689                | GG                              | AA                | 1946477976               |
| SNP_P3_100410_15814390 | NC_021167.1    | Ca_kabuli_chr08 | 15814390                | CC                              | TT                | 1946477978               |
| SNP_P3_100411_15815668 | NC_021167.1    | Ca_kabuli_chr08 | 15815668                | CC                              | TT                | 1946477980               |
| SNP_P3_100413_15821288 | NC_021167.1    | Ca_kabuli_chr08 | 15821288                | AA                              | CC                | 1946477981               |
| SNP_P3_100414_15821289 | NC_021167.1    | Ca_kabuli_chr08 | 15821289                | AA                              | CC                | 1946477983               |
| SNP_P3_100415_15822923 | NC_021167.1    | Ca_kabuli_chr08 | 15822923                | AA                              | CC                | 1946477984               |
| SNP_P3_100416_15827268 | NC_021167.1    | Ca_kabuli_chr08 | 15827268                | CC                              | AA                | 1946477986               |
| SNP_P3_100417_15829967 | NC_021167.1    | Ca_kabuli_chr08 | 15829967                | GG                              | TT                | 1946477987               |
| SNP_P3_100419_15850493 | NC_021167.1    | Ca_kabuli_chr08 | 15850493                | AA                              | GG                | 1946477989               |
| SNP_P3_100420_15850511 | NC_021167.1    | Ca_kabuli_chr08 | 15850511                | AA                              | GG                | 1946477990               |
| SNP_P3_100421_15856819 | NC_021167.1    | Ca_kabuli_chr08 | 15856819                | CC                              | TT                | 1946477992               |
| SNP_P3_100424_15876747 | NC_021167.1    | Ca_kabuli_chr08 | 15876747                | AA                              | GG                | 1946477993               |
| SNP_P3_100425_15876818 | NC_021167.1    | Ca_kabuli_chr08 | 15876818                | CC                              | TT                | 1946477995               |
| SNP_P3_100427_15879974 | NC_021167.1    | Ca_kabuli_chr08 | 15879974                | CC                              | TT                | 1946477996               |
| SNP_P3_100429_15880258 | NC_021167.1    | Ca_kabuli_chr08 | 15880258                | TT                              | CC                | 1946477998               |
| SNP_P3_100430_15880524 | NC_021167.1    | Ca_kabuli_chr08 | 15880524                | CC                              | GG                | 1946477999               |
| SNP_P3_100431_15880534 | NC_021167.1    | Ca_kabuli_chr08 | 15880534                | TT                              | CC                | 1946478001               |
| SNP_P3_100432_15880566 | NC_021167.1    | Ca_kabuli_chr08 | 15880566                | TT                              | GG                | 1946478002               |
| SNP_P3_100435_15881296 | NC_021167.1    | Ca_kabuli_chr08 | 15881296                | AA                              | GG                | 1946478004               |
| SNP_P3_100436_15881337 | NC_021167.1    | Ca_kabuli_chr08 | 15881337                | GG                              | TT                | 1946478006               |
| SNP_P3_100437_15881342 | NC_021167.1    | Ca_kabuli_chr08 | 15881342                | CC                              | GG                | 1946478007               |
| SNP_P3_100438_15881572 | NC_021167.1    | Ca_kabuli_chr08 | 15881572                | AA                              | GG                | 1946478009               |
| SNP_P3_100439_15881589 | NC_021167.1    | Ca_kabuli_chr08 | 15881589                | CC                              | GG                | 1946478010               |

| SNPs IDs               | Chromosome IDs | Chromosomes     | Physical positions (bp) | CDC Frontier (Reference genome) | (Pusa 256 & HPNB) | NCBI SNPdb Accession IDs |
|------------------------|----------------|-----------------|-------------------------|---------------------------------|-------------------|--------------------------|
| SNP_P3_100440_15881624 | NC_021167.1    | Ca_kabuli_chr08 | 15881624                | CC                              | TT                | 1946478012               |
| SNP_P3_100441_15881914 | NC_021167.1    | Ca_kabuli_chr08 | 15881914                | AA                              | GG                | 1946478013               |
| SNP_P3_100442_15881982 | NC_021167.1    | Ca_kabuli_chr08 | 15881982                | TT                              | AA                | 1946478015               |
| SNP_P3_100443_15881994 | NC_021167.1    | Ca_kabuli_chr08 | 15881994                | TT                              | CC                | 1946478016               |
| SNP_P3_100444_15882353 | NC_021167.1    | Ca_kabuli_chr08 | 15882353                | GG                              | AA                | 1946478018               |
| SNP_P3_100445_15882556 | NC_021167.1    | Ca_kabuli_chr08 | 15882556                | GG                              | AA                | 1946478019               |
| SNP_P3_100446_15882599 | NC_021167.1    | Ca_kabuli_chr08 | 15882599                | GG                              | AA                | 1946478021               |
| SNP_P3_100447_15889865 | NC_021167.1    | Ca_kabuli_chr08 | 15889865                | TT                              | GG                | 1946478023               |
| SNP_P3_100448_15889900 | NC_021167.1    | Ca_kabuli_chr08 | 15889900                | TT                              | CC                | 1946478024               |
| SNP_P3_100449_15889901 | NC_021167.1    | Ca_kabuli_chr08 | 15889901                | TT                              | CC                | 1946478026               |
| SNP_P3_100450_15890217 | NC_021167.1    | Ca_kabuli_chr08 | 15890217                | GG                              | CC                | 1946478027               |
| SNP_P3_100451_15890339 | NC_021167.1    | Ca_kabuli_chr08 | 15890339                | CC                              | TT                | 1946478029               |
| SNP_P3_100452_15891028 | NC_021167.1    | Ca_kabuli_chr08 | 15891028                | CC                              | TT                | 1946478030               |
| SNP_P3_100453_15892340 | NC_021167.1    | Ca_kabuli_chr08 | 15892340                | GG                              | TT                | 1946478032               |
| SNP_P3_100455_15892424 | NC_021167.1    | Ca_kabuli_chr08 | 15892424                | GG                              | TT                | 1946478034               |
| SNP_P3_100456_15892437 | NC_021167.1    | Ca_kabuli_chr08 | 15892437                | CC                              | TT                | 1946478035               |
| SNP_P3_100457_15892608 | NC_021167.1    | Ca_kabuli_chr08 | 15892608                | TT                              | CC                | 1946478037               |
| SNP_P3_100459_15892808 | NC_021167.1    | Ca_kabuli_chr08 | 15892808                | TT                              | GG                | 1946478038               |
| SNP_P3_100460_15892859 | NC_021167.1    | Ca_kabuli_chr08 | 15892859                | GG                              | TT                | 1946478040               |
| SNP_P3_100461_15893116 | NC_021167.1    | Ca_kabuli_chr08 | 15893116                | AA                              | GG                | 1946478041               |
| SNP_P3_100462_15893132 | NC_021167.1    | Ca_kabuli_chr08 | 15893132                | GG                              | AA                | 1946478043               |
| SNP_P3_100463_15893821 | NC_021167.1    | Ca_kabuli_chr08 | 15893821                | TT                              | CC                | 1946478044               |
| SNP_P3_100464_15894376 | NC_021167.1    | Ca_kabuli_chr08 | 15894376                | AA                              | TT                | 1946478046               |
| SNP_P3_100465_15896095 | NC_021167.1    | Ca_kabuli_chr08 | 15896095                | GG                              | AA                | 1946478047               |
| SNP_P3_100467_15896142 | NC_021167.1    | Ca_kabuli_chr08 | 15896142                | CC                              | TT                | 1946478049               |
| SNP_P3_100468_15896202 | NC_021167.1    | Ca_kabuli_chr08 | 15896202                | AA                              | TT                | 1946478050               |
| SNP_P3_100469_15896356 | NC_021167.1    | Ca_kabuli_chr08 | 15896356                | AA                              | GG                | 1946478052               |
| SNP_P3_100470_15897412 | NC_021167.1    | Ca_kabuli_chr08 | 15897412                | GG                              | AA                | 1946478053               |
| SNP_P3_100471_15897420 | NC_021167.1    | Ca_kabuli_chr08 | 15897420                | CC                              | GG                | 1946478055               |
| SNP_P3_100472_15897753 | NC_021167.1    | Ca_kabuli_chr08 | 15897753                | CC                              | AA                | 1946478056               |
| SNP_P3_100473_15897982 | NC_021167.1    | Ca_kabuli_chr08 | 15897982                | TT                              | AA                | 1946478057               |
| SNP_P3_100474_15898026 | NC_021167.1    | Ca_kabuli_chr08 | 15898026                | TT                              | CC                | 1946478059               |
| SNP_P3_100475_15899135 | NC_021167.1    | Ca_kabuli_chr08 | 15899135                | AA                              | GG                | 1946478060               |
| SNP_P3_100477_15919081 | NC_021167.1    | Ca_kabuli_chr08 | 15919081                | CC                              | GG                | 1946478062               |
| SNP_P3_100479_15921847 | NC_021167.1    | Ca_kabuli_chr08 | 15921847                | AA                              | GG                | 1946478063               |
| SNP_P3_100480_15921886 | NC_021167.1    | Ca_kabuli_chr08 | 15921886                | TT                              | GG                | 1946478065               |
| SNP_P3_100481_15921992 | NC_021167.1    | Ca_kabuli_chr08 | 15921992                | AA                              | GG                | 1946478066               |
| SNP_P3_100482_15922206 | NC_021167.1    | Ca_kabuli_chr08 | 15922206                | GG                              | TT                | 1946478068               |
| SNP_P3_100483_15922447 | NC_021167.1    | Ca_kabuli_chr08 | 15922447                | CC                              | TT                | 1946478069               |
| SNP_P3_100484_15923633 | NC_021167.1    | Ca_kabuli_chr08 | 15923633                | CC                              | TT                | 1946478071               |
| SNP_P3_100487_15925610 | NC_021167.1    | Ca_kabuli_chr08 | 15925610                | TT                              | AA                | 1946478072               |
| SNP_P3_100488_15925611 | NC_021167.1    | Ca_kabuli_chr08 | 15925611                | TT                              | AA                | 1946478074               |

| SNPs IDs               | Chromosome IDs | Chromosomes     | Physical positions (bp) | CDC Frontier (Reference genome) | (Pusa 256 & HPNB) | NCBI SNPdb Accession IDs |
|------------------------|----------------|-----------------|-------------------------|---------------------------------|-------------------|--------------------------|
| SNP_P3_100489_15925612 | NC_021167.1    | Ca_kabuli_chr08 | 15925612                | TT                              | AA                | 1946478075               |
| SNP_P3_100490_15925613 | NC_021167.1    | Ca_kabuli_chr08 | 15925613                | TT                              | AA                | 1946478077               |
| SNP_P3_100493_15928714 | NC_021167.1    | Ca_kabuli_chr08 | 15928714                | AA                              | GG                | 1946478078               |
| SNP_P3_100494_15934799 | NC_021167.1    | Ca_kabuli_chr08 | 15934799                | AA                              | CC                | 1946478080               |
| SNP_P3_100496_15942672 | NC_021167.1    | Ca_kabuli_chr08 | 15942672                | CC                              | GG                | 1946478081               |
| SNP_P3_100497_15952857 | NC_021167.1    | Ca_kabuli_chr08 | 15952857                | TT                              | CC                | 1946478083               |
| SNP_P3_100498_15972217 | NC_021167.1    | Ca_kabuli_chr08 | 15972217                | TT                              | AA                | 1946478084               |
| SNP_P3_100499_15972247 | NC_021167.1    | Ca_kabuli_chr08 | 15972247                | CC                              | TT                | 1946478086               |
| SNP_P3_100500_15972256 | NC_021167.1    | Ca_kabuli_chr08 | 15972256                | CC                              | TT                | 1946478087               |
| SNP_P3_100501_15972283 | NC_021167.1    | Ca_kabuli_chr08 | 15972283                | AA                              | CC                | 1946478089               |
| SNP_P3_100502_15972322 | NC_021167.1    | Ca_kabuli_chr08 | 15972322                | CC                              | TT                | 1946478091               |
| SNP_P3_100503_15972397 | NC_021167.1    | Ca_kabuli_chr08 | 15972397                | CC                              | TT                | 1946478092               |
| SNP_P3_100505_15972510 | NC_021167.1    | Ca_kabuli_chr08 | 15972510                | TT                              | AA                | 1946478094               |
| SNP_P3_100506_15972676 | NC_021167.1    | Ca_kabuli_chr08 | 15972676                | AA                              | TT                | 1946478095               |
| SNP_P3_100507_15972680 | NC_021167.1    | Ca_kabuli_chr08 | 15972680                | AA                              | TT                | 1946478097               |
| SNP_P3_100508_15972683 | NC_021167.1    | Ca_kabuli_chr08 | 15972683                | TT                              | CC                | 1946478098               |
| SNP_P3_100509_15972684 | NC_021167.1    | Ca_kabuli_chr08 | 15972684                | CC                              | AA                | 1946478100               |
| SNP_P3_100510_15972686 | NC_021167.1    | Ca_kabuli_chr08 | 15972686                | AA                              | GG                | 1946478101               |
| SNP_P3_100511_15972719 | NC_021167.1    | Ca_kabuli_chr08 | 15972719                | GG                              | TT                | 1946478103               |
| SNP_P3_100512_15972754 | NC_021167.1    | Ca_kabuli_chr08 | 15972754                | GG                              | AA                | 1946478104               |
| SNP_P3_100513_15972759 | NC_021167.1    | Ca_kabuli_chr08 | 15972759                | GG                              | AA                | 1946478106               |
| SNP_P3_100514_15972768 | NC_021167.1    | Ca_kabuli_chr08 | 15972768                | AA                              | CC                | 1946478108               |
| SNP_P3_100515_15972809 | NC_021167.1    | Ca_kabuli_chr08 | 15972809                | AA                              | GG                | 1946478109               |
| SNP_P3_100516_15972816 | NC_021167.1    | Ca_kabuli_chr08 | 15972816                | TT                              | AA                | 1946478111               |
| SNP_P3_100517_15972837 | NC_021167.1    | Ca_kabuli_chr08 | 15972837                | AA                              | CC                | 1946478112               |
| SNP_P3_100518_15972856 | NC_021167.1    | Ca_kabuli_chr08 | 15972856                | GG                              | TT                | 1946478114               |
| SNP_P3_100519_15972910 | NC_021167.1    | Ca_kabuli_chr08 | 15972910                | AA                              | GG                | 1946478115               |
| SNP_P3_100520_15972917 | NC_021167.1    | Ca_kabuli_chr08 | 15972917                | AA                              | GG                | 1946478117               |
| SNP_P3_100521_15987253 | NC_021167.1    | Ca_kabuli_chr08 | 15987253                | AA                              | GG                | 1946478118               |
| SNP_P3_100522_16000359 | NC_021167.1    | Ca_kabuli_chr08 | 16000359                | CC                              | TT                | 1946478120               |
| SNP_P3_100523_16037221 | NC_021167.1    | Ca_kabuli_chr08 | 16037221                | GG                              | AA                | 1946478122               |
| SNP_P3_100524_16058386 | NC_021167.1    | Ca_kabuli_chr08 | 16058386                | GG                              | AA                | 1946478123               |
| SNP_P3_100526_16125567 | NC_021167.1    | Ca_kabuli_chr08 | 16125567                | CC                              | TT                | 1946478125               |
| SNP_P3_100528_16161445 | NC_021167.1    | Ca_kabuli_chr08 | 16161445                | GG                              | AA                | 1946478126               |
| SNP_P3_100529_16171657 | NC_021167.1    | Ca_kabuli_chr08 | 16171657                | AA                              | GG                | 1946478128               |
| SNP_P3_100530_16174541 | NC_021167.1    | Ca_kabuli_chr08 | 16174541                | CC                              | TT                | 1946478129               |
| SNP_P3_100531_16212786 | NC_021167.1    | Ca_kabuli_chr08 | 16212786                | TT                              | GG                | 1946478131               |
| SNP_P3_100532_16212871 | NC_021167.1    | Ca_kabuli_chr08 | 16212871                | GG                              | TT                | 1946478132               |
| SNP_P3_100533_16212875 | NC_021167.1    | Ca_kabuli_chr08 | 16212875                | CC                              | TT                | 1946478134               |
| SNP_P3_100534_16213260 | NC_021167.1    | Ca_kabuli_chr08 | 16213260                | AA                              | GG                | 1946478135               |
| SNP_P3_100535_16213280 | NC_021167.1    | Ca_kabuli_chr08 | 16213280                | GG                              | TT                | 1946478137               |
| SNP_P3_100536_16213286 | NC_021167.1    | Ca_kabuli_chr08 | 16213286                | AA                              | GG                | 1946478138               |

| SNPs IDs               | Chromosome IDs | Chromosomes     | Physical positions (bp) | CDC Frontier (Reference genome) | (Pusa 256 & HPNB) | NCBI SNPdb Accession IDs |
|------------------------|----------------|-----------------|-------------------------|---------------------------------|-------------------|--------------------------|
| SNP_P3_100537_16213301 | NC_021167.1    | Ca_kabuli_chr08 | 16213301                | TT                              | CC                | 1946478140               |
| SNP_P3_100538_16213389 | NC_021167.1    | Ca_kabuli_chr08 | 16213389                | CC                              | TT                | 1946478141               |
| SNP_P3_100539_16213398 | NC_021167.1    | Ca_kabuli_chr08 | 16213398                | CC                              | GG                | 1946478143               |
| SNP_P3_100541_16239881 | NC_021167.1    | Ca_kabuli_chr08 | 16239881                | TT                              | GG                | 1946478144               |
| SNP_P3_100542_16265525 | NC_021167.1    | Ca_kabuli_chr08 | 16265525                | TT                              | AA                | 1946478146               |
| SNP_P3_100544_16297495 | NC_021167.1    | Ca_kabuli_chr08 | 16297495                | TT                              | CC                | 1946478147               |
| SNP_P3_100545_16314817 | NC_021167.1    | Ca_kabuli_chr08 | 16314817                | AA                              | TT                | 1946478149               |
| SNP_P3_100546_16314906 | NC_021167.1    | Ca_kabuli_chr08 | 16314906                | AA                              | GG                | 1946478151               |
| SNP_P3_100547_16314931 | NC_021167.1    | Ca_kabuli_chr08 | 16314931                | GG                              | AA                | 1946478152               |
| SNP_P3_100549_16315165 | NC_021167.1    | Ca_kabuli_chr08 | 16315165                | AA                              | GG                | 1946478154               |
| SNP_P3_100550_16315186 | NC_021167.1    | Ca_kabuli_chr08 | 16315186                | GG                              | TT                | 1946478155               |
| SNP_P3_100551_16315233 | NC_021167.1    | Ca_kabuli_chr08 | 16315233                | CC                              | TT                | 1946478157               |
| SNP_P3_100552_16315267 | NC_021167.1    | Ca_kabuli_chr08 | 16315267                | GG                              | TT                | 1946478158               |
| SNP_P3_100555_16316012 | NC_021167.1    | Ca_kabuli_chr08 | 16316012                | TT                              | AA                | 1946478160               |
| SNP_P3_100557_16316436 | NC_021167.1    | Ca_kabuli_chr08 | 16316436                | TT                              | AA                | 1946478162               |
| SNP_P3_100558_16316708 | NC_021167.1    | Ca_kabuli_chr08 | 16316708                | AA                              | GG                | 1946478163               |
| SNP_P3_100559_16316721 | NC_021167.1    | Ca_kabuli_chr08 | 16316721                | TT                              | CC                | 1946478164               |
| SNP_P3_100560_16316734 | NC_021167.1    | Ca_kabuli_chr08 | 16316734                | AA                              | GG                | 1946478166               |
| SNP_P3_100561_16316735 | NC_021167.1    | Ca_kabuli_chr08 | 16316735                | AA                              | CC                | 1946478167               |
| SNP_P3_100562_16316737 | NC_021167.1    | Ca_kabuli_chr08 | 16316737                | GG                              | CC                | 1946478169               |
| SNP_P3_100563_16316745 | NC_021167.1    | Ca_kabuli_chr08 | 16316745                | GG                              | AA                | 1946478170               |
| SNP_P3_100564_16316747 | NC_021167.1    | Ca_kabuli_chr08 | 16316747                | TT                              | GG                | 1946478172               |
| SNP_P3_100565_16316772 | NC_021167.1    | Ca_kabuli_chr08 | 16316772                | TT                              | CC                | 1946478174               |
| SNP_P3_100566_16316785 | NC_021167.1    | Ca_kabuli_chr08 | 16316785                | CC                              | TT                | 1946478175               |
| SNP_P3_100567_16316793 | NC_021167.1    | Ca_kabuli_chr08 | 16316793                | GG                              | AA                | 1946478177               |
| SNP_P3_100568_16316848 | NC_021167.1    | Ca_kabuli_chr08 | 16316848                | TT                              | CC                | 1946478178               |
| SNP_P3_100569_16320422 | NC_021167.1    | Ca_kabuli_chr08 | 16320422                | GG                              | TT                | 1946478180               |
| SNP_P3_100571_16352772 | NC_021167.1    | Ca_kabuli_chr08 | 16352772                | TT                              | CC                | 1946478181               |
| SNP_P3_100572_16352982 | NC_021167.1    | Ca_kabuli_chr08 | 16352982                | CC                              | TT                | 1946478183               |
| SNP_P3_100573_16375571 | NC_021167.1    | Ca_kabuli_chr08 | 16375571                | CC                              | TT                | 1946478184               |
| SNP_P3_100574_16375573 | NC_021167.1    | Ca_kabuli_chr08 | 16375573                | AA                              | TT                | 1946478186               |
| SNP_P3_100575_16442642 | NC_021167.1    | Ca_kabuli_chr08 | 16442642                | TT                              | CC                | 1946478188               |
| SNP_P3_100576_16463510 | NC_021167.1    | Ca_kabuli_chr08 | 16463510                | TT                              | CC                | 1946478189               |
| SNP_P3_100577_16463566 | NC_021167.1    | Ca_kabuli_chr08 | 16463566                | TT                              | GG                | 1946478190               |
| SNP_P3_100578_16463569 | NC_021167.1    | Ca_kabuli_chr08 | 16463569                | CC                              | TT                | 1946478192               |
| SNP_P3_100579_16463581 | NC_021167.1    | Ca_kabuli_chr08 | 16463581                | AA                              | GG                | 1946478193               |
| SNP_P3_100580_16463593 | NC_021167.1    | Ca_kabuli_chr08 | 16463593                | AA                              | TT                | 1946478195               |
| SNP_P3_100581_16463617 | NC_021167.1    | Ca_kabuli_chr08 | 16463617                | GG                              | AA                | 1946478196               |
| SNP_P3_100582_16463626 | NC_021167.1    | Ca_kabuli_chr08 | 16463626                | AA                              | GG                | 1946478198               |
| SNP_P3_100583_16463638 | NC_021167.1    | Ca_kabuli_chr08 | 16463638                | AA                              | GG                | 1946478200               |
| SNP_P3_100584_16463644 | NC_021167.1    | Ca_kabuli_chr08 | 16463644                | AA                              | TT                | 1946478201               |
| SNP_P3_100585_16463656 | NC_021167.1    | Ca_kabuli_chr08 | 16463656                | AA                              | GG                | 1946478203               |

| SNPs IDs               | Chromosome IDs | Chromosomes     | Physical positions (bp) | CDC Frontier (Reference genome) | (Pusa 256 & HPNB) | NCBI SNPdb Accession IDs |
|------------------------|----------------|-----------------|-------------------------|---------------------------------|-------------------|--------------------------|
| SNP_P3_100586_16463662 | NC_021167.1    | Ca_kabuli_chr08 | 16463662                | TT                              | CC                | 1946478204               |
| SNP_P3_100587_16463680 | NC_021167.1    | Ca_kabuli_chr08 | 16463680                | AA                              | TT                | 1946478206               |
| SNP_P3_100588_16463686 | NC_021167.1    | Ca_kabuli_chr08 | 16463686                | AA                              | GG                | 1946478207               |
| SNP_P3_100589_16463695 | NC_021167.1    | Ca_kabuli_chr08 | 16463695                | TT                              | GG                | 1946478209               |
| SNP_P3_100590_16463701 | NC_021167.1    | Ca_kabuli_chr08 | 16463701                | AA                              | TT                | 1946478210               |
| SNP_P3_100591_16463733 | NC_021167.1    | Ca_kabuli_chr08 | 16463733                | AA                              | GG                | 1946478212               |
| SNP_P3_100592_16463743 | NC_021167.1    | Ca_kabuli_chr08 | 16463743                | AA                              | TT                | 1946478213               |
| SNP_P3_100593_16463764 | NC_021167.1    | Ca_kabuli_chr08 | 16463764                | AA                              | GG                | 1946478215               |
| SNP_P3_100594_16463873 | NC_021167.1    | Ca_kabuli_chr08 | 16463873                | CC                              | TT                | 1946478216               |
| SNP_P3_100595_16463964 | NC_021167.1    | Ca_kabuli_chr08 | 16463964                | AA                              | TT                | 1946478218               |
| SNP_P3_100596_16463984 | NC_021167.1    | Ca_kabuli_chr08 | 16463984                | GG                              | AA                | 1946478219               |
| SNP_P3_100597_16463991 | NC_021167.1    | Ca_kabuli_chr08 | 16463991                | CC                              | AA                | 1946478221               |
| SNP_P3_100598_16464427 | NC_021167.1    | Ca_kabuli_chr08 | 16464427                | GG                              | AA                | 1946478223               |
| SNP_P3_100599_16464478 | NC_021167.1    | Ca_kabuli_chr08 | 16464478                | TT                              | CC                | 1946478224               |
| SNP_P3_100600_16464481 | NC_021167.1    | Ca_kabuli_chr08 | 16464481                | CC                              | TT                | 1946478226               |
| SNP_P3_100601_16464876 | NC_021167.1    | Ca_kabuli_chr08 | 16464876                | TT                              | CC                | 1946478228               |
| SNP_P3_100602_16464893 | NC_021167.1    | Ca_kabuli_chr08 | 16464893                | GG                              | TT                | 1946478229               |
| SNP_P3_100603_16464976 | NC_021167.1    | Ca_kabuli_chr08 | 16464976                | GG                              | AA                | 1946478231               |
| SNP_P3_100604_16465023 | NC_021167.1    | Ca_kabuli_chr08 | 16465023                | AA                              | GG                | 1946478232               |
| SNP_P3_100606_3735     | NW_004515637.1 | Scaffold2       | 3735                    | TT                              | AA                | 1946478234               |
| SNP_P3_100607_3888     | NW_004515637.1 | Scaffold2       | 3888                    | AA                              | CC                | 1946478235               |
| SNP_P3_100608_4076     | NW_004515637.1 | Scaffold2       | 4076                    | TT                              | CC                | 1946478237               |
| SNP_P3_100609_4079     | NW_004515637.1 | Scaffold2       | 4079                    | AA                              | GG                | 1946478238               |
| SNP_P3_100610_4100     | NW_004515637.1 | Scaffold2       | 4100                    | AA                              | GG                | 1946478240               |
| SNP_P3_100611_4124     | NW_004515637.1 | Scaffold2       | 4124                    | CC                              | AA                | 1946478241               |
| SNP_P3_100612_4132     | NW_004515637.1 | Scaffold2       | 4132                    | GG                              | AA                | 1946478243               |
| SNP_P3_100613_4275     | NW_004515637.1 | Scaffold2       | 4275                    | AA                              | GG                | 1946478244               |
| SNP_P3_100614_8125     | NW_004515637.1 | Scaffold2       | 8125                    | TT                              | CC                | 1946478246               |
| SNP_P3_100615_8165     | NW_004515637.1 | Scaffold2       | 8165                    | TT                              | CC                | 1946478247               |
| SNP_P3_100616_8177     | NW_004515637.1 | Scaffold2       | 8177                    | CC                              | TT                | 1946478249               |
| SNP_P3_100617_8192     | NW_004515637.1 | Scaffold2       | 8192                    | CC                              | TT                | 1946478250               |
| SNP_P3_100618_8258     | NW_004515637.1 | Scaffold2       | 8258                    | AA                              | GG                | 1946478252               |
| SNP_P3_100619_8423     | NW_004515637.1 | Scaffold2       | 8423                    | GG                              | TT                | 1946478253               |
| SNP_P3_100621_16268    | NW_004515637.1 | Scaffold2       | 16268                   | GG                              | TT                | 1946478255               |
| SNP_P3_100622_25658    | NW_004515637.1 | Scaffold2       | 25658                   | GG                              | TT                | 1946478256               |
| SNP_P3_100623_27673    | NW_004515637.1 | Scaffold2       | 27673                   | CC                              | TT                | 1946478258               |
| SNP_P3_100624_33144    | NW_004515637.1 | Scaffold2       | 33144                   | AA                              | GG                | 1946478259               |
| SNP_P3_100625_40576    | NW_004515637.1 | Scaffold2       | 40576                   | GG                              | AA                | 1946478261               |
| SNP_P3_100627_52014    | NW_004515637.1 | Scaffold2       | 52014                   | AA                              | GG                | 1946478263               |
| SNP_P3_100628_67606    | NW_004515637.1 | Scaffold2       | 67606                   | AA                              | CC                | 1946478264               |
| SNP_P3_100629_68330    | NW_004515637.1 | Scaffold2       | 68330                   | TT                              | CC                | 1946478266               |
| SNP_P3_100630_68801    | NW_004515637.1 | Scaffold2       | 68801                   | CC                              | TT                | 1946478267               |

| SNPs IDs             | Chromosome IDs | Chromosomes | Physical positions (bp) | CDC Frontier (Reference genome) | (Pusa 256 & HPNB) | NCBI SNPdb Accession IDs |
|----------------------|----------------|-------------|-------------------------|---------------------------------|-------------------|--------------------------|
| SNP_P3_100631_69935  | NW_004515637.1 | Scaffold2   | 69935                   | GG                              | TT                | 1946478269               |
| SNP_P3_100632_69942  | NW_004515637.1 | Scaffold2   | 69942                   | AA                              | GG                | 1946478270               |
| SNP_P3_100633_70024  | NW_004515637.1 | Scaffold2   | 70024                   | CC                              | GG                | 1946478272               |
| SNP_P3_100634_70053  | NW_004515637.1 | Scaffold2   | 70053                   | AA                              | TT                | 1946478274               |
| SNP_P3_100635_70280  | NW_004515637.1 | Scaffold2   | 70280                   | AA                              | GG                | 1946478275               |
| SNP_P3_100636_70527  | NW_004515637.1 | Scaffold2   | 70527                   | CC                              | AA                | 1946478277               |
| SNP_P3_100637_70539  | NW_004515637.1 | Scaffold2   | 70539                   | TT                              | GG                | 1946478278               |
| SNP_P3_100638_70967  | NW_004515637.1 | Scaffold2   | 70967                   | AA                              | GG                | 1946478280               |
| SNP_P3_100639_71290  | NW_004515637.1 | Scaffold2   | 71290                   | TT                              | GG                | 1946478281               |
| SNP_P3_100640_71323  | NW_004515637.1 | Scaffold2   | 71323                   | AA                              | CC                | 1946478283               |
| SNP_P3_100641_71340  | NW_004515637.1 | Scaffold2   | 71340                   | AA                              | CC                | 1946478284               |
| SNP_P3_100643_79376  | NW_004515637.1 | Scaffold2   | 79376                   | TT                              | CC                | 1946478286               |
| SNP_P3_100644_79444  | NW_004515637.1 | Scaffold2   | 79444                   | CC                              | AA                | 1946478287               |
| SNP_P3_100645_79463  | NW_004515637.1 | Scaffold2   | 79463                   | GG                              | TT                | 1946478289               |
| SNP_P3_100646_83657  | NW_004515637.1 | Scaffold2   | 83657                   | TT                              | CC                | 1946478290               |
| SNP_P3_100647_83922  | NW_004515637.1 | Scaffold2   | 83922                   | AA                              | GG                | 1946478292               |
| SNP_P3_100648_95971  | NW_004515637.1 | Scaffold2   | 95971                   | CC                              | TT                | 1946478294               |
| SNP_P3_100650_100036 | NW_004515637.1 | Scaffold2   | 100036                  | TT                              | CC                | 1946478295               |
| SNP_P3_100651_103902 | NW_004515637.1 | Scaffold2   | 103902                  | CC                              | GG                | 1946478297               |
| SNP_P3_100652_103927 | NW_004515637.1 | Scaffold2   | 103927                  | CC                              | TT                | 1946478298               |
| SNP_P3_100653_103938 | NW_004515637.1 | Scaffold2   | 103938                  | TT                              | CC                | 1946478300               |
| SNP_P3_100654_104043 | NW_004515637.1 | Scaffold2   | 104043                  | AA                              | CC                | 1946478301               |
| SNP_P3_100655_104130 | NW_004515637.1 | Scaffold2   | 104130                  | AA                              | TT                | 1946478303               |
| SNP_P3_100656_104144 | NW_004515637.1 | Scaffold2   | 104144                  | CC                              | AA                | 1946478304               |
| SNP_P3_100657_135632 | NW_004515637.1 | Scaffold2   | 135632                  | AA                              | GG                | 1946478306               |
| SNP_P3_100659_144554 | NW_004515637.1 | Scaffold2   | 144554                  | AA                              | CC                | 1946478307               |
| SNP_P3_100660_144752 | NW_004515637.1 | Scaffold2   | 144752                  | CC                              | TT                | 1946478309               |
| SNP_P3_100661_162915 | NW_004515637.1 | Scaffold2   | 162915                  | AA                              | GG                | 1946478310               |
| SNP_P3_100662_162953 | NW_004515637.1 | Scaffold2   | 162953                  | GG                              | AA                | 1946478311               |
| SNP_P3_100663_190860 | NW_004515637.1 | Scaffold2   | 190860                  | TT                              | AA                | 1946478313               |
| SNP_P3_100665_199950 | NW_004515637.1 | Scaffold2   | 199950                  | TT                              | GG                | 1946478314               |
| SNP_P3_100666_200217 | NW_004515637.1 | Scaffold2   | 200217                  | AA                              | GG                | 1946478316               |
| SNP_P3_100667_207920 | NW_004515637.1 | Scaffold2   | 207920                  | TT                              | AA                | 1946478318               |
| SNP_P3_100668_210020 | NW_004515637.1 | Scaffold2   | 210020                  | CC                              | TT                | 1946478319               |
| SNP_P3_100669_210025 | NW_004515637.1 | Scaffold2   | 210025                  | GG                              | AA                | 1946478321               |
| SNP_P3_100670_210714 | NW_004515637.1 | Scaffold2   | 210714                  | AA                              | CC                | 1946478322               |
| SNP_P3_100671_210733 | NW_004515637.1 | Scaffold2   | 210733                  | GG                              | AA                | 1946478324               |
| SNP_P3_100672_210970 | NW_004515637.1 | Scaffold2   | 210970                  | CC                              | TT                | 1946478325               |
| SNP_P3_100673_211560 | NW_004515637.1 | Scaffold2   | 211560                  | AA                              | CC                | 1946478327               |
| SNP_P3_100674_211599 | NW_004515637.1 | Scaffold2   | 211599                  | TT                              | GG                | 1946478329               |
| SNP_P3_100675_211841 | NW_004515637.1 | Scaffold2   | 211841                  | GG                              | AA                | 1946478330               |
| SNP_P3_100676_211903 | NW_004515637.1 | Scaffold2   | 211903                  | TT                              | CC                | 1946478332               |

| SNPs IDs             | Chromosome IDs | Chromosomes | Physical positions (bp) | CDC Frontier (Reference genome) | (Pusa 256 & HPNB) | NCBI SNPdb Accession IDs |
|----------------------|----------------|-------------|-------------------------|---------------------------------|-------------------|--------------------------|
| SNP_P3_100677_211930 | NW_004515637.1 | Scaffold2   | 211930                  | GG                              | CC                | 1946478333               |
| SNP_P3_100678_211958 | NW_004515637.1 | Scaffold2   | 211958                  | AA                              | GG                | 1946478335               |
| SNP_P3_100679_211988 | NW_004515637.1 | Scaffold2   | 211988                  | TT                              | CC                | 1946478336               |
| SNP_P3_100680_212230 | NW_004515637.1 | Scaffold2   | 212230                  | GG                              | TT                | 1946478338               |
| SNP_P3_100681_212377 | NW_004515637.1 | Scaffold2   | 212377                  | AA                              | TT                | 1946478339               |
| SNP_P3_100682_212382 | NW_004515637.1 | Scaffold2   | 212382                  | AA                              | GG                | 1946478341               |
| SNP_P3_100683_212422 | NW_004515637.1 | Scaffold2   | 212422                  | TT                              | GG                | 1946478342               |
| SNP_P3_100684_221738 | NW_004515637.1 | Scaffold2   | 221738                  | AA                              | GG                | 1946478344               |
| SNP_P3_100685_226196 | NW_004515637.1 | Scaffold2   | 226196                  | AA                              | CC                | 1946478345               |
| SNP_P3_100686_226200 | NW_004515637.1 | Scaffold2   | 226200                  | AA                              | TT                | 1946478347               |
| SNP_P3_100687_226423 | NW_004515637.1 | Scaffold2   | 226423                  | AA                              | GG                | 1946478348               |
| SNP_P3_100688_226435 | NW_004515637.1 | Scaffold2   | 226435                  | GG                              | AA                | 1946478350               |
| SNP_P3_100689_226440 | NW_004515637.1 | Scaffold2   | 226440                  | AA                              | GG                | 1946478351               |
| SNP_P3_100690_226441 | NW_004515637.1 | Scaffold2   | 226441                  | AA                              | GG                | 1946478353               |
| SNP_P3_100691_226450 | NW_004515637.1 | Scaffold2   | 226450                  | CC                              | AA                | 1946478354               |
| SNP_P3_100692_226513 | NW_004515637.1 | Scaffold2   | 226513                  | AA                              | GG                | 1946478356               |
| SNP_P3_100693_238326 | NW_004515637.1 | Scaffold2   | 238326                  | TT                              | GG                | 1946478357               |
| SNP_P3_100694_238601 | NW_004515637.1 | Scaffold2   | 238601                  | TT                              | AA                | 1946478359               |
| SNP_P3_100695_238761 | NW_004515637.1 | Scaffold2   | 238761                  | TT                              | CC                | 1946478360               |
| SNP_P3_100696_239200 | NW_004515637.1 | Scaffold2   | 239200                  | GG                              | AA                | 1946478362               |
| SNP_P3_100697_239219 | NW_004515637.1 | Scaffold2   | 239219                  | GG                              | AA                | 1946478363               |
| SNP_P3_100698_239221 | NW_004515637.1 | Scaffold2   | 239221                  | GG                              | AA                | 1946478364               |
| SNP_P3_100699_288947 | NW_004515637.1 | Scaffold2   | 288947                  | TT                              | GG                | 1946478366               |
| SNP_P3_100700_300894 | NW_004515637.1 | Scaffold2   | 300894                  | TT                              | CC                | 1946478367               |
| SNP_P3_100701_300992 | NW_004515637.1 | Scaffold2   | 300992                  | TT                              | AA                | 1946478369               |
| SNP_P3_100702_301358 | NW_004515637.1 | Scaffold2   | 301358                  | TT                              | CC                | 1946478370               |
| SNP_P3_100703_301487 | NW_004515637.1 | Scaffold2   | 301487                  | AA                              | GG                | 1946478372               |
| SNP_P3_100705_304183 | NW_004515637.1 | Scaffold2   | 304183                  | CC                              | TT                | 1946478373               |
| SNP_P3_100708_317158 | NW_004515637.1 | Scaffold2   | 317158                  | GG                              | TT                | 1946478375               |
| SNP_P3_100709_319236 | NW_004515637.1 | Scaffold2   | 319236                  | TT                              | CC                | 1946478376               |
| SNP_P3_100711_354437 | NW_004515637.1 | Scaffold2   | 354437                  | CC                              | TT                | 1946478378               |
| SNP_P3_100712_357795 | NW_004515637.1 | Scaffold2   | 357795                  | AA                              | GG                | 1946478379               |
| SNP_P3_100713_357866 | NW_004515637.1 | Scaffold2   | 357866                  | CC                              | TT                | 1946478381               |
| SNP_P3_100714_358149 | NW_004515637.1 | Scaffold2   | 358149                  | TT                              | CC                | 1946478382               |
| SNP_P3_100715_358227 | NW_004515637.1 | Scaffold2   | 358227                  | TT                              | CC                | 1946478383               |
| SNP_P3_100716_358228 | NW_004515637.1 | Scaffold2   | 358228                  | GG                              | AA                | 1946478385               |
| SNP_P3_100717_368695 | NW_004515637.1 | Scaffold2   | 368695                  | GG                              | AA                | 1946478386               |
| SNP_P3_100718_368782 | NW_004515637.1 | Scaffold2   | 368782                  | AA                              | CC                | 1946478388               |
| SNP_P3_100719_402745 | NW_004515637.1 | Scaffold2   | 402745                  | AA                              | GG                | 1946478389               |
| SNP_P3_100720_402757 | NW_004515637.1 | Scaffold2   | 402757                  | AA                              | GG                | 1946478390               |
| SNP_P3_100721_402844 | NW_004515637.1 | Scaffold2   | 402844                  | TT                              | CC                | 1946478392               |
| SNP_P3_100722_402845 | NW_004515637.1 | Scaffold2   | 402845                  | AA                              | GG                | 1946478393               |

| SNPs IDs             | Chromosome IDs | Chromosomes | Physical positions (bp) | CDC Frontier (Reference genome) | (Pusa 256 & HPNB) | NCBI SNPdb Accession IDs |
|----------------------|----------------|-------------|-------------------------|---------------------------------|-------------------|--------------------------|
| SNP_P3_100723_407694 | NW_004515637.1 | Scaffold2   | 407694                  | GG                              | TT                | 1946478395               |
| SNP_P3_100724_407700 | NW_004515637.1 | Scaffold2   | 407700                  | AA                              | GG                | 1946478397               |
| SNP_P3_100725_407740 | NW_004515637.1 | Scaffold2   | 407740                  | TT                              | GG                | 1946478398               |
| SNP_P3_100726_408001 | NW_004515637.1 | Scaffold2   | 408001                  | TT                              | CC                | 1946478400               |
| SNP_P3_100727_408119 | NW_004515637.1 | Scaffold2   | 408119                  | TT                              | CC                | 1946478401               |
| SNP_P3_100728_408122 | NW_004515637.1 | Scaffold2   | 408122                  | AA                              | CC                | 1946478403               |
| SNP_P3_100729_408132 | NW_004515637.1 | Scaffold2   | 408132                  | TT                              | GG                | 1946478404               |
| SNP_P3_100730_408637 | NW_004515637.1 | Scaffold2   | 408637                  | GG                              | TT                | 1946478406               |
| SNP_P3_100731_408900 | NW_004515637.1 | Scaffold2   | 408900                  | CC                              | TT                | 1946478407               |
| SNP_P3_100732_411073 | NW_004515637.1 | Scaffold2   | 411073                  | TT                              | CC                | 1946478409               |
| SNP_P3_100733_411742 | NW_004515637.1 | Scaffold2   | 411742                  | CC                              | TT                | 1946478410               |
| SNP_P3_100734_412519 | NW_004515637.1 | Scaffold2   | 412519                  | CC                              | TT                | 1946478412               |
| SNP_P3_100735_442612 | NW_004515637.1 | Scaffold2   | 442612                  | CC                              | TT                | 1946478413               |
| SNP_P3_100736_442628 | NW_004515637.1 | Scaffold2   | 442628                  | TT                              | AA                | 1946478415               |
| SNP_P3_100737_442647 | NW_004515637.1 | Scaffold2   | 442647                  | AA                              | GG                | 1946478416               |
| SNP_P3_100738_442841 | NW_004515637.1 | Scaffold2   | 442841                  | CC                              | AA                | 1946478418               |
| SNP_P3_100739_444458 | NW_004515637.1 | Scaffold2   | 444458                  | AA                              | GG                | 1946478419               |
| SNP_P3_100740_444459 | NW_004515637.1 | Scaffold2   | 444459                  | AA                              | GG                | 1946478421               |
| SNP_P3_100741_444474 | NW_004515637.1 | Scaffold2   | 444474                  | GG                              | AA                | 1946478422               |
| SNP_P3_100742_444477 | NW_004515637.1 | Scaffold2   | 444477                  | CC                              | AA                | 1946478424               |
| SNP_P3_100743_444478 | NW_004515637.1 | Scaffold2   | 444478                  | CC                              | TT                | 1946478425               |
| SNP_P3_100744_444485 | NW_004515637.1 | Scaffold2   | 444485                  | TT                              | GG                | 1946478427               |
| SNP_P3_100745_460657 | NW_004515637.1 | Scaffold2   | 460657                  | GG                              | TT                | 1946478428               |
| SNP_P3_100746_460660 | NW_004515637.1 | Scaffold2   | 460660                  | AA                              | GG                | 1946478430               |
| SNP_P3_100747_463196 | NW_004515637.1 | Scaffold2   | 463196                  | TT                              | CC                | 1946478431               |
| SNP_P3_100748_463201 | NW_004515637.1 | Scaffold2   | 463201                  | CC                              | GG                | 1946478433               |
| SNP_P3_100749_463209 | NW_004515637.1 | Scaffold2   | 463209                  | GG                              | TT                | 1946478434               |
| SNP_P3_100750_468767 | NW_004515637.1 | Scaffold2   | 468767                  | AA                              | GG                | 1946478436               |
| SNP_P3_100752_481608 | NW_004515637.1 | Scaffold2   | 481608                  | TT                              | CC                | 1946478437               |
| SNP_P3_100753_481621 | NW_004515637.1 | Scaffold2   | 481621                  | TT                              | CC                | 1946478439               |
| SNP_P3_100754_485418 | NW_004515637.1 | Scaffold2   | 485418                  | GG                              | AA                | 1946478441               |
| SNP_P3_100755_487281 | NW_004515637.1 | Scaffold2   | 487281                  | CC                              | TT                | 1946478442               |
| SNP_P3_100756_495200 | NW_004515637.1 | Scaffold2   | 495200                  | GG                              | AA                | 1946478444               |
| SNP_P3_100757_495206 | NW_004515637.1 | Scaffold2   | 495206                  | AA                              | GG                | 1946478445               |
| SNP_P3_100758_500364 | NW_004515637.1 | Scaffold2   | 500364                  | GG                              | TT                | 1946478447               |
| SNP_P3_100759_503782 | NW_004515637.1 | Scaffold2   | 503782                  | TT                              | GG                | 1946478448               |
| SNP_P3_100761_504086 | NW_004515637.1 | Scaffold2   | 504086                  | CC                              | TT                | 1946478450               |
| SNP_P3_100762_504093 | NW_004515637.1 | Scaffold2   | 504093                  | CC                              | TT                | 1946478451               |
| SNP_P3_100764_505961 | NW_004515637.1 | Scaffold2   | 505961                  | TT                              | CC                | 1946478453               |
| SNP_P3_100765_511132 | NW_004515637.1 | Scaffold2   | 511132                  | AA                              | GG                | 1946478455               |
| SNP_P3_100766_527803 | NW_004515637.1 | Scaffold2   | 527803                  | AA                              | GG                | 1946478456               |
| SNP_P3_100767_527845 | NW_004515637.1 | Scaffold2   | 527845                  | AA                              | GG                | 1946478458               |



| SNPs IDs             | Chromosome IDs | Chromosomes | Physical positions (bp) | CDC Frontier (Reference genome) | (Pusa 256 & HPNB) | NCBI SNPdb Accession IDs |
|----------------------|----------------|-------------|-------------------------|---------------------------------|-------------------|--------------------------|
| SNP_P3_100768_527886 | NW_004515637.1 | Scaffold2   | 527886                  | TT                              | GG                | 1946478459               |
| SNP_P3_100770_541140 | NW_004515637.1 | Scaffold2   | 541140                  | TT                              | CC                | 1946478461               |
| SNP_P3_100771_1022   | NW_004515638.1 | Scaffold5   | 1022                    | CC                              | TT                | 1946478462               |
| SNP_P3_100772_1496   | NW_004515638.1 | Scaffold5   | 1496                    | AA                              | CC                | 1946478464               |
| SNP_P3_100774_1542   | NW_004515638.1 | Scaffold5   | 1542                    | AA                              | GG                | 1946478465               |
| SNP_P3_100775_1565   | NW_004515638.1 | Scaffold5   | 1565                    | AA                              | GG                | 1946478467               |
| SNP_P3_100776_2280   | NW_004515638.1 | Scaffold5   | 2280                    | TT                              | CC                | 1946478468               |
| SNP_P3_100777_3012   | NW_004515638.1 | Scaffold5   | 3012                    | AA                              | GG                | 1946478470               |
| SNP_P3_100778_3333   | NW_004515638.1 | Scaffold5   | 3333                    | CC                              | AA                | 1946478471               |
| SNP_P3_100779_5525   | NW_004515638.1 | Scaffold5   | 5525                    | CC                              | TT                | 1946478473               |
| SNP_P3_100780_5598   | NW_004515638.1 | Scaffold5   | 5598                    | CC                              | AA                | 1946478474               |
| SNP_P3_100781_5948   | NW_004515638.1 | Scaffold5   | 5948                    | AA                              | GG                | 1946478476               |
| SNP_P3_100782_6008   | NW_004515638.1 | Scaffold5   | 6008                    | TT                              | AA                | 1946478477               |
| SNP_P3_100783_9657   | NW_004515638.1 | Scaffold5   | 9657                    | AA                              | GG                | 1946478478               |
| SNP_P3_100784_17486  | NW_004515638.1 | Scaffold5   | 17486                   | TT                              | CC                | 1946478480               |
| SNP_P3_100785_17576  | NW_004515638.1 | Scaffold5   | 17576                   | CC                              | AA                | 1946478481               |
| SNP_P3_100786_2043   | NW_004515639.1 | Scaffold7   | 2043                    | CC                              | AA                | 1946478483               |
| SNP_P3_100787_2090   | NW_004515639.1 | Scaffold7   | 2090                    | TT                              | AA                | 1946478484               |
| SNP_P3_100788_2598   | NW_004515639.1 | Scaffold7   | 2598                    | TT                              | CC                | 1946478486               |
| SNP_P3_100789_36976  | NW_004515639.1 | Scaffold7   | 36976                   | AA                              | GG                | 1946478487               |
| SNP_P3_100790_38310  | NW_004515639.1 | Scaffold7   | 38310                   | TT                              | AA                | 1946478489               |
| SNP_P3_100791_50486  | NW_004515639.1 | Scaffold7   | 50486                   | GG                              | AA                | 1946478491               |
| SNP_P3_100792_50492  | NW_004515639.1 | Scaffold7   | 50492                   | CC                              | TT                | 1946478492               |
| SNP_P3_100793_50519  | NW_004515639.1 | Scaffold7   | 50519                   | CC                              | GG                | 1946478494               |
| SNP_P3_100794_79369  | NW_004515639.1 | Scaffold7   | 79369                   | AA                              | GG                | 1946478495               |
| SNP_P3_100795_79393  | NW_004515639.1 | Scaffold7   | 79393                   | TT                              | CC                | 1946478497               |
| SNP_P3_100796_79410  | NW_004515639.1 | Scaffold7   | 79410                   | AA                              | GG                | 1946478498               |
| SNP_P3_100797_79449  | NW_004515639.1 | Scaffold7   | 79449                   | TT                              | CC                | 1946478500               |
| SNP_P3_100798_79481  | NW_004515639.1 | Scaffold7   | 79481                   | AA                              | CC                | 1946478502               |
| SNP_P3_100799_94156  | NW_004515639.1 | Scaffold7   | 94156                   | GG                              | AA                | 1946478503               |
| SNP_P3_100800_94503  | NW_004515639.1 | Scaffold7   | 94503                   | AA                              | GG                | 1946478505               |
| SNP_P3_100801_94654  | NW_004515639.1 | Scaffold7   | 94654                   | GG                              | TT                | 1946478506               |
| SNP_P3_100802_116312 | NW_004515639.1 | Scaffold7   | 116312                  | AA                              | TT                | 1946478508               |
| SNP_P3_100803_138366 | NW_004515639.1 | Scaffold7   | 138366                  | AA                              | TT                | 1946478510               |
| SNP_P3_100804_140276 | NW_004515639.1 | Scaffold7   | 140276                  | TT                              | AA                | 1946478511               |
| SNP_P3_100805_169671 | NW_004515639.1 | Scaffold7   | 169671                  | AA                              | TT                | 1946478513               |
| SNP_P3_100806_170195 | NW_004515639.1 | Scaffold7   | 170195                  | AA                              | CC                | 1946478514               |
| SNP_P3_100807_170228 | NW_004515639.1 | Scaffold7   | 170228                  | TT                              | CC                | 1946478516               |
| SNP_P3_100808_170269 | NW_004515639.1 | Scaffold7   | 170269                  | AA                              | GG                | 1946478517               |
| SNP_P3_100809_170303 | NW_004515639.1 | Scaffold7   | 170303                  | AA                              | TT                | 1946478519               |
| SNP_P3_100810_170369 | NW_004515639.1 | Scaffold7   | 170369                  | AA                              | GG                | 1946478520               |
| SNP_P3_100811_170380 | NW_004515639.1 | Scaffold7   | 170380                  | AA                              | GG                | 1946478521               |

| SNPs IDs             | Chromosome IDs | Chromosomes | Physical positions (bp) | CDC Frontier (Reference genome) | (Pusa 256 & HPNB) | NCBI SNPdb Accession IDs |
|----------------------|----------------|-------------|-------------------------|---------------------------------|-------------------|--------------------------|
| SNP_P3_100812_170426 | NW_004515639.1 | Scaffold7   | 170426                  | TT                              | AA                | 1946478523               |
| SNP_P3_100813_170445 | NW_004515639.1 | Scaffold7   | 170445                  | TT                              | CC                | 1946478524               |
| SNP_P3_100814_170456 | NW_004515639.1 | Scaffold7   | 170456                  | AA                              | GG                | 1946478526               |
| SNP_P3_100815_170476 | NW_004515639.1 | Scaffold7   | 170476                  | CC                              | TT                | 1946478528               |
| SNP_P3_100816_170492 | NW_004515639.1 | Scaffold7   | 170492                  | TT                              | CC                | 1946478529               |
| SNP_P3_100817_170512 | NW_004515639.1 | Scaffold7   | 170512                  | AA                              | GG                | 1946478531               |
| SNP_P3_100818_170515 | NW_004515639.1 | Scaffold7   | 170515                  | CC                              | TT                | 1946478532               |
| SNP_P3_100819_188735 | NW_004515639.1 | Scaffold7   | 188735                  | TT                              | CC                | 1946478534               |
| SNP_P3_100820_190326 | NW_004515639.1 | Scaffold7   | 190326                  | CC                              | TT                | 1946478535               |
| SNP_P3_100821_190366 | NW_004515639.1 | Scaffold7   | 190366                  | AA                              | GG                | 1946478537               |
| SNP_P3_100822_190528 | NW_004515639.1 | Scaffold7   | 190528                  | TT                              | CC                | 1946478538               |
| SNP_P3_100823_210748 | NW_004515639.1 | Scaffold7   | 210748                  | AA                              | TT                | 1946478540               |
| SNP_P3_100824_210751 | NW_004515639.1 | Scaffold7   | 210751                  | TT                              | CC                | 1946478542               |
| SNP_P3_100825_210769 | NW_004515639.1 | Scaffold7   | 210769                  | AA                              | CC                | 1946478543               |
| SNP_P3_100826_210782 | NW_004515639.1 | Scaffold7   | 210782                  | TT                              | CC                | 1946478545               |
| SNP_P3_100827_210790 | NW_004515639.1 | Scaffold7   | 210790                  | TT                              | CC                | 1946478546               |
| SNP_P3_100828_210800 | NW_004515639.1 | Scaffold7   | 210800                  | GG                              | AA                | 1946478548               |
| SNP_P3_100829_210802 | NW_004515639.1 | Scaffold7   | 210802                  | AA                              | TT                | 1946478550               |
| SNP_P3_100830_210808 | NW_004515639.1 | Scaffold7   | 210808                  | AA                              | GG                | 1946478551               |
| SNP_P3_100831_210813 | NW_004515639.1 | Scaffold7   | 210813                  | AA                              | GG                | 1946478553               |
| SNP_P3_100832_210814 | NW_004515639.1 | Scaffold7   | 210814                  | CC                              | TT                | 1946478554               |
| SNP_P3_100833_210820 | NW_004515639.1 | Scaffold7   | 210820                  | GG                              | AA                | 1946478556               |
| SNP_P3_100834_210964 | NW_004515639.1 | Scaffold7   | 210964                  | CC                              | TT                | 1946478557               |
| SNP_P3_100835_210967 | NW_004515639.1 | Scaffold7   | 210967                  | TT                              | GG                | 1946478559               |
| SNP_P3_100836_214132 | NW_004515639.1 | Scaffold7   | 214132                  | CC                              | AA                | 1946478560               |
| SNP_P3_100837_214136 | NW_004515639.1 | Scaffold7   | 214136                  | AA                              | GG                | 1946478562               |
| SNP_P3_100838_214189 | NW_004515639.1 | Scaffold7   | 214189                  | AA                              | CC                | 1946478564               |
| SNP_P3_100839_214481 | NW_004515639.1 | Scaffold7   | 214481                  | CC                              | AA                | 1946478565               |
| SNP_P3_100840_214489 | NW_004515639.1 | Scaffold7   | 214489                  | TT                              | GG                | 1946478567               |
| SNP_P3_100841_214495 | NW_004515639.1 | Scaffold7   | 214495                  | GG                              | AA                | 1946478568               |
| SNP_P3_100842_214535 | NW_004515639.1 | Scaffold7   | 214535                  | AA                              | TT                | 1946478570               |
| SNP_P3_100843_214542 | NW_004515639.1 | Scaffold7   | 214542                  | CC                              | AA                | 1946478571               |
| SNP_P3_100844_214546 | NW_004515639.1 | Scaffold7   | 214546                  | CC                              | AA                | 1946478573               |
| SNP_P3_100845_214558 | NW_004515639.1 | Scaffold7   | 214558                  | TT                              | GG                | 1946478575               |
| SNP_P3_100846_214559 | NW_004515639.1 | Scaffold7   | 214559                  | CC                              | AA                | 1946478576               |
| SNP_P3_100847_215031 | NW_004515639.1 | Scaffold7   | 215031                  | TT                              | CC                | 1946478578               |
| SNP_P3_100849_215181 | NW_004515639.1 | Scaffold7   | 215181                  | TT                              | CC                | 1946478579               |
| SNP_P3_100850_215351 | NW_004515639.1 | Scaffold7   | 215351                  | TT                              | CC                | 1946478581               |
| SNP_P3_100851_215374 | NW_004515639.1 | Scaffold7   | 215374                  | GG                              | AA                | 1946478582               |
| SNP_P3_100852_247205 | NW_004515639.1 | Scaffold7   | 247205                  | TT                              | CC                | 1946478584               |
| SNP_P3_100853_247327 | NW_004515639.1 | Scaffold7   | 247327                  | GG                              | AA                | 1946478585               |
| SNP_P3_100854_247413 | NW_004515639.1 | Scaffold7   | 247413                  | TT                              | AA                | 1946478587               |

| SNPs IDs             | Chromosome IDs | Chromosomes | Physical positions (bp) | CDC Frontier (Reference genome) | (Pusa 256 & HPNB) | NCBI SNPdb Accession IDs |
|----------------------|----------------|-------------|-------------------------|---------------------------------|-------------------|--------------------------|
| SNP_P3_100855_254724 | NW_004515639.1 | Scaffold7   | 254724                  | TT                              | CC                | 1946478589               |
| SNP_P3_100856_254883 | NW_004515639.1 | Scaffold7   | 254883                  | AA                              | GG                | 1946478590               |
| SNP_P3_100858_254925 | NW_004515639.1 | Scaffold7   | 254925                  | CC                              | TT                | 1946478592               |
| SNP_P3_100859_255098 | NW_004515639.1 | Scaffold7   | 255098                  | TT                              | GG                | 1946478593               |
| SNP_P3_100860_255130 | NW_004515639.1 | Scaffold7   | 255130                  | GG                              | TT                | 1946478595               |
| SNP_P3_100861_255149 | NW_004515639.1 | Scaffold7   | 255149                  | AA                              | TT                | 1946478596               |
| SNP_P3_100862_255206 | NW_004515639.1 | Scaffold7   | 255206                  | TT                              | CC                | 1946478598               |
| SNP_P3_100863_255217 | NW_004515639.1 | Scaffold7   | 255217                  | CC                              | TT                | 1946478599               |
| SNP_P3_100864_255223 | NW_004515639.1 | Scaffold7   | 255223                  | AA                              | GG                | 1946478601               |
| SNP_P3_100865_255238 | NW_004515639.1 | Scaffold7   | 255238                  | CC                              | TT                | 1946478603               |
| SNP_P3_100866_255261 | NW_004515639.1 | Scaffold7   | 255261                  | TT                              | CC                | 1946478605               |
| SNP_P3_100867_262959 | NW_004515639.1 | Scaffold7   | 262959                  | CC                              | TT                | 1946478607               |
| SNP_P3_100868_263383 | NW_004515639.1 | Scaffold7   | 263383                  | TT                              | CC                | 1946478608               |
| SNP_P3_100869_268829 | NW_004515639.1 | Scaffold7   | 268829                  | TT                              | CC                | 1946478610               |
| SNP_P3_100870_273446 | NW_004515639.1 | Scaffold7   | 273446                  | TT                              | GG                | 1946478611               |
| SNP_P3_100871_273473 | NW_004515639.1 | Scaffold7   | 273473                  | TT                              | CC                | 1946478613               |
| SNP_P3_100872_273489 | NW_004515639.1 | Scaffold7   | 273489                  | TT                              | CC                | 1946478615               |
| SNP_P3_100873_273626 | NW_004515639.1 | Scaffold7   | 273626                  | CC                              | GG                | 1946478616               |
| SNP_P3_100874_273636 | NW_004515639.1 | Scaffold7   | 273636                  | TT                              | CC                | 1946478618               |
| SNP_P3_100875_273643 | NW_004515639.1 | Scaffold7   | 273643                  | TT                              | AA                | 1946478619               |
| SNP_P3_100876_273665 | NW_004515639.1 | Scaffold7   | 273665                  | CC                              | TT                | 1946478621               |
| SNP_P3_100877_273694 | NW_004515639.1 | Scaffold7   | 273694                  | TT                              | AA                | 1946478623               |
| SNP_P3_100878_274038 | NW_004515639.1 | Scaffold7   | 274038                  | GG                              | AA                | 1946478624               |
| SNP_P3_100879_274049 | NW_004515639.1 | Scaffold7   | 274049                  | TT                              | GG                | 1946478626               |
| SNP_P3_100880_274111 | NW_004515639.1 | Scaffold7   | 274111                  | GG                              | AA                | 1946478627               |
| SNP_P3_100881_8544   | NW_004515640.1 | Scaffold9   | 8544                    | CC                              | TT                | 1946478629               |
| SNP_P3_100882_8572   | NW_004515640.1 | Scaffold9   | 8572                    | AA                              | CC                | 1946478631               |
| SNP_P3_100883_12429  | NW_004515640.1 | Scaffold9   | 12429                   | CC                              | AA                | 1946478632               |
| SNP_P3_100884_12511  | NW_004515640.1 | Scaffold9   | 12511                   | AA                              | GG                | 1946478634               |
| SNP_P3_100885_12870  | NW_004515640.1 | Scaffold9   | 12870                   | TT                              | GG                | 1946478635               |
| SNP_P3_100886_15371  | NW_004515640.1 | Scaffold9   | 15371                   | GG                              | TT                | 1946478637               |
| SNP_P3_100887_15374  | NW_004515640.1 | Scaffold9   | 15374                   | GG                              | AA                | 1946478639               |
| SNP_P3_100888_34558  | NW_004515640.1 | Scaffold9   | 34558                   | GG                              | TT                | 1946478640               |
| SNP_P3_100889_34564  | NW_004515640.1 | Scaffold9   | 34564                   | AA                              | GG                | 1946478642               |
| SNP_P3_100891_34850  | NW_004515640.1 | Scaffold9   | 34850                   | GG                              | AA                | 1946478644               |
| SNP_P3_100892_34915  | NW_004515640.1 | Scaffold9   | 34915                   | AA                              | GG                | 1946478645               |
| SNP_P3_100893_34943  | NW_004515640.1 | Scaffold9   | 34943                   | TT                              | AA                | 1946478647               |
| SNP_P3_100894_35106  | NW_004515640.1 | Scaffold9   | 35106                   | TT                              | AA                | 1946478649               |
| SNP_P3_100895_41217  | NW_004515640.1 | Scaffold9   | 41217                   | AA                              | GG                | 1946478650               |
| SNP_P3_100896_68412  | NW_004515640.1 | Scaffold9   | 68412                   | AA                              | TT                | 1946478652               |
| SNP_P3_100897_68417  | NW_004515640.1 | Scaffold9   | 68417                   | TT                              | CC                | 1946478653               |
| SNP_P3_100898_68426  | NW_004515640.1 | Scaffold9   | 68426                   | CC                              | AA                | 1946478655               |

| SNPs IDs            | Chromosome IDs | Chromosomes | Physical positions (bp) | CDC Frontier (Reference genome) | (Pusa 256 & HPNB) | NCBI SNPdb Accession IDs |
|---------------------|----------------|-------------|-------------------------|---------------------------------|-------------------|--------------------------|
| SNP_P3_100899_76101 | NW_004515640.1 | Scaffold9   | 76101                   | AA                              | GG                | 1946478657               |
| SNP_P3_100900_76109 | NW_004515640.1 | Scaffold9   | 76109                   | GG                              | AA                | 1946478658               |
| SNP_P3_100901_76110 | NW_004515640.1 | Scaffold9   | 76110                   | GG                              | AA                | 1946478660               |
| SNP_P3_100902_76137 | NW_004515640.1 | Scaffold9   | 76137                   | GG                              | TT                | 1946478662               |
| SNP_P3_100903_76369 | NW_004515640.1 | Scaffold9   | 76369                   | GG                              | AA                | 1946478663               |
| SNP_P3_100904_76908 | NW_004515640.1 | Scaffold9   | 76908                   | GG                              | AA                | 1946478665               |
| SNP_P3_100905_77087 | NW_004515640.1 | Scaffold9   | 77087                   | CC                              | TT                | 1946478667               |
| SNP_P3_100906_77219 | NW_004515640.1 | Scaffold9   | 77219                   | CC                              | TT                | 1946478668               |
| SNP_P3_100907_77380 | NW_004515640.1 | Scaffold9   | 77380                   | AA                              | GG                | 1946478670               |
| SNP_P3_100908_94182 | NW_004515640.1 | Scaffold9   | 94182                   | CC                              | TT                | 1946478672               |
| SNP_P3_100909_94193 | NW_004515640.1 | Scaffold9   | 94193                   | GG                              | AA                | 1946478673               |
| SNP_P3_100910_94203 | NW_004515640.1 | Scaffold9   | 94203                   | GG                              | AA                | 1946478675               |
| SNP_P3_100911_94207 | NW_004515640.1 | Scaffold9   | 94207                   | TT                              | AA                | 1946478676               |
| SNP_P3_100912_94254 | NW_004515640.1 | Scaffold9   | 94254                   | GG                              | AA                | 1946478678               |
| SNP_P3_100913_97339 | NW_004515640.1 | Scaffold9   | 97339                   | TT                              | GG                | 1946478679               |
| SNP_P3_100914_97345 | NW_004515640.1 | Scaffold9   | 97345                   | AA                              | CC                | 1946478681               |
| SNP_P3_100915_97386 | NW_004515640.1 | Scaffold9   | 97386                   | GG                              | AA                | 1946478682               |
| SNP_P3_100916_97444 | NW_004515640.1 | Scaffold9   | 97444                   | TT                              | CC                | 1946478684               |
| SNP_P3_100917_97458 | NW_004515640.1 | Scaffold9   | 97458                   | TT                              | CC                | 1946478686               |
| SNP_P3_100918_97603 | NW_004515640.1 | Scaffold9   | 97603                   | GG                              | AA                | 1946478687               |
| SNP_P3_100919_97606 | NW_004515640.1 | Scaffold9   | 97606                   | TT                              | CC                | 1946478689               |
| SNP_P3_100920_97632 | NW_004515640.1 | Scaffold9   | 97632                   | CC                              | GG                | 1946478690               |
| SNP_P3_100921_8732  | NW_004515641.1 | Scaffold10  | 8732                    | CC                              | TT                | 1946478692               |
| SNP_P3_100922_8775  | NW_004515641.1 | Scaffold10  | 8775                    | TT                              | CC                | 1946478693               |
| SNP_P3_100923_19910 | NW_004515641.1 | Scaffold10  | 19910                   | CC                              | TT                | 1946478695               |
| SNP_P3_100924_20307 | NW_004515641.1 | Scaffold10  | 20307                   | GG                              | AA                | 1946478696               |
| SNP_P3_100925_23377 | NW_004515641.1 | Scaffold10  | 23377                   | CC                              | AA                | 1946478698               |
| SNP_P3_100926_23757 | NW_004515641.1 | Scaffold10  | 23757                   | TT                              | CC                | 1946478699               |
| SNP_P3_100927_34624 | NW_004515641.1 | Scaffold10  | 34624                   | CC                              | TT                | 1946478701               |
| SNP_P3_100928_34629 | NW_004515641.1 | Scaffold10  | 34629                   | CC                              | TT                | 1946478703               |
| SNP_P3_100929_34670 | NW_004515641.1 | Scaffold10  | 34670                   | GG                              | CC                | 1946478704               |
| SNP_P3_100930_34673 | NW_004515641.1 | Scaffold10  | 34673                   | GG                              | AA                | 1946478706               |
| SNP_P3_100931_34692 | NW_004515641.1 | Scaffold10  | 34692                   | AA                              | GG                | 1946478707               |
| SNP_P3_100932_34708 | NW_004515641.1 | Scaffold10  | 34708                   | AA                              | TT                | 1946478709               |
| SNP_P3_100933_34724 | NW_004515641.1 | Scaffold10  | 34724                   | AA                              | GG                | 1946478711               |
| SNP_P3_100934_55574 | NW_004515641.1 | Scaffold10  | 55574                   | GG                              | AA                | 1946478712               |
| SNP_P3_100935_55605 | NW_004515641.1 | Scaffold10  | 55605                   | GG                              | AA                | 1946478714               |
| SNP_P3_100936_86311 | NW_004515641.1 | Scaffold10  | 86311                   | CC                              | AA                | 1946478715               |
| SNP_P3_100937_86320 | NW_004515641.1 | Scaffold10  | 86320                   | TT                              | CC                | 1946478717               |
| SNP_P3_100938_87374 | NW_004515641.1 | Scaffold10  | 87374                   | CC                              | TT                | 1946478718               |
| SNP_P3_100939_87377 | NW_004515641.1 | Scaffold10  | 87377                   | GG                              | TT                | 1946478720               |
| SNP_P3_100940_87401 | NW_004515641.1 | Scaffold10  | 87401                   | TT                              | CC                | 1946478721               |

| SNPs IDs             | Chromosome IDs | Chromosomes | Physical positions (bp) | CDC Frontier (Reference genome) | (Pusa 256 & HPNB) | NCBI SNPdb Accession IDs |
|----------------------|----------------|-------------|-------------------------|---------------------------------|-------------------|--------------------------|
| SNP_P3_100941_87411  | NW_004515641.1 | Scaffold10  | 87411                   | TT                              | CC                | 1946478723               |
| SNP_P3_100942_87424  | NW_004515641.1 | Scaffold10  | 87424                   | AA                              | GG                | 1946478728               |
| SNP_P3_100943_87462  | NW_004515641.1 | Scaffold10  | 87462                   | CC                              | AA                | 1946478730               |
| SNP_P3_100944_87494  | NW_004515641.1 | Scaffold10  | 87494                   | AA                              | GG                | 1946478731               |
| SNP_P3_100945_87537  | NW_004515641.1 | Scaffold10  | 87537                   | AA                              | CC                | 1946478733               |
| SNP_P3_100946_87763  | NW_004515641.1 | Scaffold10  | 87763                   | AA                              | GG                | 1946478734               |
| SNP_P3_100947_87818  | NW_004515641.1 | Scaffold10  | 87818                   | AA                              | GG                | 1946478736               |
| SNP_P3_100948_87907  | NW_004515641.1 | Scaffold10  | 87907                   | TT                              | CC                | 1946478738               |
| SNP_P3_100949_89471  | NW_004515641.1 | Scaffold10  | 89471                   | AA                              | TT                | 1946478739               |
| SNP_P3_100950_89659  | NW_004515641.1 | Scaffold10  | 89659                   | TT                              | CC                | 1946478741               |
| SNP_P3_100951_89698  | NW_004515641.1 | Scaffold10  | 89698                   | GG                              | AA                | 1946478742               |
| SNP_P3_100952_89699  | NW_004515641.1 | Scaffold10  | 89699                   | AA                              | TT                | 1946478744               |
| SNP_P3_100953_89724  | NW_004515641.1 | Scaffold10  | 89724                   | CC                              | TT                | 1946478745               |
| SNP_P3_100954_89730  | NW_004515641.1 | Scaffold10  | 89730                   | CC                              | GG                | 1946478747               |
| SNP_P3_100955_90057  | NW_004515641.1 | Scaffold10  | 90057                   | GG                              | AA                | 1946478748               |
| SNP_P3_100956_90116  | NW_004515641.1 | Scaffold10  | 90116                   | TT                              | CC                | 1946478750               |
| SNP_P3_100957_90118  | NW_004515641.1 | Scaffold10  | 90118                   | GG                              | CC                | 1946478751               |
| SNP_P3_100958_91464  | NW_004515641.1 | Scaffold10  | 91464                   | AA                              | CC                | 1946478753               |
| SNP_P3_100959_91472  | NW_004515641.1 | Scaffold10  | 91472                   | CC                              | TT                | 1946478755               |
| SNP_P3_100960_91491  | NW_004515641.1 | Scaffold10  | 91491                   | TT                              | AA                | 1946478756               |
| SNP_P3_100961_91517  | NW_004515641.1 | Scaffold10  | 91517                   | TT                              | CC                | 1946478758               |
| SNP_P3_100962_91561  | NW_004515641.1 | Scaffold10  | 91561                   | CC                              | TT                | 1946478759               |
| SNP_P3_100963_91619  | NW_004515641.1 | Scaffold10  | 91619                   | GG                              | TT                | 1946478761               |
| SNP_P3_100964_91669  | NW_004515641.1 | Scaffold10  | 91669                   | TT                              | AA                | 1946478763               |
| SNP_P3_100965_91879  | NW_004515641.1 | Scaffold10  | 91879                   | TT                              | AA                | 1946478764               |
| SNP_P3_100966_91886  | NW_004515641.1 | Scaffold10  | 91886                   | CC                              | TT                | 1946478766               |
| SNP_P3_100967_91889  | NW_004515641.1 | Scaffold10  | 91889                   | GG                              | TT                | 1946478767               |
| SNP_P3_100968_91909  | NW_004515641.1 | Scaffold10  | 91909                   | GG                              | CC                | 1946478769               |
| SNP_P3_100969_91913  | NW_004515641.1 | Scaffold10  | 91913                   | TT                              | CC                | 1946478770               |
| SNP_P3_100970_91923  | NW_004515641.1 | Scaffold10  | 91923                   | TT                              | CC                | 1946478772               |
| SNP_P3_100971_91974  | NW_004515641.1 | Scaffold10  | 91974                   | CC                              | AA                | 1946478773               |
| SNP_P3_100973_92594  | NW_004515641.1 | Scaffold10  | 92594                   | TT                              | CC                | 1946478775               |
| SNP_P3_100974_92600  | NW_004515641.1 | Scaffold10  | 92600                   | CC                              | TT                | 1946478776               |
| SNP_P3_100975_92602  | NW_004515641.1 | Scaffold10  | 92602                   | AA                              | CC                | 1946478778               |
| SNP_P3_100976_106928 | NW_004515641.1 | Scaffold10  | 106928                  | CC                              | TT                | 1946478780               |
| SNP_P3_100977_7382   | NW_004515642.1 | Scaffold11  | 7382                    | TT                              | CC                | 1946478781               |
| SNP_P3_100978_8374   | NW_004515642.1 | Scaffold11  | 8374                    | GG                              | AA                | 1946478783               |
| SNP_P3_100979_8725   | NW_004515642.1 | Scaffold11  | 8725                    | CC                              | TT                | 1946478784               |
| SNP_P3_100980_8763   | NW_004515642.1 | Scaffold11  | 8763                    | GG                              | AA                | 1946478786               |
| SNP_P3_100981_14916  | NW_004515642.1 | Scaffold11  | 14916                   | TT                              | AA                | 1946478787               |
| SNP_P3_100982_17174  | NW_004515642.1 | Scaffold11  | 17174                   | AA                              | TT                | 1946478789               |
| SNP_P3_100983_17872  | NW_004515642.1 | Scaffold11  | 17872                   | TT                              | CC                | 1946478790               |

| SNPs IDs             | Chromosome IDs | Chromosomes | Physical positions (bp) | CDC Frontier (Reference genome) | (Pusa 256 & HPNB) | NCBI SNPdb Accession IDs |
|----------------------|----------------|-------------|-------------------------|---------------------------------|-------------------|--------------------------|
| SNP_P3_100984_7299   | NW_004515643.1 | Scaffold12  | 7299                    | GG                              | TT                | 1946478792               |
| SNP_P3_100985_8590   | NW_004515643.1 | Scaffold12  | 8590                    | GG                              | AA                | 1946478794               |
| SNP_P3_100986_9022   | NW_004515643.1 | Scaffold12  | 9022                    | CC                              | AA                | 1946478795               |
| SNP_P3_100987_16002  | NW_004515643.1 | Scaffold12  | 16002                   | AA                              | TT                | 1946478797               |
| SNP_P3_100988_16003  | NW_004515643.1 | Scaffold12  | 16003                   | AA                              | GG                | 1946478798               |
| SNP_P3_100989_16084  | NW_004515643.1 | Scaffold12  | 16084                   | TT                              | CC                | 1946478800               |
| SNP_P3_100990_16125  | NW_004515643.1 | Scaffold12  | 16125                   | CC                              | TT                | 1946478802               |
| SNP_P3_100991_16130  | NW_004515643.1 | Scaffold12  | 16130                   | CC                              | TT                | 1946478803               |
| SNP_P3_100992_16301  | NW_004515643.1 | Scaffold12  | 16301                   | TT                              | GG                | 1946478805               |
| SNP_P3_100993_16377  | NW_004515643.1 | Scaffold12  | 16377                   | AA                              | GG                | 1946478806               |
| SNP_P3_100994_16408  | NW_004515643.1 | Scaffold12  | 16408                   | AA                              | GG                | 1946478808               |
| SNP_P3_100996_16671  | NW_004515643.1 | Scaffold12  | 16671                   | TT                              | CC                | 1946478809               |
| SNP_P3_100997_16673  | NW_004515643.1 | Scaffold12  | 16673                   | GG                              | AA                | 1946478811               |
| SNP_P3_101000_18544  | NW_004515643.1 | Scaffold12  | 18544                   | GG                              | AA                | 1946478812               |
| SNP_P3_101001_57982  | NW_004515643.1 | Scaffold12  | 57982                   | GG                              | AA                | 1946478814               |
| SNP_P3_101003_58048  | NW_004515643.1 | Scaffold12  | 58048                   | AA                              | GG                | 1946478816               |
| SNP_P3_101004_58049  | NW_004515643.1 | Scaffold12  | 58049                   | AA                              | GG                | 1946478817               |
| SNP_P3_101005_58108  | NW_004515643.1 | Scaffold12  | 58108                   | AA                              | TT                | 1946478819               |
| SNP_P3_101006_58110  | NW_004515643.1 | Scaffold12  | 58110                   | GG                              | CC                | 1946478820               |
| SNP_P3_101007_58111  | NW_004515643.1 | Scaffold12  | 58111                   | TT                              | AA                | 1946478822               |
| SNP_P3_101008_58112  | NW_004515643.1 | Scaffold12  | 58112                   | GG                              | AA                | 1946478823               |
| SNP_P3_101009_58113  | NW_004515643.1 | Scaffold12  | 58113                   | TT                              | AA                | 1946478825               |
| SNP_P3_101010_58115  | NW_004515643.1 | Scaffold12  | 58115                   | AA                              | TT                | 1946478827               |
| SNP_P3_101011_99377  | NW_004515643.1 | Scaffold12  | 99377                   | AA                              | GG                | 1946478828               |
| SNP_P3_101012_101921 | NW_004515643.1 | Scaffold12  | 101921                  | CC                              | AA                | 1946478830               |
| SNP_P3_101013_110398 | NW_004515643.1 | Scaffold12  | 110398                  | AA                              | CC                | 1946478832               |
| SNP_P3_101014_110412 | NW_004515643.1 | Scaffold12  | 110412                  | AA                              | TT                | 1946478833               |
| SNP_P3_101015_110511 | NW_004515643.1 | Scaffold12  | 110511                  | GG                              | AA                | 1946478835               |
| SNP_P3_101016_110515 | NW_004515643.1 | Scaffold12  | 110515                  | AA                              | CC                | 1946478837               |
| SNP_P3_101017_110556 | NW_004515643.1 | Scaffold12  | 110556                  | GG                              | TT                | 1946478838               |
| SNP_P3_101018_110572 | NW_004515643.1 | Scaffold12  | 110572                  | GG                              | TT                | 1946478840               |
| SNP_P3_101019_110680 | NW_004515643.1 | Scaffold12  | 110680                  | TT                              | CC                | 1946478842               |
| SNP_P3_101020_150734 | NW_004515643.1 | Scaffold12  | 150734                  | GG                              | CC                | 1946478843               |
| SNP_P3_101021_159630 | NW_004515643.1 | Scaffold12  | 159630                  | AA                              | CC                | 1946478845               |
| SNP_P3_101022_160082 | NW_004515643.1 | Scaffold12  | 160082                  | TT                              | CC                | 1946478846               |
| SNP_P3_101023_160519 | NW_004515643.1 | Scaffold12  | 160519                  | GG                              | TT                | 1946478848               |
| SNP_P3_101024_160993 | NW_004515643.1 | Scaffold12  | 160993                  | TT                              | CC                | 1946478850               |
| SNP_P3_101025_161007 | NW_004515643.1 | Scaffold12  | 161007                  | TT                              | GG                | 1946478851               |
| SNP_P3_101026_177674 | NW_004515643.1 | Scaffold12  | 177674                  | CC                              | TT                | 1946478853               |
| SNP_P3_101027_190007 | NW_004515643.1 | Scaffold12  | 190007                  | AA                              | GG                | 1946478854               |
| SNP_P3_101028_190055 | NW_004515643.1 | Scaffold12  | 190055                  | CC                              | TT                | 1946478856               |
| SNP_P3_101029_198299 | NW_004515643.1 | Scaffold12  | 198299                  | AA                              | GG                | 1946478857               |

| SNPs IDs             | Chromosome IDs | Chromosomes | Physical positions (bp) | CDC Frontier (Reference genome) | (Pusa 256 & HPNB) | NCBI SNPdb Accession IDs |
|----------------------|----------------|-------------|-------------------------|---------------------------------|-------------------|--------------------------|
| SNP_P3_101030_198311 | NW_004515643.1 | Scaffold12  | 198311                  | TT                              | GG                | 1946478859               |
| SNP_P3_101031_198390 | NW_004515643.1 | Scaffold12  | 198390                  | GG                              | AA                | 1946478860               |
| SNP_P3_101032_198432 | NW_004515643.1 | Scaffold12  | 198432                  | TT                              | CC                | 1946478862               |
| SNP_P3_101033_198467 | NW_004515643.1 | Scaffold12  | 198467                  | GG                              | CC                | 1946478863               |
| SNP_P3_101034_198484 | NW_004515643.1 | Scaffold12  | 198484                  | AA                              | GG                | 1946478865               |
| SNP_P3_101035_198500 | NW_004515643.1 | Scaffold12  | 198500                  | TT                              | CC                | 1946478867               |
| SNP_P3_101036_198507 | NW_004515643.1 | Scaffold12  | 198507                  | AA                              | GG                | 1946478868               |
| SNP_P3_101037_198553 | NW_004515643.1 | Scaffold12  | 198553                  | AA                              | GG                | 1946478870               |
| SNP_P3_101038_198645 | NW_004515643.1 | Scaffold12  | 198645                  | TT                              | CC                | 1946478872               |
| SNP_P3_101039_198691 | NW_004515643.1 | Scaffold12  | 198691                  | TT                              | CC                | 1946478873               |
| SNP_P3_101040_198772 | NW_004515643.1 | Scaffold12  | 198772                  | GG                              | TT                | 1946478875               |
| SNP_P3_101041_198777 | NW_004515643.1 | Scaffold12  | 198777                  | GG                              | AA                | 1946478876               |
| SNP_P3_101042_198780 | NW_004515643.1 | Scaffold12  | 198780                  | GG                              | AA                | 1946478878               |
| SNP_P3_101043_198814 | NW_004515643.1 | Scaffold12  | 198814                  | CC                              | TT                | 1946478879               |
| SNP_P3_101044_198824 | NW_004515643.1 | Scaffold12  | 198824                  | GG                              | AA                | 1946478881               |
| SNP_P3_101045_198847 | NW_004515643.1 | Scaffold12  | 198847                  | AA                              | GG                | 1946478882               |
| SNP_P3_101046_198895 | NW_004515643.1 | Scaffold12  | 198895                  | TT                              | CC                | 1946478884               |
| SNP_P3_101047_218405 | NW_004515643.1 | Scaffold12  | 218405                  | TT                              | CC                | 1946478885               |
| SNP_P3_101048_237995 | NW_004515643.1 | Scaffold12  | 237995                  | TT                              | CC                | 1946478887               |
| SNP_P3_101049_238157 | NW_004515643.1 | Scaffold12  | 238157                  | CC                              | AA                | 1946478889               |
| SNP_P3_101050_238190 | NW_004515643.1 | Scaffold12  | 238190                  | TT                              | CC                | 1946478890               |
| SNP_P3_101051_238192 | NW_004515643.1 | Scaffold12  | 238192                  | GG                              | TT                | 1946478892               |
| SNP_P3_101052_238197 | NW_004515643.1 | Scaffold12  | 238197                  | AA                              | GG                | 1946478893               |
| SNP_P3_101053_238270 | NW_004515643.1 | Scaffold12  | 238270                  | TT                              | CC                | 1946478895               |
| SNP_P3_101054_238282 | NW_004515643.1 | Scaffold12  | 238282                  | AA                              | GG                | 1946478896               |
| SNP_P3_101055_239915 | NW_004515643.1 | Scaffold12  | 239915                  | AA                              | CC                | 1946478898               |
| SNP_P3_101056_240489 | NW_004515643.1 | Scaffold12  | 240489                  | CC                              | GG                | 1946478900               |
| SNP_P3_101057_240811 | NW_004515643.1 | Scaffold12  | 240811                  | AA                              | TT                | 1946478901               |
| SNP_P3_101058_240814 | NW_004515643.1 | Scaffold12  | 240814                  | TT                              | GG                | 1946478903               |
| SNP_P3_101059_240853 | NW_004515643.1 | Scaffold12  | 240853                  | CC                              | GG                | 1946478904               |
| SNP_P3_101060_249777 | NW_004515643.1 | Scaffold12  | 249777                  | GG                              | AA                | 1946478906               |
| SNP_P3_101061_259189 | NW_004515643.1 | Scaffold12  | 259189                  | TT                              | CC                | 1946478907               |
| SNP_P3_101062_259192 | NW_004515643.1 | Scaffold12  | 259192                  | GG                              | TT                | 1946478909               |
| SNP_P3_101063_293027 | NW_004515643.1 | Scaffold12  | 293027                  | CC                              | TT                | 1946478910               |
| SNP_P3_101064_293388 | NW_004515643.1 | Scaffold12  | 293388                  | AA                              | GG                | 1946478912               |
| SNP_P3_101065_296054 | NW_004515643.1 | Scaffold12  | 296054                  | AA                              | GG                | 1946478913               |
| SNP_P3_101066_296064 | NW_004515643.1 | Scaffold12  | 296064                  | AA                              | GG                | 1946478915               |
| SNP_P3_101067_296078 | NW_004515643.1 | Scaffold12  | 296078                  | GG                              | TT                | 1946478917               |
| SNP_P3_101068_296079 | NW_004515643.1 | Scaffold12  | 296079                  | CC                              | TT                | 1946478918               |
| SNP_P3_101069_296104 | NW_004515643.1 | Scaffold12  | 296104                  | CC                              | TT                | 1946478920               |
| SNP_P3_101070_296247 | NW_004515643.1 | Scaffold12  | 296247                  | AA                              | GG                | 1946478921               |
| SNP_P3_101071_296444 | NW_004515643.1 | Scaffold12  | 296444                  | GG                              | AA                | 1946478923               |

| SNPs IDs             | Chromosome IDs | Chromosomes | Physical positions (bp) | CDC Frontier (Reference genome) | (Pusa 256 & HPNB) | NCBI SNPdb Accession IDs |
|----------------------|----------------|-------------|-------------------------|---------------------------------|-------------------|--------------------------|
| SNP_P3_101072_296449 | NW_004515643.1 | Scaffold12  | 296449                  | AA                              | GG                | 1946478924               |
| SNP_P3_101073_296480 | NW_004515643.1 | Scaffold12  | 296480                  | TT                              | AA                | 1946478926               |
| SNP_P3_101074_296500 | NW_004515643.1 | Scaffold12  | 296500                  | TT                              | GG                | 1946478927               |
| SNP_P3_101075_296528 | NW_004515643.1 | Scaffold12  | 296528                  | TT                              | CC                | 1946478928               |
| SNP_P3_101076_296538 | NW_004515643.1 | Scaffold12  | 296538                  | TT                              | CC                | 1946478930               |
| SNP_P3_101077_296582 | NW_004515643.1 | Scaffold12  | 296582                  | TT                              | CC                | 1946478931               |
| SNP_P3_101079_296712 | NW_004515643.1 | Scaffold12  | 296712                  | AA                              | GG                | 1946478933               |
| SNP_P3_101080_305949 | NW_004515643.1 | Scaffold12  | 305949                  | GG                              | TT                | 1946478934               |
| SNP_P3_101082_352124 | NW_004515643.1 | Scaffold12  | 352124                  | GG                              | TT                | 1946478936               |
| SNP_P3_101083_352136 | NW_004515643.1 | Scaffold12  | 352136                  | GG                              | AA                | 1946478937               |
| SNP_P3_101084_352166 | NW_004515643.1 | Scaffold12  | 352166                  | CC                              | GG                | 1946478939               |
| SNP_P3_101086_3020   | NW_004515644.1 | Scaffold13  | 3020                    | CC                              | AA                | 1946478940               |
| SNP_P3_101087_9232   | NW_004515644.1 | Scaffold13  | 9232                    | TT                              | GG                | 1946478942               |
| SNP_P3_101088_14219  | NW_004515644.1 | Scaffold13  | 14219                   | TT                              | AA                | 1946478943               |
| SNP_P3_101089_17127  | NW_004515644.1 | Scaffold13  | 17127                   | AA                              | TT                | 1946478944               |
| SNP_P3_101090_17201  | NW_004515644.1 | Scaffold13  | 17201                   | GG                              | CC                | 1946478946               |
| SNP_P3_101091_18579  | NW_004515644.1 | Scaffold13  | 18579                   | TT                              | AA                | 1946478947               |
| SNP_P3_101092_18582  | NW_004515644.1 | Scaffold13  | 18582                   | GG                              | TT                | 1946478949               |
| SNP_P3_101093_18583  | NW_004515644.1 | Scaffold13  | 18583                   | AA                              | TT                | 1946478950               |
| SNP_P3_101094_22968  | NW_004515644.1 | Scaffold13  | 22968                   | TT                              | GG                | 1946478952               |
| SNP_P3_101095_26321  | NW_004515644.1 | Scaffold13  | 26321                   | TT                              | GG                | 1946478953               |
| SNP_P3_101096_26341  | NW_004515644.1 | Scaffold13  | 26341                   | AA                              | GG                | 1946478954               |
| SNP_P3_101097_26352  | NW_004515644.1 | Scaffold13  | 26352                   | TT                              | AA                | 1946478956               |
| SNP_P3_101098_26398  | NW_004515644.1 | Scaffold13  | 26398                   | CC                              | GG                | 1946478957               |
| SNP_P3_101099_26400  | NW_004515644.1 | Scaffold13  | 26400                   | CC                              | GG                | 1946478959               |
| SNP_P3_101100_26629  | NW_004515644.1 | Scaffold13  | 26629                   | TT                              | AA                | 1946478960               |
| SNP_P3_101101_26649  | NW_004515644.1 | Scaffold13  | 26649                   | TT                              | CC                | 1946478962               |
| SNP_P3_101102_26665  | NW_004515644.1 | Scaffold13  | 26665                   | CC                              | TT                | 1946478963               |
| SNP_P3_101103_26690  | NW_004515644.1 | Scaffold13  | 26690                   | AA                              | GG                | 1946478964               |
| SNP_P3_101104_26794  | NW_004515644.1 | Scaffold13  | 26794                   | CC                              | GG                | 1946478966               |
| SNP_P3_101105_28397  | NW_004515644.1 | Scaffold13  | 28397                   | AA                              | GG                | 1946478967               |
| SNP_P3_101106_28445  | NW_004515644.1 | Scaffold13  | 28445                   | GG                              | AA                | 1946478969               |
| SNP_P3_101107_28818  | NW_004515644.1 | Scaffold13  | 28818                   | CC                              | TT                | 1946478970               |
| SNP_P3_101109_32987  | NW_004515644.1 | Scaffold13  | 32987                   | AA                              | TT                | 1946478972               |
| SNP_P3_101110_33032  | NW_004515644.1 | Scaffold13  | 33032                   | AA                              | GG                | 1946478973               |
| SNP_P3_101111_33049  | NW_004515644.1 | Scaffold13  | 33049                   | CC                              | TT                | 1946478975               |
| SNP_P3_101112_33061  | NW_004515644.1 | Scaffold13  | 33061                   | GG                              | AA                | 1946478976               |
| SNP_P3_101114_33098  | NW_004515644.1 | Scaffold13  | 33098                   | AA                              | TT                | 1946478978               |
| SNP_P3_101115_33099  | NW_004515644.1 | Scaffold13  | 33099                   | TT                              | CC                | 1946478979               |
| SNP_P3_101116_33103  | NW_004515644.1 | Scaffold13  | 33103                   | TT                              | CC                | 1946478981               |
| SNP_P3_101117_33137  | NW_004515644.1 | Scaffold13  | 33137                   | GG                              | AA                | 1946478982               |
| SNP_P3_101118_33140  | NW_004515644.1 | Scaffold13  | 33140                   | AA                              | GG                | 1946478984               |



| SNPs IDs            | Chromosome IDs | Chromosomes | Physical positions (bp) | CDC Frontier (Reference genome) | (Pusa 256 & HPNB) | NCBI SNPdb Accession IDs |
|---------------------|----------------|-------------|-------------------------|---------------------------------|-------------------|--------------------------|
| SNP_P3_101119_33150 | NW_004515644.1 | Scaffold13  | 33150                   | AA                              | GG                | 1946478985               |
| SNP_P3_101120_33375 | NW_004515644.1 | Scaffold13  | 33375                   | CC                              | TT                | 1946478987               |
| SNP_P3_101121_33470 | NW_004515644.1 | Scaffold13  | 33470                   | CC                              | AA                | 1946478988               |
| SNP_P3_101122_33806 | NW_004515644.1 | Scaffold13  | 33806                   | CC                              | AA                | 1946478990               |
| SNP_P3_101123_35873 | NW_004515644.1 | Scaffold13  | 35873                   | TT                              | AA                | 1946478992               |
| SNP_P3_101124_35878 | NW_004515644.1 | Scaffold13  | 35878                   | TT                              | AA                | 1946478993               |
| SNP_P3_101125_43438 | NW_004515644.1 | Scaffold13  | 43438                   | TT                              | CC                | 1946478995               |
| SNP_P3_101126_44106 | NW_004515644.1 | Scaffold13  | 44106                   | AA                              | GG                | 1946478996               |
| SNP_P3_101127_46012 | NW_004515644.1 | Scaffold13  | 46012                   | AA                              | GG                | 1946478998               |
| SNP_P3_101129_58616 | NW_004515644.1 | Scaffold13  | 58616                   | TT                              | AA                | 1946478999               |
| SNP_P3_101130_65550 | NW_004515644.1 | Scaffold13  | 65550                   | AA                              | GG                | 1946479001               |
| SNP_P3_101131_93941 | NW_004515644.1 | Scaffold13  | 93941                   | AA                              | CC                | 1946479002               |
| SNP_P3_101132_98081 | NW_004515644.1 | Scaffold13  | 98081                   | AA                              | GG                | 1946479004               |
| SNP_P3_101133_3502  | NW_004515645.1 | Scaffold15  | 3502                    | GG                              | AA                | 1946479005               |
| SNP_P3_101134_19448 | NW_004515645.1 | Scaffold15  | 19448                   | GG                              | CC                | 1946479010               |
| SNP_P3_101135_19485 | NW_004515645.1 | Scaffold15  | 19485                   | AA                              | TT                | 1946479012               |
| SNP_P3_101137_20094 | NW_004515645.1 | Scaffold15  | 20094                   | AA                              | TT                | 1946479013               |
| SNP_P3_101138_20290 | NW_004515645.1 | Scaffold15  | 20290                   | TT                              | GG                | 1946479015               |
| SNP_P3_101139_20336 | NW_004515645.1 | Scaffold15  | 20336                   | CC                              | TT                | 1946479016               |
| SNP_P3_101140_20371 | NW_004515645.1 | Scaffold15  | 20371                   | GG                              | TT                | 1946479018               |
| SNP_P3_101141_27464 | NW_004515645.1 | Scaffold15  | 27464                   | GG                              | TT                | 1946479019               |
| SNP_P3_101142_27631 | NW_004515645.1 | Scaffold15  | 27631                   | CC                              | TT                | 1946479021               |
| SNP_P3_101143_27660 | NW_004515645.1 | Scaffold15  | 27660                   | CC                              | TT                | 1946479022               |
| SNP_P3_101144_27721 | NW_004515645.1 | Scaffold15  | 27721                   | AA                              | GG                | 1946479024               |
| SNP_P3_101145_28798 | NW_004515645.1 | Scaffold15  | 28798                   | TT                              | CC                | 1946479025               |
| SNP_P3_101146_28849 | NW_004515645.1 | Scaffold15  | 28849                   | TT                              | CC                | 1946479027               |
| SNP_P3_101147_28944 | NW_004515645.1 | Scaffold15  | 28944                   | AA                              | TT                | 1946479028               |
| SNP_P3_101148_32233 | NW_004515645.1 | Scaffold15  | 32233                   | TT                              | CC                | 1946479030               |
| SNP_P3_101149_33890 | NW_004515645.1 | Scaffold15  | 33890                   | TT                              | CC                | 1946479031               |
| SNP_P3_101150_38284 | NW_004515645.1 | Scaffold15  | 38284                   | GG                              | AA                | 1946479033               |
| SNP_P3_101151_38453 | NW_004515645.1 | Scaffold15  | 38453                   | AA                              | CC                | 1946479034               |
| SNP_P3_101152_38457 | NW_004515645.1 | Scaffold15  | 38457                   | CC                              | TT                | 1946479036               |
| SNP_P3_101153_38458 | NW_004515645.1 | Scaffold15  | 38458                   | TT                              | GG                | 1946479037               |
| SNP_P3_101154_43872 | NW_004515645.1 | Scaffold15  | 43872                   | GG                              | AA                | 1946479039               |
| SNP_P3_101155_43876 | NW_004515645.1 | Scaffold15  | 43876                   | TT                              | AA                | 1946479040               |
| SNP_P3_101156_49356 | NW_004515645.1 | Scaffold15  | 49356                   | CC                              | GG                | 1946479042               |
| SNP_P3_101157_49655 | NW_004515645.1 | Scaffold15  | 49655                   | TT                              | CC                | 1946479043               |
| SNP_P3_101158_51647 | NW_004515645.1 | Scaffold15  | 51647                   | TT                              | CC                | 1946479045               |
| SNP_P3_101159_51654 | NW_004515645.1 | Scaffold15  | 51654                   | GG                              | CC                | 1946479047               |
| SNP_P3_101160_63134 | NW_004515645.1 | Scaffold15  | 63134                   | GG                              | TT                | 1946479048               |
| SNP_P3_101161_63175 | NW_004515645.1 | Scaffold15  | 63175                   | AA                              | CC                | 1946479050               |
| SNP_P3_101162_63193 | NW_004515645.1 | Scaffold15  | 63193                   | GG                              | CC                | 1946479051               |

| SNPs IDs             | Chromosome IDs | Chromosomes | Physical positions (bp) | CDC Frontier (Reference genome) | (Pusa 256 & HPNB) | NCBI SNPdb Accession IDs |
|----------------------|----------------|-------------|-------------------------|---------------------------------|-------------------|--------------------------|
| SNP_P3_101163_63258  | NW_004515645.1 | Scaffold15  | 63258                   | GG                              | AA                | 1946479053               |
| SNP_P3_101164_66685  | NW_004515645.1 | Scaffold15  | 66685                   | TT                              | AA                | 1946479054               |
| SNP_P3_101165_67294  | NW_004515645.1 | Scaffold15  | 67294                   | AA                              | TT                | 1946479056               |
| SNP_P3_101166_67986  | NW_004515645.1 | Scaffold15  | 67986                   | GG                              | AA                | 1946479057               |
| SNP_P3_101167_70346  | NW_004515645.1 | Scaffold15  | 70346                   | CC                              | TT                | 1946479059               |
| SNP_P3_101168_70348  | NW_004515645.1 | Scaffold15  | 70348                   | GG                              | AA                | 1946479060               |
| SNP_P3_101169_70366  | NW_004515645.1 | Scaffold15  | 70366                   | GG                              | AA                | 1946479062               |
| SNP_P3_101170_70502  | NW_004515645.1 | Scaffold15  | 70502                   | AA                              | GG                | 1946479063               |
| SNP_P3_101171_70541  | NW_004515645.1 | Scaffold15  | 70541                   | AA                              | GG                | 1946479065               |
| SNP_P3_101172_70549  | NW_004515645.1 | Scaffold15  | 70549                   | AA                              | GG                | 1946479066               |
| SNP_P3_101173_70569  | NW_004515645.1 | Scaffold15  | 70569                   | GG                              | CC                | 1946479068               |
| SNP_P3_101174_70607  | NW_004515645.1 | Scaffold15  | 70607                   | CC                              | GG                | 1946479070               |
| SNP_P3_101175_70618  | NW_004515645.1 | Scaffold15  | 70618                   | GG                              | AA                | 1946479071               |
| SNP_P3_101176_76989  | NW_004515645.1 | Scaffold15  | 76989                   | CC                              | GG                | 1946479073               |
| SNP_P3_101177_86586  | NW_004515645.1 | Scaffold15  | 86586                   | GG                              | AA                | 1946479074               |
| SNP_P3_101179_103786 | NW_004515645.1 | Scaffold15  | 103786                  | TT                              | CC                | 1946479076               |
| SNP_P3_101180_113111 | NW_004515645.1 | Scaffold15  | 113111                  | AA                              | GG                | 1946479077               |
| SNP_P3_101181_115221 | NW_004515645.1 | Scaffold15  | 115221                  | GG                              | AA                | 1946479079               |
| SNP_P3_101182_115441 | NW_004515645.1 | Scaffold15  | 115441                  | CC                              | AA                | 1946479080               |
| SNP_P3_101183_115553 | NW_004515645.1 | Scaffold15  | 115553                  | CC                              | TT                | 1946479082               |
| SNP_P3_101184_119237 | NW_004515645.1 | Scaffold15  | 119237                  | CC                              | TT                | 1946479083               |
| SNP_P3_101185_130986 | NW_004515645.1 | Scaffold15  | 130986                  | TT                              | AA                | 1946479085               |
| SNP_P3_101187_139632 | NW_004515645.1 | Scaffold15  | 139632                  | AA                              | TT                | 1946479086               |
| SNP_P3_101188_139994 | NW_004515645.1 | Scaffold15  | 139994                  | AA                              | TT                | 1946479088               |
| SNP_P3_101189_140336 | NW_004515645.1 | Scaffold15  | 140336                  | TT                              | CC                | 1946479089               |
| SNP_P3_101190_140361 | NW_004515645.1 | Scaffold15  | 140361                  | TT                              | CC                | 1946479091               |
| SNP_P3_101191_140916 | NW_004515645.1 | Scaffold15  | 140916                  | AA                              | GG                | 1946479092               |
| SNP_P3_101192_141042 | NW_004515645.1 | Scaffold15  | 141042                  | AA                              | GG                | 1946479094               |
| SNP_P3_101193_143706 | NW_004515645.1 | Scaffold15  | 143706                  | GG                              | AA                | 1946479095               |
| SNP_P3_101195_144014 | NW_004515645.1 | Scaffold15  | 144014                  | TT                              | AA                | 1946479097               |
| SNP_P3_101196_144076 | NW_004515645.1 | Scaffold15  | 144076                  | GG                              | AA                | 1946479098               |
| SNP_P3_101198_158245 | NW_004515645.1 | Scaffold15  | 158245                  | GG                              | AA                | 1946479100               |
| SNP_P3_101199_158258 | NW_004515645.1 | Scaffold15  | 158258                  | AA                              | TT                | 1946479101               |
| SNP_P3_101200_165598 | NW_004515645.1 | Scaffold15  | 165598                  | CC                              | GG                | 1946479103               |
| SNP_P3_101201_165611 | NW_004515645.1 | Scaffold15  | 165611                  | CC                              | TT                | 1946479104               |
| SNP_P3_101202_165648 | NW_004515645.1 | Scaffold15  | 165648                  | GG                              | AA                | 1946479106               |
| SNP_P3_101203_165649 | NW_004515645.1 | Scaffold15  | 165649                  | CC                              | AA                | 1946479108               |
| SNP_P3_101204_165677 | NW_004515645.1 | Scaffold15  | 165677                  | AA                              | GG                | 1946479109               |
| SNP_P3_101205_165754 | NW_004515645.1 | Scaffold15  | 165754                  | TT                              | GG                | 1946479111               |
| SNP_P3_101206_169035 | NW_004515645.1 | Scaffold15  | 169035                  | TT                              | GG                | 1946479112               |
| SNP_P3_101207_827    | NW_004515646.1 | Scaffold16  | 827                     | TT                              | GG                | 1946479114               |
| SNP_P3_101208_894    | NW_004515646.1 | Scaffold16  | 894                     | TT                              | CC                | 1946479115               |

| SNPs IDs             | Chromosome IDs | Chromosomes | Physical positions (bp) | CDC Frontier (Reference genome) | (Pusa 256 & HPNB) | NCBI SNPdb Accession IDs |
|----------------------|----------------|-------------|-------------------------|---------------------------------|-------------------|--------------------------|
| SNP_P3_101209_896    | NW_004515646.1 | Scaffold16  | 896                     | GG                              | AA                | 1946479117               |
| SNP_P3_101210_912    | NW_004515646.1 | Scaffold16  | 912                     | GG                              | AA                | 1946479118               |
| SNP_P3_101211_924    | NW_004515646.1 | Scaffold16  | 924                     | AA                              | GG                | 1946479120               |
| SNP_P3_101212_939    | NW_004515646.1 | Scaffold16  | 939                     | GG                              | AA                | 1946479121               |
| SNP_P3_101213_949    | NW_004515646.1 | Scaffold16  | 949                     | AA                              | GG                | 1946479123               |
| SNP_P3_101214_955    | NW_004515646.1 | Scaffold16  | 955                     | AA                              | GG                | 1946479125               |
| SNP_P3_101215_984    | NW_004515646.1 | Scaffold16  | 984                     | AA                              | GG                | 1946479126               |
| SNP_P3_101216_990    | NW_004515646.1 | Scaffold16  | 990                     | GG                              | TT                | 1946479128               |
| SNP_P3_101217_992    | NW_004515646.1 | Scaffold16  | 992                     | AA                              | CC                | 1946479129               |
| SNP_P3_101218_1009   | NW_004515646.1 | Scaffold16  | 1009                    | TT                              | GG                | 1946479131               |
| SNP_P3_101219_1068   | NW_004515646.1 | Scaffold16  | 1068                    | TT                              | CC                | 1946479132               |
| SNP_P3_101220_1292   | NW_004515646.1 | Scaffold16  | 1292                    | GG                              | AA                | 1946479134               |
| SNP_P3_101221_3567   | NW_004515646.1 | Scaffold16  | 3567                    | CC                              | AA                | 1946479135               |
| SNP_P3_101223_4687   | NW_004515646.1 | Scaffold16  | 4687                    | AA                              | CC                | 1946479137               |
| SNP_P3_101224_3597   | NW_004515647.1 | Scaffold17  | 3597                    | TT                              | CC                | 1946479139               |
| SNP_P3_101225_5677   | NW_004515647.1 | Scaffold17  | 5677                    | TT                              | CC                | 1946479140               |
| SNP_P3_101226_6016   | NW_004515647.1 | Scaffold17  | 6016                    | AA                              | GG                | 1946479142               |
| SNP_P3_101227_41888  | NW_004515647.1 | Scaffold17  | 41888                   | AA                              | GG                | 1946479144               |
| SNP_P3_101228_44356  | NW_004515647.1 | Scaffold17  | 44356                   | CC                              | TT                | 1946479145               |
| SNP_P3_101229_93835  | NW_004515647.1 | Scaffold17  | 93835                   | GG                              | AA                | 1946479147               |
| SNP_P3_101230_93863  | NW_004515647.1 | Scaffold17  | 93863                   | CC                              | AA                | 1946479148               |
| SNP_P3_101231_93902  | NW_004515647.1 | Scaffold17  | 93902                   | CC                              | TT                | 1946479150               |
| SNP_P3_101232_95083  | NW_004515647.1 | Scaffold17  | 95083                   | TT                              | AA                | 1946479152               |
| SNP_P3_101233_95255  | NW_004515647.1 | Scaffold17  | 95255                   | AA                              | GG                | 1946479153               |
| SNP_P3_101234_95280  | NW_004515647.1 | Scaffold17  | 95280                   | CC                              | AA                | 1946479155               |
| SNP_P3_101235_95285  | NW_004515647.1 | Scaffold17  | 95285                   | TT                              | CC                | 1946479156               |
| SNP_P3_101236_95508  | NW_004515647.1 | Scaffold17  | 95508                   | AA                              | CC                | 1946479158               |
| SNP_P3_101237_95544  | NW_004515647.1 | Scaffold17  | 95544                   | AA                              | CC                | 1946479159               |
| SNP_P3_101238_95598  | NW_004515647.1 | Scaffold17  | 95598                   | CC                              | TT                | 1946479161               |
| SNP_P3_101239_95747  | NW_004515647.1 | Scaffold17  | 95747                   | TT                              | CC                | 1946479162               |
| SNP_P3_101240_96693  | NW_004515647.1 | Scaffold17  | 96693                   | TT                              | CC                | 1946479164               |
| SNP_P3_101241_99587  | NW_004515647.1 | Scaffold17  | 99587                   | TT                              | CC                | 1946479165               |
| SNP_P3_101242_99811  | NW_004515647.1 | Scaffold17  | 99811                   | GG                              | AA                | 1946479167               |
| SNP_P3_101243_99826  | NW_004515647.1 | Scaffold17  | 99826                   | AA                              | TT                | 1946479168               |
| SNP_P3_101244_99833  | NW_004515647.1 | Scaffold17  | 99833                   | TT                              | CC                | 1946479170               |
| SNP_P3_101246_99950  | NW_004515647.1 | Scaffold17  | 99950                   | TT                              | CC                | 1946479171               |
| SNP_P3_101247_99997  | NW_004515647.1 | Scaffold17  | 99997                   | AA                              | TT                | 1946479173               |
| SNP_P3_101249_101846 | NW_004515647.1 | Scaffold17  | 101846                  | TT                              | CC                | 1946479174               |
| SNP_P3_101250_103501 | NW_004515647.1 | Scaffold17  | 103501                  | AA                              | GG                | 1946479176               |
| SNP_P3_101251_122829 | NW_004515647.1 | Scaffold17  | 122829                  | TT                              | CC                | 1946479177               |
| SNP_P3_101252_123518 | NW_004515647.1 | Scaffold17  | 123518                  | AA                              | GG                | 1946479179               |
| SNP_P3_101253_123996 | NW_004515647.1 | Scaffold17  | 123996                  | CC                              | TT                | 1946479180               |

| SNPs IDs             | Chromosome IDs | Chromosomes | Physical positions (bp) | CDC Frontier (Reference genome) | (Pusa 256 & HPNB) | NCBI SNPdb Accession IDs |
|----------------------|----------------|-------------|-------------------------|---------------------------------|-------------------|--------------------------|
| SNP_P3_101254_124075 | NW_004515647.1 | Scaffold17  | 124075                  | AA                              | TT                | 1946479182               |
| SNP_P3_101255_125547 | NW_004515647.1 | Scaffold17  | 125547                  | GG                              | TT                | 1946479183               |
| SNP_P3_101256_125584 | NW_004515647.1 | Scaffold17  | 125584                  | TT                              | CC                | 1946479185               |
| SNP_P3_101257_125586 | NW_004515647.1 | Scaffold17  | 125586                  | GG                              | AA                | 1946479186               |
| SNP_P3_101258_128417 | NW_004515647.1 | Scaffold17  | 128417                  | TT                              | GG                | 1946479188               |
| SNP_P3_101259_128427 | NW_004515647.1 | Scaffold17  | 128427                  | GG                              | TT                | 1946479189               |
| SNP_P3_101260_135415 | NW_004515647.1 | Scaffold17  | 135415                  | CC                              | GG                | 1946479191               |
| SNP_P3_101261_142646 | NW_004515647.1 | Scaffold17  | 142646                  | TT                              | CC                | 1946479192               |
| SNP_P3_101262_142680 | NW_004515647.1 | Scaffold17  | 142680                  | GG                              | AA                | 1946479194               |
| SNP_P3_101263_142801 | NW_004515647.1 | Scaffold17  | 142801                  | GG                              | AA                | 1946479195               |
| SNP_P3_101264_143168 | NW_004515647.1 | Scaffold17  | 143168                  | CC                              | AA                | 1946479197               |
| SNP_P3_101265_148404 | NW_004515647.1 | Scaffold17  | 148404                  | CC                              | TT                | 1946479198               |
| SNP_P3_101266_148877 | NW_004515647.1 | Scaffold17  | 148877                  | AA                              | CC                | 1946479200               |
| SNP_P3_101267_148932 | NW_004515647.1 | Scaffold17  | 148932                  | TT                              | CC                | 1946479201               |
| SNP_P3_101268_153125 | NW_004515647.1 | Scaffold17  | 153125                  | TT                              | CC                | 1946479203               |
| SNP_P3_101269_157700 | NW_004515647.1 | Scaffold17  | 157700                  | TT                              | CC                | 1946479204               |
| SNP_P3_101270_157730 | NW_004515647.1 | Scaffold17  | 157730                  | AA                              | GG                | 1946479205               |
| SNP_P3_101271_157752 | NW_004515647.1 | Scaffold17  | 157752                  | GG                              | AA                | 1946479207               |
| SNP_P3_101272_157922 | NW_004515647.1 | Scaffold17  | 157922                  | AA                              | GG                | 1946479208               |
| SNP_P3_101273_157926 | NW_004515647.1 | Scaffold17  | 157926                  | TT                              | GG                | 1946479210               |
| SNP_P3_101274_157956 | NW_004515647.1 | Scaffold17  | 157956                  | GG                              | CC                | 1946479211               |
| SNP_P3_101275_170670 | NW_004515647.1 | Scaffold17  | 170670                  | TT                              | AA                | 1946479212               |
| SNP_P3_101276_197503 | NW_004515647.1 | Scaffold17  | 197503                  | TT                              | CC                | 1946479214               |
| SNP_P3_101277_197512 | NW_004515647.1 | Scaffold17  | 197512                  | GG                              | AA                | 1946479215               |
| SNP_P3_101278_197518 | NW_004515647.1 | Scaffold17  | 197518                  | GG                              | TT                | 1946479217               |
| SNP_P3_101279_214991 | NW_004515647.1 | Scaffold17  | 214991                  | AA                              | TT                | 1946479218               |
| SNP_P3_101280_232065 | NW_004515647.1 | Scaffold17  | 232065                  | AA                              | TT                | 1946479220               |
| SNP_P3_101281_233347 | NW_004515647.1 | Scaffold17  | 233347                  | CC                              | GG                | 1946479221               |
| SNP_P3_101282_233541 | NW_004515647.1 | Scaffold17  | 233541                  | AA                              | TT                | 1946479223               |
| SNP_P3_101283_233595 | NW_004515647.1 | Scaffold17  | 233595                  | CC                              | TT                | 1946479224               |
| SNP_P3_101284_233659 | NW_004515647.1 | Scaffold17  | 233659                  | AA                              | GG                | 1946479225               |
| SNP_P3_101285_235594 | NW_004515647.1 | Scaffold17  | 235594                  | AA                              | TT                | 1946479227               |
| SNP_P3_101286_238441 | NW_004515647.1 | Scaffold17  | 238441                  | AA                              | GG                | 1946479228               |
| SNP_P3_101287_239765 | NW_004515647.1 | Scaffold17  | 239765                  | TT                              | AA                | 1946479230               |
| SNP_P3_101288_283485 | NW_004515647.1 | Scaffold17  | 283485                  | GG                              | AA                | 1946479231               |
| SNP_P3_101289_291623 | NW_004515647.1 | Scaffold17  | 291623                  | TT                              | CC                | 1946479233               |
| SNP_P3_101290_291830 | NW_004515647.1 | Scaffold17  | 291830                  | CC                              | TT                | 1946479234               |
| SNP_P3_101291_291917 | NW_004515647.1 | Scaffold17  | 291917                  | AA                              | TT                | 1946479236               |
| SNP_P3_101292_292010 | NW_004515647.1 | Scaffold17  | 292010                  | AA                              | TT                | 1946479237               |
| SNP_P3_101293_292068 | NW_004515647.1 | Scaffold17  | 292068                  | CC                              | TT                | 1946479239               |
| SNP_P3_101294_292224 | NW_004515647.1 | Scaffold17  | 292224                  | AA                              | GG                | 1946479240               |
| SNP_P3_101295_292267 | NW_004515647.1 | Scaffold17  | 292267                  | GG                              | AA                | 1946479242               |

| SNPs IDs             | Chromosome IDs | Chromosomes | Physical positions (bp) | CDC Frontier (Reference genome) | (Pusa 256 & HPNB) | NCBI SNPdb Accession IDs |
|----------------------|----------------|-------------|-------------------------|---------------------------------|-------------------|--------------------------|
| SNP_P3_101296_292273 | NW_004515647.1 | Scaffold17  | 292273                  | AA                              | CC                | 1946479243               |
| SNP_P3_101297_292274 | NW_004515647.1 | Scaffold17  | 292274                  | AA                              | GG                | 1946479245               |
| SNP_P3_101298_292593 | NW_004515647.1 | Scaffold17  | 292593                  | TT                              | GG                | 1946479246               |
| SNP_P3_101299_292796 | NW_004515647.1 | Scaffold17  | 292796                  | GG                              | AA                | 1946479248               |
| SNP_P3_101300_292869 | NW_004515647.1 | Scaffold17  | 292869                  | TT                              | CC                | 1946479249               |
| SNP_P3_101301_293110 | NW_004515647.1 | Scaffold17  | 293110                  | AA                              | TT                | 1946479251               |
| SNP_P3_101302_293317 | NW_004515647.1 | Scaffold17  | 293317                  | AA                              | CC                | 1946479252               |
| SNP_P3_101303_294785 | NW_004515647.1 | Scaffold17  | 294785                  | TT                              | AA                | 1946479254               |
| SNP_P3_101304_294810 | NW_004515647.1 | Scaffold17  | 294810                  | AA                              | GG                | 1946479255               |
| SNP_P3_101305_296737 | NW_004515647.1 | Scaffold17  | 296737                  | CC                              | AA                | 1946479257               |
| SNP_P3_101306_296993 | NW_004515647.1 | Scaffold17  | 296993                  | TT                              | CC                | 1946479258               |
| SNP_P3_101307_297240 | NW_004515647.1 | Scaffold17  | 297240                  | GG                              | AA                | 1946479260               |
| SNP_P3_101309_297506 | NW_004515647.1 | Scaffold17  | 297506                  | CC                              | TT                | 1946479262               |
| SNP_P3_101310_297823 | NW_004515647.1 | Scaffold17  | 297823                  | AA                              | GG                | 1946479264               |
| SNP_P3_101311_304219 | NW_004515647.1 | Scaffold17  | 304219                  | GG                              | TT                | 1946479265               |
| SNP_P3_101312_304335 | NW_004515647.1 | Scaffold17  | 304335                  | TT                              | CC                | 1946479267               |
| SNP_P3_101313_304380 | NW_004515647.1 | Scaffold17  | 304380                  | GG                              | TT                | 1946479269               |
| SNP_P3_101314_304598 | NW_004515647.1 | Scaffold17  | 304598                  | TT                              | CC                | 1946479270               |
| SNP_P3_101315_308245 | NW_004515647.1 | Scaffold17  | 308245                  | AA                              | GG                | 1946479272               |
| SNP_P3_101316_948    | NW_004515648.1 | Scaffold22  | 948                     | TT                              | CC                | 1946479273               |
| SNP_P3_101317_976    | NW_004515648.1 | Scaffold22  | 976                     | TT                              | CC                | 1946479275               |
| SNP_P3_101318_12988  | NW_004515648.1 | Scaffold22  | 12988                   | CC                              | TT                | 1946479276               |
| SNP_P3_101319_24398  | NW_004515648.1 | Scaffold22  | 24398                   | CC                              | TT                | 1946479278               |
| SNP_P3_101320_24407  | NW_004515648.1 | Scaffold22  | 24407                   | CC                              | TT                | 1946479279               |
| SNP_P3_101321_24426  | NW_004515648.1 | Scaffold22  | 24426                   | TT                              | GG                | 1946479281               |
| SNP_P3_101323_24530  | NW_004515648.1 | Scaffold22  | 24530                   | CC                              | TT                | 1946479282               |
| SNP_P3_101324_24869  | NW_004515648.1 | Scaffold22  | 24869                   | AA                              | GG                | 1946479284               |
| SNP_P3_101325_24879  | NW_004515648.1 | Scaffold22  | 24879                   | TT                              | CC                | 1946479285               |
| SNP_P3_101326_24948  | NW_004515648.1 | Scaffold22  | 24948                   | AA                              | TT                | 1946479287               |
| SNP_P3_101327_29606  | NW_004515648.1 | Scaffold22  | 29606                   | GG                              | TT                | 1946479288               |
| SNP_P3_101328_29661  | NW_004515648.1 | Scaffold22  | 29661                   | CC                              | TT                | 1946479290               |
| SNP_P3_101330_32666  | NW_004515648.1 | Scaffold22  | 32666                   | TT                              | CC                | 1946479291               |
| SNP_P3_101331_34133  | NW_004515648.1 | Scaffold22  | 34133                   | TT                              | CC                | 1946479293               |
| SNP_P3_101333_34280  | NW_004515648.1 | Scaffold22  | 34280                   | TT                              | CC                | 1946479294               |
| SNP_P3_101334_34316  | NW_004515648.1 | Scaffold22  | 34316                   | TT                              | CC                | 1946479296               |
| SNP_P3_101335_34359  | NW_004515648.1 | Scaffold22  | 34359                   | AA                              | CC                | 1946479297               |
| SNP_P3_101336_34369  | NW_004515648.1 | Scaffold22  | 34369                   | TT                              | CC                | 1946479299               |
| SNP_P3_101337_34394  | NW_004515648.1 | Scaffold22  | 34394                   | AA                              | GG                | 1946479301               |
| SNP_P3_101338_34427  | NW_004515648.1 | Scaffold22  | 34427                   | CC                              | AA                | 1946479302               |
| SNP_P3_101339_34429  | NW_004515648.1 | Scaffold22  | 34429                   | GG                              | AA                | 1946479304               |
| SNP_P3_101340_34434  | NW_004515648.1 | Scaffold22  | 34434                   | TT                              | GG                | 1946479305               |
| SNP_P3_101341_34493  | NW_004515648.1 | Scaffold22  | 34493                   | TT                              | GG                | 1946479307               |

| SNPs IDs            | Chromosome IDs | Chromosomes | Physical positions (bp) | CDC Frontier (Reference genome) | (Pusa 256 & HPNB) | NCBI SNPdb Accession IDs |
|---------------------|----------------|-------------|-------------------------|---------------------------------|-------------------|--------------------------|
| SNP_P3_101343_34570 | NW_004515648.1 | Scaffold22  | 34570                   | CC                              | TT                | 1946479308               |
| SNP_P3_101344_34585 | NW_004515648.1 | Scaffold22  | 34585                   | CC                              | TT                | 1946479310               |
| SNP_P3_101345_34586 | NW_004515648.1 | Scaffold22  | 34586                   | TT                              | GG                | 1946479311               |
| SNP_P3_101346_34592 | NW_004515648.1 | Scaffold22  | 34592                   | CC                              | GG                | 1946479313               |
| SNP_P3_101347_34647 | NW_004515648.1 | Scaffold22  | 34647                   | GG                              | TT                | 1946479314               |
| SNP_P3_101348_34724 | NW_004515648.1 | Scaffold22  | 34724                   | TT                              | CC                | 1946479316               |
| SNP_P3_101349_34752 | NW_004515648.1 | Scaffold22  | 34752                   | GG                              | AA                | 1946479317               |
| SNP_P3_101350_34761 | NW_004515648.1 | Scaffold22  | 34761                   | AA                              | GG                | 1946479319               |
| SNP_P3_101351_34766 | NW_004515648.1 | Scaffold22  | 34766                   | GG                              | AA                | 1946479320               |
| SNP_P3_101352_34767 | NW_004515648.1 | Scaffold22  | 34767                   | GG                              | AA                | 1946479322               |
| SNP_P3_101353_34810 | NW_004515648.1 | Scaffold22  | 34810                   | CC                              | AA                | 1946479323               |
| SNP_P3_101354_34841 | NW_004515648.1 | Scaffold22  | 34841                   | CC                              | AA                | 1946479325               |
| SNP_P3_101355_34855 | NW_004515648.1 | Scaffold22  | 34855                   | CC                              | AA                | 1946479326               |
| SNP_P3_101356_34856 | NW_004515648.1 | Scaffold22  | 34856                   | AA                              | GG                | 1946479328               |
| SNP_P3_101357_34998 | NW_004515648.1 | Scaffold22  | 34998                   | CC                              | GG                | 1946479329               |
| SNP_P3_101358_35026 | NW_004515648.1 | Scaffold22  | 35026                   | GG                              | AA                | 1946479331               |
| SNP_P3_101359_35041 | NW_004515648.1 | Scaffold22  | 35041                   | TT                              | AA                | 1946479332               |
| SNP_P3_101360_35057 | NW_004515648.1 | Scaffold22  | 35057                   | CC                              | TT                | 1946479334               |
| SNP_P3_101361_35061 | NW_004515648.1 | Scaffold22  | 35061                   | GG                              | CC                | 1946479335               |
| SNP_P3_101362_35063 | NW_004515648.1 | Scaffold22  | 35063                   | GG                              | AA                | 1946479337               |
| SNP_P3_101363_41747 | NW_004515648.1 | Scaffold22  | 41747                   | AA                              | GG                | 1946479338               |
| SNP_P3_101364_41837 | NW_004515648.1 | Scaffold22  | 41837                   | GG                              | TT                | 1946479340               |
| SNP_P3_101365_41915 | NW_004515648.1 | Scaffold22  | 41915                   | AA                              | GG                | 1946479342               |
| SNP_P3_101366_243   | NW_004515649.1 | Scaffold25  | 243                     | CC                              | TT                | 1946479343               |
| SNP_P3_101367_338   | NW_004515649.1 | Scaffold25  | 338                     | AA                              | TT                | 1946479345               |
| SNP_P3_101368_450   | NW_004515649.1 | Scaffold25  | 450                     | AA                              | TT                | 1946479346               |
| SNP_P3_101369_14336 | NW_004515649.1 | Scaffold25  | 14336                   | TT                              | CC                | 1946479348               |
| SNP_P3_101370_14756 | NW_004515649.1 | Scaffold25  | 14756                   | CC                              | GG                | 1946479349               |
| SNP_P3_101371_16117 | NW_004515649.1 | Scaffold25  | 16117                   | AA                              | GG                | 1946479351               |
| SNP_P3_101372_16358 | NW_004515649.1 | Scaffold25  | 16358                   | TT                              | GG                | 1946479352               |
| SNP_P3_101373_16427 | NW_004515649.1 | Scaffold25  | 16427                   | AA                              | GG                | 1946479354               |
| SNP_P3_101374_17215 | NW_004515649.1 | Scaffold25  | 17215                   | TT                              | GG                | 1946479356               |
| SNP_P3_101375_17298 | NW_004515649.1 | Scaffold25  | 17298                   | TT                              | GG                | 1946479357               |
| SNP_P3_101376_19368 | NW_004515649.1 | Scaffold25  | 19368                   | TT                              | GG                | 1946479359               |
| SNP_P3_101377_19475 | NW_004515649.1 | Scaffold25  | 19475                   | TT                              | CC                | 1946479360               |
| SNP_P3_101378_19490 | NW_004515649.1 | Scaffold25  | 19490                   | AA                              | TT                | 1946479362               |
| SNP_P3_101379_20091 | NW_004515649.1 | Scaffold25  | 20091                   | CC                              | TT                | 1946479363               |
| SNP_P3_101380_20369 | NW_004515649.1 | Scaffold25  | 20369                   | TT                              | CC                | 1946479365               |
| SNP_P3_101381_22512 | NW_004515649.1 | Scaffold25  | 22512                   | CC                              | TT                | 1946479366               |
| SNP_P3_101382_33851 | NW_004515649.1 | Scaffold25  | 33851                   | AA                              | TT                | 1946479368               |
| SNP_P3_101383_35323 | NW_004515649.1 | Scaffold25  | 35323                   | TT                              | AA                | 1946479369               |
| SNP_P3_101384_39027 | NW_004515649.1 | Scaffold25  | 39027                   | TT                              | AA                | 1946479371               |

| SNPs IDs            | Chromosome IDs | Chromosomes | Physical positions (bp) | CDC Frontier (Reference genome) | (Pusa 256 & HPNB) | NCBI SNPdb Accession IDs |
|---------------------|----------------|-------------|-------------------------|---------------------------------|-------------------|--------------------------|
| SNP_P3_101385_39357 | NW_004515649.1 | Scaffold25  | 39357                   | GG                              | AA                | 1946479372               |
| SNP_P3_101386_39449 | NW_004515649.1 | Scaffold25  | 39449                   | TT                              | AA                | 1946479374               |
| SNP_P3_101387_39747 | NW_004515649.1 | Scaffold25  | 39747                   | GG                              | TT                | 1946479376               |
| SNP_P3_101388_41791 | NW_004515649.1 | Scaffold25  | 41791                   | GG                              | TT                | 1946479377               |
| SNP_P3_101389_43124 | NW_004515649.1 | Scaffold25  | 43124                   | CC                              | TT                | 1946479379               |
| SNP_P3_101390_43131 | NW_004515649.1 | Scaffold25  | 43131                   | CC                              | AA                | 1946479380               |
| SNP_P3_101391_43344 | NW_004515649.1 | Scaffold25  | 43344                   | GG                              | AA                | 1946479382               |
| SNP_P3_101392_44734 | NW_004515649.1 | Scaffold25  | 44734                   | GG                              | AA                | 1946479384               |
| SNP_P3_101393_44735 | NW_004515649.1 | Scaffold25  | 44735                   | CC                              | TT                | 1946479385               |
| SNP_P3_101394_45631 | NW_004515649.1 | Scaffold25  | 45631                   | AA                              | GG                | 1946479387               |
| SNP_P3_101395_46051 | NW_004515649.1 | Scaffold25  | 46051                   | AA                              | GG                | 1946479388               |
| SNP_P3_101396_46342 | NW_004515649.1 | Scaffold25  | 46342                   | CC                              | TT                | 1946479390               |
| SNP_P3_101397_46477 | NW_004515649.1 | Scaffold25  | 46477                   | GG                              | CC                | 1946479391               |
| SNP_P3_101398_49152 | NW_004515649.1 | Scaffold25  | 49152                   | CC                              | TT                | 1946479393               |
| SNP_P3_101399_49188 | NW_004515649.1 | Scaffold25  | 49188                   | AA                              | TT                | 1946479394               |
| SNP_P3_101400_49189 | NW_004515649.1 | Scaffold25  | 49189                   | CC                              | TT                | 1946479396               |
| SNP_P3_101401_49517 | NW_004515649.1 | Scaffold25  | 49517                   | GG                              | AA                | 1946479397               |
| SNP_P3_101402_50994 | NW_004515649.1 | Scaffold25  | 50994                   | TT                              | AA                | 1946479399               |
| SNP_P3_101403_51026 | NW_004515649.1 | Scaffold25  | 51026                   | TT                              | CC                | 1946479400               |
| SNP_P3_101404_51182 | NW_004515649.1 | Scaffold25  | 51182                   | TT                              | CC                | 1946479402               |
| SNP_P3_101405_51412 | NW_004515649.1 | Scaffold25  | 51412                   | TT                              | CC                | 1946479403               |
| SNP_P3_101407_52907 | NW_004515649.1 | Scaffold25  | 52907                   | GG                              | CC                | 1946479405               |
| SNP_P3_101408_55183 | NW_004515649.1 | Scaffold25  | 55183                   | AA                              | GG                | 1946479406               |
| SNP_P3_101409_55358 | NW_004515649.1 | Scaffold25  | 55358                   | GG                              | TT                | 1946479408               |
| SNP_P3_101410_56303 | NW_004515649.1 | Scaffold25  | 56303                   | TT                              | GG                | 1946479409               |
| SNP_P3_101411_57118 | NW_004515649.1 | Scaffold25  | 57118                   | CC                              | TT                | 1946479411               |
| SNP_P3_101412_57128 | NW_004515649.1 | Scaffold25  | 57128                   | CC                              | TT                | 1946479412               |
| SNP_P3_101413_58218 | NW_004515649.1 | Scaffold25  | 58218                   | CC                              | GG                | 1946479414               |
| SNP_P3_101414_59877 | NW_004515649.1 | Scaffold25  | 59877                   | GG                              | TT                | 1946479415               |
| SNP_P3_101415_60400 | NW_004515649.1 | Scaffold25  | 60400                   | GG                              | CC                | 1946479417               |
| SNP_P3_101416_60420 | NW_004515649.1 | Scaffold25  | 60420                   | AA                              | CC                | 1946479418               |
| SNP_P3_101417_60432 | NW_004515649.1 | Scaffold25  | 60432                   | CC                              | TT                | 1946479420               |
| SNP_P3_101418_60584 | NW_004515649.1 | Scaffold25  | 60584                   | AA                              | TT                | 1946479421               |
| SNP_P3_101419_60686 | NW_004515649.1 | Scaffold25  | 60686                   | AA                              | GG                | 1946479423               |
| SNP_P3_101420_60706 | NW_004515649.1 | Scaffold25  | 60706                   | AA                              | TT                | 1946479424               |
| SNP_P3_101421_60728 | NW_004515649.1 | Scaffold25  | 60728                   | CC                              | TT                | 1946479426               |
| SNP_P3_101422_61777 | NW_004515649.1 | Scaffold25  | 61777                   | TT                              | CC                | 1946479428               |
| SNP_P3_101423_61974 | NW_004515649.1 | Scaffold25  | 61974                   | CC                              | GG                | 1946479429               |
| SNP_P3_101424_62048 | NW_004515649.1 | Scaffold25  | 62048                   | CC                              | AA                | 1946479431               |
| SNP_P3_101425_62183 | NW_004515649.1 | Scaffold25  | 62183                   | AA                              | CC                | 1946479432               |
| SNP_P3_101426_62277 | NW_004515649.1 | Scaffold25  | 62277                   | GG                              | AA                | 1946479434               |
| SNP_P3_101427_67202 | NW_004515649.1 | Scaffold25  | 67202                   | TT                              | CC                | 1946479435               |

| SNPs IDs             | Chromosome IDs | Chromosomes | Physical positions (bp) | CDC Frontier (Reference genome) | (Pusa 256 & HPNB) | NCBI SNPdb Accession IDs |
|----------------------|----------------|-------------|-------------------------|---------------------------------|-------------------|--------------------------|
| SNP_P3_101428_68382  | NW_004515649.1 | Scaffold25  | 68382                   | AA                              | GG                | 1946479437               |
| SNP_P3_101429_70294  | NW_004515649.1 | Scaffold25  | 70294                   | AA                              | GG                | 1946479439               |
| SNP_P3_101430_71168  | NW_004515649.1 | Scaffold25  | 71168                   | CC                              | TT                | 1946479440               |
| SNP_P3_101432_71238  | NW_004515649.1 | Scaffold25  | 71238                   | AA                              | GG                | 1946479442               |
| SNP_P3_101433_71304  | NW_004515649.1 | Scaffold25  | 71304                   | GG                              | TT                | 1946479443               |
| SNP_P3_101434_71429  | NW_004515649.1 | Scaffold25  | 71429                   | AA                              | GG                | 1946479445               |
| SNP_P3_101435_71792  | NW_004515649.1 | Scaffold25  | 71792                   | AA                              | GG                | 1946479446               |
| SNP_P3_101436_72094  | NW_004515649.1 | Scaffold25  | 72094                   | TT                              | GG                | 1946479448               |
| SNP_P3_101437_72104  | NW_004515649.1 | Scaffold25  | 72104                   | GG                              | AA                | 1946479449               |
| SNP_P3_101438_72119  | NW_004515649.1 | Scaffold25  | 72119                   | CC                              | TT                | 1946479451               |
| SNP_P3_101439_72136  | NW_004515649.1 | Scaffold25  | 72136                   | GG                              | AA                | 1946479452               |
| SNP_P3_101440_72137  | NW_004515649.1 | Scaffold25  | 72137                   | AA                              | GG                | 1946479454               |
| SNP_P3_101442_73453  | NW_004515649.1 | Scaffold25  | 73453                   | CC                              | TT                | 1946479455               |
| SNP_P3_101443_73699  | NW_004515649.1 | Scaffold25  | 73699                   | GG                              | CC                | 1946479457               |
| SNP_P3_101444_74394  | NW_004515649.1 | Scaffold25  | 74394                   | TT                              | AA                | 1946479458               |
| SNP_P3_101445_76056  | NW_004515649.1 | Scaffold25  | 76056                   | AA                              | CC                | 1946479460               |
| SNP_P3_101447_77108  | NW_004515649.1 | Scaffold25  | 77108                   | CC                              | AA                | 1946479461               |
| SNP_P3_101448_78452  | NW_004515649.1 | Scaffold25  | 78452                   | CC                              | AA                | 1946479463               |
| SNP_P3_101449_78453  | NW_004515649.1 | Scaffold25  | 78453                   | CC                              | TT                | 1946479464               |
| SNP_P3_101450_79083  | NW_004515649.1 | Scaffold25  | 79083                   | AA                              | CC                | 1946479466               |
| SNP_P3_101451_6083   | NW_004515650.1 | Scaffold26  | 6083                    | TT                              | CC                | 1946479467               |
| SNP_P3_101452_6365   | NW_004515650.1 | Scaffold26  | 6365                    | GG                              | AA                | 1946479469               |
| SNP_P3_101453_6373   | NW_004515650.1 | Scaffold26  | 6373                    | CC                              | TT                | 1946479470               |
| SNP_P3_101454_18862  | NW_004515650.1 | Scaffold26  | 18862                   | TT                              | CC                | 1946479472               |
| SNP_P3_101455_18870  | NW_004515650.1 | Scaffold26  | 18870                   | AA                              | CC                | 1946479473               |
| SNP_P3_101456_18894  | NW_004515650.1 | Scaffold26  | 18894                   | CC                              | AA                | 1946479475               |
| SNP_P3_101457_20468  | NW_004515650.1 | Scaffold26  | 20468                   | GG                              | AA                | 1946479476               |
| SNP_P3_101459_20879  | NW_004515650.1 | Scaffold26  | 20879                   | GG                              | CC                | 1946479478               |
| SNP_P3_101460_21268  | NW_004515650.1 | Scaffold26  | 21268                   | CC                              | AA                | 1946479479               |
| SNP_P3_101461_21294  | NW_004515650.1 | Scaffold26  | 21294                   | AA                              | GG                | 1946479481               |
| SNP_P3_101462_21308  | NW_004515650.1 | Scaffold26  | 21308                   | TT                              | CC                | 1946479482               |
| SNP_P3_101463_31295  | NW_004515650.1 | Scaffold26  | 31295                   | TT                              | GG                | 1946479484               |
| SNP_P3_101464_56693  | NW_004515650.1 | Scaffold26  | 56693                   | CC                              | TT                | 1946479485               |
| SNP_P3_101465_74477  | NW_004515650.1 | Scaffold26  | 74477                   | TT                              | GG                | 1946479487               |
| SNP_P3_101467_112272 | NW_004515650.1 | Scaffold26  | 112272                  | CC                              | AA                | 1946479488               |
| SNP_P3_101468_112312 | NW_004515650.1 | Scaffold26  | 112312                  | GG                              | AA                | 1946479490               |
| SNP_P3_101469_112374 | NW_004515650.1 | Scaffold26  | 112374                  | TT                              | GG                | 1946479491               |
| SNP_P3_101470_112376 | NW_004515650.1 | Scaffold26  | 112376                  | AA                              | GG                | 1946479493               |
| SNP_P3_101471_127544 | NW_004515650.1 | Scaffold26  | 127544                  | CC                              | AA                | 1946479494               |
| SNP_P3_101472_128832 | NW_004515650.1 | Scaffold26  | 128832                  | AA                              | GG                | 1946479496               |
| SNP_P3_101473_128916 | NW_004515650.1 | Scaffold26  | 128916                  | GG                              | TT                | 1946479497               |
| SNP_P3_101474_128983 | NW_004515650.1 | Scaffold26  | 128983                  | AA                              | GG                | 1946479499               |



| SNPs IDs             | Chromosome IDs | Chromosomes | Physical positions (bp) | CDC Frontier (Reference genome) | (Pusa 256 & HPNB) | NCBI SNPdb Accession IDs |
|----------------------|----------------|-------------|-------------------------|---------------------------------|-------------------|--------------------------|
| SNP_P3_101475_129117 | NW_004515650.1 | Scaffold26  | 129117                  | TT                              | CC                | 1946479500               |
| SNP_P3_101476_129131 | NW_004515650.1 | Scaffold26  | 129131                  | AA                              | GG                | 1946479502               |
| SNP_P3_101477_134135 | NW_004515650.1 | Scaffold26  | 134135                  | GG                              | AA                | 1946479503               |
| SNP_P3_101478_134191 | NW_004515650.1 | Scaffold26  | 134191                  | CC                              | TT                | 1946479505               |
| SNP_P3_101479_145329 | NW_004515650.1 | Scaffold26  | 145329                  | CC                              | AA                | 1946479506               |
| SNP_P3_101480_146917 | NW_004515650.1 | Scaffold26  | 146917                  | CC                              | GG                | 1946479508               |
| SNP_P3_101481_167007 | NW_004515650.1 | Scaffold26  | 167007                  | GG                              | TT                | 1946479509               |
| SNP_P3_101483_173502 | NW_004515650.1 | Scaffold26  | 173502                  | TT                              | GG                | 1946479511               |
| SNP_P3_101484_191780 | NW_004515650.1 | Scaffold26  | 191780                  | GG                              | AA                | 1946479512               |
| SNP_P3_101485_193936 | NW_004515650.1 | Scaffold26  | 193936                  | TT                              | CC                | 1946479514               |
| SNP_P3_101486_193965 | NW_004515650.1 | Scaffold26  | 193965                  | AA                              | CC                | 1946479515               |
| SNP_P3_101487_193993 | NW_004515650.1 | Scaffold26  | 193993                  | GG                              | AA                | 1946479517               |
| SNP_P3_101488_194301 | NW_004515650.1 | Scaffold26  | 194301                  | TT                              | AA                | 1946479518               |
| SNP_P3_101490_208894 | NW_004515650.1 | Scaffold26  | 208894                  | AA                              | GG                | 1946479520               |
| SNP_P3_101491_208902 | NW_004515650.1 | Scaffold26  | 208902                  | AA                              | TT                | 1946479521               |
| SNP_P3_101492_208904 | NW_004515650.1 | Scaffold26  | 208904                  | AA                              | CC                | 1946479523               |
| SNP_P3_101493_208905 | NW_004515650.1 | Scaffold26  | 208905                  | TT                              | CC                | 1946479525               |
| SNP_P3_101494_208906 | NW_004515650.1 | Scaffold26  | 208906                  | AA                              | TT                | 1946479526               |
| SNP_P3_101496_209176 | NW_004515650.1 | Scaffold26  | 209176                  | GG                              | AA                | 1946479528               |
| SNP_P3_101497_209193 | NW_004515650.1 | Scaffold26  | 209193                  | AA                              | GG                | 1946479529               |
| SNP_P3_101498_209241 | NW_004515650.1 | Scaffold26  | 209241                  | GG                              | CC                | 1946479531               |
| SNP_P3_101499_224266 | NW_004515650.1 | Scaffold26  | 224266                  | TT                              | CC                | 1946479532               |
| SNP_P3_101500_224290 | NW_004515650.1 | Scaffold26  | 224290                  | TT                              | CC                | 1946479534               |
| SNP_P3_101501_224308 | NW_004515650.1 | Scaffold26  | 224308                  | TT                              | AA                | 1946479535               |
| SNP_P3_101502_224325 | NW_004515650.1 | Scaffold26  | 224325                  | GG                              | AA                | 1946479537               |
| SNP_P3_101503_224354 | NW_004515650.1 | Scaffold26  | 224354                  | GG                              | AA                | 1946479538               |
| SNP_P3_101504_224358 | NW_004515650.1 | Scaffold26  | 224358                  | GG                              | AA                | 1946479540               |
| SNP_P3_101505_224405 | NW_004515650.1 | Scaffold26  | 224405                  | TT                              | CC                | 1946479541               |
| SNP_P3_101506_224532 | NW_004515650.1 | Scaffold26  | 224532                  | GG                              | AA                | 1946479543               |
| SNP_P3_101507_224685 | NW_004515650.1 | Scaffold26  | 224685                  | TT                              | CC                | 1946479545               |
| SNP_P3_101508_227551 | NW_004515650.1 | Scaffold26  | 227551                  | TT                              | AA                | 1946479546               |
| SNP_P3_101509_227573 | NW_004515650.1 | Scaffold26  | 227573                  | GG                              | AA                | 1946479548               |
| SNP_P3_101510_227668 | NW_004515650.1 | Scaffold26  | 227668                  | TT                              | CC                | 1946479549               |
| SNP_P3_101511_227709 | NW_004515650.1 | Scaffold26  | 227709                  | TT                              | CC                | 1946479551               |
| SNP_P3_101512_227799 | NW_004515650.1 | Scaffold26  | 227799                  | TT                              | CC                | 1946479552               |
| SNP_P3_101513_227820 | NW_004515650.1 | Scaffold26  | 227820                  | AA                              | GG                | 1946479554               |
| SNP_P3_101514_227825 | NW_004515650.1 | Scaffold26  | 227825                  | GG                              | AA                | 1946479555               |
| SNP_P3_101515_288525 | NW_004515650.1 | Scaffold26  | 288525                  | AA                              | GG                | 1946479557               |
| SNP_P3_101516_294816 | NW_004515650.1 | Scaffold26  | 294816                  | AA                              | GG                | 1946479559               |
| SNP_P3_101517_295048 | NW_004515650.1 | Scaffold26  | 295048                  | CC                              | TT                | 1946479560               |
| SNP_P3_101518_295068 | NW_004515650.1 | Scaffold26  | 295068                  | GG                              | AA                | 1946479562               |
| SNP_P3_101519_295077 | NW_004515650.1 | Scaffold26  | 295077                  | CC                              | TT                | 1946479563               |

| SNPs IDs             | Chromosome IDs | Chromosomes | Physical positions (bp) | CDC Frontier (Reference genome) | (Pusa 256 & HPNB) | NCBI SNPdb Accession IDs |
|----------------------|----------------|-------------|-------------------------|---------------------------------|-------------------|--------------------------|
| SNP_P3_101520_295090 | NW_004515650.1 | Scaffold26  | 295090                  | GG                              | TT                | 1946479565               |
| SNP_P3_101521_295120 | NW_004515650.1 | Scaffold26  | 295120                  | GG                              | TT                | 1946479566               |
| SNP_P3_101522_295129 | NW_004515650.1 | Scaffold26  | 295129                  | TT                              | GG                | 1946479568               |
| SNP_P3_101523_295133 | NW_004515650.1 | Scaffold26  | 295133                  | AA                              | GG                | 1946479569               |
| SNP_P3_101524_295135 | NW_004515650.1 | Scaffold26  | 295135                  | GG                              | AA                | 1946479571               |
| SNP_P3_101525_295160 | NW_004515650.1 | Scaffold26  | 295160                  | TT                              | GG                | 1946479572               |
| SNP_P3_101526_295168 | NW_004515650.1 | Scaffold26  | 295168                  | CC                              | TT                | 1946479574               |
| SNP_P3_101527_295260 | NW_004515650.1 | Scaffold26  | 295260                  | TT                              | CC                | 1946479576               |
| SNP_P3_101528_295317 | NW_004515650.1 | Scaffold26  | 295317                  | CC                              | TT                | 1946479577               |
| SNP_P3_101529_295327 | NW_004515650.1 | Scaffold26  | 295327                  | CC                              | TT                | 1946479579               |
| SNP_P3_101531_352924 | NW_004515650.1 | Scaffold26  | 352924                  | TT                              | GG                | 1946479580               |
| SNP_P3_101532_352926 | NW_004515650.1 | Scaffold26  | 352926                  | TT                              | AA                | 1946479582               |
| SNP_P3_101533_429913 | NW_004515650.1 | Scaffold26  | 429913                  | GG                              | TT                | 1946479584               |
| SNP_P3_101534_455741 | NW_004515650.1 | Scaffold26  | 455741                  | AA                              | GG                | 1946479585               |
| SNP_P3_101535_469782 | NW_004515650.1 | Scaffold26  | 469782                  | CC                              | TT                | 1946479587               |
| SNP_P3_101536_486081 | NW_004515650.1 | Scaffold26  | 486081                  | TT                              | CC                | 1946479588               |
| SNP_P3_101537_486102 | NW_004515650.1 | Scaffold26  | 486102                  | TT                              | CC                | 1946479590               |
| SNP_P3_101538_486116 | NW_004515650.1 | Scaffold26  | 486116                  | TT                              | CC                | 1946479591               |
| SNP_P3_101539_488463 | NW_004515650.1 | Scaffold26  | 488463                  | GG                              | AA                | 1946479593               |
| SNP_P3_101540_491117 | NW_004515650.1 | Scaffold26  | 491117                  | GG                              | AA                | 1946479594               |
| SNP_P3_101541_491144 | NW_004515650.1 | Scaffold26  | 491144                  | AA                              | TT                | 1946479596               |
| SNP_P3_101542_491145 | NW_004515650.1 | Scaffold26  | 491145                  | AA                              | CC                | 1946479598               |
| SNP_P3_101543_491234 | NW_004515650.1 | Scaffold26  | 491234                  | TT                              | GG                | 1946479599               |
| SNP_P3_101544_501272 | NW_004515650.1 | Scaffold26  | 501272                  | TT                              | GG                | 1946479601               |
| SNP_P3_101545_501454 | NW_004515650.1 | Scaffold26  | 501454                  | GG                              | AA                | 1946479602               |
| SNP_P3_101546_501728 | NW_004515650.1 | Scaffold26  | 501728                  | TT                              | CC                | 1946479604               |
| SNP_P3_101547_502182 | NW_004515650.1 | Scaffold26  | 502182                  | GG                              | TT                | 1946479605               |
| SNP_P3_101548_502489 | NW_004515650.1 | Scaffold26  | 502489                  | GG                              | AA                | 1946479607               |
| SNP_P3_101549_502923 | NW_004515650.1 | Scaffold26  | 502923                  | TT                              | AA                | 1946479608               |
| SNP_P3_101550_502956 | NW_004515650.1 | Scaffold26  | 502956                  | GG                              | AA                | 1946479610               |
| SNP_P3_101551_502966 | NW_004515650.1 | Scaffold26  | 502966                  | TT                              | CC                | 1946479611               |
| SNP_P3_101552_503124 | NW_004515650.1 | Scaffold26  | 503124                  | TT                              | CC                | 1946479613               |
| SNP_P3_101553_503238 | NW_004515650.1 | Scaffold26  | 503238                  | AA                              | GG                | 1946479615               |
| SNP_P3_101554_503260 | NW_004515650.1 | Scaffold26  | 503260                  | GG                              | AA                | 1946479616               |
| SNP_P3_101555_503274 | NW_004515650.1 | Scaffold26  | 503274                  | AA                              | GG                | 1946479618               |
| SNP_P3_101556_503289 | NW_004515650.1 | Scaffold26  | 503289                  | GG                              | CC                | 1946479619               |
| SNP_P3_101557_503328 | NW_004515650.1 | Scaffold26  | 503328                  | AA                              | GG                | 1946479621               |
| SNP_P3_101558_503354 | NW_004515650.1 | Scaffold26  | 503354                  | TT                              | CC                | 1946479622               |
| SNP_P3_101559_503370 | NW_004515650.1 | Scaffold26  | 503370                  | AA                              | GG                | 1946479624               |
| SNP_P3_101560_503376 | NW_004515650.1 | Scaffold26  | 503376                  | CC                              | TT                | 1946479626               |
| SNP_P3_101561_503383 | NW_004515650.1 | Scaffold26  | 503383                  | TT                              | CC                | 1946479627               |
| SNP_P3_101562_503393 | NW_004515650.1 | Scaffold26  | 503393                  | GG                              | AA                | 1946479629               |

| SNPs IDs             | Chromosome IDs | Chromosomes | Physical positions (bp) | CDC Frontier (Reference genome) | (Pusa 256 & HPNB) | NCBI SNPdb Accession IDs |
|----------------------|----------------|-------------|-------------------------|---------------------------------|-------------------|--------------------------|
| SNP_P3_101563_503409 | NW_004515650.1 | Scaffold26  | 503409                  | TT                              | CC                | 1946479630               |
| SNP_P3_101564_503431 | NW_004515650.1 | Scaffold26  | 503431                  | AA                              | GG                | 1946479632               |
| SNP_P3_101565_503437 | NW_004515650.1 | Scaffold26  | 503437                  | TT                              | CC                | 1946479634               |
| SNP_P3_101568_506276 | NW_004515650.1 | Scaffold26  | 506276                  | TT                              | GG                | 1946479636               |
| SNP_P3_101569_506293 | NW_004515650.1 | Scaffold26  | 506293                  | AA                              | TT                | 1946479637               |
| SNP_P3_101570_513520 | NW_004515650.1 | Scaffold26  | 513520                  | TT                              | CC                | 1946479639               |
| SNP_P3_101571_518187 | NW_004515650.1 | Scaffold26  | 518187                  | GG                              | AA                | 1946479640               |
| SNP_P3_101573_543969 | NW_004515650.1 | Scaffold26  | 543969                  | CC                              | TT                | 1946479642               |
| SNP_P3_101574_544848 | NW_004515650.1 | Scaffold26  | 544848                  | CC                              | TT                | 1946479644               |
| SNP_P3_101575_545091 | NW_004515650.1 | Scaffold26  | 545091                  | TT                              | CC                | 1946479645               |
| SNP_P3_101576_545195 | NW_004515650.1 | Scaffold26  | 545195                  | AA                              | TT                | 1946479647               |
| SNP_P3_101577_546027 | NW_004515650.1 | Scaffold26  | 546027                  | TT                              | CC                | 1946479649               |
| SNP_P3_101579_560141 | NW_004515650.1 | Scaffold26  | 560141                  | TT                              | GG                | 1946479650               |
| SNP_P3_101580_560158 | NW_004515650.1 | Scaffold26  | 560158                  | AA                              | GG                | 1946479652               |
| SNP_P3_101581_575697 | NW_004515650.1 | Scaffold26  | 575697                  | CC                              | TT                | 1946479654               |
| SNP_P3_101582_575700 | NW_004515650.1 | Scaffold26  | 575700                  | TT                              | CC                | 1946479655               |
| SNP_P3_101583_575747 | NW_004515650.1 | Scaffold26  | 575747                  | CC                              | GG                | 1946479657               |
| SNP_P3_101584_575761 | NW_004515650.1 | Scaffold26  | 575761                  | CC                              | TT                | 1946479658               |
| SNP_P3_101585_575776 | NW_004515650.1 | Scaffold26  | 575776                  | CC                              | AA                | 1946479660               |
| SNP_P3_101586_575788 | NW_004515650.1 | Scaffold26  | 575788                  | GG                              | AA                | 1946479661               |
| SNP_P3_101587_611341 | NW_004515650.1 | Scaffold26  | 611341                  | TT                              | CC                | 1946479663               |
| SNP_P3_101588_122    | NW_004515651.1 | Scaffold29  | 122                     | CC                              | GG                | 1946479665               |
| SNP_P3_101589_404    | NW_004515651.1 | Scaffold29  | 404                     | GG                              | AA                | 1946479666               |
| SNP_P3_101590_658    | NW_004515651.1 | Scaffold29  | 658                     | TT                              | GG                | 1946479668               |
| SNP_P3_101591_661    | NW_004515651.1 | Scaffold29  | 661                     | AA                              | CC                | 1946479670               |
| SNP_P3_101592_2493   | NW_004515651.1 | Scaffold29  | 2493                    | TT                              | CC                | 1946479671               |
| SNP_P3_101593_3108   | NW_004515651.1 | Scaffold29  | 3108                    | AA                              | TT                | 1946479673               |
| SNP_P3_101594_3143   | NW_004515651.1 | Scaffold29  | 3143                    | AA                              | GG                | 1946479674               |
| SNP_P3_101595_3169   | NW_004515651.1 | Scaffold29  | 3169                    | GG                              | AA                | 1946479676               |
| SNP_P3_101596_5897   | NW_004515651.1 | Scaffold29  | 5897                    | GG                              | AA                | 1946479678               |
| SNP_P3_101597_6672   | NW_004515651.1 | Scaffold29  | 6672                    | GG                              | AA                | 1946479679               |
| SNP_P3_101598_7416   | NW_004515651.1 | Scaffold29  | 7416                    | AA                              | GG                | 1946479681               |
| SNP_P3_101599_12789  | NW_004515651.1 | Scaffold29  | 12789                   | TT                              | CC                | 1946479683               |
| SNP_P3_101600_16745  | NW_004515651.1 | Scaffold29  | 16745                   | AA                              | TT                | 1946479684               |
| SNP_P3_101601_22448  | NW_004515651.1 | Scaffold29  | 22448                   | CC                              | AA                | 1946479686               |
| SNP_P3_101602_28113  | NW_004515651.1 | Scaffold29  | 28113                   | CC                              | AA                | 1946479688               |
| SNP_P3_101603_28192  | NW_004515651.1 | Scaffold29  | 28192                   | GG                              | CC                | 1946479689               |
| SNP_P3_101604_34003  | NW_004515651.1 | Scaffold29  | 34003                   | AA                              | GG                | 1946479691               |
| SNP_P3_101605_41653  | NW_004515651.1 | Scaffold29  | 41653                   | TT                              | CC                | 1946479692               |
| SNP_P3_101606_42386  | NW_004515651.1 | Scaffold29  | 42386                   | CC                              | AA                | 1946479694               |
| SNP_P3_101607_42427  | NW_004515651.1 | Scaffold29  | 42427                   | CC                              | GG                | 1946479695               |
| SNP_P3_101608_43232  | NW_004515651.1 | Scaffold29  | 43232                   | TT                              | CC                | 1946479697               |

| SNPs IDs            | Chromosome IDs | Chromosomes | Physical positions (bp) | CDC Frontier (Reference genome) | (Pusa 256 & HPNB) | NCBI SNPdb Accession IDs |
|---------------------|----------------|-------------|-------------------------|---------------------------------|-------------------|--------------------------|
| SNP_P3_101609_43542 | NW_004515651.1 | Scaffold29  | 43542                   | AA                              | GG                | 1946479699               |
| SNP_P3_101610_45465 | NW_004515651.1 | Scaffold29  | 45465                   | AA                              | CC                | 1946479700               |
| SNP_P3_101611_45468 | NW_004515651.1 | Scaffold29  | 45468                   | GG                              | TT                | 1946479702               |
| SNP_P3_101612_55624 | NW_004515651.1 | Scaffold29  | 55624                   | TT                              | AA                | 1946479704               |
| SNP_P3_101613_55913 | NW_004515651.1 | Scaffold29  | 55913                   | CC                              | TT                | 1946479705               |
| SNP_P3_101614_55919 | NW_004515651.1 | Scaffold29  | 55919                   | AA                              | GG                | 1946479707               |
| SNP_P3_101615_55922 | NW_004515651.1 | Scaffold29  | 55922                   | CC                              | TT                | 1946479708               |
| SNP_P3_101616_56203 | NW_004515651.1 | Scaffold29  | 56203                   | GG                              | AA                | 1946479710               |
| SNP_P3_101617_56238 | NW_004515651.1 | Scaffold29  | 56238                   | GG                              | AA                | 1946479711               |
| SNP_P3_101618_57103 | NW_004515651.1 | Scaffold29  | 57103                   | GG                              | AA                | 1946479713               |
| SNP_P3_101619_58394 | NW_004515651.1 | Scaffold29  | 58394                   | AA                              | TT                | 1946479714               |
| SNP_P3_101620_58734 | NW_004515651.1 | Scaffold29  | 58734                   | TT                              | GG                | 1946479716               |
| SNP_P3_101621_63157 | NW_004515651.1 | Scaffold29  | 63157                   | CC                              | TT                | 1946479717               |
| SNP_P3_101622_63311 | NW_004515651.1 | Scaffold29  | 63311                   | TT                              | CC                | 1946479719               |
| SNP_P3_101623_63320 | NW_004515651.1 | Scaffold29  | 63320                   | TT                              | GG                | 1946479721               |
| SNP_P3_101624_63333 | NW_004515651.1 | Scaffold29  | 63333                   | TT                              | CC                | 1946479722               |
| SNP_P3_101625_63352 | NW_004515651.1 | Scaffold29  | 63352                   | GG                              | AA                | 1946479724               |
| SNP_P3_101626_63367 | NW_004515651.1 | Scaffold29  | 63367                   | TT                              | CC                | 1946479725               |
| SNP_P3_101627_63392 | NW_004515651.1 | Scaffold29  | 63392                   | AA                              | GG                | 1946479727               |
| SNP_P3_101628_63401 | NW_004515651.1 | Scaffold29  | 63401                   | GG                              | AA                | 1946479729               |
| SNP_P3_101629_63406 | NW_004515651.1 | Scaffold29  | 63406                   | TT                              | CC                | 1946479730               |
| SNP_P3_101630_63419 | NW_004515651.1 | Scaffold29  | 63419                   | TT                              | CC                | 1946479732               |
| SNP_P3_101631_63626 | NW_004515651.1 | Scaffold29  | 63626                   | AA                              | TT                | 1946479733               |
| SNP_P3_101632_82502 | NW_004515651.1 | Scaffold29  | 82502                   | TT                              | CC                | 1946479735               |
| SNP_P3_101633_82691 | NW_004515651.1 | Scaffold29  | 82691                   | CC                              | AA                | 1946479736               |
| SNP_P3_101634_83297 | NW_004515651.1 | Scaffold29  | 83297                   | AA                              | TT                | 1946479738               |
| SNP_P3_101635_83560 | NW_004515651.1 | Scaffold29  | 83560                   | TT                              | GG                | 1946479740               |
| SNP_P3_101636_83723 | NW_004515651.1 | Scaffold29  | 83723                   | TT                              | CC                | 1946479741               |
| SNP_P3_101637_85958 | NW_004515651.1 | Scaffold29  | 85958                   | CC                              | AA                | 1946479743               |
| SNP_P3_101638_86321 | NW_004515651.1 | Scaffold29  | 86321                   | TT                              | AA                | 1946479744               |
| SNP_P3_101639_86323 | NW_004515651.1 | Scaffold29  | 86323                   | CC                              | TT                | 1946479746               |
| SNP_P3_101640_89403 | NW_004515651.1 | Scaffold29  | 89403                   | GG                              | AA                | 1946479747               |
| SNP_P3_101641_91372 | NW_004515651.1 | Scaffold29  | 91372                   | GG                              | AA                | 1946479749               |
| SNP_P3_101642_91424 | NW_004515651.1 | Scaffold29  | 91424                   | TT                              | CC                | 1946479751               |
| SNP_P3_101643_91506 | NW_004515651.1 | Scaffold29  | 91506                   | AA                              | TT                | 1946479752               |
| SNP_P3_101644_91514 | NW_004515651.1 | Scaffold29  | 91514                   | TT                              | GG                | 1946479754               |
| SNP_P3_101645_91785 | NW_004515651.1 | Scaffold29  | 91785                   | TT                              | AA                | 1946479755               |
| SNP_P3_101646_91806 | NW_004515651.1 | Scaffold29  | 91806                   | AA                              | GG                | 1946479757               |
| SNP_P3_101647_92071 | NW_004515651.1 | Scaffold29  | 92071                   | AA                              | CC                | 1946479758               |
| SNP_P3_101648_92096 | NW_004515651.1 | Scaffold29  | 92096                   | GG                              | TT                | 1946479760               |
| SNP_P3_101649_92124 | NW_004515651.1 | Scaffold29  | 92124                   | AA                              | CC                | 1946479761               |
| SNP_P3_101650_92127 | NW_004515651.1 | Scaffold29  | 92127                   | CC                              | TT                | 1946479763               |

| SNPs IDs            | Chromosome IDs | Chromosomes | Physical positions (bp) | CDC Frontier (Reference genome) | (Pusa 256 & HPNB) | NCBI SNPdb Accession IDs |
|---------------------|----------------|-------------|-------------------------|---------------------------------|-------------------|--------------------------|
| SNP_P3_101651_92212 | NW_004515651.1 | Scaffold29  | 92212                   | AA                              | GG                | 1946479764               |
| SNP_P3_101652_92417 | NW_004515651.1 | Scaffold29  | 92417                   | CC                              | AA                | 1946479766               |
| SNP_P3_101653_92422 | NW_004515651.1 | Scaffold29  | 92422                   | GG                              | AA                | 1946479767               |
| SNP_P3_101654_92463 | NW_004515651.1 | Scaffold29  | 92463                   | AA                              | GG                | 1946479769               |
| SNP_P3_101655_92504 | NW_004515651.1 | Scaffold29  | 92504                   | GG                              | AA                | 1946479770               |
| SNP_P3_101656_92954 | NW_004515651.1 | Scaffold29  | 92954                   | GG                              | AA                | 1946479772               |
| SNP_P3_101657_93050 | NW_004515651.1 | Scaffold29  | 93050                   | AA                              | CC                | 1946479773               |
| SNP_P3_101658_93142 | NW_004515651.1 | Scaffold29  | 93142                   | GG                              | AA                | 1946479775               |
| SNP_P3_101659_93183 | NW_004515651.1 | Scaffold29  | 93183                   | CC                              | AA                | 1946479777               |
| SNP_P3_101660_93184 | NW_004515651.1 | Scaffold29  | 93184                   | AA                              | CC                | 1946479778               |
| SNP_P3_101661_93232 | NW_004515651.1 | Scaffold29  | 93232                   | GG                              | CC                | 1946479780               |
| SNP_P3_101662_93254 | NW_004515651.1 | Scaffold29  | 93254                   | TT                              | AA                | 1946479781               |
| SNP_P3_101663_93296 | NW_004515651.1 | Scaffold29  | 93296                   | CC                              | AA                | 1946479783               |
| SNP_P3_101664_93300 | NW_004515651.1 | Scaffold29  | 93300                   | AA                              | GG                | 1946479784               |
| SNP_P3_101665_93398 | NW_004515651.1 | Scaffold29  | 93398                   | CC                              | AA                | 1946479786               |
| SNP_P3_101666_93401 | NW_004515651.1 | Scaffold29  | 93401                   | TT                              | AA                | 1946479788               |
| SNP_P3_101667_93429 | NW_004515651.1 | Scaffold29  | 93429                   | TT                              | CC                | 1946479789               |
| SNP_P3_101668_93466 | NW_004515651.1 | Scaffold29  | 93466                   | TT                              | CC                | 1946479791               |
| SNP_P3_101669_93518 | NW_004515651.1 | Scaffold29  | 93518                   | TT                              | CC                | 1946479792               |
| SNP_P3_101670_93608 | NW_004515651.1 | Scaffold29  | 93608                   | AA                              | CC                | 1946479794               |
| SNP_P3_101671_93694 | NW_004515651.1 | Scaffold29  | 93694                   | TT                              | GG                | 1946479795               |
| SNP_P3_101672_93697 | NW_004515651.1 | Scaffold29  | 93697                   | AA                              | TT                | 1946479797               |
| SNP_P3_101673_95084 | NW_004515651.1 | Scaffold29  | 95084                   | AA                              | TT                | 1946479798               |
| SNP_P3_101674_95305 | NW_004515651.1 | Scaffold29  | 95305                   | CC                              | TT                | 1946479799               |
| SNP_P3_101675_95515 | NW_004515651.1 | Scaffold29  | 95515                   | AA                              | TT                | 1946479801               |
| SNP_P3_101676_95524 | NW_004515651.1 | Scaffold29  | 95524                   | TT                              | CC                | 1946479803               |
| SNP_P3_101677_95531 | NW_004515651.1 | Scaffold29  | 95531                   | CC                              | TT                | 1946479804               |
| SNP_P3_101678_95537 | NW_004515651.1 | Scaffold29  | 95537                   | TT                              | AA                | 1946479806               |
| SNP_P3_101679_95548 | NW_004515651.1 | Scaffold29  | 95548                   | GG                              | TT                | 1946479807               |
| SNP_P3_101680_97802 | NW_004515651.1 | Scaffold29  | 97802                   | CC                              | TT                | 1946479809               |
| SNP_P3_101681_97803 | NW_004515651.1 | Scaffold29  | 97803                   | AA                              | TT                | 1946479810               |
| SNP_P3_101682_97969 | NW_004515651.1 | Scaffold29  | 97969                   | GG                              | TT                | 1946479812               |
| SNP_P3_101683_97989 | NW_004515651.1 | Scaffold29  | 97989                   | TT                              | GG                | 1946479813               |
| SNP_P3_101684_98031 | NW_004515651.1 | Scaffold29  | 98031                   | CC                              | TT                | 1946479815               |
| SNP_P3_101685_98048 | NW_004515651.1 | Scaffold29  | 98048                   | GG                              | TT                | 1946479816               |
| SNP_P3_101686_98067 | NW_004515651.1 | Scaffold29  | 98067                   | CC                              | GG                | 1946479818               |
| SNP_P3_101687_98159 | NW_004515651.1 | Scaffold29  | 98159                   | TT                              | CC                | 1946479819               |
| SNP_P3_101688_98162 | NW_004515651.1 | Scaffold29  | 98162                   | CC                              | TT                | 1946479821               |
| SNP_P3_101689_98388 | NW_004515651.1 | Scaffold29  | 98388                   | CC                              | GG                | 1946479822               |
| SNP_P3_101690_98403 | NW_004515651.1 | Scaffold29  | 98403                   | CC                              | TT                | 1946479824               |
| SNP_P3_101691_98510 | NW_004515651.1 | Scaffold29  | 98510                   | AA                              | GG                | 1946479826               |
| SNP_P3_101692_98513 | NW_004515651.1 | Scaffold29  | 98513                   | AA                              | GG                | 1946479827               |

| SNPs IDs             | Chromosome IDs | Chromosomes | Physical positions (bp) | CDC Frontier (Reference genome) | (Pusa 256 & HPNB) | NCBI SNPdb Accession IDs |
|----------------------|----------------|-------------|-------------------------|---------------------------------|-------------------|--------------------------|
| SNP_P3_101693_98638  | NW_004515651.1 | Scaffold29  | 98638                   | GG                              | CC                | 1946479829               |
| SNP_P3_101694_98659  | NW_004515651.1 | Scaffold29  | 98659                   | TT                              | AA                | 1946479830               |
| SNP_P3_101695_98685  | NW_004515651.1 | Scaffold29  | 98685                   | TT                              | CC                | 1946479832               |
| SNP_P3_101696_98729  | NW_004515651.1 | Scaffold29  | 98729                   | TT                              | GG                | 1946479833               |
| SNP_P3_101697_98858  | NW_004515651.1 | Scaffold29  | 98858                   | GG                              | AA                | 1946479835               |
| SNP_P3_101698_98967  | NW_004515651.1 | Scaffold29  | 98967                   | AA                              | GG                | 1946479836               |
| SNP_P3_101699_99016  | NW_004515651.1 | Scaffold29  | 99016                   | TT                              | GG                | 1946479838               |
| SNP_P3_101700_99223  | NW_004515651.1 | Scaffold29  | 99223                   | CC                              | AA                | 1946479839               |
| SNP_P3_101701_100370 | NW_004515651.1 | Scaffold29  | 100370                  | TT                              | GG                | 1946479841               |
| SNP_P3_101702_100388 | NW_004515651.1 | Scaffold29  | 100388                  | CC                              | TT                | 1946479843               |
| SNP_P3_101703_100398 | NW_004515651.1 | Scaffold29  | 100398                  | GG                              | TT                | 1946479844               |
| SNP_P3_101705_100657 | NW_004515651.1 | Scaffold29  | 100657                  | GG                              | AA                | 1946479846               |
| SNP_P3_101706_100738 | NW_004515651.1 | Scaffold29  | 100738                  | AA                              | CC                | 1946479847               |
| SNP_P3_101707_100765 | NW_004515651.1 | Scaffold29  | 100765                  | TT                              | GG                | 1946479849               |
| SNP_P3_101708_100794 | NW_004515651.1 | Scaffold29  | 100794                  | TT                              | CC                | 1946479851               |
| SNP_P3_101709_100849 | NW_004515651.1 | Scaffold29  | 100849                  | CC                              | AA                | 1946479852               |
| SNP_P3_101710_101000 | NW_004515651.1 | Scaffold29  | 101000                  | GG                              | CC                | 1946479854               |
| SNP_P3_101712_101142 | NW_004515651.1 | Scaffold29  | 101142                  | TT                              | AA                | 1946479855               |
| SNP_P3_101713_101159 | NW_004515651.1 | Scaffold29  | 101159                  | TT                              | CC                | 1946479857               |
| SNP_P3_101714_101186 | NW_004515651.1 | Scaffold29  | 101186                  | CC                              | TT                | 1946479859               |
| SNP_P3_101715_101363 | NW_004515651.1 | Scaffold29  | 101363                  | GG                              | AA                | 1946479860               |
| SNP_P3_101716_101381 | NW_004515651.1 | Scaffold29  | 101381                  | TT                              | AA                | 1946479862               |
| SNP_P3_101717_101414 | NW_004515651.1 | Scaffold29  | 101414                  | TT                              | CC                | 1946479863               |
| SNP_P3_101718_101552 | NW_004515651.1 | Scaffold29  | 101552                  | GG                              | CC                | 1946479865               |
| SNP_P3_101719_101585 | NW_004515651.1 | Scaffold29  | 101585                  | TT                              | AA                | 1946479867               |
| SNP_P3_101720_101642 | NW_004515651.1 | Scaffold29  | 101642                  | TT                              | CC                | 1946479868               |
| SNP_P3_101721_101654 | NW_004515651.1 | Scaffold29  | 101654                  | TT                              | CC                | 1946479870               |
| SNP_P3_101722_101659 | NW_004515651.1 | Scaffold29  | 101659                  | CC                              | TT                | 1946479871               |
| SNP_P3_101723_101693 | NW_004515651.1 | Scaffold29  | 101693                  | CC                              | GG                | 1946479873               |
| SNP_P3_101724_101738 | NW_004515651.1 | Scaffold29  | 101738                  | TT                              | CC                | 1946479875               |
| SNP_P3_101725_101808 | NW_004515651.1 | Scaffold29  | 101808                  | AA                              | CC                | 1946479876               |
| SNP_P3_101726_101845 | NW_004515651.1 | Scaffold29  | 101845                  | CC                              | TT                | 1946479878               |
| SNP_P3_101727_101866 | NW_004515651.1 | Scaffold29  | 101866                  | TT                              | GG                | 1946479879               |
| SNP_P3_101728_101968 | NW_004515651.1 | Scaffold29  | 101968                  | GG                              | TT                | 1946479881               |
| SNP_P3_101729_102030 | NW_004515651.1 | Scaffold29  | 102030                  | GG                              | TT                | 1946479882               |
| SNP_P3_101730_102046 | NW_004515651.1 | Scaffold29  | 102046                  | GG                              | AA                | 1946479884               |
| SNP_P3_101731_102060 | NW_004515651.1 | Scaffold29  | 102060                  | CC                              | AA                | 1946479885               |
| SNP_P3_101732_102175 | NW_004515651.1 | Scaffold29  | 102175                  | GG                              | AA                | 1946479887               |
| SNP_P3_101733_102188 | NW_004515651.1 | Scaffold29  | 102188                  | AA                              | GG                | 1946479889               |
| SNP_P3_101734_102281 | NW_004515651.1 | Scaffold29  | 102281                  | GG                              | CC                | 1946479890               |
| SNP_P3_101735_102321 | NW_004515651.1 | Scaffold29  | 102321                  | AA                              | GG                | 1946479892               |
| SNP_P3_101736_102456 | NW_004515651.1 | Scaffold29  | 102456                  | GG                              | TT                | 1946479893               |

| SNPs IDs             | Chromosome IDs | Chromosomes | Physical positions (bp) | CDC Frontier (Reference genome) | (Pusa 256 & HPNB) | NCBI SNPdb Accession IDs |
|----------------------|----------------|-------------|-------------------------|---------------------------------|-------------------|--------------------------|
| SNP_P3_101737_102474 | NW_004515651.1 | Scaffold29  | 102474                  | GG                              | CC                | 1946479895               |
| SNP_P3_101738_102508 | NW_004515651.1 | Scaffold29  | 102508                  | GG                              | AA                | 1946479896               |
| SNP_P3_101739_102545 | NW_004515651.1 | Scaffold29  | 102545                  | GG                              | AA                | 1946479898               |
| SNP_P3_101740_102549 | NW_004515651.1 | Scaffold29  | 102549                  | AA                              | CC                | 1946479899               |
| SNP_P3_101741_103301 | NW_004515651.1 | Scaffold29  | 103301                  | AA                              | GG                | 1946479901               |
| SNP_P3_101742_103854 | NW_004515651.1 | Scaffold29  | 103854                  | TT                              | CC                | 1946479903               |
| SNP_P3_101743_103903 | NW_004515651.1 | Scaffold29  | 103903                  | AA                              | GG                | 1946479904               |
| SNP_P3_101744_104183 | NW_004515651.1 | Scaffold29  | 104183                  | GG                              | AA                | 1946479906               |
| SNP_P3_101745_107691 | NW_004515651.1 | Scaffold29  | 107691                  | GG                              | TT                | 1946479907               |
| SNP_P3_101746_107719 | NW_004515651.1 | Scaffold29  | 107719                  | CC                              | TT                | 1946479909               |
| SNP_P3_101747_108454 | NW_004515651.1 | Scaffold29  | 108454                  | AA                              | TT                | 1946479910               |
| SNP_P3_101748_108456 | NW_004515651.1 | Scaffold29  | 108456                  | CC                              | TT                | 1946479912               |
| SNP_P3_101749_108648 | NW_004515651.1 | Scaffold29  | 108648                  | GG                              | TT                | 1946479913               |
| SNP_P3_101750_108705 | NW_004515651.1 | Scaffold29  | 108705                  | CC                              | AA                | 1946479915               |
| SNP_P3_101751_108921 | NW_004515651.1 | Scaffold29  | 108921                  | TT                              | CC                | 1946479917               |
| SNP_P3_101752_108962 | NW_004515651.1 | Scaffold29  | 108962                  | TT                              | AA                | 1946479918               |
| SNP_P3_101753_108988 | NW_004515651.1 | Scaffold29  | 108988                  | CC                              | TT                | 1946479920               |
| SNP_P3_101754_109143 | NW_004515651.1 | Scaffold29  | 109143                  | GG                              | AA                | 1946479921               |
| SNP_P3_101755_109240 | NW_004515651.1 | Scaffold29  | 109240                  | GG                              | AA                | 1946479923               |
| SNP_P3_101756_109424 | NW_004515651.1 | Scaffold29  | 109424                  | CC                              | TT                | 1946479924               |
| SNP_P3_101757_109464 | NW_004515651.1 | Scaffold29  | 109464                  | TT                              | CC                | 1946479926               |
| SNP_P3_101758_111034 | NW_004515651.1 | Scaffold29  | 111034                  | AA                              | CC                | 1946479928               |
| SNP_P3_101759_112031 | NW_004515651.1 | Scaffold29  | 112031                  | TT                              | CC                | 1946479929               |
| SNP_P3_101760_118112 | NW_004515651.1 | Scaffold29  | 118112                  | GG                              | TT                | 1946479932               |
| SNP_P3_101761_118140 | NW_004515651.1 | Scaffold29  | 118140                  | GG                              | TT                | 1946479933               |
| SNP_P3_101762_118141 | NW_004515651.1 | Scaffold29  | 118141                  | TT                              | CC                | 1946479935               |
| SNP_P3_101763_118164 | NW_004515651.1 | Scaffold29  | 118164                  | AA                              | GG                | 1946479936               |
| SNP_P3_101764_120029 | NW_004515651.1 | Scaffold29  | 120029                  | CC                              | TT                | 1946479938               |
| SNP_P3_101765_120040 | NW_004515651.1 | Scaffold29  | 120040                  | TT                              | CC                | 1946479939               |
| SNP_P3_101766_120063 | NW_004515651.1 | Scaffold29  | 120063                  | GG                              | AA                | 1946479941               |
| SNP_P3_101767_120082 | NW_004515651.1 | Scaffold29  | 120082                  | TT                              | CC                | 1946479942               |
| SNP_P3_101768_120094 | NW_004515651.1 | Scaffold29  | 120094                  | TT                              | CC                | 1946479944               |
| SNP_P3_101769_120258 | NW_004515651.1 | Scaffold29  | 120258                  | TT                              | CC                | 1946479945               |
| SNP_P3_101770_120275 | NW_004515651.1 | Scaffold29  | 120275                  | TT                              | GG                | 1946479947               |
| SNP_P3_101771_120277 | NW_004515651.1 | Scaffold29  | 120277                  | AA                              | TT                | 1946479948               |
| SNP_P3_101772_120317 | NW_004515651.1 | Scaffold29  | 120317                  | CC                              | AA                | 1946479950               |
| SNP_P3_101773_120407 | NW_004515651.1 | Scaffold29  | 120407                  | AA                              | GG                | 1946479951               |
| SNP_P3_101774_120500 | NW_004515651.1 | Scaffold29  | 120500                  | GG                              | AA                | 1946479953               |
| SNP_P3_101775_120602 | NW_004515651.1 | Scaffold29  | 120602                  | TT                              | GG                | 1946479955               |
| SNP_P3_101776_120748 | NW_004515651.1 | Scaffold29  | 120748                  | TT                              | GG                | 1946479956               |
| SNP_P3_101777_120792 | NW_004515651.1 | Scaffold29  | 120792                  | TT                              | GG                | 1946479958               |
| SNP_P3_101778_120801 | NW_004515651.1 | Scaffold29  | 120801                  | TT                              | CC                | 1946479959               |

| SNPs IDs             | Chromosome IDs | Chromosomes | Physical positions (bp) | CDC Frontier (Reference genome) | (Pusa 256 & HPNB) | NCBI SNPdb Accession IDs |
|----------------------|----------------|-------------|-------------------------|---------------------------------|-------------------|--------------------------|
| SNP_P3_101779_120892 | NW_004515651.1 | Scaffold29  | 120892                  | AA                              | TT                | 1946479961               |
| SNP_P3_101780_120917 | NW_004515651.1 | Scaffold29  | 120917                  | CC                              | TT                | 1946479962               |
| SNP_P3_101781_120929 | NW_004515651.1 | Scaffold29  | 120929                  | AA                              | GG                | 1946479964               |
| SNP_P3_101782_120959 | NW_004515651.1 | Scaffold29  | 120959                  | AA                              | TT                | 1946479966               |
| SNP_P3_101783_121000 | NW_004515651.1 | Scaffold29  | 121000                  | GG                              | TT                | 1946479967               |
| SNP_P3_101784_121048 | NW_004515651.1 | Scaffold29  | 121048                  | AA                              | CC                | 1946479969               |
| SNP_P3_101785_121859 | NW_004515651.1 | Scaffold29  | 121859                  | GG                              | AA                | 1946479970               |
| SNP_P3_101786_127629 | NW_004515651.1 | Scaffold29  | 127629                  | AA                              | GG                | 1946479972               |
| SNP_P3_101787_127867 | NW_004515651.1 | Scaffold29  | 127867                  | GG                              | AA                | 1946479973               |
| SNP_P3_101788_127871 | NW_004515651.1 | Scaffold29  | 127871                  | GG                              | AA                | 1946479975               |
| SNP_P3_101789_127939 | NW_004515651.1 | Scaffold29  | 127939                  | CC                              | TT                | 1946479976               |
| SNP_P3_101790_127940 | NW_004515651.1 | Scaffold29  | 127940                  | TT                              | CC                | 1946479978               |
| SNP_P3_101791_128884 | NW_004515651.1 | Scaffold29  | 128884                  | CC                              | GG                | 1946479979               |
| SNP_P3_101792_128887 | NW_004515651.1 | Scaffold29  | 128887                  | CC                              | TT                | 1946479981               |
| SNP_P3_101793_128905 | NW_004515651.1 | Scaffold29  | 128905                  | TT                              | CC                | 1946479982               |
| SNP_P3_101794_129123 | NW_004515651.1 | Scaffold29  | 129123                  | TT                              | CC                | 1946479984               |
| SNP_P3_101795_129159 | NW_004515651.1 | Scaffold29  | 129159                  | CC                              | AA                | 1946479985               |
| SNP_P3_101797_134642 | NW_004515651.1 | Scaffold29  | 134642                  | AA                              | GG                | 1946479987               |
| SNP_P3_101798_134779 | NW_004515651.1 | Scaffold29  | 134779                  | AA                              | TT                | 1946479988               |
| SNP_P3_101799_134810 | NW_004515651.1 | Scaffold29  | 134810                  | TT                              | AA                | 1946479990               |
| SNP_P3_101800_134858 | NW_004515651.1 | Scaffold29  | 134858                  | AA                              | CC                | 1946479991               |
| SNP_P3_101801_134874 | NW_004515651.1 | Scaffold29  | 134874                  | CC                              | AA                | 1946479993               |
| SNP_P3_101802_134952 | NW_004515651.1 | Scaffold29  | 134952                  | TT                              | CC                | 1946479994               |
| SNP_P3_101803_134953 | NW_004515651.1 | Scaffold29  | 134953                  | GG                              | AA                | 1946479996               |
| SNP_P3_101804_134958 | NW_004515651.1 | Scaffold29  | 134958                  | CC                              | GG                | 1946479997               |
| SNP_P3_101805_134960 | NW_004515651.1 | Scaffold29  | 134960                  | AA                              | GG                | 1946479999               |
| SNP_P3_101806_134965 | NW_004515651.1 | Scaffold29  | 134965                  | CC                              | AA                | 1946480000               |
| SNP_P3_101807_134973 | NW_004515651.1 | Scaffold29  | 134973                  | AA                              | TT                | 1946480001               |
| SNP_P3_101808_134988 | NW_004515651.1 | Scaffold29  | 134988                  | TT                              | AA                | 1946480003               |
| SNP_P3_101809_134989 | NW_004515651.1 | Scaffold29  | 134989                  | TT                              | AA                | 1946480004               |
| SNP_P3_101810_135009 | NW_004515651.1 | Scaffold29  | 135009                  | CC                              | AA                | 1946480006               |
| SNP_P3_101811_135027 | NW_004515651.1 | Scaffold29  | 135027                  | TT                              | AA                | 1946480007               |
| SNP_P3_101812_135066 | NW_004515651.1 | Scaffold29  | 135066                  | TT                              | GG                | 1946480009               |
| SNP_P3_101813_135067 | NW_004515651.1 | Scaffold29  | 135067                  | TT                              | CC                | 1946480010               |
| SNP_P3_101814_135263 | NW_004515651.1 | Scaffold29  | 135263                  | AA                              | GG                | 1946480012               |
| SNP_P3_101815_137620 | NW_004515651.1 | Scaffold29  | 137620                  | TT                              | AA                | 1946480013               |
| SNP_P3_101816_137657 | NW_004515651.1 | Scaffold29  | 137657                  | TT                              | AA                | 1946480015               |
| SNP_P3_101817_137687 | NW_004515651.1 | Scaffold29  | 137687                  | GG                              | AA                | 1946480016               |
| SNP_P3_101818_137757 | NW_004515651.1 | Scaffold29  | 137757                  | TT                              | CC                | 1946480018               |
| SNP_P3_101819_137764 | NW_004515651.1 | Scaffold29  | 137764                  | CC                              | AA                | 1946480019               |
| SNP_P3_101820_137849 | NW_004515651.1 | Scaffold29  | 137849                  | TT                              | GG                | 1946480020               |
| SNP_P3_101821_137857 | NW_004515651.1 | Scaffold29  | 137857                  | TT                              | GG                | 1946480022               |



| SNPs IDs             | Chromosome IDs | Chromosomes | Physical positions (bp) | CDC Frontier (Reference genome) | (Pusa 256 & HPNB) | NCBI SNPdb Accession IDs |
|----------------------|----------------|-------------|-------------------------|---------------------------------|-------------------|--------------------------|
| SNP_P3_101822_137892 | NW_004515651.1 | Scaffold29  | 137892                  | TT                              | CC                | 1946480023               |
| SNP_P3_101823_137933 | NW_004515651.1 | Scaffold29  | 137933                  | CC                              | AA                | 1946480025               |
| SNP_P3_101824_137961 | NW_004515651.1 | Scaffold29  | 137961                  | GG                              | AA                | 1946480026               |
| SNP_P3_101825_137964 | NW_004515651.1 | Scaffold29  | 137964                  | GG                              | CC                | 1946480028               |
| SNP_P3_101826_137966 | NW_004515651.1 | Scaffold29  | 137966                  | CC                              | GG                | 1946480029               |
| SNP_P3_101827_138001 | NW_004515651.1 | Scaffold29  | 138001                  | GG                              | AA                | 1946480031               |
| SNP_P3_101828_138079 | NW_004515651.1 | Scaffold29  | 138079                  | CC                              | GG                | 1946480032               |
| SNP_P3_101829_138182 | NW_004515651.1 | Scaffold29  | 138182                  | GG                              | CC                | 1946480034               |
| SNP_P3_101830_138205 | NW_004515651.1 | Scaffold29  | 138205                  | TT                              | CC                | 1946480035               |
| SNP_P3_101831_138237 | NW_004515651.1 | Scaffold29  | 138237                  | GG                              | AA                | 1946480037               |
| SNP_P3_101832_138284 | NW_004515651.1 | Scaffold29  | 138284                  | CC                              | GG                | 1946480038               |
| SNP_P3_101833_138344 | NW_004515651.1 | Scaffold29  | 138344                  | CC                              | AA                | 1946480040               |
| SNP_P3_101834_138381 | NW_004515651.1 | Scaffold29  | 138381                  | TT                              | CC                | 1946480041               |
| SNP_P3_101835_138419 | NW_004515651.1 | Scaffold29  | 138419                  | GG                              | TT                | 1946480043               |
| SNP_P3_101836_138436 | NW_004515651.1 | Scaffold29  | 138436                  | GG                              | AA                | 1946480044               |
| SNP_P3_101837_138437 | NW_004515651.1 | Scaffold29  | 138437                  | AA                              | TT                | 1946480046               |
| SNP_P3_101838_138513 | NW_004515651.1 | Scaffold29  | 138513                  | TT                              | CC                | 1946480047               |
| SNP_P3_101839_138862 | NW_004515651.1 | Scaffold29  | 138862                  | GG                              | AA                | 1946480049               |
| SNP_P3_101840_144869 | NW_004515651.1 | Scaffold29  | 144869                  | CC                              | TT                | 1946480051               |
| SNP_P3_101841_145033 | NW_004515651.1 | Scaffold29  | 145033                  | TT                              | CC                | 1946480052               |
| SNP_P3_101842_145167 | NW_004515651.1 | Scaffold29  | 145167                  | AA                              | CC                | 1946480054               |
| SNP_P3_101843_145185 | NW_004515651.1 | Scaffold29  | 145185                  | GG                              | AA                | 1946480055               |
| SNP_P3_101844_145215 | NW_004515651.1 | Scaffold29  | 145215                  | AA                              | GG                | 1946480057               |
| SNP_P3_101845_145230 | NW_004515651.1 | Scaffold29  | 145230                  | AA                              | TT                | 1946480058               |
| SNP_P3_101846_145309 | NW_004515651.1 | Scaffold29  | 145309                  | TT                              | AA                | 1946480060               |
| SNP_P3_101847_145346 | NW_004515651.1 | Scaffold29  | 145346                  | AA                              | CC                | 1946480062               |
| SNP_P3_101848_145356 | NW_004515651.1 | Scaffold29  | 145356                  | TT                              | GG                | 1946480063               |
| SNP_P3_101849_145366 | NW_004515651.1 | Scaffold29  | 145366                  | TT                              | GG                | 1946480065               |
| SNP_P3_101850_145524 | NW_004515651.1 | Scaffold29  | 145524                  | CC                              | TT                | 1946480067               |
| SNP_P3_101851_147061 | NW_004515651.1 | Scaffold29  | 147061                  | GG                              | AA                | 1946480068               |
| SNP_P3_101852_147077 | NW_004515651.1 | Scaffold29  | 147077                  | TT                              | CC                | 1946480070               |
| SNP_P3_101853_147095 | NW_004515651.1 | Scaffold29  | 147095                  | TT                              | GG                | 1946480071               |
| SNP_P3_101854_147118 | NW_004515651.1 | Scaffold29  | 147118                  | CC                              | TT                | 1946480073               |
| SNP_P3_101855_147257 | NW_004515651.1 | Scaffold29  | 147257                  | TT                              | GG                | 1946480075               |
| SNP_P3_101856_147267 | NW_004515651.1 | Scaffold29  | 147267                  | CC                              | GG                | 1946480076               |
| SNP_P3_101857_147275 | NW_004515651.1 | Scaffold29  | 147275                  | CC                              | TT                | 1946480078               |
| SNP_P3_101858_147286 | NW_004515651.1 | Scaffold29  | 147286                  | TT                              | AA                | 1946480080               |
| SNP_P3_101859_147369 | NW_004515651.1 | Scaffold29  | 147369                  | TT                              | AA                | 1946480081               |
| SNP_P3_101860_147411 | NW_004515651.1 | Scaffold29  | 147411                  | AA                              | GG                | 1946480083               |
| SNP_P3_101861_147626 | NW_004515651.1 | Scaffold29  | 147626                  | TT                              | AA                | 1946480084               |
| SNP_P3_101862_147654 | NW_004515651.1 | Scaffold29  | 147654                  | GG                              | AA                | 1946480086               |
| SNP_P3_101863_150801 | NW_004515651.1 | Scaffold29  | 150801                  | CC                              | TT                | 1946480087               |

| SNPs IDs             | Chromosome IDs | Chromosomes | Physical positions (bp) | CDC Frontier (Reference genome) | (Pusa 256 & HPNB) | NCBI SNPdb Accession IDs |
|----------------------|----------------|-------------|-------------------------|---------------------------------|-------------------|--------------------------|
| SNP_P3_101864_150807 | NW_004515651.1 | Scaffold29  | 150807                  | AA                              | GG                | 1946480089               |
| SNP_P3_101865_150840 | NW_004515651.1 | Scaffold29  | 150840                  | TT                              | GG                | 1946480091               |
| SNP_P3_101866_150844 | NW_004515651.1 | Scaffold29  | 150844                  | TT                              | GG                | 1946480092               |
| SNP_P3_101867_150882 | NW_004515651.1 | Scaffold29  | 150882                  | GG                              | AA                | 1946480094               |
| SNP_P3_101868_150898 | NW_004515651.1 | Scaffold29  | 150898                  | GG                              | AA                | 1946480095               |
| SNP_P3_101869_150936 | NW_004515651.1 | Scaffold29  | 150936                  | TT                              | CC                | 1946480097               |
| SNP_P3_101870_151057 | NW_004515651.1 | Scaffold29  | 151057                  | GG                              | TT                | 1946480099               |
| SNP_P3_101871_151071 | NW_004515651.1 | Scaffold29  | 151071                  | GG                              | AA                | 1946480100               |
| SNP_P3_101872_151154 | NW_004515651.1 | Scaffold29  | 151154                  | AA                              | GG                | 1946480102               |
| SNP_P3_101873_151166 | NW_004515651.1 | Scaffold29  | 151166                  | TT                              | GG                | 1946480103               |
| SNP_P3_101874_151451 | NW_004515651.1 | Scaffold29  | 151451                  | AA                              | CC                | 1946480105               |
| SNP_P3_101876_162372 | NW_004515651.1 | Scaffold29  | 162372                  | AA                              | GG                | 1946480106               |
| SNP_P3_101877_163993 | NW_004515651.1 | Scaffold29  | 163993                  | AA                              | GG                | 1946480108               |
| SNP_P3_101878_167368 | NW_004515651.1 | Scaffold29  | 167368                  | AA                              | GG                | 1946480110               |
| SNP_P3_101879_167400 | NW_004515651.1 | Scaffold29  | 167400                  | TT                              | CC                | 1946480111               |
| SNP_P3_101880_167403 | NW_004515651.1 | Scaffold29  | 167403                  | GG                              | TT                | 1946480113               |
| SNP_P3_101881_176428 | NW_004515651.1 | Scaffold29  | 176428                  | AA                              | TT                | 1946480114               |
| SNP_P3_101882_184372 | NW_004515651.1 | Scaffold29  | 184372                  | TT                              | CC                | 1946480116               |
| SNP_P3_101883_184733 | NW_004515651.1 | Scaffold29  | 184733                  | AA                              | GG                | 1946480117               |
| SNP_P3_101884_186670 | NW_004515651.1 | Scaffold29  | 186670                  | GG                              | TT                | 1946480119               |
| SNP_P3_101885_186676 | NW_004515651.1 | Scaffold29  | 186676                  | TT                              | AA                | 1946480121               |
| SNP_P3_101886_190500 | NW_004515651.1 | Scaffold29  | 190500                  | GG                              | CC                | 1946480122               |
| SNP_P3_101887_190501 | NW_004515651.1 | Scaffold29  | 190501                  | AA                              | TT                | 1946480124               |
| SNP_P3_101888_190903 | NW_004515651.1 | Scaffold29  | 190903                  | GG                              | AA                | 1946480126               |
| SNP_P3_101889_190914 | NW_004515651.1 | Scaffold29  | 190914                  | AA                              | TT                | 1946480127               |
| SNP_P3_101890_190916 | NW_004515651.1 | Scaffold29  | 190916                  | TT                              | GG                | 1946480129               |
| SNP_P3_101891_200434 | NW_004515651.1 | Scaffold29  | 200434                  | TT                              | GG                | 1946480130               |
| SNP_P3_101892_200926 | NW_004515651.1 | Scaffold29  | 200926                  | AA                              | GG                | 1946480132               |
| SNP_P3_101893_200958 | NW_004515651.1 | Scaffold29  | 200958                  | TT                              | CC                | 1946480133               |
| SNP_P3_101894_200994 | NW_004515651.1 | Scaffold29  | 200994                  | AA                              | GG                | 1946480135               |
| SNP_P3_101895_201434 | NW_004515651.1 | Scaffold29  | 201434                  | TT                              | CC                | 1946480137               |
| SNP_P3_101896_204021 | NW_004515651.1 | Scaffold29  | 204021                  | AA                              | GG                | 1946480138               |
| SNP_P3_101897_209417 | NW_004515651.1 | Scaffold29  | 209417                  | AA                              | CC                | 1946480140               |
| SNP_P3_101898_209496 | NW_004515651.1 | Scaffold29  | 209496                  | TT                              | GG                | 1946480141               |
| SNP_P3_101899_209543 | NW_004515651.1 | Scaffold29  | 209543                  | AA                              | CC                | 1946480142               |
| SNP_P3_101900_209562 | NW_004515651.1 | Scaffold29  | 209562                  | GG                              | AA                | 1946480143               |
| SNP_P3_101901_209571 | NW_004515651.1 | Scaffold29  | 209571                  | AA                              | GG                | 1946480145               |
| SNP_P3_101902_209607 | NW_004515651.1 | Scaffold29  | 209607                  | CC                              | TT                | 1946480146               |
| SNP_P3_101903_209651 | NW_004515651.1 | Scaffold29  | 209651                  | AA                              | GG                | 1946480148               |
| SNP_P3_101904_209682 | NW_004515651.1 | Scaffold29  | 209682                  | CC                              | TT                | 1946480150               |
| SNP_P3_101905_209690 | NW_004515651.1 | Scaffold29  | 209690                  | TT                              | GG                | 1946480151               |
| SNP_P3_101906_209711 | NW_004515651.1 | Scaffold29  | 209711                  | AA                              | GG                | 1946480153               |

| SNPs IDs             | Chromosome IDs | Chromosomes | Physical positions (bp) | CDC Frontier (Reference genome) | (Pusa 256 & HPNB) | NCBI SNPdb Accession IDs |
|----------------------|----------------|-------------|-------------------------|---------------------------------|-------------------|--------------------------|
| SNP_P3_101907_209751 | NW_004515651.1 | Scaffold29  | 209751                  | AA                              | GG                | 1946480154               |
| SNP_P3_101908_209754 | NW_004515651.1 | Scaffold29  | 209754                  | GG                              | TT                | 1946480156               |
| SNP_P3_101909_209764 | NW_004515651.1 | Scaffold29  | 209764                  | TT                              | CC                | 1946480157               |
| SNP_P3_101910_209946 | NW_004515651.1 | Scaffold29  | 209946                  | CC                              | TT                | 1946480159               |
| SNP_P3_101911_212647 | NW_004515651.1 | Scaffold29  | 212647                  | TT                              | CC                | 1946480160               |
| SNP_P3_101912_214834 | NW_004515651.1 | Scaffold29  | 214834                  | AA                              | GG                | 1946480162               |
| SNP_P3_101913_222154 | NW_004515651.1 | Scaffold29  | 222154                  | TT                              | AA                | 1946480163               |
| SNP_P3_101914_222155 | NW_004515651.1 | Scaffold29  | 222155                  | TT                              | CC                | 1946480165               |
| SNP_P3_101915_228004 | NW_004515651.1 | Scaffold29  | 228004                  | GG                              | TT                | 1946480167               |
| SNP_P3_101916_228156 | NW_004515651.1 | Scaffold29  | 228156                  | CC                              | TT                | 1946480168               |
| SNP_P3_101917_228175 | NW_004515651.1 | Scaffold29  | 228175                  | TT                              | AA                | 1946480170               |
| SNP_P3_101918_228312 | NW_004515651.1 | Scaffold29  | 228312                  | CC                              | TT                | 1946480171               |
| SNP_P3_101919_228337 | NW_004515651.1 | Scaffold29  | 228337                  | GG                              | AA                | 1946480173               |
| SNP_P3_101920_230176 | NW_004515651.1 | Scaffold29  | 230176                  | AA                              | GG                | 1946480174               |
| SNP_P3_101921_230378 | NW_004515651.1 | Scaffold29  | 230378                  | CC                              | TT                | 1946480176               |
| SNP_P3_101922_230379 | NW_004515651.1 | Scaffold29  | 230379                  | AA                              | GG                | 1946480178               |
| SNP_P3_101923_230732 | NW_004515651.1 | Scaffold29  | 230732                  | GG                              | TT                | 1946480179               |
| SNP_P3_101924_233622 | NW_004515651.1 | Scaffold29  | 233622                  | AA                              | TT                | 1946480181               |
| SNP_P3_101925_233632 | NW_004515651.1 | Scaffold29  | 233632                  | CC                              | TT                | 1946480182               |
| SNP_P3_101926_233648 | NW_004515651.1 | Scaffold29  | 233648                  | GG                              | AA                | 1946480184               |
| SNP_P3_101927_234317 | NW_004515651.1 | Scaffold29  | 234317                  | CC                              | AA                | 1946480185               |
| SNP_P3_101928_234340 | NW_004515651.1 | Scaffold29  | 234340                  | AA                              | GG                | 1946480187               |
| SNP_P3_101929_234373 | NW_004515651.1 | Scaffold29  | 234373                  | CC                              | TT                | 1946480189               |
| SNP_P3_101930_234374 | NW_004515651.1 | Scaffold29  | 234374                  | AA                              | GG                | 1946480190               |
| SNP_P3_101931_234785 | NW_004515651.1 | Scaffold29  | 234785                  | TT                              | CC                | 1946480192               |
| SNP_P3_101932_234802 | NW_004515651.1 | Scaffold29  | 234802                  | GG                              | AA                | 1946480193               |
| SNP_P3_101933_238914 | NW_004515651.1 | Scaffold29  | 238914                  | CC                              | TT                | 1946480195               |
| SNP_P3_101934_238929 | NW_004515651.1 | Scaffold29  | 238929                  | TT                              | CC                | 1946480197               |
| SNP_P3_101935_238954 | NW_004515651.1 | Scaffold29  | 238954                  | GG                              | AA                | 1946480198               |
| SNP_P3_101936_239179 | NW_004515651.1 | Scaffold29  | 239179                  | AA                              | TT                | 1946480200               |
| SNP_P3_101937_239329 | NW_004515651.1 | Scaffold29  | 239329                  | GG                              | TT                | 1946480201               |
| SNP_P3_101938_239332 | NW_004515651.1 | Scaffold29  | 239332                  | AA                              | GG                | 1946480203               |
| SNP_P3_101939_240217 | NW_004515651.1 | Scaffold29  | 240217                  | AA                              | GG                | 1946480204               |
| SNP_P3_101940_241625 | NW_004515651.1 | Scaffold29  | 241625                  | AA                              | GG                | 1946480206               |
| SNP_P3_101941_241644 | NW_004515651.1 | Scaffold29  | 241644                  | TT                              | AA                | 1946480207               |
| SNP_P3_101942_241648 | NW_004515651.1 | Scaffold29  | 241648                  | GG                              | TT                | 1946480209               |
| SNP_P3_101943_241941 | NW_004515651.1 | Scaffold29  | 241941                  | GG                              | TT                | 1946480211               |
| SNP_P3_101944_242097 | NW_004515651.1 | Scaffold29  | 242097                  | TT                              | AA                | 1946480212               |
| SNP_P3_101945_242313 | NW_004515651.1 | Scaffold29  | 242313                  | CC                              | GG                | 1946480214               |
| SNP_P3_101946_242466 | NW_004515651.1 | Scaffold29  | 242466                  | AA                              | TT                | 1946480215               |
| SNP_P3_101947_242510 | NW_004515651.1 | Scaffold29  | 242510                  | AA                              | CC                | 1946480217               |
| SNP_P3_101948_242958 | NW_004515651.1 | Scaffold29  | 242958                  | TT                              | GG                | 1946480218               |

| SNPs IDs            | Chromosome IDs | Chromosomes | Physical positions (bp) | CDC Frontier (Reference genome) | (Pusa 256 & HPNB) | NCBI SNPdb Accession IDs |
|---------------------|----------------|-------------|-------------------------|---------------------------------|-------------------|--------------------------|
| SNP_P3_101949_448   | NW_004515652.1 | Scaffold30  | 448                     | TT                              | CC                | 1946480220               |
| SNP_P3_101950_765   | NW_004515652.1 | Scaffold30  | 765                     | CC                              | AA                | 1946480222               |
| SNP_P3_101951_836   | NW_004515652.1 | Scaffold30  | 836                     | CC                              | AA                | 1946480223               |
| SNP_P3_101952_1405  | NW_004515652.1 | Scaffold30  | 1405                    | GG                              | AA                | 1946480225               |
| SNP_P3_101953_1546  | NW_004515652.1 | Scaffold30  | 1546                    | AA                              | GG                | 1946480226               |
| SNP_P3_101954_1552  | NW_004515652.1 | Scaffold30  | 1552                    | TT                              | CC                | 1946480228               |
| SNP_P3_101955_1564  | NW_004515652.1 | Scaffold30  | 1564                    | AA                              | TT                | 1946480229               |
| SNP_P3_101956_1600  | NW_004515652.1 | Scaffold30  | 1600                    | TT                              | CC                | 1946480231               |
| SNP_P3_101957_1813  | NW_004515652.1 | Scaffold30  | 1813                    | TT                              | GG                | 1946480232               |
| SNP_P3_101958_1828  | NW_004515652.1 | Scaffold30  | 1828                    | TT                              | CC                | 1946480234               |
| SNP_P3_101959_1873  | NW_004515652.1 | Scaffold30  | 1873                    | TT                              | CC                | 1946480235               |
| SNP_P3_101960_1908  | NW_004515652.1 | Scaffold30  | 1908                    | AA                              | GG                | 1946480237               |
| SNP_P3_101961_1912  | NW_004515652.1 | Scaffold30  | 1912                    | GG                              | AA                | 1946480239               |
| SNP_P3_101962_1921  | NW_004515652.1 | Scaffold30  | 1921                    | AA                              | CC                | 1946480240               |
| SNP_P3_101963_1936  | NW_004515652.1 | Scaffold30  | 1936                    | TT                              | CC                | 1946480242               |
| SNP_P3_101964_1944  | NW_004515652.1 | Scaffold30  | 1944                    | TT                              | GG                | 1946480243               |
| SNP_P3_101965_1946  | NW_004515652.1 | Scaffold30  | 1946                    | GG                              | AA                | 1946480245               |
| SNP_P3_101966_1957  | NW_004515652.1 | Scaffold30  | 1957                    | CC                              | TT                | 1946480246               |
| SNP_P3_101967_1958  | NW_004515652.1 | Scaffold30  | 1958                    | CC                              | TT                | 1946480248               |
| SNP_P3_101968_1984  | NW_004515652.1 | Scaffold30  | 1984                    | TT                              | CC                | 1946480250               |
| SNP_P3_101969_1992  | NW_004515652.1 | Scaffold30  | 1992                    | TT                              | CC                | 1946480251               |
| SNP_P3_101970_2001  | NW_004515652.1 | Scaffold30  | 2001                    | AA                              | CC                | 1946480253               |
| SNP_P3_101971_2002  | NW_004515652.1 | Scaffold30  | 2002                    | TT                              | CC                | 1946480254               |
| SNP_P3_101972_2004  | NW_004515652.1 | Scaffold30  | 2004                    | GG                              | CC                | 1946480256               |
| SNP_P3_101973_2032  | NW_004515652.1 | Scaffold30  | 2032                    | CC                              | TT                | 1946480257               |
| SNP_P3_101974_2041  | NW_004515652.1 | Scaffold30  | 2041                    | GG                              | AA                | 1946480259               |
| SNP_P3_101975_2050  | NW_004515652.1 | Scaffold30  | 2050                    | TT                              | CC                | 1946480260               |
| SNP_P3_101976_2056  | NW_004515652.1 | Scaffold30  | 2056                    | TT                              | AA                | 1946480262               |
| SNP_P3_101977_2064  | NW_004515652.1 | Scaffold30  | 2064                    | TT                              | CC                | 1946480263               |
| SNP_P3_101978_6346  | NW_004515652.1 | Scaffold30  | 6346                    | AA                              | CC                | 1946480265               |
| SNP_P3_101979_12471 | NW_004515652.1 | Scaffold30  | 12471                   | GG                              | CC                | 1946480266               |
| SNP_P3_101980_13617 | NW_004515652.1 | Scaffold30  | 13617                   | AA                              | CC                | 1946480268               |
| SNP_P3_101981_14219 | NW_004515652.1 | Scaffold30  | 14219                   | GG                              | CC                | 1946480270               |
| SNP_P3_101982_15248 | NW_004515652.1 | Scaffold30  | 15248                   | GG                              | AA                | 1946480271               |
| SNP_P3_101983_23863 | NW_004515652.1 | Scaffold30  | 23863                   | GG                              | AA                | 1946480273               |
| SNP_P3_101984_23881 | NW_004515652.1 | Scaffold30  | 23881                   | GG                              | AA                | 1946480274               |
| SNP_P3_101985_28937 | NW_004515652.1 | Scaffold30  | 28937                   | TT                              | CC                | 1946480276               |
| SNP_P3_101986_71530 | NW_004515652.1 | Scaffold30  | 71530                   | GG                              | CC                | 1946480277               |
| SNP_P3_101987_72074 | NW_004515652.1 | Scaffold30  | 72074                   | TT                              | GG                | 1946480279               |
| SNP_P3_101988_78359 | NW_004515652.1 | Scaffold30  | 78359                   | AA                              | CC                | 1946480280               |
| SNP_P3_101989_78743 | NW_004515652.1 | Scaffold30  | 78743                   | TT                              | CC                | 1946480282               |
| SNP_P3_101990_78783 | NW_004515652.1 | Scaffold30  | 78783                   | AA                              | CC                | 1946480283               |

| SNPs IDs             | Chromosome IDs | Chromosomes | Physical positions (bp) | CDC Frontier (Reference genome) | (Pusa 256 & HPNB) | NCBI SNPdb Accession IDs |
|----------------------|----------------|-------------|-------------------------|---------------------------------|-------------------|--------------------------|
| SNP_P3_101991_78800  | NW_004515652.1 | Scaffold30  | 78800                   | CC                              | AA                | 1946480285               |
| SNP_P3_101992_78865  | NW_004515652.1 | Scaffold30  | 78865                   | GG                              | AA                | 1946480286               |
| SNP_P3_101993_78866  | NW_004515652.1 | Scaffold30  | 78866                   | GG                              | AA                | 1946480288               |
| SNP_P3_101994_78992  | NW_004515652.1 | Scaffold30  | 78992                   | TT                              | CC                | 1946480289               |
| SNP_P3_101995_84690  | NW_004515652.1 | Scaffold30  | 84690                   | TT                              | AA                | 1946480291               |
| SNP_P3_101996_84709  | NW_004515652.1 | Scaffold30  | 84709                   | AA                              | GG                | 1946480292               |
| SNP_P3_101997_84735  | NW_004515652.1 | Scaffold30  | 84735                   | CC                              | TT                | 1946480294               |
| SNP_P3_101998_85470  | NW_004515652.1 | Scaffold30  | 85470                   | TT                              | GG                | 1946480295               |
| SNP_P3_101999_85753  | NW_004515652.1 | Scaffold30  | 85753                   | CC                              | AA                | 1946480297               |
| SNP_P3_102000_85920  | NW_004515652.1 | Scaffold30  | 85920                   | AA                              | TT                | 1946480298               |
| SNP_P3_102001_85930  | NW_004515652.1 | Scaffold30  | 85930                   | TT                              | GG                | 1946480300               |
| SNP_P3_102002_85998  | NW_004515652.1 | Scaffold30  | 85998                   | GG                              | CC                | 1946480301               |
| SNP_P3_102003_86042  | NW_004515652.1 | Scaffold30  | 86042                   | TT                              | CC                | 1946480303               |
| SNP_P3_102004_86053  | NW_004515652.1 | Scaffold30  | 86053                   | CC                              | TT                | 1946480304               |
| SNP_P3_102005_86068  | NW_004515652.1 | Scaffold30  | 86068                   | CC                              | TT                | 1946480306               |
| SNP_P3_102006_86070  | NW_004515652.1 | Scaffold30  | 86070                   | CC                              | TT                | 1946480307               |
| SNP_P3_102007_86098  | NW_004515652.1 | Scaffold30  | 86098                   | GG                              | CC                | 1946480309               |
| SNP_P3_102008_86108  | NW_004515652.1 | Scaffold30  | 86108                   | GG                              | CC                | 1946480311               |
| SNP_P3_102009_86144  | NW_004515652.1 | Scaffold30  | 86144                   | TT                              | CC                | 1946480312               |
| SNP_P3_102010_86192  | NW_004515652.1 | Scaffold30  | 86192                   | TT                              | CC                | 1946480314               |
| SNP_P3_102011_86201  | NW_004515652.1 | Scaffold30  | 86201                   | TT                              | CC                | 1946480315               |
| SNP_P3_102013_89617  | NW_004515652.1 | Scaffold30  | 89617                   | GG                              | AA                | 1946480317               |
| SNP_P3_102014_91886  | NW_004515652.1 | Scaffold30  | 91886                   | CC                              | TT                | 1946480318               |
| SNP_P3_102015_93183  | NW_004515652.1 | Scaffold30  | 93183                   | AA                              | GG                | 1946480320               |
| SNP_P3_102016_93185  | NW_004515652.1 | Scaffold30  | 93185                   | CC                              | AA                | 1946480321               |
| SNP_P3_102017_93298  | NW_004515652.1 | Scaffold30  | 93298                   | CC                              | TT                | 1946480323               |
| SNP_P3_102018_97172  | NW_004515652.1 | Scaffold30  | 97172                   | GG                              | TT                | 1946480325               |
| SNP_P3_102019_97176  | NW_004515652.1 | Scaffold30  | 97176                   | TT                              | AA                | 1946480326               |
| SNP_P3_102020_97189  | NW_004515652.1 | Scaffold30  | 97189                   | TT                              | AA                | 1946480328               |
| SNP_P3_102021_97646  | NW_004515652.1 | Scaffold30  | 97646                   | CC                              | TT                | 1946480329               |
| SNP_P3_102022_98379  | NW_004515652.1 | Scaffold30  | 98379                   | TT                              | AA                | 1946480331               |
| SNP_P3_102023_98723  | NW_004515652.1 | Scaffold30  | 98723                   | CC                              | AA                | 1946480332               |
| SNP_P3_102024_98980  | NW_004515652.1 | Scaffold30  | 98980                   | TT                              | AA                | 1946480334               |
| SNP_P3_102025_99021  | NW_004515652.1 | Scaffold30  | 99021                   | CC                              | AA                | 1946480335               |
| SNP_P3_102026_99121  | NW_004515652.1 | Scaffold30  | 99121                   | AA                              | GG                | 1946480337               |
| SNP_P3_102027_99636  | NW_004515652.1 | Scaffold30  | 99636                   | GG                              | AA                | 1946480338               |
| SNP_P3_102028_103375 | NW_004515652.1 | Scaffold30  | 103375                  | CC                              | AA                | 1946480340               |
| SNP_P3_102029_103455 | NW_004515652.1 | Scaffold30  | 103455                  | GG                              | AA                | 1946480342               |
| SNP_P3_102030_103488 | NW_004515652.1 | Scaffold30  | 103488                  | TT                              | CC                | 1946480343               |
| SNP_P3_102031_103898 | NW_004515652.1 | Scaffold30  | 103898                  | GG                              | AA                | 1946480345               |
| SNP_P3_102032_104041 | NW_004515652.1 | Scaffold30  | 104041                  | AA                              | CC                | 1946480346               |
| SNP_P3_102033_104790 | NW_004515652.1 | Scaffold30  | 104790                  | GG                              | TT                | 1946480348               |

| SNPs IDs             | Chromosome IDs | Chromosomes | Physical positions (bp) | CDC Frontier (Reference genome) | (Pusa 256 & HPNB) | NCBI SNPdb Accession IDs |
|----------------------|----------------|-------------|-------------------------|---------------------------------|-------------------|--------------------------|
| SNP_P3_102034_111241 | NW_004515652.1 | Scaffold30  | 111241                  | GG                              | CC                | 1946480349               |
| SNP_P3_102035_119446 | NW_004515652.1 | Scaffold30  | 119446                  | GG                              | AA                | 1946480351               |
| SNP_P3_102036_119454 | NW_004515652.1 | Scaffold30  | 119454                  | TT                              | CC                | 1946480352               |
| SNP_P3_102037_119455 | NW_004515652.1 | Scaffold30  | 119455                  | TT                              | CC                | 1946480354               |
| SNP_P3_102038_126125 | NW_004515652.1 | Scaffold30  | 126125                  | TT                              | CC                | 1946480355               |
| SNP_P3_102039_126175 | NW_004515652.1 | Scaffold30  | 126175                  | GG                              | TT                | 1946480357               |
| SNP_P3_102040_126244 | NW_004515652.1 | Scaffold30  | 126244                  | TT                              | AA                | 1946480359               |
| SNP_P3_102041_126385 | NW_004515652.1 | Scaffold30  | 126385                  | CC                              | TT                | 1946480360               |
| SNP_P3_102042_131068 | NW_004515652.1 | Scaffold30  | 131068                  | CC                              | AA                | 1946480362               |
| SNP_P3_102043_131071 | NW_004515652.1 | Scaffold30  | 131071                  | CC                              | AA                | 1946480363               |
| SNP_P3_102044_131072 | NW_004515652.1 | Scaffold30  | 131072                  | CC                              | TT                | 1946480365               |
| SNP_P3_102045_136523 | NW_004515652.1 | Scaffold30  | 136523                  | AA                              | CC                | 1946480366               |
| SNP_P3_102046_136525 | NW_004515652.1 | Scaffold30  | 136525                  | AA                              | TT                | 1946480368               |
| SNP_P3_102047_136537 | NW_004515652.1 | Scaffold30  | 136537                  | CC                              | TT                | 1946480369               |
| SNP_P3_102048_136543 | NW_004515652.1 | Scaffold30  | 136543                  | AA                              | TT                | 1946480371               |
| SNP_P3_102049_136609 | NW_004515652.1 | Scaffold30  | 136609                  | CC                              | TT                | 1946480372               |
| SNP_P3_102050_136621 | NW_004515652.1 | Scaffold30  | 136621                  | CC                              | TT                | 1946480374               |
| SNP_P3_102051_136656 | NW_004515652.1 | Scaffold30  | 136656                  | AA                              | TT                | 1946480375               |
| SNP_P3_102052_136661 | NW_004515652.1 | Scaffold30  | 136661                  | TT                              | AA                | 1946480377               |
| SNP_P3_102053_136755 | NW_004515652.1 | Scaffold30  | 136755                  | AA                              | TT                | 1946480378               |
| SNP_P3_102054_136757 | NW_004515652.1 | Scaffold30  | 136757                  | TT                              | GG                | 1946480380               |
| SNP_P3_102055_137541 | NW_004515652.1 | Scaffold30  | 137541                  | GG                              | AA                | 1946480382               |
| SNP_P3_102056_3181   | NW_004515653.1 | Scaffold36  | 3181                    | TT                              | CC                | 1946480383               |
| SNP_P3_102057_9243   | NW_004515653.1 | Scaffold36  | 9243                    | AA                              | CC                | 1946480385               |
| SNP_P3_102058_9260   | NW_004515653.1 | Scaffold36  | 9260                    | AA                              | GG                | 1946480386               |
| SNP_P3_102059_9262   | NW_004515653.1 | Scaffold36  | 9262                    | CC                              | AA                | 1946480388               |
| SNP_P3_102060_9305   | NW_004515653.1 | Scaffold36  | 9305                    | CC                              | TT                | 1946480389               |
| SNP_P3_102061_9317   | NW_004515653.1 | Scaffold36  | 9317                    | TT                              | CC                | 1946480391               |
| SNP_P3_102062_24955  | NW_004515653.1 | Scaffold36  | 24955                   | CC                              | AA                | 1946480393               |
| SNP_P3_102063_26153  | NW_004515653.1 | Scaffold36  | 26153                   | GG                              | TT                | 1946480394               |
| SNP_P3_102064_75519  | NW_004515653.1 | Scaffold36  | 75519                   | CC                              | TT                | 1946480396               |
| SNP_P3_102065_94431  | NW_004515653.1 | Scaffold36  | 94431                   | CC                              | TT                | 1946480398               |
| SNP_P3_102066_119326 | NW_004515653.1 | Scaffold36  | 119326                  | CC                              | TT                | 1946480399               |
| SNP_P3_102067_126964 | NW_004515653.1 | Scaffold36  | 126964                  | TT                              | CC                | 1946480401               |
| SNP_P3_102068_134765 | NW_004515653.1 | Scaffold36  | 134765                  | GG                              | AA                | 1946480402               |
| SNP_P3_102069_135186 | NW_004515653.1 | Scaffold36  | 135186                  | AA                              | CC                | 1946480404               |
| SNP_P3_102071_140052 | NW_004515653.1 | Scaffold36  | 140052                  | CC                              | GG                | 1946480406               |
| SNP_P3_102072_141930 | NW_004515653.1 | Scaffold36  | 141930                  | TT                              | CC                | 1946480407               |
| SNP_P3_102073_201474 | NW_004515653.1 | Scaffold36  | 201474                  | AA                              | CC                | 1946480409               |
| SNP_P3_102074_209248 | NW_004515653.1 | Scaffold36  | 209248                  | CC                              | TT                | 1946480411               |
| SNP_P3_102075_209770 | NW_004515653.1 | Scaffold36  | 209770                  | TT                              | CC                | 1946480412               |
| SNP_P3_102076_210826 | NW_004515653.1 | Scaffold36  | 210826                  | TT                              | GG                | 1946480414               |

| SNPs IDs             | Chromosome IDs | Chromosomes | Physical positions (bp) | CDC Frontier (Reference genome) | (Pusa 256 & HPNB) | NCBI SNPdb Accession IDs |
|----------------------|----------------|-------------|-------------------------|---------------------------------|-------------------|--------------------------|
| SNP_P3_102077_215031 | NW_004515653.1 | Scaffold36  | 215031                  | CC                              | GG                | 1946480415               |
| SNP_P3_102078_221683 | NW_004515653.1 | Scaffold36  | 221683                  | AA                              | GG                | 1946480417               |
| SNP_P3_102079_221708 | NW_004515653.1 | Scaffold36  | 221708                  | AA                              | GG                | 1946480419               |
| SNP_P3_102080_221866 | NW_004515653.1 | Scaffold36  | 221866                  | AA                              | GG                | 1946480420               |
| SNP_P3_102081_221882 | NW_004515653.1 | Scaffold36  | 221882                  | CC                              | AA                | 1946480422               |
| SNP_P3_102082_221902 | NW_004515653.1 | Scaffold36  | 221902                  | GG                              | AA                | 1946480423               |
| SNP_P3_102083_221916 | NW_004515653.1 | Scaffold36  | 221916                  | TT                              | CC                | 1946480425               |
| SNP_P3_102084_221929 | NW_004515653.1 | Scaffold36  | 221929                  | TT                              | CC                | 1946480427               |
| SNP_P3_102085_221944 | NW_004515653.1 | Scaffold36  | 221944                  | GG                              | TT                | 1946480428               |
| SNP_P3_102086_221952 | NW_004515653.1 | Scaffold36  | 221952                  | GG                              | AA                | 1946480430               |
| SNP_P3_102087_221965 | NW_004515653.1 | Scaffold36  | 221965                  | GG                              | AA                | 1946480432               |
| SNP_P3_102088_221966 | NW_004515653.1 | Scaffold36  | 221966                  | GG                              | AA                | 1946480433               |
| SNP_P3_102089_221969 | NW_004515653.1 | Scaffold36  | 221969                  | TT                              | CC                | 1946480435               |
| SNP_P3_102090_221999 | NW_004515653.1 | Scaffold36  | 221999                  | AA                              | CC                | 1946480437               |
| SNP_P3_102091_222030 | NW_004515653.1 | Scaffold36  | 222030                  | GG                              | CC                | 1946480439               |
| SNP_P3_102092_222067 | NW_004515653.1 | Scaffold36  | 222067                  | TT                              | GG                | 1946480440               |
| SNP_P3_102093_222327 | NW_004515653.1 | Scaffold36  | 222327                  | CC                              | GG                | 1946480442               |
| SNP_P3_102094_222343 | NW_004515653.1 | Scaffold36  | 222343                  | GG                              | TT                | 1946480444               |
| SNP_P3_102095_227685 | NW_004515653.1 | Scaffold36  | 227685                  | TT                              | CC                | 1946480445               |
| SNP_P3_102096_227737 | NW_004515653.1 | Scaffold36  | 227737                  | GG                              | AA                | 1946480447               |
| SNP_P3_102097_227924 | NW_004515653.1 | Scaffold36  | 227924                  | AA                              | CC                | 1946480448               |
| SNP_P3_102098_228037 | NW_004515653.1 | Scaffold36  | 228037                  | AA                              | GG                | 1946480450               |
| SNP_P3_102100_236702 | NW_004515653.1 | Scaffold36  | 236702                  | TT                              | AA                | 1946480452               |
| SNP_P3_102101_236827 | NW_004515653.1 | Scaffold36  | 236827                  | GG                              | AA                | 1946480453               |
| SNP_P3_102102_241239 | NW_004515653.1 | Scaffold36  | 241239                  | CC                              | TT                | 1946480455               |
| SNP_P3_102103_241512 | NW_004515653.1 | Scaffold36  | 241512                  | AA                              | GG                | 1946480457               |
| SNP_P3_102104_241536 | NW_004515653.1 | Scaffold36  | 241536                  | TT                              | AA                | 1946480458               |
| SNP_P3_102105_261167 | NW_004515653.1 | Scaffold36  | 261167                  | CC                              | TT                | 1946480460               |
| SNP_P3_102106_261171 | NW_004515653.1 | Scaffold36  | 261171                  | CC                              | GG                | 1946480461               |
| SNP_P3_102107_261237 | NW_004515653.1 | Scaffold36  | 261237                  | AA                              | TT                | 1946480463               |
| SNP_P3_102108_261238 | NW_004515653.1 | Scaffold36  | 261238                  | GG                              | TT                | 1946480465               |
| SNP_P3_102109_261239 | NW_004515653.1 | Scaffold36  | 261239                  | TT                              | GG                | 1946480466               |
| SNP_P3_102110_272677 | NW_004515653.1 | Scaffold36  | 272677                  | TT                              | CC                | 1946480468               |
| SNP_P3_102111_275859 | NW_004515653.1 | Scaffold36  | 275859                  | TT                              | CC                | 1946480470               |
| SNP_P3_102112_281235 | NW_004515653.1 | Scaffold36  | 281235                  | GG                              | TT                | 1946480471               |
| SNP_P3_102113_281240 | NW_004515653.1 | Scaffold36  | 281240                  | AA                              | GG                | 1946480473               |
| SNP_P3_102114_281243 | NW_004515653.1 | Scaffold36  | 281243                  | TT                              | GG                | 1946480475               |
| SNP_P3_102115_281569 | NW_004515653.1 | Scaffold36  | 281569                  | CC                              | AA                | 1946480476               |
| SNP_P3_102116_281573 | NW_004515653.1 | Scaffold36  | 281573                  | TT                              | AA                | 1946480478               |
| SNP_P3_102118_298663 | NW_004515653.1 | Scaffold36  | 298663                  | TT                              | AA                | 1946480480               |
| SNP_P3_102119_308013 | NW_004515653.1 | Scaffold36  | 308013                  | GG                              | TT                | 1946480481               |
| SNP_P3_102120_308369 | NW_004515653.1 | Scaffold36  | 308369                  | AA                              | CC                | 1946480483               |

| SNPs IDs             | Chromosome IDs | Chromosomes | Physical positions (bp) | CDC Frontier (Reference genome) | (Pusa 256 & HPNB) | NCBI SNPdb Accession IDs |
|----------------------|----------------|-------------|-------------------------|---------------------------------|-------------------|--------------------------|
| SNP_P3_102121_308583 | NW_004515653.1 | Scaffold36  | 308583                  | TT                              | CC                | 1946480485               |
| SNP_P3_102122_316740 | NW_004515653.1 | Scaffold36  | 316740                  | AA                              | TT                | 1946480486               |
| SNP_P3_102123_317102 | NW_004515653.1 | Scaffold36  | 317102                  | CC                              | AA                | 1946480488               |
| SNP_P3_102124_317104 | NW_004515653.1 | Scaffold36  | 317104                  | GG                              | CC                | 1946480489               |
| SNP_P3_102125_319824 | NW_004515653.1 | Scaffold36  | 319824                  | AA                              | TT                | 1946480491               |
| SNP_P3_102126_319867 | NW_004515653.1 | Scaffold36  | 319867                  | AA                              | GG                | 1946480493               |
| SNP_P3_102127_319947 | NW_004515653.1 | Scaffold36  | 319947                  | CC                              | AA                | 1946480494               |
| SNP_P3_102128_319958 | NW_004515653.1 | Scaffold36  | 319958                  | AA                              | CC                | 1946480496               |
| SNP_P3_102129_319971 | NW_004515653.1 | Scaffold36  | 319971                  | TT                              | CC                | 1946480497               |
| SNP_P3_102130_319977 | NW_004515653.1 | Scaffold36  | 319977                  | AA                              | TT                | 1946480499               |
| SNP_P3_102131_319985 | NW_004515653.1 | Scaffold36  | 319985                  | TT                              | CC                | 1946480500               |
| SNP_P3_102132_319988 | NW_004515653.1 | Scaffold36  | 319988                  | AA                              | GG                | 1946480502               |
| SNP_P3_102133_320046 | NW_004515653.1 | Scaffold36  | 320046                  | AA                              | GG                | 1946480504               |
| SNP_P3_102134_320241 | NW_004515653.1 | Scaffold36  | 320241                  | AA                              | GG                | 1946480505               |
| SNP_P3_102135_320298 | NW_004515653.1 | Scaffold36  | 320298                  | GG                              | TT                | 1946480507               |
| SNP_P3_102136_320369 | NW_004515653.1 | Scaffold36  | 320369                  | AA                              | GG                | 1946480508               |
| SNP_P3_102137_324988 | NW_004515653.1 | Scaffold36  | 324988                  | GG                              | AA                | 1946480510               |
| SNP_P3_102138_327963 | NW_004515653.1 | Scaffold36  | 327963                  | CC                              | TT                | 1946480512               |
| SNP_P3_102139_327997 | NW_004515653.1 | Scaffold36  | 327997                  | AA                              | GG                | 1946480513               |
| SNP_P3_102140_330694 | NW_004515653.1 | Scaffold36  | 330694                  | GG                              | AA                | 1946480515               |
| SNP_P3_102141_330758 | NW_004515653.1 | Scaffold36  | 330758                  | AA                              | TT                | 1946480516               |
| SNP_P3_102142_330999 | NW_004515653.1 | Scaffold36  | 330999                  | TT                              | AA                | 1946480518               |
| SNP_P3_102143_331161 | NW_004515653.1 | Scaffold36  | 331161                  | AA                              | GG                | 1946480519               |
| SNP_P3_102144_336215 | NW_004515653.1 | Scaffold36  | 336215                  | GG                              | TT                | 1946480521               |
| SNP_P3_102145_336274 | NW_004515653.1 | Scaffold36  | 336274                  | CC                              | TT                | 1946480523               |
| SNP_P3_102146_5926   | NW_004515654.1 | Scaffold37  | 5926                    | AA                              | TT                | 1946480524               |
| SNP_P3_102147_8302   | NW_004515654.1 | Scaffold37  | 8302                    | AA                              | GG                | 1946480526               |
| SNP_P3_102148_8657   | NW_004515654.1 | Scaffold37  | 8657                    | CC                              | TT                | 1946480527               |
| SNP_P3_102149_11534  | NW_004515654.1 | Scaffold37  | 11534                   | CC                              | TT                | 1946480529               |
| SNP_P3_102150_15272  | NW_004515654.1 | Scaffold37  | 15272                   | AA                              | GG                | 1946480530               |
| SNP_P3_102152_15321  | NW_004515654.1 | Scaffold37  | 15321                   | AA                              | TT                | 1946480532               |
| SNP_P3_102153_15355  | NW_004515654.1 | Scaffold37  | 15355                   | AA                              | TT                | 1946480533               |
| SNP_P3_102154_15357  | NW_004515654.1 | Scaffold37  | 15357                   | AA                              | CC                | 1946480535               |
| SNP_P3_102155_15363  | NW_004515654.1 | Scaffold37  | 15363                   | TT                              | CC                | 1946480536               |
| SNP_P3_102156_15400  | NW_004515654.1 | Scaffold37  | 15400                   | CC                              | TT                | 1946480538               |
| SNP_P3_102157_22324  | NW_004515654.1 | Scaffold37  | 22324                   | GG                              | AA                | 1946480539               |
| SNP_P3_102158_22499  | NW_004515654.1 | Scaffold37  | 22499                   | AA                              | TT                | 1946480541               |
| SNP_P3_102159_22763  | NW_004515654.1 | Scaffold37  | 22763                   | TT                              | AA                | 1946480543               |
| SNP_P3_102160_22778  | NW_004515654.1 | Scaffold37  | 22778                   | TT                              | CC                | 1946480544               |
| SNP_P3_102161_22796  | NW_004515654.1 | Scaffold37  | 22796                   | CC                              | TT                | 1946480546               |
| SNP_P3_102162_26609  | NW_004515654.1 | Scaffold37  | 26609                   | GG                              | AA                | 1946480547               |
| SNP_P3_102163_28520  | NW_004515654.1 | Scaffold37  | 28520                   | TT                              | AA                | 1946480549               |



| SNPs IDs             | Chromosome IDs | Chromosomes | Physical positions (bp) | CDC Frontier (Reference genome) | (Pusa 256 & HPNB) | NCBI SNPdb Accession IDs |
|----------------------|----------------|-------------|-------------------------|---------------------------------|-------------------|--------------------------|
| SNP_P3_102164_31945  | NW_004515654.1 | Scaffold37  | 31945                   | CC                              | TT                | 1946480550               |
| SNP_P3_102165_34728  | NW_004515654.1 | Scaffold37  | 34728                   | AA                              | CC                | 1946480552               |
| SNP_P3_102166_36931  | NW_004515654.1 | Scaffold37  | 36931                   | AA                              | GG                | 1946480554               |
| SNP_P3_102167_38884  | NW_004515654.1 | Scaffold37  | 38884                   | CC                              | TT                | 1946480555               |
| SNP_P3_102168_52661  | NW_004515654.1 | Scaffold37  | 52661                   | TT                              | CC                | 1946480557               |
| SNP_P3_102169_58727  | NW_004515654.1 | Scaffold37  | 58727                   | CC                              | AA                | 1946480558               |
| SNP_P3_102170_58772  | NW_004515654.1 | Scaffold37  | 58772                   | CC                              | GG                | 1946480560               |
| SNP_P3_102171_59140  | NW_004515654.1 | Scaffold37  | 59140                   | AA                              | GG                | 1946480562               |
| SNP_P3_102172_75764  | NW_004515654.1 | Scaffold37  | 75764                   | GG                              | TT                | 1946480564               |
| SNP_P3_102173_75859  | NW_004515654.1 | Scaffold37  | 75859                   | CC                              | AA                | 1946480565               |
| SNP_P3_102174_79550  | NW_004515654.1 | Scaffold37  | 79550                   | CC                              | TT                | 1946480567               |
| SNP_P3_102175_83224  | NW_004515654.1 | Scaffold37  | 83224                   | TT                              | AA                | 1946480569               |
| SNP_P3_102176_88515  | NW_004515654.1 | Scaffold37  | 88515                   | TT                              | GG                | 1946480571               |
| SNP_P3_102177_97478  | NW_004515654.1 | Scaffold37  | 97478                   | TT                              | CC                | 1946480572               |
| SNP_P3_102178_110551 | NW_004515654.1 | Scaffold37  | 110551                  | GG                              | CC                | 1946480574               |
| SNP_P3_102179_110578 | NW_004515654.1 | Scaffold37  | 110578                  | CC                              | GG                | 1946480575               |
| SNP_P3_102180_122953 | NW_004515654.1 | Scaffold37  | 122953                  | TT                              | AA                | 1946480577               |
| SNP_P3_102181_123264 | NW_004515654.1 | Scaffold37  | 123264                  | GG                              | CC                | 1946480579               |
| SNP_P3_102182_126478 | NW_004515654.1 | Scaffold37  | 126478                  | CC                              | AA                | 1946480580               |
| SNP_P3_102183_134205 | NW_004515654.1 | Scaffold37  | 134205                  | AA                              | GG                | 1946480582               |
| SNP_P3_102184_134218 | NW_004515654.1 | Scaffold37  | 134218                  | TT                              | GG                | 1946480583               |
| SNP_P3_102185_134253 | NW_004515654.1 | Scaffold37  | 134253                  | AA                              | GG                | 1946480585               |
| SNP_P3_102186_134255 | NW_004515654.1 | Scaffold37  | 134255                  | AA                              | TT                | 1946480586               |
| SNP_P3_102187_134258 | NW_004515654.1 | Scaffold37  | 134258                  | AA                              | GG                | 1946480588               |
| SNP_P3_102188_134284 | NW_004515654.1 | Scaffold37  | 134284                  | AA                              | CC                | 1946480589               |
| SNP_P3_102189_134290 | NW_004515654.1 | Scaffold37  | 134290                  | GG                              | AA                | 1946480591               |
| SNP_P3_102190_134299 | NW_004515654.1 | Scaffold37  | 134299                  | TT                              | CC                | 1946480592               |
| SNP_P3_102191_134378 | NW_004515654.1 | Scaffold37  | 134378                  | TT                              | AA                | 1946480594               |
| SNP_P3_102192_134396 | NW_004515654.1 | Scaffold37  | 134396                  | TT                              | AA                | 1946480596               |
| SNP_P3_102193_134470 | NW_004515654.1 | Scaffold37  | 134470                  | GG                              | TT                | 1946480597               |
| SNP_P3_102194_134475 | NW_004515654.1 | Scaffold37  | 134475                  | AA                              | GG                | 1946480599               |
| SNP_P3_102195_134538 | NW_004515654.1 | Scaffold37  | 134538                  | AA                              | GG                | 1946480600               |
| SNP_P3_102196_134546 | NW_004515654.1 | Scaffold37  | 134546                  | CC                              | TT                | 1946480602               |
| SNP_P3_102197_134585 | NW_004515654.1 | Scaffold37  | 134585                  | TT                              | CC                | 1946480605               |
| SNP_P3_102198_134653 | NW_004515654.1 | Scaffold37  | 134653                  | AA                              | GG                | 1946480606               |
| SNP_P3_102199_134674 | NW_004515654.1 | Scaffold37  | 134674                  | TT                              | GG                | 1946480608               |
| SNP_P3_102200_134711 | NW_004515654.1 | Scaffold37  | 134711                  | GG                              | AA                | 1946480610               |
| SNP_P3_102201_136130 | NW_004515654.1 | Scaffold37  | 136130                  | CC                              | AA                | 1946480611               |
| SNP_P3_102202_136172 | NW_004515654.1 | Scaffold37  | 136172                  | CC                              | AA                | 1946480613               |
| SNP_P3_102203_136177 | NW_004515654.1 | Scaffold37  | 136177                  | GG                              | AA                | 1946480615               |
| SNP_P3_102204_136199 | NW_004515654.1 | Scaffold37  | 136199                  | AA                              | GG                | 1946480616               |
| SNP_P3_102205_136290 | NW_004515654.1 | Scaffold37  | 136290                  | AA                              | TT                | 1946480618               |

| SNPs IDs             | Chromosome IDs | Chromosomes | Physical positions (bp) | CDC Frontier (Reference genome) | (Pusa 256 & HPNB) | NCBI SNPdb Accession IDs |
|----------------------|----------------|-------------|-------------------------|---------------------------------|-------------------|--------------------------|
| SNP_P3_102206_136298 | NW_004515654.1 | Scaffold37  | 136298                  | TT                              | GG                | 1946480619               |
| SNP_P3_102207_136550 | NW_004515654.1 | Scaffold37  | 136550                  | AA                              | CC                | 1946480621               |
| SNP_P3_102208_136719 | NW_004515654.1 | Scaffold37  | 136719                  | AA                              | GG                | 1946480622               |
| SNP_P3_102209_136722 | NW_004515654.1 | Scaffold37  | 136722                  | GG                              | AA                | 1946480624               |
| SNP_P3_102210_136766 | NW_004515654.1 | Scaffold37  | 136766                  | AA                              | GG                | 1946480626               |
| SNP_P3_102211_136770 | NW_004515654.1 | Scaffold37  | 136770                  | TT                              | GG                | 1946480627               |
| SNP_P3_102212_136785 | NW_004515654.1 | Scaffold37  | 136785                  | TT                              | CC                | 1946480629               |
| SNP_P3_102213_136791 | NW_004515654.1 | Scaffold37  | 136791                  | CC                              | TT                | 1946480630               |
| SNP_P3_102214_136803 | NW_004515654.1 | Scaffold37  | 136803                  | GG                              | TT                | 1946480632               |
| SNP_P3_102215_140595 | NW_004515654.1 | Scaffold37  | 140595                  | TT                              | CC                | 1946480633               |
| SNP_P3_102216_148957 | NW_004515654.1 | Scaffold37  | 148957                  | AA                              | TT                | 1946480635               |
| SNP_P3_102217_160344 | NW_004515654.1 | Scaffold37  | 160344                  | AA                              | GG                | 1946480636               |
| SNP_P3_102219_160360 | NW_004515654.1 | Scaffold37  | 160360                  | GG                              | TT                | 1946480638               |
| SNP_P3_102220_8061   | NW_004515655.1 | Scaffold38  | 8061                    | GG                              | TT                | 1946480640               |
| SNP_P3_102221_8137   | NW_004515655.1 | Scaffold38  | 8137                    | CC                              | AA                | 1946480641               |
| SNP_P3_102222_8383   | NW_004515655.1 | Scaffold38  | 8383                    | GG                              | AA                | 1946480643               |
| SNP_P3_102223_9834   | NW_004515655.1 | Scaffold38  | 9834                    | TT                              | CC                | 1946480644               |
| SNP_P3_102224_9897   | NW_004515655.1 | Scaffold38  | 9897                    | TT                              | CC                | 1946480646               |
| SNP_P3_102225_9999   | NW_004515655.1 | Scaffold38  | 9999                    | AA                              | CC                | 1946480647               |
| SNP_P3_102226_10035  | NW_004515655.1 | Scaffold38  | 10035                   | GG                              | AA                | 1946480649               |
| SNP_P3_102227_10648  | NW_004515655.1 | Scaffold38  | 10648                   | TT                              | GG                | 1946480651               |
| SNP_P3_102228_18369  | NW_004515655.1 | Scaffold38  | 18369                   | AA                              | GG                | 1946480652               |
| SNP_P3_102229_18375  | NW_004515655.1 | Scaffold38  | 18375                   | TT                              | CC                | 1946480654               |
| SNP_P3_102230_18645  | NW_004515655.1 | Scaffold38  | 18645                   | TT                              | CC                | 1946480655               |
| SNP_P3_102231_18728  | NW_004515655.1 | Scaffold38  | 18728                   | GG                              | AA                | 1946480657               |
| SNP_P3_102234_31511  | NW_004515655.1 | Scaffold38  | 31511                   | AA                              | TT                | 1946480659               |
| SNP_P3_102235_32841  | NW_004515655.1 | Scaffold38  | 32841                   | AA                              | TT                | 1946480660               |
| SNP_P3_102237_54650  | NW_004515655.1 | Scaffold38  | 54650                   | TT                              | GG                | 1946480662               |
| SNP_P3_102238_54808  | NW_004515655.1 | Scaffold38  | 54808                   | CC                              | TT                | 1946480663               |
| SNP_P3_102239_55103  | NW_004515655.1 | Scaffold38  | 55103                   | GG                              | AA                | 1946480665               |
| SNP_P3_102240_61079  | NW_004515655.1 | Scaffold38  | 61079                   | CC                              | AA                | 1946480667               |
| SNP_P3_102241_61232  | NW_004515655.1 | Scaffold38  | 61232                   | TT                              | CC                | 1946480668               |
| SNP_P3_102242_64646  | NW_004515655.1 | Scaffold38  | 64646                   | AA                              | GG                | 1946480670               |
| SNP_P3_102243_65884  | NW_004515655.1 | Scaffold38  | 65884                   | GG                              | TT                | 1946480671               |
| SNP_P3_102244_69058  | NW_004515655.1 | Scaffold38  | 69058                   | AA                              | GG                | 1946480673               |
| SNP_P3_102245_69865  | NW_004515655.1 | Scaffold38  | 69865                   | TT                              | CC                | 1946480674               |
| SNP_P3_102246_70831  | NW_004515655.1 | Scaffold38  | 70831                   | GG                              | AA                | 1946480676               |
| SNP_P3_102247_73796  | NW_004515655.1 | Scaffold38  | 73796                   | AA                              | CC                | 1946480678               |
| SNP_P3_102248_74178  | NW_004515655.1 | Scaffold38  | 74178                   | TT                              | GG                | 1946480679               |
| SNP_P3_102249_74213  | NW_004515655.1 | Scaffold38  | 74213                   | AA                              | GG                | 1946480681               |
| SNP_P3_102250_74265  | NW_004515655.1 | Scaffold38  | 74265                   | CC                              | GG                | 1946480682               |
| SNP_P3_102251_74595  | NW_004515655.1 | Scaffold38  | 74595                   | AA                              | GG                | 1946480684               |

| SNPs IDs             | Chromosome IDs | Chromosomes | Physical positions (bp) | CDC Frontier (Reference genome) | (Pusa 256 & HPNB) | NCBI SNPdb Accession IDs |
|----------------------|----------------|-------------|-------------------------|---------------------------------|-------------------|--------------------------|
| SNP_P3_102252_74727  | NW_004515655.1 | Scaffold38  | 74727                   | TT                              | CC                | 1946480685               |
| SNP_P3_102253_75437  | NW_004515655.1 | Scaffold38  | 75437                   | GG                              | TT                | 1946480687               |
| SNP_P3_102254_75468  | NW_004515655.1 | Scaffold38  | 75468                   | GG                              | CC                | 1946480688               |
| SNP_P3_102255_75726  | NW_004515655.1 | Scaffold38  | 75726                   | TT                              | GG                | 1946480690               |
| SNP_P3_102256_78228  | NW_004515655.1 | Scaffold38  | 78228                   | CC                              | TT                | 1946480692               |
| SNP_P3_102257_78433  | NW_004515655.1 | Scaffold38  | 78433                   | GG                              | TT                | 1946480693               |
| SNP_P3_102258_78457  | NW_004515655.1 | Scaffold38  | 78457                   | TT                              | CC                | 1946480695               |
| SNP_P3_102259_78470  | NW_004515655.1 | Scaffold38  | 78470                   | AA                              | GG                | 1946480696               |
| SNP_P3_102260_78490  | NW_004515655.1 | Scaffold38  | 78490                   | CC                              | TT                | 1946480698               |
| SNP_P3_102261_79133  | NW_004515655.1 | Scaffold38  | 79133                   | AA                              | GG                | 1946480699               |
| SNP_P3_102262_81746  | NW_004515655.1 | Scaffold38  | 81746                   | GG                              | AA                | 1946480701               |
| SNP_P3_102263_98701  | NW_004515655.1 | Scaffold38  | 98701                   | GG                              | AA                | 1946480702               |
| SNP_P3_102264_99908  | NW_004515655.1 | Scaffold38  | 99908                   | CC                              | TT                | 1946480704               |
| SNP_P3_102265_111396 | NW_004515655.1 | Scaffold38  | 111396                  | TT                              | CC                | 1946480705               |
| SNP_P3_102266_114496 | NW_004515655.1 | Scaffold38  | 114496                  | AA                              | TT                | 1946480707               |
| SNP_P3_102267_117415 | NW_004515655.1 | Scaffold38  | 117415                  | CC                              | TT                | 1946480708               |
| SNP_P3_102268_119320 | NW_004515655.1 | Scaffold38  | 119320                  | CC                              | TT                | 1946480710               |
| SNP_P3_102269_119489 | NW_004515655.1 | Scaffold38  | 119489                  | AA                              | CC                | 1946480711               |
| SNP_P3_102270_120809 | NW_004515655.1 | Scaffold38  | 120809                  | AA                              | GG                | 1946480713               |
| SNP_P3_102271_120813 | NW_004515655.1 | Scaffold38  | 120813                  | GG                              | TT                | 1946480714               |
| SNP_P3_102272_121490 | NW_004515655.1 | Scaffold38  | 121490                  | TT                              | CC                | 1946480716               |
| SNP_P3_102273_129691 | NW_004515655.1 | Scaffold38  | 129691                  | AA                              | GG                | 1946480718               |
| SNP_P3_102274_129903 | NW_004515655.1 | Scaffold38  | 129903                  | GG                              | AA                | 1946480719               |
| SNP_P3_102275_131159 | NW_004515655.1 | Scaffold38  | 131159                  | CC                              | GG                | 1946480721               |
| SNP_P3_102276_133422 | NW_004515655.1 | Scaffold38  | 133422                  | CC                              | TT                | 1946480722               |
| SNP_P3_102277_133426 | NW_004515655.1 | Scaffold38  | 133426                  | AA                              | GG                | 1946480724               |
| SNP_P3_102278_133644 | NW_004515655.1 | Scaffold38  | 133644                  | TT                              | CC                | 1946480726               |
| SNP_P3_102279_133727 | NW_004515655.1 | Scaffold38  | 133727                  | CC                              | TT                | 1946480727               |
| SNP_P3_102280_134108 | NW_004515655.1 | Scaffold38  | 134108                  | TT                              | AA                | 1946480729               |
| SNP_P3_102281_137034 | NW_004515655.1 | Scaffold38  | 137034                  | CC                              | TT                | 1946480730               |
| SNP_P3_102282_137504 | NW_004515655.1 | Scaffold38  | 137504                  | CC                              | TT                | 1946480732               |
| SNP_P3_102283_137550 | NW_004515655.1 | Scaffold38  | 137550                  | AA                              | GG                | 1946480734               |
| SNP_P3_102284_137725 | NW_004515655.1 | Scaffold38  | 137725                  | GG                              | TT                | 1946480735               |
| SNP_P3_102285_141153 | NW_004515655.1 | Scaffold38  | 141153                  | TT                              | CC                | 1946480737               |
| SNP_P3_102286_141484 | NW_004515655.1 | Scaffold38  | 141484                  | AA                              | GG                | 1946480738               |
| SNP_P3_102287_141530 | NW_004515655.1 | Scaffold38  | 141530                  | GG                              | AA                | 1946480740               |
| SNP_P3_102288_147459 | NW_004515655.1 | Scaffold38  | 147459                  | CC                              | GG                | 1946480741               |
| SNP_P3_102289_147762 | NW_004515655.1 | Scaffold38  | 147762                  | AA                              | GG                | 1946480743               |
| SNP_P3_102290_148355 | NW_004515655.1 | Scaffold38  | 148355                  | CC                              | TT                | 1946480745               |
| SNP_P3_102291_152987 | NW_004515655.1 | Scaffold38  | 152987                  | CC                              | AA                | 1946480746               |
| SNP_P3_102292_155424 | NW_004515655.1 | Scaffold38  | 155424                  | GG                              | AA                | 1946480748               |
| SNP_P3_102293_173692 | NW_004515655.1 | Scaffold38  | 173692                  | AA                              | TT                | 1946480749               |

| SNPs IDs             | Chromosome IDs | Chromosomes | Physical positions (bp) | CDC Frontier (Reference genome) | (Pusa 256 & HPNB) | NCBI SNPdb Accession IDs |
|----------------------|----------------|-------------|-------------------------|---------------------------------|-------------------|--------------------------|
| SNP_P3_102294_173709 | NW_004515655.1 | Scaffold38  | 173709                  | AA                              | CC                | 1946480751               |
| SNP_P3_102295_176354 | NW_004515655.1 | Scaffold38  | 176354                  | AA                              | TT                | 1946480752               |
| SNP_P3_102296_179674 | NW_004515655.1 | Scaffold38  | 179674                  | AA                              | GG                | 1946480754               |
| SNP_P3_102297_179910 | NW_004515655.1 | Scaffold38  | 179910                  | TT                              | GG                | 1946480755               |
| SNP_P3_102298_181689 | NW_004515655.1 | Scaffold38  | 181689                  | CC                              | TT                | 1946480757               |
| SNP_P3_102299_183283 | NW_004515655.1 | Scaffold38  | 183283                  | CC                              | AA                | 1946480759               |
| SNP_P3_102302_186225 | NW_004515655.1 | Scaffold38  | 186225                  | GG                              | AA                | 1946480760               |
| SNP_P3_102304_189044 | NW_004515655.1 | Scaffold38  | 189044                  | TT                              | CC                | 1946480762               |
| SNP_P3_102305_190013 | NW_004515655.1 | Scaffold38  | 190013                  | GG                              | AA                | 1946480763               |
| SNP_P3_102307_193325 | NW_004515655.1 | Scaffold38  | 193325                  | TT                              | AA                | 1946480765               |
| SNP_P3_102309_205179 | NW_004515655.1 | Scaffold38  | 205179                  | CC                              | TT                | 1946480766               |
| SNP_P3_102310_215710 | NW_004515655.1 | Scaffold38  | 215710                  | CC                              | TT                | 1946480768               |
| SNP_P3_102311_215848 | NW_004515655.1 | Scaffold38  | 215848                  | TT                              | CC                | 1946480769               |
| SNP_P3_102312_216196 | NW_004515655.1 | Scaffold38  | 216196                  | TT                              | CC                | 1946480771               |
| SNP_P3_102313_228435 | NW_004515655.1 | Scaffold38  | 228435                  | AA                              | GG                | 1946480772               |
| SNP_P3_102314_235124 | NW_004515655.1 | Scaffold38  | 235124                  | AA                              | GG                | 1946480774               |
| SNP_P3_102315_235861 | NW_004515655.1 | Scaffold38  | 235861                  | CC                              | TT                | 1946480775               |
| SNP_P3_102316_236123 | NW_004515655.1 | Scaffold38  | 236123                  | CC                              | TT                | 1946480777               |
| SNP_P3_102317_238159 | NW_004515655.1 | Scaffold38  | 238159                  | AA                              | GG                | 1946480778               |
| SNP_P3_102318_238183 | NW_004515655.1 | Scaffold38  | 238183                  | CC                              | TT                | 1946480780               |
| SNP_P3_102320_241209 | NW_004515655.1 | Scaffold38  | 241209                  | AA                              | GG                | 1946480781               |
| SNP_P3_102322_247417 | NW_004515655.1 | Scaffold38  | 247417                  | GG                              | TT                | 1946480783               |
| SNP_P3_102324_248236 | NW_004515655.1 | Scaffold38  | 248236                  | GG                              | AA                | 1946480784               |
| SNP_P3_102326_251095 | NW_004515655.1 | Scaffold38  | 251095                  | AA                              | GG                | 1946480786               |
| SNP_P3_102327_252071 | NW_004515655.1 | Scaffold38  | 252071                  | AA                              | GG                | 1946480788               |
| SNP_P3_102328_252120 | NW_004515655.1 | Scaffold38  | 252120                  | TT                              | AA                | 1946480789               |
| SNP_P3_102329_252156 | NW_004515655.1 | Scaffold38  | 252156                  | AA                              | TT                | 1946480791               |
| SNP_P3_102330_252175 | NW_004515655.1 | Scaffold38  | 252175                  | CC                              | AA                | 1946480794               |
| SNP_P3_102331_252178 | NW_004515655.1 | Scaffold38  | 252178                  | AA                              | GG                | 1946480795               |
| SNP_P3_102332_252215 | NW_004515655.1 | Scaffold38  | 252215                  | GG                              | AA                | 1946480797               |
| SNP_P3_102333_252358 | NW_004515655.1 | Scaffold38  | 252358                  | GG                              | CC                | 1946480798               |
| SNP_P3_102334_252360 | NW_004515655.1 | Scaffold38  | 252360                  | AA                              | GG                | 1946480800               |
| SNP_P3_102335_252370 | NW_004515655.1 | Scaffold38  | 252370                  | CC                              | TT                | 1946480801               |
| SNP_P3_102336_252381 | NW_004515655.1 | Scaffold38  | 252381                  | TT                              | CC                | 1946480803               |
| SNP_P3_102337_254190 | NW_004515655.1 | Scaffold38  | 254190                  | GG                              | AA                | 1946480804               |
| SNP_P3_102338_256233 | NW_004515655.1 | Scaffold38  | 256233                  | CC                              | AA                | 1946480806               |
| SNP_P3_102339_259271 | NW_004515655.1 | Scaffold38  | 259271                  | GG                              | AA                | 1946480807               |
| SNP_P3_102341_264346 | NW_004515655.1 | Scaffold38  | 264346                  | TT                              | AA                | 1946480809               |
| SNP_P3_102343_268349 | NW_004515655.1 | Scaffold38  | 268349                  | GG                              | AA                | 1946480810               |
| SNP_P3_102346_274726 | NW_004515655.1 | Scaffold38  | 274726                  | GG                              | TT                | 1946480812               |
| SNP_P3_102348_289728 | NW_004515655.1 | Scaffold38  | 289728                  | AA                              | GG                | 1946480814               |
| SNP_P3_102349_289795 | NW_004515655.1 | Scaffold38  | 289795                  | GG                              | AA                | 1946480815               |

| SNPs IDs             | Chromosome IDs | Chromosomes | Physical positions (bp) | CDC Frontier (Reference genome) | (Pusa 256 & HPNB) | NCBI SNPdb Accession IDs |
|----------------------|----------------|-------------|-------------------------|---------------------------------|-------------------|--------------------------|
| SNP_P3_102350_289971 | NW_004515655.1 | Scaffold38  | 289971                  | TT                              | GG                | 1946480817               |
| SNP_P3_102351_290071 | NW_004515655.1 | Scaffold38  | 290071                  | TT                              | CC                | 1946480818               |
| SNP_P3_102352_290146 | NW_004515655.1 | Scaffold38  | 290146                  | TT                              | CC                | 1946480820               |
| SNP_P3_102353_292898 | NW_004515655.1 | Scaffold38  | 292898                  | GG                              | AA                | 1946480822               |
| SNP_P3_102354_294945 | NW_004515655.1 | Scaffold38  | 294945                  | TT                              | AA                | 1946480823               |
| SNP_P3_102355_317714 | NW_004515655.1 | Scaffold38  | 317714                  | TT                              | CC                | 1946480825               |
| SNP_P3_102356_317735 | NW_004515655.1 | Scaffold38  | 317735                  | TT                              | CC                | 1946480826               |
| SNP_P3_102357_318267 | NW_004515655.1 | Scaffold38  | 318267                  | TT                              | GG                | 1946480828               |
| SNP_P3_102358_318278 | NW_004515655.1 | Scaffold38  | 318278                  | GG                              | TT                | 1946480830               |
| SNP_P3_102361_333640 | NW_004515655.1 | Scaffold38  | 333640                  | GG                              | AA                | 1946480831               |
| SNP_P3_102362_334208 | NW_004515655.1 | Scaffold38  | 334208                  | GG                              | AA                | 1946480833               |
| SNP_P3_102363_334283 | NW_004515655.1 | Scaffold38  | 334283                  | TT                              | CC                | 1946480835               |
| SNP_P3_102364_335400 | NW_004515655.1 | Scaffold38  | 335400                  | AA                              | GG                | 1946480836               |
| SNP_P3_102365_337685 | NW_004515655.1 | Scaffold38  | 337685                  | AA                              | GG                | 1946480838               |
| SNP_P3_102367_340998 | NW_004515655.1 | Scaffold38  | 340998                  | CC                              | AA                | 1946480839               |
| SNP_P3_102369_353001 | NW_004515655.1 | Scaffold38  | 353001                  | CC                              | GG                | 1946480841               |
| SNP_P3_102370_360752 | NW_004515655.1 | Scaffold38  | 360752                  | TT                              | CC                | 1946480843               |
| SNP_P3_102372_386835 | NW_004515655.1 | Scaffold38  | 386835                  | TT                              | AA                | 1946480844               |
| SNP_P3_102373_390030 | NW_004515655.1 | Scaffold38  | 390030                  | CC                              | TT                | 1946480846               |
| SNP_P3_102374_394311 | NW_004515655.1 | Scaffold38  | 394311                  | CC                              | TT                | 1946480847               |
| SNP_P3_102376_399510 | NW_004515655.1 | Scaffold38  | 399510                  | CC                              | TT                | 1946480849               |
| SNP_P3_102377_402607 | NW_004515655.1 | Scaffold38  | 402607                  | AA                              | TT                | 1946480851               |
| SNP_P3_102378_404336 | NW_004515655.1 | Scaffold38  | 404336                  | CC                              | TT                | 1946480852               |
| SNP_P3_102379_406890 | NW_004515655.1 | Scaffold38  | 406890                  | TT                              | CC                | 1946480854               |
| SNP_P3_102380_409030 | NW_004515655.1 | Scaffold38  | 409030                  | CC                              | TT                | 1946480856               |
| SNP_P3_102381_409322 | NW_004515655.1 | Scaffold38  | 409322                  | AA                              | TT                | 1946480857               |
| SNP_P3_102383_409355 | NW_004515655.1 | Scaffold38  | 409355                  | TT                              | AA                | 1946480859               |
| SNP_P3_102384_411922 | NW_004515655.1 | Scaffold38  | 411922                  | AA                              | GG                | 1946480860               |
| SNP_P3_102385_411941 | NW_004515655.1 | Scaffold38  | 411941                  | TT                              | CC                | 1946480862               |
| SNP_P3_102386_411987 | NW_004515655.1 | Scaffold38  | 411987                  | TT                              | AA                | 1946480864               |
| SNP_P3_102387_412226 | NW_004515655.1 | Scaffold38  | 412226                  | CC                              | TT                | 1946480866               |
| SNP_P3_102388_412229 | NW_004515655.1 | Scaffold38  | 412229                  | AA                              | GG                | 1946480867               |
| SNP_P3_102389_412267 | NW_004515655.1 | Scaffold38  | 412267                  | TT                              | CC                | 1946480869               |
| SNP_P3_102390_412291 | NW_004515655.1 | Scaffold38  | 412291                  | TT                              | CC                | 1946480870               |
| SNP_P3_102391_413713 | NW_004515655.1 | Scaffold38  | 413713                  | CC                              | AA                | 1946480872               |
| SNP_P3_102392_413719 | NW_004515655.1 | Scaffold38  | 413719                  | AA                              | GG                | 1946480874               |
| SNP_P3_102393_413785 | NW_004515655.1 | Scaffold38  | 413785                  | GG                              | AA                | 1946480875               |
| SNP_P3_102395_413837 | NW_004515655.1 | Scaffold38  | 413837                  | TT                              | CC                | 1946480877               |
| SNP_P3_102396_414013 | NW_004515655.1 | Scaffold38  | 414013                  | CC                              | TT                | 1946480878               |
| SNP_P3_102397_414086 | NW_004515655.1 | Scaffold38  | 414086                  | AA                              | GG                | 1946480880               |
| SNP_P3_102398_418818 | NW_004515655.1 | Scaffold38  | 418818                  | AA                              | GG                | 1946480881               |
| SNP_P3_102399_418833 | NW_004515655.1 | Scaffold38  | 418833                  | CC                              | AA                | 1946480883               |

| SNPs IDs             | Chromosome IDs | Chromosomes | Physical positions (bp) | CDC Frontier (Reference genome) | (Pusa 256 & HPNB) | NCBI SNPdb Accession IDs |
|----------------------|----------------|-------------|-------------------------|---------------------------------|-------------------|--------------------------|
| SNP_P3_102400_419737 | NW_004515655.1 | Scaffold38  | 419737                  | TT                              | CC                | 1946480884               |
| SNP_P3_102401_421653 | NW_004515655.1 | Scaffold38  | 421653                  | TT                              | CC                | 1946480886               |
| SNP_P3_102402_421832 | NW_004515655.1 | Scaffold38  | 421832                  | GG                              | TT                | 1946480887               |
| SNP_P3_102403_424041 | NW_004515655.1 | Scaffold38  | 424041                  | TT                              | CC                | 1946480889               |
| SNP_P3_102404_425874 | NW_004515655.1 | Scaffold38  | 425874                  | AA                              | TT                | 1946480890               |
| SNP_P3_102406_433968 | NW_004515655.1 | Scaffold38  | 433968                  | GG                              | AA                | 1946480892               |
| SNP_P3_102407_452167 | NW_004515655.1 | Scaffold38  | 452167                  | CC                              | TT                | 1946480893               |
| SNP_P3_102408_452415 | NW_004515655.1 | Scaffold38  | 452415                  | GG                              | AA                | 1946480895               |
| SNP_P3_102410_457392 | NW_004515655.1 | Scaffold38  | 457392                  | AA                              | CC                | 1946480896               |
| SNP_P3_102411_462870 | NW_004515655.1 | Scaffold38  | 462870                  | TT                              | CC                | 1946480898               |
| SNP_P3_102412_471290 | NW_004515655.1 | Scaffold38  | 471290                  | TT                              | CC                | 1946480899               |
| SNP_P3_102413_473867 | NW_004515655.1 | Scaffold38  | 473867                  | GG                              | AA                | 1946480901               |
| SNP_P3_102414_473909 | NW_004515655.1 | Scaffold38  | 473909                  | CC                              | GG                | 1946480902               |
| SNP_P3_102415_473934 | NW_004515655.1 | Scaffold38  | 473934                  | AA                              | GG                | 1946480904               |
| SNP_P3_102417_474125 | NW_004515655.1 | Scaffold38  | 474125                  | CC                              | AA                | 1946480905               |
| SNP_P3_102418_477168 | NW_004515655.1 | Scaffold38  | 477168                  | GG                              | AA                | 1946480907               |
| SNP_P3_102419_487822 | NW_004515655.1 | Scaffold38  | 487822                  | TT                              | CC                | 1946480908               |
| SNP_P3_102420_487861 | NW_004515655.1 | Scaffold38  | 487861                  | GG                              | TT                | 1946480910               |
| SNP_P3_102421_488213 | NW_004515655.1 | Scaffold38  | 488213                  | GG                              | AA                | 1946480911               |
| SNP_P3_102422_488219 | NW_004515655.1 | Scaffold38  | 488219                  | TT                              | CC                | 1946480913               |
| SNP_P3_102423_488220 | NW_004515655.1 | Scaffold38  | 488220                  | CC                              | AA                | 1946480914               |
| SNP_P3_102424_488221 | NW_004515655.1 | Scaffold38  | 488221                  | CC                              | TT                | 1946480915               |
| SNP_P3_102425_488548 | NW_004515655.1 | Scaffold38  | 488548                  | AA                              | TT                | 1946480917               |
| SNP_P3_102426_488945 | NW_004515655.1 | Scaffold38  | 488945                  | CC                              | TT                | 1946480918               |
| SNP_P3_102427_488973 | NW_004515655.1 | Scaffold38  | 488973                  | TT                              | CC                | 1946480920               |
| SNP_P3_102429_489218 | NW_004515655.1 | Scaffold38  | 489218                  | TT                              | CC                | 1946480921               |
| SNP_P3_102430_489270 | NW_004515655.1 | Scaffold38  | 489270                  | CC                              | TT                | 1946480923               |
| SNP_P3_102431_489271 | NW_004515655.1 | Scaffold38  | 489271                  | TT                              | CC                | 1946480924               |
| SNP_P3_102432_489525 | NW_004515655.1 | Scaffold38  | 489525                  | TT                              | AA                | 1946480926               |
| SNP_P3_102434_497498 | NW_004515655.1 | Scaffold38  | 497498                  | TT                              | GG                | 1946480927               |
| SNP_P3_102435_498776 | NW_004515655.1 | Scaffold38  | 498776                  | TT                              | CC                | 1946480928               |
| SNP_P3_102436_500549 | NW_004515655.1 | Scaffold38  | 500549                  | AA                              | GG                | 1946480930               |
| SNP_P3_102437_501846 | NW_004515655.1 | Scaffold38  | 501846                  | AA                              | GG                | 1946480931               |
| SNP_P3_102439_503695 | NW_004515655.1 | Scaffold38  | 503695                  | TT                              | CC                | 1946480933               |
| SNP_P3_102440_503742 | NW_004515655.1 | Scaffold38  | 503742                  | TT                              | CC                | 1946480934               |
| SNP_P3_102441_503989 | NW_004515655.1 | Scaffold38  | 503989                  | AA                              | CC                | 1946480936               |
| SNP_P3_102442_504349 | NW_004515655.1 | Scaffold38  | 504349                  | TT                              | CC                | 1946480937               |
| SNP_P3_102443_504366 | NW_004515655.1 | Scaffold38  | 504366                  | AA                              | GG                | 1946480938               |
| SNP_P3_102444_504391 | NW_004515655.1 | Scaffold38  | 504391                  | AA                              | GG                | 1946480940               |
| SNP_P3_102445_504401 | NW_004515655.1 | Scaffold38  | 504401                  | TT                              | AA                | 1946480941               |
| SNP_P3_102446_504413 | NW_004515655.1 | Scaffold38  | 504413                  | TT                              | GG                | 1946480943               |
| SNP_P3_102447_504417 | NW_004515655.1 | Scaffold38  | 504417                  | CC                              | TT                | 1946480944               |

| SNPs IDs             | Chromosome IDs | Chromosomes | Physical positions (bp) | CDC Frontier (Reference genome) | (Pusa 256 & HPNB) | NCBI SNPdb Accession IDs |
|----------------------|----------------|-------------|-------------------------|---------------------------------|-------------------|--------------------------|
| SNP_P3_102448_504432 | NW_004515655.1 | Scaffold38  | 504432                  | TT                              | GG                | 1946480946               |
| SNP_P3_102449_511046 | NW_004515655.1 | Scaffold38  | 511046                  | AA                              | GG                | 1946480947               |
| SNP_P3_102450_511092 | NW_004515655.1 | Scaffold38  | 511092                  | CC                              | TT                | 1946480949               |
| SNP_P3_102451_511464 | NW_004515655.1 | Scaffold38  | 511464                  | CC                              | TT                | 1946480950               |
| SNP_P3_102453_511691 | NW_004515655.1 | Scaffold38  | 511691                  | AA                              | GG                | 1946480951               |
| SNP_P3_102454_511966 | NW_004515655.1 | Scaffold38  | 511966                  | CC                              | TT                | 1946480953               |
| SNP_P3_102455_511981 | NW_004515655.1 | Scaffold38  | 511981                  | TT                              | CC                | 1946480954               |
| SNP_P3_102456_512534 | NW_004515655.1 | Scaffold38  | 512534                  | GG                              | AA                | 1946480956               |
| SNP_P3_102457_513075 | NW_004515655.1 | Scaffold38  | 513075                  | AA                              | GG                | 1946480957               |
| SNP_P3_102458_513288 | NW_004515655.1 | Scaffold38  | 513288                  | TT                              | GG                | 1946480958               |
| SNP_P3_102459_518484 | NW_004515655.1 | Scaffold38  | 518484                  | TT                              | CC                | 1946480960               |
| SNP_P3_102460_524121 | NW_004515655.1 | Scaffold38  | 524121                  | CC                              | TT                | 1946480961               |
| SNP_P3_102461_524140 | NW_004515655.1 | Scaffold38  | 524140                  | GG                              | AA                | 1946480963               |
| SNP_P3_102462_524246 | NW_004515655.1 | Scaffold38  | 524246                  | GG                              | AA                | 1946480964               |
| SNP_P3_102463_524526 | NW_004515655.1 | Scaffold38  | 524526                  | CC                              | GG                | 1946480965               |
| SNP_P3_102464_524570 | NW_004515655.1 | Scaffold38  | 524570                  | AA                              | CC                | 1946480967               |
| SNP_P3_102465_525840 | NW_004515655.1 | Scaffold38  | 525840                  | CC                              | GG                | 1946480968               |
| SNP_P3_102466_525860 | NW_004515655.1 | Scaffold38  | 525860                  | TT                              | CC                | 1946480969               |
| SNP_P3_102467_526383 | NW_004515655.1 | Scaffold38  | 526383                  | GG                              | CC                | 1946480971               |
| SNP_P3_102468_528619 | NW_004515655.1 | Scaffold38  | 528619                  | AA                              | GG                | 1946480972               |
| SNP_P3_102469_535594 | NW_004515655.1 | Scaffold38  | 535594                  | CC                              | TT                | 1946480974               |
| SNP_P3_102470_539874 | NW_004515655.1 | Scaffold38  | 539874                  | AA                              | CC                | 1946480975               |
| SNP_P3_102471_539982 | NW_004515655.1 | Scaffold38  | 539982                  | GG                              | TT                | 1946480977               |
| SNP_P3_102472_541439 | NW_004515655.1 | Scaffold38  | 541439                  | CC                              | TT                | 1946480978               |
| SNP_P3_102473_541585 | NW_004515655.1 | Scaffold38  | 541585                  | GG                              | AA                | 1946480980               |
| SNP_P3_102474_541786 | NW_004515655.1 | Scaffold38  | 541786                  | AA                              | TT                | 1946480981               |
| SNP_P3_102475_541795 | NW_004515655.1 | Scaffold38  | 541795                  | GG                              | AA                | 1946480982               |
| SNP_P3_102476_541839 | NW_004515655.1 | Scaffold38  | 541839                  | TT                              | CC                | 1946480984               |
| SNP_P3_102477_541844 | NW_004515655.1 | Scaffold38  | 541844                  | CC                              | AA                | 1946480985               |
| SNP_P3_102478_541876 | NW_004515655.1 | Scaffold38  | 541876                  | AA                              | GG                | 1946480987               |
| SNP_P3_102479_541901 | NW_004515655.1 | Scaffold38  | 541901                  | CC                              | TT                | 1946480988               |
| SNP_P3_102480_541918 | NW_004515655.1 | Scaffold38  | 541918                  | AA                              | GG                | 1946480989               |
| SNP_P3_102482_40146  | NW_004515656.1 | Scaffold39  | 40146                   | TT                              | CC                | 1946480991               |
| SNP_P3_102484_44789  | NW_004515656.1 | Scaffold39  | 44789                   | AA                              | TT                | 1946480992               |
| SNP_P3_102485_65     | NW_004515657.1 | Scaffold40  | 65                      | AA                              | GG                | 1946480993               |
| SNP_P3_102486_415    | NW_004515657.1 | Scaffold40  | 415                     | AA                              | GG                | 1946480995               |
| SNP_P3_102487_582    | NW_004515657.1 | Scaffold40  | 582                     | CC                              | GG                | 1946480996               |
| SNP_P3_102488_906    | NW_004515657.1 | Scaffold40  | 906                     | TT                              | CC                | 1946480997               |
| SNP_P3_102489_974    | NW_004515657.1 | Scaffold40  | 974                     | AA                              | GG                | 1946480999               |
| SNP_P3_102490_12380  | NW_004515657.1 | Scaffold40  | 12380                   | AA                              | GG                | 1946481000               |
| SNP_P3_102491_12404  | NW_004515657.1 | Scaffold40  | 12404                   | GG                              | TT                | 1946481002               |
| SNP_P3_102492_12413  | NW_004515657.1 | Scaffold40  | 12413                   | CC                              | TT                | 1946481003               |

| SNPs IDs            | Chromosome IDs | Chromosomes | Physical positions (bp) | CDC Frontier (Reference genome) | (Pusa 256 & HPNB) | NCBI SNPdb Accession IDs |
|---------------------|----------------|-------------|-------------------------|---------------------------------|-------------------|--------------------------|
| SNP_P3_102493_12414 | NW_004515657.1 | Scaffold40  | 12414                   | GG                              | TT                | 1946481004               |
| SNP_P3_102494_12418 | NW_004515657.1 | Scaffold40  | 12418                   | GG                              | TT                | 1946481006               |
| SNP_P3_102495_12424 | NW_004515657.1 | Scaffold40  | 12424                   | GG                              | AA                | 1946481007               |
| SNP_P3_102496_12442 | NW_004515657.1 | Scaffold40  | 12442                   | CC                              | TT                | 1946481009               |
| SNP_P3_102497_12451 | NW_004515657.1 | Scaffold40  | 12451                   | TT                              | CC                | 1946481010               |
| SNP_P3_102498_12454 | NW_004515657.1 | Scaffold40  | 12454                   | TT                              | CC                | 1946481011               |
| SNP_P3_102499_12461 | NW_004515657.1 | Scaffold40  | 12461                   | GG                              | AA                | 1946481013               |
| SNP_P3_102500_40967 | NW_004515657.1 | Scaffold40  | 40967                   | CC                              | TT                | 1946481014               |
| SNP_P3_102501_40969 | NW_004515657.1 | Scaffold40  | 40969                   | AA                              | GG                | 1946481015               |
| SNP_P3_102502_41035 | NW_004515657.1 | Scaffold40  | 41035                   | GG                              | TT                | 1946481017               |
| SNP_P3_102503_41227 | NW_004515657.1 | Scaffold40  | 41227                   | CC                              | TT                | 1946481018               |
| SNP_P3_102504_41345 | NW_004515657.1 | Scaffold40  | 41345                   | TT                              | CC                | 1946481020               |
| SNP_P3_102507_56944 | NW_004515657.1 | Scaffold40  | 56944                   | GG                              | AA                | 1946481021               |
| SNP_P3_102508_58162 | NW_004515657.1 | Scaffold40  | 58162                   | AA                              | GG                | 1946481022               |
| SNP_P3_102509_58915 | NW_004515657.1 | Scaffold40  | 58915                   | AA                              | CC                | 1946481024               |
| SNP_P3_102510_58937 | NW_004515657.1 | Scaffold40  | 58937                   | TT                              | CC                | 1946481025               |
| SNP_P3_102511_58986 | NW_004515657.1 | Scaffold40  | 58986                   | CC                              | TT                | 1946481027               |
| SNP_P3_102512_58990 | NW_004515657.1 | Scaffold40  | 58990                   | TT                              | CC                | 1946481028               |
| SNP_P3_102513_58991 | NW_004515657.1 | Scaffold40  | 58991                   | GG                              | TT                | 1946481030               |
| SNP_P3_102514_59109 | NW_004515657.1 | Scaffold40  | 59109                   | AA                              | CC                | 1946481031               |
| SNP_P3_102515_59113 | NW_004515657.1 | Scaffold40  | 59113                   | AA                              | TT                | 1946481032               |
| SNP_P3_102516_59132 | NW_004515657.1 | Scaffold40  | 59132                   | CC                              | TT                | 1946481034               |
| SNP_P3_102517_59229 | NW_004515657.1 | Scaffold40  | 59229                   | AA                              | GG                | 1946481035               |
| SNP_P3_102518_59265 | NW_004515657.1 | Scaffold40  | 59265                   | TT                              | CC                | 1946481036               |
| SNP_P3_102519_59336 | NW_004515657.1 | Scaffold40  | 59336                   | AA                              | GG                | 1946481038               |
| SNP_P3_102520_59431 | NW_004515657.1 | Scaffold40  | 59431                   | GG                              | TT                | 1946481039               |
| SNP_P3_102521_59436 | NW_004515657.1 | Scaffold40  | 59436                   | GG                              | CC                | 1946481041               |
| SNP_P3_102522_59546 | NW_004515657.1 | Scaffold40  | 59546                   | AA                              | TT                | 1946481042               |
| SNP_P3_102523_59552 | NW_004515657.1 | Scaffold40  | 59552                   | TT                              | CC                | 1946481043               |
| SNP_P3_102524_59570 | NW_004515657.1 | Scaffold40  | 59570                   | CC                              | TT                | 1946481045               |
| SNP_P3_102525_59718 | NW_004515657.1 | Scaffold40  | 59718                   | AA                              | GG                | 1946481046               |
| SNP_P3_102526_59781 | NW_004515657.1 | Scaffold40  | 59781                   | TT                              | CC                | 1946481048               |
| SNP_P3_102527_59842 | NW_004515657.1 | Scaffold40  | 59842                   | TT                              | AA                | 1946481049               |
| SNP_P3_102528_66473 | NW_004515657.1 | Scaffold40  | 66473                   | TT                              | GG                | 1946481051               |
| SNP_P3_102529_68014 | NW_004515657.1 | Scaffold40  | 68014                   | TT                              | GG                | 1946481052               |
| SNP_P3_102530_68026 | NW_004515657.1 | Scaffold40  | 68026                   | CC                              | AA                | 1946481053               |
| SNP_P3_102531_68027 | NW_004515657.1 | Scaffold40  | 68027                   | TT                              | GG                | 1946481055               |
| SNP_P3_102532_68050 | NW_004515657.1 | Scaffold40  | 68050                   | TT                              | CC                | 1946481056               |
| SNP_P3_102533_68086 | NW_004515657.1 | Scaffold40  | 68086                   | AA                              | GG                | 1946481057               |
| SNP_P3_102534_76117 | NW_004515657.1 | Scaffold40  | 76117                   | AA                              | GG                | 1946481059               |
| SNP_P3_102535_76589 | NW_004515657.1 | Scaffold40  | 76589                   | AA                              | CC                | 1946481060               |
| SNP_P3_102536_76591 | NW_004515657.1 | Scaffold40  | 76591                   | TT                              | CC                | 1946481062               |



| SNPs IDs             | Chromosome IDs | Chromosomes | Physical positions (bp) | CDC Frontier (Reference genome) | (Pusa 256 & HPNB) | NCBI SNPdb Accession IDs |
|----------------------|----------------|-------------|-------------------------|---------------------------------|-------------------|--------------------------|
| SNP_P3_102537_76749  | NW_004515657.1 | Scaffold40  | 76749                   | TT                              | CC                | 1946481063               |
| SNP_P3_102538_87660  | NW_004515657.1 | Scaffold40  | 87660                   | CC                              | TT                | 1946481064               |
| SNP_P3_102539_87825  | NW_004515657.1 | Scaffold40  | 87825                   | CC                              | TT                | 1946481066               |
| SNP_P3_102540_87849  | NW_004515657.1 | Scaffold40  | 87849                   | GG                              | AA                | 1946481067               |
| SNP_P3_102541_87874  | NW_004515657.1 | Scaffold40  | 87874                   | GG                              | TT                | 1946481069               |
| SNP_P3_102542_88369  | NW_004515657.1 | Scaffold40  | 88369                   | TT                              | CC                | 1946481070               |
| SNP_P3_102543_88372  | NW_004515657.1 | Scaffold40  | 88372                   | AA                              | CC                | 1946481071               |
| SNP_P3_102544_98889  | NW_004515657.1 | Scaffold40  | 98889                   | TT                              | CC                | 1946481073               |
| SNP_P3_102545_98912  | NW_004515657.1 | Scaffold40  | 98912                   | AA                              | GG                | 1946481074               |
| SNP_P3_102546_98916  | NW_004515657.1 | Scaffold40  | 98916                   | GG                              | AA                | 1946481075               |
| SNP_P3_102547_98929  | NW_004515657.1 | Scaffold40  | 98929                   | TT                              | CC                | 1946481077               |
| SNP_P3_102548_98930  | NW_004515657.1 | Scaffold40  | 98930                   | GG                              | AA                | 1946481078               |
| SNP_P3_102549_98950  | NW_004515657.1 | Scaffold40  | 98950                   | AA                              | GG                | 1946481079               |
| SNP_P3_102550_99180  | NW_004515657.1 | Scaffold40  | 99180                   | CC                              | TT                | 1946481081               |
| SNP_P3_102551_99181  | NW_004515657.1 | Scaffold40  | 99181                   | CC                              | GG                | 1946481082               |
| SNP_P3_102552_100855 | NW_004515657.1 | Scaffold40  | 100855                  | CC                              | TT                | 1946481084               |
| SNP_P3_102553_100895 | NW_004515657.1 | Scaffold40  | 100895                  | TT                              | CC                | 1946481085               |
| SNP_P3_102554_100994 | NW_004515657.1 | Scaffold40  | 100994                  | AA                              | TT                | 1946481086               |
| SNP_P3_102555_101022 | NW_004515657.1 | Scaffold40  | 101022                  | TT                              | CC                | 1946481088               |
| SNP_P3_102556_101046 | NW_004515657.1 | Scaffold40  | 101046                  | TT                              | AA                | 1946481089               |
| SNP_P3_102557_101126 | NW_004515657.1 | Scaffold40  | 101126                  | AA                              | TT                | 1946481091               |
| SNP_P3_102558_101207 | NW_004515657.1 | Scaffold40  | 101207                  | TT                              | AA                | 1946481092               |
| SNP_P3_102559_101389 | NW_004515657.1 | Scaffold40  | 101389                  | TT                              | CC                | 1946481094               |
| SNP_P3_102560_101435 | NW_004515657.1 | Scaffold40  | 101435                  | GG                              | AA                | 1946481095               |
| SNP_P3_102561_101453 | NW_004515657.1 | Scaffold40  | 101453                  | GG                              | CC                | 1946481097               |
| SNP_P3_102562_101477 | NW_004515657.1 | Scaffold40  | 101477                  | AA                              | GG                | 1946481098               |
| SNP_P3_102563_101478 | NW_004515657.1 | Scaffold40  | 101478                  | GG                              | AA                | 1946481100               |
| SNP_P3_102564_101485 | NW_004515657.1 | Scaffold40  | 101485                  | TT                              | CC                | 1946481101               |
| SNP_P3_102565_101487 | NW_004515657.1 | Scaffold40  | 101487                  | AA                              | TT                | 1946481103               |
| SNP_P3_102566_101504 | NW_004515657.1 | Scaffold40  | 101504                  | CC                              | TT                | 1946481104               |
| SNP_P3_102567_101510 | NW_004515657.1 | Scaffold40  | 101510                  | CC                              | TT                | 1946481106               |
| SNP_P3_102568_101526 | NW_004515657.1 | Scaffold40  | 101526                  | TT                              | AA                | 1946481107               |
| SNP_P3_102569_101545 | NW_004515657.1 | Scaffold40  | 101545                  | GG                              | AA                | 1946481108               |
| SNP_P3_102570_101595 | NW_004515657.1 | Scaffold40  | 101595                  | GG                              | AA                | 1946481110               |
| SNP_P3_102571_101596 | NW_004515657.1 | Scaffold40  | 101596                  | CC                              | AA                | 1946481111               |
| SNP_P3_102572_101605 | NW_004515657.1 | Scaffold40  | 101605                  | GG                              | AA                | 1946481112               |
| SNP_P3_102573_101663 | NW_004515657.1 | Scaffold40  | 101663                  | TT                              | AA                | 1946481114               |
| SNP_P3_102574_101912 | NW_004515657.1 | Scaffold40  | 101912                  | CC                              | GG                | 1946481115               |
| SNP_P3_102575_102079 | NW_004515657.1 | Scaffold40  | 102079                  | AA                              | GG                | 1946481117               |
| SNP_P3_102576_108567 | NW_004515657.1 | Scaffold40  | 108567                  | AA                              | CC                | 1946481118               |
| SNP_P3_102577_108717 | NW_004515657.1 | Scaffold40  | 108717                  | GG                              | AA                | 1946481119               |
| SNP_P3_102578_108918 | NW_004515657.1 | Scaffold40  | 108918                  | AA                              | GG                | 1946481121               |

| SNPs IDs             | Chromosome IDs | Chromosomes | Physical positions (bp) | CDC Frontier (Reference genome) | (Pusa 256 & HPNB) | NCBI SNPdb Accession IDs |
|----------------------|----------------|-------------|-------------------------|---------------------------------|-------------------|--------------------------|
| SNP_P3_102579_108934 | NW_004515657.1 | Scaffold40  | 108934                  | TT                              | AA                | 1946481122               |
| SNP_P3_102580_108953 | NW_004515657.1 | Scaffold40  | 108953                  | CC                              | TT                | 1946481124               |
| SNP_P3_102581_133067 | NW_004515657.1 | Scaffold40  | 133067                  | AA                              | TT                | 1946481125               |
| SNP_P3_102582_135162 | NW_004515657.1 | Scaffold40  | 135162                  | TT                              | CC                | 1946481126               |
| SNP_P3_102583_135322 | NW_004515657.1 | Scaffold40  | 135322                  | TT                              | AA                | 1946481128               |
| SNP_P3_102584_135374 | NW_004515657.1 | Scaffold40  | 135374                  | CC                              | TT                | 1946481129               |
| SNP_P3_102585_135379 | NW_004515657.1 | Scaffold40  | 135379                  | AA                              | CC                | 1946481131               |
| SNP_P3_102586_135484 | NW_004515657.1 | Scaffold40  | 135484                  | TT                              | AA                | 1946481132               |
| SNP_P3_102587_142404 | NW_004515657.1 | Scaffold40  | 142404                  | GG                              | TT                | 1946481133               |
| SNP_P3_102588_202323 | NW_004515657.1 | Scaffold40  | 202323                  | TT                              | AA                | 1946481135               |
| SNP_P3_102590_212965 | NW_004515657.1 | Scaffold40  | 212965                  | TT                              | GG                | 1946481136               |
| SNP_P3_102591_212989 | NW_004515657.1 | Scaffold40  | 212989                  | AA                              | GG                | 1946481137               |
| SNP_P3_102592_212997 | NW_004515657.1 | Scaffold40  | 212997                  | TT                              | CC                | 1946481139               |
| SNP_P3_102593_213015 | NW_004515657.1 | Scaffold40  | 213015                  | AA                              | GG                | 1946481140               |
| SNP_P3_102594_214979 | NW_004515657.1 | Scaffold40  | 214979                  | CC                              | TT                | 1946481142               |
| SNP_P3_102595_229194 | NW_004515657.1 | Scaffold40  | 229194                  | TT                              | GG                | 1946481143               |
| SNP_P3_102596_229262 | NW_004515657.1 | Scaffold40  | 229262                  | GG                              | AA                | 1946481144               |
| SNP_P3_102597_229283 | NW_004515657.1 | Scaffold40  | 229283                  | AA                              | GG                | 1946481146               |
| SNP_P3_102598_229322 | NW_004515657.1 | Scaffold40  | 229322                  | AA                              | GG                | 1946481147               |
| SNP_P3_102599_229435 | NW_004515657.1 | Scaffold40  | 229435                  | AA                              | GG                | 1946481149               |
| SNP_P3_102600_229453 | NW_004515657.1 | Scaffold40  | 229453                  | TT                              | CC                | 1946481150               |
| SNP_P3_102601_229456 | NW_004515657.1 | Scaffold40  | 229456                  | GG                              | TT                | 1946481151               |
| SNP_P3_102602_229489 | NW_004515657.1 | Scaffold40  | 229489                  | CC                              | AA                | 1946481153               |
| SNP_P3_102603_229492 | NW_004515657.1 | Scaffold40  | 229492                  | AA                              | TT                | 1946481154               |
| SNP_P3_102604_229525 | NW_004515657.1 | Scaffold40  | 229525                  | AA                              | GG                | 1946481156               |
| SNP_P3_102605_229571 | NW_004515657.1 | Scaffold40  | 229571                  | AA                              | TT                | 1946481157               |
| SNP_P3_102606_229588 | NW_004515657.1 | Scaffold40  | 229588                  | AA                              | GG                | 1946481158               |
| SNP_P3_102607_229618 | NW_004515657.1 | Scaffold40  | 229618                  | CC                              | TT                | 1946481160               |
| SNP_P3_102608_230630 | NW_004515657.1 | Scaffold40  | 230630                  | GG                              | AA                | 1946481161               |
| SNP_P3_102609_231233 | NW_004515657.1 | Scaffold40  | 231233                  | CC                              | TT                | 1946481163               |
| SNP_P3_102610_231249 | NW_004515657.1 | Scaffold40  | 231249                  | CC                              | TT                | 1946481164               |
| SNP_P3_102611_231712 | NW_004515657.1 | Scaffold40  | 231712                  | AA                              | CC                | 1946481165               |
| SNP_P3_102612_231713 | NW_004515657.1 | Scaffold40  | 231713                  | TT                              | GG                | 1946481167               |
| SNP_P3_102613_231749 | NW_004515657.1 | Scaffold40  | 231749                  | GG                              | CC                | 1946481168               |
| SNP_P3_102614_261079 | NW_004515657.1 | Scaffold40  | 261079                  | AA                              | GG                | 1946481170               |
| SNP_P3_102615_261090 | NW_004515657.1 | Scaffold40  | 261090                  | TT                              | CC                | 1946481171               |
| SNP_P3_102616_261292 | NW_004515657.1 | Scaffold40  | 261292                  | TT                              | GG                | 1946481173               |
| SNP_P3_102617_261303 | NW_004515657.1 | Scaffold40  | 261303                  | CC                              | TT                | 1946481174               |
| SNP_P3_102618_264793 | NW_004515657.1 | Scaffold40  | 264793                  | TT                              | CC                | 1946481176               |
| SNP_P3_102620_314676 | NW_004515657.1 | Scaffold40  | 314676                  | AA                              | GG                | 1946481177               |
| SNP_P3_102621_330029 | NW_004515657.1 | Scaffold40  | 330029                  | CC                              | AA                | 1946481178               |
| SNP_P3_102622_330047 | NW_004515657.1 | Scaffold40  | 330047                  | GG                              | AA                | 1946481180               |

| SNPs IDs             | Chromosome IDs | Chromosomes | Physical positions (bp) | CDC Frontier (Reference genome) | (Pusa 256 & HPNB) | NCBI SNPdb Accession IDs |
|----------------------|----------------|-------------|-------------------------|---------------------------------|-------------------|--------------------------|
| SNP_P3_102623_330441 | NW_004515657.1 | Scaffold40  | 330441                  | GG                              | CC                | 1946481181               |
| SNP_P3_102624_362906 | NW_004515657.1 | Scaffold40  | 362906                  | TT                              | CC                | 1946481183               |
| SNP_P3_102625_362911 | NW_004515657.1 | Scaffold40  | 362911                  | TT                              | CC                | 1946481184               |
| SNP_P3_102627_362999 | NW_004515657.1 | Scaffold40  | 362999                  | TT                              | AA                | 1946481185               |
| SNP_P3_102628_363131 | NW_004515657.1 | Scaffold40  | 363131                  | GG                              | AA                | 1946481187               |
| SNP_P3_102629_363235 | NW_004515657.1 | Scaffold40  | 363235                  | CC                              | TT                | 1946481188               |
| SNP_P3_102630_363280 | NW_004515657.1 | Scaffold40  | 363280                  | AA                              | TT                | 1946481190               |
| SNP_P3_102631_363291 | NW_004515657.1 | Scaffold40  | 363291                  | CC                              | AA                | 1946481192               |
| SNP_P3_102632_363302 | NW_004515657.1 | Scaffold40  | 363302                  | CC                              | TT                | 1946481193               |
| SNP_P3_102633_363396 | NW_004515657.1 | Scaffold40  | 363396                  | CC                              | AA                | 1946481195               |
| SNP_P3_102634_363469 | NW_004515657.1 | Scaffold40  | 363469                  | CC                              | TT                | 1946481196               |
| SNP_P3_102635_363494 | NW_004515657.1 | Scaffold40  | 363494                  | CC                              | TT                | 1946481198               |
| SNP_P3_102636_393263 | NW_004515657.1 | Scaffold40  | 393263                  | TT                              | AA                | 1946481199               |
| SNP_P3_102637_393594 | NW_004515657.1 | Scaffold40  | 393594                  | TT                              | CC                | 1946481201               |
| SNP_P3_102638_400221 | NW_004515657.1 | Scaffold40  | 400221                  | AA                              | GG                | 1946481202               |
| SNP_P3_102639_405153 | NW_004515657.1 | Scaffold40  | 405153                  | GG                              | CC                | 1946481203               |
| SNP_P3_102641_440253 | NW_004515657.1 | Scaffold40  | 440253                  | AA                              | GG                | 1946481205               |
| SNP_P3_102642_457037 | NW_004515657.1 | Scaffold40  | 457037                  | GG                              | AA                | 1946481206               |
| SNP_P3_102643_457253 | NW_004515657.1 | Scaffold40  | 457253                  | TT                              | CC                | 1946481208               |
| SNP_P3_102644_464409 | NW_004515657.1 | Scaffold40  | 464409                  | GG                              | AA                | 1946481209               |
| SNP_P3_102645_466524 | NW_004515657.1 | Scaffold40  | 466524                  | GG                              | AA                | 1946481210               |
| SNP_P3_102646_466819 | NW_004515657.1 | Scaffold40  | 466819                  | CC                              | GG                | 1946481212               |
| SNP_P3_102647_467040 | NW_004515657.1 | Scaffold40  | 467040                  | GG                              | CC                | 1946481214               |
| SNP_P3_102648_467057 | NW_004515657.1 | Scaffold40  | 467057                  | TT                              | CC                | 1946481215               |
| SNP_P3_102649_496317 | NW_004515657.1 | Scaffold40  | 496317                  | TT                              | GG                | 1946481217               |
| SNP_P3_102651_513554 | NW_004515657.1 | Scaffold40  | 513554                  | GG                              | CC                | 1946481218               |
| SNP_P3_102652_513563 | NW_004515657.1 | Scaffold40  | 513563                  | GG                              | AA                | 1946481220               |
| SNP_P3_102653_560589 | NW_004515657.1 | Scaffold40  | 560589                  | TT                              | CC                | 1946481221               |
| SNP_P3_102654_578667 | NW_004515657.1 | Scaffold40  | 578667                  | GG                              | AA                | 1946481223               |
| SNP_P3_102655_580623 | NW_004515657.1 | Scaffold40  | 580623                  | CC                              | TT                | 1946481224               |
| SNP_P3_102656_580864 | NW_004515657.1 | Scaffold40  | 580864                  | AA                              | CC                | 1946481226               |
| SNP_P3_102657_580927 | NW_004515657.1 | Scaffold40  | 580927                  | CC                              | TT                | 1946481227               |
| SNP_P3_102658_606092 | NW_004515657.1 | Scaffold40  | 606092                  | GG                              | AA                | 1946481229               |
| SNP_P3_102659_648918 | NW_004515657.1 | Scaffold40  | 648918                  | TT                              | CC                | 1946481230               |
| SNP_P3_102661_651364 | NW_004515657.1 | Scaffold40  | 651364                  | TT                              | GG                | 1946481232               |
| SNP_P3_102662_651613 | NW_004515657.1 | Scaffold40  | 651613                  | TT                              | CC                | 1946481233               |
| SNP_P3_102663_651700 | NW_004515657.1 | Scaffold40  | 651700                  | TT                              | CC                | 1946481234               |
| SNP_P3_102664_658928 | NW_004515657.1 | Scaffold40  | 658928                  | TT                              | CC                | 1946481236               |
| SNP_P3_102665_662177 | NW_004515657.1 | Scaffold40  | 662177                  | AA                              | GG                | 1946481238               |
| SNP_P3_102667_694427 | NW_004515657.1 | Scaffold40  | 694427                  | TT                              | AA                | 1946481239               |
| SNP_P3_102668_766838 | NW_004515657.1 | Scaffold40  | 766838                  | CC                              | GG                | 1946481240               |
| SNP_P3_102669_799295 | NW_004515657.1 | Scaffold40  | 799295                  | CC                              | AA                | 1946481242               |

| SNPs IDs             | Chromosome IDs | Chromosomes | Physical positions (bp) | CDC Frontier (Reference genome) | (Pusa 256 & HPNB) | NCBI SNPdb Accession IDs |
|----------------------|----------------|-------------|-------------------------|---------------------------------|-------------------|--------------------------|
| SNP_P3_102670_799318 | NW_004515657.1 | Scaffold40  | 799318                  | CC                              | TT                | 1946481243               |
| SNP_P3_102671_799917 | NW_004515657.1 | Scaffold40  | 799917                  | GG                              | AA                | 1946481245               |
| SNP_P3_102672_799974 | NW_004515657.1 | Scaffold40  | 799974                  | CC                              | TT                | 1946481246               |
| SNP_P3_102673_800053 | NW_004515657.1 | Scaffold40  | 800053                  | AA                              | CC                | 1946481248               |
| SNP_P3_102674_800095 | NW_004515657.1 | Scaffold40  | 800095                  | GG                              | TT                | 1946481249               |
| SNP_P3_102675_800100 | NW_004515657.1 | Scaffold40  | 800100                  | GG                              | AA                | 1946481251               |
| SNP_P3_102676_800551 | NW_004515657.1 | Scaffold40  | 800551                  | TT                              | AA                | 1946481252               |
| SNP_P3_102677_800602 | NW_004515657.1 | Scaffold40  | 800602                  | CC                              | TT                | 1946481253               |
| SNP_P3_102678_800653 | NW_004515657.1 | Scaffold40  | 800653                  | AA                              | TT                | 1946481255               |
| SNP_P3_102679_800675 | NW_004515657.1 | Scaffold40  | 800675                  | CC                              | TT                | 1946481256               |
| SNP_P3_102680_800792 | NW_004515657.1 | Scaffold40  | 800792                  | CC                              | GG                | 1946481258               |
| SNP_P3_102681_819201 | NW_004515657.1 | Scaffold40  | 819201                  | CC                              | GG                | 1946481259               |
| SNP_P3_102682_829075 | NW_004515657.1 | Scaffold40  | 829075                  | AA                              | CC                | 1946481261               |
| SNP_P3_102683_829085 | NW_004515657.1 | Scaffold40  | 829085                  | CC                              | TT                | 1946481262               |
| SNP_P3_102684_829348 | NW_004515657.1 | Scaffold40  | 829348                  | TT                              | AA                | 1946481264               |
| SNP_P3_102685_829355 | NW_004515657.1 | Scaffold40  | 829355                  | CC                              | TT                | 1946481265               |
| SNP_P3_102686_833665 | NW_004515657.1 | Scaffold40  | 833665                  | CC                              | TT                | 1946481267               |
| SNP_P3_102687_839727 | NW_004515657.1 | Scaffold40  | 839727                  | AA                              | CC                | 1946481268               |
| SNP_P3_102688_839733 | NW_004515657.1 | Scaffold40  | 839733                  | AA                              | GG                | 1946481270               |
| SNP_P3_102689_840155 | NW_004515657.1 | Scaffold40  | 840155                  | AA                              | TT                | 1946481271               |
| SNP_P3_102690_841158 | NW_004515657.1 | Scaffold40  | 841158                  | CC                              | TT                | 1946481273               |
| SNP_P3_102691_841165 | NW_004515657.1 | Scaffold40  | 841165                  | TT                              | CC                | 1946481274               |
| SNP_P3_102692_841170 | NW_004515657.1 | Scaffold40  | 841170                  | TT                              | AA                | 1946481276               |
| SNP_P3_102693_841180 | NW_004515657.1 | Scaffold40  | 841180                  | TT                              | CC                | 1946481277               |
| SNP_P3_102694_841181 | NW_004515657.1 | Scaffold40  | 841181                  | TT                              | CC                | 1946481278               |
| SNP_P3_102695_841185 | NW_004515657.1 | Scaffold40  | 841185                  | CC                              | TT                | 1946481280               |
| SNP_P3_102697_845192 | NW_004515657.1 | Scaffold40  | 845192                  | CC                              | TT                | 1946481281               |
| SNP_P3_102698_845427 | NW_004515657.1 | Scaffold40  | 845427                  | TT                              | GG                | 1946481283               |
| SNP_P3_102700_850475 | NW_004515657.1 | Scaffold40  | 850475                  | CC                              | TT                | 1946481284               |
| SNP_P3_102701_852041 | NW_004515657.1 | Scaffold40  | 852041                  | CC                              | GG                | 1946481286               |
| SNP_P3_102702_852112 | NW_004515657.1 | Scaffold40  | 852112                  | GG                              | AA                | 1946481287               |
| SNP_P3_102703_852165 | NW_004515657.1 | Scaffold40  | 852165                  | GG                              | AA                | 1946481289               |
| SNP_P3_102704_852702 | NW_004515657.1 | Scaffold40  | 852702                  | TT                              | CC                | 1946481290               |
| SNP_P3_102705_854300 | NW_004515657.1 | Scaffold40  | 854300                  | CC                              | TT                | 1946481292               |
| SNP_P3_102707_855951 | NW_004515657.1 | Scaffold40  | 855951                  | AA                              | GG                | 1946481293               |
| SNP_P3_102708_855993 | NW_004515657.1 | Scaffold40  | 855993                  | TT                              | CC                | 1946481294               |
| SNP_P3_102709_858801 | NW_004515657.1 | Scaffold40  | 858801                  | AA                              | GG                | 1946481296               |
| SNP_P3_102710_858835 | NW_004515657.1 | Scaffold40  | 858835                  | AA                              | GG                | 1946481297               |
| SNP_P3_102711_859015 | NW_004515657.1 | Scaffold40  | 859015                  | GG                              | AA                | 1946481298               |
| SNP_P3_102712_860193 | NW_004515657.1 | Scaffold40  | 860193                  | CC                              | TT                | 1946481300               |
| SNP_P3_102713_860194 | NW_004515657.1 | Scaffold40  | 860194                  | GG                              | AA                | 1946481301               |
| SNP_P3_102714_860426 | NW_004515657.1 | Scaffold40  | 860426                  | GG                              | CC                | 1946481303               |

| SNPs IDs             | Chromosome IDs | Chromosomes | Physical positions (bp) | CDC Frontier (Reference genome) | (Pusa 256 & HPNB) | NCBI SNPdb Accession IDs |
|----------------------|----------------|-------------|-------------------------|---------------------------------|-------------------|--------------------------|
| SNP_P3_102715_861314 | NW_004515657.1 | Scaffold40  | 861314                  | CC                              | TT                | 1946481304               |
| SNP_P3_102716_862399 | NW_004515657.1 | Scaffold40  | 862399                  | TT                              | AA                | 1946481305               |
| SNP_P3_102717_862705 | NW_004515657.1 | Scaffold40  | 862705                  | GG                              | AA                | 1946481307               |
| SNP_P3_102718_864437 | NW_004515657.1 | Scaffold40  | 864437                  | AA                              | GG                | 1946481308               |
| SNP_P3_102719_869079 | NW_004515657.1 | Scaffold40  | 869079                  | TT                              | CC                | 1946481310               |
| SNP_P3_102720_870537 | NW_004515657.1 | Scaffold40  | 870537                  | GG                              | TT                | 1946481311               |
| SNP_P3_102721_873882 | NW_004515657.1 | Scaffold40  | 873882                  | TT                              | AA                | 1946481312               |
| SNP_P3_102723_874695 | NW_004515657.1 | Scaffold40  | 874695                  | TT                              | CC                | 1946481314               |
| SNP_P3_102724_874932 | NW_004515657.1 | Scaffold40  | 874932                  | TT                              | CC                | 1946481315               |
| SNP_P3_102725_874933 | NW_004515657.1 | Scaffold40  | 874933                  | GG                              | AA                | 1946481317               |
| SNP_P3_102726_874996 | NW_004515657.1 | Scaffold40  | 874996                  | AA                              | GG                | 1946481318               |
| SNP_P3_102727_875016 | NW_004515657.1 | Scaffold40  | 875016                  | AA                              | GG                | 1946481320               |
| SNP_P3_102728_885412 | NW_004515657.1 | Scaffold40  | 885412                  | AA                              | GG                | 1946481321               |
| SNP_P3_102729_886266 | NW_004515657.1 | Scaffold40  | 886266                  | TT                              | GG                | 1946481322               |
| SNP_P3_102730_887451 | NW_004515657.1 | Scaffold40  | 887451                  | TT                              | GG                | 1946481325               |
| SNP_P3_102731_888336 | NW_004515657.1 | Scaffold40  | 888336                  | AA                              | GG                | 1946481326               |
| SNP_P3_102732_888346 | NW_004515657.1 | Scaffold40  | 888346                  | GG                              | TT                | 1946481328               |
| SNP_P3_102733_888625 | NW_004515657.1 | Scaffold40  | 888625                  | AA                              | GG                | 1946481329               |
| SNP_P3_102734_890656 | NW_004515657.1 | Scaffold40  | 890656                  | AA                              | CC                | 1946481330               |
| SNP_P3_102735_894339 | NW_004515657.1 | Scaffold40  | 894339                  | CC                              | TT                | 1946481332               |
| SNP_P3_102736_894387 | NW_004515657.1 | Scaffold40  | 894387                  | AA                              | CC                | 1946481333               |
| SNP_P3_102737_898392 | NW_004515657.1 | Scaffold40  | 898392                  | TT                              | CC                | 1946481335               |
| SNP_P3_102738_899522 | NW_004515657.1 | Scaffold40  | 899522                  | AA                              | CC                | 1946481336               |
| SNP_P3_102740_900766 | NW_004515657.1 | Scaffold40  | 900766                  | AA                              | GG                | 1946481338               |
| SNP_P3_102741_901803 | NW_004515657.1 | Scaffold40  | 901803                  | GG                              | AA                | 1946481339               |
| SNP_P3_102742_902544 | NW_004515657.1 | Scaffold40  | 902544                  | TT                              | CC                | 1946481341               |
| SNP_P3_102743_907491 | NW_004515657.1 | Scaffold40  | 907491                  | TT                              | AA                | 1946481342               |
| SNP_P3_102745_918799 | NW_004515657.1 | Scaffold40  | 918799                  | CC                              | TT                | 1946481344               |
| SNP_P3_102746_918993 | NW_004515657.1 | Scaffold40  | 918993                  | TT                              | AA                | 1946481345               |
| SNP_P3_102747_919151 | NW_004515657.1 | Scaffold40  | 919151                  | CC                              | TT                | 1946481346               |
| SNP_P3_102748_919198 | NW_004515657.1 | Scaffold40  | 919198                  | AA                              | TT                | 1946481348               |
| SNP_P3_102749_919251 | NW_004515657.1 | Scaffold40  | 919251                  | CC                              | TT                | 1946481349               |
| SNP_P3_102750_919276 | NW_004515657.1 | Scaffold40  | 919276                  | AA                              | GG                | 1946481350               |
| SNP_P3_102751_919506 | NW_004515657.1 | Scaffold40  | 919506                  | TT                              | CC                | 1946481352               |
| SNP_P3_102752_919921 | NW_004515657.1 | Scaffold40  | 919921                  | CC                              | AA                | 1946481353               |
| SNP_P3_102753_921184 | NW_004515657.1 | Scaffold40  | 921184                  | AA                              | TT                | 1946481355               |
| SNP_P3_102754_921204 | NW_004515657.1 | Scaffold40  | 921204                  | TT                              | AA                | 1946481356               |
| SNP_P3_102755_921523 | NW_004515657.1 | Scaffold40  | 921523                  | TT                              | GG                | 1946481358               |
| SNP_P3_102756_921551 | NW_004515657.1 | Scaffold40  | 921551                  | CC                              | TT                | 1946481359               |
| SNP_P3_102757_921558 | NW_004515657.1 | Scaffold40  | 921558                  | GG                              | TT                | 1946481360               |
| SNP_P3_102758_921854 | NW_004515657.1 | Scaffold40  | 921854                  | CC                              | GG                | 1946481362               |
| SNP_P3_102759_921874 | NW_004515657.1 | Scaffold40  | 921874                  | AA                              | GG                | 1946481363               |

| SNPs IDs             | Chromosome IDs | Chromosomes | Physical positions (bp) | CDC Frontier (Reference genome) | (Pusa 256 & HPNB) | NCBI SNPdb Accession IDs |
|----------------------|----------------|-------------|-------------------------|---------------------------------|-------------------|--------------------------|
| SNP_P3_102760_921885 | NW_004515657.1 | Scaffold40  | 921885                  | CC                              | TT                | 1946481365               |
| SNP_P3_102761_921905 | NW_004515657.1 | Scaffold40  | 921905                  | CC                              | TT                | 1946481366               |
| SNP_P3_102762_921942 | NW_004515657.1 | Scaffold40  | 921942                  | CC                              | GG                | 1946481367               |
| SNP_P3_102764_922142 | NW_004515657.1 | Scaffold40  | 922142                  | AA                              | TT                | 1946481369               |
| SNP_P3_102765_922164 | NW_004515657.1 | Scaffold40  | 922164                  | GG                              | CC                | 1946481370               |
| SNP_P3_102766_922332 | NW_004515657.1 | Scaffold40  | 922332                  | GG                              | AA                | 1946481372               |
| SNP_P3_102767_925023 | NW_004515657.1 | Scaffold40  | 925023                  | GG                              | AA                | 1946481374               |
| SNP_P3_102768_925326 | NW_004515657.1 | Scaffold40  | 925326                  | AA                              | GG                | 1946481375               |
| SNP_P3_102770_926073 | NW_004515657.1 | Scaffold40  | 926073                  | GG                              | AA                | 1946481377               |
| SNP_P3_102771_926098 | NW_004515657.1 | Scaffold40  | 926098                  | AA                              | GG                | 1946481378               |
| SNP_P3_102773_926178 | NW_004515657.1 | Scaffold40  | 926178                  | CC                              | AA                | 1946481379               |
| SNP_P3_102774_926323 | NW_004515657.1 | Scaffold40  | 926323                  | AA                              | GG                | 1946481381               |
| SNP_P3_102775_926712 | NW_004515657.1 | Scaffold40  | 926712                  | TT                              | CC                | 1946481382               |
| SNP_P3_102776_937079 | NW_004515657.1 | Scaffold40  | 937079                  | GG                              | AA                | 1946481384               |
| SNP_P3_102777_937137 | NW_004515657.1 | Scaffold40  | 937137                  | AA                              | GG                | 1946481385               |
| SNP_P3_102778_937159 | NW_004515657.1 | Scaffold40  | 937159                  | AA                              | GG                | 1946481387               |
| SNP_P3_102779_937390 | NW_004515657.1 | Scaffold40  | 937390                  | CC                              | TT                | 1946481388               |
| SNP_P3_102780_937407 | NW_004515657.1 | Scaffold40  | 937407                  | TT                              | CC                | 1946481389               |
| SNP_P3_102781_937614 | NW_004515657.1 | Scaffold40  | 937614                  | TT                              | CC                | 1946481391               |
| SNP_P3_102782_954761 | NW_004515657.1 | Scaffold40  | 954761                  | TT                              | CC                | 1946481392               |
| SNP_P3_102783_956876 | NW_004515657.1 | Scaffold40  | 956876                  | TT                              | CC                | 1946481394               |
| SNP_P3_102784_957216 | NW_004515657.1 | Scaffold40  | 957216                  | GG                              | AA                | 1946481395               |
| SNP_P3_102785_958532 | NW_004515657.1 | Scaffold40  | 958532                  | GG                              | TT                | 1946481396               |
| SNP_P3_102786_959982 | NW_004515657.1 | Scaffold40  | 959982                  | GG                              | CC                | 1946481398               |
| SNP_P3_102787_960010 | NW_004515657.1 | Scaffold40  | 960010                  | TT                              | CC                | 1946481399               |
| SNP_P3_102788_960321 | NW_004515657.1 | Scaffold40  | 960321                  | GG                              | AA                | 1946481400               |
| SNP_P3_102789_960379 | NW_004515657.1 | Scaffold40  | 960379                  | AA                              | GG                | 1946481402               |
| SNP_P3_102790_960553 | NW_004515657.1 | Scaffold40  | 960553                  | GG                              | AA                | 1946481403               |
| SNP_P3_102791_960944 | NW_004515657.1 | Scaffold40  | 960944                  | CC                              | AA                | 1946481405               |
| SNP_P3_102792_961053 | NW_004515657.1 | Scaffold40  | 961053                  | CC                              | GG                | 1946481406               |
| SNP_P3_102793_961982 | NW_004515657.1 | Scaffold40  | 961982                  | GG                              | AA                | 1946481408               |
| SNP_P3_102794_975722 | NW_004515657.1 | Scaffold40  | 975722                  | AA                              | TT                | 1946481409               |
| SNP_P3_102795_976593 | NW_004515657.1 | Scaffold40  | 976593                  | AA                              | GG                | 1946481410               |
| SNP_P3_102796_976862 | NW_004515657.1 | Scaffold40  | 976862                  | TT                              | CC                | 1946481412               |
| SNP_P3_102798_977115 | NW_004515657.1 | Scaffold40  | 977115                  | TT                              | CC                | 1946481413               |
| SNP_P3_102800_979371 | NW_004515657.1 | Scaffold40  | 979371                  | TT                              | CC                | 1946481415               |
| SNP_P3_102801_981492 | NW_004515657.1 | Scaffold40  | 981492                  | AA                              | CC                | 1946481416               |
| SNP_P3_102802_981635 | NW_004515657.1 | Scaffold40  | 981635                  | AA                              | CC                | 1946481417               |
| SNP_P3_102803_981690 | NW_004515657.1 | Scaffold40  | 981690                  | GG                              | AA                | 1946481419               |
| SNP_P3_102804_982479 | NW_004515657.1 | Scaffold40  | 982479                  | GG                              | TT                | 1946481420               |
| SNP_P3_102806_983045 | NW_004515657.1 | Scaffold40  | 983045                  | TT                              | AA                | 1946481422               |
| SNP_P3_102807_983137 | NW_004515657.1 | Scaffold40  | 983137                  | CC                              | TT                | 1946481423               |

| SNPs IDs              | Chromosome IDs | Chromosomes | Physical positions (bp) | CDC Frontier (Reference genome) | (Pusa 256 & HPNB) | NCBI SNPdb Accession IDs |
|-----------------------|----------------|-------------|-------------------------|---------------------------------|-------------------|--------------------------|
| SNP_P3_102808_983423  | NW_004515657.1 | Scaffold40  | 983423                  | TT                              | CC                | 1946481425               |
| SNP_P3_102809_983463  | NW_004515657.1 | Scaffold40  | 983463                  | AA                              | GG                | 1946481426               |
| SNP_P3_102810_983798  | NW_004515657.1 | Scaffold40  | 983798                  | AA                              | GG                | 1946481427               |
| SNP_P3_102812_986838  | NW_004515657.1 | Scaffold40  | 986838                  | AA                              | GG                | 1946481429               |
| SNP_P3_102813_987469  | NW_004515657.1 | Scaffold40  | 987469                  | AA                              | GG                | 1946481430               |
| SNP_P3_102814_988120  | NW_004515657.1 | Scaffold40  | 988120                  | TT                              | CC                | 1946481432               |
| SNP_P3_102815_990128  | NW_004515657.1 | Scaffold40  | 990128                  | TT                              | CC                | 1946481433               |
| SNP_P3_102816_990605  | NW_004515657.1 | Scaffold40  | 990605                  | TT                              | AA                | 1946481434               |
| SNP_P3_102817_990655  | NW_004515657.1 | Scaffold40  | 990655                  | GG                              | AA                | 1946481436               |
| SNP_P3_102818_990727  | NW_004515657.1 | Scaffold40  | 990727                  | TT                              | CC                | 1946481437               |
| SNP_P3_102819_990754  | NW_004515657.1 | Scaffold40  | 990754                  | TT                              | CC                | 1946481439               |
| SNP_P3_102820_991232  | NW_004515657.1 | Scaffold40  | 991232                  | AA                              | GG                | 1946481440               |
| SNP_P3_102821_991278  | NW_004515657.1 | Scaffold40  | 991278                  | CC                              | TT                | 1946481441               |
| SNP_P3_102822_991580  | NW_004515657.1 | Scaffold40  | 991580                  | AA                              | GG                | 1946481443               |
| SNP_P3_102823_991585  | NW_004515657.1 | Scaffold40  | 991585                  | TT                              | CC                | 1946481444               |
| SNP_P3_102825_994014  | NW_004515657.1 | Scaffold40  | 994014                  | TT                              | CC                | 1946481446               |
| SNP_P3_102826_1004745 | NW_004515657.1 | Scaffold40  | 1004745                 | GG                              | AA                | 1946481447               |
| SNP_P3_102827_1004759 | NW_004515657.1 | Scaffold40  | 1004759                 | TT                              | CC                | 1946481448               |
| SNP_P3_102828_1004876 | NW_004515657.1 | Scaffold40  | 1004876                 | AA                              | GG                | 1946481450               |
| SNP_P3_102829_1004890 | NW_004515657.1 | Scaffold40  | 1004890                 | CC                              | TT                | 1946481451               |
| SNP_P3_102830_1004891 | NW_004515657.1 | Scaffold40  | 1004891                 | AA                              | GG                | 1946481453               |
| SNP_P3_102831_1005201 | NW_004515657.1 | Scaffold40  | 1005201                 | CC                              | TT                | 1946481454               |
| SNP_P3_102832_1005212 | NW_004515657.1 | Scaffold40  | 1005212                 | CC                              | TT                | 1946481456               |
| SNP_P3_102833_1005702 | NW_004515657.1 | Scaffold40  | 1005702                 | AA                              | GG                | 1946481457               |
| SNP_P3_102834_1005709 | NW_004515657.1 | Scaffold40  | 1005709                 | TT                              | CC                | 1946481459               |
| SNP_P3_102835_1006001 | NW_004515657.1 | Scaffold40  | 1006001                 | CC                              | TT                | 1946481460               |
| SNP_P3_102836_1006731 | NW_004515657.1 | Scaffold40  | 1006731                 | AA                              | TT                | 1946481462               |
| SNP_P3_102837_1007710 | NW_004515657.1 | Scaffold40  | 1007710                 | AA                              | TT                | 1946481463               |
| SNP_P3_102838_1007719 | NW_004515657.1 | Scaffold40  | 1007719                 | GG                              | AA                | 1946481464               |
| SNP_P3_102840_1008490 | NW_004515657.1 | Scaffold40  | 1008490                 | GG                              | CC                | 1946481466               |
| SNP_P3_102841_1008524 | NW_004515657.1 | Scaffold40  | 1008524                 | TT                              | CC                | 1946481467               |
| SNP_P3_102842_1008637 | NW_004515657.1 | Scaffold40  | 1008637                 | GG                              | CC                | 1946481469               |
| SNP_P3_102843_1008662 | NW_004515657.1 | Scaffold40  | 1008662                 | CC                              | AA                | 1946481470               |
| SNP_P3_102844_1008664 | NW_004515657.1 | Scaffold40  | 1008664                 | AA                              | GG                | 1946481472               |
| SNP_P3_102845_1008748 | NW_004515657.1 | Scaffold40  | 1008748                 | TT                              | AA                | 1946481473               |
| SNP_P3_102846_1008829 | NW_004515657.1 | Scaffold40  | 1008829                 | AA                              | TT                | 1946481475               |
| SNP_P3_102847_1008851 | NW_004515657.1 | Scaffold40  | 1008851                 | AA                              | GG                | 1946481476               |
| SNP_P3_102849_1009023 | NW_004515657.1 | Scaffold40  | 1009023                 | AA                              | GG                | 1946481477               |
| SNP_P3_102850_1016966 | NW_004515657.1 | Scaffold40  | 1016966                 | CC                              | AA                | 1946481479               |
| SNP_P3_102851_1017984 | NW_004515657.1 | Scaffold40  | 1017984                 | CC                              | AA                | 1946481480               |
| SNP_P3_102853_1018511 | NW_004515657.1 | Scaffold40  | 1018511                 | TT                              | GG                | 1946481482               |
| SNP_P3_102854_1020020 | NW_004515657.1 | Scaffold40  | 1020020                 | AA                              | CC                | 1946481483               |

| SNPs IDs              | Chromosome IDs | Chromosomes | Physical positions (bp) | CDC Frontier (Reference genome) | (Pusa 256 & HPNB) | NCBI SNPdb Accession IDs |
|-----------------------|----------------|-------------|-------------------------|---------------------------------|-------------------|--------------------------|
| SNP_P3_102855_1020049 | NW_004515657.1 | Scaffold40  | 1020049                 | AA                              | GG                | 1946481485               |
| SNP_P3_102857_1020747 | NW_004515657.1 | Scaffold40  | 1020747                 | GG                              | AA                | 1946481486               |
| SNP_P3_102858_1022197 | NW_004515657.1 | Scaffold40  | 1022197                 | CC                              | TT                | 1946481488               |
| SNP_P3_102859_1022209 | NW_004515657.1 | Scaffold40  | 1022209                 | CC                              | TT                | 1946481489               |
| SNP_P3_102860_1023465 | NW_004515657.1 | Scaffold40  | 1023465                 | GG                              | AA                | 1946481490               |
| SNP_P3_102861_1023472 | NW_004515657.1 | Scaffold40  | 1023472                 | AA                              | GG                | 1946481492               |
| SNP_P3_102862_1023482 | NW_004515657.1 | Scaffold40  | 1023482                 | CC                              | TT                | 1946481494               |
| SNP_P3_102863_1023540 | NW_004515657.1 | Scaffold40  | 1023540                 | TT                              | AA                | 1946481495               |
| SNP_P3_102864_1023541 | NW_004515657.1 | Scaffold40  | 1023541                 | GG                              | AA                | 1946481497               |
| SNP_P3_102865_1023546 | NW_004515657.1 | Scaffold40  | 1023546                 | AA                              | GG                | 1946481498               |
| SNP_P3_102866_1023589 | NW_004515657.1 | Scaffold40  | 1023589                 | TT                              | CC                | 1946481499               |
| SNP_P3_102867_1023929 | NW_004515657.1 | Scaffold40  | 1023929                 | CC                              | TT                | 1946481501               |
| SNP_P3_102868_1024246 | NW_004515657.1 | Scaffold40  | 1024246                 | CC                              | TT                | 1946481502               |
| SNP_P3_102869_1024247 | NW_004515657.1 | Scaffold40  | 1024247                 | TT                              | CC                | 1946481504               |
| SNP_P3_102870_1024268 | NW_004515657.1 | Scaffold40  | 1024268                 | TT                              | GG                | 1946481505               |
| SNP_P3_102871_1024670 | NW_004515657.1 | Scaffold40  | 1024670                 | GG                              | CC                | 1946481506               |
| SNP_P3_102872_1024790 | NW_004515657.1 | Scaffold40  | 1024790                 | GG                              | CC                | 1946481508               |
| SNP_P3_102873_1024802 | NW_004515657.1 | Scaffold40  | 1024802                 | CC                              | TT                | 1946481509               |
| SNP_P3_102874_1024809 | NW_004515657.1 | Scaffold40  | 1024809                 | CC                              | AA                | 1946481510               |
| SNP_P3_102875_1027268 | NW_004515657.1 | Scaffold40  | 1027268                 | CC                              | AA                | 1946481512               |
| SNP_P3_102876_1027271 | NW_004515657.1 | Scaffold40  | 1027271                 | TT                              | CC                | 1946481513               |
| SNP_P3_102877_1027637 | NW_004515657.1 | Scaffold40  | 1027637                 | CC                              | TT                | 1946481515               |
| SNP_P3_102878_1028351 | NW_004515657.1 | Scaffold40  | 1028351                 | GG                              | AA                | 1946481516               |
| SNP_P3_102879_1028387 | NW_004515657.1 | Scaffold40  | 1028387                 | CC                              | AA                | 1946481517               |
| SNP_P3_102880_1028415 | NW_004515657.1 | Scaffold40  | 1028415                 | GG                              | CC                | 1946481519               |
| SNP_P3_102881_1028442 | NW_004515657.1 | Scaffold40  | 1028442                 | GG                              | AA                | 1946481520               |
| SNP_P3_102884_1030439 | NW_004515657.1 | Scaffold40  | 1030439                 | CC                              | TT                | 1946481521               |
| SNP_P3_102885_1030765 | NW_004515657.1 | Scaffold40  | 1030765                 | AA                              | TT                | 1946481523               |
| SNP_P3_102886_1031473 | NW_004515657.1 | Scaffold40  | 1031473                 | CC                              | TT                | 1946481524               |
| SNP_P3_102887_1031971 | NW_004515657.1 | Scaffold40  | 1031971                 | TT                              | CC                | 1946481525               |
| SNP_P3_102888_1032271 | NW_004515657.1 | Scaffold40  | 1032271                 | CC                              | TT                | 1946481527               |
| SNP_P3_102889_1032560 | NW_004515657.1 | Scaffold40  | 1032560                 | TT                              | CC                | 1946481528               |
| SNP_P3_102890_1033662 | NW_004515657.1 | Scaffold40  | 1033662                 | AA                              | GG                | 1946481529               |
| SNP_P3_102891_1040836 | NW_004515657.1 | Scaffold40  | 1040836                 | TT                              | CC                | 1946481531               |
| SNP_P3_102892_1043075 | NW_004515657.1 | Scaffold40  | 1043075                 | CC                              | AA                | 1946481532               |
| SNP_P3_102893_1044277 | NW_004515657.1 | Scaffold40  | 1044277                 | AA                              | GG                | 1946481533               |
| SNP_P3_102894_1045052 | NW_004515657.1 | Scaffold40  | 1045052                 | CC                              | GG                | 1946481535               |
| SNP_P3_102895_1045080 | NW_004515657.1 | Scaffold40  | 1045080                 | AA                              | GG                | 1946481536               |
| SNP_P3_102896_1047641 | NW_004515657.1 | Scaffold40  | 1047641                 | AA                              | GG                | 1946481538               |
| SNP_P3_102897_1049122 | NW_004515657.1 | Scaffold40  | 1049122                 | AA                              | GG                | 1946481539               |
| SNP_P3_102898_1049135 | NW_004515657.1 | Scaffold40  | 1049135                 | AA                              | CC                | 1946481540               |
| SNP_P3_102899_1049649 | NW_004515657.1 | Scaffold40  | 1049649                 | CC                              | AA                | 1946481542               |



| SNPs IDs              | Chromosome IDs | Chromosomes | Physical positions (bp) | CDC Frontier (Reference genome) | (Pusa 256 & HPNB) | NCBI SNPdb Accession IDs |
|-----------------------|----------------|-------------|-------------------------|---------------------------------|-------------------|--------------------------|
| SNP_P3_102900_1050497 | NW_004515657.1 | Scaffold40  | 1050497                 | TT                              | CC                | 1946481543               |
| SNP_P3_102901_1050576 | NW_004515657.1 | Scaffold40  | 1050576                 | TT                              | AA                | 1946481544               |
| SNP_P3_102902_1050979 | NW_004515657.1 | Scaffold40  | 1050979                 | TT                              | GG                | 1946481546               |
| SNP_P3_102903_1053838 | NW_004515657.1 | Scaffold40  | 1053838                 | GG                              | AA                | 1946481547               |
| SNP_P3_102904_1053860 | NW_004515657.1 | Scaffold40  | 1053860                 | GG                              | AA                | 1946481548               |
| SNP_P3_102906_1054666 | NW_004515657.1 | Scaffold40  | 1054666                 | GG                              | AA                | 1946481550               |
| SNP_P3_102907_1054685 | NW_004515657.1 | Scaffold40  | 1054685                 | GG                              | AA                | 1946481551               |
| SNP_P3_102908_1054701 | NW_004515657.1 | Scaffold40  | 1054701                 | AA                              | TT                | 1946481552               |
| SNP_P3_102909_1054723 | NW_004515657.1 | Scaffold40  | 1054723                 | GG                              | AA                | 1946481554               |
| SNP_P3_102910_1054766 | NW_004515657.1 | Scaffold40  | 1054766                 | GG                              | AA                | 1946481555               |
| SNP_P3_102911_1054768 | NW_004515657.1 | Scaffold40  | 1054768                 | TT                              | CC                | 1946481556               |
| SNP_P3_102912_1056304 | NW_004515657.1 | Scaffold40  | 1056304                 | AA                              | GG                | 1946481558               |
| SNP_P3_102913_1056384 | NW_004515657.1 | Scaffold40  | 1056384                 | TT                              | GG                | 1946481559               |
| SNP_P3_102915_1057622 | NW_004515657.1 | Scaffold40  | 1057622                 | TT                              | CC                | 1946481561               |
| SNP_P3_102916_1057653 | NW_004515657.1 | Scaffold40  | 1057653                 | CC                              | TT                | 1946481562               |
| SNP_P3_102917_1057666 | NW_004515657.1 | Scaffold40  | 1057666                 | AA                              | CC                | 1946481563               |
| SNP_P3_102918_1059791 | NW_004515657.1 | Scaffold40  | 1059791                 | CC                              | TT                | 1946481565               |
| SNP_P3_102919_1059796 | NW_004515657.1 | Scaffold40  | 1059796                 | TT                              | CC                | 1946481566               |
| SNP_P3_102920_1059811 | NW_004515657.1 | Scaffold40  | 1059811                 | AA                              | GG                | 1946481567               |
| SNP_P3_102921_1059895 | NW_004515657.1 | Scaffold40  | 1059895                 | AA                              | GG                | 1946481569               |
| SNP_P3_102922_1059896 | NW_004515657.1 | Scaffold40  | 1059896                 | GG                              | AA                | 1946481570               |
| SNP_P3_102923_1059950 | NW_004515657.1 | Scaffold40  | 1059950                 | CC                              | TT                | 1946481571               |
| SNP_P3_102924_1060158 | NW_004515657.1 | Scaffold40  | 1060158                 | TT                              | CC                | 1946481573               |
| SNP_P3_102925_1060425 | NW_004515657.1 | Scaffold40  | 1060425                 | AA                              | GG                | 1946481574               |
| SNP_P3_102926_1066041 | NW_004515657.1 | Scaffold40  | 1066041                 | AA                              | GG                | 1946481576               |
| SNP_P3_102927_4200    | NW_004515658.1 | Scaffold41  | 4200                    | TT                              | CC                | 1946481577               |
| SNP_P3_102930_25161   | NW_004515658.1 | Scaffold41  | 25161                   | GG                              | TT                | 1946481578               |
| SNP_P3_102931_25162   | NW_004515658.1 | Scaffold41  | 25162                   | CC                              | AA                | 1946481580               |
| SNP_P3_102932_25164   | NW_004515658.1 | Scaffold41  | 25164                   | CC                              | TT                | 1946481581               |
| SNP_P3_102933_25182   | NW_004515658.1 | Scaffold41  | 25182                   | TT                              | CC                | 1946481588               |
| SNP_P3_102934_25237   | NW_004515658.1 | Scaffold41  | 25237                   | GG                              | AA                | 1946481590               |
| SNP_P3_102935_25249   | NW_004515658.1 | Scaffold41  | 25249                   | TT                              | GG                | 1946481591               |
| SNP_P3_102936_25256   | NW_004515658.1 | Scaffold41  | 25256                   | TT                              | CC                | 1946481593               |
| SNP_P3_102937_25260   | NW_004515658.1 | Scaffold41  | 25260                   | TT                              | CC                | 1946481594               |
| SNP_P3_102938_25266   | NW_004515658.1 | Scaffold41  | 25266                   | CC                              | TT                | 1946481595               |
| SNP_P3_102939_25296   | NW_004515658.1 | Scaffold41  | 25296                   | GG                              | TT                | 1946481597               |
| SNP_P3_102940_25329   | NW_004515658.1 | Scaffold41  | 25329                   | GG                              | AA                | 1946481598               |
| SNP_P3_102941_25555   | NW_004515658.1 | Scaffold41  | 25555                   | GG                              | AA                | 1946481600               |
| SNP_P3_102942_28318   | NW_004515658.1 | Scaffold41  | 28318                   | CC                              | TT                | 1946481601               |
| SNP_P3_102943_28339   | NW_004515658.1 | Scaffold41  | 28339                   | AA                              | GG                | 1946481603               |
| SNP_P3_102944_28378   | NW_004515658.1 | Scaffold41  | 28378                   | CC                              | TT                | 1946481604               |
| SNP_P3_102946_58085   | NW_004515658.1 | Scaffold41  | 58085                   | GG                              | AA                | 1946481605               |

| SNPs IDs             | Chromosome IDs | Chromosomes | Physical positions (bp) | CDC Frontier (Reference genome) | (Pusa 256 & HPNB) | NCBI SNPdb Accession IDs |
|----------------------|----------------|-------------|-------------------------|---------------------------------|-------------------|--------------------------|
| SNP_P3_102948_73444  | NW_004515658.1 | Scaffold41  | 73444                   | TT                              | GG                | 1946481607               |
| SNP_P3_102950_89356  | NW_004515658.1 | Scaffold41  | 89356                   | AA                              | GG                | 1946481608               |
| SNP_P3_102951_92997  | NW_004515658.1 | Scaffold41  | 92997                   | AA                              | CC                | 1946481609               |
| SNP_P3_102952_100695 | NW_004515658.1 | Scaffold41  | 100695                  | AA                              | GG                | 1946481611               |
| SNP_P3_102953_100922 | NW_004515658.1 | Scaffold41  | 100922                  | GG                              | CC                | 1946481612               |
| SNP_P3_102954_108521 | NW_004515658.1 | Scaffold41  | 108521                  | TT                              | AA                | 1946481614               |
| SNP_P3_102955_108565 | NW_004515658.1 | Scaffold41  | 108565                  | CC                              | GG                | 1946481615               |
| SNP_P3_102956_113252 | NW_004515658.1 | Scaffold41  | 113252                  | CC                              | GG                | 1946481616               |
| SNP_P3_102957_113385 | NW_004515658.1 | Scaffold41  | 113385                  | GG                              | TT                | 1946481618               |
| SNP_P3_102958_113773 | NW_004515658.1 | Scaffold41  | 113773                  | TT                              | CC                | 1946481619               |
| SNP_P3_102959_113817 | NW_004515658.1 | Scaffold41  | 113817                  | AA                              | GG                | 1946481621               |
| SNP_P3_102960_114018 | NW_004515658.1 | Scaffold41  | 114018                  | AA                              | TT                | 1946481622               |
| SNP_P3_102961_114062 | NW_004515658.1 | Scaffold41  | 114062                  | TT                              | AA                | 1946481623               |
| SNP_P3_102962_114068 | NW_004515658.1 | Scaffold41  | 114068                  | AA                              | TT                | 1946481625               |
| SNP_P3_102963_114118 | NW_004515658.1 | Scaffold41  | 114118                  | GG                              | CC                | 1946481626               |
| SNP_P3_102964_114167 | NW_004515658.1 | Scaffold41  | 114167                  | TT                              | CC                | 1946481628               |
| SNP_P3_102965_114744 | NW_004515658.1 | Scaffold41  | 114744                  | TT                              | AA                | 1946481629               |
| SNP_P3_102966_114772 | NW_004515658.1 | Scaffold41  | 114772                  | TT                              | AA                | 1946481631               |
| SNP_P3_102967_114808 | NW_004515658.1 | Scaffold41  | 114808                  | AA                              | GG                | 1946481632               |
| SNP_P3_102968_114861 | NW_004515658.1 | Scaffold41  | 114861                  | TT                              | CC                | 1946481634               |
| SNP_P3_102969_115099 | NW_004515658.1 | Scaffold41  | 115099                  | CC                              | TT                | 1946481635               |
| SNP_P3_102970_115895 | NW_004515658.1 | Scaffold41  | 115895                  | CC                              | TT                | 1946481636               |
| SNP_P3_102971_115901 | NW_004515658.1 | Scaffold41  | 115901                  | TT                              | GG                | 1946481638               |
| SNP_P3_102972_116465 | NW_004515658.1 | Scaffold41  | 116465                  | TT                              | GG                | 1946481639               |
| SNP_P3_102973_116543 | NW_004515658.1 | Scaffold41  | 116543                  | AA                              | CC                | 1946481641               |
| SNP_P3_102974_116574 | NW_004515658.1 | Scaffold41  | 116574                  | AA                              | CC                | 1946481642               |
| SNP_P3_102975_122063 | NW_004515658.1 | Scaffold41  | 122063                  | AA                              | GG                | 1946481644               |
| SNP_P3_102976_122085 | NW_004515658.1 | Scaffold41  | 122085                  | TT                              | CC                | 1946481645               |
| SNP_P3_102977_122127 | NW_004515658.1 | Scaffold41  | 122127                  | TT                              | CC                | 1946481647               |
| SNP_P3_102978_122128 | NW_004515658.1 | Scaffold41  | 122128                  | AA                              | GG                | 1946481648               |
| SNP_P3_102979_122189 | NW_004515658.1 | Scaffold41  | 122189                  | TT                              | CC                | 1946481650               |
| SNP_P3_102980_122203 | NW_004515658.1 | Scaffold41  | 122203                  | AA                              | GG                | 1946481651               |
| SNP_P3_102982_122285 | NW_004515658.1 | Scaffold41  | 122285                  | TT                              | CC                | 1946481653               |
| SNP_P3_102983_122286 | NW_004515658.1 | Scaffold41  | 122286                  | GG                              | AA                | 1946481654               |
| SNP_P3_102984_122301 | NW_004515658.1 | Scaffold41  | 122301                  | AA                              | GG                | 1946481656               |
| SNP_P3_102985_122302 | NW_004515658.1 | Scaffold41  | 122302                  | TT                              | GG                | 1946481657               |
| SNP_P3_102989_122465 | NW_004515658.1 | Scaffold41  | 122465                  | TT                              | GG                | 1946481658               |
| SNP_P3_102990_122497 | NW_004515658.1 | Scaffold41  | 122497                  | TT                              | CC                | 1946481660               |
| SNP_P3_102991_122509 | NW_004515658.1 | Scaffold41  | 122509                  | TT                              | CC                | 1946481661               |
| SNP_P3_102992_122510 | NW_004515658.1 | Scaffold41  | 122510                  | TT                              | GG                | 1946481663               |
| SNP_P3_102993_122513 | NW_004515658.1 | Scaffold41  | 122513                  | TT                              | CC                | 1946481664               |
| SNP_P3_102994_122527 | NW_004515658.1 | Scaffold41  | 122527                  | TT                              | GG                | 1946481666               |

| SNPs IDs             | Chromosome IDs | Chromosomes | Physical positions (bp) | CDC Frontier (Reference genome) | (Pusa 256 & HPNB) | NCBI SNPdb Accession IDs |
|----------------------|----------------|-------------|-------------------------|---------------------------------|-------------------|--------------------------|
| SNP_P3_102995_122633 | NW_004515658.1 | Scaffold41  | 122633                  | TT                              | CC                | 1946481667               |
| SNP_P3_102996_165089 | NW_004515658.1 | Scaffold41  | 165089                  | TT                              | CC                | 1946481668               |
| SNP_P3_102997_166516 | NW_004515658.1 | Scaffold41  | 166516                  | GG                              | AA                | 1946481670               |
| SNP_P3_102998_177872 | NW_004515658.1 | Scaffold41  | 177872                  | TT                              | GG                | 1946481671               |
| SNP_P3_102999_157    | NW_004515660.1 | Scaffold44  | 157                     | AA                              | GG                | 1946481673               |
| SNP_P3_103000_434    | NW_004515660.1 | Scaffold44  | 434                     | CC                              | TT                | 1946481674               |
| SNP_P3_103001_637    | NW_004515660.1 | Scaffold44  | 637                     | TT                              | GG                | 1946481676               |
| SNP_P3_103002_14895  | NW_004515660.1 | Scaffold44  | 14895                   | CC                              | TT                | 1946481677               |
| SNP_P3_103003_21152  | NW_004515660.1 | Scaffold44  | 21152                   | GG                              | CC                | 1946481678               |
| SNP_P3_103004_27751  | NW_004515660.1 | Scaffold44  | 27751                   | TT                              | AA                | 1946481680               |
| SNP_P3_103005_67948  | NW_004515660.1 | Scaffold44  | 67948                   | GG                              | CC                | 1946481681               |
| SNP_P3_103006_69191  | NW_004515660.1 | Scaffold44  | 69191                   | CC                              | AA                | 1946481683               |
| SNP_P3_103007_93114  | NW_004515660.1 | Scaffold44  | 93114                   | AA                              | TT                | 1946481684               |
| SNP_P3_103008_93208  | NW_004515660.1 | Scaffold44  | 93208                   | CC                              | TT                | 1946481685               |
| SNP_P3_103009_96902  | NW_004515660.1 | Scaffold44  | 96902                   | TT                              | CC                | 1946481687               |
| SNP_P3_103010_98151  | NW_004515660.1 | Scaffold44  | 98151                   | AA                              | CC                | 1946481688               |
| SNP_P3_103011_106416 | NW_004515660.1 | Scaffold44  | 106416                  | GG                              | TT                | 1946481690               |
| SNP_P3_103012_114640 | NW_004515660.1 | Scaffold44  | 114640                  | CC                              | TT                | 1946481691               |
| SNP_P3_103013_127079 | NW_004515660.1 | Scaffold44  | 127079                  | TT                              | GG                | 1946481693               |
| SNP_P3_103014_127099 | NW_004515660.1 | Scaffold44  | 127099                  | AA                              | GG                | 1946481694               |
| SNP_P3_103015_128113 | NW_004515660.1 | Scaffold44  | 128113                  | CC                              | TT                | 1946481696               |
| SNP_P3_103016_128942 | NW_004515660.1 | Scaffold44  | 128942                  | TT                              | GG                | 1946481697               |
| SNP_P3_103017_147199 | NW_004515660.1 | Scaffold44  | 147199                  | TT                              | CC                | 1946481698               |
| SNP_P3_103019_170327 | NW_004515660.1 | Scaffold44  | 170327                  | TT                              | CC                | 1946481700               |
| SNP_P3_103020_173628 | NW_004515660.1 | Scaffold44  | 173628                  | TT                              | CC                | 1946481701               |
| SNP_P3_103021_204719 | NW_004515660.1 | Scaffold44  | 204719                  | TT                              | CC                | 1946481703               |
| SNP_P3_103022_205027 | NW_004515660.1 | Scaffold44  | 205027                  | CC                              | AA                | 1946481704               |
| SNP_P3_103023_205973 | NW_004515660.1 | Scaffold44  | 205973                  | CC                              | AA                | 1946481706               |
| SNP_P3_103024_212763 | NW_004515660.1 | Scaffold44  | 212763                  | AA                              | GG                | 1946481707               |
| SNP_P3_103025_215399 | NW_004515660.1 | Scaffold44  | 215399                  | GG                              | AA                | 1946481709               |
| SNP_P3_103026_238535 | NW_004515660.1 | Scaffold44  | 238535                  | GG                              | AA                | 1946481710               |
| SNP_P3_103028_282200 | NW_004515660.1 | Scaffold44  | 282200                  | AA                              | GG                | 1946481711               |
| SNP_P3_103029_282217 | NW_004515660.1 | Scaffold44  | 282217                  | AA                              | TT                | 1946481713               |
| SNP_P3_103030_282490 | NW_004515660.1 | Scaffold44  | 282490                  | CC                              | TT                | 1946481714               |
| SNP_P3_103031_282504 | NW_004515660.1 | Scaffold44  | 282504                  | AA                              | GG                | 1946481716               |
| SNP_P3_103032_282531 | NW_004515660.1 | Scaffold44  | 282531                  | GG                              | AA                | 1946481717               |
| SNP_P3_103033_282592 | NW_004515660.1 | Scaffold44  | 282592                  | TT                              | AA                | 1946481719               |
| SNP_P3_103036_291317 | NW_004515660.1 | Scaffold44  | 291317                  | GG                              | AA                | 1946481720               |
| SNP_P3_103037_850    | NW_004515661.1 | Scaffold46  | 850                     | GG                              | AA                | 1946481721               |
| SNP_P3_103038_900    | NW_004515661.1 | Scaffold46  | 900                     | AA                              | GG                | 1946481723               |
| SNP_P3_103039_1624   | NW_004515661.1 | Scaffold46  | 1624                    | GG                              | AA                | 1946481724               |
| SNP_P3_103040_1823   | NW_004515661.1 | Scaffold46  | 1823                    | AA                              | GG                | 1946481726               |

| SNPs IDs           | Chromosome IDs | Chromosomes | Physical positions (bp) | CDC Frontier (Reference genome) | (Pusa 256 & HPNB) | NCBI SNPdb Accession IDs |
|--------------------|----------------|-------------|-------------------------|---------------------------------|-------------------|--------------------------|
| SNP_P3_103041_1911 | NW_004515661.1 | Scaffold46  | 1911                    | TT                              | CC                | 1946481727               |
| SNP_P3_103042_2064 | NW_004515661.1 | Scaffold46  | 2064                    | AA                              | GG                | 1946481728               |
| SNP_P3_103043_3001 | NW_004515661.1 | Scaffold46  | 3001                    | TT                              | GG                | 1946481730               |
| SNP_P3_103044_3022 | NW_004515661.1 | Scaffold46  | 3022                    | TT                              | CC                | 1946481731               |
| SNP_P3_103045_3108 | NW_004515661.1 | Scaffold46  | 3108                    | CC                              | TT                | 1946481733               |
| SNP_P3_103046_3190 | NW_004515661.1 | Scaffold46  | 3190                    | AA                              | CC                | 1946481734               |
| SNP_P3_103047_3193 | NW_004515661.1 | Scaffold46  | 3193                    | CC                              | GG                | 1946481736               |
| SNP_P3_103048_3288 | NW_004515661.1 | Scaffold46  | 3288                    | GG                              | AA                | 1946481737               |
| SNP_P3_103049_3575 | NW_004515661.1 | Scaffold46  | 3575                    | AA                              | CC                | 1946481738               |
| SNP_P3_103050_3606 | NW_004515661.1 | Scaffold46  | 3606                    | GG                              | AA                | 1946481740               |
| SNP_P3_103051_3988 | NW_004515661.1 | Scaffold46  | 3988                    | AA                              | CC                | 1946481741               |
| SNP_P3_103052_3989 | NW_004515661.1 | Scaffold46  | 3989                    | TT                              | AA                | 1946481743               |
| SNP_P3_103053_3992 | NW_004515661.1 | Scaffold46  | 3992                    | GG                              | TT                | 1946481744               |
| SNP_P3_103054_4185 | NW_004515661.1 | Scaffold46  | 4185                    | GG                              | AA                | 1946481746               |
| SNP_P3_103055_4309 | NW_004515661.1 | Scaffold46  | 4309                    | TT                              | CC                | 1946481747               |
| SNP_P3_103056_4423 | NW_004515661.1 | Scaffold46  | 4423                    | AA                              | GG                | 1946481749               |
| SNP_P3_103057_4451 | NW_004515661.1 | Scaffold46  | 4451                    | CC                              | TT                | 1946481750               |
| SNP_P3_103058_4496 | NW_004515661.1 | Scaffold46  | 4496                    | GG                              | AA                | 1946481751               |
| SNP_P3_103059_4749 | NW_004515661.1 | Scaffold46  | 4749                    | AA                              | GG                | 1946481753               |
| SNP_P3_103060_5073 | NW_004515661.1 | Scaffold46  | 5073                    | TT                              | GG                | 1946481754               |
| SNP_P3_103061_5087 | NW_004515661.1 | Scaffold46  | 5087                    | TT                              | AA                | 1946481756               |
| SNP_P3_103062_5178 | NW_004515661.1 | Scaffold46  | 5178                    | AA                              | GG                | 1946481757               |
| SNP_P3_103063_5192 | NW_004515661.1 | Scaffold46  | 5192                    | TT                              | CC                | 1946481758               |
| SNP_P3_103064_5345 | NW_004515661.1 | Scaffold46  | 5345                    | AA                              | CC                | 1946481760               |
| SNP_P3_103065_5367 | NW_004515661.1 | Scaffold46  | 5367                    | GG                              | TT                | 1946481761               |
| SNP_P3_103066_5424 | NW_004515661.1 | Scaffold46  | 5424                    | CC                              | TT                | 1946481763               |
| SNP_P3_103067_5587 | NW_004515661.1 | Scaffold46  | 5587                    | CC                              | TT                | 1946481764               |
| SNP_P3_103068_5590 | NW_004515661.1 | Scaffold46  | 5590                    | AA                              | CC                | 1946481766               |
| SNP_P3_103069_5611 | NW_004515661.1 | Scaffold46  | 5611                    | TT                              | CC                | 1946481767               |
| SNP_P3_103070_5767 | NW_004515661.1 | Scaffold46  | 5767                    | CC                              | TT                | 1946481769               |
| SNP_P3_103071_5832 | NW_004515661.1 | Scaffold46  | 5832                    | GG                              | AA                | 1946481770               |
| SNP_P3_103074_6374 | NW_004515661.1 | Scaffold46  | 6374                    | AA                              | GG                | 1946481772               |
| SNP_P3_103075_6444 | NW_004515661.1 | Scaffold46  | 6444                    | TT                              | CC                | 1946481773               |
| SNP_P3_103076_6459 | NW_004515661.1 | Scaffold46  | 6459                    | AA                              | GG                | 1946481774               |
| SNP_P3_103077_6538 | NW_004515661.1 | Scaffold46  | 6538                    | AA                              | GG                | 1946481776               |
| SNP_P3_103078_6845 | NW_004515661.1 | Scaffold46  | 6845                    | TT                              | AA                | 1946481777               |
| SNP_P3_103079_6860 | NW_004515661.1 | Scaffold46  | 6860                    | AA                              | GG                | 1946481779               |
| SNP_P3_103080_6987 | NW_004515661.1 | Scaffold46  | 6987                    | CC                              | TT                | 1946481780               |
| SNP_P3_103081_7046 | NW_004515661.1 | Scaffold46  | 7046                    | GG                              | AA                | 1946481782               |
| SNP_P3_103082_7335 | NW_004515661.1 | Scaffold46  | 7335                    | TT                              | CC                | 1946481783               |
| SNP_P3_103083_7412 | NW_004515661.1 | Scaffold46  | 7412                    | CC                              | TT                | 1946481785               |
| SNP_P3_103084_7423 | NW_004515661.1 | Scaffold46  | 7423                    | TT                              | CC                | 1946481786               |

| SNPs IDs            | Chromosome IDs | Chromosomes | Physical positions (bp) | CDC Frontier (Reference genome) | (Pusa 256 & HPNB) | NCBI SNPdb Accession IDs |
|---------------------|----------------|-------------|-------------------------|---------------------------------|-------------------|--------------------------|
| SNP_P3_103085_7516  | NW_004515661.1 | Scaffold46  | 7516                    | GG                              | CC                | 1946481787               |
| SNP_P3_103086_7629  | NW_004515661.1 | Scaffold46  | 7629                    | AA                              | GG                | 1946481789               |
| SNP_P3_103087_7713  | NW_004515661.1 | Scaffold46  | 7713                    | TT                              | GG                | 1946481790               |
| SNP_P3_103088_7788  | NW_004515661.1 | Scaffold46  | 7788                    | AA                              | TT                | 1946481792               |
| SNP_P3_103089_7789  | NW_004515661.1 | Scaffold46  | 7789                    | GG                              | AA                | 1946481793               |
| SNP_P3_103090_7803  | NW_004515661.1 | Scaffold46  | 7803                    | TT                              | GG                | 1946481794               |
| SNP_P3_103091_7815  | NW_004515661.1 | Scaffold46  | 7815                    | CC                              | GG                | 1946481796               |
| SNP_P3_103092_7865  | NW_004515661.1 | Scaffold46  | 7865                    | TT                              | AA                | 1946481797               |
| SNP_P3_103093_7928  | NW_004515661.1 | Scaffold46  | 7928                    | TT                              | CC                | 1946481799               |
| SNP_P3_103094_7952  | NW_004515661.1 | Scaffold46  | 7952                    | GG                              | CC                | 1946481800               |
| SNP_P3_103095_8033  | NW_004515661.1 | Scaffold46  | 8033                    | AA                              | GG                | 1946481802               |
| SNP_P3_103096_8055  | NW_004515661.1 | Scaffold46  | 8055                    | GG                              | CC                | 1946481803               |
| SNP_P3_103097_8091  | NW_004515661.1 | Scaffold46  | 8091                    | AA                              | CC                | 1946481804               |
| SNP_P3_103098_8093  | NW_004515661.1 | Scaffold46  | 8093                    | GG                              | TT                | 1946481806               |
| SNP_P3_103099_8100  | NW_004515661.1 | Scaffold46  | 8100                    | GG                              | TT                | 1946481807               |
| SNP_P3_103100_8118  | NW_004515661.1 | Scaffold46  | 8118                    | CC                              | TT                | 1946481809               |
| SNP_P3_103101_8122  | NW_004515661.1 | Scaffold46  | 8122                    | TT                              | CC                | 1946481810               |
| SNP_P3_103102_8193  | NW_004515661.1 | Scaffold46  | 8193                    | GG                              | CC                | 1946481811               |
| SNP_P3_103103_8224  | NW_004515661.1 | Scaffold46  | 8224                    | GG                              | AA                | 1946481813               |
| SNP_P3_103104_8349  | NW_004515661.1 | Scaffold46  | 8349                    | AA                              | GG                | 1946481814               |
| SNP_P3_103105_8350  | NW_004515661.1 | Scaffold46  | 8350                    | CC                              | TT                | 1946481816               |
| SNP_P3_103106_8442  | NW_004515661.1 | Scaffold46  | 8442                    | CC                              | GG                | 1946481817               |
| SNP_P3_103107_8460  | NW_004515661.1 | Scaffold46  | 8460                    | GG                              | AA                | 1946481819               |
| SNP_P3_103108_8489  | NW_004515661.1 | Scaffold46  | 8489                    | GG                              | TT                | 1946481820               |
| SNP_P3_103109_8518  | NW_004515661.1 | Scaffold46  | 8518                    | CC                              | GG                | 1946481821               |
| SNP_P3_103110_8557  | NW_004515661.1 | Scaffold46  | 8557                    | AA                              | CC                | 1946481823               |
| SNP_P3_103112_9155  | NW_004515661.1 | Scaffold46  | 9155                    | AA                              | TT                | 1946481824               |
| SNP_P3_103113_9440  | NW_004515661.1 | Scaffold46  | 9440                    | CC                              | TT                | 1946481826               |
| SNP_P3_103114_9458  | NW_004515661.1 | Scaffold46  | 9458                    | AA                              | GG                | 1946481827               |
| SNP_P3_103115_9558  | NW_004515661.1 | Scaffold46  | 9558                    | GG                              | CC                | 1946481828               |
| SNP_P3_103116_14148 | NW_004515661.1 | Scaffold46  | 14148                   | AA                              | CC                | 1946481830               |
| SNP_P3_103117_14149 | NW_004515661.1 | Scaffold46  | 14149                   | CC                              | GG                | 1946481831               |
| SNP_P3_103118_14172 | NW_004515661.1 | Scaffold46  | 14172                   | TT                              | CC                | 1946481833               |
| SNP_P3_103119_14264 | NW_004515661.1 | Scaffold46  | 14264                   | GG                              | AA                | 1946481834               |
| SNP_P3_103120_14266 | NW_004515661.1 | Scaffold46  | 14266                   | GG                              | AA                | 1946481836               |
| SNP_P3_103121_14330 | NW_004515661.1 | Scaffold46  | 14330                   | AA                              | CC                | 1946481837               |
| SNP_P3_103122_14331 | NW_004515661.1 | Scaffold46  | 14331                   | CC                              | AA                | 1946481839               |
| SNP_P3_103123_14442 | NW_004515661.1 | Scaffold46  | 14442                   | TT                              | GG                | 1946481840               |
| SNP_P3_103124_14470 | NW_004515661.1 | Scaffold46  | 14470                   | GG                              | CC                | 1946481842               |
| SNP_P3_103125_14484 | NW_004515661.1 | Scaffold46  | 14484                   | TT                              | AA                | 1946481843               |
| SNP_P3_103126_14505 | NW_004515661.1 | Scaffold46  | 14505                   | TT                              | AA                | 1946481844               |
| SNP_P3_103127_14558 | NW_004515661.1 | Scaffold46  | 14558                   | AA                              | GG                | 1946481846               |

| SNPs IDs            | Chromosome IDs | Chromosomes | Physical positions (bp) | CDC Frontier (Reference genome) | (Pusa 256 & HPNB) | NCBI SNPdb Accession IDs |
|---------------------|----------------|-------------|-------------------------|---------------------------------|-------------------|--------------------------|
| SNP_P3_103128_14643 | NW_004515661.1 | Scaffold46  | 14643                   | AA                              | GG                | 1946481847               |
| SNP_P3_103129_14671 | NW_004515661.1 | Scaffold46  | 14671                   | CC                              | TT                | 1946481849               |
| SNP_P3_103130_14800 | NW_004515661.1 | Scaffold46  | 14800                   | AA                              | GG                | 1946481850               |
| SNP_P3_103131_14818 | NW_004515661.1 | Scaffold46  | 14818                   | GG                              | CC                | 1946481852               |
| SNP_P3_103132_14821 | NW_004515661.1 | Scaffold46  | 14821                   | TT                              | AA                | 1946481853               |
| SNP_P3_103133_14891 | NW_004515661.1 | Scaffold46  | 14891                   | GG                              | AA                | 1946481855               |
| SNP_P3_103134_14960 | NW_004515661.1 | Scaffold46  | 14960                   | TT                              | GG                | 1946481856               |
| SNP_P3_103135_14996 | NW_004515661.1 | Scaffold46  | 14996                   | TT                              | AA                | 1946481857               |
| SNP_P3_103136_15020 | NW_004515661.1 | Scaffold46  | 15020                   | AA                              | GG                | 1946481859               |
| SNP_P3_103137_15063 | NW_004515661.1 | Scaffold46  | 15063                   | TT                              | CC                | 1946481860               |
| SNP_P3_103138_15140 | NW_004515661.1 | Scaffold46  | 15140                   | TT                              | GG                | 1946481861               |
| SNP_P3_103139_15235 | NW_004515661.1 | Scaffold46  | 15235                   | CC                              | TT                | 1946481863               |
| SNP_P3_103140_15266 | NW_004515661.1 | Scaffold46  | 15266                   | AA                              | CC                | 1946481864               |
| SNP_P3_103141_15458 | NW_004515661.1 | Scaffold46  | 15458                   | GG                              | AA                | 1946481866               |
| SNP_P3_103142_15460 | NW_004515661.1 | Scaffold46  | 15460                   | TT                              | AA                | 1946481867               |
| SNP_P3_103143_15486 | NW_004515661.1 | Scaffold46  | 15486                   | TT                              | CC                | 1946481869               |
| SNP_P3_103144_15535 | NW_004515661.1 | Scaffold46  | 15535                   | TT                              | CC                | 1946481870               |
| SNP_P3_103145_15598 | NW_004515661.1 | Scaffold46  | 15598                   | TT                              | CC                | 1946481872               |
| SNP_P3_103146_15797 | NW_004515661.1 | Scaffold46  | 15797                   | GG                              | AA                | 1946481873               |
| SNP_P3_103147_15833 | NW_004515661.1 | Scaffold46  | 15833                   | CC                              | GG                | 1946481875               |
| SNP_P3_103148_15929 | NW_004515661.1 | Scaffold46  | 15929                   | CC                              | GG                | 1946481876               |
| SNP_P3_103149_16278 | NW_004515661.1 | Scaffold46  | 16278                   | AA                              | GG                | 1946481878               |
| SNP_P3_103150_19998 | NW_004515661.1 | Scaffold46  | 19998                   | CC                              | AA                | 1946481879               |
| SNP_P3_103151_20178 | NW_004515661.1 | Scaffold46  | 20178                   | GG                              | AA                | 1946481881               |
| SNP_P3_103152_20311 | NW_004515661.1 | Scaffold46  | 20311                   | AA                              | GG                | 1946481882               |
| SNP_P3_103153_20351 | NW_004515661.1 | Scaffold46  | 20351                   | AA                              | GG                | 1946481884               |
| SNP_P3_103154_20363 | NW_004515661.1 | Scaffold46  | 20363                   | TT                              | CC                | 1946481885               |
| SNP_P3_103155_20497 | NW_004515661.1 | Scaffold46  | 20497                   | GG                              | AA                | 1946481887               |
| SNP_P3_103156_20940 | NW_004515661.1 | Scaffold46  | 20940                   | TT                              | AA                | 1946481889               |
| SNP_P3_103157_20959 | NW_004515661.1 | Scaffold46  | 20959                   | AA                              | GG                | 1946481890               |
| SNP_P3_103158_20998 | NW_004515661.1 | Scaffold46  | 20998                   | AA                              | CC                | 1946481892               |
| SNP_P3_103159_21069 | NW_004515661.1 | Scaffold46  | 21069                   | GG                              | CC                | 1946481893               |
| SNP_P3_103160_21150 | NW_004515661.1 | Scaffold46  | 21150                   | GG                              | AA                | 1946481895               |
| SNP_P3_103161_21227 | NW_004515661.1 | Scaffold46  | 21227                   | TT                              | AA                | 1946481896               |
| SNP_P3_103162_21382 | NW_004515661.1 | Scaffold46  | 21382                   | CC                              | AA                | 1946481898               |
| SNP_P3_103163_21437 | NW_004515661.1 | Scaffold46  | 21437                   | AA                              | GG                | 1946481899               |
| SNP_P3_103164_21787 | NW_004515661.1 | Scaffold46  | 21787                   | GG                              | AA                | 1946481901               |
| SNP_P3_103165_24347 | NW_004515661.1 | Scaffold46  | 24347                   | AA                              | CC                | 1946481902               |
| SNP_P3_103166_24408 | NW_004515661.1 | Scaffold46  | 24408                   | CC                              | AA                | 1946481904               |
| SNP_P3_103167_24487 | NW_004515661.1 | Scaffold46  | 24487                   | TT                              | AA                | 1946481905               |
| SNP_P3_103168_24506 | NW_004515661.1 | Scaffold46  | 24506                   | GG                              | AA                | 1946481907               |
| SNP_P3_103169_24539 | NW_004515661.1 | Scaffold46  | 24539                   | GG                              | AA                | 1946481908               |

| SNPs IDs            | Chromosome IDs | Chromosomes | Physical positions (bp) | CDC Frontier (Reference genome) | (Pusa 256 & HPNB) | NCBI SNPdb Accession IDs |
|---------------------|----------------|-------------|-------------------------|---------------------------------|-------------------|--------------------------|
| SNP_P3_103170_24545 | NW_004515661.1 | Scaffold46  | 24545                   | GG                              | AA                | 1946481910               |
| SNP_P3_103171_26486 | NW_004515661.1 | Scaffold46  | 26486                   | GG                              | TT                | 1946481911               |
| SNP_P3_103172_27943 | NW_004515661.1 | Scaffold46  | 27943                   | TT                              | CC                | 1946481913               |
| SNP_P3_103173_28083 | NW_004515661.1 | Scaffold46  | 28083                   | TT                              | AA                | 1946481914               |
| SNP_P3_103174_28087 | NW_004515661.1 | Scaffold46  | 28087                   | AA                              | GG                | 1946481916               |
| SNP_P3_103175_28438 | NW_004515661.1 | Scaffold46  | 28438                   | TT                              | CC                | 1946481917               |
| SNP_P3_103176_31280 | NW_004515661.1 | Scaffold46  | 31280                   | CC                              | TT                | 1946481919               |
| SNP_P3_103177_32755 | NW_004515661.1 | Scaffold46  | 32755                   | AA                              | TT                | 1946481920               |
| SNP_P3_103178_32759 | NW_004515661.1 | Scaffold46  | 32759                   | GG                              | AA                | 1946481921               |
| SNP_P3_103179_32873 | NW_004515661.1 | Scaffold46  | 32873                   | TT                              | CC                | 1946481923               |
| SNP_P3_103180_32917 | NW_004515661.1 | Scaffold46  | 32917                   | GG                              | CC                | 1946481924               |
| SNP_P3_103181_34225 | NW_004515661.1 | Scaffold46  | 34225                   | AA                              | TT                | 1946481926               |
| SNP_P3_103182_34390 | NW_004515661.1 | Scaffold46  | 34390                   | TT                              | CC                | 1946481927               |
| SNP_P3_103183_34399 | NW_004515661.1 | Scaffold46  | 34399                   | CC                              | TT                | 1946481929               |
| SNP_P3_103184_34422 | NW_004515661.1 | Scaffold46  | 34422                   | TT                              | GG                | 1946481930               |
| SNP_P3_103185_34517 | NW_004515661.1 | Scaffold46  | 34517                   | CC                              | TT                | 1946481932               |
| SNP_P3_103186_34526 | NW_004515661.1 | Scaffold46  | 34526                   | CC                              | TT                | 1946481933               |
| SNP_P3_103187_34697 | NW_004515661.1 | Scaffold46  | 34697                   | TT                              | AA                | 1946481935               |
| SNP_P3_103188_34716 | NW_004515661.1 | Scaffold46  | 34716                   | CC                              | TT                | 1946481936               |
| SNP_P3_103189_34717 | NW_004515661.1 | Scaffold46  | 34717                   | AA                              | GG                | 1946481938               |
| SNP_P3_103190_38741 | NW_004515661.1 | Scaffold46  | 38741                   | CC                              | TT                | 1946481939               |
| SNP_P3_103191_38747 | NW_004515661.1 | Scaffold46  | 38747                   | TT                              | AA                | 1946481941               |
| SNP_P3_103192_38765 | NW_004515661.1 | Scaffold46  | 38765                   | TT                              | AA                | 1946481942               |
| SNP_P3_103193_38780 | NW_004515661.1 | Scaffold46  | 38780                   | TT                              | CC                | 1946481943               |
| SNP_P3_103194_38898 | NW_004515661.1 | Scaffold46  | 38898                   | AA                              | GG                | 1946481945               |
| SNP_P3_103195_38926 | NW_004515661.1 | Scaffold46  | 38926                   | TT                              | CC                | 1946481946               |
| SNP_P3_103196_39040 | NW_004515661.1 | Scaffold46  | 39040                   | CC                              | AA                | 1946481948               |
| SNP_P3_103197_39045 | NW_004515661.1 | Scaffold46  | 39045                   | TT                              | CC                | 1946481949               |
| SNP_P3_103198_39107 | NW_004515661.1 | Scaffold46  | 39107                   | TT                              | GG                | 1946481951               |
| SNP_P3_103199_39438 | NW_004515661.1 | Scaffold46  | 39438                   | CC                              | AA                | 1946481952               |
| SNP_P3_103200_39470 | NW_004515661.1 | Scaffold46  | 39470                   | CC                              | TT                | 1946481954               |
| SNP_P3_103201_39546 | NW_004515661.1 | Scaffold46  | 39546                   | CC                              | GG                | 1946481955               |
| SNP_P3_103202_39657 | NW_004515661.1 | Scaffold46  | 39657                   | TT                              | CC                | 1946481956               |
| SNP_P3_103203_39695 | NW_004515661.1 | Scaffold46  | 39695                   | GG                              | AA                | 1946481958               |
| SNP_P3_103204_39855 | NW_004515661.1 | Scaffold46  | 39855                   | CC                              | GG                | 1946481959               |
| SNP_P3_103205_40004 | NW_004515661.1 | Scaffold46  | 40004                   | TT                              | CC                | 1946481961               |
| SNP_P3_103206_40015 | NW_004515661.1 | Scaffold46  | 40015                   | TT                              | CC                | 1946481962               |
| SNP_P3_103207_40089 | NW_004515661.1 | Scaffold46  | 40089                   | CC                              | AA                | 1946481964               |
| SNP_P3_103208_40248 | NW_004515661.1 | Scaffold46  | 40248                   | AA                              | GG                | 1946481965               |
| SNP_P3_103209_40260 | NW_004515661.1 | Scaffold46  | 40260                   | TT                              | AA                | 1946481966               |
| SNP_P3_103211_41094 | NW_004515661.1 | Scaffold46  | 41094                   | TT                              | CC                | 1946481968               |
| SNP_P3_103212_41715 | NW_004515661.1 | Scaffold46  | 41715                   | AA                              | TT                | 1946481969               |

| SNPs IDs             | Chromosome IDs | Chromosomes | Physical positions (bp) | CDC Frontier (Reference genome) | (Pusa 256 & HPNB) | NCBI SNPdb Accession IDs |
|----------------------|----------------|-------------|-------------------------|---------------------------------|-------------------|--------------------------|
| SNP_P3_103213_41895  | NW_004515661.1 | Scaffold46  | 41895                   | TT                              | CC                | 1946481970               |
| SNP_P3_103214_41896  | NW_004515661.1 | Scaffold46  | 41896                   | CC                              | TT                | 1946481972               |
| SNP_P3_103215_7738   | NW_004515662.1 | Scaffold48  | 7738                    | AA                              | TT                | 1946481973               |
| SNP_P3_103216_8165   | NW_004515662.1 | Scaffold48  | 8165                    | GG                              | TT                | 1946481975               |
| SNP_P3_103217_11503  | NW_004515662.1 | Scaffold48  | 11503                   | TT                              | GG                | 1946481976               |
| SNP_P3_103219_11918  | NW_004515662.1 | Scaffold48  | 11918                   | GG                              | AA                | 1946481977               |
| SNP_P3_103221_15963  | NW_004515662.1 | Scaffold48  | 15963                   | GG                              | AA                | 1946481979               |
| SNP_P3_103222_16072  | NW_004515662.1 | Scaffold48  | 16072                   | GG                              | AA                | 1946481980               |
| SNP_P3_103223_16074  | NW_004515662.1 | Scaffold48  | 16074                   | CC                              | GG                | 1946481982               |
| SNP_P3_103224_16081  | NW_004515662.1 | Scaffold48  | 16081                   | CC                              | AA                | 1946481983               |
| SNP_P3_103225_56419  | NW_004515662.1 | Scaffold48  | 56419                   | GG                              | AA                | 1946481984               |
| SNP_P3_103226_56619  | NW_004515662.1 | Scaffold48  | 56619                   | AA                              | GG                | 1946481986               |
| SNP_P3_103227_56664  | NW_004515662.1 | Scaffold48  | 56664                   | GG                              | AA                | 1946481987               |
| SNP_P3_103228_56847  | NW_004515662.1 | Scaffold48  | 56847                   | TT                              | GG                | 1946481989               |
| SNP_P3_103230_57024  | NW_004515662.1 | Scaffold48  | 57024                   | TT                              | CC                | 1946481990               |
| SNP_P3_103231_81125  | NW_004515662.1 | Scaffold48  | 81125                   | CC                              | AA                | 1946481991               |
| SNP_P3_103232_90770  | NW_004515662.1 | Scaffold48  | 90770                   | CC                              | GG                | 1946481993               |
| SNP_P3_103233_112587 | NW_004515662.1 | Scaffold48  | 112587                  | GG                              | TT                | 1946481994               |
| SNP_P3_103234_112594 | NW_004515662.1 | Scaffold48  | 112594                  | AA                              | GG                | 1946481996               |
| SNP_P3_103235_112597 | NW_004515662.1 | Scaffold48  | 112597                  | CC                              | AA                | 1946481997               |
| SNP_P3_103236_112619 | NW_004515662.1 | Scaffold48  | 112619                  | GG                              | AA                | 1946481999               |
| SNP_P3_103237_139691 | NW_004515662.1 | Scaffold48  | 139691                  | GG                              | AA                | 1946482000               |
| SNP_P3_103238_140014 | NW_004515662.1 | Scaffold48  | 140014                  | GG                              | AA                | 1946482001               |
| SNP_P3_103239_140784 | NW_004515662.1 | Scaffold48  | 140784                  | CC                              | TT                | 1946482003               |
| SNP_P3_103240_140895 | NW_004515662.1 | Scaffold48  | 140895                  | CC                              | GG                | 1946482004               |
| SNP_P3_103241_140913 | NW_004515662.1 | Scaffold48  | 140913                  | TT                              | CC                | 1946482006               |
| SNP_P3_103242_140917 | NW_004515662.1 | Scaffold48  | 140917                  | AA                              | GG                | 1946482007               |
| SNP_P3_103243_140926 | NW_004515662.1 | Scaffold48  | 140926                  | TT                              | CC                | 1946482008               |
| SNP_P3_103244_141081 | NW_004515662.1 | Scaffold48  | 141081                  | TT                              | CC                | 1946482010               |
| SNP_P3_103245_141117 | NW_004515662.1 | Scaffold48  | 141117                  | GG                              | AA                | 1946482011               |
| SNP_P3_103246_141133 | NW_004515662.1 | Scaffold48  | 141133                  | TT                              | CC                | 1946482013               |
| SNP_P3_103247_141134 | NW_004515662.1 | Scaffold48  | 141134                  | AA                              | GG                | 1946482014               |
| SNP_P3_103249_215895 | NW_004515662.1 | Scaffold48  | 215895                  | GG                              | TT                | 1946482015               |
| SNP_P3_103250_215902 | NW_004515662.1 | Scaffold48  | 215902                  | AA                              | CC                | 1946482017               |
| SNP_P3_103252_304486 | NW_004515662.1 | Scaffold48  | 304486                  | CC                              | TT                | 1946482018               |
| SNP_P3_103253_325579 | NW_004515662.1 | Scaffold48  | 325579                  | AA                              | CC                | 1946482020               |
| SNP_P3_103254_325628 | NW_004515662.1 | Scaffold48  | 325628                  | CC                              | TT                | 1946482021               |
| SNP_P3_103255_326060 | NW_004515662.1 | Scaffold48  | 326060                  | GG                              | AA                | 1946482022               |
| SNP_P3_103256_326292 | NW_004515662.1 | Scaffold48  | 326292                  | AA                              | GG                | 1946482024               |
| SNP_P3_103257_326309 | NW_004515662.1 | Scaffold48  | 326309                  | TT                              | CC                | 1946482025               |
| SNP_P3_103258_326315 | NW_004515662.1 | Scaffold48  | 326315                  | CC                              | TT                | 1946482027               |
| SNP_P3_103259_326364 | NW_004515662.1 | Scaffold48  | 326364                  | AA                              | CC                | 1946482028               |



| SNPs IDs             | Chromosome IDs | Chromosomes | Physical positions (bp) | CDC Frontier (Reference genome) | (Pusa 256 & HPNB) | NCBI SNPdb Accession IDs |
|----------------------|----------------|-------------|-------------------------|---------------------------------|-------------------|--------------------------|
| SNP_P3_103260_326387 | NW_004515662.1 | Scaffold48  | 326387                  | TT                              | GG                | 1946482030               |
| SNP_P3_103262_353290 | NW_004515662.1 | Scaffold48  | 353290                  | AA                              | GG                | 1946482032               |
| SNP_P3_103263_360836 | NW_004515662.1 | Scaffold48  | 360836                  | TT                              | CC                | 1946482034               |
| SNP_P3_103264_361244 | NW_004515662.1 | Scaffold48  | 361244                  | TT                              | GG                | 1946482035               |
| SNP_P3_103265_367478 | NW_004515662.1 | Scaffold48  | 367478                  | AA                              | GG                | 1946482037               |
| SNP_P3_103266_367639 | NW_004515662.1 | Scaffold48  | 367639                  | TT                              | GG                | 1946482038               |
| SNP_P3_103267_373417 | NW_004515662.1 | Scaffold48  | 373417                  | AA                              | GG                | 1946482039               |
| SNP_P3_103268_381150 | NW_004515662.1 | Scaffold48  | 381150                  | AA                              | GG                | 1946482041               |
| SNP_P3_103269_381533 | NW_004515662.1 | Scaffold48  | 381533                  | CC                              | GG                | 1946482042               |
| SNP_P3_103270_381537 | NW_004515662.1 | Scaffold48  | 381537                  | GG                              | TT                | 1946482043               |
| SNP_P3_103271_426989 | NW_004515662.1 | Scaffold48  | 426989                  | GG                              | AA                | 1946482045               |
| SNP_P3_103272_429813 | NW_004515662.1 | Scaffold48  | 429813                  | CC                              | AA                | 1946482046               |
| SNP_P3_103273_431955 | NW_004515662.1 | Scaffold48  | 431955                  | CC                              | AA                | 1946482048               |
| SNP_P3_103274_431989 | NW_004515662.1 | Scaffold48  | 431989                  | GG                              | AA                | 1946482049               |
| SNP_P3_103275_449284 | NW_004515662.1 | Scaffold48  | 449284                  | AA                              | CC                | 1946482050               |
| SNP_P3_103276_455934 | NW_004515662.1 | Scaffold48  | 455934                  | TT                              | GG                | 1946482052               |
| SNP_P3_103277_532    | NW_004515663.1 | Scaffold49  | 532                     | CC                              | TT                | 1946482053               |
| SNP_P3_103278_537    | NW_004515663.1 | Scaffold49  | 537                     | TT                              | AA                | 1946482055               |
| SNP_P3_103279_2557   | NW_004515664.1 | Scaffold50  | 2557                    | CC                              | TT                | 1946482056               |
| SNP_P3_103280_2559   | NW_004515664.1 | Scaffold50  | 2559                    | AA                              | CC                | 1946482057               |
| SNP_P3_103281_2584   | NW_004515664.1 | Scaffold50  | 2584                    | CC                              | TT                | 1946482059               |
| SNP_P3_103282_2593   | NW_004515664.1 | Scaffold50  | 2593                    | GG                              | AA                | 1946482060               |
| SNP_P3_103283_2644   | NW_004515664.1 | Scaffold50  | 2644                    | GG                              | AA                | 1946482062               |
| SNP_P3_103284_2645   | NW_004515664.1 | Scaffold50  | 2645                    | TT                              | CC                | 1946482063               |
| SNP_P3_103285_3463   | NW_004515664.1 | Scaffold50  | 3463                    | CC                              | AA                | 1946482064               |
| SNP_P3_103286_3464   | NW_004515664.1 | Scaffold50  | 3464                    | CC                              | TT                | 1946482066               |
| SNP_P3_103287_3533   | NW_004515664.1 | Scaffold50  | 3533                    | CC                              | TT                | 1946482067               |
| SNP_P3_103288_5734   | NW_004515664.1 | Scaffold50  | 5734                    | CC                              | AA                | 1946482069               |
| SNP_P3_103289_5916   | NW_004515664.1 | Scaffold50  | 5916                    | CC                              | TT                | 1946482070               |
| SNP_P3_103290_5980   | NW_004515664.1 | Scaffold50  | 5980                    | AA                              | GG                | 1946482072               |
| SNP_P3_103291_6106   | NW_004515664.1 | Scaffold50  | 6106                    | CC                              | TT                | 1946482073               |
| SNP_P3_103292_6282   | NW_004515664.1 | Scaffold50  | 6282                    | AA                              | GG                | 1946482075               |
| SNP_P3_103293_6395   | NW_004515664.1 | Scaffold50  | 6395                    | TT                              | CC                | 1946482076               |
| SNP_P3_103294_6406   | NW_004515664.1 | Scaffold50  | 6406                    | GG                              | AA                | 1946482078               |
| SNP_P3_103295_9214   | NW_004515664.1 | Scaffold50  | 9214                    | CC                              | TT                | 1946482079               |
| SNP_P3_103296_9253   | NW_004515664.1 | Scaffold50  | 9253                    | CC                              | TT                | 1946482080               |
| SNP_P3_103297_9510   | NW_004515664.1 | Scaffold50  | 9510                    | AA                              | CC                | 1946482082               |
| SNP_P3_103298_9555   | NW_004515664.1 | Scaffold50  | 9555                    | CC                              | TT                | 1946482083               |
| SNP_P3_103299_9568   | NW_004515664.1 | Scaffold50  | 9568                    | TT                              | AA                | 1946482085               |
| SNP_P3_103300_10770  | NW_004515664.1 | Scaffold50  | 10770                   | GG                              | AA                | 1946482086               |
| SNP_P3_103301_10776  | NW_004515664.1 | Scaffold50  | 10776                   | GG                              | AA                | 1946482087               |
| SNP_P3_103302_12096  | NW_004515664.1 | Scaffold50  | 12096                   | AA                              | TT                | 1946482089               |

| SNPs IDs             | Chromosome IDs | Chromosomes | Physical positions (bp) | CDC Frontier (Reference genome) | (Pusa 256 & HPNB) | NCBI SNPdb Accession IDs |
|----------------------|----------------|-------------|-------------------------|---------------------------------|-------------------|--------------------------|
| SNP_P3_103303_12168  | NW_004515664.1 | Scaffold50  | 12168                   | AA                              | GG                | 1946482090               |
| SNP_P3_103304_12222  | NW_004515664.1 | Scaffold50  | 12222                   | GG                              | CC                | 1946482091               |
| SNP_P3_103305_14322  | NW_004515664.1 | Scaffold50  | 14322                   | AA                              | GG                | 1946482093               |
| SNP_P3_103306_14540  | NW_004515664.1 | Scaffold50  | 14540                   | AA                              | GG                | 1946482094               |
| SNP_P3_103307_18549  | NW_004515664.1 | Scaffold50  | 18549                   | AA                              | CC                | 1946482096               |
| SNP_P3_103308_18994  | NW_004515664.1 | Scaffold50  | 18994                   | TT                              | CC                | 1946482097               |
| SNP_P3_103309_19097  | NW_004515664.1 | Scaffold50  | 19097                   | CC                              | TT                | 1946482099               |
| SNP_P3_103311_46500  | NW_004515664.1 | Scaffold50  | 46500                   | AA                              | TT                | 1946482100               |
| SNP_P3_103312_46508  | NW_004515664.1 | Scaffold50  | 46508                   | CC                              | AA                | 1946482101               |
| SNP_P3_103313_46518  | NW_004515664.1 | Scaffold50  | 46518                   | CC                              | TT                | 1946482103               |
| SNP_P3_103314_46536  | NW_004515664.1 | Scaffold50  | 46536                   | AA                              | GG                | 1946482104               |
| SNP_P3_103315_46562  | NW_004515664.1 | Scaffold50  | 46562                   | TT                              | AA                | 1946482106               |
| SNP_P3_103316_46612  | NW_004515664.1 | Scaffold50  | 46612                   | TT                              | AA                | 1946482107               |
| SNP_P3_103317_46618  | NW_004515664.1 | Scaffold50  | 46618                   | TT                              | AA                | 1946482109               |
| SNP_P3_103318_46632  | NW_004515664.1 | Scaffold50  | 46632                   | AA                              | CC                | 1946482110               |
| SNP_P3_103319_46635  | NW_004515664.1 | Scaffold50  | 46635                   | TT                              | CC                | 1946482111               |
| SNP_P3_103320_46817  | NW_004515664.1 | Scaffold50  | 46817                   | AA                              | TT                | 1946482113               |
| SNP_P3_103321_46875  | NW_004515664.1 | Scaffold50  | 46875                   | AA                              | GG                | 1946482114               |
| SNP_P3_103322_46901  | NW_004515664.1 | Scaffold50  | 46901                   | TT                              | CC                | 1946482115               |
| SNP_P3_103323_46911  | NW_004515664.1 | Scaffold50  | 46911                   | AA                              | TT                | 1946482117               |
| SNP_P3_103324_65101  | NW_004515664.1 | Scaffold50  | 65101                   | GG                              | CC                | 1946482118               |
| SNP_P3_103325_76564  | NW_004515664.1 | Scaffold50  | 76564                   | GG                              | TT                | 1946482119               |
| SNP_P3_103326_84502  | NW_004515664.1 | Scaffold50  | 84502                   | TT                              | CC                | 1946482121               |
| SNP_P3_103328_88464  | NW_004515664.1 | Scaffold50  | 88464                   | TT                              | GG                | 1946482122               |
| SNP_P3_103329_105721 | NW_004515664.1 | Scaffold50  | 105721                  | TT                              | CC                | 1946482123               |
| SNP_P3_103330_105737 | NW_004515664.1 | Scaffold50  | 105737                  | AA                              | GG                | 1946482125               |
| SNP_P3_103331_105891 | NW_004515664.1 | Scaffold50  | 105891                  | AA                              | GG                | 1946482126               |
| SNP_P3_103332_110221 | NW_004515664.1 | Scaffold50  | 110221                  | AA                              | GG                | 1946482128               |
| SNP_P3_103334_123379 | NW_004515664.1 | Scaffold50  | 123379                  | AA                              | TT                | 1946482129               |
| SNP_P3_103335_131352 | NW_004515664.1 | Scaffold50  | 131352                  | CC                              | TT                | 1946482130               |
| SNP_P3_103336_136264 | NW_004515664.1 | Scaffold50  | 136264                  | TT                              | AA                | 1946482132               |
| SNP_P3_103337_136297 | NW_004515664.1 | Scaffold50  | 136297                  | TT                              | CC                | 1946482133               |
| SNP_P3_103338_136318 | NW_004515664.1 | Scaffold50  | 136318                  | GG                              | AA                | 1946482134               |
| SNP_P3_103339_150110 | NW_004515664.1 | Scaffold50  | 150110                  | GG                              | AA                | 1946482136               |
| SNP_P3_103340_161662 | NW_004515664.1 | Scaffold50  | 161662                  | CC                              | TT                | 1946482137               |
| SNP_P3_103341_161690 | NW_004515664.1 | Scaffold50  | 161690                  | AA                              | GG                | 1946482139               |
| SNP_P3_103343_173309 | NW_004515664.1 | Scaffold50  | 173309                  | TT                              | AA                | 1946482140               |
| SNP_P3_103344_183091 | NW_004515664.1 | Scaffold50  | 183091                  | GG                              | AA                | 1946482141               |
| SNP_P3_103345_186791 | NW_004515664.1 | Scaffold50  | 186791                  | AA                              | CC                | 1946482143               |
| SNP_P3_103346_186817 | NW_004515664.1 | Scaffold50  | 186817                  | AA                              | CC                | 1946482144               |
| SNP_P3_103347_191453 | NW_004515664.1 | Scaffold50  | 191453                  | TT                              | CC                | 1946482146               |
| SNP_P3_103348_191709 | NW_004515664.1 | Scaffold50  | 191709                  | AA                              | CC                | 1946482147               |

| SNPs IDs             | Chromosome IDs | Chromosomes | Physical positions (bp) | CDC Frontier (Reference genome) | (Pusa 256 & HPNB) | NCBI SNPdb Accession IDs |
|----------------------|----------------|-------------|-------------------------|---------------------------------|-------------------|--------------------------|
| SNP_P3_103349_191760 | NW_004515664.1 | Scaffold50  | 191760                  | AA                              | GG                | 1946482148               |
| SNP_P3_103350_191790 | NW_004515664.1 | Scaffold50  | 191790                  | AA                              | GG                | 1946482150               |
| SNP_P3_103351_191803 | NW_004515664.1 | Scaffold50  | 191803                  | GG                              | AA                | 1946482151               |
| SNP_P3_103353_193139 | NW_004515664.1 | Scaffold50  | 193139                  | CC                              | GG                | 1946482152               |
| SNP_P3_103354_193159 | NW_004515664.1 | Scaffold50  | 193159                  | GG                              | AA                | 1946482154               |
| SNP_P3_103355_193609 | NW_004515664.1 | Scaffold50  | 193609                  | TT                              | CC                | 1946482155               |
| SNP_P3_103356_194061 | NW_004515664.1 | Scaffold50  | 194061                  | CC                              | AA                | 1946482156               |
| SNP_P3_103357_195736 | NW_004515664.1 | Scaffold50  | 195736                  | AA                              | GG                | 1946482158               |
| SNP_P3_103358_195777 | NW_004515664.1 | Scaffold50  | 195777                  | AA                              | GG                | 1946482159               |
| SNP_P3_103359_195800 | NW_004515664.1 | Scaffold50  | 195800                  | AA                              | GG                | 1946482161               |
| SNP_P3_103360_196010 | NW_004515664.1 | Scaffold50  | 196010                  | CC                              | AA                | 1946482162               |
| SNP_P3_103361_196015 | NW_004515664.1 | Scaffold50  | 196015                  | CC                              | AA                | 1946482163               |
| SNP_P3_103362_196016 | NW_004515664.1 | Scaffold50  | 196016                  | CC                              | TT                | 1946482165               |
| SNP_P3_103363_196017 | NW_004515664.1 | Scaffold50  | 196017                  | CC                              | GG                | 1946482166               |
| SNP_P3_103364_196024 | NW_004515664.1 | Scaffold50  | 196024                  | TT                              | CC                | 1946482167               |
| SNP_P3_103365_196026 | NW_004515664.1 | Scaffold50  | 196026                  | TT                              | AA                | 1946482169               |
| SNP_P3_103366_196032 | NW_004515664.1 | Scaffold50  | 196032                  | TT                              | AA                | 1946482170               |
| SNP_P3_103369_196127 | NW_004515664.1 | Scaffold50  | 196127                  | GG                              | TT                | 1946482171               |
| SNP_P3_103370_196162 | NW_004515664.1 | Scaffold50  | 196162                  | AA                              | GG                | 1946482173               |
| SNP_P3_103371_200725 | NW_004515664.1 | Scaffold50  | 200725                  | TT                              | CC                | 1946482174               |
| SNP_P3_103372_201610 | NW_004515664.1 | Scaffold50  | 201610                  | AA                              | CC                | 1946482175               |
| SNP_P3_103373_201660 | NW_004515664.1 | Scaffold50  | 201660                  | AA                              | CC                | 1946482177               |
| SNP_P3_103374_201675 | NW_004515664.1 | Scaffold50  | 201675                  | AA                              | GG                | 1946482178               |
| SNP_P3_103375_201730 | NW_004515664.1 | Scaffold50  | 201730                  | AA                              | GG                | 1946482180               |
| SNP_P3_103376_201754 | NW_004515664.1 | Scaffold50  | 201754                  | AA                              | GG                | 1946482181               |
| SNP_P3_103377_202129 | NW_004515664.1 | Scaffold50  | 202129                  | CC                              | GG                | 1946482182               |
| SNP_P3_103378_202172 | NW_004515664.1 | Scaffold50  | 202172                  | TT                              | CC                | 1946482184               |
| SNP_P3_103379_202233 | NW_004515664.1 | Scaffold50  | 202233                  | GG                              | CC                | 1946482185               |
| SNP_P3_103380_202286 | NW_004515664.1 | Scaffold50  | 202286                  | AA                              | GG                | 1946482186               |
| SNP_P3_103381_202309 | NW_004515664.1 | Scaffold50  | 202309                  | AA                              | GG                | 1946482188               |
| SNP_P3_103383_218579 | NW_004515664.1 | Scaffold50  | 218579                  | AA                              | CC                | 1946482189               |
| SNP_P3_103384_218589 | NW_004515664.1 | Scaffold50  | 218589                  | TT                              | CC                | 1946482191               |
| SNP_P3_103385_218600 | NW_004515664.1 | Scaffold50  | 218600                  | AA                              | GG                | 1946482192               |
| SNP_P3_103387_282005 | NW_004515664.1 | Scaffold50  | 282005                  | AA                              | CC                | 1946482193               |
| SNP_P3_103390_333703 | NW_004515664.1 | Scaffold50  | 333703                  | TT                              | CC                | 1946482195               |
| SNP_P3_103391_333864 | NW_004515664.1 | Scaffold50  | 333864                  | TT                              | GG                | 1946482196               |
| SNP_P3_103394_379062 | NW_004515664.1 | Scaffold50  | 379062                  | GG                              | AA                | 1946482198               |
| SNP_P3_103395_382302 | NW_004515664.1 | Scaffold50  | 382302                  | TT                              | AA                | 1946482199               |
| SNP_P3_103397_423452 | NW_004515664.1 | Scaffold50  | 423452                  | CC                              | TT                | 1946482200               |
| SNP_P3_103398_423492 | NW_004515664.1 | Scaffold50  | 423492                  | AA                              | GG                | 1946482202               |
| SNP_P3_103399_423511 | NW_004515664.1 | Scaffold50  | 423511                  | AA                              | GG                | 1946482203               |
| SNP_P3_103400_436981 | NW_004515664.1 | Scaffold50  | 436981                  | GG                              | AA                | 1946482205               |

| SNPs IDs             | Chromosome IDs | Chromosomes | Physical positions (bp) | CDC Frontier (Reference genome) | (Pusa 256 & HPNB) | NCBI SNPdb Accession IDs |
|----------------------|----------------|-------------|-------------------------|---------------------------------|-------------------|--------------------------|
| SNP_P3_103401_437010 | NW_004515664.1 | Scaffold50  | 437010                  | AA                              | GG                | 1946482206               |
| SNP_P3_103402_437124 | NW_004515664.1 | Scaffold50  | 437124                  | TT                              | CC                | 1946482207               |
| SNP_P3_103403_437410 | NW_004515664.1 | Scaffold50  | 437410                  | CC                              | TT                | 1946482209               |
| SNP_P3_103405_464038 | NW_004515664.1 | Scaffold50  | 464038                  | GG                              | AA                | 1946482210               |
| SNP_P3_103406_465832 | NW_004515664.1 | Scaffold50  | 465832                  | AA                              | GG                | 1946482211               |
| SNP_P3_103407_466542 | NW_004515664.1 | Scaffold50  | 466542                  | CC                              | TT                | 1946482213               |
| SNP_P3_103408_470703 | NW_004515664.1 | Scaffold50  | 470703                  | GG                              | AA                | 1946482214               |
| SNP_P3_103409_473089 | NW_004515664.1 | Scaffold50  | 473089                  | CC                              | AA                | 1946482215               |
| SNP_P3_103410_2014   | NW_004515665.1 | Scaffold53  | 2014                    | TT                              | CC                | 1946482217               |
| SNP_P3_103411_2102   | NW_004515665.1 | Scaffold53  | 2102                    | AA                              | CC                | 1946482218               |
| SNP_P3_103413_2211   | NW_004515665.1 | Scaffold53  | 2211                    | TT                              | AA                | 1946482219               |
| SNP_P3_103414_2225   | NW_004515665.1 | Scaffold53  | 2225                    | TT                              | CC                | 1946482221               |
| SNP_P3_103415_2295   | NW_004515665.1 | Scaffold53  | 2295                    | TT                              | CC                | 1946482222               |
| SNP_P3_103416_2327   | NW_004515665.1 | Scaffold53  | 2327                    | TT                              | CC                | 1946482223               |
| SNP_P3_103417_65623  | NW_004515665.1 | Scaffold53  | 65623                   | AA                              | GG                | 1946482225               |
| SNP_P3_103418_65680  | NW_004515665.1 | Scaffold53  | 65680                   | TT                              | GG                | 1946482226               |
| SNP_P3_103419_65963  | NW_004515665.1 | Scaffold53  | 65963                   | AA                              | GG                | 1946482228               |
| SNP_P3_103420_81296  | NW_004515665.1 | Scaffold53  | 81296                   | AA                              | GG                | 1946482229               |
| SNP_P3_103422_91846  | NW_004515665.1 | Scaffold53  | 91846                   | CC                              | GG                | 1946482230               |
| SNP_P3_103423_96312  | NW_004515665.1 | Scaffold53  | 96312                   | AA                              | GG                | 1946482232               |
| SNP_P3_103424_96666  | NW_004515665.1 | Scaffold53  | 96666                   | AA                              | GG                | 1946482233               |
| SNP_P3_103425_102840 | NW_004515665.1 | Scaffold53  | 102840                  | GG                              | AA                | 1946482235               |
| SNP_P3_103426_103266 | NW_004515665.1 | Scaffold53  | 103266                  | CC                              | TT                | 1946482236               |
| SNP_P3_103427_103586 | NW_004515665.1 | Scaffold53  | 103586                  | AA                              | GG                | 1946482237               |
| SNP_P3_103428_103609 | NW_004515665.1 | Scaffold53  | 103609                  | CC                              | TT                | 1946482239               |
| SNP_P3_103429_104118 | NW_004515665.1 | Scaffold53  | 104118                  | CC                              | AA                | 1946482240               |
| SNP_P3_103431_115328 | NW_004515665.1 | Scaffold53  | 115328                  | GG                              | AA                | 1946482242               |
| SNP_P3_103432_124864 | NW_004515665.1 | Scaffold53  | 124864                  | TT                              | AA                | 1946482243               |
| SNP_P3_103433_124905 | NW_004515665.1 | Scaffold53  | 124905                  | CC                              | AA                | 1946482245               |
| SNP_P3_103435_125295 | NW_004515665.1 | Scaffold53  | 125295                  | AA                              | GG                | 1946482246               |
| SNP_P3_103436_125356 | NW_004515665.1 | Scaffold53  | 125356                  | AA                              | CC                | 1946482248               |
| SNP_P3_103437_125413 | NW_004515665.1 | Scaffold53  | 125413                  | AA                              | TT                | 1946482249               |
| SNP_P3_103438_126857 | NW_004515665.1 | Scaffold53  | 126857                  | AA                              | GG                | 1946482251               |
| SNP_P3_103439_126875 | NW_004515665.1 | Scaffold53  | 126875                  | AA                              | TT                | 1946482253               |
| SNP_P3_103440_126892 | NW_004515665.1 | Scaffold53  | 126892                  | GG                              | AA                | 1946482255               |
| SNP_P3_103441_126931 | NW_004515665.1 | Scaffold53  | 126931                  | AA                              | TT                | 1946482256               |
| SNP_P3_103442_126946 | NW_004515665.1 | Scaffold53  | 126946                  | AA                              | GG                | 1946482258               |
| SNP_P3_103443_127387 | NW_004515665.1 | Scaffold53  | 127387                  | TT                              | AA                | 1946482259               |
| SNP_P3_103444_127485 | NW_004515665.1 | Scaffold53  | 127485                  | CC                              | TT                | 1946482261               |
| SNP_P3_103445_127506 | NW_004515665.1 | Scaffold53  | 127506                  | AA                              | GG                | 1946482262               |
| SNP_P3_103446_132274 | NW_004515665.1 | Scaffold53  | 132274                  | CC                              | AA                | 1946482264               |
| SNP_P3_103447_132317 | NW_004515665.1 | Scaffold53  | 132317                  | AA                              | GG                | 1946482265               |

| SNPs IDs             | Chromosome IDs | Chromosomes | Physical positions (bp) | CDC Frontier (Reference genome) | (Pusa 256 & HPNB) | NCBI SNPdb Accession IDs |
|----------------------|----------------|-------------|-------------------------|---------------------------------|-------------------|--------------------------|
| SNP_P3_103448_132900 | NW_004515665.1 | Scaffold53  | 132900                  | TT                              | CC                | 1946482267               |
| SNP_P3_103449_134418 | NW_004515665.1 | Scaffold53  | 134418                  | CC                              | TT                | 1946482268               |
| SNP_P3_103450_135286 | NW_004515665.1 | Scaffold53  | 135286                  | TT                              | CC                | 1946482270               |
| SNP_P3_103451_135738 | NW_004515665.1 | Scaffold53  | 135738                  | AA                              | TT                | 1946482271               |
| SNP_P3_103452_136111 | NW_004515665.1 | Scaffold53  | 136111                  | TT                              | AA                | 1946482273               |
| SNP_P3_103454_362    | NW_004515666.1 | Scaffold55  | 362                     | AA                              | CC                | 1946482274               |
| SNP_P3_103456_791    | NW_004515666.1 | Scaffold55  | 791                     | CC                              | TT                | 1946482276               |
| SNP_P3_103457_433    | NW_004515667.1 | Scaffold56  | 433                     | AA                              | GG                | 1946482277               |
| SNP_P3_103458_1012   | NW_004515667.1 | Scaffold56  | 1012                    | TT                              | GG                | 1946482278               |
| SNP_P3_103459_1501   | NW_004515667.1 | Scaffold56  | 1501                    | TT                              | AA                | 1946482280               |
| SNP_P3_103460_1729   | NW_004515667.1 | Scaffold56  | 1729                    | CC                              | GG                | 1946482281               |
| SNP_P3_103461_1771   | NW_004515667.1 | Scaffold56  | 1771                    | TT                              | GG                | 1946482283               |
| SNP_P3_103462_1832   | NW_004515667.1 | Scaffold56  | 1832                    | GG                              | CC                | 1946482284               |
| SNP_P3_103463_2110   | NW_004515667.1 | Scaffold56  | 2110                    | CC                              | TT                | 1946482286               |
| SNP_P3_103464_2230   | NW_004515667.1 | Scaffold56  | 2230                    | TT                              | AA                | 1946482287               |
| SNP_P3_103465_2300   | NW_004515667.1 | Scaffold56  | 2300                    | CC                              | TT                | 1946482289               |
| SNP_P3_103466_2538   | NW_004515667.1 | Scaffold56  | 2538                    | AA                              | GG                | 1946482290               |
| SNP_P3_103467_2561   | NW_004515667.1 | Scaffold56  | 2561                    | TT                              | CC                | 1946482292               |
| SNP_P3_103468_3120   | NW_004515667.1 | Scaffold56  | 3120                    | GG                              | CC                | 1946482293               |
| SNP_P3_103469_3396   | NW_004515667.1 | Scaffold56  | 3396                    | TT                              | GG                | 1946482295               |
| SNP_P3_103470_3434   | NW_004515667.1 | Scaffold56  | 3434                    | GG                              | AA                | 1946482296               |
| SNP_P3_103471_3450   | NW_004515667.1 | Scaffold56  | 3450                    | CC                              | AA                | 1946482297               |
| SNP_P3_103472_3476   | NW_004515667.1 | Scaffold56  | 3476                    | TT                              | AA                | 1946482299               |
| SNP_P3_103473_3490   | NW_004515667.1 | Scaffold56  | 3490                    | CC                              | TT                | 1946482300               |
| SNP_P3_103474_5886   | NW_004515667.1 | Scaffold56  | 5886                    | AA                              | TT                | 1946482302               |
| SNP_P3_103475_6692   | NW_004515667.1 | Scaffold56  | 6692                    | TT                              | CC                | 1946482303               |
| SNP_P3_103476_12596  | NW_004515667.1 | Scaffold56  | 12596                   | AA                              | GG                | 1946482304               |
| SNP_P3_103477_3381   | NW_004515668.1 | Scaffold62  | 3381                    | TT                              | GG                | 1946482306               |
| SNP_P3_103478_4975   | NW_004515668.1 | Scaffold62  | 4975                    | TT                              | CC                | 1946482307               |
| SNP_P3_103479_6578   | NW_004515668.1 | Scaffold62  | 6578                    | AA                              | GG                | 1946482309               |
| SNP_P3_103480_6611   | NW_004515668.1 | Scaffold62  | 6611                    | AA                              | GG                | 1946482310               |
| SNP_P3_103481_9305   | NW_004515668.1 | Scaffold62  | 9305                    | GG                              | AA                | 1946482311               |
| SNP_P3_103482_9414   | NW_004515668.1 | Scaffold62  | 9414                    | AA                              | GG                | 1946482313               |
| SNP_P3_103483_9552   | NW_004515668.1 | Scaffold62  | 9552                    | TT                              | GG                | 1946482314               |
| SNP_P3_103484_10501  | NW_004515668.1 | Scaffold62  | 10501                   | AA                              | GG                | 1946482316               |
| SNP_P3_103485_10825  | NW_004515668.1 | Scaffold62  | 10825                   | TT                              | CC                | 1946482317               |
| SNP_P3_103486_16435  | NW_004515668.1 | Scaffold62  | 16435                   | TT                              | CC                | 1946482318               |
| SNP_P3_103487_16571  | NW_004515668.1 | Scaffold62  | 16571                   | TT                              | CC                | 1946482320               |
| SNP_P3_103488_17932  | NW_004515668.1 | Scaffold62  | 17932                   | TT                              | GG                | 1946482321               |
| SNP_P3_103489_18238  | NW_004515668.1 | Scaffold62  | 18238                   | GG                              | TT                | 1946482323               |
| SNP_P3_103490_18245  | NW_004515668.1 | Scaffold62  | 18245                   | GG                              | AA                | 1946482324               |
| SNP_P3_103491_18261  | NW_004515668.1 | Scaffold62  | 18261                   | TT                              | GG                | 1946482325               |

| SNPs IDs             | Chromosome IDs | Chromosomes | Physical positions (bp) | CDC Frontier (Reference genome) | (Pusa 256 & HPNB) | NCBI SNPdb Accession IDs |
|----------------------|----------------|-------------|-------------------------|---------------------------------|-------------------|--------------------------|
| SNP_P3_103492_20100  | NW_004515668.1 | Scaffold62  | 20100                   | AA                              | GG                | 1946482327               |
| SNP_P3_103493_20267  | NW_004515668.1 | Scaffold62  | 20267                   | GG                              | AA                | 1946482328               |
| SNP_P3_103494_20315  | NW_004515668.1 | Scaffold62  | 20315                   | AA                              | GG                | 1946482330               |
| SNP_P3_103495_20338  | NW_004515668.1 | Scaffold62  | 20338                   | TT                              | AA                | 1946482331               |
| SNP_P3_103496_20417  | NW_004515668.1 | Scaffold62  | 20417                   | GG                              | CC                | 1946482333               |
| SNP_P3_103497_20587  | NW_004515668.1 | Scaffold62  | 20587                   | CC                              | TT                | 1946482334               |
| SNP_P3_103498_20622  | NW_004515668.1 | Scaffold62  | 20622                   | GG                              | AA                | 1946482335               |
| SNP_P3_103500_20652  | NW_004515668.1 | Scaffold62  | 20652                   | TT                              | AA                | 1946482337               |
| SNP_P3_103501_20679  | NW_004515668.1 | Scaffold62  | 20679                   | TT                              | CC                | 1946482338               |
| SNP_P3_103502_20729  | NW_004515668.1 | Scaffold62  | 20729                   | AA                              | GG                | 1946482340               |
| SNP_P3_103503_20776  | NW_004515668.1 | Scaffold62  | 20776                   | AA                              | GG                | 1946482341               |
| SNP_P3_103504_20837  | NW_004515668.1 | Scaffold62  | 20837                   | CC                              | AA                | 1946482343               |
| SNP_P3_103505_45573  | NW_004515668.1 | Scaffold62  | 45573                   | CC                              | TT                | 1946482344               |
| SNP_P3_103506_45674  | NW_004515668.1 | Scaffold62  | 45674                   | CC                              | TT                | 1946482346               |
| SNP_P3_103507_47477  | NW_004515668.1 | Scaffold62  | 47477                   | AA                              | CC                | 1946482347               |
| SNP_P3_103508_47485  | NW_004515668.1 | Scaffold62  | 47485                   | AA                              | GG                | 1946482348               |
| SNP_P3_103509_48819  | NW_004515668.1 | Scaffold62  | 48819                   | GG                              | AA                | 1946482350               |
| SNP_P3_103510_54414  | NW_004515668.1 | Scaffold62  | 54414                   | GG                              | AA                | 1946482351               |
| SNP_P3_103511_54429  | NW_004515668.1 | Scaffold62  | 54429                   | CC                              | GG                | 1946482353               |
| SNP_P3_103512_55549  | NW_004515668.1 | Scaffold62  | 55549                   | GG                              | TT                | 1946482354               |
| SNP_P3_103513_55895  | NW_004515668.1 | Scaffold62  | 55895                   | CC                              | GG                | 1946482356               |
| SNP_P3_103514_55907  | NW_004515668.1 | Scaffold62  | 55907                   | TT                              | CC                | 1946482357               |
| SNP_P3_103515_57099  | NW_004515668.1 | Scaffold62  | 57099                   | TT                              | AA                | 1946482358               |
| SNP_P3_103516_75374  | NW_004515668.1 | Scaffold62  | 75374                   | TT                              | CC                | 1946482360               |
| SNP_P3_103517_81890  | NW_004515668.1 | Scaffold62  | 81890                   | GG                              | AA                | 1946482361               |
| SNP_P3_103518_81916  | NW_004515668.1 | Scaffold62  | 81916                   | AA                              | GG                | 1946482363               |
| SNP_P3_103519_81929  | NW_004515668.1 | Scaffold62  | 81929                   | TT                              | AA                | 1946482364               |
| SNP_P3_103520_81935  | NW_004515668.1 | Scaffold62  | 81935                   | AA                              | CC                | 1946482366               |
| SNP_P3_103521_87427  | NW_004515668.1 | Scaffold62  | 87427                   | CC                              | GG                | 1946482367               |
| SNP_P3_103522_95108  | NW_004515668.1 | Scaffold62  | 95108                   | TT                              | GG                | 1946482368               |
| SNP_P3_103523_115614 | NW_004515668.1 | Scaffold62  | 115614                  | TT                              | CC                | 1946482370               |
| SNP_P3_103524_116514 | NW_004515668.1 | Scaffold62  | 116514                  | AA                              | TT                | 1946482371               |
| SNP_P3_103525_116533 | NW_004515668.1 | Scaffold62  | 116533                  | GG                              | AA                | 1946482373               |
| SNP_P3_103526_116562 | NW_004515668.1 | Scaffold62  | 116562                  | GG                              | AA                | 1946482374               |
| SNP_P3_103527_116815 | NW_004515668.1 | Scaffold62  | 116815                  | AA                              | CC                | 1946482376               |
| SNP_P3_103528_120292 | NW_004515668.1 | Scaffold62  | 120292                  | CC                              | TT                | 1946482377               |
| SNP_P3_103529_125675 | NW_004515668.1 | Scaffold62  | 125675                  | GG                              | AA                | 1946482378               |
| SNP_P3_103530_128792 | NW_004515668.1 | Scaffold62  | 128792                  | AA                              | TT                | 1946482380               |
| SNP_P3_103531_132265 | NW_004515668.1 | Scaffold62  | 132265                  | GG                              | TT                | 1946482381               |
| SNP_P3_103532_140798 | NW_004515668.1 | Scaffold62  | 140798                  | CC                              | GG                | 1946482383               |
| SNP_P3_103533_140926 | NW_004515668.1 | Scaffold62  | 140926                  | GG                              | TT                | 1946482384               |
| SNP_P3_103534_140928 | NW_004515668.1 | Scaffold62  | 140928                  | GG                              | AA                | 1946482386               |

| SNPs IDs             | Chromosome IDs | Chromosomes | Physical positions (bp) | CDC Frontier (Reference genome) | (Pusa 256 & HPNB) | NCBI SNPdb Accession IDs |
|----------------------|----------------|-------------|-------------------------|---------------------------------|-------------------|--------------------------|
| SNP_P3_103535_141345 | NW_004515668.1 | Scaffold62  | 141345                  | TT                              | CC                | 1946482387               |
| SNP_P3_103536_148990 | NW_004515668.1 | Scaffold62  | 148990                  | TT                              | CC                | 1946482388               |
| SNP_P3_103537_149852 | NW_004515668.1 | Scaffold62  | 149852                  | AA                              | GG                | 1946482390               |
| SNP_P3_103538_149903 | NW_004515668.1 | Scaffold62  | 149903                  | AA                              | TT                | 1946482391               |
| SNP_P3_103539_150018 | NW_004515668.1 | Scaffold62  | 150018                  | CC                              | TT                | 1946482393               |
| SNP_P3_103540_150064 | NW_004515668.1 | Scaffold62  | 150064                  | CC                              | TT                | 1946482394               |
| SNP_P3_103541_150094 | NW_004515668.1 | Scaffold62  | 150094                  | TT                              | CC                | 1946482395               |
| SNP_P3_103545_150527 | NW_004515668.1 | Scaffold62  | 150527                  | TT                              | GG                | 1946482397               |
| SNP_P3_103546_150546 | NW_004515668.1 | Scaffold62  | 150546                  | CC                              | AA                | 1946482398               |
| SNP_P3_103547_150588 | NW_004515668.1 | Scaffold62  | 150588                  | AA                              | GG                | 1946482400               |
| SNP_P3_103548_150840 | NW_004515668.1 | Scaffold62  | 150840                  | AA                              | GG                | 1946482401               |
| SNP_P3_103549_150928 | NW_004515668.1 | Scaffold62  | 150928                  | TT                              | GG                | 1946482403               |
| SNP_P3_103551_150983 | NW_004515668.1 | Scaffold62  | 150983                  | AA                              | TT                | 1946482404               |
| SNP_P3_103552_150990 | NW_004515668.1 | Scaffold62  | 150990                  | AA                              | GG                | 1946482405               |
| SNP_P3_103553_152299 | NW_004515668.1 | Scaffold62  | 152299                  | CC                              | TT                | 1946482407               |
| SNP_P3_103554_154059 | NW_004515668.1 | Scaffold62  | 154059                  | GG                              | TT                | 1946482408               |
| SNP_P3_103555_158413 | NW_004515668.1 | Scaffold62  | 158413                  | AA                              | CC                | 1946482410               |
| SNP_P3_103556_158422 | NW_004515668.1 | Scaffold62  | 158422                  | TT                              | CC                | 1946482411               |
| SNP_P3_103557_158757 | NW_004515668.1 | Scaffold62  | 158757                  | AA                              | CC                | 1946482412               |
| SNP_P3_103558_158828 | NW_004515668.1 | Scaffold62  | 158828                  | AA                              | GG                | 1946482414               |
| SNP_P3_103559_160995 | NW_004515668.1 | Scaffold62  | 160995                  | CC                              | TT                | 1946482415               |
| SNP_P3_103560_161002 | NW_004515668.1 | Scaffold62  | 161002                  | TT                              | CC                | 1946482417               |
| SNP_P3_103561_161056 | NW_004515668.1 | Scaffold62  | 161056                  | AA                              | TT                | 1946482418               |
| SNP_P3_103562_161057 | NW_004515668.1 | Scaffold62  | 161057                  | TT                              | AA                | 1946482419               |
| SNP_P3_103563_161058 | NW_004515668.1 | Scaffold62  | 161058                  | GG                              | TT                | 1946482421               |
| SNP_P3_103564_161118 | NW_004515668.1 | Scaffold62  | 161118                  | TT                              | CC                | 1946482422               |
| SNP_P3_103565_161167 | NW_004515668.1 | Scaffold62  | 161167                  | AA                              | GG                | 1946482424               |
| SNP_P3_103566_162556 | NW_004515668.1 | Scaffold62  | 162556                  | AA                              | GG                | 1946482425               |
| SNP_P3_103567_175473 | NW_004515668.1 | Scaffold62  | 175473                  | TT                              | CC                | 1946482426               |
| SNP_P3_103568_175567 | NW_004515668.1 | Scaffold62  | 175567                  | GG                              | AA                | 1946482428               |
| SNP_P3_103569_176207 | NW_004515668.1 | Scaffold62  | 176207                  | AA                              | GG                | 1946482429               |
| SNP_P3_103570_186612 | NW_004515668.1 | Scaffold62  | 186612                  | TT                              | AA                | 1946482431               |
| SNP_P3_103571_186613 | NW_004515668.1 | Scaffold62  | 186613                  | GG                              | TT                | 1946482432               |
| SNP_P3_103572_186649 | NW_004515668.1 | Scaffold62  | 186649                  | CC                              | TT                | 1946482433               |
| SNP_P3_103573_186805 | NW_004515668.1 | Scaffold62  | 186805                  | CC                              | TT                | 1946482435               |
| SNP_P3_103574_186940 | NW_004515668.1 | Scaffold62  | 186940                  | GG                              | AA                | 1946482436               |
| SNP_P3_103575_187001 | NW_004515668.1 | Scaffold62  | 187001                  | TT                              | GG                | 1946482438               |
| SNP_P3_103576_187020 | NW_004515668.1 | Scaffold62  | 187020                  | TT                              | GG                | 1946482439               |
| SNP_P3_103577_192889 | NW_004515668.1 | Scaffold62  | 192889                  | AA                              | GG                | 1946482440               |
| SNP_P3_103578_192929 | NW_004515668.1 | Scaffold62  | 192929                  | CC                              | TT                | 1946482442               |
| SNP_P3_103579_192988 | NW_004515668.1 | Scaffold62  | 192988                  | AA                              | GG                | 1946482443               |
| SNP_P3_103580_193024 | NW_004515668.1 | Scaffold62  | 193024                  | CC                              | TT                | 1946482445               |

| SNPs IDs             | Chromosome IDs | Chromosomes | Physical positions (bp) | CDC Frontier (Reference genome) | (Pusa 256 & HPNB) | NCBI SNPdb Accession IDs |
|----------------------|----------------|-------------|-------------------------|---------------------------------|-------------------|--------------------------|
| SNP_P3_103581_205123 | NW_004515668.1 | Scaffold62  | 205123                  | AA                              | GG                | 1946482446               |
| SNP_P3_103582_205148 | NW_004515668.1 | Scaffold62  | 205148                  | TT                              | CC                | 1946482447               |
| SNP_P3_103583_205151 | NW_004515668.1 | Scaffold62  | 205151                  | TT                              | CC                | 1946482449               |
| SNP_P3_103584_205590 | NW_004515668.1 | Scaffold62  | 205590                  | TT                              | CC                | 1946482450               |
| SNP_P3_103585_207290 | NW_004515668.1 | Scaffold62  | 207290                  | AA                              | TT                | 1946482451               |
| SNP_P3_103586_207758 | NW_004515668.1 | Scaffold62  | 207758                  | AA                              | GG                | 1946482453               |
| SNP_P3_103587_207777 | NW_004515668.1 | Scaffold62  | 207777                  | AA                              | CC                | 1946482454               |
| SNP_P3_103588_207779 | NW_004515668.1 | Scaffold62  | 207779                  | TT                              | CC                | 1946482456               |
| SNP_P3_103589_207797 | NW_004515668.1 | Scaffold62  | 207797                  | GG                              | AA                | 1946482457               |
| SNP_P3_103590_208832 | NW_004515668.1 | Scaffold62  | 208832                  | CC                              | AA                | 1946482458               |
| SNP_P3_103591_208844 | NW_004515668.1 | Scaffold62  | 208844                  | CC                              | TT                | 1946482460               |
| SNP_P3_103592_208908 | NW_004515668.1 | Scaffold62  | 208908                  | TT                              | CC                | 1946482461               |
| SNP_P3_103593_208956 | NW_004515668.1 | Scaffold62  | 208956                  | GG                              | TT                | 1946482463               |
| SNP_P3_103594_208991 | NW_004515668.1 | Scaffold62  | 208991                  | AA                              | GG                | 1946482464               |
| SNP_P3_103595_208995 | NW_004515668.1 | Scaffold62  | 208995                  | CC                              | TT                | 1946482465               |
| SNP_P3_103596_209237 | NW_004515668.1 | Scaffold62  | 209237                  | CC                              | TT                | 1946482467               |
| SNP_P3_103597_209240 | NW_004515668.1 | Scaffold62  | 209240                  | CC                              | TT                | 1946482468               |
| SNP_P3_103598_209241 | NW_004515668.1 | Scaffold62  | 209241                  | TT                              | AA                | 1946482470               |
| SNP_P3_103599_209260 | NW_004515668.1 | Scaffold62  | 209260                  | TT                              | AA                | 1946482471               |
| SNP_P3_103600_209284 | NW_004515668.1 | Scaffold62  | 209284                  | TT                              | GG                | 1946482472               |
| SNP_P3_103601_209309 | NW_004515668.1 | Scaffold62  | 209309                  | CC                              | TT                | 1946482474               |
| SNP_P3_103602_209312 | NW_004515668.1 | Scaffold62  | 209312                  | AA                              | TT                | 1946482475               |
| SNP_P3_103603_209314 | NW_004515668.1 | Scaffold62  | 209314                  | TT                              | GG                | 1946482476               |
| SNP_P3_103604_210078 | NW_004515668.1 | Scaffold62  | 210078                  | TT                              | CC                | 1946482478               |
| SNP_P3_103605_210305 | NW_004515668.1 | Scaffold62  | 210305                  | TT                              | GG                | 1946482479               |
| SNP_P3_103606_212568 | NW_004515668.1 | Scaffold62  | 212568                  | AA                              | TT                | 1946482481               |
| SNP_P3_103607_212756 | NW_004515668.1 | Scaffold62  | 212756                  | GG                              | AA                | 1946482482               |
| SNP_P3_103608_212869 | NW_004515668.1 | Scaffold62  | 212869                  | GG                              | AA                | 1946482484               |
| SNP_P3_103609_226048 | NW_004515668.1 | Scaffold62  | 226048                  | AA                              | TT                | 1946482485               |
| SNP_P3_103610_228289 | NW_004515668.1 | Scaffold62  | 228289                  | TT                              | CC                | 1946482487               |
| SNP_P3_103611_228317 | NW_004515668.1 | Scaffold62  | 228317                  | GG                              | AA                | 1946482488               |
| SNP_P3_103612_228326 | NW_004515668.1 | Scaffold62  | 228326                  | AA                              | GG                | 1946482489               |
| SNP_P3_103613_228331 | NW_004515668.1 | Scaffold62  | 228331                  | CC                              | TT                | 1946482491               |
| SNP_P3_103614_228345 | NW_004515668.1 | Scaffold62  | 228345                  | GG                              | AA                | 1946482492               |
| SNP_P3_103615_228516 | NW_004515668.1 | Scaffold62  | 228516                  | GG                              | TT                | 1946482494               |
| SNP_P3_103616_228526 | NW_004515668.1 | Scaffold62  | 228526                  | TT                              | GG                | 1946482495               |
| SNP_P3_103617_228692 | NW_004515668.1 | Scaffold62  | 228692                  | CC                              | TT                | 1946482496               |
| SNP_P3_103618_228693 | NW_004515668.1 | Scaffold62  | 228693                  | AA                              | GG                | 1946482498               |
| SNP_P3_103619_228702 | NW_004515668.1 | Scaffold62  | 228702                  | CC                              | AA                | 1946482499               |
| SNP_P3_103620_230151 | NW_004515668.1 | Scaffold62  | 230151                  | AA                              | GG                | 1946482501               |
| SNP_P3_103621_230218 | NW_004515668.1 | Scaffold62  | 230218                  | CC                              | TT                | 1946482502               |
| SNP_P3_103622_230219 | NW_004515668.1 | Scaffold62  | 230219                  | AA                              | GG                | 1946482504               |



| SNPs IDs             | Chromosome IDs | Chromosomes | Physical positions (bp) | CDC Frontier (Reference genome) | (Pusa 256 & HPNB) | NCBI SNPdb Accession IDs |
|----------------------|----------------|-------------|-------------------------|---------------------------------|-------------------|--------------------------|
| SNP_P3_103623_230329 | NW_004515668.1 | Scaffold62  | 230329                  | GG                              | CC                | 1946482505               |
| SNP_P3_103624_230344 | NW_004515668.1 | Scaffold62  | 230344                  | AA                              | TT                | 1946482506               |
| SNP_P3_103625_230648 | NW_004515668.1 | Scaffold62  | 230648                  | CC                              | GG                | 1946482508               |
| SNP_P3_103626_230666 | NW_004515668.1 | Scaffold62  | 230666                  | CC                              | GG                | 1946482509               |
| SNP_P3_103627_230667 | NW_004515668.1 | Scaffold62  | 230667                  | CC                              | TT                | 1946482511               |
| SNP_P3_103628_230700 | NW_004515668.1 | Scaffold62  | 230700                  | CC                              | TT                | 1946482512               |
| SNP_P3_103629_230796 | NW_004515668.1 | Scaffold62  | 230796                  | AA                              | TT                | 1946482513               |
| SNP_P3_103630_230809 | NW_004515668.1 | Scaffold62  | 230809                  | AA                              | GG                | 1946482515               |
| SNP_P3_103631_240823 | NW_004515668.1 | Scaffold62  | 240823                  | TT                              | AA                | 1946482516               |
| SNP_P3_103632_240829 | NW_004515668.1 | Scaffold62  | 240829                  | AA                              | TT                | 1946482518               |
| SNP_P3_103633_240838 | NW_004515668.1 | Scaffold62  | 240838                  | GG                              | AA                | 1946482519               |
| SNP_P3_103634_241091 | NW_004515668.1 | Scaffold62  | 241091                  | AA                              | TT                | 1946482520               |
| SNP_P3_103635_241112 | NW_004515668.1 | Scaffold62  | 241112                  | AA                              | GG                | 1946482522               |
| SNP_P3_103636_241140 | NW_004515668.1 | Scaffold62  | 241140                  | CC                              | AA                | 1946482523               |
| SNP_P3_103637_241174 | NW_004515668.1 | Scaffold62  | 241174                  | CC                              | TT                | 1946482524               |
| SNP_P3_103638_242930 | NW_004515668.1 | Scaffold62  | 242930                  | AA                              | GG                | 1946482526               |
| SNP_P3_103639_248559 | NW_004515668.1 | Scaffold62  | 248559                  | TT                              | GG                | 1946482527               |
| SNP_P3_103640_248576 | NW_004515668.1 | Scaffold62  | 248576                  | AA                              | CC                | 1946482529               |
| SNP_P3_103641_248580 | NW_004515668.1 | Scaffold62  | 248580                  | AA                              | GG                | 1946482530               |
| SNP_P3_103642_248612 | NW_004515668.1 | Scaffold62  | 248612                  | AA                              | CC                | 1946482531               |
| SNP_P3_103643_248632 | NW_004515668.1 | Scaffold62  | 248632                  | AA                              | TT                | 1946482533               |
| SNP_P3_103644_248674 | NW_004515668.1 | Scaffold62  | 248674                  | GG                              | TT                | 1946482534               |
| SNP_P3_103645_248700 | NW_004515668.1 | Scaffold62  | 248700                  | GG                              | TT                | 1946482535               |
| SNP_P3_103646_248753 | NW_004515668.1 | Scaffold62  | 248753                  | AA                              | CC                | 1946482537               |
| SNP_P3_103647_248768 | NW_004515668.1 | Scaffold62  | 248768                  | TT                              | AA                | 1946482538               |
| SNP_P3_103648_248789 | NW_004515668.1 | Scaffold62  | 248789                  | CC                              | GG                | 1946482540               |
| SNP_P3_103649_248805 | NW_004515668.1 | Scaffold62  | 248805                  | TT                              | GG                | 1946482541               |
| SNP_P3_103650_248844 | NW_004515668.1 | Scaffold62  | 248844                  | TT                              | AA                | 1946482543               |
| SNP_P3_103651_248847 | NW_004515668.1 | Scaffold62  | 248847                  | TT                              | AA                | 1946482544               |
| SNP_P3_103652_248848 | NW_004515668.1 | Scaffold62  | 248848                  | GG                              | CC                | 1946482545               |
| SNP_P3_103653_248849 | NW_004515668.1 | Scaffold62  | 248849                  | TT                              | AA                | 1946482547               |
| SNP_P3_103654_249543 | NW_004515668.1 | Scaffold62  | 249543                  | CC                              | AA                | 1946482548               |
| SNP_P3_103655_249570 | NW_004515668.1 | Scaffold62  | 249570                  | GG                              | TT                | 1946482550               |
| SNP_P3_103656_249575 | NW_004515668.1 | Scaffold62  | 249575                  | GG                              | AA                | 1946482551               |
| SNP_P3_103657_249886 | NW_004515668.1 | Scaffold62  | 249886                  | CC                              | GG                | 1946482553               |
| SNP_P3_103658_249897 | NW_004515668.1 | Scaffold62  | 249897                  | TT                              | AA                | 1946482554               |
| SNP_P3_103659_249934 | NW_004515668.1 | Scaffold62  | 249934                  | CC                              | TT                | 1946482556               |
| SNP_P3_103660_258965 | NW_004515668.1 | Scaffold62  | 258965                  | AA                              | GG                | 1946482557               |
| SNP_P3_103661_260497 | NW_004515668.1 | Scaffold62  | 260497                  | CC                              | TT                | 1946482558               |
| SNP_P3_103662_260559 | NW_004515668.1 | Scaffold62  | 260559                  | TT                              | AA                | 1946482560               |
| SNP_P3_103663_260721 | NW_004515668.1 | Scaffold62  | 260721                  | CC                              | TT                | 1946482561               |
| SNP_P3_103664_260764 | NW_004515668.1 | Scaffold62  | 260764                  | AA                              | GG                | 1946482563               |

| SNPs IDs             | Chromosome IDs | Chromosomes | Physical positions (bp) | CDC Frontier (Reference genome) | (Pusa 256 & HPNB) | NCBI SNPdb Accession IDs |
|----------------------|----------------|-------------|-------------------------|---------------------------------|-------------------|--------------------------|
| SNP_P3_103665_260803 | NW_004515668.1 | Scaffold62  | 260803                  | CC                              | AA                | 1946482564               |
| SNP_P3_103666_260830 | NW_004515668.1 | Scaffold62  | 260830                  | TT                              | AA                | 1946482565               |
| SNP_P3_103667_261016 | NW_004515668.1 | Scaffold62  | 261016                  | GG                              | TT                | 1946482567               |
| SNP_P3_103668_261073 | NW_004515668.1 | Scaffold62  | 261073                  | TT                              | CC                | 1946482568               |
| SNP_P3_103669_261079 | NW_004515668.1 | Scaffold62  | 261079                  | AA                              | TT                | 1946482570               |
| SNP_P3_103670_261252 | NW_004515668.1 | Scaffold62  | 261252                  | TT                              | GG                | 1946482571               |
| SNP_P3_103671_261264 | NW_004515668.1 | Scaffold62  | 261264                  | CC                              | TT                | 1946482573               |
| SNP_P3_103672_261332 | NW_004515668.1 | Scaffold62  | 261332                  | TT                              | GG                | 1946482574               |
| SNP_P3_103673_261390 | NW_004515668.1 | Scaffold62  | 261390                  | TT                              | CC                | 1946482575               |
| SNP_P3_103674_261415 | NW_004515668.1 | Scaffold62  | 261415                  | CC                              | AA                | 1946482577               |
| SNP_P3_103675_261422 | NW_004515668.1 | Scaffold62  | 261422                  | TT                              | CC                | 1946482578               |
| SNP_P3_103676_261768 | NW_004515668.1 | Scaffold62  | 261768                  | TT                              | GG                | 1946482580               |
| SNP_P3_103677_261957 | NW_004515668.1 | Scaffold62  | 261957                  | AA                              | CC                | 1946482581               |
| SNP_P3_103678_270662 | NW_004515668.1 | Scaffold62  | 270662                  | CC                              | GG                | 1946482582               |
| SNP_P3_103679_270693 | NW_004515668.1 | Scaffold62  | 270693                  | GG                              | AA                | 1946482584               |
| SNP_P3_103680_273402 | NW_004515668.1 | Scaffold62  | 273402                  | TT                              | CC                | 1946482585               |
| SNP_P3_103681_273438 | NW_004515668.1 | Scaffold62  | 273438                  | AA                              | GG                | 1946482587               |
| SNP_P3_103682_276309 | NW_004515668.1 | Scaffold62  | 276309                  | CC                              | AA                | 1946482588               |
| SNP_P3_103683_279403 | NW_004515668.1 | Scaffold62  | 279403                  | GG                              | AA                | 1946482589               |
| SNP_P3_103684_279769 | NW_004515668.1 | Scaffold62  | 279769                  | CC                              | TT                | 1946482591               |
| SNP_P3_103685_280709 | NW_004515668.1 | Scaffold62  | 280709                  | GG                              | AA                | 1946482592               |
| SNP_P3_103686_283543 | NW_004515668.1 | Scaffold62  | 283543                  | TT                              | AA                | 1946482594               |
| SNP_P3_103687_283593 | NW_004515668.1 | Scaffold62  | 283593                  | AA                              | TT                | 1946482595               |
| SNP_P3_103688_283641 | NW_004515668.1 | Scaffold62  | 283641                  | AA                              | CC                | 1946482596               |
| SNP_P3_103689_283642 | NW_004515668.1 | Scaffold62  | 283642                  | AA                              | CC                | 1946482598               |
| SNP_P3_103690_283650 | NW_004515668.1 | Scaffold62  | 283650                  | AA                              | TT                | 1946482599               |
| SNP_P3_103691_283780 | NW_004515668.1 | Scaffold62  | 283780                  | CC                              | TT                | 1946482600               |
| SNP_P3_103692_283784 | NW_004515668.1 | Scaffold62  | 283784                  | TT                              | AA                | 1946482602               |
| SNP_P3_103693_283801 | NW_004515668.1 | Scaffold62  | 283801                  | AA                              | GG                | 1946482603               |
| SNP_P3_103694_283839 | NW_004515668.1 | Scaffold62  | 283839                  | CC                              | TT                | 1946482605               |
| SNP_P3_103695_283850 | NW_004515668.1 | Scaffold62  | 283850                  | TT                              | AA                | 1946482606               |
| SNP_P3_103696_283920 | NW_004515668.1 | Scaffold62  | 283920                  | GG                              | AA                | 1946482607               |
| SNP_P3_103697_284018 | NW_004515668.1 | Scaffold62  | 284018                  | CC                              | AA                | 1946482609               |
| SNP_P3_103698_284049 | NW_004515668.1 | Scaffold62  | 284049                  | CC                              | TT                | 1946482610               |
| SNP_P3_103699_284160 | NW_004515668.1 | Scaffold62  | 284160                  | GG                              | AA                | 1946482612               |
| SNP_P3_103700_292715 | NW_004515668.1 | Scaffold62  | 292715                  | CC                              | AA                | 1946482613               |
| SNP_P3_103701_292716 | NW_004515668.1 | Scaffold62  | 292716                  | CC                              | TT                | 1946482614               |
| SNP_P3_103702_324263 | NW_004515668.1 | Scaffold62  | 324263                  | CC                              | TT                | 1946482616               |
| SNP_P3_103703_324875 | NW_004515668.1 | Scaffold62  | 324875                  | CC                              | TT                | 1946482617               |
| SNP_P3_103704_324964 | NW_004515668.1 | Scaffold62  | 324964                  | AA                              | GG                | 1946482619               |
| SNP_P3_103705_325068 | NW_004515668.1 | Scaffold62  | 325068                  | AA                              | TT                | 1946482620               |
| SNP_P3_103706_325121 | NW_004515668.1 | Scaffold62  | 325121                  | CC                              | GG                | 1946482621               |

| SNPs IDs             | Chromosome IDs | Chromosomes | Physical positions (bp) | CDC Frontier (Reference genome) | (Pusa 256 & HPNB) | NCBI SNPdb Accession IDs |
|----------------------|----------------|-------------|-------------------------|---------------------------------|-------------------|--------------------------|
| SNP_P3_103707_326844 | NW_004515668.1 | Scaffold62  | 326844                  | AA                              | CC                | 1946482623               |
| SNP_P3_103708_327008 | NW_004515668.1 | Scaffold62  | 327008                  | AA                              | TT                | 1946482624               |
| SNP_P3_103709_327063 | NW_004515668.1 | Scaffold62  | 327063                  | AA                              | CC                | 1946482626               |
| SNP_P3_103710_327077 | NW_004515668.1 | Scaffold62  | 327077                  | CC                              | TT                | 1946482627               |
| SNP_P3_103711_327219 | NW_004515668.1 | Scaffold62  | 327219                  | TT                              | GG                | 1946482629               |
| SNP_P3_103712_327365 | NW_004515668.1 | Scaffold62  | 327365                  | TT                              | CC                | 1946482630               |
| SNP_P3_103713_329161 | NW_004515668.1 | Scaffold62  | 329161                  | TT                              | GG                | 1946482632               |
| SNP_P3_103714_333366 | NW_004515668.1 | Scaffold62  | 333366                  | GG                              | TT                | 1946482633               |
| SNP_P3_103715_338676 | NW_004515668.1 | Scaffold62  | 338676                  | CC                              | AA                | 1946482634               |
| SNP_P3_103717_340281 | NW_004515668.1 | Scaffold62  | 340281                  | TT                              | AA                | 1946482636               |
| SNP_P3_103718_343803 | NW_004515668.1 | Scaffold62  | 343803                  | AA                              | CC                | 1946482637               |
| SNP_P3_103719_344052 | NW_004515668.1 | Scaffold62  | 344052                  | TT                              | AA                | 1946482638               |
| SNP_P3_103720_344829 | NW_004515668.1 | Scaffold62  | 344829                  | CC                              | TT                | 1946482639               |
| SNP_P3_103721_347587 | NW_004515668.1 | Scaffold62  | 347587                  | TT                              | CC                | 1946482640               |
| SNP_P3_103722_347634 | NW_004515668.1 | Scaffold62  | 347634                  | GG                              | AA                | 1946482641               |
| SNP_P3_103723_352128 | NW_004515668.1 | Scaffold62  | 352128                  | GG                              | AA                | 1946482642               |
| SNP_P3_103725_5276   | NW_004515669.1 | Scaffold63  | 5276                    | AA                              | GG                | 1946482643               |
| SNP_P3_103726_5277   | NW_004515669.1 | Scaffold63  | 5277                    | TT                              | GG                | 1946482644               |
| SNP_P3_103727_5540   | NW_004515669.1 | Scaffold63  | 5540                    | TT                              | AA                | 1946482646               |
| SNP_P3_103728_5569   | NW_004515669.1 | Scaffold63  | 5569                    | GG                              | AA                | 1946482647               |
| SNP_P3_103729_5775   | NW_004515669.1 | Scaffold63  | 5775                    | GG                              | AA                | 1946482649               |
| SNP_P3_103730_6824   | NW_004515669.1 | Scaffold63  | 6824                    | AA                              | GG                | 1946482650               |
| SNP_P3_103731_6838   | NW_004515669.1 | Scaffold63  | 6838                    | TT                              | CC                | 1946482651               |
| SNP_P3_103732_16810  | NW_004515669.1 | Scaffold63  | 16810                   | GG                              | TT                | 1946482653               |
| SNP_P3_103733_16877  | NW_004515669.1 | Scaffold63  | 16877                   | AA                              | TT                | 1946482654               |
| SNP_P3_103734_16880  | NW_004515669.1 | Scaffold63  | 16880                   | AA                              | GG                | 1946482656               |
| SNP_P3_103735_19435  | NW_004515669.1 | Scaffold63  | 19435                   | GG                              | AA                | 1946482657               |
| SNP_P3_103736_19596  | NW_004515669.1 | Scaffold63  | 19596                   | CC                              | GG                | 1946482658               |
| SNP_P3_103737_19712  | NW_004515669.1 | Scaffold63  | 19712                   | CC                              | TT                | 1946482660               |
| SNP_P3_103738_20614  | NW_004515669.1 | Scaffold63  | 20614                   | AA                              | GG                | 1946482661               |
| SNP_P3_103739_20660  | NW_004515669.1 | Scaffold63  | 20660                   | GG                              | AA                | 1946482663               |
| SNP_P3_103740_20877  | NW_004515669.1 | Scaffold63  | 20877                   | TT                              | GG                | 1946482664               |
| SNP_P3_103741_20880  | NW_004515669.1 | Scaffold63  | 20880                   | TT                              | AA                | 1946482665               |
| SNP_P3_103742_20905  | NW_004515669.1 | Scaffold63  | 20905                   | GG                              | CC                | 1946482667               |
| SNP_P3_103743_21024  | NW_004515669.1 | Scaffold63  | 21024                   | AA                              | GG                | 1946482668               |
| SNP_P3_103744_21080  | NW_004515669.1 | Scaffold63  | 21080                   | GG                              | TT                | 1946482670               |
| SNP_P3_103745_21212  | NW_004515669.1 | Scaffold63  | 21212                   | GG                              | TT                | 1946482671               |
| SNP_P3_103746_21257  | NW_004515669.1 | Scaffold63  | 21257                   | GG                              | AA                | 1946482672               |
| SNP_P3_103747_21300  | NW_004515669.1 | Scaffold63  | 21300                   | TT                              | GG                | 1946482674               |
| SNP_P3_103748_21326  | NW_004515669.1 | Scaffold63  | 21326                   | AA                              | GG                | 1946482675               |
| SNP_P3_103749_21330  | NW_004515669.1 | Scaffold63  | 21330                   | AA                              | GG                | 1946482677               |
| SNP_P3_103750_21380  | NW_004515669.1 | Scaffold63  | 21380                   | TT                              | AA                | 1946482678               |

| SNPs IDs            | Chromosome IDs | Chromosomes | Physical positions (bp) | CDC Frontier (Reference genome) | (Pusa 256 & HPNB) | NCBI SNPdb Accession IDs |
|---------------------|----------------|-------------|-------------------------|---------------------------------|-------------------|--------------------------|
| SNP_P3_103751_21405 | NW_004515669.1 | Scaffold63  | 21405                   | AA                              | GG                | 1946482680               |
| SNP_P3_103752_21411 | NW_004515669.1 | Scaffold63  | 21411                   | AA                              | GG                | 1946482681               |
| SNP_P3_103753_21428 | NW_004515669.1 | Scaffold63  | 21428                   | GG                              | AA                | 1946482682               |
| SNP_P3_103754_21735 | NW_004515669.1 | Scaffold63  | 21735                   | AA                              | GG                | 1946482684               |
| SNP_P3_103755_23008 | NW_004515669.1 | Scaffold63  | 23008                   | CC                              | TT                | 1946482685               |
| SNP_P3_103756_23027 | NW_004515669.1 | Scaffold63  | 23027                   | AA                              | GG                | 1946482686               |
| SNP_P3_103757_23057 | NW_004515669.1 | Scaffold63  | 23057                   | AA                              | GG                | 1946482688               |
| SNP_P3_103758_23211 | NW_004515669.1 | Scaffold63  | 23211                   | CC                              | TT                | 1946482689               |
| SNP_P3_103759_23235 | NW_004515669.1 | Scaffold63  | 23235                   | GG                              | AA                | 1946482691               |
| SNP_P3_103760_26333 | NW_004515669.1 | Scaffold63  | 26333                   | CC                              | AA                | 1946482692               |
| SNP_P3_103761_31101 | NW_004515669.1 | Scaffold63  | 31101                   | CC                              | TT                | 1946482693               |
| SNP_P3_103762_36288 | NW_004515669.1 | Scaffold63  | 36288                   | TT                              | AA                | 1946482695               |
| SNP_P3_103763_36307 | NW_004515669.1 | Scaffold63  | 36307                   | TT                              | AA                | 1946482696               |
| SNP_P3_103764_41886 | NW_004515669.1 | Scaffold63  | 41886                   | TT                              | CC                | 1946482698               |
| SNP_P3_103765_41899 | NW_004515669.1 | Scaffold63  | 41899                   | CC                              | TT                | 1946482699               |
| SNP_P3_103766_41911 | NW_004515669.1 | Scaffold63  | 41911                   | AA                              | GG                | 1946482700               |
| SNP_P3_103767_43750 | NW_004515669.1 | Scaffold63  | 43750                   | TT                              | AA                | 1946482702               |
| SNP_P3_103768_43828 | NW_004515669.1 | Scaffold63  | 43828                   | GG                              | AA                | 1946482703               |
| SNP_P3_103769_50120 | NW_004515669.1 | Scaffold63  | 50120                   | GG                              | TT                | 1946482704               |
| SNP_P3_103770_51876 | NW_004515669.1 | Scaffold63  | 51876                   | CC                              | AA                | 1946482706               |
| SNP_P3_103771_52193 | NW_004515669.1 | Scaffold63  | 52193                   | AA                              | GG                | 1946482707               |
| SNP_P3_103772_52210 | NW_004515669.1 | Scaffold63  | 52210                   | GG                              | AA                | 1946482709               |
| SNP_P3_103773_54032 | NW_004515669.1 | Scaffold63  | 54032                   | GG                              | TT                | 1946482710               |
| SNP_P3_103774_54046 | NW_004515669.1 | Scaffold63  | 54046                   | CC                              | AA                | 1946482711               |
| SNP_P3_103775_54088 | NW_004515669.1 | Scaffold63  | 54088                   | GG                              | AA                | 1946482713               |
| SNP_P3_103776_54093 | NW_004515669.1 | Scaffold63  | 54093                   | AA                              | GG                | 1946482714               |
| SNP_P3_103777_54496 | NW_004515669.1 | Scaffold63  | 54496                   | TT                              | AA                | 1946482715               |
| SNP_P3_103778_55002 | NW_004515669.1 | Scaffold63  | 55002                   | TT                              | GG                | 1946482717               |
| SNP_P3_103779_57413 | NW_004515669.1 | Scaffold63  | 57413                   | TT                              | CC                | 1946482718               |
| SNP_P3_103782_59350 | NW_004515669.1 | Scaffold63  | 59350                   | AA                              | TT                | 1946482719               |
| SNP_P3_103783_59375 | NW_004515669.1 | Scaffold63  | 59375                   | CC                              | TT                | 1946482721               |
| SNP_P3_103784_59395 | NW_004515669.1 | Scaffold63  | 59395                   | TT                              | AA                | 1946482722               |
| SNP_P3_103785_59430 | NW_004515669.1 | Scaffold63  | 59430                   | TT                              | CC                | 1946482724               |
| SNP_P3_103786_59448 | NW_004515669.1 | Scaffold63  | 59448                   | AA                              | TT                | 1946482725               |
| SNP_P3_103787_59672 | NW_004515669.1 | Scaffold63  | 59672                   | TT                              | CC                | 1946482726               |
| SNP_P3_103788_63724 | NW_004515669.1 | Scaffold63  | 63724                   | TT                              | CC                | 1946482728               |
| SNP_P3_103789_63733 | NW_004515669.1 | Scaffold63  | 63733                   | GG                              | AA                | 1946482729               |
| SNP_P3_103790_64178 | NW_004515669.1 | Scaffold63  | 64178                   | GG                              | TT                | 1946482731               |
| SNP_P3_103792_64477 | NW_004515669.1 | Scaffold63  | 64477                   | AA                              | TT                | 1946482732               |
| SNP_P3_103793_64540 | NW_004515669.1 | Scaffold63  | 64540                   | TT                              | CC                | 1946482733               |
| SNP_P3_103794_12010 | NW_004515671.1 | Scaffold71  | 12010                   | CC                              | TT                | 1946482735               |
| SNP_P3_103795_20024 | NW_004515671.1 | Scaffold71  | 20024                   | AA                              | CC                | 1946482736               |

| SNPs IDs            | Chromosome IDs | Chromosomes | Physical positions (bp) | CDC Frontier (Reference genome) | (Pusa 256 & HPNB) | NCBI SNPdb Accession IDs |
|---------------------|----------------|-------------|-------------------------|---------------------------------|-------------------|--------------------------|
| SNP_P3_103796_21009 | NW_004515671.1 | Scaffold71  | 21009                   | TT                              | CC                | 1946482738               |
| SNP_P3_103797_21012 | NW_004515671.1 | Scaffold71  | 21012                   | CC                              | GG                | 1946482739               |
| SNP_P3_103798_21024 | NW_004515671.1 | Scaffold71  | 21024                   | GG                              | TT                | 1946482740               |
| SNP_P3_103799_21044 | NW_004515671.1 | Scaffold71  | 21044                   | CC                              | GG                | 1946482742               |
| SNP_P3_103801_21144 | NW_004515671.1 | Scaffold71  | 21144                   | TT                              | CC                | 1946482743               |
| SNP_P3_103802_21150 | NW_004515671.1 | Scaffold71  | 21150                   | AA                              | GG                | 1946482744               |
| SNP_P3_103803_21270 | NW_004515671.1 | Scaffold71  | 21270                   | TT                              | CC                | 1946482746               |
| SNP_P3_103804_21423 | NW_004515671.1 | Scaffold71  | 21423                   | TT                              | CC                | 1946482747               |
| SNP_P3_103805_21458 | NW_004515671.1 | Scaffold71  | 21458                   | AA                              | CC                | 1946482749               |
| SNP_P3_103806_21459 | NW_004515671.1 | Scaffold71  | 21459                   | TT                              | AA                | 1946482750               |
| SNP_P3_103808_39247 | NW_004515671.1 | Scaffold71  | 39247                   | CC                              | TT                | 1946482751               |
| SNP_P3_103809_40758 | NW_004515671.1 | Scaffold71  | 40758                   | CC                              | TT                | 1946482753               |
| SNP_P3_103810_43446 | NW_004515671.1 | Scaffold71  | 43446                   | CC                              | TT                | 1946482754               |
| SNP_P3_103811_52235 | NW_004515671.1 | Scaffold71  | 52235                   | CC                              | GG                | 1946482756               |
| SNP_P3_103812_52501 | NW_004515671.1 | Scaffold71  | 52501                   | GG                              | TT                | 1946482757               |
| SNP_P3_103813_4796  | NW_004515672.1 | Scaffold72  | 4796                    | GG                              | AA                | 1946482758               |
| SNP_P3_103814_8517  | NW_004515672.1 | Scaffold72  | 8517                    | TT                              | CC                | 1946482760               |
| SNP_P3_103815_8599  | NW_004515672.1 | Scaffold72  | 8599                    | AA                              | CC                | 1946482761               |
| SNP_P3_103816_8635  | NW_004515672.1 | Scaffold72  | 8635                    | AA                              | CC                | 1946482763               |
| SNP_P3_103817_8662  | NW_004515672.1 | Scaffold72  | 8662                    | AA                              | GG                | 1946482764               |
| SNP_P3_103818_8727  | NW_004515672.1 | Scaffold72  | 8727                    | GG                              | TT                | 1946482765               |
| SNP_P3_103819_9818  | NW_004515672.1 | Scaffold72  | 9818                    | GG                              | CC                | 1946482767               |
| SNP_P3_103820_9832  | NW_004515672.1 | Scaffold72  | 9832                    | GG                              | AA                | 1946482768               |
| SNP_P3_103821_15204 | NW_004515672.1 | Scaffold72  | 15204                   | TT                              | CC                | 1946482770               |
| SNP_P3_103822_15250 | NW_004515672.1 | Scaffold72  | 15250                   | GG                              | TT                | 1946482771               |
| SNP_P3_103823_15386 | NW_004515672.1 | Scaffold72  | 15386                   | AA                              | CC                | 1946482773               |
| SNP_P3_103824_902   | NW_004515674.1 | Scaffold74  | 902                     | GG                              | CC                | 1946482775               |
| SNP_P3_103825_1006  | NW_004515674.1 | Scaffold74  | 1006                    | TT                              | CC                | 1946482777               |
| SNP_P3_103826_1008  | NW_004515674.1 | Scaffold74  | 1008                    | GG                              | AA                | 1946482778               |
| SNP_P3_103827_1102  | NW_004515674.1 | Scaffold74  | 1102                    | TT                              | AA                | 1946482779               |
| SNP_P3_103828_1135  | NW_004515674.1 | Scaffold74  | 1135                    | TT                              | AA                | 1946482781               |
| SNP_P3_103829_4921  | NW_004515674.1 | Scaffold74  | 4921                    | AA                              | TT                | 1946482782               |
| SNP_P3_103830_18030 | NW_004515674.1 | Scaffold74  | 18030                   | TT                              | AA                | 1946482784               |
| SNP_P3_103832_19983 | NW_004515674.1 | Scaffold74  | 19983                   | AA                              | GG                | 1946482785               |
| SNP_P3_103833_30194 | NW_004515674.1 | Scaffold74  | 30194                   | AA                              | GG                | 1946482787               |
| SNP_P3_103834_34550 | NW_004515674.1 | Scaffold74  | 34550                   | GG                              | AA                | 1946482788               |
| SNP_P3_103835_42269 | NW_004515674.1 | Scaffold74  | 42269                   | AA                              | CC                | 1946482790               |
| SNP_P3_103836_42286 | NW_004515674.1 | Scaffold74  | 42286                   | GG                              | TT                | 1946482791               |
| SNP_P3_103837_55230 | NW_004515674.1 | Scaffold74  | 55230                   | AA                              | TT                | 1946482792               |
| SNP_P3_103838_55387 | NW_004515674.1 | Scaffold74  | 55387                   | AA                              | GG                | 1946482794               |
| SNP_P3_103839_55444 | NW_004515674.1 | Scaffold74  | 55444                   | CC                              | TT                | 1946482795               |
| SNP_P3_103840_56746 | NW_004515674.1 | Scaffold74  | 56746                   | AA                              | GG                | 1946482797               |

| SNPs IDs            | Chromosome IDs | Chromosomes | Physical positions (bp) | CDC Frontier (Reference genome) | (Pusa 256 & HPNB) | NCBI SNPdb Accession IDs |
|---------------------|----------------|-------------|-------------------------|---------------------------------|-------------------|--------------------------|
| SNP_P3_103841_56772 | NW_004515674.1 | Scaffold74  | 56772                   | CC                              | AA                | 1946482798               |
| SNP_P3_103842_56953 | NW_004515674.1 | Scaffold74  | 56953                   | GG                              | AA                | 1946482800               |
| SNP_P3_103843_56958 | NW_004515674.1 | Scaffold74  | 56958                   | TT                              | CC                | 1946482801               |
| SNP_P3_103844_66007 | NW_004515674.1 | Scaffold74  | 66007                   | AA                              | GG                | 1946482803               |
| SNP_P3_103845_66046 | NW_004515674.1 | Scaffold74  | 66046                   | CC                              | AA                | 1946482804               |
| SNP_P3_103846_66054 | NW_004515674.1 | Scaffold74  | 66054                   | AA                              | GG                | 1946482806               |
| SNP_P3_103847_66061 | NW_004515674.1 | Scaffold74  | 66061                   | CC                              | GG                | 1946482807               |
| SNP_P3_103848_66292 | NW_004515674.1 | Scaffold74  | 66292                   | CC                              | AA                | 1946482809               |
| SNP_P3_103849_66297 | NW_004515674.1 | Scaffold74  | 66297                   | CC                              | TT                | 1946482810               |
| SNP_P3_103850_66300 | NW_004515674.1 | Scaffold74  | 66300                   | GG                              | TT                | 1946482812               |
| SNP_P3_103851_66301 | NW_004515674.1 | Scaffold74  | 66301                   | TT                              | CC                | 1946482813               |
| SNP_P3_103852_66307 | NW_004515674.1 | Scaffold74  | 66307                   | CC                              | GG                | 1946482814               |
| SNP_P3_103853_66310 | NW_004515674.1 | Scaffold74  | 66310                   | GG                              | TT                | 1946482816               |
| SNP_P3_103854_66314 | NW_004515674.1 | Scaffold74  | 66314                   | AA                              | TT                | 1946482817               |
| SNP_P3_103855_66417 | NW_004515674.1 | Scaffold74  | 66417                   | GG                              | TT                | 1946482819               |
| SNP_P3_103856_68927 | NW_004515674.1 | Scaffold74  | 68927                   | TT                              | AA                | 1946482820               |
| SNP_P3_103857_68987 | NW_004515674.1 | Scaffold74  | 68987                   | AA                              | GG                | 1946482822               |
| SNP_P3_103858_70536 | NW_004515674.1 | Scaffold74  | 70536                   | AA                              | CC                | 1946482823               |
| SNP_P3_103860_70799 | NW_004515674.1 | Scaffold74  | 70799                   | CC                              | TT                | 1946482825               |
| SNP_P3_103862_71111 | NW_004515674.1 | Scaffold74  | 71111                   | AA                              | CC                | 1946482826               |
| SNP_P3_103863_72231 | NW_004515674.1 | Scaffold74  | 72231                   | TT                              | CC                | 1946482828               |
| SNP_P3_103864_72264 | NW_004515674.1 | Scaffold74  | 72264                   | AA                              | CC                | 1946482829               |
| SNP_P3_103865_72269 | NW_004515674.1 | Scaffold74  | 72269                   | TT                              | CC                | 1946482830               |
| SNP_P3_103866_72272 | NW_004515674.1 | Scaffold74  | 72272                   | TT                              | AA                | 1946482832               |
| SNP_P3_103867_72273 | NW_004515674.1 | Scaffold74  | 72273                   | CC                              | TT                | 1946482833               |
| SNP_P3_103868_72279 | NW_004515674.1 | Scaffold74  | 72279                   | GG                              | TT                | 1946482835               |
| SNP_P3_103869_72280 | NW_004515674.1 | Scaffold74  | 72280                   | AA                              | GG                | 1946482836               |
| SNP_P3_103870_72616 | NW_004515674.1 | Scaffold74  | 72616                   | TT                              | CC                | 1946482837               |
| SNP_P3_103871_88116 | NW_004515674.1 | Scaffold74  | 88116                   | AA                              | GG                | 1946482839               |
| SNP_P3_103872_88977 | NW_004515674.1 | Scaffold74  | 88977                   | AA                              | CC                | 1946482840               |
| SNP_P3_103873_90513 | NW_004515674.1 | Scaffold74  | 90513                   | TT                              | AA                | 1946482842               |
| SNP_P3_103874_90582 | NW_004515674.1 | Scaffold74  | 90582                   | AA                              | GG                | 1946482843               |
| SNP_P3_103875_90593 | NW_004515674.1 | Scaffold74  | 90593                   | CC                              | GG                | 1946482845               |
| SNP_P3_103876_90620 | NW_004515674.1 | Scaffold74  | 90620                   | TT                              | AA                | 1946482846               |
| SNP_P3_103877_90764 | NW_004515674.1 | Scaffold74  | 90764                   | AA                              | GG                | 1946482847               |
| SNP_P3_103878_90961 | NW_004515674.1 | Scaffold74  | 90961                   | AA                              | GG                | 1946482849               |
| SNP_P3_103879_91001 | NW_004515674.1 | Scaffold74  | 91001                   | AA                              | GG                | 1946482850               |
| SNP_P3_103880_91129 | NW_004515674.1 | Scaffold74  | 91129                   | GG                              | CC                | 1946482852               |
| SNP_P3_103881_91158 | NW_004515674.1 | Scaffold74  | 91158                   | GG                              | TT                | 1946482853               |
| SNP_P3_103882_93677 | NW_004515674.1 | Scaffold74  | 93677                   | AA                              | TT                | 1946482854               |
| SNP_P3_103883_93800 | NW_004515674.1 | Scaffold74  | 93800                   | CC                              | AA                | 1946482856               |
| SNP_P3_103884_93804 | NW_004515674.1 | Scaffold74  | 93804                   | GG                              | TT                | 1946482857               |

| SNPs IDs             | Chromosome IDs | Chromosomes | Physical positions (bp) | CDC Frontier (Reference genome) | (Pusa 256 & HPNB) | NCBI SNPdb Accession IDs |
|----------------------|----------------|-------------|-------------------------|---------------------------------|-------------------|--------------------------|
| SNP_P3_103885_93988  | NW_004515674.1 | Scaffold74  | 93988                   | GG                              | TT                | 1946482858               |
| SNP_P3_103886_94000  | NW_004515674.1 | Scaffold74  | 94000                   | TT                              | CC                | 1946482860               |
| SNP_P3_103887_95604  | NW_004515674.1 | Scaffold74  | 95604                   | AA                              | TT                | 1946482861               |
| SNP_P3_103888_95717  | NW_004515674.1 | Scaffold74  | 95717                   | TT                              | CC                | 1946482862               |
| SNP_P3_103889_95735  | NW_004515674.1 | Scaffold74  | 95735                   | TT                              | AA                | 1946482864               |
| SNP_P3_103890_95737  | NW_004515674.1 | Scaffold74  | 95737                   | TT                              | AA                | 1946482865               |
| SNP_P3_103891_95744  | NW_004515674.1 | Scaffold74  | 95744                   | AA                              | TT                | 1946482867               |
| SNP_P3_103892_64     | NW_004515675.1 | Scaffold76  | 64                      | TT                              | CC                | 1946482868               |
| SNP_P3_103893_380    | NW_004515675.1 | Scaffold76  | 380                     | TT                              | AA                | 1946482869               |
| SNP_P3_103897_56186  | NW_004515676.1 | Scaffold80  | 56186                   | TT                              | CC                | 1946482871               |
| SNP_P3_103898_56617  | NW_004515676.1 | Scaffold80  | 56617                   | CC                              | TT                | 1946482872               |
| SNP_P3_103899_56668  | NW_004515676.1 | Scaffold80  | 56668                   | TT                              | GG                | 1946482873               |
| SNP_P3_103900_56708  | NW_004515676.1 | Scaffold80  | 56708                   | AA                              | CC                | 1946482875               |
| SNP_P3_103901_56758  | NW_004515676.1 | Scaffold80  | 56758                   | TT                              | CC                | 1946482876               |
| SNP_P3_103903_56850  | NW_004515676.1 | Scaffold80  | 56850                   | TT                              | GG                | 1946482878               |
| SNP_P3_103906_66400  | NW_004515676.1 | Scaffold80  | 66400                   | GG                              | AA                | 1946482879               |
| SNP_P3_103907_79446  | NW_004515676.1 | Scaffold80  | 79446                   | AA                              | GG                | 1946482880               |
| SNP_P3_103908_79463  | NW_004515676.1 | Scaffold80  | 79463                   | AA                              | GG                | 1946482882               |
| SNP_P3_103909_79464  | NW_004515676.1 | Scaffold80  | 79464                   | AA                              | TT                | 1946482883               |
| SNP_P3_103910_83428  | NW_004515676.1 | Scaffold80  | 83428                   | GG                              | AA                | 1946482885               |
| SNP_P3_103911_83889  | NW_004515676.1 | Scaffold80  | 83889                   | AA                              | GG                | 1946482886               |
| SNP_P3_103912_90122  | NW_004515676.1 | Scaffold80  | 90122                   | GG                              | AA                | 1946482887               |
| SNP_P3_103913_90141  | NW_004515676.1 | Scaffold80  | 90141                   | GG                              | AA                | 1946482889               |
| SNP_P3_103914_90178  | NW_004515676.1 | Scaffold80  | 90178                   | AA                              | CC                | 1946482890               |
| SNP_P3_103915_90207  | NW_004515676.1 | Scaffold80  | 90207                   | AA                              | GG                | 1946482891               |
| SNP_P3_103916_90234  | NW_004515676.1 | Scaffold80  | 90234                   | TT                              | GG                | 1946482893               |
| SNP_P3_103917_101664 | NW_004515676.1 | Scaffold80  | 101664                  | TT                              | CC                | 1946482894               |
| SNP_P3_103918_101869 | NW_004515676.1 | Scaffold80  | 101869                  | CC                              | TT                | 1946482896               |
| SNP_P3_103919_101895 | NW_004515676.1 | Scaffold80  | 101895                  | CC                              | GG                | 1946482897               |
| SNP_P3_103920_101929 | NW_004515676.1 | Scaffold80  | 101929                  | CC                              | TT                | 1946482899               |
| SNP_P3_103921_119738 | NW_004515676.1 | Scaffold80  | 119738                  | TT                              | CC                | 1946482900               |
| SNP_P3_103922_125465 | NW_004515676.1 | Scaffold80  | 125465                  | TT                              | AA                | 1946482901               |
| SNP_P3_103923_125511 | NW_004515676.1 | Scaffold80  | 125511                  | TT                              | AA                | 1946482903               |
| SNP_P3_103924_133149 | NW_004515676.1 | Scaffold80  | 133149                  | TT                              | AA                | 1946482904               |
| SNP_P3_103925_133169 | NW_004515676.1 | Scaffold80  | 133169                  | AA                              | CC                | 1946482906               |
| SNP_P3_103926_134445 | NW_004515676.1 | Scaffold80  | 134445                  | GG                              | TT                | 1946482907               |
| SNP_P3_103927_134458 | NW_004515676.1 | Scaffold80  | 134458                  | CC                              | TT                | 1946482909               |
| SNP_P3_103928_144212 | NW_004515676.1 | Scaffold80  | 144212                  | AA                              | TT                | 1946482910               |
| SNP_P3_103929_144426 | NW_004515676.1 | Scaffold80  | 144426                  | AA                              | GG                | 1946482911               |
| SNP_P3_103930_144466 | NW_004515676.1 | Scaffold80  | 144466                  | CC                              | TT                | 1946482913               |
| SNP_P3_103931_144682 | NW_004515676.1 | Scaffold80  | 144682                  | TT                              | CC                | 1946482914               |
| SNP_P3_103932_144697 | NW_004515676.1 | Scaffold80  | 144697                  | AA                              | CC                | 1946482916               |

| SNPs IDs             | Chromosome IDs | Chromosomes | Physical positions (bp) | CDC Frontier (Reference genome) | (Pusa 256 & HPNB) | NCBI SNPdb Accession IDs |
|----------------------|----------------|-------------|-------------------------|---------------------------------|-------------------|--------------------------|
| SNP_P3_103933_144704 | NW_004515676.1 | Scaffold80  | 144704                  | GG                              | AA                | 1946482917               |
| SNP_P3_103934_144737 | NW_004515676.1 | Scaffold80  | 144737                  | TT                              | GG                | 1946482919               |
| SNP_P3_103935_144766 | NW_004515676.1 | Scaffold80  | 144766                  | AA                              | GG                | 1946482920               |
| SNP_P3_103936_150705 | NW_004515676.1 | Scaffold80  | 150705                  | TT                              | GG                | 1946482921               |
| SNP_P3_103937_150774 | NW_004515676.1 | Scaffold80  | 150774                  | TT                              | CC                | 1946482923               |
| SNP_P3_103938_150908 | NW_004515676.1 | Scaffold80  | 150908                  | AA                              | GG                | 1946482924               |
| SNP_P3_103939_151382 | NW_004515676.1 | Scaffold80  | 151382                  | TT                              | CC                | 1946482926               |
| SNP_P3_103940_173329 | NW_004515676.1 | Scaffold80  | 173329                  | TT                              | AA                | 1946482927               |
| SNP_P3_103941_209747 | NW_004515676.1 | Scaffold80  | 209747                  | AA                              | TT                | 1946482928               |
| SNP_P3_103942_209988 | NW_004515676.1 | Scaffold80  | 209988                  | AA                              | CC                | 1946482930               |
| SNP_P3_103945_273140 | NW_004515676.1 | Scaffold80  | 273140                  | AA                              | GG                | 1946482931               |
| SNP_P3_103947_273519 | NW_004515676.1 | Scaffold80  | 273519                  | AA                              | GG                | 1946482933               |
| SNP_P3_103948_290049 | NW_004515676.1 | Scaffold80  | 290049                  | CC                              | GG                | 1946482934               |
| SNP_P3_103949_315050 | NW_004515676.1 | Scaffold80  | 315050                  | TT                              | CC                | 1946482936               |
| SNP_P3_103950_331929 | NW_004515676.1 | Scaffold80  | 331929                  | CC                              | TT                | 1946482937               |
| SNP_P3_103951_331954 | NW_004515676.1 | Scaffold80  | 331954                  | AA                              | CC                | 1946482939               |
| SNP_P3_103952_331955 | NW_004515676.1 | Scaffold80  | 331955                  | AA                              | GG                | 1946482940               |
| SNP_P3_103953_332274 | NW_004515676.1 | Scaffold80  | 332274                  | GG                              | AA                | 1946482941               |
| SNP_P3_103954_332302 | NW_004515676.1 | Scaffold80  | 332302                  | AA                              | GG                | 1946482943               |
| SNP_P3_103955_332313 | NW_004515676.1 | Scaffold80  | 332313                  | TT                              | GG                | 1946482944               |
| SNP_P3_103956_346244 | NW_004515676.1 | Scaffold80  | 346244                  | AA                              | GG                | 1946482946               |
| SNP_P3_103957_350626 | NW_004515676.1 | Scaffold80  | 350626                  | CC                              | TT                | 1946482947               |
| SNP_P3_103958_350678 | NW_004515676.1 | Scaffold80  | 350678                  | TT                              | CC                | 1946482948               |
| SNP_P3_103959_350696 | NW_004515676.1 | Scaffold80  | 350696                  | CC                              | TT                | 1946482950               |
| SNP_P3_103960_350766 | NW_004515676.1 | Scaffold80  | 350766                  | AA                              | GG                | 1946482951               |
| SNP_P3_103961_354107 | NW_004515676.1 | Scaffold80  | 354107                  | TT                              | CC                | 1946482952               |
| SNP_P3_103962_354121 | NW_004515676.1 | Scaffold80  | 354121                  | TT                              | CC                | 1946482954               |
| SNP_P3_103963_354347 | NW_004515676.1 | Scaffold80  | 354347                  | GG                              | AA                | 1946482955               |
| SNP_P3_103965_354915 | NW_004515676.1 | Scaffold80  | 354915                  | GG                              | AA                | 1946482956               |
| SNP_P3_103966_354954 | NW_004515676.1 | Scaffold80  | 354954                  | GG                              | AA                | 1946482958               |
| SNP_P3_103967_354959 | NW_004515676.1 | Scaffold80  | 354959                  | GG                              | AA                | 1946482959               |
| SNP_P3_103968_354964 | NW_004515676.1 | Scaffold80  | 354964                  | AA                              | GG                | 1946482961               |
| SNP_P3_103969_357546 | NW_004515676.1 | Scaffold80  | 357546                  | TT                              | GG                | 1946482962               |
| SNP_P3_103970_357554 | NW_004515676.1 | Scaffold80  | 357554                  | AA                              | GG                | 1946482963               |
| SNP_P3_103971_358203 | NW_004515676.1 | Scaffold80  | 358203                  | GG                              | AA                | 1946482965               |
| SNP_P3_103972_358227 | NW_004515676.1 | Scaffold80  | 358227                  | CC                              | AA                | 1946482966               |
| SNP_P3_103973_358229 | NW_004515676.1 | Scaffold80  | 358229                  | AA                              | GG                | 1946482967               |
| SNP_P3_103974_358230 | NW_004515676.1 | Scaffold80  | 358230                  | GG                              | AA                | 1946482969               |
| SNP_P3_103975_358236 | NW_004515676.1 | Scaffold80  | 358236                  | GG                              | AA                | 1946482970               |
| SNP_P3_103976_358242 | NW_004515676.1 | Scaffold80  | 358242                  | CC                              | TT                | 1946482971               |
| SNP_P3_103977_359517 | NW_004515676.1 | Scaffold80  | 359517                  | CC                              | TT                | 1946482973               |
| SNP_P3_103978_364567 | NW_004515676.1 | Scaffold80  | 364567                  | AA                              | GG                | 1946482974               |



| SNPs IDs             | Chromosome IDs | Chromosomes | Physical positions (bp) | CDC Frontier (Reference genome) | (Pusa 256 & HPNB) | NCBI SNPdb Accession IDs |
|----------------------|----------------|-------------|-------------------------|---------------------------------|-------------------|--------------------------|
| SNP_P3_103979_364583 | NW_004515676.1 | Scaffold80  | 364583                  | GG                              | AA                | 1946482976               |
| SNP_P3_103980_364594 | NW_004515676.1 | Scaffold80  | 364594                  | AA                              | TT                | 1946482977               |
| SNP_P3_103981_364639 | NW_004515676.1 | Scaffold80  | 364639                  | TT                              | GG                | 1946482978               |
| SNP_P3_103982_365349 | NW_004515676.1 | Scaffold80  | 365349                  | GG                              | TT                | 1946482980               |
| SNP_P3_103983_367591 | NW_004515676.1 | Scaffold80  | 367591                  | GG                              | AA                | 1946482981               |
| SNP_P3_103984_379990 | NW_004515676.1 | Scaffold80  | 379990                  | CC                              | TT                | 1946482983               |
| SNP_P3_103985_379991 | NW_004515676.1 | Scaffold80  | 379991                  | TT                              | CC                | 1946482984               |
| SNP_P3_103986_379992 | NW_004515676.1 | Scaffold80  | 379992                  | AA                              | TT                | 1946482986               |
| SNP_P3_103987_380008 | NW_004515676.1 | Scaffold80  | 380008                  | TT                              | CC                | 1946482987               |
| SNP_P3_103988_382495 | NW_004515676.1 | Scaffold80  | 382495                  | TT                              | CC                | 1946482989               |
| SNP_P3_103989_382498 | NW_004515676.1 | Scaffold80  | 382498                  | AA                              | CC                | 1946482990               |
| SNP_P3_103990_382521 | NW_004515676.1 | Scaffold80  | 382521                  | TT                              | CC                | 1946482991               |
| SNP_P3_103991_382570 | NW_004515676.1 | Scaffold80  | 382570                  | TT                              | CC                | 1946482993               |
| SNP_P3_103992_396387 | NW_004515676.1 | Scaffold80  | 396387                  | TT                              | AA                | 1946482994               |
| SNP_P3_103993_429866 | NW_004515676.1 | Scaffold80  | 429866                  | GG                              | AA                | 1946482996               |
| SNP_P3_103994_431561 | NW_004515676.1 | Scaffold80  | 431561                  | AA                              | GG                | 1946482997               |
| SNP_P3_103996_33408  | NW_004515677.1 | Scaffold81  | 33408                   | AA                              | GG                | 1946482998               |
| SNP_P3_103997_66635  | NW_004515677.1 | Scaffold81  | 66635                   | GG                              | AA                | 1946483000               |
| SNP_P3_103998_67799  | NW_004515677.1 | Scaffold81  | 67799                   | AA                              | CC                | 1946483001               |
| SNP_P3_103999_90451  | NW_004515677.1 | Scaffold81  | 90451                   | AA                              | GG                | 1946483003               |
| SNP_P3_104000_90456  | NW_004515677.1 | Scaffold81  | 90456                   | CC                              | TT                | 1946483004               |
| SNP_P3_104001_90513  | NW_004515677.1 | Scaffold81  | 90513                   | CC                              | AA                | 1946483005               |
| SNP_P3_104002_90599  | NW_004515677.1 | Scaffold81  | 90599                   | AA                              | TT                | 1946483007               |
| SNP_P3_104003_90615  | NW_004515677.1 | Scaffold81  | 90615                   | CC                              | TT                | 1946483008               |
| SNP_P3_104004_90628  | NW_004515677.1 | Scaffold81  | 90628                   | AA                              | CC                | 1946483010               |
| SNP_P3_104005_90691  | NW_004515677.1 | Scaffold81  | 90691                   | GG                              | TT                | 1946483011               |
| SNP_P3_104006_90700  | NW_004515677.1 | Scaffold81  | 90700                   | GG                              | AA                | 1946483013               |
| SNP_P3_104007_91219  | NW_004515677.1 | Scaffold81  | 91219                   | AA                              | TT                | 1946483016               |
| SNP_P3_104008_91305  | NW_004515677.1 | Scaffold81  | 91305                   | AA                              | GG                | 1946483017               |
| SNP_P3_104009_91314  | NW_004515677.1 | Scaffold81  | 91314                   | GG                              | TT                | 1946483019               |
| SNP_P3_104010_91326  | NW_004515677.1 | Scaffold81  | 91326                   | TT                              | AA                | 1946483020               |
| SNP_P3_104011_91338  | NW_004515677.1 | Scaffold81  | 91338                   | CC                              | AA                | 1946483022               |
| SNP_P3_104012_91356  | NW_004515677.1 | Scaffold81  | 91356                   | CC                              | TT                | 1946483023               |
| SNP_P3_104014_91424  | NW_004515677.1 | Scaffold81  | 91424                   | GG                              | CC                | 1946483025               |
| SNP_P3_104015_91446  | NW_004515677.1 | Scaffold81  | 91446                   | GG                              | AA                | 1946483026               |
| SNP_P3_104016_91448  | NW_004515677.1 | Scaffold81  | 91448                   | GG                              | AA                | 1946483027               |
| SNP_P3_104017_91469  | NW_004515677.1 | Scaffold81  | 91469                   | GG                              | CC                | 1946483029               |
| SNP_P3_104018_91499  | NW_004515677.1 | Scaffold81  | 91499                   | TT                              | CC                | 1946483030               |
| SNP_P3_104019_91502  | NW_004515677.1 | Scaffold81  | 91502                   | AA                              | TT                | 1946483032               |
| SNP_P3_104020_91513  | NW_004515677.1 | Scaffold81  | 91513                   | AA                              | GG                | 1946483033               |
| SNP_P3_104021_91524  | NW_004515677.1 | Scaffold81  | 91524                   | GG                              | AA                | 1946483035               |
| SNP_P3_104022_91561  | NW_004515677.1 | Scaffold81  | 91561                   | GG                              | AA                | 1946483036               |

| SNPs IDs            | Chromosome IDs | Chromosomes | Physical positions (bp) | CDC Frontier (Reference genome) | (Pusa 256 & HPNB) | NCBI SNPdb Accession IDs |
|---------------------|----------------|-------------|-------------------------|---------------------------------|-------------------|--------------------------|
| SNP_P3_104023_91602 | NW_004515677.1 | Scaffold81  | 91602                   | AA                              | CC                | 1946483037               |
| SNP_P3_104024_91603 | NW_004515677.1 | Scaffold81  | 91603                   | CC                              | AA                | 1946483039               |
| SNP_P3_104025_91643 | NW_004515677.1 | Scaffold81  | 91643                   | GG                              | AA                | 1946483040               |
| SNP_P3_104026_91665 | NW_004515677.1 | Scaffold81  | 91665                   | AA                              | GG                | 1946483041               |
| SNP_P3_104027_91773 | NW_004515677.1 | Scaffold81  | 91773                   | AA                              | TT                | 1946483043               |
| SNP_P3_104028_91778 | NW_004515677.1 | Scaffold81  | 91778                   | GG                              | CC                | 1946483044               |
| SNP_P3_104030_91866 | NW_004515677.1 | Scaffold81  | 91866                   | CC                              | TT                | 1946483046               |
| SNP_P3_104031_91928 | NW_004515677.1 | Scaffold81  | 91928                   | AA                              | GG                | 1946483047               |
| SNP_P3_104032_91931 | NW_004515677.1 | Scaffold81  | 91931                   | AA                              | TT                | 1946483049               |
| SNP_P3_104033_92003 | NW_004515677.1 | Scaffold81  | 92003                   | AA                              | TT                | 1946483050               |
| SNP_P3_104034_92010 | NW_004515677.1 | Scaffold81  | 92010                   | TT                              | AA                | 1946483051               |
| SNP_P3_104035_92017 | NW_004515677.1 | Scaffold81  | 92017                   | AA                              | GG                | 1946483053               |
| SNP_P3_104036_92033 | NW_004515677.1 | Scaffold81  | 92033                   | AA                              | TT                | 1946483054               |
| SNP_P3_104037_5562  | NW_004515679.1 | Scaffold83  | 5562                    | GG                              | TT                | 1946483056               |
| SNP_P3_104038_5577  | NW_004515679.1 | Scaffold83  | 5577                    | AA                              | GG                | 1946483057               |
| SNP_P3_104039_646   | NW_004515680.1 | Scaffold84  | 646                     | GG                              | AA                | 1946483059               |
| SNP_P3_104040_544   | NW_004515681.1 | Scaffold86  | 544                     | TT                              | GG                | 1946483060               |
| SNP_P3_104041_17111 | NW_004515681.1 | Scaffold86  | 17111                   | CC                              | TT                | 1946483061               |
| SNP_P3_104042_18731 | NW_004515681.1 | Scaffold86  | 18731                   | GG                              | AA                | 1946483063               |
| SNP_P3_104043_18734 | NW_004515681.1 | Scaffold86  | 18734                   | CC                              | GG                | 1946483064               |
| SNP_P3_104044_26046 | NW_004515681.1 | Scaffold86  | 26046                   | GG                              | TT                | 1946483065               |
| SNP_P3_104045_26100 | NW_004515681.1 | Scaffold86  | 26100                   | GG                              | TT                | 1946483067               |
| SNP_P3_104046_26101 | NW_004515681.1 | Scaffold86  | 26101                   | GG                              | AA                | 1946483068               |
| SNP_P3_104047_26107 | NW_004515681.1 | Scaffold86  | 26107                   | AA                              | TT                | 1946483070               |
| SNP_P3_104048_26115 | NW_004515681.1 | Scaffold86  | 26115                   | AA                              | GG                | 1946483071               |
| SNP_P3_104049_26350 | NW_004515681.1 | Scaffold86  | 26350                   | GG                              | AA                | 1946483072               |
| SNP_P3_104050_30961 | NW_004515681.1 | Scaffold86  | 30961                   | GG                              | AA                | 1946483074               |
| SNP_P3_104051_30980 | NW_004515681.1 | Scaffold86  | 30980                   | CC                              | TT                | 1946483075               |
| SNP_P3_104052_31241 | NW_004515681.1 | Scaffold86  | 31241                   | AA                              | GG                | 1946483077               |
| SNP_P3_104053_31375 | NW_004515681.1 | Scaffold86  | 31375                   | GG                              | AA                | 1946483078               |
| SNP_P3_104054_33628 | NW_004515681.1 | Scaffold86  | 33628                   | GG                              | CC                | 1946483079               |
| SNP_P3_104055_39618 | NW_004515681.1 | Scaffold86  | 39618                   | CC                              | TT                | 1946483081               |
| SNP_P3_104056_39661 | NW_004515681.1 | Scaffold86  | 39661                   | GG                              | AA                | 1946483082               |
| SNP_P3_104057_40509 | NW_004515681.1 | Scaffold86  | 40509                   | TT                              | CC                | 1946483084               |
| SNP_P3_104058_47636 | NW_004515681.1 | Scaffold86  | 47636                   | AA                              | CC                | 1946483085               |
| SNP_P3_104059_48524 | NW_004515681.1 | Scaffold86  | 48524                   | AA                              | CC                | 1946483086               |
| SNP_P3_104060_88196 | NW_004515681.1 | Scaffold86  | 88196                   | AA                              | GG                | 1946483088               |
| SNP_P3_104061_88269 | NW_004515681.1 | Scaffold86  | 88269                   | CC                              | TT                | 1946483089               |
| SNP_P3_104062_88275 | NW_004515681.1 | Scaffold86  | 88275                   | AA                              | GG                | 1946483091               |
| SNP_P3_104063_88566 | NW_004515681.1 | Scaffold86  | 88566                   | TT                              | AA                | 1946483092               |
| SNP_P3_104064_88577 | NW_004515681.1 | Scaffold86  | 88577                   | AA                              | GG                | 1946483094               |
| SNP_P3_104065_91954 | NW_004515681.1 | Scaffold86  | 91954                   | GG                              | TT                | 1946483095               |

| SNPs IDs             | Chromosome IDs | Chromosomes | Physical positions (bp) | CDC Frontier (Reference genome) | (Pusa 256 & HPNB) | NCBI SNPdb Accession IDs |
|----------------------|----------------|-------------|-------------------------|---------------------------------|-------------------|--------------------------|
| SNP_P3_104066_92001  | NW_004515681.1 | Scaffold86  | 92001                   | AA                              | CC                | 1946483097               |
| SNP_P3_104067_92356  | NW_004515681.1 | Scaffold86  | 92356                   | AA                              | GG                | 1946483098               |
| SNP_P3_104068_9071   | NW_004515682.1 | Scaffold87  | 9071                    | AA                              | GG                | 1946483100               |
| SNP_P3_104069_9181   | NW_004515682.1 | Scaffold87  | 9181                    | CC                              | TT                | 1946483101               |
| SNP_P3_104070_9216   | NW_004515682.1 | Scaffold87  | 9216                    | CC                              | AA                | 1946483102               |
| SNP_P3_104071_9294   | NW_004515682.1 | Scaffold87  | 9294                    | CC                              | TT                | 1946483104               |
| SNP_P3_104072_9297   | NW_004515682.1 | Scaffold87  | 9297                    | GG                              | TT                | 1946483105               |
| SNP_P3_104073_9424   | NW_004515682.1 | Scaffold87  | 9424                    | TT                              | CC                | 1946483107               |
| SNP_P3_104074_9456   | NW_004515682.1 | Scaffold87  | 9456                    | AA                              | GG                | 1946483108               |
| SNP_P3_104075_9465   | NW_004515682.1 | Scaffold87  | 9465                    | AA                              | GG                | 1946483110               |
| SNP_P3_104076_9472   | NW_004515682.1 | Scaffold87  | 9472                    | GG                              | CC                | 1946483111               |
| SNP_P3_104077_52144  | NW_004515682.1 | Scaffold87  | 52144                   | GG                              | AA                | 1946483113               |
| SNP_P3_104078_79112  | NW_004515682.1 | Scaffold87  | 79112                   | GG                              | CC                | 1946483114               |
| SNP_P3_104079_87399  | NW_004515682.1 | Scaffold87  | 87399                   | GG                              | AA                | 1946483115               |
| SNP_P3_104080_87801  | NW_004515682.1 | Scaffold87  | 87801                   | GG                              | AA                | 1946483117               |
| SNP_P3_104081_115795 | NW_004515682.1 | Scaffold87  | 115795                  | CC                              | AA                | 1946483118               |
| SNP_P3_104082_118009 | NW_004515682.1 | Scaffold87  | 118009                  | AA                              | GG                | 1946483120               |
| SNP_P3_104083_118021 | NW_004515682.1 | Scaffold87  | 118021                  | GG                              | AA                | 1946483121               |
| SNP_P3_104084_118022 | NW_004515682.1 | Scaffold87  | 118022                  | CC                              | TT                | 1946483123               |
| SNP_P3_104085_118025 | NW_004515682.1 | Scaffold87  | 118025                  | TT                              | GG                | 1946483124               |
| SNP_P3_104086_118030 | NW_004515682.1 | Scaffold87  | 118030                  | CC                              | TT                | 1946483126               |
| SNP_P3_104087_118108 | NW_004515682.1 | Scaffold87  | 118108                  | CC                              | TT                | 1946483127               |
| SNP_P3_104088_118109 | NW_004515682.1 | Scaffold87  | 118109                  | CC                              | TT                | 1946483128               |
| SNP_P3_104089_118111 | NW_004515682.1 | Scaffold87  | 118111                  | TT                              | AA                | 1946483130               |
| SNP_P3_104090_118123 | NW_004515682.1 | Scaffold87  | 118123                  | TT                              | AA                | 1946483131               |
| SNP_P3_104091_118196 | NW_004515682.1 | Scaffold87  | 118196                  | GG                              | AA                | 1946483133               |
| SNP_P3_104092_118265 | NW_004515682.1 | Scaffold87  | 118265                  | CC                              | TT                | 1946483134               |
| SNP_P3_104093_120906 | NW_004515682.1 | Scaffold87  | 120906                  | AA                              | GG                | 1946483136               |
| SNP_P3_104094_140470 | NW_004515682.1 | Scaffold87  | 140470                  | GG                              | TT                | 1946483137               |
| SNP_P3_104095_140791 | NW_004515682.1 | Scaffold87  | 140791                  | AA                              | GG                | 1946483138               |
| SNP_P3_104096_149115 | NW_004515682.1 | Scaffold87  | 149115                  | AA                              | GG                | 1946483140               |
| SNP_P3_104097_149153 | NW_004515682.1 | Scaffold87  | 149153                  | AA                              | TT                | 1946483141               |
| SNP_P3_104098_149200 | NW_004515682.1 | Scaffold87  | 149200                  | AA                              | GG                | 1946483143               |
| SNP_P3_104099_149349 | NW_004515682.1 | Scaffold87  | 149349                  | GG                              | TT                | 1946483144               |
| SNP_P3_104101_149490 | NW_004515682.1 | Scaffold87  | 149490                  | TT                              | CC                | 1946483146               |
| SNP_P3_104102_157596 | NW_004515682.1 | Scaffold87  | 157596                  | GG                              | CC                | 1946483147               |
| SNP_P3_104103_158760 | NW_004515682.1 | Scaffold87  | 158760                  | CC                              | GG                | 1946483149               |
| SNP_P3_104104_158811 | NW_004515682.1 | Scaffold87  | 158811                  | GG                              | AA                | 1946483150               |
| SNP_P3_104105_158828 | NW_004515682.1 | Scaffold87  | 158828                  | GG                              | AA                | 1946483151               |
| SNP_P3_104106_158889 | NW_004515682.1 | Scaffold87  | 158889                  | TT                              | GG                | 1946483153               |
| SNP_P3_104107_158934 | NW_004515682.1 | Scaffold87  | 158934                  | TT                              | CC                | 1946483154               |
| SNP_P3_104108_158943 | NW_004515682.1 | Scaffold87  | 158943                  | AA                              | GG                | 1946483156               |

| SNPs IDs             | Chromosome IDs | Chromosomes | Physical positions (bp) | CDC Frontier (Reference genome) | (Pusa 256 & HPNB) | NCBI SNPdb Accession IDs |
|----------------------|----------------|-------------|-------------------------|---------------------------------|-------------------|--------------------------|
| SNP_P3_104109_275839 | NW_004515682.1 | Scaffold87  | 275839                  | AA                              | TT                | 1946483157               |
| SNP_P3_104110_280060 | NW_004515682.1 | Scaffold87  | 280060                  | AA                              | GG                | 1946483158               |
| SNP_P3_104111_287920 | NW_004515682.1 | Scaffold87  | 287920                  | CC                              | TT                | 1946483160               |
| SNP_P3_104112_298717 | NW_004515682.1 | Scaffold87  | 298717                  | AA                              | GG                | 1946483161               |
| SNP_P3_104113_306847 | NW_004515682.1 | Scaffold87  | 306847                  | AA                              | GG                | 1946483163               |
| SNP_P3_104114_306852 | NW_004515682.1 | Scaffold87  | 306852                  | CC                              | AA                | 1946483164               |
| SNP_P3_104115_306863 | NW_004515682.1 | Scaffold87  | 306863                  | AA                              | GG                | 1946483165               |
| SNP_P3_104116_306877 | NW_004515682.1 | Scaffold87  | 306877                  | CC                              | TT                | 1946483167               |
| SNP_P3_104117_306899 | NW_004515682.1 | Scaffold87  | 306899                  | AA                              | GG                | 1946483168               |
| SNP_P3_104118_310489 | NW_004515682.1 | Scaffold87  | 310489                  | TT                              | AA                | 1946483169               |
| SNP_P3_104119_333298 | NW_004515682.1 | Scaffold87  | 333298                  | CC                              | TT                | 1946483171               |
| SNP_P3_104120_340002 | NW_004515682.1 | Scaffold87  | 340002                  | TT                              | GG                | 1946483172               |
| SNP_P3_104121_340651 | NW_004515682.1 | Scaffold87  | 340651                  | TT                              | AA                | 1946483174               |
| SNP_P3_104122_341055 | NW_004515682.1 | Scaffold87  | 341055                  | AA                              | GG                | 1946483175               |
| SNP_P3_104123_346889 | NW_004515682.1 | Scaffold87  | 346889                  | AA                              | TT                | 1946483177               |
| SNP_P3_104125_411257 | NW_004515682.1 | Scaffold87  | 411257                  | TT                              | CC                | 1946483178               |
| SNP_P3_104127_421780 | NW_004515682.1 | Scaffold87  | 421780                  | GG                              | AA                | 1946483179               |
| SNP_P3_104128_421782 | NW_004515682.1 | Scaffold87  | 421782                  | CC                              | TT                | 1946483181               |
| SNP_P3_104129_429259 | NW_004515682.1 | Scaffold87  | 429259                  | AA                              | GG                | 1946483182               |
| SNP_P3_104130_435172 | NW_004515682.1 | Scaffold87  | 435172                  | TT                              | AA                | 1946483184               |
| SNP_P3_104131_435203 | NW_004515682.1 | Scaffold87  | 435203                  | GG                              | AA                | 1946483185               |
| SNP_P3_104132_435227 | NW_004515682.1 | Scaffold87  | 435227                  | GG                              | AA                | 1946483187               |
| SNP_P3_104133_445415 | NW_004515682.1 | Scaffold87  | 445415                  | AA                              | GG                | 1946483188               |
| SNP_P3_104134_445431 | NW_004515682.1 | Scaffold87  | 445431                  | GG                              | CC                | 1946483189               |
| SNP_P3_104135_445495 | NW_004515682.1 | Scaffold87  | 445495                  | CC                              | TT                | 1946483191               |
| SNP_P3_104136_461931 | NW_004515682.1 | Scaffold87  | 461931                  | AA                              | CC                | 1946483192               |
| SNP_P3_104137_462277 | NW_004515682.1 | Scaffold87  | 462277                  | CC                              | GG                | 1946483194               |
| SNP_P3_104138_462290 | NW_004515682.1 | Scaffold87  | 462290                  | CC                              | TT                | 1946483195               |
| SNP_P3_104139_468733 | NW_004515682.1 | Scaffold87  | 468733                  | TT                              | CC                | 1946483197               |
| SNP_P3_104140_468754 | NW_004515682.1 | Scaffold87  | 468754                  | CC                              | TT                | 1946483198               |
| SNP_P3_104141_468790 | NW_004515682.1 | Scaffold87  | 468790                  | TT                              | CC                | 1946483199               |
| SNP_P3_104142_468922 | NW_004515682.1 | Scaffold87  | 468922                  | CC                              | TT                | 1946483201               |
| SNP_P3_104143_468938 | NW_004515682.1 | Scaffold87  | 468938                  | GG                              | TT                | 1946483202               |
| SNP_P3_104144_468952 | NW_004515682.1 | Scaffold87  | 468952                  | CC                              | TT                | 1946483204               |
| SNP_P3_104145_468980 | NW_004515682.1 | Scaffold87  | 468980                  | CC                              | TT                | 1946483205               |
| SNP_P3_104146_469100 | NW_004515682.1 | Scaffold87  | 469100                  | GG                              | AA                | 1946483206               |
| SNP_P3_104147_469134 | NW_004515682.1 | Scaffold87  | 469134                  | TT                              | GG                | 1946483208               |
| SNP_P3_104148_469247 | NW_004515682.1 | Scaffold87  | 469247                  | TT                              | CC                | 1946483209               |
| SNP_P3_104149_471075 | NW_004515682.1 | Scaffold87  | 471075                  | CC                              | TT                | 1946483211               |
| SNP_P3_104150_471444 | NW_004515682.1 | Scaffold87  | 471444                  | AA                              | TT                | 1946483212               |
| SNP_P3_104151_471501 | NW_004515682.1 | Scaffold87  | 471501                  | AA                              | GG                | 1946483213               |
| SNP_P3_104152_471519 | NW_004515682.1 | Scaffold87  | 471519                  | TT                              | AA                | 1946483215               |

| SNPs IDs             | Chromosome IDs | Chromosomes | Physical positions (bp) | CDC Frontier (Reference genome) | (Pusa 256 & HPNB) | NCBI SNPdb Accession IDs |
|----------------------|----------------|-------------|-------------------------|---------------------------------|-------------------|--------------------------|
| SNP_P3_104153_471945 | NW_004515682.1 | Scaffold87  | 471945                  | GG                              | AA                | 1946483216               |
| SNP_P3_104154_475554 | NW_004515682.1 | Scaffold87  | 475554                  | TT                              | GG                | 1946483218               |
| SNP_P3_104155_475564 | NW_004515682.1 | Scaffold87  | 475564                  | AA                              | TT                | 1946483219               |
| SNP_P3_104156_485121 | NW_004515682.1 | Scaffold87  | 485121                  | TT                              | GG                | 1946483221               |
| SNP_P3_104158_503677 | NW_004515682.1 | Scaffold87  | 503677                  | AA                              | GG                | 1946483222               |
| SNP_P3_104159_503718 | NW_004515682.1 | Scaffold87  | 503718                  | TT                              | CC                | 1946483223               |
| SNP_P3_104160_503752 | NW_004515682.1 | Scaffold87  | 503752                  | TT                              | CC                | 1946483225               |
| SNP_P3_104161_504111 | NW_004515682.1 | Scaffold87  | 504111                  | GG                              | CC                | 1946483226               |
| SNP_P3_104162_511140 | NW_004515682.1 | Scaffold87  | 511140                  | GG                              | AA                | 1946483228               |
| SNP_P3_104164_527388 | NW_004515682.1 | Scaffold87  | 527388                  | CC                              | TT                | 1946483229               |
| SNP_P3_104165_529725 | NW_004515682.1 | Scaffold87  | 529725                  | TT                              | CC                | 1946483231               |
| SNP_P3_104166_538418 | NW_004515682.1 | Scaffold87  | 538418                  | TT                              | CC                | 1946483232               |
| SNP_P3_104167_538666 | NW_004515682.1 | Scaffold87  | 538666                  | CC                              | TT                | 1946483234               |
| SNP_P3_104168_538913 | NW_004515682.1 | Scaffold87  | 538913                  | AA                              | GG                | 1946483235               |
| SNP_P3_104169_538921 | NW_004515682.1 | Scaffold87  | 538921                  | GG                              | AA                | 1946483236               |
| SNP_P3_104170_593616 | NW_004515682.1 | Scaffold87  | 593616                  | AA                              | GG                | 1946483238               |
| SNP_P3_104171_593817 | NW_004515682.1 | Scaffold87  | 593817                  | GG                              | AA                | 1946483239               |
| SNP_P3_104172_593837 | NW_004515682.1 | Scaffold87  | 593837                  | CC                              | AA                | 1946483241               |
| SNP_P3_104173_593858 | NW_004515682.1 | Scaffold87  | 593858                  | GG                              | AA                | 1946483242               |
| SNP_P3_104174_593945 | NW_004515682.1 | Scaffold87  | 593945                  | TT                              | AA                | 1946483243               |
| SNP_P3_104175_594167 | NW_004515682.1 | Scaffold87  | 594167                  | GG                              | TT                | 1946483245               |
| SNP_P3_104176_595285 | NW_004515682.1 | Scaffold87  | 595285                  | AA                              | GG                | 1946483246               |
| SNP_P3_104177_595291 | NW_004515682.1 | Scaffold87  | 595291                  | CC                              | TT                | 1946483248               |
| SNP_P3_104178_595350 | NW_004515682.1 | Scaffold87  | 595350                  | AA                              | GG                | 1946483249               |
| SNP_P3_104179_595490 | NW_004515682.1 | Scaffold87  | 595490                  | GG                              | TT                | 1946483251               |
| SNP_P3_104180_595542 | NW_004515682.1 | Scaffold87  | 595542                  | TT                              | AA                | 1946483252               |
| SNP_P3_104181_595591 | NW_004515682.1 | Scaffold87  | 595591                  | TT                              | CC                | 1946483254               |
| SNP_P3_104182_595592 | NW_004515682.1 | Scaffold87  | 595592                  | TT                              | AA                | 1946483255               |
| SNP_P3_104183_595614 | NW_004515682.1 | Scaffold87  | 595614                  | TT                              | CC                | 1946483256               |
| SNP_P3_104184_595921 | NW_004515682.1 | Scaffold87  | 595921                  | GG                              | AA                | 1946483258               |
| SNP_P3_104185_596042 | NW_004515682.1 | Scaffold87  | 596042                  | GG                              | AA                | 1946483259               |
| SNP_P3_104186_596043 | NW_004515682.1 | Scaffold87  | 596043                  | TT                              | CC                | 1946483261               |
| SNP_P3_104187_596044 | NW_004515682.1 | Scaffold87  | 596044                  | TT                              | CC                | 1946483262               |
| SNP_P3_104188_596661 | NW_004515682.1 | Scaffold87  | 596661                  | TT                              | CC                | 1946483264               |
| SNP_P3_104189_596675 | NW_004515682.1 | Scaffold87  | 596675                  | AA                              | CC                | 1946483265               |
| SNP_P3_104190_596981 | NW_004515682.1 | Scaffold87  | 596981                  | GG                              | AA                | 1946483267               |
| SNP_P3_104191_597728 | NW_004515682.1 | Scaffold87  | 597728                  | AA                              | GG                | 1946483268               |
| SNP_P3_104192_598090 | NW_004515682.1 | Scaffold87  | 598090                  | GG                              | TT                | 1946483269               |
| SNP_P3_104193_598166 | NW_004515682.1 | Scaffold87  | 598166                  | TT                              | CC                | 1946483271               |
| SNP_P3_104194_598308 | NW_004515682.1 | Scaffold87  | 598308                  | GG                              | CC                | 1946483272               |
| SNP_P3_104195_598355 | NW_004515682.1 | Scaffold87  | 598355                  | AA                              | TT                | 1946483273               |
| SNP_P3_104196_598388 | NW_004515682.1 | Scaffold87  | 598388                  | CC                              | TT                | 1946483275               |

| SNPs IDs             | Chromosome IDs | Chromosomes | Physical positions (bp) | CDC Frontier (Reference genome) | (Pusa 256 & HPNB) | NCBI SNPdb Accession IDs |
|----------------------|----------------|-------------|-------------------------|---------------------------------|-------------------|--------------------------|
| SNP_P3_104197_598481 | NW_004515682.1 | Scaffold87  | 598481                  | TT                              | CC                | 1946483276               |
| SNP_P3_104199_58780  | NW_004515683.1 | Scaffold88  | 58780                   | AA                              | TT                | 1946483278               |
| SNP_P3_104201_79088  | NW_004515683.1 | Scaffold88  | 79088                   | GG                              | AA                | 1946483279               |
| SNP_P3_104202_79640  | NW_004515683.1 | Scaffold88  | 79640                   | GG                              | TT                | 1946483280               |
| SNP_P3_104203_86085  | NW_004515683.1 | Scaffold88  | 86085                   | TT                              | AA                | 1946483282               |
| SNP_P3_104204_86177  | NW_004515683.1 | Scaffold88  | 86177                   | TT                              | CC                | 1946483283               |
| SNP_P3_104206_123138 | NW_004515683.1 | Scaffold88  | 123138                  | GG                              | AA                | 1946483285               |
| SNP_P3_104207_123484 | NW_004515683.1 | Scaffold88  | 123484                  | TT                              | CC                | 1946483286               |
| SNP_P3_104208_129001 | NW_004515683.1 | Scaffold88  | 129001                  | AA                              | GG                | 1946483287               |
| SNP_P3_104209_133845 | NW_004515683.1 | Scaffold88  | 133845                  | GG                              | TT                | 1946483289               |
| SNP_P3_104210_134229 | NW_004515683.1 | Scaffold88  | 134229                  | TT                              | GG                | 1946483290               |
| SNP_P3_104211_134316 | NW_004515683.1 | Scaffold88  | 134316                  | AA                              | GG                | 1946483292               |
| SNP_P3_104212_156591 | NW_004515683.1 | Scaffold88  | 156591                  | TT                              | CC                | 1946483293               |
| SNP_P3_104213_165264 | NW_004515683.1 | Scaffold88  | 165264                  | CC                              | TT                | 1946483294               |
| SNP_P3_104215_246989 | NW_004515683.1 | Scaffold88  | 246989                  | TT                              | CC                | 1946483296               |
| SNP_P3_104216_6541   | NW_004515684.1 | Scaffold89  | 6541                    | TT                              | CC                | 1946483297               |
| SNP_P3_104217_6576   | NW_004515684.1 | Scaffold89  | 6576                    | GG                              | AA                | 1946483299               |
| SNP_P3_104218_6586   | NW_004515684.1 | Scaffold89  | 6586                    | AA                              | GG                | 1946483300               |
| SNP_P3_104219_7528   | NW_004515684.1 | Scaffold89  | 7528                    | TT                              | AA                | 1946483301               |
| SNP_P3_104220_7543   | NW_004515684.1 | Scaffold89  | 7543                    | TT                              | AA                | 1946483303               |
| SNP_P3_104221_7593   | NW_004515684.1 | Scaffold89  | 7593                    | AA                              | TT                | 1946483304               |
| SNP_P3_104222_12521  | NW_004515684.1 | Scaffold89  | 12521                   | TT                              | CC                | 1946483306               |
| SNP_P3_104223_13174  | NW_004515684.1 | Scaffold89  | 13174                   | CC                              | AA                | 1946483307               |
| SNP_P3_104224_13220  | NW_004515684.1 | Scaffold89  | 13220                   | GG                              | AA                | 1946483308               |
| SNP_P3_104225_13223  | NW_004515684.1 | Scaffold89  | 13223                   | AA                              | TT                | 1946483310               |
| SNP_P3_104226_13487  | NW_004515684.1 | Scaffold89  | 13487                   | AA                              | CC                | 1946483311               |
| SNP_P3_104227_13505  | NW_004515684.1 | Scaffold89  | 13505                   | AA                              | GG                | 1946483313               |
| SNP_P3_104228_13562  | NW_004515684.1 | Scaffold89  | 13562                   | TT                              | CC                | 1946483314               |
| SNP_P3_104229_13609  | NW_004515684.1 | Scaffold89  | 13609                   | TT                              | GG                | 1946483315               |
| SNP_P3_104230_22690  | NW_004515684.1 | Scaffold89  | 22690                   | TT                              | CC                | 1946483317               |
| SNP_P3_104231_23117  | NW_004515684.1 | Scaffold89  | 23117                   | AA                              | GG                | 1946483318               |
| SNP_P3_104232_23562  | NW_004515684.1 | Scaffold89  | 23562                   | TT                              | CC                | 1946483320               |
| SNP_P3_104233_23850  | NW_004515684.1 | Scaffold89  | 23850                   | CC                              | TT                | 1946483321               |
| SNP_P3_104235_23943  | NW_004515684.1 | Scaffold89  | 23943                   | TT                              | CC                | 1946483322               |
| SNP_P3_104236_23957  | NW_004515684.1 | Scaffold89  | 23957                   | AA                              | GG                | 1946483324               |
| SNP_P3_104237_24052  | NW_004515684.1 | Scaffold89  | 24052                   | GG                              | AA                | 1946483325               |
| SNP_P3_104238_24148  | NW_004515684.1 | Scaffold89  | 24148                   | CC                              | TT                | 1946483327               |
| SNP_P3_104239_24247  | NW_004515684.1 | Scaffold89  | 24247                   | AA                              | GG                | 1946483328               |
| SNP_P3_104240_24271  | NW_004515684.1 | Scaffold89  | 24271                   | CC                              | TT                | 1946483330               |
| SNP_P3_104241_25110  | NW_004515684.1 | Scaffold89  | 25110                   | GG                              | TT                | 1946483331               |
| SNP_P3_104244_50495  | NW_004515684.1 | Scaffold89  | 50495                   | AA                              | GG                | 1946483333               |
| SNP_P3_104245_84164  | NW_004515684.1 | Scaffold89  | 84164                   | TT                              | GG                | 1946483334               |

| SNPs IDs             | Chromosome IDs | Chromosomes | Physical positions (bp) | CDC Frontier (Reference genome) | (Pusa 256 & HPNB) | NCBI SNPdb Accession IDs |
|----------------------|----------------|-------------|-------------------------|---------------------------------|-------------------|--------------------------|
| SNP_P3_104246_93755  | NW_004515684.1 | Scaffold89  | 93755                   | GG                              | AA                | 1946483336               |
| SNP_P3_104247_95122  | NW_004515684.1 | Scaffold89  | 95122                   | AA                              | GG                | 1946483337               |
| SNP_P3_104248_99031  | NW_004515684.1 | Scaffold89  | 99031                   | TT                              | AA                | 1946483339               |
| SNP_P3_104250_140148 | NW_004515684.1 | Scaffold89  | 140148                  | TT                              | CC                | 1946483340               |
| SNP_P3_104251_140172 | NW_004515684.1 | Scaffold89  | 140172                  | AA                              | GG                | 1946483341               |
| SNP_P3_104252_140173 | NW_004515684.1 | Scaffold89  | 140173                  | GG                              | TT                | 1946483343               |
| SNP_P3_104253_140412 | NW_004515684.1 | Scaffold89  | 140412                  | CC                              | TT                | 1946483344               |
| SNP_P3_104254_140415 | NW_004515684.1 | Scaffold89  | 140415                  | AA                              | CC                | 1946483346               |
| SNP_P3_104255_140416 | NW_004515684.1 | Scaffold89  | 140416                  | AA                              | GG                | 1946483347               |
| SNP_P3_104256_140772 | NW_004515684.1 | Scaffold89  | 140772                  | GG                              | AA                | 1946483348               |
| SNP_P3_104257_140777 | NW_004515684.1 | Scaffold89  | 140777                  | AA                              | GG                | 1946483350               |
| SNP_P3_104258_140801 | NW_004515684.1 | Scaffold89  | 140801                  | AA                              | GG                | 1946483351               |
| SNP_P3_104260_147022 | NW_004515684.1 | Scaffold89  | 147022                  | TT                              | AA                | 1946483353               |
| SNP_P3_104261_151654 | NW_004515684.1 | Scaffold89  | 151654                  | GG                              | AA                | 1946483354               |
| SNP_P3_104262_168903 | NW_004515684.1 | Scaffold89  | 168903                  | TT                              | AA                | 1946483356               |
| SNP_P3_104263_169043 | NW_004515684.1 | Scaffold89  | 169043                  | AA                              | GG                | 1946483357               |
| SNP_P3_104264_169061 | NW_004515684.1 | Scaffold89  | 169061                  | AA                              | GG                | 1946483358               |
| SNP_P3_104265_169458 | NW_004515684.1 | Scaffold89  | 169458                  | TT                              | AA                | 1946483360               |
| SNP_P3_104266_175631 | NW_004515684.1 | Scaffold89  | 175631                  | CC                              | TT                | 1946483361               |
| SNP_P3_104267_181186 | NW_004515684.1 | Scaffold89  | 181186                  | AA                              | GG                | 1946483363               |
| SNP_P3_104268_181188 | NW_004515684.1 | Scaffold89  | 181188                  | TT                              | AA                | 1946483364               |
| SNP_P3_104269_181200 | NW_004515684.1 | Scaffold89  | 181200                  | CC                              | TT                | 1946483365               |
| SNP_P3_104270_181222 | NW_004515684.1 | Scaffold89  | 181222                  | AA                              | CC                | 1946483367               |
| SNP_P3_104271_197717 | NW_004515684.1 | Scaffold89  | 197717                  | CC                              | AA                | 1946483368               |
| SNP_P3_104272_199493 | NW_004515684.1 | Scaffold89  | 199493                  | AA                              | GG                | 1946483370               |
| SNP_P3_104273_204367 | NW_004515684.1 | Scaffold89  | 204367                  | AA                              | CC                | 1946483371               |
| SNP_P3_104275_212940 | NW_004515684.1 | Scaffold89  | 212940                  | AA                              | GG                | 1946483372               |
| SNP_P3_104276_212951 | NW_004515684.1 | Scaffold89  | 212951                  | CC                              | TT                | 1946483374               |
| SNP_P3_104277_221175 | NW_004515684.1 | Scaffold89  | 221175                  | TT                              | CC                | 1946483375               |
| SNP_P3_104278_221464 | NW_004515684.1 | Scaffold89  | 221464                  | AA                              | CC                | 1946483377               |
| SNP_P3_104279_221465 | NW_004515684.1 | Scaffold89  | 221465                  | TT                              | AA                | 1946483378               |
| SNP_P3_104280_221478 | NW_004515684.1 | Scaffold89  | 221478                  | AA                              | GG                | 1946483379               |
| SNP_P3_104281_221483 | NW_004515684.1 | Scaffold89  | 221483                  | TT                              | CC                | 1946483381               |
| SNP_P3_104282_221574 | NW_004515684.1 | Scaffold89  | 221574                  | AA                              | GG                | 1946483382               |
| SNP_P3_104283_221583 | NW_004515684.1 | Scaffold89  | 221583                  | TT                              | CC                | 1946483384               |
| SNP_P3_104284_221601 | NW_004515684.1 | Scaffold89  | 221601                  | TT                              | CC                | 1946483385               |
| SNP_P3_104285_221799 | NW_004515684.1 | Scaffold89  | 221799                  | AA                              | GG                | 1946483386               |
| SNP_P3_104286_221813 | NW_004515684.1 | Scaffold89  | 221813                  | CC                              | TT                | 1946483388               |
| SNP_P3_104287_221854 | NW_004515684.1 | Scaffold89  | 221854                  | TT                              | CC                | 1946483389               |
| SNP_P3_104288_221870 | NW_004515684.1 | Scaffold89  | 221870                  | AA                              | GG                | 1946483391               |
| SNP_P3_104289_221904 | NW_004515684.1 | Scaffold89  | 221904                  | TT                              | CC                | 1946483392               |
| SNP_P3_104290_221934 | NW_004515684.1 | Scaffold89  | 221934                  | TT                              | CC                | 1946483394               |

| SNPs IDs             | Chromosome IDs | Chromosomes | Physical positions (bp) | CDC Frontier (Reference genome) | (Pusa 256 & HPNB) | NCBI SNPdb Accession IDs |
|----------------------|----------------|-------------|-------------------------|---------------------------------|-------------------|--------------------------|
| SNP_P3_104292_221981 | NW_004515684.1 | Scaffold89  | 221981                  | TT                              | CC                | 1946483395               |
| SNP_P3_104293_222013 | NW_004515684.1 | Scaffold89  | 222013                  | TT                              | CC                | 1946483397               |
| SNP_P3_104294_222312 | NW_004515684.1 | Scaffold89  | 222312                  | CC                              | TT                | 1946483398               |
| SNP_P3_104295_222875 | NW_004515684.1 | Scaffold89  | 222875                  | GG                              | TT                | 1946483400               |
| SNP_P3_104297_272    | NW_004515685.1 | Scaffold92  | 272                     | AA                              | GG                | 1946483401               |
| SNP_P3_104298_3381   | NW_004515685.1 | Scaffold92  | 3381                    | CC                              | TT                | 1946483403               |
| SNP_P3_104299_3432   | NW_004515685.1 | Scaffold92  | 3432                    | TT                              | CC                | 1946483404               |
| SNP_P3_104300_3720   | NW_004515685.1 | Scaffold92  | 3720                    | CC                              | TT                | 1946483406               |
| SNP_P3_104301_3959   | NW_004515685.1 | Scaffold92  | 3959                    | TT                              | CC                | 1946483407               |
| SNP_P3_104302_4093   | NW_004515685.1 | Scaffold92  | 4093                    | TT                              | CC                | 1946483408               |
| SNP_P3_104303_4423   | NW_004515685.1 | Scaffold92  | 4423                    | TT                              | CC                | 1946483410               |
| SNP_P3_104304_4456   | NW_004515685.1 | Scaffold92  | 4456                    | TT                              | AA                | 1946483411               |
| SNP_P3_104305_4495   | NW_004515685.1 | Scaffold92  | 4495                    | AA                              | GG                | 1946483413               |
| SNP_P3_104306_4551   | NW_004515685.1 | Scaffold92  | 4551                    | CC                              | AA                | 1946483414               |
| SNP_P3_104307_16573  | NW_004515685.1 | Scaffold92  | 16573                   | GG                              | TT                | 1946483415               |
| SNP_P3_104308_25868  | NW_004515685.1 | Scaffold92  | 25868                   | CC                              | TT                | 1946483417               |
| SNP_P3_104309_27363  | NW_004515685.1 | Scaffold92  | 27363                   | CC                              | AA                | 1946483418               |
| SNP_P3_104310_28317  | NW_004515685.1 | Scaffold92  | 28317                   | AA                              | GG                | 1946483420               |
| SNP_P3_104311_28367  | NW_004515685.1 | Scaffold92  | 28367                   | AA                              | GG                | 1946483421               |
| SNP_P3_104312_28472  | NW_004515685.1 | Scaffold92  | 28472                   | GG                              | CC                | 1946483422               |
| SNP_P3_104313_28718  | NW_004515685.1 | Scaffold92  | 28718                   | TT                              | CC                | 1946483424               |
| SNP_P3_104314_28719  | NW_004515685.1 | Scaffold92  | 28719                   | AA                              | GG                | 1946483425               |
| SNP_P3_104315_28770  | NW_004515685.1 | Scaffold92  | 28770                   | AA                              | TT                | 1946483427               |
| SNP_P3_104316_28865  | NW_004515685.1 | Scaffold92  | 28865                   | GG                              | AA                | 1946483428               |
| SNP_P3_104317_28921  | NW_004515685.1 | Scaffold92  | 28921                   | AA                              | TT                | 1946483429               |
| SNP_P3_104318_28935  | NW_004515685.1 | Scaffold92  | 28935                   | TT                              | AA                | 1946483431               |
| SNP_P3_104319_28944  | NW_004515685.1 | Scaffold92  | 28944                   | GG                              | AA                | 1946483432               |
| SNP_P3_104320_28960  | NW_004515685.1 | Scaffold92  | 28960                   | AA                              | CC                | 1946483433               |
| SNP_P3_104321_29205  | NW_004515685.1 | Scaffold92  | 29205                   | CC                              | TT                | 1946483435               |
| SNP_P3_104322_29219  | NW_004515685.1 | Scaffold92  | 29219                   | GG                              | AA                | 1946483436               |
| SNP_P3_104323_29347  | NW_004515685.1 | Scaffold92  | 29347                   | TT                              | AA                | 1946483438               |
| SNP_P3_104324_31097  | NW_004515685.1 | Scaffold92  | 31097                   | TT                              | AA                | 1946483439               |
| SNP_P3_104325_31342  | NW_004515685.1 | Scaffold92  | 31342                   | AA                              | TT                | 1946483441               |
| SNP_P3_104326_31344  | NW_004515685.1 | Scaffold92  | 31344                   | AA                              | CC                | 1946483442               |
| SNP_P3_104327_31617  | NW_004515685.1 | Scaffold92  | 31617                   | AA                              | CC                | 1946483444               |
| SNP_P3_104328_31628  | NW_004515685.1 | Scaffold92  | 31628                   | TT                              | AA                | 1946483445               |
| SNP_P3_104329_31741  | NW_004515685.1 | Scaffold92  | 31741                   | GG                              | TT                | 1946483447               |
| SNP_P3_104330_32663  | NW_004515685.1 | Scaffold92  | 32663                   | AA                              | TT                | 1946483448               |
| SNP_P3_104332_33016  | NW_004515685.1 | Scaffold92  | 33016                   | GG                              | AA                | 1946483449               |
| SNP_P3_104333_33200  | NW_004515685.1 | Scaffold92  | 33200                   | GG                              | AA                | 1946483451               |
| SNP_P3_104334_33967  | NW_004515685.1 | Scaffold92  | 33967                   | CC                              | TT                | 1946483452               |
| SNP_P3_104335_34465  | NW_004515685.1 | Scaffold92  | 34465                   | AA                              | GG                | 1946483454               |



| SNPs IDs            | Chromosome IDs | Chromosomes | Physical positions (bp) | CDC Frontier (Reference genome) | (Pusa 256 & HPNB) | NCBI SNPdb Accession IDs |
|---------------------|----------------|-------------|-------------------------|---------------------------------|-------------------|--------------------------|
| SNP_P3_104336_34748 | NW_004515685.1 | Scaffold92  | 34748                   | GG                              | TT                | 1946483455               |
| SNP_P3_104337_34779 | NW_004515685.1 | Scaffold92  | 34779                   | GG                              | CC                | 1946483457               |
| SNP_P3_104338_34794 | NW_004515685.1 | Scaffold92  | 34794                   | CC                              | TT                | 1946483458               |
| SNP_P3_104339_34919 | NW_004515685.1 | Scaffold92  | 34919                   | TT                              | CC                | 1946483459               |
| SNP_P3_104340_34943 | NW_004515685.1 | Scaffold92  | 34943                   | TT                              | CC                | 1946483461               |
| SNP_P3_104341_34975 | NW_004515685.1 | Scaffold92  | 34975                   | AA                              | GG                | 1946483462               |
| SNP_P3_104342_34979 | NW_004515685.1 | Scaffold92  | 34979                   | GG                              | CC                | 1946483464               |
| SNP_P3_104343_35070 | NW_004515685.1 | Scaffold92  | 35070                   | TT                              | CC                | 1946483465               |
| SNP_P3_104344_35106 | NW_004515685.1 | Scaffold92  | 35106                   | CC                              | TT                | 1946483467               |
| SNP_P3_104345_35149 | NW_004515685.1 | Scaffold92  | 35149                   | AA                              | GG                | 1946483468               |
| SNP_P3_104346_35151 | NW_004515685.1 | Scaffold92  | 35151                   | AA                              | GG                | 1946483469               |
| SNP_P3_104347_35417 | NW_004515685.1 | Scaffold92  | 35417                   | TT                              | GG                | 1946483471               |
| SNP_P3_104348_35451 | NW_004515685.1 | Scaffold92  | 35451                   | CC                              | TT                | 1946483472               |
| SNP_P3_104349_35616 | NW_004515685.1 | Scaffold92  | 35616                   | GG                              | TT                | 1946483474               |
| SNP_P3_104350_39283 | NW_004515685.1 | Scaffold92  | 39283                   | TT                              | AA                | 1946483475               |
| SNP_P3_104351_39296 | NW_004515685.1 | Scaffold92  | 39296                   | AA                              | CC                | 1946483476               |
| SNP_P3_104352_39297 | NW_004515685.1 | Scaffold92  | 39297                   | AA                              | CC                | 1946483478               |
| SNP_P3_104353_40916 | NW_004515685.1 | Scaffold92  | 40916                   | AA                              | TT                | 1946483479               |
| SNP_P3_104354_41462 | NW_004515685.1 | Scaffold92  | 41462                   | TT                              | CC                | 1946483481               |
| SNP_P3_104355_44767 | NW_004515685.1 | Scaffold92  | 44767                   | TT                              | GG                | 1946483482               |
| SNP_P3_104356_44775 | NW_004515685.1 | Scaffold92  | 44775                   | CC                              | TT                | 1946483484               |
| SNP_P3_104357_44875 | NW_004515685.1 | Scaffold92  | 44875                   | GG                              | AA                | 1946483485               |
| SNP_P3_104358_44884 | NW_004515685.1 | Scaffold92  | 44884                   | CC                              | TT                | 1946483487               |
| SNP_P3_104359_45106 | NW_004515685.1 | Scaffold92  | 45106                   | TT                              | AA                | 1946483488               |
| SNP_P3_104360_45208 | NW_004515685.1 | Scaffold92  | 45208                   | CC                              | TT                | 1946483490               |
| SNP_P3_104362_49894 | NW_004515685.1 | Scaffold92  | 49894                   | GG                              | AA                | 1946483491               |
| SNP_P3_104363_49900 | NW_004515685.1 | Scaffold92  | 49900                   | CC                              | TT                | 1946483492               |
| SNP_P3_104364_49906 | NW_004515685.1 | Scaffold92  | 49906                   | CC                              | AA                | 1946483494               |
| SNP_P3_104365_49922 | NW_004515685.1 | Scaffold92  | 49922                   | CC                              | TT                | 1946483495               |
| SNP_P3_104366_49966 | NW_004515685.1 | Scaffold92  | 49966                   | GG                              | AA                | 1946483497               |
| SNP_P3_104367_50180 | NW_004515685.1 | Scaffold92  | 50180                   | TT                              | CC                | 1946483498               |
| SNP_P3_104368_69118 | NW_004515685.1 | Scaffold92  | 69118                   | GG                              | TT                | 1946483499               |
| SNP_P3_104369_69142 | NW_004515685.1 | Scaffold92  | 69142                   | TT                              | CC                | 1946483501               |
| SNP_P3_104370_69169 | NW_004515685.1 | Scaffold92  | 69169                   | AA                              | CC                | 1946483502               |
| SNP_P3_104371_69170 | NW_004515685.1 | Scaffold92  | 69170                   | AA                              | CC                | 1946483504               |
| SNP_P3_104372_69174 | NW_004515685.1 | Scaffold92  | 69174                   | CC                              | GG                | 1946483506               |
| SNP_P3_104373_69179 | NW_004515685.1 | Scaffold92  | 69179                   | CC                              | TT                | 1946483507               |
| SNP_P3_104374_69626 | NW_004515685.1 | Scaffold92  | 69626                   | TT                              | CC                | 1946483509               |
| SNP_P3_104375_80505 | NW_004515685.1 | Scaffold92  | 80505                   | CC                              | AA                | 1946483510               |
| SNP_P3_104376_82454 | NW_004515685.1 | Scaffold92  | 82454                   | CC                              | TT                | 1946483511               |
| SNP_P3_104377_85493 | NW_004515685.1 | Scaffold92  | 85493                   | AA                              | TT                | 1946483513               |
| SNP_P3_104378_85740 | NW_004515685.1 | Scaffold92  | 85740                   | AA                              | GG                | 1946483514               |

| SNPs IDs             | Chromosome IDs | Chromosomes | Physical positions (bp) | CDC Frontier (Reference genome) | (Pusa 256 & HPNB) | NCBI SNPdb Accession IDs |
|----------------------|----------------|-------------|-------------------------|---------------------------------|-------------------|--------------------------|
| SNP_P3_104379_89077  | NW_004515685.1 | Scaffold92  | 89077                   | GG                              | TT                | 1946483516               |
| SNP_P3_104380_92416  | NW_004515685.1 | Scaffold92  | 92416                   | AA                              | CC                | 1946483517               |
| SNP_P3_104381_92471  | NW_004515685.1 | Scaffold92  | 92471                   | TT                              | GG                | 1946483518               |
| SNP_P3_104382_92738  | NW_004515685.1 | Scaffold92  | 92738                   | TT                              | AA                | 1946483520               |
| SNP_P3_104384_99850  | NW_004515685.1 | Scaffold92  | 99850                   | TT                              | CC                | 1946483521               |
| SNP_P3_104385_101992 | NW_004515685.1 | Scaffold92  | 101992                  | TT                              | GG                | 1946483523               |
| SNP_P3_104386_102000 | NW_004515685.1 | Scaffold92  | 102000                  | AA                              | TT                | 1946483524               |
| SNP_P3_104387_107999 | NW_004515685.1 | Scaffold92  | 107999                  | TT                              | CC                | 1946483526               |
| SNP_P3_104388_108910 | NW_004515685.1 | Scaffold92  | 108910                  | AA                              | TT                | 1946483527               |
| SNP_P3_104389_108989 | NW_004515685.1 | Scaffold92  | 108989                  | TT                              | CC                | 1946483528               |
| SNP_P3_104391_108994 | NW_004515685.1 | Scaffold92  | 108994                  | AA                              | TT                | 1946483530               |
| SNP_P3_104392_108997 | NW_004515685.1 | Scaffold92  | 108997                  | TT                              | GG                | 1946483531               |
| SNP_P3_104393_109139 | NW_004515685.1 | Scaffold92  | 109139                  | AA                              | GG                | 1946483533               |
| SNP_P3_104394_109150 | NW_004515685.1 | Scaffold92  | 109150                  | CC                              | AA                | 1946483534               |
| SNP_P3_104395_109173 | NW_004515685.1 | Scaffold92  | 109173                  | TT                              | CC                | 1946483535               |
| SNP_P3_104396_109255 | NW_004515685.1 | Scaffold92  | 109255                  | CC                              | TT                | 1946483537               |
| SNP_P3_104397_109414 | NW_004515685.1 | Scaffold92  | 109414                  | GG                              | AA                | 1946483538               |
| SNP_P3_104398_109482 | NW_004515685.1 | Scaffold92  | 109482                  | TT                              | CC                | 1946483539               |
| SNP_P3_104399_109724 | NW_004515685.1 | Scaffold92  | 109724                  | CC                              | TT                | 1946483541               |
| SNP_P3_104400_109727 | NW_004515685.1 | Scaffold92  | 109727                  | AA                              | GG                | 1946483542               |
| SNP_P3_104401_109841 | NW_004515685.1 | Scaffold92  | 109841                  | GG                              | CC                | 1946483544               |
| SNP_P3_104402_109993 | NW_004515685.1 | Scaffold92  | 109993                  | TT                              | CC                | 1946483545               |
| SNP_P3_104403_110101 | NW_004515685.1 | Scaffold92  | 110101                  | CC                              | TT                | 1946483546               |
| SNP_P3_104404_110490 | NW_004515685.1 | Scaffold92  | 110490                  | TT                              | CC                | 1946483548               |
| SNP_P3_104405_114284 | NW_004515685.1 | Scaffold92  | 114284                  | AA                              | TT                | 1946483549               |
| SNP_P3_104406_122154 | NW_004515685.1 | Scaffold92  | 122154                  | CC                              | TT                | 1946483550               |
| SNP_P3_104407_122437 | NW_004515685.1 | Scaffold92  | 122437                  | GG                              | TT                | 1946483552               |
| SNP_P3_104408_7384   | NW_004515686.1 | Scaffold93  | 7384                    | CC                              | TT                | 1946483553               |
| SNP_P3_104409_7561   | NW_004515686.1 | Scaffold93  | 7561                    | GG                              | AA                | 1946483555               |
| SNP_P3_104410_7687   | NW_004515686.1 | Scaffold93  | 7687                    | GG                              | TT                | 1946483556               |
| SNP_P3_104411_7721   | NW_004515686.1 | Scaffold93  | 7721                    | GG                              | AA                | 1946483557               |
| SNP_P3_104412_8360   | NW_004515686.1 | Scaffold93  | 8360                    | AA                              | GG                | 1946483559               |
| SNP_P3_104413_9276   | NW_004515686.1 | Scaffold93  | 9276                    | GG                              | TT                | 1946483560               |
| SNP_P3_104414_9322   | NW_004515686.1 | Scaffold93  | 9322                    | AA                              | GG                | 1946483561               |
| SNP_P3_104415_9327   | NW_004515686.1 | Scaffold93  | 9327                    | AA                              | CC                | 1946483563               |
| SNP_P3_104416_9363   | NW_004515686.1 | Scaffold93  | 9363                    | AA                              | TT                | 1946483564               |
| SNP_P3_104417_9382   | NW_004515686.1 | Scaffold93  | 9382                    | TT                              | GG                | 1946483566               |
| SNP_P3_104418_9457   | NW_004515686.1 | Scaffold93  | 9457                    | AA                              | GG                | 1946483567               |
| SNP_P3_104419_9643   | NW_004515686.1 | Scaffold93  | 9643                    | TT                              | CC                | 1946483568               |
| SNP_P3_104420_9699   | NW_004515686.1 | Scaffold93  | 9699                    | AA                              | CC                | 1946483570               |
| SNP_P3_104421_9708   | NW_004515686.1 | Scaffold93  | 9708                    | CC                              | TT                | 1946483571               |
| SNP_P3_104422_27343  | NW_004515686.1 | Scaffold93  | 27343                   | TT                              | CC                | 1946483572               |

| SNPs IDs             | Chromosome IDs | Chromosomes | Physical positions (bp) | CDC Frontier (Reference genome) | (Pusa 256 & HPNB) | NCBI SNPdb Accession IDs |
|----------------------|----------------|-------------|-------------------------|---------------------------------|-------------------|--------------------------|
| SNP_P3_104423_27351  | NW_004515686.1 | Scaffold93  | 27351                   | CC                              | TT                | 1946483574               |
| SNP_P3_104424_27758  | NW_004515686.1 | Scaffold93  | 27758                   | TT                              | CC                | 1946483575               |
| SNP_P3_104425_27812  | NW_004515686.1 | Scaffold93  | 27812                   | CC                              | TT                | 1946483577               |
| SNP_P3_104426_28357  | NW_004515686.1 | Scaffold93  | 28357                   | AA                              | GG                | 1946483578               |
| SNP_P3_104427_28535  | NW_004515686.1 | Scaffold93  | 28535                   | TT                              | CC                | 1946483579               |
| SNP_P3_104428_28682  | NW_004515686.1 | Scaffold93  | 28682                   | CC                              | TT                | 1946483581               |
| SNP_P3_104429_28715  | NW_004515686.1 | Scaffold93  | 28715                   | CC                              | AA                | 1946483582               |
| SNP_P3_104431_38601  | NW_004515686.1 | Scaffold93  | 38601                   | GG                              | AA                | 1946483583               |
| SNP_P3_104432_41716  | NW_004515686.1 | Scaffold93  | 41716                   | CC                              | TT                | 1946483585               |
| SNP_P3_104433_46774  | NW_004515686.1 | Scaffold93  | 46774                   | TT                              | GG                | 1946483586               |
| SNP_P3_104434_46796  | NW_004515686.1 | Scaffold93  | 46796                   | AA                              | GG                | 1946483587               |
| SNP_P3_104435_46867  | NW_004515686.1 | Scaffold93  | 46867                   | TT                              | CC                | 1946483589               |
| SNP_P3_104436_46884  | NW_004515686.1 | Scaffold93  | 46884                   | AA                              | GG                | 1946483590               |
| SNP_P3_104437_46895  | NW_004515686.1 | Scaffold93  | 46895                   | TT                              | AA                | 1946483592               |
| SNP_P3_104438_46902  | NW_004515686.1 | Scaffold93  | 46902                   | TT                              | CC                | 1946483593               |
| SNP_P3_104439_46930  | NW_004515686.1 | Scaffold93  | 46930                   | AA                              | CC                | 1946483594               |
| SNP_P3_104440_46946  | NW_004515686.1 | Scaffold93  | 46946                   | CC                              | TT                | 1946483596               |
| SNP_P3_104441_47465  | NW_004515686.1 | Scaffold93  | 47465                   | TT                              | CC                | 1946483597               |
| SNP_P3_104442_47774  | NW_004515686.1 | Scaffold93  | 47774                   | TT                              | AA                | 1946483599               |
| SNP_P3_104443_47816  | NW_004515686.1 | Scaffold93  | 47816                   | AA                              | TT                | 1946483600               |
| SNP_P3_104444_63376  | NW_004515686.1 | Scaffold93  | 63376                   | TT                              | CC                | 1946483601               |
| SNP_P3_104445_63497  | NW_004515686.1 | Scaffold93  | 63497                   | AA                              | CC                | 1946483603               |
| SNP_P3_104446_63499  | NW_004515686.1 | Scaffold93  | 63499                   | TT                              | GG                | 1946483604               |
| SNP_P3_104447_63683  | NW_004515686.1 | Scaffold93  | 63683                   | AA                              | GG                | 1946483605               |
| SNP_P3_104448_94180  | NW_004515686.1 | Scaffold93  | 94180                   | CC                              | TT                | 1946483607               |
| SNP_P3_104449_94243  | NW_004515686.1 | Scaffold93  | 94243                   | CC                              | GG                | 1946483608               |
| SNP_P3_104450_94498  | NW_004515686.1 | Scaffold93  | 94498                   | GG                              | AA                | 1946483609               |
| SNP_P3_104451_94557  | NW_004515686.1 | Scaffold93  | 94557                   | TT                              | AA                | 1946483611               |
| SNP_P3_104452_95852  | NW_004515686.1 | Scaffold93  | 95852                   | AA                              | GG                | 1946483612               |
| SNP_P3_104453_97170  | NW_004515686.1 | Scaffold93  | 97170                   | TT                              | CC                | 1946483614               |
| SNP_P3_104454_97175  | NW_004515686.1 | Scaffold93  | 97175                   | TT                              | CC                | 1946483615               |
| SNP_P3_104455_97193  | NW_004515686.1 | Scaffold93  | 97193                   | AA                              | TT                | 1946483616               |
| SNP_P3_104456_97293  | NW_004515686.1 | Scaffold93  | 97293                   | TT                              | CC                | 1946483618               |
| SNP_P3_104457_97321  | NW_004515686.1 | Scaffold93  | 97321                   | AA                              | GG                | 1946483619               |
| SNP_P3_104458_113985 | NW_004515686.1 | Scaffold93  | 113985                  | AA                              | GG                | 1946483621               |
| SNP_P3_104459_114008 | NW_004515686.1 | Scaffold93  | 114008                  | AA                              | GG                | 1946483622               |
| SNP_P3_104461_132665 | NW_004515686.1 | Scaffold93  | 132665                  | AA                              | CC                | 1946483623               |
| SNP_P3_104462_132680 | NW_004515686.1 | Scaffold93  | 132680                  | AA                              | TT                | 1946483625               |
| SNP_P3_104463_132692 | NW_004515686.1 | Scaffold93  | 132692                  | GG                              | TT                | 1946483626               |
| SNP_P3_104464_140813 | NW_004515686.1 | Scaffold93  | 140813                  | TT                              | CC                | 1946483628               |
| SNP_P3_104465_140886 | NW_004515686.1 | Scaffold93  | 140886                  | AA                              | GG                | 1946483629               |
| SNP_P3_104466_140904 | NW_004515686.1 | Scaffold93  | 140904                  | AA                              | CC                | 1946483630               |

| SNPs IDs             | Chromosome IDs | Chromosomes | Physical positions (bp) | CDC Frontier (Reference genome) | (Pusa 256 & HPNB) | NCBI SNPdb Accession IDs |
|----------------------|----------------|-------------|-------------------------|---------------------------------|-------------------|--------------------------|
| SNP_P3_104467_141086 | NW_004515686.1 | Scaffold93  | 141086                  | CC                              | TT                | 1946483632               |
| SNP_P3_104468_141088 | NW_004515686.1 | Scaffold93  | 141088                  | TT                              | CC                | 1946483633               |
| SNP_P3_104470_141174 | NW_004515686.1 | Scaffold93  | 141174                  | CC                              | TT                | 1946483635               |
| SNP_P3_104471_141258 | NW_004515686.1 | Scaffold93  | 141258                  | AA                              | GG                | 1946483636               |
| SNP_P3_104472_141358 | NW_004515686.1 | Scaffold93  | 141358                  | AA                              | GG                | 1946483637               |
| SNP_P3_104473_149053 | NW_004515686.1 | Scaffold93  | 149053                  | AA                              | GG                | 1946483639               |
| SNP_P3_104474_149173 | NW_004515686.1 | Scaffold93  | 149173                  | AA                              | GG                | 1946483640               |
| SNP_P3_104475_149180 | NW_004515686.1 | Scaffold93  | 149180                  | TT                              | AA                | 1946483642               |
| SNP_P3_104476_149184 | NW_004515686.1 | Scaffold93  | 149184                  | TT                              | GG                | 1946483643               |
| SNP_P3_104477_149519 | NW_004515686.1 | Scaffold93  | 149519                  | TT                              | CC                | 1946483644               |
| SNP_P3_104478_149529 | NW_004515686.1 | Scaffold93  | 149529                  | CC                              | GG                | 1946483646               |
| SNP_P3_104480_153318 | NW_004515686.1 | Scaffold93  | 153318                  | AA                              | GG                | 1946483647               |
| SNP_P3_104481_153621 | NW_004515686.1 | Scaffold93  | 153621                  | TT                              | CC                | 1946483648               |
| SNP_P3_104482_153897 | NW_004515686.1 | Scaffold93  | 153897                  | TT                              | CC                | 1946483650               |
| SNP_P3_104483_160216 | NW_004515686.1 | Scaffold93  | 160216                  | TT                              | AA                | 1946483651               |
| SNP_P3_104484_180662 | NW_004515686.1 | Scaffold93  | 180662                  | AA                              | CC                | 1946483653               |
| SNP_P3_104485_180685 | NW_004515686.1 | Scaffold93  | 180685                  | TT                              | CC                | 1946483654               |
| SNP_P3_104486_185426 | NW_004515686.1 | Scaffold93  | 185426                  | AA                              | CC                | 1946483655               |
| SNP_P3_104487_192383 | NW_004515686.1 | Scaffold93  | 192383                  | GG                              | AA                | 1946483657               |
| SNP_P3_104488_192487 | NW_004515686.1 | Scaffold93  | 192487                  | GG                              | AA                | 1946483658               |
| SNP_P3_104489_192509 | NW_004515686.1 | Scaffold93  | 192509                  | CC                              | TT                | 1946483660               |
| SNP_P3_104490_210390 | NW_004515686.1 | Scaffold93  | 210390                  | CC                              | TT                | 1946483661               |
| SNP_P3_104491_210398 | NW_004515686.1 | Scaffold93  | 210398                  | TT                              | AA                | 1946483662               |
| SNP_P3_104492_210403 | NW_004515686.1 | Scaffold93  | 210403                  | GG                              | AA                | 1946483664               |
| SNP_P3_104493_213132 | NW_004515686.1 | Scaffold93  | 213132                  | TT                              | CC                | 1946483665               |
| SNP_P3_104494_218457 | NW_004515686.1 | Scaffold93  | 218457                  | TT                              | GG                | 1946483666               |
| SNP_P3_104497_223955 | NW_004515686.1 | Scaffold93  | 223955                  | AA                              | GG                | 1946483668               |
| SNP_P3_104498_230752 | NW_004515686.1 | Scaffold93  | 230752                  | AA                              | GG                | 1946483669               |
| SNP_P3_104499_230756 | NW_004515686.1 | Scaffold93  | 230756                  | AA                              | GG                | 1946483671               |
| SNP_P3_104500_230816 | NW_004515686.1 | Scaffold93  | 230816                  | AA                              | CC                | 1946483672               |
| SNP_P3_104502_261978 | NW_004515686.1 | Scaffold93  | 261978                  | TT                              | GG                | 1946483673               |
| SNP_P3_104503_264352 | NW_004515686.1 | Scaffold93  | 264352                  | CC                              | TT                | 1946483675               |
| SNP_P3_104504_264495 | NW_004515686.1 | Scaffold93  | 264495                  | TT                              | CC                | 1946483676               |
| SNP_P3_104506_296248 | NW_004515686.1 | Scaffold93  | 296248                  | GG                              | AA                | 1946483678               |
| SNP_P3_104508_296277 | NW_004515686.1 | Scaffold93  | 296277                  | GG                              | AA                | 1946483679               |
| SNP_P3_104509_296320 | NW_004515686.1 | Scaffold93  | 296320                  | TT                              | CC                | 1946483680               |
| SNP_P3_104510_296322 | NW_004515686.1 | Scaffold93  | 296322                  | GG                              | AA                | 1946483682               |
| SNP_P3_104511_296531 | NW_004515686.1 | Scaffold93  | 296531                  | GG                              | AA                | 1946483683               |
| SNP_P3_104512_296561 | NW_004515686.1 | Scaffold93  | 296561                  | CC                              | TT                | 1946483685               |
| SNP_P3_104513_296565 | NW_004515686.1 | Scaffold93  | 296565                  | CC                              | TT                | 1946483686               |
| SNP_P3_104514_296596 | NW_004515686.1 | Scaffold93  | 296596                  | TT                              | GG                | 1946483688               |
| SNP_P3_104515_296619 | NW_004515686.1 | Scaffold93  | 296619                  | GG                              | AA                | 1946483689               |

| SNPs IDs             | Chromosome IDs | Chromosomes | Physical positions (bp) | CDC Frontier (Reference genome) | (Pusa 256 & HPNB) | NCBI SNPdb Accession IDs |
|----------------------|----------------|-------------|-------------------------|---------------------------------|-------------------|--------------------------|
| SNP_P3_104516_296628 | NW_004515686.1 | Scaffold93  | 296628                  | AA                              | CC                | 1946483691               |
| SNP_P3_104517_296671 | NW_004515686.1 | Scaffold93  | 296671                  | TT                              | CC                | 1946483692               |
| SNP_P3_104518_296679 | NW_004515686.1 | Scaffold93  | 296679                  | GG                              | AA                | 1946483694               |
| SNP_P3_104519_296720 | NW_004515686.1 | Scaffold93  | 296720                  | TT                              | GG                | 1946483695               |
| SNP_P3_104520_304135 | NW_004515686.1 | Scaffold93  | 304135                  | TT                              | CC                | 1946483697               |
| SNP_P3_104521_305867 | NW_004515686.1 | Scaffold93  | 305867                  | TT                              | CC                | 1946483698               |
| SNP_P3_104523_321041 | NW_004515686.1 | Scaffold93  | 321041                  | CC                              | TT                | 1946483700               |
| SNP_P3_104524_324181 | NW_004515686.1 | Scaffold93  | 324181                  | CC                              | TT                | 1946483701               |
| SNP_P3_104525_326479 | NW_004515686.1 | Scaffold93  | 326479                  | TT                              | CC                | 1946483703               |
| SNP_P3_104526_337779 | NW_004515686.1 | Scaffold93  | 337779                  | GG                              | AA                | 1946483704               |
| SNP_P3_104527_337851 | NW_004515686.1 | Scaffold93  | 337851                  | TT                              | CC                | 1946483705               |
| SNP_P3_104528_337889 | NW_004515686.1 | Scaffold93  | 337889                  | TT                              | CC                | 1946483707               |
| SNP_P3_104529_337925 | NW_004515686.1 | Scaffold93  | 337925                  | TT                              | CC                | 1946483709               |
| SNP_P3_104530_338015 | NW_004515686.1 | Scaffold93  | 338015                  | AA                              | GG                | 1946483710               |
| SNP_P3_104532_338043 | NW_004515686.1 | Scaffold93  | 338043                  | AA                              | CC                | 1946483712               |
| SNP_P3_104533_338060 | NW_004515686.1 | Scaffold93  | 338060                  | CC                              | AA                | 1946483713               |
| SNP_P3_104534_338074 | NW_004515686.1 | Scaffold93  | 338074                  | CC                              | GG                | 1946483715               |
| SNP_P3_104535_338084 | NW_004515686.1 | Scaffold93  | 338084                  | CC                              | TT                | 1946483716               |
| SNP_P3_104537_338103 | NW_004515686.1 | Scaffold93  | 338103                  | GG                              | TT                | 1946483717               |
| SNP_P3_104538_338114 | NW_004515686.1 | Scaffold93  | 338114                  | TT                              | GG                | 1946483719               |
| SNP_P3_104539_338127 | NW_004515686.1 | Scaffold93  | 338127                  | CC                              | GG                | 1946483720               |
| SNP_P3_104540_338135 | NW_004515686.1 | Scaffold93  | 338135                  | GG                              | TT                | 1946483721               |
| SNP_P3_104541_338224 | NW_004515686.1 | Scaffold93  | 338224                  | AA                              | GG                | 1946483723               |
| SNP_P3_104542_338317 | NW_004515686.1 | Scaffold93  | 338317                  | AA                              | GG                | 1946483724               |
| SNP_P3_104543_338327 | NW_004515686.1 | Scaffold93  | 338327                  | AA                              | CC                | 1946483726               |
| SNP_P3_104544_338408 | NW_004515686.1 | Scaffold93  | 338408                  | GG                              | AA                | 1946483727               |
| SNP_P3_104545_338502 | NW_004515686.1 | Scaffold93  | 338502                  | GG                              | AA                | 1946483729               |
| SNP_P3_104546_347209 | NW_004515686.1 | Scaffold93  | 347209                  | TT                              | CC                | 1946483730               |
| SNP_P3_104547_355928 | NW_004515686.1 | Scaffold93  | 355928                  | TT                              | CC                | 1946483731               |
| SNP_P3_104548_356048 | NW_004515686.1 | Scaffold93  | 356048                  | CC                              | GG                | 1946483733               |
| SNP_P3_104549_356254 | NW_004515686.1 | Scaffold93  | 356254                  | TT                              | AA                | 1946483734               |
| SNP_P3_104550_362879 | NW_004515686.1 | Scaffold93  | 362879                  | AA                              | GG                | 1946483736               |
| SNP_P3_104552_481687 | NW_004515686.1 | Scaffold93  | 481687                  | TT                              | CC                | 1946483737               |
| SNP_P3_104553_483448 | NW_004515686.1 | Scaffold93  | 483448                  | TT                              | GG                | 1946483739               |
| SNP_P3_104554_483455 | NW_004515686.1 | Scaffold93  | 483455                  | GG                              | AA                | 1946483740               |
| SNP_P3_104555_483472 | NW_004515686.1 | Scaffold93  | 483472                  | TT                              | AA                | 1946483741               |
| SNP_P3_104556_483517 | NW_004515686.1 | Scaffold93  | 483517                  | AA                              | GG                | 1946483743               |
| SNP_P3_104557_483613 | NW_004515686.1 | Scaffold93  | 483613                  | GG                              | AA                | 1946483744               |
| SNP_P3_104558_483653 | NW_004515686.1 | Scaffold93  | 483653                  | TT                              | CC                | 1946483746               |
| SNP_P3_104559_483661 | NW_004515686.1 | Scaffold93  | 483661                  | AA                              | GG                | 1946483747               |
| SNP_P3_104560_483787 | NW_004515686.1 | Scaffold93  | 483787                  | CC                              | TT                | 1946483748               |
| SNP_P3_104561_496198 | NW_004515686.1 | Scaffold93  | 496198                  | GG                              | AA                | 1946483750               |

| SNPs IDs             | Chromosome IDs | Chromosomes | Physical positions (bp) | CDC Frontier (Reference genome) | (Pusa 256 & HPNB) | NCBI SNPdb Accession IDs |
|----------------------|----------------|-------------|-------------------------|---------------------------------|-------------------|--------------------------|
| SNP_P3_104562_499075 | NW_004515686.1 | Scaffold93  | 499075                  | TT                              | CC                | 1946483751               |
| SNP_P3_104563_499126 | NW_004515686.1 | Scaffold93  | 499126                  | CC                              | TT                | 1946483753               |
| SNP_P3_104564_503470 | NW_004515686.1 | Scaffold93  | 503470                  | TT                              | CC                | 1946483754               |
| SNP_P3_104566_503489 | NW_004515686.1 | Scaffold93  | 503489                  | TT                              | GG                | 1946483755               |
| SNP_P3_104567_503529 | NW_004515686.1 | Scaffold93  | 503529                  | AA                              | GG                | 1946483757               |
| SNP_P3_104569_503540 | NW_004515686.1 | Scaffold93  | 503540                  | AA                              | CC                | 1946483758               |
| SNP_P3_104570_503547 | NW_004515686.1 | Scaffold93  | 503547                  | AA                              | GG                | 1946483760               |
| SNP_P3_104571_503550 | NW_004515686.1 | Scaffold93  | 503550                  | GG                              | CC                | 1946483761               |
| SNP_P3_104572_503556 | NW_004515686.1 | Scaffold93  | 503556                  | GG                              | TT                | 1946483762               |
| SNP_P3_104573_503562 | NW_004515686.1 | Scaffold93  | 503562                  | AA                              | TT                | 1946483764               |
| SNP_P3_104574_503566 | NW_004515686.1 | Scaffold93  | 503566                  | TT                              | GG                | 1946483765               |
| SNP_P3_104575_503582 | NW_004515686.1 | Scaffold93  | 503582                  | GG                              | CC                | 1946483767               |
| SNP_P3_104577_515504 | NW_004515686.1 | Scaffold93  | 515504                  | TT                              | CC                | 1946483768               |
| SNP_P3_104578_527225 | NW_004515686.1 | Scaffold93  | 527225                  | AA                              | GG                | 1946483770               |
| SNP_P3_104579_527276 | NW_004515686.1 | Scaffold93  | 527276                  | CC                              | TT                | 1946483771               |
| SNP_P3_104580_572673 | NW_004515686.1 | Scaffold93  | 572673                  | CC                              | TT                | 1946483772               |
| SNP_P3_104581_572797 | NW_004515686.1 | Scaffold93  | 572797                  | TT                              | CC                | 1946483774               |
| SNP_P3_104582_572803 | NW_004515686.1 | Scaffold93  | 572803                  | CC                              | AA                | 1946483775               |
| SNP_P3_104583_572872 | NW_004515686.1 | Scaffold93  | 572872                  | AA                              | TT                | 1946483777               |
| SNP_P3_104584_572953 | NW_004515686.1 | Scaffold93  | 572953                  | TT                              | AA                | 1946483778               |
| SNP_P3_104585_573062 | NW_004515686.1 | Scaffold93  | 573062                  | TT                              | CC                | 1946483780               |
| SNP_P3_104586_573063 | NW_004515686.1 | Scaffold93  | 573063                  | GG                              | AA                | 1946483781               |
| SNP_P3_104587_573177 | NW_004515686.1 | Scaffold93  | 573177                  | GG                              | AA                | 1946483783               |
| SNP_P3_104588_573190 | NW_004515686.1 | Scaffold93  | 573190                  | TT                              | CC                | 1946483784               |
| SNP_P3_104589_573273 | NW_004515686.1 | Scaffold93  | 573273                  | CC                              | TT                | 1946483785               |
| SNP_P3_104591_573301 | NW_004515686.1 | Scaffold93  | 573301                  | CC                              | AA                | 1946483787               |
| SNP_P3_104592_573472 | NW_004515686.1 | Scaffold93  | 573472                  | GG                              | CC                | 1946483788               |
| SNP_P3_104593_573906 | NW_004515686.1 | Scaffold93  | 573906                  | TT                              | GG                | 1946483790               |
| SNP_P3_104594_574270 | NW_004515686.1 | Scaffold93  | 574270                  | CC                              | TT                | 1946483791               |
| SNP_P3_104595_598152 | NW_004515686.1 | Scaffold93  | 598152                  | CC                              | AA                | 1946483792               |
| SNP_P3_104596_624591 | NW_004515686.1 | Scaffold93  | 624591                  | CC                              | TT                | 1946483794               |
| SNP_P3_104597_624942 | NW_004515686.1 | Scaffold93  | 624942                  | GG                              | AA                | 1946483795               |
| SNP_P3_104598_625732 | NW_004515686.1 | Scaffold93  | 625732                  | CC                              | TT                | 1946483797               |
| SNP_P3_104599_626020 | NW_004515686.1 | Scaffold93  | 626020                  | CC                              | GG                | 1946483798               |
| SNP_P3_104600_640186 | NW_004515686.1 | Scaffold93  | 640186                  | GG                              | AA                | 1946483799               |
| SNP_P3_104601_651794 | NW_004515686.1 | Scaffold93  | 651794                  | CC                              | TT                | 1946483801               |
| SNP_P3_104602_651850 | NW_004515686.1 | Scaffold93  | 651850                  | TT                              | AA                | 1946483802               |
| SNP_P3_104603_653940 | NW_004515686.1 | Scaffold93  | 653940                  | CC                              | TT                | 1946483804               |
| SNP_P3_104605_662868 | NW_004515686.1 | Scaffold93  | 662868                  | AA                              | CC                | 1946483805               |
| SNP_P3_104606_663130 | NW_004515686.1 | Scaffold93  | 663130                  | TT                              | CC                | 1946483806               |
| SNP_P3_104607_663182 | NW_004515686.1 | Scaffold93  | 663182                  | CC                              | AA                | 1946483808               |
| SNP_P3_104608_663197 | NW_004515686.1 | Scaffold93  | 663197                  | TT                              | AA                | 1946483809               |

| SNPs IDs             | Chromosome IDs | Chromosomes | Physical positions (bp) | CDC Frontier (Reference genome) | (Pusa 256 & HPNB) | NCBI SNPdb Accession IDs |
|----------------------|----------------|-------------|-------------------------|---------------------------------|-------------------|--------------------------|
| SNP_P3_104609_1927   | NW_004515687.1 | Scaffold96  | 1927                    | CC                              | AA                | 1946483810               |
| SNP_P3_104610_1984   | NW_004515687.1 | Scaffold96  | 1984                    | AA                              | GG                | 1946483812               |
| SNP_P3_104611_1986   | NW_004515687.1 | Scaffold96  | 1986                    | GG                              | AA                | 1946483813               |
| SNP_P3_104612_2275   | NW_004515687.1 | Scaffold96  | 2275                    | CC                              | TT                | 1946483815               |
| SNP_P3_104613_2334   | NW_004515687.1 | Scaffold96  | 2334                    | TT                              | CC                | 1946483816               |
| SNP_P3_104614_3781   | NW_004515687.1 | Scaffold96  | 3781                    | GG                              | AA                | 1946483817               |
| SNP_P3_104615_3804   | NW_004515687.1 | Scaffold96  | 3804                    | GG                              | AA                | 1946483819               |
| SNP_P3_104616_6155   | NW_004515687.1 | Scaffold96  | 6155                    | CC                              | TT                | 1946483820               |
| SNP_P3_104617_16795  | NW_004515687.1 | Scaffold96  | 16795                   | TT                              | GG                | 1946483822               |
| SNP_P3_104619_94110  | NW_004515687.1 | Scaffold96  | 94110                   | CC                              | TT                | 1946483823               |
| SNP_P3_104620_100497 | NW_004515687.1 | Scaffold96  | 100497                  | CC                              | TT                | 1946483825               |
| SNP_P3_104621_107062 | NW_004515687.1 | Scaffold96  | 107062                  | TT                              | CC                | 1946483826               |
| SNP_P3_104622_107083 | NW_004515687.1 | Scaffold96  | 107083                  | TT                              | GG                | 1946483827               |
| SNP_P3_104623_107091 | NW_004515687.1 | Scaffold96  | 107091                  | AA                              | GG                | 1946483829               |
| SNP_P3_104624_108707 | NW_004515687.1 | Scaffold96  | 108707                  | CC                              | GG                | 1946483830               |
| SNP_P3_104625_108742 | NW_004515687.1 | Scaffold96  | 108742                  | AA                              | GG                | 1946483832               |
| SNP_P3_104626_108796 | NW_004515687.1 | Scaffold96  | 108796                  | AA                              | TT                | 1946483833               |
| SNP_P3_104627_127902 | NW_004515687.1 | Scaffold96  | 127902                  | GG                              | AA                | 1946483834               |
| SNP_P3_104628_141105 | NW_004515687.1 | Scaffold96  | 141105                  | GG                              | AA                | 1946483836               |
| SNP_P3_104629_142026 | NW_004515687.1 | Scaffold96  | 142026                  | TT                              | CC                | 1946483838               |
| SNP_P3_104630_142386 | NW_004515687.1 | Scaffold96  | 142386                  | CC                              | TT                | 1946483839               |
| SNP_P3_104631_142396 | NW_004515687.1 | Scaffold96  | 142396                  | GG                              | TT                | 1946483841               |
| SNP_P3_104632_155231 | NW_004515687.1 | Scaffold96  | 155231                  | CC                              | TT                | 1946483842               |
| SNP_P3_104633_159487 | NW_004515687.1 | Scaffold96  | 159487                  | GG                              | AA                | 1946483843               |
| SNP_P3_104634_159883 | NW_004515687.1 | Scaffold96  | 159883                  | CC                              | TT                | 1946483845               |
| SNP_P3_104635_159904 | NW_004515687.1 | Scaffold96  | 159904                  | AA                              | GG                | 1946483846               |
| SNP_P3_104636_159950 | NW_004515687.1 | Scaffold96  | 159950                  | GG                              | AA                | 1946483847               |
| SNP_P3_104637_160024 | NW_004515687.1 | Scaffold96  | 160024                  | TT                              | CC                | 1946483849               |
| SNP_P3_104638_160043 | NW_004515687.1 | Scaffold96  | 160043                  | TT                              | GG                | 1946483850               |
| SNP_P3_104639_160069 | NW_004515687.1 | Scaffold96  | 160069                  | TT                              | GG                | 1946483852               |
| SNP_P3_104640_160091 | NW_004515687.1 | Scaffold96  | 160091                  | TT                              | CC                | 1946483853               |
| SNP_P3_104641_160118 | NW_004515687.1 | Scaffold96  | 160118                  | AA                              | TT                | 1946483854               |
| SNP_P3_104642_169381 | NW_004515687.1 | Scaffold96  | 169381                  | TT                              | CC                | 1946483856               |
| SNP_P3_104643_170942 | NW_004515687.1 | Scaffold96  | 170942                  | TT                              | CC                | 1946483857               |
| SNP_P3_104644_180837 | NW_004515687.1 | Scaffold96  | 180837                  | GG                              | AA                | 1946483858               |
| SNP_P3_104645_180943 | NW_004515687.1 | Scaffold96  | 180943                  | GG                              | AA                | 1946483860               |
| SNP_P3_104646_180952 | NW_004515687.1 | Scaffold96  | 180952                  | TT                              | AA                | 1946483861               |
| SNP_P3_104647_180961 | NW_004515687.1 | Scaffold96  | 180961                  | AA                              | CC                | 1946483863               |
| SNP_P3_104648_181031 | NW_004515687.1 | Scaffold96  | 181031                  | TT                              | AA                | 1946483864               |
| SNP_P3_104649_181333 | NW_004515687.1 | Scaffold96  | 181333                  | CC                              | TT                | 1946483865               |
| SNP_P3_104651_199451 | NW_004515687.1 | Scaffold96  | 199451                  | AA                              | TT                | 1946483867               |
| SNP_P3_104652_227599 | NW_004515687.1 | Scaffold96  | 227599                  | CC                              | AA                | 1946483868               |

| SNPs IDs             | Chromosome IDs | Chromosomes | Physical positions (bp) | CDC Frontier (Reference genome) | (Pusa 256 & HPNB) | NCBI SNPdb Accession IDs |
|----------------------|----------------|-------------|-------------------------|---------------------------------|-------------------|--------------------------|
| SNP_P3_104653_229898 | NW_004515687.1 | Scaffold96  | 229898                  | CC                              | AA                | 1946483870               |
| SNP_P3_104654_261529 | NW_004515687.1 | Scaffold96  | 261529                  | TT                              | CC                | 1946483871               |
| SNP_P3_104655_261686 | NW_004515687.1 | Scaffold96  | 261686                  | GG                              | AA                | 1946483872               |
| SNP_P3_104657_282460 | NW_004515687.1 | Scaffold96  | 282460                  | CC                              | AA                | 1946483874               |
| SNP_P3_104658_282469 | NW_004515687.1 | Scaffold96  | 282469                  | CC                              | AA                | 1946483875               |
| SNP_P3_104659_299842 | NW_004515687.1 | Scaffold96  | 299842                  | CC                              | AA                | 1946483876               |
| SNP_P3_104661_316524 | NW_004515687.1 | Scaffold96  | 316524                  | CC                              | TT                | 1946483878               |
| SNP_P3_104662_316537 | NW_004515687.1 | Scaffold96  | 316537                  | CC                              | GG                | 1946483879               |
| SNP_P3_104663_316562 | NW_004515687.1 | Scaffold96  | 316562                  | CC                              | TT                | 1946483881               |
| SNP_P3_104665_316637 | NW_004515687.1 | Scaffold96  | 316637                  | CC                              | TT                | 1946483882               |
| SNP_P3_104666_321076 | NW_004515687.1 | Scaffold96  | 321076                  | CC                              | TT                | 1946483883               |
| SNP_P3_104667_321088 | NW_004515687.1 | Scaffold96  | 321088                  | TT                              | CC                | 1946483885               |
| SNP_P3_104668_335236 | NW_004515687.1 | Scaffold96  | 335236                  | AA                              | GG                | 1946483886               |
| SNP_P3_104669_335238 | NW_004515687.1 | Scaffold96  | 335238                  | CC                              | AA                | 1946483888               |
| SNP_P3_104670_341485 | NW_004515687.1 | Scaffold96  | 341485                  | AA                              | CC                | 1946483889               |
| SNP_P3_104671_13937  | NW_004515688.1 | Scaffold98  | 13937                   | GG                              | AA                | 1946483890               |
| SNP_P3_104672_14611  | NW_004515688.1 | Scaffold98  | 14611                   | AA                              | TT                | 1946483892               |
| SNP_P3_104673_14619  | NW_004515688.1 | Scaffold98  | 14619                   | TT                              | CC                | 1946483893               |
| SNP_P3_104674_33895  | NW_004515688.1 | Scaffold98  | 33895                   | AA                              | CC                | 1946483894               |
| SNP_P3_104675_38663  | NW_004515688.1 | Scaffold98  | 38663                   | TT                              | AA                | 1946483896               |
| SNP_P3_104676_38717  | NW_004515688.1 | Scaffold98  | 38717                   | AA                              | GG                | 1946483897               |
| SNP_P3_104677_54009  | NW_004515688.1 | Scaffold98  | 54009                   | AA                              | GG                | 1946483899               |
| SNP_P3_104678_54149  | NW_004515688.1 | Scaffold98  | 54149                   | TT                              | AA                | 1946483900               |
| SNP_P3_104679_89115  | NW_004515688.1 | Scaffold98  | 89115                   | AA                              | TT                | 1946483901               |
| SNP_P3_104680_89134  | NW_004515688.1 | Scaffold98  | 89134                   | TT                              | CC                | 1946483903               |
| SNP_P3_104681_98489  | NW_004515688.1 | Scaffold98  | 98489                   | AA                              | TT                | 1946483904               |
| SNP_P3_104682_98492  | NW_004515688.1 | Scaffold98  | 98492                   | GG                              | TT                | 1946483906               |
| SNP_P3_104683_101758 | NW_004515688.1 | Scaffold98  | 101758                  | AA                              | GG                | 1946483907               |
| SNP_P3_104684_101998 | NW_004515688.1 | Scaffold98  | 101998                  | TT                              | CC                | 1946483908               |
| SNP_P3_104686_107933 | NW_004515688.1 | Scaffold98  | 107933                  | GG                              | AA                | 1946483910               |
| SNP_P3_104687_107934 | NW_004515688.1 | Scaffold98  | 107934                  | AA                              | TT                | 1946483911               |
| SNP_P3_104688_107935 | NW_004515688.1 | Scaffold98  | 107935                  | TT                              | CC                | 1946483913               |
| SNP_P3_104689_108017 | NW_004515688.1 | Scaffold98  | 108017                  | GG                              | TT                | 1946483914               |
| SNP_P3_104690_109881 | NW_004515688.1 | Scaffold98  | 109881                  | CC                              | TT                | 1946483916               |
| SNP_P3_104691_109957 | NW_004515688.1 | Scaffold98  | 109957                  | TT                              | CC                | 1946483917               |
| SNP_P3_104692_109966 | NW_004515688.1 | Scaffold98  | 109966                  | TT                              | CC                | 1946483918               |
| SNP_P3_104693_144308 | NW_004515688.1 | Scaffold98  | 144308                  | AA                              | GG                | 1946483920               |
| SNP_P3_104694_162958 | NW_004515688.1 | Scaffold98  | 162958                  | CC                              | TT                | 1946483921               |
| SNP_P3_104696_163956 | NW_004515688.1 | Scaffold98  | 163956                  | AA                              | GG                | 1946483923               |
| SNP_P3_104697_164010 | NW_004515688.1 | Scaffold98  | 164010                  | GG                              | AA                | 1946483924               |
| SNP_P3_104699_171868 | NW_004515688.1 | Scaffold98  | 171868                  | GG                              | AA                | 1946483925               |
| SNP_P3_104700_174265 | NW_004515688.1 | Scaffold98  | 174265                  | GG                              | AA                | 1946483927               |



| SNPs IDs             | Chromosome IDs | Chromosomes | Physical positions (bp) | CDC Frontier (Reference genome) | (Pusa 256 & HPNB) | NCBI SNPdb Accession IDs |
|----------------------|----------------|-------------|-------------------------|---------------------------------|-------------------|--------------------------|
| SNP_P3_104702_250265 | NW_004515688.1 | Scaffold98  | 250265                  | CC                              | TT                | 1946483928               |
| SNP_P3_104703_256130 | NW_004515688.1 | Scaffold98  | 256130                  | GG                              | TT                | 1946483930               |
| SNP_P3_104704_257095 | NW_004515688.1 | Scaffold98  | 257095                  | GG                              | AA                | 1946483931               |
| SNP_P3_104705_270824 | NW_004515688.1 | Scaffold98  | 270824                  | AA                              | GG                | 1946483932               |
| SNP_P3_104706_271201 | NW_004515688.1 | Scaffold98  | 271201                  | AA                              | GG                | 1946483934               |
| SNP_P3_104707_271225 | NW_004515688.1 | Scaffold98  | 271225                  | CC                              | TT                | 1946483935               |
| SNP_P3_104708_277329 | NW_004515688.1 | Scaffold98  | 277329                  | TT                              | CC                | 1946483937               |
| SNP_P3_104709_283467 | NW_004515688.1 | Scaffold98  | 283467                  | AA                              | GG                | 1946483940               |
| SNP_P3_104710_296374 | NW_004515688.1 | Scaffold98  | 296374                  | AA                              | GG                | 1946483942               |
| SNP_P3_104711_304452 | NW_004515688.1 | Scaffold98  | 304452                  | CC                              | TT                | 1946483943               |
| SNP_P3_104712_312466 | NW_004515688.1 | Scaffold98  | 312466                  | AA                              | TT                | 1946483945               |
| SNP_P3_104714_318002 | NW_004515688.1 | Scaffold98  | 318002                  | TT                              | GG                | 1946483946               |
| SNP_P3_104715_335065 | NW_004515688.1 | Scaffold98  | 335065                  | GG                              | AA                | 1946483948               |
| SNP_P3_104716_336174 | NW_004515688.1 | Scaffold98  | 336174                  | AA                              | TT                | 1946483949               |
| SNP_P3_104717_336202 | NW_004515688.1 | Scaffold98  | 336202                  | AA                              | GG                | 1946483951               |
| SNP_P3_104718_336227 | NW_004515688.1 | Scaffold98  | 336227                  | AA                              | TT                | 1946483952               |
| SNP_P3_104720_376845 | NW_004515688.1 | Scaffold98  | 376845                  | CC                              | TT                | 1946483954               |
| SNP_P3_104721_406566 | NW_004515688.1 | Scaffold98  | 406566                  | AA                              | GG                | 1946483955               |
| SNP_P3_104723_414843 | NW_004515688.1 | Scaffold98  | 414843                  | AA                              | GG                | 1946483957               |
| SNP_P3_104725_416865 | NW_004515688.1 | Scaffold98  | 416865                  | CC                              | GG                | 1946483958               |
| SNP_P3_104726_416885 | NW_004515688.1 | Scaffold98  | 416885                  | CC                              | TT                | 1946483960               |
| SNP_P3_104727_417256 | NW_004515688.1 | Scaffold98  | 417256                  | TT                              | CC                | 1946483961               |
| SNP_P3_104728_417281 | NW_004515688.1 | Scaffold98  | 417281                  | CC                              | TT                | 1946483963               |
| SNP_P3_104729_417298 | NW_004515688.1 | Scaffold98  | 417298                  | CC                              | AA                | 1946483964               |
| SNP_P3_104730_446684 | NW_004515688.1 | Scaffold98  | 446684                  | GG                              | AA                | 1946483966               |
| SNP_P3_104731_452466 | NW_004515688.1 | Scaffold98  | 452466                  | TT                              | GG                | 1946483967               |
| SNP_P3_104732_459223 | NW_004515688.1 | Scaffold98  | 459223                  | CC                              | TT                | 1946483969               |
| SNP_P3_104733_474668 | NW_004515688.1 | Scaffold98  | 474668                  | TT                              | CC                | 1946483970               |
| SNP_P3_104734_475072 | NW_004515688.1 | Scaffold98  | 475072                  | AA                              | GG                | 1946483971               |
| SNP_P3_104735_475509 | NW_004515688.1 | Scaffold98  | 475509                  | AA                              | GG                | 1946483973               |
| SNP_P3_104736_478521 | NW_004515688.1 | Scaffold98  | 478521                  | AA                              | TT                | 1946483974               |
| SNP_P3_104737_492394 | NW_004515688.1 | Scaffold98  | 492394                  | GG                              | CC                | 1946483976               |
| SNP_P3_104738_499921 | NW_004515688.1 | Scaffold98  | 499921                  | TT                              | AA                | 1946483977               |
| SNP_P3_104740_524286 | NW_004515688.1 | Scaffold98  | 524286                  | GG                              | TT                | 1946483979               |
| SNP_P3_104741_524460 | NW_004515688.1 | Scaffold98  | 524460                  | AA                              | GG                | 1946483980               |
| SNP_P3_104742_524550 | NW_004515688.1 | Scaffold98  | 524550                  | CC                              | TT                | 1946483982               |
| SNP_P3_104743_524662 | NW_004515688.1 | Scaffold98  | 524662                  | AA                              | CC                | 1946483983               |
| SNP_P3_104744_528451 | NW_004515688.1 | Scaffold98  | 528451                  | CC                              | AA                | 1946483985               |
| SNP_P3_104745_567539 | NW_004515688.1 | Scaffold98  | 567539                  | CC                              | TT                | 1946483986               |
| SNP_P3_104746_575206 | NW_004515688.1 | Scaffold98  | 575206                  | GG                              | TT                | 1946483988               |
| SNP_P3_104747_602017 | NW_004515688.1 | Scaffold98  | 602017                  | TT                              | CC                | 1946483989               |
| SNP_P3_104749_660189 | NW_004515688.1 | Scaffold98  | 660189                  | GG                              | AA                | 1946483990               |

| SNPs IDs             | Chromosome IDs | Chromosomes | Physical positions (bp) | CDC Frontier (Reference genome) | (Pusa 256 & HPNB) | NCBI SNPdb Accession IDs |
|----------------------|----------------|-------------|-------------------------|---------------------------------|-------------------|--------------------------|
| SNP_P3_104751_685464 | NW_004515688.1 | Scaffold98  | 685464                  | AA                              | CC                | 1946483992               |
| SNP_P3_104752_699681 | NW_004515688.1 | Scaffold98  | 699681                  | TT                              | CC                | 1946483993               |
| SNP_P3_104753_702482 | NW_004515688.1 | Scaffold98  | 702482                  | AA                              | TT                | 1946483995               |
| SNP_P3_104754_702484 | NW_004515688.1 | Scaffold98  | 702484                  | CC                              | TT                | 1946483996               |
| SNP_P3_104755_5725   | NW_004515689.1 | Scaffold99  | 5725                    | TT                              | CC                | 1946483997               |
| SNP_P3_104756_5746   | NW_004515689.1 | Scaffold99  | 5746                    | CC                              | AA                | 1946483999               |
| SNP_P3_104757_5747   | NW_004515689.1 | Scaffold99  | 5747                    | CC                              | TT                | 1946484000               |
| SNP_P3_104758_5782   | NW_004515689.1 | Scaffold99  | 5782                    | CC                              | AA                | 1946484002               |
| SNP_P3_104759_6022   | NW_004515689.1 | Scaffold99  | 6022                    | CC                              | TT                | 1946484003               |
| SNP_P3_104760_11544  | NW_004515689.1 | Scaffold99  | 11544                   | AA                              | TT                | 1946484005               |
| SNP_P3_104761_11555  | NW_004515689.1 | Scaffold99  | 11555                   | AA                              | GG                | 1946484006               |
| SNP_P3_104762_11556  | NW_004515689.1 | Scaffold99  | 11556                   | CC                              | GG                | 1946484007               |
| SNP_P3_104763_11772  | NW_004515689.1 | Scaffold99  | 11772                   | AA                              | CC                | 1946484009               |
| SNP_P3_104764_11773  | NW_004515689.1 | Scaffold99  | 11773                   | GG                              | CC                | 1946484010               |
| SNP_P3_104765_11801  | NW_004515689.1 | Scaffold99  | 11801                   | GG                              | TT                | 1946484012               |
| SNP_P3_104766_51556  | NW_004515689.1 | Scaffold99  | 51556                   | CC                              | TT                | 1946484013               |
| SNP_P3_104768_58352  | NW_004515689.1 | Scaffold99  | 58352                   | CC                              | TT                | 1946484015               |
| SNP_P3_104769_58378  | NW_004515689.1 | Scaffold99  | 58378                   | CC                              | AA                | 1946484016               |
| SNP_P3_104770_69579  | NW_004515689.1 | Scaffold99  | 69579                   | GG                              | AA                | 1946484017               |
| SNP_P3_104771_69590  | NW_004515689.1 | Scaffold99  | 69590                   | GG                              | AA                | 1946484019               |
| SNP_P3_104772_69634  | NW_004515689.1 | Scaffold99  | 69634                   | AA                              | CC                | 1946484020               |
| SNP_P3_104773_71325  | NW_004515689.1 | Scaffold99  | 71325                   | TT                              | AA                | 1946484022               |
| SNP_P3_104775_81669  | NW_004515689.1 | Scaffold99  | 81669                   | TT                              | AA                | 1946484023               |
| SNP_P3_104776_82009  | NW_004515689.1 | Scaffold99  | 82009                   | AA                              | TT                | 1946484025               |
| SNP_P3_104777_82026  | NW_004515689.1 | Scaffold99  | 82026                   | AA                              | GG                | 1946484026               |
| SNP_P3_104779_109298 | NW_004515689.1 | Scaffold99  | 109298                  | CC                              | TT                | 1946484028               |
| SNP_P3_104780_110486 | NW_004515689.1 | Scaffold99  | 110486                  | AA                              | TT                | 1946484029               |
| SNP_P3_104781_111825 | NW_004515689.1 | Scaffold99  | 111825                  | GG                              | AA                | 1946484031               |
| SNP_P3_104782_111833 | NW_004515689.1 | Scaffold99  | 111833                  | GG                              | AA                | 1946484032               |
| SNP_P3_104783_112247 | NW_004515689.1 | Scaffold99  | 112247                  | AA                              | TT                | 1946484034               |
| SNP_P3_104784_118054 | NW_004515689.1 | Scaffold99  | 118054                  | AA                              | TT                | 1946484035               |
| SNP_P3_104785_118225 | NW_004515689.1 | Scaffold99  | 118225                  | GG                              | TT                | 1946484037               |
| SNP_P3_104786_118230 | NW_004515689.1 | Scaffold99  | 118230                  | GG                              | TT                | 1946484038               |
| SNP_P3_104787_118248 | NW_004515689.1 | Scaffold99  | 118248                  | CC                              | GG                | 1946484039               |
| SNP_P3_104788_124808 | NW_004515689.1 | Scaffold99  | 124808                  | GG                              | AA                | 1946484041               |
| SNP_P3_104789_132395 | NW_004515689.1 | Scaffold99  | 132395                  | GG                              | AA                | 1946484042               |
| SNP_P3_104790_132473 | NW_004515689.1 | Scaffold99  | 132473                  | GG                              | AA                | 1946484044               |
| SNP_P3_104791_132750 | NW_004515689.1 | Scaffold99  | 132750                  | TT                              | CC                | 1946484045               |
| SNP_P3_104792_132799 | NW_004515689.1 | Scaffold99  | 132799                  | TT                              | CC                | 1946484047               |
| SNP_P3_104793_132812 | NW_004515689.1 | Scaffold99  | 132812                  | AA                              | CC                | 1946484048               |
| SNP_P3_104794_132815 | NW_004515689.1 | Scaffold99  | 132815                  | GG                              | TT                | 1946484050               |
| SNP_P3_104795_132835 | NW_004515689.1 | Scaffold99  | 132835                  | AA                              | GG                | 1946484051               |

| SNPs IDs             | Chromosome IDs | Chromosomes | Physical positions (bp) | CDC Frontier (Reference genome) | (Pusa 256 & HPNB) | NCBI SNPdb Accession IDs |
|----------------------|----------------|-------------|-------------------------|---------------------------------|-------------------|--------------------------|
| SNP_P3_104796_132872 | NW_004515689.1 | Scaffold99  | 132872                  | TT                              | CC                | 1946484053               |
| SNP_P3_104797_133171 | NW_004515689.1 | Scaffold99  | 133171                  | TT                              | CC                | 1946484054               |
| SNP_P3_104798_160695 | NW_004515689.1 | Scaffold99  | 160695                  | TT                              | GG                | 1946484056               |
| SNP_P3_104799_163240 | NW_004515689.1 | Scaffold99  | 163240                  | TT                              | GG                | 1946484057               |
| SNP_P3_104800_176534 | NW_004515689.1 | Scaffold99  | 176534                  | GG                              | AA                | 1946484059               |
| SNP_P3_104801_199288 | NW_004515689.1 | Scaffold99  | 199288                  | TT                              | AA                | 1946484060               |
| SNP_P3_104802_199381 | NW_004515689.1 | Scaffold99  | 199381                  | GG                              | AA                | 1946484061               |
| SNP_P3_104803_200114 | NW_004515689.1 | Scaffold99  | 200114                  | AA                              | GG                | 1946484063               |
| SNP_P3_104804_207532 | NW_004515689.1 | Scaffold99  | 207532                  | GG                              | AA                | 1946484064               |
| SNP_P3_104805_208413 | NW_004515689.1 | Scaffold99  | 208413                  | TT                              | GG                | 1946484066               |
| SNP_P3_104806_215175 | NW_004515689.1 | Scaffold99  | 215175                  | AA                              | GG                | 1946484067               |
| SNP_P3_104807_215181 | NW_004515689.1 | Scaffold99  | 215181                  | TT                              | CC                | 1946484069               |
| SNP_P3_104808_215457 | NW_004515689.1 | Scaffold99  | 215457                  | GG                              | AA                | 1946484070               |
| SNP_P3_104809_215569 | NW_004515689.1 | Scaffold99  | 215569                  | GG                              | AA                | 1946484072               |
| SNP_P3_104810_223287 | NW_004515689.1 | Scaffold99  | 223287                  | TT                              | CC                | 1946484073               |
| SNP_P3_104811_233867 | NW_004515689.1 | Scaffold99  | 233867                  | AA                              | CC                | 1946484075               |
| SNP_P3_104812_236893 | NW_004515689.1 | Scaffold99  | 236893                  | AA                              | CC                | 1946484076               |
| SNP_P3_104813_236897 | NW_004515689.1 | Scaffold99  | 236897                  | CC                              | AA                | 1946484078               |
| SNP_P3_104815_236912 | NW_004515689.1 | Scaffold99  | 236912                  | TT                              | AA                | 1946484079               |
| SNP_P3_104816_236958 | NW_004515689.1 | Scaffold99  | 236958                  | TT                              | CC                | 1946484081               |
| SNP_P3_104817_240750 | NW_004515689.1 | Scaffold99  | 240750                  | TT                              | CC                | 1946484082               |
| SNP_P3_104818_240787 | NW_004515689.1 | Scaffold99  | 240787                  | AA                              | TT                | 1946484084               |
| SNP_P3_104819_241966 | NW_004515689.1 | Scaffold99  | 241966                  | TT                              | CC                | 1946484085               |
| SNP_P3_104820_241968 | NW_004515689.1 | Scaffold99  | 241968                  | GG                              | AA                | 1946484087               |
| SNP_P3_104821_241990 | NW_004515689.1 | Scaffold99  | 241990                  | AA                              | GG                | 1946484088               |
| SNP_P3_104822_242317 | NW_004515689.1 | Scaffold99  | 242317                  | AA                              | GG                | 1946484090               |
| SNP_P3_104823_3639   | NW_004515690.1 | Scaffold100 | 3639                    | AA                              | GG                | 1946484091               |
| SNP_P3_104824_9154   | NW_004515690.1 | Scaffold100 | 9154                    | GG                              | AA                | 1946484093               |
| SNP_P3_104825_9156   | NW_004515690.1 | Scaffold100 | 9156                    | TT                              | CC                | 1946484094               |
| SNP_P3_104826_9160   | NW_004515690.1 | Scaffold100 | 9160                    | CC                              | GG                | 1946484095               |
| SNP_P3_104827_9180   | NW_004515690.1 | Scaffold100 | 9180                    | GG                              | TT                | 1946484097               |
| SNP_P3_104828_9189   | NW_004515690.1 | Scaffold100 | 9189                    | CC                              | TT                | 1946484098               |
| SNP_P3_104829_9243   | NW_004515690.1 | Scaffold100 | 9243                    | AA                              | TT                | 1946484100               |
| SNP_P3_104830_9413   | NW_004515690.1 | Scaffold100 | 9413                    | AA                              | GG                | 1946484101               |
| SNP_P3_104831_9513   | NW_004515690.1 | Scaffold100 | 9513                    | CC                              | TT                | 1946484103               |
| SNP_P3_104832_9616   | NW_004515690.1 | Scaffold100 | 9616                    | TT                              | CC                | 1946484104               |
| SNP_P3_104833_14030  | NW_004515690.1 | Scaffold100 | 14030                   | TT                              | AA                | 1946484106               |
| SNP_P3_104834_14637  | NW_004515690.1 | Scaffold100 | 14637                   | TT                              | AA                | 1946484107               |
| SNP_P3_104835_14987  | NW_004515690.1 | Scaffold100 | 14987                   | TT                              | GG                | 1946484109               |
| SNP_P3_104836_18710  | NW_004515690.1 | Scaffold100 | 18710                   | CC                              | GG                | 1946484110               |
| SNP_P3_104837_18718  | NW_004515690.1 | Scaffold100 | 18718                   | AA                              | GG                | 1946484112               |
| SNP_P3_104838_18733  | NW_004515690.1 | Scaffold100 | 18733                   | TT                              | GG                | 1946484113               |

| SNPs IDs             | Chromosome IDs | Chromosomes | Physical positions (bp) | CDC Frontier (Reference genome) | (Pusa 256 & HPNB) | NCBI SNPdb Accession IDs |
|----------------------|----------------|-------------|-------------------------|---------------------------------|-------------------|--------------------------|
| SNP_P3_104839_18738  | NW_004515690.1 | Scaffold100 | 18738                   | TT                              | CC                | 1946484115               |
| SNP_P3_104840_18759  | NW_004515690.1 | Scaffold100 | 18759                   | GG                              | AA                | 1946484116               |
| SNP_P3_104841_18770  | NW_004515690.1 | Scaffold100 | 18770                   | TT                              | AA                | 1946484118               |
| SNP_P3_104842_18777  | NW_004515690.1 | Scaffold100 | 18777                   | CC                              | TT                | 1946484119               |
| SNP_P3_104843_18779  | NW_004515690.1 | Scaffold100 | 18779                   | AA                              | GG                | 1946484121               |
| SNP_P3_104844_18789  | NW_004515690.1 | Scaffold100 | 18789                   | GG                              | AA                | 1946484122               |
| SNP_P3_104845_18793  | NW_004515690.1 | Scaffold100 | 18793                   | TT                              | GG                | 1946484124               |
| SNP_P3_104846_18804  | NW_004515690.1 | Scaffold100 | 18804                   | GG                              | CC                | 1946484125               |
| SNP_P3_104847_18846  | NW_004515690.1 | Scaffold100 | 18846                   | AA                              | GG                | 1946484127               |
| SNP_P3_104848_18849  | NW_004515690.1 | Scaffold100 | 18849                   | TT                              | CC                | 1946484128               |
| SNP_P3_104849_18854  | NW_004515690.1 | Scaffold100 | 18854                   | GG                              | TT                | 1946484130               |
| SNP_P3_104850_18871  | NW_004515690.1 | Scaffold100 | 18871                   | TT                              | AA                | 1946484131               |
| SNP_P3_104851_18882  | NW_004515690.1 | Scaffold100 | 18882                   | CC                              | TT                | 1946484133               |
| SNP_P3_104852_18895  | NW_004515690.1 | Scaffold100 | 18895                   | GG                              | AA                | 1946484134               |
| SNP_P3_104853_18900  | NW_004515690.1 | Scaffold100 | 18900                   | TT                              | CC                | 1946484136               |
| SNP_P3_104854_19132  | NW_004515690.1 | Scaffold100 | 19132                   | AA                              | TT                | 1946484137               |
| SNP_P3_104855_19140  | NW_004515690.1 | Scaffold100 | 19140                   | AA                              | TT                | 1946484139               |
| SNP_P3_104856_41455  | NW_004515690.1 | Scaffold100 | 41455                   | TT                              | CC                | 1946484140               |
| SNP_P3_104857_53545  | NW_004515690.1 | Scaffold100 | 53545                   | AA                              | GG                | 1946484141               |
| SNP_P3_104858_53550  | NW_004515690.1 | Scaffold100 | 53550                   | TT                              | GG                | 1946484143               |
| SNP_P3_104859_43309  | NW_004515691.1 | Scaffold102 | 43309                   | TT                              | GG                | 1946484144               |
| SNP_P3_104860_43327  | NW_004515691.1 | Scaffold102 | 43327                   | TT                              | AA                | 1946484146               |
| SNP_P3_104861_43333  | NW_004515691.1 | Scaffold102 | 43333                   | AA                              | GG                | 1946484147               |
| SNP_P3_104862_53411  | NW_004515691.1 | Scaffold102 | 53411                   | CC                              | TT                | 1946484149               |
| SNP_P3_104863_53420  | NW_004515691.1 | Scaffold102 | 53420                   | GG                              | TT                | 1946484150               |
| SNP_P3_104864_104495 | NW_004515691.1 | Scaffold102 | 104495                  | TT                              | CC                | 1946484152               |
| SNP_P3_104865_104695 | NW_004515691.1 | Scaffold102 | 104695                  | TT                              | CC                | 1946484153               |
| SNP_P3_104866_104842 | NW_004515691.1 | Scaffold102 | 104842                  | CC                              | TT                | 1946484155               |
| SNP_P3_104867_104994 | NW_004515691.1 | Scaffold102 | 104994                  | TT                              | GG                | 1946484156               |
| SNP_P3_104868_105031 | NW_004515691.1 | Scaffold102 | 105031                  | TT                              | CC                | 1946484157               |
| SNP_P3_104869_105059 | NW_004515691.1 | Scaffold102 | 105059                  | AA                              | GG                | 1946484159               |
| SNP_P3_104870_105064 | NW_004515691.1 | Scaffold102 | 105064                  | CC                              | TT                | 1946484160               |
| SNP_P3_104871_105066 | NW_004515691.1 | Scaffold102 | 105066                  | AA                              | GG                | 1946484162               |
| SNP_P3_104872_106792 | NW_004515691.1 | Scaffold102 | 106792                  | GG                              | TT                | 1946484163               |
| SNP_P3_104873_106951 | NW_004515691.1 | Scaffold102 | 106951                  | GG                              | AA                | 1946484165               |
| SNP_P3_104874_106974 | NW_004515691.1 | Scaffold102 | 106974                  | GG                              | AA                | 1946484166               |
| SNP_P3_104875_117673 | NW_004515691.1 | Scaffold102 | 117673                  | AA                              | TT                | 1946484168               |
| SNP_P3_104876_121518 | NW_004515691.1 | Scaffold102 | 121518                  | CC                              | AA                | 1946484169               |
| SNP_P3_104877_121784 | NW_004515691.1 | Scaffold102 | 121784                  | TT                              | AA                | 1946484171               |
| SNP_P3_104878_121927 | NW_004515691.1 | Scaffold102 | 121927                  | CC                              | TT                | 1946484172               |
| SNP_P3_104879_142423 | NW_004515691.1 | Scaffold102 | 142423                  | CC                              | AA                | 1946484174               |
| SNP_P3_104880_142424 | NW_004515691.1 | Scaffold102 | 142424                  | AA                              | TT                | 1946484175               |

| SNPs IDs             | Chromosome IDs | Chromosomes   | Physical positions (bp) | CDC Frontier (Reference genome) | (Pusa 256 & HPNB) | NCBI SNPdb Accession IDs |
|----------------------|----------------|---------------|-------------------------|---------------------------------|-------------------|--------------------------|
| SNP_P3_104881_143676 | NW_004515691.1 | Scaffold102   | 143676                  | TT                              | CC                | 1946484177               |
| SNP_P3_104882_143712 | NW_004515691.1 | Scaffold102   | 143712                  | AA                              | GG                | 1946484178               |
| SNP_P3_104883_143787 | NW_004515691.1 | Scaffold102   | 143787                  | GG                              | AA                | 1946484179               |
| SNP_P3_104884_143822 | NW_004515691.1 | Scaffold102   | 143822                  | TT                              | CC                | 1946484181               |
| SNP_P3_104885_144162 | NW_004515691.1 | Scaffold102   | 144162                  | GG                              | AA                | 1946484182               |
| SNP_P3_104887_297    | NW_004515692.1 | Scaffold103   | 297                     | TT                              | GG                | 1946484184               |
| SNP_P3_104888_174    | NW_004515693.1 | Scaffold106   | 174                     | GG                              | AA                | 1946484185               |
| SNP_P3_104889_1068   | NW_004515693.1 | Scaffold106   | 1068                    | GG                              | TT                | 1946484187               |
| SNP_P3_104890_1167   | NW_004515693.1 | Scaffold106   | 1167                    | TT                              | CC                | 1946484188               |
| SNP_P3_104891_7954   | NW_004515694.1 | Scaffold109_1 | 7954                    | GG                              | AA                | 1946484190               |
| SNP_P3_104892_8266   | NW_004515694.1 | Scaffold109_1 | 8266                    | TT                              | AA                | 1946484191               |
| SNP_P3_104893_8275   | NW_004515694.1 | Scaffold109_1 | 8275                    | GG                              | AA                | 1946484193               |
| SNP_P3_104894_8281   | NW_004515694.1 | Scaffold109_1 | 8281                    | GG                              | AA                | 1946484194               |
| SNP_P3_104895_8326   | NW_004515694.1 | Scaffold109_1 | 8326                    | CC                              | AA                | 1946484196               |
| SNP_P3_104896_8339   | NW_004515694.1 | Scaffold109_1 | 8339                    | AA                              | GG                | 1946484197               |
| SNP_P3_104897_23847  | NW_004515694.1 | Scaffold109_1 | 23847                   | TT                              | CC                | 1946484199               |
| SNP_P3_104898_24273  | NW_004515694.1 | Scaffold109_1 | 24273                   | AA                              | GG                | 1946484200               |
| SNP_P3_104900_60512  | NW_004515694.1 | Scaffold109_1 | 60512                   | CC                              | TT                | 1946484202               |
| SNP_P3_104901_60582  | NW_004515694.1 | Scaffold109_1 | 60582                   | CC                              | AA                | 1946484203               |
| SNP_P3_104902_60669  | NW_004515694.1 | Scaffold109_1 | 60669                   | AA                              | GG                | 1946484205               |
| SNP_P3_104903_60729  | NW_004515694.1 | Scaffold109_1 | 60729                   | AA                              | CC                | 1946484206               |
| SNP_P3_104904_60768  | NW_004515694.1 | Scaffold109_1 | 60768                   | AA                              | GG                | 1946484207               |
| SNP_P3_104905_60778  | NW_004515694.1 | Scaffold109_1 | 60778                   | TT                              | GG                | 1946484209               |
| SNP_P3_104906_60837  | NW_004515694.1 | Scaffold109_1 | 60837                   | AA                              | CC                | 1946484210               |
| SNP_P3_104907_60840  | NW_004515694.1 | Scaffold109_1 | 60840                   | TT                              | CC                | 1946484212               |
| SNP_P3_104908_60850  | NW_004515694.1 | Scaffold109_1 | 60850                   | AA                              | TT                | 1946484213               |
| SNP_P3_104909_60888  | NW_004515694.1 | Scaffold109_1 | 60888                   | TT                              | CC                | 1946484215               |
| SNP_P3_104910_60922  | NW_004515694.1 | Scaffold109_1 | 60922                   | GG                              | AA                | 1946484216               |
| SNP_P3_104911_60945  | NW_004515694.1 | Scaffold109_1 | 60945                   | TT                              | CC                | 1946484218               |
| SNP_P3_104912_60970  | NW_004515694.1 | Scaffold109_1 | 60970                   | TT                              | AA                | 1946484219               |
| SNP_P3_104913_61024  | NW_004515694.1 | Scaffold109_1 | 61024                   | CC                              | TT                | 1946484221               |
| SNP_P3_104914_61030  | NW_004515694.1 | Scaffold109_1 | 61030                   | GG                              | AA                | 1946484222               |
| SNP_P3_104915_61033  | NW_004515694.1 | Scaffold109_1 | 61033                   | CC                              | TT                | 1946484224               |
| SNP_P3_104916_61051  | NW_004515694.1 | Scaffold109_1 | 61051                   | AA                              | CC                | 1946484225               |
| SNP_P3_104917_61054  | NW_004515694.1 | Scaffold109_1 | 61054                   | AA                              | TT                | 1946484227               |
| SNP_P3_104918_61114  | NW_004515694.1 | Scaffold109_1 | 61114                   | TT                              | CC                | 1946484228               |
| SNP_P3_104919_61159  | NW_004515694.1 | Scaffold109_1 | 61159                   | GG                              | AA                | 1946484230               |
| SNP_P3_104920_66745  | NW_004515694.1 | Scaffold109_1 | 66745                   | CC                              | TT                | 1946484231               |
| SNP_P3_104921_66764  | NW_004515694.1 | Scaffold109_1 | 66764                   | GG                              | CC                | 1946484233               |
| SNP_P3_104922_66799  | NW_004515694.1 | Scaffold109_1 | 66799                   | AA                              | CC                | 1946484234               |
| SNP_P3_104924_90920  | NW_004515694.1 | Scaffold109_1 | 90920                   | AA                              | TT                | 1946484235               |
| SNP_P3_104925_95991  | NW_004515694.1 | Scaffold109_1 | 95991                   | TT                              | AA                | 1946484237               |

| SNPs IDs             | Chromosome IDs | Chromosomes   | Physical positions (bp) | CDC Frontier (Reference genome) | (Pusa 256 & HPNB) | NCBI SNPdb Accession IDs |
|----------------------|----------------|---------------|-------------------------|---------------------------------|-------------------|--------------------------|
| SNP_P3_104926_96034  | NW_004515694.1 | Scaffold109_1 | 96034                   | TT                              | GG                | 1946484238               |
| SNP_P3_104927_96036  | NW_004515694.1 | Scaffold109_1 | 96036                   | TT                              | CC                | 1946484240               |
| SNP_P3_104928_96037  | NW_004515694.1 | Scaffold109_1 | 96037                   | CC                              | TT                | 1946484241               |
| SNP_P3_104929_96056  | NW_004515694.1 | Scaffold109_1 | 96056                   | GG                              | AA                | 1946484243               |
| SNP_P3_104930_96156  | NW_004515694.1 | Scaffold109_1 | 96156                   | CC                              | AA                | 1946484244               |
| SNP_P3_104931_96643  | NW_004515694.1 | Scaffold109_1 | 96643                   | AA                              | CC                | 1946484247               |
| SNP_P3_104932_105052 | NW_004515694.1 | Scaffold109_1 | 105052                  | CC                              | TT                | 1946484248               |
| SNP_P3_104933_136269 | NW_004515694.1 | Scaffold109_1 | 136269                  | TT                              | CC                | 1946484250               |
| SNP_P3_104934_153753 | NW_004515694.1 | Scaffold109_1 | 153753                  | GG                              | CC                | 1946484251               |
| SNP_P3_104935_153767 | NW_004515694.1 | Scaffold109_1 | 153767                  | TT                              | GG                | 1946484253               |
| SNP_P3_104937_160289 | NW_004515694.1 | Scaffold109_1 | 160289                  | TT                              | AA                | 1946484254               |
| SNP_P3_104938_160411 | NW_004515694.1 | Scaffold109_1 | 160411                  | TT                              | CC                | 1946484256               |
| SNP_P3_104939_160414 | NW_004515694.1 | Scaffold109_1 | 160414                  | TT                              | CC                | 1946484257               |
| SNP_P3_104941_195161 | NW_004515694.1 | Scaffold109_1 | 195161                  | CC                              | TT                | 1946484259               |
| SNP_P3_104942_221279 | NW_004515694.1 | Scaffold109_1 | 221279                  | AA                              | GG                | 1946484260               |
| SNP_P3_104943_246827 | NW_004515694.1 | Scaffold109_1 | 246827                  | CC                              | GG                | 1946484262               |
| SNP_P3_104944_246847 | NW_004515694.1 | Scaffold109_1 | 246847                  | TT                              | GG                | 1946484263               |
| SNP_P3_104945_247276 | NW_004515694.1 | Scaffold109_1 | 247276                  | AA                              | CC                | 1946484265               |
| SNP_P3_104946_247313 | NW_004515694.1 | Scaffold109_1 | 247313                  | TT                              | CC                | 1946484266               |
| SNP_P3_104947_248646 | NW_004515694.1 | Scaffold109_1 | 248646                  | AA                              | GG                | 1946484268               |
| SNP_P3_104949_248859 | NW_004515694.1 | Scaffold109_1 | 248859                  | AA                              | GG                | 1946484269               |
| SNP_P3_104950_248900 | NW_004515694.1 | Scaffold109_1 | 248900                  | AA                              | GG                | 1946484271               |
| SNP_P3_104951_275346 | NW_004515694.1 | Scaffold109_1 | 275346                  | AA                              | GG                | 1946484272               |
| SNP_P3_104952_277293 | NW_004515694.1 | Scaffold109_1 | 277293                  | AA                              | GG                | 1946484273               |
| SNP_P3_104953_281249 | NW_004515694.1 | Scaffold109_1 | 281249                  | GG                              | TT                | 1946484275               |
| SNP_P3_104954_281969 | NW_004515694.1 | Scaffold109_1 | 281969                  | CC                              | TT                | 1946484276               |
| SNP_P3_104955_417347 | NW_004515694.1 | Scaffold109_1 | 417347                  | AA                              | GG                | 1946484278               |
| SNP_P3_104956_420664 | NW_004515694.1 | Scaffold109_1 | 420664                  | CC                              | TT                | 1946484279               |
| SNP_P3_104957_420671 | NW_004515694.1 | Scaffold109_1 | 420671                  | TT                              | GG                | 1946484281               |
| SNP_P3_104959_452710 | NW_004515694.1 | Scaffold109_1 | 452710                  | CC                              | TT                | 1946484282               |
| SNP_P3_104962_474741 | NW_004515694.1 | Scaffold109_1 | 474741                  | TT                              | CC                | 1946484284               |
| SNP_P3_104963_480728 | NW_004515694.1 | Scaffold109_1 | 480728                  | GG                              | AA                | 1946484285               |
| SNP_P3_104964_498070 | NW_004515694.1 | Scaffold109_1 | 498070                  | TT                              | GG                | 1946484287               |
| SNP_P3_104965_504436 | NW_004515694.1 | Scaffold109_1 | 504436                  | GG                              | AA                | 1946484288               |
| SNP_P3_104966_504517 | NW_004515694.1 | Scaffold109_1 | 504517                  | TT                              | CC                | 1946484290               |
| SNP_P3_104967_504568 | NW_004515694.1 | Scaffold109_1 | 504568                  | GG                              | AA                | 1946484291               |
| SNP_P3_104968_504855 | NW_004515694.1 | Scaffold109_1 | 504855                  | AA                              | CC                | 1946484292               |
| SNP_P3_104969_504878 | NW_004515694.1 | Scaffold109_1 | 504878                  | GG                              | TT                | 1946484294               |
| SNP_P3_104970_504932 | NW_004515694.1 | Scaffold109_1 | 504932                  | AA                              | GG                | 1946484295               |
| SNP_P3_104971_504936 | NW_004515694.1 | Scaffold109_1 | 504936                  | TT                              | CC                | 1946484296               |
| SNP_P3_104972_550589 | NW_004515694.1 | Scaffold109_1 | 550589                  | AA                              | GG                | 1946484298               |
| SNP_P3_104973_569157 | NW_004515694.1 | Scaffold109_1 | 569157                  | TT                              | CC                | 1946484299               |

| SNPs IDs             | Chromosome IDs | Chromosomes   | Physical positions (bp) | CDC Frontier (Reference genome) | (Pusa 256 & HPNB) | NCBI SNPdb Accession IDs |
|----------------------|----------------|---------------|-------------------------|---------------------------------|-------------------|--------------------------|
| SNP_P3_104974_569437 | NW_004515694.1 | Scaffold109_1 | 569437                  | CC                              | TT                | 1946484301               |
| SNP_P3_104975_569445 | NW_004515694.1 | Scaffold109_1 | 569445                  | TT                              | CC                | 1946484302               |
| SNP_P3_104976_569506 | NW_004515694.1 | Scaffold109_1 | 569506                  | AA                              | GG                | 1946484304               |
| SNP_P3_104977_569507 | NW_004515694.1 | Scaffold109_1 | 569507                  | TT                              | CC                | 1946484305               |
| SNP_P3_104978_569530 | NW_004515694.1 | Scaffold109_1 | 569530                  | AA                              | GG                | 1946484306               |
| SNP_P3_104979_620514 | NW_004515694.1 | Scaffold109_1 | 620514                  | CC                              | AA                | 1946484308               |
| SNP_P3_104980_628044 | NW_004515694.1 | Scaffold109_1 | 628044                  | AA                              | GG                | 1946484309               |
| SNP_P3_104981_645263 | NW_004515694.1 | Scaffold109_1 | 645263                  | CC                              | TT                | 1946484311               |
| SNP_P3_104982_654232 | NW_004515694.1 | Scaffold109_1 | 654232                  | GG                              | AA                | 1946484312               |
| SNP_P3_104983_654244 | NW_004515694.1 | Scaffold109_1 | 654244                  | TT                              | CC                | 1946484314               |
| SNP_P3_104984_654265 | NW_004515694.1 | Scaffold109_1 | 654265                  | GG                              | AA                | 1946484315               |
| SNP_P3_104985_671451 | NW_004515694.1 | Scaffold109_1 | 671451                  | TT                              | AA                | 1946484317               |
| SNP_P3_104987_724762 | NW_004515694.1 | Scaffold109_1 | 724762                  | CC                              | TT                | 1946484318               |
| SNP_P3_104989_741607 | NW_004515694.1 | Scaffold109_1 | 741607                  | GG                              | AA                | 1946484320               |
| SNP_P3_104990_755807 | NW_004515694.1 | Scaffold109_1 | 755807                  | AA                              | GG                | 1946484321               |
| SNP_P3_104991_773275 | NW_004515694.1 | Scaffold109_1 | 773275                  | CC                              | TT                | 1946484322               |
| SNP_P3_104992_776929 | NW_004515694.1 | Scaffold109_1 | 776929                  | TT                              | CC                | 1946484324               |
| SNP_P3_104993_802545 | NW_004515694.1 | Scaffold109_1 | 802545                  | TT                              | AA                | 1946484325               |
| SNP_P3_104994_802572 | NW_004515694.1 | Scaffold109_1 | 802572                  | TT                              | CC                | 1946484327               |
| SNP_P3_104995_846025 | NW_004515694.1 | Scaffold109_1 | 846025                  | TT                              | AA                | 1946484328               |
| SNP_P3_104996_846084 | NW_004515694.1 | Scaffold109_1 | 846084                  | AA                              | GG                | 1946484330               |
| SNP_P3_104997_846088 | NW_004515694.1 | Scaffold109_1 | 846088                  | TT                              | CC                | 1946484331               |
| SNP_P3_104998_846323 | NW_004515694.1 | Scaffold109_1 | 846323                  | TT                              | GG                | 1946484333               |
| SNP_P3_104999_846338 | NW_004515694.1 | Scaffold109_1 | 846338                  | AA                              | GG                | 1946484334               |
| SNP_P3_105000_6067   | NW_004515695.1 | Scaffold110   | 6067                    | TT                              | CC                | 1946484336               |
| SNP_P3_105001_6141   | NW_004515695.1 | Scaffold110   | 6141                    | CC                              | TT                | 1946484337               |
| SNP_P3_105002_6156   | NW_004515695.1 | Scaffold110   | 6156                    | GG                              | TT                | 1946484339               |
| SNP_P3_105003_4921   | NW_004515696.1 | Scaffold111   | 4921                    | CC                              | AA                | 1946484340               |
| SNP_P3_105004_4959   | NW_004515696.1 | Scaffold111   | 4959                    | AA                              | CC                | 1946484341               |
| SNP_P3_105006_60719  | NW_004515696.1 | Scaffold111   | 60719                   | AA                              | GG                | 1946484343               |
| SNP_P3_105007_85521  | NW_004515696.1 | Scaffold111   | 85521                   | CC                              | TT                | 1946484344               |
| SNP_P3_105008_99885  | NW_004515696.1 | Scaffold111   | 99885                   | CC                              | AA                | 1946484346               |
| SNP_P3_105009_99886  | NW_004515696.1 | Scaffold111   | 99886                   | CC                              | AA                | 1946484347               |
| SNP_P3_105010_99887  | NW_004515696.1 | Scaffold111   | 99887                   | TT                              | CC                | 1946484349               |
| SNP_P3_105011_99889  | NW_004515696.1 | Scaffold111   | 99889                   | CC                              | AA                | 1946484350               |
| SNP_P3_105012_99891  | NW_004515696.1 | Scaffold111   | 99891                   | CC                              | GG                | 1946484352               |
| SNP_P3_105013_99919  | NW_004515696.1 | Scaffold111   | 99919                   | TT                              | CC                | 1946484353               |
| SNP_P3_105014_99929  | NW_004515696.1 | Scaffold111   | 99929                   | AA                              | GG                | 1946484355               |
| SNP_P3_105017_2698   | NW_004515697.1 | Scaffold113   | 2698                    | AA                              | TT                | 1946484356               |
| SNP_P3_105018_3988   | NW_004515697.1 | Scaffold113   | 3988                    | TT                              | AA                | 1946484358               |
| SNP_P3_105019_4037   | NW_004515697.1 | Scaffold113   | 4037                    | TT                              | CC                | 1946484359               |
| SNP_P3_105020_453    | NW_004515698.1 | Scaffold114   | 453                     | TT                              | AA                | 1946484360               |

| SNPs IDs            | Chromosome IDs | Chromosomes | Physical positions (bp) | CDC Frontier (Reference genome) | (Pusa 256 & HPNB) | NCBI SNPdb Accession IDs |
|---------------------|----------------|-------------|-------------------------|---------------------------------|-------------------|--------------------------|
| SNP_P3_105021_749   | NW_004515698.1 | Scaffold114 | 749                     | GG                              | CC                | 1946484362               |
| SNP_P3_105022_985   | NW_004515699.1 | Scaffold115 | 985                     | CC                              | TT                | 1946484363               |
| SNP_P3_105023_992   | NW_004515699.1 | Scaffold115 | 992                     | GG                              | CC                | 1946484365               |
| SNP_P3_105024_8708  | NW_004515699.1 | Scaffold115 | 8708                    | AA                              | CC                | 1946484366               |
| SNP_P3_105025_8817  | NW_004515699.1 | Scaffold115 | 8817                    | GG                              | AA                | 1946484368               |
| SNP_P3_105026_9938  | NW_004515699.1 | Scaffold115 | 9938                    | GG                              | TT                | 1946484369               |
| SNP_P3_105027_26776 | NW_004515699.1 | Scaffold115 | 26776                   | TT                              | CC                | 1946484371               |
| SNP_P3_105028_26818 | NW_004515699.1 | Scaffold115 | 26818                   | AA                              | TT                | 1946484372               |
| SNP_P3_105029_27166 | NW_004515699.1 | Scaffold115 | 27166                   | TT                              | CC                | 1946484374               |
| SNP_P3_105030_27181 | NW_004515699.1 | Scaffold115 | 27181                   | AA                              | CC                | 1946484375               |
| SNP_P3_105031_27224 | NW_004515699.1 | Scaffold115 | 27224                   | AA                              | TT                | 1946484377               |
| SNP_P3_105032_31468 | NW_004515699.1 | Scaffold115 | 31468                   | AA                              | GG                | 1946484378               |
| SNP_P3_105033_31469 | NW_004515699.1 | Scaffold115 | 31469                   | GG                              | TT                | 1946484379               |
| SNP_P3_105034_37768 | NW_004515699.1 | Scaffold115 | 37768                   | AA                              | TT                | 1946484381               |
| SNP_P3_105035_37806 | NW_004515699.1 | Scaffold115 | 37806                   | CC                              | AA                | 1946484382               |
| SNP_P3_105036_37835 | NW_004515699.1 | Scaffold115 | 37835                   | TT                              | GG                | 1946484384               |
| SNP_P3_105037_37840 | NW_004515699.1 | Scaffold115 | 37840                   | GG                              | AA                | 1946484385               |
| SNP_P3_105038_38093 | NW_004515699.1 | Scaffold115 | 38093                   | AA                              | GG                | 1946484387               |
| SNP_P3_105039_38109 | NW_004515699.1 | Scaffold115 | 38109                   | GG                              | AA                | 1946484388               |
| SNP_P3_105040_40112 | NW_004515699.1 | Scaffold115 | 40112                   | AA                              | TT                | 1946484390               |
| SNP_P3_105041_43199 | NW_004515699.1 | Scaffold115 | 43199                   | TT                              | AA                | 1946484391               |
| SNP_P3_105042_43214 | NW_004515699.1 | Scaffold115 | 43214                   | TT                              | AA                | 1946484393               |
| SNP_P3_105043_43223 | NW_004515699.1 | Scaffold115 | 43223                   | GG                              | CC                | 1946484394               |
| SNP_P3_105044_43229 | NW_004515699.1 | Scaffold115 | 43229                   | GG                              | AA                | 1946484396               |
| SNP_P3_105045_43484 | NW_004515699.1 | Scaffold115 | 43484                   | CC                              | TT                | 1946484397               |
| SNP_P3_105046_51678 | NW_004515699.1 | Scaffold115 | 51678                   | AA                              | GG                | 1946484398               |
| SNP_P3_105047_51996 | NW_004515699.1 | Scaffold115 | 51996                   | TT                              | CC                | 1946484400               |
| SNP_P3_105048_52005 | NW_004515699.1 | Scaffold115 | 52005                   | AA                              | CC                | 1946484401               |
| SNP_P3_105050_52231 | NW_004515699.1 | Scaffold115 | 52231                   | TT                              | AA                | 1946484403               |
| SNP_P3_105051_52249 | NW_004515699.1 | Scaffold115 | 52249                   | TT                              | CC                | 1946484404               |
| SNP_P3_105052_52259 | NW_004515699.1 | Scaffold115 | 52259                   | AA                              | CC                | 1946484406               |
| SNP_P3_105053_52360 | NW_004515699.1 | Scaffold115 | 52360                   | CC                              | TT                | 1946484407               |
| SNP_P3_105054_52400 | NW_004515699.1 | Scaffold115 | 52400                   | CC                              | AA                | 1946484409               |
| SNP_P3_105055_52459 | NW_004515699.1 | Scaffold115 | 52459                   | CC                              | AA                | 1946484410               |
| SNP_P3_105056_52664 | NW_004515699.1 | Scaffold115 | 52664                   | AA                              | CC                | 1946484412               |
| SNP_P3_105057_52719 | NW_004515699.1 | Scaffold115 | 52719                   | GG                              | TT                | 1946484413               |
| SNP_P3_105058_52824 | NW_004515699.1 | Scaffold115 | 52824                   | AA                              | GG                | 1946484415               |
| SNP_P3_105059_52896 | NW_004515699.1 | Scaffold115 | 52896                   | GG                              | AA                | 1946484416               |
| SNP_P3_105060_52907 | NW_004515699.1 | Scaffold115 | 52907                   | TT                              | GG                | 1946484418               |
| SNP_P3_105061_52939 | NW_004515699.1 | Scaffold115 | 52939                   | CC                              | TT                | 1946484419               |
| SNP_P3_105062_52984 | NW_004515699.1 | Scaffold115 | 52984                   | GG                              | AA                | 1946484421               |
| SNP_P3_105063_52993 | NW_004515699.1 | Scaffold115 | 52993                   | TT                              | AA                | 1946484422               |



| SNPs IDs             | Chromosome IDs | Chromosomes | Physical positions (bp) | CDC Frontier (Reference genome) | (Pusa 256 & HPNB) | NCBI SNPdb Accession IDs |
|----------------------|----------------|-------------|-------------------------|---------------------------------|-------------------|--------------------------|
| SNP_P3_105064_53073  | NW_004515699.1 | Scaffold115 | 53073                   | TT                              | GG                | 1946484423               |
| SNP_P3_105065_56158  | NW_004515699.1 | Scaffold115 | 56158                   | GG                              | AA                | 1946484425               |
| SNP_P3_105066_56176  | NW_004515699.1 | Scaffold115 | 56176                   | AA                              | CC                | 1946484427               |
| SNP_P3_105067_57116  | NW_004515699.1 | Scaffold115 | 57116                   | CC                              | AA                | 1946484428               |
| SNP_P3_105068_57118  | NW_004515699.1 | Scaffold115 | 57118                   | AA                              | CC                | 1946484429               |
| SNP_P3_105069_57211  | NW_004515699.1 | Scaffold115 | 57211                   | CC                              | GG                | 1946484431               |
| SNP_P3_105070_57367  | NW_004515699.1 | Scaffold115 | 57367                   | AA                              | CC                | 1946484432               |
| SNP_P3_105072_25715  | NW_004515700.1 | Scaffold118 | 25715                   | GG                              | TT                | 1946484434               |
| SNP_P3_105073_25718  | NW_004515700.1 | Scaffold118 | 25718                   | TT                              | CC                | 1946484435               |
| SNP_P3_105074_25721  | NW_004515700.1 | Scaffold118 | 25721                   | CC                              | TT                | 1946484437               |
| SNP_P3_105075_25724  | NW_004515700.1 | Scaffold118 | 25724                   | GG                              | AA                | 1946484438               |
| SNP_P3_105076_25751  | NW_004515700.1 | Scaffold118 | 25751                   | GG                              | TT                | 1946484439               |
| SNP_P3_105077_25754  | NW_004515700.1 | Scaffold118 | 25754                   | GG                              | AA                | 1946484441               |
| SNP_P3_105078_25805  | NW_004515700.1 | Scaffold118 | 25805                   | AA                              | GG                | 1946484442               |
| SNP_P3_105079_26736  | NW_004515700.1 | Scaffold118 | 26736                   | AA                              | GG                | 1946484444               |
| SNP_P3_105080_26891  | NW_004515700.1 | Scaffold118 | 26891                   | CC                              | AA                | 1946484445               |
| SNP_P3_105081_26926  | NW_004515700.1 | Scaffold118 | 26926                   | CC                              | GG                | 1946484447               |
| SNP_P3_105082_27176  | NW_004515700.1 | Scaffold118 | 27176                   | GG                              | AA                | 1946484448               |
| SNP_P3_105083_27200  | NW_004515700.1 | Scaffold118 | 27200                   | GG                              | AA                | 1946484449               |
| SNP_P3_105084_27226  | NW_004515700.1 | Scaffold118 | 27226                   | AA                              | GG                | 1946484451               |
| SNP_P3_105085_27241  | NW_004515700.1 | Scaffold118 | 27241                   | AA                              | GG                | 1946484452               |
| SNP_P3_105086_30186  | NW_004515700.1 | Scaffold118 | 30186                   | TT                              | GG                | 1946484454               |
| SNP_P3_105087_30210  | NW_004515700.1 | Scaffold118 | 30210                   | GG                              | AA                | 1946484455               |
| SNP_P3_105088_42412  | NW_004515700.1 | Scaffold118 | 42412                   | AA                              | TT                | 1946484457               |
| SNP_P3_105089_53626  | NW_004515700.1 | Scaffold118 | 53626                   | AA                              | GG                | 1946484458               |
| SNP_P3_105090_53635  | NW_004515700.1 | Scaffold118 | 53635                   | TT                              | AA                | 1946484459               |
| SNP_P3_105091_53637  | NW_004515700.1 | Scaffold118 | 53637                   | TT                              | CC                | 1946484461               |
| SNP_P3_105092_54001  | NW_004515700.1 | Scaffold118 | 54001                   | TT                              | CC                | 1946484462               |
| SNP_P3_105093_92125  | NW_004515700.1 | Scaffold118 | 92125                   | CC                              | TT                | 1946484464               |
| SNP_P3_105094_100584 | NW_004515700.1 | Scaffold118 | 100584                  | AA                              | CC                | 1946484465               |
| SNP_P3_105096_113345 | NW_004515700.1 | Scaffold118 | 113345                  | CC                              | TT                | 1946484467               |
| SNP_P3_105097_113357 | NW_004515700.1 | Scaffold118 | 113357                  | CC                              | TT                | 1946484468               |
| SNP_P3_105098_113452 | NW_004515700.1 | Scaffold118 | 113452                  | TT                              | CC                | 1946484470               |
| SNP_P3_105099_113471 | NW_004515700.1 | Scaffold118 | 113471                  | TT                              | CC                | 1946484471               |
| SNP_P3_105100_113698 | NW_004515700.1 | Scaffold118 | 113698                  | GG                              | AA                | 1946484472               |
| SNP_P3_105101_118597 | NW_004515700.1 | Scaffold118 | 118597                  | GG                              | AA                | 1946484474               |
| SNP_P3_105102_118625 | NW_004515700.1 | Scaffold118 | 118625                  | TT                              | AA                | 1946484475               |
| SNP_P3_105104_145175 | NW_004515700.1 | Scaffold118 | 145175                  | AA                              | GG                | 1946484477               |
| SNP_P3_105106_171646 | NW_004515700.1 | Scaffold118 | 171646                  | GG                              | AA                | 1946484478               |
| SNP_P3_105107_173131 | NW_004515700.1 | Scaffold118 | 173131                  | CC                              | TT                | 1946484480               |
| SNP_P3_105109_175361 | NW_004515700.1 | Scaffold118 | 175361                  | TT                              | AA                | 1946484481               |
| SNP_P3_105110_178466 | NW_004515700.1 | Scaffold118 | 178466                  | CC                              | TT                | 1946484483               |

| SNPs IDs             | Chromosome IDs | Chromosomes | Physical positions (bp) | CDC Frontier (Reference genome) | (Pusa 256 & HPNB) | NCBI SNPdb Accession IDs |
|----------------------|----------------|-------------|-------------------------|---------------------------------|-------------------|--------------------------|
| SNP_P3_105111_178471 | NW_004515700.1 | Scaffold118 | 178471                  | AA                              | GG                | 1946484484               |
| SNP_P3_105112_178477 | NW_004515700.1 | Scaffold118 | 178477                  | AA                              | GG                | 1946484485               |
| SNP_P3_105114_189286 | NW_004515700.1 | Scaffold118 | 189286                  | TT                              | CC                | 1946484487               |
| SNP_P3_105115_189290 | NW_004515700.1 | Scaffold118 | 189290                  | CC                              | TT                | 1946484488               |
| SNP_P3_105116_227647 | NW_004515700.1 | Scaffold118 | 227647                  | GG                              | AA                | 1946484490               |
| SNP_P3_105117_257888 | NW_004515700.1 | Scaffold118 | 257888                  | AA                              | TT                | 1946484491               |
| SNP_P3_105118_368469 | NW_004515700.1 | Scaffold118 | 368469                  | CC                              | GG                | 1946484493               |
| SNP_P3_105120_460889 | NW_004515700.1 | Scaffold118 | 460889                  | GG                              | AA                | 1946484494               |
| SNP_P3_105121_460904 | NW_004515700.1 | Scaffold118 | 460904                  | GG                              | TT                | 1946484496               |
| SNP_P3_105122_461130 | NW_004515700.1 | Scaffold118 | 461130                  | AA                              | GG                | 1946484497               |
| SNP_P3_105123_461349 | NW_004515700.1 | Scaffold118 | 461349                  | AA                              | TT                | 1946484499               |
| SNP_P3_105124_463075 | NW_004515700.1 | Scaffold118 | 463075                  | GG                              | AA                | 1946484500               |
| SNP_P3_105125_463089 | NW_004515700.1 | Scaffold118 | 463089                  | AA                              | TT                | 1946484501               |
| SNP_P3_105126_463287 | NW_004515700.1 | Scaffold118 | 463287                  | GG                              | AA                | 1946484503               |
| SNP_P3_105127_463288 | NW_004515700.1 | Scaffold118 | 463288                  | AA                              | TT                | 1946484504               |
| SNP_P3_105128_463296 | NW_004515700.1 | Scaffold118 | 463296                  | TT                              | GG                | 1946484506               |
| SNP_P3_105129_463380 | NW_004515700.1 | Scaffold118 | 463380                  | CC                              | GG                | 1946484507               |
| SNP_P3_105130_463405 | NW_004515700.1 | Scaffold118 | 463405                  | AA                              | GG                | 1946484509               |
| SNP_P3_105131_463418 | NW_004515700.1 | Scaffold118 | 463418                  | AA                              | TT                | 1946484510               |
| SNP_P3_105132_465492 | NW_004515700.1 | Scaffold118 | 465492                  | TT                              | CC                | 1946484512               |
| SNP_P3_105133_465519 | NW_004515700.1 | Scaffold118 | 465519                  | GG                              | AA                | 1946484513               |
| SNP_P3_105134_465787 | NW_004515700.1 | Scaffold118 | 465787                  | TT                              | GG                | 1946484514               |
| SNP_P3_105135_465864 | NW_004515700.1 | Scaffold118 | 465864                  | CC                              | TT                | 1946484516               |
| SNP_P3_105136_465896 | NW_004515700.1 | Scaffold118 | 465896                  | CC                              | GG                | 1946484517               |
| SNP_P3_105137_466136 | NW_004515700.1 | Scaffold118 | 466136                  | TT                              | CC                | 1946484519               |
| SNP_P3_105139_511856 | NW_004515700.1 | Scaffold118 | 511856                  | CC                              | TT                | 1946484520               |
| SNP_P3_105140_518882 | NW_004515700.1 | Scaffold118 | 518882                  | AA                              | CC                | 1946484522               |
| SNP_P3_105143_554065 | NW_004515700.1 | Scaffold118 | 554065                  | GG                              | AA                | 1946484523               |
| SNP_P3_105144_560636 | NW_004515700.1 | Scaffold118 | 560636                  | TT                              | CC                | 1946484525               |
| SNP_P3_105145_560715 | NW_004515700.1 | Scaffold118 | 560715                  | AA                              | TT                | 1946484526               |
| SNP_P3_105146_560733 | NW_004515700.1 | Scaffold118 | 560733                  | AA                              | GG                | 1946484528               |
| SNP_P3_105148_569608 | NW_004515700.1 | Scaffold118 | 569608                  | TT                              | GG                | 1946484529               |
| SNP_P3_105149_591263 | NW_004515700.1 | Scaffold118 | 591263                  | GG                              | AA                | 1946484530               |
| SNP_P3_105150_591273 | NW_004515700.1 | Scaffold118 | 591273                  | TT                              | GG                | 1946484532               |
| SNP_P3_105151_592268 | NW_004515700.1 | Scaffold118 | 592268                  | CC                              | GG                | 1946484533               |
| SNP_P3_105152_592573 | NW_004515700.1 | Scaffold118 | 592573                  | GG                              | AA                | 1946484535               |
| SNP_P3_105153_593072 | NW_004515700.1 | Scaffold118 | 593072                  | GG                              | AA                | 1946484536               |
| SNP_P3_105155_603365 | NW_004515700.1 | Scaffold118 | 603365                  | TT                              | CC                | 1946484538               |
| SNP_P3_105156_607929 | NW_004515700.1 | Scaffold118 | 607929                  | AA                              | CC                | 1946484539               |
| SNP_P3_105157_608992 | NW_004515700.1 | Scaffold118 | 608992                  | TT                              | GG                | 1946484541               |
| SNP_P3_105158_618822 | NW_004515700.1 | Scaffold118 | 618822                  | TT                              | AA                | 1946484542               |
| SNP_P3_105159_635015 | NW_004515700.1 | Scaffold118 | 635015                  | AA                              | CC                | 1946484544               |

| SNPs IDs             | Chromosome IDs | Chromosomes | Physical positions (bp) | CDC Frontier (Reference genome) | (Pusa 256 & HPNB) | NCBI SNPdb Accession IDs |
|----------------------|----------------|-------------|-------------------------|---------------------------------|-------------------|--------------------------|
| SNP_P3_105160_635020 | NW_004515700.1 | Scaffold118 | 635020                  | CC                              | TT                | 1946484545               |
| SNP_P3_105161_635054 | NW_004515700.1 | Scaffold118 | 635054                  | GG                              | AA                | 1946484547               |
| SNP_P3_105162_641974 | NW_004515700.1 | Scaffold118 | 641974                  | TT                              | GG                | 1946484548               |
| SNP_P3_105163_438    | NW_004515701.1 | Scaffold119 | 438                     | AA                              | CC                | 1946484549               |
| SNP_P3_105164_12060  | NW_004515701.1 | Scaffold119 | 12060                   | AA                              | GG                | 1946484551               |
| SNP_P3_105165_12163  | NW_004515701.1 | Scaffold119 | 12163                   | CC                              | AA                | 1946484552               |
| SNP_P3_105166_15647  | NW_004515701.1 | Scaffold119 | 15647                   | CC                              | AA                | 1946484554               |
| SNP_P3_105167_15696  | NW_004515701.1 | Scaffold119 | 15696                   | GG                              | CC                | 1946484555               |
| SNP_P3_105168_15749  | NW_004515701.1 | Scaffold119 | 15749                   | CC                              | TT                | 1946484557               |
| SNP_P3_105170_16302  | NW_004515701.1 | Scaffold119 | 16302                   | AA                              | TT                | 1946484558               |
| SNP_P3_105172_16359  | NW_004515701.1 | Scaffold119 | 16359                   | GG                              | AA                | 1946484560               |
| SNP_P3_105173_16369  | NW_004515701.1 | Scaffold119 | 16369                   | AA                              | TT                | 1946484561               |
| SNP_P3_105174_16399  | NW_004515701.1 | Scaffold119 | 16399                   | TT                              | CC                | 1946484563               |
| SNP_P3_105175_16402  | NW_004515701.1 | Scaffold119 | 16402                   | CC                              | TT                | 1946484564               |
| SNP_P3_105176_16409  | NW_004515701.1 | Scaffold119 | 16409                   | AA                              | TT                | 1946484566               |
| SNP_P3_105177_16659  | NW_004515701.1 | Scaffold119 | 16659                   | CC                              | AA                | 1946484567               |
| SNP_P3_105178_16902  | NW_004515701.1 | Scaffold119 | 16902                   | GG                              | AA                | 1946484569               |
| SNP_P3_105179_17087  | NW_004515701.1 | Scaffold119 | 17087                   | TT                              | AA                | 1946484570               |
| SNP_P3_105180_17237  | NW_004515701.1 | Scaffold119 | 17237                   | GG                              | AA                | 1946484571               |
| SNP_P3_105181_17437  | NW_004515701.1 | Scaffold119 | 17437                   | GG                              | AA                | 1946484573               |
| SNP_P3_105182_17487  | NW_004515701.1 | Scaffold119 | 17487                   | GG                              | AA                | 1946484574               |
| SNP_P3_105183_17740  | NW_004515701.1 | Scaffold119 | 17740                   | AA                              | GG                | 1946484576               |
| SNP_P3_105184_17977  | NW_004515701.1 | Scaffold119 | 17977                   | AA                              | TT                | 1946484577               |
| SNP_P3_105185_18283  | NW_004515701.1 | Scaffold119 | 18283                   | TT                              | GG                | 1946484579               |
| SNP_P3_105186_18354  | NW_004515701.1 | Scaffold119 | 18354                   | GG                              | CC                | 1946484580               |
| SNP_P3_105187_21688  | NW_004515701.1 | Scaffold119 | 21688                   | TT                              | GG                | 1946484582               |
| SNP_P3_105188_26547  | NW_004515701.1 | Scaffold119 | 26547                   | GG                              | AA                | 1946484583               |
| SNP_P3_105190_48137  | NW_004515701.1 | Scaffold119 | 48137                   | CC                              | TT                | 1946484585               |
| SNP_P3_105191_48164  | NW_004515701.1 | Scaffold119 | 48164                   | TT                              | CC                | 1946484586               |
| SNP_P3_105192_48211  | NW_004515701.1 | Scaffold119 | 48211                   | GG                              | AA                | 1946484588               |
| SNP_P3_105193_48217  | NW_004515701.1 | Scaffold119 | 48217                   | AA                              | GG                | 1946484589               |
| SNP_P3_105194_48588  | NW_004515701.1 | Scaffold119 | 48588                   | TT                              | CC                | 1946484591               |
| SNP_P3_105195_48605  | NW_004515701.1 | Scaffold119 | 48605                   | AA                              | GG                | 1946484592               |
| SNP_P3_105196_49343  | NW_004515701.1 | Scaffold119 | 49343                   | CC                              | TT                | 1946484593               |
| SNP_P3_105197_52777  | NW_004515701.1 | Scaffold119 | 52777                   | TT                              | GG                | 1946484595               |
| SNP_P3_105198_54946  | NW_004515701.1 | Scaffold119 | 54946                   | TT                              | CC                | 1946484596               |
| SNP_P3_105199_58449  | NW_004515701.1 | Scaffold119 | 58449                   | TT                              | GG                | 1946484598               |
| SNP_P3_105200_62321  | NW_004515701.1 | Scaffold119 | 62321                   | TT                              | CC                | 1946484599               |
| SNP_P3_105201_70308  | NW_004515701.1 | Scaffold119 | 70308                   | TT                              | CC                | 1946484601               |
| SNP_P3_105202_70492  | NW_004515701.1 | Scaffold119 | 70492                   | GG                              | TT                | 1946484602               |
| SNP_P3_105203_70505  | NW_004515701.1 | Scaffold119 | 70505                   | GG                              | AA                | 1946484604               |
| SNP_P3_105205_70831  | NW_004515701.1 | Scaffold119 | 70831                   | GG                              | AA                | 1946484605               |

| SNPs IDs            | Chromosome IDs | Chromosomes | Physical positions (bp) | CDC Frontier (Reference genome) | (Pusa 256 & HPNB) | NCBI SNPdb Accession IDs |
|---------------------|----------------|-------------|-------------------------|---------------------------------|-------------------|--------------------------|
| SNP_P3_105206_70843 | NW_004515701.1 | Scaffold119 | 70843                   | AA                              | GG                | 1946484607               |
| SNP_P3_105207_70851 | NW_004515701.1 | Scaffold119 | 70851                   | AA                              | TT                | 1946484608               |
| SNP_P3_105208_71263 | NW_004515701.1 | Scaffold119 | 71263                   | TT                              | AA                | 1946484610               |
| SNP_P3_105209_71548 | NW_004515701.1 | Scaffold119 | 71548                   | CC                              | TT                | 1946484611               |
| SNP_P3_105210_71687 | NW_004515701.1 | Scaffold119 | 71687                   | CC                              | TT                | 1946484612               |
| SNP_P3_105211_72145 | NW_004515701.1 | Scaffold119 | 72145                   | AA                              | CC                | 1946484614               |
| SNP_P3_105212_72212 | NW_004515701.1 | Scaffold119 | 72212                   | CC                              | TT                | 1946484615               |
| SNP_P3_105213_72221 | NW_004515701.1 | Scaffold119 | 72221                   | CC                              | TT                | 1946484617               |
| SNP_P3_105214_72251 | NW_004515701.1 | Scaffold119 | 72251                   | CC                              | TT                | 1946484618               |
| SNP_P3_105215_2496  | NW_004515702.1 | Scaffold120 | 2496                    | TT                              | CC                | 1946484620               |
| SNP_P3_105216_2890  | NW_004515702.1 | Scaffold120 | 2890                    | AA                              | GG                | 1946484621               |
| SNP_P3_105217_2903  | NW_004515702.1 | Scaffold120 | 2903                    | AA                              | CC                | 1946484623               |
| SNP_P3_105218_5650  | NW_004515702.1 | Scaffold120 | 5650                    | CC                              | TT                | 1946484624               |
| SNP_P3_105219_6961  | NW_004515702.1 | Scaffold120 | 6961                    | CC                              | TT                | 1946484626               |
| SNP_P3_105220_6976  | NW_004515702.1 | Scaffold120 | 6976                    | TT                              | CC                | 1946484627               |
| SNP_P3_105221_8638  | NW_004515702.1 | Scaffold120 | 8638                    | GG                              | AA                | 1946484629               |
| SNP_P3_105222_9028  | NW_004515702.1 | Scaffold120 | 9028                    | TT                              | CC                | 1946484630               |
| SNP_P3_105223_9057  | NW_004515702.1 | Scaffold120 | 9057                    | AA                              | GG                | 1946484632               |
| SNP_P3_105224_10053 | NW_004515702.1 | Scaffold120 | 10053                   | TT                              | GG                | 1946484633               |
| SNP_P3_105225_10059 | NW_004515702.1 | Scaffold120 | 10059                   | CC                              | AA                | 1946484634               |
| SNP_P3_105226_10101 | NW_004515702.1 | Scaffold120 | 10101                   | GG                              | TT                | 1946484636               |
| SNP_P3_105227_12232 | NW_004515703.1 | Scaffold123 | 12232                   | CC                              | TT                | 1946484637               |
| SNP_P3_105228_18819 | NW_004515703.1 | Scaffold123 | 18819                   | GG                              | TT                | 1946484639               |
| SNP_P3_105229_33359 | NW_004515703.1 | Scaffold123 | 33359                   | AA                              | GG                | 1946484640               |
| SNP_P3_105230_33511 | NW_004515703.1 | Scaffold123 | 33511                   | TT                              | AA                | 1946484642               |
| SNP_P3_105231_33546 | NW_004515703.1 | Scaffold123 | 33546                   | CC                              | TT                | 1946484643               |
| SNP_P3_105232_33667 | NW_004515703.1 | Scaffold123 | 33667                   | CC                              | TT                | 1946484645               |
| SNP_P3_105233_33714 | NW_004515703.1 | Scaffold123 | 33714                   | TT                              | CC                | 1946484646               |
| SNP_P3_105234_33723 | NW_004515703.1 | Scaffold123 | 33723                   | AA                              | GG                | 1946484648               |
| SNP_P3_105236_33772 | NW_004515703.1 | Scaffold123 | 33772                   | CC                              | TT                | 1946484649               |
| SNP_P3_105237_33833 | NW_004515703.1 | Scaffold123 | 33833                   | GG                              | AA                | 1946484651               |
| SNP_P3_105238_33840 | NW_004515703.1 | Scaffold123 | 33840                   | CC                              | TT                | 1946484652               |
| SNP_P3_105239_34960 | NW_004515703.1 | Scaffold123 | 34960                   | CC                              | AA                | 1946484654               |
| SNP_P3_105240_34967 | NW_004515703.1 | Scaffold123 | 34967                   | AA                              | GG                | 1946484655               |
| SNP_P3_105241_35049 | NW_004515703.1 | Scaffold123 | 35049                   | AA                              | GG                | 1946484656               |
| SNP_P3_105242_35113 | NW_004515703.1 | Scaffold123 | 35113                   | TT                              | CC                | 1946484658               |
| SNP_P3_105243_35372 | NW_004515703.1 | Scaffold123 | 35372                   | CC                              | TT                | 1946484659               |
| SNP_P3_105244_35383 | NW_004515703.1 | Scaffold123 | 35383                   | AA                              | GG                | 1946484661               |
| SNP_P3_105245_35392 | NW_004515703.1 | Scaffold123 | 35392                   | GG                              | AA                | 1946484662               |
| SNP_P3_105246_37517 | NW_004515703.1 | Scaffold123 | 37517                   | GG                              | CC                | 1946484664               |
| SNP_P3_105247_37521 | NW_004515703.1 | Scaffold123 | 37521                   | GG                              | TT                | 1946484665               |
| SNP_P3_105248_37541 | NW_004515703.1 | Scaffold123 | 37541                   | AA                              | CC                | 1946484667               |

| SNPs IDs             | Chromosome IDs | Chromosomes | Physical positions (bp) | CDC Frontier (Reference genome) | (Pusa 256 & HPNB) | NCBI SNPdb Accession IDs |
|----------------------|----------------|-------------|-------------------------|---------------------------------|-------------------|--------------------------|
| SNP_P3_105249_37574  | NW_004515703.1 | Scaffold123 | 37574                   | GG                              | AA                | 1946484668               |
| SNP_P3_105250_37578  | NW_004515703.1 | Scaffold123 | 37578                   | TT                              | GG                | 1946484670               |
| SNP_P3_105251_37579  | NW_004515703.1 | Scaffold123 | 37579                   | CC                              | GG                | 1946484671               |
| SNP_P3_105252_37740  | NW_004515703.1 | Scaffold123 | 37740                   | CC                              | AA                | 1946484673               |
| SNP_P3_105253_53202  | NW_004515703.1 | Scaffold123 | 53202                   | GG                              | AA                | 1946484674               |
| SNP_P3_105254_61070  | NW_004515703.1 | Scaffold123 | 61070                   | GG                              | TT                | 1946484676               |
| SNP_P3_105255_61902  | NW_004515703.1 | Scaffold123 | 61902                   | CC                              | TT                | 1946484677               |
| SNP_P3_105256_66627  | NW_004515703.1 | Scaffold123 | 66627                   | TT                              | CC                | 1946484679               |
| SNP_P3_105257_66664  | NW_004515703.1 | Scaffold123 | 66664                   | CC                              | TT                | 1946484680               |
| SNP_P3_105258_66723  | NW_004515703.1 | Scaffold123 | 66723                   | TT                              | CC                | 1946484681               |
| SNP_P3_105259_66956  | NW_004515703.1 | Scaffold123 | 66956                   | TT                              | CC                | 1946484683               |
| SNP_P3_105261_98187  | NW_004515703.1 | Scaffold123 | 98187                   | TT                              | CC                | 1946484684               |
| SNP_P3_105262_98199  | NW_004515703.1 | Scaffold123 | 98199                   | AA                              | GG                | 1946484686               |
| SNP_P3_105263_98205  | NW_004515703.1 | Scaffold123 | 98205                   | TT                              | CC                | 1946484688               |
| SNP_P3_105264_98219  | NW_004515703.1 | Scaffold123 | 98219                   | AA                              | GG                | 1946484689               |
| SNP_P3_105265_98526  | NW_004515703.1 | Scaffold123 | 98526                   | AA                              | GG                | 1946484690               |
| SNP_P3_105266_98536  | NW_004515703.1 | Scaffold123 | 98536                   | GG                              | AA                | 1946484692               |
| SNP_P3_105267_101725 | NW_004515703.1 | Scaffold123 | 101725                  | AA                              | GG                | 1946484693               |
| SNP_P3_105268_136463 | NW_004515703.1 | Scaffold123 | 136463                  | AA                              | GG                | 1946484695               |
| SNP_P3_105269_136477 | NW_004515703.1 | Scaffold123 | 136477                  | AA                              | GG                | 1946484696               |
| SNP_P3_105270_136485 | NW_004515703.1 | Scaffold123 | 136485                  | AA                              | GG                | 1946484698               |
| SNP_P3_105271_136825 | NW_004515703.1 | Scaffold123 | 136825                  | AA                              | GG                | 1946484699               |
| SNP_P3_105272_137116 | NW_004515703.1 | Scaffold123 | 137116                  | TT                              | GG                | 1946484701               |
| SNP_P3_105273_137167 | NW_004515703.1 | Scaffold123 | 137167                  | CC                              | TT                | 1946484702               |
| SNP_P3_105274_137180 | NW_004515703.1 | Scaffold123 | 137180                  | GG                              | AA                | 1946484703               |
| SNP_P3_105275_137181 | NW_004515703.1 | Scaffold123 | 137181                  | GG                              | AA                | 1946484705               |
| SNP_P3_105276_141550 | NW_004515703.1 | Scaffold123 | 141550                  | AA                              | CC                | 1946484706               |
| SNP_P3_105277_141701 | NW_004515703.1 | Scaffold123 | 141701                  | CC                              | TT                | 1946484708               |
| SNP_P3_105278_141735 | NW_004515703.1 | Scaffold123 | 141735                  | AA                              | GG                | 1946484709               |
| SNP_P3_105279_141782 | NW_004515703.1 | Scaffold123 | 141782                  | TT                              | AA                | 1946484711               |
| SNP_P3_105280_147462 | NW_004515703.1 | Scaffold123 | 147462                  | GG                              | AA                | 1946484712               |
| SNP_P3_105281_163934 | NW_004515703.1 | Scaffold123 | 163934                  | AA                              | TT                | 1946484714               |
| SNP_P3_105282_172547 | NW_004515703.1 | Scaffold123 | 172547                  | CC                              | TT                | 1946484715               |
| SNP_P3_105283_213767 | NW_004515703.1 | Scaffold123 | 213767                  | TT                              | CC                | 1946484717               |
| SNP_P3_105284_213769 | NW_004515703.1 | Scaffold123 | 213769                  | GG                              | CC                | 1946484718               |
| SNP_P3_105285_213775 | NW_004515703.1 | Scaffold123 | 213775                  | CC                              | AA                | 1946484720               |
| SNP_P3_105286_213776 | NW_004515703.1 | Scaffold123 | 213776                  | AA                              | CC                | 1946484721               |
| SNP_P3_105287_213779 | NW_004515703.1 | Scaffold123 | 213779                  | TT                              | AA                | 1946484723               |
| SNP_P3_105288_213830 | NW_004515703.1 | Scaffold123 | 213830                  | GG                              | AA                | 1946484724               |
| SNP_P3_105289_237304 | NW_004515703.1 | Scaffold123 | 237304                  | CC                              | TT                | 1946484726               |
| SNP_P3_105290_237690 | NW_004515703.1 | Scaffold123 | 237690                  | AA                              | CC                | 1946484727               |
| SNP_P3_105291_252296 | NW_004515703.1 | Scaffold123 | 252296                  | TT                              | GG                | 1946484728               |

| SNPs IDs             | Chromosome IDs | Chromosomes | Physical positions (bp) | CDC Frontier (Reference genome) | (Pusa 256 & HPNB) | NCBI SNPdb Accession IDs |
|----------------------|----------------|-------------|-------------------------|---------------------------------|-------------------|--------------------------|
| SNP_P3_105292_269556 | NW_004515703.1 | Scaffold123 | 269556                  | TT                              | GG                | 1946484730               |
| SNP_P3_105293_270060 | NW_004515703.1 | Scaffold123 | 270060                  | CC                              | TT                | 1946484731               |
| SNP_P3_105295_280332 | NW_004515703.1 | Scaffold123 | 280332                  | TT                              | AA                | 1946484733               |
| SNP_P3_105296_301048 | NW_004515703.1 | Scaffold123 | 301048                  | TT                              | CC                | 1946484734               |
| SNP_P3_105297_344069 | NW_004515703.1 | Scaffold123 | 344069                  | TT                              | CC                | 1946484736               |
| SNP_P3_105298_344099 | NW_004515703.1 | Scaffold123 | 344099                  | TT                              | CC                | 1946484737               |
| SNP_P3_105299_348268 | NW_004515703.1 | Scaffold123 | 348268                  | AA                              | GG                | 1946484739               |
| SNP_P3_105301_391412 | NW_004515703.1 | Scaffold123 | 391412                  | GG                              | AA                | 1946484740               |
| SNP_P3_105302_405467 | NW_004515703.1 | Scaffold123 | 405467                  | GG                              | AA                | 1946484742               |
| SNP_P3_105303_3145   | NW_004515705.1 | Scaffold126 | 3145                    | TT                              | CC                | 1946484743               |
| SNP_P3_105304_3372   | NW_004515705.1 | Scaffold126 | 3372                    | CC                              | TT                | 1946484744               |
| SNP_P3_105305_4309   | NW_004515705.1 | Scaffold126 | 4309                    | AA                              | TT                | 1946484746               |
| SNP_P3_105306_4315   | NW_004515705.1 | Scaffold126 | 4315                    | TT                              | AA                | 1946484747               |
| SNP_P3_105307_5826   | NW_004515705.1 | Scaffold126 | 5826                    | TT                              | AA                | 1946484749               |
| SNP_P3_105308_5856   | NW_004515705.1 | Scaffold126 | 5856                    | AA                              | TT                | 1946484750               |
| SNP_P3_105309_6261   | NW_004515705.1 | Scaffold126 | 6261                    | AA                              | GG                | 1946484752               |
| SNP_P3_105310_7711   | NW_004515705.1 | Scaffold126 | 7711                    | CC                              | TT                | 1946484753               |
| SNP_P3_105311_12109  | NW_004515705.1 | Scaffold126 | 12109                   | TT                              | AA                | 1946484755               |
| SNP_P3_105312_12166  | NW_004515705.1 | Scaffold126 | 12166                   | CC                              | AA                | 1946484756               |
| SNP_P3_105313_16261  | NW_004515705.1 | Scaffold126 | 16261                   | TT                              | AA                | 1946484758               |
| SNP_P3_105314_16344  | NW_004515705.1 | Scaffold126 | 16344                   | GG                              | AA                | 1946484759               |
| SNP_P3_105315_16349  | NW_004515705.1 | Scaffold126 | 16349                   | TT                              | CC                | 1946484761               |
| SNP_P3_105316_16361  | NW_004515705.1 | Scaffold126 | 16361                   | TT                              | AA                | 1946484762               |
| SNP_P3_105317_16372  | NW_004515705.1 | Scaffold126 | 16372                   | TT                              | AA                | 1946484763               |
| SNP_P3_105318_16397  | NW_004515705.1 | Scaffold126 | 16397                   | TT                              | GG                | 1946484765               |
| SNP_P3_105319_16404  | NW_004515705.1 | Scaffold126 | 16404                   | TT                              | CC                | 1946484766               |
| SNP_P3_105320_16412  | NW_004515705.1 | Scaffold126 | 16412                   | CC                              | GG                | 1946484768               |
| SNP_P3_105321_16439  | NW_004515705.1 | Scaffold126 | 16439                   | GG                              | TT                | 1946484769               |
| SNP_P3_105322_9805   | NW_004515706.1 | Scaffold127 | 9805                    | TT                              | GG                | 1946484771               |
| SNP_P3_105323_10095  | NW_004515706.1 | Scaffold127 | 10095                   | CC                              | GG                | 1946484772               |
| SNP_P3_105324_11728  | NW_004515706.1 | Scaffold127 | 11728                   | CC                              | TT                | 1946484774               |
| SNP_P3_105326_18837  | NW_004515706.1 | Scaffold127 | 18837                   | CC                              | AA                | 1946484775               |
| SNP_P3_105328_18839  | NW_004515706.1 | Scaffold127 | 18839                   | TT                              | AA                | 1946484776               |
| SNP_P3_105329_20240  | NW_004515706.1 | Scaffold127 | 20240                   | GG                              | AA                | 1946484778               |
| SNP_P3_105330_20247  | NW_004515706.1 | Scaffold127 | 20247                   | TT                              | GG                | 1946484779               |
| SNP_P3_105331_20273  | NW_004515706.1 | Scaffold127 | 20273                   | TT                              | AA                | 1946484781               |
| SNP_P3_105332_20274  | NW_004515706.1 | Scaffold127 | 20274                   | TT                              | AA                | 1946484782               |
| SNP_P3_105333_20276  | NW_004515706.1 | Scaffold127 | 20276                   | TT                              | CC                | 1946484784               |
| SNP_P3_105334_20277  | NW_004515706.1 | Scaffold127 | 20277                   | TT                              | CC                | 1946484785               |
| SNP_P3_105335_20288  | NW_004515706.1 | Scaffold127 | 20288                   | TT                              | CC                | 1946484787               |
| SNP_P3_105336_20289  | NW_004515706.1 | Scaffold127 | 20289                   | AA                              | CC                | 1946484788               |
| SNP_P3_105337_20421  | NW_004515706.1 | Scaffold127 | 20421                   | AA                              | GG                | 1946484789               |

| SNPs IDs             | Chromosome IDs | Chromosomes | Physical positions (bp) | CDC Frontier (Reference genome) | (Pusa 256 & HPNB) | NCBI SNPdb Accession IDs |
|----------------------|----------------|-------------|-------------------------|---------------------------------|-------------------|--------------------------|
| SNP_P3_105339_46606  | NW_004515706.1 | Scaffold127 | 46606                   | TT                              | GG                | 1946484791               |
| SNP_P3_105340_46642  | NW_004515706.1 | Scaffold127 | 46642                   | AA                              | GG                | 1946484792               |
| SNP_P3_105341_46916  | NW_004515706.1 | Scaffold127 | 46916                   | GG                              | AA                | 1946484794               |
| SNP_P3_105342_47169  | NW_004515706.1 | Scaffold127 | 47169                   | CC                              | TT                | 1946484795               |
| SNP_P3_105343_47191  | NW_004515706.1 | Scaffold127 | 47191                   | CC                              | TT                | 1946484797               |
| SNP_P3_105344_47214  | NW_004515706.1 | Scaffold127 | 47214                   | GG                              | CC                | 1946484798               |
| SNP_P3_105345_47215  | NW_004515706.1 | Scaffold127 | 47215                   | GG                              | AA                | 1946484800               |
| SNP_P3_105346_47282  | NW_004515706.1 | Scaffold127 | 47282                   | GG                              | AA                | 1946484801               |
| SNP_P3_105347_49338  | NW_004515706.1 | Scaffold127 | 49338                   | TT                              | AA                | 1946484802               |
| SNP_P3_105348_49339  | NW_004515706.1 | Scaffold127 | 49339                   | TT                              | CC                | 1946484804               |
| SNP_P3_105349_49340  | NW_004515706.1 | Scaffold127 | 49340                   | GG                              | AA                | 1946484805               |
| SNP_P3_105350_53434  | NW_004515706.1 | Scaffold127 | 53434                   | GG                              | TT                | 1946484807               |
| SNP_P3_105351_53605  | NW_004515706.1 | Scaffold127 | 53605                   | TT                              | GG                | 1946484808               |
| SNP_P3_105352_53606  | NW_004515706.1 | Scaffold127 | 53606                   | AA                              | TT                | 1946484810               |
| SNP_P3_105353_53607  | NW_004515706.1 | Scaffold127 | 53607                   | TT                              | AA                | 1946484811               |
| SNP_P3_105354_53608  | NW_004515706.1 | Scaffold127 | 53608                   | GG                              | AA                | 1946484813               |
| SNP_P3_105355_53615  | NW_004515706.1 | Scaffold127 | 53615                   | TT                              | CC                | 1946484814               |
| SNP_P3_105357_53670  | NW_004515706.1 | Scaffold127 | 53670                   | TT                              | GG                | 1946484816               |
| SNP_P3_105358_53676  | NW_004515706.1 | Scaffold127 | 53676                   | TT                              | GG                | 1946484817               |
| SNP_P3_105359_53989  | NW_004515706.1 | Scaffold127 | 53989                   | AA                              | TT                | 1946484819               |
| SNP_P3_105361_54097  | NW_004515706.1 | Scaffold127 | 54097                   | AA                              | TT                | 1946484820               |
| SNP_P3_105362_54349  | NW_004515706.1 | Scaffold127 | 54349                   | AA                              | GG                | 1946484822               |
| SNP_P3_105363_54740  | NW_004515706.1 | Scaffold127 | 54740                   | AA                              | GG                | 1946484823               |
| SNP_P3_105364_55066  | NW_004515706.1 | Scaffold127 | 55066                   | TT                              | CC                | 1946484825               |
| SNP_P3_105365_55117  | NW_004515706.1 | Scaffold127 | 55117                   | TT                              | CC                | 1946484826               |
| SNP_P3_105366_70204  | NW_004515706.1 | Scaffold127 | 70204                   | GG                              | AA                | 1946484828               |
| SNP_P3_105367_83261  | NW_004515706.1 | Scaffold127 | 83261                   | TT                              | AA                | 1946484829               |
| SNP_P3_105368_101015 | NW_004515706.1 | Scaffold127 | 101015                  | AA                              | TT                | 1946484830               |
| SNP_P3_105369_106412 | NW_004515706.1 | Scaffold127 | 106412                  | TT                              | GG                | 1946484832               |
| SNP_P3_105371_116136 | NW_004515706.1 | Scaffold127 | 116136                  | TT                              | GG                | 1946484833               |
| SNP_P3_105372_116436 | NW_004515706.1 | Scaffold127 | 116436                  | TT                              | CC                | 1946484835               |
| SNP_P3_105373_131756 | NW_004515706.1 | Scaffold127 | 131756                  | AA                              | GG                | 1946484836               |
| SNP_P3_105374_131759 | NW_004515706.1 | Scaffold127 | 131759                  | TT                              | GG                | 1946484838               |
| SNP_P3_105375_135547 | NW_004515706.1 | Scaffold127 | 135547                  | TT                              | GG                | 1946484839               |
| SNP_P3_105376_135994 | NW_004515706.1 | Scaffold127 | 135994                  | TT                              | CC                | 1946484841               |
| SNP_P3_105377_140048 | NW_004515706.1 | Scaffold127 | 140048                  | TT                              | GG                | 1946484842               |
| SNP_P3_105379_152055 | NW_004515706.1 | Scaffold127 | 152055                  | GG                              | AA                | 1946484843               |
| SNP_P3_105380_165654 | NW_004515706.1 | Scaffold127 | 165654                  | GG                              | CC                | 1946484845               |
| SNP_P3_105381_175965 | NW_004515706.1 | Scaffold127 | 175965                  | CC                              | TT                | 1946484846               |
| SNP_P3_105382_184749 | NW_004515706.1 | Scaffold127 | 184749                  | AA                              | GG                | 1946484848               |
| SNP_P3_105383_184763 | NW_004515706.1 | Scaffold127 | 184763                  | AA                              | TT                | 1946484849               |
| SNP_P3_105384_184768 | NW_004515706.1 | Scaffold127 | 184768                  | TT                              | CC                | 1946484851               |

| SNPs IDs             | Chromosome IDs | Chromosomes | Physical positions (bp) | CDC Frontier (Reference genome) | (Pusa 256 & HPNB) | NCBI SNPdb Accession IDs |
|----------------------|----------------|-------------|-------------------------|---------------------------------|-------------------|--------------------------|
| SNP_P3_105385_184799 | NW_004515706.1 | Scaffold127 | 184799                  | TT                              | GG                | 1946484852               |
| SNP_P3_105386_184819 | NW_004515706.1 | Scaffold127 | 184819                  | AA                              | GG                | 1946484854               |
| SNP_P3_105387_184921 | NW_004515706.1 | Scaffold127 | 184921                  | CC                              | TT                | 1946484855               |
| SNP_P3_105388_184953 | NW_004515706.1 | Scaffold127 | 184953                  | TT                              | AA                | 1946484857               |
| SNP_P3_105389_184979 | NW_004515706.1 | Scaffold127 | 184979                  | AA                              | GG                | 1946484858               |
| SNP_P3_105390_185067 | NW_004515706.1 | Scaffold127 | 185067                  | TT                              | CC                | 1946484859               |
| SNP_P3_105391_201686 | NW_004515706.1 | Scaffold127 | 201686                  | AA                              | GG                | 1946484861               |
| SNP_P3_105392_215689 | NW_004515706.1 | Scaffold127 | 215689                  | TT                              | AA                | 1946484862               |
| SNP_P3_105393_215772 | NW_004515706.1 | Scaffold127 | 215772                  | CC                              | TT                | 1946484864               |
| SNP_P3_105394_229456 | NW_004515706.1 | Scaffold127 | 229456                  | TT                              | CC                | 1946484865               |
| SNP_P3_105395_229457 | NW_004515706.1 | Scaffold127 | 229457                  | AA                              | GG                | 1946484867               |
| SNP_P3_105396_229469 | NW_004515706.1 | Scaffold127 | 229469                  | GG                              | AA                | 1946484868               |
| SNP_P3_105397_229517 | NW_004515706.1 | Scaffold127 | 229517                  | TT                              | GG                | 1946484870               |
| SNP_P3_105398_229548 | NW_004515706.1 | Scaffold127 | 229548                  | AA                              | GG                | 1946484871               |
| SNP_P3_105399_229572 | NW_004515706.1 | Scaffold127 | 229572                  | GG                              | AA                | 1946484873               |
| SNP_P3_105400_229747 | NW_004515706.1 | Scaffold127 | 229747                  | TT                              | CC                | 1946484874               |
| SNP_P3_105401_231736 | NW_004515706.1 | Scaffold127 | 231736                  | TT                              | GG                | 1946484875               |
| SNP_P3_105402_231742 | NW_004515706.1 | Scaffold127 | 231742                  | GG                              | TT                | 1946484877               |
| SNP_P3_105403_231745 | NW_004515706.1 | Scaffold127 | 231745                  | AA                              | TT                | 1946484878               |
| SNP_P3_105404_231746 | NW_004515706.1 | Scaffold127 | 231746                  | AA                              | TT                | 1946484880               |
| SNP_P3_105405_232103 | NW_004515706.1 | Scaffold127 | 232103                  | AA                              | CC                | 1946484881               |
| SNP_P3_105406_232643 | NW_004515706.1 | Scaffold127 | 232643                  | GG                              | AA                | 1946484883               |
| SNP_P3_105407_234854 | NW_004515706.1 | Scaffold127 | 234854                  | GG                              | AA                | 1946484884               |
| SNP_P3_105408_240049 | NW_004515706.1 | Scaffold127 | 240049                  | TT                              | CC                | 1946484886               |
| SNP_P3_105409_240200 | NW_004515706.1 | Scaffold127 | 240200                  | AA                              | GG                | 1946484887               |
| SNP_P3_105410_240227 | NW_004515706.1 | Scaffold127 | 240227                  | TT                              | CC                | 1946484889               |
| SNP_P3_105411_240276 | NW_004515706.1 | Scaffold127 | 240276                  | TT                              | AA                | 1946484890               |
| SNP_P3_105412_240287 | NW_004515706.1 | Scaffold127 | 240287                  | CC                              | TT                | 1946484892               |
| SNP_P3_105413_240367 | NW_004515706.1 | Scaffold127 | 240367                  | GG                              | AA                | 1946484893               |
| SNP_P3_105414_245803 | NW_004515706.1 | Scaffold127 | 245803                  | AA                              | GG                | 1946484895               |
| SNP_P3_105415_246066 | NW_004515706.1 | Scaffold127 | 246066                  | GG                              | TT                | 1946484896               |
| SNP_P3_105416_246083 | NW_004515706.1 | Scaffold127 | 246083                  | GG                              | AA                | 1946484898               |
| SNP_P3_105417_246923 | NW_004515706.1 | Scaffold127 | 246923                  | GG                              | AA                | 1946484899               |
| SNP_P3_105418_255784 | NW_004515706.1 | Scaffold127 | 255784                  | TT                              | CC                | 1946484901               |
| SNP_P3_105419_255810 | NW_004515706.1 | Scaffold127 | 255810                  | CC                              | TT                | 1946484902               |
| SNP_P3_105420_256051 | NW_004515706.1 | Scaffold127 | 256051                  | AA                              | TT                | 1946484904               |
| SNP_P3_105421_256064 | NW_004515706.1 | Scaffold127 | 256064                  | TT                              | CC                | 1946484905               |
| SNP_P3_105422_256808 | NW_004515706.1 | Scaffold127 | 256808                  | AA                              | CC                | 1946484907               |
| SNP_P3_105423_256867 | NW_004515706.1 | Scaffold127 | 256867                  | TT                              | CC                | 1946484908               |
| SNP_P3_105424_265735 | NW_004515706.1 | Scaffold127 | 265735                  | TT                              | CC                | 1946484910               |
| SNP_P3_105425_270011 | NW_004515706.1 | Scaffold127 | 270011                  | TT                              | CC                | 1946484911               |
| SNP_P3_105426_270012 | NW_004515706.1 | Scaffold127 | 270012                  | AA                              | CC                | 1946484913               |



| SNPs IDs             | Chromosome IDs | Chromosomes | Physical positions (bp) | CDC Frontier (Reference genome) | (Pusa 256 & HPNB) | NCBI SNPdb Accession IDs |
|----------------------|----------------|-------------|-------------------------|---------------------------------|-------------------|--------------------------|
| SNP_P3_105427_270013 | NW_004515706.1 | Scaffold127 | 270013                  | CC                              | GG                | 1946484914               |
| SNP_P3_105428_270062 | NW_004515706.1 | Scaffold127 | 270062                  | GG                              | AA                | 1946484916               |
| SNP_P3_105429_270214 | NW_004515706.1 | Scaffold127 | 270214                  | GG                              | AA                | 1946484917               |
| SNP_P3_105430_270319 | NW_004515706.1 | Scaffold127 | 270319                  | AA                              | CC                | 1946484919               |
| SNP_P3_105431_270342 | NW_004515706.1 | Scaffold127 | 270342                  | TT                              | CC                | 1946484920               |
| SNP_P3_105432_270343 | NW_004515706.1 | Scaffold127 | 270343                  | CC                              | TT                | 1946484921               |
| SNP_P3_105433_270369 | NW_004515706.1 | Scaffold127 | 270369                  | CC                              | GG                | 1946484923               |
| SNP_P3_105435_270736 | NW_004515706.1 | Scaffold127 | 270736                  | CC                              | TT                | 1946484924               |
| SNP_P3_105437_270776 | NW_004515706.1 | Scaffold127 | 270776                  | CC                              | AA                | 1946484926               |
| SNP_P3_105438_270778 | NW_004515706.1 | Scaffold127 | 270778                  | AA                              | GG                | 1946484927               |
| SNP_P3_105439_270790 | NW_004515706.1 | Scaffold127 | 270790                  | TT                              | GG                | 1946484929               |
| SNP_P3_105440_270809 | NW_004515706.1 | Scaffold127 | 270809                  | AA                              | TT                | 1946484930               |
| SNP_P3_105441_274951 | NW_004515706.1 | Scaffold127 | 274951                  | AA                              | GG                | 1946484932               |
| SNP_P3_105442_274954 | NW_004515706.1 | Scaffold127 | 274954                  | AA                              | CC                | 1946484933               |
| SNP_P3_105443_275006 | NW_004515706.1 | Scaffold127 | 275006                  | TT                              | CC                | 1946484935               |
| SNP_P3_105444_299524 | NW_004515706.1 | Scaffold127 | 299524                  | AA                              | GG                | 1946484936               |
| SNP_P3_105445_299553 | NW_004515706.1 | Scaffold127 | 299553                  | GG                              | CC                | 1946484938               |
| SNP_P3_105446_299604 | NW_004515706.1 | Scaffold127 | 299604                  | GG                              | AA                | 1946484939               |
| SNP_P3_105447_299611 | NW_004515706.1 | Scaffold127 | 299611                  | AA                              | GG                | 1946484940               |
| SNP_P3_105448_299633 | NW_004515706.1 | Scaffold127 | 299633                  | TT                              | AA                | 1946484942               |
| SNP_P3_105449_299661 | NW_004515706.1 | Scaffold127 | 299661                  | TT                              | CC                | 1946484943               |
| SNP_P3_105450_304939 | NW_004515706.1 | Scaffold127 | 304939                  | AA                              | GG                | 1946484945               |
| SNP_P3_105451_305054 | NW_004515706.1 | Scaffold127 | 305054                  | GG                              | CC                | 1946484946               |
| SNP_P3_105452_305417 | NW_004515706.1 | Scaffold127 | 305417                  | AA                              | TT                | 1946484948               |
| SNP_P3_105453_305423 | NW_004515706.1 | Scaffold127 | 305423                  | AA                              | TT                | 1946484949               |
| SNP_P3_105454_5547   | NW_004515707.1 | Scaffold128 | 5547                    | GG                              | AA                | 1946484951               |
| SNP_P3_105455_5558   | NW_004515707.1 | Scaffold128 | 5558                    | TT                              | CC                | 1946484952               |
| SNP_P3_105456_5728   | NW_004515707.1 | Scaffold128 | 5728                    | TT                              | GG                | 1946484953               |
| SNP_P3_105457_5770   | NW_004515707.1 | Scaffold128 | 5770                    | TT                              | GG                | 1946484955               |
| SNP_P3_105458_5894   | NW_004515707.1 | Scaffold128 | 5894                    | GG                              | TT                | 1946484956               |
| SNP_P3_105459_5961   | NW_004515707.1 | Scaffold128 | 5961                    | AA                              | CC                | 1946484958               |
| SNP_P3_105460_6065   | NW_004515707.1 | Scaffold128 | 6065                    | AA                              | GG                | 1946484959               |
| SNP_P3_105461_6887   | NW_004515707.1 | Scaffold128 | 6887                    | CC                              | TT                | 1946484961               |
| SNP_P3_105462_7784   | NW_004515707.1 | Scaffold128 | 7784                    | GG                              | AA                | 1946484962               |
| SNP_P3_105463_12563  | NW_004515707.1 | Scaffold128 | 12563                   | TT                              | AA                | 1946484964               |
| SNP_P3_105464_12976  | NW_004515707.1 | Scaffold128 | 12976                   | GG                              | AA                | 1946484965               |
| SNP_P3_105465_26231  | NW_004515707.1 | Scaffold128 | 26231                   | GG                              | AA                | 1946484967               |
| SNP_P3_105466_32622  | NW_004515707.1 | Scaffold128 | 32622                   | AA                              | GG                | 1946484968               |
| SNP_P3_105467_32711  | NW_004515707.1 | Scaffold128 | 32711                   | GG                              | AA                | 1946484970               |
| SNP_P3_105468_32767  | NW_004515707.1 | Scaffold128 | 32767                   | TT                              | CC                | 1946484971               |
| SNP_P3_105469_32788  | NW_004515707.1 | Scaffold128 | 32788                   | TT                              | GG                | 1946484972               |
| SNP_P3_105470_32812  | NW_004515707.1 | Scaffold128 | 32812                   | TT                              | CC                | 1946484974               |

| SNPs IDs             | Chromosome IDs | Chromosomes | Physical positions (bp) | CDC Frontier (Reference genome) | (Pusa 256 & HPNB) | NCBI SNPdb Accession IDs |
|----------------------|----------------|-------------|-------------------------|---------------------------------|-------------------|--------------------------|
| SNP_P3_105471_32836  | NW_004515707.1 | Scaffold128 | 32836                   | CC                              | AA                | 1946484975               |
| SNP_P3_105473_49123  | NW_004515707.1 | Scaffold128 | 49123                   | GG                              | AA                | 1946484977               |
| SNP_P3_105474_68384  | NW_004515707.1 | Scaffold128 | 68384                   | TT                              | CC                | 1946484978               |
| SNP_P3_105475_68755  | NW_004515707.1 | Scaffold128 | 68755                   | TT                              | GG                | 1946484980               |
| SNP_P3_105476_82555  | NW_004515707.1 | Scaffold128 | 82555                   | GG                              | AA                | 1946484981               |
| SNP_P3_105477_85591  | NW_004515707.1 | Scaffold128 | 85591                   | GG                              | AA                | 1946484983               |
| SNP_P3_105478_87228  | NW_004515707.1 | Scaffold128 | 87228                   | TT                              | CC                | 1946484984               |
| SNP_P3_105479_90926  | NW_004515707.1 | Scaffold128 | 90926                   | TT                              | CC                | 1946484986               |
| SNP_P3_105480_108003 | NW_004515707.1 | Scaffold128 | 108003                  | AA                              | TT                | 1946484987               |
| SNP_P3_105482_174307 | NW_004515707.1 | Scaffold128 | 174307                  | GG                              | AA                | 1946484989               |
| SNP_P3_105483_174926 | NW_004515707.1 | Scaffold128 | 174926                  | AA                              | GG                | 1946484990               |
| SNP_P3_105485_177090 | NW_004515707.1 | Scaffold128 | 177090                  | CC                              | GG                | 1946484992               |
| SNP_P3_105486_177109 | NW_004515707.1 | Scaffold128 | 177109                  | TT                              | AA                | 1946484993               |
| SNP_P3_105487_180103 | NW_004515707.1 | Scaffold128 | 180103                  | AA                              | GG                | 1946484995               |
| SNP_P3_105488_197803 | NW_004515707.1 | Scaffold128 | 197803                  | AA                              | GG                | 1946484996               |
| SNP_P3_105489_197984 | NW_004515707.1 | Scaffold128 | 197984                  | AA                              | GG                | 1946484998               |
| SNP_P3_105490_200085 | NW_004515707.1 | Scaffold128 | 200085                  | CC                              | TT                | 1946484999               |
| SNP_P3_105491_200086 | NW_004515707.1 | Scaffold128 | 200086                  | AA                              | GG                | 1946485001               |
| SNP_P3_105492_205812 | NW_004515707.1 | Scaffold128 | 205812                  | TT                              | AA                | 1946485002               |
| SNP_P3_105493_221547 | NW_004515707.1 | Scaffold128 | 221547                  | CC                              | TT                | 1946485004               |
| SNP_P3_105494_221553 | NW_004515707.1 | Scaffold128 | 221553                  | TT                              | CC                | 1946485005               |
| SNP_P3_105495_227809 | NW_004515707.1 | Scaffold128 | 227809                  | GG                              | AA                | 1946485007               |
| SNP_P3_105496_240687 | NW_004515707.1 | Scaffold128 | 240687                  | TT                              | CC                | 1946485008               |
| SNP_P3_105497_240960 | NW_004515707.1 | Scaffold128 | 240960                  | TT                              | GG                | 1946485010               |
| SNP_P3_105498_240966 | NW_004515707.1 | Scaffold128 | 240966                  | GG                              | CC                | 1946485011               |
| SNP_P3_105499_240989 | NW_004515707.1 | Scaffold128 | 240989                  | TT                              | GG                | 1946485012               |
| SNP_P3_105500_241002 | NW_004515707.1 | Scaffold128 | 241002                  | TT                              | CC                | 1946485014               |
| SNP_P3_105501_249889 | NW_004515707.1 | Scaffold128 | 249889                  | TT                              | AA                | 1946485015               |
| SNP_P3_105502_252272 | NW_004515707.1 | Scaffold128 | 252272                  | GG                              | AA                | 1946485017               |
| SNP_P3_105504_256599 | NW_004515707.1 | Scaffold128 | 256599                  | AA                              | GG                | 1946485018               |
| SNP_P3_105505_263577 | NW_004515707.1 | Scaffold128 | 263577                  | GG                              | AA                | 1946485020               |
| SNP_P3_105506_263608 | NW_004515707.1 | Scaffold128 | 263608                  | AA                              | CC                | 1946485022               |
| SNP_P3_105507_279112 | NW_004515707.1 | Scaffold128 | 279112                  | AA                              | GG                | 1946485024               |
| SNP_P3_105508_279406 | NW_004515707.1 | Scaffold128 | 279406                  | CC                              | AA                | 1946485026               |
| SNP_P3_105509_285259 | NW_004515707.1 | Scaffold128 | 285259                  | GG                              | AA                | 1946485027               |
| SNP_P3_105511_285399 | NW_004515707.1 | Scaffold128 | 285399                  | AA                              | GG                | 1946485029               |
| SNP_P3_105512_285506 | NW_004515707.1 | Scaffold128 | 285506                  | GG                              | AA                | 1946485030               |
| SNP_P3_105514_295192 | NW_004515707.1 | Scaffold128 | 295192                  | TT                              | CC                | 1946485032               |
| SNP_P3_105515_323675 | NW_004515707.1 | Scaffold128 | 323675                  | CC                              | TT                | 1946485033               |
| SNP_P3_105516_344041 | NW_004515707.1 | Scaffold128 | 344041                  | CC                              | TT                | 1946485035               |
| SNP_P3_105517_345964 | NW_004515707.1 | Scaffold128 | 345964                  | TT                              | CC                | 1946485036               |
| SNP_P3_105518_346113 | NW_004515707.1 | Scaffold128 | 346113                  | AA                              | GG                | 1946485038               |

| SNPs IDs             | Chromosome IDs | Chromosomes | Physical positions (bp) | CDC Frontier (Reference genome) | (Pusa 256 & HPNB) | NCBI SNPdb Accession IDs |
|----------------------|----------------|-------------|-------------------------|---------------------------------|-------------------|--------------------------|
| SNP_P3_105519_346122 | NW_004515707.1 | Scaffold128 | 346122                  | TT                              | AA                | 1946485039               |
| SNP_P3_105520_346172 | NW_004515707.1 | Scaffold128 | 346172                  | AA                              | GG                | 1946485041               |
| SNP_P3_105521_346336 | NW_004515707.1 | Scaffold128 | 346336                  | TT                              | CC                | 1946485043               |
| SNP_P3_105522_346379 | NW_004515707.1 | Scaffold128 | 346379                  | TT                              | GG                | 1946485044               |
| SNP_P3_105523_346434 | NW_004515707.1 | Scaffold128 | 346434                  | CC                              | TT                | 1946485046               |
| SNP_P3_105524_346463 | NW_004515707.1 | Scaffold128 | 346463                  | GG                              | AA                | 1946485047               |
| SNP_P3_105525_346473 | NW_004515707.1 | Scaffold128 | 346473                  | GG                              | CC                | 1946485049               |
| SNP_P3_105526_347635 | NW_004515707.1 | Scaffold128 | 347635                  | CC                              | AA                | 1946485050               |
| SNP_P3_105527_350531 | NW_004515707.1 | Scaffold128 | 350531                  | CC                              | AA                | 1946485051               |
| SNP_P3_105528_375495 | NW_004515707.1 | Scaffold128 | 375495                  | TT                              | CC                | 1946485053               |
| SNP_P3_105529_375651 | NW_004515707.1 | Scaffold128 | 375651                  | TT                              | GG                | 1946485054               |
| SNP_P3_105530_379926 | NW_004515707.1 | Scaffold128 | 379926                  | GG                              | TT                | 1946485056               |
| SNP_P3_105531_393099 | NW_004515707.1 | Scaffold128 | 393099                  | TT                              | CC                | 1946485058               |
| SNP_P3_105532_393105 | NW_004515707.1 | Scaffold128 | 393105                  | GG                              | AA                | 1946485059               |
| SNP_P3_105533_393232 | NW_004515707.1 | Scaffold128 | 393232                  | CC                              | TT                | 1946485061               |
| SNP_P3_105534_393520 | NW_004515707.1 | Scaffold128 | 393520                  | AA                              | TT                | 1946485062               |
| SNP_P3_105535_393613 | NW_004515707.1 | Scaffold128 | 393613                  | AA                              | TT                | 1946485063               |
| SNP_P3_105536_396927 | NW_004515707.1 | Scaffold128 | 396927                  | TT                              | GG                | 1946485065               |
| SNP_P3_105537_400763 | NW_004515707.1 | Scaffold128 | 400763                  | CC                              | TT                | 1946485066               |
| SNP_P3_105538_402270 | NW_004515707.1 | Scaffold128 | 402270                  | TT                              | CC                | 1946485068               |
| SNP_P3_105539_402271 | NW_004515707.1 | Scaffold128 | 402271                  | CC                              | TT                | 1946485069               |
| SNP_P3_105540_404011 | NW_004515707.1 | Scaffold128 | 404011                  | AA                              | TT                | 1946485071               |
| SNP_P3_105541_404025 | NW_004515707.1 | Scaffold128 | 404025                  | CC                              | TT                | 1946485072               |
| SNP_P3_105542_404391 | NW_004515707.1 | Scaffold128 | 404391                  | CC                              | TT                | 1946485074               |
| SNP_P3_105543_408313 | NW_004515707.1 | Scaffold128 | 408313                  | CC                              | TT                | 1946485075               |
| SNP_P3_105544_408316 | NW_004515707.1 | Scaffold128 | 408316                  | TT                              | CC                | 1946485077               |
| SNP_P3_105545_416856 | NW_004515707.1 | Scaffold128 | 416856                  | GG                              | TT                | 1946485078               |
| SNP_P3_105546_416921 | NW_004515707.1 | Scaffold128 | 416921                  | CC                              | TT                | 1946485079               |
| SNP_P3_105547_417151 | NW_004515707.1 | Scaffold128 | 417151                  | CC                              | TT                | 1946485081               |
| SNP_P3_105548_417264 | NW_004515707.1 | Scaffold128 | 417264                  | AA                              | GG                | 1946485082               |
| SNP_P3_105549_417273 | NW_004515707.1 | Scaffold128 | 417273                  | TT                              | AA                | 1946485084               |
| SNP_P3_105550_417276 | NW_004515707.1 | Scaffold128 | 417276                  | TT                              | AA                | 1946485085               |
| SNP_P3_105551_417294 | NW_004515707.1 | Scaffold128 | 417294                  | GG                              | AA                | 1946485087               |
| SNP_P3_105552_427975 | NW_004515707.1 | Scaffold128 | 427975                  | TT                              | CC                | 1946485088               |
| SNP_P3_105553_429459 | NW_004515707.1 | Scaffold128 | 429459                  | GG                              | TT                | 1946485090               |
| SNP_P3_105554_429736 | NW_004515707.1 | Scaffold128 | 429736                  | GG                              | TT                | 1946485091               |
| SNP_P3_105555_429774 | NW_004515707.1 | Scaffold128 | 429774                  | TT                              | CC                | 1946485093               |
| SNP_P3_105556_429938 | NW_004515707.1 | Scaffold128 | 429938                  | GG                              | TT                | 1946485094               |
| SNP_P3_105557_430434 | NW_004515707.1 | Scaffold128 | 430434                  | GG                              | AA                | 1946485096               |
| SNP_P3_105558_432366 | NW_004515707.1 | Scaffold128 | 432366                  | CC                              | TT                | 1946485098               |
| SNP_P3_105559_437346 | NW_004515707.1 | Scaffold128 | 437346                  | AA                              | TT                | 1946485099               |
| SNP_P3_105560_437378 | NW_004515707.1 | Scaffold128 | 437378                  | TT                              | GG                | 1946485100               |

| SNPs IDs             | Chromosome IDs | Chromosomes | Physical positions (bp) | CDC Frontier (Reference genome) | (Pusa 256 & HPNB) | NCBI SNPdb Accession IDs |
|----------------------|----------------|-------------|-------------------------|---------------------------------|-------------------|--------------------------|
| SNP_P3_105561_437385 | NW_004515707.1 | Scaffold128 | 437385                  | AA                              | GG                | 1946485102               |
| SNP_P3_105562_441420 | NW_004515707.1 | Scaffold128 | 441420                  | GG                              | AA                | 1946485103               |
| SNP_P3_105563_448535 | NW_004515707.1 | Scaffold128 | 448535                  | TT                              | AA                | 1946485105               |
| SNP_P3_105564_448594 | NW_004515707.1 | Scaffold128 | 448594                  | TT                              | AA                | 1946485106               |
| SNP_P3_105565_448609 | NW_004515707.1 | Scaffold128 | 448609                  | CC                              | GG                | 1946485108               |
| SNP_P3_105566_448612 | NW_004515707.1 | Scaffold128 | 448612                  | TT                              | CC                | 1946485109               |
| SNP_P3_105567_450391 | NW_004515707.1 | Scaffold128 | 450391                  | CC                              | TT                | 1946485111               |
| SNP_P3_105568_450425 | NW_004515707.1 | Scaffold128 | 450425                  | CC                              | AA                | 1946485112               |
| SNP_P3_105569_450435 | NW_004515707.1 | Scaffold128 | 450435                  | CC                              | TT                | 1946485114               |
| SNP_P3_105570_450490 | NW_004515707.1 | Scaffold128 | 450490                  | TT                              | AA                | 1946485115               |
| SNP_P3_105571_450545 | NW_004515707.1 | Scaffold128 | 450545                  | GG                              | AA                | 1946485117               |
| SNP_P3_105572_450713 | NW_004515707.1 | Scaffold128 | 450713                  | CC                              | TT                | 1946485118               |
| SNP_P3_105573_450785 | NW_004515707.1 | Scaffold128 | 450785                  | TT                              | AA                | 1946485120               |
| SNP_P3_105574_450878 | NW_004515707.1 | Scaffold128 | 450878                  | AA                              | TT                | 1946485121               |
| SNP_P3_105575_475659 | NW_004515707.1 | Scaffold128 | 475659                  | GG                              | TT                | 1946485123               |
| SNP_P3_105576_531815 | NW_004515707.1 | Scaffold128 | 531815                  | AA                              | CC                | 1946485124               |
| SNP_P3_105577_531835 | NW_004515707.1 | Scaffold128 | 531835                  | TT                              | AA                | 1946485126               |
| SNP_P3_105578_531843 | NW_004515707.1 | Scaffold128 | 531843                  | GG                              | CC                | 1946485127               |
| SNP_P3_105579_531862 | NW_004515707.1 | Scaffold128 | 531862                  | TT                              | CC                | 1946485129               |
| SNP_P3_105580_532045 | NW_004515707.1 | Scaffold128 | 532045                  | TT                              | CC                | 1946485130               |
| SNP_P3_105581_532049 | NW_004515707.1 | Scaffold128 | 532049                  | TT                              | CC                | 1946485132               |
| SNP_P3_105582_538183 | NW_004515707.1 | Scaffold128 | 538183                  | GG                              | AA                | 1946485134               |
| SNP_P3_105583_540359 | NW_004515707.1 | Scaffold128 | 540359                  | CC                              | TT                | 1946485135               |
| SNP_P3_105584_540486 | NW_004515707.1 | Scaffold128 | 540486                  | CC                              | TT                | 1946485137               |
| SNP_P3_105585_540569 | NW_004515707.1 | Scaffold128 | 540569                  | AA                              | GG                | 1946485138               |
| SNP_P3_105586_540570 | NW_004515707.1 | Scaffold128 | 540570                  | CC                              | TT                | 1946485140               |
| SNP_P3_105587_549838 | NW_004515707.1 | Scaffold128 | 549838                  | AA                              | CC                | 1946485141               |
| SNP_P3_105588_550165 | NW_004515707.1 | Scaffold128 | 550165                  | AA                              | GG                | 1946485143               |
| SNP_P3_105589_550220 | NW_004515707.1 | Scaffold128 | 550220                  | GG                              | AA                | 1946485144               |
| SNP_P3_105590_567883 | NW_004515707.1 | Scaffold128 | 567883                  | CC                              | AA                | 1946485146               |
| SNP_P3_105591_578374 | NW_004515707.1 | Scaffold128 | 578374                  | AA                              | TT                | 1946485147               |
| SNP_P3_105592_578559 | NW_004515707.1 | Scaffold128 | 578559                  | TT                              | CC                | 1946485149               |
| SNP_P3_105593_578729 | NW_004515707.1 | Scaffold128 | 578729                  | CC                              | AA                | 1946485150               |
| SNP_P3_105594_578831 | NW_004515707.1 | Scaffold128 | 578831                  | CC                              | TT                | 1946485152               |
| SNP_P3_105595_578870 | NW_004515707.1 | Scaffold128 | 578870                  | AA                              | GG                | 1946485153               |
| SNP_P3_105596_580401 | NW_004515707.1 | Scaffold128 | 580401                  | CC                              | GG                | 1946485155               |
| SNP_P3_105597_580813 | NW_004515707.1 | Scaffold128 | 580813                  | TT                              | CC                | 1946485156               |
| SNP_P3_105598_580854 | NW_004515707.1 | Scaffold128 | 580854                  | GG                              | TT                | 1946485158               |
| SNP_P3_105599_581007 | NW_004515707.1 | Scaffold128 | 581007                  | GG                              | TT                | 1946485159               |
| SNP_P3_105600_581010 | NW_004515707.1 | Scaffold128 | 581010                  | CC                              | TT                | 1946485161               |
| SNP_P3_105601_581023 | NW_004515707.1 | Scaffold128 | 581023                  | GG                              | AA                | 1946485162               |
| SNP_P3_105602_581026 | NW_004515707.1 | Scaffold128 | 581026                  | AA                              | CC                | 1946485164               |

| SNPs IDs             | Chromosome IDs | Chromosomes | Physical positions (bp) | CDC Frontier (Reference genome) | (Pusa 256 & HPNB) | NCBI SNPdb Accession IDs |
|----------------------|----------------|-------------|-------------------------|---------------------------------|-------------------|--------------------------|
| SNP_P3_105603_581160 | NW_004515707.1 | Scaffold128 | 581160                  | CC                              | AA                | 1946485165               |
| SNP_P3_105604_581307 | NW_004515707.1 | Scaffold128 | 581307                  | AA                              | TT                | 1946485167               |
| SNP_P3_105606_581334 | NW_004515707.1 | Scaffold128 | 581334                  | CC                              | TT                | 1946485168               |
| SNP_P3_105607_581361 | NW_004515707.1 | Scaffold128 | 581361                  | AA                              | CC                | 1946485170               |
| SNP_P3_105608_587711 | NW_004515707.1 | Scaffold128 | 587711                  | TT                              | AA                | 1946485171               |
| SNP_P3_105611_593782 | NW_004515707.1 | Scaffold128 | 593782                  | TT                              | CC                | 1946485173               |
| SNP_P3_105613_605863 | NW_004515707.1 | Scaffold128 | 605863                  | AA                              | TT                | 1946485174               |
| SNP_P3_105614_605865 | NW_004515707.1 | Scaffold128 | 605865                  | TT                              | AA                | 1946485176               |
| SNP_P3_105615_605866 | NW_004515707.1 | Scaffold128 | 605866                  | CC                              | TT                | 1946485177               |
| SNP_P3_105616_605876 | NW_004515707.1 | Scaffold128 | 605876                  | CC                              | TT                | 1946485179               |
| SNP_P3_105617_608030 | NW_004515707.1 | Scaffold128 | 608030                  | AA                              | GG                | 1946485180               |
| SNP_P3_105618_608087 | NW_004515707.1 | Scaffold128 | 608087                  | CC                              | TT                | 1946485182               |
| SNP_P3_105619_659125 | NW_004515707.1 | Scaffold128 | 659125                  | AA                              | GG                | 1946485183               |
| SNP_P3_105620_669128 | NW_004515707.1 | Scaffold128 | 669128                  | GG                              | TT                | 1946485184               |
| SNP_P3_105621_669183 | NW_004515707.1 | Scaffold128 | 669183                  | TT                              | CC                | 1946485186               |
| SNP_P3_105622_669475 | NW_004515707.1 | Scaffold128 | 669475                  | CC                              | TT                | 1946485187               |
| SNP_P3_105623_669505 | NW_004515707.1 | Scaffold128 | 669505                  | TT                              | GG                | 1946485189               |
| SNP_P3_105624_673625 | NW_004515707.1 | Scaffold128 | 673625                  | TT                              | CC                | 1946485190               |
| SNP_P3_105625_676539 | NW_004515707.1 | Scaffold128 | 676539                  | CC                              | TT                | 1946485192               |
| SNP_P3_105626_689112 | NW_004515707.1 | Scaffold128 | 689112                  | CC                              | TT                | 1946485193               |
| SNP_P3_105627_689134 | NW_004515707.1 | Scaffold128 | 689134                  | AA                              | GG                | 1946485195               |
| SNP_P3_105628_689163 | NW_004515707.1 | Scaffold128 | 689163                  | AA                              | TT                | 1946485196               |
| SNP_P3_105629_695798 | NW_004515707.1 | Scaffold128 | 695798                  | CC                              | GG                | 1946485198               |
| SNP_P3_105630_701432 | NW_004515707.1 | Scaffold128 | 701432                  | TT                              | CC                | 1946485199               |
| SNP_P3_105631_701456 | NW_004515707.1 | Scaffold128 | 701456                  | GG                              | AA                | 1946485201               |
| SNP_P3_105632_701474 | NW_004515707.1 | Scaffold128 | 701474                  | TT                              | AA                | 1946485202               |
| SNP_P3_105633_711215 | NW_004515707.1 | Scaffold128 | 711215                  | GG                              | TT                | 1946485204               |
| SNP_P3_105634_711235 | NW_004515707.1 | Scaffold128 | 711235                  | GG                              | AA                | 1946485205               |
| SNP_P3_105635_711255 | NW_004515707.1 | Scaffold128 | 711255                  | GG                              | AA                | 1946485207               |
| SNP_P3_105636_711639 | NW_004515707.1 | Scaffold128 | 711639                  | TT                              | CC                | 1946485208               |
| SNP_P3_105637_711685 | NW_004515707.1 | Scaffold128 | 711685                  | CC                              | TT                | 1946485210               |
| SNP_P3_105638_718948 | NW_004515707.1 | Scaffold128 | 718948                  | GG                              | AA                | 1946485211               |
| SNP_P3_105639_719184 | NW_004515707.1 | Scaffold128 | 719184                  | TT                              | CC                | 1946485213               |
| SNP_P3_105640_719345 | NW_004515707.1 | Scaffold128 | 719345                  | TT                              | AA                | 1946485214               |
| SNP_P3_105641_719582 | NW_004515707.1 | Scaffold128 | 719582                  | TT                              | CC                | 1946485216               |
| SNP_P3_105642_724568 | NW_004515707.1 | Scaffold128 | 724568                  | AA                              | GG                | 1946485217               |
| SNP_P3_105643_729194 | NW_004515707.1 | Scaffold128 | 729194                  | AA                              | GG                | 1946485219               |
| SNP_P3_105644_729770 | NW_004515707.1 | Scaffold128 | 729770                  | GG                              | AA                | 1946485220               |
| SNP_P3_105645_731237 | NW_004515707.1 | Scaffold128 | 731237                  | TT                              | CC                | 1946485222               |
| SNP_P3_105646_731281 | NW_004515707.1 | Scaffold128 | 731281                  | TT                              | AA                | 1946485223               |
| SNP_P3_105647_732465 | NW_004515707.1 | Scaffold128 | 732465                  | TT                              | CC                | 1946485225               |
| SNP_P3_105648_732515 | NW_004515707.1 | Scaffold128 | 732515                  | AA                              | TT                | 1946485226               |

| SNPs IDs             | Chromosome IDs | Chromosomes | Physical positions (bp) | CDC Frontier (Reference genome) | (Pusa 256 & HPNB) | NCBI SNPdb Accession IDs |
|----------------------|----------------|-------------|-------------------------|---------------------------------|-------------------|--------------------------|
| SNP_P3_105649_732718 | NW_004515707.1 | Scaffold128 | 732718                  | AA                              | GG                | 1946485228               |
| SNP_P3_105650_732744 | NW_004515707.1 | Scaffold128 | 732744                  | GG                              | AA                | 1946485229               |
| SNP_P3_105651_732772 | NW_004515707.1 | Scaffold128 | 732772                  | CC                              | AA                | 1946485231               |
| SNP_P3_105652_732802 | NW_004515707.1 | Scaffold128 | 732802                  | AA                              | CC                | 1946485232               |
| SNP_P3_105653_732818 | NW_004515707.1 | Scaffold128 | 732818                  | AA                              | TT                | 1946485234               |
| SNP_P3_105654_732850 | NW_004515707.1 | Scaffold128 | 732850                  | TT                              | AA                | 1946485235               |
| SNP_P3_105655_732874 | NW_004515707.1 | Scaffold128 | 732874                  | CC                              | TT                | 1946485237               |
| SNP_P3_105656_732958 | NW_004515707.1 | Scaffold128 | 732958                  | TT                              | AA                | 1946485238               |
| SNP_P3_105657_746221 | NW_004515707.1 | Scaffold128 | 746221                  | GG                              | TT                | 1946485239               |
| SNP_P3_105658_746773 | NW_004515707.1 | Scaffold128 | 746773                  | CC                              | GG                | 1946485241               |
| SNP_P3_105661_747484 | NW_004515707.1 | Scaffold128 | 747484                  | CC                              | TT                | 1946485242               |
| SNP_P3_105662_747506 | NW_004515707.1 | Scaffold128 | 747506                  | AA                              | CC                | 1946485244               |
| SNP_P3_105663_747647 | NW_004515707.1 | Scaffold128 | 747647                  | GG                              | AA                | 1946485245               |
| SNP_P3_105664_747693 | NW_004515707.1 | Scaffold128 | 747693                  | AA                              | GG                | 1946485247               |
| SNP_P3_105665_747694 | NW_004515707.1 | Scaffold128 | 747694                  | TT                              | AA                | 1946485248               |
| SNP_P3_105666_747760 | NW_004515707.1 | Scaffold128 | 747760                  | GG                              | AA                | 1946485250               |
| SNP_P3_105667_747816 | NW_004515707.1 | Scaffold128 | 747816                  | TT                              | AA                | 1946485251               |
| SNP_P3_105668_747877 | NW_004515707.1 | Scaffold128 | 747877                  | AA                              | TT                | 1946485253               |
| SNP_P3_105669_757404 | NW_004515707.1 | Scaffold128 | 757404                  | CC                              | GG                | 1946485254               |
| SNP_P3_105670_757407 | NW_004515707.1 | Scaffold128 | 757407                  | CC                              | TT                | 1946485255               |
| SNP_P3_105671_759583 | NW_004515707.1 | Scaffold128 | 759583                  | AA                              | GG                | 1946485257               |
| SNP_P3_105672_762384 | NW_004515707.1 | Scaffold128 | 762384                  | AA                              | CC                | 1946485258               |
| SNP_P3_105673_766589 | NW_004515707.1 | Scaffold128 | 766589                  | TT                              | GG                | 1946485260               |
| SNP_P3_105674_766590 | NW_004515707.1 | Scaffold128 | 766590                  | CC                              | TT                | 1946485261               |
| SNP_P3_105675_766591 | NW_004515707.1 | Scaffold128 | 766591                  | AA                              | GG                | 1946485263               |
| SNP_P3_105676_766598 | NW_004515707.1 | Scaffold128 | 766598                  | TT                              | AA                | 1946485264               |
| SNP_P3_105677_766600 | NW_004515707.1 | Scaffold128 | 766600                  | AA                              | GG                | 1946485266               |
| SNP_P3_105678_766607 | NW_004515707.1 | Scaffold128 | 766607                  | GG                              | TT                | 1946485268               |
| SNP_P3_105679_780546 | NW_004515707.1 | Scaffold128 | 780546                  | GG                              | AA                | 1946485269               |
| SNP_P3_105680_786201 | NW_004515707.1 | Scaffold128 | 786201                  | CC                              | TT                | 1946485271               |
| SNP_P3_105681_810266 | NW_004515707.1 | Scaffold128 | 810266                  | GG                              | AA                | 1946485272               |
| SNP_P3_105682_813085 | NW_004515707.1 | Scaffold128 | 813085                  | AA                              | TT                | 1946485274               |
| SNP_P3_105683_820564 | NW_004515707.1 | Scaffold128 | 820564                  | TT                              | CC                | 1946485275               |
| SNP_P3_105684_820681 | NW_004515707.1 | Scaffold128 | 820681                  | AA                              | TT                | 1946485276               |
| SNP_P3_105685_820695 | NW_004515707.1 | Scaffold128 | 820695                  | AA                              | CC                | 1946485278               |
| SNP_P3_105686_820697 | NW_004515707.1 | Scaffold128 | 820697                  | AA                              | CC                | 1946485279               |
| SNP_P3_105687_820876 | NW_004515707.1 | Scaffold128 | 820876                  | TT                              | CC                | 1946485281               |
| SNP_P3_105688_820932 | NW_004515707.1 | Scaffold128 | 820932                  | AA                              | GG                | 1946485282               |
| SNP_P3_105689_820960 | NW_004515707.1 | Scaffold128 | 820960                  | TT                              | AA                | 1946485284               |
| SNP_P3_105690_822363 | NW_004515707.1 | Scaffold128 | 822363                  | GG                              | AA                | 1946485285               |
| SNP_P3_105691_848338 | NW_004515707.1 | Scaffold128 | 848338                  | TT                              | CC                | 1946485287               |
| SNP_P3_105692_853451 | NW_004515707.1 | Scaffold128 | 853451                  | CC                              | AA                | 1946485288               |

| SNPs IDs             | Chromosome IDs | Chromosomes | Physical positions (bp) | CDC Frontier (Reference genome) | (Pusa 256 & HPNB) | NCBI SNPdb Accession IDs |
|----------------------|----------------|-------------|-------------------------|---------------------------------|-------------------|--------------------------|
| SNP_P3_105693_853456 | NW_004515707.1 | Scaffold128 | 853456                  | CC                              | TT                | 1946485289               |
| SNP_P3_105695_854367 | NW_004515707.1 | Scaffold128 | 854367                  | GG                              | AA                | 1946485291               |
| SNP_P3_105696_854381 | NW_004515707.1 | Scaffold128 | 854381                  | AA                              | TT                | 1946485292               |
| SNP_P3_105697_859056 | NW_004515707.1 | Scaffold128 | 859056                  | AA                              | GG                | 1946485294               |
| SNP_P3_105698_859601 | NW_004515707.1 | Scaffold128 | 859601                  | GG                              | TT                | 1946485295               |
| SNP_P3_105699_887432 | NW_004515707.1 | Scaffold128 | 887432                  | CC                              | GG                | 1946485297               |
| SNP_P3_105700_12915  | NW_004515708.1 | Scaffold131 | 12915                   | CC                              | GG                | 1946485298               |
| SNP_P3_105701_12954  | NW_004515708.1 | Scaffold131 | 12954                   | AA                              | GG                | 1946485300               |
| SNP_P3_105702_13021  | NW_004515708.1 | Scaffold131 | 13021                   | TT                              | GG                | 1946485301               |
| SNP_P3_105703_13026  | NW_004515708.1 | Scaffold131 | 13026                   | AA                              | GG                | 1946485303               |
| SNP_P3_105704_13038  | NW_004515708.1 | Scaffold131 | 13038                   | TT                              | CC                | 1946485304               |
| SNP_P3_105705_13067  | NW_004515708.1 | Scaffold131 | 13067                   | GG                              | AA                | 1946485306               |
| SNP_P3_105706_13291  | NW_004515708.1 | Scaffold131 | 13291                   | TT                              | CC                | 1946485307               |
| SNP_P3_105707_13373  | NW_004515708.1 | Scaffold131 | 13373                   | AA                              | TT                | 1946485309               |
| SNP_P3_105708_21769  | NW_004515708.1 | Scaffold131 | 21769                   | TT                              | AA                | 1946485310               |
| SNP_P3_105709_27060  | NW_004515708.1 | Scaffold131 | 27060                   | AA                              | GG                | 1946485311               |
| SNP_P3_105710_28346  | NW_004515708.1 | Scaffold131 | 28346                   | CC                              | AA                | 1946485313               |
| SNP_P3_105711_28652  | NW_004515708.1 | Scaffold131 | 28652                   | AA                              | GG                | 1946485314               |
| SNP_P3_105712_28715  | NW_004515708.1 | Scaffold131 | 28715                   | GG                              | AA                | 1946485316               |
| SNP_P3_105713_28753  | NW_004515708.1 | Scaffold131 | 28753                   | TT                              | CC                | 1946485317               |
| SNP_P3_105714_30537  | NW_004515708.1 | Scaffold131 | 30537                   | TT                              | GG                | 1946485319               |
| SNP_P3_105715_30610  | NW_004515708.1 | Scaffold131 | 30610                   | TT                              | AA                | 1946485320               |
| SNP_P3_105716_38181  | NW_004515708.1 | Scaffold131 | 38181                   | CC                              | TT                | 1946485322               |
| SNP_P3_105717_38213  | NW_004515708.1 | Scaffold131 | 38213                   | AA                              | TT                | 1946485323               |
| SNP_P3_105718_38254  | NW_004515708.1 | Scaffold131 | 38254                   | AA                              | GG                | 1946485325               |
| SNP_P3_105719_6659   | NW_004515709.1 | Scaffold132 | 6659                    | GG                              | AA                | 1946485326               |
| SNP_P3_105720_19891  | NW_004515709.1 | Scaffold132 | 19891                   | GG                              | AA                | 1946485327               |
| SNP_P3_105721_22745  | NW_004515709.1 | Scaffold132 | 22745                   | CC                              | TT                | 1946485329               |
| SNP_P3_105722_27485  | NW_004515709.1 | Scaffold132 | 27485                   | TT                              | CC                | 1946485330               |
| SNP_P3_105723_27527  | NW_004515709.1 | Scaffold132 | 27527                   | CC                              | AA                | 1946485332               |
| SNP_P3_105724_35570  | NW_004515709.1 | Scaffold132 | 35570                   | GG                              | TT                | 1946485333               |
| SNP_P3_105725_35653  | NW_004515709.1 | Scaffold132 | 35653                   | CC                              | AA                | 1946485335               |
| SNP_P3_105726_41382  | NW_004515709.1 | Scaffold132 | 41382                   | GG                              | AA                | 1946485336               |
| SNP_P3_105727_41390  | NW_004515709.1 | Scaffold132 | 41390                   | TT                              | CC                | 1946485338               |
| SNP_P3_105728_41558  | NW_004515709.1 | Scaffold132 | 41558                   | AA                              | TT                | 1946485339               |
| SNP_P3_105729_41654  | NW_004515709.1 | Scaffold132 | 41654                   | CC                              | TT                | 1946485341               |
| SNP_P3_105730_41660  | NW_004515709.1 | Scaffold132 | 41660                   | TT                              | AA                | 1946485342               |
| SNP_P3_105731_41673  | NW_004515709.1 | Scaffold132 | 41673                   | TT                              | GG                | 1946485344               |
| SNP_P3_105732_41755  | NW_004515709.1 | Scaffold132 | 41755                   | AA                              | GG                | 1946485345               |
| SNP_P3_105733_50393  | NW_004515709.1 | Scaffold132 | 50393                   | CC                              | TT                | 1946485347               |
| SNP_P3_105734_50403  | NW_004515709.1 | Scaffold132 | 50403                   | TT                              | CC                | 1946485348               |
| SNP_P3_105735_50404  | NW_004515709.1 | Scaffold132 | 50404                   | TT                              | CC                | 1946485350               |

| SNPs IDs             | Chromosome IDs | Chromosomes | Physical positions (bp) | CDC Frontier (Reference genome) | (Pusa 256 & HPNB) | NCBI SNPdb Accession IDs |
|----------------------|----------------|-------------|-------------------------|---------------------------------|-------------------|--------------------------|
| SNP_P3_105736_50405  | NW_004515709.1 | Scaffold132 | 50405                   | AA                              | GG                | 1946485351               |
| SNP_P3_105737_50406  | NW_004515709.1 | Scaffold132 | 50406                   | TT                              | AA                | 1946485353               |
| SNP_P3_105738_50407  | NW_004515709.1 | Scaffold132 | 50407                   | GG                              | AA                | 1946485354               |
| SNP_P3_105739_53991  | NW_004515709.1 | Scaffold132 | 53991                   | TT                              | GG                | 1946485356               |
| SNP_P3_105740_54019  | NW_004515709.1 | Scaffold132 | 54019                   | TT                              | AA                | 1946485357               |
| SNP_P3_105741_54050  | NW_004515709.1 | Scaffold132 | 54050                   | GG                              | CC                | 1946485359               |
| SNP_P3_105742_54075  | NW_004515709.1 | Scaffold132 | 54075                   | GG                              | AA                | 1946485360               |
| SNP_P3_105743_54162  | NW_004515709.1 | Scaffold132 | 54162                   | AA                              | GG                | 1946485362               |
| SNP_P3_105744_54384  | NW_004515709.1 | Scaffold132 | 54384                   | CC                              | TT                | 1946485363               |
| SNP_P3_105745_54462  | NW_004515709.1 | Scaffold132 | 54462                   | GG                              | AA                | 1946485365               |
| SNP_P3_105746_54487  | NW_004515709.1 | Scaffold132 | 54487                   | GG                              | AA                | 1946485366               |
| SNP_P3_105747_60629  | NW_004515709.1 | Scaffold132 | 60629                   | CC                              | TT                | 1946485368               |
| SNP_P3_105748_60633  | NW_004515709.1 | Scaffold132 | 60633                   | TT                              | CC                | 1946485369               |
| SNP_P3_105749_60721  | NW_004515709.1 | Scaffold132 | 60721                   | AA                              | TT                | 1946485371               |
| SNP_P3_105750_60722  | NW_004515709.1 | Scaffold132 | 60722                   | AA                              | GG                | 1946485372               |
| SNP_P3_105751_60736  | NW_004515709.1 | Scaffold132 | 60736                   | TT                              | CC                | 1946485374               |
| SNP_P3_105752_60737  | NW_004515709.1 | Scaffold132 | 60737                   | CC                              | TT                | 1946485375               |
| SNP_P3_105753_60761  | NW_004515709.1 | Scaffold132 | 60761                   | GG                              | TT                | 1946485376               |
| SNP_P3_105754_60913  | NW_004515709.1 | Scaffold132 | 60913                   | GG                              | AA                | 1946485378               |
| SNP_P3_105755_60976  | NW_004515709.1 | Scaffold132 | 60976                   | TT                              | AA                | 1946485379               |
| SNP_P3_105756_61003  | NW_004515709.1 | Scaffold132 | 61003                   | TT                              | GG                | 1946485381               |
| SNP_P3_105757_66338  | NW_004515709.1 | Scaffold132 | 66338                   | GG                              | AA                | 1946485382               |
| SNP_P3_105758_66352  | NW_004515709.1 | Scaffold132 | 66352                   | TT                              | CC                | 1946485384               |
| SNP_P3_105759_87266  | NW_004515709.1 | Scaffold132 | 87266                   | GG                              | CC                | 1946485385               |
| SNP_P3_105760_94991  | NW_004515709.1 | Scaffold132 | 94991                   | CC                              | TT                | 1946485387               |
| SNP_P3_105761_95008  | NW_004515709.1 | Scaffold132 | 95008                   | TT                              | AA                | 1946485388               |
| SNP_P3_105762_99191  | NW_004515709.1 | Scaffold132 | 99191                   | TT                              | CC                | 1946485390               |
| SNP_P3_105763_99194  | NW_004515709.1 | Scaffold132 | 99194                   | AA                              | GG                | 1946485391               |
| SNP_P3_105764_99203  | NW_004515709.1 | Scaffold132 | 99203                   | AA                              | GG                | 1946485393               |
| SNP_P3_105765_99335  | NW_004515709.1 | Scaffold132 | 99335                   | TT                              | AA                | 1946485394               |
| SNP_P3_105766_99343  | NW_004515709.1 | Scaffold132 | 99343                   | TT                              | CC                | 1946485396               |
| SNP_P3_105767_113944 | NW_004515709.1 | Scaffold132 | 113944                  | CC                              | GG                | 1946485397               |
| SNP_P3_105768_120436 | NW_004515709.1 | Scaffold132 | 120436                  | TT                              | CC                | 1946485399               |
| SNP_P3_105769_137555 | NW_004515709.1 | Scaffold132 | 137555                  | GG                              | AA                | 1946485400               |
| SNP_P3_105770_137567 | NW_004515709.1 | Scaffold132 | 137567                  | CC                              | TT                | 1946485401               |
| SNP_P3_105771_137626 | NW_004515709.1 | Scaffold132 | 137626                  | GG                              | AA                | 1946485403               |
| SNP_P3_105773_153196 | NW_004515709.1 | Scaffold132 | 153196                  | GG                              | TT                | 1946485404               |
| SNP_P3_105774_153198 | NW_004515709.1 | Scaffold132 | 153198                  | CC                              | GG                | 1946485406               |
| SNP_P3_105775_153199 | NW_004515709.1 | Scaffold132 | 153199                  | GG                              | TT                | 1946485407               |
| SNP_P3_105776_153200 | NW_004515709.1 | Scaffold132 | 153200                  | GG                              | CC                | 1946485409               |
| SNP_P3_105777_153212 | NW_004515709.1 | Scaffold132 | 153212                  | GG                              | TT                | 1946485410               |
| SNP_P3_105778_153506 | NW_004515709.1 | Scaffold132 | 153506                  | AA                              | GG                | 1946485412               |



| SNPs IDs             | Chromosome IDs | Chromosomes | Physical positions (bp) | CDC Frontier (Reference genome) | (Pusa 256 & HPNB) | NCBI SNPdb Accession IDs |
|----------------------|----------------|-------------|-------------------------|---------------------------------|-------------------|--------------------------|
| SNP_P3_105779_153521 | NW_004515709.1 | Scaffold132 | 153521                  | TT                              | AA                | 1946485413               |
| SNP_P3_105780_163243 | NW_004515709.1 | Scaffold132 | 163243                  | AA                              | GG                | 1946485414               |
| SNP_P3_105781_13687  | NW_004515710.1 | Scaffold133 | 13687                   | GG                              | AA                | 1946485416               |
| SNP_P3_105782_13748  | NW_004515710.1 | Scaffold133 | 13748                   | TT                              | AA                | 1946485417               |
| SNP_P3_105783_13822  | NW_004515710.1 | Scaffold133 | 13822                   | CC                              | GG                | 1946485419               |
| SNP_P3_105784_19170  | NW_004515710.1 | Scaffold133 | 19170                   | GG                              | AA                | 1946485420               |
| SNP_P3_105785_20476  | NW_004515711.1 | Scaffold134 | 20476                   | CC                              | TT                | 1946485422               |
| SNP_P3_105786_58566  | NW_004515711.1 | Scaffold134 | 58566                   | TT                              | AA                | 1946485423               |
| SNP_P3_105788_103694 | NW_004515711.1 | Scaffold134 | 103694                  | AA                              | GG                | 1946485425               |
| SNP_P3_105789_103699 | NW_004515711.1 | Scaffold134 | 103699                  | TT                              | GG                | 1946485426               |
| SNP_P3_105790_103704 | NW_004515711.1 | Scaffold134 | 103704                  | CC                              | TT                | 1946485428               |
| SNP_P3_105791_103988 | NW_004515711.1 | Scaffold134 | 103988                  | AA                              | TT                | 1946485429               |
| SNP_P3_105792_161144 | NW_004515711.1 | Scaffold134 | 161144                  | AA                              | GG                | 1946485431               |
| SNP_P3_105793_162349 | NW_004515711.1 | Scaffold134 | 162349                  | TT                              | GG                | 1946485432               |
| SNP_P3_105794_162364 | NW_004515711.1 | Scaffold134 | 162364                  | AA                              | TT                | 1946485434               |
| SNP_P3_105795_162407 | NW_004515711.1 | Scaffold134 | 162407                  | AA                              | GG                | 1946485435               |
| SNP_P3_105796_166688 | NW_004515711.1 | Scaffold134 | 166688                  | TT                              | CC                | 1946485436               |
| SNP_P3_105797_166906 | NW_004515711.1 | Scaffold134 | 166906                  | TT                              | CC                | 1946485438               |
| SNP_P3_105798_166916 | NW_004515711.1 | Scaffold134 | 166916                  | TT                              | CC                | 1946485439               |
| SNP_P3_105799_166991 | NW_004515711.1 | Scaffold134 | 166991                  | AA                              | GG                | 1946485441               |
| SNP_P3_105800_167403 | NW_004515711.1 | Scaffold134 | 167403                  | GG                              | AA                | 1946485442               |
| SNP_P3_105801_167421 | NW_004515711.1 | Scaffold134 | 167421                  | TT                              | CC                | 1946485444               |
| SNP_P3_105803_216401 | NW_004515711.1 | Scaffold134 | 216401                  | TT                              | CC                | 1946485445               |
| SNP_P3_105804_225071 | NW_004515711.1 | Scaffold134 | 225071                  | GG                              | AA                | 1946485447               |
| SNP_P3_105805_246364 | NW_004515711.1 | Scaffold134 | 246364                  | GG                              | TT                | 1946485448               |
| SNP_P3_105806_262911 | NW_004515711.1 | Scaffold134 | 262911                  | CC                              | TT                | 1946485450               |
| SNP_P3_105807_266833 | NW_004515711.1 | Scaffold134 | 266833                  | GG                              | AA                | 1946485451               |
| SNP_P3_105808_297686 | NW_004515711.1 | Scaffold134 | 297686                  | GG                              | AA                | 1946485453               |
| SNP_P3_105809_323217 | NW_004515711.1 | Scaffold134 | 323217                  | TT                              | CC                | 1946485454               |
| SNP_P3_105810_323238 | NW_004515711.1 | Scaffold134 | 323238                  | AA                              | GG                | 1946485456               |
| SNP_P3_105811_323246 | NW_004515711.1 | Scaffold134 | 323246                  | TT                              | CC                | 1946485457               |
| SNP_P3_105812_323258 | NW_004515711.1 | Scaffold134 | 323258                  | AA                              | GG                | 1946485459               |
| SNP_P3_105813_323261 | NW_004515711.1 | Scaffold134 | 323261                  | TT                              | CC                | 1946485460               |
| SNP_P3_105814_323381 | NW_004515711.1 | Scaffold134 | 323381                  | AA                              | GG                | 1946485462               |
| SNP_P3_105815_330140 | NW_004515711.1 | Scaffold134 | 330140                  | TT                              | CC                | 1946485463               |
| SNP_P3_105816_334384 | NW_004515711.1 | Scaffold134 | 334384                  | TT                              | CC                | 1946485465               |
| SNP_P3_105817_334396 | NW_004515711.1 | Scaffold134 | 334396                  | TT                              | GG                | 1946485466               |
| SNP_P3_105818_334539 | NW_004515711.1 | Scaffold134 | 334539                  | AA                              | GG                | 1946485468               |
| SNP_P3_105819_334569 | NW_004515711.1 | Scaffold134 | 334569                  | GG                              | AA                | 1946485469               |
| SNP_P3_105820_334694 | NW_004515711.1 | Scaffold134 | 334694                  | AA                              | TT                | 1946485470               |
| SNP_P3_105821_334739 | NW_004515711.1 | Scaffold134 | 334739                  | TT                              | CC                | 1946485472               |
| SNP_P3_105822_336564 | NW_004515711.1 | Scaffold134 | 336564                  | TT                              | CC                | 1946485473               |

| SNPs IDs             | Chromosome IDs | Chromosomes | Physical positions (bp) | CDC Frontier (Reference genome) | (Pusa 256 & HPNB) | NCBI SNPdb Accession IDs |
|----------------------|----------------|-------------|-------------------------|---------------------------------|-------------------|--------------------------|
| SNP_P3_105823_336664 | NW_004515711.1 | Scaffold134 | 336664                  | TT                              | CC                | 1946485475               |
| SNP_P3_105824_336666 | NW_004515711.1 | Scaffold134 | 336666                  | AA                              | CC                | 1946485476               |
| SNP_P3_105825_336670 | NW_004515711.1 | Scaffold134 | 336670                  | TT                              | AA                | 1946485478               |
| SNP_P3_105826_336712 | NW_004515711.1 | Scaffold134 | 336712                  | TT                              | AA                | 1946485479               |
| SNP_P3_105827_336788 | NW_004515711.1 | Scaffold134 | 336788                  | TT                              | CC                | 1946485481               |
| SNP_P3_105828_337151 | NW_004515711.1 | Scaffold134 | 337151                  | TT                              | CC                | 1946485482               |
| SNP_P3_105829_358588 | NW_004515711.1 | Scaffold134 | 358588                  | GG                              | TT                | 1946485484               |
| SNP_P3_105830_364459 | NW_004515711.1 | Scaffold134 | 364459                  | TT                              | CC                | 1946485486               |
| SNP_P3_105831_364832 | NW_004515711.1 | Scaffold134 | 364832                  | GG                              | AA                | 1946485487               |
| SNP_P3_105832_364855 | NW_004515711.1 | Scaffold134 | 364855                  | AA                              | TT                | 1946485488               |
| SNP_P3_105833_364892 | NW_004515711.1 | Scaffold134 | 364892                  | TT                              | CC                | 1946485490               |
| SNP_P3_105834_364915 | NW_004515711.1 | Scaffold134 | 364915                  | AA                              | CC                | 1946485491               |
| SNP_P3_105836_365205 | NW_004515711.1 | Scaffold134 | 365205                  | AA                              | TT                | 1946485493               |
| SNP_P3_105837_365236 | NW_004515711.1 | Scaffold134 | 365236                  | GG                              | TT                | 1946485494               |
| SNP_P3_105838_365237 | NW_004515711.1 | Scaffold134 | 365237                  | AA                              | GG                | 1946485496               |
| SNP_P3_105839_365387 | NW_004515711.1 | Scaffold134 | 365387                  | AA                              | GG                | 1946485497               |
| SNP_P3_105840_399419 | NW_004515711.1 | Scaffold134 | 399419                  | TT                              | CC                | 1946485499               |
| SNP_P3_105841_400995 | NW_004515711.1 | Scaffold134 | 400995                  | TT                              | AA                | 1946485500               |
| SNP_P3_105842_420134 | NW_004515711.1 | Scaffold134 | 420134                  | TT                              | AA                | 1946485502               |
| SNP_P3_105843_420139 | NW_004515711.1 | Scaffold134 | 420139                  | AA                              | CC                | 1946485503               |
| SNP_P3_105845_451457 | NW_004515711.1 | Scaffold134 | 451457                  | TT                              | CC                | 1946485505               |
| SNP_P3_105846_451490 | NW_004515711.1 | Scaffold134 | 451490                  | TT                              | GG                | 1946485506               |
| SNP_P3_105847_451491 | NW_004515711.1 | Scaffold134 | 451491                  | AA                              | TT                | 1946485508               |
| SNP_P3_105848_451528 | NW_004515711.1 | Scaffold134 | 451528                  | CC                              | TT                | 1946485509               |
| SNP_P3_105849_451570 | NW_004515711.1 | Scaffold134 | 451570                  | CC                              | TT                | 1946485510               |
| SNP_P3_105850_451595 | NW_004515711.1 | Scaffold134 | 451595                  | TT                              | AA                | 1946485512               |
| SNP_P3_105851_451765 | NW_004515711.1 | Scaffold134 | 451765                  | TT                              | CC                | 1946485513               |
| SNP_P3_105852_451893 | NW_004515711.1 | Scaffold134 | 451893                  | CC                              | TT                | 1946485515               |
| SNP_P3_105853_454638 | NW_004515711.1 | Scaffold134 | 454638                  | CC                              | TT                | 1946485516               |
| SNP_P3_105854_458751 | NW_004515711.1 | Scaffold134 | 458751                  | GG                              | AA                | 1946485518               |
| SNP_P3_105855_459760 | NW_004515711.1 | Scaffold134 | 459760                  | AA                              | GG                | 1946485519               |
| SNP_P3_105856_459766 | NW_004515711.1 | Scaffold134 | 459766                  | GG                              | TT                | 1946485521               |
| SNP_P3_105857_463417 | NW_004515711.1 | Scaffold134 | 463417                  | GG                              | TT                | 1946485522               |
| SNP_P3_105858_469125 | NW_004515711.1 | Scaffold134 | 469125                  | AA                              | GG                | 1946485524               |
| SNP_P3_105859_469150 | NW_004515711.1 | Scaffold134 | 469150                  | CC                              | TT                | 1946485525               |
| SNP_P3_105860_472556 | NW_004515711.1 | Scaffold134 | 472556                  | AA                              | CC                | 1946485526               |
| SNP_P3_105861_489638 | NW_004515711.1 | Scaffold134 | 489638                  | TT                              | CC                | 1946485528               |
| SNP_P3_105862_542659 | NW_004515711.1 | Scaffold134 | 542659                  | AA                              | TT                | 1946485529               |
| SNP_P3_105863_556511 | NW_004515711.1 | Scaffold134 | 556511                  | AA                              | CC                | 1946485531               |
| SNP_P3_105864_556571 | NW_004515711.1 | Scaffold134 | 556571                  | TT                              | AA                | 1946485539               |
| SNP_P3_105865_556583 | NW_004515711.1 | Scaffold134 | 556583                  | AA                              | GG                | 1946485540               |
| SNP_P3_105866_556589 | NW_004515711.1 | Scaffold134 | 556589                  | CC                              | TT                | 1946485542               |

| SNPs IDs             | Chromosome IDs | Chromosomes | Physical positions (bp) | CDC Frontier (Reference genome) | (Pusa 256 & HPNB) | NCBI SNPdb Accession IDs |
|----------------------|----------------|-------------|-------------------------|---------------------------------|-------------------|--------------------------|
| SNP_P3_105867_562765 | NW_004515711.1 | Scaffold134 | 562765                  | AA                              | TT                | 1946485543               |
| SNP_P3_105868_564146 | NW_004515711.1 | Scaffold134 | 564146                  | AA                              | GG                | 1946485544               |
| SNP_P3_105869_564462 | NW_004515711.1 | Scaffold134 | 564462                  | AA                              | TT                | 1946485546               |
| SNP_P3_105870_231    | NW_004515712.1 | Scaffold135 | 231                     | CC                              | TT                | 1946485547               |
| SNP_P3_105871_260    | NW_004515712.1 | Scaffold135 | 260                     | TT                              | CC                | 1946485549               |
| SNP_P3_105872_3477   | NW_004515712.1 | Scaffold135 | 3477                    | AA                              | TT                | 1946485550               |
| SNP_P3_105873_3480   | NW_004515712.1 | Scaffold135 | 3480                    | TT                              | CC                | 1946485552               |
| SNP_P3_105874_3496   | NW_004515712.1 | Scaffold135 | 3496                    | TT                              | CC                | 1946485553               |
| SNP_P3_105875_3501   | NW_004515712.1 | Scaffold135 | 3501                    | TT                              | CC                | 1946485554               |
| SNP_P3_105876_8469   | NW_004515712.1 | Scaffold135 | 8469                    | CC                              | TT                | 1946485556               |
| SNP_P3_105877_10145  | NW_004515712.1 | Scaffold135 | 10145                   | AA                              | CC                | 1946485557               |
| SNP_P3_105878_10150  | NW_004515712.1 | Scaffold135 | 10150                   | GG                              | AA                | 1946485559               |
| SNP_P3_105879_35360  | NW_004515712.1 | Scaffold135 | 35360                   | AA                              | TT                | 1946485560               |
| SNP_P3_105880_53259  | NW_004515712.1 | Scaffold135 | 53259                   | TT                              | GG                | 1946485562               |
| SNP_P3_105881_53295  | NW_004515712.1 | Scaffold135 | 53295                   | GG                              | CC                | 1946485563               |
| SNP_P3_105882_56896  | NW_004515712.1 | Scaffold135 | 56896                   | AA                              | GG                | 1946485564               |
| SNP_P3_105883_56917  | NW_004515712.1 | Scaffold135 | 56917                   | TT                              | CC                | 1946485566               |
| SNP_P3_105884_57028  | NW_004515712.1 | Scaffold135 | 57028                   | GG                              | AA                | 1946485567               |
| SNP_P3_105885_57115  | NW_004515712.1 | Scaffold135 | 57115                   | CC                              | TT                | 1946485569               |
| SNP_P3_105886_57134  | NW_004515712.1 | Scaffold135 | 57134                   | TT                              | AA                | 1946485570               |
| SNP_P3_105887_57175  | NW_004515712.1 | Scaffold135 | 57175                   | CC                              | TT                | 1946485571               |
| SNP_P3_105888_57179  | NW_004515712.1 | Scaffold135 | 57179                   | TT                              | AA                | 1946485573               |
| SNP_P3_105889_57206  | NW_004515712.1 | Scaffold135 | 57206                   | TT                              | AA                | 1946485574               |
| SNP_P3_105890_57286  | NW_004515712.1 | Scaffold135 | 57286                   | CC                              | TT                | 1946485576               |
| SNP_P3_105891_57408  | NW_004515712.1 | Scaffold135 | 57408                   | CC                              | AA                | 1946485577               |
| SNP_P3_105892_57410  | NW_004515712.1 | Scaffold135 | 57410                   | TT                              | CC                | 1946485579               |
| SNP_P3_105893_57414  | NW_004515712.1 | Scaffold135 | 57414                   | TT                              | AA                | 1946485580               |
| SNP_P3_105894_57421  | NW_004515712.1 | Scaffold135 | 57421                   | AA                              | TT                | 1946485581               |
| SNP_P3_105895_57477  | NW_004515712.1 | Scaffold135 | 57477                   | CC                              | TT                | 1946485583               |
| SNP_P3_105896_57550  | NW_004515712.1 | Scaffold135 | 57550                   | CC                              | TT                | 1946485584               |
| SNP_P3_105897_57636  | NW_004515712.1 | Scaffold135 | 57636                   | TT                              | CC                | 1946485586               |
| SNP_P3_105898_61933  | NW_004515712.1 | Scaffold135 | 61933                   | TT                              | CC                | 1946485587               |
| SNP_P3_105899_69451  | NW_004515712.1 | Scaffold135 | 69451                   | GG                              | AA                | 1946485588               |
| SNP_P3_105900_73331  | NW_004515712.1 | Scaffold135 | 73331                   | AA                              | GG                | 1946485590               |
| SNP_P3_105901_73348  | NW_004515712.1 | Scaffold135 | 73348                   | AA                              | GG                | 1946485591               |
| SNP_P3_105902_73775  | NW_004515712.1 | Scaffold135 | 73775                   | CC                              | GG                | 1946485593               |
| SNP_P3_105903_80979  | NW_004515712.1 | Scaffold135 | 80979                   | AA                              | CC                | 1946485594               |
| SNP_P3_105904_95342  | NW_004515712.1 | Scaffold135 | 95342                   | TT                              | CC                | 1946485596               |
| SNP_P3_105905_95487  | NW_004515712.1 | Scaffold135 | 95487                   | AA                              | GG                | 1946485597               |
| SNP_P3_105906_95962  | NW_004515712.1 | Scaffold135 | 95962                   | CC                              | AA                | 1946485599               |
| SNP_P3_105907_96032  | NW_004515712.1 | Scaffold135 | 96032                   | AA                              | TT                | 1946485600               |
| SNP_P3_105908_96464  | NW_004515712.1 | Scaffold135 | 96464                   | CC                              | AA                | 1946485602               |

| SNPs IDs             | Chromosome IDs | Chromosomes | Physical positions (bp) | CDC Frontier (Reference genome) | (Pusa 256 & HPNB) | NCBI SNPdb Accession IDs |
|----------------------|----------------|-------------|-------------------------|---------------------------------|-------------------|--------------------------|
| SNP_P3_105909_111205 | NW_004515712.1 | Scaffold135 | 111205                  | TT                              | CC                | 1946485603               |
| SNP_P3_105910_111248 | NW_004515712.1 | Scaffold135 | 111248                  | TT                              | CC                | 1946485604               |
| SNP_P3_105911_111256 | NW_004515712.1 | Scaffold135 | 111256                  | AA                              | CC                | 1946485606               |
| SNP_P3_105912_111275 | NW_004515712.1 | Scaffold135 | 111275                  | TT                              | CC                | 1946485607               |
| SNP_P3_105913_111318 | NW_004515712.1 | Scaffold135 | 111318                  | TT                              | GG                | 1946485609               |
| SNP_P3_105914_111609 | NW_004515712.1 | Scaffold135 | 111609                  | TT                              | CC                | 1946485610               |
| SNP_P3_105915_111629 | NW_004515712.1 | Scaffold135 | 111629                  | TT                              | CC                | 1946485612               |
| SNP_P3_105916_111634 | NW_004515712.1 | Scaffold135 | 111634                  | TT                              | GG                | 1946485613               |
| SNP_P3_105917_111672 | NW_004515712.1 | Scaffold135 | 111672                  | GG                              | AA                | 1946485615               |
| SNP_P3_105918_111708 | NW_004515712.1 | Scaffold135 | 111708                  | AA                              | GG                | 1946485616               |
| SNP_P3_105919_112089 | NW_004515712.1 | Scaffold135 | 112089                  | CC                              | TT                | 1946485618               |
| SNP_P3_105920_112512 | NW_004515712.1 | Scaffold135 | 112512                  | AA                              | GG                | 1946485619               |
| SNP_P3_105921_112520 | NW_004515712.1 | Scaffold135 | 112520                  | TT                              | CC                | 1946485621               |
| SNP_P3_105922_112522 | NW_004515712.1 | Scaffold135 | 112522                  | GG                              | TT                | 1946485622               |
| SNP_P3_105923_113198 | NW_004515712.1 | Scaffold135 | 113198                  | GG                              | AA                | 1946485624               |
| SNP_P3_105925_115487 | NW_004515712.1 | Scaffold135 | 115487                  | TT                              | CC                | 1946485625               |
| SNP_P3_105926_115594 | NW_004515712.1 | Scaffold135 | 115594                  | TT                              | CC                | 1946485626               |
| SNP_P3_105927_115603 | NW_004515712.1 | Scaffold135 | 115603                  | TT                              | CC                | 1946485628               |
| SNP_P3_105928_115623 | NW_004515712.1 | Scaffold135 | 115623                  | TT                              | CC                | 1946485629               |
| SNP_P3_105929_115625 | NW_004515712.1 | Scaffold135 | 115625                  | AA                              | TT                | 1946485631               |
| SNP_P3_105930_115629 | NW_004515712.1 | Scaffold135 | 115629                  | GG                              | AA                | 1946485632               |
| SNP_P3_105931_115717 | NW_004515712.1 | Scaffold135 | 115717                  | CC                              | TT                | 1946485634               |
| SNP_P3_105932_115730 | NW_004515712.1 | Scaffold135 | 115730                  | TT                              | CC                | 1946485635               |
| SNP_P3_105933_115854 | NW_004515712.1 | Scaffold135 | 115854                  | AA                              | TT                | 1946485637               |
| SNP_P3_105934_115860 | NW_004515712.1 | Scaffold135 | 115860                  | AA                              | TT                | 1946485638               |
| SNP_P3_105935_115891 | NW_004515712.1 | Scaffold135 | 115891                  | CC                              | TT                | 1946485640               |
| SNP_P3_105936_115911 | NW_004515712.1 | Scaffold135 | 115911                  | TT                              | CC                | 1946485641               |
| SNP_P3_105937_115923 | NW_004515712.1 | Scaffold135 | 115923                  | CC                              | TT                | 1946485642               |
| SNP_P3_105938_115924 | NW_004515712.1 | Scaffold135 | 115924                  | AA                              | GG                | 1946485644               |
| SNP_P3_105939_115985 | NW_004515712.1 | Scaffold135 | 115985                  | CC                              | TT                | 1946485645               |
| SNP_P3_105940_1164   | NW_004515713.1 | Scaffold136 | 1164                    | AA                              | TT                | 1946485647               |
| SNP_P3_105941_34976  | NW_004515713.1 | Scaffold136 | 34976                   | TT                              | GG                | 1946485648               |
| SNP_P3_105945_5821   | NW_004515715.1 | Scaffold140 | 5821                    | CC                              | TT                | 1946485650               |
| SNP_P3_105946_6016   | NW_004515715.1 | Scaffold140 | 6016                    | GG                              | AA                | 1946485651               |
| SNP_P3_105947_6041   | NW_004515715.1 | Scaffold140 | 6041                    | TT                              | AA                | 1946485653               |
| SNP_P3_105948_7442   | NW_004515715.1 | Scaffold140 | 7442                    | TT                              | CC                | 1946485654               |
| SNP_P3_105950_15962  | NW_004515715.1 | Scaffold140 | 15962                   | AA                              | TT                | 1946485656               |
| SNP_P3_105951_16348  | NW_004515715.1 | Scaffold140 | 16348                   | TT                              | AA                | 1946485657               |
| SNP_P3_105952_16350  | NW_004515715.1 | Scaffold140 | 16350                   | TT                              | AA                | 1946485659               |
| SNP_P3_105953_16375  | NW_004515715.1 | Scaffold140 | 16375                   | CC                              | TT                | 1946485660               |
| SNP_P3_105954_16743  | NW_004515715.1 | Scaffold140 | 16743                   | TT                              | AA                | 1946485662               |
| SNP_P3_105955_25687  | NW_004515715.1 | Scaffold140 | 25687                   | CC                              | TT                | 1946485663               |

| SNPs IDs            | Chromosome IDs | Chromosomes | Physical positions (bp) | CDC Frontier (Reference genome) | (Pusa 256 & HPNB) | NCBI SNPdb Accession IDs |
|---------------------|----------------|-------------|-------------------------|---------------------------------|-------------------|--------------------------|
| SNP_P3_105956_25697 | NW_004515715.1 | Scaffold140 | 25697                   | GG                              | CC                | 1946485664               |
| SNP_P3_105957_25719 | NW_004515715.1 | Scaffold140 | 25719                   | GG                              | TT                | 1946485666               |
| SNP_P3_105958_25721 | NW_004515715.1 | Scaffold140 | 25721                   | AA                              | GG                | 1946485667               |
| SNP_P3_105960_25822 | NW_004515715.1 | Scaffold140 | 25822                   | GG                              | AA                | 1946485669               |
| SNP_P3_105961_25823 | NW_004515715.1 | Scaffold140 | 25823                   | TT                              | GG                | 1946485670               |
| SNP_P3_105962_25831 | NW_004515715.1 | Scaffold140 | 25831                   | GG                              | TT                | 1946485672               |
| SNP_P3_105963_26129 | NW_004515715.1 | Scaffold140 | 26129                   | GG                              | AA                | 1946485673               |
| SNP_P3_105964_26713 | NW_004515715.1 | Scaffold140 | 26713                   | GG                              | AA                | 1946485675               |
| SNP_P3_105965_27358 | NW_004515715.1 | Scaffold140 | 27358                   | TT                              | GG                | 1946485676               |
| SNP_P3_105966_27904 | NW_004515715.1 | Scaffold140 | 27904                   | AA                              | GG                | 1946485678               |
| SNP_P3_105967_36754 | NW_004515715.1 | Scaffold140 | 36754                   | TT                              | AA                | 1946485679               |
| SNP_P3_105968_36780 | NW_004515715.1 | Scaffold140 | 36780                   | GG                              | AA                | 1946485681               |
| SNP_P3_105969_36798 | NW_004515715.1 | Scaffold140 | 36798                   | AA                              | TT                | 1946485682               |
| SNP_P3_105971_36965 | NW_004515715.1 | Scaffold140 | 36965                   | TT                              | CC                | 1946485683               |
| SNP_P3_105972_36986 | NW_004515715.1 | Scaffold140 | 36986                   | TT                              | CC                | 1946485685               |
| SNP_P3_105973_37034 | NW_004515715.1 | Scaffold140 | 37034                   | TT                              | CC                | 1946485686               |
| SNP_P3_105974_37135 | NW_004515715.1 | Scaffold140 | 37135                   | TT                              | AA                | 1946485688               |
| SNP_P3_105975_37256 | NW_004515715.1 | Scaffold140 | 37256                   | AA                              | TT                | 1946485689               |
| SNP_P3_105976_37293 | NW_004515715.1 | Scaffold140 | 37293                   | AA                              | GG                | 1946485691               |
| SNP_P3_105977_37336 | NW_004515715.1 | Scaffold140 | 37336                   | AA                              | GG                | 1946485692               |
| SNP_P3_105978_49678 | NW_004515715.1 | Scaffold140 | 49678                   | AA                              | TT                | 1946485694               |
| SNP_P3_105979_12207 | NW_004515716.1 | Scaffold141 | 12207                   | TT                              | CC                | 1946485695               |
| SNP_P3_105980_12264 | NW_004515716.1 | Scaffold141 | 12264                   | CC                              | TT                | 1946485696               |
| SNP_P3_105981_12299 | NW_004515716.1 | Scaffold141 | 12299                   | AA                              | CC                | 1946485698               |
| SNP_P3_105982_14090 | NW_004515716.1 | Scaffold141 | 14090                   | CC                              | TT                | 1946485699               |
| SNP_P3_105983_14442 | NW_004515716.1 | Scaffold141 | 14442                   | TT                              | CC                | 1946485701               |
| SNP_P3_105984_15983 | NW_004515716.1 | Scaffold141 | 15983                   | GG                              | AA                | 1946485702               |
| SNP_P3_105985_16385 | NW_004515716.1 | Scaffold141 | 16385                   | AA                              | TT                | 1946485703               |
| SNP_P3_105986_16512 | NW_004515716.1 | Scaffold141 | 16512                   | CC                              | TT                | 1946485705               |
| SNP_P3_105987_16866 | NW_004515716.1 | Scaffold141 | 16866                   | CC                              | TT                | 1946485706               |
| SNP_P3_105988_16991 | NW_004515716.1 | Scaffold141 | 16991                   | AA                              | GG                | 1946485708               |
| SNP_P3_105989_17141 | NW_004515716.1 | Scaffold141 | 17141                   | AA                              | CC                | 1946485709               |
| SNP_P3_105990_17204 | NW_004515716.1 | Scaffold141 | 17204                   | TT                              | CC                | 1946485710               |
| SNP_P3_105991_17725 | NW_004515716.1 | Scaffold141 | 17725                   | AA                              | GG                | 1946485712               |
| SNP_P3_105992_18079 | NW_004515716.1 | Scaffold141 | 18079                   | CC                              | TT                | 1946485713               |
| SNP_P3_105993_18408 | NW_004515716.1 | Scaffold141 | 18408                   | CC                              | GG                | 1946485715               |
| SNP_P3_105994_24288 | NW_004515716.1 | Scaffold141 | 24288                   | AA                              | TT                | 1946485716               |
| SNP_P3_105995_24289 | NW_004515716.1 | Scaffold141 | 24289                   | TT                              | CC                | 1946485718               |
| SNP_P3_105996_26290 | NW_004515716.1 | Scaffold141 | 26290                   | TT                              | AA                | 1946485719               |
| SNP_P3_105997_26298 | NW_004515716.1 | Scaffold141 | 26298                   | TT                              | GG                | 1946485720               |
| SNP_P3_105998_29637 | NW_004515716.1 | Scaffold141 | 29637                   | GG                              | AA                | 1946485722               |
| SNP_P3_105999_31400 | NW_004515716.1 | Scaffold141 | 31400                   | CC                              | TT                | 1946485723               |

| SNPs IDs             | Chromosome IDs | Chromosomes | Physical positions (bp) | CDC Frontier (Reference genome) | (Pusa 256 & HPNB) | NCBI SNPdb Accession IDs |
|----------------------|----------------|-------------|-------------------------|---------------------------------|-------------------|--------------------------|
| SNP_P3_106000_31745  | NW_004515716.1 | Scaffold141 | 31745                   | AA                              | TT                | 1946485725               |
| SNP_P3_106001_43618  | NW_004515716.1 | Scaffold141 | 43618                   | CC                              | TT                | 1946485726               |
| SNP_P3_106002_44173  | NW_004515716.1 | Scaffold141 | 44173                   | GG                              | AA                | 1946485728               |
| SNP_P3_106003_48452  | NW_004515716.1 | Scaffold141 | 48452                   | GG                              | AA                | 1946485729               |
| SNP_P3_106004_48468  | NW_004515716.1 | Scaffold141 | 48468                   | AA                              | GG                | 1946485730               |
| SNP_P3_106005_51350  | NW_004515716.1 | Scaffold141 | 51350                   | CC                              | TT                | 1946485732               |
| SNP_P3_106006_51356  | NW_004515716.1 | Scaffold141 | 51356                   | GG                              | TT                | 1946485733               |
| SNP_P3_106007_51357  | NW_004515716.1 | Scaffold141 | 51357                   | GG                              | CC                | 1946485735               |
| SNP_P3_106008_51360  | NW_004515716.1 | Scaffold141 | 51360                   | TT                              | AA                | 1946485736               |
| SNP_P3_106009_51365  | NW_004515716.1 | Scaffold141 | 51365                   | AA                              | CC                | 1946485737               |
| SNP_P3_106010_51370  | NW_004515716.1 | Scaffold141 | 51370                   | TT                              | AA                | 1946485739               |
| SNP_P3_106011_55914  | NW_004515716.1 | Scaffold141 | 55914                   | TT                              | CC                | 1946485740               |
| SNP_P3_106012_56111  | NW_004515716.1 | Scaffold141 | 56111                   | AA                              | GG                | 1946485742               |
| SNP_P3_106013_56152  | NW_004515716.1 | Scaffold141 | 56152                   | TT                              | CC                | 1946485743               |
| SNP_P3_106014_56211  | NW_004515716.1 | Scaffold141 | 56211                   | GG                              | AA                | 1946485744               |
| SNP_P3_106015_56419  | NW_004515716.1 | Scaffold141 | 56419                   | AA                              | GG                | 1946485746               |
| SNP_P3_106016_56426  | NW_004515716.1 | Scaffold141 | 56426                   | CC                              | AA                | 1946485747               |
| SNP_P3_106017_56519  | NW_004515716.1 | Scaffold141 | 56519                   | TT                              | CC                | 1946485749               |
| SNP_P3_106018_56539  | NW_004515716.1 | Scaffold141 | 56539                   | GG                              | AA                | 1946485750               |
| SNP_P3_106019_56560  | NW_004515716.1 | Scaffold141 | 56560                   | CC                              | AA                | 1946485752               |
| SNP_P3_106020_56599  | NW_004515716.1 | Scaffold141 | 56599                   | AA                              | GG                | 1946485753               |
| SNP_P3_106021_59681  | NW_004515716.1 | Scaffold141 | 59681                   | CC                              | GG                | 1946485754               |
| SNP_P3_106022_67014  | NW_004515716.1 | Scaffold141 | 67014                   | AA                              | CC                | 1946485756               |
| SNP_P3_106023_67060  | NW_004515716.1 | Scaffold141 | 67060                   | AA                              | GG                | 1946485757               |
| SNP_P3_106024_67171  | NW_004515716.1 | Scaffold141 | 67171                   | TT                              | CC                | 1946485759               |
| SNP_P3_106025_67226  | NW_004515716.1 | Scaffold141 | 67226                   | AA                              | CC                | 1946485760               |
| SNP_P3_106026_67422  | NW_004515716.1 | Scaffold141 | 67422                   | TT                              | AA                | 1946485762               |
| SNP_P3_106027_67477  | NW_004515716.1 | Scaffold141 | 67477                   | GG                              | AA                | 1946485763               |
| SNP_P3_106028_67500  | NW_004515716.1 | Scaffold141 | 67500                   | AA                              | GG                | 1946485764               |
| SNP_P3_106029_67592  | NW_004515716.1 | Scaffold141 | 67592                   | TT                              | CC                | 1946485766               |
| SNP_P3_106030_68708  | NW_004515716.1 | Scaffold141 | 68708                   | CC                              | TT                | 1946485767               |
| SNP_P3_106031_68875  | NW_004515716.1 | Scaffold141 | 68875                   | GG                              | TT                | 1946485769               |
| SNP_P3_106032_68899  | NW_004515716.1 | Scaffold141 | 68899                   | CC                              | TT                | 1946485770               |
| SNP_P3_106033_69215  | NW_004515716.1 | Scaffold141 | 69215                   | TT                              | GG                | 1946485772               |
| SNP_P3_106034_77205  | NW_004515716.1 | Scaffold141 | 77205                   | AA                              | GG                | 1946485773               |
| SNP_P3_106035_78488  | NW_004515716.1 | Scaffold141 | 78488                   | AA                              | CC                | 1946485774               |
| SNP_P3_106036_78493  | NW_004515716.1 | Scaffold141 | 78493                   | AA                              | CC                | 1946485777               |
| SNP_P3_106037_90235  | NW_004515716.1 | Scaffold141 | 90235                   | CC                              | TT                | 1946485778               |
| SNP_P3_106038_101795 | NW_004515716.1 | Scaffold141 | 101795                  | TT                              | CC                | 1946485780               |
| SNP_P3_106039_114126 | NW_004515716.1 | Scaffold141 | 114126                  | GG                              | AA                | 1946485781               |
| SNP_P3_106040_114169 | NW_004515716.1 | Scaffold141 | 114169                  | CC                              | GG                | 1946485783               |
| SNP_P3_106041_114437 | NW_004515716.1 | Scaffold141 | 114437                  | CC                              | GG                | 1946485784               |

| SNPs IDs             | Chromosome IDs | Chromosomes | Physical positions (bp) | CDC Frontier (Reference genome) | (Pusa 256 & HPNB) | NCBI SNPdb Accession IDs |
|----------------------|----------------|-------------|-------------------------|---------------------------------|-------------------|--------------------------|
| SNP_P3_106042_114971 | NW_004515716.1 | Scaffold141 | 114971                  | TT                              | CC                | 1946485785               |
| SNP_P3_106043_132740 | NW_004515716.1 | Scaffold141 | 132740                  | AA                              | GG                | 1946485787               |
| SNP_P3_106044_132750 | NW_004515716.1 | Scaffold141 | 132750                  | AA                              | GG                | 1946485788               |
| SNP_P3_106045_132781 | NW_004515716.1 | Scaffold141 | 132781                  | TT                              | GG                | 1946485790               |
| SNP_P3_106046_132878 | NW_004515716.1 | Scaffold141 | 132878                  | TT                              | CC                | 1946485791               |
| SNP_P3_106047_132905 | NW_004515716.1 | Scaffold141 | 132905                  | TT                              | AA                | 1946485793               |
| SNP_P3_106048_132931 | NW_004515716.1 | Scaffold141 | 132931                  | AA                              | TT                | 1946485794               |
| SNP_P3_106049_132933 | NW_004515716.1 | Scaffold141 | 132933                  | AA                              | GG                | 1946485795               |
| SNP_P3_106050_133009 | NW_004515716.1 | Scaffold141 | 133009                  | TT                              | CC                | 1946485797               |
| SNP_P3_106051_133039 | NW_004515716.1 | Scaffold141 | 133039                  | TT                              | GG                | 1946485798               |
| SNP_P3_106052_133049 | NW_004515716.1 | Scaffold141 | 133049                  | CC                              | TT                | 1946485800               |
| SNP_P3_106053_133103 | NW_004515716.1 | Scaffold141 | 133103                  | TT                              | CC                | 1946485801               |
| SNP_P3_106054_133136 | NW_004515716.1 | Scaffold141 | 133136                  | CC                              | TT                | 1946485803               |
| SNP_P3_106055_133150 | NW_004515716.1 | Scaffold141 | 133150                  | TT                              | GG                | 1946485804               |
| SNP_P3_106056_133166 | NW_004515716.1 | Scaffold141 | 133166                  | CC                              | TT                | 1946485805               |
| SNP_P3_106057_133169 | NW_004515716.1 | Scaffold141 | 133169                  | TT                              | GG                | 1946485807               |
| SNP_P3_106058_133199 | NW_004515716.1 | Scaffold141 | 133199                  | TT                              | AA                | 1946485808               |
| SNP_P3_106059_133233 | NW_004515716.1 | Scaffold141 | 133233                  | GG                              | AA                | 1946485810               |
| SNP_P3_106060_133237 | NW_004515716.1 | Scaffold141 | 133237                  | AA                              | CC                | 1946485811               |
| SNP_P3_106061_133242 | NW_004515716.1 | Scaffold141 | 133242                  | CC                              | TT                | 1946485813               |
| SNP_P3_106062_133259 | NW_004515716.1 | Scaffold141 | 133259                  | GG                              | AA                | 1946485814               |
| SNP_P3_106063_133271 | NW_004515716.1 | Scaffold141 | 133271                  | TT                              | CC                | 1946485815               |
| SNP_P3_106064_137960 | NW_004515716.1 | Scaffold141 | 137960                  | GG                              | AA                | 1946485817               |
| SNP_P3_106065_138695 | NW_004515716.1 | Scaffold141 | 138695                  | GG                              | TT                | 1946485818               |
| SNP_P3_106066_138724 | NW_004515716.1 | Scaffold141 | 138724                  | AA                              | CC                | 1946485820               |
| SNP_P3_106067_138941 | NW_004515716.1 | Scaffold141 | 138941                  | CC                              | GG                | 1946485821               |
| SNP_P3_106068_139720 | NW_004515716.1 | Scaffold141 | 139720                  | AA                              | GG                | 1946485823               |
| SNP_P3_106069_139862 | NW_004515716.1 | Scaffold141 | 139862                  | TT                              | GG                | 1946485824               |
| SNP_P3_106070_139888 | NW_004515716.1 | Scaffold141 | 139888                  | AA                              | TT                | 1946485825               |
| SNP_P3_106071_139951 | NW_004515716.1 | Scaffold141 | 139951                  | TT                              | CC                | 1946485827               |
| SNP_P3_106072_140185 | NW_004515716.1 | Scaffold141 | 140185                  | TT                              | GG                | 1946485828               |
| SNP_P3_106073_140272 | NW_004515716.1 | Scaffold141 | 140272                  | CC                              | TT                | 1946485830               |
| SNP_P3_106074_140554 | NW_004515716.1 | Scaffold141 | 140554                  | AA                              | CC                | 1946485831               |
| SNP_P3_106075_140573 | NW_004515716.1 | Scaffold141 | 140573                  | CC                              | TT                | 1946485833               |
| SNP_P3_106076_146559 | NW_004515716.1 | Scaffold141 | 146559                  | CC                              | TT                | 1946485834               |
| SNP_P3_106077_146575 | NW_004515716.1 | Scaffold141 | 146575                  | GG                              | CC                | 1946485835               |
| SNP_P3_106078_146633 | NW_004515716.1 | Scaffold141 | 146633                  | AA                              | TT                | 1946485837               |
| SNP_P3_106079_146722 | NW_004515716.1 | Scaffold141 | 146722                  | AA                              | GG                | 1946485838               |
| SNP_P3_106080_146944 | NW_004515716.1 | Scaffold141 | 146944                  | TT                              | GG                | 1946485840               |
| SNP_P3_106081_147487 | NW_004515716.1 | Scaffold141 | 147487                  | AA                              | CC                | 1946485841               |
| SNP_P3_106082_147540 | NW_004515716.1 | Scaffold141 | 147540                  | AA                              | TT                | 1946485843               |
| SNP_P3_106083_147554 | NW_004515716.1 | Scaffold141 | 147554                  | GG                              | CC                | 1946485844               |

| SNPs IDs             | Chromosome IDs | Chromosomes | Physical positions (bp) | CDC Frontier (Reference genome) | (Pusa 256 & HPNB) | NCBI SNPdb Accession IDs |
|----------------------|----------------|-------------|-------------------------|---------------------------------|-------------------|--------------------------|
| SNP_P3_106084_148532 | NW_004515716.1 | Scaffold141 | 148532                  | GG                              | TT                | 1946485846               |
| SNP_P3_106085_150953 | NW_004515716.1 | Scaffold141 | 150953                  | TT                              | GG                | 1946485847               |
| SNP_P3_106086_150982 | NW_004515716.1 | Scaffold141 | 150982                  | CC                              | GG                | 1946485848               |
| SNP_P3_106087_150998 | NW_004515716.1 | Scaffold141 | 150998                  | AA                              | TT                | 1946485850               |
| SNP_P3_106088_151268 | NW_004515716.1 | Scaffold141 | 151268                  | TT                              | AA                | 1946485851               |
| SNP_P3_106089_165830 | NW_004515716.1 | Scaffold141 | 165830                  | CC                              | AA                | 1946485853               |
| SNP_P3_106090_166082 | NW_004515716.1 | Scaffold141 | 166082                  | AA                              | CC                | 1946485854               |
| SNP_P3_106091_166086 | NW_004515716.1 | Scaffold141 | 166086                  | CC                              | GG                | 1946485856               |
| SNP_P3_106092_166087 | NW_004515716.1 | Scaffold141 | 166087                  | GG                              | AA                | 1946485857               |
| SNP_P3_106093_166121 | NW_004515716.1 | Scaffold141 | 166121                  | TT                              | GG                | 1946485858               |
| SNP_P3_106094_166162 | NW_004515716.1 | Scaffold141 | 166162                  | GG                              | TT                | 1946485860               |
| SNP_P3_106095_166166 | NW_004515716.1 | Scaffold141 | 166166                  | TT                              | GG                | 1946485861               |
| SNP_P3_106096_166510 | NW_004515716.1 | Scaffold141 | 166510                  | GG                              | AA                | 1946485863               |
| SNP_P3_106097_171743 | NW_004515716.1 | Scaffold141 | 171743                  | AA                              | GG                | 1946485864               |
| SNP_P3_106098_171906 | NW_004515716.1 | Scaffold141 | 171906                  | TT                              | CC                | 1946485866               |
| SNP_P3_106099_172027 | NW_004515716.1 | Scaffold141 | 172027                  | AA                              | TT                | 1946485867               |
| SNP_P3_106100_172182 | NW_004515716.1 | Scaffold141 | 172182                  | CC                              | GG                | 1946485868               |
| SNP_P3_106101_172226 | NW_004515716.1 | Scaffold141 | 172226                  | AA                              | GG                | 1946485870               |
| SNP_P3_106102_172300 | NW_004515716.1 | Scaffold141 | 172300                  | TT                              | AA                | 1946485871               |
| SNP_P3_106103_173241 | NW_004515716.1 | Scaffold141 | 173241                  | AA                              | GG                | 1946485873               |
| SNP_P3_106104_4020   | NW_004515717.1 | Scaffold142 | 4020                    | TT                              | CC                | 1946485874               |
| SNP_P3_106105_4021   | NW_004515717.1 | Scaffold142 | 4021                    | GG                              | AA                | 1946485875               |
| SNP_P3_106106_4662   | NW_004515717.1 | Scaffold142 | 4662                    | CC                              | TT                | 1946485877               |
| SNP_P3_106107_4676   | NW_004515717.1 | Scaffold142 | 4676                    | TT                              | CC                | 1946485878               |
| SNP_P3_106108_4689   | NW_004515717.1 | Scaffold142 | 4689                    | GG                              | TT                | 1946485880               |
| SNP_P3_106109_4746   | NW_004515717.1 | Scaffold142 | 4746                    | TT                              | GG                | 1946485881               |
| SNP_P3_106110_4869   | NW_004515717.1 | Scaffold142 | 4869                    | AA                              | GG                | 1946485883               |
| SNP_P3_106111_5347   | NW_004515717.1 | Scaffold142 | 5347                    | AA                              | GG                | 1946485884               |
| SNP_P3_106112_5410   | NW_004515717.1 | Scaffold142 | 5410                    | TT                              | CC                | 1946485885               |
| SNP_P3_106113_8805   | NW_004515718.1 | Scaffold143 | 8805                    | TT                              | AA                | 1946485887               |
| SNP_P3_106114_13815  | NW_004515718.1 | Scaffold143 | 13815                   | AA                              | TT                | 1946485888               |
| SNP_P3_106115_13831  | NW_004515718.1 | Scaffold143 | 13831                   | AA                              | GG                | 1946485890               |
| SNP_P3_106116_13838  | NW_004515718.1 | Scaffold143 | 13838                   | AA                              | GG                | 1946485891               |
| SNP_P3_106117_13858  | NW_004515718.1 | Scaffold143 | 13858                   | AA                              | GG                | 1946485892               |
| SNP_P3_106119_14103  | NW_004515718.1 | Scaffold143 | 14103                   | TT                              | CC                | 1946485894               |
| SNP_P3_106120_27115  | NW_004515718.1 | Scaffold143 | 27115                   | TT                              | CC                | 1946485895               |
| SNP_P3_106121_38411  | NW_004515718.1 | Scaffold143 | 38411                   | AA                              | CC                | 1946485897               |
| SNP_P3_106122_44090  | NW_004515718.1 | Scaffold143 | 44090                   | CC                              | TT                | 1946485898               |
| SNP_P3_106124_67417  | NW_004515718.1 | Scaffold143 | 67417                   | TT                              | CC                | 1946485899               |
| SNP_P3_106125_67418  | NW_004515718.1 | Scaffold143 | 67418                   | TT                              | CC                | 1946485901               |
| SNP_P3_106126_67472  | NW_004515718.1 | Scaffold143 | 67472                   | AA                              | GG                | 1946485902               |
| SNP_P3_106127_67518  | NW_004515718.1 | Scaffold143 | 67518                   | GG                              | AA                | 1946485904               |



| SNPs IDs             | Chromosome IDs | Chromosomes | Physical positions (bp) | CDC Frontier (Reference genome) | (Pusa 256 & HPNB) | NCBI SNPdb Accession IDs |
|----------------------|----------------|-------------|-------------------------|---------------------------------|-------------------|--------------------------|
| SNP_P3_106129_67536  | NW_004515718.1 | Scaffold143 | 67536                   | AA                              | TT                | 1946485905               |
| SNP_P3_106130_67578  | NW_004515718.1 | Scaffold143 | 67578                   | CC                              | TT                | 1946485907               |
| SNP_P3_106131_67679  | NW_004515718.1 | Scaffold143 | 67679                   | AA                              | TT                | 1946485908               |
| SNP_P3_106132_67698  | NW_004515718.1 | Scaffold143 | 67698                   | AA                              | TT                | 1946485909               |
| SNP_P3_106133_67889  | NW_004515718.1 | Scaffold143 | 67889                   | AA                              | CC                | 1946485911               |
| SNP_P3_106134_67949  | NW_004515718.1 | Scaffold143 | 67949                   | AA                              | GG                | 1946485912               |
| SNP_P3_106135_67988  | NW_004515718.1 | Scaffold143 | 67988                   | TT                              | GG                | 1946485914               |
| SNP_P3_106136_68005  | NW_004515718.1 | Scaffold143 | 68005                   | AA                              | GG                | 1946485915               |
| SNP_P3_106137_68042  | NW_004515718.1 | Scaffold143 | 68042                   | CC                              | TT                | 1946485917               |
| SNP_P3_106138_68057  | NW_004515718.1 | Scaffold143 | 68057                   | AA                              | TT                | 1946485918               |
| SNP_P3_106139_84121  | NW_004515718.1 | Scaffold143 | 84121                   | GG                              | AA                | 1946485920               |
| SNP_P3_106140_84151  | NW_004515718.1 | Scaffold143 | 84151                   | GG                              | TT                | 1946485921               |
| SNP_P3_106141_84190  | NW_004515718.1 | Scaffold143 | 84190                   | AA                              | CC                | 1946485922               |
| SNP_P3_106142_84191  | NW_004515718.1 | Scaffold143 | 84191                   | GG                              | AA                | 1946485924               |
| SNP_P3_106144_120854 | NW_004515718.1 | Scaffold143 | 120854                  | AA                              | GG                | 1946485925               |
| SNP_P3_106145_121417 | NW_004515718.1 | Scaffold143 | 121417                  | GG                              | AA                | 1946485927               |
| SNP_P3_106146_124538 | NW_004515718.1 | Scaffold143 | 124538                  | AA                              | GG                | 1946485928               |
| SNP_P3_106147_124818 | NW_004515718.1 | Scaffold143 | 124818                  | GG                              | TT                | 1946485930               |
| SNP_P3_106148_124846 | NW_004515718.1 | Scaffold143 | 124846                  | AA                              | CC                | 1946485931               |
| SNP_P3_106149_124893 | NW_004515718.1 | Scaffold143 | 124893                  | AA                              | TT                | 1946485932               |
| SNP_P3_106150_126752 | NW_004515718.1 | Scaffold143 | 126752                  | TT                              | CC                | 1946485934               |
| SNP_P3_106151_126754 | NW_004515718.1 | Scaffold143 | 126754                  | AA                              | GG                | 1946485935               |
| SNP_P3_106152_138784 | NW_004515718.1 | Scaffold143 | 138784                  | AA                              | GG                | 1946485937               |
| SNP_P3_106153_146849 | NW_004515718.1 | Scaffold143 | 146849                  | CC                              | TT                | 1946485938               |
| SNP_P3_106154_152887 | NW_004515718.1 | Scaffold143 | 152887                  | TT                              | CC                | 1946485939               |
| SNP_P3_106155_152950 | NW_004515718.1 | Scaffold143 | 152950                  | AA                              | CC                | 1946485941               |
| SNP_P3_106156_152952 | NW_004515718.1 | Scaffold143 | 152952                  | CC                              | TT                | 1946485942               |
| SNP_P3_106158_185553 | NW_004515718.1 | Scaffold143 | 185553                  | CC                              | TT                | 1946485944               |
| SNP_P3_106160_207673 | NW_004515718.1 | Scaffold143 | 207673                  | CC                              | AA                | 1946485945               |
| SNP_P3_106161_227565 | NW_004515718.1 | Scaffold143 | 227565                  | AA                              | GG                | 1946485947               |
| SNP_P3_106162_227607 | NW_004515718.1 | Scaffold143 | 227607                  | CC                              | TT                | 1946485948               |
| SNP_P3_106163_227609 | NW_004515718.1 | Scaffold143 | 227609                  | AA                              | CC                | 1946485950               |
| SNP_P3_106164_231083 | NW_004515718.1 | Scaffold143 | 231083                  | AA                              | GG                | 1946485951               |
| SNP_P3_106165_233804 | NW_004515718.1 | Scaffold143 | 233804                  | TT                              | GG                | 1946485953               |
| SNP_P3_106166_233813 | NW_004515718.1 | Scaffold143 | 233813                  | GG                              | TT                | 1946485954               |
| SNP_P3_106167_234047 | NW_004515718.1 | Scaffold143 | 234047                  | CC                              | TT                | 1946485956               |
| SNP_P3_106168_234506 | NW_004515718.1 | Scaffold143 | 234506                  | AA                              | TT                | 1946485957               |
| SNP_P3_106169_234520 | NW_004515718.1 | Scaffold143 | 234520                  | AA                              | GG                | 1946485958               |
| SNP_P3_106170_234552 | NW_004515718.1 | Scaffold143 | 234552                  | AA                              | GG                | 1946485960               |
| SNP_P3_106171_786    | NW_004515719.1 | Scaffold144 | 786                     | CC                              | TT                | 1946485961               |
| SNP_P3_106172_852    | NW_004515719.1 | Scaffold144 | 852                     | TT                              | AA                | 1946485963               |
| SNP_P3_106174_1052   | NW_004515719.1 | Scaffold144 | 1052                    | AA                              | GG                | 1946485964               |

| SNPs IDs            | Chromosome IDs | Chromosomes | Physical positions (bp) | CDC Frontier (Reference genome) | (Pusa 256 & HPNB) | NCBI SNPdb Accession IDs |
|---------------------|----------------|-------------|-------------------------|---------------------------------|-------------------|--------------------------|
| SNP_P3_106175_1092  | NW_004515719.1 | Scaffold144 | 1092                    | GG                              | AA                | 1946485966               |
| SNP_P3_106176_1095  | NW_004515719.1 | Scaffold144 | 1095                    | AA                              | GG                | 1946485967               |
| SNP_P3_106177_1099  | NW_004515719.1 | Scaffold144 | 1099                    | AA                              | TT                | 1946485969               |
| SNP_P3_106178_1107  | NW_004515719.1 | Scaffold144 | 1107                    | AA                              | TT                | 1946485970               |
| SNP_P3_106179_1117  | NW_004515719.1 | Scaffold144 | 1117                    | GG                              | CC                | 1946485972               |
| SNP_P3_106180_1560  | NW_004515719.1 | Scaffold144 | 1560                    | AA                              | CC                | 1946485973               |
| SNP_P3_106181_1790  | NW_004515719.1 | Scaffold144 | 1790                    | AA                              | CC                | 1946485974               |
| SNP_P3_106182_2627  | NW_004515719.1 | Scaffold144 | 2627                    | GG                              | AA                | 1946485976               |
| SNP_P3_106183_3666  | NW_004515719.1 | Scaffold144 | 3666                    | TT                              | GG                | 1946485977               |
| SNP_P3_106184_3864  | NW_004515719.1 | Scaffold144 | 3864                    | GG                              | CC                | 1946485979               |
| SNP_P3_106185_3882  | NW_004515719.1 | Scaffold144 | 3882                    | TT                              | AA                | 1946485980               |
| SNP_P3_106186_4028  | NW_004515719.1 | Scaffold144 | 4028                    | AA                              | CC                | 1946485982               |
| SNP_P3_106187_11333 | NW_004515719.1 | Scaffold144 | 11333                   | CC                              | AA                | 1946485983               |
| SNP_P3_106188_17173 | NW_004515719.1 | Scaffold144 | 17173                   | TT                              | AA                | 1946485985               |
| SNP_P3_106189_17182 | NW_004515719.1 | Scaffold144 | 17182                   | AA                              | GG                | 1946485986               |
| SNP_P3_106190_17198 | NW_004515719.1 | Scaffold144 | 17198                   | TT                              | CC                | 1946486013               |
| SNP_P3_106191_17201 | NW_004515719.1 | Scaffold144 | 17201                   | CC                              | TT                | 1946486014               |
| SNP_P3_106192_17226 | NW_004515719.1 | Scaffold144 | 17226                   | AA                              | GG                | 1946486015               |
| SNP_P3_106193_17670 | NW_004515719.1 | Scaffold144 | 17670                   | TT                              | GG                | 1946486017               |
| SNP_P3_106194_17806 | NW_004515719.1 | Scaffold144 | 17806                   | AA                              | CC                | 1946486018               |
| SNP_P3_106195_17834 | NW_004515719.1 | Scaffold144 | 17834                   | CC                              | TT                | 1946486020               |
| SNP_P3_106196_17970 | NW_004515719.1 | Scaffold144 | 17970                   | CC                              | AA                | 1946486021               |
| SNP_P3_106197_941   | NW_004515720.1 | Scaffold146 | 941                     | GG                              | AA                | 1946486023               |
| SNP_P3_106198_9324  | NW_004515720.1 | Scaffold146 | 9324                    | CC                              | TT                | 1946486024               |
| SNP_P3_106199_9371  | NW_004515720.1 | Scaffold146 | 9371                    | TT                              | CC                | 1946486025               |
| SNP_P3_106201_9656  | NW_004515720.1 | Scaffold146 | 9656                    | AA                              | CC                | 1946486027               |
| SNP_P3_106202_9666  | NW_004515720.1 | Scaffold146 | 9666                    | GG                              | CC                | 1946486028               |
| SNP_P3_106203_9671  | NW_004515720.1 | Scaffold146 | 9671                    | TT                              | AA                | 1946486030               |
| SNP_P3_106204_9847  | NW_004515720.1 | Scaffold146 | 9847                    | AA                              | GG                | 1946486031               |
| SNP_P3_106205_10029 | NW_004515720.1 | Scaffold146 | 10029                   | CC                              | TT                | 1946486033               |
| SNP_P3_106206_10074 | NW_004515720.1 | Scaffold146 | 10074                   | GG                              | AA                | 1946486034               |
| SNP_P3_106207_10418 | NW_004515720.1 | Scaffold146 | 10418                   | CC                              | AA                | 1946486035               |
| SNP_P3_106208_12137 | NW_004515720.1 | Scaffold146 | 12137                   | TT                              | CC                | 1946486037               |
| SNP_P3_106209_12181 | NW_004515720.1 | Scaffold146 | 12181                   | TT                              | CC                | 1946486038               |
| SNP_P3_106210_12186 | NW_004515720.1 | Scaffold146 | 12186                   | AA                              | GG                | 1946486040               |
| SNP_P3_106211_12221 | NW_004515720.1 | Scaffold146 | 12221                   | GG                              | TT                | 1946486041               |
| SNP_P3_106212_12226 | NW_004515720.1 | Scaffold146 | 12226                   | AA                              | GG                | 1946486043               |
| SNP_P3_106213_12233 | NW_004515720.1 | Scaffold146 | 12233                   | TT                              | CC                | 1946486044               |
| SNP_P3_106214_12258 | NW_004515720.1 | Scaffold146 | 12258                   | CC                              | TT                | 1946486046               |
| SNP_P3_106215_12284 | NW_004515720.1 | Scaffold146 | 12284                   | CC                              | GG                | 1946486047               |
| SNP_P3_106216_12316 | NW_004515720.1 | Scaffold146 | 12316                   | TT                              | CC                | 1946486048               |
| SNP_P3_106217_12384 | NW_004515720.1 | Scaffold146 | 12384                   | TT                              | GG                | 1946486050               |

| SNPs IDs            | Chromosome IDs | Chromosomes | Physical positions (bp) | CDC Frontier (Reference genome) | (Pusa 256 & HPNB) | NCBI SNPdb Accession IDs |
|---------------------|----------------|-------------|-------------------------|---------------------------------|-------------------|--------------------------|
| SNP_P3_106218_12408 | NW_004515720.1 | Scaffold146 | 12408                   | GG                              | AA                | 1946486052               |
| SNP_P3_106219_12419 | NW_004515720.1 | Scaffold146 | 12419                   | CC                              | AA                | 1946486053               |
| SNP_P3_106220_12432 | NW_004515720.1 | Scaffold146 | 12432                   | TT                              | CC                | 1946486055               |
| SNP_P3_106221_28125 | NW_004515720.1 | Scaffold146 | 28125                   | AA                              | TT                | 1946486056               |
| SNP_P3_106222_36490 | NW_004515720.1 | Scaffold146 | 36490                   | CC                              | AA                | 1946486057               |
| SNP_P3_106223_36543 | NW_004515720.1 | Scaffold146 | 36543                   | AA                              | TT                | 1946486059               |
| SNP_P3_106224_36620 | NW_004515720.1 | Scaffold146 | 36620                   | GG                              | AA                | 1946486060               |
| SNP_P3_106225_36799 | NW_004515720.1 | Scaffold146 | 36799                   | AA                              | GG                | 1946486062               |
| SNP_P3_106226_37102 | NW_004515720.1 | Scaffold146 | 37102                   | CC                              | TT                | 1946486063               |
| SNP_P3_106227_37122 | NW_004515720.1 | Scaffold146 | 37122                   | GG                              | AA                | 1946486065               |
| SNP_P3_106228_43512 | NW_004515720.1 | Scaffold146 | 43512                   | GG                              | TT                | 1946486066               |
| SNP_P3_106229_70113 | NW_004515720.1 | Scaffold146 | 70113                   | AA                              | GG                | 1946486068               |
| SNP_P3_106230_70234 | NW_004515720.1 | Scaffold146 | 70234                   | TT                              | CC                | 1946486069               |
| SNP_P3_106231_70235 | NW_004515720.1 | Scaffold146 | 70235                   | AA                              | TT                | 1946486070               |
| SNP_P3_106232_70237 | NW_004515720.1 | Scaffold146 | 70237                   | TT                              | CC                | 1946486072               |
| SNP_P3_106233_70514 | NW_004515720.1 | Scaffold146 | 70514                   | AA                              | GG                | 1946486073               |
| SNP_P3_106234_70875 | NW_004515720.1 | Scaffold146 | 70875                   | AA                              | GG                | 1946486075               |
| SNP_P3_106235_70881 | NW_004515720.1 | Scaffold146 | 70881                   | GG                              | AA                | 1946486076               |
| SNP_P3_106236_70890 | NW_004515720.1 | Scaffold146 | 70890                   | AA                              | GG                | 1946486078               |
| SNP_P3_106237_70922 | NW_004515720.1 | Scaffold146 | 70922                   | TT                              | CC                | 1946486079               |
| SNP_P3_106239_82113 | NW_004515720.1 | Scaffold146 | 82113                   | TT                              | AA                | 1946486080               |
| SNP_P3_106240_82138 | NW_004515720.1 | Scaffold146 | 82138                   | AA                              | GG                | 1946486082               |
| SNP_P3_106241_82152 | NW_004515720.1 | Scaffold146 | 82152                   | AA                              | GG                | 1946486083               |
| SNP_P3_106242_82174 | NW_004515720.1 | Scaffold146 | 82174                   | GG                              | CC                | 1946486085               |
| SNP_P3_106243_82185 | NW_004515720.1 | Scaffold146 | 82185                   | TT                              | GG                | 1946486086               |
| SNP_P3_106244_82510 | NW_004515720.1 | Scaffold146 | 82510                   | TT                              | CC                | 1946486088               |
| SNP_P3_106245_82650 | NW_004515720.1 | Scaffold146 | 82650                   | TT                              | AA                | 1946486089               |
| SNP_P3_106246_83317 | NW_004515720.1 | Scaffold146 | 83317                   | GG                              | AA                | 1946486090               |
| SNP_P3_106247_83318 | NW_004515720.1 | Scaffold146 | 83318                   | AA                              | TT                | 1946486092               |
| SNP_P3_106248_83340 | NW_004515720.1 | Scaffold146 | 83340                   | GG                              | TT                | 1946486093               |
| SNP_P3_106249_83351 | NW_004515720.1 | Scaffold146 | 83351                   | AA                              | TT                | 1946486095               |
| SNP_P3_106250_83378 | NW_004515720.1 | Scaffold146 | 83378                   | CC                              | TT                | 1946486096               |
| SNP_P3_106251_83380 | NW_004515720.1 | Scaffold146 | 83380                   | AA                              | TT                | 1946486097               |
| SNP_P3_106252_83385 | NW_004515720.1 | Scaffold146 | 83385                   | AA                              | GG                | 1946486099               |
| SNP_P3_106253_83400 | NW_004515720.1 | Scaffold146 | 83400                   | CC                              | TT                | 1946486100               |
| SNP_P3_106254_83429 | NW_004515720.1 | Scaffold146 | 83429                   | CC                              | GG                | 1946486102               |
| SNP_P3_106255_83430 | NW_004515720.1 | Scaffold146 | 83430                   | AA                              | GG                | 1946486103               |
| SNP_P3_106256_83447 | NW_004515720.1 | Scaffold146 | 83447                   | TT                              | AA                | 1946486105               |
| SNP_P3_106257_83460 | NW_004515720.1 | Scaffold146 | 83460                   | TT                              | GG                | 1946486106               |
| SNP_P3_106258_83527 | NW_004515720.1 | Scaffold146 | 83527                   | GG                              | CC                | 1946486108               |
| SNP_P3_106259_83536 | NW_004515720.1 | Scaffold146 | 83536                   | AA                              | CC                | 1946486109               |
| SNP_P3_106260_83708 | NW_004515720.1 | Scaffold146 | 83708                   | CC                              | AA                | 1946486110               |

| SNPs IDs            | Chromosome IDs | Chromosomes | Physical positions (bp) | CDC Frontier (Reference genome) | (Pusa 256 & HPNB) | NCBI SNPdb Accession IDs |
|---------------------|----------------|-------------|-------------------------|---------------------------------|-------------------|--------------------------|
| SNP_P3_106261_83760 | NW_004515720.1 | Scaffold146 | 83760                   | AA                              | TT                | 1946486112               |
| SNP_P3_106262_83770 | NW_004515720.1 | Scaffold146 | 83770                   | TT                              | AA                | 1946486113               |
| SNP_P3_106263_83791 | NW_004515720.1 | Scaffold146 | 83791                   | TT                              | CC                | 1946486115               |
| SNP_P3_106265_84306 | NW_004515720.1 | Scaffold146 | 84306                   | TT                              | AA                | 1946486116               |
| SNP_P3_106266_86160 | NW_004515720.1 | Scaffold146 | 86160                   | GG                              | CC                | 1946486118               |
| SNP_P3_106267_86293 | NW_004515720.1 | Scaffold146 | 86293                   | TT                              | AA                | 1946486119               |
| SNP_P3_106268_86512 | NW_004515720.1 | Scaffold146 | 86512                   | AA                              | TT                | 1946486120               |
| SNP_P3_106269_86513 | NW_004515720.1 | Scaffold146 | 86513                   | TT                              | AA                | 1946486122               |
| SNP_P3_106270_86532 | NW_004515720.1 | Scaffold146 | 86532                   | TT                              | AA                | 1946486123               |
| SNP_P3_106271_180   | NW_004515721.1 | Scaffold150 | 180                     | AA                              | GG                | 1946486125               |
| SNP_P3_106272_4370  | NW_004515721.1 | Scaffold150 | 4370                    | CC                              | GG                | 1946486126               |
| SNP_P3_106273_5858  | NW_004515721.1 | Scaffold150 | 5858                    | GG                              | TT                | 1946486127               |
| SNP_P3_106274_8032  | NW_004515721.1 | Scaffold150 | 8032                    | AA                              | CC                | 1946486129               |
| SNP_P3_106275_667   | NW_004515722.1 | Scaffold151 | 667                     | CC                              | GG                | 1946486130               |
| SNP_P3_106277_860   | NW_004515722.1 | Scaffold151 | 860                     | TT                              | AA                | 1946486132               |
| SNP_P3_106278_1159  | NW_004515722.1 | Scaffold151 | 1159                    | AA                              | TT                | 1946486133               |
| SNP_P3_106279_1175  | NW_004515722.1 | Scaffold151 | 1175                    | AA                              | GG                | 1946486135               |
| SNP_P3_106281_1499  | NW_004515722.1 | Scaffold151 | 1499                    | AA                              | CC                | 1946486136               |
| SNP_P3_106282_1510  | NW_004515722.1 | Scaffold151 | 1510                    | AA                              | TT                | 1946486137               |
| SNP_P3_106283_1570  | NW_004515722.1 | Scaffold151 | 1570                    | TT                              | AA                | 1946486139               |
| SNP_P3_106284_1597  | NW_004515722.1 | Scaffold151 | 1597                    | TT                              | CC                | 1946486140               |
| SNP_P3_106285_1843  | NW_004515722.1 | Scaffold151 | 1843                    | CC                              | GG                | 1946486142               |
| SNP_P3_106286_1847  | NW_004515722.1 | Scaffold151 | 1847                    | AA                              | CC                | 1946486143               |
| SNP_P3_106287_1850  | NW_004515722.1 | Scaffold151 | 1850                    | AA                              | GG                | 1946486145               |
| SNP_P3_106288_1875  | NW_004515722.1 | Scaffold151 | 1875                    | AA                              | CC                | 1946486146               |
| SNP_P3_106289_1889  | NW_004515722.1 | Scaffold151 | 1889                    | CC                              | TT                | 1946486148               |
| SNP_P3_106291_2034  | NW_004515722.1 | Scaffold151 | 2034                    | GG                              | AA                | 1946486149               |
| SNP_P3_106292_2160  | NW_004515722.1 | Scaffold151 | 2160                    | CC                              | AA                | 1946486150               |
| SNP_P3_106294_2791  | NW_004515722.1 | Scaffold151 | 2791                    | TT                              | CC                | 1946486152               |
| SNP_P3_106295_2792  | NW_004515722.1 | Scaffold151 | 2792                    | AA                              | TT                | 1946486153               |
| SNP_P3_106296_4586  | NW_004515722.1 | Scaffold151 | 4586                    | GG                              | TT                | 1946486155               |
| SNP_P3_106297_4757  | NW_004515722.1 | Scaffold151 | 4757                    | TT                              | CC                | 1946486156               |
| SNP_P3_106299_5042  | NW_004515722.1 | Scaffold151 | 5042                    | CC                              | TT                | 1946486158               |
| SNP_P3_106300_5423  | NW_004515722.1 | Scaffold151 | 5423                    | AA                              | GG                | 1946486159               |
| SNP_P3_106301_6098  | NW_004515722.1 | Scaffold151 | 6098                    | GG                              | TT                | 1946486161               |
| SNP_P3_106302_6302  | NW_004515722.1 | Scaffold151 | 6302                    | TT                              | CC                | 1946486162               |
| SNP_P3_106303_6336  | NW_004515722.1 | Scaffold151 | 6336                    | AA                              | GG                | 1946486163               |
| SNP_P3_106304_6472  | NW_004515722.1 | Scaffold151 | 6472                    | AA                              | TT                | 1946486165               |
| SNP_P3_106305_6801  | NW_004515722.1 | Scaffold151 | 6801                    | AA                              | GG                | 1946486166               |
| SNP_P3_106306_6898  | NW_004515722.1 | Scaffold151 | 6898                    | AA                              | GG                | 1946486168               |
| SNP_P3_106307_7043  | NW_004515722.1 | Scaffold151 | 7043                    | AA                              | GG                | 1946486169               |
| SNP_P3_106308_7071  | NW_004515722.1 | Scaffold151 | 7071                    | AA                              | GG                | 1946486171               |

| SNPs IDs            | Chromosome IDs | Chromosomes | Physical positions (bp) | CDC Frontier (Reference genome) | (Pusa 256 & HPNB) | NCBI SNPdb Accession IDs |
|---------------------|----------------|-------------|-------------------------|---------------------------------|-------------------|--------------------------|
| SNP_P3_106309_7096  | NW_004515722.1 | Scaffold151 | 7096                    | TT                              | GG                | 1946486172               |
| SNP_P3_106310_7153  | NW_004515722.1 | Scaffold151 | 7153                    | TT                              | CC                | 1946486173               |
| SNP_P3_106311_7176  | NW_004515722.1 | Scaffold151 | 7176                    | GG                              | AA                | 1946486175               |
| SNP_P3_106312_7389  | NW_004515722.1 | Scaffold151 | 7389                    | AA                              | GG                | 1946486176               |
| SNP_P3_106313_7396  | NW_004515722.1 | Scaffold151 | 7396                    | AA                              | GG                | 1946486178               |
| SNP_P3_106314_7464  | NW_004515722.1 | Scaffold151 | 7464                    | AA                              | GG                | 1946486179               |
| SNP_P3_106315_7522  | NW_004515722.1 | Scaffold151 | 7522                    | GG                              | AA                | 1946486181               |
| SNP_P3_106316_7523  | NW_004515722.1 | Scaffold151 | 7523                    | CC                              | TT                | 1946486182               |
| SNP_P3_106317_7566  | NW_004515722.1 | Scaffold151 | 7566                    | GG                              | AA                | 1946486184               |
| SNP_P3_106318_7593  | NW_004515722.1 | Scaffold151 | 7593                    | GG                              | AA                | 1946486185               |
| SNP_P3_106319_7656  | NW_004515722.1 | Scaffold151 | 7656                    | AA                              | GG                | 1946486186               |
| SNP_P3_106320_7787  | NW_004515722.1 | Scaffold151 | 7787                    | AA                              | GG                | 1946486188               |
| SNP_P3_106321_9664  | NW_004515722.1 | Scaffold151 | 9664                    | TT                              | CC                | 1946486189               |
| SNP_P3_106322_10320 | NW_004515722.1 | Scaffold151 | 10320                   | AA                              | TT                | 1946486191               |
| SNP_P3_106323_10322 | NW_004515722.1 | Scaffold151 | 10322                   | TT                              | CC                | 1946486192               |
| SNP_P3_106324_10690 | NW_004515722.1 | Scaffold151 | 10690                   | TT                              | CC                | 1946486193               |
| SNP_P3_106325_11038 | NW_004515722.1 | Scaffold151 | 11038                   | TT                              | CC                | 1946486195               |
| SNP_P3_106326_11041 | NW_004515722.1 | Scaffold151 | 11041                   | TT                              | CC                | 1946486196               |
| SNP_P3_106328_11237 | NW_004515722.1 | Scaffold151 | 11237                   | AA                              | GG                | 1946486198               |
| SNP_P3_106330_11562 | NW_004515722.1 | Scaffold151 | 11562                   | CC                              | TT                | 1946486199               |
| SNP_P3_106331_11733 | NW_004515722.1 | Scaffold151 | 11733                   | GG                              | AA                | 1946486201               |
| SNP_P3_106332_17511 | NW_004515722.1 | Scaffold151 | 17511                   | TT                              | CC                | 1946486202               |
| SNP_P3_106333_17973 | NW_004515722.1 | Scaffold151 | 17973                   | TT                              | AA                | 1946486203               |
| SNP_P3_106334_18429 | NW_004515722.1 | Scaffold151 | 18429                   | GG                              | AA                | 1946486205               |
| SNP_P3_106335_18638 | NW_004515722.1 | Scaffold151 | 18638                   | GG                              | AA                | 1946486206               |
| SNP_P3_106336_18789 | NW_004515722.1 | Scaffold151 | 18789                   | GG                              | AA                | 1946486208               |
| SNP_P3_106337_18874 | NW_004515722.1 | Scaffold151 | 18874                   | AA                              | TT                | 1946486209               |
| SNP_P3_106338_19003 | NW_004515722.1 | Scaffold151 | 19003                   | CC                              | TT                | 1946486211               |
| SNP_P3_106339_19030 | NW_004515722.1 | Scaffold151 | 19030                   | GG                              | AA                | 1946486212               |
| SNP_P3_106340_19402 | NW_004515722.1 | Scaffold151 | 19402                   | GG                              | AA                | 1946486213               |
| SNP_P3_106341_19528 | NW_004515722.1 | Scaffold151 | 19528                   | AA                              | GG                | 1946486215               |
| SNP_P3_106342_25426 | NW_004515722.1 | Scaffold151 | 25426                   | CC                              | AA                | 1946486216               |
| SNP_P3_106343_25453 | NW_004515722.1 | Scaffold151 | 25453                   | GG                              | AA                | 1946486218               |
| SNP_P3_106344_25484 | NW_004515722.1 | Scaffold151 | 25484                   | GG                              | AA                | 1946486219               |
| SNP_P3_106345_25505 | NW_004515722.1 | Scaffold151 | 25505                   | CC                              | AA                | 1946486221               |
| SNP_P3_106346_25660 | NW_004515722.1 | Scaffold151 | 25660                   | TT                              | CC                | 1946486222               |
| SNP_P3_106347_25916 | NW_004515722.1 | Scaffold151 | 25916                   | AA                              | GG                | 1946486223               |
| SNP_P3_106348_25917 | NW_004515722.1 | Scaffold151 | 25917                   | CC                              | GG                | 1946486225               |
| SNP_P3_106349_26556 | NW_004515722.1 | Scaffold151 | 26556                   | AA                              | CC                | 1946486226               |
| SNP_P3_106350_26582 | NW_004515722.1 | Scaffold151 | 26582                   | GG                              | TT                | 1946486228               |
| SNP_P3_106351_26591 | NW_004515722.1 | Scaffold151 | 26591                   | GG                              | CC                | 1946486229               |
| SNP_P3_106352_26901 | NW_004515722.1 | Scaffold151 | 26901                   | CC                              | TT                | 1946486231               |

| SNPs IDs            | Chromosome IDs | Chromosomes | Physical positions (bp) | CDC Frontier (Reference genome) | (Pusa 256 & HPNB) | NCBI SNPdb Accession IDs |
|---------------------|----------------|-------------|-------------------------|---------------------------------|-------------------|--------------------------|
| SNP_P3_106353_26915 | NW_004515722.1 | Scaffold151 | 26915                   | GG                              | TT                | 1946486232               |
| SNP_P3_106354_27009 | NW_004515722.1 | Scaffold151 | 27009                   | GG                              | CC                | 1946486233               |
| SNP_P3_106355_27016 | NW_004515722.1 | Scaffold151 | 27016                   | TT                              | CC                | 1946486235               |
| SNP_P3_106356_27269 | NW_004515722.1 | Scaffold151 | 27269                   | GG                              | CC                | 1946486236               |
| SNP_P3_106357_27428 | NW_004515722.1 | Scaffold151 | 27428                   | AA                              | TT                | 1946486238               |
| SNP_P3_106358_27429 | NW_004515722.1 | Scaffold151 | 27429                   | TT                              | AA                | 1946486239               |
| SNP_P3_106359_27596 | NW_004515722.1 | Scaffold151 | 27596                   | GG                              | AA                | 1946486241               |
| SNP_P3_106360_27905 | NW_004515722.1 | Scaffold151 | 27905                   | CC                              | TT                | 1946486242               |
| SNP_P3_106361_27928 | NW_004515722.1 | Scaffold151 | 27928                   | AA                              | GG                | 1946486243               |
| SNP_P3_106362_28234 | NW_004515722.1 | Scaffold151 | 28234                   | CC                              | TT                | 1946486245               |
| SNP_P3_106363_28391 | NW_004515722.1 | Scaffold151 | 28391                   | CC                              | TT                | 1946486246               |
| SNP_P3_106364_28547 | NW_004515722.1 | Scaffold151 | 28547                   | GG                              | AA                | 1946486248               |
| SNP_P3_106365_28613 | NW_004515722.1 | Scaffold151 | 28613                   | CC                              | AA                | 1946486249               |
| SNP_P3_106366_28884 | NW_004515722.1 | Scaffold151 | 28884                   | CC                              | AA                | 1946486250               |
| SNP_P3_106367_29369 | NW_004515722.1 | Scaffold151 | 29369                   | TT                              | AA                | 1946486252               |
| SNP_P3_106369_29479 | NW_004515722.1 | Scaffold151 | 29479                   | GG                              | AA                | 1946486253               |
| SNP_P3_106370_35733 | NW_004515722.1 | Scaffold151 | 35733                   | CC                              | GG                | 1946486255               |
| SNP_P3_106371_35740 | NW_004515722.1 | Scaffold151 | 35740                   | AA                              | GG                | 1946486256               |
| SNP_P3_106372_35741 | NW_004515722.1 | Scaffold151 | 35741                   | CC                              | TT                | 1946486258               |
| SNP_P3_106373_35768 | NW_004515722.1 | Scaffold151 | 35768                   | TT                              | CC                | 1946486259               |
| SNP_P3_106374_35802 | NW_004515722.1 | Scaffold151 | 35802                   | TT                              | AA                | 1946486260               |
| SNP_P3_106375_35812 | NW_004515722.1 | Scaffold151 | 35812                   | AA                              | CC                | 1946486262               |
| SNP_P3_106376_35875 | NW_004515722.1 | Scaffold151 | 35875                   | GG                              | AA                | 1946486263               |
| SNP_P3_106377_35898 | NW_004515722.1 | Scaffold151 | 35898                   | AA                              | GG                | 1946486265               |
| SNP_P3_106379_36091 | NW_004515722.1 | Scaffold151 | 36091                   | TT                              | AA                | 1946486266               |
| SNP_P3_106380_36108 | NW_004515722.1 | Scaffold151 | 36108                   | AA                              | GG                | 1946486268               |
| SNP_P3_106381_42342 | NW_004515722.1 | Scaffold151 | 42342                   | AA                              | GG                | 1946486269               |
| SNP_P3_106383_42369 | NW_004515722.1 | Scaffold151 | 42369                   | CC                              | GG                | 1946486270               |
| SNP_P3_106384_42549 | NW_004515722.1 | Scaffold151 | 42549                   | TT                              | CC                | 1946486272               |
| SNP_P3_106385_42562 | NW_004515722.1 | Scaffold151 | 42562                   | TT                              | AA                | 1946486273               |
| SNP_P3_106386_42773 | NW_004515722.1 | Scaffold151 | 42773                   | TT                              | CC                | 1946486275               |
| SNP_P3_106387_42813 | NW_004515722.1 | Scaffold151 | 42813                   | AA                              | GG                | 1946486276               |
| SNP_P3_106388_42824 | NW_004515722.1 | Scaffold151 | 42824                   | TT                              | AA                | 1946486278               |
| SNP_P3_106389_42856 | NW_004515722.1 | Scaffold151 | 42856                   | TT                              | GG                | 1946486279               |
| SNP_P3_106390_42857 | NW_004515722.1 | Scaffold151 | 42857                   | TT                              | CC                | 1946486280               |
| SNP_P3_106391_44246 | NW_004515722.1 | Scaffold151 | 44246                   | TT                              | AA                | 1946486282               |
| SNP_P3_106392_57558 | NW_004515722.1 | Scaffold151 | 57558                   | GG                              | CC                | 1946486283               |
| SNP_P3_106393_63696 | NW_004515722.1 | Scaffold151 | 63696                   | GG                              | TT                | 1946486285               |
| SNP_P3_106394_65877 | NW_004515722.1 | Scaffold151 | 65877                   | CC                              | TT                | 1946486286               |
| SNP_P3_106395_67318 | NW_004515722.1 | Scaffold151 | 67318                   | AA                              | TT                | 1946486287               |
| SNP_P3_106397_96530 | NW_004515722.1 | Scaffold151 | 96530                   | GG                              | AA                | 1946486289               |
| SNP_P3_106398_96934 | NW_004515722.1 | Scaffold151 | 96934                   | AA                              | GG                | 1946486290               |

| SNPs IDs             | Chromosome IDs | Chromosomes | Physical positions (bp) | CDC Frontier (Reference genome) | (Pusa 256 & HPNB) | NCBI SNPdb Accession IDs |
|----------------------|----------------|-------------|-------------------------|---------------------------------|-------------------|--------------------------|
| SNP_P3_106399_96979  | NW_004515722.1 | Scaffold151 | 96979                   | TT                              | CC                | 1946486292               |
| SNP_P3_106400_97400  | NW_004515722.1 | Scaffold151 | 97400                   | CC                              | TT                | 1946486293               |
| SNP_P3_106401_99051  | NW_004515722.1 | Scaffold151 | 99051                   | GG                              | AA                | 1946486295               |
| SNP_P3_106402_104559 | NW_004515722.1 | Scaffold151 | 104559                  | GG                              | AA                | 1946486296               |
| SNP_P3_106403_107122 | NW_004515722.1 | Scaffold151 | 107122                  | TT                              | CC                | 1946486298               |
| SNP_P3_106404_108000 | NW_004515722.1 | Scaffold151 | 108000                  | CC                              | TT                | 1946486299               |
| SNP_P3_106405_108007 | NW_004515722.1 | Scaffold151 | 108007                  | AA                              | TT                | 1946486301               |
| SNP_P3_106406_111482 | NW_004515722.1 | Scaffold151 | 111482                  | CC                              | TT                | 1946486302               |
| SNP_P3_106409_174743 | NW_004515722.1 | Scaffold151 | 174743                  | GG                              | AA                | 1946486303               |
| SNP_P3_106410_175683 | NW_004515722.1 | Scaffold151 | 175683                  | TT                              | GG                | 1946486305               |
| SNP_P3_106411_178079 | NW_004515722.1 | Scaffold151 | 178079                  | GG                              | TT                | 1946486306               |
| SNP_P3_106412_178435 | NW_004515722.1 | Scaffold151 | 178435                  | TT                              | CC                | 1946486308               |
| SNP_P3_106413_178436 | NW_004515722.1 | Scaffold151 | 178436                  | AA                              | GG                | 1946486309               |
| SNP_P3_106414_178459 | NW_004515722.1 | Scaffold151 | 178459                  | GG                              | TT                | 1946486311               |
| SNP_P3_106415_178468 | NW_004515722.1 | Scaffold151 | 178468                  | CC                              | GG                | 1946486312               |
| SNP_P3_106416_181302 | NW_004515722.1 | Scaffold151 | 181302                  | TT                              | CC                | 1946486314               |
| SNP_P3_106417_201375 | NW_004515722.1 | Scaffold151 | 201375                  | TT                              | AA                | 1946486315               |
| SNP_P3_106419_202005 | NW_004515722.1 | Scaffold151 | 202005                  | TT                              | CC                | 1946486317               |
| SNP_P3_106420_205487 | NW_004515722.1 | Scaffold151 | 205487                  | GG                              | TT                | 1946486318               |
| SNP_P3_106421_216552 | NW_004515722.1 | Scaffold151 | 216552                  | TT                              | CC                | 1946486320               |
| SNP_P3_106422_217474 | NW_004515722.1 | Scaffold151 | 217474                  | GG                              | CC                | 1946486321               |
| SNP_P3_106423_218876 | NW_004515722.1 | Scaffold151 | 218876                  | AA                              | CC                | 1946486323               |
| SNP_P3_106424_219319 | NW_004515722.1 | Scaffold151 | 219319                  | GG                              | AA                | 1946486324               |
| SNP_P3_106426_222272 | NW_004515722.1 | Scaffold151 | 222272                  | CC                              | GG                | 1946486325               |
| SNP_P3_106427_224186 | NW_004515722.1 | Scaffold151 | 224186                  | AA                              | GG                | 1946486327               |
| SNP_P3_106428_239060 | NW_004515722.1 | Scaffold151 | 239060                  | AA                              | GG                | 1946486328               |
| SNP_P3_106429_239156 | NW_004515722.1 | Scaffold151 | 239156                  | TT                              | GG                | 1946486330               |
| SNP_P3_106430_245866 | NW_004515722.1 | Scaffold151 | 245866                  | CC                              | AA                | 1946486331               |
| SNP_P3_106431_259730 | NW_004515722.1 | Scaffold151 | 259730                  | TT                              | CC                | 1946486333               |
| SNP_P3_106432_282298 | NW_004515722.1 | Scaffold151 | 282298                  | AA                              | CC                | 1946486334               |
| SNP_P3_106433_309495 | NW_004515722.1 | Scaffold151 | 309495                  | AA                              | GG                | 1946486336               |
| SNP_P3_106434_311509 | NW_004515722.1 | Scaffold151 | 311509                  | TT                              | CC                | 1946486337               |
| SNP_P3_106435_321037 | NW_004515722.1 | Scaffold151 | 321037                  | TT                              | AA                | 1946486339               |
| SNP_P3_106436_1183   | NW_004515723.1 | Scaffold153 | 1183                    | TT                              | AA                | 1946486340               |
| SNP_P3_106437_6344   | NW_004515723.1 | Scaffold153 | 6344                    | TT                              | GG                | 1946486342               |
| SNP_P3_106438_6621   | NW_004515723.1 | Scaffold153 | 6621                    | TT                              | CC                | 1946486343               |
| SNP_P3_106439_6634   | NW_004515723.1 | Scaffold153 | 6634                    | TT                              | CC                | 1946486345               |
| SNP_P3_106440_12624  | NW_004515723.1 | Scaffold153 | 12624                   | AA                              | GG                | 1946486346               |
| SNP_P3_106441_13845  | NW_004515723.1 | Scaffold153 | 13845                   | TT                              | AA                | 1946486348               |
| SNP_P3_106442_15485  | NW_004515723.1 | Scaffold153 | 15485                   | GG                              | AA                | 1946486349               |
| SNP_P3_106443_19453  | NW_004515723.1 | Scaffold153 | 19453                   | GG                              | AA                | 1946486351               |
| SNP_P3_106444_19484  | NW_004515723.1 | Scaffold153 | 19484                   | GG                              | CC                | 1946486352               |

| SNPs IDs             | Chromosome IDs | Chromosomes | Physical positions (bp) | CDC Frontier (Reference genome) | (Pusa 256 & HPNB) | NCBI SNPdb Accession IDs |
|----------------------|----------------|-------------|-------------------------|---------------------------------|-------------------|--------------------------|
| SNP_P3_106445_19673  | NW_004515723.1 | Scaffold153 | 19673                   | TT                              | CC                | 1946486353               |
| SNP_P3_106446_19908  | NW_004515723.1 | Scaffold153 | 19908                   | AA                              | CC                | 1946486355               |
| SNP_P3_106447_19919  | NW_004515723.1 | Scaffold153 | 19919                   | TT                              | AA                | 1946486356               |
| SNP_P3_106448_20050  | NW_004515723.1 | Scaffold153 | 20050                   | TT                              | CC                | 1946486358               |
| SNP_P3_106449_20052  | NW_004515723.1 | Scaffold153 | 20052                   | TT                              | CC                | 1946486359               |
| SNP_P3_106450_28122  | NW_004515723.1 | Scaffold153 | 28122                   | GG                              | TT                | 1946486361               |
| SNP_P3_106451_28124  | NW_004515723.1 | Scaffold153 | 28124                   | TT                              | GG                | 1946486362               |
| SNP_P3_106452_31059  | NW_004515723.1 | Scaffold153 | 31059                   | GG                              | AA                | 1946486364               |
| SNP_P3_106453_31079  | NW_004515723.1 | Scaffold153 | 31079                   | TT                              | GG                | 1946486365               |
| SNP_P3_106454_31089  | NW_004515723.1 | Scaffold153 | 31089                   | TT                              | GG                | 1946486367               |
| SNP_P3_106455_33611  | NW_004515723.1 | Scaffold153 | 33611                   | TT                              | CC                | 1946486368               |
| SNP_P3_106456_33963  | NW_004515723.1 | Scaffold153 | 33963                   | CC                              | TT                | 1946486370               |
| SNP_P3_106457_34055  | NW_004515723.1 | Scaffold153 | 34055                   | GG                              | AA                | 1946486371               |
| SNP_P3_106458_38550  | NW_004515723.1 | Scaffold153 | 38550                   | TT                              | AA                | 1946486373               |
| SNP_P3_106459_40233  | NW_004515723.1 | Scaffold153 | 40233                   | AA                              | GG                | 1946486374               |
| SNP_P3_106460_42039  | NW_004515723.1 | Scaffold153 | 42039                   | CC                              | TT                | 1946486376               |
| SNP_P3_106461_45804  | NW_004515723.1 | Scaffold153 | 45804                   | GG                              | AA                | 1946486377               |
| SNP_P3_106462_51382  | NW_004515723.1 | Scaffold153 | 51382                   | CC                              | TT                | 1946486379               |
| SNP_P3_106463_56474  | NW_004515723.1 | Scaffold153 | 56474                   | AA                              | GG                | 1946486380               |
| SNP_P3_106464_66520  | NW_004515723.1 | Scaffold153 | 66520                   | AA                              | GG                | 1946486382               |
| SNP_P3_106466_80976  | NW_004515723.1 | Scaffold153 | 80976                   | AA                              | GG                | 1946486383               |
| SNP_P3_106467_80999  | NW_004515723.1 | Scaffold153 | 80999                   | TT                              | CC                | 1946486385               |
| SNP_P3_106469_81518  | NW_004515723.1 | Scaffold153 | 81518                   | AA                              | TT                | 1946486386               |
| SNP_P3_106470_81711  | NW_004515723.1 | Scaffold153 | 81711                   | AA                              | GG                | 1946486388               |
| SNP_P3_106471_89899  | NW_004515723.1 | Scaffold153 | 89899                   | TT                              | AA                | 1946486389               |
| SNP_P3_106472_89983  | NW_004515723.1 | Scaffold153 | 89983                   | TT                              | CC                | 1946486391               |
| SNP_P3_106473_90006  | NW_004515723.1 | Scaffold153 | 90006                   | TT                              | GG                | 1946486392               |
| SNP_P3_106474_90056  | NW_004515723.1 | Scaffold153 | 90056                   | CC                              | TT                | 1946486394               |
| SNP_P3_106475_90141  | NW_004515723.1 | Scaffold153 | 90141                   | AA                              | CC                | 1946486395               |
| SNP_P3_106476_90424  | NW_004515723.1 | Scaffold153 | 90424                   | CC                              | AA                | 1946486397               |
| SNP_P3_106477_92073  | NW_004515723.1 | Scaffold153 | 92073                   | TT                              | CC                | 1946486398               |
| SNP_P3_106478_104712 | NW_004515723.1 | Scaffold153 | 104712                  | AA                              | GG                | 1946486400               |
| SNP_P3_106479_104837 | NW_004515723.1 | Scaffold153 | 104837                  | TT                              | CC                | 1946486401               |
| SNP_P3_106480_105712 | NW_004515723.1 | Scaffold153 | 105712                  | CC                              | TT                | 1946486402               |
| SNP_P3_106481_106521 | NW_004515723.1 | Scaffold153 | 106521                  | AA                              | GG                | 1946486404               |
| SNP_P3_106482_107910 | NW_004515723.1 | Scaffold153 | 107910                  | GG                              | AA                | 1946486405               |
| SNP_P3_106483_17606  | NW_004515725.1 | Scaffold157 | 17606                   | GG                              | TT                | 1946486407               |
| SNP_P3_106484_17633  | NW_004515725.1 | Scaffold157 | 17633                   | AA                              | CC                | 1946486408               |
| SNP_P3_106485_18374  | NW_004515725.1 | Scaffold157 | 18374                   | TT                              | AA                | 1946486410               |
| SNP_P3_106487_26717  | NW_004515725.1 | Scaffold157 | 26717                   | AA                              | GG                | 1946486411               |
| SNP_P3_106488_42623  | NW_004515725.1 | Scaffold157 | 42623                   | CC                              | TT                | 1946486413               |
| SNP_P3_106489_63092  | NW_004515725.1 | Scaffold157 | 63092                   | AA                              | GG                | 1946486414               |



| SNPs IDs             | Chromosome IDs | Chromosomes | Physical positions (bp) | CDC Frontier (Reference genome) | (Pusa 256 & HPNB) | NCBI SNPdb Accession IDs |
|----------------------|----------------|-------------|-------------------------|---------------------------------|-------------------|--------------------------|
| SNP_P3_106490_116007 | NW_004515725.1 | Scaffold157 | 116007                  | CC                              | TT                | 1946486416               |
| SNP_P3_106494_164533 | NW_004515725.1 | Scaffold157 | 164533                  | TT                              | CC                | 1946486417               |
| SNP_P3_106495_164823 | NW_004515725.1 | Scaffold157 | 164823                  | TT                              | GG                | 1946486419               |
| SNP_P3_106496_169282 | NW_004515725.1 | Scaffold157 | 169282                  | TT                              | CC                | 1946486420               |
| SNP_P3_106497_169457 | NW_004515725.1 | Scaffold157 | 169457                  | CC                              | TT                | 1946486422               |
| SNP_P3_106498_169471 | NW_004515725.1 | Scaffold157 | 169471                  | TT                              | CC                | 1946486423               |
| SNP_P3_106499_169543 | NW_004515725.1 | Scaffold157 | 169543                  | CC                              | AA                | 1946486425               |
| SNP_P3_106500_169634 | NW_004515725.1 | Scaffold157 | 169634                  | CC                              | TT                | 1946486426               |
| SNP_P3_106501_169745 | NW_004515725.1 | Scaffold157 | 169745                  | TT                              | CC                | 1946486428               |
| SNP_P3_106502_169764 | NW_004515725.1 | Scaffold157 | 169764                  | TT                              | CC                | 1946486429               |
| SNP_P3_106503_169782 | NW_004515725.1 | Scaffold157 | 169782                  | TT                              | CC                | 1946486431               |
| SNP_P3_106504_185476 | NW_004515725.1 | Scaffold157 | 185476                  | GG                              | AA                | 1946486432               |
| SNP_P3_106506_218867 | NW_004515725.1 | Scaffold157 | 218867                  | TT                              | GG                | 1946486434               |
| SNP_P3_106507_239771 | NW_004515725.1 | Scaffold157 | 239771                  | GG                              | AA                | 1946486435               |
| SNP_P3_106508_244938 | NW_004515725.1 | Scaffold157 | 244938                  | CC                              | TT                | 1946486437               |
| SNP_P3_106509_244991 | NW_004515725.1 | Scaffold157 | 244991                  | TT                              | AA                | 1946486438               |
| SNP_P3_106510_244996 | NW_004515725.1 | Scaffold157 | 244996                  | TT                              | AA                | 1946486440               |
| SNP_P3_106511_245245 | NW_004515725.1 | Scaffold157 | 245245                  | GG                              | CC                | 1946486441               |
| SNP_P3_106512_245266 | NW_004515725.1 | Scaffold157 | 245266                  | AA                              | GG                | 1946486442               |
| SNP_P3_106513_245285 | NW_004515725.1 | Scaffold157 | 245285                  | AA                              | GG                | 1946486444               |
| SNP_P3_106514_245969 | NW_004515725.1 | Scaffold157 | 245969                  | GG                              | AA                | 1946486445               |
| SNP_P3_106515_245977 | NW_004515725.1 | Scaffold157 | 245977                  | TT                              | CC                | 1946486447               |
| SNP_P3_106517_246033 | NW_004515725.1 | Scaffold157 | 246033                  | CC                              | TT                | 1946486448               |
| SNP_P3_106518_246956 | NW_004515725.1 | Scaffold157 | 246956                  | TT                              | GG                | 1946486450               |
| SNP_P3_106519_246961 | NW_004515725.1 | Scaffold157 | 246961                  | AA                              | GG                | 1946486451               |
| SNP_P3_106520_246965 | NW_004515725.1 | Scaffold157 | 246965                  | GG                              | TT                | 1946486453               |
| SNP_P3_106521_246985 | NW_004515725.1 | Scaffold157 | 246985                  | TT                              | CC                | 1946486454               |
| SNP_P3_106522_246993 | NW_004515725.1 | Scaffold157 | 246993                  | CC                              | TT                | 1946486456               |
| SNP_P3_106523_248056 | NW_004515725.1 | Scaffold157 | 248056                  | GG                              | AA                | 1946486457               |
| SNP_P3_106524_248057 | NW_004515725.1 | Scaffold157 | 248057                  | AA                              | CC                | 1946486459               |
| SNP_P3_106525_248102 | NW_004515725.1 | Scaffold157 | 248102                  | GG                              | AA                | 1946486460               |
| SNP_P3_106527_252258 | NW_004515725.1 | Scaffold157 | 252258                  | TT                              | CC                | 1946486462               |
| SNP_P3_106528_252262 | NW_004515725.1 | Scaffold157 | 252262                  | AA                              | GG                | 1946486463               |
| SNP_P3_106529_252264 | NW_004515725.1 | Scaffold157 | 252264                  | CC                              | TT                | 1946486464               |
| SNP_P3_106530_252612 | NW_004515725.1 | Scaffold157 | 252612                  | CC                              | TT                | 1946486466               |
| SNP_P3_106533_253644 | NW_004515725.1 | Scaffold157 | 253644                  | CC                              | AA                | 1946486467               |
| SNP_P3_106534_254339 | NW_004515725.1 | Scaffold157 | 254339                  | TT                              | GG                | 1946486469               |
| SNP_P3_106535_254361 | NW_004515725.1 | Scaffold157 | 254361                  | CC                              | TT                | 1946486470               |
| SNP_P3_106536_254522 | NW_004515725.1 | Scaffold157 | 254522                  | AA                              | GG                | 1946486472               |
| SNP_P3_106537_254627 | NW_004515725.1 | Scaffold157 | 254627                  | TT                              | GG                | 1946486473               |
| SNP_P3_106539_255793 | NW_004515725.1 | Scaffold157 | 255793                  | TT                              | CC                | 1946486475               |
| SNP_P3_106541_255902 | NW_004515725.1 | Scaffold157 | 255902                  | AA                              | GG                | 1946486476               |

| SNPs IDs             | Chromosome IDs | Chromosomes | Physical positions (bp) | CDC Frontier (Reference genome) | (Pusa 256 & HPNB) | NCBI SNPdb Accession IDs |
|----------------------|----------------|-------------|-------------------------|---------------------------------|-------------------|--------------------------|
| SNP_P3_106543_255989 | NW_004515725.1 | Scaffold157 | 255989                  | AA                              | TT                | 1946486478               |
| SNP_P3_106544_255996 | NW_004515725.1 | Scaffold157 | 255996                  | AA                              | GG                | 1946486479               |
| SNP_P3_106545_257422 | NW_004515725.1 | Scaffold157 | 257422                  | TT                              | AA                | 1946486481               |
| SNP_P3_106546_257635 | NW_004515725.1 | Scaffold157 | 257635                  | TT                              | CC                | 1946486482               |
| SNP_P3_106547_257678 | NW_004515725.1 | Scaffold157 | 257678                  | CC                              | TT                | 1946486484               |
| SNP_P3_106548_257942 | NW_004515725.1 | Scaffold157 | 257942                  | AA                              | GG                | 1946486485               |
| SNP_P3_106549_257989 | NW_004515725.1 | Scaffold157 | 257989                  | TT                              | AA                | 1946486487               |
| SNP_P3_106550_258036 | NW_004515725.1 | Scaffold157 | 258036                  | AA                              | GG                | 1946486488               |
| SNP_P3_106551_258179 | NW_004515725.1 | Scaffold157 | 258179                  | AA                              | GG                | 1946486490               |
| SNP_P3_106552_258208 | NW_004515725.1 | Scaffold157 | 258208                  | AA                              | GG                | 1946486491               |
| SNP_P3_106553_258220 | NW_004515725.1 | Scaffold157 | 258220                  | AA                              | TT                | 1946486493               |
| SNP_P3_106554_258256 | NW_004515725.1 | Scaffold157 | 258256                  | AA                              | GG                | 1946486494               |
| SNP_P3_106555_258272 | NW_004515725.1 | Scaffold157 | 258272                  | TT                              | CC                | 1946486496               |
| SNP_P3_106556_258309 | NW_004515725.1 | Scaffold157 | 258309                  | GG                              | TT                | 1946486498               |
| SNP_P3_106557_280548 | NW_004515725.1 | Scaffold157 | 280548                  | GG                              | AA                | 1946486499               |
| SNP_P3_106558_280590 | NW_004515725.1 | Scaffold157 | 280590                  | AA                              | GG                | 1946486501               |
| SNP_P3_106559_280698 | NW_004515725.1 | Scaffold157 | 280698                  | CC                              | TT                | 1946486503               |
| SNP_P3_106560_280775 | NW_004515725.1 | Scaffold157 | 280775                  | TT                              | CC                | 1946486504               |
| SNP_P3_106561_280837 | NW_004515725.1 | Scaffold157 | 280837                  | GG                              | AA                | 1946486506               |
| SNP_P3_106562_280838 | NW_004515725.1 | Scaffold157 | 280838                  | AA                              | GG                | 1946486507               |
| SNP_P3_106563_281090 | NW_004515725.1 | Scaffold157 | 281090                  | GG                              | TT                | 1946486509               |
| SNP_P3_106565_281126 | NW_004515725.1 | Scaffold157 | 281126                  | GG                              | TT                | 1946486510               |
| SNP_P3_106566_281169 | NW_004515725.1 | Scaffold157 | 281169                  | CC                              | AA                | 1946486512               |
| SNP_P3_106567_281214 | NW_004515725.1 | Scaffold157 | 281214                  | TT                              | CC                | 1946486513               |
| SNP_P3_106568_282757 | NW_004515725.1 | Scaffold157 | 282757                  | TT                              | AA                | 1946486515               |
| SNP_P3_106569_288972 | NW_004515725.1 | Scaffold157 | 288972                  | CC                              | TT                | 1946486516               |
| SNP_P3_106570_289232 | NW_004515725.1 | Scaffold157 | 289232                  | CC                              | TT                | 1946486518               |
| SNP_P3_106571_289254 | NW_004515725.1 | Scaffold157 | 289254                  | TT                              | AA                | 1946486519               |
| SNP_P3_106573_290615 | NW_004515725.1 | Scaffold157 | 290615                  | GG                              | AA                | 1946486521               |
| SNP_P3_106574_290644 | NW_004515725.1 | Scaffold157 | 290644                  | GG                              | AA                | 1946486522               |
| SNP_P3_106575_290655 | NW_004515725.1 | Scaffold157 | 290655                  | TT                              | GG                | 1946486523               |
| SNP_P3_106576_303069 | NW_004515725.1 | Scaffold157 | 303069                  | TT                              | CC                | 1946486525               |
| SNP_P3_106577_303807 | NW_004515725.1 | Scaffold157 | 303807                  | GG                              | CC                | 1946486526               |
| SNP_P3_106578_303868 | NW_004515725.1 | Scaffold157 | 303868                  | CC                              | TT                | 1946486528               |
| SNP_P3_106579_303897 | NW_004515725.1 | Scaffold157 | 303897                  | TT                              | CC                | 1946486529               |
| SNP_P3_106580_305497 | NW_004515725.1 | Scaffold157 | 305497                  | AA                              | GG                | 1946486531               |
| SNP_P3_106581_305856 | NW_004515725.1 | Scaffold157 | 305856                  | CC                              | TT                | 1946486532               |
| SNP_P3_106582_305896 | NW_004515725.1 | Scaffold157 | 305896                  | TT                              | CC                | 1946486534               |
| SNP_P3_106584_308783 | NW_004515725.1 | Scaffold157 | 308783                  | GG                              | TT                | 1946486535               |
| SNP_P3_106585_309136 | NW_004515725.1 | Scaffold157 | 309136                  | GG                              | TT                | 1946486537               |
| SNP_P3_106586_309574 | NW_004515725.1 | Scaffold157 | 309574                  | CC                              | TT                | 1946486538               |
| SNP_P3_106587_309846 | NW_004515725.1 | Scaffold157 | 309846                  | CC                              | TT                | 1946486540               |

| SNPs IDs             | Chromosome IDs | Chromosomes | Physical positions (bp) | CDC Frontier (Reference genome) | (Pusa 256 & HPNB) | NCBI SNPdb Accession IDs |
|----------------------|----------------|-------------|-------------------------|---------------------------------|-------------------|--------------------------|
| SNP_P3_106588_309878 | NW_004515725.1 | Scaffold157 | 309878                  | GG                              | TT                | 1946486541               |
| SNP_P3_106589_311763 | NW_004515725.1 | Scaffold157 | 311763                  | TT                              | GG                | 1946486543               |
| SNP_P3_106590_312764 | NW_004515725.1 | Scaffold157 | 312764                  | AA                              | CC                | 1946486544               |
| SNP_P3_106592_315431 | NW_004515725.1 | Scaffold157 | 315431                  | TT                              | GG                | 1946486546               |
| SNP_P3_106594_325439 | NW_004515725.1 | Scaffold157 | 325439                  | AA                              | GG                | 1946486547               |
| SNP_P3_106596_327600 | NW_004515725.1 | Scaffold157 | 327600                  | CC                              | TT                | 1946486549               |
| SNP_P3_106598_328132 | NW_004515725.1 | Scaffold157 | 328132                  | CC                              | GG                | 1946486550               |
| SNP_P3_106599_328168 | NW_004515725.1 | Scaffold157 | 328168                  | GG                              | AA                | 1946486552               |
| SNP_P3_106600_328248 | NW_004515725.1 | Scaffold157 | 328248                  | TT                              | CC                | 1946486553               |
| SNP_P3_106602_328323 | NW_004515725.1 | Scaffold157 | 328323                  | CC                              | AA                | 1946486555               |
| SNP_P3_106603_328392 | NW_004515725.1 | Scaffold157 | 328392                  | TT                              | CC                | 1946486556               |
| SNP_P3_106604_328393 | NW_004515725.1 | Scaffold157 | 328393                  | AA                              | GG                | 1946486558               |
| SNP_P3_106605_328498 | NW_004515725.1 | Scaffold157 | 328498                  | AA                              | GG                | 1946486559               |
| SNP_P3_106606_328516 | NW_004515725.1 | Scaffold157 | 328516                  | GG                              | AA                | 1946486561               |
| SNP_P3_106607_328657 | NW_004515725.1 | Scaffold157 | 328657                  | GG                              | AA                | 1946486563               |
| SNP_P3_106608_328702 | NW_004515725.1 | Scaffold157 | 328702                  | TT                              | CC                | 1946486564               |
| SNP_P3_106609_328805 | NW_004515725.1 | Scaffold157 | 328805                  | GG                              | AA                | 1946486566               |
| SNP_P3_106610_329019 | NW_004515725.1 | Scaffold157 | 329019                  | AA                              | GG                | 1946486567               |
| SNP_P3_106612_329513 | NW_004515725.1 | Scaffold157 | 329513                  | GG                              | AA                | 1946486569               |
| SNP_P3_106613_329517 | NW_004515725.1 | Scaffold157 | 329517                  | GG                              | TT                | 1946486570               |
| SNP_P3_106614_330361 | NW_004515725.1 | Scaffold157 | 330361                  | AA                              | GG                | 1946486572               |
| SNP_P3_106615_330564 | NW_004515725.1 | Scaffold157 | 330564                  | GG                              | AA                | 1946486573               |
| SNP_P3_106616_330623 | NW_004515725.1 | Scaffold157 | 330623                  | AA                              | GG                | 1946486575               |
| SNP_P3_106617_330637 | NW_004515725.1 | Scaffold157 | 330637                  | TT                              | GG                | 1946486576               |
| SNP_P3_106618_330671 | NW_004515725.1 | Scaffold157 | 330671                  | TT                              | CC                | 1946486578               |
| SNP_P3_106619_330676 | NW_004515725.1 | Scaffold157 | 330676                  | AA                              | GG                | 1946486579               |
| SNP_P3_106620_330724 | NW_004515725.1 | Scaffold157 | 330724                  | GG                              | AA                | 1946486581               |
| SNP_P3_106621_330730 | NW_004515725.1 | Scaffold157 | 330730                  | AA                              | GG                | 1946486582               |
| SNP_P3_106622_330734 | NW_004515725.1 | Scaffold157 | 330734                  | TT                              | CC                | 1946486584               |
| SNP_P3_106623_330736 | NW_004515725.1 | Scaffold157 | 330736                  | AA                              | GG                | 1946486585               |
| SNP_P3_106624_330812 | NW_004515725.1 | Scaffold157 | 330812                  | AA                              | GG                | 1946486586               |
| SNP_P3_106625_330840 | NW_004515725.1 | Scaffold157 | 330840                  | AA                              | GG                | 1946486588               |
| SNP_P3_106626_330855 | NW_004515725.1 | Scaffold157 | 330855                  | TT                              | GG                | 1946486589               |
| SNP_P3_106627_330873 | NW_004515725.1 | Scaffold157 | 330873                  | TT                              | CC                | 1946486591               |
| SNP_P3_106628_330893 | NW_004515725.1 | Scaffold157 | 330893                  | AA                              | TT                | 1946486592               |
| SNP_P3_106629_330937 | NW_004515725.1 | Scaffold157 | 330937                  | GG                              | AA                | 1946486594               |
| SNP_P3_106630_330991 | NW_004515725.1 | Scaffold157 | 330991                  | AA                              | GG                | 1946486595               |
| SNP_P3_106631_330993 | NW_004515725.1 | Scaffold157 | 330993                  | AA                              | GG                | 1946486597               |
| SNP_P3_106632_331003 | NW_004515725.1 | Scaffold157 | 331003                  | GG                              | AA                | 1946486598               |
| SNP_P3_106633_331020 | NW_004515725.1 | Scaffold157 | 331020                  | CC                              | GG                | 1946486600               |
| SNP_P3_106634_331119 | NW_004515725.1 | Scaffold157 | 331119                  | AA                              | GG                | 1946486601               |
| SNP_P3_106635_331169 | NW_004515725.1 | Scaffold157 | 331169                  | CC                              | TT                | 1946486602               |

| SNPs IDs             | Chromosome IDs | Chromosomes | Physical positions (bp) | CDC Frontier (Reference genome) | (Pusa 256 & HPNB) | NCBI SNPdb Accession IDs |
|----------------------|----------------|-------------|-------------------------|---------------------------------|-------------------|--------------------------|
| SNP_P3_106636_331616 | NW_004515725.1 | Scaffold157 | 331616                  | CC                              | TT                | 1946486604               |
| SNP_P3_106637_332692 | NW_004515725.1 | Scaffold157 | 332692                  | GG                              | AA                | 1946486605               |
| SNP_P3_106638_334515 | NW_004515725.1 | Scaffold157 | 334515                  | TT                              | CC                | 1946486607               |
| SNP_P3_106639_334559 | NW_004515725.1 | Scaffold157 | 334559                  | AA                              | TT                | 1946486608               |
| SNP_P3_106641_335785 | NW_004515725.1 | Scaffold157 | 335785                  | AA                              | GG                | 1946486610               |
| SNP_P3_106642_336151 | NW_004515725.1 | Scaffold157 | 336151                  | GG                              | CC                | 1946486611               |
| SNP_P3_106644_336685 | NW_004515725.1 | Scaffold157 | 336685                  | GG                              | TT                | 1946486613               |
| SNP_P3_106645_336707 | NW_004515725.1 | Scaffold157 | 336707                  | TT                              | GG                | 1946486614               |
| SNP_P3_106646_336847 | NW_004515725.1 | Scaffold157 | 336847                  | AA                              | TT                | 1946486615               |
| SNP_P3_106647_336889 | NW_004515725.1 | Scaffold157 | 336889                  | CC                              | AA                | 1946486617               |
| SNP_P3_106648_337030 | NW_004515725.1 | Scaffold157 | 337030                  | AA                              | TT                | 1946486618               |
| SNP_P3_106649_337430 | NW_004515725.1 | Scaffold157 | 337430                  | AA                              | GG                | 1946486620               |
| SNP_P3_106650_337771 | NW_004515725.1 | Scaffold157 | 337771                  | CC                              | TT                | 1946486621               |
| SNP_P3_106651_338379 | NW_004515725.1 | Scaffold157 | 338379                  | GG                              | TT                | 1946486623               |
| SNP_P3_106652_338402 | NW_004515725.1 | Scaffold157 | 338402                  | GG                              | AA                | 1946486624               |
| SNP_P3_106653_338475 | NW_004515725.1 | Scaffold157 | 338475                  | AA                              | TT                | 1946486626               |
| SNP_P3_106654_338783 | NW_004515725.1 | Scaffold157 | 338783                  | GG                              | AA                | 1946486627               |
| SNP_P3_106655_339408 | NW_004515725.1 | Scaffold157 | 339408                  | GG                              | AA                | 1946486628               |
| SNP_P3_106656_340258 | NW_004515725.1 | Scaffold157 | 340258                  | GG                              | CC                | 1946486630               |
| SNP_P3_106657_340259 | NW_004515725.1 | Scaffold157 | 340259                  | TT                              | AA                | 1946486631               |
| SNP_P3_106658_340266 | NW_004515725.1 | Scaffold157 | 340266                  | AA                              | GG                | 1946486633               |
| SNP_P3_106659_340267 | NW_004515725.1 | Scaffold157 | 340267                  | TT                              | GG                | 1946486634               |
| SNP_P3_106660_342265 | NW_004515725.1 | Scaffold157 | 342265                  | GG                              | TT                | 1946486636               |
| SNP_P3_106661_342291 | NW_004515725.1 | Scaffold157 | 342291                  | GG                              | AA                | 1946486637               |
| SNP_P3_106662_343009 | NW_004515725.1 | Scaffold157 | 343009                  | CC                              | TT                | 1946486638               |
| SNP_P3_106665_345564 | NW_004515725.1 | Scaffold157 | 345564                  | GG                              | CC                | 1946486640               |
| SNP_P3_106666_346801 | NW_004515725.1 | Scaffold157 | 346801                  | AA                              | CC                | 1946486641               |
| SNP_P3_106667_346910 | NW_004515725.1 | Scaffold157 | 346910                  | AA                              | GG                | 1946486643               |
| SNP_P3_106669_348751 | NW_004515725.1 | Scaffold157 | 348751                  | AA                              | TT                | 1946486644               |
| SNP_P3_106671_352147 | NW_004515725.1 | Scaffold157 | 352147                  | AA                              | TT                | 1946486646               |
| SNP_P3_106675_359201 | NW_004515725.1 | Scaffold157 | 359201                  | AA                              | CC                | 1946486647               |
| SNP_P3_106676_359210 | NW_004515725.1 | Scaffold157 | 359210                  | TT                              | CC                | 1946486649               |
| SNP_P3_106677_359229 | NW_004515725.1 | Scaffold157 | 359229                  | CC                              | TT                | 1946486650               |
| SNP_P3_106678_359232 | NW_004515725.1 | Scaffold157 | 359232                  | GG                              | TT                | 1946486651               |
| SNP_P3_106681_359828 | NW_004515725.1 | Scaffold157 | 359828                  | AA                              | CC                | 1946486653               |
| SNP_P3_106683_360193 | NW_004515725.1 | Scaffold157 | 360193                  | AA                              | GG                | 1946486654               |
| SNP_P3_106684_360220 | NW_004515725.1 | Scaffold157 | 360220                  | GG                              | AA                | 1946486656               |
| SNP_P3_106685_360231 | NW_004515725.1 | Scaffold157 | 360231                  | AA                              | GG                | 1946486657               |
| SNP_P3_106686_362640 | NW_004515725.1 | Scaffold157 | 362640                  | GG                              | AA                | 1946486659               |
| SNP_P3_106687_362693 | NW_004515725.1 | Scaffold157 | 362693                  | TT                              | AA                | 1946486660               |
| SNP_P3_106688_362694 | NW_004515725.1 | Scaffold157 | 362694                  | GG                              | CC                | 1946486662               |
| SNP_P3_106689_362712 | NW_004515725.1 | Scaffold157 | 362712                  | GG                              | AA                | 1946486663               |

| SNPs IDs             | Chromosome IDs | Chromosomes | Physical positions (bp) | CDC Frontier (Reference genome) | (Pusa 256 & HPNB) | NCBI SNPdb Accession IDs |
|----------------------|----------------|-------------|-------------------------|---------------------------------|-------------------|--------------------------|
| SNP_P3_106690_362881 | NW_004515725.1 | Scaffold157 | 362881                  | GG                              | TT                | 1946486664               |
| SNP_P3_106691_362913 | NW_004515725.1 | Scaffold157 | 362913                  | CC                              | TT                | 1946486666               |
| SNP_P3_106692_377844 | NW_004515725.1 | Scaffold157 | 377844                  | AA                              | CC                | 1946486667               |
| SNP_P3_106693_377917 | NW_004515725.1 | Scaffold157 | 377917                  | GG                              | AA                | 1946486669               |
| SNP_P3_106695_377961 | NW_004515725.1 | Scaffold157 | 377961                  | GG                              | TT                | 1946486670               |
| SNP_P3_106696_391426 | NW_004515725.1 | Scaffold157 | 391426                  | AA                              | CC                | 1946486672               |
| SNP_P3_106697_391434 | NW_004515725.1 | Scaffold157 | 391434                  | AA                              | GG                | 1946486673               |
| SNP_P3_106698_399176 | NW_004515725.1 | Scaffold157 | 399176                  | TT                              | CC                | 1946486675               |
| SNP_P3_106699_399177 | NW_004515725.1 | Scaffold157 | 399177                  | GG                              | AA                | 1946486676               |
| SNP_P3_106700_399953 | NW_004515725.1 | Scaffold157 | 399953                  | TT                              | CC                | 1946486678               |
| SNP_P3_106701_402779 | NW_004515725.1 | Scaffold157 | 402779                  | GG                              | AA                | 1946486679               |
| SNP_P3_106702_402874 | NW_004515725.1 | Scaffold157 | 402874                  | AA                              | GG                | 1946486681               |
| SNP_P3_106703_403091 | NW_004515725.1 | Scaffold157 | 403091                  | AA                              | CC                | 1946486682               |
| SNP_P3_106704_403328 | NW_004515725.1 | Scaffold157 | 403328                  | AA                              | GG                | 1946486683               |
| SNP_P3_106705_406737 | NW_004515725.1 | Scaffold157 | 406737                  | GG                              | TT                | 1946486685               |
| SNP_P3_106706_406753 | NW_004515725.1 | Scaffold157 | 406753                  | GG                              | TT                | 1946486686               |
| SNP_P3_106707_419386 | NW_004515725.1 | Scaffold157 | 419386                  | AA                              | GG                | 1946486688               |
| SNP_P3_106708_419394 | NW_004515725.1 | Scaffold157 | 419394                  | AA                              | GG                | 1946486689               |
| SNP_P3_106709_448833 | NW_004515725.1 | Scaffold157 | 448833                  | GG                              | CC                | 1946486691               |
| SNP_P3_106710_459522 | NW_004515725.1 | Scaffold157 | 459522                  | GG                              | AA                | 1946486692               |
| SNP_P3_106711_459739 | NW_004515725.1 | Scaffold157 | 459739                  | AA                              | TT                | 1946486694               |
| SNP_P3_106712_459740 | NW_004515725.1 | Scaffold157 | 459740                  | CC                              | AA                | 1946486695               |
| SNP_P3_106713_474408 | NW_004515725.1 | Scaffold157 | 474408                  | AA                              | TT                | 1946486696               |
| SNP_P3_106714_474409 | NW_004515725.1 | Scaffold157 | 474409                  | AA                              | TT                | 1946486698               |
| SNP_P3_106715_477341 | NW_004515725.1 | Scaffold157 | 477341                  | TT                              | AA                | 1946486699               |
| SNP_P3_106716_482822 | NW_004515725.1 | Scaffold157 | 482822                  | TT                              | CC                | 1946486701               |
| SNP_P3_106717_489403 | NW_004515725.1 | Scaffold157 | 489403                  | CC                              | GG                | 1946486702               |
| SNP_P3_106718_489476 | NW_004515725.1 | Scaffold157 | 489476                  | TT                              | GG                | 1946486704               |
| SNP_P3_106719_489484 | NW_004515725.1 | Scaffold157 | 489484                  | GG                              | AA                | 1946486705               |
| SNP_P3_106720_514776 | NW_004515725.1 | Scaffold157 | 514776                  | GG                              | AA                | 1946486706               |
| SNP_P3_106721_514823 | NW_004515725.1 | Scaffold157 | 514823                  | CC                              | GG                | 1946486708               |
| SNP_P3_106722_515144 | NW_004515725.1 | Scaffold157 | 515144                  | AA                              | GG                | 1946486709               |
| SNP_P3_106723_515151 | NW_004515725.1 | Scaffold157 | 515151                  | TT                              | CC                | 1946486711               |
| SNP_P3_106724_515158 | NW_004515725.1 | Scaffold157 | 515158                  | CC                              | TT                | 1946486712               |
| SNP_P3_106725_515162 | NW_004515725.1 | Scaffold157 | 515162                  | TT                              | CC                | 1946486714               |
| SNP_P3_106726_533961 | NW_004515725.1 | Scaffold157 | 533961                  | CC                              | TT                | 1946486715               |
| SNP_P3_106727_534248 | NW_004515725.1 | Scaffold157 | 534248                  | AA                              | GG                | 1946486717               |
| SNP_P3_106730_8662   | NW_004515726.1 | Scaffold158 | 8662                    | AA                              | CC                | 1946486718               |
| SNP_P3_106731_8681   | NW_004515726.1 | Scaffold158 | 8681                    | CC                              | TT                | 1946486719               |
| SNP_P3_106732_8683   | NW_004515726.1 | Scaffold158 | 8683                    | GG                              | TT                | 1946486721               |
| SNP_P3_106733_8684   | NW_004515726.1 | Scaffold158 | 8684                    | GG                              | AA                | 1946486722               |
| SNP_P3_106734_27129  | NW_004515726.1 | Scaffold158 | 27129                   | TT                              | CC                | 1946486724               |

| SNPs IDs             | Chromosome IDs | Chromosomes | Physical positions (bp) | CDC Frontier (Reference genome) | (Pusa 256 & HPNB) | NCBI SNPdb Accession IDs |
|----------------------|----------------|-------------|-------------------------|---------------------------------|-------------------|--------------------------|
| SNP_P3_106735_28236  | NW_004515726.1 | Scaffold158 | 28236                   | AA                              | GG                | 1946486725               |
| SNP_P3_106736_28259  | NW_004515726.1 | Scaffold158 | 28259                   | TT                              | CC                | 1946486727               |
| SNP_P3_106737_28264  | NW_004515726.1 | Scaffold158 | 28264                   | TT                              | CC                | 1946486728               |
| SNP_P3_106738_70284  | NW_004515726.1 | Scaffold158 | 70284                   | TT                              | CC                | 1946486729               |
| SNP_P3_106739_70447  | NW_004515726.1 | Scaffold158 | 70447                   | GG                              | AA                | 1946486731               |
| SNP_P3_106740_75733  | NW_004515726.1 | Scaffold158 | 75733                   | AA                              | GG                | 1946486732               |
| SNP_P3_106741_75751  | NW_004515726.1 | Scaffold158 | 75751                   | TT                              | CC                | 1946486734               |
| SNP_P3_106742_75757  | NW_004515726.1 | Scaffold158 | 75757                   | TT                              | GG                | 1946486735               |
| SNP_P3_106743_80096  | NW_004515726.1 | Scaffold158 | 80096                   | GG                              | CC                | 1946486737               |
| SNP_P3_106744_106969 | NW_004515726.1 | Scaffold158 | 106969                  | GG                              | AA                | 1946486738               |
| SNP_P3_106745_107008 | NW_004515726.1 | Scaffold158 | 107008                  | GG                              | AA                | 1946486739               |
| SNP_P3_106746_107331 | NW_004515726.1 | Scaffold158 | 107331                  | AA                              | CC                | 1946486741               |
| SNP_P3_106747_107388 | NW_004515726.1 | Scaffold158 | 107388                  | CC                              | TT                | 1946486742               |
| SNP_P3_106748_107409 | NW_004515726.1 | Scaffold158 | 107409                  | CC                              | TT                | 1946486744               |
| SNP_P3_106749_107421 | NW_004515726.1 | Scaffold158 | 107421                  | AA                              | GG                | 1946486745               |
| SNP_P3_106751_121905 | NW_004515726.1 | Scaffold158 | 121905                  | TT                              | GG                | 1946486747               |
| SNP_P3_106752_121931 | NW_004515726.1 | Scaffold158 | 121931                  | GG                              | TT                | 1946486748               |
| SNP_P3_106753_121958 | NW_004515726.1 | Scaffold158 | 121958                  | CC                              | TT                | 1946486749               |
| SNP_P3_106754_121978 | NW_004515726.1 | Scaffold158 | 121978                  | AA                              | CC                | 1946486751               |
| SNP_P3_106755_131630 | NW_004515726.1 | Scaffold158 | 131630                  | GG                              | AA                | 1946486752               |
| SNP_P3_106757_131652 | NW_004515726.1 | Scaffold158 | 131652                  | TT                              | CC                | 1946486754               |
| SNP_P3_106758_131701 | NW_004515726.1 | Scaffold158 | 131701                  | CC                              | TT                | 1946486755               |
| SNP_P3_106759_131754 | NW_004515726.1 | Scaffold158 | 131754                  | CC                              | AA                | 1946486757               |
| SNP_P3_106760_131762 | NW_004515726.1 | Scaffold158 | 131762                  | AA                              | GG                | 1946486758               |
| SNP_P3_106761_131797 | NW_004515726.1 | Scaffold158 | 131797                  | TT                              | CC                | 1946486759               |
| SNP_P3_106762_131953 | NW_004515726.1 | Scaffold158 | 131953                  | AA                              | TT                | 1946486761               |
| SNP_P3_106763_132136 | NW_004515726.1 | Scaffold158 | 132136                  | AA                              | CC                | 1946486762               |
| SNP_P3_106764_132160 | NW_004515726.1 | Scaffold158 | 132160                  | TT                              | CC                | 1946486764               |
| SNP_P3_106765_132213 | NW_004515726.1 | Scaffold158 | 132213                  | TT                              | CC                | 1946486765               |
| SNP_P3_106766_132228 | NW_004515726.1 | Scaffold158 | 132228                  | TT                              | GG                | 1946486767               |
| SNP_P3_106767_132242 | NW_004515726.1 | Scaffold158 | 132242                  | TT                              | CC                | 1946486768               |
| SNP_P3_106768_132332 | NW_004515726.1 | Scaffold158 | 132332                  | TT                              | CC                | 1946486770               |
| SNP_P3_106769_132360 | NW_004515726.1 | Scaffold158 | 132360                  | TT                              | GG                | 1946486771               |
| SNP_P3_106770_132403 | NW_004515726.1 | Scaffold158 | 132403                  | AA                              | GG                | 1946486773               |
| SNP_P3_106771_132413 | NW_004515726.1 | Scaffold158 | 132413                  | AA                              | GG                | 1946486774               |
| SNP_P3_106774_40681  | NW_004515728.1 | Scaffold166 | 40681                   | AA                              | GG                | 1946486775               |
| SNP_P3_106775_55486  | NW_004515728.1 | Scaffold166 | 55486                   | TT                              | AA                | 1946486777               |
| SNP_P3_106776_60948  | NW_004515728.1 | Scaffold166 | 60948                   | GG                              | AA                | 1946486778               |
| SNP_P3_106777_68293  | NW_004515728.1 | Scaffold166 | 68293                   | GG                              | AA                | 1946486780               |
| SNP_P3_106779_85431  | NW_004515728.1 | Scaffold166 | 85431                   | AA                              | TT                | 1946486781               |
| SNP_P3_106780_97886  | NW_004515728.1 | Scaffold166 | 97886                   | AA                              | TT                | 1946486783               |
| SNP_P3_106781_98128  | NW_004515728.1 | Scaffold166 | 98128                   | GG                              | AA                | 1946486784               |

| SNPs IDs             | Chromosome IDs | Chromosomes | Physical positions (bp) | CDC Frontier (Reference genome) | (Pusa 256 & HPNB) | NCBI SNPdb Accession IDs |
|----------------------|----------------|-------------|-------------------------|---------------------------------|-------------------|--------------------------|
| SNP_P3_106782_98147  | NW_004515728.1 | Scaffold166 | 98147                   | AA                              | GG                | 1946486785               |
| SNP_P3_106783_98667  | NW_004515728.1 | Scaffold166 | 98667                   | TT                              | AA                | 1946486787               |
| SNP_P3_106784_98701  | NW_004515728.1 | Scaffold166 | 98701                   | GG                              | AA                | 1946486788               |
| SNP_P3_106785_98745  | NW_004515728.1 | Scaffold166 | 98745                   | AA                              | CC                | 1946486790               |
| SNP_P3_106786_98781  | NW_004515728.1 | Scaffold166 | 98781                   | TT                              | GG                | 1946486791               |
| SNP_P3_106787_99164  | NW_004515728.1 | Scaffold166 | 99164                   | AA                              | GG                | 1946486793               |
| SNP_P3_106788_106795 | NW_004515728.1 | Scaffold166 | 106795                  | GG                              | AA                | 1946486816               |
| SNP_P3_106789_106838 | NW_004515728.1 | Scaffold166 | 106838                  | CC                              | TT                | 1946486818               |
| SNP_P3_106790_107339 | NW_004515728.1 | Scaffold166 | 107339                  | AA                              | GG                | 1946486819               |
| SNP_P3_106791_107724 | NW_004515728.1 | Scaffold166 | 107724                  | AA                              | GG                | 1946486821               |
| SNP_P3_106792_108734 | NW_004515728.1 | Scaffold166 | 108734                  | CC                              | TT                | 1946486822               |
| SNP_P3_106793_128716 | NW_004515728.1 | Scaffold166 | 128716                  | AA                              | TT                | 1946486824               |
| SNP_P3_106794_128728 | NW_004515728.1 | Scaffold166 | 128728                  | TT                              | AA                | 1946486825               |
| SNP_P3_106795_134141 | NW_004515728.1 | Scaffold166 | 134141                  | TT                              | AA                | 1946486827               |
| SNP_P3_106796_143261 | NW_004515728.1 | Scaffold166 | 143261                  | TT                              | GG                | 1946486828               |
| SNP_P3_106797_162286 | NW_004515728.1 | Scaffold166 | 162286                  | GG                              | CC                | 1946486830               |
| SNP_P3_106798_166807 | NW_004515728.1 | Scaffold166 | 166807                  | AA                              | TT                | 1946486831               |
| SNP_P3_106799_166814 | NW_004515728.1 | Scaffold166 | 166814                  | AA                              | GG                | 1946486833               |
| SNP_P3_106800_167111 | NW_004515728.1 | Scaffold166 | 167111                  | CC                              | TT                | 1946486834               |
| SNP_P3_106801_172337 | NW_004515728.1 | Scaffold166 | 172337                  | TT                              | GG                | 1946486835               |
| SNP_P3_106802_189243 | NW_004515728.1 | Scaffold166 | 189243                  | AA                              | GG                | 1946486837               |
| SNP_P3_106803_189273 | NW_004515728.1 | Scaffold166 | 189273                  | AA                              | TT                | 1946486839               |
| SNP_P3_106804_196756 | NW_004515728.1 | Scaffold166 | 196756                  | CC                              | TT                | 1946486841               |
| SNP_P3_106805_196836 | NW_004515728.1 | Scaffold166 | 196836                  | TT                              | GG                | 1946486842               |
| SNP_P3_106806_196891 | NW_004515728.1 | Scaffold166 | 196891                  | CC                              | GG                | 1946486844               |
| SNP_P3_106807_196896 | NW_004515728.1 | Scaffold166 | 196896                  | GG                              | AA                | 1946486846               |
| SNP_P3_106808_196945 | NW_004515728.1 | Scaffold166 | 196945                  | CC                              | GG                | 1946486847               |
| SNP_P3_106809_199898 | NW_004515728.1 | Scaffold166 | 199898                  | AA                              | GG                | 1946486849               |
| SNP_P3_106810_212563 | NW_004515728.1 | Scaffold166 | 212563                  | GG                              | TT                | 1946486851               |
| SNP_P3_106811_227058 | NW_004515728.1 | Scaffold166 | 227058                  | AA                              | GG                | 1946486852               |
| SNP_P3_106812_227286 | NW_004515728.1 | Scaffold166 | 227286                  | CC                              | TT                | 1946486854               |
| SNP_P3_106813_227305 | NW_004515728.1 | Scaffold166 | 227305                  | GG                              | TT                | 1946486856               |
| SNP_P3_106815_227643 | NW_004515728.1 | Scaffold166 | 227643                  | CC                              | TT                | 1946486857               |
| SNP_P3_106816_229358 | NW_004515728.1 | Scaffold166 | 229358                  | TT                              | AA                | 1946486859               |
| SNP_P3_106817_229360 | NW_004515728.1 | Scaffold166 | 229360                  | CC                              | GG                | 1946486861               |
| SNP_P3_106818_250430 | NW_004515728.1 | Scaffold166 | 250430                  | GG                              | AA                | 1946486863               |
| SNP_P3_106819_251027 | NW_004515728.1 | Scaffold166 | 251027                  | CC                              | AA                | 1946486864               |
| SNP_P3_106820_266490 | NW_004515728.1 | Scaffold166 | 266490                  | AA                              | TT                | 1946486866               |
| SNP_P3_106821_284799 | NW_004515728.1 | Scaffold166 | 284799                  | GG                              | AA                | 1946486868               |
| SNP_P3_106822_285053 | NW_004515728.1 | Scaffold166 | 285053                  | GG                              | AA                | 1946486869               |
| SNP_P3_106823_294362 | NW_004515728.1 | Scaffold166 | 294362                  | TT                              | GG                | 1946486871               |
| SNP_P3_106824_298924 | NW_004515728.1 | Scaffold166 | 298924                  | GG                              | TT                | 1946486872               |

| SNPs IDs             | Chromosome IDs | Chromosomes | Physical positions (bp) | CDC Frontier (Reference genome) | (Pusa 256 & HPNB) | NCBI SNPdb Accession IDs |
|----------------------|----------------|-------------|-------------------------|---------------------------------|-------------------|--------------------------|
| SNP_P3_106825_298972 | NW_004515728.1 | Scaffold166 | 298972                  | GG                              | TT                | 1946486874               |
| SNP_P3_106826_299005 | NW_004515728.1 | Scaffold166 | 299005                  | CC                              | TT                | 1946486875               |
| SNP_P3_106827_299022 | NW_004515728.1 | Scaffold166 | 299022                  | TT                              | CC                | 1946486877               |
| SNP_P3_106828_299028 | NW_004515728.1 | Scaffold166 | 299028                  | AA                              | GG                | 1946486878               |
| SNP_P3_106829_299052 | NW_004515728.1 | Scaffold166 | 299052                  | AA                              | TT                | 1946486880               |
| SNP_P3_106830_299065 | NW_004515728.1 | Scaffold166 | 299065                  | GG                              | AA                | 1946486881               |
| SNP_P3_106831_299078 | NW_004515728.1 | Scaffold166 | 299078                  | AA                              | TT                | 1946486883               |
| SNP_P3_106832_299117 | NW_004515728.1 | Scaffold166 | 299117                  | CC                              | TT                | 1946486884               |
| SNP_P3_106833_299137 | NW_004515728.1 | Scaffold166 | 299137                  | TT                              | CC                | 1946486885               |
| SNP_P3_106834_299146 | NW_004515728.1 | Scaffold166 | 299146                  | TT                              | CC                | 1946486887               |
| SNP_P3_106835_299340 | NW_004515728.1 | Scaffold166 | 299340                  | TT                              | GG                | 1946486888               |
| SNP_P3_106836_5728   | NW_004515729.1 | Scaffold167 | 5728                    | TT                              | AA                | 1946486890               |
| SNP_P3_106837_5876   | NW_004515729.1 | Scaffold167 | 5876                    | TT                              | AA                | 1946486891               |
| SNP_P3_106838_5892   | NW_004515729.1 | Scaffold167 | 5892                    | TT                              | CC                | 1946486893               |
| SNP_P3_106839_6141   | NW_004515729.1 | Scaffold167 | 6141                    | AA                              | GG                | 1946486894               |
| SNP_P3_106840_6144   | NW_004515729.1 | Scaffold167 | 6144                    | TT                              | CC                | 1946486896               |
| SNP_P3_106841_6272   | NW_004515729.1 | Scaffold167 | 6272                    | TT                              | AA                | 1946486897               |
| SNP_P3_106842_6346   | NW_004515729.1 | Scaffold167 | 6346                    | CC                              | TT                | 1946486898               |
| SNP_P3_106843_10130  | NW_004515729.1 | Scaffold167 | 10130                   | GG                              | TT                | 1946486900               |
| SNP_P3_106845_10415  | NW_004515729.1 | Scaffold167 | 10415                   | TT                              | CC                | 1946486901               |
| SNP_P3_106846_10428  | NW_004515729.1 | Scaffold167 | 10428                   | GG                              | CC                | 1946486903               |
| SNP_P3_106847_20669  | NW_004515729.1 | Scaffold167 | 20669                   | AA                              | CC                | 1946486904               |
| SNP_P3_106848_23325  | NW_004515729.1 | Scaffold167 | 23325                   | TT                              | CC                | 1946486906               |
| SNP_P3_106849_28987  | NW_004515729.1 | Scaffold167 | 28987                   | CC                              | AA                | 1946486907               |
| SNP_P3_106850_29010  | NW_004515729.1 | Scaffold167 | 29010                   | TT                              | CC                | 1946486909               |
| SNP_P3_106852_29335  | NW_004515729.1 | Scaffold167 | 29335                   | TT                              | GG                | 1946486910               |
| SNP_P3_106853_38705  | NW_004515729.1 | Scaffold167 | 38705                   | TT                              | CC                | 1946486912               |
| SNP_P3_106854_38766  | NW_004515729.1 | Scaffold167 | 38766                   | GG                              | CC                | 1946486913               |
| SNP_P3_106855_38855  | NW_004515729.1 | Scaffold167 | 38855                   | GG                              | AA                | 1946486915               |
| SNP_P3_106856_38862  | NW_004515729.1 | Scaffold167 | 38862                   | AA                              | TT                | 1946486916               |
| SNP_P3_106857_39079  | NW_004515729.1 | Scaffold167 | 39079                   | CC                              | TT                | 1946486918               |
| SNP_P3_106858_39139  | NW_004515729.1 | Scaffold167 | 39139                   | TT                              | CC                | 1946486919               |
| SNP_P3_106859_39197  | NW_004515729.1 | Scaffold167 | 39197                   | TT                              | GG                | 1946486920               |
| SNP_P3_106860_39229  | NW_004515729.1 | Scaffold167 | 39229                   | TT                              | AA                | 1946486922               |
| SNP_P3_106861_54210  | NW_004515729.1 | Scaffold167 | 54210                   | CC                              | TT                | 1946486923               |
| SNP_P3_106862_63039  | NW_004515729.1 | Scaffold167 | 63039                   | GG                              | CC                | 1946486925               |
| SNP_P3_106863_63075  | NW_004515729.1 | Scaffold167 | 63075                   | AA                              | GG                | 1946486926               |
| SNP_P3_106866_67993  | NW_004515729.1 | Scaffold167 | 67993                   | AA                              | TT                | 1946486928               |
| SNP_P3_106867_68029  | NW_004515729.1 | Scaffold167 | 68029                   | GG                              | TT                | 1946486929               |
| SNP_P3_106868_68285  | NW_004515729.1 | Scaffold167 | 68285                   | GG                              | AA                | 1946486931               |
| SNP_P3_106869_68315  | NW_004515729.1 | Scaffold167 | 68315                   | GG                              | AA                | 1946486932               |
| SNP_P3_106870_68359  | NW_004515729.1 | Scaffold167 | 68359                   | GG                              | AA                | 1946486933               |



| SNPs IDs             | Chromosome IDs | Chromosomes | Physical positions (bp) | CDC Frontier (Reference genome) | (Pusa 256 & HPNB) | NCBI SNPdb Accession IDs |
|----------------------|----------------|-------------|-------------------------|---------------------------------|-------------------|--------------------------|
| SNP_P3_106871_68372  | NW_004515729.1 | Scaffold167 | 68372                   | TT                              | CC                | 1946486935               |
| SNP_P3_106872_68440  | NW_004515729.1 | Scaffold167 | 68440                   | TT                              | CC                | 1946486936               |
| SNP_P3_106873_68453  | NW_004515729.1 | Scaffold167 | 68453                   | GG                              | CC                | 1946486938               |
| SNP_P3_106874_68518  | NW_004515729.1 | Scaffold167 | 68518                   | GG                              | CC                | 1946486939               |
| SNP_P3_106875_68519  | NW_004515729.1 | Scaffold167 | 68519                   | GG                              | AA                | 1946486941               |
| SNP_P3_106876_68527  | NW_004515729.1 | Scaffold167 | 68527                   | GG                              | AA                | 1946486942               |
| SNP_P3_106878_152096 | NW_004515729.1 | Scaffold167 | 152096                  | GG                              | AA                | 1946486943               |
| SNP_P3_106879_152866 | NW_004515729.1 | Scaffold167 | 152866                  | TT                              | CC                | 1946486945               |
| SNP_P3_106880_152927 | NW_004515729.1 | Scaffold167 | 152927                  | TT                              | AA                | 1946486946               |
| SNP_P3_106881_152983 | NW_004515729.1 | Scaffold167 | 152983                  | TT                              | GG                | 1946486948               |
| SNP_P3_106882_153163 | NW_004515729.1 | Scaffold167 | 153163                  | TT                              | CC                | 1946486949               |
| SNP_P3_106883_153174 | NW_004515729.1 | Scaffold167 | 153174                  | GG                              | AA                | 1946486951               |
| SNP_P3_106884_153211 | NW_004515729.1 | Scaffold167 | 153211                  | TT                              | CC                | 1946486952               |
| SNP_P3_106885_202129 | NW_004515729.1 | Scaffold167 | 202129                  | TT                              | CC                | 1946486954               |
| SNP_P3_106887_213509 | NW_004515729.1 | Scaffold167 | 213509                  | AA                              | GG                | 1946486955               |
| SNP_P3_106888_217802 | NW_004515729.1 | Scaffold167 | 217802                  | AA                              | CC                | 1946486956               |
| SNP_P3_106889_217816 | NW_004515729.1 | Scaffold167 | 217816                  | TT                              | GG                | 1946486958               |
| SNP_P3_106890_217837 | NW_004515729.1 | Scaffold167 | 217837                  | AA                              | GG                | 1946486959               |
| SNP_P3_106891_217893 | NW_004515729.1 | Scaffold167 | 217893                  | GG                              | AA                | 1946486961               |
| SNP_P3_106892_217925 | NW_004515729.1 | Scaffold167 | 217925                  | TT                              | CC                | 1946486962               |
| SNP_P3_106893_217951 | NW_004515729.1 | Scaffold167 | 217951                  | GG                              | AA                | 1946486964               |
| SNP_P3_106894_217964 | NW_004515729.1 | Scaffold167 | 217964                  | AA                              | CC                | 1946486965               |
| SNP_P3_106895_217967 | NW_004515729.1 | Scaffold167 | 217967                  | TT                              | AA                | 1946486967               |
| SNP_P3_106896_217983 | NW_004515729.1 | Scaffold167 | 217983                  | AA                              | GG                | 1946486968               |
| SNP_P3_106898_217985 | NW_004515729.1 | Scaffold167 | 217985                  | TT                              | AA                | 1946486970               |
| SNP_P3_106899_219289 | NW_004515729.1 | Scaffold167 | 219289                  | AA                              | GG                | 1946486971               |
| SNP_P3_106901_219332 | NW_004515729.1 | Scaffold167 | 219332                  | TT                              | AA                | 1946486972               |
| SNP_P3_106902_219384 | NW_004515729.1 | Scaffold167 | 219384                  | AA                              | GG                | 1946486974               |
| SNP_P3_106903_219597 | NW_004515729.1 | Scaffold167 | 219597                  | TT                              | CC                | 1946486975               |
| SNP_P3_106904_219980 | NW_004515729.1 | Scaffold167 | 219980                  | AA                              | GG                | 1946486977               |
| SNP_P3_106905_219985 | NW_004515729.1 | Scaffold167 | 219985                  | AA                              | GG                | 1946486978               |
| SNP_P3_106906_219992 | NW_004515729.1 | Scaffold167 | 219992                  | AA                              | GG                | 1946486980               |
| SNP_P3_106907_220003 | NW_004515729.1 | Scaffold167 | 220003                  | AA                              | GG                | 1946486981               |
| SNP_P3_106908_220059 | NW_004515729.1 | Scaffold167 | 220059                  | CC                              | GG                | 1946486982               |
| SNP_P3_106909_220063 | NW_004515729.1 | Scaffold167 | 220063                  | CC                              | TT                | 1946486984               |
| SNP_P3_106910_220072 | NW_004515729.1 | Scaffold167 | 220072                  | TT                              | CC                | 1946486985               |
| SNP_P3_106911_220112 | NW_004515729.1 | Scaffold167 | 220112                  | TT                              | CC                | 1946486987               |
| SNP_P3_106912_220191 | NW_004515729.1 | Scaffold167 | 220191                  | AA                              | GG                | 1946486988               |
| SNP_P3_106913_220229 | NW_004515729.1 | Scaffold167 | 220229                  | AA                              | CC                | 1946486989               |
| SNP_P3_106914_220269 | NW_004515729.1 | Scaffold167 | 220269                  | CC                              | TT                | 1946486991               |
| SNP_P3_106915_220271 | NW_004515729.1 | Scaffold167 | 220271                  | GG                              | AA                | 1946486992               |
| SNP_P3_106916_220301 | NW_004515729.1 | Scaffold167 | 220301                  | AA                              | CC                | 1946486994               |

| SNPs IDs             | Chromosome IDs | Chromosomes | Physical positions (bp) | CDC Frontier (Reference genome) | (Pusa 256 & HPNB) | NCBI SNPdb Accession IDs |
|----------------------|----------------|-------------|-------------------------|---------------------------------|-------------------|--------------------------|
| SNP_P3_106917_220303 | NW_004515729.1 | Scaffold167 | 220303                  | GG                              | AA                | 1946486995               |
| SNP_P3_106918_220304 | NW_004515729.1 | Scaffold167 | 220304                  | GG                              | AA                | 1946486997               |
| SNP_P3_106919_220328 | NW_004515729.1 | Scaffold167 | 220328                  | TT                              | CC                | 1946486998               |
| SNP_P3_106920_222648 | NW_004515729.1 | Scaffold167 | 222648                  | GG                              | AA                | 1946486999               |
| SNP_P3_106921_223700 | NW_004515729.1 | Scaffold167 | 223700                  | AA                              | TT                | 1946487001               |
| SNP_P3_106922_288900 | NW_004515729.1 | Scaffold167 | 288900                  | AA                              | TT                | 1946487002               |
| SNP_P3_106923_288904 | NW_004515729.1 | Scaffold167 | 288904                  | CC                              | TT                | 1946487004               |
| SNP_P3_106925_295259 | NW_004515729.1 | Scaffold167 | 295259                  | AA                              | GG                | 1946487005               |
| SNP_P3_106927_298616 | NW_004515729.1 | Scaffold167 | 298616                  | AA                              | GG                | 1946487007               |
| SNP_P3_106928_303097 | NW_004515729.1 | Scaffold167 | 303097                  | AA                              | GG                | 1946487008               |
| SNP_P3_106929_303098 | NW_004515729.1 | Scaffold167 | 303098                  | CC                              | AA                | 1946487010               |
| SNP_P3_106930_303103 | NW_004515729.1 | Scaffold167 | 303103                  | CC                              | TT                | 1946487011               |
| SNP_P3_106931_303143 | NW_004515729.1 | Scaffold167 | 303143                  | TT                              | CC                | 1946487012               |
| SNP_P3_106932_303222 | NW_004515729.1 | Scaffold167 | 303222                  | GG                              | TT                | 1946487014               |
| SNP_P3_106933_303286 | NW_004515729.1 | Scaffold167 | 303286                  | AA                              | GG                | 1946487015               |
| SNP_P3_106934_303429 | NW_004515729.1 | Scaffold167 | 303429                  | GG                              | AA                | 1946487017               |
| SNP_P3_106935_303524 | NW_004515729.1 | Scaffold167 | 303524                  | GG                              | TT                | 1946487018               |
| SNP_P3_106936_303534 | NW_004515729.1 | Scaffold167 | 303534                  | AA                              | GG                | 1946487020               |
| SNP_P3_106937_303553 | NW_004515729.1 | Scaffold167 | 303553                  | AA                              | GG                | 1946487021               |
| SNP_P3_106938_304581 | NW_004515729.1 | Scaffold167 | 304581                  | TT                              | CC                | 1946487023               |
| SNP_P3_106939_304791 | NW_004515729.1 | Scaffold167 | 304791                  | AA                              | CC                | 1946487024               |
| SNP_P3_106940_310178 | NW_004515729.1 | Scaffold167 | 310178                  | GG                              | TT                | 1946487026               |
| SNP_P3_106941_318283 | NW_004515729.1 | Scaffold167 | 318283                  | AA                              | GG                | 1946487027               |
| SNP_P3_106942_318348 | NW_004515729.1 | Scaffold167 | 318348                  | AA                              | GG                | 1946487029               |
| SNP_P3_106943_318367 | NW_004515729.1 | Scaffold167 | 318367                  | TT                              | CC                | 1946487030               |
| SNP_P3_106944_318645 | NW_004515729.1 | Scaffold167 | 318645                  | GG                              | TT                | 1946487031               |
| SNP_P3_106945_318650 | NW_004515729.1 | Scaffold167 | 318650                  | CC                              | TT                | 1946487033               |
| SNP_P3_106946_318652 | NW_004515729.1 | Scaffold167 | 318652                  | AA                              | GG                | 1946487034               |
| SNP_P3_106947_318667 | NW_004515729.1 | Scaffold167 | 318667                  | AA                              | GG                | 1946487036               |
| SNP_P3_106948_318750 | NW_004515729.1 | Scaffold167 | 318750                  | AA                              | GG                | 1946487037               |
| SNP_P3_106949_318775 | NW_004515729.1 | Scaffold167 | 318775                  | AA                              | CC                | 1946487039               |
| SNP_P3_106950_320806 | NW_004515729.1 | Scaffold167 | 320806                  | AA                              | GG                | 1946487040               |
| SNP_P3_106951_320872 | NW_004515729.1 | Scaffold167 | 320872                  | AA                              | CC                | 1946487042               |
| SNP_P3_106952_322859 | NW_004515729.1 | Scaffold167 | 322859                  | TT                              | AA                | 1946487043               |
| SNP_P3_106953_322895 | NW_004515729.1 | Scaffold167 | 322895                  | AA                              | TT                | 1946487045               |
| SNP_P3_106955_323198 | NW_004515729.1 | Scaffold167 | 323198                  | CC                              | TT                | 1946487046               |
| SNP_P3_106956_323210 | NW_004515729.1 | Scaffold167 | 323210                  | CC                              | TT                | 1946487048               |
| SNP_P3_106957_323233 | NW_004515729.1 | Scaffold167 | 323233                  | AA                              | GG                | 1946487049               |
| SNP_P3_106958_323321 | NW_004515729.1 | Scaffold167 | 323321                  | CC                              | AA                | 1946487050               |
| SNP_P3_106959_323375 | NW_004515729.1 | Scaffold167 | 323375                  | GG                              | AA                | 1946487052               |
| SNP_P3_106960_323384 | NW_004515729.1 | Scaffold167 | 323384                  | TT                              | CC                | 1946487053               |
| SNP_P3_106961_331993 | NW_004515729.1 | Scaffold167 | 331993                  | CC                              | TT                | 1946487055               |

| SNPs IDs             | Chromosome IDs | Chromosomes | Physical positions (bp) | CDC Frontier (Reference genome) | (Pusa 256 & HPNB) | NCBI SNPdb Accession IDs |
|----------------------|----------------|-------------|-------------------------|---------------------------------|-------------------|--------------------------|
| SNP_P3_106962_332023 | NW_004515729.1 | Scaffold167 | 332023                  | TT                              | CC                | 1946487056               |
| SNP_P3_106963_332305 | NW_004515729.1 | Scaffold167 | 332305                  | GG                              | TT                | 1946487058               |
| SNP_P3_106964_332306 | NW_004515729.1 | Scaffold167 | 332306                  | TT                              | AA                | 1946487059               |
| SNP_P3_106965_332321 | NW_004515729.1 | Scaffold167 | 332321                  | AA                              | GG                | 1946487060               |
| SNP_P3_106966_332347 | NW_004515729.1 | Scaffold167 | 332347                  | AA                              | TT                | 1946487062               |
| SNP_P3_106967_332358 | NW_004515729.1 | Scaffold167 | 332358                  | GG                              | AA                | 1946487063               |
| SNP_P3_106969_415324 | NW_004515729.1 | Scaffold167 | 415324                  | TT                              | CC                | 1946487065               |
| SNP_P3_106970_447299 | NW_004515729.1 | Scaffold167 | 447299                  | TT                              | CC                | 1946487066               |
| SNP_P3_106971_449656 | NW_004515729.1 | Scaffold167 | 449656                  | CC                              | TT                | 1946487068               |
| SNP_P3_106972_459551 | NW_004515729.1 | Scaffold167 | 459551                  | AA                              | TT                | 1946487069               |
| SNP_P3_106973_459552 | NW_004515729.1 | Scaffold167 | 459552                  | GG                              | TT                | 1946487071               |
| SNP_P3_106974_1475   | NW_004515730.1 | Scaffold170 | 1475                    | AA                              | GG                | 1946487072               |
| SNP_P3_106975_4669   | NW_004515730.1 | Scaffold170 | 4669                    | TT                              | CC                | 1946487073               |
| SNP_P3_106976_13454  | NW_004515730.1 | Scaffold170 | 13454                   | GG                              | AA                | 1946487075               |
| SNP_P3_106977_13504  | NW_004515730.1 | Scaffold170 | 13504                   | TT                              | CC                | 1946487076               |
| SNP_P3_106978_13538  | NW_004515730.1 | Scaffold170 | 13538                   | AA                              | GG                | 1946487078               |
| SNP_P3_106979_13723  | NW_004515730.1 | Scaffold170 | 13723                   | AA                              | GG                | 1946487079               |
| SNP_P3_106980_13739  | NW_004515730.1 | Scaffold170 | 13739                   | TT                              | CC                | 1946487081               |
| SNP_P3_106981_13754  | NW_004515730.1 | Scaffold170 | 13754                   | AA                              | GG                | 1946487082               |
| SNP_P3_106982_8159   | NW_004515731.1 | Scaffold171 | 8159                    | TT                              | CC                | 1946487084               |
| SNP_P3_106983_8175   | NW_004515731.1 | Scaffold171 | 8175                    | AA                              | TT                | 1946487085               |
| SNP_P3_106984_9488   | NW_004515731.1 | Scaffold171 | 9488                    | TT                              | GG                | 1946487087               |
| SNP_P3_106985_12748  | NW_004515731.1 | Scaffold171 | 12748                   | CC                              | GG                | 1946487088               |
| SNP_P3_106986_14761  | NW_004515731.1 | Scaffold171 | 14761                   | GG                              | TT                | 1946487089               |
| SNP_P3_106987_14803  | NW_004515731.1 | Scaffold171 | 14803                   | TT                              | CC                | 1946487091               |
| SNP_P3_106988_15435  | NW_004515731.1 | Scaffold171 | 15435                   | AA                              | GG                | 1946487092               |
| SNP_P3_106989_16444  | NW_004515731.1 | Scaffold171 | 16444                   | AA                              | TT                | 1946487094               |
| SNP_P3_106990_16512  | NW_004515731.1 | Scaffold171 | 16512                   | CC                              | AA                | 1946487095               |
| SNP_P3_106991_16573  | NW_004515731.1 | Scaffold171 | 16573                   | AA                              | TT                | 1946487097               |
| SNP_P3_106992_18382  | NW_004515731.1 | Scaffold171 | 18382                   | TT                              | GG                | 1946487098               |
| SNP_P3_106993_19475  | NW_004515731.1 | Scaffold171 | 19475                   | AA                              | GG                | 1946487099               |
| SNP_P3_106994_19957  | NW_004515731.1 | Scaffold171 | 19957                   | GG                              | CC                | 1946487101               |
| SNP_P3_106995_20015  | NW_004515731.1 | Scaffold171 | 20015                   | GG                              | CC                | 1946487102               |
| SNP_P3_106996_21912  | NW_004515731.1 | Scaffold171 | 21912                   | TT                              | AA                | 1946487104               |
| SNP_P3_106997_21917  | NW_004515731.1 | Scaffold171 | 21917                   | AA                              | GG                | 1946487105               |
| SNP_P3_106998_26057  | NW_004515731.1 | Scaffold171 | 26057                   | AA                              | TT                | 1946487107               |
| SNP_P3_106999_26486  | NW_004515731.1 | Scaffold171 | 26486                   | AA                              | CC                | 1946487108               |
| SNP_P3_107000_26523  | NW_004515731.1 | Scaffold171 | 26523                   | TT                              | GG                | 1946487110               |
| SNP_P3_107001_27040  | NW_004515731.1 | Scaffold171 | 27040                   | TT                              | GG                | 1946487111               |
| SNP_P3_107002_27317  | NW_004515731.1 | Scaffold171 | 27317                   | TT                              | AA                | 1946487112               |
| SNP_P3_107003_27860  | NW_004515731.1 | Scaffold171 | 27860                   | TT                              | CC                | 1946487114               |
| SNP_P3_107004_27861  | NW_004515731.1 | Scaffold171 | 27861                   | TT                              | AA                | 1946487115               |

| SNPs IDs             | Chromosome IDs | Chromosomes | Physical positions (bp) | CDC Frontier (Reference genome) | (Pusa 256 & HPNB) | NCBI SNPdb Accession IDs |
|----------------------|----------------|-------------|-------------------------|---------------------------------|-------------------|--------------------------|
| SNP_P3_107005_33506  | NW_004515731.1 | Scaffold171 | 33506                   | GG                              | AA                | 1946487117               |
| SNP_P3_107006_36839  | NW_004515731.1 | Scaffold171 | 36839                   | CC                              | TT                | 1946487118               |
| SNP_P3_107007_37238  | NW_004515731.1 | Scaffold171 | 37238                   | AA                              | GG                | 1946487120               |
| SNP_P3_107008_46292  | NW_004515731.1 | Scaffold171 | 46292                   | GG                              | AA                | 1946487121               |
| SNP_P3_107010_48224  | NW_004515731.1 | Scaffold171 | 48224                   | GG                              | AA                | 1946487122               |
| SNP_P3_107011_48372  | NW_004515731.1 | Scaffold171 | 48372                   | GG                              | AA                | 1946487124               |
| SNP_P3_107012_49100  | NW_004515731.1 | Scaffold171 | 49100                   | TT                              | CC                | 1946487125               |
| SNP_P3_107013_54192  | NW_004515731.1 | Scaffold171 | 54192                   | AA                              | TT                | 1946487127               |
| SNP_P3_107014_57525  | NW_004515731.1 | Scaffold171 | 57525                   | TT                              | AA                | 1946487140               |
| SNP_P3_107015_57841  | NW_004515731.1 | Scaffold171 | 57841                   | CC                              | AA                | 1946487142               |
| SNP_P3_107016_58019  | NW_004515731.1 | Scaffold171 | 58019                   | GG                              | AA                | 1946487143               |
| SNP_P3_107017_58391  | NW_004515731.1 | Scaffold171 | 58391                   | CC                              | TT                | 1946487145               |
| SNP_P3_107018_77652  | NW_004515731.1 | Scaffold171 | 77652                   | TT                              | AA                | 1946487146               |
| SNP_P3_107019_96383  | NW_004515731.1 | Scaffold171 | 96383                   | AA                              | GG                | 1946487147               |
| SNP_P3_107020_105367 | NW_004515731.1 | Scaffold171 | 105367                  | TT                              | GG                | 1946487149               |
| SNP_P3_107021_105410 | NW_004515731.1 | Scaffold171 | 105410                  | TT                              | AA                | 1946487150               |
| SNP_P3_107022_105411 | NW_004515731.1 | Scaffold171 | 105411                  | GG                              | AA                | 1946487152               |
| SNP_P3_107023_105625 | NW_004515731.1 | Scaffold171 | 105625                  | TT                              | CC                | 1946487153               |
| SNP_P3_107024_105663 | NW_004515731.1 | Scaffold171 | 105663                  | TT                              | CC                | 1946487155               |
| SNP_P3_107025_105700 | NW_004515731.1 | Scaffold171 | 105700                  | CC                              | AA                | 1946487156               |
| SNP_P3_107026_105770 | NW_004515731.1 | Scaffold171 | 105770                  | TT                              | CC                | 1946487158               |
| SNP_P3_107027_107215 | NW_004515731.1 | Scaffold171 | 107215                  | CC                              | TT                | 1946487159               |
| SNP_P3_107028_109194 | NW_004515731.1 | Scaffold171 | 109194                  | AA                              | TT                | 1946487161               |
| SNP_P3_107030_118230 | NW_004515731.1 | Scaffold171 | 118230                  | AA                              | GG                | 1946487162               |
| SNP_P3_107031_119993 | NW_004515731.1 | Scaffold171 | 119993                  | AA                              | GG                | 1946487164               |
| SNP_P3_107032_121603 | NW_004515731.1 | Scaffold171 | 121603                  | GG                              | CC                | 1946487165               |
| SNP_P3_107033_121627 | NW_004515731.1 | Scaffold171 | 121627                  | TT                              | CC                | 1946487167               |
| SNP_P3_107034_121647 | NW_004515731.1 | Scaffold171 | 121647                  | AA                              | GG                | 1946487168               |
| SNP_P3_107035_121851 | NW_004515731.1 | Scaffold171 | 121851                  | GG                              | AA                | 1946487170               |
| SNP_P3_107036_123351 | NW_004515731.1 | Scaffold171 | 123351                  | CC                              | TT                | 1946487171               |
| SNP_P3_107037_124742 | NW_004515731.1 | Scaffold171 | 124742                  | AA                              | CC                | 1946487172               |
| SNP_P3_107039_125587 | NW_004515731.1 | Scaffold171 | 125587                  | TT                              | CC                | 1946487174               |
| SNP_P3_107040_129781 | NW_004515731.1 | Scaffold171 | 129781                  | AA                              | CC                | 1946487175               |
| SNP_P3_107041_129815 | NW_004515731.1 | Scaffold171 | 129815                  | TT                              | CC                | 1946487177               |
| SNP_P3_107042_129847 | NW_004515731.1 | Scaffold171 | 129847                  | CC                              | AA                | 1946487178               |
| SNP_P3_107043_129998 | NW_004515731.1 | Scaffold171 | 129998                  | AA                              | TT                | 1946487180               |
| SNP_P3_107044_130009 | NW_004515731.1 | Scaffold171 | 130009                  | TT                              | CC                | 1946487181               |
| SNP_P3_107045_130012 | NW_004515731.1 | Scaffold171 | 130012                  | CC                              | AA                | 1946487183               |
| SNP_P3_107046_130046 | NW_004515731.1 | Scaffold171 | 130046                  | TT                              | GG                | 1946487184               |
| SNP_P3_107047_130118 | NW_004515731.1 | Scaffold171 | 130118                  | TT                              | CC                | 1946487186               |
| SNP_P3_107048_130161 | NW_004515731.1 | Scaffold171 | 130161                  | AA                              | GG                | 1946487187               |
| SNP_P3_107049_130331 | NW_004515731.1 | Scaffold171 | 130331                  | GG                              | AA                | 1946487189               |

| SNPs IDs             | Chromosome IDs | Chromosomes | Physical positions (bp) | CDC Frontier (Reference genome) | (Pusa 256 & HPNB) | NCBI SNPdb Accession IDs |
|----------------------|----------------|-------------|-------------------------|---------------------------------|-------------------|--------------------------|
| SNP_P3_107050_130458 | NW_004515731.1 | Scaffold171 | 130458                  | CC                              | GG                | 1946487191               |
| SNP_P3_107051_130788 | NW_004515731.1 | Scaffold171 | 130788                  | TT                              | CC                | 1946487193               |
| SNP_P3_107052_131504 | NW_004515731.1 | Scaffold171 | 131504                  | TT                              | AA                | 1946487194               |
| SNP_P3_107053_133222 | NW_004515731.1 | Scaffold171 | 133222                  | AA                              | CC                | 1946487195               |
| SNP_P3_107054_135849 | NW_004515731.1 | Scaffold171 | 135849                  | TT                              | CC                | 1946487197               |
| SNP_P3_107055_135952 | NW_004515731.1 | Scaffold171 | 135952                  | AA                              | GG                | 1946487198               |
| SNP_P3_107056_136040 | NW_004515731.1 | Scaffold171 | 136040                  | GG                              | AA                | 1946487200               |
| SNP_P3_107057_136051 | NW_004515731.1 | Scaffold171 | 136051                  | GG                              | AA                | 1946487201               |
| SNP_P3_107058_136161 | NW_004515731.1 | Scaffold171 | 136161                  | AA                              | GG                | 1946487203               |
| SNP_P3_107059_136235 | NW_004515731.1 | Scaffold171 | 136235                  | CC                              | AA                | 1946487204               |
| SNP_P3_107060_136237 | NW_004515731.1 | Scaffold171 | 136237                  | TT                              | AA                | 1946487206               |
| SNP_P3_107061_137071 | NW_004515731.1 | Scaffold171 | 137071                  | CC                              | AA                | 1946487207               |
| SNP_P3_107062_137095 | NW_004515731.1 | Scaffold171 | 137095                  | TT                              | AA                | 1946487209               |
| SNP_P3_107063_137153 | NW_004515731.1 | Scaffold171 | 137153                  | AA                              | GG                | 1946487210               |
| SNP_P3_107064_137163 | NW_004515731.1 | Scaffold171 | 137163                  | GG                              | AA                | 1946487211               |
| SNP_P3_107065_137196 | NW_004515731.1 | Scaffold171 | 137196                  | AA                              | CC                | 1946487213               |
| SNP_P3_107066_137231 | NW_004515731.1 | Scaffold171 | 137231                  | TT                              | CC                | 1946487214               |
| SNP_P3_107067_137945 | NW_004515731.1 | Scaffold171 | 137945                  | GG                              | AA                | 1946487216               |
| SNP_P3_107068_137946 | NW_004515731.1 | Scaffold171 | 137946                  | TT                              | AA                | 1946487217               |
| SNP_P3_107070_142559 | NW_004515731.1 | Scaffold171 | 142559                  | CC                              | AA                | 1946487219               |
| SNP_P3_107071_142564 | NW_004515731.1 | Scaffold171 | 142564                  | GG                              | AA                | 1946487220               |
| SNP_P3_107072_142570 | NW_004515731.1 | Scaffold171 | 142570                  | AA                              | GG                | 1946487221               |
| SNP_P3_107073_144660 | NW_004515731.1 | Scaffold171 | 144660                  | GG                              | AA                | 1946487223               |
| SNP_P3_107074_145655 | NW_004515731.1 | Scaffold171 | 145655                  | TT                              | CC                | 1946487224               |
| SNP_P3_107075_151388 | NW_004515731.1 | Scaffold171 | 151388                  | GG                              | AA                | 1946487226               |
| SNP_P3_107076_157887 | NW_004515731.1 | Scaffold171 | 157887                  | TT                              | CC                | 1946487227               |
| SNP_P3_107078_166770 | NW_004515731.1 | Scaffold171 | 166770                  | TT                              | CC                | 1946487229               |
| SNP_P3_107079_168650 | NW_004515731.1 | Scaffold171 | 168650                  | TT                              | CC                | 1946487230               |
| SNP_P3_107080_178452 | NW_004515731.1 | Scaffold171 | 178452                  | GG                              | AA                | 1946487232               |
| SNP_P3_107081_179306 | NW_004515731.1 | Scaffold171 | 179306                  | TT                              | CC                | 1946487233               |
| SNP_P3_107083_182491 | NW_004515731.1 | Scaffold171 | 182491                  | GG                              | AA                | 1946487235               |
| SNP_P3_107084_182602 | NW_004515731.1 | Scaffold171 | 182602                  | TT                              | AA                | 1946487236               |
| SNP_P3_107085_182611 | NW_004515731.1 | Scaffold171 | 182611                  | CC                              | TT                | 1946487238               |
| SNP_P3_107086_182635 | NW_004515731.1 | Scaffold171 | 182635                  | CC                              | TT                | 1946487239               |
| SNP_P3_107087_188157 | NW_004515731.1 | Scaffold171 | 188157                  | AA                              | GG                | 1946487241               |
| SNP_P3_107088_188774 | NW_004515731.1 | Scaffold171 | 188774                  | GG                              | TT                | 1946487242               |
| SNP_P3_107089_188845 | NW_004515731.1 | Scaffold171 | 188845                  | CC                              | TT                | 1946487244               |
| SNP_P3_107091_190809 | NW_004515731.1 | Scaffold171 | 190809                  | CC                              | TT                | 1946487245               |
| SNP_P3_107092_192974 | NW_004515731.1 | Scaffold171 | 192974                  | AA                              | CC                | 1946487247               |
| SNP_P3_107093_193047 | NW_004515731.1 | Scaffold171 | 193047                  | CC                              | GG                | 1946487248               |
| SNP_P3_107094_198173 | NW_004515731.1 | Scaffold171 | 198173                  | TT                              | GG                | 1946487250               |
| SNP_P3_107095_198196 | NW_004515731.1 | Scaffold171 | 198196                  | AA                              | TT                | 1946487251               |

| SNPs IDs             | Chromosome IDs | Chromosomes | Physical positions (bp) | CDC Frontier (Reference genome) | (Pusa 256 & HPNB) | NCBI SNPdb Accession IDs |
|----------------------|----------------|-------------|-------------------------|---------------------------------|-------------------|--------------------------|
| SNP_P3_107096_199200 | NW_004515731.1 | Scaffold171 | 199200                  | GG                              | CC                | 1946487253               |
| SNP_P3_107097_199239 | NW_004515731.1 | Scaffold171 | 199239                  | GG                              | AA                | 1946487254               |
| SNP_P3_107098_200039 | NW_004515731.1 | Scaffold171 | 200039                  | TT                              | GG                | 1946487256               |
| SNP_P3_107099_201686 | NW_004515731.1 | Scaffold171 | 201686                  | AA                              | CC                | 1946487258               |
| SNP_P3_107100_201698 | NW_004515731.1 | Scaffold171 | 201698                  | CC                              | TT                | 1946487259               |
| SNP_P3_107101_209476 | NW_004515731.1 | Scaffold171 | 209476                  | AA                              | GG                | 1946487261               |
| SNP_P3_107102_217406 | NW_004515731.1 | Scaffold171 | 217406                  | TT                              | GG                | 1946487262               |
| SNP_P3_107103_218039 | NW_004515731.1 | Scaffold171 | 218039                  | AA                              | GG                | 1946487264               |
| SNP_P3_107104_218949 | NW_004515731.1 | Scaffold171 | 218949                  | TT                              | CC                | 1946487265               |
| SNP_P3_107105_219152 | NW_004515731.1 | Scaffold171 | 219152                  | AA                              | GG                | 1946487267               |
| SNP_P3_107106_219159 | NW_004515731.1 | Scaffold171 | 219159                  | CC                              | TT                | 1946487268               |
| SNP_P3_107107_219246 | NW_004515731.1 | Scaffold171 | 219246                  | AA                              | GG                | 1946487270               |
| SNP_P3_107108_219268 | NW_004515731.1 | Scaffold171 | 219268                  | GG                              | AA                | 1946487271               |
| SNP_P3_107109_220994 | NW_004515731.1 | Scaffold171 | 220994                  | CC                              | AA                | 1946487273               |
| SNP_P3_107111_234892 | NW_004515731.1 | Scaffold171 | 234892                  | AA                              | GG                | 1946487274               |
| SNP_P3_107112_24769  | NW_004515732.1 | Scaffold172 | 24769                   | CC                              | GG                | 1946487276               |
| SNP_P3_107113_24772  | NW_004515732.1 | Scaffold172 | 24772                   | CC                              | GG                | 1946487277               |
| SNP_P3_107115_3827   | NW_004515733.1 | Scaffold174 | 3827                    | GG                              | AA                | 1946487278               |
| SNP_P3_107118_4969   | NW_004515733.1 | Scaffold174 | 4969                    | CC                              | GG                | 1946487280               |
| SNP_P3_107119_8364   | NW_004515733.1 | Scaffold174 | 8364                    | GG                              | AA                | 1946487281               |
| SNP_P3_107120_8849   | NW_004515733.1 | Scaffold174 | 8849                    | TT                              | GG                | 1946487283               |
| SNP_P3_107122_9861   | NW_004515733.1 | Scaffold174 | 9861                    | CC                              | TT                | 1946487284               |
| SNP_P3_107123_9894   | NW_004515733.1 | Scaffold174 | 9894                    | TT                              | GG                | 1946487286               |
| SNP_P3_107125_12333  | NW_004515733.1 | Scaffold174 | 12333                   | TT                              | CC                | 1946487287               |
| SNP_P3_107126_12526  | NW_004515733.1 | Scaffold174 | 12526                   | CC                              | TT                | 1946487289               |
| SNP_P3_107127_12608  | NW_004515733.1 | Scaffold174 | 12608                   | AA                              | TT                | 1946487290               |
| SNP_P3_107128_12869  | NW_004515733.1 | Scaffold174 | 12869                   | CC                              | TT                | 1946487292               |
| SNP_P3_107129_13037  | NW_004515733.1 | Scaffold174 | 13037                   | AA                              | GG                | 1946487293               |
| SNP_P3_107130_15154  | NW_004515733.1 | Scaffold174 | 15154                   | AA                              | GG                | 1946487295               |
| SNP_P3_107131_15539  | NW_004515733.1 | Scaffold174 | 15539                   | TT                              | CC                | 1946487296               |
| SNP_P3_107133_19270  | NW_004515733.1 | Scaffold174 | 19270                   | AA                              | GG                | 1946487298               |
| SNP_P3_107134_20685  | NW_004515733.1 | Scaffold174 | 20685                   | AA                              | GG                | 1946487299               |
| SNP_P3_107135_21606  | NW_004515733.1 | Scaffold174 | 21606                   | TT                              | CC                | 1946487301               |
| SNP_P3_107136_26703  | NW_004515733.1 | Scaffold174 | 26703                   | GG                              | TT                | 1946487302               |
| SNP_P3_107137_28581  | NW_004515733.1 | Scaffold174 | 28581                   | TT                              | AA                | 1946487303               |
| SNP_P3_107138_35103  | NW_004515733.1 | Scaffold174 | 35103                   | CC                              | AA                | 1946487305               |
| SNP_P3_107139_45711  | NW_004515733.1 | Scaffold174 | 45711                   | AA                              | GG                | 1946487306               |
| SNP_P3_107140_61454  | NW_004515733.1 | Scaffold174 | 61454                   | TT                              | CC                | 1946487308               |
| SNP_P3_107141_64378  | NW_004515733.1 | Scaffold174 | 64378                   | AA                              | TT                | 1946487309               |
| SNP_P3_107143_67040  | NW_004515733.1 | Scaffold174 | 67040                   | GG                              | AA                | 1946487311               |
| SNP_P3_107144_69032  | NW_004515733.1 | Scaffold174 | 69032                   | AA                              | CC                | 1946487312               |
| SNP_P3_107145_69498  | NW_004515733.1 | Scaffold174 | 69498                   | GG                              | AA                | 1946487314               |

| SNPs IDs             | Chromosome IDs | Chromosomes | Physical positions (bp) | CDC Frontier (Reference genome) | (Pusa 256 & HPNB) | NCBI SNPdb Accession IDs |
|----------------------|----------------|-------------|-------------------------|---------------------------------|-------------------|--------------------------|
| SNP_P3_107146_71369  | NW_004515733.1 | Scaffold174 | 71369                   | AA                              | CC                | 1946487315               |
| SNP_P3_107147_80475  | NW_004515733.1 | Scaffold174 | 80475                   | TT                              | CC                | 1946487317               |
| SNP_P3_107148_85280  | NW_004515733.1 | Scaffold174 | 85280                   | CC                              | TT                | 1946487318               |
| SNP_P3_107149_85391  | NW_004515733.1 | Scaffold174 | 85391                   | GG                              | TT                | 1946487320               |
| SNP_P3_107150_85401  | NW_004515733.1 | Scaffold174 | 85401                   | GG                              | AA                | 1946487321               |
| SNP_P3_107151_89898  | NW_004515733.1 | Scaffold174 | 89898                   | TT                              | CC                | 1946487323               |
| SNP_P3_107152_89899  | NW_004515733.1 | Scaffold174 | 89899                   | AA                              | GG                | 1946487324               |
| SNP_P3_107153_89909  | NW_004515733.1 | Scaffold174 | 89909                   | GG                              | AA                | 1946487326               |
| SNP_P3_107154_89934  | NW_004515733.1 | Scaffold174 | 89934                   | CC                              | TT                | 1946487327               |
| SNP_P3_107155_89945  | NW_004515733.1 | Scaffold174 | 89945                   | TT                              | AA                | 1946487328               |
| SNP_P3_107156_89958  | NW_004515733.1 | Scaffold174 | 89958                   | AA                              | CC                | 1946487330               |
| SNP_P3_107157_89977  | NW_004515733.1 | Scaffold174 | 89977                   | AA                              | GG                | 1946487331               |
| SNP_P3_107158_89997  | NW_004515733.1 | Scaffold174 | 89997                   | GG                              | TT                | 1946487333               |
| SNP_P3_107159_90010  | NW_004515733.1 | Scaffold174 | 90010                   | AA                              | CC                | 1946487334               |
| SNP_P3_107160_90018  | NW_004515733.1 | Scaffold174 | 90018                   | AA                              | GG                | 1946487336               |
| SNP_P3_107161_90051  | NW_004515733.1 | Scaffold174 | 90051                   | AA                              | GG                | 1946487337               |
| SNP_P3_107162_90107  | NW_004515733.1 | Scaffold174 | 90107                   | AA                              | TT                | 1946487339               |
| SNP_P3_107163_90169  | NW_004515733.1 | Scaffold174 | 90169                   | TT                              | AA                | 1946487340               |
| SNP_P3_107164_90187  | NW_004515733.1 | Scaffold174 | 90187                   | AA                              | TT                | 1946487342               |
| SNP_P3_107165_90219  | NW_004515733.1 | Scaffold174 | 90219                   | TT                              | CC                | 1946487343               |
| SNP_P3_107166_90224  | NW_004515733.1 | Scaffold174 | 90224                   | GG                              | AA                | 1946487345               |
| SNP_P3_107167_90416  | NW_004515733.1 | Scaffold174 | 90416                   | AA                              | GG                | 1946487346               |
| SNP_P3_107168_90478  | NW_004515733.1 | Scaffold174 | 90478                   | TT                              | AA                | 1946487348               |
| SNP_P3_107169_90531  | NW_004515733.1 | Scaffold174 | 90531                   | TT                              | CC                | 1946487349               |
| SNP_P3_107170_92137  | NW_004515733.1 | Scaffold174 | 92137                   | AA                              | CC                | 1946487351               |
| SNP_P3_107171_99433  | NW_004515733.1 | Scaffold174 | 99433                   | GG                              | AA                | 1946487352               |
| SNP_P3_107173_105726 | NW_004515733.1 | Scaffold174 | 105726                  | CC                              | TT                | 1946487354               |
| SNP_P3_107174_105728 | NW_004515733.1 | Scaffold174 | 105728                  | AA                              | CC                | 1946487355               |
| SNP_P3_107175_105729 | NW_004515733.1 | Scaffold174 | 105729                  | AA                              | CC                | 1946487356               |
| SNP_P3_107176_106228 | NW_004515733.1 | Scaffold174 | 106228                  | TT                              | CC                | 1946487358               |
| SNP_P3_107177_111064 | NW_004515733.1 | Scaffold174 | 111064                  | TT                              | CC                | 1946487359               |
| SNP_P3_107184_119550 | NW_004515733.1 | Scaffold174 | 119550                  | GG                              | AA                | 1946487361               |
| SNP_P3_107185_122047 | NW_004515733.1 | Scaffold174 | 122047                  | AA                              | GG                | 1946487362               |
| SNP_P3_107186_124181 | NW_004515733.1 | Scaffold174 | 124181                  | CC                              | TT                | 1946487364               |
| SNP_P3_107188_130395 | NW_004515733.1 | Scaffold174 | 130395                  | CC                              | TT                | 1946487365               |
| SNP_P3_107189_134479 | NW_004515733.1 | Scaffold174 | 134479                  | CC                              | GG                | 1946487367               |
| SNP_P3_107190_136440 | NW_004515733.1 | Scaffold174 | 136440                  | CC                              | AA                | 1946487368               |
| SNP_P3_107191_139678 | NW_004515733.1 | Scaffold174 | 139678                  | AA                              | GG                | 1946487370               |
| SNP_P3_107192_142723 | NW_004515733.1 | Scaffold174 | 142723                  | CC                              | TT                | 1946487371               |
| SNP_P3_107193_143055 | NW_004515733.1 | Scaffold174 | 143055                  | AA                              | GG                | 1946487373               |
| SNP_P3_107195_144297 | NW_004515733.1 | Scaffold174 | 144297                  | AA                              | GG                | 1946487374               |
| SNP_P3_107196_146033 | NW_004515733.1 | Scaffold174 | 146033                  | TT                              | CC                | 1946487376               |

| SNPs IDs             | Chromosome IDs | Chromosomes | Physical positions (bp) | CDC Frontier (Reference genome) | (Pusa 256 & HPNB) | NCBI SNPdb Accession IDs |
|----------------------|----------------|-------------|-------------------------|---------------------------------|-------------------|--------------------------|
| SNP_P3_107197_148923 | NW_004515733.1 | Scaffold174 | 148923                  | GG                              | TT                | 1946487377               |
| SNP_P3_107198_149738 | NW_004515733.1 | Scaffold174 | 149738                  | GG                              | CC                | 1946487378               |
| SNP_P3_107199_150234 | NW_004515733.1 | Scaffold174 | 150234                  | TT                              | GG                | 1946487380               |
| SNP_P3_107200_152723 | NW_004515733.1 | Scaffold174 | 152723                  | TT                              | CC                | 1946487382               |
| SNP_P3_107201_156167 | NW_004515733.1 | Scaffold174 | 156167                  | AA                              | GG                | 1946487383               |
| SNP_P3_107202_156178 | NW_004515733.1 | Scaffold174 | 156178                  | AA                              | GG                | 1946487385               |
| SNP_P3_107203_159804 | NW_004515733.1 | Scaffold174 | 159804                  | TT                              | CC                | 1946487386               |
| SNP_P3_107204_166309 | NW_004515733.1 | Scaffold174 | 166309                  | AA                              | CC                | 1946487388               |
| SNP_P3_107205_167695 | NW_004515733.1 | Scaffold174 | 167695                  | AA                              | GG                | 1946487389               |
| SNP_P3_107206_167711 | NW_004515733.1 | Scaffold174 | 167711                  | AA                              | TT                | 1946487390               |
| SNP_P3_107207_171324 | NW_004515733.1 | Scaffold174 | 171324                  | TT                              | CC                | 1946487391               |
| SNP_P3_107208_178468 | NW_004515733.1 | Scaffold174 | 178468                  | CC                              | TT                | 1946487392               |
| SNP_P3_107209_178551 | NW_004515733.1 | Scaffold174 | 178551                  | CC                              | TT                | 1946487393               |
| SNP_P3_107210_180894 | NW_004515733.1 | Scaffold174 | 180894                  | AA                              | GG                | 1946487394               |
| SNP_P3_107211_185029 | NW_004515733.1 | Scaffold174 | 185029                  | AA                              | GG                | 1946487395               |
| SNP_P3_107213_186959 | NW_004515733.1 | Scaffold174 | 186959                  | AA                              | GG                | 1946487396               |
| SNP_P3_107215_189308 | NW_004515733.1 | Scaffold174 | 189308                  | TT                              | CC                | 1946487397               |
| SNP_P3_107217_191271 | NW_004515733.1 | Scaffold174 | 191271                  | GG                              | AA                | 1946487398               |
| SNP_P3_107218_191316 | NW_004515733.1 | Scaffold174 | 191316                  | AA                              | GG                | 1946487399               |
| SNP_P3_107219_191349 | NW_004515733.1 | Scaffold174 | 191349                  | CC                              | TT                | 1946487400               |
| SNP_P3_107220_191359 | NW_004515733.1 | Scaffold174 | 191359                  | CC                              | GG                | 1946487401               |
| SNP_P3_107221_191401 | NW_004515733.1 | Scaffold174 | 191401                  | TT                              | AA                | 1946487402               |
| SNP_P3_107222_191452 | NW_004515733.1 | Scaffold174 | 191452                  | AA                              | GG                | 1946487403               |
| SNP_P3_107223_196631 | NW_004515733.1 | Scaffold174 | 196631                  | CC                              | TT                | 1946487404               |
| SNP_P3_107224_197354 | NW_004515733.1 | Scaffold174 | 197354                  | GG                              | AA                | 1946487405               |
| SNP_P3_107225_198948 | NW_004515733.1 | Scaffold174 | 198948                  | TT                              | CC                | 1946487406               |
| SNP_P3_107226_200066 | NW_004515733.1 | Scaffold174 | 200066                  | TT                              | GG                | 1946487407               |
| SNP_P3_107227_201149 | NW_004515733.1 | Scaffold174 | 201149                  | TT                              | AA                | 1946487408               |
| SNP_P3_107229_201747 | NW_004515733.1 | Scaffold174 | 201747                  | TT                              | CC                | 1946487409               |
| SNP_P3_107230_201934 | NW_004515733.1 | Scaffold174 | 201934                  | AA                              | GG                | 1946487410               |
| SNP_P3_107231_201986 | NW_004515733.1 | Scaffold174 | 201986                  | AA                              | GG                | 1946487411               |
| SNP_P3_107232_202001 | NW_004515733.1 | Scaffold174 | 202001                  | AA                              | GG                | 1946487412               |
| SNP_P3_107233_203588 | NW_004515733.1 | Scaffold174 | 203588                  | AA                              | TT                | 1946487413               |
| SNP_P3_107234_203892 | NW_004515733.1 | Scaffold174 | 203892                  | CC                              | TT                | 1946487414               |
| SNP_P3_107235_204259 | NW_004515733.1 | Scaffold174 | 204259                  | CC                              | TT                | 1946487415               |
| SNP_P3_107236_204359 | NW_004515733.1 | Scaffold174 | 204359                  | CC                              | TT                | 1946487416               |
| SNP_P3_107237_205108 | NW_004515733.1 | Scaffold174 | 205108                  | AA                              | GG                | 1946487417               |
| SNP_P3_107238_205193 | NW_004515733.1 | Scaffold174 | 205193                  | AA                              | CC                | 1946487418               |
| SNP_P3_107239_205365 | NW_004515733.1 | Scaffold174 | 205365                  | CC                              | TT                | 1946487419               |
| SNP_P3_107240_206044 | NW_004515733.1 | Scaffold174 | 206044                  | CC                              | TT                | 1946487420               |
| SNP_P3_107241_207446 | NW_004515733.1 | Scaffold174 | 207446                  | AA                              | GG                | 1946487421               |
| SNP_P3_107242_208366 | NW_004515733.1 | Scaffold174 | 208366                  | TT                              | AA                | 1946487422               |



| SNPs IDs             | Chromosome IDs | Chromosomes | Physical positions (bp) | CDC Frontier (Reference genome) | (Pusa 256 & HPNB) | NCBI SNPdb Accession IDs |
|----------------------|----------------|-------------|-------------------------|---------------------------------|-------------------|--------------------------|
| SNP_P3_107244_208809 | NW_004515733.1 | Scaffold174 | 208809                  | GG                              | AA                | 1946487423               |
| SNP_P3_107246_213725 | NW_004515733.1 | Scaffold174 | 213725                  | GG                              | TT                | 1946487424               |
| SNP_P3_107247_216018 | NW_004515733.1 | Scaffold174 | 216018                  | TT                              | CC                | 1946487425               |
| SNP_P3_107248_221321 | NW_004515733.1 | Scaffold174 | 221321                  | AA                              | GG                | 1946487426               |
| SNP_P3_107249_221326 | NW_004515733.1 | Scaffold174 | 221326                  | AA                              | GG                | 1946487427               |
| SNP_P3_107250_221394 | NW_004515733.1 | Scaffold174 | 221394                  | TT                              | CC                | 1946487428               |
| SNP_P3_107251_221448 | NW_004515733.1 | Scaffold174 | 221448                  | TT                              | AA                | 1946487429               |
| SNP_P3_107253_223927 | NW_004515733.1 | Scaffold174 | 223927                  | CC                              | TT                | 1946487430               |
| SNP_P3_107254_224802 | NW_004515733.1 | Scaffold174 | 224802                  | AA                              | GG                | 1946487431               |
| SNP_P3_107255_225087 | NW_004515733.1 | Scaffold174 | 225087                  | AA                              | GG                | 1946487432               |
| SNP_P3_107256_229299 | NW_004515733.1 | Scaffold174 | 229299                  | GG                              | TT                | 1946487433               |
| SNP_P3_107257_231226 | NW_004515733.1 | Scaffold174 | 231226                  | TT                              | AA                | 1946487434               |
| SNP_P3_107258_231746 | NW_004515733.1 | Scaffold174 | 231746                  | CC                              | AA                | 1946487435               |
| SNP_P3_107259_236160 | NW_004515733.1 | Scaffold174 | 236160                  | AA                              | GG                | 1946487436               |
| SNP_P3_107260_238299 | NW_004515733.1 | Scaffold174 | 238299                  | CC                              | TT                | 1946487437               |
| SNP_P3_107262_240021 | NW_004515733.1 | Scaffold174 | 240021                  | GG                              | AA                | 1946487438               |
| SNP_P3_107263_240321 | NW_004515733.1 | Scaffold174 | 240321                  | TT                              | CC                | 1946487439               |
| SNP_P3_107264_252876 | NW_004515733.1 | Scaffold174 | 252876                  | GG                              | TT                | 1946487440               |
| SNP_P3_107265_252903 | NW_004515733.1 | Scaffold174 | 252903                  | GG                              | AA                | 1946487441               |
| SNP_P3_107266_258037 | NW_004515733.1 | Scaffold174 | 258037                  | TT                              | CC                | 1946487442               |
| SNP_P3_107267_262139 | NW_004515733.1 | Scaffold174 | 262139                  | TT                              | GG                | 1946487443               |
| SNP_P3_107268_270025 | NW_004515733.1 | Scaffold174 | 270025                  | GG                              | AA                | 1946487444               |
| SNP_P3_107270_281814 | NW_004515733.1 | Scaffold174 | 281814                  | AA                              | TT                | 1946487445               |
| SNP_P3_107271_283903 | NW_004515733.1 | Scaffold174 | 283903                  | CC                              | AA                | 1946487446               |
| SNP_P3_107273_288357 | NW_004515733.1 | Scaffold174 | 288357                  | GG                              | AA                | 1946487447               |
| SNP_P3_107274_302530 | NW_004515733.1 | Scaffold174 | 302530                  | AA                              | GG                | 1946487448               |
| SNP_P3_107275_302538 | NW_004515733.1 | Scaffold174 | 302538                  | CC                              | AA                | 1946487449               |
| SNP_P3_107276_303938 | NW_004515733.1 | Scaffold174 | 303938                  | GG                              | TT                | 1946487450               |
| SNP_P3_107277_305087 | NW_004515733.1 | Scaffold174 | 305087                  | CC                              | TT                | 1946487451               |
| SNP_P3_107278_305140 | NW_004515733.1 | Scaffold174 | 305140                  | GG                              | CC                | 1946487452               |
| SNP_P3_107279_306365 | NW_004515733.1 | Scaffold174 | 306365                  | TT                              | AA                | 1946487453               |
| SNP_P3_107280_307501 | NW_004515733.1 | Scaffold174 | 307501                  | GG                              | AA                | 1946487454               |
| SNP_P3_107281_319714 | NW_004515733.1 | Scaffold174 | 319714                  | TT                              | CC                | 1946487455               |
| SNP_P3_107282_320860 | NW_004515733.1 | Scaffold174 | 320860                  | AA                              | GG                | 1946487456               |
| SNP_P3_107283_329221 | NW_004515733.1 | Scaffold174 | 329221                  | TT                              | CC                | 1946487457               |
| SNP_P3_107284_330087 | NW_004515733.1 | Scaffold174 | 330087                  | TT                              | CC                | 1946487458               |
| SNP_P3_107285_331366 | NW_004515733.1 | Scaffold174 | 331366                  | CC                              | AA                | 1946487459               |
| SNP_P3_107286_335077 | NW_004515733.1 | Scaffold174 | 335077                  | TT                              | CC                | 1946487460               |
| SNP_P3_107287_338332 | NW_004515733.1 | Scaffold174 | 338332                  | GG                              | TT                | 1946487461               |
| SNP_P3_107289_349784 | NW_004515733.1 | Scaffold174 | 349784                  | GG                              | AA                | 1946487462               |
| SNP_P3_107291_350075 | NW_004515733.1 | Scaffold174 | 350075                  | CC                              | AA                | 1946487463               |
| SNP_P3_107293_350148 | NW_004515733.1 | Scaffold174 | 350148                  | AA                              | GG                | 1946487464               |

| SNPs IDs             | Chromosome IDs | Chromosomes | Physical positions (bp) | CDC Frontier (Reference genome) | (Pusa 256 & HPNB) | NCBI SNPdb Accession IDs |
|----------------------|----------------|-------------|-------------------------|---------------------------------|-------------------|--------------------------|
| SNP_P3_107294_351187 | NW_004515733.1 | Scaffold174 | 351187                  | TT                              | CC                | 1946487465               |
| SNP_P3_107295_351737 | NW_004515733.1 | Scaffold174 | 351737                  | TT                              | GG                | 1946487466               |
| SNP_P3_107296_352099 | NW_004515733.1 | Scaffold174 | 352099                  | TT                              | CC                | 1946487467               |
| SNP_P3_107297_352583 | NW_004515733.1 | Scaffold174 | 352583                  | TT                              | CC                | 1946487468               |
| SNP_P3_107298_352584 | NW_004515733.1 | Scaffold174 | 352584                  | AA                              | GG                | 1946487469               |
| SNP_P3_107299_352617 | NW_004515733.1 | Scaffold174 | 352617                  | TT                              | CC                | 1946487470               |
| SNP_P3_107300_352629 | NW_004515733.1 | Scaffold174 | 352629                  | TT                              | GG                | 1946487471               |
| SNP_P3_107301_352692 | NW_004515733.1 | Scaffold174 | 352692                  | TT                              | GG                | 1946487472               |
| SNP_P3_107303_352831 | NW_004515733.1 | Scaffold174 | 352831                  | AA                              | GG                | 1946487473               |
| SNP_P3_107304_353084 | NW_004515733.1 | Scaffold174 | 353084                  | TT                              | CC                | 1946487474               |
| SNP_P3_107305_354471 | NW_004515733.1 | Scaffold174 | 354471                  | AA                              | GG                | 1946487475               |
| SNP_P3_107306_354527 | NW_004515733.1 | Scaffold174 | 354527                  | CC                              | TT                | 1946487476               |
| SNP_P3_107307_363172 | NW_004515733.1 | Scaffold174 | 363172                  | CC                              | TT                | 1946487477               |
| SNP_P3_107308_366867 | NW_004515733.1 | Scaffold174 | 366867                  | AA                              | TT                | 1946487478               |
| SNP_P3_107309_367437 | NW_004515733.1 | Scaffold174 | 367437                  | GG                              | AA                | 1946487479               |
| SNP_P3_107312_369440 | NW_004515733.1 | Scaffold174 | 369440                  | TT                              | GG                | 1946487480               |
| SNP_P3_107314_370996 | NW_004515733.1 | Scaffold174 | 370996                  | CC                              | TT                | 1946487481               |
| SNP_P3_107315_374695 | NW_004515733.1 | Scaffold174 | 374695                  | GG                              | AA                | 1946487482               |
| SNP_P3_107316_374896 | NW_004515733.1 | Scaffold174 | 374896                  | TT                              | AA                | 1946487483               |
| SNP_P3_107317_376860 | NW_004515733.1 | Scaffold174 | 376860                  | TT                              | CC                | 1946487484               |
| SNP_P3_107318_379605 | NW_004515733.1 | Scaffold174 | 379605                  | CC                              | GG                | 1946487485               |
| SNP_P3_107319_379773 | NW_004515733.1 | Scaffold174 | 379773                  | GG                              | AA                | 1946487486               |
| SNP_P3_107320_379847 | NW_004515733.1 | Scaffold174 | 379847                  | CC                              | TT                | 1946487487               |
| SNP_P3_107321_380612 | NW_004515733.1 | Scaffold174 | 380612                  | TT                              | CC                | 1946487488               |
| SNP_P3_107322_386367 | NW_004515733.1 | Scaffold174 | 386367                  | CC                              | TT                | 1946487489               |
| SNP_P3_107323_386383 | NW_004515733.1 | Scaffold174 | 386383                  | GG                              | AA                | 1946487490               |
| SNP_P3_107324_388162 | NW_004515733.1 | Scaffold174 | 388162                  | AA                              | GG                | 1946487491               |
| SNP_P3_107325_398965 | NW_004515733.1 | Scaffold174 | 398965                  | AA                              | CC                | 1946487492               |
| SNP_P3_107326_406759 | NW_004515733.1 | Scaffold174 | 406759                  | GG                              | TT                | 1946487493               |
| SNP_P3_107328_409257 | NW_004515733.1 | Scaffold174 | 409257                  | AA                              | GG                | 1946487494               |
| SNP_P3_107329_409350 | NW_004515733.1 | Scaffold174 | 409350                  | AA                              | GG                | 1946487495               |
| SNP_P3_107330_418691 | NW_004515733.1 | Scaffold174 | 418691                  | GG                              | TT                | 1946487496               |
| SNP_P3_107331_418755 | NW_004515733.1 | Scaffold174 | 418755                  | TT                              | CC                | 1946487497               |
| SNP_P3_107332_421213 | NW_004515733.1 | Scaffold174 | 421213                  | AA                              | GG                | 1946487498               |
| SNP_P3_107334_422780 | NW_004515733.1 | Scaffold174 | 422780                  | CC                              | TT                | 1946487499               |
| SNP_P3_107335_423216 | NW_004515733.1 | Scaffold174 | 423216                  | TT                              | CC                | 1946487500               |
| SNP_P3_107337_424653 | NW_004515733.1 | Scaffold174 | 424653                  | GG                              | TT                | 1946487501               |
| SNP_P3_107339_424888 | NW_004515733.1 | Scaffold174 | 424888                  | GG                              | AA                | 1946487502               |
| SNP_P3_107340_425893 | NW_004515733.1 | Scaffold174 | 425893                  | TT                              | CC                | 1946487503               |
| SNP_P3_107342_427616 | NW_004515733.1 | Scaffold174 | 427616                  | CC                              | TT                | 1946487504               |
| SNP_P3_107343_429267 | NW_004515733.1 | Scaffold174 | 429267                  | GG                              | AA                | 1946487505               |
| SNP_P3_107344_429840 | NW_004515733.1 | Scaffold174 | 429840                  | TT                              | CC                | 1946487506               |

| SNPs IDs             | Chromosome IDs | Chromosomes | Physical positions (bp) | CDC Frontier (Reference genome) | (Pusa 256 & HPNB) | NCBI SNPdb Accession IDs |
|----------------------|----------------|-------------|-------------------------|---------------------------------|-------------------|--------------------------|
| SNP_P3_107345_431222 | NW_004515733.1 | Scaffold174 | 431222                  | GG                              | AA                | 1946487507               |
| SNP_P3_107346_434419 | NW_004515733.1 | Scaffold174 | 434419                  | AA                              | TT                | 1946487508               |
| SNP_P3_107347_434420 | NW_004515733.1 | Scaffold174 | 434420                  | AA                              | TT                | 1946487509               |
| SNP_P3_107349_437392 | NW_004515733.1 | Scaffold174 | 437392                  | GG                              | AA                | 1946487510               |
| SNP_P3_107350_440934 | NW_004515733.1 | Scaffold174 | 440934                  | AA                              | GG                | 1946487511               |
| SNP_P3_107353_448927 | NW_004515733.1 | Scaffold174 | 448927                  | TT                              | AA                | 1946487512               |
| SNP_P3_107356_452662 | NW_004515733.1 | Scaffold174 | 452662                  | CC                              | TT                | 1946487513               |
| SNP_P3_107357_452682 | NW_004515733.1 | Scaffold174 | 452682                  | CC                              | TT                | 1946487514               |
| SNP_P3_107358_452690 | NW_004515733.1 | Scaffold174 | 452690                  | CC                              | GG                | 1946487515               |
| SNP_P3_107359_462651 | NW_004515733.1 | Scaffold174 | 462651                  | AA                              | GG                | 1946487516               |
| SNP_P3_107360_465901 | NW_004515733.1 | Scaffold174 | 465901                  | TT                              | CC                | 1946487517               |
| SNP_P3_107361_466449 | NW_004515733.1 | Scaffold174 | 466449                  | GG                              | AA                | 1946487518               |
| SNP_P3_107362_466683 | NW_004515733.1 | Scaffold174 | 466683                  | AA                              | CC                | 1946487519               |
| SNP_P3_107364_468369 | NW_004515733.1 | Scaffold174 | 468369                  | AA                              | TT                | 1946487520               |
| SNP_P3_107365_468389 | NW_004515733.1 | Scaffold174 | 468389                  | AA                              | GG                | 1946487521               |
| SNP_P3_107366_468709 | NW_004515733.1 | Scaffold174 | 468709                  | TT                              | CC                | 1946487522               |
| SNP_P3_107367_470283 | NW_004515733.1 | Scaffold174 | 470283                  | GG                              | AA                | 1946487523               |
| SNP_P3_107368_470453 | NW_004515733.1 | Scaffold174 | 470453                  | AA                              | GG                | 1946487524               |
| SNP_P3_107369_470510 | NW_004515733.1 | Scaffold174 | 470510                  | AA                              | GG                | 1946487525               |
| SNP_P3_107370_470520 | NW_004515733.1 | Scaffold174 | 470520                  | GG                              | TT                | 1946487526               |
| SNP_P3_107371_470528 | NW_004515733.1 | Scaffold174 | 470528                  | AA                              | TT                | 1946487527               |
| SNP_P3_107372_470534 | NW_004515733.1 | Scaffold174 | 470534                  | CC                              | AA                | 1946487528               |
| SNP_P3_107373_470558 | NW_004515733.1 | Scaffold174 | 470558                  | GG                              | AA                | 1946487529               |
| SNP_P3_107374_470564 | NW_004515733.1 | Scaffold174 | 470564                  | TT                              | AA                | 1946487530               |
| SNP_P3_107375_470587 | NW_004515733.1 | Scaffold174 | 470587                  | AA                              | GG                | 1946487531               |
| SNP_P3_107376_470666 | NW_004515733.1 | Scaffold174 | 470666                  | GG                              | AA                | 1946487532               |
| SNP_P3_107378_470693 | NW_004515733.1 | Scaffold174 | 470693                  | GG                              | AA                | 1946487533               |
| SNP_P3_107379_470711 | NW_004515733.1 | Scaffold174 | 470711                  | TT                              | CC                | 1946487534               |
| SNP_P3_107380_470849 | NW_004515733.1 | Scaffold174 | 470849                  | TT                              | CC                | 1946487535               |
| SNP_P3_107381_470971 | NW_004515733.1 | Scaffold174 | 470971                  | GG                              | CC                | 1946487536               |
| SNP_P3_107382_471622 | NW_004515733.1 | Scaffold174 | 471622                  | AA                              | CC                | 1946487537               |
| SNP_P3_107383_477511 | NW_004515733.1 | Scaffold174 | 477511                  | GG                              | CC                | 1946487538               |
| SNP_P3_107384_479055 | NW_004515733.1 | Scaffold174 | 479055                  | CC                              | TT                | 1946487539               |
| SNP_P3_107386_479476 | NW_004515733.1 | Scaffold174 | 479476                  | AA                              | GG                | 1946487540               |
| SNP_P3_107387_479486 | NW_004515733.1 | Scaffold174 | 479486                  | GG                              | TT                | 1946487541               |
| SNP_P3_107388_479714 | NW_004515733.1 | Scaffold174 | 479714                  | TT                              | GG                | 1946487542               |
| SNP_P3_107389_479760 | NW_004515733.1 | Scaffold174 | 479760                  | AA                              | CC                | 1946487543               |
| SNP_P3_107390_479837 | NW_004515733.1 | Scaffold174 | 479837                  | GG                              | AA                | 1946487544               |
| SNP_P3_107391_480696 | NW_004515733.1 | Scaffold174 | 480696                  | TT                              | AA                | 1946487545               |
| SNP_P3_107392_480703 | NW_004515733.1 | Scaffold174 | 480703                  | CC                              | TT                | 1946487546               |
| SNP_P3_107393_481947 | NW_004515733.1 | Scaffold174 | 481947                  | AA                              | GG                | 1946487548               |
| SNP_P3_107394_482453 | NW_004515733.1 | Scaffold174 | 482453                  | TT                              | CC                | 1946487549               |

| SNPs IDs             | Chromosome IDs | Chromosomes | Physical positions (bp) | CDC Frontier (Reference genome) | (Pusa 256 & HPNB) | NCBI SNPdb Accession IDs |
|----------------------|----------------|-------------|-------------------------|---------------------------------|-------------------|--------------------------|
| SNP_P3_107395_485327 | NW_004515733.1 | Scaffold174 | 485327                  | CC                              | TT                | 1946487551               |
| SNP_P3_107396_489845 | NW_004515733.1 | Scaffold174 | 489845                  | AA                              | CC                | 1946487552               |
| SNP_P3_107397_489846 | NW_004515733.1 | Scaffold174 | 489846                  | AA                              | GG                | 1946487554               |
| SNP_P3_107398_489855 | NW_004515733.1 | Scaffold174 | 489855                  | TT                              | AA                | 1946487555               |
| SNP_P3_107399_491794 | NW_004515733.1 | Scaffold174 | 491794                  | TT                              | CC                | 1946487557               |
| SNP_P3_107400_493211 | NW_004515733.1 | Scaffold174 | 493211                  | AA                              | CC                | 1946487558               |
| SNP_P3_107401_493269 | NW_004515733.1 | Scaffold174 | 493269                  | CC                              | AA                | 1946487559               |
| SNP_P3_107402_495298 | NW_004515733.1 | Scaffold174 | 495298                  | GG                              | TT                | 1946487561               |
| SNP_P3_107403_498191 | NW_004515733.1 | Scaffold174 | 498191                  | CC                              | AA                | 1946487562               |
| SNP_P3_107405_34689  | NW_004515735.1 | Scaffold181 | 34689                   | AA                              | GG                | 1946487564               |
| SNP_P3_107406_34697  | NW_004515735.1 | Scaffold181 | 34697                   | AA                              | GG                | 1946487565               |
| SNP_P3_107407_38709  | NW_004515735.1 | Scaffold181 | 38709                   | CC                              | TT                | 1946487567               |
| SNP_P3_107409_104048 | NW_004515735.1 | Scaffold181 | 104048                  | CC                              | TT                | 1946487568               |
| SNP_P3_107410_117194 | NW_004515735.1 | Scaffold181 | 117194                  | CC                              | TT                | 1946487570               |
| SNP_P3_107411_122044 | NW_004515735.1 | Scaffold181 | 122044                  | TT                              | CC                | 1946487571               |
| SNP_P3_107412_126862 | NW_004515735.1 | Scaffold181 | 126862                  | GG                              | AA                | 1946487573               |
| SNP_P3_107413_136934 | NW_004515735.1 | Scaffold181 | 136934                  | AA                              | GG                | 1946487574               |
| SNP_P3_107414_164484 | NW_004515735.1 | Scaffold181 | 164484                  | AA                              | GG                | 1946487575               |
| SNP_P3_107416_189911 | NW_004515735.1 | Scaffold181 | 189911                  | CC                              | AA                | 1946487577               |
| SNP_P3_107417_203970 | NW_004515735.1 | Scaffold181 | 203970                  | TT                              | CC                | 1946487578               |
| SNP_P3_107418_25340  | NW_004515738.1 | Scaffold186 | 25340                   | TT                              | CC                | 1946487580               |
| SNP_P3_107419_25807  | NW_004515738.1 | Scaffold186 | 25807                   | GG                              | TT                | 1946487581               |
| SNP_P3_107420_25834  | NW_004515738.1 | Scaffold186 | 25834                   | CC                              | AA                | 1946487583               |
| SNP_P3_107421_36460  | NW_004515738.1 | Scaffold186 | 36460                   | TT                              | CC                | 1946487584               |
| SNP_P3_107422_36469  | NW_004515738.1 | Scaffold186 | 36469                   | TT                              | CC                | 1946487585               |
| SNP_P3_107423_36490  | NW_004515738.1 | Scaffold186 | 36490                   | AA                              | GG                | 1946487587               |
| SNP_P3_107424_49326  | NW_004515738.1 | Scaffold186 | 49326                   | CC                              | AA                | 1946487588               |
| SNP_P3_107425_65058  | NW_004515738.1 | Scaffold186 | 65058                   | TT                              | CC                | 1946487590               |
| SNP_P3_107426_77320  | NW_004515738.1 | Scaffold186 | 77320                   | CC                              | TT                | 1946487591               |
| SNP_P3_107427_78617  | NW_004515738.1 | Scaffold186 | 78617                   | GG                              | AA                | 1946487593               |
| SNP_P3_107428_79299  | NW_004515738.1 | Scaffold186 | 79299                   | AA                              | CC                | 1946487594               |
| SNP_P3_107429_79326  | NW_004515738.1 | Scaffold186 | 79326                   | GG                              | AA                | 1946487596               |
| SNP_P3_107430_79332  | NW_004515738.1 | Scaffold186 | 79332                   | GG                              | AA                | 1946487597               |
| SNP_P3_107431_92935  | NW_004515738.1 | Scaffold186 | 92935                   | AA                              | GG                | 1946487598               |
| SNP_P3_107432_118881 | NW_004515738.1 | Scaffold186 | 118881                  | CC                              | TT                | 1946487600               |
| SNP_P3_107433_124727 | NW_004515738.1 | Scaffold186 | 124727                  | CC                              | TT                | 1946487601               |
| SNP_P3_107434_124978 | NW_004515738.1 | Scaffold186 | 124978                  | TT                              | CC                | 1946487603               |
| SNP_P3_107435_125093 | NW_004515738.1 | Scaffold186 | 125093                  | CC                              | TT                | 1946487604               |
| SNP_P3_107436_125184 | NW_004515738.1 | Scaffold186 | 125184                  | AA                              | GG                | 1946487606               |
| SNP_P3_107437_151599 | NW_004515738.1 | Scaffold186 | 151599                  | AA                              | TT                | 1946487607               |
| SNP_P3_107438_151641 | NW_004515738.1 | Scaffold186 | 151641                  | AA                              | GG                | 1946487608               |
| SNP_P3_107439_176334 | NW_004515738.1 | Scaffold186 | 176334                  | TT                              | GG                | 1946487610               |

| SNPs IDs             | Chromosome IDs | Chromosomes | Physical positions (bp) | CDC Frontier (Reference genome) | (Pusa 256 & HPNB) | NCBI SNPdb Accession IDs |
|----------------------|----------------|-------------|-------------------------|---------------------------------|-------------------|--------------------------|
| SNP_P3_107440_176380 | NW_004515738.1 | Scaffold186 | 176380                  | TT                              | GG                | 1946487611               |
| SNP_P3_107441_176412 | NW_004515738.1 | Scaffold186 | 176412                  | TT                              | CC                | 1946487613               |
| SNP_P3_107442_176708 | NW_004515738.1 | Scaffold186 | 176708                  | GG                              | AA                | 1946487614               |
| SNP_P3_107443_176736 | NW_004515738.1 | Scaffold186 | 176736                  | CC                              | TT                | 1946487616               |
| SNP_P3_107444_176782 | NW_004515738.1 | Scaffold186 | 176782                  | CC                              | TT                | 1946487617               |
| SNP_P3_107445_176828 | NW_004515738.1 | Scaffold186 | 176828                  | TT                              | CC                | 1946487618               |
| SNP_P3_107446_176831 | NW_004515738.1 | Scaffold186 | 176831                  | AA                              | GG                | 1946487620               |
| SNP_P3_107447_176867 | NW_004515738.1 | Scaffold186 | 176867                  | AA                              | GG                | 1946487621               |
| SNP_P3_107448_178782 | NW_004515738.1 | Scaffold186 | 178782                  | GG                              | CC                | 1946487623               |
| SNP_P3_107449_178783 | NW_004515738.1 | Scaffold186 | 178783                  | TT                              | CC                | 1946487624               |
| SNP_P3_107450_178816 | NW_004515738.1 | Scaffold186 | 178816                  | CC                              | TT                | 1946487626               |
| SNP_P3_107451_178827 | NW_004515738.1 | Scaffold186 | 178827                  | AA                              | GG                | 1946487627               |
| SNP_P3_107452_178933 | NW_004515738.1 | Scaffold186 | 178933                  | GG                              | AA                | 1946487629               |
| SNP_P3_107453_178957 | NW_004515738.1 | Scaffold186 | 178957                  | CC                              | TT                | 1946487630               |
| SNP_P3_107454_179044 | NW_004515738.1 | Scaffold186 | 179044                  | TT                              | CC                | 1946487632               |
| SNP_P3_107455_179100 | NW_004515738.1 | Scaffold186 | 179100                  | GG                              | AA                | 1946487633               |
| SNP_P3_107456_179146 | NW_004515738.1 | Scaffold186 | 179146                  | TT                              | CC                | 1946487634               |
| SNP_P3_107457_179318 | NW_004515738.1 | Scaffold186 | 179318                  | AA                              | CC                | 1946487636               |
| SNP_P3_107458_234745 | NW_004515738.1 | Scaffold186 | 234745                  | CC                              | GG                | 1946487637               |
| SNP_P3_107459_235044 | NW_004515738.1 | Scaffold186 | 235044                  | AA                              | CC                | 1946487639               |
| SNP_P3_107461_252848 | NW_004515738.1 | Scaffold186 | 252848                  | CC                              | TT                | 1946487640               |
| SNP_P3_107462_252885 | NW_004515738.1 | Scaffold186 | 252885                  | TT                              | CC                | 1946487641               |
| SNP_P3_107463_253788 | NW_004515738.1 | Scaffold186 | 253788                  | TT                              | CC                | 1946487643               |
| SNP_P3_107464_255453 | NW_004515738.1 | Scaffold186 | 255453                  | CC                              | TT                | 1946487644               |
| SNP_P3_107466_307483 | NW_004515738.1 | Scaffold186 | 307483                  | AA                              | GG                | 1946487646               |
| SNP_P3_107467_307530 | NW_004515738.1 | Scaffold186 | 307530                  | TT                              | CC                | 1946487647               |
| SNP_P3_107468_311229 | NW_004515738.1 | Scaffold186 | 311229                  | CC                              | AA                | 1946487648               |
| SNP_P3_107469_311236 | NW_004515738.1 | Scaffold186 | 311236                  | CC                              | AA                | 1946487650               |
| SNP_P3_107470_330898 | NW_004515738.1 | Scaffold186 | 330898                  | GG                              | TT                | 1946487651               |
| SNP_P3_107471_331147 | NW_004515738.1 | Scaffold186 | 331147                  | CC                              | AA                | 1946487653               |
| SNP_P3_107472_331149 | NW_004515738.1 | Scaffold186 | 331149                  | AA                              | CC                | 1946487654               |
| SNP_P3_107473_335172 | NW_004515738.1 | Scaffold186 | 335172                  | CC                              | TT                | 1946487656               |
| SNP_P3_107474_349896 | NW_004515738.1 | Scaffold186 | 349896                  | AA                              | TT                | 1946487657               |
| SNP_P3_107475_350088 | NW_004515738.1 | Scaffold186 | 350088                  | TT                              | CC                | 1946487658               |
| SNP_P3_107476_350136 | NW_004515738.1 | Scaffold186 | 350136                  | AA                              | CC                | 1946487660               |
| SNP_P3_107477_351024 | NW_004515738.1 | Scaffold186 | 351024                  | AA                              | GG                | 1946487661               |
| SNP_P3_107478_351043 | NW_004515738.1 | Scaffold186 | 351043                  | GG                              | TT                | 1946487663               |
| SNP_P3_107479_351245 | NW_004515738.1 | Scaffold186 | 351245                  | CC                              | GG                | 1946487664               |
| SNP_P3_107480_351436 | NW_004515738.1 | Scaffold186 | 351436                  | TT                              | CC                | 1946487666               |
| SNP_P3_107481_351440 | NW_004515738.1 | Scaffold186 | 351440                  | TT                              | GG                | 1946487667               |
| SNP_P3_107482_351515 | NW_004515738.1 | Scaffold186 | 351515                  | TT                              | AA                | 1946487668               |
| SNP_P3_107483_355250 | NW_004515738.1 | Scaffold186 | 355250                  | GG                              | AA                | 1946487670               |

| SNPs IDs             | Chromosome IDs | Chromosomes | Physical positions (bp) | CDC Frontier (Reference genome) | (Pusa 256 & HPNB) | NCBI SNPdb Accession IDs |
|----------------------|----------------|-------------|-------------------------|---------------------------------|-------------------|--------------------------|
| SNP_P3_107484_364436 | NW_004515738.1 | Scaffold186 | 364436                  | AA                              | TT                | 1946487671               |
| SNP_P3_107485_364440 | NW_004515738.1 | Scaffold186 | 364440                  | AA                              | GG                | 1946487673               |
| SNP_P3_107486_370716 | NW_004515738.1 | Scaffold186 | 370716                  | AA                              | TT                | 1946487674               |
| SNP_P3_107487_371227 | NW_004515738.1 | Scaffold186 | 371227                  | GG                              | AA                | 1946487676               |
| SNP_P3_107488_445553 | NW_004515738.1 | Scaffold186 | 445553                  | GG                              | TT                | 1946487677               |
| SNP_P3_107489_460229 | NW_004515738.1 | Scaffold186 | 460229                  | AA                              | CC                | 1946487678               |
| SNP_P3_107490_28131  | NW_004515740.1 | Scaffold193 | 28131                   | AA                              | GG                | 1946487680               |
| SNP_P3_107491_28132  | NW_004515740.1 | Scaffold193 | 28132                   | AA                              | TT                | 1946487681               |
| SNP_P3_107492_32828  | NW_004515740.1 | Scaffold193 | 32828                   | AA                              | TT                | 1946487683               |
| SNP_P3_107493_50003  | NW_004515740.1 | Scaffold193 | 50003                   | GG                              | CC                | 1946487684               |
| SNP_P3_107494_50335  | NW_004515740.1 | Scaffold193 | 50335                   | TT                              | CC                | 1946487686               |
| SNP_P3_107495_61942  | NW_004515740.1 | Scaffold193 | 61942                   | GG                              | AA                | 1946487687               |
| SNP_P3_107496_63823  | NW_004515740.1 | Scaffold193 | 63823                   | GG                              | AA                | 1946487688               |
| SNP_P3_107498_65818  | NW_004515740.1 | Scaffold193 | 65818                   | GG                              | TT                | 1946487690               |
| SNP_P3_107499_79447  | NW_004515740.1 | Scaffold193 | 79447                   | CC                              | TT                | 1946487691               |
| SNP_P3_107500_79469  | NW_004515740.1 | Scaffold193 | 79469                   | AA                              | CC                | 1946487693               |
| SNP_P3_107501_79478  | NW_004515740.1 | Scaffold193 | 79478                   | TT                              | CC                | 1946487694               |
| SNP_P3_107502_79545  | NW_004515740.1 | Scaffold193 | 79545                   | AA                              | GG                | 1946487696               |
| SNP_P3_107504_79661  | NW_004515740.1 | Scaffold193 | 79661                   | TT                              | AA                | 1946487697               |
| SNP_P3_107506_79774  | NW_004515740.1 | Scaffold193 | 79774                   | TT                              | CC                | 1946487699               |
| SNP_P3_107507_79830  | NW_004515740.1 | Scaffold193 | 79830                   | GG                              | AA                | 1946487700               |
| SNP_P3_107508_80018  | NW_004515740.1 | Scaffold193 | 80018                   | AA                              | CC                | 1946487702               |
| SNP_P3_107509_87351  | NW_004515740.1 | Scaffold193 | 87351                   | TT                              | AA                | 1946487703               |
| SNP_P3_107511_167253 | NW_004515740.1 | Scaffold193 | 167253                  | CC                              | TT                | 1946487705               |
| SNP_P3_107512_168471 | NW_004515740.1 | Scaffold193 | 168471                  | GG                              | TT                | 1946487706               |
| SNP_P3_107514_200070 | NW_004515740.1 | Scaffold193 | 200070                  | TT                              | GG                | 1946487708               |
| SNP_P3_107515_201823 | NW_004515740.1 | Scaffold193 | 201823                  | CC                              | TT                | 1946487709               |
| SNP_P3_107516_201979 | NW_004515740.1 | Scaffold193 | 201979                  | TT                              | CC                | 1946487711               |
| SNP_P3_107517_208267 | NW_004515740.1 | Scaffold193 | 208267                  | TT                              | CC                | 1946487712               |
| SNP_P3_107518_208273 | NW_004515740.1 | Scaffold193 | 208273                  | TT                              | CC                | 1946487714               |
| SNP_P3_107519_208280 | NW_004515740.1 | Scaffold193 | 208280                  | GG                              | AA                | 1946487715               |
| SNP_P3_107520_208282 | NW_004515740.1 | Scaffold193 | 208282                  | AA                              | GG                | 1946487717               |
| SNP_P3_107521_208306 | NW_004515740.1 | Scaffold193 | 208306                  | CC                              | TT                | 1946487718               |
| SNP_P3_107522_208333 | NW_004515740.1 | Scaffold193 | 208333                  | TT                              | CC                | 1946487719               |
| SNP_P3_107523_208347 | NW_004515740.1 | Scaffold193 | 208347                  | AA                              | GG                | 1946487721               |
| SNP_P3_107524_208361 | NW_004515740.1 | Scaffold193 | 208361                  | GG                              | AA                | 1946487722               |
| SNP_P3_107525_208382 | NW_004515740.1 | Scaffold193 | 208382                  | TT                              | CC                | 1946487724               |
| SNP_P3_107526_208386 | NW_004515740.1 | Scaffold193 | 208386                  | TT                              | CC                | 1946487725               |
| SNP_P3_107527_208486 | NW_004515740.1 | Scaffold193 | 208486                  | AA                              | GG                | 1946487727               |
| SNP_P3_107528_208620 | NW_004515740.1 | Scaffold193 | 208620                  | AA                              | GG                | 1946487728               |
| SNP_P3_107529_208727 | NW_004515740.1 | Scaffold193 | 208727                  | CC                              | GG                | 1946487729               |
| SNP_P3_107530_208773 | NW_004515740.1 | Scaffold193 | 208773                  | GG                              | CC                | 1946487731               |

| SNPs IDs             | Chromosome IDs | Chromosomes | Physical positions (bp) | CDC Frontier (Reference genome) | (Pusa 256 & HPNB) | NCBI SNPdb Accession IDs |
|----------------------|----------------|-------------|-------------------------|---------------------------------|-------------------|--------------------------|
| SNP_P3_107531_213066 | NW_004515740.1 | Scaffold193 | 213066                  | GG                              | AA                | 1946487732               |
| SNP_P3_107532_228083 | NW_004515740.1 | Scaffold193 | 228083                  | AA                              | GG                | 1946487734               |
| SNP_P3_107536_255505 | NW_004515740.1 | Scaffold193 | 255505                  | TT                              | CC                | 1946487735               |
| SNP_P3_107537_255506 | NW_004515740.1 | Scaffold193 | 255506                  | CC                              | TT                | 1946487737               |
| SNP_P3_107538_272179 | NW_004515740.1 | Scaffold193 | 272179                  | AA                              | TT                | 1946487738               |
| SNP_P3_107539_280341 | NW_004515740.1 | Scaffold193 | 280341                  | CC                              | TT                | 1946487739               |
| SNP_P3_107540_280649 | NW_004515740.1 | Scaffold193 | 280649                  | TT                              | CC                | 1946487741               |
| SNP_P3_107541_280650 | NW_004515740.1 | Scaffold193 | 280650                  | GG                              | TT                | 1946487742               |
| SNP_P3_107542_291482 | NW_004515740.1 | Scaffold193 | 291482                  | CC                              | TT                | 1946487744               |
| SNP_P3_107543_295630 | NW_004515740.1 | Scaffold193 | 295630                  | AA                              | GG                | 1946487745               |
| SNP_P3_107544_295646 | NW_004515740.1 | Scaffold193 | 295646                  | AA                              | GG                | 1946487747               |
| SNP_P3_107545_295650 | NW_004515740.1 | Scaffold193 | 295650                  | TT                              | CC                | 1946487748               |
| SNP_P3_107546_295654 | NW_004515740.1 | Scaffold193 | 295654                  | TT                              | GG                | 1946487750               |
| SNP_P3_107547_295685 | NW_004515740.1 | Scaffold193 | 295685                  | GG                              | AA                | 1946487751               |
| SNP_P3_107548_295711 | NW_004515740.1 | Scaffold193 | 295711                  | GG                              | AA                | 1946487752               |
| SNP_P3_107549_295754 | NW_004515740.1 | Scaffold193 | 295754                  | AA                              | TT                | 1946487754               |
| SNP_P3_107550_295813 | NW_004515740.1 | Scaffold193 | 295813                  | CC                              | TT                | 1946487755               |
| SNP_P3_107551_295859 | NW_004515740.1 | Scaffold193 | 295859                  | CC                              | TT                | 1946487757               |
| SNP_P3_107552_296025 | NW_004515740.1 | Scaffold193 | 296025                  | GG                              | AA                | 1946487758               |
| SNP_P3_107553_296034 | NW_004515740.1 | Scaffold193 | 296034                  | CC                              | AA                | 1946487760               |
| SNP_P3_107554_296055 | NW_004515740.1 | Scaffold193 | 296055                  | AA                              | GG                | 1946487761               |
| SNP_P3_107555_296088 | NW_004515740.1 | Scaffold193 | 296088                  | CC                              | TT                | 1946487763               |
| SNP_P3_107556_296090 | NW_004515740.1 | Scaffold193 | 296090                  | AA                              | GG                | 1946487764               |
| SNP_P3_107557_296096 | NW_004515740.1 | Scaffold193 | 296096                  | TT                              | CC                | 1946487766               |
| SNP_P3_107558_296229 | NW_004515740.1 | Scaffold193 | 296229                  | AA                              | GG                | 1946487767               |
| SNP_P3_107559_296250 | NW_004515740.1 | Scaffold193 | 296250                  | AA                              | GG                | 1946487768               |
| SNP_P3_107560_305474 | NW_004515740.1 | Scaffold193 | 305474                  | CC                              | TT                | 1946487770               |
| SNP_P3_107561_305615 | NW_004515740.1 | Scaffold193 | 305615                  | TT                              | CC                | 1946487771               |
| SNP_P3_107562_306402 | NW_004515740.1 | Scaffold193 | 306402                  | GG                              | TT                | 1946487773               |
| SNP_P3_107563_306404 | NW_004515740.1 | Scaffold193 | 306404                  | GG                              | AA                | 1946487774               |
| SNP_P3_107564_310189 | NW_004515740.1 | Scaffold193 | 310189                  | GG                              | AA                | 1946487776               |
| SNP_P3_107565_310216 | NW_004515740.1 | Scaffold193 | 310216                  | CC                              | GG                | 1946487777               |
| SNP_P3_107566_310239 | NW_004515740.1 | Scaffold193 | 310239                  | CC                              | TT                | 1946487779               |
| SNP_P3_107567_310256 | NW_004515740.1 | Scaffold193 | 310256                  | CC                              | TT                | 1946487780               |
| SNP_P3_107568_310279 | NW_004515740.1 | Scaffold193 | 310279                  | AA                              | CC                | 1946487782               |
| SNP_P3_107569_310350 | NW_004515740.1 | Scaffold193 | 310350                  | GG                              | AA                | 1946487783               |
| SNP_P3_107570_310385 | NW_004515740.1 | Scaffold193 | 310385                  | TT                              | CC                | 1946487785               |
| SNP_P3_107571_310386 | NW_004515740.1 | Scaffold193 | 310386                  | TT                              | GG                | 1946487786               |
| SNP_P3_107572_310478 | NW_004515740.1 | Scaffold193 | 310478                  | CC                              | AA                | 1946487788               |
| SNP_P3_107573_310514 | NW_004515740.1 | Scaffold193 | 310514                  | TT                              | AA                | 1946487789               |
| SNP_P3_107574_316668 | NW_004515740.1 | Scaffold193 | 316668                  | CC                              | TT                | 1946487791               |
| SNP_P3_107575_317082 | NW_004515740.1 | Scaffold193 | 317082                  | CC                              | TT                | 1946487792               |

| SNPs IDs             | Chromosome IDs | Chromosomes | Physical positions (bp) | CDC Frontier (Reference genome) | (Pusa 256 & HPNB) | NCBI SNPdb Accession IDs |
|----------------------|----------------|-------------|-------------------------|---------------------------------|-------------------|--------------------------|
| SNP_P3_107576_318918 | NW_004515740.1 | Scaffold193 | 318918                  | GG                              | AA                | 1946487794               |
| SNP_P3_107577_321508 | NW_004515740.1 | Scaffold193 | 321508                  | CC                              | TT                | 1946487795               |
| SNP_P3_107578_329499 | NW_004515740.1 | Scaffold193 | 329499                  | GG                              | AA                | 1946487797               |
| SNP_P3_107580_329670 | NW_004515740.1 | Scaffold193 | 329670                  | GG                              | CC                | 1946487798               |
| SNP_P3_107581_329751 | NW_004515740.1 | Scaffold193 | 329751                  | AA                              | GG                | 1946487799               |
| SNP_P3_107582_336680 | NW_004515740.1 | Scaffold193 | 336680                  | TT                              | CC                | 1946487801               |
| SNP_P3_107583_336691 | NW_004515740.1 | Scaffold193 | 336691                  | AA                              | GG                | 1946487802               |
| SNP_P3_107584_352794 | NW_004515740.1 | Scaffold193 | 352794                  | TT                              | CC                | 1946487804               |
| SNP_P3_107585_354614 | NW_004515740.1 | Scaffold193 | 354614                  | CC                              | GG                | 1946487805               |
| SNP_P3_107586_377983 | NW_004515740.1 | Scaffold193 | 377983                  | TT                              | CC                | 1946487807               |
| SNP_P3_107587_385661 | NW_004515740.1 | Scaffold193 | 385661                  | AA                              | GG                | 1946487808               |
| SNP_P3_107590_397427 | NW_004515740.1 | Scaffold193 | 397427                  | AA                              | GG                | 1946487810               |
| SNP_P3_107591_401100 | NW_004515740.1 | Scaffold193 | 401100                  | AA                              | CC                | 1946487811               |
| SNP_P3_107592_401139 | NW_004515740.1 | Scaffold193 | 401139                  | AA                              | GG                | 1946487813               |
| SNP_P3_107593_407250 | NW_004515740.1 | Scaffold193 | 407250                  | AA                              | GG                | 1946487814               |
| SNP_P3_107595_417526 | NW_004515740.1 | Scaffold193 | 417526                  | TT                              | GG                | 1946487816               |
| SNP_P3_107596_417537 | NW_004515740.1 | Scaffold193 | 417537                  | TT                              | GG                | 1946487817               |
| SNP_P3_107597_417551 | NW_004515740.1 | Scaffold193 | 417551                  | AA                              | GG                | 1946487819               |
| SNP_P3_107598_417566 | NW_004515740.1 | Scaffold193 | 417566                  | TT                              | GG                | 1946487820               |
| SNP_P3_107599_420552 | NW_004515740.1 | Scaffold193 | 420552                  | CC                              | TT                | 1946487821               |
| SNP_P3_107600_428958 | NW_004515740.1 | Scaffold193 | 428958                  | CC                              | TT                | 1946487823               |
| SNP_P3_107601_428970 | NW_004515740.1 | Scaffold193 | 428970                  | TT                              | CC                | 1946487824               |
| SNP_P3_107602_428972 | NW_004515740.1 | Scaffold193 | 428972                  | GG                              | TT                | 1946487826               |
| SNP_P3_107603_429014 | NW_004515740.1 | Scaffold193 | 429014                  | TT                              | GG                | 1946487827               |
| SNP_P3_107604_429247 | NW_004515740.1 | Scaffold193 | 429247                  | CC                              | TT                | 1946487829               |
| SNP_P3_107605_429251 | NW_004515740.1 | Scaffold193 | 429251                  | AA                              | GG                | 1946487830               |
| SNP_P3_107607_436132 | NW_004515740.1 | Scaffold193 | 436132                  | AA                              | GG                | 1946487832               |
| SNP_P3_107608_444702 | NW_004515740.1 | Scaffold193 | 444702                  | TT                              | CC                | 1946487833               |
| SNP_P3_107611_469120 | NW_004515740.1 | Scaffold193 | 469120                  | TT                              | CC                | 1946487835               |
| SNP_P3_107612_9263   | NW_004515741.1 | Scaffold194 | 9263                    | TT                              | CC                | 1946487836               |
| SNP_P3_107613_9376   | NW_004515741.1 | Scaffold194 | 9376                    | AA                              | GG                | 1946487838               |
| SNP_P3_107615_739    | NW_004515742.1 | Scaffold195 | 739                     | GG                              | AA                | 1946487839               |
| SNP_P3_107616_422    | NW_004515743.1 | Scaffold196 | 422                     | AA                              | GG                | 1946487841               |
| SNP_P3_107617_1111   | NW_004515743.1 | Scaffold196 | 1111                    | AA                              | GG                | 1946487842               |
| SNP_P3_107618_1163   | NW_004515743.1 | Scaffold196 | 1163                    | CC                              | AA                | 1946487844               |
| SNP_P3_107619_1170   | NW_004515743.1 | Scaffold196 | 1170                    | TT                              | AA                | 1946487845               |
| SNP_P3_107620_1194   | NW_004515743.1 | Scaffold196 | 1194                    | GG                              | TT                | 1946487846               |
| SNP_P3_107621_1519   | NW_004515743.1 | Scaffold196 | 1519                    | AA                              | TT                | 1946487848               |
| SNP_P3_107622_13673  | NW_004515743.1 | Scaffold196 | 13673                   | AA                              | GG                | 1946487849               |
| SNP_P3_107623_18249  | NW_004515743.1 | Scaffold196 | 18249                   | AA                              | TT                | 1946487851               |
| SNP_P3_107625_25130  | NW_004515744.1 | Scaffold198 | 25130                   | CC                              | TT                | 1946487852               |
| SNP_P3_107627_50904  | NW_004515744.1 | Scaffold198 | 50904                   | GG                              | AA                | 1946487854               |



| SNPs IDs             | Chromosome IDs | Chromosomes | Physical positions (bp) | CDC Frontier (Reference genome) | (Pusa 256 & HPNB) | NCBI SNPdb Accession IDs |
|----------------------|----------------|-------------|-------------------------|---------------------------------|-------------------|--------------------------|
| SNP_P3_107628_51222  | NW_004515744.1 | Scaffold198 | 51222                   | GG                              | AA                | 1946487855               |
| SNP_P3_107629_54777  | NW_004515744.1 | Scaffold198 | 54777                   | TT                              | CC                | 1946487857               |
| SNP_P3_107630_56356  | NW_004515744.1 | Scaffold198 | 56356                   | AA                              | GG                | 1946487858               |
| SNP_P3_107631_56389  | NW_004515744.1 | Scaffold198 | 56389                   | AA                              | TT                | 1946487859               |
| SNP_P3_107632_56395  | NW_004515744.1 | Scaffold198 | 56395                   | AA                              | TT                | 1946487861               |
| SNP_P3_107633_56398  | NW_004515744.1 | Scaffold198 | 56398                   | GG                              | AA                | 1946487862               |
| SNP_P3_107634_56399  | NW_004515744.1 | Scaffold198 | 56399                   | AA                              | GG                | 1946487864               |
| SNP_P3_107635_56495  | NW_004515744.1 | Scaffold198 | 56495                   | TT                              | CC                | 1946487865               |
| SNP_P3_107636_56503  | NW_004515744.1 | Scaffold198 | 56503                   | TT                              | CC                | 1946487867               |
| SNP_P3_107637_56548  | NW_004515744.1 | Scaffold198 | 56548                   | TT                              | CC                | 1946487868               |
| SNP_P3_107638_65551  | NW_004515744.1 | Scaffold198 | 65551                   | TT                              | AA                | 1946487870               |
| SNP_P3_107639_65560  | NW_004515744.1 | Scaffold198 | 65560                   | AA                              | GG                | 1946487871               |
| SNP_P3_107640_65949  | NW_004515744.1 | Scaffold198 | 65949                   | GG                              | CC                | 1946487873               |
| SNP_P3_107641_65950  | NW_004515744.1 | Scaffold198 | 65950                   | TT                              | CC                | 1946487874               |
| SNP_P3_107642_65960  | NW_004515744.1 | Scaffold198 | 65960                   | TT                              | CC                | 1946487875               |
| SNP_P3_107643_98211  | NW_004515744.1 | Scaffold198 | 98211                   | TT                              | AA                | 1946487877               |
| SNP_P3_107645_118680 | NW_004515744.1 | Scaffold198 | 118680                  | TT                              | AA                | 1946487878               |
| SNP_P3_107647_147817 | NW_004515744.1 | Scaffold198 | 147817                  | CC                              | AA                | 1946487880               |
| SNP_P3_107648_162521 | NW_004515744.1 | Scaffold198 | 162521                  | AA                              | CC                | 1946487882               |
| SNP_P3_107649_177412 | NW_004515744.1 | Scaffold198 | 177412                  | TT                              | CC                | 1946487883               |
| SNP_P3_107650_183433 | NW_004515744.1 | Scaffold198 | 183433                  | GG                              | AA                | 1946487885               |
| SNP_P3_107651_184491 | NW_004515744.1 | Scaffold198 | 184491                  | GG                              | AA                | 1946487886               |
| SNP_P3_107652_184706 | NW_004515744.1 | Scaffold198 | 184706                  | TT                              | AA                | 1946487887               |
| SNP_P3_107653_184745 | NW_004515744.1 | Scaffold198 | 184745                  | TT                              | AA                | 1946487889               |
| SNP_P3_107654_184852 | NW_004515744.1 | Scaffold198 | 184852                  | CC                              | TT                | 1946487890               |
| SNP_P3_107655_188043 | NW_004515744.1 | Scaffold198 | 188043                  | TT                              | CC                | 1946487892               |
| SNP_P3_107656_188093 | NW_004515744.1 | Scaffold198 | 188093                  | GG                              | AA                | 1946487893               |
| SNP_P3_107657_188102 | NW_004515744.1 | Scaffold198 | 188102                  | GG                              | AA                | 1946487896               |
| SNP_P3_107658_188108 | NW_004515744.1 | Scaffold198 | 188108                  | CC                              | TT                | 1946487897               |
| SNP_P3_107659_188113 | NW_004515744.1 | Scaffold198 | 188113                  | TT                              | CC                | 1946487899               |
| SNP_P3_107660_188122 | NW_004515744.1 | Scaffold198 | 188122                  | CC                              | TT                | 1946487900               |
| SNP_P3_107661_188126 | NW_004515744.1 | Scaffold198 | 188126                  | CC                              | AA                | 1946487902               |
| SNP_P3_107662_188162 | NW_004515744.1 | Scaffold198 | 188162                  | AA                              | TT                | 1946487903               |
| SNP_P3_107663_211114 | NW_004515744.1 | Scaffold198 | 211114                  | TT                              | AA                | 1946487905               |
| SNP_P3_107664_235760 | NW_004515744.1 | Scaffold198 | 235760                  | GG                              | AA                | 1946487906               |
| SNP_P3_107665_235764 | NW_004515744.1 | Scaffold198 | 235764                  | GG                              | TT                | 1946487907               |
| SNP_P3_107666_251472 | NW_004515744.1 | Scaffold198 | 251472                  | TT                              | GG                | 1946487909               |
| SNP_P3_107667_251488 | NW_004515744.1 | Scaffold198 | 251488                  | AA                              | GG                | 1946487910               |
| SNP_P3_107668_251518 | NW_004515744.1 | Scaffold198 | 251518                  | AA                              | GG                | 1946487912               |
| SNP_P3_107669_251556 | NW_004515744.1 | Scaffold198 | 251556                  | CC                              | TT                | 1946487913               |
| SNP_P3_107670_251569 | NW_004515744.1 | Scaffold198 | 251569                  | AA                              | GG                | 1946487915               |
| SNP_P3_107671_267497 | NW_004515744.1 | Scaffold198 | 267497                  | CC                              | TT                | 1946487916               |

| SNPs IDs             | Chromosome IDs | Chromosomes | Physical positions (bp) | CDC Frontier (Reference genome) | (Pusa 256 & HPNB) | NCBI SNPdb Accession IDs |
|----------------------|----------------|-------------|-------------------------|---------------------------------|-------------------|--------------------------|
| SNP_P3_107672_267507 | NW_004515744.1 | Scaffold198 | 267507                  | CC                              | TT                | 1946487918               |
| SNP_P3_107673_281995 | NW_004515744.1 | Scaffold198 | 281995                  | GG                              | AA                | 1946487919               |
| SNP_P3_107674_282331 | NW_004515744.1 | Scaffold198 | 282331                  | TT                              | CC                | 1946487921               |
| SNP_P3_107675_287031 | NW_004515744.1 | Scaffold198 | 287031                  | TT                              | GG                | 1946487922               |
| SNP_P3_107676_287269 | NW_004515744.1 | Scaffold198 | 287269                  | CC                              | TT                | 1946487923               |
| SNP_P3_107677_287323 | NW_004515744.1 | Scaffold198 | 287323                  | AA                              | GG                | 1946487925               |
| SNP_P3_107678_291324 | NW_004515744.1 | Scaffold198 | 291324                  | GG                              | TT                | 1946487926               |
| SNP_P3_107679_291336 | NW_004515744.1 | Scaffold198 | 291336                  | AA                              | TT                | 1946487928               |
| SNP_P3_107680_291607 | NW_004515744.1 | Scaffold198 | 291607                  | CC                              | AA                | 1946487929               |
| SNP_P3_107681_291628 | NW_004515744.1 | Scaffold198 | 291628                  | AA                              | TT                | 1946487931               |
| SNP_P3_107682_291655 | NW_004515744.1 | Scaffold198 | 291655                  | AA                              | TT                | 1946487932               |
| SNP_P3_107683_291658 | NW_004515744.1 | Scaffold198 | 291658                  | GG                              | AA                | 1946487934               |
| SNP_P3_107684_291667 | NW_004515744.1 | Scaffold198 | 291667                  | AA                              | GG                | 1946487935               |
| SNP_P3_107685_291670 | NW_004515744.1 | Scaffold198 | 291670                  | AA                              | GG                | 1946487937               |
| SNP_P3_107686_291706 | NW_004515744.1 | Scaffold198 | 291706                  | TT                              | CC                | 1946487938               |
| SNP_P3_107687_320283 | NW_004515744.1 | Scaffold198 | 320283                  | TT                              | AA                | 1946487940               |
| SNP_P3_107688_328213 | NW_004515744.1 | Scaffold198 | 328213                  | AA                              | GG                | 1946487941               |
| SNP_P3_107689_328227 | NW_004515744.1 | Scaffold198 | 328227                  | CC                              | TT                | 1946487943               |
| SNP_P3_107690_330214 | NW_004515744.1 | Scaffold198 | 330214                  | AA                              | GG                | 1946487944               |
| SNP_P3_107691_330278 | NW_004515744.1 | Scaffold198 | 330278                  | AA                              | TT                | 1946487945               |
| SNP_P3_107692_330304 | NW_004515744.1 | Scaffold198 | 330304                  | TT                              | CC                | 1946487947               |
| SNP_P3_107693_330416 | NW_004515744.1 | Scaffold198 | 330416                  | TT                              | CC                | 1946487948               |
| SNP_P3_107694_330569 | NW_004515744.1 | Scaffold198 | 330569                  | TT                              | CC                | 1946487950               |
| SNP_P3_107695_330637 | NW_004515744.1 | Scaffold198 | 330637                  | AA                              | CC                | 1946487951               |
| SNP_P3_107696_330678 | NW_004515744.1 | Scaffold198 | 330678                  | TT                              | GG                | 1946487953               |
| SNP_P3_107697_330722 | NW_004515744.1 | Scaffold198 | 330722                  | TT                              | CC                | 1946487954               |
| SNP_P3_107698_330749 | NW_004515744.1 | Scaffold198 | 330749                  | GG                              | AA                | 1946487956               |
| SNP_P3_107699_330785 | NW_004515744.1 | Scaffold198 | 330785                  | TT                              | AA                | 1946487957               |
| SNP_P3_107700_335540 | NW_004515744.1 | Scaffold198 | 335540                  | TT                              | GG                | 1946487959               |
| SNP_P3_107701_335575 | NW_004515744.1 | Scaffold198 | 335575                  | GG                              | AA                | 1946487960               |
| SNP_P3_107702_335587 | NW_004515744.1 | Scaffold198 | 335587                  | TT                              | CC                | 1946487962               |
| SNP_P3_107703_335588 | NW_004515744.1 | Scaffold198 | 335588                  | AA                              | GG                | 1946487963               |
| SNP_P3_107704_335739 | NW_004515744.1 | Scaffold198 | 335739                  | TT                              | GG                | 1946487965               |
| SNP_P3_107705_335815 | NW_004515744.1 | Scaffold198 | 335815                  | GG                              | AA                | 1946487966               |
| SNP_P3_107707_373326 | NW_004515744.1 | Scaffold198 | 373326                  | CC                              | AA                | 1946487967               |
| SNP_P3_107708_373378 | NW_004515744.1 | Scaffold198 | 373378                  | CC                              | TT                | 1946487969               |
| SNP_P3_107709_373696 | NW_004515744.1 | Scaffold198 | 373696                  | AA                              | TT                | 1946487970               |
| SNP_P3_107710_373726 | NW_004515744.1 | Scaffold198 | 373726                  | TT                              | CC                | 1946487972               |
| SNP_P3_107711_373735 | NW_004515744.1 | Scaffold198 | 373735                  | CC                              | AA                | 1946487973               |
| SNP_P3_107712_410889 | NW_004515744.1 | Scaffold198 | 410889                  | AA                              | TT                | 1946487975               |
| SNP_P3_107714_413398 | NW_004515744.1 | Scaffold198 | 413398                  | GG                              | TT                | 1946487976               |
| SNP_P3_107715_413454 | NW_004515744.1 | Scaffold198 | 413454                  | CC                              | AA                | 1946487978               |

| SNPs IDs             | Chromosome IDs | Chromosomes | Physical positions (bp) | CDC Frontier (Reference genome) | (Pusa 256 & HPNB) | NCBI SNPdb Accession IDs |
|----------------------|----------------|-------------|-------------------------|---------------------------------|-------------------|--------------------------|
| SNP_P3_107716_413458 | NW_004515744.1 | Scaffold198 | 413458                  | CC                              | TT                | 1946487979               |
| SNP_P3_107717_416040 | NW_004515744.1 | Scaffold198 | 416040                  | TT                              | CC                | 1946487981               |
| SNP_P3_107718_416061 | NW_004515744.1 | Scaffold198 | 416061                  | AA                              | GG                | 1946487982               |
| SNP_P3_107719_416084 | NW_004515744.1 | Scaffold198 | 416084                  | TT                              | CC                | 1946487984               |
| SNP_P3_107720_416096 | NW_004515744.1 | Scaffold198 | 416096                  | CC                              | AA                | 1946487985               |
| SNP_P3_107721_420695 | NW_004515744.1 | Scaffold198 | 420695                  | CC                              | AA                | 1946487986               |
| SNP_P3_107722_420716 | NW_004515744.1 | Scaffold198 | 420716                  | TT                              | GG                | 1946487988               |
| SNP_P3_107723_420806 | NW_004515744.1 | Scaffold198 | 420806                  | AA                              | TT                | 1946487989               |
| SNP_P3_107724_420807 | NW_004515744.1 | Scaffold198 | 420807                  | AA                              | TT                | 1946487991               |
| SNP_P3_107725_420881 | NW_004515744.1 | Scaffold198 | 420881                  | TT                              | GG                | 1946487992               |
| SNP_P3_107726_421049 | NW_004515744.1 | Scaffold198 | 421049                  | AA                              | TT                | 1946487994               |
| SNP_P3_107727_421052 | NW_004515744.1 | Scaffold198 | 421052                  | TT                              | CC                | 1946487995               |
| SNP_P3_107728_421134 | NW_004515744.1 | Scaffold198 | 421134                  | CC                              | TT                | 1946487997               |
| SNP_P3_107729_423104 | NW_004515744.1 | Scaffold198 | 423104                  | GG                              | AA                | 1946487998               |
| SNP_P3_107730_423239 | NW_004515744.1 | Scaffold198 | 423239                  | AA                              | GG                | 1946487999               |
| SNP_P3_107731_423373 | NW_004515744.1 | Scaffold198 | 423373                  | CC                              | TT                | 1946488001               |
| SNP_P3_107732_423535 | NW_004515744.1 | Scaffold198 | 423535                  | AA                              | CC                | 1946488002               |
| SNP_P3_107733_423536 | NW_004515744.1 | Scaffold198 | 423536                  | GG                              | AA                | 1946488004               |
| SNP_P3_107734_423601 | NW_004515744.1 | Scaffold198 | 423601                  | AA                              | TT                | 1946488005               |
| SNP_P3_107735_423646 | NW_004515744.1 | Scaffold198 | 423646                  | GG                              | AA                | 1946488007               |
| SNP_P3_107737_443721 | NW_004515744.1 | Scaffold198 | 443721                  | CC                              | TT                | 1946488008               |
| SNP_P3_107738_444825 | NW_004515744.1 | Scaffold198 | 444825                  | AA                              | GG                | 1946488009               |
| SNP_P3_107739_444833 | NW_004515744.1 | Scaffold198 | 444833                  | GG                              | AA                | 1946488011               |
| SNP_P3_107740_445130 | NW_004515744.1 | Scaffold198 | 445130                  | TT                              | CC                | 1946488012               |
| SNP_P3_107741_446472 | NW_004515744.1 | Scaffold198 | 446472                  | GG                              | AA                | 1946488014               |
| SNP_P3_107742_467122 | NW_004515744.1 | Scaffold198 | 467122                  | AA                              | CC                | 1946488015               |
| SNP_P3_107743_467124 | NW_004515744.1 | Scaffold198 | 467124                  | TT                              | AA                | 1946488017               |
| SNP_P3_107744_472930 | NW_004515744.1 | Scaffold198 | 472930                  | TT                              | CC                | 1946488018               |
| SNP_P3_107745_473314 | NW_004515744.1 | Scaffold198 | 473314                  | CC                              | AA                | 1946488019               |
| SNP_P3_107746_473337 | NW_004515744.1 | Scaffold198 | 473337                  | TT                              | GG                | 1946488021               |
| SNP_P3_107747_490922 | NW_004515744.1 | Scaffold198 | 490922                  | AA                              | TT                | 1946488022               |
| SNP_P3_107748_500211 | NW_004515744.1 | Scaffold198 | 500211                  | GG                              | AA                | 1946488024               |
| SNP_P3_107749_501036 | NW_004515744.1 | Scaffold198 | 501036                  | GG                              | TT                | 1946488025               |
| SNP_P3_107750_501433 | NW_004515744.1 | Scaffold198 | 501433                  | TT                              | AA                | 1946488027               |
| SNP_P3_107751_501474 | NW_004515744.1 | Scaffold198 | 501474                  | CC                              | AA                | 1946488028               |
| SNP_P3_107753_501524 | NW_004515744.1 | Scaffold198 | 501524                  | GG                              | TT                | 1946488029               |
| SNP_P3_107754_501550 | NW_004515744.1 | Scaffold198 | 501550                  | TT                              | CC                | 1946488031               |
| SNP_P3_107755_501606 | NW_004515744.1 | Scaffold198 | 501606                  | AA                              | GG                | 1946488032               |
| SNP_P3_107756_501683 | NW_004515744.1 | Scaffold198 | 501683                  | AA                              | CC                | 1946488034               |
| SNP_P3_107757_501738 | NW_004515744.1 | Scaffold198 | 501738                  | AA                              | TT                | 1946488035               |
| SNP_P3_107758_510286 | NW_004515744.1 | Scaffold198 | 510286                  | GG                              | TT                | 1946488036               |
| SNP_P3_107759_594305 | NW_004515744.1 | Scaffold198 | 594305                  | GG                              | CC                | 1946488038               |

| SNPs IDs             | Chromosome IDs | Chromosomes | Physical positions (bp) | CDC Frontier (Reference genome) | (Pusa 256 & HPNB) | NCBI SNPdb Accession IDs |
|----------------------|----------------|-------------|-------------------------|---------------------------------|-------------------|--------------------------|
| SNP_P3_107760_594306 | NW_004515744.1 | Scaffold198 | 594306                  | CC                              | AA                | 1946488039               |
| SNP_P3_107761_594308 | NW_004515744.1 | Scaffold198 | 594308                  | GG                              | TT                | 1946488041               |
| SNP_P3_107762_595844 | NW_004515744.1 | Scaffold198 | 595844                  | TT                              | CC                | 1946488042               |
| SNP_P3_107763_595851 | NW_004515744.1 | Scaffold198 | 595851                  | AA                              | GG                | 1946488044               |
| SNP_P3_107764_621234 | NW_004515744.1 | Scaffold198 | 621234                  | TT                              | CC                | 1946488045               |
| SNP_P3_107765_621239 | NW_004515744.1 | Scaffold198 | 621239                  | GG                              | CC                | 1946488046               |
| SNP_P3_107766_630404 | NW_004515744.1 | Scaffold198 | 630404                  | TT                              | AA                | 1946488048               |
| SNP_P3_107767_631467 | NW_004515744.1 | Scaffold198 | 631467                  | GG                              | TT                | 1946488049               |
| SNP_P3_107768_631618 | NW_004515744.1 | Scaffold198 | 631618                  | AA                              | GG                | 1946488051               |
| SNP_P3_107769_631627 | NW_004515744.1 | Scaffold198 | 631627                  | AA                              | GG                | 1946488052               |
| SNP_P3_107770_631654 | NW_004515744.1 | Scaffold198 | 631654                  | CC                              | GG                | 1946488054               |
| SNP_P3_107771_631671 | NW_004515744.1 | Scaffold198 | 631671                  | AA                              | GG                | 1946488055               |
| SNP_P3_107772_631712 | NW_004515744.1 | Scaffold198 | 631712                  | GG                              | TT                | 1946488056               |
| SNP_P3_107773_632755 | NW_004515744.1 | Scaffold198 | 632755                  | GG                              | AA                | 1946488058               |
| SNP_P3_107774_632801 | NW_004515744.1 | Scaffold198 | 632801                  | AA                              | CC                | 1946488059               |
| SNP_P3_107775_632803 | NW_004515744.1 | Scaffold198 | 632803                  | AA                              | CC                | 1946488061               |
| SNP_P3_107776_632846 | NW_004515744.1 | Scaffold198 | 632846                  | GG                              | AA                | 1946488062               |
| SNP_P3_107777_632944 | NW_004515744.1 | Scaffold198 | 632944                  | GG                              | CC                | 1946488063               |
| SNP_P3_107778_633046 | NW_004515744.1 | Scaffold198 | 633046                  | AA                              | GG                | 1946488065               |
| SNP_P3_107779_633047 | NW_004515744.1 | Scaffold198 | 633047                  | CC                              | TT                | 1946488066               |
| SNP_P3_107780_633048 | NW_004515744.1 | Scaffold198 | 633048                  | TT                              | GG                | 1946488068               |
| SNP_P3_107781_633049 | NW_004515744.1 | Scaffold198 | 633049                  | GG                              | CC                | 1946488069               |
| SNP_P3_107782_633055 | NW_004515744.1 | Scaffold198 | 633055                  | CC                              | AA                | 1946488071               |
| SNP_P3_107783_633325 | NW_004515744.1 | Scaffold198 | 633325                  | GG                              | AA                | 1946488072               |
| SNP_P3_107784_633352 | NW_004515744.1 | Scaffold198 | 633352                  | GG                              | AA                | 1946488074               |
| SNP_P3_107785_633415 | NW_004515744.1 | Scaffold198 | 633415                  | GG                              | CC                | 1946488075               |
| SNP_P3_107786_633511 | NW_004515744.1 | Scaffold198 | 633511                  | GG                              | CC                | 1946488076               |
| SNP_P3_107788_633596 | NW_004515744.1 | Scaffold198 | 633596                  | TT                              | CC                | 1946488078               |
| SNP_P3_107789_633607 | NW_004515744.1 | Scaffold198 | 633607                  | GG                              | TT                | 1946488079               |
| SNP_P3_107790_637384 | NW_004515744.1 | Scaffold198 | 637384                  | CC                              | TT                | 1946488081               |
| SNP_P3_107791_637418 | NW_004515744.1 | Scaffold198 | 637418                  | AA                              | CC                | 1946488082               |
| SNP_P3_107792_637564 | NW_004515744.1 | Scaffold198 | 637564                  | CC                              | TT                | 1946488084               |
| SNP_P3_107795_637904 | NW_004515744.1 | Scaffold198 | 637904                  | GG                              | AA                | 1946488085               |
| SNP_P3_107796_5247   | NW_004515746.1 | Scaffold200 | 5247                    | AA                              | CC                | 1946488086               |
| SNP_P3_107797_5433   | NW_004515746.1 | Scaffold200 | 5433                    | GG                              | TT                | 1946488088               |
| SNP_P3_107798_5788   | NW_004515746.1 | Scaffold200 | 5788                    | TT                              | AA                | 1946488089               |
| SNP_P3_107799_5789   | NW_004515746.1 | Scaffold200 | 5789                    | TT                              | AA                | 1946488091               |
| SNP_P3_107800_37749  | NW_004515746.1 | Scaffold200 | 37749                   | AA                              | TT                | 1946488092               |
| SNP_P3_107801_39497  | NW_004515746.1 | Scaffold200 | 39497                   | AA                              | TT                | 1946488094               |
| SNP_P3_107802_43823  | NW_004515746.1 | Scaffold200 | 43823                   | CC                              | AA                | 1946488095               |
| SNP_P3_107803_49485  | NW_004515746.1 | Scaffold200 | 49485                   | AA                              | TT                | 1946488096               |
| SNP_P3_107804_51103  | NW_004515746.1 | Scaffold200 | 51103                   | CC                              | TT                | 1946488098               |

| SNPs IDs             | Chromosome IDs | Chromosomes | Physical positions (bp) | CDC Frontier (Reference genome) | (Pusa 256 & HPNB) | NCBI SNPdb Accession IDs |
|----------------------|----------------|-------------|-------------------------|---------------------------------|-------------------|--------------------------|
| SNP_P3_107805_54893  | NW_004515746.1 | Scaffold200 | 54893                   | GG                              | CC                | 1946488099               |
| SNP_P3_107806_70012  | NW_004515746.1 | Scaffold200 | 70012                   | AA                              | GG                | 1946488101               |
| SNP_P3_107807_94888  | NW_004515746.1 | Scaffold200 | 94888                   | AA                              | CC                | 1946488102               |
| SNP_P3_107808_94894  | NW_004515746.1 | Scaffold200 | 94894                   | TT                              | CC                | 1946488104               |
| SNP_P3_107809_94906  | NW_004515746.1 | Scaffold200 | 94906                   | AA                              | GG                | 1946488105               |
| SNP_P3_107810_100221 | NW_004515746.1 | Scaffold200 | 100221                  | CC                              | AA                | 1946488106               |
| SNP_P3_107811_107502 | NW_004515746.1 | Scaffold200 | 107502                  | CC                              | TT                | 1946488108               |
| SNP_P3_107812_107505 | NW_004515746.1 | Scaffold200 | 107505                  | CC                              | TT                | 1946488109               |
| SNP_P3_107813_107533 | NW_004515746.1 | Scaffold200 | 107533                  | GG                              | AA                | 1946488111               |
| SNP_P3_107814_109072 | NW_004515746.1 | Scaffold200 | 109072                  | AA                              | GG                | 1946488112               |
| SNP_P3_107815_109430 | NW_004515746.1 | Scaffold200 | 109430                  | TT                              | CC                | 1946488113               |
| SNP_P3_107816_1430   | NW_004515747.1 | Scaffold202 | 1430                    | CC                              | TT                | 1946488115               |
| SNP_P3_107817_3713   | NW_004515747.1 | Scaffold202 | 3713                    | AA                              | TT                | 1946488116               |
| SNP_P3_107818_3761   | NW_004515747.1 | Scaffold202 | 3761                    | TT                              | CC                | 1946488118               |
| SNP_P3_107819_4225   | NW_004515747.1 | Scaffold202 | 4225                    | CC                              | AA                | 1946488119               |
| SNP_P3_107821_7982   | NW_004515747.1 | Scaffold202 | 7982                    | CC                              | TT                | 1946488121               |
| SNP_P3_107822_7998   | NW_004515747.1 | Scaffold202 | 7998                    | AA                              | TT                | 1946488122               |
| SNP_P3_107824_10420  | NW_004515747.1 | Scaffold202 | 10420                   | TT                              | CC                | 1946488124               |
| SNP_P3_107825_10431  | NW_004515747.1 | Scaffold202 | 10431                   | AA                              | GG                | 1946488125               |
| SNP_P3_107826_10480  | NW_004515747.1 | Scaffold202 | 10480                   | AA                              | CC                | 1946488127               |
| SNP_P3_107827_10490  | NW_004515747.1 | Scaffold202 | 10490                   | AA                              | CC                | 1946488128               |
| SNP_P3_107828_10515  | NW_004515747.1 | Scaffold202 | 10515                   | TT                              | AA                | 1946488129               |
| SNP_P3_107829_10538  | NW_004515747.1 | Scaffold202 | 10538                   | TT                              | AA                | 1946488131               |
| SNP_P3_107830_16842  | NW_004515747.1 | Scaffold202 | 16842                   | CC                              | GG                | 1946488132               |
| SNP_P3_107831_16849  | NW_004515747.1 | Scaffold202 | 16849                   | GG                              | AA                | 1946488134               |
| SNP_P3_107832_16914  | NW_004515747.1 | Scaffold202 | 16914                   | GG                              | TT                | 1946488135               |
| SNP_P3_107833_16920  | NW_004515747.1 | Scaffold202 | 16920                   | AA                              | GG                | 1946488137               |
| SNP_P3_107834_17161  | NW_004515747.1 | Scaffold202 | 17161                   | CC                              | AA                | 1946488138               |
| SNP_P3_107835_17248  | NW_004515747.1 | Scaffold202 | 17248                   | AA                              | TT                | 1946488139               |
| SNP_P3_107836_17342  | NW_004515747.1 | Scaffold202 | 17342                   | TT                              | CC                | 1946488141               |
| SNP_P3_107837_17421  | NW_004515747.1 | Scaffold202 | 17421                   | GG                              | TT                | 1946488142               |
| SNP_P3_107838_17508  | NW_004515747.1 | Scaffold202 | 17508                   | CC                              | AA                | 1946488144               |
| SNP_P3_107839_17518  | NW_004515747.1 | Scaffold202 | 17518                   | TT                              | GG                | 1946488145               |
| SNP_P3_107840_17630  | NW_004515747.1 | Scaffold202 | 17630                   | GG                              | AA                | 1946488147               |
| SNP_P3_107841_17752  | NW_004515747.1 | Scaffold202 | 17752                   | CC                              | TT                | 1946488148               |
| SNP_P3_107842_17767  | NW_004515747.1 | Scaffold202 | 17767                   | AA                              | GG                | 1946488150               |
| SNP_P3_107843_17793  | NW_004515747.1 | Scaffold202 | 17793                   | TT                              | CC                | 1946488151               |
| SNP_P3_107845_17850  | NW_004515747.1 | Scaffold202 | 17850                   | GG                              | AA                | 1946488152               |
| SNP_P3_107846_17857  | NW_004515747.1 | Scaffold202 | 17857                   | GG                              | AA                | 1946488154               |
| SNP_P3_107847_17913  | NW_004515747.1 | Scaffold202 | 17913                   | AA                              | CC                | 1946488155               |
| SNP_P3_107848_19922  | NW_004515747.1 | Scaffold202 | 19922                   | GG                              | AA                | 1946488157               |
| SNP_P3_107849_19938  | NW_004515747.1 | Scaffold202 | 19938                   | TT                              | GG                | 1946488158               |

| SNPs IDs            | Chromosome IDs | Chromosomes | Physical positions (bp) | CDC Frontier (Reference genome) | (Pusa 256 & HPNB) | NCBI SNPdb Accession IDs |
|---------------------|----------------|-------------|-------------------------|---------------------------------|-------------------|--------------------------|
| SNP_P3_107850_19940 | NW_004515747.1 | Scaffold202 | 19940                   | TT                              | CC                | 1946488159               |
| SNP_P3_107851_19985 | NW_004515747.1 | Scaffold202 | 19985                   | GG                              | AA                | 1946488161               |
| SNP_P3_107852_19994 | NW_004515747.1 | Scaffold202 | 19994                   | TT                              | AA                | 1946488162               |
| SNP_P3_107853_20059 | NW_004515747.1 | Scaffold202 | 20059                   | AA                              | GG                | 1946488164               |
| SNP_P3_107854_20097 | NW_004515747.1 | Scaffold202 | 20097                   | AA                              | CC                | 1946488165               |
| SNP_P3_107855_20219 | NW_004515747.1 | Scaffold202 | 20219                   | GG                              | TT                | 1946488167               |
| SNP_P3_107856_20297 | NW_004515747.1 | Scaffold202 | 20297                   | GG                              | AA                | 1946488168               |
| SNP_P3_107857_20303 | NW_004515747.1 | Scaffold202 | 20303                   | GG                              | TT                | 1946488169               |
| SNP_P3_107858_20338 | NW_004515747.1 | Scaffold202 | 20338                   | TT                              | AA                | 1946488171               |
| SNP_P3_107859_20389 | NW_004515747.1 | Scaffold202 | 20389                   | TT                              | CC                | 1946488172               |
| SNP_P3_107860_20403 | NW_004515747.1 | Scaffold202 | 20403                   | AA                              | GG                | 1946488174               |
| SNP_P3_107861_20471 | NW_004515747.1 | Scaffold202 | 20471                   | AA                              | GG                | 1946488175               |
| SNP_P3_107862_20474 | NW_004515747.1 | Scaffold202 | 20474                   | GG                              | TT                | 1946488177               |
| SNP_P3_107864_20572 | NW_004515747.1 | Scaffold202 | 20572                   | CC                              | TT                | 1946488178               |
| SNP_P3_107865_20613 | NW_004515747.1 | Scaffold202 | 20613                   | CC                              | TT                | 1946488179               |
| SNP_P3_107866_20741 | NW_004515747.1 | Scaffold202 | 20741                   | CC                              | AA                | 1946488181               |
| SNP_P3_107867_20821 | NW_004515747.1 | Scaffold202 | 20821                   | TT                              | AA                | 1946488182               |
| SNP_P3_107868_20914 | NW_004515747.1 | Scaffold202 | 20914                   | TT                              | CC                | 1946488183               |
| SNP_P3_107869_20925 | NW_004515747.1 | Scaffold202 | 20925                   | CC                              | TT                | 1946488185               |
| SNP_P3_107870_20976 | NW_004515747.1 | Scaffold202 | 20976                   | TT                              | AA                | 1946488186               |
| SNP_P3_107871_21020 | NW_004515747.1 | Scaffold202 | 21020                   | CC                              | TT                | 1946488188               |
| SNP_P3_107872_21028 | NW_004515747.1 | Scaffold202 | 21028                   | AA                              | GG                | 1946488189               |
| SNP_P3_107875_22663 | NW_004515747.1 | Scaffold202 | 22663                   | CC                              | TT                | 1946488190               |
| SNP_P3_107876_22710 | NW_004515747.1 | Scaffold202 | 22710                   | CC                              | TT                | 1946488192               |
| SNP_P3_107877_22729 | NW_004515747.1 | Scaffold202 | 22729                   | CC                              | AA                | 1946488193               |
| SNP_P3_107879_22796 | NW_004515747.1 | Scaffold202 | 22796                   | TT                              | GG                | 1946488195               |
| SNP_P3_107880_22899 | NW_004515747.1 | Scaffold202 | 22899                   | AA                              | TT                | 1946488196               |
| SNP_P3_107881_22951 | NW_004515747.1 | Scaffold202 | 22951                   | AA                              | TT                | 1946488198               |
| SNP_P3_107882_22972 | NW_004515747.1 | Scaffold202 | 22972                   | CC                              | TT                | 1946488199               |
| SNP_P3_107883_23650 | NW_004515747.1 | Scaffold202 | 23650                   | TT                              | CC                | 1946488200               |
| SNP_P3_107884_23698 | NW_004515747.1 | Scaffold202 | 23698                   | AA                              | GG                | 1946488202               |
| SNP_P3_107885_23710 | NW_004515747.1 | Scaffold202 | 23710                   | AA                              | GG                | 1946488203               |
| SNP_P3_107886_23790 | NW_004515747.1 | Scaffold202 | 23790                   | CC                              | AA                | 1946488205               |
| SNP_P3_107888_23850 | NW_004515747.1 | Scaffold202 | 23850                   | AA                              | GG                | 1946488206               |
| SNP_P3_107889_23920 | NW_004515747.1 | Scaffold202 | 23920                   | AA                              | CC                | 1946488208               |
| SNP_P3_107890_24044 | NW_004515747.1 | Scaffold202 | 24044                   | TT                              | CC                | 1946488209               |
| SNP_P3_107891_24259 | NW_004515747.1 | Scaffold202 | 24259                   | TT                              | CC                | 1946488210               |
| SNP_P3_107892_24296 | NW_004515747.1 | Scaffold202 | 24296                   | CC                              | TT                | 1946488212               |
| SNP_P3_107893_24363 | NW_004515747.1 | Scaffold202 | 24363                   | TT                              | GG                | 1946488213               |
| SNP_P3_107894_24406 | NW_004515747.1 | Scaffold202 | 24406                   | AA                              | GG                | 1946488215               |
| SNP_P3_107895_24595 | NW_004515747.1 | Scaffold202 | 24595                   | AA                              | GG                | 1946488216               |
| SNP_P3_107896_24642 | NW_004515747.1 | Scaffold202 | 24642                   | AA                              | GG                | 1946488218               |

| SNPs IDs            | Chromosome IDs | Chromosomes | Physical positions (bp) | CDC Frontier (Reference genome) | (Pusa 256 & HPNB) | NCBI SNPdb Accession IDs |
|---------------------|----------------|-------------|-------------------------|---------------------------------|-------------------|--------------------------|
| SNP_P3_107897_24663 | NW_004515747.1 | Scaffold202 | 24663                   | TT                              | CC                | 1946488219               |
| SNP_P3_107898_24664 | NW_004515747.1 | Scaffold202 | 24664                   | AA                              | GG                | 1946488221               |
| SNP_P3_107899_24691 | NW_004515747.1 | Scaffold202 | 24691                   | GG                              | TT                | 1946488222               |
| SNP_P3_107900_24700 | NW_004515747.1 | Scaffold202 | 24700                   | AA                              | GG                | 1946488223               |
| SNP_P3_107901_24728 | NW_004515747.1 | Scaffold202 | 24728                   | TT                              | CC                | 1946488225               |
| SNP_P3_107902_24730 | NW_004515747.1 | Scaffold202 | 24730                   | GG                              | AA                | 1946488226               |
| SNP_P3_107903_24939 | NW_004515747.1 | Scaffold202 | 24939                   | TT                              | GG                | 1946488228               |
| SNP_P3_107904_24942 | NW_004515747.1 | Scaffold202 | 24942                   | TT                              | AA                | 1946488229               |
| SNP_P3_107905_24971 | NW_004515747.1 | Scaffold202 | 24971                   | CC                              | TT                | 1946488231               |
| SNP_P3_107906_25030 | NW_004515747.1 | Scaffold202 | 25030                   | GG                              | AA                | 1946488232               |
| SNP_P3_107907_27575 | NW_004515747.1 | Scaffold202 | 27575                   | AA                              | CC                | 1946488234               |
| SNP_P3_107908_27629 | NW_004515747.1 | Scaffold202 | 27629                   | GG                              | AA                | 1946488235               |
| SNP_P3_107909_27769 | NW_004515747.1 | Scaffold202 | 27769                   | GG                              | TT                | 1946488237               |
| SNP_P3_107910_27871 | NW_004515747.1 | Scaffold202 | 27871                   | GG                              | AA                | 1946488238               |
| SNP_P3_107911_29880 | NW_004515747.1 | Scaffold202 | 29880                   | CC                              | TT                | 1946488240               |
| SNP_P3_107912_35582 | NW_004515747.1 | Scaffold202 | 35582                   | TT                              | AA                | 1946488241               |
| SNP_P3_107913_35585 | NW_004515747.1 | Scaffold202 | 35585                   | CC                              | TT                | 1946488243               |
| SNP_P3_107914_35665 | NW_004515747.1 | Scaffold202 | 35665                   | CC                              | GG                | 1946488244               |
| SNP_P3_107915_35778 | NW_004515747.1 | Scaffold202 | 35778                   | CC                              | TT                | 1946488246               |
| SNP_P3_107916_35834 | NW_004515747.1 | Scaffold202 | 35834                   | AA                              | GG                | 1946488247               |
| SNP_P3_107917_35907 | NW_004515747.1 | Scaffold202 | 35907                   | AA                              | GG                | 1946488249               |
| SNP_P3_107918_35941 | NW_004515747.1 | Scaffold202 | 35941                   | CC                              | TT                | 1946488250               |
| SNP_P3_107919_35976 | NW_004515747.1 | Scaffold202 | 35976                   | AA                              | CC                | 1946488251               |
| SNP_P3_107920_36173 | NW_004515747.1 | Scaffold202 | 36173                   | GG                              | AA                | 1946488253               |
| SNP_P3_107921_36332 | NW_004515747.1 | Scaffold202 | 36332                   | CC                              | TT                | 1946488254               |
| SNP_P3_107922_36463 | NW_004515747.1 | Scaffold202 | 36463                   | CC                              | TT                | 1946488256               |
| SNP_P3_107923_36503 | NW_004515747.1 | Scaffold202 | 36503                   | GG                              | AA                | 1946488257               |
| SNP_P3_107924_36549 | NW_004515747.1 | Scaffold202 | 36549                   | TT                              | GG                | 1946488259               |
| SNP_P3_107925_36619 | NW_004515747.1 | Scaffold202 | 36619                   | GG                              | TT                | 1946488260               |
| SNP_P3_107927_36855 | NW_004515747.1 | Scaffold202 | 36855                   | TT                              | GG                | 1946488261               |
| SNP_P3_107928_36900 | NW_004515747.1 | Scaffold202 | 36900                   | CC                              | TT                | 1946488263               |
| SNP_P3_107929_36941 | NW_004515747.1 | Scaffold202 | 36941                   | AA                              | TT                | 1946488264               |
| SNP_P3_107930_37244 | NW_004515747.1 | Scaffold202 | 37244                   | TT                              | CC                | 1946488266               |
| SNP_P3_107931_37375 | NW_004515747.1 | Scaffold202 | 37375                   | AA                              | GG                | 1946488267               |
| SNP_P3_107932_37400 | NW_004515747.1 | Scaffold202 | 37400                   | GG                              | CC                | 1946488268               |
| SNP_P3_107933_37585 | NW_004515747.1 | Scaffold202 | 37585                   | TT                              | AA                | 1946488270               |
| SNP_P3_107934_37825 | NW_004515747.1 | Scaffold202 | 37825                   | AA                              | TT                | 1946488271               |
| SNP_P3_107937_37989 | NW_004515747.1 | Scaffold202 | 37989                   | GG                              | AA                | 1946488273               |
| SNP_P3_107938_37994 | NW_004515747.1 | Scaffold202 | 37994                   | TT                              | CC                | 1946488274               |
| SNP_P3_107939_38080 | NW_004515747.1 | Scaffold202 | 38080                   | TT                              | GG                | 1946488276               |
| SNP_P3_107940_38083 | NW_004515747.1 | Scaffold202 | 38083                   | AA                              | GG                | 1946488277               |
| SNP_P3_107941_38090 | NW_004515747.1 | Scaffold202 | 38090                   | GG                              | AA                | 1946488279               |

| SNPs IDs            | Chromosome IDs | Chromosomes | Physical positions (bp) | CDC Frontier (Reference genome) | (Pusa 256 & HPNB) | NCBI SNPdb Accession IDs |
|---------------------|----------------|-------------|-------------------------|---------------------------------|-------------------|--------------------------|
| SNP_P3_107942_38236 | NW_004515747.1 | Scaffold202 | 38236                   | GG                              | AA                | 1946488280               |
| SNP_P3_107943_38539 | NW_004515747.1 | Scaffold202 | 38539                   | TT                              | GG                | 1946488281               |
| SNP_P3_107944_38675 | NW_004515747.1 | Scaffold202 | 38675                   | AA                              | TT                | 1946488283               |
| SNP_P3_107945_38695 | NW_004515747.1 | Scaffold202 | 38695                   | GG                              | TT                | 1946488284               |
| SNP_P3_107946_38746 | NW_004515747.1 | Scaffold202 | 38746                   | GG                              | AA                | 1946488286               |
| SNP_P3_107947_38775 | NW_004515747.1 | Scaffold202 | 38775                   | CC                              | TT                | 1946488287               |
| SNP_P3_107948_38796 | NW_004515747.1 | Scaffold202 | 38796                   | GG                              | AA                | 1946488289               |
| SNP_P3_107949_38836 | NW_004515747.1 | Scaffold202 | 38836                   | CC                              | TT                | 1946488290               |
| SNP_P3_107950_38846 | NW_004515747.1 | Scaffold202 | 38846                   | GG                              | AA                | 1946488292               |
| SNP_P3_107951_38848 | NW_004515747.1 | Scaffold202 | 38848                   | TT                              | CC                | 1946488293               |
| SNP_P3_107952_38895 | NW_004515747.1 | Scaffold202 | 38895                   | AA                              | GG                | 1946488295               |
| SNP_P3_107953_38989 | NW_004515747.1 | Scaffold202 | 38989                   | AA                              | CC                | 1946488296               |
| SNP_P3_107954_39013 | NW_004515747.1 | Scaffold202 | 39013                   | GG                              | AA                | 1946488297               |
| SNP_P3_107956_39178 | NW_004515747.1 | Scaffold202 | 39178                   | GG                              | AA                | 1946488299               |
| SNP_P3_107959_39344 | NW_004515747.1 | Scaffold202 | 39344                   | GG                              | AA                | 1946488300               |
| SNP_P3_107960_39351 | NW_004515747.1 | Scaffold202 | 39351                   | TT                              | CC                | 1946488302               |
| SNP_P3_107961_39377 | NW_004515747.1 | Scaffold202 | 39377                   | GG                              | AA                | 1946488303               |
| SNP_P3_107962_39413 | NW_004515747.1 | Scaffold202 | 39413                   | GG                              | TT                | 1946488305               |
| SNP_P3_107963_39414 | NW_004515747.1 | Scaffold202 | 39414                   | CC                              | TT                | 1946488307               |
| SNP_P3_107964_39418 | NW_004515747.1 | Scaffold202 | 39418                   | TT                              | GG                | 1946488308               |
| SNP_P3_107965_39645 | NW_004515747.1 | Scaffold202 | 39645                   | CC                              | TT                | 1946488310               |
| SNP_P3_107966_40848 | NW_004515747.1 | Scaffold202 | 40848                   | AA                              | CC                | 1946488312               |
| SNP_P3_107967_40901 | NW_004515747.1 | Scaffold202 | 40901                   | AA                              | GG                | 1946488313               |
| SNP_P3_107968_41208 | NW_004515747.1 | Scaffold202 | 41208                   | CC                              | TT                | 1946488315               |
| SNP_P3_107969_44773 | NW_004515747.1 | Scaffold202 | 44773                   | CC                              | TT                | 1946488316               |
| SNP_P3_107970_45789 | NW_004515747.1 | Scaffold202 | 45789                   | AA                              | GG                | 1946488318               |
| SNP_P3_107971_45848 | NW_004515747.1 | Scaffold202 | 45848                   | CC                              | TT                | 1946488319               |
| SNP_P3_107972_52542 | NW_004515747.1 | Scaffold202 | 52542                   | GG                              | CC                | 1946488321               |
| SNP_P3_107973_52858 | NW_004515747.1 | Scaffold202 | 52858                   | AA                              | TT                | 1946488322               |
| SNP_P3_107974_53336 | NW_004515747.1 | Scaffold202 | 53336                   | CC                              | TT                | 1946488324               |
| SNP_P3_107975_53473 | NW_004515747.1 | Scaffold202 | 53473                   | TT                              | AA                | 1946488325               |
| SNP_P3_107976_53503 | NW_004515747.1 | Scaffold202 | 53503                   | TT                              | CC                | 1946488327               |
| SNP_P3_107977_53512 | NW_004515747.1 | Scaffold202 | 53512                   | CC                              | AA                | 1946488328               |
| SNP_P3_107978_53522 | NW_004515747.1 | Scaffold202 | 53522                   | GG                              | AA                | 1946488329               |
| SNP_P3_107979_53550 | NW_004515747.1 | Scaffold202 | 53550                   | AA                              | GG                | 1946488331               |
| SNP_P3_107980_53634 | NW_004515747.1 | Scaffold202 | 53634                   | GG                              | AA                | 1946488332               |
| SNP_P3_107981_60969 | NW_004515747.1 | Scaffold202 | 60969                   | CC                              | TT                | 1946488334               |
| SNP_P3_107983_62088 | NW_004515747.1 | Scaffold202 | 62088                   | GG                              | TT                | 1946488335               |
| SNP_P3_107984_62442 | NW_004515747.1 | Scaffold202 | 62442                   | TT                              | CC                | 1946488337               |
| SNP_P3_107985_90523 | NW_004515747.1 | Scaffold202 | 90523                   | GG                              | TT                | 1946488338               |
| SNP_P3_107986_90597 | NW_004515747.1 | Scaffold202 | 90597                   | GG                              | CC                | 1946488340               |
| SNP_P3_107987_90773 | NW_004515747.1 | Scaffold202 | 90773                   | TT                              | CC                | 1946488341               |



| SNPs IDs            | Chromosome IDs | Chromosomes | Physical positions (bp) | CDC Frontier (Reference genome) | (Pusa 256 & HPNB) | NCBI SNPdb Accession IDs |
|---------------------|----------------|-------------|-------------------------|---------------------------------|-------------------|--------------------------|
| SNP_P3_107988_93016 | NW_004515747.1 | Scaffold202 | 93016                   | GG                              | AA                | 1946488343               |
| SNP_P3_107989_93081 | NW_004515747.1 | Scaffold202 | 93081                   | GG                              | TT                | 1946488344               |
| SNP_P3_107990_93108 | NW_004515747.1 | Scaffold202 | 93108                   | GG                              | TT                | 1946488346               |
| SNP_P3_107991_93142 | NW_004515747.1 | Scaffold202 | 93142                   | AA                              | TT                | 1946488347               |
| SNP_P3_107992_93654 | NW_004515747.1 | Scaffold202 | 93654                   | GG                              | AA                | 1946488349               |
| SNP_P3_107993_93702 | NW_004515747.1 | Scaffold202 | 93702                   | AA                              | GG                | 1946488350               |
| SNP_P3_107994_94027 | NW_004515747.1 | Scaffold202 | 94027                   | CC                              | TT                | 1946488352               |
| SNP_P3_107995_94030 | NW_004515747.1 | Scaffold202 | 94030                   | CC                              | GG                | 1946488353               |
| SNP_P3_107996_94097 | NW_004515747.1 | Scaffold202 | 94097                   | AA                              | GG                | 1946488355               |
| SNP_P3_107997_94235 | NW_004515747.1 | Scaffold202 | 94235                   | CC                              | TT                | 1946488356               |
| SNP_P3_107998_94318 | NW_004515747.1 | Scaffold202 | 94318                   | GG                              | TT                | 1946488357               |
| SNP_P3_107999_94482 | NW_004515747.1 | Scaffold202 | 94482                   | TT                              | CC                | 1946488359               |
| SNP_P3_108000_94594 | NW_004515747.1 | Scaffold202 | 94594                   | CC                              | TT                | 1946488360               |
| SNP_P3_108001_94787 | NW_004515747.1 | Scaffold202 | 94787                   | AA                              | GG                | 1946488362               |
| SNP_P3_108002_94912 | NW_004515747.1 | Scaffold202 | 94912                   | AA                              | GG                | 1946488363               |
| SNP_P3_108003_94918 | NW_004515747.1 | Scaffold202 | 94918                   | CC                              | TT                | 1946488365               |
| SNP_P3_108004_94919 | NW_004515747.1 | Scaffold202 | 94919                   | AA                              | GG                | 1946488366               |
| SNP_P3_108005_95070 | NW_004515747.1 | Scaffold202 | 95070                   | TT                              | GG                | 1946488368               |
| SNP_P3_108006_95071 | NW_004515747.1 | Scaffold202 | 95071                   | AA                              | CC                | 1946488369               |
| SNP_P3_108007_95182 | NW_004515747.1 | Scaffold202 | 95182                   | GG                              | AA                | 1946488371               |
| SNP_P3_108008_95246 | NW_004515747.1 | Scaffold202 | 95246                   | AA                              | TT                | 1946488372               |
| SNP_P3_108009_95276 | NW_004515747.1 | Scaffold202 | 95276                   | TT                              | CC                | 1946488374               |
| SNP_P3_108010_95429 | NW_004515747.1 | Scaffold202 | 95429                   | AA                              | GG                | 1946488375               |
| SNP_P3_108011_95438 | NW_004515747.1 | Scaffold202 | 95438                   | AA                              | GG                | 1946488377               |
| SNP_P3_108012_95496 | NW_004515747.1 | Scaffold202 | 95496                   | AA                              | GG                | 1946488378               |
| SNP_P3_108013_95533 | NW_004515747.1 | Scaffold202 | 95533                   | AA                              | GG                | 1946488380               |
| SNP_P3_108014_95609 | NW_004515747.1 | Scaffold202 | 95609                   | TT                              | CC                | 1946488381               |
| SNP_P3_108015_95619 | NW_004515747.1 | Scaffold202 | 95619                   | GG                              | AA                | 1946488383               |
| SNP_P3_108016_95708 | NW_004515747.1 | Scaffold202 | 95708                   | GG                              | AA                | 1946488393               |
| SNP_P3_108017_95792 | NW_004515747.1 | Scaffold202 | 95792                   | GG                              | AA                | 1946488394               |
| SNP_P3_108018_95869 | NW_004515747.1 | Scaffold202 | 95869                   | TT                              | CC                | 1946488396               |
| SNP_P3_108019_95904 | NW_004515747.1 | Scaffold202 | 95904                   | AA                              | GG                | 1946488397               |
| SNP_P3_108020_95942 | NW_004515747.1 | Scaffold202 | 95942                   | TT                              | CC                | 1946488399               |
| SNP_P3_108021_96043 | NW_004515747.1 | Scaffold202 | 96043                   | GG                              | AA                | 1946488400               |
| SNP_P3_108022_96074 | NW_004515747.1 | Scaffold202 | 96074                   | AA                              | GG                | 1946488402               |
| SNP_P3_108023_96097 | NW_004515747.1 | Scaffold202 | 96097                   | GG                              | AA                | 1946488403               |
| SNP_P3_108024_96140 | NW_004515747.1 | Scaffold202 | 96140                   | TT                              | CC                | 1946488405               |
| SNP_P3_108025_96281 | NW_004515747.1 | Scaffold202 | 96281                   | AA                              | GG                | 1946488406               |
| SNP_P3_108026_96333 | NW_004515747.1 | Scaffold202 | 96333                   | AA                              | GG                | 1946488408               |
| SNP_P3_108027_96363 | NW_004515747.1 | Scaffold202 | 96363                   | GG                              | TT                | 1946488409               |
| SNP_P3_108028_96394 | NW_004515747.1 | Scaffold202 | 96394                   | AA                              | TT                | 1946488411               |
| SNP_P3_108029_96397 | NW_004515747.1 | Scaffold202 | 96397                   | AA                              | GG                | 1946488412               |

| SNPs IDs             | Chromosome IDs | Chromosomes | Physical positions (bp) | CDC Frontier (Reference genome) | (Pusa 256 & HPNB) | NCBI SNPdb Accession IDs |
|----------------------|----------------|-------------|-------------------------|---------------------------------|-------------------|--------------------------|
| SNP_P3_108030_96444  | NW_004515747.1 | Scaffold202 | 96444                   | AA                              | GG                | 1946488414               |
| SNP_P3_108031_96456  | NW_004515747.1 | Scaffold202 | 96456                   | CC                              | TT                | 1946488415               |
| SNP_P3_108032_96532  | NW_004515747.1 | Scaffold202 | 96532                   | TT                              | GG                | 1946488417               |
| SNP_P3_108033_96580  | NW_004515747.1 | Scaffold202 | 96580                   | GG                              | TT                | 1946488418               |
| SNP_P3_108034_96589  | NW_004515747.1 | Scaffold202 | 96589                   | TT                              | AA                | 1946488420               |
| SNP_P3_108035_96614  | NW_004515747.1 | Scaffold202 | 96614                   | TT                              | CC                | 1946488421               |
| SNP_P3_108036_96868  | NW_004515747.1 | Scaffold202 | 96868                   | CC                              | AA                | 1946488422               |
| SNP_P3_108037_97636  | NW_004515747.1 | Scaffold202 | 97636                   | AA                              | GG                | 1946488424               |
| SNP_P3_108038_97768  | NW_004515747.1 | Scaffold202 | 97768                   | CC                              | GG                | 1946488425               |
| SNP_P3_108039_97839  | NW_004515747.1 | Scaffold202 | 97839                   | TT                              | CC                | 1946488427               |
| SNP_P3_108040_98047  | NW_004515747.1 | Scaffold202 | 98047                   | AA                              | GG                | 1946488429               |
| SNP_P3_108041_98426  | NW_004515747.1 | Scaffold202 | 98426                   | CC                              | GG                | 1946488430               |
| SNP_P3_108042_98607  | NW_004515747.1 | Scaffold202 | 98607                   | GG                              | AA                | 1946488432               |
| SNP_P3_108043_98848  | NW_004515747.1 | Scaffold202 | 98848                   | CC                              | AA                | 1946488433               |
| SNP_P3_108044_99123  | NW_004515747.1 | Scaffold202 | 99123                   | TT                              | CC                | 1946488435               |
| SNP_P3_108045_99273  | NW_004515747.1 | Scaffold202 | 99273                   | GG                              | CC                | 1946488436               |
| SNP_P3_108046_99420  | NW_004515747.1 | Scaffold202 | 99420                   | AA                              | GG                | 1946488438               |
| SNP_P3_108047_100186 | NW_004515747.1 | Scaffold202 | 100186                  | TT                              | CC                | 1946488439               |
| SNP_P3_108048_100216 | NW_004515747.1 | Scaffold202 | 100216                  | AA                              | TT                | 1946488440               |
| SNP_P3_108049_100359 | NW_004515747.1 | Scaffold202 | 100359                  | CC                              | AA                | 1946488442               |
| SNP_P3_108050_101772 | NW_004515747.1 | Scaffold202 | 101772                  | AA                              | GG                | 1946488443               |
| SNP_P3_108052_103956 | NW_004515747.1 | Scaffold202 | 103956                  | GG                              | AA                | 1946488445               |
| SNP_P3_108054_104037 | NW_004515747.1 | Scaffold202 | 104037                  | AA                              | TT                | 1946488446               |
| SNP_P3_108055_104044 | NW_004515747.1 | Scaffold202 | 104044                  | TT                              | AA                | 1946488448               |
| SNP_P3_108056_104045 | NW_004515747.1 | Scaffold202 | 104045                  | AA                              | TT                | 1946488449               |
| SNP_P3_108057_104082 | NW_004515747.1 | Scaffold202 | 104082                  | CC                              | TT                | 1946488451               |
| SNP_P3_108058_104187 | NW_004515747.1 | Scaffold202 | 104187                  | AA                              | CC                | 1946488452               |
| SNP_P3_108059_104221 | NW_004515747.1 | Scaffold202 | 104221                  | GG                              | CC                | 1946488454               |
| SNP_P3_108061_104407 | NW_004515747.1 | Scaffold202 | 104407                  | GG                              | AA                | 1946488455               |
| SNP_P3_108062_104669 | NW_004515747.1 | Scaffold202 | 104669                  | TT                              | GG                | 1946488457               |
| SNP_P3_108063_104714 | NW_004515747.1 | Scaffold202 | 104714                  | AA                              | TT                | 1946488458               |
| SNP_P3_108065_104889 | NW_004515747.1 | Scaffold202 | 104889                  | AA                              | GG                | 1946488460               |
| SNP_P3_108066_23583  | NW_004515748.1 | Scaffold204 | 23583                   | CC                              | TT                | 1946488461               |
| SNP_P3_108067_23632  | NW_004515748.1 | Scaffold204 | 23632                   | CC                              | TT                | 1946488463               |
| SNP_P3_108068_23652  | NW_004515748.1 | Scaffold204 | 23652                   | AA                              | TT                | 1946488464               |
| SNP_P3_108069_23657  | NW_004515748.1 | Scaffold204 | 23657                   | GG                              | TT                | 1946488466               |
| SNP_P3_108070_23814  | NW_004515748.1 | Scaffold204 | 23814                   | GG                              | AA                | 1946488467               |
| SNP_P3_108071_23859  | NW_004515748.1 | Scaffold204 | 23859                   | AA                              | CC                | 1946488469               |
| SNP_P3_108072_29358  | NW_004515748.1 | Scaffold204 | 29358                   | GG                              | AA                | 1946488470               |
| SNP_P3_108073_34794  | NW_004515748.1 | Scaffold204 | 34794                   | CC                              | GG                | 1946488472               |
| SNP_P3_108074_34832  | NW_004515748.1 | Scaffold204 | 34832                   | GG                              | AA                | 1946488473               |
| SNP_P3_108075_34845  | NW_004515748.1 | Scaffold204 | 34845                   | TT                              | AA                | 1946488475               |

| SNPs IDs            | Chromosome IDs | Chromosomes | Physical positions (bp) | CDC Frontier (Reference genome) | (Pusa 256 & HPNB) | NCBI SNPdb Accession IDs |
|---------------------|----------------|-------------|-------------------------|---------------------------------|-------------------|--------------------------|
| SNP_P3_108076_52617 | NW_004515748.1 | Scaffold204 | 52617                   | GG                              | CC                | 1946488476               |
| SNP_P3_108077_52640 | NW_004515748.1 | Scaffold204 | 52640                   | TT                              | CC                | 1946488478               |
| SNP_P3_108078_52647 | NW_004515748.1 | Scaffold204 | 52647                   | TT                              | AA                | 1946488479               |
| SNP_P3_108079_52648 | NW_004515748.1 | Scaffold204 | 52648                   | AA                              | GG                | 1946488481               |
| SNP_P3_108080_52695 | NW_004515748.1 | Scaffold204 | 52695                   | GG                              | AA                | 1946488482               |
| SNP_P3_108081_52709 | NW_004515748.1 | Scaffold204 | 52709                   | AA                              | GG                | 1946488483               |
| SNP_P3_108082_31778 | NW_004515749.1 | Scaffold205 | 31778                   | TT                              | CC                | 1946488485               |
| SNP_P3_108083_40552 | NW_004515749.1 | Scaffold205 | 40552                   | AA                              | TT                | 1946488486               |
| SNP_P3_108085_40703 | NW_004515749.1 | Scaffold205 | 40703                   | TT                              | CC                | 1946488488               |
| SNP_P3_108086_40739 | NW_004515749.1 | Scaffold205 | 40739                   | AA                              | CC                | 1946488489               |
| SNP_P3_108087_40896 | NW_004515749.1 | Scaffold205 | 40896                   | TT                              | CC                | 1946488491               |
| SNP_P3_108088_40964 | NW_004515749.1 | Scaffold205 | 40964                   | TT                              | CC                | 1946488492               |
| SNP_P3_108089_40983 | NW_004515749.1 | Scaffold205 | 40983                   | AA                              | GG                | 1946488494               |
| SNP_P3_108090_41014 | NW_004515749.1 | Scaffold205 | 41014                   | CC                              | TT                | 1946488495               |
| SNP_P3_108091_41016 | NW_004515749.1 | Scaffold205 | 41016                   | AA                              | GG                | 1946488496               |
| SNP_P3_108092_41078 | NW_004515749.1 | Scaffold205 | 41078                   | CC                              | TT                | 1946488498               |
| SNP_P3_108094_41124 | NW_004515749.1 | Scaffold205 | 41124                   | TT                              | AA                | 1946488499               |
| SNP_P3_108095_41133 | NW_004515749.1 | Scaffold205 | 41133                   | CC                              | AA                | 1946488501               |
| SNP_P3_108096_41135 | NW_004515749.1 | Scaffold205 | 41135                   | TT                              | CC                | 1946488502               |
| SNP_P3_108097_41634 | NW_004515749.1 | Scaffold205 | 41634                   | AA                              | GG                | 1946488504               |
| SNP_P3_108098_41688 | NW_004515749.1 | Scaffold205 | 41688                   | AA                              | CC                | 1946488505               |
| SNP_P3_108099_41708 | NW_004515749.1 | Scaffold205 | 41708                   | TT                              | CC                | 1946488507               |
| SNP_P3_108100_41758 | NW_004515749.1 | Scaffold205 | 41758                   | TT                              | CC                | 1946488508               |
| SNP_P3_108101_41878 | NW_004515749.1 | Scaffold205 | 41878                   | TT                              | AA                | 1946488510               |
| SNP_P3_108102_41997 | NW_004515749.1 | Scaffold205 | 41997                   | TT                              | CC                | 1946488511               |
| SNP_P3_108103_41999 | NW_004515749.1 | Scaffold205 | 41999                   | GG                              | AA                | 1946488512               |
| SNP_P3_108104_42023 | NW_004515749.1 | Scaffold205 | 42023                   | CC                              | TT                | 1946488514               |
| SNP_P3_108105_42048 | NW_004515749.1 | Scaffold205 | 42048                   | GG                              | AA                | 1946488515               |
| SNP_P3_108106_42052 | NW_004515749.1 | Scaffold205 | 42052                   | TT                              | CC                | 1946488517               |
| SNP_P3_108107_42104 | NW_004515749.1 | Scaffold205 | 42104                   | AA                              | TT                | 1946488518               |
| SNP_P3_108108_42204 | NW_004515749.1 | Scaffold205 | 42204                   | GG                              | AA                | 1946488520               |
| SNP_P3_108109_42248 | NW_004515749.1 | Scaffold205 | 42248                   | CC                              | TT                | 1946488521               |
| SNP_P3_108110_42290 | NW_004515749.1 | Scaffold205 | 42290                   | AA                              | GG                | 1946488523               |
| SNP_P3_108111_42422 | NW_004515749.1 | Scaffold205 | 42422                   | GG                              | AA                | 1946488524               |
| SNP_P3_108112_46496 | NW_004515749.1 | Scaffold205 | 46496                   | CC                              | TT                | 1946488525               |
| SNP_P3_108113_46569 | NW_004515749.1 | Scaffold205 | 46569                   | AA                              | GG                | 1946488527               |
| SNP_P3_108115_66575 | NW_004515749.1 | Scaffold205 | 66575                   | CC                              | TT                | 1946488528               |
| SNP_P3_108116_70839 | NW_004515749.1 | Scaffold205 | 70839                   | TT                              | AA                | 1946488530               |
| SNP_P3_108117_74725 | NW_004515749.1 | Scaffold205 | 74725                   | AA                              | CC                | 1946488531               |
| SNP_P3_108118_75575 | NW_004515749.1 | Scaffold205 | 75575                   | AA                              | GG                | 1946488533               |
| SNP_P3_108119_75592 | NW_004515749.1 | Scaffold205 | 75592                   | CC                              | TT                | 1946488534               |
| SNP_P3_108120_76054 | NW_004515749.1 | Scaffold205 | 76054                   | GG                              | AA                | 1946488536               |

| SNPs IDs             | Chromosome IDs | Chromosomes | Physical positions (bp) | CDC Frontier (Reference genome) | (Pusa 256 & HPNB) | NCBI SNPdb Accession IDs |
|----------------------|----------------|-------------|-------------------------|---------------------------------|-------------------|--------------------------|
| SNP_P3_108121_81983  | NW_004515749.1 | Scaffold205 | 81983                   | GG                              | CC                | 1946488537               |
| SNP_P3_108123_112657 | NW_004515749.1 | Scaffold205 | 112657                  | TT                              | CC                | 1946488539               |
| SNP_P3_108124_113401 | NW_004515749.1 | Scaffold205 | 113401                  | AA                              | TT                | 1946488540               |
| SNP_P3_108125_113402 | NW_004515749.1 | Scaffold205 | 113402                  | AA                              | GG                | 1946488542               |
| SNP_P3_108126_114640 | NW_004515749.1 | Scaffold205 | 114640                  | AA                              | GG                | 1946488543               |
| SNP_P3_108127_115058 | NW_004515749.1 | Scaffold205 | 115058                  | GG                              | AA                | 1946488545               |
| SNP_P3_108128_115608 | NW_004515749.1 | Scaffold205 | 115608                  | AA                              | CC                | 1946488546               |
| SNP_P3_108129_116025 | NW_004515749.1 | Scaffold205 | 116025                  | CC                              | TT                | 1946488548               |
| SNP_P3_108130_116102 | NW_004515749.1 | Scaffold205 | 116102                  | AA                              | CC                | 1946488549               |
| SNP_P3_108131_116449 | NW_004515749.1 | Scaffold205 | 116449                  | AA                              | GG                | 1946488551               |
| SNP_P3_108132_149831 | NW_004515749.1 | Scaffold205 | 149831                  | AA                              | GG                | 1946488552               |
| SNP_P3_108133_150565 | NW_004515749.1 | Scaffold205 | 150565                  | TT                              | CC                | 1946488553               |
| SNP_P3_108134_195042 | NW_004515749.1 | Scaffold205 | 195042                  | AA                              | CC                | 1946488555               |
| SNP_P3_108135_195057 | NW_004515749.1 | Scaffold205 | 195057                  | AA                              | CC                | 1946488556               |
| SNP_P3_108136_195121 | NW_004515749.1 | Scaffold205 | 195121                  | GG                              | AA                | 1946488558               |
| SNP_P3_108137_195254 | NW_004515749.1 | Scaffold205 | 195254                  | GG                              | TT                | 1946488559               |
| SNP_P3_108138_195332 | NW_004515749.1 | Scaffold205 | 195332                  | AA                              | GG                | 1946488561               |
| SNP_P3_108139_195336 | NW_004515749.1 | Scaffold205 | 195336                  | CC                              | TT                | 1946488562               |
| SNP_P3_108140_195344 | NW_004515749.1 | Scaffold205 | 195344                  | TT                              | CC                | 1946488564               |
| SNP_P3_108141_195346 | NW_004515749.1 | Scaffold205 | 195346                  | AA                              | GG                | 1946488565               |
| SNP_P3_108142_195355 | NW_004515749.1 | Scaffold205 | 195355                  | AA                              | CC                | 1946488567               |
| SNP_P3_108143_195378 | NW_004515749.1 | Scaffold205 | 195378                  | GG                              | AA                | 1946488568               |
| SNP_P3_108144_198934 | NW_004515749.1 | Scaffold205 | 198934                  | CC                              | GG                | 1946488570               |
| SNP_P3_108145_198972 | NW_004515749.1 | Scaffold205 | 198972                  | AA                              | GG                | 1946488571               |
| SNP_P3_108146_199165 | NW_004515749.1 | Scaffold205 | 199165                  | AA                              | TT                | 1946488573               |
| SNP_P3_108147_199205 | NW_004515749.1 | Scaffold205 | 199205                  | AA                              | GG                | 1946488574               |
| SNP_P3_108148_199237 | NW_004515749.1 | Scaffold205 | 199237                  | TT                              | CC                | 1946488576               |
| SNP_P3_108149_199306 | NW_004515749.1 | Scaffold205 | 199306                  | AA                              | GG                | 1946488577               |
| SNP_P3_108150_199398 | NW_004515749.1 | Scaffold205 | 199398                  | AA                              | GG                | 1946488579               |
| SNP_P3_108151_199401 | NW_004515749.1 | Scaffold205 | 199401                  | AA                              | GG                | 1946488580               |
| SNP_P3_108152_199440 | NW_004515749.1 | Scaffold205 | 199440                  | TT                              | CC                | 1946488581               |
| SNP_P3_108153_199501 | NW_004515749.1 | Scaffold205 | 199501                  | TT                              | AA                | 1946488583               |
| SNP_P3_108154_211892 | NW_004515749.1 | Scaffold205 | 211892                  | GG                              | AA                | 1946488585               |
| SNP_P3_108155_214037 | NW_004515749.1 | Scaffold205 | 214037                  | GG                              | AA                | 1946488586               |
| SNP_P3_108156_25350  | NW_004515750.1 | Scaffold206 | 25350                   | GG                              | TT                | 1946488588               |
| SNP_P3_108157_26032  | NW_004515750.1 | Scaffold206 | 26032                   | AA                              | TT                | 1946488589               |
| SNP_P3_108158_34843  | NW_004515750.1 | Scaffold206 | 34843                   | TT                              | GG                | 1946488590               |
| SNP_P3_108159_40037  | NW_004515750.1 | Scaffold206 | 40037                   | GG                              | AA                | 1946488592               |
| SNP_P3_108160_56313  | NW_004515750.1 | Scaffold206 | 56313                   | TT                              | CC                | 1946488593               |
| SNP_P3_108161_62134  | NW_004515750.1 | Scaffold206 | 62134                   | AA                              | GG                | 1946488595               |
| SNP_P3_108162_62141  | NW_004515750.1 | Scaffold206 | 62141                   | AA                              | GG                | 1946488597               |
| SNP_P3_108163_62916  | NW_004515750.1 | Scaffold206 | 62916                   | CC                              | TT                | 1946488598               |

| SNPs IDs             | Chromosome IDs | Chromosomes | Physical positions (bp) | CDC Frontier (Reference genome) | (Pusa 256 & HPNB) | NCBI SNPdb Accession IDs |
|----------------------|----------------|-------------|-------------------------|---------------------------------|-------------------|--------------------------|
| SNP_P3_108164_68193  | NW_004515750.1 | Scaffold206 | 68193                   | GG                              | AA                | 1946488599               |
| SNP_P3_108165_68268  | NW_004515750.1 | Scaffold206 | 68268                   | CC                              | TT                | 1946488601               |
| SNP_P3_108166_74171  | NW_004515750.1 | Scaffold206 | 74171                   | TT                              | CC                | 1946488603               |
| SNP_P3_108167_74194  | NW_004515750.1 | Scaffold206 | 74194                   | TT                              | AA                | 1946488604               |
| SNP_P3_108168_77206  | NW_004515750.1 | Scaffold206 | 77206                   | CC                              | TT                | 1946488606               |
| SNP_P3_108169_85699  | NW_004515750.1 | Scaffold206 | 85699                   | CC                              | TT                | 1946488607               |
| SNP_P3_108170_85711  | NW_004515750.1 | Scaffold206 | 85711                   | AA                              | TT                | 1946488608               |
| SNP_P3_108171_85739  | NW_004515750.1 | Scaffold206 | 85739                   | AA                              | GG                | 1946488610               |
| SNP_P3_108172_89931  | NW_004515750.1 | Scaffold206 | 89931                   | AA                              | GG                | 1946488611               |
| SNP_P3_108173_106596 | NW_004515750.1 | Scaffold206 | 106596                  | TT                              | GG                | 1946488613               |
| SNP_P3_108174_106675 | NW_004515750.1 | Scaffold206 | 106675                  | TT                              | CC                | 1946488614               |
| SNP_P3_108175_108233 | NW_004515750.1 | Scaffold206 | 108233                  | AA                              | GG                | 1946488616               |
| SNP_P3_108176_108353 | NW_004515750.1 | Scaffold206 | 108353                  | TT                              | CC                | 1946488617               |
| SNP_P3_108177_108379 | NW_004515750.1 | Scaffold206 | 108379                  | AA                              | CC                | 1946488619               |
| SNP_P3_108178_108613 | NW_004515750.1 | Scaffold206 | 108613                  | GG                              | AA                | 1946488620               |
| SNP_P3_108179_108627 | NW_004515750.1 | Scaffold206 | 108627                  | AA                              | TT                | 1946488622               |
| SNP_P3_108180_108724 | NW_004515750.1 | Scaffold206 | 108724                  | CC                              | AA                | 1946488623               |
| SNP_P3_108181_108758 | NW_004515750.1 | Scaffold206 | 108758                  | AA                              | GG                | 1946488625               |
| SNP_P3_108182_111510 | NW_004515750.1 | Scaffold206 | 111510                  | CC                              | TT                | 1946488626               |
| SNP_P3_108183_111594 | NW_004515750.1 | Scaffold206 | 111594                  | TT                              | GG                | 1946488628               |
| SNP_P3_108184_111607 | NW_004515750.1 | Scaffold206 | 111607                  | TT                              | CC                | 1946488629               |
| SNP_P3_108185_114050 | NW_004515750.1 | Scaffold206 | 114050                  | AA                              | GG                | 1946488631               |
| SNP_P3_108186_115271 | NW_004515750.1 | Scaffold206 | 115271                  | AA                              | GG                | 1946488632               |
| SNP_P3_108187_115275 | NW_004515750.1 | Scaffold206 | 115275                  | TT                              | GG                | 1946488634               |
| SNP_P3_108188_115300 | NW_004515750.1 | Scaffold206 | 115300                  | GG                              | TT                | 1946488635               |
| SNP_P3_108189_115461 | NW_004515750.1 | Scaffold206 | 115461                  | TT                              | AA                | 1946488636               |
| SNP_P3_108190_115530 | NW_004515750.1 | Scaffold206 | 115530                  | TT                              | CC                | 1946488638               |
| SNP_P3_108191_115539 | NW_004515750.1 | Scaffold206 | 115539                  | AA                              | GG                | 1946488639               |
| SNP_P3_108192_115661 | NW_004515750.1 | Scaffold206 | 115661                  | AA                              | CC                | 1946488642               |
| SNP_P3_108193_115671 | NW_004515750.1 | Scaffold206 | 115671                  | TT                              | CC                | 1946488643               |
| SNP_P3_108194_115694 | NW_004515750.1 | Scaffold206 | 115694                  | GG                              | AA                | 1946488645               |
| SNP_P3_108195_115808 | NW_004515750.1 | Scaffold206 | 115808                  | AA                              | GG                | 1946488646               |
| SNP_P3_108196_115810 | NW_004515750.1 | Scaffold206 | 115810                  | CC                              | AA                | 1946488647               |
| SNP_P3_108197_115824 | NW_004515750.1 | Scaffold206 | 115824                  | TT                              | CC                | 1946488649               |
| SNP_P3_108198_119897 | NW_004515750.1 | Scaffold206 | 119897                  | AA                              | GG                | 1946488650               |
| SNP_P3_108199_120110 | NW_004515750.1 | Scaffold206 | 120110                  | GG                              | TT                | 1946488652               |
| SNP_P3_108200_120157 | NW_004515750.1 | Scaffold206 | 120157                  | GG                              | AA                | 1946488653               |
| SNP_P3_108201_120158 | NW_004515750.1 | Scaffold206 | 120158                  | GG                              | AA                | 1946488655               |
| SNP_P3_108202_120240 | NW_004515750.1 | Scaffold206 | 120240                  | CC                              | GG                | 1946488656               |
| SNP_P3_108203_139575 | NW_004515750.1 | Scaffold206 | 139575                  | TT                              | AA                | 1946488657               |
| SNP_P3_108204_139834 | NW_004515750.1 | Scaffold206 | 139834                  | GG                              | AA                | 1946488659               |
| SNP_P3_108205_139846 | NW_004515750.1 | Scaffold206 | 139846                  | AA                              | GG                | 1946488660               |

| SNPs IDs             | Chromosome IDs | Chromosomes | Physical positions (bp) | CDC Frontier (Reference genome) | (Pusa 256 & HPNB) | NCBI SNPdb Accession IDs |
|----------------------|----------------|-------------|-------------------------|---------------------------------|-------------------|--------------------------|
| SNP_P3_108206_139874 | NW_004515750.1 | Scaffold206 | 139874                  | TT                              | GG                | 1946488662               |
| SNP_P3_108207_139924 | NW_004515750.1 | Scaffold206 | 139924                  | AA                              | GG                | 1946488663               |
| SNP_P3_108208_139932 | NW_004515750.1 | Scaffold206 | 139932                  | TT                              | GG                | 1946488664               |
| SNP_P3_108209_139990 | NW_004515750.1 | Scaffold206 | 139990                  | CC                              | TT                | 1946488666               |
| SNP_P3_108210_140006 | NW_004515750.1 | Scaffold206 | 140006                  | TT                              | GG                | 1946488667               |
| SNP_P3_108211_140017 | NW_004515750.1 | Scaffold206 | 140017                  | AA                              | GG                | 1946488669               |
| SNP_P3_108212_140018 | NW_004515750.1 | Scaffold206 | 140018                  | GG                              | AA                | 1946488670               |
| SNP_P3_108213_140043 | NW_004515750.1 | Scaffold206 | 140043                  | AA                              | TT                | 1946488672               |
| SNP_P3_108214_140105 | NW_004515750.1 | Scaffold206 | 140105                  | TT                              | CC                | 1946488673               |
| SNP_P3_108215_140159 | NW_004515750.1 | Scaffold206 | 140159                  | CC                              | TT                | 1946488675               |
| SNP_P3_108216_140181 | NW_004515750.1 | Scaffold206 | 140181                  | TT                              | CC                | 1946488676               |
| SNP_P3_108217_140237 | NW_004515750.1 | Scaffold206 | 140237                  | AA                              | GG                | 1946488678               |
| SNP_P3_108218_140243 | NW_004515750.1 | Scaffold206 | 140243                  | TT                              | CC                | 1946488679               |
| SNP_P3_108219_140254 | NW_004515750.1 | Scaffold206 | 140254                  | AA                              | GG                | 1946488680               |
| SNP_P3_108220_140255 | NW_004515750.1 | Scaffold206 | 140255                  | AA                              | TT                | 1946488682               |
| SNP_P3_108221_140291 | NW_004515750.1 | Scaffold206 | 140291                  | TT                              | CC                | 1946488683               |
| SNP_P3_108222_140294 | NW_004515750.1 | Scaffold206 | 140294                  | CC                              | TT                | 1946488685               |
| SNP_P3_108223_140312 | NW_004515750.1 | Scaffold206 | 140312                  | CC                              | TT                | 1946488686               |
| SNP_P3_108224_152402 | NW_004515750.1 | Scaffold206 | 152402                  | GG                              | TT                | 1946488688               |
| SNP_P3_108225_157197 | NW_004515750.1 | Scaffold206 | 157197                  | CC                              | GG                | 1946488689               |
| SNP_P3_108226_157204 | NW_004515750.1 | Scaffold206 | 157204                  | AA                              | CC                | 1946488690               |
| SNP_P3_108227_160080 | NW_004515750.1 | Scaffold206 | 160080                  | GG                              | AA                | 1946488692               |
| SNP_P3_108228_160148 | NW_004515750.1 | Scaffold206 | 160148                  | AA                              | GG                | 1946488693               |
| SNP_P3_108230_164035 | NW_004515750.1 | Scaffold206 | 164035                  | CC                              | GG                | 1946488695               |
| SNP_P3_108231_164307 | NW_004515750.1 | Scaffold206 | 164307                  | GG                              | AA                | 1946488696               |
| SNP_P3_108232_164418 | NW_004515750.1 | Scaffold206 | 164418                  | AA                              | GG                | 1946488698               |
| SNP_P3_108233_164442 | NW_004515750.1 | Scaffold206 | 164442                  | CC                              | TT                | 1946488699               |
| SNP_P3_108234_166683 | NW_004515750.1 | Scaffold206 | 166683                  | TT                              | AA                | 1946488701               |
| SNP_P3_108235_166896 | NW_004515750.1 | Scaffold206 | 166896                  | AA                              | TT                | 1946488702               |
| SNP_P3_108236_166914 | NW_004515750.1 | Scaffold206 | 166914                  | AA                              | CC                | 1946488703               |
| SNP_P3_108237_175512 | NW_004515750.1 | Scaffold206 | 175512                  | GG                              | CC                | 1946488705               |
| SNP_P3_108238_175581 | NW_004515750.1 | Scaffold206 | 175581                  | TT                              | AA                | 1946488707               |
| SNP_P3_108239_175594 | NW_004515750.1 | Scaffold206 | 175594                  | GG                              | AA                | 1946488708               |
| SNP_P3_108241_175760 | NW_004515750.1 | Scaffold206 | 175760                  | TT                              | CC                | 1946488710               |
| SNP_P3_108242_175767 | NW_004515750.1 | Scaffold206 | 175767                  | AA                              | TT                | 1946488711               |
| SNP_P3_108243_175775 | NW_004515750.1 | Scaffold206 | 175775                  | CC                              | TT                | 1946488713               |
| SNP_P3_108244_175966 | NW_004515750.1 | Scaffold206 | 175966                  | CC                              | TT                | 1946488714               |
| SNP_P3_108246_176357 | NW_004515750.1 | Scaffold206 | 176357                  | TT                              | CC                | 1946488715               |
| SNP_P3_108247_189783 | NW_004515750.1 | Scaffold206 | 189783                  | CC                              | TT                | 1946488717               |
| SNP_P3_108248_190545 | NW_004515750.1 | Scaffold206 | 190545                  | CC                              | TT                | 1946488718               |
| SNP_P3_108249_190577 | NW_004515750.1 | Scaffold206 | 190577                  | CC                              | TT                | 1946488720               |
| SNP_P3_108250_190582 | NW_004515750.1 | Scaffold206 | 190582                  | CC                              | TT                | 1946488721               |

| SNPs IDs             | Chromosome IDs | Chromosomes | Physical positions (bp) | CDC Frontier (Reference genome) | (Pusa 256 & HPNB) | NCBI SNPdb Accession IDs |
|----------------------|----------------|-------------|-------------------------|---------------------------------|-------------------|--------------------------|
| SNP_P3_108251_190583 | NW_004515750.1 | Scaffold206 | 190583                  | GG                              | AA                | 1946488723               |
| SNP_P3_108253_198592 | NW_004515750.1 | Scaffold206 | 198592                  | AA                              | GG                | 1946488724               |
| SNP_P3_108254_198661 | NW_004515750.1 | Scaffold206 | 198661                  | AA                              | GG                | 1946488726               |
| SNP_P3_108255_199511 | NW_004515750.1 | Scaffold206 | 199511                  | TT                              | CC                | 1946488727               |
| SNP_P3_108257_222720 | NW_004515750.1 | Scaffold206 | 222720                  | CC                              | TT                | 1946488728               |
| SNP_P3_108258_226671 | NW_004515750.1 | Scaffold206 | 226671                  | GG                              | TT                | 1946488730               |
| SNP_P3_108259_233720 | NW_004515750.1 | Scaffold206 | 233720                  | TT                              | CC                | 1946488731               |
| SNP_P3_108260_234390 | NW_004515750.1 | Scaffold206 | 234390                  | GG                              | TT                | 1946488733               |
| SNP_P3_108261_234450 | NW_004515750.1 | Scaffold206 | 234450                  | TT                              | CC                | 1946488734               |
| SNP_P3_108262_234504 | NW_004515750.1 | Scaffold206 | 234504                  | TT                              | AA                | 1946488736               |
| SNP_P3_108263_234785 | NW_004515750.1 | Scaffold206 | 234785                  | TT                              | CC                | 1946488737               |
| SNP_P3_108264_234795 | NW_004515750.1 | Scaffold206 | 234795                  | TT                              | CC                | 1946488739               |
| SNP_P3_108265_234822 | NW_004515750.1 | Scaffold206 | 234822                  | GG                              | AA                | 1946488740               |
| SNP_P3_108266_234859 | NW_004515750.1 | Scaffold206 | 234859                  | AA                              | CC                | 1946488742               |
| SNP_P3_108267_235021 | NW_004515750.1 | Scaffold206 | 235021                  | TT                              | CC                | 1946488743               |
| SNP_P3_108268_235043 | NW_004515750.1 | Scaffold206 | 235043                  | GG                              | TT                | 1946488744               |
| SNP_P3_108269_238563 | NW_004515750.1 | Scaffold206 | 238563                  | CC                              | TT                | 1946488746               |
| SNP_P3_108270_247328 | NW_004515750.1 | Scaffold206 | 247328                  | CC                              | TT                | 1946488747               |
| SNP_P3_108271_247485 | NW_004515750.1 | Scaffold206 | 247485                  | TT                              | GG                | 1946488749               |
| SNP_P3_108272_251070 | NW_004515750.1 | Scaffold206 | 251070                  | AA                              | TT                | 1946488750               |
| SNP_P3_108273_251071 | NW_004515750.1 | Scaffold206 | 251071                  | TT                              | GG                | 1946488752               |
| SNP_P3_108274_267129 | NW_004515750.1 | Scaffold206 | 267129                  | AA                              | GG                | 1946488753               |
| SNP_P3_108275_272191 | NW_004515750.1 | Scaffold206 | 272191                  | AA                              | GG                | 1946488755               |
| SNP_P3_108276_272335 | NW_004515750.1 | Scaffold206 | 272335                  | CC                              | AA                | 1946488756               |
| SNP_P3_108278_2354   | NW_004515751.1 | Scaffold207 | 2354                    | TT                              | CC                | 1946488758               |
| SNP_P3_108279_6236   | NW_004515751.1 | Scaffold207 | 6236                    | AA                              | GG                | 1946488759               |
| SNP_P3_108281_6961   | NW_004515751.1 | Scaffold207 | 6961                    | CC                              | AA                | 1946488761               |
| SNP_P3_108282_7174   | NW_004515751.1 | Scaffold207 | 7174                    | CC                              | TT                | 1946488762               |
| SNP_P3_108283_7352   | NW_004515751.1 | Scaffold207 | 7352                    | AA                              | TT                | 1946488764               |
| SNP_P3_108284_7484   | NW_004515751.1 | Scaffold207 | 7484                    | GG                              | TT                | 1946488765               |
| SNP_P3_108285_7544   | NW_004515751.1 | Scaffold207 | 7544                    | GG                              | AA                | 1946488767               |
| SNP_P3_108286_7760   | NW_004515751.1 | Scaffold207 | 7760                    | TT                              | CC                | 1946488768               |
| SNP_P3_108287_7795   | NW_004515751.1 | Scaffold207 | 7795                    | AA                              | TT                | 1946488770               |
| SNP_P3_108288_8056   | NW_004515751.1 | Scaffold207 | 8056                    | AA                              | GG                | 1946488771               |
| SNP_P3_108289_8119   | NW_004515751.1 | Scaffold207 | 8119                    | TT                              | CC                | 1946488773               |
| SNP_P3_108290_8215   | NW_004515751.1 | Scaffold207 | 8215                    | AA                              | GG                | 1946488774               |
| SNP_P3_108291_8217   | NW_004515751.1 | Scaffold207 | 8217                    | GG                              | TT                | 1946488776               |
| SNP_P3_108292_8439   | NW_004515751.1 | Scaffold207 | 8439                    | TT                              | CC                | 1946488777               |
| SNP_P3_108293_9466   | NW_004515751.1 | Scaffold207 | 9466                    | CC                              | TT                | 1946488779               |
| SNP_P3_108294_9513   | NW_004515751.1 | Scaffold207 | 9513                    | AA                              | GG                | 1946488780               |
| SNP_P3_108295_9623   | NW_004515751.1 | Scaffold207 | 9623                    | TT                              | CC                | 1946488781               |
| SNP_P3_108297_9640   | NW_004515751.1 | Scaffold207 | 9640                    | AA                              | TT                | 1946488783               |

| SNPs IDs            | Chromosome IDs | Chromosomes | Physical positions (bp) | CDC Frontier (Reference genome) | (Pusa 256 & HPNB) | NCBI SNPdb Accession IDs |
|---------------------|----------------|-------------|-------------------------|---------------------------------|-------------------|--------------------------|
| SNP_P3_108298_9728  | NW_004515751.1 | Scaffold207 | 9728                    | TT                              | AA                | 1946488784               |
| SNP_P3_108299_9762  | NW_004515751.1 | Scaffold207 | 9762                    | GG                              | CC                | 1946488786               |
| SNP_P3_108300_9831  | NW_004515751.1 | Scaffold207 | 9831                    | TT                              | AA                | 1946488787               |
| SNP_P3_108301_9910  | NW_004515751.1 | Scaffold207 | 9910                    | CC                              | TT                | 1946488789               |
| SNP_P3_108302_9943  | NW_004515751.1 | Scaffold207 | 9943                    | AA                              | GG                | 1946488790               |
| SNP_P3_108303_9946  | NW_004515751.1 | Scaffold207 | 9946                    | TT                              | AA                | 1946488792               |
| SNP_P3_108304_23971 | NW_004515751.1 | Scaffold207 | 23971                   | AA                              | CC                | 1946488793               |
| SNP_P3_108305_24910 | NW_004515751.1 | Scaffold207 | 24910                   | AA                              | GG                | 1946488795               |
| SNP_P3_108306_25138 | NW_004515751.1 | Scaffold207 | 25138                   | TT                              | GG                | 1946488796               |
| SNP_P3_108307_25181 | NW_004515751.1 | Scaffold207 | 25181                   | CC                              | TT                | 1946488798               |
| SNP_P3_108308_25183 | NW_004515751.1 | Scaffold207 | 25183                   | AA                              | CC                | 1946488799               |
| SNP_P3_108309_36293 | NW_004515751.1 | Scaffold207 | 36293                   | GG                              | AA                | 1946488801               |
| SNP_P3_108310_36296 | NW_004515751.1 | Scaffold207 | 36296                   | TT                              | AA                | 1946488802               |
| SNP_P3_108311_476   | NW_004515752.1 | Scaffold208 | 476                     | GG                              | AA                | 1946488804               |
| SNP_P3_108312_10922 | NW_004515752.1 | Scaffold208 | 10922                   | TT                              | CC                | 1946488805               |
| SNP_P3_108313_11066 | NW_004515752.1 | Scaffold208 | 11066                   | GG                              | AA                | 1946488807               |
| SNP_P3_108315_15739 | NW_004515752.1 | Scaffold208 | 15739                   | AA                              | TT                | 1946488808               |
| SNP_P3_108316_15749 | NW_004515752.1 | Scaffold208 | 15749                   | TT                              | CC                | 1946488810               |
| SNP_P3_108317_15780 | NW_004515752.1 | Scaffold208 | 15780                   | TT                              | AA                | 1946488811               |
| SNP_P3_108318_15792 | NW_004515752.1 | Scaffold208 | 15792                   | GG                              | TT                | 1946488813               |
| SNP_P3_108319_15832 | NW_004515752.1 | Scaffold208 | 15832                   | GG                              | TT                | 1946488814               |
| SNP_P3_108320_16123 | NW_004515752.1 | Scaffold208 | 16123                   | AA                              | GG                | 1946488816               |
| SNP_P3_108321_18416 | NW_004515752.1 | Scaffold208 | 18416                   | GG                              | AA                | 1946488817               |
| SNP_P3_108322_18420 | NW_004515752.1 | Scaffold208 | 18420                   | TT                              | CC                | 1946488819               |
| SNP_P3_108323_19368 | NW_004515752.1 | Scaffold208 | 19368                   | AA                              | GG                | 1946488820               |
| SNP_P3_108324_19376 | NW_004515752.1 | Scaffold208 | 19376                   | TT                              | CC                | 1946488822               |
| SNP_P3_108325_19388 | NW_004515752.1 | Scaffold208 | 19388                   | AA                              | GG                | 1946488823               |
| SNP_P3_108326_19411 | NW_004515752.1 | Scaffold208 | 19411                   | GG                              | AA                | 1946488825               |
| SNP_P3_108327_20982 | NW_004515752.1 | Scaffold208 | 20982                   | CC                              | TT                | 1946488826               |
| SNP_P3_108328_20989 | NW_004515752.1 | Scaffold208 | 20989                   | AA                              | GG                | 1946488828               |
| SNP_P3_108329_21035 | NW_004515752.1 | Scaffold208 | 21035                   | AA                              | GG                | 1946488829               |
| SNP_P3_108330_21043 | NW_004515752.1 | Scaffold208 | 21043                   | CC                              | GG                | 1946488831               |
| SNP_P3_108331_21058 | NW_004515752.1 | Scaffold208 | 21058                   | CC                              | GG                | 1946488832               |
| SNP_P3_108332_21149 | NW_004515752.1 | Scaffold208 | 21149                   | GG                              | TT                | 1946488834               |
| SNP_P3_108333_21167 | NW_004515752.1 | Scaffold208 | 21167                   | TT                              | CC                | 1946488835               |
| SNP_P3_108334_21169 | NW_004515752.1 | Scaffold208 | 21169                   | AA                              | TT                | 1946488837               |
| SNP_P3_108335_21176 | NW_004515752.1 | Scaffold208 | 21176                   | TT                              | CC                | 1946488838               |
| SNP_P3_108336_21463 | NW_004515752.1 | Scaffold208 | 21463                   | AA                              | TT                | 1946488840               |
| SNP_P3_108337_21505 | NW_004515752.1 | Scaffold208 | 21505                   | AA                              | CC                | 1946488841               |
| SNP_P3_108338_21533 | NW_004515752.1 | Scaffold208 | 21533                   | AA                              | GG                | 1946488843               |
| SNP_P3_108339_21586 | NW_004515752.1 | Scaffold208 | 21586                   | GG                              | AA                | 1946488844               |
| SNP_P3_108340_21917 | NW_004515752.1 | Scaffold208 | 21917                   | CC                              | AA                | 1946488846               |



| SNPs IDs             | Chromosome IDs | Chromosomes | Physical positions (bp) | CDC Frontier (Reference genome) | (Pusa 256 & HPNB) | NCBI SNPdb Accession IDs |
|----------------------|----------------|-------------|-------------------------|---------------------------------|-------------------|--------------------------|
| SNP_P3_108341_23932  | NW_004515752.1 | Scaffold208 | 23932                   | CC                              | TT                | 1946488847               |
| SNP_P3_108342_26220  | NW_004515752.1 | Scaffold208 | 26220                   | CC                              | TT                | 1946488849               |
| SNP_P3_108343_35811  | NW_004515752.1 | Scaffold208 | 35811                   | TT                              | CC                | 1946488850               |
| SNP_P3_108344_38885  | NW_004515752.1 | Scaffold208 | 38885                   | AA                              | TT                | 1946488852               |
| SNP_P3_108345_39278  | NW_004515752.1 | Scaffold208 | 39278                   | AA                              | GG                | 1946488853               |
| SNP_P3_108346_44860  | NW_004515752.1 | Scaffold208 | 44860                   | GG                              | AA                | 1946488855               |
| SNP_P3_108347_48108  | NW_004515752.1 | Scaffold208 | 48108                   | CC                              | TT                | 1946488856               |
| SNP_P3_108348_51871  | NW_004515752.1 | Scaffold208 | 51871                   | AA                              | CC                | 1946488858               |
| SNP_P3_108349_57991  | NW_004515752.1 | Scaffold208 | 57991                   | CC                              | TT                | 1946488860               |
| SNP_P3_108350_74561  | NW_004515752.1 | Scaffold208 | 74561                   | CC                              | GG                | 1946488861               |
| SNP_P3_108351_74971  | NW_004515752.1 | Scaffold208 | 74971                   | GG                              | AA                | 1946488863               |
| SNP_P3_108352_87201  | NW_004515752.1 | Scaffold208 | 87201                   | GG                              | AA                | 1946488864               |
| SNP_P3_108353_112326 | NW_004515752.1 | Scaffold208 | 112326                  | CC                              | AA                | 1946488865               |
| SNP_P3_108354_112335 | NW_004515752.1 | Scaffold208 | 112335                  | CC                              | TT                | 1946488867               |
| SNP_P3_108355_119425 | NW_004515752.1 | Scaffold208 | 119425                  | TT                              | AA                | 1946488868               |
| SNP_P3_108356_119629 | NW_004515752.1 | Scaffold208 | 119629                  | TT                              | CC                | 1946488870               |
| SNP_P3_108357_119732 | NW_004515752.1 | Scaffold208 | 119732                  | CC                              | TT                | 1946488871               |
| SNP_P3_108358_119942 | NW_004515752.1 | Scaffold208 | 119942                  | AA                              | GG                | 1946488873               |
| SNP_P3_108359_124923 | NW_004515752.1 | Scaffold208 | 124923                  | AA                              | GG                | 1946488874               |
| SNP_P3_108360_126343 | NW_004515752.1 | Scaffold208 | 126343                  | GG                              | TT                | 1946488876               |
| SNP_P3_108361_126384 | NW_004515752.1 | Scaffold208 | 126384                  | CC                              | TT                | 1946488877               |
| SNP_P3_108362_126395 | NW_004515752.1 | Scaffold208 | 126395                  | AA                              | GG                | 1946488879               |
| SNP_P3_108363_126434 | NW_004515752.1 | Scaffold208 | 126434                  | AA                              | CC                | 1946488880               |
| SNP_P3_108364_126791 | NW_004515752.1 | Scaffold208 | 126791                  | TT                              | CC                | 1946488882               |
| SNP_P3_108365_127392 | NW_004515752.1 | Scaffold208 | 127392                  | TT                              | CC                | 1946488883               |
| SNP_P3_108366_127746 | NW_004515752.1 | Scaffold208 | 127746                  | TT                              | CC                | 1946488885               |
| SNP_P3_108367_127758 | NW_004515752.1 | Scaffold208 | 127758                  | CC                              | AA                | 1946488886               |
| SNP_P3_108368_127783 | NW_004515752.1 | Scaffold208 | 127783                  | GG                              | AA                | 1946488888               |
| SNP_P3_108370_156815 | NW_004515752.1 | Scaffold208 | 156815                  | TT                              | AA                | 1946488889               |
| SNP_P3_108371_156847 | NW_004515752.1 | Scaffold208 | 156847                  | CC                              | TT                | 1946488890               |
| SNP_P3_108372_157208 | NW_004515752.1 | Scaffold208 | 157208                  | TT                              | CC                | 1946488892               |
| SNP_P3_108373_163196 | NW_004515752.1 | Scaffold208 | 163196                  | AA                              | GG                | 1946488893               |
| SNP_P3_108374_169673 | NW_004515752.1 | Scaffold208 | 169673                  | GG                              | TT                | 1946488895               |
| SNP_P3_108375_171975 | NW_004515752.1 | Scaffold208 | 171975                  | AA                              | GG                | 1946488896               |
| SNP_P3_108376_173588 | NW_004515752.1 | Scaffold208 | 173588                  | TT                              | AA                | 1946488898               |
| SNP_P3_108377_173958 | NW_004515752.1 | Scaffold208 | 173958                  | GG                              | AA                | 1946488899               |
| SNP_P3_108378_174028 | NW_004515752.1 | Scaffold208 | 174028                  | CC                              | TT                | 1946488901               |
| SNP_P3_108380_174295 | NW_004515752.1 | Scaffold208 | 174295                  | CC                              | TT                | 1946488902               |
| SNP_P3_108381_174372 | NW_004515752.1 | Scaffold208 | 174372                  | TT                              | CC                | 1946488904               |
| SNP_P3_108382_180110 | NW_004515752.1 | Scaffold208 | 180110                  | TT                              | GG                | 1946488905               |
| SNP_P3_108383_195121 | NW_004515752.1 | Scaffold208 | 195121                  | CC                              | TT                | 1946488907               |
| SNP_P3_108384_195173 | NW_004515752.1 | Scaffold208 | 195173                  | GG                              | AA                | 1946488908               |

| SNPs IDs             | Chromosome IDs | Chromosomes | Physical positions (bp) | CDC Frontier (Reference genome) | (Pusa 256 & HPNB) | NCBI SNPdb Accession IDs |
|----------------------|----------------|-------------|-------------------------|---------------------------------|-------------------|--------------------------|
| SNP_P3_108385_215155 | NW_004515752.1 | Scaffold208 | 215155                  | GG                              | AA                | 1946488910               |
| SNP_P3_108387_255408 | NW_004515752.1 | Scaffold208 | 255408                  | CC                              | TT                | 1946488911               |
| SNP_P3_108388_312422 | NW_004515752.1 | Scaffold208 | 312422                  | CC                              | AA                | 1946488913               |
| SNP_P3_108389_312425 | NW_004515752.1 | Scaffold208 | 312425                  | GG                              | AA                | 1946488914               |
| SNP_P3_108390_313521 | NW_004515752.1 | Scaffold208 | 313521                  | CC                              | TT                | 1946488916               |
| SNP_P3_108391_320568 | NW_004515752.1 | Scaffold208 | 320568                  | TT                              | GG                | 1946488917               |
| SNP_P3_108393_347138 | NW_004515752.1 | Scaffold208 | 347138                  | GG                              | AA                | 1946488919               |
| SNP_P3_108394_347154 | NW_004515752.1 | Scaffold208 | 347154                  | CC                              | TT                | 1946488920               |
| SNP_P3_108395_347472 | NW_004515752.1 | Scaffold208 | 347472                  | GG                              | TT                | 1946488922               |
| SNP_P3_108396_347510 | NW_004515752.1 | Scaffold208 | 347510                  | CC                              | TT                | 1946488923               |
| SNP_P3_108397_347521 | NW_004515752.1 | Scaffold208 | 347521                  | AA                              | GG                | 1946488925               |
| SNP_P3_108398_347537 | NW_004515752.1 | Scaffold208 | 347537                  | AA                              | TT                | 1946488926               |
| SNP_P3_108399_347544 | NW_004515752.1 | Scaffold208 | 347544                  | TT                              | CC                | 1946488928               |
| SNP_P3_108400_355261 | NW_004515752.1 | Scaffold208 | 355261                  | AA                              | GG                | 1946488929               |
| SNP_P3_108401_365182 | NW_004515752.1 | Scaffold208 | 365182                  | TT                              | CC                | 1946488930               |
| SNP_P3_108402_377598 | NW_004515752.1 | Scaffold208 | 377598                  | AA                              | GG                | 1946488932               |
| SNP_P3_108403_386731 | NW_004515752.1 | Scaffold208 | 386731                  | TT                              | AA                | 1946488933               |
| SNP_P3_108404_420586 | NW_004515752.1 | Scaffold208 | 420586                  | GG                              | AA                | 1946488935               |
| SNP_P3_108405_421244 | NW_004515752.1 | Scaffold208 | 421244                  | AA                              | GG                | 1946488936               |
| SNP_P3_108406_425065 | NW_004515752.1 | Scaffold208 | 425065                  | TT                              | CC                | 1946488938               |
| SNP_P3_108407_447386 | NW_004515752.1 | Scaffold208 | 447386                  | AA                              | TT                | 1946488939               |
| SNP_P3_108408_447607 | NW_004515752.1 | Scaffold208 | 447607                  | AA                              | GG                | 1946488941               |
| SNP_P3_108409_458316 | NW_004515752.1 | Scaffold208 | 458316                  | CC                              | TT                | 1946488942               |
| SNP_P3_108410_2295   | NW_004515753.1 | Scaffold209 | 2295                    | CC                              | TT                | 1946488944               |
| SNP_P3_108411_2314   | NW_004515753.1 | Scaffold209 | 2314                    | GG                              | AA                | 1946488945               |
| SNP_P3_108412_2468   | NW_004515753.1 | Scaffold209 | 2468                    | CC                              | TT                | 1946488947               |
| SNP_P3_108413_2489   | NW_004515753.1 | Scaffold209 | 2489                    | AA                              | GG                | 1946488948               |
| SNP_P3_108414_2595   | NW_004515753.1 | Scaffold209 | 2595                    | GG                              | CC                | 1946488950               |
| SNP_P3_108415_2625   | NW_004515753.1 | Scaffold209 | 2625                    | GG                              | TT                | 1946488951               |
| SNP_P3_108416_2674   | NW_004515753.1 | Scaffold209 | 2674                    | AA                              | CC                | 1946488953               |
| SNP_P3_108417_3023   | NW_004515753.1 | Scaffold209 | 3023                    | TT                              | AA                | 1946488954               |
| SNP_P3_108418_5620   | NW_004515753.1 | Scaffold209 | 5620                    | TT                              | AA                | 1946488955               |
| SNP_P3_108419_5629   | NW_004515753.1 | Scaffold209 | 5629                    | GG                              | CC                | 1946488957               |
| SNP_P3_108420_5669   | NW_004515753.1 | Scaffold209 | 5669                    | AA                              | CC                | 1946488958               |
| SNP_P3_108421_5679   | NW_004515753.1 | Scaffold209 | 5679                    | GG                              | AA                | 1946488960               |
| SNP_P3_108422_5702   | NW_004515753.1 | Scaffold209 | 5702                    | TT                              | CC                | 1946488961               |
| SNP_P3_108423_5720   | NW_004515753.1 | Scaffold209 | 5720                    | CC                              | AA                | 1946488963               |
| SNP_P3_108424_5768   | NW_004515753.1 | Scaffold209 | 5768                    | AA                              | GG                | 1946488964               |
| SNP_P3_108425_5770   | NW_004515753.1 | Scaffold209 | 5770                    | TT                              | AA                | 1946488966               |
| SNP_P3_108426_5826   | NW_004515753.1 | Scaffold209 | 5826                    | AA                              | TT                | 1946488967               |
| SNP_P3_108427_5958   | NW_004515753.1 | Scaffold209 | 5958                    | TT                              | CC                | 1946488969               |
| SNP_P3_108428_6040   | NW_004515753.1 | Scaffold209 | 6040                    | AA                              | TT                | 1946488970               |

| SNPs IDs            | Chromosome IDs | Chromosomes | Physical positions (bp) | CDC Frontier (Reference genome) | (Pusa 256 & HPNB) | NCBI SNPdb Accession IDs |
|---------------------|----------------|-------------|-------------------------|---------------------------------|-------------------|--------------------------|
| SNP_P3_108429_6138  | NW_004515753.1 | Scaffold209 | 6138                    | GG                              | CC                | 1946488972               |
| SNP_P3_108430_6314  | NW_004515753.1 | Scaffold209 | 6314                    | CC                              | TT                | 1946488973               |
| SNP_P3_108431_6327  | NW_004515753.1 | Scaffold209 | 6327                    | AA                              | TT                | 1946488975               |
| SNP_P3_108432_7670  | NW_004515753.1 | Scaffold209 | 7670                    | TT                              | GG                | 1946488976               |
| SNP_P3_108433_7683  | NW_004515753.1 | Scaffold209 | 7683                    | CC                              | TT                | 1946488978               |
| SNP_P3_108434_7695  | NW_004515753.1 | Scaffold209 | 7695                    | TT                              | AA                | 1946488979               |
| SNP_P3_108435_7754  | NW_004515753.1 | Scaffold209 | 7754                    | GG                              | CC                | 1946488980               |
| SNP_P3_108436_7999  | NW_004515753.1 | Scaffold209 | 7999                    | TT                              | CC                | 1946488982               |
| SNP_P3_108437_8034  | NW_004515753.1 | Scaffold209 | 8034                    | TT                              | CC                | 1946488983               |
| SNP_P3_108438_15472 | NW_004515753.1 | Scaffold209 | 15472                   | TT                              | AA                | 1946488985               |
| SNP_P3_108439_15476 | NW_004515753.1 | Scaffold209 | 15476                   | TT                              | CC                | 1946488986               |
| SNP_P3_108440_31636 | NW_004515753.1 | Scaffold209 | 31636                   | AA                              | CC                | 1946488988               |
| SNP_P3_108441_31667 | NW_004515753.1 | Scaffold209 | 31667                   | AA                              | TT                | 1946488989               |
| SNP_P3_108442_39672 | NW_004515753.1 | Scaffold209 | 39672                   | AA                              | GG                | 1946488991               |
| SNP_P3_108443_39685 | NW_004515753.1 | Scaffold209 | 39685                   | CC                              | AA                | 1946488992               |
| SNP_P3_108444_39704 | NW_004515753.1 | Scaffold209 | 39704                   | CC                              | AA                | 1946488994               |
| SNP_P3_108445_61329 | NW_004515753.1 | Scaffold209 | 61329                   | CC                              | TT                | 1946488995               |
| SNP_P3_108446_61688 | NW_004515753.1 | Scaffold209 | 61688                   | CC                              | TT                | 1946488997               |
| SNP_P3_108447_65562 | NW_004515753.1 | Scaffold209 | 65562                   | TT                              | CC                | 1946488998               |
| SNP_P3_108448_65619 | NW_004515753.1 | Scaffold209 | 65619                   | GG                              | AA                | 1946489000               |
| SNP_P3_108449_65686 | NW_004515753.1 | Scaffold209 | 65686                   | AA                              | GG                | 1946489001               |
| SNP_P3_108450_65740 | NW_004515753.1 | Scaffold209 | 65740                   | TT                              | CC                | 1946489003               |
| SNP_P3_108451_65813 | NW_004515753.1 | Scaffold209 | 65813                   | TT                              | CC                | 1946489004               |
| SNP_P3_108452_65932 | NW_004515753.1 | Scaffold209 | 65932                   | AA                              | GG                | 1946489005               |
| SNP_P3_108453_66013 | NW_004515753.1 | Scaffold209 | 66013                   | TT                              | GG                | 1946489007               |
| SNP_P3_108454_66036 | NW_004515753.1 | Scaffold209 | 66036                   | TT                              | CC                | 1946489008               |
| SNP_P3_108455_66052 | NW_004515753.1 | Scaffold209 | 66052                   | CC                              | AA                | 1946489010               |
| SNP_P3_108456_66108 | NW_004515753.1 | Scaffold209 | 66108                   | GG                              | AA                | 1946489011               |
| SNP_P3_108457_66147 | NW_004515753.1 | Scaffold209 | 66147                   | TT                              | AA                | 1946489013               |
| SNP_P3_108458_66186 | NW_004515753.1 | Scaffold209 | 66186                   | CC                              | TT                | 1946489014               |
| SNP_P3_108459_78021 | NW_004515753.1 | Scaffold209 | 78021                   | GG                              | AA                | 1946489016               |
| SNP_P3_108460_78030 | NW_004515753.1 | Scaffold209 | 78030                   | TT                              | CC                | 1946489017               |
| SNP_P3_108461_78037 | NW_004515753.1 | Scaffold209 | 78037                   | TT                              | CC                | 1946489019               |
| SNP_P3_108462_79500 | NW_004515753.1 | Scaffold209 | 79500                   | GG                              | CC                | 1946489020               |
| SNP_P3_108463_79521 | NW_004515753.1 | Scaffold209 | 79521                   | TT                              | CC                | 1946489022               |
| SNP_P3_108464_83869 | NW_004515753.1 | Scaffold209 | 83869                   | AA                              | CC                | 1946489023               |
| SNP_P3_108465_83891 | NW_004515753.1 | Scaffold209 | 83891                   | TT                              | CC                | 1946489025               |
| SNP_P3_108466_84301 | NW_004515753.1 | Scaffold209 | 84301                   | CC                              | AA                | 1946489026               |
| SNP_P3_108467_89506 | NW_004515753.1 | Scaffold209 | 89506                   | CC                              | AA                | 1946489028               |
| SNP_P3_108468_92130 | NW_004515753.1 | Scaffold209 | 92130                   | GG                              | AA                | 1946489029               |
| SNP_P3_108469_92581 | NW_004515753.1 | Scaffold209 | 92581                   | GG                              | CC                | 1946489030               |
| SNP_P3_108471_92940 | NW_004515753.1 | Scaffold209 | 92940                   | TT                              | GG                | 1946489032               |

| SNPs IDs             | Chromosome IDs | Chromosomes | Physical positions (bp) | CDC Frontier (Reference genome) | (Pusa 256 & HPNB) | NCBI SNPdb Accession IDs |
|----------------------|----------------|-------------|-------------------------|---------------------------------|-------------------|--------------------------|
| SNP_P3_108472_92944  | NW_004515753.1 | Scaffold209 | 92944                   | CC                              | TT                | 1946489033               |
| SNP_P3_108473_92945  | NW_004515753.1 | Scaffold209 | 92945                   | CC                              | TT                | 1946489035               |
| SNP_P3_108475_132249 | NW_004515753.1 | Scaffold209 | 132249                  | TT                              | GG                | 1946489037               |
| SNP_P3_108476_138365 | NW_004515753.1 | Scaffold209 | 138365                  | CC                              | TT                | 1946489038               |
| SNP_P3_108477_138791 | NW_004515753.1 | Scaffold209 | 138791                  | CC                              | TT                | 1946489040               |
| SNP_P3_108478_139011 | NW_004515753.1 | Scaffold209 | 139011                  | GG                              | AA                | 1946489041               |
| SNP_P3_108479_139213 | NW_004515753.1 | Scaffold209 | 139213                  | GG                              | CC                | 1946489043               |
| SNP_P3_108480_139277 | NW_004515753.1 | Scaffold209 | 139277                  | CC                              | TT                | 1946489044               |
| SNP_P3_108481_139293 | NW_004515753.1 | Scaffold209 | 139293                  | AA                              | GG                | 1946489046               |
| SNP_P3_108482_144869 | NW_004515753.1 | Scaffold209 | 144869                  | AA                              | GG                | 1946489047               |
| SNP_P3_108483_145588 | NW_004515753.1 | Scaffold209 | 145588                  | AA                              | CC                | 1946489049               |
| SNP_P3_108484_155533 | NW_004515753.1 | Scaffold209 | 155533                  | AA                              | GG                | 1946489050               |
| SNP_P3_108485_189009 | NW_004515753.1 | Scaffold209 | 189009                  | AA                              | GG                | 1946489052               |
| SNP_P3_108486_189088 | NW_004515753.1 | Scaffold209 | 189088                  | TT                              | GG                | 1946489053               |
| SNP_P3_108487_198596 | NW_004515753.1 | Scaffold209 | 198596                  | GG                              | AA                | 1946489055               |
| SNP_P3_108488_198613 | NW_004515753.1 | Scaffold209 | 198613                  | AA                              | TT                | 1946489056               |
| SNP_P3_108489_198636 | NW_004515753.1 | Scaffold209 | 198636                  | CC                              | TT                | 1946489058               |
| SNP_P3_108490_214369 | NW_004515753.1 | Scaffold209 | 214369                  | CC                              | AA                | 1946489059               |
| SNP_P3_108491_217794 | NW_004515753.1 | Scaffold209 | 217794                  | TT                              | CC                | 1946489061               |
| SNP_P3_108492_218140 | NW_004515753.1 | Scaffold209 | 218140                  | TT                              | AA                | 1946489062               |
| SNP_P3_108494_231439 | NW_004515753.1 | Scaffold209 | 231439                  | TT                              | CC                | 1946489064               |
| SNP_P3_108495_244743 | NW_004515753.1 | Scaffold209 | 244743                  | CC                              | GG                | 1946489065               |
| SNP_P3_108496_251256 | NW_004515753.1 | Scaffold209 | 251256                  | GG                              | CC                | 1946489067               |
| SNP_P3_108497_253244 | NW_004515753.1 | Scaffold209 | 253244                  | AA                              | GG                | 1946489068               |
| SNP_P3_108498_253250 | NW_004515753.1 | Scaffold209 | 253250                  | AA                              | TT                | 1946489069               |
| SNP_P3_108499_253253 | NW_004515753.1 | Scaffold209 | 253253                  | AA                              | CC                | 1946489071               |
| SNP_P3_108500_253255 | NW_004515753.1 | Scaffold209 | 253255                  | AA                              | CC                | 1946489072               |
| SNP_P3_108502_258324 | NW_004515753.1 | Scaffold209 | 258324                  | GG                              | AA                | 1946489074               |
| SNP_P3_108503_258420 | NW_004515753.1 | Scaffold209 | 258420                  | TT                              | AA                | 1946489075               |
| SNP_P3_108504_258527 | NW_004515753.1 | Scaffold209 | 258527                  | GG                              | AA                | 1946489077               |
| SNP_P3_108505_258704 | NW_004515753.1 | Scaffold209 | 258704                  | TT                              | CC                | 1946489078               |
| SNP_P3_108506_258714 | NW_004515753.1 | Scaffold209 | 258714                  | CC                              | GG                | 1946489080               |
| SNP_P3_108507_265468 | NW_004515753.1 | Scaffold209 | 265468                  | TT                              | GG                | 1946489081               |
| SNP_P3_108508_267577 | NW_004515753.1 | Scaffold209 | 267577                  | GG                              | AA                | 1946489083               |
| SNP_P3_108509_274262 | NW_004515753.1 | Scaffold209 | 274262                  | AA                              | GG                | 1946489084               |
| SNP_P3_108510_274275 | NW_004515753.1 | Scaffold209 | 274275                  | CC                              | TT                | 1946489086               |
| SNP_P3_108511_296498 | NW_004515753.1 | Scaffold209 | 296498                  | TT                              | CC                | 1946489087               |
| SNP_P3_108512_298255 | NW_004515753.1 | Scaffold209 | 298255                  | GG                              | CC                | 1946489089               |
| SNP_P3_108513_298336 | NW_004515753.1 | Scaffold209 | 298336                  | TT                              | CC                | 1946489090               |
| SNP_P3_108514_298341 | NW_004515753.1 | Scaffold209 | 298341                  | TT                              | CC                | 1946489091               |
| SNP_P3_108515_298366 | NW_004515753.1 | Scaffold209 | 298366                  | CC                              | GG                | 1946489093               |
| SNP_P3_108516_329395 | NW_004515753.1 | Scaffold209 | 329395                  | TT                              | CC                | 1946489094               |

| SNPs IDs             | Chromosome IDs | Chromosomes | Physical positions (bp) | CDC Frontier (Reference genome) | (Pusa 256 & HPNB) | NCBI SNPdb Accession IDs |
|----------------------|----------------|-------------|-------------------------|---------------------------------|-------------------|--------------------------|
| SNP_P3_108517_329407 | NW_004515753.1 | Scaffold209 | 329407                  | AA                              | TT                | 1946489096               |
| SNP_P3_108518_329408 | NW_004515753.1 | Scaffold209 | 329408                  | AA                              | TT                | 1946489097               |
| SNP_P3_108519_329409 | NW_004515753.1 | Scaffold209 | 329409                  | AA                              | GG                | 1946489099               |
| SNP_P3_108520_329411 | NW_004515753.1 | Scaffold209 | 329411                  | CC                              | TT                | 1946489100               |
| SNP_P3_108521_329412 | NW_004515753.1 | Scaffold209 | 329412                  | CC                              | AA                | 1946489102               |
| SNP_P3_108522_329420 | NW_004515753.1 | Scaffold209 | 329420                  | GG                              | AA                | 1946489103               |
| SNP_P3_108523_329436 | NW_004515753.1 | Scaffold209 | 329436                  | GG                              | AA                | 1946489105               |
| SNP_P3_108524_329439 | NW_004515753.1 | Scaffold209 | 329439                  | CC                              | AA                | 1946489106               |
| SNP_P3_108525_329440 | NW_004515753.1 | Scaffold209 | 329440                  | AA                              | CC                | 1946489108               |
| SNP_P3_108526_329508 | NW_004515753.1 | Scaffold209 | 329508                  | AA                              | TT                | 1946489109               |
| SNP_P3_108527_329565 | NW_004515753.1 | Scaffold209 | 329565                  | GG                              | TT                | 1946489111               |
| SNP_P3_108528_329582 | NW_004515753.1 | Scaffold209 | 329582                  | GG                              | TT                | 1946489112               |
| SNP_P3_108529_329606 | NW_004515753.1 | Scaffold209 | 329606                  | AA                              | CC                | 1946489114               |
| SNP_P3_108530_329607 | NW_004515753.1 | Scaffold209 | 329607                  | GG                              | TT                | 1946489115               |
| SNP_P3_108531_329627 | NW_004515753.1 | Scaffold209 | 329627                  | AA                              | TT                | 1946489116               |
| SNP_P3_108532_329798 | NW_004515753.1 | Scaffold209 | 329798                  | GG                              | AA                | 1946489118               |
| SNP_P3_108533_329804 | NW_004515753.1 | Scaffold209 | 329804                  | TT                              | AA                | 1946489119               |
| SNP_P3_108534_329916 | NW_004515753.1 | Scaffold209 | 329916                  | GG                              | AA                | 1946489121               |
| SNP_P3_108535_330059 | NW_004515753.1 | Scaffold209 | 330059                  | TT                              | CC                | 1946489122               |
| SNP_P3_108536_330084 | NW_004515753.1 | Scaffold209 | 330084                  | TT                              | CC                | 1946489124               |
| SNP_P3_108537_330112 | NW_004515753.1 | Scaffold209 | 330112                  | AA                              | CC                | 1946489125               |
| SNP_P3_108538_330325 | NW_004515753.1 | Scaffold209 | 330325                  | AA                              | TT                | 1946489127               |
| SNP_P3_108539_330655 | NW_004515753.1 | Scaffold209 | 330655                  | TT                              | CC                | 1946489128               |
| SNP_P3_108540_344150 | NW_004515753.1 | Scaffold209 | 344150                  | CC                              | GG                | 1946489130               |
| SNP_P3_108541_345077 | NW_004515753.1 | Scaffold209 | 345077                  | TT                              | CC                | 1946489131               |
| SNP_P3_108542_345109 | NW_004515753.1 | Scaffold209 | 345109                  | AA                              | GG                | 1946489133               |
| SNP_P3_108543_345154 | NW_004515753.1 | Scaffold209 | 345154                  | AA                              | GG                | 1946489134               |
| SNP_P3_108544_345174 | NW_004515753.1 | Scaffold209 | 345174                  | CC                              | GG                | 1946489136               |
| SNP_P3_108545_345190 | NW_004515753.1 | Scaffold209 | 345190                  | GG                              | TT                | 1946489137               |
| SNP_P3_108546_345278 | NW_004515753.1 | Scaffold209 | 345278                  | AA                              | GG                | 1946489139               |
| SNP_P3_108547_345303 | NW_004515753.1 | Scaffold209 | 345303                  | GG                              | AA                | 1946489140               |
| SNP_P3_108548_345316 | NW_004515753.1 | Scaffold209 | 345316                  | TT                              | CC                | 1946489142               |
| SNP_P3_108549_345348 | NW_004515753.1 | Scaffold209 | 345348                  | AA                              | GG                | 1946489143               |
| SNP_P3_108550_345410 | NW_004515753.1 | Scaffold209 | 345410                  | AA                              | GG                | 1946489145               |
| SNP_P3_108551_345413 | NW_004515753.1 | Scaffold209 | 345413                  | GG                              | AA                | 1946489146               |
| SNP_P3_108552_345509 | NW_004515753.1 | Scaffold209 | 345509                  | CC                              | AA                | 1946489148               |
| SNP_P3_108553_345560 | NW_004515753.1 | Scaffold209 | 345560                  | AA                              | TT                | 1946489149               |
| SNP_P3_108554_345582 | NW_004515753.1 | Scaffold209 | 345582                  | GG                              | TT                | 1946489151               |
| SNP_P3_108555_345612 | NW_004515753.1 | Scaffold209 | 345612                  | CC                              | AA                | 1946489152               |
| SNP_P3_108556_345659 | NW_004515753.1 | Scaffold209 | 345659                  | TT                              | AA                | 1946489153               |
| SNP_P3_108557_345718 | NW_004515753.1 | Scaffold209 | 345718                  | GG                              | TT                | 1946489155               |
| SNP_P3_108558_345822 | NW_004515753.1 | Scaffold209 | 345822                  | AA                              | CC                | 1946489156               |

| SNPs IDs             | Chromosome IDs | Chromosomes | Physical positions (bp) | CDC Frontier (Reference genome) | (Pusa 256 & HPNB) | NCBI SNPdb Accession IDs |
|----------------------|----------------|-------------|-------------------------|---------------------------------|-------------------|--------------------------|
| SNP_P3_108559_345852 | NW_004515753.1 | Scaffold209 | 345852                  | AA                              | TT                | 1946489158               |
| SNP_P3_108560_345853 | NW_004515753.1 | Scaffold209 | 345853                  | AA                              | TT                | 1946489159               |
| SNP_P3_108561_356269 | NW_004515753.1 | Scaffold209 | 356269                  | CC                              | AA                | 1946489161               |
| SNP_P3_108562_356271 | NW_004515753.1 | Scaffold209 | 356271                  | AA                              | GG                | 1946489162               |
| SNP_P3_108563_356282 | NW_004515753.1 | Scaffold209 | 356282                  | CC                              | TT                | 1946489164               |
| SNP_P3_108564_356310 | NW_004515753.1 | Scaffold209 | 356310                  | TT                              | AA                | 1946489165               |
| SNP_P3_108565_356313 | NW_004515753.1 | Scaffold209 | 356313                  | CC                              | AA                | 1946489166               |
| SNP_P3_108566_356596 | NW_004515753.1 | Scaffold209 | 356596                  | TT                              | CC                | 1946489168               |
| SNP_P3_108567_358019 | NW_004515753.1 | Scaffold209 | 358019                  | AA                              | TT                | 1946489169               |
| SNP_P3_108568_358106 | NW_004515753.1 | Scaffold209 | 358106                  | AA                              | GG                | 1946489171               |
| SNP_P3_108569_358158 | NW_004515753.1 | Scaffold209 | 358158                  | GG                              | AA                | 1946489172               |
| SNP_P3_108570_358193 | NW_004515753.1 | Scaffold209 | 358193                  | CC                              | TT                | 1946489174               |
| SNP_P3_108571_358200 | NW_004515753.1 | Scaffold209 | 358200                  | GG                              | AA                | 1946489175               |
| SNP_P3_108572_358249 | NW_004515753.1 | Scaffold209 | 358249                  | TT                              | AA                | 1946489176               |
| SNP_P3_108573_358276 | NW_004515753.1 | Scaffold209 | 358276                  | TT                              | CC                | 1946489178               |
| SNP_P3_108574_358284 | NW_004515753.1 | Scaffold209 | 358284                  | TT                              | GG                | 1946489179               |
| SNP_P3_108575_358351 | NW_004515753.1 | Scaffold209 | 358351                  | AA                              | GG                | 1946489181               |
| SNP_P3_108576_358390 | NW_004515753.1 | Scaffold209 | 358390                  | TT                              | GG                | 1946489182               |
| SNP_P3_108577_358478 | NW_004515753.1 | Scaffold209 | 358478                  | TT                              | GG                | 1946489184               |
| SNP_P3_108578_358511 | NW_004515753.1 | Scaffold209 | 358511                  | GG                              | AA                | 1946489185               |
| SNP_P3_108579_361295 | NW_004515753.1 | Scaffold209 | 361295                  | CC                              | TT                | 1946489187               |
| SNP_P3_108580_374914 | NW_004515753.1 | Scaffold209 | 374914                  | AA                              | CC                | 1946489188               |
| SNP_P3_108581_374920 | NW_004515753.1 | Scaffold209 | 374920                  | AA                              | TT                | 1946489189               |
| SNP_P3_108582_374923 | NW_004515753.1 | Scaffold209 | 374923                  | AA                              | TT                | 1946489191               |
| SNP_P3_108583_377363 | NW_004515753.1 | Scaffold209 | 377363                  | TT                              | AA                | 1946489192               |
| SNP_P3_108585_378676 | NW_004515753.1 | Scaffold209 | 378676                  | CC                              | TT                | 1946489194               |
| SNP_P3_108586_378677 | NW_004515753.1 | Scaffold209 | 378677                  | TT                              | CC                | 1946489195               |
| SNP_P3_108587_378736 | NW_004515753.1 | Scaffold209 | 378736                  | CC                              | TT                | 1946489197               |
| SNP_P3_108588_378739 | NW_004515753.1 | Scaffold209 | 378739                  | TT                              | CC                | 1946489198               |
| SNP_P3_108589_378780 | NW_004515753.1 | Scaffold209 | 378780                  | CC                              | GG                | 1946489199               |
| SNP_P3_108590_379045 | NW_004515753.1 | Scaffold209 | 379045                  | CC                              | TT                | 1946489201               |
| SNP_P3_108591_14482  | NW_004515754.1 | Scaffold210 | 14482                   | CC                              | TT                | 1946489202               |
| SNP_P3_108592_31555  | NW_004515754.1 | Scaffold210 | 31555                   | AA                              | GG                | 1946489204               |
| SNP_P3_108593_31634  | NW_004515754.1 | Scaffold210 | 31634                   | TT                              | AA                | 1946489205               |
| SNP_P3_108594_31649  | NW_004515754.1 | Scaffold210 | 31649                   | TT                              | CC                | 1946489207               |
| SNP_P3_108595_31654  | NW_004515754.1 | Scaffold210 | 31654                   | AA                              | GG                | 1946489208               |
| SNP_P3_108597_31728  | NW_004515754.1 | Scaffold210 | 31728                   | TT                              | CC                | 1946489210               |
| SNP_P3_108598_31830  | NW_004515754.1 | Scaffold210 | 31830                   | CC                              | GG                | 1946489211               |
| SNP_P3_108599_31831  | NW_004515754.1 | Scaffold210 | 31831                   | AA                              | GG                | 1946489213               |
| SNP_P3_108600_31854  | NW_004515754.1 | Scaffold210 | 31854                   | TT                              | AA                | 1946489214               |
| SNP_P3_108601_31856  | NW_004515754.1 | Scaffold210 | 31856                   | AA                              | GG                | 1946489216               |
| SNP_P3_108602_31950  | NW_004515754.1 | Scaffold210 | 31950                   | CC                              | TT                | 1946489217               |

| SNPs IDs             | Chromosome IDs | Chromosomes | Physical positions (bp) | CDC Frontier (Reference genome) | (Pusa 256 & HPNB) | NCBI SNPdb Accession IDs |
|----------------------|----------------|-------------|-------------------------|---------------------------------|-------------------|--------------------------|
| SNP_P3_108603_32424  | NW_004515754.1 | Scaffold210 | 32424                   | CC                              | AA                | 1946489218               |
| SNP_P3_108604_32564  | NW_004515754.1 | Scaffold210 | 32564                   | GG                              | TT                | 1946489220               |
| SNP_P3_108605_37813  | NW_004515754.1 | Scaffold210 | 37813                   | CC                              | TT                | 1946489221               |
| SNP_P3_108606_43685  | NW_004515754.1 | Scaffold210 | 43685                   | TT                              | CC                | 1946489223               |
| SNP_P3_108607_48717  | NW_004515754.1 | Scaffold210 | 48717                   | TT                              | CC                | 1946489224               |
| SNP_P3_108608_95493  | NW_004515754.1 | Scaffold210 | 95493                   | AA                              | TT                | 1946489226               |
| SNP_P3_108609_95848  | NW_004515754.1 | Scaffold210 | 95848                   | TT                              | AA                | 1946489227               |
| SNP_P3_108610_95856  | NW_004515754.1 | Scaffold210 | 95856                   | TT                              | CC                | 1946489229               |
| SNP_P3_108611_95912  | NW_004515754.1 | Scaffold210 | 95912                   | TT                              | GG                | 1946489230               |
| SNP_P3_108612_95913  | NW_004515754.1 | Scaffold210 | 95913                   | TT                              | AA                | 1946489232               |
| SNP_P3_108613_111881 | NW_004515754.1 | Scaffold210 | 111881                  | TT                              | GG                | 1946489233               |
| SNP_P3_108614_175423 | NW_004515754.1 | Scaffold210 | 175423                  | AA                              | TT                | 1946489234               |
| SNP_P3_108615_189125 | NW_004515754.1 | Scaffold210 | 189125                  | AA                              | GG                | 1946489236               |
| SNP_P3_108616_191292 | NW_004515754.1 | Scaffold210 | 191292                  | AA                              | GG                | 1946489237               |
| SNP_P3_108617_191669 | NW_004515754.1 | Scaffold210 | 191669                  | TT                              | CC                | 1946489239               |
| SNP_P3_108618_191715 | NW_004515754.1 | Scaffold210 | 191715                  | AA                              | GG                | 1946489240               |
| SNP_P3_108619_191730 | NW_004515754.1 | Scaffold210 | 191730                  | CC                              | AA                | 1946489242               |
| SNP_P3_108620_192016 | NW_004515754.1 | Scaffold210 | 192016                  | GG                              | AA                | 1946489243               |
| SNP_P3_108621_192378 | NW_004515754.1 | Scaffold210 | 192378                  | AA                              | GG                | 1946489245               |
| SNP_P3_108622_192667 | NW_004515754.1 | Scaffold210 | 192667                  | TT                              | CC                | 1946489246               |
| SNP_P3_108623_192670 | NW_004515754.1 | Scaffold210 | 192670                  | TT                              | CC                | 1946489248               |
| SNP_P3_108624_192697 | NW_004515754.1 | Scaffold210 | 192697                  | TT                              | CC                | 1946489249               |
| SNP_P3_108625_192712 | NW_004515754.1 | Scaffold210 | 192712                  | TT                              | GG                | 1946489251               |
| SNP_P3_108626_192734 | NW_004515754.1 | Scaffold210 | 192734                  | AA                              | GG                | 1946489252               |
| SNP_P3_108627_192772 | NW_004515754.1 | Scaffold210 | 192772                  | GG                              | AA                | 1946489254               |
| SNP_P3_108628_192791 | NW_004515754.1 | Scaffold210 | 192791                  | TT                              | CC                | 1946489255               |
| SNP_P3_108629_192822 | NW_004515754.1 | Scaffold210 | 192822                  | GG                              | AA                | 1946489256               |
| SNP_P3_108630_192825 | NW_004515754.1 | Scaffold210 | 192825                  | AA                              | TT                | 1946489258               |
| SNP_P3_108631_192867 | NW_004515754.1 | Scaffold210 | 192867                  | AA                              | GG                | 1946489259               |
| SNP_P3_108632_223191 | NW_004515754.1 | Scaffold210 | 223191                  | GG                              | AA                | 1946489261               |
| SNP_P3_108633_223290 | NW_004515754.1 | Scaffold210 | 223290                  | GG                              | AA                | 1946489262               |
| SNP_P3_108634_223324 | NW_004515754.1 | Scaffold210 | 223324                  | TT                              | CC                | 1946489264               |
| SNP_P3_108635_223491 | NW_004515754.1 | Scaffold210 | 223491                  | CC                              | TT                | 1946489265               |
| SNP_P3_108636_233532 | NW_004515754.1 | Scaffold210 | 233532                  | TT                              | CC                | 1946489266               |
| SNP_P3_108637_233696 | NW_004515754.1 | Scaffold210 | 233696                  | AA                              | CC                | 1946489268               |
| SNP_P3_108638_233859 | NW_004515754.1 | Scaffold210 | 233859                  | CC                              | TT                | 1946489269               |
| SNP_P3_108639_233861 | NW_004515754.1 | Scaffold210 | 233861                  | GG                              | AA                | 1946489270               |
| SNP_P3_108640_234011 | NW_004515754.1 | Scaffold210 | 234011                  | TT                              | GG                | 1946489271               |
| SNP_P3_108641_245793 | NW_004515754.1 | Scaffold210 | 245793                  | AA                              | CC                | 1946489272               |
| SNP_P3_108642_265236 | NW_004515754.1 | Scaffold210 | 265236                  | TT                              | AA                | 1946489273               |
| SNP_P3_108643_265582 | NW_004515754.1 | Scaffold210 | 265582                  | AA                              | CC                | 1946489274               |
| SNP_P3_108644_268950 | NW_004515754.1 | Scaffold210 | 268950                  | AA                              | GG                | 1946489275               |

| SNPs IDs             | Chromosome IDs | Chromosomes | Physical positions (bp) | CDC Frontier (Reference genome) | (Pusa 256 & HPNB) | NCBI SNPdb Accession IDs |
|----------------------|----------------|-------------|-------------------------|---------------------------------|-------------------|--------------------------|
| SNP_P3_108645_269326 | NW_004515754.1 | Scaffold210 | 269326                  | TT                              | GG                | 1946489276               |
| SNP_P3_108646_287777 | NW_004515754.1 | Scaffold210 | 287777                  | GG                              | AA                | 1946489277               |
| SNP_P3_108649_298803 | NW_004515754.1 | Scaffold210 | 298803                  | GG                              | AA                | 1946489278               |
| SNP_P3_108650_298816 | NW_004515754.1 | Scaffold210 | 298816                  | AA                              | GG                | 1946489279               |
| SNP_P3_108651_298817 | NW_004515754.1 | Scaffold210 | 298817                  | TT                              | AA                | 1946489281               |
| SNP_P3_108652_298818 | NW_004515754.1 | Scaffold210 | 298818                  | TT                              | AA                | 1946489282               |
| SNP_P3_108653_298981 | NW_004515754.1 | Scaffold210 | 298981                  | TT                              | GG                | 1946489284               |
| SNP_P3_108655_301859 | NW_004515754.1 | Scaffold210 | 301859                  | AA                              | TT                | 1946489285               |
| SNP_P3_108656_330689 | NW_004515754.1 | Scaffold210 | 330689                  | GG                              | CC                | 1946489287               |
| SNP_P3_108658_330904 | NW_004515754.1 | Scaffold210 | 330904                  | CC                              | TT                | 1946489288               |
| SNP_P3_108659_337684 | NW_004515754.1 | Scaffold210 | 337684                  | GG                              | TT                | 1946489289               |
| SNP_P3_108660_337702 | NW_004515754.1 | Scaffold210 | 337702                  | AA                              | GG                | 1946489291               |
| SNP_P3_108661_337759 | NW_004515754.1 | Scaffold210 | 337759                  | TT                              | GG                | 1946489292               |
| SNP_P3_108662_337767 | NW_004515754.1 | Scaffold210 | 337767                  | CC                              | GG                | 1946489294               |
| SNP_P3_108663_337769 | NW_004515754.1 | Scaffold210 | 337769                  | GG                              | AA                | 1946489295               |
| SNP_P3_108664_337805 | NW_004515754.1 | Scaffold210 | 337805                  | AA                              | CC                | 1946489297               |
| SNP_P3_108665_343872 | NW_004515754.1 | Scaffold210 | 343872                  | CC                              | GG                | 1946489298               |
| SNP_P3_108666_345233 | NW_004515754.1 | Scaffold210 | 345233                  | GG                              | AA                | 1946489299               |
| SNP_P3_108667_345628 | NW_004515754.1 | Scaffold210 | 345628                  | GG                              | TT                | 1946489301               |
| SNP_P3_108668_381406 | NW_004515754.1 | Scaffold210 | 381406                  | AA                              | GG                | 1946489302               |
| SNP_P3_108669_387831 | NW_004515754.1 | Scaffold210 | 387831                  | GG                              | AA                | 1946489304               |
| SNP_P3_108670_387964 | NW_004515754.1 | Scaffold210 | 387964                  | TT                              | CC                | 1946489305               |
| SNP_P3_108671_388204 | NW_004515754.1 | Scaffold210 | 388204                  | AA                              | GG                | 1946489307               |
| SNP_P3_108672_388333 | NW_004515754.1 | Scaffold210 | 388333                  | TT                              | CC                | 1946489308               |
| SNP_P3_108674_422904 | NW_004515754.1 | Scaffold210 | 422904                  | AA                              | GG                | 1946489309               |
| SNP_P3_108675_429654 | NW_004515754.1 | Scaffold210 | 429654                  | AA                              | GG                | 1946489311               |
| SNP_P3_108676_429752 | NW_004515754.1 | Scaffold210 | 429752                  | AA                              | GG                | 1946489312               |
| SNP_P3_108677_429757 | NW_004515754.1 | Scaffold210 | 429757                  | TT                              | CC                | 1946489314               |
| SNP_P3_108678_429784 | NW_004515754.1 | Scaffold210 | 429784                  | AA                              | TT                | 1946489315               |
| SNP_P3_108679_429788 | NW_004515754.1 | Scaffold210 | 429788                  | CC                              | GG                | 1946489317               |
| SNP_P3_108680_429794 | NW_004515754.1 | Scaffold210 | 429794                  | TT                              | GG                | 1946489318               |
| SNP_P3_108681_429796 | NW_004515754.1 | Scaffold210 | 429796                  | TT                              | AA                | 1946489320               |
| SNP_P3_108682_429961 | NW_004515754.1 | Scaffold210 | 429961                  | AA                              | GG                | 1946489321               |
| SNP_P3_108683_429995 | NW_004515754.1 | Scaffold210 | 429995                  | AA                              | GG                | 1946489322               |
| SNP_P3_108684_448776 | NW_004515754.1 | Scaffold210 | 448776                  | TT                              | CC                | 1946489324               |
| SNP_P3_108685_483240 | NW_004515754.1 | Scaffold210 | 483240                  | GG                              | AA                | 1946489325               |
| SNP_P3_108686_483915 | NW_004515754.1 | Scaffold210 | 483915                  | CC                              | AA                | 1946489327               |
| SNP_P3_108687_483954 | NW_004515754.1 | Scaffold210 | 483954                  | CC                              | TT                | 1946489328               |
| SNP_P3_108688_485933 | NW_004515754.1 | Scaffold210 | 485933                  | CC                              | AA                | 1946489330               |
| SNP_P3_108689_496205 | NW_004515754.1 | Scaffold210 | 496205                  | AA                              | CC                | 1946489331               |
| SNP_P3_108691_504979 | NW_004515754.1 | Scaffold210 | 504979                  | CC                              | GG                | 1946489332               |
| SNP_P3_108692_513599 | NW_004515754.1 | Scaffold210 | 513599                  | CC                              | TT                | 1946489334               |



| SNPs IDs             | Chromosome IDs | Chromosomes | Physical positions (bp) | CDC Frontier (Reference genome) | (Pusa 256 & HPNB) | NCBI SNPdb Accession IDs |
|----------------------|----------------|-------------|-------------------------|---------------------------------|-------------------|--------------------------|
| SNP_P3_108693_513617 | NW_004515754.1 | Scaffold210 | 513617                  | TT                              | CC                | 1946489335               |
| SNP_P3_108694_513661 | NW_004515754.1 | Scaffold210 | 513661                  | AA                              | GG                | 1946489337               |
| SNP_P3_108695_513665 | NW_004515754.1 | Scaffold210 | 513665                  | AA                              | GG                | 1946489338               |
| SNP_P3_108696_532009 | NW_004515754.1 | Scaffold210 | 532009                  | GG                              | AA                | 1946489340               |
| SNP_P3_108698_568665 | NW_004515754.1 | Scaffold210 | 568665                  | TT                              | CC                | 1946489341               |
| SNP_P3_108699_568728 | NW_004515754.1 | Scaffold210 | 568728                  | CC                              | TT                | 1946489343               |
| SNP_P3_108700_569060 | NW_004515754.1 | Scaffold210 | 569060                  | CC                              | TT                | 1946489344               |
| SNP_P3_108701_569072 | NW_004515754.1 | Scaffold210 | 569072                  | TT                              | CC                | 1946489345               |
| SNP_P3_108702_572526 | NW_004515754.1 | Scaffold210 | 572526                  | GG                              | AA                | 1946489347               |
| SNP_P3_108703_572533 | NW_004515754.1 | Scaffold210 | 572533                  | AA                              | CC                | 1946489348               |
| SNP_P3_108704_572537 | NW_004515754.1 | Scaffold210 | 572537                  | CC                              | TT                | 1946489350               |
| SNP_P3_108705_572877 | NW_004515754.1 | Scaffold210 | 572877                  | CC                              | TT                | 1946489351               |
| SNP_P3_108706_572907 | NW_004515754.1 | Scaffold210 | 572907                  | CC                              | TT                | 1946489353               |
| SNP_P3_108707_573013 | NW_004515754.1 | Scaffold210 | 573013                  | AA                              | GG                | 1946489354               |
| SNP_P3_108708_573028 | NW_004515754.1 | Scaffold210 | 573028                  | AA                              | GG                | 1946489355               |
| SNP_P3_108709_573084 | NW_004515754.1 | Scaffold210 | 573084                  | GG                              | AA                | 1946489357               |
| SNP_P3_108710_576766 | NW_004515754.1 | Scaffold210 | 576766                  | TT                              | AA                | 1946489358               |
| SNP_P3_108711_576834 | NW_004515754.1 | Scaffold210 | 576834                  | AA                              | TT                | 1946489360               |
| SNP_P3_108712_576855 | NW_004515754.1 | Scaffold210 | 576855                  | CC                              | TT                | 1946489361               |
| SNP_P3_108713_576909 | NW_004515754.1 | Scaffold210 | 576909                  | GG                              | CC                | 1946489363               |
| SNP_P3_108714_576950 | NW_004515754.1 | Scaffold210 | 576950                  | GG                              | AA                | 1946489364               |
| SNP_P3_108715_577006 | NW_004515754.1 | Scaffold210 | 577006                  | TT                              | AA                | 1946489365               |
| SNP_P3_108716_577019 | NW_004515754.1 | Scaffold210 | 577019                  | GG                              | TT                | 1946489367               |
| SNP_P3_108717_577028 | NW_004515754.1 | Scaffold210 | 577028                  | AA                              | TT                | 1946489368               |
| SNP_P3_108718_577402 | NW_004515754.1 | Scaffold210 | 577402                  | AA                              | GG                | 1946489370               |
| SNP_P3_108719_577466 | NW_004515754.1 | Scaffold210 | 577466                  | AA                              | GG                | 1946489371               |
| SNP_P3_108720_577491 | NW_004515754.1 | Scaffold210 | 577491                  | GG                              | AA                | 1946489373               |
| SNP_P3_108721_577591 | NW_004515754.1 | Scaffold210 | 577591                  | GG                              | AA                | 1946489374               |
| SNP_P3_108722_577641 | NW_004515754.1 | Scaffold210 | 577641                  | AA                              | CC                | 1946489376               |
| SNP_P3_108723_577677 | NW_004515754.1 | Scaffold210 | 577677                  | GG                              | AA                | 1946489377               |
| SNP_P3_108724_577781 | NW_004515754.1 | Scaffold210 | 577781                  | AA                              | GG                | 1946489378               |
| SNP_P3_108725_577869 | NW_004515754.1 | Scaffold210 | 577869                  | TT                              | CC                | 1946489380               |
| SNP_P3_108726_577911 | NW_004515754.1 | Scaffold210 | 577911                  | AA                              | CC                | 1946489381               |
| SNP_P3_108727_579219 | NW_004515754.1 | Scaffold210 | 579219                  | CC                              | TT                | 1946489383               |
| SNP_P3_108728_580325 | NW_004515754.1 | Scaffold210 | 580325                  | CC                              | TT                | 1946489384               |
| SNP_P3_108729_580337 | NW_004515754.1 | Scaffold210 | 580337                  | CC                              | GG                | 1946489386               |
| SNP_P3_108730_580375 | NW_004515754.1 | Scaffold210 | 580375                  | AA                              | CC                | 1946489387               |
| SNP_P3_108731_580596 | NW_004515754.1 | Scaffold210 | 580596                  | CC                              | GG                | 1946489390               |
| SNP_P3_108732_580628 | NW_004515754.1 | Scaffold210 | 580628                  | TT                              | AA                | 1946489391               |
| SNP_P3_108733_580670 | NW_004515754.1 | Scaffold210 | 580670                  | CC                              | AA                | 1946489392               |
| SNP_P3_108735_580957 | NW_004515754.1 | Scaffold210 | 580957                  | AA                              | GG                | 1946489394               |
| SNP_P3_108736_580968 | NW_004515754.1 | Scaffold210 | 580968                  | AA                              | TT                | 1946489395               |

| SNPs IDs             | Chromosome IDs | Chromosomes | Physical positions (bp) | CDC Frontier (Reference genome) | (Pusa 256 & HPNB) | NCBI SNPdb Accession IDs |
|----------------------|----------------|-------------|-------------------------|---------------------------------|-------------------|--------------------------|
| SNP_P3_108737_581026 | NW_004515754.1 | Scaffold210 | 581026                  | GG                              | TT                | 1946489397               |
| SNP_P3_108738_584880 | NW_004515754.1 | Scaffold210 | 584880                  | AA                              | CC                | 1946489398               |
| SNP_P3_108739_602720 | NW_004515754.1 | Scaffold210 | 602720                  | TT                              | AA                | 1946489400               |
| SNP_P3_108740_607366 | NW_004515754.1 | Scaffold210 | 607366                  | AA                              | TT                | 1946489401               |
| SNP_P3_108741_607381 | NW_004515754.1 | Scaffold210 | 607381                  | CC                              | TT                | 1946489403               |
| SNP_P3_108742_614530 | NW_004515754.1 | Scaffold210 | 614530                  | AA                              | TT                | 1946489404               |
| SNP_P3_108743_620420 | NW_004515754.1 | Scaffold210 | 620420                  | TT                              | CC                | 1946489405               |
| SNP_P3_108744_620807 | NW_004515754.1 | Scaffold210 | 620807                  | GG                              | TT                | 1946489407               |
| SNP_P3_108745_620819 | NW_004515754.1 | Scaffold210 | 620819                  | TT                              | CC                | 1946489408               |
| SNP_P3_108746_621139 | NW_004515754.1 | Scaffold210 | 621139                  | TT                              | GG                | 1946489410               |
| SNP_P3_108747_621465 | NW_004515754.1 | Scaffold210 | 621465                  | AA                              | GG                | 1946489411               |
| SNP_P3_108748_621466 | NW_004515754.1 | Scaffold210 | 621466                  | GG                              | AA                | 1946489413               |
| SNP_P3_108749_621482 | NW_004515754.1 | Scaffold210 | 621482                  | GG                              | TT                | 1946489414               |
| SNP_P3_108750_621606 | NW_004515754.1 | Scaffold210 | 621606                  | TT                              | CC                | 1946489416               |
| SNP_P3_108751_621614 | NW_004515754.1 | Scaffold210 | 621614                  | AA                              | GG                | 1946489417               |
| SNP_P3_108752_621619 | NW_004515754.1 | Scaffold210 | 621619                  | GG                              | AA                | 1946489418               |
| SNP_P3_108754_621800 | NW_004515754.1 | Scaffold210 | 621800                  | TT                              | CC                | 1946489420               |
| SNP_P3_108755_621857 | NW_004515754.1 | Scaffold210 | 621857                  | TT                              | AA                | 1946489421               |
| SNP_P3_108756_621999 | NW_004515754.1 | Scaffold210 | 621999                  | AA                              | TT                | 1946489423               |
| SNP_P3_108757_623554 | NW_004515754.1 | Scaffold210 | 623554                  | TT                              | GG                | 1946489424               |
| SNP_P3_108758_8515   | NW_004515755.1 | Scaffold212 | 8515                    | AA                              | CC                | 1946489426               |
| SNP_P3_108759_8521   | NW_004515755.1 | Scaffold212 | 8521                    | CC                              | TT                | 1946489427               |
| SNP_P3_108760_8677   | NW_004515755.1 | Scaffold212 | 8677                    | GG                              | AA                | 1946489429               |
| SNP_P3_108761_8739   | NW_004515755.1 | Scaffold212 | 8739                    | CC                              | GG                | 1946489430               |
| SNP_P3_108762_8808   | NW_004515755.1 | Scaffold212 | 8808                    | CC                              | TT                | 1946489431               |
| SNP_P3_108763_8904   | NW_004515755.1 | Scaffold212 | 8904                    | AA                              | GG                | 1946489433               |
| SNP_P3_108764_8989   | NW_004515755.1 | Scaffold212 | 8989                    | CC                              | TT                | 1946489434               |
| SNP_P3_108765_9107   | NW_004515755.1 | Scaffold212 | 9107                    | CC                              | TT                | 1946489436               |
| SNP_P3_108766_33916  | NW_004515755.1 | Scaffold212 | 33916                   | AA                              | TT                | 1946489437               |
| SNP_P3_108767_33932  | NW_004515755.1 | Scaffold212 | 33932                   | TT                              | CC                | 1946489439               |
| SNP_P3_108768_64609  | NW_004515755.1 | Scaffold212 | 64609                   | CC                              | AA                | 1946489440               |
| SNP_P3_108769_65950  | NW_004515755.1 | Scaffold212 | 65950                   | TT                              | CC                | 1946489441               |
| SNP_P3_108770_65951  | NW_004515755.1 | Scaffold212 | 65951                   | AA                              | GG                | 1946489443               |
| SNP_P3_108771_66275  | NW_004515755.1 | Scaffold212 | 66275                   | TT                              | CC                | 1946489444               |
| SNP_P3_108772_84353  | NW_004515755.1 | Scaffold212 | 84353                   | CC                              | TT                | 1946489446               |
| SNP_P3_108773_85773  | NW_004515755.1 | Scaffold212 | 85773                   | AA                              | GG                | 1946489447               |
| SNP_P3_108774_88003  | NW_004515755.1 | Scaffold212 | 88003                   | AA                              | CC                | 1946489448               |
| SNP_P3_108775_89120  | NW_004515755.1 | Scaffold212 | 89120                   | CC                              | TT                | 1946489450               |
| SNP_P3_108776_89503  | NW_004515755.1 | Scaffold212 | 89503                   | AA                              | TT                | 1946489451               |
| SNP_P3_108778_101089 | NW_004515755.1 | Scaffold212 | 101089                  | CC                              | TT                | 1946489453               |
| SNP_P3_108780_125783 | NW_004515755.1 | Scaffold212 | 125783                  | GG                              | AA                | 1946489454               |
| SNP_P3_108781_125786 | NW_004515755.1 | Scaffold212 | 125786                  | AA                              | CC                | 1946489455               |

| SNPs IDs             | Chromosome IDs | Chromosomes | Physical positions (bp) | CDC Frontier (Reference genome) | (Pusa 256 & HPNB) | NCBI SNPdb Accession IDs |
|----------------------|----------------|-------------|-------------------------|---------------------------------|-------------------|--------------------------|
| SNP_P3_108783_161438 | NW_004515755.1 | Scaffold212 | 161438                  | AA                              | CC                | 1946489457               |
| SNP_P3_108784_161447 | NW_004515755.1 | Scaffold212 | 161447                  | CC                              | TT                | 1946489458               |
| SNP_P3_108785_161458 | NW_004515755.1 | Scaffold212 | 161458                  | AA                              | GG                | 1946489460               |
| SNP_P3_108786_161490 | NW_004515755.1 | Scaffold212 | 161490                  | TT                              | GG                | 1946489461               |
| SNP_P3_108787_180832 | NW_004515755.1 | Scaffold212 | 180832                  | CC                              | TT                | 1946489463               |
| SNP_P3_108788_180938 | NW_004515755.1 | Scaffold212 | 180938                  | TT                              | GG                | 1946489464               |
| SNP_P3_108789_180981 | NW_004515755.1 | Scaffold212 | 180981                  | TT                              | AA                | 1946489466               |
| SNP_P3_108790_181056 | NW_004515755.1 | Scaffold212 | 181056                  | CC                              | AA                | 1946489467               |
| SNP_P3_108791_181153 | NW_004515755.1 | Scaffold212 | 181153                  | CC                              | AA                | 1946489469               |
| SNP_P3_108792_181362 | NW_004515755.1 | Scaffold212 | 181362                  | CC                              | TT                | 1946489471               |
| SNP_P3_108793_181367 | NW_004515755.1 | Scaffold212 | 181367                  | AA                              | TT                | 1946489473               |
| SNP_P3_108794_201998 | NW_004515755.1 | Scaffold212 | 201998                  | CC                              | TT                | 1946489475               |
| SNP_P3_108795_207339 | NW_004515755.1 | Scaffold212 | 207339                  | TT                              | CC                | 1946489476               |
| SNP_P3_108796_207542 | NW_004515755.1 | Scaffold212 | 207542                  | AA                              | CC                | 1946489478               |
| SNP_P3_108797_207545 | NW_004515755.1 | Scaffold212 | 207545                  | AA                              | GG                | 1946489479               |
| SNP_P3_108798_207805 | NW_004515755.1 | Scaffold212 | 207805                  | TT                              | CC                | 1946489481               |
| SNP_P3_108799_207809 | NW_004515755.1 | Scaffold212 | 207809                  | TT                              | CC                | 1946489482               |
| SNP_P3_108800_207838 | NW_004515755.1 | Scaffold212 | 207838                  | TT                              | CC                | 1946489484               |
| SNP_P3_108801_209695 | NW_004515755.1 | Scaffold212 | 209695                  | TT                              | CC                | 1946489485               |
| SNP_P3_108802_215617 | NW_004515755.1 | Scaffold212 | 215617                  | AA                              | CC                | 1946489487               |
| SNP_P3_108803_215650 | NW_004515755.1 | Scaffold212 | 215650                  | CC                              | TT                | 1946489488               |
| SNP_P3_108804_215654 | NW_004515755.1 | Scaffold212 | 215654                  | TT                              | GG                | 1946489489               |
| SNP_P3_108805_215710 | NW_004515755.1 | Scaffold212 | 215710                  | GG                              | TT                | 1946489491               |
| SNP_P3_108806_216105 | NW_004515755.1 | Scaffold212 | 216105                  | TT                              | CC                | 1946489492               |
| SNP_P3_108807_216163 | NW_004515755.1 | Scaffold212 | 216163                  | CC                              | TT                | 1946489494               |
| SNP_P3_108808_253417 | NW_004515755.1 | Scaffold212 | 253417                  | GG                              | AA                | 1946489495               |
| SNP_P3_108809_273304 | NW_004515755.1 | Scaffold212 | 273304                  | TT                              | CC                | 1946489497               |
| SNP_P3_108810_277580 | NW_004515755.1 | Scaffold212 | 277580                  | GG                              | AA                | 1946489498               |
| SNP_P3_108812_296272 | NW_004515755.1 | Scaffold212 | 296272                  | GG                              | CC                | 1946489500               |
| SNP_P3_108813_296366 | NW_004515755.1 | Scaffold212 | 296366                  | GG                              | TT                | 1946489501               |
| SNP_P3_108814_296919 | NW_004515755.1 | Scaffold212 | 296919                  | AA                              | TT                | 1946489503               |
| SNP_P3_108815_296929 | NW_004515755.1 | Scaffold212 | 296929                  | TT                              | GG                | 1946489504               |
| SNP_P3_108816_296932 | NW_004515755.1 | Scaffold212 | 296932                  | AA                              | CC                | 1946489505               |
| SNP_P3_108817_301965 | NW_004515755.1 | Scaffold212 | 301965                  | GG                              | AA                | 1946489507               |
| SNP_P3_108818_302177 | NW_004515755.1 | Scaffold212 | 302177                  | AA                              | TT                | 1946489508               |
| SNP_P3_108819_331621 | NW_004515755.1 | Scaffold212 | 331621                  | GG                              | TT                | 1946489510               |
| SNP_P3_108820_331627 | NW_004515755.1 | Scaffold212 | 331627                  | GG                              | AA                | 1946489511               |
| SNP_P3_108821_332025 | NW_004515755.1 | Scaffold212 | 332025                  | GG                              | TT                | 1946489513               |
| SNP_P3_108822_332169 | NW_004515755.1 | Scaffold212 | 332169                  | GG                              | TT                | 1946489514               |
| SNP_P3_108823_332230 | NW_004515755.1 | Scaffold212 | 332230                  | CC                              | AA                | 1946489516               |
| SNP_P3_108824_353924 | NW_004515755.1 | Scaffold212 | 353924                  | CC                              | AA                | 1946489517               |
| SNP_P3_108825_353931 | NW_004515755.1 | Scaffold212 | 353931                  | AA                              | TT                | 1946489519               |

| SNPs IDs             | Chromosome IDs | Chromosomes | Physical positions (bp) | CDC Frontier (Reference genome) | (Pusa 256 & HPNB) | NCBI SNPdb Accession IDs |
|----------------------|----------------|-------------|-------------------------|---------------------------------|-------------------|--------------------------|
| SNP_P3_108826_354044 | NW_004515755.1 | Scaffold212 | 354044                  | GG                              | AA                | 1946489520               |
| SNP_P3_108827_354322 | NW_004515755.1 | Scaffold212 | 354322                  | AA                              | GG                | 1946489522               |
| SNP_P3_108828_354623 | NW_004515755.1 | Scaffold212 | 354623                  | AA                              | TT                | 1946489523               |
| SNP_P3_108829_354654 | NW_004515755.1 | Scaffold212 | 354654                  | CC                              | TT                | 1946489525               |
| SNP_P3_108830_354692 | NW_004515755.1 | Scaffold212 | 354692                  | TT                              | CC                | 1946489526               |
| SNP_P3_108831_356364 | NW_004515755.1 | Scaffold212 | 356364                  | AA                              | CC                | 1946489528               |
| SNP_P3_108832_356394 | NW_004515755.1 | Scaffold212 | 356394                  | TT                              | CC                | 1946489529               |
| SNP_P3_108833_356470 | NW_004515755.1 | Scaffold212 | 356470                  | GG                              | CC                | 1946489531               |
| SNP_P3_108834_356490 | NW_004515755.1 | Scaffold212 | 356490                  | AA                              | CC                | 1946489532               |
| SNP_P3_108835_356527 | NW_004515755.1 | Scaffold212 | 356527                  | AA                              | TT                | 1946489534               |
| SNP_P3_108836_356531 | NW_004515755.1 | Scaffold212 | 356531                  | AA                              | GG                | 1946489535               |
| SNP_P3_108837_356559 | NW_004515755.1 | Scaffold212 | 356559                  | TT                              | GG                | 1946489536               |
| SNP_P3_108838_356587 | NW_004515755.1 | Scaffold212 | 356587                  | TT                              | CC                | 1946489538               |
| SNP_P3_108839_356634 | NW_004515755.1 | Scaffold212 | 356634                  | GG                              | TT                | 1946489539               |
| SNP_P3_108840_356814 | NW_004515755.1 | Scaffold212 | 356814                  | TT                              | CC                | 1946489541               |
| SNP_P3_108841_356837 | NW_004515755.1 | Scaffold212 | 356837                  | AA                              | GG                | 1946489542               |
| SNP_P3_108842_356840 | NW_004515755.1 | Scaffold212 | 356840                  | AA                              | GG                | 1946489544               |
| SNP_P3_108843_356874 | NW_004515755.1 | Scaffold212 | 356874                  | AA                              | CC                | 1946489545               |
| SNP_P3_108844_356885 | NW_004515755.1 | Scaffold212 | 356885                  | CC                              | GG                | 1946489547               |
| SNP_P3_108845_356896 | NW_004515755.1 | Scaffold212 | 356896                  | TT                              | GG                | 1946489548               |
| SNP_P3_108846_356979 | NW_004515755.1 | Scaffold212 | 356979                  | GG                              | AA                | 1946489550               |
| SNP_P3_108847_356996 | NW_004515755.1 | Scaffold212 | 356996                  | GG                              | AA                | 1946489551               |
| SNP_P3_108848_357009 | NW_004515755.1 | Scaffold212 | 357009                  | GG                              | AA                | 1946489553               |
| SNP_P3_108849_357016 | NW_004515755.1 | Scaffold212 | 357016                  | CC                              | TT                | 1946489554               |
| SNP_P3_108850_357039 | NW_004515755.1 | Scaffold212 | 357039                  | CC                              | TT                | 1946489556               |
| SNP_P3_108851_357045 | NW_004515755.1 | Scaffold212 | 357045                  | CC                              | GG                | 1946489557               |
| SNP_P3_108852_363979 | NW_004515755.1 | Scaffold212 | 363979                  | TT                              | AA                | 1946489559               |
| SNP_P3_108853_365672 | NW_004515755.1 | Scaffold212 | 365672                  | AA                              | GG                | 1946489560               |
| SNP_P3_108854_366004 | NW_004515755.1 | Scaffold212 | 366004                  | TT                              | CC                | 1946489562               |
| SNP_P3_108855_366039 | NW_004515755.1 | Scaffold212 | 366039                  | TT                              | CC                | 1946489563               |
| SNP_P3_108856_368309 | NW_004515755.1 | Scaffold212 | 368309                  | AA                              | CC                | 1946489564               |
| SNP_P3_108857_368558 | NW_004515755.1 | Scaffold212 | 368558                  | AA                              | GG                | 1946489566               |
| SNP_P3_108858_368839 | NW_004515755.1 | Scaffold212 | 368839                  | GG                              | AA                | 1946489567               |
| SNP_P3_108859_368868 | NW_004515755.1 | Scaffold212 | 368868                  | GG                              | TT                | 1946489569               |
| SNP_P3_108860_369277 | NW_004515755.1 | Scaffold212 | 369277                  | TT                              | CC                | 1946489570               |
| SNP_P3_108861_369382 | NW_004515755.1 | Scaffold212 | 369382                  | GG                              | AA                | 1946489572               |
| SNP_P3_108862_375053 | NW_004515755.1 | Scaffold212 | 375053                  | CC                              | AA                | 1946489573               |
| SNP_P3_108863_380313 | NW_004515755.1 | Scaffold212 | 380313                  | AA                              | TT                | 1946489575               |
| SNP_P3_108864_390316 | NW_004515755.1 | Scaffold212 | 390316                  | TT                              | CC                | 1946489576               |
| SNP_P3_108865_411572 | NW_004515755.1 | Scaffold212 | 411572                  | CC                              | TT                | 1946489580               |
| SNP_P3_108866_420225 | NW_004515755.1 | Scaffold212 | 420225                  | TT                              | GG                | 1946489582               |
| SNP_P3_108867_420226 | NW_004515755.1 | Scaffold212 | 420226                  | AA                              | GG                | 1946489583               |

| SNPs IDs             | Chromosome IDs | Chromosomes | Physical positions (bp) | CDC Frontier (Reference genome) | (Pusa 256 & HPNB) | NCBI SNPdb Accession IDs |
|----------------------|----------------|-------------|-------------------------|---------------------------------|-------------------|--------------------------|
| SNP_P3_108868_420624 | NW_004515755.1 | Scaffold212 | 420624                  | GG                              | TT                | 1946489585               |
| SNP_P3_108869_426145 | NW_004515755.1 | Scaffold212 | 426145                  | CC                              | AA                | 1946489586               |
| SNP_P3_108870_426167 | NW_004515755.1 | Scaffold212 | 426167                  | AA                              | CC                | 1946489588               |
| SNP_P3_108871_426175 | NW_004515755.1 | Scaffold212 | 426175                  | TT                              | CC                | 1946489589               |
| SNP_P3_108872_426176 | NW_004515755.1 | Scaffold212 | 426176                  | GG                              | AA                | 1946489591               |
| SNP_P3_108873_463412 | NW_004515755.1 | Scaffold212 | 463412                  | CC                              | AA                | 1946489592               |
| SNP_P3_108874_463437 | NW_004515755.1 | Scaffold212 | 463437                  | AA                              | TT                | 1946489593               |
| SNP_P3_108875_463438 | NW_004515755.1 | Scaffold212 | 463438                  | TT                              | GG                | 1946489595               |
| SNP_P3_108876_463452 | NW_004515755.1 | Scaffold212 | 463452                  | GG                              | AA                | 1946489596               |
| SNP_P3_108877_463476 | NW_004515755.1 | Scaffold212 | 463476                  | TT                              | GG                | 1946489598               |
| SNP_P3_108878_463503 | NW_004515755.1 | Scaffold212 | 463503                  | TT                              | AA                | 1946489599               |
| SNP_P3_108879_463544 | NW_004515755.1 | Scaffold212 | 463544                  | AA                              | GG                | 1946489601               |
| SNP_P3_108881_464598 | NW_004515755.1 | Scaffold212 | 464598                  | GG                              | AA                | 1946489602               |
| SNP_P3_108882_495530 | NW_004515755.1 | Scaffold212 | 495530                  | CC                              | TT                | 1946489603               |
| SNP_P3_108883_500674 | NW_004515755.1 | Scaffold212 | 500674                  | CC                              | TT                | 1946489605               |
| SNP_P3_108884_500687 | NW_004515755.1 | Scaffold212 | 500687                  | TT                              | GG                | 1946489606               |
| SNP_P3_108885_500733 | NW_004515755.1 | Scaffold212 | 500733                  | AA                              | GG                | 1946489608               |
| SNP_P3_108886_500932 | NW_004515755.1 | Scaffold212 | 500932                  | AA                              | TT                | 1946489609               |
| SNP_P3_108887_500934 | NW_004515755.1 | Scaffold212 | 500934                  | TT                              | GG                | 1946489611               |
| SNP_P3_108888_500941 | NW_004515755.1 | Scaffold212 | 500941                  | AA                              | CC                | 1946489612               |
| SNP_P3_108889_500942 | NW_004515755.1 | Scaffold212 | 500942                  | GG                              | AA                | 1946489613               |
| SNP_P3_108890_500949 | NW_004515755.1 | Scaffold212 | 500949                  | TT                              | CC                | 1946489615               |
| SNP_P3_108891_501001 | NW_004515755.1 | Scaffold212 | 501001                  | GG                              | CC                | 1946489617               |
| SNP_P3_108894_501058 | NW_004515755.1 | Scaffold212 | 501058                  | CC                              | TT                | 1946489618               |
| SNP_P3_108895_6875   | NW_004515756.1 | Scaffold214 | 6875                    | GG                              | TT                | 1946489620               |
| SNP_P3_108896_6937   | NW_004515756.1 | Scaffold214 | 6937                    | CC                              | TT                | 1946489621               |
| SNP_P3_108897_6993   | NW_004515756.1 | Scaffold214 | 6993                    | GG                              | TT                | 1946489622               |
| SNP_P3_108898_7511   | NW_004515756.1 | Scaffold214 | 7511                    | AA                              | TT                | 1946489624               |
| SNP_P3_108899_14322  | NW_004515756.1 | Scaffold214 | 14322                   | AA                              | CC                | 1946489625               |
| SNP_P3_108900_14359  | NW_004515756.1 | Scaffold214 | 14359                   | CC                              | AA                | 1946489627               |
| SNP_P3_108901_14400  | NW_004515756.1 | Scaffold214 | 14400                   | AA                              | GG                | 1946489628               |
| SNP_P3_108902_14401  | NW_004515756.1 | Scaffold214 | 14401                   | AA                              | CC                | 1946489630               |
| SNP_P3_108903_14682  | NW_004515756.1 | Scaffold214 | 14682                   | TT                              | CC                | 1946489631               |
| SNP_P3_108904_18619  | NW_004515756.1 | Scaffold214 | 18619                   | GG                              | TT                | 1946489633               |
| SNP_P3_108906_19659  | NW_004515756.1 | Scaffold214 | 19659                   | TT                              | GG                | 1946489634               |
| SNP_P3_108907_23731  | NW_004515756.1 | Scaffold214 | 23731                   | CC                              | TT                | 1946489636               |
| SNP_P3_108908_24773  | NW_004515756.1 | Scaffold214 | 24773                   | AA                              | GG                | 1946489637               |
| SNP_P3_108909_28973  | NW_004515756.1 | Scaffold214 | 28973                   | TT                              | GG                | 1946489639               |
| SNP_P3_108910_29010  | NW_004515756.1 | Scaffold214 | 29010                   | CC                              | TT                | 1946489640               |
| SNP_P3_108911_29373  | NW_004515756.1 | Scaffold214 | 29373                   | AA                              | GG                | 1946489642               |
| SNP_P3_108912_29489  | NW_004515756.1 | Scaffold214 | 29489                   | TT                              | CC                | 1946489643               |
| SNP_P3_108913_29565  | NW_004515756.1 | Scaffold214 | 29565                   | TT                              | CC                | 1946489645               |

| SNPs IDs            | Chromosome IDs | Chromosomes | Physical positions (bp) | CDC Frontier (Reference genome) | (Pusa 256 & HPNB) | NCBI SNPdb Accession IDs |
|---------------------|----------------|-------------|-------------------------|---------------------------------|-------------------|--------------------------|
| SNP_P3_108914_30485 | NW_004515756.1 | Scaffold214 | 30485                   | GG                              | AA                | 1946489646               |
| SNP_P3_108915_30511 | NW_004515756.1 | Scaffold214 | 30511                   | CC                              | GG                | 1946489648               |
| SNP_P3_108916_30537 | NW_004515756.1 | Scaffold214 | 30537                   | CC                              | TT                | 1946489649               |
| SNP_P3_108917_34765 | NW_004515756.1 | Scaffold214 | 34765                   | TT                              | AA                | 1946489650               |
| SNP_P3_108918_34823 | NW_004515756.1 | Scaffold214 | 34823                   | AA                              | TT                | 1946489652               |
| SNP_P3_108919_35310 | NW_004515756.1 | Scaffold214 | 35310                   | GG                              | AA                | 1946489653               |
| SNP_P3_108920_35311 | NW_004515756.1 | Scaffold214 | 35311                   | AA                              | GG                | 1946489655               |
| SNP_P3_108921_35355 | NW_004515756.1 | Scaffold214 | 35355                   | TT                              | CC                | 1946489656               |
| SNP_P3_108922_35375 | NW_004515756.1 | Scaffold214 | 35375                   | AA                              | GG                | 1946489658               |
| SNP_P3_108923_39306 | NW_004515756.1 | Scaffold214 | 39306                   | AA                              | GG                | 1946489659               |
| SNP_P3_108924_49796 | NW_004515756.1 | Scaffold214 | 49796                   | CC                              | TT                | 1946489661               |
| SNP_P3_108925_50174 | NW_004515756.1 | Scaffold214 | 50174                   | GG                              | TT                | 1946489662               |
| SNP_P3_108926_51685 | NW_004515756.1 | Scaffold214 | 51685                   | TT                              | CC                | 1946489664               |
| SNP_P3_108927_51695 | NW_004515756.1 | Scaffold214 | 51695                   | AA                              | GG                | 1946489665               |
| SNP_P3_108928_52282 | NW_004515756.1 | Scaffold214 | 52282                   | TT                              | CC                | 1946489667               |
| SNP_P3_108929_54754 | NW_004515756.1 | Scaffold214 | 54754                   | CC                              | TT                | 1946489668               |
| SNP_P3_108930_54832 | NW_004515756.1 | Scaffold214 | 54832                   | TT                              | GG                | 1946489670               |
| SNP_P3_108931_54890 | NW_004515756.1 | Scaffold214 | 54890                   | TT                              | AA                | 1946489671               |
| SNP_P3_108932_55137 | NW_004515756.1 | Scaffold214 | 55137                   | AA                              | GG                | 1946489673               |
| SNP_P3_108933_55172 | NW_004515756.1 | Scaffold214 | 55172                   | CC                              | TT                | 1946489674               |
| SNP_P3_108934_55243 | NW_004515756.1 | Scaffold214 | 55243                   | TT                              | CC                | 1946489675               |
| SNP_P3_108935_55245 | NW_004515756.1 | Scaffold214 | 55245                   | TT                              | CC                | 1946489677               |
| SNP_P3_108936_55261 | NW_004515756.1 | Scaffold214 | 55261                   | GG                              | AA                | 1946489678               |
| SNP_P3_108937_55510 | NW_004515756.1 | Scaffold214 | 55510                   | TT                              | AA                | 1946489680               |
| SNP_P3_108938_59809 | NW_004515756.1 | Scaffold214 | 59809                   | CC                              | GG                | 1946489681               |
| SNP_P3_108939_59823 | NW_004515756.1 | Scaffold214 | 59823                   | GG                              | AA                | 1946489683               |
| SNP_P3_108940_59846 | NW_004515756.1 | Scaffold214 | 59846                   | AA                              | TT                | 1946489684               |
| SNP_P3_108941_62239 | NW_004515756.1 | Scaffold214 | 62239                   | TT                              | CC                | 1946489686               |
| SNP_P3_108942_79386 | NW_004515756.1 | Scaffold214 | 79386                   | GG                              | AA                | 1946489687               |
| SNP_P3_108943_79522 | NW_004515756.1 | Scaffold214 | 79522                   | AA                              | GG                | 1946489689               |
| SNP_P3_108944_81036 | NW_004515756.1 | Scaffold214 | 81036                   | TT                              | GG                | 1946489690               |
| SNP_P3_108945_81093 | NW_004515756.1 | Scaffold214 | 81093                   | AA                              | TT                | 1946489691               |
| SNP_P3_108946_81344 | NW_004515756.1 | Scaffold214 | 81344                   | CC                              | TT                | 1946489693               |
| SNP_P3_108947_82070 | NW_004515756.1 | Scaffold214 | 82070                   | AA                              | TT                | 1946489694               |
| SNP_P3_108948_86731 | NW_004515756.1 | Scaffold214 | 86731                   | CC                              | TT                | 1946489696               |
| SNP_P3_108949_87034 | NW_004515756.1 | Scaffold214 | 87034                   | AA                              | GG                | 1946489697               |
| SNP_P3_108950_87444 | NW_004515756.1 | Scaffold214 | 87444                   | GG                              | CC                | 1946489699               |
| SNP_P3_108951_87544 | NW_004515756.1 | Scaffold214 | 87544                   | AA                              | CC                | 1946489700               |
| SNP_P3_108952_92041 | NW_004515756.1 | Scaffold214 | 92041                   | CC                              | AA                | 1946489702               |
| SNP_P3_108953_92188 | NW_004515756.1 | Scaffold214 | 92188                   | CC                              | TT                | 1946489703               |
| SNP_P3_108954_92340 | NW_004515756.1 | Scaffold214 | 92340                   | GG                              | AA                | 1946489704               |
| SNP_P3_108955_97773 | NW_004515756.1 | Scaffold214 | 97773                   | AA                              | TT                | 1946489706               |

| SNPs IDs             | Chromosome IDs | Chromosomes | Physical positions (bp) | CDC Frontier (Reference genome) | (Pusa 256 & HPNB) | NCBI SNPdb Accession IDs |
|----------------------|----------------|-------------|-------------------------|---------------------------------|-------------------|--------------------------|
| SNP_P3_108956_98037  | NW_004515756.1 | Scaffold214 | 98037                   | AA                              | CC                | 1946489707               |
| SNP_P3_108957_104418 | NW_004515756.1 | Scaffold214 | 104418                  | CC                              | TT                | 1946489709               |
| SNP_P3_108958_106341 | NW_004515756.1 | Scaffold214 | 106341                  | GG                              | AA                | 1946489710               |
| SNP_P3_108959_106347 | NW_004515756.1 | Scaffold214 | 106347                  | AA                              | CC                | 1946489712               |
| SNP_P3_108960_106450 | NW_004515756.1 | Scaffold214 | 106450                  | GG                              | AA                | 1946489713               |
| SNP_P3_108961_118607 | NW_004515756.1 | Scaffold214 | 118607                  | AA                              | GG                | 1946489715               |
| SNP_P3_108962_120145 | NW_004515756.1 | Scaffold214 | 120145                  | CC                              | GG                | 1946489716               |
| SNP_P3_108963_120301 | NW_004515756.1 | Scaffold214 | 120301                  | AA                              | CC                | 1946489718               |
| SNP_P3_108964_120470 | NW_004515756.1 | Scaffold214 | 120470                  | AA                              | TT                | 1946489719               |
| SNP_P3_108965_125580 | NW_004515756.1 | Scaffold214 | 125580                  | CC                              | TT                | 1946489720               |
| SNP_P3_108966_125677 | NW_004515756.1 | Scaffold214 | 125677                  | GG                              | AA                | 1946489722               |
| SNP_P3_108967_125782 | NW_004515756.1 | Scaffold214 | 125782                  | GG                              | AA                | 1946489723               |
| SNP_P3_108968_128104 | NW_004515756.1 | Scaffold214 | 128104                  | CC                              | TT                | 1946489725               |
| SNP_P3_108969_128109 | NW_004515756.1 | Scaffold214 | 128109                  | CC                              | TT                | 1946489726               |
| SNP_P3_108970_128119 | NW_004515756.1 | Scaffold214 | 128119                  | GG                              | TT                | 1946489728               |
| SNP_P3_108971_128193 | NW_004515756.1 | Scaffold214 | 128193                  | AA                              | GG                | 1946489729               |
| SNP_P3_108972_128201 | NW_004515756.1 | Scaffold214 | 128201                  | CC                              | AA                | 1946489731               |
| SNP_P3_108973_131111 | NW_004515756.1 | Scaffold214 | 131111                  | TT                              | AA                | 1946489732               |
| SNP_P3_108974_131287 | NW_004515756.1 | Scaffold214 | 131287                  | GG                              | AA                | 1946489734               |
| SNP_P3_108975_134850 | NW_004515756.1 | Scaffold214 | 134850                  | AA                              | TT                | 1946489735               |
| SNP_P3_108976_134981 | NW_004515756.1 | Scaffold214 | 134981                  | CC                              | GG                | 1946489736               |
| SNP_P3_108977_135103 | NW_004515756.1 | Scaffold214 | 135103                  | TT                              | AA                | 1946489738               |
| SNP_P3_108978_135104 | NW_004515756.1 | Scaffold214 | 135104                  | CC                              | TT                | 1946489739               |
| SNP_P3_108979_135159 | NW_004515756.1 | Scaffold214 | 135159                  | GG                              | TT                | 1946489741               |
| SNP_P3_108980_136994 | NW_004515756.1 | Scaffold214 | 136994                  | AA                              | TT                | 1946489742               |
| SNP_P3_108981_137032 | NW_004515756.1 | Scaffold214 | 137032                  | TT                              | CC                | 1946489744               |
| SNP_P3_108982_137357 | NW_004515756.1 | Scaffold214 | 137357                  | TT                              | GG                | 1946489745               |
| SNP_P3_108983_138131 | NW_004515756.1 | Scaffold214 | 138131                  | AA                              | CC                | 1946489748               |
| SNP_P3_108984_138137 | NW_004515756.1 | Scaffold214 | 138137                  | CC                              | TT                | 1946489749               |
| SNP_P3_108985_138261 | NW_004515756.1 | Scaffold214 | 138261                  | AA                              | GG                | 1946489750               |
| SNP_P3_108986_138486 | NW_004515756.1 | Scaffold214 | 138486                  | GG                              | TT                | 1946489752               |
| SNP_P3_108987_138712 | NW_004515756.1 | Scaffold214 | 138712                  | TT                              | GG                | 1946489753               |
| SNP_P3_108988_138771 | NW_004515756.1 | Scaffold214 | 138771                  | AA                              | GG                | 1946489755               |
| SNP_P3_108989_139241 | NW_004515756.1 | Scaffold214 | 139241                  | CC                              | TT                | 1946489756               |
| SNP_P3_108990_139270 | NW_004515756.1 | Scaffold214 | 139270                  | CC                              | TT                | 1946489758               |
| SNP_P3_108991_139295 | NW_004515756.1 | Scaffold214 | 139295                  | CC                              | GG                | 1946489759               |
| SNP_P3_108992_139309 | NW_004515756.1 | Scaffold214 | 139309                  | AA                              | CC                | 1946489761               |
| SNP_P3_108993_139401 | NW_004515756.1 | Scaffold214 | 139401                  | TT                              | GG                | 1946489762               |
| SNP_P3_108994_141797 | NW_004515756.1 | Scaffold214 | 141797                  | AA                              | CC                | 1946489764               |
| SNP_P3_108995_142781 | NW_004515756.1 | Scaffold214 | 142781                  | AA                              | GG                | 1946489765               |
| SNP_P3_108996_142799 | NW_004515756.1 | Scaffold214 | 142799                  | GG                              | CC                | 1946489767               |
| SNP_P3_108997_142849 | NW_004515756.1 | Scaffold214 | 142849                  | AA                              | TT                | 1946489768               |

| SNPs IDs             | Chromosome IDs | Chromosomes | Physical positions (bp) | CDC Frontier (Reference genome) | (Pusa 256 & HPNB) | NCBI SNPdb Accession IDs |
|----------------------|----------------|-------------|-------------------------|---------------------------------|-------------------|--------------------------|
| SNP_P3_108998_142875 | NW_004515756.1 | Scaffold214 | 142875                  | AA                              | CC                | 1946489770               |
| SNP_P3_108999_144470 | NW_004515756.1 | Scaffold214 | 144470                  | GG                              | TT                | 1946489771               |
| SNP_P3_109000_144563 | NW_004515756.1 | Scaffold214 | 144563                  | AA                              | GG                | 1946489773               |
| SNP_P3_109001_144612 | NW_004515756.1 | Scaffold214 | 144612                  | TT                              | AA                | 1946489774               |
| SNP_P3_109002_144774 | NW_004515756.1 | Scaffold214 | 144774                  | AA                              | TT                | 1946489775               |
| SNP_P3_109003_144834 | NW_004515756.1 | Scaffold214 | 144834                  | AA                              | CC                | 1946489777               |
| SNP_P3_109004_144894 | NW_004515756.1 | Scaffold214 | 144894                  | AA                              | GG                | 1946489778               |
| SNP_P3_109005_14175  | NW_004515757.1 | Scaffold217 | 14175                   | GG                              | TT                | 1946489780               |
| SNP_P3_109006_14352  | NW_004515757.1 | Scaffold217 | 14352                   | GG                              | TT                | 1946489781               |
| SNP_P3_109007_14443  | NW_004515757.1 | Scaffold217 | 14443                   | GG                              | CC                | 1946489783               |
| SNP_P3_109008_14460  | NW_004515757.1 | Scaffold217 | 14460                   | CC                              | AA                | 1946489784               |
| SNP_P3_109009_16808  | NW_004515757.1 | Scaffold217 | 16808                   | CC                              | AA                | 1946489786               |
| SNP_P3_109010_16876  | NW_004515757.1 | Scaffold217 | 16876                   | CC                              | GG                | 1946489787               |
| SNP_P3_109011_18018  | NW_004515757.1 | Scaffold217 | 18018                   | GG                              | TT                | 1946489789               |
| SNP_P3_109012_647    | NW_004515758.1 | Scaffold220 | 647                     | TT                              | AA                | 1946489790               |
| SNP_P3_109013_1186   | NW_004515758.1 | Scaffold220 | 1186                    | AA                              | CC                | 1946489792               |
| SNP_P3_109014_1210   | NW_004515758.1 | Scaffold220 | 1210                    | CC                              | TT                | 1946489793               |
| SNP_P3_109015_1532   | NW_004515758.1 | Scaffold220 | 1532                    | TT                              | CC                | 1946489794               |
| SNP_P3_109016_1541   | NW_004515758.1 | Scaffold220 | 1541                    | CC                              | TT                | 1946489796               |
| SNP_P3_109017_1646   | NW_004515758.1 | Scaffold220 | 1646                    | GG                              | TT                | 1946489797               |
| SNP_P3_109018_1708   | NW_004515758.1 | Scaffold220 | 1708                    | AA                              | CC                | 1946489799               |
| SNP_P3_109019_2089   | NW_004515758.1 | Scaffold220 | 2089                    | GG                              | TT                | 1946489800               |
| SNP_P3_109020_4706   | NW_004515758.1 | Scaffold220 | 4706                    | TT                              | AA                | 1946489801               |
| SNP_P3_109021_4772   | NW_004515758.1 | Scaffold220 | 4772                    | CC                              | TT                | 1946489803               |
| SNP_P3_109022_4812   | NW_004515758.1 | Scaffold220 | 4812                    | GG                              | CC                | 1946489804               |
| SNP_P3_109023_4981   | NW_004515758.1 | Scaffold220 | 4981                    | AA                              | GG                | 1946489806               |
| SNP_P3_109024_4987   | NW_004515758.1 | Scaffold220 | 4987                    | TT                              | CC                | 1946489807               |
| SNP_P3_109025_4988   | NW_004515758.1 | Scaffold220 | 4988                    | CC                              | TT                | 1946489808               |
| SNP_P3_109026_4989   | NW_004515758.1 | Scaffold220 | 4989                    | GG                              | AA                | 1946489810               |
| SNP_P3_109027_5414   | NW_004515758.1 | Scaffold220 | 5414                    | AA                              | TT                | 1946489811               |
| SNP_P3_109028_5470   | NW_004515758.1 | Scaffold220 | 5470                    | CC                              | GG                | 1946489813               |
| SNP_P3_109029_5789   | NW_004515758.1 | Scaffold220 | 5789                    | AA                              | GG                | 1946489814               |
| SNP_P3_109030_6065   | NW_004515758.1 | Scaffold220 | 6065                    | CC                              | AA                | 1946489816               |
| SNP_P3_109031_9230   | NW_004515759.1 | Scaffold221 | 9230                    | CC                              | GG                | 1946489817               |
| SNP_P3_109032_18471  | NW_004515759.1 | Scaffold221 | 18471                   | AA                              | CC                | 1946489819               |
| SNP_P3_109033_18834  | NW_004515759.1 | Scaffold221 | 18834                   | AA                              | GG                | 1946489820               |
| SNP_P3_109034_18850  | NW_004515759.1 | Scaffold221 | 18850                   | AA                              | TT                | 1946489822               |
| SNP_P3_109035_18858  | NW_004515759.1 | Scaffold221 | 18858                   | AA                              | GG                | 1946489823               |
| SNP_P3_109036_18866  | NW_004515759.1 | Scaffold221 | 18866                   | AA                              | TT                | 1946489824               |
| SNP_P3_109037_18889  | NW_004515759.1 | Scaffold221 | 18889                   | TT                              | AA                | 1946489826               |
| SNP_P3_109038_26376  | NW_004515759.1 | Scaffold221 | 26376                   | CC                              | TT                | 1946489827               |
| SNP_P3_109039_32281  | NW_004515759.1 | Scaffold221 | 32281                   | AA                              | GG                | 1946489829               |



| SNPs IDs             | Chromosome IDs | Chromosomes | Physical positions (bp) | CDC Frontier (Reference genome) | (Pusa 256 & HPNB) | NCBI SNPdb Accession IDs |
|----------------------|----------------|-------------|-------------------------|---------------------------------|-------------------|--------------------------|
| SNP_P3_109040_32291  | NW_004515759.1 | Scaffold221 | 32291                   | TT                              | GG                | 1946489830               |
| SNP_P3_109041_61219  | NW_004515759.1 | Scaffold221 | 61219                   | TT                              | CC                | 1946489832               |
| SNP_P3_109042_61301  | NW_004515759.1 | Scaffold221 | 61301                   | CC                              | AA                | 1946489833               |
| SNP_P3_109043_61306  | NW_004515759.1 | Scaffold221 | 61306                   | TT                              | CC                | 1946489835               |
| SNP_P3_109044_61317  | NW_004515759.1 | Scaffold221 | 61317                   | AA                              | GG                | 1946489836               |
| SNP_P3_109045_61644  | NW_004515759.1 | Scaffold221 | 61644                   | AA                              | GG                | 1946489837               |
| SNP_P3_109046_61672  | NW_004515759.1 | Scaffold221 | 61672                   | GG                              | AA                | 1946489839               |
| SNP_P3_109047_62617  | NW_004515759.1 | Scaffold221 | 62617                   | TT                              | CC                | 1946489840               |
| SNP_P3_109048_62907  | NW_004515759.1 | Scaffold221 | 62907                   | AA                              | GG                | 1946489842               |
| SNP_P3_109049_62913  | NW_004515759.1 | Scaffold221 | 62913                   | TT                              | CC                | 1946489843               |
| SNP_P3_109050_64635  | NW_004515759.1 | Scaffold221 | 64635                   | AA                              | TT                | 1946489845               |
| SNP_P3_109051_64653  | NW_004515759.1 | Scaffold221 | 64653                   | CC                              | AA                | 1946489846               |
| SNP_P3_109052_64665  | NW_004515759.1 | Scaffold221 | 64665                   | AA                              | GG                | 1946489848               |
| SNP_P3_109053_64685  | NW_004515759.1 | Scaffold221 | 64685                   | TT                              | CC                | 1946489849               |
| SNP_P3_109054_65000  | NW_004515759.1 | Scaffold221 | 65000                   | AA                              | GG                | 1946489851               |
| SNP_P3_109055_65208  | NW_004515759.1 | Scaffold221 | 65208                   | GG                              | AA                | 1946489852               |
| SNP_P3_109056_67552  | NW_004515759.1 | Scaffold221 | 67552                   | TT                              | CC                | 1946489853               |
| SNP_P3_109058_81383  | NW_004515759.1 | Scaffold221 | 81383                   | TT                              | CC                | 1946489855               |
| SNP_P3_109059_81406  | NW_004515759.1 | Scaffold221 | 81406                   | GG                              | TT                | 1946489856               |
| SNP_P3_109060_81497  | NW_004515759.1 | Scaffold221 | 81497                   | TT                              | CC                | 1946489858               |
| SNP_P3_109061_81505  | NW_004515759.1 | Scaffold221 | 81505                   | TT                              | CC                | 1946489859               |
| SNP_P3_109062_81525  | NW_004515759.1 | Scaffold221 | 81525                   | TT                              | CC                | 1946489861               |
| SNP_P3_109063_85547  | NW_004515759.1 | Scaffold221 | 85547                   | GG                              | AA                | 1946489862               |
| SNP_P3_109064_92573  | NW_004515759.1 | Scaffold221 | 92573                   | AA                              | GG                | 1946489863               |
| SNP_P3_109065_93960  | NW_004515759.1 | Scaffold221 | 93960                   | AA                              | GG                | 1946489865               |
| SNP_P3_109066_109884 | NW_004515759.1 | Scaffold221 | 109884                  | AA                              | TT                | 1946489866               |
| SNP_P3_109067_109925 | NW_004515759.1 | Scaffold221 | 109925                  | CC                              | AA                | 1946489868               |
| SNP_P3_109068_109980 | NW_004515759.1 | Scaffold221 | 109980                  | GG                              | AA                | 1946489869               |
| SNP_P3_109069_110024 | NW_004515759.1 | Scaffold221 | 110024                  | GG                              | AA                | 1946489871               |
| SNP_P3_109070_110034 | NW_004515759.1 | Scaffold221 | 110034                  | AA                              | GG                | 1946489872               |
| SNP_P3_109071_110066 | NW_004515759.1 | Scaffold221 | 110066                  | CC                              | TT                | 1946489874               |
| SNP_P3_109072_110376 | NW_004515759.1 | Scaffold221 | 110376                  | GG                              | CC                | 1946489875               |
| SNP_P3_109073_110453 | NW_004515759.1 | Scaffold221 | 110453                  | TT                              | CC                | 1946489877               |
| SNP_P3_109074_110459 | NW_004515759.1 | Scaffold221 | 110459                  | CC                              | AA                | 1946489878               |
| SNP_P3_109075_13159  | NW_004515760.1 | Scaffold222 | 13159                   | TT                              | AA                | 1946489879               |
| SNP_P3_109076_13204  | NW_004515760.1 | Scaffold222 | 13204                   | CC                              | TT                | 1946489881               |
| SNP_P3_109077_13205  | NW_004515760.1 | Scaffold222 | 13205                   | AA                              | GG                | 1946489882               |
| SNP_P3_109078_25888  | NW_004515760.1 | Scaffold222 | 25888                   | CC                              | GG                | 1946489884               |
| SNP_P3_109079_26763  | NW_004515760.1 | Scaffold222 | 26763                   | GG                              | TT                | 1946489885               |
| SNP_P3_109081_32912  | NW_004515760.1 | Scaffold222 | 32912                   | CC                              | AA                | 1946489887               |
| SNP_P3_109082_33300  | NW_004515760.1 | Scaffold222 | 33300                   | GG                              | AA                | 1946489888               |
| SNP_P3_109083_33343  | NW_004515760.1 | Scaffold222 | 33343                   | AA                              | GG                | 1946489890               |

| SNPs IDs             | Chromosome IDs | Chromosomes | Physical positions (bp) | CDC Frontier (Reference genome) | (Pusa 256 & HPNB) | NCBI SNPdb Accession IDs |
|----------------------|----------------|-------------|-------------------------|---------------------------------|-------------------|--------------------------|
| SNP_P3_109084_35786  | NW_004515760.1 | Scaffold222 | 35786                   | AA                              | CC                | 1946489891               |
| SNP_P3_109085_46729  | NW_004515760.1 | Scaffold222 | 46729                   | AA                              | GG                | 1946489893               |
| SNP_P3_109086_46735  | NW_004515760.1 | Scaffold222 | 46735                   | AA                              | GG                | 1946489894               |
| SNP_P3_109087_47333  | NW_004515760.1 | Scaffold222 | 47333                   | AA                              | GG                | 1946489895               |
| SNP_P3_109088_47351  | NW_004515760.1 | Scaffold222 | 47351                   | TT                              | AA                | 1946489897               |
| SNP_P3_109089_48128  | NW_004515760.1 | Scaffold222 | 48128                   | CC                              | TT                | 1946489898               |
| SNP_P3_109090_55220  | NW_004515760.1 | Scaffold222 | 55220                   | CC                              | TT                | 1946489900               |
| SNP_P3_109091_55339  | NW_004515760.1 | Scaffold222 | 55339                   | GG                              | CC                | 1946489901               |
| SNP_P3_109092_61745  | NW_004515760.1 | Scaffold222 | 61745                   | CC                              | TT                | 1946489903               |
| SNP_P3_109093_65848  | NW_004515760.1 | Scaffold222 | 65848                   | AA                              | GG                | 1946489904               |
| SNP_P3_109094_12204  | NW_004515761.1 | Scaffold223 | 12204                   | AA                              | GG                | 1946489905               |
| SNP_P3_109096_20084  | NW_004515761.1 | Scaffold223 | 20084                   | GG                              | CC                | 1946489907               |
| SNP_P3_109097_28684  | NW_004515761.1 | Scaffold223 | 28684                   | AA                              | GG                | 1946489908               |
| SNP_P3_109098_36484  | NW_004515761.1 | Scaffold223 | 36484                   | AA                              | GG                | 1946489910               |
| SNP_P3_109099_36543  | NW_004515761.1 | Scaffold223 | 36543                   | TT                              | GG                | 1946489911               |
| SNP_P3_109100_41183  | NW_004515761.1 | Scaffold223 | 41183                   | GG                              | AA                | 1946489913               |
| SNP_P3_109102_49693  | NW_004515761.1 | Scaffold223 | 49693                   | GG                              | AA                | 1946489914               |
| SNP_P3_109103_61172  | NW_004515761.1 | Scaffold223 | 61172                   | GG                              | AA                | 1946489915               |
| SNP_P3_109104_61701  | NW_004515761.1 | Scaffold223 | 61701                   | TT                              | CC                | 1946489917               |
| SNP_P3_109106_78760  | NW_004515761.1 | Scaffold223 | 78760                   | CC                              | TT                | 1946489918               |
| SNP_P3_109108_95363  | NW_004515761.1 | Scaffold223 | 95363                   | GG                              | AA                | 1946489920               |
| SNP_P3_109109_95383  | NW_004515761.1 | Scaffold223 | 95383                   | AA                              | CC                | 1946489921               |
| SNP_P3_109110_95390  | NW_004515761.1 | Scaffold223 | 95390                   | AA                              | GG                | 1946489923               |
| SNP_P3_109111_95723  | NW_004515761.1 | Scaffold223 | 95723                   | CC                              | TT                | 1946489924               |
| SNP_P3_109112_95859  | NW_004515761.1 | Scaffold223 | 95859                   | AA                              | CC                | 1946489925               |
| SNP_P3_109113_95862  | NW_004515761.1 | Scaffold223 | 95862                   | AA                              | GG                | 1946489927               |
| SNP_P3_109115_97593  | NW_004515761.1 | Scaffold223 | 97593                   | TT                              | CC                | 1946489928               |
| SNP_P3_109116_142854 | NW_004515761.1 | Scaffold223 | 142854                  | TT                              | CC                | 1946489930               |
| SNP_P3_109117_144225 | NW_004515761.1 | Scaffold223 | 144225                  | AA                              | GG                | 1946489931               |
| SNP_P3_109118_146741 | NW_004515761.1 | Scaffold223 | 146741                  | AA                              | GG                | 1946489932               |
| SNP_P3_109119_146758 | NW_004515761.1 | Scaffold223 | 146758                  | GG                              | AA                | 1946489934               |
| SNP_P3_109120_146787 | NW_004515761.1 | Scaffold223 | 146787                  | CC                              | AA                | 1946489935               |
| SNP_P3_109121_175051 | NW_004515761.1 | Scaffold223 | 175051                  | CC                              | AA                | 1946489937               |
| SNP_P3_109122_176202 | NW_004515761.1 | Scaffold223 | 176202                  | TT                              | CC                | 1946489938               |
| SNP_P3_109124_180179 | NW_004515761.1 | Scaffold223 | 180179                  | AA                              | GG                | 1946489940               |
| SNP_P3_109125_181273 | NW_004515761.1 | Scaffold223 | 181273                  | TT                              | GG                | 1946489941               |
| SNP_P3_109126_182069 | NW_004515761.1 | Scaffold223 | 182069                  | GG                              | AA                | 1946489942               |
| SNP_P3_109127_182153 | NW_004515761.1 | Scaffold223 | 182153                  | CC                              | TT                | 1946489944               |
| SNP_P3_109128_182154 | NW_004515761.1 | Scaffold223 | 182154                  | TT                              | CC                | 1946489945               |
| SNP_P3_109129_182257 | NW_004515761.1 | Scaffold223 | 182257                  | AA                              | TT                | 1946489947               |
| SNP_P3_109130_184088 | NW_004515761.1 | Scaffold223 | 184088                  | GG                              | AA                | 1946489948               |
| SNP_P3_109131_187386 | NW_004515761.1 | Scaffold223 | 187386                  | CC                              | AA                | 1946489950               |

| SNPs IDs             | Chromosome IDs | Chromosomes | Physical positions (bp) | CDC Frontier (Reference genome) | (Pusa 256 & HPNB) | NCBI SNPdb Accession IDs |
|----------------------|----------------|-------------|-------------------------|---------------------------------|-------------------|--------------------------|
| SNP_P3_109132_6617   | NW_004515762.1 | Scaffold224 | 6617                    | AA                              | GG                | 1946489951               |
| SNP_P3_109133_8154   | NW_004515762.1 | Scaffold224 | 8154                    | AA                              | GG                | 1946489953               |
| SNP_P3_109134_8304   | NW_004515762.1 | Scaffold224 | 8304                    | AA                              | GG                | 1946489954               |
| SNP_P3_109135_20312  | NW_004515762.1 | Scaffold224 | 20312                   | AA                              | GG                | 1946489955               |
| SNP_P3_109136_20397  | NW_004515762.1 | Scaffold224 | 20397                   | CC                              | TT                | 1946489957               |
| SNP_P3_109137_20412  | NW_004515762.1 | Scaffold224 | 20412                   | GG                              | AA                | 1946489958               |
| SNP_P3_109138_20419  | NW_004515762.1 | Scaffold224 | 20419                   | AA                              | CC                | 1946489960               |
| SNP_P3_109139_20428  | NW_004515762.1 | Scaffold224 | 20428                   | GG                              | AA                | 1946489961               |
| SNP_P3_109140_20488  | NW_004515762.1 | Scaffold224 | 20488                   | CC                              | AA                | 1946489962               |
| SNP_P3_109141_20499  | NW_004515762.1 | Scaffold224 | 20499                   | GG                              | AA                | 1946489964               |
| SNP_P3_109142_20501  | NW_004515762.1 | Scaffold224 | 20501                   | GG                              | AA                | 1946489965               |
| SNP_P3_109143_20526  | NW_004515762.1 | Scaffold224 | 20526                   | TT                              | GG                | 1946489967               |
| SNP_P3_109144_20761  | NW_004515762.1 | Scaffold224 | 20761                   | CC                              | TT                | 1946489968               |
| SNP_P3_109146_20822  | NW_004515762.1 | Scaffold224 | 20822                   | TT                              | CC                | 1946489970               |
| SNP_P3_109148_20878  | NW_004515762.1 | Scaffold224 | 20878                   | TT                              | CC                | 1946489971               |
| SNP_P3_109149_20908  | NW_004515762.1 | Scaffold224 | 20908                   | AA                              | CC                | 1946489973               |
| SNP_P3_109150_20937  | NW_004515762.1 | Scaffold224 | 20937                   | CC                              | TT                | 1946489974               |
| SNP_P3_109151_34677  | NW_004515762.1 | Scaffold224 | 34677                   | TT                              | CC                | 1946489976               |
| SNP_P3_109152_34720  | NW_004515762.1 | Scaffold224 | 34720                   | GG                              | TT                | 1946489977               |
| SNP_P3_109153_37051  | NW_004515762.1 | Scaffold224 | 37051                   | AA                              | GG                | 1946489978               |
| SNP_P3_109154_48791  | NW_004515762.1 | Scaffold224 | 48791                   | TT                              | CC                | 1946489980               |
| SNP_P3_109155_95137  | NW_004515762.1 | Scaffold224 | 95137                   | TT                              | AA                | 1946489981               |
| SNP_P3_109156_95364  | NW_004515762.1 | Scaffold224 | 95364                   | CC                              | TT                | 1946489982               |
| SNP_P3_109157_95415  | NW_004515762.1 | Scaffold224 | 95415                   | AA                              | TT                | 1946489983               |
| SNP_P3_109159_113144 | NW_004515762.1 | Scaffold224 | 113144                  | TT                              | CC                | 1946489984               |
| SNP_P3_109160_140760 | NW_004515762.1 | Scaffold224 | 140760                  | TT                              | CC                | 1946489985               |
| SNP_P3_109161_140787 | NW_004515762.1 | Scaffold224 | 140787                  | AA                              | GG                | 1946489986               |
| SNP_P3_109162_140807 | NW_004515762.1 | Scaffold224 | 140807                  | AA                              | GG                | 1946489987               |
| SNP_P3_109163_140812 | NW_004515762.1 | Scaffold224 | 140812                  | AA                              | CC                | 1946489988               |
| SNP_P3_109164_140813 | NW_004515762.1 | Scaffold224 | 140813                  | TT                              | CC                | 1946489989               |
| SNP_P3_109165_141164 | NW_004515762.1 | Scaffold224 | 141164                  | AA                              | TT                | 1946489990               |
| SNP_P3_109166_141171 | NW_004515762.1 | Scaffold224 | 141171                  | AA                              | GG                | 1946489991               |
| SNP_P3_109167_141187 | NW_004515762.1 | Scaffold224 | 141187                  | GG                              | CC                | 1946489992               |
| SNP_P3_109168_145455 | NW_004515762.1 | Scaffold224 | 145455                  | AA                              | GG                | 1946489993               |
| SNP_P3_109169_145579 | NW_004515762.1 | Scaffold224 | 145579                  | TT                              | CC                | 1946489995               |
| SNP_P3_109170_148700 | NW_004515762.1 | Scaffold224 | 148700                  | GG                              | AA                | 1946489996               |
| SNP_P3_109171_151282 | NW_004515762.1 | Scaffold224 | 151282                  | AA                              | GG                | 1946489998               |
| SNP_P3_109172_151284 | NW_004515762.1 | Scaffold224 | 151284                  | AA                              | CC                | 1946489999               |
| SNP_P3_109173_151319 | NW_004515762.1 | Scaffold224 | 151319                  | AA                              | GG                | 1946490002               |
| SNP_P3_109174_151320 | NW_004515762.1 | Scaffold224 | 151320                  | AA                              | GG                | 1946490003               |
| SNP_P3_109175_151342 | NW_004515762.1 | Scaffold224 | 151342                  | AA                              | CC                | 1946490005               |
| SNP_P3_109176_151724 | NW_004515762.1 | Scaffold224 | 151724                  | TT                              | CC                | 1946490006               |

| SNPs IDs             | Chromosome IDs | Chromosomes | Physical positions (bp) | CDC Frontier (Reference genome) | (Pusa 256 & HPNB) | NCBI SNPdb Accession IDs |
|----------------------|----------------|-------------|-------------------------|---------------------------------|-------------------|--------------------------|
| SNP_P3_109177_152117 | NW_004515762.1 | Scaffold224 | 152117                  | AA                              | CC                | 1946490007               |
| SNP_P3_109178_152163 | NW_004515762.1 | Scaffold224 | 152163                  | AA                              | CC                | 1946490009               |
| SNP_P3_109179_152179 | NW_004515762.1 | Scaffold224 | 152179                  | AA                              | TT                | 1946490010               |
| SNP_P3_109180_152191 | NW_004515762.1 | Scaffold224 | 152191                  | AA                              | GG                | 1946490012               |
| SNP_P3_109181_152192 | NW_004515762.1 | Scaffold224 | 152192                  | TT                              | AA                | 1946490013               |
| SNP_P3_109182_152197 | NW_004515762.1 | Scaffold224 | 152197                  | GG                              | AA                | 1946490015               |
| SNP_P3_109183_152228 | NW_004515762.1 | Scaffold224 | 152228                  | GG                              | CC                | 1946490016               |
| SNP_P3_109184_152236 | NW_004515762.1 | Scaffold224 | 152236                  | GG                              | CC                | 1946490018               |
| SNP_P3_109185_152251 | NW_004515762.1 | Scaffold224 | 152251                  | TT                              | AA                | 1946490019               |
| SNP_P3_109186_152252 | NW_004515762.1 | Scaffold224 | 152252                  | TT                              | CC                | 1946490020               |
| SNP_P3_109187_152269 | NW_004515762.1 | Scaffold224 | 152269                  | AA                              | CC                | 1946490022               |
| SNP_P3_109188_152287 | NW_004515762.1 | Scaffold224 | 152287                  | GG                              | CC                | 1946490023               |
| SNP_P3_109189_152288 | NW_004515762.1 | Scaffold224 | 152288                  | TT                              | CC                | 1946490025               |
| SNP_P3_109190_152570 | NW_004515762.1 | Scaffold224 | 152570                  | AA                              | GG                | 1946490026               |
| SNP_P3_109191_152579 | NW_004515762.1 | Scaffold224 | 152579                  | AA                              | TT                | 1946490028               |
| SNP_P3_109192_152595 | NW_004515762.1 | Scaffold224 | 152595                  | GG                              | AA                | 1946490029               |
| SNP_P3_109193_152669 | NW_004515762.1 | Scaffold224 | 152669                  | AA                              | GG                | 1946490030               |
| SNP_P3_109194_152676 | NW_004515762.1 | Scaffold224 | 152676                  | AA                              | GG                | 1946490032               |
| SNP_P3_109195_152682 | NW_004515762.1 | Scaffold224 | 152682                  | AA                              | CC                | 1946490033               |
| SNP_P3_109196_153500 | NW_004515762.1 | Scaffold224 | 153500                  | AA                              | GG                | 1946490035               |
| SNP_P3_109197_153573 | NW_004515762.1 | Scaffold224 | 153573                  | TT                              | CC                | 1946490036               |
| SNP_P3_109198_153855 | NW_004515762.1 | Scaffold224 | 153855                  | TT                              | CC                | 1946490037               |
| SNP_P3_109199_153893 | NW_004515762.1 | Scaffold224 | 153893                  | AA                              | GG                | 1946490039               |
| SNP_P3_109200_161091 | NW_004515762.1 | Scaffold224 | 161091                  | CC                              | TT                | 1946490040               |
| SNP_P3_109201_161097 | NW_004515762.1 | Scaffold224 | 161097                  | AA                              | GG                | 1946490042               |
| SNP_P3_109202_161114 | NW_004515762.1 | Scaffold224 | 161114                  | TT                              | CC                | 1946490043               |
| SNP_P3_109203_161150 | NW_004515762.1 | Scaffold224 | 161150                  | TT                              | CC                | 1946490045               |
| SNP_P3_109204_161249 | NW_004515762.1 | Scaffold224 | 161249                  | CC                              | TT                | 1946490046               |
| SNP_P3_109205_161257 | NW_004515762.1 | Scaffold224 | 161257                  | TT                              | GG                | 1946490047               |
| SNP_P3_109206_161314 | NW_004515762.1 | Scaffold224 | 161314                  | TT                              | CC                | 1946490049               |
| SNP_P3_109207_161320 | NW_004515762.1 | Scaffold224 | 161320                  | TT                              | CC                | 1946490050               |
| SNP_P3_109208_161322 | NW_004515762.1 | Scaffold224 | 161322                  | AA                              | GG                | 1946490052               |
| SNP_P3_109209_161324 | NW_004515762.1 | Scaffold224 | 161324                  | TT                              | CC                | 1946490053               |
| SNP_P3_109210_161332 | NW_004515762.1 | Scaffold224 | 161332                  | TT                              | CC                | 1946490055               |
| SNP_P3_109211_161345 | NW_004515762.1 | Scaffold224 | 161345                  | AA                              | GG                | 1946490056               |
| SNP_P3_109212_161484 | NW_004515762.1 | Scaffold224 | 161484                  | GG                              | AA                | 1946490057               |
| SNP_P3_109213_161486 | NW_004515762.1 | Scaffold224 | 161486                  | GG                              | CC                | 1946490059               |
| SNP_P3_109214_161525 | NW_004515762.1 | Scaffold224 | 161525                  | AA                              | GG                | 1946490060               |
| SNP_P3_109215_161547 | NW_004515762.1 | Scaffold224 | 161547                  | TT                              | CC                | 1946490062               |
| SNP_P3_109216_161567 | NW_004515762.1 | Scaffold224 | 161567                  | TT                              | CC                | 1946490063               |
| SNP_P3_109217_161632 | NW_004515762.1 | Scaffold224 | 161632                  | AA                              | GG                | 1946490065               |
| SNP_P3_109218_161659 | NW_004515762.1 | Scaffold224 | 161659                  | TT                              | CC                | 1946490066               |

| SNPs IDs             | Chromosome IDs | Chromosomes | Physical positions (bp) | CDC Frontier (Reference genome) | (Pusa 256 & HPNB) | NCBI SNPdb Accession IDs |
|----------------------|----------------|-------------|-------------------------|---------------------------------|-------------------|--------------------------|
| SNP_P3_109219_161683 | NW_004515762.1 | Scaffold224 | 161683                  | AA                              | GG                | 1946490068               |
| SNP_P3_109220_161694 | NW_004515762.1 | Scaffold224 | 161694                  | CC                              | GG                | 1946490069               |
| SNP_P3_109221_161752 | NW_004515762.1 | Scaffold224 | 161752                  | GG                              | TT                | 1946490070               |
| SNP_P3_109222_161761 | NW_004515762.1 | Scaffold224 | 161761                  | AA                              | GG                | 1946490072               |
| SNP_P3_109223_165323 | NW_004515762.1 | Scaffold224 | 165323                  | AA                              | GG                | 1946490073               |
| SNP_P3_109224_165328 | NW_004515762.1 | Scaffold224 | 165328                  | GG                              | TT                | 1946490075               |
| SNP_P3_109225_175268 | NW_004515762.1 | Scaffold224 | 175268                  | TT                              | CC                | 1946490076               |
| SNP_P3_109226_180925 | NW_004515762.1 | Scaffold224 | 180925                  | TT                              | CC                | 1946490078               |
| SNP_P3_109228_185858 | NW_004515762.1 | Scaffold224 | 185858                  | TT                              | GG                | 1946490079               |
| SNP_P3_109229_185890 | NW_004515762.1 | Scaffold224 | 185890                  | AA                              | TT                | 1946490080               |
| SNP_P3_109230_185919 | NW_004515762.1 | Scaffold224 | 185919                  | TT                              | CC                | 1946490082               |
| SNP_P3_109231_185928 | NW_004515762.1 | Scaffold224 | 185928                  | TT                              | GG                | 1946490083               |
| SNP_P3_109232_186158 | NW_004515762.1 | Scaffold224 | 186158                  | AA                              | GG                | 1946490085               |
| SNP_P3_109233_186187 | NW_004515762.1 | Scaffold224 | 186187                  | TT                              | CC                | 1946490086               |
| SNP_P3_109234_186188 | NW_004515762.1 | Scaffold224 | 186188                  | GG                              | CC                | 1946490088               |
| SNP_P3_109235_186225 | NW_004515762.1 | Scaffold224 | 186225                  | GG                              | TT                | 1946490089               |
| SNP_P3_109236_186233 | NW_004515762.1 | Scaffold224 | 186233                  | TT                              | CC                | 1946490090               |
| SNP_P3_109237_186235 | NW_004515762.1 | Scaffold224 | 186235                  | AA                              | GG                | 1946490092               |
| SNP_P3_109238_186248 | NW_004515762.1 | Scaffold224 | 186248                  | AA                              | GG                | 1946490093               |
| SNP_P3_109239_186254 | NW_004515762.1 | Scaffold224 | 186254                  | AA                              | GG                | 1946490095               |
| SNP_P3_109240_186270 | NW_004515762.1 | Scaffold224 | 186270                  | AA                              | GG                | 1946490096               |
| SNP_P3_109241_186289 | NW_004515762.1 | Scaffold224 | 186289                  | TT                              | GG                | 1946490098               |
| SNP_P3_109242_186323 | NW_004515762.1 | Scaffold224 | 186323                  | AA                              | GG                | 1946490099               |
| SNP_P3_109243_186356 | NW_004515762.1 | Scaffold224 | 186356                  | TT                              | CC                | 1946490101               |
| SNP_P3_109244_186357 | NW_004515762.1 | Scaffold224 | 186357                  | AA                              | GG                | 1946490102               |
| SNP_P3_109245_186371 | NW_004515762.1 | Scaffold224 | 186371                  | TT                              | CC                | 1946490103               |
| SNP_P3_109246_186398 | NW_004515762.1 | Scaffold224 | 186398                  | AA                              | GG                | 1946490105               |
| SNP_P3_109247_186532 | NW_004515762.1 | Scaffold224 | 186532                  | AA                              | GG                | 1946490106               |
| SNP_P3_109249_186589 | NW_004515762.1 | Scaffold224 | 186589                  | CC                              | TT                | 1946490108               |
| SNP_P3_109250_186603 | NW_004515762.1 | Scaffold224 | 186603                  | AA                              | GG                | 1946490109               |
| SNP_P3_109251_186619 | NW_004515762.1 | Scaffold224 | 186619                  | AA                              | GG                | 1946490111               |
| SNP_P3_109252_186639 | NW_004515762.1 | Scaffold224 | 186639                  | AA                              | GG                | 1946490112               |
| SNP_P3_109253_186645 | NW_004515762.1 | Scaffold224 | 186645                  | TT                              | CC                | 1946490113               |
| SNP_P3_109254_186789 | NW_004515762.1 | Scaffold224 | 186789                  | TT                              | CC                | 1946490115               |
| SNP_P3_109255_186800 | NW_004515762.1 | Scaffold224 | 186800                  | GG                              | AA                | 1946490116               |
| SNP_P3_109256_186803 | NW_004515762.1 | Scaffold224 | 186803                  | AA                              | GG                | 1946490118               |
| SNP_P3_109257_204225 | NW_004515762.1 | Scaffold224 | 204225                  | TT                              | GG                | 1946490119               |
| SNP_P3_109258_204226 | NW_004515762.1 | Scaffold224 | 204226                  | TT                              | CC                | 1946490121               |
| SNP_P3_109259_221395 | NW_004515762.1 | Scaffold224 | 221395                  | CC                              | GG                | 1946490122               |
| SNP_P3_109260_249297 | NW_004515762.1 | Scaffold224 | 249297                  | AA                              | GG                | 1946490124               |
| SNP_P3_109261_252176 | NW_004515762.1 | Scaffold224 | 252176                  | GG                              | CC                | 1946490125               |
| SNP_P3_109262_260680 | NW_004515762.1 | Scaffold224 | 260680                  | AA                              | CC                | 1946490126               |

| SNPs IDs             | Chromosome IDs | Chromosomes | Physical positions (bp) | CDC Frontier (Reference genome) | (Pusa 256 & HPNB) | NCBI SNPdb Accession IDs |
|----------------------|----------------|-------------|-------------------------|---------------------------------|-------------------|--------------------------|
| SNP_P3_109264_294209 | NW_004515762.1 | Scaffold224 | 294209                  | AA                              | GG                | 1946490128               |
| SNP_P3_109265_294281 | NW_004515762.1 | Scaffold224 | 294281                  | CC                              | TT                | 1946490129               |
| SNP_P3_109266_294402 | NW_004515762.1 | Scaffold224 | 294402                  | AA                              | GG                | 1946490131               |
| SNP_P3_109267_12407  | NW_004515763.1 | Scaffold227 | 12407                   | AA                              | GG                | 1946490132               |
| SNP_P3_109268_24769  | NW_004515763.1 | Scaffold227 | 24769                   | CC                              | TT                | 1946490134               |
| SNP_P3_109269_26820  | NW_004515763.1 | Scaffold227 | 26820                   | TT                              | CC                | 1946490135               |
| SNP_P3_109270_32394  | NW_004515763.1 | Scaffold227 | 32394                   | GG                              | AA                | 1946490137               |
| SNP_P3_109271_32397  | NW_004515763.1 | Scaffold227 | 32397                   | CC                              | AA                | 1946490138               |
| SNP_P3_109272_32401  | NW_004515763.1 | Scaffold227 | 32401                   | TT                              | CC                | 1946490140               |
| SNP_P3_109273_32415  | NW_004515763.1 | Scaffold227 | 32415                   | TT                              | CC                | 1946490141               |
| SNP_P3_109274_32423  | NW_004515763.1 | Scaffold227 | 32423                   | CC                              | TT                | 1946490142               |
| SNP_P3_109275_32431  | NW_004515763.1 | Scaffold227 | 32431                   | CC                              | GG                | 1946490144               |
| SNP_P3_109276_32455  | NW_004515763.1 | Scaffold227 | 32455                   | CC                              | TT                | 1946490145               |
| SNP_P3_109277_32505  | NW_004515763.1 | Scaffold227 | 32505                   | GG                              | AA                | 1946490147               |
| SNP_P3_109278_32507  | NW_004515763.1 | Scaffold227 | 32507                   | AA                              | CC                | 1946490148               |
| SNP_P3_109279_33743  | NW_004515763.1 | Scaffold227 | 33743                   | TT                              | CC                | 1946490149               |
| SNP_P3_109281_59522  | NW_004515763.1 | Scaffold227 | 59522                   | AA                              | CC                | 1946490151               |
| SNP_P3_109282_59907  | NW_004515763.1 | Scaffold227 | 59907                   | GG                              | AA                | 1946490152               |
| SNP_P3_109283_59983  | NW_004515763.1 | Scaffold227 | 59983                   | AA                              | CC                | 1946490154               |
| SNP_P3_109284_59986  | NW_004515763.1 | Scaffold227 | 59986                   | AA                              | CC                | 1946490155               |
| SNP_P3_109285_61414  | NW_004515763.1 | Scaffold227 | 61414                   | GG                              | TT                | 1946490157               |
| SNP_P3_109286_80425  | NW_004515763.1 | Scaffold227 | 80425                   | GG                              | AA                | 1946490158               |
| SNP_P3_109287_80426  | NW_004515763.1 | Scaffold227 | 80426                   | TT                              | GG                | 1946490159               |
| SNP_P3_109288_88786  | NW_004515763.1 | Scaffold227 | 88786                   | TT                              | CC                | 1946490161               |
| SNP_P3_109289_127450 | NW_004515763.1 | Scaffold227 | 127450                  | GG                              | AA                | 1946490162               |
| SNP_P3_109290_133704 | NW_004515763.1 | Scaffold227 | 133704                  | CC                              | AA                | 1946490164               |
| SNP_P3_109291_134777 | NW_004515763.1 | Scaffold227 | 134777                  | TT                              | CC                | 1946490165               |
| SNP_P3_109292_134778 | NW_004515763.1 | Scaffold227 | 134778                  | TT                              | CC                | 1946490167               |
| SNP_P3_109293_134780 | NW_004515763.1 | Scaffold227 | 134780                  | TT                              | CC                | 1946490168               |
| SNP_P3_109294_134791 | NW_004515763.1 | Scaffold227 | 134791                  | AA                              | GG                | 1946490169               |
| SNP_P3_109295_135105 | NW_004515763.1 | Scaffold227 | 135105                  | AA                              | GG                | 1946490171               |
| SNP_P3_109296_135147 | NW_004515763.1 | Scaffold227 | 135147                  | AA                              | GG                | 1946490172               |
| SNP_P3_109297_135259 | NW_004515763.1 | Scaffold227 | 135259                  | GG                              | AA                | 1946490174               |
| SNP_P3_109298_135302 | NW_004515763.1 | Scaffold227 | 135302                  | TT                              | CC                | 1946490175               |
| SNP_P3_109299_135312 | NW_004515763.1 | Scaffold227 | 135312                  | TT                              | CC                | 1946490177               |
| SNP_P3_109300_135315 | NW_004515763.1 | Scaffold227 | 135315                  | TT                              | CC                | 1946490178               |
| SNP_P3_109301_135387 | NW_004515763.1 | Scaffold227 | 135387                  | TT                              | GG                | 1946490180               |
| SNP_P3_109302_135403 | NW_004515763.1 | Scaffold227 | 135403                  | AA                              | GG                | 1946490181               |
| SNP_P3_109303_135408 | NW_004515763.1 | Scaffold227 | 135408                  | AA                              | CC                | 1946490183               |
| SNP_P3_109304_135409 | NW_004515763.1 | Scaffold227 | 135409                  | AA                              | GG                | 1946490184               |
| SNP_P3_109305_135419 | NW_004515763.1 | Scaffold227 | 135419                  | TT                              | CC                | 1946490186               |
| SNP_P3_109306_135455 | NW_004515763.1 | Scaffold227 | 135455                  | TT                              | CC                | 1946490187               |

| SNPs IDs             | Chromosome IDs | Chromosomes | Physical positions (bp) | CDC Frontier (Reference genome) | (Pusa 256 & HPNB) | NCBI SNPdb Accession IDs |
|----------------------|----------------|-------------|-------------------------|---------------------------------|-------------------|--------------------------|
| SNP_P3_109308_135525 | NW_004515763.1 | Scaffold227 | 135525                  | AA                              | GG                | 1946490188               |
| SNP_P3_109309_135532 | NW_004515763.1 | Scaffold227 | 135532                  | AA                              | CC                | 1946490190               |
| SNP_P3_109310_136507 | NW_004515763.1 | Scaffold227 | 136507                  | AA                              | GG                | 1946490191               |
| SNP_P3_109311_136515 | NW_004515763.1 | Scaffold227 | 136515                  | AA                              | TT                | 1946490193               |
| SNP_P3_109312_136528 | NW_004515763.1 | Scaffold227 | 136528                  | CC                              | GG                | 1946490194               |
| SNP_P3_109313_136549 | NW_004515763.1 | Scaffold227 | 136549                  | GG                              | TT                | 1946490196               |
| SNP_P3_109314_136559 | NW_004515763.1 | Scaffold227 | 136559                  | CC                              | TT                | 1946490197               |
| SNP_P3_109315_136817 | NW_004515763.1 | Scaffold227 | 136817                  | TT                              | CC                | 1946490199               |
| SNP_P3_109316_136841 | NW_004515763.1 | Scaffold227 | 136841                  | TT                              | GG                | 1946490200               |
| SNP_P3_109317_136878 | NW_004515763.1 | Scaffold227 | 136878                  | TT                              | CC                | 1946490202               |
| SNP_P3_109318_136901 | NW_004515763.1 | Scaffold227 | 136901                  | AA                              | CC                | 1946490203               |
| SNP_P3_109319_136917 | NW_004515763.1 | Scaffold227 | 136917                  | TT                              | AA                | 1946490205               |
| SNP_P3_109320_136929 | NW_004515763.1 | Scaffold227 | 136929                  | AA                              | CC                | 1946490206               |
| SNP_P3_109321_136935 | NW_004515763.1 | Scaffold227 | 136935                  | TT                              | AA                | 1946490208               |
| SNP_P3_109322_136938 | NW_004515763.1 | Scaffold227 | 136938                  | GG                              | AA                | 1946490209               |
| SNP_P3_109323_136939 | NW_004515763.1 | Scaffold227 | 136939                  | CC                              | GG                | 1946490211               |
| SNP_P3_109324_138530 | NW_004515763.1 | Scaffold227 | 138530                  | TT                              | CC                | 1946490212               |
| SNP_P3_109325_138560 | NW_004515763.1 | Scaffold227 | 138560                  | TT                              | CC                | 1946490213               |
| SNP_P3_109326_140572 | NW_004515763.1 | Scaffold227 | 140572                  | AA                              | GG                | 1946490215               |
| SNP_P3_109327_140577 | NW_004515763.1 | Scaffold227 | 140577                  | TT                              | CC                | 1946490216               |
| SNP_P3_109328_140884 | NW_004515763.1 | Scaffold227 | 140884                  | TT                              | AA                | 1946490218               |
| SNP_P3_109329_140918 | NW_004515763.1 | Scaffold227 | 140918                  | AA                              | CC                | 1946490219               |
| SNP_P3_109330_140921 | NW_004515763.1 | Scaffold227 | 140921                  | AA                              | CC                | 1946490221               |
| SNP_P3_109331_140937 | NW_004515763.1 | Scaffold227 | 140937                  | AA                              | TT                | 1946490222               |
| SNP_P3_109333_141016 | NW_004515763.1 | Scaffold227 | 141016                  | GG                              | TT                | 1946490224               |
| SNP_P3_109334_141037 | NW_004515763.1 | Scaffold227 | 141037                  | TT                              | CC                | 1946490225               |
| SNP_P3_109335_141068 | NW_004515763.1 | Scaffold227 | 141068                  | AA                              | GG                | 1946490227               |
| SNP_P3_109336_141164 | NW_004515763.1 | Scaffold227 | 141164                  | GG                              | AA                | 1946490228               |
| SNP_P3_109337_141177 | NW_004515763.1 | Scaffold227 | 141177                  | TT                              | CC                | 1946490230               |
| SNP_P3_109338_141207 | NW_004515763.1 | Scaffold227 | 141207                  | TT                              | AA                | 1946490231               |
| SNP_P3_109339_141256 | NW_004515763.1 | Scaffold227 | 141256                  | TT                              | CC                | 1946490233               |
| SNP_P3_109340_141564 | NW_004515763.1 | Scaffold227 | 141564                  | AA                              | GG                | 1946490234               |
| SNP_P3_109341_141594 | NW_004515763.1 | Scaffold227 | 141594                  | AA                              | CC                | 1946490236               |
| SNP_P3_109342_141599 | NW_004515763.1 | Scaffold227 | 141599                  | CC                              | TT                | 1946490237               |
| SNP_P3_109343_141605 | NW_004515763.1 | Scaffold227 | 141605                  | CC                              | GG                | 1946490239               |
| SNP_P3_109344_141609 | NW_004515763.1 | Scaffold227 | 141609                  | AA                              | GG                | 1946490240               |
| SNP_P3_109345_141680 | NW_004515763.1 | Scaffold227 | 141680                  | GG                              | CC                | 1946490242               |
| SNP_P3_109346_141685 | NW_004515763.1 | Scaffold227 | 141685                  | TT                              | CC                | 1946490243               |
| SNP_P3_109347_142520 | NW_004515763.1 | Scaffold227 | 142520                  | TT                              | CC                | 1946490245               |
| SNP_P3_109348_142522 | NW_004515763.1 | Scaffold227 | 142522                  | CC                              | AA                | 1946490246               |
| SNP_P3_109349_142524 | NW_004515763.1 | Scaffold227 | 142524                  | TT                              | CC                | 1946490248               |
| SNP_P3_109350_142531 | NW_004515763.1 | Scaffold227 | 142531                  | TT                              | CC                | 1946490249               |

| SNPs IDs             | Chromosome IDs | Chromosomes | Physical positions (bp) | CDC Frontier (Reference genome) | (Pusa 256 & HPNB) | NCBI SNPdb Accession IDs |
|----------------------|----------------|-------------|-------------------------|---------------------------------|-------------------|--------------------------|
| SNP_P3_109351_142547 | NW_004515763.1 | Scaffold227 | 142547                  | AA                              | GG                | 1946490251               |
| SNP_P3_109352_142553 | NW_004515763.1 | Scaffold227 | 142553                  | AA                              | GG                | 1946490252               |
| SNP_P3_109353_142564 | NW_004515763.1 | Scaffold227 | 142564                  | AA                              | CC                | 1946490254               |
| SNP_P3_109355_142902 | NW_004515763.1 | Scaffold227 | 142902                  | CC                              | GG                | 1946490255               |
| SNP_P3_109356_143105 | NW_004515763.1 | Scaffold227 | 143105                  | TT                              | CC                | 1946490257               |
| SNP_P3_109357_144233 | NW_004515763.1 | Scaffold227 | 144233                  | AA                              | GG                | 1946490258               |
| SNP_P3_109358_144260 | NW_004515763.1 | Scaffold227 | 144260                  | TT                              | CC                | 1946490260               |
| SNP_P3_109359_144360 | NW_004515763.1 | Scaffold227 | 144360                  | TT                              | AA                | 1946490261               |
| SNP_P3_109360_144406 | NW_004515763.1 | Scaffold227 | 144406                  | TT                              | CC                | 1946490263               |
| SNP_P3_109362_144514 | NW_004515763.1 | Scaffold227 | 144514                  | TT                              | CC                | 1946490264               |
| SNP_P3_109363_144516 | NW_004515763.1 | Scaffold227 | 144516                  | AA                              | CC                | 1946490266               |
| SNP_P3_109364_144525 | NW_004515763.1 | Scaffold227 | 144525                  | AA                              | CC                | 1946490267               |
| SNP_P3_109365_144542 | NW_004515763.1 | Scaffold227 | 144542                  | AA                              | GG                | 1946490269               |
| SNP_P3_109366_144561 | NW_004515763.1 | Scaffold227 | 144561                  | TT                              | CC                | 1946490270               |
| SNP_P3_109367_144587 | NW_004515763.1 | Scaffold227 | 144587                  | AA                              | GG                | 1946490272               |
| SNP_P3_109368_144618 | NW_004515763.1 | Scaffold227 | 144618                  | AA                              | CC                | 1946490273               |
| SNP_P3_109369_147205 | NW_004515763.1 | Scaffold227 | 147205                  | TT                              | GG                | 1946490275               |
| SNP_P3_109370_154693 | NW_004515763.1 | Scaffold227 | 154693                  | TT                              | CC                | 1946490276               |
| SNP_P3_109371_158488 | NW_004515763.1 | Scaffold227 | 158488                  | CC                              | AA                | 1946490278               |
| SNP_P3_109372_164849 | NW_004515763.1 | Scaffold227 | 164849                  | GG                              | AA                | 1946490279               |
| SNP_P3_109373_165214 | NW_004515763.1 | Scaffold227 | 165214                  | CC                              | TT                | 1946490281               |
| SNP_P3_109375_195072 | NW_004515763.1 | Scaffold227 | 195072                  | CC                              | AA                | 1946490282               |
| SNP_P3_109376_195080 | NW_004515763.1 | Scaffold227 | 195080                  | AA                              | CC                | 1946490284               |
| SNP_P3_109377_195092 | NW_004515763.1 | Scaffold227 | 195092                  | TT                              | CC                | 1946490285               |
| SNP_P3_109378_195149 | NW_004515763.1 | Scaffold227 | 195149                  | TT                              | GG                | 1946490287               |
| SNP_P3_109379_195271 | NW_004515763.1 | Scaffold227 | 195271                  | AA                              | TT                | 1946490288               |
| SNP_P3_109380_195431 | NW_004515763.1 | Scaffold227 | 195431                  | GG                              | TT                | 1946490290               |
| SNP_P3_109381_195497 | NW_004515763.1 | Scaffold227 | 195497                  | CC                              | AA                | 1946490291               |
| SNP_P3_109382_195547 | NW_004515763.1 | Scaffold227 | 195547                  | TT                              | CC                | 1946490293               |
| SNP_P3_109383_195606 | NW_004515763.1 | Scaffold227 | 195606                  | AA                              | CC                | 1946490294               |
| SNP_P3_109384_195667 | NW_004515763.1 | Scaffold227 | 195667                  | AA                              | GG                | 1946490296               |
| SNP_P3_109386_195708 | NW_004515763.1 | Scaffold227 | 195708                  | TT                              | CC                | 1946490297               |
| SNP_P3_109387_195725 | NW_004515763.1 | Scaffold227 | 195725                  | AA                              | GG                | 1946490299               |
| SNP_P3_109388_195734 | NW_004515763.1 | Scaffold227 | 195734                  | CC                              | GG                | 1946490300               |
| SNP_P3_109389_195790 | NW_004515763.1 | Scaffold227 | 195790                  | TT                              | AA                | 1946490302               |
| SNP_P3_109390_195856 | NW_004515763.1 | Scaffold227 | 195856                  | AA                              | CC                | 1946490303               |
| SNP_P3_109391_195891 | NW_004515763.1 | Scaffold227 | 195891                  | GG                              | TT                | 1946490305               |
| SNP_P3_109392_195936 | NW_004515763.1 | Scaffold227 | 195936                  | CC                              | TT                | 1946490306               |
| SNP_P3_109393_195940 | NW_004515763.1 | Scaffold227 | 195940                  | AA                              | CC                | 1946490307               |
| SNP_P3_109395_196012 | NW_004515763.1 | Scaffold227 | 196012                  | GG                              | AA                | 1946490309               |
| SNP_P3_109396_196046 | NW_004515763.1 | Scaffold227 | 196046                  | TT                              | CC                | 1946490310               |
| SNP_P3_109397_196089 | NW_004515763.1 | Scaffold227 | 196089                  | AA                              | GG                | 1946490312               |



| SNPs IDs             | Chromosome IDs | Chromosomes | Physical positions (bp) | CDC Frontier (Reference genome) | (Pusa 256 & HPNB) | NCBI SNPdb Accession IDs |
|----------------------|----------------|-------------|-------------------------|---------------------------------|-------------------|--------------------------|
| SNP_P3_109398_196095 | NW_004515763.1 | Scaffold227 | 196095                  | AA                              | GG                | 1946490313               |
| SNP_P3_109400_196149 | NW_004515763.1 | Scaffold227 | 196149                  | AA                              | TT                | 1946490315               |
| SNP_P3_109401_196157 | NW_004515763.1 | Scaffold227 | 196157                  | AA                              | GG                | 1946490316               |
| SNP_P3_109402_196185 | NW_004515763.1 | Scaffold227 | 196185                  | AA                              | GG                | 1946490318               |
| SNP_P3_109403_196193 | NW_004515763.1 | Scaffold227 | 196193                  | CC                              | TT                | 1946490319               |
| SNP_P3_109404_196196 | NW_004515763.1 | Scaffold227 | 196196                  | CC                              | TT                | 1946490321               |
| SNP_P3_109405_196228 | NW_004515763.1 | Scaffold227 | 196228                  | AA                              | CC                | 1946490322               |
| SNP_P3_109407_196384 | NW_004515763.1 | Scaffold227 | 196384                  | TT                              | AA                | 1946490324               |
| SNP_P3_109408_196445 | NW_004515763.1 | Scaffold227 | 196445                  | CC                              | TT                | 1946490325               |
| SNP_P3_109409_196469 | NW_004515763.1 | Scaffold227 | 196469                  | TT                              | CC                | 1946490326               |
| SNP_P3_109410_196496 | NW_004515763.1 | Scaffold227 | 196496                  | TT                              | CC                | 1946490328               |
| SNP_P3_109411_196583 | NW_004515763.1 | Scaffold227 | 196583                  | GG                              | AA                | 1946490329               |
| SNP_P3_109412_196801 | NW_004515763.1 | Scaffold227 | 196801                  | AA                              | GG                | 1946490331               |
| SNP_P3_109413_196838 | NW_004515763.1 | Scaffold227 | 196838                  | GG                              | AA                | 1946490332               |
| SNP_P3_109414_196840 | NW_004515763.1 | Scaffold227 | 196840                  | TT                              | GG                | 1946490334               |
| SNP_P3_109415_197139 | NW_004515763.1 | Scaffold227 | 197139                  | GG                              | AA                | 1946490335               |
| SNP_P3_109416_197296 | NW_004515763.1 | Scaffold227 | 197296                  | GG                              | AA                | 1946490337               |
| SNP_P3_109417_197349 | NW_004515763.1 | Scaffold227 | 197349                  | TT                              | CC                | 1946490338               |
| SNP_P3_109418_197397 | NW_004515763.1 | Scaffold227 | 197397                  | TT                              | CC                | 1946490340               |
| SNP_P3_109420_197493 | NW_004515763.1 | Scaffold227 | 197493                  | GG                              | AA                | 1946490341               |
| SNP_P3_109421_197506 | NW_004515763.1 | Scaffold227 | 197506                  | CC                              | TT                | 1946490343               |
| SNP_P3_109422_197552 | NW_004515763.1 | Scaffold227 | 197552                  | AA                              | TT                | 1946490344               |
| SNP_P3_109423_197575 | NW_004515763.1 | Scaffold227 | 197575                  | CC                              | TT                | 1946490346               |
| SNP_P3_109424_197615 | NW_004515763.1 | Scaffold227 | 197615                  | AA                              | CC                | 1946490347               |
| SNP_P3_109425_197630 | NW_004515763.1 | Scaffold227 | 197630                  | AA                              | GG                | 1946490348               |
| SNP_P3_109426_197633 | NW_004515763.1 | Scaffold227 | 197633                  | GG                              | AA                | 1946490350               |
| SNP_P3_109427_197727 | NW_004515763.1 | Scaffold227 | 197727                  | CC                              | GG                | 1946490351               |
| SNP_P3_109428_197730 | NW_004515763.1 | Scaffold227 | 197730                  | GG                              | TT                | 1946490353               |
| SNP_P3_109429_197747 | NW_004515763.1 | Scaffold227 | 197747                  | CC                              | TT                | 1946490354               |
| SNP_P3_109430_197792 | NW_004515763.1 | Scaffold227 | 197792                  | TT                              | AA                | 1946490356               |
| SNP_P3_109431_197937 | NW_004515763.1 | Scaffold227 | 197937                  | GG                              | CC                | 1946490357               |
| SNP_P3_109432_197954 | NW_004515763.1 | Scaffold227 | 197954                  | AA                              | GG                | 1946490359               |
| SNP_P3_109433_197988 | NW_004515763.1 | Scaffold227 | 197988                  | CC                              | AA                | 1946490360               |
| SNP_P3_109434_197989 | NW_004515763.1 | Scaffold227 | 197989                  | AA                              | GG                | 1946490362               |
| SNP_P3_109435_197997 | NW_004515763.1 | Scaffold227 | 197997                  | AA                              | CC                | 1946490363               |
| SNP_P3_109436_198003 | NW_004515763.1 | Scaffold227 | 198003                  | GG                              | CC                | 1946490365               |
| SNP_P3_109437_198012 | NW_004515763.1 | Scaffold227 | 198012                  | AA                              | CC                | 1946490366               |
| SNP_P3_109438_198046 | NW_004515763.1 | Scaffold227 | 198046                  | TT                              | CC                | 1946490368               |
| SNP_P3_109439_198137 | NW_004515763.1 | Scaffold227 | 198137                  | AA                              | GG                | 1946490369               |
| SNP_P3_109440_198148 | NW_004515763.1 | Scaffold227 | 198148                  | GG                              | AA                | 1946490371               |
| SNP_P3_109441_198185 | NW_004515763.1 | Scaffold227 | 198185                  | AA                              | CC                | 1946490372               |
| SNP_P3_109442_198192 | NW_004515763.1 | Scaffold227 | 198192                  | GG                              | AA                | 1946490374               |

| SNPs IDs             | Chromosome IDs | Chromosomes | Physical positions (bp) | CDC Frontier (Reference genome) | (Pusa 256 & HPNB) | NCBI SNPdb Accession IDs |
|----------------------|----------------|-------------|-------------------------|---------------------------------|-------------------|--------------------------|
| SNP_P3_109443_198218 | NW_004515763.1 | Scaffold227 | 198218                  | AA                              | GG                | 1946490375               |
| SNP_P3_109444_198386 | NW_004515763.1 | Scaffold227 | 198386                  | CC                              | TT                | 1946490377               |
| SNP_P3_109446_198402 | NW_004515763.1 | Scaffold227 | 198402                  | CC                              | TT                | 1946490378               |
| SNP_P3_109447_207449 | NW_004515763.1 | Scaffold227 | 207449                  | CC                              | TT                | 1946490379               |
| SNP_P3_109448_207450 | NW_004515763.1 | Scaffold227 | 207450                  | AA                              | CC                | 1946490381               |
| SNP_P3_109449_207451 | NW_004515763.1 | Scaffold227 | 207451                  | CC                              | AA                | 1946490382               |
| SNP_P3_109450_211220 | NW_004515763.1 | Scaffold227 | 211220                  | CC                              | TT                | 1946490384               |
| SNP_P3_109451_211248 | NW_004515763.1 | Scaffold227 | 211248                  | AA                              | TT                | 1946490385               |
| SNP_P3_109452_211253 | NW_004515763.1 | Scaffold227 | 211253                  | CC                              | AA                | 1946490387               |
| SNP_P3_109453_211671 | NW_004515763.1 | Scaffold227 | 211671                  | AA                              | GG                | 1946490388               |
| SNP_P3_109454_224844 | NW_004515763.1 | Scaffold227 | 224844                  | AA                              | GG                | 1946490390               |
| SNP_P3_109455_251220 | NW_004515763.1 | Scaffold227 | 251220                  | TT                              | CC                | 1946490391               |
| SNP_P3_109456_290478 | NW_004515763.1 | Scaffold227 | 290478                  | TT                              | CC                | 1946490393               |
| SNP_P3_109457_291111 | NW_004515763.1 | Scaffold227 | 291111                  | TT                              | CC                | 1946490394               |
| SNP_P3_109458_297484 | NW_004515763.1 | Scaffold227 | 297484                  | AA                              | GG                | 1946490396               |
| SNP_P3_109459_304524 | NW_004515763.1 | Scaffold227 | 304524                  | GG                              | CC                | 1946490397               |
| SNP_P3_109460_304606 | NW_004515763.1 | Scaffold227 | 304606                  | TT                              | AA                | 1946490399               |
| SNP_P3_109461_315113 | NW_004515763.1 | Scaffold227 | 315113                  | CC                              | TT                | 1946490400               |
| SNP_P3_109462_325095 | NW_004515763.1 | Scaffold227 | 325095                  | AA                              | GG                | 1946490402               |
| SNP_P3_109463_325220 | NW_004515763.1 | Scaffold227 | 325220                  | AA                              | GG                | 1946490403               |
| SNP_P3_109464_341426 | NW_004515763.1 | Scaffold227 | 341426                  | CC                              | AA                | 1946490404               |
| SNP_P3_109465_341460 | NW_004515763.1 | Scaffold227 | 341460                  | AA                              | GG                | 1946490406               |
| SNP_P3_109466_341462 | NW_004515763.1 | Scaffold227 | 341462                  | TT                              | CC                | 1946490407               |
| SNP_P3_109467_341468 | NW_004515763.1 | Scaffold227 | 341468                  | CC                              | TT                | 1946490409               |
| SNP_P3_109468_341899 | NW_004515763.1 | Scaffold227 | 341899                  | CC                              | TT                | 1946490410               |
| SNP_P3_109469_351291 | NW_004515763.1 | Scaffold227 | 351291                  | TT                              | AA                | 1946490412               |
| SNP_P3_109470_351510 | NW_004515763.1 | Scaffold227 | 351510                  | AA                              | GG                | 1946490413               |
| SNP_P3_109471_351803 | NW_004515763.1 | Scaffold227 | 351803                  | TT                              | AA                | 1946490415               |
| SNP_P3_109472_354933 | NW_004515763.1 | Scaffold227 | 354933                  | AA                              | CC                | 1946490416               |
| SNP_P3_109473_358796 | NW_004515763.1 | Scaffold227 | 358796                  | TT                              | CC                | 1946490418               |
| SNP_P3_109474_359237 | NW_004515763.1 | Scaffold227 | 359237                  | GG                              | CC                | 1946490419               |
| SNP_P3_109475_364992 | NW_004515763.1 | Scaffold227 | 364992                  | TT                              | AA                | 1946490421               |
| SNP_P3_109476_365218 | NW_004515763.1 | Scaffold227 | 365218                  | CC                              | TT                | 1946490422               |
| SNP_P3_109477_365245 | NW_004515763.1 | Scaffold227 | 365245                  | TT                              | CC                | 1946490424               |
| SNP_P3_109478_365283 | NW_004515763.1 | Scaffold227 | 365283                  | GG                              | TT                | 1946490425               |
| SNP_P3_109479_365301 | NW_004515763.1 | Scaffold227 | 365301                  | TT                              | CC                | 1946490427               |
| SNP_P3_109480_365303 | NW_004515763.1 | Scaffold227 | 365303                  | GG                              | AA                | 1946490428               |
| SNP_P3_109481_379079 | NW_004515763.1 | Scaffold227 | 379079                  | CC                              | TT                | 1946490429               |
| SNP_P3_109482_379097 | NW_004515763.1 | Scaffold227 | 379097                  | TT                              | CC                | 1946490431               |
| SNP_P3_109483_379614 | NW_004515763.1 | Scaffold227 | 379614                  | CC                              | AA                | 1946490432               |
| SNP_P3_109484_379653 | NW_004515763.1 | Scaffold227 | 379653                  | AA                              | GG                | 1946490434               |
| SNP_P3_109487_564    | NW_004515764.1 | Scaffold228 | 564                     | GG                              | TT                | 1946490435               |

| SNPs IDs             | Chromosome IDs | Chromosomes | Physical positions (bp) | CDC Frontier (Reference genome) | (Pusa 256 & HPNB) | NCBI SNPdb Accession IDs |
|----------------------|----------------|-------------|-------------------------|---------------------------------|-------------------|--------------------------|
| SNP_P3_109488_9539   | NW_004515764.1 | Scaffold228 | 9539                    | TT                              | CC                | 1946490437               |
| SNP_P3_109489_9589   | NW_004515764.1 | Scaffold228 | 9589                    | CC                              | TT                | 1946490438               |
| SNP_P3_109490_9631   | NW_004515764.1 | Scaffold228 | 9631                    | AA                              | CC                | 1946490440               |
| SNP_P3_109491_9637   | NW_004515764.1 | Scaffold228 | 9637                    | TT                              | GG                | 1946490441               |
| SNP_P3_109492_9905   | NW_004515764.1 | Scaffold228 | 9905                    | TT                              | AA                | 1946490443               |
| SNP_P3_109493_9929   | NW_004515764.1 | Scaffold228 | 9929                    | GG                              | TT                | 1946490444               |
| SNP_P3_109494_9945   | NW_004515764.1 | Scaffold228 | 9945                    | CC                              | TT                | 1946490445               |
| SNP_P3_109495_19405  | NW_004515764.1 | Scaffold228 | 19405                   | CC                              | TT                | 1946490447               |
| SNP_P3_109496_24882  | NW_004515764.1 | Scaffold228 | 24882                   | TT                              | GG                | 1946490448               |
| SNP_P3_109497_25038  | NW_004515764.1 | Scaffold228 | 25038                   | TT                              | AA                | 1946490450               |
| SNP_P3_109498_25118  | NW_004515764.1 | Scaffold228 | 25118                   | GG                              | AA                | 1946490451               |
| SNP_P3_109499_25124  | NW_004515764.1 | Scaffold228 | 25124                   | TT                              | AA                | 1946490453               |
| SNP_P3_109500_25399  | NW_004515764.1 | Scaffold228 | 25399                   | TT                              | CC                | 1946490454               |
| SNP_P3_109501_26046  | NW_004515764.1 | Scaffold228 | 26046                   | GG                              | AA                | 1946490456               |
| SNP_P3_109502_64646  | NW_004515764.1 | Scaffold228 | 64646                   | AA                              | GG                | 1946490457               |
| SNP_P3_109503_64676  | NW_004515764.1 | Scaffold228 | 64676                   | AA                              | GG                | 1946490459               |
| SNP_P3_109504_64716  | NW_004515764.1 | Scaffold228 | 64716                   | CC                              | TT                | 1946490460               |
| SNP_P3_109505_64719  | NW_004515764.1 | Scaffold228 | 64719                   | CC                              | AA                | 1946490462               |
| SNP_P3_109506_64741  | NW_004515764.1 | Scaffold228 | 64741                   | AA                              | GG                | 1946490463               |
| SNP_P3_109507_66130  | NW_004515764.1 | Scaffold228 | 66130                   | TT                              | CC                | 1946490464               |
| SNP_P3_109508_67979  | NW_004515764.1 | Scaffold228 | 67979                   | CC                              | TT                | 1946490466               |
| SNP_P3_109509_80106  | NW_004515764.1 | Scaffold228 | 80106                   | TT                              | CC                | 1946490467               |
| SNP_P3_109510_88701  | NW_004515764.1 | Scaffold228 | 88701                   | GG                              | TT                | 1946490469               |
| SNP_P3_109512_95524  | NW_004515764.1 | Scaffold228 | 95524                   | AA                              | GG                | 1946490470               |
| SNP_P3_109513_99466  | NW_004515764.1 | Scaffold228 | 99466                   | TT                              | CC                | 1946490472               |
| SNP_P3_109514_99470  | NW_004515764.1 | Scaffold228 | 99470                   | GG                              | TT                | 1946490473               |
| SNP_P3_109515_99494  | NW_004515764.1 | Scaffold228 | 99494                   | AA                              | GG                | 1946490474               |
| SNP_P3_109516_99535  | NW_004515764.1 | Scaffold228 | 99535                   | CC                              | GG                | 1946490476               |
| SNP_P3_109517_99546  | NW_004515764.1 | Scaffold228 | 99546                   | TT                              | CC                | 1946490477               |
| SNP_P3_109518_99579  | NW_004515764.1 | Scaffold228 | 99579                   | GG                              | AA                | 1946490479               |
| SNP_P3_109519_101606 | NW_004515764.1 | Scaffold228 | 101606                  | TT                              | CC                | 1946490480               |
| SNP_P3_109520_106259 | NW_004515764.1 | Scaffold228 | 106259                  | CC                              | TT                | 1946490482               |
| SNP_P3_109521_109108 | NW_004515764.1 | Scaffold228 | 109108                  | GG                              | TT                | 1946490483               |
| SNP_P3_109522_109447 | NW_004515764.1 | Scaffold228 | 109447                  | AA                              | TT                | 1946490485               |
| SNP_P3_109523_109454 | NW_004515764.1 | Scaffold228 | 109454                  | TT                              | AA                | 1946490486               |
| SNP_P3_109524_117125 | NW_004515764.1 | Scaffold228 | 117125                  | TT                              | CC                | 1946490487               |
| SNP_P3_109525_117411 | NW_004515764.1 | Scaffold228 | 117411                  | TT                              | CC                | 1946490489               |
| SNP_P3_109526_117431 | NW_004515764.1 | Scaffold228 | 117431                  | AA                              | GG                | 1946490490               |
| SNP_P3_109527_117653 | NW_004515764.1 | Scaffold228 | 117653                  | TT                              | CC                | 1946490492               |
| SNP_P3_109528_117740 | NW_004515764.1 | Scaffold228 | 117740                  | GG                              | AA                | 1946490493               |
| SNP_P3_109529_117755 | NW_004515764.1 | Scaffold228 | 117755                  | TT                              | CC                | 1946490495               |
| SNP_P3_109530_117759 | NW_004515764.1 | Scaffold228 | 117759                  | CC                              | TT                | 1946490496               |

| SNPs IDs             | Chromosome IDs | Chromosomes | Physical positions (bp) | CDC Frontier (Reference genome) | (Pusa 256 & HPNB) | NCBI SNPdb Accession IDs |
|----------------------|----------------|-------------|-------------------------|---------------------------------|-------------------|--------------------------|
| SNP_P3_109531_117853 | NW_004515764.1 | Scaffold228 | 117853                  | TT                              | GG                | 1946490498               |
| SNP_P3_109532_117858 | NW_004515764.1 | Scaffold228 | 117858                  | GG                              | CC                | 1946490499               |
| SNP_P3_109533_117892 | NW_004515764.1 | Scaffold228 | 117892                  | TT                              | CC                | 1946490500               |
| SNP_P3_109534_122102 | NW_004515764.1 | Scaffold228 | 122102                  | TT                              | AA                | 1946490502               |
| SNP_P3_109535_122206 | NW_004515764.1 | Scaffold228 | 122206                  | TT                              | CC                | 1946490503               |
| SNP_P3_109536_122232 | NW_004515764.1 | Scaffold228 | 122232                  | CC                              | GG                | 1946490505               |
| SNP_P3_109537_122238 | NW_004515764.1 | Scaffold228 | 122238                  | TT                              | GG                | 1946490506               |
| SNP_P3_109538_129753 | NW_004515764.1 | Scaffold228 | 129753                  | TT                              | GG                | 1946490508               |
| SNP_P3_109539_129781 | NW_004515764.1 | Scaffold228 | 129781                  | TT                              | CC                | 1946490509               |
| SNP_P3_109540_129803 | NW_004515764.1 | Scaffold228 | 129803                  | TT                              | CC                | 1946490510               |
| SNP_P3_109541_130163 | NW_004515764.1 | Scaffold228 | 130163                  | AA                              | GG                | 1946490512               |
| SNP_P3_109542_134117 | NW_004515764.1 | Scaffold228 | 134117                  | TT                              | AA                | 1946490513               |
| SNP_P3_109543_134736 | NW_004515764.1 | Scaffold228 | 134736                  | AA                              | TT                | 1946490515               |
| SNP_P3_109544_134747 | NW_004515764.1 | Scaffold228 | 134747                  | CC                              | TT                | 1946490516               |
| SNP_P3_109545_134758 | NW_004515764.1 | Scaffold228 | 134758                  | TT                              | CC                | 1946490518               |
| SNP_P3_109546_134913 | NW_004515764.1 | Scaffold228 | 134913                  | AA                              | GG                | 1946490519               |
| SNP_P3_109547_134945 | NW_004515764.1 | Scaffold228 | 134945                  | AA                              | TT                | 1946490520               |
| SNP_P3_109548_134996 | NW_004515764.1 | Scaffold228 | 134996                  | GG                              | CC                | 1946490522               |
| SNP_P3_109550_137304 | NW_004515764.1 | Scaffold228 | 137304                  | AA                              | GG                | 1946490523               |
| SNP_P3_109551_137435 | NW_004515764.1 | Scaffold228 | 137435                  | GG                              | CC                | 1946490525               |
| SNP_P3_109552_139440 | NW_004515764.1 | Scaffold228 | 139440                  | CC                              | AA                | 1946490526               |
| SNP_P3_109553_147527 | NW_004515764.1 | Scaffold228 | 147527                  | CC                              | AA                | 1946490528               |
| SNP_P3_109554_147575 | NW_004515764.1 | Scaffold228 | 147575                  | CC                              | TT                | 1946490529               |
| SNP_P3_109555_148304 | NW_004515764.1 | Scaffold228 | 148304                  | AA                              | TT                | 1946490530               |
| SNP_P3_109556_148325 | NW_004515764.1 | Scaffold228 | 148325                  | TT                              | CC                | 1946490532               |
| SNP_P3_109557_148540 | NW_004515764.1 | Scaffold228 | 148540                  | CC                              | TT                | 1946490533               |
| SNP_P3_109558_148544 | NW_004515764.1 | Scaffold228 | 148544                  | GG                              | AA                | 1946490535               |
| SNP_P3_109559_148623 | NW_004515764.1 | Scaffold228 | 148623                  | AA                              | TT                | 1946490536               |
| SNP_P3_109560_148633 | NW_004515764.1 | Scaffold228 | 148633                  | CC                              | TT                | 1946490538               |
| SNP_P3_109561_149616 | NW_004515764.1 | Scaffold228 | 149616                  | AA                              | CC                | 1946490539               |
| SNP_P3_109562_149713 | NW_004515764.1 | Scaffold228 | 149713                  | GG                              | CC                | 1946490541               |
| SNP_P3_109563_149762 | NW_004515764.1 | Scaffold228 | 149762                  | TT                              | CC                | 1946490542               |
| SNP_P3_109564_149927 | NW_004515764.1 | Scaffold228 | 149927                  | TT                              | CC                | 1946490544               |
| SNP_P3_109565_150194 | NW_004515764.1 | Scaffold228 | 150194                  | AA                              | GG                | 1946490545               |
| SNP_P3_109566_155091 | NW_004515764.1 | Scaffold228 | 155091                  | TT                              | CC                | 1946490547               |
| SNP_P3_109567_155458 | NW_004515764.1 | Scaffold228 | 155458                  | TT                              | CC                | 1946490548               |
| SNP_P3_109568_155720 | NW_004515764.1 | Scaffold228 | 155720                  | CC                              | TT                | 1946490550               |
| SNP_P3_109569_155721 | NW_004515764.1 | Scaffold228 | 155721                  | GG                              | AA                | 1946490551               |
| SNP_P3_109570_155774 | NW_004515764.1 | Scaffold228 | 155774                  | TT                              | CC                | 1946490552               |
| SNP_P3_109571_158320 | NW_004515764.1 | Scaffold228 | 158320                  | AA                              | GG                | 1946490554               |
| SNP_P3_109572_158370 | NW_004515764.1 | Scaffold228 | 158370                  | AA                              | GG                | 1946490555               |
| SNP_P3_109573_158371 | NW_004515764.1 | Scaffold228 | 158371                  | GG                              | CC                | 1946490557               |

| SNPs IDs             | Chromosome IDs | Chromosomes | Physical positions (bp) | CDC Frontier (Reference genome) | (Pusa 256 & HPNB) | NCBI SNPdb Accession IDs |
|----------------------|----------------|-------------|-------------------------|---------------------------------|-------------------|--------------------------|
| SNP_P3_109574_158372 | NW_004515764.1 | Scaffold228 | 158372                  | AA                              | CC                | 1946490558               |
| SNP_P3_109575_160373 | NW_004515764.1 | Scaffold228 | 160373                  | AA                              | GG                | 1946490560               |
| SNP_P3_109576_160379 | NW_004515764.1 | Scaffold228 | 160379                  | AA                              | CC                | 1946490561               |
| SNP_P3_109577_160387 | NW_004515764.1 | Scaffold228 | 160387                  | AA                              | GG                | 1946490563               |
| SNP_P3_109578_160393 | NW_004515764.1 | Scaffold228 | 160393                  | AA                              | TT                | 1946490564               |
| SNP_P3_109579_160397 | NW_004515764.1 | Scaffold228 | 160397                  | AA                              | TT                | 1946490566               |
| SNP_P3_109580_160783 | NW_004515764.1 | Scaffold228 | 160783                  | AA                              | GG                | 1946490567               |
| SNP_P3_109581_160806 | NW_004515764.1 | Scaffold228 | 160806                  | AA                              | TT                | 1946490569               |
| SNP_P3_109582_164718 | NW_004515764.1 | Scaffold228 | 164718                  | CC                              | TT                | 1946490570               |
| SNP_P3_109583_164733 | NW_004515764.1 | Scaffold228 | 164733                  | AA                              | TT                | 1946490572               |
| SNP_P3_109584_164800 | NW_004515764.1 | Scaffold228 | 164800                  | CC                              | TT                | 1946490573               |
| SNP_P3_109585_164801 | NW_004515764.1 | Scaffold228 | 164801                  | CC                              | AA                | 1946490575               |
| SNP_P3_109586_164805 | NW_004515764.1 | Scaffold228 | 164805                  | GG                              | AA                | 1946490576               |
| SNP_P3_109587_164891 | NW_004515764.1 | Scaffold228 | 164891                  | CC                              | TT                | 1946490578               |
| SNP_P3_109588_164908 | NW_004515764.1 | Scaffold228 | 164908                  | CC                              | TT                | 1946490579               |
| SNP_P3_109589_164910 | NW_004515764.1 | Scaffold228 | 164910                  | AA                              | GG                | 1946490580               |
| SNP_P3_109590_164932 | NW_004515764.1 | Scaffold228 | 164932                  | GG                              | TT                | 1946490582               |
| SNP_P3_109591_164936 | NW_004515764.1 | Scaffold228 | 164936                  | AA                              | GG                | 1946490583               |
| SNP_P3_109592_165013 | NW_004515764.1 | Scaffold228 | 165013                  | AA                              | GG                | 1946490585               |
| SNP_P3_109593_165049 | NW_004515764.1 | Scaffold228 | 165049                  | AA                              | GG                | 1946490586               |
| SNP_P3_109594_165240 | NW_004515764.1 | Scaffold228 | 165240                  | AA                              | GG                | 1946490588               |
| SNP_P3_109595_174503 | NW_004515764.1 | Scaffold228 | 174503                  | AA                              | TT                | 1946490589               |
| SNP_P3_109596_174526 | NW_004515764.1 | Scaffold228 | 174526                  | TT                              | AA                | 1946490591               |
| SNP_P3_109597_174801 | NW_004515764.1 | Scaffold228 | 174801                  | CC                              | TT                | 1946490592               |
| SNP_P3_109598_175266 | NW_004515764.1 | Scaffold228 | 175266                  | AA                              | TT                | 1946490594               |
| SNP_P3_109599_175367 | NW_004515764.1 | Scaffold228 | 175367                  | TT                              | GG                | 1946490595               |
| SNP_P3_109600_175369 | NW_004515764.1 | Scaffold228 | 175369                  | CC                              | TT                | 1946490597               |
| SNP_P3_109601_176107 | NW_004515764.1 | Scaffold228 | 176107                  | AA                              | GG                | 1946490598               |
| SNP_P3_109602_176157 | NW_004515764.1 | Scaffold228 | 176157                  | CC                              | TT                | 1946490600               |
| SNP_P3_109603_176165 | NW_004515764.1 | Scaffold228 | 176165                  | AA                              | CC                | 1946490601               |
| SNP_P3_109604_176299 | NW_004515764.1 | Scaffold228 | 176299                  | AA                              | GG                | 1946490603               |
| SNP_P3_109605_176412 | NW_004515764.1 | Scaffold228 | 176412                  | CC                              | TT                | 1946490604               |
| SNP_P3_109606_176446 | NW_004515764.1 | Scaffold228 | 176446                  | AA                              | GG                | 1946490606               |
| SNP_P3_109607_176671 | NW_004515764.1 | Scaffold228 | 176671                  | TT                              | AA                | 1946490607               |
| SNP_P3_109609_177650 | NW_004515764.1 | Scaffold228 | 177650                  | TT                              | CC                | 1946490608               |
| SNP_P3_109610_177819 | NW_004515764.1 | Scaffold228 | 177819                  | AA                              | GG                | 1946490610               |
| SNP_P3_109611_177977 | NW_004515764.1 | Scaffold228 | 177977                  | GG                              | AA                | 1946490611               |
| SNP_P3_109612_178008 | NW_004515764.1 | Scaffold228 | 178008                  | CC                              | TT                | 1946490613               |
| SNP_P3_109613_178032 | NW_004515764.1 | Scaffold228 | 178032                  | CC                              | AA                | 1946490614               |
| SNP_P3_109614_178072 | NW_004515764.1 | Scaffold228 | 178072                  | GG                              | AA                | 1946490616               |
| SNP_P3_109615_178123 | NW_004515764.1 | Scaffold228 | 178123                  | CC                              | TT                | 1946490617               |
| SNP_P3_109616_178147 | NW_004515764.1 | Scaffold228 | 178147                  | GG                              | AA                | 1946490619               |

| SNPs IDs             | Chromosome IDs | Chromosomes | Physical positions (bp) | CDC Frontier (Reference genome) | (Pusa 256 & HPNB) | NCBI SNPdb Accession IDs |
|----------------------|----------------|-------------|-------------------------|---------------------------------|-------------------|--------------------------|
| SNP_P3_109617_178664 | NW_004515764.1 | Scaffold228 | 178664                  | AA                              | GG                | 1946490620               |
| SNP_P3_109618_179315 | NW_004515764.1 | Scaffold228 | 179315                  | TT                              | CC                | 1946490622               |
| SNP_P3_109619_179320 | NW_004515764.1 | Scaffold228 | 179320                  | AA                              | GG                | 1946490623               |
| SNP_P3_109620_179369 | NW_004515764.1 | Scaffold228 | 179369                  | TT                              | CC                | 1946490625               |
| SNP_P3_109621_179441 | NW_004515764.1 | Scaffold228 | 179441                  | TT                              | CC                | 1946490626               |
| SNP_P3_109622_179503 | NW_004515764.1 | Scaffold228 | 179503                  | TT                              | CC                | 1946490628               |
| SNP_P3_109623_179545 | NW_004515764.1 | Scaffold228 | 179545                  | GG                              | CC                | 1946490629               |
| SNP_P3_109624_179636 | NW_004515764.1 | Scaffold228 | 179636                  | TT                              | CC                | 1946490630               |
| SNP_P3_109625_179669 | NW_004515764.1 | Scaffold228 | 179669                  | AA                              | TT                | 1946490632               |
| SNP_P3_109626_179914 | NW_004515764.1 | Scaffold228 | 179914                  | GG                              | CC                | 1946490633               |
| SNP_P3_109627_179919 | NW_004515764.1 | Scaffold228 | 179919                  | CC                              | TT                | 1946490635               |
| SNP_P3_109628_179925 | NW_004515764.1 | Scaffold228 | 179925                  | CC                              | AA                | 1946490636               |
| SNP_P3_109629_179946 | NW_004515764.1 | Scaffold228 | 179946                  | TT                              | CC                | 1946490638               |
| SNP_P3_109630_179976 | NW_004515764.1 | Scaffold228 | 179976                  | TT                              | GG                | 1946490639               |
| SNP_P3_109631_180084 | NW_004515764.1 | Scaffold228 | 180084                  | GG                              | AA                | 1946490641               |
| SNP_P3_109632_180110 | NW_004515764.1 | Scaffold228 | 180110                  | TT                              | GG                | 1946490642               |
| SNP_P3_109633_180164 | NW_004515764.1 | Scaffold228 | 180164                  | AA                              | GG                | 1946490644               |
| SNP_P3_109634_180502 | NW_004515764.1 | Scaffold228 | 180502                  | AA                              | GG                | 1946490645               |
| SNP_P3_109635_180579 | NW_004515764.1 | Scaffold228 | 180579                  | TT                              | GG                | 1946490647               |
| SNP_P3_109636_180786 | NW_004515764.1 | Scaffold228 | 180786                  | TT                              | CC                | 1946490648               |
| SNP_P3_109638_183591 | NW_004515764.1 | Scaffold228 | 183591                  | CC                              | AA                | 1946490650               |
| SNP_P3_109639_184374 | NW_004515764.1 | Scaffold228 | 184374                  | AA                              | GG                | 1946490652               |
| SNP_P3_109640_184391 | NW_004515764.1 | Scaffold228 | 184391                  | AA                              | TT                | 1946490653               |
| SNP_P3_109641_185410 | NW_004515764.1 | Scaffold228 | 185410                  | TT                              | CC                | 1946490655               |
| SNP_P3_109642_185551 | NW_004515764.1 | Scaffold228 | 185551                  | AA                              | GG                | 1946490656               |
| SNP_P3_109643_185807 | NW_004515764.1 | Scaffold228 | 185807                  | GG                              | CC                | 1946490658               |
| SNP_P3_109644_185822 | NW_004515764.1 | Scaffold228 | 185822                  | CC                              | AA                | 1946490659               |
| SNP_P3_109645_185914 | NW_004515764.1 | Scaffold228 | 185914                  | TT                              | AA                | 1946490661               |
| SNP_P3_109646_186223 | NW_004515764.1 | Scaffold228 | 186223                  | CC                              | TT                | 1946490662               |
| SNP_P3_109647_186254 | NW_004515764.1 | Scaffold228 | 186254                  | GG                              | CC                | 1946490663               |
| SNP_P3_109648_186708 | NW_004515764.1 | Scaffold228 | 186708                  | AA                              | CC                | 1946490665               |
| SNP_P3_109649_186756 | NW_004515764.1 | Scaffold228 | 186756                  | AA                              | GG                | 1946490666               |
| SNP_P3_109650_187077 | NW_004515764.1 | Scaffold228 | 187077                  | AA                              | GG                | 1946490668               |
| SNP_P3_109651_187911 | NW_004515764.1 | Scaffold228 | 187911                  | GG                              | AA                | 1946490669               |
| SNP_P3_109652_188143 | NW_004515764.1 | Scaffold228 | 188143                  | TT                              | CC                | 1946490671               |
| SNP_P3_109653_188269 | NW_004515764.1 | Scaffold228 | 188269                  | AA                              | CC                | 1946490672               |
| SNP_P3_109654_188400 | NW_004515764.1 | Scaffold228 | 188400                  | GG                              | AA                | 1946490674               |
| SNP_P3_109655_188442 | NW_004515764.1 | Scaffold228 | 188442                  | GG                              | AA                | 1946490675               |
| SNP_P3_109656_188492 | NW_004515764.1 | Scaffold228 | 188492                  | GG                              | AA                | 1946490677               |
| SNP_P3_109657_188553 | NW_004515764.1 | Scaffold228 | 188553                  | CC                              | TT                | 1946490678               |
| SNP_P3_109658_188645 | NW_004515764.1 | Scaffold228 | 188645                  | TT                              | GG                | 1946490680               |
| SNP_P3_109659_188740 | NW_004515764.1 | Scaffold228 | 188740                  | GG                              | AA                | 1946490681               |

| SNPs IDs             | Chromosome IDs | Chromosomes | Physical positions (bp) | CDC Frontier (Reference genome) | (Pusa 256 & HPNB) | NCBI SNPdb Accession IDs |
|----------------------|----------------|-------------|-------------------------|---------------------------------|-------------------|--------------------------|
| SNP_P3_109660_188744 | NW_004515764.1 | Scaffold228 | 188744                  | CC                              | GG                | 1946490683               |
| SNP_P3_109661_188746 | NW_004515764.1 | Scaffold228 | 188746                  | AA                              | CC                | 1946490684               |
| SNP_P3_109662_188799 | NW_004515764.1 | Scaffold228 | 188799                  | TT                              | AA                | 1946490686               |
| SNP_P3_109663_188825 | NW_004515764.1 | Scaffold228 | 188825                  | TT                              | CC                | 1946490687               |
| SNP_P3_109664_188885 | NW_004515764.1 | Scaffold228 | 188885                  | CC                              | TT                | 1946490689               |
| SNP_P3_109665_188891 | NW_004515764.1 | Scaffold228 | 188891                  | GG                              | AA                | 1946490690               |
| SNP_P3_109666_189159 | NW_004515764.1 | Scaffold228 | 189159                  | GG                              | AA                | 1946490692               |
| SNP_P3_109667_189167 | NW_004515764.1 | Scaffold228 | 189167                  | GG                              | CC                | 1946490693               |
| SNP_P3_109668_189372 | NW_004515764.1 | Scaffold228 | 189372                  | TT                              | CC                | 1946490695               |
| SNP_P3_109669_196897 | NW_004515764.1 | Scaffold228 | 196897                  | GG                              | CC                | 1946490696               |
| SNP_P3_109670_2237   | NW_004515765.1 | Scaffold229 | 2237                    | CC                              | TT                | 1946490698               |
| SNP_P3_109671_16547  | NW_004515765.1 | Scaffold229 | 16547                   | TT                              | CC                | 1946490699               |
| SNP_P3_109672_19885  | NW_004515765.1 | Scaffold229 | 19885                   | GG                              | AA                | 1946490701               |
| SNP_P3_109673_20004  | NW_004515765.1 | Scaffold229 | 20004                   | GG                              | AA                | 1946490702               |
| SNP_P3_109674_20112  | NW_004515765.1 | Scaffold229 | 20112                   | TT                              | CC                | 1946490704               |
| SNP_P3_109675_21805  | NW_004515765.1 | Scaffold229 | 21805                   | CC                              | TT                | 1946490705               |
| SNP_P3_109676_24574  | NW_004515765.1 | Scaffold229 | 24574                   | AA                              | GG                | 1946490707               |
| SNP_P3_109677_30863  | NW_004515765.1 | Scaffold229 | 30863                   | GG                              | AA                | 1946490708               |
| SNP_P3_109678_30886  | NW_004515765.1 | Scaffold229 | 30886                   | AA                              | GG                | 1946490710               |
| SNP_P3_109679_33781  | NW_004515765.1 | Scaffold229 | 33781                   | AA                              | GG                | 1946490711               |
| SNP_P3_109680_33894  | NW_004515765.1 | Scaffold229 | 33894                   | TT                              | CC                | 1946490712               |
| SNP_P3_109681_34054  | NW_004515765.1 | Scaffold229 | 34054                   | CC                              | TT                | 1946490714               |
| SNP_P3_109682_34092  | NW_004515765.1 | Scaffold229 | 34092                   | GG                              | AA                | 1946490715               |
| SNP_P3_109683_34094  | NW_004515765.1 | Scaffold229 | 34094                   | AA                              | CC                | 1946490717               |
| SNP_P3_109684_37095  | NW_004515765.1 | Scaffold229 | 37095                   | GG                              | CC                | 1946490718               |
| SNP_P3_109686_45665  | NW_004515765.1 | Scaffold229 | 45665                   | AA                              | TT                | 1946490720               |
| SNP_P3_109687_45673  | NW_004515765.1 | Scaffold229 | 45673                   | AA                              | TT                | 1946490721               |
| SNP_P3_109688_47435  | NW_004515765.1 | Scaffold229 | 47435                   | AA                              | CC                | 1946490723               |
| SNP_P3_109689_47482  | NW_004515765.1 | Scaffold229 | 47482                   | GG                              | TT                | 1946490724               |
| SNP_P3_109690_47505  | NW_004515765.1 | Scaffold229 | 47505                   | TT                              | CC                | 1946490726               |
| SNP_P3_109691_48797  | NW_004515765.1 | Scaffold229 | 48797                   | CC                              | AA                | 1946490727               |
| SNP_P3_109692_48804  | NW_004515765.1 | Scaffold229 | 48804                   | AA                              | TT                | 1946490729               |
| SNP_P3_109693_48840  | NW_004515765.1 | Scaffold229 | 48840                   | AA                              | GG                | 1946490730               |
| SNP_P3_109694_48885  | NW_004515765.1 | Scaffold229 | 48885                   | AA                              | GG                | 1946490731               |
| SNP_P3_109695_49137  | NW_004515765.1 | Scaffold229 | 49137                   | TT                              | AA                | 1946490733               |
| SNP_P3_109696_53139  | NW_004515765.1 | Scaffold229 | 53139                   | TT                              | AA                | 1946490734               |
| SNP_P3_109697_53158  | NW_004515765.1 | Scaffold229 | 53158                   | CC                              | TT                | 1946490736               |
| SNP_P3_109698_53462  | NW_004515765.1 | Scaffold229 | 53462                   | GG                              | TT                | 1946490737               |
| SNP_P3_109699_64196  | NW_004515765.1 | Scaffold229 | 64196                   | AA                              | GG                | 1946490739               |
| SNP_P3_109700_75572  | NW_004515765.1 | Scaffold229 | 75572                   | AA                              | GG                | 1946490740               |
| SNP_P3_109701_75588  | NW_004515765.1 | Scaffold229 | 75588                   | GG                              | AA                | 1946490742               |
| SNP_P3_109702_75874  | NW_004515765.1 | Scaffold229 | 75874                   | CC                              | TT                | 1946490743               |

| SNPs IDs             | Chromosome IDs | Chromosomes | Physical positions (bp) | CDC Frontier (Reference genome) | (Pusa 256 & HPNB) | NCBI SNPdb Accession IDs |
|----------------------|----------------|-------------|-------------------------|---------------------------------|-------------------|--------------------------|
| SNP_P3_109703_75908  | NW_004515765.1 | Scaffold229 | 75908                   | CC                              | GG                | 1946490745               |
| SNP_P3_109704_75923  | NW_004515765.1 | Scaffold229 | 75923                   | AA                              | TT                | 1946490746               |
| SNP_P3_109705_75935  | NW_004515765.1 | Scaffold229 | 75935                   | CC                              | AA                | 1946490748               |
| SNP_P3_109706_82015  | NW_004515765.1 | Scaffold229 | 82015                   | AA                              | CC                | 1946490749               |
| SNP_P3_109707_82018  | NW_004515765.1 | Scaffold229 | 82018                   | TT                              | CC                | 1946490751               |
| SNP_P3_109708_82083  | NW_004515765.1 | Scaffold229 | 82083                   | AA                              | GG                | 1946490752               |
| SNP_P3_109709_82193  | NW_004515765.1 | Scaffold229 | 82193                   | GG                              | CC                | 1946490754               |
| SNP_P3_109710_82226  | NW_004515765.1 | Scaffold229 | 82226                   | TT                              | CC                | 1946490755               |
| SNP_P3_109711_82356  | NW_004515765.1 | Scaffold229 | 82356                   | AA                              | GG                | 1946490757               |
| SNP_P3_109712_82625  | NW_004515765.1 | Scaffold229 | 82625                   | AA                              | CC                | 1946490758               |
| SNP_P3_109713_82648  | NW_004515765.1 | Scaffold229 | 82648                   | CC                              | AA                | 1946490760               |
| SNP_P3_109714_82651  | NW_004515765.1 | Scaffold229 | 82651                   | AA                              | GG                | 1946490761               |
| SNP_P3_109715_82677  | NW_004515765.1 | Scaffold229 | 82677                   | CC                              | TT                | 1946490763               |
| SNP_P3_109716_82688  | NW_004515765.1 | Scaffold229 | 82688                   | GG                              | AA                | 1946490764               |
| SNP_P3_109717_82693  | NW_004515765.1 | Scaffold229 | 82693                   | CC                              | TT                | 1946490765               |
| SNP_P3_109718_82694  | NW_004515765.1 | Scaffold229 | 82694                   | AA                              | GG                | 1946490768               |
| SNP_P3_109719_82698  | NW_004515765.1 | Scaffold229 | 82698                   | CC                              | TT                | 1946490769               |
| SNP_P3_109720_82707  | NW_004515765.1 | Scaffold229 | 82707                   | GG                              | AA                | 1946490771               |
| SNP_P3_109721_83991  | NW_004515765.1 | Scaffold229 | 83991                   | AA                              | TT                | 1946490772               |
| SNP_P3_109722_84996  | NW_004515765.1 | Scaffold229 | 84996                   | TT                              | GG                | 1946490774               |
| SNP_P3_109723_85147  | NW_004515765.1 | Scaffold229 | 85147                   | AA                              | TT                | 1946490775               |
| SNP_P3_109725_91985  | NW_004515765.1 | Scaffold229 | 91985                   | TT                              | AA                | 1946490777               |
| SNP_P3_109726_97594  | NW_004515765.1 | Scaffold229 | 97594                   | CC                              | TT                | 1946490778               |
| SNP_P3_109727_97729  | NW_004515765.1 | Scaffold229 | 97729                   | GG                              | AA                | 1946490780               |
| SNP_P3_109728_97864  | NW_004515765.1 | Scaffold229 | 97864                   | AA                              | CC                | 1946490781               |
| SNP_P3_109729_97876  | NW_004515765.1 | Scaffold229 | 97876                   | GG                              | AA                | 1946490783               |
| SNP_P3_109730_102931 | NW_004515765.1 | Scaffold229 | 102931                  | TT                              | CC                | 1946490784               |
| SNP_P3_109731_102997 | NW_004515765.1 | Scaffold229 | 102997                  | AA                              | CC                | 1946490786               |
| SNP_P3_109732_103011 | NW_004515765.1 | Scaffold229 | 103011                  | GG                              | AA                | 1946490787               |
| SNP_P3_109733_103192 | NW_004515765.1 | Scaffold229 | 103192                  | TT                              | AA                | 1946490789               |
| SNP_P3_109734_106378 | NW_004515765.1 | Scaffold229 | 106378                  | AA                              | TT                | 1946490790               |
| SNP_P3_109735_106380 | NW_004515765.1 | Scaffold229 | 106380                  | CC                              | AA                | 1946490792               |
| SNP_P3_109736_106381 | NW_004515765.1 | Scaffold229 | 106381                  | GG                              | AA                | 1946490793               |
| SNP_P3_109737_106392 | NW_004515765.1 | Scaffold229 | 106392                  | GG                              | AA                | 1946490795               |
| SNP_P3_109738_106403 | NW_004515765.1 | Scaffold229 | 106403                  | AA                              | GG                | 1946490796               |
| SNP_P3_109739_106404 | NW_004515765.1 | Scaffold229 | 106404                  | CC                              | AA                | 1946490798               |
| SNP_P3_109740_106407 | NW_004515765.1 | Scaffold229 | 106407                  | CC                              | TT                | 1946490799               |
| SNP_P3_109741_106427 | NW_004515765.1 | Scaffold229 | 106427                  | TT                              | GG                | 1946490801               |
| SNP_P3_109742_106430 | NW_004515765.1 | Scaffold229 | 106430                  | GG                              | AA                | 1946490802               |
| SNP_P3_109743_106462 | NW_004515765.1 | Scaffold229 | 106462                  | TT                              | GG                | 1946490804               |
| SNP_P3_109744_114183 | NW_004515765.1 | Scaffold229 | 114183                  | TT                              | CC                | 1946490805               |
| SNP_P3_109745_114231 | NW_004515765.1 | Scaffold229 | 114231                  | TT                              | CC                | 1946490807               |



| SNPs IDs             | Chromosome IDs | Chromosomes | Physical positions (bp) | CDC Frontier (Reference genome) | (Pusa 256 & HPNB) | NCBI SNPdb Accession IDs |
|----------------------|----------------|-------------|-------------------------|---------------------------------|-------------------|--------------------------|
| SNP_P3_109746_114591 | NW_004515765.1 | Scaffold229 | 114591                  | CC                              | AA                | 1946490808               |
| SNP_P3_109747_114628 | NW_004515765.1 | Scaffold229 | 114628                  | AA                              | CC                | 1946490809               |
| SNP_P3_109748_114636 | NW_004515765.1 | Scaffold229 | 114636                  | CC                              | GG                | 1946490811               |
| SNP_P3_109749_114638 | NW_004515765.1 | Scaffold229 | 114638                  | GG                              | CC                | 1946490812               |
| SNP_P3_109750_114645 | NW_004515765.1 | Scaffold229 | 114645                  | TT                              | GG                | 1946490814               |
| SNP_P3_109751_114689 | NW_004515765.1 | Scaffold229 | 114689                  | CC                              | AA                | 1946490815               |
| SNP_P3_109752_115917 | NW_004515765.1 | Scaffold229 | 115917                  | CC                              | GG                | 1946490817               |
| SNP_P3_109753_121482 | NW_004515765.1 | Scaffold229 | 121482                  | GG                              | AA                | 1946490818               |
| SNP_P3_109754_126420 | NW_004515765.1 | Scaffold229 | 126420                  | TT                              | AA                | 1946490819               |
| SNP_P3_109755_128507 | NW_004515765.1 | Scaffold229 | 128507                  | AA                              | GG                | 1946490821               |
| SNP_P3_109756_136050 | NW_004515765.1 | Scaffold229 | 136050                  | TT                              | GG                | 1946490822               |
| SNP_P3_109757_139628 | NW_004515765.1 | Scaffold229 | 139628                  | GG                              | AA                | 1946490824               |
| SNP_P3_109758_141164 | NW_004515765.1 | Scaffold229 | 141164                  | GG                              | AA                | 1946490825               |
| SNP_P3_109759_156314 | NW_004515765.1 | Scaffold229 | 156314                  | AA                              | CC                | 1946490827               |
| SNP_P3_109760_156642 | NW_004515765.1 | Scaffold229 | 156642                  | CC                              | AA                | 1946490828               |
| SNP_P3_109761_157705 | NW_004515765.1 | Scaffold229 | 157705                  | AA                              | CC                | 1946490830               |
| SNP_P3_109762_157874 | NW_004515765.1 | Scaffold229 | 157874                  | GG                              | AA                | 1946490831               |
| SNP_P3_109763_157926 | NW_004515765.1 | Scaffold229 | 157926                  | GG                              | TT                | 1946490832               |
| SNP_P3_109764_160531 | NW_004515765.1 | Scaffold229 | 160531                  | GG                              | TT                | 1946490834               |
| SNP_P3_109765_160789 | NW_004515765.1 | Scaffold229 | 160789                  | AA                              | GG                | 1946490835               |
| SNP_P3_109766_64     | NW_004515766.1 | Scaffold231 | 64                      | GG                              | TT                | 1946490837               |
| SNP_P3_109767_68     | NW_004515766.1 | Scaffold231 | 68                      | TT                              | AA                | 1946490838               |
| SNP_P3_109768_309    | NW_004515766.1 | Scaffold231 | 309                     | AA                              | CC                | 1946490840               |
| SNP_P3_109769_328    | NW_004515766.1 | Scaffold231 | 328                     | TT                              | CC                | 1946490841               |
| SNP_P3_109770_10331  | NW_004515766.1 | Scaffold231 | 10331                   | CC                              | GG                | 1946490842               |
| SNP_P3_109771_10428  | NW_004515766.1 | Scaffold231 | 10428                   | TT                              | AA                | 1946490844               |
| SNP_P3_109772_10441  | NW_004515766.1 | Scaffold231 | 10441                   | TT                              | CC                | 1946490845               |
| SNP_P3_109773_10442  | NW_004515766.1 | Scaffold231 | 10442                   | GG                              | AA                | 1946490847               |
| SNP_P3_109774_16616  | NW_004515766.1 | Scaffold231 | 16616                   | CC                              | TT                | 1946490848               |
| SNP_P3_109775_17248  | NW_004515766.1 | Scaffold231 | 17248                   | AA                              | TT                | 1946490850               |
| SNP_P3_109777_23900  | NW_004515766.1 | Scaffold231 | 23900                   | CC                              | TT                | 1946490851               |
| SNP_P3_109778_1297   | NW_004515768.1 | Scaffold233 | 1297                    | TT                              | CC                | 1946490853               |
| SNP_P3_109779_2518   | NW_004515768.1 | Scaffold233 | 2518                    | TT                              | CC                | 1946490854               |
| SNP_P3_109780_2522   | NW_004515768.1 | Scaffold233 | 2522                    | TT                              | CC                | 1946490856               |
| SNP_P3_109781_26438  | NW_004515769.1 | Scaffold235 | 26438                   | GG                              | AA                | 1946490857               |
| SNP_P3_109782_26807  | NW_004515769.1 | Scaffold235 | 26807                   | TT                              | CC                | 1946490859               |
| SNP_P3_109783_41785  | NW_004515769.1 | Scaffold235 | 41785                   | TT                              | AA                | 1946490860               |
| SNP_P3_109785_41803  | NW_004515769.1 | Scaffold235 | 41803                   | GG                              | TT                | 1946490861               |
| SNP_P3_109786_42137  | NW_004515769.1 | Scaffold235 | 42137                   | AA                              | CC                | 1946490863               |
| SNP_P3_109787_42146  | NW_004515769.1 | Scaffold235 | 42146                   | CC                              | AA                | 1946490864               |
| SNP_P3_109788_45475  | NW_004515769.1 | Scaffold235 | 45475                   | TT                              | CC                | 1946490866               |
| SNP_P3_109789_46066  | NW_004515769.1 | Scaffold235 | 46066                   | CC                              | AA                | 1946490867               |

| SNPs IDs             | Chromosome IDs | Chromosomes | Physical positions (bp) | CDC Frontier (Reference genome) | (Pusa 256 & HPNB) | NCBI SNPdb Accession IDs |
|----------------------|----------------|-------------|-------------------------|---------------------------------|-------------------|--------------------------|
| SNP_P3_109790_46954  | NW_004515769.1 | Scaffold235 | 46954                   | GG                              | AA                | 1946490869               |
| SNP_P3_109791_47060  | NW_004515769.1 | Scaffold235 | 47060                   | GG                              | AA                | 1946490870               |
| SNP_P3_109792_47067  | NW_004515769.1 | Scaffold235 | 47067                   | AA                              | CC                | 1946490871               |
| SNP_P3_109793_47090  | NW_004515769.1 | Scaffold235 | 47090                   | AA                              | GG                | 1946490873               |
| SNP_P3_109794_47146  | NW_004515769.1 | Scaffold235 | 47146                   | AA                              | GG                | 1946490874               |
| SNP_P3_109795_47181  | NW_004515769.1 | Scaffold235 | 47181                   | AA                              | TT                | 1946490876               |
| SNP_P3_109796_47307  | NW_004515769.1 | Scaffold235 | 47307                   | TT                              | CC                | 1946490877               |
| SNP_P3_109797_47313  | NW_004515769.1 | Scaffold235 | 47313                   | AA                              | GG                | 1946490879               |
| SNP_P3_109798_47320  | NW_004515769.1 | Scaffold235 | 47320                   | AA                              | TT                | 1946490880               |
| SNP_P3_109799_47329  | NW_004515769.1 | Scaffold235 | 47329                   | AA                              | TT                | 1946490881               |
| SNP_P3_109800_48003  | NW_004515769.1 | Scaffold235 | 48003                   | CC                              | TT                | 1946490883               |
| SNP_P3_109801_48023  | NW_004515769.1 | Scaffold235 | 48023                   | AA                              | CC                | 1946490884               |
| SNP_P3_109802_48084  | NW_004515769.1 | Scaffold235 | 48084                   | AA                              | GG                | 1946490886               |
| SNP_P3_109803_48296  | NW_004515769.1 | Scaffold235 | 48296                   | TT                              | AA                | 1946490887               |
| SNP_P3_109804_48321  | NW_004515769.1 | Scaffold235 | 48321                   | TT                              | AA                | 1946490889               |
| SNP_P3_109805_59484  | NW_004515769.1 | Scaffold235 | 59484                   | GG                              | TT                | 1946490890               |
| SNP_P3_109806_59486  | NW_004515769.1 | Scaffold235 | 59486                   | TT                              | GG                | 1946490892               |
| SNP_P3_109807_60153  | NW_004515769.1 | Scaffold235 | 60153                   | TT                              | AA                | 1946490893               |
| SNP_P3_109808_60191  | NW_004515769.1 | Scaffold235 | 60191                   | TT                              | GG                | 1946490894               |
| SNP_P3_109809_60200  | NW_004515769.1 | Scaffold235 | 60200                   | TT                              | CC                | 1946490896               |
| SNP_P3_109810_60207  | NW_004515769.1 | Scaffold235 | 60207                   | TT                              | CC                | 1946490897               |
| SNP_P3_109811_60607  | NW_004515769.1 | Scaffold235 | 60607                   | CC                              | TT                | 1946490899               |
| SNP_P3_109812_101181 | NW_004515769.1 | Scaffold235 | 101181                  | GG                              | AA                | 1946490900               |
| SNP_P3_109813_101225 | NW_004515769.1 | Scaffold235 | 101225                  | CC                              | TT                | 1946490902               |
| SNP_P3_109814_101236 | NW_004515769.1 | Scaffold235 | 101236                  | GG                              | AA                | 1946490903               |
| SNP_P3_109815_101259 | NW_004515769.1 | Scaffold235 | 101259                  | GG                              | AA                | 1946490905               |
| SNP_P3_109816_135203 | NW_004515769.1 | Scaffold235 | 135203                  | TT                              | CC                | 1946490906               |
| SNP_P3_109817_143697 | NW_004515769.1 | Scaffold235 | 143697                  | TT                              | GG                | 1946490907               |
| SNP_P3_109818_143698 | NW_004515769.1 | Scaffold235 | 143698                  | AA                              | GG                | 1946490909               |
| SNP_P3_109819_143701 | NW_004515769.1 | Scaffold235 | 143701                  | CC                              | AA                | 1946490910               |
| SNP_P3_109820_146215 | NW_004515769.1 | Scaffold235 | 146215                  | TT                              | AA                | 1946490912               |
| SNP_P3_109822_146265 | NW_004515769.1 | Scaffold235 | 146265                  | GG                              | AA                | 1946490913               |
| SNP_P3_109823_146314 | NW_004515769.1 | Scaffold235 | 146314                  | CC                              | TT                | 1946490914               |
| SNP_P3_109824_149014 | NW_004515769.1 | Scaffold235 | 149014                  | CC                              | AA                | 1946490916               |
| SNP_P3_109825_149019 | NW_004515769.1 | Scaffold235 | 149019                  | TT                              | AA                | 1946490917               |
| SNP_P3_109826_149020 | NW_004515769.1 | Scaffold235 | 149020                  | CC                              | TT                | 1946490919               |
| SNP_P3_109827_149049 | NW_004515769.1 | Scaffold235 | 149049                  | GG                              | CC                | 1946490920               |
| SNP_P3_109828_162935 | NW_004515769.1 | Scaffold235 | 162935                  | GG                              | AA                | 1946490922               |
| SNP_P3_109829_200534 | NW_004515769.1 | Scaffold235 | 200534                  | GG                              | AA                | 1946490923               |
| SNP_P3_109830_205257 | NW_004515769.1 | Scaffold235 | 205257                  | GG                              | AA                | 1946490925               |
| SNP_P3_109831_205288 | NW_004515769.1 | Scaffold235 | 205288                  | AA                              | GG                | 1946490926               |
| SNP_P3_109832_205328 | NW_004515769.1 | Scaffold235 | 205328                  | AA                              | GG                | 1946490928               |

| SNPs IDs             | Chromosome IDs | Chromosomes | Physical positions (bp) | CDC Frontier (Reference genome) | (Pusa 256 & HPNB) | NCBI SNPdb Accession IDs |
|----------------------|----------------|-------------|-------------------------|---------------------------------|-------------------|--------------------------|
| SNP_P3_109833_205335 | NW_004515769.1 | Scaffold235 | 205335                  | GG                              | AA                | 1946490929               |
| SNP_P3_109834_205373 | NW_004515769.1 | Scaffold235 | 205373                  | CC                              | TT                | 1946490930               |
| SNP_P3_109835_205384 | NW_004515769.1 | Scaffold235 | 205384                  | AA                              | CC                | 1946490932               |
| SNP_P3_109836_205388 | NW_004515769.1 | Scaffold235 | 205388                  | TT                              | CC                | 1946490933               |
| SNP_P3_109837_205413 | NW_004515769.1 | Scaffold235 | 205413                  | GG                              | AA                | 1946490935               |
| SNP_P3_109838_205430 | NW_004515769.1 | Scaffold235 | 205430                  | GG                              | TT                | 1946490936               |
| SNP_P3_109839_205435 | NW_004515769.1 | Scaffold235 | 205435                  | GG                              | CC                | 1946490938               |
| SNP_P3_109840_205514 | NW_004515769.1 | Scaffold235 | 205514                  | CC                              | TT                | 1946490939               |
| SNP_P3_109841_205535 | NW_004515769.1 | Scaffold235 | 205535                  | TT                              | CC                | 1946490940               |
| SNP_P3_109842_205554 | NW_004515769.1 | Scaffold235 | 205554                  | TT                              | CC                | 1946490942               |
| SNP_P3_109843_205604 | NW_004515769.1 | Scaffold235 | 205604                  | TT                              | GG                | 1946490943               |
| SNP_P3_109844_205630 | NW_004515769.1 | Scaffold235 | 205630                  | GG                              | TT                | 1946490945               |
| SNP_P3_109846_211953 | NW_004515769.1 | Scaffold235 | 211953                  | AA                              | GG                | 1946490946               |
| SNP_P3_109847_232261 | NW_004515769.1 | Scaffold235 | 232261                  | AA                              | TT                | 1946490948               |
| SNP_P3_109848_288287 | NW_004515769.1 | Scaffold235 | 288287                  | GG                              | AA                | 1946490949               |
| SNP_P3_109849_234    | NW_004515770.1 | Scaffold236 | 234                     | CC                              | TT                | 1946490951               |
| SNP_P3_109850_2258   | NW_004515770.1 | Scaffold236 | 2258                    | TT                              | GG                | 1946490952               |
| SNP_P3_109851_2415   | NW_004515770.1 | Scaffold236 | 2415                    | AA                              | GG                | 1946490954               |
| SNP_P3_109852_2585   | NW_004515770.1 | Scaffold236 | 2585                    | TT                              | AA                | 1946490955               |
| SNP_P3_109853_4731   | NW_004515770.1 | Scaffold236 | 4731                    | AA                              | CC                | 1946490957               |
| SNP_P3_109854_5195   | NW_004515770.1 | Scaffold236 | 5195                    | TT                              | GG                | 1946490958               |
| SNP_P3_109855_5285   | NW_004515770.1 | Scaffold236 | 5285                    | AA                              | GG                | 1946490960               |
| SNP_P3_109856_5365   | NW_004515770.1 | Scaffold236 | 5365                    | TT                              | AA                | 1946490961               |
| SNP_P3_109857_5485   | NW_004515770.1 | Scaffold236 | 5485                    | AA                              | GG                | 1946490962               |
| SNP_P3_109858_5755   | NW_004515770.1 | Scaffold236 | 5755                    | AA                              | TT                | 1946490964               |
| SNP_P3_109859_5775   | NW_004515770.1 | Scaffold236 | 5775                    | AA                              | TT                | 1946490965               |
| SNP_P3_109860_12073  | NW_004515770.1 | Scaffold236 | 12073                   | CC                              | TT                | 1946490967               |
| SNP_P3_109861_12526  | NW_004515770.1 | Scaffold236 | 12526                   | TT                              | CC                | 1946490968               |
| SNP_P3_109862_17123  | NW_004515770.1 | Scaffold236 | 17123                   | CC                              | GG                | 1946490970               |
| SNP_P3_109863_17127  | NW_004515770.1 | Scaffold236 | 17127                   | AA                              | GG                | 1946490971               |
| SNP_P3_109864_17333  | NW_004515770.1 | Scaffold236 | 17333                   | CC                              | AA                | 1946490973               |
| SNP_P3_109865_22887  | NW_004515770.1 | Scaffold236 | 22887                   | GG                              | AA                | 1946490974               |
| SNP_P3_109866_22939  | NW_004515770.1 | Scaffold236 | 22939                   | AA                              | GG                | 1946490976               |
| SNP_P3_109867_22968  | NW_004515770.1 | Scaffold236 | 22968                   | CC                              | TT                | 1946490977               |
| SNP_P3_109868_23041  | NW_004515770.1 | Scaffold236 | 23041                   | TT                              | CC                | 1946490979               |
| SNP_P3_109869_23092  | NW_004515770.1 | Scaffold236 | 23092                   | CC                              | AA                | 1946490980               |
| SNP_P3_109870_23099  | NW_004515770.1 | Scaffold236 | 23099                   | CC                              | TT                | 1946490982               |
| SNP_P3_109871_23112  | NW_004515770.1 | Scaffold236 | 23112                   | AA                              | GG                | 1946490983               |
| SNP_P3_109872_23153  | NW_004515770.1 | Scaffold236 | 23153                   | CC                              | TT                | 1946490985               |
| SNP_P3_109873_23166  | NW_004515770.1 | Scaffold236 | 23166                   | TT                              | CC                | 1946490986               |
| SNP_P3_109874_23375  | NW_004515770.1 | Scaffold236 | 23375                   | TT                              | CC                | 1946490988               |
| SNP_P3_109875_23403  | NW_004515770.1 | Scaffold236 | 23403                   | GG                              | TT                | 1946490989               |

| SNPs IDs            | Chromosome IDs | Chromosomes | Physical positions (bp) | CDC Frontier (Reference genome) | (Pusa 256 & HPNB) | NCBI SNPdb Accession IDs |
|---------------------|----------------|-------------|-------------------------|---------------------------------|-------------------|--------------------------|
| SNP_P3_109876_23439 | NW_004515770.1 | Scaffold236 | 23439                   | AA                              | GG                | 1946490990               |
| SNP_P3_109877_23468 | NW_004515770.1 | Scaffold236 | 23468                   | AA                              | TT                | 1946490992               |
| SNP_P3_109878_23512 | NW_004515770.1 | Scaffold236 | 23512                   | CC                              | AA                | 1946490993               |
| SNP_P3_109879_23533 | NW_004515770.1 | Scaffold236 | 23533                   | TT                              | AA                | 1946490995               |
| SNP_P3_109880_23561 | NW_004515770.1 | Scaffold236 | 23561                   | AA                              | GG                | 1946490996               |
| SNP_P3_109881_23608 | NW_004515770.1 | Scaffold236 | 23608                   | AA                              | GG                | 1946490998               |
| SNP_P3_109882_23753 | NW_004515770.1 | Scaffold236 | 23753                   | AA                              | TT                | 1946490999               |
| SNP_P3_109883_23755 | NW_004515770.1 | Scaffold236 | 23755                   | AA                              | GG                | 1946491001               |
| SNP_P3_109884_23769 | NW_004515770.1 | Scaffold236 | 23769                   | CC                              | TT                | 1946491002               |
| SNP_P3_109885_23778 | NW_004515770.1 | Scaffold236 | 23778                   | TT                              | CC                | 1946491004               |
| SNP_P3_109886_23789 | NW_004515770.1 | Scaffold236 | 23789                   | CC                              | GG                | 1946491005               |
| SNP_P3_109887_23827 | NW_004515770.1 | Scaffold236 | 23827                   | AA                              | GG                | 1946491007               |
| SNP_P3_109888_23838 | NW_004515770.1 | Scaffold236 | 23838                   | AA                              | GG                | 1946491008               |
| SNP_P3_109889_23877 | NW_004515770.1 | Scaffold236 | 23877                   | GG                              | AA                | 1946491010               |
| SNP_P3_109890_23943 | NW_004515770.1 | Scaffold236 | 23943                   | CC                              | TT                | 1946491011               |
| SNP_P3_109891_23964 | NW_004515770.1 | Scaffold236 | 23964                   | TT                              | CC                | 1946491013               |
| SNP_P3_109892_23971 | NW_004515770.1 | Scaffold236 | 23971                   | CC                              | TT                | 1946491014               |
| SNP_P3_109894_25387 | NW_004515770.1 | Scaffold236 | 25387                   | GG                              | AA                | 1946491016               |
| SNP_P3_109895_25477 | NW_004515770.1 | Scaffold236 | 25477                   | AA                              | GG                | 1946491017               |
| SNP_P3_109896_25588 | NW_004515770.1 | Scaffold236 | 25588                   | AA                              | GG                | 1946491018               |
| SNP_P3_109897_25608 | NW_004515770.1 | Scaffold236 | 25608                   | AA                              | TT                | 1946491020               |
| SNP_P3_109898_25613 | NW_004515770.1 | Scaffold236 | 25613                   | GG                              | AA                | 1946491021               |
| SNP_P3_109899_25617 | NW_004515770.1 | Scaffold236 | 25617                   | AA                              | TT                | 1946491023               |
| SNP_P3_109900_25688 | NW_004515770.1 | Scaffold236 | 25688                   | CC                              | AA                | 1946491024               |
| SNP_P3_109901_25872 | NW_004515770.1 | Scaffold236 | 25872                   | TT                              | CC                | 1946491026               |
| SNP_P3_109902_25889 | NW_004515770.1 | Scaffold236 | 25889                   | GG                              | TT                | 1946491027               |
| SNP_P3_109903_26040 | NW_004515770.1 | Scaffold236 | 26040                   | CC                              | TT                | 1946491029               |
| SNP_P3_109904_26618 | NW_004515770.1 | Scaffold236 | 26618                   | TT                              | CC                | 1946491030               |
| SNP_P3_109905_26718 | NW_004515770.1 | Scaffold236 | 26718                   | CC                              | TT                | 1946491032               |
| SNP_P3_109906_26863 | NW_004515770.1 | Scaffold236 | 26863                   | AA                              | CC                | 1946491033               |
| SNP_P3_109907_26947 | NW_004515770.1 | Scaffold236 | 26947                   | AA                              | GG                | 1946491035               |
| SNP_P3_109908_26954 | NW_004515770.1 | Scaffold236 | 26954                   | AA                              | CC                | 1946491036               |
| SNP_P3_109909_27286 | NW_004515770.1 | Scaffold236 | 27286                   | CC                              | TT                | 1946491038               |
| SNP_P3_109910_27495 | NW_004515770.1 | Scaffold236 | 27495                   | TT                              | CC                | 1946491039               |
| SNP_P3_109911_27850 | NW_004515770.1 | Scaffold236 | 27850                   | GG                              | AA                | 1946491041               |
| SNP_P3_109912_28804 | NW_004515770.1 | Scaffold236 | 28804                   | GG                              | TT                | 1946491042               |
| SNP_P3_109913_29072 | NW_004515770.1 | Scaffold236 | 29072                   | TT                              | AA                | 1946491044               |
| SNP_P3_109914_29100 | NW_004515770.1 | Scaffold236 | 29100                   | GG                              | AA                | 1946491045               |
| SNP_P3_109915_29128 | NW_004515770.1 | Scaffold236 | 29128                   | CC                              | AA                | 1946491047               |
| SNP_P3_109916_29131 | NW_004515770.1 | Scaffold236 | 29131                   | CC                              | TT                | 1946491048               |
| SNP_P3_109917_29178 | NW_004515770.1 | Scaffold236 | 29178                   | TT                              | AA                | 1946491050               |
| SNP_P3_109918_29197 | NW_004515770.1 | Scaffold236 | 29197                   | AA                              | CC                | 1946491051               |

| SNPs IDs            | Chromosome IDs | Chromosomes | Physical positions (bp) | CDC Frontier (Reference genome) | (Pusa 256 & HPNB) | NCBI SNPdb Accession IDs |
|---------------------|----------------|-------------|-------------------------|---------------------------------|-------------------|--------------------------|
| SNP_P3_109919_29223 | NW_004515770.1 | Scaffold236 | 29223                   | AA                              | GG                | 1946491053               |
| SNP_P3_109920_29243 | NW_004515770.1 | Scaffold236 | 29243                   | TT                              | CC                | 1946491054               |
| SNP_P3_109921_29525 | NW_004515770.1 | Scaffold236 | 29525                   | AA                              | CC                | 1946491055               |
| SNP_P3_109922_29795 | NW_004515770.1 | Scaffold236 | 29795                   | CC                              | TT                | 1946491057               |
| SNP_P3_109923_29835 | NW_004515770.1 | Scaffold236 | 29835                   | TT                              | CC                | 1946491058               |
| SNP_P3_109924_29836 | NW_004515770.1 | Scaffold236 | 29836                   | GG                              | TT                | 1946491060               |
| SNP_P3_109925_29865 | NW_004515770.1 | Scaffold236 | 29865                   | AA                              | TT                | 1946491061               |
| SNP_P3_109926_30822 | NW_004515770.1 | Scaffold236 | 30822                   | CC                              | AA                | 1946491063               |
| SNP_P3_109927_31537 | NW_004515770.1 | Scaffold236 | 31537                   | CC                              | TT                | 1946491064               |
| SNP_P3_109928_32041 | NW_004515770.1 | Scaffold236 | 32041                   | TT                              | CC                | 1946491065               |
| SNP_P3_109930_42201 | NW_004515770.1 | Scaffold236 | 42201                   | GG                              | TT                | 1946491067               |
| SNP_P3_109931_43130 | NW_004515770.1 | Scaffold236 | 43130                   | CC                              | TT                | 1946491068               |
| SNP_P3_109932_43261 | NW_004515770.1 | Scaffold236 | 43261                   | GG                              | AA                | 1946491070               |
| SNP_P3_109933_43790 | NW_004515770.1 | Scaffold236 | 43790                   | CC                              | TT                | 1946491071               |
| SNP_P3_109934_44905 | NW_004515770.1 | Scaffold236 | 44905                   | GG                              | AA                | 1946491073               |
| SNP_P3_109935_44906 | NW_004515770.1 | Scaffold236 | 44906                   | TT                              | AA                | 1946491074               |
| SNP_P3_109936_45300 | NW_004515770.1 | Scaffold236 | 45300                   | GG                              | CC                | 1946491076               |
| SNP_P3_109937_45597 | NW_004515770.1 | Scaffold236 | 45597                   | GG                              | TT                | 1946491077               |
| SNP_P3_109938_45746 | NW_004515770.1 | Scaffold236 | 45746                   | AA                              | GG                | 1946491079               |
| SNP_P3_109939_46562 | NW_004515770.1 | Scaffold236 | 46562                   | GG                              | AA                | 1946491080               |
| SNP_P3_109940_51480 | NW_004515770.1 | Scaffold236 | 51480                   | TT                              | GG                | 1946491082               |
| SNP_P3_109941_51701 | NW_004515770.1 | Scaffold236 | 51701                   | AA                              | TT                | 1946491083               |
| SNP_P3_109942_52077 | NW_004515770.1 | Scaffold236 | 52077                   | CC                              | GG                | 1946491085               |
| SNP_P3_109943_52440 | NW_004515770.1 | Scaffold236 | 52440                   | CC                              | TT                | 1946491086               |
| SNP_P3_109944_52519 | NW_004515770.1 | Scaffold236 | 52519                   | CC                              | GG                | 1946491088               |
| SNP_P3_109945_58577 | NW_004515770.1 | Scaffold236 | 58577                   | GG                              | AA                | 1946491089               |
| SNP_P3_109946_59205 | NW_004515770.1 | Scaffold236 | 59205                   | TT                              | CC                | 1946491090               |
| SNP_P3_109947_59223 | NW_004515770.1 | Scaffold236 | 59223                   | GG                              | CC                | 1946491092               |
| SNP_P3_109948_59252 | NW_004515770.1 | Scaffold236 | 59252                   | TT                              | AA                | 1946491093               |
| SNP_P3_109949_59636 | NW_004515770.1 | Scaffold236 | 59636                   | CC                              | GG                | 1946491095               |
| SNP_P3_109950_59731 | NW_004515770.1 | Scaffold236 | 59731                   | AA                              | GG                | 1946491096               |
| SNP_P3_109951_60464 | NW_004515770.1 | Scaffold236 | 60464                   | AA                              | TT                | 1946491098               |
| SNP_P3_109952_60927 | NW_004515770.1 | Scaffold236 | 60927                   | AA                              | TT                | 1946491099               |
| SNP_P3_109953_61199 | NW_004515770.1 | Scaffold236 | 61199                   | TT                              | AA                | 1946491101               |
| SNP_P3_109954_64216 | NW_004515770.1 | Scaffold236 | 64216                   | TT                              | GG                | 1946491102               |
| SNP_P3_109955_64226 | NW_004515770.1 | Scaffold236 | 64226                   | CC                              | TT                | 1946491104               |
| SNP_P3_109956_64301 | NW_004515770.1 | Scaffold236 | 64301                   | GG                              | AA                | 1946491105               |
| SNP_P3_109957_64468 | NW_004515770.1 | Scaffold236 | 64468                   | CC                              | TT                | 1946491107               |
| SNP_P3_109958_64503 | NW_004515770.1 | Scaffold236 | 64503                   | CC                              | TT                | 1946491108               |
| SNP_P3_109959_64506 | NW_004515770.1 | Scaffold236 | 64506                   | AA                              | GG                | 1946491110               |
| SNP_P3_109960_64508 | NW_004515770.1 | Scaffold236 | 64508                   | AA                              | TT                | 1946491111               |
| SNP_P3_109961_64676 | NW_004515770.1 | Scaffold236 | 64676                   | TT                              | CC                | 1946491113               |

| SNPs IDs            | Chromosome IDs | Chromosomes | Physical positions (bp) | CDC Frontier (Reference genome) | (Pusa 256 & HPNB) | NCBI SNPdb Accession IDs |
|---------------------|----------------|-------------|-------------------------|---------------------------------|-------------------|--------------------------|
| SNP_P3_109962_66326 | NW_004515770.1 | Scaffold236 | 66326                   | GG                              | CC                | 1946491114               |
| SNP_P3_109963_66400 | NW_004515770.1 | Scaffold236 | 66400                   | GG                              | CC                | 1946491116               |
| SNP_P3_109964_67787 | NW_004515770.1 | Scaffold236 | 67787                   | TT                              | CC                | 1946491117               |
| SNP_P3_109965_72026 | NW_004515770.1 | Scaffold236 | 72026                   | AA                              | TT                | 1946491118               |
| SNP_P3_109966_72027 | NW_004515770.1 | Scaffold236 | 72027                   | TT                              | AA                | 1946491120               |
| SNP_P3_109967_2415  | NW_004515771.1 | Scaffold237 | 2415                    | CC                              | AA                | 1946491121               |
| SNP_P3_109968_16243 | NW_004515771.1 | Scaffold237 | 16243                   | TT                              | GG                | 1946491123               |
| SNP_P3_109969_57251 | NW_004515771.1 | Scaffold237 | 57251                   | CC                              | TT                | 1946491124               |
| SNP_P3_109970_57864 | NW_004515771.1 | Scaffold237 | 57864                   | GG                              | AA                | 1946491126               |
| SNP_P3_109971_58051 | NW_004515771.1 | Scaffold237 | 58051                   | CC                              | GG                | 1946491127               |
| SNP_P3_109972_58101 | NW_004515771.1 | Scaffold237 | 58101                   | TT                              | CC                | 1946491129               |
| SNP_P3_109973_58105 | NW_004515771.1 | Scaffold237 | 58105                   | TT                              | CC                | 1946491130               |
| SNP_P3_109974_58185 | NW_004515771.1 | Scaffold237 | 58185                   | AA                              | GG                | 1946491132               |
| SNP_P3_109975_58204 | NW_004515771.1 | Scaffold237 | 58204                   | TT                              | CC                | 1946491133               |
| SNP_P3_109976_58283 | NW_004515771.1 | Scaffold237 | 58283                   | TT                              | CC                | 1946491135               |
| SNP_P3_109977_58298 | NW_004515771.1 | Scaffold237 | 58298                   | AA                              | GG                | 1946491136               |
| SNP_P3_109978_60074 | NW_004515771.1 | Scaffold237 | 60074                   | AA                              | GG                | 1946491138               |
| SNP_P3_109979_61745 | NW_004515771.1 | Scaffold237 | 61745                   | AA                              | CC                | 1946491139               |
| SNP_P3_109980_70746 | NW_004515771.1 | Scaffold237 | 70746                   | AA                              | TT                | 1946491140               |
| SNP_P3_109981_70750 | NW_004515771.1 | Scaffold237 | 70750                   | CC                              | TT                | 1946491142               |
| SNP_P3_109982_70853 | NW_004515771.1 | Scaffold237 | 70853                   | TT                              | AA                | 1946491144               |
| SNP_P3_109983_71142 | NW_004515771.1 | Scaffold237 | 71142                   | CC                              | AA                | 1946491145               |
| SNP_P3_109984_71585 | NW_004515771.1 | Scaffold237 | 71585                   | TT                              | GG                | 1946491147               |
| SNP_P3_109985_71730 | NW_004515771.1 | Scaffold237 | 71730                   | TT                              | AA                | 1946491148               |
| SNP_P3_109986_71751 | NW_004515771.1 | Scaffold237 | 71751                   | TT                              | CC                | 1946491150               |
| SNP_P3_109987_71781 | NW_004515771.1 | Scaffold237 | 71781                   | CC                              | AA                | 1946491151               |
| SNP_P3_109988_688   | NW_004515772.1 | Scaffold238 | 688                     | AA                              | GG                | 1946491153               |
| SNP_P3_109989_731   | NW_004515772.1 | Scaffold238 | 731                     | CC                              | TT                | 1946491154               |
| SNP_P3_109990_865   | NW_004515772.1 | Scaffold238 | 865                     | GG                              | TT                | 1946491156               |
| SNP_P3_109991_928   | NW_004515772.1 | Scaffold238 | 928                     | TT                              | AA                | 1946491157               |
| SNP_P3_109992_1092  | NW_004515772.1 | Scaffold238 | 1092                    | GG                              | AA                | 1946491159               |
| SNP_P3_109993_1102  | NW_004515772.1 | Scaffold238 | 1102                    | TT                              | GG                | 1946491160               |
| SNP_P3_109994_1107  | NW_004515772.1 | Scaffold238 | 1107                    | AA                              | GG                | 1946491162               |
| SNP_P3_109995_1111  | NW_004515772.1 | Scaffold238 | 1111                    | AA                              | GG                | 1946491163               |
| SNP_P3_109996_1155  | NW_004515772.1 | Scaffold238 | 1155                    | TT                              | CC                | 1946491165               |
| SNP_P3_109997_1169  | NW_004515772.1 | Scaffold238 | 1169                    | TT                              | CC                | 1946491166               |
| SNP_P3_109998_1259  | NW_004515772.1 | Scaffold238 | 1259                    | TT                              | AA                | 1946491168               |
| SNP_P3_109999_1291  | NW_004515772.1 | Scaffold238 | 1291                    | AA                              | CC                | 1946491169               |
| SNP_P3_110000_1342  | NW_004515772.1 | Scaffold238 | 1342                    | CC                              | TT                | 1946491171               |
| SNP_P3_110001_1430  | NW_004515772.1 | Scaffold238 | 1430                    | GG                              | CC                | 1946491172               |
| SNP_P3_110002_1988  | NW_004515772.1 | Scaffold238 | 1988                    | AA                              | GG                | 1946491174               |
| SNP_P3_110003_1989  | NW_004515772.1 | Scaffold238 | 1989                    | AA                              | GG                | 1946491175               |

| SNPs IDs            | Chromosome IDs | Chromosomes | Physical positions (bp) | CDC Frontier (Reference genome) | (Pusa 256 & HPNB) | NCBI SNPdb Accession IDs |
|---------------------|----------------|-------------|-------------------------|---------------------------------|-------------------|--------------------------|
| SNP_P3_110004_2072  | NW_004515772.1 | Scaffold238 | 2072                    | GG                              | AA                | 1946491177               |
| SNP_P3_110005_2294  | NW_004515772.1 | Scaffold238 | 2294                    | AA                              | TT                | 1946491178               |
| SNP_P3_110006_2636  | NW_004515772.1 | Scaffold238 | 2636                    | AA                              | GG                | 1946491180               |
| SNP_P3_110007_2707  | NW_004515772.1 | Scaffold238 | 2707                    | GG                              | AA                | 1946491181               |
| SNP_P3_110008_2728  | NW_004515772.1 | Scaffold238 | 2728                    | AA                              | GG                | 1946491183               |
| SNP_P3_110009_4408  | NW_004515772.1 | Scaffold238 | 4408                    | CC                              | TT                | 1946491184               |
| SNP_P3_110010_4443  | NW_004515772.1 | Scaffold238 | 4443                    | AA                              | TT                | 1946491186               |
| SNP_P3_110011_7568  | NW_004515772.1 | Scaffold238 | 7568                    | TT                              | CC                | 1946491187               |
| SNP_P3_110012_8017  | NW_004515772.1 | Scaffold238 | 8017                    | AA                              | TT                | 1946491189               |
| SNP_P3_110013_8324  | NW_004515772.1 | Scaffold238 | 8324                    | AA                              | GG                | 1946491191               |
| SNP_P3_110014_14339 | NW_004515772.1 | Scaffold238 | 14339                   | GG                              | AA                | 1946491192               |
| SNP_P3_110015_19191 | NW_004515772.1 | Scaffold238 | 19191                   | TT                              | AA                | 1946491194               |
| SNP_P3_110016_19862 | NW_004515772.1 | Scaffold238 | 19862                   | TT                              | GG                | 1946491195               |
| SNP_P3_110017_20520 | NW_004515772.1 | Scaffold238 | 20520                   | CC                              | TT                | 1946491197               |
| SNP_P3_110018_20604 | NW_004515772.1 | Scaffold238 | 20604                   | AA                              | TT                | 1946491198               |
| SNP_P3_110019_20672 | NW_004515772.1 | Scaffold238 | 20672                   | GG                              | AA                | 1946491200               |
| SNP_P3_110020_20675 | NW_004515772.1 | Scaffold238 | 20675                   | AA                              | CC                | 1946491201               |
| SNP_P3_110021_23823 | NW_004515772.1 | Scaffold238 | 23823                   | AA                              | TT                | 1946491203               |
| SNP_P3_110023_23964 | NW_004515772.1 | Scaffold238 | 23964                   | CC                              | TT                | 1946491204               |
| SNP_P3_110024_24308 | NW_004515772.1 | Scaffold238 | 24308                   | AA                              | TT                | 1946491206               |
| SNP_P3_110025_25287 | NW_004515772.1 | Scaffold238 | 25287                   | AA                              | TT                | 1946491207               |
| SNP_P3_110026_27371 | NW_004515772.1 | Scaffold238 | 27371                   | CC                              | AA                | 1946491209               |
| SNP_P3_110027_27692 | NW_004515772.1 | Scaffold238 | 27692                   | CC                              | TT                | 1946491210               |
| SNP_P3_110028_27705 | NW_004515772.1 | Scaffold238 | 27705                   | TT                              | CC                | 1946491212               |
| SNP_P3_110029_27804 | NW_004515772.1 | Scaffold238 | 27804                   | GG                              | TT                | 1946491213               |
| SNP_P3_110030_27814 | NW_004515772.1 | Scaffold238 | 27814                   | CC                              | GG                | 1946491215               |
| SNP_P3_110031_2224  | NW_004515773.1 | Scaffold239 | 2224                    | AA                              | TT                | 1946491216               |
| SNP_P3_110032_4955  | NW_004515773.1 | Scaffold239 | 4955                    | AA                              | CC                | 1946491218               |
| SNP_P3_110033_4966  | NW_004515773.1 | Scaffold239 | 4966                    | CC                              | TT                | 1946491219               |
| SNP_P3_110034_5248  | NW_004515773.1 | Scaffold239 | 5248                    | TT                              | CC                | 1946491220               |
| SNP_P3_110035_5270  | NW_004515773.1 | Scaffold239 | 5270                    | AA                              | GG                | 1946491222               |
| SNP_P3_110036_5288  | NW_004515773.1 | Scaffold239 | 5288                    | AA                              | GG                | 1946491223               |
| SNP_P3_110037_5298  | NW_004515773.1 | Scaffold239 | 5298                    | AA                              | GG                | 1946491225               |
| SNP_P3_110038_8428  | NW_004515773.1 | Scaffold239 | 8428                    | GG                              | AA                | 1946491226               |
| SNP_P3_110039_8434  | NW_004515773.1 | Scaffold239 | 8434                    | CC                              | TT                | 1946491228               |
| SNP_P3_110040_8484  | NW_004515773.1 | Scaffold239 | 8484                    | GG                              | AA                | 1946491229               |
| SNP_P3_110041_15146 | NW_004515773.1 | Scaffold239 | 15146                   | GG                              | CC                | 1946491230               |
| SNP_P3_110042_15160 | NW_004515773.1 | Scaffold239 | 15160                   | AA                              | CC                | 1946491232               |
| SNP_P3_110043_15172 | NW_004515773.1 | Scaffold239 | 15172                   | TT                              | CC                | 1946491233               |
| SNP_P3_110044_15188 | NW_004515773.1 | Scaffold239 | 15188                   | GG                              | AA                | 1946491235               |
| SNP_P3_110045_15208 | NW_004515773.1 | Scaffold239 | 15208                   | AA                              | GG                | 1946491236               |
| SNP_P3_110046_15209 | NW_004515773.1 | Scaffold239 | 15209                   | GG                              | AA                | 1946491238               |

| SNPs IDs            | Chromosome IDs | Chromosomes | Physical positions (bp) | CDC Frontier (Reference genome) | (Pusa 256 & HPNB) | NCBI SNPdb Accession IDs |
|---------------------|----------------|-------------|-------------------------|---------------------------------|-------------------|--------------------------|
| SNP_P3_110047_15254 | NW_004515773.1 | Scaffold239 | 15254                   | GG                              | AA                | 1946491239               |
| SNP_P3_110048_15255 | NW_004515773.1 | Scaffold239 | 15255                   | GG                              | AA                | 1946491240               |
| SNP_P3_110049_21291 | NW_004515773.1 | Scaffold239 | 21291                   | GG                              | AA                | 1946491242               |
| SNP_P3_110050_23583 | NW_004515773.1 | Scaffold239 | 23583                   | GG                              | TT                | 1946491243               |
| SNP_P3_110051_23592 | NW_004515773.1 | Scaffold239 | 23592                   | GG                              | AA                | 1946491245               |
| SNP_P3_110052_23788 | NW_004515773.1 | Scaffold239 | 23788                   | AA                              | GG                | 1946491246               |
| SNP_P3_110053_23805 | NW_004515773.1 | Scaffold239 | 23805                   | TT                              | CC                | 1946491248               |
| SNP_P3_110054_23832 | NW_004515773.1 | Scaffold239 | 23832                   | TT                              | AA                | 1946491249               |
| SNP_P3_110055_23835 | NW_004515773.1 | Scaffold239 | 23835                   | AA                              | CC                | 1946491250               |
| SNP_P3_110056_25456 | NW_004515773.1 | Scaffold239 | 25456                   | CC                              | GG                | 1946491252               |
| SNP_P3_110057_25476 | NW_004515773.1 | Scaffold239 | 25476                   | GG                              | AA                | 1946491253               |
| SNP_P3_110058_25784 | NW_004515773.1 | Scaffold239 | 25784                   | AA                              | TT                | 1946491255               |
| SNP_P3_110059_25785 | NW_004515773.1 | Scaffold239 | 25785                   | CC                              | TT                | 1946491256               |
| SNP_P3_110060_25796 | NW_004515773.1 | Scaffold239 | 25796                   | TT                              | CC                | 1946491258               |
| SNP_P3_110061_27442 | NW_004515773.1 | Scaffold239 | 27442                   | AA                              | CC                | 1946491259               |
| SNP_P3_110062_36899 | NW_004515773.1 | Scaffold239 | 36899                   | AA                              | TT                | 1946491261               |
| SNP_P3_110063_36989 | NW_004515773.1 | Scaffold239 | 36989                   | CC                              | AA                | 1946491262               |
| SNP_P3_110064_37421 | NW_004515773.1 | Scaffold239 | 37421                   | CC                              | AA                | 1946491263               |
| SNP_P3_110065_37426 | NW_004515773.1 | Scaffold239 | 37426                   | CC                              | TT                | 1946491265               |
| SNP_P3_110066_37433 | NW_004515773.1 | Scaffold239 | 37433                   | AA                              | TT                | 1946491266               |
| SNP_P3_110067_45071 | NW_004515773.1 | Scaffold239 | 45071                   | TT                              | CC                | 1946491268               |
| SNP_P3_110068_49915 | NW_004515773.1 | Scaffold239 | 49915                   | CC                              | TT                | 1946491269               |
| SNP_P3_110069_49921 | NW_004515773.1 | Scaffold239 | 49921                   | AA                              | TT                | 1946491271               |
| SNP_P3_110070_49923 | NW_004515773.1 | Scaffold239 | 49923                   | AA                              | TT                | 1946491272               |
| SNP_P3_110071_49950 | NW_004515773.1 | Scaffold239 | 49950                   | AA                              | GG                | 1946491274               |
| SNP_P3_110072_50057 | NW_004515773.1 | Scaffold239 | 50057                   | GG                              | AA                | 1946491275               |
| SNP_P3_110073_50141 | NW_004515773.1 | Scaffold239 | 50141                   | TT                              | CC                | 1946491276               |
| SNP_P3_110074_50183 | NW_004515773.1 | Scaffold239 | 50183                   | AA                              | TT                | 1946491278               |
| SNP_P3_110075_50184 | NW_004515773.1 | Scaffold239 | 50184                   | AA                              | GG                | 1946491279               |
| SNP_P3_110076_50210 | NW_004515773.1 | Scaffold239 | 50210                   | AA                              | CC                | 1946491281               |
| SNP_P3_110077_50213 | NW_004515773.1 | Scaffold239 | 50213                   | TT                              | AA                | 1946491282               |
| SNP_P3_110078_50221 | NW_004515773.1 | Scaffold239 | 50221                   | GG                              | AA                | 1946491284               |
| SNP_P3_110080_50232 | NW_004515773.1 | Scaffold239 | 50232                   | GG                              | AA                | 1946491285               |
| SNP_P3_110081_50249 | NW_004515773.1 | Scaffold239 | 50249                   | AA                              | CC                | 1946491286               |
| SNP_P3_110082_50581 | NW_004515773.1 | Scaffold239 | 50581                   | GG                              | AA                | 1946491288               |
| SNP_P3_110083_50588 | NW_004515773.1 | Scaffold239 | 50588                   | AA                              | GG                | 1946491289               |
| SNP_P3_110084_54139 | NW_004515773.1 | Scaffold239 | 54139                   | CC                              | TT                | 1946491291               |
| SNP_P3_110085_54148 | NW_004515773.1 | Scaffold239 | 54148                   | TT                              | AA                | 1946491292               |
| SNP_P3_110086_54407 | NW_004515773.1 | Scaffold239 | 54407                   | AA                              | GG                | 1946491295               |
| SNP_P3_110087_54418 | NW_004515773.1 | Scaffold239 | 54418                   | GG                              | AA                | 1946491297               |
| SNP_P3_110088_55626 | NW_004515773.1 | Scaffold239 | 55626                   | GG                              | TT                | 1946491299               |
| SNP_P3_110089_56891 | NW_004515773.1 | Scaffold239 | 56891                   | AA                              | CC                | 1946491300               |



| SNPs IDs            | Chromosome IDs | Chromosomes | Physical positions (bp) | CDC Frontier (Reference genome) | (Pusa 256 & HPNB) | NCBI SNPdb Accession IDs |
|---------------------|----------------|-------------|-------------------------|---------------------------------|-------------------|--------------------------|
| SNP_P3_110090_59612 | NW_004515773.1 | Scaffold239 | 59612                   | TT                              | AA                | 1946491302               |
| SNP_P3_110091_59625 | NW_004515773.1 | Scaffold239 | 59625                   | GG                              | CC                | 1946491303               |
| SNP_P3_110092_59634 | NW_004515773.1 | Scaffold239 | 59634                   | TT                              | CC                | 1946491306               |
| SNP_P3_110093_59644 | NW_004515773.1 | Scaffold239 | 59644                   | AA                              | TT                | 1946491307               |
| SNP_P3_110094_59653 | NW_004515773.1 | Scaffold239 | 59653                   | CC                              | TT                | 1946491309               |
| SNP_P3_110095_59675 | NW_004515773.1 | Scaffold239 | 59675                   | AA                              | CC                | 1946491310               |
| SNP_P3_110096_61489 | NW_004515773.1 | Scaffold239 | 61489                   | CC                              | AA                | 1946491312               |
| SNP_P3_110097_61505 | NW_004515773.1 | Scaffold239 | 61505                   | GG                              | AA                | 1946491313               |
| SNP_P3_110098_61509 | NW_004515773.1 | Scaffold239 | 61509                   | TT                              | CC                | 1946491315               |
| SNP_P3_110099_61522 | NW_004515773.1 | Scaffold239 | 61522                   | GG                              | TT                | 1946491316               |
| SNP_P3_110100_61523 | NW_004515773.1 | Scaffold239 | 61523                   | CC                              | AA                | 1946491318               |
| SNP_P3_110101_61535 | NW_004515773.1 | Scaffold239 | 61535                   | TT                              | CC                | 1946491319               |
| SNP_P3_110102_61541 | NW_004515773.1 | Scaffold239 | 61541                   | TT                              | CC                | 1946491321               |
| SNP_P3_110104_64494 | NW_004515773.1 | Scaffold239 | 64494                   | TT                              | AA                | 1946491322               |
| SNP_P3_110105_64512 | NW_004515773.1 | Scaffold239 | 64512                   | TT                              | CC                | 1946491323               |
| SNP_P3_110107_64861 | NW_004515773.1 | Scaffold239 | 64861                   | GG                              | TT                | 1946491325               |
| SNP_P3_110108_64978 | NW_004515773.1 | Scaffold239 | 64978                   | CC                              | AA                | 1946491326               |
| SNP_P3_110109_64993 | NW_004515773.1 | Scaffold239 | 64993                   | CC                              | AA                | 1946491328               |
| SNP_P3_110110_65102 | NW_004515773.1 | Scaffold239 | 65102                   | AA                              | GG                | 1946491329               |
| SNP_P3_110111_65113 | NW_004515773.1 | Scaffold239 | 65113                   | AA                              | TT                | 1946491331               |
| SNP_P3_110112_75258 | NW_004515773.1 | Scaffold239 | 75258                   | CC                              | AA                | 1946491332               |
| SNP_P3_110113_75675 | NW_004515773.1 | Scaffold239 | 75675                   | TT                              | CC                | 1946491334               |
| SNP_P3_110114_75676 | NW_004515773.1 | Scaffold239 | 75676                   | GG                              | AA                | 1946491335               |
| SNP_P3_110115_80998 | NW_004515773.1 | Scaffold239 | 80998                   | GG                              | CC                | 1946491337               |
| SNP_P3_110116_81010 | NW_004515773.1 | Scaffold239 | 81010                   | TT                              | AA                | 1946491338               |
| SNP_P3_110117_83787 | NW_004515773.1 | Scaffold239 | 83787                   | TT                              | CC                | 1946491339               |
| SNP_P3_110118_85004 | NW_004515773.1 | Scaffold239 | 85004                   | AA                              | GG                | 1946491341               |
| SNP_P3_110119_85685 | NW_004515773.1 | Scaffold239 | 85685                   | GG                              | CC                | 1946491342               |
| SNP_P3_110120_88318 | NW_004515773.1 | Scaffold239 | 88318                   | AA                              | GG                | 1946491344               |
| SNP_P3_110121_88329 | NW_004515773.1 | Scaffold239 | 88329                   | GG                              | AA                | 1946491345               |
| SNP_P3_110122_88331 | NW_004515773.1 | Scaffold239 | 88331                   | CC                              | AA                | 1946491347               |
| SNP_P3_110123_88333 | NW_004515773.1 | Scaffold239 | 88333                   | TT                              | CC                | 1946491348               |
| SNP_P3_110124_88345 | NW_004515773.1 | Scaffold239 | 88345                   | CC                              | TT                | 1946491350               |
| SNP_P3_110125_88945 | NW_004515773.1 | Scaffold239 | 88945                   | TT                              | GG                | 1946491351               |
| SNP_P3_110126_88950 | NW_004515773.1 | Scaffold239 | 88950                   | GG                              | CC                | 1946491352               |
| SNP_P3_110127_88977 | NW_004515773.1 | Scaffold239 | 88977                   | GG                              | AA                | 1946491354               |
| SNP_P3_110128_88989 | NW_004515773.1 | Scaffold239 | 88989                   | CC                              | TT                | 1946491355               |
| SNP_P3_110129_89132 | NW_004515773.1 | Scaffold239 | 89132                   | TT                              | CC                | 1946491357               |
| SNP_P3_110130_89375 | NW_004515773.1 | Scaffold239 | 89375                   | GG                              | TT                | 1946491358               |
| SNP_P3_110131_89387 | NW_004515773.1 | Scaffold239 | 89387                   | CC                              | AA                | 1946491359               |
| SNP_P3_110132_89475 | NW_004515773.1 | Scaffold239 | 89475                   | AA                              | GG                | 1946491361               |
| SNP_P3_110133_89477 | NW_004515773.1 | Scaffold239 | 89477                   | GG                              | CC                | 1946491362               |

| SNPs IDs            | Chromosome IDs | Chromosomes | Physical positions (bp) | CDC Frontier (Reference genome) | (Pusa 256 & HPNB) | NCBI SNPdb Accession IDs |
|---------------------|----------------|-------------|-------------------------|---------------------------------|-------------------|--------------------------|
| SNP_P3_110134_89484 | NW_004515773.1 | Scaffold239 | 89484                   | AA                              | GG                | 1946491364               |
| SNP_P3_110135_89653 | NW_004515773.1 | Scaffold239 | 89653                   | GG                              | AA                | 1946491365               |
| SNP_P3_110136_89667 | NW_004515773.1 | Scaffold239 | 89667                   | TT                              | CC                | 1946491367               |
| SNP_P3_110137_89681 | NW_004515773.1 | Scaffold239 | 89681                   | AA                              | TT                | 1946491368               |
| SNP_P3_110138_89801 | NW_004515773.1 | Scaffold239 | 89801                   | GG                              | AA                | 1946491369               |
| SNP_P3_110139_89802 | NW_004515773.1 | Scaffold239 | 89802                   | GG                              | AA                | 1946491371               |
| SNP_P3_110140_89836 | NW_004515773.1 | Scaffold239 | 89836                   | CC                              | TT                | 1946491372               |
| SNP_P3_110141_89892 | NW_004515773.1 | Scaffold239 | 89892                   | AA                              | TT                | 1946491374               |
| SNP_P3_110142_89893 | NW_004515773.1 | Scaffold239 | 89893                   | GG                              | TT                | 1946491375               |
| SNP_P3_110143_89900 | NW_004515773.1 | Scaffold239 | 89900                   | TT                              | AA                | 1946491377               |
| SNP_P3_110144_89948 | NW_004515773.1 | Scaffold239 | 89948                   | TT                              | GG                | 1946491378               |
| SNP_P3_110145_89991 | NW_004515773.1 | Scaffold239 | 89991                   | TT                              | AA                | 1946491379               |
| SNP_P3_110146_90011 | NW_004515773.1 | Scaffold239 | 90011                   | CC                              | AA                | 1946491381               |
| SNP_P3_110147_90023 | NW_004515773.1 | Scaffold239 | 90023                   | CC                              | TT                | 1946491382               |
| SNP_P3_110148_90065 | NW_004515773.1 | Scaffold239 | 90065                   | GG                              | CC                | 1946491384               |
| SNP_P3_110149_90070 | NW_004515773.1 | Scaffold239 | 90070                   | CC                              | TT                | 1946491385               |
| SNP_P3_110150_96778 | NW_004515773.1 | Scaffold239 | 96778                   | GG                              | TT                | 1946491387               |
| SNP_P3_110151_96793 | NW_004515773.1 | Scaffold239 | 96793                   | AA                              | TT                | 1946491388               |
| SNP_P3_110152_96867 | NW_004515773.1 | Scaffold239 | 96867                   | TT                              | CC                | 1946491389               |
| SNP_P3_110153_97093 | NW_004515773.1 | Scaffold239 | 97093                   | AA                              | GG                | 1946491391               |
| SNP_P3_110154_97223 | NW_004515773.1 | Scaffold239 | 97223                   | TT                              | CC                | 1946491392               |
| SNP_P3_110155_97250 | NW_004515773.1 | Scaffold239 | 97250                   | GG                              | CC                | 1946491394               |
| SNP_P3_110156_97493 | NW_004515773.1 | Scaffold239 | 97493                   | GG                              | TT                | 1946491395               |
| SNP_P3_110157_97504 | NW_004515773.1 | Scaffold239 | 97504                   | CC                              | GG                | 1946491396               |
| SNP_P3_110158_97508 | NW_004515773.1 | Scaffold239 | 97508                   | TT                              | GG                | 1946491398               |
| SNP_P3_110159_97574 | NW_004515773.1 | Scaffold239 | 97574                   | CC                              | TT                | 1946491399               |
| SNP_P3_110160_97611 | NW_004515773.1 | Scaffold239 | 97611                   | TT                              | CC                | 1946491401               |
| SNP_P3_110161_97622 | NW_004515773.1 | Scaffold239 | 97622                   | TT                              | GG                | 1946491402               |
| SNP_P3_110162_97631 | NW_004515773.1 | Scaffold239 | 97631                   | AA                              | CC                | 1946491404               |
| SNP_P3_110163_97638 | NW_004515773.1 | Scaffold239 | 97638                   | CC                              | TT                | 1946491405               |
| SNP_P3_110164_97641 | NW_004515773.1 | Scaffold239 | 97641                   | CC                              | GG                | 1946491406               |
| SNP_P3_110165_97676 | NW_004515773.1 | Scaffold239 | 97676                   | TT                              | CC                | 1946491408               |
| SNP_P3_110166_97712 | NW_004515773.1 | Scaffold239 | 97712                   | AA                              | CC                | 1946491409               |
| SNP_P3_110167_97748 | NW_004515773.1 | Scaffold239 | 97748                   | CC                              | TT                | 1946491411               |
| SNP_P3_110168_97799 | NW_004515773.1 | Scaffold239 | 97799                   | GG                              | TT                | 1946491412               |
| SNP_P3_110169_97962 | NW_004515773.1 | Scaffold239 | 97962                   | TT                              | CC                | 1946491414               |
| SNP_P3_110170_97978 | NW_004515773.1 | Scaffold239 | 97978                   | CC                              | TT                | 1946491415               |
| SNP_P3_110171_98019 | NW_004515773.1 | Scaffold239 | 98019                   | TT                              | AA                | 1946491416               |
| SNP_P3_110172_98034 | NW_004515773.1 | Scaffold239 | 98034                   | CC                              | GG                | 1946491418               |
| SNP_P3_110173_98044 | NW_004515773.1 | Scaffold239 | 98044                   | GG                              | TT                | 1946491419               |
| SNP_P3_110174_98061 | NW_004515773.1 | Scaffold239 | 98061                   | TT                              | AA                | 1946491421               |
| SNP_P3_110175_98087 | NW_004515773.1 | Scaffold239 | 98087                   | TT                              | CC                | 1946491422               |

| SNPs IDs             | Chromosome IDs | Chromosomes | Physical positions (bp) | CDC Frontier (Reference genome) | (Pusa 256 & HPNB) | NCBI SNPdb Accession IDs |
|----------------------|----------------|-------------|-------------------------|---------------------------------|-------------------|--------------------------|
| SNP_P3_110176_98104  | NW_004515773.1 | Scaffold239 | 98104                   | CC                              | GG                | 1946491424               |
| SNP_P3_110177_98121  | NW_004515773.1 | Scaffold239 | 98121                   | GG                              | AA                | 1946491425               |
| SNP_P3_110178_98176  | NW_004515773.1 | Scaffold239 | 98176                   | TT                              | CC                | 1946491427               |
| SNP_P3_110179_98177  | NW_004515773.1 | Scaffold239 | 98177                   | GG                              | AA                | 1946491428               |
| SNP_P3_110180_98182  | NW_004515773.1 | Scaffold239 | 98182                   | AA                              | CC                | 1946491429               |
| SNP_P3_110181_98197  | NW_004515773.1 | Scaffold239 | 98197                   | CC                              | TT                | 1946491431               |
| SNP_P3_110182_98221  | NW_004515773.1 | Scaffold239 | 98221                   | GG                              | AA                | 1946491432               |
| SNP_P3_110183_98237  | NW_004515773.1 | Scaffold239 | 98237                   | TT                              | CC                | 1946491434               |
| SNP_P3_110184_98263  | NW_004515773.1 | Scaffold239 | 98263                   | AA                              | GG                | 1946491435               |
| SNP_P3_110185_98313  | NW_004515773.1 | Scaffold239 | 98313                   | CC                              | TT                | 1946491437               |
| SNP_P3_110186_98339  | NW_004515773.1 | Scaffold239 | 98339                   | TT                              | CC                | 1946491438               |
| SNP_P3_110187_98363  | NW_004515773.1 | Scaffold239 | 98363                   | GG                              | TT                | 1946491439               |
| SNP_P3_110188_98371  | NW_004515773.1 | Scaffold239 | 98371                   | TT                              | GG                | 1946491441               |
| SNP_P3_110189_98372  | NW_004515773.1 | Scaffold239 | 98372                   | TT                              | CC                | 1946491442               |
| SNP_P3_110190_98401  | NW_004515773.1 | Scaffold239 | 98401                   | TT                              | AA                | 1946491444               |
| SNP_P3_110191_98434  | NW_004515773.1 | Scaffold239 | 98434                   | GG                              | TT                | 1946491445               |
| SNP_P3_110192_98439  | NW_004515773.1 | Scaffold239 | 98439                   | TT                              | AA                | 1946491447               |
| SNP_P3_110193_98455  | NW_004515773.1 | Scaffold239 | 98455                   | CC                              | AA                | 1946491448               |
| SNP_P3_110194_98463  | NW_004515773.1 | Scaffold239 | 98463                   | GG                              | AA                | 1946491450               |
| SNP_P3_110195_98464  | NW_004515773.1 | Scaffold239 | 98464                   | GG                              | AA                | 1946491451               |
| SNP_P3_110196_98483  | NW_004515773.1 | Scaffold239 | 98483                   | AA                              | GG                | 1946491453               |
| SNP_P3_110197_108470 | NW_004515773.1 | Scaffold239 | 108470                  | TT                              | CC                | 1946491454               |
| SNP_P3_110198_109035 | NW_004515773.1 | Scaffold239 | 109035                  | TT                              | AA                | 1946491456               |
| SNP_P3_110201_109370 | NW_004515773.1 | Scaffold239 | 109370                  | AA                              | GG                | 1946491457               |
| SNP_P3_110202_109722 | NW_004515773.1 | Scaffold239 | 109722                  | CC                              | AA                | 1946491459               |
| SNP_P3_110203_109825 | NW_004515773.1 | Scaffold239 | 109825                  | TT                              | CC                | 1946491460               |
| SNP_P3_110205_109888 | NW_004515773.1 | Scaffold239 | 109888                  | GG                              | TT                | 1946491461               |
| SNP_P3_110206_109954 | NW_004515773.1 | Scaffold239 | 109954                  | CC                              | TT                | 1946491463               |
| SNP_P3_110207_109989 | NW_004515773.1 | Scaffold239 | 109989                  | TT                              | AA                | 1946491464               |
| SNP_P3_110208_110004 | NW_004515773.1 | Scaffold239 | 110004                  | CC                              | TT                | 1946491466               |
| SNP_P3_110209_110132 | NW_004515773.1 | Scaffold239 | 110132                  | CC                              | TT                | 1946491467               |
| SNP_P3_110210_4629   | NW_004515774.1 | Scaffold240 | 4629                    | CC                              | TT                | 1946491469               |
| SNP_P3_110211_4645   | NW_004515774.1 | Scaffold240 | 4645                    | CC                              | TT                | 1946491470               |
| SNP_P3_110214_54840  | NW_004515774.1 | Scaffold240 | 54840                   | AA                              | GG                | 1946491472               |
| SNP_P3_110215_54896  | NW_004515774.1 | Scaffold240 | 54896                   | CC                              | TT                | 1946491473               |
| SNP_P3_110216_58738  | NW_004515774.1 | Scaffold240 | 58738                   | CC                              | TT                | 1946491475               |
| SNP_P3_110217_58750  | NW_004515774.1 | Scaffold240 | 58750                   | AA                              | GG                | 1946491476               |
| SNP_P3_110218_59140  | NW_004515774.1 | Scaffold240 | 59140                   | AA                              | GG                | 1946491477               |
| SNP_P3_110220_73014  | NW_004515774.1 | Scaffold240 | 73014                   | TT                              | GG                | 1946491479               |
| SNP_P3_110221_73019  | NW_004515774.1 | Scaffold240 | 73019                   | GG                              | AA                | 1946491480               |
| SNP_P3_110222_73052  | NW_004515774.1 | Scaffold240 | 73052                   | CC                              | TT                | 1946491482               |
| SNP_P3_110223_73056  | NW_004515774.1 | Scaffold240 | 73056                   | TT                              | AA                | 1946491483               |

| SNPs IDs             | Chromosome IDs | Chromosomes | Physical positions (bp) | CDC Frontier (Reference genome) | (Pusa 256 & HPNB) | NCBI SNPdb Accession IDs |
|----------------------|----------------|-------------|-------------------------|---------------------------------|-------------------|--------------------------|
| SNP_P3_110224_73069  | NW_004515774.1 | Scaffold240 | 73069                   | TT                              | AA                | 1946491485               |
| SNP_P3_110225_73119  | NW_004515774.1 | Scaffold240 | 73119                   | AA                              | GG                | 1946491486               |
| SNP_P3_110227_73464  | NW_004515774.1 | Scaffold240 | 73464                   | GG                              | AA                | 1946491488               |
| SNP_P3_110228_73525  | NW_004515774.1 | Scaffold240 | 73525                   | AA                              | CC                | 1946491489               |
| SNP_P3_110229_73530  | NW_004515774.1 | Scaffold240 | 73530                   | TT                              | AA                | 1946491490               |
| SNP_P3_110230_100966 | NW_004515774.1 | Scaffold240 | 100966                  | GG                              | CC                | 1946491492               |
| SNP_P3_110231_100979 | NW_004515774.1 | Scaffold240 | 100979                  | CC                              | AA                | 1946491493               |
| SNP_P3_110232_101000 | NW_004515774.1 | Scaffold240 | 101000                  | AA                              | CC                | 1946491495               |
| SNP_P3_110233_101024 | NW_004515774.1 | Scaffold240 | 101024                  | TT                              | CC                | 1946491496               |
| SNP_P3_110234_101059 | NW_004515774.1 | Scaffold240 | 101059                  | CC                              | TT                | 1946491498               |
| SNP_P3_110235_101358 | NW_004515774.1 | Scaffold240 | 101358                  | CC                              | TT                | 1946491499               |
| SNP_P3_110236_101363 | NW_004515774.1 | Scaffold240 | 101363                  | AA                              | TT                | 1946491501               |
| SNP_P3_110237_101370 | NW_004515774.1 | Scaffold240 | 101370                  | TT                              | CC                | 1946491502               |
| SNP_P3_110238_117062 | NW_004515774.1 | Scaffold240 | 117062                  | GG                              | TT                | 1946491503               |
| SNP_P3_110239_130182 | NW_004515774.1 | Scaffold240 | 130182                  | GG                              | AA                | 1946491505               |
| SNP_P3_110240_139332 | NW_004515774.1 | Scaffold240 | 139332                  | AA                              | GG                | 1946491506               |
| SNP_P3_110241_142198 | NW_004515774.1 | Scaffold240 | 142198                  | CC                              | AA                | 1946491508               |
| SNP_P3_110242_142215 | NW_004515774.1 | Scaffold240 | 142215                  | GG                              | AA                | 1946491509               |
| SNP_P3_110243_142277 | NW_004515774.1 | Scaffold240 | 142277                  | TT                              | CC                | 1946491511               |
| SNP_P3_110244_142302 | NW_004515774.1 | Scaffold240 | 142302                  | TT                              | AA                | 1946491512               |
| SNP_P3_110245_142325 | NW_004515774.1 | Scaffold240 | 142325                  | AA                              | TT                | 1946491514               |
| SNP_P3_110246_142329 | NW_004515774.1 | Scaffold240 | 142329                  | CC                              | AA                | 1946491515               |
| SNP_P3_110247_142344 | NW_004515774.1 | Scaffold240 | 142344                  | TT                              | GG                | 1946491516               |
| SNP_P3_110248_142774 | NW_004515774.1 | Scaffold240 | 142774                  | CC                              | TT                | 1946491518               |
| SNP_P3_110249_142776 | NW_004515774.1 | Scaffold240 | 142776                  | TT                              | CC                | 1946491519               |
| SNP_P3_110250_142791 | NW_004515774.1 | Scaffold240 | 142791                  | CC                              | TT                | 1946491521               |
| SNP_P3_110251_142917 | NW_004515774.1 | Scaffold240 | 142917                  | TT                              | GG                | 1946491522               |
| SNP_P3_110252_142920 | NW_004515774.1 | Scaffold240 | 142920                  | TT                              | CC                | 1946491524               |
| SNP_P3_110253_142921 | NW_004515774.1 | Scaffold240 | 142921                  | GG                              | AA                | 1946491525               |
| SNP_P3_110254_142922 | NW_004515774.1 | Scaffold240 | 142922                  | AA                              | CC                | 1946491527               |
| SNP_P3_110255_142944 | NW_004515774.1 | Scaffold240 | 142944                  | TT                              | CC                | 1946491528               |
| SNP_P3_110256_143754 | NW_004515774.1 | Scaffold240 | 143754                  | TT                              | AA                | 1946491530               |
| SNP_P3_110257_143768 | NW_004515774.1 | Scaffold240 | 143768                  | CC                              | AA                | 1946491531               |
| SNP_P3_110258_145027 | NW_004515774.1 | Scaffold240 | 145027                  | CC                              | TT                | 1946491533               |
| SNP_P3_110259_145182 | NW_004515774.1 | Scaffold240 | 145182                  | CC                              | TT                | 1946491535               |
| SNP_P3_110260_145185 | NW_004515774.1 | Scaffold240 | 145185                  | TT                              | GG                | 1946491536               |
| SNP_P3_110261_147268 | NW_004515774.1 | Scaffold240 | 147268                  | AA                              | GG                | 1946491538               |
| SNP_P3_110262_148062 | NW_004515774.1 | Scaffold240 | 148062                  | TT                              | CC                | 1946491539               |
| SNP_P3_110264_149727 | NW_004515774.1 | Scaffold240 | 149727                  | CC                              | TT                | 1946491541               |
| SNP_P3_110266_150309 | NW_004515774.1 | Scaffold240 | 150309                  | AA                              | GG                | 1946491542               |
| SNP_P3_110268_151401 | NW_004515774.1 | Scaffold240 | 151401                  | CC                              | TT                | 1946491544               |
| SNP_P3_110269_151905 | NW_004515774.1 | Scaffold240 | 151905                  | GG                              | AA                | 1946491545               |

| SNPs IDs             | Chromosome IDs | Chromosomes | Physical positions (bp) | CDC Frontier (Reference genome) | (Pusa 256 & HPNB) | NCBI SNPdb Accession IDs |
|----------------------|----------------|-------------|-------------------------|---------------------------------|-------------------|--------------------------|
| SNP_P3_110270_153962 | NW_004515774.1 | Scaffold240 | 153962                  | TT                              | CC                | 1946491547               |
| SNP_P3_110271_155587 | NW_004515774.1 | Scaffold240 | 155587                  | CC                              | TT                | 1946491548               |
| SNP_P3_110273_157115 | NW_004515774.1 | Scaffold240 | 157115                  | GG                              | TT                | 1946491550               |
| SNP_P3_110274_2817   | NW_004515775.1 | Scaffold242 | 2817                    | CC                              | TT                | 1946491551               |
| SNP_P3_110275_2818   | NW_004515775.1 | Scaffold242 | 2818                    | CC                              | AA                | 1946491553               |
| SNP_P3_110276_4534   | NW_004515775.1 | Scaffold242 | 4534                    | TT                              | GG                | 1946491554               |
| SNP_P3_110277_8474   | NW_004515775.1 | Scaffold242 | 8474                    | AA                              | CC                | 1946491556               |
| SNP_P3_110278_8871   | NW_004515775.1 | Scaffold242 | 8871                    | TT                              | CC                | 1946491557               |
| SNP_P3_110279_9073   | NW_004515775.1 | Scaffold242 | 9073                    | TT                              | CC                | 1946491559               |
| SNP_P3_110280_9302   | NW_004515775.1 | Scaffold242 | 9302                    | AA                              | CC                | 1946491560               |
| SNP_P3_110281_10782  | NW_004515775.1 | Scaffold242 | 10782                   | TT                              | AA                | 1946491561               |
| SNP_P3_110282_10971  | NW_004515775.1 | Scaffold242 | 10971                   | AA                              | GG                | 1946491563               |
| SNP_P3_110283_17219  | NW_004515775.1 | Scaffold242 | 17219                   | GG                              | CC                | 1946491564               |
| SNP_P3_110284_19779  | NW_004515775.1 | Scaffold242 | 19779                   | AA                              | TT                | 1946491566               |
| SNP_P3_110285_22483  | NW_004515775.1 | Scaffold242 | 22483                   | TT                              | CC                | 1946491567               |
| SNP_P3_110286_23801  | NW_004515775.1 | Scaffold242 | 23801                   | TT                              | CC                | 1946491569               |
| SNP_P3_110287_24103  | NW_004515775.1 | Scaffold242 | 24103                   | GG                              | AA                | 1946491570               |
| SNP_P3_110288_25018  | NW_004515775.1 | Scaffold242 | 25018                   | GG                              | CC                | 1946491572               |
| SNP_P3_110290_30366  | NW_004515775.1 | Scaffold242 | 30366                   | TT                              | CC                | 1946491573               |
| SNP_P3_110291_42110  | NW_004515775.1 | Scaffold242 | 42110                   | GG                              | AA                | 1946491574               |
| SNP_P3_110292_42658  | NW_004515775.1 | Scaffold242 | 42658                   | CC                              | TT                | 1946491576               |
| SNP_P3_110293_42896  | NW_004515775.1 | Scaffold242 | 42896                   | CC                              | AA                | 1946491577               |
| SNP_P3_110294_44671  | NW_004515775.1 | Scaffold242 | 44671                   | CC                              | GG                | 1946491579               |
| SNP_P3_110296_44837  | NW_004515775.1 | Scaffold242 | 44837                   | TT                              | GG                | 1946491580               |
| SNP_P3_110297_44839  | NW_004515775.1 | Scaffold242 | 44839                   | CC                              | AA                | 1946491582               |
| SNP_P3_110298_44853  | NW_004515775.1 | Scaffold242 | 44853                   | CC                              | AA                | 1946491583               |
| SNP_P3_110299_45094  | NW_004515775.1 | Scaffold242 | 45094                   | TT                              | CC                | 1946491584               |
| SNP_P3_110300_45227  | NW_004515775.1 | Scaffold242 | 45227                   | TT                              | GG                | 1946491586               |
| SNP_P3_110301_45228  | NW_004515775.1 | Scaffold242 | 45228                   | AA                              | GG                | 1946491587               |
| SNP_P3_110302_45243  | NW_004515775.1 | Scaffold242 | 45243                   | AA                              | GG                | 1946491589               |
| SNP_P3_110303_45294  | NW_004515775.1 | Scaffold242 | 45294                   | AA                              | GG                | 1946491590               |
| SNP_P3_110304_45366  | NW_004515775.1 | Scaffold242 | 45366                   | TT                              | CC                | 1946491592               |
| SNP_P3_110305_45468  | NW_004515775.1 | Scaffold242 | 45468                   | TT                              | AA                | 1946491593               |
| SNP_P3_110306_45475  | NW_004515775.1 | Scaffold242 | 45475                   | AA                              | GG                | 1946491595               |
| SNP_P3_110307_45483  | NW_004515775.1 | Scaffold242 | 45483                   | GG                              | AA                | 1946491596               |
| SNP_P3_110308_45485  | NW_004515775.1 | Scaffold242 | 45485                   | GG                              | TT                | 1946491597               |
| SNP_P3_110309_45516  | NW_004515775.1 | Scaffold242 | 45516                   | CC                              | TT                | 1946491599               |
| SNP_P3_110310_49412  | NW_004515775.1 | Scaffold242 | 49412                   | GG                              | AA                | 1946491600               |
| SNP_P3_110311_50294  | NW_004515775.1 | Scaffold242 | 50294                   | TT                              | CC                | 1946491602               |
| SNP_P3_110312_50301  | NW_004515775.1 | Scaffold242 | 50301                   | CC                              | AA                | 1946491603               |
| SNP_P3_110313_50335  | NW_004515775.1 | Scaffold242 | 50335                   | AA                              | GG                | 1946491605               |
| SNP_P3_110314_50356  | NW_004515775.1 | Scaffold242 | 50356                   | GG                              | AA                | 1946491606               |

| SNPs IDs             | Chromosome IDs | Chromosomes | Physical positions (bp) | CDC Frontier (Reference genome) | (Pusa 256 & HPNB) | NCBI SNPdb Accession IDs |
|----------------------|----------------|-------------|-------------------------|---------------------------------|-------------------|--------------------------|
| SNP_P3_110315_50365  | NW_004515775.1 | Scaffold242 | 50365                   | CC                              | GG                | 1946491608               |
| SNP_P3_110316_50421  | NW_004515775.1 | Scaffold242 | 50421                   | AA                              | GG                | 1946491609               |
| SNP_P3_110317_50426  | NW_004515775.1 | Scaffold242 | 50426                   | TT                              | CC                | 1946491611               |
| SNP_P3_110318_50644  | NW_004515775.1 | Scaffold242 | 50644                   | AA                              | GG                | 1946491612               |
| SNP_P3_110319_50832  | NW_004515775.1 | Scaffold242 | 50832                   | AA                              | GG                | 1946491613               |
| SNP_P3_110320_50861  | NW_004515775.1 | Scaffold242 | 50861                   | TT                              | CC                | 1946491615               |
| SNP_P3_110321_50879  | NW_004515775.1 | Scaffold242 | 50879                   | AA                              | GG                | 1946491616               |
| SNP_P3_110322_51027  | NW_004515775.1 | Scaffold242 | 51027                   | TT                              | CC                | 1946491618               |
| SNP_P3_110324_52229  | NW_004515775.1 | Scaffold242 | 52229                   | TT                              | AA                | 1946491619               |
| SNP_P3_110325_52231  | NW_004515775.1 | Scaffold242 | 52231                   | AA                              | CC                | 1946491621               |
| SNP_P3_110326_52503  | NW_004515775.1 | Scaffold242 | 52503                   | AA                              | GG                | 1946491622               |
| SNP_P3_110327_54306  | NW_004515775.1 | Scaffold242 | 54306                   | AA                              | GG                | 1946491624               |
| SNP_P3_110328_64397  | NW_004515775.1 | Scaffold242 | 64397                   | CC                              | TT                | 1946491625               |
| SNP_P3_110329_64740  | NW_004515775.1 | Scaffold242 | 64740                   | GG                              | AA                | 1946491627               |
| SNP_P3_110330_64769  | NW_004515775.1 | Scaffold242 | 64769                   | GG                              | AA                | 1946491628               |
| SNP_P3_110331_82394  | NW_004515775.1 | Scaffold242 | 82394                   | GG                              | TT                | 1946491629               |
| SNP_P3_110332_97691  | NW_004515775.1 | Scaffold242 | 97691                   | GG                              | AA                | 1946491631               |
| SNP_P3_110333_97901  | NW_004515775.1 | Scaffold242 | 97901                   | AA                              | GG                | 1946491632               |
| SNP_P3_110334_98150  | NW_004515775.1 | Scaffold242 | 98150                   | TT                              | AA                | 1946491634               |
| SNP_P3_110335_103749 | NW_004515775.1 | Scaffold242 | 103749                  | CC                              | TT                | 1946491635               |
| SNP_P3_110336_103775 | NW_004515775.1 | Scaffold242 | 103775                  | CC                              | TT                | 1946491637               |
| SNP_P3_110337_103779 | NW_004515775.1 | Scaffold242 | 103779                  | CC                              | AA                | 1946491638               |
| SNP_P3_110338_103998 | NW_004515775.1 | Scaffold242 | 103998                  | CC                              | TT                | 1946491640               |
| SNP_P3_110339_104050 | NW_004515775.1 | Scaffold242 | 104050                  | AA                              | GG                | 1946491641               |
| SNP_P3_110340_108197 | NW_004515775.1 | Scaffold242 | 108197                  | CC                              | TT                | 1946491643               |
| SNP_P3_110341_108207 | NW_004515775.1 | Scaffold242 | 108207                  | CC                              | AA                | 1946491644               |
| SNP_P3_110342_108234 | NW_004515775.1 | Scaffold242 | 108234                  | TT                              | CC                | 1946491646               |
| SNP_P3_110343_108282 | NW_004515775.1 | Scaffold242 | 108282                  | CC                              | TT                | 1946491647               |
| SNP_P3_110344_113989 | NW_004515775.1 | Scaffold242 | 113989                  | AA                              | GG                | 1946491649               |
| SNP_P3_110345_115811 | NW_004515775.1 | Scaffold242 | 115811                  | CC                              | TT                | 1946491650               |
| SNP_P3_110346_116505 | NW_004515775.1 | Scaffold242 | 116505                  | GG                              | AA                | 1946491652               |
| SNP_P3_110347_117929 | NW_004515775.1 | Scaffold242 | 117929                  | AA                              | GG                | 1946491653               |
| SNP_P3_110348_119380 | NW_004515775.1 | Scaffold242 | 119380                  | CC                              | TT                | 1946491654               |
| SNP_P3_110349_119617 | NW_004515775.1 | Scaffold242 | 119617                  | TT                              | CC                | 1946491656               |
| SNP_P3_110350_122452 | NW_004515775.1 | Scaffold242 | 122452                  | TT                              | CC                | 1946491657               |
| SNP_P3_110351_123010 | NW_004515775.1 | Scaffold242 | 123010                  | CC                              | TT                | 1946491659               |
| SNP_P3_110352_146432 | NW_004515775.1 | Scaffold242 | 146432                  | AA                              | TT                | 1946491661               |
| SNP_P3_110353_151256 | NW_004515775.1 | Scaffold242 | 151256                  | CC                              | TT                | 1946491662               |
| SNP_P3_110354_152118 | NW_004515775.1 | Scaffold242 | 152118                  | AA                              | GG                | 1946491663               |
| SNP_P3_110355_156781 | NW_004515775.1 | Scaffold242 | 156781                  | AA                              | GG                | 1946491665               |
| SNP_P3_110356_164794 | NW_004515775.1 | Scaffold242 | 164794                  | TT                              | AA                | 1946491666               |
| SNP_P3_110358_169547 | NW_004515775.1 | Scaffold242 | 169547                  | CC                              | TT                | 1946491668               |

| SNPs IDs             | Chromosome IDs | Chromosomes | Physical positions (bp) | CDC Frontier (Reference genome) | (Pusa 256 & HPNB) | NCBI SNPdb Accession IDs |
|----------------------|----------------|-------------|-------------------------|---------------------------------|-------------------|--------------------------|
| SNP_P3_110359_172314 | NW_004515775.1 | Scaffold242 | 172314                  | AA                              | CC                | 1946491669               |
| SNP_P3_110360_174553 | NW_004515775.1 | Scaffold242 | 174553                  | GG                              | TT                | 1946491671               |
| SNP_P3_110361_176610 | NW_004515775.1 | Scaffold242 | 176610                  | GG                              | AA                | 1946491672               |
| SNP_P3_110362_181630 | NW_004515775.1 | Scaffold242 | 181630                  | GG                              | AA                | 1946491674               |
| SNP_P3_110363_182199 | NW_004515775.1 | Scaffold242 | 182199                  | AA                              | GG                | 1946491675               |
| SNP_P3_110364_191423 | NW_004515775.1 | Scaffold242 | 191423                  | GG                              | AA                | 1946491677               |
| SNP_P3_110365_191552 | NW_004515775.1 | Scaffold242 | 191552                  | TT                              | CC                | 1946491678               |
| SNP_P3_110366_191717 | NW_004515775.1 | Scaffold242 | 191717                  | TT                              | AA                | 1946491680               |
| SNP_P3_110367_195978 | NW_004515775.1 | Scaffold242 | 195978                  | AA                              | TT                | 1946491681               |
| SNP_P3_110368_210654 | NW_004515775.1 | Scaffold242 | 210654                  | GG                              | TT                | 1946491683               |
| SNP_P3_110369_211548 | NW_004515775.1 | Scaffold242 | 211548                  | AA                              | GG                | 1946491684               |
| SNP_P3_110370_213818 | NW_004515775.1 | Scaffold242 | 213818                  | CC                              | GG                | 1946491686               |
| SNP_P3_110371_219208 | NW_004515775.1 | Scaffold242 | 219208                  | CC                              | TT                | 1946491687               |
| SNP_P3_110372_222500 | NW_004515775.1 | Scaffold242 | 222500                  | CC                              | AA                | 1946491689               |
| SNP_P3_110373_223049 | NW_004515775.1 | Scaffold242 | 223049                  | AA                              | TT                | 1946491690               |
| SNP_P3_110374_229265 | NW_004515775.1 | Scaffold242 | 229265                  | GG                              | AA                | 1946491691               |
| SNP_P3_110375_229946 | NW_004515775.1 | Scaffold242 | 229946                  | CC                              | AA                | 1946491693               |
| SNP_P3_110376_230073 | NW_004515775.1 | Scaffold242 | 230073                  | GG                              | AA                | 1946491694               |
| SNP_P3_110379_236049 | NW_004515775.1 | Scaffold242 | 236049                  | GG                              | TT                | 1946491696               |
| SNP_P3_110380_236050 | NW_004515775.1 | Scaffold242 | 236050                  | TT                              | AA                | 1946491697               |
| SNP_P3_110382_244176 | NW_004515775.1 | Scaffold242 | 244176                  | AA                              | GG                | 1946491699               |
| SNP_P3_110384_253205 | NW_004515775.1 | Scaffold242 | 253205                  | CC                              | TT                | 1946491700               |
| SNP_P3_110385_254050 | NW_004515775.1 | Scaffold242 | 254050                  | TT                              | CC                | 1946491702               |
| SNP_P3_110386_254390 | NW_004515775.1 | Scaffold242 | 254390                  | GG                              | AA                | 1946491703               |
| SNP_P3_110387_254885 | NW_004515775.1 | Scaffold242 | 254885                  | TT                              | CC                | 1946491705               |
| SNP_P3_110388_255547 | NW_004515775.1 | Scaffold242 | 255547                  | CC                              | TT                | 1946491706               |
| SNP_P3_110390_264990 | NW_004515775.1 | Scaffold242 | 264990                  | TT                              | CC                | 1946491707               |
| SNP_P3_110391_269278 | NW_004515775.1 | Scaffold242 | 269278                  | GG                              | AA                | 1946491709               |
| SNP_P3_110392_270709 | NW_004515775.1 | Scaffold242 | 270709                  | CC                              | AA                | 1946491710               |
| SNP_P3_110393_288374 | NW_004515775.1 | Scaffold242 | 288374                  | AA                              | GG                | 1946491712               |
| SNP_P3_110394_298719 | NW_004515775.1 | Scaffold242 | 298719                  | CC                              | GG                | 1946491713               |
| SNP_P3_110395_298945 | NW_004515775.1 | Scaffold242 | 298945                  | AA                              | CC                | 1946491715               |
| SNP_P3_110396_306972 | NW_004515775.1 | Scaffold242 | 306972                  | TT                              | CC                | 1946491716               |
| SNP_P3_110398_309863 | NW_004515775.1 | Scaffold242 | 309863                  | AA                              | GG                | 1946491718               |
| SNP_P3_110399_310194 | NW_004515775.1 | Scaffold242 | 310194                  | TT                              | CC                | 1946491719               |
| SNP_P3_110400_310227 | NW_004515775.1 | Scaffold242 | 310227                  | TT                              | CC                | 1946491721               |
| SNP_P3_110401_310232 | NW_004515775.1 | Scaffold242 | 310232                  | CC                              | TT                | 1946491722               |
| SNP_P3_110402_310251 | NW_004515775.1 | Scaffold242 | 310251                  | CC                              | TT                | 1946491724               |
| SNP_P3_110403_310282 | NW_004515775.1 | Scaffold242 | 310282                  | TT                              | CC                | 1946491725               |
| SNP_P3_110404_311756 | NW_004515775.1 | Scaffold242 | 311756                  | AA                              | CC                | 1946491727               |
| SNP_P3_110405_313260 | NW_004515775.1 | Scaffold242 | 313260                  | CC                              | GG                | 1946491728               |
| SNP_P3_110406_313347 | NW_004515775.1 | Scaffold242 | 313347                  | TT                              | CC                | 1946491729               |

| SNPs IDs             | Chromosome IDs | Chromosomes | Physical positions (bp) | CDC Frontier (Reference genome) | (Pusa 256 & HPNB) | NCBI SNPdb Accession IDs |
|----------------------|----------------|-------------|-------------------------|---------------------------------|-------------------|--------------------------|
| SNP_P3_110408_314727 | NW_004515775.1 | Scaffold242 | 314727                  | CC                              | AA                | 1946491731               |
| SNP_P3_110409_316002 | NW_004515775.1 | Scaffold242 | 316002                  | CC                              | AA                | 1946491732               |
| SNP_P3_110410_324719 | NW_004515775.1 | Scaffold242 | 324719                  | GG                              | TT                | 1946491734               |
| SNP_P3_110411_325461 | NW_004515775.1 | Scaffold242 | 325461                  | GG                              | CC                | 1946491735               |
| SNP_P3_110412_327163 | NW_004515775.1 | Scaffold242 | 327163                  | AA                              | GG                | 1946491737               |
| SNP_P3_110413_328829 | NW_004515775.1 | Scaffold242 | 328829                  | AA                              | GG                | 1946491738               |
| SNP_P3_110414_334766 | NW_004515775.1 | Scaffold242 | 334766                  | CC                              | TT                | 1946491739               |
| SNP_P3_110415_335901 | NW_004515775.1 | Scaffold242 | 335901                  | TT                              | CC                | 1946491741               |
| SNP_P3_110416_336670 | NW_004515775.1 | Scaffold242 | 336670                  | GG                              | AA                | 1946491742               |
| SNP_P3_110417_338586 | NW_004515775.1 | Scaffold242 | 338586                  | TT                              | AA                | 1946491744               |
| SNP_P3_110418_339146 | NW_004515775.1 | Scaffold242 | 339146                  | TT                              | CC                | 1946491745               |
| SNP_P3_110419_339309 | NW_004515775.1 | Scaffold242 | 339309                  | AA                              | GG                | 1946491747               |
| SNP_P3_110420_339310 | NW_004515775.1 | Scaffold242 | 339310                  | AA                              | CC                | 1946491748               |
| SNP_P3_110421_339311 | NW_004515775.1 | Scaffold242 | 339311                  | AA                              | CC                | 1946491750               |
| SNP_P3_110422_344323 | NW_004515775.1 | Scaffold242 | 344323                  | CC                              | GG                | 1946491751               |
| SNP_P3_110423_353888 | NW_004515775.1 | Scaffold242 | 353888                  | CC                              | TT                | 1946491753               |
| SNP_P3_110424_354369 | NW_004515775.1 | Scaffold242 | 354369                  | CC                              | TT                | 1946491754               |
| SNP_P3_110425_355170 | NW_004515775.1 | Scaffold242 | 355170                  | CC                              | TT                | 1946491756               |
| SNP_P3_110426_355396 | NW_004515775.1 | Scaffold242 | 355396                  | GG                              | AA                | 1946491757               |
| SNP_P3_110427_355608 | NW_004515775.1 | Scaffold242 | 355608                  | AA                              | GG                | 1946491759               |
| SNP_P3_110428_356992 | NW_004515775.1 | Scaffold242 | 356992                  | CC                              | AA                | 1946491760               |
| SNP_P3_110429_358538 | NW_004515775.1 | Scaffold242 | 358538                  | AA                              | GG                | 1946491762               |
| SNP_P3_110432_361589 | NW_004515775.1 | Scaffold242 | 361589                  | CC                              | AA                | 1946491763               |
| SNP_P3_110433_361590 | NW_004515775.1 | Scaffold242 | 361590                  | CC                              | TT                | 1946491765               |
| SNP_P3_110434_364176 | NW_004515775.1 | Scaffold242 | 364176                  | GG                              | TT                | 1946491766               |
| SNP_P3_110435_364776 | NW_004515775.1 | Scaffold242 | 364776                  | CC                              | AA                | 1946491767               |
| SNP_P3_110436_366735 | NW_004515775.1 | Scaffold242 | 366735                  | AA                              | GG                | 1946491769               |
| SNP_P3_110437_367825 | NW_004515775.1 | Scaffold242 | 367825                  | GG                              | TT                | 1946491770               |
| SNP_P3_110439_372636 | NW_004515775.1 | Scaffold242 | 372636                  | TT                              | AA                | 1946491772               |
| SNP_P3_110440_374479 | NW_004515775.1 | Scaffold242 | 374479                  | TT                              | GG                | 1946491773               |
| SNP_P3_110441_377509 | NW_004515775.1 | Scaffold242 | 377509                  | AA                              | GG                | 1946491775               |
| SNP_P3_110442_384574 | NW_004515775.1 | Scaffold242 | 384574                  | AA                              | GG                | 1946491776               |
| SNP_P3_110444_394517 | NW_004515775.1 | Scaffold242 | 394517                  | AA                              | TT                | 1946491778               |
| SNP_P3_110445_397421 | NW_004515775.1 | Scaffold242 | 397421                  | AA                              | GG                | 1946491779               |
| SNP_P3_110446_397818 | NW_004515775.1 | Scaffold242 | 397818                  | CC                              | AA                | 1946491781               |
| SNP_P3_110447_398120 | NW_004515775.1 | Scaffold242 | 398120                  | CC                              | TT                | 1946491782               |
| SNP_P3_110448_398128 | NW_004515775.1 | Scaffold242 | 398128                  | AA                              | GG                | 1946491784               |
| SNP_P3_110449_398609 | NW_004515775.1 | Scaffold242 | 398609                  | GG                              | TT                | 1946491785               |
| SNP_P3_110450_398952 | NW_004515775.1 | Scaffold242 | 398952                  | AA                              | GG                | 1946491786               |
| SNP_P3_110451_399247 | NW_004515775.1 | Scaffold242 | 399247                  | CC                              | GG                | 1946491788               |
| SNP_P3_110452_399301 | NW_004515775.1 | Scaffold242 | 399301                  | AA                              | GG                | 1946491789               |
| SNP_P3_110453_400481 | NW_004515775.1 | Scaffold242 | 400481                  | AA                              | CC                | 1946491791               |



| SNPs IDs             | Chromosome IDs | Chromosomes | Physical positions (bp) | CDC Frontier (Reference genome) | (Pusa 256 & HPNB) | NCBI SNPdb Accession IDs |
|----------------------|----------------|-------------|-------------------------|---------------------------------|-------------------|--------------------------|
| SNP_P3_110454_404886 | NW_004515775.1 | Scaffold242 | 404886                  | GG                              | AA                | 1946491792               |
| SNP_P3_110455_405629 | NW_004515775.1 | Scaffold242 | 405629                  | GG                              | AA                | 1946491794               |
| SNP_P3_110457_405939 | NW_004515775.1 | Scaffold242 | 405939                  | CC                              | TT                | 1946491795               |
| SNP_P3_110458_406031 | NW_004515775.1 | Scaffold242 | 406031                  | AA                              | GG                | 1946491797               |
| SNP_P3_110459_411892 | NW_004515775.1 | Scaffold242 | 411892                  | AA                              | TT                | 1946491798               |
| SNP_P3_110460_414650 | NW_004515775.1 | Scaffold242 | 414650                  | GG                              | CC                | 1946491799               |
| SNP_P3_110461_414799 | NW_004515775.1 | Scaffold242 | 414799                  | CC                              | TT                | 1946491801               |
| SNP_P3_110463_418076 | NW_004515775.1 | Scaffold242 | 418076                  | AA                              | CC                | 1946491802               |
| SNP_P3_110464_418210 | NW_004515775.1 | Scaffold242 | 418210                  | AA                              | GG                | 1946491804               |
| SNP_P3_110465_418292 | NW_004515775.1 | Scaffold242 | 418292                  | AA                              | GG                | 1946491805               |
| SNP_P3_110466_418518 | NW_004515775.1 | Scaffold242 | 418518                  | AA                              | TT                | 1946491807               |
| SNP_P3_110467_418886 | NW_004515775.1 | Scaffold242 | 418886                  | CC                              | TT                | 1946491808               |
| SNP_P3_110468_419205 | NW_004515775.1 | Scaffold242 | 419205                  | AA                              | CC                | 1946491809               |
| SNP_P3_110469_419254 | NW_004515775.1 | Scaffold242 | 419254                  | CC                              | AA                | 1946491811               |
| SNP_P3_110470_421997 | NW_004515775.1 | Scaffold242 | 421997                  | AA                              | CC                | 1946491812               |
| SNP_P3_110473_429766 | NW_004515775.1 | Scaffold242 | 429766                  | TT                              | CC                | 1946491814               |
| SNP_P3_110474_431100 | NW_004515775.1 | Scaffold242 | 431100                  | AA                              | CC                | 1946491815               |
| SNP_P3_110475_431646 | NW_004515775.1 | Scaffold242 | 431646                  | GG                              | AA                | 1946491817               |
| SNP_P3_110476_438519 | NW_004515775.1 | Scaffold242 | 438519                  | TT                              | GG                | 1946491818               |
| SNP_P3_110477_439593 | NW_004515775.1 | Scaffold242 | 439593                  | AA                              | GG                | 1946491820               |
| SNP_P3_110479_449088 | NW_004515775.1 | Scaffold242 | 449088                  | TT                              | CC                | 1946491821               |
| SNP_P3_110480_450172 | NW_004515775.1 | Scaffold242 | 450172                  | GG                              | AA                | 1946491822               |
| SNP_P3_110481_450173 | NW_004515775.1 | Scaffold242 | 450173                  | CC                              | GG                | 1946491824               |
| SNP_P3_110482_450810 | NW_004515775.1 | Scaffold242 | 450810                  | GG                              | AA                | 1946491825               |
| SNP_P3_110484_455617 | NW_004515775.1 | Scaffold242 | 455617                  | GG                              | AA                | 1946491827               |
| SNP_P3_110485_460730 | NW_004515775.1 | Scaffold242 | 460730                  | AA                              | TT                | 1946491828               |
| SNP_P3_110486_460731 | NW_004515775.1 | Scaffold242 | 460731                  | AA                              | TT                | 1946491830               |
| SNP_P3_110487_460732 | NW_004515775.1 | Scaffold242 | 460732                  | AA                              | TT                | 1946491831               |
| SNP_P3_110488_460733 | NW_004515775.1 | Scaffold242 | 460733                  | AA                              | TT                | 1946491833               |
| SNP_P3_110489_462697 | NW_004515775.1 | Scaffold242 | 462697                  | GG                              | AA                | 1946491834               |
| SNP_P3_110490_462737 | NW_004515775.1 | Scaffold242 | 462737                  | TT                              | CC                | 1946491836               |
| SNP_P3_110491_462750 | NW_004515775.1 | Scaffold242 | 462750                  | AA                              | TT                | 1946491837               |
| SNP_P3_110492_465277 | NW_004515775.1 | Scaffold242 | 465277                  | TT                              | CC                | 1946491838               |
| SNP_P3_110493_466320 | NW_004515775.1 | Scaffold242 | 466320                  | GG                              | CC                | 1946491840               |
| SNP_P3_110494_471432 | NW_004515775.1 | Scaffold242 | 471432                  | CC                              | AA                | 1946491841               |
| SNP_P3_110495_472658 | NW_004515775.1 | Scaffold242 | 472658                  | GG                              | TT                | 1946491843               |
| SNP_P3_110496_483329 | NW_004515775.1 | Scaffold242 | 483329                  | CC                              | TT                | 1946491844               |
| SNP_P3_110497_487876 | NW_004515775.1 | Scaffold242 | 487876                  | TT                              | CC                | 1946491846               |
| SNP_P3_110498_487902 | NW_004515775.1 | Scaffold242 | 487902                  | AA                              | GG                | 1946491847               |
| SNP_P3_110499_489286 | NW_004515775.1 | Scaffold242 | 489286                  | GG                              | AA                | 1946491848               |
| SNP_P3_110500_490765 | NW_004515775.1 | Scaffold242 | 490765                  | TT                              | GG                | 1946491850               |
| SNP_P3_110501_492695 | NW_004515775.1 | Scaffold242 | 492695                  | AA                              | TT                | 1946491851               |

| SNPs IDs             | Chromosome IDs | Chromosomes | Physical positions (bp) | CDC Frontier (Reference genome) | (Pusa 256 & HPNB) | NCBI SNPdb Accession IDs |
|----------------------|----------------|-------------|-------------------------|---------------------------------|-------------------|--------------------------|
| SNP_P3_110504_503454 | NW_004515775.1 | Scaffold242 | 503454                  | AA                              | GG                | 1946491853               |
| SNP_P3_110506_506286 | NW_004515775.1 | Scaffold242 | 506286                  | AA                              | GG                | 1946491854               |
| SNP_P3_110507_506292 | NW_004515775.1 | Scaffold242 | 506292                  | AA                              | GG                | 1946491856               |
| SNP_P3_110511_513602 | NW_004515775.1 | Scaffold242 | 513602                  | GG                              | TT                | 1946491857               |
| SNP_P3_110512_513635 | NW_004515775.1 | Scaffold242 | 513635                  | AA                              | GG                | 1946491859               |
| SNP_P3_110513_513643 | NW_004515775.1 | Scaffold242 | 513643                  | TT                              | AA                | 1946491860               |
| SNP_P3_110514_513647 | NW_004515775.1 | Scaffold242 | 513647                  | GG                              | AA                | 1946491861               |
| SNP_P3_110516_514595 | NW_004515775.1 | Scaffold242 | 514595                  | CC                              | TT                | 1946491863               |
| SNP_P3_110517_518735 | NW_004515775.1 | Scaffold242 | 518735                  | TT                              | CC                | 1946491864               |
| SNP_P3_110518_521031 | NW_004515775.1 | Scaffold242 | 521031                  | TT                              | CC                | 1946491866               |
| SNP_P3_110519_521036 | NW_004515775.1 | Scaffold242 | 521036                  | AA                              | TT                | 1946491867               |
| SNP_P3_110520_521060 | NW_004515775.1 | Scaffold242 | 521060                  | AA                              | GG                | 1946491869               |
| SNP_P3_110521_521405 | NW_004515775.1 | Scaffold242 | 521405                  | GG                              | TT                | 1946491870               |
| SNP_P3_110523_523622 | NW_004515775.1 | Scaffold242 | 523622                  | GG                              | TT                | 1946491872               |
| SNP_P3_110525_531999 | NW_004515775.1 | Scaffold242 | 531999                  | AA                              | GG                | 1946491873               |
| SNP_P3_110526_534168 | NW_004515775.1 | Scaffold242 | 534168                  | CC                              | TT                | 1946491874               |
| SNP_P3_110527_534171 | NW_004515775.1 | Scaffold242 | 534171                  | GG                              | AA                | 1946491876               |
| SNP_P3_110528_534535 | NW_004515775.1 | Scaffold242 | 534535                  | AA                              | GG                | 1946491877               |
| SNP_P3_110529_534540 | NW_004515775.1 | Scaffold242 | 534540                  | GG                              | AA                | 1946491879               |
| SNP_P3_110530_536753 | NW_004515775.1 | Scaffold242 | 536753                  | CC                              | TT                | 1946491880               |
| SNP_P3_110531_536902 | NW_004515775.1 | Scaffold242 | 536902                  | CC                              | AA                | 1946491882               |
| SNP_P3_110532_537049 | NW_004515775.1 | Scaffold242 | 537049                  | AA                              | TT                | 1946491883               |
| SNP_P3_110533_537327 | NW_004515775.1 | Scaffold242 | 537327                  | GG                              | AA                | 1946491885               |
| SNP_P3_110534_537337 | NW_004515775.1 | Scaffold242 | 537337                  | CC                              | TT                | 1946491886               |
| SNP_P3_110535_538074 | NW_004515775.1 | Scaffold242 | 538074                  | GG                              | AA                | 1946491888               |
| SNP_P3_110536_538329 | NW_004515775.1 | Scaffold242 | 538329                  | AA                              | CC                | 1946491889               |
| SNP_P3_110537_539869 | NW_004515775.1 | Scaffold242 | 539869                  | AA                              | GG                | 1946491891               |
| SNP_P3_110538_539944 | NW_004515775.1 | Scaffold242 | 539944                  | GG                              | TT                | 1946491892               |
| SNP_P3_110539_540414 | NW_004515775.1 | Scaffold242 | 540414                  | AA                              | GG                | 1946491894               |
| SNP_P3_110540_540434 | NW_004515775.1 | Scaffold242 | 540434                  | GG                              | AA                | 1946491895               |
| SNP_P3_110541_546047 | NW_004515775.1 | Scaffold242 | 546047                  | GG                              | AA                | 1946491897               |
| SNP_P3_110542_546056 | NW_004515775.1 | Scaffold242 | 546056                  | TT                              | AA                | 1946491898               |
| SNP_P3_110543_546082 | NW_004515775.1 | Scaffold242 | 546082                  | AA                              | GG                | 1946491899               |
| SNP_P3_110544_549751 | NW_004515775.1 | Scaffold242 | 549751                  | GG                              | TT                | 1946491901               |
| SNP_P3_110545_550344 | NW_004515775.1 | Scaffold242 | 550344                  | TT                              | CC                | 1946491902               |
| SNP_P3_110546_552421 | NW_004515775.1 | Scaffold242 | 552421                  | TT                              | GG                | 1946491904               |
| SNP_P3_110547_552422 | NW_004515775.1 | Scaffold242 | 552422                  | TT                              | CC                | 1946491905               |
| SNP_P3_110548_553024 | NW_004515775.1 | Scaffold242 | 553024                  | GG                              | TT                | 1946491907               |
| SNP_P3_110549_553355 | NW_004515775.1 | Scaffold242 | 553355                  | TT                              | GG                | 1946491908               |
| SNP_P3_110551_555173 | NW_004515775.1 | Scaffold242 | 555173                  | AA                              | TT                | 1946491910               |
| SNP_P3_110552_561638 | NW_004515775.1 | Scaffold242 | 561638                  | AA                              | CC                | 1946491911               |
| SNP_P3_110553_561694 | NW_004515775.1 | Scaffold242 | 561694                  | AA                              | GG                | 1946491913               |

| SNPs IDs             | Chromosome IDs | Chromosomes | Physical positions (bp) | CDC Frontier (Reference genome) | (Pusa 256 & HPNB) | NCBI SNPdb Accession IDs |
|----------------------|----------------|-------------|-------------------------|---------------------------------|-------------------|--------------------------|
| SNP_P3_110554_561698 | NW_004515775.1 | Scaffold242 | 561698                  | CC                              | GG                | 1946491914               |
| SNP_P3_110555_561706 | NW_004515775.1 | Scaffold242 | 561706                  | TT                              | CC                | 1946491916               |
| SNP_P3_110556_562110 | NW_004515775.1 | Scaffold242 | 562110                  | TT                              | CC                | 1946491917               |
| SNP_P3_110557_567939 | NW_004515775.1 | Scaffold242 | 567939                  | AA                              | TT                | 1946491918               |
| SNP_P3_110558_569508 | NW_004515775.1 | Scaffold242 | 569508                  | CC                              | TT                | 1946491920               |
| SNP_P3_110559_572345 | NW_004515775.1 | Scaffold242 | 572345                  | GG                              | AA                | 1946491921               |
| SNP_P3_110560_572448 | NW_004515775.1 | Scaffold242 | 572448                  | TT                              | AA                | 1946491923               |
| SNP_P3_110561_572473 | NW_004515775.1 | Scaffold242 | 572473                  | CC                              | TT                | 1946491924               |
| SNP_P3_110562_572585 | NW_004515775.1 | Scaffold242 | 572585                  | CC                              | GG                | 1946491926               |
| SNP_P3_110563_572609 | NW_004515775.1 | Scaffold242 | 572609                  | AA                              | CC                | 1946491927               |
| SNP_P3_110564_572614 | NW_004515775.1 | Scaffold242 | 572614                  | CC                              | TT                | 1946491929               |
| SNP_P3_110565_574122 | NW_004515775.1 | Scaffold242 | 574122                  | AA                              | GG                | 1946491930               |
| SNP_P3_110568_583290 | NW_004515775.1 | Scaffold242 | 583290                  | GG                              | AA                | 1946491932               |
| SNP_P3_110569_584450 | NW_004515775.1 | Scaffold242 | 584450                  | GG                              | AA                | 1946491933               |
| SNP_P3_110571_584966 | NW_004515775.1 | Scaffold242 | 584966                  | AA                              | GG                | 1946491934               |
| SNP_P3_110572_586953 | NW_004515775.1 | Scaffold242 | 586953                  | TT                              | GG                | 1946491936               |
| SNP_P3_110573_589612 | NW_004515775.1 | Scaffold242 | 589612                  | AA                              | TT                | 1946491937               |
| SNP_P3_110574_590744 | NW_004515775.1 | Scaffold242 | 590744                  | TT                              | CC                | 1946491939               |
| SNP_P3_110575_593448 | NW_004515775.1 | Scaffold242 | 593448                  | TT                              | AA                | 1946491940               |
| SNP_P3_110577_594094 | NW_004515775.1 | Scaffold242 | 594094                  | TT                              | AA                | 1946491942               |
| SNP_P3_110578_598819 | NW_004515775.1 | Scaffold242 | 598819                  | TT                              | AA                | 1946491943               |
| SNP_P3_110579_602324 | NW_004515775.1 | Scaffold242 | 602324                  | CC                              | TT                | 1946491944               |
| SNP_P3_110580_602384 | NW_004515775.1 | Scaffold242 | 602384                  | CC                              | TT                | 1946491946               |
| SNP_P3_110581_602398 | NW_004515775.1 | Scaffold242 | 602398                  | TT                              | CC                | 1946491947               |
| SNP_P3_110582_606131 | NW_004515775.1 | Scaffold242 | 606131                  | GG                              | AA                | 1946491949               |
| SNP_P3_110583_606329 | NW_004515775.1 | Scaffold242 | 606329                  | GG                              | AA                | 1946491950               |
| SNP_P3_110584_606374 | NW_004515775.1 | Scaffold242 | 606374                  | CC                              | TT                | 1946491952               |
| SNP_P3_110585_607133 | NW_004515775.1 | Scaffold242 | 607133                  | CC                              | GG                | 1946491953               |
| SNP_P3_110586_608228 | NW_004515775.1 | Scaffold242 | 608228                  | AA                              | GG                | 1946491954               |
| SNP_P3_110587_610862 | NW_004515775.1 | Scaffold242 | 610862                  | CC                              | TT                | 1946491956               |
| SNP_P3_110588_612678 | NW_004515775.1 | Scaffold242 | 612678                  | AA                              | TT                | 1946491957               |
| SNP_P3_110589_613290 | NW_004515775.1 | Scaffold242 | 613290                  | GG                              | AA                | 1946491959               |
| SNP_P3_110590_613298 | NW_004515775.1 | Scaffold242 | 613298                  | CC                              | TT                | 1946491960               |
| SNP_P3_110591_614474 | NW_004515775.1 | Scaffold242 | 614474                  | AA                              | GG                | 1946491962               |
| SNP_P3_110592_614478 | NW_004515775.1 | Scaffold242 | 614478                  | TT                              | CC                | 1946491963               |
| SNP_P3_110593_614989 | NW_004515775.1 | Scaffold242 | 614989                  | TT                              | CC                | 1946491964               |
| SNP_P3_110594_615259 | NW_004515775.1 | Scaffold242 | 615259                  | CC                              | TT                | 1946491966               |
| SNP_P3_110595_618159 | NW_004515775.1 | Scaffold242 | 618159                  | AA                              | GG                | 1946491967               |
| SNP_P3_110596_618328 | NW_004515775.1 | Scaffold242 | 618328                  | CC                              | TT                | 1946491969               |
| SNP_P3_110597_618584 | NW_004515775.1 | Scaffold242 | 618584                  | AA                              | GG                | 1946491970               |
| SNP_P3_110598_620200 | NW_004515775.1 | Scaffold242 | 620200                  | CC                              | TT                | 1946491971               |
| SNP_P3_110599_624581 | NW_004515775.1 | Scaffold242 | 624581                  | AA                              | GG                | 1946491973               |

| SNPs IDs             | Chromosome IDs | Chromosomes | Physical positions (bp) | CDC Frontier (Reference genome) | (Pusa 256 & HPNB) | NCBI SNPdb Accession IDs |
|----------------------|----------------|-------------|-------------------------|---------------------------------|-------------------|--------------------------|
| SNP_P3_110600_624598 | NW_004515775.1 | Scaffold242 | 624598                  | AA                              | GG                | 1946491974               |
| SNP_P3_110601_624631 | NW_004515775.1 | Scaffold242 | 624631                  | AA                              | GG                | 1946491976               |
| SNP_P3_110602_624679 | NW_004515775.1 | Scaffold242 | 624679                  | GG                              | AA                | 1946491977               |
| SNP_P3_110603_624707 | NW_004515775.1 | Scaffold242 | 624707                  | AA                              | GG                | 1946491978               |
| SNP_P3_110604_624901 | NW_004515775.1 | Scaffold242 | 624901                  | CC                              | AA                | 1946491980               |
| SNP_P3_110605_624922 | NW_004515775.1 | Scaffold242 | 624922                  | AA                              | CC                | 1946491981               |
| SNP_P3_110606_624983 | NW_004515775.1 | Scaffold242 | 624983                  | TT                              | CC                | 1946491983               |
| SNP_P3_110607_625515 | NW_004515775.1 | Scaffold242 | 625515                  | TT                              | AA                | 1946491984               |
| SNP_P3_110608_628308 | NW_004515775.1 | Scaffold242 | 628308                  | TT                              | CC                | 1946491986               |
| SNP_P3_110609_628689 | NW_004515775.1 | Scaffold242 | 628689                  | GG                              | AA                | 1946491987               |
| SNP_P3_110610_628809 | NW_004515775.1 | Scaffold242 | 628809                  | TT                              | CC                | 1946491989               |
| SNP_P3_110611_633742 | NW_004515775.1 | Scaffold242 | 633742                  | TT                              | AA                | 1946491990               |
| SNP_P3_110612_634365 | NW_004515775.1 | Scaffold242 | 634365                  | TT                              | CC                | 1946491991               |
| SNP_P3_110613_634717 | NW_004515775.1 | Scaffold242 | 634717                  | GG                              | CC                | 1946491993               |
| SNP_P3_110614_637221 | NW_004515775.1 | Scaffold242 | 637221                  | CC                              | TT                | 1946491994               |
| SNP_P3_110615_638360 | NW_004515775.1 | Scaffold242 | 638360                  | TT                              | GG                | 1946491996               |
| SNP_P3_110616_638524 | NW_004515775.1 | Scaffold242 | 638524                  | TT                              | CC                | 1946491997               |
| SNP_P3_110617_638887 | NW_004515775.1 | Scaffold242 | 638887                  | CC                              | TT                | 1946491999               |
| SNP_P3_110618_643420 | NW_004515775.1 | Scaffold242 | 643420                  | GG                              | AA                | 1946492000               |
| SNP_P3_110619_643732 | NW_004515775.1 | Scaffold242 | 643732                  | AA                              | TT                | 1946492002               |
| SNP_P3_110620_644926 | NW_004515775.1 | Scaffold242 | 644926                  | CC                              | TT                | 1946492003               |
| SNP_P3_110621_653639 | NW_004515775.1 | Scaffold242 | 653639                  | GG                              | AA                | 1946492005               |
| SNP_P3_110622_664866 | NW_004515775.1 | Scaffold242 | 664866                  | GG                              | CC                | 1946492006               |
| SNP_P3_110623_666066 | NW_004515775.1 | Scaffold242 | 666066                  | AA                              | GG                | 1946492007               |
| SNP_P3_110624_669341 | NW_004515775.1 | Scaffold242 | 669341                  | GG                              | AA                | 1946492009               |
| SNP_P3_110625_670053 | NW_004515775.1 | Scaffold242 | 670053                  | GG                              | AA                | 1946492010               |
| SNP_P3_110626_670873 | NW_004515775.1 | Scaffold242 | 670873                  | GG                              | TT                | 1946492012               |
| SNP_P3_110627_670917 | NW_004515775.1 | Scaffold242 | 670917                  | CC                              | TT                | 1946492013               |
| SNP_P3_110628_675312 | NW_004515775.1 | Scaffold242 | 675312                  | TT                              | CC                | 1946492015               |
| SNP_P3_110629_675594 | NW_004515775.1 | Scaffold242 | 675594                  | CC                              | TT                | 1946492016               |
| SNP_P3_110630_675845 | NW_004515775.1 | Scaffold242 | 675845                  | AA                              | GG                | 1946492017               |
| SNP_P3_110632_679928 | NW_004515775.1 | Scaffold242 | 679928                  | TT                              | GG                | 1946492019               |
| SNP_P3_110634_683695 | NW_004515775.1 | Scaffold242 | 683695                  | AA                              | CC                | 1946492020               |
| SNP_P3_110635_684895 | NW_004515775.1 | Scaffold242 | 684895                  | AA                              | GG                | 1946492022               |
| SNP_P3_110636_684898 | NW_004515775.1 | Scaffold242 | 684898                  | CC                              | TT                | 1946492023               |
| SNP_P3_110637_685822 | NW_004515775.1 | Scaffold242 | 685822                  | TT                              | CC                | 1946492025               |
| SNP_P3_110638_688249 | NW_004515775.1 | Scaffold242 | 688249                  | GG                              | AA                | 1946492026               |
| SNP_P3_110640_689187 | NW_004515775.1 | Scaffold242 | 689187                  | CC                              | TT                | 1946492027               |
| SNP_P3_110642_689812 | NW_004515775.1 | Scaffold242 | 689812                  | TT                              | AA                | 1946492029               |
| SNP_P3_110643_690386 | NW_004515775.1 | Scaffold242 | 690386                  | CC                              | AA                | 1946492030               |
| SNP_P3_110644_691351 | NW_004515775.1 | Scaffold242 | 691351                  | CC                              | TT                | 1946492032               |
| SNP_P3_110645_692144 | NW_004515775.1 | Scaffold242 | 692144                  | TT                              | GG                | 1946492033               |

| SNPs IDs             | Chromosome IDs | Chromosomes | Physical positions (bp) | CDC Frontier (Reference genome) | (Pusa 256 & HPNB) | NCBI SNPdb Accession IDs |
|----------------------|----------------|-------------|-------------------------|---------------------------------|-------------------|--------------------------|
| SNP_P3_110646_692992 | NW_004515775.1 | Scaffold242 | 692992                  | CC                              | TT                | 1946492035               |
| SNP_P3_110647_695047 | NW_004515775.1 | Scaffold242 | 695047                  | CC                              | TT                | 1946492036               |
| SNP_P3_110648_695788 | NW_004515775.1 | Scaffold242 | 695788                  | TT                              | CC                | 1946492037               |
| SNP_P3_110649_698114 | NW_004515775.1 | Scaffold242 | 698114                  | AA                              | GG                | 1946492039               |
| SNP_P3_110651_699612 | NW_004515775.1 | Scaffold242 | 699612                  | TT                              | CC                | 1946492040               |
| SNP_P3_110652_699614 | NW_004515775.1 | Scaffold242 | 699614                  | AA                              | TT                | 1946492042               |
| SNP_P3_110653_700384 | NW_004515775.1 | Scaffold242 | 700384                  | TT                              | CC                | 1946492043               |
| SNP_P3_110654_701142 | NW_004515775.1 | Scaffold242 | 701142                  | GG                              | AA                | 1946492045               |
| SNP_P3_110655_701350 | NW_004515775.1 | Scaffold242 | 701350                  | CC                              | TT                | 1946492046               |
| SNP_P3_110656_701537 | NW_004515775.1 | Scaffold242 | 701537                  | AA                              | GG                | 1946492048               |
| SNP_P3_110657_701547 | NW_004515775.1 | Scaffold242 | 701547                  | CC                              | TT                | 1946492049               |
| SNP_P3_110658_701668 | NW_004515775.1 | Scaffold242 | 701668                  | CC                              | TT                | 1946492051               |
| SNP_P3_110659_701698 | NW_004515775.1 | Scaffold242 | 701698                  | AA                              | TT                | 1946492052               |
| SNP_P3_110660_705032 | NW_004515775.1 | Scaffold242 | 705032                  | CC                              | TT                | 1946492054               |
| SNP_P3_110661_710783 | NW_004515775.1 | Scaffold242 | 710783                  | AA                              | GG                | 1946492055               |
| SNP_P3_110663_712002 | NW_004515775.1 | Scaffold242 | 712002                  | GG                              | AA                | 1946492057               |
| SNP_P3_110664_718837 | NW_004515775.1 | Scaffold242 | 718837                  | AA                              | GG                | 1946492058               |
| SNP_P3_110665_718838 | NW_004515775.1 | Scaffold242 | 718838                  | CC                              | TT                | 1946492060               |
| SNP_P3_110666_730739 | NW_004515775.1 | Scaffold242 | 730739                  | TT                              | CC                | 1946492061               |
| SNP_P3_110667_732589 | NW_004515775.1 | Scaffold242 | 732589                  | AA                              | GG                | 1946492063               |
| SNP_P3_110668_732712 | NW_004515775.1 | Scaffold242 | 732712                  | AA                              | GG                | 1946492064               |
| SNP_P3_110671_732956 | NW_004515775.1 | Scaffold242 | 732956                  | TT                              | AA                | 1946492065               |
| SNP_P3_110674_735569 | NW_004515775.1 | Scaffold242 | 735569                  | TT                              | GG                | 1946492067               |
| SNP_P3_110675_735608 | NW_004515775.1 | Scaffold242 | 735608                  | AA                              | CC                | 1946492068               |
| SNP_P3_110676_735724 | NW_004515775.1 | Scaffold242 | 735724                  | GG                              | TT                | 1946492070               |
| SNP_P3_110677_735727 | NW_004515775.1 | Scaffold242 | 735727                  | GG                              | AA                | 1946492071               |
| SNP_P3_110678_735746 | NW_004515775.1 | Scaffold242 | 735746                  | GG                              | AA                | 1946492073               |
| SNP_P3_110679_736024 | NW_004515775.1 | Scaffold242 | 736024                  | GG                              | AA                | 1946492074               |
| SNP_P3_110680_736027 | NW_004515775.1 | Scaffold242 | 736027                  | GG                              | TT                | 1946492075               |
| SNP_P3_110681_737648 | NW_004515775.1 | Scaffold242 | 737648                  | TT                              | GG                | 1946492076               |
| SNP_P3_110682_737657 | NW_004515775.1 | Scaffold242 | 737657                  | TT                              | GG                | 1946492077               |
| SNP_P3_110683_737919 | NW_004515775.1 | Scaffold242 | 737919                  | AA                              | GG                | 1946492078               |
| SNP_P3_110684_737924 | NW_004515775.1 | Scaffold242 | 737924                  | CC                              | AA                | 1946492079               |
| SNP_P3_110685_739322 | NW_004515775.1 | Scaffold242 | 739322                  | AA                              | GG                | 1946492080               |
| SNP_P3_110686_756376 | NW_004515775.1 | Scaffold242 | 756376                  | CC                              | TT                | 1946492082               |
| SNP_P3_110687_758746 | NW_004515775.1 | Scaffold242 | 758746                  | TT                              | CC                | 1946492083               |
| SNP_P3_110688_759003 | NW_004515775.1 | Scaffold242 | 759003                  | GG                              | CC                | 1946492085               |
| SNP_P3_110689_759082 | NW_004515775.1 | Scaffold242 | 759082                  | GG                              | TT                | 1946492086               |
| SNP_P3_110690_761912 | NW_004515775.1 | Scaffold242 | 761912                  | CC                              | TT                | 1946492087               |
| SNP_P3_110691_762226 | NW_004515775.1 | Scaffold242 | 762226                  | AA                              | CC                | 1946492089               |
| SNP_P3_110692_765724 | NW_004515775.1 | Scaffold242 | 765724                  | AA                              | GG                | 1946492090               |
| SNP_P3_110693_767667 | NW_004515775.1 | Scaffold242 | 767667                  | GG                              | TT                | 1946492092               |

| SNPs IDs             | Chromosome IDs | Chromosomes | Physical positions (bp) | CDC Frontier (Reference genome) | (Pusa 256 & HPNB) | NCBI SNPdb Accession IDs |
|----------------------|----------------|-------------|-------------------------|---------------------------------|-------------------|--------------------------|
| SNP_P3_110694_767712 | NW_004515775.1 | Scaffold242 | 767712                  | TT                              | AA                | 1946492093               |
| SNP_P3_110695_767727 | NW_004515775.1 | Scaffold242 | 767727                  | GG                              | AA                | 1946492094               |
| SNP_P3_110696_767730 | NW_004515775.1 | Scaffold242 | 767730                  | GG                              | AA                | 1946492096               |
| SNP_P3_110697_767950 | NW_004515775.1 | Scaffold242 | 767950                  | TT                              | GG                | 1946492097               |
| SNP_P3_110698_767961 | NW_004515775.1 | Scaffold242 | 767961                  | GG                              | TT                | 1946492099               |
| SNP_P3_110699_768030 | NW_004515775.1 | Scaffold242 | 768030                  | GG                              | AA                | 1946492100               |
| SNP_P3_110700_768037 | NW_004515775.1 | Scaffold242 | 768037                  | CC                              | TT                | 1946492101               |
| SNP_P3_110701_768989 | NW_004515775.1 | Scaffold242 | 768989                  | AA                              | GG                | 1946492103               |
| SNP_P3_110702_769449 | NW_004515775.1 | Scaffold242 | 769449                  | AA                              | TT                | 1946492104               |
| SNP_P3_110703_770382 | NW_004515775.1 | Scaffold242 | 770382                  | CC                              | GG                | 1946492106               |
| SNP_P3_110704_771538 | NW_004515775.1 | Scaffold242 | 771538                  | AA                              | GG                | 1946492107               |
| SNP_P3_110705_771814 | NW_004515775.1 | Scaffold242 | 771814                  | GG                              | CC                | 1946492108               |
| SNP_P3_110706_771906 | NW_004515775.1 | Scaffold242 | 771906                  | CC                              | TT                | 1946492110               |
| SNP_P3_110707_771920 | NW_004515775.1 | Scaffold242 | 771920                  | CC                              | TT                | 1946492112               |
| SNP_P3_110708_773677 | NW_004515775.1 | Scaffold242 | 773677                  | TT                              | GG                | 1946492114               |
| SNP_P3_110709_773881 | NW_004515775.1 | Scaffold242 | 773881                  | TT                              | CC                | 1946492115               |
| SNP_P3_110710_774247 | NW_004515775.1 | Scaffold242 | 774247                  | TT                              | AA                | 1946492117               |
| SNP_P3_110711_774278 | NW_004515775.1 | Scaffold242 | 774278                  | AA                              | GG                | 1946492118               |
| SNP_P3_110712_775752 | NW_004515775.1 | Scaffold242 | 775752                  | GG                              | AA                | 1946492119               |
| SNP_P3_110713_783395 | NW_004515775.1 | Scaffold242 | 783395                  | AA                              | GG                | 1946492121               |
| SNP_P3_110714_783434 | NW_004515775.1 | Scaffold242 | 783434                  | CC                              | TT                | 1946492122               |
| SNP_P3_110715_785100 | NW_004515775.1 | Scaffold242 | 785100                  | TT                              | GG                | 1946492124               |
| SNP_P3_110716_786683 | NW_004515775.1 | Scaffold242 | 786683                  | TT                              | CC                | 1946492125               |
| SNP_P3_110717_787012 | NW_004515775.1 | Scaffold242 | 787012                  | CC                              | TT                | 1946492127               |
| SNP_P3_110718_787026 | NW_004515775.1 | Scaffold242 | 787026                  | GG                              | CC                | 1946492128               |
| SNP_P3_110719_787339 | NW_004515775.1 | Scaffold242 | 787339                  | TT                              | CC                | 1946492129               |
| SNP_P3_110720_787437 | NW_004515775.1 | Scaffold242 | 787437                  | TT                              | AA                | 1946492131               |
| SNP_P3_110721_787576 | NW_004515775.1 | Scaffold242 | 787576                  | GG                              | AA                | 1946492132               |
| SNP_P3_110722_787646 | NW_004515775.1 | Scaffold242 | 787646                  | TT                              | AA                | 1946492134               |
| SNP_P3_110723_792473 | NW_004515775.1 | Scaffold242 | 792473                  | CC                              | AA                | 1946492135               |
| SNP_P3_110724_792864 | NW_004515775.1 | Scaffold242 | 792864                  | GG                              | TT                | 1946492137               |
| SNP_P3_110726_801049 | NW_004515775.1 | Scaffold242 | 801049                  | TT                              | GG                | 1946492138               |
| SNP_P3_110728_801837 | NW_004515775.1 | Scaffold242 | 801837                  | TT                              | CC                | 1946492140               |
| SNP_P3_110729_801886 | NW_004515775.1 | Scaffold242 | 801886                  | GG                              | AA                | 1946492141               |
| SNP_P3_110730_801960 | NW_004515775.1 | Scaffold242 | 801960                  | AA                              | GG                | 1946492143               |
| SNP_P3_110731_801991 | NW_004515775.1 | Scaffold242 | 801991                  | TT                              | CC                | 1946492144               |
| SNP_P3_110733_802563 | NW_004515775.1 | Scaffold242 | 802563                  | GG                              | TT                | 1946492146               |
| SNP_P3_110734_803008 | NW_004515775.1 | Scaffold242 | 803008                  | GG                              | AA                | 1946492147               |
| SNP_P3_110735_803019 | NW_004515775.1 | Scaffold242 | 803019                  | GG                              | AA                | 1946492148               |
| SNP_P3_110736_803082 | NW_004515775.1 | Scaffold242 | 803082                  | TT                              | CC                | 1946492150               |
| SNP_P3_110737_803447 | NW_004515775.1 | Scaffold242 | 803447                  | AA                              | TT                | 1946492151               |
| SNP_P3_110738_804360 | NW_004515775.1 | Scaffold242 | 804360                  | GG                              | AA                | 1946492153               |

| SNPs IDs             | Chromosome IDs | Chromosomes | Physical positions (bp) | CDC Frontier (Reference genome) | (Pusa 256 & HPNB) | NCBI SNPdb Accession IDs |
|----------------------|----------------|-------------|-------------------------|---------------------------------|-------------------|--------------------------|
| SNP_P3_110739_804366 | NW_004515775.1 | Scaffold242 | 804366                  | GG                              | CC                | 1946492154               |
| SNP_P3_110740_810235 | NW_004515775.1 | Scaffold242 | 810235                  | CC                              | TT                | 1946492156               |
| SNP_P3_110741_810737 | NW_004515775.1 | Scaffold242 | 810737                  | CC                              | TT                | 1946492157               |
| SNP_P3_110742_811024 | NW_004515775.1 | Scaffold242 | 811024                  | CC                              | AA                | 1946492159               |
| SNP_P3_110743_811165 | NW_004515775.1 | Scaffold242 | 811165                  | CC                              | AA                | 1946492160               |
| SNP_P3_110744_812239 | NW_004515775.1 | Scaffold242 | 812239                  | AA                              | GG                | 1946492162               |
| SNP_P3_110745_813207 | NW_004515775.1 | Scaffold242 | 813207                  | AA                              | TT                | 1946492163               |
| SNP_P3_110746_817023 | NW_004515775.1 | Scaffold242 | 817023                  | TT                              | CC                | 1946492164               |
| SNP_P3_110747_818325 | NW_004515775.1 | Scaffold242 | 818325                  | GG                              | AA                | 1946492166               |
| SNP_P3_110748_818475 | NW_004515775.1 | Scaffold242 | 818475                  | AA                              | TT                | 1946492167               |
| SNP_P3_110749_820574 | NW_004515775.1 | Scaffold242 | 820574                  | AA                              | GG                | 1946492169               |
| SNP_P3_110750_820576 | NW_004515775.1 | Scaffold242 | 820576                  | AA                              | TT                | 1946492170               |
| SNP_P3_110751_820623 | NW_004515775.1 | Scaffold242 | 820623                  | GG                              | AA                | 1946492172               |
| SNP_P3_110752_820885 | NW_004515775.1 | Scaffold242 | 820885                  | GG                              | CC                | 1946492173               |
| SNP_P3_110753_820907 | NW_004515775.1 | Scaffold242 | 820907                  | GG                              | TT                | 1946492174               |
| SNP_P3_110754_108    | NW_004515776.1 | Scaffold243 | 108                     | GG                              | AA                | 1946492176               |
| SNP_P3_110755_109    | NW_004515776.1 | Scaffold243 | 109                     | AA                              | CC                | 1946492177               |
| SNP_P3_110756_137    | NW_004515776.1 | Scaffold243 | 137                     | AA                              | CC                | 1946492179               |
| SNP_P3_110757_838    | NW_004515777.1 | Scaffold244 | 838                     | CC                              | TT                | 1946492180               |
| SNP_P3_110758_3583   | NW_004515777.1 | Scaffold244 | 3583                    | TT                              | AA                | 1946492182               |
| SNP_P3_110759_14245  | NW_004515777.1 | Scaffold244 | 14245                   | TT                              | CC                | 1946492183               |
| SNP_P3_110760_293    | NW_004515778.1 | Scaffold246 | 293                     | GG                              | AA                | 1946492184               |
| SNP_P3_110761_461    | NW_004515778.1 | Scaffold246 | 461                     | GG                              | TT                | 1946492186               |
| SNP_P3_110762_469    | NW_004515778.1 | Scaffold246 | 469                     | GG                              | AA                | 1946492187               |
| SNP_P3_110763_1255   | NW_004515778.1 | Scaffold246 | 1255                    | CC                              | GG                | 1946492189               |
| SNP_P3_110764_4529   | NW_004515778.1 | Scaffold246 | 4529                    | GG                              | AA                | 1946492190               |
| SNP_P3_110765_13269  | NW_004515778.1 | Scaffold246 | 13269                   | AA                              | GG                | 1946492192               |
| SNP_P3_110766_27014  | NW_004515778.1 | Scaffold246 | 27014                   | TT                              | CC                | 1946492193               |
| SNP_P3_110767_28416  | NW_004515778.1 | Scaffold246 | 28416                   | CC                              | GG                | 1946492195               |
| SNP_P3_110768_28428  | NW_004515778.1 | Scaffold246 | 28428                   | CC                              | GG                | 1946492196               |
| SNP_P3_110769_28432  | NW_004515778.1 | Scaffold246 | 28432                   | CC                              | TT                | 1946492197               |
| SNP_P3_110770_28455  | NW_004515778.1 | Scaffold246 | 28455                   | TT                              | GG                | 1946492199               |
| SNP_P3_110771_30901  | NW_004515778.1 | Scaffold246 | 30901                   | GG                              | TT                | 1946492200               |
| SNP_P3_110772_35881  | NW_004515778.1 | Scaffold246 | 35881                   | CC                              | TT                | 1946492202               |
| SNP_P3_110773_36001  | NW_004515778.1 | Scaffold246 | 36001                   | TT                              | CC                | 1946492203               |
| SNP_P3_110774_45806  | NW_004515778.1 | Scaffold246 | 45806                   | CC                              | TT                | 1946492205               |
| SNP_P3_110775_45869  | NW_004515778.1 | Scaffold246 | 45869                   | TT                              | AA                | 1946492206               |
| SNP_P3_110776_45870  | NW_004515778.1 | Scaffold246 | 45870                   | GG                              | AA                | 1946492208               |
| SNP_P3_110777_54731  | NW_004515778.1 | Scaffold246 | 54731                   | GG                              | AA                | 1946492209               |
| SNP_P3_110778_55134  | NW_004515778.1 | Scaffold246 | 55134                   | TT                              | GG                | 1946492210               |
| SNP_P3_110779_55341  | NW_004515778.1 | Scaffold246 | 55341                   | TT                              | AA                | 1946492212               |
| SNP_P3_110780_55471  | NW_004515778.1 | Scaffold246 | 55471                   | CC                              | TT                | 1946492213               |

| SNPs IDs            | Chromosome IDs | Chromosomes | Physical positions (bp) | CDC Frontier (Reference genome) | (Pusa 256 & HPNB) | NCBI SNPdb Accession IDs |
|---------------------|----------------|-------------|-------------------------|---------------------------------|-------------------|--------------------------|
| SNP_P3_110781_55517 | NW_004515778.1 | Scaffold246 | 55517                   | AA                              | GG                | 1946492215               |
| SNP_P3_110782_56594 | NW_004515778.1 | Scaffold246 | 56594                   | CC                              | TT                | 1946492216               |
| SNP_P3_110783_56595 | NW_004515778.1 | Scaffold246 | 56595                   | CC                              | GG                | 1946492218               |
| SNP_P3_110784_60939 | NW_004515778.1 | Scaffold246 | 60939                   | TT                              | AA                | 1946492219               |
| SNP_P3_110785_67572 | NW_004515778.1 | Scaffold246 | 67572                   | GG                              | AA                | 1946492220               |
| SNP_P3_110786_67664 | NW_004515778.1 | Scaffold246 | 67664                   | TT                              | CC                | 1946492222               |
| SNP_P3_110787_67896 | NW_004515778.1 | Scaffold246 | 67896                   | TT                              | CC                | 1946492223               |
| SNP_P3_110788_67949 | NW_004515778.1 | Scaffold246 | 67949                   | CC                              | AA                | 1946492225               |
| SNP_P3_110789_1275  | NW_004515779.1 | Scaffold249 | 1275                    | CC                              | AA                | 1946492226               |
| SNP_P3_110790_1288  | NW_004515779.1 | Scaffold249 | 1288                    | TT                              | CC                | 1946492228               |
| SNP_P3_110791_1533  | NW_004515779.1 | Scaffold249 | 1533                    | TT                              | CC                | 1946492229               |
| SNP_P3_110792_1566  | NW_004515779.1 | Scaffold249 | 1566                    | TT                              | GG                | 1946492230               |
| SNP_P3_110793_1621  | NW_004515779.1 | Scaffold249 | 1621                    | TT                              | AA                | 1946492232               |
| SNP_P3_110794_1659  | NW_004515779.1 | Scaffold249 | 1659                    | AA                              | GG                | 1946492233               |
| SNP_P3_110795_1718  | NW_004515779.1 | Scaffold249 | 1718                    | CC                              | TT                | 1946492235               |
| SNP_P3_110796_1793  | NW_004515779.1 | Scaffold249 | 1793                    | GG                              | AA                | 1946492237               |
| SNP_P3_110797_1831  | NW_004515779.1 | Scaffold249 | 1831                    | GG                              | TT                | 1946492238               |
| SNP_P3_110798_4252  | NW_004515779.1 | Scaffold249 | 4252                    | GG                              | AA                | 1946492239               |
| SNP_P3_110799_4408  | NW_004515779.1 | Scaffold249 | 4408                    | CC                              | TT                | 1946492241               |
| SNP_P3_110800_4447  | NW_004515779.1 | Scaffold249 | 4447                    | TT                              | CC                | 1946492242               |
| SNP_P3_110801_4488  | NW_004515779.1 | Scaffold249 | 4488                    | TT                              | AA                | 1946492244               |
| SNP_P3_110802_4801  | NW_004515779.1 | Scaffold249 | 4801                    | CC                              | GG                | 1946492245               |
| SNP_P3_110803_10126 | NW_004515779.1 | Scaffold249 | 10126                   | TT                              | CC                | 1946492247               |
| SNP_P3_110804_10136 | NW_004515779.1 | Scaffold249 | 10136                   | CC                              | TT                | 1946492248               |
| SNP_P3_110805_10988 | NW_004515779.1 | Scaffold249 | 10988                   | CC                              | TT                | 1946492249               |
| SNP_P3_110806_12907 | NW_004515779.1 | Scaffold249 | 12907                   | GG                              | AA                | 1946492251               |
| SNP_P3_110807_18469 | NW_004515779.1 | Scaffold249 | 18469                   | GG                              | TT                | 1946492252               |
| SNP_P3_110808_19970 | NW_004515779.1 | Scaffold249 | 19970                   | AA                              | CC                | 1946492254               |
| SNP_P3_110809_20291 | NW_004515779.1 | Scaffold249 | 20291                   | GG                              | CC                | 1946492255               |
| SNP_P3_110810_23798 | NW_004515779.1 | Scaffold249 | 23798                   | TT                              | CC                | 1946492256               |
| SNP_P3_110811_23864 | NW_004515779.1 | Scaffold249 | 23864                   | AA                              | TT                | 1946492258               |
| SNP_P3_110812_50820 | NW_004515779.1 | Scaffold249 | 50820                   | CC                              | TT                | 1946492259               |
| SNP_P3_110813_52801 | NW_004515779.1 | Scaffold249 | 52801                   | AA                              | GG                | 1946492261               |
| SNP_P3_110814_54100 | NW_004515779.1 | Scaffold249 | 54100                   | CC                              | AA                | 1946492262               |
| SNP_P3_110815_54111 | NW_004515779.1 | Scaffold249 | 54111                   | AA                              | TT                | 1946492264               |
| SNP_P3_110816_54160 | NW_004515779.1 | Scaffold249 | 54160                   | AA                              | CC                | 1946492265               |
| SNP_P3_110818_54166 | NW_004515779.1 | Scaffold249 | 54166                   | AA                              | TT                | 1946492266               |
| SNP_P3_110819_54178 | NW_004515779.1 | Scaffold249 | 54178                   | GG                              | AA                | 1946492268               |
| SNP_P3_110820_54198 | NW_004515779.1 | Scaffold249 | 54198                   | TT                              | GG                | 1946492269               |
| SNP_P3_110821_54200 | NW_004515779.1 | Scaffold249 | 54200                   | AA                              | CC                | 1946492271               |
| SNP_P3_110822_54225 | NW_004515779.1 | Scaffold249 | 54225                   | TT                              | GG                | 1946492272               |
| SNP_P3_110823_54265 | NW_004515779.1 | Scaffold249 | 54265                   | AA                              | TT                | 1946492274               |



| SNPs IDs             | Chromosome IDs | Chromosomes | Physical positions (bp) | CDC Frontier (Reference genome) | (Pusa 256 & HPNB) | NCBI SNPdb Accession IDs |
|----------------------|----------------|-------------|-------------------------|---------------------------------|-------------------|--------------------------|
| SNP_P3_110824_54290  | NW_004515779.1 | Scaffold249 | 54290                   | CC                              | TT                | 1946492275               |
| SNP_P3_110825_54338  | NW_004515779.1 | Scaffold249 | 54338                   | TT                              | AA                | 1946492277               |
| SNP_P3_110826_54343  | NW_004515779.1 | Scaffold249 | 54343                   | TT                              | CC                | 1946492278               |
| SNP_P3_110827_54418  | NW_004515779.1 | Scaffold249 | 54418                   | AA                              | GG                | 1946492279               |
| SNP_P3_110828_54447  | NW_004515779.1 | Scaffold249 | 54447                   | TT                              | GG                | 1946492281               |
| SNP_P3_110829_54461  | NW_004515779.1 | Scaffold249 | 54461                   | GG                              | AA                | 1946492282               |
| SNP_P3_110830_54485  | NW_004515779.1 | Scaffold249 | 54485                   | TT                              | AA                | 1946492284               |
| SNP_P3_110831_56993  | NW_004515779.1 | Scaffold249 | 56993                   | AA                              | TT                | 1946492285               |
| SNP_P3_110832_57766  | NW_004515779.1 | Scaffold249 | 57766                   | GG                              | TT                | 1946492287               |
| SNP_P3_110833_60038  | NW_004515779.1 | Scaffold249 | 60038                   | GG                              | CC                | 1946492288               |
| SNP_P3_110834_68917  | NW_004515779.1 | Scaffold249 | 68917                   | TT                              | CC                | 1946492290               |
| SNP_P3_110835_68923  | NW_004515779.1 | Scaffold249 | 68923                   | CC                              | GG                | 1946492291               |
| SNP_P3_110836_69163  | NW_004515779.1 | Scaffold249 | 69163                   | CC                              | AA                | 1946492292               |
| SNP_P3_110837_73265  | NW_004515779.1 | Scaffold249 | 73265                   | GG                              | AA                | 1946492294               |
| SNP_P3_110838_73316  | NW_004515779.1 | Scaffold249 | 73316                   | AA                              | GG                | 1946492295               |
| SNP_P3_110839_73317  | NW_004515779.1 | Scaffold249 | 73317                   | CC                              | TT                | 1946492297               |
| SNP_P3_110841_73373  | NW_004515779.1 | Scaffold249 | 73373                   | GG                              | AA                | 1946492298               |
| SNP_P3_110842_73377  | NW_004515779.1 | Scaffold249 | 73377                   | GG                              | TT                | 1946492300               |
| SNP_P3_110843_73536  | NW_004515779.1 | Scaffold249 | 73536                   | AA                              | TT                | 1946492301               |
| SNP_P3_110844_73541  | NW_004515779.1 | Scaffold249 | 73541                   | CC                              | GG                | 1946492302               |
| SNP_P3_110845_73566  | NW_004515779.1 | Scaffold249 | 73566                   | AA                              | CC                | 1946492304               |
| SNP_P3_110846_73635  | NW_004515779.1 | Scaffold249 | 73635                   | GG                              | AA                | 1946492305               |
| SNP_P3_110847_87432  | NW_004515779.1 | Scaffold249 | 87432                   | GG                              | AA                | 1946492307               |
| SNP_P3_110848_87456  | NW_004515779.1 | Scaffold249 | 87456                   | CC                              | TT                | 1946492308               |
| SNP_P3_110849_87656  | NW_004515779.1 | Scaffold249 | 87656                   | AA                              | GG                | 1946492310               |
| SNP_P3_110850_87675  | NW_004515779.1 | Scaffold249 | 87675                   | CC                              | GG                | 1946492311               |
| SNP_P3_110851_87687  | NW_004515779.1 | Scaffold249 | 87687                   | AA                              | CC                | 1946492312               |
| SNP_P3_110852_87720  | NW_004515779.1 | Scaffold249 | 87720                   | AA                              | TT                | 1946492314               |
| SNP_P3_110853_87996  | NW_004515779.1 | Scaffold249 | 87996                   | AA                              | GG                | 1946492316               |
| SNP_P3_110854_88000  | NW_004515779.1 | Scaffold249 | 88000                   | TT                              | GG                | 1946492318               |
| SNP_P3_110855_88264  | NW_004515779.1 | Scaffold249 | 88264                   | TT                              | CC                | 1946492319               |
| SNP_P3_110856_88277  | NW_004515779.1 | Scaffold249 | 88277                   | CC                              | AA                | 1946492321               |
| SNP_P3_110857_88281  | NW_004515779.1 | Scaffold249 | 88281                   | TT                              | AA                | 1946492322               |
| SNP_P3_110858_89471  | NW_004515779.1 | Scaffold249 | 89471                   | AA                              | GG                | 1946492323               |
| SNP_P3_110859_98785  | NW_004515779.1 | Scaffold249 | 98785                   | AA                              | GG                | 1946492325               |
| SNP_P3_110860_109094 | NW_004515779.1 | Scaffold249 | 109094                  | TT                              | CC                | 1946492326               |
| SNP_P3_110861_111447 | NW_004515779.1 | Scaffold249 | 111447                  | GG                              | AA                | 1946492328               |
| SNP_P3_110862_126080 | NW_004515779.1 | Scaffold249 | 126080                  | AA                              | TT                | 1946492329               |
| SNP_P3_110864_139135 | NW_004515779.1 | Scaffold249 | 139135                  | TT                              | CC                | 1946492330               |
| SNP_P3_110865_139143 | NW_004515779.1 | Scaffold249 | 139143                  | CC                              | TT                | 1946492332               |
| SNP_P3_110866_141719 | NW_004515779.1 | Scaffold249 | 141719                  | GG                              | AA                | 1946492333               |
| SNP_P3_110867_141767 | NW_004515779.1 | Scaffold249 | 141767                  | TT                              | GG                | 1946492335               |

| SNPs IDs             | Chromosome IDs | Chromosomes | Physical positions (bp) | CDC Frontier (Reference genome) | (Pusa 256 & HPNB) | NCBI SNPdb Accession IDs |
|----------------------|----------------|-------------|-------------------------|---------------------------------|-------------------|--------------------------|
| SNP_P3_110868_141770 | NW_004515779.1 | Scaffold249 | 141770                  | AA                              | TT                | 1946492336               |
| SNP_P3_110869_141825 | NW_004515779.1 | Scaffold249 | 141825                  | AA                              | GG                | 1946492337               |
| SNP_P3_110870_141976 | NW_004515779.1 | Scaffold249 | 141976                  | GG                              | AA                | 1946492339               |
| SNP_P3_110871_142049 | NW_004515779.1 | Scaffold249 | 142049                  | TT                              | AA                | 1946492340               |
| SNP_P3_110872_142136 | NW_004515779.1 | Scaffold249 | 142136                  | AA                              | GG                | 1946492342               |
| SNP_P3_110873_142326 | NW_004515779.1 | Scaffold249 | 142326                  | CC                              | AA                | 1946492343               |
| SNP_P3_110874_142457 | NW_004515779.1 | Scaffold249 | 142457                  | GG                              | AA                | 1946492344               |
| SNP_P3_110876_144894 | NW_004515779.1 | Scaffold249 | 144894                  | AA                              | TT                | 1946492346               |
| SNP_P3_110877_145053 | NW_004515779.1 | Scaffold249 | 145053                  | CC                              | TT                | 1946492347               |
| SNP_P3_110878_145121 | NW_004515779.1 | Scaffold249 | 145121                  | CC                              | GG                | 1946492349               |
| SNP_P3_110879_145148 | NW_004515779.1 | Scaffold249 | 145148                  | GG                              | CC                | 1946492350               |
| SNP_P3_110880_145171 | NW_004515779.1 | Scaffold249 | 145171                  | CC                              | AA                | 1946492352               |
| SNP_P3_110881_145313 | NW_004515779.1 | Scaffold249 | 145313                  | TT                              | AA                | 1946492353               |
| SNP_P3_110882_145373 | NW_004515779.1 | Scaffold249 | 145373                  | TT                              | AA                | 1946492354               |
| SNP_P3_110884_145507 | NW_004515779.1 | Scaffold249 | 145507                  | AA                              | GG                | 1946492356               |
| SNP_P3_110885_145546 | NW_004515779.1 | Scaffold249 | 145546                  | AA                              | TT                | 1946492357               |
| SNP_P3_110886_145559 | NW_004515779.1 | Scaffold249 | 145559                  | AA                              | TT                | 1946492359               |
| SNP_P3_110887_145652 | NW_004515779.1 | Scaffold249 | 145652                  | AA                              | TT                | 1946492360               |
| SNP_P3_110888_145686 | NW_004515779.1 | Scaffold249 | 145686                  | CC                              | AA                | 1946492361               |
| SNP_P3_110889_145688 | NW_004515779.1 | Scaffold249 | 145688                  | AA                              | CC                | 1946492363               |
| SNP_P3_110890_145689 | NW_004515779.1 | Scaffold249 | 145689                  | GG                              | CC                | 1946492364               |
| SNP_P3_110891_145693 | NW_004515779.1 | Scaffold249 | 145693                  | GG                              | AA                | 1946492366               |
| SNP_P3_110892_145703 | NW_004515779.1 | Scaffold249 | 145703                  | TT                              | CC                | 1946492367               |
| SNP_P3_110893_145713 | NW_004515779.1 | Scaffold249 | 145713                  | AA                              | CC                | 1946492369               |
| SNP_P3_110894_145820 | NW_004515779.1 | Scaffold249 | 145820                  | TT                              | AA                | 1946492370               |
| SNP_P3_110895_146062 | NW_004515779.1 | Scaffold249 | 146062                  | TT                              | CC                | 1946492371               |
| SNP_P3_110896_152972 | NW_004515779.1 | Scaffold249 | 152972                  | AA                              | GG                | 1946492373               |
| SNP_P3_110897_155183 | NW_004515779.1 | Scaffold249 | 155183                  | CC                              | AA                | 1946492374               |
| SNP_P3_110898_164723 | NW_004515779.1 | Scaffold249 | 164723                  | AA                              | GG                | 1946492376               |
| SNP_P3_110899_167333 | NW_004515779.1 | Scaffold249 | 167333                  | AA                              | GG                | 1946492377               |
| SNP_P3_110900_169104 | NW_004515779.1 | Scaffold249 | 169104                  | TT                              | AA                | 1946492378               |
| SNP_P3_110901_169126 | NW_004515779.1 | Scaffold249 | 169126                  | AA                              | GG                | 1946492380               |
| SNP_P3_110902_169148 | NW_004515779.1 | Scaffold249 | 169148                  | CC                              | GG                | 1946492381               |
| SNP_P3_110903_169152 | NW_004515779.1 | Scaffold249 | 169152                  | GG                              | AA                | 1946492383               |
| SNP_P3_110904_170588 | NW_004515779.1 | Scaffold249 | 170588                  | TT                              | CC                | 1946492384               |
| SNP_P3_110905_170606 | NW_004515779.1 | Scaffold249 | 170606                  | CC                              | TT                | 1946492385               |
| SNP_P3_110906_170676 | NW_004515779.1 | Scaffold249 | 170676                  | AA                              | TT                | 1946492387               |
| SNP_P3_110907_180456 | NW_004515779.1 | Scaffold249 | 180456                  | GG                              | CC                | 1946492388               |
| SNP_P3_110908_180648 | NW_004515779.1 | Scaffold249 | 180648                  | GG                              | AA                | 1946492390               |
| SNP_P3_110909_181427 | NW_004515779.1 | Scaffold249 | 181427                  | CC                              | TT                | 1946492391               |
| SNP_P3_110910_181452 | NW_004515779.1 | Scaffold249 | 181452                  | AA                              | TT                | 1946492393               |
| SNP_P3_110911_190087 | NW_004515779.1 | Scaffold249 | 190087                  | AA                              | CC                | 1946492394               |

| SNPs IDs             | Chromosome IDs | Chromosomes | Physical positions (bp) | CDC Frontier (Reference genome) | (Pusa 256 & HPNB) | NCBI SNPdb Accession IDs |
|----------------------|----------------|-------------|-------------------------|---------------------------------|-------------------|--------------------------|
| SNP_P3_110912_190281 | NW_004515779.1 | Scaffold249 | 190281                  | TT                              | GG                | 1946492395               |
| SNP_P3_110913_196380 | NW_004515779.1 | Scaffold249 | 196380                  | CC                              | TT                | 1946492397               |
| SNP_P3_110914_196411 | NW_004515779.1 | Scaffold249 | 196411                  | AA                              | CC                | 1946492398               |
| SNP_P3_110916_196417 | NW_004515779.1 | Scaffold249 | 196417                  | AA                              | GG                | 1946492400               |
| SNP_P3_110917_196485 | NW_004515779.1 | Scaffold249 | 196485                  | AA                              | GG                | 1946492401               |
| SNP_P3_110918_196527 | NW_004515779.1 | Scaffold249 | 196527                  | CC                              | TT                | 1946492403               |
| SNP_P3_110919_197614 | NW_004515779.1 | Scaffold249 | 197614                  | AA                              | TT                | 1946492404               |
| SNP_P3_110920_203182 | NW_004515779.1 | Scaffold249 | 203182                  | AA                              | GG                | 1946492405               |
| SNP_P3_110921_153    | NW_004515780.1 | Scaffold250 | 153                     | TT                              | CC                | 1946492407               |
| SNP_P3_110922_516    | NW_004515780.1 | Scaffold250 | 516                     | TT                              | AA                | 1946492408               |
| SNP_P3_110924_42295  | NW_004515780.1 | Scaffold250 | 42295                   | TT                              | CC                | 1946492410               |
| SNP_P3_110925_48649  | NW_004515780.1 | Scaffold250 | 48649                   | AA                              | GG                | 1946492411               |
| SNP_P3_110927_64283  | NW_004515780.1 | Scaffold250 | 64283                   | AA                              | GG                | 1946492413               |
| SNP_P3_110928_64298  | NW_004515780.1 | Scaffold250 | 64298                   | TT                              | CC                | 1946492414               |
| SNP_P3_110929_77484  | NW_004515780.1 | Scaffold250 | 77484                   | TT                              | CC                | 1946492416               |
| SNP_P3_110930_77506  | NW_004515780.1 | Scaffold250 | 77506                   | AA                              | GG                | 1946492417               |
| SNP_P3_110931_77709  | NW_004515780.1 | Scaffold250 | 77709                   | CC                              | TT                | 1946492418               |
| SNP_P3_110932_77710  | NW_004515780.1 | Scaffold250 | 77710                   | AA                              | TT                | 1946492420               |
| SNP_P3_110933_77751  | NW_004515780.1 | Scaffold250 | 77751                   | TT                              | CC                | 1946492421               |
| SNP_P3_110934_79402  | NW_004515780.1 | Scaffold250 | 79402                   | CC                              | GG                | 1946492423               |
| SNP_P3_110935_82172  | NW_004515780.1 | Scaffold250 | 82172                   | AA                              | GG                | 1946492424               |
| SNP_P3_110936_82178  | NW_004515780.1 | Scaffold250 | 82178                   | CC                              | AA                | 1946492425               |
| SNP_P3_110937_82252  | NW_004515780.1 | Scaffold250 | 82252                   | CC                              | TT                | 1946492427               |
| SNP_P3_110938_82282  | NW_004515780.1 | Scaffold250 | 82282                   | GG                              | CC                | 1946492428               |
| SNP_P3_110939_82302  | NW_004515780.1 | Scaffold250 | 82302                   | GG                              | AA                | 1946492430               |
| SNP_P3_110940_82347  | NW_004515780.1 | Scaffold250 | 82347                   | TT                              | CC                | 1946492431               |
| SNP_P3_110941_82447  | NW_004515780.1 | Scaffold250 | 82447                   | CC                              | AA                | 1946492433               |
| SNP_P3_110942_82461  | NW_004515780.1 | Scaffold250 | 82461                   | AA                              | TT                | 1946492434               |
| SNP_P3_110943_82482  | NW_004515780.1 | Scaffold250 | 82482                   | AA                              | TT                | 1946492435               |
| SNP_P3_110944_82543  | NW_004515780.1 | Scaffold250 | 82543                   | TT                              | GG                | 1946492437               |
| SNP_P3_110945_82612  | NW_004515780.1 | Scaffold250 | 82612                   | AA                              | CC                | 1946492438               |
| SNP_P3_110947_86148  | NW_004515780.1 | Scaffold250 | 86148                   | AA                              | GG                | 1946492440               |
| SNP_P3_110948_86187  | NW_004515780.1 | Scaffold250 | 86187                   | GG                              | AA                | 1946492441               |
| SNP_P3_110949_86191  | NW_004515780.1 | Scaffold250 | 86191                   | AA                              | GG                | 1946492443               |
| SNP_P3_110950_86195  | NW_004515780.1 | Scaffold250 | 86195                   | CC                              | TT                | 1946492444               |
| SNP_P3_110951_86221  | NW_004515780.1 | Scaffold250 | 86221                   | GG                              | CC                | 1946492445               |
| SNP_P3_110952_86235  | NW_004515780.1 | Scaffold250 | 86235                   | CC                              | TT                | 1946492447               |
| SNP_P3_110953_91049  | NW_004515780.1 | Scaffold250 | 91049                   | GG                              | AA                | 1946492448               |
| SNP_P3_110954_91927  | NW_004515780.1 | Scaffold250 | 91927                   | GG                              | AA                | 1946492450               |
| SNP_P3_110955_120862 | NW_004515780.1 | Scaffold250 | 120862                  | AA                              | CC                | 1946492451               |
| SNP_P3_110956_655    | NW_004515781.1 | Scaffold251 | 655                     | TT                              | CC                | 1946492453               |
| SNP_P3_110957_693    | NW_004515781.1 | Scaffold251 | 693                     | AA                              | TT                | 1946492454               |

| SNPs IDs           | Chromosome IDs | Chromosomes | Physical positions (bp) | CDC Frontier (Reference genome) | (Pusa 256 & HPNB) | NCBI SNPdb Accession IDs |
|--------------------|----------------|-------------|-------------------------|---------------------------------|-------------------|--------------------------|
| SNP_P3_110958_716  | NW_004515781.1 | Scaffold251 | 716                     | TT                              | AA                | 1946492455               |
| SNP_P3_110959_1311 | NW_004515781.1 | Scaffold251 | 1311                    | GG                              | CC                | 1946492457               |
| SNP_P3_110960_2669 | NW_004515781.1 | Scaffold251 | 2669                    | AA                              | CC                | 1946492458               |
| SNP_P3_110961_2716 | NW_004515781.1 | Scaffold251 | 2716                    | AA                              | GG                | 1946492460               |
| SNP_P3_110962_2938 | NW_004515781.1 | Scaffold251 | 2938                    | CC                              | TT                | 1946492461               |
| SNP_P3_110963_2959 | NW_004515781.1 | Scaffold251 | 2959                    | CC                              | AA                | 1946492462               |
| SNP_P3_110964_2971 | NW_004515781.1 | Scaffold251 | 2971                    | CC                              | TT                | 1946492464               |
| SNP_P3_110965_2984 | NW_004515781.1 | Scaffold251 | 2984                    | CC                              | AA                | 1946492465               |
| SNP_P3_110966_2985 | NW_004515781.1 | Scaffold251 | 2985                    | TT                              | GG                | 1946492467               |
| SNP_P3_110967_2997 | NW_004515781.1 | Scaffold251 | 2997                    | AA                              | GG                | 1946492468               |
| SNP_P3_110968_2998 | NW_004515781.1 | Scaffold251 | 2998                    | AA                              | GG                | 1946492470               |
| SNP_P3_110969_3125 | NW_004515781.1 | Scaffold251 | 3125                    | AA                              | TT                | 1946492471               |
| SNP_P3_110970_3166 | NW_004515781.1 | Scaffold251 | 3166                    | TT                              | GG                | 1946492472               |
| SNP_P3_110971_6150 | NW_004515781.1 | Scaffold251 | 6150                    | GG                              | AA                | 1946492474               |
| SNP_P3_110972_6156 | NW_004515781.1 | Scaffold251 | 6156                    | CC                              | GG                | 1946492475               |
| SNP_P3_110973_6369 | NW_004515781.1 | Scaffold251 | 6369                    | CC                              | AA                | 1946492477               |
| SNP_P3_110974_6619 | NW_004515781.1 | Scaffold251 | 6619                    | AA                              | GG                | 1946492478               |
| SNP_P3_110975_8307 | NW_004515781.1 | Scaffold251 | 8307                    | CC                              | TT                | 1946492479               |
| SNP_P3_110976_8642 | NW_004515781.1 | Scaffold251 | 8642                    | TT                              | AA                | 1946492481               |
| SNP_P3_110977_8917 | NW_004515784.1 | Scaffold255 | 8917                    | CC                              | TT                | 1946492482               |
| SNP_P3_110978_8923 | NW_004515784.1 | Scaffold255 | 8923                    | GG                              | AA                | 1946492484               |
| SNP_P3_110979_8929 | NW_004515784.1 | Scaffold255 | 8929                    | AA                              | GG                | 1946492485               |
| SNP_P3_110980_8992 | NW_004515784.1 | Scaffold255 | 8992                    | CC                              | TT                | 1946492487               |
| SNP_P3_110981_8995 | NW_004515784.1 | Scaffold255 | 8995                    | AA                              | GG                | 1946492488               |
| SNP_P3_110982_9165 | NW_004515784.1 | Scaffold255 | 9165                    | AA                              | GG                | 1946492489               |
| SNP_P3_110983_9184 | NW_004515784.1 | Scaffold255 | 9184                    | TT                              | CC                | 1946492491               |
| SNP_P3_110984_9194 | NW_004515784.1 | Scaffold255 | 9194                    | CC                              | TT                | 1946492492               |
| SNP_P3_110985_9211 | NW_004515784.1 | Scaffold255 | 9211                    | AA                              | GG                | 1946492494               |
| SNP_P3_110986_9220 | NW_004515784.1 | Scaffold255 | 9220                    | AA                              | GG                | 1946492495               |
| SNP_P3_110987_9226 | NW_004515784.1 | Scaffold255 | 9226                    | TT                              | CC                | 1946492497               |
| SNP_P3_110988_9250 | NW_004515784.1 | Scaffold255 | 9250                    | CC                              | TT                | 1946492498               |
| SNP_P3_110989_9259 | NW_004515784.1 | Scaffold255 | 9259                    | GG                              | AA                | 1946492499               |
| SNP_P3_110990_9263 | NW_004515784.1 | Scaffold255 | 9263                    | AA                              | GG                | 1946492501               |
| SNP_P3_110991_9271 | NW_004515784.1 | Scaffold255 | 9271                    | CC                              | GG                | 1946492502               |
| SNP_P3_110992_9280 | NW_004515784.1 | Scaffold255 | 9280                    | TT                              | CC                | 1946492504               |
| SNP_P3_110993_9304 | NW_004515784.1 | Scaffold255 | 9304                    | TT                              | GG                | 1946492505               |
| SNP_P3_110994_9307 | NW_004515784.1 | Scaffold255 | 9307                    | AA                              | GG                | 1946492507               |
| SNP_P3_110995_9347 | NW_004515784.1 | Scaffold255 | 9347                    | AA                              | CC                | 1946492508               |
| SNP_P3_110996_9355 | NW_004515784.1 | Scaffold255 | 9355                    | AA                              | GG                | 1946492509               |
| SNP_P3_110997_9370 | NW_004515784.1 | Scaffold255 | 9370                    | TT                              | GG                | 1946492511               |
| SNP_P3_110998_9383 | NW_004515784.1 | Scaffold255 | 9383                    | TT                              | CC                | 1946492512               |
| SNP_P3_110999_9406 | NW_004515784.1 | Scaffold255 | 9406                    | TT                              | AA                | 1946492514               |

| SNPs IDs            | Chromosome IDs | Chromosomes | Physical positions (bp) | CDC Frontier (Reference genome) | (Pusa 256 & HPNB) | NCBI SNPdb Accession IDs |
|---------------------|----------------|-------------|-------------------------|---------------------------------|-------------------|--------------------------|
| SNP_P3_111000_9409  | NW_004515784.1 | Scaffold255 | 9409                    | AA                              | GG                | 1946492515               |
| SNP_P3_111002_11055 | NW_004515784.1 | Scaffold255 | 11055                   | GG                              | CC                | 1946492517               |
| SNP_P3_111004_38631 | NW_004515784.1 | Scaffold255 | 38631                   | GG                              | AA                | 1946492518               |
| SNP_P3_111005_45931 | NW_004515784.1 | Scaffold255 | 45931                   | AA                              | GG                | 1946492519               |
| SNP_P3_111006_45960 | NW_004515784.1 | Scaffold255 | 45960                   | GG                              | TT                | 1946492521               |
| SNP_P3_111007_45985 | NW_004515784.1 | Scaffold255 | 45985                   | GG                              | TT                | 1946492522               |
| SNP_P3_111008_46198 | NW_004515784.1 | Scaffold255 | 46198                   | AA                              | GG                | 1946492524               |
| SNP_P3_111009_46247 | NW_004515784.1 | Scaffold255 | 46247                   | TT                              | GG                | 1946492525               |
| SNP_P3_111010_46259 | NW_004515784.1 | Scaffold255 | 46259                   | TT                              | AA                | 1946492527               |
| SNP_P3_111011_46279 | NW_004515784.1 | Scaffold255 | 46279                   | GG                              | AA                | 1946492528               |
| SNP_P3_111012_47670 | NW_004515784.1 | Scaffold255 | 47670                   | CC                              | TT                | 1946492530               |
| SNP_P3_111013_47673 | NW_004515784.1 | Scaffold255 | 47673                   | AA                              | GG                | 1946492531               |
| SNP_P3_111014_51325 | NW_004515784.1 | Scaffold255 | 51325                   | AA                              | TT                | 1946492532               |
| SNP_P3_111015_59409 | NW_004515784.1 | Scaffold255 | 59409                   | CC                              | TT                | 1946492534               |
| SNP_P3_111016_59422 | NW_004515784.1 | Scaffold255 | 59422                   | CC                              | AA                | 1946492535               |
| SNP_P3_111017_60429 | NW_004515784.1 | Scaffold255 | 60429                   | CC                              | AA                | 1946492537               |
| SNP_P3_111018_69967 | NW_004515784.1 | Scaffold255 | 69967                   | AA                              | TT                | 1946492538               |
| SNP_P3_111019_69977 | NW_004515784.1 | Scaffold255 | 69977                   | CC                              | AA                | 1946492540               |
| SNP_P3_111020_70011 | NW_004515784.1 | Scaffold255 | 70011                   | AA                              | CC                | 1946492541               |
| SNP_P3_111021_70026 | NW_004515784.1 | Scaffold255 | 70026                   | GG                              | CC                | 1946492542               |
| SNP_P3_111022_70040 | NW_004515784.1 | Scaffold255 | 70040                   | TT                              | CC                | 1946492544               |
| SNP_P3_111023_70113 | NW_004515784.1 | Scaffold255 | 70113                   | TT                              | CC                | 1946492545               |
| SNP_P3_111024_70327 | NW_004515784.1 | Scaffold255 | 70327                   | AA                              | CC                | 1946492547               |
| SNP_P3_111025_70347 | NW_004515784.1 | Scaffold255 | 70347                   | AA                              | CC                | 1946492548               |
| SNP_P3_111026_70400 | NW_004515784.1 | Scaffold255 | 70400                   | CC                              | TT                | 1946492550               |
| SNP_P3_111027_70412 | NW_004515784.1 | Scaffold255 | 70412                   | CC                              | TT                | 1946492551               |
| SNP_P3_111028_79358 | NW_004515784.1 | Scaffold255 | 79358                   | AA                              | TT                | 1946492552               |
| SNP_P3_111029_79497 | NW_004515784.1 | Scaffold255 | 79497                   | CC                              | GG                | 1946492554               |
| SNP_P3_111030_79510 | NW_004515784.1 | Scaffold255 | 79510                   | TT                              | GG                | 1946492555               |
| SNP_P3_111031_85549 | NW_004515784.1 | Scaffold255 | 85549                   | GG                              | AA                | 1946492557               |
| SNP_P3_111032_85719 | NW_004515784.1 | Scaffold255 | 85719                   | TT                              | GG                | 1946492558               |
| SNP_P3_111033_85720 | NW_004515784.1 | Scaffold255 | 85720                   | AA                              | GG                | 1946492559               |
| SNP_P3_111034_1767  | NW_004515785.1 | Scaffold256 | 1767                    | AA                              | TT                | 1946492561               |
| SNP_P3_111035_1782  | NW_004515785.1 | Scaffold256 | 1782                    | TT                              | AA                | 1946492562               |
| SNP_P3_111036_2438  | NW_004515785.1 | Scaffold256 | 2438                    | AA                              | TT                | 1946492564               |
| SNP_P3_111037_2439  | NW_004515785.1 | Scaffold256 | 2439                    | AA                              | TT                | 1946492565               |
| SNP_P3_111038_5452  | NW_004515785.1 | Scaffold256 | 5452                    | CC                              | TT                | 1946492567               |
| SNP_P3_111039_5470  | NW_004515785.1 | Scaffold256 | 5470                    | TT                              | GG                | 1946492568               |
| SNP_P3_111040_10353 | NW_004515785.1 | Scaffold256 | 10353                   | AA                              | GG                | 1946492569               |
| SNP_P3_111041_10376 | NW_004515785.1 | Scaffold256 | 10376                   | GG                              | AA                | 1946492571               |
| SNP_P3_111042_10550 | NW_004515785.1 | Scaffold256 | 10550                   | CC                              | TT                | 1946492572               |
| SNP_P3_111043_10568 | NW_004515785.1 | Scaffold256 | 10568                   | GG                              | TT                | 1946492574               |

| SNPs IDs             | Chromosome IDs | Chromosomes | Physical positions (bp) | CDC Frontier (Reference genome) | (Pusa 256 & HPNB) | NCBI SNPdb Accession IDs |
|----------------------|----------------|-------------|-------------------------|---------------------------------|-------------------|--------------------------|
| SNP_P3_111044_10578  | NW_004515785.1 | Scaffold256 | 10578                   | AA                              | TT                | 1946492575               |
| SNP_P3_111045_10594  | NW_004515785.1 | Scaffold256 | 10594                   | TT                              | CC                | 1946492576               |
| SNP_P3_111046_36222  | NW_004515785.1 | Scaffold256 | 36222                   | AA                              | TT                | 1946492578               |
| SNP_P3_111047_36380  | NW_004515785.1 | Scaffold256 | 36380                   | AA                              | GG                | 1946492579               |
| SNP_P3_111048_36749  | NW_004515785.1 | Scaffold256 | 36749                   | AA                              | CC                | 1946492581               |
| SNP_P3_111049_36775  | NW_004515785.1 | Scaffold256 | 36775                   | AA                              | GG                | 1946492582               |
| SNP_P3_111050_43308  | NW_004515785.1 | Scaffold256 | 43308                   | TT                              | CC                | 1946492584               |
| SNP_P3_111052_43581  | NW_004515785.1 | Scaffold256 | 43581                   | TT                              | CC                | 1946492585               |
| SNP_P3_111053_43615  | NW_004515785.1 | Scaffold256 | 43615                   | TT                              | CC                | 1946492586               |
| SNP_P3_111054_43641  | NW_004515785.1 | Scaffold256 | 43641                   | GG                              | AA                | 1946492588               |
| SNP_P3_111055_43698  | NW_004515785.1 | Scaffold256 | 43698                   | CC                              | AA                | 1946492589               |
| SNP_P3_111056_43742  | NW_004515785.1 | Scaffold256 | 43742                   | GG                              | AA                | 1946492591               |
| SNP_P3_111057_43760  | NW_004515785.1 | Scaffold256 | 43760                   | TT                              | AA                | 1946492592               |
| SNP_P3_111058_44115  | NW_004515785.1 | Scaffold256 | 44115                   | GG                              | AA                | 1946492593               |
| SNP_P3_111059_44157  | NW_004515785.1 | Scaffold256 | 44157                   | GG                              | TT                | 1946492595               |
| SNP_P3_111060_44165  | NW_004515785.1 | Scaffold256 | 44165                   | GG                              | AA                | 1946492596               |
| SNP_P3_111062_61884  | NW_004515785.1 | Scaffold256 | 61884                   | AA                              | GG                | 1946492598               |
| SNP_P3_111063_62209  | NW_004515785.1 | Scaffold256 | 62209                   | TT                              | CC                | 1946492599               |
| SNP_P3_111064_62211  | NW_004515785.1 | Scaffold256 | 62211                   | TT                              | GG                | 1946492601               |
| SNP_P3_111065_87381  | NW_004515785.1 | Scaffold256 | 87381                   | AA                              | GG                | 1946492602               |
| SNP_P3_111066_87414  | NW_004515785.1 | Scaffold256 | 87414                   | AA                              | CC                | 1946492603               |
| SNP_P3_111067_87418  | NW_004515785.1 | Scaffold256 | 87418                   | TT                              | CC                | 1946492605               |
| SNP_P3_111068_92137  | NW_004515785.1 | Scaffold256 | 92137                   | GG                              | AA                | 1946492606               |
| SNP_P3_111069_101361 | NW_004515785.1 | Scaffold256 | 101361                  | CC                              | TT                | 1946492608               |
| SNP_P3_111070_101362 | NW_004515785.1 | Scaffold256 | 101362                  | CC                              | GG                | 1946492609               |
| SNP_P3_111071_101363 | NW_004515785.1 | Scaffold256 | 101363                  | CC                              | GG                | 1946492611               |
| SNP_P3_111072_101444 | NW_004515785.1 | Scaffold256 | 101444                  | TT                              | CC                | 1946492612               |
| SNP_P3_111073_101453 | NW_004515785.1 | Scaffold256 | 101453                  | TT                              | AA                | 1946492614               |
| SNP_P3_111074_101455 | NW_004515785.1 | Scaffold256 | 101455                  | AA                              | GG                | 1946492615               |
| SNP_P3_111075_101657 | NW_004515785.1 | Scaffold256 | 101657                  | CC                              | AA                | 1946492617               |
| SNP_P3_111076_101663 | NW_004515785.1 | Scaffold256 | 101663                  | TT                              | AA                | 1946492618               |
| SNP_P3_111077_101719 | NW_004515785.1 | Scaffold256 | 101719                  | AA                              | TT                | 1946492619               |
| SNP_P3_111078_101724 | NW_004515785.1 | Scaffold256 | 101724                  | TT                              | AA                | 1946492621               |
| SNP_P3_111079_101791 | NW_004515785.1 | Scaffold256 | 101791                  | TT                              | CC                | 1946492622               |
| SNP_P3_111080_101898 | NW_004515785.1 | Scaffold256 | 101898                  | TT                              | CC                | 1946492624               |
| SNP_P3_111081_124108 | NW_004515785.1 | Scaffold256 | 124108                  | TT                              | AA                | 1946492625               |
| SNP_P3_111082_124109 | NW_004515785.1 | Scaffold256 | 124109                  | TT                              | GG                | 1946492627               |
| SNP_P3_111083_124126 | NW_004515785.1 | Scaffold256 | 124126                  | CC                              | TT                | 1946492628               |
| SNP_P3_111084_124139 | NW_004515785.1 | Scaffold256 | 124139                  | GG                              | AA                | 1946492629               |
| SNP_P3_111085_124140 | NW_004515785.1 | Scaffold256 | 124140                  | GG                              | AA                | 1946492631               |
| SNP_P3_111088_146391 | NW_004515785.1 | Scaffold256 | 146391                  | TT                              | CC                | 1946492632               |
| SNP_P3_111089_147864 | NW_004515785.1 | Scaffold256 | 147864                  | GG                              | AA                | 1946492634               |

| SNPs IDs             | Chromosome IDs | Chromosomes | Physical positions (bp) | CDC Frontier (Reference genome) | (Pusa 256 & HPNB) | NCBI SNPdb Accession IDs |
|----------------------|----------------|-------------|-------------------------|---------------------------------|-------------------|--------------------------|
| SNP_P3_111090_147870 | NW_004515785.1 | Scaffold256 | 147870                  | AA                              | CC                | 1946492635               |
| SNP_P3_111091_171559 | NW_004515785.1 | Scaffold256 | 171559                  | TT                              | CC                | 1946492637               |
| SNP_P3_111092_171844 | NW_004515785.1 | Scaffold256 | 171844                  | TT                              | CC                | 1946492638               |
| SNP_P3_111093_171861 | NW_004515785.1 | Scaffold256 | 171861                  | AA                              | GG                | 1946492639               |
| SNP_P3_111094_171893 | NW_004515785.1 | Scaffold256 | 171893                  | AA                              | TT                | 1946492641               |
| SNP_P3_111095_171952 | NW_004515785.1 | Scaffold256 | 171952                  | CC                              | TT                | 1946492642               |
| SNP_P3_111096_1449   | NW_004515786.1 | Scaffold260 | 1449                    | CC                              | TT                | 1946492644               |
| SNP_P3_111097_1628   | NW_004515786.1 | Scaffold260 | 1628                    | TT                              | AA                | 1946492645               |
| SNP_P3_111098_1646   | NW_004515786.1 | Scaffold260 | 1646                    | CC                              | TT                | 1946492646               |
| SNP_P3_111100_1900   | NW_004515786.1 | Scaffold260 | 1900                    | TT                              | AA                | 1946492648               |
| SNP_P3_111101_1933   | NW_004515786.1 | Scaffold260 | 1933                    | TT                              | CC                | 1946492649               |
| SNP_P3_111102_1953   | NW_004515786.1 | Scaffold260 | 1953                    | AA                              | GG                | 1946492651               |
| SNP_P3_111103_1959   | NW_004515786.1 | Scaffold260 | 1959                    | AA                              | GG                | 1946492652               |
| SNP_P3_111104_1981   | NW_004515786.1 | Scaffold260 | 1981                    | AA                              | CC                | 1946492653               |
| SNP_P3_111105_15980  | NW_004515786.1 | Scaffold260 | 15980                   | TT                              | GG                | 1946492655               |
| SNP_P3_111106_15986  | NW_004515786.1 | Scaffold260 | 15986                   | CC                              | AA                | 1946492656               |
| SNP_P3_111107_17230  | NW_004515786.1 | Scaffold260 | 17230                   | CC                              | TT                | 1946492658               |
| SNP_P3_111108_17248  | NW_004515786.1 | Scaffold260 | 17248                   | CC                              | TT                | 1946492659               |
| SNP_P3_111109_17259  | NW_004515786.1 | Scaffold260 | 17259                   | CC                              | TT                | 1946492661               |
| SNP_P3_111110_34598  | NW_004515786.1 | Scaffold260 | 34598                   | AA                              | GG                | 1946492662               |
| SNP_P3_111111_58220  | NW_004515786.1 | Scaffold260 | 58220                   | TT                              | CC                | 1946492663               |
| SNP_P3_111112_58600  | NW_004515786.1 | Scaffold260 | 58600                   | AA                              | CC                | 1946492665               |
| SNP_P3_111113_64925  | NW_004515786.1 | Scaffold260 | 64925                   | AA                              | GG                | 1946492666               |
| SNP_P3_111114_64928  | NW_004515786.1 | Scaffold260 | 64928                   | TT                              | AA                | 1946492668               |
| SNP_P3_111115_64939  | NW_004515786.1 | Scaffold260 | 64939                   | AA                              | TT                | 1946492669               |
| SNP_P3_111116_64953  | NW_004515786.1 | Scaffold260 | 64953                   | TT                              | AA                | 1946492670               |
| SNP_P3_111117_64954  | NW_004515786.1 | Scaffold260 | 64954                   | TT                              | GG                | 1946492672               |
| SNP_P3_111118_64978  | NW_004515786.1 | Scaffold260 | 64978                   | AA                              | CC                | 1946492673               |
| SNP_P3_111119_65031  | NW_004515786.1 | Scaffold260 | 65031                   | TT                              | AA                | 1946492675               |
| SNP_P3_111120_65035  | NW_004515786.1 | Scaffold260 | 65035                   | AA                              | TT                | 1946492676               |
| SNP_P3_111121_65048  | NW_004515786.1 | Scaffold260 | 65048                   | CC                              | TT                | 1946492677               |
| SNP_P3_111122_65139  | NW_004515786.1 | Scaffold260 | 65139                   | AA                              | GG                | 1946492679               |
| SNP_P3_111123_65309  | NW_004515786.1 | Scaffold260 | 65309                   | TT                              | AA                | 1946492680               |
| SNP_P3_111124_65332  | NW_004515786.1 | Scaffold260 | 65332                   | TT                              | AA                | 1946492682               |
| SNP_P3_111125_65370  | NW_004515786.1 | Scaffold260 | 65370                   | CC                              | TT                | 1946492683               |
| SNP_P3_111126_65374  | NW_004515786.1 | Scaffold260 | 65374                   | CC                              | TT                | 1946492684               |
| SNP_P3_111127_65396  | NW_004515786.1 | Scaffold260 | 65396                   | AA                              | GG                | 1946492686               |
| SNP_P3_111128_65399  | NW_004515786.1 | Scaffold260 | 65399                   | TT                              | CC                | 1946492687               |
| SNP_P3_111129_67573  | NW_004515786.1 | Scaffold260 | 67573                   | GG                              | TT                | 1946492689               |
| SNP_P3_111130_67575  | NW_004515786.1 | Scaffold260 | 67575                   | AA                              | GG                | 1946492690               |
| SNP_P3_111131_73356  | NW_004515786.1 | Scaffold260 | 73356                   | TT                              | GG                | 1946492692               |
| SNP_P3_111132_75269  | NW_004515786.1 | Scaffold260 | 75269                   | GG                              | TT                | 1946492693               |

| SNPs IDs             | Chromosome IDs | Chromosomes | Physical positions (bp) | CDC Frontier (Reference genome) | (Pusa 256 & HPNB) | NCBI SNPdb Accession IDs |
|----------------------|----------------|-------------|-------------------------|---------------------------------|-------------------|--------------------------|
| SNP_P3_111133_75301  | NW_004515786.1 | Scaffold260 | 75301                   | CC                              | TT                | 1946492694               |
| SNP_P3_111135_87518  | NW_004515786.1 | Scaffold260 | 87518                   | GG                              | AA                | 1946492696               |
| SNP_P3_111137_128993 | NW_004515786.1 | Scaffold260 | 128993                  | AA                              | GG                | 1946492697               |
| SNP_P3_111138_143710 | NW_004515786.1 | Scaffold260 | 143710                  | AA                              | GG                | 1946492699               |
| SNP_P3_111139_144269 | NW_004515786.1 | Scaffold260 | 144269                  | CC                              | TT                | 1946492700               |
| SNP_P3_111140_173907 | NW_004515786.1 | Scaffold260 | 173907                  | AA                              | GG                | 1946492702               |
| SNP_P3_111141_174326 | NW_004515786.1 | Scaffold260 | 174326                  | AA                              | GG                | 1946492703               |
| SNP_P3_111142_191751 | NW_004515786.1 | Scaffold260 | 191751                  | GG                              | AA                | 1946492704               |
| SNP_P3_111143_205184 | NW_004515786.1 | Scaffold260 | 205184                  | TT                              | AA                | 1946492706               |
| SNP_P3_111144_209493 | NW_004515786.1 | Scaffold260 | 209493                  | CC                              | TT                | 1946492707               |
| SNP_P3_111145_209515 | NW_004515786.1 | Scaffold260 | 209515                  | GG                              | AA                | 1946492709               |
| SNP_P3_111146_209518 | NW_004515786.1 | Scaffold260 | 209518                  | GG                              | AA                | 1946492710               |
| SNP_P3_111147_209519 | NW_004515786.1 | Scaffold260 | 209519                  | TT                              | CC                | 1946492712               |
| SNP_P3_111148_209561 | NW_004515786.1 | Scaffold260 | 209561                  | CC                              | AA                | 1946492713               |
| SNP_P3_111149_209585 | NW_004515786.1 | Scaffold260 | 209585                  | TT                              | AA                | 1946492715               |
| SNP_P3_111150_210669 | NW_004515786.1 | Scaffold260 | 210669                  | GG                              | AA                | 1946492716               |
| SNP_P3_111152_214249 | NW_004515786.1 | Scaffold260 | 214249                  | CC                              | TT                | 1946492717               |
| SNP_P3_111153_233674 | NW_004515786.1 | Scaffold260 | 233674                  | GG                              | TT                | 1946492719               |
| SNP_P3_111154_233704 | NW_004515786.1 | Scaffold260 | 233704                  | CC                              | TT                | 1946492720               |
| SNP_P3_111155_233761 | NW_004515786.1 | Scaffold260 | 233761                  | AA                              | TT                | 1946492722               |
| SNP_P3_111156_237198 | NW_004515786.1 | Scaffold260 | 237198                  | TT                              | CC                | 1946492723               |
| SNP_P3_111157_242134 | NW_004515786.1 | Scaffold260 | 242134                  | GG                              | AA                | 1946492725               |
| SNP_P3_111158_255716 | NW_004515786.1 | Scaffold260 | 255716                  | AA                              | GG                | 1946492726               |
| SNP_P3_111159_257241 | NW_004515786.1 | Scaffold260 | 257241                  | TT                              | CC                | 1946492727               |
| SNP_P3_111160_257318 | NW_004515786.1 | Scaffold260 | 257318                  | TT                              | CC                | 1946492729               |
| SNP_P3_111161_257678 | NW_004515786.1 | Scaffold260 | 257678                  | CC                              | TT                | 1946492730               |
| SNP_P3_111162_257691 | NW_004515786.1 | Scaffold260 | 257691                  | TT                              | AA                | 1946492732               |
| SNP_P3_111163_267253 | NW_004515786.1 | Scaffold260 | 267253                  | GG                              | AA                | 1946492733               |
| SNP_P3_111164_273585 | NW_004515786.1 | Scaffold260 | 273585                  | AA                              | GG                | 1946492735               |
| SNP_P3_111165_273592 | NW_004515786.1 | Scaffold260 | 273592                  | AA                              | GG                | 1946492736               |
| SNP_P3_111167_276144 | NW_004515786.1 | Scaffold260 | 276144                  | CC                              | TT                | 1946492738               |
| SNP_P3_111168_326324 | NW_004515786.1 | Scaffold260 | 326324                  | TT                              | GG                | 1946492739               |
| SNP_P3_111169_330270 | NW_004515786.1 | Scaffold260 | 330270                  | TT                              | CC                | 1946492740               |
| SNP_P3_111170_330346 | NW_004515786.1 | Scaffold260 | 330346                  | TT                              | CC                | 1946492742               |
| SNP_P3_111171_330591 | NW_004515786.1 | Scaffold260 | 330591                  | AA                              | GG                | 1946492743               |
| SNP_P3_111172_332515 | NW_004515786.1 | Scaffold260 | 332515                  | GG                              | TT                | 1946492745               |
| SNP_P3_111173_332527 | NW_004515786.1 | Scaffold260 | 332527                  | AA                              | GG                | 1946492746               |
| SNP_P3_111174_334555 | NW_004515786.1 | Scaffold260 | 334555                  | TT                              | GG                | 1946492748               |
| SNP_P3_111176_349167 | NW_004515786.1 | Scaffold260 | 349167                  | GG                              | AA                | 1946492749               |
| SNP_P3_111177_354873 | NW_004515786.1 | Scaffold260 | 354873                  | CC                              | TT                | 1946492750               |
| SNP_P3_111178_354876 | NW_004515786.1 | Scaffold260 | 354876                  | TT                              | AA                | 1946492752               |
| SNP_P3_111179_354924 | NW_004515786.1 | Scaffold260 | 354924                  | AA                              | TT                | 1946492753               |



| SNPs IDs             | Chromosome IDs | Chromosomes | Physical positions (bp) | CDC Frontier (Reference genome) | (Pusa 256 & HPNB) | NCBI SNPdb Accession IDs |
|----------------------|----------------|-------------|-------------------------|---------------------------------|-------------------|--------------------------|
| SNP_P3_111180_354927 | NW_004515786.1 | Scaffold260 | 354927                  | AA                              | GG                | 1946492755               |
| SNP_P3_111181_354928 | NW_004515786.1 | Scaffold260 | 354928                  | CC                              | TT                | 1946492756               |
| SNP_P3_111182_354944 | NW_004515786.1 | Scaffold260 | 354944                  | AA                              | CC                | 1946492758               |
| SNP_P3_111183_355036 | NW_004515786.1 | Scaffold260 | 355036                  | AA                              | CC                | 1946492759               |
| SNP_P3_111184_355165 | NW_004515786.1 | Scaffold260 | 355165                  | TT                              | CC                | 1946492760               |
| SNP_P3_111185_355222 | NW_004515786.1 | Scaffold260 | 355222                  | GG                              | AA                | 1946492762               |
| SNP_P3_111187_355751 | NW_004515786.1 | Scaffold260 | 355751                  | AA                              | GG                | 1946492763               |
| SNP_P3_111188_355757 | NW_004515786.1 | Scaffold260 | 355757                  | CC                              | TT                | 1946492765               |
| SNP_P3_111189_355774 | NW_004515786.1 | Scaffold260 | 355774                  | TT                              | CC                | 1946492766               |
| SNP_P3_111190_356023 | NW_004515786.1 | Scaffold260 | 356023                  | GG                              | AA                | 1946492768               |
| SNP_P3_111191_356191 | NW_004515786.1 | Scaffold260 | 356191                  | TT                              | CC                | 1946492769               |
| SNP_P3_111192_356289 | NW_004515786.1 | Scaffold260 | 356289                  | AA                              | TT                | 1946492770               |
| SNP_P3_111193_356532 | NW_004515786.1 | Scaffold260 | 356532                  | AA                              | GG                | 1946492772               |
| SNP_P3_111194_356544 | NW_004515786.1 | Scaffold260 | 356544                  | CC                              | AA                | 1946492773               |
| SNP_P3_111195_380135 | NW_004515786.1 | Scaffold260 | 380135                  | AA                              | GG                | 1946492775               |
| SNP_P3_111196_380166 | NW_004515786.1 | Scaffold260 | 380166                  | GG                              | TT                | 1946492776               |
| SNP_P3_111197_380365 | NW_004515786.1 | Scaffold260 | 380365                  | GG                              | CC                | 1946492778               |
| SNP_P3_111198_380513 | NW_004515786.1 | Scaffold260 | 380513                  | AA                              | GG                | 1946492779               |
| SNP_P3_111200_414163 | NW_004515786.1 | Scaffold260 | 414163                  | GG                              | AA                | 1946492780               |
| SNP_P3_111201_415483 | NW_004515786.1 | Scaffold260 | 415483                  | TT                              | CC                | 1946492782               |
| SNP_P3_111203_417538 | NW_004515786.1 | Scaffold260 | 417538                  | AA                              | GG                | 1946492783               |
| SNP_P3_111204_417545 | NW_004515786.1 | Scaffold260 | 417545                  | CC                              | TT                | 1946492787               |
| SNP_P3_111205_417549 | NW_004515786.1 | Scaffold260 | 417549                  | GG                              | AA                | 1946492788               |
| SNP_P3_111206_422767 | NW_004515786.1 | Scaffold260 | 422767                  | CC                              | TT                | 1946492790               |
| SNP_P3_111207_423007 | NW_004515786.1 | Scaffold260 | 423007                  | AA                              | GG                | 1946492791               |
| SNP_P3_111209_423508 | NW_004515786.1 | Scaffold260 | 423508                  | CC                              | TT                | 1946492793               |
| SNP_P3_111210_436677 | NW_004515786.1 | Scaffold260 | 436677                  | CC                              | TT                | 1946492794               |
| SNP_P3_111211_451244 | NW_004515786.1 | Scaffold260 | 451244                  | CC                              | AA                | 1946492795               |
| SNP_P3_111212_11449  | NW_004515788.1 | Scaffold263 | 11449                   | AA                              | GG                | 1946492797               |
| SNP_P3_111213_11863  | NW_004515788.1 | Scaffold263 | 11863                   | CC                              | GG                | 1946492798               |
| SNP_P3_111214_20198  | NW_004515788.1 | Scaffold263 | 20198                   | GG                              | AA                | 1946492800               |
| SNP_P3_111215_20292  | NW_004515788.1 | Scaffold263 | 20292                   | CC                              | AA                | 1946492801               |
| SNP_P3_111216_20472  | NW_004515788.1 | Scaffold263 | 20472                   | AA                              | TT                | 1946492802               |
| SNP_P3_111217_20572  | NW_004515788.1 | Scaffold263 | 20572                   | TT                              | CC                | 1946492804               |
| SNP_P3_111218_20600  | NW_004515788.1 | Scaffold263 | 20600                   | TT                              | CC                | 1946492805               |
| SNP_P3_111219_20643  | NW_004515788.1 | Scaffold263 | 20643                   | CC                              | GG                | 1946492807               |
| SNP_P3_111220_20672  | NW_004515788.1 | Scaffold263 | 20672                   | TT                              | GG                | 1946492808               |
| SNP_P3_111221_20673  | NW_004515788.1 | Scaffold263 | 20673                   | TT                              | CC                | 1946492809               |
| SNP_P3_111222_42323  | NW_004515788.1 | Scaffold263 | 42323                   | CC                              | TT                | 1946492811               |
| SNP_P3_111223_64724  | NW_004515788.1 | Scaffold263 | 64724                   | TT                              | CC                | 1946492812               |
| SNP_P3_111224_81322  | NW_004515788.1 | Scaffold263 | 81322                   | AA                              | GG                | 1946492814               |
| SNP_P3_111225_89169  | NW_004515788.1 | Scaffold263 | 89169                   | AA                              | CC                | 1946492815               |

| SNPs IDs             | Chromosome IDs | Chromosomes | Physical positions (bp) | CDC Frontier (Reference genome) | (Pusa 256 & HPNB) | NCBI SNPdb Accession IDs |
|----------------------|----------------|-------------|-------------------------|---------------------------------|-------------------|--------------------------|
| SNP_P3_111226_96898  | NW_004515788.1 | Scaffold263 | 96898                   | CC                              | TT                | 1946492817               |
| SNP_P3_111227_154970 | NW_004515788.1 | Scaffold263 | 154970                  | CC                              | TT                | 1946492818               |
| SNP_P3_111229_165292 | NW_004515788.1 | Scaffold263 | 165292                  | CC                              | GG                | 1946492819               |
| SNP_P3_111230_165454 | NW_004515788.1 | Scaffold263 | 165454                  | GG                              | AA                | 1946492821               |
| SNP_P3_111231_165645 | NW_004515788.1 | Scaffold263 | 165645                  | AA                              | GG                | 1946492822               |
| SNP_P3_111232_165797 | NW_004515788.1 | Scaffold263 | 165797                  | GG                              | TT                | 1946492824               |
| SNP_P3_111234_165880 | NW_004515788.1 | Scaffold263 | 165880                  | TT                              | GG                | 1946492825               |
| SNP_P3_111235_165940 | NW_004515788.1 | Scaffold263 | 165940                  | AA                              | GG                | 1946492827               |
| SNP_P3_111236_165970 | NW_004515788.1 | Scaffold263 | 165970                  | TT                              | CC                | 1946492828               |
| SNP_P3_111237_166013 | NW_004515788.1 | Scaffold263 | 166013                  | TT                              | CC                | 1946492829               |
| SNP_P3_111238_166352 | NW_004515788.1 | Scaffold263 | 166352                  | CC                              | TT                | 1946492831               |
| SNP_P3_111239_166357 | NW_004515788.1 | Scaffold263 | 166357                  | CC                              | TT                | 1946492832               |
| SNP_P3_111240_166757 | NW_004515788.1 | Scaffold263 | 166757                  | GG                              | AA                | 1946492834               |
| SNP_P3_111241_166772 | NW_004515788.1 | Scaffold263 | 166772                  | TT                              | GG                | 1946492835               |
| SNP_P3_111242_172904 | NW_004515788.1 | Scaffold263 | 172904                  | AA                              | GG                | 1946492837               |
| SNP_P3_111243_174059 | NW_004515788.1 | Scaffold263 | 174059                  | GG                              | AA                | 1946492838               |
| SNP_P3_111244_174169 | NW_004515788.1 | Scaffold263 | 174169                  | CC                              | TT                | 1946492839               |
| SNP_P3_111245_176160 | NW_004515788.1 | Scaffold263 | 176160                  | GG                              | AA                | 1946492841               |
| SNP_P3_111246_176205 | NW_004515788.1 | Scaffold263 | 176205                  | AA                              | GG                | 1946492842               |
| SNP_P3_111247_176246 | NW_004515788.1 | Scaffold263 | 176246                  | AA                              | TT                | 1946492844               |
| SNP_P3_111248_176269 | NW_004515788.1 | Scaffold263 | 176269                  | AA                              | GG                | 1946492845               |
| SNP_P3_111249_176274 | NW_004515788.1 | Scaffold263 | 176274                  | GG                              | AA                | 1946492847               |
| SNP_P3_111250_176353 | NW_004515788.1 | Scaffold263 | 176353                  | GG                              | TT                | 1946492848               |
| SNP_P3_111251_176400 | NW_004515788.1 | Scaffold263 | 176400                  | TT                              | AA                | 1946492849               |
| SNP_P3_111252_176623 | NW_004515788.1 | Scaffold263 | 176623                  | CC                              | TT                | 1946492851               |
| SNP_P3_111253_176630 | NW_004515788.1 | Scaffold263 | 176630                  | GG                              | AA                | 1946492852               |
| SNP_P3_111254_176635 | NW_004515788.1 | Scaffold263 | 176635                  | CC                              | TT                | 1946492854               |
| SNP_P3_111255_176655 | NW_004515788.1 | Scaffold263 | 176655                  | CC                              | TT                | 1946492855               |
| SNP_P3_111256_177842 | NW_004515788.1 | Scaffold263 | 177842                  | AA                              | CC                | 1946492856               |
| SNP_P3_111257_177975 | NW_004515788.1 | Scaffold263 | 177975                  | TT                              | AA                | 1946492858               |
| SNP_P3_111258_178162 | NW_004515788.1 | Scaffold263 | 178162                  | AA                              | GG                | 1946492859               |
| SNP_P3_111260_185032 | NW_004515788.1 | Scaffold263 | 185032                  | GG                              | CC                | 1946492861               |
| SNP_P3_111261_895    | NW_004515790.1 | Scaffold268 | 895                     | AA                              | GG                | 1946492862               |
| SNP_P3_111262_3768   | NW_004515790.1 | Scaffold268 | 3768                    | CC                              | TT                | 1946492864               |
| SNP_P3_111263_4693   | NW_004515790.1 | Scaffold268 | 4693                    | CC                              | TT                | 1946492865               |
| SNP_P3_111264_13121  | NW_004515790.1 | Scaffold268 | 13121                   | TT                              | AA                | 1946492866               |
| SNP_P3_111265_13150  | NW_004515790.1 | Scaffold268 | 13150                   | GG                              | TT                | 1946492868               |
| SNP_P3_111266_13180  | NW_004515790.1 | Scaffold268 | 13180                   | CC                              | AA                | 1946492869               |
| SNP_P3_111267_13200  | NW_004515790.1 | Scaffold268 | 13200                   | TT                              | CC                | 1946492871               |
| SNP_P3_111268_13202  | NW_004515790.1 | Scaffold268 | 13202                   | GG                              | TT                | 1946492872               |
| SNP_P3_111269_13216  | NW_004515790.1 | Scaffold268 | 13216                   | TT                              | CC                | 1946492874               |
| SNP_P3_111270_13223  | NW_004515790.1 | Scaffold268 | 13223                   | GG                              | TT                | 1946492875               |

| SNPs IDs            | Chromosome IDs | Chromosomes | Physical positions (bp) | CDC Frontier (Reference genome) | (Pusa 256 & HPNB) | NCBI SNPdb Accession IDs |
|---------------------|----------------|-------------|-------------------------|---------------------------------|-------------------|--------------------------|
| SNP_P3_111271_13229 | NW_004515790.1 | Scaffold268 | 13229                   | AA                              | GG                | 1946492877               |
| SNP_P3_111272_13237 | NW_004515790.1 | Scaffold268 | 13237                   | CC                              | AA                | 1946492878               |
| SNP_P3_111273_13359 | NW_004515790.1 | Scaffold268 | 13359                   | TT                              | CC                | 1946492879               |
| SNP_P3_111274_15849 | NW_004515790.1 | Scaffold268 | 15849                   | CC                              | TT                | 1946492881               |
| SNP_P3_111275_15895 | NW_004515790.1 | Scaffold268 | 15895                   | CC                              | TT                | 1946492882               |
| SNP_P3_111276_30715 | NW_004515790.1 | Scaffold268 | 30715                   | GG                              | TT                | 1946492884               |
| SNP_P3_111277_34236 | NW_004515790.1 | Scaffold268 | 34236                   | AA                              | TT                | 1946492885               |
| SNP_P3_111278_43077 | NW_004515790.1 | Scaffold268 | 43077                   | TT                              | CC                | 1946492887               |
| SNP_P3_111279_43657 | NW_004515790.1 | Scaffold268 | 43657                   | GG                              | AA                | 1946492888               |
| SNP_P3_111280_43846 | NW_004515790.1 | Scaffold268 | 43846                   | AA                              | GG                | 1946492889               |
| SNP_P3_111281_45132 | NW_004515790.1 | Scaffold268 | 45132                   | TT                              | CC                | 1946492891               |
| SNP_P3_111283_45426 | NW_004515790.1 | Scaffold268 | 45426                   | AA                              | TT                | 1946492892               |
| SNP_P3_111284_45427 | NW_004515790.1 | Scaffold268 | 45427                   | TT                              | AA                | 1946492894               |
| SNP_P3_111285_45676 | NW_004515790.1 | Scaffold268 | 45676                   | TT                              | AA                | 1946492895               |
| SNP_P3_111286_45677 | NW_004515790.1 | Scaffold268 | 45677                   | AA                              | TT                | 1946492897               |
| SNP_P3_111287_56160 | NW_004515790.1 | Scaffold268 | 56160                   | AA                              | TT                | 1946492898               |
| SNP_P3_111288_58319 | NW_004515790.1 | Scaffold268 | 58319                   | AA                              | GG                | 1946492899               |
| SNP_P3_111289_58532 | NW_004515790.1 | Scaffold268 | 58532                   | TT                              | CC                | 1946492901               |
| SNP_P3_111290_60978 | NW_004515790.1 | Scaffold268 | 60978                   | AA                              | CC                | 1946492902               |
| SNP_P3_111291_1891  | NW_004515791.1 | Scaffold269 | 1891                    | GG                              | AA                | 1946492904               |
| SNP_P3_111292_3176  | NW_004515791.1 | Scaffold269 | 3176                    | GG                              | AA                | 1946492905               |
| SNP_P3_111293_3193  | NW_004515791.1 | Scaffold269 | 3193                    | AA                              | GG                | 1946492907               |
| SNP_P3_111294_3327  | NW_004515791.1 | Scaffold269 | 3327                    | GG                              | CC                | 1946492908               |
| SNP_P3_111295_3333  | NW_004515791.1 | Scaffold269 | 3333                    | CC                              | TT                | 1946492909               |
| SNP_P3_111296_3378  | NW_004515791.1 | Scaffold269 | 3378                    | TT                              | CC                | 1946492911               |
| SNP_P3_111297_3380  | NW_004515791.1 | Scaffold269 | 3380                    | CC                              | AA                | 1946492912               |
| SNP_P3_111298_3398  | NW_004515791.1 | Scaffold269 | 3398                    | GG                              | AA                | 1946492914               |
| SNP_P3_111299_3558  | NW_004515791.1 | Scaffold269 | 3558                    | GG                              | AA                | 1946492915               |
| SNP_P3_111300_3612  | NW_004515791.1 | Scaffold269 | 3612                    | AA                              | CC                | 1946492917               |
| SNP_P3_111302_3706  | NW_004515791.1 | Scaffold269 | 3706                    | CC                              | TT                | 1946492918               |
| SNP_P3_111303_3710  | NW_004515791.1 | Scaffold269 | 3710                    | TT                              | GG                | 1946492920               |
| SNP_P3_111304_15422 | NW_004515792.1 | Scaffold271 | 15422                   | AA                              | GG                | 1946492921               |
| SNP_P3_111306_16754 | NW_004515792.1 | Scaffold271 | 16754                   | GG                              | CC                | 1946492923               |
| SNP_P3_111307_19539 | NW_004515792.1 | Scaffold271 | 19539                   | TT                              | CC                | 1946492924               |
| SNP_P3_111308_19554 | NW_004515792.1 | Scaffold271 | 19554                   | GG                              | AA                | 1946492926               |
| SNP_P3_111309_19557 | NW_004515792.1 | Scaffold271 | 19557                   | TT                              | CC                | 1946492927               |
| SNP_P3_111310_19564 | NW_004515792.1 | Scaffold271 | 19564                   | CC                              | TT                | 1946492928               |
| SNP_P3_111311_19600 | NW_004515792.1 | Scaffold271 | 19600                   | CC                              | TT                | 1946492930               |
| SNP_P3_111312_19623 | NW_004515792.1 | Scaffold271 | 19623                   | AA                              | CC                | 1946492931               |
| SNP_P3_111313_19690 | NW_004515792.1 | Scaffold271 | 19690                   | TT                              | CC                | 1946492933               |
| SNP_P3_111314_19720 | NW_004515792.1 | Scaffold271 | 19720                   | CC                              | TT                | 1946492934               |
| SNP_P3_111315_19732 | NW_004515792.1 | Scaffold271 | 19732                   | TT                              | CC                | 1946492936               |

| SNPs IDs             | Chromosome IDs | Chromosomes | Physical positions (bp) | CDC Frontier (Reference genome) | (Pusa 256 & HPNB) | NCBI SNPdb Accession IDs |
|----------------------|----------------|-------------|-------------------------|---------------------------------|-------------------|--------------------------|
| SNP_P3_111316_19756  | NW_004515792.1 | Scaffold271 | 19756                   | CC                              | TT                | 1946492937               |
| SNP_P3_111317_19958  | NW_004515792.1 | Scaffold271 | 19958                   | TT                              | AA                | 1946492938               |
| SNP_P3_111318_20006  | NW_004515792.1 | Scaffold271 | 20006                   | AA                              | GG                | 1946492940               |
| SNP_P3_111319_20015  | NW_004515792.1 | Scaffold271 | 20015                   | TT                              | CC                | 1946492941               |
| SNP_P3_111320_20018  | NW_004515792.1 | Scaffold271 | 20018                   | TT                              | AA                | 1946492943               |
| SNP_P3_111321_20035  | NW_004515792.1 | Scaffold271 | 20035                   | GG                              | AA                | 1946492944               |
| SNP_P3_111322_20771  | NW_004515792.1 | Scaffold271 | 20771                   | AA                              | GG                | 1946492946               |
| SNP_P3_111323_20911  | NW_004515792.1 | Scaffold271 | 20911                   | AA                              | GG                | 1946492947               |
| SNP_P3_111324_21041  | NW_004515792.1 | Scaffold271 | 21041                   | CC                              | GG                | 1946492949               |
| SNP_P3_111325_22759  | NW_004515792.1 | Scaffold271 | 22759                   | CC                              | AA                | 1946492950               |
| SNP_P3_111326_22986  | NW_004515792.1 | Scaffold271 | 22986                   | AA                              | GG                | 1946492952               |
| SNP_P3_111327_27143  | NW_004515792.1 | Scaffold271 | 27143                   | CC                              | TT                | 1946492953               |
| SNP_P3_111328_34284  | NW_004515792.1 | Scaffold271 | 34284                   | CC                              | GG                | 1946492954               |
| SNP_P3_111329_43924  | NW_004515792.1 | Scaffold271 | 43924                   | TT                              | CC                | 1946492956               |
| SNP_P3_111330_44094  | NW_004515792.1 | Scaffold271 | 44094                   | GG                              | TT                | 1946492957               |
| SNP_P3_111331_53719  | NW_004515792.1 | Scaffold271 | 53719                   | TT                              | CC                | 1946492959               |
| SNP_P3_111333_61483  | NW_004515792.1 | Scaffold271 | 61483                   | AA                              | GG                | 1946492960               |
| SNP_P3_111334_71295  | NW_004515792.1 | Scaffold271 | 71295                   | CC                              | AA                | 1946492962               |
| SNP_P3_111335_71354  | NW_004515792.1 | Scaffold271 | 71354                   | GG                              | TT                | 1946492963               |
| SNP_P3_111336_71357  | NW_004515792.1 | Scaffold271 | 71357                   | GG                              | AA                | 1946492965               |
| SNP_P3_111338_85892  | NW_004515792.1 | Scaffold271 | 85892                   | CC                              | TT                | 1946492966               |
| SNP_P3_111339_96049  | NW_004515792.1 | Scaffold271 | 96049                   | GG                              | TT                | 1946492968               |
| SNP_P3_111340_140625 | NW_004515792.1 | Scaffold271 | 140625                  | AA                              | GG                | 1946492969               |
| SNP_P3_111341_172904 | NW_004515792.1 | Scaffold271 | 172904                  | GG                              | AA                | 1946492971               |
| SNP_P3_111342_204744 | NW_004515792.1 | Scaffold271 | 204744                  | GG                              | AA                | 1946492972               |
| SNP_P3_111343_204897 | NW_004515792.1 | Scaffold271 | 204897                  | GG                              | AA                | 1946492974               |
| SNP_P3_111344_204954 | NW_004515792.1 | Scaffold271 | 204954                  | GG                              | AA                | 1946492975               |
| SNP_P3_111345_204988 | NW_004515792.1 | Scaffold271 | 204988                  | GG                              | AA                | 1946492977               |
| SNP_P3_111346_205119 | NW_004515792.1 | Scaffold271 | 205119                  | AA                              | GG                | 1946492978               |
| SNP_P3_111347_205135 | NW_004515792.1 | Scaffold271 | 205135                  | AA                              | GG                | 1946492980               |
| SNP_P3_111348_205167 | NW_004515792.1 | Scaffold271 | 205167                  | GG                              | AA                | 1946492981               |
| SNP_P3_111349_205186 | NW_004515792.1 | Scaffold271 | 205186                  | GG                              | CC                | 1946492983               |
| SNP_P3_111350_205216 | NW_004515792.1 | Scaffold271 | 205216                  | CC                              | TT                | 1946492985               |
| SNP_P3_111351_205308 | NW_004515792.1 | Scaffold271 | 205308                  | GG                              | AA                | 1946492986               |
| SNP_P3_111352_205381 | NW_004515792.1 | Scaffold271 | 205381                  | CC                              | AA                | 1946492988               |
| SNP_P3_111353_205688 | NW_004515792.1 | Scaffold271 | 205688                  | AA                              | GG                | 1946492990               |
| SNP_P3_111355_205984 | NW_004515792.1 | Scaffold271 | 205984                  | CC                              | TT                | 1946492991               |
| SNP_P3_111356_222467 | NW_004515792.1 | Scaffold271 | 222467                  | CC                              | TT                | 1946492993               |
| SNP_P3_111358_276872 | NW_004515792.1 | Scaffold271 | 276872                  | GG                              | AA                | 1946492995               |
| SNP_P3_111359_277292 | NW_004515792.1 | Scaffold271 | 277292                  | GG                              | AA                | 1946492997               |
| SNP_P3_111360_561    | NW_004515793.1 | Scaffold273 | 561                     | TT                              | GG                | 1946492998               |
| SNP_P3_111361_6442   | NW_004515793.1 | Scaffold273 | 6442                    | TT                              | CC                | 1946493000               |

| SNPs IDs             | Chromosome IDs | Chromosomes | Physical positions (bp) | CDC Frontier (Reference genome) | (Pusa 256 & HPNB) | NCBI SNPdb Accession IDs |
|----------------------|----------------|-------------|-------------------------|---------------------------------|-------------------|--------------------------|
| SNP_P3_111362_6443   | NW_004515793.1 | Scaffold273 | 6443                    | AA                              | CC                | 1946493001               |
| SNP_P3_111363_6447   | NW_004515793.1 | Scaffold273 | 6447                    | TT                              | AA                | 1946493003               |
| SNP_P3_111364_11886  | NW_004515793.1 | Scaffold273 | 11886                   | GG                              | AA                | 1946493004               |
| SNP_P3_111365_26207  | NW_004515793.1 | Scaffold273 | 26207                   | TT                              | AA                | 1946493006               |
| SNP_P3_111366_26221  | NW_004515793.1 | Scaffold273 | 26221                   | AA                              | GG                | 1946493007               |
| SNP_P3_111367_48834  | NW_004515793.1 | Scaffold273 | 48834                   | TT                              | CC                | 1946493009               |
| SNP_P3_111368_48835  | NW_004515793.1 | Scaffold273 | 48835                   | AA                              | GG                | 1946493010               |
| SNP_P3_111369_50452  | NW_004515793.1 | Scaffold273 | 50452                   | AA                              | GG                | 1946493011               |
| SNP_P3_111370_50464  | NW_004515793.1 | Scaffold273 | 50464                   | CC                              | TT                | 1946493013               |
| SNP_P3_111371_50639  | NW_004515793.1 | Scaffold273 | 50639                   | TT                              | AA                | 1946493014               |
| SNP_P3_111372_50684  | NW_004515793.1 | Scaffold273 | 50684                   | AA                              | GG                | 1946493016               |
| SNP_P3_111373_50715  | NW_004515793.1 | Scaffold273 | 50715                   | AA                              | TT                | 1946493017               |
| SNP_P3_111374_50723  | NW_004515793.1 | Scaffold273 | 50723                   | GG                              | AA                | 1946493019               |
| SNP_P3_111375_51051  | NW_004515793.1 | Scaffold273 | 51051                   | TT                              | GG                | 1946493020               |
| SNP_P3_111376_51354  | NW_004515793.1 | Scaffold273 | 51354                   | AA                              | GG                | 1946493022               |
| SNP_P3_111377_65436  | NW_004515793.1 | Scaffold273 | 65436                   | GG                              | TT                | 1946493026               |
| SNP_P3_111378_65451  | NW_004515793.1 | Scaffold273 | 65451                   | AA                              | TT                | 1946493027               |
| SNP_P3_111379_65469  | NW_004515793.1 | Scaffold273 | 65469                   | AA                              | CC                | 1946493029               |
| SNP_P3_111380_68301  | NW_004515793.1 | Scaffold273 | 68301                   | AA                              | GG                | 1946493030               |
| SNP_P3_111381_83263  | NW_004515793.1 | Scaffold273 | 83263                   | TT                              | CC                | 1946493032               |
| SNP_P3_111382_83266  | NW_004515793.1 | Scaffold273 | 83266                   | AA                              | GG                | 1946493033               |
| SNP_P3_111383_83315  | NW_004515793.1 | Scaffold273 | 83315                   | TT                              | CC                | 1946493035               |
| SNP_P3_111385_83421  | NW_004515793.1 | Scaffold273 | 83421                   | AA                              | GG                | 1946493036               |
| SNP_P3_111386_83577  | NW_004515793.1 | Scaffold273 | 83577                   | TT                              | GG                | 1946493038               |
| SNP_P3_111387_103969 | NW_004515793.1 | Scaffold273 | 103969                  | AA                              | GG                | 1946493039               |
| SNP_P3_111389_143087 | NW_004515793.1 | Scaffold273 | 143087                  | TT                              | CC                | 1946493040               |
| SNP_P3_111390_143548 | NW_004515793.1 | Scaffold273 | 143548                  | TT                              | AA                | 1946493042               |
| SNP_P3_111391_143987 | NW_004515793.1 | Scaffold273 | 143987                  | TT                              | CC                | 1946493043               |
| SNP_P3_111392_143989 | NW_004515793.1 | Scaffold273 | 143989                  | AA                              | TT                | 1946493045               |
| SNP_P3_111393_144009 | NW_004515793.1 | Scaffold273 | 144009                  | TT                              | CC                | 1946493047               |
| SNP_P3_111394_144467 | NW_004515793.1 | Scaffold273 | 144467                  | CC                              | TT                | 1946493048               |
| SNP_P3_111395_144576 | NW_004515793.1 | Scaffold273 | 144576                  | TT                              | CC                | 1946493049               |
| SNP_P3_111396_185783 | NW_004515793.1 | Scaffold273 | 185783                  | TT                              | CC                | 1946493051               |
| SNP_P3_111397_185799 | NW_004515793.1 | Scaffold273 | 185799                  | TT                              | AA                | 1946493053               |
| SNP_P3_111398_190296 | NW_004515793.1 | Scaffold273 | 190296                  | AA                              | GG                | 1946493054               |
| SNP_P3_111399_190348 | NW_004515793.1 | Scaffold273 | 190348                  | AA                              | GG                | 1946493056               |
| SNP_P3_111400_190438 | NW_004515793.1 | Scaffold273 | 190438                  | TT                              | CC                | 1946493057               |
| SNP_P3_111401_190486 | NW_004515793.1 | Scaffold273 | 190486                  | CC                              | TT                | 1946493059               |
| SNP_P3_111402_190564 | NW_004515793.1 | Scaffold273 | 190564                  | AA                              | CC                | 1946493060               |
| SNP_P3_111403_190586 | NW_004515793.1 | Scaffold273 | 190586                  | CC                              | GG                | 1946493061               |
| SNP_P3_111404_190683 | NW_004515793.1 | Scaffold273 | 190683                  | GG                              | TT                | 1946493063               |
| SNP_P3_111405_190691 | NW_004515793.1 | Scaffold273 | 190691                  | TT                              | CC                | 1946493064               |

| SNPs IDs             | Chromosome IDs | Chromosomes | Physical positions (bp) | CDC Frontier (Reference genome) | (Pusa 256 & HPNB) | NCBI SNPdb Accession IDs |
|----------------------|----------------|-------------|-------------------------|---------------------------------|-------------------|--------------------------|
| SNP_P3_111406_190765 | NW_004515793.1 | Scaffold273 | 190765                  | AA                              | GG                | 1946493066               |
| SNP_P3_111407_190882 | NW_004515793.1 | Scaffold273 | 190882                  | TT                              | CC                | 1946493068               |
| SNP_P3_111408_190905 | NW_004515793.1 | Scaffold273 | 190905                  | TT                              | CC                | 1946493069               |
| SNP_P3_111409_190949 | NW_004515793.1 | Scaffold273 | 190949                  | TT                              | GG                | 1946493071               |
| SNP_P3_111410_191739 | NW_004515793.1 | Scaffold273 | 191739                  | TT                              | CC                | 1946493072               |
| SNP_P3_111411_191750 | NW_004515793.1 | Scaffold273 | 191750                  | GG                              | CC                | 1946493074               |
| SNP_P3_111412_191760 | NW_004515793.1 | Scaffold273 | 191760                  | AA                              | GG                | 1946493076               |
| SNP_P3_111413_191841 | NW_004515793.1 | Scaffold273 | 191841                  | TT                              | CC                | 1946493077               |
| SNP_P3_111414_191857 | NW_004515793.1 | Scaffold273 | 191857                  | AA                              | GG                | 1946493079               |
| SNP_P3_111415_191858 | NW_004515793.1 | Scaffold273 | 191858                  | CC                              | TT                | 1946493080               |
| SNP_P3_111416_191870 | NW_004515793.1 | Scaffold273 | 191870                  | TT                              | CC                | 1946493082               |
| SNP_P3_111417_191910 | NW_004515793.1 | Scaffold273 | 191910                  | TT                              | AA                | 1946493083               |
| SNP_P3_111418_209268 | NW_004515793.1 | Scaffold273 | 209268                  | AA                              | GG                | 1946493085               |
| SNP_P3_111420_209680 | NW_004515793.1 | Scaffold273 | 209680                  | AA                              | CC                | 1946493086               |
| SNP_P3_111421_209705 | NW_004515793.1 | Scaffold273 | 209705                  | TT                              | GG                | 1946493088               |
| SNP_P3_111422_209716 | NW_004515793.1 | Scaffold273 | 209716                  | AA                              | GG                | 1946493089               |
| SNP_P3_111423_6930   | NW_004515794.1 | Scaffold275 | 6930                    | CC                              | AA                | 1946493091               |
| SNP_P3_111424_7146   | NW_004515794.1 | Scaffold275 | 7146                    | CC                              | GG                | 1946493093               |
| SNP_P3_111425_7147   | NW_004515794.1 | Scaffold275 | 7147                    | AA                              | GG                | 1946493095               |
| SNP_P3_111426_7834   | NW_004515794.1 | Scaffold275 | 7834                    | AA                              | GG                | 1946493096               |
| SNP_P3_111427_8164   | NW_004515794.1 | Scaffold275 | 8164                    | GG                              | AA                | 1946493098               |
| SNP_P3_111428_8179   | NW_004515794.1 | Scaffold275 | 8179                    | AA                              | GG                | 1946493099               |
| SNP_P3_111429_8223   | NW_004515794.1 | Scaffold275 | 8223                    | AA                              | GG                | 1946493100               |
| SNP_P3_111430_15750  | NW_004515794.1 | Scaffold275 | 15750                   | TT                              | CC                | 1946493102               |
| SNP_P3_111431_16140  | NW_004515794.1 | Scaffold275 | 16140                   | GG                              | CC                | 1946493103               |
| SNP_P3_111432_16195  | NW_004515794.1 | Scaffold275 | 16195                   | AA                              | GG                | 1946493105               |
| SNP_P3_111433_33050  | NW_004515794.1 | Scaffold275 | 33050                   | AA                              | GG                | 1946493106               |
| SNP_P3_111434_59502  | NW_004515794.1 | Scaffold275 | 59502                   | GG                              | AA                | 1946493108               |
| SNP_P3_111435_67385  | NW_004515794.1 | Scaffold275 | 67385                   | CC                              | TT                | 1946493109               |
| SNP_P3_111436_112344 | NW_004515794.1 | Scaffold275 | 112344                  | AA                              | GG                | 1946493111               |
| SNP_P3_111439_142439 | NW_004515794.1 | Scaffold275 | 142439                  | GG                              | TT                | 1946493112               |
| SNP_P3_111440_143089 | NW_004515794.1 | Scaffold275 | 143089                  | AA                              | TT                | 1946493114               |
| SNP_P3_111441_143172 | NW_004515794.1 | Scaffold275 | 143172                  | GG                              | AA                | 1946493115               |
| SNP_P3_111442_143668 | NW_004515794.1 | Scaffold275 | 143668                  | CC                              | TT                | 1946493116               |
| SNP_P3_111443_143681 | NW_004515794.1 | Scaffold275 | 143681                  | CC                              | TT                | 1946493118               |
| SNP_P3_111444_143698 | NW_004515794.1 | Scaffold275 | 143698                  | TT                              | AA                | 1946493119               |
| SNP_P3_111445_143768 | NW_004515794.1 | Scaffold275 | 143768                  | AA                              | TT                | 1946493121               |
| SNP_P3_111446_143781 | NW_004515794.1 | Scaffold275 | 143781                  | TT                              | CC                | 1946493122               |
| SNP_P3_111447_143900 | NW_004515794.1 | Scaffold275 | 143900                  | TT                              | CC                | 1946493124               |
| SNP_P3_111448_145819 | NW_004515794.1 | Scaffold275 | 145819                  | AA                              | CC                | 1946493125               |
| SNP_P3_111449_146150 | NW_004515794.1 | Scaffold275 | 146150                  | AA                              | GG                | 1946493127               |
| SNP_P3_111450_146161 | NW_004515794.1 | Scaffold275 | 146161                  | TT                              | CC                | 1946493128               |

| SNPs IDs             | Chromosome IDs | Chromosomes | Physical positions (bp) | CDC Frontier (Reference genome) | (Pusa 256 & HPNB) | NCBI SNPdb Accession IDs |
|----------------------|----------------|-------------|-------------------------|---------------------------------|-------------------|--------------------------|
| SNP_P3_111451_146865 | NW_004515794.1 | Scaffold275 | 146865                  | AA                              | GG                | 1946493129               |
| SNP_P3_111452_147129 | NW_004515794.1 | Scaffold275 | 147129                  | TT                              | AA                | 1946493131               |
| SNP_P3_111454_147189 | NW_004515794.1 | Scaffold275 | 147189                  | CC                              | TT                | 1946493132               |
| SNP_P3_111455_147561 | NW_004515794.1 | Scaffold275 | 147561                  | GG                              | CC                | 1946493134               |
| SNP_P3_111456_147583 | NW_004515794.1 | Scaffold275 | 147583                  | TT                              | CC                | 1946493135               |
| SNP_P3_111457_148181 | NW_004515794.1 | Scaffold275 | 148181                  | GG                              | TT                | 1946493137               |
| SNP_P3_111458_148399 | NW_004515794.1 | Scaffold275 | 148399                  | AA                              | GG                | 1946493138               |
| SNP_P3_111459_160838 | NW_004515794.1 | Scaffold275 | 160838                  | TT                              | GG                | 1946493140               |
| SNP_P3_111461_162101 | NW_004515794.1 | Scaffold275 | 162101                  | GG                              | AA                | 1946493141               |
| SNP_P3_111462_162171 | NW_004515794.1 | Scaffold275 | 162171                  | AA                              | GG                | 1946493142               |
| SNP_P3_111464_162392 | NW_004515794.1 | Scaffold275 | 162392                  | TT                              | AA                | 1946493144               |
| SNP_P3_111465_162473 | NW_004515794.1 | Scaffold275 | 162473                  | TT                              | AA                | 1946493145               |
| SNP_P3_111466_162519 | NW_004515794.1 | Scaffold275 | 162519                  | TT                              | CC                | 1946493147               |
| SNP_P3_111467_162551 | NW_004515794.1 | Scaffold275 | 162551                  | AA                              | CC                | 1946493148               |
| SNP_P3_111468_162555 | NW_004515794.1 | Scaffold275 | 162555                  | GG                              | TT                | 1946493150               |
| SNP_P3_111469_162607 | NW_004515794.1 | Scaffold275 | 162607                  | TT                              | AA                | 1946493151               |
| SNP_P3_111470_167233 | NW_004515794.1 | Scaffold275 | 167233                  | AA                              | GG                | 1946493153               |
| SNP_P3_111471_167264 | NW_004515794.1 | Scaffold275 | 167264                  | GG                              | AA                | 1946493154               |
| SNP_P3_111472_167269 | NW_004515794.1 | Scaffold275 | 167269                  | CC                              | AA                | 1946493156               |
| SNP_P3_111473_167270 | NW_004515794.1 | Scaffold275 | 167270                  | AA                              | CC                | 1946493157               |
| SNP_P3_111474_167275 | NW_004515794.1 | Scaffold275 | 167275                  | AA                              | CC                | 1946493159               |
| SNP_P3_111475_167356 | NW_004515794.1 | Scaffold275 | 167356                  | GG                              | TT                | 1946493160               |
| SNP_P3_111476_167511 | NW_004515794.1 | Scaffold275 | 167511                  | TT                              | CC                | 1946493162               |
| SNP_P3_111477_167686 | NW_004515794.1 | Scaffold275 | 167686                  | TT                              | AA                | 1946493163               |
| SNP_P3_111478_167710 | NW_004515794.1 | Scaffold275 | 167710                  | TT                              | CC                | 1946493165               |
| SNP_P3_111479_167746 | NW_004515794.1 | Scaffold275 | 167746                  | GG                              | TT                | 1946493166               |
| SNP_P3_111480_167806 | NW_004515794.1 | Scaffold275 | 167806                  | TT                              | GG                | 1946493168               |
| SNP_P3_111481_183162 | NW_004515794.1 | Scaffold275 | 183162                  | CC                              | TT                | 1946493169               |
| SNP_P3_111482_207988 | NW_004515794.1 | Scaffold275 | 207988                  | AA                              | CC                | 1946493171               |
| SNP_P3_111483_208355 | NW_004515794.1 | Scaffold275 | 208355                  | AA                              | TT                | 1946493172               |
| SNP_P3_111484_208356 | NW_004515794.1 | Scaffold275 | 208356                  | TT                              | AA                | 1946493174               |
| SNP_P3_111485_208369 | NW_004515794.1 | Scaffold275 | 208369                  | TT                              | AA                | 1946493175               |
| SNP_P3_111486_208768 | NW_004515794.1 | Scaffold275 | 208768                  | AA                              | GG                | 1946493176               |
| SNP_P3_111487_208793 | NW_004515794.1 | Scaffold275 | 208793                  | CC                              | GG                | 1946493178               |
| SNP_P3_111488_208824 | NW_004515794.1 | Scaffold275 | 208824                  | AA                              | GG                | 1946493179               |
| SNP_P3_111489_226090 | NW_004515794.1 | Scaffold275 | 226090                  | AA                              | CC                | 1946493181               |
| SNP_P3_111490_226155 | NW_004515794.1 | Scaffold275 | 226155                  | CC                              | TT                | 1946493182               |
| SNP_P3_111491_235920 | NW_004515794.1 | Scaffold275 | 235920                  | TT                              | AA                | 1946493184               |
| SNP_P3_111492_244478 | NW_004515794.1 | Scaffold275 | 244478                  | GG                              | AA                | 1946493185               |
| SNP_P3_111493_283438 | NW_004515794.1 | Scaffold275 | 283438                  | AA                              | CC                | 1946493187               |
| SNP_P3_111494_294445 | NW_004515794.1 | Scaffold275 | 294445                  | TT                              | CC                | 1946493188               |
| SNP_P3_111495_294486 | NW_004515794.1 | Scaffold275 | 294486                  | AA                              | TT                | 1946493190               |

| SNPs IDs             | Chromosome IDs | Chromosomes | Physical positions (bp) | CDC Frontier (Reference genome) | (Pusa 256 & HPNB) | NCBI SNPdb Accession IDs |
|----------------------|----------------|-------------|-------------------------|---------------------------------|-------------------|--------------------------|
| SNP_P3_111496_294527 | NW_004515794.1 | Scaffold275 | 294527                  | GG                              | TT                | 1946493191               |
| SNP_P3_111497_294868 | NW_004515794.1 | Scaffold275 | 294868                  | GG                              | AA                | 1946493193               |
| SNP_P3_111498_294903 | NW_004515794.1 | Scaffold275 | 294903                  | CC                              | TT                | 1946493194               |
| SNP_P3_111499_294930 | NW_004515794.1 | Scaffold275 | 294930                  | AA                              | TT                | 1946493195               |
| SNP_P3_111500_294940 | NW_004515794.1 | Scaffold275 | 294940                  | AA                              | GG                | 1946493197               |
| SNP_P3_111501_294941 | NW_004515794.1 | Scaffold275 | 294941                  | AA                              | GG                | 1946493198               |
| SNP_P3_111502_316525 | NW_004515794.1 | Scaffold275 | 316525                  | TT                              | GG                | 1946493200               |
| SNP_P3_111505_358619 | NW_004515794.1 | Scaffold275 | 358619                  | CC                              | TT                | 1946493201               |
| SNP_P3_111506_358621 | NW_004515794.1 | Scaffold275 | 358621                  | CC                              | TT                | 1946493203               |
| SNP_P3_111507_358667 | NW_004515794.1 | Scaffold275 | 358667                  | GG                              | AA                | 1946493204               |
| SNP_P3_111508_376960 | NW_004515794.1 | Scaffold275 | 376960                  | CC                              | TT                | 1946493205               |
| SNP_P3_111510_377102 | NW_004515794.1 | Scaffold275 | 377102                  | AA                              | GG                | 1946493207               |
| SNP_P3_111511_377116 | NW_004515794.1 | Scaffold275 | 377116                  | TT                              | CC                | 1946493208               |
| SNP_P3_111512_377509 | NW_004515794.1 | Scaffold275 | 377509                  | TT                              | CC                | 1946493210               |
| SNP_P3_111514_383211 | NW_004515794.1 | Scaffold275 | 383211                  | TT                              | CC                | 1946493211               |
| SNP_P3_111515_383220 | NW_004515794.1 | Scaffold275 | 383220                  | GG                              | AA                | 1946493213               |
| SNP_P3_111516_383223 | NW_004515794.1 | Scaffold275 | 383223                  | GG                              | AA                | 1946493214               |
| SNP_P3_111517_383236 | NW_004515794.1 | Scaffold275 | 383236                  | AA                              | GG                | 1946493216               |
| SNP_P3_111518_399492 | NW_004515794.1 | Scaffold275 | 399492                  | AA                              | GG                | 1946493217               |
| SNP_P3_111519_399537 | NW_004515794.1 | Scaffold275 | 399537                  | CC                              | TT                | 1946493219               |
| SNP_P3_111520_399639 | NW_004515794.1 | Scaffold275 | 399639                  | AA                              | TT                | 1946493220               |
| SNP_P3_111521_403444 | NW_004515794.1 | Scaffold275 | 403444                  | CC                              | AA                | 1946493222               |
| SNP_P3_111522_403851 | NW_004515794.1 | Scaffold275 | 403851                  | TT                              | CC                | 1946493223               |
| SNP_P3_111523_405066 | NW_004515794.1 | Scaffold275 | 405066                  | TT                              | AA                | 1946493225               |
| SNP_P3_111524_405116 | NW_004515794.1 | Scaffold275 | 405116                  | TT                              | CC                | 1946493226               |
| SNP_P3_111525_405121 | NW_004515794.1 | Scaffold275 | 405121                  | GG                              | AA                | 1946493228               |
| SNP_P3_111526_405254 | NW_004515794.1 | Scaffold275 | 405254                  | AA                              | CC                | 1946493229               |
| SNP_P3_111527_405263 | NW_004515794.1 | Scaffold275 | 405263                  | AA                              | GG                | 1946493231               |
| SNP_P3_111528_405272 | NW_004515794.1 | Scaffold275 | 405272                  | AA                              | CC                | 1946493232               |
| SNP_P3_111529_405290 | NW_004515794.1 | Scaffold275 | 405290                  | CC                              | TT                | 1946493233               |
| SNP_P3_111530_405291 | NW_004515794.1 | Scaffold275 | 405291                  | GG                              | TT                | 1946493235               |
| SNP_P3_111531_405294 | NW_004515794.1 | Scaffold275 | 405294                  | TT                              | GG                | 1946493236               |
| SNP_P3_111532_405317 | NW_004515794.1 | Scaffold275 | 405317                  | CC                              | TT                | 1946493238               |
| SNP_P3_111533_405320 | NW_004515794.1 | Scaffold275 | 405320                  | TT                              | CC                | 1946493239               |
| SNP_P3_111534_405349 | NW_004515794.1 | Scaffold275 | 405349                  | AA                              | GG                | 1946493241               |
| SNP_P3_111535_405765 | NW_004515794.1 | Scaffold275 | 405765                  | AA                              | CC                | 1946493242               |
| SNP_P3_111536_406462 | NW_004515794.1 | Scaffold275 | 406462                  | CC                              | GG                | 1946493244               |
| SNP_P3_111537_415017 | NW_004515794.1 | Scaffold275 | 415017                  | GG                              | TT                | 1946493245               |
| SNP_P3_111538_424633 | NW_004515794.1 | Scaffold275 | 424633                  | AA                              | TT                | 1946493247               |
| SNP_P3_111539_424720 | NW_004515794.1 | Scaffold275 | 424720                  | GG                              | AA                | 1946493248               |
| SNP_P3_111540_429288 | NW_004515794.1 | Scaffold275 | 429288                  | GG                              | TT                | 1946493250               |
| SNP_P3_111541_429290 | NW_004515794.1 | Scaffold275 | 429290                  | GG                              | CC                | 1946493251               |



| SNPs IDs             | Chromosome IDs | Chromosomes | Physical positions (bp) | CDC Frontier (Reference genome) | (Pusa 256 & HPNB) | NCBI SNPdb Accession IDs |
|----------------------|----------------|-------------|-------------------------|---------------------------------|-------------------|--------------------------|
| SNP_P3_111542_431339 | NW_004515794.1 | Scaffold275 | 431339                  | TT                              | GG                | 1946493253               |
| SNP_P3_111543_431354 | NW_004515794.1 | Scaffold275 | 431354                  | AA                              | GG                | 1946493254               |
| SNP_P3_111544_448419 | NW_004515794.1 | Scaffold275 | 448419                  | GG                              | AA                | 1946493256               |
| SNP_P3_111545_458243 | NW_004515794.1 | Scaffold275 | 458243                  | CC                              | TT                | 1946493258               |
| SNP_P3_111546_462237 | NW_004515794.1 | Scaffold275 | 462237                  | TT                              | CC                | 1946493259               |
| SNP_P3_111547_478126 | NW_004515794.1 | Scaffold275 | 478126                  | TT                              | CC                | 1946493261               |
| SNP_P3_111548_490890 | NW_004515794.1 | Scaffold275 | 490890                  | AA                              | GG                | 1946493262               |
| SNP_P3_111549_491336 | NW_004515794.1 | Scaffold275 | 491336                  | GG                              | TT                | 1946493264               |
| SNP_P3_111550_491337 | NW_004515794.1 | Scaffold275 | 491337                  | CC                              | AA                | 1946493265               |
| SNP_P3_111551_491432 | NW_004515794.1 | Scaffold275 | 491432                  | CC                              | TT                | 1946493267               |
| SNP_P3_111552_491450 | NW_004515794.1 | Scaffold275 | 491450                  | CC                              | TT                | 1946493268               |
| SNP_P3_111553_491552 | NW_004515794.1 | Scaffold275 | 491552                  | AA                              | TT                | 1946493270               |
| SNP_P3_111554_492057 | NW_004515794.1 | Scaffold275 | 492057                  | GG                              | AA                | 1946493271               |
| SNP_P3_111555_492234 | NW_004515794.1 | Scaffold275 | 492234                  | CC                              | AA                | 1946493273               |
| SNP_P3_111556_492263 | NW_004515794.1 | Scaffold275 | 492263                  | TT                              | AA                | 1946493274               |
| SNP_P3_111557_492290 | NW_004515794.1 | Scaffold275 | 492290                  | TT                              | AA                | 1946493276               |
| SNP_P3_111558_492306 | NW_004515794.1 | Scaffold275 | 492306                  | AA                              | GG                | 1946493277               |
| SNP_P3_111559_498013 | NW_004515794.1 | Scaffold275 | 498013                  | TT                              | CC                | 1946493279               |
| SNP_P3_111560_523911 | NW_004515794.1 | Scaffold275 | 523911                  | CC                              | AA                | 1946493280               |
| SNP_P3_111561_523946 | NW_004515794.1 | Scaffold275 | 523946                  | AA                              | GG                | 1946493282               |
| SNP_P3_111562_523963 | NW_004515794.1 | Scaffold275 | 523963                  | TT                              | GG                | 1946493283               |
| SNP_P3_111563_523997 | NW_004515794.1 | Scaffold275 | 523997                  | AA                              | GG                | 1946493285               |
| SNP_P3_111564_524032 | NW_004515794.1 | Scaffold275 | 524032                  | AA                              | GG                | 1946493286               |
| SNP_P3_111565_524284 | NW_004515794.1 | Scaffold275 | 524284                  | AA                              | GG                | 1946493288               |
| SNP_P3_111566_524335 | NW_004515794.1 | Scaffold275 | 524335                  | GG                              | CC                | 1946493289               |
| SNP_P3_111567_524392 | NW_004515794.1 | Scaffold275 | 524392                  | AA                              | GG                | 1946493291               |
| SNP_P3_111568_546709 | NW_004515794.1 | Scaffold275 | 546709                  | TT                              | GG                | 1946493292               |
| SNP_P3_111569_546901 | NW_004515794.1 | Scaffold275 | 546901                  | TT                              | CC                | 1946493294               |
| SNP_P3_111570_560723 | NW_004515794.1 | Scaffold275 | 560723                  | AA                              | GG                | 1946493295               |
| SNP_P3_111571_562303 | NW_004515794.1 | Scaffold275 | 562303                  | GG                              | CC                | 1946493297               |
| SNP_P3_111572_578238 | NW_004515794.1 | Scaffold275 | 578238                  | CC                              | TT                | 1946493298               |
| SNP_P3_111573_581068 | NW_004515794.1 | Scaffold275 | 581068                  | TT                              | AA                | 1946493300               |
| SNP_P3_111574_581078 | NW_004515794.1 | Scaffold275 | 581078                  | AA                              | TT                | 1946493301               |
| SNP_P3_111575_581084 | NW_004515794.1 | Scaffold275 | 581084                  | AA                              | CC                | 1946493303               |
| SNP_P3_111576_586477 | NW_004515794.1 | Scaffold275 | 586477                  | AA                              | TT                | 1946493304               |
| SNP_P3_111577_586480 | NW_004515794.1 | Scaffold275 | 586480                  | TT                              | CC                | 1946493305               |
| SNP_P3_111578_594971 | NW_004515794.1 | Scaffold275 | 594971                  | TT                              | CC                | 1946493307               |
| SNP_P3_111579_607231 | NW_004515794.1 | Scaffold275 | 607231                  | CC                              | TT                | 1946493308               |
| SNP_P3_111580_607272 | NW_004515794.1 | Scaffold275 | 607272                  | TT                              | CC                | 1946493310               |
| SNP_P3_111581_607336 | NW_004515794.1 | Scaffold275 | 607336                  | AA                              | GG                | 1946493311               |
| SNP_P3_111582_607341 | NW_004515794.1 | Scaffold275 | 607341                  | GG                              | TT                | 1946493313               |
| SNP_P3_111583_623884 | NW_004515794.1 | Scaffold275 | 623884                  | CC                              | TT                | 1946493314               |

| SNPs IDs             | Chromosome IDs | Chromosomes | Physical positions (bp) | CDC Frontier (Reference genome) | (Pusa 256 & HPNB) | NCBI SNPdb Accession IDs |
|----------------------|----------------|-------------|-------------------------|---------------------------------|-------------------|--------------------------|
| SNP_P3_111584_624306 | NW_004515794.1 | Scaffold275 | 624306                  | TT                              | AA                | 1946493316               |
| SNP_P3_111585_634433 | NW_004515794.1 | Scaffold275 | 634433                  | AA                              | GG                | 1946493317               |
| SNP_P3_111586_634440 | NW_004515794.1 | Scaffold275 | 634440                  | TT                              | AA                | 1946493319               |
| SNP_P3_111587_634460 | NW_004515794.1 | Scaffold275 | 634460                  | GG                              | AA                | 1946493320               |
| SNP_P3_111588_634461 | NW_004515794.1 | Scaffold275 | 634461                  | CC                              | GG                | 1946493321               |
| SNP_P3_111589_634494 | NW_004515794.1 | Scaffold275 | 634494                  | CC                              | GG                | 1946493323               |
| SNP_P3_111590_647937 | NW_004515794.1 | Scaffold275 | 647937                  | GG                              | TT                | 1946493324               |
| SNP_P3_111591_647947 | NW_004515794.1 | Scaffold275 | 647947                  | GG                              | AA                | 1946493326               |
| SNP_P3_111592_647956 | NW_004515794.1 | Scaffold275 | 647956                  | TT                              | AA                | 1946493327               |
| SNP_P3_111593_649140 | NW_004515794.1 | Scaffold275 | 649140                  | TT                              | CC                | 1946493329               |
| SNP_P3_111594_655862 | NW_004515794.1 | Scaffold275 | 655862                  | GG                              | AA                | 1946493330               |
| SNP_P3_111595_656871 | NW_004515794.1 | Scaffold275 | 656871                  | GG                              | TT                | 1946493332               |
| SNP_P3_111596_661364 | NW_004515794.1 | Scaffold275 | 661364                  | GG                              | AA                | 1946493333               |
| SNP_P3_111597_668188 | NW_004515794.1 | Scaffold275 | 668188                  | AA                              | GG                | 1946493335               |
| SNP_P3_111598_681340 | NW_004515794.1 | Scaffold275 | 681340                  | TT                              | CC                | 1946493336               |
| SNP_P3_111599_682239 | NW_004515794.1 | Scaffold275 | 682239                  | CC                              | TT                | 1946493338               |
| SNP_P3_111600_684357 | NW_004515794.1 | Scaffold275 | 684357                  | TT                              | AA                | 1946493339               |
| SNP_P3_111601_688333 | NW_004515794.1 | Scaffold275 | 688333                  | AA                              | TT                | 1946493341               |
| SNP_P3_111602_710603 | NW_004515794.1 | Scaffold275 | 710603                  | CC                              | TT                | 1946493342               |
| SNP_P3_111603_710900 | NW_004515794.1 | Scaffold275 | 710900                  | AA                              | GG                | 1946493343               |
| SNP_P3_111604_710904 | NW_004515794.1 | Scaffold275 | 710904                  | GG                              | AA                | 1946493345               |
| SNP_P3_111605_710930 | NW_004515794.1 | Scaffold275 | 710930                  | CC                              | GG                | 1946493346               |
| SNP_P3_111606_711219 | NW_004515794.1 | Scaffold275 | 711219                  | GG                              | AA                | 1946493348               |
| SNP_P3_111607_717706 | NW_004515794.1 | Scaffold275 | 717706                  | GG                              | AA                | 1946493349               |
| SNP_P3_111608_717803 | NW_004515794.1 | Scaffold275 | 717803                  | CC                              | AA                | 1946493351               |
| SNP_P3_111609_728598 | NW_004515794.1 | Scaffold275 | 728598                  | TT                              | AA                | 1946493352               |
| SNP_P3_111610_728744 | NW_004515794.1 | Scaffold275 | 728744                  | TT                              | AA                | 1946493354               |
| SNP_P3_111611_728755 | NW_004515794.1 | Scaffold275 | 728755                  | TT                              | AA                | 1946493355               |
| SNP_P3_111612_728944 | NW_004515794.1 | Scaffold275 | 728944                  | CC                              | TT                | 1946493357               |
| SNP_P3_111613_729106 | NW_004515794.1 | Scaffold275 | 729106                  | TT                              | GG                | 1946493358               |
| SNP_P3_111614_729122 | NW_004515794.1 | Scaffold275 | 729122                  | TT                              | CC                | 1946493360               |
| SNP_P3_111615_729134 | NW_004515794.1 | Scaffold275 | 729134                  | AA                              | CC                | 1946493361               |
| SNP_P3_111616_729145 | NW_004515794.1 | Scaffold275 | 729145                  | AA                              | GG                | 1946493362               |
| SNP_P3_111617_729162 | NW_004515794.1 | Scaffold275 | 729162                  | TT                              | AA                | 1946493364               |
| SNP_P3_111618_749037 | NW_004515794.1 | Scaffold275 | 749037                  | AA                              | GG                | 1946493365               |
| SNP_P3_111619_749219 | NW_004515794.1 | Scaffold275 | 749219                  | GG                              | AA                | 1946493367               |
| SNP_P3_111620_749222 | NW_004515794.1 | Scaffold275 | 749222                  | TT                              | GG                | 1946493368               |
| SNP_P3_111621_749313 | NW_004515794.1 | Scaffold275 | 749313                  | GG                              | TT                | 1946493370               |
| SNP_P3_111622_749655 | NW_004515794.1 | Scaffold275 | 749655                  | GG                              | AA                | 1946493371               |
| SNP_P3_111623_749664 | NW_004515794.1 | Scaffold275 | 749664                  | GG                              | AA                | 1946493373               |
| SNP_P3_111624_751042 | NW_004515794.1 | Scaffold275 | 751042                  | CC                              | TT                | 1946493374               |
| SNP_P3_111625_751079 | NW_004515794.1 | Scaffold275 | 751079                  | AA                              | GG                | 1946493375               |

| SNPs IDs             | Chromosome IDs | Chromosomes | Physical positions (bp) | CDC Frontier (Reference genome) | (Pusa 256 & HPNB) | NCBI SNPdb Accession IDs |
|----------------------|----------------|-------------|-------------------------|---------------------------------|-------------------|--------------------------|
| SNP_P3_111626_751084 | NW_004515794.1 | Scaffold275 | 751084                  | GG                              | AA                | 1946493377               |
| SNP_P3_111627_755860 | NW_004515794.1 | Scaffold275 | 755860                  | AA                              | GG                | 1946493378               |
| SNP_P3_111628_755865 | NW_004515794.1 | Scaffold275 | 755865                  | AA                              | TT                | 1946493380               |
| SNP_P3_111629_758498 | NW_004515794.1 | Scaffold275 | 758498                  | CC                              | GG                | 1946493381               |
| SNP_P3_111630_758512 | NW_004515794.1 | Scaffold275 | 758512                  | TT                              | CC                | 1946493383               |
| SNP_P3_111631_765539 | NW_004515794.1 | Scaffold275 | 765539                  | TT                              | GG                | 1946493384               |
| SNP_P3_111632_766790 | NW_004515794.1 | Scaffold275 | 766790                  | CC                              | GG                | 1946493386               |
| SNP_P3_111633_780266 | NW_004515794.1 | Scaffold275 | 780266                  | GG                              | AA                | 1946493387               |
| SNP_P3_111634_781149 | NW_004515794.1 | Scaffold275 | 781149                  | CC                              | AA                | 1946493389               |
| SNP_P3_111635_781174 | NW_004515794.1 | Scaffold275 | 781174                  | AA                              | GG                | 1946493390               |
| SNP_P3_111636_781278 | NW_004515794.1 | Scaffold275 | 781278                  | TT                              | CC                | 1946493392               |
| SNP_P3_111638_781502 | NW_004515794.1 | Scaffold275 | 781502                  | GG                              | AA                | 1946493393               |
| SNP_P3_111639_781505 | NW_004515794.1 | Scaffold275 | 781505                  | GG                              | AA                | 1946493395               |
| SNP_P3_111640_781538 | NW_004515794.1 | Scaffold275 | 781538                  | TT                              | AA                | 1946493396               |
| SNP_P3_111641_781983 | NW_004515794.1 | Scaffold275 | 781983                  | TT                              | GG                | 1946493398               |
| SNP_P3_111642_782382 | NW_004515794.1 | Scaffold275 | 782382                  | CC                              | AA                | 1946493399               |
| SNP_P3_111643_797916 | NW_004515794.1 | Scaffold275 | 797916                  | AA                              | TT                | 1946493401               |
| SNP_P3_111644_798214 | NW_004515794.1 | Scaffold275 | 798214                  | AA                              | CC                | 1946493402               |
| SNP_P3_111645_798221 | NW_004515794.1 | Scaffold275 | 798221                  | AA                              | GG                | 1946493404               |
| SNP_P3_111646_798394 | NW_004515794.1 | Scaffold275 | 798394                  | AA                              | GG                | 1946493405               |
| SNP_P3_111647_799494 | NW_004515794.1 | Scaffold275 | 799494                  | AA                              | TT                | 1946493406               |
| SNP_P3_111648_799544 | NW_004515794.1 | Scaffold275 | 799544                  | TT                              | GG                | 1946493408               |
| SNP_P3_111649_799550 | NW_004515794.1 | Scaffold275 | 799550                  | AA                              | CC                | 1946493409               |
| SNP_P3_111650_799559 | NW_004515794.1 | Scaffold275 | 799559                  | TT                              | CC                | 1946493411               |
| SNP_P3_111651_801534 | NW_004515794.1 | Scaffold275 | 801534                  | AA                              | GG                | 1946493412               |
| SNP_P3_111652_802282 | NW_004515794.1 | Scaffold275 | 802282                  | GG                              | AA                | 1946493414               |
| SNP_P3_111653_802304 | NW_004515794.1 | Scaffold275 | 802304                  | TT                              | AA                | 1946493415               |
| SNP_P3_111654_802749 | NW_004515794.1 | Scaffold275 | 802749                  | CC                              | TT                | 1946493417               |
| SNP_P3_111655_812186 | NW_004515794.1 | Scaffold275 | 812186                  | GG                              | AA                | 1946493418               |
| SNP_P3_111656_812200 | NW_004515794.1 | Scaffold275 | 812200                  | GG                              | AA                | 1946493420               |
| SNP_P3_111657_812275 | NW_004515794.1 | Scaffold275 | 812275                  | GG                              | AA                | 1946493421               |
| SNP_P3_111658_812553 | NW_004515794.1 | Scaffold275 | 812553                  | AA                              | GG                | 1946493423               |
| SNP_P3_111659_812587 | NW_004515794.1 | Scaffold275 | 812587                  | TT                              | CC                | 1946493424               |
| SNP_P3_111660_812608 | NW_004515794.1 | Scaffold275 | 812608                  | CC                              | TT                | 1946493426               |
| SNP_P3_111661_812661 | NW_004515794.1 | Scaffold275 | 812661                  | GG                              | CC                | 1946493427               |
| SNP_P3_111662_812688 | NW_004515794.1 | Scaffold275 | 812688                  | TT                              | GG                | 1946493429               |
| SNP_P3_111663_813626 | NW_004515794.1 | Scaffold275 | 813626                  | CC                              | AA                | 1946493430               |
| SNP_P3_111664_813761 | NW_004515794.1 | Scaffold275 | 813761                  | CC                              | AA                | 1946493432               |
| SNP_P3_111665_813787 | NW_004515794.1 | Scaffold275 | 813787                  | GG                              | CC                | 1946493433               |
| SNP_P3_111666_1174   | NW_004515795.1 | Scaffold276 | 1174                    | TT                              | GG                | 1946493435               |
| SNP_P3_111667_13492  | NW_004515795.1 | Scaffold276 | 13492                   | GG                              | AA                | 1946493436               |
| SNP_P3_111668_13536  | NW_004515795.1 | Scaffold276 | 13536                   | CC                              | TT                | 1946493438               |

| SNPs IDs            | Chromosome IDs | Chromosomes | Physical positions (bp) | CDC Frontier (Reference genome) | (Pusa 256 & HPNB) | NCBI SNPdb Accession IDs |
|---------------------|----------------|-------------|-------------------------|---------------------------------|-------------------|--------------------------|
| SNP_P3_111669_13542 | NW_004515795.1 | Scaffold276 | 13542                   | TT                              | CC                | 1946493439               |
| SNP_P3_111670_13593 | NW_004515795.1 | Scaffold276 | 13593                   | TT                              | CC                | 1946493441               |
| SNP_P3_111671_13619 | NW_004515795.1 | Scaffold276 | 13619                   | CC                              | AA                | 1946493442               |
| SNP_P3_111672_13637 | NW_004515795.1 | Scaffold276 | 13637                   | AA                              | GG                | 1946493444               |
| SNP_P3_111673_21571 | NW_004515795.1 | Scaffold276 | 21571                   | TT                              | CC                | 1946493445               |
| SNP_P3_111674_21827 | NW_004515795.1 | Scaffold276 | 21827                   | AA                              | GG                | 1946493447               |
| SNP_P3_111675_21847 | NW_004515795.1 | Scaffold276 | 21847                   | AA                              | GG                | 1946493448               |
| SNP_P3_111677_52976 | NW_004515795.1 | Scaffold276 | 52976                   | GG                              | CC                | 1946493449               |
| SNP_P3_111678_53125 | NW_004515795.1 | Scaffold276 | 53125                   | AA                              | CC                | 1946493451               |
| SNP_P3_111679_53387 | NW_004515795.1 | Scaffold276 | 53387                   | AA                              | GG                | 1946493452               |
| SNP_P3_111680_53418 | NW_004515795.1 | Scaffold276 | 53418                   | CC                              | TT                | 1946493454               |
| SNP_P3_111681_69477 | NW_004515795.1 | Scaffold276 | 69477                   | AA                              | GG                | 1946493455               |
| SNP_P3_111682_483   | NW_004515796.1 | Scaffold277 | 483                     | GG                              | TT                | 1946493457               |
| SNP_P3_111683_642   | NW_004515796.1 | Scaffold277 | 642                     | GG                              | AA                | 1946493459               |
| SNP_P3_111684_675   | NW_004515796.1 | Scaffold277 | 675                     | GG                              | TT                | 1946493460               |
| SNP_P3_111685_729   | NW_004515796.1 | Scaffold277 | 729                     | CC                              | TT                | 1946493461               |
| SNP_P3_111686_823   | NW_004515796.1 | Scaffold277 | 823                     | TT                              | GG                | 1946493463               |
| SNP_P3_111687_873   | NW_004515796.1 | Scaffold277 | 873                     | AA                              | GG                | 1946493464               |
| SNP_P3_111688_879   | NW_004515796.1 | Scaffold277 | 879                     | AA                              | GG                | 1946493466               |
| SNP_P3_111689_975   | NW_004515796.1 | Scaffold277 | 975                     | TT                              | CC                | 1946493467               |
| SNP_P3_111690_1486  | NW_004515796.1 | Scaffold277 | 1486                    | GG                              | AA                | 1946493469               |
| SNP_P3_111691_1514  | NW_004515796.1 | Scaffold277 | 1514                    | TT                              | CC                | 1946493470               |
| SNP_P3_111692_1596  | NW_004515796.1 | Scaffold277 | 1596                    | AA                              | CC                | 1946493472               |
| SNP_P3_111693_3519  | NW_004515796.1 | Scaffold277 | 3519                    | TT                              | CC                | 1946493473               |
| SNP_P3_111694_3520  | NW_004515796.1 | Scaffold277 | 3520                    | TT                              | AA                | 1946493475               |
| SNP_P3_111695_3750  | NW_004515796.1 | Scaffold277 | 3750                    | AA                              | GG                | 1946493476               |
| SNP_P3_111696_4322  | NW_004515796.1 | Scaffold277 | 4322                    | AA                              | GG                | 1946493478               |
| SNP_P3_111698_4504  | NW_004515796.1 | Scaffold277 | 4504                    | GG                              | AA                | 1946493479               |
| SNP_P3_111700_4612  | NW_004515796.1 | Scaffold277 | 4612                    | AA                              | TT                | 1946493481               |
| SNP_P3_111702_4929  | NW_004515796.1 | Scaffold277 | 4929                    | CC                              | GG                | 1946493482               |
| SNP_P3_111703_5231  | NW_004515796.1 | Scaffold277 | 5231                    | CC                              | GG                | 1946493484               |
| SNP_P3_111704_5290  | NW_004515796.1 | Scaffold277 | 5290                    | AA                              | GG                | 1946493485               |
| SNP_P3_111705_5326  | NW_004515796.1 | Scaffold277 | 5326                    | GG                              | AA                | 1946493487               |
| SNP_P3_111706_5363  | NW_004515796.1 | Scaffold277 | 5363                    | AA                              | TT                | 1946493488               |
| SNP_P3_111707_5367  | NW_004515796.1 | Scaffold277 | 5367                    | AA                              | TT                | 1946493489               |
| SNP_P3_111708_5419  | NW_004515796.1 | Scaffold277 | 5419                    | TT                              | CC                | 1946493491               |
| SNP_P3_111709_5467  | NW_004515796.1 | Scaffold277 | 5467                    | TT                              | CC                | 1946493492               |
| SNP_P3_111710_5483  | NW_004515796.1 | Scaffold277 | 5483                    | GG                              | AA                | 1946493494               |
| SNP_P3_111711_5501  | NW_004515796.1 | Scaffold277 | 5501                    | GG                              | TT                | 1946493495               |
| SNP_P3_111712_5502  | NW_004515796.1 | Scaffold277 | 5502                    | GG                              | AA                | 1946493497               |
| SNP_P3_111713_5579  | NW_004515796.1 | Scaffold277 | 5579                    | TT                              | CC                | 1946493498               |
| SNP_P3_111714_5931  | NW_004515796.1 | Scaffold277 | 5931                    | CC                              | TT                | 1946493500               |

| SNPs IDs             | Chromosome IDs | Chromosomes | Physical positions (bp) | CDC Frontier (Reference genome) | (Pusa 256 & HPNB) | NCBI SNPdb Accession IDs |
|----------------------|----------------|-------------|-------------------------|---------------------------------|-------------------|--------------------------|
| SNP_P3_111715_11056  | NW_004515796.1 | Scaffold277 | 11056                   | CC                              | AA                | 1946493501               |
| SNP_P3_111716_12661  | NW_004515796.1 | Scaffold277 | 12661                   | TT                              | CC                | 1946493502               |
| SNP_P3_111717_18779  | NW_004515796.1 | Scaffold277 | 18779                   | CC                              | AA                | 1946493504               |
| SNP_P3_111718_60497  | NW_004515796.1 | Scaffold277 | 60497                   | TT                              | CC                | 1946493505               |
| SNP_P3_111719_63176  | NW_004515796.1 | Scaffold277 | 63176                   | CC                              | AA                | 1946493507               |
| SNP_P3_111720_76740  | NW_004515796.1 | Scaffold277 | 76740                   | GG                              | AA                | 1946493508               |
| SNP_P3_111721_79398  | NW_004515796.1 | Scaffold277 | 79398                   | GG                              | AA                | 1946493510               |
| SNP_P3_111722_79559  | NW_004515796.1 | Scaffold277 | 79559                   | GG                              | TT                | 1946493511               |
| SNP_P3_111723_79999  | NW_004515796.1 | Scaffold277 | 79999                   | AA                              | GG                | 1946493512               |
| SNP_P3_111724_108794 | NW_004515796.1 | Scaffold277 | 108794                  | GG                              | AA                | 1946493514               |
| SNP_P3_111725_125828 | NW_004515796.1 | Scaffold277 | 125828                  | AA                              | GG                | 1946493516               |
| SNP_P3_111726_132355 | NW_004515796.1 | Scaffold277 | 132355                  | AA                              | TT                | 1946493517               |
| SNP_P3_111727_132391 | NW_004515796.1 | Scaffold277 | 132391                  | TT                              | CC                | 1946493518               |
| SNP_P3_111728_132854 | NW_004515796.1 | Scaffold277 | 132854                  | TT                              | CC                | 1946493520               |
| SNP_P3_111729_132859 | NW_004515796.1 | Scaffold277 | 132859                  | GG                              | AA                | 1946493522               |
| SNP_P3_111730_132874 | NW_004515796.1 | Scaffold277 | 132874                  | GG                              | TT                | 1946493523               |
| SNP_P3_111731_132906 | NW_004515796.1 | Scaffold277 | 132906                  | AA                              | CC                | 1946493524               |
| SNP_P3_111732_151773 | NW_004515796.1 | Scaffold277 | 151773                  | GG                              | CC                | 1946493526               |
| SNP_P3_111734_152305 | NW_004515796.1 | Scaffold277 | 152305                  | GG                              | AA                | 1946493527               |
| SNP_P3_111735_152325 | NW_004515796.1 | Scaffold277 | 152325                  | TT                              | AA                | 1946493529               |
| SNP_P3_111736_165709 | NW_004515796.1 | Scaffold277 | 165709                  | CC                              | AA                | 1946493530               |
| SNP_P3_111737_165750 | NW_004515796.1 | Scaffold277 | 165750                  | GG                              | TT                | 1946493532               |
| SNP_P3_111738_165825 | NW_004515796.1 | Scaffold277 | 165825                  | GG                              | TT                | 1946493533               |
| SNP_P3_111739_165865 | NW_004515796.1 | Scaffold277 | 165865                  | TT                              | AA                | 1946493534               |
| SNP_P3_111740_165962 | NW_004515796.1 | Scaffold277 | 165962                  | AA                              | TT                | 1946493535               |
| SNP_P3_111741_165979 | NW_004515796.1 | Scaffold277 | 165979                  | TT                              | GG                | 1946493536               |
| SNP_P3_111742_166068 | NW_004515796.1 | Scaffold277 | 166068                  | GG                              | TT                | 1946493537               |
| SNP_P3_111743_166230 | NW_004515796.1 | Scaffold277 | 166230                  | TT                              | AA                | 1946493538               |
| SNP_P3_111744_168587 | NW_004515796.1 | Scaffold277 | 168587                  | TT                              | AA                | 1946493539               |
| SNP_P3_111745_184628 | NW_004515796.1 | Scaffold277 | 184628                  | AA                              | GG                | 1946493540               |
| SNP_P3_111746_184684 | NW_004515796.1 | Scaffold277 | 184684                  | CC                              | AA                | 1946493541               |
| SNP_P3_111748_185152 | NW_004515796.1 | Scaffold277 | 185152                  | GG                              | CC                | 1946493542               |
| SNP_P3_111749_185172 | NW_004515796.1 | Scaffold277 | 185172                  | AA                              | GG                | 1946493543               |
| SNP_P3_111750_185183 | NW_004515796.1 | Scaffold277 | 185183                  | TT                              | GG                | 1946493544               |
| SNP_P3_111751_188835 | NW_004515796.1 | Scaffold277 | 188835                  | CC                              | AA                | 1946493545               |
| SNP_P3_111752_188875 | NW_004515796.1 | Scaffold277 | 188875                  | GG                              | AA                | 1946493546               |
| SNP_P3_111753_189067 | NW_004515796.1 | Scaffold277 | 189067                  | GG                              | AA                | 1946493547               |
| SNP_P3_111754_189072 | NW_004515796.1 | Scaffold277 | 189072                  | TT                              | CC                | 1946493548               |
| SNP_P3_111755_189127 | NW_004515796.1 | Scaffold277 | 189127                  | TT                              | AA                | 1946493549               |
| SNP_P3_111756_189170 | NW_004515796.1 | Scaffold277 | 189170                  | GG                              | AA                | 1946493550               |
| SNP_P3_111757_191590 | NW_004515796.1 | Scaffold277 | 191590                  | AA                              | TT                | 1946493551               |
| SNP_P3_111758_201866 | NW_004515796.1 | Scaffold277 | 201866                  | CC                              | TT                | 1946493552               |

| SNPs IDs             | Chromosome IDs | Chromosomes | Physical positions (bp) | CDC Frontier (Reference genome) | (Pusa 256 & HPNB) | NCBI SNPdb Accession IDs |
|----------------------|----------------|-------------|-------------------------|---------------------------------|-------------------|--------------------------|
| SNP_P3_111759_201940 | NW_004515796.1 | Scaffold277 | 201940                  | AA                              | GG                | 1946493553               |
| SNP_P3_111760_202226 | NW_004515796.1 | Scaffold277 | 202226                  | GG                              | AA                | 1946493554               |
| SNP_P3_111761_202286 | NW_004515796.1 | Scaffold277 | 202286                  | CC                              | TT                | 1946493555               |
| SNP_P3_111762_202299 | NW_004515796.1 | Scaffold277 | 202299                  | AA                              | GG                | 1946493556               |
| SNP_P3_111763_202464 | NW_004515796.1 | Scaffold277 | 202464                  | CC                              | TT                | 1946493557               |
| SNP_P3_111764_202501 | NW_004515796.1 | Scaffold277 | 202501                  | TT                              | GG                | 1946493558               |
| SNP_P3_111765_202502 | NW_004515796.1 | Scaffold277 | 202502                  | GG                              | AA                | 1946493559               |
| SNP_P3_111766_202504 | NW_004515796.1 | Scaffold277 | 202504                  | CC                              | TT                | 1946493560               |
| SNP_P3_111767_202539 | NW_004515796.1 | Scaffold277 | 202539                  | AA                              | GG                | 1946493561               |
| SNP_P3_111768_202654 | NW_004515796.1 | Scaffold277 | 202654                  | CC                              | TT                | 1946493562               |
| SNP_P3_111769_202681 | NW_004515796.1 | Scaffold277 | 202681                  | TT                              | AA                | 1946493563               |
| SNP_P3_111770_202794 | NW_004515796.1 | Scaffold277 | 202794                  | GG                              | AA                | 1946493564               |
| SNP_P3_111771_202796 | NW_004515796.1 | Scaffold277 | 202796                  | AA                              | GG                | 1946493565               |
| SNP_P3_111772_202812 | NW_004515796.1 | Scaffold277 | 202812                  | AA                              | GG                | 1946493566               |
| SNP_P3_111773_202839 | NW_004515796.1 | Scaffold277 | 202839                  | AA                              | GG                | 1946493567               |
| SNP_P3_111774_205116 | NW_004515796.1 | Scaffold277 | 205116                  | TT                              | CC                | 1946493568               |
| SNP_P3_111775_205166 | NW_004515796.1 | Scaffold277 | 205166                  | GG                              | TT                | 1946493570               |
| SNP_P3_111776_205179 | NW_004515796.1 | Scaffold277 | 205179                  | AA                              | GG                | 1946493571               |
| SNP_P3_111777_205331 | NW_004515796.1 | Scaffold277 | 205331                  | TT                              | CC                | 1946493573               |
| SNP_P3_111778_205337 | NW_004515796.1 | Scaffold277 | 205337                  | TT                              | CC                | 1946493574               |
| SNP_P3_111779_205353 | NW_004515796.1 | Scaffold277 | 205353                  | CC                              | TT                | 1946493576               |
| SNP_P3_111780_205416 | NW_004515796.1 | Scaffold277 | 205416                  | TT                              | CC                | 1946493577               |
| SNP_P3_111782_210904 | NW_004515796.1 | Scaffold277 | 210904                  | AA                              | GG                | 1946493579               |
| SNP_P3_111783_218472 | NW_004515796.1 | Scaffold277 | 218472                  | AA                              | TT                | 1946493580               |
| SNP_P3_111784_218538 | NW_004515796.1 | Scaffold277 | 218538                  | AA                              | CC                | 1946493581               |
| SNP_P3_111785_218582 | NW_004515796.1 | Scaffold277 | 218582                  | AA                              | GG                | 1946493583               |
| SNP_P3_111786_218598 | NW_004515796.1 | Scaffold277 | 218598                  | AA                              | TT                | 1946493584               |
| SNP_P3_111787_218762 | NW_004515796.1 | Scaffold277 | 218762                  | AA                              | CC                | 1946493586               |
| SNP_P3_111788_219186 | NW_004515796.1 | Scaffold277 | 219186                  | AA                              | CC                | 1946493587               |
| SNP_P3_111789_229512 | NW_004515796.1 | Scaffold277 | 229512                  | CC                              | TT                | 1946493589               |
| SNP_P3_111790_229522 | NW_004515796.1 | Scaffold277 | 229522                  | AA                              | GG                | 1946493590               |
| SNP_P3_111791_234909 | NW_004515796.1 | Scaffold277 | 234909                  | AA                              | GG                | 1946493592               |
| SNP_P3_111792_247285 | NW_004515796.1 | Scaffold277 | 247285                  | AA                              | GG                | 1946493593               |
| SNP_P3_111793_247293 | NW_004515796.1 | Scaffold277 | 247293                  | TT                              | CC                | 1946493595               |
| SNP_P3_111794_247318 | NW_004515796.1 | Scaffold277 | 247318                  | TT                              | GG                | 1946493596               |
| SNP_P3_111795_247343 | NW_004515796.1 | Scaffold277 | 247343                  | GG                              | AA                | 1946493597               |
| SNP_P3_111796_247438 | NW_004515796.1 | Scaffold277 | 247438                  | AA                              | TT                | 1946493599               |
| SNP_P3_111797_247474 | NW_004515796.1 | Scaffold277 | 247474                  | CC                              | AA                | 1946493600               |
| SNP_P3_111798_247483 | NW_004515796.1 | Scaffold277 | 247483                  | GG                              | TT                | 1946493602               |
| SNP_P3_111799_252022 | NW_004515796.1 | Scaffold277 | 252022                  | TT                              | CC                | 1946493603               |
| SNP_P3_111800_252116 | NW_004515796.1 | Scaffold277 | 252116                  | CC                              | TT                | 1946493605               |
| SNP_P3_111801_252147 | NW_004515796.1 | Scaffold277 | 252147                  | TT                              | AA                | 1946493606               |

| SNPs IDs             | Chromosome IDs | Chromosomes | Physical positions (bp) | CDC Frontier (Reference genome) | (Pusa 256 & HPNB) | NCBI SNPdb Accession IDs |
|----------------------|----------------|-------------|-------------------------|---------------------------------|-------------------|--------------------------|
| SNP_P3_111802_252155 | NW_004515796.1 | Scaffold277 | 252155                  | CC                              | TT                | 1946493607               |
| SNP_P3_111803_252175 | NW_004515796.1 | Scaffold277 | 252175                  | TT                              | CC                | 1946493609               |
| SNP_P3_111804_252220 | NW_004515796.1 | Scaffold277 | 252220                  | CC                              | AA                | 1946493610               |
| SNP_P3_111805_252352 | NW_004515796.1 | Scaffold277 | 252352                  | AA                              | GG                | 1946493612               |
| SNP_P3_111806_252378 | NW_004515796.1 | Scaffold277 | 252378                  | GG                              | AA                | 1946493613               |
| SNP_P3_111808_252474 | NW_004515796.1 | Scaffold277 | 252474                  | TT                              | CC                | 1946493614               |
| SNP_P3_111809_252496 | NW_004515796.1 | Scaffold277 | 252496                  | AA                              | GG                | 1946493616               |
| SNP_P3_111810_252914 | NW_004515796.1 | Scaffold277 | 252914                  | TT                              | CC                | 1946493617               |
| SNP_P3_111811_252935 | NW_004515796.1 | Scaffold277 | 252935                  | AA                              | TT                | 1946493619               |
| SNP_P3_111812_262969 | NW_004515796.1 | Scaffold277 | 262969                  | TT                              | AA                | 1946493620               |
| SNP_P3_111813_523    | NW_004515797.1 | Scaffold280 | 523                     | GG                              | TT                | 1946493622               |
| SNP_P3_111814_592    | NW_004515797.1 | Scaffold280 | 592                     | AA                              | TT                | 1946493623               |
| SNP_P3_111815_4903   | NW_004515797.1 | Scaffold280 | 4903                    | AA                              | TT                | 1946493624               |
| SNP_P3_111817_5176   | NW_004515797.1 | Scaffold280 | 5176                    | TT                              | AA                | 1946493625               |
| SNP_P3_111818_5203   | NW_004515797.1 | Scaffold280 | 5203                    | CC                              | AA                | 1946493626               |
| SNP_P3_111819_6449   | NW_004515797.1 | Scaffold280 | 6449                    | CC                              | TT                | 1946493627               |
| SNP_P3_111820_10252  | NW_004515797.1 | Scaffold280 | 10252                   | CC                              | AA                | 1946493628               |
| SNP_P3_111821_10290  | NW_004515797.1 | Scaffold280 | 10290                   | TT                              | AA                | 1946493629               |
| SNP_P3_111822_10297  | NW_004515797.1 | Scaffold280 | 10297                   | TT                              | AA                | 1946493630               |
| SNP_P3_111823_10339  | NW_004515797.1 | Scaffold280 | 10339                   | AA                              | CC                | 1946493631               |
| SNP_P3_111824_10581  | NW_004515797.1 | Scaffold280 | 10581                   | AA                              | CC                | 1946493632               |
| SNP_P3_111825_10629  | NW_004515797.1 | Scaffold280 | 10629                   | CC                              | AA                | 1946493633               |
| SNP_P3_111826_10646  | NW_004515797.1 | Scaffold280 | 10646                   | TT                              | AA                | 1946493634               |
| SNP_P3_111827_10664  | NW_004515797.1 | Scaffold280 | 10664                   | TT                              | CC                | 1946493635               |
| SNP_P3_111828_10912  | NW_004515797.1 | Scaffold280 | 10912                   | TT                              | GG                | 1946493636               |
| SNP_P3_111829_10957  | NW_004515797.1 | Scaffold280 | 10957                   | AA                              | CC                | 1946493637               |
| SNP_P3_111830_11631  | NW_004515797.1 | Scaffold280 | 11631                   | AA                              | TT                | 1946493638               |
| SNP_P3_111831_15044  | NW_004515797.1 | Scaffold280 | 15044                   | AA                              | CC                | 1946493639               |
| SNP_P3_111832_15581  | NW_004515797.1 | Scaffold280 | 15581                   | CC                              | AA                | 1946493640               |
| SNP_P3_111833_17697  | NW_004515797.1 | Scaffold280 | 17697                   | TT                              | GG                | 1946493641               |
| SNP_P3_111834_17755  | NW_004515797.1 | Scaffold280 | 17755                   | AA                              | GG                | 1946493642               |
| SNP_P3_111835_17894  | NW_004515797.1 | Scaffold280 | 17894                   | AA                              | TT                | 1946493644               |
| SNP_P3_111836_17898  | NW_004515797.1 | Scaffold280 | 17898                   | AA                              | TT                | 1946493645               |
| SNP_P3_111837_17932  | NW_004515797.1 | Scaffold280 | 17932                   | CC                              | AA                | 1946493646               |
| SNP_P3_111838_17936  | NW_004515797.1 | Scaffold280 | 17936                   | TT                              | AA                | 1946493648               |
| SNP_P3_111839_17976  | NW_004515797.1 | Scaffold280 | 17976                   | CC                              | AA                | 1946493649               |
| SNP_P3_111840_17984  | NW_004515797.1 | Scaffold280 | 17984                   | AA                              | GG                | 1946493651               |
| SNP_P3_111841_20981  | NW_004515797.1 | Scaffold280 | 20981                   | TT                              | CC                | 1946493652               |
| SNP_P3_111842_23337  | NW_004515797.1 | Scaffold280 | 23337                   | GG                              | AA                | 1946493653               |
| SNP_P3_111843_35056  | NW_004515797.1 | Scaffold280 | 35056                   | AA                              | GG                | 1946493655               |
| SNP_P3_111844_35138  | NW_004515797.1 | Scaffold280 | 35138                   | GG                              | AA                | 1946493656               |
| SNP_P3_111845_35181  | NW_004515797.1 | Scaffold280 | 35181                   | TT                              | CC                | 1946493658               |

| SNPs IDs            | Chromosome IDs | Chromosomes | Physical positions (bp) | CDC Frontier (Reference genome) | (Pusa 256 & HPNB) | NCBI SNPdb Accession IDs |
|---------------------|----------------|-------------|-------------------------|---------------------------------|-------------------|--------------------------|
| SNP_P3_111846_35279 | NW_004515797.1 | Scaffold280 | 35279                   | CC                              | TT                | 1946493659               |
| SNP_P3_111847_35301 | NW_004515797.1 | Scaffold280 | 35301                   | TT                              | CC                | 1946493661               |
| SNP_P3_111848_35302 | NW_004515797.1 | Scaffold280 | 35302                   | GG                              | AA                | 1946493662               |
| SNP_P3_111849_35318 | NW_004515797.1 | Scaffold280 | 35318                   | AA                              | TT                | 1946493663               |
| SNP_P3_111850_35362 | NW_004515797.1 | Scaffold280 | 35362                   | TT                              | CC                | 1946493665               |
| SNP_P3_111851_47777 | NW_004515797.1 | Scaffold280 | 47777                   | TT                              | CC                | 1946493666               |
| SNP_P3_111853_61287 | NW_004515797.1 | Scaffold280 | 61287                   | AA                              | CC                | 1946493668               |
| SNP_P3_111854_61291 | NW_004515797.1 | Scaffold280 | 61291                   | TT                              | CC                | 1946493669               |
| SNP_P3_111855_61294 | NW_004515797.1 | Scaffold280 | 61294                   | AA                              | TT                | 1946493671               |
| SNP_P3_111856_62526 | NW_004515797.1 | Scaffold280 | 62526                   | CC                              | AA                | 1946493672               |
| SNP_P3_111857_67451 | NW_004515797.1 | Scaffold280 | 67451                   | CC                              | TT                | 1946493674               |
| SNP_P3_111858_70571 | NW_004515797.1 | Scaffold280 | 70571                   | AA                              | GG                | 1946493675               |
| SNP_P3_111859_73675 | NW_004515797.1 | Scaffold280 | 73675                   | GG                              | CC                | 1946493677               |
| SNP_P3_111860_73740 | NW_004515797.1 | Scaffold280 | 73740                   | CC                              | TT                | 1946493678               |
| SNP_P3_111861_73775 | NW_004515797.1 | Scaffold280 | 73775                   | TT                              | CC                | 1946493680               |
| SNP_P3_111862_73925 | NW_004515797.1 | Scaffold280 | 73925                   | GG                              | AA                | 1946493681               |
| SNP_P3_111863_74198 | NW_004515797.1 | Scaffold280 | 74198                   | TT                              | CC                | 1946493682               |
| SNP_P3_111864_74205 | NW_004515797.1 | Scaffold280 | 74205                   | TT                              | CC                | 1946493684               |
| SNP_P3_111865_74222 | NW_004515797.1 | Scaffold280 | 74222                   | CC                              | AA                | 1946493685               |
| SNP_P3_111866_74232 | NW_004515797.1 | Scaffold280 | 74232                   | AA                              | GG                | 1946493687               |
| SNP_P3_111867_74245 | NW_004515797.1 | Scaffold280 | 74245                   | TT                              | GG                | 1946493688               |
| SNP_P3_111868_74248 | NW_004515797.1 | Scaffold280 | 74248                   | TT                              | CC                | 1946493690               |
| SNP_P3_111869_74311 | NW_004515797.1 | Scaffold280 | 74311                   | AA                              | GG                | 1946493691               |
| SNP_P3_111870_75983 | NW_004515797.1 | Scaffold280 | 75983                   | GG                              | AA                | 1946493693               |
| SNP_P3_111871_77344 | NW_004515797.1 | Scaffold280 | 77344                   | AA                              | TT                | 1946493694               |
| SNP_P3_111872_78996 | NW_004515797.1 | Scaffold280 | 78996                   | AA                              | TT                | 1946493696               |
| SNP_P3_111873_82750 | NW_004515797.1 | Scaffold280 | 82750                   | TT                              | CC                | 1946493697               |
| SNP_P3_111874_83350 | NW_004515797.1 | Scaffold280 | 83350                   | CC                              | AA                | 1946493699               |
| SNP_P3_111875_83355 | NW_004515797.1 | Scaffold280 | 83355                   | TT                              | AA                | 1946493700               |
| SNP_P3_111876_83396 | NW_004515797.1 | Scaffold280 | 83396                   | AA                              | CC                | 1946493702               |
| SNP_P3_111877_83417 | NW_004515797.1 | Scaffold280 | 83417                   | TT                              | CC                | 1946493703               |
| SNP_P3_111878_83437 | NW_004515797.1 | Scaffold280 | 83437                   | AA                              | CC                | 1946493705               |
| SNP_P3_111880_92423 | NW_004515797.1 | Scaffold280 | 92423                   | TT                              | CC                | 1946493706               |
| SNP_P3_111881_92427 | NW_004515797.1 | Scaffold280 | 92427                   | TT                              | AA                | 1946493708               |
| SNP_P3_111882_93852 | NW_004515797.1 | Scaffold280 | 93852                   | CC                              | TT                | 1946493709               |
| SNP_P3_111884_97957 | NW_004515797.1 | Scaffold280 | 97957                   | TT                              | AA                | 1946493711               |
| SNP_P3_111885_97959 | NW_004515797.1 | Scaffold280 | 97959                   | TT                              | GG                | 1946493712               |
| SNP_P3_111886_97978 | NW_004515797.1 | Scaffold280 | 97978                   | TT                              | CC                | 1946493713               |
| SNP_P3_111887_97995 | NW_004515797.1 | Scaffold280 | 97995                   | TT                              | CC                | 1946493715               |
| SNP_P3_111889_98175 | NW_004515797.1 | Scaffold280 | 98175                   | AA                              | CC                | 1946493716               |
| SNP_P3_111890_98176 | NW_004515797.1 | Scaffold280 | 98176                   | TT                              | GG                | 1946493718               |
| SNP_P3_111891_98554 | NW_004515797.1 | Scaffold280 | 98554                   | AA                              | GG                | 1946493719               |



| SNPs IDs             | Chromosome IDs | Chromosomes | Physical positions (bp) | CDC Frontier (Reference genome) | (Pusa 256 & HPNB) | NCBI SNPdb Accession IDs |
|----------------------|----------------|-------------|-------------------------|---------------------------------|-------------------|--------------------------|
| SNP_P3_111892_100758 | NW_004515797.1 | Scaffold280 | 100758                  | TT                              | CC                | 1946493721               |
| SNP_P3_111893_105598 | NW_004515797.1 | Scaffold280 | 105598                  | TT                              | CC                | 1946493722               |
| SNP_P3_111894_105602 | NW_004515797.1 | Scaffold280 | 105602                  | AA                              | GG                | 1946493723               |
| SNP_P3_111895_106204 | NW_004515797.1 | Scaffold280 | 106204                  | TT                              | AA                | 1946493725               |
| SNP_P3_111896_106224 | NW_004515797.1 | Scaffold280 | 106224                  | AA                              | GG                | 1946493726               |
| SNP_P3_111897_106241 | NW_004515797.1 | Scaffold280 | 106241                  | AA                              | GG                | 1946493728               |
| SNP_P3_111898_106581 | NW_004515797.1 | Scaffold280 | 106581                  | TT                              | CC                | 1946493729               |
| SNP_P3_111900_107588 | NW_004515797.1 | Scaffold280 | 107588                  | AA                              | GG                | 1946493731               |
| SNP_P3_111901_107713 | NW_004515797.1 | Scaffold280 | 107713                  | TT                              | GG                | 1946493732               |
| SNP_P3_111902_107734 | NW_004515797.1 | Scaffold280 | 107734                  | AA                              | CC                | 1946493734               |
| SNP_P3_111903_107758 | NW_004515797.1 | Scaffold280 | 107758                  | AA                              | GG                | 1946493735               |
| SNP_P3_111904_107794 | NW_004515797.1 | Scaffold280 | 107794                  | TT                              | CC                | 1946493737               |
| SNP_P3_111905_107965 | NW_004515797.1 | Scaffold280 | 107965                  | AA                              | CC                | 1946493738               |
| SNP_P3_111906_107979 | NW_004515797.1 | Scaffold280 | 107979                  | TT                              | GG                | 1946493740               |
| SNP_P3_111907_108030 | NW_004515797.1 | Scaffold280 | 108030                  | AA                              | TT                | 1946493741               |
| SNP_P3_111908_108043 | NW_004515797.1 | Scaffold280 | 108043                  | AA                              | GG                | 1946493743               |
| SNP_P3_111909_108048 | NW_004515797.1 | Scaffold280 | 108048                  | AA                              | CC                | 1946493744               |
| SNP_P3_111910_108109 | NW_004515797.1 | Scaffold280 | 108109                  | AA                              | GG                | 1946493746               |
| SNP_P3_111911_108185 | NW_004515797.1 | Scaffold280 | 108185                  | GG                              | CC                | 1946493747               |
| SNP_P3_111912_108212 | NW_004515797.1 | Scaffold280 | 108212                  | TT                              | CC                | 1946493749               |
| SNP_P3_111913_110262 | NW_004515797.1 | Scaffold280 | 110262                  | AA                              | GG                | 1946493750               |
| SNP_P3_111914_110356 | NW_004515797.1 | Scaffold280 | 110356                  | TT                              | CC                | 1946493752               |
| SNP_P3_111915_112047 | NW_004515797.1 | Scaffold280 | 112047                  | AA                              | GG                | 1946493753               |
| SNP_P3_111916_112072 | NW_004515797.1 | Scaffold280 | 112072                  | CC                              | AA                | 1946493755               |
| SNP_P3_111917_112145 | NW_004515797.1 | Scaffold280 | 112145                  | AA                              | GG                | 1946493756               |
| SNP_P3_111918_112596 | NW_004515797.1 | Scaffold280 | 112596                  | TT                              | CC                | 1946493758               |
| SNP_P3_111919_113381 | NW_004515797.1 | Scaffold280 | 113381                  | AA                              | TT                | 1946493759               |
| SNP_P3_111920_113385 | NW_004515797.1 | Scaffold280 | 113385                  | TT                              | GG                | 1946493761               |
| SNP_P3_111921_113428 | NW_004515797.1 | Scaffold280 | 113428                  | GG                              | TT                | 1946493762               |
| SNP_P3_111922_113440 | NW_004515797.1 | Scaffold280 | 113440                  | TT                              | GG                | 1946493764               |
| SNP_P3_111923_113463 | NW_004515797.1 | Scaffold280 | 113463                  | AA                              | GG                | 1946493765               |
| SNP_P3_111924_113514 | NW_004515797.1 | Scaffold280 | 113514                  | TT                              | GG                | 1946493767               |
| SNP_P3_111925_113527 | NW_004515797.1 | Scaffold280 | 113527                  | AA                              | CC                | 1946493768               |
| SNP_P3_111926_113567 | NW_004515797.1 | Scaffold280 | 113567                  | CC                              | GG                | 1946493770               |
| SNP_P3_111927_113783 | NW_004515797.1 | Scaffold280 | 113783                  | AA                              | GG                | 1946493771               |
| SNP_P3_111928_113826 | NW_004515797.1 | Scaffold280 | 113826                  | AA                              | GG                | 1946493773               |
| SNP_P3_111929_113883 | NW_004515797.1 | Scaffold280 | 113883                  | AA                              | GG                | 1946493774               |
| SNP_P3_111930_114036 | NW_004515797.1 | Scaffold280 | 114036                  | AA                              | GG                | 1946493776               |
| SNP_P3_111931_114122 | NW_004515797.1 | Scaffold280 | 114122                  | GG                              | TT                | 1946493777               |
| SNP_P3_111932_114134 | NW_004515797.1 | Scaffold280 | 114134                  | CC                              | GG                | 1946493779               |
| SNP_P3_111933_114202 | NW_004515797.1 | Scaffold280 | 114202                  | AA                              | GG                | 1946493780               |
| SNP_P3_111934_114783 | NW_004515797.1 | Scaffold280 | 114783                  | TT                              | AA                | 1946493782               |

| SNPs IDs             | Chromosome IDs | Chromosomes | Physical positions (bp) | CDC Frontier (Reference genome) | (Pusa 256 & HPNB) | NCBI SNPdb Accession IDs |
|----------------------|----------------|-------------|-------------------------|---------------------------------|-------------------|--------------------------|
| SNP_P3_111935_114799 | NW_004515797.1 | Scaffold280 | 114799                  | TT                              | CC                | 1946493783               |
| SNP_P3_111936_114817 | NW_004515797.1 | Scaffold280 | 114817                  | TT                              | CC                | 1946493785               |
| SNP_P3_111937_114840 | NW_004515797.1 | Scaffold280 | 114840                  | AA                              | GG                | 1946493786               |
| SNP_P3_111938_114882 | NW_004515797.1 | Scaffold280 | 114882                  | TT                              | CC                | 1946493788               |
| SNP_P3_111939_114920 | NW_004515797.1 | Scaffold280 | 114920                  | TT                              | CC                | 1946493789               |
| SNP_P3_111940_114938 | NW_004515797.1 | Scaffold280 | 114938                  | AA                              | GG                | 1946493791               |
| SNP_P3_111941_115013 | NW_004515797.1 | Scaffold280 | 115013                  | GG                              | AA                | 1946493792               |
| SNP_P3_111942_115105 | NW_004515797.1 | Scaffold280 | 115105                  | AA                              | GG                | 1946493794               |
| SNP_P3_111943_115124 | NW_004515797.1 | Scaffold280 | 115124                  | AA                              | GG                | 1946493795               |
| SNP_P3_111945_115195 | NW_004515797.1 | Scaffold280 | 115195                  | TT                              | CC                | 1946493797               |
| SNP_P3_111946_115268 | NW_004515797.1 | Scaffold280 | 115268                  | TT                              | CC                | 1946493798               |
| SNP_P3_111947_115377 | NW_004515797.1 | Scaffold280 | 115377                  | AA                              | GG                | 1946493800               |
| SNP_P3_111948_115460 | NW_004515797.1 | Scaffold280 | 115460                  | TT                              | CC                | 1946493801               |
| SNP_P3_111949_115508 | NW_004515797.1 | Scaffold280 | 115508                  | AA                              | GG                | 1946493803               |
| SNP_P3_111950_116800 | NW_004515797.1 | Scaffold280 | 116800                  | TT                              | CC                | 1946493804               |
| SNP_P3_111951_116803 | NW_004515797.1 | Scaffold280 | 116803                  | AA                              | GG                | 1946493806               |
| SNP_P3_111952_116899 | NW_004515797.1 | Scaffold280 | 116899                  | AA                              | CC                | 1946493807               |
| SNP_P3_111953_116904 | NW_004515797.1 | Scaffold280 | 116904                  | TT                              | CC                | 1946493809               |
| SNP_P3_111954_116930 | NW_004515797.1 | Scaffold280 | 116930                  | AA                              | GG                | 1946493810               |
| SNP_P3_111956_118402 | NW_004515797.1 | Scaffold280 | 118402                  | AA                              | GG                | 1946493812               |
| SNP_P3_111957_118610 | NW_004515797.1 | Scaffold280 | 118610                  | AA                              | CC                | 1946493813               |
| SNP_P3_111958_118782 | NW_004515797.1 | Scaffold280 | 118782                  | TT                              | CC                | 1946493815               |
| SNP_P3_111959_118823 | NW_004515797.1 | Scaffold280 | 118823                  | AA                              | GG                | 1946493816               |
| SNP_P3_111960_118904 | NW_004515797.1 | Scaffold280 | 118904                  | TT                              | CC                | 1946493818               |
| SNP_P3_111961_118947 | NW_004515797.1 | Scaffold280 | 118947                  | AA                              | CC                | 1946493819               |
| SNP_P3_111962_119037 | NW_004515797.1 | Scaffold280 | 119037                  | GG                              | CC                | 1946493821               |
| SNP_P3_111963_119045 | NW_004515797.1 | Scaffold280 | 119045                  | AA                              | GG                | 1946493822               |
| SNP_P3_111964_119079 | NW_004515797.1 | Scaffold280 | 119079                  | TT                              | GG                | 1946493823               |
| SNP_P3_111965_119080 | NW_004515797.1 | Scaffold280 | 119080                  | AA                              | TT                | 1946493825               |
| SNP_P3_111966_119194 | NW_004515797.1 | Scaffold280 | 119194                  | GG                              | TT                | 1946493827               |
| SNP_P3_111967_119218 | NW_004515797.1 | Scaffold280 | 119218                  | TT                              | CC                | 1946493828               |
| SNP_P3_111968_119247 | NW_004515797.1 | Scaffold280 | 119247                  | AA                              | CC                | 1946493831               |
| SNP_P3_111969_119310 | NW_004515797.1 | Scaffold280 | 119310                  | AA                              | CC                | 1946493832               |
| SNP_P3_111970_119320 | NW_004515797.1 | Scaffold280 | 119320                  | TT                              | CC                | 1946493834               |
| SNP_P3_111971_119333 | NW_004515797.1 | Scaffold280 | 119333                  | CC                              | TT                | 1946493835               |
| SNP_P3_111972_119412 | NW_004515797.1 | Scaffold280 | 119412                  | AA                              | CC                | 1946493836               |
| SNP_P3_111973_119422 | NW_004515797.1 | Scaffold280 | 119422                  | AA                              | GG                | 1946493838               |
| SNP_P3_111974_119458 | NW_004515797.1 | Scaffold280 | 119458                  | AA                              | CC                | 1946493839               |
| SNP_P3_111975_120991 | NW_004515797.1 | Scaffold280 | 120991                  | AA                              | TT                | 1946493841               |
| SNP_P3_111977_128592 | NW_004515797.1 | Scaffold280 | 128592                  | AA                              | CC                | 1946493842               |
| SNP_P3_111978_128684 | NW_004515797.1 | Scaffold280 | 128684                  | AA                              | CC                | 1946493844               |
| SNP_P3_111979_128707 | NW_004515797.1 | Scaffold280 | 128707                  | CC                              | TT                | 1946493845               |

| SNPs IDs             | Chromosome IDs | Chromosomes | Physical positions (bp) | CDC Frontier (Reference genome) | (Pusa 256 & HPNB) | NCBI SNPdb Accession IDs |
|----------------------|----------------|-------------|-------------------------|---------------------------------|-------------------|--------------------------|
| SNP_P3_111981_138786 | NW_004515797.1 | Scaffold280 | 138786                  | TT                              | GG                | 1946493847               |
| SNP_P3_111982_138940 | NW_004515797.1 | Scaffold280 | 138940                  | TT                              | GG                | 1946493848               |
| SNP_P3_111983_159956 | NW_004515797.1 | Scaffold280 | 159956                  | TT                              | AA                | 1946493849               |
| SNP_P3_111984_159980 | NW_004515797.1 | Scaffold280 | 159980                  | CC                              | AA                | 1946493851               |
| SNP_P3_111985_160335 | NW_004515797.1 | Scaffold280 | 160335                  | GG                              | AA                | 1946493852               |
| SNP_P3_111986_166161 | NW_004515797.1 | Scaffold280 | 166161                  | AA                              | GG                | 1946493854               |
| SNP_P3_111987_166166 | NW_004515797.1 | Scaffold280 | 166166                  | AA                              | TT                | 1946493855               |
| SNP_P3_111988_166167 | NW_004515797.1 | Scaffold280 | 166167                  | AA                              | GG                | 1946493857               |
| SNP_P3_111989_166230 | NW_004515797.1 | Scaffold280 | 166230                  | CC                              | TT                | 1946493858               |
| SNP_P3_111990_166261 | NW_004515797.1 | Scaffold280 | 166261                  | GG                              | AA                | 1946493860               |
| SNP_P3_111991_166308 | NW_004515797.1 | Scaffold280 | 166308                  | CC                              | AA                | 1946493861               |
| SNP_P3_111992_166500 | NW_004515797.1 | Scaffold280 | 166500                  | GG                              | AA                | 1946493863               |
| SNP_P3_111993_166547 | NW_004515797.1 | Scaffold280 | 166547                  | TT                              | AA                | 1946493864               |
| SNP_P3_111994_166564 | NW_004515797.1 | Scaffold280 | 166564                  | AA                              | TT                | 1946493865               |
| SNP_P3_111995_166664 | NW_004515797.1 | Scaffold280 | 166664                  | AA                              | CC                | 1946493867               |
| SNP_P3_111996_166747 | NW_004515797.1 | Scaffold280 | 166747                  | AA                              | TT                | 1946493868               |
| SNP_P3_111997_177855 | NW_004515797.1 | Scaffold280 | 177855                  | TT                              | CC                | 1946493870               |
| SNP_P3_111998_177856 | NW_004515797.1 | Scaffold280 | 177856                  | AA                              | CC                | 1946493871               |
| SNP_P3_111999_200086 | NW_004515797.1 | Scaffold280 | 200086                  | TT                              | AA                | 1946493873               |
| SNP_P3_112000_200089 | NW_004515797.1 | Scaffold280 | 200089                  | AA                              | CC                | 1946493874               |
| SNP_P3_112001_200577 | NW_004515797.1 | Scaffold280 | 200577                  | TT                              | CC                | 1946493875               |
| SNP_P3_112002_206063 | NW_004515797.1 | Scaffold280 | 206063                  | AA                              | GG                | 1946493877               |
| SNP_P3_112003_206094 | NW_004515797.1 | Scaffold280 | 206094                  | TT                              | CC                | 1946493878               |
| SNP_P3_112004_206136 | NW_004515797.1 | Scaffold280 | 206136                  | CC                              | GG                | 1946493880               |
| SNP_P3_112005_206234 | NW_004515797.1 | Scaffold280 | 206234                  | TT                              | CC                | 1946493881               |
| SNP_P3_112006_211072 | NW_004515797.1 | Scaffold280 | 211072                  | GG                              | AA                | 1946493883               |
| SNP_P3_112007_217358 | NW_004515797.1 | Scaffold280 | 217358                  | GG                              | AA                | 1946493884               |
| SNP_P3_112008_217409 | NW_004515797.1 | Scaffold280 | 217409                  | AA                              | GG                | 1946493886               |
| SNP_P3_112009_217754 | NW_004515797.1 | Scaffold280 | 217754                  | GG                              | CC                | 1946493887               |
| SNP_P3_112010_217802 | NW_004515797.1 | Scaffold280 | 217802                  | AA                              | TT                | 1946493889               |
| SNP_P3_112011_217825 | NW_004515797.1 | Scaffold280 | 217825                  | TT                              | CC                | 1946493890               |
| SNP_P3_112012_217832 | NW_004515797.1 | Scaffold280 | 217832                  | TT                              | AA                | 1946493891               |
| SNP_P3_112013_224733 | NW_004515797.1 | Scaffold280 | 224733                  | AA                              | GG                | 1946493893               |
| SNP_P3_112014_224751 | NW_004515797.1 | Scaffold280 | 224751                  | GG                              | CC                | 1946493894               |
| SNP_P3_112015_225989 | NW_004515797.1 | Scaffold280 | 225989                  | TT                              | GG                | 1946493896               |
| SNP_P3_112016_240018 | NW_004515797.1 | Scaffold280 | 240018                  | CC                              | AA                | 1946493897               |
| SNP_P3_112017_240106 | NW_004515797.1 | Scaffold280 | 240106                  | AA                              | GG                | 1946493898               |
| SNP_P3_112018_240143 | NW_004515797.1 | Scaffold280 | 240143                  | TT                              | CC                | 1946493900               |
| SNP_P3_112019_240144 | NW_004515797.1 | Scaffold280 | 240144                  | GG                              | AA                | 1946493901               |
| SNP_P3_112020_249433 | NW_004515797.1 | Scaffold280 | 249433                  | GG                              | TT                | 1946493903               |
| SNP_P3_112021_266161 | NW_004515797.1 | Scaffold280 | 266161                  | TT                              | GG                | 1946493904               |
| SNP_P3_112023_267636 | NW_004515797.1 | Scaffold280 | 267636                  | AA                              | GG                | 1946493906               |

| SNPs IDs             | Chromosome IDs | Chromosomes | Physical positions (bp) | CDC Frontier (Reference genome) | (Pusa 256 & HPNB) | NCBI SNPdb Accession IDs |
|----------------------|----------------|-------------|-------------------------|---------------------------------|-------------------|--------------------------|
| SNP_P3_112024_283234 | NW_004515797.1 | Scaffold280 | 283234                  | GG                              | AA                | 1946493907               |
| SNP_P3_112025_294604 | NW_004515797.1 | Scaffold280 | 294604                  | CC                              | TT                | 1946493908               |
| SNP_P3_112026_295052 | NW_004515797.1 | Scaffold280 | 295052                  | GG                              | CC                | 1946493910               |
| SNP_P3_112027_298356 | NW_004515797.1 | Scaffold280 | 298356                  | TT                              | AA                | 1946493911               |
| SNP_P3_112028_298964 | NW_004515797.1 | Scaffold280 | 298964                  | CC                              | GG                | 1946493913               |
| SNP_P3_112030_302201 | NW_004515797.1 | Scaffold280 | 302201                  | GG                              | AA                | 1946493914               |
| SNP_P3_112031_302468 | NW_004515797.1 | Scaffold280 | 302468                  | GG                              | CC                | 1946493916               |
| SNP_P3_112032_302477 | NW_004515797.1 | Scaffold280 | 302477                  | TT                              | CC                | 1946493917               |
| SNP_P3_112033_302535 | NW_004515797.1 | Scaffold280 | 302535                  | AA                              | CC                | 1946493918               |
| SNP_P3_112034_304918 | NW_004515797.1 | Scaffold280 | 304918                  | TT                              | CC                | 1946493920               |
| SNP_P3_112035_305277 | NW_004515797.1 | Scaffold280 | 305277                  | TT                              | CC                | 1946493921               |
| SNP_P3_112036_319357 | NW_004515797.1 | Scaffold280 | 319357                  | TT                              | GG                | 1946493923               |
| SNP_P3_112037_319573 | NW_004515797.1 | Scaffold280 | 319573                  | TT                              | GG                | 1946493924               |
| SNP_P3_112038_319583 | NW_004515797.1 | Scaffold280 | 319583                  | TT                              | CC                | 1946493926               |
| SNP_P3_112039_319612 | NW_004515797.1 | Scaffold280 | 319612                  | GG                              | AA                | 1946493927               |
| SNP_P3_112040_319685 | NW_004515797.1 | Scaffold280 | 319685                  | AA                              | GG                | 1946493928               |
| SNP_P3_112041_319835 | NW_004515797.1 | Scaffold280 | 319835                  | TT                              | GG                | 1946493930               |
| SNP_P3_112042_320014 | NW_004515797.1 | Scaffold280 | 320014                  | TT                              | AA                | 1946493931               |
| SNP_P3_112043_320022 | NW_004515797.1 | Scaffold280 | 320022                  | TT                              | AA                | 1946493933               |
| SNP_P3_112044_320079 | NW_004515797.1 | Scaffold280 | 320079                  | CC                              | AA                | 1946493934               |
| SNP_P3_112045_320172 | NW_004515797.1 | Scaffold280 | 320172                  | TT                              | CC                | 1946493936               |
| SNP_P3_112046_320222 | NW_004515797.1 | Scaffold280 | 320222                  | AA                              | TT                | 1946493937               |
| SNP_P3_112048_324325 | NW_004515797.1 | Scaffold280 | 324325                  | TT                              | AA                | 1946493939               |
| SNP_P3_112049_324354 | NW_004515797.1 | Scaffold280 | 324354                  | GG                              | AA                | 1946493940               |
| SNP_P3_112050_324390 | NW_004515797.1 | Scaffold280 | 324390                  | TT                              | GG                | 1946493942               |
| SNP_P3_112051_324426 | NW_004515797.1 | Scaffold280 | 324426                  | CC                              | TT                | 1946493943               |
| SNP_P3_112052_324466 | NW_004515797.1 | Scaffold280 | 324466                  | AA                              | CC                | 1946493944               |
| SNP_P3_112053_324472 | NW_004515797.1 | Scaffold280 | 324472                  | GG                              | AA                | 1946493946               |
| SNP_P3_112054_330199 | NW_004515797.1 | Scaffold280 | 330199                  | AA                              | GG                | 1946493947               |
| SNP_P3_112055_335237 | NW_004515797.1 | Scaffold280 | 335237                  | TT                              | CC                | 1946493949               |
| SNP_P3_112056_335509 | NW_004515797.1 | Scaffold280 | 335509                  | CC                              | TT                | 1946493950               |
| SNP_P3_112057_335531 | NW_004515797.1 | Scaffold280 | 335531                  | AA                              | GG                | 1946493952               |
| SNP_P3_112058_335535 | NW_004515797.1 | Scaffold280 | 335535                  | GG                              | AA                | 1946493953               |
| SNP_P3_112059_338383 | NW_004515797.1 | Scaffold280 | 338383                  | CC                              | AA                | 1946493955               |
| SNP_P3_112060_350155 | NW_004515797.1 | Scaffold280 | 350155                  | TT                              | AA                | 1946493956               |
| SNP_P3_112061_350156 | NW_004515797.1 | Scaffold280 | 350156                  | GG                              | CC                | 1946493958               |
| SNP_P3_112062_351773 | NW_004515797.1 | Scaffold280 | 351773                  | GG                              | AA                | 1946493959               |
| SNP_P3_112063_352432 | NW_004515797.1 | Scaffold280 | 352432                  | CC                              | AA                | 1946493961               |
| SNP_P3_112064_352450 | NW_004515797.1 | Scaffold280 | 352450                  | TT                              | CC                | 1946493962               |
| SNP_P3_112065_352494 | NW_004515797.1 | Scaffold280 | 352494                  | TT                              | AA                | 1946493964               |
| SNP_P3_112066_352542 | NW_004515797.1 | Scaffold280 | 352542                  | TT                              | CC                | 1946493965               |
| SNP_P3_112067_372738 | NW_004515797.1 | Scaffold280 | 372738                  | AA                              | CC                | 1946493967               |

| SNPs IDs             | Chromosome IDs | Chromosomes | Physical positions (bp) | CDC Frontier (Reference genome) | (Pusa 256 & HPNB) | NCBI SNPdb Accession IDs |
|----------------------|----------------|-------------|-------------------------|---------------------------------|-------------------|--------------------------|
| SNP_P3_112068_373494 | NW_004515797.1 | Scaffold280 | 373494                  | GG                              | AA                | 1946493968               |
| SNP_P3_112069_373604 | NW_004515797.1 | Scaffold280 | 373604                  | GG                              | TT                | 1946493970               |
| SNP_P3_112070_373644 | NW_004515797.1 | Scaffold280 | 373644                  | TT                              | CC                | 1946493971               |
| SNP_P3_112071_373926 | NW_004515797.1 | Scaffold280 | 373926                  | CC                              | TT                | 1946493973               |
| SNP_P3_112072_373945 | NW_004515797.1 | Scaffold280 | 373945                  | AA                              | CC                | 1946493974               |
| SNP_P3_112073_373950 | NW_004515797.1 | Scaffold280 | 373950                  | GG                              | AA                | 1946493975               |
| SNP_P3_112074_374425 | NW_004515797.1 | Scaffold280 | 374425                  | AA                              | CC                | 1946493977               |
| SNP_P3_112075_374436 | NW_004515797.1 | Scaffold280 | 374436                  | CC                              | TT                | 1946493978               |
| SNP_P3_112076_374629 | NW_004515797.1 | Scaffold280 | 374629                  | GG                              | CC                | 1946493980               |
| SNP_P3_112077_374646 | NW_004515797.1 | Scaffold280 | 374646                  | AA                              | GG                | 1946493981               |
| SNP_P3_112078_374726 | NW_004515797.1 | Scaffold280 | 374726                  | GG                              | CC                | 1946493983               |
| SNP_P3_112079_374764 | NW_004515797.1 | Scaffold280 | 374764                  | AA                              | GG                | 1946493985               |
| SNP_P3_112080_374789 | NW_004515797.1 | Scaffold280 | 374789                  | TT                              | GG                | 1946493986               |
| SNP_P3_112081_374811 | NW_004515797.1 | Scaffold280 | 374811                  | AA                              | GG                | 1946493988               |
| SNP_P3_112082_374890 | NW_004515797.1 | Scaffold280 | 374890                  | TT                              | CC                | 1946493989               |
| SNP_P3_112083_375152 | NW_004515797.1 | Scaffold280 | 375152                  | AA                              | GG                | 1946493991               |
| SNP_P3_112084_375214 | NW_004515797.1 | Scaffold280 | 375214                  | AA                              | CC                | 1946493992               |
| SNP_P3_112085_378410 | NW_004515797.1 | Scaffold280 | 378410                  | CC                              | TT                | 1946493994               |
| SNP_P3_112086_378479 | NW_004515797.1 | Scaffold280 | 378479                  | GG                              | AA                | 1946493995               |
| SNP_P3_112087_378541 | NW_004515797.1 | Scaffold280 | 378541                  | GG                              | AA                | 1946493996               |
| SNP_P3_112089_378651 | NW_004515797.1 | Scaffold280 | 378651                  | GG                              | AA                | 1946493998               |
| SNP_P3_112090_378760 | NW_004515797.1 | Scaffold280 | 378760                  | AA                              | GG                | 1946493999               |
| SNP_P3_112091_378763 | NW_004515797.1 | Scaffold280 | 378763                  | GG                              | TT                | 1946494001               |
| SNP_P3_112092_378853 | NW_004515797.1 | Scaffold280 | 378853                  | CC                              | AA                | 1946494002               |
| SNP_P3_112093_378885 | NW_004515797.1 | Scaffold280 | 378885                  | TT                              | AA                | 1946494004               |
| SNP_P3_112094_378934 | NW_004515797.1 | Scaffold280 | 378934                  | TT                              | CC                | 1946494005               |
| SNP_P3_112095_379148 | NW_004515797.1 | Scaffold280 | 379148                  | AA                              | CC                | 1946494007               |
| SNP_P3_112096_379569 | NW_004515797.1 | Scaffold280 | 379569                  | AA                              | GG                | 1946494008               |
| SNP_P3_112097_381835 | NW_004515797.1 | Scaffold280 | 381835                  | TT                              | GG                | 1946494010               |
| SNP_P3_112098_381909 | NW_004515797.1 | Scaffold280 | 381909                  | GG                              | AA                | 1946494011               |
| SNP_P3_112099_381962 | NW_004515797.1 | Scaffold280 | 381962                  | GG                              | AA                | 1946494013               |
| SNP_P3_112100_382196 | NW_004515797.1 | Scaffold280 | 382196                  | GG                              | AA                | 1946494014               |
| SNP_P3_112101_382246 | NW_004515797.1 | Scaffold280 | 382246                  | TT                              | CC                | 1946494016               |
| SNP_P3_112102_387229 | NW_004515797.1 | Scaffold280 | 387229                  | TT                              | CC                | 1946494017               |
| SNP_P3_112103_387368 | NW_004515797.1 | Scaffold280 | 387368                  | AA                              | GG                | 1946494019               |
| SNP_P3_112104_387933 | NW_004515797.1 | Scaffold280 | 387933                  | GG                              | AA                | 1946494020               |
| SNP_P3_112105_392558 | NW_004515797.1 | Scaffold280 | 392558                  | CC                              | TT                | 1946494022               |
| SNP_P3_112106_626    | NW_004515798.1 | Scaffold281 | 626                     | TT                              | CC                | 1946494024               |
| SNP_P3_112107_629    | NW_004515798.1 | Scaffold281 | 629                     | CC                              | TT                | 1946494025               |
| SNP_P3_112108_699    | NW_004515798.1 | Scaffold281 | 699                     | AA                              | GG                | 1946494027               |
| SNP_P3_112109_739    | NW_004515798.1 | Scaffold281 | 739                     | AA                              | TT                | 1946494028               |
| SNP_P3_112110_791    | NW_004515798.1 | Scaffold281 | 791                     | GG                              | AA                | 1946494033               |

| SNPs IDs           | Chromosome IDs | Chromosomes | Physical positions (bp) | CDC Frontier (Reference genome) | (Pusa 256 & HPNB) | NCBI SNPdb Accession IDs |
|--------------------|----------------|-------------|-------------------------|---------------------------------|-------------------|--------------------------|
| SNP_P3_112111_793  | NW_004515798.1 | Scaffold281 | 793                     | GG                              | AA                | 1946494035               |
| SNP_P3_112112_802  | NW_004515798.1 | Scaffold281 | 802                     | AA                              | GG                | 1946494036               |
| SNP_P3_112113_817  | NW_004515798.1 | Scaffold281 | 817                     | CC                              | GG                | 1946494038               |
| SNP_P3_112114_857  | NW_004515798.1 | Scaffold281 | 857                     | GG                              | AA                | 1946494040               |
| SNP_P3_112115_910  | NW_004515798.1 | Scaffold281 | 910                     | TT                              | CC                | 1946494041               |
| SNP_P3_112116_930  | NW_004515798.1 | Scaffold281 | 930                     | GG                              | AA                | 1946494043               |
| SNP_P3_112117_1143 | NW_004515798.1 | Scaffold281 | 1143                    | AA                              | GG                | 1946494044               |
| SNP_P3_112118_1170 | NW_004515798.1 | Scaffold281 | 1170                    | CC                              | TT                | 1946494046               |
| SNP_P3_112119_1195 | NW_004515798.1 | Scaffold281 | 1195                    | CC                              | TT                | 1946494047               |
| SNP_P3_112120_1217 | NW_004515798.1 | Scaffold281 | 1217                    | GG                              | TT                | 1946494049               |
| SNP_P3_112121_1251 | NW_004515798.1 | Scaffold281 | 1251                    | AA                              | GG                | 1946494050               |
| SNP_P3_112123_1322 | NW_004515798.1 | Scaffold281 | 1322                    | TT                              | CC                | 1946494052               |
| SNP_P3_112126_1547 | NW_004515798.1 | Scaffold281 | 1547                    | TT                              | CC                | 1946494053               |
| SNP_P3_112127_1575 | NW_004515798.1 | Scaffold281 | 1575                    | CC                              | TT                | 1946494055               |
| SNP_P3_112128_1618 | NW_004515798.1 | Scaffold281 | 1618                    | GG                              | TT                | 1946494056               |
| SNP_P3_112129_1652 | NW_004515798.1 | Scaffold281 | 1652                    | TT                              | AA                | 1946494058               |
| SNP_P3_112130_1653 | NW_004515798.1 | Scaffold281 | 1653                    | GG                              | AA                | 1946494059               |
| SNP_P3_112131_1657 | NW_004515798.1 | Scaffold281 | 1657                    | TT                              | CC                | 1946494061               |
| SNP_P3_112132_1661 | NW_004515798.1 | Scaffold281 | 1661                    | TT                              | CC                | 1946494062               |
| SNP_P3_112133_1711 | NW_004515798.1 | Scaffold281 | 1711                    | AA                              | GG                | 1946494064               |
| SNP_P3_112134_1721 | NW_004515798.1 | Scaffold281 | 1721                    | TT                              | AA                | 1946494065               |
| SNP_P3_112135_1744 | NW_004515798.1 | Scaffold281 | 1744                    | AA                              | GG                | 1946494066               |
| SNP_P3_112136_1755 | NW_004515798.1 | Scaffold281 | 1755                    | CC                              | TT                | 1946494068               |
| SNP_P3_112137_1775 | NW_004515798.1 | Scaffold281 | 1775                    | AA                              | GG                | 1946494069               |
| SNP_P3_112138_1779 | NW_004515798.1 | Scaffold281 | 1779                    | AA                              | GG                | 1946494071               |
| SNP_P3_112139_1782 | NW_004515798.1 | Scaffold281 | 1782                    | GG                              | AA                | 1946494073               |
| SNP_P3_112140_2138 | NW_004515798.1 | Scaffold281 | 2138                    | AA                              | GG                | 1946494074               |
| SNP_P3_112141_2159 | NW_004515798.1 | Scaffold281 | 2159                    | GG                              | CC                | 1946494076               |
| SNP_P3_112143_2268 | NW_004515798.1 | Scaffold281 | 2268                    | CC                              | TT                | 1946494077               |
| SNP_P3_112144_2273 | NW_004515798.1 | Scaffold281 | 2273                    | CC                              | TT                | 1946494079               |
| SNP_P3_112145_2278 | NW_004515798.1 | Scaffold281 | 2278                    | TT                              | CC                | 1946494080               |
| SNP_P3_112146_2285 | NW_004515798.1 | Scaffold281 | 2285                    | CC                              | GG                | 1946494082               |
| SNP_P3_112147_2286 | NW_004515798.1 | Scaffold281 | 2286                    | AA                              | TT                | 1946494083               |
| SNP_P3_112148_2622 | NW_004515798.1 | Scaffold281 | 2622                    | CC                              | TT                | 1946494085               |
| SNP_P3_112149_2624 | NW_004515798.1 | Scaffold281 | 2624                    | TT                              | CC                | 1946494086               |
| SNP_P3_112150_2625 | NW_004515798.1 | Scaffold281 | 2625                    | TT                              | GG                | 1946494088               |
| SNP_P3_112151_2831 | NW_004515798.1 | Scaffold281 | 2831                    | CC                              | TT                | 1946494089               |
| SNP_P3_112152_2911 | NW_004515798.1 | Scaffold281 | 2911                    | TT                              | AA                | 1946494091               |
| SNP_P3_112153_2935 | NW_004515798.1 | Scaffold281 | 2935                    | GG                              | TT                | 1946494092               |
| SNP_P3_112155_3034 | NW_004515798.1 | Scaffold281 | 3034                    | CC                              | TT                | 1946494094               |
| SNP_P3_112157_3141 | NW_004515798.1 | Scaffold281 | 3141                    | AA                              | CC                | 1946494095               |
| SNP_P3_112158_3234 | NW_004515798.1 | Scaffold281 | 3234                    | TT                              | CC                | 1946494096               |

| SNPs IDs           | Chromosome IDs | Chromosomes | Physical positions (bp) | CDC Frontier (Reference genome) | (Pusa 256 & HPNB) | NCBI SNPdb Accession IDs |
|--------------------|----------------|-------------|-------------------------|---------------------------------|-------------------|--------------------------|
| SNP_P3_112159_3256 | NW_004515798.1 | Scaffold281 | 3256                    | TT                              | CC                | 1946494098               |
| SNP_P3_112160_3274 | NW_004515798.1 | Scaffold281 | 3274                    | TT                              | CC                | 1946494099               |
| SNP_P3_112162_3362 | NW_004515798.1 | Scaffold281 | 3362                    | CC                              | AA                | 1946494101               |
| SNP_P3_112164_3433 | NW_004515798.1 | Scaffold281 | 3433                    | TT                              | AA                | 1946494102               |
| SNP_P3_112165_3435 | NW_004515798.1 | Scaffold281 | 3435                    | AA                              | TT                | 1946494104               |
| SNP_P3_112166_3436 | NW_004515798.1 | Scaffold281 | 3436                    | GG                              | AA                | 1946494105               |
| SNP_P3_112167_3439 | NW_004515798.1 | Scaffold281 | 3439                    | GG                              | AA                | 1946494107               |
| SNP_P3_112168_3442 | NW_004515798.1 | Scaffold281 | 3442                    | GG                              | CC                | 1946494108               |
| SNP_P3_112169_3480 | NW_004515798.1 | Scaffold281 | 3480                    | CC                              | GG                | 1946494110               |
| SNP_P3_112170_3510 | NW_004515798.1 | Scaffold281 | 3510                    | TT                              | CC                | 1946494111               |
| SNP_P3_112171_3561 | NW_004515798.1 | Scaffold281 | 3561                    | AA                              | TT                | 1946494113               |
| SNP_P3_112172_3603 | NW_004515798.1 | Scaffold281 | 3603                    | AA                              | GG                | 1946494114               |
| SNP_P3_112173_3648 | NW_004515798.1 | Scaffold281 | 3648                    | AA                              | GG                | 1946494116               |
| SNP_P3_112174_3651 | NW_004515798.1 | Scaffold281 | 3651                    | TT                              | CC                | 1946494117               |
| SNP_P3_112175_3694 | NW_004515798.1 | Scaffold281 | 3694                    | TT                              | CC                | 1946494119               |
| SNP_P3_112176_3719 | NW_004515798.1 | Scaffold281 | 3719                    | CC                              | TT                | 1946494120               |
| SNP_P3_112178_3757 | NW_004515798.1 | Scaffold281 | 3757                    | CC                              | TT                | 1946494121               |
| SNP_P3_112179_3810 | NW_004515798.1 | Scaffold281 | 3810                    | GG                              | CC                | 1946494123               |
| SNP_P3_112180_3880 | NW_004515798.1 | Scaffold281 | 3880                    | AA                              | GG                | 1946494124               |
| SNP_P3_112181_3908 | NW_004515798.1 | Scaffold281 | 3908                    | AA                              | CC                | 1946494126               |
| SNP_P3_112182_4031 | NW_004515798.1 | Scaffold281 | 4031                    | AA                              | CC                | 1946494127               |
| SNP_P3_112183_4093 | NW_004515798.1 | Scaffold281 | 4093                    | TT                              | AA                | 1946494129               |
| SNP_P3_112185_4173 | NW_004515798.1 | Scaffold281 | 4173                    | AA                              | GG                | 1946494130               |
| SNP_P3_112187_4234 | NW_004515798.1 | Scaffold281 | 4234                    | TT                              | CC                | 1946494132               |
| SNP_P3_112188_4248 | NW_004515798.1 | Scaffold281 | 4248                    | TT                              | CC                | 1946494134               |
| SNP_P3_112189_4347 | NW_004515798.1 | Scaffold281 | 4347                    | TT                              | AA                | 1946494135               |
| SNP_P3_112190_4671 | NW_004515798.1 | Scaffold281 | 4671                    | AA                              | TT                | 1946494137               |
| SNP_P3_112191_4672 | NW_004515798.1 | Scaffold281 | 4672                    | TT                              | CC                | 1946494138               |
| SNP_P3_112192_4807 | NW_004515798.1 | Scaffold281 | 4807                    | GG                              | TT                | 1946494139               |
| SNP_P3_112194_4976 | NW_004515798.1 | Scaffold281 | 4976                    | AA                              | CC                | 1946494141               |
| SNP_P3_112195_5011 | NW_004515798.1 | Scaffold281 | 5011                    | GG                              | AA                | 1946494142               |
| SNP_P3_112197_5149 | NW_004515798.1 | Scaffold281 | 5149                    | TT                              | CC                | 1946494144               |
| SNP_P3_112198_5157 | NW_004515798.1 | Scaffold281 | 5157                    | CC                              | TT                | 1946494145               |
| SNP_P3_112199_5168 | NW_004515798.1 | Scaffold281 | 5168                    | TT                              | CC                | 1946494147               |
| SNP_P3_112200_5181 | NW_004515798.1 | Scaffold281 | 5181                    | TT                              | AA                | 1946494148               |
| SNP_P3_112201_5182 | NW_004515798.1 | Scaffold281 | 5182                    | AA                              | CC                | 1946494149               |
| SNP_P3_112202_5199 | NW_004515798.1 | Scaffold281 | 5199                    | GG                              | AA                | 1946494151               |
| SNP_P3_112203_5200 | NW_004515798.1 | Scaffold281 | 5200                    | CC                              | TT                | 1946494152               |
| SNP_P3_112204_5345 | NW_004515798.1 | Scaffold281 | 5345                    | TT                              | CC                | 1946494154               |
| SNP_P3_112205_5362 | NW_004515798.1 | Scaffold281 | 5362                    | AA                              | GG                | 1946494155               |
| SNP_P3_112206_5363 | NW_004515798.1 | Scaffold281 | 5363                    | CC                              | GG                | 1946494157               |
| SNP_P3_112207_5400 | NW_004515798.1 | Scaffold281 | 5400                    | GG                              | CC                | 1946494158               |

| SNPs IDs            | Chromosome IDs | Chromosomes | Physical positions (bp) | CDC Frontier (Reference genome) | (Pusa 256 & HPNB) | NCBI SNPdb Accession IDs |
|---------------------|----------------|-------------|-------------------------|---------------------------------|-------------------|--------------------------|
| SNP_P3_112208_5401  | NW_004515798.1 | Scaffold281 | 5401                    | CC                              | GG                | 1946494160               |
| SNP_P3_112209_5406  | NW_004515798.1 | Scaffold281 | 5406                    | CC                              | TT                | 1946494161               |
| SNP_P3_112210_6621  | NW_004515798.1 | Scaffold281 | 6621                    | CC                              | GG                | 1946494163               |
| SNP_P3_112211_6999  | NW_004515798.1 | Scaffold281 | 6999                    | AA                              | GG                | 1946494164               |
| SNP_P3_112212_7051  | NW_004515798.1 | Scaffold281 | 7051                    | GG                              | AA                | 1946494166               |
| SNP_P3_112213_7080  | NW_004515798.1 | Scaffold281 | 7080                    | GG                              | TT                | 1946494167               |
| SNP_P3_112214_7081  | NW_004515798.1 | Scaffold281 | 7081                    | AA                              | TT                | 1946494169               |
| SNP_P3_112215_7084  | NW_004515798.1 | Scaffold281 | 7084                    | GG                              | AA                | 1946494170               |
| SNP_P3_112216_7099  | NW_004515798.1 | Scaffold281 | 7099                    | CC                              | TT                | 1946494172               |
| SNP_P3_112217_8678  | NW_004515798.1 | Scaffold281 | 8678                    | GG                              | TT                | 1946494173               |
| SNP_P3_112218_8871  | NW_004515798.1 | Scaffold281 | 8871                    | GG                              | AA                | 1946494175               |
| SNP_P3_112219_9266  | NW_004515798.1 | Scaffold281 | 9266                    | TT                              | CC                | 1946494176               |
| SNP_P3_112220_9277  | NW_004515798.1 | Scaffold281 | 9277                    | GG                              | CC                | 1946494178               |
| SNP_P3_112221_9321  | NW_004515798.1 | Scaffold281 | 9321                    | CC                              | AA                | 1946494179               |
| SNP_P3_112222_9337  | NW_004515798.1 | Scaffold281 | 9337                    | CC                              | TT                | 1946494181               |
| SNP_P3_112223_9343  | NW_004515798.1 | Scaffold281 | 9343                    | GG                              | CC                | 1946494182               |
| SNP_P3_112224_9372  | NW_004515798.1 | Scaffold281 | 9372                    | TT                              | CC                | 1946494184               |
| SNP_P3_112225_27037 | NW_004515798.1 | Scaffold281 | 27037                   | CC                              | TT                | 1946494185               |
| SNP_P3_112226_27072 | NW_004515798.1 | Scaffold281 | 27072                   | GG                              | AA                | 1946494187               |
| SNP_P3_112227_27223 | NW_004515798.1 | Scaffold281 | 27223                   | CC                              | TT                | 1946494188               |
| SNP_P3_112229_27233 | NW_004515798.1 | Scaffold281 | 27233                   | GG                              | TT                | 1946494190               |
| SNP_P3_112230_27234 | NW_004515798.1 | Scaffold281 | 27234                   | GG                              | AA                | 1946494191               |
| SNP_P3_112231_27245 | NW_004515798.1 | Scaffold281 | 27245                   | AA                              | GG                | 1946494193               |
| SNP_P3_112232_27248 | NW_004515798.1 | Scaffold281 | 27248                   | AA                              | GG                | 1946494194               |
| SNP_P3_112233_27249 | NW_004515798.1 | Scaffold281 | 27249                   | TT                              | GG                | 1946494196               |
| SNP_P3_112234_27268 | NW_004515798.1 | Scaffold281 | 27268                   | AA                              | GG                | 1946494197               |
| SNP_P3_112235_27314 | NW_004515798.1 | Scaffold281 | 27314                   | AA                              | GG                | 1946494199               |
| SNP_P3_112236_27317 | NW_004515798.1 | Scaffold281 | 27317                   | AA                              | GG                | 1946494200               |
| SNP_P3_112237_27338 | NW_004515798.1 | Scaffold281 | 27338                   | AA                              | GG                | 1946494201               |
| SNP_P3_112238_27349 | NW_004515798.1 | Scaffold281 | 27349                   | GG                              | AA                | 1946494203               |
| SNP_P3_112239_27354 | NW_004515798.1 | Scaffold281 | 27354                   | TT                              | GG                | 1946494204               |
| SNP_P3_112240_27359 | NW_004515798.1 | Scaffold281 | 27359                   | TT                              | GG                | 1946494206               |
| SNP_P3_112241_27394 | NW_004515798.1 | Scaffold281 | 27394                   | AA                              | TT                | 1946494207               |
| SNP_P3_112242_27396 | NW_004515798.1 | Scaffold281 | 27396                   | AA                              | TT                | 1946494209               |
| SNP_P3_112243_3111  | NW_004515799.1 | Scaffold282 | 3111                    | GG                              | AA                | 1946494210               |
| SNP_P3_112244_3114  | NW_004515799.1 | Scaffold282 | 3114                    | GG                              | CC                | 1946494212               |
| SNP_P3_112246_8223  | NW_004515799.1 | Scaffold282 | 8223                    | AA                              | GG                | 1946494213               |
| SNP_P3_112247_19677 | NW_004515799.1 | Scaffold282 | 19677                   | CC                              | TT                | 1946494215               |
| SNP_P3_112248_25533 | NW_004515799.1 | Scaffold282 | 25533                   | TT                              | CC                | 1946494216               |
| SNP_P3_112249_38127 | NW_004515799.1 | Scaffold282 | 38127                   | AA                              | GG                | 1946494218               |
| SNP_P3_112250_38165 | NW_004515799.1 | Scaffold282 | 38165                   | TT                              | CC                | 1946494219               |
| SNP_P3_112251_38176 | NW_004515799.1 | Scaffold282 | 38176                   | CC                              | TT                | 1946494221               |



| SNPs IDs            | Chromosome IDs | Chromosomes | Physical positions (bp) | CDC Frontier (Reference genome) | (Pusa 256 & HPNB) | NCBI SNPdb Accession IDs |
|---------------------|----------------|-------------|-------------------------|---------------------------------|-------------------|--------------------------|
| SNP_P3_112252_38197 | NW_004515799.1 | Scaffold282 | 38197                   | TT                              | GG                | 1946494222               |
| SNP_P3_112253_39469 | NW_004515799.1 | Scaffold282 | 39469                   | TT                              | GG                | 1946494224               |
| SNP_P3_112254_39573 | NW_004515799.1 | Scaffold282 | 39573                   | CC                              | TT                | 1946494225               |
| SNP_P3_112255_39578 | NW_004515799.1 | Scaffold282 | 39578                   | CC                              | TT                | 1946494227               |
| SNP_P3_112256_39692 | NW_004515799.1 | Scaffold282 | 39692                   | GG                              | AA                | 1946494228               |
| SNP_P3_112257_39717 | NW_004515799.1 | Scaffold282 | 39717                   | GG                              | CC                | 1946494230               |
| SNP_P3_112258_39728 | NW_004515799.1 | Scaffold282 | 39728                   | CC                              | TT                | 1946494231               |
| SNP_P3_112259_39732 | NW_004515799.1 | Scaffold282 | 39732                   | GG                              | CC                | 1946494233               |
| SNP_P3_112260_39921 | NW_004515799.1 | Scaffold282 | 39921                   | CC                              | TT                | 1946494234               |
| SNP_P3_112261_39925 | NW_004515799.1 | Scaffold282 | 39925                   | TT                              | CC                | 1946494236               |
| SNP_P3_112262_39947 | NW_004515799.1 | Scaffold282 | 39947                   | GG                              | AA                | 1946494237               |
| SNP_P3_112263_40119 | NW_004515799.1 | Scaffold282 | 40119                   | AA                              | TT                | 1946494239               |
| SNP_P3_112264_40120 | NW_004515799.1 | Scaffold282 | 40120                   | TT                              | CC                | 1946494240               |
| SNP_P3_112265_40156 | NW_004515799.1 | Scaffold282 | 40156                   | AA                              | GG                | 1946494242               |
| SNP_P3_112266_62466 | NW_004515799.1 | Scaffold282 | 62466                   | GG                              | AA                | 1946494243               |
| SNP_P3_112267_62799 | NW_004515799.1 | Scaffold282 | 62799                   | AA                              | GG                | 1946494245               |
| SNP_P3_112268_63191 | NW_004515799.1 | Scaffold282 | 63191                   | CC                              | TT                | 1946494246               |
| SNP_P3_112269_69883 | NW_004515799.1 | Scaffold282 | 69883                   | CC                              | TT                | 1946494248               |
| SNP_P3_112270_75288 | NW_004515799.1 | Scaffold282 | 75288                   | CC                              | TT                | 1946494249               |
| SNP_P3_112271_75296 | NW_004515799.1 | Scaffold282 | 75296                   | AA                              | GG                | 1946494251               |
| SNP_P3_112272_75311 | NW_004515799.1 | Scaffold282 | 75311                   | AA                              | GG                | 1946494252               |
| SNP_P3_112273_75358 | NW_004515799.1 | Scaffold282 | 75358                   | AA                              | GG                | 1946494254               |
| SNP_P3_112274_75387 | NW_004515799.1 | Scaffold282 | 75387                   | CC                              | TT                | 1946494255               |
| SNP_P3_112275_76881 | NW_004515799.1 | Scaffold282 | 76881                   | CC                              | TT                | 1946494257               |
| SNP_P3_112276_2305  | NW_004515800.1 | Scaffold283 | 2305                    | CC                              | AA                | 1946494258               |
| SNP_P3_112277_5429  | NW_004515800.1 | Scaffold283 | 5429                    | TT                              | CC                | 1946494260               |
| SNP_P3_112278_16431 | NW_004515800.1 | Scaffold283 | 16431                   | AA                              | GG                | 1946494261               |
| SNP_P3_112279_16463 | NW_004515800.1 | Scaffold283 | 16463                   | GG                              | CC                | 1946494263               |
| SNP_P3_112280_16513 | NW_004515800.1 | Scaffold283 | 16513                   | TT                              | CC                | 1946494264               |
| SNP_P3_112281_16629 | NW_004515800.1 | Scaffold283 | 16629                   | GG                              | TT                | 1946494266               |
| SNP_P3_112282_25928 | NW_004515800.1 | Scaffold283 | 25928                   | CC                              | TT                | 1946494267               |
| SNP_P3_112283_26213 | NW_004515800.1 | Scaffold283 | 26213                   | GG                              | TT                | 1946494269               |
| SNP_P3_112284_29361 | NW_004515800.1 | Scaffold283 | 29361                   | GG                              | AA                | 1946494270               |
| SNP_P3_112285_29409 | NW_004515800.1 | Scaffold283 | 29409                   | CC                              | GG                | 1946494272               |
| SNP_P3_112286_29440 | NW_004515800.1 | Scaffold283 | 29440                   | GG                              | AA                | 1946494273               |
| SNP_P3_112287_29444 | NW_004515800.1 | Scaffold283 | 29444                   | CC                              | TT                | 1946494275               |
| SNP_P3_112288_29447 | NW_004515800.1 | Scaffold283 | 29447                   | AA                              | TT                | 1946494276               |
| SNP_P3_112289_29502 | NW_004515800.1 | Scaffold283 | 29502                   | CC                              | AA                | 1946494277               |
| SNP_P3_112290_29924 | NW_004515800.1 | Scaffold283 | 29924                   | AA                              | GG                | 1946494279               |
| SNP_P3_112291_41717 | NW_004515800.1 | Scaffold283 | 41717                   | AA                              | CC                | 1946494280               |
| SNP_P3_112292_46402 | NW_004515800.1 | Scaffold283 | 46402                   | AA                              | CC                | 1946494282               |
| SNP_P3_112294_73228 | NW_004515800.1 | Scaffold283 | 73228                   | TT                              | CC                | 1946494283               |

| SNPs IDs             | Chromosome IDs | Chromosomes | Physical positions (bp) | CDC Frontier (Reference genome) | (Pusa 256 & HPNB) | NCBI SNPdb Accession IDs |
|----------------------|----------------|-------------|-------------------------|---------------------------------|-------------------|--------------------------|
| SNP_P3_112295_73303  | NW_004515800.1 | Scaffold283 | 73303                   | CC                              | AA                | 1946494285               |
| SNP_P3_112296_90845  | NW_004515800.1 | Scaffold283 | 90845                   | TT                              | CC                | 1946494286               |
| SNP_P3_112297_91119  | NW_004515800.1 | Scaffold283 | 91119                   | TT                              | AA                | 1946494288               |
| SNP_P3_112298_91167  | NW_004515800.1 | Scaffold283 | 91167                   | AA                              | GG                | 1946494289               |
| SNP_P3_112300_91368  | NW_004515800.1 | Scaffold283 | 91368                   | AA                              | TT                | 1946494291               |
| SNP_P3_112301_95255  | NW_004515800.1 | Scaffold283 | 95255                   | AA                              | TT                | 1946494292               |
| SNP_P3_112302_95306  | NW_004515800.1 | Scaffold283 | 95306                   | AA                              | TT                | 1946494294               |
| SNP_P3_112303_95580  | NW_004515800.1 | Scaffold283 | 95580                   | TT                              | AA                | 1946494295               |
| SNP_P3_112304_95602  | NW_004515800.1 | Scaffold283 | 95602                   | CC                              | TT                | 1946494297               |
| SNP_P3_112305_105614 | NW_004515800.1 | Scaffold283 | 105614                  | AA                              | TT                | 1946494298               |
| SNP_P3_112306_111085 | NW_004515800.1 | Scaffold283 | 111085                  | AA                              | GG                | 1946494300               |
| SNP_P3_112307_111086 | NW_004515800.1 | Scaffold283 | 111086                  | TT                              | AA                | 1946494301               |
| SNP_P3_112308_111094 | NW_004515800.1 | Scaffold283 | 111094                  | TT                              | AA                | 1946494303               |
| SNP_P3_112311_4740   | NW_004515801.1 | Scaffold284 | 4740                    | TT                              | CC                | 1946494304               |
| SNP_P3_112312_4815   | NW_004515801.1 | Scaffold284 | 4815                    | CC                              | GG                | 1946494306               |
| SNP_P3_112313_4913   | NW_004515801.1 | Scaffold284 | 4913                    | AA                              | CC                | 1946494307               |
| SNP_P3_112314_4950   | NW_004515801.1 | Scaffold284 | 4950                    | TT                              | CC                | 1946494309               |
| SNP_P3_112315_5785   | NW_004515801.1 | Scaffold284 | 5785                    | TT                              | CC                | 1946494311               |
| SNP_P3_112316_6138   | NW_004515801.1 | Scaffold284 | 6138                    | CC                              | TT                | 1946494312               |
| SNP_P3_112317_6182   | NW_004515801.1 | Scaffold284 | 6182                    | GG                              | AA                | 1946494314               |
| SNP_P3_112318_6487   | NW_004515801.1 | Scaffold284 | 6487                    | AA                              | GG                | 1946494315               |
| SNP_P3_112319_7270   | NW_004515801.1 | Scaffold284 | 7270                    | CC                              | GG                | 1946494317               |
| SNP_P3_112320_7600   | NW_004515801.1 | Scaffold284 | 7600                    | GG                              | AA                | 1946494318               |
| SNP_P3_112321_10354  | NW_004515801.1 | Scaffold284 | 10354                   | CC                              | TT                | 1946494320               |
| SNP_P3_112322_10453  | NW_004515801.1 | Scaffold284 | 10453                   | CC                              | AA                | 1946494321               |
| SNP_P3_112323_10799  | NW_004515801.1 | Scaffold284 | 10799                   | GG                              | AA                | 1946494323               |
| SNP_P3_112324_10820  | NW_004515801.1 | Scaffold284 | 10820                   | GG                              | AA                | 1946494324               |
| SNP_P3_112325_11205  | NW_004515801.1 | Scaffold284 | 11205                   | CC                              | TT                | 1946494326               |
| SNP_P3_112326_12292  | NW_004515801.1 | Scaffold284 | 12292                   | TT                              | AA                | 1946494327               |
| SNP_P3_112327_12378  | NW_004515801.1 | Scaffold284 | 12378                   | CC                              | AA                | 1946494329               |
| SNP_P3_112328_13103  | NW_004515801.1 | Scaffold284 | 13103                   | GG                              | TT                | 1946494330               |
| SNP_P3_112329_14900  | NW_004515801.1 | Scaffold284 | 14900                   | AA                              | TT                | 1946494332               |
| SNP_P3_112330_15004  | NW_004515801.1 | Scaffold284 | 15004                   | GG                              | TT                | 1946494333               |
| SNP_P3_112331_15416  | NW_004515801.1 | Scaffold284 | 15416                   | GG                              | TT                | 1946494335               |
| SNP_P3_112332_15536  | NW_004515801.1 | Scaffold284 | 15536                   | TT                              | AA                | 1946494336               |
| SNP_P3_112333_16966  | NW_004515801.1 | Scaffold284 | 16966                   | GG                              | AA                | 1946494337               |
| SNP_P3_112334_17371  | NW_004515801.1 | Scaffold284 | 17371                   | CC                              | TT                | 1946494339               |
| SNP_P3_112335_21377  | NW_004515801.1 | Scaffold284 | 21377                   | CC                              | GG                | 1946494340               |
| SNP_P3_112337_21576  | NW_004515801.1 | Scaffold284 | 21576                   | GG                              | TT                | 1946494342               |
| SNP_P3_112338_21742  | NW_004515801.1 | Scaffold284 | 21742                   | GG                              | AA                | 1946494343               |
| SNP_P3_112339_21839  | NW_004515801.1 | Scaffold284 | 21839                   | AA                              | CC                | 1946494345               |
| SNP_P3_112340_21866  | NW_004515801.1 | Scaffold284 | 21866                   | AA                              | GG                | 1946494346               |

| SNPs IDs             | Chromosome IDs | Chromosomes | Physical positions (bp) | CDC Frontier (Reference genome) | (Pusa 256 & HPNB) | NCBI SNPdb Accession IDs |
|----------------------|----------------|-------------|-------------------------|---------------------------------|-------------------|--------------------------|
| SNP_P3_112341_21868  | NW_004515801.1 | Scaffold284 | 21868                   | AA                              | TT                | 1946494348               |
| SNP_P3_112342_21880  | NW_004515801.1 | Scaffold284 | 21880                   | TT                              | CC                | 1946494349               |
| SNP_P3_112343_22131  | NW_004515801.1 | Scaffold284 | 22131                   | CC                              | TT                | 1946494351               |
| SNP_P3_112344_22219  | NW_004515801.1 | Scaffold284 | 22219                   | TT                              | AA                | 1946494352               |
| SNP_P3_112345_23037  | NW_004515801.1 | Scaffold284 | 23037                   | AA                              | GG                | 1946494353               |
| SNP_P3_112346_40738  | NW_004515801.1 | Scaffold284 | 40738                   | TT                              | CC                | 1946494355               |
| SNP_P3_112347_40748  | NW_004515801.1 | Scaffold284 | 40748                   | CC                              | TT                | 1946494356               |
| SNP_P3_112348_40750  | NW_004515801.1 | Scaffold284 | 40750                   | GG                              | AA                | 1946494358               |
| SNP_P3_112349_40751  | NW_004515801.1 | Scaffold284 | 40751                   | CC                              | AA                | 1946494359               |
| SNP_P3_112350_40767  | NW_004515801.1 | Scaffold284 | 40767                   | TT                              | AA                | 1946494361               |
| SNP_P3_112351_40773  | NW_004515801.1 | Scaffold284 | 40773                   | CC                              | AA                | 1946494362               |
| SNP_P3_112352_40779  | NW_004515801.1 | Scaffold284 | 40779                   | AA                              | TT                | 1946494364               |
| SNP_P3_112354_40984  | NW_004515801.1 | Scaffold284 | 40984                   | AA                              | TT                | 1946494365               |
| SNP_P3_112355_41008  | NW_004515801.1 | Scaffold284 | 41008                   | AA                              | GG                | 1946494367               |
| SNP_P3_112356_49893  | NW_004515801.1 | Scaffold284 | 49893                   | TT                              | GG                | 1946494368               |
| SNP_P3_112357_49916  | NW_004515801.1 | Scaffold284 | 49916                   | GG                              | CC                | 1946494370               |
| SNP_P3_112358_49951  | NW_004515801.1 | Scaffold284 | 49951                   | AA                              | GG                | 1946494371               |
| SNP_P3_112359_49962  | NW_004515801.1 | Scaffold284 | 49962                   | GG                              | AA                | 1946494373               |
| SNP_P3_112360_49971  | NW_004515801.1 | Scaffold284 | 49971                   | GG                              | AA                | 1946494374               |
| SNP_P3_112361_50028  | NW_004515801.1 | Scaffold284 | 50028                   | CC                              | TT                | 1946494376               |
| SNP_P3_112362_50076  | NW_004515801.1 | Scaffold284 | 50076                   | TT                              | AA                | 1946494377               |
| SNP_P3_112363_50099  | NW_004515801.1 | Scaffold284 | 50099                   | AA                              | TT                | 1946494379               |
| SNP_P3_112364_50111  | NW_004515801.1 | Scaffold284 | 50111                   | GG                              | AA                | 1946494380               |
| SNP_P3_112365_50116  | NW_004515801.1 | Scaffold284 | 50116                   | TT                              | GG                | 1946494382               |
| SNP_P3_112366_50148  | NW_004515801.1 | Scaffold284 | 50148                   | TT                              | AA                | 1946494383               |
| SNP_P3_112367_50264  | NW_004515801.1 | Scaffold284 | 50264                   | GG                              | TT                | 1946494385               |
| SNP_P3_112368_50291  | NW_004515801.1 | Scaffold284 | 50291                   | GG                              | TT                | 1946494386               |
| SNP_P3_112369_50302  | NW_004515801.1 | Scaffold284 | 50302                   | TT                              | AA                | 1946494388               |
| SNP_P3_112370_84510  | NW_004515801.1 | Scaffold284 | 84510                   | GG                              | AA                | 1946494390               |
| SNP_P3_112371_84796  | NW_004515801.1 | Scaffold284 | 84796                   | TT                              | AA                | 1946494391               |
| SNP_P3_112372_84797  | NW_004515801.1 | Scaffold284 | 84797                   | AA                              | TT                | 1946494393               |
| SNP_P3_112373_102959 | NW_004515801.1 | Scaffold284 | 102959                  | GG                              | CC                | 1946494394               |
| SNP_P3_112374_104533 | NW_004515801.1 | Scaffold284 | 104533                  | CC                              | TT                | 1946494396               |
| SNP_P3_112375_128271 | NW_004515801.1 | Scaffold284 | 128271                  | GG                              | AA                | 1946494397               |
| SNP_P3_112376_138148 | NW_004515801.1 | Scaffold284 | 138148                  | CC                              | AA                | 1946494399               |
| SNP_P3_112377_142591 | NW_004515801.1 | Scaffold284 | 142591                  | AA                              | TT                | 1946494400               |
| SNP_P3_112378_163687 | NW_004515801.1 | Scaffold284 | 163687                  | GG                              | AA                | 1946494402               |
| SNP_P3_112379_206950 | NW_004515801.1 | Scaffold284 | 206950                  | TT                              | GG                | 1946494403               |
| SNP_P3_112380_207167 | NW_004515801.1 | Scaffold284 | 207167                  | CC                              | TT                | 1946494405               |
| SNP_P3_112381_207176 | NW_004515801.1 | Scaffold284 | 207176                  | CC                              | TT                | 1946494406               |
| SNP_P3_112382_207339 | NW_004515801.1 | Scaffold284 | 207339                  | TT                              | GG                | 1946494408               |
| SNP_P3_112384_252996 | NW_004515801.1 | Scaffold284 | 252996                  | TT                              | CC                | 1946494409               |

| SNPs IDs             | Chromosome IDs | Chromosomes | Physical positions (bp) | CDC Frontier (Reference genome) | (Pusa 256 & HPNB) | NCBI SNPdb Accession IDs |
|----------------------|----------------|-------------|-------------------------|---------------------------------|-------------------|--------------------------|
| SNP_P3_112385_253014 | NW_004515801.1 | Scaffold284 | 253014                  | TT                              | CC                | 1946494411               |
| SNP_P3_112386_257141 | NW_004515801.1 | Scaffold284 | 257141                  | CC                              | TT                | 1946494412               |
| SNP_P3_112387_257170 | NW_004515801.1 | Scaffold284 | 257170                  | CC                              | AA                | 1946494414               |
| SNP_P3_112388_257181 | NW_004515801.1 | Scaffold284 | 257181                  | TT                              | CC                | 1946494416               |
| SNP_P3_112389_257184 | NW_004515801.1 | Scaffold284 | 257184                  | AA                              | TT                | 1946494417               |
| SNP_P3_112390_257186 | NW_004515801.1 | Scaffold284 | 257186                  | AA                              | GG                | 1946494419               |
| SNP_P3_112391_257246 | NW_004515801.1 | Scaffold284 | 257246                  | CC                              | TT                | 1946494420               |
| SNP_P3_112392_257415 | NW_004515801.1 | Scaffold284 | 257415                  | GG                              | AA                | 1946494421               |
| SNP_P3_112393_257435 | NW_004515801.1 | Scaffold284 | 257435                  | CC                              | AA                | 1946494423               |
| SNP_P3_112394_257557 | NW_004515801.1 | Scaffold284 | 257557                  | GG                              | TT                | 1946494424               |
| SNP_P3_112395_257560 | NW_004515801.1 | Scaffold284 | 257560                  | AA                              | GG                | 1946494426               |
| SNP_P3_112396_265235 | NW_004515801.1 | Scaffold284 | 265235                  | AA                              | GG                | 1946494427               |
| SNP_P3_112397_265237 | NW_004515801.1 | Scaffold284 | 265237                  | TT                              | CC                | 1946494429               |
| SNP_P3_112398_265246 | NW_004515801.1 | Scaffold284 | 265246                  | AA                              | GG                | 1946494430               |
| SNP_P3_112400_296646 | NW_004515801.1 | Scaffold284 | 296646                  | GG                              | AA                | 1946494432               |
| SNP_P3_112401_296673 | NW_004515801.1 | Scaffold284 | 296673                  | TT                              | CC                | 1946494433               |
| SNP_P3_112403_328545 | NW_004515801.1 | Scaffold284 | 328545                  | AA                              | TT                | 1946494435               |
| SNP_P3_112404_328547 | NW_004515801.1 | Scaffold284 | 328547                  | AA                              | CC                | 1946494436               |
| SNP_P3_112406_352335 | NW_004515801.1 | Scaffold284 | 352335                  | AA                              | GG                | 1946494438               |
| SNP_P3_112407_352630 | NW_004515801.1 | Scaffold284 | 352630                  | GG                              | AA                | 1946494439               |
| SNP_P3_112408_352672 | NW_004515801.1 | Scaffold284 | 352672                  | AA                              | GG                | 1946494441               |
| SNP_P3_112409_352945 | NW_004515801.1 | Scaffold284 | 352945                  | AA                              | GG                | 1946494442               |
| SNP_P3_112410_353197 | NW_004515801.1 | Scaffold284 | 353197                  | GG                              | AA                | 1946494444               |
| SNP_P3_112411_353392 | NW_004515801.1 | Scaffold284 | 353392                  | TT                              | CC                | 1946494445               |
| SNP_P3_112412_353623 | NW_004515801.1 | Scaffold284 | 353623                  | CC                              | TT                | 1946494447               |
| SNP_P3_112413_353647 | NW_004515801.1 | Scaffold284 | 353647                  | CC                              | TT                | 1946494448               |
| SNP_P3_112414_365922 | NW_004515801.1 | Scaffold284 | 365922                  | TT                              | CC                | 1946494450               |
| SNP_P3_112415_373714 | NW_004515801.1 | Scaffold284 | 373714                  | AA                              | GG                | 1946494451               |
| SNP_P3_112418_463245 | NW_004515801.1 | Scaffold284 | 463245                  | CC                              | AA                | 1946494453               |
| SNP_P3_112419_463252 | NW_004515801.1 | Scaffold284 | 463252                  | CC                              | TT                | 1946494454               |
| SNP_P3_112420_463254 | NW_004515801.1 | Scaffold284 | 463254                  | TT                              | GG                | 1946494456               |
| SNP_P3_112421_465821 | NW_004515801.1 | Scaffold284 | 465821                  | CC                              | TT                | 1946494457               |
| SNP_P3_112422_467893 | NW_004515801.1 | Scaffold284 | 467893                  | CC                              | GG                | 1946494459               |
| SNP_P3_112423_468184 | NW_004515801.1 | Scaffold284 | 468184                  | GG                              | AA                | 1946494460               |
| SNP_P3_112424_468693 | NW_004515801.1 | Scaffold284 | 468693                  | AA                              | CC                | 1946494461               |
| SNP_P3_112425_468766 | NW_004515801.1 | Scaffold284 | 468766                  | CC                              | TT                | 1946494463               |
| SNP_P3_112426_468817 | NW_004515801.1 | Scaffold284 | 468817                  | AA                              | CC                | 1946494464               |
| SNP_P3_112427_471928 | NW_004515801.1 | Scaffold284 | 471928                  | CC                              | TT                | 1946494466               |
| SNP_P3_112428_471968 | NW_004515801.1 | Scaffold284 | 471968                  | AA                              | GG                | 1946494467               |
| SNP_P3_112429_472321 | NW_004515801.1 | Scaffold284 | 472321                  | AA                              | GG                | 1946494469               |
| SNP_P3_112430_472534 | NW_004515801.1 | Scaffold284 | 472534                  | TT                              | CC                | 1946494470               |
| SNP_P3_112431_472559 | NW_004515801.1 | Scaffold284 | 472559                  | AA                              | GG                | 1946494472               |

| SNPs IDs             | Chromosome IDs | Chromosomes | Physical positions (bp) | CDC Frontier (Reference genome) | (Pusa 256 & HPNB) | NCBI SNPdb Accession IDs |
|----------------------|----------------|-------------|-------------------------|---------------------------------|-------------------|--------------------------|
| SNP_P3_112432_472570 | NW_004515801.1 | Scaffold284 | 472570                  | TT                              | CC                | 1946494473               |
| SNP_P3_112433_472728 | NW_004515801.1 | Scaffold284 | 472728                  | GG                              | AA                | 1946494475               |
| SNP_P3_112434_472743 | NW_004515801.1 | Scaffold284 | 472743                  | CC                              | TT                | 1946494476               |
| SNP_P3_112435_472905 | NW_004515801.1 | Scaffold284 | 472905                  | GG                              | AA                | 1946494478               |
| SNP_P3_112436_472914 | NW_004515801.1 | Scaffold284 | 472914                  | GG                              | AA                | 1946494479               |
| SNP_P3_112437_472928 | NW_004515801.1 | Scaffold284 | 472928                  | AA                              | CC                | 1946494481               |
| SNP_P3_112438_472972 | NW_004515801.1 | Scaffold284 | 472972                  | AA                              | GG                | 1946494482               |
| SNP_P3_112439_472973 | NW_004515801.1 | Scaffold284 | 472973                  | TT                              | CC                | 1946494484               |
| SNP_P3_112440_472987 | NW_004515801.1 | Scaffold284 | 472987                  | AA                              | GG                | 1946494485               |
| SNP_P3_112441_472990 | NW_004515801.1 | Scaffold284 | 472990                  | AA                              | GG                | 1946494487               |
| SNP_P3_112442_472992 | NW_004515801.1 | Scaffold284 | 472992                  | CC                              | AA                | 1946494488               |
| SNP_P3_112443_473093 | NW_004515801.1 | Scaffold284 | 473093                  | AA                              | GG                | 1946494490               |
| SNP_P3_112445_480519 | NW_004515801.1 | Scaffold284 | 480519                  | AA                              | TT                | 1946494491               |
| SNP_P3_112447_516093 | NW_004515801.1 | Scaffold284 | 516093                  | CC                              | TT                | 1946494493               |
| SNP_P3_112448_531572 | NW_004515801.1 | Scaffold284 | 531572                  | AA                              | GG                | 1946494494               |
| SNP_P3_112449_540219 | NW_004515801.1 | Scaffold284 | 540219                  | GG                              | AA                | 1946494496               |
| SNP_P3_112450_552514 | NW_004515801.1 | Scaffold284 | 552514                  | AA                              | GG                | 1946494497               |
| SNP_P3_112451_561169 | NW_004515801.1 | Scaffold284 | 561169                  | TT                              | CC                | 1946494499               |
| SNP_P3_112452_561173 | NW_004515801.1 | Scaffold284 | 561173                  | AA                              | GG                | 1946494500               |
| SNP_P3_112453_561181 | NW_004515801.1 | Scaffold284 | 561181                  | TT                              | CC                | 1946494502               |
| SNP_P3_112454_561584 | NW_004515801.1 | Scaffold284 | 561584                  | AA                              | GG                | 1946494503               |
| SNP_P3_112457_722408 | NW_004515801.1 | Scaffold284 | 722408                  | GG                              | AA                | 1946494505               |
| SNP_P3_112458_722706 | NW_004515801.1 | Scaffold284 | 722706                  | CC                              | TT                | 1946494506               |
| SNP_P3_112459_722770 | NW_004515801.1 | Scaffold284 | 722770                  | TT                              | CC                | 1946494508               |
| SNP_P3_112460_722791 | NW_004515801.1 | Scaffold284 | 722791                  | CC                              | AA                | 1946494509               |
| SNP_P3_112461_722792 | NW_004515801.1 | Scaffold284 | 722792                  | CC                              | TT                | 1946494511               |
| SNP_P3_112462_748011 | NW_004515801.1 | Scaffold284 | 748011                  | CC                              | AA                | 1946494512               |
| SNP_P3_112463_760892 | NW_004515801.1 | Scaffold284 | 760892                  | TT                              | CC                | 1946494514               |
| SNP_P3_112464_763789 | NW_004515801.1 | Scaffold284 | 763789                  | CC                              | AA                | 1946494515               |
| SNP_P3_112465_766553 | NW_004515801.1 | Scaffold284 | 766553                  | CC                              | TT                | 1946494517               |
| SNP_P3_112466_771311 | NW_004515801.1 | Scaffold284 | 771311                  | TT                              | CC                | 1946494518               |
| SNP_P3_112467_771334 | NW_004515801.1 | Scaffold284 | 771334                  | GG                              | AA                | 1946494520               |
| SNP_P3_112468_771385 | NW_004515801.1 | Scaffold284 | 771385                  | TT                              | CC                | 1946494521               |
| SNP_P3_112469_803118 | NW_004515801.1 | Scaffold284 | 803118                  | CC                              | TT                | 1946494523               |
| SNP_P3_112470_803131 | NW_004515801.1 | Scaffold284 | 803131                  | GG                              | TT                | 1946494524               |
| SNP_P3_112471_803132 | NW_004515801.1 | Scaffold284 | 803132                  | GG                              | TT                | 1946494526               |
| SNP_P3_112472_803164 | NW_004515801.1 | Scaffold284 | 803164                  | GG                              | AA                | 1946494527               |
| SNP_P3_112473_803441 | NW_004515801.1 | Scaffold284 | 803441                  | TT                              | GG                | 1946494529               |
| SNP_P3_112474_803445 | NW_004515801.1 | Scaffold284 | 803445                  | GG                              | TT                | 1946494530               |
| SNP_P3_112476_861402 | NW_004515801.1 | Scaffold284 | 861402                  | CC                              | GG                | 1946494532               |
| SNP_P3_112477_871072 | NW_004515801.1 | Scaffold284 | 871072                  | AA                              | CC                | 1946494533               |
| SNP_P3_112478_893922 | NW_004515801.1 | Scaffold284 | 893922                  | CC                              | AA                | 1946494534               |

| SNPs IDs             | Chromosome IDs | Chromosomes | Physical positions (bp) | CDC Frontier (Reference genome) | (Pusa 256 & HPNB) | NCBI SNPdb Accession IDs |
|----------------------|----------------|-------------|-------------------------|---------------------------------|-------------------|--------------------------|
| SNP_P3_112479_902108 | NW_004515801.1 | Scaffold284 | 902108                  | TT                              | CC                | 1946494536               |
| SNP_P3_112480_902112 | NW_004515801.1 | Scaffold284 | 902112                  | AA                              | TT                | 1946494537               |
| SNP_P3_112481_902114 | NW_004515801.1 | Scaffold284 | 902114                  | TT                              | AA                | 1946494539               |
| SNP_P3_112482_902124 | NW_004515801.1 | Scaffold284 | 902124                  | GG                              | TT                | 1946494541               |
| SNP_P3_112483_902128 | NW_004515801.1 | Scaffold284 | 902128                  | AA                              | CC                | 1946494542               |
| SNP_P3_112484_902137 | NW_004515801.1 | Scaffold284 | 902137                  | AA                              | CC                | 1946494544               |
| SNP_P3_112485_902139 | NW_004515801.1 | Scaffold284 | 902139                  | CC                              | GG                | 1946494545               |
| SNP_P3_112486_905388 | NW_004515801.1 | Scaffold284 | 905388                  | CC                              | AA                | 1946494546               |
| SNP_P3_112487_908304 | NW_004515801.1 | Scaffold284 | 908304                  | CC                              | AA                | 1946494548               |
| SNP_P3_112488_915081 | NW_004515801.1 | Scaffold284 | 915081                  | GG                              | AA                | 1946494549               |
| SNP_P3_112489_915082 | NW_004515801.1 | Scaffold284 | 915082                  | AA                              | GG                | 1946494551               |
| SNP_P3_112490_915083 | NW_004515801.1 | Scaffold284 | 915083                  | CC                              | TT                | 1946494552               |
| SNP_P3_112491_915089 | NW_004515801.1 | Scaffold284 | 915089                  | CC                              | TT                | 1946494554               |
| SNP_P3_112492_915266 | NW_004515801.1 | Scaffold284 | 915266                  | CC                              | TT                | 1946494555               |
| SNP_P3_112493_915398 | NW_004515801.1 | Scaffold284 | 915398                  | AA                              | GG                | 1946494557               |
| SNP_P3_112494_915520 | NW_004515801.1 | Scaffold284 | 915520                  | GG                              | AA                | 1946494558               |
| SNP_P3_112495_915649 | NW_004515801.1 | Scaffold284 | 915649                  | GG                              | CC                | 1946494560               |
| SNP_P3_112496_62     | NW_004515803.1 | Scaffold287 | 62                      | AA                              | GG                | 1946494561               |
| SNP_P3_112497_64     | NW_004515803.1 | Scaffold287 | 64                      | AA                              | TT                | 1946494563               |
| SNP_P3_112498_69     | NW_004515803.1 | Scaffold287 | 69                      | AA                              | GG                | 1946494564               |
| SNP_P3_112499_18511  | NW_004515803.1 | Scaffold287 | 18511                   | AA                              | TT                | 1946494566               |
| SNP_P3_112500_18542  | NW_004515803.1 | Scaffold287 | 18542                   | GG                              | AA                | 1946494567               |
| SNP_P3_112501_18551  | NW_004515803.1 | Scaffold287 | 18551                   | GG                              | TT                | 1946494569               |
| SNP_P3_112502_18717  | NW_004515803.1 | Scaffold287 | 18717                   | CC                              | AA                | 1946494570               |
| SNP_P3_112503_18730  | NW_004515803.1 | Scaffold287 | 18730                   | GG                              | TT                | 1946494572               |
| SNP_P3_112504_18732  | NW_004515803.1 | Scaffold287 | 18732                   | TT                              | CC                | 1946494573               |
| SNP_P3_112505_18733  | NW_004515803.1 | Scaffold287 | 18733                   | CC                              | GG                | 1946494575               |
| SNP_P3_112506_19178  | NW_004515803.1 | Scaffold287 | 19178                   | TT                              | CC                | 1946494576               |
| SNP_P3_112507_19184  | NW_004515803.1 | Scaffold287 | 19184                   | CC                              | AA                | 1946494578               |
| SNP_P3_112508_19223  | NW_004515803.1 | Scaffold287 | 19223                   | GG                              | CC                | 1946494579               |
| SNP_P3_112509_19253  | NW_004515803.1 | Scaffold287 | 19253                   | AA                              | TT                | 1946494581               |
| SNP_P3_112510_19257  | NW_004515803.1 | Scaffold287 | 19257                   | TT                              | GG                | 1946494582               |
| SNP_P3_112511_19306  | NW_004515803.1 | Scaffold287 | 19306                   | TT                              | GG                | 1946494584               |
| SNP_P3_112512_19334  | NW_004515803.1 | Scaffold287 | 19334                   | TT                              | GG                | 1946494585               |
| SNP_P3_112513_19341  | NW_004515803.1 | Scaffold287 | 19341                   | AA                              | GG                | 1946494586               |
| SNP_P3_112514_19358  | NW_004515803.1 | Scaffold287 | 19358                   | AA                              | TT                | 1946494588               |
| SNP_P3_112515_19429  | NW_004515803.1 | Scaffold287 | 19429                   | AA                              | TT                | 1946494589               |
| SNP_P3_112516_19462  | NW_004515803.1 | Scaffold287 | 19462                   | TT                              | GG                | 1946494591               |
| SNP_P3_112517_19499  | NW_004515803.1 | Scaffold287 | 19499                   | GG                              | AA                | 1946494592               |
| SNP_P3_112518_19513  | NW_004515803.1 | Scaffold287 | 19513                   | TT                              | AA                | 1946494595               |
| SNP_P3_112519_19519  | NW_004515803.1 | Scaffold287 | 19519                   | TT                              | AA                | 1946494596               |
| SNP_P3_112520_19534  | NW_004515803.1 | Scaffold287 | 19534                   | TT                              | CC                | 1946494598               |

| SNPs IDs             | Chromosome IDs | Chromosomes | Physical positions (bp) | CDC Frontier (Reference genome) | (Pusa 256 & HPNB) | NCBI SNPdb Accession IDs |
|----------------------|----------------|-------------|-------------------------|---------------------------------|-------------------|--------------------------|
| SNP_P3_112521_19565  | NW_004515803.1 | Scaffold287 | 19565                   | TT                              | GG                | 1946494599               |
| SNP_P3_112522_19571  | NW_004515803.1 | Scaffold287 | 19571                   | AA                              | CC                | 1946494601               |
| SNP_P3_112523_19637  | NW_004515803.1 | Scaffold287 | 19637                   | AA                              | GG                | 1946494602               |
| SNP_P3_112524_21483  | NW_004515803.1 | Scaffold287 | 21483                   | CC                              | GG                | 1946494604               |
| SNP_P3_112525_21487  | NW_004515803.1 | Scaffold287 | 21487                   | TT                              | GG                | 1946494605               |
| SNP_P3_112526_21495  | NW_004515803.1 | Scaffold287 | 21495                   | CC                              | GG                | 1946494607               |
| SNP_P3_112527_22251  | NW_004515803.1 | Scaffold287 | 22251                   | TT                              | GG                | 1946494608               |
| SNP_P3_112528_22268  | NW_004515803.1 | Scaffold287 | 22268                   | GG                              | TT                | 1946494609               |
| SNP_P3_112529_22419  | NW_004515803.1 | Scaffold287 | 22419                   | CC                              | TT                | 1946494611               |
| SNP_P3_112531_22669  | NW_004515803.1 | Scaffold287 | 22669                   | TT                              | CC                | 1946494612               |
| SNP_P3_112532_22725  | NW_004515803.1 | Scaffold287 | 22725                   | AA                              | GG                | 1946494614               |
| SNP_P3_112533_22732  | NW_004515803.1 | Scaffold287 | 22732                   | GG                              | AA                | 1946494615               |
| SNP_P3_112534_22752  | NW_004515803.1 | Scaffold287 | 22752                   | AA                              | GG                | 1946494617               |
| SNP_P3_112535_22759  | NW_004515803.1 | Scaffold287 | 22759                   | GG                              | CC                | 1946494618               |
| SNP_P3_112536_22800  | NW_004515803.1 | Scaffold287 | 22800                   | AA                              | GG                | 1946494620               |
| SNP_P3_112537_22971  | NW_004515803.1 | Scaffold287 | 22971                   | GG                              | TT                | 1946494621               |
| SNP_P3_112538_23657  | NW_004515803.1 | Scaffold287 | 23657                   | CC                              | TT                | 1946494623               |
| SNP_P3_112539_25494  | NW_004515803.1 | Scaffold287 | 25494                   | TT                              | CC                | 1946494624               |
| SNP_P3_112540_25502  | NW_004515803.1 | Scaffold287 | 25502                   | CC                              | AA                | 1946494626               |
| SNP_P3_112541_25547  | NW_004515803.1 | Scaffold287 | 25547                   | AA                              | GG                | 1946494627               |
| SNP_P3_112542_25560  | NW_004515803.1 | Scaffold287 | 25560                   | AA                              | TT                | 1946494629               |
| SNP_P3_112543_25569  | NW_004515803.1 | Scaffold287 | 25569                   | TT                              | AA                | 1946494630               |
| SNP_P3_112544_25581  | NW_004515803.1 | Scaffold287 | 25581                   | CC                              | GG                | 1946494632               |
| SNP_P3_112545_25751  | NW_004515803.1 | Scaffold287 | 25751                   | TT                              | CC                | 1946494633               |
| SNP_P3_112546_25789  | NW_004515803.1 | Scaffold287 | 25789                   | GG                              | CC                | 1946494635               |
| SNP_P3_112547_27552  | NW_004515803.1 | Scaffold287 | 27552                   | AA                              | GG                | 1946494636               |
| SNP_P3_112548_49703  | NW_004515803.1 | Scaffold287 | 49703                   | CC                              | AA                | 1946494637               |
| SNP_P3_112549_58186  | NW_004515803.1 | Scaffold287 | 58186                   | CC                              | TT                | 1946494639               |
| SNP_P3_112550_58189  | NW_004515803.1 | Scaffold287 | 58189                   | AA                              | GG                | 1946494640               |
| SNP_P3_112551_73248  | NW_004515803.1 | Scaffold287 | 73248                   | AA                              | GG                | 1946494642               |
| SNP_P3_112552_78780  | NW_004515803.1 | Scaffold287 | 78780                   | AA                              | GG                | 1946494643               |
| SNP_P3_112553_78814  | NW_004515803.1 | Scaffold287 | 78814                   | AA                              | GG                | 1946494645               |
| SNP_P3_112554_78819  | NW_004515803.1 | Scaffold287 | 78819                   | AA                              | GG                | 1946494646               |
| SNP_P3_112555_78916  | NW_004515803.1 | Scaffold287 | 78916                   | CC                              | GG                | 1946494648               |
| SNP_P3_112556_84477  | NW_004515803.1 | Scaffold287 | 84477                   | AA                              | GG                | 1946494649               |
| SNP_P3_112557_84932  | NW_004515803.1 | Scaffold287 | 84932                   | GG                              | AA                | 1946494651               |
| SNP_P3_112558_86438  | NW_004515803.1 | Scaffold287 | 86438                   | AA                              | GG                | 1946494652               |
| SNP_P3_112559_92290  | NW_004515803.1 | Scaffold287 | 92290                   | GG                              | AA                | 1946494654               |
| SNP_P3_112560_92318  | NW_004515803.1 | Scaffold287 | 92318                   | TT                              | CC                | 1946494655               |
| SNP_P3_112561_106299 | NW_004515803.1 | Scaffold287 | 106299                  | TT                              | CC                | 1946494657               |
| SNP_P3_112562_119205 | NW_004515803.1 | Scaffold287 | 119205                  | TT                              | AA                | 1946494658               |
| SNP_P3_112563_137477 | NW_004515803.1 | Scaffold287 | 137477                  | TT                              | AA                | 1946494660               |

| SNPs IDs             | Chromosome IDs | Chromosomes | Physical positions (bp) | CDC Frontier (Reference genome) | (Pusa 256 & HPNB) | NCBI SNPdb Accession IDs |
|----------------------|----------------|-------------|-------------------------|---------------------------------|-------------------|--------------------------|
| SNP_P3_112564_137484 | NW_004515803.1 | Scaffold287 | 137484                  | GG                              | TT                | 1946494661               |
| SNP_P3_112565_170444 | NW_004515803.1 | Scaffold287 | 170444                  | GG                              | TT                | 1946494663               |
| SNP_P3_112566_170734 | NW_004515803.1 | Scaffold287 | 170734                  | TT                              | GG                | 1946494664               |
| SNP_P3_112567_170737 | NW_004515803.1 | Scaffold287 | 170737                  | GG                              | TT                | 1946494666               |
| SNP_P3_112568_170765 | NW_004515803.1 | Scaffold287 | 170765                  | TT                              | AA                | 1946494667               |
| SNP_P3_112569_170809 | NW_004515803.1 | Scaffold287 | 170809                  | AA                              | CC                | 1946494669               |
| SNP_P3_112570_170812 | NW_004515803.1 | Scaffold287 | 170812                  | CC                              | TT                | 1946494670               |
| SNP_P3_112571_170828 | NW_004515803.1 | Scaffold287 | 170828                  | AA                              | CC                | 1946494672               |
| SNP_P3_112572_170865 | NW_004515803.1 | Scaffold287 | 170865                  | TT                              | CC                | 1946494673               |
| SNP_P3_112574_171171 | NW_004515803.1 | Scaffold287 | 171171                  | TT                              | CC                | 1946494675               |
| SNP_P3_112575_171174 | NW_004515803.1 | Scaffold287 | 171174                  | AA                              | GG                | 1946494676               |
| SNP_P3_112577_182599 | NW_004515803.1 | Scaffold287 | 182599                  | CC                              | TT                | 1946494678               |
| SNP_P3_112578_182603 | NW_004515803.1 | Scaffold287 | 182603                  | AA                              | GG                | 1946494679               |
| SNP_P3_112579_185637 | NW_004515803.1 | Scaffold287 | 185637                  | AA                              | TT                | 1946494681               |
| SNP_P3_112580_207121 | NW_004515803.1 | Scaffold287 | 207121                  | CC                              | TT                | 1946494682               |
| SNP_P3_112581_260859 | NW_004515803.1 | Scaffold287 | 260859                  | TT                              | CC                | 1946494684               |
| SNP_P3_112582_269852 | NW_004515803.1 | Scaffold287 | 269852                  | TT                              | CC                | 1946494686               |
| SNP_P3_112583_270229 | NW_004515803.1 | Scaffold287 | 270229                  | TT                              | AA                | 1946494687               |
| SNP_P3_112584_274030 | NW_004515803.1 | Scaffold287 | 274030                  | AA                              | GG                | 1946494689               |
| SNP_P3_112585_278561 | NW_004515803.1 | Scaffold287 | 278561                  | TT                              | CC                | 1946494690               |
| SNP_P3_112586_330393 | NW_004515803.1 | Scaffold287 | 330393                  | TT                              | CC                | 1946494692               |
| SNP_P3_112587_330442 | NW_004515803.1 | Scaffold287 | 330442                  | TT                              | GG                | 1946494693               |
| SNP_P3_112588_330463 | NW_004515803.1 | Scaffold287 | 330463                  | TT                              | CC                | 1946494695               |
| SNP_P3_112589_330490 | NW_004515803.1 | Scaffold287 | 330490                  | TT                              | GG                | 1946494696               |
| SNP_P3_112590_330804 | NW_004515803.1 | Scaffold287 | 330804                  | CC                              | TT                | 1946494698               |
| SNP_P3_112591_334146 | NW_004515803.1 | Scaffold287 | 334146                  | AA                              | CC                | 1946494700               |
| SNP_P3_112592_334149 | NW_004515803.1 | Scaffold287 | 334149                  | GG                              | TT                | 1946494701               |
| SNP_P3_112593_334367 | NW_004515803.1 | Scaffold287 | 334367                  | AA                              | GG                | 1946494703               |
| SNP_P3_112594_8922   | NW_004515805.1 | Scaffold290 | 8922                    | TT                              | CC                | 1946494704               |
| SNP_P3_112595_8952   | NW_004515805.1 | Scaffold290 | 8952                    | TT                              | CC                | 1946494706               |
| SNP_P3_112596_11336  | NW_004515805.1 | Scaffold290 | 11336                   | TT                              | CC                | 1946494707               |
| SNP_P3_112597_13268  | NW_004515805.1 | Scaffold290 | 13268                   | GG                              | CC                | 1946494709               |
| SNP_P3_112598_13831  | NW_004515805.1 | Scaffold290 | 13831                   | AA                              | TT                | 1946494710               |
| SNP_P3_112599_13931  | NW_004515805.1 | Scaffold290 | 13931                   | CC                              | TT                | 1946494712               |
| SNP_P3_112600_14075  | NW_004515805.1 | Scaffold290 | 14075                   | CC                              | AA                | 1946494713               |
| SNP_P3_112601_14110  | NW_004515805.1 | Scaffold290 | 14110                   | CC                              | AA                | 1946494715               |
| SNP_P3_112602_33633  | NW_004515805.1 | Scaffold290 | 33633                   | GG                              | CC                | 1946494716               |
| SNP_P3_112603_34698  | NW_004515805.1 | Scaffold290 | 34698                   | AA                              | GG                | 1946494718               |
| SNP_P3_112604_34721  | NW_004515805.1 | Scaffold290 | 34721                   | AA                              | GG                | 1946494719               |
| SNP_P3_112606_35332  | NW_004515805.1 | Scaffold290 | 35332                   | CC                              | TT                | 1946494721               |
| SNP_P3_112607_36239  | NW_004515805.1 | Scaffold290 | 36239                   | TT                              | GG                | 1946494722               |
| SNP_P3_112608_41493  | NW_004515805.1 | Scaffold290 | 41493                   | CC                              | TT                | 1946494724               |



| SNPs IDs             | Chromosome IDs | Chromosomes | Physical positions (bp) | CDC Frontier (Reference genome) | (Pusa 256 & HPNB) | NCBI SNPdb Accession IDs |
|----------------------|----------------|-------------|-------------------------|---------------------------------|-------------------|--------------------------|
| SNP_P3_112609_42073  | NW_004515805.1 | Scaffold290 | 42073                   | CC                              | GG                | 1946494725               |
| SNP_P3_112610_44835  | NW_004515805.1 | Scaffold290 | 44835                   | AA                              | CC                | 1946494727               |
| SNP_P3_112611_44836  | NW_004515805.1 | Scaffold290 | 44836                   | TT                              | AA                | 1946494728               |
| SNP_P3_112612_44938  | NW_004515805.1 | Scaffold290 | 44938                   | CC                              | TT                | 1946494730               |
| SNP_P3_112613_45093  | NW_004515805.1 | Scaffold290 | 45093                   | TT                              | AA                | 1946494731               |
| SNP_P3_112615_50366  | NW_004515805.1 | Scaffold290 | 50366                   | GG                              | AA                | 1946494732               |
| SNP_P3_112616_50403  | NW_004515805.1 | Scaffold290 | 50403                   | CC                              | TT                | 1946494734               |
| SNP_P3_112617_50540  | NW_004515805.1 | Scaffold290 | 50540                   | GG                              | TT                | 1946494735               |
| SNP_P3_112618_53150  | NW_004515805.1 | Scaffold290 | 53150                   | AA                              | GG                | 1946494737               |
| SNP_P3_112619_63787  | NW_004515805.1 | Scaffold290 | 63787                   | AA                              | GG                | 1946494738               |
| SNP_P3_112622_99278  | NW_004515805.1 | Scaffold290 | 99278                   | CC                              | TT                | 1946494740               |
| SNP_P3_112623_106455 | NW_004515805.1 | Scaffold290 | 106455                  | TT                              | CC                | 1946494741               |
| SNP_P3_112624_108928 | NW_004515805.1 | Scaffold290 | 108928                  | TT                              | GG                | 1946494743               |
| SNP_P3_112625_109951 | NW_004515805.1 | Scaffold290 | 109951                  | GG                              | TT                | 1946494744               |
| SNP_P3_112626_110188 | NW_004515805.1 | Scaffold290 | 110188                  | CC                              | TT                | 1946494746               |
| SNP_P3_112627_112788 | NW_004515805.1 | Scaffold290 | 112788                  | GG                              | CC                | 1946494747               |
| SNP_P3_112628_112857 | NW_004515805.1 | Scaffold290 | 112857                  | GG                              | AA                | 1946494749               |
| SNP_P3_112629_113793 | NW_004515805.1 | Scaffold290 | 113793                  | GG                              | TT                | 1946494750               |
| SNP_P3_112630_113849 | NW_004515805.1 | Scaffold290 | 113849                  | GG                              | AA                | 1946494751               |
| SNP_P3_112631_115518 | NW_004515805.1 | Scaffold290 | 115518                  | AA                              | GG                | 1946494753               |
| SNP_P3_112632_117835 | NW_004515805.1 | Scaffold290 | 117835                  | AA                              | CC                | 1946494754               |
| SNP_P3_112633_124951 | NW_004515805.1 | Scaffold290 | 124951                  | CC                              | TT                | 1946494756               |
| SNP_P3_112634_125977 | NW_004515805.1 | Scaffold290 | 125977                  | CC                              | AA                | 1946494757               |
| SNP_P3_112635_125999 | NW_004515805.1 | Scaffold290 | 125999                  | TT                              | GG                | 1946494759               |
| SNP_P3_112636_126003 | NW_004515805.1 | Scaffold290 | 126003                  | AA                              | GG                | 1946494760               |
| SNP_P3_112638_131822 | NW_004515805.1 | Scaffold290 | 131822                  | CC                              | TT                | 1946494762               |
| SNP_P3_112640_140019 | NW_004515805.1 | Scaffold290 | 140019                  | GG                              | AA                | 1946494763               |
| SNP_P3_112641_141761 | NW_004515805.1 | Scaffold290 | 141761                  | AA                              | GG                | 1946494765               |
| SNP_P3_112642_142697 | NW_004515805.1 | Scaffold290 | 142697                  | AA                              | GG                | 1946494766               |
| SNP_P3_112643_142739 | NW_004515805.1 | Scaffold290 | 142739                  | CC                              | TT                | 1946494768               |
| SNP_P3_112644_142976 | NW_004515805.1 | Scaffold290 | 142976                  | GG                              | AA                | 1946494769               |
| SNP_P3_112645_143564 | NW_004515805.1 | Scaffold290 | 143564                  | AA                              | TT                | 1946494771               |
| SNP_P3_112646_145686 | NW_004515805.1 | Scaffold290 | 145686                  | AA                              | GG                | 1946494772               |
| SNP_P3_112647_146483 | NW_004515805.1 | Scaffold290 | 146483                  | CC                              | TT                | 1946494774               |
| SNP_P3_112648_146502 | NW_004515805.1 | Scaffold290 | 146502                  | TT                              | AA                | 1946494775               |
| SNP_P3_112649_146871 | NW_004515805.1 | Scaffold290 | 146871                  | TT                              | CC                | 1946494777               |
| SNP_P3_112650_146899 | NW_004515805.1 | Scaffold290 | 146899                  | AA                              | CC                | 1946494778               |
| SNP_P3_112651_150599 | NW_004515805.1 | Scaffold290 | 150599                  | TT                              | CC                | 1946494780               |
| SNP_P3_112652_153352 | NW_004515805.1 | Scaffold290 | 153352                  | AA                              | GG                | 1946494781               |
| SNP_P3_112653_153693 | NW_004515805.1 | Scaffold290 | 153693                  | TT                              | GG                | 1946494783               |
| SNP_P3_112654_154099 | NW_004515805.1 | Scaffold290 | 154099                  | GG                              | AA                | 1946494784               |
| SNP_P3_112655_154743 | NW_004515805.1 | Scaffold290 | 154743                  | TT                              | GG                | 1946494786               |

| SNPs IDs             | Chromosome IDs | Chromosomes | Physical positions (bp) | CDC Frontier (Reference genome) | (Pusa 256 & HPNB) | NCBI SNPdb Accession IDs |
|----------------------|----------------|-------------|-------------------------|---------------------------------|-------------------|--------------------------|
| SNP_P3_112656_157555 | NW_004515805.1 | Scaffold290 | 157555                  | CC                              | TT                | 1946494787               |
| SNP_P3_112657_166515 | NW_004515805.1 | Scaffold290 | 166515                  | CC                              | TT                | 1946494789               |
| SNP_P3_112658_169439 | NW_004515805.1 | Scaffold290 | 169439                  | TT                              | CC                | 1946494790               |
| SNP_P3_112659_170933 | NW_004515805.1 | Scaffold290 | 170933                  | TT                              | GG                | 1946494792               |
| SNP_P3_112660_177155 | NW_004515805.1 | Scaffold290 | 177155                  | CC                              | TT                | 1946494793               |
| SNP_P3_112662_178536 | NW_004515805.1 | Scaffold290 | 178536                  | GG                              | CC                | 1946494795               |
| SNP_P3_112663_179511 | NW_004515805.1 | Scaffold290 | 179511                  | CC                              | TT                | 1946494796               |
| SNP_P3_112664_188037 | NW_004515805.1 | Scaffold290 | 188037                  | CC                              | TT                | 1946494798               |
| SNP_P3_112665_188435 | NW_004515805.1 | Scaffold290 | 188435                  | TT                              | CC                | 1946494799               |
| SNP_P3_112666_191563 | NW_004515805.1 | Scaffold290 | 191563                  | TT                              | GG                | 1946494801               |
| SNP_P3_112668_196360 | NW_004515805.1 | Scaffold290 | 196360                  | CC                              | TT                | 1946494802               |
| SNP_P3_112669_200107 | NW_004515805.1 | Scaffold290 | 200107                  | TT                              | CC                | 1946494804               |
| SNP_P3_112670_200315 | NW_004515805.1 | Scaffold290 | 200315                  | CC                              | GG                | 1946494805               |
| SNP_P3_112671_200528 | NW_004515805.1 | Scaffold290 | 200528                  | TT                              | CC                | 1946494807               |
| SNP_P3_112673_209395 | NW_004515805.1 | Scaffold290 | 209395                  | GG                              | AA                | 1946494808               |
| SNP_P3_112674_210823 | NW_004515805.1 | Scaffold290 | 210823                  | GG                              | TT                | 1946494809               |
| SNP_P3_112675_210869 | NW_004515805.1 | Scaffold290 | 210869                  | AA                              | CC                | 1946494811               |
| SNP_P3_112676_213020 | NW_004515805.1 | Scaffold290 | 213020                  | CC                              | GG                | 1946494812               |
| SNP_P3_112677_219379 | NW_004515805.1 | Scaffold290 | 219379                  | AA                              | CC                | 1946494814               |
| SNP_P3_112678_219380 | NW_004515805.1 | Scaffold290 | 219380                  | GG                              | AA                | 1946494815               |
| SNP_P3_112679_221173 | NW_004515805.1 | Scaffold290 | 221173                  | GG                              | AA                | 1946494817               |
| SNP_P3_112680_223655 | NW_004515805.1 | Scaffold290 | 223655                  | CC                              | TT                | 1946494818               |
| SNP_P3_112681_223928 | NW_004515805.1 | Scaffold290 | 223928                  | GG                              | AA                | 1946494820               |
| SNP_P3_112683_224692 | NW_004515805.1 | Scaffold290 | 224692                  | GG                              | AA                | 1946494821               |
| SNP_P3_112684_228225 | NW_004515805.1 | Scaffold290 | 228225                  | TT                              | CC                | 1946494823               |
| SNP_P3_112686_233710 | NW_004515805.1 | Scaffold290 | 233710                  | GG                              | TT                | 1946494824               |
| SNP_P3_112687_250707 | NW_004515805.1 | Scaffold290 | 250707                  | TT                              | GG                | 1946494826               |
| SNP_P3_112688_250847 | NW_004515805.1 | Scaffold290 | 250847                  | TT                              | CC                | 1946494827               |
| SNP_P3_112689_250893 | NW_004515805.1 | Scaffold290 | 250893                  | CC                              | TT                | 1946494829               |
| SNP_P3_112690_250951 | NW_004515805.1 | Scaffold290 | 250951                  | TT                              | CC                | 1946494830               |
| SNP_P3_112691_251371 | NW_004515805.1 | Scaffold290 | 251371                  | AA                              | GG                | 1946494832               |
| SNP_P3_112692_251390 | NW_004515805.1 | Scaffold290 | 251390                  | GG                              | AA                | 1946494833               |
| SNP_P3_112693_251400 | NW_004515805.1 | Scaffold290 | 251400                  | GG                              | AA                | 1946494835               |
| SNP_P3_112694_251412 | NW_004515805.1 | Scaffold290 | 251412                  | GG                              | AA                | 1946494836               |
| SNP_P3_112695_251415 | NW_004515805.1 | Scaffold290 | 251415                  | AA                              | GG                | 1946494838               |
| SNP_P3_112696_251830 | NW_004515805.1 | Scaffold290 | 251830                  | GG                              | AA                | 1946494839               |
| SNP_P3_112697_251988 | NW_004515805.1 | Scaffold290 | 251988                  | AA                              | CC                | 1946494841               |
| SNP_P3_112698_252002 | NW_004515805.1 | Scaffold290 | 252002                  | CC                              | GG                | 1946494842               |
| SNP_P3_112699_252005 | NW_004515805.1 | Scaffold290 | 252005                  | TT                              | CC                | 1946494844               |
| SNP_P3_112700_252152 | NW_004515805.1 | Scaffold290 | 252152                  | TT                              | CC                | 1946494845               |
| SNP_P3_112701_252196 | NW_004515805.1 | Scaffold290 | 252196                  | AA                              | GG                | 1946494847               |
| SNP_P3_112702_252204 | NW_004515805.1 | Scaffold290 | 252204                  | TT                              | CC                | 1946494848               |

| SNPs IDs             | Chromosome IDs | Chromosomes | Physical positions (bp) | CDC Frontier (Reference genome) | (Pusa 256 & HPNB) | NCBI SNPdb Accession IDs |
|----------------------|----------------|-------------|-------------------------|---------------------------------|-------------------|--------------------------|
| SNP_P3_112703_252509 | NW_004515805.1 | Scaffold290 | 252509                  | CC                              | TT                | 1946494850               |
| SNP_P3_112704_252529 | NW_004515805.1 | Scaffold290 | 252529                  | CC                              | GG                | 1946494851               |
| SNP_P3_112705_252935 | NW_004515805.1 | Scaffold290 | 252935                  | GG                              | TT                | 1946494853               |
| SNP_P3_112706_253005 | NW_004515805.1 | Scaffold290 | 253005                  | GG                              | AA                | 1946494854               |
| SNP_P3_112707_271108 | NW_004515805.1 | Scaffold290 | 271108                  | TT                              | CC                | 1946494856               |
| SNP_P3_112708_272185 | NW_004515805.1 | Scaffold290 | 272185                  | CC                              | GG                | 1946494857               |
| SNP_P3_112709_272212 | NW_004515805.1 | Scaffold290 | 272212                  | AA                              | TT                | 1946494858               |
| SNP_P3_112710_283502 | NW_004515805.1 | Scaffold290 | 283502                  | CC                              | TT                | 1946494860               |
| SNP_P3_112711_283655 | NW_004515805.1 | Scaffold290 | 283655                  | GG                              | AA                | 1946494861               |
| SNP_P3_112712_286797 | NW_004515805.1 | Scaffold290 | 286797                  | CC                              | TT                | 1946494863               |
| SNP_P3_112713_290151 | NW_004515805.1 | Scaffold290 | 290151                  | GG                              | AA                | 1946494864               |
| SNP_P3_112714_290434 | NW_004515805.1 | Scaffold290 | 290434                  | AA                              | CC                | 1946494866               |
| SNP_P3_112716_295016 | NW_004515805.1 | Scaffold290 | 295016                  | GG                              | AA                | 1946494867               |
| SNP_P3_112717_298325 | NW_004515805.1 | Scaffold290 | 298325                  | CC                              | TT                | 1946494869               |
| SNP_P3_112718_300670 | NW_004515805.1 | Scaffold290 | 300670                  | AA                              | TT                | 1946494870               |
| SNP_P3_112720_306189 | NW_004515805.1 | Scaffold290 | 306189                  | GG                              | TT                | 1946494872               |
| SNP_P3_112721_307018 | NW_004515805.1 | Scaffold290 | 307018                  | CC                              | TT                | 1946494873               |
| SNP_P3_112722_309187 | NW_004515805.1 | Scaffold290 | 309187                  | GG                              | AA                | 1946494875               |
| SNP_P3_112723_309201 | NW_004515805.1 | Scaffold290 | 309201                  | AA                              | GG                | 1946494876               |
| SNP_P3_112724_309218 | NW_004515805.1 | Scaffold290 | 309218                  | CC                              | TT                | 1946494878               |
| SNP_P3_112725_310230 | NW_004515805.1 | Scaffold290 | 310230                  | AA                              | GG                | 1946494879               |
| SNP_P3_112727_312165 | NW_004515805.1 | Scaffold290 | 312165                  | TT                              | CC                | 1946494881               |
| SNP_P3_112728_312357 | NW_004515805.1 | Scaffold290 | 312357                  | GG                              | AA                | 1946494883               |
| SNP_P3_112729_312638 | NW_004515805.1 | Scaffold290 | 312638                  | GG                              | AA                | 1946494884               |
| SNP_P3_112730_312724 | NW_004515805.1 | Scaffold290 | 312724                  | GG                              | AA                | 1946494886               |
| SNP_P3_112731_314509 | NW_004515805.1 | Scaffold290 | 314509                  | AA                              | TT                | 1946494887               |
| SNP_P3_112732_314947 | NW_004515805.1 | Scaffold290 | 314947                  | AA                              | TT                | 1946494889               |
| SNP_P3_112733_317167 | NW_004515805.1 | Scaffold290 | 317167                  | GG                              | AA                | 1946494890               |
| SNP_P3_112734_328867 | NW_004515805.1 | Scaffold290 | 328867                  | CC                              | TT                | 1946494892               |
| SNP_P3_112735_333936 | NW_004515805.1 | Scaffold290 | 333936                  | TT                              | CC                | 1946494893               |
| SNP_P3_112736_337017 | NW_004515805.1 | Scaffold290 | 337017                  | CC                              | TT                | 1946494895               |
| SNP_P3_112738_339888 | NW_004515805.1 | Scaffold290 | 339888                  | CC                              | GG                | 1946494896               |
| SNP_P3_112739_340875 | NW_004515805.1 | Scaffold290 | 340875                  | AA                              | TT                | 1946494898               |
| SNP_P3_112740_341583 | NW_004515805.1 | Scaffold290 | 341583                  | GG                              | AA                | 1946494899               |
| SNP_P3_112741_342995 | NW_004515805.1 | Scaffold290 | 342995                  | AA                              | CC                | 1946494901               |
| SNP_P3_112742_348277 | NW_004515805.1 | Scaffold290 | 348277                  | CC                              | TT                | 1946494902               |
| SNP_P3_112743_361613 | NW_004515805.1 | Scaffold290 | 361613                  | GG                              | AA                | 1946494904               |
| SNP_P3_112744_372086 | NW_004515805.1 | Scaffold290 | 372086                  | TT                              | AA                | 1946494906               |
| SNP_P3_112746_373123 | NW_004515805.1 | Scaffold290 | 373123                  | AA                              | GG                | 1946494907               |
| SNP_P3_112748_383347 | NW_004515805.1 | Scaffold290 | 383347                  | CC                              | TT                | 1946494909               |
| SNP_P3_112749_390236 | NW_004515805.1 | Scaffold290 | 390236                  | TT                              | CC                | 1946494910               |
| SNP_P3_112750_391120 | NW_004515805.1 | Scaffold290 | 391120                  | AA                              | TT                | 1946494912               |

| SNPs IDs             | Chromosome IDs | Chromosomes | Physical positions (bp) | CDC Frontier (Reference genome) | (Pusa 256 & HPNB) | NCBI SNPdb Accession IDs |
|----------------------|----------------|-------------|-------------------------|---------------------------------|-------------------|--------------------------|
| SNP_P3_112751_391167 | NW_004515805.1 | Scaffold290 | 391167                  | GG                              | TT                | 1946494913               |
| SNP_P3_112752_391482 | NW_004515805.1 | Scaffold290 | 391482                  | AA                              | CC                | 1946494915               |
| SNP_P3_112753_393299 | NW_004515805.1 | Scaffold290 | 393299                  | TT                              | CC                | 1946494916               |
| SNP_P3_112754_394233 | NW_004515805.1 | Scaffold290 | 394233                  | GG                              | CC                | 1946494918               |
| SNP_P3_112755_395935 | NW_004515805.1 | Scaffold290 | 395935                  | TT                              | GG                | 1946494919               |
| SNP_P3_112756_395959 | NW_004515805.1 | Scaffold290 | 395959                  | AA                              | TT                | 1946494921               |
| SNP_P3_112757_398369 | NW_004515805.1 | Scaffold290 | 398369                  | CC                              | TT                | 1946494922               |
| SNP_P3_112759_398570 | NW_004515805.1 | Scaffold290 | 398570                  | AA                              | GG                | 1946494924               |
| SNP_P3_112761_400935 | NW_004515805.1 | Scaffold290 | 400935                  | AA                              | TT                | 1946494925               |
| SNP_P3_112762_411140 | NW_004515805.1 | Scaffold290 | 411140                  | AA                              | GG                | 1946494927               |
| SNP_P3_112763_416569 | NW_004515805.1 | Scaffold290 | 416569                  | CC                              | TT                | 1946494928               |
| SNP_P3_112764_416723 | NW_004515805.1 | Scaffold290 | 416723                  | AA                              | TT                | 1946494930               |
| SNP_P3_112767_427126 | NW_004515805.1 | Scaffold290 | 427126                  | TT                              | CC                | 1946494931               |
| SNP_P3_112769_433256 | NW_004515805.1 | Scaffold290 | 433256                  | GG                              | AA                | 1946494933               |
| SNP_P3_112771_456364 | NW_004515805.1 | Scaffold290 | 456364                  | GG                              | AA                | 1946494934               |
| SNP_P3_112772_465079 | NW_004515805.1 | Scaffold290 | 465079                  | TT                              | GG                | 1946494936               |
| SNP_P3_112773_467808 | NW_004515805.1 | Scaffold290 | 467808                  | AA                              | TT                | 1946494937               |
| SNP_P3_112774_470378 | NW_004515805.1 | Scaffold290 | 470378                  | TT                              | GG                | 1946494939               |
| SNP_P3_112777_475255 | NW_004515805.1 | Scaffold290 | 475255                  | CC                              | TT                | 1946494940               |
| SNP_P3_112778_475266 | NW_004515805.1 | Scaffold290 | 475266                  | CC                              | GG                | 1946494942               |
| SNP_P3_112779_491101 | NW_004515805.1 | Scaffold290 | 491101                  | AA                              | GG                | 1946494943               |
| SNP_P3_112780_491243 | NW_004515805.1 | Scaffold290 | 491243                  | GG                              | TT                | 1946494945               |
| SNP_P3_112781_491500 | NW_004515805.1 | Scaffold290 | 491500                  | AA                              | CC                | 1946494946               |
| SNP_P3_112782_499430 | NW_004515805.1 | Scaffold290 | 499430                  | GG                              | TT                | 1946494954               |
| SNP_P3_112783_499744 | NW_004515805.1 | Scaffold290 | 499744                  | TT                              | CC                | 1946494956               |
| SNP_P3_112784_499761 | NW_004515805.1 | Scaffold290 | 499761                  | GG                              | CC                | 1946494957               |
| SNP_P3_112785_499851 | NW_004515805.1 | Scaffold290 | 499851                  | GG                              | AA                | 1946494959               |
| SNP_P3_112786_499939 | NW_004515805.1 | Scaffold290 | 499939                  | GG                              | AA                | 1946494960               |
| SNP_P3_112787_499954 | NW_004515805.1 | Scaffold290 | 499954                  | CC                              | TT                | 1946494962               |
| SNP_P3_112788_500014 | NW_004515805.1 | Scaffold290 | 500014                  | AA                              | GG                | 1946494963               |
| SNP_P3_112789_500017 | NW_004515805.1 | Scaffold290 | 500017                  | AA                              | GG                | 1946494965               |
| SNP_P3_112790_500031 | NW_004515805.1 | Scaffold290 | 500031                  | CC                              | TT                | 1946494966               |
| SNP_P3_112791_500066 | NW_004515805.1 | Scaffold290 | 500066                  | AA                              | GG                | 1946494968               |
| SNP_P3_112792_500068 | NW_004515805.1 | Scaffold290 | 500068                  | AA                              | GG                | 1946494969               |
| SNP_P3_112793_500078 | NW_004515805.1 | Scaffold290 | 500078                  | TT                              | GG                | 1946494971               |
| SNP_P3_112794_500253 | NW_004515805.1 | Scaffold290 | 500253                  | AA                              | GG                | 1946494972               |
| SNP_P3_112795_500315 | NW_004515805.1 | Scaffold290 | 500315                  | AA                              | GG                | 1946494974               |
| SNP_P3_112796_500379 | NW_004515805.1 | Scaffold290 | 500379                  | GG                              | AA                | 1946494975               |
| SNP_P3_112797_500380 | NW_004515805.1 | Scaffold290 | 500380                  | TT                              | CC                | 1946494977               |
| SNP_P3_112798_500382 | NW_004515805.1 | Scaffold290 | 500382                  | TT                              | CC                | 1946494978               |
| SNP_P3_112799_500418 | NW_004515805.1 | Scaffold290 | 500418                  | GG                              | AA                | 1946494980               |
| SNP_P3_112800_500438 | NW_004515805.1 | Scaffold290 | 500438                  | TT                              | CC                | 1946494981               |

| SNPs IDs             | Chromosome IDs | Chromosomes | Physical positions (bp) | CDC Frontier (Reference genome) | (Pusa 256 & HPNB) | NCBI SNPdb Accession IDs |
|----------------------|----------------|-------------|-------------------------|---------------------------------|-------------------|--------------------------|
| SNP_P3_112801_500449 | NW_004515805.1 | Scaffold290 | 500449                  | AA                              | GG                | 1946494983               |
| SNP_P3_112802_500468 | NW_004515805.1 | Scaffold290 | 500468                  | AA                              | TT                | 1946494984               |
| SNP_P3_112803_500472 | NW_004515805.1 | Scaffold290 | 500472                  | TT                              | AA                | 1946494986               |
| SNP_P3_112804_502939 | NW_004515805.1 | Scaffold290 | 502939                  | TT                              | CC                | 1946494987               |
| SNP_P3_112805_505589 | NW_004515805.1 | Scaffold290 | 505589                  | AA                              | TT                | 1946494988               |
| SNP_P3_112806_506207 | NW_004515805.1 | Scaffold290 | 506207                  | CC                              | AA                | 1946494990               |
| SNP_P3_112807_512708 | NW_004515805.1 | Scaffold290 | 512708                  | GG                              | TT                | 1946494991               |
| SNP_P3_112808_512718 | NW_004515805.1 | Scaffold290 | 512718                  | GG                              | AA                | 1946494993               |
| SNP_P3_112809_544517 | NW_004515805.1 | Scaffold290 | 544517                  | TT                              | CC                | 1946494994               |
| SNP_P3_112810_544518 | NW_004515805.1 | Scaffold290 | 544518                  | CC                              | TT                | 1946494996               |
| SNP_P3_112811_544533 | NW_004515805.1 | Scaffold290 | 544533                  | CC                              | AA                | 1946494997               |
| SNP_P3_112812_544587 | NW_004515805.1 | Scaffold290 | 544587                  | GG                              | AA                | 1946494999               |
| SNP_P3_112813_544623 | NW_004515805.1 | Scaffold290 | 544623                  | AA                              | GG                | 1946495000               |
| SNP_P3_112814_544637 | NW_004515805.1 | Scaffold290 | 544637                  | CC                              | AA                | 1946495002               |
| SNP_P3_112815_544643 | NW_004515805.1 | Scaffold290 | 544643                  | CC                              | TT                | 1946495003               |
| SNP_P3_112816_544653 | NW_004515805.1 | Scaffold290 | 544653                  | AA                              | GG                | 1946495005               |
| SNP_P3_112817_544778 | NW_004515805.1 | Scaffold290 | 544778                  | TT                              | GG                | 1946495006               |
| SNP_P3_112818_544850 | NW_004515805.1 | Scaffold290 | 544850                  | CC                              | TT                | 1946495008               |
| SNP_P3_112819_544858 | NW_004515805.1 | Scaffold290 | 544858                  | GG                              | AA                | 1946495009               |
| SNP_P3_112820_544873 | NW_004515805.1 | Scaffold290 | 544873                  | TT                              | GG                | 1946495011               |
| SNP_P3_112821_544878 | NW_004515805.1 | Scaffold290 | 544878                  | GG                              | AA                | 1946495012               |
| SNP_P3_112822_552789 | NW_004515805.1 | Scaffold290 | 552789                  | GG                              | AA                | 1946495014               |
| SNP_P3_112823_555752 | NW_004515805.1 | Scaffold290 | 555752                  | CC                              | TT                | 1946495015               |
| SNP_P3_112824_557805 | NW_004515805.1 | Scaffold290 | 557805                  | CC                              | TT                | 1946495017               |
| SNP_P3_112825_561135 | NW_004515805.1 | Scaffold290 | 561135                  | CC                              | TT                | 1946495018               |
| SNP_P3_112826_561211 | NW_004515805.1 | Scaffold290 | 561211                  | AA                              | GG                | 1946495020               |
| SNP_P3_112827_561500 | NW_004515805.1 | Scaffold290 | 561500                  | TT                              | CC                | 1946495021               |
| SNP_P3_112828_561506 | NW_004515805.1 | Scaffold290 | 561506                  | AA                              | CC                | 1946495023               |
| SNP_P3_112829_561511 | NW_004515805.1 | Scaffold290 | 561511                  | GG                              | TT                | 1946495024               |
| SNP_P3_112830_561837 | NW_004515805.1 | Scaffold290 | 561837                  | TT                              | AA                | 1946495026               |
| SNP_P3_112831_561843 | NW_004515805.1 | Scaffold290 | 561843                  | GG                              | AA                | 1946495027               |
| SNP_P3_112832_571682 | NW_004515805.1 | Scaffold290 | 571682                  | CC                              | AA                | 1946495029               |
| SNP_P3_112833_571699 | NW_004515805.1 | Scaffold290 | 571699                  | AA                              | GG                | 1946495030               |
| SNP_P3_112834_571709 | NW_004515805.1 | Scaffold290 | 571709                  | AA                              | GG                | 1946495032               |
| SNP_P3_112835_571717 | NW_004515805.1 | Scaffold290 | 571717                  | TT                              | CC                | 1946495033               |
| SNP_P3_112836_571963 | NW_004515805.1 | Scaffold290 | 571963                  | TT                              | CC                | 1946495035               |
| SNP_P3_112837_572061 | NW_004515805.1 | Scaffold290 | 572061                  | AA                              | GG                | 1946495036               |
| SNP_P3_112838_572089 | NW_004515805.1 | Scaffold290 | 572089                  | CC                              | TT                | 1946495038               |
| SNP_P3_112839_572090 | NW_004515805.1 | Scaffold290 | 572090                  | AA                              | CC                | 1946495039               |
| SNP_P3_112840_572091 | NW_004515805.1 | Scaffold290 | 572091                  | AA                              | GG                | 1946495040               |
| SNP_P3_112841_572100 | NW_004515805.1 | Scaffold290 | 572100                  | TT                              | CC                | 1946495042               |
| SNP_P3_112842_572229 | NW_004515805.1 | Scaffold290 | 572229                  | GG                              | AA                | 1946495043               |

| SNPs IDs             | Chromosome IDs | Chromosomes | Physical positions (bp) | CDC Frontier (Reference genome) | (Pusa 256 & HPNB) | NCBI SNPdb Accession IDs |
|----------------------|----------------|-------------|-------------------------|---------------------------------|-------------------|--------------------------|
| SNP_P3_112843_572231 | NW_004515805.1 | Scaffold290 | 572231                  | TT                              | CC                | 1946495045               |
| SNP_P3_112844_572249 | NW_004515805.1 | Scaffold290 | 572249                  | AA                              | GG                | 1946495047               |
| SNP_P3_112845_572275 | NW_004515805.1 | Scaffold290 | 572275                  | AA                              | TT                | 1946495048               |
| SNP_P3_112846_572611 | NW_004515805.1 | Scaffold290 | 572611                  | AA                              | GG                | 1946495050               |
| SNP_P3_112850_590160 | NW_004515805.1 | Scaffold290 | 590160                  | TT                              | GG                | 1946495051               |
| SNP_P3_112851_590167 | NW_004515805.1 | Scaffold290 | 590167                  | TT                              | AA                | 1946495052               |
| SNP_P3_112852_591066 | NW_004515805.1 | Scaffold290 | 591066                  | AA                              | GG                | 1946495054               |
| SNP_P3_112853_604144 | NW_004515805.1 | Scaffold290 | 604144                  | AA                              | GG                | 1946495055               |
| SNP_P3_112854_605107 | NW_004515805.1 | Scaffold290 | 605107                  | AA                              | CC                | 1946495057               |
| SNP_P3_112855_606084 | NW_004515805.1 | Scaffold290 | 606084                  | GG                              | AA                | 1946495058               |
| SNP_P3_112856_613471 | NW_004515805.1 | Scaffold290 | 613471                  | AA                              | GG                | 1946495060               |
| SNP_P3_112857_613664 | NW_004515805.1 | Scaffold290 | 613664                  | TT                              | CC                | 1946495061               |
| SNP_P3_112858_615997 | NW_004515805.1 | Scaffold290 | 615997                  | TT                              | GG                | 1946495063               |
| SNP_P3_112859_620387 | NW_004515805.1 | Scaffold290 | 620387                  | GG                              | AA                | 1946495064               |
| SNP_P3_112861_639210 | NW_004515805.1 | Scaffold290 | 639210                  | CC                              | TT                | 1946495066               |
| SNP_P3_112862_639631 | NW_004515805.1 | Scaffold290 | 639631                  | AA                              | GG                | 1946495067               |
| SNP_P3_112863_640921 | NW_004515805.1 | Scaffold290 | 640921                  | TT                              | AA                | 1946495069               |
| SNP_P3_112864_641104 | NW_004515805.1 | Scaffold290 | 641104                  | CC                              | TT                | 1946495070               |
| SNP_P3_112865_648023 | NW_004515805.1 | Scaffold290 | 648023                  | AA                              | GG                | 1946495072               |
| SNP_P3_112866_656408 | NW_004515805.1 | Scaffold290 | 656408                  | CC                              | TT                | 1946495073               |
| SNP_P3_112867_656425 | NW_004515805.1 | Scaffold290 | 656425                  | GG                              | CC                | 1946495075               |
| SNP_P3_112868_656506 | NW_004515805.1 | Scaffold290 | 656506                  | TT                              | CC                | 1946495076               |
| SNP_P3_112869_656543 | NW_004515805.1 | Scaffold290 | 656543                  | CC                              | TT                | 1946495078               |
| SNP_P3_112870_660228 | NW_004515805.1 | Scaffold290 | 660228                  | AA                              | GG                | 1946495079               |
| SNP_P3_112873_670685 | NW_004515805.1 | Scaffold290 | 670685                  | TT                              | CC                | 1946495081               |
| SNP_P3_112874_674096 | NW_004515805.1 | Scaffold290 | 674096                  | CC                              | TT                | 1946495082               |
| SNP_P3_112875_674182 | NW_004515805.1 | Scaffold290 | 674182                  | GG                              | AA                | 1946495084               |
| SNP_P3_112877_674606 | NW_004515805.1 | Scaffold290 | 674606                  | GG                              | TT                | 1946495085               |
| SNP_P3_112879_679791 | NW_004515805.1 | Scaffold290 | 679791                  | AA                              | GG                | 1946495087               |
| SNP_P3_112880_680260 | NW_004515805.1 | Scaffold290 | 680260                  | AA                              | GG                | 1946495088               |
| SNP_P3_112881_681763 | NW_004515805.1 | Scaffold290 | 681763                  | AA                              | GG                | 1946495089               |
| SNP_P3_112882_682518 | NW_004515805.1 | Scaffold290 | 682518                  | AA                              | TT                | 1946495091               |
| SNP_P3_112883_689700 | NW_004515805.1 | Scaffold290 | 689700                  | GG                              | AA                | 1946495092               |
| SNP_P3_112884_690122 | NW_004515805.1 | Scaffold290 | 690122                  | AA                              | GG                | 1946495094               |
| SNP_P3_112886_694971 | NW_004515805.1 | Scaffold290 | 694971                  | GG                              | CC                | 1946495095               |
| SNP_P3_112887_700081 | NW_004515805.1 | Scaffold290 | 700081                  | AA                              | GG                | 1946495097               |
| SNP_P3_112888_702131 | NW_004515805.1 | Scaffold290 | 702131                  | GG                              | CC                | 1946495098               |
| SNP_P3_112890_709724 | NW_004515805.1 | Scaffold290 | 709724                  | CC                              | GG                | 1946495100               |
| SNP_P3_112891_709773 | NW_004515805.1 | Scaffold290 | 709773                  | GG                              | AA                | 1946495101               |
| SNP_P3_112892_710120 | NW_004515805.1 | Scaffold290 | 710120                  | AA                              | GG                | 1946495103               |
| SNP_P3_112893_710148 | NW_004515805.1 | Scaffold290 | 710148                  | CC                              | AA                | 1946495104               |
| SNP_P3_112894_711136 | NW_004515805.1 | Scaffold290 | 711136                  | TT                              | GG                | 1946495106               |

| SNPs IDs             | Chromosome IDs | Chromosomes | Physical positions (bp) | CDC Frontier (Reference genome) | (Pusa 256 & HPNB) | NCBI SNPdb Accession IDs |
|----------------------|----------------|-------------|-------------------------|---------------------------------|-------------------|--------------------------|
| SNP_P3_112895_712272 | NW_004515805.1 | Scaffold290 | 712272                  | CC                              | AA                | 1946495107               |
| SNP_P3_112896_728010 | NW_004515805.1 | Scaffold290 | 728010                  | TT                              | AA                | 1946495109               |
| SNP_P3_112897_731850 | NW_004515805.1 | Scaffold290 | 731850                  | TT                              | AA                | 1946495110               |
| SNP_P3_112898_731940 | NW_004515805.1 | Scaffold290 | 731940                  | AA                              | GG                | 1946495112               |
| SNP_P3_112899_732777 | NW_004515805.1 | Scaffold290 | 732777                  | AA                              | GG                | 1946495113               |
| SNP_P3_112902_744858 | NW_004515805.1 | Scaffold290 | 744858                  | AA                              | GG                | 1946495115               |
| SNP_P3_112903_745535 | NW_004515805.1 | Scaffold290 | 745535                  | CC                              | TT                | 1946495116               |
| SNP_P3_112904_749299 | NW_004515805.1 | Scaffold290 | 749299                  | AA                              | CC                | 1946495118               |
| SNP_P3_112905_749325 | NW_004515805.1 | Scaffold290 | 749325                  | AA                              | GG                | 1946495119               |
| SNP_P3_112906_750069 | NW_004515805.1 | Scaffold290 | 750069                  | GG                              | AA                | 1946495121               |
| SNP_P3_112907_753962 | NW_004515805.1 | Scaffold290 | 753962                  | CC                              | TT                | 1946495122               |
| SNP_P3_112908_754303 | NW_004515805.1 | Scaffold290 | 754303                  | TT                              | AA                | 1946495124               |
| SNP_P3_112909_754668 | NW_004515805.1 | Scaffold290 | 754668                  | CC                              | TT                | 1946495125               |
| SNP_P3_112910_757675 | NW_004515805.1 | Scaffold290 | 757675                  | CC                              | TT                | 1946495126               |
| SNP_P3_112911_758022 | NW_004515805.1 | Scaffold290 | 758022                  | CC                              | TT                | 1946495128               |
| SNP_P3_112912_758024 | NW_004515805.1 | Scaffold290 | 758024                  | CC                              | TT                | 1946495129               |
| SNP_P3_112913_758937 | NW_004515805.1 | Scaffold290 | 758937                  | CC                              | AA                | 1946495131               |
| SNP_P3_112914_759116 | NW_004515805.1 | Scaffold290 | 759116                  | GG                              | AA                | 1946495132               |
| SNP_P3_112915_759642 | NW_004515805.1 | Scaffold290 | 759642                  | TT                              | CC                | 1946495134               |
| SNP_P3_112916_760414 | NW_004515805.1 | Scaffold290 | 760414                  | AA                              | CC                | 1946495135               |
| SNP_P3_112917_761704 | NW_004515805.1 | Scaffold290 | 761704                  | GG                              | AA                | 1946495137               |
| SNP_P3_112918_762663 | NW_004515805.1 | Scaffold290 | 762663                  | AA                              | TT                | 1946495138               |
| SNP_P3_112919_763883 | NW_004515805.1 | Scaffold290 | 763883                  | GG                              | AA                | 1946495140               |
| SNP_P3_112920_764044 | NW_004515805.1 | Scaffold290 | 764044                  | TT                              | CC                | 1946495141               |
| SNP_P3_112922_766773 | NW_004515805.1 | Scaffold290 | 766773                  | GG                              | AA                | 1946495143               |
| SNP_P3_112923_767210 | NW_004515805.1 | Scaffold290 | 767210                  | AA                              | GG                | 1946495144               |
| SNP_P3_112924_774404 | NW_004515805.1 | Scaffold290 | 774404                  | CC                              | TT                | 1946495146               |
| SNP_P3_112925_777912 | NW_004515805.1 | Scaffold290 | 777912                  | TT                              | CC                | 1946495147               |
| SNP_P3_112926_796714 | NW_004515805.1 | Scaffold290 | 796714                  | AA                              | TT                | 1946495149               |
| SNP_P3_112927_797286 | NW_004515805.1 | Scaffold290 | 797286                  | GG                              | TT                | 1946495150               |
| SNP_P3_112928_797422 | NW_004515805.1 | Scaffold290 | 797422                  | GG                              | CC                | 1946495152               |
| SNP_P3_112929_797438 | NW_004515805.1 | Scaffold290 | 797438                  | AA                              | GG                | 1946495153               |
| SNP_P3_112930_797450 | NW_004515805.1 | Scaffold290 | 797450                  | TT                              | CC                | 1946495155               |
| SNP_P3_112931_797715 | NW_004515805.1 | Scaffold290 | 797715                  | GG                              | AA                | 1946495156               |
| SNP_P3_112932_798289 | NW_004515805.1 | Scaffold290 | 798289                  | CC                              | TT                | 1946495158               |
| SNP_P3_112933_800975 | NW_004515805.1 | Scaffold290 | 800975                  | GG                              | AA                | 1946495159               |
| SNP_P3_112934_803045 | NW_004515805.1 | Scaffold290 | 803045                  | CC                              | TT                | 1946495161               |
| SNP_P3_112935_803224 | NW_004515805.1 | Scaffold290 | 803224                  | AA                              | GG                | 1946495162               |
| SNP_P3_112936_805285 | NW_004515805.1 | Scaffold290 | 805285                  | AA                              | CC                | 1946495164               |
| SNP_P3_112937_805342 | NW_004515805.1 | Scaffold290 | 805342                  | AA                              | TT                | 1946495165               |
| SNP_P3_112938_813677 | NW_004515805.1 | Scaffold290 | 813677                  | CC                              | TT                | 1946495167               |
| SNP_P3_112939_813710 | NW_004515805.1 | Scaffold290 | 813710                  | TT                              | CC                | 1946495168               |

| SNPs IDs             | Chromosome IDs | Chromosomes | Physical positions (bp) | CDC Frontier (Reference genome) | (Pusa 256 & HPNB) | NCBI SNPdb Accession IDs |
|----------------------|----------------|-------------|-------------------------|---------------------------------|-------------------|--------------------------|
| SNP_P3_112940_813716 | NW_004515805.1 | Scaffold290 | 813716                  | CC                              | TT                | 1946495170               |
| SNP_P3_112941_813722 | NW_004515805.1 | Scaffold290 | 813722                  | TT                              | CC                | 1946495171               |
| SNP_P3_112942_813749 | NW_004515805.1 | Scaffold290 | 813749                  | AA                              | GG                | 1946495173               |
| SNP_P3_112943_813788 | NW_004515805.1 | Scaffold290 | 813788                  | TT                              | GG                | 1946495174               |
| SNP_P3_112944_814483 | NW_004515805.1 | Scaffold290 | 814483                  | TT                              | AA                | 1946495176               |
| SNP_P3_112945_814760 | NW_004515805.1 | Scaffold290 | 814760                  | TT                              | CC                | 1946495177               |
| SNP_P3_112946_815082 | NW_004515805.1 | Scaffold290 | 815082                  | TT                              | CC                | 1946495179               |
| SNP_P3_112947_815760 | NW_004515805.1 | Scaffold290 | 815760                  | TT                              | GG                | 1946495180               |
| SNP_P3_112948_816219 | NW_004515805.1 | Scaffold290 | 816219                  | AA                              | CC                | 1946495182               |
| SNP_P3_112949_817373 | NW_004515805.1 | Scaffold290 | 817373                  | AA                              | GG                | 1946495183               |
| SNP_P3_112950_817702 | NW_004515805.1 | Scaffold290 | 817702                  | TT                              | GG                | 1946495185               |
| SNP_P3_112951_818291 | NW_004515805.1 | Scaffold290 | 818291                  | AA                              | CC                | 1946495186               |
| SNP_P3_112953_818508 | NW_004515805.1 | Scaffold290 | 818508                  | TT                              | AA                | 1946495188               |
| SNP_P3_112954_818513 | NW_004515805.1 | Scaffold290 | 818513                  | AA                              | TT                | 1946495189               |
| SNP_P3_112956_821834 | NW_004515805.1 | Scaffold290 | 821834                  | GG                              | TT                | 1946495191               |
| SNP_P3_112957_823863 | NW_004515805.1 | Scaffold290 | 823863                  | TT                              | CC                | 1946495193               |
| SNP_P3_112958_823884 | NW_004515805.1 | Scaffold290 | 823884                  | GG                              | TT                | 1946495194               |
| SNP_P3_112959_827011 | NW_004515805.1 | Scaffold290 | 827011                  | AA                              | GG                | 1946495196               |
| SNP_P3_112960_827280 | NW_004515805.1 | Scaffold290 | 827280                  | GG                              | AA                | 1946495197               |
| SNP_P3_112961_829363 | NW_004515805.1 | Scaffold290 | 829363                  | TT                              | GG                | 1946495198               |
| SNP_P3_112962_829904 | NW_004515805.1 | Scaffold290 | 829904                  | GG                              | AA                | 1946495200               |
| SNP_P3_112963_829931 | NW_004515805.1 | Scaffold290 | 829931                  | GG                              | AA                | 1946495201               |
| SNP_P3_112964_830194 | NW_004515805.1 | Scaffold290 | 830194                  | CC                              | TT                | 1946495203               |
| SNP_P3_112965_838281 | NW_004515805.1 | Scaffold290 | 838281                  | CC                              | AA                | 1946495204               |
| SNP_P3_112966_839347 | NW_004515805.1 | Scaffold290 | 839347                  | AA                              | CC                | 1946495206               |
| SNP_P3_112967_844930 | NW_004515805.1 | Scaffold290 | 844930                  | GG                              | TT                | 1946495207               |
| SNP_P3_112968_845269 | NW_004515805.1 | Scaffold290 | 845269                  | GG                              | AA                | 1946495209               |
| SNP_P3_112969_846096 | NW_004515805.1 | Scaffold290 | 846096                  | GG                              | CC                | 1946495210               |
| SNP_P3_112970_847912 | NW_004515805.1 | Scaffold290 | 847912                  | AA                              | GG                | 1946495211               |
| SNP_P3_112971_848044 | NW_004515805.1 | Scaffold290 | 848044                  | CC                              | TT                | 1946495213               |
| SNP_P3_112972_848939 | NW_004515805.1 | Scaffold290 | 848939                  | CC                              | GG                | 1946495214               |
| SNP_P3_112973_848944 | NW_004515805.1 | Scaffold290 | 848944                  | GG                              | TT                | 1946495216               |
| SNP_P3_112974_848951 | NW_004515805.1 | Scaffold290 | 848951                  | TT                              | AA                | 1946495217               |
| SNP_P3_112975_849249 | NW_004515805.1 | Scaffold290 | 849249                  | CC                              | TT                | 1946495219               |
| SNP_P3_112976_849308 | NW_004515805.1 | Scaffold290 | 849308                  | TT                              | CC                | 1946495220               |
| SNP_P3_112978_850462 | NW_004515805.1 | Scaffold290 | 850462                  | GG                              | AA                | 1946495222               |
| SNP_P3_112979_854299 | NW_004515805.1 | Scaffold290 | 854299                  | GG                              | TT                | 1946495223               |
| SNP_P3_112981_859879 | NW_004515805.1 | Scaffold290 | 859879                  | GG                              | AA                | 1946495225               |
| SNP_P3_112983_867755 | NW_004515805.1 | Scaffold290 | 867755                  | AA                              | CC                | 1946495226               |
| SNP_P3_112984_874452 | NW_004515805.1 | Scaffold290 | 874452                  | AA                              | GG                | 1946495227               |
| SNP_P3_112985_874460 | NW_004515805.1 | Scaffold290 | 874460                  | AA                              | GG                | 1946495229               |
| SNP_P3_112986_874817 | NW_004515805.1 | Scaffold290 | 874817                  | TT                              | CC                | 1946495230               |



| SNPs IDs             | Chromosome IDs | Chromosomes | Physical positions (bp) | CDC Frontier (Reference genome) | (Pusa 256 & HPNB) | NCBI SNPdb Accession IDs |
|----------------------|----------------|-------------|-------------------------|---------------------------------|-------------------|--------------------------|
| SNP_P3_112987_877539 | NW_004515805.1 | Scaffold290 | 877539                  | GG                              | TT                | 1946495232               |
| SNP_P3_112988_878935 | NW_004515805.1 | Scaffold290 | 878935                  | AA                              | TT                | 1946495233               |
| SNP_P3_112989_879542 | NW_004515805.1 | Scaffold290 | 879542                  | AA                              | CC                | 1946495235               |
| SNP_P3_112990_879584 | NW_004515805.1 | Scaffold290 | 879584                  | TT                              | CC                | 1946495236               |
| SNP_P3_112991_882392 | NW_004515805.1 | Scaffold290 | 882392                  | AA                              | CC                | 1946495238               |
| SNP_P3_112992_887543 | NW_004515805.1 | Scaffold290 | 887543                  | CC                              | TT                | 1946495239               |
| SNP_P3_112994_892462 | NW_004515805.1 | Scaffold290 | 892462                  | TT                              | GG                | 1946495241               |
| SNP_P3_112996_896866 | NW_004515805.1 | Scaffold290 | 896866                  | TT                              | CC                | 1946495242               |
| SNP_P3_112997_899615 | NW_004515805.1 | Scaffold290 | 899615                  | GG                              | AA                | 1946495244               |
| SNP_P3_112998_899619 | NW_004515805.1 | Scaffold290 | 899619                  | CC                              | TT                | 1946495245               |
| SNP_P3_112999_901309 | NW_004515805.1 | Scaffold290 | 901309                  | CC                              | AA                | 1946495247               |
| SNP_P3_113000_906612 | NW_004515805.1 | Scaffold290 | 906612                  | GG                              | AA                | 1946495249               |
| SNP_P3_113001_906732 | NW_004515805.1 | Scaffold290 | 906732                  | CC                              | TT                | 1946495250               |
| SNP_P3_113002_907159 | NW_004515805.1 | Scaffold290 | 907159                  | TT                              | CC                | 1946495251               |
| SNP_P3_113003_909788 | NW_004515805.1 | Scaffold290 | 909788                  | GG                              | AA                | 1946495253               |
| SNP_P3_113004_910055 | NW_004515805.1 | Scaffold290 | 910055                  | GG                              | AA                | 1946495254               |
| SNP_P3_113006_912141 | NW_004515805.1 | Scaffold290 | 912141                  | TT                              | AA                | 1946495256               |
| SNP_P3_113007_912142 | NW_004515805.1 | Scaffold290 | 912142                  | CC                              | GG                | 1946495257               |
| SNP_P3_113008_830    | NW_004515806.1 | Scaffold292 | 830                     | AA                              | GG                | 1946495259               |
| SNP_P3_113009_2156   | NW_004515806.1 | Scaffold292 | 2156                    | GG                              | CC                | 1946495260               |
| SNP_P3_113010_5290   | NW_004515806.1 | Scaffold292 | 5290                    | AA                              | CC                | 1946495262               |
| SNP_P3_113011_5295   | NW_004515806.1 | Scaffold292 | 5295                    | AA                              | TT                | 1946495263               |
| SNP_P3_113013_5498   | NW_004515806.1 | Scaffold292 | 5498                    | AA                              | CC                | 1946495264               |
| SNP_P3_113014_617    | NW_004515807.1 | Scaffold293 | 617                     | AA                              | TT                | 1946495266               |
| SNP_P3_113015_1795   | NW_004515807.1 | Scaffold293 | 1795                    | TT                              | AA                | 1946495267               |
| SNP_P3_113016_6455   | NW_004515807.1 | Scaffold293 | 6455                    | CC                              | TT                | 1946495269               |
| SNP_P3_113017_10971  | NW_004515807.1 | Scaffold293 | 10971                   | AA                              | CC                | 1946495272               |
| SNP_P3_113018_10993  | NW_004515807.1 | Scaffold293 | 10993                   | AA                              | CC                | 1946495274               |
| SNP_P3_113019_11176  | NW_004515807.1 | Scaffold293 | 11176                   | AA                              | GG                | 1946495275               |
| SNP_P3_113020_12860  | NW_004515807.1 | Scaffold293 | 12860                   | AA                              | GG                | 1946495277               |
| SNP_P3_113021_12938  | NW_004515807.1 | Scaffold293 | 12938                   | CC                              | TT                | 1946495278               |
| SNP_P3_113022_12967  | NW_004515807.1 | Scaffold293 | 12967                   | CC                              | AA                | 1946495280               |
| SNP_P3_113023_12976  | NW_004515807.1 | Scaffold293 | 12976                   | GG                              | AA                | 1946495281               |
| SNP_P3_113024_12983  | NW_004515807.1 | Scaffold293 | 12983                   | TT                              | AA                | 1946495283               |
| SNP_P3_113025_12997  | NW_004515807.1 | Scaffold293 | 12997                   | TT                              | CC                | 1946495284               |
| SNP_P3_113026_13006  | NW_004515807.1 | Scaffold293 | 13006                   | TT                              | CC                | 1946495286               |
| SNP_P3_113027_13007  | NW_004515807.1 | Scaffold293 | 13007                   | CC                              | TT                | 1946495287               |
| SNP_P3_113028_13015  | NW_004515807.1 | Scaffold293 | 13015                   | CC                              | GG                | 1946495288               |
| SNP_P3_113029_13030  | NW_004515807.1 | Scaffold293 | 13030                   | CC                              | TT                | 1946495290               |
| SNP_P3_113030_13058  | NW_004515807.1 | Scaffold293 | 13058                   | TT                              | CC                | 1946495291               |
| SNP_P3_113031_19964  | NW_004515807.1 | Scaffold293 | 19964                   | AA                              | TT                | 1946495293               |
| SNP_P3_113032_19977  | NW_004515807.1 | Scaffold293 | 19977                   | AA                              | CC                | 1946495294               |

| SNPs IDs            | Chromosome IDs | Chromosomes | Physical positions (bp) | CDC Frontier (Reference genome) | (Pusa 256 & HPNB) | NCBI SNPdb Accession IDs |
|---------------------|----------------|-------------|-------------------------|---------------------------------|-------------------|--------------------------|
| SNP_P3_113033_23830 | NW_004515807.1 | Scaffold293 | 23830                   | GG                              | AA                | 1946495296               |
| SNP_P3_113035_30190 | NW_004515807.1 | Scaffold293 | 30190                   | TT                              | GG                | 1946495297               |
| SNP_P3_113036_30273 | NW_004515807.1 | Scaffold293 | 30273                   | GG                              | AA                | 1946495298               |
| SNP_P3_113037_30297 | NW_004515807.1 | Scaffold293 | 30297                   | TT                              | CC                | 1946495300               |
| SNP_P3_113038_30395 | NW_004515807.1 | Scaffold293 | 30395                   | AA                              | GG                | 1946495301               |
| SNP_P3_113039_30428 | NW_004515807.1 | Scaffold293 | 30428                   | AA                              | GG                | 1946495303               |
| SNP_P3_113041_30457 | NW_004515807.1 | Scaffold293 | 30457                   | TT                              | CC                | 1946495304               |
| SNP_P3_113042_30467 | NW_004515807.1 | Scaffold293 | 30467                   | TT                              | CC                | 1946495306               |
| SNP_P3_113043_30614 | NW_004515807.1 | Scaffold293 | 30614                   | GG                              | AA                | 1946495307               |
| SNP_P3_113044_30632 | NW_004515807.1 | Scaffold293 | 30632                   | TT                              | CC                | 1946495308               |
| SNP_P3_113045_30634 | NW_004515807.1 | Scaffold293 | 30634                   | GG                              | AA                | 1946495310               |
| SNP_P3_113046_33582 | NW_004515807.1 | Scaffold293 | 33582                   | CC                              | AA                | 1946495311               |
| SNP_P3_113047_33685 | NW_004515807.1 | Scaffold293 | 33685                   | AA                              | GG                | 1946495313               |
| SNP_P3_113048_35422 | NW_004515807.1 | Scaffold293 | 35422                   | TT                              | AA                | 1946495314               |
| SNP_P3_113049_38999 | NW_004515807.1 | Scaffold293 | 38999                   | GG                              | CC                | 1946495315               |
| SNP_P3_113050_39000 | NW_004515807.1 | Scaffold293 | 39000                   | CC                              | AA                | 1946495317               |
| SNP_P3_113051_43701 | NW_004515807.1 | Scaffold293 | 43701                   | TT                              | CC                | 1946495318               |
| SNP_P3_113052_45782 | NW_004515807.1 | Scaffold293 | 45782                   | TT                              | AA                | 1946495320               |
| SNP_P3_113053_51279 | NW_004515807.1 | Scaffold293 | 51279                   | GG                              | AA                | 1946495321               |
| SNP_P3_113054_51297 | NW_004515807.1 | Scaffold293 | 51297                   | AA                              | TT                | 1946495323               |
| SNP_P3_113055_51323 | NW_004515807.1 | Scaffold293 | 51323                   | AA                              | GG                | 1946495324               |
| SNP_P3_113056_239   | NW_004515808.1 | Scaffold295 | 239                     | AA                              | GG                | 1946495326               |
| SNP_P3_113057_245   | NW_004515808.1 | Scaffold295 | 245                     | CC                              | AA                | 1946495327               |
| SNP_P3_113058_363   | NW_004515808.1 | Scaffold295 | 363                     | TT                              | GG                | 1946495328               |
| SNP_P3_113059_368   | NW_004515808.1 | Scaffold295 | 368                     | TT                              | AA                | 1946495330               |
| SNP_P3_113060_374   | NW_004515808.1 | Scaffold295 | 374                     | TT                              | CC                | 1946495331               |
| SNP_P3_113061_378   | NW_004515808.1 | Scaffold295 | 378                     | CC                              | TT                | 1946495333               |
| SNP_P3_113062_379   | NW_004515808.1 | Scaffold295 | 379                     | AA                              | TT                | 1946495334               |
| SNP_P3_113063_389   | NW_004515808.1 | Scaffold295 | 389                     | TT                              | CC                | 1946495336               |
| SNP_P3_113064_395   | NW_004515808.1 | Scaffold295 | 395                     | CC                              | TT                | 1946495337               |
| SNP_P3_113065_428   | NW_004515808.1 | Scaffold295 | 428                     | GG                              | AA                | 1946495338               |
| SNP_P3_113066_429   | NW_004515808.1 | Scaffold295 | 429                     | TT                              | AA                | 1946495340               |
| SNP_P3_113067_608   | NW_004515808.1 | Scaffold295 | 608                     | AA                              | GG                | 1946495341               |
| SNP_P3_113068_610   | NW_004515808.1 | Scaffold295 | 610                     | AA                              | GG                | 1946495343               |
| SNP_P3_113069_617   | NW_004515808.1 | Scaffold295 | 617                     | TT                              | AA                | 1946495344               |
| SNP_P3_113070_703   | NW_004515808.1 | Scaffold295 | 703                     | TT                              | CC                | 1946495346               |
| SNP_P3_113071_723   | NW_004515808.1 | Scaffold295 | 723                     | TT                              | CC                | 1946495347               |
| SNP_P3_113072_763   | NW_004515808.1 | Scaffold295 | 763                     | TT                              | CC                | 1946495349               |
| SNP_P3_113074_844   | NW_004515808.1 | Scaffold295 | 844                     | GG                              | CC                | 1946495350               |
| SNP_P3_113075_2511  | NW_004515808.1 | Scaffold295 | 2511                    | TT                              | GG                | 1946495352               |
| SNP_P3_113076_2555  | NW_004515808.1 | Scaffold295 | 2555                    | AA                              | GG                | 1946495353               |
| SNP_P3_113077_8310  | NW_004515808.1 | Scaffold295 | 8310                    | GG                              | TT                | 1946495354               |

| SNPs IDs            | Chromosome IDs | Chromosomes | Physical positions (bp) | CDC Frontier (Reference genome) | (Pusa 256 & HPNB) | NCBI SNPdb Accession IDs |
|---------------------|----------------|-------------|-------------------------|---------------------------------|-------------------|--------------------------|
| SNP_P3_113078_32111 | NW_004515808.1 | Scaffold295 | 32111                   | AA                              | CC                | 1946495356               |
| SNP_P3_113079_418   | NW_004515809.1 | Scaffold296 | 418                     | AA                              | GG                | 1946495357               |
| SNP_P3_113080_10167 | NW_004515809.1 | Scaffold296 | 10167                   | CC                              | TT                | 1946495359               |
| SNP_P3_113081_10205 | NW_004515809.1 | Scaffold296 | 10205                   | GG                              | CC                | 1946495361               |
| SNP_P3_113082_10230 | NW_004515809.1 | Scaffold296 | 10230                   | CC                              | TT                | 1946495363               |
| SNP_P3_113083_10401 | NW_004515809.1 | Scaffold296 | 10401                   | TT                              | CC                | 1946495365               |
| SNP_P3_113084_10422 | NW_004515809.1 | Scaffold296 | 10422                   | CC                              | AA                | 1946495367               |
| SNP_P3_113085_10554 | NW_004515809.1 | Scaffold296 | 10554                   | CC                              | TT                | 1946495368               |
| SNP_P3_113086_10592 | NW_004515809.1 | Scaffold296 | 10592                   | GG                              | AA                | 1946495370               |
| SNP_P3_113087_10630 | NW_004515809.1 | Scaffold296 | 10630                   | GG                              | TT                | 1946495371               |
| SNP_P3_113088_10685 | NW_004515809.1 | Scaffold296 | 10685                   | CC                              | TT                | 1946495373               |
| SNP_P3_113090_11152 | NW_004515809.1 | Scaffold296 | 11152                   | GG                              | TT                | 1946495374               |
| SNP_P3_113091_11193 | NW_004515809.1 | Scaffold296 | 11193                   | GG                              | AA                | 1946495376               |
| SNP_P3_113092_11296 | NW_004515809.1 | Scaffold296 | 11296                   | CC                              | TT                | 1946495377               |
| SNP_P3_113094_11376 | NW_004515809.1 | Scaffold296 | 11376                   | CC                              | TT                | 1946495378               |
| SNP_P3_113095_11586 | NW_004515809.1 | Scaffold296 | 11586                   | GG                              | AA                | 1946495380               |
| SNP_P3_113096_11829 | NW_004515809.1 | Scaffold296 | 11829                   | CC                              | TT                | 1946495381               |
| SNP_P3_113097_12012 | NW_004515809.1 | Scaffold296 | 12012                   | TT                              | CC                | 1946495383               |
| SNP_P3_113098_14275 | NW_004515809.1 | Scaffold296 | 14275                   | TT                              | AA                | 1946495384               |
| SNP_P3_113099_14473 | NW_004515809.1 | Scaffold296 | 14473                   | CC                              | TT                | 1946495386               |
| SNP_P3_113100_14800 | NW_004515809.1 | Scaffold296 | 14800                   | GG                              | AA                | 1946495387               |
| SNP_P3_113101_14809 | NW_004515809.1 | Scaffold296 | 14809                   | CC                              | AA                | 1946495389               |
| SNP_P3_113102_14960 | NW_004515809.1 | Scaffold296 | 14960                   | GG                              | AA                | 1946495390               |
| SNP_P3_113103_15029 | NW_004515809.1 | Scaffold296 | 15029                   | TT                              | CC                | 1946495392               |
| SNP_P3_113104_15212 | NW_004515809.1 | Scaffold296 | 15212                   | TT                              | CC                | 1946495393               |
| SNP_P3_113105_15232 | NW_004515809.1 | Scaffold296 | 15232                   | TT                              | CC                | 1946495395               |
| SNP_P3_113106_15250 | NW_004515809.1 | Scaffold296 | 15250                   | AA                              | CC                | 1946495396               |
| SNP_P3_113107_15253 | NW_004515809.1 | Scaffold296 | 15253                   | CC                              | TT                | 1946495398               |
| SNP_P3_113108_15320 | NW_004515809.1 | Scaffold296 | 15320                   | CC                              | TT                | 1946495399               |
| SNP_P3_113109_15367 | NW_004515809.1 | Scaffold296 | 15367                   | AA                              | GG                | 1946495401               |
| SNP_P3_113110_15377 | NW_004515809.1 | Scaffold296 | 15377                   | TT                              | CC                | 1946495402               |
| SNP_P3_113111_15419 | NW_004515809.1 | Scaffold296 | 15419                   | AA                              | TT                | 1946495404               |
| SNP_P3_113112_15424 | NW_004515809.1 | Scaffold296 | 15424                   | GG                              | AA                | 1946495405               |
| SNP_P3_113113_15458 | NW_004515809.1 | Scaffold296 | 15458                   | GG                              | AA                | 1946495407               |
| SNP_P3_113114_15460 | NW_004515809.1 | Scaffold296 | 15460                   | CC                              | TT                | 1946495408               |
| SNP_P3_113115_15486 | NW_004515809.1 | Scaffold296 | 15486                   | GG                              | AA                | 1946495410               |
| SNP_P3_113116_15507 | NW_004515809.1 | Scaffold296 | 15507                   | TT                              | CC                | 1946495411               |
| SNP_P3_113117_15519 | NW_004515809.1 | Scaffold296 | 15519                   | AA                              | GG                | 1946495413               |
| SNP_P3_113118_15523 | NW_004515809.1 | Scaffold296 | 15523                   | TT                              | AA                | 1946495415               |
| SNP_P3_113119_15540 | NW_004515809.1 | Scaffold296 | 15540                   | CC                              | AA                | 1946495416               |
| SNP_P3_113120_15572 | NW_004515809.1 | Scaffold296 | 15572                   | GG                              | AA                | 1946495418               |
| SNP_P3_113121_15596 | NW_004515809.1 | Scaffold296 | 15596                   | CC                              | TT                | 1946495419               |

| SNPs IDs            | Chromosome IDs | Chromosomes | Physical positions (bp) | CDC Frontier (Reference genome) | (Pusa 256 & HPNB) | NCBI SNPdb Accession IDs |
|---------------------|----------------|-------------|-------------------------|---------------------------------|-------------------|--------------------------|
| SNP_P3_113122_15625 | NW_004515809.1 | Scaffold296 | 15625                   | TT                              | CC                | 1946495421               |
| SNP_P3_113123_15641 | NW_004515809.1 | Scaffold296 | 15641                   | AA                              | CC                | 1946495422               |
| SNP_P3_113124_15645 | NW_004515809.1 | Scaffold296 | 15645                   | CC                              | AA                | 1946495424               |
| SNP_P3_113125_15744 | NW_004515809.1 | Scaffold296 | 15744                   | TT                              | GG                | 1946495426               |
| SNP_P3_113126_15769 | NW_004515809.1 | Scaffold296 | 15769                   | AA                              | GG                | 1946495427               |
| SNP_P3_113127_15770 | NW_004515809.1 | Scaffold296 | 15770                   | GG                              | AA                | 1946495429               |
| SNP_P3_113128_15787 | NW_004515809.1 | Scaffold296 | 15787                   | CC                              | GG                | 1946495430               |
| SNP_P3_113129_15789 | NW_004515809.1 | Scaffold296 | 15789                   | GG                              | AA                | 1946495431               |
| SNP_P3_113130_15791 | NW_004515809.1 | Scaffold296 | 15791                   | AA                              | CC                | 1946495433               |
| SNP_P3_113131_15802 | NW_004515809.1 | Scaffold296 | 15802                   | CC                              | TT                | 1946495434               |
| SNP_P3_113132_15823 | NW_004515809.1 | Scaffold296 | 15823                   | TT                              | GG                | 1946495436               |
| SNP_P3_113133_15835 | NW_004515809.1 | Scaffold296 | 15835                   | GG                              | AA                | 1946495437               |
| SNP_P3_113134_15861 | NW_004515809.1 | Scaffold296 | 15861                   | TT                              | GG                | 1946495439               |
| SNP_P3_113135_15872 | NW_004515809.1 | Scaffold296 | 15872                   | GG                              | AA                | 1946495440               |
| SNP_P3_113136_15882 | NW_004515809.1 | Scaffold296 | 15882                   | CC                              | AA                | 1946495442               |
| SNP_P3_113137_15928 | NW_004515809.1 | Scaffold296 | 15928                   | AA                              | CC                | 1946495443               |
| SNP_P3_113138_15992 | NW_004515809.1 | Scaffold296 | 15992                   | CC                              | AA                | 1946495445               |
| SNP_P3_113139_16152 | NW_004515809.1 | Scaffold296 | 16152                   | AA                              | CC                | 1946495446               |
| SNP_P3_113141_16313 | NW_004515809.1 | Scaffold296 | 16313                   | GG                              | CC                | 1946495448               |
| SNP_P3_113142_16328 | NW_004515809.1 | Scaffold296 | 16328                   | CC                              | AA                | 1946495449               |
| SNP_P3_113143_16336 | NW_004515809.1 | Scaffold296 | 16336                   | CC                              | TT                | 1946495451               |
| SNP_P3_113144_16351 | NW_004515809.1 | Scaffold296 | 16351                   | CC                              | TT                | 1946495452               |
| SNP_P3_113145_16354 | NW_004515809.1 | Scaffold296 | 16354                   | AA                              | GG                | 1946495454               |
| SNP_P3_113146_16380 | NW_004515809.1 | Scaffold296 | 16380                   | TT                              | GG                | 1946495455               |
| SNP_P3_113147_16409 | NW_004515809.1 | Scaffold296 | 16409                   | TT                              | CC                | 1946495457               |
| SNP_P3_113148_16454 | NW_004515809.1 | Scaffold296 | 16454                   | TT                              | CC                | 1946495458               |
| SNP_P3_113149_16456 | NW_004515809.1 | Scaffold296 | 16456                   | GG                              | AA                | 1946495460               |
| SNP_P3_113150_16472 | NW_004515809.1 | Scaffold296 | 16472                   | TT                              | GG                | 1946495461               |
| SNP_P3_113151_16496 | NW_004515809.1 | Scaffold296 | 16496                   | TT                              | CC                | 1946495463               |
| SNP_P3_113152_16564 | NW_004515809.1 | Scaffold296 | 16564                   | AA                              | GG                | 1946495464               |
| SNP_P3_113153_16589 | NW_004515809.1 | Scaffold296 | 16589                   | CC                              | TT                | 1946495466               |
| SNP_P3_113154_16594 | NW_004515809.1 | Scaffold296 | 16594                   | AA                              | GG                | 1946495467               |
| SNP_P3_113155_16637 | NW_004515809.1 | Scaffold296 | 16637                   | CC                              | TT                | 1946495469               |
| SNP_P3_113156_16646 | NW_004515809.1 | Scaffold296 | 16646                   | AA                              | GG                | 1946495471               |
| SNP_P3_113157_16693 | NW_004515809.1 | Scaffold296 | 16693                   | CC                              | TT                | 1946495472               |
| SNP_P3_113158_16703 | NW_004515809.1 | Scaffold296 | 16703                   | AA                              | GG                | 1946495474               |
| SNP_P3_113159_16730 | NW_004515809.1 | Scaffold296 | 16730                   | GG                              | TT                | 1946495475               |
| SNP_P3_113160_16747 | NW_004515809.1 | Scaffold296 | 16747                   | AA                              | CC                | 1946495477               |
| SNP_P3_113161_16798 | NW_004515809.1 | Scaffold296 | 16798                   | TT                              | CC                | 1946495478               |
| SNP_P3_113162_16813 | NW_004515809.1 | Scaffold296 | 16813                   | CC                              | TT                | 1946495480               |
| SNP_P3_113163_16814 | NW_004515809.1 | Scaffold296 | 16814                   | CC                              | AA                | 1946495481               |
| SNP_P3_113164_16826 | NW_004515809.1 | Scaffold296 | 16826                   | GG                              | AA                | 1946495483               |

| SNPs IDs             | Chromosome IDs | Chromosomes | Physical positions (bp) | CDC Frontier (Reference genome) | (Pusa 256 & HPNB) | NCBI SNPdb Accession IDs |
|----------------------|----------------|-------------|-------------------------|---------------------------------|-------------------|--------------------------|
| SNP_P3_113165_16856  | NW_004515809.1 | Scaffold296 | 16856                   | GG                              | AA                | 1946495484               |
| SNP_P3_113166_16867  | NW_004515809.1 | Scaffold296 | 16867                   | AA                              | TT                | 1946495486               |
| SNP_P3_113167_16874  | NW_004515809.1 | Scaffold296 | 16874                   | TT                              | CC                | 1946495487               |
| SNP_P3_113168_16898  | NW_004515809.1 | Scaffold296 | 16898                   | TT                              | CC                | 1946495488               |
| SNP_P3_113170_68328  | NW_004515809.1 | Scaffold296 | 68328                   | GG                              | AA                | 1946495490               |
| SNP_P3_113171_78576  | NW_004515809.1 | Scaffold296 | 78576                   | CC                              | AA                | 1946495491               |
| SNP_P3_113172_78616  | NW_004515809.1 | Scaffold296 | 78616                   | AA                              | GG                | 1946495493               |
| SNP_P3_113173_78647  | NW_004515809.1 | Scaffold296 | 78647                   | GG                              | TT                | 1946495494               |
| SNP_P3_113175_78724  | NW_004515809.1 | Scaffold296 | 78724                   | GG                              | AA                | 1946495496               |
| SNP_P3_113176_78771  | NW_004515809.1 | Scaffold296 | 78771                   | AA                              | GG                | 1946495497               |
| SNP_P3_113177_78783  | NW_004515809.1 | Scaffold296 | 78783                   | GG                              | TT                | 1946495499               |
| SNP_P3_113178_78799  | NW_004515809.1 | Scaffold296 | 78799                   | AA                              | GG                | 1946495500               |
| SNP_P3_113179_78816  | NW_004515809.1 | Scaffold296 | 78816                   | GG                              | AA                | 1946495502               |
| SNP_P3_113180_78951  | NW_004515809.1 | Scaffold296 | 78951                   | TT                              | GG                | 1946495503               |
| SNP_P3_113181_79061  | NW_004515809.1 | Scaffold296 | 79061                   | AA                              | GG                | 1946495505               |
| SNP_P3_113182_79092  | NW_004515809.1 | Scaffold296 | 79092                   | TT                              | GG                | 1946495506               |
| SNP_P3_113183_83369  | NW_004515809.1 | Scaffold296 | 83369                   | AA                              | GG                | 1946495508               |
| SNP_P3_113184_113603 | NW_004515809.1 | Scaffold296 | 113603                  | GG                              | AA                | 1946495509               |
| SNP_P3_113185_140242 | NW_004515809.1 | Scaffold296 | 140242                  | AA                              | CC                | 1946495511               |
| SNP_P3_113186_198528 | NW_004515809.1 | Scaffold296 | 198528                  | AA                              | GG                | 1946495512               |
| SNP_P3_113187_225117 | NW_004515809.1 | Scaffold296 | 225117                  | CC                              | AA                | 1946495514               |
| SNP_P3_113188_225127 | NW_004515809.1 | Scaffold296 | 225127                  | GG                              | AA                | 1946495515               |
| SNP_P3_113189_225140 | NW_004515809.1 | Scaffold296 | 225140                  | TT                              | AA                | 1946495517               |
| SNP_P3_113190_225151 | NW_004515809.1 | Scaffold296 | 225151                  | GG                              | CC                | 1946495518               |
| SNP_P3_113191_225152 | NW_004515809.1 | Scaffold296 | 225152                  | AA                              | GG                | 1946495520               |
| SNP_P3_113192_225172 | NW_004515809.1 | Scaffold296 | 225172                  | GG                              | CC                | 1946495521               |
| SNP_P3_113194_259037 | NW_004515809.1 | Scaffold296 | 259037                  | GG                              | AA                | 1946495523               |
| SNP_P3_113196_259141 | NW_004515809.1 | Scaffold296 | 259141                  | TT                              | AA                | 1946495524               |
| SNP_P3_113197_259200 | NW_004515809.1 | Scaffold296 | 259200                  | AA                              | TT                | 1946495526               |
| SNP_P3_113198_259221 | NW_004515809.1 | Scaffold296 | 259221                  | AA                              | GG                | 1946495527               |
| SNP_P3_113199_259230 | NW_004515809.1 | Scaffold296 | 259230                  | AA                              | TT                | 1946495528               |
| SNP_P3_113200_259231 | NW_004515809.1 | Scaffold296 | 259231                  | AA                              | TT                | 1946495530               |
| SNP_P3_113201_259241 | NW_004515809.1 | Scaffold296 | 259241                  | AA                              | GG                | 1946495531               |
| SNP_P3_113202_259246 | NW_004515809.1 | Scaffold296 | 259246                  | TT                              | CC                | 1946495533               |
| SNP_P3_113203_259247 | NW_004515809.1 | Scaffold296 | 259247                  | CC                              | TT                | 1946495534               |
| SNP_P3_113204_259341 | NW_004515809.1 | Scaffold296 | 259341                  | GG                              | AA                | 1946495536               |
| SNP_P3_113205_260822 | NW_004515809.1 | Scaffold296 | 260822                  | TT                              | AA                | 1946495537               |
| SNP_P3_113206_260846 | NW_004515809.1 | Scaffold296 | 260846                  | TT                              | CC                | 1946495539               |
| SNP_P3_113207_260876 | NW_004515809.1 | Scaffold296 | 260876                  | TT                              | CC                | 1946495540               |
| SNP_P3_113208_260896 | NW_004515809.1 | Scaffold296 | 260896                  | TT                              | AA                | 1946495542               |
| SNP_P3_113209_261137 | NW_004515809.1 | Scaffold296 | 261137                  | GG                              | AA                | 1946495543               |
| SNP_P3_113210_261173 | NW_004515809.1 | Scaffold296 | 261173                  | AA                              | GG                | 1946495545               |

| SNPs IDs             | Chromosome IDs | Chromosomes | Physical positions (bp) | CDC Frontier (Reference genome) | (Pusa 256 & HPNB) | NCBI SNPdb Accession IDs |
|----------------------|----------------|-------------|-------------------------|---------------------------------|-------------------|--------------------------|
| SNP_P3_113211_261194 | NW_004515809.1 | Scaffold296 | 261194                  | AA                              | GG                | 1946495546               |
| SNP_P3_113212_261254 | NW_004515809.1 | Scaffold296 | 261254                  | AA                              | GG                | 1946495548               |
| SNP_P3_113213_261259 | NW_004515809.1 | Scaffold296 | 261259                  | TT                              | CC                | 1946495549               |
| SNP_P3_113214_261290 | NW_004515809.1 | Scaffold296 | 261290                  | TT                              | CC                | 1946495551               |
| SNP_P3_113215_261332 | NW_004515809.1 | Scaffold296 | 261332                  | GG                              | AA                | 1946495552               |
| SNP_P3_113216_261347 | NW_004515809.1 | Scaffold296 | 261347                  | AA                              | GG                | 1946495554               |
| SNP_P3_113218_261476 | NW_004515809.1 | Scaffold296 | 261476                  | CC                              | TT                | 1946495555               |
| SNP_P3_113219_261535 | NW_004515809.1 | Scaffold296 | 261535                  | TT                              | AA                | 1946495557               |
| SNP_P3_113220_261545 | NW_004515809.1 | Scaffold296 | 261545                  | AA                              | TT                | 1946495558               |
| SNP_P3_113221_261546 | NW_004515809.1 | Scaffold296 | 261546                  | AA                              | GG                | 1946495560               |
| SNP_P3_113222_261564 | NW_004515809.1 | Scaffold296 | 261564                  | TT                              | CC                | 1946495561               |
| SNP_P3_113224_261701 | NW_004515809.1 | Scaffold296 | 261701                  | AA                              | GG                | 1946495563               |
| SNP_P3_113226_262010 | NW_004515809.1 | Scaffold296 | 262010                  | TT                              | CC                | 1946495564               |
| SNP_P3_113227_262028 | NW_004515809.1 | Scaffold296 | 262028                  | CC                              | TT                | 1946495566               |
| SNP_P3_113228_262296 | NW_004515809.1 | Scaffold296 | 262296                  | AA                              | GG                | 1946495567               |
| SNP_P3_113229_262323 | NW_004515809.1 | Scaffold296 | 262323                  | CC                              | AA                | 1946495569               |
| SNP_P3_113230_262645 | NW_004515809.1 | Scaffold296 | 262645                  | AA                              | GG                | 1946495570               |
| SNP_P3_113231_262730 | NW_004515809.1 | Scaffold296 | 262730                  | CC                              | GG                | 1946495572               |
| SNP_P3_113232_262755 | NW_004515809.1 | Scaffold296 | 262755                  | GG                              | AA                | 1946495573               |
| SNP_P3_113233_262770 | NW_004515809.1 | Scaffold296 | 262770                  | GG                              | AA                | 1946495575               |
| SNP_P3_113234_262803 | NW_004515809.1 | Scaffold296 | 262803                  | AA                              | GG                | 1946495576               |
| SNP_P3_113236_262852 | NW_004515809.1 | Scaffold296 | 262852                  | AA                              | GG                | 1946495578               |
| SNP_P3_113237_264721 | NW_004515809.1 | Scaffold296 | 264721                  | AA                              | TT                | 1946495579               |
| SNP_P3_113238_264864 | NW_004515809.1 | Scaffold296 | 264864                  | AA                              | TT                | 1946495581               |
| SNP_P3_113239_264867 | NW_004515809.1 | Scaffold296 | 264867                  | AA                              | CC                | 1946495582               |
| SNP_P3_113240_265058 | NW_004515809.1 | Scaffold296 | 265058                  | GG                              | CC                | 1946495583               |
| SNP_P3_113241_265144 | NW_004515809.1 | Scaffold296 | 265144                  | TT                              | GG                | 1946495585               |
| SNP_P3_113242_265145 | NW_004515809.1 | Scaffold296 | 265145                  | TT                              | AA                | 1946495586               |
| SNP_P3_113243_265183 | NW_004515809.1 | Scaffold296 | 265183                  | GG                              | TT                | 1946495588               |
| SNP_P3_113244_265208 | NW_004515809.1 | Scaffold296 | 265208                  | GG                              | CC                | 1946495590               |
| SNP_P3_113245_265274 | NW_004515809.1 | Scaffold296 | 265274                  | GG                              | AA                | 1946495591               |
| SNP_P3_113247_265369 | NW_004515809.1 | Scaffold296 | 265369                  | AA                              | GG                | 1946495593               |
| SNP_P3_113248_265378 | NW_004515809.1 | Scaffold296 | 265378                  | TT                              | CC                | 1946495594               |
| SNP_P3_113249_265435 | NW_004515809.1 | Scaffold296 | 265435                  | GG                              | TT                | 1946495596               |
| SNP_P3_113250_265458 | NW_004515809.1 | Scaffold296 | 265458                  | TT                              | CC                | 1946495597               |
| SNP_P3_113251_265518 | NW_004515809.1 | Scaffold296 | 265518                  | GG                              | CC                | 1946495599               |
| SNP_P3_113252_265530 | NW_004515809.1 | Scaffold296 | 265530                  | AA                              | GG                | 1946495600               |
| SNP_P3_113253_265584 | NW_004515809.1 | Scaffold296 | 265584                  | TT                              | CC                | 1946495602               |
| SNP_P3_113254_266216 | NW_004515809.1 | Scaffold296 | 266216                  | AA                              | TT                | 1946495603               |
| SNP_P3_113256_346803 | NW_004515809.1 | Scaffold296 | 346803                  | CC                              | TT                | 1946495605               |
| SNP_P3_113257_346851 | NW_004515809.1 | Scaffold296 | 346851                  | CC                              | TT                | 1946495606               |
| SNP_P3_113258_346853 | NW_004515809.1 | Scaffold296 | 346853                  | GG                              | AA                | 1946495608               |

| SNPs IDs             | Chromosome IDs | Chromosomes | Physical positions (bp) | CDC Frontier (Reference genome) | (Pusa 256 & HPNB) | NCBI SNPdb Accession IDs |
|----------------------|----------------|-------------|-------------------------|---------------------------------|-------------------|--------------------------|
| SNP_P3_113259_346874 | NW_004515809.1 | Scaffold296 | 346874                  | CC                              | TT                | 1946495609               |
| SNP_P3_113260_347153 | NW_004515809.1 | Scaffold296 | 347153                  | CC                              | TT                | 1946495611               |
| SNP_P3_113261_347163 | NW_004515809.1 | Scaffold296 | 347163                  | CC                              | TT                | 1946495612               |
| SNP_P3_113262_349676 | NW_004515809.1 | Scaffold296 | 349676                  | TT                              | AA                | 1946495614               |
| SNP_P3_113263_349678 | NW_004515809.1 | Scaffold296 | 349678                  | GG                              | CC                | 1946495615               |
| SNP_P3_113264_371434 | NW_004515809.1 | Scaffold296 | 371434                  | CC                              | TT                | 1946495617               |
| SNP_P3_113265_400652 | NW_004515809.1 | Scaffold296 | 400652                  | CC                              | TT                | 1946495618               |
| SNP_P3_113267_406920 | NW_004515809.1 | Scaffold296 | 406920                  | CC                              | GG                | 1946495620               |
| SNP_P3_113268_427492 | NW_004515809.1 | Scaffold296 | 427492                  | TT                              | CC                | 1946495621               |
| SNP_P3_113269_432470 | NW_004515809.1 | Scaffold296 | 432470                  | AA                              | GG                | 1946495623               |
| SNP_P3_113270_434751 | NW_004515809.1 | Scaffold296 | 434751                  | TT                              | CC                | 1946495624               |
| SNP_P3_113271_434792 | NW_004515809.1 | Scaffold296 | 434792                  | TT                              | AA                | 1946495626               |
| SNP_P3_113272_441071 | NW_004515809.1 | Scaffold296 | 441071                  | GG                              | CC                | 1946495627               |
| SNP_P3_113273_441092 | NW_004515809.1 | Scaffold296 | 441092                  | CC                              | TT                | 1946495629               |
| SNP_P3_113274_472381 | NW_004515809.1 | Scaffold296 | 472381                  | CC                              | AA                | 1946495630               |
| SNP_P3_113275_485328 | NW_004515809.1 | Scaffold296 | 485328                  | CC                              | GG                | 1946495632               |
| SNP_P3_113276_485368 | NW_004515809.1 | Scaffold296 | 485368                  | TT                              | CC                | 1946495633               |
| SNP_P3_113277_485833 | NW_004515809.1 | Scaffold296 | 485833                  | AA                              | TT                | 1946495635               |
| SNP_P3_113278_1493   | NW_004515810.1 | Scaffold298 | 1493                    | AA                              | TT                | 1946495636               |
| SNP_P3_113279_1575   | NW_004515810.1 | Scaffold298 | 1575                    | AA                              | GG                | 1946495638               |
| SNP_P3_113280_2591   | NW_004515810.1 | Scaffold298 | 2591                    | TT                              | AA                | 1946495640               |
| SNP_P3_113281_2594   | NW_004515810.1 | Scaffold298 | 2594                    | AA                              | TT                | 1946495641               |
| SNP_P3_113282_2686   | NW_004515810.1 | Scaffold298 | 2686                    | TT                              | CC                | 1946495643               |
| SNP_P3_113283_2712   | NW_004515810.1 | Scaffold298 | 2712                    | CC                              | TT                | 1946495644               |
| SNP_P3_113284_2937   | NW_004515810.1 | Scaffold298 | 2937                    | AA                              | TT                | 1946495646               |
| SNP_P3_113285_2938   | NW_004515810.1 | Scaffold298 | 2938                    | CC                              | AA                | 1946495647               |
| SNP_P3_113286_3567   | NW_004515810.1 | Scaffold298 | 3567                    | TT                              | CC                | 1946495649               |
| SNP_P3_113287_3751   | NW_004515810.1 | Scaffold298 | 3751                    | TT                              | CC                | 1946495650               |
| SNP_P3_113288_3768   | NW_004515810.1 | Scaffold298 | 3768                    | GG                              | CC                | 1946495652               |
| SNP_P3_113289_3773   | NW_004515810.1 | Scaffold298 | 3773                    | CC                              | TT                | 1946495653               |
| SNP_P3_113290_3777   | NW_004515810.1 | Scaffold298 | 3777                    | GG                              | AA                | 1946495655               |
| SNP_P3_113291_3784   | NW_004515810.1 | Scaffold298 | 3784                    | CC                              | AA                | 1946495656               |
| SNP_P3_113292_3830   | NW_004515810.1 | Scaffold298 | 3830                    | CC                              | TT                | 1946495658               |
| SNP_P3_113293_3919   | NW_004515810.1 | Scaffold298 | 3919                    | AA                              | GG                | 1946495659               |
| SNP_P3_113294_4001   | NW_004515810.1 | Scaffold298 | 4001                    | AA                              | GG                | 1946495660               |
| SNP_P3_113295_4119   | NW_004515810.1 | Scaffold298 | 4119                    | AA                              | CC                | 1946495662               |
| SNP_P3_113296_4184   | NW_004515810.1 | Scaffold298 | 4184                    | TT                              | GG                | 1946495663               |
| SNP_P3_113297_4226   | NW_004515810.1 | Scaffold298 | 4226                    | TT                              | AA                | 1946495665               |
| SNP_P3_113298_5342   | NW_004515810.1 | Scaffold298 | 5342                    | CC                              | TT                | 1946495666               |
| SNP_P3_113299_6364   | NW_004515810.1 | Scaffold298 | 6364                    | AA                              | CC                | 1946495668               |
| SNP_P3_113300_7987   | NW_004515810.1 | Scaffold298 | 7987                    | AA                              | TT                | 1946495669               |
| SNP_P3_113302_8261   | NW_004515810.1 | Scaffold298 | 8261                    | TT                              | GG                | 1946495670               |

| SNPs IDs             | Chromosome IDs | Chromosomes | Physical positions (bp) | CDC Frontier (Reference genome) | (Pusa 256 & HPNB) | NCBI SNPdb Accession IDs |
|----------------------|----------------|-------------|-------------------------|---------------------------------|-------------------|--------------------------|
| SNP_P3_113303_8429   | NW_004515810.1 | Scaffold298 | 8429                    | AA                              | TT                | 1946495672               |
| SNP_P3_113304_8578   | NW_004515810.1 | Scaffold298 | 8578                    | CC                              | TT                | 1946495673               |
| SNP_P3_113305_8788   | NW_004515810.1 | Scaffold298 | 8788                    | CC                              | AA                | 1946495675               |
| SNP_P3_113307_9117   | NW_004515810.1 | Scaffold298 | 9117                    | TT                              | CC                | 1946495676               |
| SNP_P3_113308_9138   | NW_004515810.1 | Scaffold298 | 9138                    | AA                              | GG                | 1946495678               |
| SNP_P3_113309_9139   | NW_004515810.1 | Scaffold298 | 9139                    | AA                              | GG                | 1946495679               |
| SNP_P3_113310_9152   | NW_004515810.1 | Scaffold298 | 9152                    | GG                              | CC                | 1946495681               |
| SNP_P3_113311_9448   | NW_004515810.1 | Scaffold298 | 9448                    | TT                              | GG                | 1946495682               |
| SNP_P3_113312_9452   | NW_004515810.1 | Scaffold298 | 9452                    | TT                              | GG                | 1946495683               |
| SNP_P3_113313_9494   | NW_004515810.1 | Scaffold298 | 9494                    | AA                              | TT                | 1946495685               |
| SNP_P3_113314_9709   | NW_004515810.1 | Scaffold298 | 9709                    | TT                              | AA                | 1946495686               |
| SNP_P3_113315_9748   | NW_004515810.1 | Scaffold298 | 9748                    | TT                              | CC                | 1946495688               |
| SNP_P3_113316_9802   | NW_004515810.1 | Scaffold298 | 9802                    | TT                              | CC                | 1946495689               |
| SNP_P3_113317_10034  | NW_004515810.1 | Scaffold298 | 10034                   | TT                              | CC                | 1946495691               |
| SNP_P3_113318_10039  | NW_004515810.1 | Scaffold298 | 10039                   | TT                              | GG                | 1946495692               |
| SNP_P3_113319_10174  | NW_004515810.1 | Scaffold298 | 10174                   | TT                              | CC                | 1946495694               |
| SNP_P3_113320_14059  | NW_004515810.1 | Scaffold298 | 14059                   | AA                              | TT                | 1946495695               |
| SNP_P3_113321_14212  | NW_004515810.1 | Scaffold298 | 14212                   | CC                              | AA                | 1946495696               |
| SNP_P3_113322_14392  | NW_004515810.1 | Scaffold298 | 14392                   | AA                              | CC                | 1946495698               |
| SNP_P3_113324_34367  | NW_004515810.1 | Scaffold298 | 34367                   | TT                              | AA                | 1946495699               |
| SNP_P3_113325_34433  | NW_004515810.1 | Scaffold298 | 34433                   | GG                              | AA                | 1946495701               |
| SNP_P3_113326_70680  | NW_004515810.1 | Scaffold298 | 70680                   | TT                              | GG                | 1946495702               |
| SNP_P3_113327_70942  | NW_004515810.1 | Scaffold298 | 70942                   | TT                              | GG                | 1946495704               |
| SNP_P3_113328_71073  | NW_004515810.1 | Scaffold298 | 71073                   | GG                              | AA                | 1946495705               |
| SNP_P3_113329_71168  | NW_004515810.1 | Scaffold298 | 71168                   | TT                              | CC                | 1946495707               |
| SNP_P3_113330_71729  | NW_004515810.1 | Scaffold298 | 71729                   | GG                              | AA                | 1946495708               |
| SNP_P3_113331_85626  | NW_004515810.1 | Scaffold298 | 85626                   | CC                              | TT                | 1946495710               |
| SNP_P3_113332_98344  | NW_004515810.1 | Scaffold298 | 98344                   | CC                              | TT                | 1946495711               |
| SNP_P3_113333_101188 | NW_004515810.1 | Scaffold298 | 101188                  | TT                              | GG                | 1946495713               |
| SNP_P3_113334_101192 | NW_004515810.1 | Scaffold298 | 101192                  | CC                              | TT                | 1946495714               |
| SNP_P3_113335_101194 | NW_004515810.1 | Scaffold298 | 101194                  | CC                              | TT                | 1946495716               |
| SNP_P3_113336_101207 | NW_004515810.1 | Scaffold298 | 101207                  | CC                              | TT                | 1946495717               |
| SNP_P3_113337_106497 | NW_004515810.1 | Scaffold298 | 106497                  | TT                              | CC                | 1946495719               |
| SNP_P3_113338_106792 | NW_004515810.1 | Scaffold298 | 106792                  | AA                              | TT                | 1946495720               |
| SNP_P3_113339_122783 | NW_004515810.1 | Scaffold298 | 122783                  | TT                              | GG                | 1946495722               |
| SNP_P3_113340_122792 | NW_004515810.1 | Scaffold298 | 122792                  | GG                              | AA                | 1946495723               |
| SNP_P3_113341_127141 | NW_004515810.1 | Scaffold298 | 127141                  | CC                              | GG                | 1946495724               |
| SNP_P3_113342_127470 | NW_004515810.1 | Scaffold298 | 127470                  | GG                              | CC                | 1946495726               |
| SNP_P3_113343_127511 | NW_004515810.1 | Scaffold298 | 127511                  | AA                              | CC                | 1946495727               |
| SNP_P3_113344_127515 | NW_004515810.1 | Scaffold298 | 127515                  | AA                              | CC                | 1946495729               |
| SNP_P3_113345_127523 | NW_004515810.1 | Scaffold298 | 127523                  | AA                              | GG                | 1946495730               |
| SNP_P3_113346_127526 | NW_004515810.1 | Scaffold298 | 127526                  | TT                              | CC                | 1946495732               |



| SNPs IDs             | Chromosome IDs | Chromosomes | Physical positions (bp) | CDC Frontier (Reference genome) | (Pusa 256 & HPNB) | NCBI SNPdb Accession IDs |
|----------------------|----------------|-------------|-------------------------|---------------------------------|-------------------|--------------------------|
| SNP_P3_113348_134905 | NW_004515810.1 | Scaffold298 | 134905                  | AA                              | TT                | 1946495733               |
| SNP_P3_113349_147729 | NW_004515810.1 | Scaffold298 | 147729                  | CC                              | TT                | 1946495735               |
| SNP_P3_113350_147749 | NW_004515810.1 | Scaffold298 | 147749                  | GG                              | CC                | 1946495736               |
| SNP_P3_113351_147866 | NW_004515810.1 | Scaffold298 | 147866                  | AA                              | GG                | 1946495738               |
| SNP_P3_113352_150181 | NW_004515810.1 | Scaffold298 | 150181                  | AA                              | GG                | 1946495739               |
| SNP_P3_113353_155054 | NW_004515810.1 | Scaffold298 | 155054                  | TT                              | CC                | 1946495741               |
| SNP_P3_113354_155330 | NW_004515810.1 | Scaffold298 | 155330                  | AA                              | GG                | 1946495742               |
| SNP_P3_113355_155336 | NW_004515810.1 | Scaffold298 | 155336                  | GG                              | TT                | 1946495743               |
| SNP_P3_113356_155370 | NW_004515810.1 | Scaffold298 | 155370                  | AA                              | GG                | 1946495745               |
| SNP_P3_113357_155513 | NW_004515810.1 | Scaffold298 | 155513                  | CC                              | TT                | 1946495746               |
| SNP_P3_113358_155679 | NW_004515810.1 | Scaffold298 | 155679                  | CC                              | TT                | 1946495748               |
| SNP_P3_113359_155700 | NW_004515810.1 | Scaffold298 | 155700                  | GG                              | AA                | 1946495749               |
| SNP_P3_113361_156101 | NW_004515810.1 | Scaffold298 | 156101                  | AA                              | GG                | 1946495750               |
| SNP_P3_113362_185975 | NW_004515810.1 | Scaffold298 | 185975                  | CC                              | TT                | 1946495752               |
| SNP_P3_113363_187889 | NW_004515810.1 | Scaffold298 | 187889                  | TT                              | CC                | 1946495753               |
| SNP_P3_113364_187890 | NW_004515810.1 | Scaffold298 | 187890                  | GG                              | AA                | 1946495755               |
| SNP_P3_113365_188339 | NW_004515810.1 | Scaffold298 | 188339                  | GG                              | TT                | 1946495756               |
| SNP_P3_113366_189951 | NW_004515810.1 | Scaffold298 | 189951                  | AA                              | CC                | 1946495758               |
| SNP_P3_113367_193600 | NW_004515810.1 | Scaffold298 | 193600                  | AA                              | CC                | 1946495759               |
| SNP_P3_113368_193658 | NW_004515810.1 | Scaffold298 | 193658                  | GG                              | AA                | 1946495761               |
| SNP_P3_113369_201820 | NW_004515810.1 | Scaffold298 | 201820                  | TT                              | CC                | 1946495762               |
| SNP_P3_113370_201825 | NW_004515810.1 | Scaffold298 | 201825                  | GG                              | AA                | 1946495763               |
| SNP_P3_113371_202012 | NW_004515810.1 | Scaffold298 | 202012                  | AA                              | GG                | 1946495765               |
| SNP_P3_113372_202059 | NW_004515810.1 | Scaffold298 | 202059                  | AA                              | GG                | 1946495766               |
| SNP_P3_113373_202091 | NW_004515810.1 | Scaffold298 | 202091                  | AA                              | GG                | 1946495768               |
| SNP_P3_113374_204962 | NW_004515810.1 | Scaffold298 | 204962                  | TT                              | CC                | 1946495769               |
| SNP_P3_113375_207801 | NW_004515810.1 | Scaffold298 | 207801                  | TT                              | AA                | 1946495771               |
| SNP_P3_113376_207852 | NW_004515810.1 | Scaffold298 | 207852                  | TT                              | GG                | 1946495772               |
| SNP_P3_113377_207915 | NW_004515810.1 | Scaffold298 | 207915                  | AA                              | CC                | 1946495774               |
| SNP_P3_113378_207966 | NW_004515810.1 | Scaffold298 | 207966                  | GG                              | TT                | 1946495775               |
| SNP_P3_113379_208028 | NW_004515810.1 | Scaffold298 | 208028                  | CC                              | TT                | 1946495777               |
| SNP_P3_113380_208055 | NW_004515810.1 | Scaffold298 | 208055                  | GG                              | AA                | 1946495778               |
| SNP_P3_113381_208076 | NW_004515810.1 | Scaffold298 | 208076                  | AA                              | GG                | 1946495780               |
| SNP_P3_113384_208249 | NW_004515810.1 | Scaffold298 | 208249                  | CC                              | TT                | 1946495781               |
| SNP_P3_113385_208347 | NW_004515810.1 | Scaffold298 | 208347                  | AA                              | GG                | 1946495783               |
| SNP_P3_113386_208376 | NW_004515810.1 | Scaffold298 | 208376                  | CC                              | GG                | 1946495784               |
| SNP_P3_113387_208381 | NW_004515810.1 | Scaffold298 | 208381                  | GG                              | AA                | 1946495786               |
| SNP_P3_113388_208490 | NW_004515810.1 | Scaffold298 | 208490                  | GG                              | AA                | 1946495787               |
| SNP_P3_113389_208502 | NW_004515810.1 | Scaffold298 | 208502                  | GG                              | AA                | 1946495788               |
| SNP_P3_113390_208619 | NW_004515810.1 | Scaffold298 | 208619                  | TT                              | AA                | 1946495790               |
| SNP_P3_113391_208620 | NW_004515810.1 | Scaffold298 | 208620                  | AA                              | TT                | 1946495791               |
| SNP_P3_113392_208664 | NW_004515810.1 | Scaffold298 | 208664                  | AA                              | GG                | 1946495793               |

| SNPs IDs             | Chromosome IDs | Chromosomes | Physical positions (bp) | CDC Frontier (Reference genome) | (Pusa 256 & HPNB) | NCBI SNPdb Accession IDs |
|----------------------|----------------|-------------|-------------------------|---------------------------------|-------------------|--------------------------|
| SNP_P3_113393_210715 | NW_004515810.1 | Scaffold298 | 210715                  | GG                              | AA                | 1946495794               |
| SNP_P3_113394_211096 | NW_004515810.1 | Scaffold298 | 211096                  | AA                              | GG                | 1946495796               |
| SNP_P3_113395_211457 | NW_004515810.1 | Scaffold298 | 211457                  | TT                              | CC                | 1946495797               |
| SNP_P3_113396_211731 | NW_004515810.1 | Scaffold298 | 211731                  | AA                              | CC                | 1946495799               |
| SNP_P3_113397_211739 | NW_004515810.1 | Scaffold298 | 211739                  | GG                              | TT                | 1946495800               |
| SNP_P3_113398_211963 | NW_004515810.1 | Scaffold298 | 211963                  | AA                              | TT                | 1946495802               |
| SNP_P3_113400_212157 | NW_004515810.1 | Scaffold298 | 212157                  | GG                              | TT                | 1946495803               |
| SNP_P3_113401_212176 | NW_004515810.1 | Scaffold298 | 212176                  | AA                              | TT                | 1946495805               |
| SNP_P3_113402_212739 | NW_004515810.1 | Scaffold298 | 212739                  | AA                              | TT                | 1946495806               |
| SNP_P3_113403_213301 | NW_004515810.1 | Scaffold298 | 213301                  | TT                              | AA                | 1946495808               |
| SNP_P3_113404_314    | NW_004515811.1 | Scaffold299 | 314                     | AA                              | GG                | 1946495809               |
| SNP_P3_113405_4122   | NW_004515811.1 | Scaffold299 | 4122                    | CC                              | TT                | 1946495811               |
| SNP_P3_113406_4334   | NW_004515811.1 | Scaffold299 | 4334                    | CC                              | TT                | 1946495812               |
| SNP_P3_113407_4358   | NW_004515811.1 | Scaffold299 | 4358                    | TT                              | GG                | 1946495814               |
| SNP_P3_113408_10251  | NW_004515811.1 | Scaffold299 | 10251                   | CC                              | TT                | 1946495815               |
| SNP_P3_113409_10979  | NW_004515811.1 | Scaffold299 | 10979                   | TT                              | CC                | 1946495817               |
| SNP_P3_113410_10993  | NW_004515811.1 | Scaffold299 | 10993                   | AA                              | TT                | 1946495818               |
| SNP_P3_113411_10994  | NW_004515811.1 | Scaffold299 | 10994                   | GG                              | AA                | 1946495820               |
| SNP_P3_113412_11001  | NW_004515811.1 | Scaffold299 | 11001                   | TT                              | GG                | 1946495821               |
| SNP_P3_113413_36460  | NW_004515811.1 | Scaffold299 | 36460                   | TT                              | CC                | 1946495823               |
| SNP_P3_113414_36520  | NW_004515811.1 | Scaffold299 | 36520                   | AA                              | GG                | 1946495824               |
| SNP_P3_113415_36526  | NW_004515811.1 | Scaffold299 | 36526                   | GG                              | TT                | 1946495826               |
| SNP_P3_113416_36705  | NW_004515811.1 | Scaffold299 | 36705                   | TT                              | CC                | 1946495827               |
| SNP_P3_113417_52696  | NW_004515811.1 | Scaffold299 | 52696                   | TT                              | GG                | 1946495829               |
| SNP_P3_113418_52697  | NW_004515811.1 | Scaffold299 | 52697                   | GG                              | AA                | 1946495831               |
| SNP_P3_113419_52724  | NW_004515811.1 | Scaffold299 | 52724                   | TT                              | CC                | 1946495832               |
| SNP_P3_113421_66427  | NW_004515811.1 | Scaffold299 | 66427                   | GG                              | CC                | 1946495834               |
| SNP_P3_113422_67357  | NW_004515811.1 | Scaffold299 | 67357                   | AA                              | GG                | 1946495835               |
| SNP_P3_113423_93100  | NW_004515811.1 | Scaffold299 | 93100                   | CC                              | GG                | 1946495837               |
| SNP_P3_113424_112803 | NW_004515811.1 | Scaffold299 | 112803                  | AA                              | GG                | 1946495838               |
| SNP_P3_113425_121209 | NW_004515811.1 | Scaffold299 | 121209                  | TT                              | GG                | 1946495840               |
| SNP_P3_113426_135144 | NW_004515811.1 | Scaffold299 | 135144                  | AA                              | CC                | 1946495842               |
| SNP_P3_113427_135167 | NW_004515811.1 | Scaffold299 | 135167                  | AA                              | TT                | 1946495843               |
| SNP_P3_113428_135185 | NW_004515811.1 | Scaffold299 | 135185                  | AA                              | GG                | 1946495845               |
| SNP_P3_113429_135189 | NW_004515811.1 | Scaffold299 | 135189                  | TT                              | GG                | 1946495846               |
| SNP_P3_113430_135195 | NW_004515811.1 | Scaffold299 | 135195                  | GG                              | CC                | 1946495848               |
| SNP_P3_113431_135218 | NW_004515811.1 | Scaffold299 | 135218                  | TT                              | CC                | 1946495849               |
| SNP_P3_113432_135219 | NW_004515811.1 | Scaffold299 | 135219                  | GG                              | AA                | 1946495851               |
| SNP_P3_113433_153177 | NW_004515811.1 | Scaffold299 | 153177                  | AA                              | GG                | 1946495852               |
| SNP_P3_113434_153219 | NW_004515811.1 | Scaffold299 | 153219                  | AA                              | GG                | 1946495854               |
| SNP_P3_113435_158540 | NW_004515811.1 | Scaffold299 | 158540                  | AA                              | TT                | 1946495855               |
| SNP_P3_113436_158625 | NW_004515811.1 | Scaffold299 | 158625                  | AA                              | GG                | 1946495857               |

| SNPs IDs             | Chromosome IDs | Chromosomes | Physical positions (bp) | CDC Frontier (Reference genome) | (Pusa 256 & HPNB) | NCBI SNPdb Accession IDs |
|----------------------|----------------|-------------|-------------------------|---------------------------------|-------------------|--------------------------|
| SNP_P3_113437_158654 | NW_004515811.1 | Scaffold299 | 158654                  | AA                              | GG                | 1946495859               |
| SNP_P3_113438_158693 | NW_004515811.1 | Scaffold299 | 158693                  | TT                              | GG                | 1946495860               |
| SNP_P3_113439_158720 | NW_004515811.1 | Scaffold299 | 158720                  | GG                              | AA                | 1946495862               |
| SNP_P3_113440_158734 | NW_004515811.1 | Scaffold299 | 158734                  | CC                              | TT                | 1946495863               |
| SNP_P3_113441_158776 | NW_004515811.1 | Scaffold299 | 158776                  | CC                              | TT                | 1946495865               |
| SNP_P3_113442_158887 | NW_004515811.1 | Scaffold299 | 158887                  | GG                              | AA                | 1946495866               |
| SNP_P3_113443_158948 | NW_004515811.1 | Scaffold299 | 158948                  | AA                              | GG                | 1946495868               |
| SNP_P3_113445_158966 | NW_004515811.1 | Scaffold299 | 158966                  | AA                              | CC                | 1946495870               |
| SNP_P3_113446_159163 | NW_004515811.1 | Scaffold299 | 159163                  | GG                              | AA                | 1946495871               |
| SNP_P3_113447_159165 | NW_004515811.1 | Scaffold299 | 159165                  | AA                              | GG                | 1946495873               |
| SNP_P3_113448_159210 | NW_004515811.1 | Scaffold299 | 159210                  | TT                              | AA                | 1946495874               |
| SNP_P3_113449_197243 | NW_004515811.1 | Scaffold299 | 197243                  | GG                              | AA                | 1946495876               |
| SNP_P3_113450_202974 | NW_004515811.1 | Scaffold299 | 202974                  | TT                              | GG                | 1946495877               |
| SNP_P3_113451_205981 | NW_004515811.1 | Scaffold299 | 205981                  | GG                              | CC                | 1946495879               |
| SNP_P3_113452_206088 | NW_004515811.1 | Scaffold299 | 206088                  | CC                              | TT                | 1946495880               |
| SNP_P3_113453_206110 | NW_004515811.1 | Scaffold299 | 206110                  | TT                              | GG                | 1946495882               |
| SNP_P3_113454_206172 | NW_004515811.1 | Scaffold299 | 206172                  | CC                              | TT                | 1946495883               |
| SNP_P3_113455_206216 | NW_004515811.1 | Scaffold299 | 206216                  | AA                              | GG                | 1946495885               |
| SNP_P3_113456_206339 | NW_004515811.1 | Scaffold299 | 206339                  | AA                              | GG                | 1946495886               |
| SNP_P3_113457_206387 | NW_004515811.1 | Scaffold299 | 206387                  | AA                              | CC                | 1946495888               |
| SNP_P3_113458_206416 | NW_004515811.1 | Scaffold299 | 206416                  | AA                              | CC                | 1946495889               |
| SNP_P3_113459_206427 | NW_004515811.1 | Scaffold299 | 206427                  | AA                              | GG                | 1946495891               |
| SNP_P3_113460_206471 | NW_004515811.1 | Scaffold299 | 206471                  | AA                              | GG                | 1946495893               |
| SNP_P3_113461_206535 | NW_004515811.1 | Scaffold299 | 206535                  | AA                              | GG                | 1946495894               |
| SNP_P3_113462_211233 | NW_004515811.1 | Scaffold299 | 211233                  | CC                              | TT                | 1946495896               |
| SNP_P3_113463_211281 | NW_004515811.1 | Scaffold299 | 211281                  | TT                              | CC                | 1946495898               |
| SNP_P3_113464_211283 | NW_004515811.1 | Scaffold299 | 211283                  | CC                              | GG                | 1946495899               |
| SNP_P3_113465_213277 | NW_004515811.1 | Scaffold299 | 213277                  | AA                              | GG                | 1946495901               |
| SNP_P3_113467_213570 | NW_004515811.1 | Scaffold299 | 213570                  | TT                              | GG                | 1946495902               |
| SNP_P3_113468_213617 | NW_004515811.1 | Scaffold299 | 213617                  | CC                              | TT                | 1946495904               |
| SNP_P3_113469_213653 | NW_004515811.1 | Scaffold299 | 213653                  | AA                              | TT                | 1946495905               |
| SNP_P3_113470_213801 | NW_004515811.1 | Scaffold299 | 213801                  | TT                              | CC                | 1946495907               |
| SNP_P3_113472_214420 | NW_004515811.1 | Scaffold299 | 214420                  | AA                              | GG                | 1946495908               |
| SNP_P3_113473_6570   | NW_004515812.1 | Scaffold300 | 6570                    | TT                              | AA                | 1946495910               |
| SNP_P3_113474_8004   | NW_004515812.1 | Scaffold300 | 8004                    | TT                              | GG                | 1946495911               |
| SNP_P3_113475_12567  | NW_004515812.1 | Scaffold300 | 12567                   | AA                              | TT                | 1946495913               |
| SNP_P3_113476_14175  | NW_004515812.1 | Scaffold300 | 14175                   | CC                              | TT                | 1946495914               |
| SNP_P3_113477_23956  | NW_004515812.1 | Scaffold300 | 23956                   | AA                              | CC                | 1946495916               |
| SNP_P3_113478_23961  | NW_004515812.1 | Scaffold300 | 23961                   | TT                              | AA                | 1946495917               |
| SNP_P3_113479_28290  | NW_004515812.1 | Scaffold300 | 28290                   | CC                              | AA                | 1946495919               |
| SNP_P3_113480_28720  | NW_004515812.1 | Scaffold300 | 28720                   | CC                              | AA                | 1946495920               |
| SNP_P3_113481_31606  | NW_004515812.1 | Scaffold300 | 31606                   | GG                              | AA                | 1946495922               |

| SNPs IDs             | Chromosome IDs | Chromosomes | Physical positions (bp) | CDC Frontier (Reference genome) | (Pusa 256 & HPNB) | NCBI SNPdb Accession IDs |
|----------------------|----------------|-------------|-------------------------|---------------------------------|-------------------|--------------------------|
| SNP_P3_113482_31607  | NW_004515812.1 | Scaffold300 | 31607                   | TT                              | AA                | 1946495923               |
| SNP_P3_113483_31628  | NW_004515812.1 | Scaffold300 | 31628                   | AA                              | CC                | 1946495925               |
| SNP_P3_113484_31640  | NW_004515812.1 | Scaffold300 | 31640                   | CC                              | AA                | 1946495926               |
| SNP_P3_113485_31641  | NW_004515812.1 | Scaffold300 | 31641                   | CC                              | TT                | 1946495928               |
| SNP_P3_113486_31644  | NW_004515812.1 | Scaffold300 | 31644                   | CC                              | GG                | 1946495929               |
| SNP_P3_113487_32341  | NW_004515812.1 | Scaffold300 | 32341                   | AA                              | GG                | 1946495931               |
| SNP_P3_113488_32774  | NW_004515812.1 | Scaffold300 | 32774                   | CC                              | GG                | 1946495932               |
| SNP_P3_113489_36347  | NW_004515812.1 | Scaffold300 | 36347                   | TT                              | GG                | 1946495934               |
| SNP_P3_113490_40499  | NW_004515812.1 | Scaffold300 | 40499                   | GG                              | TT                | 1946495935               |
| SNP_P3_113491_41063  | NW_004515812.1 | Scaffold300 | 41063                   | AA                              | GG                | 1946495937               |
| SNP_P3_113492_41064  | NW_004515812.1 | Scaffold300 | 41064                   | CC                              | GG                | 1946495938               |
| SNP_P3_113493_41115  | NW_004515812.1 | Scaffold300 | 41115                   | TT                              | AA                | 1946495940               |
| SNP_P3_113494_41128  | NW_004515812.1 | Scaffold300 | 41128                   | GG                              | TT                | 1946495941               |
| SNP_P3_113495_41263  | NW_004515812.1 | Scaffold300 | 41263                   | GG                              | AA                | 1946495943               |
| SNP_P3_113496_45448  | NW_004515812.1 | Scaffold300 | 45448                   | AA                              | GG                | 1946495944               |
| SNP_P3_113497_49882  | NW_004515812.1 | Scaffold300 | 49882                   | CC                              | AA                | 1946495946               |
| SNP_P3_113498_52053  | NW_004515812.1 | Scaffold300 | 52053                   | TT                              | AA                | 1946495948               |
| SNP_P3_113499_57867  | NW_004515812.1 | Scaffold300 | 57867                   | CC                              | TT                | 1946495949               |
| SNP_P3_113500_62519  | NW_004515812.1 | Scaffold300 | 62519                   | CC                              | TT                | 1946495951               |
| SNP_P3_113502_84165  | NW_004515812.1 | Scaffold300 | 84165                   | AA                              | CC                | 1946495952               |
| SNP_P3_113503_84883  | NW_004515812.1 | Scaffold300 | 84883                   | CC                              | TT                | 1946495954               |
| SNP_P3_113504_89480  | NW_004515812.1 | Scaffold300 | 89480                   | CC                              | AA                | 1946495955               |
| SNP_P3_113505_92460  | NW_004515812.1 | Scaffold300 | 92460                   | GG                              | CC                | 1946495957               |
| SNP_P3_113506_92464  | NW_004515812.1 | Scaffold300 | 92464                   | GG                              | CC                | 1946495958               |
| SNP_P3_113507_92465  | NW_004515812.1 | Scaffold300 | 92465                   | TT                              | AA                | 1946495960               |
| SNP_P3_113508_101023 | NW_004515812.1 | Scaffold300 | 101023                  | TT                              | CC                | 1946495961               |
| SNP_P3_113509_101412 | NW_004515812.1 | Scaffold300 | 101412                  | AA                              | CC                | 1946495963               |
| SNP_P3_113510_101434 | NW_004515812.1 | Scaffold300 | 101434                  | CC                              | TT                | 1946495964               |
| SNP_P3_113511_101446 | NW_004515812.1 | Scaffold300 | 101446                  | GG                              | AA                | 1946495966               |
| SNP_P3_113512_101452 | NW_004515812.1 | Scaffold300 | 101452                  | AA                              | GG                | 1946495967               |
| SNP_P3_113513_101495 | NW_004515812.1 | Scaffold300 | 101495                  | TT                              | GG                | 1946495969               |
| SNP_P3_113514_101536 | NW_004515812.1 | Scaffold300 | 101536                  | CC                              | GG                | 1946495970               |
| SNP_P3_113515_101540 | NW_004515812.1 | Scaffold300 | 101540                  | CC                              | GG                | 1946495972               |
| SNP_P3_113516_101541 | NW_004515812.1 | Scaffold300 | 101541                  | AA                              | TT                | 1946495973               |
| SNP_P3_113517_101578 | NW_004515812.1 | Scaffold300 | 101578                  | CC                              | TT                | 1946495975               |
| SNP_P3_113518_101599 | NW_004515812.1 | Scaffold300 | 101599                  | AA                              | CC                | 1946495976               |
| SNP_P3_113519_101634 | NW_004515812.1 | Scaffold300 | 101634                  | AA                              | CC                | 1946495978               |
| SNP_P3_113520_109019 | NW_004515812.1 | Scaffold300 | 109019                  | TT                              | AA                | 1946495979               |
| SNP_P3_113521_109023 | NW_004515812.1 | Scaffold300 | 109023                  | TT                              | AA                | 1946495981               |
| SNP_P3_113522_109045 | NW_004515812.1 | Scaffold300 | 109045                  | AA                              | CC                | 1946495982               |
| SNP_P3_113523_109292 | NW_004515812.1 | Scaffold300 | 109292                  | CC                              | TT                | 1946495984               |
| SNP_P3_113524_116915 | NW_004515812.1 | Scaffold300 | 116915                  | TT                              | AA                | 1946495985               |

| SNPs IDs             | Chromosome IDs | Chromosomes | Physical positions (bp) | CDC Frontier (Reference genome) | (Pusa 256 & HPNB) | NCBI SNPdb Accession IDs |
|----------------------|----------------|-------------|-------------------------|---------------------------------|-------------------|--------------------------|
| SNP_P3_113525_1214   | NW_004515813.1 | Scaffold301 | 1214                    | TT                              | GG                | 1946495987               |
| SNP_P3_113526_5233   | NW_004515814.1 | Scaffold303 | 5233                    | TT                              | CC                | 1946495988               |
| SNP_P3_113527_9923   | NW_004515814.1 | Scaffold303 | 9923                    | CC                              | TT                | 1946495990               |
| SNP_P3_113528_9933   | NW_004515814.1 | Scaffold303 | 9933                    | TT                              | AA                | 1946495991               |
| SNP_P3_113529_9944   | NW_004515814.1 | Scaffold303 | 9944                    | TT                              | GG                | 1946495993               |
| SNP_P3_113530_29744  | NW_004515814.1 | Scaffold303 | 29744                   | GG                              | TT                | 1946495994               |
| SNP_P3_113531_29830  | NW_004515814.1 | Scaffold303 | 29830                   | AA                              | CC                | 1946495996               |
| SNP_P3_113532_30124  | NW_004515814.1 | Scaffold303 | 30124                   | AA                              | CC                | 1946495997               |
| SNP_P3_113533_30130  | NW_004515814.1 | Scaffold303 | 30130                   | GG                              | CC                | 1946495999               |
| SNP_P3_113534_30138  | NW_004515814.1 | Scaffold303 | 30138                   | AA                              | GG                | 1946496001               |
| SNP_P3_113535_30143  | NW_004515814.1 | Scaffold303 | 30143                   | AA                              | GG                | 1946496002               |
| SNP_P3_113536_30257  | NW_004515814.1 | Scaffold303 | 30257                   | GG                              | TT                | 1946496004               |
| SNP_P3_113537_30259  | NW_004515814.1 | Scaffold303 | 30259                   | TT                              | AA                | 1946496005               |
| SNP_P3_113538_39084  | NW_004515814.1 | Scaffold303 | 39084                   | TT                              | CC                | 1946496007               |
| SNP_P3_113539_61579  | NW_004515814.1 | Scaffold303 | 61579                   | CC                              | TT                | 1946496008               |
| SNP_P3_113540_69143  | NW_004515814.1 | Scaffold303 | 69143                   | GG                              | AA                | 1946496010               |
| SNP_P3_113542_78215  | NW_004515814.1 | Scaffold303 | 78215                   | GG                              | AA                | 1946496011               |
| SNP_P3_113543_89526  | NW_004515814.1 | Scaffold303 | 89526                   | AA                              | GG                | 1946496012               |
| SNP_P3_113544_89729  | NW_004515814.1 | Scaffold303 | 89729                   | GG                              | CC                | 1946496014               |
| SNP_P3_113545_90950  | NW_004515814.1 | Scaffold303 | 90950                   | CC                              | TT                | 1946496015               |
| SNP_P3_113546_90953  | NW_004515814.1 | Scaffold303 | 90953                   | GG                              | AA                | 1946496017               |
| SNP_P3_113548_120605 | NW_004515814.1 | Scaffold303 | 120605                  | GG                              | TT                | 1946496018               |
| SNP_P3_113549_120655 | NW_004515814.1 | Scaffold303 | 120655                  | TT                              | CC                | 1946496020               |
| SNP_P3_113551_648    | NW_004515815.1 | Scaffold304 | 648                     | TT                              | AA                | 1946496021               |
| SNP_P3_113552_649    | NW_004515815.1 | Scaffold304 | 649                     | AA                              | TT                | 1946496023               |
| SNP_P3_113553_868    | NW_004515815.1 | Scaffold304 | 868                     | GG                              | AA                | 1946496024               |
| SNP_P3_113554_2106   | NW_004515816.1 | Scaffold305 | 2106                    | TT                              | CC                | 1946496026               |
| SNP_P3_113555_2107   | NW_004515816.1 | Scaffold305 | 2107                    | AA                              | TT                | 1946496027               |
| SNP_P3_113556_2305   | NW_004515816.1 | Scaffold305 | 2305                    | AA                              | GG                | 1946496029               |
| SNP_P3_113557_3942   | NW_004515816.1 | Scaffold305 | 3942                    | CC                              | AA                | 1946496030               |
| SNP_P3_113558_3954   | NW_004515816.1 | Scaffold305 | 3954                    | TT                              | GG                | 1946496032               |
| SNP_P3_113559_4072   | NW_004515816.1 | Scaffold305 | 4072                    | TT                              | CC                | 1946496033               |
| SNP_P3_113560_15055  | NW_004515816.1 | Scaffold305 | 15055                   | TT                              | CC                | 1946496035               |
| SNP_P3_113561_15060  | NW_004515816.1 | Scaffold305 | 15060                   | AA                              | TT                | 1946496036               |
| SNP_P3_113562_15078  | NW_004515816.1 | Scaffold305 | 15078                   | AA                              | GG                | 1946496038               |
| SNP_P3_113563_30042  | NW_004515816.1 | Scaffold305 | 30042                   | AA                              | GG                | 1946496039               |
| SNP_P3_113564_30049  | NW_004515816.1 | Scaffold305 | 30049                   | AA                              | GG                | 1946496041               |
| SNP_P3_113565_30107  | NW_004515816.1 | Scaffold305 | 30107                   | TT                              | CC                | 1946496042               |
| SNP_P3_113566_30110  | NW_004515816.1 | Scaffold305 | 30110                   | GG                              | AA                | 1946496044               |
| SNP_P3_113567_30111  | NW_004515816.1 | Scaffold305 | 30111                   | AA                              | TT                | 1946496046               |
| SNP_P3_113568_30133  | NW_004515816.1 | Scaffold305 | 30133                   | AA                              | CC                | 1946496047               |
| SNP_P3_113569_30364  | NW_004515816.1 | Scaffold305 | 30364                   | GG                              | CC                | 1946496049               |

| SNPs IDs             | Chromosome IDs | Chromosomes | Physical positions (bp) | CDC Frontier (Reference genome) | (Pusa 256 & HPNB) | NCBI SNPdb Accession IDs |
|----------------------|----------------|-------------|-------------------------|---------------------------------|-------------------|--------------------------|
| SNP_P3_113570_30370  | NW_004515816.1 | Scaffold305 | 30370                   | CC                              | TT                | 1946496050               |
| SNP_P3_113571_30388  | NW_004515816.1 | Scaffold305 | 30388                   | AA                              | GG                | 1946496052               |
| SNP_P3_113572_30413  | NW_004515816.1 | Scaffold305 | 30413                   | TT                              | CC                | 1946496053               |
| SNP_P3_113573_30424  | NW_004515816.1 | Scaffold305 | 30424                   | AA                              | GG                | 1946496055               |
| SNP_P3_113574_30439  | NW_004515816.1 | Scaffold305 | 30439                   | TT                              | CC                | 1946496056               |
| SNP_P3_113575_30440  | NW_004515816.1 | Scaffold305 | 30440                   | TT                              | CC                | 1946496058               |
| SNP_P3_113576_30518  | NW_004515816.1 | Scaffold305 | 30518                   | CC                              | TT                | 1946496059               |
| SNP_P3_113577_31562  | NW_004515816.1 | Scaffold305 | 31562                   | TT                              | GG                | 1946496061               |
| SNP_P3_113578_31568  | NW_004515816.1 | Scaffold305 | 31568                   | TT                              | AA                | 1946496062               |
| SNP_P3_113579_31578  | NW_004515816.1 | Scaffold305 | 31578                   | GG                              | AA                | 1946496064               |
| SNP_P3_113580_31633  | NW_004515816.1 | Scaffold305 | 31633                   | TT                              | CC                | 1946496065               |
| SNP_P3_113581_31679  | NW_004515816.1 | Scaffold305 | 31679                   | TT                              | CC                | 1946496067               |
| SNP_P3_113582_31733  | NW_004515816.1 | Scaffold305 | 31733                   | TT                              | CC                | 1946496069               |
| SNP_P3_113583_31771  | NW_004515816.1 | Scaffold305 | 31771                   | TT                              | GG                | 1946496070               |
| SNP_P3_113584_31773  | NW_004515816.1 | Scaffold305 | 31773                   | GG                              | AA                | 1946496072               |
| SNP_P3_113585_31781  | NW_004515816.1 | Scaffold305 | 31781                   | TT                              | CC                | 1946496073               |
| SNP_P3_113586_31904  | NW_004515816.1 | Scaffold305 | 31904                   | AA                              | GG                | 1946496075               |
| SNP_P3_113587_31927  | NW_004515816.1 | Scaffold305 | 31927                   | CC                              | TT                | 1946496077               |
| SNP_P3_113588_31948  | NW_004515816.1 | Scaffold305 | 31948                   | AA                              | GG                | 1946496078               |
| SNP_P3_113589_31958  | NW_004515816.1 | Scaffold305 | 31958                   | CC                              | TT                | 1946496080               |
| SNP_P3_113590_31967  | NW_004515816.1 | Scaffold305 | 31967                   | TT                              | CC                | 1946496081               |
| SNP_P3_113591_31994  | NW_004515816.1 | Scaffold305 | 31994                   | GG                              | AA                | 1946496083               |
| SNP_P3_113592_31997  | NW_004515816.1 | Scaffold305 | 31997                   | GG                              | TT                | 1946496084               |
| SNP_P3_113593_32054  | NW_004515816.1 | Scaffold305 | 32054                   | CC                              | TT                | 1946496086               |
| SNP_P3_113594_32518  | NW_004515816.1 | Scaffold305 | 32518                   | TT                              | CC                | 1946496087               |
| SNP_P3_113595_32531  | NW_004515816.1 | Scaffold305 | 32531                   | GG                              | CC                | 1946496089               |
| SNP_P3_113596_64689  | NW_004515816.1 | Scaffold305 | 64689                   | GG                              | AA                | 1946496090               |
| SNP_P3_113597_64719  | NW_004515816.1 | Scaffold305 | 64719                   | TT                              | CC                | 1946496092               |
| SNP_P3_113598_66044  | NW_004515816.1 | Scaffold305 | 66044                   | AA                              | TT                | 1946496093               |
| SNP_P3_113599_87297  | NW_004515816.1 | Scaffold305 | 87297                   | TT                              | GG                | 1946496095               |
| SNP_P3_113600_87299  | NW_004515816.1 | Scaffold305 | 87299                   | AA                              | GG                | 1946496096               |
| SNP_P3_113602_97694  | NW_004515816.1 | Scaffold305 | 97694                   | GG                              | AA                | 1946496098               |
| SNP_P3_113603_99787  | NW_004515816.1 | Scaffold305 | 99787                   | GG                              | TT                | 1946496099               |
| SNP_P3_113604_99805  | NW_004515816.1 | Scaffold305 | 99805                   | GG                              | TT                | 1946496101               |
| SNP_P3_113605_121886 | NW_004515816.1 | Scaffold305 | 121886                  | TT                              | CC                | 1946496102               |
| SNP_P3_113606_121916 | NW_004515816.1 | Scaffold305 | 121916                  | GG                              | TT                | 1946496104               |
| SNP_P3_113607_121925 | NW_004515816.1 | Scaffold305 | 121925                  | TT                              | CC                | 1946496105               |
| SNP_P3_113608_124352 | NW_004515816.1 | Scaffold305 | 124352                  | AA                              | TT                | 1946496106               |
| SNP_P3_113609_124800 | NW_004515816.1 | Scaffold305 | 124800                  | CC                              | AA                | 1946496108               |
| SNP_P3_113610_124816 | NW_004515816.1 | Scaffold305 | 124816                  | TT                              | CC                | 1946496110               |
| SNP_P3_113611_124848 | NW_004515816.1 | Scaffold305 | 124848                  | GG                              | TT                | 1946496111               |
| SNP_P3_113612_132328 | NW_004515816.1 | Scaffold305 | 132328                  | AA                              | GG                | 1946496113               |

| SNPs IDs             | Chromosome IDs | Chromosomes | Physical positions (bp) | CDC Frontier (Reference genome) | (Pusa 256 & HPNB) | NCBI SNPdb Accession IDs |
|----------------------|----------------|-------------|-------------------------|---------------------------------|-------------------|--------------------------|
| SNP_P3_113613_132347 | NW_004515816.1 | Scaffold305 | 132347                  | AA                              | CC                | 1946496114               |
| SNP_P3_113614_132349 | NW_004515816.1 | Scaffold305 | 132349                  | GG                              | AA                | 1946496116               |
| SNP_P3_113615_132385 | NW_004515816.1 | Scaffold305 | 132385                  | TT                              | CC                | 1946496118               |
| SNP_P3_113616_132420 | NW_004515816.1 | Scaffold305 | 132420                  | AA                              | GG                | 1946496119               |
| SNP_P3_113617_136921 | NW_004515816.1 | Scaffold305 | 136921                  | TT                              | GG                | 1946496121               |
| SNP_P3_113619_141242 | NW_004515816.1 | Scaffold305 | 141242                  | GG                              | TT                | 1946496122               |
| SNP_P3_113620_145554 | NW_004515816.1 | Scaffold305 | 145554                  | TT                              | CC                | 1946496124               |
| SNP_P3_113621_159145 | NW_004515816.1 | Scaffold305 | 159145                  | GG                              | TT                | 1946496125               |
| SNP_P3_113622_162772 | NW_004515816.1 | Scaffold305 | 162772                  | TT                              | AA                | 1946496127               |
| SNP_P3_113623_184169 | NW_004515816.1 | Scaffold305 | 184169                  | CC                              | AA                | 1946496128               |
| SNP_P3_113624_184179 | NW_004515816.1 | Scaffold305 | 184179                  | TT                              | GG                | 1946496130               |
| SNP_P3_113625_193196 | NW_004515816.1 | Scaffold305 | 193196                  | AA                              | GG                | 1946496131               |
| SNP_P3_113626_194714 | NW_004515816.1 | Scaffold305 | 194714                  | GG                              | TT                | 1946496133               |
| SNP_P3_113627_194722 | NW_004515816.1 | Scaffold305 | 194722                  | AA                              | TT                | 1946496134               |
| SNP_P3_113628_203956 | NW_004515816.1 | Scaffold305 | 203956                  | GG                              | AA                | 1946496136               |
| SNP_P3_113629_203990 | NW_004515816.1 | Scaffold305 | 203990                  | CC                              | AA                | 1946496137               |
| SNP_P3_113630_205064 | NW_004515816.1 | Scaffold305 | 205064                  | AA                              | GG                | 1946496139               |
| SNP_P3_113631_205065 | NW_004515816.1 | Scaffold305 | 205065                  | TT                              | GG                | 1946496140               |
| SNP_P3_113632_205093 | NW_004515816.1 | Scaffold305 | 205093                  | CC                              | TT                | 1946496142               |
| SNP_P3_113633_205131 | NW_004515816.1 | Scaffold305 | 205131                  | CC                              | AA                | 1946496143               |
| SNP_P3_113634_205166 | NW_004515816.1 | Scaffold305 | 205166                  | TT                              | CC                | 1946496145               |
| SNP_P3_113635_205461 | NW_004515816.1 | Scaffold305 | 205461                  | AA                              | TT                | 1946496146               |
| SNP_P3_113636_7654   | NW_004515817.1 | Scaffold306 | 7654                    | CC                              | TT                | 1946496148               |
| SNP_P3_113637_7708   | NW_004515817.1 | Scaffold306 | 7708                    | TT                              | CC                | 1946496149               |
| SNP_P3_113638_36454  | NW_004515817.1 | Scaffold306 | 36454                   | CC                              | TT                | 1946496151               |
| SNP_P3_113639_36790  | NW_004515817.1 | Scaffold306 | 36790                   | TT                              | GG                | 1946496152               |
| SNP_P3_113640_37510  | NW_004515817.1 | Scaffold306 | 37510                   | CC                              | AA                | 1946496154               |
| SNP_P3_113641_37520  | NW_004515817.1 | Scaffold306 | 37520                   | GG                              | AA                | 1946496155               |
| SNP_P3_113642_39693  | NW_004515817.1 | Scaffold306 | 39693                   | AA                              | CC                | 1946496156               |
| SNP_P3_113643_41527  | NW_004515817.1 | Scaffold306 | 41527                   | GG                              | AA                | 1946496158               |
| SNP_P3_113644_44845  | NW_004515817.1 | Scaffold306 | 44845                   | AA                              | GG                | 1946496159               |
| SNP_P3_113645_44853  | NW_004515817.1 | Scaffold306 | 44853                   | AA                              | GG                | 1946496161               |
| SNP_P3_113646_44890  | NW_004515817.1 | Scaffold306 | 44890                   | CC                              | TT                | 1946496162               |
| SNP_P3_113647_45554  | NW_004515817.1 | Scaffold306 | 45554                   | CC                              | TT                | 1946496164               |
| SNP_P3_113648_45609  | NW_004515817.1 | Scaffold306 | 45609                   | AA                              | GG                | 1946496165               |
| SNP_P3_113649_45891  | NW_004515817.1 | Scaffold306 | 45891                   | TT                              | CC                | 1946496167               |
| SNP_P3_113650_47240  | NW_004515817.1 | Scaffold306 | 47240                   | CC                              | GG                | 1946496168               |
| SNP_P3_113651_47545  | NW_004515817.1 | Scaffold306 | 47545                   | CC                              | TT                | 1946496170               |
| SNP_P3_113652_47602  | NW_004515817.1 | Scaffold306 | 47602                   | TT                              | CC                | 1946496171               |
| SNP_P3_113653_47608  | NW_004515817.1 | Scaffold306 | 47608                   | AA                              | CC                | 1946496173               |
| SNP_P3_113655_48141  | NW_004515817.1 | Scaffold306 | 48141                   | TT                              | GG                | 1946496174               |
| SNP_P3_113656_48198  | NW_004515817.1 | Scaffold306 | 48198                   | GG                              | AA                | 1946496176               |

| SNPs IDs            | Chromosome IDs | Chromosomes | Physical positions (bp) | CDC Frontier (Reference genome) | (Pusa 256 & HPNB) | NCBI SNPdb Accession IDs |
|---------------------|----------------|-------------|-------------------------|---------------------------------|-------------------|--------------------------|
| SNP_P3_113657_49848 | NW_004515817.1 | Scaffold306 | 49848                   | AA                              | CC                | 1946496177               |
| SNP_P3_113658_50113 | NW_004515817.1 | Scaffold306 | 50113                   | AA                              | CC                | 1946496179               |
| SNP_P3_113659_51704 | NW_004515817.1 | Scaffold306 | 51704                   | TT                              | CC                | 1946496180               |
| SNP_P3_113660_52370 | NW_004515817.1 | Scaffold306 | 52370                   | TT                              | CC                | 1946496182               |
| SNP_P3_113662_58867 | NW_004515817.1 | Scaffold306 | 58867                   | GG                              | AA                | 1946496183               |
| SNP_P3_113663_58898 | NW_004515817.1 | Scaffold306 | 58898                   | TT                              | AA                | 1946496185               |
| SNP_P3_113664_59164 | NW_004515817.1 | Scaffold306 | 59164                   | GG                              | CC                | 1946496186               |
| SNP_P3_113665_59908 | NW_004515817.1 | Scaffold306 | 59908                   | TT                              | CC                | 1946496188               |
| SNP_P3_113667_65354 | NW_004515817.1 | Scaffold306 | 65354                   | AA                              | GG                | 1946496189               |
| SNP_P3_113668_65369 | NW_004515817.1 | Scaffold306 | 65369                   | TT                              | CC                | 1946496191               |
| SNP_P3_113669_77073 | NW_004515817.1 | Scaffold306 | 77073                   | AA                              | GG                | 1946496192               |
| SNP_P3_113670_77680 | NW_004515817.1 | Scaffold306 | 77680                   | CC                              | TT                | 1946496194               |
| SNP_P3_113671_77841 | NW_004515817.1 | Scaffold306 | 77841                   | AA                              | CC                | 1946496195               |
| SNP_P3_113672_78273 | NW_004515817.1 | Scaffold306 | 78273                   | AA                              | TT                | 1946496197               |
| SNP_P3_113673_78306 | NW_004515817.1 | Scaffold306 | 78306                   | TT                              | CC                | 1946496198               |
| SNP_P3_113674_78591 | NW_004515817.1 | Scaffold306 | 78591                   | TT                              | GG                | 1946496199               |
| SNP_P3_113675_78592 | NW_004515817.1 | Scaffold306 | 78592                   | GG                              | AA                | 1946496201               |
| SNP_P3_113676_78691 | NW_004515817.1 | Scaffold306 | 78691                   | TT                              | AA                | 1946496202               |
| SNP_P3_113677_79508 | NW_004515817.1 | Scaffold306 | 79508                   | AA                              | CC                | 1946496204               |
| SNP_P3_113678_79511 | NW_004515817.1 | Scaffold306 | 79511                   | AA                              | CC                | 1946496205               |
| SNP_P3_113679_83232 | NW_004515817.1 | Scaffold306 | 83232                   | TT                              | GG                | 1946496207               |
| SNP_P3_113680_83259 | NW_004515817.1 | Scaffold306 | 83259                   | TT                              | AA                | 1946496208               |
| SNP_P3_113681_83263 | NW_004515817.1 | Scaffold306 | 83263                   | CC                              | TT                | 1946496210               |
| SNP_P3_113682_88755 | NW_004515817.1 | Scaffold306 | 88755                   | TT                              | CC                | 1946496211               |
| SNP_P3_113683_88789 | NW_004515817.1 | Scaffold306 | 88789                   | CC                              | AA                | 1946496213               |
| SNP_P3_113684_88890 | NW_004515817.1 | Scaffold306 | 88890                   | CC                              | GG                | 1946496215               |
| SNP_P3_113685_89156 | NW_004515817.1 | Scaffold306 | 89156                   | AA                              | GG                | 1946496217               |
| SNP_P3_113686_90046 | NW_004515817.1 | Scaffold306 | 90046                   | AA                              | GG                | 1946496218               |
| SNP_P3_113687_90450 | NW_004515817.1 | Scaffold306 | 90450                   | AA                              | GG                | 1946496220               |
| SNP_P3_113688_93949 | NW_004515817.1 | Scaffold306 | 93949                   | GG                              | AA                | 1946496221               |
| SNP_P3_113689_95030 | NW_004515817.1 | Scaffold306 | 95030                   | TT                              | CC                | 1946496223               |
| SNP_P3_113690_95296 | NW_004515817.1 | Scaffold306 | 95296                   | TT                              | CC                | 1946496224               |
| SNP_P3_113691_95819 | NW_004515817.1 | Scaffold306 | 95819                   | CC                              | AA                | 1946496225               |
| SNP_P3_113692_96395 | NW_004515817.1 | Scaffold306 | 96395                   | TT                              | GG                | 1946496227               |
| SNP_P3_113693_96635 | NW_004515817.1 | Scaffold306 | 96635                   | TT                              | AA                | 1946496228               |
| SNP_P3_113694_96652 | NW_004515817.1 | Scaffold306 | 96652                   | TT                              | GG                | 1946496230               |
| SNP_P3_113695_96951 | NW_004515817.1 | Scaffold306 | 96951                   | TT                              | CC                | 1946496231               |
| SNP_P3_113696_96963 | NW_004515817.1 | Scaffold306 | 96963                   | GG                              | AA                | 1946496233               |
| SNP_P3_113697_96983 | NW_004515817.1 | Scaffold306 | 96983                   | CC                              | AA                | 1946496234               |
| SNP_P3_113698_97350 | NW_004515817.1 | Scaffold306 | 97350                   | AA                              | GG                | 1946496236               |
| SNP_P3_113699_97690 | NW_004515817.1 | Scaffold306 | 97690                   | TT                              | CC                | 1946496237               |
| SNP_P3_113700_97702 | NW_004515817.1 | Scaffold306 | 97702                   | CC                              | TT                | 1946496238               |



| SNPs IDs             | Chromosome IDs | Chromosomes | Physical positions (bp) | CDC Frontier (Reference genome) | (Pusa 256 & HPNB) | NCBI SNPdb Accession IDs |
|----------------------|----------------|-------------|-------------------------|---------------------------------|-------------------|--------------------------|
| SNP_P3_113701_97955  | NW_004515817.1 | Scaffold306 | 97955                   | CC                              | TT                | 1946496240               |
| SNP_P3_113702_98883  | NW_004515817.1 | Scaffold306 | 98883                   | GG                              | AA                | 1946496241               |
| SNP_P3_113703_100687 | NW_004515817.1 | Scaffold306 | 100687                  | AA                              | TT                | 1946496243               |
| SNP_P3_113704_100721 | NW_004515817.1 | Scaffold306 | 100721                  | GG                              | AA                | 1946496244               |
| SNP_P3_113705_101409 | NW_004515817.1 | Scaffold306 | 101409                  | CC                              | AA                | 1946496246               |
| SNP_P3_113706_104716 | NW_004515817.1 | Scaffold306 | 104716                  | TT                              | CC                | 1946496247               |
| SNP_P3_113707_104787 | NW_004515817.1 | Scaffold306 | 104787                  | CC                              | TT                | 1946496249               |
| SNP_P3_113708_106003 | NW_004515817.1 | Scaffold306 | 106003                  | CC                              | TT                | 1946496250               |
| SNP_P3_113709_107190 | NW_004515817.1 | Scaffold306 | 107190                  | AA                              | CC                | 1946496252               |
| SNP_P3_113710_110468 | NW_004515817.1 | Scaffold306 | 110468                  | TT                              | AA                | 1946496253               |
| SNP_P3_113711_119900 | NW_004515817.1 | Scaffold306 | 119900                  | GG                              | AA                | 1946496255               |
| SNP_P3_113712_119930 | NW_004515817.1 | Scaffold306 | 119930                  | GG                              | TT                | 1946496256               |
| SNP_P3_113713_126270 | NW_004515817.1 | Scaffold306 | 126270                  | CC                              | TT                | 1946496258               |
| SNP_P3_113714_126581 | NW_004515817.1 | Scaffold306 | 126581                  | CC                              | TT                | 1946496259               |
| SNP_P3_113715_127402 | NW_004515817.1 | Scaffold306 | 127402                  | CC                              | AA                | 1946496260               |
| SNP_P3_113716_127489 | NW_004515817.1 | Scaffold306 | 127489                  | AA                              | TT                | 1946496262               |
| SNP_P3_113717_127671 | NW_004515817.1 | Scaffold306 | 127671                  | AA                              | GG                | 1946496263               |
| SNP_P3_113718_127679 | NW_004515817.1 | Scaffold306 | 127679                  | CC                              | TT                | 1946496265               |
| SNP_P3_113719_127822 | NW_004515817.1 | Scaffold306 | 127822                  | CC                              | GG                | 1946496266               |
| SNP_P3_113720_127942 | NW_004515817.1 | Scaffold306 | 127942                  | TT                              | AA                | 1946496268               |
| SNP_P3_113721_128032 | NW_004515817.1 | Scaffold306 | 128032                  | TT                              | GG                | 1946496269               |
| SNP_P3_113722_128122 | NW_004515817.1 | Scaffold306 | 128122                  | CC                              | TT                | 1946496271               |
| SNP_P3_113723_128170 | NW_004515817.1 | Scaffold306 | 128170                  | AA                              | GG                | 1946496272               |
| SNP_P3_113724_128171 | NW_004515817.1 | Scaffold306 | 128171                  | TT                              | AA                | 1946496274               |
| SNP_P3_113725_128173 | NW_004515817.1 | Scaffold306 | 128173                  | AA                              | TT                | 1946496275               |
| SNP_P3_113727_128619 | NW_004515817.1 | Scaffold306 | 128619                  | GG                              | AA                | 1946496277               |
| SNP_P3_113728_128864 | NW_004515817.1 | Scaffold306 | 128864                  | AA                              | GG                | 1946496278               |
| SNP_P3_113731_130265 | NW_004515817.1 | Scaffold306 | 130265                  | TT                              | AA                | 1946496280               |
| SNP_P3_113732_130311 | NW_004515817.1 | Scaffold306 | 130311                  | AA                              | TT                | 1946496281               |
| SNP_P3_113733_130320 | NW_004515817.1 | Scaffold306 | 130320                  | AA                              | GG                | 1946496282               |
| SNP_P3_113734_130338 | NW_004515817.1 | Scaffold306 | 130338                  | GG                              | AA                | 1946496284               |
| SNP_P3_113735_130525 | NW_004515817.1 | Scaffold306 | 130525                  | CC                              | TT                | 1946496285               |
| SNP_P3_113737_130666 | NW_004515817.1 | Scaffold306 | 130666                  | TT                              | GG                | 1946496287               |
| SNP_P3_113738_130767 | NW_004515817.1 | Scaffold306 | 130767                  | AA                              | CC                | 1946496288               |
| SNP_P3_113739_130858 | NW_004515817.1 | Scaffold306 | 130858                  | GG                              | AA                | 1946496290               |
| SNP_P3_113740_131271 | NW_004515817.1 | Scaffold306 | 131271                  | AA                              | TT                | 1946496291               |
| SNP_P3_113741_131368 | NW_004515817.1 | Scaffold306 | 131368                  | TT                              | CC                | 1946496293               |
| SNP_P3_113742_131508 | NW_004515817.1 | Scaffold306 | 131508                  | AA                              | GG                | 1946496294               |
| SNP_P3_113743_131622 | NW_004515817.1 | Scaffold306 | 131622                  | GG                              | CC                | 1946496296               |
| SNP_P3_113744_131708 | NW_004515817.1 | Scaffold306 | 131708                  | AA                              | GG                | 1946496297               |
| SNP_P3_113745_132079 | NW_004515817.1 | Scaffold306 | 132079                  | GG                              | AA                | 1946496299               |
| SNP_P3_113746_146583 | NW_004515817.1 | Scaffold306 | 146583                  | GG                              | AA                | 1946496300               |

| SNPs IDs             | Chromosome IDs | Chromosomes | Physical positions (bp) | CDC Frontier (Reference genome) | (Pusa 256 & HPNB) | NCBI SNPdb Accession IDs |
|----------------------|----------------|-------------|-------------------------|---------------------------------|-------------------|--------------------------|
| SNP_P3_113747_146596 | NW_004515817.1 | Scaffold306 | 146596                  | TT                              | CC                | 1946496302               |
| SNP_P3_113748_146604 | NW_004515817.1 | Scaffold306 | 146604                  | GG                              | AA                | 1946496303               |
| SNP_P3_113749_146626 | NW_004515817.1 | Scaffold306 | 146626                  | GG                              | AA                | 1946496305               |
| SNP_P3_113750_148608 | NW_004515817.1 | Scaffold306 | 148608                  | AA                              | CC                | 1946496306               |
| SNP_P3_113751_149245 | NW_004515817.1 | Scaffold306 | 149245                  | TT                              | GG                | 1946496308               |
| SNP_P3_113752_149490 | NW_004515817.1 | Scaffold306 | 149490                  | TT                              | CC                | 1946496309               |
| SNP_P3_113753_162934 | NW_004515817.1 | Scaffold306 | 162934                  | TT                              | GG                | 1946496311               |
| SNP_P3_113755_166464 | NW_004515817.1 | Scaffold306 | 166464                  | AA                              | TT                | 1946496312               |
| SNP_P3_113756_166472 | NW_004515817.1 | Scaffold306 | 166472                  | AA                              | GG                | 1946496314               |
| SNP_P3_113757_166670 | NW_004515817.1 | Scaffold306 | 166670                  | CC                              | GG                | 1946496315               |
| SNP_P3_113758_166867 | NW_004515817.1 | Scaffold306 | 166867                  | AA                              | GG                | 1946496316               |
| SNP_P3_113759_179972 | NW_004515817.1 | Scaffold306 | 179972                  | GG                              | AA                | 1946496318               |
| SNP_P3_113762_185611 | NW_004515817.1 | Scaffold306 | 185611                  | CC                              | TT                | 1946496319               |
| SNP_P3_113763_186590 | NW_004515817.1 | Scaffold306 | 186590                  | TT                              | AA                | 1946496321               |
| SNP_P3_113764_186763 | NW_004515817.1 | Scaffold306 | 186763                  | TT                              | GG                | 1946496322               |
| SNP_P3_113765_197076 | NW_004515817.1 | Scaffold306 | 197076                  | GG                              | CC                | 1946496324               |
| SNP_P3_113766_197432 | NW_004515817.1 | Scaffold306 | 197432                  | TT                              | AA                | 1946496325               |
| SNP_P3_113767_197841 | NW_004515817.1 | Scaffold306 | 197841                  | CC                              | TT                | 1946496327               |
| SNP_P3_113768_203026 | NW_004515817.1 | Scaffold306 | 203026                  | CC                              | TT                | 1946496328               |
| SNP_P3_113769_203336 | NW_004515817.1 | Scaffold306 | 203336                  | CC                              | TT                | 1946496330               |
| SNP_P3_113770_203645 | NW_004515817.1 | Scaffold306 | 203645                  | TT                              | GG                | 1946496331               |
| SNP_P3_113771_203979 | NW_004515817.1 | Scaffold306 | 203979                  | CC                              | TT                | 1946496333               |
| SNP_P3_113772_203984 | NW_004515817.1 | Scaffold306 | 203984                  | GG                              | AA                | 1946496334               |
| SNP_P3_113773_204078 | NW_004515817.1 | Scaffold306 | 204078                  | GG                              | CC                | 1946496336               |
| SNP_P3_113774_208187 | NW_004515817.1 | Scaffold306 | 208187                  | CC                              | TT                | 1946496337               |
| SNP_P3_113775_208200 | NW_004515817.1 | Scaffold306 | 208200                  | CC                              | AA                | 1946496339               |
| SNP_P3_113776_208842 | NW_004515817.1 | Scaffold306 | 208842                  | GG                              | AA                | 1946496340               |
| SNP_P3_113777_213227 | NW_004515817.1 | Scaffold306 | 213227                  | TT                              | CC                | 1946496342               |
| SNP_P3_113778_213229 | NW_004515817.1 | Scaffold306 | 213229                  | GG                              | AA                | 1946496343               |
| SNP_P3_113779_213301 | NW_004515817.1 | Scaffold306 | 213301                  | AA                              | TT                | 1946496345               |
| SNP_P3_113780_213357 | NW_004515817.1 | Scaffold306 | 213357                  | TT                              | CC                | 1946496346               |
| SNP_P3_113781_214533 | NW_004515817.1 | Scaffold306 | 214533                  | CC                              | TT                | 1946496347               |
| SNP_P3_113782_214855 | NW_004515817.1 | Scaffold306 | 214855                  | AA                              | CC                | 1946496349               |
| SNP_P3_113783_214861 | NW_004515817.1 | Scaffold306 | 214861                  | GG                              | AA                | 1946496350               |
| SNP_P3_113784_214919 | NW_004515817.1 | Scaffold306 | 214919                  | CC                              | TT                | 1946496352               |
| SNP_P3_113785_214945 | NW_004515817.1 | Scaffold306 | 214945                  | AA                              | CC                | 1946496353               |
| SNP_P3_113786_214984 | NW_004515817.1 | Scaffold306 | 214984                  | AA                              | GG                | 1946496354               |
| SNP_P3_113787_214988 | NW_004515817.1 | Scaffold306 | 214988                  | AA                              | CC                | 1946496356               |
| SNP_P3_113788_215293 | NW_004515817.1 | Scaffold306 | 215293                  | TT                              | GG                | 1946496357               |
| SNP_P3_113789_215300 | NW_004515817.1 | Scaffold306 | 215300                  | AA                              | CC                | 1946496359               |
| SNP_P3_113790_216358 | NW_004515817.1 | Scaffold306 | 216358                  | AA                              | GG                | 1946496360               |
| SNP_P3_113791_216430 | NW_004515817.1 | Scaffold306 | 216430                  | TT                              | GG                | 1946496362               |

| SNPs IDs             | Chromosome IDs | Chromosomes | Physical positions (bp) | CDC Frontier (Reference genome) | (Pusa 256 & HPNB) | NCBI SNPdb Accession IDs |
|----------------------|----------------|-------------|-------------------------|---------------------------------|-------------------|--------------------------|
| SNP_P3_113792_219494 | NW_004515817.1 | Scaffold306 | 219494                  | AA                              | GG                | 1946496363               |
| SNP_P3_113793_219528 | NW_004515817.1 | Scaffold306 | 219528                  | TT                              | GG                | 1946496365               |
| SNP_P3_113794_219737 | NW_004515817.1 | Scaffold306 | 219737                  | TT                              | CC                | 1946496366               |
| SNP_P3_113795_219772 | NW_004515817.1 | Scaffold306 | 219772                  | CC                              | TT                | 1946496368               |
| SNP_P3_113796_221630 | NW_004515817.1 | Scaffold306 | 221630                  | GG                              | CC                | 1946496369               |
| SNP_P3_113797_222126 | NW_004515817.1 | Scaffold306 | 222126                  | GG                              | TT                | 1946496371               |
| SNP_P3_113798_224373 | NW_004515817.1 | Scaffold306 | 224373                  | AA                              | TT                | 1946496372               |
| SNP_P3_113799_234513 | NW_004515817.1 | Scaffold306 | 234513                  | TT                              | CC                | 1946496374               |
| SNP_P3_113800_246925 | NW_004515817.1 | Scaffold306 | 246925                  | AA                              | TT                | 1946496375               |
| SNP_P3_113801_249050 | NW_004515817.1 | Scaffold306 | 249050                  | TT                              | CC                | 1946496377               |
| SNP_P3_113802_249332 | NW_004515817.1 | Scaffold306 | 249332                  | AA                              | CC                | 1946496378               |
| SNP_P3_113803_251078 | NW_004515817.1 | Scaffold306 | 251078                  | GG                              | TT                | 1946496380               |
| SNP_P3_113804_252765 | NW_004515817.1 | Scaffold306 | 252765                  | AA                              | CC                | 1946496381               |
| SNP_P3_113805_252766 | NW_004515817.1 | Scaffold306 | 252766                  | CC                              | AA                | 1946496383               |
| SNP_P3_113807_264393 | NW_004515817.1 | Scaffold306 | 264393                  | CC                              | TT                | 1946496384               |
| SNP_P3_113808_265331 | NW_004515817.1 | Scaffold306 | 265331                  | GG                              | AA                | 1946496386               |
| SNP_P3_113809_267436 | NW_004515817.1 | Scaffold306 | 267436                  | TT                              | AA                | 1946496387               |
| SNP_P3_113810_269205 | NW_004515817.1 | Scaffold306 | 269205                  | GG                              | AA                | 1946496389               |
| SNP_P3_113811_269242 | NW_004515817.1 | Scaffold306 | 269242                  | GG                              | CC                | 1946496390               |
| SNP_P3_113812_270236 | NW_004515817.1 | Scaffold306 | 270236                  | TT                              | CC                | 1946496391               |
| SNP_P3_113813_271315 | NW_004515817.1 | Scaffold306 | 271315                  | TT                              | GG                | 1946496393               |
| SNP_P3_113814_271319 | NW_004515817.1 | Scaffold306 | 271319                  | CC                              | TT                | 1946496394               |
| SNP_P3_113815_274024 | NW_004515817.1 | Scaffold306 | 274024                  | GG                              | CC                | 1946496396               |
| SNP_P3_113816_276624 | NW_004515817.1 | Scaffold306 | 276624                  | TT                              | AA                | 1946496398               |
| SNP_P3_113817_276645 | NW_004515817.1 | Scaffold306 | 276645                  | GG                              | TT                | 1946496399               |
| SNP_P3_113818_276675 | NW_004515817.1 | Scaffold306 | 276675                  | TT                              | GG                | 1946496400               |
| SNP_P3_113819_276946 | NW_004515817.1 | Scaffold306 | 276946                  | TT                              | CC                | 1946496402               |
| SNP_P3_113821_280297 | NW_004515817.1 | Scaffold306 | 280297                  | GG                              | CC                | 1946496403               |
| SNP_P3_113822_287980 | NW_004515817.1 | Scaffold306 | 287980                  | GG                              | AA                | 1946496405               |
| SNP_P3_113823_289876 | NW_004515817.1 | Scaffold306 | 289876                  | AA                              | GG                | 1946496406               |
| SNP_P3_113824_295058 | NW_004515817.1 | Scaffold306 | 295058                  | CC                              | AA                | 1946496408               |
| SNP_P3_113825_296967 | NW_004515817.1 | Scaffold306 | 296967                  | AA                              | GG                | 1946496409               |
| SNP_P3_113826_296974 | NW_004515817.1 | Scaffold306 | 296974                  | TT                              | CC                | 1946496411               |
| SNP_P3_113827_302242 | NW_004515817.1 | Scaffold306 | 302242                  | AA                              | GG                | 1946496412               |
| SNP_P3_113828_306330 | NW_004515817.1 | Scaffold306 | 306330                  | CC                              | AA                | 1946496414               |
| SNP_P3_113829_315208 | NW_004515817.1 | Scaffold306 | 315208                  | GG                              | AA                | 1946496415               |
| SNP_P3_113830_315218 | NW_004515817.1 | Scaffold306 | 315218                  | GG                              | AA                | 1946496417               |
| SNP_P3_113831_315219 | NW_004515817.1 | Scaffold306 | 315219                  | CC                              | TT                | 1946496418               |
| SNP_P3_113832_327921 | NW_004515817.1 | Scaffold306 | 327921                  | GG                              | AA                | 1946496419               |
| SNP_P3_113833_327963 | NW_004515817.1 | Scaffold306 | 327963                  | AA                              | GG                | 1946496421               |
| SNP_P3_113834_328207 | NW_004515817.1 | Scaffold306 | 328207                  | AA                              | CC                | 1946496422               |
| SNP_P3_113835_329877 | NW_004515817.1 | Scaffold306 | 329877                  | CC                              | AA                | 1946496424               |

| SNPs IDs             | Chromosome IDs | Chromosomes | Physical positions (bp) | CDC Frontier (Reference genome) | (Pusa 256 & HPNB) | NCBI SNPdb Accession IDs |
|----------------------|----------------|-------------|-------------------------|---------------------------------|-------------------|--------------------------|
| SNP_P3_113836_332399 | NW_004515817.1 | Scaffold306 | 332399                  | TT                              | CC                | 1946496425               |
| SNP_P3_113837_332731 | NW_004515817.1 | Scaffold306 | 332731                  | GG                              | AA                | 1946496427               |
| SNP_P3_113838_332957 | NW_004515817.1 | Scaffold306 | 332957                  | TT                              | CC                | 1946496428               |
| SNP_P3_113840_333000 | NW_004515817.1 | Scaffold306 | 333000                  | AA                              | GG                | 1946496430               |
| SNP_P3_113841_333079 | NW_004515817.1 | Scaffold306 | 333079                  | AA                              | GG                | 1946496431               |
| SNP_P3_113842_333102 | NW_004515817.1 | Scaffold306 | 333102                  | CC                              | AA                | 1946496433               |
| SNP_P3_113843_334365 | NW_004515817.1 | Scaffold306 | 334365                  | TT                              | GG                | 1946496434               |
| SNP_P3_113844_334394 | NW_004515817.1 | Scaffold306 | 334394                  | GG                              | TT                | 1946496436               |
| SNP_P3_113845_334499 | NW_004515817.1 | Scaffold306 | 334499                  | GG                              | AA                | 1946496437               |
| SNP_P3_113847_343086 | NW_004515817.1 | Scaffold306 | 343086                  | GG                              | AA                | 1946496439               |
| SNP_P3_113848_344899 | NW_004515817.1 | Scaffold306 | 344899                  | AA                              | TT                | 1946496440               |
| SNP_P3_113849_345654 | NW_004515817.1 | Scaffold306 | 345654                  | CC                              | TT                | 1946496442               |
| SNP_P3_113850_348163 | NW_004515817.1 | Scaffold306 | 348163                  | GG                              | TT                | 1946496443               |
| SNP_P3_113851_348196 | NW_004515817.1 | Scaffold306 | 348196                  | AA                              | GG                | 1946496445               |
| SNP_P3_113852_350653 | NW_004515817.1 | Scaffold306 | 350653                  | CC                              | TT                | 1946496446               |
| SNP_P3_113853_350736 | NW_004515817.1 | Scaffold306 | 350736                  | AA                              | CC                | 1946496448               |
| SNP_P3_113854_351349 | NW_004515817.1 | Scaffold306 | 351349                  | GG                              | AA                | 1946496449               |
| SNP_P3_113855_357884 | NW_004515817.1 | Scaffold306 | 357884                  | AA                              | GG                | 1946496451               |
| SNP_P3_113856_360845 | NW_004515817.1 | Scaffold306 | 360845                  | GG                              | AA                | 1946496452               |
| SNP_P3_113857_360904 | NW_004515817.1 | Scaffold306 | 360904                  | GG                              | TT                | 1946496454               |
| SNP_P3_113858_363528 | NW_004515817.1 | Scaffold306 | 363528                  | TT                              | AA                | 1946496455               |
| SNP_P3_113859_363529 | NW_004515817.1 | Scaffold306 | 363529                  | AA                              | CC                | 1946496457               |
| SNP_P3_113860_363693 | NW_004515817.1 | Scaffold306 | 363693                  | CC                              | TT                | 1946496458               |
| SNP_P3_113861_369723 | NW_004515817.1 | Scaffold306 | 369723                  | GG                              | TT                | 1946496459               |
| SNP_P3_113862_371002 | NW_004515817.1 | Scaffold306 | 371002                  | CC                              | AA                | 1946496461               |
| SNP_P3_113863_371586 | NW_004515817.1 | Scaffold306 | 371586                  | TT                              | CC                | 1946496462               |
| SNP_P3_113864_374267 | NW_004515817.1 | Scaffold306 | 374267                  | TT                              | CC                | 1946496464               |
| SNP_P3_113865_374268 | NW_004515817.1 | Scaffold306 | 374268                  | AA                              | CC                | 1946496465               |
| SNP_P3_113866_378474 | NW_004515817.1 | Scaffold306 | 378474                  | GG                              | TT                | 1946496467               |
| SNP_P3_113867_378498 | NW_004515817.1 | Scaffold306 | 378498                  | AA                              | GG                | 1946496469               |
| SNP_P3_113868_379576 | NW_004515817.1 | Scaffold306 | 379576                  | TT                              | CC                | 1946496470               |
| SNP_P3_113869_381213 | NW_004515817.1 | Scaffold306 | 381213                  | AA                              | TT                | 1946496471               |
| SNP_P3_113870_381395 | NW_004515817.1 | Scaffold306 | 381395                  | AA                              | CC                | 1946496473               |
| SNP_P3_113871_384362 | NW_004515817.1 | Scaffold306 | 384362                  | TT                              | CC                | 1946496475               |
| SNP_P3_113872_390874 | NW_004515817.1 | Scaffold306 | 390874                  | GG                              | AA                | 1946496476               |
| SNP_P3_113873_391076 | NW_004515817.1 | Scaffold306 | 391076                  | CC                              | TT                | 1946496477               |
| SNP_P3_113874_391077 | NW_004515817.1 | Scaffold306 | 391077                  | TT                              | CC                | 1946496479               |
| SNP_P3_113875_398720 | NW_004515817.1 | Scaffold306 | 398720                  | AA                              | CC                | 1946496480               |
| SNP_P3_113876_399006 | NW_004515817.1 | Scaffold306 | 399006                  | AA                              | GG                | 1946496482               |
| SNP_P3_113877_399159 | NW_004515817.1 | Scaffold306 | 399159                  | TT                              | CC                | 1946496483               |
| SNP_P3_113878_399164 | NW_004515817.1 | Scaffold306 | 399164                  | TT                              | AA                | 1946496485               |
| SNP_P3_113879_400699 | NW_004515817.1 | Scaffold306 | 400699                  | GG                              | TT                | 1946496486               |

| SNPs IDs             | Chromosome IDs | Chromosomes | Physical positions (bp) | CDC Frontier (Reference genome) | (Pusa 256 & HPNB) | NCBI SNPdb Accession IDs |
|----------------------|----------------|-------------|-------------------------|---------------------------------|-------------------|--------------------------|
| SNP_P3_113880_401261 | NW_004515817.1 | Scaffold306 | 401261                  | AA                              | GG                | 1946496488               |
| SNP_P3_113881_401527 | NW_004515817.1 | Scaffold306 | 401527                  | TT                              | CC                | 1946496489               |
| SNP_P3_113882_403745 | NW_004515817.1 | Scaffold306 | 403745                  | CC                              | TT                | 1946496491               |
| SNP_P3_113883_416780 | NW_004515817.1 | Scaffold306 | 416780                  | TT                              | AA                | 1946496492               |
| SNP_P3_113884_418129 | NW_004515817.1 | Scaffold306 | 418129                  | CC                              | TT                | 1946496494               |
| SNP_P3_113885_418204 | NW_004515817.1 | Scaffold306 | 418204                  | AA                              | GG                | 1946496495               |
| SNP_P3_113886_418238 | NW_004515817.1 | Scaffold306 | 418238                  | CC                              | AA                | 1946496497               |
| SNP_P3_113887_418278 | NW_004515817.1 | Scaffold306 | 418278                  | AA                              | GG                | 1946496498               |
| SNP_P3_113888_418287 | NW_004515817.1 | Scaffold306 | 418287                  | AA                              | TT                | 1946496500               |
| SNP_P3_113889_418477 | NW_004515817.1 | Scaffold306 | 418477                  | CC                              | TT                | 1946496501               |
| SNP_P3_113891_418509 | NW_004515817.1 | Scaffold306 | 418509                  | CC                              | AA                | 1946496503               |
| SNP_P3_113892_418614 | NW_004515817.1 | Scaffold306 | 418614                  | AA                              | CC                | 1946496504               |
| SNP_P3_113893_421214 | NW_004515817.1 | Scaffold306 | 421214                  | GG                              | AA                | 1946496506               |
| SNP_P3_113894_421485 | NW_004515817.1 | Scaffold306 | 421485                  | AA                              | GG                | 1946496507               |
| SNP_P3_113895_421517 | NW_004515817.1 | Scaffold306 | 421517                  | CC                              | GG                | 1946496509               |
| SNP_P3_113896_421773 | NW_004515817.1 | Scaffold306 | 421773                  | GG                              | AA                | 1946496510               |
| SNP_P3_113897_422415 | NW_004515817.1 | Scaffold306 | 422415                  | TT                              | GG                | 1946496512               |
| SNP_P3_113898_422957 | NW_004515817.1 | Scaffold306 | 422957                  | AA                              | TT                | 1946496513               |
| SNP_P3_113900_424663 | NW_004515817.1 | Scaffold306 | 424663                  | CC                              | TT                | 1946496515               |
| SNP_P3_113901_424731 | NW_004515817.1 | Scaffold306 | 424731                  | CC                              | AA                | 1946496516               |
| SNP_P3_113902_424832 | NW_004515817.1 | Scaffold306 | 424832                  | TT                              | AA                | 1946496517               |
| SNP_P3_113904_424967 | NW_004515817.1 | Scaffold306 | 424967                  | CC                              | TT                | 1946496519               |
| SNP_P3_113905_444785 | NW_004515817.1 | Scaffold306 | 444785                  | GG                              | AA                | 1946496520               |
| SNP_P3_113906_444955 | NW_004515817.1 | Scaffold306 | 444955                  | TT                              | CC                | 1946496522               |
| SNP_P3_113907_445440 | NW_004515817.1 | Scaffold306 | 445440                  | AA                              | GG                | 1946496523               |
| SNP_P3_113908_446823 | NW_004515817.1 | Scaffold306 | 446823                  | CC                              | AA                | 1946496525               |
| SNP_P3_113909_447316 | NW_004515817.1 | Scaffold306 | 447316                  | TT                              | CC                | 1946496526               |
| SNP_P3_113910_447468 | NW_004515817.1 | Scaffold306 | 447468                  | TT                              | GG                | 1946496528               |
| SNP_P3_113911_447477 | NW_004515817.1 | Scaffold306 | 447477                  | CC                              | TT                | 1946496529               |
| SNP_P3_113912_447492 | NW_004515817.1 | Scaffold306 | 447492                  | AA                              | GG                | 1946496531               |
| SNP_P3_113913_447543 | NW_004515817.1 | Scaffold306 | 447543                  | AA                              | CC                | 1946496532               |
| SNP_P3_113914_447575 | NW_004515817.1 | Scaffold306 | 447575                  | GG                              | AA                | 1946496534               |
| SNP_P3_113915_447717 | NW_004515817.1 | Scaffold306 | 447717                  | CC                              | TT                | 1946496535               |
| SNP_P3_113916_449488 | NW_004515817.1 | Scaffold306 | 449488                  | TT                              | CC                | 1946496536               |
| SNP_P3_113917_449733 | NW_004515817.1 | Scaffold306 | 449733                  | CC                              | TT                | 1946496538               |
| SNP_P3_113918_450812 | NW_004515817.1 | Scaffold306 | 450812                  | CC                              | TT                | 1946496539               |
| SNP_P3_113919_451531 | NW_004515817.1 | Scaffold306 | 451531                  | TT                              | AA                | 1946496541               |
| SNP_P3_113920_451554 | NW_004515817.1 | Scaffold306 | 451554                  | TT                              | AA                | 1946496542               |
| SNP_P3_113921_451743 | NW_004515817.1 | Scaffold306 | 451743                  | GG                              | AA                | 1946496544               |
| SNP_P3_113922_451744 | NW_004515817.1 | Scaffold306 | 451744                  | TT                              | AA                | 1946496545               |
| SNP_P3_113923_451762 | NW_004515817.1 | Scaffold306 | 451762                  | AA                              | GG                | 1946496547               |
| SNP_P3_113924_453892 | NW_004515817.1 | Scaffold306 | 453892                  | AA                              | GG                | 1946496548               |

| SNPs IDs             | Chromosome IDs | Chromosomes   | Physical positions (bp) | CDC Frontier (Reference genome) | (Pusa 256 & HPNB) | NCBI SNPdb Accession IDs |
|----------------------|----------------|---------------|-------------------------|---------------------------------|-------------------|--------------------------|
| SNP_P3_113925_455616 | NW_004515817.1 | Scaffold306   | 455616                  | GG                              | TT                | 1946496550               |
| SNP_P3_113926_455621 | NW_004515817.1 | Scaffold306   | 455621                  | CC                              | TT                | 1946496551               |
| SNP_P3_113927_464354 | NW_004515817.1 | Scaffold306   | 464354                  | GG                              | TT                | 1946496553               |
| SNP_P3_113928_464470 | NW_004515817.1 | Scaffold306   | 464470                  | CC                              | TT                | 1946496554               |
| SNP_P3_113929_464755 | NW_004515817.1 | Scaffold306   | 464755                  | AA                              | GG                | 1946496556               |
| SNP_P3_113930_466935 | NW_004515817.1 | Scaffold306   | 466935                  | GG                              | AA                | 1946496557               |
| SNP_P3_113931_467890 | NW_004515817.1 | Scaffold306   | 467890                  | GG                              | TT                | 1946496559               |
| SNP_P3_113932_467940 | NW_004515817.1 | Scaffold306   | 467940                  | TT                              | CC                | 1946496560               |
| SNP_P3_113933_467972 | NW_004515817.1 | Scaffold306   | 467972                  | GG                              | AA                | 1946496562               |
| SNP_P3_113934_469967 | NW_004515817.1 | Scaffold306   | 469967                  | AA                              | GG                | 1946496563               |
| SNP_P3_113935_475360 | NW_004515817.1 | Scaffold306   | 475360                  | CC                              | TT                | 1946496564               |
| SNP_P3_113936_480558 | NW_004515817.1 | Scaffold306   | 480558                  | GG                              | CC                | 1946496566               |
| SNP_P3_113937_480588 | NW_004515817.1 | Scaffold306   | 480588                  | GG                              | TT                | 1946496567               |
| SNP_P3_113938_480617 | NW_004515817.1 | Scaffold306   | 480617                  | AA                              | GG                | 1946496569               |
| SNP_P3_113939_482850 | NW_004515817.1 | Scaffold306   | 482850                  | CC                              | TT                | 1946496570               |
| SNP_P3_113940_482882 | NW_004515817.1 | Scaffold306   | 482882                  | CC                              | TT                | 1946496572               |
| SNP_P3_113941_483181 | NW_004515817.1 | Scaffold306   | 483181                  | CC                              | TT                | 1946496573               |
| SNP_P3_113942_483216 | NW_004515817.1 | Scaffold306   | 483216                  | AA                              | GG                | 1946496575               |
| SNP_P3_113943_483523 | NW_004515817.1 | Scaffold306   | 483523                  | TT                              | CC                | 1946496576               |
| SNP_P3_113944_483972 | NW_004515817.1 | Scaffold306   | 483972                  | AA                              | TT                | 1946496577               |
| SNP_P3_113945_11190  | NW_004515818.1 | Scaffold308_2 | 11190                   | CC                              | GG                | 1946496579               |
| SNP_P3_113949_69929  | NW_004515818.1 | Scaffold308_2 | 69929                   | GG                              | AA                | 1946496580               |
| SNP_P3_113950_69960  | NW_004515818.1 | Scaffold308_2 | 69960                   | TT                              | GG                | 1946496582               |
| SNP_P3_113951_75198  | NW_004515818.1 | Scaffold308_2 | 75198                   | TT                              | CC                | 1946496583               |
| SNP_P3_113952_76110  | NW_004515818.1 | Scaffold308_2 | 76110                   | CC                              | TT                | 1946496585               |
| SNP_P3_113953_76179  | NW_004515818.1 | Scaffold308_2 | 76179                   | GG                              | AA                | 1946496586               |
| SNP_P3_113955_76267  | NW_004515818.1 | Scaffold308_2 | 76267                   | AA                              | GG                | 1946496588               |
| SNP_P3_113956_76299  | NW_004515818.1 | Scaffold308_2 | 76299                   | TT                              | GG                | 1946496589               |
| SNP_P3_113958_76528  | NW_004515818.1 | Scaffold308_2 | 76528                   | GG                              | CC                | 1946496591               |
| SNP_P3_113959_76530  | NW_004515818.1 | Scaffold308_2 | 76530                   | CC                              | AA                | 1946496592               |
| SNP_P3_113960_76565  | NW_004515818.1 | Scaffold308_2 | 76565                   | AA                              | TT                | 1946496594               |
| SNP_P3_113961_77948  | NW_004515818.1 | Scaffold308_2 | 77948                   | GG                              | AA                | 1946496595               |
| SNP_P3_113962_79711  | NW_004515818.1 | Scaffold308_2 | 79711                   | CC                              | GG                | 1946496597               |
| SNP_P3_113963_79713  | NW_004515818.1 | Scaffold308_2 | 79713                   | AA                              | GG                | 1946496598               |
| SNP_P3_113964_79716  | NW_004515818.1 | Scaffold308_2 | 79716                   | TT                              | AA                | 1946496599               |
| SNP_P3_113965_79756  | NW_004515818.1 | Scaffold308_2 | 79756                   | CC                              | TT                | 1946496601               |
| SNP_P3_113966_80048  | NW_004515818.1 | Scaffold308_2 | 80048                   | TT                              | AA                | 1946496603               |
| SNP_P3_113967_80087  | NW_004515818.1 | Scaffold308_2 | 80087                   | CC                              | TT                | 1946496604               |
| SNP_P3_113968_80131  | NW_004515818.1 | Scaffold308_2 | 80131                   | TT                              | GG                | 1946496605               |
| SNP_P3_113969_80146  | NW_004515818.1 | Scaffold308_2 | 80146                   | AA                              | GG                | 1946496607               |
| SNP_P3_113970_84021  | NW_004515818.1 | Scaffold308_2 | 84021                   | CC                              | AA                | 1946496608               |
| SNP_P3_113971_84096  | NW_004515818.1 | Scaffold308_2 | 84096                   | AA                              | GG                | 1946496610               |

| SNPs IDs             | Chromosome IDs | Chromosomes   | Physical positions (bp) | CDC Frontier (Reference genome) | (Pusa 256 & HPNB) | NCBI SNPdb Accession IDs |
|----------------------|----------------|---------------|-------------------------|---------------------------------|-------------------|--------------------------|
| SNP_P3_113972_84675  | NW_004515818.1 | Scaffold308_2 | 84675                   | CC                              | TT                | 1946496611               |
| SNP_P3_113973_84683  | NW_004515818.1 | Scaffold308_2 | 84683                   | GG                              | AA                | 1946496613               |
| SNP_P3_113974_84767  | NW_004515818.1 | Scaffold308_2 | 84767                   | TT                              | CC                | 1946496614               |
| SNP_P3_113975_84848  | NW_004515818.1 | Scaffold308_2 | 84848                   | AA                              | GG                | 1946496616               |
| SNP_P3_113976_84889  | NW_004515818.1 | Scaffold308_2 | 84889                   | TT                              | AA                | 1946496617               |
| SNP_P3_113977_85042  | NW_004515818.1 | Scaffold308_2 | 85042                   | GG                              | AA                | 1946496619               |
| SNP_P3_113979_85441  | NW_004515818.1 | Scaffold308_2 | 85441                   | TT                              | AA                | 1946496620               |
| SNP_P3_113980_85514  | NW_004515818.1 | Scaffold308_2 | 85514                   | TT                              | AA                | 1946496622               |
| SNP_P3_113981_88132  | NW_004515818.1 | Scaffold308_2 | 88132                   | AA                              | GG                | 1946496623               |
| SNP_P3_113982_118722 | NW_004515818.1 | Scaffold308_2 | 118722                  | GG                              | AA                | 1946496625               |
| SNP_P3_113983_173828 | NW_004515818.1 | Scaffold308_2 | 173828                  | TT                              | GG                | 1946496626               |
| SNP_P3_113984_173829 | NW_004515818.1 | Scaffold308_2 | 173829                  | AA                              | GG                | 1946496628               |
| SNP_P3_113985_173909 | NW_004515818.1 | Scaffold308_2 | 173909                  | AA                              | GG                | 1946496629               |
| SNP_P3_113986_174292 | NW_004515818.1 | Scaffold308_2 | 174292                  | AA                              | GG                | 1946496631               |
| SNP_P3_113988_247648 | NW_004515818.1 | Scaffold308_2 | 247648                  | TT                              | GG                | 1946496632               |
| SNP_P3_113989_262432 | NW_004515818.1 | Scaffold308_2 | 262432                  | GG                              | TT                | 1946496634               |
| SNP_P3_113990_262469 | NW_004515818.1 | Scaffold308_2 | 262469                  | AA                              | GG                | 1946496635               |
| SNP_P3_113992_262643 | NW_004515818.1 | Scaffold308_2 | 262643                  | CC                              | AA                | 1946496637               |
| SNP_P3_113993_262645 | NW_004515818.1 | Scaffold308_2 | 262645                  | AA                              | GG                | 1946496639               |
| SNP_P3_113994_262662 | NW_004515818.1 | Scaffold308_2 | 262662                  | AA                              | TT                | 1946496640               |
| SNP_P3_113997_263428 | NW_004515818.1 | Scaffold308_2 | 263428                  | AA                              | GG                | 1946496642               |
| SNP_P3_113999_263534 | NW_004515818.1 | Scaffold308_2 | 263534                  | GG                              | CC                | 1946496643               |
| SNP_P3_114000_263546 | NW_004515818.1 | Scaffold308_2 | 263546                  | CC                              | TT                | 1946496645               |
| SNP_P3_114001_263580 | NW_004515818.1 | Scaffold308_2 | 263580                  | AA                              | GG                | 1946496646               |
| SNP_P3_114002_263596 | NW_004515818.1 | Scaffold308_2 | 263596                  | TT                              | CC                | 1946496648               |
| SNP_P3_114003_263630 | NW_004515818.1 | Scaffold308_2 | 263630                  | CC                              | GG                | 1946496649               |
| SNP_P3_114004_263639 | NW_004515818.1 | Scaffold308_2 | 263639                  | GG                              | AA                | 1946496651               |
| SNP_P3_114005_263649 | NW_004515818.1 | Scaffold308_2 | 263649                  | CC                              | AA                | 1946496652               |
| SNP_P3_114006_263650 | NW_004515818.1 | Scaffold308_2 | 263650                  | TT                              | CC                | 1946496654               |
| SNP_P3_114007_264340 | NW_004515818.1 | Scaffold308_2 | 264340                  | AA                              | GG                | 1946496655               |
| SNP_P3_114008_264341 | NW_004515818.1 | Scaffold308_2 | 264341                  | CC                              | AA                | 1946496657               |
| SNP_P3_114010_264371 | NW_004515818.1 | Scaffold308_2 | 264371                  | GG                              | TT                | 1946496658               |
| SNP_P3_114012_264419 | NW_004515818.1 | Scaffold308_2 | 264419                  | AA                              | GG                | 1946496660               |
| SNP_P3_114013_264472 | NW_004515818.1 | Scaffold308_2 | 264472                  | AA                              | TT                | 1946496661               |
| SNP_P3_114014_264480 | NW_004515818.1 | Scaffold308_2 | 264480                  | GG                              | TT                | 1946496663               |
| SNP_P3_114015_264499 | NW_004515818.1 | Scaffold308_2 | 264499                  | GG                              | CC                | 1946496664               |
| SNP_P3_114017_264557 | NW_004515818.1 | Scaffold308_2 | 264557                  | AA                              | GG                | 1946496666               |
| SNP_P3_114018_264589 | NW_004515818.1 | Scaffold308_2 | 264589                  | TT                              | AA                | 1946496667               |
| SNP_P3_114019_264602 | NW_004515818.1 | Scaffold308_2 | 264602                  | AA                              | GG                | 1946496668               |
| SNP_P3_114021_264880 | NW_004515818.1 | Scaffold308_2 | 264880                  | CC                              | AA                | 1946496670               |
| SNP_P3_114022_264885 | NW_004515818.1 | Scaffold308_2 | 264885                  | TT                              | AA                | 1946496671               |
| SNP_P3_114023_264912 | NW_004515818.1 | Scaffold308_2 | 264912                  | TT                              | CC                | 1946496673               |

| SNPs IDs             | Chromosome IDs | Chromosomes   | Physical positions (bp) | CDC Frontier (Reference genome) | (Pusa 256 & HPNB) | NCBI SNPdb Accession IDs |
|----------------------|----------------|---------------|-------------------------|---------------------------------|-------------------|--------------------------|
| SNP_P3_114024_264956 | NW_004515818.1 | Scaffold308_2 | 264956                  | AA                              | GG                | 1946496674               |
| SNP_P3_114025_265008 | NW_004515818.1 | Scaffold308_2 | 265008                  | TT                              | CC                | 1946496676               |
| SNP_P3_114026_265368 | NW_004515818.1 | Scaffold308_2 | 265368                  | GG                              | AA                | 1946496677               |
| SNP_P3_114027_265395 | NW_004515818.1 | Scaffold308_2 | 265395                  | TT                              | CC                | 1946496679               |
| SNP_P3_114028_265423 | NW_004515818.1 | Scaffold308_2 | 265423                  | AA                              | GG                | 1946496680               |
| SNP_P3_114030_265767 | NW_004515818.1 | Scaffold308_2 | 265767                  | TT                              | CC                | 1946496682               |
| SNP_P3_114031_265820 | NW_004515818.1 | Scaffold308_2 | 265820                  | TT                              | AA                | 1946496683               |
| SNP_P3_114032_265837 | NW_004515818.1 | Scaffold308_2 | 265837                  | TT                              | CC                | 1946496684               |
| SNP_P3_114033_266021 | NW_004515818.1 | Scaffold308_2 | 266021                  | TT                              | CC                | 1946496686               |
| SNP_P3_114035_266366 | NW_004515818.1 | Scaffold308_2 | 266366                  | AA                              | GG                | 1946496687               |
| SNP_P3_114036_266372 | NW_004515818.1 | Scaffold308_2 | 266372                  | TT                              | AA                | 1946496689               |
| SNP_P3_114037_266380 | NW_004515818.1 | Scaffold308_2 | 266380                  | TT                              | CC                | 1946496690               |
| SNP_P3_114038_267031 | NW_004515818.1 | Scaffold308_2 | 267031                  | AA                              | GG                | 1946496692               |
| SNP_P3_114039_267037 | NW_004515818.1 | Scaffold308_2 | 267037                  | TT                              | CC                | 1946496693               |
| SNP_P3_114041_307305 | NW_004515818.1 | Scaffold308_2 | 307305                  | GG                              | AA                | 1946496694               |
| SNP_P3_114042_307355 | NW_004515818.1 | Scaffold308_2 | 307355                  | TT                              | CC                | 1946496696               |
| SNP_P3_114043_307377 | NW_004515818.1 | Scaffold308_2 | 307377                  | TT                              | CC                | 1946496697               |
| SNP_P3_114044_307677 | NW_004515818.1 | Scaffold308_2 | 307677                  | AA                              | GG                | 1946496699               |
| SNP_P3_114045_320736 | NW_004515818.1 | Scaffold308_2 | 320736                  | AA                              | GG                | 1946496700               |
| SNP_P3_114047_325474 | NW_004515818.1 | Scaffold308_2 | 325474                  | TT                              | AA                | 1946496702               |
| SNP_P3_114048_325584 | NW_004515818.1 | Scaffold308_2 | 325584                  | CC                              | TT                | 1946496703               |
| SNP_P3_114049_325662 | NW_004515818.1 | Scaffold308_2 | 325662                  | GG                              | AA                | 1946496704               |
| SNP_P3_114051_6444   | NW_004515819.1 | Scaffold310   | 6444                    | AA                              | CC                | 1946496706               |
| SNP_P3_114052_6486   | NW_004515819.1 | Scaffold310   | 6486                    | GG                              | CC                | 1946496707               |
| SNP_P3_114053_6493   | NW_004515819.1 | Scaffold310   | 6493                    | AA                              | GG                | 1946496709               |
| SNP_P3_114054_6534   | NW_004515819.1 | Scaffold310   | 6534                    | AA                              | CC                | 1946496710               |
| SNP_P3_114055_6541   | NW_004515819.1 | Scaffold310   | 6541                    | TT                              | GG                | 1946496712               |
| SNP_P3_114056_6792   | NW_004515819.1 | Scaffold310   | 6792                    | TT                              | CC                | 1946496713               |
| SNP_P3_114057_6949   | NW_004515819.1 | Scaffold310   | 6949                    | TT                              | AA                | 1946496714               |
| SNP_P3_114058_6986   | NW_004515819.1 | Scaffold310   | 6986                    | TT                              | CC                | 1946496716               |
| SNP_P3_114059_7429   | NW_004515819.1 | Scaffold310   | 7429                    | CC                              | TT                | 1946496717               |
| SNP_P3_114060_7456   | NW_004515819.1 | Scaffold310   | 7456                    | TT                              | CC                | 1946496719               |
| SNP_P3_114061_7663   | NW_004515819.1 | Scaffold310   | 7663                    | CC                              | AA                | 1946496720               |
| SNP_P3_114062_7857   | NW_004515819.1 | Scaffold310   | 7857                    | GG                              | CC                | 1946496721               |
| SNP_P3_114063_8649   | NW_004515819.1 | Scaffold310   | 8649                    | AA                              | TT                | 1946496723               |
| SNP_P3_114064_11677  | NW_004515819.1 | Scaffold310   | 11677                   | AA                              | TT                | 1946496724               |
| SNP_P3_114065_12364  | NW_004515819.1 | Scaffold310   | 12364                   | GG                              | TT                | 1946496726               |
| SNP_P3_114066_12478  | NW_004515819.1 | Scaffold310   | 12478                   | GG                              | AA                | 1946496727               |
| SNP_P3_114067_12572  | NW_004515819.1 | Scaffold310   | 12572                   | TT                              | CC                | 1946496729               |
| SNP_P3_114068_23599  | NW_004515819.1 | Scaffold310   | 23599                   | TT                              | AA                | 1946496730               |
| SNP_P3_114069_24040  | NW_004515819.1 | Scaffold310   | 24040                   | CC                              | TT                | 1946496732               |
| SNP_P3_114070_24041  | NW_004515819.1 | Scaffold310   | 24041                   | AA                              | GG                | 1946496733               |



| SNPs IDs            | Chromosome IDs | Chromosomes | Physical positions (bp) | CDC Frontier (Reference genome) | (Pusa 256 & HPNB) | NCBI SNPdb Accession IDs |
|---------------------|----------------|-------------|-------------------------|---------------------------------|-------------------|--------------------------|
| SNP_P3_114071_24047 | NW_004515819.1 | Scaffold310 | 24047                   | TT                              | AA                | 1946496734               |
| SNP_P3_114072_24101 | NW_004515819.1 | Scaffold310 | 24101                   | AA                              | TT                | 1946496736               |
| SNP_P3_114073_24201 | NW_004515819.1 | Scaffold310 | 24201                   | GG                              | AA                | 1946496737               |
| SNP_P3_114074_25854 | NW_004515819.1 | Scaffold310 | 25854                   | AA                              | GG                | 1946496739               |
| SNP_P3_114075_25946 | NW_004515819.1 | Scaffold310 | 25946                   | CC                              | TT                | 1946496740               |
| SNP_P3_114076_26214 | NW_004515819.1 | Scaffold310 | 26214                   | CC                              | TT                | 1946496741               |
| SNP_P3_114078_26254 | NW_004515819.1 | Scaffold310 | 26254                   | CC                              | TT                | 1946496743               |
| SNP_P3_114079_26281 | NW_004515819.1 | Scaffold310 | 26281                   | CC                              | AA                | 1946496745               |
| SNP_P3_114080_26284 | NW_004515819.1 | Scaffold310 | 26284                   | CC                              | TT                | 1946496746               |
| SNP_P3_114081_26294 | NW_004515819.1 | Scaffold310 | 26294                   | GG                              | AA                | 1946496748               |
| SNP_P3_114082_34773 | NW_004515819.1 | Scaffold310 | 34773                   | AA                              | GG                | 1946496749               |
| SNP_P3_114083_37948 | NW_004515819.1 | Scaffold310 | 37948                   | TT                              | AA                | 1946496751               |
| SNP_P3_114084_38250 | NW_004515819.1 | Scaffold310 | 38250                   | TT                              | AA                | 1946496752               |
| SNP_P3_114085_38268 | NW_004515819.1 | Scaffold310 | 38268                   | AA                              | TT                | 1946496753               |
| SNP_P3_114086_39835 | NW_004515819.1 | Scaffold310 | 39835                   | TT                              | AA                | 1946496755               |
| SNP_P3_114087_4150  | NW_004515820.1 | Scaffold311 | 4150                    | AA                              | GG                | 1946496756               |
| SNP_P3_114088_4226  | NW_004515820.1 | Scaffold311 | 4226                    | AA                              | GG                | 1946496758               |
| SNP_P3_114089_4488  | NW_004515820.1 | Scaffold311 | 4488                    | GG                              | CC                | 1946496759               |
| SNP_P3_114090_4507  | NW_004515820.1 | Scaffold311 | 4507                    | TT                              | CC                | 1946496761               |
| SNP_P3_114091_5604  | NW_004515820.1 | Scaffold311 | 5604                    | AA                              | CC                | 1946496762               |
| SNP_P3_114092_9045  | NW_004515820.1 | Scaffold311 | 9045                    | CC                              | AA                | 1946496763               |
| SNP_P3_114093_9868  | NW_004515820.1 | Scaffold311 | 9868                    | GG                              | AA                | 1946496765               |
| SNP_P3_114094_9894  | NW_004515820.1 | Scaffold311 | 9894                    | AA                              | TT                | 1946496766               |
| SNP_P3_114095_15096 | NW_004515820.1 | Scaffold311 | 15096                   | TT                              | CC                | 1946496768               |
| SNP_P3_114096_18619 | NW_004515820.1 | Scaffold311 | 18619                   | GG                              | AA                | 1946496769               |
| SNP_P3_114097_18631 | NW_004515820.1 | Scaffold311 | 18631                   | GG                              | TT                | 1946496771               |
| SNP_P3_114098_19247 | NW_004515820.1 | Scaffold311 | 19247                   | TT                              | GG                | 1946496772               |
| SNP_P3_114099_21111 | NW_004515820.1 | Scaffold311 | 21111                   | TT                              | CC                | 1946496774               |
| SNP_P3_114100_21112 | NW_004515820.1 | Scaffold311 | 21112                   | TT                              | GG                | 1946496775               |
| SNP_P3_114101_21113 | NW_004515820.1 | Scaffold311 | 21113                   | TT                              | CC                | 1946496776               |
| SNP_P3_114102_21237 | NW_004515820.1 | Scaffold311 | 21237                   | GG                              | AA                | 1946496778               |
| SNP_P3_114103_21358 | NW_004515820.1 | Scaffold311 | 21358                   | TT                              | CC                | 1946496779               |
| SNP_P3_114104_21367 | NW_004515820.1 | Scaffold311 | 21367                   | AA                              | CC                | 1946496781               |
| SNP_P3_114105_22653 | NW_004515820.1 | Scaffold311 | 22653                   | GG                              | AA                | 1946496782               |
| SNP_P3_114106_22665 | NW_004515820.1 | Scaffold311 | 22665                   | GG                              | CC                | 1946496784               |
| SNP_P3_114107_22771 | NW_004515820.1 | Scaffold311 | 22771                   | AA                              | TT                | 1946496785               |
| SNP_P3_114108_22974 | NW_004515820.1 | Scaffold311 | 22974                   | GG                              | AA                | 1946496787               |
| SNP_P3_114110_24003 | NW_004515820.1 | Scaffold311 | 24003                   | GG                              | CC                | 1946496788               |
| SNP_P3_114111_24348 | NW_004515820.1 | Scaffold311 | 24348                   | TT                              | GG                | 1946496790               |
| SNP_P3_114112_24400 | NW_004515820.1 | Scaffold311 | 24400                   | TT                              | CC                | 1946496791               |
| SNP_P3_114113_24533 | NW_004515820.1 | Scaffold311 | 24533                   | TT                              | GG                | 1946496793               |
| SNP_P3_114114_24844 | NW_004515820.1 | Scaffold311 | 24844                   | GG                              | CC                | 1946496794               |

| SNPs IDs            | Chromosome IDs | Chromosomes | Physical positions (bp) | CDC Frontier (Reference genome) | (Pusa 256 & HPNB) | NCBI SNPdb Accession IDs |
|---------------------|----------------|-------------|-------------------------|---------------------------------|-------------------|--------------------------|
| SNP_P3_114115_24864 | NW_004515820.1 | Scaffold311 | 24864                   | AA                              | GG                | 1946496795               |
| SNP_P3_114116_24921 | NW_004515820.1 | Scaffold311 | 24921                   | GG                              | AA                | 1946496797               |
| SNP_P3_114117_25024 | NW_004515820.1 | Scaffold311 | 25024                   | GG                              | AA                | 1946496798               |
| SNP_P3_114118_25068 | NW_004515820.1 | Scaffold311 | 25068                   | TT                              | CC                | 1946496800               |
| SNP_P3_114119_25197 | NW_004515820.1 | Scaffold311 | 25197                   | CC                              | GG                | 1946496801               |
| SNP_P3_114120_33751 | NW_004515820.1 | Scaffold311 | 33751                   | CC                              | TT                | 1946496803               |
| SNP_P3_114121_43377 | NW_004515820.1 | Scaffold311 | 43377                   | AA                              | TT                | 1946496804               |
| SNP_P3_114122_43475 | NW_004515820.1 | Scaffold311 | 43475                   | GG                              | AA                | 1946496805               |
| SNP_P3_114123_43661 | NW_004515820.1 | Scaffold311 | 43661                   | TT                              | GG                | 1946496807               |
| SNP_P3_114124_43666 | NW_004515820.1 | Scaffold311 | 43666                   | AA                              | TT                | 1946496808               |
| SNP_P3_114125_43667 | NW_004515820.1 | Scaffold311 | 43667                   | AA                              | GG                | 1946496810               |
| SNP_P3_114126_43689 | NW_004515820.1 | Scaffold311 | 43689                   | AA                              | CC                | 1946496811               |
| SNP_P3_114127_43722 | NW_004515820.1 | Scaffold311 | 43722                   | AA                              | GG                | 1946496813               |
| SNP_P3_114128_43919 | NW_004515820.1 | Scaffold311 | 43919                   | TT                              | AA                | 1946496814               |
| SNP_P3_114129_45248 | NW_004515820.1 | Scaffold311 | 45248                   | GG                              | AA                | 1946496816               |
| SNP_P3_114130_45259 | NW_004515820.1 | Scaffold311 | 45259                   | GG                              | CC                | 1946496817               |
| SNP_P3_114131_49984 | NW_004515820.1 | Scaffold311 | 49984                   | AA                              | CC                | 1946496819               |
| SNP_P3_114132_51187 | NW_004515820.1 | Scaffold311 | 51187                   | AA                              | TT                | 1946496820               |
| SNP_P3_114133_56275 | NW_004515820.1 | Scaffold311 | 56275                   | GG                              | CC                | 1946496822               |
| SNP_P3_114134_60618 | NW_004515820.1 | Scaffold311 | 60618                   | AA                              | CC                | 1946496823               |
| SNP_P3_114135_72790 | NW_004515820.1 | Scaffold311 | 72790                   | GG                              | TT                | 1946496824               |
| SNP_P3_114136_73090 | NW_004515820.1 | Scaffold311 | 73090                   | GG                              | CC                | 1946496826               |
| SNP_P3_114137_73128 | NW_004515820.1 | Scaffold311 | 73128                   | TT                              | CC                | 1946496827               |
| SNP_P3_114138_73180 | NW_004515820.1 | Scaffold311 | 73180                   | GG                              | TT                | 1946496829               |
| SNP_P3_114139_73193 | NW_004515820.1 | Scaffold311 | 73193                   | AA                              | GG                | 1946496830               |
| SNP_P3_114140_90199 | NW_004515820.1 | Scaffold311 | 90199                   | AA                              | CC                | 1946496832               |
| SNP_P3_114141_90470 | NW_004515820.1 | Scaffold311 | 90470                   | GG                              | TT                | 1946496833               |
| SNP_P3_114142_90583 | NW_004515820.1 | Scaffold311 | 90583                   | GG                              | TT                | 1946496835               |
| SNP_P3_114143_91595 | NW_004515820.1 | Scaffold311 | 91595                   | GG                              | AA                | 1946496836               |
| SNP_P3_114144_91626 | NW_004515820.1 | Scaffold311 | 91626                   | GG                              | TT                | 1946496838               |
| SNP_P3_114145_91629 | NW_004515820.1 | Scaffold311 | 91629                   | TT                              | CC                | 1946496839               |
| SNP_P3_114146_91658 | NW_004515820.1 | Scaffold311 | 91658                   | CC                              | TT                | 1946496841               |
| SNP_P3_114147_91668 | NW_004515820.1 | Scaffold311 | 91668                   | GG                              | AA                | 1946496842               |
| SNP_P3_114149_92059 | NW_004515820.1 | Scaffold311 | 92059                   | AA                              | TT                | 1946496843               |
| SNP_P3_114150_92229 | NW_004515820.1 | Scaffold311 | 92229                   | AA                              | TT                | 1946496845               |
| SNP_P3_114151_92247 | NW_004515820.1 | Scaffold311 | 92247                   | CC                              | GG                | 1946496846               |
| SNP_P3_114152_98091 | NW_004515820.1 | Scaffold311 | 98091                   | AA                              | GG                | 1946496848               |
| SNP_P3_114153_98102 | NW_004515820.1 | Scaffold311 | 98102                   | TT                              | CC                | 1946496849               |
| SNP_P3_114154_98103 | NW_004515820.1 | Scaffold311 | 98103                   | CC                              | GG                | 1946496851               |
| SNP_P3_114155_98107 | NW_004515820.1 | Scaffold311 | 98107                   | TT                              | AA                | 1946496852               |
| SNP_P3_114156_98112 | NW_004515820.1 | Scaffold311 | 98112                   | AA                              | TT                | 1946496854               |
| SNP_P3_114157_98118 | NW_004515820.1 | Scaffold311 | 98118                   | TT                              | AA                | 1946496855               |

| SNPs IDs             | Chromosome IDs | Chromosomes | Physical positions (bp) | CDC Frontier (Reference genome) | (Pusa 256 & HPNB) | NCBI SNPdb Accession IDs |
|----------------------|----------------|-------------|-------------------------|---------------------------------|-------------------|--------------------------|
| SNP_P3_114158_98143  | NW_004515820.1 | Scaffold311 | 98143                   | GG                              | TT                | 1946496857               |
| SNP_P3_114159_102205 | NW_004515820.1 | Scaffold311 | 102205                  | TT                              | AA                | 1946496858               |
| SNP_P3_114160_102208 | NW_004515820.1 | Scaffold311 | 102208                  | GG                              | TT                | 1946496860               |
| SNP_P3_114161_102284 | NW_004515820.1 | Scaffold311 | 102284                  | AA                              | GG                | 1946496861               |
| SNP_P3_114162_102424 | NW_004515820.1 | Scaffold311 | 102424                  | AA                              | CC                | 1946496863               |
| SNP_P3_114163_102433 | NW_004515820.1 | Scaffold311 | 102433                  | AA                              | TT                | 1946496864               |
| SNP_P3_114164_111383 | NW_004515820.1 | Scaffold311 | 111383                  | AA                              | GG                | 1946496866               |
| SNP_P3_114165_114132 | NW_004515820.1 | Scaffold311 | 114132                  | AA                              | TT                | 1946496867               |
| SNP_P3_114166_123226 | NW_004515820.1 | Scaffold311 | 123226                  | AA                              | GG                | 1946496868               |
| SNP_P3_114167_123320 | NW_004515820.1 | Scaffold311 | 123320                  | GG                              | AA                | 1946496870               |
| SNP_P3_114168_123354 | NW_004515820.1 | Scaffold311 | 123354                  | AA                              | TT                | 1946496871               |
| SNP_P3_114169_123536 | NW_004515820.1 | Scaffold311 | 123536                  | AA                              | TT                | 1946496873               |
| SNP_P3_114170_123575 | NW_004515820.1 | Scaffold311 | 123575                  | TT                              | CC                | 1946496875               |
| SNP_P3_114171_123601 | NW_004515820.1 | Scaffold311 | 123601                  | AA                              | TT                | 1946496876               |
| SNP_P3_114172_123603 | NW_004515820.1 | Scaffold311 | 123603                  | AA                              | CC                | 1946496878               |
| SNP_P3_114173_123609 | NW_004515820.1 | Scaffold311 | 123609                  | TT                              | CC                | 1946496879               |
| SNP_P3_114174_123622 | NW_004515820.1 | Scaffold311 | 123622                  | CC                              | GG                | 1946496881               |
| SNP_P3_114175_123641 | NW_004515820.1 | Scaffold311 | 123641                  | GG                              | AA                | 1946496882               |
| SNP_P3_114176_123694 | NW_004515820.1 | Scaffold311 | 123694                  | GG                              | AA                | 1946496884               |
| SNP_P3_114177_129354 | NW_004515820.1 | Scaffold311 | 129354                  | TT                              | CC                | 1946496885               |
| SNP_P3_114178_129688 | NW_004515820.1 | Scaffold311 | 129688                  | GG                              | TT                | 1946496886               |
| SNP_P3_114179_129706 | NW_004515820.1 | Scaffold311 | 129706                  | CC                              | TT                | 1946496888               |
| SNP_P3_114180_129803 | NW_004515820.1 | Scaffold311 | 129803                  | AA                              | GG                | 1946496889               |
| SNP_P3_114181_131355 | NW_004515820.1 | Scaffold311 | 131355                  | GG                              | CC                | 1946496891               |
| SNP_P3_114183_135019 | NW_004515820.1 | Scaffold311 | 135019                  | AA                              | CC                | 1946496892               |
| SNP_P3_114185_139592 | NW_004515820.1 | Scaffold311 | 139592                  | AA                              | GG                | 1946496894               |
| SNP_P3_114188_154264 | NW_004515820.1 | Scaffold311 | 154264                  | GG                              | AA                | 1946496895               |
| SNP_P3_114189_154269 | NW_004515820.1 | Scaffold311 | 154269                  | AA                              | GG                | 1946496897               |
| SNP_P3_114190_159906 | NW_004515820.1 | Scaffold311 | 159906                  | AA                              | CC                | 1946496898               |
| SNP_P3_114191_160278 | NW_004515820.1 | Scaffold311 | 160278                  | AA                              | CC                | 1946496899               |
| SNP_P3_114192_160279 | NW_004515820.1 | Scaffold311 | 160279                  | CC                              | AA                | 1946496901               |
| SNP_P3_114193_160324 | NW_004515820.1 | Scaffold311 | 160324                  | CC                              | TT                | 1946496902               |
| SNP_P3_114194_160449 | NW_004515820.1 | Scaffold311 | 160449                  | AA                              | GG                | 1946496904               |
| SNP_P3_114195_160583 | NW_004515820.1 | Scaffold311 | 160583                  | AA                              | GG                | 1946496906               |
| SNP_P3_114196_160651 | NW_004515820.1 | Scaffold311 | 160651                  | TT                              | GG                | 1946496908               |
| SNP_P3_114197_160735 | NW_004515820.1 | Scaffold311 | 160735                  | TT                              | CC                | 1946496909               |
| SNP_P3_114198_160979 | NW_004515820.1 | Scaffold311 | 160979                  | GG                              | CC                | 1946496911               |
| SNP_P3_114199_169635 | NW_004515820.1 | Scaffold311 | 169635                  | AA                              | TT                | 1946496912               |
| SNP_P3_114200_169649 | NW_004515820.1 | Scaffold311 | 169649                  | TT                              | CC                | 1946496914               |
| SNP_P3_114201_169676 | NW_004515820.1 | Scaffold311 | 169676                  | TT                              | GG                | 1946496915               |
| SNP_P3_114202_169908 | NW_004515820.1 | Scaffold311 | 169908                  | GG                              | AA                | 1946496917               |
| SNP_P3_114203_169970 | NW_004515820.1 | Scaffold311 | 169970                  | TT                              | CC                | 1946496918               |

| SNPs IDs             | Chromosome IDs | Chromosomes | Physical positions (bp) | CDC Frontier (Reference genome) | (Pusa 256 & HPNB) | NCBI SNPdb Accession IDs |
|----------------------|----------------|-------------|-------------------------|---------------------------------|-------------------|--------------------------|
| SNP_P3_114204_175460 | NW_004515820.1 | Scaffold311 | 175460                  | TT                              | CC                | 1946496919               |
| SNP_P3_114205_175469 | NW_004515820.1 | Scaffold311 | 175469                  | GG                              | TT                | 1946496921               |
| SNP_P3_114206_175495 | NW_004515820.1 | Scaffold311 | 175495                  | GG                              | AA                | 1946496922               |
| SNP_P3_114207_175818 | NW_004515820.1 | Scaffold311 | 175818                  | TT                              | AA                | 1946496924               |
| SNP_P3_114208_180563 | NW_004515820.1 | Scaffold311 | 180563                  | TT                              | GG                | 1946496925               |
| SNP_P3_114209_180656 | NW_004515820.1 | Scaffold311 | 180656                  | AA                              | GG                | 1946496927               |
| SNP_P3_114210_180742 | NW_004515820.1 | Scaffold311 | 180742                  | TT                              | CC                | 1946496928               |
| SNP_P3_114211_180906 | NW_004515820.1 | Scaffold311 | 180906                  | GG                              | AA                | 1946496930               |
| SNP_P3_114212_180936 | NW_004515820.1 | Scaffold311 | 180936                  | TT                              | CC                | 1946496931               |
| SNP_P3_114213_180937 | NW_004515820.1 | Scaffold311 | 180937                  | GG                              | AA                | 1946496933               |
| SNP_P3_114214_180966 | NW_004515820.1 | Scaffold311 | 180966                  | CC                              | TT                | 1946496934               |
| SNP_P3_114215_180997 | NW_004515820.1 | Scaffold311 | 180997                  | AA                              | TT                | 1946496936               |
| SNP_P3_114216_181014 | NW_004515820.1 | Scaffold311 | 181014                  | GG                              | AA                | 1946496939               |
| SNP_P3_114217_181017 | NW_004515820.1 | Scaffold311 | 181017                  | CC                              | TT                | 1946496941               |
| SNP_P3_114218_181029 | NW_004515820.1 | Scaffold311 | 181029                  | AA                              | GG                | 1946496942               |
| SNP_P3_114219_181049 | NW_004515820.1 | Scaffold311 | 181049                  | GG                              | AA                | 1946496944               |
| SNP_P3_114220_181081 | NW_004515820.1 | Scaffold311 | 181081                  | TT                              | CC                | 1946496945               |
| SNP_P3_114221_182254 | NW_004515820.1 | Scaffold311 | 182254                  | CC                              | TT                | 1946496947               |
| SNP_P3_114222_188197 | NW_004515820.1 | Scaffold311 | 188197                  | GG                              | CC                | 1946496949               |
| SNP_P3_114223_193249 | NW_004515820.1 | Scaffold311 | 193249                  | TT                              | AA                | 1946496950               |
| SNP_P3_114224_193252 | NW_004515820.1 | Scaffold311 | 193252                  | GG                              | TT                | 1946496952               |
| SNP_P3_114225_205852 | NW_004515820.1 | Scaffold311 | 205852                  | TT                              | CC                | 1946496953               |
| SNP_P3_114226_205874 | NW_004515820.1 | Scaffold311 | 205874                  | TT                              | AA                | 1946496954               |
| SNP_P3_114227_216648 | NW_004515820.1 | Scaffold311 | 216648                  | CC                              | TT                | 1946496956               |
| SNP_P3_114228_227819 | NW_004515820.1 | Scaffold311 | 227819                  | GG                              | AA                | 1946496957               |
| SNP_P3_114229_227863 | NW_004515820.1 | Scaffold311 | 227863                  | GG                              | AA                | 1946496959               |
| SNP_P3_114230_227869 | NW_004515820.1 | Scaffold311 | 227869                  | TT                              | CC                | 1946496961               |
| SNP_P3_114231_227872 | NW_004515820.1 | Scaffold311 | 227872                  | AA                              | GG                | 1946496962               |
| SNP_P3_114232_227879 | NW_004515820.1 | Scaffold311 | 227879                  | TT                              | AA                | 1946496964               |
| SNP_P3_114233_227883 | NW_004515820.1 | Scaffold311 | 227883                  | TT                              | CC                | 1946496965               |
| SNP_P3_114234_230264 | NW_004515820.1 | Scaffold311 | 230264                  | GG                              | AA                | 1946496967               |
| SNP_P3_114235_230781 | NW_004515820.1 | Scaffold311 | 230781                  | GG                              | AA                | 1946496968               |
| SNP_P3_114236_231462 | NW_004515820.1 | Scaffold311 | 231462                  | TT                              | CC                | 1946496970               |
| SNP_P3_114237_233320 | NW_004515820.1 | Scaffold311 | 233320                  | GG                              | AA                | 1946496971               |
| SNP_P3_114238_694    | NW_004515822.1 | Scaffold313 | 694                     | CC                              | GG                | 1946496973               |
| SNP_P3_114239_700    | NW_004515822.1 | Scaffold313 | 700                     | AA                              | CC                | 1946496975               |
| SNP_P3_114240_745    | NW_004515822.1 | Scaffold313 | 745                     | GG                              | TT                | 1946496976               |
| SNP_P3_114241_4999   | NW_004515822.1 | Scaffold313 | 4999                    | TT                              | CC                | 1946496977               |
| SNP_P3_114243_6274   | NW_004515822.1 | Scaffold313 | 6274                    | CC                              | GG                | 1946496979               |
| SNP_P3_114244_6446   | NW_004515822.1 | Scaffold313 | 6446                    | AA                              | TT                | 1946496981               |
| SNP_P3_114245_6447   | NW_004515822.1 | Scaffold313 | 6447                    | CC                              | AA                | 1946496984               |
| SNP_P3_114246_6575   | NW_004515822.1 | Scaffold313 | 6575                    | TT                              | GG                | 1946496985               |

| SNPs IDs             | Chromosome IDs | Chromosomes | Physical positions (bp) | CDC Frontier (Reference genome) | (Pusa 256 & HPNB) | NCBI SNPdb Accession IDs |
|----------------------|----------------|-------------|-------------------------|---------------------------------|-------------------|--------------------------|
| SNP_P3_114247_6584   | NW_004515822.1 | Scaffold313 | 6584                    | GG                              | CC                | 1946496987               |
| SNP_P3_114248_6601   | NW_004515822.1 | Scaffold313 | 6601                    | GG                              | TT                | 1946496988               |
| SNP_P3_114249_6645   | NW_004515822.1 | Scaffold313 | 6645                    | AA                              | GG                | 1946496990               |
| SNP_P3_114250_6648   | NW_004515822.1 | Scaffold313 | 6648                    | AA                              | TT                | 1946496991               |
| SNP_P3_114251_6723   | NW_004515822.1 | Scaffold313 | 6723                    | AA                              | CC                | 1946496993               |
| SNP_P3_114252_6733   | NW_004515822.1 | Scaffold313 | 6733                    | CC                              | TT                | 1946496994               |
| SNP_P3_114253_6774   | NW_004515822.1 | Scaffold313 | 6774                    | AA                              | GG                | 1946496996               |
| SNP_P3_114254_7441   | NW_004515822.1 | Scaffold313 | 7441                    | AA                              | GG                | 1946496997               |
| SNP_P3_114256_22536  | NW_004515823.1 | Scaffold314 | 22536                   | GG                              | CC                | 1946496999               |
| SNP_P3_114257_22585  | NW_004515823.1 | Scaffold314 | 22585                   | CC                              | TT                | 1946497001               |
| SNP_P3_114258_22645  | NW_004515823.1 | Scaffold314 | 22645                   | AA                              | GG                | 1946497002               |
| SNP_P3_114259_22686  | NW_004515823.1 | Scaffold314 | 22686                   | AA                              | GG                | 1946497004               |
| SNP_P3_114260_22699  | NW_004515823.1 | Scaffold314 | 22699                   | TT                              | CC                | 1946497005               |
| SNP_P3_114261_22706  | NW_004515823.1 | Scaffold314 | 22706                   | CC                              | AA                | 1946497007               |
| SNP_P3_114262_22723  | NW_004515823.1 | Scaffold314 | 22723                   | GG                              | AA                | 1946497008               |
| SNP_P3_114263_22765  | NW_004515823.1 | Scaffold314 | 22765                   | TT                              | CC                | 1946497010               |
| SNP_P3_114264_22858  | NW_004515823.1 | Scaffold314 | 22858                   | AA                              | GG                | 1946497011               |
| SNP_P3_114265_22880  | NW_004515823.1 | Scaffold314 | 22880                   | CC                              | GG                | 1946497013               |
| SNP_P3_114266_22890  | NW_004515823.1 | Scaffold314 | 22890                   | CC                              | TT                | 1946497014               |
| SNP_P3_114267_22918  | NW_004515823.1 | Scaffold314 | 22918                   | AA                              | GG                | 1946497016               |
| SNP_P3_114268_22972  | NW_004515823.1 | Scaffold314 | 22972                   | GG                              | CC                | 1946497017               |
| SNP_P3_114269_23037  | NW_004515823.1 | Scaffold314 | 23037                   | AA                              | GG                | 1946497019               |
| SNP_P3_114270_23164  | NW_004515823.1 | Scaffold314 | 23164                   | CC                              | TT                | 1946497020               |
| SNP_P3_114271_23196  | NW_004515823.1 | Scaffold314 | 23196                   | GG                              | TT                | 1946497022               |
| SNP_P3_114272_23218  | NW_004515823.1 | Scaffold314 | 23218                   | GG                              | AA                | 1946497023               |
| SNP_P3_114273_23232  | NW_004515823.1 | Scaffold314 | 23232                   | TT                              | CC                | 1946497024               |
| SNP_P3_114274_23236  | NW_004515823.1 | Scaffold314 | 23236                   | GG                              | TT                | 1946497026               |
| SNP_P3_114275_23241  | NW_004515823.1 | Scaffold314 | 23241                   | TT                              | GG                | 1946497027               |
| SNP_P3_114276_23297  | NW_004515823.1 | Scaffold314 | 23297                   | AA                              | GG                | 1946497029               |
| SNP_P3_114277_23321  | NW_004515823.1 | Scaffold314 | 23321                   | AA                              | GG                | 1946497030               |
| SNP_P3_114278_36127  | NW_004515823.1 | Scaffold314 | 36127                   | CC                              | TT                | 1946497032               |
| SNP_P3_114279_50727  | NW_004515823.1 | Scaffold314 | 50727                   | TT                              | CC                | 1946497033               |
| SNP_P3_114280_72383  | NW_004515823.1 | Scaffold314 | 72383                   | CC                              | TT                | 1946497034               |
| SNP_P3_114282_113458 | NW_004515823.1 | Scaffold314 | 113458                  | GG                              | AA                | 1946497036               |
| SNP_P3_114283_113474 | NW_004515823.1 | Scaffold314 | 113474                  | GG                              | AA                | 1946497038               |
| SNP_P3_114284_119583 | NW_004515823.1 | Scaffold314 | 119583                  | CC                              | AA                | 1946497039               |
| SNP_P3_114285_189248 | NW_004515823.1 | Scaffold314 | 189248                  | AA                              | GG                | 1946497041               |
| SNP_P3_114287_222170 | NW_004515823.1 | Scaffold314 | 222170                  | TT                              | GG                | 1946497042               |
| SNP_P3_114289_222398 | NW_004515823.1 | Scaffold314 | 222398                  | GG                              | CC                | 1946497044               |
| SNP_P3_114290_222657 | NW_004515823.1 | Scaffold314 | 222657                  | CC                              | TT                | 1946497045               |
| SNP_P3_114291_222730 | NW_004515823.1 | Scaffold314 | 222730                  | CC                              | TT                | 1946497046               |
| SNP_P3_114292_222989 | NW_004515823.1 | Scaffold314 | 222989                  | CC                              | TT                | 1946497048               |

| SNPs IDs             | Chromosome IDs | Chromosomes | Physical positions (bp) | CDC Frontier (Reference genome) | (Pusa 256 & HPNB) | NCBI SNPdb Accession IDs |
|----------------------|----------------|-------------|-------------------------|---------------------------------|-------------------|--------------------------|
| SNP_P3_114293_222997 | NW_004515823.1 | Scaffold314 | 222997                  | AA                              | TT                | 1946497049               |
| SNP_P3_114294_223479 | NW_004515823.1 | Scaffold314 | 223479                  | GG                              | AA                | 1946497051               |
| SNP_P3_114295_223938 | NW_004515823.1 | Scaffold314 | 223938                  | AA                              | TT                | 1946497052               |
| SNP_P3_114296_224056 | NW_004515823.1 | Scaffold314 | 224056                  | TT                              | CC                | 1946497054               |
| SNP_P3_114297_224324 | NW_004515823.1 | Scaffold314 | 224324                  | CC                              | TT                | 1946497055               |
| SNP_P3_114298_224500 | NW_004515823.1 | Scaffold314 | 224500                  | TT                              | GG                | 1946497057               |
| SNP_P3_114299_229677 | NW_004515823.1 | Scaffold314 | 229677                  | TT                              | CC                | 1946497058               |
| SNP_P3_114300_229695 | NW_004515823.1 | Scaffold314 | 229695                  | CC                              | TT                | 1946497060               |
| SNP_P3_114301_231526 | NW_004515823.1 | Scaffold314 | 231526                  | AA                              | GG                | 1946497061               |
| SNP_P3_114302_231751 | NW_004515823.1 | Scaffold314 | 231751                  | GG                              | AA                | 1946497062               |
| SNP_P3_114303_232451 | NW_004515823.1 | Scaffold314 | 232451                  | TT                              | GG                | 1946497064               |
| SNP_P3_114305_272916 | NW_004515823.1 | Scaffold314 | 272916                  | CC                              | TT                | 1946497066               |
| SNP_P3_114306_273754 | NW_004515823.1 | Scaffold314 | 273754                  | TT                              | GG                | 1946497067               |
| SNP_P3_114307_274870 | NW_004515823.1 | Scaffold314 | 274870                  | TT                              | CC                | 1946497069               |
| SNP_P3_114308_274878 | NW_004515823.1 | Scaffold314 | 274878                  | TT                              | CC                | 1946497070               |
| SNP_P3_114309_274879 | NW_004515823.1 | Scaffold314 | 274879                  | TT                              | AA                | 1946497071               |
| SNP_P3_114310_275361 | NW_004515823.1 | Scaffold314 | 275361                  | GG                              | CC                | 1946497073               |
| SNP_P3_114311_275416 | NW_004515823.1 | Scaffold314 | 275416                  | AA                              | CC                | 1946497074               |
| SNP_P3_114312_275550 | NW_004515823.1 | Scaffold314 | 275550                  | AA                              | GG                | 1946497076               |
| SNP_P3_114313_275593 | NW_004515823.1 | Scaffold314 | 275593                  | AA                              | TT                | 1946497077               |
| SNP_P3_114314_275594 | NW_004515823.1 | Scaffold314 | 275594                  | GG                              | TT                | 1946497079               |
| SNP_P3_114315_275595 | NW_004515823.1 | Scaffold314 | 275595                  | TT                              | CC                | 1946497080               |
| SNP_P3_114316_275596 | NW_004515823.1 | Scaffold314 | 275596                  | GG                              | TT                | 1946497082               |
| SNP_P3_114317_275619 | NW_004515823.1 | Scaffold314 | 275619                  | TT                              | CC                | 1946497083               |
| SNP_P3_114318_275659 | NW_004515823.1 | Scaffold314 | 275659                  | GG                              | TT                | 1946497084               |
| SNP_P3_114319_276233 | NW_004515823.1 | Scaffold314 | 276233                  | GG                              | AA                | 1946497086               |
| SNP_P3_114320_308207 | NW_004515823.1 | Scaffold314 | 308207                  | TT                              | CC                | 1946497087               |
| SNP_P3_114321_316265 | NW_004515823.1 | Scaffold314 | 316265                  | TT                              | CC                | 1946497089               |
| SNP_P3_114322_316327 | NW_004515823.1 | Scaffold314 | 316327                  | TT                              | GG                | 1946497090               |
| SNP_P3_114323_316561 | NW_004515823.1 | Scaffold314 | 316561                  | TT                              | GG                | 1946497092               |
| SNP_P3_114324_316579 | NW_004515823.1 | Scaffold314 | 316579                  | TT                              | GG                | 1946497093               |
| SNP_P3_114325_316627 | NW_004515823.1 | Scaffold314 | 316627                  | AA                              | GG                | 1946497095               |
| SNP_P3_114326_326865 | NW_004515823.1 | Scaffold314 | 326865                  | CC                              | AA                | 1946497096               |
| SNP_P3_114327_338478 | NW_004515823.1 | Scaffold314 | 338478                  | TT                              | CC                | 1946497098               |
| SNP_P3_114328_340963 | NW_004515823.1 | Scaffold314 | 340963                  | AA                              | GG                | 1946497099               |
| SNP_P3_114329_376411 | NW_004515823.1 | Scaffold314 | 376411                  | AA                              | GG                | 1946497101               |
| SNP_P3_114330_378504 | NW_004515823.1 | Scaffold314 | 378504                  | AA                              | GG                | 1946497102               |
| SNP_P3_114331_378590 | NW_004515823.1 | Scaffold314 | 378590                  | GG                              | AA                | 1946497104               |
| SNP_P3_114332_380869 | NW_004515823.1 | Scaffold314 | 380869                  | GG                              | AA                | 1946497105               |
| SNP_P3_114333_380896 | NW_004515823.1 | Scaffold314 | 380896                  | TT                              | CC                | 1946497106               |
| SNP_P3_114334_380899 | NW_004515823.1 | Scaffold314 | 380899                  | TT                              | CC                | 1946497108               |
| SNP_P3_114336_422631 | NW_004515823.1 | Scaffold314 | 422631                  | GG                              | AA                | 1946497109               |

| SNPs IDs             | Chromosome IDs | Chromosomes | Physical positions (bp) | CDC Frontier (Reference genome) | (Pusa 256 & HPNB) | NCBI SNPdb Accession IDs |
|----------------------|----------------|-------------|-------------------------|---------------------------------|-------------------|--------------------------|
| SNP_P3_114337_450777 | NW_004515823.1 | Scaffold314 | 450777                  | CC                              | AA                | 1946497111               |
| SNP_P3_114338_503048 | NW_004515823.1 | Scaffold314 | 503048                  | GG                              | AA                | 1946497112               |
| SNP_P3_114339_506272 | NW_004515823.1 | Scaffold314 | 506272                  | TT                              | CC                | 1946497114               |
| SNP_P3_114340_508103 | NW_004515823.1 | Scaffold314 | 508103                  | GG                              | CC                | 1946497115               |
| SNP_P3_114341_512226 | NW_004515823.1 | Scaffold314 | 512226                  | GG                              | AA                | 1946497117               |
| SNP_P3_114342_512258 | NW_004515823.1 | Scaffold314 | 512258                  | GG                              | AA                | 1946497118               |
| SNP_P3_114343_512625 | NW_004515823.1 | Scaffold314 | 512625                  | AA                              | GG                | 1946497119               |
| SNP_P3_114344_541323 | NW_004515823.1 | Scaffold314 | 541323                  | TT                              | AA                | 1946497121               |
| SNP_P3_114345_553156 | NW_004515823.1 | Scaffold314 | 553156                  | AA                              | CC                | 1946497122               |
| SNP_P3_114346_554683 | NW_004515823.1 | Scaffold314 | 554683                  | GG                              | TT                | 1946497124               |
| SNP_P3_114347_555615 | NW_004515823.1 | Scaffold314 | 555615                  | GG                              | CC                | 1946497125               |
| SNP_P3_114348_574944 | NW_004515823.1 | Scaffold314 | 574944                  | CC                              | TT                | 1946497127               |
| SNP_P3_114349_574951 | NW_004515823.1 | Scaffold314 | 574951                  | TT                              | GG                | 1946497128               |
| SNP_P3_114350_581802 | NW_004515823.1 | Scaffold314 | 581802                  | AA                              | GG                | 1946497130               |
| SNP_P3_114352_590139 | NW_004515823.1 | Scaffold314 | 590139                  | TT                              | GG                | 1946497131               |
| SNP_P3_114353_629435 | NW_004515823.1 | Scaffold314 | 629435                  | AA                              | GG                | 1946497133               |
| SNP_P3_114354_666678 | NW_004515823.1 | Scaffold314 | 666678                  | GG                              | AA                | 1946497134               |
| SNP_P3_114355_740745 | NW_004515823.1 | Scaffold314 | 740745                  | TT                              | AA                | 1946497135               |
| SNP_P3_114356_740808 | NW_004515823.1 | Scaffold314 | 740808                  | CC                              | TT                | 1946497137               |
| SNP_P3_114357_742246 | NW_004515823.1 | Scaffold314 | 742246                  | AA                              | TT                | 1946497138               |
| SNP_P3_114358_742249 | NW_004515823.1 | Scaffold314 | 742249                  | AA                              | CC                | 1946497140               |
| SNP_P3_114359_759254 | NW_004515823.1 | Scaffold314 | 759254                  | TT                              | CC                | 1946497141               |
| SNP_P3_114360_759635 | NW_004515823.1 | Scaffold314 | 759635                  | CC                              | TT                | 1946497143               |
| SNP_P3_114361_759642 | NW_004515823.1 | Scaffold314 | 759642                  | GG                              | CC                | 1946497144               |
| SNP_P3_114362_759737 | NW_004515823.1 | Scaffold314 | 759737                  | AA                              | TT                | 1946497145               |
| SNP_P3_114363_760016 | NW_004515823.1 | Scaffold314 | 760016                  | GG                              | AA                | 1946497147               |
| SNP_P3_114364_760045 | NW_004515823.1 | Scaffold314 | 760045                  | TT                              | CC                | 1946497148               |
| SNP_P3_114365_1020   | NW_004515824.1 | Scaffold315 | 1020                    | GG                              | CC                | 1946497150               |
| SNP_P3_114366_59     | NW_004515825.1 | Scaffold317 | 59                      | CC                              | TT                | 1946497151               |
| SNP_P3_114367_64     | NW_004515825.1 | Scaffold317 | 64                      | TT                              | CC                | 1946497153               |
| SNP_P3_114368_116    | NW_004515825.1 | Scaffold317 | 116                     | AA                              | CC                | 1946497154               |
| SNP_P3_114369_174    | NW_004515825.1 | Scaffold317 | 174                     | GG                              | CC                | 1946497156               |
| SNP_P3_114370_308    | NW_004515825.1 | Scaffold317 | 308                     | GG                              | AA                | 1946497157               |
| SNP_P3_114371_394    | NW_004515825.1 | Scaffold317 | 394                     | GG                              | AA                | 1946497158               |
| SNP_P3_114372_685    | NW_004515825.1 | Scaffold317 | 685                     | AA                              | GG                | 1946497160               |
| SNP_P3_114373_694    | NW_004515825.1 | Scaffold317 | 694                     | AA                              | GG                | 1946497161               |
| SNP_P3_114374_5182   | NW_004515825.1 | Scaffold317 | 5182                    | GG                              | AA                | 1946497163               |
| SNP_P3_114375_6490   | NW_004515825.1 | Scaffold317 | 6490                    | CC                              | TT                | 1946497164               |
| SNP_P3_114376_11695  | NW_004515825.1 | Scaffold317 | 11695                   | AA                              | CC                | 1946497166               |
| SNP_P3_114378_23073  | NW_004515825.1 | Scaffold317 | 23073                   | TT                              | CC                | 1946497168               |
| SNP_P3_114379_46388  | NW_004515825.1 | Scaffold317 | 46388                   | CC                              | TT                | 1946497169               |
| SNP_P3_114380_46476  | NW_004515825.1 | Scaffold317 | 46476                   | AA                              | GG                | 1946497170               |

| SNPs IDs             | Chromosome IDs | Chromosomes | Physical positions (bp) | CDC Frontier (Reference genome) | (Pusa 256 & HPNB) | NCBI SNPdb Accession IDs |
|----------------------|----------------|-------------|-------------------------|---------------------------------|-------------------|--------------------------|
| SNP_P3_114381_46500  | NW_004515825.1 | Scaffold317 | 46500                   | TT                              | CC                | 1946497172               |
| SNP_P3_114382_46565  | NW_004515825.1 | Scaffold317 | 46565                   | GG                              | TT                | 1946497173               |
| SNP_P3_114383_46681  | NW_004515825.1 | Scaffold317 | 46681                   | GG                              | CC                | 1946497175               |
| SNP_P3_114384_46710  | NW_004515825.1 | Scaffold317 | 46710                   | AA                              | GG                | 1946497176               |
| SNP_P3_114385_46737  | NW_004515825.1 | Scaffold317 | 46737                   | AA                              | GG                | 1946497178               |
| SNP_P3_114386_46770  | NW_004515825.1 | Scaffold317 | 46770                   | TT                              | CC                | 1946497179               |
| SNP_P3_114387_46807  | NW_004515825.1 | Scaffold317 | 46807                   | GG                              | AA                | 1946497180               |
| SNP_P3_114388_46872  | NW_004515825.1 | Scaffold317 | 46872                   | AA                              | GG                | 1946497182               |
| SNP_P3_114389_46911  | NW_004515825.1 | Scaffold317 | 46911                   | AA                              | GG                | 1946497183               |
| SNP_P3_114390_46923  | NW_004515825.1 | Scaffold317 | 46923                   | AA                              | TT                | 1946497185               |
| SNP_P3_114391_48303  | NW_004515825.1 | Scaffold317 | 48303                   | CC                              | TT                | 1946497186               |
| SNP_P3_114392_54223  | NW_004515825.1 | Scaffold317 | 54223                   | TT                              | GG                | 1946497188               |
| SNP_P3_114393_54232  | NW_004515825.1 | Scaffold317 | 54232                   | GG                              | AA                | 1946497189               |
| SNP_P3_114394_54275  | NW_004515825.1 | Scaffold317 | 54275                   | TT                              | GG                | 1946497191               |
| SNP_P3_114395_54391  | NW_004515825.1 | Scaffold317 | 54391                   | AA                              | GG                | 1946497192               |
| SNP_P3_114396_54408  | NW_004515825.1 | Scaffold317 | 54408                   | AA                              | CC                | 1946497194               |
| SNP_P3_114397_54588  | NW_004515825.1 | Scaffold317 | 54588                   | AA                              | GG                | 1946497195               |
| SNP_P3_114398_59794  | NW_004515825.1 | Scaffold317 | 59794                   | TT                              | CC                | 1946497196               |
| SNP_P3_114399_62935  | NW_004515825.1 | Scaffold317 | 62935                   | TT                              | AA                | 1946497198               |
| SNP_P3_114400_72684  | NW_004515825.1 | Scaffold317 | 72684                   | TT                              | CC                | 1946497199               |
| SNP_P3_114401_72719  | NW_004515825.1 | Scaffold317 | 72719                   | TT                              | CC                | 1946497201               |
| SNP_P3_114402_72779  | NW_004515825.1 | Scaffold317 | 72779                   | TT                              | AA                | 1946497202               |
| SNP_P3_114403_76661  | NW_004515825.1 | Scaffold317 | 76661                   | AA                              | CC                | 1946497204               |
| SNP_P3_114404_84455  | NW_004515825.1 | Scaffold317 | 84455                   | GG                              | TT                | 1946497205               |
| SNP_P3_114405_84470  | NW_004515825.1 | Scaffold317 | 84470                   | GG                              | AA                | 1946497207               |
| SNP_P3_114406_84497  | NW_004515825.1 | Scaffold317 | 84497                   | TT                              | AA                | 1946497208               |
| SNP_P3_114407_105563 | NW_004515825.1 | Scaffold317 | 105563                  | TT                              | GG                | 1946497210               |
| SNP_P3_114408_107631 | NW_004515825.1 | Scaffold317 | 107631                  | GG                              | AA                | 1946497211               |
| SNP_P3_114409_107660 | NW_004515825.1 | Scaffold317 | 107660                  | GG                              | AA                | 1946497213               |
| SNP_P3_114410_107736 | NW_004515825.1 | Scaffold317 | 107736                  | AA                              | GG                | 1946497214               |
| SNP_P3_114411_107912 | NW_004515825.1 | Scaffold317 | 107912                  | TT                              | CC                | 1946497216               |
| SNP_P3_114412_112904 | NW_004515825.1 | Scaffold317 | 112904                  | AA                              | TT                | 1946497217               |
| SNP_P3_114413_113241 | NW_004515825.1 | Scaffold317 | 113241                  | GG                              | AA                | 1946497218               |
| SNP_P3_114414_134770 | NW_004515825.1 | Scaffold317 | 134770                  | AA                              | CC                | 1946497220               |
| SNP_P3_114415_135020 | NW_004515825.1 | Scaffold317 | 135020                  | GG                              | AA                | 1946497221               |
| SNP_P3_114416_136022 | NW_004515825.1 | Scaffold317 | 136022                  | GG                              | AA                | 1946497223               |
| SNP_P3_114417_136405 | NW_004515825.1 | Scaffold317 | 136405                  | TT                              | CC                | 1946497224               |
| SNP_P3_114418_140460 | NW_004515825.1 | Scaffold317 | 140460                  | GG                              | CC                | 1946497226               |
| SNP_P3_114419_145788 | NW_004515825.1 | Scaffold317 | 145788                  | GG                              | AA                | 1946497227               |
| SNP_P3_114420_145919 | NW_004515825.1 | Scaffold317 | 145919                  | AA                              | GG                | 1946497229               |
| SNP_P3_114421_145973 | NW_004515825.1 | Scaffold317 | 145973                  | TT                              | GG                | 1946497230               |
| SNP_P3_114422_146008 | NW_004515825.1 | Scaffold317 | 146008                  | AA                              | GG                | 1946497232               |



| SNPs IDs             | Chromosome IDs | Chromosomes | Physical positions (bp) | CDC Frontier (Reference genome) | (Pusa 256 & HPNB) | NCBI SNPdb Accession IDs |
|----------------------|----------------|-------------|-------------------------|---------------------------------|-------------------|--------------------------|
| SNP_P3_114423_157193 | NW_004515825.1 | Scaffold317 | 157193                  | TT                              | GG                | 1946497233               |
| SNP_P3_114424_163404 | NW_004515825.1 | Scaffold317 | 163404                  | AA                              | TT                | 1946497235               |
| SNP_P3_114425_163431 | NW_004515825.1 | Scaffold317 | 163431                  | TT                              | GG                | 1946497236               |
| SNP_P3_114426_163449 | NW_004515825.1 | Scaffold317 | 163449                  | TT                              | CC                | 1946497238               |
| SNP_P3_114427_163720 | NW_004515825.1 | Scaffold317 | 163720                  | CC                              | AA                | 1946497239               |
| SNP_P3_114428_163768 | NW_004515825.1 | Scaffold317 | 163768                  | TT                              | CC                | 1946497241               |
| SNP_P3_114429_171784 | NW_004515825.1 | Scaffold317 | 171784                  | AA                              | TT                | 1946497242               |
| SNP_P3_114430_171862 | NW_004515825.1 | Scaffold317 | 171862                  | AA                              | GG                | 1946497243               |
| SNP_P3_114431_171928 | NW_004515825.1 | Scaffold317 | 171928                  | CC                              | TT                | 1946497245               |
| SNP_P3_114432_172463 | NW_004515825.1 | Scaffold317 | 172463                  | AA                              | TT                | 1946497246               |
| SNP_P3_114433_173343 | NW_004515825.1 | Scaffold317 | 173343                  | TT                              | GG                | 1946497248               |
| SNP_P3_114434_180247 | NW_004515825.1 | Scaffold317 | 180247                  | AA                              | GG                | 1946497249               |
| SNP_P3_114435_180259 | NW_004515825.1 | Scaffold317 | 180259                  | AA                              | GG                | 1946497251               |
| SNP_P3_114436_180274 | NW_004515825.1 | Scaffold317 | 180274                  | TT                              | GG                | 1946497252               |
| SNP_P3_114437_180298 | NW_004515825.1 | Scaffold317 | 180298                  | TT                              | GG                | 1946497254               |
| SNP_P3_114438_180364 | NW_004515825.1 | Scaffold317 | 180364                  | CC                              | AA                | 1946497255               |
| SNP_P3_114439_180394 | NW_004515825.1 | Scaffold317 | 180394                  | GG                              | TT                | 1946497256               |
| SNP_P3_114440_180410 | NW_004515825.1 | Scaffold317 | 180410                  | AA                              | GG                | 1946497258               |
| SNP_P3_114441_180470 | NW_004515825.1 | Scaffold317 | 180470                  | AA                              | GG                | 1946497259               |
| SNP_P3_114442_180574 | NW_004515825.1 | Scaffold317 | 180574                  | TT                              | CC                | 1946497261               |
| SNP_P3_114443_180592 | NW_004515825.1 | Scaffold317 | 180592                  | TT                              | AA                | 1946497262               |
| SNP_P3_114444_180593 | NW_004515825.1 | Scaffold317 | 180593                  | AA                              | GG                | 1946497264               |
| SNP_P3_114445_180603 | NW_004515825.1 | Scaffold317 | 180603                  | TT                              | GG                | 1946497265               |
| SNP_P3_114446_180619 | NW_004515825.1 | Scaffold317 | 180619                  | GG                              | AA                | 1946497267               |
| SNP_P3_114447_180628 | NW_004515825.1 | Scaffold317 | 180628                  | TT                              | CC                | 1946497268               |
| SNP_P3_114448_180640 | NW_004515825.1 | Scaffold317 | 180640                  | AA                              | TT                | 1946497269               |
| SNP_P3_114449_180655 | NW_004515825.1 | Scaffold317 | 180655                  | AA                              | GG                | 1946497271               |
| SNP_P3_114450_180673 | NW_004515825.1 | Scaffold317 | 180673                  | TT                              | AA                | 1946497272               |
| SNP_P3_114451_180704 | NW_004515825.1 | Scaffold317 | 180704                  | TT                              | GG                | 1946497274               |
| SNP_P3_114452_183192 | NW_004515825.1 | Scaffold317 | 183192                  | CC                              | GG                | 1946497275               |
| SNP_P3_114454_187923 | NW_004515825.1 | Scaffold317 | 187923                  | TT                              | CC                | 1946497277               |
| SNP_P3_114455_189778 | NW_004515825.1 | Scaffold317 | 189778                  | TT                              | GG                | 1946497278               |
| SNP_P3_114456_189809 | NW_004515825.1 | Scaffold317 | 189809                  | TT                              | CC                | 1946497280               |
| SNP_P3_114457_189836 | NW_004515825.1 | Scaffold317 | 189836                  | CC                              | TT                | 1946497281               |
| SNP_P3_114458_189861 | NW_004515825.1 | Scaffold317 | 189861                  | GG                              | CC                | 1946497283               |
| SNP_P3_114459_190149 | NW_004515825.1 | Scaffold317 | 190149                  | GG                              | AA                | 1946497284               |
| SNP_P3_114460_192980 | NW_004515825.1 | Scaffold317 | 192980                  | CC                              | TT                | 1946497285               |
| SNP_P3_114461_195065 | NW_004515825.1 | Scaffold317 | 195065                  | CC                              | TT                | 1946497287               |
| SNP_P3_114462_195082 | NW_004515825.1 | Scaffold317 | 195082                  | TT                              | GG                | 1946497288               |
| SNP_P3_114463_195111 | NW_004515825.1 | Scaffold317 | 195111                  | CC                              | TT                | 1946497290               |
| SNP_P3_114464_195129 | NW_004515825.1 | Scaffold317 | 195129                  | GG                              | CC                | 1946497291               |
| SNP_P3_114465_195197 | NW_004515825.1 | Scaffold317 | 195197                  | AA                              | GG                | 1946497293               |

| SNPs IDs             | Chromosome IDs | Chromosomes | Physical positions (bp) | CDC Frontier (Reference genome) | (Pusa 256 & HPNB) | NCBI SNPdb Accession IDs |
|----------------------|----------------|-------------|-------------------------|---------------------------------|-------------------|--------------------------|
| SNP_P3_114468_215493 | NW_004515825.1 | Scaffold317 | 215493                  | TT                              | CC                | 1946497294               |
| SNP_P3_114469_215650 | NW_004515825.1 | Scaffold317 | 215650                  | AA                              | GG                | 1946497296               |
| SNP_P3_114470_215664 | NW_004515825.1 | Scaffold317 | 215664                  | GG                              | TT                | 1946497297               |
| SNP_P3_114471_215673 | NW_004515825.1 | Scaffold317 | 215673                  | TT                              | CC                | 1946497299               |
| SNP_P3_114472_215683 | NW_004515825.1 | Scaffold317 | 215683                  | CC                              | TT                | 1946497300               |
| SNP_P3_114473_215699 | NW_004515825.1 | Scaffold317 | 215699                  | AA                              | GG                | 1946497302               |
| SNP_P3_114474_215808 | NW_004515825.1 | Scaffold317 | 215808                  | TT                              | CC                | 1946497303               |
| SNP_P3_114475_217750 | NW_004515825.1 | Scaffold317 | 217750                  | CC                              | TT                | 1946497305               |
| SNP_P3_114477_217948 | NW_004515825.1 | Scaffold317 | 217948                  | CC                              | TT                | 1946497306               |
| SNP_P3_114478_218037 | NW_004515825.1 | Scaffold317 | 218037                  | CC                              | TT                | 1946497308               |
| SNP_P3_114479_218108 | NW_004515825.1 | Scaffold317 | 218108                  | GG                              | AA                | 1946497309               |
| SNP_P3_114480_218138 | NW_004515825.1 | Scaffold317 | 218138                  | CC                              | TT                | 1946497311               |
| SNP_P3_114482_218170 | NW_004515825.1 | Scaffold317 | 218170                  | TT                              | CC                | 1946497312               |
| SNP_P3_114483_218212 | NW_004515825.1 | Scaffold317 | 218212                  | TT                              | CC                | 1946497314               |
| SNP_P3_114484_218213 | NW_004515825.1 | Scaffold317 | 218213                  | CC                              | GG                | 1946497315               |
| SNP_P3_114485_218226 | NW_004515825.1 | Scaffold317 | 218226                  | TT                              | AA                | 1946497317               |
| SNP_P3_114486_218271 | NW_004515825.1 | Scaffold317 | 218271                  | AA                              | GG                | 1946497318               |
| SNP_P3_114487_218296 | NW_004515825.1 | Scaffold317 | 218296                  | AA                              | GG                | 1946497320               |
| SNP_P3_114488_219954 | NW_004515825.1 | Scaffold317 | 219954                  | CC                              | TT                | 1946497321               |
| SNP_P3_114489_219969 | NW_004515825.1 | Scaffold317 | 219969                  | GG                              | AA                | 1946497323               |
| SNP_P3_114490_219978 | NW_004515825.1 | Scaffold317 | 219978                  | AA                              | GG                | 1946497324               |
| SNP_P3_114491_229935 | NW_004515825.1 | Scaffold317 | 229935                  | CC                              | AA                | 1946497326               |
| SNP_P3_114492_229955 | NW_004515825.1 | Scaffold317 | 229955                  | TT                              | CC                | 1946497327               |
| SNP_P3_114493_230741 | NW_004515825.1 | Scaffold317 | 230741                  | TT                              | CC                | 1946497329               |
| SNP_P3_114494_230762 | NW_004515825.1 | Scaffold317 | 230762                  | CC                              | AA                | 1946497330               |
| SNP_P3_114495_231125 | NW_004515825.1 | Scaffold317 | 231125                  | GG                              | CC                | 1946497332               |
| SNP_P3_114496_2607   | NW_004515826.1 | Scaffold319 | 2607                    | GG                              | AA                | 1946497333               |
| SNP_P3_114497_6687   | NW_004515826.1 | Scaffold319 | 6687                    | GG                              | AA                | 1946497335               |
| SNP_P3_114498_6733   | NW_004515826.1 | Scaffold319 | 6733                    | CC                              | GG                | 1946497336               |
| SNP_P3_114499_6759   | NW_004515826.1 | Scaffold319 | 6759                    | GG                              | AA                | 1946497338               |
| SNP_P3_114500_6774   | NW_004515826.1 | Scaffold319 | 6774                    | AA                              | CC                | 1946497339               |
| SNP_P3_114501_7011   | NW_004515826.1 | Scaffold319 | 7011                    | GG                              | CC                | 1946497341               |
| SNP_P3_114502_7056   | NW_004515826.1 | Scaffold319 | 7056                    | GG                              | AA                | 1946497342               |
| SNP_P3_114503_7174   | NW_004515826.1 | Scaffold319 | 7174                    | GG                              | TT                | 1946497344               |
| SNP_P3_114504_7175   | NW_004515826.1 | Scaffold319 | 7175                    | GG                              | AA                | 1946497345               |
| SNP_P3_114505_7178   | NW_004515826.1 | Scaffold319 | 7178                    | TT                              | CC                | 1946497347               |
| SNP_P3_114506_7381   | NW_004515826.1 | Scaffold319 | 7381                    | GG                              | AA                | 1946497348               |
| SNP_P3_114507_7501   | NW_004515826.1 | Scaffold319 | 7501                    | CC                              | TT                | 1946497350               |
| SNP_P3_114509_10674  | NW_004515826.1 | Scaffold319 | 10674                   | CC                              | AA                | 1946497351               |
| SNP_P3_114510_11943  | NW_004515826.1 | Scaffold319 | 11943                   | TT                              | CC                | 1946497353               |
| SNP_P3_114511_12069  | NW_004515826.1 | Scaffold319 | 12069                   | AA                              | GG                | 1946497354               |
| SNP_P3_114512_12078  | NW_004515826.1 | Scaffold319 | 12078                   | AA                              | GG                | 1946497356               |

| SNPs IDs            | Chromosome IDs | Chromosomes | Physical positions (bp) | CDC Frontier (Reference genome) | (Pusa 256 & HPNB) | NCBI SNPdb Accession IDs |
|---------------------|----------------|-------------|-------------------------|---------------------------------|-------------------|--------------------------|
| SNP_P3_114513_12458 | NW_004515826.1 | Scaffold319 | 12458                   | GG                              | AA                | 1946497357               |
| SNP_P3_114514_12471 | NW_004515826.1 | Scaffold319 | 12471                   | TT                              | CC                | 1946497359               |
| SNP_P3_114515_12550 | NW_004515826.1 | Scaffold319 | 12550                   | AA                              | CC                | 1946497360               |
| SNP_P3_114516_14690 | NW_004515826.1 | Scaffold319 | 14690                   | GG                              | AA                | 1946497362               |
| SNP_P3_114517_14763 | NW_004515826.1 | Scaffold319 | 14763                   | CC                              | GG                | 1946497363               |
| SNP_P3_114518_14820 | NW_004515826.1 | Scaffold319 | 14820                   | GG                              | AA                | 1946497365               |
| SNP_P3_114519_14828 | NW_004515826.1 | Scaffold319 | 14828                   | GG                              | CC                | 1946497366               |
| SNP_P3_114520_14829 | NW_004515826.1 | Scaffold319 | 14829                   | AA                              | CC                | 1946497367               |
| SNP_P3_114521_14833 | NW_004515826.1 | Scaffold319 | 14833                   | CC                              | TT                | 1946497369               |
| SNP_P3_114522_16161 | NW_004515826.1 | Scaffold319 | 16161                   | GG                              | TT                | 1946497370               |
| SNP_P3_114523_34542 | NW_004515826.1 | Scaffold319 | 34542                   | CC                              | TT                | 1946497372               |
| SNP_P3_114524_35405 | NW_004515826.1 | Scaffold319 | 35405                   | AA                              | GG                | 1946497373               |
| SNP_P3_114525_35428 | NW_004515826.1 | Scaffold319 | 35428                   | TT                              | CC                | 1946497375               |
| SNP_P3_114526_35441 | NW_004515826.1 | Scaffold319 | 35441                   | CC                              | TT                | 1946497376               |
| SNP_P3_114527_35443 | NW_004515826.1 | Scaffold319 | 35443                   | AA                              | GG                | 1946497378               |
| SNP_P3_114528_35450 | NW_004515826.1 | Scaffold319 | 35450                   | AA                              | GG                | 1946497379               |
| SNP_P3_114529_40974 | NW_004515826.1 | Scaffold319 | 40974                   | TT                              | CC                | 1946497381               |
| SNP_P3_114530_42902 | NW_004515826.1 | Scaffold319 | 42902                   | AA                              | GG                | 1946497382               |
| SNP_P3_114531_42904 | NW_004515826.1 | Scaffold319 | 42904                   | TT                              | AA                | 1946497384               |
| SNP_P3_114532_42914 | NW_004515826.1 | Scaffold319 | 42914                   | AA                              | CC                | 1946497385               |
| SNP_P3_114533_43222 | NW_004515826.1 | Scaffold319 | 43222                   | GG                              | TT                | 1946497386               |
| SNP_P3_114534_43298 | NW_004515826.1 | Scaffold319 | 43298                   | TT                              | AA                | 1946497388               |
| SNP_P3_114535_43318 | NW_004515826.1 | Scaffold319 | 43318                   | AA                              | TT                | 1946497389               |
| SNP_P3_114536_43346 | NW_004515826.1 | Scaffold319 | 43346                   | TT                              | AA                | 1946497391               |
| SNP_P3_114537_43354 | NW_004515826.1 | Scaffold319 | 43354                   | GG                              | TT                | 1946497392               |
| SNP_P3_114538_43360 | NW_004515826.1 | Scaffold319 | 43360                   | AA                              | GG                | 1946497394               |
| SNP_P3_114539_43388 | NW_004515826.1 | Scaffold319 | 43388                   | TT                              | AA                | 1946497395               |
| SNP_P3_114540_43585 | NW_004515826.1 | Scaffold319 | 43585                   | GG                              | TT                | 1946497397               |
| SNP_P3_114541_43599 | NW_004515826.1 | Scaffold319 | 43599                   | AA                              | GG                | 1946497399               |
| SNP_P3_114542_43620 | NW_004515826.1 | Scaffold319 | 43620                   | AA                              | TT                | 1946497400               |
| SNP_P3_114543_52350 | NW_004515826.1 | Scaffold319 | 52350                   | AA                              | GG                | 1946497402               |
| SNP_P3_114544_52369 | NW_004515826.1 | Scaffold319 | 52369                   | TT                              | CC                | 1946497404               |
| SNP_P3_114545_52705 | NW_004515826.1 | Scaffold319 | 52705                   | TT                              | GG                | 1946497405               |
| SNP_P3_114546_55538 | NW_004515826.1 | Scaffold319 | 55538                   | TT                              | CC                | 1946497407               |
| SNP_P3_114547_55557 | NW_004515826.1 | Scaffold319 | 55557                   | TT                              | CC                | 1946497408               |
| SNP_P3_114548_56000 | NW_004515826.1 | Scaffold319 | 56000                   | AA                              | GG                | 1946497410               |
| SNP_P3_114549_56480 | NW_004515826.1 | Scaffold319 | 56480                   | GG                              | AA                | 1946497411               |
| SNP_P3_114550_56521 | NW_004515826.1 | Scaffold319 | 56521                   | CC                              | AA                | 1946497413               |
| SNP_P3_114551_56547 | NW_004515826.1 | Scaffold319 | 56547                   | CC                              | AA                | 1946497414               |
| SNP_P3_114552_56611 | NW_004515826.1 | Scaffold319 | 56611                   | TT                              | CC                | 1946497415               |
| SNP_P3_114553_56612 | NW_004515826.1 | Scaffold319 | 56612                   | TT                              | CC                | 1946497417               |
| SNP_P3_114554_64    | NW_004515827.1 | Scaffold321 | 64                      | CC                              | GG                | 1946497418               |

| SNPs IDs            | Chromosome IDs | Chromosomes | Physical positions (bp) | CDC Frontier (Reference genome) | (Pusa 256 & HPNB) | NCBI SNPdb Accession IDs |
|---------------------|----------------|-------------|-------------------------|---------------------------------|-------------------|--------------------------|
| SNP_P3_114555_108   | NW_004515827.1 | Scaffold321 | 108                     | TT                              | AA                | 1946497420               |
| SNP_P3_114556_174   | NW_004515827.1 | Scaffold321 | 174                     | TT                              | CC                | 1946497421               |
| SNP_P3_114557_201   | NW_004515827.1 | Scaffold321 | 201                     | GG                              | AA                | 1946497423               |
| SNP_P3_114558_208   | NW_004515827.1 | Scaffold321 | 208                     | TT                              | AA                | 1946497424               |
| SNP_P3_114559_6908  | NW_004515827.1 | Scaffold321 | 6908                    | CC                              | GG                | 1946497425               |
| SNP_P3_114560_7235  | NW_004515827.1 | Scaffold321 | 7235                    | TT                              | GG                | 1946497427               |
| SNP_P3_114561_7237  | NW_004515827.1 | Scaffold321 | 7237                    | TT                              | AA                | 1946497428               |
| SNP_P3_114562_7561  | NW_004515827.1 | Scaffold321 | 7561                    | TT                              | AA                | 1946497430               |
| SNP_P3_114563_9037  | NW_004515827.1 | Scaffold321 | 9037                    | AA                              | GG                | 1946497431               |
| SNP_P3_114564_9736  | NW_004515827.1 | Scaffold321 | 9736                    | TT                              | AA                | 1946497433               |
| SNP_P3_114565_9775  | NW_004515827.1 | Scaffold321 | 9775                    | AA                              | CC                | 1946497434               |
| SNP_P3_114566_9843  | NW_004515827.1 | Scaffold321 | 9843                    | TT                              | AA                | 1946497436               |
| SNP_P3_114567_9997  | NW_004515827.1 | Scaffold321 | 9997                    | AA                              | GG                | 1946497437               |
| SNP_P3_114568_10040 | NW_004515827.1 | Scaffold321 | 10040                   | CC                              | TT                | 1946497438               |
| SNP_P3_114569_10117 | NW_004515827.1 | Scaffold321 | 10117                   | AA                              | GG                | 1946497440               |
| SNP_P3_114570_12695 | NW_004515827.1 | Scaffold321 | 12695                   | GG                              | TT                | 1946497441               |
| SNP_P3_114571_12734 | NW_004515827.1 | Scaffold321 | 12734                   | TT                              | CC                | 1946497443               |
| SNP_P3_114572_12741 | NW_004515827.1 | Scaffold321 | 12741                   | TT                              | CC                | 1946497444               |
| SNP_P3_114573_12777 | NW_004515827.1 | Scaffold321 | 12777                   | CC                              | GG                | 1946497446               |
| SNP_P3_114574_12862 | NW_004515827.1 | Scaffold321 | 12862                   | AA                              | TT                | 1946497447               |
| SNP_P3_114575_12927 | NW_004515827.1 | Scaffold321 | 12927                   | GG                              | TT                | 1946497449               |
| SNP_P3_114576_13082 | NW_004515827.1 | Scaffold321 | 13082                   | AA                              | TT                | 1946497450               |
| SNP_P3_114577_13243 | NW_004515827.1 | Scaffold321 | 13243                   | AA                              | GG                | 1946497452               |
| SNP_P3_114578_13633 | NW_004515827.1 | Scaffold321 | 13633                   | AA                              | CC                | 1946497453               |
| SNP_P3_114579_13648 | NW_004515827.1 | Scaffold321 | 13648                   | CC                              | AA                | 1946497455               |
| SNP_P3_114580_14400 | NW_004515827.1 | Scaffold321 | 14400                   | GG                              | CC                | 1946497456               |
| SNP_P3_114581_14523 | NW_004515827.1 | Scaffold321 | 14523                   | AA                              | GG                | 1946497458               |
| SNP_P3_114582_19232 | NW_004515827.1 | Scaffold321 | 19232                   | AA                              | GG                | 1946497459               |
| SNP_P3_114583_19240 | NW_004515827.1 | Scaffold321 | 19240                   | TT                              | CC                | 1946497460               |
| SNP_P3_114584_22074 | NW_004515827.1 | Scaffold321 | 22074                   | CC                              | TT                | 1946497462               |
| SNP_P3_114585_25609 | NW_004515827.1 | Scaffold321 | 25609                   | GG                              | CC                | 1946497463               |
| SNP_P3_114586_27725 | NW_004515827.1 | Scaffold321 | 27725                   | CC                              | TT                | 1946497465               |
| SNP_P3_114587_27782 | NW_004515827.1 | Scaffold321 | 27782                   | AA                              | CC                | 1946497466               |
| SNP_P3_114588_27828 | NW_004515827.1 | Scaffold321 | 27828                   | GG                              | AA                | 1946497468               |
| SNP_P3_114589_27855 | NW_004515827.1 | Scaffold321 | 27855                   | TT                              | AA                | 1946497469               |
| SNP_P3_114590_27868 | NW_004515827.1 | Scaffold321 | 27868                   | GG                              | AA                | 1946497471               |
| SNP_P3_114592_27998 | NW_004515827.1 | Scaffold321 | 27998                   | GG                              | AA                | 1946497472               |
| SNP_P3_114593_28065 | NW_004515827.1 | Scaffold321 | 28065                   | TT                              | CC                | 1946497474               |
| SNP_P3_114594_28084 | NW_004515827.1 | Scaffold321 | 28084                   | AA                              | GG                | 1946497475               |
| SNP_P3_114595_28130 | NW_004515827.1 | Scaffold321 | 28130                   | GG                              | CC                | 1946497477               |
| SNP_P3_114596_28210 | NW_004515827.1 | Scaffold321 | 28210                   | AA                              | GG                | 1946497478               |
| SNP_P3_114597_29536 | NW_004515827.1 | Scaffold321 | 29536                   | TT                              | CC                | 1946497480               |

| SNPs IDs            | Chromosome IDs | Chromosomes | Physical positions (bp) | CDC Frontier (Reference genome) | (Pusa 256 & HPNB) | NCBI SNPdb Accession IDs |
|---------------------|----------------|-------------|-------------------------|---------------------------------|-------------------|--------------------------|
| SNP_P3_114598_29713 | NW_004515827.1 | Scaffold321 | 29713                   | CC                              | TT                | 1946497481               |
| SNP_P3_114599_33096 | NW_004515827.1 | Scaffold321 | 33096                   | AA                              | CC                | 1946497483               |
| SNP_P3_114600_33438 | NW_004515827.1 | Scaffold321 | 33438                   | CC                              | GG                | 1946497484               |
| SNP_P3_114602_36118 | NW_004515827.1 | Scaffold321 | 36118                   | GG                              | AA                | 1946497486               |
| SNP_P3_114603_36125 | NW_004515827.1 | Scaffold321 | 36125                   | CC                              | AA                | 1946497487               |
| SNP_P3_114604_36756 | NW_004515827.1 | Scaffold321 | 36756                   | AA                              | TT                | 1946497489               |
| SNP_P3_114605_37487 | NW_004515827.1 | Scaffold321 | 37487                   | GG                              | TT                | 1946497490               |
| SNP_P3_114606_37605 | NW_004515827.1 | Scaffold321 | 37605                   | GG                              | AA                | 1946497492               |
| SNP_P3_114607_38013 | NW_004515827.1 | Scaffold321 | 38013                   | CC                              | AA                | 1946497493               |
| SNP_P3_114608_38037 | NW_004515827.1 | Scaffold321 | 38037                   | GG                              | TT                | 1946497495               |
| SNP_P3_114609_38245 | NW_004515827.1 | Scaffold321 | 38245                   | TT                              | AA                | 1946497496               |
| SNP_P3_114610_38274 | NW_004515827.1 | Scaffold321 | 38274                   | TT                              | AA                | 1946497498               |
| SNP_P3_114611_38315 | NW_004515827.1 | Scaffold321 | 38315                   | CC                              | TT                | 1946497499               |
| SNP_P3_114612_38316 | NW_004515827.1 | Scaffold321 | 38316                   | CC                              | AA                | 1946497501               |
| SNP_P3_114613_38360 | NW_004515827.1 | Scaffold321 | 38360                   | AA                              | CC                | 1946497503               |
| SNP_P3_114614_38400 | NW_004515827.1 | Scaffold321 | 38400                   | CC                              | GG                | 1946497504               |
| SNP_P3_114615_38424 | NW_004515827.1 | Scaffold321 | 38424                   | GG                              | TT                | 1946497506               |
| SNP_P3_114617_38539 | NW_004515827.1 | Scaffold321 | 38539                   | TT                              | CC                | 1946497507               |
| SNP_P3_114618_38593 | NW_004515827.1 | Scaffold321 | 38593                   | TT                              | CC                | 1946497509               |
| SNP_P3_114619_38641 | NW_004515827.1 | Scaffold321 | 38641                   | GG                              | AA                | 1946497511               |
| SNP_P3_114620_38706 | NW_004515827.1 | Scaffold321 | 38706                   | TT                              | AA                | 1946497512               |
| SNP_P3_114621_38760 | NW_004515827.1 | Scaffold321 | 38760                   | TT                              | AA                | 1946497514               |
| SNP_P3_114622_38778 | NW_004515827.1 | Scaffold321 | 38778                   | AA                              | TT                | 1946497515               |
| SNP_P3_114623_38785 | NW_004515827.1 | Scaffold321 | 38785                   | GG                              | CC                | 1946497517               |
| SNP_P3_114624_38914 | NW_004515827.1 | Scaffold321 | 38914                   | GG                              | AA                | 1946497518               |
| SNP_P3_114625_38983 | NW_004515827.1 | Scaffold321 | 38983                   | GG                              | AA                | 1946497520               |
| SNP_P3_114626_39068 | NW_004515827.1 | Scaffold321 | 39068                   | TT                              | AA                | 1946497521               |
| SNP_P3_114627_39085 | NW_004515827.1 | Scaffold321 | 39085                   | AA                              | GG                | 1946497523               |
| SNP_P3_114628_39109 | NW_004515827.1 | Scaffold321 | 39109                   | CC                              | AA                | 1946497524               |
| SNP_P3_114629_39144 | NW_004515827.1 | Scaffold321 | 39144                   | GG                              | AA                | 1946497526               |
| SNP_P3_114630_39164 | NW_004515827.1 | Scaffold321 | 39164                   | TT                              | AA                | 1946497527               |
| SNP_P3_114631_39267 | NW_004515827.1 | Scaffold321 | 39267                   | AA                              | GG                | 1946497529               |
| SNP_P3_114633_39328 | NW_004515827.1 | Scaffold321 | 39328                   | GG                              | AA                | 1946497530               |
| SNP_P3_114634_39340 | NW_004515827.1 | Scaffold321 | 39340                   | TT                              | CC                | 1946497532               |
| SNP_P3_114635_39372 | NW_004515827.1 | Scaffold321 | 39372                   | AA                              | GG                | 1946497533               |
| SNP_P3_114636_39383 | NW_004515827.1 | Scaffold321 | 39383                   | AA                              | GG                | 1946497534               |
| SNP_P3_114637_43941 | NW_004515827.1 | Scaffold321 | 43941                   | CC                              | AA                | 1946497536               |
| SNP_P3_114638_44016 | NW_004515827.1 | Scaffold321 | 44016                   | TT                              | CC                | 1946497538               |
| SNP_P3_114639_44038 | NW_004515827.1 | Scaffold321 | 44038                   | CC                              | AA                | 1946497539               |
| SNP_P3_114640_45391 | NW_004515827.1 | Scaffold321 | 45391                   | TT                              | AA                | 1946497541               |
| SNP_P3_114641_45937 | NW_004515827.1 | Scaffold321 | 45937                   | CC                              | TT                | 1946497542               |
| SNP_P3_114642_45953 | NW_004515827.1 | Scaffold321 | 45953                   | AA                              | CC                | 1946497544               |

| SNPs IDs            | Chromosome IDs | Chromosomes | Physical positions (bp) | CDC Frontier (Reference genome) | (Pusa 256 & HPNB) | NCBI SNPdb Accession IDs |
|---------------------|----------------|-------------|-------------------------|---------------------------------|-------------------|--------------------------|
| SNP_P3_114643_58465 | NW_004515827.1 | Scaffold321 | 58465                   | GG                              | AA                | 1946497545               |
| SNP_P3_114644_58470 | NW_004515827.1 | Scaffold321 | 58470                   | GG                              | TT                | 1946497547               |
| SNP_P3_114645_58532 | NW_004515827.1 | Scaffold321 | 58532                   | GG                              | AA                | 1946497548               |
| SNP_P3_114646_58855 | NW_004515827.1 | Scaffold321 | 58855                   | CC                              | TT                | 1946497550               |
| SNP_P3_114647_58865 | NW_004515827.1 | Scaffold321 | 58865                   | CC                              | TT                | 1946497551               |
| SNP_P3_114648_58888 | NW_004515827.1 | Scaffold321 | 58888                   | GG                              | AA                | 1946497553               |
| SNP_P3_114649_58914 | NW_004515827.1 | Scaffold321 | 58914                   | CC                              | GG                | 1946497554               |
| SNP_P3_114650_58980 | NW_004515827.1 | Scaffold321 | 58980                   | AA                              | GG                | 1946497556               |
| SNP_P3_114651_61845 | NW_004515827.1 | Scaffold321 | 61845                   | GG                              | AA                | 1946497557               |
| SNP_P3_114652_66718 | NW_004515827.1 | Scaffold321 | 66718                   | AA                              | GG                | 1946497559               |
| SNP_P3_114653_66730 | NW_004515827.1 | Scaffold321 | 66730                   | AA                              | GG                | 1946497560               |
| SNP_P3_114654_66927 | NW_004515827.1 | Scaffold321 | 66927                   | TT                              | CC                | 1946497562               |
| SNP_P3_114655_66939 | NW_004515827.1 | Scaffold321 | 66939                   | TT                              | AA                | 1946497563               |
| SNP_P3_114656_67550 | NW_004515827.1 | Scaffold321 | 67550                   | TT                              | CC                | 1946497565               |
| SNP_P3_114657_67664 | NW_004515827.1 | Scaffold321 | 67664                   | CC                              | TT                | 1946497567               |
| SNP_P3_114658_67669 | NW_004515827.1 | Scaffold321 | 67669                   | AA                              | GG                | 1946497568               |
| SNP_P3_114659_67869 | NW_004515827.1 | Scaffold321 | 67869                   | CC                              | TT                | 1946497570               |
| SNP_P3_114660_67884 | NW_004515827.1 | Scaffold321 | 67884                   | CC                              | TT                | 1946497571               |
| SNP_P3_114661_67938 | NW_004515827.1 | Scaffold321 | 67938                   | AA                              | CC                | 1946497573               |
| SNP_P3_114662_72891 | NW_004515827.1 | Scaffold321 | 72891                   | CC                              | TT                | 1946497574               |
| SNP_P3_114663_72908 | NW_004515827.1 | Scaffold321 | 72908                   | AA                              | GG                | 1946497576               |
| SNP_P3_114664_72918 | NW_004515827.1 | Scaffold321 | 72918                   | AA                              | TT                | 1946497577               |
| SNP_P3_114665_73063 | NW_004515827.1 | Scaffold321 | 73063                   | CC                              | AA                | 1946497579               |
| SNP_P3_114666_73227 | NW_004515827.1 | Scaffold321 | 73227                   | AA                              | CC                | 1946497580               |
| SNP_P3_114667_73264 | NW_004515827.1 | Scaffold321 | 73264                   | AA                              | GG                | 1946497582               |
| SNP_P3_114668_73319 | NW_004515827.1 | Scaffold321 | 73319                   | GG                              | CC                | 1946497583               |
| SNP_P3_114670_81060 | NW_004515827.1 | Scaffold321 | 81060                   | AA                              | CC                | 1946497584               |
| SNP_P3_114671_81153 | NW_004515827.1 | Scaffold321 | 81153                   | TT                              | CC                | 1946497586               |
| SNP_P3_114672_81203 | NW_004515827.1 | Scaffold321 | 81203                   | TT                              | CC                | 1946497587               |
| SNP_P3_114673_81376 | NW_004515827.1 | Scaffold321 | 81376                   | AA                              | GG                | 1946497589               |
| SNP_P3_114674_83156 | NW_004515827.1 | Scaffold321 | 83156                   | AA                              | TT                | 1946497590               |
| SNP_P3_114675_83158 | NW_004515827.1 | Scaffold321 | 83158                   | AA                              | TT                | 1946497592               |
| SNP_P3_114676_83170 | NW_004515827.1 | Scaffold321 | 83170                   | TT                              | AA                | 1946497593               |
| SNP_P3_114677_83209 | NW_004515827.1 | Scaffold321 | 83209                   | AA                              | TT                | 1946497595               |
| SNP_P3_114678_83277 | NW_004515827.1 | Scaffold321 | 83277                   | TT                              | AA                | 1946497596               |
| SNP_P3_114679_83284 | NW_004515827.1 | Scaffold321 | 83284                   | TT                              | AA                | 1946497598               |
| SNP_P3_114680_83306 | NW_004515827.1 | Scaffold321 | 83306                   | AA                              | GG                | 1946497599               |
| SNP_P3_114681_83311 | NW_004515827.1 | Scaffold321 | 83311                   | CC                              | TT                | 1946497601               |
| SNP_P3_114682_83361 | NW_004515827.1 | Scaffold321 | 83361                   | CC                              | GG                | 1946497603               |
| SNP_P3_114683_83362 | NW_004515827.1 | Scaffold321 | 83362                   | AA                              | CC                | 1946497604               |
| SNP_P3_114684_83499 | NW_004515827.1 | Scaffold321 | 83499                   | GG                              | AA                | 1946497606               |
| SNP_P3_114685_83710 | NW_004515827.1 | Scaffold321 | 83710                   | TT                              | CC                | 1946497607               |

| SNPs IDs             | Chromosome IDs | Chromosomes | Physical positions (bp) | CDC Frontier (Reference genome) | (Pusa 256 & HPNB) | NCBI SNPdb Accession IDs |
|----------------------|----------------|-------------|-------------------------|---------------------------------|-------------------|--------------------------|
| SNP_P3_114686_83728  | NW_004515827.1 | Scaffold321 | 83728                   | CC                              | TT                | 1946497609               |
| SNP_P3_114687_83801  | NW_004515827.1 | Scaffold321 | 83801                   | AA                              | TT                | 1946497610               |
| SNP_P3_114688_2482   | NW_004515828.1 | Scaffold322 | 2482                    | TT                              | GG                | 1946497612               |
| SNP_P3_114690_8094   | NW_004515828.1 | Scaffold322 | 8094                    | CC                              | GG                | 1946497613               |
| SNP_P3_114691_8102   | NW_004515828.1 | Scaffold322 | 8102                    | AA                              | TT                | 1946497615               |
| SNP_P3_114692_26972  | NW_004515828.1 | Scaffold322 | 26972                   | TT                              | AA                | 1946497616               |
| SNP_P3_114693_38044  | NW_004515828.1 | Scaffold322 | 38044                   | GG                              | AA                | 1946497618               |
| SNP_P3_114694_38058  | NW_004515828.1 | Scaffold322 | 38058                   | TT                              | CC                | 1946497619               |
| SNP_P3_114695_38085  | NW_004515828.1 | Scaffold322 | 38085                   | TT                              | CC                | 1946497621               |
| SNP_P3_114696_38104  | NW_004515828.1 | Scaffold322 | 38104                   | GG                              | TT                | 1946497622               |
| SNP_P3_114697_54079  | NW_004515828.1 | Scaffold322 | 54079                   | CC                              | GG                | 1946497624               |
| SNP_P3_114698_54097  | NW_004515828.1 | Scaffold322 | 54097                   | GG                              | CC                | 1946497625               |
| SNP_P3_114700_54366  | NW_004515828.1 | Scaffold322 | 54366                   | TT                              | CC                | 1946497627               |
| SNP_P3_114701_55180  | NW_004515828.1 | Scaffold322 | 55180                   | AA                              | TT                | 1946497628               |
| SNP_P3_114702_55216  | NW_004515828.1 | Scaffold322 | 55216                   | GG                              | CC                | 1946497630               |
| SNP_P3_114703_55475  | NW_004515828.1 | Scaffold322 | 55475                   | GG                              | AA                | 1946497631               |
| SNP_P3_114704_55479  | NW_004515828.1 | Scaffold322 | 55479                   | GG                              | TT                | 1946497633               |
| SNP_P3_114706_55713  | NW_004515828.1 | Scaffold322 | 55713                   | CC                              | AA                | 1946497634               |
| SNP_P3_114707_57444  | NW_004515828.1 | Scaffold322 | 57444                   | TT                              | CC                | 1946497636               |
| SNP_P3_114708_57601  | NW_004515828.1 | Scaffold322 | 57601                   | GG                              | TT                | 1946497638               |
| SNP_P3_114709_83132  | NW_004515828.1 | Scaffold322 | 83132                   | CC                              | TT                | 1946497639               |
| SNP_P3_114710_86692  | NW_004515828.1 | Scaffold322 | 86692                   | CC                              | TT                | 1946497641               |
| SNP_P3_114711_86884  | NW_004515828.1 | Scaffold322 | 86884                   | GG                              | AA                | 1946497643               |
| SNP_P3_114712_87057  | NW_004515828.1 | Scaffold322 | 87057                   | AA                              | GG                | 1946497644               |
| SNP_P3_114713_87060  | NW_004515828.1 | Scaffold322 | 87060                   | GG                              | TT                | 1946497646               |
| SNP_P3_114714_87089  | NW_004515828.1 | Scaffold322 | 87089                   | CC                              | AA                | 1946497647               |
| SNP_P3_114715_87115  | NW_004515828.1 | Scaffold322 | 87115                   | TT                              | CC                | 1946497649               |
| SNP_P3_114716_87140  | NW_004515828.1 | Scaffold322 | 87140                   | TT                              | CC                | 1946497650               |
| SNP_P3_114717_87293  | NW_004515828.1 | Scaffold322 | 87293                   | AA                              | TT                | 1946497652               |
| SNP_P3_114718_90385  | NW_004515828.1 | Scaffold322 | 90385                   | AA                              | GG                | 1946497654               |
| SNP_P3_114719_90406  | NW_004515828.1 | Scaffold322 | 90406                   | CC                              | GG                | 1946497656               |
| SNP_P3_114720_99548  | NW_004515828.1 | Scaffold322 | 99548                   | AA                              | GG                | 1946497657               |
| SNP_P3_114721_103397 | NW_004515828.1 | Scaffold322 | 103397                  | CC                              | TT                | 1946497659               |
| SNP_P3_114722_108028 | NW_004515828.1 | Scaffold322 | 108028                  | AA                              | CC                | 1946497660               |
| SNP_P3_114723_108068 | NW_004515828.1 | Scaffold322 | 108068                  | GG                              | AA                | 1946497662               |
| SNP_P3_114724_116705 | NW_004515828.1 | Scaffold322 | 116705                  | TT                              | CC                | 1946497663               |
| SNP_P3_114725_119278 | NW_004515828.1 | Scaffold322 | 119278                  | TT                              | AA                | 1946497665               |
| SNP_P3_114726_144771 | NW_004515828.1 | Scaffold322 | 144771                  | TT                              | GG                | 1946497666               |
| SNP_P3_114727_151506 | NW_004515828.1 | Scaffold322 | 151506                  | TT                              | AA                | 1946497668               |
| SNP_P3_114728_151517 | NW_004515828.1 | Scaffold322 | 151517                  | AA                              | GG                | 1946497669               |
| SNP_P3_114729_151519 | NW_004515828.1 | Scaffold322 | 151519                  | TT                              | GG                | 1946497671               |
| SNP_P3_114730_151547 | NW_004515828.1 | Scaffold322 | 151547                  | TT                              | GG                | 1946497672               |

| SNPs IDs             | Chromosome IDs | Chromosomes | Physical positions (bp) | CDC Frontier (Reference genome) | (Pusa 256 & HPNB) | NCBI SNPdb Accession IDs |
|----------------------|----------------|-------------|-------------------------|---------------------------------|-------------------|--------------------------|
| SNP_P3_114731_151580 | NW_004515828.1 | Scaffold322 | 151580                  | AA                              | GG                | 1946497674               |
| SNP_P3_114732_151881 | NW_004515828.1 | Scaffold322 | 151881                  | GG                              | AA                | 1946497676               |
| SNP_P3_114733_151905 | NW_004515828.1 | Scaffold322 | 151905                  | TT                              | CC                | 1946497677               |
| SNP_P3_114734_151912 | NW_004515828.1 | Scaffold322 | 151912                  | GG                              | TT                | 1946497679               |
| SNP_P3_114735_151957 | NW_004515828.1 | Scaffold322 | 151957                  | GG                              | CC                | 1946497680               |
| SNP_P3_114736_152024 | NW_004515828.1 | Scaffold322 | 152024                  | CC                              | AA                | 1946497681               |
| SNP_P3_114737_152036 | NW_004515828.1 | Scaffold322 | 152036                  | CC                              | GG                | 1946497683               |
| SNP_P3_114738_152120 | NW_004515828.1 | Scaffold322 | 152120                  | TT                              | AA                | 1946497684               |
| SNP_P3_114739_152215 | NW_004515828.1 | Scaffold322 | 152215                  | AA                              | TT                | 1946497686               |
| SNP_P3_114740_152222 | NW_004515828.1 | Scaffold322 | 152222                  | AA                              | GG                | 1946497687               |
| SNP_P3_114741_162274 | NW_004515828.1 | Scaffold322 | 162274                  | TT                              | AA                | 1946497689               |
| SNP_P3_114742_162281 | NW_004515828.1 | Scaffold322 | 162281                  | GG                              | AA                | 1946497690               |
| SNP_P3_114743_162284 | NW_004515828.1 | Scaffold322 | 162284                  | GG                              | TT                | 1946497691               |
| SNP_P3_114744_162342 | NW_004515828.1 | Scaffold322 | 162342                  | CC                              | TT                | 1946497693               |
| SNP_P3_114745_162585 | NW_004515828.1 | Scaffold322 | 162585                  | GG                              | TT                | 1946497694               |
| SNP_P3_114746_162620 | NW_004515828.1 | Scaffold322 | 162620                  | CC                              | AA                | 1946497696               |
| SNP_P3_114747_162643 | NW_004515828.1 | Scaffold322 | 162643                  | AA                              | TT                | 1946497697               |
| SNP_P3_114748_168595 | NW_004515828.1 | Scaffold322 | 168595                  | TT                              | AA                | 1946497699               |
| SNP_P3_114749_168609 | NW_004515828.1 | Scaffold322 | 168609                  | TT                              | CC                | 1946497700               |
| SNP_P3_114750_168613 | NW_004515828.1 | Scaffold322 | 168613                  | AA                              | CC                | 1946497701               |
| SNP_P3_114751_168639 | NW_004515828.1 | Scaffold322 | 168639                  | GG                              | AA                | 1946497703               |
| SNP_P3_114752_168678 | NW_004515828.1 | Scaffold322 | 168678                  | CC                              | TT                | 1946497704               |
| SNP_P3_114753_168751 | NW_004515828.1 | Scaffold322 | 168751                  | CC                              | AA                | 1946497706               |
| SNP_P3_114754_168786 | NW_004515828.1 | Scaffold322 | 168786                  | TT                              | CC                | 1946497707               |
| SNP_P3_114755_168879 | NW_004515828.1 | Scaffold322 | 168879                  | GG                              | AA                | 1946497709               |
| SNP_P3_114756_168889 | NW_004515828.1 | Scaffold322 | 168889                  | GG                              | AA                | 1946497710               |
| SNP_P3_114757_168919 | NW_004515828.1 | Scaffold322 | 168919                  | AA                              | TT                | 1946497712               |
| SNP_P3_114758_168970 | NW_004515828.1 | Scaffold322 | 168970                  | AA                              | TT                | 1946497713               |
| SNP_P3_114759_169003 | NW_004515828.1 | Scaffold322 | 169003                  | GG                              | CC                | 1946497714               |
| SNP_P3_114760_169006 | NW_004515828.1 | Scaffold322 | 169006                  | TT                              | CC                | 1946497716               |
| SNP_P3_114761_169019 | NW_004515828.1 | Scaffold322 | 169019                  | TT                              | AA                | 1946497718               |
| SNP_P3_114762_169059 | NW_004515828.1 | Scaffold322 | 169059                  | AA                              | TT                | 1946497719               |
| SNP_P3_114763_169072 | NW_004515828.1 | Scaffold322 | 169072                  | TT                              | CC                | 1946497721               |
| SNP_P3_114764_169101 | NW_004515828.1 | Scaffold322 | 169101                  | GG                              | CC                | 1946497722               |
| SNP_P3_114765_169105 | NW_004515828.1 | Scaffold322 | 169105                  | TT                              | AA                | 1946497724               |
| SNP_P3_114766_169113 | NW_004515828.1 | Scaffold322 | 169113                  | GG                              | CC                | 1946497725               |
| SNP_P3_114767_169116 | NW_004515828.1 | Scaffold322 | 169116                  | CC                              | GG                | 1946497727               |
| SNP_P3_114768_169177 | NW_004515828.1 | Scaffold322 | 169177                  | GG                              | CC                | 1946497728               |
| SNP_P3_114769_169475 | NW_004515828.1 | Scaffold322 | 169475                  | GG                              | AA                | 1946497730               |
| SNP_P3_114770_170041 | NW_004515828.1 | Scaffold322 | 170041                  | TT                              | CC                | 1946497731               |
| SNP_P3_114771_170229 | NW_004515828.1 | Scaffold322 | 170229                  | TT                              | CC                | 1946497733               |
| SNP_P3_114772_170307 | NW_004515828.1 | Scaffold322 | 170307                  | GG                              | TT                | 1946497734               |



| SNPs IDs             | Chromosome IDs | Chromosomes | Physical positions (bp) | CDC Frontier (Reference genome) | (Pusa 256 & HPNB) | NCBI SNPdb Accession IDs |
|----------------------|----------------|-------------|-------------------------|---------------------------------|-------------------|--------------------------|
| SNP_P3_114773_170324 | NW_004515828.1 | Scaffold322 | 170324                  | TT                              | GG                | 1946497736               |
| SNP_P3_114774_170441 | NW_004515828.1 | Scaffold322 | 170441                  | CC                              | GG                | 1946497737               |
| SNP_P3_114775_174517 | NW_004515828.1 | Scaffold322 | 174517                  | GG                              | CC                | 1946497739               |
| SNP_P3_114776_174825 | NW_004515828.1 | Scaffold322 | 174825                  | TT                              | CC                | 1946497740               |
| SNP_P3_114777_174832 | NW_004515828.1 | Scaffold322 | 174832                  | GG                              | AA                | 1946497742               |
| SNP_P3_114778_174917 | NW_004515828.1 | Scaffold322 | 174917                  | AA                              | GG                | 1946497743               |
| SNP_P3_114779_2071   | NW_004515829.1 | Scaffold323 | 2071                    | CC                              | AA                | 1946497745               |
| SNP_P3_114780_2080   | NW_004515829.1 | Scaffold323 | 2080                    | CC                              | GG                | 1946497746               |
| SNP_P3_114781_2196   | NW_004515829.1 | Scaffold323 | 2196                    | TT                              | CC                | 1946497747               |
| SNP_P3_114782_2243   | NW_004515829.1 | Scaffold323 | 2243                    | AA                              | CC                | 1946497748               |
| SNP_P3_114783_2258   | NW_004515829.1 | Scaffold323 | 2258                    | TT                              | CC                | 1946497749               |
| SNP_P3_114784_2311   | NW_004515829.1 | Scaffold323 | 2311                    | TT                              | AA                | 1946497751               |
| SNP_P3_114785_2329   | NW_004515829.1 | Scaffold323 | 2329                    | TT                              | AA                | 1946497752               |
| SNP_P3_114786_2374   | NW_004515829.1 | Scaffold323 | 2374                    | TT                              | AA                | 1946497754               |
| SNP_P3_114787_2543   | NW_004515829.1 | Scaffold323 | 2543                    | AA                              | GG                | 1946497755               |
| SNP_P3_114788_2559   | NW_004515829.1 | Scaffold323 | 2559                    | TT                              | CC                | 1946497756               |
| SNP_P3_114789_2590   | NW_004515829.1 | Scaffold323 | 2590                    | AA                              | GG                | 1946497757               |
| SNP_P3_114790_2610   | NW_004515829.1 | Scaffold323 | 2610                    | AA                              | GG                | 1946497758               |
| SNP_P3_114791_3161   | NW_004515829.1 | Scaffold323 | 3161                    | GG                              | CC                | 1946497759               |
| SNP_P3_114792_3221   | NW_004515829.1 | Scaffold323 | 3221                    | TT                              | GG                | 1946497761               |
| SNP_P3_114793_3227   | NW_004515829.1 | Scaffold323 | 3227                    | GG                              | TT                | 1946497762               |
| SNP_P3_114794_3228   | NW_004515829.1 | Scaffold323 | 3228                    | TT                              | AA                | 1946497764               |
| SNP_P3_114795_5338   | NW_004515829.1 | Scaffold323 | 5338                    | TT                              | AA                | 1946497765               |
| SNP_P3_114796_9879   | NW_004515829.1 | Scaffold323 | 9879                    | AA                              | GG                | 1946497767               |
| SNP_P3_114797_11243  | NW_004515829.1 | Scaffold323 | 11243                   | CC                              | GG                | 1946497768               |
| SNP_P3_114798_11838  | NW_004515829.1 | Scaffold323 | 11838                   | GG                              | AA                | 1946497770               |
| SNP_P3_114799_11951  | NW_004515829.1 | Scaffold323 | 11951                   | AA                              | CC                | 1946497771               |
| SNP_P3_114800_13321  | NW_004515829.1 | Scaffold323 | 13321                   | CC                              | GG                | 1946497773               |
| SNP_P3_114801_13328  | NW_004515829.1 | Scaffold323 | 13328                   | AA                              | GG                | 1946497774               |
| SNP_P3_114802_13332  | NW_004515829.1 | Scaffold323 | 13332                   | TT                              | AA                | 1946497776               |
| SNP_P3_114803_13848  | NW_004515829.1 | Scaffold323 | 13848                   | AA                              | GG                | 1946497777               |
| SNP_P3_114804_14163  | NW_004515829.1 | Scaffold323 | 14163                   | CC                              | TT                | 1946497779               |
| SNP_P3_114805_22487  | NW_004515829.1 | Scaffold323 | 22487                   | CC                              | AA                | 1946497781               |
| SNP_P3_114806_31061  | NW_004515829.1 | Scaffold323 | 31061                   | GG                              | TT                | 1946497783               |
| SNP_P3_114807_32903  | NW_004515829.1 | Scaffold323 | 32903                   | CC                              | TT                | 1946497784               |
| SNP_P3_114808_45913  | NW_004515829.1 | Scaffold323 | 45913                   | GG                              | TT                | 1946497786               |
| SNP_P3_114809_45920  | NW_004515829.1 | Scaffold323 | 45920                   | AA                              | CC                | 1946497787               |
| SNP_P3_114810_45975  | NW_004515829.1 | Scaffold323 | 45975                   | CC                              | AA                | 1946497789               |
| SNP_P3_114811_45987  | NW_004515829.1 | Scaffold323 | 45987                   | TT                              | GG                | 1946497790               |
| SNP_P3_114812_45995  | NW_004515829.1 | Scaffold323 | 45995                   | CC                              | GG                | 1946497792               |
| SNP_P3_114813_47439  | NW_004515829.1 | Scaffold323 | 47439                   | AA                              | CC                | 1946497794               |
| SNP_P3_114814_54006  | NW_004515829.1 | Scaffold323 | 54006                   | AA                              | GG                | 1946497795               |

| SNPs IDs            | Chromosome IDs | Chromosomes | Physical positions (bp) | CDC Frontier (Reference genome) | (Pusa 256 & HPNB) | NCBI SNPdb Accession IDs |
|---------------------|----------------|-------------|-------------------------|---------------------------------|-------------------|--------------------------|
| SNP_P3_114815_54107 | NW_004515829.1 | Scaffold323 | 54107                   | TT                              | CC                | 1946497797               |
| SNP_P3_114816_54108 | NW_004515829.1 | Scaffold323 | 54108                   | CC                              | AA                | 1946497798               |
| SNP_P3_114817_54124 | NW_004515829.1 | Scaffold323 | 54124                   | TT                              | CC                | 1946497800               |
| SNP_P3_114818_54160 | NW_004515829.1 | Scaffold323 | 54160                   | GG                              | TT                | 1946497802               |
| SNP_P3_114819_57687 | NW_004515829.1 | Scaffold323 | 57687                   | AA                              | TT                | 1946497803               |
| SNP_P3_114820_57794 | NW_004515829.1 | Scaffold323 | 57794                   | AA                              | TT                | 1946497805               |
| SNP_P3_114821_58187 | NW_004515829.1 | Scaffold323 | 58187                   | AA                              | TT                | 1946497806               |
| SNP_P3_114822_64447 | NW_004515829.1 | Scaffold323 | 64447                   | AA                              | CC                | 1946497808               |
| SNP_P3_114823_3773  | NW_004515830.1 | Scaffold324 | 3773                    | AA                              | GG                | 1946497809               |
| SNP_P3_114824_3797  | NW_004515830.1 | Scaffold324 | 3797                    | CC                              | TT                | 1946497811               |
| SNP_P3_114825_3799  | NW_004515830.1 | Scaffold324 | 3799                    | AA                              | GG                | 1946497812               |
| SNP_P3_114826_3843  | NW_004515830.1 | Scaffold324 | 3843                    | AA                              | GG                | 1946497814               |
| SNP_P3_114827_3906  | NW_004515830.1 | Scaffold324 | 3906                    | TT                              | CC                | 1946497816               |
| SNP_P3_114828_4326  | NW_004515830.1 | Scaffold324 | 4326                    | AA                              | GG                | 1946497817               |
| SNP_P3_114829_6319  | NW_004515830.1 | Scaffold324 | 6319                    | AA                              | CC                | 1946497819               |
| SNP_P3_114830_10549 | NW_004515830.1 | Scaffold324 | 10549                   | GG                              | TT                | 1946497820               |
| SNP_P3_114831_11056 | NW_004515830.1 | Scaffold324 | 11056                   | TT                              | CC                | 1946497822               |
| SNP_P3_114832_17237 | NW_004515830.1 | Scaffold324 | 17237                   | AA                              | GG                | 1946497823               |
| SNP_P3_114833_17565 | NW_004515830.1 | Scaffold324 | 17565                   | AA                              | GG                | 1946497825               |
| SNP_P3_114834_17603 | NW_004515830.1 | Scaffold324 | 17603                   | TT                              | CC                | 1946497826               |
| SNP_P3_114835_19585 | NW_004515830.1 | Scaffold324 | 19585                   | AA                              | TT                | 1946497828               |
| SNP_P3_114836_19619 | NW_004515830.1 | Scaffold324 | 19619                   | AA                              | CC                | 1946497830               |
| SNP_P3_114837_19694 | NW_004515830.1 | Scaffold324 | 19694                   | AA                              | CC                | 1946497831               |
| SNP_P3_114838_19705 | NW_004515830.1 | Scaffold324 | 19705                   | AA                              | GG                | 1946497833               |
| SNP_P3_114839_19961 | NW_004515830.1 | Scaffold324 | 19961                   | AA                              | CC                | 1946497834               |
| SNP_P3_114840_20051 | NW_004515830.1 | Scaffold324 | 20051                   | CC                              | TT                | 1946497836               |
| SNP_P3_114841_26296 | NW_004515830.1 | Scaffold324 | 26296                   | GG                              | AA                | 1946497837               |
| SNP_P3_114842_26902 | NW_004515830.1 | Scaffold324 | 26902                   | TT                              | CC                | 1946497839               |
| SNP_P3_114843_26931 | NW_004515830.1 | Scaffold324 | 26931                   | TT                              | CC                | 1946497840               |
| SNP_P3_114844_27306 | NW_004515830.1 | Scaffold324 | 27306                   | TT                              | CC                | 1946497842               |
| SNP_P3_114845_27345 | NW_004515830.1 | Scaffold324 | 27345                   | AA                              | CC                | 1946497844               |
| SNP_P3_114846_27966 | NW_004515830.1 | Scaffold324 | 27966                   | GG                              | AA                | 1946497845               |
| SNP_P3_114847_28054 | NW_004515830.1 | Scaffold324 | 28054                   | TT                              | CC                | 1946497847               |
| SNP_P3_114848_33989 | NW_004515830.1 | Scaffold324 | 33989                   | AA                              | GG                | 1946497848               |
| SNP_P3_114849_33991 | NW_004515830.1 | Scaffold324 | 33991                   | TT                              | AA                | 1946497850               |
| SNP_P3_114850_34003 | NW_004515830.1 | Scaffold324 | 34003                   | CC                              | TT                | 1946497851               |
| SNP_P3_114851_34007 | NW_004515830.1 | Scaffold324 | 34007                   | GG                              | CC                | 1946497853               |
| SNP_P3_114852_34010 | NW_004515830.1 | Scaffold324 | 34010                   | TT                              | AA                | 1946497854               |
| SNP_P3_114853_34259 | NW_004515830.1 | Scaffold324 | 34259                   | TT                              | AA                | 1946497856               |
| SNP_P3_114854_34290 | NW_004515830.1 | Scaffold324 | 34290                   | CC                              | TT                | 1946497857               |
| SNP_P3_114855_34349 | NW_004515830.1 | Scaffold324 | 34349                   | TT                              | CC                | 1946497859               |
| SNP_P3_114856_34350 | NW_004515830.1 | Scaffold324 | 34350                   | TT                              | CC                | 1946497860               |

| SNPs IDs             | Chromosome IDs | Chromosomes | Physical positions (bp) | CDC Frontier (Reference genome) | (Pusa 256 & HPNB) | NCBI SNPdb Accession IDs |
|----------------------|----------------|-------------|-------------------------|---------------------------------|-------------------|--------------------------|
| SNP_P3_114857_41548  | NW_004515830.1 | Scaffold324 | 41548                   | TT                              | CC                | 1946497862               |
| SNP_P3_114858_45386  | NW_004515830.1 | Scaffold324 | 45386                   | TT                              | GG                | 1946497863               |
| SNP_P3_114859_45589  | NW_004515830.1 | Scaffold324 | 45589                   | AA                              | GG                | 1946497865               |
| SNP_P3_114860_45599  | NW_004515830.1 | Scaffold324 | 45599                   | TT                              | GG                | 1946497866               |
| SNP_P3_114861_51290  | NW_004515830.1 | Scaffold324 | 51290                   | GG                              | AA                | 1946497868               |
| SNP_P3_114862_53155  | NW_004515830.1 | Scaffold324 | 53155                   | AA                              | GG                | 1946497869               |
| SNP_P3_114863_53186  | NW_004515830.1 | Scaffold324 | 53186                   | TT                              | CC                | 1946497871               |
| SNP_P3_114864_53514  | NW_004515830.1 | Scaffold324 | 53514                   | CC                              | TT                | 1946497872               |
| SNP_P3_114865_58589  | NW_004515830.1 | Scaffold324 | 58589                   | GG                              | AA                | 1946497874               |
| SNP_P3_114866_58689  | NW_004515830.1 | Scaffold324 | 58689                   | GG                              | CC                | 1946497875               |
| SNP_P3_114867_59469  | NW_004515830.1 | Scaffold324 | 59469                   | GG                              | TT                | 1946497877               |
| SNP_P3_114868_59590  | NW_004515830.1 | Scaffold324 | 59590                   | TT                              | CC                | 1946497878               |
| SNP_P3_114869_59605  | NW_004515830.1 | Scaffold324 | 59605                   | CC                              | TT                | 1946497879               |
| SNP_P3_114871_77824  | NW_004515830.1 | Scaffold324 | 77824                   | TT                              | AA                | 1946497881               |
| SNP_P3_114872_77825  | NW_004515830.1 | Scaffold324 | 77825                   | GG                              | AA                | 1946497882               |
| SNP_P3_114873_77883  | NW_004515830.1 | Scaffold324 | 77883                   | GG                              | CC                | 1946497884               |
| SNP_P3_114874_77931  | NW_004515830.1 | Scaffold324 | 77931                   | AA                              | GG                | 1946497885               |
| SNP_P3_114875_78139  | NW_004515830.1 | Scaffold324 | 78139                   | TT                              | GG                | 1946497887               |
| SNP_P3_114876_78157  | NW_004515830.1 | Scaffold324 | 78157                   | TT                              | CC                | 1946497888               |
| SNP_P3_114877_85727  | NW_004515830.1 | Scaffold324 | 85727                   | CC                              | GG                | 1946497890               |
| SNP_P3_114878_85808  | NW_004515830.1 | Scaffold324 | 85808                   | AA                              | CC                | 1946497891               |
| SNP_P3_114879_85922  | NW_004515830.1 | Scaffold324 | 85922                   | AA                              | CC                | 1946497893               |
| SNP_P3_114880_85957  | NW_004515830.1 | Scaffold324 | 85957                   | GG                              | AA                | 1946497894               |
| SNP_P3_114881_85958  | NW_004515830.1 | Scaffold324 | 85958                   | CC                              | TT                | 1946497895               |
| SNP_P3_114882_85988  | NW_004515830.1 | Scaffold324 | 85988                   | CC                              | AA                | 1946497897               |
| SNP_P3_114883_86008  | NW_004515830.1 | Scaffold324 | 86008                   | AA                              | GG                | 1946497898               |
| SNP_P3_114884_86041  | NW_004515830.1 | Scaffold324 | 86041                   | GG                              | AA                | 1946497900               |
| SNP_P3_114885_86190  | NW_004515830.1 | Scaffold324 | 86190                   | AA                              | GG                | 1946497901               |
| SNP_P3_114887_87151  | NW_004515830.1 | Scaffold324 | 87151                   | AA                              | GG                | 1946497903               |
| SNP_P3_114888_87596  | NW_004515830.1 | Scaffold324 | 87596                   | AA                              | TT                | 1946497904               |
| SNP_P3_114889_89450  | NW_004515830.1 | Scaffold324 | 89450                   | GG                              | AA                | 1946497906               |
| SNP_P3_114890_109549 | NW_004515830.1 | Scaffold324 | 109549                  | AA                              | GG                | 1946497907               |
| SNP_P3_114891_123252 | NW_004515830.1 | Scaffold324 | 123252                  | AA                              | GG                | 1946497909               |
| SNP_P3_114892_123280 | NW_004515830.1 | Scaffold324 | 123280                  | CC                              | TT                | 1946497910               |
| SNP_P3_114893_124286 | NW_004515830.1 | Scaffold324 | 124286                  | GG                              | TT                | 1946497911               |
| SNP_P3_114894_125183 | NW_004515830.1 | Scaffold324 | 125183                  | GG                              | AA                | 1946497913               |
| SNP_P3_114895_129588 | NW_004515830.1 | Scaffold324 | 129588                  | GG                              | AA                | 1946497914               |
| SNP_P3_114896_129591 | NW_004515830.1 | Scaffold324 | 129591                  | CC                              | AA                | 1946497916               |
| SNP_P3_114897_131070 | NW_004515830.1 | Scaffold324 | 131070                  | AA                              | TT                | 1946497917               |
| SNP_P3_114898_134061 | NW_004515830.1 | Scaffold324 | 134061                  | AA                              | TT                | 1946497919               |
| SNP_P3_114899_134063 | NW_004515830.1 | Scaffold324 | 134063                  | TT                              | AA                | 1946497920               |
| SNP_P3_114900_134106 | NW_004515830.1 | Scaffold324 | 134106                  | TT                              | CC                | 1946497922               |

| SNPs IDs             | Chromosome IDs | Chromosomes | Physical positions (bp) | CDC Frontier (Reference genome) | (Pusa 256 & HPNB) | NCBI SNPdb Accession IDs |
|----------------------|----------------|-------------|-------------------------|---------------------------------|-------------------|--------------------------|
| SNP_P3_114901_134111 | NW_004515830.1 | Scaffold324 | 134111                  | CC                              | TT                | 1946497923               |
| SNP_P3_114902_134120 | NW_004515830.1 | Scaffold324 | 134120                  | GG                              | AA                | 1946497925               |
| SNP_P3_114903_136447 | NW_004515830.1 | Scaffold324 | 136447                  | GG                              | AA                | 1946497926               |
| SNP_P3_114904_136490 | NW_004515830.1 | Scaffold324 | 136490                  | CC                              | TT                | 1946497927               |
| SNP_P3_114905_136507 | NW_004515830.1 | Scaffold324 | 136507                  | AA                              | GG                | 1946497929               |
| SNP_P3_114906_136512 | NW_004515830.1 | Scaffold324 | 136512                  | GG                              | AA                | 1946497930               |
| SNP_P3_114907_148914 | NW_004515830.1 | Scaffold324 | 148914                  | TT                              | AA                | 1946497932               |
| SNP_P3_114908_149904 | NW_004515830.1 | Scaffold324 | 149904                  | CC                              | TT                | 1946497933               |
| SNP_P3_114909_159570 | NW_004515830.1 | Scaffold324 | 159570                  | TT                              | GG                | 1946497935               |
| SNP_P3_114910_161457 | NW_004515830.1 | Scaffold324 | 161457                  | AA                              | GG                | 1946497936               |
| SNP_P3_114911_164013 | NW_004515830.1 | Scaffold324 | 164013                  | CC                              | GG                | 1946497938               |
| SNP_P3_114912_165663 | NW_004515830.1 | Scaffold324 | 165663                  | AA                              | GG                | 1946497939               |
| SNP_P3_114913_165723 | NW_004515830.1 | Scaffold324 | 165723                  | AA                              | GG                | 1946497941               |
| SNP_P3_114914_165726 | NW_004515830.1 | Scaffold324 | 165726                  | GG                              | AA                | 1946497942               |
| SNP_P3_114915_179242 | NW_004515830.1 | Scaffold324 | 179242                  | CC                              | TT                | 1946497944               |
| SNP_P3_114916_180195 | NW_004515830.1 | Scaffold324 | 180195                  | TT                              | CC                | 1946497945               |
| SNP_P3_114917_180209 | NW_004515830.1 | Scaffold324 | 180209                  | CC                              | GG                | 1946497947               |
| SNP_P3_114918_180465 | NW_004515830.1 | Scaffold324 | 180465                  | GG                              | AA                | 1946497948               |
| SNP_P3_114919_180498 | NW_004515830.1 | Scaffold324 | 180498                  | CC                              | AA                | 1946497950               |
| SNP_P3_114920_180583 | NW_004515830.1 | Scaffold324 | 180583                  | TT                              | CC                | 1946497951               |
| SNP_P3_114921_182372 | NW_004515830.1 | Scaffold324 | 182372                  | AA                              | GG                | 1946497953               |
| SNP_P3_114922_183972 | NW_004515830.1 | Scaffold324 | 183972                  | CC                              | TT                | 1946497954               |
| SNP_P3_114923_184876 | NW_004515830.1 | Scaffold324 | 184876                  | AA                              | CC                | 1946497955               |
| SNP_P3_114924_185373 | NW_004515830.1 | Scaffold324 | 185373                  | TT                              | GG                | 1946497957               |
| SNP_P3_114925_186187 | NW_004515830.1 | Scaffold324 | 186187                  | AA                              | GG                | 1946497958               |
| SNP_P3_114926_186207 | NW_004515830.1 | Scaffold324 | 186207                  | CC                              | TT                | 1946497960               |
| SNP_P3_114927_186229 | NW_004515830.1 | Scaffold324 | 186229                  | CC                              | TT                | 1946497961               |
| SNP_P3_114928_186362 | NW_004515830.1 | Scaffold324 | 186362                  | AA                              | GG                | 1946497963               |
| SNP_P3_114929_216003 | NW_004515830.1 | Scaffold324 | 216003                  | GG                              | AA                | 1946497964               |
| SNP_P3_114931_220390 | NW_004515830.1 | Scaffold324 | 220390                  | TT                              | AA                | 1946497966               |
| SNP_P3_114932_224044 | NW_004515830.1 | Scaffold324 | 224044                  | CC                              | TT                | 1946497967               |
| SNP_P3_114933_224465 | NW_004515830.1 | Scaffold324 | 224465                  | TT                              | CC                | 1946497969               |
| SNP_P3_114934_224501 | NW_004515830.1 | Scaffold324 | 224501                  | AA                              | GG                | 1946497970               |
| SNP_P3_114935_224640 | NW_004515830.1 | Scaffold324 | 224640                  | GG                              | AA                | 1946497971               |
| SNP_P3_114936_224811 | NW_004515830.1 | Scaffold324 | 224811                  | TT                              | GG                | 1946497973               |
| SNP_P3_114937_225600 | NW_004515830.1 | Scaffold324 | 225600                  | AA                              | TT                | 1946497974               |
| SNP_P3_114938_226613 | NW_004515830.1 | Scaffold324 | 226613                  | AA                              | GG                | 1946497976               |
| SNP_P3_114939_226806 | NW_004515830.1 | Scaffold324 | 226806                  | AA                              | GG                | 1946497977               |
| SNP_P3_114940_227220 | NW_004515830.1 | Scaffold324 | 227220                  | AA                              | GG                | 1946497979               |
| SNP_P3_114941_227271 | NW_004515830.1 | Scaffold324 | 227271                  | AA                              | GG                | 1946497980               |
| SNP_P3_114943_243196 | NW_004515830.1 | Scaffold324 | 243196                  | GG                              | AA                | 1946497982               |
| SNP_P3_114944_243271 | NW_004515830.1 | Scaffold324 | 243271                  | AA                              | GG                | 1946497983               |

| SNPs IDs             | Chromosome IDs | Chromosomes | Physical positions (bp) | CDC Frontier (Reference genome) | (Pusa 256 & HPNB) | NCBI SNPdb Accession IDs |
|----------------------|----------------|-------------|-------------------------|---------------------------------|-------------------|--------------------------|
| SNP_P3_114945_244917 | NW_004515830.1 | Scaffold324 | 244917                  | GG                              | AA                | 1946497985               |
| SNP_P3_114946_244952 | NW_004515830.1 | Scaffold324 | 244952                  | TT                              | CC                | 1946497986               |
| SNP_P3_114947_244953 | NW_004515830.1 | Scaffold324 | 244953                  | AA                              | TT                | 1946497988               |
| SNP_P3_114948_245232 | NW_004515830.1 | Scaffold324 | 245232                  | AA                              | GG                | 1946497989               |
| SNP_P3_114949_280006 | NW_004515830.1 | Scaffold324 | 280006                  | TT                              | AA                | 1946497991               |
| SNP_P3_114950_280030 | NW_004515830.1 | Scaffold324 | 280030                  | CC                              | AA                | 1946497992               |
| SNP_P3_114951_280058 | NW_004515830.1 | Scaffold324 | 280058                  | AA                              | GG                | 1946497994               |
| SNP_P3_114952_280162 | NW_004515830.1 | Scaffold324 | 280162                  | TT                              | GG                | 1946497995               |
| SNP_P3_114953_280172 | NW_004515830.1 | Scaffold324 | 280172                  | CC                              | AA                | 1946497997               |
| SNP_P3_114954_281600 | NW_004515830.1 | Scaffold324 | 281600                  | AA                              | GG                | 1946497998               |
| SNP_P3_114955_281649 | NW_004515830.1 | Scaffold324 | 281649                  | GG                              | AA                | 1946498000               |
| SNP_P3_114956_281995 | NW_004515830.1 | Scaffold324 | 281995                  | GG                              | CC                | 1946498001               |
| SNP_P3_114957_282025 | NW_004515830.1 | Scaffold324 | 282025                  | TT                              | GG                | 1946498003               |
| SNP_P3_114958_282027 | NW_004515830.1 | Scaffold324 | 282027                  | AA                              | CC                | 1946498004               |
| SNP_P3_114959_282608 | NW_004515830.1 | Scaffold324 | 282608                  | AA                              | GG                | 1946498005               |
| SNP_P3_114960_299259 | NW_004515830.1 | Scaffold324 | 299259                  | AA                              | GG                | 1946498007               |
| SNP_P3_114961_299265 | NW_004515830.1 | Scaffold324 | 299265                  | AA                              | GG                | 1946498008               |
| SNP_P3_114962_299905 | NW_004515830.1 | Scaffold324 | 299905                  | GG                              | AA                | 1946498010               |
| SNP_P3_114963_311289 | NW_004515830.1 | Scaffold324 | 311289                  | CC                              | TT                | 1946498011               |
| SNP_P3_114964_311647 | NW_004515830.1 | Scaffold324 | 311647                  | CC                              | TT                | 1946498013               |
| SNP_P3_114965_311656 | NW_004515830.1 | Scaffold324 | 311656                  | GG                              | TT                | 1946498014               |
| SNP_P3_114966_312020 | NW_004515830.1 | Scaffold324 | 312020                  | GG                              | AA                | 1946498016               |
| SNP_P3_114967_312030 | NW_004515830.1 | Scaffold324 | 312030                  | TT                              | CC                | 1946498017               |
| SNP_P3_114968_312072 | NW_004515830.1 | Scaffold324 | 312072                  | AA                              | CC                | 1946498018               |
| SNP_P3_114969_312078 | NW_004515830.1 | Scaffold324 | 312078                  | TT                              | AA                | 1946498020               |
| SNP_P3_114970_312206 | NW_004515830.1 | Scaffold324 | 312206                  | AA                              | GG                | 1946498021               |
| SNP_P3_114971_312275 | NW_004515830.1 | Scaffold324 | 312275                  | AA                              | CC                | 1946498023               |
| SNP_P3_114972_312463 | NW_004515830.1 | Scaffold324 | 312463                  | CC                              | GG                | 1946498024               |
| SNP_P3_114973_327478 | NW_004515830.1 | Scaffold324 | 327478                  | AA                              | GG                | 1946498026               |
| SNP_P3_114974_330770 | NW_004515830.1 | Scaffold324 | 330770                  | TT                              | CC                | 1946498027               |
| SNP_P3_114975_331011 | NW_004515830.1 | Scaffold324 | 331011                  | TT                              | CC                | 1946498029               |
| SNP_P3_114976_331048 | NW_004515830.1 | Scaffold324 | 331048                  | AA                              | GG                | 1946498030               |
| SNP_P3_114977_331078 | NW_004515830.1 | Scaffold324 | 331078                  | TT                              | GG                | 1946498032               |
| SNP_P3_114978_340498 | NW_004515830.1 | Scaffold324 | 340498                  | TT                              | CC                | 1946498033               |
| SNP_P3_114979_340523 | NW_004515830.1 | Scaffold324 | 340523                  | AA                              | TT                | 1946498035               |
| SNP_P3_114980_340554 | NW_004515830.1 | Scaffold324 | 340554                  | AA                              | CC                | 1946498036               |
| SNP_P3_114981_344099 | NW_004515830.1 | Scaffold324 | 344099                  | GG                              | AA                | 1946498037               |
| SNP_P3_114982_344115 | NW_004515830.1 | Scaffold324 | 344115                  | TT                              | AA                | 1946498039               |
| SNP_P3_114983_344172 | NW_004515830.1 | Scaffold324 | 344172                  | GG                              | AA                | 1946498040               |
| SNP_P3_114984_346710 | NW_004515830.1 | Scaffold324 | 346710                  | AA                              | CC                | 1946498042               |
| SNP_P3_114985_347066 | NW_004515830.1 | Scaffold324 | 347066                  | CC                              | TT                | 1946498043               |
| SNP_P3_114987_351342 | NW_004515830.1 | Scaffold324 | 351342                  | TT                              | CC                | 1946498045               |

| SNPs IDs             | Chromosome IDs | Chromosomes | Physical positions (bp) | CDC Frontier (Reference genome) | (Pusa 256 & HPNB) | NCBI SNPdb Accession IDs |
|----------------------|----------------|-------------|-------------------------|---------------------------------|-------------------|--------------------------|
| SNP_P3_114988_351423 | NW_004515830.1 | Scaffold324 | 351423                  | AA                              | CC                | 1946498046               |
| SNP_P3_114989_351438 | NW_004515830.1 | Scaffold324 | 351438                  | AA                              | GG                | 1946498048               |
| SNP_P3_114990_351450 | NW_004515830.1 | Scaffold324 | 351450                  | AA                              | GG                | 1946498049               |
| SNP_P3_114991_351669 | NW_004515830.1 | Scaffold324 | 351669                  | GG                              | CC                | 1946498051               |
| SNP_P3_114992_351724 | NW_004515830.1 | Scaffold324 | 351724                  | AA                              | CC                | 1946498052               |
| SNP_P3_114993_351788 | NW_004515830.1 | Scaffold324 | 351788                  | TT                              | GG                | 1946498054               |
| SNP_P3_114994_352683 | NW_004515830.1 | Scaffold324 | 352683                  | GG                              | CC                | 1946498055               |
| SNP_P3_114995_354150 | NW_004515830.1 | Scaffold324 | 354150                  | GG                              | TT                | 1946498057               |
| SNP_P3_114996_354153 | NW_004515830.1 | Scaffold324 | 354153                  | TT                              | CC                | 1946498058               |
| SNP_P3_114997_354162 | NW_004515830.1 | Scaffold324 | 354162                  | TT                              | CC                | 1946498060               |
| SNP_P3_114998_354399 | NW_004515830.1 | Scaffold324 | 354399                  | CC                              | TT                | 1946498061               |
| SNP_P3_114999_357307 | NW_004515830.1 | Scaffold324 | 357307                  | GG                              | AA                | 1946498063               |
| SNP_P3_115000_357317 | NW_004515830.1 | Scaffold324 | 357317                  | AA                              | CC                | 1946498064               |
| SNP_P3_115001_357321 | NW_004515830.1 | Scaffold324 | 357321                  | GG                              | AA                | 1946498065               |
| SNP_P3_115002_357322 | NW_004515830.1 | Scaffold324 | 357322                  | TT                              | CC                | 1946498067               |
| SNP_P3_115003_357346 | NW_004515830.1 | Scaffold324 | 357346                  | AA                              | GG                | 1946498068               |
| SNP_P3_115004_357419 | NW_004515830.1 | Scaffold324 | 357419                  | CC                              | GG                | 1946498070               |
| SNP_P3_115005_367639 | NW_004515830.1 | Scaffold324 | 367639                  | AA                              | GG                | 1946498071               |
| SNP_P3_115006_368108 | NW_004515830.1 | Scaffold324 | 368108                  | CC                              | GG                | 1946498073               |
| SNP_P3_115007_368144 | NW_004515830.1 | Scaffold324 | 368144                  | TT                              | GG                | 1946498074               |
| SNP_P3_115008_368474 | NW_004515830.1 | Scaffold324 | 368474                  | TT                              | CC                | 1946498076               |
| SNP_P3_115009_368476 | NW_004515830.1 | Scaffold324 | 368476                  | CC                              | TT                | 1946498077               |
| SNP_P3_115010_368495 | NW_004515830.1 | Scaffold324 | 368495                  | GG                              | TT                | 1946498079               |
| SNP_P3_115011_368709 | NW_004515830.1 | Scaffold324 | 368709                  | AA                              | GG                | 1946498080               |
| SNP_P3_115012_371025 | NW_004515830.1 | Scaffold324 | 371025                  | CC                              | AA                | 1946498082               |
| SNP_P3_115014_371111 | NW_004515830.1 | Scaffold324 | 371111                  | AA                              | CC                | 1946498083               |
| SNP_P3_115015_371178 | NW_004515830.1 | Scaffold324 | 371178                  | TT                              | AA                | 1946498085               |
| SNP_P3_115016_371232 | NW_004515830.1 | Scaffold324 | 371232                  | GG                              | AA                | 1946498086               |
| SNP_P3_115017_371243 | NW_004515830.1 | Scaffold324 | 371243                  | TT                              | CC                | 1946498088               |
| SNP_P3_115018_371466 | NW_004515830.1 | Scaffold324 | 371466                  | AA                              | GG                | 1946498089               |
| SNP_P3_115019_372635 | NW_004515830.1 | Scaffold324 | 372635                  | GG                              | CC                | 1946498090               |
| SNP_P3_115020_373029 | NW_004515830.1 | Scaffold324 | 373029                  | TT                              | AA                | 1946498092               |
| SNP_P3_115021_373031 | NW_004515830.1 | Scaffold324 | 373031                  | TT                              | CC                | 1946498093               |
| SNP_P3_115022_373062 | NW_004515830.1 | Scaffold324 | 373062                  | TT                              | CC                | 1946498095               |
| SNP_P3_115023_378358 | NW_004515830.1 | Scaffold324 | 378358                  | TT                              | AA                | 1946498096               |
| SNP_P3_115024_378385 | NW_004515830.1 | Scaffold324 | 378385                  | AA                              | TT                | 1946498098               |
| SNP_P3_115025_378402 | NW_004515830.1 | Scaffold324 | 378402                  | GG                              | TT                | 1946498099               |
| SNP_P3_115026_378712 | NW_004515830.1 | Scaffold324 | 378712                  | AA                              | GG                | 1946498101               |
| SNP_P3_115027_383421 | NW_004515830.1 | Scaffold324 | 383421                  | TT                              | CC                | 1946498102               |
| SNP_P3_115028_383440 | NW_004515830.1 | Scaffold324 | 383440                  | CC                              | TT                | 1946498104               |
| SNP_P3_115029_383466 | NW_004515830.1 | Scaffold324 | 383466                  | CC                              | TT                | 1946498105               |
| SNP_P3_115030_383514 | NW_004515830.1 | Scaffold324 | 383514                  | AA                              | GG                | 1946498107               |

| SNPs IDs             | Chromosome IDs | Chromosomes | Physical positions (bp) | CDC Frontier (Reference genome) | (Pusa 256 & HPNB) | NCBI SNPdb Accession IDs |
|----------------------|----------------|-------------|-------------------------|---------------------------------|-------------------|--------------------------|
| SNP_P3_115031_383528 | NW_004515830.1 | Scaffold324 | 383528                  | CC                              | GG                | 1946498108               |
| SNP_P3_115032_383541 | NW_004515830.1 | Scaffold324 | 383541                  | AA                              | GG                | 1946498110               |
| SNP_P3_115033_383590 | NW_004515830.1 | Scaffold324 | 383590                  | CC                              | AA                | 1946498111               |
| SNP_P3_115034_383591 | NW_004515830.1 | Scaffold324 | 383591                  | GG                              | AA                | 1946498113               |
| SNP_P3_115035_383599 | NW_004515830.1 | Scaffold324 | 383599                  | GG                              | CC                | 1946498114               |
| SNP_P3_115036_383605 | NW_004515830.1 | Scaffold324 | 383605                  | CC                              | TT                | 1946498116               |
| SNP_P3_115037_383630 | NW_004515830.1 | Scaffold324 | 383630                  | GG                              | AA                | 1946498117               |
| SNP_P3_115038_383676 | NW_004515830.1 | Scaffold324 | 383676                  | TT                              | CC                | 1946498119               |
| SNP_P3_115039_385250 | NW_004515830.1 | Scaffold324 | 385250                  | AA                              | TT                | 1946498120               |
| SNP_P3_115040_387209 | NW_004515830.1 | Scaffold324 | 387209                  | TT                              | GG                | 1946498122               |
| SNP_P3_115041_387315 | NW_004515830.1 | Scaffold324 | 387315                  | AA                              | GG                | 1946498123               |
| SNP_P3_115042_387428 | NW_004515830.1 | Scaffold324 | 387428                  | TT                              | GG                | 1946498125               |
| SNP_P3_115043_387667 | NW_004515830.1 | Scaffold324 | 387667                  | AA                              | TT                | 1946498126               |
| SNP_P3_115044_387687 | NW_004515830.1 | Scaffold324 | 387687                  | GG                              | AA                | 1946498128               |
| SNP_P3_115045_387733 | NW_004515830.1 | Scaffold324 | 387733                  | GG                              | AA                | 1946498129               |
| SNP_P3_115046_391798 | NW_004515830.1 | Scaffold324 | 391798                  | CC                              | TT                | 1946498131               |
| SNP_P3_115047_395263 | NW_004515830.1 | Scaffold324 | 395263                  | CC                              | TT                | 1946498132               |
| SNP_P3_115048_395272 | NW_004515830.1 | Scaffold324 | 395272                  | TT                              | CC                | 1946498134               |
| SNP_P3_115049_395292 | NW_004515830.1 | Scaffold324 | 395292                  | AA                              | GG                | 1946498135               |
| SNP_P3_115050_395295 | NW_004515830.1 | Scaffold324 | 395295                  | CC                              | AA                | 1946498137               |
| SNP_P3_115051_395296 | NW_004515830.1 | Scaffold324 | 395296                  | AA                              | TT                | 1946498138               |
| SNP_P3_115052_395299 | NW_004515830.1 | Scaffold324 | 395299                  | AA                              | TT                | 1946498140               |
| SNP_P3_115053_395305 | NW_004515830.1 | Scaffold324 | 395305                  | TT                              | GG                | 1946498141               |
| SNP_P3_115054_395310 | NW_004515830.1 | Scaffold324 | 395310                  | AA                              | TT                | 1946498143               |
| SNP_P3_115055_406730 | NW_004515830.1 | Scaffold324 | 406730                  | GG                              | TT                | 1946498144               |
| SNP_P3_115056_407656 | NW_004515830.1 | Scaffold324 | 407656                  | GG                              | AA                | 1946498146               |
| SNP_P3_115057_414052 | NW_004515830.1 | Scaffold324 | 414052                  | AA                              | GG                | 1946498147               |
| SNP_P3_115058_414415 | NW_004515830.1 | Scaffold324 | 414415                  | GG                              | AA                | 1946498149               |
| SNP_P3_115059_415884 | NW_004515830.1 | Scaffold324 | 415884                  | AA                              | CC                | 1946498150               |
| SNP_P3_115060_415905 | NW_004515830.1 | Scaffold324 | 415905                  | AA                              | CC                | 1946498152               |
| SNP_P3_115061_425043 | NW_004515830.1 | Scaffold324 | 425043                  | CC                              | AA                | 1946498153               |
| SNP_P3_115062_427669 | NW_004515830.1 | Scaffold324 | 427669                  | CC                              | AA                | 1946498155               |
| SNP_P3_115063_427921 | NW_004515830.1 | Scaffold324 | 427921                  | AA                              | GG                | 1946498156               |
| SNP_P3_115064_427937 | NW_004515830.1 | Scaffold324 | 427937                  | AA                              | CC                | 1946498158               |
| SNP_P3_115065_427939 | NW_004515830.1 | Scaffold324 | 427939                  | CC                              | TT                | 1946498159               |
| SNP_P3_115066_427958 | NW_004515830.1 | Scaffold324 | 427958                  | GG                              | CC                | 1946498161               |
| SNP_P3_115067_435574 | NW_004515830.1 | Scaffold324 | 435574                  | TT                              | GG                | 1946498162               |
| SNP_P3_115068_435592 | NW_004515830.1 | Scaffold324 | 435592                  | TT                              | AA                | 1946498164               |
| SNP_P3_115069_442049 | NW_004515830.1 | Scaffold324 | 442049                  | GG                              | AA                | 1946498165               |
| SNP_P3_115070_445383 | NW_004515830.1 | Scaffold324 | 445383                  | CC                              | GG                | 1946498167               |
| SNP_P3_115071_450805 | NW_004515830.1 | Scaffold324 | 450805                  | GG                              | AA                | 1946498168               |
| SNP_P3_115072_451178 | NW_004515830.1 | Scaffold324 | 451178                  | GG                              | TT                | 1946498170               |

| SNPs IDs             | Chromosome IDs | Chromosomes | Physical positions (bp) | CDC Frontier (Reference genome) | (Pusa 256 & HPNB) | NCBI SNPdb Accession IDs |
|----------------------|----------------|-------------|-------------------------|---------------------------------|-------------------|--------------------------|
| SNP_P3_115073_451240 | NW_004515830.1 | Scaffold324 | 451240                  | AA                              | CC                | 1946498171               |
| SNP_P3_115074_457033 | NW_004515830.1 | Scaffold324 | 457033                  | TT                              | CC                | 1946498173               |
| SNP_P3_115075_457061 | NW_004515830.1 | Scaffold324 | 457061                  | TT                              | AA                | 1946498174               |
| SNP_P3_115076_457108 | NW_004515830.1 | Scaffold324 | 457108                  | AA                              | CC                | 1946498176               |
| SNP_P3_115077_457127 | NW_004515830.1 | Scaffold324 | 457127                  | TT                              | CC                | 1946498177               |
| SNP_P3_115078_457252 | NW_004515830.1 | Scaffold324 | 457252                  | GG                              | CC                | 1946498179               |
| SNP_P3_115079_457549 | NW_004515830.1 | Scaffold324 | 457549                  | CC                              | AA                | 1946498180               |
| SNP_P3_115080_1019   | NW_004515831.1 | Scaffold325 | 1019                    | AA                              | GG                | 1946498181               |
| SNP_P3_115081_1633   | NW_004515831.1 | Scaffold325 | 1633                    | AA                              | CC                | 1946498183               |
| SNP_P3_115082_2417   | NW_004515831.1 | Scaffold325 | 2417                    | CC                              | AA                | 1946498184               |
| SNP_P3_115083_2423   | NW_004515831.1 | Scaffold325 | 2423                    | CC                              | TT                | 1946498186               |
| SNP_P3_115084_2577   | NW_004515831.1 | Scaffold325 | 2577                    | GG                              | AA                | 1946498187               |
| SNP_P3_115085_3015   | NW_004515831.1 | Scaffold325 | 3015                    | AA                              | GG                | 1946498189               |
| SNP_P3_115086_10198  | NW_004515831.1 | Scaffold325 | 10198                   | CC                              | GG                | 1946498190               |
| SNP_P3_115087_10228  | NW_004515831.1 | Scaffold325 | 10228                   | TT                              | CC                | 1946498192               |
| SNP_P3_115088_12119  | NW_004515834.1 | Scaffold328 | 12119                   | CC                              | GG                | 1946498193               |
| SNP_P3_115089_12126  | NW_004515834.1 | Scaffold328 | 12126                   | TT                              | AA                | 1946498195               |
| SNP_P3_115090_12128  | NW_004515834.1 | Scaffold328 | 12128                   | GG                              | TT                | 1946498196               |
| SNP_P3_115091_12139  | NW_004515834.1 | Scaffold328 | 12139                   | TT                              | GG                | 1946498198               |
| SNP_P3_115092_12151  | NW_004515834.1 | Scaffold328 | 12151                   | CC                              | GG                | 1946498199               |
| SNP_P3_115093_12233  | NW_004515834.1 | Scaffold328 | 12233                   | TT                              | AA                | 1946498201               |
| SNP_P3_115094_12260  | NW_004515834.1 | Scaffold328 | 12260                   | AA                              | GG                | 1946498202               |
| SNP_P3_115095_12278  | NW_004515834.1 | Scaffold328 | 12278                   | CC                              | TT                | 1946498204               |
| SNP_P3_115096_12289  | NW_004515834.1 | Scaffold328 | 12289                   | GG                              | TT                | 1946498205               |
| SNP_P3_115097_12364  | NW_004515834.1 | Scaffold328 | 12364                   | CC                              | AA                | 1946498207               |
| SNP_P3_115098_12403  | NW_004515834.1 | Scaffold328 | 12403                   | TT                              | CC                | 1946498208               |
| SNP_P3_115099_12405  | NW_004515834.1 | Scaffold328 | 12405                   | GG                              | AA                | 1946498210               |
| SNP_P3_115100_12630  | NW_004515834.1 | Scaffold328 | 12630                   | AA                              | TT                | 1946498211               |
| SNP_P3_115101_12666  | NW_004515834.1 | Scaffold328 | 12666                   | TT                              | AA                | 1946498213               |
| SNP_P3_115102_12667  | NW_004515834.1 | Scaffold328 | 12667                   | TT                              | GG                | 1946498214               |
| SNP_P3_115103_12675  | NW_004515834.1 | Scaffold328 | 12675                   | AA                              | TT                | 1946498216               |
| SNP_P3_115104_12684  | NW_004515834.1 | Scaffold328 | 12684                   | AA                              | GG                | 1946498217               |
| SNP_P3_115105_1431   | NW_004515835.1 | Scaffold330 | 1431                    | AA                              | GG                | 1946498218               |
| SNP_P3_115106_1437   | NW_004515835.1 | Scaffold330 | 1437                    | GG                              | AA                | 1946498220               |
| SNP_P3_115107_2358   | NW_004515835.1 | Scaffold330 | 2358                    | AA                              | GG                | 1946498221               |
| SNP_P3_115108_2379   | NW_004515835.1 | Scaffold330 | 2379                    | GG                              | AA                | 1946498223               |
| SNP_P3_115109_2397   | NW_004515835.1 | Scaffold330 | 2397                    | GG                              | CC                | 1946498224               |
| SNP_P3_115110_2607   | NW_004515835.1 | Scaffold330 | 2607                    | AA                              | GG                | 1946498226               |
| SNP_P3_115111_2788   | NW_004515835.1 | Scaffold330 | 2788                    | AA                              | TT                | 1946498227               |
| SNP_P3_115112_2818   | NW_004515835.1 | Scaffold330 | 2818                    | CC                              | GG                | 1946498229               |
| SNP_P3_115113_2907   | NW_004515835.1 | Scaffold330 | 2907                    | CC                              | TT                | 1946498230               |
| SNP_P3_115115_2964   | NW_004515835.1 | Scaffold330 | 2964                    | AA                              | GG                | 1946498232               |



| SNPs IDs            | Chromosome IDs | Chromosomes | Physical positions (bp) | CDC Frontier (Reference genome) | (Pusa 256 & HPNB) | NCBI SNPdb Accession IDs |
|---------------------|----------------|-------------|-------------------------|---------------------------------|-------------------|--------------------------|
| SNP_P3_115117_9963  | NW_004515835.1 | Scaffold330 | 9963                    | GG                              | CC                | 1946498233               |
| SNP_P3_115118_10036 | NW_004515835.1 | Scaffold330 | 10036                   | AA                              | TT                | 1946498235               |
| SNP_P3_115121_10224 | NW_004515835.1 | Scaffold330 | 10224                   | CC                              | GG                | 1946498236               |
| SNP_P3_115122_10244 | NW_004515835.1 | Scaffold330 | 10244                   | CC                              | TT                | 1946498238               |
| SNP_P3_115123_10247 | NW_004515835.1 | Scaffold330 | 10247                   | TT                              | GG                | 1946498239               |
| SNP_P3_115124_10257 | NW_004515835.1 | Scaffold330 | 10257                   | AA                              | TT                | 1946498241               |
| SNP_P3_115125_10268 | NW_004515835.1 | Scaffold330 | 10268                   | CC                              | TT                | 1946498242               |
| SNP_P3_115126_10294 | NW_004515835.1 | Scaffold330 | 10294                   | CC                              | TT                | 1946498244               |
| SNP_P3_115127_10296 | NW_004515835.1 | Scaffold330 | 10296                   | GG                              | CC                | 1946498246               |
| SNP_P3_115129_10603 | NW_004515835.1 | Scaffold330 | 10603                   | AA                              | GG                | 1946498247               |
| SNP_P3_115130_10606 | NW_004515835.1 | Scaffold330 | 10606                   | GG                              | TT                | 1946498249               |
| SNP_P3_115131_10622 | NW_004515835.1 | Scaffold330 | 10622                   | AA                              | TT                | 1946498250               |
| SNP_P3_115132_15622 | NW_004515835.1 | Scaffold330 | 15622                   | AA                              | GG                | 1946498252               |
| SNP_P3_115133_238   | NW_004515836.1 | Scaffold331 | 238                     | GG                              | AA                | 1946498253               |
| SNP_P3_115134_760   | NW_004515836.1 | Scaffold331 | 760                     | AA                              | CC                | 1946498255               |
| SNP_P3_115135_834   | NW_004515836.1 | Scaffold331 | 834                     | AA                              | TT                | 1946498256               |
| SNP_P3_115136_4122  | NW_004515836.1 | Scaffold331 | 4122                    | TT                              | AA                | 1946498258               |
| SNP_P3_115138_20617 | NW_004515836.1 | Scaffold331 | 20617                   | AA                              | CC                | 1946498259               |
| SNP_P3_115139_20955 | NW_004515836.1 | Scaffold331 | 20955                   | TT                              | CC                | 1946498261               |
| SNP_P3_115140_21027 | NW_004515836.1 | Scaffold331 | 21027                   | TT                              | GG                | 1946498262               |
| SNP_P3_115141_24809 | NW_004515836.1 | Scaffold331 | 24809                   | GG                              | AA                | 1946498264               |
| SNP_P3_115142_24993 | NW_004515836.1 | Scaffold331 | 24993                   | AA                              | GG                | 1946498265               |
| SNP_P3_115144_35006 | NW_004515836.1 | Scaffold331 | 35006                   | AA                              | GG                | 1946498267               |
| SNP_P3_115145_43611 | NW_004515836.1 | Scaffold331 | 43611                   | TT                              | GG                | 1946498268               |
| SNP_P3_115146_43695 | NW_004515836.1 | Scaffold331 | 43695                   | CC                              | TT                | 1946498270               |
| SNP_P3_115147_43907 | NW_004515836.1 | Scaffold331 | 43907                   | AA                              | CC                | 1946498271               |
| SNP_P3_115148_43957 | NW_004515836.1 | Scaffold331 | 43957                   | TT                              | CC                | 1946498273               |
| SNP_P3_115149_43959 | NW_004515836.1 | Scaffold331 | 43959                   | GG                              | AA                | 1946498274               |
| SNP_P3_115150_43968 | NW_004515836.1 | Scaffold331 | 43968                   | GG                              | AA                | 1946498276               |
| SNP_P3_115151_50228 | NW_004515836.1 | Scaffold331 | 50228                   | TT                              | CC                | 1946498277               |
| SNP_P3_115152_52808 | NW_004515836.1 | Scaffold331 | 52808                   | CC                              | AA                | 1946498288               |
| SNP_P3_115153_52809 | NW_004515836.1 | Scaffold331 | 52809                   | GG                              | AA                | 1946498289               |
| SNP_P3_115154_56272 | NW_004515836.1 | Scaffold331 | 56272                   | AA                              | CC                | 1946498291               |
| SNP_P3_115155_56456 | NW_004515836.1 | Scaffold331 | 56456                   | CC                              | TT                | 1946498292               |
| SNP_P3_115156_59101 | NW_004515836.1 | Scaffold331 | 59101                   | GG                              | TT                | 1946498294               |
| SNP_P3_115157_60670 | NW_004515836.1 | Scaffold331 | 60670                   | GG                              | TT                | 1946498295               |
| SNP_P3_115158_62227 | NW_004515836.1 | Scaffold331 | 62227                   | AA                              | CC                | 1946498297               |
| SNP_P3_115159_62233 | NW_004515836.1 | Scaffold331 | 62233                   | TT                              | CC                | 1946498298               |
| SNP_P3_115160_66770 | NW_004515836.1 | Scaffold331 | 66770                   | GG                              | AA                | 1946498300               |
| SNP_P3_115161_67759 | NW_004515836.1 | Scaffold331 | 67759                   | AA                              | GG                | 1946498301               |
| SNP_P3_115162_68071 | NW_004515836.1 | Scaffold331 | 68071                   | CC                              | GG                | 1946498303               |
| SNP_P3_115163_68108 | NW_004515836.1 | Scaffold331 | 68108                   | TT                              | GG                | 1946498304               |

| SNPs IDs             | Chromosome IDs | Chromosomes | Physical positions (bp) | CDC Frontier (Reference genome) | (Pusa 256 & HPNB) | NCBI SNPdb Accession IDs |
|----------------------|----------------|-------------|-------------------------|---------------------------------|-------------------|--------------------------|
| SNP_P3_115164_68111  | NW_004515836.1 | Scaffold331 | 68111                   | TT                              | CC                | 1946498306               |
| SNP_P3_115165_68114  | NW_004515836.1 | Scaffold331 | 68114                   | AA                              | CC                | 1946498307               |
| SNP_P3_115166_68119  | NW_004515836.1 | Scaffold331 | 68119                   | TT                              | CC                | 1946498309               |
| SNP_P3_115167_68120  | NW_004515836.1 | Scaffold331 | 68120                   | AA                              | TT                | 1946498310               |
| SNP_P3_115168_73761  | NW_004515836.1 | Scaffold331 | 73761                   | GG                              | TT                | 1946498312               |
| SNP_P3_115169_74011  | NW_004515836.1 | Scaffold331 | 74011                   | AA                              | TT                | 1946498313               |
| SNP_P3_115170_75205  | NW_004515836.1 | Scaffold331 | 75205                   | GG                              | AA                | 1946498315               |
| SNP_P3_115171_90713  | NW_004515836.1 | Scaffold331 | 90713                   | TT                              | AA                | 1946498316               |
| SNP_P3_115172_90726  | NW_004515836.1 | Scaffold331 | 90726                   | TT                              | CC                | 1946498318               |
| SNP_P3_115173_102272 | NW_004515836.1 | Scaffold331 | 102272                  | GG                              | AA                | 1946498319               |
| SNP_P3_115174_102278 | NW_004515836.1 | Scaffold331 | 102278                  | AA                              | TT                | 1946498321               |
| SNP_P3_115175_102317 | NW_004515836.1 | Scaffold331 | 102317                  | AA                              | TT                | 1946498322               |
| SNP_P3_115176_108373 | NW_004515836.1 | Scaffold331 | 108373                  | CC                              | TT                | 1946498323               |
| SNP_P3_115177_129444 | NW_004515836.1 | Scaffold331 | 129444                  | AA                              | GG                | 1946498325               |
| SNP_P3_115178_129481 | NW_004515836.1 | Scaffold331 | 129481                  | TT                              | CC                | 1946498326               |
| SNP_P3_115179_129492 | NW_004515836.1 | Scaffold331 | 129492                  | CC                              | AA                | 1946498328               |
| SNP_P3_115180_129494 | NW_004515836.1 | Scaffold331 | 129494                  | CC                              | TT                | 1946498329               |
| SNP_P3_115181_129518 | NW_004515836.1 | Scaffold331 | 129518                  | CC                              | TT                | 1946498331               |
| SNP_P3_115182_129657 | NW_004515836.1 | Scaffold331 | 129657                  | AA                              | CC                | 1946498332               |
| SNP_P3_115183_129758 | NW_004515836.1 | Scaffold331 | 129758                  | CC                              | TT                | 1946498334               |
| SNP_P3_115184_129805 | NW_004515836.1 | Scaffold331 | 129805                  | CC                              | GG                | 1946498335               |
| SNP_P3_115185_133206 | NW_004515836.1 | Scaffold331 | 133206                  | TT                              | AA                | 1946498337               |
| SNP_P3_115187_155604 | NW_004515836.1 | Scaffold331 | 155604                  | CC                              | TT                | 1946498338               |
| SNP_P3_115188_155652 | NW_004515836.1 | Scaffold331 | 155652                  | CC                              | TT                | 1946498340               |
| SNP_P3_115189_162390 | NW_004515836.1 | Scaffold331 | 162390                  | TT                              | AA                | 1946498342               |
| SNP_P3_115190_166083 | NW_004515836.1 | Scaffold331 | 166083                  | CC                              | GG                | 1946498343               |
| SNP_P3_115192_209137 | NW_004515836.1 | Scaffold331 | 209137                  | CC                              | GG                | 1946498346               |
| SNP_P3_115193_209150 | NW_004515836.1 | Scaffold331 | 209150                  | AA                              | GG                | 1946498347               |
| SNP_P3_115194_220264 | NW_004515836.1 | Scaffold331 | 220264                  | GG                              | AA                | 1946498349               |
| SNP_P3_115195_224387 | NW_004515836.1 | Scaffold331 | 224387                  | TT                              | AA                | 1946498350               |
| SNP_P3_115196_242891 | NW_004515836.1 | Scaffold331 | 242891                  | CC                              | TT                | 1946498352               |
| SNP_P3_115197_243161 | NW_004515836.1 | Scaffold331 | 243161                  | CC                              | AA                | 1946498353               |
| SNP_P3_115198_243169 | NW_004515836.1 | Scaffold331 | 243169                  | GG                              | AA                | 1946498355               |
| SNP_P3_115199_246345 | NW_004515836.1 | Scaffold331 | 246345                  | GG                              | AA                | 1946498357               |
| SNP_P3_115200_291366 | NW_004515836.1 | Scaffold331 | 291366                  | AA                              | GG                | 1946498358               |
| SNP_P3_115201_301820 | NW_004515836.1 | Scaffold331 | 301820                  | CC                              | TT                | 1946498360               |
| SNP_P3_115202_48648  | NW_004515837.1 | Scaffold332 | 48648                   | TT                              | CC                | 1946498361               |
| SNP_P3_115203_48665  | NW_004515837.1 | Scaffold332 | 48665                   | TT                              | CC                | 1946498362               |
| SNP_P3_115204_48874  | NW_004515837.1 | Scaffold332 | 48874                   | TT                              | CC                | 1946498363               |
| SNP_P3_115205_50307  | NW_004515837.1 | Scaffold332 | 50307                   | AA                              | GG                | 1946498364               |
| SNP_P3_115206_51861  | NW_004515837.1 | Scaffold332 | 51861                   | TT                              | GG                | 1946498365               |
| SNP_P3_115207_51982  | NW_004515837.1 | Scaffold332 | 51982                   | TT                              | GG                | 1946498366               |

| SNPs IDs             | Chromosome IDs | Chromosomes | Physical positions (bp) | CDC Frontier (Reference genome) | (Pusa 256 & HPNB) | NCBI SNPdb Accession IDs |
|----------------------|----------------|-------------|-------------------------|---------------------------------|-------------------|--------------------------|
| SNP_P3_115208_51990  | NW_004515837.1 | Scaffold332 | 51990                   | TT                              | GG                | 1946498367               |
| SNP_P3_115209_52054  | NW_004515837.1 | Scaffold332 | 52054                   | AA                              | GG                | 1946498368               |
| SNP_P3_115210_52122  | NW_004515837.1 | Scaffold332 | 52122                   | CC                              | TT                | 1946498369               |
| SNP_P3_115211_52138  | NW_004515837.1 | Scaffold332 | 52138                   | GG                              | AA                | 1946498370               |
| SNP_P3_115212_52169  | NW_004515837.1 | Scaffold332 | 52169                   | AA                              | CC                | 1946498371               |
| SNP_P3_115213_52765  | NW_004515837.1 | Scaffold332 | 52765                   | AA                              | GG                | 1946498372               |
| SNP_P3_115214_52778  | NW_004515837.1 | Scaffold332 | 52778                   | TT                              | AA                | 1946498373               |
| SNP_P3_115215_52784  | NW_004515837.1 | Scaffold332 | 52784                   | TT                              | CC                | 1946498375               |
| SNP_P3_115216_52836  | NW_004515837.1 | Scaffold332 | 52836                   | TT                              | CC                | 1946498376               |
| SNP_P3_115217_52839  | NW_004515837.1 | Scaffold332 | 52839                   | TT                              | CC                | 1946498378               |
| SNP_P3_115218_52893  | NW_004515837.1 | Scaffold332 | 52893                   | TT                              | CC                | 1946498379               |
| SNP_P3_115219_52907  | NW_004515837.1 | Scaffold332 | 52907                   | GG                              | AA                | 1946498381               |
| SNP_P3_115220_53021  | NW_004515837.1 | Scaffold332 | 53021                   | AA                              | GG                | 1946498382               |
| SNP_P3_115221_53069  | NW_004515837.1 | Scaffold332 | 53069                   | GG                              | AA                | 1946498384               |
| SNP_P3_115222_53113  | NW_004515837.1 | Scaffold332 | 53113                   | TT                              | GG                | 1946498385               |
| SNP_P3_115223_67850  | NW_004515837.1 | Scaffold332 | 67850                   | GG                              | TT                | 1946498387               |
| SNP_P3_115224_70174  | NW_004515837.1 | Scaffold332 | 70174                   | AA                              | GG                | 1946498388               |
| SNP_P3_115225_101134 | NW_004515837.1 | Scaffold332 | 101134                  | GG                              | AA                | 1946498390               |
| SNP_P3_115226_154153 | NW_004515837.1 | Scaffold332 | 154153                  | AA                              | GG                | 1946498391               |
| SNP_P3_115228_160354 | NW_004515837.1 | Scaffold332 | 160354                  | CC                              | TT                | 1946498393               |
| SNP_P3_115229_203755 | NW_004515837.1 | Scaffold332 | 203755                  | AA                              | GG                | 1946498394               |
| SNP_P3_115230_203756 | NW_004515837.1 | Scaffold332 | 203756                  | CC                              | TT                | 1946498396               |
| SNP_P3_115231_220502 | NW_004515837.1 | Scaffold332 | 220502                  | TT                              | AA                | 1946498397               |
| SNP_P3_115232_220504 | NW_004515837.1 | Scaffold332 | 220504                  | GG                              | AA                | 1946498399               |
| SNP_P3_115233_223345 | NW_004515837.1 | Scaffold332 | 223345                  | CC                              | GG                | 1946498400               |
| SNP_P3_115234_226182 | NW_004515837.1 | Scaffold332 | 226182                  | GG                              | AA                | 1946498402               |
| SNP_P3_115235_4822   | NW_004515838.1 | Scaffold333 | 4822                    | GG                              | TT                | 1946498403               |
| SNP_P3_115236_5048   | NW_004515838.1 | Scaffold333 | 5048                    | GG                              | AA                | 1946498405               |
| SNP_P3_115237_5098   | NW_004515838.1 | Scaffold333 | 5098                    | AA                              | TT                | 1946498406               |
| SNP_P3_115238_5185   | NW_004515838.1 | Scaffold333 | 5185                    | CC                              | TT                | 1946498408               |
| SNP_P3_115239_8646   | NW_004515838.1 | Scaffold333 | 8646                    | AA                              | GG                | 1946498409               |
| SNP_P3_115241_12701  | NW_004515838.1 | Scaffold333 | 12701                   | GG                              | AA                | 1946498411               |
| SNP_P3_115242_12967  | NW_004515838.1 | Scaffold333 | 12967                   | AA                              | CC                | 1946498412               |
| SNP_P3_115243_14346  | NW_004515838.1 | Scaffold333 | 14346                   | AA                              | GG                | 1946498414               |
| SNP_P3_115244_16806  | NW_004515838.1 | Scaffold333 | 16806                   | CC                              | TT                | 1946498415               |
| SNP_P3_115245_19399  | NW_004515838.1 | Scaffold333 | 19399                   | GG                              | AA                | 1946498417               |
| SNP_P3_115246_19612  | NW_004515838.1 | Scaffold333 | 19612                   | AA                              | CC                | 1946498418               |
| SNP_P3_115247_19668  | NW_004515838.1 | Scaffold333 | 19668                   | TT                              | CC                | 1946498420               |
| SNP_P3_115249_19883  | NW_004515838.1 | Scaffold333 | 19883                   | TT                              | AA                | 1946498421               |
| SNP_P3_115250_19978  | NW_004515838.1 | Scaffold333 | 19978                   | AA                              | GG                | 1946498423               |
| SNP_P3_115251_20034  | NW_004515838.1 | Scaffold333 | 20034                   | AA                              | CC                | 1946498424               |
| SNP_P3_115252_21561  | NW_004515838.1 | Scaffold333 | 21561                   | TT                              | CC                | 1946498426               |

| SNPs IDs             | Chromosome IDs | Chromosomes | Physical positions (bp) | CDC Frontier (Reference genome) | (Pusa 256 & HPNB) | NCBI SNPdb Accession IDs |
|----------------------|----------------|-------------|-------------------------|---------------------------------|-------------------|--------------------------|
| SNP_P3_115254_22409  | NW_004515838.1 | Scaffold333 | 22409                   | GG                              | AA                | 1946498428               |
| SNP_P3_115255_22519  | NW_004515838.1 | Scaffold333 | 22519                   | TT                              | CC                | 1946498429               |
| SNP_P3_115256_22525  | NW_004515838.1 | Scaffold333 | 22525                   | CC                              | TT                | 1946498431               |
| SNP_P3_115257_22621  | NW_004515838.1 | Scaffold333 | 22621                   | GG                              | TT                | 1946498432               |
| SNP_P3_115258_22958  | NW_004515838.1 | Scaffold333 | 22958                   | CC                              | AA                | 1946498434               |
| SNP_P3_115259_26653  | NW_004515838.1 | Scaffold333 | 26653                   | TT                              | CC                | 1946498435               |
| SNP_P3_115260_26682  | NW_004515838.1 | Scaffold333 | 26682                   | TT                              | GG                | 1946498437               |
| SNP_P3_115261_27006  | NW_004515838.1 | Scaffold333 | 27006                   | AA                              | TT                | 1946498438               |
| SNP_P3_115262_28081  | NW_004515838.1 | Scaffold333 | 28081                   | GG                              | AA                | 1946498440               |
| SNP_P3_115263_28429  | NW_004515838.1 | Scaffold333 | 28429                   | TT                              | CC                | 1946498441               |
| SNP_P3_115264_35808  | NW_004515838.1 | Scaffold333 | 35808                   | AA                              | GG                | 1946498443               |
| SNP_P3_115265_44410  | NW_004515838.1 | Scaffold333 | 44410                   | CC                              | TT                | 1946498444               |
| SNP_P3_115266_44423  | NW_004515838.1 | Scaffold333 | 44423                   | TT                              | AA                | 1946498446               |
| SNP_P3_115267_44562  | NW_004515838.1 | Scaffold333 | 44562                   | TT                              | AA                | 1946498447               |
| SNP_P3_115268_44644  | NW_004515838.1 | Scaffold333 | 44644                   | CC                              | AA                | 1946498449               |
| SNP_P3_115269_44950  | NW_004515838.1 | Scaffold333 | 44950                   | TT                              | GG                | 1946498450               |
| SNP_P3_115270_44982  | NW_004515838.1 | Scaffold333 | 44982                   | CC                              | TT                | 1946498452               |
| SNP_P3_115271_45090  | NW_004515838.1 | Scaffold333 | 45090                   | TT                              | AA                | 1946498453               |
| SNP_P3_115272_45227  | NW_004515838.1 | Scaffold333 | 45227                   | AA                              | CC                | 1946498455               |
| SNP_P3_115273_45307  | NW_004515838.1 | Scaffold333 | 45307                   | TT                              | CC                | 1946498456               |
| SNP_P3_115274_45529  | NW_004515838.1 | Scaffold333 | 45529                   | AA                              | GG                | 1946498458               |
| SNP_P3_115275_56489  | NW_004515838.1 | Scaffold333 | 56489                   | TT                              | GG                | 1946498459               |
| SNP_P3_115276_71621  | NW_004515838.1 | Scaffold333 | 71621                   | CC                              | TT                | 1946498461               |
| SNP_P3_115277_71707  | NW_004515838.1 | Scaffold333 | 71707                   | TT                              | AA                | 1946498462               |
| SNP_P3_115278_91702  | NW_004515838.1 | Scaffold333 | 91702                   | CC                              | GG                | 1946498464               |
| SNP_P3_115279_92046  | NW_004515838.1 | Scaffold333 | 92046                   | CC                              | TT                | 1946498465               |
| SNP_P3_115280_100728 | NW_004515838.1 | Scaffold333 | 100728                  | GG                              | AA                | 1946498466               |
| SNP_P3_115281_100786 | NW_004515838.1 | Scaffold333 | 100786                  | TT                              | CC                | 1946498468               |
| SNP_P3_115282_100883 | NW_004515838.1 | Scaffold333 | 100883                  | TT                              | CC                | 1946498469               |
| SNP_P3_115283_101169 | NW_004515838.1 | Scaffold333 | 101169                  | TT                              | GG                | 1946498471               |
| SNP_P3_115284_101184 | NW_004515838.1 | Scaffold333 | 101184                  | AA                              | TT                | 1946498472               |
| SNP_P3_115285_101187 | NW_004515838.1 | Scaffold333 | 101187                  | GG                              | TT                | 1946498474               |
| SNP_P3_115286_101193 | NW_004515838.1 | Scaffold333 | 101193                  | TT                              | CC                | 1946498475               |
| SNP_P3_115287_101196 | NW_004515838.1 | Scaffold333 | 101196                  | AA                              | TT                | 1946498477               |
| SNP_P3_115288_4978   | NW_004515839.1 | Scaffold334 | 4978                    | CC                              | TT                | 1946498478               |
| SNP_P3_115289_5079   | NW_004515839.1 | Scaffold334 | 5079                    | CC                              | TT                | 1946498480               |
| SNP_P3_115290_5080   | NW_004515839.1 | Scaffold334 | 5080                    | TT                              | CC                | 1946498481               |
| SNP_P3_115291_5106   | NW_004515839.1 | Scaffold334 | 5106                    | AA                              | GG                | 1946498483               |
| SNP_P3_115292_5291   | NW_004515839.1 | Scaffold334 | 5291                    | GG                              | AA                | 1946498484               |
| SNP_P3_115293_40949  | NW_004515839.1 | Scaffold334 | 40949                   | GG                              | AA                | 1946498486               |
| SNP_P3_115295_64593  | NW_004515839.1 | Scaffold334 | 64593                   | AA                              | CC                | 1946498487               |
| SNP_P3_115296_64929  | NW_004515839.1 | Scaffold334 | 64929                   | AA                              | GG                | 1946498489               |

| SNPs IDs             | Chromosome IDs | Chromosomes | Physical positions (bp) | CDC Frontier (Reference genome) | (Pusa 256 & HPNB) | NCBI SNPdb Accession IDs |
|----------------------|----------------|-------------|-------------------------|---------------------------------|-------------------|--------------------------|
| SNP_P3_115297_68772  | NW_004515839.1 | Scaffold334 | 68772                   | GG                              | AA                | 1946498490               |
| SNP_P3_115298_68792  | NW_004515839.1 | Scaffold334 | 68792                   | AA                              | CC                | 1946498492               |
| SNP_P3_115299_68850  | NW_004515839.1 | Scaffold334 | 68850                   | GG                              | AA                | 1946498493               |
| SNP_P3_115300_68904  | NW_004515839.1 | Scaffold334 | 68904                   | AA                              | GG                | 1946498495               |
| SNP_P3_115301_68952  | NW_004515839.1 | Scaffold334 | 68952                   | CC                              | TT                | 1946498496               |
| SNP_P3_115302_68962  | NW_004515839.1 | Scaffold334 | 68962                   | TT                              | CC                | 1946498497               |
| SNP_P3_115303_69021  | NW_004515839.1 | Scaffold334 | 69021                   | TT                              | CC                | 1946498499               |
| SNP_P3_115304_69027  | NW_004515839.1 | Scaffold334 | 69027                   | AA                              | GG                | 1946498501               |
| SNP_P3_115305_69088  | NW_004515839.1 | Scaffold334 | 69088                   | GG                              | AA                | 1946498502               |
| SNP_P3_115306_69110  | NW_004515839.1 | Scaffold334 | 69110                   | TT                              | GG                | 1946498504               |
| SNP_P3_115307_69151  | NW_004515839.1 | Scaffold334 | 69151                   | AA                              | CC                | 1946498505               |
| SNP_P3_115308_69173  | NW_004515839.1 | Scaffold334 | 69173                   | AA                              | GG                | 1946498507               |
| SNP_P3_115309_69175  | NW_004515839.1 | Scaffold334 | 69175                   | AA                              | GG                | 1946498508               |
| SNP_P3_115310_69305  | NW_004515839.1 | Scaffold334 | 69305                   | TT                              | CC                | 1946498510               |
| SNP_P3_115311_69336  | NW_004515839.1 | Scaffold334 | 69336                   | TT                              | CC                | 1946498511               |
| SNP_P3_115312_77621  | NW_004515839.1 | Scaffold334 | 77621                   | AA                              | CC                | 1946498512               |
| SNP_P3_115313_105840 | NW_004515839.1 | Scaffold334 | 105840                  | TT                              | CC                | 1946498514               |
| SNP_P3_115314_105844 | NW_004515839.1 | Scaffold334 | 105844                  | CC                              | TT                | 1946498516               |
| SNP_P3_115315_105849 | NW_004515839.1 | Scaffold334 | 105849                  | AA                              | TT                | 1946498517               |
| SNP_P3_115316_105852 | NW_004515839.1 | Scaffold334 | 105852                  | CC                              | AA                | 1946498519               |
| SNP_P3_115317_105882 | NW_004515839.1 | Scaffold334 | 105882                  | TT                              | CC                | 1946498520               |
| SNP_P3_115318_105903 | NW_004515839.1 | Scaffold334 | 105903                  | TT                              | AA                | 1946498522               |
| SNP_P3_115319_105913 | NW_004515839.1 | Scaffold334 | 105913                  | TT                              | CC                | 1946498523               |
| SNP_P3_115320_105945 | NW_004515839.1 | Scaffold334 | 105945                  | TT                              | AA                | 1946498525               |
| SNP_P3_115321_105951 | NW_004515839.1 | Scaffold334 | 105951                  | AA                              | CC                | 1946498526               |
| SNP_P3_115322_105960 | NW_004515839.1 | Scaffold334 | 105960                  | TT                              | CC                | 1946498528               |
| SNP_P3_115323_105966 | NW_004515839.1 | Scaffold334 | 105966                  | TT                              | AA                | 1946498529               |
| SNP_P3_115324_105984 | NW_004515839.1 | Scaffold334 | 105984                  | AA                              | GG                | 1946498531               |
| SNP_P3_115325_106008 | NW_004515839.1 | Scaffold334 | 106008                  | TT                              | CC                | 1946498532               |
| SNP_P3_115326_106020 | NW_004515839.1 | Scaffold334 | 106020                  | TT                              | CC                | 1946498533               |
| SNP_P3_115327_106080 | NW_004515839.1 | Scaffold334 | 106080                  | AA                              | CC                | 1946498535               |
| SNP_P3_115328_106214 | NW_004515839.1 | Scaffold334 | 106214                  | GG                              | TT                | 1946498537               |
| SNP_P3_115329_106358 | NW_004515839.1 | Scaffold334 | 106358                  | TT                              | AA                | 1946498538               |
| SNP_P3_115330_108584 | NW_004515839.1 | Scaffold334 | 108584                  | TT                              | AA                | 1946498540               |
| SNP_P3_115331_108596 | NW_004515839.1 | Scaffold334 | 108596                  | GG                              | TT                | 1946498541               |
| SNP_P3_115332_108714 | NW_004515839.1 | Scaffold334 | 108714                  | AA                              | CC                | 1946498543               |
| SNP_P3_115333_108805 | NW_004515839.1 | Scaffold334 | 108805                  | TT                              | CC                | 1946498544               |
| SNP_P3_115334_108814 | NW_004515839.1 | Scaffold334 | 108814                  | AA                              | CC                | 1946498546               |
| SNP_P3_115335_108868 | NW_004515839.1 | Scaffold334 | 108868                  | CC                              | TT                | 1946498547               |
| SNP_P3_115336_108912 | NW_004515839.1 | Scaffold334 | 108912                  | CC                              | AA                | 1946498549               |
| SNP_P3_115337_108939 | NW_004515839.1 | Scaffold334 | 108939                  | AA                              | TT                | 1946498550               |
| SNP_P3_115338_109006 | NW_004515839.1 | Scaffold334 | 109006                  | GG                              | AA                | 1946498552               |

| SNPs IDs             | Chromosome IDs | Chromosomes | Physical positions (bp) | CDC Frontier (Reference genome) | (Pusa 256 & HPNB) | NCBI SNPdb Accession IDs |
|----------------------|----------------|-------------|-------------------------|---------------------------------|-------------------|--------------------------|
| SNP_P3_115339_109019 | NW_004515839.1 | Scaffold334 | 109019                  | TT                              | CC                | 1946498554               |
| SNP_P3_115340_109083 | NW_004515839.1 | Scaffold334 | 109083                  | TT                              | CC                | 1946498555               |
| SNP_P3_115341_110607 | NW_004515839.1 | Scaffold334 | 110607                  | AA                              | CC                | 1946498557               |
| SNP_P3_115342_112484 | NW_004515839.1 | Scaffold334 | 112484                  | CC                              | TT                | 1946498558               |
| SNP_P3_115343_112508 | NW_004515839.1 | Scaffold334 | 112508                  | GG                              | AA                | 1946498560               |
| SNP_P3_115344_151355 | NW_004515839.1 | Scaffold334 | 151355                  | TT                              | CC                | 1946498562               |
| SNP_P3_115345_156363 | NW_004515839.1 | Scaffold334 | 156363                  | GG                              | AA                | 1946498563               |
| SNP_P3_115346_156371 | NW_004515839.1 | Scaffold334 | 156371                  | TT                              | CC                | 1946498565               |
| SNP_P3_115347_159438 | NW_004515839.1 | Scaffold334 | 159438                  | TT                              | AA                | 1946498566               |
| SNP_P3_115348_28818  | NW_004515840.1 | Scaffold335 | 28818                   | AA                              | GG                | 1946498568               |
| SNP_P3_115349_28888  | NW_004515840.1 | Scaffold335 | 28888                   | TT                              | CC                | 1946498569               |
| SNP_P3_115350_28901  | NW_004515840.1 | Scaffold335 | 28901                   | TT                              | GG                | 1946498571               |
| SNP_P3_115351_28902  | NW_004515840.1 | Scaffold335 | 28902                   | AA                              | TT                | 1946498572               |
| SNP_P3_115352_28919  | NW_004515840.1 | Scaffold335 | 28919                   | TT                              | CC                | 1946498574               |
| SNP_P3_115353_32452  | NW_004515840.1 | Scaffold335 | 32452                   | CC                              | AA                | 1946498575               |
| SNP_P3_115354_45054  | NW_004515840.1 | Scaffold335 | 45054                   | AA                              | TT                | 1946498577               |
| SNP_P3_115355_65293  | NW_004515840.1 | Scaffold335 | 65293                   | AA                              | GG                | 1946498578               |
| SNP_P3_115356_65532  | NW_004515840.1 | Scaffold335 | 65532                   | AA                              | TT                | 1946498580               |
| SNP_P3_115357_81357  | NW_004515840.1 | Scaffold335 | 81357                   | AA                              | CC                | 1946498581               |
| SNP_P3_115358_81401  | NW_004515840.1 | Scaffold335 | 81401                   | TT                              | CC                | 1946498583               |
| SNP_P3_115359_81436  | NW_004515840.1 | Scaffold335 | 81436                   | AA                              | TT                | 1946498584               |
| SNP_P3_115361_91588  | NW_004515840.1 | Scaffold335 | 91588                   | TT                              | AA                | 1946498586               |
| SNP_P3_115362_101475 | NW_004515840.1 | Scaffold335 | 101475                  | AA                              | TT                | 1946498587               |
| SNP_P3_115363_102010 | NW_004515840.1 | Scaffold335 | 102010                  | AA                              | GG                | 1946498589               |
| SNP_P3_115364_134598 | NW_004515840.1 | Scaffold335 | 134598                  | AA                              | TT                | 1946498591               |
| SNP_P3_115365_134615 | NW_004515840.1 | Scaffold335 | 134615                  | CC                              | TT                | 1946498592               |
| SNP_P3_115366_134646 | NW_004515840.1 | Scaffold335 | 134646                  | GG                              | AA                | 1946498594               |
| SNP_P3_115367_134653 | NW_004515840.1 | Scaffold335 | 134653                  | TT                              | CC                | 1946498595               |
| SNP_P3_115368_134697 | NW_004515840.1 | Scaffold335 | 134697                  | GG                              | CC                | 1946498597               |
| SNP_P3_115369_134745 | NW_004515840.1 | Scaffold335 | 134745                  | TT                              | CC                | 1946498598               |
| SNP_P3_115370_134772 | NW_004515840.1 | Scaffold335 | 134772                  | AA                              | TT                | 1946498600               |
| SNP_P3_115371_134789 | NW_004515840.1 | Scaffold335 | 134789                  | AA                              | TT                | 1946498601               |
| SNP_P3_115372_134930 | NW_004515840.1 | Scaffold335 | 134930                  | TT                              | GG                | 1946498603               |
| SNP_P3_115373_134982 | NW_004515840.1 | Scaffold335 | 134982                  | GG                              | TT                | 1946498604               |
| SNP_P3_115374_135860 | NW_004515840.1 | Scaffold335 | 135860                  | AA                              | GG                | 1946498606               |
| SNP_P3_115375_137179 | NW_004515840.1 | Scaffold335 | 137179                  | AA                              | GG                | 1946498607               |
| SNP_P3_115376_137327 | NW_004515840.1 | Scaffold335 | 137327                  | GG                              | AA                | 1946498609               |
| SNP_P3_115377_137449 | NW_004515840.1 | Scaffold335 | 137449                  | AA                              | CC                | 1946498610               |
| SNP_P3_115378_137492 | NW_004515840.1 | Scaffold335 | 137492                  | AA                              | TT                | 1946498612               |
| SNP_P3_115380_137805 | NW_004515840.1 | Scaffold335 | 137805                  | AA                              | TT                | 1946498613               |
| SNP_P3_115381_137808 | NW_004515840.1 | Scaffold335 | 137808                  | AA                              | TT                | 1946498615               |
| SNP_P3_115382_137817 | NW_004515840.1 | Scaffold335 | 137817                  | TT                              | CC                | 1946498616               |

| SNPs IDs             | Chromosome IDs | Chromosomes | Physical positions (bp) | CDC Frontier (Reference genome) | (Pusa 256 & HPNB) | NCBI SNPdb Accession IDs |
|----------------------|----------------|-------------|-------------------------|---------------------------------|-------------------|--------------------------|
| SNP_P3_115383_137833 | NW_004515840.1 | Scaffold335 | 137833                  | AA                              | GG                | 1946498618               |
| SNP_P3_115385_137975 | NW_004515840.1 | Scaffold335 | 137975                  | AA                              | GG                | 1946498619               |
| SNP_P3_115386_138001 | NW_004515840.1 | Scaffold335 | 138001                  | AA                              | GG                | 1946498621               |
| SNP_P3_115387_138007 | NW_004515840.1 | Scaffold335 | 138007                  | AA                              | CC                | 1946498623               |
| SNP_P3_115388_138448 | NW_004515840.1 | Scaffold335 | 138448                  | CC                              | TT                | 1946498624               |
| SNP_P3_115389_139151 | NW_004515840.1 | Scaffold335 | 139151                  | CC                              | AA                | 1946498626               |
| SNP_P3_115390_139438 | NW_004515840.1 | Scaffold335 | 139438                  | TT                              | CC                | 1946498627               |
| SNP_P3_115391_139441 | NW_004515840.1 | Scaffold335 | 139441                  | TT                              | GG                | 1946498629               |
| SNP_P3_115392_142244 | NW_004515840.1 | Scaffold335 | 142244                  | GG                              | AA                | 1946498631               |
| SNP_P3_115393_142249 | NW_004515840.1 | Scaffold335 | 142249                  | CC                              | TT                | 1946498632               |
| SNP_P3_115394_143434 | NW_004515840.1 | Scaffold335 | 143434                  | CC                              | AA                | 1946498634               |
| SNP_P3_115395_148158 | NW_004515840.1 | Scaffold335 | 148158                  | CC                              | GG                | 1946498635               |
| SNP_P3_115396_157761 | NW_004515840.1 | Scaffold335 | 157761                  | AA                              | GG                | 1946498637               |
| SNP_P3_115397_157771 | NW_004515840.1 | Scaffold335 | 157771                  | TT                              | CC                | 1946498638               |
| SNP_P3_115398_157803 | NW_004515840.1 | Scaffold335 | 157803                  | GG                              | TT                | 1946498640               |
| SNP_P3_115399_157814 | NW_004515840.1 | Scaffold335 | 157814                  | AA                              | GG                | 1946498642               |
| SNP_P3_115400_157911 | NW_004515840.1 | Scaffold335 | 157911                  | GG                              | AA                | 1946498643               |
| SNP_P3_115401_157915 | NW_004515840.1 | Scaffold335 | 157915                  | GG                              | AA                | 1946498645               |
| SNP_P3_115402_157976 | NW_004515840.1 | Scaffold335 | 157976                  | TT                              | CC                | 1946498647               |
| SNP_P3_115403_158094 | NW_004515840.1 | Scaffold335 | 158094                  | TT                              | CC                | 1946498648               |
| SNP_P3_115404_164802 | NW_004515840.1 | Scaffold335 | 164802                  | GG                              | AA                | 1946498650               |
| SNP_P3_115405_165243 | NW_004515840.1 | Scaffold335 | 165243                  | CC                              | TT                | 1946498651               |
| SNP_P3_115407_195396 | NW_004515840.1 | Scaffold335 | 195396                  | AA                              | GG                | 1946498653               |
| SNP_P3_115408_195435 | NW_004515840.1 | Scaffold335 | 195435                  | AA                              | GG                | 1946498654               |
| SNP_P3_115410_207243 | NW_004515840.1 | Scaffold335 | 207243                  | AA                              | GG                | 1946498656               |
| SNP_P3_115411_207639 | NW_004515840.1 | Scaffold335 | 207639                  | TT                              | GG                | 1946498657               |
| SNP_P3_115412_211420 | NW_004515840.1 | Scaffold335 | 211420                  | TT                              | CC                | 1946498659               |
| SNP_P3_115413_216049 | NW_004515840.1 | Scaffold335 | 216049                  | TT                              | GG                | 1946498660               |
| SNP_P3_115414_216296 | NW_004515840.1 | Scaffold335 | 216296                  | GG                              | AA                | 1946498662               |
| SNP_P3_115415_218771 | NW_004515840.1 | Scaffold335 | 218771                  | AA                              | TT                | 1946498664               |
| SNP_P3_115416_218854 | NW_004515840.1 | Scaffold335 | 218854                  | TT                              | AA                | 1946498665               |
| SNP_P3_115417_12130  | NW_004515841.1 | Scaffold336 | 12130                   | AA                              | CC                | 1946498667               |
| SNP_P3_115418_12180  | NW_004515841.1 | Scaffold336 | 12180                   | TT                              | CC                | 1946498668               |
| SNP_P3_115419_12207  | NW_004515841.1 | Scaffold336 | 12207                   | GG                              | AA                | 1946498670               |
| SNP_P3_115420_12438  | NW_004515841.1 | Scaffold336 | 12438                   | AA                              | GG                | 1946498886               |
| SNP_P3_115421_13226  | NW_004515841.1 | Scaffold336 | 13226                   | CC                              | TT                | 1946498888               |
| SNP_P3_115422_13243  | NW_004515841.1 | Scaffold336 | 13243                   | TT                              | GG                | 1946498889               |
| SNP_P3_115423_13533  | NW_004515841.1 | Scaffold336 | 13533                   | CC                              | AA                | 1946498891               |
| SNP_P3_115424_13591  | NW_004515841.1 | Scaffold336 | 13591                   | AA                              | TT                | 1946498893               |
| SNP_P3_115425_13677  | NW_004515841.1 | Scaffold336 | 13677                   | AA                              | GG                | 1946498894               |
| SNP_P3_115426_13685  | NW_004515841.1 | Scaffold336 | 13685                   | CC                              | TT                | 1946498895               |
| SNP_P3_115427_13740  | NW_004515841.1 | Scaffold336 | 13740                   | AA                              | GG                | 1946498897               |

| SNPs IDs             | Chromosome IDs | Chromosomes | Physical positions (bp) | CDC Frontier (Reference genome) | (Pusa 256 & HPNB) | NCBI SNPdb Accession IDs |
|----------------------|----------------|-------------|-------------------------|---------------------------------|-------------------|--------------------------|
| SNP_P3_115429_63808  | NW_004515841.1 | Scaffold336 | 63808                   | AA                              | GG                | 1946498899               |
| SNP_P3_115430_63822  | NW_004515841.1 | Scaffold336 | 63822                   | AA                              | GG                | 1946498900               |
| SNP_P3_115431_64062  | NW_004515841.1 | Scaffold336 | 64062                   | GG                              | CC                | 1946498902               |
| SNP_P3_115432_64233  | NW_004515841.1 | Scaffold336 | 64233                   | CC                              | TT                | 1946498903               |
| SNP_P3_115433_64257  | NW_004515841.1 | Scaffold336 | 64257                   | GG                              | TT                | 1946498905               |
| SNP_P3_115434_65017  | NW_004515841.1 | Scaffold336 | 65017                   | GG                              | AA                | 1946498907               |
| SNP_P3_115435_65436  | NW_004515841.1 | Scaffold336 | 65436                   | TT                              | GG                | 1946498908               |
| SNP_P3_115436_65499  | NW_004515841.1 | Scaffold336 | 65499                   | TT                              | CC                | 1946498910               |
| SNP_P3_115437_67784  | NW_004515841.1 | Scaffold336 | 67784                   | AA                              | GG                | 1946498911               |
| SNP_P3_115439_68830  | NW_004515841.1 | Scaffold336 | 68830                   | TT                              | AA                | 1946498913               |
| SNP_P3_115440_68864  | NW_004515841.1 | Scaffold336 | 68864                   | GG                              | TT                | 1946498915               |
| SNP_P3_115441_82611  | NW_004515841.1 | Scaffold336 | 82611                   | CC                              | TT                | 1946498917               |
| SNP_P3_115442_82617  | NW_004515841.1 | Scaffold336 | 82617                   | TT                              | AA                | 1946498919               |
| SNP_P3_115443_90934  | NW_004515841.1 | Scaffold336 | 90934                   | GG                              | AA                | 1946498920               |
| SNP_P3_115444_90981  | NW_004515841.1 | Scaffold336 | 90981                   | AA                              | GG                | 1946498922               |
| SNP_P3_115445_99303  | NW_004515841.1 | Scaffold336 | 99303                   | GG                              | CC                | 1946498923               |
| SNP_P3_115446_105989 | NW_004515841.1 | Scaffold336 | 105989                  | GG                              | TT                | 1946498925               |
| SNP_P3_115447_117087 | NW_004515841.1 | Scaffold336 | 117087                  | AA                              | GG                | 1946498926               |
| SNP_P3_115448_117134 | NW_004515841.1 | Scaffold336 | 117134                  | AA                              | GG                | 1946498928               |
| SNP_P3_115449_117135 | NW_004515841.1 | Scaffold336 | 117135                  | TT                              | CC                | 1946498929               |
| SNP_P3_115450_134406 | NW_004515841.1 | Scaffold336 | 134406                  | CC                              | GG                | 1946498931               |
| SNP_P3_115451_152942 | NW_004515841.1 | Scaffold336 | 152942                  | TT                              | CC                | 1946498932               |
| SNP_P3_115452_177667 | NW_004515841.1 | Scaffold336 | 177667                  | TT                              | CC                | 1946498934               |
| SNP_P3_115453_177676 | NW_004515841.1 | Scaffold336 | 177676                  | CC                              | GG                | 1946498935               |
| SNP_P3_115454_177725 | NW_004515841.1 | Scaffold336 | 177725                  | GG                              | TT                | 1946498937               |
| SNP_P3_115455_177778 | NW_004515841.1 | Scaffold336 | 177778                  | AA                              | CC                | 1946498938               |
| SNP_P3_115456_177783 | NW_004515841.1 | Scaffold336 | 177783                  | TT                              | CC                | 1946498940               |
| SNP_P3_115457_178164 | NW_004515841.1 | Scaffold336 | 178164                  | AA                              | GG                | 1946498942               |
| SNP_P3_115458_178187 | NW_004515841.1 | Scaffold336 | 178187                  | TT                              | CC                | 1946498943               |
| SNP_P3_115459_178220 | NW_004515841.1 | Scaffold336 | 178220                  | AA                              | GG                | 1946498945               |
| SNP_P3_115460_178501 | NW_004515841.1 | Scaffold336 | 178501                  | AA                              | CC                | 1946498946               |
| SNP_P3_115461_178545 | NW_004515841.1 | Scaffold336 | 178545                  | TT                              | AA                | 1946498948               |
| SNP_P3_115462_178959 | NW_004515841.1 | Scaffold336 | 178959                  | AA                              | CC                | 1946498949               |
| SNP_P3_115463_184524 | NW_004515841.1 | Scaffold336 | 184524                  | TT                              | AA                | 1946498951               |
| SNP_P3_115464_184876 | NW_004515841.1 | Scaffold336 | 184876                  | GG                              | AA                | 1946498952               |
| SNP_P3_115466_186801 | NW_004515841.1 | Scaffold336 | 186801                  | CC                              | AA                | 1946498954               |
| SNP_P3_115467_187863 | NW_004515841.1 | Scaffold336 | 187863                  | AA                              | GG                | 1946498955               |
| SNP_P3_115469_203546 | NW_004515841.1 | Scaffold336 | 203546                  | TT                              | CC                | 1946498957               |
| SNP_P3_115470_216742 | NW_004515841.1 | Scaffold336 | 216742                  | CC                              | TT                | 1946498958               |
| SNP_P3_115471_273253 | NW_004515841.1 | Scaffold336 | 273253                  | TT                              | CC                | 1946498960               |
| SNP_P3_115473_333995 | NW_004515841.1 | Scaffold336 | 333995                  | AA                              | GG                | 1946498961               |
| SNP_P3_115474_360823 | NW_004515841.1 | Scaffold336 | 360823                  | TT                              | CC                | 1946498963               |



| SNPs IDs             | Chromosome IDs | Chromosomes | Physical positions (bp) | CDC Frontier (Reference genome) | (Pusa 256 & HPNB) | NCBI SNPdb Accession IDs |
|----------------------|----------------|-------------|-------------------------|---------------------------------|-------------------|--------------------------|
| SNP_P3_115475_360869 | NW_004515841.1 | Scaffold336 | 360869                  | AA                              | GG                | 1946498964               |
| SNP_P3_115476_360932 | NW_004515841.1 | Scaffold336 | 360932                  | AA                              | CC                | 1946498966               |
| SNP_P3_115477_360971 | NW_004515841.1 | Scaffold336 | 360971                  | AA                              | CC                | 1946498967               |
| SNP_P3_115479_392148 | NW_004515841.1 | Scaffold336 | 392148                  | TT                              | CC                | 1946498969               |
| SNP_P3_115480_392156 | NW_004515841.1 | Scaffold336 | 392156                  | GG                              | AA                | 1946498970               |
| SNP_P3_115481_399995 | NW_004515841.1 | Scaffold336 | 399995                  | TT                              | CC                | 1946498972               |
| SNP_P3_115482_400144 | NW_004515841.1 | Scaffold336 | 400144                  | TT                              | AA                | 1946498973               |
| SNP_P3_115483_400293 | NW_004515841.1 | Scaffold336 | 400293                  | TT                              | AA                | 1946498975               |
| SNP_P3_115484_400348 | NW_004515841.1 | Scaffold336 | 400348                  | GG                              | AA                | 1946498977               |
| SNP_P3_115485_400352 | NW_004515841.1 | Scaffold336 | 400352                  | TT                              | CC                | 1946498978               |
| SNP_P3_115486_400366 | NW_004515841.1 | Scaffold336 | 400366                  | TT                              | CC                | 1946498980               |
| SNP_P3_115487_400368 | NW_004515841.1 | Scaffold336 | 400368                  | GG                              | AA                | 1946498981               |
| SNP_P3_115488_400557 | NW_004515841.1 | Scaffold336 | 400557                  | GG                              | AA                | 1946498983               |
| SNP_P3_115489_400560 | NW_004515841.1 | Scaffold336 | 400560                  | GG                              | AA                | 1946498984               |
| SNP_P3_115490_400565 | NW_004515841.1 | Scaffold336 | 400565                  | AA                              | GG                | 1946498986               |
| SNP_P3_115491_406411 | NW_004515841.1 | Scaffold336 | 406411                  | CC                              | TT                | 1946498987               |
| SNP_P3_115493_441315 | NW_004515841.1 | Scaffold336 | 441315                  | TT                              | GG                | 1946498989               |
| SNP_P3_115494_443602 | NW_004515841.1 | Scaffold336 | 443602                  | TT                              | AA                | 1946498990               |
| SNP_P3_115495_459163 | NW_004515841.1 | Scaffold336 | 459163                  | GG                              | AA                | 1946498992               |
| SNP_P3_115496_469822 | NW_004515841.1 | Scaffold336 | 469822                  | GG                              | TT                | 1946498993               |
| SNP_P3_115498_493345 | NW_004515841.1 | Scaffold336 | 493345                  | AA                              | GG                | 1946498994               |
| SNP_P3_115499_493358 | NW_004515841.1 | Scaffold336 | 493358                  | GG                              | TT                | 1946498996               |
| SNP_P3_115500_495068 | NW_004515841.1 | Scaffold336 | 495068                  | TT                              | GG                | 1946498997               |
| SNP_P3_115501_499004 | NW_004515841.1 | Scaffold336 | 499004                  | AA                              | GG                | 1946498999               |
| SNP_P3_115502_529802 | NW_004515841.1 | Scaffold336 | 529802                  | TT                              | CC                | 1946499000               |
| SNP_P3_115503_529807 | NW_004515841.1 | Scaffold336 | 529807                  | TT                              | AA                | 1946499002               |
| SNP_P3_115505_529888 | NW_004515841.1 | Scaffold336 | 529888                  | TT                              | CC                | 1946499003               |
| SNP_P3_115506_530113 | NW_004515841.1 | Scaffold336 | 530113                  | AA                              | CC                | 1946499005               |
| SNP_P3_115507_530124 | NW_004515841.1 | Scaffold336 | 530124                  | AA                              | GG                | 1946499006               |
| SNP_P3_115508_530174 | NW_004515841.1 | Scaffold336 | 530174                  | CC                              | TT                | 1946499008               |
| SNP_P3_115509_530181 | NW_004515841.1 | Scaffold336 | 530181                  | TT                              | GG                | 1946499009               |
| SNP_P3_115510_530276 | NW_004515841.1 | Scaffold336 | 530276                  | AA                              | GG                | 1946499011               |
| SNP_P3_115511_536243 | NW_004515841.1 | Scaffold336 | 536243                  | GG                              | AA                | 1946499013               |
| SNP_P3_115513_538373 | NW_004515841.1 | Scaffold336 | 538373                  | AA                              | GG                | 1946499014               |
| SNP_P3_115514_538401 | NW_004515841.1 | Scaffold336 | 538401                  | TT                              | GG                | 1946499016               |
| SNP_P3_115515_538409 | NW_004515841.1 | Scaffold336 | 538409                  | GG                              | AA                | 1946499017               |
| SNP_P3_115516_538413 | NW_004515841.1 | Scaffold336 | 538413                  | AA                              | GG                | 1946499019               |
| SNP_P3_115517_538479 | NW_004515841.1 | Scaffold336 | 538479                  | TT                              | GG                | 1946499020               |
| SNP_P3_115518_538530 | NW_004515841.1 | Scaffold336 | 538530                  | GG                              | AA                | 1946499022               |
| SNP_P3_115519_538646 | NW_004515841.1 | Scaffold336 | 538646                  | TT                              | CC                | 1946499023               |
| SNP_P3_115520_538670 | NW_004515841.1 | Scaffold336 | 538670                  | AA                              | GG                | 1946499025               |
| SNP_P3_115521_538689 | NW_004515841.1 | Scaffold336 | 538689                  | AA                              | GG                | 1946499026               |

| SNPs IDs             | Chromosome IDs | Chromosomes | Physical positions (bp) | CDC Frontier (Reference genome) | (Pusa 256 & HPNB) | NCBI SNPdb Accession IDs |
|----------------------|----------------|-------------|-------------------------|---------------------------------|-------------------|--------------------------|
| SNP_P3_115522_538761 | NW_004515841.1 | Scaffold336 | 538761                  | GG                              | AA                | 1946499028               |
| SNP_P3_115523_538780 | NW_004515841.1 | Scaffold336 | 538780                  | TT                              | CC                | 1946499029               |
| SNP_P3_115524_538854 | NW_004515841.1 | Scaffold336 | 538854                  | TT                              | GG                | 1946499031               |
| SNP_P3_115525_538862 | NW_004515841.1 | Scaffold336 | 538862                  | CC                              | AA                | 1946499032               |
| SNP_P3_115526_539299 | NW_004515841.1 | Scaffold336 | 539299                  | TT                              | GG                | 1946499034               |
| SNP_P3_115527_544355 | NW_004515841.1 | Scaffold336 | 544355                  | CC                              | TT                | 1946499035               |
| SNP_P3_115528_546851 | NW_004515841.1 | Scaffold336 | 546851                  | GG                              | AA                | 1946499037               |
| SNP_P3_115529_565417 | NW_004515841.1 | Scaffold336 | 565417                  | AA                              | GG                | 1946499038               |
| SNP_P3_115530_565427 | NW_004515841.1 | Scaffold336 | 565427                  | TT                              | CC                | 1946499040               |
| SNP_P3_115531_565666 | NW_004515841.1 | Scaffold336 | 565666                  | AA                              | CC                | 1946499041               |
| SNP_P3_115532_583610 | NW_004515841.1 | Scaffold336 | 583610                  | CC                              | TT                | 1946499043               |
| SNP_P3_115533_583619 | NW_004515841.1 | Scaffold336 | 583619                  | TT                              | GG                | 1946499044               |
| SNP_P3_115534_583629 | NW_004515841.1 | Scaffold336 | 583629                  | CC                              | AA                | 1946499046               |
| SNP_P3_115535_583640 | NW_004515841.1 | Scaffold336 | 583640                  | AA                              | GG                | 1946499047               |
| SNP_P3_115536_583658 | NW_004515841.1 | Scaffold336 | 583658                  | TT                              | CC                | 1946499049               |
| SNP_P3_115537_583664 | NW_004515841.1 | Scaffold336 | 583664                  | AA                              | GG                | 1946499050               |
| SNP_P3_115538_583697 | NW_004515841.1 | Scaffold336 | 583697                  | AA                              | CC                | 1946499052               |
| SNP_P3_115539_584021 | NW_004515841.1 | Scaffold336 | 584021                  | AA                              | GG                | 1946499053               |
| SNP_P3_115540_584043 | NW_004515841.1 | Scaffold336 | 584043                  | GG                              | TT                | 1946499055               |
| SNP_P3_115542_598585 | NW_004515841.1 | Scaffold336 | 598585                  | AA                              | GG                | 1946499056               |
| SNP_P3_115543_613695 | NW_004515841.1 | Scaffold336 | 613695                  | GG                              | AA                | 1946499058               |
| SNP_P3_115544_616547 | NW_004515841.1 | Scaffold336 | 616547                  | AA                              | GG                | 1946499059               |
| SNP_P3_115545_616959 | NW_004515841.1 | Scaffold336 | 616959                  | CC                              | TT                | 1946499061               |
| SNP_P3_115546_617479 | NW_004515841.1 | Scaffold336 | 617479                  | CC                              | AA                | 1946499063               |
| SNP_P3_115549_633847 | NW_004515841.1 | Scaffold336 | 633847                  | AA                              | GG                | 1946499064               |
| SNP_P3_115550_633900 | NW_004515841.1 | Scaffold336 | 633900                  | AA                              | GG                | 1946499066               |
| SNP_P3_115552_633926 | NW_004515841.1 | Scaffold336 | 633926                  | AA                              | GG                | 1946499067               |
| SNP_P3_115553_634003 | NW_004515841.1 | Scaffold336 | 634003                  | GG                              | TT                | 1946499069               |
| SNP_P3_115554_634151 | NW_004515841.1 | Scaffold336 | 634151                  | GG                              | AA                | 1946499070               |
| SNP_P3_115555_634155 | NW_004515841.1 | Scaffold336 | 634155                  | AA                              | GG                | 1946499072               |
| SNP_P3_115556_634248 | NW_004515841.1 | Scaffold336 | 634248                  | TT                              | CC                | 1946499073               |
| SNP_P3_115557_634266 | NW_004515841.1 | Scaffold336 | 634266                  | AA                              | GG                | 1946499075               |
| SNP_P3_115558_634377 | NW_004515841.1 | Scaffold336 | 634377                  | AA                              | GG                | 1946499076               |
| SNP_P3_115559_634541 | NW_004515841.1 | Scaffold336 | 634541                  | AA                              | CC                | 1946499078               |
| SNP_P3_115560_647262 | NW_004515841.1 | Scaffold336 | 647262                  | TT                              | CC                | 1946499079               |
| SNP_P3_115561_647329 | NW_004515841.1 | Scaffold336 | 647329                  | TT                              | GG                | 1946499081               |
| SNP_P3_115562_671936 | NW_004515841.1 | Scaffold336 | 671936                  | GG                              | AA                | 1946499082               |
| SNP_P3_115563_676619 | NW_004515841.1 | Scaffold336 | 676619                  | TT                              | CC                | 1946499084               |
| SNP_P3_115564_683464 | NW_004515841.1 | Scaffold336 | 683464                  | AA                              | CC                | 1946499085               |
| SNP_P3_115565_683522 | NW_004515841.1 | Scaffold336 | 683522                  | AA                              | GG                | 1946499087               |
| SNP_P3_115566_683663 | NW_004515841.1 | Scaffold336 | 683663                  | AA                              | GG                | 1946499088               |
| SNP_P3_115567_683881 | NW_004515841.1 | Scaffold336 | 683881                  | TT                              | CC                | 1946499090               |

| SNPs IDs             | Chromosome IDs | Chromosomes | Physical positions (bp) | CDC Frontier (Reference genome) | (Pusa 256 & HPNB) | NCBI SNPdb Accession IDs |
|----------------------|----------------|-------------|-------------------------|---------------------------------|-------------------|--------------------------|
| SNP_P3_115568_683917 | NW_004515841.1 | Scaffold336 | 683917                  | GG                              | AA                | 1946499091               |
| SNP_P3_115569_683929 | NW_004515841.1 | Scaffold336 | 683929                  | TT                              | CC                | 1946499092               |
| SNP_P3_115570_709784 | NW_004515841.1 | Scaffold336 | 709784                  | AA                              | GG                | 1946499094               |
| SNP_P3_115571_709815 | NW_004515841.1 | Scaffold336 | 709815                  | AA                              | CC                | 1946499095               |
| SNP_P3_115572_709844 | NW_004515841.1 | Scaffold336 | 709844                  | AA                              | GG                | 1946499097               |
| SNP_P3_115573_709937 | NW_004515841.1 | Scaffold336 | 709937                  | TT                              | GG                | 1946499098               |
| SNP_P3_115574_710048 | NW_004515841.1 | Scaffold336 | 710048                  | AA                              | GG                | 1946499100               |
| SNP_P3_115575_710068 | NW_004515841.1 | Scaffold336 | 710068                  | GG                              | TT                | 1946499101               |
| SNP_P3_115577_757938 | NW_004515841.1 | Scaffold336 | 757938                  | TT                              | CC                | 1946499103               |
| SNP_P3_115578_758051 | NW_004515841.1 | Scaffold336 | 758051                  | TT                              | CC                | 1946499104               |
| SNP_P3_115579_758059 | NW_004515841.1 | Scaffold336 | 758059                  | TT                              | CC                | 1946499106               |
| SNP_P3_115580_758076 | NW_004515841.1 | Scaffold336 | 758076                  | AA                              | GG                | 1946499108               |
| SNP_P3_115581_758099 | NW_004515841.1 | Scaffold336 | 758099                  | TT                              | GG                | 1946499109               |
| SNP_P3_115582_763146 | NW_004515841.1 | Scaffold336 | 763146                  | TT                              | CC                | 1946499111               |
| SNP_P3_115583_764589 | NW_004515841.1 | Scaffold336 | 764589                  | TT                              | CC                | 1946499112               |
| SNP_P3_115584_764826 | NW_004515841.1 | Scaffold336 | 764826                  | AA                              | GG                | 1946499114               |
| SNP_P3_115585_764898 | NW_004515841.1 | Scaffold336 | 764898                  | GG                              | TT                | 1946499115               |
| SNP_P3_115586_765040 | NW_004515841.1 | Scaffold336 | 765040                  | TT                              | GG                | 1946499116               |
| SNP_P3_115587_765069 | NW_004515841.1 | Scaffold336 | 765069                  | GG                              | CC                | 1946499118               |
| SNP_P3_115588_768063 | NW_004515841.1 | Scaffold336 | 768063                  | TT                              | GG                | 1946499119               |
| SNP_P3_115589_785047 | NW_004515841.1 | Scaffold336 | 785047                  | GG                              | AA                | 1946499121               |
| SNP_P3_115590_785050 | NW_004515841.1 | Scaffold336 | 785050                  | GG                              | AA                | 1946499122               |
| SNP_P3_115591_785051 | NW_004515841.1 | Scaffold336 | 785051                  | GG                              | CC                | 1946499124               |
| SNP_P3_115592_798078 | NW_004515841.1 | Scaffold336 | 798078                  | TT                              | AA                | 1946499125               |
| SNP_P3_115593_800641 | NW_004515841.1 | Scaffold336 | 800641                  | CC                              | TT                | 1946499127               |
| SNP_P3_115594_803453 | NW_004515841.1 | Scaffold336 | 803453                  | CC                              | GG                | 1946499128               |
| SNP_P3_115595_805479 | NW_004515841.1 | Scaffold336 | 805479                  | TT                              | GG                | 1946499130               |
| SNP_P3_115596_805497 | NW_004515841.1 | Scaffold336 | 805497                  | CC                              | TT                | 1946499131               |
| SNP_P3_115597_805532 | NW_004515841.1 | Scaffold336 | 805532                  | TT                              | GG                | 1946499133               |
| SNP_P3_115598_805822 | NW_004515841.1 | Scaffold336 | 805822                  | GG                              | AA                | 1946499134               |
| SNP_P3_115599_805909 | NW_004515841.1 | Scaffold336 | 805909                  | AA                              | GG                | 1946499136               |
| SNP_P3_115600_809864 | NW_004515841.1 | Scaffold336 | 809864                  | TT                              | GG                | 1946499137               |
| SNP_P3_115601_819742 | NW_004515841.1 | Scaffold336 | 819742                  | TT                              | GG                | 1946499139               |
| SNP_P3_115602_822030 | NW_004515841.1 | Scaffold336 | 822030                  | CC                              | AA                | 1946499140               |
| SNP_P3_115603_850093 | NW_004515841.1 | Scaffold336 | 850093                  | CC                              | AA                | 1946499142               |
| SNP_P3_115604_852620 | NW_004515841.1 | Scaffold336 | 852620                  | TT                              | AA                | 1946499143               |
| SNP_P3_115605_867806 | NW_004515841.1 | Scaffold336 | 867806                  | GG                              | AA                | 1946499145               |
| SNP_P3_115606_44772  | NW_004515842.1 | Scaffold338 | 44772                   | CC                              | TT                | 1946499146               |
| SNP_P3_115607_44773  | NW_004515842.1 | Scaffold338 | 44773                   | GG                              | TT                | 1946499148               |
| SNP_P3_115608_71253  | NW_004515842.1 | Scaffold338 | 71253                   | AA                              | TT                | 1946499149               |
| SNP_P3_115609_71440  | NW_004515842.1 | Scaffold338 | 71440                   | AA                              | GG                | 1946499151               |
| SNP_P3_115610_71497  | NW_004515842.1 | Scaffold338 | 71497                   | AA                              | GG                | 1946499152               |

| SNPs IDs            | Chromosome IDs | Chromosomes | Physical positions (bp) | CDC Frontier (Reference genome) | (Pusa 256 & HPNB) | NCBI SNPdb Accession IDs |
|---------------------|----------------|-------------|-------------------------|---------------------------------|-------------------|--------------------------|
| SNP_P3_115611_71633 | NW_004515842.1 | Scaffold338 | 71633                   | CC                              | TT                | 1946499154               |
| SNP_P3_115612_71725 | NW_004515842.1 | Scaffold338 | 71725                   | GG                              | AA                | 1946499155               |
| SNP_P3_115614_8337  | NW_004515843.1 | Scaffold340 | 8337                    | TT                              | AA                | 1946499156               |
| SNP_P3_115615_8580  | NW_004515843.1 | Scaffold340 | 8580                    | AA                              | TT                | 1946499158               |
| SNP_P3_115616_8754  | NW_004515843.1 | Scaffold340 | 8754                    | GG                              | AA                | 1946499159               |
| SNP_P3_115617_8968  | NW_004515843.1 | Scaffold340 | 8968                    | TT                              | CC                | 1946499161               |
| SNP_P3_115618_9819  | NW_004515843.1 | Scaffold340 | 9819                    | CC                              | TT                | 1946499162               |
| SNP_P3_115619_9874  | NW_004515843.1 | Scaffold340 | 9874                    | GG                              | AA                | 1946499164               |
| SNP_P3_115620_10404 | NW_004515843.1 | Scaffold340 | 10404                   | GG                              | AA                | 1946499165               |
| SNP_P3_115621_11303 | NW_004515843.1 | Scaffold340 | 11303                   | GG                              | TT                | 1946499167               |
| SNP_P3_115622_11310 | NW_004515843.1 | Scaffold340 | 11310                   | AA                              | GG                | 1946499169               |
| SNP_P3_115623_12123 | NW_004515843.1 | Scaffold340 | 12123                   | AA                              | CC                | 1946499170               |
| SNP_P3_115624_12171 | NW_004515843.1 | Scaffold340 | 12171                   | TT                              | AA                | 1946499172               |
| SNP_P3_115625_12175 | NW_004515843.1 | Scaffold340 | 12175                   | CC                              | AA                | 1946499173               |
| SNP_P3_115626_12394 | NW_004515843.1 | Scaffold340 | 12394                   | CC                              | AA                | 1946499175               |
| SNP_P3_115627_12399 | NW_004515843.1 | Scaffold340 | 12399                   | TT                              | CC                | 1946499176               |
| SNP_P3_115628_17655 | NW_004515843.1 | Scaffold340 | 17655                   | GG                              | AA                | 1946499178               |
| SNP_P3_115630_36794 | NW_004515843.1 | Scaffold340 | 36794                   | CC                              | TT                | 1946499179               |
| SNP_P3_115631_37929 | NW_004515843.1 | Scaffold340 | 37929                   | GG                              | TT                | 1946499181               |
| SNP_P3_115632_38098 | NW_004515843.1 | Scaffold340 | 38098                   | CC                              | TT                | 1946499182               |
| SNP_P3_115633_38734 | NW_004515843.1 | Scaffold340 | 38734                   | TT                              | CC                | 1946499183               |
| SNP_P3_115634_41441 | NW_004515843.1 | Scaffold340 | 41441                   | CC                              | GG                | 1946499185               |
| SNP_P3_115635_45153 | NW_004515843.1 | Scaffold340 | 45153                   | AA                              | GG                | 1946499186               |
| SNP_P3_115636_45421 | NW_004515843.1 | Scaffold340 | 45421                   | CC                              | TT                | 1946499188               |
| SNP_P3_115637_48148 | NW_004515843.1 | Scaffold340 | 48148                   | AA                              | TT                | 1946499189               |
| SNP_P3_115639_49392 | NW_004515843.1 | Scaffold340 | 49392                   | TT                              | CC                | 1946499191               |
| SNP_P3_115640_53528 | NW_004515843.1 | Scaffold340 | 53528                   | AA                              | CC                | 1946499192               |
| SNP_P3_115641_58532 | NW_004515843.1 | Scaffold340 | 58532                   | GG                              | AA                | 1946499194               |
| SNP_P3_115643_60636 | NW_004515843.1 | Scaffold340 | 60636                   | CC                              | TT                | 1946499196               |
| SNP_P3_115645_60780 | NW_004515843.1 | Scaffold340 | 60780                   | GG                              | AA                | 1946499197               |
| SNP_P3_115646_60879 | NW_004515843.1 | Scaffold340 | 60879                   | CC                              | TT                | 1946499199               |
| SNP_P3_115647_66358 | NW_004515843.1 | Scaffold340 | 66358                   | AA                              | CC                | 1946499200               |
| SNP_P3_115648_66609 | NW_004515843.1 | Scaffold340 | 66609                   | CC                              | TT                | 1946499202               |
| SNP_P3_115650_68876 | NW_004515843.1 | Scaffold340 | 68876                   | AA                              | GG                | 1946499203               |
| SNP_P3_115651_68953 | NW_004515843.1 | Scaffold340 | 68953                   | CC                              | TT                | 1946499205               |
| SNP_P3_115652_68955 | NW_004515843.1 | Scaffold340 | 68955                   | AA                              | GG                | 1946499206               |
| SNP_P3_115653_69053 | NW_004515843.1 | Scaffold340 | 69053                   | CC                              | TT                | 1946499208               |
| SNP_P3_115654_69317 | NW_004515843.1 | Scaffold340 | 69317                   | GG                              | AA                | 1946499209               |
| SNP_P3_115655_69451 | NW_004515843.1 | Scaffold340 | 69451                   | GG                              | CC                | 1946499211               |
| SNP_P3_115656_76400 | NW_004515843.1 | Scaffold340 | 76400                   | AA                              | GG                | 1946499212               |
| SNP_P3_115657_76406 | NW_004515843.1 | Scaffold340 | 76406                   | AA                              | GG                | 1946499214               |
| SNP_P3_115658_76443 | NW_004515843.1 | Scaffold340 | 76443                   | GG                              | AA                | 1946499215               |

| SNPs IDs             | Chromosome IDs | Chromosomes | Physical positions (bp) | CDC Frontier (Reference genome) | (Pusa 256 & HPNB) | NCBI SNPdb Accession IDs |
|----------------------|----------------|-------------|-------------------------|---------------------------------|-------------------|--------------------------|
| SNP_P3_115659_76447  | NW_004515843.1 | Scaffold340 | 76447                   | CC                              | TT                | 1946499217               |
| SNP_P3_115660_76833  | NW_004515843.1 | Scaffold340 | 76833                   | TT                              | CC                | 1946499218               |
| SNP_P3_115661_77545  | NW_004515843.1 | Scaffold340 | 77545                   | TT                              | CC                | 1946499220               |
| SNP_P3_115662_79161  | NW_004515843.1 | Scaffold340 | 79161                   | AA                              | GG                | 1946499222               |
| SNP_P3_115664_79470  | NW_004515843.1 | Scaffold340 | 79470                   | TT                              | AA                | 1946499223               |
| SNP_P3_115665_86143  | NW_004515843.1 | Scaffold340 | 86143                   | GG                              | CC                | 1946499225               |
| SNP_P3_115666_90218  | NW_004515843.1 | Scaffold340 | 90218                   | CC                              | TT                | 1946499226               |
| SNP_P3_115667_90236  | NW_004515843.1 | Scaffold340 | 90236                   | CC                              | TT                | 1946499228               |
| SNP_P3_115668_90255  | NW_004515843.1 | Scaffold340 | 90255                   | TT                              | CC                | 1946499229               |
| SNP_P3_115669_90585  | NW_004515843.1 | Scaffold340 | 90585                   | TT                              | GG                | 1946499231               |
| SNP_P3_115670_90690  | NW_004515843.1 | Scaffold340 | 90690                   | GG                              | AA                | 1946499232               |
| SNP_P3_115671_90701  | NW_004515843.1 | Scaffold340 | 90701                   | GG                              | AA                | 1946499234               |
| SNP_P3_115672_90716  | NW_004515843.1 | Scaffold340 | 90716                   | GG                              | AA                | 1946499235               |
| SNP_P3_115673_90732  | NW_004515843.1 | Scaffold340 | 90732                   | GG                              | AA                | 1946499237               |
| SNP_P3_115674_90790  | NW_004515843.1 | Scaffold340 | 90790                   | CC                              | TT                | 1946499238               |
| SNP_P3_115675_90820  | NW_004515843.1 | Scaffold340 | 90820                   | AA                              | CC                | 1946499239               |
| SNP_P3_115676_91139  | NW_004515843.1 | Scaffold340 | 91139                   | TT                              | CC                | 1946499241               |
| SNP_P3_115677_91282  | NW_004515843.1 | Scaffold340 | 91282                   | TT                              | AA                | 1946499242               |
| SNP_P3_115678_91324  | NW_004515843.1 | Scaffold340 | 91324                   | CC                              | GG                | 1946499244               |
| SNP_P3_115679_98141  | NW_004515843.1 | Scaffold340 | 98141                   | GG                              | TT                | 1946499245               |
| SNP_P3_115681_101456 | NW_004515843.1 | Scaffold340 | 101456                  | TT                              | GG                | 1946499247               |
| SNP_P3_115682_101860 | NW_004515843.1 | Scaffold340 | 101860                  | CC                              | TT                | 1946499248               |
| SNP_P3_115683_105205 | NW_004515843.1 | Scaffold340 | 105205                  | AA                              | CC                | 1946499250               |
| SNP_P3_115684_106553 | NW_004515843.1 | Scaffold340 | 106553                  | TT                              | GG                | 1946499251               |
| SNP_P3_115685_110521 | NW_004515843.1 | Scaffold340 | 110521                  | GG                              | TT                | 1946499253               |
| SNP_P3_115686_110522 | NW_004515843.1 | Scaffold340 | 110522                  | CC                              | AA                | 1946499254               |
| SNP_P3_115687_111660 | NW_004515843.1 | Scaffold340 | 111660                  | GG                              | AA                | 1946499256               |
| SNP_P3_115688_111784 | NW_004515843.1 | Scaffold340 | 111784                  | TT                              | CC                | 1946499257               |
| SNP_P3_115689_111946 | NW_004515843.1 | Scaffold340 | 111946                  | CC                              | AA                | 1946499259               |
| SNP_P3_115690_111948 | NW_004515843.1 | Scaffold340 | 111948                  | AA                              | TT                | 1946499260               |
| SNP_P3_115691_113203 | NW_004515843.1 | Scaffold340 | 113203                  | AA                              | TT                | 1946499262               |
| SNP_P3_115692_114180 | NW_004515843.1 | Scaffold340 | 114180                  | GG                              | TT                | 1946499263               |
| SNP_P3_115693_118599 | NW_004515843.1 | Scaffold340 | 118599                  | CC                              | AA                | 1946499265               |
| SNP_P3_115694_118835 | NW_004515843.1 | Scaffold340 | 118835                  | AA                              | CC                | 1946499266               |
| SNP_P3_115695_119034 | NW_004515843.1 | Scaffold340 | 119034                  | AA                              | GG                | 1946499268               |
| SNP_P3_115697_121817 | NW_004515843.1 | Scaffold340 | 121817                  | GG                              | AA                | 1946499269               |
| SNP_P3_115698_122373 | NW_004515843.1 | Scaffold340 | 122373                  | AA                              | GG                | 1946499271               |
| SNP_P3_115699_122408 | NW_004515843.1 | Scaffold340 | 122408                  | GG                              | AA                | 1946499272               |
| SNP_P3_115700_122417 | NW_004515843.1 | Scaffold340 | 122417                  | CC                              | AA                | 1946499274               |
| SNP_P3_115701_122445 | NW_004515843.1 | Scaffold340 | 122445                  | AA                              | GG                | 1946499275               |
| SNP_P3_115702_126411 | NW_004515843.1 | Scaffold340 | 126411                  | TT                              | GG                | 1946499277               |
| SNP_P3_115703_128097 | NW_004515843.1 | Scaffold340 | 128097                  | AA                              | GG                | 1946499278               |

| SNPs IDs             | Chromosome IDs | Chromosomes | Physical positions (bp) | CDC Frontier (Reference genome) | (Pusa 256 & HPNB) | NCBI SNPdb Accession IDs |
|----------------------|----------------|-------------|-------------------------|---------------------------------|-------------------|--------------------------|
| SNP_P3_115704_128100 | NW_004515843.1 | Scaffold340 | 128100                  | GG                              | CC                | 1946499280               |
| SNP_P3_115705_128470 | NW_004515843.1 | Scaffold340 | 128470                  | GG                              | TT                | 1946499281               |
| SNP_P3_115706_128544 | NW_004515843.1 | Scaffold340 | 128544                  | AA                              | GG                | 1946499283               |
| SNP_P3_115707_129085 | NW_004515843.1 | Scaffold340 | 129085                  | CC                              | TT                | 1946499284               |
| SNP_P3_115708_131551 | NW_004515843.1 | Scaffold340 | 131551                  | AA                              | GG                | 1946499286               |
| SNP_P3_115709_131603 | NW_004515843.1 | Scaffold340 | 131603                  | CC                              | TT                | 1946499287               |
| SNP_P3_115710_132239 | NW_004515843.1 | Scaffold340 | 132239                  | CC                              | AA                | 1946499289               |
| SNP_P3_115711_132587 | NW_004515843.1 | Scaffold340 | 132587                  | AA                              | GG                | 1946499290               |
| SNP_P3_115712_132884 | NW_004515843.1 | Scaffold340 | 132884                  | GG                              | AA                | 1946499292               |
| SNP_P3_115713_135245 | NW_004515843.1 | Scaffold340 | 135245                  | GG                              | CC                | 1946499293               |
| SNP_P3_115715_135898 | NW_004515843.1 | Scaffold340 | 135898                  | AA                              | CC                | 1946499295               |
| SNP_P3_115716_137078 | NW_004515843.1 | Scaffold340 | 137078                  | CC                              | TT                | 1946499296               |
| SNP_P3_115717_137079 | NW_004515843.1 | Scaffold340 | 137079                  | CC                              | GG                | 1946499298               |
| SNP_P3_115719_137566 | NW_004515843.1 | Scaffold340 | 137566                  | CC                              | GG                | 1946499299               |
| SNP_P3_115721_138363 | NW_004515843.1 | Scaffold340 | 138363                  | GG                              | CC                | 1946499301               |
| SNP_P3_115722_142498 | NW_004515843.1 | Scaffold340 | 142498                  | TT                              | CC                | 1946499302               |
| SNP_P3_115724_145879 | NW_004515843.1 | Scaffold340 | 145879                  | CC                              | GG                | 1946499304               |
| SNP_P3_115725_147534 | NW_004515843.1 | Scaffold340 | 147534                  | TT                              | CC                | 1946499305               |
| SNP_P3_115726_148771 | NW_004515843.1 | Scaffold340 | 148771                  | TT                              | CC                | 1946499307               |
| SNP_P3_115727_148798 | NW_004515843.1 | Scaffold340 | 148798                  | AA                              | TT                | 1946499308               |
| SNP_P3_115728_149740 | NW_004515843.1 | Scaffold340 | 149740                  | CC                              | GG                | 1946499310               |
| SNP_P3_115729_152506 | NW_004515843.1 | Scaffold340 | 152506                  | GG                              | AA                | 1946499311               |
| SNP_P3_115731_155259 | NW_004515843.1 | Scaffold340 | 155259                  | GG                              | AA                | 1946499313               |
| SNP_P3_115732_155319 | NW_004515843.1 | Scaffold340 | 155319                  | TT                              | CC                | 1946499314               |
| SNP_P3_115733_155399 | NW_004515843.1 | Scaffold340 | 155399                  | CC                              | TT                | 1946499316               |
| SNP_P3_115734_157389 | NW_004515843.1 | Scaffold340 | 157389                  | AA                              | GG                | 1946499317               |
| SNP_P3_115735_158848 | NW_004515843.1 | Scaffold340 | 158848                  | AA                              | TT                | 1946499319               |
| SNP_P3_115736_159820 | NW_004515843.1 | Scaffold340 | 159820                  | CC                              | TT                | 1946499320               |
| SNP_P3_115737_160150 | NW_004515843.1 | Scaffold340 | 160150                  | TT                              | GG                | 1946499322               |
| SNP_P3_115738_160259 | NW_004515843.1 | Scaffold340 | 160259                  | AA                              | GG                | 1946499323               |
| SNP_P3_115739_160782 | NW_004515843.1 | Scaffold340 | 160782                  | TT                              | GG                | 1946499325               |
| SNP_P3_115740_161051 | NW_004515843.1 | Scaffold340 | 161051                  | TT                              | CC                | 1946499326               |
| SNP_P3_115743_164266 | NW_004515843.1 | Scaffold340 | 164266                  | AA                              | GG                | 1946499328               |
| SNP_P3_115744_164718 | NW_004515843.1 | Scaffold340 | 164718                  | CC                              | TT                | 1946499329               |
| SNP_P3_115745_164894 | NW_004515843.1 | Scaffold340 | 164894                  | CC                              | GG                | 1946499331               |
| SNP_P3_115746_165109 | NW_004515843.1 | Scaffold340 | 165109                  | AA                              | GG                | 1946499332               |
| SNP_P3_115747_165175 | NW_004515843.1 | Scaffold340 | 165175                  | TT                              | AA                | 1946499334               |
| SNP_P3_115748_166529 | NW_004515843.1 | Scaffold340 | 166529                  | AA                              | GG                | 1946499336               |
| SNP_P3_115749_166551 | NW_004515843.1 | Scaffold340 | 166551                  | AA                              | GG                | 1946499337               |
| SNP_P3_115751_174509 | NW_004515843.1 | Scaffold340 | 174509                  | AA                              | TT                | 1946499339               |
| SNP_P3_115752_175445 | NW_004515843.1 | Scaffold340 | 175445                  | TT                              | AA                | 1946499340               |
| SNP_P3_115753_175447 | NW_004515843.1 | Scaffold340 | 175447                  | CC                              | AA                | 1946499342               |

| SNPs IDs             | Chromosome IDs | Chromosomes | Physical positions (bp) | CDC Frontier (Reference genome) | (Pusa 256 & HPNB) | NCBI SNPdb Accession IDs |
|----------------------|----------------|-------------|-------------------------|---------------------------------|-------------------|--------------------------|
| SNP_P3_115755_186424 | NW_004515843.1 | Scaffold340 | 186424                  | CC                              | TT                | 1946499344               |
| SNP_P3_115756_186569 | NW_004515843.1 | Scaffold340 | 186569                  | GG                              | AA                | 1946499346               |
| SNP_P3_115758_195585 | NW_004515843.1 | Scaffold340 | 195585                  | GG                              | AA                | 1946499347               |
| SNP_P3_115759_196155 | NW_004515843.1 | Scaffold340 | 196155                  | AA                              | GG                | 1946499349               |
| SNP_P3_115760_196318 | NW_004515843.1 | Scaffold340 | 196318                  | CC                              | AA                | 1946499350               |
| SNP_P3_115761_198506 | NW_004515843.1 | Scaffold340 | 198506                  | TT                              | AA                | 1946499352               |
| SNP_P3_115762_201408 | NW_004515843.1 | Scaffold340 | 201408                  | GG                              | AA                | 1946499353               |
| SNP_P3_115763_201424 | NW_004515843.1 | Scaffold340 | 201424                  | AA                              | GG                | 1946499355               |
| SNP_P3_115764_204367 | NW_004515843.1 | Scaffold340 | 204367                  | AA                              | GG                | 1946499356               |
| SNP_P3_115765_204582 | NW_004515843.1 | Scaffold340 | 204582                  | TT                              | CC                | 1946499358               |
| SNP_P3_115766_205793 | NW_004515843.1 | Scaffold340 | 205793                  | CC                              | TT                | 1946499359               |
| SNP_P3_115767_206902 | NW_004515843.1 | Scaffold340 | 206902                  | GG                              | CC                | 1946499360               |
| SNP_P3_115768_214074 | NW_004515843.1 | Scaffold340 | 214074                  | TT                              | GG                | 1946499362               |
| SNP_P3_115769_214305 | NW_004515843.1 | Scaffold340 | 214305                  | AA                              | GG                | 1946499363               |
| SNP_P3_115771_218430 | NW_004515843.1 | Scaffold340 | 218430                  | GG                              | AA                | 1946499365               |
| SNP_P3_115772_218440 | NW_004515843.1 | Scaffold340 | 218440                  | GG                              | TT                | 1946499366               |
| SNP_P3_115773_218447 | NW_004515843.1 | Scaffold340 | 218447                  | AA                              | TT                | 1946499368               |
| SNP_P3_115774_219176 | NW_004515843.1 | Scaffold340 | 219176                  | CC                              | TT                | 1946499369               |
| SNP_P3_115775_219247 | NW_004515843.1 | Scaffold340 | 219247                  | GG                              | CC                | 1946499371               |
| SNP_P3_115776_219397 | NW_004515843.1 | Scaffold340 | 219397                  | CC                              | TT                | 1946499372               |
| SNP_P3_115777_219749 | NW_004515843.1 | Scaffold340 | 219749                  | GG                              | AA                | 1946499374               |
| SNP_P3_115778_221504 | NW_004515843.1 | Scaffold340 | 221504                  | GG                              | AA                | 1946499375               |
| SNP_P3_115779_223514 | NW_004515843.1 | Scaffold340 | 223514                  | AA                              | GG                | 1946499377               |
| SNP_P3_115780_227947 | NW_004515843.1 | Scaffold340 | 227947                  | CC                              | TT                | 1946499378               |
| SNP_P3_115781_238396 | NW_004515843.1 | Scaffold340 | 238396                  | GG                              | AA                | 1946499380               |
| SNP_P3_115782_238445 | NW_004515843.1 | Scaffold340 | 238445                  | GG                              | TT                | 1946499382               |
| SNP_P3_115783_238529 | NW_004515843.1 | Scaffold340 | 238529                  | CC                              | AA                | 1946499383               |
| SNP_P3_115784_238691 | NW_004515843.1 | Scaffold340 | 238691                  | CC                              | AA                | 1946499385               |
| SNP_P3_115785_239553 | NW_004515843.1 | Scaffold340 | 239553                  | TT                              | CC                | 1946499386               |
| SNP_P3_115786_242014 | NW_004515843.1 | Scaffold340 | 242014                  | CC                              | TT                | 1946499388               |
| SNP_P3_115787_242042 | NW_004515843.1 | Scaffold340 | 242042                  | AA                              | GG                | 1946499389               |
| SNP_P3_115788_242078 | NW_004515843.1 | Scaffold340 | 242078                  | GG                              | TT                | 1946499390               |
| SNP_P3_115789_242091 | NW_004515843.1 | Scaffold340 | 242091                  | TT                              | AA                | 1946499392               |
| SNP_P3_115790_242097 | NW_004515843.1 | Scaffold340 | 242097                  | AA                              | GG                | 1946499393               |
| SNP_P3_115791_242131 | NW_004515843.1 | Scaffold340 | 242131                  | TT                              | CC                | 1946499395               |
| SNP_P3_115792_242159 | NW_004515843.1 | Scaffold340 | 242159                  | AA                              | GG                | 1946499397               |
| SNP_P3_115793_242168 | NW_004515843.1 | Scaffold340 | 242168                  | CC                              | TT                | 1946499398               |
| SNP_P3_115794_242192 | NW_004515843.1 | Scaffold340 | 242192                  | CC                              | TT                | 1946499400               |
| SNP_P3_115795_242199 | NW_004515843.1 | Scaffold340 | 242199                  | TT                              | GG                | 1946499401               |
| SNP_P3_115796_242225 | NW_004515843.1 | Scaffold340 | 242225                  | AA                              | CC                | 1946499402               |
| SNP_P3_115797_242360 | NW_004515843.1 | Scaffold340 | 242360                  | TT                              | CC                | 1946499404               |
| SNP_P3_115798_242440 | NW_004515843.1 | Scaffold340 | 242440                  | CC                              | TT                | 1946499405               |

| SNPs IDs             | Chromosome IDs | Chromosomes | Physical positions (bp) | CDC Frontier (Reference genome) | (Pusa 256 & HPNB) | NCBI SNPdb Accession IDs |
|----------------------|----------------|-------------|-------------------------|---------------------------------|-------------------|--------------------------|
| SNP_P3_115799_242461 | NW_004515843.1 | Scaffold340 | 242461                  | TT                              | CC                | 1946499407               |
| SNP_P3_115800_242472 | NW_004515843.1 | Scaffold340 | 242472                  | TT                              | GG                | 1946499408               |
| SNP_P3_115801_242473 | NW_004515843.1 | Scaffold340 | 242473                  | GG                              | TT                | 1946499410               |
| SNP_P3_115802_243384 | NW_004515843.1 | Scaffold340 | 243384                  | TT                              | CC                | 1946499411               |
| SNP_P3_115803_244716 | NW_004515843.1 | Scaffold340 | 244716                  | CC                              | AA                | 1946499413               |
| SNP_P3_115804_244786 | NW_004515843.1 | Scaffold340 | 244786                  | GG                              | AA                | 1946499414               |
| SNP_P3_115805_245086 | NW_004515843.1 | Scaffold340 | 245086                  | TT                              | GG                | 1946499416               |
| SNP_P3_115806_245601 | NW_004515843.1 | Scaffold340 | 245601                  | CC                              | TT                | 1946499417               |
| SNP_P3_115807_245755 | NW_004515843.1 | Scaffold340 | 245755                  | AA                              | GG                | 1946499419               |
| SNP_P3_115808_246307 | NW_004515843.1 | Scaffold340 | 246307                  | AA                              | GG                | 1946499420               |
| SNP_P3_115809_246677 | NW_004515843.1 | Scaffold340 | 246677                  | TT                              | GG                | 1946499421               |
| SNP_P3_115810_247301 | NW_004515843.1 | Scaffold340 | 247301                  | TT                              | CC                | 1946499423               |
| SNP_P3_115811_249279 | NW_004515843.1 | Scaffold340 | 249279                  | CC                              | TT                | 1946499424               |
| SNP_P3_115814_259960 | NW_004515843.1 | Scaffold340 | 259960                  | GG                              | AA                | 1946499426               |
| SNP_P3_115816_260419 | NW_004515843.1 | Scaffold340 | 260419                  | CC                              | TT                | 1946499428               |
| SNP_P3_115817_263650 | NW_004515843.1 | Scaffold340 | 263650                  | AA                              | TT                | 1946499429               |
| SNP_P3_115818_263807 | NW_004515843.1 | Scaffold340 | 263807                  | AA                              | CC                | 1946499431               |
| SNP_P3_115819_270282 | NW_004515843.1 | Scaffold340 | 270282                  | GG                              | CC                | 1946499432               |
| SNP_P3_115820_270637 | NW_004515843.1 | Scaffold340 | 270637                  | AA                              | TT                | 1946499434               |
| SNP_P3_115821_270869 | NW_004515843.1 | Scaffold340 | 270869                  | CC                              | TT                | 1946499435               |
| SNP_P3_115822_271054 | NW_004515843.1 | Scaffold340 | 271054                  | AA                              | GG                | 1946499437               |
| SNP_P3_115823_271273 | NW_004515843.1 | Scaffold340 | 271273                  | CC                              | TT                | 1946499438               |
| SNP_P3_115824_276150 | NW_004515843.1 | Scaffold340 | 276150                  | AA                              | GG                | 1946499440               |
| SNP_P3_115825_276188 | NW_004515843.1 | Scaffold340 | 276188                  | AA                              | GG                | 1946499441               |
| SNP_P3_115826_277033 | NW_004515843.1 | Scaffold340 | 277033                  | CC                              | GG                | 1946499443               |
| SNP_P3_115827_277208 | NW_004515843.1 | Scaffold340 | 277208                  | CC                              | TT                | 1946499444               |
| SNP_P3_115828_277294 | NW_004515843.1 | Scaffold340 | 277294                  | CC                              | TT                | 1946499446               |
| SNP_P3_115829_277973 | NW_004515843.1 | Scaffold340 | 277973                  | GG                              | AA                | 1946499447               |
| SNP_P3_115832_280307 | NW_004515843.1 | Scaffold340 | 280307                  | TT                              | AA                | 1946499449               |
| SNP_P3_115833_281806 | NW_004515843.1 | Scaffold340 | 281806                  | AA                              | GG                | 1946499450               |
| SNP_P3_115834_282212 | NW_004515843.1 | Scaffold340 | 282212                  | AA                              | GG                | 1946499452               |
| SNP_P3_115835_283163 | NW_004515843.1 | Scaffold340 | 283163                  | GG                              | AA                | 1946499453               |
| SNP_P3_115837_284915 | NW_004515843.1 | Scaffold340 | 284915                  | GG                              | AA                | 1946499455               |
| SNP_P3_115838_284980 | NW_004515843.1 | Scaffold340 | 284980                  | AA                              | GG                | 1946499456               |
| SNP_P3_115839_285455 | NW_004515843.1 | Scaffold340 | 285455                  | TT                              | GG                | 1946499458               |
| SNP_P3_115840_289989 | NW_004515843.1 | Scaffold340 | 289989                  | AA                              | GG                | 1946499459               |
| SNP_P3_115841_290044 | NW_004515843.1 | Scaffold340 | 290044                  | CC                              | GG                | 1946499461               |
| SNP_P3_115842_290903 | NW_004515843.1 | Scaffold340 | 290903                  | CC                              | TT                | 1946499462               |
| SNP_P3_115843_292106 | NW_004515843.1 | Scaffold340 | 292106                  | TT                              | CC                | 1946499464               |
| SNP_P3_115844_294076 | NW_004515843.1 | Scaffold340 | 294076                  | CC                              | AA                | 1946499465               |
| SNP_P3_115845_294270 | NW_004515843.1 | Scaffold340 | 294270                  | CC                              | AA                | 1946499467               |
| SNP_P3_115846_294319 | NW_004515843.1 | Scaffold340 | 294319                  | CC                              | AA                | 1946499469               |



| SNPs IDs             | Chromosome IDs | Chromosomes | Physical positions (bp) | CDC Frontier (Reference genome) | (Pusa 256 & HPNB) | NCBI SNPdb Accession IDs |
|----------------------|----------------|-------------|-------------------------|---------------------------------|-------------------|--------------------------|
| SNP_P3_115847_294363 | NW_004515843.1 | Scaffold340 | 294363                  | GG                              | AA                | 1946499470               |
| SNP_P3_115848_294914 | NW_004515843.1 | Scaffold340 | 294914                  | TT                              | CC                | 1946499472               |
| SNP_P3_115849_295426 | NW_004515843.1 | Scaffold340 | 295426                  | CC                              | TT                | 1946499473               |
| SNP_P3_115850_295473 | NW_004515843.1 | Scaffold340 | 295473                  | TT                              | CC                | 1946499475               |
| SNP_P3_115851_295497 | NW_004515843.1 | Scaffold340 | 295497                  | TT                              | AA                | 1946499476               |
| SNP_P3_115852_295838 | NW_004515843.1 | Scaffold340 | 295838                  | AA                              | GG                | 1946499478               |
| SNP_P3_115853_295861 | NW_004515843.1 | Scaffold340 | 295861                  | TT                              | AA                | 1946499480               |
| SNP_P3_115854_296648 | NW_004515843.1 | Scaffold340 | 296648                  | CC                              | TT                | 1946499481               |
| SNP_P3_115855_299860 | NW_004515843.1 | Scaffold340 | 299860                  | AA                              | TT                | 1946499483               |
| SNP_P3_115856_299926 | NW_004515843.1 | Scaffold340 | 299926                  | AA                              | GG                | 1946499484               |
| SNP_P3_115857_301648 | NW_004515843.1 | Scaffold340 | 301648                  | CC                              | TT                | 1946499486               |
| SNP_P3_115858_302306 | NW_004515843.1 | Scaffold340 | 302306                  | AA                              | CC                | 1946499487               |
| SNP_P3_115859_304691 | NW_004515843.1 | Scaffold340 | 304691                  | AA                              | GG                | 1946499489               |
| SNP_P3_115860_305066 | NW_004515843.1 | Scaffold340 | 305066                  | GG                              | AA                | 1946499490               |
| SNP_P3_115861_309931 | NW_004515843.1 | Scaffold340 | 309931                  | AA                              | TT                | 1946499492               |
| SNP_P3_115862_314431 | NW_004515843.1 | Scaffold340 | 314431                  | GG                              | TT                | 1946499494               |
| SNP_P3_115863_315027 | NW_004515843.1 | Scaffold340 | 315027                  | TT                              | CC                | 1946499495               |
| SNP_P3_115864_315101 | NW_004515843.1 | Scaffold340 | 315101                  | GG                              | TT                | 1946499497               |
| SNP_P3_115866_318510 | NW_004515843.1 | Scaffold340 | 318510                  | CC                              | TT                | 1946499498               |
| SNP_P3_115867_669    | NW_004515844.1 | Scaffold341 | 669                     | AA                              | GG                | 1946499500               |
| SNP_P3_115868_879    | NW_004515844.1 | Scaffold341 | 879                     | TT                              | CC                | 1946499501               |
| SNP_P3_115869_3924   | NW_004515844.1 | Scaffold341 | 3924                    | CC                              | TT                | 1946499503               |
| SNP_P3_115870_68166  | NW_004515844.1 | Scaffold341 | 68166                   | AA                              | CC                | 1946499504               |
| SNP_P3_115871_70256  | NW_004515844.1 | Scaffold341 | 70256                   | GG                              | CC                | 1946499506               |
| SNP_P3_115872_74447  | NW_004515844.1 | Scaffold341 | 74447                   | AA                              | CC                | 1946499507               |
| SNP_P3_115873_92559  | NW_004515844.1 | Scaffold341 | 92559                   | CC                              | TT                | 1946499509               |
| SNP_P3_115874_92581  | NW_004515844.1 | Scaffold341 | 92581                   | GG                              | AA                | 1946499510               |
| SNP_P3_115875_100384 | NW_004515844.1 | Scaffold341 | 100384                  | GG                              | CC                | 1946499512               |
| SNP_P3_115876_104260 | NW_004515844.1 | Scaffold341 | 104260                  | AA                              | CC                | 1946499513               |
| SNP_P3_115877_108442 | NW_004515844.1 | Scaffold341 | 108442                  | AA                              | GG                | 1946499515               |
| SNP_P3_115878_108507 | NW_004515844.1 | Scaffold341 | 108507                  | GG                              | AA                | 1946499516               |
| SNP_P3_115879_116192 | NW_004515844.1 | Scaffold341 | 116192                  | GG                              | TT                | 1946499518               |
| SNP_P3_115880_116204 | NW_004515844.1 | Scaffold341 | 116204                  | TT                              | GG                | 1946499519               |
| SNP_P3_115881_116243 | NW_004515844.1 | Scaffold341 | 116243                  | TT                              | CC                | 1946499521               |
| SNP_P3_115882_116299 | NW_004515844.1 | Scaffold341 | 116299                  | GG                              | TT                | 1946499522               |
| SNP_P3_115883_116329 | NW_004515844.1 | Scaffold341 | 116329                  | GG                              | TT                | 1946499524               |
| SNP_P3_115884_116356 | NW_004515844.1 | Scaffold341 | 116356                  | AA                              | GG                | 1946499525               |
| SNP_P3_115885_116373 | NW_004515844.1 | Scaffold341 | 116373                  | TT                              | AA                | 1946499527               |
| SNP_P3_115886_122607 | NW_004515844.1 | Scaffold341 | 122607                  | TT                              | CC                | 1946499528               |
| SNP_P3_115887_135144 | NW_004515844.1 | Scaffold341 | 135144                  | AA                              | GG                | 1946499530               |
| SNP_P3_115888_135180 | NW_004515844.1 | Scaffold341 | 135180                  | TT                              | GG                | 1946499531               |
| SNP_P3_115889_135238 | NW_004515844.1 | Scaffold341 | 135238                  | AA                              | TT                | 1946499533               |

| SNPs IDs             | Chromosome IDs | Chromosomes | Physical positions (bp) | CDC Frontier (Reference genome) | (Pusa 256 & HPNB) | NCBI SNPdb Accession IDs |
|----------------------|----------------|-------------|-------------------------|---------------------------------|-------------------|--------------------------|
| SNP_P3_115890_135265 | NW_004515844.1 | Scaffold341 | 135265                  | AA                              | GG                | 1946499534               |
| SNP_P3_115892_135569 | NW_004515844.1 | Scaffold341 | 135569                  | GG                              | TT                | 1946499536               |
| SNP_P3_115893_135605 | NW_004515844.1 | Scaffold341 | 135605                  | TT                              | AA                | 1946499537               |
| SNP_P3_115894_135608 | NW_004515844.1 | Scaffold341 | 135608                  | GG                              | TT                | 1946499539               |
| SNP_P3_115895_138015 | NW_004515844.1 | Scaffold341 | 138015                  | CC                              | TT                | 1946499540               |
| SNP_P3_115896_143584 | NW_004515844.1 | Scaffold341 | 143584                  | AA                              | TT                | 1946499542               |
| SNP_P3_115897_144350 | NW_004515844.1 | Scaffold341 | 144350                  | TT                              | CC                | 1946499543               |
| SNP_P3_115898_144371 | NW_004515844.1 | Scaffold341 | 144371                  | AA                              | TT                | 1946499545               |
| SNP_P3_115899_144879 | NW_004515844.1 | Scaffold341 | 144879                  | AA                              | GG                | 1946499546               |
| SNP_P3_115900_155070 | NW_004515844.1 | Scaffold341 | 155070                  | CC                              | TT                | 1946499548               |
| SNP_P3_115901_159360 | NW_004515844.1 | Scaffold341 | 159360                  | CC                              | TT                | 1946499549               |
| SNP_P3_115902_168791 | NW_004515844.1 | Scaffold341 | 168791                  | CC                              | TT                | 1946499551               |
| SNP_P3_115903_172759 | NW_004515844.1 | Scaffold341 | 172759                  | CC                              | TT                | 1946499552               |
| SNP_P3_115904_173747 | NW_004515844.1 | Scaffold341 | 173747                  | CC                              | TT                | 1946499554               |
| SNP_P3_115906_173794 | NW_004515844.1 | Scaffold341 | 173794                  | AA                              | CC                | 1946499555               |
| SNP_P3_115907_173801 | NW_004515844.1 | Scaffold341 | 173801                  | CC                              | TT                | 1946499557               |
| SNP_P3_115908_173802 | NW_004515844.1 | Scaffold341 | 173802                  | CC                              | TT                | 1946499558               |
| SNP_P3_115909_184974 | NW_004515844.1 | Scaffold341 | 184974                  | AA                              | CC                | 1946499560               |
| SNP_P3_115910_185029 | NW_004515844.1 | Scaffold341 | 185029                  | AA                              | TT                | 1946499561               |
| SNP_P3_115911_185041 | NW_004515844.1 | Scaffold341 | 185041                  | CC                              | TT                | 1946499563               |
| SNP_P3_115912_185067 | NW_004515844.1 | Scaffold341 | 185067                  | CC                              | TT                | 1946499564               |
| SNP_P3_115913_185354 | NW_004515844.1 | Scaffold341 | 185354                  | CC                              | TT                | 1946499566               |
| SNP_P3_115914_185400 | NW_004515844.1 | Scaffold341 | 185400                  | CC                              | TT                | 1946499567               |
| SNP_P3_115915_185542 | NW_004515844.1 | Scaffold341 | 185542                  | AA                              | GG                | 1946499569               |
| SNP_P3_115917_461    | NW_004515845.1 | Scaffold342 | 461                     | TT                              | AA                | 1946499570               |
| SNP_P3_115918_651    | NW_004515845.1 | Scaffold342 | 651                     | TT                              | GG                | 1946499572               |
| SNP_P3_115919_652    | NW_004515845.1 | Scaffold342 | 652                     | TT                              | CC                | 1946499573               |
| SNP_P3_115920_674    | NW_004515845.1 | Scaffold342 | 674                     | AA                              | GG                | 1946499575               |
| SNP_P3_115921_881    | NW_004515845.1 | Scaffold342 | 881                     | AA                              | GG                | 1946499577               |
| SNP_P3_115922_14787  | NW_004515845.1 | Scaffold342 | 14787                   | GG                              | TT                | 1946499578               |
| SNP_P3_115923_19093  | NW_004515845.1 | Scaffold342 | 19093                   | CC                              | GG                | 1946499580               |
| SNP_P3_115924_19257  | NW_004515845.1 | Scaffold342 | 19257                   | CC                              | GG                | 1946499581               |
| SNP_P3_115925_19269  | NW_004515845.1 | Scaffold342 | 19269                   | CC                              | TT                | 1946499583               |
| SNP_P3_115926_19525  | NW_004515845.1 | Scaffold342 | 19525                   | TT                              | CC                | 1946499584               |
| SNP_P3_115927_19564  | NW_004515845.1 | Scaffold342 | 19564                   | AA                              | CC                | 1946499585               |
| SNP_P3_115928_19565  | NW_004515845.1 | Scaffold342 | 19565                   | TT                              | AA                | 1946499587               |
| SNP_P3_115929_19566  | NW_004515845.1 | Scaffold342 | 19566                   | CC                              | AA                | 1946499588               |
| SNP_P3_115930_19567  | NW_004515845.1 | Scaffold342 | 19567                   | TT                              | CC                | 1946499590               |
| SNP_P3_115931_19633  | NW_004515845.1 | Scaffold342 | 19633                   | TT                              | CC                | 1946499591               |
| SNP_P3_115932_23996  | NW_004515845.1 | Scaffold342 | 23996                   | TT                              | CC                | 1946499593               |
| SNP_P3_115934_46110  | NW_004515845.1 | Scaffold342 | 46110                   | CC                              | TT                | 1946499594               |
| SNP_P3_115935_46112  | NW_004515845.1 | Scaffold342 | 46112                   | CC                              | GG                | 1946499596               |

| SNPs IDs             | Chromosome IDs | Chromosomes | Physical positions (bp) | CDC Frontier (Reference genome) | (Pusa 256 & HPNB) | NCBI SNPdb Accession IDs |
|----------------------|----------------|-------------|-------------------------|---------------------------------|-------------------|--------------------------|
| SNP_P3_115936_61391  | NW_004515845.1 | Scaffold342 | 61391                   | TT                              | CC                | 1946499597               |
| SNP_P3_115937_61396  | NW_004515845.1 | Scaffold342 | 61396                   | CC                              | TT                | 1946499599               |
| SNP_P3_115938_63516  | NW_004515845.1 | Scaffold342 | 63516                   | AA                              | CC                | 1946499600               |
| SNP_P3_115939_63521  | NW_004515845.1 | Scaffold342 | 63521                   | CC                              | AA                | 1946499602               |
| SNP_P3_115940_78731  | NW_004515845.1 | Scaffold342 | 78731                   | TT                              | CC                | 1946499603               |
| SNP_P3_115941_80405  | NW_004515845.1 | Scaffold342 | 80405                   | GG                              | AA                | 1946499605               |
| SNP_P3_115943_120849 | NW_004515845.1 | Scaffold342 | 120849                  | TT                              | CC                | 1946499606               |
| SNP_P3_115944_120863 | NW_004515845.1 | Scaffold342 | 120863                  | GG                              | AA                | 1946499608               |
| SNP_P3_115945_121038 | NW_004515845.1 | Scaffold342 | 121038                  | CC                              | AA                | 1946499609               |
| SNP_P3_115946_121080 | NW_004515845.1 | Scaffold342 | 121080                  | GG                              | TT                | 1946499610               |
| SNP_P3_115947_125463 | NW_004515845.1 | Scaffold342 | 125463                  | TT                              | CC                | 1946499612               |
| SNP_P3_115948_125502 | NW_004515845.1 | Scaffold342 | 125502                  | TT                              | CC                | 1946499613               |
| SNP_P3_115949_125534 | NW_004515845.1 | Scaffold342 | 125534                  | CC                              | TT                | 1946499615               |
| SNP_P3_115950_125558 | NW_004515845.1 | Scaffold342 | 125558                  | TT                              | CC                | 1946499616               |
| SNP_P3_115951_125580 | NW_004515845.1 | Scaffold342 | 125580                  | GG                              | AA                | 1946499618               |
| SNP_P3_115952_125621 | NW_004515845.1 | Scaffold342 | 125621                  | AA                              | TT                | 1946499619               |
| SNP_P3_115953_125627 | NW_004515845.1 | Scaffold342 | 125627                  | TT                              | AA                | 1946499621               |
| SNP_P3_115954_125636 | NW_004515845.1 | Scaffold342 | 125636                  | GG                              | AA                | 1946499622               |
| SNP_P3_115955_125694 | NW_004515845.1 | Scaffold342 | 125694                  | AA                              | CC                | 1946499624               |
| SNP_P3_115956_125728 | NW_004515845.1 | Scaffold342 | 125728                  | AA                              | CC                | 1946499625               |
| SNP_P3_115957_125831 | NW_004515845.1 | Scaffold342 | 125831                  | TT                              | CC                | 1946499627               |
| SNP_P3_115958_125853 | NW_004515845.1 | Scaffold342 | 125853                  | TT                              | CC                | 1946499628               |
| SNP_P3_115959_125899 | NW_004515845.1 | Scaffold342 | 125899                  | AA                              | GG                | 1946499630               |
| SNP_P3_115960_125940 | NW_004515845.1 | Scaffold342 | 125940                  | TT                              | CC                | 1946499631               |
| SNP_P3_115961_126136 | NW_004515845.1 | Scaffold342 | 126136                  | TT                              | CC                | 1946499633               |
| SNP_P3_115962_132446 | NW_004515845.1 | Scaffold342 | 132446                  | TT                              | CC                | 1946499634               |
| SNP_P3_115963_132992 | NW_004515845.1 | Scaffold342 | 132992                  | GG                              | TT                | 1946499635               |
| SNP_P3_115964_133054 | NW_004515845.1 | Scaffold342 | 133054                  | AA                              | GG                | 1946499637               |
| SNP_P3_115965_133253 | NW_004515845.1 | Scaffold342 | 133253                  | TT                              | CC                | 1946499638               |
| SNP_P3_115966_133329 | NW_004515845.1 | Scaffold342 | 133329                  | TT                              | AA                | 1946499640               |
| SNP_P3_115967_133337 | NW_004515845.1 | Scaffold342 | 133337                  | TT                              | CC                | 1946499641               |
| SNP_P3_115968_164569 | NW_004515845.1 | Scaffold342 | 164569                  | TT                              | AA                | 1946499643               |
| SNP_P3_115969_183570 | NW_004515845.1 | Scaffold342 | 183570                  | TT                              | GG                | 1946499644               |
| SNP_P3_115970_183593 | NW_004515845.1 | Scaffold342 | 183593                  | GG                              | CC                | 1946499646               |
| SNP_P3_115971_183650 | NW_004515845.1 | Scaffold342 | 183650                  | TT                              | CC                | 1946499647               |
| SNP_P3_115972_183732 | NW_004515845.1 | Scaffold342 | 183732                  | GG                              | CC                | 1946499649               |
| SNP_P3_115973_183758 | NW_004515845.1 | Scaffold342 | 183758                  | AA                              | TT                | 1946499650               |
| SNP_P3_115974_183762 | NW_004515845.1 | Scaffold342 | 183762                  | TT                              | CC                | 1946499652               |
| SNP_P3_115975_183771 | NW_004515845.1 | Scaffold342 | 183771                  | CC                              | TT                | 1946499653               |
| SNP_P3_115976_183772 | NW_004515845.1 | Scaffold342 | 183772                  | TT                              | CC                | 1946499655               |
| SNP_P3_115977_185952 | NW_004515845.1 | Scaffold342 | 185952                  | AA                              | TT                | 1946499656               |
| SNP_P3_115978_185966 | NW_004515845.1 | Scaffold342 | 185966                  | TT                              | CC                | 1946499658               |

| SNPs IDs             | Chromosome IDs | Chromosomes   | Physical positions (bp) | CDC Frontier (Reference genome) | (Pusa 256 & HPNB) | NCBI SNPdb Accession IDs |
|----------------------|----------------|---------------|-------------------------|---------------------------------|-------------------|--------------------------|
| SNP_P3_115979_207132 | NW_004515845.1 | Scaffold342   | 207132                  | GG                              | CC                | 1946499659               |
| SNP_P3_115980_213941 | NW_004515845.1 | Scaffold342   | 213941                  | TT                              | GG                | 1946499661               |
| SNP_P3_115981_214105 | NW_004515845.1 | Scaffold342   | 214105                  | TT                              | GG                | 1946499662               |
| SNP_P3_115982_234417 | NW_004515845.1 | Scaffold342   | 234417                  | CC                              | TT                | 1946499663               |
| SNP_P3_115983_241586 | NW_004515845.1 | Scaffold342   | 241586                  | GG                              | AA                | 1946499665               |
| SNP_P3_115984_241611 | NW_004515845.1 | Scaffold342   | 241611                  | AA                              | GG                | 1946499666               |
| SNP_P3_115985_241618 | NW_004515845.1 | Scaffold342   | 241618                  | CC                              | TT                | 1946499668               |
| SNP_P3_115986_241678 | NW_004515845.1 | Scaffold342   | 241678                  | CC                              | TT                | 1946499669               |
| SNP_P3_115987_242381 | NW_004515845.1 | Scaffold342   | 242381                  | AA                              | TT                | 1946499671               |
| SNP_P3_115988_248165 | NW_004515845.1 | Scaffold342   | 248165                  | GG                              | AA                | 1946499672               |
| SNP_P3_115989_252070 | NW_004515845.1 | Scaffold342   | 252070                  | AA                              | CC                | 1946499674               |
| SNP_P3_115990_308341 | NW_004515845.1 | Scaffold342   | 308341                  | CC                              | TT                | 1946499675               |
| SNP_P3_115992_325208 | NW_004515845.1 | Scaffold342   | 325208                  | TT                              | AA                | 1946499677               |
| SNP_P3_115993_325213 | NW_004515845.1 | Scaffold342   | 325213                  | GG                              | TT                | 1946499678               |
| SNP_P3_115994_325320 | NW_004515845.1 | Scaffold342   | 325320                  | CC                              | AA                | 1946499680               |
| SNP_P3_115995_327709 | NW_004515845.1 | Scaffold342   | 327709                  | GG                              | AA                | 1946499681               |
| SNP_P3_115996_340036 | NW_004515845.1 | Scaffold342   | 340036                  | GG                              | AA                | 1946499683               |
| SNP_P3_115997_340050 | NW_004515845.1 | Scaffold342   | 340050                  | GG                              | AA                | 1946499684               |
| SNP_P3_115998_340113 | NW_004515845.1 | Scaffold342   | 340113                  | TT                              | CC                | 1946499686               |
| SNP_P3_115999_340175 | NW_004515845.1 | Scaffold342   | 340175                  | AA                              | GG                | 1946499687               |
| SNP_P3_116000_340176 | NW_004515845.1 | Scaffold342   | 340176                  | GG                              | AA                | 1946499689               |
| SNP_P3_116001_340405 | NW_004515845.1 | Scaffold342   | 340405                  | CC                              | TT                | 1946499690               |
| SNP_P3_116002_340444 | NW_004515845.1 | Scaffold342   | 340444                  | TT                              | CC                | 1946499692               |
| SNP_P3_116003_340499 | NW_004515845.1 | Scaffold342   | 340499                  | CC                              | GG                | 1946499693               |
| SNP_P3_116005_345028 | NW_004515845.1 | Scaffold342   | 345028                  | CC                              | GG                | 1946499695               |
| SNP_P3_116006_359595 | NW_004515845.1 | Scaffold342   | 359595                  | GG                              | AA                | 1946499696               |
| SNP_P3_116007_359936 | NW_004515845.1 | Scaffold342   | 359936                  | TT                              | CC                | 1946499698               |
| SNP_P3_116008_370223 | NW_004515845.1 | Scaffold342   | 370223                  | AA                              | TT                | 1946499699               |
| SNP_P3_116010_370710 | NW_004515845.1 | Scaffold342   | 370710                  | AA                              | GG                | 1946499701               |
| SNP_P3_116011_372449 | NW_004515845.1 | Scaffold342   | 372449                  | AA                              | GG                | 1946499702               |
| SNP_P3_116012_9098   | NW_004515847.1 | Scaffold346_1 | 9098                    | GG                              | TT                | 1946499704               |
| SNP_P3_116014_9146   | NW_004515847.1 | Scaffold346_1 | 9146                    | CC                              | TT                | 1946499705               |
| SNP_P3_116015_41881  | NW_004515847.1 | Scaffold346_1 | 41881                   | CC                              | TT                | 1946499707               |
| SNP_P3_116016_41904  | NW_004515847.1 | Scaffold346_1 | 41904                   | GG                              | AA                | 1946499708               |
| SNP_P3_116017_41984  | NW_004515847.1 | Scaffold346_1 | 41984                   | AA                              | CC                | 1946499710               |
| SNP_P3_116018_42068  | NW_004515847.1 | Scaffold346_1 | 42068                   | GG                              | CC                | 1946499711               |
| SNP_P3_116019_42109  | NW_004515847.1 | Scaffold346_1 | 42109                   | AA                              | GG                | 1946499713               |
| SNP_P3_116020_42134  | NW_004515847.1 | Scaffold346_1 | 42134                   | GG                              | AA                | 1946499714               |
| SNP_P3_116021_42169  | NW_004515847.1 | Scaffold346_1 | 42169                   | TT                              | CC                | 1946499716               |
| SNP_P3_116022_42170  | NW_004515847.1 | Scaffold346_1 | 42170                   | GG                              | AA                | 1946499717               |
| SNP_P3_116023_42281  | NW_004515847.1 | Scaffold346_1 | 42281                   | AA                              | GG                | 1946499719               |
| SNP_P3_116024_42439  | NW_004515847.1 | Scaffold346_1 | 42439                   | GG                              | TT                | 1946499720               |

| SNPs IDs             | Chromosome IDs | Chromosomes   | Physical positions (bp) | CDC Frontier (Reference genome) | (Pusa 256 & HPNB) | NCBI SNPdb Accession IDs |
|----------------------|----------------|---------------|-------------------------|---------------------------------|-------------------|--------------------------|
| SNP_P3_116025_42521  | NW_004515847.1 | Scaffold346_1 | 42521                   | AA                              | GG                | 1946499722               |
| SNP_P3_116026_42554  | NW_004515847.1 | Scaffold346_1 | 42554                   | CC                              | TT                | 1946499723               |
| SNP_P3_116027_42795  | NW_004515847.1 | Scaffold346_1 | 42795                   | CC                              | TT                | 1946499725               |
| SNP_P3_116028_42864  | NW_004515847.1 | Scaffold346_1 | 42864                   | CC                              | TT                | 1946499726               |
| SNP_P3_116029_46412  | NW_004515847.1 | Scaffold346_1 | 46412                   | CC                              | TT                | 1946499728               |
| SNP_P3_116030_47011  | NW_004515847.1 | Scaffold346_1 | 47011                   | CC                              | TT                | 1946499729               |
| SNP_P3_116031_47013  | NW_004515847.1 | Scaffold346_1 | 47013                   | AA                              | GG                | 1946499731               |
| SNP_P3_116032_74016  | NW_004515847.1 | Scaffold346_1 | 74016                   | TT                              | AA                | 1946499732               |
| SNP_P3_116033_78986  | NW_004515847.1 | Scaffold346_1 | 78986                   | GG                              | TT                | 1946499734               |
| SNP_P3_116035_120058 | NW_004515847.1 | Scaffold346_1 | 120058                  | GG                              | AA                | 1946499735               |
| SNP_P3_116036_120066 | NW_004515847.1 | Scaffold346_1 | 120066                  | GG                              | AA                | 1946499737               |
| SNP_P3_116037_130009 | NW_004515847.1 | Scaffold346_1 | 130009                  | TT                              | CC                | 1946499738               |
| SNP_P3_116039_186881 | NW_004515847.1 | Scaffold346_1 | 186881                  | AA                              | GG                | 1946499740               |
| SNP_P3_116040_199112 | NW_004515847.1 | Scaffold346_1 | 199112                  | TT                              | CC                | 1946499741               |
| SNP_P3_116041_199119 | NW_004515847.1 | Scaffold346_1 | 199119                  | AA                              | GG                | 1946499743               |
| SNP_P3_116042_199245 | NW_004515847.1 | Scaffold346_1 | 199245                  | CC                              | TT                | 1946499744               |
| SNP_P3_116043_199293 | NW_004515847.1 | Scaffold346_1 | 199293                  | GG                              | AA                | 1946499746               |
| SNP_P3_116044_199317 | NW_004515847.1 | Scaffold346_1 | 199317                  | TT                              | CC                | 1946499747               |
| SNP_P3_116045_199326 | NW_004515847.1 | Scaffold346_1 | 199326                  | AA                              | GG                | 1946499749               |
| SNP_P3_116046_199449 | NW_004515847.1 | Scaffold346_1 | 199449                  | AA                              | GG                | 1946499750               |
| SNP_P3_116047_199716 | NW_004515847.1 | Scaffold346_1 | 199716                  | AA                              | GG                | 1946499752               |
| SNP_P3_116048_210980 | NW_004515847.1 | Scaffold346_1 | 210980                  | TT                              | CC                | 1946499753               |
| SNP_P3_116049_236188 | NW_004515847.1 | Scaffold346_1 | 236188                  | AA                              | GG                | 1946499754               |
| SNP_P3_116050_236455 | NW_004515847.1 | Scaffold346_1 | 236455                  | CC                              | GG                | 1946499756               |
| SNP_P3_116051_238394 | NW_004515847.1 | Scaffold346_1 | 238394                  | AA                              | GG                | 1946499757               |
| SNP_P3_116052_238687 | NW_004515847.1 | Scaffold346_1 | 238687                  | TT                              | CC                | 1946499759               |
| SNP_P3_116053_238698 | NW_004515847.1 | Scaffold346_1 | 238698                  | TT                              | CC                | 1946499760               |
| SNP_P3_116054_256675 | NW_004515847.1 | Scaffold346_1 | 256675                  | TT                              | CC                | 1946499762               |
| SNP_P3_116055_308059 | NW_004515847.1 | Scaffold346_1 | 308059                  | CC                              | AA                | 1946499763               |
| SNP_P3_116056_319706 | NW_004515847.1 | Scaffold346_1 | 319706                  | CC                              | GG                | 1946499765               |
| SNP_P3_116057_1278   | NW_004515849.1 | Scaffold349   | 1278                    | AA                              | CC                | 1946499766               |
| SNP_P3_116058_1286   | NW_004515849.1 | Scaffold349   | 1286                    | GG                              | AA                | 1946499768               |
| SNP_P3_116059_15279  | NW_004515849.1 | Scaffold349   | 15279                   | AA                              | GG                | 1946499770               |
| SNP_P3_116060_36229  | NW_004515849.1 | Scaffold349   | 36229                   | TT                              | CC                | 1946499771               |
| SNP_P3_116061_36321  | NW_004515849.1 | Scaffold349   | 36321                   | AA                              | GG                | 1946499772               |
| SNP_P3_116064_67733  | NW_004515849.1 | Scaffold349   | 67733                   | TT                              | AA                | 1946499774               |
| SNP_P3_116065_67752  | NW_004515849.1 | Scaffold349   | 67752                   | AA                              | GG                | 1946499775               |
| SNP_P3_116066_67756  | NW_004515849.1 | Scaffold349   | 67756                   | AA                              | GG                | 1946499777               |
| SNP_P3_116067_67767  | NW_004515849.1 | Scaffold349   | 67767                   | TT                              | CC                | 1946499778               |
| SNP_P3_116069_72262  | NW_004515849.1 | Scaffold349   | 72262                   | AA                              | GG                | 1946499780               |
| SNP_P3_116070_89974  | NW_004515849.1 | Scaffold349   | 89974                   | TT                              | GG                | 1946499781               |
| SNP_P3_116071_91417  | NW_004515849.1 | Scaffold349   | 91417                   | AA                              | GG                | 1946499783               |

| SNPs IDs             | Chromosome IDs | Chromosomes | Physical positions (bp) | CDC Frontier (Reference genome) | (Pusa 256 & HPNB) | NCBI SNPdb Accession IDs |
|----------------------|----------------|-------------|-------------------------|---------------------------------|-------------------|--------------------------|
| SNP_P3_116072_91975  | NW_004515849.1 | Scaffold349 | 91975                   | CC                              | TT                | 1946499784               |
| SNP_P3_116073_91997  | NW_004515849.1 | Scaffold349 | 91997                   | CC                              | TT                | 1946499786               |
| SNP_P3_116074_92073  | NW_004515849.1 | Scaffold349 | 92073                   | CC                              | GG                | 1946499787               |
| SNP_P3_116075_92313  | NW_004515849.1 | Scaffold349 | 92313                   | AA                              | GG                | 1946499788               |
| SNP_P3_116076_92369  | NW_004515849.1 | Scaffold349 | 92369                   | TT                              | GG                | 1946499790               |
| SNP_P3_116077_92411  | NW_004515849.1 | Scaffold349 | 92411                   | AA                              | TT                | 1946499791               |
| SNP_P3_116078_98798  | NW_004515849.1 | Scaffold349 | 98798                   | GG                              | TT                | 1946499793               |
| SNP_P3_116079_128919 | NW_004515849.1 | Scaffold349 | 128919                  | GG                              | AA                | 1946499794               |
| SNP_P3_116080_159465 | NW_004515849.1 | Scaffold349 | 159465                  | AA                              | CC                | 1946499796               |
| SNP_P3_116081_160000 | NW_004515849.1 | Scaffold349 | 160000                  | AA                              | TT                | 1946499797               |
| SNP_P3_116082_160011 | NW_004515849.1 | Scaffold349 | 160011                  | CC                              | TT                | 1946499799               |
| SNP_P3_116083_160031 | NW_004515849.1 | Scaffold349 | 160031                  | TT                              | CC                | 1946499800               |
| SNP_P3_116084_160089 | NW_004515849.1 | Scaffold349 | 160089                  | AA                              | GG                | 1946499801               |
| SNP_P3_116085_166957 | NW_004515849.1 | Scaffold349 | 166957                  | TT                              | CC                | 1946499803               |
| SNP_P3_116087_167105 | NW_004515849.1 | Scaffold349 | 167105                  | AA                              | GG                | 1946499804               |
| SNP_P3_116088_172964 | NW_004515849.1 | Scaffold349 | 172964                  | TT                              | AA                | 1946499806               |
| SNP_P3_116089_174316 | NW_004515849.1 | Scaffold349 | 174316                  | AA                              | CC                | 1946499807               |
| SNP_P3_116090_177690 | NW_004515849.1 | Scaffold349 | 177690                  | AA                              | TT                | 1946499809               |
| SNP_P3_116091_177697 | NW_004515849.1 | Scaffold349 | 177697                  | GG                              | AA                | 1946499810               |
| SNP_P3_116092_177715 | NW_004515849.1 | Scaffold349 | 177715                  | TT                              | CC                | 1946499812               |
| SNP_P3_116093_177737 | NW_004515849.1 | Scaffold349 | 177737                  | CC                              | TT                | 1946499813               |
| SNP_P3_116095_177804 | NW_004515849.1 | Scaffold349 | 177804                  | AA                              | GG                | 1946499815               |
| SNP_P3_116096_177834 | NW_004515849.1 | Scaffold349 | 177834                  | CC                              | AA                | 1946499816               |
| SNP_P3_116097_177844 | NW_004515849.1 | Scaffold349 | 177844                  | GG                              | TT                | 1946499817               |
| SNP_P3_116098_178108 | NW_004515849.1 | Scaffold349 | 178108                  | CC                              | TT                | 1946499819               |
| SNP_P3_116099_178175 | NW_004515849.1 | Scaffold349 | 178175                  | CC                              | GG                | 1946499820               |
| SNP_P3_116100_214493 | NW_004515849.1 | Scaffold349 | 214493                  | GG                              | AA                | 1946499822               |
| SNP_P3_116101_233984 | NW_004515849.1 | Scaffold349 | 233984                  | AA                              | GG                | 1946499824               |
| SNP_P3_116102_238188 | NW_004515849.1 | Scaffold349 | 238188                  | CC                              | AA                | 1946499826               |
| SNP_P3_116103_238244 | NW_004515849.1 | Scaffold349 | 238244                  | TT                              | CC                | 1946499827               |
| SNP_P3_116104_238453 | NW_004515849.1 | Scaffold349 | 238453                  | CC                              | TT                | 1946499828               |
| SNP_P3_116105_238987 | NW_004515849.1 | Scaffold349 | 238987                  | AA                              | CC                | 1946499830               |
| SNP_P3_116106_282120 | NW_004515849.1 | Scaffold349 | 282120                  | GG                              | AA                | 1946499831               |
| SNP_P3_116107_290887 | NW_004515849.1 | Scaffold349 | 290887                  | AA                              | CC                | 1946499833               |
| SNP_P3_116108_327577 | NW_004515849.1 | Scaffold349 | 327577                  | CC                              | AA                | 1946499834               |
| SNP_P3_116109_335237 | NW_004515849.1 | Scaffold349 | 335237                  | GG                              | AA                | 1946499836               |
| SNP_P3_116111_335470 | NW_004515849.1 | Scaffold349 | 335470                  | CC                              | TT                | 1946499837               |
| SNP_P3_116112_335501 | NW_004515849.1 | Scaffold349 | 335501                  | TT                              | AA                | 1946499839               |
| SNP_P3_116113_335716 | NW_004515849.1 | Scaffold349 | 335716                  | GG                              | AA                | 1946499840               |
| SNP_P3_116114_338992 | NW_004515849.1 | Scaffold349 | 338992                  | AA                              | CC                | 1946499842               |
| SNP_P3_116115_346948 | NW_004515849.1 | Scaffold349 | 346948                  | AA                              | GG                | 1946499843               |
| SNP_P3_116116_347096 | NW_004515849.1 | Scaffold349 | 347096                  | AA                              | TT                | 1946499845               |

| SNPs IDs             | Chromosome IDs | Chromosomes | Physical positions (bp) | CDC Frontier (Reference genome) | (Pusa 256 & HPNB) | NCBI SNPdb Accession IDs |
|----------------------|----------------|-------------|-------------------------|---------------------------------|-------------------|--------------------------|
| SNP_P3_116117_558    | NW_004515850.1 | Scaffold350 | 558                     | GG                              | AA                | 1946499846               |
| SNP_P3_116118_584    | NW_004515850.1 | Scaffold350 | 584                     | AA                              | TT                | 1946499848               |
| SNP_P3_116119_5639   | NW_004515850.1 | Scaffold350 | 5639                    | GG                              | AA                | 1946499849               |
| SNP_P3_116120_5829   | NW_004515850.1 | Scaffold350 | 5829                    | CC                              | GG                | 1946499851               |
| SNP_P3_116121_5838   | NW_004515850.1 | Scaffold350 | 5838                    | CC                              | TT                | 1946499853               |
| SNP_P3_116122_5850   | NW_004515850.1 | Scaffold350 | 5850                    | GG                              | TT                | 1946499854               |
| SNP_P3_116123_6219   | NW_004515850.1 | Scaffold350 | 6219                    | TT                              | CC                | 1946499856               |
| SNP_P3_116124_9512   | NW_004515850.1 | Scaffold350 | 9512                    | TT                              | CC                | 1946499857               |
| SNP_P3_116125_10306  | NW_004515850.1 | Scaffold350 | 10306                   | GG                              | CC                | 1946499859               |
| SNP_P3_116126_16059  | NW_004515850.1 | Scaffold350 | 16059                   | TT                              | CC                | 1946499860               |
| SNP_P3_116127_30527  | NW_004515850.1 | Scaffold350 | 30527                   | TT                              | AA                | 1946499862               |
| SNP_P3_116128_36646  | NW_004515850.1 | Scaffold350 | 36646                   | AA                              | GG                | 1946499863               |
| SNP_P3_116129_36654  | NW_004515850.1 | Scaffold350 | 36654                   | TT                              | CC                | 1946499865               |
| SNP_P3_116130_36664  | NW_004515850.1 | Scaffold350 | 36664                   | GG                              | AA                | 1946499866               |
| SNP_P3_116131_36733  | NW_004515850.1 | Scaffold350 | 36733                   | AA                              | GG                | 1946499868               |
| SNP_P3_116132_36744  | NW_004515850.1 | Scaffold350 | 36744                   | AA                              | TT                | 1946499869               |
| SNP_P3_116133_36755  | NW_004515850.1 | Scaffold350 | 36755                   | TT                              | AA                | 1946499871               |
| SNP_P3_116134_37208  | NW_004515850.1 | Scaffold350 | 37208                   | AA                              | GG                | 1946499872               |
| SNP_P3_116135_41908  | NW_004515850.1 | Scaffold350 | 41908                   | TT                              | GG                | 1946499874               |
| SNP_P3_116136_41925  | NW_004515850.1 | Scaffold350 | 41925                   | CC                              | TT                | 1946499875               |
| SNP_P3_116137_45310  | NW_004515850.1 | Scaffold350 | 45310                   | TT                              | GG                | 1946499877               |
| SNP_P3_116138_45312  | NW_004515850.1 | Scaffold350 | 45312                   | AA                              | TT                | 1946499878               |
| SNP_P3_116139_60664  | NW_004515850.1 | Scaffold350 | 60664                   | GG                              | TT                | 1946499880               |
| SNP_P3_116140_67076  | NW_004515850.1 | Scaffold350 | 67076                   | GG                              | TT                | 1946499881               |
| SNP_P3_116141_67091  | NW_004515850.1 | Scaffold350 | 67091                   | CC                              | TT                | 1946499883               |
| SNP_P3_116142_68491  | NW_004515850.1 | Scaffold350 | 68491                   | TT                              | CC                | 1946499884               |
| SNP_P3_116143_68506  | NW_004515850.1 | Scaffold350 | 68506                   | GG                              | AA                | 1946499886               |
| SNP_P3_116144_69521  | NW_004515850.1 | Scaffold350 | 69521                   | AA                              | CC                | 1946499887               |
| SNP_P3_116145_69552  | NW_004515850.1 | Scaffold350 | 69552                   | GG                              | AA                | 1946499888               |
| SNP_P3_116146_69564  | NW_004515850.1 | Scaffold350 | 69564                   | CC                              | TT                | 1946499890               |
| SNP_P3_116147_69980  | NW_004515850.1 | Scaffold350 | 69980                   | TT                              | CC                | 1946499891               |
| SNP_P3_116148_70052  | NW_004515850.1 | Scaffold350 | 70052                   | CC                              | TT                | 1946499893               |
| SNP_P3_116149_86386  | NW_004515850.1 | Scaffold350 | 86386                   | GG                              | TT                | 1946499894               |
| SNP_P3_116150_86388  | NW_004515850.1 | Scaffold350 | 86388                   | TT                              | AA                | 1946499896               |
| SNP_P3_116151_86484  | NW_004515850.1 | Scaffold350 | 86484                   | CC                              | GG                | 1946499897               |
| SNP_P3_116152_86753  | NW_004515850.1 | Scaffold350 | 86753                   | GG                              | AA                | 1946499899               |
| SNP_P3_116153_86826  | NW_004515850.1 | Scaffold350 | 86826                   | TT                              | GG                | 1946499900               |
| SNP_P3_116154_86839  | NW_004515850.1 | Scaffold350 | 86839                   | AA                              | GG                | 1946499902               |
| SNP_P3_116155_86904  | NW_004515850.1 | Scaffold350 | 86904                   | AA                              | GG                | 1946499903               |
| SNP_P3_116156_95347  | NW_004515850.1 | Scaffold350 | 95347                   | CC                              | TT                | 1946499905               |
| SNP_P3_116157_103771 | NW_004515850.1 | Scaffold350 | 103771                  | GG                              | TT                | 1946499906               |
| SNP_P3_116158_103781 | NW_004515850.1 | Scaffold350 | 103781                  | CC                              | TT                | 1946499907               |

| SNPs IDs             | Chromosome IDs | Chromosomes | Physical positions (bp) | CDC Frontier (Reference genome) | (Pusa 256 & HPNB) | NCBI SNPdb Accession IDs |
|----------------------|----------------|-------------|-------------------------|---------------------------------|-------------------|--------------------------|
| SNP_P3_116159_104133 | NW_004515850.1 | Scaffold350 | 104133                  | AA                              | TT                | 1946499909               |
| SNP_P3_116160_114919 | NW_004515850.1 | Scaffold350 | 114919                  | CC                              | TT                | 1946499910               |
| SNP_P3_116161_114944 | NW_004515850.1 | Scaffold350 | 114944                  | TT                              | CC                | 1946499912               |
| SNP_P3_116163_128168 | NW_004515850.1 | Scaffold350 | 128168                  | GG                              | AA                | 1946499913               |
| SNP_P3_116164_128199 | NW_004515850.1 | Scaffold350 | 128199                  | TT                              | GG                | 1946499915               |
| SNP_P3_116165_135631 | NW_004515850.1 | Scaffold350 | 135631                  | AA                              | CC                | 1946499916               |
| SNP_P3_116166_146817 | NW_004515850.1 | Scaffold350 | 146817                  | GG                              | AA                | 1946499918               |
| SNP_P3_116167_150564 | NW_004515850.1 | Scaffold350 | 150564                  | AA                              | GG                | 1946499919               |
| SNP_P3_116168_151114 | NW_004515850.1 | Scaffold350 | 151114                  | AA                              | GG                | 1946499921               |
| SNP_P3_116169_165101 | NW_004515850.1 | Scaffold350 | 165101                  | GG                              | AA                | 1946499922               |
| SNP_P3_116170_165206 | NW_004515850.1 | Scaffold350 | 165206                  | CC                              | TT                | 1946499923               |
| SNP_P3_116171_165244 | NW_004515850.1 | Scaffold350 | 165244                  | GG                              | CC                | 1946499925               |
| SNP_P3_116173_165798 | NW_004515850.1 | Scaffold350 | 165798                  | TT                              | CC                | 1946499926               |
| SNP_P3_116174_165825 | NW_004515850.1 | Scaffold350 | 165825                  | CC                              | AA                | 1946499928               |
| SNP_P3_116175_166048 | NW_004515850.1 | Scaffold350 | 166048                  | TT                              | AA                | 1946499929               |
| SNP_P3_116176_4414   | NW_004515851.1 | Scaffold351 | 4414                    | CC                              | GG                | 1946499931               |
| SNP_P3_116177_4743   | NW_004515851.1 | Scaffold351 | 4743                    | AA                              | GG                | 1946499932               |
| SNP_P3_116178_4760   | NW_004515851.1 | Scaffold351 | 4760                    | TT                              | AA                | 1946499934               |
| SNP_P3_116179_7924   | NW_004515851.1 | Scaffold351 | 7924                    | AA                              | CC                | 1946499935               |
| SNP_P3_116180_8214   | NW_004515851.1 | Scaffold351 | 8214                    | GG                              | AA                | 1946499937               |
| SNP_P3_116181_8263   | NW_004515851.1 | Scaffold351 | 8263                    | AA                              | TT                | 1946499938               |
| SNP_P3_116182_8381   | NW_004515851.1 | Scaffold351 | 8381                    | TT                              | AA                | 1946499939               |
| SNP_P3_116183_15509  | NW_004515851.1 | Scaffold351 | 15509                   | GG                              | AA                | 1946499941               |
| SNP_P3_116184_15793  | NW_004515851.1 | Scaffold351 | 15793                   | TT                              | CC                | 1946499942               |
| SNP_P3_116185_15794  | NW_004515851.1 | Scaffold351 | 15794                   | GG                              | AA                | 1946499944               |
| SNP_P3_116186_15820  | NW_004515851.1 | Scaffold351 | 15820                   | TT                              | GG                | 1946499945               |
| SNP_P3_116187_24128  | NW_004515851.1 | Scaffold351 | 24128                   | TT                              | AA                | 1946499947               |
| SNP_P3_116188_24268  | NW_004515851.1 | Scaffold351 | 24268                   | GG                              | AA                | 1946499948               |
| SNP_P3_116189_24285  | NW_004515851.1 | Scaffold351 | 24285                   | CC                              | GG                | 1946499950               |
| SNP_P3_116190_24385  | NW_004515851.1 | Scaffold351 | 24385                   | AA                              | CC                | 1946499951               |
| SNP_P3_116191_41945  | NW_004515851.1 | Scaffold351 | 41945                   | AA                              | TT                | 1946499953               |
| SNP_P3_116192_59646  | NW_004515851.1 | Scaffold351 | 59646                   | TT                              | AA                | 1946499954               |
| SNP_P3_116193_66533  | NW_004515851.1 | Scaffold351 | 66533                   | GG                              | AA                | 1946499955               |
| SNP_P3_116194_67199  | NW_004515851.1 | Scaffold351 | 67199                   | CC                              | TT                | 1946499957               |
| SNP_P3_116195_6890   | NW_004515852.1 | Scaffold352 | 6890                    | AA                              | TT                | 1946499958               |
| SNP_P3_116196_22275  | NW_004515852.1 | Scaffold352 | 22275                   | CC                              | AA                | 1946499960               |
| SNP_P3_116197_22912  | NW_004515852.1 | Scaffold352 | 22912                   | CC                              | TT                | 1946499961               |
| SNP_P3_116198_23106  | NW_004515852.1 | Scaffold352 | 23106                   | TT                              | CC                | 1946499963               |
| SNP_P3_116199_23152  | NW_004515852.1 | Scaffold352 | 23152                   | CC                              | TT                | 1946499964               |
| SNP_P3_116200_23167  | NW_004515852.1 | Scaffold352 | 23167                   | TT                              | CC                | 1946499966               |
| SNP_P3_116201_23223  | NW_004515852.1 | Scaffold352 | 23223                   | AA                              | GG                | 1946499967               |
| SNP_P3_116202_23291  | NW_004515852.1 | Scaffold352 | 23291                   | CC                              | TT                | 1946499969               |



| SNPs IDs             | Chromosome IDs | Chromosomes | Physical positions (bp) | CDC Frontier (Reference genome) | (Pusa 256 & HPNB) | NCBI SNPdb Accession IDs |
|----------------------|----------------|-------------|-------------------------|---------------------------------|-------------------|--------------------------|
| SNP_P3_116204_26292  | NW_004515852.1 | Scaffold352 | 26292                   | TT                              | CC                | 1946499970               |
| SNP_P3_116205_35184  | NW_004515852.1 | Scaffold352 | 35184                   | GG                              | AA                | 1946499972               |
| SNP_P3_116206_35193  | NW_004515852.1 | Scaffold352 | 35193                   | AA                              | GG                | 1946499973               |
| SNP_P3_116207_35197  | NW_004515852.1 | Scaffold352 | 35197                   | TT                              | CC                | 1946499975               |
| SNP_P3_116208_35212  | NW_004515852.1 | Scaffold352 | 35212                   | AA                              | CC                | 1946499976               |
| SNP_P3_116209_48651  | NW_004515852.1 | Scaffold352 | 48651                   | GG                              | AA                | 1946499978               |
| SNP_P3_116210_48673  | NW_004515852.1 | Scaffold352 | 48673                   | CC                              | GG                | 1946499979               |
| SNP_P3_116211_48759  | NW_004515852.1 | Scaffold352 | 48759                   | GG                              | AA                | 1946499981               |
| SNP_P3_116212_48783  | NW_004515852.1 | Scaffold352 | 48783                   | TT                              | AA                | 1946499982               |
| SNP_P3_116213_48787  | NW_004515852.1 | Scaffold352 | 48787                   | GG                              | AA                | 1946499984               |
| SNP_P3_116214_52398  | NW_004515852.1 | Scaffold352 | 52398                   | TT                              | CC                | 1946499985               |
| SNP_P3_116215_52403  | NW_004515852.1 | Scaffold352 | 52403                   | CC                              | TT                | 1946499986               |
| SNP_P3_116216_52407  | NW_004515852.1 | Scaffold352 | 52407                   | AA                              | CC                | 1946499988               |
| SNP_P3_116217_54821  | NW_004515852.1 | Scaffold352 | 54821                   | AA                              | GG                | 1946499989               |
| SNP_P3_116218_54883  | NW_004515852.1 | Scaffold352 | 54883                   | AA                              | TT                | 1946499991               |
| SNP_P3_116219_57972  | NW_004515852.1 | Scaffold352 | 57972                   | GG                              | AA                | 1946499992               |
| SNP_P3_116220_57984  | NW_004515852.1 | Scaffold352 | 57984                   | CC                              | AA                | 1946499994               |
| SNP_P3_116221_62276  | NW_004515852.1 | Scaffold352 | 62276                   | CC                              | TT                | 1946499995               |
| SNP_P3_116222_63811  | NW_004515852.1 | Scaffold352 | 63811                   | TT                              | CC                | 1946499997               |
| SNP_P3_116223_63980  | NW_004515852.1 | Scaffold352 | 63980                   | TT                              | AA                | 1946499998               |
| SNP_P3_116224_95363  | NW_004515852.1 | Scaffold352 | 95363                   | AA                              | GG                | 1946500000               |
| SNP_P3_116225_103952 | NW_004515852.1 | Scaffold352 | 103952                  | AA                              | GG                | 1946500001               |
| SNP_P3_116226_106677 | NW_004515852.1 | Scaffold352 | 106677                  | TT                              | CC                | 1946500003               |
| SNP_P3_116227_106684 | NW_004515852.1 | Scaffold352 | 106684                  | GG                              | TT                | 1946500004               |
| SNP_P3_116228_106685 | NW_004515852.1 | Scaffold352 | 106685                  | GG                              | CC                | 1946500006               |
| SNP_P3_116229_106702 | NW_004515852.1 | Scaffold352 | 106702                  | GG                              | TT                | 1946500007               |
| SNP_P3_116230_106721 | NW_004515852.1 | Scaffold352 | 106721                  | TT                              | GG                | 1946500009               |
| SNP_P3_116231_107908 | NW_004515852.1 | Scaffold352 | 107908                  | CC                              | TT                | 1946500010               |
| SNP_P3_116232_109087 | NW_004515852.1 | Scaffold352 | 109087                  | AA                              | TT                | 1946500012               |
| SNP_P3_116234_133447 | NW_004515852.1 | Scaffold352 | 133447                  | TT                              | AA                | 1946500013               |
| SNP_P3_116236_133603 | NW_004515852.1 | Scaffold352 | 133603                  | GG                              | CC                | 1946500015               |
| SNP_P3_116237_133606 | NW_004515852.1 | Scaffold352 | 133606                  | GG                              | AA                | 1946500016               |
| SNP_P3_116238_133918 | NW_004515852.1 | Scaffold352 | 133918                  | AA                              | TT                | 1946500017               |
| SNP_P3_116239_152113 | NW_004515852.1 | Scaffold352 | 152113                  | TT                              | CC                | 1946500019               |
| SNP_P3_116240_154136 | NW_004515852.1 | Scaffold352 | 154136                  | CC                              | TT                | 1946500020               |
| SNP_P3_116241_154633 | NW_004515852.1 | Scaffold352 | 154633                  | AA                              | GG                | 1946500022               |
| SNP_P3_116242_154652 | NW_004515852.1 | Scaffold352 | 154652                  | TT                              | CC                | 1946500023               |
| SNP_P3_116243_154676 | NW_004515852.1 | Scaffold352 | 154676                  | TT                              | GG                | 1946500024               |
| SNP_P3_116244_154914 | NW_004515852.1 | Scaffold352 | 154914                  | TT                              | CC                | 1946500026               |
| SNP_P3_116245_172571 | NW_004515852.1 | Scaffold352 | 172571                  | AA                              | CC                | 1946500027               |
| SNP_P3_116246_172572 | NW_004515852.1 | Scaffold352 | 172572                  | TT                              | CC                | 1946500029               |
| SNP_P3_116247_172637 | NW_004515852.1 | Scaffold352 | 172637                  | CC                              | TT                | 1946500030               |

| SNPs IDs             | Chromosome IDs | Chromosomes | Physical positions (bp) | CDC Frontier (Reference genome) | (Pusa 256 & HPNB) | NCBI SNPdb Accession IDs |
|----------------------|----------------|-------------|-------------------------|---------------------------------|-------------------|--------------------------|
| SNP_P3_116248_172666 | NW_004515852.1 | Scaffold352 | 172666                  | TT                              | GG                | 1946500032               |
| SNP_P3_116249_173000 | NW_004515852.1 | Scaffold352 | 173000                  | GG                              | AA                | 1946500033               |
| SNP_P3_116250_173059 | NW_004515852.1 | Scaffold352 | 173059                  | CC                              | TT                | 1946500034               |
| SNP_P3_116251_174360 | NW_004515852.1 | Scaffold352 | 174360                  | CC                              | TT                | 1946500036               |
| SNP_P3_116252_174485 | NW_004515852.1 | Scaffold352 | 174485                  | AA                              | TT                | 1946500037               |
| SNP_P3_116253_174544 | NW_004515852.1 | Scaffold352 | 174544                  | AA                              | GG                | 1946500039               |
| SNP_P3_116254_174548 | NW_004515852.1 | Scaffold352 | 174548                  | CC                              | GG                | 1946500040               |
| SNP_P3_116255_174549 | NW_004515852.1 | Scaffold352 | 174549                  | GG                              | AA                | 1946500042               |
| SNP_P3_116256_177507 | NW_004515852.1 | Scaffold352 | 177507                  | GG                              | AA                | 1946500043               |
| SNP_P3_116257_177578 | NW_004515852.1 | Scaffold352 | 177578                  | CC                              | TT                | 1946500044               |
| SNP_P3_116258_177643 | NW_004515852.1 | Scaffold352 | 177643                  | TT                              | CC                | 1946500046               |
| SNP_P3_116259_177875 | NW_004515852.1 | Scaffold352 | 177875                  | AA                              | GG                | 1946500047               |
| SNP_P3_116260_177908 | NW_004515852.1 | Scaffold352 | 177908                  | CC                              | TT                | 1946500049               |
| SNP_P3_116261_177951 | NW_004515852.1 | Scaffold352 | 177951                  | CC                              | TT                | 1946500050               |
| SNP_P3_116264_178017 | NW_004515852.1 | Scaffold352 | 178017                  | AA                              | TT                | 1946500052               |
| SNP_P3_116265_178129 | NW_004515852.1 | Scaffold352 | 178129                  | AA                              | GG                | 1946500053               |
| SNP_P3_116266_178191 | NW_004515852.1 | Scaffold352 | 178191                  | CC                              | GG                | 1946500054               |
| SNP_P3_116267_178247 | NW_004515852.1 | Scaffold352 | 178247                  | GG                              | CC                | 1946500056               |
| SNP_P3_116268_178351 | NW_004515852.1 | Scaffold352 | 178351                  | TT                              | GG                | 1946500057               |
| SNP_P3_116269_178473 | NW_004515852.1 | Scaffold352 | 178473                  | TT                              | GG                | 1946500059               |
| SNP_P3_116270_178478 | NW_004515852.1 | Scaffold352 | 178478                  | CC                              | GG                | 1946500060               |
| SNP_P3_116272_178720 | NW_004515852.1 | Scaffold352 | 178720                  | GG                              | CC                | 1946500062               |
| SNP_P3_116273_178739 | NW_004515852.1 | Scaffold352 | 178739                  | GG                              | CC                | 1946500063               |
| SNP_P3_116274_178807 | NW_004515852.1 | Scaffold352 | 178807                  | TT                              | CC                | 1946500064               |
| SNP_P3_116275_179013 | NW_004515852.1 | Scaffold352 | 179013                  | TT                              | CC                | 1946500066               |
| SNP_P3_116276_179142 | NW_004515852.1 | Scaffold352 | 179142                  | GG                              | AA                | 1946500067               |
| SNP_P3_116277_179147 | NW_004515852.1 | Scaffold352 | 179147                  | TT                              | CC                | 1946500069               |
| SNP_P3_116278_180829 | NW_004515852.1 | Scaffold352 | 180829                  | AA                              | GG                | 1946500070               |
| SNP_P3_116279_182645 | NW_004515852.1 | Scaffold352 | 182645                  | GG                              | AA                | 1946500071               |
| SNP_P3_116280_183345 | NW_004515852.1 | Scaffold352 | 183345                  | GG                              | AA                | 1946500073               |
| SNP_P3_116281_188959 | NW_004515852.1 | Scaffold352 | 188959                  | GG                              | TT                | 1946500074               |
| SNP_P3_116282_189478 | NW_004515852.1 | Scaffold352 | 189478                  | AA                              | CC                | 1946500076               |
| SNP_P3_116283_189492 | NW_004515852.1 | Scaffold352 | 189492                  | CC                              | TT                | 1946500077               |
| SNP_P3_116284_191887 | NW_004515852.1 | Scaffold352 | 191887                  | GG                              | AA                | 1946500079               |
| SNP_P3_116285_192059 | NW_004515852.1 | Scaffold352 | 192059                  | GG                              | AA                | 1946500080               |
| SNP_P3_116287_193088 | NW_004515852.1 | Scaffold352 | 193088                  | TT                              | CC                | 1946500081               |
| SNP_P3_116288_193321 | NW_004515852.1 | Scaffold352 | 193321                  | CC                              | TT                | 1946500083               |
| SNP_P3_116289_193376 | NW_004515852.1 | Scaffold352 | 193376                  | AA                              | GG                | 1946500084               |
| SNP_P3_116290_194116 | NW_004515852.1 | Scaffold352 | 194116                  | CC                              | TT                | 1946500086               |
| SNP_P3_116291_194338 | NW_004515852.1 | Scaffold352 | 194338                  | AA                              | TT                | 1946500087               |
| SNP_P3_116292_194520 | NW_004515852.1 | Scaffold352 | 194520                  | TT                              | CC                | 1946500089               |
| SNP_P3_116293_194555 | NW_004515852.1 | Scaffold352 | 194555                  | CC                              | TT                | 1946500090               |

| SNPs IDs            | Chromosome IDs | Chromosomes | Physical positions (bp) | CDC Frontier (Reference genome) | (Pusa 256 & HPNB) | NCBI SNPdb Accession IDs |
|---------------------|----------------|-------------|-------------------------|---------------------------------|-------------------|--------------------------|
| SNP_P3_116294_6827  | NW_004515853.1 | Scaffold353 | 6827                    | TT                              | CC                | 1946500091               |
| SNP_P3_116295_14507 | NW_004515853.1 | Scaffold353 | 14507                   | AA                              | GG                | 1946500094               |
| SNP_P3_116296_16896 | NW_004515853.1 | Scaffold353 | 16896                   | GG                              | AA                | 1946500095               |
| SNP_P3_116297_16902 | NW_004515853.1 | Scaffold353 | 16902                   | GG                              | AA                | 1946500097               |
| SNP_P3_116298_19070 | NW_004515853.1 | Scaffold353 | 19070                   | CC                              | TT                | 1946500098               |
| SNP_P3_116299_19096 | NW_004515853.1 | Scaffold353 | 19096                   | GG                              | TT                | 1946500099               |
| SNP_P3_116300_19793 | NW_004515853.1 | Scaffold353 | 19793                   | AA                              | TT                | 1946500101               |
| SNP_P3_116301_25530 | NW_004515853.1 | Scaffold353 | 25530                   | CC                              | TT                | 1946500102               |
| SNP_P3_116302_28194 | NW_004515853.1 | Scaffold353 | 28194                   | TT                              | CC                | 1946500104               |
| SNP_P3_116303_28309 | NW_004515853.1 | Scaffold353 | 28309                   | TT                              | AA                | 1946500105               |
| SNP_P3_116304_28481 | NW_004515853.1 | Scaffold353 | 28481                   | AA                              | GG                | 1946500107               |
| SNP_P3_116305_31006 | NW_004515853.1 | Scaffold353 | 31006                   | AA                              | GG                | 1946500108               |
| SNP_P3_116306_31009 | NW_004515853.1 | Scaffold353 | 31009                   | AA                              | GG                | 1946500109               |
| SNP_P3_116307_43968 | NW_004515853.1 | Scaffold353 | 43968                   | CC                              | TT                | 1946500111               |
| SNP_P3_116308_59026 | NW_004515853.1 | Scaffold353 | 59026                   | AA                              | TT                | 1946500112               |
| SNP_P3_116309_59073 | NW_004515853.1 | Scaffold353 | 59073                   | CC                              | TT                | 1946500114               |
| SNP_P3_116310_59079 | NW_004515853.1 | Scaffold353 | 59079                   | TT                              | AA                | 1946500115               |
| SNP_P3_116311_59086 | NW_004515853.1 | Scaffold353 | 59086                   | TT                              | CC                | 1946500116               |
| SNP_P3_116312_59108 | NW_004515853.1 | Scaffold353 | 59108                   | GG                              | TT                | 1946500118               |
| SNP_P3_116313_59110 | NW_004515853.1 | Scaffold353 | 59110                   | GG                              | TT                | 1946500119               |
| SNP_P3_116314_59111 | NW_004515853.1 | Scaffold353 | 59111                   | TT                              | CC                | 1946500121               |
| SNP_P3_116315_59269 | NW_004515853.1 | Scaffold353 | 59269                   | AA                              | CC                | 1946500122               |
| SNP_P3_116316_59972 | NW_004515853.1 | Scaffold353 | 59972                   | AA                              | GG                | 1946500124               |
| SNP_P3_116317_727   | NW_004515855.1 | Scaffold355 | 727                     | AA                              | CC                | 1946500125               |
| SNP_P3_116318_951   | NW_004515855.1 | Scaffold355 | 951                     | TT                              | GG                | 1946500127               |
| SNP_P3_116319_999   | NW_004515855.1 | Scaffold355 | 999                     | AA                              | CC                | 1946500128               |
| SNP_P3_116320_1055  | NW_004515855.1 | Scaffold355 | 1055                    | GG                              | AA                | 1946500129               |
| SNP_P3_116321_1078  | NW_004515855.1 | Scaffold355 | 1078                    | AA                              | TT                | 1946500131               |
| SNP_P3_116322_1144  | NW_004515855.1 | Scaffold355 | 1144                    | AA                              | GG                | 1946500132               |
| SNP_P3_116324_1433  | NW_004515855.1 | Scaffold355 | 1433                    | CC                              | TT                | 1946500134               |
| SNP_P3_116325_1446  | NW_004515855.1 | Scaffold355 | 1446                    | GG                              | AA                | 1946500135               |
| SNP_P3_116326_2145  | NW_004515855.1 | Scaffold355 | 2145                    | TT                              | GG                | 1946500137               |
| SNP_P3_116327_7661  | NW_004515855.1 | Scaffold355 | 7661                    | CC                              | AA                | 1946500138               |
| SNP_P3_116328_7972  | NW_004515855.1 | Scaffold355 | 7972                    | AA                              | GG                | 1946500140               |
| SNP_P3_116329_7981  | NW_004515855.1 | Scaffold355 | 7981                    | TT                              | AA                | 1946500141               |
| SNP_P3_116330_15722 | NW_004515855.1 | Scaffold355 | 15722                   | TT                              | AA                | 1946500143               |
| SNP_P3_116331_15759 | NW_004515855.1 | Scaffold355 | 15759                   | CC                              | AA                | 1946500144               |
| SNP_P3_116332_15862 | NW_004515855.1 | Scaffold355 | 15862                   | GG                              | CC                | 1946500146               |
| SNP_P3_116333_16039 | NW_004515855.1 | Scaffold355 | 16039                   | CC                              | TT                | 1946500147               |
| SNP_P3_116334_16875 | NW_004515855.1 | Scaffold355 | 16875                   | CC                              | TT                | 1946500149               |
| SNP_P3_116335_31372 | NW_004515855.1 | Scaffold355 | 31372                   | GG                              | AA                | 1946500150               |
| SNP_P3_116336_31973 | NW_004515855.1 | Scaffold355 | 31973                   | CC                              | AA                | 1946500151               |

| SNPs IDs            | Chromosome IDs | Chromosomes | Physical positions (bp) | CDC Frontier (Reference genome) | (Pusa 256 & HPNB) | NCBI SNPdb Accession IDs |
|---------------------|----------------|-------------|-------------------------|---------------------------------|-------------------|--------------------------|
| SNP_P3_116337_36427 | NW_004515855.1 | Scaffold355 | 36427                   | CC                              | TT                | 1946500153               |
| SNP_P3_116338_42692 | NW_004515855.1 | Scaffold355 | 42692                   | TT                              | CC                | 1946500154               |
| SNP_P3_116339_42708 | NW_004515855.1 | Scaffold355 | 42708                   | TT                              | CC                | 1946500156               |
| SNP_P3_116340_42726 | NW_004515855.1 | Scaffold355 | 42726                   | GG                              | TT                | 1946500157               |
| SNP_P3_116341_43387 | NW_004515855.1 | Scaffold355 | 43387                   | TT                              | GG                | 1946500159               |
| SNP_P3_116342_44692 | NW_004515855.1 | Scaffold355 | 44692                   | TT                              | AA                | 1946500160               |
| SNP_P3_116343_44784 | NW_004515855.1 | Scaffold355 | 44784                   | AA                              | TT                | 1946500161               |
| SNP_P3_116344_51901 | NW_004515855.1 | Scaffold355 | 51901                   | AA                              | GG                | 1946500163               |
| SNP_P3_116345_51979 | NW_004515855.1 | Scaffold355 | 51979                   | TT                              | CC                | 1946500164               |
| SNP_P3_116346_52259 | NW_004515855.1 | Scaffold355 | 52259                   | GG                              | CC                | 1946500166               |
| SNP_P3_116347_52306 | NW_004515855.1 | Scaffold355 | 52306                   | TT                              | CC                | 1946500167               |
| SNP_P3_116349_64761 | NW_004515855.1 | Scaffold355 | 64761                   | TT                              | CC                | 1946500169               |
| SNP_P3_116350_66635 | NW_004515855.1 | Scaffold355 | 66635                   | GG                              | TT                | 1946500170               |
| SNP_P3_116351_72411 | NW_004515855.1 | Scaffold355 | 72411                   | TT                              | CC                | 1946500172               |
| SNP_P3_116352_72412 | NW_004515855.1 | Scaffold355 | 72412                   | GG                              | AA                | 1946500174               |
| SNP_P3_116353_72414 | NW_004515855.1 | Scaffold355 | 72414                   | GG                              | TT                | 1946500175               |
| SNP_P3_116354_72418 | NW_004515855.1 | Scaffold355 | 72418                   | GG                              | AA                | 1946500176               |
| SNP_P3_116355_77066 | NW_004515855.1 | Scaffold355 | 77066                   | CC                              | GG                | 1946500178               |
| SNP_P3_116356_86434 | NW_004515855.1 | Scaffold355 | 86434                   | AA                              | GG                | 1946500180               |
| SNP_P3_116357_86462 | NW_004515855.1 | Scaffold355 | 86462                   | CC                              | TT                | 1946500182               |
| SNP_P3_116358_86523 | NW_004515855.1 | Scaffold355 | 86523                   | CC                              | TT                | 1946500183               |
| SNP_P3_116359_86555 | NW_004515855.1 | Scaffold355 | 86555                   | TT                              | CC                | 1946500185               |
| SNP_P3_116360_86567 | NW_004515855.1 | Scaffold355 | 86567                   | AA                              | GG                | 1946500186               |
| SNP_P3_116361_86570 | NW_004515855.1 | Scaffold355 | 86570                   | CC                              | GG                | 1946500188               |
| SNP_P3_116362_86659 | NW_004515855.1 | Scaffold355 | 86659                   | AA                              | CC                | 1946500189               |
| SNP_P3_116363_86698 | NW_004515855.1 | Scaffold355 | 86698                   | TT                              | CC                | 1946500191               |
| SNP_P3_116364_86724 | NW_004515855.1 | Scaffold355 | 86724                   | AA                              | GG                | 1946500192               |
| SNP_P3_116365_86899 | NW_004515855.1 | Scaffold355 | 86899                   | AA                              | CC                | 1946500194               |
| SNP_P3_116366_87056 | NW_004515855.1 | Scaffold355 | 87056                   | TT                              | AA                | 1946500195               |
| SNP_P3_116367_88179 | NW_004515855.1 | Scaffold355 | 88179                   | GG                              | TT                | 1946500197               |
| SNP_P3_116368_88592 | NW_004515855.1 | Scaffold355 | 88592                   | CC                              | AA                | 1946500198               |
| SNP_P3_116369_88609 | NW_004515855.1 | Scaffold355 | 88609                   | AA                              | GG                | 1946500199               |
| SNP_P3_116370_88619 | NW_004515855.1 | Scaffold355 | 88619                   | TT                              | CC                | 1946500201               |
| SNP_P3_116371_88620 | NW_004515855.1 | Scaffold355 | 88620                   | CC                              | TT                | 1946500202               |
| SNP_P3_116372_88629 | NW_004515855.1 | Scaffold355 | 88629                   | TT                              | CC                | 1946500204               |
| SNP_P3_116373_88630 | NW_004515855.1 | Scaffold355 | 88630                   | CC                              | GG                | 1946500205               |
| SNP_P3_116374_88647 | NW_004515855.1 | Scaffold355 | 88647                   | TT                              | CC                | 1946500207               |
| SNP_P3_116375_88694 | NW_004515855.1 | Scaffold355 | 88694                   | AA                              | GG                | 1946500208               |
| SNP_P3_116376_88725 | NW_004515855.1 | Scaffold355 | 88725                   | AA                              | GG                | 1946500210               |
| SNP_P3_116377_88726 | NW_004515855.1 | Scaffold355 | 88726                   | AA                              | CC                | 1946500211               |
| SNP_P3_116378_90908 | NW_004515855.1 | Scaffold355 | 90908                   | CC                              | TT                | 1946500213               |
| SNP_P3_116379_307   | NW_004515856.1 | Scaffold357 | 307                     | AA                              | GG                | 1946500214               |

| SNPs IDs            | Chromosome IDs | Chromosomes | Physical positions (bp) | CDC Frontier (Reference genome) | (Pusa 256 & HPNB) | NCBI SNPdb Accession IDs |
|---------------------|----------------|-------------|-------------------------|---------------------------------|-------------------|--------------------------|
| SNP_P3_116381_1287  | NW_004515856.1 | Scaffold357 | 1287                    | CC                              | GG                | 1946500216               |
| SNP_P3_116382_1327  | NW_004515856.1 | Scaffold357 | 1327                    | AA                              | GG                | 1946500217               |
| SNP_P3_116383_1483  | NW_004515856.1 | Scaffold357 | 1483                    | AA                              | GG                | 1946500219               |
| SNP_P3_116384_1558  | NW_004515856.1 | Scaffold357 | 1558                    | CC                              | GG                | 1946500220               |
| SNP_P3_116385_1635  | NW_004515856.1 | Scaffold357 | 1635                    | CC                              | TT                | 1946500222               |
| SNP_P3_116386_1651  | NW_004515856.1 | Scaffold357 | 1651                    | CC                              | AA                | 1946500223               |
| SNP_P3_116387_1656  | NW_004515856.1 | Scaffold357 | 1656                    | CC                              | GG                | 1946500225               |
| SNP_P3_116388_1661  | NW_004515856.1 | Scaffold357 | 1661                    | CC                              | AA                | 1946500226               |
| SNP_P3_116389_1712  | NW_004515856.1 | Scaffold357 | 1712                    | AA                              | TT                | 1946500228               |
| SNP_P3_116390_1763  | NW_004515856.1 | Scaffold357 | 1763                    | AA                              | TT                | 1946500229               |
| SNP_P3_116391_1854  | NW_004515856.1 | Scaffold357 | 1854                    | GG                              | AA                | 1946500230               |
| SNP_P3_116392_1860  | NW_004515856.1 | Scaffold357 | 1860                    | TT                              | GG                | 1946500232               |
| SNP_P3_116393_1885  | NW_004515856.1 | Scaffold357 | 1885                    | AA                              | GG                | 1946500233               |
| SNP_P3_116394_1910  | NW_004515856.1 | Scaffold357 | 1910                    | AA                              | CC                | 1946500235               |
| SNP_P3_116395_1963  | NW_004515856.1 | Scaffold357 | 1963                    | TT                              | AA                | 1946500236               |
| SNP_P3_116396_2269  | NW_004515856.1 | Scaffold357 | 2269                    | CC                              | TT                | 1946500238               |
| SNP_P3_116397_13800 | NW_004515858.1 | Scaffold362 | 13800                   | CC                              | TT                | 1946500239               |
| SNP_P3_116398_13845 | NW_004515858.1 | Scaffold362 | 13845                   | AA                              | CC                | 1946500241               |
| SNP_P3_116399_14159 | NW_004515858.1 | Scaffold362 | 14159                   | TT                              | CC                | 1946500242               |
| SNP_P3_116400_14187 | NW_004515858.1 | Scaffold362 | 14187                   | AA                              | GG                | 1946500243               |
| SNP_P3_116401_14210 | NW_004515858.1 | Scaffold362 | 14210                   | TT                              | GG                | 1946500245               |
| SNP_P3_116402_14230 | NW_004515858.1 | Scaffold362 | 14230                   | TT                              | GG                | 1946500246               |
| SNP_P3_116403_14232 | NW_004515858.1 | Scaffold362 | 14232                   | AA                              | CC                | 1946500248               |
| SNP_P3_116404_15497 | NW_004515858.1 | Scaffold362 | 15497                   | AA                              | GG                | 1946500249               |
| SNP_P3_116405_18275 | NW_004515858.1 | Scaffold362 | 18275                   | AA                              | TT                | 1946500251               |
| SNP_P3_116406_18283 | NW_004515858.1 | Scaffold362 | 18283                   | AA                              | GG                | 1946500252               |
| SNP_P3_116407_18565 | NW_004515858.1 | Scaffold362 | 18565                   | CC                              | AA                | 1946500254               |
| SNP_P3_116409_48408 | NW_004515858.1 | Scaffold362 | 48408                   | AA                              | TT                | 1946500255               |
| SNP_P3_116410_48410 | NW_004515858.1 | Scaffold362 | 48410                   | AA                              | CC                | 1946500257               |
| SNP_P3_116411_59878 | NW_004515858.1 | Scaffold362 | 59878                   | AA                              | TT                | 1946500258               |
| SNP_P3_116413_75441 | NW_004515858.1 | Scaffold362 | 75441                   | TT                              | CC                | 1946500260               |
| SNP_P3_116415_80535 | NW_004515858.1 | Scaffold362 | 80535                   | CC                              | TT                | 1946500262               |
| SNP_P3_116416_80662 | NW_004515858.1 | Scaffold362 | 80662                   | TT                              | CC                | 1946500263               |
| SNP_P3_116417_80714 | NW_004515858.1 | Scaffold362 | 80714                   | TT                              | CC                | 1946500265               |
| SNP_P3_116418_80880 | NW_004515858.1 | Scaffold362 | 80880                   | TT                              | CC                | 1946500266               |
| SNP_P3_116419_80883 | NW_004515858.1 | Scaffold362 | 80883                   | GG                              | AA                | 1946500268               |
| SNP_P3_116420_80911 | NW_004515858.1 | Scaffold362 | 80911                   | AA                              | GG                | 1946500269               |
| SNP_P3_116421_80924 | NW_004515858.1 | Scaffold362 | 80924                   | TT                              | AA                | 1946500271               |
| SNP_P3_116422_81003 | NW_004515858.1 | Scaffold362 | 81003                   | CC                              | TT                | 1946500272               |
| SNP_P3_116423_81024 | NW_004515858.1 | Scaffold362 | 81024                   | CC                              | TT                | 1946500274               |
| SNP_P3_116424_81057 | NW_004515858.1 | Scaffold362 | 81057                   | CC                              | AA                | 1946500275               |
| SNP_P3_116425_81070 | NW_004515858.1 | Scaffold362 | 81070                   | AA                              | GG                | 1946500277               |

| SNPs IDs             | Chromosome IDs | Chromosomes | Physical positions (bp) | CDC Frontier (Reference genome) | (Pusa 256 & HPNB) | NCBI SNPdb Accession IDs |
|----------------------|----------------|-------------|-------------------------|---------------------------------|-------------------|--------------------------|
| SNP_P3_116426_81089  | NW_004515858.1 | Scaffold362 | 81089                   | TT                              | CC                | 1946500278               |
| SNP_P3_116427_81104  | NW_004515858.1 | Scaffold362 | 81104                   | AA                              | CC                | 1946500280               |
| SNP_P3_116428_81116  | NW_004515858.1 | Scaffold362 | 81116                   | CC                              | TT                | 1946500281               |
| SNP_P3_116429_98616  | NW_004515858.1 | Scaffold362 | 98616                   | AA                              | GG                | 1946500283               |
| SNP_P3_116430_100179 | NW_004515858.1 | Scaffold362 | 100179                  | AA                              | CC                | 1946500284               |
| SNP_P3_116431_115445 | NW_004515858.1 | Scaffold362 | 115445                  | TT                              | CC                | 1946500286               |
| SNP_P3_116432_120680 | NW_004515858.1 | Scaffold362 | 120680                  | CC                              | AA                | 1946500287               |
| SNP_P3_116433_131310 | NW_004515858.1 | Scaffold362 | 131310                  | GG                              | CC                | 1946500289               |
| SNP_P3_116434_131348 | NW_004515858.1 | Scaffold362 | 131348                  | CC                              | AA                | 1946500290               |
| SNP_P3_116435_131691 | NW_004515858.1 | Scaffold362 | 131691                  | CC                              | AA                | 1946500292               |
| SNP_P3_116436_131720 | NW_004515858.1 | Scaffold362 | 131720                  | TT                              | AA                | 1946500293               |
| SNP_P3_116437_164137 | NW_004515858.1 | Scaffold362 | 164137                  | TT                              | CC                | 1946500295               |
| SNP_P3_116438_166063 | NW_004515858.1 | Scaffold362 | 166063                  | CC                              | AA                | 1946500296               |
| SNP_P3_116439_166243 | NW_004515858.1 | Scaffold362 | 166243                  | TT                              | AA                | 1946500298               |
| SNP_P3_116440_166399 | NW_004515858.1 | Scaffold362 | 166399                  | GG                              | TT                | 1946500299               |
| SNP_P3_116442_166457 | NW_004515858.1 | Scaffold362 | 166457                  | AA                              | GG                | 1946500301               |
| SNP_P3_116443_166535 | NW_004515858.1 | Scaffold362 | 166535                  | CC                              | AA                | 1946500302               |
| SNP_P3_116444_166584 | NW_004515858.1 | Scaffold362 | 166584                  | TT                              | AA                | 1946500304               |
| SNP_P3_116445_166636 | NW_004515858.1 | Scaffold362 | 166636                  | AA                              | GG                | 1946500305               |
| SNP_P3_116446_166673 | NW_004515858.1 | Scaffold362 | 166673                  | AA                              | TT                | 1946500307               |
| SNP_P3_116447_170209 | NW_004515858.1 | Scaffold362 | 170209                  | AA                              | GG                | 1946500308               |
| SNP_P3_116448_186275 | NW_004515858.1 | Scaffold362 | 186275                  | AA                              | GG                | 1946500310               |
| SNP_P3_116449_186288 | NW_004515858.1 | Scaffold362 | 186288                  | CC                              | TT                | 1946500311               |
| SNP_P3_116450_186296 | NW_004515858.1 | Scaffold362 | 186296                  | GG                              | TT                | 1946500313               |
| SNP_P3_116451_186300 | NW_004515858.1 | Scaffold362 | 186300                  | CC                              | TT                | 1946500314               |
| SNP_P3_116453_223502 | NW_004515858.1 | Scaffold362 | 223502                  | AA                              | GG                | 1946500315               |
| SNP_P3_116454_260136 | NW_004515858.1 | Scaffold362 | 260136                  | CC                              | TT                | 1946500317               |
| SNP_P3_116455_260174 | NW_004515858.1 | Scaffold362 | 260174                  | AA                              | GG                | 1946500318               |
| SNP_P3_116456_261794 | NW_004515858.1 | Scaffold362 | 261794                  | CC                              | TT                | 1946500320               |
| SNP_P3_116457_263891 | NW_004515858.1 | Scaffold362 | 263891                  | CC                              | AA                | 1946500321               |
| SNP_P3_116458_264193 | NW_004515858.1 | Scaffold362 | 264193                  | AA                              | GG                | 1946500323               |
| SNP_P3_116459_265923 | NW_004515858.1 | Scaffold362 | 265923                  | TT                              | GG                | 1946500324               |
| SNP_P3_116460_267511 | NW_004515858.1 | Scaffold362 | 267511                  | AA                              | CC                | 1946500326               |
| SNP_P3_116462_273331 | NW_004515858.1 | Scaffold362 | 273331                  | GG                              | AA                | 1946500327               |
| SNP_P3_116463_300819 | NW_004515858.1 | Scaffold362 | 300819                  | AA                              | GG                | 1946500329               |
| SNP_P3_116464_301765 | NW_004515858.1 | Scaffold362 | 301765                  | GG                              | TT                | 1946500330               |
| SNP_P3_116465_301964 | NW_004515858.1 | Scaffold362 | 301964                  | GG                              | AA                | 1946500332               |
| SNP_P3_116466_301968 | NW_004515858.1 | Scaffold362 | 301968                  | AA                              | CC                | 1946500333               |
| SNP_P3_116467_317057 | NW_004515858.1 | Scaffold362 | 317057                  | AA                              | GG                | 1946500335               |
| SNP_P3_116468_317084 | NW_004515858.1 | Scaffold362 | 317084                  | GG                              | AA                | 1946500336               |
| SNP_P3_116469_322296 | NW_004515858.1 | Scaffold362 | 322296                  | AA                              | GG                | 1946500338               |
| SNP_P3_116470_342324 | NW_004515858.1 | Scaffold362 | 342324                  | GG                              | AA                | 1946500339               |

| SNPs IDs             | Chromosome IDs | Chromosomes | Physical positions (bp) | CDC Frontier (Reference genome) | (Pusa 256 & HPNB) | NCBI SNPdb Accession IDs |
|----------------------|----------------|-------------|-------------------------|---------------------------------|-------------------|--------------------------|
| SNP_P3_116471_349140 | NW_004515858.1 | Scaffold362 | 349140                  | GG                              | AA                | 1946500341               |
| SNP_P3_116472_349470 | NW_004515858.1 | Scaffold362 | 349470                  | TT                              | CC                | 1946500342               |
| SNP_P3_116473_349504 | NW_004515858.1 | Scaffold362 | 349504                  | AA                              | GG                | 1946500343               |
| SNP_P3_116474_350546 | NW_004515858.1 | Scaffold362 | 350546                  | AA                              | GG                | 1946500345               |
| SNP_P3_116475_355888 | NW_004515858.1 | Scaffold362 | 355888                  | CC                              | TT                | 1946500346               |
| SNP_P3_116476_366629 | NW_004515858.1 | Scaffold362 | 366629                  | CC                              | TT                | 1946500348               |
| SNP_P3_116477_64     | NW_004515859.1 | Scaffold363 | 64                      | CC                              | TT                | 1946500349               |
| SNP_P3_116478_65     | NW_004515859.1 | Scaffold363 | 65                      | TT                              | CC                | 1946500351               |
| SNP_P3_116479_102    | NW_004515859.1 | Scaffold363 | 102                     | CC                              | TT                | 1946500352               |
| SNP_P3_116480_257    | NW_004515859.1 | Scaffold363 | 257                     | TT                              | CC                | 1946500353               |
| SNP_P3_116481_271    | NW_004515859.1 | Scaffold363 | 271                     | GG                              | AA                | 1946500355               |
| SNP_P3_116482_334    | NW_004515859.1 | Scaffold363 | 334                     | CC                              | GG                | 1946500356               |
| SNP_P3_116483_368    | NW_004515859.1 | Scaffold363 | 368                     | GG                              | AA                | 1946500358               |
| SNP_P3_116484_448    | NW_004515859.1 | Scaffold363 | 448                     | CC                              | TT                | 1946500359               |
| SNP_P3_116485_451    | NW_004515859.1 | Scaffold363 | 451                     | AA                              | GG                | 1946500361               |
| SNP_P3_116486_452    | NW_004515859.1 | Scaffold363 | 452                     | TT                              | AA                | 1946500362               |
| SNP_P3_116487_500    | NW_004515859.1 | Scaffold363 | 500                     | GG                              | CC                | 1946500364               |
| SNP_P3_116488_535    | NW_004515859.1 | Scaffold363 | 535                     | AA                              | GG                | 1946500365               |
| SNP_P3_116489_617    | NW_004515859.1 | Scaffold363 | 617                     | AA                              | GG                | 1946500367               |
| SNP_P3_116490_618    | NW_004515859.1 | Scaffold363 | 618                     | GG                              | AA                | 1946500368               |
| SNP_P3_116491_620    | NW_004515859.1 | Scaffold363 | 620                     | TT                              | AA                | 1946500370               |
| SNP_P3_116492_628    | NW_004515859.1 | Scaffold363 | 628                     | AA                              | GG                | 1946500371               |
| SNP_P3_116493_724    | NW_004515859.1 | Scaffold363 | 724                     | GG                              | TT                | 1946500373               |
| SNP_P3_116494_25256  | NW_004515859.1 | Scaffold363 | 25256                   | AA                              | GG                | 1946500374               |
| SNP_P3_116495_32978  | NW_004515859.1 | Scaffold363 | 32978                   | CC                              | AA                | 1946500376               |
| SNP_P3_116497_84365  | NW_004515859.1 | Scaffold363 | 84365                   | GG                              | AA                | 1946500377               |
| SNP_P3_116498_84778  | NW_004515859.1 | Scaffold363 | 84778                   | GG                              | AA                | 1946500379               |
| SNP_P3_116499_85000  | NW_004515859.1 | Scaffold363 | 85000                   | TT                              | GG                | 1946500380               |
| SNP_P3_116500_85772  | NW_004515859.1 | Scaffold363 | 85772                   | AA                              | GG                | 1946500382               |
| SNP_P3_116501_85864  | NW_004515859.1 | Scaffold363 | 85864                   | TT                              | GG                | 1946500383               |
| SNP_P3_116502_96385  | NW_004515859.1 | Scaffold363 | 96385                   | GG                              | CC                | 1946500385               |
| SNP_P3_116503_96420  | NW_004515859.1 | Scaffold363 | 96420                   | TT                              | CC                | 1946500386               |
| SNP_P3_116504_96421  | NW_004515859.1 | Scaffold363 | 96421                   | GG                              | TT                | 1946500388               |
| SNP_P3_116505_96455  | NW_004515859.1 | Scaffold363 | 96455                   | AA                              | GG                | 1946500390               |
| SNP_P3_116506_96461  | NW_004515859.1 | Scaffold363 | 96461                   | TT                              | AA                | 1946500391               |
| SNP_P3_116507_96468  | NW_004515859.1 | Scaffold363 | 96468                   | TT                              | CC                | 1946500393               |
| SNP_P3_116508_96477  | NW_004515859.1 | Scaffold363 | 96477                   | GG                              | TT                | 1946500394               |
| SNP_P3_116509_96501  | NW_004515859.1 | Scaffold363 | 96501                   | AA                              | TT                | 1946500396               |
| SNP_P3_116510_96515  | NW_004515859.1 | Scaffold363 | 96515                   | CC                              | TT                | 1946500397               |
| SNP_P3_116511_96553  | NW_004515859.1 | Scaffold363 | 96553                   | AA                              | GG                | 1946500399               |
| SNP_P3_116512_96556  | NW_004515859.1 | Scaffold363 | 96556                   | TT                              | CC                | 1946500400               |
| SNP_P3_116513_96560  | NW_004515859.1 | Scaffold363 | 96560                   | GG                              | AA                | 1946500402               |

| SNPs IDs             | Chromosome IDs | Chromosomes | Physical positions (bp) | CDC Frontier (Reference genome) | (Pusa 256 & HPNB) | NCBI SNPdb Accession IDs |
|----------------------|----------------|-------------|-------------------------|---------------------------------|-------------------|--------------------------|
| SNP_P3_116514_96561  | NW_004515859.1 | Scaffold363 | 96561                   | CC                              | TT                | 1946500403               |
| SNP_P3_116515_96566  | NW_004515859.1 | Scaffold363 | 96566                   | CC                              | TT                | 1946500405               |
| SNP_P3_116516_96581  | NW_004515859.1 | Scaffold363 | 96581                   | TT                              | CC                | 1946500406               |
| SNP_P3_116517_96583  | NW_004515859.1 | Scaffold363 | 96583                   | CC                              | TT                | 1946500408               |
| SNP_P3_116518_96587  | NW_004515859.1 | Scaffold363 | 96587                   | AA                              | GG                | 1946500409               |
| SNP_P3_116519_96602  | NW_004515859.1 | Scaffold363 | 96602                   | TT                              | AA                | 1946500411               |
| SNP_P3_116522_96730  | NW_004515859.1 | Scaffold363 | 96730                   | GG                              | AA                | 1946500413               |
| SNP_P3_116523_96768  | NW_004515859.1 | Scaffold363 | 96768                   | TT                              | CC                | 1946500414               |
| SNP_P3_116524_96776  | NW_004515859.1 | Scaffold363 | 96776                   | TT                              | CC                | 1946500415               |
| SNP_P3_116525_96900  | NW_004515859.1 | Scaffold363 | 96900                   | TT                              | GG                | 1946500417               |
| SNP_P3_116526_96909  | NW_004515859.1 | Scaffold363 | 96909                   | CC                              | TT                | 1946500419               |
| SNP_P3_116527_96914  | NW_004515859.1 | Scaffold363 | 96914                   | CC                              | TT                | 1946500420               |
| SNP_P3_116528_96919  | NW_004515859.1 | Scaffold363 | 96919                   | TT                              | CC                | 1946500422               |
| SNP_P3_116529_97011  | NW_004515859.1 | Scaffold363 | 97011                   | GG                              | CC                | 1946500423               |
| SNP_P3_116530_97044  | NW_004515859.1 | Scaffold363 | 97044                   | CC                              | GG                | 1946500425               |
| SNP_P3_116531_97059  | NW_004515859.1 | Scaffold363 | 97059                   | CC                              | TT                | 1946500426               |
| SNP_P3_116533_23757  | NW_004515861.1 | Scaffold366 | 23757                   | AA                              | CC                | 1946500428               |
| SNP_P3_116534_23758  | NW_004515861.1 | Scaffold366 | 23758                   | GG                              | AA                | 1946500429               |
| SNP_P3_116535_33891  | NW_004515861.1 | Scaffold366 | 33891                   | GG                              | TT                | 1946500431               |
| SNP_P3_116536_33894  | NW_004515861.1 | Scaffold366 | 33894                   | TT                              | CC                | 1946500432               |
| SNP_P3_116537_33963  | NW_004515861.1 | Scaffold366 | 33963                   | TT                              | AA                | 1946500434               |
| SNP_P3_116538_33966  | NW_004515861.1 | Scaffold366 | 33966                   | AA                              | TT                | 1946500435               |
| SNP_P3_116539_34247  | NW_004515861.1 | Scaffold366 | 34247                   | CC                              | TT                | 1946500437               |
| SNP_P3_116540_34322  | NW_004515861.1 | Scaffold366 | 34322                   | AA                              | GG                | 1946500438               |
| SNP_P3_116541_47354  | NW_004515861.1 | Scaffold366 | 47354                   | GG                              | TT                | 1946500440               |
| SNP_P3_116542_49515  | NW_004515861.1 | Scaffold366 | 49515                   | CC                              | TT                | 1946500441               |
| SNP_P3_116543_60890  | NW_004515861.1 | Scaffold366 | 60890                   | CC                              | TT                | 1946500443               |
| SNP_P3_116544_61138  | NW_004515861.1 | Scaffold366 | 61138                   | TT                              | CC                | 1946500444               |
| SNP_P3_116545_61566  | NW_004515861.1 | Scaffold366 | 61566                   | CC                              | TT                | 1946500446               |
| SNP_P3_116546_61576  | NW_004515861.1 | Scaffold366 | 61576                   | CC                              | AA                | 1946500447               |
| SNP_P3_116548_70768  | NW_004515861.1 | Scaffold366 | 70768                   | GG                              | AA                | 1946500449               |
| SNP_P3_116549_79985  | NW_004515861.1 | Scaffold366 | 79985                   | GG                              | AA                | 1946500450               |
| SNP_P3_116551_107705 | NW_004515861.1 | Scaffold366 | 107705                  | AA                              | GG                | 1946500452               |
| SNP_P3_116552_107712 | NW_004515861.1 | Scaffold366 | 107712                  | TT                              | CC                | 1946500453               |
| SNP_P3_116553_107727 | NW_004515861.1 | Scaffold366 | 107727                  | TT                              | CC                | 1946500455               |
| SNP_P3_116554_107728 | NW_004515861.1 | Scaffold366 | 107728                  | TT                              | CC                | 1946500456               |
| SNP_P3_116555_107729 | NW_004515861.1 | Scaffold366 | 107729                  | GG                              | TT                | 1946500458               |
| SNP_P3_116556_107946 | NW_004515861.1 | Scaffold366 | 107946                  | GG                              | TT                | 1946500459               |
| SNP_P3_116557_115997 | NW_004515861.1 | Scaffold366 | 115997                  | AA                              | GG                | 1946500461               |
| SNP_P3_116558_116003 | NW_004515861.1 | Scaffold366 | 116003                  | TT                              | CC                | 1946500462               |
| SNP_P3_116559_116004 | NW_004515861.1 | Scaffold366 | 116004                  | AA                              | GG                | 1946500464               |
| SNP_P3_116561_133791 | NW_004515861.1 | Scaffold366 | 133791                  | AA                              | GG                | 1946500465               |



| SNPs IDs             | Chromosome IDs | Chromosomes | Physical positions (bp) | CDC Frontier (Reference genome) | (Pusa 256 & HPNB) | NCBI SNPdb Accession IDs |
|----------------------|----------------|-------------|-------------------------|---------------------------------|-------------------|--------------------------|
| SNP_P3_116562_156016 | NW_004515861.1 | Scaffold366 | 156016                  | CC                              | TT                | 1946500467               |
| SNP_P3_116563_156023 | NW_004515861.1 | Scaffold366 | 156023                  | AA                              | TT                | 1946500468               |
| SNP_P3_116564_2644   | NW_004515862.1 | Scaffold367 | 2644                    | TT                              | CC                | 1946500470               |
| SNP_P3_116566_6023   | NW_004515862.1 | Scaffold367 | 6023                    | CC                              | TT                | 1946500471               |
| SNP_P3_116567_6268   | NW_004515862.1 | Scaffold367 | 6268                    | CC                              | TT                | 1946500473               |
| SNP_P3_116568_6311   | NW_004515862.1 | Scaffold367 | 6311                    | AA                              | CC                | 1946500474               |
| SNP_P3_116570_6556   | NW_004515862.1 | Scaffold367 | 6556                    | AA                              | GG                | 1946500476               |
| SNP_P3_116571_6612   | NW_004515862.1 | Scaffold367 | 6612                    | GG                              | AA                | 1946500477               |
| SNP_P3_116572_12273  | NW_004515862.1 | Scaffold367 | 12273                   | AA                              | TT                | 1946500479               |
| SNP_P3_116573_12708  | NW_004515862.1 | Scaffold367 | 12708                   | CC                              | AA                | 1946500480               |
| SNP_P3_116574_15290  | NW_004515862.1 | Scaffold367 | 15290                   | AA                              | TT                | 1946500482               |
| SNP_P3_116575_19728  | NW_004515862.1 | Scaffold367 | 19728                   | CC                              | TT                | 1946500483               |
| SNP_P3_116576_20090  | NW_004515862.1 | Scaffold367 | 20090                   | TT                              | CC                | 1946500485               |
| SNP_P3_116577_20095  | NW_004515862.1 | Scaffold367 | 20095                   | TT                              | CC                | 1946500486               |
| SNP_P3_116578_20110  | NW_004515862.1 | Scaffold367 | 20110                   | GG                              | AA                | 1946500488               |
| SNP_P3_116579_20133  | NW_004515862.1 | Scaffold367 | 20133                   | AA                              | TT                | 1946500489               |
| SNP_P3_116580_20134  | NW_004515862.1 | Scaffold367 | 20134                   | TT                              | CC                | 1946500491               |
| SNP_P3_116581_20205  | NW_004515862.1 | Scaffold367 | 20205                   | TT                              | AA                | 1946500492               |
| SNP_P3_116582_20215  | NW_004515862.1 | Scaffold367 | 20215                   | CC                              | AA                | 1946500494               |
| SNP_P3_116583_24636  | NW_004515862.1 | Scaffold367 | 24636                   | AA                              | GG                | 1946500495               |
| SNP_P3_116584_25061  | NW_004515862.1 | Scaffold367 | 25061                   | TT                              | CC                | 1946500497               |
| SNP_P3_116585_25126  | NW_004515862.1 | Scaffold367 | 25126                   | TT                              | AA                | 1946500498               |
| SNP_P3_116586_25200  | NW_004515862.1 | Scaffold367 | 25200                   | TT                              | CC                | 1946500499               |
| SNP_P3_116587_25222  | NW_004515862.1 | Scaffold367 | 25222                   | TT                              | CC                | 1946500501               |
| SNP_P3_116588_34550  | NW_004515862.1 | Scaffold367 | 34550                   | CC                              | TT                | 1946500502               |
| SNP_P3_116590_36468  | NW_004515862.1 | Scaffold367 | 36468                   | AA                              | GG                | 1946500504               |
| SNP_P3_116592_45300  | NW_004515862.1 | Scaffold367 | 45300                   | AA                              | GG                | 1946500505               |
| SNP_P3_116593_45307  | NW_004515862.1 | Scaffold367 | 45307                   | CC                              | AA                | 1946500507               |
| SNP_P3_116594_45403  | NW_004515862.1 | Scaffold367 | 45403                   | TT                              | GG                | 1946500508               |
| SNP_P3_116595_45413  | NW_004515862.1 | Scaffold367 | 45413                   | AA                              | GG                | 1946500510               |
| SNP_P3_116596_51439  | NW_004515862.1 | Scaffold367 | 51439                   | TT                              | GG                | 1946500511               |
| SNP_P3_116597_51452  | NW_004515862.1 | Scaffold367 | 51452                   | AA                              | CC                | 1946500513               |
| SNP_P3_116598_51465  | NW_004515862.1 | Scaffold367 | 51465                   | GG                              | AA                | 1946500514               |
| SNP_P3_116599_51474  | NW_004515862.1 | Scaffold367 | 51474                   | GG                              | TT                | 1946500516               |
| SNP_P3_116600_51519  | NW_004515862.1 | Scaffold367 | 51519                   | CC                              | TT                | 1946500517               |
| SNP_P3_116601_51552  | NW_004515862.1 | Scaffold367 | 51552                   | TT                              | AA                | 1946500519               |
| SNP_P3_116602_51565  | NW_004515862.1 | Scaffold367 | 51565                   | GG                              | CC                | 1946500520               |
| SNP_P3_116603_51613  | NW_004515862.1 | Scaffold367 | 51613                   | TT                              | CC                | 1946500521               |
| SNP_P3_116604_51651  | NW_004515862.1 | Scaffold367 | 51651                   | TT                              | CC                | 1946500523               |
| SNP_P3_116605_51714  | NW_004515862.1 | Scaffold367 | 51714                   | TT                              | AA                | 1946500524               |
| SNP_P3_116606_51716  | NW_004515862.1 | Scaffold367 | 51716                   | GG                              | AA                | 1946500526               |
| SNP_P3_116607_51915  | NW_004515862.1 | Scaffold367 | 51915                   | CC                              | TT                | 1946500527               |

| SNPs IDs            | Chromosome IDs | Chromosomes | Physical positions (bp) | CDC Frontier (Reference genome) | (Pusa 256 & HPNB) | NCBI SNPdb Accession IDs |
|---------------------|----------------|-------------|-------------------------|---------------------------------|-------------------|--------------------------|
| SNP_P3_116608_52450 | NW_004515862.1 | Scaffold367 | 52450                   | AA                              | GG                | 1946500529               |
| SNP_P3_116609_52463 | NW_004515862.1 | Scaffold367 | 52463                   | GG                              | AA                | 1946500530               |
| SNP_P3_116610_52497 | NW_004515862.1 | Scaffold367 | 52497                   | TT                              | AA                | 1946500532               |
| SNP_P3_116611_52539 | NW_004515862.1 | Scaffold367 | 52539                   | GG                              | CC                | 1946500533               |
| SNP_P3_116612_52800 | NW_004515862.1 | Scaffold367 | 52800                   | GG                              | AA                | 1946500535               |
| SNP_P3_116613_55744 | NW_004515862.1 | Scaffold367 | 55744                   | AA                              | CC                | 1946500536               |
| SNP_P3_116614_55811 | NW_004515862.1 | Scaffold367 | 55811                   | TT                              | CC                | 1946500538               |
| SNP_P3_116615_61872 | NW_004515862.1 | Scaffold367 | 61872                   | CC                              | TT                | 1946500539               |
| SNP_P3_116616_61920 | NW_004515862.1 | Scaffold367 | 61920                   | CC                              | TT                | 1946500541               |
| SNP_P3_116617_61922 | NW_004515862.1 | Scaffold367 | 61922                   | AA                              | CC                | 1946500542               |
| SNP_P3_116618_62136 | NW_004515862.1 | Scaffold367 | 62136                   | CC                              | TT                | 1946500544               |
| SNP_P3_116619_62172 | NW_004515862.1 | Scaffold367 | 62172                   | AA                              | GG                | 1946500545               |
| SNP_P3_116620_62750 | NW_004515862.1 | Scaffold367 | 62750                   | TT                              | CC                | 1946500547               |
| SNP_P3_116621_67209 | NW_004515862.1 | Scaffold367 | 67209                   | TT                              | CC                | 1946500548               |
| SNP_P3_116622_67223 | NW_004515862.1 | Scaffold367 | 67223                   | CC                              | TT                | 1946500550               |
| SNP_P3_116623_67574 | NW_004515862.1 | Scaffold367 | 67574                   | CC                              | TT                | 1946500551               |
| SNP_P3_116624_67601 | NW_004515862.1 | Scaffold367 | 67601                   | GG                              | AA                | 1946500553               |
| SNP_P3_116625_72175 | NW_004515862.1 | Scaffold367 | 72175                   | CC                              | GG                | 1946500554               |
| SNP_P3_116626_72278 | NW_004515862.1 | Scaffold367 | 72278                   | AA                              | GG                | 1946500556               |
| SNP_P3_116627_72284 | NW_004515862.1 | Scaffold367 | 72284                   | TT                              | CC                | 1946500557               |
| SNP_P3_116628_72306 | NW_004515862.1 | Scaffold367 | 72306                   | TT                              | CC                | 1946500559               |
| SNP_P3_116629_72307 | NW_004515862.1 | Scaffold367 | 72307                   | GG                              | AA                | 1946500560               |
| SNP_P3_116630_78950 | NW_004515862.1 | Scaffold367 | 78950                   | TT                              | CC                | 1946500562               |
| SNP_P3_116631_79012 | NW_004515862.1 | Scaffold367 | 79012                   | GG                              | AA                | 1946500563               |
| SNP_P3_116632_79146 | NW_004515862.1 | Scaffold367 | 79146                   | CC                              | TT                | 1946500565               |
| SNP_P3_116633_79180 | NW_004515862.1 | Scaffold367 | 79180                   | TT                              | CC                | 1946500566               |
| SNP_P3_116634_79302 | NW_004515862.1 | Scaffold367 | 79302                   | AA                              | GG                | 1946500568               |
| SNP_P3_116635_79352 | NW_004515862.1 | Scaffold367 | 79352                   | AA                              | GG                | 1946500569               |
| SNP_P3_116636_79378 | NW_004515862.1 | Scaffold367 | 79378                   | TT                              | CC                | 1946500571               |
| SNP_P3_116637_79380 | NW_004515862.1 | Scaffold367 | 79380                   | CC                              | AA                | 1946500573               |
| SNP_P3_116638_81676 | NW_004515862.1 | Scaffold367 | 81676                   | TT                              | GG                | 1946500574               |
| SNP_P3_116639_81989 | NW_004515862.1 | Scaffold367 | 81989                   | TT                              | CC                | 1946500576               |
| SNP_P3_116640_83916 | NW_004515862.1 | Scaffold367 | 83916                   | CC                              | GG                | 1946500577               |
| SNP_P3_116641_85744 | NW_004515862.1 | Scaffold367 | 85744                   | TT                              | CC                | 1946500579               |
| SNP_P3_116642_86115 | NW_004515862.1 | Scaffold367 | 86115                   | TT                              | GG                | 1946500580               |
| SNP_P3_116643_86346 | NW_004515862.1 | Scaffold367 | 86346                   | AA                              | GG                | 1946500582               |
| SNP_P3_116644_91465 | NW_004515862.1 | Scaffold367 | 91465                   | TT                              | CC                | 1946500583               |
| SNP_P3_116645_92766 | NW_004515862.1 | Scaffold367 | 92766                   | CC                              | TT                | 1946500585               |
| SNP_P3_116646_92781 | NW_004515862.1 | Scaffold367 | 92781                   | CC                              | TT                | 1946500586               |
| SNP_P3_116647_92810 | NW_004515862.1 | Scaffold367 | 92810                   | AA                              | GG                | 1946500588               |
| SNP_P3_116648_92841 | NW_004515862.1 | Scaffold367 | 92841                   | TT                              | CC                | 1946500590               |
| SNP_P3_116649_92846 | NW_004515862.1 | Scaffold367 | 92846                   | AA                              | GG                | 1946500591               |

| SNPs IDs             | Chromosome IDs | Chromosomes | Physical positions (bp) | CDC Frontier (Reference genome) | (Pusa 256 & HPNB) | NCBI SNPdb Accession IDs |
|----------------------|----------------|-------------|-------------------------|---------------------------------|-------------------|--------------------------|
| SNP_P3_116650_92869  | NW_004515862.1 | Scaffold367 | 92869                   | TT                              | GG                | 1946500593               |
| SNP_P3_116651_92871  | NW_004515862.1 | Scaffold367 | 92871                   | TT                              | AA                | 1946500594               |
| SNP_P3_116652_92883  | NW_004515862.1 | Scaffold367 | 92883                   | AA                              | GG                | 1946500596               |
| SNP_P3_116653_101069 | NW_004515862.1 | Scaffold367 | 101069                  | AA                              | GG                | 1946500597               |
| SNP_P3_116654_105814 | NW_004515862.1 | Scaffold367 | 105814                  | GG                              | AA                | 1946500599               |
| SNP_P3_116655_105817 | NW_004515862.1 | Scaffold367 | 105817                  | GG                              | AA                | 1946500600               |
| SNP_P3_116656_107126 | NW_004515862.1 | Scaffold367 | 107126                  | AA                              | GG                | 1946500602               |
| SNP_P3_116657_119149 | NW_004515862.1 | Scaffold367 | 119149                  | TT                              | AA                | 1946500603               |
| SNP_P3_116658_119179 | NW_004515862.1 | Scaffold367 | 119179                  | TT                              | CC                | 1946500605               |
| SNP_P3_116659_119784 | NW_004515862.1 | Scaffold367 | 119784                  | TT                              | GG                | 1946500606               |
| SNP_P3_116660_119791 | NW_004515862.1 | Scaffold367 | 119791                  | AA                              | GG                | 1946500608               |
| SNP_P3_116661_119802 | NW_004515862.1 | Scaffold367 | 119802                  | GG                              | AA                | 1946500609               |
| SNP_P3_116662_119827 | NW_004515862.1 | Scaffold367 | 119827                  | CC                              | AA                | 1946500611               |
| SNP_P3_116663_119831 | NW_004515862.1 | Scaffold367 | 119831                  | TT                              | GG                | 1946500612               |
| SNP_P3_116664_119883 | NW_004515862.1 | Scaffold367 | 119883                  | AA                              | CC                | 1946500614               |
| SNP_P3_116665_123852 | NW_004515862.1 | Scaffold367 | 123852                  | TT                              | AA                | 1946500615               |
| SNP_P3_116666_133841 | NW_004515862.1 | Scaffold367 | 133841                  | AA                              | GG                | 1946500617               |
| SNP_P3_116667_134133 | NW_004515862.1 | Scaffold367 | 134133                  | AA                              | CC                | 1946500618               |
| SNP_P3_116668_134246 | NW_004515862.1 | Scaffold367 | 134246                  | AA                              | TT                | 1946500620               |
| SNP_P3_116669_135624 | NW_004515862.1 | Scaffold367 | 135624                  | AA                              | TT                | 1946500621               |
| SNP_P3_116670_136765 | NW_004515862.1 | Scaffold367 | 136765                  | CC                              | TT                | 1946500623               |
| SNP_P3_116671_136781 | NW_004515862.1 | Scaffold367 | 136781                  | TT                              | CC                | 1946500624               |
| SNP_P3_116672_136782 | NW_004515862.1 | Scaffold367 | 136782                  | TT                              | CC                | 1946500626               |
| SNP_P3_116673_136786 | NW_004515862.1 | Scaffold367 | 136786                  | TT                              | GG                | 1946500627               |
| SNP_P3_116674_136902 | NW_004515862.1 | Scaffold367 | 136902                  | AA                              | GG                | 1946500629               |
| SNP_P3_116675_149303 | NW_004515862.1 | Scaffold367 | 149303                  | AA                              | TT                | 1946500630               |
| SNP_P3_116676_149311 | NW_004515862.1 | Scaffold367 | 149311                  | GG                              | CC                | 1946500632               |
| SNP_P3_116677_149394 | NW_004515862.1 | Scaffold367 | 149394                  | CC                              | GG                | 1946500633               |
| SNP_P3_116678_149401 | NW_004515862.1 | Scaffold367 | 149401                  | AA                              | GG                | 1946500635               |
| SNP_P3_116679_149526 | NW_004515862.1 | Scaffold367 | 149526                  | TT                              | AA                | 1946500636               |
| SNP_P3_116680_157833 | NW_004515862.1 | Scaffold367 | 157833                  | AA                              | CC                | 1946500638               |
| SNP_P3_116681_157839 | NW_004515862.1 | Scaffold367 | 157839                  | TT                              | CC                | 1946500639               |
| SNP_P3_116682_158893 | NW_004515862.1 | Scaffold367 | 158893                  | CC                              | TT                | 1946500641               |
| SNP_P3_116683_158970 | NW_004515862.1 | Scaffold367 | 158970                  | TT                              | AA                | 1946500642               |
| SNP_P3_116685_11369  | NW_004515863.1 | Scaffold369 | 11369                   | AA                              | GG                | 1946500644               |
| SNP_P3_116686_11377  | NW_004515863.1 | Scaffold369 | 11377                   | GG                              | AA                | 1946500645               |
| SNP_P3_116687_11430  | NW_004515863.1 | Scaffold369 | 11430                   | CC                              | AA                | 1946500647               |
| SNP_P3_116688_11716  | NW_004515863.1 | Scaffold369 | 11716                   | CC                              | TT                | 1946500648               |
| SNP_P3_116689_14355  | NW_004515863.1 | Scaffold369 | 14355                   | GG                              | AA                | 1946500650               |
| SNP_P3_116690_23781  | NW_004515863.1 | Scaffold369 | 23781                   | CC                              | AA                | 1946500651               |
| SNP_P3_116691_29001  | NW_004515863.1 | Scaffold369 | 29001                   | AA                              | TT                | 1946500653               |
| SNP_P3_116693_59452  | NW_004515863.1 | Scaffold369 | 59452                   | AA                              | TT                | 1946500654               |

| SNPs IDs             | Chromosome IDs | Chromosomes | Physical positions (bp) | CDC Frontier (Reference genome) | (Pusa 256 & HPNB) | NCBI SNPdb Accession IDs |
|----------------------|----------------|-------------|-------------------------|---------------------------------|-------------------|--------------------------|
| SNP_P3_116694_73447  | NW_004515863.1 | Scaffold369 | 73447                   | GG                              | AA                | 1946500656               |
| SNP_P3_116696_107041 | NW_004515863.1 | Scaffold369 | 107041                  | TT                              | CC                | 1946500657               |
| SNP_P3_116698_128056 | NW_004515863.1 | Scaffold369 | 128056                  | GG                              | AA                | 1946500659               |
| SNP_P3_116699_135619 | NW_004515863.1 | Scaffold369 | 135619                  | AA                              | GG                | 1946500660               |
| SNP_P3_116700_150254 | NW_004515863.1 | Scaffold369 | 150254                  | GG                              | AA                | 1946500662               |
| SNP_P3_116701_164858 | NW_004515863.1 | Scaffold369 | 164858                  | TT                              | CC                | 1946500663               |
| SNP_P3_116702_166591 | NW_004515863.1 | Scaffold369 | 166591                  | TT                              | CC                | 1946500665               |
| SNP_P3_116703_177498 | NW_004515863.1 | Scaffold369 | 177498                  | AA                              | TT                | 1946500666               |
| SNP_P3_116704_177499 | NW_004515863.1 | Scaffold369 | 177499                  | CC                              | AA                | 1946500668               |
| SNP_P3_116705_179107 | NW_004515863.1 | Scaffold369 | 179107                  | GG                              | AA                | 1946500669               |
| SNP_P3_116706_179112 | NW_004515863.1 | Scaffold369 | 179112                  | AA                              | GG                | 1946500671               |
| SNP_P3_116707_179129 | NW_004515863.1 | Scaffold369 | 179129                  | TT                              | GG                | 1946500672               |
| SNP_P3_116708_179130 | NW_004515863.1 | Scaffold369 | 179130                  | TT                              | CC                | 1946500674               |
| SNP_P3_116709_179156 | NW_004515863.1 | Scaffold369 | 179156                  | AA                              | GG                | 1946500675               |
| SNP_P3_116710_179200 | NW_004515863.1 | Scaffold369 | 179200                  | AA                              | GG                | 1946500677               |
| SNP_P3_116711_179530 | NW_004515863.1 | Scaffold369 | 179530                  | TT                              | CC                | 1946500678               |
| SNP_P3_116712_11068  | NW_004515864.1 | Scaffold370 | 11068                   | AA                              | GG                | 1946500680               |
| SNP_P3_116713_18088  | NW_004515864.1 | Scaffold370 | 18088                   | AA                              | GG                | 1946500681               |
| SNP_P3_116714_18488  | NW_004515864.1 | Scaffold370 | 18488                   | CC                              | TT                | 1946500683               |
| SNP_P3_116715_23499  | NW_004515864.1 | Scaffold370 | 23499                   | GG                              | AA                | 1946500684               |
| SNP_P3_116716_23510  | NW_004515864.1 | Scaffold370 | 23510                   | CC                              | AA                | 1946500686               |
| SNP_P3_116717_27063  | NW_004515864.1 | Scaffold370 | 27063                   | GG                              | CC                | 1946500687               |
| SNP_P3_116718_28971  | NW_004515864.1 | Scaffold370 | 28971                   | CC                              | TT                | 1946500689               |
| SNP_P3_116719_28972  | NW_004515864.1 | Scaffold370 | 28972                   | AA                              | GG                | 1946500690               |
| SNP_P3_116720_28995  | NW_004515864.1 | Scaffold370 | 28995                   | TT                              | CC                | 1946500692               |
| SNP_P3_116721_29007  | NW_004515864.1 | Scaffold370 | 29007                   | TT                              | AA                | 1946500706               |
| SNP_P3_116722_29075  | NW_004515864.1 | Scaffold370 | 29075                   | GG                              | AA                | 1946500707               |
| SNP_P3_116723_29081  | NW_004515864.1 | Scaffold370 | 29081                   | TT                              | CC                | 1946500709               |
| SNP_P3_116724_29280  | NW_004515864.1 | Scaffold370 | 29280                   | AA                              | GG                | 1946500710               |
| SNP_P3_116725_29315  | NW_004515864.1 | Scaffold370 | 29315                   | GG                              | CC                | 1946500712               |
| SNP_P3_116726_29444  | NW_004515864.1 | Scaffold370 | 29444                   | TT                              | CC                | 1946500713               |
| SNP_P3_116727_29593  | NW_004515864.1 | Scaffold370 | 29593                   | AA                              | GG                | 1946500715               |
| SNP_P3_116728_29599  | NW_004515864.1 | Scaffold370 | 29599                   | AA                              | GG                | 1946500716               |
| SNP_P3_116729_29606  | NW_004515864.1 | Scaffold370 | 29606                   | CC                              | TT                | 1946500718               |
| SNP_P3_116730_29753  | NW_004515864.1 | Scaffold370 | 29753                   | AA                              | GG                | 1946500719               |
| SNP_P3_116731_29815  | NW_004515864.1 | Scaffold370 | 29815                   | CC                              | AA                | 1946500721               |
| SNP_P3_116732_31759  | NW_004515864.1 | Scaffold370 | 31759                   | TT                              | CC                | 1946500722               |
| SNP_P3_116733_31845  | NW_004515864.1 | Scaffold370 | 31845                   | AA                              | GG                | 1946500724               |
| SNP_P3_116734_32002  | NW_004515864.1 | Scaffold370 | 32002                   | TT                              | CC                | 1946500725               |
| SNP_P3_116735_32087  | NW_004515864.1 | Scaffold370 | 32087                   | AA                              | TT                | 1946500727               |
| SNP_P3_116736_32120  | NW_004515864.1 | Scaffold370 | 32120                   | AA                              | GG                | 1946500728               |
| SNP_P3_116737_32347  | NW_004515864.1 | Scaffold370 | 32347                   | AA                              | GG                | 1946500729               |

| SNPs IDs            | Chromosome IDs | Chromosomes | Physical positions (bp) | CDC Frontier (Reference genome) | (Pusa 256 & HPNB) | NCBI SNPdb Accession IDs |
|---------------------|----------------|-------------|-------------------------|---------------------------------|-------------------|--------------------------|
| SNP_P3_116738_32362 | NW_004515864.1 | Scaffold370 | 32362                   | TT                              | CC                | 1946500731               |
| SNP_P3_116739_32385 | NW_004515864.1 | Scaffold370 | 32385                   | CC                              | TT                | 1946500732               |
| SNP_P3_116740_32400 | NW_004515864.1 | Scaffold370 | 32400                   | TT                              | CC                | 1946500734               |
| SNP_P3_116741_32405 | NW_004515864.1 | Scaffold370 | 32405                   | CC                              | GG                | 1946500736               |
| SNP_P3_116742_32419 | NW_004515864.1 | Scaffold370 | 32419                   | AA                              | GG                | 1946500737               |
| SNP_P3_116743_32429 | NW_004515864.1 | Scaffold370 | 32429                   | CC                              | AA                | 1946500738               |
| SNP_P3_116744_32430 | NW_004515864.1 | Scaffold370 | 32430                   | CC                              | AA                | 1946500740               |
| SNP_P3_116745_32508 | NW_004515864.1 | Scaffold370 | 32508                   | CC                              | TT                | 1946500741               |
| SNP_P3_116746_32613 | NW_004515864.1 | Scaffold370 | 32613                   | TT                              | GG                | 1946500743               |
| SNP_P3_116747_32646 | NW_004515864.1 | Scaffold370 | 32646                   | GG                              | AA                | 1946500744               |
| SNP_P3_116748_32648 | NW_004515864.1 | Scaffold370 | 32648                   | CC                              | TT                | 1946500746               |
| SNP_P3_116749_32653 | NW_004515864.1 | Scaffold370 | 32653                   | GG                              | CC                | 1946500747               |
| SNP_P3_116750_32659 | NW_004515864.1 | Scaffold370 | 32659                   | AA                              | GG                | 1946500749               |
| SNP_P3_116751_32757 | NW_004515864.1 | Scaffold370 | 32757                   | AA                              | GG                | 1946500750               |
| SNP_P3_116752_33947 | NW_004515864.1 | Scaffold370 | 33947                   | AA                              | GG                | 1946500752               |
| SNP_P3_116753_33960 | NW_004515864.1 | Scaffold370 | 33960                   | AA                              | GG                | 1946500753               |
| SNP_P3_116754_34053 | NW_004515864.1 | Scaffold370 | 34053                   | CC                              | TT                | 1946500754               |
| SNP_P3_116755_34087 | NW_004515864.1 | Scaffold370 | 34087                   | GG                              | TT                | 1946500756               |
| SNP_P3_116756_34108 | NW_004515864.1 | Scaffold370 | 34108                   | CC                              | TT                | 1946500757               |
| SNP_P3_116757_34113 | NW_004515864.1 | Scaffold370 | 34113                   | TT                              | CC                | 1946500759               |
| SNP_P3_116758_34192 | NW_004515864.1 | Scaffold370 | 34192                   | GG                              | AA                | 1946500760               |
| SNP_P3_116759_34327 | NW_004515864.1 | Scaffold370 | 34327                   | GG                              | CC                | 1946500762               |
| SNP_P3_116760_34353 | NW_004515864.1 | Scaffold370 | 34353                   | TT                              | AA                | 1946500763               |
| SNP_P3_116761_34388 | NW_004515864.1 | Scaffold370 | 34388                   | AA                              | TT                | 1946500765               |
| SNP_P3_116762_34442 | NW_004515864.1 | Scaffold370 | 34442                   | CC                              | TT                | 1946500766               |
| SNP_P3_116763_34504 | NW_004515864.1 | Scaffold370 | 34504                   | CC                              | TT                | 1946500768               |
| SNP_P3_116764_34610 | NW_004515864.1 | Scaffold370 | 34610                   | TT                              | CC                | 1946500769               |
| SNP_P3_116765_34672 | NW_004515864.1 | Scaffold370 | 34672                   | AA                              | TT                | 1946500770               |
| SNP_P3_116766_34678 | NW_004515864.1 | Scaffold370 | 34678                   | CC                              | TT                | 1946500772               |
| SNP_P3_116767_34746 | NW_004515864.1 | Scaffold370 | 34746                   | TT                              | GG                | 1946500773               |
| SNP_P3_116768_34754 | NW_004515864.1 | Scaffold370 | 34754                   | CC                              | GG                | 1946500775               |
| SNP_P3_116769_34762 | NW_004515864.1 | Scaffold370 | 34762                   | AA                              | GG                | 1946500776               |
| SNP_P3_116770_34773 | NW_004515864.1 | Scaffold370 | 34773                   | TT                              | CC                | 1946500778               |
| SNP_P3_116771_34979 | NW_004515864.1 | Scaffold370 | 34979                   | CC                              | AA                | 1946500779               |
| SNP_P3_116772_35081 | NW_004515864.1 | Scaffold370 | 35081                   | GG                              | AA                | 1946500781               |
| SNP_P3_116773_35263 | NW_004515864.1 | Scaffold370 | 35263                   | AA                              | GG                | 1946500782               |
| SNP_P3_116774_35277 | NW_004515864.1 | Scaffold370 | 35277                   | TT                              | GG                | 1946500784               |
| SNP_P3_116775_35288 | NW_004515864.1 | Scaffold370 | 35288                   | TT                              | GG                | 1946500785               |
| SNP_P3_116776_35363 | NW_004515864.1 | Scaffold370 | 35363                   | CC                              | TT                | 1946500786               |
| SNP_P3_116777_35420 | NW_004515864.1 | Scaffold370 | 35420                   | CC                              | TT                | 1946500788               |
| SNP_P3_116778_35461 | NW_004515864.1 | Scaffold370 | 35461                   | AA                              | CC                | 1946500789               |
| SNP_P3_116779_35479 | NW_004515864.1 | Scaffold370 | 35479                   | AA                              | GG                | 1946500791               |

| SNPs IDs            | Chromosome IDs | Chromosomes | Physical positions (bp) | CDC Frontier (Reference genome) | (Pusa 256 & HPNB) | NCBI SNPdb Accession IDs |
|---------------------|----------------|-------------|-------------------------|---------------------------------|-------------------|--------------------------|
| SNP_P3_116780_35490 | NW_004515864.1 | Scaffold370 | 35490                   | GG                              | AA                | 1946500792               |
| SNP_P3_116781_35530 | NW_004515864.1 | Scaffold370 | 35530                   | AA                              | TT                | 1946500793               |
| SNP_P3_116782_35552 | NW_004515864.1 | Scaffold370 | 35552                   | GG                              | CC                | 1946500795               |
| SNP_P3_116783_35741 | NW_004515864.1 | Scaffold370 | 35741                   | GG                              | TT                | 1946500796               |
| SNP_P3_116784_35752 | NW_004515864.1 | Scaffold370 | 35752                   | AA                              | CC                | 1946500798               |
| SNP_P3_116785_35824 | NW_004515864.1 | Scaffold370 | 35824                   | GG                              | AA                | 1946500799               |
| SNP_P3_116786_35865 | NW_004515864.1 | Scaffold370 | 35865                   | CC                              | TT                | 1946500800               |
| SNP_P3_116787_35868 | NW_004515864.1 | Scaffold370 | 35868                   | TT                              | CC                | 1946500802               |
| SNP_P3_116788_36003 | NW_004515864.1 | Scaffold370 | 36003                   | TT                              | CC                | 1946500805               |
| SNP_P3_116789_36056 | NW_004515864.1 | Scaffold370 | 36056                   | GG                              | TT                | 1946500806               |
| SNP_P3_116790_36078 | NW_004515864.1 | Scaffold370 | 36078                   | CC                              | GG                | 1946500808               |
| SNP_P3_116791_36151 | NW_004515864.1 | Scaffold370 | 36151                   | AA                              | TT                | 1946500809               |
| SNP_P3_116792_36173 | NW_004515864.1 | Scaffold370 | 36173                   | GG                              | AA                | 1946500810               |
| SNP_P3_116794_36757 | NW_004515864.1 | Scaffold370 | 36757                   | AA                              | GG                | 1946500812               |
| SNP_P3_116795_36843 | NW_004515864.1 | Scaffold370 | 36843                   | CC                              | AA                | 1946500813               |
| SNP_P3_116796_36881 | NW_004515864.1 | Scaffold370 | 36881                   | AA                              | GG                | 1946500815               |
| SNP_P3_116797_36920 | NW_004515864.1 | Scaffold370 | 36920                   | AA                              | GG                | 1946500816               |
| SNP_P3_116798_36922 | NW_004515864.1 | Scaffold370 | 36922                   | CC                              | TT                | 1946500818               |
| SNP_P3_116799_37008 | NW_004515864.1 | Scaffold370 | 37008                   | AA                              | CC                | 1946500819               |
| SNP_P3_116800_37065 | NW_004515864.1 | Scaffold370 | 37065                   | TT                              | CC                | 1946500821               |
| SNP_P3_116801_37073 | NW_004515864.1 | Scaffold370 | 37073                   | AA                              | GG                | 1946500822               |
| SNP_P3_116802_37122 | NW_004515864.1 | Scaffold370 | 37122                   | TT                              | CC                | 1946500824               |
| SNP_P3_116803_37273 | NW_004515864.1 | Scaffold370 | 37273                   | GG                              | AA                | 1946500825               |
| SNP_P3_116804_37310 | NW_004515864.1 | Scaffold370 | 37310                   | TT                              | GG                | 1946500827               |
| SNP_P3_116805_37532 | NW_004515864.1 | Scaffold370 | 37532                   | AA                              | GG                | 1946500828               |
| SNP_P3_116806_37565 | NW_004515864.1 | Scaffold370 | 37565                   | TT                              | AA                | 1946500830               |
| SNP_P3_116807_37738 | NW_004515864.1 | Scaffold370 | 37738                   | GG                              | AA                | 1946500831               |
| SNP_P3_116809_37882 | NW_004515864.1 | Scaffold370 | 37882                   | AA                              | CC                | 1946500833               |
| SNP_P3_116810_37912 | NW_004515864.1 | Scaffold370 | 37912                   | GG                              | AA                | 1946500834               |
| SNP_P3_116811_37928 | NW_004515864.1 | Scaffold370 | 37928                   | TT                              | AA                | 1946500835               |
| SNP_P3_116812_37950 | NW_004515864.1 | Scaffold370 | 37950                   | CC                              | TT                | 1946500837               |
| SNP_P3_116813_38006 | NW_004515864.1 | Scaffold370 | 38006                   | AA                              | TT                | 1946500838               |
| SNP_P3_116814_38053 | NW_004515864.1 | Scaffold370 | 38053                   | CC                              | TT                | 1946500840               |
| SNP_P3_116815_38054 | NW_004515864.1 | Scaffold370 | 38054                   | TT                              | CC                | 1946500841               |
| SNP_P3_116816_38065 | NW_004515864.1 | Scaffold370 | 38065                   | GG                              | TT                | 1946500843               |
| SNP_P3_116817_38069 | NW_004515864.1 | Scaffold370 | 38069                   | CC                              | AA                | 1946500844               |
| SNP_P3_116818_38074 | NW_004515864.1 | Scaffold370 | 38074                   | TT                              | GG                | 1946500846               |
| SNP_P3_116819_38099 | NW_004515864.1 | Scaffold370 | 38099                   | GG                              | CC                | 1946500847               |
| SNP_P3_116820_38116 | NW_004515864.1 | Scaffold370 | 38116                   | GG                              | AA                | 1946500849               |
| SNP_P3_116821_38121 | NW_004515864.1 | Scaffold370 | 38121                   | CC                              | TT                | 1946500850               |
| SNP_P3_116822_38157 | NW_004515864.1 | Scaffold370 | 38157                   | TT                              | CC                | 1946500852               |
| SNP_P3_116823_38159 | NW_004515864.1 | Scaffold370 | 38159                   | AA                              | TT                | 1946500853               |

| SNPs IDs            | Chromosome IDs | Chromosomes | Physical positions (bp) | CDC Frontier (Reference genome) | (Pusa 256 & HPNB) | NCBI SNPdb Accession IDs |
|---------------------|----------------|-------------|-------------------------|---------------------------------|-------------------|--------------------------|
| SNP_P3_116824_38180 | NW_004515864.1 | Scaffold370 | 38180                   | TT                              | AA                | 1946500854               |
| SNP_P3_116825_38192 | NW_004515864.1 | Scaffold370 | 38192                   | TT                              | CC                | 1946500856               |
| SNP_P3_116826_38261 | NW_004515864.1 | Scaffold370 | 38261                   | GG                              | TT                | 1946500857               |
| SNP_P3_116827_38263 | NW_004515864.1 | Scaffold370 | 38263                   | TT                              | CC                | 1946500859               |
| SNP_P3_116828_38349 | NW_004515864.1 | Scaffold370 | 38349                   | TT                              | CC                | 1946500860               |
| SNP_P3_116829_38352 | NW_004515864.1 | Scaffold370 | 38352                   | GG                              | AA                | 1946500862               |
| SNP_P3_116830_38430 | NW_004515864.1 | Scaffold370 | 38430                   | TT                              | CC                | 1946500863               |
| SNP_P3_116831_38477 | NW_004515864.1 | Scaffold370 | 38477                   | TT                              | CC                | 1946500865               |
| SNP_P3_116832_38565 | NW_004515864.1 | Scaffold370 | 38565                   | CC                              | AA                | 1946500866               |
| SNP_P3_116833_38573 | NW_004515864.1 | Scaffold370 | 38573                   | AA                              | GG                | 1946500867               |
| SNP_P3_116834_38868 | NW_004515864.1 | Scaffold370 | 38868                   | CC                              | TT                | 1946500869               |
| SNP_P3_116835_39807 | NW_004515864.1 | Scaffold370 | 39807                   | AA                              | GG                | 1946500870               |
| SNP_P3_116836_39992 | NW_004515864.1 | Scaffold370 | 39992                   | GG                              | TT                | 1946500872               |
| SNP_P3_116837_40009 | NW_004515864.1 | Scaffold370 | 40009                   | GG                              | CC                | 1946500873               |
| SNP_P3_116838_40024 | NW_004515864.1 | Scaffold370 | 40024                   | TT                              | GG                | 1946500875               |
| SNP_P3_116839_40142 | NW_004515864.1 | Scaffold370 | 40142                   | GG                              | AA                | 1946500876               |
| SNP_P3_116840_40149 | NW_004515864.1 | Scaffold370 | 40149                   | GG                              | AA                | 1946500878               |
| SNP_P3_116841_40154 | NW_004515864.1 | Scaffold370 | 40154                   | AA                              | GG                | 1946500879               |
| SNP_P3_116842_40196 | NW_004515864.1 | Scaffold370 | 40196                   | AA                              | GG                | 1946500881               |
| SNP_P3_116843_40215 | NW_004515864.1 | Scaffold370 | 40215                   | TT                              | CC                | 1946500882               |
| SNP_P3_116844_40257 | NW_004515864.1 | Scaffold370 | 40257                   | TT                              | CC                | 1946500883               |
| SNP_P3_116845_40273 | NW_004515864.1 | Scaffold370 | 40273                   | AA                              | CC                | 1946500885               |
| SNP_P3_116846_40351 | NW_004515864.1 | Scaffold370 | 40351                   | AA                              | GG                | 1946500886               |
| SNP_P3_116847_40404 | NW_004515864.1 | Scaffold370 | 40404                   | TT                              | CC                | 1946500888               |
| SNP_P3_116848_40433 | NW_004515864.1 | Scaffold370 | 40433                   | CC                              | TT                | 1946500889               |
| SNP_P3_116849_40440 | NW_004515864.1 | Scaffold370 | 40440                   | CC                              | GG                | 1946500891               |
| SNP_P3_116850_40442 | NW_004515864.1 | Scaffold370 | 40442                   | CC                              | TT                | 1946500892               |
| SNP_P3_116851_40445 | NW_004515864.1 | Scaffold370 | 40445                   | TT                              | CC                | 1946500894               |
| SNP_P3_116852_40458 | NW_004515864.1 | Scaffold370 | 40458                   | TT                              | AA                | 1946500895               |
| SNP_P3_116854_40573 | NW_004515864.1 | Scaffold370 | 40573                   | TT                              | GG                | 1946500896               |
| SNP_P3_116855_40604 | NW_004515864.1 | Scaffold370 | 40604                   | GG                              | AA                | 1946500898               |
| SNP_P3_116856_40625 | NW_004515864.1 | Scaffold370 | 40625                   | TT                              | AA                | 1946500899               |
| SNP_P3_116857_41590 | NW_004515864.1 | Scaffold370 | 41590                   | AA                              | GG                | 1946500901               |
| SNP_P3_116858_41665 | NW_004515864.1 | Scaffold370 | 41665                   | GG                              | AA                | 1946500902               |
| SNP_P3_116859_43491 | NW_004515864.1 | Scaffold370 | 43491                   | AA                              | CC                | 1946500904               |
| SNP_P3_116860_43528 | NW_004515864.1 | Scaffold370 | 43528                   | TT                              | GG                | 1946500905               |
| SNP_P3_116861_43547 | NW_004515864.1 | Scaffold370 | 43547                   | AA                              | GG                | 1946500907               |
| SNP_P3_116862_43609 | NW_004515864.1 | Scaffold370 | 43609                   | GG                              | AA                | 1946500908               |
| SNP_P3_116863_43631 | NW_004515864.1 | Scaffold370 | 43631                   | TT                              | CC                | 1946500910               |
| SNP_P3_116864_43644 | NW_004515864.1 | Scaffold370 | 43644                   | TT                              | CC                | 1946500911               |
| SNP_P3_116865_44406 | NW_004515864.1 | Scaffold370 | 44406                   | GG                              | AA                | 1946500913               |
| SNP_P3_116866_45128 | NW_004515864.1 | Scaffold370 | 45128                   | GG                              | TT                | 1946500914               |

| SNPs IDs            | Chromosome IDs | Chromosomes | Physical positions (bp) | CDC Frontier (Reference genome) | (Pusa 256 & HPNB) | NCBI SNPdb Accession IDs |
|---------------------|----------------|-------------|-------------------------|---------------------------------|-------------------|--------------------------|
| SNP_P3_116867_45364 | NW_004515864.1 | Scaffold370 | 45364                   | AA                              | TT                | 1946500916               |
| SNP_P3_116868_45467 | NW_004515864.1 | Scaffold370 | 45467                   | GG                              | AA                | 1946500917               |
| SNP_P3_116869_45477 | NW_004515864.1 | Scaffold370 | 45477                   | CC                              | AA                | 1946500919               |
| SNP_P3_116870_45481 | NW_004515864.1 | Scaffold370 | 45481                   | GG                              | AA                | 1946500920               |
| SNP_P3_116871_45560 | NW_004515864.1 | Scaffold370 | 45560                   | CC                              | GG                | 1946500922               |
| SNP_P3_116872_45567 | NW_004515864.1 | Scaffold370 | 45567                   | CC                              | AA                | 1946500923               |
| SNP_P3_116873_45593 | NW_004515864.1 | Scaffold370 | 45593                   | TT                              | CC                | 1946500925               |
| SNP_P3_116874_45606 | NW_004515864.1 | Scaffold370 | 45606                   | GG                              | AA                | 1946500926               |
| SNP_P3_116875_45607 | NW_004515864.1 | Scaffold370 | 45607                   | GG                              | TT                | 1946500928               |
| SNP_P3_116876_45648 | NW_004515864.1 | Scaffold370 | 45648                   | CC                              | TT                | 1946500929               |
| SNP_P3_116877_45695 | NW_004515864.1 | Scaffold370 | 45695                   | AA                              | GG                | 1946500931               |
| SNP_P3_116878_45699 | NW_004515864.1 | Scaffold370 | 45699                   | GG                              | TT                | 1946500932               |
| SNP_P3_116879_45714 | NW_004515864.1 | Scaffold370 | 45714                   | TT                              | CC                | 1946500934               |
| SNP_P3_116880_45719 | NW_004515864.1 | Scaffold370 | 45719                   | AA                              | GG                | 1946500935               |
| SNP_P3_116881_45731 | NW_004515864.1 | Scaffold370 | 45731                   | AA                              | CC                | 1946500937               |
| SNP_P3_116882_45739 | NW_004515864.1 | Scaffold370 | 45739                   | GG                              | AA                | 1946500938               |
| SNP_P3_116883_45785 | NW_004515864.1 | Scaffold370 | 45785                   | CC                              | TT                | 1946500940               |
| SNP_P3_116884_45844 | NW_004515864.1 | Scaffold370 | 45844                   | GG                              | CC                | 1946500941               |
| SNP_P3_116885_45871 | NW_004515864.1 | Scaffold370 | 45871                   | GG                              | AA                | 1946500943               |
| SNP_P3_116886_45901 | NW_004515864.1 | Scaffold370 | 45901                   | GG                              | AA                | 1946500944               |
| SNP_P3_116887_46036 | NW_004515864.1 | Scaffold370 | 46036                   | CC                              | TT                | 1946500946               |
| SNP_P3_116888_46146 | NW_004515864.1 | Scaffold370 | 46146                   | AA                              | GG                | 1946500947               |
| SNP_P3_116889_46171 | NW_004515864.1 | Scaffold370 | 46171                   | CC                              | GG                | 1946500949               |
| SNP_P3_116890_46219 | NW_004515864.1 | Scaffold370 | 46219                   | CC                              | AA                | 1946500950               |
| SNP_P3_116891_46897 | NW_004515864.1 | Scaffold370 | 46897                   | GG                              | AA                | 1946500952               |
| SNP_P3_116892_48935 | NW_004515864.1 | Scaffold370 | 48935                   | AA                              | TT                | 1946500953               |
| SNP_P3_116893_50102 | NW_004515864.1 | Scaffold370 | 50102                   | TT                              | AA                | 1946500955               |
| SNP_P3_116894_50103 | NW_004515864.1 | Scaffold370 | 50103                   | AA                              | TT                | 1946500956               |
| SNP_P3_116895_50636 | NW_004515864.1 | Scaffold370 | 50636                   | TT                              | CC                | 1946500958               |
| SNP_P3_116896_50796 | NW_004515864.1 | Scaffold370 | 50796                   | GG                              | CC                | 1946500959               |
| SNP_P3_116897_50914 | NW_004515864.1 | Scaffold370 | 50914                   | GG                              | TT                | 1946500961               |
| SNP_P3_116898_50919 | NW_004515864.1 | Scaffold370 | 50919                   | CC                              | TT                | 1946500962               |
| SNP_P3_116899_55434 | NW_004515864.1 | Scaffold370 | 55434                   | CC                              | TT                | 1946500964               |
| SNP_P3_116900_55628 | NW_004515864.1 | Scaffold370 | 55628                   | TT                              | CC                | 1946500965               |
| SNP_P3_116901_56218 | NW_004515864.1 | Scaffold370 | 56218                   | TT                              | AA                | 1946500967               |
| SNP_P3_116902_56219 | NW_004515864.1 | Scaffold370 | 56219                   | AA                              | TT                | 1946500968               |
| SNP_P3_116903_56228 | NW_004515864.1 | Scaffold370 | 56228                   | CC                              | TT                | 1946500970               |
| SNP_P3_116904_56307 | NW_004515864.1 | Scaffold370 | 56307                   | AA                              | GG                | 1946500971               |
| SNP_P3_116905_56308 | NW_004515864.1 | Scaffold370 | 56308                   | AA                              | TT                | 1946500973               |
| SNP_P3_116906_56344 | NW_004515864.1 | Scaffold370 | 56344                   | TT                              | GG                | 1946500974               |
| SNP_P3_116907_56614 | NW_004515864.1 | Scaffold370 | 56614                   | GG                              | TT                | 1946500976               |
| SNP_P3_116908_56695 | NW_004515864.1 | Scaffold370 | 56695                   | TT                              | GG                | 1946500977               |



| SNPs IDs            | Chromosome IDs | Chromosomes | Physical positions (bp) | CDC Frontier (Reference genome) | (Pusa 256 & HPNB) | NCBI SNPdb Accession IDs |
|---------------------|----------------|-------------|-------------------------|---------------------------------|-------------------|--------------------------|
| SNP_P3_116909_56737 | NW_004515864.1 | Scaffold370 | 56737                   | TT                              | GG                | 1946500979               |
| SNP_P3_116910_56738 | NW_004515864.1 | Scaffold370 | 56738                   | CC                              | TT                | 1946500980               |
| SNP_P3_116911_56744 | NW_004515864.1 | Scaffold370 | 56744                   | AA                              | GG                | 1946500982               |
| SNP_P3_116912_56814 | NW_004515864.1 | Scaffold370 | 56814                   | TT                              | AA                | 1946500983               |
| SNP_P3_116913_56840 | NW_004515864.1 | Scaffold370 | 56840                   | CC                              | GG                | 1946500985               |
| SNP_P3_116914_56868 | NW_004515864.1 | Scaffold370 | 56868                   | CC                              | TT                | 1946500986               |
| SNP_P3_116915_56981 | NW_004515864.1 | Scaffold370 | 56981                   | AA                              | TT                | 1946500988               |
| SNP_P3_116916_56984 | NW_004515864.1 | Scaffold370 | 56984                   | AA                              | GG                | 1946500989               |
| SNP_P3_116917_57068 | NW_004515864.1 | Scaffold370 | 57068                   | TT                              | CC                | 1946500991               |
| SNP_P3_116918_57103 | NW_004515864.1 | Scaffold370 | 57103                   | TT                              | CC                | 1946500992               |
| SNP_P3_116919_57109 | NW_004515864.1 | Scaffold370 | 57109                   | AA                              | TT                | 1946500994               |
| SNP_P3_116920_57128 | NW_004515864.1 | Scaffold370 | 57128                   | TT                              | CC                | 1946500995               |
| SNP_P3_116921_57185 | NW_004515864.1 | Scaffold370 | 57185                   | TT                              | CC                | 1946500997               |
| SNP_P3_116922_57215 | NW_004515864.1 | Scaffold370 | 57215                   | TT                              | CC                | 1946500998               |
| SNP_P3_116923_57611 | NW_004515864.1 | Scaffold370 | 57611                   | GG                              | AA                | 1946501000               |
| SNP_P3_116924_57623 | NW_004515864.1 | Scaffold370 | 57623                   | CC                              | AA                | 1946501001               |
| SNP_P3_116925_57911 | NW_004515864.1 | Scaffold370 | 57911                   | GG                              | CC                | 1946501002               |
| SNP_P3_116926_58108 | NW_004515864.1 | Scaffold370 | 58108                   | GG                              | AA                | 1946501004               |
| SNP_P3_116927_58128 | NW_004515864.1 | Scaffold370 | 58128                   | AA                              | CC                | 1946501005               |
| SNP_P3_116929_58205 | NW_004515864.1 | Scaffold370 | 58205                   | CC                              | TT                | 1946501007               |
| SNP_P3_116930_58235 | NW_004515864.1 | Scaffold370 | 58235                   | CC                              | TT                | 1946501008               |
| SNP_P3_116931_58275 | NW_004515864.1 | Scaffold370 | 58275                   | CC                              | TT                | 1946501010               |
| SNP_P3_116932_58286 | NW_004515864.1 | Scaffold370 | 58286                   | CC                              | TT                | 1946501011               |
| SNP_P3_116933_58330 | NW_004515864.1 | Scaffold370 | 58330                   | AA                              | CC                | 1946501013               |
| SNP_P3_116934_58364 | NW_004515864.1 | Scaffold370 | 58364                   | CC                              | AA                | 1946501014               |
| SNP_P3_116935_58666 | NW_004515864.1 | Scaffold370 | 58666                   | TT                              | AA                | 1946501016               |
| SNP_P3_116936_58671 | NW_004515864.1 | Scaffold370 | 58671                   | CC                              | GG                | 1946501017               |
| SNP_P3_116937_58707 | NW_004515864.1 | Scaffold370 | 58707                   | TT                              | GG                | 1946501019               |
| SNP_P3_116938_58759 | NW_004515864.1 | Scaffold370 | 58759                   | AA                              | GG                | 1946501020               |
| SNP_P3_116939_58767 | NW_004515864.1 | Scaffold370 | 58767                   | TT                              | GG                | 1946501022               |
| SNP_P3_116940_58865 | NW_004515864.1 | Scaffold370 | 58865                   | AA                              | GG                | 1946501023               |
| SNP_P3_116941_58897 | NW_004515864.1 | Scaffold370 | 58897                   | TT                              | CC                | 1946501025               |
| SNP_P3_116942_58956 | NW_004515864.1 | Scaffold370 | 58956                   | CC                              | GG                | 1946501026               |
| SNP_P3_116943_58971 | NW_004515864.1 | Scaffold370 | 58971                   | AA                              | GG                | 1946501028               |
| SNP_P3_116944_59015 | NW_004515864.1 | Scaffold370 | 59015                   | TT                              | CC                | 1946501029               |
| SNP_P3_116945_59099 | NW_004515864.1 | Scaffold370 | 59099                   | TT                              | AA                | 1946501030               |
| SNP_P3_116946_59104 | NW_004515864.1 | Scaffold370 | 59104                   | CC                              | TT                | 1946501032               |
| SNP_P3_116947_59123 | NW_004515864.1 | Scaffold370 | 59123                   | GG                              | CC                | 1946501033               |
| SNP_P3_116948_59166 | NW_004515864.1 | Scaffold370 | 59166                   | CC                              | TT                | 1946501035               |
| SNP_P3_116949_59179 | NW_004515864.1 | Scaffold370 | 59179                   | CC                              | TT                | 1946501036               |
| SNP_P3_116950_59180 | NW_004515864.1 | Scaffold370 | 59180                   | GG                              | AA                | 1946501038               |
| SNP_P3_116951_59223 | NW_004515864.1 | Scaffold370 | 59223                   | TT                              | AA                | 1946501039               |

| SNPs IDs            | Chromosome IDs | Chromosomes | Physical positions (bp) | CDC Frontier (Reference genome) | (Pusa 256 & HPNB) | NCBI SNPdb Accession IDs |
|---------------------|----------------|-------------|-------------------------|---------------------------------|-------------------|--------------------------|
| SNP_P3_116952_59426 | NW_004515864.1 | Scaffold370 | 59426                   | AA                              | GG                | 1946501040               |
| SNP_P3_116953_59440 | NW_004515864.1 | Scaffold370 | 59440                   | AA                              | GG                | 1946501042               |
| SNP_P3_116954_59473 | NW_004515864.1 | Scaffold370 | 59473                   | GG                              | AA                | 1946501043               |
| SNP_P3_116955_59683 | NW_004515864.1 | Scaffold370 | 59683                   | GG                              | AA                | 1946501045               |
| SNP_P3_116956_59704 | NW_004515864.1 | Scaffold370 | 59704                   | TT                              | AA                | 1946501046               |
| SNP_P3_116957_59744 | NW_004515864.1 | Scaffold370 | 59744                   | TT                              | AA                | 1946501048               |
| SNP_P3_116958_60089 | NW_004515864.1 | Scaffold370 | 60089                   | AA                              | GG                | 1946501049               |
| SNP_P3_116959_60114 | NW_004515864.1 | Scaffold370 | 60114                   | TT                              | AA                | 1946501050               |
| SNP_P3_116960_60427 | NW_004515864.1 | Scaffold370 | 60427                   | AA                              | GG                | 1946501052               |
| SNP_P3_116961_60822 | NW_004515864.1 | Scaffold370 | 60822                   | GG                              | AA                | 1946501053               |
| SNP_P3_116962_62480 | NW_004515864.1 | Scaffold370 | 62480                   | AA                              | CC                | 1946501055               |
| SNP_P3_116963_62545 | NW_004515864.1 | Scaffold370 | 62545                   | TT                              | CC                | 1946501056               |
| SNP_P3_116964_62870 | NW_004515864.1 | Scaffold370 | 62870                   | GG                              | AA                | 1946501058               |
| SNP_P3_116965_62945 | NW_004515864.1 | Scaffold370 | 62945                   | CC                              | TT                | 1946501059               |
| SNP_P3_116966_62997 | NW_004515864.1 | Scaffold370 | 62997                   | GG                              | AA                | 1946501061               |
| SNP_P3_116967_62999 | NW_004515864.1 | Scaffold370 | 62999                   | AA                              | TT                | 1946501062               |
| SNP_P3_116968_63117 | NW_004515864.1 | Scaffold370 | 63117                   | GG                              | TT                | 1946501064               |
| SNP_P3_116969_63254 | NW_004515864.1 | Scaffold370 | 63254                   | CC                              | AA                | 1946501065               |
| SNP_P3_116970_63280 | NW_004515864.1 | Scaffold370 | 63280                   | TT                              | CC                | 1946501067               |
| SNP_P3_116971_63309 | NW_004515864.1 | Scaffold370 | 63309                   | AA                              | GG                | 1946501068               |
| SNP_P3_116972_63382 | NW_004515864.1 | Scaffold370 | 63382                   | CC                              | GG                | 1946501069               |
| SNP_P3_116973_63450 | NW_004515864.1 | Scaffold370 | 63450                   | GG                              | AA                | 1946501071               |
| SNP_P3_116974_63489 | NW_004515864.1 | Scaffold370 | 63489                   | TT                              | CC                | 1946501072               |
| SNP_P3_116975_63528 | NW_004515864.1 | Scaffold370 | 63528                   | TT                              | CC                | 1946501074               |
| SNP_P3_116976_63578 | NW_004515864.1 | Scaffold370 | 63578                   | TT                              | CC                | 1946501075               |
| SNP_P3_116977_63605 | NW_004515864.1 | Scaffold370 | 63605                   | GG                              | TT                | 1946501077               |
| SNP_P3_116978_63680 | NW_004515864.1 | Scaffold370 | 63680                   | GG                              | AA                | 1946501078               |
| SNP_P3_116979_63711 | NW_004515864.1 | Scaffold370 | 63711                   | CC                              | TT                | 1946501080               |
| SNP_P3_116980_63783 | NW_004515864.1 | Scaffold370 | 63783                   | CC                              | TT                | 1946501081               |
| SNP_P3_116981_63810 | NW_004515864.1 | Scaffold370 | 63810                   | CC                              | TT                | 1946501083               |
| SNP_P3_116982_63812 | NW_004515864.1 | Scaffold370 | 63812                   | AA                              | TT                | 1946501084               |
| SNP_P3_116983_63828 | NW_004515864.1 | Scaffold370 | 63828                   | AA                              | TT                | 1946501086               |
| SNP_P3_116984_63863 | NW_004515864.1 | Scaffold370 | 63863                   | CC                              | GG                | 1946501087               |
| SNP_P3_116985_63866 | NW_004515864.1 | Scaffold370 | 63866                   | GG                              | AA                | 1946501089               |
| SNP_P3_116986_63867 | NW_004515864.1 | Scaffold370 | 63867                   | AA                              | GG                | 1946501090               |
| SNP_P3_116987_63962 | NW_004515864.1 | Scaffold370 | 63962                   | AA                              | TT                | 1946501092               |
| SNP_P3_116988_63990 | NW_004515864.1 | Scaffold370 | 63990                   | GG                              | AA                | 1946501093               |
| SNP_P3_116989_64010 | NW_004515864.1 | Scaffold370 | 64010                   | TT                              | GG                | 1946501095               |
| SNP_P3_116990_64026 | NW_004515864.1 | Scaffold370 | 64026                   | TT                              | GG                | 1946501096               |
| SNP_P3_116991_64055 | NW_004515864.1 | Scaffold370 | 64055                   | CC                              | TT                | 1946501098               |
| SNP_P3_116992_64099 | NW_004515864.1 | Scaffold370 | 64099                   | TT                              | CC                | 1946501099               |
| SNP_P3_116993_64103 | NW_004515864.1 | Scaffold370 | 64103                   | CC                              | GG                | 1946501100               |

| SNPs IDs            | Chromosome IDs | Chromosomes | Physical positions (bp) | CDC Frontier (Reference genome) | (Pusa 256 & HPNB) | NCBI SNPdb Accession IDs |
|---------------------|----------------|-------------|-------------------------|---------------------------------|-------------------|--------------------------|
| SNP_P3_116994_64173 | NW_004515864.1 | Scaffold370 | 64173                   | AA                              | GG                | 1946501102               |
| SNP_P3_116995_64448 | NW_004515864.1 | Scaffold370 | 64448                   | TT                              | CC                | 1946501103               |
| SNP_P3_116996_64473 | NW_004515864.1 | Scaffold370 | 64473                   | GG                              | AA                | 1946501105               |
| SNP_P3_116997_64521 | NW_004515864.1 | Scaffold370 | 64521                   | TT                              | CC                | 1946501106               |
| SNP_P3_116998_64536 | NW_004515864.1 | Scaffold370 | 64536                   | TT                              | CC                | 1946501108               |
| SNP_P3_116999_64662 | NW_004515864.1 | Scaffold370 | 64662                   | AA                              | CC                | 1946501109               |
| SNP_P3_117000_64920 | NW_004515864.1 | Scaffold370 | 64920                   | AA                              | GG                | 1946501111               |
| SNP_P3_117001_64933 | NW_004515864.1 | Scaffold370 | 64933                   | TT                              | GG                | 1946501112               |
| SNP_P3_117002_64945 | NW_004515864.1 | Scaffold370 | 64945                   | AA                              | TT                | 1946501114               |
| SNP_P3_117003_65046 | NW_004515864.1 | Scaffold370 | 65046                   | GG                              | TT                | 1946501115               |
| SNP_P3_117004_65769 | NW_004515864.1 | Scaffold370 | 65769                   | GG                              | CC                | 1946501116               |
| SNP_P3_117005_66081 | NW_004515864.1 | Scaffold370 | 66081                   | AA                              | GG                | 1946501118               |
| SNP_P3_117006_66087 | NW_004515864.1 | Scaffold370 | 66087                   | GG                              | AA                | 1946501119               |
| SNP_P3_117007_66309 | NW_004515864.1 | Scaffold370 | 66309                   | TT                              | AA                | 1946501121               |
| SNP_P3_117008_66310 | NW_004515864.1 | Scaffold370 | 66310                   | TT                              | CC                | 1946501122               |
| SNP_P3_117009_66320 | NW_004515864.1 | Scaffold370 | 66320                   | TT                              | CC                | 1946501124               |
| SNP_P3_117010_66332 | NW_004515864.1 | Scaffold370 | 66332                   | CC                              | GG                | 1946501125               |
| SNP_P3_117011_66403 | NW_004515864.1 | Scaffold370 | 66403                   | GG                              | AA                | 1946501127               |
| SNP_P3_117012_66432 | NW_004515864.1 | Scaffold370 | 66432                   | TT                              | GG                | 1946501128               |
| SNP_P3_117013_66510 | NW_004515864.1 | Scaffold370 | 66510                   | AA                              | GG                | 1946501129               |
| SNP_P3_117014_66534 | NW_004515864.1 | Scaffold370 | 66534                   | GG                              | CC                | 1946501131               |
| SNP_P3_117015_66589 | NW_004515864.1 | Scaffold370 | 66589                   | CC                              | GG                | 1946501132               |
| SNP_P3_117016_66594 | NW_004515864.1 | Scaffold370 | 66594                   | GG                              | TT                | 1946501134               |
| SNP_P3_117017_66665 | NW_004515864.1 | Scaffold370 | 66665                   | TT                              | CC                | 1946501135               |
| SNP_P3_117018_66715 | NW_004515864.1 | Scaffold370 | 66715                   | AA                              | TT                | 1946501137               |
| SNP_P3_117019_66782 | NW_004515864.1 | Scaffold370 | 66782                   | TT                              | GG                | 1946501138               |
| SNP_P3_117020_66812 | NW_004515864.1 | Scaffold370 | 66812                   | TT                              | AA                | 1946501140               |
| SNP_P3_117021_66846 | NW_004515864.1 | Scaffold370 | 66846                   | GG                              | TT                | 1946501141               |
| SNP_P3_117022_66887 | NW_004515864.1 | Scaffold370 | 66887                   | GG                              | AA                | 1946501142               |
| SNP_P3_117023_66893 | NW_004515864.1 | Scaffold370 | 66893                   | GG                              | AA                | 1946501144               |
| SNP_P3_117024_66902 | NW_004515864.1 | Scaffold370 | 66902                   | AA                              | CC                | 1946501145               |
| SNP_P3_117025_66932 | NW_004515864.1 | Scaffold370 | 66932                   | AA                              | GG                | 1946501147               |
| SNP_P3_117026_66939 | NW_004515864.1 | Scaffold370 | 66939                   | CC                              | AA                | 1946501148               |
| SNP_P3_117027_66947 | NW_004515864.1 | Scaffold370 | 66947                   | TT                              | CC                | 1946501150               |
| SNP_P3_117028_66965 | NW_004515864.1 | Scaffold370 | 66965                   | TT                              | CC                | 1946501151               |
| SNP_P3_117029_66981 | NW_004515864.1 | Scaffold370 | 66981                   | AA                              | TT                | 1946501153               |
| SNP_P3_117030_66988 | NW_004515864.1 | Scaffold370 | 66988                   | TT                              | CC                | 1946501154               |
| SNP_P3_117031_67010 | NW_004515864.1 | Scaffold370 | 67010                   | GG                              | AA                | 1946501156               |
| SNP_P3_117032_67029 | NW_004515864.1 | Scaffold370 | 67029                   | CC                              | AA                | 1946501157               |
| SNP_P3_117033_67037 | NW_004515864.1 | Scaffold370 | 67037                   | TT                              | GG                | 1946501159               |
| SNP_P3_117034_67084 | NW_004515864.1 | Scaffold370 | 67084                   | GG                              | AA                | 1946501160               |
| SNP_P3_117035_67242 | NW_004515864.1 | Scaffold370 | 67242                   | AA                              | GG                | 1946501161               |

| SNPs IDs            | Chromosome IDs | Chromosomes | Physical positions (bp) | CDC Frontier (Reference genome) | (Pusa 256 & HPNB) | NCBI SNPdb Accession IDs |
|---------------------|----------------|-------------|-------------------------|---------------------------------|-------------------|--------------------------|
| SNP_P3_117036_67338 | NW_004515864.1 | Scaffold370 | 67338                   | TT                              | AA                | 1946501163               |
| SNP_P3_117037_67427 | NW_004515864.1 | Scaffold370 | 67427                   | TT                              | CC                | 1946501165               |
| SNP_P3_117038_67776 | NW_004515864.1 | Scaffold370 | 67776                   | TT                              | AA                | 1946501166               |
| SNP_P3_117039_67803 | NW_004515864.1 | Scaffold370 | 67803                   | GG                              | CC                | 1946501168               |
| SNP_P3_117040_68629 | NW_004515864.1 | Scaffold370 | 68629                   | TT                              | CC                | 1946501169               |
| SNP_P3_117041_68936 | NW_004515864.1 | Scaffold370 | 68936                   | GG                              | AA                | 1946501171               |
| SNP_P3_117042_68940 | NW_004515864.1 | Scaffold370 | 68940                   | AA                              | GG                | 1946501172               |
| SNP_P3_117043_69472 | NW_004515864.1 | Scaffold370 | 69472                   | TT                              | AA                | 1946501174               |
| SNP_P3_117044_69789 | NW_004515864.1 | Scaffold370 | 69789                   | CC                              | TT                | 1946501176               |
| SNP_P3_117045_71257 | NW_004515864.1 | Scaffold370 | 71257                   | AA                              | TT                | 1946501177               |
| SNP_P3_117046_71522 | NW_004515864.1 | Scaffold370 | 71522                   | TT                              | AA                | 1946501179               |
| SNP_P3_117047_71523 | NW_004515864.1 | Scaffold370 | 71523                   | TT                              | AA                | 1946501180               |
| SNP_P3_117048_71914 | NW_004515864.1 | Scaffold370 | 71914                   | AA                              | GG                | 1946501181               |
| SNP_P3_117049_74350 | NW_004515864.1 | Scaffold370 | 74350                   | AA                              | TT                | 1946501183               |
| SNP_P3_117050_74388 | NW_004515864.1 | Scaffold370 | 74388                   | TT                              | AA                | 1946501184               |
| SNP_P3_117051_74405 | NW_004515864.1 | Scaffold370 | 74405                   | GG                              | TT                | 1946501186               |
| SNP_P3_117052_74424 | NW_004515864.1 | Scaffold370 | 74424                   | TT                              | CC                | 1946501187               |
| SNP_P3_117053_74439 | NW_004515864.1 | Scaffold370 | 74439                   | GG                              | AA                | 1946501189               |
| SNP_P3_117054_74453 | NW_004515864.1 | Scaffold370 | 74453                   | TT                              | CC                | 1946501190               |
| SNP_P3_117055_74552 | NW_004515864.1 | Scaffold370 | 74552                   | AA                              | TT                | 1946501192               |
| SNP_P3_117056_74596 | NW_004515864.1 | Scaffold370 | 74596                   | AA                              | GG                | 1946501193               |
| SNP_P3_117057_74665 | NW_004515864.1 | Scaffold370 | 74665                   | TT                              | CC                | 1946501195               |
| SNP_P3_117058_74811 | NW_004515864.1 | Scaffold370 | 74811                   | AA                              | CC                | 1946501196               |
| SNP_P3_117059_74831 | NW_004515864.1 | Scaffold370 | 74831                   | CC                              | AA                | 1946501198               |
| SNP_P3_117060_74885 | NW_004515864.1 | Scaffold370 | 74885                   | AA                              | GG                | 1946501199               |
| SNP_P3_117061_74898 | NW_004515864.1 | Scaffold370 | 74898                   | CC                              | TT                | 1946501201               |
| SNP_P3_117062_74918 | NW_004515864.1 | Scaffold370 | 74918                   | GG                              | TT                | 1946501202               |
| SNP_P3_117063_74982 | NW_004515864.1 | Scaffold370 | 74982                   | CC                              | TT                | 1946501204               |
| SNP_P3_117064_74995 | NW_004515864.1 | Scaffold370 | 74995                   | TT                              | AA                | 1946501205               |
| SNP_P3_117065_75018 | NW_004515864.1 | Scaffold370 | 75018                   | CC                              | TT                | 1946501207               |
| SNP_P3_117066_75019 | NW_004515864.1 | Scaffold370 | 75019                   | GG                              | TT                | 1946501208               |
| SNP_P3_117067_75060 | NW_004515864.1 | Scaffold370 | 75060                   | AA                              | TT                | 1946501209               |
| SNP_P3_117068_75064 | NW_004515864.1 | Scaffold370 | 75064                   | GG                              | AA                | 1946501211               |
| SNP_P3_117070_75181 | NW_004515864.1 | Scaffold370 | 75181                   | TT                              | CC                | 1946501212               |
| SNP_P3_117071_75183 | NW_004515864.1 | Scaffold370 | 75183                   | AA                              | GG                | 1946501214               |
| SNP_P3_117072_75222 | NW_004515864.1 | Scaffold370 | 75222                   | TT                              | GG                | 1946501215               |
| SNP_P3_117073_75268 | NW_004515864.1 | Scaffold370 | 75268                   | GG                              | CC                | 1946501217               |
| SNP_P3_117074_75304 | NW_004515864.1 | Scaffold370 | 75304                   | GG                              | AA                | 1946501218               |
| SNP_P3_117075_75326 | NW_004515864.1 | Scaffold370 | 75326                   | CC                              | TT                | 1946501220               |
| SNP_P3_117076_75396 | NW_004515864.1 | Scaffold370 | 75396                   | GG                              | AA                | 1946501221               |
| SNP_P3_117077_75399 | NW_004515864.1 | Scaffold370 | 75399                   | CC                              | GG                | 1946501223               |
| SNP_P3_117078_75412 | NW_004515864.1 | Scaffold370 | 75412                   | GG                              | AA                | 1946501224               |

| SNPs IDs            | Chromosome IDs | Chromosomes | Physical positions (bp) | CDC Frontier (Reference genome) | (Pusa 256 & HPNB) | NCBI SNPdb Accession IDs |
|---------------------|----------------|-------------|-------------------------|---------------------------------|-------------------|--------------------------|
| SNP_P3_117079_75435 | NW_004515864.1 | Scaffold370 | 75435                   | GG                              | CC                | 1946501225               |
| SNP_P3_117080_75444 | NW_004515864.1 | Scaffold370 | 75444                   | CC                              | AA                | 1946501227               |
| SNP_P3_117081_75453 | NW_004515864.1 | Scaffold370 | 75453                   | TT                              | GG                | 1946501228               |
| SNP_P3_117082_75605 | NW_004515864.1 | Scaffold370 | 75605                   | GG                              | CC                | 1946501230               |
| SNP_P3_117083_75672 | NW_004515864.1 | Scaffold370 | 75672                   | AA                              | GG                | 1946501231               |
| SNP_P3_117084_76531 | NW_004515864.1 | Scaffold370 | 76531                   | GG                              | AA                | 1946501233               |
| SNP_P3_117086_76732 | NW_004515864.1 | Scaffold370 | 76732                   | TT                              | AA                | 1946501234               |
| SNP_P3_117087_76858 | NW_004515864.1 | Scaffold370 | 76858                   | AA                              | GG                | 1946501236               |
| SNP_P3_117088_76885 | NW_004515864.1 | Scaffold370 | 76885                   | GG                              | AA                | 1946501237               |
| SNP_P3_117089_76894 | NW_004515864.1 | Scaffold370 | 76894                   | GG                              | AA                | 1946501239               |
| SNP_P3_117090_76908 | NW_004515864.1 | Scaffold370 | 76908                   | CC                              | TT                | 1946501240               |
| SNP_P3_117091_76909 | NW_004515864.1 | Scaffold370 | 76909                   | GG                              | TT                | 1946501241               |
| SNP_P3_117092_76959 | NW_004515864.1 | Scaffold370 | 76959                   | CC                              | TT                | 1946501243               |
| SNP_P3_117093_76980 | NW_004515864.1 | Scaffold370 | 76980                   | GG                              | AA                | 1946501244               |
| SNP_P3_117094_77048 | NW_004515864.1 | Scaffold370 | 77048                   | GG                              | AA                | 1946501246               |
| SNP_P3_117095_77144 | NW_004515864.1 | Scaffold370 | 77144                   | TT                              | AA                | 1946501247               |
| SNP_P3_117096_77161 | NW_004515864.1 | Scaffold370 | 77161                   | AA                              | GG                | 1946501249               |
| SNP_P3_117097_77181 | NW_004515864.1 | Scaffold370 | 77181                   | TT                              | AA                | 1946501250               |
| SNP_P3_117098_77183 | NW_004515864.1 | Scaffold370 | 77183                   | CC                              | AA                | 1946501251               |
| SNP_P3_117099_77213 | NW_004515864.1 | Scaffold370 | 77213                   | TT                              | CC                | 1946501253               |
| SNP_P3_117100_77256 | NW_004515864.1 | Scaffold370 | 77256                   | AA                              | CC                | 1946501254               |
| SNP_P3_117101_77258 | NW_004515864.1 | Scaffold370 | 77258                   | GG                              | AA                | 1946501256               |
| SNP_P3_117102_77267 | NW_004515864.1 | Scaffold370 | 77267                   | AA                              | CC                | 1946501257               |
| SNP_P3_117103_77327 | NW_004515864.1 | Scaffold370 | 77327                   | AA                              | TT                | 1946501259               |
| SNP_P3_117104_77331 | NW_004515864.1 | Scaffold370 | 77331                   | CC                              | TT                | 1946501260               |
| SNP_P3_117105_77345 | NW_004515864.1 | Scaffold370 | 77345                   | TT                              | CC                | 1946501262               |
| SNP_P3_117106_77368 | NW_004515864.1 | Scaffold370 | 77368                   | AA                              | TT                | 1946501263               |
| SNP_P3_117107_77523 | NW_004515864.1 | Scaffold370 | 77523                   | CC                              | TT                | 1946501265               |
| SNP_P3_117108_77545 | NW_004515864.1 | Scaffold370 | 77545                   | AA                              | TT                | 1946501266               |
| SNP_P3_117109_77570 | NW_004515864.1 | Scaffold370 | 77570                   | GG                              | TT                | 1946501268               |
| SNP_P3_117110_77832 | NW_004515864.1 | Scaffold370 | 77832                   | AA                              | GG                | 1946501284               |
| SNP_P3_117111_77836 | NW_004515864.1 | Scaffold370 | 77836                   | CC                              | TT                | 1946501286               |
| SNP_P3_117112_77952 | NW_004515864.1 | Scaffold370 | 77952                   | CC                              | TT                | 1946501287               |
| SNP_P3_117113_78119 | NW_004515864.1 | Scaffold370 | 78119                   | TT                              | CC                | 1946501289               |
| SNP_P3_117114_78254 | NW_004515864.1 | Scaffold370 | 78254                   | AA                              | TT                | 1946501290               |
| SNP_P3_117115_78259 | NW_004515864.1 | Scaffold370 | 78259                   | AA                              | TT                | 1946501292               |
| SNP_P3_117116_78308 | NW_004515864.1 | Scaffold370 | 78308                   | CC                              | TT                | 1946501293               |
| SNP_P3_117117_78367 | NW_004515864.1 | Scaffold370 | 78367                   | TT                              | GG                | 1946501294               |
| SNP_P3_117118_78383 | NW_004515864.1 | Scaffold370 | 78383                   | TT                              | CC                | 1946501296               |
| SNP_P3_117119_78419 | NW_004515864.1 | Scaffold370 | 78419                   | CC                              | TT                | 1946501297               |
| SNP_P3_117120_78421 | NW_004515864.1 | Scaffold370 | 78421                   | CC                              | AA                | 1946501299               |
| SNP_P3_117121_78585 | NW_004515864.1 | Scaffold370 | 78585                   | AA                              | GG                | 1946501300               |

| SNPs IDs            | Chromosome IDs | Chromosomes | Physical positions (bp) | CDC Frontier (Reference genome) | (Pusa 256 & HPNB) | NCBI SNPdb Accession IDs |
|---------------------|----------------|-------------|-------------------------|---------------------------------|-------------------|--------------------------|
| SNP_P3_117122_78593 | NW_004515864.1 | Scaffold370 | 78593                   | AA                              | GG                | 1946501302               |
| SNP_P3_117123_78644 | NW_004515864.1 | Scaffold370 | 78644                   | AA                              | CC                | 1946501303               |
| SNP_P3_117124_78663 | NW_004515864.1 | Scaffold370 | 78663                   | AA                              | CC                | 1946501304               |
| SNP_P3_117125_78867 | NW_004515864.1 | Scaffold370 | 78867                   | GG                              | AA                | 1946501306               |
| SNP_P3_117126_78868 | NW_004515864.1 | Scaffold370 | 78868                   | GG                              | CC                | 1946501307               |
| SNP_P3_117127_78895 | NW_004515864.1 | Scaffold370 | 78895                   | CC                              | GG                | 1946501309               |
| SNP_P3_117128_79650 | NW_004515864.1 | Scaffold370 | 79650                   | AA                              | CC                | 1946501310               |
| SNP_P3_117129_79782 | NW_004515864.1 | Scaffold370 | 79782                   | GG                              | AA                | 1946501312               |
| SNP_P3_117130_79810 | NW_004515864.1 | Scaffold370 | 79810                   | GG                              | AA                | 1946501313               |
| SNP_P3_117131_79891 | NW_004515864.1 | Scaffold370 | 79891                   | TT                              | CC                | 1946501314               |
| SNP_P3_117132_79928 | NW_004515864.1 | Scaffold370 | 79928                   | TT                              | CC                | 1946501316               |
| SNP_P3_117133_80014 | NW_004515864.1 | Scaffold370 | 80014                   | CC                              | TT                | 1946501317               |
| SNP_P3_117134_80020 | NW_004515864.1 | Scaffold370 | 80020                   | TT                              | AA                | 1946501319               |
| SNP_P3_117135_80134 | NW_004515864.1 | Scaffold370 | 80134                   | AA                              | GG                | 1946501320               |
| SNP_P3_117136_80490 | NW_004515864.1 | Scaffold370 | 80490                   | GG                              | CC                | 1946501322               |
| SNP_P3_117137_80590 | NW_004515864.1 | Scaffold370 | 80590                   | AA                              | GG                | 1946501323               |
| SNP_P3_117138_80835 | NW_004515864.1 | Scaffold370 | 80835                   | GG                              | CC                | 1946501325               |
| SNP_P3_117139_80955 | NW_004515864.1 | Scaffold370 | 80955                   | GG                              | CC                | 1946501326               |
| SNP_P3_117140_80996 | NW_004515864.1 | Scaffold370 | 80996                   | CC                              | TT                | 1946501328               |
| SNP_P3_117141_81019 | NW_004515864.1 | Scaffold370 | 81019                   | AA                              | TT                | 1946501329               |
| SNP_P3_117142_81036 | NW_004515864.1 | Scaffold370 | 81036                   | CC                              | GG                | 1946501330               |
| SNP_P3_117143_81069 | NW_004515864.1 | Scaffold370 | 81069                   | GG                              | AA                | 1946501332               |
| SNP_P3_117144_81311 | NW_004515864.1 | Scaffold370 | 81311                   | TT                              | CC                | 1946501333               |
| SNP_P3_117145_81488 | NW_004515864.1 | Scaffold370 | 81488                   | GG                              | AA                | 1946501335               |
| SNP_P3_117146_81500 | NW_004515864.1 | Scaffold370 | 81500                   | GG                              | CC                | 1946501336               |
| SNP_P3_117147_81528 | NW_004515864.1 | Scaffold370 | 81528                   | GG                              | AA                | 1946501338               |
| SNP_P3_117148_81581 | NW_004515864.1 | Scaffold370 | 81581                   | CC                              | TT                | 1946501339               |
| SNP_P3_117149_81594 | NW_004515864.1 | Scaffold370 | 81594                   | TT                              | AA                | 1946501341               |
| SNP_P3_117150_81601 | NW_004515864.1 | Scaffold370 | 81601                   | CC                              | AA                | 1946501342               |
| SNP_P3_117151_81833 | NW_004515864.1 | Scaffold370 | 81833                   | AA                              | CC                | 1946501343               |
| SNP_P3_117152_81865 | NW_004515864.1 | Scaffold370 | 81865                   | TT                              | CC                | 1946501345               |
| SNP_P3_117153_81957 | NW_004515864.1 | Scaffold370 | 81957                   | GG                              | TT                | 1946501346               |
| SNP_P3_117154_81971 | NW_004515864.1 | Scaffold370 | 81971                   | CC                              | TT                | 1946501348               |
| SNP_P3_117155_82072 | NW_004515864.1 | Scaffold370 | 82072                   | GG                              | AA                | 1946501349               |
| SNP_P3_117156_82092 | NW_004515864.1 | Scaffold370 | 82092                   | TT                              | CC                | 1946501351               |
| SNP_P3_117157_82433 | NW_004515864.1 | Scaffold370 | 82433                   | TT                              | CC                | 1946501352               |
| SNP_P3_117158_82461 | NW_004515864.1 | Scaffold370 | 82461                   | TT                              | CC                | 1946501354               |
| SNP_P3_117159_82619 | NW_004515864.1 | Scaffold370 | 82619                   | TT                              | GG                | 1946501355               |
| SNP_P3_117160_82728 | NW_004515864.1 | Scaffold370 | 82728                   | TT                              | CC                | 1946501356               |
| SNP_P3_117161_82730 | NW_004515864.1 | Scaffold370 | 82730                   | CC                              | TT                | 1946501358               |
| SNP_P3_117162_82920 | NW_004515864.1 | Scaffold370 | 82920                   | GG                              | AA                | 1946501359               |
| SNP_P3_117163_83467 | NW_004515864.1 | Scaffold370 | 83467                   | AA                              | TT                | 1946501361               |

| SNPs IDs            | Chromosome IDs | Chromosomes | Physical positions (bp) | CDC Frontier (Reference genome) | (Pusa 256 & HPNB) | NCBI SNPdb Accession IDs |
|---------------------|----------------|-------------|-------------------------|---------------------------------|-------------------|--------------------------|
| SNP_P3_117164_83509 | NW_004515864.1 | Scaffold370 | 83509                   | AA                              | TT                | 1946501362               |
| SNP_P3_117165_83827 | NW_004515864.1 | Scaffold370 | 83827                   | TT                              | CC                | 1946501364               |
| SNP_P3_117166_83848 | NW_004515864.1 | Scaffold370 | 83848                   | TT                              | AA                | 1946501365               |
| SNP_P3_117167_85189 | NW_004515864.1 | Scaffold370 | 85189                   | GG                              | AA                | 1946501367               |
| SNP_P3_117168_85396 | NW_004515864.1 | Scaffold370 | 85396                   | CC                              | AA                | 1946501368               |
| SNP_P3_117169_85455 | NW_004515864.1 | Scaffold370 | 85455                   | TT                              | CC                | 1946501370               |
| SNP_P3_117170_86568 | NW_004515864.1 | Scaffold370 | 86568                   | TT                              | AA                | 1946501371               |
| SNP_P3_117171_86976 | NW_004515864.1 | Scaffold370 | 86976                   | TT                              | CC                | 1946501372               |
| SNP_P3_117172_87282 | NW_004515864.1 | Scaffold370 | 87282                   | TT                              | CC                | 1946501374               |
| SNP_P3_117173_87458 | NW_004515864.1 | Scaffold370 | 87458                   | AA                              | TT                | 1946501375               |
| SNP_P3_117174_87496 | NW_004515864.1 | Scaffold370 | 87496                   | GG                              | AA                | 1946501377               |
| SNP_P3_117175_87725 | NW_004515864.1 | Scaffold370 | 87725                   | GG                              | AA                | 1946501378               |
| SNP_P3_117176_87802 | NW_004515864.1 | Scaffold370 | 87802                   | GG                              | AA                | 1946501380               |
| SNP_P3_117177_87919 | NW_004515864.1 | Scaffold370 | 87919                   | TT                              | AA                | 1946501381               |
| SNP_P3_117178_88028 | NW_004515864.1 | Scaffold370 | 88028                   | AA                              | GG                | 1946501383               |
| SNP_P3_117179_88184 | NW_004515864.1 | Scaffold370 | 88184                   | TT                              | CC                | 1946501384               |
| SNP_P3_117180_88212 | NW_004515864.1 | Scaffold370 | 88212                   | TT                              | CC                | 1946501386               |
| SNP_P3_117181_88448 | NW_004515864.1 | Scaffold370 | 88448                   | CC                              | TT                | 1946501387               |
| SNP_P3_117182_88476 | NW_004515864.1 | Scaffold370 | 88476                   | TT                              | CC                | 1946501389               |
| SNP_P3_117183_88590 | NW_004515864.1 | Scaffold370 | 88590                   | AA                              | CC                | 1946501390               |
| SNP_P3_117184_88633 | NW_004515864.1 | Scaffold370 | 88633                   | TT                              | CC                | 1946501392               |
| SNP_P3_117185_88685 | NW_004515864.1 | Scaffold370 | 88685                   | TT                              | CC                | 1946501393               |
| SNP_P3_117186_88722 | NW_004515864.1 | Scaffold370 | 88722                   | CC                              | GG                | 1946501395               |
| SNP_P3_117187_88754 | NW_004515864.1 | Scaffold370 | 88754                   | TT                              | GG                | 1946501396               |
| SNP_P3_117188_89184 | NW_004515864.1 | Scaffold370 | 89184                   | GG                              | AA                | 1946501397               |
| SNP_P3_117189_89238 | NW_004515864.1 | Scaffold370 | 89238                   | CC                              | GG                | 1946501399               |
| SNP_P3_117190_89291 | NW_004515864.1 | Scaffold370 | 89291                   | TT                              | CC                | 1946501400               |
| SNP_P3_117191_89299 | NW_004515864.1 | Scaffold370 | 89299                   | TT                              | CC                | 1946501402               |
| SNP_P3_117192_89338 | NW_004515864.1 | Scaffold370 | 89338                   | TT                              | CC                | 1946501403               |
| SNP_P3_117193_89358 | NW_004515864.1 | Scaffold370 | 89358                   | AA                              | GG                | 1946501405               |
| SNP_P3_117194_89413 | NW_004515864.1 | Scaffold370 | 89413                   | CC                              | AA                | 1946501406               |
| SNP_P3_117195_89460 | NW_004515864.1 | Scaffold370 | 89460                   | TT                              | CC                | 1946501407               |
| SNP_P3_117196_89500 | NW_004515864.1 | Scaffold370 | 89500                   | AA                              | TT                | 1946501409               |
| SNP_P3_117197_89601 | NW_004515864.1 | Scaffold370 | 89601                   | GG                              | AA                | 1946501410               |
| SNP_P3_117198_89703 | NW_004515864.1 | Scaffold370 | 89703                   | AA                              | TT                | 1946501412               |
| SNP_P3_117199_89749 | NW_004515864.1 | Scaffold370 | 89749                   | GG                              | AA                | 1946501413               |
| SNP_P3_117201_89808 | NW_004515864.1 | Scaffold370 | 89808                   | GG                              | AA                | 1946501415               |
| SNP_P3_117202_89864 | NW_004515864.1 | Scaffold370 | 89864                   | CC                              | TT                | 1946501416               |
| SNP_P3_117203_89904 | NW_004515864.1 | Scaffold370 | 89904                   | TT                              | GG                | 1946501417               |
| SNP_P3_117204_90044 | NW_004515864.1 | Scaffold370 | 90044                   | TT                              | AA                | 1946501419               |
| SNP_P3_117205_90106 | NW_004515864.1 | Scaffold370 | 90106                   | TT                              | CC                | 1946501420               |
| SNP_P3_117206_90117 | NW_004515864.1 | Scaffold370 | 90117                   | GG                              | AA                | 1946501422               |

| SNPs IDs            | Chromosome IDs | Chromosomes | Physical positions (bp) | CDC Frontier (Reference genome) | (Pusa 256 & HPNB) | NCBI SNPdb Accession IDs |
|---------------------|----------------|-------------|-------------------------|---------------------------------|-------------------|--------------------------|
| SNP_P3_117207_90250 | NW_004515864.1 | Scaffold370 | 90250                   | TT                              | GG                | 1946501423               |
| SNP_P3_117208_90296 | NW_004515864.1 | Scaffold370 | 90296                   | GG                              | TT                | 1946501425               |
| SNP_P3_117209_90343 | NW_004515864.1 | Scaffold370 | 90343                   | AA                              | GG                | 1946501426               |
| SNP_P3_117210_90386 | NW_004515864.1 | Scaffold370 | 90386                   | TT                              | AA                | 1946501428               |
| SNP_P3_117211_90593 | NW_004515864.1 | Scaffold370 | 90593                   | TT                              | CC                | 1946501429               |
| SNP_P3_117212_90615 | NW_004515864.1 | Scaffold370 | 90615                   | GG                              | AA                | 1946501430               |
| SNP_P3_117213_90667 | NW_004515864.1 | Scaffold370 | 90667                   | CC                              | TT                | 1946501432               |
| SNP_P3_117214_92651 | NW_004515864.1 | Scaffold370 | 92651                   | AA                              | CC                | 1946501433               |
| SNP_P3_117215_92682 | NW_004515864.1 | Scaffold370 | 92682                   | CC                              | AA                | 1946501435               |
| SNP_P3_117216_92738 | NW_004515864.1 | Scaffold370 | 92738                   | AA                              | CC                | 1946501436               |
| SNP_P3_117217_92780 | NW_004515864.1 | Scaffold370 | 92780                   | GG                              | TT                | 1946501438               |
| SNP_P3_117218_92818 | NW_004515864.1 | Scaffold370 | 92818                   | CC                              | TT                | 1946501439               |
| SNP_P3_117219_92909 | NW_004515864.1 | Scaffold370 | 92909                   | TT                              | CC                | 1946501441               |
| SNP_P3_117220_92931 | NW_004515864.1 | Scaffold370 | 92931                   | AA                              | GG                | 1946501442               |
| SNP_P3_117221_92952 | NW_004515864.1 | Scaffold370 | 92952                   | GG                              | TT                | 1946501443               |
| SNP_P3_117222_92988 | NW_004515864.1 | Scaffold370 | 92988                   | CC                              | TT                | 1946501445               |
| SNP_P3_117223_93085 | NW_004515864.1 | Scaffold370 | 93085                   | GG                              | AA                | 1946501446               |
| SNP_P3_117224_93113 | NW_004515864.1 | Scaffold370 | 93113                   | TT                              | GG                | 1946501448               |
| SNP_P3_117225_93135 | NW_004515864.1 | Scaffold370 | 93135                   | AA                              | CC                | 1946501449               |
| SNP_P3_117226_93431 | NW_004515864.1 | Scaffold370 | 93431                   | GG                              | AA                | 1946501451               |
| SNP_P3_117227_93432 | NW_004515864.1 | Scaffold370 | 93432                   | AA                              | TT                | 1946501452               |
| SNP_P3_117228_93760 | NW_004515864.1 | Scaffold370 | 93760                   | CC                              | TT                | 1946501454               |
| SNP_P3_117229_93771 | NW_004515864.1 | Scaffold370 | 93771                   | GG                              | AA                | 1946501455               |
| SNP_P3_117230_93787 | NW_004515864.1 | Scaffold370 | 93787                   | TT                              | CC                | 1946501456               |
| SNP_P3_117231_94081 | NW_004515864.1 | Scaffold370 | 94081                   | GG                              | AA                | 1946501458               |
| SNP_P3_117232_94449 | NW_004515864.1 | Scaffold370 | 94449                   | GG                              | CC                | 1946501459               |
| SNP_P3_117233_94702 | NW_004515864.1 | Scaffold370 | 94702                   | AA                              | TT                | 1946501461               |
| SNP_P3_117234_94805 | NW_004515864.1 | Scaffold370 | 94805                   | AA                              | TT                | 1946501462               |
| SNP_P3_117235_94806 | NW_004515864.1 | Scaffold370 | 94806                   | TT                              | GG                | 1946501464               |
| SNP_P3_117236_94807 | NW_004515864.1 | Scaffold370 | 94807                   | GG                              | AA                | 1946501465               |
| SNP_P3_117237_94834 | NW_004515864.1 | Scaffold370 | 94834                   | CC                              | AA                | 1946501467               |
| SNP_P3_117238_94840 | NW_004515864.1 | Scaffold370 | 94840                   | CC                              | TT                | 1946501468               |
| SNP_P3_117239_94854 | NW_004515864.1 | Scaffold370 | 94854                   | CC                              | TT                | 1946501469               |
| SNP_P3_117240_94897 | NW_004515864.1 | Scaffold370 | 94897                   | AA                              | CC                | 1946501471               |
| SNP_P3_117241_94912 | NW_004515864.1 | Scaffold370 | 94912                   | CC                              | GG                | 1946501472               |
| SNP_P3_117242_94956 | NW_004515864.1 | Scaffold370 | 94956                   | AA                              | GG                | 1946501474               |
| SNP_P3_117243_95259 | NW_004515864.1 | Scaffold370 | 95259                   | TT                              | CC                | 1946501475               |
| SNP_P3_117244_95297 | NW_004515864.1 | Scaffold370 | 95297                   | TT                              | CC                | 1946501476               |
| SNP_P3_117245_95415 | NW_004515864.1 | Scaffold370 | 95415                   | CC                              | TT                | 1946501478               |
| SNP_P3_117246_95420 | NW_004515864.1 | Scaffold370 | 95420                   | TT                              | CC                | 1946501479               |
| SNP_P3_117247_95421 | NW_004515864.1 | Scaffold370 | 95421                   | TT                              | AA                | 1946501481               |
| SNP_P3_117248_95422 | NW_004515864.1 | Scaffold370 | 95422                   | AA                              | TT                | 1946501482               |



| SNPs IDs             | Chromosome IDs | Chromosomes | Physical positions (bp) | CDC Frontier (Reference genome) | (Pusa 256 & HPNB) | NCBI SNPdb Accession IDs |
|----------------------|----------------|-------------|-------------------------|---------------------------------|-------------------|--------------------------|
| SNP_P3_117249_95425  | NW_004515864.1 | Scaffold370 | 95425                   | GG                              | TT                | 1946501484               |
| SNP_P3_117250_95961  | NW_004515864.1 | Scaffold370 | 95961                   | CC                              | AA                | 1946501486               |
| SNP_P3_117251_99930  | NW_004515864.1 | Scaffold370 | 99930                   | GG                              | AA                | 1946501487               |
| SNP_P3_117252_99945  | NW_004515864.1 | Scaffold370 | 99945                   | TT                              | AA                | 1946501489               |
| SNP_P3_117253_99968  | NW_004515864.1 | Scaffold370 | 99968                   | AA                              | CC                | 1946501491               |
| SNP_P3_117254_100022 | NW_004515864.1 | Scaffold370 | 100022                  | TT                              | GG                | 1946501492               |
| SNP_P3_117255_100062 | NW_004515864.1 | Scaffold370 | 100062                  | CC                              | AA                | 1946501494               |
| SNP_P3_117256_100064 | NW_004515864.1 | Scaffold370 | 100064                  | TT                              | GG                | 1946501495               |
| SNP_P3_117257_100136 | NW_004515864.1 | Scaffold370 | 100136                  | GG                              | TT                | 1946501497               |
| SNP_P3_117258_100155 | NW_004515864.1 | Scaffold370 | 100155                  | GG                              | AA                | 1946501498               |
| SNP_P3_117259_100184 | NW_004515864.1 | Scaffold370 | 100184                  | AA                              | TT                | 1946501500               |
| SNP_P3_117260_100207 | NW_004515864.1 | Scaffold370 | 100207                  | TT                              | CC                | 1946501501               |
| SNP_P3_117261_100388 | NW_004515864.1 | Scaffold370 | 100388                  | CC                              | AA                | 1946501503               |
| SNP_P3_117262_100389 | NW_004515864.1 | Scaffold370 | 100389                  | AA                              | TT                | 1946501504               |
| SNP_P3_117263_100396 | NW_004515864.1 | Scaffold370 | 100396                  | GG                              | AA                | 1946501506               |
| SNP_P3_117264_100403 | NW_004515864.1 | Scaffold370 | 100403                  | GG                              | AA                | 1946501507               |
| SNP_P3_117265_100404 | NW_004515864.1 | Scaffold370 | 100404                  | TT                              | AA                | 1946501509               |
| SNP_P3_117266_100484 | NW_004515864.1 | Scaffold370 | 100484                  | CC                              | AA                | 1946501510               |
| SNP_P3_117267_100486 | NW_004515864.1 | Scaffold370 | 100486                  | TT                              | CC                | 1946501512               |
| SNP_P3_117268_100510 | NW_004515864.1 | Scaffold370 | 100510                  | GG                              | AA                | 1946501513               |
| SNP_P3_117269_100606 | NW_004515864.1 | Scaffold370 | 100606                  | AA                              | GG                | 1946501514               |
| SNP_P3_117270_100777 | NW_004515864.1 | Scaffold370 | 100777                  | GG                              | CC                | 1946501516               |
| SNP_P3_117271_100862 | NW_004515864.1 | Scaffold370 | 100862                  | CC                              | AA                | 1946501517               |
| SNP_P3_117272_100882 | NW_004515864.1 | Scaffold370 | 100882                  | TT                              | CC                | 1946501519               |
| SNP_P3_117273_100883 | NW_004515864.1 | Scaffold370 | 100883                  | TT                              | AA                | 1946501520               |
| SNP_P3_117274_100898 | NW_004515864.1 | Scaffold370 | 100898                  | GG                              | AA                | 1946501522               |
| SNP_P3_117275_100973 | NW_004515864.1 | Scaffold370 | 100973                  | AA                              | CC                | 1946501524               |
| SNP_P3_117276_101009 | NW_004515864.1 | Scaffold370 | 101009                  | AA                              | GG                | 1946501525               |
| SNP_P3_117277_101019 | NW_004515864.1 | Scaffold370 | 101019                  | TT                              | AA                | 1946501527               |
| SNP_P3_117278_101021 | NW_004515864.1 | Scaffold370 | 101021                  | CC                              | AA                | 1946501528               |
| SNP_P3_117279_101031 | NW_004515864.1 | Scaffold370 | 101031                  | TT                              | CC                | 1946501530               |
| SNP_P3_117281_101101 | NW_004515864.1 | Scaffold370 | 101101                  | AA                              | GG                | 1946501531               |
| SNP_P3_117282_101133 | NW_004515864.1 | Scaffold370 | 101133                  | CC                              | AA                | 1946501532               |
| SNP_P3_117283_101427 | NW_004515864.1 | Scaffold370 | 101427                  | AA                              | TT                | 1946501534               |
| SNP_P3_117284_102011 | NW_004515864.1 | Scaffold370 | 102011                  | GG                              | AA                | 1946501535               |
| SNP_P3_117285_102028 | NW_004515864.1 | Scaffold370 | 102028                  | AA                              | GG                | 1946501537               |
| SNP_P3_117286_102378 | NW_004515864.1 | Scaffold370 | 102378                  | TT                              | CC                | 1946501538               |
| SNP_P3_117287_102515 | NW_004515864.1 | Scaffold370 | 102515                  | GG                              | AA                | 1946501540               |
| SNP_P3_117288_102561 | NW_004515864.1 | Scaffold370 | 102561                  | AA                              | GG                | 1946501541               |
| SNP_P3_117289_102571 | NW_004515864.1 | Scaffold370 | 102571                  | TT                              | GG                | 1946501542               |
| SNP_P3_117290_102572 | NW_004515864.1 | Scaffold370 | 102572                  | GG                              | AA                | 1946501544               |
| SNP_P3_117291_102579 | NW_004515864.1 | Scaffold370 | 102579                  | AA                              | CC                | 1946501545               |

| SNPs IDs             | Chromosome IDs | Chromosomes | Physical positions (bp) | CDC Frontier (Reference genome) | (Pusa 256 & HPNB) | NCBI SNPdb Accession IDs |
|----------------------|----------------|-------------|-------------------------|---------------------------------|-------------------|--------------------------|
| SNP_P3_117292_102614 | NW_004515864.1 | Scaffold370 | 102614                  | TT                              | AA                | 1946501547               |
| SNP_P3_117293_102637 | NW_004515864.1 | Scaffold370 | 102637                  | CC                              | TT                | 1946501548               |
| SNP_P3_117294_102638 | NW_004515864.1 | Scaffold370 | 102638                  | CC                              | GG                | 1946501550               |
| SNP_P3_117295_102942 | NW_004515864.1 | Scaffold370 | 102942                  | AA                              | GG                | 1946501551               |
| SNP_P3_117296_102945 | NW_004515864.1 | Scaffold370 | 102945                  | AA                              | GG                | 1946501552               |
| SNP_P3_117297_103099 | NW_004515864.1 | Scaffold370 | 103099                  | AA                              | GG                | 1946501554               |
| SNP_P3_117298_104598 | NW_004515864.1 | Scaffold370 | 104598                  | CC                              | AA                | 1946501555               |
| SNP_P3_117299_104618 | NW_004515864.1 | Scaffold370 | 104618                  | CC                              | TT                | 1946501557               |
| SNP_P3_117300_104635 | NW_004515864.1 | Scaffold370 | 104635                  | GG                              | AA                | 1946501558               |
| SNP_P3_117301_104636 | NW_004515864.1 | Scaffold370 | 104636                  | GG                              | AA                | 1946501560               |
| SNP_P3_117302_104754 | NW_004515864.1 | Scaffold370 | 104754                  | AA                              | CC                | 1946501561               |
| SNP_P3_117303_104982 | NW_004515864.1 | Scaffold370 | 104982                  | TT                              | CC                | 1946501563               |
| SNP_P3_117304_105447 | NW_004515864.1 | Scaffold370 | 105447                  | TT                              | GG                | 1946501564               |
| SNP_P3_117305_106039 | NW_004515864.1 | Scaffold370 | 106039                  | AA                              | TT                | 1946501565               |
| SNP_P3_117306_106089 | NW_004515864.1 | Scaffold370 | 106089                  | CC                              | TT                | 1946501566               |
| SNP_P3_117307_106389 | NW_004515864.1 | Scaffold370 | 106389                  | GG                              | TT                | 1946501567               |
| SNP_P3_117308_106562 | NW_004515864.1 | Scaffold370 | 106562                  | CC                              | GG                | 1946501568               |
| SNP_P3_117309_106630 | NW_004515864.1 | Scaffold370 | 106630                  | AA                              | TT                | 1946501569               |
| SNP_P3_117310_106631 | NW_004515864.1 | Scaffold370 | 106631                  | AA                              | CC                | 1946501570               |
| SNP_P3_117312_106907 | NW_004515864.1 | Scaffold370 | 106907                  | TT                              | AA                | 1946501571               |
| SNP_P3_117313_106916 | NW_004515864.1 | Scaffold370 | 106916                  | AA                              | TT                | 1946501572               |
| SNP_P3_117314_106918 | NW_004515864.1 | Scaffold370 | 106918                  | TT                              | CC                | 1946501573               |
| SNP_P3_117315_106942 | NW_004515864.1 | Scaffold370 | 106942                  | AA                              | CC                | 1946501574               |
| SNP_P3_117316_107126 | NW_004515864.1 | Scaffold370 | 107126                  | CC                              | TT                | 1946501575               |
| SNP_P3_117317_107129 | NW_004515864.1 | Scaffold370 | 107129                  | CC                              | GG                | 1946501576               |
| SNP_P3_117318_107213 | NW_004515864.1 | Scaffold370 | 107213                  | CC                              | TT                | 1946501577               |
| SNP_P3_117319_107238 | NW_004515864.1 | Scaffold370 | 107238                  | AA                              | GG                | 1946501578               |
| SNP_P3_117320_107362 | NW_004515864.1 | Scaffold370 | 107362                  | CC                              | AA                | 1946501579               |
| SNP_P3_117321_107409 | NW_004515864.1 | Scaffold370 | 107409                  | AA                              | TT                | 1946501580               |
| SNP_P3_117322_107445 | NW_004515864.1 | Scaffold370 | 107445                  | GG                              | TT                | 1946501581               |
| SNP_P3_117323_107456 | NW_004515864.1 | Scaffold370 | 107456                  | AA                              | GG                | 1946501582               |
| SNP_P3_117324_107492 | NW_004515864.1 | Scaffold370 | 107492                  | TT                              | AA                | 1946501583               |
| SNP_P3_117325_107856 | NW_004515864.1 | Scaffold370 | 107856                  | CC                              | AA                | 1946501584               |
| SNP_P3_117326_107941 | NW_004515864.1 | Scaffold370 | 107941                  | GG                              | AA                | 1946501585               |
| SNP_P3_117327_108013 | NW_004515864.1 | Scaffold370 | 108013                  | TT                              | CC                | 1946501586               |
| SNP_P3_117328_108143 | NW_004515864.1 | Scaffold370 | 108143                  | GG                              | TT                | 1946501587               |
| SNP_P3_117329_108166 | NW_004515864.1 | Scaffold370 | 108166                  | TT                              | GG                | 1946501588               |
| SNP_P3_117330_108180 | NW_004515864.1 | Scaffold370 | 108180                  | GG                              | AA                | 1946501589               |
| SNP_P3_117331_108993 | NW_004515864.1 | Scaffold370 | 108993                  | AA                              | GG                | 1946501590               |
| SNP_P3_117332_109478 | NW_004515864.1 | Scaffold370 | 109478                  | GG                              | AA                | 1946501591               |
| SNP_P3_117333_109547 | NW_004515864.1 | Scaffold370 | 109547                  | CC                              | AA                | 1946501592               |
| SNP_P3_117334_110216 | NW_004515864.1 | Scaffold370 | 110216                  | AA                              | GG                | 1946501593               |

| SNPs IDs             | Chromosome IDs | Chromosomes | Physical positions (bp) | CDC Frontier (Reference genome) | (Pusa 256 & HPNB) | NCBI SNPdb Accession IDs |
|----------------------|----------------|-------------|-------------------------|---------------------------------|-------------------|--------------------------|
| SNP_P3_117335_110232 | NW_004515864.1 | Scaffold370 | 110232                  | GG                              | TT                | 1946501594               |
| SNP_P3_117336_110244 | NW_004515864.1 | Scaffold370 | 110244                  | AA                              | TT                | 1946501595               |
| SNP_P3_117337_110470 | NW_004515864.1 | Scaffold370 | 110470                  | CC                              | AA                | 1946501596               |
| SNP_P3_117338_110494 | NW_004515864.1 | Scaffold370 | 110494                  | AA                              | TT                | 1946501597               |
| SNP_P3_117339_110511 | NW_004515864.1 | Scaffold370 | 110511                  | GG                              | AA                | 1946501598               |
| SNP_P3_117340_110612 | NW_004515864.1 | Scaffold370 | 110612                  | GG                              | AA                | 1946501599               |
| SNP_P3_117341_110656 | NW_004515864.1 | Scaffold370 | 110656                  | TT                              | CC                | 1946501600               |
| SNP_P3_117342_110876 | NW_004515864.1 | Scaffold370 | 110876                  | TT                              | CC                | 1946501601               |
| SNP_P3_117343_111135 | NW_004515864.1 | Scaffold370 | 111135                  | CC                              | AA                | 1946501602               |
| SNP_P3_117344_114027 | NW_004515864.1 | Scaffold370 | 114027                  | GG                              | AA                | 1946501603               |
| SNP_P3_117345_119520 | NW_004515864.1 | Scaffold370 | 119520                  | AA                              | CC                | 1946501604               |
| SNP_P3_117346_122802 | NW_004515864.1 | Scaffold370 | 122802                  | CC                              | AA                | 1946501605               |
| SNP_P3_117347_125478 | NW_004515864.1 | Scaffold370 | 125478                  | AA                              | TT                | 1946501606               |
| SNP_P3_117348_125512 | NW_004515864.1 | Scaffold370 | 125512                  | AA                              | GG                | 1946501607               |
| SNP_P3_117349_135986 | NW_004515864.1 | Scaffold370 | 135986                  | TT                              | AA                | 1946501608               |
| SNP_P3_117350_136001 | NW_004515864.1 | Scaffold370 | 136001                  | TT                              | CC                | 1946501609               |
| SNP_P3_117351_136324 | NW_004515864.1 | Scaffold370 | 136324                  | AA                              | GG                | 1946501610               |
| SNP_P3_117352_137864 | NW_004515864.1 | Scaffold370 | 137864                  | GG                              | AA                | 1946501612               |
| SNP_P3_117353_159384 | NW_004515864.1 | Scaffold370 | 159384                  | CC                              | TT                | 1946501613               |
| SNP_P3_117354_159393 | NW_004515864.1 | Scaffold370 | 159393                  | GG                              | CC                | 1946501614               |
| SNP_P3_117355_159439 | NW_004515864.1 | Scaffold370 | 159439                  | AA                              | TT                | 1946501616               |
| SNP_P3_117357_162256 | NW_004515864.1 | Scaffold370 | 162256                  | AA                              | TT                | 1946501617               |
| SNP_P3_117358_163884 | NW_004515864.1 | Scaffold370 | 163884                  | TT                              | CC                | 1946501619               |
| SNP_P3_117359_163917 | NW_004515864.1 | Scaffold370 | 163917                  | TT                              | CC                | 1946501620               |
| SNP_P3_117360_163930 | NW_004515864.1 | Scaffold370 | 163930                  | GG                              | TT                | 1946501622               |
| SNP_P3_117361_164165 | NW_004515864.1 | Scaffold370 | 164165                  | CC                              | AA                | 1946501623               |
| SNP_P3_117362_164252 | NW_004515864.1 | Scaffold370 | 164252                  | TT                              | CC                | 1946501625               |
| SNP_P3_117363_164267 | NW_004515864.1 | Scaffold370 | 164267                  | GG                              | TT                | 1946501626               |
| SNP_P3_117364_164283 | NW_004515864.1 | Scaffold370 | 164283                  | AA                              | TT                | 1946501627               |
| SNP_P3_117365_164318 | NW_004515864.1 | Scaffold370 | 164318                  | TT                              | GG                | 1946501629               |
| SNP_P3_117366_164825 | NW_004515864.1 | Scaffold370 | 164825                  | TT                              | CC                | 1946501630               |
| SNP_P3_117367_166508 | NW_004515864.1 | Scaffold370 | 166508                  | CC                              | TT                | 1946501632               |
| SNP_P3_117368_166523 | NW_004515864.1 | Scaffold370 | 166523                  | CC                              | TT                | 1946501633               |
| SNP_P3_117369_175150 | NW_004515864.1 | Scaffold370 | 175150                  | TT                              | GG                | 1946501635               |
| SNP_P3_117370_181509 | NW_004515864.1 | Scaffold370 | 181509                  | AA                              | GG                | 1946501636               |
| SNP_P3_117371_181520 | NW_004515864.1 | Scaffold370 | 181520                  | AA                              | TT                | 1946501637               |
| SNP_P3_117372_181592 | NW_004515864.1 | Scaffold370 | 181592                  | AA                              | GG                | 1946501639               |
| SNP_P3_117373_181644 | NW_004515864.1 | Scaffold370 | 181644                  | CC                              | TT                | 1946501640               |
| SNP_P3_117374_181747 | NW_004515864.1 | Scaffold370 | 181747                  | CC                              | AA                | 1946501642               |
| SNP_P3_117375_181792 | NW_004515864.1 | Scaffold370 | 181792                  | AA                              | CC                | 1946501643               |
| SNP_P3_117376_181884 | NW_004515864.1 | Scaffold370 | 181884                  | CC                              | AA                | 1946501645               |
| SNP_P3_117377_181891 | NW_004515864.1 | Scaffold370 | 181891                  | TT                              | CC                | 1946501646               |

| SNPs IDs             | Chromosome IDs | Chromosomes | Physical positions (bp) | CDC Frontier (Reference genome) | (Pusa 256 & HPNB) | NCBI SNPdb Accession IDs |
|----------------------|----------------|-------------|-------------------------|---------------------------------|-------------------|--------------------------|
| SNP_P3_117378_181898 | NW_004515864.1 | Scaffold370 | 181898                  | GG                              | TT                | 1946501647               |
| SNP_P3_117379_181952 | NW_004515864.1 | Scaffold370 | 181952                  | GG                              | AA                | 1946501649               |
| SNP_P3_117380_182671 | NW_004515864.1 | Scaffold370 | 182671                  | GG                              | TT                | 1946501650               |
| SNP_P3_117381_203241 | NW_004515864.1 | Scaffold370 | 203241                  | GG                              | CC                | 1946501652               |
| SNP_P3_117382_203252 | NW_004515864.1 | Scaffold370 | 203252                  | TT                              | CC                | 1946501653               |
| SNP_P3_117383_837    | NW_004515865.1 | Scaffold373 | 837                     | CC                              | TT                | 1946501655               |
| SNP_P3_117384_978    | NW_004515865.1 | Scaffold373 | 978                     | TT                              | GG                | 1946501656               |
| SNP_P3_117385_1297   | NW_004515865.1 | Scaffold373 | 1297                    | AA                              | GG                | 1946501657               |
| SNP_P3_117387_1359   | NW_004515865.1 | Scaffold373 | 1359                    | CC                              | GG                | 1946501659               |
| SNP_P3_117388_1413   | NW_004515865.1 | Scaffold373 | 1413                    | TT                              | CC                | 1946501660               |
| SNP_P3_117389_1428   | NW_004515865.1 | Scaffold373 | 1428                    | AA                              | GG                | 1946501662               |
| SNP_P3_117390_2201   | NW_004515865.1 | Scaffold373 | 2201                    | TT                              | AA                | 1946501663               |
| SNP_P3_117391_25372  | NW_004515865.1 | Scaffold373 | 25372                   | AA                              | GG                | 1946501664               |
| SNP_P3_117392_25373  | NW_004515865.1 | Scaffold373 | 25373                   | GG                              | AA                | 1946501666               |
| SNP_P3_117393_25461  | NW_004515865.1 | Scaffold373 | 25461                   | TT                              | AA                | 1946501667               |
| SNP_P3_117394_25534  | NW_004515865.1 | Scaffold373 | 25534                   | TT                              | CC                | 1946501669               |
| SNP_P3_117395_25686  | NW_004515865.1 | Scaffold373 | 25686                   | AA                              | TT                | 1946501670               |
| SNP_P3_117396_25690  | NW_004515865.1 | Scaffold373 | 25690                   | AA                              | TT                | 1946501672               |
| SNP_P3_117397_25767  | NW_004515865.1 | Scaffold373 | 25767                   | AA                              | CC                | 1946501673               |
| SNP_P3_117398_25790  | NW_004515865.1 | Scaffold373 | 25790                   | TT                              | AA                | 1946501674               |
| SNP_P3_117399_25799  | NW_004515865.1 | Scaffold373 | 25799                   | TT                              | AA                | 1946501676               |
| SNP_P3_117400_25847  | NW_004515865.1 | Scaffold373 | 25847                   | CC                              | TT                | 1946501677               |
| SNP_P3_117402_34741  | NW_004515865.1 | Scaffold373 | 34741                   | GG                              | AA                | 1946501679               |
| SNP_P3_117403_34754  | NW_004515865.1 | Scaffold373 | 34754                   | TT                              | AA                | 1946501680               |
| SNP_P3_117404_41946  | NW_004515865.1 | Scaffold373 | 41946                   | GG                              | CC                | 1946501682               |
| SNP_P3_117405_41953  | NW_004515865.1 | Scaffold373 | 41953                   | TT                              | AA                | 1946501683               |
| SNP_P3_117406_41958  | NW_004515865.1 | Scaffold373 | 41958                   | AA                              | TT                | 1946501685               |
| SNP_P3_117407_41972  | NW_004515865.1 | Scaffold373 | 41972                   | TT                              | AA                | 1946501686               |
| SNP_P3_117408_41994  | NW_004515865.1 | Scaffold373 | 41994                   | TT                              | GG                | 1946501688               |
| SNP_P3_117409_50151  | NW_004515865.1 | Scaffold373 | 50151                   | AA                              | TT                | 1946501689               |
| SNP_P3_117410_50624  | NW_004515865.1 | Scaffold373 | 50624                   | TT                              | GG                | 1946501691               |
| SNP_P3_117411_55799  | NW_004515865.1 | Scaffold373 | 55799                   | TT                              | AA                | 1946501692               |
| SNP_P3_117413_2581   | NW_004515866.1 | Scaffold374 | 2581                    | AA                              | GG                | 1946501694               |
| SNP_P3_117414_2825   | NW_004515866.1 | Scaffold374 | 2825                    | TT                              | CC                | 1946501695               |
| SNP_P3_117415_12991  | NW_004515866.1 | Scaffold374 | 12991                   | AA                              | GG                | 1946501697               |
| SNP_P3_117418_23912  | NW_004515866.1 | Scaffold374 | 23912                   | AA                              | GG                | 1946501698               |
| SNP_P3_117419_28903  | NW_004515866.1 | Scaffold374 | 28903                   | CC                              | TT                | 1946501700               |
| SNP_P3_117420_29862  | NW_004515866.1 | Scaffold374 | 29862                   | AA                              | CC                | 1946501701               |
| SNP_P3_117421_47730  | NW_004515866.1 | Scaffold374 | 47730                   | TT                              | GG                | 1946501703               |
| SNP_P3_117422_47811  | NW_004515866.1 | Scaffold374 | 47811                   | AA                              | GG                | 1946501704               |
| SNP_P3_117423_47816  | NW_004515866.1 | Scaffold374 | 47816                   | CC                              | TT                | 1946501706               |
| SNP_P3_117424_47826  | NW_004515866.1 | Scaffold374 | 47826                   | AA                              | GG                | 1946501707               |

| SNPs IDs             | Chromosome IDs | Chromosomes | Physical positions (bp) | CDC Frontier (Reference genome) | (Pusa 256 & HPNB) | NCBI SNPdb Accession IDs |
|----------------------|----------------|-------------|-------------------------|---------------------------------|-------------------|--------------------------|
| SNP_P3_117425_47856  | NW_004515866.1 | Scaffold374 | 47856                   | TT                              | CC                | 1946501708               |
| SNP_P3_117426_47881  | NW_004515866.1 | Scaffold374 | 47881                   | AA                              | GG                | 1946501710               |
| SNP_P3_117427_47885  | NW_004515866.1 | Scaffold374 | 47885                   | AA                              | GG                | 1946501711               |
| SNP_P3_117428_47921  | NW_004515866.1 | Scaffold374 | 47921                   | AA                              | GG                | 1946501713               |
| SNP_P3_117429_47967  | NW_004515866.1 | Scaffold374 | 47967                   | AA                              | GG                | 1946501714               |
| SNP_P3_117430_47971  | NW_004515866.1 | Scaffold374 | 47971                   | TT                              | GG                | 1946501716               |
| SNP_P3_117431_48262  | NW_004515866.1 | Scaffold374 | 48262                   | TT                              | GG                | 1946501717               |
| SNP_P3_117432_48300  | NW_004515866.1 | Scaffold374 | 48300                   | TT                              | CC                | 1946501719               |
| SNP_P3_117433_52833  | NW_004515866.1 | Scaffold374 | 52833                   | TT                              | CC                | 1946501720               |
| SNP_P3_117434_52881  | NW_004515866.1 | Scaffold374 | 52881                   | AA                              | CC                | 1946501721               |
| SNP_P3_117435_52918  | NW_004515866.1 | Scaffold374 | 52918                   | GG                              | AA                | 1946501723               |
| SNP_P3_117436_52935  | NW_004515866.1 | Scaffold374 | 52935                   | GG                              | AA                | 1946501724               |
| SNP_P3_117437_52952  | NW_004515866.1 | Scaffold374 | 52952                   | CC                              | TT                | 1946501726               |
| SNP_P3_117439_77182  | NW_004515866.1 | Scaffold374 | 77182                   | GG                              | AA                | 1946501727               |
| SNP_P3_117440_77591  | NW_004515866.1 | Scaffold374 | 77591                   | CC                              | GG                | 1946501729               |
| SNP_P3_117441_118439 | NW_004515866.1 | Scaffold374 | 118439                  | CC                              | TT                | 1946501730               |
| SNP_P3_117442_118448 | NW_004515866.1 | Scaffold374 | 118448                  | CC                              | TT                | 1946501732               |
| SNP_P3_117443_118450 | NW_004515866.1 | Scaffold374 | 118450                  | GG                              | AA                | 1946501733               |
| SNP_P3_117444_118558 | NW_004515866.1 | Scaffold374 | 118558                  | TT                              | GG                | 1946501734               |
| SNP_P3_117446_118693 | NW_004515866.1 | Scaffold374 | 118693                  | AA                              | TT                | 1946501736               |
| SNP_P3_117447_118790 | NW_004515866.1 | Scaffold374 | 118790                  | CC                              | AA                | 1946501737               |
| SNP_P3_117448_118864 | NW_004515866.1 | Scaffold374 | 118864                  | TT                              | CC                | 1946501739               |
| SNP_P3_117449_119019 | NW_004515866.1 | Scaffold374 | 119019                  | GG                              | TT                | 1946501740               |
| SNP_P3_117450_119076 | NW_004515866.1 | Scaffold374 | 119076                  | AA                              | TT                | 1946501742               |
| SNP_P3_117451_119097 | NW_004515866.1 | Scaffold374 | 119097                  | CC                              | TT                | 1946501743               |
| SNP_P3_117452_119555 | NW_004515866.1 | Scaffold374 | 119555                  | GG                              | AA                | 1946501745               |
| SNP_P3_117453_119567 | NW_004515866.1 | Scaffold374 | 119567                  | TT                              | AA                | 1946501746               |
| SNP_P3_117454_119822 | NW_004515866.1 | Scaffold374 | 119822                  | GG                              | AA                | 1946501747               |
| SNP_P3_117455_120052 | NW_004515866.1 | Scaffold374 | 120052                  | CC                              | GG                | 1946501749               |
| SNP_P3_117456_120068 | NW_004515866.1 | Scaffold374 | 120068                  | AA                              | GG                | 1946501750               |
| SNP_P3_117457_120070 | NW_004515866.1 | Scaffold374 | 120070                  | TT                              | GG                | 1946501752               |
| SNP_P3_117458_120118 | NW_004515866.1 | Scaffold374 | 120118                  | AA                              | CC                | 1946501753               |
| SNP_P3_117459_120146 | NW_004515866.1 | Scaffold374 | 120146                  | CC                              | AA                | 1946501755               |
| SNP_P3_117460_120162 | NW_004515866.1 | Scaffold374 | 120162                  | CC                              | TT                | 1946501756               |
| SNP_P3_117461_120220 | NW_004515866.1 | Scaffold374 | 120220                  | CC                              | TT                | 1946501758               |
| SNP_P3_117462_120234 | NW_004515866.1 | Scaffold374 | 120234                  | TT                              | CC                | 1946501759               |
| SNP_P3_117463_120273 | NW_004515866.1 | Scaffold374 | 120273                  | CC                              | AA                | 1946501761               |
| SNP_P3_117464_120281 | NW_004515866.1 | Scaffold374 | 120281                  | AA                              | CC                | 1946501762               |
| SNP_P3_117465_121859 | NW_004515866.1 | Scaffold374 | 121859                  | TT                              | AA                | 1946501764               |
| SNP_P3_117466_121892 | NW_004515866.1 | Scaffold374 | 121892                  | TT                              | GG                | 1946501765               |
| SNP_P3_117467_121899 | NW_004515866.1 | Scaffold374 | 121899                  | CC                              | TT                | 1946501767               |
| SNP_P3_117468_121914 | NW_004515866.1 | Scaffold374 | 121914                  | TT                              | AA                | 1946501768               |

| SNPs IDs             | Chromosome IDs | Chromosomes | Physical positions (bp) | CDC Frontier (Reference genome) | (Pusa 256 & HPNB) | NCBI SNPdb Accession IDs |
|----------------------|----------------|-------------|-------------------------|---------------------------------|-------------------|--------------------------|
| SNP_P3_117469_121953 | NW_004515866.1 | Scaffold374 | 121953                  | GG                              | AA                | 1946501770               |
| SNP_P3_117470_121965 | NW_004515866.1 | Scaffold374 | 121965                  | TT                              | CC                | 1946501771               |
| SNP_P3_117471_121975 | NW_004515866.1 | Scaffold374 | 121975                  | AA                              | TT                | 1946501773               |
| SNP_P3_117472_121976 | NW_004515866.1 | Scaffold374 | 121976                  | AA                              | TT                | 1946501774               |
| SNP_P3_117473_121978 | NW_004515866.1 | Scaffold374 | 121978                  | GG                              | AA                | 1946501776               |
| SNP_P3_117474_121987 | NW_004515866.1 | Scaffold374 | 121987                  | GG                              | AA                | 1946501777               |
| SNP_P3_117475_121988 | NW_004515866.1 | Scaffold374 | 121988                  | AA                              | GG                | 1946501779               |
| SNP_P3_117476_122170 | NW_004515866.1 | Scaffold374 | 122170                  | GG                              | AA                | 1946501780               |
| SNP_P3_117477_123267 | NW_004515866.1 | Scaffold374 | 123267                  | TT                              | AA                | 1946501782               |
| SNP_P3_117478_128794 | NW_004515866.1 | Scaffold374 | 128794                  | TT                              | CC                | 1946501783               |
| SNP_P3_117479_128836 | NW_004515866.1 | Scaffold374 | 128836                  | CC                              | AA                | 1946501784               |
| SNP_P3_117480_128860 | NW_004515866.1 | Scaffold374 | 128860                  | CC                              | TT                | 1946501786               |
| SNP_P3_117481_128879 | NW_004515866.1 | Scaffold374 | 128879                  | TT                              | CC                | 1946501787               |
| SNP_P3_117482_128887 | NW_004515866.1 | Scaffold374 | 128887                  | GG                              | AA                | 1946501789               |
| SNP_P3_117483_128891 | NW_004515866.1 | Scaffold374 | 128891                  | TT                              | AA                | 1946501790               |
| SNP_P3_117484_128915 | NW_004515866.1 | Scaffold374 | 128915                  | TT                              | CC                | 1946501791               |
| SNP_P3_117485_128924 | NW_004515866.1 | Scaffold374 | 128924                  | CC                              | TT                | 1946501793               |
| SNP_P3_117486_128929 | NW_004515866.1 | Scaffold374 | 128929                  | GG                              | AA                | 1946501794               |
| SNP_P3_117487_128930 | NW_004515866.1 | Scaffold374 | 128930                  | GG                              | AA                | 1946501796               |
| SNP_P3_117488_128948 | NW_004515866.1 | Scaffold374 | 128948                  | CC                              | TT                | 1946501797               |
| SNP_P3_117489_129128 | NW_004515866.1 | Scaffold374 | 129128                  | CC                              | TT                | 1946501799               |
| SNP_P3_117491_129246 | NW_004515866.1 | Scaffold374 | 129246                  | TT                              | CC                | 1946501800               |
| SNP_P3_117492_129316 | NW_004515866.1 | Scaffold374 | 129316                  | GG                              | CC                | 1946501802               |
| SNP_P3_117493_131546 | NW_004515866.1 | Scaffold374 | 131546                  | TT                              | CC                | 1946501803               |
| SNP_P3_117494_138014 | NW_004515866.1 | Scaffold374 | 138014                  | CC                              | TT                | 1946501805               |
| SNP_P3_117495_138155 | NW_004515866.1 | Scaffold374 | 138155                  | CC                              | TT                | 1946501991               |
| SNP_P3_117496_138167 | NW_004515866.1 | Scaffold374 | 138167                  | GG                              | AA                | 1946501992               |
| SNP_P3_117497_138278 | NW_004515866.1 | Scaffold374 | 138278                  | CC                              | TT                | 1946501994               |
| SNP_P3_117498_138280 | NW_004515866.1 | Scaffold374 | 138280                  | GG                              | TT                | 1946501995               |
| SNP_P3_117499_141890 | NW_004515866.1 | Scaffold374 | 141890                  | AA                              | CC                | 1946501997               |
| SNP_P3_117501_141932 | NW_004515866.1 | Scaffold374 | 141932                  | CC                              | TT                | 1946501998               |
| SNP_P3_117502_141939 | NW_004515866.1 | Scaffold374 | 141939                  | GG                              | CC                | 1946502000               |
| SNP_P3_117503_141975 | NW_004515866.1 | Scaffold374 | 141975                  | AA                              | TT                | 1946502001               |
| SNP_P3_117504_141992 | NW_004515866.1 | Scaffold374 | 141992                  | CC                              | TT                | 1946502003               |
| SNP_P3_117506_142015 | NW_004515866.1 | Scaffold374 | 142015                  | AA                              | GG                | 1946502004               |
| SNP_P3_117507_142046 | NW_004515866.1 | Scaffold374 | 142046                  | CC                              | TT                | 1946502006               |
| SNP_P3_117508_142057 | NW_004515866.1 | Scaffold374 | 142057                  | AA                              | TT                | 1946502007               |
| SNP_P3_117510_142072 | NW_004515866.1 | Scaffold374 | 142072                  | AA                              | TT                | 1946502009               |
| SNP_P3_117511_142080 | NW_004515866.1 | Scaffold374 | 142080                  | TT                              | AA                | 1946502010               |
| SNP_P3_117512_142097 | NW_004515866.1 | Scaffold374 | 142097                  | CC                              | TT                | 1946502012               |
| SNP_P3_117513_142125 | NW_004515866.1 | Scaffold374 | 142125                  | TT                              | GG                | 1946502013               |
| SNP_P3_117514_142127 | NW_004515866.1 | Scaffold374 | 142127                  | AA                              | CC                | 1946502015               |

| SNPs IDs             | Chromosome IDs | Chromosomes | Physical positions (bp) | CDC Frontier (Reference genome) | (Pusa 256 & HPNB) | NCBI SNPdb Accession IDs |
|----------------------|----------------|-------------|-------------------------|---------------------------------|-------------------|--------------------------|
| SNP_P3_117515_149359 | NW_004515866.1 | Scaffold374 | 149359                  | CC                              | TT                | 1946502016               |
| SNP_P3_117516_149498 | NW_004515866.1 | Scaffold374 | 149498                  | CC                              | TT                | 1946502018               |
| SNP_P3_117518_149563 | NW_004515866.1 | Scaffold374 | 149563                  | TT                              | AA                | 1946502019               |
| SNP_P3_117519_149565 | NW_004515866.1 | Scaffold374 | 149565                  | TT                              | CC                | 1946502021               |
| SNP_P3_117520_149601 | NW_004515866.1 | Scaffold374 | 149601                  | AA                              | GG                | 1946502022               |
| SNP_P3_117521_149626 | NW_004515866.1 | Scaffold374 | 149626                  | TT                              | CC                | 1946502024               |
| SNP_P3_117522_149731 | NW_004515866.1 | Scaffold374 | 149731                  | AA                              | CC                | 1946502025               |
| SNP_P3_117523_153659 | NW_004515866.1 | Scaffold374 | 153659                  | AA                              | TT                | 1946502027               |
| SNP_P3_117524_153691 | NW_004515866.1 | Scaffold374 | 153691                  | AA                              | GG                | 1946502028               |
| SNP_P3_117525_153692 | NW_004515866.1 | Scaffold374 | 153692                  | CC                              | AA                | 1946502030               |
| SNP_P3_117526_154652 | NW_004515866.1 | Scaffold374 | 154652                  | TT                              | GG                | 1946502031               |
| SNP_P3_117528_154757 | NW_004515866.1 | Scaffold374 | 154757                  | AA                              | CC                | 1946502032               |
| SNP_P3_117529_155119 | NW_004515866.1 | Scaffold374 | 155119                  | AA                              | TT                | 1946502034               |
| SNP_P3_117530_156672 | NW_004515866.1 | Scaffold374 | 156672                  | AA                              | GG                | 1946502035               |
| SNP_P3_117531_156704 | NW_004515866.1 | Scaffold374 | 156704                  | TT                              | GG                | 1946502037               |
| SNP_P3_117532_156728 | NW_004515866.1 | Scaffold374 | 156728                  | AA                              | GG                | 1946502038               |
| SNP_P3_117533_157098 | NW_004515866.1 | Scaffold374 | 157098                  | GG                              | CC                | 1946502040               |
| SNP_P3_117534_157118 | NW_004515866.1 | Scaffold374 | 157118                  | AA                              | GG                | 1946502041               |
| SNP_P3_117535_157366 | NW_004515866.1 | Scaffold374 | 157366                  | TT                              | CC                | 1946502043               |
| SNP_P3_117536_157403 | NW_004515866.1 | Scaffold374 | 157403                  | TT                              | CC                | 1946502044               |
| SNP_P3_117537_157413 | NW_004515866.1 | Scaffold374 | 157413                  | TT                              | GG                | 1946502046               |
| SNP_P3_117539_162135 | NW_004515866.1 | Scaffold374 | 162135                  | GG                              | TT                | 1946502047               |
| SNP_P3_117540_165391 | NW_004515866.1 | Scaffold374 | 165391                  | GG                              | AA                | 1946502049               |
| SNP_P3_117541_193433 | NW_004515866.1 | Scaffold374 | 193433                  | AA                              | GG                | 1946502050               |
| SNP_P3_117542_193991 | NW_004515866.1 | Scaffold374 | 193991                  | CC                              | TT                | 1946502052               |
| SNP_P3_117543_203052 | NW_004515866.1 | Scaffold374 | 203052                  | TT                              | CC                | 1946502053               |
| SNP_P3_117545_205194 | NW_004515866.1 | Scaffold374 | 205194                  | AA                              | GG                | 1946502055               |
| SNP_P3_117546_205393 | NW_004515866.1 | Scaffold374 | 205393                  | CC                              | TT                | 1946502056               |
| SNP_P3_117548_206219 | NW_004515866.1 | Scaffold374 | 206219                  | TT                              | AA                | 1946502057               |
| SNP_P3_117549_206222 | NW_004515866.1 | Scaffold374 | 206222                  | GG                              | AA                | 1946502059               |
| SNP_P3_117550_10291  | NW_004515867.1 | Scaffold377 | 10291                   | GG                              | AA                | 1946502060               |
| SNP_P3_117551_30646  | NW_004515867.1 | Scaffold377 | 30646                   | AA                              | GG                | 1946502062               |
| SNP_P3_117552_30671  | NW_004515867.1 | Scaffold377 | 30671                   | CC                              | TT                | 1946502063               |
| SNP_P3_117553_30744  | NW_004515867.1 | Scaffold377 | 30744                   | GG                              | AA                | 1946502065               |
| SNP_P3_117554_30814  | NW_004515867.1 | Scaffold377 | 30814                   | CC                              | TT                | 1946502066               |
| SNP_P3_117555_30885  | NW_004515867.1 | Scaffold377 | 30885                   | AA                              | GG                | 1946502068               |
| SNP_P3_117556_31083  | NW_004515867.1 | Scaffold377 | 31083                   | GG                              | AA                | 1946502069               |
| SNP_P3_117557_31113  | NW_004515867.1 | Scaffold377 | 31113                   | CC                              | TT                | 1946502071               |
| SNP_P3_117559_31133  | NW_004515867.1 | Scaffold377 | 31133                   | CC                              | TT                | 1946502072               |
| SNP_P3_117560_31186  | NW_004515867.1 | Scaffold377 | 31186                   | AA                              | GG                | 1946502074               |
| SNP_P3_117561_31232  | NW_004515867.1 | Scaffold377 | 31232                   | GG                              | AA                | 1946502075               |
| SNP_P3_117562_31240  | NW_004515867.1 | Scaffold377 | 31240                   | GG                              | AA                | 1946502077               |

| SNPs IDs             | Chromosome IDs | Chromosomes | Physical positions (bp) | CDC Frontier (Reference genome) | (Pusa 256 & HPNB) | NCBI SNPdb Accession IDs |
|----------------------|----------------|-------------|-------------------------|---------------------------------|-------------------|--------------------------|
| SNP_P3_117563_33309  | NW_004515867.1 | Scaffold377 | 33309                   | AA                              | GG                | 1946502078               |
| SNP_P3_117564_33690  | NW_004515867.1 | Scaffold377 | 33690                   | CC                              | TT                | 1946502080               |
| SNP_P3_117565_38380  | NW_004515867.1 | Scaffold377 | 38380                   | TT                              | AA                | 1946502081               |
| SNP_P3_117566_75249  | NW_004515867.1 | Scaffold377 | 75249                   | GG                              | AA                | 1946502082               |
| SNP_P3_117568_75561  | NW_004515867.1 | Scaffold377 | 75561                   | TT                              | AA                | 1946502084               |
| SNP_P3_117569_75569  | NW_004515867.1 | Scaffold377 | 75569                   | CC                              | AA                | 1946502085               |
| SNP_P3_117570_76481  | NW_004515867.1 | Scaffold377 | 76481                   | TT                              | CC                | 1946502087               |
| SNP_P3_117571_98310  | NW_004515867.1 | Scaffold377 | 98310                   | AA                              | GG                | 1946502088               |
| SNP_P3_117572_98655  | NW_004515867.1 | Scaffold377 | 98655                   | CC                              | TT                | 1946502090               |
| SNP_P3_117573_98718  | NW_004515867.1 | Scaffold377 | 98718                   | CC                              | GG                | 1946502091               |
| SNP_P3_117574_98852  | NW_004515867.1 | Scaffold377 | 98852                   | CC                              | TT                | 1946502093               |
| SNP_P3_117575_98868  | NW_004515867.1 | Scaffold377 | 98868                   | AA                              | GG                | 1946502094               |
| SNP_P3_117576_98870  | NW_004515867.1 | Scaffold377 | 98870                   | CC                              | TT                | 1946502096               |
| SNP_P3_117577_98914  | NW_004515867.1 | Scaffold377 | 98914                   | TT                              | AA                | 1946502097               |
| SNP_P3_117578_139707 | NW_004515867.1 | Scaffold377 | 139707                  | TT                              | GG                | 1946502099               |
| SNP_P3_117579_139742 | NW_004515867.1 | Scaffold377 | 139742                  | CC                              | TT                | 1946502100               |
| SNP_P3_117581_165112 | NW_004515867.1 | Scaffold377 | 165112                  | GG                              | TT                | 1946502102               |
| SNP_P3_117582_182104 | NW_004515867.1 | Scaffold377 | 182104                  | AA                              | GG                | 1946502103               |
| SNP_P3_117583_182157 | NW_004515867.1 | Scaffold377 | 182157                  | TT                              | AA                | 1946502105               |
| SNP_P3_117584_182163 | NW_004515867.1 | Scaffold377 | 182163                  | AA                              | GG                | 1946502106               |
| SNP_P3_117585_182585 | NW_004515867.1 | Scaffold377 | 182585                  | TT                              | CC                | 1946502108               |
| SNP_P3_117586_182592 | NW_004515867.1 | Scaffold377 | 182592                  | GG                              | AA                | 1946502109               |
| SNP_P3_117587_182602 | NW_004515867.1 | Scaffold377 | 182602                  | TT                              | GG                | 1946502111               |
| SNP_P3_117588_182621 | NW_004515867.1 | Scaffold377 | 182621                  | TT                              | GG                | 1946502112               |
| SNP_P3_117589_191612 | NW_004515867.1 | Scaffold377 | 191612                  | GG                              | AA                | 1946502114               |
| SNP_P3_117590_191644 | NW_004515867.1 | Scaffold377 | 191644                  | CC                              | TT                | 1946502115               |
| SNP_P3_117591_191656 | NW_004515867.1 | Scaffold377 | 191656                  | TT                              | GG                | 1946502117               |
| SNP_P3_117592_191659 | NW_004515867.1 | Scaffold377 | 191659                  | AA                              | TT                | 1946502118               |
| SNP_P3_117593_191662 | NW_004515867.1 | Scaffold377 | 191662                  | AA                              | GG                | 1946502120               |
| SNP_P3_117594_207076 | NW_004515867.1 | Scaffold377 | 207076                  | TT                              | GG                | 1946502121               |
| SNP_P3_117595_207454 | NW_004515867.1 | Scaffold377 | 207454                  | AA                              | GG                | 1946502123               |
| SNP_P3_117596_207501 | NW_004515867.1 | Scaffold377 | 207501                  | AA                              | GG                | 1946502124               |
| SNP_P3_117597_207558 | NW_004515867.1 | Scaffold377 | 207558                  | TT                              | GG                | 1946502126               |
| SNP_P3_117598_207640 | NW_004515867.1 | Scaffold377 | 207640                  | TT                              | CC                | 1946502127               |
| SNP_P3_117600_214886 | NW_004515867.1 | Scaffold377 | 214886                  | AA                              | GG                | 1946502129               |
| SNP_P3_117601_214894 | NW_004515867.1 | Scaffold377 | 214894                  | TT                              | CC                | 1946502130               |
| SNP_P3_117602_218657 | NW_004515867.1 | Scaffold377 | 218657                  | CC                              | TT                | 1946502132               |
| SNP_P3_117603_218660 | NW_004515867.1 | Scaffold377 | 218660                  | CC                              | AA                | 1946502133               |
| SNP_P3_117604_223810 | NW_004515867.1 | Scaffold377 | 223810                  | TT                              | AA                | 1946502135               |
| SNP_P3_117605_248987 | NW_004515867.1 | Scaffold377 | 248987                  | CC                              | TT                | 1946502136               |
| SNP_P3_117606_251257 | NW_004515867.1 | Scaffold377 | 251257                  | TT                              | CC                | 1946502138               |
| SNP_P3_117607_251272 | NW_004515867.1 | Scaffold377 | 251272                  | AA                              | GG                | 1946502139               |



| SNPs IDs             | Chromosome IDs | Chromosomes | Physical positions (bp) | CDC Frontier (Reference genome) | (Pusa 256 & HPNB) | NCBI SNPdb Accession IDs |
|----------------------|----------------|-------------|-------------------------|---------------------------------|-------------------|--------------------------|
| SNP_P3_117608_251392 | NW_004515867.1 | Scaffold377 | 251392                  | GG                              | AA                | 1946502141               |
| SNP_P3_117609_251395 | NW_004515867.1 | Scaffold377 | 251395                  | AA                              | TT                | 1946502142               |
| SNP_P3_117610_251401 | NW_004515867.1 | Scaffold377 | 251401                  | GG                              | AA                | 1946502144               |
| SNP_P3_117611_251436 | NW_004515867.1 | Scaffold377 | 251436                  | AA                              | TT                | 1946502145               |
| SNP_P3_117613_251489 | NW_004515867.1 | Scaffold377 | 251489                  | GG                              | AA                | 1946502147               |
| SNP_P3_117614_251516 | NW_004515867.1 | Scaffold377 | 251516                  | AA                              | GG                | 1946502148               |
| SNP_P3_117615_251523 | NW_004515867.1 | Scaffold377 | 251523                  | GG                              | AA                | 1946502150               |
| SNP_P3_117616_251530 | NW_004515867.1 | Scaffold377 | 251530                  | AA                              | GG                | 1946502151               |
| SNP_P3_117617_251534 | NW_004515867.1 | Scaffold377 | 251534                  | TT                              | CC                | 1946502153               |
| SNP_P3_117618_251543 | NW_004515867.1 | Scaffold377 | 251543                  | AA                              | GG                | 1946502154               |
| SNP_P3_117619_251571 | NW_004515867.1 | Scaffold377 | 251571                  | AA                              | GG                | 1946502156               |
| SNP_P3_117620_251822 | NW_004515867.1 | Scaffold377 | 251822                  | AA                              | TT                | 1946502157               |
| SNP_P3_117621_261530 | NW_004515867.1 | Scaffold377 | 261530                  | TT                              | CC                | 1946502159               |
| SNP_P3_117622_261544 | NW_004515867.1 | Scaffold377 | 261544                  | GG                              | AA                | 1946502160               |
| SNP_P3_117623_261578 | NW_004515867.1 | Scaffold377 | 261578                  | TT                              | AA                | 1946502162               |
| SNP_P3_117624_261583 | NW_004515867.1 | Scaffold377 | 261583                  | AA                              | GG                | 1946502163               |
| SNP_P3_117625_261670 | NW_004515867.1 | Scaffold377 | 261670                  | TT                              | CC                | 1946502165               |
| SNP_P3_117626_261993 | NW_004515867.1 | Scaffold377 | 261993                  | TT                              | CC                | 1946502166               |
| SNP_P3_117628_262016 | NW_004515867.1 | Scaffold377 | 262016                  | AA                              | GG                | 1946502168               |
| SNP_P3_117630_264023 | NW_004515867.1 | Scaffold377 | 264023                  | AA                              | TT                | 1946502169               |
| SNP_P3_117631_331009 | NW_004515867.1 | Scaffold377 | 331009                  | CC                              | AA                | 1946502170               |
| SNP_P3_117632_331048 | NW_004515867.1 | Scaffold377 | 331048                  | CC                              | TT                | 1946502172               |
| SNP_P3_117633_331055 | NW_004515867.1 | Scaffold377 | 331055                  | GG                              | AA                | 1946502173               |
| SNP_P3_117634_331083 | NW_004515867.1 | Scaffold377 | 331083                  | AA                              | TT                | 1946502175               |
| SNP_P3_117635_343090 | NW_004515867.1 | Scaffold377 | 343090                  | TT                              | CC                | 1946502176               |
| SNP_P3_117636_343204 | NW_004515867.1 | Scaffold377 | 343204                  | AA                              | TT                | 1946502178               |
| SNP_P3_117637_343225 | NW_004515867.1 | Scaffold377 | 343225                  | AA                              | GG                | 1946502179               |
| SNP_P3_117638_343260 | NW_004515867.1 | Scaffold377 | 343260                  | AA                              | GG                | 1946502181               |
| SNP_P3_117639_357668 | NW_004515867.1 | Scaffold377 | 357668                  | TT                              | AA                | 1946502182               |
| SNP_P3_117640_357691 | NW_004515867.1 | Scaffold377 | 357691                  | GG                              | TT                | 1946502184               |
| SNP_P3_117643_372169 | NW_004515867.1 | Scaffold377 | 372169                  | AA                              | TT                | 1946502185               |
| SNP_P3_117645_394265 | NW_004515867.1 | Scaffold377 | 394265                  | GG                              | AA                | 1946502187               |
| SNP_P3_117646_394297 | NW_004515867.1 | Scaffold377 | 394297                  | AA                              | GG                | 1946502188               |
| SNP_P3_117647_394312 | NW_004515867.1 | Scaffold377 | 394312                  | TT                              | GG                | 1946502190               |
| SNP_P3_117648_394347 | NW_004515867.1 | Scaffold377 | 394347                  | GG                              | TT                | 1946502191               |
| SNP_P3_117649_394376 | NW_004515867.1 | Scaffold377 | 394376                  | CC                              | TT                | 1946502193               |
| SNP_P3_117650_397272 | NW_004515867.1 | Scaffold377 | 397272                  | AA                              | TT                | 1946502194               |
| SNP_P3_117651_397318 | NW_004515867.1 | Scaffold377 | 397318                  | TT                              | CC                | 1946502196               |
| SNP_P3_117652_397320 | NW_004515867.1 | Scaffold377 | 397320                  | CC                              | TT                | 1946502197               |
| SNP_P3_117653_397324 | NW_004515867.1 | Scaffold377 | 397324                  | AA                              | GG                | 1946502198               |
| SNP_P3_117654_397333 | NW_004515867.1 | Scaffold377 | 397333                  | TT                              | AA                | 1946502200               |
| SNP_P3_117655_397352 | NW_004515867.1 | Scaffold377 | 397352                  | GG                              | AA                | 1946502201               |

| SNPs IDs             | Chromosome IDs | Chromosomes | Physical positions (bp) | CDC Frontier (Reference genome) | (Pusa 256 & HPNB) | NCBI SNPdb Accession IDs |
|----------------------|----------------|-------------|-------------------------|---------------------------------|-------------------|--------------------------|
| SNP_P3_117656_397583 | NW_004515867.1 | Scaffold377 | 397583                  | CC                              | TT                | 1946502203               |
| SNP_P3_117657_400093 | NW_004515867.1 | Scaffold377 | 400093                  | GG                              | AA                | 1946502204               |
| SNP_P3_117659_400204 | NW_004515867.1 | Scaffold377 | 400204                  | GG                              | AA                | 1946502206               |
| SNP_P3_117660_400329 | NW_004515867.1 | Scaffold377 | 400329                  | TT                              | CC                | 1946502207               |
| SNP_P3_117661_400426 | NW_004515867.1 | Scaffold377 | 400426                  | AA                              | GG                | 1946502209               |
| SNP_P3_117662_400450 | NW_004515867.1 | Scaffold377 | 400450                  | AA                              | GG                | 1946502210               |
| SNP_P3_117663_400509 | NW_004515867.1 | Scaffold377 | 400509                  | GG                              | AA                | 1946502211               |
| SNP_P3_117664_404899 | NW_004515867.1 | Scaffold377 | 404899                  | GG                              | TT                | 1946502213               |
| SNP_P3_117665_405173 | NW_004515867.1 | Scaffold377 | 405173                  | TT                              | GG                | 1946502214               |
| SNP_P3_117666_417698 | NW_004515867.1 | Scaffold377 | 417698                  | CC                              | TT                | 1946502216               |
| SNP_P3_117667_418994 | NW_004515867.1 | Scaffold377 | 418994                  | TT                              | AA                | 1946502217               |
| SNP_P3_117668_419071 | NW_004515867.1 | Scaffold377 | 419071                  | GG                              | TT                | 1946502219               |
| SNP_P3_117669_419104 | NW_004515867.1 | Scaffold377 | 419104                  | TT                              | CC                | 1946502220               |
| SNP_P3_117670_426514 | NW_004515867.1 | Scaffold377 | 426514                  | CC                              | TT                | 1946502222               |
| SNP_P3_117671_426561 | NW_004515867.1 | Scaffold377 | 426561                  | TT                              | CC                | 1946502223               |
| SNP_P3_117672_432420 | NW_004515867.1 | Scaffold377 | 432420                  | TT                              | CC                | 1946502225               |
| SNP_P3_117673_433395 | NW_004515867.1 | Scaffold377 | 433395                  | TT                              | CC                | 1946502226               |
| SNP_P3_117674_433515 | NW_004515867.1 | Scaffold377 | 433515                  | AA                              | TT                | 1946502227               |
| SNP_P3_117675_433539 | NW_004515867.1 | Scaffold377 | 433539                  | GG                              | CC                | 1946502229               |
| SNP_P3_117676_9427   | NW_004515869.1 | Scaffold379 | 9427                    | CC                              | TT                | 1946502230               |
| SNP_P3_117677_10867  | NW_004515869.1 | Scaffold379 | 10867                   | GG                              | TT                | 1946502232               |
| SNP_P3_117678_20894  | NW_004515869.1 | Scaffold379 | 20894                   | CC                              | GG                | 1946502233               |
| SNP_P3_117679_22745  | NW_004515869.1 | Scaffold379 | 22745                   | AA                              | CC                | 1946502235               |
| SNP_P3_117680_36879  | NW_004515869.1 | Scaffold379 | 36879                   | CC                              | TT                | 1946502236               |
| SNP_P3_117681_71600  | NW_004515869.1 | Scaffold379 | 71600                   | TT                              | CC                | 1946502237               |
| SNP_P3_117682_91586  | NW_004515869.1 | Scaffold379 | 91586                   | AA                              | GG                | 1946502239               |
| SNP_P3_117683_93863  | NW_004515869.1 | Scaffold379 | 93863                   | GG                              | AA                | 1946502240               |
| SNP_P3_117684_108245 | NW_004515869.1 | Scaffold379 | 108245                  | TT                              | CC                | 1946502242               |
| SNP_P3_117685_108286 | NW_004515869.1 | Scaffold379 | 108286                  | TT                              | GG                | 1946502243               |
| SNP_P3_117686_108310 | NW_004515869.1 | Scaffold379 | 108310                  | GG                              | AA                | 1946502245               |
| SNP_P3_117687_108328 | NW_004515869.1 | Scaffold379 | 108328                  | GG                              | AA                | 1946502246               |
| SNP_P3_117688_135818 | NW_004515869.1 | Scaffold379 | 135818                  | AA                              | TT                | 1946502248               |
| SNP_P3_117690_136101 | NW_004515869.1 | Scaffold379 | 136101                  | TT                              | AA                | 1946502249               |
| SNP_P3_117691_136102 | NW_004515869.1 | Scaffold379 | 136102                  | TT                              | CC                | 1946502250               |
| SNP_P3_117692_136337 | NW_004515869.1 | Scaffold379 | 136337                  | TT                              | CC                | 1946502252               |
| SNP_P3_117693_136339 | NW_004515869.1 | Scaffold379 | 136339                  | TT                              | AA                | 1946502253               |
| SNP_P3_117694_136398 | NW_004515869.1 | Scaffold379 | 136398                  | GG                              | AA                | 1946502255               |
| SNP_P3_117695_162419 | NW_004515869.1 | Scaffold379 | 162419                  | AA                              | CC                | 1946502256               |
| SNP_P3_117696_162453 | NW_004515869.1 | Scaffold379 | 162453                  | GG                              | AA                | 1946502258               |
| SNP_P3_117697_165241 | NW_004515869.1 | Scaffold379 | 165241                  | CC                              | TT                | 1946502259               |
| SNP_P3_117698_176523 | NW_004515869.1 | Scaffold379 | 176523                  | TT                              | GG                | 1946502261               |
| SNP_P3_117699_194414 | NW_004515869.1 | Scaffold379 | 194414                  | AA                              | GG                | 1946502262               |

| SNPs IDs            | Chromosome IDs | Chromosomes | Physical positions (bp) | CDC Frontier (Reference genome) | (Pusa 256 & HPNB) | NCBI SNPdb Accession IDs |
|---------------------|----------------|-------------|-------------------------|---------------------------------|-------------------|--------------------------|
| SNP_P3_117701_1410  | NW_004515870.1 | Scaffold381 | 1410                    | GG                              | AA                | 1946502263               |
| SNP_P3_117702_1927  | NW_004515870.1 | Scaffold381 | 1927                    | CC                              | TT                | 1946502265               |
| SNP_P3_117703_5599  | NW_004515870.1 | Scaffold381 | 5599                    | CC                              | TT                | 1946502266               |
| SNP_P3_117705_6540  | NW_004515870.1 | Scaffold381 | 6540                    | GG                              | AA                | 1946502268               |
| SNP_P3_117706_6568  | NW_004515870.1 | Scaffold381 | 6568                    | CC                              | GG                | 1946502269               |
| SNP_P3_117707_6571  | NW_004515870.1 | Scaffold381 | 6571                    | TT                              | AA                | 1946502271               |
| SNP_P3_117708_6668  | NW_004515870.1 | Scaffold381 | 6668                    | TT                              | AA                | 1946502272               |
| SNP_P3_117709_6802  | NW_004515870.1 | Scaffold381 | 6802                    | AA                              | TT                | 1946502274               |
| SNP_P3_117710_6803  | NW_004515870.1 | Scaffold381 | 6803                    | AA                              | GG                | 1946502275               |
| SNP_P3_117711_6804  | NW_004515870.1 | Scaffold381 | 6804                    | TT                              | GG                | 1946502277               |
| SNP_P3_117712_6808  | NW_004515870.1 | Scaffold381 | 6808                    | AA                              | TT                | 1946502278               |
| SNP_P3_117713_6817  | NW_004515870.1 | Scaffold381 | 6817                    | CC                              | AA                | 1946502280               |
| SNP_P3_117715_6929  | NW_004515870.1 | Scaffold381 | 6929                    | AA                              | TT                | 1946502281               |
| SNP_P3_117716_8526  | NW_004515870.1 | Scaffold381 | 8526                    | GG                              | TT                | 1946502283               |
| SNP_P3_117717_8585  | NW_004515870.1 | Scaffold381 | 8585                    | GG                              | AA                | 1946502284               |
| SNP_P3_117718_9729  | NW_004515870.1 | Scaffold381 | 9729                    | GG                              | TT                | 1946502286               |
| SNP_P3_117719_9958  | NW_004515870.1 | Scaffold381 | 9958                    | CC                              | AA                | 1946502287               |
| SNP_P3_117720_10024 | NW_004515870.1 | Scaffold381 | 10024                   | AA                              | GG                | 1946502289               |
| SNP_P3_117721_10165 | NW_004515870.1 | Scaffold381 | 10165                   | CC                              | AA                | 1946502290               |
| SNP_P3_117722_10168 | NW_004515870.1 | Scaffold381 | 10168                   | TT                              | GG                | 1946502292               |
| SNP_P3_117723_10185 | NW_004515870.1 | Scaffold381 | 10185                   | TT                              | AA                | 1946502293               |
| SNP_P3_117724_10189 | NW_004515870.1 | Scaffold381 | 10189                   | AA                              | GG                | 1946502295               |
| SNP_P3_117725_10191 | NW_004515870.1 | Scaffold381 | 10191                   | TT                              | GG                | 1946502296               |
| SNP_P3_117726_10287 | NW_004515870.1 | Scaffold381 | 10287                   | CC                              | TT                | 1946502298               |
| SNP_P3_117727_10299 | NW_004515870.1 | Scaffold381 | 10299                   | AA                              | CC                | 1946502299               |
| SNP_P3_117728_10301 | NW_004515870.1 | Scaffold381 | 10301                   | GG                              | AA                | 1946502301               |
| SNP_P3_117729_10341 | NW_004515870.1 | Scaffold381 | 10341                   | GG                              | TT                | 1946502302               |
| SNP_P3_117730_10381 | NW_004515870.1 | Scaffold381 | 10381                   | AA                              | TT                | 1946502303               |
| SNP_P3_117731_12667 | NW_004515870.1 | Scaffold381 | 12667                   | TT                              | CC                | 1946502305               |
| SNP_P3_117732_12715 | NW_004515870.1 | Scaffold381 | 12715                   | AA                              | TT                | 1946502307               |
| SNP_P3_117733_21896 | NW_004515871.1 | Scaffold382 | 21896                   | CC                              | GG                | 1946502308               |
| SNP_P3_117734_22763 | NW_004515871.1 | Scaffold382 | 22763                   | CC                              | AA                | 1946502309               |
| SNP_P3_117735_22838 | NW_004515871.1 | Scaffold382 | 22838                   | TT                              | CC                | 1946502311               |
| SNP_P3_117736_26109 | NW_004515871.1 | Scaffold382 | 26109                   | AA                              | GG                | 1946502312               |
| SNP_P3_117737_26119 | NW_004515871.1 | Scaffold382 | 26119                   | AA                              | TT                | 1946502314               |
| SNP_P3_117738_26494 | NW_004515871.1 | Scaffold382 | 26494                   | TT                              | CC                | 1946502315               |
| SNP_P3_117739_26732 | NW_004515871.1 | Scaffold382 | 26732                   | AA                              | TT                | 1946502317               |
| SNP_P3_117740_26975 | NW_004515871.1 | Scaffold382 | 26975                   | CC                              | TT                | 1946502318               |
| SNP_P3_117741_29235 | NW_004515871.1 | Scaffold382 | 29235                   | GG                              | AA                | 1946502320               |
| SNP_P3_117742_29259 | NW_004515871.1 | Scaffold382 | 29259                   | GG                              | AA                | 1946502321               |
| SNP_P3_117743_29264 | NW_004515871.1 | Scaffold382 | 29264                   | CC                              | AA                | 1946502322               |
| SNP_P3_117744_42793 | NW_004515871.1 | Scaffold382 | 42793                   | TT                              | CC                | 1946502324               |

| SNPs IDs             | Chromosome IDs | Chromosomes | Physical positions (bp) | CDC Frontier (Reference genome) | (Pusa 256 & HPNB) | NCBI SNPdb Accession IDs |
|----------------------|----------------|-------------|-------------------------|---------------------------------|-------------------|--------------------------|
| SNP_P3_117745_61062  | NW_004515871.1 | Scaffold382 | 61062                   | GG                              | AA                | 1946502325               |
| SNP_P3_117746_64045  | NW_004515871.1 | Scaffold382 | 64045                   | CC                              | AA                | 1946502327               |
| SNP_P3_117747_65145  | NW_004515871.1 | Scaffold382 | 65145                   | CC                              | AA                | 1946502328               |
| SNP_P3_117748_65159  | NW_004515871.1 | Scaffold382 | 65159                   | CC                              | AA                | 1946502330               |
| SNP_P3_117749_78570  | NW_004515871.1 | Scaffold382 | 78570                   | TT                              | CC                | 1946502331               |
| SNP_P3_117750_79273  | NW_004515871.1 | Scaffold382 | 79273                   | TT                              | CC                | 1946502333               |
| SNP_P3_117751_79326  | NW_004515871.1 | Scaffold382 | 79326                   | AA                              | GG                | 1946502334               |
| SNP_P3_117752_82247  | NW_004515871.1 | Scaffold382 | 82247                   | TT                              | CC                | 1946502336               |
| SNP_P3_117753_82268  | NW_004515871.1 | Scaffold382 | 82268                   | TT                              | CC                | 1946502337               |
| SNP_P3_117754_83138  | NW_004515871.1 | Scaffold382 | 83138                   | CC                              | TT                | 1946502339               |
| SNP_P3_117755_90378  | NW_004515871.1 | Scaffold382 | 90378                   | CC                              | TT                | 1946502340               |
| SNP_P3_117756_90427  | NW_004515871.1 | Scaffold382 | 90427                   | AA                              | CC                | 1946502342               |
| SNP_P3_117757_90507  | NW_004515871.1 | Scaffold382 | 90507                   | TT                              | AA                | 1946502343               |
| SNP_P3_117758_90663  | NW_004515871.1 | Scaffold382 | 90663                   | AA                              | GG                | 1946502345               |
| SNP_P3_117759_90785  | NW_004515871.1 | Scaffold382 | 90785                   | AA                              | GG                | 1946502346               |
| SNP_P3_117760_90807  | NW_004515871.1 | Scaffold382 | 90807                   | CC                              | TT                | 1946502348               |
| SNP_P3_117761_90823  | NW_004515871.1 | Scaffold382 | 90823                   | CC                              | TT                | 1946502349               |
| SNP_P3_117762_90851  | NW_004515871.1 | Scaffold382 | 90851                   | AA                              | GG                | 1946502351               |
| SNP_P3_117763_90889  | NW_004515871.1 | Scaffold382 | 90889                   | AA                              | CC                | 1946502352               |
| SNP_P3_117764_90984  | NW_004515871.1 | Scaffold382 | 90984                   | CC                              | GG                | 1946502354               |
| SNP_P3_117765_91129  | NW_004515871.1 | Scaffold382 | 91129                   | TT                              | CC                | 1946502355               |
| SNP_P3_117766_91332  | NW_004515871.1 | Scaffold382 | 91332                   | GG                              | CC                | 1946502357               |
| SNP_P3_117767_105474 | NW_004515871.1 | Scaffold382 | 105474                  | TT                              | CC                | 1946502358               |
| SNP_P3_117768_105633 | NW_004515871.1 | Scaffold382 | 105633                  | AA                              | GG                | 1946502360               |
| SNP_P3_117769_106915 | NW_004515871.1 | Scaffold382 | 106915                  | GG                              | TT                | 1946502361               |
| SNP_P3_117770_9666   | NW_004515872.1 | Scaffold383 | 9666                    | GG                              | AA                | 1946502363               |
| SNP_P3_117771_9753   | NW_004515872.1 | Scaffold383 | 9753                    | TT                              | AA                | 1946502364               |
| SNP_P3_117772_9766   | NW_004515872.1 | Scaffold383 | 9766                    | GG                              | AA                | 1946502366               |
| SNP_P3_117773_9807   | NW_004515872.1 | Scaffold383 | 9807                    | GG                              | AA                | 1946502367               |
| SNP_P3_117774_9808   | NW_004515872.1 | Scaffold383 | 9808                    | AA                              | TT                | 1946502368               |
| SNP_P3_117775_9867   | NW_004515872.1 | Scaffold383 | 9867                    | AA                              | CC                | 1946502370               |
| SNP_P3_117776_9932   | NW_004515872.1 | Scaffold383 | 9932                    | TT                              | CC                | 1946502371               |
| SNP_P3_117777_10091  | NW_004515872.1 | Scaffold383 | 10091                   | TT                              | CC                | 1946502373               |
| SNP_P3_117778_10359  | NW_004515872.1 | Scaffold383 | 10359                   | AA                              | GG                | 1946502374               |
| SNP_P3_117779_10726  | NW_004515872.1 | Scaffold383 | 10726                   | TT                              | CC                | 1946502376               |
| SNP_P3_117780_17300  | NW_004515872.1 | Scaffold383 | 17300                   | GG                              | AA                | 1946502377               |
| SNP_P3_117781_21079  | NW_004515872.1 | Scaffold383 | 21079                   | GG                              | AA                | 1946502378               |
| SNP_P3_117782_34224  | NW_004515872.1 | Scaffold383 | 34224                   | AA                              | GG                | 1946502380               |
| SNP_P3_117783_40565  | NW_004515872.1 | Scaffold383 | 40565                   | AA                              | TT                | 1946502381               |
| SNP_P3_117784_46251  | NW_004515872.1 | Scaffold383 | 46251                   | CC                              | TT                | 1946502383               |
| SNP_P3_117785_51105  | NW_004515872.1 | Scaffold383 | 51105                   | CC                              | AA                | 1946502384               |
| SNP_P3_117786_77493  | NW_004515872.1 | Scaffold383 | 77493                   | TT                              | CC                | 1946502386               |

| SNPs IDs             | Chromosome IDs | Chromosomes | Physical positions (bp) | CDC Frontier (Reference genome) | (Pusa 256 & HPNB) | NCBI SNPdb Accession IDs |
|----------------------|----------------|-------------|-------------------------|---------------------------------|-------------------|--------------------------|
| SNP_P3_117787_79073  | NW_004515872.1 | Scaffold383 | 79073                   | TT                              | CC                | 1946502387               |
| SNP_P3_117788_80210  | NW_004515872.1 | Scaffold383 | 80210                   | TT                              | GG                | 1946502389               |
| SNP_P3_117789_81375  | NW_004515872.1 | Scaffold383 | 81375                   | AA                              | GG                | 1946502390               |
| SNP_P3_117790_81403  | NW_004515872.1 | Scaffold383 | 81403                   | TT                              | CC                | 1946502392               |
| SNP_P3_117791_81420  | NW_004515872.1 | Scaffold383 | 81420                   | CC                              | TT                | 1946502393               |
| SNP_P3_117792_81485  | NW_004515872.1 | Scaffold383 | 81485                   | AA                              | GG                | 1946502395               |
| SNP_P3_117793_81530  | NW_004515872.1 | Scaffold383 | 81530                   | CC                              | TT                | 1946502396               |
| SNP_P3_117794_81744  | NW_004515872.1 | Scaffold383 | 81744                   | CC                              | TT                | 1946502398               |
| SNP_P3_117795_81763  | NW_004515872.1 | Scaffold383 | 81763                   | AA                              | GG                | 1946502399               |
| SNP_P3_117796_81811  | NW_004515872.1 | Scaffold383 | 81811                   | GG                              | AA                | 1946502401               |
| SNP_P3_117797_87845  | NW_004515872.1 | Scaffold383 | 87845                   | CC                              | TT                | 1946502402               |
| SNP_P3_117798_87893  | NW_004515872.1 | Scaffold383 | 87893                   | GG                              | AA                | 1946502403               |
| SNP_P3_117799_88008  | NW_004515872.1 | Scaffold383 | 88008                   | CC                              | AA                | 1946502405               |
| SNP_P3_117800_88028  | NW_004515872.1 | Scaffold383 | 88028                   | AA                              | CC                | 1946502406               |
| SNP_P3_117801_93813  | NW_004515872.1 | Scaffold383 | 93813                   | AA                              | GG                | 1946502408               |
| SNP_P3_117802_94019  | NW_004515872.1 | Scaffold383 | 94019                   | TT                              | GG                | 1946502409               |
| SNP_P3_117803_94059  | NW_004515872.1 | Scaffold383 | 94059                   | GG                              | TT                | 1946502411               |
| SNP_P3_117804_113881 | NW_004515872.1 | Scaffold383 | 113881                  | CC                              | TT                | 1946502412               |
| SNP_P3_117805_118654 | NW_004515872.1 | Scaffold383 | 118654                  | TT                              | AA                | 1946502414               |
| SNP_P3_117806_118655 | NW_004515872.1 | Scaffold383 | 118655                  | TT                              | CC                | 1946502415               |
| SNP_P3_117807_118698 | NW_004515872.1 | Scaffold383 | 118698                  | TT                              | AA                | 1946502417               |
| SNP_P3_117808_118706 | NW_004515872.1 | Scaffold383 | 118706                  | TT                              | AA                | 1946502418               |
| SNP_P3_117809_118741 | NW_004515872.1 | Scaffold383 | 118741                  | TT                              | CC                | 1946502420               |
| SNP_P3_117810_118755 | NW_004515872.1 | Scaffold383 | 118755                  | AA                              | GG                | 1946502421               |
| SNP_P3_117811_128458 | NW_004515872.1 | Scaffold383 | 128458                  | GG                              | AA                | 1946502422               |
| SNP_P3_117812_128494 | NW_004515872.1 | Scaffold383 | 128494                  | CC                              | TT                | 1946502424               |
| SNP_P3_117813_128927 | NW_004515872.1 | Scaffold383 | 128927                  | GG                              | AA                | 1946502425               |
| SNP_P3_117814_128935 | NW_004515872.1 | Scaffold383 | 128935                  | AA                              | GG                | 1946502427               |
| SNP_P3_117815_128977 | NW_004515872.1 | Scaffold383 | 128977                  | GG                              | AA                | 1946502428               |
| SNP_P3_117816_133731 | NW_004515872.1 | Scaffold383 | 133731                  | CC                              | AA                | 1946502430               |
| SNP_P3_117818_137452 | NW_004515872.1 | Scaffold383 | 137452                  | AA                              | GG                | 1946502431               |
| SNP_P3_117819_137468 | NW_004515872.1 | Scaffold383 | 137468                  | GG                              | TT                | 1946502432               |
| SNP_P3_117820_137483 | NW_004515872.1 | Scaffold383 | 137483                  | CC                              | GG                | 1946502434               |
| SNP_P3_117821_137514 | NW_004515872.1 | Scaffold383 | 137514                  | GG                              | TT                | 1946502436               |
| SNP_P3_117822_137589 | NW_004515872.1 | Scaffold383 | 137589                  | AA                              | CC                | 1946502437               |
| SNP_P3_117823_137888 | NW_004515872.1 | Scaffold383 | 137888                  | TT                              | AA                | 1946502438               |
| SNP_P3_117824_137902 | NW_004515872.1 | Scaffold383 | 137902                  | GG                              | AA                | 1946502440               |
| SNP_P3_117825_175851 | NW_004515872.1 | Scaffold383 | 175851                  | GG                              | AA                | 1946502441               |
| SNP_P3_117826_182956 | NW_004515872.1 | Scaffold383 | 182956                  | GG                              | TT                | 1946502443               |
| SNP_P3_117827_195666 | NW_004515872.1 | Scaffold383 | 195666                  | TT                              | CC                | 1946502444               |
| SNP_P3_117828_195739 | NW_004515872.1 | Scaffold383 | 195739                  | GG                              | AA                | 1946502446               |
| SNP_P3_117829_195890 | NW_004515872.1 | Scaffold383 | 195890                  | TT                              | CC                | 1946502447               |

| SNPs IDs             | Chromosome IDs | Chromosomes | Physical positions (bp) | CDC Frontier (Reference genome) | (Pusa 256 & HPNB) | NCBI SNPdb Accession IDs |
|----------------------|----------------|-------------|-------------------------|---------------------------------|-------------------|--------------------------|
| SNP_P3_117830_205175 | NW_004515872.1 | Scaffold383 | 205175                  | CC                              | TT                | 1946502449               |
| SNP_P3_117831_205633 | NW_004515872.1 | Scaffold383 | 205633                  | GG                              | AA                | 1946502450               |
| SNP_P3_117832_205634 | NW_004515872.1 | Scaffold383 | 205634                  | TT                              | CC                | 1946502452               |
| SNP_P3_117833_209861 | NW_004515872.1 | Scaffold383 | 209861                  | GG                              | AA                | 1946502453               |
| SNP_P3_117835_209993 | NW_004515872.1 | Scaffold383 | 209993                  | TT                              | AA                | 1946502455               |
| SNP_P3_117837_210106 | NW_004515872.1 | Scaffold383 | 210106                  | CC                              | AA                | 1946502457               |
| SNP_P3_117838_210169 | NW_004515872.1 | Scaffold383 | 210169                  | TT                              | GG                | 1946502458               |
| SNP_P3_117839_210364 | NW_004515872.1 | Scaffold383 | 210364                  | GG                              | AA                | 1946502460               |
| SNP_P3_117840_248150 | NW_004515872.1 | Scaffold383 | 248150                  | CC                              | GG                | 1946502461               |
| SNP_P3_117841_2667   | NW_004515873.1 | Scaffold387 | 2667                    | GG                              | TT                | 1946502463               |
| SNP_P3_117842_2764   | NW_004515873.1 | Scaffold387 | 2764                    | GG                              | TT                | 1946502464               |
| SNP_P3_117843_4329   | NW_004515873.1 | Scaffold387 | 4329                    | GG                              | AA                | 1946502466               |
| SNP_P3_117844_5424   | NW_004515873.1 | Scaffold387 | 5424                    | GG                              | CC                | 1946502467               |
| SNP_P3_117845_15761  | NW_004515873.1 | Scaffold387 | 15761                   | AA                              | TT                | 1946502469               |
| SNP_P3_117846_15809  | NW_004515873.1 | Scaffold387 | 15809                   | AA                              | GG                | 1946502470               |
| SNP_P3_117847_15888  | NW_004515873.1 | Scaffold387 | 15888                   | GG                              | TT                | 1946502472               |
| SNP_P3_117848_15911  | NW_004515873.1 | Scaffold387 | 15911                   | AA                              | CC                | 1946502473               |
| SNP_P3_117849_15946  | NW_004515873.1 | Scaffold387 | 15946                   | AA                              | TT                | 1946502475               |
| SNP_P3_117850_15990  | NW_004515873.1 | Scaffold387 | 15990                   | TT                              | CC                | 1946502477               |
| SNP_P3_117852_16114  | NW_004515873.1 | Scaffold387 | 16114                   | TT                              | CC                | 1946502478               |
| SNP_P3_117853_16158  | NW_004515873.1 | Scaffold387 | 16158                   | TT                              | GG                | 1946502479               |
| SNP_P3_117854_16197  | NW_004515873.1 | Scaffold387 | 16197                   | GG                              | TT                | 1946502481               |
| SNP_P3_117855_16288  | NW_004515873.1 | Scaffold387 | 16288                   | CC                              | TT                | 1946502482               |
| SNP_P3_117856_16297  | NW_004515873.1 | Scaffold387 | 16297                   | GG                              | AA                | 1946502484               |
| SNP_P3_117857_16341  | NW_004515873.1 | Scaffold387 | 16341                   | AA                              | CC                | 1946502485               |
| SNP_P3_117858_16368  | NW_004515873.1 | Scaffold387 | 16368                   | GG                              | AA                | 1946502487               |
| SNP_P3_117859_16441  | NW_004515873.1 | Scaffold387 | 16441                   | TT                              | AA                | 1946502488               |
| SNP_P3_117860_16452  | NW_004515873.1 | Scaffold387 | 16452                   | CC                              | GG                | 1946502490               |
| SNP_P3_117861_16491  | NW_004515873.1 | Scaffold387 | 16491                   | CC                              | TT                | 1946502491               |
| SNP_P3_117862_16494  | NW_004515873.1 | Scaffold387 | 16494                   | TT                              | CC                | 1946502493               |
| SNP_P3_117863_16605  | NW_004515873.1 | Scaffold387 | 16605                   | GG                              | AA                | 1946502494               |
| SNP_P3_117864_16629  | NW_004515873.1 | Scaffold387 | 16629                   | GG                              | TT                | 1946502496               |
| SNP_P3_117865_16636  | NW_004515873.1 | Scaffold387 | 16636                   | TT                              | GG                | 1946502497               |
| SNP_P3_117866_16668  | NW_004515873.1 | Scaffold387 | 16668                   | TT                              | CC                | 1946502499               |
| SNP_P3_117867_16679  | NW_004515873.1 | Scaffold387 | 16679                   | AA                              | GG                | 1946502500               |
| SNP_P3_117868_16692  | NW_004515873.1 | Scaffold387 | 16692                   | GG                              | CC                | 1946502502               |
| SNP_P3_117869_16703  | NW_004515873.1 | Scaffold387 | 16703                   | TT                              | AA                | 1946502503               |
| SNP_P3_117870_16760  | NW_004515873.1 | Scaffold387 | 16760                   | CC                              | TT                | 1946502505               |
| SNP_P3_117871_16789  | NW_004515873.1 | Scaffold387 | 16789                   | GG                              | AA                | 1946502506               |
| SNP_P3_117872_16797  | NW_004515873.1 | Scaffold387 | 16797                   | GG                              | TT                | 1946502508               |
| SNP_P3_117873_16805  | NW_004515873.1 | Scaffold387 | 16805                   | CC                              | GG                | 1946502509               |
| SNP_P3_117874_16816  | NW_004515873.1 | Scaffold387 | 16816                   | AA                              | GG                | 1946502511               |

| SNPs IDs            | Chromosome IDs | Chromosomes | Physical positions (bp) | CDC Frontier (Reference genome) | (Pusa 256 & HPNB) | NCBI SNPdb Accession IDs |
|---------------------|----------------|-------------|-------------------------|---------------------------------|-------------------|--------------------------|
| SNP_P3_117875_16827 | NW_004515873.1 | Scaffold387 | 16827                   | AA                              | GG                | 1946502512               |
| SNP_P3_117876_16842 | NW_004515873.1 | Scaffold387 | 16842                   | TT                              | CC                | 1946502513               |
| SNP_P3_117877_17057 | NW_004515873.1 | Scaffold387 | 17057                   | TT                              | CC                | 1946502515               |
| SNP_P3_117878_17282 | NW_004515873.1 | Scaffold387 | 17282                   | TT                              | CC                | 1946502516               |
| SNP_P3_117879_17291 | NW_004515873.1 | Scaffold387 | 17291                   | CC                              | AA                | 1946502518               |
| SNP_P3_117880_17560 | NW_004515873.1 | Scaffold387 | 17560                   | GG                              | AA                | 1946502519               |
| SNP_P3_117881_17613 | NW_004515873.1 | Scaffold387 | 17613                   | CC                              | AA                | 1946502521               |
| SNP_P3_117882_17619 | NW_004515873.1 | Scaffold387 | 17619                   | AA                              | GG                | 1946502522               |
| SNP_P3_117883_17629 | NW_004515873.1 | Scaffold387 | 17629                   | GG                              | CC                | 1946502524               |
| SNP_P3_117884_17718 | NW_004515873.1 | Scaffold387 | 17718                   | CC                              | TT                | 1946502525               |
| SNP_P3_117885_17760 | NW_004515873.1 | Scaffold387 | 17760                   | AA                              | GG                | 1946502527               |
| SNP_P3_117886_17766 | NW_004515873.1 | Scaffold387 | 17766                   | CC                              | TT                | 1946502528               |
| SNP_P3_117887_17775 | NW_004515873.1 | Scaffold387 | 17775                   | CC                              | TT                | 1946502530               |
| SNP_P3_117888_17872 | NW_004515873.1 | Scaffold387 | 17872                   | AA                              | GG                | 1946502531               |
| SNP_P3_117889_17924 | NW_004515873.1 | Scaffold387 | 17924                   | TT                              | GG                | 1946502532               |
| SNP_P3_117890_18058 | NW_004515873.1 | Scaffold387 | 18058                   | CC                              | TT                | 1946502534               |
| SNP_P3_117891_18101 | NW_004515873.1 | Scaffold387 | 18101                   | AA                              | TT                | 1946502535               |
| SNP_P3_117892_18107 | NW_004515873.1 | Scaffold387 | 18107                   | GG                              | AA                | 1946502537               |
| SNP_P3_117893_18154 | NW_004515873.1 | Scaffold387 | 18154                   | CC                              | TT                | 1946502538               |
| SNP_P3_117894_18171 | NW_004515873.1 | Scaffold387 | 18171                   | TT                              | AA                | 1946502540               |
| SNP_P3_117895_18177 | NW_004515873.1 | Scaffold387 | 18177                   | CC                              | TT                | 1946502541               |
| SNP_P3_117896_18225 | NW_004515873.1 | Scaffold387 | 18225                   | GG                              | AA                | 1946502543               |
| SNP_P3_117897_18463 | NW_004515873.1 | Scaffold387 | 18463                   | CC                              | AA                | 1946502544               |
| SNP_P3_117898_18486 | NW_004515873.1 | Scaffold387 | 18486                   | CC                              | TT                | 1946502546               |
| SNP_P3_117899_18495 | NW_004515873.1 | Scaffold387 | 18495                   | AA                              | GG                | 1946502547               |
| SNP_P3_117900_18496 | NW_004515873.1 | Scaffold387 | 18496                   | TT                              | CC                | 1946502548               |
| SNP_P3_117901_18587 | NW_004515873.1 | Scaffold387 | 18587                   | AA                              | GG                | 1946502550               |
| SNP_P3_117902_18606 | NW_004515873.1 | Scaffold387 | 18606                   | GG                              | AA                | 1946502551               |
| SNP_P3_117903_18646 | NW_004515873.1 | Scaffold387 | 18646                   | GG                              | TT                | 1946502553               |
| SNP_P3_117904_18676 | NW_004515873.1 | Scaffold387 | 18676                   | AA                              | GG                | 1946502554               |
| SNP_P3_117905_18703 | NW_004515873.1 | Scaffold387 | 18703                   | CC                              | GG                | 1946502556               |
| SNP_P3_117906_18704 | NW_004515873.1 | Scaffold387 | 18704                   | AA                              | GG                | 1946502557               |
| SNP_P3_117907_18732 | NW_004515873.1 | Scaffold387 | 18732                   | TT                              | CC                | 1946502559               |
| SNP_P3_117908_18780 | NW_004515873.1 | Scaffold387 | 18780                   | CC                              | TT                | 1946502560               |
| SNP_P3_117909_18910 | NW_004515873.1 | Scaffold387 | 18910                   | TT                              | CC                | 1946502562               |
| SNP_P3_117910_18916 | NW_004515873.1 | Scaffold387 | 18916                   | CC                              | AA                | 1946502563               |
| SNP_P3_117911_18943 | NW_004515873.1 | Scaffold387 | 18943                   | AA                              | CC                | 1946502565               |
| SNP_P3_117912_18944 | NW_004515873.1 | Scaffold387 | 18944                   | AA                              | TT                | 1946502566               |
| SNP_P3_117913_18989 | NW_004515873.1 | Scaffold387 | 18989                   | GG                              | TT                | 1946502568               |
| SNP_P3_117914_19010 | NW_004515873.1 | Scaffold387 | 19010                   | AA                              | GG                | 1946502569               |
| SNP_P3_117915_19068 | NW_004515873.1 | Scaffold387 | 19068                   | CC                              | AA                | 1946502571               |
| SNP_P3_117916_19175 | NW_004515873.1 | Scaffold387 | 19175                   | AA                              | GG                | 1946502572               |

| SNPs IDs            | Chromosome IDs | Chromosomes | Physical positions (bp) | CDC Frontier (Reference genome) | (Pusa 256 & HPNB) | NCBI SNPdb Accession IDs |
|---------------------|----------------|-------------|-------------------------|---------------------------------|-------------------|--------------------------|
| SNP_P3_117917_19178 | NW_004515873.1 | Scaffold387 | 19178                   | AA                              | CC                | 1946502573               |
| SNP_P3_117918_19247 | NW_004515873.1 | Scaffold387 | 19247                   | TT                              | AA                | 1946502575               |
| SNP_P3_117920_19284 | NW_004515873.1 | Scaffold387 | 19284                   | GG                              | TT                | 1946502576               |
| SNP_P3_117921_19395 | NW_004515873.1 | Scaffold387 | 19395                   | CC                              | TT                | 1946502578               |
| SNP_P3_117922_19467 | NW_004515873.1 | Scaffold387 | 19467                   | TT                              | GG                | 1946502579               |
| SNP_P3_117923_19545 | NW_004515873.1 | Scaffold387 | 19545                   | CC                              | AA                | 1946502581               |
| SNP_P3_117924_19574 | NW_004515873.1 | Scaffold387 | 19574                   | GG                              | AA                | 1946502582               |
| SNP_P3_117925_20565 | NW_004515873.1 | Scaffold387 | 20565                   | CC                              | TT                | 1946502584               |
| SNP_P3_117926_20794 | NW_004515873.1 | Scaffold387 | 20794                   | TT                              | CC                | 1946502585               |
| SNP_P3_117928_20802 | NW_004515873.1 | Scaffold387 | 20802                   | TT                              | GG                | 1946502587               |
| SNP_P3_117929_22841 | NW_004515873.1 | Scaffold387 | 22841                   | GG                              | AA                | 1946502588               |
| SNP_P3_117930_22845 | NW_004515873.1 | Scaffold387 | 22845                   | CC                              | AA                | 1946502590               |
| SNP_P3_117931_22907 | NW_004515873.1 | Scaffold387 | 22907                   | GG                              | TT                | 1946502591               |
| SNP_P3_117932_22932 | NW_004515873.1 | Scaffold387 | 22932                   | AA                              | CC                | 1946502592               |
| SNP_P3_117934_23003 | NW_004515873.1 | Scaffold387 | 23003                   | TT                              | GG                | 1946502594               |
| SNP_P3_117935_23028 | NW_004515873.1 | Scaffold387 | 23028                   | GG                              | AA                | 1946502595               |
| SNP_P3_117936_23087 | NW_004515873.1 | Scaffold387 | 23087                   | GG                              | AA                | 1946502597               |
| SNP_P3_117940_23519 | NW_004515873.1 | Scaffold387 | 23519                   | AA                              | CC                | 1946502599               |
| SNP_P3_117941_23531 | NW_004515873.1 | Scaffold387 | 23531                   | TT                              | AA                | 1946502601               |
| SNP_P3_117942_23538 | NW_004515873.1 | Scaffold387 | 23538                   | GG                              | AA                | 1946502602               |
| SNP_P3_117944_23684 | NW_004515873.1 | Scaffold387 | 23684                   | AA                              | TT                | 1946502604               |
| SNP_P3_117945_23691 | NW_004515873.1 | Scaffold387 | 23691                   | GG                              | AA                | 1946502605               |
| SNP_P3_117946_23705 | NW_004515873.1 | Scaffold387 | 23705                   | TT                              | CC                | 1946502607               |
| SNP_P3_117947_23792 | NW_004515873.1 | Scaffold387 | 23792                   | GG                              | AA                | 1946502608               |
| SNP_P3_117948_23799 | NW_004515873.1 | Scaffold387 | 23799                   | CC                              | TT                | 1946502609               |
| SNP_P3_117949_23828 | NW_004515873.1 | Scaffold387 | 23828                   | CC                              | AA                | 1946502611               |
| SNP_P3_117950_23859 | NW_004515873.1 | Scaffold387 | 23859                   | CC                              | TT                | 1946502612               |
| SNP_P3_117951_23928 | NW_004515873.1 | Scaffold387 | 23928                   | AA                              | GG                | 1946502614               |
| SNP_P3_117952_23985 | NW_004515873.1 | Scaffold387 | 23985                   | GG                              | TT                | 1946502615               |
| SNP_P3_117954_24028 | NW_004515873.1 | Scaffold387 | 24028                   | AA                              | TT                | 1946502617               |
| SNP_P3_117955_24060 | NW_004515873.1 | Scaffold387 | 24060                   | CC                              | GG                | 1946502618               |
| SNP_P3_117956_24143 | NW_004515873.1 | Scaffold387 | 24143                   | AA                              | GG                | 1946502620               |
| SNP_P3_117957_24314 | NW_004515873.1 | Scaffold387 | 24314                   | CC                              | TT                | 1946502621               |
| SNP_P3_117958_24824 | NW_004515873.1 | Scaffold387 | 24824                   | TT                              | CC                | 1946502623               |
| SNP_P3_117959_24856 | NW_004515873.1 | Scaffold387 | 24856                   | GG                              | TT                | 1946502624               |
| SNP_P3_117960_24954 | NW_004515873.1 | Scaffold387 | 24954                   | GG                              | AA                | 1946502625               |
| SNP_P3_117961_24960 | NW_004515873.1 | Scaffold387 | 24960                   | TT                              | CC                | 1946502627               |
| SNP_P3_117962_24989 | NW_004515873.1 | Scaffold387 | 24989                   | TT                              | AA                | 1946502628               |
| SNP_P3_117963_25158 | NW_004515873.1 | Scaffold387 | 25158                   | TT                              | GG                | 1946502630               |
| SNP_P3_117964_25230 | NW_004515873.1 | Scaffold387 | 25230                   | TT                              | CC                | 1946502631               |
| SNP_P3_117965_25239 | NW_004515873.1 | Scaffold387 | 25239                   | CC                              | GG                | 1946502633               |
| SNP_P3_117966_25242 | NW_004515873.1 | Scaffold387 | 25242                   | TT                              | AA                | 1946502634               |



| SNPs IDs             | Chromosome IDs | Chromosomes | Physical positions (bp) | CDC Frontier (Reference genome) | (Pusa 256 & HPNB) | NCBI SNPdb Accession IDs |
|----------------------|----------------|-------------|-------------------------|---------------------------------|-------------------|--------------------------|
| SNP_P3_117967_27584  | NW_004515873.1 | Scaffold387 | 27584                   | GG                              | CC                | 1946502636               |
| SNP_P3_117968_31178  | NW_004515873.1 | Scaffold387 | 31178                   | TT                              | CC                | 1946502637               |
| SNP_P3_117969_31207  | NW_004515873.1 | Scaffold387 | 31207                   | AA                              | GG                | 1946502638               |
| SNP_P3_117970_31213  | NW_004515873.1 | Scaffold387 | 31213                   | AA                              | GG                | 1946502640               |
| SNP_P3_117971_31219  | NW_004515873.1 | Scaffold387 | 31219                   | TT                              | CC                | 1946502641               |
| SNP_P3_117972_40549  | NW_004515873.1 | Scaffold387 | 40549                   | GG                              | AA                | 1946502643               |
| SNP_P3_117973_40555  | NW_004515873.1 | Scaffold387 | 40555                   | CC                              | TT                | 1946502644               |
| SNP_P3_117974_40583  | NW_004515873.1 | Scaffold387 | 40583                   | AA                              | GG                | 1946502646               |
| SNP_P3_117975_40609  | NW_004515873.1 | Scaffold387 | 40609                   | GG                              | AA                | 1946502648               |
| SNP_P3_117976_40624  | NW_004515873.1 | Scaffold387 | 40624                   | AA                              | GG                | 1946502649               |
| SNP_P3_117977_40940  | NW_004515873.1 | Scaffold387 | 40940                   | AA                              | GG                | 1946502650               |
| SNP_P3_117978_41014  | NW_004515873.1 | Scaffold387 | 41014                   | TT                              | CC                | 1946502652               |
| SNP_P3_117979_47862  | NW_004515873.1 | Scaffold387 | 47862                   | TT                              | CC                | 1946502653               |
| SNP_P3_117980_69336  | NW_004515873.1 | Scaffold387 | 69336                   | TT                              | CC                | 1946502655               |
| SNP_P3_117981_97113  | NW_004515873.1 | Scaffold387 | 97113                   | CC                              | TT                | 1946502656               |
| SNP_P3_117982_97133  | NW_004515873.1 | Scaffold387 | 97133                   | CC                              | AA                | 1946502658               |
| SNP_P3_117983_97506  | NW_004515873.1 | Scaffold387 | 97506                   | TT                              | CC                | 1946502659               |
| SNP_P3_117984_102199 | NW_004515873.1 | Scaffold387 | 102199                  | GG                              | AA                | 1946502660               |
| SNP_P3_117985_102200 | NW_004515873.1 | Scaffold387 | 102200                  | AA                              | TT                | 1946502662               |
| SNP_P3_117986_111350 | NW_004515873.1 | Scaffold387 | 111350                  | CC                              | GG                | 1946502663               |
| SNP_P3_117987_111566 | NW_004515873.1 | Scaffold387 | 111566                  | GG                              | AA                | 1946502665               |
| SNP_P3_117988_111580 | NW_004515873.1 | Scaffold387 | 111580                  | GG                              | AA                | 1946502666               |
| SNP_P3_117989_111589 | NW_004515873.1 | Scaffold387 | 111589                  | CC                              | AA                | 1946502668               |
| SNP_P3_117990_111661 | NW_004515873.1 | Scaffold387 | 111661                  | AA                              | GG                | 1946502669               |
| SNP_P3_117991_111665 | NW_004515873.1 | Scaffold387 | 111665                  | CC                              | AA                | 1946502670               |
| SNP_P3_117992_111787 | NW_004515873.1 | Scaffold387 | 111787                  | CC                              | AA                | 1946502672               |
| SNP_P3_117993_111806 | NW_004515873.1 | Scaffold387 | 111806                  | TT                              | AA                | 1946502673               |
| SNP_P3_117994_114908 | NW_004515873.1 | Scaffold387 | 114908                  | AA                              | GG                | 1946502675               |
| SNP_P3_117995_119963 | NW_004515873.1 | Scaffold387 | 119963                  | GG                              | CC                | 1946502676               |
| SNP_P3_117996_120480 | NW_004515873.1 | Scaffold387 | 120480                  | TT                              | CC                | 1946502678               |
| SNP_P3_117997_121205 | NW_004515873.1 | Scaffold387 | 121205                  | AA                              | GG                | 1946502679               |
| SNP_P3_117998_121235 | NW_004515873.1 | Scaffold387 | 121235                  | GG                              | AA                | 1946502681               |
| SNP_P3_117999_121257 | NW_004515873.1 | Scaffold387 | 121257                  | TT                              | CC                | 1946502682               |
| SNP_P3_118000_123913 | NW_004515873.1 | Scaffold387 | 123913                  | GG                              | AA                | 1946502684               |
| SNP_P3_118001_124099 | NW_004515873.1 | Scaffold387 | 124099                  | CC                              | GG                | 1946502685               |
| SNP_P3_118002_124108 | NW_004515873.1 | Scaffold387 | 124108                  | TT                              | CC                | 1946502687               |
| SNP_P3_118003_124117 | NW_004515873.1 | Scaffold387 | 124117                  | CC                              | AA                | 1946502688               |
| SNP_P3_118004_124132 | NW_004515873.1 | Scaffold387 | 124132                  | TT                              | GG                | 1946502689               |
| SNP_P3_118005_124150 | NW_004515873.1 | Scaffold387 | 124150                  | GG                              | AA                | 1946502691               |
| SNP_P3_118006_124180 | NW_004515873.1 | Scaffold387 | 124180                  | AA                              | TT                | 1946502692               |
| SNP_P3_118007_124181 | NW_004515873.1 | Scaffold387 | 124181                  | AA                              | GG                | 1946502694               |
| SNP_P3_118008_126620 | NW_004515873.1 | Scaffold387 | 126620                  | AA                              | GG                | 1946502695               |

| SNPs IDs             | Chromosome IDs | Chromosomes | Physical positions (bp) | CDC Frontier (Reference genome) | (Pusa 256 & HPNB) | NCBI SNPdb Accession IDs |
|----------------------|----------------|-------------|-------------------------|---------------------------------|-------------------|--------------------------|
| SNP_P3_118009_126621 | NW_004515873.1 | Scaffold387 | 126621                  | CC                              | TT                | 1946502697               |
| SNP_P3_118010_126672 | NW_004515873.1 | Scaffold387 | 126672                  | AA                              | GG                | 1946502698               |
| SNP_P3_118011_159989 | NW_004515873.1 | Scaffold387 | 159989                  | AA                              | GG                | 1946502699               |
| SNP_P3_118012_160001 | NW_004515873.1 | Scaffold387 | 160001                  | TT                              | CC                | 1946502701               |
| SNP_P3_118013_160046 | NW_004515873.1 | Scaffold387 | 160046                  | AA                              | GG                | 1946502702               |
| SNP_P3_118014_160796 | NW_004515873.1 | Scaffold387 | 160796                  | AA                              | CC                | 1946502704               |
| SNP_P3_118015_160836 | NW_004515873.1 | Scaffold387 | 160836                  | CC                              | TT                | 1946502705               |
| SNP_P3_118016_160844 | NW_004515873.1 | Scaffold387 | 160844                  | TT                              | CC                | 1946502707               |
| SNP_P3_118017_160846 | NW_004515873.1 | Scaffold387 | 160846                  | GG                              | AA                | 1946502708               |
| SNP_P3_118018_160916 | NW_004515873.1 | Scaffold387 | 160916                  | CC                              | GG                | 1946502710               |
| SNP_P3_118019_160947 | NW_004515873.1 | Scaffold387 | 160947                  | CC                              | TT                | 1946502711               |
| SNP_P3_118020_160959 | NW_004515873.1 | Scaffold387 | 160959                  | AA                              | TT                | 1946502713               |
| SNP_P3_118022_161031 | NW_004515873.1 | Scaffold387 | 161031                  | AA                              | GG                | 1946502714               |
| SNP_P3_118023_161103 | NW_004515873.1 | Scaffold387 | 161103                  | AA                              | GG                | 1946502716               |
| SNP_P3_118024_161136 | NW_004515873.1 | Scaffold387 | 161136                  | GG                              | AA                | 1946502717               |
| SNP_P3_118025_161207 | NW_004515873.1 | Scaffold387 | 161207                  | GG                              | AA                | 1946502719               |
| SNP_P3_118026_161211 | NW_004515873.1 | Scaffold387 | 161211                  | AA                              | TT                | 1946502720               |
| SNP_P3_118027_161283 | NW_004515873.1 | Scaffold387 | 161283                  | AA                              | GG                | 1946502722               |
| SNP_P3_118028_161353 | NW_004515873.1 | Scaffold387 | 161353                  | AA                              | CC                | 1946502723               |
| SNP_P3_118030_161446 | NW_004515873.1 | Scaffold387 | 161446                  | TT                              | CC                | 1946502725               |
| SNP_P3_118031_161509 | NW_004515873.1 | Scaffold387 | 161509                  | CC                              | TT                | 1946502726               |
| SNP_P3_118032_161543 | NW_004515873.1 | Scaffold387 | 161543                  | TT                              | CC                | 1946502727               |
| SNP_P3_118033_161560 | NW_004515873.1 | Scaffold387 | 161560                  | TT                              | AA                | 1946502729               |
| SNP_P3_118034_63     | NW_004515874.1 | Scaffold388 | 63                      | TT                              | GG                | 1946502730               |
| SNP_P3_118035_64     | NW_004515874.1 | Scaffold388 | 64                      | TT                              | CC                | 1946502732               |
| SNP_P3_118036_2249   | NW_004515874.1 | Scaffold388 | 2249                    | TT                              | CC                | 1946502733               |
| SNP_P3_118037_7707   | NW_004515874.1 | Scaffold388 | 7707                    | TT                              | GG                | 1946502735               |
| SNP_P3_118039_12259  | NW_004515874.1 | Scaffold388 | 12259                   | CC                              | AA                | 1946502737               |
| SNP_P3_118040_13723  | NW_004515874.1 | Scaffold388 | 13723                   | AA                              | GG                | 1946502738               |
| SNP_P3_118041_23092  | NW_004515874.1 | Scaffold388 | 23092                   | CC                              | AA                | 1946502740               |
| SNP_P3_118042_23523  | NW_004515874.1 | Scaffold388 | 23523                   | AA                              | CC                | 1946502741               |
| SNP_P3_118043_26202  | NW_004515874.1 | Scaffold388 | 26202                   | TT                              | GG                | 1946502743               |
| SNP_P3_118044_26572  | NW_004515874.1 | Scaffold388 | 26572                   | TT                              | AA                | 1946502744               |
| SNP_P3_118045_26580  | NW_004515874.1 | Scaffold388 | 26580                   | TT                              | AA                | 1946502746               |
| SNP_P3_118046_26743  | NW_004515874.1 | Scaffold388 | 26743                   | GG                              | AA                | 1946502747               |
| SNP_P3_118047_26885  | NW_004515874.1 | Scaffold388 | 26885                   | AA                              | GG                | 1946502748               |
| SNP_P3_118048_27034  | NW_004515874.1 | Scaffold388 | 27034                   | GG                              | AA                | 1946502750               |
| SNP_P3_118049_30224  | NW_004515874.1 | Scaffold388 | 30224                   | CC                              | TT                | 1946502751               |
| SNP_P3_118050_30375  | NW_004515874.1 | Scaffold388 | 30375                   | CC                              | TT                | 1946502753               |
| SNP_P3_118051_30377  | NW_004515874.1 | Scaffold388 | 30377                   | GG                              | AA                | 1946502754               |
| SNP_P3_118052_30398  | NW_004515874.1 | Scaffold388 | 30398                   | CC                              | TT                | 1946502756               |
| SNP_P3_118053_30436  | NW_004515874.1 | Scaffold388 | 30436                   | AA                              | GG                | 1946502757               |

| SNPs IDs            | Chromosome IDs | Chromosomes | Physical positions (bp) | CDC Frontier (Reference genome) | (Pusa 256 & HPNB) | NCBI SNPdb Accession IDs |
|---------------------|----------------|-------------|-------------------------|---------------------------------|-------------------|--------------------------|
| SNP_P3_118054_30653 | NW_004515874.1 | Scaffold388 | 30653                   | AA                              | GG                | 1946502759               |
| SNP_P3_118055_31819 | NW_004515874.1 | Scaffold388 | 31819                   | GG                              | TT                | 1946502760               |
| SNP_P3_118056_31843 | NW_004515874.1 | Scaffold388 | 31843                   | GG                              | AA                | 1946502762               |
| SNP_P3_118057_31879 | NW_004515874.1 | Scaffold388 | 31879                   | CC                              | TT                | 1946502763               |
| SNP_P3_118058_31944 | NW_004515874.1 | Scaffold388 | 31944                   | CC                              | TT                | 1946502765               |
| SNP_P3_118059_32540 | NW_004515874.1 | Scaffold388 | 32540                   | GG                              | AA                | 1946502766               |
| SNP_P3_118060_32743 | NW_004515874.1 | Scaffold388 | 32743                   | CC                              | TT                | 1946502768               |
| SNP_P3_118061_34011 | NW_004515874.1 | Scaffold388 | 34011                   | AA                              | GG                | 1946502769               |
| SNP_P3_118062_34647 | NW_004515874.1 | Scaffold388 | 34647                   | TT                              | CC                | 1946502770               |
| SNP_P3_118063_35255 | NW_004515874.1 | Scaffold388 | 35255                   | AA                              | TT                | 1946502772               |
| SNP_P3_118064_35278 | NW_004515874.1 | Scaffold388 | 35278                   | GG                              | AA                | 1946502773               |
| SNP_P3_118065_35375 | NW_004515874.1 | Scaffold388 | 35375                   | GG                              | AA                | 1946502775               |
| SNP_P3_118066_37089 | NW_004515874.1 | Scaffold388 | 37089                   | CC                              | AA                | 1946502776               |
| SNP_P3_118067_37117 | NW_004515874.1 | Scaffold388 | 37117                   | CC                              | TT                | 1946502778               |
| SNP_P3_118068_39163 | NW_004515874.1 | Scaffold388 | 39163                   | CC                              | TT                | 1946502779               |
| SNP_P3_118069_42728 | NW_004515874.1 | Scaffold388 | 42728                   | TT                              | AA                | 1946502781               |
| SNP_P3_118070_45612 | NW_004515874.1 | Scaffold388 | 45612                   | GG                              | TT                | 1946502782               |
| SNP_P3_118071_45615 | NW_004515874.1 | Scaffold388 | 45615                   | CC                              | TT                | 1946502783               |
| SNP_P3_118072_46753 | NW_004515874.1 | Scaffold388 | 46753                   | GG                              | TT                | 1946502785               |
| SNP_P3_118073_47016 | NW_004515874.1 | Scaffold388 | 47016                   | TT                              | CC                | 1946502786               |
| SNP_P3_118074_47130 | NW_004515874.1 | Scaffold388 | 47130                   | AA                              | TT                | 1946502788               |
| SNP_P3_118075_47328 | NW_004515874.1 | Scaffold388 | 47328                   | GG                              | AA                | 1946502789               |
| SNP_P3_118076_47427 | NW_004515874.1 | Scaffold388 | 47427                   | CC                              | GG                | 1946502791               |
| SNP_P3_118077_47874 | NW_004515874.1 | Scaffold388 | 47874                   | AA                              | CC                | 1946502792               |
| SNP_P3_118078_49911 | NW_004515874.1 | Scaffold388 | 49911                   | AA                              | TT                | 1946502794               |
| SNP_P3_118079_49912 | NW_004515874.1 | Scaffold388 | 49912                   | AA                              | TT                | 1946502795               |
| SNP_P3_118080_49927 | NW_004515874.1 | Scaffold388 | 49927                   | GG                              | AA                | 1946502797               |
| SNP_P3_118081_49935 | NW_004515874.1 | Scaffold388 | 49935                   | CC                              | AA                | 1946502798               |
| SNP_P3_118082_49936 | NW_004515874.1 | Scaffold388 | 49936                   | CC                              | AA                | 1946502800               |
| SNP_P3_118083_50595 | NW_004515874.1 | Scaffold388 | 50595                   | AA                              | TT                | 1946502802               |
| SNP_P3_118084_50977 | NW_004515874.1 | Scaffold388 | 50977                   | CC                              | GG                | 1946502803               |
| SNP_P3_118085_50990 | NW_004515874.1 | Scaffold388 | 50990                   | TT                              | CC                | 1946502805               |
| SNP_P3_118086_51003 | NW_004515874.1 | Scaffold388 | 51003                   | CC                              | TT                | 1946502806               |
| SNP_P3_118087_51304 | NW_004515874.1 | Scaffold388 | 51304                   | TT                              | GG                | 1946502808               |
| SNP_P3_118088_51324 | NW_004515874.1 | Scaffold388 | 51324                   | TT                              | GG                | 1946502809               |
| SNP_P3_118089_10898 | NW_004515875.1 | Scaffold389 | 10898                   | AA                              | GG                | 1946502811               |
| SNP_P3_118090_10928 | NW_004515875.1 | Scaffold389 | 10928                   | AA                              | TT                | 1946502812               |
| SNP_P3_118091_435   | NW_004515878.1 | Scaffold393 | 435                     | CC                              | TT                | 1946502814               |
| SNP_P3_118092_6979  | NW_004515879.1 | Scaffold395 | 6979                    | CC                              | TT                | 1946502815               |
| SNP_P3_118093_7229  | NW_004515879.1 | Scaffold395 | 7229                    | TT                              | CC                | 1946502817               |
| SNP_P3_118094_7554  | NW_004515879.1 | Scaffold395 | 7554                    | TT                              | CC                | 1946502819               |
| SNP_P3_118095_8113  | NW_004515879.1 | Scaffold395 | 8113                    | GG                              | AA                | 1946502820               |

| SNPs IDs             | Chromosome IDs | Chromosomes | Physical positions (bp) | CDC Frontier (Reference genome) | (Pusa 256 & HPNB) | NCBI SNPdb Accession IDs |
|----------------------|----------------|-------------|-------------------------|---------------------------------|-------------------|--------------------------|
| SNP_P3_118096_8126   | NW_004515879.1 | Scaffold395 | 8126                    | TT                              | CC                | 1946502822               |
| SNP_P3_118097_8129   | NW_004515879.1 | Scaffold395 | 8129                    | AA                              | TT                | 1946502823               |
| SNP_P3_118098_8137   | NW_004515879.1 | Scaffold395 | 8137                    | GG                              | AA                | 1946502825               |
| SNP_P3_118099_8149   | NW_004515879.1 | Scaffold395 | 8149                    | AA                              | GG                | 1946502826               |
| SNP_P3_118100_8170   | NW_004515879.1 | Scaffold395 | 8170                    | GG                              | AA                | 1946502828               |
| SNP_P3_118101_8171   | NW_004515879.1 | Scaffold395 | 8171                    | GG                              | CC                | 1946502829               |
| SNP_P3_118102_8197   | NW_004515879.1 | Scaffold395 | 8197                    | TT                              | AA                | 1946502831               |
| SNP_P3_118104_21705  | NW_004515879.1 | Scaffold395 | 21705                   | CC                              | TT                | 1946502832               |
| SNP_P3_118105_24226  | NW_004515879.1 | Scaffold395 | 24226                   | TT                              | CC                | 1946502834               |
| SNP_P3_118106_31113  | NW_004515879.1 | Scaffold395 | 31113                   | AA                              | GG                | 1946502835               |
| SNP_P3_118107_31156  | NW_004515879.1 | Scaffold395 | 31156                   | TT                              | AA                | 1946502837               |
| SNP_P3_118108_31234  | NW_004515879.1 | Scaffold395 | 31234                   | GG                              | CC                | 1946502839               |
| SNP_P3_118109_31239  | NW_004515879.1 | Scaffold395 | 31239                   | AA                              | GG                | 1946502840               |
| SNP_P3_118110_31601  | NW_004515879.1 | Scaffold395 | 31601                   | TT                              | GG                | 1946502842               |
| SNP_P3_118111_31603  | NW_004515879.1 | Scaffold395 | 31603                   | GG                              | TT                | 1946502843               |
| SNP_P3_118112_31618  | NW_004515879.1 | Scaffold395 | 31618                   | GG                              | AA                | 1946502845               |
| SNP_P3_118113_31645  | NW_004515879.1 | Scaffold395 | 31645                   | TT                              | AA                | 1946502846               |
| SNP_P3_118114_32289  | NW_004515879.1 | Scaffold395 | 32289                   | AA                              | GG                | 1946502848               |
| SNP_P3_118115_32332  | NW_004515879.1 | Scaffold395 | 32332                   | TT                              | AA                | 1946502849               |
| SNP_P3_118116_32338  | NW_004515879.1 | Scaffold395 | 32338                   | AA                              | CC                | 1946502851               |
| SNP_P3_118118_86438  | NW_004515879.1 | Scaffold395 | 86438                   | TT                              | AA                | 1946502852               |
| SNP_P3_118119_87431  | NW_004515879.1 | Scaffold395 | 87431                   | AA                              | GG                | 1946502854               |
| SNP_P3_118120_87436  | NW_004515879.1 | Scaffold395 | 87436                   | AA                              | GG                | 1946502855               |
| SNP_P3_118121_87496  | NW_004515879.1 | Scaffold395 | 87496                   | GG                              | AA                | 1946502857               |
| SNP_P3_118122_87519  | NW_004515879.1 | Scaffold395 | 87519                   | TT                              | GG                | 1946502858               |
| SNP_P3_118123_89070  | NW_004515879.1 | Scaffold395 | 89070                   | CC                              | AA                | 1946502860               |
| SNP_P3_118124_89072  | NW_004515879.1 | Scaffold395 | 89072                   | GG                              | TT                | 1946502861               |
| SNP_P3_118125_89085  | NW_004515879.1 | Scaffold395 | 89085                   | AA                              | GG                | 1946502863               |
| SNP_P3_118126_94684  | NW_004515879.1 | Scaffold395 | 94684                   | CC                              | TT                | 1946502864               |
| SNP_P3_118128_112662 | NW_004515879.1 | Scaffold395 | 112662                  | TT                              | CC                | 1946502866               |
| SNP_P3_118129_116273 | NW_004515879.1 | Scaffold395 | 116273                  | TT                              | CC                | 1946502867               |
| SNP_P3_118130_125606 | NW_004515879.1 | Scaffold395 | 125606                  | CC                              | TT                | 1946502869               |
| SNP_P3_118131_125672 | NW_004515879.1 | Scaffold395 | 125672                  | TT                              | AA                | 1946502870               |
| SNP_P3_118132_125685 | NW_004515879.1 | Scaffold395 | 125685                  | CC                              | AA                | 1946502872               |
| SNP_P3_118133_125702 | NW_004515879.1 | Scaffold395 | 125702                  | TT                              | CC                | 1946502873               |
| SNP_P3_118134_125705 | NW_004515879.1 | Scaffold395 | 125705                  | AA                              | GG                | 1946502875               |
| SNP_P3_118135_125708 | NW_004515879.1 | Scaffold395 | 125708                  | AA                              | GG                | 1946502876               |
| SNP_P3_118136_125765 | NW_004515879.1 | Scaffold395 | 125765                  | TT                              | CC                | 1946502878               |
| SNP_P3_118137_125795 | NW_004515879.1 | Scaffold395 | 125795                  | AA                              | GG                | 1946502879               |
| SNP_P3_118138_125968 | NW_004515879.1 | Scaffold395 | 125968                  | TT                              | CC                | 1946502881               |
| SNP_P3_118139_125970 | NW_004515879.1 | Scaffold395 | 125970                  | TT                              | CC                | 1946502883               |
| SNP_P3_118140_125975 | NW_004515879.1 | Scaffold395 | 125975                  | TT                              | CC                | 1946502884               |

| SNPs IDs             | Chromosome IDs | Chromosomes | Physical positions (bp) | CDC Frontier (Reference genome) | (Pusa 256 & HPNB) | NCBI SNPdb Accession IDs |
|----------------------|----------------|-------------|-------------------------|---------------------------------|-------------------|--------------------------|
| SNP_P3_118141_125997 | NW_004515879.1 | Scaffold395 | 125997                  | GG                              | TT                | 1946502886               |
| SNP_P3_118142_126000 | NW_004515879.1 | Scaffold395 | 126000                  | TT                              | CC                | 1946502887               |
| SNP_P3_118143_126030 | NW_004515879.1 | Scaffold395 | 126030                  | CC                              | TT                | 1946502889               |
| SNP_P3_118144_126081 | NW_004515879.1 | Scaffold395 | 126081                  | CC                              | TT                | 1946502890               |
| SNP_P3_118145_126093 | NW_004515879.1 | Scaffold395 | 126093                  | CC                              | TT                | 1946502892               |
| SNP_P3_118146_126657 | NW_004515879.1 | Scaffold395 | 126657                  | TT                              | CC                | 1946502893               |
| SNP_P3_118147_126771 | NW_004515879.1 | Scaffold395 | 126771                  | AA                              | GG                | 1946502895               |
| SNP_P3_118148_126783 | NW_004515879.1 | Scaffold395 | 126783                  | AA                              | GG                | 1946502896               |
| SNP_P3_118149_126831 | NW_004515879.1 | Scaffold395 | 126831                  | CC                              | TT                | 1946502898               |
| SNP_P3_118150_126842 | NW_004515879.1 | Scaffold395 | 126842                  | GG                              | AA                | 1946502899               |
| SNP_P3_118151_126859 | NW_004515879.1 | Scaffold395 | 126859                  | TT                              | CC                | 1946502901               |
| SNP_P3_118152_126994 | NW_004515879.1 | Scaffold395 | 126994                  | CC                              | TT                | 1946502902               |
| SNP_P3_118153_127007 | NW_004515879.1 | Scaffold395 | 127007                  | CC                              | TT                | 1946502904               |
| SNP_P3_118154_127042 | NW_004515879.1 | Scaffold395 | 127042                  | AA                              | GG                | 1946502905               |
| SNP_P3_118155_127053 | NW_004515879.1 | Scaffold395 | 127053                  | TT                              | CC                | 1946502906               |
| SNP_P3_118156_127066 | NW_004515879.1 | Scaffold395 | 127066                  | GG                              | TT                | 1946502908               |
| SNP_P3_118157_127072 | NW_004515879.1 | Scaffold395 | 127072                  | TT                              | CC                | 1946502909               |
| SNP_P3_118158_127078 | NW_004515879.1 | Scaffold395 | 127078                  | CC                              | TT                | 1946502911               |
| SNP_P3_118159_127189 | NW_004515879.1 | Scaffold395 | 127189                  | AA                              | TT                | 1946502912               |
| SNP_P3_118160_127216 | NW_004515879.1 | Scaffold395 | 127216                  | AA                              | GG                | 1946502914               |
| SNP_P3_118161_127231 | NW_004515879.1 | Scaffold395 | 127231                  | TT                              | CC                | 1946502915               |
| SNP_P3_118162_127238 | NW_004515879.1 | Scaffold395 | 127238                  | CC                              | TT                | 1946502917               |
| SNP_P3_118163_131099 | NW_004515879.1 | Scaffold395 | 131099                  | CC                              | TT                | 1946502918               |
| SNP_P3_118164_131119 | NW_004515879.1 | Scaffold395 | 131119                  | GG                              | TT                | 1946502920               |
| SNP_P3_118165_224692 | NW_004515879.1 | Scaffold395 | 224692                  | CC                              | AA                | 1946502921               |
| SNP_P3_118168_271064 | NW_004515879.1 | Scaffold395 | 271064                  | AA                              | TT                | 1946502923               |
| SNP_P3_118169_289503 | NW_004515879.1 | Scaffold395 | 289503                  | TT                              | CC                | 1946502924               |
| SNP_P3_118170_327321 | NW_004515879.1 | Scaffold395 | 327321                  | TT                              | GG                | 1946502926               |
| SNP_P3_118171_327340 | NW_004515879.1 | Scaffold395 | 327340                  | AA                              | GG                | 1946502927               |
| SNP_P3_118172_327375 | NW_004515879.1 | Scaffold395 | 327375                  | CC                              | TT                | 1946502929               |
| SNP_P3_118173_327407 | NW_004515879.1 | Scaffold395 | 327407                  | CC                              | TT                | 1946502930               |
| SNP_P3_118174_327447 | NW_004515879.1 | Scaffold395 | 327447                  | TT                              | CC                | 1946502932               |
| SNP_P3_118175_327549 | NW_004515879.1 | Scaffold395 | 327549                  | AA                              | GG                | 1946502933               |
| SNP_P3_118176_328024 | NW_004515879.1 | Scaffold395 | 328024                  | AA                              | GG                | 1946502935               |
| SNP_P3_118177_328144 | NW_004515879.1 | Scaffold395 | 328144                  | CC                              | TT                | 1946502936               |
| SNP_P3_118178_328156 | NW_004515879.1 | Scaffold395 | 328156                  | TT                              | CC                | 1946502938               |
| SNP_P3_118179_328190 | NW_004515879.1 | Scaffold395 | 328190                  | TT                              | CC                | 1946502939               |
| SNP_P3_118180_328411 | NW_004515879.1 | Scaffold395 | 328411                  | AA                              | GG                | 1946502941               |
| SNP_P3_118181_328534 | NW_004515879.1 | Scaffold395 | 328534                  | AA                              | GG                | 1946502942               |
| SNP_P3_118182_328593 | NW_004515879.1 | Scaffold395 | 328593                  | CC                              | TT                | 1946502944               |
| SNP_P3_118183_331323 | NW_004515879.1 | Scaffold395 | 331323                  | GG                              | AA                | 1946502945               |
| SNP_P3_118184_331333 | NW_004515879.1 | Scaffold395 | 331333                  | TT                              | CC                | 1946502947               |

| SNPs IDs             | Chromosome IDs | Chromosomes | Physical positions (bp) | CDC Frontier (Reference genome) | (Pusa 256 & HPNB) | NCBI SNPdb Accession IDs |
|----------------------|----------------|-------------|-------------------------|---------------------------------|-------------------|--------------------------|
| SNP_P3_118185_331336 | NW_004515879.1 | Scaffold395 | 331336                  | AA                              | CC                | 1946502948               |
| SNP_P3_118186_331340 | NW_004515879.1 | Scaffold395 | 331340                  | GG                              | TT                | 1946502950               |
| SNP_P3_118187_331344 | NW_004515879.1 | Scaffold395 | 331344                  | TT                              | AA                | 1946502951               |
| SNP_P3_118188_331762 | NW_004515879.1 | Scaffold395 | 331762                  | AA                              | GG                | 1946502953               |
| SNP_P3_118189_331786 | NW_004515879.1 | Scaffold395 | 331786                  | AA                              | CC                | 1946502954               |
| SNP_P3_118191_136    | NW_004515880.1 | Scaffold396 | 136                     | CC                              | TT                | 1946502956               |
| SNP_P3_118192_461    | NW_004515880.1 | Scaffold396 | 461                     | CC                              | GG                | 1946502957               |
| SNP_P3_118193_2788   | NW_004515880.1 | Scaffold396 | 2788                    | GG                              | TT                | 1946502959               |
| SNP_P3_118194_3534   | NW_004515880.1 | Scaffold396 | 3534                    | AA                              | GG                | 1946502960               |
| SNP_P3_118195_6186   | NW_004515880.1 | Scaffold396 | 6186                    | GG                              | AA                | 1946502962               |
| SNP_P3_118196_6213   | NW_004515880.1 | Scaffold396 | 6213                    | CC                              | TT                | 1946502963               |
| SNP_P3_118197_6234   | NW_004515880.1 | Scaffold396 | 6234                    | AA                              | GG                | 1946502965               |
| SNP_P3_118198_8475   | NW_004515880.1 | Scaffold396 | 8475                    | CC                              | AA                | 1946502966               |
| SNP_P3_118199_31332  | NW_004515880.1 | Scaffold396 | 31332                   | GG                              | AA                | 1946502968               |
| SNP_P3_118200_42375  | NW_004515880.1 | Scaffold396 | 42375                   | GG                              | AA                | 1946502969               |
| SNP_P3_118201_47833  | NW_004515880.1 | Scaffold396 | 47833                   | GG                              | TT                | 1946502971               |
| SNP_P3_118202_47842  | NW_004515880.1 | Scaffold396 | 47842                   | GG                              | CC                | 1946502972               |
| SNP_P3_118203_50412  | NW_004515880.1 | Scaffold396 | 50412                   | AA                              | GG                | 1946502974               |
| SNP_P3_118204_75468  | NW_004515880.1 | Scaffold396 | 75468                   | GG                              | AA                | 1946502975               |
| SNP_P3_118205_112362 | NW_004515880.1 | Scaffold396 | 112362                  | GG                              | TT                | 1946502977               |
| SNP_P3_118208_158121 | NW_004515880.1 | Scaffold396 | 158121                  | AA                              | TT                | 1946502978               |
| SNP_P3_118209_158189 | NW_004515880.1 | Scaffold396 | 158189                  | GG                              | AA                | 1946502980               |
| SNP_P3_118210_158465 | NW_004515880.1 | Scaffold396 | 158465                  | TT                              | CC                | 1946502981               |
| SNP_P3_118212_173804 | NW_004515880.1 | Scaffold396 | 173804                  | GG                              | AA                | 1946502983               |
| SNP_P3_118213_173923 | NW_004515880.1 | Scaffold396 | 173923                  | CC                              | TT                | 1946502984               |
| SNP_P3_118214_175451 | NW_004515880.1 | Scaffold396 | 175451                  | GG                              | TT                | 1946502986               |
| SNP_P3_118215_180707 | NW_004515880.1 | Scaffold396 | 180707                  | CC                              | TT                | 1946502987               |
| SNP_P3_118216_205849 | NW_004515880.1 | Scaffold396 | 205849                  | AA                              | GG                | 1946502989               |
| SNP_P3_118217_243568 | NW_004515880.1 | Scaffold396 | 243568                  | TT                              | AA                | 1946502990               |
| SNP_P3_118218_273244 | NW_004515880.1 | Scaffold396 | 273244                  | CC                              | TT                | 1946502992               |
| SNP_P3_118219_273292 | NW_004515880.1 | Scaffold396 | 273292                  | AA                              | GG                | 1946502993               |
| SNP_P3_118220_275466 | NW_004515880.1 | Scaffold396 | 275466                  | TT                              | AA                | 1946502995               |
| SNP_P3_118221_275545 | NW_004515880.1 | Scaffold396 | 275545                  | AA                              | CC                | 1946502996               |
| SNP_P3_118222_275797 | NW_004515880.1 | Scaffold396 | 275797                  | AA                              | GG                | 1946502997               |
| SNP_P3_118223_275825 | NW_004515880.1 | Scaffold396 | 275825                  | TT                              | GG                | 1946502999               |
| SNP_P3_118225_324095 | NW_004515880.1 | Scaffold396 | 324095                  | TT                              | CC                | 1946503000               |
| SNP_P3_118226_324300 | NW_004515880.1 | Scaffold396 | 324300                  | AA                              | GG                | 1946503002               |
| SNP_P3_118227_324433 | NW_004515880.1 | Scaffold396 | 324433                  | CC                              | AA                | 1946503003               |
| SNP_P3_118228_330776 | NW_004515880.1 | Scaffold396 | 330776                  | CC                              | TT                | 1946503005               |
| SNP_P3_118229_341313 | NW_004515880.1 | Scaffold396 | 341313                  | CC                              | AA                | 1946503006               |
| SNP_P3_118231_374205 | NW_004515880.1 | Scaffold396 | 374205                  | GG                              | AA                | 1946503008               |
| SNP_P3_118232_376944 | NW_004515880.1 | Scaffold396 | 376944                  | GG                              | CC                | 1946503009               |

| SNPs IDs             | Chromosome IDs | Chromosomes | Physical positions (bp) | CDC Frontier (Reference genome) | (Pusa 256 & HPNB) | NCBI SNPdb Accession IDs |
|----------------------|----------------|-------------|-------------------------|---------------------------------|-------------------|--------------------------|
| SNP_P3_118233_377297 | NW_004515880.1 | Scaffold396 | 377297                  | TT                              | CC                | 1946503011               |
| SNP_P3_118234_380821 | NW_004515880.1 | Scaffold396 | 380821                  | CC                              | AA                | 1946503012               |
| SNP_P3_118235_388640 | NW_004515880.1 | Scaffold396 | 388640                  | CC                              | TT                | 1946503014               |
| SNP_P3_118236_409107 | NW_004515880.1 | Scaffold396 | 409107                  | TT                              | CC                | 1946503015               |
| SNP_P3_118237_409472 | NW_004515880.1 | Scaffold396 | 409472                  | CC                              | AA                | 1946503016               |
| SNP_P3_118238_409719 | NW_004515880.1 | Scaffold396 | 409719                  | CC                              | GG                | 1946503018               |
| SNP_P3_118239_422656 | NW_004515880.1 | Scaffold396 | 422656                  | AA                              | GG                | 1946503019               |
| SNP_P3_118240_425040 | NW_004515880.1 | Scaffold396 | 425040                  | TT                              | CC                | 1946503021               |
| SNP_P3_118241_425471 | NW_004515880.1 | Scaffold396 | 425471                  | TT                              | CC                | 1946503022               |
| SNP_P3_118242_458527 | NW_004515880.1 | Scaffold396 | 458527                  | CC                              | TT                | 1946503024               |
| SNP_P3_118243_467510 | NW_004515880.1 | Scaffold396 | 467510                  | AA                              | GG                | 1946503025               |
| SNP_P3_118244_467514 | NW_004515880.1 | Scaffold396 | 467514                  | GG                              | TT                | 1946503027               |
| SNP_P3_118245_467626 | NW_004515880.1 | Scaffold396 | 467626                  | TT                              | AA                | 1946503028               |
| SNP_P3_118246_473328 | NW_004515880.1 | Scaffold396 | 473328                  | AA                              | GG                | 1946503030               |
| SNP_P3_118247_477504 | NW_004515880.1 | Scaffold396 | 477504                  | TT                              | CC                | 1946503031               |
| SNP_P3_118248_477564 | NW_004515880.1 | Scaffold396 | 477564                  | GG                              | CC                | 1946503033               |
| SNP_P3_118249_477746 | NW_004515880.1 | Scaffold396 | 477746                  | TT                              | AA                | 1946503034               |
| SNP_P3_118250_477781 | NW_004515880.1 | Scaffold396 | 477781                  | AA                              | TT                | 1946503036               |
| SNP_P3_118251_477801 | NW_004515880.1 | Scaffold396 | 477801                  | TT                              | CC                | 1946503037               |
| SNP_P3_118252_501335 | NW_004515880.1 | Scaffold396 | 501335                  | AA                              | GG                | 1946503039               |
| SNP_P3_118253_503033 | NW_004515880.1 | Scaffold396 | 503033                  | GG                              | CC                | 1946503040               |
| SNP_P3_118254_517701 | NW_004515880.1 | Scaffold396 | 517701                  | TT                              | AA                | 1946503042               |
| SNP_P3_118255_517702 | NW_004515880.1 | Scaffold396 | 517702                  | GG                              | TT                | 1946503043               |
| SNP_P3_118256_520008 | NW_004515880.1 | Scaffold396 | 520008                  | CC                              | TT                | 1946503045               |
| SNP_P3_118257_520378 | NW_004515880.1 | Scaffold396 | 520378                  | TT                              | CC                | 1946503046               |
| SNP_P3_118258_520413 | NW_004515880.1 | Scaffold396 | 520413                  | TT                              | GG                | 1946503047               |
| SNP_P3_118259_520785 | NW_004515880.1 | Scaffold396 | 520785                  | CC                              | AA                | 1946503049               |
| SNP_P3_118260_522948 | NW_004515880.1 | Scaffold396 | 522948                  | CC                              | TT                | 1946503050               |
| SNP_P3_118261_525239 | NW_004515880.1 | Scaffold396 | 525239                  | TT                              | CC                | 1946503052               |
| SNP_P3_118262_525244 | NW_004515880.1 | Scaffold396 | 525244                  | CC                              | TT                | 1946503053               |
| SNP_P3_118263_525265 | NW_004515880.1 | Scaffold396 | 525265                  | GG                              | TT                | 1946503055               |
| SNP_P3_118264_525270 | NW_004515880.1 | Scaffold396 | 525270                  | CC                              | TT                | 1946503056               |
| SNP_P3_118265_525312 | NW_004515880.1 | Scaffold396 | 525312                  | TT                              | CC                | 1946503058               |
| SNP_P3_118266_525327 | NW_004515880.1 | Scaffold396 | 525327                  | AA                              | GG                | 1946503059               |
| SNP_P3_118267_525550 | NW_004515880.1 | Scaffold396 | 525550                  | AA                              | GG                | 1946503061               |
| SNP_P3_118268_525563 | NW_004515880.1 | Scaffold396 | 525563                  | TT                              | CC                | 1946503062               |
| SNP_P3_118269_525599 | NW_004515880.1 | Scaffold396 | 525599                  | CC                              | AA                | 1946503064               |
| SNP_P3_118270_525607 | NW_004515880.1 | Scaffold396 | 525607                  | GG                              | AA                | 1946503065               |
| SNP_P3_118271_525641 | NW_004515880.1 | Scaffold396 | 525641                  | AA                              | GG                | 1946503067               |
| SNP_P3_118272_525662 | NW_004515880.1 | Scaffold396 | 525662                  | CC                              | TT                | 1946503068               |
| SNP_P3_118274_529162 | NW_004515880.1 | Scaffold396 | 529162                  | TT                              | GG                | 1946503070               |
| SNP_P3_118275_529186 | NW_004515880.1 | Scaffold396 | 529186                  | CC                              | GG                | 1946503071               |

| SNPs IDs             | Chromosome IDs | Chromosomes | Physical positions (bp) | CDC Frontier (Reference genome) | (Pusa 256 & HPNB) | NCBI SNPdb Accession IDs |
|----------------------|----------------|-------------|-------------------------|---------------------------------|-------------------|--------------------------|
| SNP_P3_118276_529197 | NW_004515880.1 | Scaffold396 | 529197                  | CC                              | TT                | 1946503073               |
| SNP_P3_118277_529318 | NW_004515880.1 | Scaffold396 | 529318                  | GG                              | TT                | 1946503074               |
| SNP_P3_118278_529378 | NW_004515880.1 | Scaffold396 | 529378                  | CC                              | GG                | 1946503075               |
| SNP_P3_118279_529453 | NW_004515880.1 | Scaffold396 | 529453                  | AA                              | CC                | 1946503077               |
| SNP_P3_118280_529454 | NW_004515880.1 | Scaffold396 | 529454                  | TT                              | AA                | 1946503078               |
| SNP_P3_118281_531199 | NW_004515880.1 | Scaffold396 | 531199                  | AA                              | TT                | 1946503080               |
| SNP_P3_118282_556343 | NW_004515880.1 | Scaffold396 | 556343                  | AA                              | TT                | 1946503081               |
| SNP_P3_118283_559391 | NW_004515880.1 | Scaffold396 | 559391                  | CC                              | TT                | 1946503083               |
| SNP_P3_118284_559404 | NW_004515880.1 | Scaffold396 | 559404                  | GG                              | CC                | 1946503084               |
| SNP_P3_118285_559406 | NW_004515880.1 | Scaffold396 | 559406                  | AA                              | GG                | 1946503086               |
| SNP_P3_118286_559441 | NW_004515880.1 | Scaffold396 | 559441                  | AA                              | TT                | 1946503087               |
| SNP_P3_118287_559526 | NW_004515880.1 | Scaffold396 | 559526                  | CC                              | TT                | 1946503089               |
| SNP_P3_118288_567336 | NW_004515880.1 | Scaffold396 | 567336                  | AA                              | TT                | 1946503090               |
| SNP_P3_118289_568643 | NW_004515880.1 | Scaffold396 | 568643                  | AA                              | GG                | 1946503092               |
| SNP_P3_118290_577392 | NW_004515880.1 | Scaffold396 | 577392                  | TT                              | GG                | 1946503093               |
| SNP_P3_118291_577476 | NW_004515880.1 | Scaffold396 | 577476                  | AA                              | GG                | 1946503094               |
| SNP_P3_118292_577481 | NW_004515880.1 | Scaffold396 | 577481                  | AA                              | CC                | 1946503096               |
| SNP_P3_118293_577493 | NW_004515880.1 | Scaffold396 | 577493                  | AA                              | CC                | 1946503097               |
| SNP_P3_118294_577497 | NW_004515880.1 | Scaffold396 | 577497                  | AA                              | TT                | 1946503099               |
| SNP_P3_118295_577498 | NW_004515880.1 | Scaffold396 | 577498                  | AA                              | GG                | 1946503100               |
| SNP_P3_118297_577615 | NW_004515880.1 | Scaffold396 | 577615                  | TT                              | GG                | 1946503102               |
| SNP_P3_118299_577976 | NW_004515880.1 | Scaffold396 | 577976                  | AA                              | CC                | 1946503104               |
| SNP_P3_118300_578123 | NW_004515880.1 | Scaffold396 | 578123                  | TT                              | GG                | 1946503105               |
| SNP_P3_118301_578130 | NW_004515880.1 | Scaffold396 | 578130                  | TT                              | CC                | 1946503107               |
| SNP_P3_118302_578134 | NW_004515880.1 | Scaffold396 | 578134                  | AA                              | TT                | 1946503108               |
| SNP_P3_118303_578144 | NW_004515880.1 | Scaffold396 | 578144                  | GG                              | CC                | 1946503110               |
| SNP_P3_118304_588535 | NW_004515880.1 | Scaffold396 | 588535                  | TT                              | AA                | 1946503111               |
| SNP_P3_118305_592781 | NW_004515880.1 | Scaffold396 | 592781                  | TT                              | AA                | 1946503113               |
| SNP_P3_118306_592805 | NW_004515880.1 | Scaffold396 | 592805                  | AA                              | GG                | 1946503114               |
| SNP_P3_118307_592862 | NW_004515880.1 | Scaffold396 | 592862                  | AA                              | CC                | 1946503116               |
| SNP_P3_118308_592937 | NW_004515880.1 | Scaffold396 | 592937                  | TT                              | CC                | 1946503117               |
| SNP_P3_118309_593087 | NW_004515880.1 | Scaffold396 | 593087                  | TT                              | CC                | 1946503119               |
| SNP_P3_118310_593190 | NW_004515880.1 | Scaffold396 | 593190                  | TT                              | AA                | 1946503120               |
| SNP_P3_118311_593209 | NW_004515880.1 | Scaffold396 | 593209                  | AA                              | CC                | 1946503122               |
| SNP_P3_118312_593216 | NW_004515880.1 | Scaffold396 | 593216                  | TT                              | AA                | 1946503123               |
| SNP_P3_118313_593454 | NW_004515880.1 | Scaffold396 | 593454                  | TT                              | AA                | 1946503125               |
| SNP_P3_118314_8465   | NW_004515881.1 | Scaffold397 | 8465                    | CC                              | TT                | 1946503126               |
| SNP_P3_118315_8695   | NW_004515881.1 | Scaffold397 | 8695                    | CC                              | TT                | 1946503128               |
| SNP_P3_118317_8790   | NW_004515881.1 | Scaffold397 | 8790                    | GG                              | TT                | 1946503129               |
| SNP_P3_118318_10136  | NW_004515881.1 | Scaffold397 | 10136                   | CC                              | TT                | 1946503131               |
| SNP_P3_118319_22789  | NW_004515881.1 | Scaffold397 | 22789                   | GG                              | CC                | 1946503132               |
| SNP_P3_118322_23700  | NW_004515881.1 | Scaffold397 | 23700                   | AA                              | TT                | 1946503134               |



| SNPs IDs             | Chromosome IDs | Chromosomes | Physical positions (bp) | CDC Frontier (Reference genome) | (Pusa 256 & HPNB) | NCBI SNPdb Accession IDs |
|----------------------|----------------|-------------|-------------------------|---------------------------------|-------------------|--------------------------|
| SNP_P3_118323_44176  | NW_004515881.1 | Scaffold397 | 44176                   | CC                              | TT                | 1946503135               |
| SNP_P3_118324_60671  | NW_004515881.1 | Scaffold397 | 60671                   | AA                              | GG                | 1946503137               |
| SNP_P3_118325_61078  | NW_004515881.1 | Scaffold397 | 61078                   | TT                              | CC                | 1946503138               |
| SNP_P3_118326_85903  | NW_004515881.1 | Scaffold397 | 85903                   | AA                              | GG                | 1946503140               |
| SNP_P3_118327_86783  | NW_004515881.1 | Scaffold397 | 86783                   | AA                              | GG                | 1946503141               |
| SNP_P3_118328_87186  | NW_004515881.1 | Scaffold397 | 87186                   | AA                              | TT                | 1946503143               |
| SNP_P3_118329_92891  | NW_004515881.1 | Scaffold397 | 92891                   | CC                              | GG                | 1946503144               |
| SNP_P3_118330_92933  | NW_004515881.1 | Scaffold397 | 92933                   | AA                              | GG                | 1946503146               |
| SNP_P3_118331_92962  | NW_004515881.1 | Scaffold397 | 92962                   | CC                              | TT                | 1946503147               |
| SNP_P3_118332_96006  | NW_004515881.1 | Scaffold397 | 96006                   | AA                              | GG                | 1946503149               |
| SNP_P3_118333_96050  | NW_004515881.1 | Scaffold397 | 96050                   | GG                              | AA                | 1946503150               |
| SNP_P3_118334_96165  | NW_004515881.1 | Scaffold397 | 96165                   | CC                              | TT                | 1946503152               |
| SNP_P3_118335_96180  | NW_004515881.1 | Scaffold397 | 96180                   | GG                              | TT                | 1946503153               |
| SNP_P3_118336_96277  | NW_004515881.1 | Scaffold397 | 96277                   | TT                              | CC                | 1946503155               |
| SNP_P3_118337_97457  | NW_004515881.1 | Scaffold397 | 97457                   | CC                              | TT                | 1946503156               |
| SNP_P3_118338_98243  | NW_004515881.1 | Scaffold397 | 98243                   | TT                              | AA                | 1946503157               |
| SNP_P3_118339_98248  | NW_004515881.1 | Scaffold397 | 98248                   | TT                              | CC                | 1946503159               |
| SNP_P3_118341_120521 | NW_004515881.1 | Scaffold397 | 120521                  | TT                              | CC                | 1946503160               |
| SNP_P3_118342_130118 | NW_004515881.1 | Scaffold397 | 130118                  | TT                              | CC                | 1946503162               |
| SNP_P3_118343_130381 | NW_004515881.1 | Scaffold397 | 130381                  | AA                              | TT                | 1946503163               |
| SNP_P3_118344_131201 | NW_004515881.1 | Scaffold397 | 131201                  | CC                              | GG                | 1946503165               |
| SNP_P3_118345_142621 | NW_004515881.1 | Scaffold397 | 142621                  | CC                              | TT                | 1946503166               |
| SNP_P3_118346_143776 | NW_004515881.1 | Scaffold397 | 143776                  | TT                              | CC                | 1946503168               |
| SNP_P3_118347_143803 | NW_004515881.1 | Scaffold397 | 143803                  | AA                              | GG                | 1946503169               |
| SNP_P3_118348_143806 | NW_004515881.1 | Scaffold397 | 143806                  | TT                              | CC                | 1946503171               |
| SNP_P3_118349_143815 | NW_004515881.1 | Scaffold397 | 143815                  | AA                              | GG                | 1946503172               |
| SNP_P3_118350_143831 | NW_004515881.1 | Scaffold397 | 143831                  | AA                              | GG                | 1946503174               |
| SNP_P3_118351_143848 | NW_004515881.1 | Scaffold397 | 143848                  | GG                              | AA                | 1946503175               |
| SNP_P3_118352_143863 | NW_004515881.1 | Scaffold397 | 143863                  | CC                              | TT                | 1946503177               |
| SNP_P3_118353_143881 | NW_004515881.1 | Scaffold397 | 143881                  | AA                              | GG                | 1946503178               |
| SNP_P3_118354_143968 | NW_004515881.1 | Scaffold397 | 143968                  | TT                              | CC                | 1946503180               |
| SNP_P3_118355_143983 | NW_004515881.1 | Scaffold397 | 143983                  | AA                              | CC                | 1946503181               |
| SNP_P3_118356_144016 | NW_004515881.1 | Scaffold397 | 144016                  | TT                              | GG                | 1946503182               |
| SNP_P3_118357_144022 | NW_004515881.1 | Scaffold397 | 144022                  | AA                              | TT                | 1946503184               |
| SNP_P3_118358_144790 | NW_004515881.1 | Scaffold397 | 144790                  | CC                              | TT                | 1946503186               |
| SNP_P3_118360_145660 | NW_004515881.1 | Scaffold397 | 145660                  | AA                              | CC                | 1946503187               |
| SNP_P3_118361_146245 | NW_004515881.1 | Scaffold397 | 146245                  | TT                              | AA                | 1946503189               |
| SNP_P3_118362_161254 | NW_004515881.1 | Scaffold397 | 161254                  | TT                              | CC                | 1946503190               |
| SNP_P3_118363_167236 | NW_004515881.1 | Scaffold397 | 167236                  | TT                              | CC                | 1946503192               |
| SNP_P3_118364_175276 | NW_004515881.1 | Scaffold397 | 175276                  | CC                              | TT                | 1946503193               |
| SNP_P3_118365_175375 | NW_004515881.1 | Scaffold397 | 175375                  | TT                              | CC                | 1946503194               |
| SNP_P3_118366_175764 | NW_004515881.1 | Scaffold397 | 175764                  | AA                              | GG                | 1946503196               |

| SNPs IDs             | Chromosome IDs | Chromosomes | Physical positions (bp) | CDC Frontier (Reference genome) | (Pusa 256 & HPNB) | NCBI SNPdb Accession IDs |
|----------------------|----------------|-------------|-------------------------|---------------------------------|-------------------|--------------------------|
| SNP_P3_118367_185107 | NW_004515881.1 | Scaffold397 | 185107                  | AA                              | GG                | 1946503197               |
| SNP_P3_118368_185133 | NW_004515881.1 | Scaffold397 | 185133                  | AA                              | TT                | 1946503199               |
| SNP_P3_118369_185153 | NW_004515881.1 | Scaffold397 | 185153                  | AA                              | GG                | 1946503200               |
| SNP_P3_118370_185160 | NW_004515881.1 | Scaffold397 | 185160                  | CC                              | TT                | 1946503202               |
| SNP_P3_118371_185373 | NW_004515881.1 | Scaffold397 | 185373                  | TT                              | CC                | 1946503203               |
| SNP_P3_118372_185414 | NW_004515881.1 | Scaffold397 | 185414                  | CC                              | AA                | 1946503205               |
| SNP_P3_118373_195205 | NW_004515881.1 | Scaffold397 | 195205                  | TT                              | AA                | 1946503206               |
| SNP_P3_118374_195269 | NW_004515881.1 | Scaffold397 | 195269                  | CC                              | TT                | 1946503208               |
| SNP_P3_118376_331264 | NW_004515881.1 | Scaffold397 | 331264                  | AA                              | GG                | 1946503209               |
| SNP_P3_118377_331289 | NW_004515881.1 | Scaffold397 | 331289                  | CC                              | TT                | 1946503210               |
| SNP_P3_118378_331309 | NW_004515881.1 | Scaffold397 | 331309                  | AA                              | CC                | 1946503212               |
| SNP_P3_118379_331310 | NW_004515881.1 | Scaffold397 | 331310                  | AA                              | CC                | 1946503213               |
| SNP_P3_118380_331347 | NW_004515881.1 | Scaffold397 | 331347                  | CC                              | GG                | 1946503215               |
| SNP_P3_118381_331564 | NW_004515881.1 | Scaffold397 | 331564                  | GG                              | AA                | 1946503216               |
| SNP_P3_118382_331586 | NW_004515881.1 | Scaffold397 | 331586                  | CC                              | TT                | 1946503218               |
| SNP_P3_118383_331596 | NW_004515881.1 | Scaffold397 | 331596                  | CC                              | TT                | 1946503219               |
| SNP_P3_118384_331604 | NW_004515881.1 | Scaffold397 | 331604                  | AA                              | TT                | 1946503221               |
| SNP_P3_118385_331612 | NW_004515881.1 | Scaffold397 | 331612                  | TT                              | AA                | 1946503222               |
| SNP_P3_118386_350791 | NW_004515881.1 | Scaffold397 | 350791                  | CC                              | TT                | 1946503223               |
| SNP_P3_118387_350861 | NW_004515881.1 | Scaffold397 | 350861                  | TT                              | CC                | 1946503225               |
| SNP_P3_118388_365928 | NW_004515881.1 | Scaffold397 | 365928                  | AA                              | GG                | 1946503226               |
| SNP_P3_118390_385594 | NW_004515881.1 | Scaffold397 | 385594                  | GG                              | AA                | 1946503228               |
| SNP_P3_118391_396497 | NW_004515881.1 | Scaffold397 | 396497                  | AA                              | GG                | 1946503229               |
| SNP_P3_118392_421544 | NW_004515881.1 | Scaffold397 | 421544                  | AA                              | CC                | 1946503231               |
| SNP_P3_118393_436260 | NW_004515881.1 | Scaffold397 | 436260                  | TT                              | AA                | 1946503232               |
| SNP_P3_118394_436368 | NW_004515881.1 | Scaffold397 | 436368                  | AA                              | TT                | 1946503234               |
| SNP_P3_118395_436416 | NW_004515881.1 | Scaffold397 | 436416                  | TT                              | CC                | 1946503235               |
| SNP_P3_118396_436454 | NW_004515881.1 | Scaffold397 | 436454                  | AA                              | TT                | 1946503236               |
| SNP_P3_118397_440661 | NW_004515881.1 | Scaffold397 | 440661                  | CC                              | TT                | 1946503238               |
| SNP_P3_118398_441441 | NW_004515881.1 | Scaffold397 | 441441                  | AA                              | GG                | 1946503239               |
| SNP_P3_118399_456564 | NW_004515881.1 | Scaffold397 | 456564                  | CC                              | GG                | 1946503241               |
| SNP_P3_118401_690    | NW_004515882.1 | Scaffold398 | 690                     | AA                              | TT                | 1946503242               |
| SNP_P3_118402_951    | NW_004515882.1 | Scaffold398 | 951                     | AA                              | TT                | 1946503244               |
| SNP_P3_118403_2544   | NW_004515882.1 | Scaffold398 | 2544                    | GG                              | AA                | 1946503245               |
| SNP_P3_118405_13918  | NW_004515882.1 | Scaffold398 | 13918                   | TT                              | CC                | 1946503247               |
| SNP_P3_118406_18183  | NW_004515882.1 | Scaffold398 | 18183                   | TT                              | CC                | 1946503248               |
| SNP_P3_118407_18289  | NW_004515882.1 | Scaffold398 | 18289                   | AA                              | GG                | 1946503249               |
| SNP_P3_118408_21254  | NW_004515882.1 | Scaffold398 | 21254                   | AA                              | GG                | 1946503251               |
| SNP_P3_118409_21265  | NW_004515882.1 | Scaffold398 | 21265                   | GG                              | AA                | 1946503252               |
| SNP_P3_118410_21281  | NW_004515882.1 | Scaffold398 | 21281                   | GG                              | AA                | 1946503254               |
| SNP_P3_118411_21287  | NW_004515882.1 | Scaffold398 | 21287                   | CC                              | TT                | 1946503255               |
| SNP_P3_118412_21293  | NW_004515882.1 | Scaffold398 | 21293                   | TT                              | CC                | 1946503257               |

| SNPs IDs            | Chromosome IDs | Chromosomes | Physical positions (bp) | CDC Frontier (Reference genome) | (Pusa 256 & HPNB) | NCBI SNPdb Accession IDs |
|---------------------|----------------|-------------|-------------------------|---------------------------------|-------------------|--------------------------|
| SNP_P3_118413_21301 | NW_004515882.1 | Scaffold398 | 21301                   | GG                              | CC                | 1946503258               |
| SNP_P3_118414_21323 | NW_004515882.1 | Scaffold398 | 21323                   | AA                              | CC                | 1946503259               |
| SNP_P3_118415_21449 | NW_004515882.1 | Scaffold398 | 21449                   | CC                              | TT                | 1946503261               |
| SNP_P3_118416_21452 | NW_004515882.1 | Scaffold398 | 21452                   | CC                              | TT                | 1946503262               |
| SNP_P3_118417_21458 | NW_004515882.1 | Scaffold398 | 21458                   | AA                              | TT                | 1946503264               |
| SNP_P3_118420_21470 | NW_004515882.1 | Scaffold398 | 21470                   | CC                              | AA                | 1946503265               |
| SNP_P3_118421_21476 | NW_004515882.1 | Scaffold398 | 21476                   | GG                              | TT                | 1946503267               |
| SNP_P3_118422_21489 | NW_004515882.1 | Scaffold398 | 21489                   | AA                              | GG                | 1946503268               |
| SNP_P3_118423_21490 | NW_004515882.1 | Scaffold398 | 21490                   | CC                              | TT                | 1946503269               |
| SNP_P3_118424_21491 | NW_004515882.1 | Scaffold398 | 21491                   | GG                              | CC                | 1946503271               |
| SNP_P3_118425_25144 | NW_004515882.1 | Scaffold398 | 25144                   | GG                              | AA                | 1946503272               |
| SNP_P3_118426_25704 | NW_004515882.1 | Scaffold398 | 25704                   | CC                              | TT                | 1946503274               |
| SNP_P3_118427_25809 | NW_004515882.1 | Scaffold398 | 25809                   | AA                              | GG                | 1946503275               |
| SNP_P3_118428_28607 | NW_004515882.1 | Scaffold398 | 28607                   | TT                              | GG                | 1946503277               |
| SNP_P3_118429_31190 | NW_004515882.1 | Scaffold398 | 31190                   | GG                              | AA                | 1946503278               |
| SNP_P3_118430_32083 | NW_004515882.1 | Scaffold398 | 32083                   | TT                              | CC                | 1946503279               |
| SNP_P3_118431_32206 | NW_004515882.1 | Scaffold398 | 32206                   | GG                              | AA                | 1946503281               |
| SNP_P3_118432_32377 | NW_004515882.1 | Scaffold398 | 32377                   | GG                              | CC                | 1946503282               |
| SNP_P3_118433_32431 | NW_004515882.1 | Scaffold398 | 32431                   | CC                              | TT                | 1946503284               |
| SNP_P3_118434_32806 | NW_004515882.1 | Scaffold398 | 32806                   | TT                              | CC                | 1946503285               |
| SNP_P3_118435_32918 | NW_004515882.1 | Scaffold398 | 32918                   | CC                              | TT                | 1946503287               |
| SNP_P3_118436_33266 | NW_004515882.1 | Scaffold398 | 33266                   | AA                              | GG                | 1946503288               |
| SNP_P3_118438_33381 | NW_004515882.1 | Scaffold398 | 33381                   | GG                              | AA                | 1946503290               |
| SNP_P3_118439_33497 | NW_004515882.1 | Scaffold398 | 33497                   | AA                              | GG                | 1946503291               |
| SNP_P3_118441_33534 | NW_004515882.1 | Scaffold398 | 33534                   | TT                              | GG                | 1946503292               |
| SNP_P3_118442_33553 | NW_004515882.1 | Scaffold398 | 33553                   | CC                              | AA                | 1946503294               |
| SNP_P3_118443_33560 | NW_004515882.1 | Scaffold398 | 33560                   | CC                              | TT                | 1946503295               |
| SNP_P3_118444_33595 | NW_004515882.1 | Scaffold398 | 33595                   | AA                              | TT                | 1946503297               |
| SNP_P3_118445_33695 | NW_004515882.1 | Scaffold398 | 33695                   | TT                              | CC                | 1946503298               |
| SNP_P3_118448_33943 | NW_004515882.1 | Scaffold398 | 33943                   | TT                              | AA                | 1946503300               |
| SNP_P3_118449_34039 | NW_004515882.1 | Scaffold398 | 34039                   | GG                              | TT                | 1946503301               |
| SNP_P3_118450_34092 | NW_004515882.1 | Scaffold398 | 34092                   | TT                              | GG                | 1946503302               |
| SNP_P3_118451_37336 | NW_004515882.1 | Scaffold398 | 37336                   | GG                              | AA                | 1946503304               |
| SNP_P3_118452_37344 | NW_004515882.1 | Scaffold398 | 37344                   | GG                              | CC                | 1946503305               |
| SNP_P3_118454_47356 | NW_004515882.1 | Scaffold398 | 47356                   | GG                              | AA                | 1946503307               |
| SNP_P3_118455_48961 | NW_004515882.1 | Scaffold398 | 48961                   | CC                              | TT                | 1946503308               |
| SNP_P3_118457_50843 | NW_004515882.1 | Scaffold398 | 50843                   | AA                              | GG                | 1946503310               |
| SNP_P3_118458_51325 | NW_004515882.1 | Scaffold398 | 51325                   | TT                              | GG                | 1946503311               |
| SNP_P3_118459_51336 | NW_004515882.1 | Scaffold398 | 51336                   | GG                              | AA                | 1946503312               |
| SNP_P3_118460_52328 | NW_004515882.1 | Scaffold398 | 52328                   | AA                              | GG                | 1946503314               |
| SNP_P3_118461_55675 | NW_004515882.1 | Scaffold398 | 55675                   | GG                              | AA                | 1946503315               |
| SNP_P3_118462_57265 | NW_004515882.1 | Scaffold398 | 57265                   | TT                              | GG                | 1946503317               |

| SNPs IDs             | Chromosome IDs | Chromosomes | Physical positions (bp) | CDC Frontier (Reference genome) | (Pusa 256 & HPNB) | NCBI SNPdb Accession IDs |
|----------------------|----------------|-------------|-------------------------|---------------------------------|-------------------|--------------------------|
| SNP_P3_118463_58256  | NW_004515882.1 | Scaffold398 | 58256                   | TT                              | CC                | 1946503318               |
| SNP_P3_118464_61914  | NW_004515882.1 | Scaffold398 | 61914                   | GG                              | AA                | 1946503320               |
| SNP_P3_118465_63477  | NW_004515882.1 | Scaffold398 | 63477                   | TT                              | GG                | 1946503321               |
| SNP_P3_118466_63852  | NW_004515882.1 | Scaffold398 | 63852                   | TT                              | CC                | 1946503323               |
| SNP_P3_118467_68140  | NW_004515882.1 | Scaffold398 | 68140                   | AA                              | GG                | 1946503324               |
| SNP_P3_118468_68223  | NW_004515882.1 | Scaffold398 | 68223                   | CC                              | TT                | 1946503326               |
| SNP_P3_118469_68422  | NW_004515882.1 | Scaffold398 | 68422                   | AA                              | GG                | 1946503327               |
| SNP_P3_118470_68658  | NW_004515882.1 | Scaffold398 | 68658                   | CC                              | TT                | 1946503329               |
| SNP_P3_118471_68671  | NW_004515882.1 | Scaffold398 | 68671                   | CC                              | TT                | 1946503330               |
| SNP_P3_118472_68672  | NW_004515882.1 | Scaffold398 | 68672                   | TT                              | AA                | 1946503331               |
| SNP_P3_118473_68689  | NW_004515882.1 | Scaffold398 | 68689                   | AA                              | TT                | 1946503333               |
| SNP_P3_118474_68695  | NW_004515882.1 | Scaffold398 | 68695                   | CC                              | AA                | 1946503334               |
| SNP_P3_118475_68706  | NW_004515882.1 | Scaffold398 | 68706                   | TT                              | CC                | 1946503336               |
| SNP_P3_118476_69807  | NW_004515882.1 | Scaffold398 | 69807                   | AA                              | TT                | 1946503337               |
| SNP_P3_118477_71199  | NW_004515882.1 | Scaffold398 | 71199                   | TT                              | AA                | 1946503339               |
| SNP_P3_118478_74471  | NW_004515882.1 | Scaffold398 | 74471                   | TT                              | CC                | 1946503340               |
| SNP_P3_118480_77285  | NW_004515882.1 | Scaffold398 | 77285                   | CC                              | TT                | 1946503342               |
| SNP_P3_118481_77429  | NW_004515882.1 | Scaffold398 | 77429                   | CC                              | TT                | 1946503343               |
| SNP_P3_118482_79380  | NW_004515882.1 | Scaffold398 | 79380                   | TT                              | CC                | 1946503345               |
| SNP_P3_118483_89626  | NW_004515882.1 | Scaffold398 | 89626                   | AA                              | GG                | 1946503347               |
| SNP_P3_118484_90949  | NW_004515882.1 | Scaffold398 | 90949                   | AA                              | GG                | 1946503348               |
| SNP_P3_118485_92505  | NW_004515882.1 | Scaffold398 | 92505                   | GG                              | AA                | 1946503350               |
| SNP_P3_118486_95271  | NW_004515882.1 | Scaffold398 | 95271                   | CC                              | AA                | 1946503351               |
| SNP_P3_118487_99136  | NW_004515882.1 | Scaffold398 | 99136                   | GG                              | AA                | 1946503353               |
| SNP_P3_118488_101082 | NW_004515882.1 | Scaffold398 | 101082                  | TT                              | AA                | 1946503354               |
| SNP_P3_118489_106274 | NW_004515882.1 | Scaffold398 | 106274                  | GG                              | CC                | 1946503355               |
| SNP_P3_118490_110487 | NW_004515882.1 | Scaffold398 | 110487                  | TT                              | CC                | 1946503357               |
| SNP_P3_118491_111371 | NW_004515882.1 | Scaffold398 | 111371                  | TT                              | CC                | 1946503358               |
| SNP_P3_118493_113253 | NW_004515882.1 | Scaffold398 | 113253                  | AA                              | GG                | 1946503360               |
| SNP_P3_118494_121159 | NW_004515882.1 | Scaffold398 | 121159                  | AA                              | GG                | 1946503361               |
| SNP_P3_118495_124607 | NW_004515882.1 | Scaffold398 | 124607                  | AA                              | GG                | 1946503362               |
| SNP_P3_118496_124937 | NW_004515882.1 | Scaffold398 | 124937                  | CC                              | TT                | 1946503364               |
| SNP_P3_118497_126417 | NW_004515882.1 | Scaffold398 | 126417                  | AA                              | CC                | 1946503365               |
| SNP_P3_118498_129228 | NW_004515882.1 | Scaffold398 | 129228                  | AA                              | GG                | 1946503367               |
| SNP_P3_118499_131497 | NW_004515882.1 | Scaffold398 | 131497                  | GG                              | AA                | 1946503368               |
| SNP_P3_118501_138832 | NW_004515882.1 | Scaffold398 | 138832                  | AA                              | TT                | 1946503370               |
| SNP_P3_118502_146081 | NW_004515882.1 | Scaffold398 | 146081                  | GG                              | AA                | 1946503372               |
| SNP_P3_118503_152187 | NW_004515882.1 | Scaffold398 | 152187                  | GG                              | TT                | 1946503374               |
| SNP_P3_118504_154062 | NW_004515882.1 | Scaffold398 | 154062                  | GG                              | AA                | 1946503375               |
| SNP_P3_118505_159868 | NW_004515882.1 | Scaffold398 | 159868                  | TT                              | AA                | 1946503377               |
| SNP_P3_118506_162394 | NW_004515882.1 | Scaffold398 | 162394                  | AA                              | GG                | 1946503378               |
| SNP_P3_118507_163052 | NW_004515882.1 | Scaffold398 | 163052                  | TT                              | GG                | 1946503379               |

| SNPs IDs             | Chromosome IDs | Chromosomes | Physical positions (bp) | CDC Frontier (Reference genome) | (Pusa 256 & HPNB) | NCBI SNPdb Accession IDs |
|----------------------|----------------|-------------|-------------------------|---------------------------------|-------------------|--------------------------|
| SNP_P3_118508_163317 | NW_004515882.1 | Scaffold398 | 163317                  | TT                              | AA                | 1946503380               |
| SNP_P3_118509_163318 | NW_004515882.1 | Scaffold398 | 163318                  | AA                              | CC                | 1946503382               |
| SNP_P3_118510_167403 | NW_004515882.1 | Scaffold398 | 167403                  | AA                              | GG                | 1946503383               |
| SNP_P3_118511_171836 | NW_004515882.1 | Scaffold398 | 171836                  | TT                              | CC                | 1946503385               |
| SNP_P3_118512_174263 | NW_004515882.1 | Scaffold398 | 174263                  | TT                              | AA                | 1946503386               |
| SNP_P3_118513_175410 | NW_004515882.1 | Scaffold398 | 175410                  | GG                              | TT                | 1946503388               |
| SNP_P3_118514_175411 | NW_004515882.1 | Scaffold398 | 175411                  | AA                              | CC                | 1946503389               |
| SNP_P3_118516_185938 | NW_004515882.1 | Scaffold398 | 185938                  | TT                              | CC                | 1946503391               |
| SNP_P3_118517_187980 | NW_004515882.1 | Scaffold398 | 187980                  | AA                              | CC                | 1946503392               |
| SNP_P3_118518_188007 | NW_004515882.1 | Scaffold398 | 188007                  | AA                              | GG                | 1946503394               |
| SNP_P3_118519_188660 | NW_004515882.1 | Scaffold398 | 188660                  | GG                              | AA                | 1946503395               |
| SNP_P3_118520_191991 | NW_004515882.1 | Scaffold398 | 191991                  | TT                              | CC                | 1946503397               |
| SNP_P3_118521_192774 | NW_004515882.1 | Scaffold398 | 192774                  | CC                              | TT                | 1946503398               |
| SNP_P3_118522_200014 | NW_004515882.1 | Scaffold398 | 200014                  | CC                              | GG                | 1946503400               |
| SNP_P3_118523_206723 | NW_004515882.1 | Scaffold398 | 206723                  | AA                              | TT                | 1946503401               |
| SNP_P3_118524_207514 | NW_004515882.1 | Scaffold398 | 207514                  | AA                              | CC                | 1946503403               |
| SNP_P3_118525_207781 | NW_004515882.1 | Scaffold398 | 207781                  | TT                              | AA                | 1946503404               |
| SNP_P3_118526_207786 | NW_004515882.1 | Scaffold398 | 207786                  | GG                              | AA                | 1946503406               |
| SNP_P3_118527_208746 | NW_004515882.1 | Scaffold398 | 208746                  | AA                              | GG                | 1946503407               |
| SNP_P3_118528_209532 | NW_004515882.1 | Scaffold398 | 209532                  | CC                              | AA                | 1946503409               |
| SNP_P3_118529_209548 | NW_004515882.1 | Scaffold398 | 209548                  | AA                              | CC                | 1946503410               |
| SNP_P3_118530_209906 | NW_004515882.1 | Scaffold398 | 209906                  | AA                              | GG                | 1946503412               |
| SNP_P3_118531_211729 | NW_004515882.1 | Scaffold398 | 211729                  | CC                              | TT                | 1946503414               |
| SNP_P3_118532_211735 | NW_004515882.1 | Scaffold398 | 211735                  | CC                              | TT                | 1946503415               |
| SNP_P3_118533_211768 | NW_004515882.1 | Scaffold398 | 211768                  | TT                              | CC                | 1946503417               |
| SNP_P3_118534_211934 | NW_004515882.1 | Scaffold398 | 211934                  | TT                              | CC                | 1946503418               |
| SNP_P3_118535_211965 | NW_004515882.1 | Scaffold398 | 211965                  | CC                              | TT                | 1946503420               |
| SNP_P3_118536_213652 | NW_004515882.1 | Scaffold398 | 213652                  | CC                              | AA                | 1946503421               |
| SNP_P3_118538_215282 | NW_004515882.1 | Scaffold398 | 215282                  | CC                              | TT                | 1946503423               |
| SNP_P3_118539_247617 | NW_004515882.1 | Scaffold398 | 247617                  | GG                              | TT                | 1946503424               |
| SNP_P3_118540_247645 | NW_004515882.1 | Scaffold398 | 247645                  | GG                              | AA                | 1946503426               |
| SNP_P3_118541_247652 | NW_004515882.1 | Scaffold398 | 247652                  | CC                              | GG                | 1946503427               |
| SNP_P3_118542_247663 | NW_004515882.1 | Scaffold398 | 247663                  | AA                              | GG                | 1946503429               |
| SNP_P3_118543_247664 | NW_004515882.1 | Scaffold398 | 247664                  | GG                              | AA                | 1946503430               |
| SNP_P3_118544_247673 | NW_004515882.1 | Scaffold398 | 247673                  | AA                              | CC                | 1946503432               |
| SNP_P3_118545_247993 | NW_004515882.1 | Scaffold398 | 247993                  | TT                              | AA                | 1946503433               |
| SNP_P3_118546_248311 | NW_004515882.1 | Scaffold398 | 248311                  | TT                              | AA                | 1946503435               |
| SNP_P3_118547_248316 | NW_004515882.1 | Scaffold398 | 248316                  | CC                              | TT                | 1946503436               |
| SNP_P3_118548_248342 | NW_004515882.1 | Scaffold398 | 248342                  | CC                              | AA                | 1946503438               |
| SNP_P3_118549_248691 | NW_004515882.1 | Scaffold398 | 248691                  | GG                              | AA                | 1946503439               |
| SNP_P3_118551_248740 | NW_004515882.1 | Scaffold398 | 248740                  | TT                              | CC                | 1946503441               |
| SNP_P3_118552_248761 | NW_004515882.1 | Scaffold398 | 248761                  | GG                              | AA                | 1946503442               |

| SNPs IDs             | Chromosome IDs | Chromosomes | Physical positions (bp) | CDC Frontier (Reference genome) | (Pusa 256 & HPNB) | NCBI SNPdb Accession IDs |
|----------------------|----------------|-------------|-------------------------|---------------------------------|-------------------|--------------------------|
| SNP_P3_118553_249062 | NW_004515882.1 | Scaffold398 | 249062                  | GG                              | AA                | 1946503444               |
| SNP_P3_118554_251189 | NW_004515882.1 | Scaffold398 | 251189                  | CC                              | TT                | 1946503445               |
| SNP_P3_118555_251557 | NW_004515882.1 | Scaffold398 | 251557                  | CC                              | TT                | 1946503447               |
| SNP_P3_118556_251558 | NW_004515882.1 | Scaffold398 | 251558                  | AA                              | TT                | 1946503448               |
| SNP_P3_118557_251597 | NW_004515882.1 | Scaffold398 | 251597                  | TT                              | AA                | 1946503449               |
| SNP_P3_118560_261409 | NW_004515882.1 | Scaffold398 | 261409                  | TT                              | GG                | 1946503451               |
| SNP_P3_118561_261501 | NW_004515882.1 | Scaffold398 | 261501                  | CC                              | AA                | 1946503452               |
| SNP_P3_118562_261556 | NW_004515882.1 | Scaffold398 | 261556                  | AA                              | CC                | 1946503454               |
| SNP_P3_118563_261571 | NW_004515882.1 | Scaffold398 | 261571                  | TT                              | CC                | 1946503455               |
| SNP_P3_118564_265595 | NW_004515882.1 | Scaffold398 | 265595                  | AA                              | GG                | 1946503457               |
| SNP_P3_118565_266593 | NW_004515882.1 | Scaffold398 | 266593                  | GG                              | AA                | 1946503458               |
| SNP_P3_118566_266888 | NW_004515882.1 | Scaffold398 | 266888                  | GG                              | AA                | 1946503460               |
| SNP_P3_118567_267593 | NW_004515882.1 | Scaffold398 | 267593                  | CC                              | TT                | 1946503461               |
| SNP_P3_118568_268211 | NW_004515882.1 | Scaffold398 | 268211                  | GG                              | AA                | 1946503463               |
| SNP_P3_118569_268610 | NW_004515882.1 | Scaffold398 | 268610                  | AA                              | GG                | 1946503464               |
| SNP_P3_118570_268616 | NW_004515882.1 | Scaffold398 | 268616                  | CC                              | TT                | 1946503466               |
| SNP_P3_118572_269345 | NW_004515882.1 | Scaffold398 | 269345                  | AA                              | GG                | 1946503467               |
| SNP_P3_118573_269510 | NW_004515882.1 | Scaffold398 | 269510                  | CC                              | TT                | 1946503469               |
| SNP_P3_118574_269990 | NW_004515882.1 | Scaffold398 | 269990                  | AA                              | TT                | 1946503470               |
| SNP_P3_118575_270180 | NW_004515882.1 | Scaffold398 | 270180                  | TT                              | CC                | 1946503472               |
| SNP_P3_118576_270194 | NW_004515882.1 | Scaffold398 | 270194                  | AA                              | TT                | 1946503473               |
| SNP_P3_118577_270208 | NW_004515882.1 | Scaffold398 | 270208                  | TT                              | AA                | 1946503475               |
| SNP_P3_118578_270569 | NW_004515882.1 | Scaffold398 | 270569                  | CC                              | GG                | 1946503476               |
| SNP_P3_118580_275315 | NW_004515882.1 | Scaffold398 | 275315                  | TT                              | AA                | 1946503478               |
| SNP_P3_118582_275653 | NW_004515882.1 | Scaffold398 | 275653                  | AA                              | GG                | 1946503479               |
| SNP_P3_118583_276001 | NW_004515882.1 | Scaffold398 | 276001                  | GG                              | AA                | 1946503481               |
| SNP_P3_118584_279374 | NW_004515882.1 | Scaffold398 | 279374                  | GG                              | CC                | 1946503483               |
| SNP_P3_118585_286037 | NW_004515882.1 | Scaffold398 | 286037                  | CC                              | TT                | 1946503484               |
| SNP_P3_118586_287279 | NW_004515882.1 | Scaffold398 | 287279                  | CC                              | TT                | 1946503486               |
| SNP_P3_118587_287740 | NW_004515882.1 | Scaffold398 | 287740                  | CC                              | TT                | 1946503487               |
| SNP_P3_118589_289760 | NW_004515882.1 | Scaffold398 | 289760                  | TT                              | GG                | 1946503489               |
| SNP_P3_118592_292558 | NW_004515882.1 | Scaffold398 | 292558                  | TT                              | GG                | 1946503490               |
| SNP_P3_118593_296733 | NW_004515882.1 | Scaffold398 | 296733                  | CC                              | TT                | 1946503492               |
| SNP_P3_118594_300336 | NW_004515882.1 | Scaffold398 | 300336                  | TT                              | CC                | 1946503493               |
| SNP_P3_118596_301411 | NW_004515882.1 | Scaffold398 | 301411                  | CC                              | TT                | 1946503495               |
| SNP_P3_118597_301593 | NW_004515882.1 | Scaffold398 | 301593                  | GG                              | AA                | 1946503496               |
| SNP_P3_118600_301782 | NW_004515882.1 | Scaffold398 | 301782                  | GG                              | CC                | 1946503498               |
| SNP_P3_118601_302172 | NW_004515882.1 | Scaffold398 | 302172                  | GG                              | AA                | 1946503499               |
| SNP_P3_118602_304525 | NW_004515882.1 | Scaffold398 | 304525                  | GG                              | AA                | 1946503501               |
| SNP_P3_118603_306783 | NW_004515882.1 | Scaffold398 | 306783                  | GG                              | AA                | 1946503502               |
| SNP_P3_118604_306882 | NW_004515882.1 | Scaffold398 | 306882                  | GG                              | AA                | 1946503504               |
| SNP_P3_118605_306904 | NW_004515882.1 | Scaffold398 | 306904                  | AA                              | GG                | 1946503505               |

| SNPs IDs             | Chromosome IDs | Chromosomes | Physical positions (bp) | CDC Frontier (Reference genome) | (Pusa 256 & HPNB) | NCBI SNPdb Accession IDs |
|----------------------|----------------|-------------|-------------------------|---------------------------------|-------------------|--------------------------|
| SNP_P3_118606_306914 | NW_004515882.1 | Scaffold398 | 306914                  | CC                              | TT                | 1946503507               |
| SNP_P3_118607_307073 | NW_004515882.1 | Scaffold398 | 307073                  | TT                              | CC                | 1946503508               |
| SNP_P3_118608_307114 | NW_004515882.1 | Scaffold398 | 307114                  | GG                              | AA                | 1946503510               |
| SNP_P3_118609_308652 | NW_004515882.1 | Scaffold398 | 308652                  | GG                              | AA                | 1946503511               |
| SNP_P3_118610_308902 | NW_004515882.1 | Scaffold398 | 308902                  | CC                              | AA                | 1946503513               |
| SNP_P3_118612_311833 | NW_004515882.1 | Scaffold398 | 311833                  | AA                              | TT                | 1946503514               |
| SNP_P3_118613_313044 | NW_004515882.1 | Scaffold398 | 313044                  | AA                              | GG                | 1946503516               |
| SNP_P3_118616_314157 | NW_004515882.1 | Scaffold398 | 314157                  | AA                              | GG                | 1946503517               |
| SNP_P3_118617_314169 | NW_004515882.1 | Scaffold398 | 314169                  | TT                              | CC                | 1946503519               |
| SNP_P3_118618_315555 | NW_004515882.1 | Scaffold398 | 315555                  | GG                              | AA                | 1946503521               |
| SNP_P3_118619_315585 | NW_004515882.1 | Scaffold398 | 315585                  | AA                              | TT                | 1946503522               |
| SNP_P3_118620_315665 | NW_004515882.1 | Scaffold398 | 315665                  | AA                              | GG                | 1946503524               |
| SNP_P3_118621_319018 | NW_004515882.1 | Scaffold398 | 319018                  | TT                              | CC                | 1946503525               |
| SNP_P3_118622_319153 | NW_004515882.1 | Scaffold398 | 319153                  | CC                              | TT                | 1946503527               |
| SNP_P3_118624_321274 | NW_004515882.1 | Scaffold398 | 321274                  | TT                              | CC                | 1946503528               |
| SNP_P3_118625_321287 | NW_004515882.1 | Scaffold398 | 321287                  | AA                              | TT                | 1946503530               |
| SNP_P3_118626_321314 | NW_004515882.1 | Scaffold398 | 321314                  | CC                              | AA                | 1946503531               |
| SNP_P3_118627_321318 | NW_004515882.1 | Scaffold398 | 321318                  | GG                              | CC                | 1946503533               |
| SNP_P3_118628_329492 | NW_004515882.1 | Scaffold398 | 329492                  | CC                              | AA                | 1946503534               |
| SNP_P3_118629_329574 | NW_004515882.1 | Scaffold398 | 329574                  | TT                              | CC                | 1946503536               |
| SNP_P3_118630_329855 | NW_004515882.1 | Scaffold398 | 329855                  | AA                              | GG                | 1946503537               |
| SNP_P3_118631_331037 | NW_004515882.1 | Scaffold398 | 331037                  | AA                              | CC                | 1946503539               |
| SNP_P3_118632_331176 | NW_004515882.1 | Scaffold398 | 331176                  | CC                              | TT                | 1946503540               |
| SNP_P3_118633_331244 | NW_004515882.1 | Scaffold398 | 331244                  | GG                              | TT                | 1946503541               |
| SNP_P3_118634_331272 | NW_004515882.1 | Scaffold398 | 331272                  | TT                              | CC                | 1946503543               |
| SNP_P3_118635_331477 | NW_004515882.1 | Scaffold398 | 331477                  | TT                              | GG                | 1946503544               |
| SNP_P3_118636_332169 | NW_004515882.1 | Scaffold398 | 332169                  | CC                              | TT                | 1946503546               |
| SNP_P3_118637_332170 | NW_004515882.1 | Scaffold398 | 332170                  | AA                              | TT                | 1946503547               |
| SNP_P3_118638_332247 | NW_004515882.1 | Scaffold398 | 332247                  | TT                              | CC                | 1946503549               |
| SNP_P3_118639_332253 | NW_004515882.1 | Scaffold398 | 332253                  | CC                              | GG                | 1946503550               |
| SNP_P3_118640_332459 | NW_004515882.1 | Scaffold398 | 332459                  | TT                              | CC                | 1946503552               |
| SNP_P3_118641_332464 | NW_004515882.1 | Scaffold398 | 332464                  | GG                              | AA                | 1946503553               |
| SNP_P3_118642_333203 | NW_004515882.1 | Scaffold398 | 333203                  | AA                              | GG                | 1946503555               |
| SNP_P3_118643_335679 | NW_004515882.1 | Scaffold398 | 335679                  | TT                              | CC                | 1946503556               |
| SNP_P3_118644_335736 | NW_004515882.1 | Scaffold398 | 335736                  | AA                              | GG                | 1946503558               |
| SNP_P3_118645_335996 | NW_004515882.1 | Scaffold398 | 335996                  | CC                              | TT                | 1946503559               |
| SNP_P3_118646_336033 | NW_004515882.1 | Scaffold398 | 336033                  | CC                              | AA                | 1946503561               |
| SNP_P3_118647_336057 | NW_004515882.1 | Scaffold398 | 336057                  | CC                              | TT                | 1946503562               |
| SNP_P3_118648_344699 | NW_004515882.1 | Scaffold398 | 344699                  | CC                              | TT                | 1946503564               |
| SNP_P3_118649_345338 | NW_004515882.1 | Scaffold398 | 345338                  | CC                              | GG                | 1946503565               |
| SNP_P3_118651_346742 | NW_004515882.1 | Scaffold398 | 346742                  | TT                              | AA                | 1946503567               |
| SNP_P3_118652_346766 | NW_004515882.1 | Scaffold398 | 346766                  | CC                              | TT                | 1946503568               |

| SNPs IDs             | Chromosome IDs | Chromosomes | Physical positions (bp) | CDC Frontier (Reference genome) | (Pusa 256 & HPNB) | NCBI SNPdb Accession IDs |
|----------------------|----------------|-------------|-------------------------|---------------------------------|-------------------|--------------------------|
| SNP_P3_118653_347374 | NW_004515882.1 | Scaffold398 | 347374                  | CC                              | AA                | 1946503570               |
| SNP_P3_118654_347386 | NW_004515882.1 | Scaffold398 | 347386                  | CC                              | TT                | 1946503571               |
| SNP_P3_118655_347557 | NW_004515882.1 | Scaffold398 | 347557                  | AA                              | TT                | 1946503572               |
| SNP_P3_118659_349768 | NW_004515882.1 | Scaffold398 | 349768                  | AA                              | GG                | 1946503574               |
| SNP_P3_118660_350261 | NW_004515882.1 | Scaffold398 | 350261                  | GG                              | TT                | 1946503575               |
| SNP_P3_118661_350616 | NW_004515882.1 | Scaffold398 | 350616                  | AA                              | GG                | 1946503577               |
| SNP_P3_118662_350650 | NW_004515882.1 | Scaffold398 | 350650                  | AA                              | CC                | 1946503578               |
| SNP_P3_118663_350688 | NW_004515882.1 | Scaffold398 | 350688                  | TT                              | CC                | 1946503580               |
| SNP_P3_118664_351164 | NW_004515882.1 | Scaffold398 | 351164                  | CC                              | AA                | 1946503581               |
| SNP_P3_118665_351370 | NW_004515882.1 | Scaffold398 | 351370                  | GG                              | AA                | 1946503583               |
| SNP_P3_118666_351446 | NW_004515882.1 | Scaffold398 | 351446                  | GG                              | AA                | 1946503585               |
| SNP_P3_118667_351447 | NW_004515882.1 | Scaffold398 | 351447                  | GG                              | AA                | 1946503586               |
| SNP_P3_118668_351522 | NW_004515882.1 | Scaffold398 | 351522                  | CC                              | TT                | 1946503587               |
| SNP_P3_118669_351525 | NW_004515882.1 | Scaffold398 | 351525                  | AA                              | GG                | 1946503589               |
| SNP_P3_118671_351737 | NW_004515882.1 | Scaffold398 | 351737                  | AA                              | GG                | 1946503590               |
| SNP_P3_118672_351743 | NW_004515882.1 | Scaffold398 | 351743                  | TT                              | CC                | 1946503592               |
| SNP_P3_118673_351902 | NW_004515882.1 | Scaffold398 | 351902                  | GG                              | AA                | 1946503593               |
| SNP_P3_118674_351947 | NW_004515882.1 | Scaffold398 | 351947                  | CC                              | TT                | 1946503595               |
| SNP_P3_118675_352188 | NW_004515882.1 | Scaffold398 | 352188                  | CC                              | TT                | 1946503596               |
| SNP_P3_118676_352192 | NW_004515882.1 | Scaffold398 | 352192                  | GG                              | TT                | 1946503598               |
| SNP_P3_118677_352204 | NW_004515882.1 | Scaffold398 | 352204                  | TT                              | CC                | 1946503599               |
| SNP_P3_118678_352243 | NW_004515882.1 | Scaffold398 | 352243                  | CC                              | TT                | 1946503601               |
| SNP_P3_118679_352249 | NW_004515882.1 | Scaffold398 | 352249                  | GG                              | AA                | 1946503602               |
| SNP_P3_118680_352285 | NW_004515882.1 | Scaffold398 | 352285                  | GG                              | CC                | 1946503604               |
| SNP_P3_118681_352303 | NW_004515882.1 | Scaffold398 | 352303                  | CC                              | TT                | 1946503605               |
| SNP_P3_118682_352507 | NW_004515882.1 | Scaffold398 | 352507                  | TT                              | GG                | 1946503607               |
| SNP_P3_118683_352658 | NW_004515882.1 | Scaffold398 | 352658                  | AA                              | CC                | 1946503608               |
| SNP_P3_118684_353184 | NW_004515882.1 | Scaffold398 | 353184                  | CC                              | TT                | 1946503609               |
| SNP_P3_118685_353199 | NW_004515882.1 | Scaffold398 | 353199                  | TT                              | AA                | 1946503611               |
| SNP_P3_118686_353239 | NW_004515882.1 | Scaffold398 | 353239                  | CC                              | TT                | 1946503612               |
| SNP_P3_118687_355412 | NW_004515882.1 | Scaffold398 | 355412                  | AA                              | GG                | 1946503614               |
| SNP_P3_118688_360589 | NW_004515882.1 | Scaffold398 | 360589                  | GG                              | AA                | 1946503615               |
| SNP_P3_118689_360592 | NW_004515882.1 | Scaffold398 | 360592                  | AA                              | TT                | 1946503617               |
| SNP_P3_118690_360611 | NW_004515882.1 | Scaffold398 | 360611                  | GG                              | AA                | 1946503618               |
| SNP_P3_118691_360675 | NW_004515882.1 | Scaffold398 | 360675                  | CC                              | TT                | 1946503620               |
| SNP_P3_118692_360694 | NW_004515882.1 | Scaffold398 | 360694                  | AA                              | GG                | 1946503621               |
| SNP_P3_118693_360816 | NW_004515882.1 | Scaffold398 | 360816                  | TT                              | AA                | 1946503623               |
| SNP_P3_118694_365287 | NW_004515882.1 | Scaffold398 | 365287                  | GG                              | TT                | 1946503624               |
| SNP_P3_118695_365703 | NW_004515882.1 | Scaffold398 | 365703                  | CC                              | TT                | 1946503625               |
| SNP_P3_118696_365725 | NW_004515882.1 | Scaffold398 | 365725                  | TT                              | GG                | 1946503627               |
| SNP_P3_118697_365728 | NW_004515882.1 | Scaffold398 | 365728                  | TT                              | GG                | 1946503629               |
| SNP_P3_118700_366325 | NW_004515882.1 | Scaffold398 | 366325                  | GG                              | AA                | 1946503630               |



| SNPs IDs             | Chromosome IDs | Chromosomes | Physical positions (bp) | CDC Frontier (Reference genome) | (Pusa 256 & HPNB) | NCBI SNPdb Accession IDs |
|----------------------|----------------|-------------|-------------------------|---------------------------------|-------------------|--------------------------|
| SNP_P3_118701_366414 | NW_004515882.1 | Scaffold398 | 366414                  | AA                              | GG                | 1946503631               |
| SNP_P3_118702_366635 | NW_004515882.1 | Scaffold398 | 366635                  | CC                              | GG                | 1946503633               |
| SNP_P3_118703_366783 | NW_004515882.1 | Scaffold398 | 366783                  | AA                              | TT                | 1946503634               |
| SNP_P3_118704_367035 | NW_004515882.1 | Scaffold398 | 367035                  | TT                              | CC                | 1946503636               |
| SNP_P3_118705_369625 | NW_004515882.1 | Scaffold398 | 369625                  | CC                              | TT                | 1946503637               |
| SNP_P3_118706_372080 | NW_004515882.1 | Scaffold398 | 372080                  | TT                              | GG                | 1946503639               |
| SNP_P3_118707_376980 | NW_004515882.1 | Scaffold398 | 376980                  | TT                              | GG                | 1946503641               |
| SNP_P3_118708_377078 | NW_004515882.1 | Scaffold398 | 377078                  | GG                              | TT                | 1946503642               |
| SNP_P3_118709_378674 | NW_004515882.1 | Scaffold398 | 378674                  | AA                              | GG                | 1946503644               |
| SNP_P3_118710_378703 | NW_004515882.1 | Scaffold398 | 378703                  | TT                              | CC                | 1946503645               |
| SNP_P3_118711_378801 | NW_004515882.1 | Scaffold398 | 378801                  | AA                              | GG                | 1946503647               |
| SNP_P3_118712_378810 | NW_004515882.1 | Scaffold398 | 378810                  | AA                              | GG                | 1946503648               |
| SNP_P3_118713_378827 | NW_004515882.1 | Scaffold398 | 378827                  | AA                              | GG                | 1946503650               |
| SNP_P3_118714_378869 | NW_004515882.1 | Scaffold398 | 378869                  | GG                              | AA                | 1946503651               |
| SNP_P3_118715_378990 | NW_004515882.1 | Scaffold398 | 378990                  | AA                              | CC                | 1946503653               |
| SNP_P3_118716_379026 | NW_004515882.1 | Scaffold398 | 379026                  | CC                              | TT                | 1946503654               |
| SNP_P3_118718_379248 | NW_004515882.1 | Scaffold398 | 379248                  | CC                              | AA                | 1946503655               |
| SNP_P3_118719_380962 | NW_004515882.1 | Scaffold398 | 380962                  | TT                              | CC                | 1946503657               |
| SNP_P3_118720_383124 | NW_004515882.1 | Scaffold398 | 383124                  | AA                              | GG                | 1946503658               |
| SNP_P3_118721_383972 | NW_004515882.1 | Scaffold398 | 383972                  | AA                              | CC                | 1946503660               |
| SNP_P3_118723_385879 | NW_004515882.1 | Scaffold398 | 385879                  | GG                              | AA                | 1946503661               |
| SNP_P3_118724_385930 | NW_004515882.1 | Scaffold398 | 385930                  | AA                              | GG                | 1946503663               |
| SNP_P3_118725_387769 | NW_004515882.1 | Scaffold398 | 387769                  | GG                              | AA                | 1946503664               |
| SNP_P3_118726_388401 | NW_004515882.1 | Scaffold398 | 388401                  | GG                              | AA                | 1946503666               |
| SNP_P3_118727_388479 | NW_004515882.1 | Scaffold398 | 388479                  | TT                              | AA                | 1946503667               |
| SNP_P3_118728_390284 | NW_004515882.1 | Scaffold398 | 390284                  | AA                              | CC                | 1946503669               |
| SNP_P3_118729_390475 | NW_004515882.1 | Scaffold398 | 390475                  | TT                              | GG                | 1946503670               |
| SNP_P3_118730_390482 | NW_004515882.1 | Scaffold398 | 390482                  | GG                              | TT                | 1946503671               |
| SNP_P3_118731_390506 | NW_004515882.1 | Scaffold398 | 390506                  | TT                              | CC                | 1946503673               |
| SNP_P3_118732_390530 | NW_004515882.1 | Scaffold398 | 390530                  | TT                              | CC                | 1946503674               |
| SNP_P3_118733_390551 | NW_004515882.1 | Scaffold398 | 390551                  | CC                              | TT                | 1946503676               |
| SNP_P3_118734_390552 | NW_004515882.1 | Scaffold398 | 390552                  | GG                              | AA                | 1946503677               |
| SNP_P3_118735_391817 | NW_004515882.1 | Scaffold398 | 391817                  | CC                              | AA                | 1946503679               |
| SNP_P3_118736_391840 | NW_004515882.1 | Scaffold398 | 391840                  | GG                              | AA                | 1946503680               |
| SNP_P3_118737_392083 | NW_004515882.1 | Scaffold398 | 392083                  | TT                              | AA                | 1946503682               |
| SNP_P3_118738_392873 | NW_004515882.1 | Scaffold398 | 392873                  | TT                              | AA                | 1946503683               |
| SNP_P3_118739_393129 | NW_004515882.1 | Scaffold398 | 393129                  | AA                              | GG                | 1946503685               |
| SNP_P3_118740_394066 | NW_004515882.1 | Scaffold398 | 394066                  | AA                              | TT                | 1946503686               |
| SNP_P3_118741_396503 | NW_004515882.1 | Scaffold398 | 396503                  | AA                              | CC                | 1946503688               |
| SNP_P3_118742_400858 | NW_004515882.1 | Scaffold398 | 400858                  | GG                              | TT                | 1946503689               |
| SNP_P3_118743_403042 | NW_004515882.1 | Scaffold398 | 403042                  | AA                              | TT                | 1946503691               |
| SNP_P3_118744_403711 | NW_004515882.1 | Scaffold398 | 403711                  | AA                              | GG                | 1946503692               |

| SNPs IDs             | Chromosome IDs | Chromosomes | Physical positions (bp) | CDC Frontier (Reference genome) | (Pusa 256 & HPNB) | NCBI SNPdb Accession IDs |
|----------------------|----------------|-------------|-------------------------|---------------------------------|-------------------|--------------------------|
| SNP_P3_118745_403968 | NW_004515882.1 | Scaffold398 | 403968                  | AA                              | TT                | 1946503694               |
| SNP_P3_118746_404755 | NW_004515882.1 | Scaffold398 | 404755                  | GG                              | AA                | 1946503695               |
| SNP_P3_118747_405612 | NW_004515882.1 | Scaffold398 | 405612                  | GG                              | TT                | 1946503697               |
| SNP_P3_118748_406625 | NW_004515882.1 | Scaffold398 | 406625                  | GG                              | AA                | 1946503698               |
| SNP_P3_118749_406649 | NW_004515882.1 | Scaffold398 | 406649                  | GG                              | TT                | 1946503700               |
| SNP_P3_118750_407094 | NW_004515882.1 | Scaffold398 | 407094                  | TT                              | GG                | 1946503701               |
| SNP_P3_118751_407144 | NW_004515882.1 | Scaffold398 | 407144                  | TT                              | CC                | 1946503703               |
| SNP_P3_118752_409209 | NW_004515882.1 | Scaffold398 | 409209                  | AA                              | GG                | 1946503704               |
| SNP_P3_118753_411971 | NW_004515882.1 | Scaffold398 | 411971                  | TT                              | CC                | 1946503706               |
| SNP_P3_118754_412149 | NW_004515882.1 | Scaffold398 | 412149                  | CC                              | TT                | 1946503707               |
| SNP_P3_118755_414473 | NW_004515882.1 | Scaffold398 | 414473                  | AA                              | TT                | 1946503709               |
| SNP_P3_118756_414824 | NW_004515882.1 | Scaffold398 | 414824                  | GG                              | AA                | 1946503710               |
| SNP_P3_118757_417859 | NW_004515882.1 | Scaffold398 | 417859                  | GG                              | TT                | 1946503712               |
| SNP_P3_118758_418086 | NW_004515882.1 | Scaffold398 | 418086                  | TT                              | CC                | 1946503713               |
| SNP_P3_118759_419220 | NW_004515882.1 | Scaffold398 | 419220                  | GG                              | AA                | 1946503715               |
| SNP_P3_118760_421636 | NW_004515882.1 | Scaffold398 | 421636                  | AA                              | CC                | 1946503716               |
| SNP_P3_118761_422749 | NW_004515882.1 | Scaffold398 | 422749                  | GG                              | TT                | 1946503718               |
| SNP_P3_118762_422765 | NW_004515882.1 | Scaffold398 | 422765                  | GG                              | AA                | 1946503719               |
| SNP_P3_118763_423254 | NW_004515882.1 | Scaffold398 | 423254                  | AA                              | GG                | 1946503721               |
| SNP_P3_118764_424636 | NW_004515882.1 | Scaffold398 | 424636                  | AA                              | CC                | 1946503722               |
| SNP_P3_118765_427353 | NW_004515882.1 | Scaffold398 | 427353                  | CC                              | TT                | 1946503724               |
| SNP_P3_118766_429558 | NW_004515882.1 | Scaffold398 | 429558                  | CC                              | GG                | 1946503725               |
| SNP_P3_118767_429770 | NW_004515882.1 | Scaffold398 | 429770                  | TT                              | CC                | 1946503727               |
| SNP_P3_118768_429845 | NW_004515882.1 | Scaffold398 | 429845                  | AA                              | TT                | 1946503728               |
| SNP_P3_118769_429857 | NW_004515882.1 | Scaffold398 | 429857                  | TT                              | AA                | 1946503730               |
| SNP_P3_118771_430709 | NW_004515882.1 | Scaffold398 | 430709                  | TT                              | CC                | 1946503731               |
| SNP_P3_118772_430890 | NW_004515882.1 | Scaffold398 | 430890                  | TT                              | AA                | 1946503732               |
| SNP_P3_118773_433446 | NW_004515882.1 | Scaffold398 | 433446                  | TT                              | CC                | 1946503734               |
| SNP_P3_118774_434484 | NW_004515882.1 | Scaffold398 | 434484                  | TT                              | CC                | 1946503735               |
| SNP_P3_118775_434599 | NW_004515882.1 | Scaffold398 | 434599                  | GG                              | AA                | 1946503737               |
| SNP_P3_118776_434904 | NW_004515882.1 | Scaffold398 | 434904                  | GG                              | AA                | 1946503738               |
| SNP_P3_118777_435220 | NW_004515882.1 | Scaffold398 | 435220                  | GG                              | AA                | 1946503740               |
| SNP_P3_118778_442293 | NW_004515882.1 | Scaffold398 | 442293                  | AA                              | GG                | 1946503741               |
| SNP_P3_118779_450153 | NW_004515882.1 | Scaffold398 | 450153                  | AA                              | TT                | 1946503743               |
| SNP_P3_118780_450258 | NW_004515882.1 | Scaffold398 | 450258                  | AA                              | GG                | 1946503744               |
| SNP_P3_118782_453562 | NW_004515882.1 | Scaffold398 | 453562                  | TT                              | AA                | 1946503745               |
| SNP_P3_118783_454592 | NW_004515882.1 | Scaffold398 | 454592                  | CC                              | TT                | 1946503747               |
| SNP_P3_118784_457216 | NW_004515882.1 | Scaffold398 | 457216                  | TT                              | CC                | 1946503748               |
| SNP_P3_118785_457991 | NW_004515882.1 | Scaffold398 | 457991                  | TT                              | AA                | 1946503750               |
| SNP_P3_118786_459386 | NW_004515882.1 | Scaffold398 | 459386                  | GG                              | AA                | 1946503751               |
| SNP_P3_118787_459529 | NW_004515882.1 | Scaffold398 | 459529                  | TT                              | AA                | 1946503753               |
| SNP_P3_118789_459631 | NW_004515882.1 | Scaffold398 | 459631                  | TT                              | GG                | 1946503754               |

| SNPs IDs             | Chromosome IDs | Chromosomes | Physical positions (bp) | CDC Frontier (Reference genome) | (Pusa 256 & HPNB) | NCBI SNPdb Accession IDs |
|----------------------|----------------|-------------|-------------------------|---------------------------------|-------------------|--------------------------|
| SNP_P3_118790_461490 | NW_004515882.1 | Scaffold398 | 461490                  | GG                              | TT                | 1946503756               |
| SNP_P3_118791_464764 | NW_004515882.1 | Scaffold398 | 464764                  | AA                              | GG                | 1946503757               |
| SNP_P3_118792_465866 | NW_004515882.1 | Scaffold398 | 465866                  | CC                              | TT                | 1946503759               |
| SNP_P3_118793_465882 | NW_004515882.1 | Scaffold398 | 465882                  | AA                              | CC                | 1946503760               |
| SNP_P3_118794_465974 | NW_004515882.1 | Scaffold398 | 465974                  | GG                              | AA                | 1946503762               |
| SNP_P3_118795_465984 | NW_004515882.1 | Scaffold398 | 465984                  | AA                              | GG                | 1946503763               |
| SNP_P3_118796_465988 | NW_004515882.1 | Scaffold398 | 465988                  | AA                              | GG                | 1946503765               |
| SNP_P3_118797_465989 | NW_004515882.1 | Scaffold398 | 465989                  | AA                              | CC                | 1946503766               |
| SNP_P3_118799_466440 | NW_004515882.1 | Scaffold398 | 466440                  | GG                              | CC                | 1946503768               |
| SNP_P3_118800_466467 | NW_004515882.1 | Scaffold398 | 466467                  | AA                              | GG                | 1946503769               |
| SNP_P3_118801_467686 | NW_004515882.1 | Scaffold398 | 467686                  | GG                              | AA                | 1946503771               |
| SNP_P3_118802_467997 | NW_004515882.1 | Scaffold398 | 467997                  | TT                              | AA                | 1946503772               |
| SNP_P3_118803_470635 | NW_004515882.1 | Scaffold398 | 470635                  | AA                              | CC                | 1946503774               |
| SNP_P3_118804_470865 | NW_004515882.1 | Scaffold398 | 470865                  | AA                              | GG                | 1946503775               |
| SNP_P3_118805_470964 | NW_004515882.1 | Scaffold398 | 470964                  | CC                              | TT                | 1946503776               |
| SNP_P3_118806_471415 | NW_004515882.1 | Scaffold398 | 471415                  | AA                              | CC                | 1946503778               |
| SNP_P3_118809_477103 | NW_004515882.1 | Scaffold398 | 477103                  | GG                              | AA                | 1946503779               |
| SNP_P3_118810_480609 | NW_004515882.1 | Scaffold398 | 480609                  | TT                              | CC                | 1946503781               |
| SNP_P3_118811_480885 | NW_004515882.1 | Scaffold398 | 480885                  | CC                              | TT                | 1946503782               |
| SNP_P3_118812_482098 | NW_004515882.1 | Scaffold398 | 482098                  | CC                              | TT                | 1946503784               |
| SNP_P3_118813_483511 | NW_004515882.1 | Scaffold398 | 483511                  | GG                              | TT                | 1946503785               |
| SNP_P3_118815_487127 | NW_004515882.1 | Scaffold398 | 487127                  | AA                              | TT                | 1946503787               |
| SNP_P3_118816_487230 | NW_004515882.1 | Scaffold398 | 487230                  | CC                              | TT                | 1946503788               |
| SNP_P3_118818_490750 | NW_004515882.1 | Scaffold398 | 490750                  | CC                              | TT                | 1946503790               |
| SNP_P3_118819_491080 | NW_004515882.1 | Scaffold398 | 491080                  | CC                              | AA                | 1946503791               |
| SNP_P3_118820_491406 | NW_004515882.1 | Scaffold398 | 491406                  | GG                              | TT                | 1946503793               |
| SNP_P3_118821_491711 | NW_004515882.1 | Scaffold398 | 491711                  | CC                              | TT                | 1946503794               |
| SNP_P3_118822_491737 | NW_004515882.1 | Scaffold398 | 491737                  | GG                              | AA                | 1946503796               |
| SNP_P3_118823_491797 | NW_004515882.1 | Scaffold398 | 491797                  | CC                              | TT                | 1946503797               |
| SNP_P3_118824_491978 | NW_004515882.1 | Scaffold398 | 491978                  | GG                              | AA                | 1946503799               |
| SNP_P3_118825_492416 | NW_004515882.1 | Scaffold398 | 492416                  | TT                              | CC                | 1946503800               |
| SNP_P3_118826_492578 | NW_004515882.1 | Scaffold398 | 492578                  | AA                              | TT                | 1946503801               |
| SNP_P3_118827_494273 | NW_004515882.1 | Scaffold398 | 494273                  | CC                              | TT                | 1946503803               |
| SNP_P3_118828_495170 | NW_004515882.1 | Scaffold398 | 495170                  | CC                              | AA                | 1946503804               |
| SNP_P3_118829_495376 | NW_004515882.1 | Scaffold398 | 495376                  | GG                              | TT                | 1946503806               |
| SNP_P3_118830_495377 | NW_004515882.1 | Scaffold398 | 495377                  | AA                              | GG                | 1946503807               |
| SNP_P3_118831_495463 | NW_004515882.1 | Scaffold398 | 495463                  | GG                              | AA                | 1946503809               |
| SNP_P3_118832_495474 | NW_004515882.1 | Scaffold398 | 495474                  | TT                              | CC                | 1946503810               |
| SNP_P3_118833_496385 | NW_004515882.1 | Scaffold398 | 496385                  | CC                              | TT                | 1946503812               |
| SNP_P3_118834_24749  | NW_004515883.1 | Scaffold399 | 24749                   | GG                              | AA                | 1946503813               |
| SNP_P3_118835_24750  | NW_004515883.1 | Scaffold399 | 24750                   | TT                              | CC                | 1946503815               |
| SNP_P3_118836_24788  | NW_004515883.1 | Scaffold399 | 24788                   | AA                              | GG                | 1946503817               |

| SNPs IDs             | Chromosome IDs | Chromosomes | Physical positions (bp) | CDC Frontier (Reference genome) | (Pusa 256 & HPNB) | NCBI SNPdb Accession IDs |
|----------------------|----------------|-------------|-------------------------|---------------------------------|-------------------|--------------------------|
| SNP_P3_118837_29398  | NW_004515883.1 | Scaffold399 | 29398                   | GG                              | TT                | 1946503818               |
| SNP_P3_118838_29476  | NW_004515883.1 | Scaffold399 | 29476                   | GG                              | CC                | 1946503820               |
| SNP_P3_118839_29804  | NW_004515883.1 | Scaffold399 | 29804                   | GG                              | AA                | 1946503821               |
| SNP_P3_118840_42487  | NW_004515883.1 | Scaffold399 | 42487                   | CC                              | TT                | 1946503823               |
| SNP_P3_118841_44351  | NW_004515883.1 | Scaffold399 | 44351                   | AA                              | TT                | 1946503824               |
| SNP_P3_118842_44378  | NW_004515883.1 | Scaffold399 | 44378                   | AA                              | GG                | 1946503826               |
| SNP_P3_118843_49518  | NW_004515883.1 | Scaffold399 | 49518                   | TT                              | AA                | 1946503828               |
| SNP_P3_118844_49542  | NW_004515883.1 | Scaffold399 | 49542                   | AA                              | GG                | 1946503830               |
| SNP_P3_118845_49849  | NW_004515883.1 | Scaffold399 | 49849                   | GG                              | AA                | 1946503831               |
| SNP_P3_118846_51412  | NW_004515883.1 | Scaffold399 | 51412                   | AA                              | GG                | 1946503833               |
| SNP_P3_118847_68149  | NW_004515883.1 | Scaffold399 | 68149                   | GG                              | TT                | 1946503834               |
| SNP_P3_118849_70705  | NW_004515883.1 | Scaffold399 | 70705                   | TT                              | CC                | 1946503836               |
| SNP_P3_118850_72219  | NW_004515883.1 | Scaffold399 | 72219                   | CC                              | TT                | 1946503838               |
| SNP_P3_118851_72236  | NW_004515883.1 | Scaffold399 | 72236                   | TT                              | CC                | 1946503839               |
| SNP_P3_118852_72247  | NW_004515883.1 | Scaffold399 | 72247                   | CC                              | AA                | 1946503841               |
| SNP_P3_118853_74228  | NW_004515883.1 | Scaffold399 | 74228                   | AA                              | CC                | 1946503843               |
| SNP_P3_118854_81693  | NW_004515883.1 | Scaffold399 | 81693                   | CC                              | TT                | 1946503844               |
| SNP_P3_118855_81810  | NW_004515883.1 | Scaffold399 | 81810                   | AA                              | GG                | 1946503846               |
| SNP_P3_118856_81820  | NW_004515883.1 | Scaffold399 | 81820                   | GG                              | AA                | 1946503847               |
| SNP_P3_118857_82565  | NW_004515883.1 | Scaffold399 | 82565                   | TT                              | AA                | 1946503849               |
| SNP_P3_118858_92605  | NW_004515883.1 | Scaffold399 | 92605                   | CC                              | TT                | 1946503851               |
| SNP_P3_118859_94699  | NW_004515883.1 | Scaffold399 | 94699                   | GG                              | CC                | 1946503852               |
| SNP_P3_118860_102130 | NW_004515883.1 | Scaffold399 | 102130                  | TT                              | CC                | 1946503854               |
| SNP_P3_118861_103569 | NW_004515883.1 | Scaffold399 | 103569                  | TT                              | AA                | 1946503855               |
| SNP_P3_118862_103570 | NW_004515883.1 | Scaffold399 | 103570                  | CC                              | TT                | 1946503857               |
| SNP_P3_118863_430    | NW_004515884.1 | Scaffold400 | 430                     | AA                              | GG                | 1946503858               |
| SNP_P3_118864_433    | NW_004515884.1 | Scaffold400 | 433                     | GG                              | AA                | 1946503860               |
| SNP_P3_118865_9489   | NW_004515884.1 | Scaffold400 | 9489                    | TT                              | CC                | 1946503861               |
| SNP_P3_118866_9516   | NW_004515884.1 | Scaffold400 | 9516                    | GG                              | AA                | 1946503864               |
| SNP_P3_118867_9938   | NW_004515884.1 | Scaffold400 | 9938                    | CC                              | TT                | 1946503866               |
| SNP_P3_118868_9945   | NW_004515884.1 | Scaffold400 | 9945                    | AA                              | TT                | 1946503867               |
| SNP_P3_118869_9956   | NW_004515884.1 | Scaffold400 | 9956                    | GG                              | CC                | 1946503869               |
| SNP_P3_118870_17170  | NW_004515884.1 | Scaffold400 | 17170                   | CC                              | TT                | 1946503870               |
| SNP_P3_118871_24332  | NW_004515884.1 | Scaffold400 | 24332                   | GG                              | AA                | 1946503872               |
| SNP_P3_118872_32637  | NW_004515884.1 | Scaffold400 | 32637                   | CC                              | TT                | 1946503873               |
| SNP_P3_118873_41266  | NW_004515884.1 | Scaffold400 | 41266                   | CC                              | TT                | 1946503875               |
| SNP_P3_118874_41693  | NW_004515884.1 | Scaffold400 | 41693                   | TT                              | CC                | 1946503876               |
| SNP_P3_118875_41714  | NW_004515884.1 | Scaffold400 | 41714                   | TT                              | CC                | 1946503878               |
| SNP_P3_118876_41718  | NW_004515884.1 | Scaffold400 | 41718                   | CC                              | TT                | 1946503879               |
| SNP_P3_118877_41730  | NW_004515884.1 | Scaffold400 | 41730                   | TT                              | CC                | 1946503881               |
| SNP_P3_118878_41800  | NW_004515884.1 | Scaffold400 | 41800                   | AA                              | CC                | 1946503882               |
| SNP_P3_118879_41853  | NW_004515884.1 | Scaffold400 | 41853                   | GG                              | AA                | 1946503883               |

| SNPs IDs             | Chromosome IDs | Chromosomes | Physical positions (bp) | CDC Frontier (Reference genome) | (Pusa 256 & HPNB) | NCBI SNPdb Accession IDs |
|----------------------|----------------|-------------|-------------------------|---------------------------------|-------------------|--------------------------|
| SNP_P3_118880_41994  | NW_004515884.1 | Scaffold400 | 41994                   | TT                              | CC                | 1946503885               |
| SNP_P3_118881_42027  | NW_004515884.1 | Scaffold400 | 42027                   | GG                              | AA                | 1946503886               |
| SNP_P3_118882_42075  | NW_004515884.1 | Scaffold400 | 42075                   | CC                              | AA                | 1946503888               |
| SNP_P3_118883_42090  | NW_004515884.1 | Scaffold400 | 42090                   | AA                              | TT                | 1946503889               |
| SNP_P3_118884_42099  | NW_004515884.1 | Scaffold400 | 42099                   | GG                              | AA                | 1946503891               |
| SNP_P3_118885_42101  | NW_004515884.1 | Scaffold400 | 42101                   | CC                              | TT                | 1946503893               |
| SNP_P3_118886_42115  | NW_004515884.1 | Scaffold400 | 42115                   | TT                              | CC                | 1946503894               |
| SNP_P3_118887_42184  | NW_004515884.1 | Scaffold400 | 42184                   | AA                              | TT                | 1946503895               |
| SNP_P3_118888_42193  | NW_004515884.1 | Scaffold400 | 42193                   | TT                              | AA                | 1946503897               |
| SNP_P3_118889_42194  | NW_004515884.1 | Scaffold400 | 42194                   | AA                              | TT                | 1946503899               |
| SNP_P3_118890_42196  | NW_004515884.1 | Scaffold400 | 42196                   | GG                              | CC                | 1946503900               |
| SNP_P3_118891_42255  | NW_004515884.1 | Scaffold400 | 42255                   | GG                              | TT                | 1946503902               |
| SNP_P3_118892_42291  | NW_004515884.1 | Scaffold400 | 42291                   | TT                              | CC                | 1946503903               |
| SNP_P3_118893_42373  | NW_004515884.1 | Scaffold400 | 42373                   | TT                              | GG                | 1946503905               |
| SNP_P3_118894_42433  | NW_004515884.1 | Scaffold400 | 42433                   | TT                              | CC                | 1946503906               |
| SNP_P3_118895_42441  | NW_004515884.1 | Scaffold400 | 42441                   | AA                              | TT                | 1946503908               |
| SNP_P3_118896_42459  | NW_004515884.1 | Scaffold400 | 42459                   | CC                              | TT                | 1946503909               |
| SNP_P3_118897_42503  | NW_004515884.1 | Scaffold400 | 42503                   | TT                              | CC                | 1946503911               |
| SNP_P3_118898_42544  | NW_004515884.1 | Scaffold400 | 42544                   | TT                              | AA                | 1946503913               |
| SNP_P3_118900_42806  | NW_004515884.1 | Scaffold400 | 42806                   | CC                              | TT                | 1946503914               |
| SNP_P3_118901_42810  | NW_004515884.1 | Scaffold400 | 42810                   | CC                              | GG                | 1946503916               |
| SNP_P3_118902_42846  | NW_004515884.1 | Scaffold400 | 42846                   | TT                              | GG                | 1946503917               |
| SNP_P3_118903_43070  | NW_004515884.1 | Scaffold400 | 43070                   | CC                              | GG                | 1946503919               |
| SNP_P3_118904_43238  | NW_004515884.1 | Scaffold400 | 43238                   | CC                              | AA                | 1946503920               |
| SNP_P3_118905_43463  | NW_004515884.1 | Scaffold400 | 43463                   | TT                              | AA                | 1946503922               |
| SNP_P3_118906_43529  | NW_004515884.1 | Scaffold400 | 43529                   | CC                              | TT                | 1946503923               |
| SNP_P3_118907_43564  | NW_004515884.1 | Scaffold400 | 43564                   | AA                              | GG                | 1946503925               |
| SNP_P3_118908_43620  | NW_004515884.1 | Scaffold400 | 43620                   | CC                              | TT                | 1946503927               |
| SNP_P3_118909_44207  | NW_004515884.1 | Scaffold400 | 44207                   | GG                              | TT                | 1946503928               |
| SNP_P3_118910_62677  | NW_004515884.1 | Scaffold400 | 62677                   | AA                              | GG                | 1946503930               |
| SNP_P3_118912_66610  | NW_004515884.1 | Scaffold400 | 66610                   | AA                              | GG                | 1946503932               |
| SNP_P3_118913_377    | NW_004515885.1 | Scaffold401 | 377                     | AA                              | GG                | 1946503933               |
| SNP_P3_118914_432    | NW_004515885.1 | Scaffold401 | 432                     | AA                              | GG                | 1946503935               |
| SNP_P3_118915_50536  | NW_004515885.1 | Scaffold401 | 50536                   | TT                              | CC                | 1946503936               |
| SNP_P3_118916_53255  | NW_004515885.1 | Scaffold401 | 53255                   | GG                              | AA                | 1946503938               |
| SNP_P3_118917_79467  | NW_004515885.1 | Scaffold401 | 79467                   | GG                              | AA                | 1946503939               |
| SNP_P3_118918_81194  | NW_004515885.1 | Scaffold401 | 81194                   | AA                              | GG                | 1946503941               |
| SNP_P3_118920_100442 | NW_004515885.1 | Scaffold401 | 100442                  | CC                              | TT                | 1946503942               |
| SNP_P3_118921_102072 | NW_004515885.1 | Scaffold401 | 102072                  | GG                              | CC                | 1946503944               |
| SNP_P3_118922_102112 | NW_004515885.1 | Scaffold401 | 102112                  | CC                              | AA                | 1946503946               |
| SNP_P3_118923_102483 | NW_004515885.1 | Scaffold401 | 102483                  | CC                              | TT                | 1946503947               |
| SNP_P3_118924_123437 | NW_004515885.1 | Scaffold401 | 123437                  | CC                              | TT                | 1946503996               |

| SNPs IDs             | Chromosome IDs | Chromosomes | Physical positions (bp) | CDC Frontier (Reference genome) | (Pusa 256 & HPNB) | NCBI SNPdb Accession IDs |
|----------------------|----------------|-------------|-------------------------|---------------------------------|-------------------|--------------------------|
| SNP_P3_118925_151228 | NW_004515885.1 | Scaffold401 | 151228                  | GG                              | CC                | 1946503997               |
| SNP_P3_118927_156435 | NW_004515885.1 | Scaffold401 | 156435                  | AA                              | TT                | 1946503999               |
| SNP_P3_118928_166548 | NW_004515885.1 | Scaffold401 | 166548                  | GG                              | TT                | 1946504000               |
| SNP_P3_118929_166668 | NW_004515885.1 | Scaffold401 | 166668                  | AA                              | GG                | 1946504002               |
| SNP_P3_118930_166831 | NW_004515885.1 | Scaffold401 | 166831                  | TT                              | CC                | 1946504003               |
| SNP_P3_118931_166914 | NW_004515885.1 | Scaffold401 | 166914                  | TT                              | GG                | 1946504005               |
| SNP_P3_118932_166924 | NW_004515885.1 | Scaffold401 | 166924                  | TT                              | AA                | 1946504006               |
| SNP_P3_118933_166941 | NW_004515885.1 | Scaffold401 | 166941                  | AA                              | GG                | 1946504008               |
| SNP_P3_118934_167002 | NW_004515885.1 | Scaffold401 | 167002                  | TT                              | CC                | 1946504009               |
| SNP_P3_118935_167073 | NW_004515885.1 | Scaffold401 | 167073                  | AA                              | GG                | 1946504010               |
| SNP_P3_118936_167086 | NW_004515885.1 | Scaffold401 | 167086                  | TT                              | GG                | 1946504012               |
| SNP_P3_118937_168756 | NW_004515885.1 | Scaffold401 | 168756                  | AA                              | GG                | 1946504013               |
| SNP_P3_118938_169029 | NW_004515885.1 | Scaffold401 | 169029                  | AA                              | TT                | 1946504015               |
| SNP_P3_118939_169032 | NW_004515885.1 | Scaffold401 | 169032                  | TT                              | GG                | 1946504016               |
| SNP_P3_118940_169058 | NW_004515885.1 | Scaffold401 | 169058                  | AA                              | CC                | 1946504018               |
| SNP_P3_118941_169061 | NW_004515885.1 | Scaffold401 | 169061                  | AA                              | GG                | 1946504019               |
| SNP_P3_118942_171387 | NW_004515885.1 | Scaffold401 | 171387                  | TT                              | AA                | 1946504021               |
| SNP_P3_118943_172151 | NW_004515885.1 | Scaffold401 | 172151                  | CC                              | TT                | 1946504022               |
| SNP_P3_118944_172255 | NW_004515885.1 | Scaffold401 | 172255                  | AA                              | TT                | 1946504024               |
| SNP_P3_118945_172269 | NW_004515885.1 | Scaffold401 | 172269                  | GG                              | TT                | 1946504025               |
| SNP_P3_118946_172399 | NW_004515885.1 | Scaffold401 | 172399                  | AA                              | CC                | 1946504027               |
| SNP_P3_118947_172413 | NW_004515885.1 | Scaffold401 | 172413                  | AA                              | GG                | 1946504029               |
| SNP_P3_118948_172457 | NW_004515885.1 | Scaffold401 | 172457                  | TT                              | CC                | 1946504030               |
| SNP_P3_118949_172467 | NW_004515885.1 | Scaffold401 | 172467                  | TT                              | CC                | 1946504032               |
| SNP_P3_118950_172495 | NW_004515885.1 | Scaffold401 | 172495                  | GG                              | AA                | 1946504033               |
| SNP_P3_118951_172500 | NW_004515885.1 | Scaffold401 | 172500                  | AA                              | GG                | 1946504035               |
| SNP_P3_118952_172503 | NW_004515885.1 | Scaffold401 | 172503                  | AA                              | GG                | 1946504036               |
| SNP_P3_118953_215463 | NW_004515885.1 | Scaffold401 | 215463                  | TT                              | CC                | 1946504038               |
| SNP_P3_118954_215810 | NW_004515885.1 | Scaffold401 | 215810                  | AA                              | GG                | 1946504039               |
| SNP_P3_118955_223300 | NW_004515885.1 | Scaffold401 | 223300                  | TT                              | CC                | 1946504041               |
| SNP_P3_118956_121    | NW_004515886.1 | Scaffold404 | 121                     | GG                              | AA                | 1946504042               |
| SNP_P3_118957_2443   | NW_004515886.1 | Scaffold404 | 2443                    | AA                              | CC                | 1946504044               |
| SNP_P3_118958_2667   | NW_004515886.1 | Scaffold404 | 2667                    | AA                              | GG                | 1946504045               |
| SNP_P3_118959_2727   | NW_004515886.1 | Scaffold404 | 2727                    | AA                              | TT                | 1946504047               |
| SNP_P3_118960_2753   | NW_004515886.1 | Scaffold404 | 2753                    | AA                              | CC                | 1946504048               |
| SNP_P3_118961_2830   | NW_004515886.1 | Scaffold404 | 2830                    | AA                              | GG                | 1946504050               |
| SNP_P3_118962_4493   | NW_004515886.1 | Scaffold404 | 4493                    | AA                              | TT                | 1946504051               |
| SNP_P3_118963_4518   | NW_004515886.1 | Scaffold404 | 4518                    | CC                              | TT                | 1946504053               |
| SNP_P3_118964_5731   | NW_004515886.1 | Scaffold404 | 5731                    | TT                              | GG                | 1946504054               |
| SNP_P3_118965_5870   | NW_004515886.1 | Scaffold404 | 5870                    | CC                              | TT                | 1946504056               |
| SNP_P3_118966_5941   | NW_004515886.1 | Scaffold404 | 5941                    | TT                              | GG                | 1946504057               |
| SNP_P3_118967_6287   | NW_004515886.1 | Scaffold404 | 6287                    | AA                              | TT                | 1946504059               |

| SNPs IDs            | Chromosome IDs | Chromosomes | Physical positions (bp) | CDC Frontier (Reference genome) | (Pusa 256 & HPNB) | NCBI SNPdb Accession IDs |
|---------------------|----------------|-------------|-------------------------|---------------------------------|-------------------|--------------------------|
| SNP_P3_118968_6305  | NW_004515886.1 | Scaffold404 | 6305                    | CC                              | TT                | 1946504060               |
| SNP_P3_118969_6391  | NW_004515886.1 | Scaffold404 | 6391                    | AA                              | TT                | 1946504062               |
| SNP_P3_118970_6393  | NW_004515886.1 | Scaffold404 | 6393                    | TT                              | GG                | 1946504063               |
| SNP_P3_118971_6404  | NW_004515886.1 | Scaffold404 | 6404                    | AA                              | CC                | 1946504064               |
| SNP_P3_118972_6493  | NW_004515886.1 | Scaffold404 | 6493                    | GG                              | CC                | 1946504066               |
| SNP_P3_118974_7130  | NW_004515886.1 | Scaffold404 | 7130                    | TT                              | CC                | 1946504067               |
| SNP_P3_118975_7346  | NW_004515886.1 | Scaffold404 | 7346                    | TT                              | AA                | 1946504069               |
| SNP_P3_118976_13110 | NW_004515886.1 | Scaffold404 | 13110                   | AA                              | GG                | 1946504071               |
| SNP_P3_118977_14522 | NW_004515886.1 | Scaffold404 | 14522                   | AA                              | TT                | 1946504072               |
| SNP_P3_118978_14532 | NW_004515886.1 | Scaffold404 | 14532                   | CC                              | GG                | 1946504074               |
| SNP_P3_118979_15281 | NW_004515886.1 | Scaffold404 | 15281                   | TT                              | AA                | 1946504075               |
| SNP_P3_118980_23775 | NW_004515886.1 | Scaffold404 | 23775                   | GG                              | AA                | 1946504077               |
| SNP_P3_118981_23823 | NW_004515886.1 | Scaffold404 | 23823                   | TT                              | AA                | 1946504078               |
| SNP_P3_118982_23830 | NW_004515886.1 | Scaffold404 | 23830                   | CC                              | AA                | 1946504080               |
| SNP_P3_118983_24107 | NW_004515886.1 | Scaffold404 | 24107                   | TT                              | AA                | 1946504082               |
| SNP_P3_118984_24183 | NW_004515886.1 | Scaffold404 | 24183                   | AA                              | CC                | 1946504083               |
| SNP_P3_118985_24287 | NW_004515886.1 | Scaffold404 | 24287                   | CC                              | TT                | 1946504085               |
| SNP_P3_118986_24345 | NW_004515886.1 | Scaffold404 | 24345                   | AA                              | CC                | 1946504086               |
| SNP_P3_118987_24863 | NW_004515886.1 | Scaffold404 | 24863                   | TT                              | CC                | 1946504088               |
| SNP_P3_118988_25409 | NW_004515886.1 | Scaffold404 | 25409                   | AA                              | GG                | 1946504089               |
| SNP_P3_118989_25500 | NW_004515886.1 | Scaffold404 | 25500                   | CC                              | GG                | 1946504091               |
| SNP_P3_118990_25508 | NW_004515886.1 | Scaffold404 | 25508                   | GG                              | AA                | 1946504092               |
| SNP_P3_118991_25612 | NW_004515886.1 | Scaffold404 | 25612                   | CC                              | TT                | 1946504094               |
| SNP_P3_118992_25619 | NW_004515886.1 | Scaffold404 | 25619                   | GG                              | AA                | 1946504095               |
| SNP_P3_118993_25667 | NW_004515886.1 | Scaffold404 | 25667                   | TT                              | GG                | 1946504097               |
| SNP_P3_118994_25709 | NW_004515886.1 | Scaffold404 | 25709                   | AA                              | GG                | 1946504098               |
| SNP_P3_118995_25840 | NW_004515886.1 | Scaffold404 | 25840                   | TT                              | AA                | 1946504100               |
| SNP_P3_118996_25848 | NW_004515886.1 | Scaffold404 | 25848                   | TT                              | GG                | 1946504102               |
| SNP_P3_118997_25849 | NW_004515886.1 | Scaffold404 | 25849                   | AA                              | GG                | 1946504103               |
| SNP_P3_118998_25867 | NW_004515886.1 | Scaffold404 | 25867                   | AA                              | GG                | 1946504105               |
| SNP_P3_118999_25909 | NW_004515886.1 | Scaffold404 | 25909                   | TT                              | CC                | 1946504106               |
| SNP_P3_119000_25933 | NW_004515886.1 | Scaffold404 | 25933                   | AA                              | TT                | 1946504108               |
| SNP_P3_119001_25943 | NW_004515886.1 | Scaffold404 | 25943                   | AA                              | GG                | 1946504110               |
| SNP_P3_119002_25978 | NW_004515886.1 | Scaffold404 | 25978                   | TT                              | CC                | 1946504111               |
| SNP_P3_119003_26044 | NW_004515886.1 | Scaffold404 | 26044                   | AA                              | CC                | 1946504113               |
| SNP_P3_119004_26074 | NW_004515886.1 | Scaffold404 | 26074                   | TT                              | CC                | 1946504114               |
| SNP_P3_119006_38229 | NW_004515886.1 | Scaffold404 | 38229                   | CC                              | TT                | 1946504116               |
| SNP_P3_119007_38238 | NW_004515886.1 | Scaffold404 | 38238                   | TT                              | CC                | 1946504117               |
| SNP_P3_119008_38242 | NW_004515886.1 | Scaffold404 | 38242                   | TT                              | CC                | 1946504119               |
| SNP_P3_119009_40634 | NW_004515886.1 | Scaffold404 | 40634                   | GG                              | AA                | 1946504120               |
| SNP_P3_119010_43788 | NW_004515886.1 | Scaffold404 | 43788                   | CC                              | TT                | 1946504122               |
| SNP_P3_119011_43792 | NW_004515886.1 | Scaffold404 | 43792                   | GG                              | AA                | 1946504123               |

| SNPs IDs            | Chromosome IDs | Chromosomes | Physical positions (bp) | CDC Frontier (Reference genome) | (Pusa 256 & HPNB) | NCBI SNPdb Accession IDs |
|---------------------|----------------|-------------|-------------------------|---------------------------------|-------------------|--------------------------|
| SNP_P3_119012_43802 | NW_004515886.1 | Scaffold404 | 43802                   | TT                              | AA                | 1946504125               |
| SNP_P3_119013_43806 | NW_004515886.1 | Scaffold404 | 43806                   | CC                              | TT                | 1946504126               |
| SNP_P3_119014_43807 | NW_004515886.1 | Scaffold404 | 43807                   | AA                              | CC                | 1946504128               |
| SNP_P3_119015_43818 | NW_004515886.1 | Scaffold404 | 43818                   | CC                              | TT                | 1946504129               |
| SNP_P3_119016_43858 | NW_004515886.1 | Scaffold404 | 43858                   | GG                              | AA                | 1946504131               |
| SNP_P3_119017_43889 | NW_004515886.1 | Scaffold404 | 43889                   | CC                              | TT                | 1946504132               |
| SNP_P3_119018_43900 | NW_004515886.1 | Scaffold404 | 43900                   | TT                              | CC                | 1946504134               |
| SNP_P3_119019_43902 | NW_004515886.1 | Scaffold404 | 43902                   | GG                              | AA                | 1946504135               |
| SNP_P3_119020_44294 | NW_004515886.1 | Scaffold404 | 44294                   | TT                              | CC                | 1946504137               |
| SNP_P3_119021_44317 | NW_004515886.1 | Scaffold404 | 44317                   | GG                              | AA                | 1946504138               |
| SNP_P3_119022_44323 | NW_004515886.1 | Scaffold404 | 44323                   | GG                              | AA                | 1946504140               |
| SNP_P3_119023_44324 | NW_004515886.1 | Scaffold404 | 44324                   | TT                              | AA                | 1946504141               |
| SNP_P3_119024_44402 | NW_004515886.1 | Scaffold404 | 44402                   | AA                              | TT                | 1946504143               |
| SNP_P3_119025_44412 | NW_004515886.1 | Scaffold404 | 44412                   | GG                              | AA                | 1946504144               |
| SNP_P3_119026_44433 | NW_004515886.1 | Scaffold404 | 44433                   | TT                              | CC                | 1946504145               |
| SNP_P3_119028_44791 | NW_004515886.1 | Scaffold404 | 44791                   | CC                              | TT                | 1946504147               |
| SNP_P3_119029_44937 | NW_004515886.1 | Scaffold404 | 44937                   | GG                              | TT                | 1946504148               |
| SNP_P3_119030_45120 | NW_004515886.1 | Scaffold404 | 45120                   | GG                              | TT                | 1946504150               |
| SNP_P3_119031_45122 | NW_004515886.1 | Scaffold404 | 45122                   | GG                              | CC                | 1946504151               |
| SNP_P3_119032_45130 | NW_004515886.1 | Scaffold404 | 45130                   | CC                              | GG                | 1946504153               |
| SNP_P3_119033_45132 | NW_004515886.1 | Scaffold404 | 45132                   | TT                              | AA                | 1946504154               |
| SNP_P3_119034_45145 | NW_004515886.1 | Scaffold404 | 45145                   | TT                              | CC                | 1946504156               |
| SNP_P3_119035_46742 | NW_004515886.1 | Scaffold404 | 46742                   | GG                              | AA                | 1946504157               |
| SNP_P3_119036_47051 | NW_004515886.1 | Scaffold404 | 47051                   | AA                              | TT                | 1946504159               |
| SNP_P3_119037_49936 | NW_004515886.1 | Scaffold404 | 49936                   | GG                              | AA                | 1946504160               |
| SNP_P3_119038_61700 | NW_004515886.1 | Scaffold404 | 61700                   | AA                              | TT                | 1946504162               |
| SNP_P3_119039_61726 | NW_004515886.1 | Scaffold404 | 61726                   | AA                              | CC                | 1946504163               |
| SNP_P3_119040_63600 | NW_004515886.1 | Scaffold404 | 63600                   | CC                              | TT                | 1946504165               |
| SNP_P3_119041_63650 | NW_004515886.1 | Scaffold404 | 63650                   | AA                              | CC                | 1946504166               |
| SNP_P3_119042_63676 | NW_004515886.1 | Scaffold404 | 63676                   | CC                              | GG                | 1946504168               |
| SNP_P3_119043_63677 | NW_004515886.1 | Scaffold404 | 63677                   | AA                              | TT                | 1946504169               |
| SNP_P3_119044_63678 | NW_004515886.1 | Scaffold404 | 63678                   | AA                              | TT                | 1946504171               |
| SNP_P3_119045_63912 | NW_004515886.1 | Scaffold404 | 63912                   | CC                              | TT                | 1946504172               |
| SNP_P3_119046_63960 | NW_004515886.1 | Scaffold404 | 63960                   | AA                              | GG                | 1946504174               |
| SNP_P3_119047_63990 | NW_004515886.1 | Scaffold404 | 63990                   | TT                              | CC                | 1946504175               |
| SNP_P3_119048_64017 | NW_004515886.1 | Scaffold404 | 64017                   | TT                              | AA                | 1946504177               |
| SNP_P3_119049_64260 | NW_004515886.1 | Scaffold404 | 64260                   | AA                              | CC                | 1946504178               |
| SNP_P3_119050_64326 | NW_004515886.1 | Scaffold404 | 64326                   | AA                              | CC                | 1946504180               |
| SNP_P3_119051_64640 | NW_004515886.1 | Scaffold404 | 64640                   | AA                              | TT                | 1946504182               |
| SNP_P3_119052_64645 | NW_004515886.1 | Scaffold404 | 64645                   | AA                              | GG                | 1946504183               |
| SNP_P3_119053_64674 | NW_004515886.1 | Scaffold404 | 64674                   | TT                              | CC                | 1946504184               |
| SNP_P3_119054_64707 | NW_004515886.1 | Scaffold404 | 64707                   | TT                              | AA                | 1946504186               |



| SNPs IDs             | Chromosome IDs | Chromosomes | Physical positions (bp) | CDC Frontier (Reference genome) | (Pusa 256 & HPNB) | NCBI SNPdb Accession IDs |
|----------------------|----------------|-------------|-------------------------|---------------------------------|-------------------|--------------------------|
| SNP_P3_119055_64737  | NW_004515886.1 | Scaffold404 | 64737                   | AA                              | TT                | 1946504187               |
| SNP_P3_119056_69344  | NW_004515886.1 | Scaffold404 | 69344                   | TT                              | AA                | 1946504189               |
| SNP_P3_119057_81461  | NW_004515886.1 | Scaffold404 | 81461                   | CC                              | AA                | 1946504190               |
| SNP_P3_119058_96948  | NW_004515886.1 | Scaffold404 | 96948                   | AA                              | GG                | 1946504192               |
| SNP_P3_119059_111636 | NW_004515886.1 | Scaffold404 | 111636                  | TT                              | AA                | 1946504193               |
| SNP_P3_119060_111637 | NW_004515886.1 | Scaffold404 | 111637                  | TT                              | CC                | 1946504195               |
| SNP_P3_119061_119682 | NW_004515886.1 | Scaffold404 | 119682                  | TT                              | GG                | 1946504196               |
| SNP_P3_119062_119693 | NW_004515886.1 | Scaffold404 | 119693                  | TT                              | CC                | 1946504198               |
| SNP_P3_119063_119695 | NW_004515886.1 | Scaffold404 | 119695                  | TT                              | CC                | 1946504199               |
| SNP_P3_119064_143549 | NW_004515886.1 | Scaffold404 | 143549                  | TT                              | GG                | 1946504201               |
| SNP_P3_119065_143559 | NW_004515886.1 | Scaffold404 | 143559                  | CC                              | TT                | 1946504202               |
| SNP_P3_119066_143605 | NW_004515886.1 | Scaffold404 | 143605                  | TT                              | AA                | 1946504204               |
| SNP_P3_119068_149514 | NW_004515886.1 | Scaffold404 | 149514                  | TT                              | GG                | 1946504205               |
| SNP_P3_119069_149515 | NW_004515886.1 | Scaffold404 | 149515                  | TT                              | CC                | 1946504207               |
| SNP_P3_119070_149879 | NW_004515886.1 | Scaffold404 | 149879                  | AA                              | GG                | 1946504208               |
| SNP_P3_119071_150778 | NW_004515886.1 | Scaffold404 | 150778                  | GG                              | TT                | 1946504210               |
| SNP_P3_119072_150837 | NW_004515886.1 | Scaffold404 | 150837                  | AA                              | GG                | 1946504211               |
| SNP_P3_119073_161379 | NW_004515886.1 | Scaffold404 | 161379                  | AA                              | GG                | 1946504213               |
| SNP_P3_119075_161868 | NW_004515886.1 | Scaffold404 | 161868                  | AA                              | GG                | 1946504214               |
| SNP_P3_119077_171064 | NW_004515886.1 | Scaffold404 | 171064                  | TT                              | CC                | 1946504216               |
| SNP_P3_119078_180167 | NW_004515886.1 | Scaffold404 | 180167                  | GG                              | TT                | 1946504217               |
| SNP_P3_119079_180191 | NW_004515886.1 | Scaffold404 | 180191                  | TT                              | CC                | 1946504219               |
| SNP_P3_119080_180203 | NW_004515886.1 | Scaffold404 | 180203                  | GG                              | AA                | 1946504220               |
| SNP_P3_119081_180259 | NW_004515886.1 | Scaffold404 | 180259                  | GG                              | TT                | 1946504221               |
| SNP_P3_119082_180599 | NW_004515886.1 | Scaffold404 | 180599                  | GG                              | TT                | 1946504223               |
| SNP_P3_119083_183911 | NW_004515886.1 | Scaffold404 | 183911                  | GG                              | CC                | 1946504224               |
| SNP_P3_119084_183959 | NW_004515886.1 | Scaffold404 | 183959                  | CC                              | TT                | 1946504226               |
| SNP_P3_119085_184064 | NW_004515886.1 | Scaffold404 | 184064                  | GG                              | CC                | 1946504227               |
| SNP_P3_119086_184116 | NW_004515886.1 | Scaffold404 | 184116                  | TT                              | CC                | 1946504229               |
| SNP_P3_119087_184196 | NW_004515886.1 | Scaffold404 | 184196                  | AA                              | GG                | 1946504230               |
| SNP_P3_119088_184308 | NW_004515886.1 | Scaffold404 | 184308                  | TT                              | GG                | 1946504232               |
| SNP_P3_119089_184360 | NW_004515886.1 | Scaffold404 | 184360                  | GG                              | AA                | 1946504233               |
| SNP_P3_119090_184368 | NW_004515886.1 | Scaffold404 | 184368                  | TT                              | CC                | 1946504235               |
| SNP_P3_119091_184373 | NW_004515886.1 | Scaffold404 | 184373                  | CC                              | TT                | 1946504236               |
| SNP_P3_119092_184378 | NW_004515886.1 | Scaffold404 | 184378                  | TT                              | AA                | 1946504238               |
| SNP_P3_119093_184393 | NW_004515886.1 | Scaffold404 | 184393                  | TT                              | AA                | 1946504239               |
| SNP_P3_119094_184394 | NW_004515886.1 | Scaffold404 | 184394                  | CC                              | AA                | 1946504241               |
| SNP_P3_119095_184405 | NW_004515886.1 | Scaffold404 | 184405                  | CC                              | TT                | 1946504242               |
| SNP_P3_119096_184423 | NW_004515886.1 | Scaffold404 | 184423                  | TT                              | CC                | 1946504244               |
| SNP_P3_119097_184447 | NW_004515886.1 | Scaffold404 | 184447                  | TT                              | CC                | 1946504245               |
| SNP_P3_119098_185672 | NW_004515886.1 | Scaffold404 | 185672                  | AA                              | GG                | 1946504247               |
| SNP_P3_119099_185699 | NW_004515886.1 | Scaffold404 | 185699                  | AA                              | GG                | 1946504248               |

| SNPs IDs             | Chromosome IDs | Chromosomes | Physical positions (bp) | CDC Frontier (Reference genome) | (Pusa 256 & HPNB) | NCBI SNPdb Accession IDs |
|----------------------|----------------|-------------|-------------------------|---------------------------------|-------------------|--------------------------|
| SNP_P3_119100_185706 | NW_004515886.1 | Scaffold404 | 185706                  | GG                              | CC                | 1946504250               |
| SNP_P3_119102_185765 | NW_004515886.1 | Scaffold404 | 185765                  | AA                              | GG                | 1946504251               |
| SNP_P3_119103_185766 | NW_004515886.1 | Scaffold404 | 185766                  | TT                              | CC                | 1946504252               |
| SNP_P3_119104_186050 | NW_004515886.1 | Scaffold404 | 186050                  | CC                              | TT                | 1946504254               |
| SNP_P3_119105_186059 | NW_004515886.1 | Scaffold404 | 186059                  | TT                              | CC                | 1946504255               |
| SNP_P3_119107_231379 | NW_004515886.1 | Scaffold404 | 231379                  | AA                              | TT                | 1946504257               |
| SNP_P3_119108_231380 | NW_004515886.1 | Scaffold404 | 231380                  | GG                              | AA                | 1946504258               |
| SNP_P3_119110_236820 | NW_004515886.1 | Scaffold404 | 236820                  | CC                              | TT                | 1946504260               |
| SNP_P3_119112_263071 | NW_004515886.1 | Scaffold404 | 263071                  | AA                              | CC                | 1946504261               |
| SNP_P3_119113_264072 | NW_004515886.1 | Scaffold404 | 264072                  | TT                              | CC                | 1946504263               |
| SNP_P3_119114_264103 | NW_004515886.1 | Scaffold404 | 264103                  | TT                              | CC                | 1946504264               |
| SNP_P3_119115_264895 | NW_004515886.1 | Scaffold404 | 264895                  | AA                              | GG                | 1946504266               |
| SNP_P3_119116_265274 | NW_004515886.1 | Scaffold404 | 265274                  | GG                              | AA                | 1946504267               |
| SNP_P3_119117_272480 | NW_004515886.1 | Scaffold404 | 272480                  | TT                              | AA                | 1946504268               |
| SNP_P3_119118_278877 | NW_004515886.1 | Scaffold404 | 278877                  | CC                              | GG                | 1946504270               |
| SNP_P3_119119_331659 | NW_004515886.1 | Scaffold404 | 331659                  | AA                              | GG                | 1946504271               |
| SNP_P3_119120_331663 | NW_004515886.1 | Scaffold404 | 331663                  | AA                              | CC                | 1946504273               |
| SNP_P3_119121_331684 | NW_004515886.1 | Scaffold404 | 331684                  | GG                              | CC                | 1946504274               |
| SNP_P3_119122_356662 | NW_004515886.1 | Scaffold404 | 356662                  | GG                              | AA                | 1946504276               |
| SNP_P3_119123_362057 | NW_004515886.1 | Scaffold404 | 362057                  | CC                              | AA                | 1946504277               |
| SNP_P3_119125_372106 | NW_004515886.1 | Scaffold404 | 372106                  | CC                              | TT                | 1946504279               |
| SNP_P3_119126_372535 | NW_004515886.1 | Scaffold404 | 372535                  | GG                              | AA                | 1946504280               |
| SNP_P3_119127_383883 | NW_004515886.1 | Scaffold404 | 383883                  | AA                              | GG                | 1946504282               |
| SNP_P3_119128_383917 | NW_004515886.1 | Scaffold404 | 383917                  | GG                              | TT                | 1946504283               |
| SNP_P3_119129_64     | NW_004515887.1 | Scaffold408 | 64                      | GG                              | CC                | 1946504285               |
| SNP_P3_119131_988    | NW_004515887.1 | Scaffold408 | 988                     | AA                              | TT                | 1946504286               |
| SNP_P3_119132_1001   | NW_004515887.1 | Scaffold408 | 1001                    | TT                              | CC                | 1946504288               |
| SNP_P3_119133_1003   | NW_004515887.1 | Scaffold408 | 1003                    | CC                              | AA                | 1946504289               |
| SNP_P3_119134_1006   | NW_004515887.1 | Scaffold408 | 1006                    | AA                              | GG                | 1946504291               |
| SNP_P3_119135_1195   | NW_004515887.1 | Scaffold408 | 1195                    | TT                              | AA                | 1946504292               |
| SNP_P3_119136_1196   | NW_004515887.1 | Scaffold408 | 1196                    | GG                              | TT                | 1946504293               |
| SNP_P3_119137_1446   | NW_004515887.1 | Scaffold408 | 1446                    | TT                              | CC                | 1946504295               |
| SNP_P3_119138_2527   | NW_004515887.1 | Scaffold408 | 2527                    | GG                              | AA                | 1946504296               |
| SNP_P3_119139_2573   | NW_004515887.1 | Scaffold408 | 2573                    | AA                              | CC                | 1946504298               |
| SNP_P3_119140_2803   | NW_004515887.1 | Scaffold408 | 2803                    | GG                              | TT                | 1946504299               |
| SNP_P3_119141_3043   | NW_004515887.1 | Scaffold408 | 3043                    | GG                              | AA                | 1946504301               |
| SNP_P3_119142_3231   | NW_004515887.1 | Scaffold408 | 3231                    | CC                              | AA                | 1946504302               |
| SNP_P3_119144_3542   | NW_004515887.1 | Scaffold408 | 3542                    | TT                              | CC                | 1946504304               |
| SNP_P3_119146_3615   | NW_004515887.1 | Scaffold408 | 3615                    | CC                              | AA                | 1946504305               |
| SNP_P3_119147_12098  | NW_004515887.1 | Scaffold408 | 12098                   | TT                              | AA                | 1946504307               |
| SNP_P3_119148_12211  | NW_004515887.1 | Scaffold408 | 12211                   | CC                              | GG                | 1946504308               |
| SNP_P3_119149_12448  | NW_004515887.1 | Scaffold408 | 12448                   | TT                              | AA                | 1946504310               |

| SNPs IDs             | Chromosome IDs | Chromosomes | Physical positions (bp) | CDC Frontier (Reference genome) | (Pusa 256 & HPNB) | NCBI SNPdb Accession IDs |
|----------------------|----------------|-------------|-------------------------|---------------------------------|-------------------|--------------------------|
| SNP_P3_119150_12475  | NW_004515887.1 | Scaffold408 | 12475                   | GG                              | AA                | 1946504311               |
| SNP_P3_119151_12490  | NW_004515887.1 | Scaffold408 | 12490                   | GG                              | AA                | 1946504313               |
| SNP_P3_119152_12509  | NW_004515887.1 | Scaffold408 | 12509                   | GG                              | AA                | 1946504314               |
| SNP_P3_119153_12514  | NW_004515887.1 | Scaffold408 | 12514                   | TT                              | CC                | 1946504316               |
| SNP_P3_119154_12515  | NW_004515887.1 | Scaffold408 | 12515                   | GG                              | AA                | 1946504317               |
| SNP_P3_119155_12601  | NW_004515887.1 | Scaffold408 | 12601                   | CC                              | TT                | 1946504318               |
| SNP_P3_119156_12613  | NW_004515887.1 | Scaffold408 | 12613                   | TT                              | AA                | 1946504320               |
| SNP_P3_119157_12706  | NW_004515887.1 | Scaffold408 | 12706                   | CC                              | TT                | 1946504321               |
| SNP_P3_119158_16904  | NW_004515887.1 | Scaffold408 | 16904                   | TT                              | CC                | 1946504323               |
| SNP_P3_119159_20483  | NW_004515887.1 | Scaffold408 | 20483                   | GG                              | CC                | 1946504324               |
| SNP_P3_119160_20490  | NW_004515887.1 | Scaffold408 | 20490                   | CC                              | TT                | 1946504326               |
| SNP_P3_119161_20533  | NW_004515887.1 | Scaffold408 | 20533                   | AA                              | TT                | 1946504327               |
| SNP_P3_119162_20787  | NW_004515887.1 | Scaffold408 | 20787                   | CC                              | TT                | 1946504329               |
| SNP_P3_119163_20880  | NW_004515887.1 | Scaffold408 | 20880                   | CC                              | TT                | 1946504330               |
| SNP_P3_119164_20940  | NW_004515887.1 | Scaffold408 | 20940                   | AA                              | GG                | 1946504332               |
| SNP_P3_119165_21200  | NW_004515887.1 | Scaffold408 | 21200                   | AA                              | GG                | 1946504333               |
| SNP_P3_119166_21203  | NW_004515887.1 | Scaffold408 | 21203                   | AA                              | TT                | 1946504335               |
| SNP_P3_119167_21302  | NW_004515887.1 | Scaffold408 | 21302                   | TT                              | AA                | 1946504336               |
| SNP_P3_119168_21323  | NW_004515887.1 | Scaffold408 | 21323                   | AA                              | GG                | 1946504338               |
| SNP_P3_119171_51031  | NW_004515887.1 | Scaffold408 | 51031                   | AA                              | GG                | 1946504339               |
| SNP_P3_119172_84403  | NW_004515887.1 | Scaffold408 | 84403                   | TT                              | GG                | 1946504341               |
| SNP_P3_119173_84413  | NW_004515887.1 | Scaffold408 | 84413                   | AA                              | CC                | 1946504342               |
| SNP_P3_119174_84481  | NW_004515887.1 | Scaffold408 | 84481                   | AA                              | GG                | 1946504344               |
| SNP_P3_119175_84584  | NW_004515887.1 | Scaffold408 | 84584                   | AA                              | GG                | 1946504345               |
| SNP_P3_119176_84702  | NW_004515887.1 | Scaffold408 | 84702                   | AA                              | CC                | 1946504347               |
| SNP_P3_119177_84715  | NW_004515887.1 | Scaffold408 | 84715                   | TT                              | CC                | 1946504348               |
| SNP_P3_119178_84864  | NW_004515887.1 | Scaffold408 | 84864                   | TT                              | GG                | 1946504350               |
| SNP_P3_119179_87006  | NW_004515887.1 | Scaffold408 | 87006                   | TT                              | GG                | 1946504352               |
| SNP_P3_119180_87046  | NW_004515887.1 | Scaffold408 | 87046                   | GG                              | CC                | 1946504353               |
| SNP_P3_119181_87062  | NW_004515887.1 | Scaffold408 | 87062                   | AA                              | CC                | 1946504355               |
| SNP_P3_119182_87158  | NW_004515887.1 | Scaffold408 | 87158                   | GG                              | TT                | 1946504356               |
| SNP_P3_119184_92543  | NW_004515887.1 | Scaffold408 | 92543                   | TT                              | CC                | 1946504358               |
| SNP_P3_119185_130476 | NW_004515887.1 | Scaffold408 | 130476                  | TT                              | CC                | 1946504359               |
| SNP_P3_119186_130676 | NW_004515887.1 | Scaffold408 | 130676                  | GG                              | TT                | 1946504361               |
| SNP_P3_119189_131049 | NW_004515887.1 | Scaffold408 | 131049                  | GG                              | AA                | 1946504362               |
| SNP_P3_119190_131124 | NW_004515887.1 | Scaffold408 | 131124                  | GG                              | AA                | 1946504364               |
| SNP_P3_119191_131127 | NW_004515887.1 | Scaffold408 | 131127                  | AA                              | TT                | 1946504365               |
| SNP_P3_119192_131161 | NW_004515887.1 | Scaffold408 | 131161                  | AA                              | TT                | 1946504367               |
| SNP_P3_119193_131180 | NW_004515887.1 | Scaffold408 | 131180                  | AA                              | GG                | 1946504368               |
| SNP_P3_119194_131219 | NW_004515887.1 | Scaffold408 | 131219                  | GG                              | TT                | 1946504370               |
| SNP_P3_119195_131272 | NW_004515887.1 | Scaffold408 | 131272                  | TT                              | AA                | 1946504371               |
| SNP_P3_119196_131308 | NW_004515887.1 | Scaffold408 | 131308                  | AA                              | TT                | 1946504373               |

| SNPs IDs             | Chromosome IDs | Chromosomes | Physical positions (bp) | CDC Frontier (Reference genome) | (Pusa 256 & HPNB) | NCBI SNPdb Accession IDs |
|----------------------|----------------|-------------|-------------------------|---------------------------------|-------------------|--------------------------|
| SNP_P3_119197_131370 | NW_004515887.1 | Scaffold408 | 131370                  | GG                              | AA                | 1946504374               |
| SNP_P3_119198_131371 | NW_004515887.1 | Scaffold408 | 131371                  | CC                              | TT                | 1946504376               |
| SNP_P3_119199_131372 | NW_004515887.1 | Scaffold408 | 131372                  | GG                              | CC                | 1946504377               |
| SNP_P3_119200_131376 | NW_004515887.1 | Scaffold408 | 131376                  | TT                              | GG                | 1946504379               |
| SNP_P3_119201_131379 | NW_004515887.1 | Scaffold408 | 131379                  | CC                              | TT                | 1946504380               |
| SNP_P3_119202_2573   | NW_004515888.1 | Scaffold409 | 2573                    | TT                              | CC                | 1946504382               |
| SNP_P3_119203_2604   | NW_004515888.1 | Scaffold409 | 2604                    | CC                              | TT                | 1946504383               |
| SNP_P3_119205_2630   | NW_004515888.1 | Scaffold409 | 2630                    | TT                              | CC                | 1946504385               |
| SNP_P3_119206_2631   | NW_004515888.1 | Scaffold409 | 2631                    | CC                              | AA                | 1946504387               |
| SNP_P3_119207_2673   | NW_004515888.1 | Scaffold409 | 2673                    | GG                              | AA                | 1946504388               |
| SNP_P3_119208_34728  | NW_004515888.1 | Scaffold409 | 34728                   | TT                              | AA                | 1946504390               |
| SNP_P3_119209_34730  | NW_004515888.1 | Scaffold409 | 34730                   | TT                              | GG                | 1946504391               |
| SNP_P3_119210_36840  | NW_004515888.1 | Scaffold409 | 36840                   | CC                              | AA                | 1946504393               |
| SNP_P3_119211_36882  | NW_004515888.1 | Scaffold409 | 36882                   | TT                              | AA                | 1946504394               |
| SNP_P3_119212_36991  | NW_004515888.1 | Scaffold409 | 36991                   | AA                              | CC                | 1946504396               |
| SNP_P3_119213_38707  | NW_004515888.1 | Scaffold409 | 38707                   | TT                              | CC                | 1946504398               |
| SNP_P3_119214_38725  | NW_004515888.1 | Scaffold409 | 38725                   | AA                              | CC                | 1946504400               |
| SNP_P3_119215_38737  | NW_004515888.1 | Scaffold409 | 38737                   | TT                              | AA                | 1946504402               |
| SNP_P3_119216_38963  | NW_004515888.1 | Scaffold409 | 38963                   | AA                              | GG                | 1946504403               |
| SNP_P3_119217_17369  | NW_004515889.1 | Scaffold411 | 17369                   | AA                              | GG                | 1946504405               |
| SNP_P3_119219_17398  | NW_004515889.1 | Scaffold411 | 17398                   | TT                              | CC                | 1946504406               |
| SNP_P3_119220_41597  | NW_004515889.1 | Scaffold411 | 41597                   | TT                              | CC                | 1946504408               |
| SNP_P3_119221_41599  | NW_004515889.1 | Scaffold411 | 41599                   | GG                              | AA                | 1946504409               |
| SNP_P3_119222_41661  | NW_004515889.1 | Scaffold411 | 41661                   | GG                              | AA                | 1946504411               |
| SNP_P3_119223_41671  | NW_004515889.1 | Scaffold411 | 41671                   | CC                              | TT                | 1946504412               |
| SNP_P3_119224_41679  | NW_004515889.1 | Scaffold411 | 41679                   | GG                              | AA                | 1946504414               |
| SNP_P3_119225_41686  | NW_004515889.1 | Scaffold411 | 41686                   | TT                              | CC                | 1946504415               |
| SNP_P3_119226_41687  | NW_004515889.1 | Scaffold411 | 41687                   | AA                              | GG                | 1946504417               |
| SNP_P3_119227_41694  | NW_004515889.1 | Scaffold411 | 41694                   | AA                              | GG                | 1946504419               |
| SNP_P3_119228_41703  | NW_004515889.1 | Scaffold411 | 41703                   | GG                              | AA                | 1946504420               |
| SNP_P3_119229_41705  | NW_004515889.1 | Scaffold411 | 41705                   | TT                              | AA                | 1946504422               |
| SNP_P3_119230_42664  | NW_004515889.1 | Scaffold411 | 42664                   | GG                              | AA                | 1946504423               |
| SNP_P3_119231_42714  | NW_004515889.1 | Scaffold411 | 42714                   | TT                              | CC                | 1946504425               |
| SNP_P3_119232_42753  | NW_004515889.1 | Scaffold411 | 42753                   | TT                              | GG                | 1946504426               |
| SNP_P3_119235_43051  | NW_004515889.1 | Scaffold411 | 43051                   | AA                              | GG                | 1946504428               |
| SNP_P3_119236_43191  | NW_004515889.1 | Scaffold411 | 43191                   | TT                              | GG                | 1946504429               |
| SNP_P3_119237_44280  | NW_004515889.1 | Scaffold411 | 44280                   | CC                              | AA                | 1946504431               |
| SNP_P3_119238_65702  | NW_004515889.1 | Scaffold411 | 65702                   | AA                              | TT                | 1946504432               |
| SNP_P3_119239_73658  | NW_004515889.1 | Scaffold411 | 73658                   | GG                              | AA                | 1946504433               |
| SNP_P3_119240_73664  | NW_004515889.1 | Scaffold411 | 73664                   | AA                              | TT                | 1946504435               |
| SNP_P3_119241_74036  | NW_004515889.1 | Scaffold411 | 74036                   | AA                              | TT                | 1946504436               |
| SNP_P3_119242_74091  | NW_004515889.1 | Scaffold411 | 74091                   | GG                              | AA                | 1946504438               |

| SNPs IDs             | Chromosome IDs | Chromosomes | Physical positions (bp) | CDC Frontier (Reference genome) | (Pusa 256 & HPNB) | NCBI SNPdb Accession IDs |
|----------------------|----------------|-------------|-------------------------|---------------------------------|-------------------|--------------------------|
| SNP_P3_119243_74188  | NW_004515889.1 | Scaffold411 | 74188                   | AA                              | GG                | 1946504439               |
| SNP_P3_119244_74191  | NW_004515889.1 | Scaffold411 | 74191                   | GG                              | TT                | 1946504441               |
| SNP_P3_119245_74198  | NW_004515889.1 | Scaffold411 | 74198                   | GG                              | AA                | 1946504442               |
| SNP_P3_119247_74664  | NW_004515889.1 | Scaffold411 | 74664                   | TT                              | AA                | 1946504444               |
| SNP_P3_119248_74668  | NW_004515889.1 | Scaffold411 | 74668                   | GG                              | AA                | 1946504445               |
| SNP_P3_119249_74677  | NW_004515889.1 | Scaffold411 | 74677                   | TT                              | CC                | 1946504447               |
| SNP_P3_119250_74693  | NW_004515889.1 | Scaffold411 | 74693                   | AA                              | TT                | 1946504448               |
| SNP_P3_119252_90135  | NW_004515889.1 | Scaffold411 | 90135                   | GG                              | AA                | 1946504450               |
| SNP_P3_119253_90138  | NW_004515889.1 | Scaffold411 | 90138                   | CC                              | TT                | 1946504451               |
| SNP_P3_119254_123365 | NW_004515889.1 | Scaffold411 | 123365                  | CC                              | TT                | 1946504453               |
| SNP_P3_119255_123397 | NW_004515889.1 | Scaffold411 | 123397                  | AA                              | GG                | 1946504454               |
| SNP_P3_119256_123463 | NW_004515889.1 | Scaffold411 | 123463                  | GG                              | CC                | 1946504456               |
| SNP_P3_119257_123471 | NW_004515889.1 | Scaffold411 | 123471                  | AA                              | GG                | 1946504457               |
| SNP_P3_119258_124412 | NW_004515889.1 | Scaffold411 | 124412                  | AA                              | GG                | 1946504459               |
| SNP_P3_119259_124422 | NW_004515889.1 | Scaffold411 | 124422                  | CC                              | AA                | 1946504460               |
| SNP_P3_119260_124491 | NW_004515889.1 | Scaffold411 | 124491                  | CC                              | AA                | 1946504462               |
| SNP_P3_119261_124925 | NW_004515889.1 | Scaffold411 | 124925                  | TT                              | GG                | 1946504463               |
| SNP_P3_119262_125407 | NW_004515889.1 | Scaffold411 | 125407                  | CC                              | AA                | 1946504465               |
| SNP_P3_119263_125430 | NW_004515889.1 | Scaffold411 | 125430                  | AA                              | CC                | 1946504466               |
| SNP_P3_119264_151050 | NW_004515889.1 | Scaffold411 | 151050                  | CC                              | TT                | 1946504468               |
| SNP_P3_119265_151245 | NW_004515889.1 | Scaffold411 | 151245                  | AA                              | GG                | 1946504469               |
| SNP_P3_119266_162086 | NW_004515889.1 | Scaffold411 | 162086                  | TT                              | GG                | 1946504471               |
| SNP_P3_119267_162147 | NW_004515889.1 | Scaffold411 | 162147                  | AA                              | GG                | 1946504472               |
| SNP_P3_119268_162383 | NW_004515889.1 | Scaffold411 | 162383                  | TT                              | CC                | 1946504474               |
| SNP_P3_119269_162385 | NW_004515889.1 | Scaffold411 | 162385                  | TT                              | AA                | 1946504475               |
| SNP_P3_119270_162386 | NW_004515889.1 | Scaffold411 | 162386                  | GG                              | AA                | 1946504477               |
| SNP_P3_119271_162505 | NW_004515889.1 | Scaffold411 | 162505                  | TT                              | CC                | 1946504478               |
| SNP_P3_119272_213851 | NW_004515889.1 | Scaffold411 | 213851                  | AA                              | TT                | 1946504480               |
| SNP_P3_119273_230913 | NW_004515889.1 | Scaffold411 | 230913                  | TT                              | GG                | 1946504481               |
| SNP_P3_119274_231481 | NW_004515889.1 | Scaffold411 | 231481                  | TT                              | CC                | 1946504483               |
| SNP_P3_119275_231662 | NW_004515889.1 | Scaffold411 | 231662                  | AA                              | TT                | 1946504484               |
| SNP_P3_119276_231671 | NW_004515889.1 | Scaffold411 | 231671                  | TT                              | GG                | 1946504486               |
| SNP_P3_119277_231677 | NW_004515889.1 | Scaffold411 | 231677                  | AA                              | GG                | 1946504487               |
| SNP_P3_119278_231680 | NW_004515889.1 | Scaffold411 | 231680                  | AA                              | GG                | 1946504489               |
| SNP_P3_119279_231897 | NW_004515889.1 | Scaffold411 | 231897                  | AA                              | GG                | 1946504491               |
| SNP_P3_119280_231933 | NW_004515889.1 | Scaffold411 | 231933                  | TT                              | CC                | 1946504492               |
| SNP_P3_119281_231952 | NW_004515889.1 | Scaffold411 | 231952                  | TT                              | CC                | 1946504494               |
| SNP_P3_119282_231972 | NW_004515889.1 | Scaffold411 | 231972                  | TT                              | CC                | 1946504495               |
| SNP_P3_119283_259308 | NW_004515889.1 | Scaffold411 | 259308                  | TT                              | CC                | 1946504497               |
| SNP_P3_119284_282156 | NW_004515889.1 | Scaffold411 | 282156                  | GG                              | TT                | 1946504498               |
| SNP_P3_119285_298109 | NW_004515889.1 | Scaffold411 | 298109                  | AA                              | CC                | 1946504499               |
| SNP_P3_119286_298120 | NW_004515889.1 | Scaffold411 | 298120                  | GG                              | CC                | 1946504501               |

| SNPs IDs             | Chromosome IDs | Chromosomes | Physical positions (bp) | CDC Frontier (Reference genome) | (Pusa 256 & HPNB) | NCBI SNPdb Accession IDs |
|----------------------|----------------|-------------|-------------------------|---------------------------------|-------------------|--------------------------|
| SNP_P3_119287_298443 | NW_004515889.1 | Scaffold411 | 298443                  | GG                              | AA                | 1946504502               |
| SNP_P3_119288_298493 | NW_004515889.1 | Scaffold411 | 298493                  | CC                              | TT                | 1946504504               |
| SNP_P3_119290_298529 | NW_004515889.1 | Scaffold411 | 298529                  | TT                              | CC                | 1946504505               |
| SNP_P3_119291_298550 | NW_004515889.1 | Scaffold411 | 298550                  | GG                              | AA                | 1946504507               |
| SNP_P3_119292_298615 | NW_004515889.1 | Scaffold411 | 298615                  | CC                              | GG                | 1946504508               |
| SNP_P3_119293_306430 | NW_004515889.1 | Scaffold411 | 306430                  | TT                              | GG                | 1946504510               |
| SNP_P3_119294_308281 | NW_004515889.1 | Scaffold411 | 308281                  | TT                              | AA                | 1946504511               |
| SNP_P3_119295_308381 | NW_004515889.1 | Scaffold411 | 308381                  | AA                              | GG                | 1946504513               |
| SNP_P3_119296_308765 | NW_004515889.1 | Scaffold411 | 308765                  | AA                              | GG                | 1946504514               |
| SNP_P3_119297_308782 | NW_004515889.1 | Scaffold411 | 308782                  | AA                              | GG                | 1946504516               |
| SNP_P3_119298_308841 | NW_004515889.1 | Scaffold411 | 308841                  | AA                              | GG                | 1946504517               |
| SNP_P3_119299_308988 | NW_004515889.1 | Scaffold411 | 308988                  | TT                              | CC                | 1946504519               |
| SNP_P3_119300_309182 | NW_004515889.1 | Scaffold411 | 309182                  | TT                              | AA                | 1946504520               |
| SNP_P3_119302_315723 | NW_004515889.1 | Scaffold411 | 315723                  | CC                              | GG                | 1946504522               |
| SNP_P3_119303_323140 | NW_004515889.1 | Scaffold411 | 323140                  | TT                              | GG                | 1946504523               |
| SNP_P3_119304_330057 | NW_004515889.1 | Scaffold411 | 330057                  | AA                              | TT                | 1946504525               |
| SNP_P3_119305_334245 | NW_004515889.1 | Scaffold411 | 334245                  | CC                              | AA                | 1946504526               |
| SNP_P3_119306_334262 | NW_004515889.1 | Scaffold411 | 334262                  | AA                              | CC                | 1946504528               |
| SNP_P3_119307_334311 | NW_004515889.1 | Scaffold411 | 334311                  | TT                              | CC                | 1946504529               |
| SNP_P3_119308_334524 | NW_004515889.1 | Scaffold411 | 334524                  | TT                              | CC                | 1946504531               |
| SNP_P3_119309_335195 | NW_004515889.1 | Scaffold411 | 335195                  | AA                              | TT                | 1946504532               |
| SNP_P3_119310_335376 | NW_004515889.1 | Scaffold411 | 335376                  | TT                              | AA                | 1946504534               |
| SNP_P3_119311_336425 | NW_004515889.1 | Scaffold411 | 336425                  | CC                              | AA                | 1946504535               |
| SNP_P3_119313_339836 | NW_004515889.1 | Scaffold411 | 339836                  | AA                              | GG                | 1946504536               |
| SNP_P3_119314_339851 | NW_004515889.1 | Scaffold411 | 339851                  | AA                              | CC                | 1946504538               |
| SNP_P3_119315_339871 | NW_004515889.1 | Scaffold411 | 339871                  | GG                              | AA                | 1946504539               |
| SNP_P3_119316_343453 | NW_004515889.1 | Scaffold411 | 343453                  | AA                              | GG                | 1946504541               |
| SNP_P3_119318_353816 | NW_004515889.1 | Scaffold411 | 353816                  | CC                              | TT                | 1946504542               |
| SNP_P3_119319_369161 | NW_004515889.1 | Scaffold411 | 369161                  | GG                              | AA                | 1946504544               |
| SNP_P3_119320_369200 | NW_004515889.1 | Scaffold411 | 369200                  | GG                              | AA                | 1946504545               |
| SNP_P3_119321_369239 | NW_004515889.1 | Scaffold411 | 369239                  | GG                              | AA                | 1946504547               |
| SNP_P3_119322_369362 | NW_004515889.1 | Scaffold411 | 369362                  | CC                              | TT                | 1946504548               |
| SNP_P3_119323_369366 | NW_004515889.1 | Scaffold411 | 369366                  | AA                              | GG                | 1946504550               |
| SNP_P3_119324_369380 | NW_004515889.1 | Scaffold411 | 369380                  | GG                              | AA                | 1946504551               |
| SNP_P3_119325_369639 | NW_004515889.1 | Scaffold411 | 369639                  | AA                              | GG                | 1946504553               |
| SNP_P3_119326_369654 | NW_004515889.1 | Scaffold411 | 369654                  | AA                              | GG                | 1946504554               |
| SNP_P3_119327_377587 | NW_004515889.1 | Scaffold411 | 377587                  | CC                              | TT                | 1946504556               |
| SNP_P3_119328_377884 | NW_004515889.1 | Scaffold411 | 377884                  | TT                              | CC                | 1946504557               |
| SNP_P3_119329_377942 | NW_004515889.1 | Scaffold411 | 377942                  | TT                              | CC                | 1946504559               |
| SNP_P3_119330_391086 | NW_004515889.1 | Scaffold411 | 391086                  | GG                              | AA                | 1946504560               |
| SNP_P3_119331_391097 | NW_004515889.1 | Scaffold411 | 391097                  | AA                              | GG                | 1946504561               |
| SNP_P3_119332_391130 | NW_004515889.1 | Scaffold411 | 391130                  | AA                              | GG                | 1946504563               |

| SNPs IDs             | Chromosome IDs | Chromosomes | Physical positions (bp) | CDC Frontier (Reference genome) | (Pusa 256 & HPNB) | NCBI SNPdb Accession IDs |
|----------------------|----------------|-------------|-------------------------|---------------------------------|-------------------|--------------------------|
| SNP_P3_119333_391136 | NW_004515889.1 | Scaffold411 | 391136                  | TT                              | AA                | 1946504564               |
| SNP_P3_119334_391145 | NW_004515889.1 | Scaffold411 | 391145                  | GG                              | CC                | 1946504566               |
| SNP_P3_119335_391148 | NW_004515889.1 | Scaffold411 | 391148                  | TT                              | GG                | 1946504567               |
| SNP_P3_119336_391455 | NW_004515889.1 | Scaffold411 | 391455                  | TT                              | CC                | 1946504569               |
| SNP_P3_119337_391517 | NW_004515889.1 | Scaffold411 | 391517                  | GG                              | AA                | 1946504570               |
| SNP_P3_119339_429235 | NW_004515889.1 | Scaffold411 | 429235                  | TT                              | CC                | 1946504572               |
| SNP_P3_119340_436537 | NW_004515889.1 | Scaffold411 | 436537                  | CC                              | GG                | 1946504573               |
| SNP_P3_119341_446025 | NW_004515889.1 | Scaffold411 | 446025                  | CC                              | TT                | 1946504575               |
| SNP_P3_119342_446026 | NW_004515889.1 | Scaffold411 | 446026                  | CC                              | TT                | 1946504576               |
| SNP_P3_119343_446050 | NW_004515889.1 | Scaffold411 | 446050                  | CC                              | AA                | 1946504578               |
| SNP_P3_119344_4915   | NW_004515890.1 | Scaffold413 | 4915                    | GG                              | AA                | 1946504579               |
| SNP_P3_119345_6025   | NW_004515890.1 | Scaffold413 | 6025                    | CC                              | AA                | 1946504581               |
| SNP_P3_119346_6122   | NW_004515890.1 | Scaffold413 | 6122                    | AA                              | CC                | 1946504582               |
| SNP_P3_119347_6185   | NW_004515890.1 | Scaffold413 | 6185                    | TT                              | GG                | 1946504583               |
| SNP_P3_119348_6335   | NW_004515890.1 | Scaffold413 | 6335                    | AA                              | GG                | 1946504584               |
| SNP_P3_119349_6509   | NW_004515890.1 | Scaffold413 | 6509                    | AA                              | GG                | 1946504586               |
| SNP_P3_119350_7110   | NW_004515890.1 | Scaffold413 | 7110                    | CC                              | GG                | 1946504587               |
| SNP_P3_119351_7185   | NW_004515890.1 | Scaffold413 | 7185                    | GG                              | CC                | 1946504589               |
| SNP_P3_119352_7202   | NW_004515890.1 | Scaffold413 | 7202                    | AA                              | TT                | 1946504590               |
| SNP_P3_119353_7228   | NW_004515890.1 | Scaffold413 | 7228                    | AA                              | GG                | 1946504592               |
| SNP_P3_119354_7362   | NW_004515890.1 | Scaffold413 | 7362                    | CC                              | GG                | 1946504593               |
| SNP_P3_119355_7377   | NW_004515890.1 | Scaffold413 | 7377                    | TT                              | CC                | 1946504595               |
| SNP_P3_119356_7454   | NW_004515890.1 | Scaffold413 | 7454                    | GG                              | AA                | 1946504596               |
| SNP_P3_119357_7482   | NW_004515890.1 | Scaffold413 | 7482                    | TT                              | CC                | 1946504597               |
| SNP_P3_119358_7721   | NW_004515890.1 | Scaffold413 | 7721                    | TT                              | CC                | 1946504599               |
| SNP_P3_119359_7908   | NW_004515890.1 | Scaffold413 | 7908                    | AA                              | TT                | 1946504600               |
| SNP_P3_119360_7982   | NW_004515890.1 | Scaffold413 | 7982                    | TT                              | AA                | 1946504602               |
| SNP_P3_119361_5291   | NW_004515891.1 | Scaffold414 | 5291                    | GG                              | AA                | 1946504603               |
| SNP_P3_119362_5334   | NW_004515891.1 | Scaffold414 | 5334                    | AA                              | TT                | 1946504605               |
| SNP_P3_119363_5363   | NW_004515891.1 | Scaffold414 | 5363                    | GG                              | TT                | 1946504606               |
| SNP_P3_119364_5501   | NW_004515891.1 | Scaffold414 | 5501                    | GG                              | AA                | 1946504608               |
| SNP_P3_119365_5513   | NW_004515891.1 | Scaffold414 | 5513                    | GG                              | TT                | 1946504609               |
| SNP_P3_119366_5527   | NW_004515891.1 | Scaffold414 | 5527                    | GG                              | TT                | 1946504611               |
| SNP_P3_119367_5583   | NW_004515891.1 | Scaffold414 | 5583                    | AA                              | TT                | 1946504612               |
| SNP_P3_119368_5660   | NW_004515891.1 | Scaffold414 | 5660                    | AA                              | CC                | 1946504614               |
| SNP_P3_119369_5676   | NW_004515891.1 | Scaffold414 | 5676                    | GG                              | AA                | 1946504615               |
| SNP_P3_119370_5862   | NW_004515891.1 | Scaffold414 | 5862                    | GG                              | TT                | 1946504617               |
| SNP_P3_119371_6783   | NW_004515891.1 | Scaffold414 | 6783                    | TT                              | AA                | 1946504618               |
| SNP_P3_119372_6785   | NW_004515891.1 | Scaffold414 | 6785                    | AA                              | GG                | 1946504620               |
| SNP_P3_119373_6787   | NW_004515891.1 | Scaffold414 | 6787                    | TT                              | AA                | 1946504621               |
| SNP_P3_119374_6790   | NW_004515891.1 | Scaffold414 | 6790                    | TT                              | AA                | 1946504623               |
| SNP_P3_119375_6792   | NW_004515891.1 | Scaffold414 | 6792                    | TT                              | AA                | 1946504624               |

| SNPs IDs            | Chromosome IDs | Chromosomes | Physical positions (bp) | CDC Frontier (Reference genome) | (Pusa 256 & HPNB) | NCBI SNPdb Accession IDs |
|---------------------|----------------|-------------|-------------------------|---------------------------------|-------------------|--------------------------|
| SNP_P3_119376_6795  | NW_004515891.1 | Scaffold414 | 6795                    | TT                              | AA                | 1946504626               |
| SNP_P3_119377_6797  | NW_004515891.1 | Scaffold414 | 6797                    | CC                              | TT                | 1946504627               |
| SNP_P3_119378_6799  | NW_004515891.1 | Scaffold414 | 6799                    | TT                              | AA                | 1946504629               |
| SNP_P3_119379_7055  | NW_004515891.1 | Scaffold414 | 7055                    | TT                              | CC                | 1946504630               |
| SNP_P3_119380_7388  | NW_004515891.1 | Scaffold414 | 7388                    | AA                              | CC                | 1946504632               |
| SNP_P3_119381_8747  | NW_004515891.1 | Scaffold414 | 8747                    | TT                              | GG                | 1946504633               |
| SNP_P3_119382_17273 | NW_004515891.1 | Scaffold414 | 17273                   | GG                              | CC                | 1946504635               |
| SNP_P3_119383_17573 | NW_004515891.1 | Scaffold414 | 17573                   | TT                              | CC                | 1946504636               |
| SNP_P3_119385_22233 | NW_004515891.1 | Scaffold414 | 22233                   | TT                              | CC                | 1946504638               |
| SNP_P3_119386_22252 | NW_004515891.1 | Scaffold414 | 22252                   | CC                              | AA                | 1946504639               |
| SNP_P3_119387_22268 | NW_004515891.1 | Scaffold414 | 22268                   | GG                              | TT                | 1946504641               |
| SNP_P3_119388_22270 | NW_004515891.1 | Scaffold414 | 22270                   | AA                              | TT                | 1946504642               |
| SNP_P3_119389_22415 | NW_004515891.1 | Scaffold414 | 22415                   | TT                              | AA                | 1946504644               |
| SNP_P3_119390_22428 | NW_004515891.1 | Scaffold414 | 22428                   | GG                              | AA                | 1946504645               |
| SNP_P3_119391_22466 | NW_004515891.1 | Scaffold414 | 22466                   | TT                              | GG                | 1946504647               |
| SNP_P3_119392_51151 | NW_004515891.1 | Scaffold414 | 51151                   | GG                              | AA                | 1946504648               |
| SNP_P3_119393_51812 | NW_004515891.1 | Scaffold414 | 51812                   | AA                              | GG                | 1946504650               |
| SNP_P3_119394_52116 | NW_004515891.1 | Scaffold414 | 52116                   | CC                              | TT                | 1946504651               |
| SNP_P3_119395_52117 | NW_004515891.1 | Scaffold414 | 52117                   | TT                              | GG                | 1946504652               |
| SNP_P3_119396_52218 | NW_004515891.1 | Scaffold414 | 52218                   | GG                              | AA                | 1946504654               |
| SNP_P3_119397_52244 | NW_004515891.1 | Scaffold414 | 52244                   | TT                              | GG                | 1946504655               |
| SNP_P3_119398_53392 | NW_004515891.1 | Scaffold414 | 53392                   | TT                              | CC                | 1946504657               |
| SNP_P3_119399_53434 | NW_004515891.1 | Scaffold414 | 53434                   | TT                              | CC                | 1946504659               |
| SNP_P3_119400_53441 | NW_004515891.1 | Scaffold414 | 53441                   | AA                              | TT                | 1946504660               |
| SNP_P3_119401_53449 | NW_004515891.1 | Scaffold414 | 53449                   | AA                              | TT                | 1946504661               |
| SNP_P3_119402_53467 | NW_004515891.1 | Scaffold414 | 53467                   | CC                              | TT                | 1946504663               |
| SNP_P3_119403_53470 | NW_004515891.1 | Scaffold414 | 53470                   | TT                              | CC                | 1946504664               |
| SNP_P3_119404_53545 | NW_004515891.1 | Scaffold414 | 53545                   | AA                              | TT                | 1946504666               |
| SNP_P3_119405_53593 | NW_004515891.1 | Scaffold414 | 53593                   | AA                              | GG                | 1946504667               |
| SNP_P3_119406_53594 | NW_004515891.1 | Scaffold414 | 53594                   | GG                              | AA                | 1946504669               |
| SNP_P3_119407_53866 | NW_004515891.1 | Scaffold414 | 53866                   | GG                              | AA                | 1946504670               |
| SNP_P3_119408_53887 | NW_004515891.1 | Scaffold414 | 53887                   | TT                              | AA                | 1946504672               |
| SNP_P3_119409_53988 | NW_004515891.1 | Scaffold414 | 53988                   | AA                              | GG                | 1946504673               |
| SNP_P3_119410_631   | NW_004515892.1 | Scaffold415 | 631                     | GG                              | AA                | 1946504675               |
| SNP_P3_119411_993   | NW_004515892.1 | Scaffold415 | 993                     | TT                              | CC                | 1946504676               |
| SNP_P3_119413_1041  | NW_004515892.1 | Scaffold415 | 1041                    | GG                              | AA                | 1946504678               |
| SNP_P3_119414_1048  | NW_004515892.1 | Scaffold415 | 1048                    | TT                              | AA                | 1946504679               |
| SNP_P3_119415_1052  | NW_004515892.1 | Scaffold415 | 1052                    | AA                              | TT                | 1946504681               |
| SNP_P3_119416_1054  | NW_004515892.1 | Scaffold415 | 1054                    | TT                              | AA                | 1946504682               |
| SNP_P3_119417_1073  | NW_004515892.1 | Scaffold415 | 1073                    | GG                              | AA                | 1946504684               |
| SNP_P3_119418_9372  | NW_004515892.1 | Scaffold415 | 9372                    | AA                              | CC                | 1946504685               |
| SNP_P3_119419_9385  | NW_004515892.1 | Scaffold415 | 9385                    | AA                              | GG                | 1946504687               |



| SNPs IDs            | Chromosome IDs | Chromosomes | Physical positions (bp) | CDC Frontier (Reference genome) | (Pusa 256 & HPNB) | NCBI SNPdb Accession IDs |
|---------------------|----------------|-------------|-------------------------|---------------------------------|-------------------|--------------------------|
| SNP_P3_119420_9634  | NW_004515892.1 | Scaffold415 | 9634                    | AA                              | TT                | 1946504688               |
| SNP_P3_119421_9655  | NW_004515892.1 | Scaffold415 | 9655                    | AA                              | GG                | 1946504690               |
| SNP_P3_119422_9683  | NW_004515892.1 | Scaffold415 | 9683                    | CC                              | AA                | 1946504691               |
| SNP_P3_119423_9711  | NW_004515892.1 | Scaffold415 | 9711                    | TT                              | AA                | 1946504694               |
| SNP_P3_119426_9659  | NW_004515893.1 | Scaffold418 | 9659                    | GG                              | CC                | 1946504695               |
| SNP_P3_119427_9660  | NW_004515893.1 | Scaffold418 | 9660                    | AA                              | GG                | 1946504697               |
| SNP_P3_119428_9724  | NW_004515893.1 | Scaffold418 | 9724                    | CC                              | AA                | 1946504698               |
| SNP_P3_119429_10043 | NW_004515893.1 | Scaffold418 | 10043                   | TT                              | CC                | 1946504700               |
| SNP_P3_119430_10060 | NW_004515893.1 | Scaffold418 | 10060                   | AA                              | TT                | 1946504701               |
| SNP_P3_119431_18959 | NW_004515893.1 | Scaffold418 | 18959                   | GG                              | CC                | 1946504703               |
| SNP_P3_119434_21679 | NW_004515893.1 | Scaffold418 | 21679                   | GG                              | TT                | 1946504704               |
| SNP_P3_119435_21687 | NW_004515893.1 | Scaffold418 | 21687                   | AA                              | TT                | 1946504706               |
| SNP_P3_119436_21703 | NW_004515893.1 | Scaffold418 | 21703                   | GG                              | CC                | 1946504707               |
| SNP_P3_119437_21714 | NW_004515893.1 | Scaffold418 | 21714                   | AA                              | TT                | 1946504709               |
| SNP_P3_119438_21720 | NW_004515893.1 | Scaffold418 | 21720                   | CC                              | TT                | 1946504710               |
| SNP_P3_119439_21774 | NW_004515893.1 | Scaffold418 | 21774                   | GG                              | AA                | 1946504712               |
| SNP_P3_119440_22044 | NW_004515893.1 | Scaffold418 | 22044                   | GG                              | CC                | 1946504713               |
| SNP_P3_119441_22436 | NW_004515893.1 | Scaffold418 | 22436                   | GG                              | AA                | 1946504715               |
| SNP_P3_119442_26457 | NW_004515893.1 | Scaffold418 | 26457                   | CC                              | GG                | 1946504716               |
| SNP_P3_119443_32173 | NW_004515893.1 | Scaffold418 | 32173                   | AA                              | CC                | 1946504718               |
| SNP_P3_119444_37158 | NW_004515893.1 | Scaffold418 | 37158                   | GG                              | AA                | 1946504719               |
| SNP_P3_119445_50487 | NW_004515893.1 | Scaffold418 | 50487                   | TT                              | AA                | 1946504721               |
| SNP_P3_119446_63439 | NW_004515893.1 | Scaffold418 | 63439                   | TT                              | GG                | 1946504722               |
| SNP_P3_119447_81786 | NW_004515893.1 | Scaffold418 | 81786                   | CC                              | TT                | 1946504724               |
| SNP_P3_119448_81787 | NW_004515893.1 | Scaffold418 | 81787                   | CC                              | GG                | 1946504725               |
| SNP_P3_119449_82022 | NW_004515893.1 | Scaffold418 | 82022                   | CC                              | TT                | 1946504727               |
| SNP_P3_119450_82125 | NW_004515893.1 | Scaffold418 | 82125                   | GG                              | TT                | 1946504728               |
| SNP_P3_119451_82135 | NW_004515893.1 | Scaffold418 | 82135                   | GG                              | AA                | 1946504730               |
| SNP_P3_119453_82343 | NW_004515893.1 | Scaffold418 | 82343                   | TT                              | CC                | 1946504731               |
| SNP_P3_119454_82367 | NW_004515893.1 | Scaffold418 | 82367                   | TT                              | CC                | 1946504733               |
| SNP_P3_119455_82472 | NW_004515893.1 | Scaffold418 | 82472                   | TT                              | CC                | 1946504734               |
| SNP_P3_119456_82505 | NW_004515893.1 | Scaffold418 | 82505                   | GG                              | CC                | 1946504736               |
| SNP_P3_119457_82546 | NW_004515893.1 | Scaffold418 | 82546                   | TT                              | AA                | 1946504737               |
| SNP_P3_119458_82652 | NW_004515893.1 | Scaffold418 | 82652                   | AA                              | GG                | 1946504738               |
| SNP_P3_119459_82794 | NW_004515893.1 | Scaffold418 | 82794                   | GG                              | TT                | 1946504740               |
| SNP_P3_119460_82802 | NW_004515893.1 | Scaffold418 | 82802                   | TT                              | CC                | 1946504741               |
| SNP_P3_119461_82863 | NW_004515893.1 | Scaffold418 | 82863                   | AA                              | CC                | 1946504743               |
| SNP_P3_119462_83127 | NW_004515893.1 | Scaffold418 | 83127                   | AA                              | GG                | 1946504744               |
| SNP_P3_119463_83163 | NW_004515893.1 | Scaffold418 | 83163                   | TT                              | CC                | 1946504746               |
| SNP_P3_119464_83179 | NW_004515893.1 | Scaffold418 | 83179                   | AA                              | CC                | 1946504747               |
| SNP_P3_119465_83195 | NW_004515893.1 | Scaffold418 | 83195                   | AA                              | GG                | 1946504749               |
| SNP_P3_119466_83230 | NW_004515893.1 | Scaffold418 | 83230                   | TT                              | CC                | 1946504750               |

| SNPs IDs             | Chromosome IDs | Chromosomes | Physical positions (bp) | CDC Frontier (Reference genome) | (Pusa 256 & HPNB) | NCBI SNPdb Accession IDs |
|----------------------|----------------|-------------|-------------------------|---------------------------------|-------------------|--------------------------|
| SNP_P3_119467_107670 | NW_004515893.1 | Scaffold418 | 107670                  | GG                              | TT                | 1946504752               |
| SNP_P3_119468_107708 | NW_004515893.1 | Scaffold418 | 107708                  | TT                              | GG                | 1946504753               |
| SNP_P3_119469_135363 | NW_004515893.1 | Scaffold418 | 135363                  | GG                              | TT                | 1946504755               |
| SNP_P3_119470_135733 | NW_004515893.1 | Scaffold418 | 135733                  | TT                              | AA                | 1946504756               |
| SNP_P3_119471_136032 | NW_004515893.1 | Scaffold418 | 136032                  | GG                              | AA                | 1946504758               |
| SNP_P3_119472_138042 | NW_004515893.1 | Scaffold418 | 138042                  | TT                              | CC                | 1946504759               |
| SNP_P3_119473_138167 | NW_004515893.1 | Scaffold418 | 138167                  | CC                              | GG                | 1946504761               |
| SNP_P3_119474_138307 | NW_004515893.1 | Scaffold418 | 138307                  | TT                              | CC                | 1946504762               |
| SNP_P3_119475_141070 | NW_004515893.1 | Scaffold418 | 141070                  | AA                              | TT                | 1946504764               |
| SNP_P3_119477_143016 | NW_004515893.1 | Scaffold418 | 143016                  | GG                              | AA                | 1946504765               |
| SNP_P3_119478_151937 | NW_004515893.1 | Scaffold418 | 151937                  | GG                              | AA                | 1946504766               |
| SNP_P3_119481_11003  | NW_004515894.1 | Scaffold419 | 11003                   | TT                              | GG                | 1946504768               |
| SNP_P3_119482_16957  | NW_004515894.1 | Scaffold419 | 16957                   | TT                              | CC                | 1946504769               |
| SNP_P3_119483_57449  | NW_004515894.1 | Scaffold419 | 57449                   | CC                              | TT                | 1946504771               |
| SNP_P3_119484_68984  | NW_004515894.1 | Scaffold419 | 68984                   | TT                              | AA                | 1946504772               |
| SNP_P3_119485_69016  | NW_004515894.1 | Scaffold419 | 69016                   | AA                              | GG                | 1946504774               |
| SNP_P3_119487_96463  | NW_004515894.1 | Scaffold419 | 96463                   | TT                              | CC                | 1946504775               |
| SNP_P3_119488_113331 | NW_004515894.1 | Scaffold419 | 113331                  | GG                              | AA                | 1946504777               |
| SNP_P3_119489_113340 | NW_004515894.1 | Scaffold419 | 113340                  | GG                              | AA                | 1946504778               |
| SNP_P3_119490_117918 | NW_004515894.1 | Scaffold419 | 117918                  | GG                              | AA                | 1946504780               |
| SNP_P3_119491_121570 | NW_004515894.1 | Scaffold419 | 121570                  | CC                              | TT                | 1946504781               |
| SNP_P3_119492_127490 | NW_004515894.1 | Scaffold419 | 127490                  | TT                              | CC                | 1946504783               |
| SNP_P3_119493_129638 | NW_004515894.1 | Scaffold419 | 129638                  | CC                              | TT                | 1946504784               |
| SNP_P3_119496_148591 | NW_004515894.1 | Scaffold419 | 148591                  | CC                              | TT                | 1946504786               |
| SNP_P3_119498_148677 | NW_004515894.1 | Scaffold419 | 148677                  | CC                              | TT                | 1946504787               |
| SNP_P3_119499_218821 | NW_004515894.1 | Scaffold419 | 218821                  | GG                              | AA                | 1946504789               |
| SNP_P3_119500_219635 | NW_004515894.1 | Scaffold419 | 219635                  | GG                              | AA                | 1946504791               |
| SNP_P3_119501_219681 | NW_004515894.1 | Scaffold419 | 219681                  | AA                              | TT                | 1946504792               |
| SNP_P3_119502_219694 | NW_004515894.1 | Scaffold419 | 219694                  | CC                              | TT                | 1946504793               |
| SNP_P3_119503_225015 | NW_004515894.1 | Scaffold419 | 225015                  | CC                              | TT                | 1946504795               |
| SNP_P3_119504_239879 | NW_004515894.1 | Scaffold419 | 239879                  | GG                              | AA                | 1946504797               |
| SNP_P3_119505_239880 | NW_004515894.1 | Scaffold419 | 239880                  | TT                              | AA                | 1946504798               |
| SNP_P3_119506_254830 | NW_004515894.1 | Scaffold419 | 254830                  | AA                              | GG                | 1946504800               |
| SNP_P3_119507_304692 | NW_004515894.1 | Scaffold419 | 304692                  | CC                              | TT                | 1946504801               |
| SNP_P3_119508_322608 | NW_004515894.1 | Scaffold419 | 322608                  | TT                              | AA                | 1946504803               |
| SNP_P3_119509_340990 | NW_004515894.1 | Scaffold419 | 340990                  | GG                              | TT                | 1946504804               |
| SNP_P3_119510_341160 | NW_004515894.1 | Scaffold419 | 341160                  | GG                              | AA                | 1946504806               |
| SNP_P3_119511_341424 | NW_004515894.1 | Scaffold419 | 341424                  | GG                              | AA                | 1946504807               |
| SNP_P3_119512_341805 | NW_004515894.1 | Scaffold419 | 341805                  | TT                              | AA                | 1946504809               |
| SNP_P3_119513_5165   | NW_004515895.1 | Scaffold420 | 5165                    | GG                              | TT                | 1946504810               |
| SNP_P3_119514_8630   | NW_004515895.1 | Scaffold420 | 8630                    | AA                              | TT                | 1946504812               |
| SNP_P3_119515_15291  | NW_004515895.1 | Scaffold420 | 15291                   | TT                              | AA                | 1946504813               |

| SNPs IDs             | Chromosome IDs | Chromosomes | Physical positions (bp) | CDC Frontier (Reference genome) | (Pusa 256 & HPNB) | NCBI SNPdb Accession IDs |
|----------------------|----------------|-------------|-------------------------|---------------------------------|-------------------|--------------------------|
| SNP_P3_119516_15712  | NW_004515895.1 | Scaffold420 | 15712                   | GG                              | AA                | 1946504815               |
| SNP_P3_119517_17959  | NW_004515895.1 | Scaffold420 | 17959                   | AA                              | GG                | 1946504817               |
| SNP_P3_119518_60596  | NW_004515895.1 | Scaffold420 | 60596                   | AA                              | GG                | 1946504818               |
| SNP_P3_119519_64660  | NW_004515895.1 | Scaffold420 | 64660                   | TT                              | GG                | 1946504820               |
| SNP_P3_119520_69340  | NW_004515895.1 | Scaffold420 | 69340                   | TT                              | CC                | 1946504821               |
| SNP_P3_119521_69502  | NW_004515895.1 | Scaffold420 | 69502                   | TT                              | CC                | 1946504822               |
| SNP_P3_119523_69678  | NW_004515895.1 | Scaffold420 | 69678                   | GG                              | TT                | 1946504824               |
| SNP_P3_119524_69690  | NW_004515895.1 | Scaffold420 | 69690                   | CC                              | TT                | 1946504825               |
| SNP_P3_119525_69763  | NW_004515895.1 | Scaffold420 | 69763                   | AA                              | GG                | 1946504827               |
| SNP_P3_119526_69765  | NW_004515895.1 | Scaffold420 | 69765                   | AA                              | GG                | 1946504828               |
| SNP_P3_119527_69786  | NW_004515895.1 | Scaffold420 | 69786                   | AA                              | GG                | 1946504830               |
| SNP_P3_119528_69900  | NW_004515895.1 | Scaffold420 | 69900                   | GG                              | AA                | 1946504831               |
| SNP_P3_119529_70035  | NW_004515895.1 | Scaffold420 | 70035                   | TT                              | GG                | 1946504833               |
| SNP_P3_119530_70138  | NW_004515895.1 | Scaffold420 | 70138                   | TT                              | CC                | 1946504834               |
| SNP_P3_119531_70320  | NW_004515895.1 | Scaffold420 | 70320                   | AA                              | GG                | 1946504836               |
| SNP_P3_119532_70359  | NW_004515895.1 | Scaffold420 | 70359                   | TT                              | AA                | 1946504837               |
| SNP_P3_119533_78409  | NW_004515895.1 | Scaffold420 | 78409                   | AA                              | GG                | 1946504839               |
| SNP_P3_119534_78464  | NW_004515895.1 | Scaffold420 | 78464                   | TT                              | GG                | 1946504840               |
| SNP_P3_119535_78777  | NW_004515895.1 | Scaffold420 | 78777                   | AA                              | GG                | 1946504842               |
| SNP_P3_119536_81427  | NW_004515895.1 | Scaffold420 | 81427                   | AA                              | TT                | 1946504843               |
| SNP_P3_119537_81429  | NW_004515895.1 | Scaffold420 | 81429                   | TT                              | CC                | 1946504845               |
| SNP_P3_119538_82304  | NW_004515895.1 | Scaffold420 | 82304                   | GG                              | CC                | 1946504846               |
| SNP_P3_119539_85776  | NW_004515895.1 | Scaffold420 | 85776                   | AA                              | GG                | 1946504848               |
| SNP_P3_119540_85857  | NW_004515895.1 | Scaffold420 | 85857                   | AA                              | TT                | 1946504849               |
| SNP_P3_119541_87323  | NW_004515895.1 | Scaffold420 | 87323                   | AA                              | GG                | 1946504851               |
| SNP_P3_119542_87896  | NW_004515895.1 | Scaffold420 | 87896                   | TT                              | AA                | 1946504852               |
| SNP_P3_119543_87993  | NW_004515895.1 | Scaffold420 | 87993                   | CC                              | TT                | 1946504854               |
| SNP_P3_119544_87996  | NW_004515895.1 | Scaffold420 | 87996                   | GG                              | AA                | 1946504855               |
| SNP_P3_119545_88231  | NW_004515895.1 | Scaffold420 | 88231                   | CC                              | TT                | 1946504857               |
| SNP_P3_119547_88267  | NW_004515895.1 | Scaffold420 | 88267                   | CC                              | TT                | 1946504858               |
| SNP_P3_119548_92759  | NW_004515895.1 | Scaffold420 | 92759                   | GG                              | AA                | 1946504859               |
| SNP_P3_119549_92812  | NW_004515895.1 | Scaffold420 | 92812                   | GG                              | CC                | 1946504861               |
| SNP_P3_119551_122732 | NW_004515895.1 | Scaffold420 | 122732                  | AA                              | GG                | 1946504862               |
| SNP_P3_119552_170377 | NW_004515895.1 | Scaffold420 | 170377                  | GG                              | TT                | 1946504864               |
| SNP_P3_119553_197484 | NW_004515895.1 | Scaffold420 | 197484                  | AA                              | TT                | 1946504865               |
| SNP_P3_119554_211051 | NW_004515895.1 | Scaffold420 | 211051                  | GG                              | TT                | 1946504867               |
| SNP_P3_119555_249376 | NW_004515895.1 | Scaffold420 | 249376                  | TT                              | CC                | 1946504868               |
| SNP_P3_119556_249381 | NW_004515895.1 | Scaffold420 | 249381                  | AA                              | CC                | 1946504869               |
| SNP_P3_119557_249406 | NW_004515895.1 | Scaffold420 | 249406                  | AA                              | CC                | 1946504871               |
| SNP_P3_119558_249580 | NW_004515895.1 | Scaffold420 | 249580                  | GG                              | AA                | 1946504872               |
| SNP_P3_119559_249618 | NW_004515895.1 | Scaffold420 | 249618                  | AA                              | TT                | 1946504874               |
| SNP_P3_119560_249620 | NW_004515895.1 | Scaffold420 | 249620                  | GG                              | CC                | 1946504875               |

| SNPs IDs             | Chromosome IDs | Chromosomes   | Physical positions (bp) | CDC Frontier (Reference genome) | (Pusa 256 & HPNB) | NCBI SNPdb Accession IDs |
|----------------------|----------------|---------------|-------------------------|---------------------------------|-------------------|--------------------------|
| SNP_P3_119561_249710 | NW_004515895.1 | Scaffold420   | 249710                  | TT                              | CC                | 1946504876               |
| SNP_P3_119562_249829 | NW_004515895.1 | Scaffold420   | 249829                  | AA                              | GG                | 1946504878               |
| SNP_P3_119564_266376 | NW_004515895.1 | Scaffold420   | 266376                  | CC                              | GG                | 1946504879               |
| SNP_P3_119565_266401 | NW_004515895.1 | Scaffold420   | 266401                  | AA                              | CC                | 1946504881               |
| SNP_P3_119566_266407 | NW_004515895.1 | Scaffold420   | 266407                  | AA                              | GG                | 1946504882               |
| SNP_P3_119567_266572 | NW_004515895.1 | Scaffold420   | 266572                  | TT                              | GG                | 1946504884               |
| SNP_P3_119568_266626 | NW_004515895.1 | Scaffold420   | 266626                  | AA                              | GG                | 1946504885               |
| SNP_P3_119569_266680 | NW_004515895.1 | Scaffold420   | 266680                  | CC                              | AA                | 1946504887               |
| SNP_P3_119570_266699 | NW_004515895.1 | Scaffold420   | 266699                  | CC                              | AA                | 1946504888               |
| SNP_P3_119571_266772 | NW_004515895.1 | Scaffold420   | 266772                  | GG                              | TT                | 1946504889               |
| SNP_P3_119572_311688 | NW_004515895.1 | Scaffold420   | 311688                  | CC                              | TT                | 1946504891               |
| SNP_P3_119573_311963 | NW_004515895.1 | Scaffold420   | 311963                  | AA                              | GG                | 1946504892               |
| SNP_P3_119574_318750 | NW_004515895.1 | Scaffold420   | 318750                  | TT                              | CC                | 1946504894               |
| SNP_P3_119575_324411 | NW_004515895.1 | Scaffold420   | 324411                  | TT                              | GG                | 1946504895               |
| SNP_P3_119576_324438 | NW_004515895.1 | Scaffold420   | 324438                  | TT                              | CC                | 1946504897               |
| SNP_P3_119577_324484 | NW_004515895.1 | Scaffold420   | 324484                  | AA                              | CC                | 1946504898               |
| SNP_P3_119578_324487 | NW_004515895.1 | Scaffold420   | 324487                  | GG                              | AA                | 1946504899               |
| SNP_P3_119579_324523 | NW_004515895.1 | Scaffold420   | 324523                  | AA                              | GG                | 1946504901               |
| SNP_P3_119580_324530 | NW_004515895.1 | Scaffold420   | 324530                  | TT                              | CC                | 1946504902               |
| SNP_P3_119581_324616 | NW_004515895.1 | Scaffold420   | 324616                  | AA                              | GG                | 1946504904               |
| SNP_P3_119582_324631 | NW_004515895.1 | Scaffold420   | 324631                  | TT                              | AA                | 1946504905               |
| SNP_P3_119583_324661 | NW_004515895.1 | Scaffold420   | 324661                  | GG                              | AA                | 1946504907               |
| SNP_P3_119584_324662 | NW_004515895.1 | Scaffold420   | 324662                  | TT                              | CC                | 1946504908               |
| SNP_P3_119585_324673 | NW_004515895.1 | Scaffold420   | 324673                  | TT                              | AA                | 1946504910               |
| SNP_P3_119586_324713 | NW_004515895.1 | Scaffold420   | 324713                  | AA                              | GG                | 1946504911               |
| SNP_P3_119587_324872 | NW_004515895.1 | Scaffold420   | 324872                  | AA                              | GG                | 1946504913               |
| SNP_P3_119588_325501 | NW_004515895.1 | Scaffold420   | 325501                  | CC                              | TT                | 1946504914               |
| SNP_P3_119590_18821  | NW_004515896.1 | Scaffold421_2 | 18821                   | GG                              | AA                | 1946504915               |
| SNP_P3_119591_18823  | NW_004515896.1 | Scaffold421_2 | 18823                   | GG                              | AA                | 1946504917               |
| SNP_P3_119593_40846  | NW_004515896.1 | Scaffold421_2 | 40846                   | CC                              | AA                | 1946504918               |
| SNP_P3_119594_45620  | NW_004515896.1 | Scaffold421_2 | 45620                   | TT                              | AA                | 1946504920               |
| SNP_P3_119595_45857  | NW_004515896.1 | Scaffold421_2 | 45857                   | AA                              | CC                | 1946504921               |
| SNP_P3_119596_149868 | NW_004515896.1 | Scaffold421_2 | 149868                  | TT                              | CC                | 1946504923               |
| SNP_P3_119597_162532 | NW_004515896.1 | Scaffold421_2 | 162532                  | CC                              | TT                | 1946504924               |
| SNP_P3_119598_162679 | NW_004515896.1 | Scaffold421_2 | 162679                  | TT                              | CC                | 1946504926               |
| SNP_P3_119599_165152 | NW_004515896.1 | Scaffold421_2 | 165152                  | AA                              | GG                | 1946504927               |
| SNP_P3_119600_165155 | NW_004515896.1 | Scaffold421_2 | 165155                  | GG                              | TT                | 1946504928               |
| SNP_P3_119601_165179 | NW_004515896.1 | Scaffold421_2 | 165179                  | AA                              | GG                | 1946504930               |
| SNP_P3_119602_165180 | NW_004515896.1 | Scaffold421_2 | 165180                  | GG                              | AA                | 1946504931               |
| SNP_P3_119603_165187 | NW_004515896.1 | Scaffold421_2 | 165187                  | TT                              | GG                | 1946504933               |
| SNP_P3_119604_165205 | NW_004515896.1 | Scaffold421_2 | 165205                  | CC                              | AA                | 1946504934               |
| SNP_P3_119605_165206 | NW_004515896.1 | Scaffold421_2 | 165206                  | TT                              | CC                | 1946504936               |

| SNPs IDs             | Chromosome IDs | Chromosomes   | Physical positions (bp) | CDC Frontier (Reference genome) | (Pusa 256 & HPNB) | NCBI SNPdb Accession IDs |
|----------------------|----------------|---------------|-------------------------|---------------------------------|-------------------|--------------------------|
| SNP_P3_119606_245302 | NW_004515896.1 | Scaffold421_2 | 245302                  | TT                              | CC                | 1946504937               |
| SNP_P3_119607_249638 | NW_004515896.1 | Scaffold421_2 | 249638                  | CC                              | TT                | 1946504939               |
| SNP_P3_119608_249654 | NW_004515896.1 | Scaffold421_2 | 249654                  | CC                              | GG                | 1946504940               |
| SNP_P3_119610_249715 | NW_004515896.1 | Scaffold421_2 | 249715                  | CC                              | TT                | 1946504942               |
| SNP_P3_119611_249738 | NW_004515896.1 | Scaffold421_2 | 249738                  | GG                              | AA                | 1946504943               |
| SNP_P3_119612_249740 | NW_004515896.1 | Scaffold421_2 | 249740                  | TT                              | CC                | 1946504945               |
| SNP_P3_119613_249830 | NW_004515896.1 | Scaffold421_2 | 249830                  | TT                              | CC                | 1946504946               |
| SNP_P3_119614_249849 | NW_004515896.1 | Scaffold421_2 | 249849                  | AA                              | CC                | 1946504948               |
| SNP_P3_119615_249853 | NW_004515896.1 | Scaffold421_2 | 249853                  | TT                              | CC                | 1946504949               |
| SNP_P3_119616_249871 | NW_004515896.1 | Scaffold421_2 | 249871                  | TT                              | CC                | 1946504950               |
| SNP_P3_119617_249872 | NW_004515896.1 | Scaffold421_2 | 249872                  | AA                              | GG                | 1946504952               |
| SNP_P3_119618_249911 | NW_004515896.1 | Scaffold421_2 | 249911                  | TT                              | GG                | 1946504953               |
| SNP_P3_119619_249958 | NW_004515896.1 | Scaffold421_2 | 249958                  | AA                              | GG                | 1946504955               |
| SNP_P3_119620_249969 | NW_004515896.1 | Scaffold421_2 | 249969                  | AA                              | GG                | 1946504956               |
| SNP_P3_119621_252487 | NW_004515896.1 | Scaffold421_2 | 252487                  | AA                              | GG                | 1946504958               |
| SNP_P3_119622_252532 | NW_004515896.1 | Scaffold421_2 | 252532                  | CC                              | TT                | 1946504959               |
| SNP_P3_119623_255151 | NW_004515896.1 | Scaffold421_2 | 255151                  | GG                              | AA                | 1946504961               |
| SNP_P3_119624_274821 | NW_004515896.1 | Scaffold421_2 | 274821                  | TT                              | CC                | 1946504962               |
| SNP_P3_119625_274851 | NW_004515896.1 | Scaffold421_2 | 274851                  | AA                              | CC                | 1946504964               |
| SNP_P3_119626_274852 | NW_004515896.1 | Scaffold421_2 | 274852                  | GG                              | AA                | 1946504965               |
| SNP_P3_119627_274932 | NW_004515896.1 | Scaffold421_2 | 274932                  | TT                              | CC                | 1946504966               |
| SNP_P3_119628_275080 | NW_004515896.1 | Scaffold421_2 | 275080                  | GG                              | AA                | 1946504968               |
| SNP_P3_119629_275252 | NW_004515896.1 | Scaffold421_2 | 275252                  | AA                              | GG                | 1946504969               |
| SNP_P3_119630_275273 | NW_004515896.1 | Scaffold421_2 | 275273                  | GG                              | TT                | 1946504971               |
| SNP_P3_119631_275328 | NW_004515896.1 | Scaffold421_2 | 275328                  | TT                              | CC                | 1946504972               |
| SNP_P3_119632_275366 | NW_004515896.1 | Scaffold421_2 | 275366                  | TT                              | AA                | 1946504974               |
| SNP_P3_119633_275369 | NW_004515896.1 | Scaffold421_2 | 275369                  | TT                              | CC                | 1946504975               |
| SNP_P3_119634_275452 | NW_004515896.1 | Scaffold421_2 | 275452                  | AA                              | GG                | 1946504976               |
| SNP_P3_119635_311114 | NW_004515896.1 | Scaffold421_2 | 311114                  | TT                              | AA                | 1946504978               |
| SNP_P3_119636_318646 | NW_004515896.1 | Scaffold421_2 | 318646                  | CC                              | TT                | 1946504979               |
| SNP_P3_119637_323165 | NW_004515896.1 | Scaffold421_2 | 323165                  | TT                              | GG                | 1946504981               |
| SNP_P3_119638_323447 | NW_004515896.1 | Scaffold421_2 | 323447                  | TT                              | CC                | 1946504982               |
| SNP_P3_119639_323476 | NW_004515896.1 | Scaffold421_2 | 323476                  | TT                              | CC                | 1946504984               |
| SNP_P3_119640_323553 | NW_004515896.1 | Scaffold421_2 | 323553                  | AA                              | GG                | 1946504985               |
| SNP_P3_119641_323859 | NW_004515896.1 | Scaffold421_2 | 323859                  | AA                              | GG                | 1946504987               |
| SNP_P3_119642_327548 | NW_004515896.1 | Scaffold421_2 | 327548                  | AA                              | GG                | 1946504988               |
| SNP_P3_119643_349898 | NW_004515896.1 | Scaffold421_2 | 349898                  | TT                              | CC                | 1946504989               |
| SNP_P3_119644_349917 | NW_004515896.1 | Scaffold421_2 | 349917                  | TT                              | CC                | 1946504991               |
| SNP_P3_119645_350173 | NW_004515896.1 | Scaffold421_2 | 350173                  | AA                              | GG                | 1946504992               |
| SNP_P3_119646_350325 | NW_004515896.1 | Scaffold421_2 | 350325                  | AA                              | GG                | 1946504994               |
| SNP_P3_119647_350326 | NW_004515896.1 | Scaffold421_2 | 350326                  | GG                              | AA                | 1946504995               |
| SNP_P3_119648_354569 | NW_004515896.1 | Scaffold421_2 | 354569                  | TT                              | CC                | 1946504997               |

| SNPs IDs             | Chromosome IDs | Chromosomes   | Physical positions (bp) | CDC Frontier (Reference genome) | (Pusa 256 & HPNB) | NCBI SNPdb Accession IDs |
|----------------------|----------------|---------------|-------------------------|---------------------------------|-------------------|--------------------------|
| SNP_P3_119649_355031 | NW_004515896.1 | Scaffold421_2 | 355031                  | GG                              | AA                | 1946504998               |
| SNP_P3_119650_361621 | NW_004515896.1 | Scaffold421_2 | 361621                  | AA                              | GG                | 1946505000               |
| SNP_P3_119651_363795 | NW_004515896.1 | Scaffold421_2 | 363795                  | AA                              | TT                | 1946505001               |
| SNP_P3_119653_364834 | NW_004515896.1 | Scaffold421_2 | 364834                  | TT                              | GG                | 1946505002               |
| SNP_P3_119654_365163 | NW_004515896.1 | Scaffold421_2 | 365163                  | CC                              | TT                | 1946505004               |
| SNP_P3_119655_365166 | NW_004515896.1 | Scaffold421_2 | 365166                  | AA                              | GG                | 1946505005               |
| SNP_P3_119656_365170 | NW_004515896.1 | Scaffold421_2 | 365170                  | AA                              | CC                | 1946505007               |
| SNP_P3_119657_365218 | NW_004515896.1 | Scaffold421_2 | 365218                  | GG                              | AA                | 1946505008               |
| SNP_P3_119658_365242 | NW_004515896.1 | Scaffold421_2 | 365242                  | AA                              | CC                | 1946505010               |
| SNP_P3_119659_365246 | NW_004515896.1 | Scaffold421_2 | 365246                  | TT                              | AA                | 1946505011               |
| SNP_P3_119661_397757 | NW_004515896.1 | Scaffold421_2 | 397757                  | TT                              | GG                | 1946505013               |
| SNP_P3_119662_397960 | NW_004515896.1 | Scaffold421_2 | 397960                  | AA                              | CC                | 1946505014               |
| SNP_P3_119663_397961 | NW_004515896.1 | Scaffold421_2 | 397961                  | GG                              | AA                | 1946505015               |
| SNP_P3_119664_413504 | NW_004515896.1 | Scaffold421_2 | 413504                  | CC                              | AA                | 1946505017               |
| SNP_P3_119665_413513 | NW_004515896.1 | Scaffold421_2 | 413513                  | CC                              | TT                | 1946505018               |
| SNP_P3_119666_416891 | NW_004515896.1 | Scaffold421_2 | 416891                  | TT                              | CC                | 1946505020               |
| SNP_P3_119667_416951 | NW_004515896.1 | Scaffold421_2 | 416951                  | TT                              | GG                | 1946505021               |
| SNP_P3_119668_421138 | NW_004515896.1 | Scaffold421_2 | 421138                  | GG                              | AA                | 1946505023               |
| SNP_P3_119669_421252 | NW_004515896.1 | Scaffold421_2 | 421252                  | TT                              | GG                | 1946505024               |
| SNP_P3_119670_421560 | NW_004515896.1 | Scaffold421_2 | 421560                  | CC                              | AA                | 1946505026               |
| SNP_P3_119671_421605 | NW_004515896.1 | Scaffold421_2 | 421605                  | CC                              | TT                | 1946505027               |
| SNP_P3_119672_421608 | NW_004515896.1 | Scaffold421_2 | 421608                  | TT                              | CC                | 1946505029               |
| SNP_P3_119673_421654 | NW_004515896.1 | Scaffold421_2 | 421654                  | CC                              | AA                | 1946505030               |
| SNP_P3_119674_422525 | NW_004515896.1 | Scaffold421_2 | 422525                  | GG                              | AA                | 1946505032               |
| SNP_P3_119675_422690 | NW_004515896.1 | Scaffold421_2 | 422690                  | CC                              | TT                | 1946505033               |
| SNP_P3_119676_422871 | NW_004515896.1 | Scaffold421_2 | 422871                  | AA                              | TT                | 1946505035               |
| SNP_P3_119677_447498 | NW_004515896.1 | Scaffold421_2 | 447498                  | AA                              | GG                | 1946505036               |
| SNP_P3_119678_447639 | NW_004515896.1 | Scaffold421_2 | 447639                  | AA                              | GG                | 1946505038               |
| SNP_P3_119679_447754 | NW_004515896.1 | Scaffold421_2 | 447754                  | GG                              | AA                | 1946505039               |
| SNP_P3_119680_447909 | NW_004515896.1 | Scaffold421_2 | 447909                  | AA                              | CC                | 1946505040               |
| SNP_P3_119681_447961 | NW_004515896.1 | Scaffold421_2 | 447961                  | CC                              | AA                | 1946505042               |
| SNP_P3_119682_447986 | NW_004515896.1 | Scaffold421_2 | 447986                  | CC                              | AA                | 1946505043               |
| SNP_P3_119683_455634 | NW_004515896.1 | Scaffold421_2 | 455634                  | CC                              | TT                | 1946505045               |
| SNP_P3_119684_455635 | NW_004515896.1 | Scaffold421_2 | 455635                  | TT                              | CC                | 1946505046               |
| SNP_P3_119685_455663 | NW_004515896.1 | Scaffold421_2 | 455663                  | TT                              | GG                | 1946505048               |
| SNP_P3_119686_455690 | NW_004515896.1 | Scaffold421_2 | 455690                  | AA                              | GG                | 1946505049               |
| SNP_P3_119688_456027 | NW_004515896.1 | Scaffold421_2 | 456027                  | TT                              | CC                | 1946505051               |
| SNP_P3_119689_456068 | NW_004515896.1 | Scaffold421_2 | 456068                  | AA                              | TT                | 1946505052               |
| SNP_P3_119690_456127 | NW_004515896.1 | Scaffold421_2 | 456127                  | AA                              | GG                | 1946505054               |
| SNP_P3_119691_462450 | NW_004515896.1 | Scaffold421_2 | 462450                  | AA                              | TT                | 1946505055               |
| SNP_P3_119692_463009 | NW_004515896.1 | Scaffold421_2 | 463009                  | TT                              | CC                | 1946505057               |
| SNP_P3_119693_465639 | NW_004515896.1 | Scaffold421_2 | 465639                  | AA                              | GG                | 1946505058               |

| SNPs IDs             | Chromosome IDs | Chromosomes   | Physical positions (bp) | CDC Frontier (Reference genome) | (Pusa 256 & HPNB) | NCBI SNPdb Accession IDs |
|----------------------|----------------|---------------|-------------------------|---------------------------------|-------------------|--------------------------|
| SNP_P3_119694_468925 | NW_004515896.1 | Scaffold421_2 | 468925                  | TT                              | CC                | 1946505060               |
| SNP_P3_119695_488781 | NW_004515896.1 | Scaffold421_2 | 488781                  | CC                              | TT                | 1946505062               |
| SNP_P3_119696_496317 | NW_004515896.1 | Scaffold421_2 | 496317                  | AA                              | TT                | 1946505063               |
| SNP_P3_119697_496632 | NW_004515896.1 | Scaffold421_2 | 496632                  | GG                              | AA                | 1946505065               |
| SNP_P3_119698_496634 | NW_004515896.1 | Scaffold421_2 | 496634                  | AA                              | GG                | 1946505066               |
| SNP_P3_119699_496681 | NW_004515896.1 | Scaffold421_2 | 496681                  | CC                              | TT                | 1946505068               |
| SNP_P3_119700_501599 | NW_004515896.1 | Scaffold421_2 | 501599                  | TT                              | GG                | 1946505069               |
| SNP_P3_119701_501630 | NW_004515896.1 | Scaffold421_2 | 501630                  | TT                              | CC                | 1946505071               |
| SNP_P3_119704_511872 | NW_004515896.1 | Scaffold421_2 | 511872                  | AA                              | GG                | 1946505072               |
| SNP_P3_119705_539416 | NW_004515896.1 | Scaffold421_2 | 539416                  | TT                              | CC                | 1946505074               |
| SNP_P3_119706_541004 | NW_004515896.1 | Scaffold421_2 | 541004                  | TT                              | AA                | 1946505075               |
| SNP_P3_119707_571933 | NW_004515896.1 | Scaffold421_2 | 571933                  | CC                              | AA                | 1946505077               |
| SNP_P3_119708_573729 | NW_004515896.1 | Scaffold421_2 | 573729                  | CC                              | GG                | 1946505078               |
| SNP_P3_119709_574090 | NW_004515896.1 | Scaffold421_2 | 574090                  | AA                              | GG                | 1946505080               |
| SNP_P3_119710_581410 | NW_004515896.1 | Scaffold421_2 | 581410                  | TT                              | CC                | 1946505081               |
| SNP_P3_119711_581427 | NW_004515896.1 | Scaffold421_2 | 581427                  | AA                              | GG                | 1946505083               |
| SNP_P3_119712_581470 | NW_004515896.1 | Scaffold421_2 | 581470                  | TT                              | CC                | 1946505084               |
| SNP_P3_119713_581782 | NW_004515896.1 | Scaffold421_2 | 581782                  | GG                              | AA                | 1946505086               |
| SNP_P3_119714_581794 | NW_004515896.1 | Scaffold421_2 | 581794                  | AA                              | CC                | 1946505087               |
| SNP_P3_119715_581884 | NW_004515896.1 | Scaffold421_2 | 581884                  | AA                              | TT                | 1946505089               |
| SNP_P3_119716_581961 | NW_004515896.1 | Scaffold421_2 | 581961                  | GG                              | AA                | 1946505090               |
| SNP_P3_119717_581970 | NW_004515896.1 | Scaffold421_2 | 581970                  | CC                              | AA                | 1946505092               |
| SNP_P3_119718_582146 | NW_004515896.1 | Scaffold421_2 | 582146                  | CC                              | AA                | 1946505093               |
| SNP_P3_119719_582307 | NW_004515896.1 | Scaffold421_2 | 582307                  | GG                              | AA                | 1946505094               |
| SNP_P3_119720_582372 | NW_004515896.1 | Scaffold421_2 | 582372                  | CC                              | TT                | 1946505096               |
| SNP_P3_119721_582957 | NW_004515896.1 | Scaffold421_2 | 582957                  | CC                              | TT                | 1946505097               |
| SNP_P3_119722_582970 | NW_004515896.1 | Scaffold421_2 | 582970                  | TT                              | CC                | 1946505099               |
| SNP_P3_119723_582976 | NW_004515896.1 | Scaffold421_2 | 582976                  | TT                              | AA                | 1946505100               |
| SNP_P3_119724_582979 | NW_004515896.1 | Scaffold421_2 | 582979                  | AA                              | TT                | 1946505102               |
| SNP_P3_119725_583041 | NW_004515896.1 | Scaffold421_2 | 583041                  | CC                              | TT                | 1946505103               |
| SNP_P3_119726_583131 | NW_004515896.1 | Scaffold421_2 | 583131                  | AA                              | CC                | 1946505105               |
| SNP_P3_119727_583132 | NW_004515896.1 | Scaffold421_2 | 583132                  | CC                              | TT                | 1946505106               |
| SNP_P3_119728_583134 | NW_004515896.1 | Scaffold421_2 | 583134                  | TT                              | CC                | 1946505108               |
| SNP_P3_119729_589240 | NW_004515896.1 | Scaffold421_2 | 589240                  | GG                              | AA                | 1946505109               |
| SNP_P3_119730_597464 | NW_004515896.1 | Scaffold421_2 | 597464                  | TT                              | CC                | 1946505111               |
| SNP_P3_119731_597497 | NW_004515896.1 | Scaffold421_2 | 597497                  | TT                              | CC                | 1946505112               |
| SNP_P3_119732_597498 | NW_004515896.1 | Scaffold421_2 | 597498                  | CC                              | TT                | 1946505114               |
| SNP_P3_119733_597864 | NW_004515896.1 | Scaffold421_2 | 597864                  | TT                              | CC                | 1946505115               |
| SNP_P3_119734_597874 | NW_004515896.1 | Scaffold421_2 | 597874                  | AA                              | GG                | 1946505117               |
| SNP_P3_119735_597883 | NW_004515896.1 | Scaffold421_2 | 597883                  | AA                              | TT                | 1946505118               |
| SNP_P3_119736_597904 | NW_004515896.1 | Scaffold421_2 | 597904                  | TT                              | AA                | 1946505120               |
| SNP_P3_119737_597939 | NW_004515896.1 | Scaffold421_2 | 597939                  | CC                              | TT                | 1946505121               |

| SNPs IDs            | Chromosome IDs | Chromosomes   | Physical positions (bp) | CDC Frontier (Reference genome) | (Pusa 256 & HPNB) | NCBI SNPdb Accession IDs |
|---------------------|----------------|---------------|-------------------------|---------------------------------|-------------------|--------------------------|
| SNP_P3_119739_284   | NW_004515897.1 | Scaffold421_1 | 284                     | AA                              | CC                | 1946505123               |
| SNP_P3_119740_906   | NW_004515897.1 | Scaffold421_1 | 906                     | CC                              | TT                | 1946505124               |
| SNP_P3_119741_2616  | NW_004515897.1 | Scaffold421_1 | 2616                    | GG                              | AA                | 1946505126               |
| SNP_P3_119743_2945  | NW_004515897.1 | Scaffold421_1 | 2945                    | GG                              | CC                | 1946505127               |
| SNP_P3_119744_3012  | NW_004515897.1 | Scaffold421_1 | 3012                    | CC                              | AA                | 1946505129               |
| SNP_P3_119745_3033  | NW_004515897.1 | Scaffold421_1 | 3033                    | CC                              | TT                | 1946505130               |
| SNP_P3_119746_3189  | NW_004515897.1 | Scaffold421_1 | 3189                    | CC                              | TT                | 1946505132               |
| SNP_P3_119747_3227  | NW_004515897.1 | Scaffold421_1 | 3227                    | GG                              | AA                | 1946505133               |
| SNP_P3_119748_3290  | NW_004515897.1 | Scaffold421_1 | 3290                    | CC                              | GG                | 1946505135               |
| SNP_P3_119749_3919  | NW_004515897.1 | Scaffold421_1 | 3919                    | AA                              | GG                | 1946505136               |
| SNP_P3_119751_4529  | NW_004515897.1 | Scaffold421_1 | 4529                    | AA                              | GG                | 1946505138               |
| SNP_P3_119752_4641  | NW_004515897.1 | Scaffold421_1 | 4641                    | CC                              | TT                | 1946505139               |
| SNP_P3_119753_4929  | NW_004515897.1 | Scaffold421_1 | 4929                    | GG                              | AA                | 1946505141               |
| SNP_P3_119754_6328  | NW_004515897.1 | Scaffold421_1 | 6328                    | CC                              | TT                | 1946505142               |
| SNP_P3_119755_18035 | NW_004515897.1 | Scaffold421_1 | 18035                   | CC                              | TT                | 1946505144               |
| SNP_P3_119756_32831 | NW_004515897.1 | Scaffold421_1 | 32831                   | AA                              | TT                | 1946505145               |
| SNP_P3_119757_38648 | NW_004515897.1 | Scaffold421_1 | 38648                   | GG                              | AA                | 1946505147               |
| SNP_P3_119758_79208 | NW_004515897.1 | Scaffold421_1 | 79208                   | CC                              | TT                | 1946505148               |
| SNP_P3_119759_87244 | NW_004515897.1 | Scaffold421_1 | 87244                   | TT                              | CC                | 1946505150               |
| SNP_P3_119760_92707 | NW_004515897.1 | Scaffold421_1 | 92707                   | CC                              | TT                | 1946505151               |
| SNP_P3_119761_97196 | NW_004515897.1 | Scaffold421_1 | 97196                   | GG                              | AA                | 1946505153               |
| SNP_P3_119762_97300 | NW_004515897.1 | Scaffold421_1 | 97300                   | TT                              | CC                | 1946505154               |
| SNP_P3_119763_98647 | NW_004515897.1 | Scaffold421_1 | 98647                   | AA                              | GG                | 1946505156               |
| SNP_P3_119764_98652 | NW_004515897.1 | Scaffold421_1 | 98652                   | AA                              | CC                | 1946505157               |
| SNP_P3_119765_98653 | NW_004515897.1 | Scaffold421_1 | 98653                   | TT                              | AA                | 1946505159               |
| SNP_P3_119766_98693 | NW_004515897.1 | Scaffold421_1 | 98693                   | AA                              | GG                | 1946505160               |
| SNP_P3_119767_16987 | NW_004515898.1 | Scaffold423   | 16987                   | CC                              | TT                | 1946505162               |
| SNP_P3_119768_16988 | NW_004515898.1 | Scaffold423   | 16988                   | AA                              | GG                | 1946505163               |
| SNP_P3_119769_17000 | NW_004515898.1 | Scaffold423   | 17000                   | AA                              | TT                | 1946505165               |
| SNP_P3_119770_17014 | NW_004515898.1 | Scaffold423   | 17014                   | GG                              | TT                | 1946505166               |
| SNP_P3_119771_17027 | NW_004515898.1 | Scaffold423   | 17027                   | AA                              | TT                | 1946505168               |
| SNP_P3_119772_17317 | NW_004515898.1 | Scaffold423   | 17317                   | AA                              | GG                | 1946505169               |
| SNP_P3_119773_17322 | NW_004515898.1 | Scaffold423   | 17322                   | TT                              | CC                | 1946505171               |
| SNP_P3_119775_14906 | NW_004515899.1 | Scaffold424   | 14906                   | TT                              | CC                | 1946505172               |
| SNP_P3_119776_15238 | NW_004515899.1 | Scaffold424   | 15238                   | AA                              | GG                | 1946505174               |
| SNP_P3_119778_19150 | NW_004515899.1 | Scaffold424   | 19150                   | TT                              | CC                | 1946505175               |
| SNP_P3_119779_19418 | NW_004515899.1 | Scaffold424   | 19418                   | GG                              | AA                | 1946505177               |
| SNP_P3_119780_24343 | NW_004515899.1 | Scaffold424   | 24343                   | AA                              | TT                | 1946505178               |
| SNP_P3_119781_29975 | NW_004515899.1 | Scaffold424   | 29975                   | CC                              | TT                | 1946505180               |
| SNP_P3_119782_30231 | NW_004515899.1 | Scaffold424   | 30231                   | TT                              | CC                | 1946505181               |
| SNP_P3_119783_33620 | NW_004515899.1 | Scaffold424   | 33620                   | TT                              | CC                | 1946505183               |
| SNP_P3_119784_33997 | NW_004515899.1 | Scaffold424   | 33997                   | TT                              | GG                | 1946505185               |



| SNPs IDs             | Chromosome IDs | Chromosomes | Physical positions (bp) | CDC Frontier (Reference genome) | (Pusa 256 & HPNB) | NCBI SNPdb Accession IDs |
|----------------------|----------------|-------------|-------------------------|---------------------------------|-------------------|--------------------------|
| SNP_P3_119785_35464  | NW_004515899.1 | Scaffold424 | 35464                   | CC                              | AA                | 1946505186               |
| SNP_P3_119786_40714  | NW_004515899.1 | Scaffold424 | 40714                   | GG                              | CC                | 1946505188               |
| SNP_P3_119787_40945  | NW_004515899.1 | Scaffold424 | 40945                   | TT                              | AA                | 1946505189               |
| SNP_P3_119788_40951  | NW_004515899.1 | Scaffold424 | 40951                   | TT                              | AA                | 1946505191               |
| SNP_P3_119789_41004  | NW_004515899.1 | Scaffold424 | 41004                   | GG                              | AA                | 1946505193               |
| SNP_P3_119790_44740  | NW_004515899.1 | Scaffold424 | 44740                   | AA                              | TT                | 1946505194               |
| SNP_P3_119791_44741  | NW_004515899.1 | Scaffold424 | 44741                   | AA                              | CC                | 1946505196               |
| SNP_P3_119792_46283  | NW_004515899.1 | Scaffold424 | 46283                   | GG                              | TT                | 1946505197               |
| SNP_P3_119793_46285  | NW_004515899.1 | Scaffold424 | 46285                   | TT                              | CC                | 1946505199               |
| SNP_P3_119794_46328  | NW_004515899.1 | Scaffold424 | 46328                   | TT                              | AA                | 1946505200               |
| SNP_P3_119795_50912  | NW_004515899.1 | Scaffold424 | 50912                   | TT                              | CC                | 1946505202               |
| SNP_P3_119796_50914  | NW_004515899.1 | Scaffold424 | 50914                   | GG                              | AA                | 1946505204               |
| SNP_P3_119798_50918  | NW_004515899.1 | Scaffold424 | 50918                   | TT                              | CC                | 1946505205               |
| SNP_P3_119799_61159  | NW_004515899.1 | Scaffold424 | 61159                   | AA                              | GG                | 1946505207               |
| SNP_P3_119800_61225  | NW_004515899.1 | Scaffold424 | 61225                   | TT                              | CC                | 1946505208               |
| SNP_P3_119801_63325  | NW_004515899.1 | Scaffold424 | 63325                   | CC                              | TT                | 1946505210               |
| SNP_P3_119802_63343  | NW_004515899.1 | Scaffold424 | 63343                   | AA                              | GG                | 1946505212               |
| SNP_P3_119803_63593  | NW_004515899.1 | Scaffold424 | 63593                   | TT                              | CC                | 1946505214               |
| SNP_P3_119804_65527  | NW_004515899.1 | Scaffold424 | 65527                   | AA                              | GG                | 1946505215               |
| SNP_P3_119805_65540  | NW_004515899.1 | Scaffold424 | 65540                   | TT                              | CC                | 1946505217               |
| SNP_P3_119806_80498  | NW_004515899.1 | Scaffold424 | 80498                   | CC                              | AA                | 1946505218               |
| SNP_P3_119807_88778  | NW_004515899.1 | Scaffold424 | 88778                   | TT                              | AA                | 1946505220               |
| SNP_P3_119808_88819  | NW_004515899.1 | Scaffold424 | 88819                   | AA                              | CC                | 1946505222               |
| SNP_P3_119809_88919  | NW_004515899.1 | Scaffold424 | 88919                   | AA                              | TT                | 1946505223               |
| SNP_P3_119810_90467  | NW_004515899.1 | Scaffold424 | 90467                   | AA                              | TT                | 1946505225               |
| SNP_P3_119811_90552  | NW_004515899.1 | Scaffold424 | 90552                   | AA                              | GG                | 1946505226               |
| SNP_P3_119813_92161  | NW_004515899.1 | Scaffold424 | 92161                   | CC                              | AA                | 1946505228               |
| SNP_P3_119814_92298  | NW_004515899.1 | Scaffold424 | 92298                   | TT                              | CC                | 1946505229               |
| SNP_P3_119815_92337  | NW_004515899.1 | Scaffold424 | 92337                   | AA                              | TT                | 1946505231               |
| SNP_P3_119816_92348  | NW_004515899.1 | Scaffold424 | 92348                   | GG                              | TT                | 1946505232               |
| SNP_P3_119817_104192 | NW_004515899.1 | Scaffold424 | 104192                  | AA                              | GG                | 1946505234               |
| SNP_P3_119818_104331 | NW_004515899.1 | Scaffold424 | 104331                  | CC                              | AA                | 1946505235               |
| SNP_P3_119819_104356 | NW_004515899.1 | Scaffold424 | 104356                  | CC                              | GG                | 1946505237               |
| SNP_P3_119820_104393 | NW_004515899.1 | Scaffold424 | 104393                  | TT                              | CC                | 1946505238               |
| SNP_P3_119821_104530 | NW_004515899.1 | Scaffold424 | 104530                  | TT                              | GG                | 1946505240               |
| SNP_P3_119822_106217 | NW_004515899.1 | Scaffold424 | 106217                  | TT                              | AA                | 1946505241               |
| SNP_P3_119823_106236 | NW_004515899.1 | Scaffold424 | 106236                  | AA                              | TT                | 1946505243               |
| SNP_P3_119824_106500 | NW_004515899.1 | Scaffold424 | 106500                  | AA                              | GG                | 1946505244               |
| SNP_P3_119825_108469 | NW_004515899.1 | Scaffold424 | 108469                  | TT                              | GG                | 1946505246               |
| SNP_P3_119826_108796 | NW_004515899.1 | Scaffold424 | 108796                  | AA                              | TT                | 1946505247               |
| SNP_P3_119827_109344 | NW_004515899.1 | Scaffold424 | 109344                  | AA                              | TT                | 1946505249               |
| SNP_P3_119828_109993 | NW_004515899.1 | Scaffold424 | 109993                  | TT                              | AA                | 1946505250               |

| SNPs IDs             | Chromosome IDs | Chromosomes | Physical positions (bp) | CDC Frontier (Reference genome) | (Pusa 256 & HPNB) | NCBI SNPdb Accession IDs |
|----------------------|----------------|-------------|-------------------------|---------------------------------|-------------------|--------------------------|
| SNP_P3_119829_112399 | NW_004515899.1 | Scaffold424 | 112399                  | TT                              | GG                | 1946505252               |
| SNP_P3_119830_112472 | NW_004515899.1 | Scaffold424 | 112472                  | AA                              | TT                | 1946505253               |
| SNP_P3_119831_112702 | NW_004515899.1 | Scaffold424 | 112702                  | CC                              | GG                | 1946505255               |
| SNP_P3_119832_112932 | NW_004515899.1 | Scaffold424 | 112932                  | GG                              | AA                | 1946505257               |
| SNP_P3_119833_113207 | NW_004515899.1 | Scaffold424 | 113207                  | CC                              | GG                | 1946505258               |
| SNP_P3_119834_113228 | NW_004515899.1 | Scaffold424 | 113228                  | TT                              | AA                | 1946505260               |
| SNP_P3_119835_115125 | NW_004515899.1 | Scaffold424 | 115125                  | CC                              | TT                | 1946505261               |
| SNP_P3_119836_115342 | NW_004515899.1 | Scaffold424 | 115342                  | AA                              | GG                | 1946505263               |
| SNP_P3_119837_115601 | NW_004515899.1 | Scaffold424 | 115601                  | CC                              | TT                | 1946505264               |
| SNP_P3_119838_124081 | NW_004515899.1 | Scaffold424 | 124081                  | AA                              | GG                | 1946505266               |
| SNP_P3_119839_124295 | NW_004515899.1 | Scaffold424 | 124295                  | AA                              | GG                | 1946505267               |
| SNP_P3_119840_124326 | NW_004515899.1 | Scaffold424 | 124326                  | TT                              | GG                | 1946505269               |
| SNP_P3_119841_124394 | NW_004515899.1 | Scaffold424 | 124394                  | AA                              | TT                | 1946505270               |
| SNP_P3_119842_124517 | NW_004515899.1 | Scaffold424 | 124517                  | AA                              | GG                | 1946505272               |
| SNP_P3_119843_124531 | NW_004515899.1 | Scaffold424 | 124531                  | AA                              | GG                | 1946505273               |
| SNP_P3_119844_124540 | NW_004515899.1 | Scaffold424 | 124540                  | TT                              | CC                | 1946505275               |
| SNP_P3_119845_502    | NW_004515900.1 | Scaffold425 | 502                     | TT                              | CC                | 1946505276               |
| SNP_P3_119846_669    | NW_004515900.1 | Scaffold425 | 669                     | AA                              | CC                | 1946505278               |
| SNP_P3_119847_690    | NW_004515900.1 | Scaffold425 | 690                     | CC                              | TT                | 1946505279               |
| SNP_P3_119848_695    | NW_004515900.1 | Scaffold425 | 695                     | TT                              | GG                | 1946505281               |
| SNP_P3_119849_717    | NW_004515900.1 | Scaffold425 | 717                     | AA                              | CC                | 1946505282               |
| SNP_P3_119850_755    | NW_004515900.1 | Scaffold425 | 755                     | AA                              | CC                | 1946505284               |
| SNP_P3_119851_795    | NW_004515900.1 | Scaffold425 | 795                     | TT                              | GG                | 1946505285               |
| SNP_P3_119852_796    | NW_004515900.1 | Scaffold425 | 796                     | CC                              | AA                | 1946505287               |
| SNP_P3_119853_1735   | NW_004515900.1 | Scaffold425 | 1735                    | GG                              | AA                | 1946505288               |
| SNP_P3_119854_3882   | NW_004515900.1 | Scaffold425 | 3882                    | CC                              | TT                | 1946505290               |
| SNP_P3_119855_3895   | NW_004515900.1 | Scaffold425 | 3895                    | TT                              | CC                | 1946505291               |
| SNP_P3_119856_13394  | NW_004515901.1 | Scaffold427 | 13394                   | TT                              | GG                | 1946505293               |
| SNP_P3_119857_15736  | NW_004515901.1 | Scaffold427 | 15736                   | CC                              | AA                | 1946505294               |
| SNP_P3_119858_15755  | NW_004515901.1 | Scaffold427 | 15755                   | GG                              | TT                | 1946505295               |
| SNP_P3_119859_15968  | NW_004515901.1 | Scaffold427 | 15968                   | TT                              | AA                | 1946505297               |
| SNP_P3_119860_16060  | NW_004515901.1 | Scaffold427 | 16060                   | TT                              | AA                | 1946505298               |
| SNP_P3_119861_16097  | NW_004515901.1 | Scaffold427 | 16097                   | AA                              | TT                | 1946505300               |
| SNP_P3_119862_44342  | NW_004515901.1 | Scaffold427 | 44342                   | GG                              | AA                | 1946505301               |
| SNP_P3_119863_47213  | NW_004515901.1 | Scaffold427 | 47213                   | AA                              | CC                | 1946505303               |
| SNP_P3_119864_53317  | NW_004515901.1 | Scaffold427 | 53317                   | GG                              | AA                | 1946505304               |
| SNP_P3_119865_59535  | NW_004515901.1 | Scaffold427 | 59535                   | GG                              | CC                | 1946505306               |
| SNP_P3_119866_64387  | NW_004515901.1 | Scaffold427 | 64387                   | AA                              | GG                | 1946505307               |
| SNP_P3_119867_64430  | NW_004515901.1 | Scaffold427 | 64430                   | AA                              | TT                | 1946505309               |
| SNP_P3_119868_72475  | NW_004515901.1 | Scaffold427 | 72475                   | GG                              | AA                | 1946505310               |
| SNP_P3_119869_82747  | NW_004515901.1 | Scaffold427 | 82747                   | TT                              | CC                | 1946505312               |
| SNP_P3_119870_83070  | NW_004515901.1 | Scaffold427 | 83070                   | CC                              | GG                | 1946505313               |

| SNPs IDs             | Chromosome IDs | Chromosomes | Physical positions (bp) | CDC Frontier (Reference genome) | (Pusa 256 & HPNB) | NCBI SNPdb Accession IDs |
|----------------------|----------------|-------------|-------------------------|---------------------------------|-------------------|--------------------------|
| SNP_P3_119871_83133  | NW_004515901.1 | Scaffold427 | 83133                   | TT                              | AA                | 1946505315               |
| SNP_P3_119872_83661  | NW_004515901.1 | Scaffold427 | 83661                   | TT                              | AA                | 1946505316               |
| SNP_P3_119873_86009  | NW_004515901.1 | Scaffold427 | 86009                   | CC                              | TT                | 1946505318               |
| SNP_P3_119874_105107 | NW_004515901.1 | Scaffold427 | 105107                  | AA                              | TT                | 1946505319               |
| SNP_P3_119875_105113 | NW_004515901.1 | Scaffold427 | 105113                  | AA                              | TT                | 1946505321               |
| SNP_P3_119877_105124 | NW_004515901.1 | Scaffold427 | 105124                  | CC                              | AA                | 1946505322               |
| SNP_P3_119878_106254 | NW_004515901.1 | Scaffold427 | 106254                  | AA                              | TT                | 1946505324               |
| SNP_P3_119879_116799 | NW_004515901.1 | Scaffold427 | 116799                  | GG                              | CC                | 1946505325               |
| SNP_P3_119880_121860 | NW_004515901.1 | Scaffold427 | 121860                  | GG                              | CC                | 1946505327               |
| SNP_P3_119881_121999 | NW_004515901.1 | Scaffold427 | 121999                  | GG                              | AA                | 1946505329               |
| SNP_P3_119882_122356 | NW_004515901.1 | Scaffold427 | 122356                  | AA                              | GG                | 1946505330               |
| SNP_P3_119883_122363 | NW_004515901.1 | Scaffold427 | 122363                  | TT                              | CC                | 1946505332               |
| SNP_P3_119884_122404 | NW_004515901.1 | Scaffold427 | 122404                  | TT                              | CC                | 1946505333               |
| SNP_P3_119885_19917  | NW_004515902.1 | Scaffold428 | 19917                   | CC                              | TT                | 1946505335               |
| SNP_P3_119886_19923  | NW_004515902.1 | Scaffold428 | 19923                   | AA                              | GG                | 1946505336               |
| SNP_P3_119888_19963  | NW_004515902.1 | Scaffold428 | 19963                   | AA                              | GG                | 1946505338               |
| SNP_P3_119889_64     | NW_004515903.1 | Scaffold429 | 64                      | CC                              | GG                | 1946505339               |
| SNP_P3_119890_87     | NW_004515903.1 | Scaffold429 | 87                      | AA                              | TT                | 1946505341               |
| SNP_P3_119891_391    | NW_004515903.1 | Scaffold429 | 391                     | CC                              | TT                | 1946505342               |
| SNP_P3_119892_393    | NW_004515903.1 | Scaffold429 | 393                     | TT                              | CC                | 1946505344               |
| SNP_P3_119893_410    | NW_004515903.1 | Scaffold429 | 410                     | CC                              | AA                | 1946505345               |
| SNP_P3_119894_437    | NW_004515903.1 | Scaffold429 | 437                     | CC                              | AA                | 1946505347               |
| SNP_P3_119895_439    | NW_004515903.1 | Scaffold429 | 439                     | CC                              | TT                | 1946505348               |
| SNP_P3_119896_497    | NW_004515903.1 | Scaffold429 | 497                     | GG                              | CC                | 1946505350               |
| SNP_P3_119897_737    | NW_004515903.1 | Scaffold429 | 737                     | CC                              | TT                | 1946505351               |
| SNP_P3_119898_2846   | NW_004515903.1 | Scaffold429 | 2846                    | TT                              | AA                | 1946505353               |
| SNP_P3_119899_8222   | NW_004515903.1 | Scaffold429 | 8222                    | AA                              | GG                | 1946505354               |
| SNP_P3_119900_8262   | NW_004515903.1 | Scaffold429 | 8262                    | AA                              | TT                | 1946505356               |
| SNP_P3_119901_8315   | NW_004515903.1 | Scaffold429 | 8315                    | TT                              | CC                | 1946505357               |
| SNP_P3_119902_8317   | NW_004515903.1 | Scaffold429 | 8317                    | GG                              | AA                | 1946505359               |
| SNP_P3_119903_8343   | NW_004515903.1 | Scaffold429 | 8343                    | AA                              | GG                | 1946505360               |
| SNP_P3_119904_8405   | NW_004515903.1 | Scaffold429 | 8405                    | AA                              | TT                | 1946505362               |
| SNP_P3_119905_8422   | NW_004515903.1 | Scaffold429 | 8422                    | AA                              | TT                | 1946505363               |
| SNP_P3_119906_8459   | NW_004515903.1 | Scaffold429 | 8459                    | AA                              | TT                | 1946505364               |
| SNP_P3_119907_8478   | NW_004515903.1 | Scaffold429 | 8478                    | CC                              | AA                | 1946505366               |
| SNP_P3_119908_8496   | NW_004515903.1 | Scaffold429 | 8496                    | GG                              | TT                | 1946505367               |
| SNP_P3_119909_8577   | NW_004515903.1 | Scaffold429 | 8577                    | CC                              | GG                | 1946505369               |
| SNP_P3_119910_8582   | NW_004515903.1 | Scaffold429 | 8582                    | TT                              | GG                | 1946505370               |
| SNP_P3_119911_8583   | NW_004515903.1 | Scaffold429 | 8583                    | AA                              | GG                | 1946505372               |
| SNP_P3_119912_8601   | NW_004515903.1 | Scaffold429 | 8601                    | AA                              | TT                | 1946505373               |
| SNP_P3_119913_8604   | NW_004515903.1 | Scaffold429 | 8604                    | TT                              | CC                | 1946505375               |
| SNP_P3_119914_8628   | NW_004515903.1 | Scaffold429 | 8628                    | TT                              | CC                | 1946505376               |

| SNPs IDs            | Chromosome IDs | Chromosomes | Physical positions (bp) | CDC Frontier (Reference genome) | (Pusa 256 & HPNB) | NCBI SNPdb Accession IDs |
|---------------------|----------------|-------------|-------------------------|---------------------------------|-------------------|--------------------------|
| SNP_P3_119915_8757  | NW_004515903.1 | Scaffold429 | 8757                    | AA                              | TT                | 1946505378               |
| SNP_P3_119916_8826  | NW_004515903.1 | Scaffold429 | 8826                    | GG                              | CC                | 1946505379               |
| SNP_P3_119917_9025  | NW_004515903.1 | Scaffold429 | 9025                    | GG                              | TT                | 1946505381               |
| SNP_P3_119918_9031  | NW_004515903.1 | Scaffold429 | 9031                    | GG                              | AA                | 1946505382               |
| SNP_P3_119919_9119  | NW_004515903.1 | Scaffold429 | 9119                    | TT                              | GG                | 1946505384               |
| SNP_P3_119920_9120  | NW_004515903.1 | Scaffold429 | 9120                    | TT                              | AA                | 1946505385               |
| SNP_P3_119921_9319  | NW_004515903.1 | Scaffold429 | 9319                    | TT                              | GG                | 1946505387               |
| SNP_P3_119922_9320  | NW_004515903.1 | Scaffold429 | 9320                    | TT                              | AA                | 1946505388               |
| SNP_P3_119923_9567  | NW_004515903.1 | Scaffold429 | 9567                    | GG                              | AA                | 1946505390               |
| SNP_P3_119924_9615  | NW_004515903.1 | Scaffold429 | 9615                    | TT                              | GG                | 1946505391               |
| SNP_P3_119925_9838  | NW_004515903.1 | Scaffold429 | 9838                    | TT                              | CC                | 1946505393               |
| SNP_P3_119926_10317 | NW_004515903.1 | Scaffold429 | 10317                   | CC                              | TT                | 1946505394               |
| SNP_P3_119927_10423 | NW_004515903.1 | Scaffold429 | 10423                   | CC                              | GG                | 1946505396               |
| SNP_P3_119928_13587 | NW_004515903.1 | Scaffold429 | 13587                   | AA                              | CC                | 1946505397               |
| SNP_P3_119929_15400 | NW_004515903.1 | Scaffold429 | 15400                   | TT                              | CC                | 1946505399               |
| SNP_P3_119930_15472 | NW_004515903.1 | Scaffold429 | 15472                   | TT                              | CC                | 1946505400               |
| SNP_P3_119931_15519 | NW_004515903.1 | Scaffold429 | 15519                   | CC                              | TT                | 1946505402               |
| SNP_P3_119932_15667 | NW_004515903.1 | Scaffold429 | 15667                   | TT                              | GG                | 1946505403               |
| SNP_P3_119933_15703 | NW_004515903.1 | Scaffold429 | 15703                   | AA                              | GG                | 1946505405               |
| SNP_P3_119934_15709 | NW_004515903.1 | Scaffold429 | 15709                   | TT                              | GG                | 1946505406               |
| SNP_P3_119935_15752 | NW_004515903.1 | Scaffold429 | 15752                   | AA                              | GG                | 1946505408               |
| SNP_P3_119936_15772 | NW_004515903.1 | Scaffold429 | 15772                   | CC                              | TT                | 1946505409               |
| SNP_P3_119937_16256 | NW_004515903.1 | Scaffold429 | 16256                   | AA                              | TT                | 1946505411               |
| SNP_P3_119938_17425 | NW_004515903.1 | Scaffold429 | 17425                   | CC                              | TT                | 1946505412               |
| SNP_P3_119939_17752 | NW_004515903.1 | Scaffold429 | 17752                   | AA                              | GG                | 1946505414               |
| SNP_P3_119940_18106 | NW_004515903.1 | Scaffold429 | 18106                   | AA                              | GG                | 1946505415               |
| SNP_P3_119941_18121 | NW_004515903.1 | Scaffold429 | 18121                   | GG                              | AA                | 1946505418               |
| SNP_P3_119942_18154 | NW_004515903.1 | Scaffold429 | 18154                   | AA                              | CC                | 1946505419               |
| SNP_P3_119943_18157 | NW_004515903.1 | Scaffold429 | 18157                   | TT                              | CC                | 1946505420               |
| SNP_P3_119944_27260 | NW_004515903.1 | Scaffold429 | 27260                   | AA                              | CC                | 1946505422               |
| SNP_P3_119945_27577 | NW_004515903.1 | Scaffold429 | 27577                   | AA                              | GG                | 1946505423               |
| SNP_P3_119946_27803 | NW_004515903.1 | Scaffold429 | 27803                   | TT                              | CC                | 1946505425               |
| SNP_P3_119947_28697 | NW_004515903.1 | Scaffold429 | 28697                   | AA                              | GG                | 1946505426               |
| SNP_P3_119948_29242 | NW_004515903.1 | Scaffold429 | 29242                   | AA                              | TT                | 1946505428               |
| SNP_P3_119949_29245 | NW_004515903.1 | Scaffold429 | 29245                   | CC                              | TT                | 1946505429               |
| SNP_P3_119950_29257 | NW_004515903.1 | Scaffold429 | 29257                   | GG                              | CC                | 1946505431               |
| SNP_P3_119951_29376 | NW_004515903.1 | Scaffold429 | 29376                   | GG                              | TT                | 1946505432               |
| SNP_P3_119952_29389 | NW_004515903.1 | Scaffold429 | 29389                   | TT                              | CC                | 1946505434               |
| SNP_P3_119953_29529 | NW_004515903.1 | Scaffold429 | 29529                   | CC                              | AA                | 1946505435               |
| SNP_P3_119954_29531 | NW_004515903.1 | Scaffold429 | 29531                   | TT                              | GG                | 1946505437               |
| SNP_P3_119955_29552 | NW_004515903.1 | Scaffold429 | 29552                   | AA                              | GG                | 1946505439               |
| SNP_P3_119956_29554 | NW_004515903.1 | Scaffold429 | 29554                   | TT                              | CC                | 1946505440               |

| SNPs IDs            | Chromosome IDs | Chromosomes | Physical positions (bp) | CDC Frontier (Reference genome) | (Pusa 256 & HPNB) | NCBI SNPdb Accession IDs |
|---------------------|----------------|-------------|-------------------------|---------------------------------|-------------------|--------------------------|
| SNP_P3_119957_29589 | NW_004515903.1 | Scaffold429 | 29589                   | GG                              | TT                | 1946505442               |
| SNP_P3_119958_29610 | NW_004515903.1 | Scaffold429 | 29610                   | TT                              | CC                | 1946505443               |
| SNP_P3_119959_29613 | NW_004515903.1 | Scaffold429 | 29613                   | AA                              | GG                | 1946505445               |
| SNP_P3_119960_29640 | NW_004515903.1 | Scaffold429 | 29640                   | TT                              | AA                | 1946505446               |
| SNP_P3_119961_29755 | NW_004515903.1 | Scaffold429 | 29755                   | AA                              | TT                | 1946505448               |
| SNP_P3_119962_31327 | NW_004515903.1 | Scaffold429 | 31327                   | CC                              | TT                | 1946505449               |
| SNP_P3_119963_31422 | NW_004515903.1 | Scaffold429 | 31422                   | GG                              | AA                | 1946505451               |
| SNP_P3_119964_34053 | NW_004515903.1 | Scaffold429 | 34053                   | TT                              | AA                | 1946505452               |
| SNP_P3_119965_41653 | NW_004515903.1 | Scaffold429 | 41653                   | AA                              | GG                | 1946505454               |
| SNP_P3_119966_43771 | NW_004515903.1 | Scaffold429 | 43771                   | TT                              | AA                | 1946505455               |
| SNP_P3_119967_48016 | NW_004515903.1 | Scaffold429 | 48016                   | CC                              | AA                | 1946505457               |
| SNP_P3_119968_58201 | NW_004515903.1 | Scaffold429 | 58201                   | GG                              | TT                | 1946505459               |
| SNP_P3_119969_59384 | NW_004515903.1 | Scaffold429 | 59384                   | AA                              | GG                | 1946505460               |
| SNP_P3_119970_59394 | NW_004515903.1 | Scaffold429 | 59394                   | GG                              | TT                | 1946505462               |
| SNP_P3_119971_59729 | NW_004515903.1 | Scaffold429 | 59729                   | CC                              | TT                | 1946505463               |
| SNP_P3_119973_67088 | NW_004515903.1 | Scaffold429 | 67088                   | AA                              | CC                | 1946505465               |
| SNP_P3_119974_67095 | NW_004515903.1 | Scaffold429 | 67095                   | AA                              | TT                | 1946505466               |
| SNP_P3_119975_69048 | NW_004515903.1 | Scaffold429 | 69048                   | AA                              | GG                | 1946505468               |
| SNP_P3_119976_69248 | NW_004515903.1 | Scaffold429 | 69248                   | TT                              | GG                | 1946505469               |
| SNP_P3_119977_69273 | NW_004515903.1 | Scaffold429 | 69273                   | TT                              | CC                | 1946505471               |
| SNP_P3_119978_69352 | NW_004515903.1 | Scaffold429 | 69352                   | AA                              | CC                | 1946505472               |
| SNP_P3_119979_69378 | NW_004515903.1 | Scaffold429 | 69378                   | TT                              | AA                | 1946505474               |
| SNP_P3_119980_69771 | NW_004515903.1 | Scaffold429 | 69771                   | TT                              | CC                | 1946505475               |
| SNP_P3_119981_69781 | NW_004515903.1 | Scaffold429 | 69781                   | AA                              | TT                | 1946505477               |
| SNP_P3_119982_69789 | NW_004515903.1 | Scaffold429 | 69789                   | TT                              | AA                | 1946505478               |
| SNP_P3_119983_69792 | NW_004515903.1 | Scaffold429 | 69792                   | AA                              | GG                | 1946505480               |
| SNP_P3_119985_72400 | NW_004515903.1 | Scaffold429 | 72400                   | TT                              | AA                | 1946505482               |
| SNP_P3_119986_72403 | NW_004515903.1 | Scaffold429 | 72403                   | AA                              | GG                | 1946505483               |
| SNP_P3_119987_72477 | NW_004515903.1 | Scaffold429 | 72477                   | AA                              | TT                | 1946505485               |
| SNP_P3_119988_72481 | NW_004515903.1 | Scaffold429 | 72481                   | AA                              | TT                | 1946505486               |
| SNP_P3_119989_72504 | NW_004515903.1 | Scaffold429 | 72504                   | AA                              | GG                | 1946505488               |
| SNP_P3_119990_72563 | NW_004515903.1 | Scaffold429 | 72563                   | GG                              | AA                | 1946505489               |
| SNP_P3_119991_72568 | NW_004515903.1 | Scaffold429 | 72568                   | TT                              | CC                | 1946505491               |
| SNP_P3_119992_72681 | NW_004515903.1 | Scaffold429 | 72681                   | AA                              | TT                | 1946505492               |
| SNP_P3_119993_72685 | NW_004515903.1 | Scaffold429 | 72685                   | TT                              | AA                | 1946505494               |
| SNP_P3_119994_72706 | NW_004515903.1 | Scaffold429 | 72706                   | AA                              | GG                | 1946505495               |
| SNP_P3_119995_72707 | NW_004515903.1 | Scaffold429 | 72707                   | CC                              | TT                | 1946505497               |
| SNP_P3_119996_72787 | NW_004515903.1 | Scaffold429 | 72787                   | GG                              | TT                | 1946505498               |
| SNP_P3_119997_77502 | NW_004515903.1 | Scaffold429 | 77502                   | TT                              | GG                | 1946505500               |
| SNP_P3_119998_77513 | NW_004515903.1 | Scaffold429 | 77513                   | CC                              | AA                | 1946505501               |
| SNP_P3_119999_77515 | NW_004515903.1 | Scaffold429 | 77515                   | CC                              | AA                | 1946505503               |
| SNP_P3_120000_78480 | NW_004515903.1 | Scaffold429 | 78480                   | GG                              | AA                | 1946505504               |

| SNPs IDs             | Chromosome IDs | Chromosomes | Physical positions (bp) | CDC Frontier (Reference genome) | (Pusa 256 & HPNB) | NCBI SNPdb Accession IDs |
|----------------------|----------------|-------------|-------------------------|---------------------------------|-------------------|--------------------------|
| SNP_P3_120001_81484  | NW_004515903.1 | Scaffold429 | 81484                   | GG                              | CC                | 1946505506               |
| SNP_P3_120002_82363  | NW_004515903.1 | Scaffold429 | 82363                   | AA                              | GG                | 1946505508               |
| SNP_P3_120003_93595  | NW_004515903.1 | Scaffold429 | 93595                   | CC                              | TT                | 1946505509               |
| SNP_P3_120004_96155  | NW_004515903.1 | Scaffold429 | 96155                   | GG                              | AA                | 1946505511               |
| SNP_P3_120005_96182  | NW_004515903.1 | Scaffold429 | 96182                   | TT                              | GG                | 1946505512               |
| SNP_P3_120006_96215  | NW_004515903.1 | Scaffold429 | 96215                   | TT                              | CC                | 1946505514               |
| SNP_P3_120007_96300  | NW_004515903.1 | Scaffold429 | 96300                   | TT                              | GG                | 1946505516               |
| SNP_P3_120008_96391  | NW_004515903.1 | Scaffold429 | 96391                   | GG                              | TT                | 1946505517               |
| SNP_P3_120009_96638  | NW_004515903.1 | Scaffold429 | 96638                   | TT                              | AA                | 1946505519               |
| SNP_P3_120010_96690  | NW_004515903.1 | Scaffold429 | 96690                   | TT                              | CC                | 1946505520               |
| SNP_P3_120011_96700  | NW_004515903.1 | Scaffold429 | 96700                   | GG                              | AA                | 1946505522               |
| SNP_P3_120012_96712  | NW_004515903.1 | Scaffold429 | 96712                   | TT                              | AA                | 1946505524               |
| SNP_P3_120013_96754  | NW_004515903.1 | Scaffold429 | 96754                   | AA                              | GG                | 1946505525               |
| SNP_P3_120014_96779  | NW_004515903.1 | Scaffold429 | 96779                   | TT                              | CC                | 1946505527               |
| SNP_P3_120015_96811  | NW_004515903.1 | Scaffold429 | 96811                   | AA                              | GG                | 1946505528               |
| SNP_P3_120016_104999 | NW_004515903.1 | Scaffold429 | 104999                  | CC                              | TT                | 1946505530               |
| SNP_P3_120017_111564 | NW_004515903.1 | Scaffold429 | 111564                  | TT                              | CC                | 1946505531               |
| SNP_P3_120018_111583 | NW_004515903.1 | Scaffold429 | 111583                  | AA                              | GG                | 1946505533               |
| SNP_P3_120019_111607 | NW_004515903.1 | Scaffold429 | 111607                  | TT                              | CC                | 1946505534               |
| SNP_P3_120020_111610 | NW_004515903.1 | Scaffold429 | 111610                  | TT                              | CC                | 1946505535               |
| SNP_P3_120021_117301 | NW_004515903.1 | Scaffold429 | 117301                  | TT                              | AA                | 1946505537               |
| SNP_P3_120022_123793 | NW_004515903.1 | Scaffold429 | 123793                  | CC                              | GG                | 1946505539               |
| SNP_P3_120023_128598 | NW_004515903.1 | Scaffold429 | 128598                  | GG                              | TT                | 1946505540               |
| SNP_P3_120024_128834 | NW_004515903.1 | Scaffold429 | 128834                  | GG                              | CC                | 1946505542               |
| SNP_P3_120025_128851 | NW_004515903.1 | Scaffold429 | 128851                  | TT                              | AA                | 1946505543               |
| SNP_P3_120026_129086 | NW_004515903.1 | Scaffold429 | 129086                  | AA                              | TT                | 1946505545               |
| SNP_P3_120027_129153 | NW_004515903.1 | Scaffold429 | 129153                  | CC                              | TT                | 1946505546               |
| SNP_P3_120028_129215 | NW_004515903.1 | Scaffold429 | 129215                  | TT                              | GG                | 1946505548               |
| SNP_P3_120029_129367 | NW_004515903.1 | Scaffold429 | 129367                  | CC                              | TT                | 1946505549               |
| SNP_P3_120030_131869 | NW_004515903.1 | Scaffold429 | 131869                  | AA                              | TT                | 1946505551               |
| SNP_P3_120031_136199 | NW_004515903.1 | Scaffold429 | 136199                  | GG                              | AA                | 1946505552               |
| SNP_P3_120032_136818 | NW_004515903.1 | Scaffold429 | 136818                  | CC                              | TT                | 1946505554               |
| SNP_P3_120033_141631 | NW_004515903.1 | Scaffold429 | 141631                  | CC                              | AA                | 1946505555               |
| SNP_P3_120034_141644 | NW_004515903.1 | Scaffold429 | 141644                  | GG                              | AA                | 1946505557               |
| SNP_P3_120035_141831 | NW_004515903.1 | Scaffold429 | 141831                  | CC                              | TT                | 1946505558               |
| SNP_P3_120036_148722 | NW_004515903.1 | Scaffold429 | 148722                  | CC                              | TT                | 1946505560               |
| SNP_P3_120037_148791 | NW_004515903.1 | Scaffold429 | 148791                  | AA                              | GG                | 1946505561               |
| SNP_P3_120038_149076 | NW_004515903.1 | Scaffold429 | 149076                  | TT                              | CC                | 1946505563               |
| SNP_P3_120039_149091 | NW_004515903.1 | Scaffold429 | 149091                  | CC                              | TT                | 1946505564               |
| SNP_P3_120040_149097 | NW_004515903.1 | Scaffold429 | 149097                  | CC                              | AA                | 1946505565               |
| SNP_P3_120041_149128 | NW_004515903.1 | Scaffold429 | 149128                  | CC                              | TT                | 1946505567               |
| SNP_P3_120042_149469 | NW_004515903.1 | Scaffold429 | 149469                  | GG                              | AA                | 1946505568               |

| SNPs IDs             | Chromosome IDs | Chromosomes | Physical positions (bp) | CDC Frontier (Reference genome) | (Pusa 256 & HPNB) | NCBI SNPdb Accession IDs |
|----------------------|----------------|-------------|-------------------------|---------------------------------|-------------------|--------------------------|
| SNP_P3_120043_150338 | NW_004515903.1 | Scaffold429 | 150338                  | CC                              | AA                | 1946505570               |
| SNP_P3_120044_150339 | NW_004515903.1 | Scaffold429 | 150339                  | CC                              | TT                | 1946505571               |
| SNP_P3_120045_150342 | NW_004515903.1 | Scaffold429 | 150342                  | CC                              | TT                | 1946505573               |
| SNP_P3_120046_156461 | NW_004515903.1 | Scaffold429 | 156461                  | TT                              | CC                | 1946505574               |
| SNP_P3_120047_156469 | NW_004515903.1 | Scaffold429 | 156469                  | TT                              | AA                | 1946505576               |
| SNP_P3_120048_156480 | NW_004515903.1 | Scaffold429 | 156480                  | AA                              | CC                | 1946505577               |
| SNP_P3_120049_156492 | NW_004515903.1 | Scaffold429 | 156492                  | TT                              | CC                | 1946505579               |
| SNP_P3_120050_157368 | NW_004515903.1 | Scaffold429 | 157368                  | AA                              | TT                | 1946505580               |
| SNP_P3_120051_160330 | NW_004515903.1 | Scaffold429 | 160330                  | AA                              | CC                | 1946505582               |
| SNP_P3_120052_160364 | NW_004515903.1 | Scaffold429 | 160364                  | GG                              | AA                | 1946505583               |
| SNP_P3_120053_160742 | NW_004515903.1 | Scaffold429 | 160742                  | TT                              | AA                | 1946505585               |
| SNP_P3_120054_164311 | NW_004515903.1 | Scaffold429 | 164311                  | TT                              | AA                | 1946505586               |
| SNP_P3_120055_172214 | NW_004515903.1 | Scaffold429 | 172214                  | CC                              | GG                | 1946505587               |
| SNP_P3_120056_174881 | NW_004515903.1 | Scaffold429 | 174881                  | TT                              | CC                | 1946505589               |
| SNP_P3_120057_174885 | NW_004515903.1 | Scaffold429 | 174885                  | GG                              | AA                | 1946505590               |
| SNP_P3_120058_176612 | NW_004515903.1 | Scaffold429 | 176612                  | AA                              | GG                | 1946505592               |
| SNP_P3_120059_176828 | NW_004515903.1 | Scaffold429 | 176828                  | CC                              | AA                | 1946505593               |
| SNP_P3_120061_178991 | NW_004515903.1 | Scaffold429 | 178991                  | CC                              | AA                | 1946505595               |
| SNP_P3_120063_181400 | NW_004515903.1 | Scaffold429 | 181400                  | TT                              | GG                | 1946505596               |
| SNP_P3_120064_181411 | NW_004515903.1 | Scaffold429 | 181411                  | AA                              | GG                | 1946505598               |
| SNP_P3_120065_181433 | NW_004515903.1 | Scaffold429 | 181433                  | AA                              | GG                | 1946505599               |
| SNP_P3_120066_181478 | NW_004515903.1 | Scaffold429 | 181478                  | AA                              | CC                | 1946505600               |
| SNP_P3_120067_181500 | NW_004515903.1 | Scaffold429 | 181500                  | AA                              | GG                | 1946505602               |
| SNP_P3_120068_181805 | NW_004515903.1 | Scaffold429 | 181805                  | GG                              | AA                | 1946505603               |
| SNP_P3_120069_188925 | NW_004515903.1 | Scaffold429 | 188925                  | AA                              | TT                | 1946505605               |
| SNP_P3_120071_64     | NW_004515904.1 | Scaffold430 | 64                      | TT                              | AA                | 1946505607               |
| SNP_P3_120073_686    | NW_004515904.1 | Scaffold430 | 686                     | AA                              | GG                | 1946505608               |
| SNP_P3_120074_894    | NW_004515904.1 | Scaffold430 | 894                     | CC                              | AA                | 1946505610               |
| SNP_P3_120075_912    | NW_004515904.1 | Scaffold430 | 912                     | GG                              | AA                | 1946505611               |
| SNP_P3_120076_1985   | NW_004515905.1 | Scaffold432 | 1985                    | TT                              | AA                | 1946505613               |
| SNP_P3_120077_2399   | NW_004515905.1 | Scaffold432 | 2399                    | TT                              | CC                | 1946505615               |
| SNP_P3_120078_2669   | NW_004515905.1 | Scaffold432 | 2669                    | GG                              | AA                | 1946505616               |
| SNP_P3_120079_2737   | NW_004515905.1 | Scaffold432 | 2737                    | TT                              | CC                | 1946505618               |
| SNP_P3_120080_4423   | NW_004515905.1 | Scaffold432 | 4423                    | AA                              | TT                | 1946505619               |
| SNP_P3_120081_4766   | NW_004515905.1 | Scaffold432 | 4766                    | AA                              | CC                | 1946505621               |
| SNP_P3_120082_4816   | NW_004515905.1 | Scaffold432 | 4816                    | TT                              | CC                | 1946505622               |
| SNP_P3_120083_4819   | NW_004515905.1 | Scaffold432 | 4819                    | TT                              | AA                | 1946505624               |
| SNP_P3_120084_4971   | NW_004515905.1 | Scaffold432 | 4971                    | CC                              | TT                | 1946505625               |
| SNP_P3_120085_5025   | NW_004515905.1 | Scaffold432 | 5025                    | CC                              | TT                | 1946505627               |
| SNP_P3_120086_5118   | NW_004515905.1 | Scaffold432 | 5118                    | GG                              | AA                | 1946505628               |
| SNP_P3_120087_10716  | NW_004515905.1 | Scaffold432 | 10716                   | GG                              | AA                | 1946505630               |
| SNP_P3_120088_10948  | NW_004515905.1 | Scaffold432 | 10948                   | GG                              | TT                | 1946505631               |

| SNPs IDs            | Chromosome IDs | Chromosomes | Physical positions (bp) | CDC Frontier (Reference genome) | (Pusa 256 & HPNB) | NCBI SNPdb Accession IDs |
|---------------------|----------------|-------------|-------------------------|---------------------------------|-------------------|--------------------------|
| SNP_P3_120089_15953 | NW_004515905.1 | Scaffold432 | 15953                   | AA                              | GG                | 1946505633               |
| SNP_P3_120090_16019 | NW_004515905.1 | Scaffold432 | 16019                   | CC                              | TT                | 1946505634               |
| SNP_P3_120091_16039 | NW_004515905.1 | Scaffold432 | 16039                   | TT                              | AA                | 1946505636               |
| SNP_P3_120092_16063 | NW_004515905.1 | Scaffold432 | 16063                   | AA                              | GG                | 1946505637               |
| SNP_P3_120093_16077 | NW_004515905.1 | Scaffold432 | 16077                   | CC                              | TT                | 1946505639               |
| SNP_P3_120094_16142 | NW_004515905.1 | Scaffold432 | 16142                   | AA                              | TT                | 1946505640               |
| SNP_P3_120095_16270 | NW_004515905.1 | Scaffold432 | 16270                   | AA                              | TT                | 1946505642               |
| SNP_P3_120096_16332 | NW_004515905.1 | Scaffold432 | 16332                   | GG                              | AA                | 1946505643               |
| SNP_P3_120097_16352 | NW_004515905.1 | Scaffold432 | 16352                   | TT                              | AA                | 1946505645               |
| SNP_P3_120098_16395 | NW_004515905.1 | Scaffold432 | 16395                   | GG                              | AA                | 1946505646               |
| SNP_P3_120099_16926 | NW_004515905.1 | Scaffold432 | 16926                   | TT                              | CC                | 1946505648               |
| SNP_P3_120100_17087 | NW_004515905.1 | Scaffold432 | 17087                   | CC                              | TT                | 1946505649               |
| SNP_P3_120101_17736 | NW_004515905.1 | Scaffold432 | 17736                   | AA                              | GG                | 1946505651               |
| SNP_P3_120102_17835 | NW_004515905.1 | Scaffold432 | 17835                   | AA                              | TT                | 1946505652               |
| SNP_P3_120103_17884 | NW_004515905.1 | Scaffold432 | 17884                   | AA                              | TT                | 1946505654               |
| SNP_P3_120104_17908 | NW_004515905.1 | Scaffold432 | 17908                   | AA                              | CC                | 1946505655               |
| SNP_P3_120105_17987 | NW_004515905.1 | Scaffold432 | 17987                   | GG                              | AA                | 1946505657               |
| SNP_P3_120106_18085 | NW_004515905.1 | Scaffold432 | 18085                   | AA                              | TT                | 1946505658               |
| SNP_P3_120107_18112 | NW_004515905.1 | Scaffold432 | 18112                   | CC                              | TT                | 1946505660               |
| SNP_P3_120108_18642 | NW_004515905.1 | Scaffold432 | 18642                   | TT                              | GG                | 1946505661               |
| SNP_P3_120109_18916 | NW_004515905.1 | Scaffold432 | 18916                   | TT                              | AA                | 1946505663               |
| SNP_P3_120110_5016  | NW_004515906.1 | Scaffold433 | 5016                    | TT                              | CC                | 1946505664               |
| SNP_P3_120111_7431  | NW_004515906.1 | Scaffold433 | 7431                    | CC                              | GG                | 1946505666               |
| SNP_P3_120113_10269 | NW_004515906.1 | Scaffold433 | 10269                   | AA                              | GG                | 1946505667               |
| SNP_P3_120114_11703 | NW_004515906.1 | Scaffold433 | 11703                   | AA                              | TT                | 1946505669               |
| SNP_P3_120115_12185 | NW_004515906.1 | Scaffold433 | 12185                   | GG                              | AA                | 1946505670               |
| SNP_P3_120116_12215 | NW_004515906.1 | Scaffold433 | 12215                   | CC                              | TT                | 1946505672               |
| SNP_P3_120117_12226 | NW_004515906.1 | Scaffold433 | 12226                   | CC                              | TT                | 1946505673               |
| SNP_P3_120118_12401 | NW_004515906.1 | Scaffold433 | 12401                   | AA                              | GG                | 1946505675               |
| SNP_P3_120119_12521 | NW_004515906.1 | Scaffold433 | 12521                   | CC                              | GG                | 1946505676               |
| SNP_P3_120120_13793 | NW_004515906.1 | Scaffold433 | 13793                   | CC                              | AA                | 1946505678               |
| SNP_P3_120121_13818 | NW_004515906.1 | Scaffold433 | 13818                   | CC                              | TT                | 1946505679               |
| SNP_P3_120122_17252 | NW_004515906.1 | Scaffold433 | 17252                   | CC                              | GG                | 1946505681               |
| SNP_P3_120123_17276 | NW_004515906.1 | Scaffold433 | 17276                   | GG                              | CC                | 1946505682               |
| SNP_P3_120125_22651 | NW_004515906.1 | Scaffold433 | 22651                   | AA                              | GG                | 1946505684               |
| SNP_P3_120126_23187 | NW_004515906.1 | Scaffold433 | 23187                   | AA                              | CC                | 1946505685               |
| SNP_P3_120127_24604 | NW_004515906.1 | Scaffold433 | 24604                   | GG                              | AA                | 1946505687               |
| SNP_P3_120129_26436 | NW_004515906.1 | Scaffold433 | 26436                   | AA                              | GG                | 1946505688               |
| SNP_P3_120130_26441 | NW_004515906.1 | Scaffold433 | 26441                   | CC                              | TT                | 1946505690               |
| SNP_P3_120131_26446 | NW_004515906.1 | Scaffold433 | 26446                   | AA                              | GG                | 1946505691               |
| SNP_P3_120132_26863 | NW_004515906.1 | Scaffold433 | 26863                   | CC                              | TT                | 1946505693               |
| SNP_P3_120133_27616 | NW_004515906.1 | Scaffold433 | 27616                   | GG                              | AA                | 1946505696               |



| SNPs IDs            | Chromosome IDs | Chromosomes | Physical positions (bp) | CDC Frontier (Reference genome) | (Pusa 256 & HPNB) | NCBI SNPdb Accession IDs |
|---------------------|----------------|-------------|-------------------------|---------------------------------|-------------------|--------------------------|
| SNP_P3_120134_29014 | NW_004515906.1 | Scaffold433 | 29014                   | AA                              | GG                | 1946505698               |
| SNP_P3_120135_29051 | NW_004515906.1 | Scaffold433 | 29051                   | CC                              | TT                | 1946505699               |
| SNP_P3_120136_29052 | NW_004515906.1 | Scaffold433 | 29052                   | CC                              | AA                | 1946505701               |
| SNP_P3_120137_29088 | NW_004515906.1 | Scaffold433 | 29088                   | GG                              | AA                | 1946505702               |
| SNP_P3_120138_29095 | NW_004515906.1 | Scaffold433 | 29095                   | TT                              | CC                | 1946505704               |
| SNP_P3_120139_29106 | NW_004515906.1 | Scaffold433 | 29106                   | TT                              | AA                | 1946505705               |
| SNP_P3_120140_29111 | NW_004515906.1 | Scaffold433 | 29111                   | AA                              | GG                | 1946505707               |
| SNP_P3_120141_29170 | NW_004515906.1 | Scaffold433 | 29170                   | TT                              | AA                | 1946505708               |
| SNP_P3_120142_29194 | NW_004515906.1 | Scaffold433 | 29194                   | TT                              | CC                | 1946505710               |
| SNP_P3_120143_29199 | NW_004515906.1 | Scaffold433 | 29199                   | CC                              | TT                | 1946505711               |
| SNP_P3_120144_29205 | NW_004515906.1 | Scaffold433 | 29205                   | AA                              | TT                | 1946505713               |
| SNP_P3_120145_29222 | NW_004515906.1 | Scaffold433 | 29222                   | CC                              | GG                | 1946505714               |
| SNP_P3_120146_29263 | NW_004515906.1 | Scaffold433 | 29263                   | AA                              | TT                | 1946505716               |
| SNP_P3_120147_29281 | NW_004515906.1 | Scaffold433 | 29281                   | GG                              | CC                | 1946505717               |
| SNP_P3_120148_29285 | NW_004515906.1 | Scaffold433 | 29285                   | GG                              | AA                | 1946505719               |
| SNP_P3_120149_29338 | NW_004515906.1 | Scaffold433 | 29338                   | CC                              | AA                | 1946505721               |
| SNP_P3_120150_29347 | NW_004515906.1 | Scaffold433 | 29347                   | AA                              | GG                | 1946505722               |
| SNP_P3_120151_29480 | NW_004515906.1 | Scaffold433 | 29480                   | CC                              | AA                | 1946505724               |
| SNP_P3_120152_29525 | NW_004515906.1 | Scaffold433 | 29525                   | GG                              | AA                | 1946505725               |
| SNP_P3_120153_29527 | NW_004515906.1 | Scaffold433 | 29527                   | AA                              | GG                | 1946505727               |
| SNP_P3_120154_29572 | NW_004515906.1 | Scaffold433 | 29572                   | AA                              | CC                | 1946505728               |
| SNP_P3_120155_29580 | NW_004515906.1 | Scaffold433 | 29580                   | GG                              | TT                | 1946505730               |
| SNP_P3_120156_29951 | NW_004515906.1 | Scaffold433 | 29951                   | AA                              | GG                | 1946505731               |
| SNP_P3_120157_30942 | NW_004515906.1 | Scaffold433 | 30942                   | CC                              | TT                | 1946505733               |
| SNP_P3_120158_36044 | NW_004515906.1 | Scaffold433 | 36044                   | AA                              | GG                | 1946505734               |
| SNP_P3_120159_36072 | NW_004515906.1 | Scaffold433 | 36072                   | CC                              | AA                | 1946505736               |
| SNP_P3_120160_36086 | NW_004515906.1 | Scaffold433 | 36086                   | GG                              | AA                | 1946505737               |
| SNP_P3_120161_36087 | NW_004515906.1 | Scaffold433 | 36087                   | GG                              | AA                | 1946505739               |
| SNP_P3_120162_36179 | NW_004515906.1 | Scaffold433 | 36179                   | CC                              | AA                | 1946505741               |
| SNP_P3_120164_54278 | NW_004515906.1 | Scaffold433 | 54278                   | AA                              | CC                | 1946505742               |
| SNP_P3_120165_56368 | NW_004515906.1 | Scaffold433 | 56368                   | AA                              | CC                | 1946505744               |
| SNP_P3_120166_56732 | NW_004515906.1 | Scaffold433 | 56732                   | AA                              | GG                | 1946505745               |
| SNP_P3_120167_64366 | NW_004515906.1 | Scaffold433 | 64366                   | CC                              | TT                | 1946505747               |
| SNP_P3_120168_65024 | NW_004515906.1 | Scaffold433 | 65024                   | GG                              | AA                | 1946505748               |
| SNP_P3_120169_65190 | NW_004515906.1 | Scaffold433 | 65190                   | AA                              | TT                | 1946505750               |
| SNP_P3_120170_67472 | NW_004515906.1 | Scaffold433 | 67472                   | CC                              | GG                | 1946505751               |
| SNP_P3_120171_70774 | NW_004515906.1 | Scaffold433 | 70774                   | AA                              | CC                | 1946505753               |
| SNP_P3_120173_73723 | NW_004515906.1 | Scaffold433 | 73723                   | TT                              | GG                | 1946505754               |
| SNP_P3_120174_74183 | NW_004515906.1 | Scaffold433 | 74183                   | CC                              | AA                | 1946505756               |
| SNP_P3_120176_76859 | NW_004515906.1 | Scaffold433 | 76859                   | CC                              | TT                | 1946505757               |
| SNP_P3_120177_77663 | NW_004515906.1 | Scaffold433 | 77663                   | AA                              | CC                | 1946505759               |
| SNP_P3_120178_86242 | NW_004515906.1 | Scaffold433 | 86242                   | AA                              | GG                | 1946505760               |

| SNPs IDs             | Chromosome IDs | Chromosomes | Physical positions (bp) | CDC Frontier (Reference genome) | (Pusa 256 & HPNB) | NCBI SNPdb Accession IDs |
|----------------------|----------------|-------------|-------------------------|---------------------------------|-------------------|--------------------------|
| SNP_P3_120180_86401  | NW_004515906.1 | Scaffold433 | 86401                   | AA                              | TT                | 1946505762               |
| SNP_P3_120181_86476  | NW_004515906.1 | Scaffold433 | 86476                   | AA                              | GG                | 1946505763               |
| SNP_P3_120183_88822  | NW_004515906.1 | Scaffold433 | 88822                   | CC                              | GG                | 1946505765               |
| SNP_P3_120184_88888  | NW_004515906.1 | Scaffold433 | 88888                   | AA                              | GG                | 1946505766               |
| SNP_P3_120186_95348  | NW_004515906.1 | Scaffold433 | 95348                   | GG                              | CC                | 1946505768               |
| SNP_P3_120188_97640  | NW_004515906.1 | Scaffold433 | 97640                   | GG                              | TT                | 1946505769               |
| SNP_P3_120189_97651  | NW_004515906.1 | Scaffold433 | 97651                   | TT                              | GG                | 1946505771               |
| SNP_P3_120191_101252 | NW_004515906.1 | Scaffold433 | 101252                  | AA                              | CC                | 1946505772               |
| SNP_P3_120192_102037 | NW_004515906.1 | Scaffold433 | 102037                  | CC                              | TT                | 1946505774               |
| SNP_P3_120193_102169 | NW_004515906.1 | Scaffold433 | 102169                  | CC                              | GG                | 1946505775               |
| SNP_P3_120194_103288 | NW_004515906.1 | Scaffold433 | 103288                  | AA                              | GG                | 1946505776               |
| SNP_P3_120195_104333 | NW_004515906.1 | Scaffold433 | 104333                  | CC                              | AA                | 1946505778               |
| SNP_P3_120196_104390 | NW_004515906.1 | Scaffold433 | 104390                  | CC                              | TT                | 1946505779               |
| SNP_P3_120198_105315 | NW_004515906.1 | Scaffold433 | 105315                  | TT                              | AA                | 1946505781               |
| SNP_P3_120199_105907 | NW_004515906.1 | Scaffold433 | 105907                  | GG                              | AA                | 1946505782               |
| SNP_P3_120200_106489 | NW_004515906.1 | Scaffold433 | 106489                  | CC                              | TT                | 1946505784               |
| SNP_P3_120201_106751 | NW_004515906.1 | Scaffold433 | 106751                  | TT                              | CC                | 1946505785               |
| SNP_P3_120202_110210 | NW_004515906.1 | Scaffold433 | 110210                  | TT                              | GG                | 1946505787               |
| SNP_P3_120203_113629 | NW_004515906.1 | Scaffold433 | 113629                  | GG                              | AA                | 1946505788               |
| SNP_P3_120204_113790 | NW_004515906.1 | Scaffold433 | 113790                  | TT                              | CC                | 1946505790               |
| SNP_P3_120205_114647 | NW_004515906.1 | Scaffold433 | 114647                  | AA                              | GG                | 1946505791               |
| SNP_P3_120206_116379 | NW_004515906.1 | Scaffold433 | 116379                  | CC                              | TT                | 1946505793               |
| SNP_P3_120207_127206 | NW_004515906.1 | Scaffold433 | 127206                  | AA                              | GG                | 1946505794               |
| SNP_P3_120208_127238 | NW_004515906.1 | Scaffold433 | 127238                  | GG                              | TT                | 1946505796               |
| SNP_P3_120209_129884 | NW_004515906.1 | Scaffold433 | 129884                  | AA                              | CC                | 1946505797               |
| SNP_P3_120210_130096 | NW_004515906.1 | Scaffold433 | 130096                  | AA                              | GG                | 1946505799               |
| SNP_P3_120211_132392 | NW_004515906.1 | Scaffold433 | 132392                  | GG                              | AA                | 1946505800               |
| SNP_P3_120212_132414 | NW_004515906.1 | Scaffold433 | 132414                  | CC                              | AA                | 1946505802               |
| SNP_P3_120213_132763 | NW_004515906.1 | Scaffold433 | 132763                  | GG                              | TT                | 1946505803               |
| SNP_P3_120214_132782 | NW_004515906.1 | Scaffold433 | 132782                  | CC                              | TT                | 1946505805               |
| SNP_P3_120215_132808 | NW_004515906.1 | Scaffold433 | 132808                  | CC                              | AA                | 1946505806               |
| SNP_P3_120216_132815 | NW_004515906.1 | Scaffold433 | 132815                  | GG                              | TT                | 1946505808               |
| SNP_P3_120217_132817 | NW_004515906.1 | Scaffold433 | 132817                  | GG                              | CC                | 1946505809               |
| SNP_P3_120218_132865 | NW_004515906.1 | Scaffold433 | 132865                  | GG                              | AA                | 1946505811               |
| SNP_P3_120219_141043 | NW_004515906.1 | Scaffold433 | 141043                  | CC                              | AA                | 1946505812               |
| SNP_P3_120220_141066 | NW_004515906.1 | Scaffold433 | 141066                  | CC                              | GG                | 1946505814               |
| SNP_P3_120221_142727 | NW_004515906.1 | Scaffold433 | 142727                  | GG                              | TT                | 1946505815               |
| SNP_P3_120222_142744 | NW_004515906.1 | Scaffold433 | 142744                  | TT                              | CC                | 1946505817               |
| SNP_P3_120223_146041 | NW_004515906.1 | Scaffold433 | 146041                  | CC                              | TT                | 1946505818               |
| SNP_P3_120224_146451 | NW_004515906.1 | Scaffold433 | 146451                  | AA                              | TT                | 1946505820               |
| SNP_P3_120225_146777 | NW_004515906.1 | Scaffold433 | 146777                  | CC                              | TT                | 1946505821               |
| SNP_P3_120228_147298 | NW_004515906.1 | Scaffold433 | 147298                  | AA                              | CC                | 1946505823               |

| SNPs IDs             | Chromosome IDs | Chromosomes | Physical positions (bp) | CDC Frontier (Reference genome) | (Pusa 256 & HPNB) | NCBI SNPdb Accession IDs |
|----------------------|----------------|-------------|-------------------------|---------------------------------|-------------------|--------------------------|
| SNP_P3_120229_147516 | NW_004515906.1 | Scaffold433 | 147516                  | TT                              | AA                | 1946505824               |
| SNP_P3_120232_148608 | NW_004515906.1 | Scaffold433 | 148608                  | TT                              | CC                | 1946505826               |
| SNP_P3_120233_148963 | NW_004515906.1 | Scaffold433 | 148963                  | AA                              | GG                | 1946505827               |
| SNP_P3_120234_148982 | NW_004515906.1 | Scaffold433 | 148982                  | AA                              | GG                | 1946505829               |
| SNP_P3_120236_149199 | NW_004515906.1 | Scaffold433 | 149199                  | TT                              | CC                | 1946505830               |
| SNP_P3_120237_150791 | NW_004515906.1 | Scaffold433 | 150791                  | CC                              | TT                | 1946505832               |
| SNP_P3_120238_151164 | NW_004515906.1 | Scaffold433 | 151164                  | TT                              | CC                | 1946505834               |
| SNP_P3_120239_151709 | NW_004515906.1 | Scaffold433 | 151709                  | GG                              | AA                | 1946505835               |
| SNP_P3_120240_151715 | NW_004515906.1 | Scaffold433 | 151715                  | AA                              | GG                | 1946505837               |
| SNP_P3_120241_151736 | NW_004515906.1 | Scaffold433 | 151736                  | GG                              | AA                | 1946505838               |
| SNP_P3_120242_151740 | NW_004515906.1 | Scaffold433 | 151740                  | TT                              | CC                | 1946505840               |
| SNP_P3_120243_151741 | NW_004515906.1 | Scaffold433 | 151741                  | CC                              | TT                | 1946505841               |
| SNP_P3_120244_152091 | NW_004515906.1 | Scaffold433 | 152091                  | CC                              | TT                | 1946505843               |
| SNP_P3_120245_152212 | NW_004515906.1 | Scaffold433 | 152212                  | AA                              | GG                | 1946505844               |
| SNP_P3_120246_152244 | NW_004515906.1 | Scaffold433 | 152244                  | GG                              | TT                | 1946505846               |
| SNP_P3_120247_152427 | NW_004515906.1 | Scaffold433 | 152427                  | GG                              | AA                | 1946505847               |
| SNP_P3_120248_152477 | NW_004515906.1 | Scaffold433 | 152477                  | AA                              | GG                | 1946505849               |
| SNP_P3_120249_152492 | NW_004515906.1 | Scaffold433 | 152492                  | GG                              | AA                | 1946505850               |
| SNP_P3_120250_152499 | NW_004515906.1 | Scaffold433 | 152499                  | CC                              | AA                | 1946505852               |
| SNP_P3_120251_152505 | NW_004515906.1 | Scaffold433 | 152505                  | AA                              | GG                | 1946505853               |
| SNP_P3_120252_152513 | NW_004515906.1 | Scaffold433 | 152513                  | GG                              | AA                | 1946505855               |
| SNP_P3_120253_154437 | NW_004515906.1 | Scaffold433 | 154437                  | CC                              | TT                | 1946505856               |
| SNP_P3_120254_155186 | NW_004515906.1 | Scaffold433 | 155186                  | TT                              | GG                | 1946505858               |
| SNP_P3_120255_155246 | NW_004515906.1 | Scaffold433 | 155246                  | CC                              | TT                | 1946505859               |
| SNP_P3_120256_155394 | NW_004515906.1 | Scaffold433 | 155394                  | AA                              | CC                | 1946505861               |
| SNP_P3_120257_155405 | NW_004515906.1 | Scaffold433 | 155405                  | AA                              | GG                | 1946505862               |
| SNP_P3_120258_155414 | NW_004515906.1 | Scaffold433 | 155414                  | CC                              | GG                | 1946505864               |
| SNP_P3_120259_155432 | NW_004515906.1 | Scaffold433 | 155432                  | CC                              | TT                | 1946505865               |
| SNP_P3_120260_155470 | NW_004515906.1 | Scaffold433 | 155470                  | TT                              | CC                | 1946505867               |
| SNP_P3_120261_155483 | NW_004515906.1 | Scaffold433 | 155483                  | AA                              | GG                | 1946505868               |
| SNP_P3_120262_155490 | NW_004515906.1 | Scaffold433 | 155490                  | TT                              | CC                | 1946505870               |
| SNP_P3_120263_155500 | NW_004515906.1 | Scaffold433 | 155500                  | AA                              | GG                | 1946505871               |
| SNP_P3_120264_155506 | NW_004515906.1 | Scaffold433 | 155506                  | AA                              | TT                | 1946505873               |
| SNP_P3_120265_155829 | NW_004515906.1 | Scaffold433 | 155829                  | CC                              | GG                | 1946505874               |
| SNP_P3_120266_156029 | NW_004515906.1 | Scaffold433 | 156029                  | CC                              | AA                | 1946505876               |
| SNP_P3_120267_157391 | NW_004515906.1 | Scaffold433 | 157391                  | CC                              | AA                | 1946505877               |
| SNP_P3_120268_157514 | NW_004515906.1 | Scaffold433 | 157514                  | TT                              | CC                | 1946505879               |
| SNP_P3_120269_157529 | NW_004515906.1 | Scaffold433 | 157529                  | CC                              | GG                | 1946505880               |
| SNP_P3_120270_157531 | NW_004515906.1 | Scaffold433 | 157531                  | TT                              | CC                | 1946505882               |
| SNP_P3_120272_157730 | NW_004515906.1 | Scaffold433 | 157730                  | AA                              | CC                | 1946505883               |
| SNP_P3_120273_158035 | NW_004515906.1 | Scaffold433 | 158035                  | AA                              | CC                | 1946505885               |
| SNP_P3_120274_158112 | NW_004515906.1 | Scaffold433 | 158112                  | GG                              | AA                | 1946505886               |

| SNPs IDs             | Chromosome IDs | Chromosomes | Physical positions (bp) | CDC Frontier (Reference genome) | (Pusa 256 & HPNB) | NCBI SNPdb Accession IDs |
|----------------------|----------------|-------------|-------------------------|---------------------------------|-------------------|--------------------------|
| SNP_P3_120275_158206 | NW_004515906.1 | Scaffold433 | 158206                  | AA                              | GG                | 1946505888               |
| SNP_P3_120276_158569 | NW_004515906.1 | Scaffold433 | 158569                  | GG                              | TT                | 1946505889               |
| SNP_P3_120277_158633 | NW_004515906.1 | Scaffold433 | 158633                  | TT                              | AA                | 1946505891               |
| SNP_P3_120278_158638 | NW_004515906.1 | Scaffold433 | 158638                  | CC                              | GG                | 1946505892               |
| SNP_P3_120279_158691 | NW_004515906.1 | Scaffold433 | 158691                  | TT                              | CC                | 1946505894               |
| SNP_P3_120280_159189 | NW_004515906.1 | Scaffold433 | 159189                  | CC                              | AA                | 1946505895               |
| SNP_P3_120281_159786 | NW_004515906.1 | Scaffold433 | 159786                  | TT                              | CC                | 1946505897               |
| SNP_P3_120282_160048 | NW_004515906.1 | Scaffold433 | 160048                  | CC                              | GG                | 1946505898               |
| SNP_P3_120283_160093 | NW_004515906.1 | Scaffold433 | 160093                  | CC                              | AA                | 1946505900               |
| SNP_P3_120284_160104 | NW_004515906.1 | Scaffold433 | 160104                  | TT                              | AA                | 1946505901               |
| SNP_P3_120285_161434 | NW_004515906.1 | Scaffold433 | 161434                  | GG                              | AA                | 1946505903               |
| SNP_P3_120287_161513 | NW_004515906.1 | Scaffold433 | 161513                  | CC                              | AA                | 1946505905               |
| SNP_P3_120288_161610 | NW_004515906.1 | Scaffold433 | 161610                  | GG                              | AA                | 1946505906               |
| SNP_P3_120289_162012 | NW_004515906.1 | Scaffold433 | 162012                  | CC                              | TT                | 1946505908               |
| SNP_P3_120290_162252 | NW_004515906.1 | Scaffold433 | 162252                  | TT                              | CC                | 1946505909               |
| SNP_P3_120291_162284 | NW_004515906.1 | Scaffold433 | 162284                  | AA                              | CC                | 1946505911               |
| SNP_P3_120293_165686 | NW_004515906.1 | Scaffold433 | 165686                  | AA                              | GG                | 1946505912               |
| SNP_P3_120294_165764 | NW_004515906.1 | Scaffold433 | 165764                  | GG                              | AA                | 1946505914               |
| SNP_P3_120295_165765 | NW_004515906.1 | Scaffold433 | 165765                  | AA                              | CC                | 1946505915               |
| SNP_P3_120296_165935 | NW_004515906.1 | Scaffold433 | 165935                  | GG                              | CC                | 1946505917               |
| SNP_P3_120298_165973 | NW_004515906.1 | Scaffold433 | 165973                  | GG                              | AA                | 1946505918               |
| SNP_P3_120299_165985 | NW_004515906.1 | Scaffold433 | 165985                  | GG                              | AA                | 1946505920               |
| SNP_P3_120300_166179 | NW_004515906.1 | Scaffold433 | 166179                  | CC                              | TT                | 1946505921               |
| SNP_P3_120301_166437 | NW_004515906.1 | Scaffold433 | 166437                  | GG                              | AA                | 1946505923               |
| SNP_P3_120302_166482 | NW_004515906.1 | Scaffold433 | 166482                  | AA                              | CC                | 1946505924               |
| SNP_P3_120303_166516 | NW_004515906.1 | Scaffold433 | 166516                  | AA                              | CC                | 1946505926               |
| SNP_P3_120304_166595 | NW_004515906.1 | Scaffold433 | 166595                  | CC                              | TT                | 1946505927               |
| SNP_P3_120305_166739 | NW_004515906.1 | Scaffold433 | 166739                  | GG                              | AA                | 1946505929               |
| SNP_P3_120306_166798 | NW_004515906.1 | Scaffold433 | 166798                  | GG                              | TT                | 1946505930               |
| SNP_P3_120307_166823 | NW_004515906.1 | Scaffold433 | 166823                  | TT                              | CC                | 1946505932               |
| SNP_P3_120309_166860 | NW_004515906.1 | Scaffold433 | 166860                  | AA                              | TT                | 1946505933               |
| SNP_P3_120310_168086 | NW_004515906.1 | Scaffold433 | 168086                  | GG                              | AA                | 1946505935               |
| SNP_P3_120311_168110 | NW_004515906.1 | Scaffold433 | 168110                  | AA                              | GG                | 1946505936               |
| SNP_P3_120312_168842 | NW_004515906.1 | Scaffold433 | 168842                  | AA                              | GG                | 1946505938               |
| SNP_P3_120313_168871 | NW_004515906.1 | Scaffold433 | 168871                  | TT                              | GG                | 1946505939               |
| SNP_P3_120314_168873 | NW_004515906.1 | Scaffold433 | 168873                  | AA                              | TT                | 1946505941               |
| SNP_P3_120315_168921 | NW_004515906.1 | Scaffold433 | 168921                  | GG                              | AA                | 1946505942               |
| SNP_P3_120316_168937 | NW_004515906.1 | Scaffold433 | 168937                  | AA                              | GG                | 1946505944               |
| SNP_P3_120317_168975 | NW_004515906.1 | Scaffold433 | 168975                  | AA                              | GG                | 1946505945               |
| SNP_P3_120318_169139 | NW_004515906.1 | Scaffold433 | 169139                  | AA                              | GG                | 1946505947               |
| SNP_P3_120319_169165 | NW_004515906.1 | Scaffold433 | 169165                  | GG                              | AA                | 1946505948               |
| SNP_P3_120320_169187 | NW_004515906.1 | Scaffold433 | 169187                  | TT                              | CC                | 1946505950               |

| SNPs IDs             | Chromosome IDs | Chromosomes | Physical positions (bp) | CDC Frontier (Reference genome) | (Pusa 256 & HPNB) | NCBI SNPdb Accession IDs |
|----------------------|----------------|-------------|-------------------------|---------------------------------|-------------------|--------------------------|
| SNP_P3_120321_169188 | NW_004515906.1 | Scaffold433 | 169188                  | CC                              | TT                | 1946505951               |
| SNP_P3_120322_169253 | NW_004515906.1 | Scaffold433 | 169253                  | CC                              | AA                | 1946505952               |
| SNP_P3_120323_169461 | NW_004515906.1 | Scaffold433 | 169461                  | AA                              | GG                | 1946505954               |
| SNP_P3_120325_169505 | NW_004515906.1 | Scaffold433 | 169505                  | GG                              | AA                | 1946505955               |
| SNP_P3_120326_169519 | NW_004515906.1 | Scaffold433 | 169519                  | TT                              | CC                | 1946505957               |
| SNP_P3_120327_1731   | NW_004515908.1 | Scaffold435 | 1731                    | TT                              | CC                | 1946505958               |
| SNP_P3_120328_1910   | NW_004515908.1 | Scaffold435 | 1910                    | GG                              | AA                | 1946505960               |
| SNP_P3_120329_6072   | NW_004515908.1 | Scaffold435 | 6072                    | GG                              | AA                | 1946505961               |
| SNP_P3_120330_13915  | NW_004515908.1 | Scaffold435 | 13915                   | TT                              | AA                | 1946505963               |
| SNP_P3_120331_36330  | NW_004515908.1 | Scaffold435 | 36330                   | TT                              | AA                | 1946505964               |
| SNP_P3_120332_36641  | NW_004515908.1 | Scaffold435 | 36641                   | CC                              | TT                | 1946505966               |
| SNP_P3_120333_40898  | NW_004515908.1 | Scaffold435 | 40898                   | AA                              | GG                | 1946505968               |
| SNP_P3_120334_76306  | NW_004515908.1 | Scaffold435 | 76306                   | CC                              | TT                | 1946505969               |
| SNP_P3_120335_76309  | NW_004515908.1 | Scaffold435 | 76309                   | CC                              | TT                | 1946505971               |
| SNP_P3_120336_76312  | NW_004515908.1 | Scaffold435 | 76312                   | CC                              | TT                | 1946505972               |
| SNP_P3_120337_76315  | NW_004515908.1 | Scaffold435 | 76315                   | CC                              | TT                | 1946505974               |
| SNP_P3_120338_94351  | NW_004515908.1 | Scaffold435 | 94351                   | AA                              | GG                | 1946505975               |
| SNP_P3_120339_108961 | NW_004515908.1 | Scaffold435 | 108961                  | TT                              | GG                | 1946505977               |
| SNP_P3_120340_109020 | NW_004515908.1 | Scaffold435 | 109020                  | TT                              | CC                | 1946505978               |
| SNP_P3_120341_109050 | NW_004515908.1 | Scaffold435 | 109050                  | TT                              | CC                | 1946505980               |
| SNP_P3_120342_109064 | NW_004515908.1 | Scaffold435 | 109064                  | CC                              | TT                | 1946505981               |
| SNP_P3_120343_109127 | NW_004515908.1 | Scaffold435 | 109127                  | TT                              | CC                | 1946505983               |
| SNP_P3_120344_109143 | NW_004515908.1 | Scaffold435 | 109143                  | CC                              | TT                | 1946505984               |
| SNP_P3_120345_109152 | NW_004515908.1 | Scaffold435 | 109152                  | AA                              | GG                | 1946505986               |
| SNP_P3_120346_109178 | NW_004515908.1 | Scaffold435 | 109178                  | CC                              | TT                | 1946505987               |
| SNP_P3_120347_109186 | NW_004515908.1 | Scaffold435 | 109186                  | TT                              | CC                | 1946505988               |
| SNP_P3_120348_109187 | NW_004515908.1 | Scaffold435 | 109187                  | AA                              | CC                | 1946505990               |
| SNP_P3_120349_109208 | NW_004515908.1 | Scaffold435 | 109208                  | GG                              | TT                | 1946505992               |
| SNP_P3_120350_109387 | NW_004515908.1 | Scaffold435 | 109387                  | CC                              | AA                | 1946505993               |
| SNP_P3_120351_109426 | NW_004515908.1 | Scaffold435 | 109426                  | TT                              | CC                | 1946505995               |
| SNP_P3_120352_109438 | NW_004515908.1 | Scaffold435 | 109438                  | CC                              | AA                | 1946505996               |
| SNP_P3_120353_109503 | NW_004515908.1 | Scaffold435 | 109503                  | CC                              | AA                | 1946505998               |
| SNP_P3_120354_109574 | NW_004515908.1 | Scaffold435 | 109574                  | CC                              | TT                | 1946505999               |
| SNP_P3_120355_1236   | NW_004515909.1 | Scaffold436 | 1236                    | AA                              | TT                | 1946506001               |
| SNP_P3_120356_1260   | NW_004515909.1 | Scaffold436 | 1260                    | TT                              | AA                | 1946506002               |
| SNP_P3_120357_1290   | NW_004515909.1 | Scaffold436 | 1290                    | AA                              | GG                | 1946506004               |
| SNP_P3_120358_1306   | NW_004515909.1 | Scaffold436 | 1306                    | AA                              | TT                | 1946506005               |
| SNP_P3_120359_2290   | NW_004515909.1 | Scaffold436 | 2290                    | GG                              | TT                | 1946506007               |
| SNP_P3_120360_2302   | NW_004515909.1 | Scaffold436 | 2302                    | AA                              | TT                | 1946506008               |
| SNP_P3_120361_2311   | NW_004515909.1 | Scaffold436 | 2311                    | AA                              | TT                | 1946506010               |
| SNP_P3_120362_2314   | NW_004515909.1 | Scaffold436 | 2314                    | AA                              | TT                | 1946506011               |
| SNP_P3_120363_2363   | NW_004515909.1 | Scaffold436 | 2363                    | GG                              | AA                | 1946506013               |

| SNPs IDs            | Chromosome IDs | Chromosomes | Physical positions (bp) | CDC Frontier (Reference genome) | (Pusa 256 & HPNB) | NCBI SNPdb Accession IDs |
|---------------------|----------------|-------------|-------------------------|---------------------------------|-------------------|--------------------------|
| SNP_P3_120364_2371  | NW_004515909.1 | Scaffold436 | 2371                    | TT                              | CC                | 1946506014               |
| SNP_P3_120365_2423  | NW_004515909.1 | Scaffold436 | 2423                    | GG                              | AA                | 1946506015               |
| SNP_P3_120366_2431  | NW_004515909.1 | Scaffold436 | 2431                    | TT                              | CC                | 1946506017               |
| SNP_P3_120367_2446  | NW_004515909.1 | Scaffold436 | 2446                    | TT                              | GG                | 1946506018               |
| SNP_P3_120368_2495  | NW_004515909.1 | Scaffold436 | 2495                    | TT                              | AA                | 1946506020               |
| SNP_P3_120369_2507  | NW_004515909.1 | Scaffold436 | 2507                    | GG                              | AA                | 1946506021               |
| SNP_P3_120370_2697  | NW_004515909.1 | Scaffold436 | 2697                    | AA                              | TT                | 1946506023               |
| SNP_P3_120371_2807  | NW_004515909.1 | Scaffold436 | 2807                    | TT                              | GG                | 1946506024               |
| SNP_P3_120372_2816  | NW_004515909.1 | Scaffold436 | 2816                    | AA                              | GG                | 1946506026               |
| SNP_P3_120373_4498  | NW_004515909.1 | Scaffold436 | 4498                    | AA                              | TT                | 1946506027               |
| SNP_P3_120374_4507  | NW_004515909.1 | Scaffold436 | 4507                    | GG                              | AA                | 1946506029               |
| SNP_P3_120375_5591  | NW_004515909.1 | Scaffold436 | 5591                    | AA                              | TT                | 1946506031               |
| SNP_P3_120376_5613  | NW_004515909.1 | Scaffold436 | 5613                    | CC                              | AA                | 1946506032               |
| SNP_P3_120377_5657  | NW_004515909.1 | Scaffold436 | 5657                    | TT                              | AA                | 1946506034               |
| SNP_P3_120378_5659  | NW_004515909.1 | Scaffold436 | 5659                    | AA                              | GG                | 1946506035               |
| SNP_P3_120379_5816  | NW_004515909.1 | Scaffold436 | 5816                    | AA                              | CC                | 1946506037               |
| SNP_P3_120380_5818  | NW_004515909.1 | Scaffold436 | 5818                    | AA                              | GG                | 1946506038               |
| SNP_P3_120381_5821  | NW_004515909.1 | Scaffold436 | 5821                    | AA                              | CC                | 1946506040               |
| SNP_P3_120382_5991  | NW_004515909.1 | Scaffold436 | 5991                    | GG                              | AA                | 1946506041               |
| SNP_P3_120383_6039  | NW_004515909.1 | Scaffold436 | 6039                    | GG                              | AA                | 1946506043               |
| SNP_P3_120384_6066  | NW_004515909.1 | Scaffold436 | 6066                    | TT                              | AA                | 1946506044               |
| SNP_P3_120385_9707  | NW_004515909.1 | Scaffold436 | 9707                    | AA                              | TT                | 1946506045               |
| SNP_P3_120386_9739  | NW_004515909.1 | Scaffold436 | 9739                    | TT                              | CC                | 1946506047               |
| SNP_P3_120387_9879  | NW_004515909.1 | Scaffold436 | 9879                    | TT                              | CC                | 1946506048               |
| SNP_P3_120388_9896  | NW_004515909.1 | Scaffold436 | 9896                    | AA                              | TT                | 1946506050               |
| SNP_P3_120389_9910  | NW_004515909.1 | Scaffold436 | 9910                    | TT                              | AA                | 1946506051               |
| SNP_P3_120390_9938  | NW_004515909.1 | Scaffold436 | 9938                    | TT                              | CC                | 1946506053               |
| SNP_P3_120391_10241 | NW_004515909.1 | Scaffold436 | 10241                   | AA                              | GG                | 1946506054               |
| SNP_P3_120392_19708 | NW_004515909.1 | Scaffold436 | 19708                   | TT                              | AA                | 1946506056               |
| SNP_P3_120393_19862 | NW_004515909.1 | Scaffold436 | 19862                   | GG                              | AA                | 1946506057               |
| SNP_P3_120394_20165 | NW_004515909.1 | Scaffold436 | 20165                   | AA                              | TT                | 1946506059               |
| SNP_P3_120395_23466 | NW_004515909.1 | Scaffold436 | 23466                   | TT                              | AA                | 1946506060               |
| SNP_P3_120396_23472 | NW_004515909.1 | Scaffold436 | 23472                   | AA                              | GG                | 1946506061               |
| SNP_P3_120397_23475 | NW_004515909.1 | Scaffold436 | 23475                   | TT                              | CC                | 1946506063               |
| SNP_P3_120398_23476 | NW_004515909.1 | Scaffold436 | 23476                   | GG                              | AA                | 1946506064               |
| SNP_P3_120399_23477 | NW_004515909.1 | Scaffold436 | 23477                   | TT                              | CC                | 1946506066               |
| SNP_P3_120400_23485 | NW_004515909.1 | Scaffold436 | 23485                   | AA                              | GG                | 1946506067               |
| SNP_P3_120401_34132 | NW_004515909.1 | Scaffold436 | 34132                   | CC                              | TT                | 1946506069               |
| SNP_P3_120402_35324 | NW_004515909.1 | Scaffold436 | 35324                   | TT                              | CC                | 1946506070               |
| SNP_P3_120403_35618 | NW_004515909.1 | Scaffold436 | 35618                   | TT                              | GG                | 1946506072               |
| SNP_P3_120404_38060 | NW_004515909.1 | Scaffold436 | 38060                   | GG                              | AA                | 1946506073               |
| SNP_P3_120406_49829 | NW_004515909.1 | Scaffold436 | 49829                   | GG                              | TT                | 1946506075               |

| SNPs IDs            | Chromosome IDs | Chromosomes | Physical positions (bp) | CDC Frontier (Reference genome) | (Pusa 256 & HPNB) | NCBI SNPdb Accession IDs |
|---------------------|----------------|-------------|-------------------------|---------------------------------|-------------------|--------------------------|
| SNP_P3_120407_49830 | NW_004515909.1 | Scaffold436 | 49830                   | AA                              | CC                | 1946506076               |
| SNP_P3_120408_56755 | NW_004515909.1 | Scaffold436 | 56755                   | GG                              | AA                | 1946506077               |
| SNP_P3_120409_59609 | NW_004515909.1 | Scaffold436 | 59609                   | TT                              | CC                | 1946506079               |
| SNP_P3_120410_60600 | NW_004515909.1 | Scaffold436 | 60600                   | AA                              | TT                | 1946506080               |
| SNP_P3_120411_65194 | NW_004515909.1 | Scaffold436 | 65194                   | CC                              | TT                | 1946506082               |
| SNP_P3_120412_65245 | NW_004515909.1 | Scaffold436 | 65245                   | GG                              | TT                | 1946506083               |
| SNP_P3_120413_65254 | NW_004515909.1 | Scaffold436 | 65254                   | AA                              | TT                | 1946506085               |
| SNP_P3_120414_65271 | NW_004515909.1 | Scaffold436 | 65271                   | GG                              | AA                | 1946506086               |
| SNP_P3_120415_65374 | NW_004515909.1 | Scaffold436 | 65374                   | AA                              | CC                | 1946506088               |
| SNP_P3_120416_65413 | NW_004515909.1 | Scaffold436 | 65413                   | GG                              | TT                | 1946506089               |
| SNP_P3_120417_65428 | NW_004515909.1 | Scaffold436 | 65428                   | AA                              | TT                | 1946506091               |
| SNP_P3_120418_65432 | NW_004515909.1 | Scaffold436 | 65432                   | AA                              | TT                | 1946506092               |
| SNP_P3_120419_65441 | NW_004515909.1 | Scaffold436 | 65441                   | CC                              | AA                | 1946506094               |
| SNP_P3_120420_65446 | NW_004515909.1 | Scaffold436 | 65446                   | GG                              | AA                | 1946506095               |
| SNP_P3_120421_67065 | NW_004515909.1 | Scaffold436 | 67065                   | GG                              | AA                | 1946506096               |
| SNP_P3_120422_67123 | NW_004515909.1 | Scaffold436 | 67123                   | AA                              | GG                | 1946506098               |
| SNP_P3_120423_67130 | NW_004515909.1 | Scaffold436 | 67130                   | TT                              | AA                | 1946506099               |
| SNP_P3_120425_67153 | NW_004515909.1 | Scaffold436 | 67153                   | GG                              | AA                | 1946506101               |
| SNP_P3_120427_71324 | NW_004515909.1 | Scaffold436 | 71324                   | CC                              | AA                | 1946506102               |
| SNP_P3_120428_72578 | NW_004515909.1 | Scaffold436 | 72578                   | CC                              | AA                | 1946506104               |
| SNP_P3_120429_73971 | NW_004515909.1 | Scaffold436 | 73971                   | CC                              | TT                | 1946506105               |
| SNP_P3_120430_74019 | NW_004515909.1 | Scaffold436 | 74019                   | CC                              | TT                | 1946506107               |
| SNP_P3_120431_74040 | NW_004515909.1 | Scaffold436 | 74040                   | GG                              | AA                | 1946506108               |
| SNP_P3_120432_74071 | NW_004515909.1 | Scaffold436 | 74071                   | GG                              | TT                | 1946506110               |
| SNP_P3_120433_74072 | NW_004515909.1 | Scaffold436 | 74072                   | GG                              | AA                | 1946506111               |
| SNP_P3_120434_74081 | NW_004515909.1 | Scaffold436 | 74081                   | TT                              | AA                | 1946506112               |
| SNP_P3_120435_74111 | NW_004515909.1 | Scaffold436 | 74111                   | AA                              | CC                | 1946506114               |
| SNP_P3_120436_74355 | NW_004515909.1 | Scaffold436 | 74355                   | CC                              | AA                | 1946506115               |
| SNP_P3_120438_2113  | NW_004515910.1 | Scaffold437 | 2113                    | TT                              | GG                | 1946506117               |
| SNP_P3_120439_2472  | NW_004515910.1 | Scaffold437 | 2472                    | TT                              | AA                | 1946506118               |
| SNP_P3_120440_2806  | NW_004515910.1 | Scaffold437 | 2806                    | TT                              | CC                | 1946506120               |
| SNP_P3_120441_2841  | NW_004515910.1 | Scaffold437 | 2841                    | GG                              | AA                | 1946506121               |
| SNP_P3_120442_2864  | NW_004515910.1 | Scaffold437 | 2864                    | AA                              | CC                | 1946506123               |
| SNP_P3_120443_4090  | NW_004515910.1 | Scaffold437 | 4090                    | TT                              | AA                | 1946506124               |
| SNP_P3_120444_4101  | NW_004515910.1 | Scaffold437 | 4101                    | TT                              | AA                | 1946506126               |
| SNP_P3_120445_4103  | NW_004515910.1 | Scaffold437 | 4103                    | TT                              | CC                | 1946506127               |
| SNP_P3_120446_4119  | NW_004515910.1 | Scaffold437 | 4119                    | TT                              | CC                | 1946506128               |
| SNP_P3_120447_4525  | NW_004515910.1 | Scaffold437 | 4525                    | TT                              | GG                | 1946506130               |
| SNP_P3_120448_4557  | NW_004515910.1 | Scaffold437 | 4557                    | TT                              | GG                | 1946506131               |
| SNP_P3_120449_4569  | NW_004515910.1 | Scaffold437 | 4569                    | AA                              | GG                | 1946506133               |
| SNP_P3_120450_4640  | NW_004515910.1 | Scaffold437 | 4640                    | AA                              | CC                | 1946506134               |
| SNP_P3_120451_4688  | NW_004515910.1 | Scaffold437 | 4688                    | TT                              | CC                | 1946506136               |

| SNPs IDs            | Chromosome IDs | Chromosomes | Physical positions (bp) | CDC Frontier (Reference genome) | (Pusa 256 & HPNB) | NCBI SNPdb Accession IDs |
|---------------------|----------------|-------------|-------------------------|---------------------------------|-------------------|--------------------------|
| SNP_P3_120452_4725  | NW_004515910.1 | Scaffold437 | 4725                    | CC                              | AA                | 1946506137               |
| SNP_P3_120453_4758  | NW_004515910.1 | Scaffold437 | 4758                    | AA                              | GG                | 1946506139               |
| SNP_P3_120454_4767  | NW_004515910.1 | Scaffold437 | 4767                    | CC                              | GG                | 1946506140               |
| SNP_P3_120455_4801  | NW_004515910.1 | Scaffold437 | 4801                    | CC                              | AA                | 1946506142               |
| SNP_P3_120456_4998  | NW_004515910.1 | Scaffold437 | 4998                    | CC                              | AA                | 1946506144               |
| SNP_P3_120457_5125  | NW_004515910.1 | Scaffold437 | 5125                    | AA                              | CC                | 1946506146               |
| SNP_P3_120458_6664  | NW_004515910.1 | Scaffold437 | 6664                    | CC                              | TT                | 1946506147               |
| SNP_P3_120459_15134 | NW_004515910.1 | Scaffold437 | 15134                   | CC                              | GG                | 1946506149               |
| SNP_P3_120460_19522 | NW_004515910.1 | Scaffold437 | 19522                   | GG                              | CC                | 1946506150               |
| SNP_P3_120461_19539 | NW_004515910.1 | Scaffold437 | 19539                   | AA                              | CC                | 1946506152               |
| SNP_P3_120462_19586 | NW_004515910.1 | Scaffold437 | 19586                   | CC                              | TT                | 1946506153               |
| SNP_P3_120463_19988 | NW_004515910.1 | Scaffold437 | 19988                   | CC                              | TT                | 1946506155               |
| SNP_P3_120464_21131 | NW_004515910.1 | Scaffold437 | 21131                   | AA                              | GG                | 1946506156               |
| SNP_P3_120465_22193 | NW_004515910.1 | Scaffold437 | 22193                   | GG                              | AA                | 1946506158               |
| SNP_P3_120466_26615 | NW_004515910.1 | Scaffold437 | 26615                   | GG                              | AA                | 1946506159               |
| SNP_P3_120467_26616 | NW_004515910.1 | Scaffold437 | 26616                   | AA                              | CC                | 1946506161               |
| SNP_P3_120468_27208 | NW_004515910.1 | Scaffold437 | 27208                   | GG                              | AA                | 1946506162               |
| SNP_P3_120469_28236 | NW_004515910.1 | Scaffold437 | 28236                   | TT                              | AA                | 1946506164               |
| SNP_P3_120470_28280 | NW_004515910.1 | Scaffold437 | 28280                   | TT                              | AA                | 1946506165               |
| SNP_P3_120471_28283 | NW_004515910.1 | Scaffold437 | 28283                   | TT                              | AA                | 1946506166               |
| SNP_P3_120472_28295 | NW_004515910.1 | Scaffold437 | 28295                   | AA                              | GG                | 1946506168               |
| SNP_P3_120473_28331 | NW_004515910.1 | Scaffold437 | 28331                   | AA                              | GG                | 1946506170               |
| SNP_P3_120474_30878 | NW_004515910.1 | Scaffold437 | 30878                   | AA                              | GG                | 1946506171               |
| SNP_P3_120475_30934 | NW_004515910.1 | Scaffold437 | 30934                   | AA                              | TT                | 1946506173               |
| SNP_P3_120476_31880 | NW_004515910.1 | Scaffold437 | 31880                   | AA                              | CC                | 1946506174               |
| SNP_P3_120477_34151 | NW_004515910.1 | Scaffold437 | 34151                   | TT                              | AA                | 1946506176               |
| SNP_P3_120478_34868 | NW_004515910.1 | Scaffold437 | 34868                   | CC                              | AA                | 1946506177               |
| SNP_P3_120479_34869 | NW_004515910.1 | Scaffold437 | 34869                   | AA                              | TT                | 1946506179               |
| SNP_P3_120480_34870 | NW_004515910.1 | Scaffold437 | 34870                   | TT                              | AA                | 1946506180               |
| SNP_P3_120481_34926 | NW_004515910.1 | Scaffold437 | 34926                   | GG                              | AA                | 1946506182               |
| SNP_P3_120482_34962 | NW_004515910.1 | Scaffold437 | 34962                   | TT                              | CC                | 1946506183               |
| SNP_P3_120483_34963 | NW_004515910.1 | Scaffold437 | 34963                   | CC                              | AA                | 1946506185               |
| SNP_P3_120484_34986 | NW_004515910.1 | Scaffold437 | 34986                   | TT                              | CC                | 1946506186               |
| SNP_P3_120485_35033 | NW_004515910.1 | Scaffold437 | 35033                   | CC                              | TT                | 1946506188               |
| SNP_P3_120486_35090 | NW_004515910.1 | Scaffold437 | 35090                   | AA                              | GG                | 1946506189               |
| SNP_P3_120487_35202 | NW_004515910.1 | Scaffold437 | 35202                   | TT                              | CC                | 1946506191               |
| SNP_P3_120488_35244 | NW_004515910.1 | Scaffold437 | 35244                   | AA                              | GG                | 1946506194               |
| SNP_P3_120489_35324 | NW_004515910.1 | Scaffold437 | 35324                   | CC                              | TT                | 1946506195               |
| SNP_P3_120490_35333 | NW_004515910.1 | Scaffold437 | 35333                   | TT                              | CC                | 1946506197               |
| SNP_P3_120491_35339 | NW_004515910.1 | Scaffold437 | 35339                   | GG                              | AA                | 1946506198               |
| SNP_P3_120492_35665 | NW_004515910.1 | Scaffold437 | 35665                   | AA                              | CC                | 1946506200               |
| SNP_P3_120493_35693 | NW_004515910.1 | Scaffold437 | 35693                   | AA                              | TT                | 1946506201               |



| SNPs IDs            | Chromosome IDs | Chromosomes | Physical positions (bp) | CDC Frontier (Reference genome) | (Pusa 256 & HPNB) | NCBI SNPdb Accession IDs |
|---------------------|----------------|-------------|-------------------------|---------------------------------|-------------------|--------------------------|
| SNP_P3_120494_35742 | NW_004515910.1 | Scaffold437 | 35742                   | TT                              | AA                | 1946506203               |
| SNP_P3_120495_35759 | NW_004515910.1 | Scaffold437 | 35759                   | CC                              | TT                | 1946506205               |
| SNP_P3_120496_35763 | NW_004515910.1 | Scaffold437 | 35763                   | TT                              | CC                | 1946506206               |
| SNP_P3_120497_35946 | NW_004515910.1 | Scaffold437 | 35946                   | GG                              | TT                | 1946506208               |
| SNP_P3_120498_37534 | NW_004515910.1 | Scaffold437 | 37534                   | TT                              | AA                | 1946506209               |
| SNP_P3_120499_37536 | NW_004515910.1 | Scaffold437 | 37536                   | AA                              | TT                | 1946506211               |
| SNP_P3_120500_45212 | NW_004515910.1 | Scaffold437 | 45212                   | CC                              | TT                | 1946506212               |
| SNP_P3_120502_50625 | NW_004515910.1 | Scaffold437 | 50625                   | AA                              | GG                | 1946506215               |
| SNP_P3_120503_50648 | NW_004515910.1 | Scaffold437 | 50648                   | CC                              | TT                | 1946506216               |
| SNP_P3_120504_50649 | NW_004515910.1 | Scaffold437 | 50649                   | AA                              | TT                | 1946506218               |
| SNP_P3_120505_50655 | NW_004515910.1 | Scaffold437 | 50655                   | AA                              | CC                | 1946506219               |
| SNP_P3_120506_52276 | NW_004515910.1 | Scaffold437 | 52276                   | GG                              | AA                | 1946506221               |
| SNP_P3_120507_52967 | NW_004515910.1 | Scaffold437 | 52967                   | TT                              | CC                | 1946506222               |
| SNP_P3_120508_53730 | NW_004515910.1 | Scaffold437 | 53730                   | CC                              | GG                | 1946506224               |
| SNP_P3_120509_53731 | NW_004515910.1 | Scaffold437 | 53731                   | TT                              | CC                | 1946506225               |
| SNP_P3_120510_57241 | NW_004515910.1 | Scaffold437 | 57241                   | AA                              | CC                | 1946506227               |
| SNP_P3_120511_57246 | NW_004515910.1 | Scaffold437 | 57246                   | TT                              | CC                | 1946506228               |
| SNP_P3_120512_60389 | NW_004515910.1 | Scaffold437 | 60389                   | AA                              | CC                | 1946506230               |
| SNP_P3_120513_60494 | NW_004515910.1 | Scaffold437 | 60494                   | TT                              | AA                | 1946506231               |
| SNP_P3_120514_60497 | NW_004515910.1 | Scaffold437 | 60497                   | GG                              | AA                | 1946506233               |
| SNP_P3_120515_63475 | NW_004515910.1 | Scaffold437 | 63475                   | CC                              | AA                | 1946506234               |
| SNP_P3_120516_67060 | NW_004515910.1 | Scaffold437 | 67060                   | TT                              | AA                | 1946506236               |
| SNP_P3_120517_70252 | NW_004515910.1 | Scaffold437 | 70252                   | AA                              | TT                | 1946506237               |
| SNP_P3_120518_70352 | NW_004515910.1 | Scaffold437 | 70352                   | TT                              | CC                | 1946506239               |
| SNP_P3_120519_72340 | NW_004515910.1 | Scaffold437 | 72340                   | CC                              | TT                | 1946506240               |
| SNP_P3_120521_932   | NW_004515911.1 | Scaffold438 | 932                     | TT                              | GG                | 1946506242               |
| SNP_P3_120522_1349  | NW_004515911.1 | Scaffold438 | 1349                    | GG                              | CC                | 1946506243               |
| SNP_P3_120523_1633  | NW_004515911.1 | Scaffold438 | 1633                    | AA                              | GG                | 1946506245               |
| SNP_P3_120524_1636  | NW_004515911.1 | Scaffold438 | 1636                    | TT                              | CC                | 1946506246               |
| SNP_P3_120525_1639  | NW_004515911.1 | Scaffold438 | 1639                    | TT                              | CC                | 1946506248               |
| SNP_P3_120526_1657  | NW_004515911.1 | Scaffold438 | 1657                    | GG                              | AA                | 1946506249               |
| SNP_P3_120527_1669  | NW_004515911.1 | Scaffold438 | 1669                    | AA                              | GG                | 1946506251               |
| SNP_P3_120528_1789  | NW_004515911.1 | Scaffold438 | 1789                    | AA                              | GG                | 1946506252               |
| SNP_P3_120529_1855  | NW_004515911.1 | Scaffold438 | 1855                    | CC                              | TT                | 1946506254               |
| SNP_P3_120530_1864  | NW_004515911.1 | Scaffold438 | 1864                    | GG                              | AA                | 1946506255               |
| SNP_P3_120531_1870  | NW_004515911.1 | Scaffold438 | 1870                    | GG                              | TT                | 1946506256               |
| SNP_P3_120532_1969  | NW_004515911.1 | Scaffold438 | 1969                    | AA                              | GG                | 1946506258               |
| SNP_P3_120533_1999  | NW_004515911.1 | Scaffold438 | 1999                    | TT                              | CC                | 1946506259               |
| SNP_P3_120534_3693  | NW_004515911.1 | Scaffold438 | 3693                    | TT                              | GG                | 1946506261               |
| SNP_P3_120535_3726  | NW_004515911.1 | Scaffold438 | 3726                    | TT                              | CC                | 1946506262               |
| SNP_P3_120536_3736  | NW_004515911.1 | Scaffold438 | 3736                    | CC                              | TT                | 1946506264               |
| SNP_P3_120537_3874  | NW_004515911.1 | Scaffold438 | 3874                    | CC                              | TT                | 1946506265               |

| SNPs IDs            | Chromosome IDs | Chromosomes | Physical positions (bp) | CDC Frontier (Reference genome) | (Pusa 256 & HPNB) | NCBI SNPdb Accession IDs |
|---------------------|----------------|-------------|-------------------------|---------------------------------|-------------------|--------------------------|
| SNP_P3_120539_3954  | NW_004515911.1 | Scaffold438 | 3954                    | TT                              | GG                | 1946506267               |
| SNP_P3_120540_4062  | NW_004515911.1 | Scaffold438 | 4062                    | CC                              | AA                | 1946506268               |
| SNP_P3_120541_5766  | NW_004515911.1 | Scaffold438 | 5766                    | AA                              | GG                | 1946506270               |
| SNP_P3_120542_6879  | NW_004515911.1 | Scaffold438 | 6879                    | AA                              | TT                | 1946506271               |
| SNP_P3_120543_6903  | NW_004515911.1 | Scaffold438 | 6903                    | GG                              | AA                | 1946506273               |
| SNP_P3_120544_6923  | NW_004515911.1 | Scaffold438 | 6923                    | GG                              | AA                | 1946506274               |
| SNP_P3_120545_6934  | NW_004515911.1 | Scaffold438 | 6934                    | CC                              | TT                | 1946506276               |
| SNP_P3_120547_6977  | NW_004515911.1 | Scaffold438 | 6977                    | GG                              | AA                | 1946506277               |
| SNP_P3_120549_40166 | NW_004515911.1 | Scaffold438 | 40166                   | TT                              | CC                | 1946506279               |
| SNP_P3_120550_40462 | NW_004515911.1 | Scaffold438 | 40462                   | CC                              | TT                | 1946506280               |
| SNP_P3_120551_52766 | NW_004515911.1 | Scaffold438 | 52766                   | AA                              | GG                | 1946506282               |
| SNP_P3_120552_52771 | NW_004515911.1 | Scaffold438 | 52771                   | CC                              | TT                | 1946506283               |
| SNP_P3_120554_66067 | NW_004515911.1 | Scaffold438 | 66067                   | TT                              | GG                | 1946506285               |
| SNP_P3_120555_68673 | NW_004515911.1 | Scaffold438 | 68673                   | TT                              | CC                | 1946506286               |
| SNP_P3_120556_72841 | NW_004515911.1 | Scaffold438 | 72841                   | AA                              | CC                | 1946506288               |
| SNP_P3_120557_74427 | NW_004515911.1 | Scaffold438 | 74427                   | AA                              | GG                | 1946506289               |
| SNP_P3_120558_74451 | NW_004515911.1 | Scaffold438 | 74451                   | AA                              | GG                | 1946506291               |
| SNP_P3_120559_74490 | NW_004515911.1 | Scaffold438 | 74490                   | TT                              | CC                | 1946506292               |
| SNP_P3_120560_74512 | NW_004515911.1 | Scaffold438 | 74512                   | AA                              | GG                | 1946506294               |
| SNP_P3_120561_74518 | NW_004515911.1 | Scaffold438 | 74518                   | TT                              | CC                | 1946506295               |
| SNP_P3_120562_74759 | NW_004515911.1 | Scaffold438 | 74759                   | TT                              | AA                | 1946506297               |
| SNP_P3_120563_74796 | NW_004515911.1 | Scaffold438 | 74796                   | TT                              | CC                | 1946506298               |
| SNP_P3_120564_74823 | NW_004515911.1 | Scaffold438 | 74823                   | AA                              | GG                | 1946506300               |
| SNP_P3_120566_74862 | NW_004515911.1 | Scaffold438 | 74862                   | AA                              | GG                | 1946506301               |
| SNP_P3_120567_74893 | NW_004515911.1 | Scaffold438 | 74893                   | AA                              | GG                | 1946506303               |
| SNP_P3_120568_74919 | NW_004515911.1 | Scaffold438 | 74919                   | TT                              | GG                | 1946506304               |
| SNP_P3_120569_74925 | NW_004515911.1 | Scaffold438 | 74925                   | TT                              | CC                | 1946506306               |
| SNP_P3_120570_74936 | NW_004515911.1 | Scaffold438 | 74936                   | AA                              | TT                | 1946506307               |
| SNP_P3_120571_74937 | NW_004515911.1 | Scaffold438 | 74937                   | CC                              | AA                | 1946506309               |
| SNP_P3_120573_75021 | NW_004515911.1 | Scaffold438 | 75021                   | AA                              | GG                | 1946506310               |
| SNP_P3_120574_75051 | NW_004515911.1 | Scaffold438 | 75051                   | TT                              | CC                | 1946506311               |
| SNP_P3_120575_75053 | NW_004515911.1 | Scaffold438 | 75053                   | AA                              | CC                | 1946506313               |
| SNP_P3_120576_75198 | NW_004515911.1 | Scaffold438 | 75198                   | CC                              | TT                | 1946506314               |
| SNP_P3_120577_75213 | NW_004515911.1 | Scaffold438 | 75213                   | TT                              | CC                | 1946506316               |
| SNP_P3_120578_75261 | NW_004515911.1 | Scaffold438 | 75261                   | GG                              | AA                | 1946506317               |
| SNP_P3_120579_76615 | NW_004515911.1 | Scaffold438 | 76615                   | GG                              | AA                | 1946506319               |
| SNP_P3_120580_76803 | NW_004515911.1 | Scaffold438 | 76803                   | TT                              | GG                | 1946506320               |
| SNP_P3_120581_76867 | NW_004515911.1 | Scaffold438 | 76867                   | CC                              | AA                | 1946506322               |
| SNP_P3_120582_76901 | NW_004515911.1 | Scaffold438 | 76901                   | TT                              | GG                | 1946506323               |
| SNP_P3_120583_93306 | NW_004515911.1 | Scaffold438 | 93306                   | TT                              | CC                | 1946506325               |
| SNP_P3_120584_93386 | NW_004515911.1 | Scaffold438 | 93386                   | AA                              | GG                | 1946506326               |
| SNP_P3_120585_93472 | NW_004515911.1 | Scaffold438 | 93472                   | CC                              | TT                | 1946506328               |

| SNPs IDs            | Chromosome IDs | Chromosomes | Physical positions (bp) | CDC Frontier (Reference genome) | (Pusa 256 & HPNB) | NCBI SNPdb Accession IDs |
|---------------------|----------------|-------------|-------------------------|---------------------------------|-------------------|--------------------------|
| SNP_P3_120586_97942 | NW_004515911.1 | Scaffold438 | 97942                   | CC                              | TT                | 1946506329               |
| SNP_P3_120587_97943 | NW_004515911.1 | Scaffold438 | 97943                   | AA                              | TT                | 1946506331               |
| SNP_P3_120588_98004 | NW_004515911.1 | Scaffold438 | 98004                   | TT                              | CC                | 1946506332               |
| SNP_P3_120589_98010 | NW_004515911.1 | Scaffold438 | 98010                   | CC                              | TT                | 1946506334               |
| SNP_P3_120590_98011 | NW_004515911.1 | Scaffold438 | 98011                   | AA                              | GG                | 1946506335               |
| SNP_P3_120591_98015 | NW_004515911.1 | Scaffold438 | 98015                   | AA                              | CC                | 1946506337               |
| SNP_P3_120592_98024 | NW_004515911.1 | Scaffold438 | 98024                   | GG                              | CC                | 1946506338               |
| SNP_P3_120593_98097 | NW_004515911.1 | Scaffold438 | 98097                   | CC                              | GG                | 1946506340               |
| SNP_P3_120594_98168 | NW_004515911.1 | Scaffold438 | 98168                   | TT                              | GG                | 1946506341               |
| SNP_P3_120595_8106  | NW_004515912.1 | Scaffold440 | 8106                    | AA                              | CC                | 1946506343               |
| SNP_P3_120596_8190  | NW_004515912.1 | Scaffold440 | 8190                    | TT                              | AA                | 1946506344               |
| SNP_P3_120597_8196  | NW_004515912.1 | Scaffold440 | 8196                    | TT                              | CC                | 1946506346               |
| SNP_P3_120598_8215  | NW_004515912.1 | Scaffold440 | 8215                    | CC                              | GG                | 1946506347               |
| SNP_P3_120600_12033 | NW_004515912.1 | Scaffold440 | 12033                   | AA                              | GG                | 1946506349               |
| SNP_P3_120601_12039 | NW_004515912.1 | Scaffold440 | 12039                   | CC                              | AA                | 1946506350               |
| SNP_P3_120602_12050 | NW_004515912.1 | Scaffold440 | 12050                   | TT                              | AA                | 1946506351               |
| SNP_P3_120603_12069 | NW_004515912.1 | Scaffold440 | 12069                   | GG                              | AA                | 1946506353               |
| SNP_P3_120604_15518 | NW_004515912.1 | Scaffold440 | 15518                   | TT                              | CC                | 1946506354               |
| SNP_P3_120605_20217 | NW_004515912.1 | Scaffold440 | 20217                   | GG                              | TT                | 1946506356               |
| SNP_P3_120606_20612 | NW_004515912.1 | Scaffold440 | 20612                   | CC                              | TT                | 1946506357               |
| SNP_P3_120607_20675 | NW_004515912.1 | Scaffold440 | 20675                   | TT                              | GG                | 1946506359               |
| SNP_P3_120608_21006 | NW_004515912.1 | Scaffold440 | 21006                   | AA                              | TT                | 1946506360               |
| SNP_P3_120609_23172 | NW_004515912.1 | Scaffold440 | 23172                   | GG                              | CC                | 1946506362               |
| SNP_P3_120610_28165 | NW_004515912.1 | Scaffold440 | 28165                   | GG                              | CC                | 1946506363               |
| SNP_P3_120611_28416 | NW_004515912.1 | Scaffold440 | 28416                   | AA                              | TT                | 1946506365               |
| SNP_P3_120612_28934 | NW_004515912.1 | Scaffold440 | 28934                   | TT                              | GG                | 1946506366               |
| SNP_P3_120613_30107 | NW_004515912.1 | Scaffold440 | 30107                   | GG                              | AA                | 1946506368               |
| SNP_P3_120614_30117 | NW_004515912.1 | Scaffold440 | 30117                   | CC                              | AA                | 1946506369               |
| SNP_P3_120615_30176 | NW_004515912.1 | Scaffold440 | 30176                   | AA                              | GG                | 1946506371               |
| SNP_P3_120616_30196 | NW_004515912.1 | Scaffold440 | 30196                   | CC                              | AA                | 1946506372               |
| SNP_P3_120617_30308 | NW_004515912.1 | Scaffold440 | 30308                   | GG                              | TT                | 1946506374               |
| SNP_P3_120618_30425 | NW_004515912.1 | Scaffold440 | 30425                   | GG                              | AA                | 1946506377               |
| SNP_P3_120619_30473 | NW_004515912.1 | Scaffold440 | 30473                   | GG                              | TT                | 1946506379               |
| SNP_P3_120620_39918 | NW_004515912.1 | Scaffold440 | 39918                   | AA                              | CC                | 1946506380               |
| SNP_P3_120621_39938 | NW_004515912.1 | Scaffold440 | 39938                   | TT                              | CC                | 1946506382               |
| SNP_P3_120622_47380 | NW_004515912.1 | Scaffold440 | 47380                   | TT                              | GG                | 1946506383               |
| SNP_P3_120623_14569 | NW_004515913.1 | Scaffold441 | 14569                   | TT                              | AA                | 1946506384               |
| SNP_P3_120624_17652 | NW_004515913.1 | Scaffold441 | 17652                   | GG                              | TT                | 1946506386               |
| SNP_P3_120625_25932 | NW_004515913.1 | Scaffold441 | 25932                   | CC                              | TT                | 1946506388               |
| SNP_P3_120626_33904 | NW_004515913.1 | Scaffold441 | 33904                   | TT                              | CC                | 1946506389               |
| SNP_P3_120627_34043 | NW_004515913.1 | Scaffold441 | 34043                   | CC                              | AA                | 1946506390               |
| SNP_P3_120628_37432 | NW_004515913.1 | Scaffold441 | 37432                   | TT                              | AA                | 1946506392               |

| SNPs IDs            | Chromosome IDs | Chromosomes | Physical positions (bp) | CDC Frontier (Reference genome) | (Pusa 256 & HPNB) | NCBI SNPdb Accession IDs |
|---------------------|----------------|-------------|-------------------------|---------------------------------|-------------------|--------------------------|
| SNP_P3_120629_1397  | NW_004515914.1 | Scaffold442 | 1397                    | TT                              | CC                | 1946506393               |
| SNP_P3_120630_1412  | NW_004515914.1 | Scaffold442 | 1412                    | CC                              | AA                | 1946506395               |
| SNP_P3_120631_1429  | NW_004515914.1 | Scaffold442 | 1429                    | GG                              | AA                | 1946506396               |
| SNP_P3_120632_1679  | NW_004515914.1 | Scaffold442 | 1679                    | GG                              | AA                | 1946506398               |
| SNP_P3_120633_1690  | NW_004515914.1 | Scaffold442 | 1690                    | AA                              | TT                | 1946506399               |
| SNP_P3_120634_1970  | NW_004515914.1 | Scaffold442 | 1970                    | CC                              | TT                | 1946506401               |
| SNP_P3_120635_1971  | NW_004515914.1 | Scaffold442 | 1971                    | CC                              | TT                | 1946506402               |
| SNP_P3_120636_1972  | NW_004515914.1 | Scaffold442 | 1972                    | CC                              | TT                | 1946506404               |
| SNP_P3_120637_1984  | NW_004515914.1 | Scaffold442 | 1984                    | TT                              | CC                | 1946506405               |
| SNP_P3_120638_10643 | NW_004515914.1 | Scaffold442 | 10643                   | GG                              | TT                | 1946506407               |
| SNP_P3_120639_10692 | NW_004515914.1 | Scaffold442 | 10692                   | CC                              | GG                | 1946506408               |
| SNP_P3_120640_10699 | NW_004515914.1 | Scaffold442 | 10699                   | GG                              | TT                | 1946506410               |
| SNP_P3_120641_10708 | NW_004515914.1 | Scaffold442 | 10708                   | AA                              | CC                | 1946506411               |
| SNP_P3_120642_14513 | NW_004515914.1 | Scaffold442 | 14513                   | AA                              | CC                | 1946506413               |
| SNP_P3_120643_14719 | NW_004515914.1 | Scaffold442 | 14719                   | TT                              | CC                | 1946506414               |
| SNP_P3_120644_19902 | NW_004515914.1 | Scaffold442 | 19902                   | TT                              | AA                | 1946506416               |
| SNP_P3_120645_19916 | NW_004515914.1 | Scaffold442 | 19916                   | GG                              | TT                | 1946506418               |
| SNP_P3_120646_19921 | NW_004515914.1 | Scaffold442 | 19921                   | CC                              | TT                | 1946506419               |
| SNP_P3_120647_19951 | NW_004515914.1 | Scaffold442 | 19951                   | CC                              | AA                | 1946506421               |
| SNP_P3_120649_21746 | NW_004515914.1 | Scaffold442 | 21746                   | CC                              | AA                | 1946506422               |
| SNP_P3_120650_22087 | NW_004515914.1 | Scaffold442 | 22087                   | TT                              | AA                | 1946506424               |
| SNP_P3_120651_24055 | NW_004515914.1 | Scaffold442 | 24055                   | TT                              | AA                | 1946506425               |
| SNP_P3_120652_24768 | NW_004515914.1 | Scaffold442 | 24768                   | CC                              | AA                | 1946506427               |
| SNP_P3_120653_35007 | NW_004515914.1 | Scaffold442 | 35007                   | GG                              | AA                | 1946506428               |
| SNP_P3_120654_35105 | NW_004515914.1 | Scaffold442 | 35105                   | CC                              | AA                | 1946506430               |
| SNP_P3_120655_35605 | NW_004515914.1 | Scaffold442 | 35605                   | CC                              | TT                | 1946506431               |
| SNP_P3_120656_35606 | NW_004515914.1 | Scaffold442 | 35606                   | GG                              | TT                | 1946506433               |
| SNP_P3_120657_35724 | NW_004515914.1 | Scaffold442 | 35724                   | TT                              | CC                | 1946506434               |
| SNP_P3_120658_35772 | NW_004515914.1 | Scaffold442 | 35772                   | AA                              | CC                | 1946506436               |
| SNP_P3_120659_36427 | NW_004515914.1 | Scaffold442 | 36427                   | CC                              | TT                | 1946506437               |
| SNP_P3_120660_36428 | NW_004515914.1 | Scaffold442 | 36428                   | TT                              | GG                | 1946506439               |
| SNP_P3_120661_36435 | NW_004515914.1 | Scaffold442 | 36435                   | AA                              | TT                | 1946506440               |
| SNP_P3_120662_36448 | NW_004515914.1 | Scaffold442 | 36448                   | AA                              | CC                | 1946506442               |
| SNP_P3_120663_36670 | NW_004515914.1 | Scaffold442 | 36670                   | AA                              | GG                | 1946506443               |
| SNP_P3_120664_36721 | NW_004515914.1 | Scaffold442 | 36721                   | TT                              | CC                | 1946506445               |
| SNP_P3_120665_36811 | NW_004515914.1 | Scaffold442 | 36811                   | TT                              | AA                | 1946506446               |
| SNP_P3_120666_36812 | NW_004515914.1 | Scaffold442 | 36812                   | AA                              | TT                | 1946506448               |
| SNP_P3_120667_37093 | NW_004515914.1 | Scaffold442 | 37093                   | CC                              | TT                | 1946506449               |
| SNP_P3_120669_41117 | NW_004515914.1 | Scaffold442 | 41117                   | CC                              | AA                | 1946506451               |
| SNP_P3_120670_41424 | NW_004515914.1 | Scaffold442 | 41424                   | GG                              | TT                | 1946506453               |
| SNP_P3_120671_41619 | NW_004515914.1 | Scaffold442 | 41619                   | CC                              | TT                | 1946506454               |
| SNP_P3_120672_50984 | NW_004515914.1 | Scaffold442 | 50984                   | GG                              | AA                | 1946506455               |

| SNPs IDs            | Chromosome IDs | Chromosomes | Physical positions (bp) | CDC Frontier (Reference genome) | (Pusa 256 & HPNB) | NCBI SNPdb Accession IDs |
|---------------------|----------------|-------------|-------------------------|---------------------------------|-------------------|--------------------------|
| SNP_P3_120673_54958 | NW_004515914.1 | Scaffold442 | 54958                   | TT                              | CC                | 1946506457               |
| SNP_P3_120675_61023 | NW_004515914.1 | Scaffold442 | 61023                   | TT                              | CC                | 1946506458               |
| SNP_P3_120676_61042 | NW_004515914.1 | Scaffold442 | 61042                   | GG                              | CC                | 1946506460               |
| SNP_P3_120677_62008 | NW_004515914.1 | Scaffold442 | 62008                   | CC                              | AA                | 1946506463               |
| SNP_P3_120678_62022 | NW_004515914.1 | Scaffold442 | 62022                   | AA                              | TT                | 1946506465               |
| SNP_P3_120679_62023 | NW_004515914.1 | Scaffold442 | 62023                   | CC                              | TT                | 1946506466               |
| SNP_P3_120680_62606 | NW_004515914.1 | Scaffold442 | 62606                   | GG                              | AA                | 1946506468               |
| SNP_P3_120681_62731 | NW_004515914.1 | Scaffold442 | 62731                   | AA                              | GG                | 1946506469               |
| SNP_P3_120682_71407 | NW_004515914.1 | Scaffold442 | 71407                   | TT                              | GG                | 1946506471               |
| SNP_P3_120683_71565 | NW_004515914.1 | Scaffold442 | 71565                   | TT                              | CC                | 1946506472               |
| SNP_P3_120684_71825 | NW_004515914.1 | Scaffold442 | 71825                   | GG                              | TT                | 1946506474               |
| SNP_P3_120685_71851 | NW_004515914.1 | Scaffold442 | 71851                   | TT                              | AA                | 1946506475               |
| SNP_P3_120686_1184  | NW_004515916.1 | Scaffold446 | 1184                    | CC                              | GG                | 1946506477               |
| SNP_P3_120687_2565  | NW_004515916.1 | Scaffold446 | 2565                    | TT                              | AA                | 1946506478               |
| SNP_P3_120688_2589  | NW_004515916.1 | Scaffold446 | 2589                    | TT                              | AA                | 1946506480               |
| SNP_P3_120689_2622  | NW_004515916.1 | Scaffold446 | 2622                    | TT                              | AA                | 1946506481               |
| SNP_P3_120690_2885  | NW_004515916.1 | Scaffold446 | 2885                    | TT                              | CC                | 1946506483               |
| SNP_P3_120691_9823  | NW_004515916.1 | Scaffold446 | 9823                    | GG                              | TT                | 1946506484               |
| SNP_P3_120692_11149 | NW_004515916.1 | Scaffold446 | 11149                   | TT                              | CC                | 1946506485               |
| SNP_P3_120693_11197 | NW_004515916.1 | Scaffold446 | 11197                   | GG                              | AA                | 1946506487               |
| SNP_P3_120694_11209 | NW_004515916.1 | Scaffold446 | 11209                   | GG                              | AA                | 1946506488               |
| SNP_P3_120695_12783 | NW_004515916.1 | Scaffold446 | 12783                   | GG                              | AA                | 1946506490               |
| SNP_P3_120696_12786 | NW_004515916.1 | Scaffold446 | 12786                   | GG                              | AA                | 1946506491               |
| SNP_P3_120697_12792 | NW_004515916.1 | Scaffold446 | 12792                   | CC                              | TT                | 1946506493               |
| SNP_P3_120698_12795 | NW_004515916.1 | Scaffold446 | 12795                   | AA                              | GG                | 1946506494               |
| SNP_P3_120699_12830 | NW_004515916.1 | Scaffold446 | 12830                   | TT                              | CC                | 1946506496               |
| SNP_P3_120700_12837 | NW_004515916.1 | Scaffold446 | 12837                   | CC                              | TT                | 1946506497               |
| SNP_P3_120701_12843 | NW_004515916.1 | Scaffold446 | 12843                   | AA                              | GG                | 1946506499               |
| SNP_P3_120702_12872 | NW_004515916.1 | Scaffold446 | 12872                   | TT                              | GG                | 1946506500               |
| SNP_P3_120703_12880 | NW_004515916.1 | Scaffold446 | 12880                   | TT                              | AA                | 1946506502               |
| SNP_P3_120704_12900 | NW_004515916.1 | Scaffold446 | 12900                   | AA                              | TT                | 1946506503               |
| SNP_P3_120706_13047 | NW_004515916.1 | Scaffold446 | 13047                   | GG                              | TT                | 1946506504               |
| SNP_P3_120707_13252 | NW_004515916.1 | Scaffold446 | 13252                   | TT                              | AA                | 1946506506               |
| SNP_P3_120708_13285 | NW_004515916.1 | Scaffold446 | 13285                   | GG                              | AA                | 1946506507               |
| SNP_P3_120709_13297 | NW_004515916.1 | Scaffold446 | 13297                   | GG                              | AA                | 1946506509               |
| SNP_P3_120710_13327 | NW_004515916.1 | Scaffold446 | 13327                   | GG                              | AA                | 1946506510               |
| SNP_P3_120711_13372 | NW_004515916.1 | Scaffold446 | 13372                   | AA                              | TT                | 1946506512               |
| SNP_P3_120712_13374 | NW_004515916.1 | Scaffold446 | 13374                   | GG                              | AA                | 1946506513               |
| SNP_P3_120713_13375 | NW_004515916.1 | Scaffold446 | 13375                   | GG                              | AA                | 1946506515               |
| SNP_P3_120714_13381 | NW_004515916.1 | Scaffold446 | 13381                   | AA                              | TT                | 1946506516               |
| SNP_P3_120715_14415 | NW_004515916.1 | Scaffold446 | 14415                   | TT                              | CC                | 1946506518               |
| SNP_P3_120716_20305 | NW_004515916.1 | Scaffold446 | 20305                   | GG                              | CC                | 1946506519               |

| SNPs IDs            | Chromosome IDs | Chromosomes | Physical positions (bp) | CDC Frontier (Reference genome) | (Pusa 256 & HPNB) | NCBI SNPdb Accession IDs |
|---------------------|----------------|-------------|-------------------------|---------------------------------|-------------------|--------------------------|
| SNP_P3_120717_20351 | NW_004515916.1 | Scaffold446 | 20351                   | GG                              | TT                | 1946506521               |
| SNP_P3_120718_20368 | NW_004515916.1 | Scaffold446 | 20368                   | CC                              | GG                | 1946506522               |
| SNP_P3_120719_34347 | NW_004515916.1 | Scaffold446 | 34347                   | AA                              | GG                | 1946506524               |
| SNP_P3_120720_36145 | NW_004515916.1 | Scaffold446 | 36145                   | GG                              | TT                | 1946506525               |
| SNP_P3_120721_36189 | NW_004515916.1 | Scaffold446 | 36189                   | AA                              | GG                | 1946506526               |
| SNP_P3_120722_45276 | NW_004515916.1 | Scaffold446 | 45276                   | CC                              | AA                | 1946506528               |
| SNP_P3_120723_50715 | NW_004515916.1 | Scaffold446 | 50715                   | GG                              | AA                | 1946506529               |
| SNP_P3_120724_61405 | NW_004515916.1 | Scaffold446 | 61405                   | GG                              | AA                | 1946506531               |
| SNP_P3_120725_61666 | NW_004515916.1 | Scaffold446 | 61666                   | CC                              | TT                | 1946506532               |
| SNP_P3_120726_61684 | NW_004515916.1 | Scaffold446 | 61684                   | CC                              | AA                | 1946506534               |
| SNP_P3_120727_61686 | NW_004515916.1 | Scaffold446 | 61686                   | AA                              | GG                | 1946506535               |
| SNP_P3_120728_61955 | NW_004515916.1 | Scaffold446 | 61955                   | AA                              | TT                | 1946506537               |
| SNP_P3_120729_61958 | NW_004515916.1 | Scaffold446 | 61958                   | TT                              | CC                | 1946506538               |
| SNP_P3_120730_65404 | NW_004515916.1 | Scaffold446 | 65404                   | AA                              | GG                | 1946506540               |
| SNP_P3_120731_65751 | NW_004515916.1 | Scaffold446 | 65751                   | GG                              | AA                | 1946506541               |
| SNP_P3_120732_65922 | NW_004515916.1 | Scaffold446 | 65922                   | TT                              | GG                | 1946506543               |
| SNP_P3_120733_65983 | NW_004515916.1 | Scaffold446 | 65983                   | CC                              | TT                | 1946506544               |
| SNP_P3_120734_65997 | NW_004515916.1 | Scaffold446 | 65997                   | AA                              | CC                | 1946506546               |
| SNP_P3_120735_66021 | NW_004515916.1 | Scaffold446 | 66021                   | GG                              | AA                | 1946506547               |
| SNP_P3_120736_66049 | NW_004515916.1 | Scaffold446 | 66049                   | CC                              | TT                | 1946506548               |
| SNP_P3_120737_66062 | NW_004515916.1 | Scaffold446 | 66062                   | GG                              | TT                | 1946506550               |
| SNP_P3_120738_66066 | NW_004515916.1 | Scaffold446 | 66066                   | TT                              | CC                | 1946506551               |
| SNP_P3_120739_66127 | NW_004515916.1 | Scaffold446 | 66127                   | TT                              | AA                | 1946506553               |
| SNP_P3_120740_66134 | NW_004515916.1 | Scaffold446 | 66134                   | TT                              | CC                | 1946506554               |
| SNP_P3_120741_66181 | NW_004515916.1 | Scaffold446 | 66181                   | AA                              | CC                | 1946506556               |
| SNP_P3_120742_66211 | NW_004515916.1 | Scaffold446 | 66211                   | AA                              | CC                | 1946506557               |
| SNP_P3_120743_66216 | NW_004515916.1 | Scaffold446 | 66216                   | GG                              | AA                | 1946506559               |
| SNP_P3_120744_66222 | NW_004515916.1 | Scaffold446 | 66222                   | CC                              | AA                | 1946506560               |
| SNP_P3_120745_66248 | NW_004515916.1 | Scaffold446 | 66248                   | CC                              | TT                | 1946506562               |
| SNP_P3_120746_66249 | NW_004515916.1 | Scaffold446 | 66249                   | TT                              | CC                | 1946506563               |
| SNP_P3_120747_66259 | NW_004515916.1 | Scaffold446 | 66259                   | AA                              | CC                | 1946506565               |
| SNP_P3_120748_66275 | NW_004515916.1 | Scaffold446 | 66275                   | TT                              | CC                | 1946506566               |
| SNP_P3_120749_66285 | NW_004515916.1 | Scaffold446 | 66285                   | CC                              | AA                | 1946506567               |
| SNP_P3_120750_66336 | NW_004515916.1 | Scaffold446 | 66336                   | AA                              | CC                | 1946506569               |
| SNP_P3_120751_66385 | NW_004515916.1 | Scaffold446 | 66385                   | CC                              | GG                | 1946506570               |
| SNP_P3_120752_66435 | NW_004515916.1 | Scaffold446 | 66435                   | GG                              | CC                | 1946506572               |
| SNP_P3_120753_66479 | NW_004515916.1 | Scaffold446 | 66479                   | AA                              | CC                | 1946506573               |
| SNP_P3_120754_66510 | NW_004515916.1 | Scaffold446 | 66510                   | CC                              | AA                | 1946506575               |
| SNP_P3_120755_66695 | NW_004515916.1 | Scaffold446 | 66695                   | TT                              | AA                | 1946506576               |
| SNP_P3_120756_67577 | NW_004515916.1 | Scaffold446 | 67577                   | CC                              | AA                | 1946506577               |
| SNP_P3_120757_67629 | NW_004515916.1 | Scaffold446 | 67629                   | CC                              | AA                | 1946506579               |
| SNP_P3_120758_67638 | NW_004515916.1 | Scaffold446 | 67638                   | CC                              | AA                | 1946506580               |

| SNPs IDs            | Chromosome IDs | Chromosomes | Physical positions (bp) | CDC Frontier (Reference genome) | (Pusa 256 & HPNB) | NCBI SNPdb Accession IDs |
|---------------------|----------------|-------------|-------------------------|---------------------------------|-------------------|--------------------------|
| SNP_P3_120759_67709 | NW_004515916.1 | Scaffold446 | 67709                   | GG                              | AA                | 1946506582               |
| SNP_P3_120760_67774 | NW_004515916.1 | Scaffold446 | 67774                   | TT                              | CC                | 1946506583               |
| SNP_P3_120762_67848 | NW_004515916.1 | Scaffold446 | 67848                   | AA                              | TT                | 1946506585               |
| SNP_P3_120764_67862 | NW_004515916.1 | Scaffold446 | 67862                   | AA                              | TT                | 1946506586               |
| SNP_P3_120765_67874 | NW_004515916.1 | Scaffold446 | 67874                   | TT                              | AA                | 1946506588               |
| SNP_P3_120766_67926 | NW_004515916.1 | Scaffold446 | 67926                   | GG                              | TT                | 1946506589               |
| SNP_P3_120767_67948 | NW_004515916.1 | Scaffold446 | 67948                   | TT                              | AA                | 1946506591               |
| SNP_P3_120768_67960 | NW_004515916.1 | Scaffold446 | 67960                   | AA                              | TT                | 1946506592               |
| SNP_P3_120769_67971 | NW_004515916.1 | Scaffold446 | 67971                   | AA                              | TT                | 1946506594               |
| SNP_P3_120770_67985 | NW_004515916.1 | Scaffold446 | 67985                   | AA                              | TT                | 1946506595               |
| SNP_P3_120771_68014 | NW_004515916.1 | Scaffold446 | 68014                   | TT                              | AA                | 1946506596               |
| SNP_P3_120772_68102 | NW_004515916.1 | Scaffold446 | 68102                   | AA                              | TT                | 1946506598               |
| SNP_P3_120773_68106 | NW_004515916.1 | Scaffold446 | 68106                   | TT                              | AA                | 1946506599               |
| SNP_P3_120774_68213 | NW_004515916.1 | Scaffold446 | 68213                   | AA                              | TT                | 1946506601               |
| SNP_P3_120775_68239 | NW_004515916.1 | Scaffold446 | 68239                   | TT                              | CC                | 1946506603               |
| SNP_P3_120776_68265 | NW_004515916.1 | Scaffold446 | 68265                   | CC                              | TT                | 1946506604               |
| SNP_P3_120777_68274 | NW_004515916.1 | Scaffold446 | 68274                   | AA                              | TT                | 1946506606               |
| SNP_P3_120778_68284 | NW_004515916.1 | Scaffold446 | 68284                   | AA                              | TT                | 1946506607               |
| SNP_P3_120779_68297 | NW_004515916.1 | Scaffold446 | 68297                   | TT                              | GG                | 1946506609               |
| SNP_P3_120780_68305 | NW_004515916.1 | Scaffold446 | 68305                   | GG                              | CC                | 1946506610               |
| SNP_P3_120781_77220 | NW_004515916.1 | Scaffold446 | 77220                   | GG                              | AA                | 1946506612               |
| SNP_P3_120782_77221 | NW_004515916.1 | Scaffold446 | 77221                   | TT                              | GG                | 1946506613               |
| SNP_P3_120783_79085 | NW_004515916.1 | Scaffold446 | 79085                   | TT                              | GG                | 1946506615               |
| SNP_P3_120784_80764 | NW_004515916.1 | Scaffold446 | 80764                   | TT                              | AA                | 1946506616               |
| SNP_P3_120785_80787 | NW_004515916.1 | Scaffold446 | 80787                   | AA                              | CC                | 1946506618               |
| SNP_P3_120786_80825 | NW_004515916.1 | Scaffold446 | 80825                   | AA                              | GG                | 1946506619               |
| SNP_P3_120787_80836 | NW_004515916.1 | Scaffold446 | 80836                   | TT                              | CC                | 1946506621               |
| SNP_P3_120788_81943 | NW_004515916.1 | Scaffold446 | 81943                   | GG                              | CC                | 1946506622               |
| SNP_P3_120789_82047 | NW_004515916.1 | Scaffold446 | 82047                   | AA                              | CC                | 1946506624               |
| SNP_P3_120790_82050 | NW_004515916.1 | Scaffold446 | 82050                   | TT                              | CC                | 1946506625               |
| SNP_P3_120792_82052 | NW_004515916.1 | Scaffold446 | 82052                   | AA                              | CC                | 1946506627               |
| SNP_P3_120793_82055 | NW_004515916.1 | Scaffold446 | 82055                   | TT                              | AA                | 1946506628               |
| SNP_P3_120794_82176 | NW_004515916.1 | Scaffold446 | 82176                   | AA                              | TT                | 1946506630               |
| SNP_P3_120795_82320 | NW_004515916.1 | Scaffold446 | 82320                   | GG                              | TT                | 1946506631               |
| SNP_P3_120796_84113 | NW_004515916.1 | Scaffold446 | 84113                   | AA                              | TT                | 1946506633               |
| SNP_P3_120797_84609 | NW_004515916.1 | Scaffold446 | 84609                   | AA                              | CC                | 1946506634               |
| SNP_P3_120798_85489 | NW_004515916.1 | Scaffold446 | 85489                   | GG                              | AA                | 1946506636               |
| SNP_P3_120799_88846 | NW_004515916.1 | Scaffold446 | 88846                   | AA                              | GG                | 1946506637               |
| SNP_P3_120800_88859 | NW_004515916.1 | Scaffold446 | 88859                   | TT                              | CC                | 1946506639               |
| SNP_P3_120801_92257 | NW_004515916.1 | Scaffold446 | 92257                   | TT                              | CC                | 1946506640               |
| SNP_P3_120802_99238 | NW_004515916.1 | Scaffold446 | 99238                   | GG                              | AA                | 1946506642               |
| SNP_P3_120803_99326 | NW_004515916.1 | Scaffold446 | 99326                   | AA                              | CC                | 1946506644               |

| SNPs IDs             | Chromosome IDs | Chromosomes | Physical positions (bp) | CDC Frontier (Reference genome) | (Pusa 256 & HPNB) | NCBI SNPdb Accession IDs |
|----------------------|----------------|-------------|-------------------------|---------------------------------|-------------------|--------------------------|
| SNP_P3_120804_99328  | NW_004515916.1 | Scaffold446 | 99328                   | GG                              | AA                | 1946506645               |
| SNP_P3_120805_99338  | NW_004515916.1 | Scaffold446 | 99338                   | CC                              | TT                | 1946506647               |
| SNP_P3_120806_99397  | NW_004515916.1 | Scaffold446 | 99397                   | TT                              | CC                | 1946506648               |
| SNP_P3_120807_99435  | NW_004515916.1 | Scaffold446 | 99435                   | GG                              | AA                | 1946506650               |
| SNP_P3_120808_99464  | NW_004515916.1 | Scaffold446 | 99464                   | TT                              | AA                | 1946506651               |
| SNP_P3_120809_99592  | NW_004515916.1 | Scaffold446 | 99592                   | GG                              | AA                | 1946506653               |
| SNP_P3_120810_99680  | NW_004515916.1 | Scaffold446 | 99680                   | CC                              | TT                | 1946506654               |
| SNP_P3_120811_99684  | NW_004515916.1 | Scaffold446 | 99684                   | TT                              | GG                | 1946506656               |
| SNP_P3_120812_99748  | NW_004515916.1 | Scaffold446 | 99748                   | AA                              | GG                | 1946506657               |
| SNP_P3_120813_99751  | NW_004515916.1 | Scaffold446 | 99751                   | AA                              | GG                | 1946506659               |
| SNP_P3_120814_100701 | NW_004515916.1 | Scaffold446 | 100701                  | CC                              | AA                | 1946506660               |
| SNP_P3_120815_101987 | NW_004515916.1 | Scaffold446 | 101987                  | TT                              | AA                | 1946506662               |
| SNP_P3_120816_102791 | NW_004515916.1 | Scaffold446 | 102791                  | TT                              | CC                | 1946506663               |
| SNP_P3_120817_109650 | NW_004515916.1 | Scaffold446 | 109650                  | GG                              | CC                | 1946506665               |
| SNP_P3_120818_109831 | NW_004515916.1 | Scaffold446 | 109831                  | TT                              | CC                | 1946506667               |
| SNP_P3_120819_109858 | NW_004515916.1 | Scaffold446 | 109858                  | CC                              | TT                | 1946506668               |
| SNP_P3_120820_109902 | NW_004515916.1 | Scaffold446 | 109902                  | AA                              | CC                | 1946506670               |
| SNP_P3_120821_110186 | NW_004515916.1 | Scaffold446 | 110186                  | TT                              | AA                | 1946506671               |
| SNP_P3_120822_110343 | NW_004515916.1 | Scaffold446 | 110343                  | AA                              | TT                | 1946506673               |
| SNP_P3_120824_118188 | NW_004515916.1 | Scaffold446 | 118188                  | CC                              | TT                | 1946506674               |
| SNP_P3_120825_118374 | NW_004515916.1 | Scaffold446 | 118374                  | TT                              | CC                | 1946506676               |
| SNP_P3_120826_118576 | NW_004515916.1 | Scaffold446 | 118576                  | AA                              | GG                | 1946506677               |
| SNP_P3_120827_118643 | NW_004515916.1 | Scaffold446 | 118643                  | TT                              | CC                | 1946506679               |
| SNP_P3_120828_118648 | NW_004515916.1 | Scaffold446 | 118648                  | TT                              | GG                | 1946506680               |
| SNP_P3_120829_118899 | NW_004515916.1 | Scaffold446 | 118899                  | CC                              | TT                | 1946506682               |
| SNP_P3_120830_118907 | NW_004515916.1 | Scaffold446 | 118907                  | AA                              | GG                | 1946506683               |
| SNP_P3_120831_119017 | NW_004515916.1 | Scaffold446 | 119017                  | GG                              | AA                | 1946506685               |
| SNP_P3_120832_119042 | NW_004515916.1 | Scaffold446 | 119042                  | AA                              | TT                | 1946506686               |
| SNP_P3_120834_124441 | NW_004515916.1 | Scaffold446 | 124441                  | GG                              | AA                | 1946506688               |
| SNP_P3_120835_124912 | NW_004515916.1 | Scaffold446 | 124912                  | GG                              | AA                | 1946506689               |
| SNP_P3_120836_124928 | NW_004515916.1 | Scaffold446 | 124928                  | TT                              | GG                | 1946506691               |
| SNP_P3_120837_124942 | NW_004515916.1 | Scaffold446 | 124942                  | GG                              | AA                | 1946506692               |
| SNP_P3_120838_129896 | NW_004515916.1 | Scaffold446 | 129896                  | TT                              | AA                | 1946506694               |
| SNP_P3_120839_133529 | NW_004515916.1 | Scaffold446 | 133529                  | GG                              | AA                | 1946506695               |
| SNP_P3_120840_133701 | NW_004515916.1 | Scaffold446 | 133701                  | AA                              | GG                | 1946506697               |
| SNP_P3_120841_133783 | NW_004515916.1 | Scaffold446 | 133783                  | TT                              | GG                | 1946506698               |
| SNP_P3_120842_133807 | NW_004515916.1 | Scaffold446 | 133807                  | TT                              | CC                | 1946506700               |
| SNP_P3_120843_133885 | NW_004515916.1 | Scaffold446 | 133885                  | GG                              | AA                | 1946506701               |
| SNP_P3_120844_134096 | NW_004515916.1 | Scaffold446 | 134096                  | AA                              | GG                | 1946506703               |
| SNP_P3_120845_135349 | NW_004515916.1 | Scaffold446 | 135349                  | TT                              | AA                | 1946506704               |
| SNP_P3_120846_135780 | NW_004515916.1 | Scaffold446 | 135780                  | AA                              | TT                | 1946506706               |
| SNP_P3_120847_135790 | NW_004515916.1 | Scaffold446 | 135790                  | TT                              | AA                | 1946506707               |



| SNPs IDs             | Chromosome IDs | Chromosomes | Physical positions (bp) | CDC Frontier (Reference genome) | (Pusa 256 & HPNB) | NCBI SNPdb Accession IDs |
|----------------------|----------------|-------------|-------------------------|---------------------------------|-------------------|--------------------------|
| SNP_P3_120848_138001 | NW_004515916.1 | Scaffold446 | 138001                  | CC                              | GG                | 1946506709               |
| SNP_P3_120850_153752 | NW_004515916.1 | Scaffold446 | 153752                  | CC                              | TT                | 1946506710               |
| SNP_P3_120851_153794 | NW_004515916.1 | Scaffold446 | 153794                  | TT                              | AA                | 1946506712               |
| SNP_P3_120852_153830 | NW_004515916.1 | Scaffold446 | 153830                  | CC                              | TT                | 1946506713               |
| SNP_P3_120853_153836 | NW_004515916.1 | Scaffold446 | 153836                  | AA                              | CC                | 1946506715               |
| SNP_P3_120854_156756 | NW_004515916.1 | Scaffold446 | 156756                  | CC                              | TT                | 1946506716               |
| SNP_P3_120855_156864 | NW_004515916.1 | Scaffold446 | 156864                  | TT                              | CC                | 1946506718               |
| SNP_P3_120856_156956 | NW_004515916.1 | Scaffold446 | 156956                  | CC                              | TT                | 1946506719               |
| SNP_P3_120857_156999 | NW_004515916.1 | Scaffold446 | 156999                  | TT                              | CC                | 1946506721               |
| SNP_P3_120858_157027 | NW_004515916.1 | Scaffold446 | 157027                  | AA                              | TT                | 1946506722               |
| SNP_P3_120859_157035 | NW_004515916.1 | Scaffold446 | 157035                  | CC                              | TT                | 1946506724               |
| SNP_P3_120860_157055 | NW_004515916.1 | Scaffold446 | 157055                  | TT                              | GG                | 1946506726               |
| SNP_P3_120861_157109 | NW_004515916.1 | Scaffold446 | 157109                  | GG                              | AA                | 1946506727               |
| SNP_P3_120862_157112 | NW_004515916.1 | Scaffold446 | 157112                  | AA                              | TT                | 1946506729               |
| SNP_P3_120863_157139 | NW_004515916.1 | Scaffold446 | 157139                  | GG                              | TT                | 1946506730               |
| SNP_P3_120864_157145 | NW_004515916.1 | Scaffold446 | 157145                  | CC                              | TT                | 1946506732               |
| SNP_P3_120865_157165 | NW_004515916.1 | Scaffold446 | 157165                  | GG                              | AA                | 1946506733               |
| SNP_P3_120866_157285 | NW_004515916.1 | Scaffold446 | 157285                  | AA                              | GG                | 1946506735               |
| SNP_P3_120867_157357 | NW_004515916.1 | Scaffold446 | 157357                  | GG                              | AA                | 1946506736               |
| SNP_P3_120868_157382 | NW_004515916.1 | Scaffold446 | 157382                  | CC                              | GG                | 1946506738               |
| SNP_P3_120869_157480 | NW_004515916.1 | Scaffold446 | 157480                  | TT                              | CC                | 1946506739               |
| SNP_P3_120870_160828 | NW_004515916.1 | Scaffold446 | 160828                  | CC                              | TT                | 1946506741               |
| SNP_P3_120871_160829 | NW_004515916.1 | Scaffold446 | 160829                  | AA                              | GG                | 1946506742               |
| SNP_P3_120872_160830 | NW_004515916.1 | Scaffold446 | 160830                  | GG                              | AA                | 1946506744               |
| SNP_P3_120873_160886 | NW_004515916.1 | Scaffold446 | 160886                  | GG                              | TT                | 1946506746               |
| SNP_P3_120874_160887 | NW_004515916.1 | Scaffold446 | 160887                  | AA                              | TT                | 1946506747               |
| SNP_P3_120875_161247 | NW_004515916.1 | Scaffold446 | 161247                  | CC                              | TT                | 1946506749               |
| SNP_P3_120876_161298 | NW_004515916.1 | Scaffold446 | 161298                  | AA                              | GG                | 1946506750               |
| SNP_P3_120877_161299 | NW_004515916.1 | Scaffold446 | 161299                  | AA                              | TT                | 1946506752               |
| SNP_P3_120878_161314 | NW_004515916.1 | Scaffold446 | 161314                  | GG                              | AA                | 1946506753               |
| SNP_P3_120879_163449 | NW_004515916.1 | Scaffold446 | 163449                  | CC                              | TT                | 1946506755               |
| SNP_P3_120880_163487 | NW_004515916.1 | Scaffold446 | 163487                  | CC                              | TT                | 1946506756               |
| SNP_P3_120881_163563 | NW_004515916.1 | Scaffold446 | 163563                  | AA                              | TT                | 1946506758               |
| SNP_P3_120883_163774 | NW_004515916.1 | Scaffold446 | 163774                  | CC                              | TT                | 1946506760               |
| SNP_P3_120884_163783 | NW_004515916.1 | Scaffold446 | 163783                  | TT                              | CC                | 1946506761               |
| SNP_P3_120885_163790 | NW_004515916.1 | Scaffold446 | 163790                  | TT                              | CC                | 1946506763               |
| SNP_P3_120886_163805 | NW_004515916.1 | Scaffold446 | 163805                  | CC                              | TT                | 1946506764               |
| SNP_P3_120887_163831 | NW_004515916.1 | Scaffold446 | 163831                  | AA                              | GG                | 1946506766               |
| SNP_P3_120888_163873 | NW_004515916.1 | Scaffold446 | 163873                  | AA                              | GG                | 1946506767               |
| SNP_P3_120889_163918 | NW_004515916.1 | Scaffold446 | 163918                  | AA                              | GG                | 1946506769               |
| SNP_P3_120890_164280 | NW_004515916.1 | Scaffold446 | 164280                  | TT                              | CC                | 1946506770               |
| SNP_P3_120891_164317 | NW_004515916.1 | Scaffold446 | 164317                  | AA                              | GG                | 1946506772               |

| SNPs IDs             | Chromosome IDs | Chromosomes | Physical positions (bp) | CDC Frontier (Reference genome) | (Pusa 256 & HPNB) | NCBI SNPdb Accession IDs |
|----------------------|----------------|-------------|-------------------------|---------------------------------|-------------------|--------------------------|
| SNP_P3_120892_165600 | NW_004515916.1 | Scaffold446 | 165600                  | TT                              | AA                | 1946506773               |
| SNP_P3_120893_165719 | NW_004515916.1 | Scaffold446 | 165719                  | CC                              | TT                | 1946506775               |
| SNP_P3_120894_166536 | NW_004515916.1 | Scaffold446 | 166536                  | GG                              | AA                | 1946506776               |
| SNP_P3_120895_166779 | NW_004515916.1 | Scaffold446 | 166779                  | TT                              | CC                | 1946506778               |
| SNP_P3_120896_166789 | NW_004515916.1 | Scaffold446 | 166789                  | TT                              | CC                | 1946506779               |
| SNP_P3_120897_166815 | NW_004515916.1 | Scaffold446 | 166815                  | AA                              | TT                | 1946506781               |
| SNP_P3_120898_168396 | NW_004515916.1 | Scaffold446 | 168396                  | TT                              | CC                | 1946506783               |
| SNP_P3_120899_171884 | NW_004515916.1 | Scaffold446 | 171884                  | GG                              | AA                | 1946506784               |
| SNP_P3_120900_177300 | NW_004515916.1 | Scaffold446 | 177300                  | GG                              | CC                | 1946506785               |
| SNP_P3_120901_177487 | NW_004515916.1 | Scaffold446 | 177487                  | GG                              | TT                | 1946506787               |
| SNP_P3_120902_177500 | NW_004515916.1 | Scaffold446 | 177500                  | TT                              | CC                | 1946506788               |
| SNP_P3_120903_177530 | NW_004515916.1 | Scaffold446 | 177530                  | GG                              | TT                | 1946506790               |
| SNP_P3_120904_177565 | NW_004515916.1 | Scaffold446 | 177565                  | AA                              | CC                | 1946506791               |
| SNP_P3_120905_180430 | NW_004515916.1 | Scaffold446 | 180430                  | TT                              | AA                | 1946506793               |
| SNP_P3_120906_180775 | NW_004515916.1 | Scaffold446 | 180775                  | TT                              | AA                | 1946506794               |
| SNP_P3_120907_181205 | NW_004515916.1 | Scaffold446 | 181205                  | CC                              | TT                | 1946506796               |
| SNP_P3_120908_181590 | NW_004515916.1 | Scaffold446 | 181590                  | AA                              | GG                | 1946506798               |
| SNP_P3_120909_181649 | NW_004515916.1 | Scaffold446 | 181649                  | AA                              | GG                | 1946506799               |
| SNP_P3_120910_186589 | NW_004515916.1 | Scaffold446 | 186589                  | TT                              | AA                | 1946506801               |
| SNP_P3_120911_186598 | NW_004515916.1 | Scaffold446 | 186598                  | AA                              | TT                | 1946506802               |
| SNP_P3_120912_192653 | NW_004515916.1 | Scaffold446 | 192653                  | TT                              | CC                | 1946506804               |
| SNP_P3_120913_202451 | NW_004515916.1 | Scaffold446 | 202451                  | AA                              | GG                | 1946506806               |
| SNP_P3_120914_202751 | NW_004515916.1 | Scaffold446 | 202751                  | TT                              | CC                | 1946506807               |
| SNP_P3_120915_204048 | NW_004515916.1 | Scaffold446 | 204048                  | AA                              | GG                | 1946506809               |
| SNP_P3_120916_218141 | NW_004515916.1 | Scaffold446 | 218141                  | GG                              | AA                | 1946506810               |
| SNP_P3_120917_218989 | NW_004515916.1 | Scaffold446 | 218989                  | GG                              | AA                | 1946506812               |
| SNP_P3_120918_224188 | NW_004515916.1 | Scaffold446 | 224188                  | AA                              | TT                | 1946506813               |
| SNP_P3_120919_224198 | NW_004515916.1 | Scaffold446 | 224198                  | AA                              | GG                | 1946506815               |
| SNP_P3_120920_224199 | NW_004515916.1 | Scaffold446 | 224199                  | CC                              | AA                | 1946506816               |
| SNP_P3_120922_224872 | NW_004515916.1 | Scaffold446 | 224872                  | CC                              | AA                | 1946506818               |
| SNP_P3_120923_224882 | NW_004515916.1 | Scaffold446 | 224882                  | TT                              | GG                | 1946506819               |
| SNP_P3_120924_227317 | NW_004515916.1 | Scaffold446 | 227317                  | TT                              | GG                | 1946506821               |
| SNP_P3_120925_227321 | NW_004515916.1 | Scaffold446 | 227321                  | CC                              | TT                | 1946506823               |
| SNP_P3_120926_231386 | NW_004515916.1 | Scaffold446 | 231386                  | AA                              | CC                | 1946506824               |
| SNP_P3_120927_232515 | NW_004515916.1 | Scaffold446 | 232515                  | AA                              | CC                | 1946506826               |
| SNP_P3_120928_232535 | NW_004515916.1 | Scaffold446 | 232535                  | AA                              | CC                | 1946506827               |
| SNP_P3_120929_232876 | NW_004515916.1 | Scaffold446 | 232876                  | TT                              | GG                | 1946506829               |
| SNP_P3_120930_233142 | NW_004515916.1 | Scaffold446 | 233142                  | AA                              | TT                | 1946506830               |
| SNP_P3_120931_233353 | NW_004515916.1 | Scaffold446 | 233353                  | CC                              | TT                | 1946506832               |
| SNP_P3_120932_233375 | NW_004515916.1 | Scaffold446 | 233375                  | CC                              | TT                | 1946506833               |
| SNP_P3_120933_233376 | NW_004515916.1 | Scaffold446 | 233376                  | AA                              | GG                | 1946506835               |
| SNP_P3_120934_233467 | NW_004515916.1 | Scaffold446 | 233467                  | AA                              | GG                | 1946506836               |

| SNPs IDs             | Chromosome IDs | Chromosomes | Physical positions (bp) | CDC Frontier (Reference genome) | (Pusa 256 & HPNB) | NCBI SNPdb Accession IDs |
|----------------------|----------------|-------------|-------------------------|---------------------------------|-------------------|--------------------------|
| SNP_P3_120935_233507 | NW_004515916.1 | Scaffold446 | 233507                  | AA                              | CC                | 1946506838               |
| SNP_P3_120936_233568 | NW_004515916.1 | Scaffold446 | 233568                  | AA                              | CC                | 1946506839               |
| SNP_P3_120937_234947 | NW_004515916.1 | Scaffold446 | 234947                  | GG                              | AA                | 1946506841               |
| SNP_P3_120938_235004 | NW_004515916.1 | Scaffold446 | 235004                  | AA                              | TT                | 1946506842               |
| SNP_P3_120939_235007 | NW_004515916.1 | Scaffold446 | 235007                  | AA                              | TT                | 1946506844               |
| SNP_P3_120940_235018 | NW_004515916.1 | Scaffold446 | 235018                  | TT                              | CC                | 1946506845               |
| SNP_P3_120941_235252 | NW_004515916.1 | Scaffold446 | 235252                  | TT                              | AA                | 1946506847               |
| SNP_P3_120942_235311 | NW_004515916.1 | Scaffold446 | 235311                  | GG                              | AA                | 1946506848               |
| SNP_P3_120943_235319 | NW_004515916.1 | Scaffold446 | 235319                  | TT                              | CC                | 1946506850               |
| SNP_P3_120945_235753 | NW_004515916.1 | Scaffold446 | 235753                  | TT                              | CC                | 1946506851               |
| SNP_P3_120946_236138 | NW_004515916.1 | Scaffold446 | 236138                  | AA                              | CC                | 1946506853               |
| SNP_P3_120947_245341 | NW_004515916.1 | Scaffold446 | 245341                  | GG                              | TT                | 1946506854               |
| SNP_P3_120948_245391 | NW_004515916.1 | Scaffold446 | 245391                  | AA                              | GG                | 1946506856               |
| SNP_P3_120949_250517 | NW_004515916.1 | Scaffold446 | 250517                  | AA                              | GG                | 1946506857               |
| SNP_P3_120950_255937 | NW_004515916.1 | Scaffold446 | 255937                  | TT                              | CC                | 1946506859               |
| SNP_P3_120951_255991 | NW_004515916.1 | Scaffold446 | 255991                  | CC                              | TT                | 1946506860               |
| SNP_P3_120952_256427 | NW_004515916.1 | Scaffold446 | 256427                  | GG                              | AA                | 1946506862               |
| SNP_P3_120953_256473 | NW_004515916.1 | Scaffold446 | 256473                  | TT                              | AA                | 1946506863               |
| SNP_P3_120954_256488 | NW_004515916.1 | Scaffold446 | 256488                  | CC                              | AA                | 1946506865               |
| SNP_P3_120955_260083 | NW_004515916.1 | Scaffold446 | 260083                  | TT                              | CC                | 1946506866               |
| SNP_P3_120956_260614 | NW_004515916.1 | Scaffold446 | 260614                  | TT                              | AA                | 1946506868               |
| SNP_P3_120957_260875 | NW_004515916.1 | Scaffold446 | 260875                  | GG                              | AA                | 1946506869               |
| SNP_P3_120958_260939 | NW_004515916.1 | Scaffold446 | 260939                  | AA                              | CC                | 1946506871               |
| SNP_P3_120959_267440 | NW_004515916.1 | Scaffold446 | 267440                  | GG                              | AA                | 1946506873               |
| SNP_P3_120960_267595 | NW_004515916.1 | Scaffold446 | 267595                  | CC                              | TT                | 1946506874               |
| SNP_P3_120961_273660 | NW_004515916.1 | Scaffold446 | 273660                  | TT                              | AA                | 1946506877               |
| SNP_P3_120962_28901  | NW_004515917.1 | Scaffold450 | 28901                   | GG                              | TT                | 1946506878               |
| SNP_P3_120963_34648  | NW_004515917.1 | Scaffold450 | 34648                   | TT                              | GG                | 1946506880               |
| SNP_P3_120964_34651  | NW_004515917.1 | Scaffold450 | 34651                   | TT                              | GG                | 1946506881               |
| SNP_P3_120965_54535  | NW_004515917.1 | Scaffold450 | 54535                   | AA                              | CC                | 1946506883               |
| SNP_P3_120966_54561  | NW_004515917.1 | Scaffold450 | 54561                   | AA                              | CC                | 1946506884               |
| SNP_P3_120967_54641  | NW_004515917.1 | Scaffold450 | 54641                   | CC                              | TT                | 1946506886               |
| SNP_P3_120968_54648  | NW_004515917.1 | Scaffold450 | 54648                   | GG                              | AA                | 1946506887               |
| SNP_P3_120969_54815  | NW_004515917.1 | Scaffold450 | 54815                   | AA                              | GG                | 1946506889               |
| SNP_P3_120970_72900  | NW_004515917.1 | Scaffold450 | 72900                   | GG                              | AA                | 1946506890               |
| SNP_P3_120971_77408  | NW_004515917.1 | Scaffold450 | 77408                   | AA                              | GG                | 1946506892               |
| SNP_P3_120972_92463  | NW_004515917.1 | Scaffold450 | 92463                   | AA                              | GG                | 1946506893               |
| SNP_P3_120973_92480  | NW_004515917.1 | Scaffold450 | 92480                   | TT                              | CC                | 1946506895               |
| SNP_P3_120974_92488  | NW_004515917.1 | Scaffold450 | 92488                   | AA                              | CC                | 1946506896               |
| SNP_P3_120976_92513  | NW_004515917.1 | Scaffold450 | 92513                   | AA                              | GG                | 1946506898               |
| SNP_P3_120977_93026  | NW_004515917.1 | Scaffold450 | 93026                   | GG                              | AA                | 1946506899               |
| SNP_P3_120978_104339 | NW_004515917.1 | Scaffold450 | 104339                  | TT                              | CC                | 1946506901               |

| SNPs IDs             | Chromosome IDs | Chromosomes | Physical positions (bp) | CDC Frontier (Reference genome) | (Pusa 256 & HPNB) | NCBI SNPdb Accession IDs |
|----------------------|----------------|-------------|-------------------------|---------------------------------|-------------------|--------------------------|
| SNP_P3_120979_104348 | NW_004515917.1 | Scaffold450 | 104348                  | AA                              | CC                | 1946506902               |
| SNP_P3_120980_105025 | NW_004515917.1 | Scaffold450 | 105025                  | GG                              | AA                | 1946506904               |
| SNP_P3_120981_108470 | NW_004515917.1 | Scaffold450 | 108470                  | TT                              | CC                | 1946506905               |
| SNP_P3_120983_108803 | NW_004515917.1 | Scaffold450 | 108803                  | AA                              | GG                | 1946506907               |
| SNP_P3_120984_119280 | NW_004515917.1 | Scaffold450 | 119280                  | AA                              | GG                | 1946506908               |
| SNP_P3_120985_129957 | NW_004515917.1 | Scaffold450 | 129957                  | AA                              | CC                | 1946506910               |
| SNP_P3_120986_129996 | NW_004515917.1 | Scaffold450 | 129996                  | AA                              | TT                | 1946506911               |
| SNP_P3_120987_131767 | NW_004515917.1 | Scaffold450 | 131767                  | TT                              | CC                | 1946506913               |
| SNP_P3_120988_131826 | NW_004515917.1 | Scaffold450 | 131826                  | TT                              | CC                | 1946506914               |
| SNP_P3_120989_131854 | NW_004515917.1 | Scaffold450 | 131854                  | AA                              | TT                | 1946506916               |
| SNP_P3_120990_132134 | NW_004515917.1 | Scaffold450 | 132134                  | AA                              | GG                | 1946506917               |
| SNP_P3_120991_133781 | NW_004515917.1 | Scaffold450 | 133781                  | CC                              | AA                | 1946506919               |
| SNP_P3_120992_133792 | NW_004515917.1 | Scaffold450 | 133792                  | CC                              | TT                | 1946506920               |
| SNP_P3_120993_133829 | NW_004515917.1 | Scaffold450 | 133829                  | AA                              | TT                | 1946506922               |
| SNP_P3_120994_133857 | NW_004515917.1 | Scaffold450 | 133857                  | AA                              | TT                | 1946506923               |
| SNP_P3_120995_134006 | NW_004515917.1 | Scaffold450 | 134006                  | AA                              | GG                | 1946506925               |
| SNP_P3_120996_134024 | NW_004515917.1 | Scaffold450 | 134024                  | AA                              | CC                | 1946506926               |
| SNP_P3_120997_134051 | NW_004515917.1 | Scaffold450 | 134051                  | AA                              | GG                | 1946506928               |
| SNP_P3_120998_152631 | NW_004515917.1 | Scaffold450 | 152631                  | CC                              | TT                | 1946506929               |
| SNP_P3_120999_152961 | NW_004515917.1 | Scaffold450 | 152961                  | TT                              | CC                | 1946506931               |
| SNP_P3_121000_177899 | NW_004515917.1 | Scaffold450 | 177899                  | TT                              | AA                | 1946506932               |
| SNP_P3_121001_178216 | NW_004515917.1 | Scaffold450 | 178216                  | CC                              | AA                | 1946506934               |
| SNP_P3_121002_178222 | NW_004515917.1 | Scaffold450 | 178222                  | AA                              | GG                | 1946506935               |
| SNP_P3_121003_197068 | NW_004515917.1 | Scaffold450 | 197068                  | CC                              | TT                | 1946506937               |
| SNP_P3_121004_197097 | NW_004515917.1 | Scaffold450 | 197097                  | CC                              | TT                | 1946506938               |
| SNP_P3_121005_235349 | NW_004515917.1 | Scaffold450 | 235349                  | TT                              | CC                | 1946506940               |
| SNP_P3_121006_235436 | NW_004515917.1 | Scaffold450 | 235436                  | AA                              | GG                | 1946506941               |
| SNP_P3_121007_235449 | NW_004515917.1 | Scaffold450 | 235449                  | AA                              | GG                | 1946506943               |
| SNP_P3_121008_235459 | NW_004515917.1 | Scaffold450 | 235459                  | CC                              | AA                | 1946506944               |
| SNP_P3_121009_235488 | NW_004515917.1 | Scaffold450 | 235488                  | GG                              | AA                | 1946506946               |
| SNP_P3_121010_235582 | NW_004515917.1 | Scaffold450 | 235582                  | TT                              | AA                | 1946506947               |
| SNP_P3_121011_235588 | NW_004515917.1 | Scaffold450 | 235588                  | TT                              | CC                | 1946506954               |
| SNP_P3_121012_235598 | NW_004515917.1 | Scaffold450 | 235598                  | AA                              | TT                | 1946506955               |
| SNP_P3_121013_235752 | NW_004515917.1 | Scaffold450 | 235752                  | CC                              | GG                | 1946506957               |
| SNP_P3_121014_235789 | NW_004515917.1 | Scaffold450 | 235789                  | TT                              | CC                | 1946506958               |
| SNP_P3_121015_235811 | NW_004515917.1 | Scaffold450 | 235811                  | AA                              | GG                | 1946506960               |
| SNP_P3_121016_236257 | NW_004515917.1 | Scaffold450 | 236257                  | TT                              | GG                | 1946506961               |
| SNP_P3_121017_241307 | NW_004515917.1 | Scaffold450 | 241307                  | AA                              | GG                | 1946506963               |
| SNP_P3_121018_241310 | NW_004515917.1 | Scaffold450 | 241310                  | AA                              | CC                | 1946506964               |
| SNP_P3_121019_241580 | NW_004515917.1 | Scaffold450 | 241580                  | GG                              | AA                | 1946506966               |
| SNP_P3_121020_241627 | NW_004515917.1 | Scaffold450 | 241627                  | TT                              | CC                | 1946506967               |
| SNP_P3_121022_326903 | NW_004515917.1 | Scaffold450 | 326903                  | GG                              | AA                | 1946506969               |

| SNPs IDs             | Chromosome IDs | Chromosomes | Physical positions (bp) | CDC Frontier (Reference genome) | (Pusa 256 & HPNB) | NCBI SNPdb Accession IDs |
|----------------------|----------------|-------------|-------------------------|---------------------------------|-------------------|--------------------------|
| SNP_P3_121023_407901 | NW_004515917.1 | Scaffold450 | 407901                  | CC                              | TT                | 1946506970               |
| SNP_P3_121024_408083 | NW_004515917.1 | Scaffold450 | 408083                  | TT                              | CC                | 1946506972               |
| SNP_P3_121026_416458 | NW_004515917.1 | Scaffold450 | 416458                  | GG                              | TT                | 1946506973               |
| SNP_P3_121027_427885 | NW_004515917.1 | Scaffold450 | 427885                  | TT                              | CC                | 1946506975               |
| SNP_P3_121028_431984 | NW_004515917.1 | Scaffold450 | 431984                  | AA                              | CC                | 1946506976               |
| SNP_P3_121029_447784 | NW_004515917.1 | Scaffold450 | 447784                  | CC                              | TT                | 1946506978               |
| SNP_P3_121030_459117 | NW_004515917.1 | Scaffold450 | 459117                  | TT                              | AA                | 1946506979               |
| SNP_P3_121031_459242 | NW_004515917.1 | Scaffold450 | 459242                  | TT                              | CC                | 1946506981               |
| SNP_P3_121032_459339 | NW_004515917.1 | Scaffold450 | 459339                  | GG                              | TT                | 1946506982               |
| SNP_P3_121033_470142 | NW_004515917.1 | Scaffold450 | 470142                  | CC                              | TT                | 1946506983               |
| SNP_P3_121034_470596 | NW_004515917.1 | Scaffold450 | 470596                  | TT                              | CC                | 1946506985               |
| SNP_P3_121035_470604 | NW_004515917.1 | Scaffold450 | 470604                  | GG                              | AA                | 1946506986               |
| SNP_P3_121036_471020 | NW_004515917.1 | Scaffold450 | 471020                  | AA                              | GG                | 1946506988               |
| SNP_P3_121037_471047 | NW_004515917.1 | Scaffold450 | 471047                  | TT                              | CC                | 1946506990               |
| SNP_P3_121038_471071 | NW_004515917.1 | Scaffold450 | 471071                  | GG                              | TT                | 1946506991               |
| SNP_P3_121039_471908 | NW_004515917.1 | Scaffold450 | 471908                  | CC                              | TT                | 1946506993               |
| SNP_P3_121040_476131 | NW_004515917.1 | Scaffold450 | 476131                  | AA                              | GG                | 1946506994               |
| SNP_P3_121041_482219 | NW_004515917.1 | Scaffold450 | 482219                  | TT                              | GG                | 1946506996               |
| SNP_P3_121042_482228 | NW_004515917.1 | Scaffold450 | 482228                  | TT                              | GG                | 1946506997               |
| SNP_P3_121043_482276 | NW_004515917.1 | Scaffold450 | 482276                  | GG                              | AA                | 1946506999               |
| SNP_P3_121044_482624 | NW_004515917.1 | Scaffold450 | 482624                  | AA                              | CC                | 1946507000               |
| SNP_P3_121045_489015 | NW_004515917.1 | Scaffold450 | 489015                  | GG                              | CC                | 1946507002               |
| SNP_P3_121046_496082 | NW_004515917.1 | Scaffold450 | 496082                  | TT                              | AA                | 1946507003               |
| SNP_P3_121047_496319 | NW_004515917.1 | Scaffold450 | 496319                  | GG                              | AA                | 1946507005               |
| SNP_P3_121048_496335 | NW_004515917.1 | Scaffold450 | 496335                  | AA                              | GG                | 1946507007               |
| SNP_P3_121049_498689 | NW_004515917.1 | Scaffold450 | 498689                  | TT                              | AA                | 1946507008               |
| SNP_P3_121050_499127 | NW_004515917.1 | Scaffold450 | 499127                  | TT                              | GG                | 1946507010               |
| SNP_P3_121051_499227 | NW_004515917.1 | Scaffold450 | 499227                  | TT                              | AA                | 1946507011               |
| SNP_P3_121052_508966 | NW_004515917.1 | Scaffold450 | 508966                  | TT                              | AA                | 1946507013               |
| SNP_P3_121053_509559 | NW_004515917.1 | Scaffold450 | 509559                  | GG                              | TT                | 1946507014               |
| SNP_P3_121054_509562 | NW_004515917.1 | Scaffold450 | 509562                  | GG                              | TT                | 1946507016               |
| SNP_P3_121055_509691 | NW_004515917.1 | Scaffold450 | 509691                  | AA                              | TT                | 1946507018               |
| SNP_P3_121056_509727 | NW_004515917.1 | Scaffold450 | 509727                  | TT                              | CC                | 1946507019               |
| SNP_P3_121057_509740 | NW_004515917.1 | Scaffold450 | 509740                  | AA                              | CC                | 1946507020               |
| SNP_P3_121058_509829 | NW_004515917.1 | Scaffold450 | 509829                  | GG                              | CC                | 1946507022               |
| SNP_P3_121059_509940 | NW_004515917.1 | Scaffold450 | 509940                  | TT                              | AA                | 1946507024               |
| SNP_P3_121060_509958 | NW_004515917.1 | Scaffold450 | 509958                  | CC                              | TT                | 1946507025               |
| SNP_P3_121061_509959 | NW_004515917.1 | Scaffold450 | 509959                  | AA                              | GG                | 1946507027               |
| SNP_P3_121062_510026 | NW_004515917.1 | Scaffold450 | 510026                  | CC                              | TT                | 1946507028               |
| SNP_P3_121063_510080 | NW_004515917.1 | Scaffold450 | 510080                  | TT                              | AA                | 1946507029               |
| SNP_P3_121064_510397 | NW_004515917.1 | Scaffold450 | 510397                  | AA                              | GG                | 1946507031               |
| SNP_P3_121065_510474 | NW_004515917.1 | Scaffold450 | 510474                  | AA                              | TT                | 1946507032               |

| SNPs IDs             | Chromosome IDs | Chromosomes | Physical positions (bp) | CDC Frontier (Reference genome) | (Pusa 256 & HPNB) | NCBI SNPdb Accession IDs |
|----------------------|----------------|-------------|-------------------------|---------------------------------|-------------------|--------------------------|
| SNP_P3_121066_510519 | NW_004515917.1 | Scaffold450 | 510519                  | AA                              | GG                | 1946507034               |
| SNP_P3_121067_510564 | NW_004515917.1 | Scaffold450 | 510564                  | CC                              | GG                | 1946507035               |
| SNP_P3_121068_510610 | NW_004515917.1 | Scaffold450 | 510610                  | CC                              | GG                | 1946507037               |
| SNP_P3_121069_511295 | NW_004515917.1 | Scaffold450 | 511295                  | GG                              | TT                | 1946507038               |
| SNP_P3_121070_514145 | NW_004515917.1 | Scaffold450 | 514145                  | TT                              | GG                | 1946507040               |
| SNP_P3_121071_514197 | NW_004515917.1 | Scaffold450 | 514197                  | TT                              | AA                | 1946507041               |
| SNP_P3_121073_515928 | NW_004515917.1 | Scaffold450 | 515928                  | AA                              | GG                | 1946507043               |
| SNP_P3_121074_515950 | NW_004515917.1 | Scaffold450 | 515950                  | GG                              | AA                | 1946507044               |
| SNP_P3_121075_515955 | NW_004515917.1 | Scaffold450 | 515955                  | CC                              | AA                | 1946507045               |
| SNP_P3_121076_516210 | NW_004515917.1 | Scaffold450 | 516210                  | GG                              | AA                | 1946507046               |
| SNP_P3_121077_516225 | NW_004515917.1 | Scaffold450 | 516225                  | AA                              | TT                | 1946507047               |
| SNP_P3_121078_516226 | NW_004515917.1 | Scaffold450 | 516226                  | CC                              | TT                | 1946507048               |
| SNP_P3_121079_516255 | NW_004515917.1 | Scaffold450 | 516255                  | CC                              | AA                | 1946507049               |
| SNP_P3_121080_516280 | NW_004515917.1 | Scaffold450 | 516280                  | TT                              | GG                | 1946507051               |
| SNP_P3_121081_516431 | NW_004515917.1 | Scaffold450 | 516431                  | GG                              | AA                | 1946507052               |
| SNP_P3_121082_517418 | NW_004515917.1 | Scaffold450 | 517418                  | TT                              | AA                | 1946507054               |
| SNP_P3_121083_517807 | NW_004515917.1 | Scaffold450 | 517807                  | TT                              | CC                | 1946507055               |
| SNP_P3_121084_518361 | NW_004515917.1 | Scaffold450 | 518361                  | AA                              | CC                | 1946507057               |
| SNP_P3_121085_518410 | NW_004515917.1 | Scaffold450 | 518410                  | GG                              | AA                | 1946507058               |
| SNP_P3_121086_518418 | NW_004515917.1 | Scaffold450 | 518418                  | CC                              | TT                | 1946507060               |
| SNP_P3_121087_518460 | NW_004515917.1 | Scaffold450 | 518460                  | AA                              | GG                | 1946507061               |
| SNP_P3_121088_518561 | NW_004515917.1 | Scaffold450 | 518561                  | TT                              | CC                | 1946507063               |
| SNP_P3_121089_518751 | NW_004515917.1 | Scaffold450 | 518751                  | CC                              | GG                | 1946507064               |
| SNP_P3_121090_518791 | NW_004515917.1 | Scaffold450 | 518791                  | CC                              | TT                | 1946507066               |
| SNP_P3_121091_518792 | NW_004515917.1 | Scaffold450 | 518792                  | GG                              | AA                | 1946507067               |
| SNP_P3_121092_522272 | NW_004515917.1 | Scaffold450 | 522272                  | AA                              | GG                | 1946507069               |
| SNP_P3_121093_1328   | NW_004515918.1 | Scaffold451 | 1328                    | TT                              | CC                | 1946507070               |
| SNP_P3_121094_1716   | NW_004515918.1 | Scaffold451 | 1716                    | AA                              | CC                | 1946507071               |
| SNP_P3_121095_5632   | NW_004515918.1 | Scaffold451 | 5632                    | GG                              | TT                | 1946507073               |
| SNP_P3_121097_15745  | NW_004515918.1 | Scaffold451 | 15745                   | TT                              | CC                | 1946507074               |
| SNP_P3_121098_17220  | NW_004515918.1 | Scaffold451 | 17220                   | TT                              | CC                | 1946507076               |
| SNP_P3_121100_17683  | NW_004515918.1 | Scaffold451 | 17683                   | CC                              | TT                | 1946507077               |
| SNP_P3_121101_19210  | NW_004515918.1 | Scaffold451 | 19210                   | AA                              | GG                | 1946507079               |
| SNP_P3_121102_21160  | NW_004515918.1 | Scaffold451 | 21160                   | CC                              | TT                | 1946507080               |
| SNP_P3_121103_21183  | NW_004515918.1 | Scaffold451 | 21183                   | AA                              | TT                | 1946507082               |
| SNP_P3_121104_21261  | NW_004515918.1 | Scaffold451 | 21261                   | TT                              | CC                | 1946507083               |
| SNP_P3_121105_21267  | NW_004515918.1 | Scaffold451 | 21267                   | AA                              | CC                | 1946507084               |
| SNP_P3_121106_21281  | NW_004515918.1 | Scaffold451 | 21281                   | AA                              | GG                | 1946507086               |
| SNP_P3_121107_21399  | NW_004515918.1 | Scaffold451 | 21399                   | TT                              | GG                | 1946507087               |
| SNP_P3_121108_23132  | NW_004515918.1 | Scaffold451 | 23132                   | CC                              | TT                | 1946507089               |
| SNP_P3_121109_23414  | NW_004515918.1 | Scaffold451 | 23414                   | TT                              | CC                | 1946507090               |
| SNP_P3_121110_25315  | NW_004515918.1 | Scaffold451 | 25315                   | TT                              | CC                | 1946507092               |

| SNPs IDs             | Chromosome IDs | Chromosomes | Physical positions (bp) | CDC Frontier (Reference genome) | (Pusa 256 & HPNB) | NCBI SNPdb Accession IDs |
|----------------------|----------------|-------------|-------------------------|---------------------------------|-------------------|--------------------------|
| SNP_P3_121111_27437  | NW_004515918.1 | Scaffold451 | 27437                   | AA                              | TT                | 1946507093               |
| SNP_P3_121112_28622  | NW_004515918.1 | Scaffold451 | 28622                   | GG                              | AA                | 1946507095               |
| SNP_P3_121113_30914  | NW_004515918.1 | Scaffold451 | 30914                   | AA                              | GG                | 1946507096               |
| SNP_P3_121114_30948  | NW_004515918.1 | Scaffold451 | 30948                   | TT                              | CC                | 1946507098               |
| SNP_P3_121115_30986  | NW_004515918.1 | Scaffold451 | 30986                   | CC                              | TT                | 1946507099               |
| SNP_P3_121116_31296  | NW_004515918.1 | Scaffold451 | 31296                   | GG                              | AA                | 1946507100               |
| SNP_P3_121118_34663  | NW_004515918.1 | Scaffold451 | 34663                   | CC                              | GG                | 1946507102               |
| SNP_P3_121119_34677  | NW_004515918.1 | Scaffold451 | 34677                   | GG                              | TT                | 1946507104               |
| SNP_P3_121120_43680  | NW_004515918.1 | Scaffold451 | 43680                   | GG                              | TT                | 1946507105               |
| SNP_P3_121121_54061  | NW_004515918.1 | Scaffold451 | 54061                   | AA                              | GG                | 1946507107               |
| SNP_P3_121122_60882  | NW_004515918.1 | Scaffold451 | 60882                   | TT                              | CC                | 1946507108               |
| SNP_P3_121123_61228  | NW_004515918.1 | Scaffold451 | 61228                   | AA                              | CC                | 1946507110               |
| SNP_P3_121125_64904  | NW_004515918.1 | Scaffold451 | 64904                   | AA                              | TT                | 1946507111               |
| SNP_P3_121126_65509  | NW_004515918.1 | Scaffold451 | 65509                   | TT                              | GG                | 1946507113               |
| SNP_P3_121127_73771  | NW_004515918.1 | Scaffold451 | 73771                   | GG                              | AA                | 1946507114               |
| SNP_P3_121128_74128  | NW_004515918.1 | Scaffold451 | 74128                   | CC                              | TT                | 1946507116               |
| SNP_P3_121129_74148  | NW_004515918.1 | Scaffold451 | 74148                   | TT                              | CC                | 1946507117               |
| SNP_P3_121130_77880  | NW_004515918.1 | Scaffold451 | 77880                   | AA                              | GG                | 1946507119               |
| SNP_P3_121131_77890  | NW_004515918.1 | Scaffold451 | 77890                   | AA                              | CC                | 1946507120               |
| SNP_P3_121132_77904  | NW_004515918.1 | Scaffold451 | 77904                   | AA                              | GG                | 1946507122               |
| SNP_P3_121133_77905  | NW_004515918.1 | Scaffold451 | 77905                   | CC                              | TT                | 1946507124               |
| SNP_P3_121134_78241  | NW_004515918.1 | Scaffold451 | 78241                   | GG                              | AA                | 1946507125               |
| SNP_P3_121135_78357  | NW_004515918.1 | Scaffold451 | 78357                   | TT                              | CC                | 1946507127               |
| SNP_P3_121136_78426  | NW_004515918.1 | Scaffold451 | 78426                   | AA                              | GG                | 1946507128               |
| SNP_P3_121137_135299 | NW_004515918.1 | Scaffold451 | 135299                  | CC                              | TT                | 1946507130               |
| SNP_P3_121138_142890 | NW_004515918.1 | Scaffold451 | 142890                  | AA                              | GG                | 1946507132               |
| SNP_P3_121139_194799 | NW_004515918.1 | Scaffold451 | 194799                  | GG                              | AA                | 1946507133               |
| SNP_P3_121140_199807 | NW_004515918.1 | Scaffold451 | 199807                  | AA                              | GG                | 1946507135               |
| SNP_P3_121141_199830 | NW_004515918.1 | Scaffold451 | 199830                  | TT                              | CC                | 1946507136               |
| SNP_P3_121142_202900 | NW_004515918.1 | Scaffold451 | 202900                  | CC                              | AA                | 1946507138               |
| SNP_P3_121143_226856 | NW_004515918.1 | Scaffold451 | 226856                  | TT                              | AA                | 1946507139               |
| SNP_P3_121144_275519 | NW_004515918.1 | Scaffold451 | 275519                  | CC                              | AA                | 1946507141               |
| SNP_P3_121145_275520 | NW_004515918.1 | Scaffold451 | 275520                  | TT                              | GG                | 1946507143               |
| SNP_P3_121147_320597 | NW_004515918.1 | Scaffold451 | 320597                  | TT                              | GG                | 1946507144               |
| SNP_P3_121149_326460 | NW_004515918.1 | Scaffold451 | 326460                  | CC                              | TT                | 1946507146               |
| SNP_P3_121150_326681 | NW_004515918.1 | Scaffold451 | 326681                  | GG                              | TT                | 1946507147               |
| SNP_P3_121151_326690 | NW_004515918.1 | Scaffold451 | 326690                  | TT                              | GG                | 1946507149               |
| SNP_P3_121152_334249 | NW_004515918.1 | Scaffold451 | 334249                  | GG                              | AA                | 1946507150               |
| SNP_P3_121153_334286 | NW_004515918.1 | Scaffold451 | 334286                  | TT                              | AA                | 1946507152               |
| SNP_P3_121154_334287 | NW_004515918.1 | Scaffold451 | 334287                  | AA                              | TT                | 1946507154               |
| SNP_P3_121155_334289 | NW_004515918.1 | Scaffold451 | 334289                  | TT                              | AA                | 1946507155               |
| SNP_P3_121156_343741 | NW_004515918.1 | Scaffold451 | 343741                  | GG                              | TT                | 1946507157               |

| SNPs IDs             | Chromosome IDs | Chromosomes | Physical positions (bp) | CDC Frontier (Reference genome) | (Pusa 256 & HPNB) | NCBI SNPdb Accession IDs |
|----------------------|----------------|-------------|-------------------------|---------------------------------|-------------------|--------------------------|
| SNP_P3_121157_349791 | NW_004515918.1 | Scaffold451 | 349791                  | TT                              | AA                | 1946507158               |
| SNP_P3_121158_378359 | NW_004515918.1 | Scaffold451 | 378359                  | CC                              | TT                | 1946507160               |
| SNP_P3_121160_388867 | NW_004515918.1 | Scaffold451 | 388867                  | TT                              | AA                | 1946507162               |
| SNP_P3_121161_390298 | NW_004515918.1 | Scaffold451 | 390298                  | CC                              | TT                | 1946507163               |
| SNP_P3_121162_390308 | NW_004515918.1 | Scaffold451 | 390308                  | TT                              | CC                | 1946507165               |
| SNP_P3_121163_390325 | NW_004515918.1 | Scaffold451 | 390325                  | GG                              | TT                | 1946507167               |
| SNP_P3_121164_390364 | NW_004515918.1 | Scaffold451 | 390364                  | CC                              | AA                | 1946507169               |
| SNP_P3_121165_390487 | NW_004515918.1 | Scaffold451 | 390487                  | TT                              | GG                | 1946507171               |
| SNP_P3_121166_390693 | NW_004515918.1 | Scaffold451 | 390693                  | CC                              | TT                | 1946507172               |
| SNP_P3_121167_390709 | NW_004515918.1 | Scaffold451 | 390709                  | AA                              | CC                | 1946507220               |
| SNP_P3_121168_394413 | NW_004515918.1 | Scaffold451 | 394413                  | AA                              | GG                | 1946507222               |
| SNP_P3_121169_394571 | NW_004515918.1 | Scaffold451 | 394571                  | TT                              | GG                | 1946507224               |
| SNP_P3_121170_417196 | NW_004515918.1 | Scaffold451 | 417196                  | CC                              | TT                | 1946507225               |
| SNP_P3_121171_449732 | NW_004515918.1 | Scaffold451 | 449732                  | GG                              | AA                | 1946507227               |
| SNP_P3_121172_477921 | NW_004515918.1 | Scaffold451 | 477921                  | AA                              | GG                | 1946507228               |
| SNP_P3_121173_492164 | NW_004515918.1 | Scaffold451 | 492164                  | GG                              | AA                | 1946507230               |
| SNP_P3_121174_519514 | NW_004515918.1 | Scaffold451 | 519514                  | CC                              | TT                | 1946507231               |
| SNP_P3_121175_2564   | NW_004515919.1 | Scaffold452 | 2564                    | TT                              | CC                | 1946507232               |
| SNP_P3_121176_2718   | NW_004515919.1 | Scaffold452 | 2718                    | CC                              | TT                | 1946507234               |
| SNP_P3_121177_2880   | NW_004515919.1 | Scaffold452 | 2880                    | CC                              | AA                | 1946507235               |
| SNP_P3_121178_3163   | NW_004515919.1 | Scaffold452 | 3163                    | TT                              | CC                | 1946507237               |
| SNP_P3_121179_4618   | NW_004515919.1 | Scaffold452 | 4618                    | AA                              | TT                | 1946507238               |
| SNP_P3_121180_6374   | NW_004515919.1 | Scaffold452 | 6374                    | TT                              | GG                | 1946507240               |
| SNP_P3_121181_7192   | NW_004515919.1 | Scaffold452 | 7192                    | AA                              | CC                | 1946507241               |
| SNP_P3_121182_7194   | NW_004515919.1 | Scaffold452 | 7194                    | AA                              | GG                | 1946507243               |
| SNP_P3_121184_7231   | NW_004515919.1 | Scaffold452 | 7231                    | TT                              | GG                | 1946507244               |
| SNP_P3_121185_6752   | NW_004515920.1 | Scaffold453 | 6752                    | AA                              | TT                | 1946507246               |
| SNP_P3_121186_13138  | NW_004515920.1 | Scaffold453 | 13138                   | CC                              | TT                | 1946507247               |
| SNP_P3_121187_20001  | NW_004515920.1 | Scaffold453 | 20001                   | GG                              | TT                | 1946507249               |
| SNP_P3_121188_20044  | NW_004515920.1 | Scaffold453 | 20044                   | CC                              | TT                | 1946507250               |
| SNP_P3_121189_20051  | NW_004515920.1 | Scaffold453 | 20051                   | AA                              | CC                | 1946507252               |
| SNP_P3_121190_20104  | NW_004515920.1 | Scaffold453 | 20104                   | TT                              | GG                | 1946507253               |
| SNP_P3_121191_20142  | NW_004515920.1 | Scaffold453 | 20142                   | CC                              | AA                | 1946507255               |
| SNP_P3_121192_20156  | NW_004515920.1 | Scaffold453 | 20156                   | AA                              | GG                | 1946507256               |
| SNP_P3_121193_20248  | NW_004515920.1 | Scaffold453 | 20248                   | AA                              | CC                | 1946507258               |
| SNP_P3_121194_20253  | NW_004515920.1 | Scaffold453 | 20253                   | TT                              | CC                | 1946507259               |
| SNP_P3_121195_20422  | NW_004515920.1 | Scaffold453 | 20422                   | TT                              | CC                | 1946507261               |
| SNP_P3_121196_20585  | NW_004515920.1 | Scaffold453 | 20585                   | AA                              | GG                | 1946507262               |
| SNP_P3_121197_76958  | NW_004515920.1 | Scaffold453 | 76958                   | GG                              | AA                | 1946507264               |
| SNP_P3_121198_77253  | NW_004515920.1 | Scaffold453 | 77253                   | GG                              | AA                | 1946507265               |
| SNP_P3_121199_78843  | NW_004515920.1 | Scaffold453 | 78843                   | CC                              | TT                | 1946507267               |
| SNP_P3_121200_78879  | NW_004515920.1 | Scaffold453 | 78879                   | AA                              | CC                | 1946507268               |



| SNPs IDs             | Chromosome IDs | Chromosomes | Physical positions (bp) | CDC Frontier (Reference genome) | (Pusa 256 & HPNB) | NCBI SNPdb Accession IDs |
|----------------------|----------------|-------------|-------------------------|---------------------------------|-------------------|--------------------------|
| SNP_P3_121201_78905  | NW_004515920.1 | Scaffold453 | 78905                   | AA                              | GG                | 1946507270               |
| SNP_P3_121203_79708  | NW_004515920.1 | Scaffold453 | 79708                   | AA                              | CC                | 1946507271               |
| SNP_P3_121204_79728  | NW_004515920.1 | Scaffold453 | 79728                   | AA                              | CC                | 1946507273               |
| SNP_P3_121206_80263  | NW_004515920.1 | Scaffold453 | 80263                   | AA                              | GG                | 1946507274               |
| SNP_P3_121207_80304  | NW_004515920.1 | Scaffold453 | 80304                   | AA                              | TT                | 1946507276               |
| SNP_P3_121208_80333  | NW_004515920.1 | Scaffold453 | 80333                   | TT                              | CC                | 1946507277               |
| SNP_P3_121209_80350  | NW_004515920.1 | Scaffold453 | 80350                   | AA                              | CC                | 1946507278               |
| SNP_P3_121210_80402  | NW_004515920.1 | Scaffold453 | 80402                   | AA                              | TT                | 1946507280               |
| SNP_P3_121211_80407  | NW_004515920.1 | Scaffold453 | 80407                   | GG                              | AA                | 1946507281               |
| SNP_P3_121212_84962  | NW_004515920.1 | Scaffold453 | 84962                   | TT                              | CC                | 1946507283               |
| SNP_P3_121213_107877 | NW_004515920.1 | Scaffold453 | 107877                  | AA                              | GG                | 1946507284               |
| SNP_P3_121214_134614 | NW_004515920.1 | Scaffold453 | 134614                  | TT                              | CC                | 1946507286               |
| SNP_P3_121216_148678 | NW_004515920.1 | Scaffold453 | 148678                  | CC                              | TT                | 1946507287               |
| SNP_P3_121217_167827 | NW_004515920.1 | Scaffold453 | 167827                  | TT                              | GG                | 1946507289               |
| SNP_P3_121218_206421 | NW_004515920.1 | Scaffold453 | 206421                  | TT                              | GG                | 1946507290               |
| SNP_P3_121219_209999 | NW_004515920.1 | Scaffold453 | 209999                  | TT                              | GG                | 1946507292               |
| SNP_P3_121220_235200 | NW_004515920.1 | Scaffold453 | 235200                  | GG                              | TT                | 1946507293               |
| SNP_P3_121221_256448 | NW_004515920.1 | Scaffold453 | 256448                  | CC                              | TT                | 1946507295               |
| SNP_P3_121222_269574 | NW_004515920.1 | Scaffold453 | 269574                  | TT                              | CC                | 1946507296               |
| SNP_P3_121223_293444 | NW_004515920.1 | Scaffold453 | 293444                  | AA                              | GG                | 1946507298               |
| SNP_P3_121224_296348 | NW_004515920.1 | Scaffold453 | 296348                  | TT                              | AA                | 1946507299               |
| SNP_P3_121225_296560 | NW_004515920.1 | Scaffold453 | 296560                  | GG                              | AA                | 1946507301               |
| SNP_P3_121226_296589 | NW_004515920.1 | Scaffold453 | 296589                  | TT                              | GG                | 1946507302               |
| SNP_P3_121227_296628 | NW_004515920.1 | Scaffold453 | 296628                  | GG                              | TT                | 1946507304               |
| SNP_P3_121228_296678 | NW_004515920.1 | Scaffold453 | 296678                  | AA                              | GG                | 1946507305               |
| SNP_P3_121229_296679 | NW_004515920.1 | Scaffold453 | 296679                  | GG                              | AA                | 1946507307               |
| SNP_P3_121231_306007 | NW_004515920.1 | Scaffold453 | 306007                  | AA                              | GG                | 1946507309               |
| SNP_P3_121232_314415 | NW_004515920.1 | Scaffold453 | 314415                  | AA                              | GG                | 1946507310               |
| SNP_P3_121233_339020 | NW_004515920.1 | Scaffold453 | 339020                  | TT                              | AA                | 1946507312               |
| SNP_P3_121234_359747 | NW_004515920.1 | Scaffold453 | 359747                  | AA                              | TT                | 1946507313               |
| SNP_P3_121235_385127 | NW_004515920.1 | Scaffold453 | 385127                  | GG                              | TT                | 1946507315               |
| SNP_P3_121236_385204 | NW_004515920.1 | Scaffold453 | 385204                  | TT                              | CC                | 1946507316               |
| SNP_P3_121237_385639 | NW_004515920.1 | Scaffold453 | 385639                  | AA                              | GG                | 1946507318               |
| SNP_P3_121238_386233 | NW_004515920.1 | Scaffold453 | 386233                  | AA                              | GG                | 1946507319               |
| SNP_P3_121239_386301 | NW_004515920.1 | Scaffold453 | 386301                  | AA                              | CC                | 1946507321               |
| SNP_P3_121240_386389 | NW_004515920.1 | Scaffold453 | 386389                  | TT                              | CC                | 1946507322               |
| SNP_P3_121241_388126 | NW_004515920.1 | Scaffold453 | 388126                  | CC                              | TT                | 1946507324               |
| SNP_P3_121242_390035 | NW_004515920.1 | Scaffold453 | 390035                  | CC                              | TT                | 1946507325               |
| SNP_P3_121243_390076 | NW_004515920.1 | Scaffold453 | 390076                  | GG                              | AA                | 1946507327               |
| SNP_P3_121244_390079 | NW_004515920.1 | Scaffold453 | 390079                  | CC                              | TT                | 1946507328               |
| SNP_P3_121245_398687 | NW_004515920.1 | Scaffold453 | 398687                  | GG                              | TT                | 1946507330               |
| SNP_P3_121246_401466 | NW_004515920.1 | Scaffold453 | 401466                  | AA                              | GG                | 1946507331               |

| SNPs IDs             | Chromosome IDs | Chromosomes | Physical positions (bp) | CDC Frontier (Reference genome) | (Pusa 256 & HPNB) | NCBI SNPdb Accession IDs |
|----------------------|----------------|-------------|-------------------------|---------------------------------|-------------------|--------------------------|
| SNP_P3_121247_401577 | NW_004515920.1 | Scaffold453 | 401577                  | TT                              | CC                | 1946507333               |
| SNP_P3_121248_401860 | NW_004515920.1 | Scaffold453 | 401860                  | TT                              | CC                | 1946507334               |
| SNP_P3_121249_401879 | NW_004515920.1 | Scaffold453 | 401879                  | TT                              | CC                | 1946507335               |
| SNP_P3_121250_401913 | NW_004515920.1 | Scaffold453 | 401913                  | CC                              | TT                | 1946507337               |
| SNP_P3_121251_401919 | NW_004515920.1 | Scaffold453 | 401919                  | TT                              | AA                | 1946507338               |
| SNP_P3_121252_401941 | NW_004515920.1 | Scaffold453 | 401941                  | TT                              | CC                | 1946507340               |
| SNP_P3_121253_402547 | NW_004515920.1 | Scaffold453 | 402547                  | GG                              | TT                | 1946507341               |
| SNP_P3_121254_405692 | NW_004515920.1 | Scaffold453 | 405692                  | GG                              | AA                | 1946507343               |
| SNP_P3_121255_405694 | NW_004515920.1 | Scaffold453 | 405694                  | TT                              | CC                | 1946507344               |
| SNP_P3_121256_410086 | NW_004515920.1 | Scaffold453 | 410086                  | CC                              | TT                | 1946507346               |
| SNP_P3_121258_453275 | NW_004515920.1 | Scaffold453 | 453275                  | TT                              | GG                | 1946507347               |
| SNP_P3_121259_466438 | NW_004515920.1 | Scaffold453 | 466438                  | AA                              | GG                | 1946507349               |
| SNP_P3_121260_468905 | NW_004515920.1 | Scaffold453 | 468905                  | TT                              | AA                | 1946507350               |
| SNP_P3_121261_469247 | NW_004515920.1 | Scaffold453 | 469247                  | TT                              | CC                | 1946507352               |
| SNP_P3_121262_471494 | NW_004515920.1 | Scaffold453 | 471494                  | GG                              | AA                | 1946507353               |
| SNP_P3_121263_495074 | NW_004515920.1 | Scaffold453 | 495074                  | GG                              | AA                | 1946507355               |
| SNP_P3_121264_495562 | NW_004515920.1 | Scaffold453 | 495562                  | GG                              | AA                | 1946507356               |
| SNP_P3_121266_497912 | NW_004515920.1 | Scaffold453 | 497912                  | CC                              | TT                | 1946507358               |
| SNP_P3_121267_498045 | NW_004515920.1 | Scaffold453 | 498045                  | AA                              | GG                | 1946507359               |
| SNP_P3_121268_498568 | NW_004515920.1 | Scaffold453 | 498568                  | GG                              | AA                | 1946507361               |
| SNP_P3_121269_498597 | NW_004515920.1 | Scaffold453 | 498597                  | GG                              | AA                | 1946507362               |
| SNP_P3_121270_498704 | NW_004515920.1 | Scaffold453 | 498704                  | CC                              | TT                | 1946507364               |
| SNP_P3_121273_500386 | NW_004515920.1 | Scaffold453 | 500386                  | AA                              | TT                | 1946507365               |
| SNP_P3_121274_500811 | NW_004515920.1 | Scaffold453 | 500811                  | AA                              | TT                | 1946507367               |
| SNP_P3_121275_500828 | NW_004515920.1 | Scaffold453 | 500828                  | TT                              | AA                | 1946507368               |
| SNP_P3_121276_501655 | NW_004515920.1 | Scaffold453 | 501655                  | TT                              | CC                | 1946507370               |
| SNP_P3_121277_501823 | NW_004515920.1 | Scaffold453 | 501823                  | TT                              | AA                | 1946507371               |
| SNP_P3_121278_501839 | NW_004515920.1 | Scaffold453 | 501839                  | TT                              | CC                | 1946507373               |
| SNP_P3_121279_501986 | NW_004515920.1 | Scaffold453 | 501986                  | TT                              | GG                | 1946507375               |
| SNP_P3_121280_502108 | NW_004515920.1 | Scaffold453 | 502108                  | TT                              | CC                | 1946507376               |
| SNP_P3_121281_502434 | NW_004515920.1 | Scaffold453 | 502434                  | GG                              | AA                | 1946507378               |
| SNP_P3_121282_502837 | NW_004515920.1 | Scaffold453 | 502837                  | CC                              | TT                | 1946507379               |
| SNP_P3_121283_503019 | NW_004515920.1 | Scaffold453 | 503019                  | AA                              | GG                | 1946507381               |
| SNP_P3_121284_503064 | NW_004515920.1 | Scaffold453 | 503064                  | CC                              | TT                | 1946507383               |
| SNP_P3_121285_503156 | NW_004515920.1 | Scaffold453 | 503156                  | GG                              | TT                | 1946507384               |
| SNP_P3_121286_503305 | NW_004515920.1 | Scaffold453 | 503305                  | AA                              | GG                | 1946507386               |
| SNP_P3_121287_503731 | NW_004515920.1 | Scaffold453 | 503731                  | GG                              | TT                | 1946507387               |
| SNP_P3_121288_503919 | NW_004515920.1 | Scaffold453 | 503919                  | CC                              | TT                | 1946507389               |
| SNP_P3_121289_525238 | NW_004515920.1 | Scaffold453 | 525238                  | TT                              | CC                | 1946507390               |
| SNP_P3_121290_525677 | NW_004515920.1 | Scaffold453 | 525677                  | CC                              | TT                | 1946507392               |
| SNP_P3_121293_526247 | NW_004515920.1 | Scaffold453 | 526247                  | CC                              | TT                | 1946507393               |
| SNP_P3_121294_526268 | NW_004515920.1 | Scaffold453 | 526268                  | CC                              | TT                | 1946507395               |

| SNPs IDs             | Chromosome IDs | Chromosomes | Physical positions (bp) | CDC Frontier (Reference genome) | (Pusa 256 & HPNB) | NCBI SNPdb Accession IDs |
|----------------------|----------------|-------------|-------------------------|---------------------------------|-------------------|--------------------------|
| SNP_P3_121295_526518 | NW_004515920.1 | Scaffold453 | 526518                  | TT                              | CC                | 1946507396               |
| SNP_P3_121296_526533 | NW_004515920.1 | Scaffold453 | 526533                  | TT                              | GG                | 1946507398               |
| SNP_P3_121297_526592 | NW_004515920.1 | Scaffold453 | 526592                  | TT                              | CC                | 1946507399               |
| SNP_P3_121298_529717 | NW_004515920.1 | Scaffold453 | 529717                  | CC                              | TT                | 1946507401               |
| SNP_P3_121299_529738 | NW_004515920.1 | Scaffold453 | 529738                  | AA                              | TT                | 1946507402               |
| SNP_P3_121300_530214 | NW_004515920.1 | Scaffold453 | 530214                  | TT                              | AA                | 1946507404               |
| SNP_P3_121301_472    | NW_004515921.1 | Scaffold454 | 472                     | TT                              | GG                | 1946507405               |
| SNP_P3_121302_557    | NW_004515921.1 | Scaffold454 | 557                     | TT                              | GG                | 1946507407               |
| SNP_P3_121303_578    | NW_004515921.1 | Scaffold454 | 578                     | TT                              | CC                | 1946507408               |
| SNP_P3_121304_907    | NW_004515921.1 | Scaffold454 | 907                     | AA                              | CC                | 1946507410               |
| SNP_P3_121305_1101   | NW_004515921.1 | Scaffold454 | 1101                    | CC                              | TT                | 1946507411               |
| SNP_P3_121306_1189   | NW_004515921.1 | Scaffold454 | 1189                    | AA                              | TT                | 1946507413               |
| SNP_P3_121307_1372   | NW_004515921.1 | Scaffold454 | 1372                    | TT                              | GG                | 1946507414               |
| SNP_P3_121308_2033   | NW_004515921.1 | Scaffold454 | 2033                    | CC                              | TT                | 1946507416               |
| SNP_P3_121309_3899   | NW_004515921.1 | Scaffold454 | 3899                    | TT                              | GG                | 1946507417               |
| SNP_P3_121310_3974   | NW_004515921.1 | Scaffold454 | 3974                    | CC                              | TT                | 1946507419               |
| SNP_P3_121311_3984   | NW_004515921.1 | Scaffold454 | 3984                    | AA                              | TT                | 1946507420               |
| SNP_P3_121312_4084   | NW_004515921.1 | Scaffold454 | 4084                    | TT                              | GG                | 1946507422               |
| SNP_P3_121313_4193   | NW_004515921.1 | Scaffold454 | 4193                    | AA                              | CC                | 1946507423               |
| SNP_P3_121314_3490   | NW_004515926.1 | Scaffold461 | 3490                    | TT                              | AA                | 1946507425               |
| SNP_P3_121315_3918   | NW_004515926.1 | Scaffold461 | 3918                    | TT                              | CC                | 1946507426               |
| SNP_P3_121316_5456   | NW_004515926.1 | Scaffold461 | 5456                    | TT                              | AA                | 1946507428               |
| SNP_P3_121317_5480   | NW_004515926.1 | Scaffold461 | 5480                    | CC                              | TT                | 1946507429               |
| SNP_P3_121318_10176  | NW_004515926.1 | Scaffold461 | 10176                   | CC                              | AA                | 1946507431               |
| SNP_P3_121319_10182  | NW_004515926.1 | Scaffold461 | 10182                   | TT                              | CC                | 1946507432               |
| SNP_P3_121320_22619  | NW_004515926.1 | Scaffold461 | 22619                   | TT                              | CC                | 1946507434               |
| SNP_P3_121322_22886  | NW_004515926.1 | Scaffold461 | 22886                   | TT                              | CC                | 1946507435               |
| SNP_P3_121323_22894  | NW_004515926.1 | Scaffold461 | 22894                   | TT                              | CC                | 1946507437               |
| SNP_P3_121324_22915  | NW_004515926.1 | Scaffold461 | 22915                   | CC                              | TT                | 1946507438               |
| SNP_P3_121325_22955  | NW_004515926.1 | Scaffold461 | 22955                   | CC                              | AA                | 1946507440               |
| SNP_P3_121326_22992  | NW_004515926.1 | Scaffold461 | 22992                   | CC                              | TT                | 1946507441               |
| SNP_P3_121327_23018  | NW_004515926.1 | Scaffold461 | 23018                   | TT                              | GG                | 1946507443               |
| SNP_P3_121328_23019  | NW_004515926.1 | Scaffold461 | 23019                   | GG                              | AA                | 1946507444               |
| SNP_P3_121329_23193  | NW_004515926.1 | Scaffold461 | 23193                   | TT                              | CC                | 1946507446               |
| SNP_P3_121330_25881  | NW_004515926.1 | Scaffold461 | 25881                   | TT                              | AA                | 1946507447               |
| SNP_P3_121331_25902  | NW_004515926.1 | Scaffold461 | 25902                   | TT                              | AA                | 1946507449               |
| SNP_P3_121332_26170  | NW_004515926.1 | Scaffold461 | 26170                   | CC                              | TT                | 1946507450               |
| SNP_P3_121333_26227  | NW_004515926.1 | Scaffold461 | 26227                   | CC                              | AA                | 1946507451               |
| SNP_P3_121334_26269  | NW_004515926.1 | Scaffold461 | 26269                   | TT                              | AA                | 1946507453               |
| SNP_P3_121335_26321  | NW_004515926.1 | Scaffold461 | 26321                   | CC                              | AA                | 1946507454               |
| SNP_P3_121336_26325  | NW_004515926.1 | Scaffold461 | 26325                   | TT                              | GG                | 1946507456               |
| SNP_P3_121337_26373  | NW_004515926.1 | Scaffold461 | 26373                   | AA                              | TT                | 1946507457               |

| SNPs IDs            | Chromosome IDs | Chromosomes | Physical positions (bp) | CDC Frontier (Reference genome) | (Pusa 256 & HPNB) | NCBI SNPdb Accession IDs |
|---------------------|----------------|-------------|-------------------------|---------------------------------|-------------------|--------------------------|
| SNP_P3_121338_12370 | NW_004515929.1 | Scaffold465 | 12370                   | TT                              | AA                | 1946507459               |
| SNP_P3_121339_13035 | NW_004515929.1 | Scaffold465 | 13035                   | TT                              | AA                | 1946507460               |
| SNP_P3_121340_14037 | NW_004515929.1 | Scaffold465 | 14037                   | AA                              | GG                | 1946507462               |
| SNP_P3_121341_14053 | NW_004515929.1 | Scaffold465 | 14053                   | CC                              | AA                | 1946507463               |
| SNP_P3_121342_548   | NW_004515930.1 | Scaffold466 | 548                     | GG                              | TT                | 1946507465               |
| SNP_P3_121343_552   | NW_004515930.1 | Scaffold466 | 552                     | AA                              | GG                | 1946507466               |
| SNP_P3_121344_565   | NW_004515930.1 | Scaffold466 | 565                     | TT                              | CC                | 1946507468               |
| SNP_P3_121345_614   | NW_004515930.1 | Scaffold466 | 614                     | GG                              | CC                | 1946507469               |
| SNP_P3_121346_631   | NW_004515930.1 | Scaffold466 | 631                     | TT                              | GG                | 1946507471               |
| SNP_P3_121347_646   | NW_004515930.1 | Scaffold466 | 646                     | TT                              | CC                | 1946507472               |
| SNP_P3_121348_2576  | NW_004515930.1 | Scaffold466 | 2576                    | TT                              | AA                | 1946507474               |
| SNP_P3_121349_2956  | NW_004515930.1 | Scaffold466 | 2956                    | TT                              | CC                | 1946507476               |
| SNP_P3_121350_2998  | NW_004515930.1 | Scaffold466 | 2998                    | AA                              | GG                | 1946507477               |
| SNP_P3_121351_3580  | NW_004515930.1 | Scaffold466 | 3580                    | TT                              | CC                | 1946507479               |
| SNP_P3_121353_12183 | NW_004515930.1 | Scaffold466 | 12183                   | GG                              | AA                | 1946507480               |
| SNP_P3_121354_12218 | NW_004515930.1 | Scaffold466 | 12218                   | GG                              | AA                | 1946507482               |
| SNP_P3_121355_13939 | NW_004515930.1 | Scaffold466 | 13939                   | GG                              | AA                | 1946507483               |
| SNP_P3_121356_14745 | NW_004515930.1 | Scaffold466 | 14745                   | AA                              | GG                | 1946507485               |
| SNP_P3_121357_14873 | NW_004515930.1 | Scaffold466 | 14873                   | GG                              | AA                | 1946507486               |
| SNP_P3_121358_18803 | NW_004515930.1 | Scaffold466 | 18803                   | TT                              | CC                | 1946507488               |
| SNP_P3_121359_18809 | NW_004515930.1 | Scaffold466 | 18809                   | AA                              | TT                | 1946507489               |
| SNP_P3_121360_23635 | NW_004515930.1 | Scaffold466 | 23635                   | TT                              | AA                | 1946507490               |
| SNP_P3_121361_23639 | NW_004515930.1 | Scaffold466 | 23639                   | CC                              | TT                | 1946507492               |
| SNP_P3_121362_23650 | NW_004515930.1 | Scaffold466 | 23650                   | AA                              | GG                | 1946507493               |
| SNP_P3_121363_23684 | NW_004515930.1 | Scaffold466 | 23684                   | AA                              | GG                | 1946507495               |
| SNP_P3_121364_30423 | NW_004515930.1 | Scaffold466 | 30423                   | CC                              | TT                | 1946507496               |
| SNP_P3_121365_32686 | NW_004515930.1 | Scaffold466 | 32686                   | AA                              | GG                | 1946507498               |
| SNP_P3_121366_38805 | NW_004515930.1 | Scaffold466 | 38805                   | AA                              | CC                | 1946507499               |
| SNP_P3_121367_38960 | NW_004515930.1 | Scaffold466 | 38960                   | AA                              | CC                | 1946507501               |
| SNP_P3_121368_38987 | NW_004515930.1 | Scaffold466 | 38987                   | AA                              | GG                | 1946507502               |
| SNP_P3_121369_39047 | NW_004515930.1 | Scaffold466 | 39047                   | GG                              | AA                | 1946507505               |
| SNP_P3_121370_39099 | NW_004515930.1 | Scaffold466 | 39099                   | TT                              | CC                | 1946507506               |
| SNP_P3_121371_41314 | NW_004515930.1 | Scaffold466 | 41314                   | GG                              | CC                | 1946507508               |
| SNP_P3_121372_55905 | NW_004515930.1 | Scaffold466 | 55905                   | AA                              | GG                | 1946507509               |
| SNP_P3_121373_66396 | NW_004515930.1 | Scaffold466 | 66396                   | AA                              | GG                | 1946507511               |
| SNP_P3_121374_66679 | NW_004515930.1 | Scaffold466 | 66679                   | CC                              | AA                | 1946507512               |
| SNP_P3_121375_72532 | NW_004515930.1 | Scaffold466 | 72532                   | TT                              | CC                | 1946507514               |
| SNP_P3_121376_72546 | NW_004515930.1 | Scaffold466 | 72546                   | TT                              | AA                | 1946507515               |
| SNP_P3_121377_73838 | NW_004515930.1 | Scaffold466 | 73838                   | TT                              | CC                | 1946507517               |
| SNP_P3_121378_74011 | NW_004515930.1 | Scaffold466 | 74011                   | GG                              | CC                | 1946507518               |
| SNP_P3_121379_74179 | NW_004515930.1 | Scaffold466 | 74179                   | CC                              | TT                | 1946507520               |
| SNP_P3_121380_79716 | NW_004515930.1 | Scaffold466 | 79716                   | AA                              | TT                | 1946507521               |

| SNPs IDs             | Chromosome IDs | Chromosomes | Physical positions (bp) | CDC Frontier (Reference genome) | (Pusa 256 & HPNB) | NCBI SNPdb Accession IDs |
|----------------------|----------------|-------------|-------------------------|---------------------------------|-------------------|--------------------------|
| SNP_P3_121381_80937  | NW_004515930.1 | Scaffold466 | 80937                   | TT                              | GG                | 1946507523               |
| SNP_P3_121382_80938  | NW_004515930.1 | Scaffold466 | 80938                   | GG                              | AA                | 1946507524               |
| SNP_P3_121383_89365  | NW_004515930.1 | Scaffold466 | 89365                   | GG                              | TT                | 1946507526               |
| SNP_P3_121384_89382  | NW_004515930.1 | Scaffold466 | 89382                   | CC                              | TT                | 1946507528               |
| SNP_P3_121386_126192 | NW_004515930.1 | Scaffold466 | 126192                  | AA                              | GG                | 1946507529               |
| SNP_P3_121387_132776 | NW_004515930.1 | Scaffold466 | 132776                  | GG                              | AA                | 1946507531               |
| SNP_P3_121388_133213 | NW_004515930.1 | Scaffold466 | 133213                  | TT                              | AA                | 1946507532               |
| SNP_P3_121389_133235 | NW_004515930.1 | Scaffold466 | 133235                  | AA                              | GG                | 1946507534               |
| SNP_P3_121390_133243 | NW_004515930.1 | Scaffold466 | 133243                  | GG                              | AA                | 1946507535               |
| SNP_P3_121391_133491 | NW_004515930.1 | Scaffold466 | 133491                  | CC                              | TT                | 1946507537               |
| SNP_P3_121392_133555 | NW_004515930.1 | Scaffold466 | 133555                  | AA                              | GG                | 1946507538               |
| SNP_P3_121393_163503 | NW_004515930.1 | Scaffold466 | 163503                  | TT                              | GG                | 1946507540               |
| SNP_P3_121394_163696 | NW_004515930.1 | Scaffold466 | 163696                  | CC                              | TT                | 1946507541               |
| SNP_P3_121395_163702 | NW_004515930.1 | Scaffold466 | 163702                  | CC                              | TT                | 1946507543               |
| SNP_P3_121396_163705 | NW_004515930.1 | Scaffold466 | 163705                  | CC                              | TT                | 1946507544               |
| SNP_P3_121397_163980 | NW_004515930.1 | Scaffold466 | 163980                  | TT                              | CC                | 1946507546               |
| SNP_P3_121398_164008 | NW_004515930.1 | Scaffold466 | 164008                  | AA                              | GG                | 1946507547               |
| SNP_P3_121399_164013 | NW_004515930.1 | Scaffold466 | 164013                  | TT                              | CC                | 1946507549               |
| SNP_P3_121400_164081 | NW_004515930.1 | Scaffold466 | 164081                  | TT                              | CC                | 1946507551               |
| SNP_P3_121401_164094 | NW_004515930.1 | Scaffold466 | 164094                  | TT                              | CC                | 1946507552               |
| SNP_P3_121402_164106 | NW_004515930.1 | Scaffold466 | 164106                  | AA                              | GG                | 1946507554               |
| SNP_P3_121403_164175 | NW_004515930.1 | Scaffold466 | 164175                  | TT                              | CC                | 1946507555               |
| SNP_P3_121404_164353 | NW_004515930.1 | Scaffold466 | 164353                  | CC                              | GG                | 1946507557               |
| SNP_P3_121405_164358 | NW_004515930.1 | Scaffold466 | 164358                  | TT                              | GG                | 1946507558               |
| SNP_P3_121406_164381 | NW_004515930.1 | Scaffold466 | 164381                  | AA                              | GG                | 1946507560               |
| SNP_P3_121407_164387 | NW_004515930.1 | Scaffold466 | 164387                  | AA                              | GG                | 1946507561               |
| SNP_P3_121408_164398 | NW_004515930.1 | Scaffold466 | 164398                  | AA                              | GG                | 1946507563               |
| SNP_P3_121409_164410 | NW_004515930.1 | Scaffold466 | 164410                  | AA                              | GG                | 1946507565               |
| SNP_P3_121410_164417 | NW_004515930.1 | Scaffold466 | 164417                  | TT                              | CC                | 1946507566               |
| SNP_P3_121411_164575 | NW_004515930.1 | Scaffold466 | 164575                  | TT                              | CC                | 1946507568               |
| SNP_P3_121412_164591 | NW_004515930.1 | Scaffold466 | 164591                  | AA                              | GG                | 1946507569               |
| SNP_P3_121413_164597 | NW_004515930.1 | Scaffold466 | 164597                  | TT                              | CC                | 1946507571               |
| SNP_P3_121414_164701 | NW_004515930.1 | Scaffold466 | 164701                  | TT                              | AA                | 1946507572               |
| SNP_P3_121415_164716 | NW_004515930.1 | Scaffold466 | 164716                  | AA                              | CC                | 1946507574               |
| SNP_P3_121416_164823 | NW_004515930.1 | Scaffold466 | 164823                  | CC                              | TT                | 1946507575               |
| SNP_P3_121417_164826 | NW_004515930.1 | Scaffold466 | 164826                  | AA                              | CC                | 1946507577               |
| SNP_P3_121418_165681 | NW_004515930.1 | Scaffold466 | 165681                  | CC                              | TT                | 1946507578               |
| SNP_P3_121419_165695 | NW_004515930.1 | Scaffold466 | 165695                  | AA                              | CC                | 1946507579               |
| SNP_P3_121420_165780 | NW_004515930.1 | Scaffold466 | 165780                  | TT                              | CC                | 1946507581               |
| SNP_P3_121421_165844 | NW_004515930.1 | Scaffold466 | 165844                  | TT                              | CC                | 1946507582               |
| SNP_P3_121422_165977 | NW_004515930.1 | Scaffold466 | 165977                  | GG                              | AA                | 1946507584               |
| SNP_P3_121423_165983 | NW_004515930.1 | Scaffold466 | 165983                  | TT                              | CC                | 1946507585               |

| SNPs IDs             | Chromosome IDs | Chromosomes | Physical positions (bp) | CDC Frontier (Reference genome) | (Pusa 256 & HPNB) | NCBI SNPdb Accession IDs |
|----------------------|----------------|-------------|-------------------------|---------------------------------|-------------------|--------------------------|
| SNP_P3_121424_166006 | NW_004515930.1 | Scaffold466 | 166006                  | TT                              | CC                | 1946507587               |
| SNP_P3_121425_166114 | NW_004515930.1 | Scaffold466 | 166114                  | AA                              | GG                | 1946507588               |
| SNP_P3_121426_166175 | NW_004515930.1 | Scaffold466 | 166175                  | TT                              | CC                | 1946507590               |
| SNP_P3_121427_166211 | NW_004515930.1 | Scaffold466 | 166211                  | CC                              | TT                | 1946507591               |
| SNP_P3_121429_166248 | NW_004515930.1 | Scaffold466 | 166248                  | TT                              | CC                | 1946507593               |
| SNP_P3_121430_166249 | NW_004515930.1 | Scaffold466 | 166249                  | GG                              | CC                | 1946507594               |
| SNP_P3_121431_166266 | NW_004515930.1 | Scaffold466 | 166266                  | AA                              | GG                | 1946507596               |
| SNP_P3_121432_166282 | NW_004515930.1 | Scaffold466 | 166282                  | AA                              | GG                | 1946507597               |
| SNP_P3_121433_166343 | NW_004515930.1 | Scaffold466 | 166343                  | TT                              | CC                | 1946507599               |
| SNP_P3_121434_166680 | NW_004515930.1 | Scaffold466 | 166680                  | AA                              | CC                | 1946507600               |
| SNP_P3_121435_166703 | NW_004515930.1 | Scaffold466 | 166703                  | TT                              | CC                | 1946507602               |
| SNP_P3_121436_166788 | NW_004515930.1 | Scaffold466 | 166788                  | TT                              | CC                | 1946507603               |
| SNP_P3_121437_166792 | NW_004515930.1 | Scaffold466 | 166792                  | AA                              | GG                | 1946507605               |
| SNP_P3_121438_166836 | NW_004515930.1 | Scaffold466 | 166836                  | GG                              | AA                | 1946507606               |
| SNP_P3_121439_166845 | NW_004515930.1 | Scaffold466 | 166845                  | AA                              | GG                | 1946507608               |
| SNP_P3_121440_166850 | NW_004515930.1 | Scaffold466 | 166850                  | TT                              | CC                | 1946507609               |
| SNP_P3_121441_166888 | NW_004515930.1 | Scaffold466 | 166888                  | TT                              | CC                | 1946507611               |
| SNP_P3_121442_167282 | NW_004515930.1 | Scaffold466 | 167282                  | CC                              | GG                | 1946507612               |
| SNP_P3_121443_167314 | NW_004515930.1 | Scaffold466 | 167314                  | AA                              | GG                | 1946507614               |
| SNP_P3_121444_167385 | NW_004515930.1 | Scaffold466 | 167385                  | TT                              | GG                | 1946507615               |
| SNP_P3_121445_167419 | NW_004515930.1 | Scaffold466 | 167419                  | TT                              | CC                | 1946507617               |
| SNP_P3_121446_167806 | NW_004515930.1 | Scaffold466 | 167806                  | AA                              | GG                | 1946507618               |
| SNP_P3_121447_169536 | NW_004515930.1 | Scaffold466 | 169536                  | TT                              | CC                | 1946507620               |
| SNP_P3_121448_169540 | NW_004515930.1 | Scaffold466 | 169540                  | GG                              | CC                | 1946507621               |
| SNP_P3_121449_169546 | NW_004515930.1 | Scaffold466 | 169546                  | GG                              | AA                | 1946507623               |
| SNP_P3_121450_169554 | NW_004515930.1 | Scaffold466 | 169554                  | TT                              | CC                | 1946507624               |
| SNP_P3_121451_169561 | NW_004515930.1 | Scaffold466 | 169561                  | TT                              | CC                | 1946507625               |
| SNP_P3_121452_169571 | NW_004515930.1 | Scaffold466 | 169571                  | AA                              | CC                | 1946507627               |
| SNP_P3_121453_169577 | NW_004515930.1 | Scaffold466 | 169577                  | AA                              | GG                | 1946507628               |
| SNP_P3_121454_169588 | NW_004515930.1 | Scaffold466 | 169588                  | AA                              | GG                | 1946507630               |
| SNP_P3_121455_169627 | NW_004515930.1 | Scaffold466 | 169627                  | AA                              | CC                | 1946507631               |
| SNP_P3_121456_169636 | NW_004515930.1 | Scaffold466 | 169636                  | GG                              | CC                | 1946507633               |
| SNP_P3_121457_169640 | NW_004515930.1 | Scaffold466 | 169640                  | TT                              | AA                | 1946507634               |
| SNP_P3_121458_169652 | NW_004515930.1 | Scaffold466 | 169652                  | TT                              | AA                | 1946507636               |
| SNP_P3_121459_169654 | NW_004515930.1 | Scaffold466 | 169654                  | GG                              | AA                | 1946507637               |
| SNP_P3_121460_169680 | NW_004515930.1 | Scaffold466 | 169680                  | AA                              | GG                | 1946507639               |
| SNP_P3_121462_169767 | NW_004515930.1 | Scaffold466 | 169767                  | TT                              | CC                | 1946507640               |
| SNP_P3_121463_169801 | NW_004515930.1 | Scaffold466 | 169801                  | AA                              | GG                | 1946507642               |
| SNP_P3_121464_169819 | NW_004515930.1 | Scaffold466 | 169819                  | AA                              | TT                | 1946507643               |
| SNP_P3_121465_169820 | NW_004515930.1 | Scaffold466 | 169820                  | TT                              | AA                | 1946507645               |
| SNP_P3_121466_169821 | NW_004515930.1 | Scaffold466 | 169821                  | AA                              | CC                | 1946507646               |
| SNP_P3_121467_169830 | NW_004515930.1 | Scaffold466 | 169830                  | AA                              | GG                | 1946507647               |

| SNPs IDs             | Chromosome IDs | Chromosomes | Physical positions (bp) | CDC Frontier (Reference genome) | (Pusa 256 & HPNB) | NCBI SNPdb Accession IDs |
|----------------------|----------------|-------------|-------------------------|---------------------------------|-------------------|--------------------------|
| SNP_P3_121468_169831 | NW_004515930.1 | Scaffold466 | 169831                  | AA                              | GG                | 1946507649               |
| SNP_P3_121469_169835 | NW_004515930.1 | Scaffold466 | 169835                  | TT                              | GG                | 1946507650               |
| SNP_P3_121470_169836 | NW_004515930.1 | Scaffold466 | 169836                  | TT                              | CC                | 1946507652               |
| SNP_P3_121471_169841 | NW_004515930.1 | Scaffold466 | 169841                  | AA                              | GG                | 1946507653               |
| SNP_P3_121472_169875 | NW_004515930.1 | Scaffold466 | 169875                  | AA                              | GG                | 1946507655               |
| SNP_P3_121473_169953 | NW_004515930.1 | Scaffold466 | 169953                  | CC                              | TT                | 1946507656               |
| SNP_P3_121474_169974 | NW_004515930.1 | Scaffold466 | 169974                  | TT                              | CC                | 1946507657               |
| SNP_P3_121475_170363 | NW_004515930.1 | Scaffold466 | 170363                  | GG                              | TT                | 1946507659               |
| SNP_P3_121477_171062 | NW_004515930.1 | Scaffold466 | 171062                  | TT                              | GG                | 1946507660               |
| SNP_P3_121478_171072 | NW_004515930.1 | Scaffold466 | 171072                  | AA                              | GG                | 1946507662               |
| SNP_P3_121479_171285 | NW_004515930.1 | Scaffold466 | 171285                  | AA                              | GG                | 1946507663               |
| SNP_P3_121480_171289 | NW_004515930.1 | Scaffold466 | 171289                  | TT                              | CC                | 1946507665               |
| SNP_P3_121481_171305 | NW_004515930.1 | Scaffold466 | 171305                  | AA                              | GG                | 1946507666               |
| SNP_P3_121482_171333 | NW_004515930.1 | Scaffold466 | 171333                  | AA                              | GG                | 1946507668               |
| SNP_P3_121483_171347 | NW_004515930.1 | Scaffold466 | 171347                  | GG                              | AA                | 1946507669               |
| SNP_P3_121484_171350 | NW_004515930.1 | Scaffold466 | 171350                  | TT                              | AA                | 1946507671               |
| SNP_P3_121485_171363 | NW_004515930.1 | Scaffold466 | 171363                  | GG                              | CC                | 1946507672               |
| SNP_P3_121486_171480 | NW_004515930.1 | Scaffold466 | 171480                  | AA                              | CC                | 1946507674               |
| SNP_P3_121487_171484 | NW_004515930.1 | Scaffold466 | 171484                  | AA                              | GG                | 1946507675               |
| SNP_P3_121488_171497 | NW_004515930.1 | Scaffold466 | 171497                  | TT                              | GG                | 1946507676               |
| SNP_P3_121489_171520 | NW_004515930.1 | Scaffold466 | 171520                  | CC                              | TT                | 1946507678               |
| SNP_P3_121490_171538 | NW_004515930.1 | Scaffold466 | 171538                  | TT                              | CC                | 1946507679               |
| SNP_P3_121491_171554 | NW_004515930.1 | Scaffold466 | 171554                  | TT                              | AA                | 1946507681               |
| SNP_P3_121492_180794 | NW_004515930.1 | Scaffold466 | 180794                  | CC                              | GG                | 1946507682               |
| SNP_P3_121493_208404 | NW_004515930.1 | Scaffold466 | 208404                  | CC                              | TT                | 1946507684               |
| SNP_P3_121494_211926 | NW_004515930.1 | Scaffold466 | 211926                  | CC                              | GG                | 1946507685               |
| SNP_P3_121495_212210 | NW_004515930.1 | Scaffold466 | 212210                  | GG                              | AA                | 1946507687               |
| SNP_P3_121496_212218 | NW_004515930.1 | Scaffold466 | 212218                  | GG                              | AA                | 1946507688               |
| SNP_P3_121497_212228 | NW_004515930.1 | Scaffold466 | 212228                  | AA                              | GG                | 1946507689               |
| SNP_P3_121498_213574 | NW_004515930.1 | Scaffold466 | 213574                  | AA                              | GG                | 1946507691               |
| SNP_P3_121499_217337 | NW_004515930.1 | Scaffold466 | 217337                  | AA                              | GG                | 1946507692               |
| SNP_P3_121500_221972 | NW_004515930.1 | Scaffold466 | 221972                  | TT                              | CC                | 1946507694               |
| SNP_P3_121501_241851 | NW_004515930.1 | Scaffold466 | 241851                  | GG                              | TT                | 1946507695               |
| SNP_P3_121502_254285 | NW_004515930.1 | Scaffold466 | 254285                  | AA                              | TT                | 1946507697               |
| SNP_P3_121504_254400 | NW_004515930.1 | Scaffold466 | 254400                  | TT                              | AA                | 1946507698               |
| SNP_P3_121505_254421 | NW_004515930.1 | Scaffold466 | 254421                  | AA                              | TT                | 1946507700               |
| SNP_P3_121506_271024 | NW_004515930.1 | Scaffold466 | 271024                  | TT                              | AA                | 1946507701               |
| SNP_P3_121507_278490 | NW_004515930.1 | Scaffold466 | 278490                  | GG                              | AA                | 1946507703               |
| SNP_P3_121509_292899 | NW_004515930.1 | Scaffold466 | 292899                  | AA                              | GG                | 1946507704               |
| SNP_P3_121510_292969 | NW_004515930.1 | Scaffold466 | 292969                  | CC                              | AA                | 1946507706               |
| SNP_P3_121511_292970 | NW_004515930.1 | Scaffold466 | 292970                  | CC                              | TT                | 1946507707               |
| SNP_P3_121512_292989 | NW_004515930.1 | Scaffold466 | 292989                  | GG                              | AA                | 1946507709               |

| SNPs IDs             | Chromosome IDs | Chromosomes | Physical positions (bp) | CDC Frontier (Reference genome) | (Pusa 256 & HPNB) | NCBI SNPdb Accession IDs |
|----------------------|----------------|-------------|-------------------------|---------------------------------|-------------------|--------------------------|
| SNP_P3_121513_293018 | NW_004515930.1 | Scaffold466 | 293018                  | TT                              | CC                | 1946507710               |
| SNP_P3_121514_293146 | NW_004515930.1 | Scaffold466 | 293146                  | GG                              | CC                | 1946507712               |
| SNP_P3_121515_820    | NW_004515931.1 | Scaffold467 | 820                     | AA                              | TT                | 1946507713               |
| SNP_P3_121516_3387   | NW_004515931.1 | Scaffold467 | 3387                    | GG                              | CC                | 1946507715               |
| SNP_P3_121517_3482   | NW_004515931.1 | Scaffold467 | 3482                    | CC                              | TT                | 1946507716               |
| SNP_P3_121518_3490   | NW_004515931.1 | Scaffold467 | 3490                    | CC                              | GG                | 1946507718               |
| SNP_P3_121519_3741   | NW_004515931.1 | Scaffold467 | 3741                    | CC                              | AA                | 1946507719               |
| SNP_P3_121520_4419   | NW_004515931.1 | Scaffold467 | 4419                    | GG                              | CC                | 1946507721               |
| SNP_P3_121521_6240   | NW_004515931.1 | Scaffold467 | 6240                    | TT                              | GG                | 1946507722               |
| SNP_P3_121522_6422   | NW_004515931.1 | Scaffold467 | 6422                    | AA                              | GG                | 1946507724               |
| SNP_P3_121523_6444   | NW_004515931.1 | Scaffold467 | 6444                    | CC                              | TT                | 1946507725               |
| SNP_P3_121524_6448   | NW_004515931.1 | Scaffold467 | 6448                    | GG                              | TT                | 1946507727               |
| SNP_P3_121525_6464   | NW_004515931.1 | Scaffold467 | 6464                    | AA                              | CC                | 1946507728               |
| SNP_P3_121527_18417  | NW_004515932.1 | Scaffold469 | 18417                   | CC                              | AA                | 1946507730               |
| SNP_P3_121528_18871  | NW_004515932.1 | Scaffold469 | 18871                   | GG                              | AA                | 1946507731               |
| SNP_P3_121529_19296  | NW_004515932.1 | Scaffold469 | 19296                   | GG                              | AA                | 1946507733               |
| SNP_P3_121530_19328  | NW_004515932.1 | Scaffold469 | 19328                   | AA                              | CC                | 1946507734               |
| SNP_P3_121531_19339  | NW_004515932.1 | Scaffold469 | 19339                   | AA                              | GG                | 1946507736               |
| SNP_P3_121532_19341  | NW_004515932.1 | Scaffold469 | 19341                   | AA                              | CC                | 1946507737               |
| SNP_P3_121533_19376  | NW_004515932.1 | Scaffold469 | 19376                   | AA                              | TT                | 1946507739               |
| SNP_P3_121534_19798  | NW_004515932.1 | Scaffold469 | 19798                   | TT                              | CC                | 1946507740               |
| SNP_P3_121535_19808  | NW_004515932.1 | Scaffold469 | 19808                   | GG                              | AA                | 1946507742               |
| SNP_P3_121537_51994  | NW_004515932.1 | Scaffold469 | 51994                   | GG                              | TT                | 1946507743               |
| SNP_P3_121538_58042  | NW_004515932.1 | Scaffold469 | 58042                   | CC                              | GG                | 1946507745               |
| SNP_P3_121539_58098  | NW_004515932.1 | Scaffold469 | 58098                   | CC                              | AA                | 1946507746               |
| SNP_P3_121540_58493  | NW_004515932.1 | Scaffold469 | 58493                   | TT                              | AA                | 1946507748               |
| SNP_P3_121542_58584  | NW_004515932.1 | Scaffold469 | 58584                   | AA                              | GG                | 1946507749               |
| SNP_P3_121543_58997  | NW_004515932.1 | Scaffold469 | 58997                   | AA                              | TT                | 1946507751               |
| SNP_P3_121545_78967  | NW_004515932.1 | Scaffold469 | 78967                   | GG                              | TT                | 1946507752               |
| SNP_P3_121546_135864 | NW_004515932.1 | Scaffold469 | 135864                  | TT                              | CC                | 1946507754               |
| SNP_P3_121547_135866 | NW_004515932.1 | Scaffold469 | 135866                  | AA                              | GG                | 1946507755               |
| SNP_P3_121548_136412 | NW_004515932.1 | Scaffold469 | 136412                  | GG                              | AA                | 1946507756               |
| SNP_P3_121549_149383 | NW_004515932.1 | Scaffold469 | 149383                  | AA                              | GG                | 1946507757               |
| SNP_P3_121550_149408 | NW_004515932.1 | Scaffold469 | 149408                  | AA                              | GG                | 1946507758               |
| SNP_P3_121551_149419 | NW_004515932.1 | Scaffold469 | 149419                  | TT                              | CC                | 1946507759               |
| SNP_P3_121552_150078 | NW_004515932.1 | Scaffold469 | 150078                  | AA                              | TT                | 1946507760               |
| SNP_P3_121553_164629 | NW_004515932.1 | Scaffold469 | 164629                  | TT                              | CC                | 1946507762               |
| SNP_P3_121554_208019 | NW_004515932.1 | Scaffold469 | 208019                  | CC                              | TT                | 1946507763               |
| SNP_P3_121555_208281 | NW_004515932.1 | Scaffold469 | 208281                  | AA                              | GG                | 1946507765               |
| SNP_P3_121556_208315 | NW_004515932.1 | Scaffold469 | 208315                  | AA                              | CC                | 1946507766               |
| SNP_P3_121557_208361 | NW_004515932.1 | Scaffold469 | 208361                  | GG                              | CC                | 1946507768               |
| SNP_P3_121558_208379 | NW_004515932.1 | Scaffold469 | 208379                  | GG                              | TT                | 1946507769               |



| SNPs IDs             | Chromosome IDs | Chromosomes | Physical positions (bp) | CDC Frontier (Reference genome) | (Pusa 256 & HPNB) | NCBI SNPdb Accession IDs |
|----------------------|----------------|-------------|-------------------------|---------------------------------|-------------------|--------------------------|
| SNP_P3_121559_208381 | NW_004515932.1 | Scaffold469 | 208381                  | AA                              | TT                | 1946507771               |
| SNP_P3_121560_208392 | NW_004515932.1 | Scaffold469 | 208392                  | GG                              | AA                | 1946507772               |
| SNP_P3_121561_208399 | NW_004515932.1 | Scaffold469 | 208399                  | AA                              | GG                | 1946507774               |
| SNP_P3_121562_208404 | NW_004515932.1 | Scaffold469 | 208404                  | AA                              | CC                | 1946507775               |
| SNP_P3_121563_208416 | NW_004515932.1 | Scaffold469 | 208416                  | TT                              | GG                | 1946507777               |
| SNP_P3_121564_208423 | NW_004515932.1 | Scaffold469 | 208423                  | AA                              | GG                | 1946507778               |
| SNP_P3_121565_208434 | NW_004515932.1 | Scaffold469 | 208434                  | TT                              | AA                | 1946507780               |
| SNP_P3_121566_208465 | NW_004515932.1 | Scaffold469 | 208465                  | TT                              | CC                | 1946507781               |
| SNP_P3_121567_208476 | NW_004515932.1 | Scaffold469 | 208476                  | CC                              | TT                | 1946507783               |
| SNP_P3_121568_222747 | NW_004515932.1 | Scaffold469 | 222747                  | GG                              | TT                | 1946507785               |
| SNP_P3_121569_226297 | NW_004515932.1 | Scaffold469 | 226297                  | CC                              | GG                | 1946507786               |
| SNP_P3_121570_4290   | NW_004515933.1 | Scaffold470 | 4290                    | GG                              | TT                | 1946507788               |
| SNP_P3_121571_17154  | NW_004515933.1 | Scaffold470 | 17154                   | CC                              | AA                | 1946507789               |
| SNP_P3_121572_17168  | NW_004515933.1 | Scaffold470 | 17168                   | TT                              | AA                | 1946507790               |
| SNP_P3_121573_17169  | NW_004515933.1 | Scaffold470 | 17169                   | CC                              | TT                | 1946507792               |
| SNP_P3_121574_42718  | NW_004515933.1 | Scaffold470 | 42718                   | GG                              | AA                | 1946507793               |
| SNP_P3_121575_42939  | NW_004515933.1 | Scaffold470 | 42939                   | TT                              | CC                | 1946507795               |
| SNP_P3_121576_42978  | NW_004515933.1 | Scaffold470 | 42978                   | TT                              | AA                | 1946507797               |
| SNP_P3_121577_43278  | NW_004515933.1 | Scaffold470 | 43278                   | CC                              | GG                | 1946507798               |
| SNP_P3_121578_43302  | NW_004515933.1 | Scaffold470 | 43302                   | CC                              | TT                | 1946507800               |
| SNP_P3_121579_44656  | NW_004515933.1 | Scaffold470 | 44656                   | AA                              | GG                | 1946507802               |
| SNP_P3_121580_45989  | NW_004515933.1 | Scaffold470 | 45989                   | TT                              | CC                | 1946507803               |
| SNP_P3_121582_46004  | NW_004515933.1 | Scaffold470 | 46004                   | GG                              | TT                | 1946507805               |
| SNP_P3_121583_126335 | NW_004515933.1 | Scaffold470 | 126335                  | GG                              | TT                | 1946507806               |
| SNP_P3_121585_186026 | NW_004515933.1 | Scaffold470 | 186026                  | GG                              | AA                | 1946507808               |
| SNP_P3_121587_186141 | NW_004515933.1 | Scaffold470 | 186141                  | TT                              | AA                | 1946507809               |
| SNP_P3_121588_186381 | NW_004515933.1 | Scaffold470 | 186381                  | CC                              | TT                | 1946507811               |
| SNP_P3_121589_186398 | NW_004515933.1 | Scaffold470 | 186398                  | GG                              | AA                | 1946507812               |
| SNP_P3_121592_287762 | NW_004515933.1 | Scaffold470 | 287762                  | AA                              | GG                | 1946507814               |
| SNP_P3_121593_310119 | NW_004515933.1 | Scaffold470 | 310119                  | CC                              | TT                | 1946507815               |
| SNP_P3_121594_321728 | NW_004515933.1 | Scaffold470 | 321728                  | AA                              | GG                | 1946507817               |
| SNP_P3_121595_321951 | NW_004515933.1 | Scaffold470 | 321951                  | AA                              | GG                | 1946507818               |
| SNP_P3_121596_321959 | NW_004515933.1 | Scaffold470 | 321959                  | GG                              | AA                | 1946507820               |
| SNP_P3_121597_321981 | NW_004515933.1 | Scaffold470 | 321981                  | AA                              | GG                | 1946507821               |
| SNP_P3_121598_322090 | NW_004515933.1 | Scaffold470 | 322090                  | GG                              | AA                | 1946507823               |
| SNP_P3_121599_322114 | NW_004515933.1 | Scaffold470 | 322114                  | CC                              | AA                | 1946507824               |
| SNP_P3_121600_322115 | NW_004515933.1 | Scaffold470 | 322115                  | AA                              | GG                | 1946507826               |
| SNP_P3_121601_322116 | NW_004515933.1 | Scaffold470 | 322116                  | TT                              | AA                | 1946507827               |
| SNP_P3_121603_336035 | NW_004515933.1 | Scaffold470 | 336035                  | CC                              | TT                | 1946507829               |
| SNP_P3_121604_336090 | NW_004515933.1 | Scaffold470 | 336090                  | GG                              | AA                | 1946507830               |
| SNP_P3_121605_336106 | NW_004515933.1 | Scaffold470 | 336106                  | GG                              | AA                | 1946507832               |
| SNP_P3_121606_336119 | NW_004515933.1 | Scaffold470 | 336119                  | AA                              | TT                | 1946507833               |

| SNPs IDs             | Chromosome IDs | Chromosomes | Physical positions (bp) | CDC Frontier (Reference genome) | (Pusa 256 & HPNB) | NCBI SNPdb Accession IDs |
|----------------------|----------------|-------------|-------------------------|---------------------------------|-------------------|--------------------------|
| SNP_P3_121607_336127 | NW_004515933.1 | Scaffold470 | 336127                  | CC                              | TT                | 1946507835               |
| SNP_P3_121608_336172 | NW_004515933.1 | Scaffold470 | 336172                  | CC                              | TT                | 1946507836               |
| SNP_P3_121609_336193 | NW_004515933.1 | Scaffold470 | 336193                  | AA                              | TT                | 1946507838               |
| SNP_P3_121610_336208 | NW_004515933.1 | Scaffold470 | 336208                  | AA                              | GG                | 1946507839               |
| SNP_P3_121611_336246 | NW_004515933.1 | Scaffold470 | 336246                  | AA                              | TT                | 1946507841               |
| SNP_P3_121612_336252 | NW_004515933.1 | Scaffold470 | 336252                  | AA                              | TT                | 1946507842               |
| SNP_P3_121614_336375 | NW_004515933.1 | Scaffold470 | 336375                  | GG                              | TT                | 1946507844               |
| SNP_P3_121615_336393 | NW_004515933.1 | Scaffold470 | 336393                  | AA                              | TT                | 1946507845               |
| SNP_P3_121616_336417 | NW_004515933.1 | Scaffold470 | 336417                  | TT                              | AA                | 1946507847               |
| SNP_P3_121617_336450 | NW_004515933.1 | Scaffold470 | 336450                  | TT                              | CC                | 1946507848               |
| SNP_P3_121618_336559 | NW_004515933.1 | Scaffold470 | 336559                  | GG                              | AA                | 1946507850               |
| SNP_P3_121619_336560 | NW_004515933.1 | Scaffold470 | 336560                  | AA                              | TT                | 1946507851               |
| SNP_P3_121620_336672 | NW_004515933.1 | Scaffold470 | 336672                  | GG                              | AA                | 1946507853               |
| SNP_P3_121621_336817 | NW_004515933.1 | Scaffold470 | 336817                  | TT                              | CC                | 1946507854               |
| SNP_P3_121622_336818 | NW_004515933.1 | Scaffold470 | 336818                  | CC                              | TT                | 1946507856               |
| SNP_P3_121623_336821 | NW_004515933.1 | Scaffold470 | 336821                  | GG                              | CC                | 1946507857               |
| SNP_P3_121624_336871 | NW_004515933.1 | Scaffold470 | 336871                  | AA                              | TT                | 1946507859               |
| SNP_P3_121625_343029 | NW_004515933.1 | Scaffold470 | 343029                  | TT                              | CC                | 1946507860               |
| SNP_P3_121626_347232 | NW_004515933.1 | Scaffold470 | 347232                  | CC                              | GG                | 1946507862               |
| SNP_P3_121627_348038 | NW_004515933.1 | Scaffold470 | 348038                  | CC                              | TT                | 1946507863               |
| SNP_P3_121628_348184 | NW_004515933.1 | Scaffold470 | 348184                  | TT                              | CC                | 1946507865               |
| SNP_P3_121629_348242 | NW_004515933.1 | Scaffold470 | 348242                  | CC                              | AA                | 1946507866               |
| SNP_P3_121630_348369 | NW_004515933.1 | Scaffold470 | 348369                  | TT                              | CC                | 1946507868               |
| SNP_P3_121631_348434 | NW_004515933.1 | Scaffold470 | 348434                  | TT                              | GG                | 1946507869               |
| SNP_P3_121632_348471 | NW_004515933.1 | Scaffold470 | 348471                  | TT                              | GG                | 1946507871               |
| SNP_P3_121633_348475 | NW_004515933.1 | Scaffold470 | 348475                  | AA                              | CC                | 1946507872               |
| SNP_P3_121634_348637 | NW_004515933.1 | Scaffold470 | 348637                  | AA                              | TT                | 1946507874               |
| SNP_P3_121635_349488 | NW_004515933.1 | Scaffold470 | 349488                  | TT                              | CC                | 1946507875               |
| SNP_P3_121636_349582 | NW_004515933.1 | Scaffold470 | 349582                  | TT                              | CC                | 1946507877               |
| SNP_P3_121637_352761 | NW_004515933.1 | Scaffold470 | 352761                  | CC                              | TT                | 1946507878               |
| SNP_P3_121638_356305 | NW_004515933.1 | Scaffold470 | 356305                  | GG                              | TT                | 1946507880               |
| SNP_P3_121639_362055 | NW_004515933.1 | Scaffold470 | 362055                  | AA                              | GG                | 1946507881               |
| SNP_P3_121640_362211 | NW_004515933.1 | Scaffold470 | 362211                  | TT                              | CC                | 1946507883               |
| SNP_P3_121641_362236 | NW_004515933.1 | Scaffold470 | 362236                  | CC                              | AA                | 1946507884               |
| SNP_P3_121642_362257 | NW_004515933.1 | Scaffold470 | 362257                  | AA                              | CC                | 1946507886               |
| SNP_P3_121644_366896 | NW_004515933.1 | Scaffold470 | 366896                  | TT                              | CC                | 1946507887               |
| SNP_P3_121645_367102 | NW_004515933.1 | Scaffold470 | 367102                  | GG                              | AA                | 1946507889               |
| SNP_P3_121646_367128 | NW_004515933.1 | Scaffold470 | 367128                  | CC                              | GG                | 1946507890               |
| SNP_P3_121647_368453 | NW_004515933.1 | Scaffold470 | 368453                  | GG                              | AA                | 1946507892               |
| SNP_P3_121648_368685 | NW_004515933.1 | Scaffold470 | 368685                  | GG                              | AA                | 1946507893               |
| SNP_P3_121649_369179 | NW_004515933.1 | Scaffold470 | 369179                  | TT                              | GG                | 1946507895               |
| SNP_P3_121650_369250 | NW_004515933.1 | Scaffold470 | 369250                  | TT                              | CC                | 1946507896               |

| SNPs IDs             | Chromosome IDs | Chromosomes | Physical positions (bp) | CDC Frontier (Reference genome) | (Pusa 256 & HPNB) | NCBI SNPdb Accession IDs |
|----------------------|----------------|-------------|-------------------------|---------------------------------|-------------------|--------------------------|
| SNP_P3_121651_369656 | NW_004515933.1 | Scaffold470 | 369656                  | TT                              | GG                | 1946507898               |
| SNP_P3_121652_370461 | NW_004515933.1 | Scaffold470 | 370461                  | CC                              | TT                | 1946507899               |
| SNP_P3_121653_370478 | NW_004515933.1 | Scaffold470 | 370478                  | GG                              | AA                | 1946507901               |
| SNP_P3_121654_370639 | NW_004515933.1 | Scaffold470 | 370639                  | GG                              | AA                | 1946507902               |
| SNP_P3_121656_370908 | NW_004515933.1 | Scaffold470 | 370908                  | AA                              | TT                | 1946507904               |
| SNP_P3_121657_371299 | NW_004515933.1 | Scaffold470 | 371299                  | GG                              | CC                | 1946507905               |
| SNP_P3_121658_371308 | NW_004515933.1 | Scaffold470 | 371308                  | TT                              | CC                | 1946507907               |
| SNP_P3_121659_372122 | NW_004515933.1 | Scaffold470 | 372122                  | CC                              | AA                | 1946507908               |
| SNP_P3_121660_372246 | NW_004515933.1 | Scaffold470 | 372246                  | TT                              | CC                | 1946507910               |
| SNP_P3_121661_372407 | NW_004515933.1 | Scaffold470 | 372407                  | CC                              | TT                | 1946507911               |
| SNP_P3_121662_372610 | NW_004515933.1 | Scaffold470 | 372610                  | CC                              | TT                | 1946507913               |
| SNP_P3_121664_372805 | NW_004515933.1 | Scaffold470 | 372805                  | CC                              | TT                | 1946507914               |
| SNP_P3_121665_373041 | NW_004515933.1 | Scaffold470 | 373041                  | TT                              | CC                | 1946507916               |
| SNP_P3_121666_373101 | NW_004515933.1 | Scaffold470 | 373101                  | TT                              | GG                | 1946507917               |
| SNP_P3_121667_373103 | NW_004515933.1 | Scaffold470 | 373103                  | TT                              | AA                | 1946507919               |
| SNP_P3_121668_373290 | NW_004515933.1 | Scaffold470 | 373290                  | CC                              | GG                | 1946507921               |
| SNP_P3_121669_373971 | NW_004515933.1 | Scaffold470 | 373971                  | TT                              | CC                | 1946507922               |
| SNP_P3_121670_374262 | NW_004515933.1 | Scaffold470 | 374262                  | CC                              | AA                | 1946507924               |
| SNP_P3_121671_374414 | NW_004515933.1 | Scaffold470 | 374414                  | CC                              | TT                | 1946507925               |
| SNP_P3_121672_375854 | NW_004515933.1 | Scaffold470 | 375854                  | TT                              | CC                | 1946507927               |
| SNP_P3_121674_377042 | NW_004515933.1 | Scaffold470 | 377042                  | CC                              | TT                | 1946507928               |
| SNP_P3_121675_377536 | NW_004515933.1 | Scaffold470 | 377536                  | GG                              | AA                | 1946507930               |
| SNP_P3_121676_377631 | NW_004515933.1 | Scaffold470 | 377631                  | GG                              | TT                | 1946507931               |
| SNP_P3_121677_377812 | NW_004515933.1 | Scaffold470 | 377812                  | CC                              | TT                | 1946507933               |
| SNP_P3_121678_379789 | NW_004515933.1 | Scaffold470 | 379789                  | TT                              | CC                | 1946507934               |
| SNP_P3_121679_380298 | NW_004515933.1 | Scaffold470 | 380298                  | TT                              | CC                | 1946507936               |
| SNP_P3_121680_380675 | NW_004515933.1 | Scaffold470 | 380675                  | CC                              | TT                | 1946507937               |
| SNP_P3_121681_380677 | NW_004515933.1 | Scaffold470 | 380677                  | TT                              | GG                | 1946507939               |
| SNP_P3_121682_380683 | NW_004515933.1 | Scaffold470 | 380683                  | CC                              | TT                | 1946507940               |
| SNP_P3_121683_380686 | NW_004515933.1 | Scaffold470 | 380686                  | CC                              | TT                | 1946507942               |
| SNP_P3_121684_382476 | NW_004515933.1 | Scaffold470 | 382476                  | AA                              | TT                | 1946507943               |
| SNP_P3_121685_383895 | NW_004515933.1 | Scaffold470 | 383895                  | GG                              | CC                | 1946507945               |
| SNP_P3_121686_386302 | NW_004515933.1 | Scaffold470 | 386302                  | TT                              | CC                | 1946507946               |
| SNP_P3_121687_387140 | NW_004515933.1 | Scaffold470 | 387140                  | GG                              | AA                | 1946507948               |
| SNP_P3_121688_389238 | NW_004515933.1 | Scaffold470 | 389238                  | GG                              | TT                | 1946507950               |
| SNP_P3_121689_389623 | NW_004515933.1 | Scaffold470 | 389623                  | TT                              | CC                | 1946507951               |
| SNP_P3_121690_389700 | NW_004515933.1 | Scaffold470 | 389700                  | TT                              | CC                | 1946507953               |
| SNP_P3_121691_389750 | NW_004515933.1 | Scaffold470 | 389750                  | TT                              | GG                | 1946507954               |
| SNP_P3_121692_389794 | NW_004515933.1 | Scaffold470 | 389794                  | TT                              | CC                | 1946507956               |
| SNP_P3_121693_390002 | NW_004515933.1 | Scaffold470 | 390002                  | CC                              | TT                | 1946507957               |
| SNP_P3_121694_390007 | NW_004515933.1 | Scaffold470 | 390007                  | TT                              | CC                | 1946507959               |
| SNP_P3_121695_673    | NW_004515934.1 | Scaffold471 | 673                     | GG                              | TT                | 1946507960               |

| SNPs IDs            | Chromosome IDs | Chromosomes | Physical positions (bp) | CDC Frontier (Reference genome) | (Pusa 256 & HPNB) | NCBI SNPdb Accession IDs |
|---------------------|----------------|-------------|-------------------------|---------------------------------|-------------------|--------------------------|
| SNP_P3_121696_1053  | NW_004515934.1 | Scaffold471 | 1053                    | CC                              | TT                | 1946507962               |
| SNP_P3_121697_3618  | NW_004515935.1 | Scaffold473 | 3618                    | TT                              | AA                | 1946507963               |
| SNP_P3_121698_3653  | NW_004515935.1 | Scaffold473 | 3653                    | GG                              | AA                | 1946507965               |
| SNP_P3_121699_3860  | NW_004515935.1 | Scaffold473 | 3860                    | CC                              | AA                | 1946507966               |
| SNP_P3_121700_4107  | NW_004515935.1 | Scaffold473 | 4107                    | CC                              | AA                | 1946507968               |
| SNP_P3_121701_4677  | NW_004515935.1 | Scaffold473 | 4677                    | GG                              | AA                | 1946507970               |
| SNP_P3_121702_5883  | NW_004515935.1 | Scaffold473 | 5883                    | CC                              | GG                | 1946507971               |
| SNP_P3_121703_6306  | NW_004515935.1 | Scaffold473 | 6306                    | AA                              | GG                | 1946507973               |
| SNP_P3_121704_6335  | NW_004515935.1 | Scaffold473 | 6335                    | AA                              | GG                | 1946507974               |
| SNP_P3_121705_6397  | NW_004515935.1 | Scaffold473 | 6397                    | CC                              | TT                | 1946507976               |
| SNP_P3_121706_12705 | NW_004515935.1 | Scaffold473 | 12705                   | AA                              | TT                | 1946507977               |
| SNP_P3_121707_12826 | NW_004515935.1 | Scaffold473 | 12826                   | GG                              | AA                | 1946507979               |
| SNP_P3_121708_12843 | NW_004515935.1 | Scaffold473 | 12843                   | TT                              | GG                | 1946507980               |
| SNP_P3_121709_12871 | NW_004515935.1 | Scaffold473 | 12871                   | GG                              | AA                | 1946507982               |
| SNP_P3_121710_12918 | NW_004515935.1 | Scaffold473 | 12918                   | GG                              | TT                | 1946507983               |
| SNP_P3_121711_12997 | NW_004515935.1 | Scaffold473 | 12997                   | GG                              | CC                | 1946507985               |
| SNP_P3_121712_13092 | NW_004515935.1 | Scaffold473 | 13092                   | AA                              | GG                | 1946507986               |
| SNP_P3_121713_13098 | NW_004515935.1 | Scaffold473 | 13098                   | AA                              | TT                | 1946507988               |
| SNP_P3_121714_13099 | NW_004515935.1 | Scaffold473 | 13099                   | CC                              | GG                | 1946507990               |
| SNP_P3_121715_13215 | NW_004515935.1 | Scaffold473 | 13215                   | TT                              | AA                | 1946507991               |
| SNP_P3_121716_13253 | NW_004515935.1 | Scaffold473 | 13253                   | AA                              | CC                | 1946507993               |
| SNP_P3_121717_13323 | NW_004515935.1 | Scaffold473 | 13323                   | AA                              | GG                | 1946507994               |
| SNP_P3_121718_30356 | NW_004515935.1 | Scaffold473 | 30356                   | GG                              | TT                | 1946507996               |
| SNP_P3_121719_5530  | NW_004515936.1 | Scaffold475 | 5530                    | TT                              | AA                | 1946507997               |
| SNP_P3_121720_5880  | NW_004515936.1 | Scaffold475 | 5880                    | TT                              | CC                | 1946507999               |
| SNP_P3_121721_5884  | NW_004515936.1 | Scaffold475 | 5884                    | GG                              | CC                | 1946508000               |
| SNP_P3_121722_19925 | NW_004515936.1 | Scaffold475 | 19925                   | AA                              | TT                | 1946508002               |
| SNP_P3_121723_20221 | NW_004515936.1 | Scaffold475 | 20221                   | TT                              | CC                | 1946508003               |
| SNP_P3_121724_20255 | NW_004515936.1 | Scaffold475 | 20255                   | AA                              | GG                | 1946508005               |
| SNP_P3_121726_22905 | NW_004515936.1 | Scaffold475 | 22905                   | AA                              | TT                | 1946508006               |
| SNP_P3_121727_32197 | NW_004515936.1 | Scaffold475 | 32197                   | TT                              | CC                | 1946508008               |
| SNP_P3_121728_35066 | NW_004515936.1 | Scaffold475 | 35066                   | TT                              | AA                | 1946508009               |
| SNP_P3_121729_36446 | NW_004515936.1 | Scaffold475 | 36446                   | AA                              | TT                | 1946508011               |
| SNP_P3_121730_36461 | NW_004515936.1 | Scaffold475 | 36461                   | AA                              | GG                | 1946508012               |
| SNP_P3_121731_36470 | NW_004515936.1 | Scaffold475 | 36470                   | TT                              | CC                | 1946508014               |
| SNP_P3_121732_36488 | NW_004515936.1 | Scaffold475 | 36488                   | CC                              | TT                | 1946508015               |
| SNP_P3_121733_36492 | NW_004515936.1 | Scaffold475 | 36492                   | AA                              | GG                | 1946508017               |
| SNP_P3_121734_36500 | NW_004515936.1 | Scaffold475 | 36500                   | TT                              | CC                | 1946508018               |
| SNP_P3_121735_36513 | NW_004515936.1 | Scaffold475 | 36513                   | AA                              | TT                | 1946508020               |
| SNP_P3_121736_39572 | NW_004515936.1 | Scaffold475 | 39572                   | GG                              | AA                | 1946508021               |
| SNP_P3_121737_44096 | NW_004515936.1 | Scaffold475 | 44096                   | CC                              | TT                | 1946508023               |
| SNP_P3_121738_44359 | NW_004515936.1 | Scaffold475 | 44359                   | GG                              | CC                | 1946508024               |

| SNPs IDs             | Chromosome IDs | Chromosomes | Physical positions (bp) | CDC Frontier (Reference genome) | (Pusa 256 & HPNB) | NCBI SNPdb Accession IDs |
|----------------------|----------------|-------------|-------------------------|---------------------------------|-------------------|--------------------------|
| SNP_P3_121739_44427  | NW_004515936.1 | Scaffold475 | 44427                   | AA                              | CC                | 1946508026               |
| SNP_P3_121740_44428  | NW_004515936.1 | Scaffold475 | 44428                   | TT                              | GG                | 1946508027               |
| SNP_P3_121741_44440  | NW_004515936.1 | Scaffold475 | 44440                   | TT                              | CC                | 1946508029               |
| SNP_P3_121742_57477  | NW_004515936.1 | Scaffold475 | 57477                   | GG                              | AA                | 1946508030               |
| SNP_P3_121743_70284  | NW_004515936.1 | Scaffold475 | 70284                   | TT                              | CC                | 1946508032               |
| SNP_P3_121744_70313  | NW_004515936.1 | Scaffold475 | 70313                   | TT                              | GG                | 1946508033               |
| SNP_P3_121745_79176  | NW_004515936.1 | Scaffold475 | 79176                   | GG                              | AA                | 1946508035               |
| SNP_P3_121746_88872  | NW_004515936.1 | Scaffold475 | 88872                   | AA                              | GG                | 1946508036               |
| SNP_P3_121747_89244  | NW_004515936.1 | Scaffold475 | 89244                   | GG                              | AA                | 1946508038               |
| SNP_P3_121748_89266  | NW_004515936.1 | Scaffold475 | 89266                   | TT                              | CC                | 1946508039               |
| SNP_P3_121749_89286  | NW_004515936.1 | Scaffold475 | 89286                   | TT                              | CC                | 1946508041               |
| SNP_P3_121750_89289  | NW_004515936.1 | Scaffold475 | 89289                   | AA                              | CC                | 1946508042               |
| SNP_P3_121751_89295  | NW_004515936.1 | Scaffold475 | 89295                   | TT                              | CC                | 1946508044               |
| SNP_P3_121752_93405  | NW_004515936.1 | Scaffold475 | 93405                   | AA                              | TT                | 1946508045               |
| SNP_P3_121753_97049  | NW_004515936.1 | Scaffold475 | 97049                   | TT                              | CC                | 1946508047               |
| SNP_P3_121754_98436  | NW_004515936.1 | Scaffold475 | 98436                   | AA                              | GG                | 1946508048               |
| SNP_P3_121755_98537  | NW_004515936.1 | Scaffold475 | 98537                   | GG                              | AA                | 1946508050               |
| SNP_P3_121756_121504 | NW_004515936.1 | Scaffold475 | 121504                  | TT                              | CC                | 1946508051               |
| SNP_P3_121757_121561 | NW_004515936.1 | Scaffold475 | 121561                  | AA                              | GG                | 1946508053               |
| SNP_P3_121758_124231 | NW_004515936.1 | Scaffold475 | 124231                  | AA                              | GG                | 1946508054               |
| SNP_P3_121759_128001 | NW_004515936.1 | Scaffold475 | 128001                  | GG                              | TT                | 1946508056               |
| SNP_P3_121760_130700 | NW_004515936.1 | Scaffold475 | 130700                  | TT                              | GG                | 1946508057               |
| SNP_P3_121761_140811 | NW_004515936.1 | Scaffold475 | 140811                  | CC                              | GG                | 1946508059               |
| SNP_P3_121762_140822 | NW_004515936.1 | Scaffold475 | 140822                  | AA                              | GG                | 1946508060               |
| SNP_P3_121763_140826 | NW_004515936.1 | Scaffold475 | 140826                  | GG                              | TT                | 1946508061               |
| SNP_P3_121764_140903 | NW_004515936.1 | Scaffold475 | 140903                  | TT                              | GG                | 1946508063               |
| SNP_P3_121765_140907 | NW_004515936.1 | Scaffold475 | 140907                  | TT                              | CC                | 1946508064               |
| SNP_P3_121767_141228 | NW_004515936.1 | Scaffold475 | 141228                  | TT                              | GG                | 1946508066               |
| SNP_P3_121768_141311 | NW_004515936.1 | Scaffold475 | 141311                  | TT                              | CC                | 1946508067               |
| SNP_P3_121769_141364 | NW_004515936.1 | Scaffold475 | 141364                  | CC                              | TT                | 1946508069               |
| SNP_P3_121770_141394 | NW_004515936.1 | Scaffold475 | 141394                  | TT                              | CC                | 1946508070               |
| SNP_P3_121771_141396 | NW_004515936.1 | Scaffold475 | 141396                  | TT                              | GG                | 1946508072               |
| SNP_P3_121772_141418 | NW_004515936.1 | Scaffold475 | 141418                  | TT                              | CC                | 1946508073               |
| SNP_P3_121773_141419 | NW_004515936.1 | Scaffold475 | 141419                  | AA                              | TT                | 1946508075               |
| SNP_P3_121774_141448 | NW_004515936.1 | Scaffold475 | 141448                  | TT                              | CC                | 1946508076               |
| SNP_P3_121775_141487 | NW_004515936.1 | Scaffold475 | 141487                  | CC                              | TT                | 1946508078               |
| SNP_P3_121776_141497 | NW_004515936.1 | Scaffold475 | 141497                  | GG                              | AA                | 1946508079               |
| SNP_P3_121777_141506 | NW_004515936.1 | Scaffold475 | 141506                  | TT                              | CC                | 1946508081               |
| SNP_P3_121778_144184 | NW_004515936.1 | Scaffold475 | 144184                  | AA                              | GG                | 1946508082               |
| SNP_P3_121779_144346 | NW_004515936.1 | Scaffold475 | 144346                  | TT                              | CC                | 1946508084               |
| SNP_P3_121780_144470 | NW_004515936.1 | Scaffold475 | 144470                  | AA                              | TT                | 1946508085               |
| SNP_P3_121781_144483 | NW_004515936.1 | Scaffold475 | 144483                  | GG                              | CC                | 1946508087               |

| SNPs IDs             | Chromosome IDs | Chromosomes | Physical positions (bp) | CDC Frontier (Reference genome) | (Pusa 256 & HPNB) | NCBI SNPdb Accession IDs |
|----------------------|----------------|-------------|-------------------------|---------------------------------|-------------------|--------------------------|
| SNP_P3_121782_144507 | NW_004515936.1 | Scaffold475 | 144507                  | TT                              | CC                | 1946508088               |
| SNP_P3_121783_144509 | NW_004515936.1 | Scaffold475 | 144509                  | AA                              | CC                | 1946508090               |
| SNP_P3_121784_144572 | NW_004515936.1 | Scaffold475 | 144572                  | CC                              | TT                | 1946508091               |
| SNP_P3_121785_144902 | NW_004515936.1 | Scaffold475 | 144902                  | TT                              | CC                | 1946508093               |
| SNP_P3_121786_144920 | NW_004515936.1 | Scaffold475 | 144920                  | AA                              | CC                | 1946508094               |
| SNP_P3_121787_144942 | NW_004515936.1 | Scaffold475 | 144942                  | TT                              | AA                | 1946508096               |
| SNP_P3_121788_144995 | NW_004515936.1 | Scaffold475 | 144995                  | CC                              | TT                | 1946508097               |
| SNP_P3_121789_145006 | NW_004515936.1 | Scaffold475 | 145006                  | TT                              | AA                | 1946508099               |
| SNP_P3_121790_145013 | NW_004515936.1 | Scaffold475 | 145013                  | AA                              | GG                | 1946508100               |
| SNP_P3_121791_145025 | NW_004515936.1 | Scaffold475 | 145025                  | TT                              | GG                | 1946508101               |
| SNP_P3_121792_145070 | NW_004515936.1 | Scaffold475 | 145070                  | AA                              | GG                | 1946508103               |
| SNP_P3_121794_145178 | NW_004515936.1 | Scaffold475 | 145178                  | AA                              | GG                | 1946508104               |
| SNP_P3_121795_145201 | NW_004515936.1 | Scaffold475 | 145201                  | AA                              | GG                | 1946508106               |
| SNP_P3_121796_145386 | NW_004515936.1 | Scaffold475 | 145386                  | TT                              | CC                | 1946508108               |
| SNP_P3_121797_145389 | NW_004515936.1 | Scaffold475 | 145389                  | GG                              | CC                | 1946508109               |
| SNP_P3_121798_145454 | NW_004515936.1 | Scaffold475 | 145454                  | AA                              | GG                | 1946508111               |
| SNP_P3_121799_148753 | NW_004515936.1 | Scaffold475 | 148753                  | TT                              | CC                | 1946508112               |
| SNP_P3_121800_148796 | NW_004515936.1 | Scaffold475 | 148796                  | AA                              | GG                | 1946508114               |
| SNP_P3_121801_148798 | NW_004515936.1 | Scaffold475 | 148798                  | AA                              | GG                | 1946508115               |
| SNP_P3_121802_148810 | NW_004515936.1 | Scaffold475 | 148810                  | AA                              | GG                | 1946508117               |
| SNP_P3_121803_148820 | NW_004515936.1 | Scaffold475 | 148820                  | CC                              | GG                | 1946508118               |
| SNP_P3_121804_148821 | NW_004515936.1 | Scaffold475 | 148821                  | AA                              | GG                | 1946508119               |
| SNP_P3_121805_162999 | NW_004515936.1 | Scaffold475 | 162999                  | AA                              | GG                | 1946508121               |
| SNP_P3_121806_163003 | NW_004515936.1 | Scaffold475 | 163003                  | AA                              | CC                | 1946508122               |
| SNP_P3_121807_163120 | NW_004515936.1 | Scaffold475 | 163120                  | AA                              | GG                | 1946508124               |
| SNP_P3_121809_163134 | NW_004515936.1 | Scaffold475 | 163134                  | TT                              | GG                | 1946508125               |
| SNP_P3_121810_163218 | NW_004515936.1 | Scaffold475 | 163218                  | TT                              | CC                | 1946508127               |
| SNP_P3_121811_163225 | NW_004515936.1 | Scaffold475 | 163225                  | AA                              | GG                | 1946508128               |
| SNP_P3_121812_163253 | NW_004515936.1 | Scaffold475 | 163253                  | TT                              | GG                | 1946508130               |
| SNP_P3_121813_163296 | NW_004515936.1 | Scaffold475 | 163296                  | AA                              | CC                | 1946508131               |
| SNP_P3_121814_163316 | NW_004515936.1 | Scaffold475 | 163316                  | GG                              | CC                | 1946508133               |
| SNP_P3_121815_163332 | NW_004515936.1 | Scaffold475 | 163332                  | TT                              | CC                | 1946508134               |
| SNP_P3_121816_163367 | NW_004515936.1 | Scaffold475 | 163367                  | GG                              | CC                | 1946508136               |
| SNP_P3_121817_163389 | NW_004515936.1 | Scaffold475 | 163389                  | TT                              | CC                | 1946508137               |
| SNP_P3_121818_163424 | NW_004515936.1 | Scaffold475 | 163424                  | AA                              | GG                | 1946508139               |
| SNP_P3_121819_163438 | NW_004515936.1 | Scaffold475 | 163438                  | TT                              | CC                | 1946508140               |
| SNP_P3_121820_163458 | NW_004515936.1 | Scaffold475 | 163458                  | TT                              | CC                | 1946508142               |
| SNP_P3_121821_163467 | NW_004515936.1 | Scaffold475 | 163467                  | TT                              | GG                | 1946508143               |
| SNP_P3_121822_163514 | NW_004515936.1 | Scaffold475 | 163514                  | AA                              | GG                | 1946508145               |
| SNP_P3_121823_163559 | NW_004515936.1 | Scaffold475 | 163559                  | TT                              | CC                | 1946508146               |
| SNP_P3_121824_163616 | NW_004515936.1 | Scaffold475 | 163616                  | TT                              | CC                | 1946508148               |
| SNP_P3_121825_163688 | NW_004515936.1 | Scaffold475 | 163688                  | AA                              | GG                | 1946508149               |

| SNPs IDs             | Chromosome IDs | Chromosomes | Physical positions (bp) | CDC Frontier (Reference genome) | (Pusa 256 & HPNB) | NCBI SNPdb Accession IDs |
|----------------------|----------------|-------------|-------------------------|---------------------------------|-------------------|--------------------------|
| SNP_P3_121826_163755 | NW_004515936.1 | Scaffold475 | 163755                  | CC                              | AA                | 1946508151               |
| SNP_P3_121827_163786 | NW_004515936.1 | Scaffold475 | 163786                  | TT                              | CC                | 1946508152               |
| SNP_P3_121828_163787 | NW_004515936.1 | Scaffold475 | 163787                  | AA                              | GG                | 1946508154               |
| SNP_P3_121829_163824 | NW_004515936.1 | Scaffold475 | 163824                  | CC                              | TT                | 1946508155               |
| SNP_P3_121830_163825 | NW_004515936.1 | Scaffold475 | 163825                  | AA                              | GG                | 1946508157               |
| SNP_P3_121831_163850 | NW_004515936.1 | Scaffold475 | 163850                  | TT                              | GG                | 1946508158               |
| SNP_P3_121832_163886 | NW_004515936.1 | Scaffold475 | 163886                  | AA                              | CC                | 1946508160               |
| SNP_P3_121833_164259 | NW_004515936.1 | Scaffold475 | 164259                  | TT                              | CC                | 1946508161               |
| SNP_P3_121834_164291 | NW_004515936.1 | Scaffold475 | 164291                  | AA                              | GG                | 1946508163               |
| SNP_P3_121835_167552 | NW_004515936.1 | Scaffold475 | 167552                  | TT                              | CC                | 1946508164               |
| SNP_P3_121836_167620 | NW_004515936.1 | Scaffold475 | 167620                  | AA                              | GG                | 1946508166               |
| SNP_P3_121837_168035 | NW_004515936.1 | Scaffold475 | 168035                  | TT                              | AA                | 1946508168               |
| SNP_P3_121838_174398 | NW_004515936.1 | Scaffold475 | 174398                  | AA                              | GG                | 1946508169               |
| SNP_P3_121839_174430 | NW_004515936.1 | Scaffold475 | 174430                  | TT                              | CC                | 1946508171               |
| SNP_P3_121840_174659 | NW_004515936.1 | Scaffold475 | 174659                  | AA                              | GG                | 1946508172               |
| SNP_P3_121842_174726 | NW_004515936.1 | Scaffold475 | 174726                  | AA                              | TT                | 1946508174               |
| SNP_P3_121843_174744 | NW_004515936.1 | Scaffold475 | 174744                  | AA                              | TT                | 1946508175               |
| SNP_P3_121844_174775 | NW_004515936.1 | Scaffold475 | 174775                  | AA                              | TT                | 1946508177               |
| SNP_P3_121845_175023 | NW_004515936.1 | Scaffold475 | 175023                  | AA                              | GG                | 1946508178               |
| SNP_P3_121846_175112 | NW_004515936.1 | Scaffold475 | 175112                  | CC                              | GG                | 1946508180               |
| SNP_P3_121847_175193 | NW_004515936.1 | Scaffold475 | 175193                  | AA                              | CC                | 1946508181               |
| SNP_P3_121848_177151 | NW_004515936.1 | Scaffold475 | 177151                  | TT                              | CC                | 1946508183               |
| SNP_P3_121849_177153 | NW_004515936.1 | Scaffold475 | 177153                  | GG                              | CC                | 1946508184               |
| SNP_P3_121850_177523 | NW_004515936.1 | Scaffold475 | 177523                  | GG                              | TT                | 1946508186               |
| SNP_P3_121851_184607 | NW_004515936.1 | Scaffold475 | 184607                  | CC                              | TT                | 1946508187               |
| SNP_P3_121852_184897 | NW_004515936.1 | Scaffold475 | 184897                  | AA                              | TT                | 1946508189               |
| SNP_P3_121853_184904 | NW_004515936.1 | Scaffold475 | 184904                  | CC                              | TT                | 1946508190               |
| SNP_P3_121854_184933 | NW_004515936.1 | Scaffold475 | 184933                  | TT                              | CC                | 1946508192               |
| SNP_P3_121855_189810 | NW_004515936.1 | Scaffold475 | 189810                  | AA                              | TT                | 1946508193               |
| SNP_P3_121856_189828 | NW_004515936.1 | Scaffold475 | 189828                  | CC                              | AA                | 1946508195               |
| SNP_P3_121857_60     | NW_004515937.1 | Scaffold476 | 60                      | CC                              | AA                | 1946508196               |
| SNP_P3_121858_106    | NW_004515937.1 | Scaffold476 | 106                     | GG                              | AA                | 1946508198               |
| SNP_P3_121859_120    | NW_004515937.1 | Scaffold476 | 120                     | CC                              | TT                | 1946508199               |
| SNP_P3_121860_123    | NW_004515937.1 | Scaffold476 | 123                     | GG                              | AA                | 1946508201               |
| SNP_P3_121861_224    | NW_004515937.1 | Scaffold476 | 224                     | TT                              | CC                | 1946508202               |
| SNP_P3_121862_295    | NW_004515937.1 | Scaffold476 | 295                     | CC                              | TT                | 1946508204               |
| SNP_P3_121863_308    | NW_004515937.1 | Scaffold476 | 308                     | TT                              | CC                | 1946508205               |
| SNP_P3_121864_420    | NW_004515937.1 | Scaffold476 | 420                     | CC                              | TT                | 1946508207               |
| SNP_P3_121865_604    | NW_004515937.1 | Scaffold476 | 604                     | AA                              | TT                | 1946508208               |
| SNP_P3_121866_645    | NW_004515937.1 | Scaffold476 | 645                     | GG                              | AA                | 1946508210               |
| SNP_P3_121867_724    | NW_004515937.1 | Scaffold476 | 724                     | AA                              | CC                | 1946508211               |
| SNP_P3_121868_762    | NW_004515937.1 | Scaffold476 | 762                     | CC                              | TT                | 1946508213               |

| SNPs IDs            | Chromosome IDs | Chromosomes | Physical positions (bp) | CDC Frontier (Reference genome) | (Pusa 256 & HPNB) | NCBI SNPdb Accession IDs |
|---------------------|----------------|-------------|-------------------------|---------------------------------|-------------------|--------------------------|
| SNP_P3_121869_763   | NW_004515937.1 | Scaffold476 | 763                     | AA                              | GG                | 1946508214               |
| SNP_P3_121870_814   | NW_004515937.1 | Scaffold476 | 814                     | TT                              | CC                | 1946508216               |
| SNP_P3_121871_1007  | NW_004515937.1 | Scaffold476 | 1007                    | GG                              | TT                | 1946508217               |
| SNP_P3_121872_1069  | NW_004515937.1 | Scaffold476 | 1069                    | GG                              | TT                | 1946508219               |
| SNP_P3_121873_1083  | NW_004515937.1 | Scaffold476 | 1083                    | GG                              | AA                | 1946508220               |
| SNP_P3_121874_1131  | NW_004515937.1 | Scaffold476 | 1131                    | GG                              | TT                | 1946508222               |
| SNP_P3_121875_1183  | NW_004515937.1 | Scaffold476 | 1183                    | AA                              | CC                | 1946508223               |
| SNP_P3_121876_1223  | NW_004515937.1 | Scaffold476 | 1223                    | TT                              | GG                | 1946508225               |
| SNP_P3_121877_1350  | NW_004515937.1 | Scaffold476 | 1350                    | TT                              | GG                | 1946508226               |
| SNP_P3_121878_1370  | NW_004515937.1 | Scaffold476 | 1370                    | TT                              | AA                | 1946508227               |
| SNP_P3_121879_1567  | NW_004515937.1 | Scaffold476 | 1567                    | TT                              | CC                | 1946508229               |
| SNP_P3_121880_1722  | NW_004515937.1 | Scaffold476 | 1722                    | GG                              | TT                | 1946508230               |
| SNP_P3_121882_5233  | NW_004515937.1 | Scaffold476 | 5233                    | AA                              | GG                | 1946508232               |
| SNP_P3_121883_5885  | NW_004515937.1 | Scaffold476 | 5885                    | AA                              | GG                | 1946508233               |
| SNP_P3_121884_6201  | NW_004515937.1 | Scaffold476 | 6201                    | CC                              | GG                | 1946508235               |
| SNP_P3_121885_7276  | NW_004515937.1 | Scaffold476 | 7276                    | AA                              | GG                | 1946508236               |
| SNP_P3_121886_9040  | NW_004515937.1 | Scaffold476 | 9040                    | CC                              | AA                | 1946508238               |
| SNP_P3_121887_9995  | NW_004515937.1 | Scaffold476 | 9995                    | TT                              | CC                | 1946508239               |
| SNP_P3_121888_9999  | NW_004515937.1 | Scaffold476 | 9999                    | GG                              | AA                | 1946508241               |
| SNP_P3_121889_10003 | NW_004515937.1 | Scaffold476 | 10003                   | GG                              | TT                | 1946508242               |
| SNP_P3_121890_10019 | NW_004515937.1 | Scaffold476 | 10019                   | GG                              | CC                | 1946508244               |
| SNP_P3_121891_10032 | NW_004515937.1 | Scaffold476 | 10032                   | GG                              | AA                | 1946508245               |
| SNP_P3_121892_10040 | NW_004515937.1 | Scaffold476 | 10040                   | GG                              | AA                | 1946508246               |
| SNP_P3_121893_10046 | NW_004515937.1 | Scaffold476 | 10046                   | CC                              | TT                | 1946508248               |
| SNP_P3_121894_10051 | NW_004515937.1 | Scaffold476 | 10051                   | CC                              | TT                | 1946508249               |
| SNP_P3_121895_10250 | NW_004515937.1 | Scaffold476 | 10250                   | TT                              | GG                | 1946508251               |
| SNP_P3_121896_10348 | NW_004515937.1 | Scaffold476 | 10348                   | TT                              | CC                | 1946508252               |
| SNP_P3_121897_10548 | NW_004515937.1 | Scaffold476 | 10548                   | GG                              | AA                | 1946508254               |
| SNP_P3_121898_10818 | NW_004515937.1 | Scaffold476 | 10818                   | CC                              | TT                | 1946508255               |
| SNP_P3_121899_10856 | NW_004515937.1 | Scaffold476 | 10856                   | AA                              | GG                | 1946508257               |
| SNP_P3_121900_10929 | NW_004515937.1 | Scaffold476 | 10929                   | TT                              | CC                | 1946508258               |
| SNP_P3_121901_10930 | NW_004515937.1 | Scaffold476 | 10930                   | TT                              | CC                | 1946508260               |
| SNP_P3_121902_10961 | NW_004515937.1 | Scaffold476 | 10961                   | AA                              | GG                | 1946508261               |
| SNP_P3_121903_11018 | NW_004515937.1 | Scaffold476 | 11018                   | AA                              | GG                | 1946508263               |
| SNP_P3_121904_11298 | NW_004515937.1 | Scaffold476 | 11298                   | TT                              | CC                | 1946508265               |
| SNP_P3_121905_11423 | NW_004515937.1 | Scaffold476 | 11423                   | GG                              | AA                | 1946508267               |
| SNP_P3_121906_11426 | NW_004515937.1 | Scaffold476 | 11426                   | GG                              | AA                | 1946508268               |
| SNP_P3_121907_11440 | NW_004515937.1 | Scaffold476 | 11440                   | AA                              | GG                | 1946508270               |
| SNP_P3_121908_11472 | NW_004515937.1 | Scaffold476 | 11472                   | CC                              | GG                | 1946508271               |
| SNP_P3_121909_867   | NW_004515938.1 | Scaffold477 | 867                     | GG                              | AA                | 1946508273               |
| SNP_P3_121910_4449  | NW_004515938.1 | Scaffold477 | 4449                    | TT                              | CC                | 1946508274               |
| SNP_P3_121911_4705  | NW_004515938.1 | Scaffold477 | 4705                    | CC                              | GG                | 1946508276               |



| SNPs IDs            | Chromosome IDs | Chromosomes | Physical positions (bp) | CDC Frontier (Reference genome) | (Pusa 256 & HPNB) | NCBI SNPdb Accession IDs |
|---------------------|----------------|-------------|-------------------------|---------------------------------|-------------------|--------------------------|
| SNP_P3_121912_5406  | NW_004515938.1 | Scaffold477 | 5406                    | CC                              | GG                | 1946508277               |
| SNP_P3_121913_6452  | NW_004515938.1 | Scaffold477 | 6452                    | CC                              | TT                | 1946508279               |
| SNP_P3_121914_6510  | NW_004515938.1 | Scaffold477 | 6510                    | CC                              | TT                | 1946508280               |
| SNP_P3_121915_6705  | NW_004515938.1 | Scaffold477 | 6705                    | AA                              | GG                | 1946508282               |
| SNP_P3_121916_7149  | NW_004515938.1 | Scaffold477 | 7149                    | TT                              | CC                | 1946508283               |
| SNP_P3_121917_7622  | NW_004515938.1 | Scaffold477 | 7622                    | TT                              | CC                | 1946508285               |
| SNP_P3_121918_8270  | NW_004515938.1 | Scaffold477 | 8270                    | CC                              | TT                | 1946508286               |
| SNP_P3_121919_8303  | NW_004515938.1 | Scaffold477 | 8303                    | GG                              | AA                | 1946508287               |
| SNP_P3_121920_8790  | NW_004515938.1 | Scaffold477 | 8790                    | TT                              | CC                | 1946508289               |
| SNP_P3_121921_9157  | NW_004515938.1 | Scaffold477 | 9157                    | AA                              | GG                | 1946508290               |
| SNP_P3_121922_9416  | NW_004515938.1 | Scaffold477 | 9416                    | CC                              | GG                | 1946508292               |
| SNP_P3_121923_9466  | NW_004515938.1 | Scaffold477 | 9466                    | CC                              | AA                | 1946508294               |
| SNP_P3_121924_9620  | NW_004515938.1 | Scaffold477 | 9620                    | GG                              | AA                | 1946508295               |
| SNP_P3_121925_9779  | NW_004515938.1 | Scaffold477 | 9779                    | CC                              | GG                | 1946508297               |
| SNP_P3_121926_9929  | NW_004515938.1 | Scaffold477 | 9929                    | GG                              | AA                | 1946508298               |
| SNP_P3_121927_9983  | NW_004515938.1 | Scaffold477 | 9983                    | GG                              | AA                | 1946508300               |
| SNP_P3_121928_10133 | NW_004515938.1 | Scaffold477 | 10133                   | GG                              | TT                | 1946508301               |
| SNP_P3_121929_10141 | NW_004515938.1 | Scaffold477 | 10141                   | TT                              | CC                | 1946508303               |
| SNP_P3_121930_10229 | NW_004515938.1 | Scaffold477 | 10229                   | AA                              | TT                | 1946508304               |
| SNP_P3_121932_10326 | NW_004515938.1 | Scaffold477 | 10326                   | GG                              | TT                | 1946508306               |
| SNP_P3_121933_10333 | NW_004515938.1 | Scaffold477 | 10333                   | TT                              | GG                | 1946508307               |
| SNP_P3_121934_10402 | NW_004515938.1 | Scaffold477 | 10402                   | AA                              | GG                | 1946508309               |
| SNP_P3_121935_10601 | NW_004515938.1 | Scaffold477 | 10601                   | TT                              | AA                | 1946508311               |
| SNP_P3_121936_10738 | NW_004515938.1 | Scaffold477 | 10738                   | GG                              | AA                | 1946508312               |
| SNP_P3_121937_10766 | NW_004515938.1 | Scaffold477 | 10766                   | CC                              | GG                | 1946508314               |
| SNP_P3_121938_10822 | NW_004515938.1 | Scaffold477 | 10822                   | TT                              | AA                | 1946508315               |
| SNP_P3_121939_10839 | NW_004515938.1 | Scaffold477 | 10839                   | TT                              | AA                | 1946508317               |
| SNP_P3_121940_11193 | NW_004515938.1 | Scaffold477 | 11193                   | GG                              | AA                | 1946508318               |
| SNP_P3_121941_11248 | NW_004515938.1 | Scaffold477 | 11248                   | AA                              | TT                | 1946508320               |
| SNP_P3_121943_11634 | NW_004515938.1 | Scaffold477 | 11634                   | AA                              | GG                | 1946508321               |
| SNP_P3_121944_11713 | NW_004515938.1 | Scaffold477 | 11713                   | GG                              | AA                | 1946508323               |
| SNP_P3_121945_11738 | NW_004515938.1 | Scaffold477 | 11738                   | AA                              | TT                | 1946508324               |
| SNP_P3_121946_11795 | NW_004515938.1 | Scaffold477 | 11795                   | AA                              | GG                | 1946508325               |
| SNP_P3_121947_11830 | NW_004515938.1 | Scaffold477 | 11830                   | AA                              | GG                | 1946508326               |
| SNP_P3_121948_11855 | NW_004515938.1 | Scaffold477 | 11855                   | GG                              | AA                | 1946508327               |
| SNP_P3_121949_11901 | NW_004515938.1 | Scaffold477 | 11901                   | TT                              | GG                | 1946508328               |
| SNP_P3_121950_11910 | NW_004515938.1 | Scaffold477 | 11910                   | CC                              | TT                | 1946508329               |
| SNP_P3_121951_11954 | NW_004515938.1 | Scaffold477 | 11954                   | TT                              | AA                | 1946508330               |
| SNP_P3_121952_11983 | NW_004515938.1 | Scaffold477 | 11983                   | GG                              | AA                | 1946508331               |
| SNP_P3_121953_11985 | NW_004515938.1 | Scaffold477 | 11985                   | TT                              | CC                | 1946508332               |
| SNP_P3_121954_12038 | NW_004515938.1 | Scaffold477 | 12038                   | TT                              | CC                | 1946508333               |
| SNP_P3_121955_12074 | NW_004515938.1 | Scaffold477 | 12074                   | CC                              | GG                | 1946508334               |

| SNPs IDs            | Chromosome IDs | Chromosomes | Physical positions (bp) | CDC Frontier (Reference genome) | (Pusa 256 & HPNB) | NCBI SNPdb Accession IDs |
|---------------------|----------------|-------------|-------------------------|---------------------------------|-------------------|--------------------------|
| SNP_P3_121956_12208 | NW_004515938.1 | Scaffold477 | 12208                   | AA                              | CC                | 1946508335               |
| SNP_P3_121957_12225 | NW_004515938.1 | Scaffold477 | 12225                   | TT                              | CC                | 1946508336               |
| SNP_P3_121958_12390 | NW_004515938.1 | Scaffold477 | 12390                   | GG                              | AA                | 1946508337               |
| SNP_P3_121959_12543 | NW_004515938.1 | Scaffold477 | 12543                   | GG                              | CC                | 1946508338               |
| SNP_P3_121960_12648 | NW_004515938.1 | Scaffold477 | 12648                   | CC                              | AA                | 1946508339               |
| SNP_P3_121961_12664 | NW_004515938.1 | Scaffold477 | 12664                   | CC                              | TT                | 1946508340               |
| SNP_P3_121962_12822 | NW_004515938.1 | Scaffold477 | 12822                   | CC                              | AA                | 1946508341               |
| SNP_P3_121963_13004 | NW_004515938.1 | Scaffold477 | 13004                   | GG                              | TT                | 1946508342               |
| SNP_P3_121964_13398 | NW_004515938.1 | Scaffold477 | 13398                   | AA                              | GG                | 1946508343               |
| SNP_P3_121965_13502 | NW_004515938.1 | Scaffold477 | 13502                   | CC                              | GG                | 1946508344               |
| SNP_P3_121966_13532 | NW_004515938.1 | Scaffold477 | 13532                   | GG                              | TT                | 1946508345               |
| SNP_P3_121967_13569 | NW_004515938.1 | Scaffold477 | 13569                   | GG                              | AA                | 1946508346               |
| SNP_P3_121968_14445 | NW_004515938.1 | Scaffold477 | 14445                   | TT                              | CC                | 1946508347               |
| SNP_P3_121969_14492 | NW_004515938.1 | Scaffold477 | 14492                   | TT                              | GG                | 1946508348               |
| SNP_P3_121970_14779 | NW_004515938.1 | Scaffold477 | 14779                   | AA                              | TT                | 1946508349               |
| SNP_P3_121971_14780 | NW_004515938.1 | Scaffold477 | 14780                   | AA                              | GG                | 1946508350               |
| SNP_P3_121972_15351 | NW_004515938.1 | Scaffold477 | 15351                   | CC                              | TT                | 1946508352               |
| SNP_P3_121973_15469 | NW_004515938.1 | Scaffold477 | 15469                   | CC                              | AA                | 1946508353               |
| SNP_P3_121974_15667 | NW_004515938.1 | Scaffold477 | 15667                   | CC                              | AA                | 1946508355               |
| SNP_P3_121975_15676 | NW_004515938.1 | Scaffold477 | 15676                   | CC                              | TT                | 1946508356               |
| SNP_P3_121976_15892 | NW_004515938.1 | Scaffold477 | 15892                   | GG                              | AA                | 1946508358               |
| SNP_P3_121977_16326 | NW_004515938.1 | Scaffold477 | 16326                   | AA                              | GG                | 1946508359               |
| SNP_P3_121978_16335 | NW_004515938.1 | Scaffold477 | 16335                   | TT                              | CC                | 1946508361               |
| SNP_P3_121979_16808 | NW_004515938.1 | Scaffold477 | 16808                   | CC                              | TT                | 1946508362               |
| SNP_P3_121980_17127 | NW_004515938.1 | Scaffold477 | 17127                   | GG                              | TT                | 1946508364               |
| SNP_P3_121981_17366 | NW_004515938.1 | Scaffold477 | 17366                   | CC                              | AA                | 1946508366               |
| SNP_P3_121982_17370 | NW_004515938.1 | Scaffold477 | 17370                   | AA                              | TT                | 1946508367               |
| SNP_P3_121983_17800 | NW_004515938.1 | Scaffold477 | 17800                   | CC                              | TT                | 1946508369               |
| SNP_P3_121984_18353 | NW_004515938.1 | Scaffold477 | 18353                   | TT                              | CC                | 1946508370               |
| SNP_P3_121985_19490 | NW_004515938.1 | Scaffold477 | 19490                   | GG                              | AA                | 1946508372               |
| SNP_P3_121986_20371 | NW_004515938.1 | Scaffold477 | 20371                   | TT                              | GG                | 1946508373               |
| SNP_P3_121987_20448 | NW_004515938.1 | Scaffold477 | 20448                   | TT                              | CC                | 1946508375               |
| SNP_P3_121988_20648 | NW_004515938.1 | Scaffold477 | 20648                   | AA                              | GG                | 1946508376               |
| SNP_P3_121990_20997 | NW_004515938.1 | Scaffold477 | 20997                   | TT                              | CC                | 1946508378               |
| SNP_P3_121991_21170 | NW_004515938.1 | Scaffold477 | 21170                   | CC                              | TT                | 1946508379               |
| SNP_P3_121992_21409 | NW_004515938.1 | Scaffold477 | 21409                   | TT                              | CC                | 1946508381               |
| SNP_P3_121993_22472 | NW_004515938.1 | Scaffold477 | 22472                   | TT                              | GG                | 1946508382               |
| SNP_P3_121994_22617 | NW_004515938.1 | Scaffold477 | 22617                   | AA                              | GG                | 1946508384               |
| SNP_P3_121995_22639 | NW_004515938.1 | Scaffold477 | 22639                   | GG                              | TT                | 1946508385               |
| SNP_P3_121996_22677 | NW_004515938.1 | Scaffold477 | 22677                   | TT                              | CC                | 1946508387               |
| SNP_P3_121997_22692 | NW_004515938.1 | Scaffold477 | 22692                   | TT                              | GG                | 1946508388               |
| SNP_P3_121998_22907 | NW_004515938.1 | Scaffold477 | 22907                   | GG                              | AA                | 1946508390               |

| SNPs IDs            | Chromosome IDs | Chromosomes | Physical positions (bp) | CDC Frontier (Reference genome) | (Pusa 256 & HPNB) | NCBI SNPdb Accession IDs |
|---------------------|----------------|-------------|-------------------------|---------------------------------|-------------------|--------------------------|
| SNP_P3_121999_23614 | NW_004515938.1 | Scaffold477 | 23614                   | TT                              | CC                | 1946508391               |
| SNP_P3_122000_28254 | NW_004515938.1 | Scaffold477 | 28254                   | CC                              | TT                | 1946508393               |
| SNP_P3_122002_28447 | NW_004515938.1 | Scaffold477 | 28447                   | CC                              | TT                | 1946508394               |
| SNP_P3_122003_30368 | NW_004515938.1 | Scaffold477 | 30368                   | AA                              | GG                | 1946508396               |
| SNP_P3_122004_30824 | NW_004515938.1 | Scaffold477 | 30824                   | CC                              | GG                | 1946508397               |
| SNP_P3_122005_31469 | NW_004515938.1 | Scaffold477 | 31469                   | GG                              | TT                | 1946508399               |
| SNP_P3_122006_32151 | NW_004515938.1 | Scaffold477 | 32151                   | TT                              | GG                | 1946508400               |
| SNP_P3_122007_32359 | NW_004515938.1 | Scaffold477 | 32359                   | TT                              | CC                | 1946508402               |
| SNP_P3_122008_32466 | NW_004515938.1 | Scaffold477 | 32466                   | GG                              | AA                | 1946508403               |
| SNP_P3_122009_33553 | NW_004515938.1 | Scaffold477 | 33553                   | AA                              | TT                | 1946508405               |
| SNP_P3_122010_33649 | NW_004515938.1 | Scaffold477 | 33649                   | TT                              | CC                | 1946508406               |
| SNP_P3_122011_33965 | NW_004515938.1 | Scaffold477 | 33965                   | TT                              | CC                | 1946508408               |
| SNP_P3_122012_34349 | NW_004515938.1 | Scaffold477 | 34349                   | TT                              | GG                | 1946508409               |
| SNP_P3_122013_34476 | NW_004515938.1 | Scaffold477 | 34476                   | TT                              | GG                | 1946508411               |
| SNP_P3_122014_35104 | NW_004515938.1 | Scaffold477 | 35104                   | AA                              | CC                | 1946508413               |
| SNP_P3_122015_35106 | NW_004515938.1 | Scaffold477 | 35106                   | AA                              | TT                | 1946508414               |
| SNP_P3_122016_35822 | NW_004515938.1 | Scaffold477 | 35822                   | CC                              | TT                | 1946508416               |
| SNP_P3_122017_37244 | NW_004515938.1 | Scaffold477 | 37244                   | TT                              | CC                | 1946508417               |
| SNP_P3_122018_42197 | NW_004515938.1 | Scaffold477 | 42197                   | CC                              | TT                | 1946508419               |
| SNP_P3_122019_43429 | NW_004515938.1 | Scaffold477 | 43429                   | CC                              | AA                | 1946508420               |
| SNP_P3_122020_43907 | NW_004515938.1 | Scaffold477 | 43907                   | CC                              | TT                | 1946508422               |
| SNP_P3_122021_43934 | NW_004515938.1 | Scaffold477 | 43934                   | TT                              | CC                | 1946508423               |
| SNP_P3_122022_44019 | NW_004515938.1 | Scaffold477 | 44019                   | TT                              | CC                | 1946508425               |
| SNP_P3_122023_44296 | NW_004515938.1 | Scaffold477 | 44296                   | GG                              | TT                | 1946508426               |
| SNP_P3_122024_44658 | NW_004515938.1 | Scaffold477 | 44658                   | AA                              | CC                | 1946508428               |
| SNP_P3_122025_46082 | NW_004515938.1 | Scaffold477 | 46082                   | CC                              | AA                | 1946508430               |
| SNP_P3_122026_46155 | NW_004515938.1 | Scaffold477 | 46155                   | AA                              | GG                | 1946508431               |
| SNP_P3_122027_46488 | NW_004515938.1 | Scaffold477 | 46488                   | CC                              | TT                | 1946508433               |
| SNP_P3_122029_46907 | NW_004515938.1 | Scaffold477 | 46907                   | GG                              | AA                | 1946508434               |
| SNP_P3_122030_47207 | NW_004515938.1 | Scaffold477 | 47207                   | TT                              | CC                | 1946508436               |
| SNP_P3_122031_47381 | NW_004515938.1 | Scaffold477 | 47381                   | GG                              | AA                | 1946508437               |
| SNP_P3_122032_47414 | NW_004515938.1 | Scaffold477 | 47414                   | TT                              | CC                | 1946508439               |
| SNP_P3_122033_47423 | NW_004515938.1 | Scaffold477 | 47423                   | TT                              | AA                | 1946508440               |
| SNP_P3_122034_47442 | NW_004515938.1 | Scaffold477 | 47442                   | AA                              | GG                | 1946508442               |
| SNP_P3_122035_47488 | NW_004515938.1 | Scaffold477 | 47488                   | AA                              | TT                | 1946508443               |
| SNP_P3_122036_47626 | NW_004515938.1 | Scaffold477 | 47626                   | CC                              | TT                | 1946508445               |
| SNP_P3_122037_49047 | NW_004515938.1 | Scaffold477 | 49047                   | TT                              | CC                | 1946508447               |
| SNP_P3_122038_52358 | NW_004515938.1 | Scaffold477 | 52358                   | AA                              | GG                | 1946508448               |
| SNP_P3_122039_52408 | NW_004515938.1 | Scaffold477 | 52408                   | TT                              | CC                | 1946508450               |
| SNP_P3_122040_52979 | NW_004515938.1 | Scaffold477 | 52979                   | TT                              | AA                | 1946508451               |
| SNP_P3_122041_53082 | NW_004515938.1 | Scaffold477 | 53082                   | AA                              | CC                | 1946508453               |
| SNP_P3_122042_53456 | NW_004515938.1 | Scaffold477 | 53456                   | AA                              | GG                | 1946508454               |

| SNPs IDs            | Chromosome IDs | Chromosomes | Physical positions (bp) | CDC Frontier (Reference genome) | (Pusa 256 & HPNB) | NCBI SNPdb Accession IDs |
|---------------------|----------------|-------------|-------------------------|---------------------------------|-------------------|--------------------------|
| SNP_P3_122043_53517 | NW_004515938.1 | Scaffold477 | 53517                   | CC                              | TT                | 1946508456               |
| SNP_P3_122044_53526 | NW_004515938.1 | Scaffold477 | 53526                   | GG                              | AA                | 1946508457               |
| SNP_P3_122045_55129 | NW_004515938.1 | Scaffold477 | 55129                   | GG                              | AA                | 1946508459               |
| SNP_P3_122046_55386 | NW_004515938.1 | Scaffold477 | 55386                   | TT                              | CC                | 1946508460               |
| SNP_P3_122047_55728 | NW_004515938.1 | Scaffold477 | 55728                   | AA                              | GG                | 1946508462               |
| SNP_P3_122048_55871 | NW_004515938.1 | Scaffold477 | 55871                   | TT                              | CC                | 1946508463               |
| SNP_P3_122049_55911 | NW_004515938.1 | Scaffold477 | 55911                   | AA                              | GG                | 1946508465               |
| SNP_P3_122050_55994 | NW_004515938.1 | Scaffold477 | 55994                   | GG                              | AA                | 1946508466               |
| SNP_P3_122051_56733 | NW_004515938.1 | Scaffold477 | 56733                   | TT                              | CC                | 1946508468               |
| SNP_P3_122052_57038 | NW_004515938.1 | Scaffold477 | 57038                   | TT                              | CC                | 1946508469               |
| SNP_P3_122053_59192 | NW_004515938.1 | Scaffold477 | 59192                   | CC                              | AA                | 1946508471               |
| SNP_P3_122054_59336 | NW_004515938.1 | Scaffold477 | 59336                   | CC                              | TT                | 1946508472               |
| SNP_P3_122055_60619 | NW_004515938.1 | Scaffold477 | 60619                   | GG                              | AA                | 1946508474               |
| SNP_P3_122056_60882 | NW_004515938.1 | Scaffold477 | 60882                   | TT                              | GG                | 1946508475               |
| SNP_P3_122057_61880 | NW_004515938.1 | Scaffold477 | 61880                   | CC                              | TT                | 1946508477               |
| SNP_P3_122058_62439 | NW_004515938.1 | Scaffold477 | 62439                   | CC                              | AA                | 1946508478               |
| SNP_P3_122059_62474 | NW_004515938.1 | Scaffold477 | 62474                   | AA                              | TT                | 1946508480               |
| SNP_P3_122060_62526 | NW_004515938.1 | Scaffold477 | 62526                   | GG                              | TT                | 1946508481               |
| SNP_P3_122061_65338 | NW_004515938.1 | Scaffold477 | 65338                   | GG                              | AA                | 1946508483               |
| SNP_P3_122062_65356 | NW_004515938.1 | Scaffold477 | 65356                   | TT                              | AA                | 1946508484               |
| SNP_P3_122063_65398 | NW_004515938.1 | Scaffold477 | 65398                   | GG                              | TT                | 1946508486               |
| SNP_P3_122064_65426 | NW_004515938.1 | Scaffold477 | 65426                   | AA                              | GG                | 1946508487               |
| SNP_P3_122065_65436 | NW_004515938.1 | Scaffold477 | 65436                   | TT                              | GG                | 1946508489               |
| SNP_P3_122066_65455 | NW_004515938.1 | Scaffold477 | 65455                   | AA                              | GG                | 1946508490               |
| SNP_P3_122067_65579 | NW_004515938.1 | Scaffold477 | 65579                   | GG                              | AA                | 1946508492               |
| SNP_P3_122068_2390  | NW_004515940.1 | Scaffold479 | 2390                    | CC                              | TT                | 1946508493               |
| SNP_P3_122069_5837  | NW_004515940.1 | Scaffold479 | 5837                    | GG                              | TT                | 1946508495               |
| SNP_P3_122070_6026  | NW_004515940.1 | Scaffold479 | 6026                    | TT                              | AA                | 1946508496               |
| SNP_P3_122071_6054  | NW_004515940.1 | Scaffold479 | 6054                    | CC                              | GG                | 1946508498               |
| SNP_P3_122072_6241  | NW_004515940.1 | Scaffold479 | 6241                    | TT                              | CC                | 1946508499               |
| SNP_P3_122073_6884  | NW_004515940.1 | Scaffold479 | 6884                    | TT                              | CC                | 1946508501               |
| SNP_P3_122074_6980  | NW_004515940.1 | Scaffold479 | 6980                    | AA                              | GG                | 1946508502               |
| SNP_P3_122075_6999  | NW_004515940.1 | Scaffold479 | 6999                    | TT                              | GG                | 1946508504               |
| SNP_P3_122076_7058  | NW_004515940.1 | Scaffold479 | 7058                    | TT                              | GG                | 1946508505               |
| SNP_P3_122077_7453  | NW_004515940.1 | Scaffold479 | 7453                    | TT                              | AA                | 1946508507               |
| SNP_P3_122078_7487  | NW_004515940.1 | Scaffold479 | 7487                    | GG                              | CC                | 1946508508               |
| SNP_P3_122080_7697  | NW_004515940.1 | Scaffold479 | 7697                    | TT                              | AA                | 1946508510               |
| SNP_P3_122081_7786  | NW_004515940.1 | Scaffold479 | 7786                    | TT                              | CC                | 1946508511               |
| SNP_P3_122082_14373 | NW_004515940.1 | Scaffold479 | 14373                   | CC                              | AA                | 1946508513               |
| SNP_P3_122083_15426 | NW_004515940.1 | Scaffold479 | 15426                   | GG                              | AA                | 1946508515               |
| SNP_P3_122084_15435 | NW_004515940.1 | Scaffold479 | 15435                   | AA                              | GG                | 1946508516               |
| SNP_P3_122085_16533 | NW_004515940.1 | Scaffold479 | 16533                   | GG                              | TT                | 1946508518               |

| SNPs IDs            | Chromosome IDs | Chromosomes | Physical positions (bp) | CDC Frontier (Reference genome) | (Pusa 256 & HPNB) | NCBI SNPdb Accession IDs |
|---------------------|----------------|-------------|-------------------------|---------------------------------|-------------------|--------------------------|
| SNP_P3_122086_16585 | NW_004515940.1 | Scaffold479 | 16585                   | AA                              | GG                | 1946508519               |
| SNP_P3_122087_16599 | NW_004515940.1 | Scaffold479 | 16599                   | CC                              | GG                | 1946508521               |
| SNP_P3_122088_16690 | NW_004515940.1 | Scaffold479 | 16690                   | AA                              | GG                | 1946508522               |
| SNP_P3_122089_16697 | NW_004515940.1 | Scaffold479 | 16697                   | TT                              | AA                | 1946508524               |
| SNP_P3_122090_16741 | NW_004515940.1 | Scaffold479 | 16741                   | AA                              | GG                | 1946508525               |
| SNP_P3_122092_16821 | NW_004515940.1 | Scaffold479 | 16821                   | AA                              | GG                | 1946508527               |
| SNP_P3_122093_16835 | NW_004515940.1 | Scaffold479 | 16835                   | GG                              | AA                | 1946508528               |
| SNP_P3_122094_16933 | NW_004515940.1 | Scaffold479 | 16933                   | AA                              | GG                | 1946508530               |
| SNP_P3_122095_17004 | NW_004515940.1 | Scaffold479 | 17004                   | TT                              | AA                | 1946508531               |
| SNP_P3_122096_17005 | NW_004515940.1 | Scaffold479 | 17005                   | AA                              | TT                | 1946508533               |
| SNP_P3_122097_17050 | NW_004515940.1 | Scaffold479 | 17050                   | AA                              | CC                | 1946508534               |
| SNP_P3_122098_17052 | NW_004515940.1 | Scaffold479 | 17052                   | GG                              | TT                | 1946508536               |
| SNP_P3_122099_17082 | NW_004515940.1 | Scaffold479 | 17082                   | TT                              | GG                | 1946508537               |
| SNP_P3_122100_17133 | NW_004515940.1 | Scaffold479 | 17133                   | TT                              | CC                | 1946508539               |
| SNP_P3_122101_17662 | NW_004515940.1 | Scaffold479 | 17662                   | AA                              | TT                | 1946508594               |
| SNP_P3_122102_17673 | NW_004515940.1 | Scaffold479 | 17673                   | AA                              | GG                | 1946508596               |
| SNP_P3_122103_17763 | NW_004515940.1 | Scaffold479 | 17763                   | CC                              | TT                | 1946508597               |
| SNP_P3_122104_17802 | NW_004515940.1 | Scaffold479 | 17802                   | GG                              | TT                | 1946508599               |
| SNP_P3_122105_17863 | NW_004515940.1 | Scaffold479 | 17863                   | CC                              | TT                | 1946508600               |
| SNP_P3_122106_17939 | NW_004515940.1 | Scaffold479 | 17939                   | GG                              | TT                | 1946508602               |
| SNP_P3_122107_17943 | NW_004515940.1 | Scaffold479 | 17943                   | CC                              | AA                | 1946508603               |
| SNP_P3_122108_17959 | NW_004515940.1 | Scaffold479 | 17959                   | AA                              | GG                | 1946508605               |
| SNP_P3_122109_17999 | NW_004515940.1 | Scaffold479 | 17999                   | CC                              | TT                | 1946508606               |
| SNP_P3_122110_18046 | NW_004515940.1 | Scaffold479 | 18046                   | TT                              | CC                | 1946508608               |
| SNP_P3_122111_18108 | NW_004515940.1 | Scaffold479 | 18108                   | AA                              | GG                | 1946508609               |
| SNP_P3_122112_18123 | NW_004515940.1 | Scaffold479 | 18123                   | CC                              | GG                | 1946508611               |
| SNP_P3_122113_18130 | NW_004515940.1 | Scaffold479 | 18130                   | CC                              | GG                | 1946508612               |
| SNP_P3_122114_18159 | NW_004515940.1 | Scaffold479 | 18159                   | GG                              | CC                | 1946508614               |
| SNP_P3_122115_18219 | NW_004515940.1 | Scaffold479 | 18219                   | AA                              | GG                | 1946508615               |
| SNP_P3_122116_18276 | NW_004515940.1 | Scaffold479 | 18276                   | AA                              | GG                | 1946508616               |
| SNP_P3_122117_18339 | NW_004515940.1 | Scaffold479 | 18339                   | GG                              | TT                | 1946508618               |
| SNP_P3_122118_20257 | NW_004515940.1 | Scaffold479 | 20257                   | TT                              | CC                | 1946508619               |
| SNP_P3_122119_20284 | NW_004515940.1 | Scaffold479 | 20284                   | AA                              | GG                | 1946508621               |
| SNP_P3_122120_20359 | NW_004515940.1 | Scaffold479 | 20359                   | GG                              | AA                | 1946508622               |
| SNP_P3_122121_20409 | NW_004515940.1 | Scaffold479 | 20409                   | CC                              | TT                | 1946508624               |
| SNP_P3_122122_20445 | NW_004515940.1 | Scaffold479 | 20445                   | TT                              | CC                | 1946508625               |
| SNP_P3_122123_20448 | NW_004515940.1 | Scaffold479 | 20448                   | GG                              | AA                | 1946508627               |
| SNP_P3_122124_23579 | NW_004515940.1 | Scaffold479 | 23579                   | GG                              | TT                | 1946508628               |
| SNP_P3_122125_23649 | NW_004515940.1 | Scaffold479 | 23649                   | AA                              | GG                | 1946508630               |
| SNP_P3_122126_23813 | NW_004515940.1 | Scaffold479 | 23813                   | AA                              | CC                | 1946508631               |
| SNP_P3_122127_24109 | NW_004515940.1 | Scaffold479 | 24109                   | CC                              | TT                | 1946508633               |
| SNP_P3_122128_31330 | NW_004515940.1 | Scaffold479 | 31330                   | CC                              | TT                | 1946508634               |

| SNPs IDs             | Chromosome IDs | Chromosomes | Physical positions (bp) | CDC Frontier (Reference genome) | (Pusa 256 & HPNB) | NCBI SNPdb Accession IDs |
|----------------------|----------------|-------------|-------------------------|---------------------------------|-------------------|--------------------------|
| SNP_P3_122129_31540  | NW_004515940.1 | Scaffold479 | 31540                   | CC                              | TT                | 1946508636               |
| SNP_P3_122130_31588  | NW_004515940.1 | Scaffold479 | 31588                   | TT                              | AA                | 1946508637               |
| SNP_P3_122131_31592  | NW_004515940.1 | Scaffold479 | 31592                   | GG                              | AA                | 1946508639               |
| SNP_P3_122132_31620  | NW_004515940.1 | Scaffold479 | 31620                   | AA                              | TT                | 1946508640               |
| SNP_P3_122133_35395  | NW_004515940.1 | Scaffold479 | 35395                   | AA                              | TT                | 1946508642               |
| SNP_P3_122134_35437  | NW_004515940.1 | Scaffold479 | 35437                   | TT                              | CC                | 1946508643               |
| SNP_P3_122135_35444  | NW_004515940.1 | Scaffold479 | 35444                   | TT                              | CC                | 1946508645               |
| SNP_P3_122136_47312  | NW_004515940.1 | Scaffold479 | 47312                   | AA                              | TT                | 1946508646               |
| SNP_P3_122137_47330  | NW_004515940.1 | Scaffold479 | 47330                   | AA                              | CC                | 1946508648               |
| SNP_P3_122138_47360  | NW_004515940.1 | Scaffold479 | 47360                   | TT                              | GG                | 1946508649               |
| SNP_P3_122139_47361  | NW_004515940.1 | Scaffold479 | 47361                   | CC                              | AA                | 1946508651               |
| SNP_P3_122140_47380  | NW_004515940.1 | Scaffold479 | 47380                   | AA                              | TT                | 1946508652               |
| SNP_P3_122141_47386  | NW_004515940.1 | Scaffold479 | 47386                   | TT                              | CC                | 1946508654               |
| SNP_P3_122142_47390  | NW_004515940.1 | Scaffold479 | 47390                   | AA                              | GG                | 1946508655               |
| SNP_P3_122143_47399  | NW_004515940.1 | Scaffold479 | 47399                   | AA                              | TT                | 1946508657               |
| SNP_P3_122144_48661  | NW_004515940.1 | Scaffold479 | 48661                   | AA                              | CC                | 1946508658               |
| SNP_P3_122145_48735  | NW_004515940.1 | Scaffold479 | 48735                   | TT                              | CC                | 1946508660               |
| SNP_P3_122146_48778  | NW_004515940.1 | Scaffold479 | 48778                   | CC                              | TT                | 1946508661               |
| SNP_P3_122147_48930  | NW_004515940.1 | Scaffold479 | 48930                   | GG                              | AA                | 1946508663               |
| SNP_P3_122148_48932  | NW_004515940.1 | Scaffold479 | 48932                   | TT                              | GG                | 1946508664               |
| SNP_P3_122149_55445  | NW_004515940.1 | Scaffold479 | 55445                   | TT                              | AA                | 1946508666               |
| SNP_P3_122150_55455  | NW_004515940.1 | Scaffold479 | 55455                   | TT                              | CC                | 1946508667               |
| SNP_P3_122151_55469  | NW_004515940.1 | Scaffold479 | 55469                   | TT                              | CC                | 1946508669               |
| SNP_P3_122152_55470  | NW_004515940.1 | Scaffold479 | 55470                   | GG                              | TT                | 1946508670               |
| SNP_P3_122153_55609  | NW_004515940.1 | Scaffold479 | 55609                   | GG                              | TT                | 1946508672               |
| SNP_P3_122154_62995  | NW_004515940.1 | Scaffold479 | 62995                   | GG                              | TT                | 1946508673               |
| SNP_P3_122155_79540  | NW_004515940.1 | Scaffold479 | 79540                   | AA                              | TT                | 1946508675               |
| SNP_P3_122156_79556  | NW_004515940.1 | Scaffold479 | 79556                   | TT                              | CC                | 1946508676               |
| SNP_P3_122157_79568  | NW_004515940.1 | Scaffold479 | 79568                   | CC                              | AA                | 1946508678               |
| SNP_P3_122158_87565  | NW_004515940.1 | Scaffold479 | 87565                   | AA                              | GG                | 1946508679               |
| SNP_P3_122159_87670  | NW_004515940.1 | Scaffold479 | 87670                   | TT                              | CC                | 1946508680               |
| SNP_P3_122160_88001  | NW_004515940.1 | Scaffold479 | 88001                   | GG                              | AA                | 1946508682               |
| SNP_P3_122161_88215  | NW_004515940.1 | Scaffold479 | 88215                   | AA                              | CC                | 1946508683               |
| SNP_P3_122162_88230  | NW_004515940.1 | Scaffold479 | 88230                   | GG                              | TT                | 1946508685               |
| SNP_P3_122163_88323  | NW_004515940.1 | Scaffold479 | 88323                   | TT                              | AA                | 1946508686               |
| SNP_P3_122165_109093 | NW_004515940.1 | Scaffold479 | 109093                  | CC                              | TT                | 1946508688               |
| SNP_P3_122166_109098 | NW_004515940.1 | Scaffold479 | 109098                  | TT                              | GG                | 1946508689               |
| SNP_P3_122168_113341 | NW_004515940.1 | Scaffold479 | 113341                  | GG                              | AA                | 1946508691               |
| SNP_P3_122169_116985 | NW_004515940.1 | Scaffold479 | 116985                  | CC                              | AA                | 1946508692               |
| SNP_P3_122170_117018 | NW_004515940.1 | Scaffold479 | 117018                  | TT                              | AA                | 1946508693               |
| SNP_P3_122171_117041 | NW_004515940.1 | Scaffold479 | 117041                  | TT                              | GG                | 1946508695               |
| SNP_P3_122172_117235 | NW_004515940.1 | Scaffold479 | 117235                  | AA                              | TT                | 1946508696               |

| SNPs IDs             | Chromosome IDs | Chromosomes | Physical positions (bp) | CDC Frontier (Reference genome) | (Pusa 256 & HPNB) | NCBI SNPdb Accession IDs |
|----------------------|----------------|-------------|-------------------------|---------------------------------|-------------------|--------------------------|
| SNP_P3_122173_117428 | NW_004515940.1 | Scaffold479 | 117428                  | GG                              | TT                | 1946508698               |
| SNP_P3_122174_117693 | NW_004515940.1 | Scaffold479 | 117693                  | TT                              | AA                | 1946508699               |
| SNP_P3_122175_121997 | NW_004515940.1 | Scaffold479 | 121997                  | TT                              | AA                | 1946508701               |
| SNP_P3_122176_122036 | NW_004515940.1 | Scaffold479 | 122036                  | TT                              | CC                | 1946508702               |
| SNP_P3_122177_122037 | NW_004515940.1 | Scaffold479 | 122037                  | TT                              | AA                | 1946508704               |
| SNP_P3_122178_125189 | NW_004515940.1 | Scaffold479 | 125189                  | GG                              | CC                | 1946508705               |
| SNP_P3_122179_125261 | NW_004515940.1 | Scaffold479 | 125261                  | TT                              | CC                | 1946508707               |
| SNP_P3_122180_125396 | NW_004515940.1 | Scaffold479 | 125396                  | CC                              | TT                | 1946508708               |
| SNP_P3_122181_125401 | NW_004515940.1 | Scaffold479 | 125401                  | GG                              | CC                | 1946508710               |
| SNP_P3_122183_125425 | NW_004515940.1 | Scaffold479 | 125425                  | TT                              | AA                | 1946508711               |
| SNP_P3_122184_125573 | NW_004515940.1 | Scaffold479 | 125573                  | TT                              | CC                | 1946508713               |
| SNP_P3_122185_125574 | NW_004515940.1 | Scaffold479 | 125574                  | GG                              | AA                | 1946508714               |
| SNP_P3_122186_125578 | NW_004515940.1 | Scaffold479 | 125578                  | TT                              | AA                | 1946508716               |
| SNP_P3_122187_125591 | NW_004515940.1 | Scaffold479 | 125591                  | TT                              | CC                | 1946508717               |
| SNP_P3_122188_125640 | NW_004515940.1 | Scaffold479 | 125640                  | AA                              | GG                | 1946508719               |
| SNP_P3_122189_125660 | NW_004515940.1 | Scaffold479 | 125660                  | GG                              | AA                | 1946508720               |
| SNP_P3_122190_125664 | NW_004515940.1 | Scaffold479 | 125664                  | TT                              | CC                | 1946508722               |
| SNP_P3_122191_125682 | NW_004515940.1 | Scaffold479 | 125682                  | GG                              | TT                | 1946508723               |
| SNP_P3_122192_125762 | NW_004515940.1 | Scaffold479 | 125762                  | TT                              | CC                | 1946508724               |
| SNP_P3_122193_125771 | NW_004515940.1 | Scaffold479 | 125771                  | GG                              | AA                | 1946508726               |
| SNP_P3_122194_125820 | NW_004515940.1 | Scaffold479 | 125820                  | AA                              | TT                | 1946508727               |
| SNP_P3_122195_125831 | NW_004515940.1 | Scaffold479 | 125831                  | TT                              | AA                | 1946508729               |
| SNP_P3_122196_126038 | NW_004515940.1 | Scaffold479 | 126038                  | AA                              | TT                | 1946508730               |
| SNP_P3_122197_126076 | NW_004515940.1 | Scaffold479 | 126076                  | TT                              | AA                | 1946508732               |
| SNP_P3_122198_129289 | NW_004515940.1 | Scaffold479 | 129289                  | CC                              | TT                | 1946508733               |
| SNP_P3_122199_129312 | NW_004515940.1 | Scaffold479 | 129312                  | CC                              | TT                | 1946508735               |
| SNP_P3_122200_129342 | NW_004515940.1 | Scaffold479 | 129342                  | GG                              | TT                | 1946508736               |
| SNP_P3_122201_129347 | NW_004515940.1 | Scaffold479 | 129347                  | CC                              | AA                | 1946508740               |
| SNP_P3_122202_130453 | NW_004515940.1 | Scaffold479 | 130453                  | AA                              | GG                | 1946508741               |
| SNP_P3_122203_130456 | NW_004515940.1 | Scaffold479 | 130456                  | AA                              | TT                | 1946508743               |
| SNP_P3_122204_130461 | NW_004515940.1 | Scaffold479 | 130461                  | AA                              | TT                | 1946508744               |
| SNP_P3_122205_130465 | NW_004515940.1 | Scaffold479 | 130465                  | GG                              | CC                | 1946508746               |
| SNP_P3_122206_130482 | NW_004515940.1 | Scaffold479 | 130482                  | CC                              | AA                | 1946508747               |
| SNP_P3_122207_130485 | NW_004515940.1 | Scaffold479 | 130485                  | GG                              | AA                | 1946508748               |
| SNP_P3_122208_130486 | NW_004515940.1 | Scaffold479 | 130486                  | GG                              | AA                | 1946508750               |
| SNP_P3_122210_130498 | NW_004515940.1 | Scaffold479 | 130498                  | CC                              | TT                | 1946508751               |
| SNP_P3_122211_130504 | NW_004515940.1 | Scaffold479 | 130504                  | AA                              | TT                | 1946508753               |
| SNP_P3_122212_130575 | NW_004515940.1 | Scaffold479 | 130575                  | TT                              | GG                | 1946508754               |
| SNP_P3_122213_130607 | NW_004515940.1 | Scaffold479 | 130607                  | TT                              | GG                | 1946508756               |
| SNP_P3_122214_130651 | NW_004515940.1 | Scaffold479 | 130651                  | TT                              | AA                | 1946508757               |
| SNP_P3_122215_130715 | NW_004515940.1 | Scaffold479 | 130715                  | TT                              | CC                | 1946508759               |
| SNP_P3_122216_130743 | NW_004515940.1 | Scaffold479 | 130743                  | TT                              | AA                | 1946508760               |

| SNPs IDs             | Chromosome IDs | Chromosomes | Physical positions (bp) | CDC Frontier (Reference genome) | (Pusa 256 & HPNB) | NCBI SNPdb Accession IDs |
|----------------------|----------------|-------------|-------------------------|---------------------------------|-------------------|--------------------------|
| SNP_P3_122217_130884 | NW_004515940.1 | Scaffold479 | 130884                  | TT                              | AA                | 1946508762               |
| SNP_P3_122218_130896 | NW_004515940.1 | Scaffold479 | 130896                  | GG                              | AA                | 1946508763               |
| SNP_P3_122219_130956 | NW_004515940.1 | Scaffold479 | 130956                  | AA                              | CC                | 1946508765               |
| SNP_P3_122220_130961 | NW_004515940.1 | Scaffold479 | 130961                  | GG                              | AA                | 1946508766               |
| SNP_P3_122221_130969 | NW_004515940.1 | Scaffold479 | 130969                  | AA                              | CC                | 1946508768               |
| SNP_P3_122222_130971 | NW_004515940.1 | Scaffold479 | 130971                  | AA                              | GG                | 1946508769               |
| SNP_P3_122223_130993 | NW_004515940.1 | Scaffold479 | 130993                  | AA                              | TT                | 1946508771               |
| SNP_P3_122224_131012 | NW_004515940.1 | Scaffold479 | 131012                  | AA                              | TT                | 1946508772               |
| SNP_P3_122225_131033 | NW_004515940.1 | Scaffold479 | 131033                  | TT                              | CC                | 1946508774               |
| SNP_P3_122226_131047 | NW_004515940.1 | Scaffold479 | 131047                  | TT                              | AA                | 1946508775               |
| SNP_P3_122227_139230 | NW_004515940.1 | Scaffold479 | 139230                  | GG                              | TT                | 1946508777               |
| SNP_P3_122228_139234 | NW_004515940.1 | Scaffold479 | 139234                  | TT                              | GG                | 1946508779               |
| SNP_P3_122229_139259 | NW_004515940.1 | Scaffold479 | 139259                  | TT                              | GG                | 1946508780               |
| SNP_P3_122230_139290 | NW_004515940.1 | Scaffold479 | 139290                  | TT                              | CC                | 1946508782               |
| SNP_P3_122231_139345 | NW_004515940.1 | Scaffold479 | 139345                  | TT                              | GG                | 1946508783               |
| SNP_P3_122232_139347 | NW_004515940.1 | Scaffold479 | 139347                  | TT                              | AA                | 1946508785               |
| SNP_P3_122233_139365 | NW_004515940.1 | Scaffold479 | 139365                  | TT                              | CC                | 1946508786               |
| SNP_P3_122234_139366 | NW_004515940.1 | Scaffold479 | 139366                  | CC                              | TT                | 1946508788               |
| SNP_P3_122235_139377 | NW_004515940.1 | Scaffold479 | 139377                  | GG                              | TT                | 1946508789               |
| SNP_P3_122236_140259 | NW_004515940.1 | Scaffold479 | 140259                  | CC                              | AA                | 1946508791               |
| SNP_P3_122237_140679 | NW_004515940.1 | Scaffold479 | 140679                  | TT                              | CC                | 1946508792               |
| SNP_P3_122238_143537 | NW_004515940.1 | Scaffold479 | 143537                  | CC                              | TT                | 1946508794               |
| SNP_P3_122239_148194 | NW_004515940.1 | Scaffold479 | 148194                  | CC                              | TT                | 1946508795               |
| SNP_P3_122240_148459 | NW_004515940.1 | Scaffold479 | 148459                  | TT                              | CC                | 1946508796               |
| SNP_P3_122241_148460 | NW_004515940.1 | Scaffold479 | 148460                  | TT                              | CC                | 1946508798               |
| SNP_P3_122242_148481 | NW_004515940.1 | Scaffold479 | 148481                  | TT                              | GG                | 1946508800               |
| SNP_P3_122243_148497 | NW_004515940.1 | Scaffold479 | 148497                  | GG                              | AA                | 1946508801               |
| SNP_P3_122244_148518 | NW_004515940.1 | Scaffold479 | 148518                  | TT                              | CC                | 1946508803               |
| SNP_P3_122245_154120 | NW_004515940.1 | Scaffold479 | 154120                  | CC                              | AA                | 1946508804               |
| SNP_P3_122246_154718 | NW_004515940.1 | Scaffold479 | 154718                  | GG                              | TT                | 1946508806               |
| SNP_P3_122247_154748 | NW_004515940.1 | Scaffold479 | 154748                  | CC                              | TT                | 1946508807               |
| SNP_P3_122248_154771 | NW_004515940.1 | Scaffold479 | 154771                  | AA                              | GG                | 1946508809               |
| SNP_P3_122249_154781 | NW_004515940.1 | Scaffold479 | 154781                  | AA                              | TT                | 1946508810               |
| SNP_P3_122250_154857 | NW_004515940.1 | Scaffold479 | 154857                  | TT                              | GG                | 1946508812               |
| SNP_P3_122251_154926 | NW_004515940.1 | Scaffold479 | 154926                  | AA                              | TT                | 1946508813               |
| SNP_P3_122252_154951 | NW_004515940.1 | Scaffold479 | 154951                  | CC                              | TT                | 1946508815               |
| SNP_P3_122253_154976 | NW_004515940.1 | Scaffold479 | 154976                  | CC                              | GG                | 1946508816               |
| SNP_P3_122254_155066 | NW_004515940.1 | Scaffold479 | 155066                  | CC                              | TT                | 1946508818               |
| SNP_P3_122255_155093 | NW_004515940.1 | Scaffold479 | 155093                  | CC                              | AA                | 1946508819               |
| SNP_P3_122256_155196 | NW_004515940.1 | Scaffold479 | 155196                  | TT                              | GG                | 1946508820               |
| SNP_P3_122257_155581 | NW_004515940.1 | Scaffold479 | 155581                  | TT                              | CC                | 1946508822               |
| SNP_P3_122258_156018 | NW_004515940.1 | Scaffold479 | 156018                  | GG                              | AA                | 1946508823               |



| SNPs IDs             | Chromosome IDs | Chromosomes | Physical positions (bp) | CDC Frontier (Reference genome) | (Pusa 256 & HPNB) | NCBI SNPdb Accession IDs |
|----------------------|----------------|-------------|-------------------------|---------------------------------|-------------------|--------------------------|
| SNP_P3_122259_156323 | NW_004515940.1 | Scaffold479 | 156323                  | GG                              | AA                | 1946508825               |
| SNP_P3_122260_156360 | NW_004515940.1 | Scaffold479 | 156360                  | TT                              | CC                | 1946508826               |
| SNP_P3_122261_156390 | NW_004515940.1 | Scaffold479 | 156390                  | TT                              | GG                | 1946508828               |
| SNP_P3_122262_156396 | NW_004515940.1 | Scaffold479 | 156396                  | CC                              | TT                | 1946508829               |
| SNP_P3_122263_160016 | NW_004515940.1 | Scaffold479 | 160016                  | CC                              | TT                | 1946508831               |
| SNP_P3_122264_160045 | NW_004515940.1 | Scaffold479 | 160045                  | GG                              | AA                | 1946508832               |
| SNP_P3_122265_20118  | NW_004515941.1 | Scaffold480 | 20118                   | GG                              | CC                | 1946508834               |
| SNP_P3_122266_20182  | NW_004515941.1 | Scaffold480 | 20182                   | TT                              | CC                | 1946508835               |
| SNP_P3_122267_20514  | NW_004515941.1 | Scaffold480 | 20514                   | TT                              | CC                | 1946508837               |
| SNP_P3_122268_33645  | NW_004515941.1 | Scaffold480 | 33645                   | TT                              | CC                | 1946508838               |
| SNP_P3_122269_33688  | NW_004515941.1 | Scaffold480 | 33688                   | CC                              | AA                | 1946508840               |
| SNP_P3_122270_33724  | NW_004515941.1 | Scaffold480 | 33724                   | CC                              | TT                | 1946508841               |
| SNP_P3_122271_33729  | NW_004515941.1 | Scaffold480 | 33729                   | AA                              | GG                | 1946508843               |
| SNP_P3_122273_33762  | NW_004515941.1 | Scaffold480 | 33762                   | AA                              | GG                | 1946508844               |
| SNP_P3_122274_33772  | NW_004515941.1 | Scaffold480 | 33772                   | AA                              | GG                | 1946508846               |
| SNP_P3_122275_34472  | NW_004515941.1 | Scaffold480 | 34472                   | AA                              | GG                | 1946508847               |
| SNP_P3_122276_34569  | NW_004515941.1 | Scaffold480 | 34569                   | TT                              | GG                | 1946508849               |
| SNP_P3_122277_34585  | NW_004515941.1 | Scaffold480 | 34585                   | TT                              | AA                | 1946508850               |
| SNP_P3_122278_42016  | NW_004515941.1 | Scaffold480 | 42016                   | CC                              | TT                | 1946508852               |
| SNP_P3_122281_43084  | NW_004515941.1 | Scaffold480 | 43084                   | GG                              | AA                | 1946508853               |
| SNP_P3_122282_43093  | NW_004515941.1 | Scaffold480 | 43093                   | AA                              | GG                | 1946508855               |
| SNP_P3_122284_43226  | NW_004515941.1 | Scaffold480 | 43226                   | TT                              | CC                | 1946508856               |
| SNP_P3_122285_43416  | NW_004515941.1 | Scaffold480 | 43416                   | GG                              | AA                | 1946508858               |
| SNP_P3_122286_43460  | NW_004515941.1 | Scaffold480 | 43460                   | CC                              | TT                | 1946508859               |
| SNP_P3_122287_43461  | NW_004515941.1 | Scaffold480 | 43461                   | TT                              | CC                | 1946508861               |
| SNP_P3_122288_43464  | NW_004515941.1 | Scaffold480 | 43464                   | TT                              | GG                | 1946508862               |
| SNP_P3_122289_43542  | NW_004515941.1 | Scaffold480 | 43542                   | AA                              | GG                | 1946508864               |
| SNP_P3_122290_43569  | NW_004515941.1 | Scaffold480 | 43569                   | AA                              | GG                | 1946508865               |
| SNP_P3_122291_43630  | NW_004515941.1 | Scaffold480 | 43630                   | TT                              | CC                | 1946508867               |
| SNP_P3_122292_43678  | NW_004515941.1 | Scaffold480 | 43678                   | GG                              | AA                | 1946508868               |
| SNP_P3_122293_54090  | NW_004515941.1 | Scaffold480 | 54090                   | GG                              | AA                | 1946508870               |
| SNP_P3_122295_77856  | NW_004515941.1 | Scaffold480 | 77856                   | GG                              | AA                | 1946508871               |
| SNP_P3_122296_78065  | NW_004515941.1 | Scaffold480 | 78065                   | CC                              | TT                | 1946508872               |
| SNP_P3_122297_78132  | NW_004515941.1 | Scaffold480 | 78132                   | AA                              | TT                | 1946508874               |
| SNP_P3_122298_78144  | NW_004515941.1 | Scaffold480 | 78144                   | CC                              | TT                | 1946508875               |
| SNP_P3_122299_78178  | NW_004515941.1 | Scaffold480 | 78178                   | CC                              | GG                | 1946508877               |
| SNP_P3_122300_78422  | NW_004515941.1 | Scaffold480 | 78422                   | AA                              | GG                | 1946508878               |
| SNP_P3_122301_86559  | NW_004515941.1 | Scaffold480 | 86559                   | GG                              | CC                | 1946508880               |
| SNP_P3_122302_86588  | NW_004515941.1 | Scaffold480 | 86588                   | AA                              | GG                | 1946508881               |
| SNP_P3_122303_249    | NW_004515942.1 | Scaffold481 | 249                     | TT                              | CC                | 1946508883               |
| SNP_P3_122304_648    | NW_004515942.1 | Scaffold481 | 648                     | AA                              | GG                | 1946508884               |
| SNP_P3_122305_661    | NW_004515942.1 | Scaffold481 | 661                     | GG                              | AA                | 1946508886               |

| SNPs IDs             | Chromosome IDs | Chromosomes | Physical positions (bp) | CDC Frontier (Reference genome) | (Pusa 256 & HPNB) | NCBI SNPdb Accession IDs |
|----------------------|----------------|-------------|-------------------------|---------------------------------|-------------------|--------------------------|
| SNP_P3_122306_666    | NW_004515942.1 | Scaffold481 | 666                     | AA                              | GG                | 1946508887               |
| SNP_P3_122307_8839   | NW_004515942.1 | Scaffold481 | 8839                    | AA                              | TT                | 1946508889               |
| SNP_P3_122308_27515  | NW_004515944.1 | Scaffold484 | 27515                   | CC                              | GG                | 1946508890               |
| SNP_P3_122309_27606  | NW_004515944.1 | Scaffold484 | 27606                   | GG                              | AA                | 1946508892               |
| SNP_P3_122310_27651  | NW_004515944.1 | Scaffold484 | 27651                   | CC                              | AA                | 1946508893               |
| SNP_P3_122311_27880  | NW_004515944.1 | Scaffold484 | 27880                   | AA                              | GG                | 1946508895               |
| SNP_P3_122312_27911  | NW_004515944.1 | Scaffold484 | 27911                   | TT                              | CC                | 1946508896               |
| SNP_P3_122313_34494  | NW_004515944.1 | Scaffold484 | 34494                   | AA                              | CC                | 1946508898               |
| SNP_P3_122314_34906  | NW_004515944.1 | Scaffold484 | 34906                   | TT                              | CC                | 1946508899               |
| SNP_P3_122315_34913  | NW_004515944.1 | Scaffold484 | 34913                   | TT                              | CC                | 1946508901               |
| SNP_P3_122316_34965  | NW_004515944.1 | Scaffold484 | 34965                   | TT                              | CC                | 1946508902               |
| SNP_P3_122317_85687  | NW_004515944.1 | Scaffold484 | 85687                   | CC                              | TT                | 1946508903               |
| SNP_P3_122318_85910  | NW_004515944.1 | Scaffold484 | 85910                   | AA                              | GG                | 1946508905               |
| SNP_P3_122319_86311  | NW_004515944.1 | Scaffold484 | 86311                   | AA                              | CC                | 1946508906               |
| SNP_P3_122320_86364  | NW_004515944.1 | Scaffold484 | 86364                   | AA                              | GG                | 1946508908               |
| SNP_P3_122321_86549  | NW_004515944.1 | Scaffold484 | 86549                   | AA                              | CC                | 1946508909               |
| SNP_P3_122322_86554  | NW_004515944.1 | Scaffold484 | 86554                   | AA                              | GG                | 1946508912               |
| SNP_P3_122323_89609  | NW_004515944.1 | Scaffold484 | 89609                   | CC                              | TT                | 1946508913               |
| SNP_P3_122324_89625  | NW_004515944.1 | Scaffold484 | 89625                   | TT                              | AA                | 1946508915               |
| SNP_P3_122325_89638  | NW_004515944.1 | Scaffold484 | 89638                   | CC                              | TT                | 1946508916               |
| SNP_P3_122326_95330  | NW_004515944.1 | Scaffold484 | 95330                   | TT                              | CC                | 1946508918               |
| SNP_P3_122327_95332  | NW_004515944.1 | Scaffold484 | 95332                   | GG                              | AA                | 1946508919               |
| SNP_P3_122328_96170  | NW_004515944.1 | Scaffold484 | 96170                   | AA                              | GG                | 1946508921               |
| SNP_P3_122329_98341  | NW_004515944.1 | Scaffold484 | 98341                   | GG                              | TT                | 1946508922               |
| SNP_P3_122330_110301 | NW_004515944.1 | Scaffold484 | 110301                  | CC                              | GG                | 1946508923               |
| SNP_P3_122331_136295 | NW_004515944.1 | Scaffold484 | 136295                  | AA                              | GG                | 1946508925               |
| SNP_P3_122334_172408 | NW_004515944.1 | Scaffold484 | 172408                  | CC                              | TT                | 1946508926               |
| SNP_P3_122335_174458 | NW_004515944.1 | Scaffold484 | 174458                  | CC                              | AA                | 1946508928               |
| SNP_P3_122336_174466 | NW_004515944.1 | Scaffold484 | 174466                  | GG                              | TT                | 1946508929               |
| SNP_P3_122338_188700 | NW_004515944.1 | Scaffold484 | 188700                  | AA                              | GG                | 1946508931               |
| SNP_P3_122339_190725 | NW_004515944.1 | Scaffold484 | 190725                  | AA                              | GG                | 1946508932               |
| SNP_P3_122340_229801 | NW_004515944.1 | Scaffold484 | 229801                  | AA                              | CC                | 1946508934               |
| SNP_P3_122341_232415 | NW_004515944.1 | Scaffold484 | 232415                  | CC                              | GG                | 1946508935               |
| SNP_P3_122342_247010 | NW_004515944.1 | Scaffold484 | 247010                  | GG                              | TT                | 1946508937               |
| SNP_P3_122343_251239 | NW_004515944.1 | Scaffold484 | 251239                  | TT                              | AA                | 1946508938               |
| SNP_P3_122344_252680 | NW_004515944.1 | Scaffold484 | 252680                  | AA                              | CC                | 1946508940               |
| SNP_P3_122345_253027 | NW_004515944.1 | Scaffold484 | 253027                  | GG                              | AA                | 1946508942               |
| SNP_P3_122346_270305 | NW_004515944.1 | Scaffold484 | 270305                  | TT                              | CC                | 1946508943               |
| SNP_P3_122347_274380 | NW_004515944.1 | Scaffold484 | 274380                  | CC                              | TT                | 1946508944               |
| SNP_P3_122348_275474 | NW_004515944.1 | Scaffold484 | 275474                  | AA                              | TT                | 1946508946               |
| SNP_P3_122350_289237 | NW_004515944.1 | Scaffold484 | 289237                  | CC                              | AA                | 1946508947               |
| SNP_P3_122351_295734 | NW_004515944.1 | Scaffold484 | 295734                  | CC                              | TT                | 1946508949               |

| SNPs IDs             | Chromosome IDs | Chromosomes | Physical positions (bp) | CDC Frontier (Reference genome) | (Pusa 256 & HPNB) | NCBI SNPdb Accession IDs |
|----------------------|----------------|-------------|-------------------------|---------------------------------|-------------------|--------------------------|
| SNP_P3_122352_296026 | NW_004515944.1 | Scaffold484 | 296026                  | AA                              | GG                | 1946508951               |
| SNP_P3_122353_296070 | NW_004515944.1 | Scaffold484 | 296070                  | GG                              | CC                | 1946508952               |
| SNP_P3_122354_298506 | NW_004515944.1 | Scaffold484 | 298506                  | AA                              | GG                | 1946508953               |
| SNP_P3_122355_304361 | NW_004515944.1 | Scaffold484 | 304361                  | CC                              | TT                | 1946508955               |
| SNP_P3_122356_305129 | NW_004515944.1 | Scaffold484 | 305129                  | TT                              | CC                | 1946508956               |
| SNP_P3_122357_316144 | NW_004515944.1 | Scaffold484 | 316144                  | GG                              | AA                | 1946508958               |
| SNP_P3_122359_329089 | NW_004515944.1 | Scaffold484 | 329089                  | GG                              | AA                | 1946508959               |
| SNP_P3_122360_334114 | NW_004515944.1 | Scaffold484 | 334114                  | AA                              | CC                | 1946508961               |
| SNP_P3_122361_334699 | NW_004515944.1 | Scaffold484 | 334699                  | GG                              | TT                | 1946508962               |
| SNP_P3_122362_379342 | NW_004515944.1 | Scaffold484 | 379342                  | AA                              | GG                | 1946508963               |
| SNP_P3_122363_387308 | NW_004515944.1 | Scaffold484 | 387308                  | TT                              | CC                | 1946508965               |
| SNP_P3_122364_390264 | NW_004515944.1 | Scaffold484 | 390264                  | TT                              | AA                | 1946508966               |
| SNP_P3_122365_390415 | NW_004515944.1 | Scaffold484 | 390415                  | TT                              | CC                | 1946508968               |
| SNP_P3_122366_394520 | NW_004515944.1 | Scaffold484 | 394520                  | AA                              | GG                | 1946508969               |
| SNP_P3_122367_394534 | NW_004515944.1 | Scaffold484 | 394534                  | TT                              | CC                | 1946508971               |
| SNP_P3_122368_394560 | NW_004515944.1 | Scaffold484 | 394560                  | AA                              | GG                | 1946508972               |
| SNP_P3_122369_394571 | NW_004515944.1 | Scaffold484 | 394571                  | CC                              | GG                | 1946508973               |
| SNP_P3_122370_394648 | NW_004515944.1 | Scaffold484 | 394648                  | AA                              | TT                | 1946508975               |
| SNP_P3_122371_394801 | NW_004515944.1 | Scaffold484 | 394801                  | CC                              | TT                | 1946508976               |
| SNP_P3_122373_394971 | NW_004515944.1 | Scaffold484 | 394971                  | CC                              | TT                | 1946508978               |
| SNP_P3_122374_441542 | NW_004515944.1 | Scaffold484 | 441542                  | AA                              | CC                | 1946508979               |
| SNP_P3_122375_444755 | NW_004515944.1 | Scaffold484 | 444755                  | TT                              | CC                | 1946508981               |
| SNP_P3_122376_448750 | NW_004515944.1 | Scaffold484 | 448750                  | CC                              | AA                | 1946508982               |
| SNP_P3_122377_449110 | NW_004515944.1 | Scaffold484 | 449110                  | CC                              | TT                | 1946508984               |
| SNP_P3_122378_449161 | NW_004515944.1 | Scaffold484 | 449161                  | AA                              | GG                | 1946508985               |
| SNP_P3_122379_452928 | NW_004515944.1 | Scaffold484 | 452928                  | GG                              | TT                | 1946508986               |
| SNP_P3_122380_452958 | NW_004515944.1 | Scaffold484 | 452958                  | AA                              | GG                | 1946508988               |
| SNP_P3_122381_453217 | NW_004515944.1 | Scaffold484 | 453217                  | AA                              | GG                | 1946508989               |
| SNP_P3_122382_453227 | NW_004515944.1 | Scaffold484 | 453227                  | AA                              | GG                | 1946508991               |
| SNP_P3_122383_453335 | NW_004515944.1 | Scaffold484 | 453335                  | AA                              | TT                | 1946508992               |
| SNP_P3_122384_453336 | NW_004515944.1 | Scaffold484 | 453336                  | AA                              | GG                | 1946508994               |
| SNP_P3_122385_464404 | NW_004515944.1 | Scaffold484 | 464404                  | TT                              | CC                | 1946508995               |
| SNP_P3_122386_464429 | NW_004515944.1 | Scaffold484 | 464429                  | GG                              | AA                | 1946508997               |
| SNP_P3_122387_475714 | NW_004515944.1 | Scaffold484 | 475714                  | TT                              | CC                | 1946508998               |
| SNP_P3_122388_484863 | NW_004515944.1 | Scaffold484 | 484863                  | TT                              | CC                | 1946508999               |
| SNP_P3_122390_492290 | NW_004515944.1 | Scaffold484 | 492290                  | TT                              | CC                | 1946509001               |
| SNP_P3_122391_506239 | NW_004515944.1 | Scaffold484 | 506239                  | CC                              | TT                | 1946509002               |
| SNP_P3_122392_509725 | NW_004515944.1 | Scaffold484 | 509725                  | AA                              | GG                | 1946509004               |
| SNP_P3_122394_532302 | NW_004515944.1 | Scaffold484 | 532302                  | GG                              | AA                | 1946509005               |
| SNP_P3_122395_561734 | NW_004515944.1 | Scaffold484 | 561734                  | CC                              | TT                | 1946509007               |
| SNP_P3_122396_570661 | NW_004515944.1 | Scaffold484 | 570661                  | CC                              | AA                | 1946509008               |
| SNP_P3_122397_578043 | NW_004515944.1 | Scaffold484 | 578043                  | GG                              | TT                | 1946509010               |

| SNPs IDs             | Chromosome IDs | Chromosomes | Physical positions (bp) | CDC Frontier (Reference genome) | (Pusa 256 & HPNB) | NCBI SNPdb Accession IDs |
|----------------------|----------------|-------------|-------------------------|---------------------------------|-------------------|--------------------------|
| SNP_P3_122398_578374 | NW_004515944.1 | Scaffold484 | 578374                  | AA                              | GG                | 1946509011               |
| SNP_P3_122399_578384 | NW_004515944.1 | Scaffold484 | 578384                  | TT                              | CC                | 1946509013               |
| SNP_P3_122400_578391 | NW_004515944.1 | Scaffold484 | 578391                  | CC                              | TT                | 1946509014               |
| SNP_P3_122401_578551 | NW_004515944.1 | Scaffold484 | 578551                  | CC                              | AA                | 1946509015               |
| SNP_P3_122402_578840 | NW_004515944.1 | Scaffold484 | 578840                  | CC                              | TT                | 1946509017               |
| SNP_P3_122403_578913 | NW_004515944.1 | Scaffold484 | 578913                  | GG                              | AA                | 1946509018               |
| SNP_P3_122404_579136 | NW_004515944.1 | Scaffold484 | 579136                  | TT                              | CC                | 1946509020               |
| SNP_P3_122406_587424 | NW_004515944.1 | Scaffold484 | 587424                  | TT                              | GG                | 1946509021               |
| SNP_P3_122407_589483 | NW_004515944.1 | Scaffold484 | 589483                  | CC                              | TT                | 1946509023               |
| SNP_P3_122408_590421 | NW_004515944.1 | Scaffold484 | 590421                  | CC                              | TT                | 1946509024               |
| SNP_P3_122409_591115 | NW_004515944.1 | Scaffold484 | 591115                  | TT                              | AA                | 1946509025               |
| SNP_P3_122410_591116 | NW_004515944.1 | Scaffold484 | 591116                  | TT                              | AA                | 1946509027               |
| SNP_P3_122411_591146 | NW_004515944.1 | Scaffold484 | 591146                  | AA                              | CC                | 1946509028               |
| SNP_P3_122412_591809 | NW_004515944.1 | Scaffold484 | 591809                  | GG                              | AA                | 1946509030               |
| SNP_P3_122413_591813 | NW_004515944.1 | Scaffold484 | 591813                  | TT                              | GG                | 1946509031               |
| SNP_P3_122414_632657 | NW_004515944.1 | Scaffold484 | 632657                  | GG                              | AA                | 1946509033               |
| SNP_P3_122415_632668 | NW_004515944.1 | Scaffold484 | 632668                  | GG                              | AA                | 1946509034               |
| SNP_P3_122416_632821 | NW_004515944.1 | Scaffold484 | 632821                  | CC                              | TT                | 1946509036               |
| SNP_P3_122417_632912 | NW_004515944.1 | Scaffold484 | 632912                  | AA                              | GG                | 1946509037               |
| SNP_P3_122418_633122 | NW_004515944.1 | Scaffold484 | 633122                  | CC                              | TT                | 1946509038               |
| SNP_P3_122420_656897 | NW_004515944.1 | Scaffold484 | 656897                  | TT                              | GG                | 1946509040               |
| SNP_P3_122421_669388 | NW_004515944.1 | Scaffold484 | 669388                  | AA                              | GG                | 1946509041               |
| SNP_P3_122422_669399 | NW_004515944.1 | Scaffold484 | 669399                  | GG                              | AA                | 1946509043               |
| SNP_P3_122423_683013 | NW_004515944.1 | Scaffold484 | 683013                  | CC                              | AA                | 1946509045               |
| SNP_P3_122424_704473 | NW_004515944.1 | Scaffold484 | 704473                  | GG                              | CC                | 1946509046               |
| SNP_P3_122425_704491 | NW_004515944.1 | Scaffold484 | 704491                  | AA                              | GG                | 1946509047               |
| SNP_P3_122426_704588 | NW_004515944.1 | Scaffold484 | 704588                  | TT                              | AA                | 1946509049               |
| SNP_P3_122427_704632 | NW_004515944.1 | Scaffold484 | 704632                  | CC                              | TT                | 1946509050               |
| SNP_P3_122428_704665 | NW_004515944.1 | Scaffold484 | 704665                  | GG                              | AA                | 1946509052               |
| SNP_P3_122429_704674 | NW_004515944.1 | Scaffold484 | 704674                  | GG                              | AA                | 1946509053               |
| SNP_P3_122430_704723 | NW_004515944.1 | Scaffold484 | 704723                  | AA                              | CC                | 1946509055               |
| SNP_P3_122431_704816 | NW_004515944.1 | Scaffold484 | 704816                  | CC                              | TT                | 1946509056               |
| SNP_P3_122432_704869 | NW_004515944.1 | Scaffold484 | 704869                  | AA                              | GG                | 1946509057               |
| SNP_P3_122433_704888 | NW_004515944.1 | Scaffold484 | 704888                  | AA                              | GG                | 1946509059               |
| SNP_P3_122434_704932 | NW_004515944.1 | Scaffold484 | 704932                  | TT                              | AA                | 1946509060               |
| SNP_P3_122435_704984 | NW_004515944.1 | Scaffold484 | 704984                  | AA                              | GG                | 1946509062               |
| SNP_P3_122436_704996 | NW_004515944.1 | Scaffold484 | 704996                  | GG                              | AA                | 1946509063               |
| SNP_P3_122437_705315 | NW_004515944.1 | Scaffold484 | 705315                  | TT                              | AA                | 1946509065               |
| SNP_P3_122438_705327 | NW_004515944.1 | Scaffold484 | 705327                  | TT                              | CC                | 1946509066               |
| SNP_P3_122439_707099 | NW_004515944.1 | Scaffold484 | 707099                  | GG                              | CC                | 1946509068               |
| SNP_P3_122440_707101 | NW_004515944.1 | Scaffold484 | 707101                  | TT                              | CC                | 1946509069               |
| SNP_P3_122441_719723 | NW_004515944.1 | Scaffold484 | 719723                  | CC                              | TT                | 1946509071               |

| SNPs IDs             | Chromosome IDs | Chromosomes | Physical positions (bp) | CDC Frontier (Reference genome) | (Pusa 256 & HPNB) | NCBI SNPdb Accession IDs |
|----------------------|----------------|-------------|-------------------------|---------------------------------|-------------------|--------------------------|
| SNP_P3_122442_719732 | NW_004515944.1 | Scaffold484 | 719732                  | CC                              | TT                | 1946509072               |
| SNP_P3_122443_719748 | NW_004515944.1 | Scaffold484 | 719748                  | AA                              | GG                | 1946509074               |
| SNP_P3_122444_719776 | NW_004515944.1 | Scaffold484 | 719776                  | CC                              | TT                | 1946509075               |
| SNP_P3_122445_720031 | NW_004515944.1 | Scaffold484 | 720031                  | AA                              | GG                | 1946509077               |
| SNP_P3_122446_736363 | NW_004515944.1 | Scaffold484 | 736363                  | CC                              | GG                | 1946509078               |
| SNP_P3_122447_736385 | NW_004515944.1 | Scaffold484 | 736385                  | AA                              | TT                | 1946509080               |
| SNP_P3_122448_736403 | NW_004515944.1 | Scaffold484 | 736403                  | TT                              | CC                | 1946509081               |
| SNP_P3_122449_736714 | NW_004515944.1 | Scaffold484 | 736714                  | CC                              | TT                | 1946509083               |
| SNP_P3_122450_736756 | NW_004515944.1 | Scaffold484 | 736756                  | AA                              | GG                | 1946509084               |
| SNP_P3_122451_736766 | NW_004515944.1 | Scaffold484 | 736766                  | AA                              | CC                | 1946509085               |
| SNP_P3_122452_736784 | NW_004515944.1 | Scaffold484 | 736784                  | CC                              | TT                | 1946509087               |
| SNP_P3_122453_742907 | NW_004515944.1 | Scaffold484 | 742907                  | CC                              | TT                | 1946509088               |
| SNP_P3_122454_742912 | NW_004515944.1 | Scaffold484 | 742912                  | AA                              | GG                | 1946509090               |
| SNP_P3_122455_763677 | NW_004515944.1 | Scaffold484 | 763677                  | AA                              | GG                | 1946509091               |
| SNP_P3_122456_763827 | NW_004515944.1 | Scaffold484 | 763827                  | AA                              | GG                | 1946509093               |
| SNP_P3_122457_763833 | NW_004515944.1 | Scaffold484 | 763833                  | AA                              | TT                | 1946509094               |
| SNP_P3_122459_764018 | NW_004515944.1 | Scaffold484 | 764018                  | AA                              | TT                | 1946509096               |
| SNP_P3_122460_764082 | NW_004515944.1 | Scaffold484 | 764082                  | AA                              | GG                | 1946509097               |
| SNP_P3_122461_764092 | NW_004515944.1 | Scaffold484 | 764092                  | AA                              | GG                | 1946509099               |
| SNP_P3_122462_764106 | NW_004515944.1 | Scaffold484 | 764106                  | AA                              | CC                | 1946509100               |
| SNP_P3_122463_784415 | NW_004515944.1 | Scaffold484 | 784415                  | AA                              | GG                | 1946509102               |
| SNP_P3_122464_788351 | NW_004515944.1 | Scaffold484 | 788351                  | AA                              | GG                | 1946509103               |
| SNP_P3_122465_788437 | NW_004515944.1 | Scaffold484 | 788437                  | AA                              | GG                | 1946509105               |
| SNP_P3_122466_788477 | NW_004515944.1 | Scaffold484 | 788477                  | GG                              | AA                | 1946509106               |
| SNP_P3_122467_788764 | NW_004515944.1 | Scaffold484 | 788764                  | GG                              | AA                | 1946509108               |
| SNP_P3_122468_788768 | NW_004515944.1 | Scaffold484 | 788768                  | GG                              | AA                | 1946509109               |
| SNP_P3_122469_794113 | NW_004515944.1 | Scaffold484 | 794113                  | AA                              | TT                | 1946509110               |
| SNP_P3_122470_794521 | NW_004515944.1 | Scaffold484 | 794521                  | AA                              | TT                | 1946509112               |
| SNP_P3_122471_794522 | NW_004515944.1 | Scaffold484 | 794522                  | TT                              | GG                | 1946509113               |
| SNP_P3_122472_794794 | NW_004515944.1 | Scaffold484 | 794794                  | CC                              | TT                | 1946509115               |
| SNP_P3_122473_794820 | NW_004515944.1 | Scaffold484 | 794820                  | AA                              | GG                | 1946509116               |
| SNP_P3_122474_794836 | NW_004515944.1 | Scaffold484 | 794836                  | AA                              | CC                | 1946509118               |
| SNP_P3_122475_3628   | NW_004515945.1 | Scaffold485 | 3628                    | GG                              | TT                | 1946509119               |
| SNP_P3_122476_3686   | NW_004515945.1 | Scaffold485 | 3686                    | GG                              | AA                | 1946509121               |
| SNP_P3_122477_3714   | NW_004515945.1 | Scaffold485 | 3714                    | TT                              | CC                | 1946509122               |
| SNP_P3_122478_4062   | NW_004515945.1 | Scaffold485 | 4062                    | AA                              | GG                | 1946509124               |
| SNP_P3_122479_4413   | NW_004515945.1 | Scaffold485 | 4413                    | GG                              | AA                | 1946509125               |
| SNP_P3_122480_6561   | NW_004515945.1 | Scaffold485 | 6561                    | AA                              | GG                | 1946509127               |
| SNP_P3_122481_20627  | NW_004515945.1 | Scaffold485 | 20627                   | AA                              | GG                | 1946509128               |
| SNP_P3_122483_92870  | NW_004515945.1 | Scaffold485 | 92870                   | GG                              | AA                | 1946509130               |
| SNP_P3_122484_92875  | NW_004515945.1 | Scaffold485 | 92875                   | TT                              | AA                | 1946509131               |
| SNP_P3_122485_104738 | NW_004515945.1 | Scaffold485 | 104738                  | TT                              | CC                | 1946509133               |

| SNPs IDs             | Chromosome IDs | Chromosomes | Physical positions (bp) | CDC Frontier (Reference genome) | (Pusa 256 & HPNB) | NCBI SNPdb Accession IDs |
|----------------------|----------------|-------------|-------------------------|---------------------------------|-------------------|--------------------------|
| SNP_P3_122486_104905 | NW_004515945.1 | Scaffold485 | 104905                  | CC                              | TT                | 1946509134               |
| SNP_P3_122487_104908 | NW_004515945.1 | Scaffold485 | 104908                  | AA                              | GG                | 1946509136               |
| SNP_P3_122488_105090 | NW_004515945.1 | Scaffold485 | 105090                  | AA                              | TT                | 1946509137               |
| SNP_P3_122489_105110 | NW_004515945.1 | Scaffold485 | 105110                  | AA                              | TT                | 1946509138               |
| SNP_P3_122490_123161 | NW_004515945.1 | Scaffold485 | 123161                  | AA                              | TT                | 1946509140               |
| SNP_P3_122491_130335 | NW_004515945.1 | Scaffold485 | 130335                  | AA                              | GG                | 1946509141               |
| SNP_P3_122492_133092 | NW_004515945.1 | Scaffold485 | 133092                  | TT                              | CC                | 1946509143               |
| SNP_P3_122493_133168 | NW_004515945.1 | Scaffold485 | 133168                  | AA                              | GG                | 1946509144               |
| SNP_P3_122494_133446 | NW_004515945.1 | Scaffold485 | 133446                  | AA                              | CC                | 1946509146               |
| SNP_P3_122495_133447 | NW_004515945.1 | Scaffold485 | 133447                  | AA                              | CC                | 1946509147               |
| SNP_P3_122496_133999 | NW_004515945.1 | Scaffold485 | 133999                  | AA                              | CC                | 1946509149               |
| SNP_P3_122497_134027 | NW_004515945.1 | Scaffold485 | 134027                  | TT                              | CC                | 1946509150               |
| SNP_P3_122499_164783 | NW_004515945.1 | Scaffold485 | 164783                  | TT                              | AA                | 1946509152               |
| SNP_P3_122500_165642 | NW_004515945.1 | Scaffold485 | 165642                  | GG                              | AA                | 1946509153               |
| SNP_P3_122501_165722 | NW_004515945.1 | Scaffold485 | 165722                  | AA                              | GG                | 1946509155               |
| SNP_P3_122502_165749 | NW_004515945.1 | Scaffold485 | 165749                  | TT                              | GG                | 1946509156               |
| SNP_P3_122503_165896 | NW_004515945.1 | Scaffold485 | 165896                  | CC                              | AA                | 1946509158               |
| SNP_P3_122504_165928 | NW_004515945.1 | Scaffold485 | 165928                  | AA                              | GG                | 1946509159               |
| SNP_P3_122505_166030 | NW_004515945.1 | Scaffold485 | 166030                  | AA                              | TT                | 1946509161               |
| SNP_P3_122506_166031 | NW_004515945.1 | Scaffold485 | 166031                  | AA                              | TT                | 1946509162               |
| SNP_P3_122507_170059 | NW_004515945.1 | Scaffold485 | 170059                  | GG                              | AA                | 1946509164               |
| SNP_P3_122508_170714 | NW_004515945.1 | Scaffold485 | 170714                  | AA                              | GG                | 1946509165               |
| SNP_P3_122509_170723 | NW_004515945.1 | Scaffold485 | 170723                  | CC                              | TT                | 1946509167               |
| SNP_P3_122510_170732 | NW_004515945.1 | Scaffold485 | 170732                  | TT                              | GG                | 1946509168               |
| SNP_P3_122511_170735 | NW_004515945.1 | Scaffold485 | 170735                  | CC                              | TT                | 1946509169               |
| SNP_P3_122512_170741 | NW_004515945.1 | Scaffold485 | 170741                  | GG                              | AA                | 1946509171               |
| SNP_P3_122513_170747 | NW_004515945.1 | Scaffold485 | 170747                  | AA                              | GG                | 1946509172               |
| SNP_P3_122514_170753 | NW_004515945.1 | Scaffold485 | 170753                  | TT                              | CC                | 1946509174               |
| SNP_P3_122515_170911 | NW_004515945.1 | Scaffold485 | 170911                  | AA                              | CC                | 1946509176               |
| SNP_P3_122517_171033 | NW_004515945.1 | Scaffold485 | 171033                  | AA                              | GG                | 1946509177               |
| SNP_P3_122518_171035 | NW_004515945.1 | Scaffold485 | 171035                  | AA                              | GG                | 1946509179               |
| SNP_P3_122519_171037 | NW_004515945.1 | Scaffold485 | 171037                  | CC                              | AA                | 1946509180               |
| SNP_P3_122520_171516 | NW_004515945.1 | Scaffold485 | 171516                  | TT                              | GG                | 1946509181               |
| SNP_P3_122521_9259   | NW_004515946.1 | Scaffold486 | 9259                    | TT                              | CC                | 1946509183               |
| SNP_P3_122522_9357   | NW_004515946.1 | Scaffold486 | 9357                    | TT                              | CC                | 1946509184               |
| SNP_P3_122523_9399   | NW_004515946.1 | Scaffold486 | 9399                    | GG                              | AA                | 1946509186               |
| SNP_P3_122524_9705   | NW_004515946.1 | Scaffold486 | 9705                    | TT                              | AA                | 1946509187               |
| SNP_P3_122525_9746   | NW_004515946.1 | Scaffold486 | 9746                    | CC                              | TT                | 1946509189               |
| SNP_P3_122526_9764   | NW_004515946.1 | Scaffold486 | 9764                    | AA                              | GG                | 1946509190               |
| SNP_P3_122527_9767   | NW_004515946.1 | Scaffold486 | 9767                    | AA                              | GG                | 1946509192               |
| SNP_P3_122528_9786   | NW_004515946.1 | Scaffold486 | 9786                    | AA                              | GG                | 1946509193               |
| SNP_P3_122529_9799   | NW_004515946.1 | Scaffold486 | 9799                    | AA                              | GG                | 1946509194               |

| SNPs IDs             | Chromosome IDs | Chromosomes | Physical positions (bp) | CDC Frontier (Reference genome) | (Pusa 256 & HPNB) | NCBI SNPdb Accession IDs |
|----------------------|----------------|-------------|-------------------------|---------------------------------|-------------------|--------------------------|
| SNP_P3_122530_21443  | NW_004515946.1 | Scaffold486 | 21443                   | CC                              | AA                | 1946509196               |
| SNP_P3_122531_33121  | NW_004515946.1 | Scaffold486 | 33121                   | AA                              | GG                | 1946509197               |
| SNP_P3_122532_33364  | NW_004515946.1 | Scaffold486 | 33364                   | TT                              | CC                | 1946509199               |
| SNP_P3_122533_33371  | NW_004515946.1 | Scaffold486 | 33371                   | TT                              | CC                | 1946509200               |
| SNP_P3_122536_40385  | NW_004515946.1 | Scaffold486 | 40385                   | TT                              | AA                | 1946509202               |
| SNP_P3_122537_40727  | NW_004515946.1 | Scaffold486 | 40727                   | CC                              | GG                | 1946509203               |
| SNP_P3_122538_40749  | NW_004515946.1 | Scaffold486 | 40749                   | TT                              | CC                | 1946509205               |
| SNP_P3_122540_45595  | NW_004515946.1 | Scaffold486 | 45595                   | CC                              | AA                | 1946509206               |
| SNP_P3_122541_45607  | NW_004515946.1 | Scaffold486 | 45607                   | GG                              | AA                | 1946509208               |
| SNP_P3_122542_51924  | NW_004515946.1 | Scaffold486 | 51924                   | GG                              | AA                | 1946509209               |
| SNP_P3_122543_51930  | NW_004515946.1 | Scaffold486 | 51930                   | AA                              | GG                | 1946509211               |
| SNP_P3_122544_51999  | NW_004515946.1 | Scaffold486 | 51999                   | TT                              | GG                | 1946509212               |
| SNP_P3_122545_52241  | NW_004515946.1 | Scaffold486 | 52241                   | CC                              | AA                | 1946509214               |
| SNP_P3_122546_52279  | NW_004515946.1 | Scaffold486 | 52279                   | GG                              | AA                | 1946509215               |
| SNP_P3_122547_52302  | NW_004515946.1 | Scaffold486 | 52302                   | TT                              | CC                | 1946509223               |
| SNP_P3_122548_60972  | NW_004515946.1 | Scaffold486 | 60972                   | GG                              | TT                | 1946509225               |
| SNP_P3_122549_61010  | NW_004515946.1 | Scaffold486 | 61010                   | GG                              | AA                | 1946509226               |
| SNP_P3_122550_61042  | NW_004515946.1 | Scaffold486 | 61042                   | TT                              | CC                | 1946509228               |
| SNP_P3_122551_85457  | NW_004515946.1 | Scaffold486 | 85457                   | GG                              | AA                | 1946509229               |
| SNP_P3_122552_88073  | NW_004515946.1 | Scaffold486 | 88073                   | TT                              | CC                | 1946509231               |
| SNP_P3_122553_99705  | NW_004515946.1 | Scaffold486 | 99705                   | GG                              | AA                | 1946509232               |
| SNP_P3_122554_99711  | NW_004515946.1 | Scaffold486 | 99711                   | AA                              | CC                | 1946509234               |
| SNP_P3_122555_100715 | NW_004515946.1 | Scaffold486 | 100715                  | TT                              | AA                | 1946509235               |
| SNP_P3_122556_101679 | NW_004515946.1 | Scaffold486 | 101679                  | CC                              | GG                | 1946509237               |
| SNP_P3_122557_102151 | NW_004515946.1 | Scaffold486 | 102151                  | AA                              | GG                | 1946509238               |
| SNP_P3_122558_102643 | NW_004515946.1 | Scaffold486 | 102643                  | CC                              | AA                | 1946509240               |
| SNP_P3_122559_103259 | NW_004515946.1 | Scaffold486 | 103259                  | AA                              | TT                | 1946509241               |
| SNP_P3_122560_103282 | NW_004515946.1 | Scaffold486 | 103282                  | GG                              | AA                | 1946509242               |
| SNP_P3_122561_103307 | NW_004515946.1 | Scaffold486 | 103307                  | TT                              | CC                | 1946509244               |
| SNP_P3_122562_103712 | NW_004515946.1 | Scaffold486 | 103712                  | TT                              | AA                | 1946509245               |
| SNP_P3_122563_103826 | NW_004515946.1 | Scaffold486 | 103826                  | AA                              | TT                | 1946509247               |
| SNP_P3_122564_103831 | NW_004515946.1 | Scaffold486 | 103831                  | AA                              | GG                | 1946509248               |
| SNP_P3_122565_103837 | NW_004515946.1 | Scaffold486 | 103837                  | TT                              | GG                | 1946509250               |
| SNP_P3_122566_103839 | NW_004515946.1 | Scaffold486 | 103839                  | AA                              | CC                | 1946509251               |
| SNP_P3_122567_104037 | NW_004515946.1 | Scaffold486 | 104037                  | TT                              | GG                | 1946509253               |
| SNP_P3_122568_109416 | NW_004515946.1 | Scaffold486 | 109416                  | AA                              | TT                | 1946509254               |
| SNP_P3_122569_109417 | NW_004515946.1 | Scaffold486 | 109417                  | AA                              | CC                | 1946509256               |
| SNP_P3_122570_109428 | NW_004515946.1 | Scaffold486 | 109428                  | GG                              | TT                | 1946509257               |
| SNP_P3_122571_116558 | NW_004515946.1 | Scaffold486 | 116558                  | TT                              | AA                | 1946509259               |
| SNP_P3_122572_116569 | NW_004515946.1 | Scaffold486 | 116569                  | TT                              | CC                | 1946509260               |
| SNP_P3_122573_116579 | NW_004515946.1 | Scaffold486 | 116579                  | TT                              | CC                | 1946509261               |
| SNP_P3_122574_118802 | NW_004515946.1 | Scaffold486 | 118802                  | TT                              | CC                | 1946509263               |

| SNPs IDs             | Chromosome IDs | Chromosomes | Physical positions (bp) | CDC Frontier (Reference genome) | (Pusa 256 & HPNB) | NCBI SNPdb Accession IDs |
|----------------------|----------------|-------------|-------------------------|---------------------------------|-------------------|--------------------------|
| SNP_P3_122575_118812 | NW_004515946.1 | Scaffold486 | 118812                  | GG                              | TT                | 1946509264               |
| SNP_P3_122576_118828 | NW_004515946.1 | Scaffold486 | 118828                  | GG                              | AA                | 1946509266               |
| SNP_P3_122577_118844 | NW_004515946.1 | Scaffold486 | 118844                  | AA                              | GG                | 1946509267               |
| SNP_P3_122578_118945 | NW_004515946.1 | Scaffold486 | 118945                  | AA                              | GG                | 1946509269               |
| SNP_P3_122579_119187 | NW_004515946.1 | Scaffold486 | 119187                  | TT                              | CC                | 1946509270               |
| SNP_P3_122580_119192 | NW_004515946.1 | Scaffold486 | 119192                  | AA                              | CC                | 1946509272               |
| SNP_P3_122581_119287 | NW_004515946.1 | Scaffold486 | 119287                  | CC                              | TT                | 1946509273               |
| SNP_P3_122582_119338 | NW_004515946.1 | Scaffold486 | 119338                  | TT                              | GG                | 1946509274               |
| SNP_P3_122583_156519 | NW_004515946.1 | Scaffold486 | 156519                  | TT                              | AA                | 1946509276               |
| SNP_P3_122584_156629 | NW_004515946.1 | Scaffold486 | 156629                  | CC                              | TT                | 1946509277               |
| SNP_P3_122585_156657 | NW_004515946.1 | Scaffold486 | 156657                  | AA                              | TT                | 1946509279               |
| SNP_P3_122586_156659 | NW_004515946.1 | Scaffold486 | 156659                  | TT                              | CC                | 1946509280               |
| SNP_P3_122587_156661 | NW_004515946.1 | Scaffold486 | 156661                  | CC                              | TT                | 1946509282               |
| SNP_P3_122588_156863 | NW_004515946.1 | Scaffold486 | 156863                  | GG                              | TT                | 1946509283               |
| SNP_P3_122589_156890 | NW_004515946.1 | Scaffold486 | 156890                  | TT                              | CC                | 1946509285               |
| SNP_P3_122590_156942 | NW_004515946.1 | Scaffold486 | 156942                  | GG                              | CC                | 1946509286               |
| SNP_P3_122591_188995 | NW_004515946.1 | Scaffold486 | 188995                  | AA                              | CC                | 1946509287               |
| SNP_P3_122592_197004 | NW_004515946.1 | Scaffold486 | 197004                  | AA                              | GG                | 1946509289               |
| SNP_P3_122593_197035 | NW_004515946.1 | Scaffold486 | 197035                  | CC                              | TT                | 1946509290               |
| SNP_P3_122594_197042 | NW_004515946.1 | Scaffold486 | 197042                  | AA                              | TT                | 1946509292               |
| SNP_P3_122595_209796 | NW_004515946.1 | Scaffold486 | 209796                  | AA                              | CC                | 1946509293               |
| SNP_P3_122596_209823 | NW_004515946.1 | Scaffold486 | 209823                  | CC                              | TT                | 1946509294               |
| SNP_P3_122597_214273 | NW_004515946.1 | Scaffold486 | 214273                  | AA                              | CC                | 1946509296               |
| SNP_P3_122598_214640 | NW_004515946.1 | Scaffold486 | 214640                  | AA                              | TT                | 1946509297               |
| SNP_P3_122599_214648 | NW_004515946.1 | Scaffold486 | 214648                  | CC                              | AA                | 1946509299               |
| SNP_P3_122600_214661 | NW_004515946.1 | Scaffold486 | 214661                  | GG                              | TT                | 1946509300               |
| SNP_P3_122601_214663 | NW_004515946.1 | Scaffold486 | 214663                  | TT                              | CC                | 1946509302               |
| SNP_P3_122602_214674 | NW_004515946.1 | Scaffold486 | 214674                  | TT                              | CC                | 1946509303               |
| SNP_P3_122603_223241 | NW_004515946.1 | Scaffold486 | 223241                  | AA                              | GG                | 1946509305               |
| SNP_P3_122604_223242 | NW_004515946.1 | Scaffold486 | 223242                  | TT                              | CC                | 1946509306               |
| SNP_P3_122605_1685   | NW_004515947.1 | Scaffold487 | 1685                    | AA                              | CC                | 1946509308               |
| SNP_P3_122606_1704   | NW_004515947.1 | Scaffold487 | 1704                    | GG                              | CC                | 1946509309               |
| SNP_P3_122607_1831   | NW_004515947.1 | Scaffold487 | 1831                    | TT                              | CC                | 1946509310               |
| SNP_P3_122608_1851   | NW_004515947.1 | Scaffold487 | 1851                    | TT                              | CC                | 1946509312               |
| SNP_P3_122609_1855   | NW_004515947.1 | Scaffold487 | 1855                    | CC                              | TT                | 1946509313               |
| SNP_P3_122610_1899   | NW_004515947.1 | Scaffold487 | 1899                    | GG                              | AA                | 1946509315               |
| SNP_P3_122611_1940   | NW_004515947.1 | Scaffold487 | 1940                    | AA                              | GG                | 1946509316               |
| SNP_P3_122612_2093   | NW_004515947.1 | Scaffold487 | 2093                    | GG                              | AA                | 1946509318               |
| SNP_P3_122613_2096   | NW_004515947.1 | Scaffold487 | 2096                    | GG                              | AA                | 1946509319               |
| SNP_P3_122614_2100   | NW_004515947.1 | Scaffold487 | 2100                    | CC                              | TT                | 1946509321               |
| SNP_P3_122615_2130   | NW_004515947.1 | Scaffold487 | 2130                    | AA                              | CC                | 1946509322               |
| SNP_P3_122616_2253   | NW_004515947.1 | Scaffold487 | 2253                    | GG                              | AA                | 1946509324               |



| SNPs IDs            | Chromosome IDs | Chromosomes | Physical positions (bp) | CDC Frontier (Reference genome) | (Pusa 256 & HPNB) | NCBI SNPdb Accession IDs |
|---------------------|----------------|-------------|-------------------------|---------------------------------|-------------------|--------------------------|
| SNP_P3_122617_2302  | NW_004515947.1 | Scaffold487 | 2302                    | TT                              | CC                | 1946509325               |
| SNP_P3_122618_2324  | NW_004515947.1 | Scaffold487 | 2324                    | AA                              | TT                | 1946509327               |
| SNP_P3_122619_2346  | NW_004515947.1 | Scaffold487 | 2346                    | CC                              | AA                | 1946509328               |
| SNP_P3_122620_2425  | NW_004515947.1 | Scaffold487 | 2425                    | TT                              | CC                | 1946509330               |
| SNP_P3_122621_2529  | NW_004515947.1 | Scaffold487 | 2529                    | AA                              | GG                | 1946509331               |
| SNP_P3_122622_3046  | NW_004515947.1 | Scaffold487 | 3046                    | CC                              | TT                | 1946509333               |
| SNP_P3_122624_8473  | NW_004515947.1 | Scaffold487 | 8473                    | CC                              | TT                | 1946509334               |
| SNP_P3_122625_8476  | NW_004515947.1 | Scaffold487 | 8476                    | TT                              | CC                | 1946509335               |
| SNP_P3_122626_9982  | NW_004515947.1 | Scaffold487 | 9982                    | TT                              | CC                | 1946509337               |
| SNP_P3_122627_10033 | NW_004515947.1 | Scaffold487 | 10033                   | AA                              | GG                | 1946509338               |
| SNP_P3_122628_10095 | NW_004515947.1 | Scaffold487 | 10095                   | GG                              | CC                | 1946509340               |
| SNP_P3_122629_10099 | NW_004515947.1 | Scaffold487 | 10099                   | TT                              | AA                | 1946509341               |
| SNP_P3_122630_10100 | NW_004515947.1 | Scaffold487 | 10100                   | GG                              | TT                | 1946509343               |
| SNP_P3_122631_10292 | NW_004515947.1 | Scaffold487 | 10292                   | TT                              | AA                | 1946509344               |
| SNP_P3_122632_10375 | NW_004515947.1 | Scaffold487 | 10375                   | CC                              | TT                | 1946509346               |
| SNP_P3_122633_10429 | NW_004515947.1 | Scaffold487 | 10429                   | TT                              | CC                | 1946509347               |
| SNP_P3_122634_10446 | NW_004515947.1 | Scaffold487 | 10446                   | GG                              | AA                | 1946509349               |
| SNP_P3_122635_16888 | NW_004515947.1 | Scaffold487 | 16888                   | CC                              | TT                | 1946509350               |
| SNP_P3_122636_27518 | NW_004515947.1 | Scaffold487 | 27518                   | TT                              | CC                | 1946509352               |
| SNP_P3_122637_30648 | NW_004515947.1 | Scaffold487 | 30648                   | CC                              | TT                | 1946509353               |
| SNP_P3_122638_30687 | NW_004515947.1 | Scaffold487 | 30687                   | CC                              | TT                | 1946509355               |
| SNP_P3_122639_31026 | NW_004515947.1 | Scaffold487 | 31026                   | TT                              | CC                | 1946509356               |
| SNP_P3_122640_33157 | NW_004515947.1 | Scaffold487 | 33157                   | TT                              | AA                | 1946509358               |
| SNP_P3_122641_33397 | NW_004515947.1 | Scaffold487 | 33397                   | CC                              | AA                | 1946509359               |
| SNP_P3_122642_37436 | NW_004515947.1 | Scaffold487 | 37436                   | GG                              | CC                | 1946509361               |
| SNP_P3_122643_37454 | NW_004515947.1 | Scaffold487 | 37454                   | CC                              | GG                | 1946509362               |
| SNP_P3_122644_37456 | NW_004515947.1 | Scaffold487 | 37456                   | AA                              | CC                | 1946509364               |
| SNP_P3_122645_37495 | NW_004515947.1 | Scaffold487 | 37495                   | GG                              | AA                | 1946509365               |
| SNP_P3_122646_40423 | NW_004515947.1 | Scaffold487 | 40423                   | TT                              | CC                | 1946509367               |
| SNP_P3_122647_40499 | NW_004515947.1 | Scaffold487 | 40499                   | TT                              | AA                | 1946509368               |
| SNP_P3_122648_40545 | NW_004515947.1 | Scaffold487 | 40545                   | GG                              | AA                | 1946509370               |
| SNP_P3_122649_40581 | NW_004515947.1 | Scaffold487 | 40581                   | TT                              | GG                | 1946509371               |
| SNP_P3_122650_40627 | NW_004515947.1 | Scaffold487 | 40627                   | TT                              | CC                | 1946509373               |
| SNP_P3_122651_40674 | NW_004515947.1 | Scaffold487 | 40674                   | TT                              | CC                | 1946509374               |
| SNP_P3_122652_40691 | NW_004515947.1 | Scaffold487 | 40691                   | CC                              | GG                | 1946509376               |
| SNP_P3_122653_40728 | NW_004515947.1 | Scaffold487 | 40728                   | TT                              | AA                | 1946509377               |
| SNP_P3_122654_40818 | NW_004515947.1 | Scaffold487 | 40818                   | CC                              | TT                | 1946509379               |
| SNP_P3_122655_40861 | NW_004515947.1 | Scaffold487 | 40861                   | AA                              | CC                | 1946509380               |
| SNP_P3_122656_40885 | NW_004515947.1 | Scaffold487 | 40885                   | AA                              | GG                | 1946509382               |
| SNP_P3_122657_40929 | NW_004515947.1 | Scaffold487 | 40929                   | TT                              | AA                | 1946509383               |
| SNP_P3_122658_40938 | NW_004515947.1 | Scaffold487 | 40938                   | TT                              | CC                | 1946509384               |
| SNP_P3_122659_40960 | NW_004515947.1 | Scaffold487 | 40960                   | CC                              | AA                | 1946509386               |

| SNPs IDs            | Chromosome IDs | Chromosomes | Physical positions (bp) | CDC Frontier (Reference genome) | (Pusa 256 & HPNB) | NCBI SNPdb Accession IDs |
|---------------------|----------------|-------------|-------------------------|---------------------------------|-------------------|--------------------------|
| SNP_P3_122660_40981 | NW_004515947.1 | Scaffold487 | 40981                   | TT                              | CC                | 1946509387               |
| SNP_P3_122661_43133 | NW_004515947.1 | Scaffold487 | 43133                   | GG                              | AA                | 1946509389               |
| SNP_P3_122662_43155 | NW_004515947.1 | Scaffold487 | 43155                   | AA                              | TT                | 1946509390               |
| SNP_P3_122663_43188 | NW_004515947.1 | Scaffold487 | 43188                   | CC                              | TT                | 1946509392               |
| SNP_P3_122664_43199 | NW_004515947.1 | Scaffold487 | 43199                   | AA                              | GG                | 1946509393               |
| SNP_P3_122665_43359 | NW_004515947.1 | Scaffold487 | 43359                   | GG                              | CC                | 1946509394               |
| SNP_P3_122666_43365 | NW_004515947.1 | Scaffold487 | 43365                   | AA                              | CC                | 1946509396               |
| SNP_P3_122667_43389 | NW_004515947.1 | Scaffold487 | 43389                   | CC                              | TT                | 1946509397               |
| SNP_P3_122668_43408 | NW_004515947.1 | Scaffold487 | 43408                   | TT                              | CC                | 1946509399               |
| SNP_P3_122669_45984 | NW_004515947.1 | Scaffold487 | 45984                   | TT                              | CC                | 1946509400               |
| SNP_P3_122670_61257 | NW_004515947.1 | Scaffold487 | 61257                   | AA                              | TT                | 1946509402               |
| SNP_P3_122672_61357 | NW_004515947.1 | Scaffold487 | 61357                   | AA                              | TT                | 1946509403               |
| SNP_P3_122673_61362 | NW_004515947.1 | Scaffold487 | 61362                   | GG                              | AA                | 1946509405               |
| SNP_P3_122674_61399 | NW_004515947.1 | Scaffold487 | 61399                   | GG                              | CC                | 1946509406               |
| SNP_P3_122675_61607 | NW_004515947.1 | Scaffold487 | 61607                   | GG                              | AA                | 1946509407               |
| SNP_P3_122676_61612 | NW_004515947.1 | Scaffold487 | 61612                   | TT                              | GG                | 1946509409               |
| SNP_P3_122677_61666 | NW_004515947.1 | Scaffold487 | 61666                   | GG                              | AA                | 1946509410               |
| SNP_P3_122678_61667 | NW_004515947.1 | Scaffold487 | 61667                   | AA                              | GG                | 1946509412               |
| SNP_P3_122679_61704 | NW_004515947.1 | Scaffold487 | 61704                   | TT                              | CC                | 1946509413               |
| SNP_P3_122680_67486 | NW_004515947.1 | Scaffold487 | 67486                   | TT                              | CC                | 1946509414               |
| SNP_P3_122681_73980 | NW_004515947.1 | Scaffold487 | 73980                   | GG                              | TT                | 1946509416               |
| SNP_P3_122682_75985 | NW_004515947.1 | Scaffold487 | 75985                   | CC                              | TT                | 1946509417               |
| SNP_P3_122683_76265 | NW_004515947.1 | Scaffold487 | 76265                   | TT                              | AA                | 1946509419               |
| SNP_P3_122684_79859 | NW_004515947.1 | Scaffold487 | 79859                   | GG                              | TT                | 1946509420               |
| SNP_P3_122685_83690 | NW_004515947.1 | Scaffold487 | 83690                   | CC                              | AA                | 1946509422               |
| SNP_P3_122686_83694 | NW_004515947.1 | Scaffold487 | 83694                   | GG                              | AA                | 1946509423               |
| SNP_P3_122687_83699 | NW_004515947.1 | Scaffold487 | 83699                   | GG                              | AA                | 1946509425               |
| SNP_P3_122688_83750 | NW_004515947.1 | Scaffold487 | 83750                   | TT                              | GG                | 1946509426               |
| SNP_P3_122689_83754 | NW_004515947.1 | Scaffold487 | 83754                   | CC                              | TT                | 1946509428               |
| SNP_P3_122690_84110 | NW_004515947.1 | Scaffold487 | 84110                   | GG                              | TT                | 1946509429               |
| SNP_P3_122691_84532 | NW_004515947.1 | Scaffold487 | 84532                   | GG                              | AA                | 1946509430               |
| SNP_P3_122693_364   | NW_004515950.1 | Scaffold491 | 364                     | AA                              | CC                | 1946509432               |
| SNP_P3_122694_414   | NW_004515950.1 | Scaffold491 | 414                     | TT                              | AA                | 1946509433               |
| SNP_P3_122695_714   | NW_004515950.1 | Scaffold491 | 714                     | AA                              | CC                | 1946509435               |
| SNP_P3_122696_4542  | NW_004515950.1 | Scaffold491 | 4542                    | GG                              | CC                | 1946509436               |
| SNP_P3_122697_4765  | NW_004515950.1 | Scaffold491 | 4765                    | CC                              | TT                | 1946509438               |
| SNP_P3_122698_4783  | NW_004515950.1 | Scaffold491 | 4783                    | AA                              | GG                | 1946509439               |
| SNP_P3_122699_5833  | NW_004515950.1 | Scaffold491 | 5833                    | GG                              | AA                | 1946509440               |
| SNP_P3_122700_8756  | NW_004515950.1 | Scaffold491 | 8756                    | AA                              | CC                | 1946509442               |
| SNP_P3_122701_8757  | NW_004515950.1 | Scaffold491 | 8757                    | GG                              | CC                | 1946509443               |
| SNP_P3_122702_9283  | NW_004515950.1 | Scaffold491 | 9283                    | GG                              | CC                | 1946509445               |
| SNP_P3_122703_9529  | NW_004515950.1 | Scaffold491 | 9529                    | GG                              | AA                | 1946509446               |

| SNPs IDs            | Chromosome IDs | Chromosomes | Physical positions (bp) | CDC Frontier (Reference genome) | (Pusa 256 & HPNB) | NCBI SNPdb Accession IDs |
|---------------------|----------------|-------------|-------------------------|---------------------------------|-------------------|--------------------------|
| SNP_P3_122704_11206 | NW_004515950.1 | Scaffold491 | 11206                   | GG                              | AA                | 1946509448               |
| SNP_P3_122705_11390 | NW_004515950.1 | Scaffold491 | 11390                   | CC                              | AA                | 1946509449               |
| SNP_P3_122706_11412 | NW_004515950.1 | Scaffold491 | 11412                   | AA                              | GG                | 1946509450               |
| SNP_P3_122707_11423 | NW_004515950.1 | Scaffold491 | 11423                   | TT                              | CC                | 1946509452               |
| SNP_P3_122708_11457 | NW_004515950.1 | Scaffold491 | 11457                   | CC                              | GG                | 1946509453               |
| SNP_P3_122709_11727 | NW_004515950.1 | Scaffold491 | 11727                   | CC                              | TT                | 1946509455               |
| SNP_P3_122710_11771 | NW_004515950.1 | Scaffold491 | 11771                   | CC                              | GG                | 1946509456               |
| SNP_P3_122711_12517 | NW_004515950.1 | Scaffold491 | 12517                   | AA                              | GG                | 1946509458               |
| SNP_P3_122712_15760 | NW_004515950.1 | Scaffold491 | 15760                   | TT                              | AA                | 1946509459               |
| SNP_P3_122713_15831 | NW_004515950.1 | Scaffold491 | 15831                   | GG                              | AA                | 1946509460               |
| SNP_P3_122714_20004 | NW_004515950.1 | Scaffold491 | 20004                   | CC                              | TT                | 1946509462               |
| SNP_P3_122716_20780 | NW_004515950.1 | Scaffold491 | 20780                   | AA                              | GG                | 1946509463               |
| SNP_P3_122717_20905 | NW_004515950.1 | Scaffold491 | 20905                   | GG                              | AA                | 1946509465               |
| SNP_P3_122719_21045 | NW_004515950.1 | Scaffold491 | 21045                   | TT                              | GG                | 1946509466               |
| SNP_P3_122720_21861 | NW_004515950.1 | Scaffold491 | 21861                   | AA                              | GG                | 1946509468               |
| SNP_P3_122721_21862 | NW_004515950.1 | Scaffold491 | 21862                   | GG                              | TT                | 1946509469               |
| SNP_P3_122722_22549 | NW_004515950.1 | Scaffold491 | 22549                   | TT                              | CC                | 1946509470               |
| SNP_P3_122723_22654 | NW_004515950.1 | Scaffold491 | 22654                   | AA                              | GG                | 1946509472               |
| SNP_P3_122724_22657 | NW_004515950.1 | Scaffold491 | 22657                   | GG                              | TT                | 1946509473               |
| SNP_P3_122725_22728 | NW_004515950.1 | Scaffold491 | 22728                   | TT                              | AA                | 1946509475               |
| SNP_P3_122726_22823 | NW_004515950.1 | Scaffold491 | 22823                   | TT                              | CC                | 1946509476               |
| SNP_P3_122727_23669 | NW_004515950.1 | Scaffold491 | 23669                   | GG                              | AA                | 1946509478               |
| SNP_P3_122728_26923 | NW_004515950.1 | Scaffold491 | 26923                   | GG                              | CC                | 1946509479               |
| SNP_P3_122729_27043 | NW_004515950.1 | Scaffold491 | 27043                   | AA                              | CC                | 1946509481               |
| SNP_P3_122730_27248 | NW_004515950.1 | Scaffold491 | 27248                   | CC                              | AA                | 1946509482               |
| SNP_P3_122731_27330 | NW_004515950.1 | Scaffold491 | 27330                   | AA                              | TT                | 1946509483               |
| SNP_P3_122732_29174 | NW_004515950.1 | Scaffold491 | 29174                   | AA                              | GG                | 1946509485               |
| SNP_P3_122733_29330 | NW_004515950.1 | Scaffold491 | 29330                   | AA                              | GG                | 1946509486               |
| SNP_P3_122734_29389 | NW_004515950.1 | Scaffold491 | 29389                   | CC                              | GG                | 1946509488               |
| SNP_P3_122735_30985 | NW_004515950.1 | Scaffold491 | 30985                   | CC                              | GG                | 1946509489               |
| SNP_P3_122736_737   | NW_004515951.1 | Scaffold492 | 737                     | AA                              | GG                | 1946509491               |
| SNP_P3_122737_751   | NW_004515951.1 | Scaffold492 | 751                     | CC                              | AA                | 1946509492               |
| SNP_P3_122738_914   | NW_004515951.1 | Scaffold492 | 914                     | CC                              | AA                | 1946509494               |
| SNP_P3_122739_1195  | NW_004515951.1 | Scaffold492 | 1195                    | GG                              | AA                | 1946509495               |
| SNP_P3_122740_2752  | NW_004515951.1 | Scaffold492 | 2752                    | GG                              | AA                | 1946509497               |
| SNP_P3_122741_5939  | NW_004515951.1 | Scaffold492 | 5939                    | CC                              | AA                | 1946509498               |
| SNP_P3_122742_5955  | NW_004515951.1 | Scaffold492 | 5955                    | GG                              | AA                | 1946509500               |
| SNP_P3_122743_6253  | NW_004515951.1 | Scaffold492 | 6253                    | AA                              | GG                | 1946509501               |
| SNP_P3_122744_15103 | NW_004515951.1 | Scaffold492 | 15103                   | AA                              | TT                | 1946509502               |
| SNP_P3_122745_15115 | NW_004515951.1 | Scaffold492 | 15115                   | GG                              | AA                | 1946509504               |
| SNP_P3_122746_15571 | NW_004515951.1 | Scaffold492 | 15571                   | AA                              | GG                | 1946509505               |
| SNP_P3_122747_27729 | NW_004515951.1 | Scaffold492 | 27729                   | TT                              | CC                | 1946509507               |

| SNPs IDs            | Chromosome IDs | Chromosomes | Physical positions (bp) | CDC Frontier (Reference genome) | (Pusa 256 & HPNB) | NCBI SNPdb Accession IDs |
|---------------------|----------------|-------------|-------------------------|---------------------------------|-------------------|--------------------------|
| SNP_P3_122748_27769 | NW_004515951.1 | Scaffold492 | 27769                   | CC                              | GG                | 1946509508               |
| SNP_P3_122749_34969 | NW_004515951.1 | Scaffold492 | 34969                   | CC                              | GG                | 1946509510               |
| SNP_P3_122750_35256 | NW_004515951.1 | Scaffold492 | 35256                   | GG                              | CC                | 1946509511               |
| SNP_P3_122751_35311 | NW_004515951.1 | Scaffold492 | 35311                   | CC                              | AA                | 1946509513               |
| SNP_P3_122752_35376 | NW_004515951.1 | Scaffold492 | 35376                   | TT                              | CC                | 1946509514               |
| SNP_P3_122753_35638 | NW_004515951.1 | Scaffold492 | 35638                   | GG                              | TT                | 1946509516               |
| SNP_P3_122754_35745 | NW_004515951.1 | Scaffold492 | 35745                   | GG                              | AA                | 1946509517               |
| SNP_P3_122755_35988 | NW_004515951.1 | Scaffold492 | 35988                   | GG                              | TT                | 1946509519               |
| SNP_P3_122756_36028 | NW_004515951.1 | Scaffold492 | 36028                   | AA                              | TT                | 1946509520               |
| SNP_P3_122757_36067 | NW_004515951.1 | Scaffold492 | 36067                   | CC                              | TT                | 1946509522               |
| SNP_P3_122758_36092 | NW_004515951.1 | Scaffold492 | 36092                   | AA                              | GG                | 1946509523               |
| SNP_P3_122759_36205 | NW_004515951.1 | Scaffold492 | 36205                   | GG                              | AA                | 1946509526               |
| SNP_P3_122760_36477 | NW_004515951.1 | Scaffold492 | 36477                   | GG                              | TT                | 1946509527               |
| SNP_P3_122761_36568 | NW_004515951.1 | Scaffold492 | 36568                   | CC                              | TT                | 1946509529               |
| SNP_P3_122762_36980 | NW_004515951.1 | Scaffold492 | 36980                   | TT                              | GG                | 1946509530               |
| SNP_P3_122763_36985 | NW_004515951.1 | Scaffold492 | 36985                   | CC                              | TT                | 1946509531               |
| SNP_P3_122764_45043 | NW_004515952.1 | Scaffold493 | 45043                   | CC                              | TT                | 1946509533               |
| SNP_P3_122765_45083 | NW_004515952.1 | Scaffold493 | 45083                   | TT                              | CC                | 1946509534               |
| SNP_P3_122766_47513 | NW_004515952.1 | Scaffold493 | 47513                   | GG                              | AA                | 1946509536               |
| SNP_P3_122767_47598 | NW_004515952.1 | Scaffold493 | 47598                   | CC                              | TT                | 1946509537               |
| SNP_P3_122768_47664 | NW_004515952.1 | Scaffold493 | 47664                   | GG                              | CC                | 1946509539               |
| SNP_P3_122769_47831 | NW_004515952.1 | Scaffold493 | 47831                   | AA                              | GG                | 1946509540               |
| SNP_P3_122771_50578 | NW_004515952.1 | Scaffold493 | 50578                   | AA                              | GG                | 1946509542               |
| SNP_P3_122772_52081 | NW_004515952.1 | Scaffold493 | 52081                   | TT                              | CC                | 1946509543               |
| SNP_P3_122773_57205 | NW_004515952.1 | Scaffold493 | 57205                   | CC                              | AA                | 1946509544               |
| SNP_P3_122774_57729 | NW_004515952.1 | Scaffold493 | 57729                   | GG                              | AA                | 1946509546               |
| SNP_P3_122775_62166 | NW_004515952.1 | Scaffold493 | 62166                   | TT                              | AA                | 1946509547               |
| SNP_P3_122776_70585 | NW_004515952.1 | Scaffold493 | 70585                   | CC                              | TT                | 1946509549               |
| SNP_P3_122777_70647 | NW_004515952.1 | Scaffold493 | 70647                   | AA                              | GG                | 1946509550               |
| SNP_P3_122778_70959 | NW_004515952.1 | Scaffold493 | 70959                   | GG                              | AA                | 1946509552               |
| SNP_P3_122779_71003 | NW_004515952.1 | Scaffold493 | 71003                   | TT                              | CC                | 1946509553               |
| SNP_P3_122780_71013 | NW_004515952.1 | Scaffold493 | 71013                   | CC                              | TT                | 1946509555               |
| SNP_P3_122781_71072 | NW_004515952.1 | Scaffold493 | 71072                   | AA                              | CC                | 1946509556               |
| SNP_P3_122782_71487 | NW_004515952.1 | Scaffold493 | 71487                   | CC                              | TT                | 1946509558               |
| SNP_P3_122783_84404 | NW_004515952.1 | Scaffold493 | 84404                   | AA                              | GG                | 1946509559               |
| SNP_P3_122784_84504 | NW_004515952.1 | Scaffold493 | 84504                   | TT                              | AA                | 1946509560               |
| SNP_P3_122785_84546 | NW_004515952.1 | Scaffold493 | 84546                   | TT                              | CC                | 1946509562               |
| SNP_P3_122786_84558 | NW_004515952.1 | Scaffold493 | 84558                   | AA                              | TT                | 1946509563               |
| SNP_P3_122787_84588 | NW_004515952.1 | Scaffold493 | 84588                   | AA                              | TT                | 1946509565               |
| SNP_P3_122788_84664 | NW_004515952.1 | Scaffold493 | 84664                   | TT                              | CC                | 1946509566               |
| SNP_P3_122789_87603 | NW_004515952.1 | Scaffold493 | 87603                   | TT                              | CC                | 1946509567               |
| SNP_P3_122790_87661 | NW_004515952.1 | Scaffold493 | 87661                   | AA                              | TT                | 1946509569               |

| SNPs IDs             | Chromosome IDs | Chromosomes | Physical positions (bp) | CDC Frontier (Reference genome) | (Pusa 256 & HPNB) | NCBI SNPdb Accession IDs |
|----------------------|----------------|-------------|-------------------------|---------------------------------|-------------------|--------------------------|
| SNP_P3_122791_87670  | NW_004515952.1 | Scaffold493 | 87670                   | TT                              | CC                | 1946509570               |
| SNP_P3_122792_87715  | NW_004515952.1 | Scaffold493 | 87715                   | AA                              | CC                | 1946509572               |
| SNP_P3_122793_87959  | NW_004515952.1 | Scaffold493 | 87959                   | TT                              | CC                | 1946509573               |
| SNP_P3_122794_87961  | NW_004515952.1 | Scaffold493 | 87961                   | AA                              | GG                | 1946509575               |
| SNP_P3_122795_87969  | NW_004515952.1 | Scaffold493 | 87969                   | GG                              | CC                | 1946509576               |
| SNP_P3_122796_87998  | NW_004515952.1 | Scaffold493 | 87998                   | AA                              | GG                | 1946509577               |
| SNP_P3_122797_88390  | NW_004515952.1 | Scaffold493 | 88390                   | GG                              | AA                | 1946509579               |
| SNP_P3_122798_88503  | NW_004515952.1 | Scaffold493 | 88503                   | CC                              | AA                | 1946509580               |
| SNP_P3_122799_88505  | NW_004515952.1 | Scaffold493 | 88505                   | TT                              | AA                | 1946509582               |
| SNP_P3_122800_88510  | NW_004515952.1 | Scaffold493 | 88510                   | AA                              | GG                | 1946509583               |
| SNP_P3_122801_88517  | NW_004515952.1 | Scaffold493 | 88517                   | AA                              | GG                | 1946509585               |
| SNP_P3_122802_94016  | NW_004515952.1 | Scaffold493 | 94016                   | GG                              | AA                | 1946509586               |
| SNP_P3_122803_94215  | NW_004515952.1 | Scaffold493 | 94215                   | TT                              | CC                | 1946509588               |
| SNP_P3_122804_94225  | NW_004515952.1 | Scaffold493 | 94225                   | AA                              | GG                | 1946509589               |
| SNP_P3_122805_94305  | NW_004515952.1 | Scaffold493 | 94305                   | AA                              | GG                | 1946509590               |
| SNP_P3_122806_102736 | NW_004515952.1 | Scaffold493 | 102736                  | TT                              | GG                | 1946509592               |
| SNP_P3_122807_106598 | NW_004515952.1 | Scaffold493 | 106598                  | AA                              | GG                | 1946509593               |
| SNP_P3_122808_114526 | NW_004515952.1 | Scaffold493 | 114526                  | CC                              | TT                | 1946509595               |
| SNP_P3_122810_124100 | NW_004515952.1 | Scaffold493 | 124100                  | CC                              | TT                | 1946509596               |
| SNP_P3_122811_124120 | NW_004515952.1 | Scaffold493 | 124120                  | CC                              | TT                | 1946509598               |
| SNP_P3_122812_124241 | NW_004515952.1 | Scaffold493 | 124241                  | AA                              | TT                | 1946509599               |
| SNP_P3_122813_124463 | NW_004515952.1 | Scaffold493 | 124463                  | TT                              | AA                | 1946509601               |
| SNP_P3_122814_125009 | NW_004515952.1 | Scaffold493 | 125009                  | AA                              | GG                | 1946509602               |
| SNP_P3_122815_125061 | NW_004515952.1 | Scaffold493 | 125061                  | TT                              | CC                | 1946509603               |
| SNP_P3_122816_125103 | NW_004515952.1 | Scaffold493 | 125103                  | AA                              | GG                | 1946509605               |
| SNP_P3_122817_125338 | NW_004515952.1 | Scaffold493 | 125338                  | GG                              | AA                | 1946509606               |
| SNP_P3_122818_125528 | NW_004515952.1 | Scaffold493 | 125528                  | CC                              | TT                | 1946509608               |
| SNP_P3_122819_125602 | NW_004515952.1 | Scaffold493 | 125602                  | AA                              | CC                | 1946509609               |
| SNP_P3_122820_125663 | NW_004515952.1 | Scaffold493 | 125663                  | TT                              | CC                | 1946509611               |
| SNP_P3_122821_125674 | NW_004515952.1 | Scaffold493 | 125674                  | CC                              | AA                | 1946509612               |
| SNP_P3_122822_125836 | NW_004515952.1 | Scaffold493 | 125836                  | TT                              | CC                | 1946509614               |
| SNP_P3_122823_125865 | NW_004515952.1 | Scaffold493 | 125865                  | AA                              | GG                | 1946509615               |
| SNP_P3_122824_126493 | NW_004515952.1 | Scaffold493 | 126493                  | AA                              | TT                | 1946509616               |
| SNP_P3_122826_132718 | NW_004515952.1 | Scaffold493 | 132718                  | GG                              | TT                | 1946509618               |
| SNP_P3_122827_138177 | NW_004515952.1 | Scaffold493 | 138177                  | GG                              | AA                | 1946509619               |
| SNP_P3_122828_138187 | NW_004515952.1 | Scaffold493 | 138187                  | AA                              | GG                | 1946509621               |
| SNP_P3_122829_138241 | NW_004515952.1 | Scaffold493 | 138241                  | AA                              | GG                | 1946509622               |
| SNP_P3_122830_138605 | NW_004515952.1 | Scaffold493 | 138605                  | AA                              | CC                | 1946509624               |
| SNP_P3_122831_142741 | NW_004515952.1 | Scaffold493 | 142741                  | AA                              | CC                | 1946509625               |
| SNP_P3_122832_142759 | NW_004515952.1 | Scaffold493 | 142759                  | CC                              | TT                | 1946509627               |
| SNP_P3_122833_142770 | NW_004515952.1 | Scaffold493 | 142770                  | TT                              | CC                | 1946509628               |
| SNP_P3_122834_142792 | NW_004515952.1 | Scaffold493 | 142792                  | AA                              | GG                | 1946509630               |

| SNPs IDs             | Chromosome IDs | Chromosomes | Physical positions (bp) | CDC Frontier (Reference genome) | (Pusa 256 & HPNB) | NCBI SNPdb Accession IDs |
|----------------------|----------------|-------------|-------------------------|---------------------------------|-------------------|--------------------------|
| SNP_P3_122835_170523 | NW_004515952.1 | Scaffold493 | 170523                  | CC                              | TT                | 1946509631               |
| SNP_P3_122836_173335 | NW_004515952.1 | Scaffold493 | 173335                  | TT                              | CC                | 1946509633               |
| SNP_P3_122837_184492 | NW_004515952.1 | Scaffold493 | 184492                  | AA                              | GG                | 1946509634               |
| SNP_P3_122838_184530 | NW_004515952.1 | Scaffold493 | 184530                  | GG                              | AA                | 1946509636               |
| SNP_P3_122839_184553 | NW_004515952.1 | Scaffold493 | 184553                  | AA                              | CC                | 1946509637               |
| SNP_P3_122840_184882 | NW_004515952.1 | Scaffold493 | 184882                  | CC                              | TT                | 1946509639               |
| SNP_P3_122841_185176 | NW_004515952.1 | Scaffold493 | 185176                  | AA                              | GG                | 1946509640               |
| SNP_P3_122842_185742 | NW_004515952.1 | Scaffold493 | 185742                  | GG                              | TT                | 1946509642               |
| SNP_P3_122843_186429 | NW_004515952.1 | Scaffold493 | 186429                  | CC                              | TT                | 1946509643               |
| SNP_P3_122844_186642 | NW_004515952.1 | Scaffold493 | 186642                  | GG                              | AA                | 1946509645               |
| SNP_P3_122845_205710 | NW_004515952.1 | Scaffold493 | 205710                  | GG                              | TT                | 1946509646               |
| SNP_P3_122846_218699 | NW_004515952.1 | Scaffold493 | 218699                  | AA                              | GG                | 1946509648               |
| SNP_P3_122847_222128 | NW_004515952.1 | Scaffold493 | 222128                  | AA                              | GG                | 1946509649               |
| SNP_P3_122848_231029 | NW_004515952.1 | Scaffold493 | 231029                  | GG                              | CC                | 1946509651               |
| SNP_P3_122849_231293 | NW_004515952.1 | Scaffold493 | 231293                  | CC                              | AA                | 1946509652               |
| SNP_P3_122850_231336 | NW_004515952.1 | Scaffold493 | 231336                  | GG                              | AA                | 1946509653               |
| SNP_P3_122851_231344 | NW_004515952.1 | Scaffold493 | 231344                  | AA                              | GG                | 1946509655               |
| SNP_P3_122852_246908 | NW_004515952.1 | Scaffold493 | 246908                  | CC                              | TT                | 1946509656               |
| SNP_P3_122853_257001 | NW_004515952.1 | Scaffold493 | 257001                  | GG                              | AA                | 1946509658               |
| SNP_P3_122854_283307 | NW_004515952.1 | Scaffold493 | 283307                  | TT                              | AA                | 1946509659               |
| SNP_P3_122855_283504 | NW_004515952.1 | Scaffold493 | 283504                  | AA                              | CC                | 1946509661               |
| SNP_P3_122856_283838 | NW_004515952.1 | Scaffold493 | 283838                  | AA                              | GG                | 1946509662               |
| SNP_P3_122857_283859 | NW_004515952.1 | Scaffold493 | 283859                  | GG                              | TT                | 1946509664               |
| SNP_P3_122858_284237 | NW_004515952.1 | Scaffold493 | 284237                  | GG                              | AA                | 1946509665               |
| SNP_P3_122859_293172 | NW_004515952.1 | Scaffold493 | 293172                  | GG                              | TT                | 1946509667               |
| SNP_P3_122860_293443 | NW_004515952.1 | Scaffold493 | 293443                  | CC                              | TT                | 1946509668               |
| SNP_P3_122862_297284 | NW_004515952.1 | Scaffold493 | 297284                  | GG                              | AA                | 1946509669               |
| SNP_P3_122863_297332 | NW_004515952.1 | Scaffold493 | 297332                  | TT                              | AA                | 1946509671               |
| SNP_P3_122864_297334 | NW_004515952.1 | Scaffold493 | 297334                  | AA                              | GG                | 1946509673               |
| SNP_P3_122865_297453 | NW_004515952.1 | Scaffold493 | 297453                  | CC                              | TT                | 1946509674               |
| SNP_P3_122866_297475 | NW_004515952.1 | Scaffold493 | 297475                  | GG                              | AA                | 1946509675               |
| SNP_P3_122867_297513 | NW_004515952.1 | Scaffold493 | 297513                  | CC                              | GG                | 1946509677               |
| SNP_P3_122868_297749 | NW_004515952.1 | Scaffold493 | 297749                  | CC                              | TT                | 1946509678               |
| SNP_P3_122869_599    | NW_004515953.1 | Scaffold495 | 599                     | TT                              | CC                | 1946509680               |
| SNP_P3_122871_9720   | NW_004515953.1 | Scaffold495 | 9720                    | TT                              | CC                | 1946509681               |
| SNP_P3_122872_10048  | NW_004515953.1 | Scaffold495 | 10048                   | TT                              | AA                | 1946509683               |
| SNP_P3_122873_10080  | NW_004515953.1 | Scaffold495 | 10080                   | AA                              | TT                | 1946509684               |
| SNP_P3_122874_10499  | NW_004515953.1 | Scaffold495 | 10499                   | CC                              | TT                | 1946509686               |
| SNP_P3_122875_12172  | NW_004515953.1 | Scaffold495 | 12172                   | TT                              | CC                | 1946509687               |
| SNP_P3_122877_23862  | NW_004515953.1 | Scaffold495 | 23862                   | TT                              | GG                | 1946509688               |
| SNP_P3_122878_24308  | NW_004515953.1 | Scaffold495 | 24308                   | GG                              | AA                | 1946509690               |
| SNP_P3_122879_28694  | NW_004515953.1 | Scaffold495 | 28694                   | TT                              | CC                | 1946509691               |

| SNPs IDs             | Chromosome IDs | Chromosomes | Physical positions (bp) | CDC Frontier (Reference genome) | (Pusa 256 & HPNB) | NCBI SNPdb Accession IDs |
|----------------------|----------------|-------------|-------------------------|---------------------------------|-------------------|--------------------------|
| SNP_P3_122880_28824  | NW_004515953.1 | Scaffold495 | 28824                   | CC                              | TT                | 1946509693               |
| SNP_P3_122881_30887  | NW_004515953.1 | Scaffold495 | 30887                   | AA                              | TT                | 1946509694               |
| SNP_P3_122882_31988  | NW_004515953.1 | Scaffold495 | 31988                   | TT                              | CC                | 1946509696               |
| SNP_P3_122883_34194  | NW_004515953.1 | Scaffold495 | 34194                   | GG                              | AA                | 1946509697               |
| SNP_P3_122884_36335  | NW_004515953.1 | Scaffold495 | 36335                   | GG                              | AA                | 1946509699               |
| SNP_P3_122885_53435  | NW_004515953.1 | Scaffold495 | 53435                   | AA                              | GG                | 1946509700               |
| SNP_P3_122886_61664  | NW_004515953.1 | Scaffold495 | 61664                   | GG                              | TT                | 1946509702               |
| SNP_P3_122887_65058  | NW_004515953.1 | Scaffold495 | 65058                   | TT                              | AA                | 1946509703               |
| SNP_P3_122888_70101  | NW_004515953.1 | Scaffold495 | 70101                   | AA                              | TT                | 1946509705               |
| SNP_P3_122889_70102  | NW_004515953.1 | Scaffold495 | 70102                   | TT                              | GG                | 1946509706               |
| SNP_P3_122890_70153  | NW_004515953.1 | Scaffold495 | 70153                   | AA                              | TT                | 1946509708               |
| SNP_P3_122891_71504  | NW_004515953.1 | Scaffold495 | 71504                   | GG                              | AA                | 1946509709               |
| SNP_P3_122892_84917  | NW_004515953.1 | Scaffold495 | 84917                   | TT                              | GG                | 1946509711               |
| SNP_P3_122893_87827  | NW_004515953.1 | Scaffold495 | 87827                   | AA                              | GG                | 1946509712               |
| SNP_P3_122894_97153  | NW_004515953.1 | Scaffold495 | 97153                   | AA                              | CC                | 1946509714               |
| SNP_P3_122895_97410  | NW_004515953.1 | Scaffold495 | 97410                   | AA                              | GG                | 1946509715               |
| SNP_P3_122896_108253 | NW_004515953.1 | Scaffold495 | 108253                  | TT                              | GG                | 1946509716               |
| SNP_P3_122897_108411 | NW_004515953.1 | Scaffold495 | 108411                  | TT                              | CC                | 1946509718               |
| SNP_P3_122898_108563 | NW_004515953.1 | Scaffold495 | 108563                  | TT                              | GG                | 1946509719               |
| SNP_P3_122900_111380 | NW_004515953.1 | Scaffold495 | 111380                  | TT                              | CC                | 1946509721               |
| SNP_P3_122901_112129 | NW_004515953.1 | Scaffold495 | 112129                  | CC                              | TT                | 1946509722               |
| SNP_P3_122902_112258 | NW_004515953.1 | Scaffold495 | 112258                  | CC                              | TT                | 1946509724               |
| SNP_P3_122903_112453 | NW_004515953.1 | Scaffold495 | 112453                  | TT                              | CC                | 1946509725               |
| SNP_P3_122904_113083 | NW_004515953.1 | Scaffold495 | 113083                  | CC                              | TT                | 1946509727               |
| SNP_P3_122906_113185 | NW_004515953.1 | Scaffold495 | 113185                  | TT                              | GG                | 1946509728               |
| SNP_P3_122907_113287 | NW_004515953.1 | Scaffold495 | 113287                  | CC                              | AA                | 1946509730               |
| SNP_P3_122908_113296 | NW_004515953.1 | Scaffold495 | 113296                  | CC                              | GG                | 1946509731               |
| SNP_P3_122909_113562 | NW_004515953.1 | Scaffold495 | 113562                  | AA                              | GG                | 1946509733               |
| SNP_P3_122910_122546 | NW_004515953.1 | Scaffold495 | 122546                  | AA                              | GG                | 1946509734               |
| SNP_P3_122912_126715 | NW_004515953.1 | Scaffold495 | 126715                  | CC                              | TT                | 1946509736               |
| SNP_P3_122913_127053 | NW_004515953.1 | Scaffold495 | 127053                  | AA                              | CC                | 1946509737               |
| SNP_P3_122914_132063 | NW_004515953.1 | Scaffold495 | 132063                  | AA                              | TT                | 1946509739               |
| SNP_P3_122915_132749 | NW_004515953.1 | Scaffold495 | 132749                  | AA                              | TT                | 1946509740               |
| SNP_P3_122916_132779 | NW_004515953.1 | Scaffold495 | 132779                  | TT                              | AA                | 1946509741               |
| SNP_P3_122917_132819 | NW_004515953.1 | Scaffold495 | 132819                  | CC                              | TT                | 1946509743               |
| SNP_P3_122918_132838 | NW_004515953.1 | Scaffold495 | 132838                  | TT                              | AA                | 1946509744               |
| SNP_P3_122920_1870   | NW_004515954.1 | Scaffold496 | 1870                    | AA                              | GG                | 1946509746               |
| SNP_P3_122922_11195  | NW_004515954.1 | Scaffold496 | 11195                   | AA                              | TT                | 1946509747               |
| SNP_P3_122923_11201  | NW_004515954.1 | Scaffold496 | 11201                   | AA                              | CC                | 1946509749               |
| SNP_P3_122924_11203  | NW_004515954.1 | Scaffold496 | 11203                   | TT                              | CC                | 1946509750               |
| SNP_P3_122925_11254  | NW_004515954.1 | Scaffold496 | 11254                   | TT                              | CC                | 1946509751               |
| SNP_P3_122926_11517  | NW_004515954.1 | Scaffold496 | 11517                   | CC                              | GG                | 1946509753               |

| SNPs IDs            | Chromosome IDs | Chromosomes | Physical positions (bp) | CDC Frontier (Reference genome) | (Pusa 256 & HPNB) | NCBI SNPdb Accession IDs |
|---------------------|----------------|-------------|-------------------------|---------------------------------|-------------------|--------------------------|
| SNP_P3_122927_11555 | NW_004515954.1 | Scaffold496 | 11555                   | AA                              | CC                | 1946509754               |
| SNP_P3_122928_11565 | NW_004515954.1 | Scaffold496 | 11565                   | AA                              | GG                | 1946509756               |
| SNP_P3_122929_11591 | NW_004515954.1 | Scaffold496 | 11591                   | AA                              | CC                | 1946509757               |
| SNP_P3_122930_11708 | NW_004515954.1 | Scaffold496 | 11708                   | GG                              | TT                | 1946509759               |
| SNP_P3_122931_14020 | NW_004515954.1 | Scaffold496 | 14020                   | CC                              | TT                | 1946509760               |
| SNP_P3_122932_14023 | NW_004515954.1 | Scaffold496 | 14023                   | CC                              | TT                | 1946509762               |
| SNP_P3_122933_23892 | NW_004515954.1 | Scaffold496 | 23892                   | AA                              | GG                | 1946509763               |
| SNP_P3_122934_32304 | NW_004515954.1 | Scaffold496 | 32304                   | TT                              | CC                | 1946509765               |
| SNP_P3_122935_32389 | NW_004515954.1 | Scaffold496 | 32389                   | AA                              | GG                | 1946509766               |
| SNP_P3_122936_32637 | NW_004515954.1 | Scaffold496 | 32637                   | TT                              | AA                | 1946509768               |
| SNP_P3_122937_32642 | NW_004515954.1 | Scaffold496 | 32642                   | AA                              | GG                | 1946509769               |
| SNP_P3_122938_32728 | NW_004515954.1 | Scaffold496 | 32728                   | AA                              | CC                | 1946509771               |
| SNP_P3_122939_32758 | NW_004515954.1 | Scaffold496 | 32758                   | AA                              | CC                | 1946509772               |
| SNP_P3_122940_32798 | NW_004515954.1 | Scaffold496 | 32798                   | AA                              | GG                | 1946509774               |
| SNP_P3_122941_34430 | NW_004515954.1 | Scaffold496 | 34430                   | AA                              | GG                | 1946509775               |
| SNP_P3_122942_35064 | NW_004515954.1 | Scaffold496 | 35064                   | GG                              | CC                | 1946509776               |
| SNP_P3_122943_35072 | NW_004515954.1 | Scaffold496 | 35072                   | TT                              | AA                | 1946509778               |
| SNP_P3_122944_39631 | NW_004515954.1 | Scaffold496 | 39631                   | GG                              | TT                | 1946509779               |
| SNP_P3_122945_41126 | NW_004515954.1 | Scaffold496 | 41126                   | GG                              | AA                | 1946509781               |
| SNP_P3_122946_42139 | NW_004515954.1 | Scaffold496 | 42139                   | AA                              | GG                | 1946509782               |
| SNP_P3_122947_42147 | NW_004515954.1 | Scaffold496 | 42147                   | AA                              | TT                | 1946509784               |
| SNP_P3_122948_42246 | NW_004515954.1 | Scaffold496 | 42246                   | TT                              | CC                | 1946509785               |
| SNP_P3_122949_42263 | NW_004515954.1 | Scaffold496 | 42263                   | AA                              | GG                | 1946509787               |
| SNP_P3_122950_42298 | NW_004515954.1 | Scaffold496 | 42298                   | TT                              | CC                | 1946509788               |
| SNP_P3_122951_42302 | NW_004515954.1 | Scaffold496 | 42302                   | GG                              | AA                | 1946509790               |
| SNP_P3_122952_42338 | NW_004515954.1 | Scaffold496 | 42338                   | AA                              | GG                | 1946509792               |
| SNP_P3_122953_42365 | NW_004515954.1 | Scaffold496 | 42365                   | AA                              | TT                | 1946509793               |
| SNP_P3_122954_42406 | NW_004515954.1 | Scaffold496 | 42406                   | CC                              | TT                | 1946509795               |
| SNP_P3_122955_42471 | NW_004515954.1 | Scaffold496 | 42471                   | AA                              | CC                | 1946509796               |
| SNP_P3_122956_42490 | NW_004515954.1 | Scaffold496 | 42490                   | AA                              | GG                | 1946509798               |
| SNP_P3_122957_42517 | NW_004515954.1 | Scaffold496 | 42517                   | GG                              | CC                | 1946509799               |
| SNP_P3_122958_42524 | NW_004515954.1 | Scaffold496 | 42524                   | GG                              | AA                | 1946509801               |
| SNP_P3_122959_42583 | NW_004515954.1 | Scaffold496 | 42583                   | CC                              | TT                | 1946509802               |
| SNP_P3_122960_42655 | NW_004515954.1 | Scaffold496 | 42655                   | AA                              | GG                | 1946509803               |
| SNP_P3_122961_43452 | NW_004515954.1 | Scaffold496 | 43452                   | TT                              | CC                | 1946509805               |
| SNP_P3_122962_43525 | NW_004515954.1 | Scaffold496 | 43525                   | AA                              | GG                | 1946509806               |
| SNP_P3_122963_55006 | NW_004515954.1 | Scaffold496 | 55006                   | AA                              | GG                | 1946509808               |
| SNP_P3_122964_55054 | NW_004515954.1 | Scaffold496 | 55054                   | AA                              | GG                | 1946509809               |
| SNP_P3_122965_55055 | NW_004515954.1 | Scaffold496 | 55055                   | AA                              | TT                | 1946509811               |
| SNP_P3_122966_55056 | NW_004515954.1 | Scaffold496 | 55056                   | TT                              | GG                | 1946509812               |
| SNP_P3_122967_55057 | NW_004515954.1 | Scaffold496 | 55057                   | GG                              | TT                | 1946509814               |
| SNP_P3_122968_55102 | NW_004515954.1 | Scaffold496 | 55102                   | AA                              | TT                | 1946509815               |



| SNPs IDs             | Chromosome IDs | Chromosomes | Physical positions (bp) | CDC Frontier (Reference genome) | (Pusa 256 & HPNB) | NCBI SNPdb Accession IDs |
|----------------------|----------------|-------------|-------------------------|---------------------------------|-------------------|--------------------------|
| SNP_P3_122969_55103  | NW_004515954.1 | Scaffold496 | 55103                   | AA                              | GG                | 1946509817               |
| SNP_P3_122970_55121  | NW_004515954.1 | Scaffold496 | 55121                   | CC                              | TT                | 1946509818               |
| SNP_P3_122971_55131  | NW_004515954.1 | Scaffold496 | 55131                   | TT                              | CC                | 1946509820               |
| SNP_P3_122972_55139  | NW_004515954.1 | Scaffold496 | 55139                   | TT                              | CC                | 1946509821               |
| SNP_P3_122973_55416  | NW_004515954.1 | Scaffold496 | 55416                   | CC                              | GG                | 1946509823               |
| SNP_P3_122974_78434  | NW_004515954.1 | Scaffold496 | 78434                   | AA                              | CC                | 1946509824               |
| SNP_P3_122975_78481  | NW_004515954.1 | Scaffold496 | 78481                   | TT                              | CC                | 1946509826               |
| SNP_P3_122976_80225  | NW_004515954.1 | Scaffold496 | 80225                   | TT                              | AA                | 1946509827               |
| SNP_P3_122977_82182  | NW_004515954.1 | Scaffold496 | 82182                   | TT                              | AA                | 1946509829               |
| SNP_P3_122978_83275  | NW_004515954.1 | Scaffold496 | 83275                   | AA                              | TT                | 1946509830               |
| SNP_P3_122979_86237  | NW_004515954.1 | Scaffold496 | 86237                   | GG                              | TT                | 1946509832               |
| SNP_P3_122980_86440  | NW_004515954.1 | Scaffold496 | 86440                   | AA                              | TT                | 1946509833               |
| SNP_P3_122981_86553  | NW_004515954.1 | Scaffold496 | 86553                   | CC                              | TT                | 1946509835               |
| SNP_P3_122982_86555  | NW_004515954.1 | Scaffold496 | 86555                   | GG                              | AA                | 1946509836               |
| SNP_P3_122983_86564  | NW_004515954.1 | Scaffold496 | 86564                   | TT                              | CC                | 1946509838               |
| SNP_P3_122984_86585  | NW_004515954.1 | Scaffold496 | 86585                   | TT                              | CC                | 1946509839               |
| SNP_P3_122985_86653  | NW_004515954.1 | Scaffold496 | 86653                   | CC                              | TT                | 1946509841               |
| SNP_P3_122986_86668  | NW_004515954.1 | Scaffold496 | 86668                   | GG                              | CC                | 1946509842               |
| SNP_P3_122987_86713  | NW_004515954.1 | Scaffold496 | 86713                   | AA                              | GG                | 1946509844               |
| SNP_P3_122988_90212  | NW_004515954.1 | Scaffold496 | 90212                   | AA                              | GG                | 1946509845               |
| SNP_P3_122989_97052  | NW_004515954.1 | Scaffold496 | 97052                   | CC                              | TT                | 1946509847               |
| SNP_P3_122990_101426 | NW_004515954.1 | Scaffold496 | 101426                  | TT                              | GG                | 1946509848               |
| SNP_P3_122991_107820 | NW_004515954.1 | Scaffold496 | 107820                  | CC                              | AA                | 1946509849               |
| SNP_P3_122992_116467 | NW_004515954.1 | Scaffold496 | 116467                  | AA                              | TT                | 1946509851               |
| SNP_P3_122993_121068 | NW_004515954.1 | Scaffold496 | 121068                  | AA                              | GG                | 1946509852               |
| SNP_P3_122994_121089 | NW_004515954.1 | Scaffold496 | 121089                  | AA                              | TT                | 1946509854               |
| SNP_P3_122995_121099 | NW_004515954.1 | Scaffold496 | 121099                  | GG                              | AA                | 1946509855               |
| SNP_P3_122996_121120 | NW_004515954.1 | Scaffold496 | 121120                  | TT                              | GG                | 1946509857               |
| SNP_P3_122997_121273 | NW_004515954.1 | Scaffold496 | 121273                  | TT                              | AA                | 1946509858               |
| SNP_P3_122998_121288 | NW_004515954.1 | Scaffold496 | 121288                  | TT                              | CC                | 1946509860               |
| SNP_P3_123000_121465 | NW_004515954.1 | Scaffold496 | 121465                  | CC                              | TT                | 1946509861               |
| SNP_P3_123001_121576 | NW_004515954.1 | Scaffold496 | 121576                  | CC                              | TT                | 1946509865               |
| SNP_P3_123002_121591 | NW_004515954.1 | Scaffold496 | 121591                  | GG                              | TT                | 1946509866               |
| SNP_P3_123003_121680 | NW_004515954.1 | Scaffold496 | 121680                  | CC                              | AA                | 1946509868               |
| SNP_P3_123004_121781 | NW_004515954.1 | Scaffold496 | 121781                  | AA                              | GG                | 1946509869               |
| SNP_P3_123005_121815 | NW_004515954.1 | Scaffold496 | 121815                  | GG                              | AA                | 1946509871               |
| SNP_P3_123006_121933 | NW_004515954.1 | Scaffold496 | 121933                  | CC                              | TT                | 1946509872               |
| SNP_P3_123007_122201 | NW_004515954.1 | Scaffold496 | 122201                  | GG                              | TT                | 1946509874               |
| SNP_P3_123008_122309 | NW_004515954.1 | Scaffold496 | 122309                  | TT                              | AA                | 1946509876               |
| SNP_P3_123009_122319 | NW_004515954.1 | Scaffold496 | 122319                  | GG                              | AA                | 1946509877               |
| SNP_P3_123010_122337 | NW_004515954.1 | Scaffold496 | 122337                  | GG                              | AA                | 1946509879               |
| SNP_P3_123011_122402 | NW_004515954.1 | Scaffold496 | 122402                  | CC                              | TT                | 1946509880               |

| SNPs IDs             | Chromosome IDs | Chromosomes | Physical positions (bp) | CDC Frontier (Reference genome) | (Pusa 256 & HPNB) | NCBI SNPdb Accession IDs |
|----------------------|----------------|-------------|-------------------------|---------------------------------|-------------------|--------------------------|
| SNP_P3_123012_122449 | NW_004515954.1 | Scaffold496 | 122449                  | GG                              | AA                | 1946509882               |
| SNP_P3_123013_122467 | NW_004515954.1 | Scaffold496 | 122467                  | AA                              | GG                | 1946509883               |
| SNP_P3_123014_122622 | NW_004515954.1 | Scaffold496 | 122622                  | AA                              | TT                | 1946509885               |
| SNP_P3_123015_122700 | NW_004515954.1 | Scaffold496 | 122700                  | GG                              | AA                | 1946509886               |
| SNP_P3_123016_122720 | NW_004515954.1 | Scaffold496 | 122720                  | CC                              | GG                | 1946509888               |
| SNP_P3_123017_122962 | NW_004515954.1 | Scaffold496 | 122962                  | CC                              | TT                | 1946509889               |
| SNP_P3_123018_123005 | NW_004515954.1 | Scaffold496 | 123005                  | AA                              | CC                | 1946509891               |
| SNP_P3_123019_123038 | NW_004515954.1 | Scaffold496 | 123038                  | CC                              | AA                | 1946509893               |
| SNP_P3_123020_123055 | NW_004515954.1 | Scaffold496 | 123055                  | GG                              | AA                | 1946509894               |
| SNP_P3_123021_123075 | NW_004515954.1 | Scaffold496 | 123075                  | CC                              | TT                | 1946509896               |
| SNP_P3_123022_123163 | NW_004515954.1 | Scaffold496 | 123163                  | AA                              | GG                | 1946509898               |
| SNP_P3_123023_123178 | NW_004515954.1 | Scaffold496 | 123178                  | CC                              | TT                | 1946509900               |
| SNP_P3_123024_123358 | NW_004515954.1 | Scaffold496 | 123358                  | TT                              | AA                | 1946509901               |
| SNP_P3_123025_123408 | NW_004515954.1 | Scaffold496 | 123408                  | TT                              | CC                | 1946509903               |
| SNP_P3_123026_123778 | NW_004515954.1 | Scaffold496 | 123778                  | AA                              | TT                | 1946509905               |
| SNP_P3_123027_123948 | NW_004515954.1 | Scaffold496 | 123948                  | AA                              | GG                | 1946509907               |
| SNP_P3_123028_124011 | NW_004515954.1 | Scaffold496 | 124011                  | TT                              | CC                | 1946509909               |
| SNP_P3_123029_124197 | NW_004515954.1 | Scaffold496 | 124197                  | TT                              | CC                | 1946509911               |
| SNP_P3_123030_124237 | NW_004515954.1 | Scaffold496 | 124237                  | CC                              | TT                | 1946509912               |
| SNP_P3_123031_124258 | NW_004515954.1 | Scaffold496 | 124258                  | CC                              | TT                | 1946509914               |
| SNP_P3_123032_124280 | NW_004515954.1 | Scaffold496 | 124280                  | TT                              | AA                | 1946509916               |
| SNP_P3_123033_124281 | NW_004515954.1 | Scaffold496 | 124281                  | TT                              | CC                | 1946509917               |
| SNP_P3_123035_125406 | NW_004515954.1 | Scaffold496 | 125406                  | CC                              | AA                | 1946509919               |
| SNP_P3_123036_127285 | NW_004515954.1 | Scaffold496 | 127285                  | TT                              | GG                | 1946509921               |
| SNP_P3_123037_128704 | NW_004515954.1 | Scaffold496 | 128704                  | AA                              | TT                | 1946509922               |
| SNP_P3_123038_129147 | NW_004515954.1 | Scaffold496 | 129147                  | CC                              | TT                | 1946509923               |
| SNP_P3_123039_129166 | NW_004515954.1 | Scaffold496 | 129166                  | CC                              | GG                | 1946509925               |
| SNP_P3_123041_129351 | NW_004515954.1 | Scaffold496 | 129351                  | CC                              | TT                | 1946509926               |
| SNP_P3_123042_129363 | NW_004515954.1 | Scaffold496 | 129363                  | TT                              | CC                | 1946509928               |
| SNP_P3_123043_129416 | NW_004515954.1 | Scaffold496 | 129416                  | GG                              | CC                | 1946509930               |
| SNP_P3_123044_129628 | NW_004515954.1 | Scaffold496 | 129628                  | AA                              | GG                | 1946509932               |
| SNP_P3_123045_129651 | NW_004515954.1 | Scaffold496 | 129651                  | CC                              | GG                | 1946509933               |
| SNP_P3_123046_135507 | NW_004515954.1 | Scaffold496 | 135507                  | AA                              | TT                | 1946509935               |
| SNP_P3_123047_144746 | NW_004515954.1 | Scaffold496 | 144746                  | TT                              | CC                | 1946509937               |
| SNP_P3_123048_145132 | NW_004515954.1 | Scaffold496 | 145132                  | CC                              | GG                | 1946509938               |
| SNP_P3_123049_149499 | NW_004515954.1 | Scaffold496 | 149499                  | TT                              | GG                | 1946509940               |
| SNP_P3_123050_149788 | NW_004515954.1 | Scaffold496 | 149788                  | TT                              | GG                | 1946509942               |
| SNP_P3_123051_150045 | NW_004515954.1 | Scaffold496 | 150045                  | TT                              | AA                | 1946509943               |
| SNP_P3_123052_165793 | NW_004515954.1 | Scaffold496 | 165793                  | TT                              | CC                | 1946509945               |
| SNP_P3_123053_165822 | NW_004515954.1 | Scaffold496 | 165822                  | TT                              | AA                | 1946509946               |
| SNP_P3_123054_184705 | NW_004515954.1 | Scaffold496 | 184705                  | TT                              | AA                | 1946509948               |
| SNP_P3_123055_184762 | NW_004515954.1 | Scaffold496 | 184762                  | CC                              | AA                | 1946509950               |

| SNPs IDs             | Chromosome IDs | Chromosomes | Physical positions (bp) | CDC Frontier (Reference genome) | (Pusa 256 & HPNB) | NCBI SNPdb Accession IDs |
|----------------------|----------------|-------------|-------------------------|---------------------------------|-------------------|--------------------------|
| SNP_P3_123056_186439 | NW_004515954.1 | Scaffold496 | 186439                  | TT                              | CC                | 1946509951               |
| SNP_P3_123057_190342 | NW_004515954.1 | Scaffold496 | 190342                  | GG                              | AA                | 1946509953               |
| SNP_P3_123058_190768 | NW_004515954.1 | Scaffold496 | 190768                  | TT                              | GG                | 1946509954               |
| SNP_P3_123059_190775 | NW_004515954.1 | Scaffold496 | 190775                  | AA                              | GG                | 1946509956               |
| SNP_P3_123060_190812 | NW_004515954.1 | Scaffold496 | 190812                  | TT                              | CC                | 1946509958               |
| SNP_P3_123061_190837 | NW_004515954.1 | Scaffold496 | 190837                  | CC                              | AA                | 1946509959               |
| SNP_P3_123062_190863 | NW_004515954.1 | Scaffold496 | 190863                  | TT                              | GG                | 1946509961               |
| SNP_P3_123063_190875 | NW_004515954.1 | Scaffold496 | 190875                  | GG                              | AA                | 1946509963               |
| SNP_P3_123064_191139 | NW_004515954.1 | Scaffold496 | 191139                  | CC                              | TT                | 1946509964               |
| SNP_P3_123065_191262 | NW_004515954.1 | Scaffold496 | 191262                  | CC                              | TT                | 1946509966               |
| SNP_P3_123066_195245 | NW_004515954.1 | Scaffold496 | 195245                  | TT                              | AA                | 1946509967               |
| SNP_P3_123067_195250 | NW_004515954.1 | Scaffold496 | 195250                  | AA                              | TT                | 1946509969               |
| SNP_P3_123068_197293 | NW_004515954.1 | Scaffold496 | 197293                  | AA                              | GG                | 1946509970               |
| SNP_P3_123069_197527 | NW_004515954.1 | Scaffold496 | 197527                  | TT                              | CC                | 1946509972               |
| SNP_P3_123070_197599 | NW_004515954.1 | Scaffold496 | 197599                  | CC                              | TT                | 1946509973               |
| SNP_P3_123071_205287 | NW_004515954.1 | Scaffold496 | 205287                  | TT                              | CC                | 1946509975               |
| SNP_P3_123072_206206 | NW_004515954.1 | Scaffold496 | 206206                  | GG                              | AA                | 1946509976               |
| SNP_P3_123073_206451 | NW_004515954.1 | Scaffold496 | 206451                  | GG                              | CC                | 1946509978               |
| SNP_P3_123074_212731 | NW_004515954.1 | Scaffold496 | 212731                  | GG                              | CC                | 1946509979               |
| SNP_P3_123075_212755 | NW_004515954.1 | Scaffold496 | 212755                  | TT                              | CC                | 1946509981               |
| SNP_P3_123076_213455 | NW_004515954.1 | Scaffold496 | 213455                  | AA                              | TT                | 1946509982               |
| SNP_P3_123077_216898 | NW_004515954.1 | Scaffold496 | 216898                  | GG                              | CC                | 1946509984               |
| SNP_P3_123078_219548 | NW_004515954.1 | Scaffold496 | 219548                  | AA                              | GG                | 1946509985               |
| SNP_P3_123079_221032 | NW_004515954.1 | Scaffold496 | 221032                  | GG                              | AA                | 1946509987               |
| SNP_P3_123080_221193 | NW_004515954.1 | Scaffold496 | 221193                  | GG                              | AA                | 1946509988               |
| SNP_P3_123081_221211 | NW_004515954.1 | Scaffold496 | 221211                  | CC                              | TT                | 1946509989               |
| SNP_P3_123082_226920 | NW_004515954.1 | Scaffold496 | 226920                  | GG                              | CC                | 1946509991               |
| SNP_P3_123083_227190 | NW_004515954.1 | Scaffold496 | 227190                  | GG                              | AA                | 1946509992               |
| SNP_P3_123084_227569 | NW_004515954.1 | Scaffold496 | 227569                  | TT                              | GG                | 1946509994               |
| SNP_P3_123085_227900 | NW_004515954.1 | Scaffold496 | 227900                  | AA                              | GG                | 1946509995               |
| SNP_P3_123086_227982 | NW_004515954.1 | Scaffold496 | 227982                  | GG                              | AA                | 1946509997               |
| SNP_P3_123087_228049 | NW_004515954.1 | Scaffold496 | 228049                  | GG                              | AA                | 1946509998               |
| SNP_P3_123088_228051 | NW_004515954.1 | Scaffold496 | 228051                  | AA                              | GG                | 1946510000               |
| SNP_P3_123089_228102 | NW_004515954.1 | Scaffold496 | 228102                  | TT                              | CC                | 1946510001               |
| SNP_P3_123090_228399 | NW_004515954.1 | Scaffold496 | 228399                  | TT                              | GG                | 1946510003               |
| SNP_P3_123091_232789 | NW_004515954.1 | Scaffold496 | 232789                  | AA                              | GG                | 1946510005               |
| SNP_P3_123092_233055 | NW_004515954.1 | Scaffold496 | 233055                  | AA                              | GG                | 1946510006               |
| SNP_P3_123093_233300 | NW_004515954.1 | Scaffold496 | 233300                  | TT                              | CC                | 1946510008               |
| SNP_P3_123094_233320 | NW_004515954.1 | Scaffold496 | 233320                  | CC                              | TT                | 1946510009               |
| SNP_P3_123095_237254 | NW_004515954.1 | Scaffold496 | 237254                  | CC                              | TT                | 1946510011               |
| SNP_P3_123096_237478 | NW_004515954.1 | Scaffold496 | 237478                  | AA                              | GG                | 1946510012               |
| SNP_P3_123097_244573 | NW_004515954.1 | Scaffold496 | 244573                  | TT                              | AA                | 1946510014               |

| SNPs IDs             | Chromosome IDs | Chromosomes | Physical positions (bp) | CDC Frontier (Reference genome) | (Pusa 256 & HPNB) | NCBI SNPdb Accession IDs |
|----------------------|----------------|-------------|-------------------------|---------------------------------|-------------------|--------------------------|
| SNP_P3_123098_244636 | NW_004515954.1 | Scaffold496 | 244636                  | CC                              | TT                | 1946510015               |
| SNP_P3_123099_245881 | NW_004515954.1 | Scaffold496 | 245881                  | TT                              | AA                | 1946510017               |
| SNP_P3_123100_245960 | NW_004515954.1 | Scaffold496 | 245960                  | GG                              | CC                | 1946510018               |
| SNP_P3_123101_245969 | NW_004515954.1 | Scaffold496 | 245969                  | AA                              | GG                | 1946510020               |
| SNP_P3_123102_245979 | NW_004515954.1 | Scaffold496 | 245979                  | TT                              | CC                | 1946510021               |
| SNP_P3_123103_246233 | NW_004515954.1 | Scaffold496 | 246233                  | AA                              | TT                | 1946510023               |
| SNP_P3_123104_246254 | NW_004515954.1 | Scaffold496 | 246254                  | AA                              | GG                | 1946510024               |
| SNP_P3_123105_264101 | NW_004515954.1 | Scaffold496 | 264101                  | CC                              | GG                | 1946510026               |
| SNP_P3_123106_264521 | NW_004515954.1 | Scaffold496 | 264521                  | AA                              | GG                | 1946510027               |
| SNP_P3_123107_264545 | NW_004515954.1 | Scaffold496 | 264545                  | AA                              | GG                | 1946510029               |
| SNP_P3_123108_264933 | NW_004515954.1 | Scaffold496 | 264933                  | GG                              | AA                | 1946510030               |
| SNP_P3_123109_269920 | NW_004515954.1 | Scaffold496 | 269920                  | AA                              | GG                | 1946510032               |
| SNP_P3_123110_277071 | NW_004515954.1 | Scaffold496 | 277071                  | AA                              | TT                | 1946510033               |
| SNP_P3_123111_28878  | NW_004515955.1 | Scaffold497 | 28878                   | AA                              | GG                | 1946510035               |
| SNP_P3_123112_28883  | NW_004515955.1 | Scaffold497 | 28883                   | TT                              | CC                | 1946510036               |
| SNP_P3_123113_28908  | NW_004515955.1 | Scaffold497 | 28908                   | GG                              | AA                | 1946510038               |
| SNP_P3_123114_29159  | NW_004515955.1 | Scaffold497 | 29159                   | TT                              | CC                | 1946510040               |
| SNP_P3_123115_29173  | NW_004515955.1 | Scaffold497 | 29173                   | GG                              | AA                | 1946510041               |
| SNP_P3_123116_33275  | NW_004515955.1 | Scaffold497 | 33275                   | CC                              | TT                | 1946510043               |
| SNP_P3_123117_33548  | NW_004515955.1 | Scaffold497 | 33548                   | AA                              | GG                | 1946510044               |
| SNP_P3_123118_33559  | NW_004515955.1 | Scaffold497 | 33559                   | TT                              | CC                | 1946510046               |
| SNP_P3_123119_33561  | NW_004515955.1 | Scaffold497 | 33561                   | GG                              | AA                | 1946510047               |
| SNP_P3_123120_33565  | NW_004515955.1 | Scaffold497 | 33565                   | GG                              | AA                | 1946510049               |
| SNP_P3_123121_33579  | NW_004515955.1 | Scaffold497 | 33579                   | GG                              | AA                | 1946510050               |
| SNP_P3_123122_33622  | NW_004515955.1 | Scaffold497 | 33622                   | CC                              | TT                | 1946510052               |
| SNP_P3_123123_33661  | NW_004515955.1 | Scaffold497 | 33661                   | TT                              | GG                | 1946510053               |
| SNP_P3_123124_43280  | NW_004515955.1 | Scaffold497 | 43280                   | CC                              | TT                | 1946510055               |
| SNP_P3_123125_45066  | NW_004515955.1 | Scaffold497 | 45066                   | AA                              | CC                | 1946510056               |
| SNP_P3_123126_45102  | NW_004515955.1 | Scaffold497 | 45102                   | TT                              | AA                | 1946510058               |
| SNP_P3_123127_45107  | NW_004515955.1 | Scaffold497 | 45107                   | AA                              | TT                | 1946510059               |
| SNP_P3_123128_45156  | NW_004515955.1 | Scaffold497 | 45156                   | TT                              | GG                | 1946510061               |
| SNP_P3_123129_47012  | NW_004515955.1 | Scaffold497 | 47012                   | TT                              | GG                | 1946510062               |
| SNP_P3_123130_47015  | NW_004515955.1 | Scaffold497 | 47015                   | GG                              | CC                | 1946510064               |
| SNP_P3_123131_60022  | NW_004515955.1 | Scaffold497 | 60022                   | TT                              | CC                | 1946510065               |
| SNP_P3_123132_63089  | NW_004515955.1 | Scaffold497 | 63089                   | TT                              | CC                | 1946510067               |
| SNP_P3_123133_63114  | NW_004515955.1 | Scaffold497 | 63114                   | AA                              | GG                | 1946510068               |
| SNP_P3_123134_63118  | NW_004515955.1 | Scaffold497 | 63118                   | TT                              | CC                | 1946510070               |
| SNP_P3_123135_63920  | NW_004515955.1 | Scaffold497 | 63920                   | TT                              | AA                | 1946510071               |
| SNP_P3_123136_68039  | NW_004515955.1 | Scaffold497 | 68039                   | GG                              | AA                | 1946510073               |
| SNP_P3_123137_69282  | NW_004515955.1 | Scaffold497 | 69282                   | GG                              | AA                | 1946510074               |
| SNP_P3_123138_69327  | NW_004515955.1 | Scaffold497 | 69327                   | TT                              | AA                | 1946510076               |
| SNP_P3_123139_69332  | NW_004515955.1 | Scaffold497 | 69332                   | TT                              | AA                | 1946510077               |

| SNPs IDs            | Chromosome IDs | Chromosomes | Physical positions (bp) | CDC Frontier (Reference genome) | (Pusa 256 & HPNB) | NCBI SNPdb Accession IDs |
|---------------------|----------------|-------------|-------------------------|---------------------------------|-------------------|--------------------------|
| SNP_P3_123140_69341 | NW_004515955.1 | Scaffold497 | 69341                   | AA                              | TT                | 1946510079               |
| SNP_P3_123141_69358 | NW_004515955.1 | Scaffold497 | 69358                   | AA                              | GG                | 1946510080               |
| SNP_P3_123142_69388 | NW_004515955.1 | Scaffold497 | 69388                   | CC                              | TT                | 1946510082               |
| SNP_P3_123143_69440 | NW_004515955.1 | Scaffold497 | 69440                   | TT                              | AA                | 1946510083               |
| SNP_P3_123144_69481 | NW_004515955.1 | Scaffold497 | 69481                   | CC                              | AA                | 1946510085               |
| SNP_P3_123145_69567 | NW_004515955.1 | Scaffold497 | 69567                   | CC                              | AA                | 1946510086               |
| SNP_P3_123146_69651 | NW_004515955.1 | Scaffold497 | 69651                   | AA                              | TT                | 1946510088               |
| SNP_P3_123147_69659 | NW_004515955.1 | Scaffold497 | 69659                   | AA                              | TT                | 1946510089               |
| SNP_P3_123148_69943 | NW_004515955.1 | Scaffold497 | 69943                   | TT                              | GG                | 1946510091               |
| SNP_P3_123149_69975 | NW_004515955.1 | Scaffold497 | 69975                   | AA                              | GG                | 1946510092               |
| SNP_P3_123150_69976 | NW_004515955.1 | Scaffold497 | 69976                   | AA                              | TT                | 1946510094               |
| SNP_P3_123151_69977 | NW_004515955.1 | Scaffold497 | 69977                   | TT                              | AA                | 1946510095               |
| SNP_P3_123152_69978 | NW_004515955.1 | Scaffold497 | 69978                   | TT                              | AA                | 1946510097               |
| SNP_P3_123153_69980 | NW_004515955.1 | Scaffold497 | 69980                   | CC                              | TT                | 1946510098               |
| SNP_P3_123155_70095 | NW_004515955.1 | Scaffold497 | 70095                   | CC                              | TT                | 1946510100               |
| SNP_P3_123156_72106 | NW_004515955.1 | Scaffold497 | 72106                   | AA                              | GG                | 1946510101               |
| SNP_P3_123157_72107 | NW_004515955.1 | Scaffold497 | 72107                   | GG                              | CC                | 1946510103               |
| SNP_P3_123158_72122 | NW_004515955.1 | Scaffold497 | 72122                   | AA                              | CC                | 1946510104               |
| SNP_P3_123159_72153 | NW_004515955.1 | Scaffold497 | 72153                   | AA                              | GG                | 1946510106               |
| SNP_P3_123160_72202 | NW_004515955.1 | Scaffold497 | 72202                   | CC                              | AA                | 1946510107               |
| SNP_P3_123161_72368 | NW_004515955.1 | Scaffold497 | 72368                   | GG                              | CC                | 1946510109               |
| SNP_P3_123162_72390 | NW_004515955.1 | Scaffold497 | 72390                   | TT                              | CC                | 1946510110               |
| SNP_P3_123163_72420 | NW_004515955.1 | Scaffold497 | 72420                   | GG                              | TT                | 1946510112               |
| SNP_P3_123164_72497 | NW_004515955.1 | Scaffold497 | 72497                   | GG                              | TT                | 1946510113               |
| SNP_P3_123165_72631 | NW_004515955.1 | Scaffold497 | 72631                   | TT                              | AA                | 1946510115               |
| SNP_P3_123166_72634 | NW_004515955.1 | Scaffold497 | 72634                   | TT                              | CC                | 1946510116               |
| SNP_P3_123167_72663 | NW_004515955.1 | Scaffold497 | 72663                   | TT                              | GG                | 1946510118               |
| SNP_P3_123168_73499 | NW_004515955.1 | Scaffold497 | 73499                   | CC                              | TT                | 1946510119               |
| SNP_P3_123169_73500 | NW_004515955.1 | Scaffold497 | 73500                   | GG                              | AA                | 1946510121               |
| SNP_P3_123170_73528 | NW_004515955.1 | Scaffold497 | 73528                   | AA                              | CC                | 1946510122               |
| SNP_P3_123171_73536 | NW_004515955.1 | Scaffold497 | 73536                   | AA                              | GG                | 1946510124               |
| SNP_P3_123172_73584 | NW_004515955.1 | Scaffold497 | 73584                   | AA                              | CC                | 1946510125               |
| SNP_P3_123173_73744 | NW_004515955.1 | Scaffold497 | 73744                   | GG                              | TT                | 1946510127               |
| SNP_P3_123174_73804 | NW_004515955.1 | Scaffold497 | 73804                   | AA                              | GG                | 1946510128               |
| SNP_P3_123175_73831 | NW_004515955.1 | Scaffold497 | 73831                   | GG                              | AA                | 1946510130               |
| SNP_P3_123176_73852 | NW_004515955.1 | Scaffold497 | 73852                   | TT                              | GG                | 1946510131               |
| SNP_P3_123177_73909 | NW_004515955.1 | Scaffold497 | 73909                   | AA                              | TT                | 1946510133               |
| SNP_P3_123178_82984 | NW_004515955.1 | Scaffold497 | 82984                   | CC                              | TT                | 1946510134               |
| SNP_P3_123179_82987 | NW_004515955.1 | Scaffold497 | 82987                   | AA                              | GG                | 1946510136               |
| SNP_P3_123181_84209 | NW_004515955.1 | Scaffold497 | 84209                   | CC                              | GG                | 1946510137               |
| SNP_P3_123182_84255 | NW_004515955.1 | Scaffold497 | 84255                   | GG                              | CC                | 1946510139               |
| SNP_P3_123183_84357 | NW_004515955.1 | Scaffold497 | 84357                   | AA                              | GG                | 1946510140               |

| SNPs IDs             | Chromosome IDs | Chromosomes | Physical positions (bp) | CDC Frontier (Reference genome) | (Pusa 256 & HPNB) | NCBI SNPdb Accession IDs |
|----------------------|----------------|-------------|-------------------------|---------------------------------|-------------------|--------------------------|
| SNP_P3_123184_84438  | NW_004515955.1 | Scaffold497 | 84438                   | AA                              | CC                | 1946510142               |
| SNP_P3_123185_84456  | NW_004515955.1 | Scaffold497 | 84456                   | TT                              | AA                | 1946510143               |
| SNP_P3_123186_84487  | NW_004515955.1 | Scaffold497 | 84487                   | CC                              | TT                | 1946510145               |
| SNP_P3_123187_84688  | NW_004515955.1 | Scaffold497 | 84688                   | AA                              | CC                | 1946510146               |
| SNP_P3_123188_84776  | NW_004515955.1 | Scaffold497 | 84776                   | TT                              | AA                | 1946510148               |
| SNP_P3_123189_85095  | NW_004515955.1 | Scaffold497 | 85095                   | TT                              | AA                | 1946510149               |
| SNP_P3_123190_88065  | NW_004515955.1 | Scaffold497 | 88065                   | GG                              | AA                | 1946510151               |
| SNP_P3_123191_90782  | NW_004515955.1 | Scaffold497 | 90782                   | TT                              | GG                | 1946510152               |
| SNP_P3_123192_92143  | NW_004515955.1 | Scaffold497 | 92143                   | TT                              | AA                | 1946510154               |
| SNP_P3_123193_92403  | NW_004515955.1 | Scaffold497 | 92403                   | TT                              | CC                | 1946510155               |
| SNP_P3_123194_93260  | NW_004515955.1 | Scaffold497 | 93260                   | TT                              | AA                | 1946510157               |
| SNP_P3_123195_93317  | NW_004515955.1 | Scaffold497 | 93317                   | AA                              | GG                | 1946510158               |
| SNP_P3_123196_93489  | NW_004515955.1 | Scaffold497 | 93489                   | TT                              | CC                | 1946510160               |
| SNP_P3_123197_93589  | NW_004515955.1 | Scaffold497 | 93589                   | TT                              | AA                | 1946510161               |
| SNP_P3_123198_93624  | NW_004515955.1 | Scaffold497 | 93624                   | TT                              | CC                | 1946510163               |
| SNP_P3_123199_93836  | NW_004515955.1 | Scaffold497 | 93836                   | TT                              | AA                | 1946510164               |
| SNP_P3_123201_94877  | NW_004515955.1 | Scaffold497 | 94877                   | CC                              | TT                | 1946510166               |
| SNP_P3_123202_94907  | NW_004515955.1 | Scaffold497 | 94907                   | TT                              | GG                | 1946510167               |
| SNP_P3_123203_94983  | NW_004515955.1 | Scaffold497 | 94983                   | AA                              | TT                | 1946510168               |
| SNP_P3_123204_95006  | NW_004515955.1 | Scaffold497 | 95006                   | GG                              | AA                | 1946510170               |
| SNP_P3_123205_95042  | NW_004515955.1 | Scaffold497 | 95042                   | AA                              | TT                | 1946510171               |
| SNP_P3_123206_95048  | NW_004515955.1 | Scaffold497 | 95048                   | TT                              | CC                | 1946510173               |
| SNP_P3_123207_95099  | NW_004515955.1 | Scaffold497 | 95099                   | TT                              | GG                | 1946510174               |
| SNP_P3_123208_95178  | NW_004515955.1 | Scaffold497 | 95178                   | AA                              | GG                | 1946510176               |
| SNP_P3_123209_100632 | NW_004515955.1 | Scaffold497 | 100632                  | TT                              | AA                | 1946510177               |
| SNP_P3_123210_6578   | NW_004515956.1 | Scaffold498 | 6578                    | TT                              | CC                | 1946510179               |
| SNP_P3_123211_23762  | NW_004515956.1 | Scaffold498 | 23762                   | GG                              | TT                | 1946510180               |
| SNP_P3_123212_26498  | NW_004515956.1 | Scaffold498 | 26498                   | CC                              | AA                | 1946510182               |
| SNP_P3_123213_43556  | NW_004515956.1 | Scaffold498 | 43556                   | TT                              | CC                | 1946510183               |
| SNP_P3_123214_43590  | NW_004515956.1 | Scaffold498 | 43590                   | TT                              | AA                | 1946510185               |
| SNP_P3_123216_48926  | NW_004515956.1 | Scaffold498 | 48926                   | GG                              | AA                | 1946510186               |
| SNP_P3_123217_51004  | NW_004515956.1 | Scaffold498 | 51004                   | AA                              | GG                | 1946510188               |
| SNP_P3_123218_51029  | NW_004515956.1 | Scaffold498 | 51029                   | TT                              | CC                | 1946510189               |
| SNP_P3_123219_62814  | NW_004515956.1 | Scaffold498 | 62814                   | AA                              | TT                | 1946510191               |
| SNP_P3_123220_92421  | NW_004515956.1 | Scaffold498 | 92421                   | CC                              | TT                | 1946510192               |
| SNP_P3_123221_92422  | NW_004515956.1 | Scaffold498 | 92422                   | TT                              | CC                | 1946510193               |
| SNP_P3_123222_96782  | NW_004515956.1 | Scaffold498 | 96782                   | AA                              | GG                | 1946510195               |
| SNP_P3_123223_112676 | NW_004515956.1 | Scaffold498 | 112676                  | AA                              | TT                | 1946510196               |
| SNP_P3_123224_149330 | NW_004515956.1 | Scaffold498 | 149330                  | CC                              | AA                | 1946510198               |
| SNP_P3_123225_155961 | NW_004515956.1 | Scaffold498 | 155961                  | CC                              | AA                | 1946510199               |
| SNP_P3_123226_158609 | NW_004515956.1 | Scaffold498 | 158609                  | GG                              | AA                | 1946510201               |
| SNP_P3_123227_171425 | NW_004515956.1 | Scaffold498 | 171425                  | GG                              | TT                | 1946510202               |

| SNPs IDs             | Chromosome IDs | Chromosomes | Physical positions (bp) | CDC Frontier (Reference genome) | (Pusa 256 & HPNB) | NCBI SNPdb Accession IDs |
|----------------------|----------------|-------------|-------------------------|---------------------------------|-------------------|--------------------------|
| SNP_P3_123228_181786 | NW_004515956.1 | Scaffold498 | 181786                  | TT                              | AA                | 1946510203               |
| SNP_P3_123230_193489 | NW_004515956.1 | Scaffold498 | 193489                  | GG                              | AA                | 1946510205               |
| SNP_P3_123231_193504 | NW_004515956.1 | Scaffold498 | 193504                  | TT                              | CC                | 1946510206               |
| SNP_P3_123232_194088 | NW_004515956.1 | Scaffold498 | 194088                  | CC                              | TT                | 1946510208               |
| SNP_P3_123233_198625 | NW_004515956.1 | Scaffold498 | 198625                  | TT                              | AA                | 1946510209               |
| SNP_P3_123234_198640 | NW_004515956.1 | Scaffold498 | 198640                  | AA                              | TT                | 1946510211               |
| SNP_P3_123235_198652 | NW_004515956.1 | Scaffold498 | 198652                  | GG                              | TT                | 1946510212               |
| SNP_P3_123236_198700 | NW_004515956.1 | Scaffold498 | 198700                  | TT                              | AA                | 1946510214               |
| SNP_P3_123237_198703 | NW_004515956.1 | Scaffold498 | 198703                  | CC                              | TT                | 1946510215               |
| SNP_P3_123238_198708 | NW_004515956.1 | Scaffold498 | 198708                  | TT                              | GG                | 1946510217               |
| SNP_P3_123239_198809 | NW_004515956.1 | Scaffold498 | 198809                  | AA                              | GG                | 1946510219               |
| SNP_P3_123240_198811 | NW_004515956.1 | Scaffold498 | 198811                  | AA                              | GG                | 1946510220               |
| SNP_P3_123241_199024 | NW_004515956.1 | Scaffold498 | 199024                  | GG                              | CC                | 1946510222               |
| SNP_P3_123242_199108 | NW_004515956.1 | Scaffold498 | 199108                  | TT                              | CC                | 1946510223               |
| SNP_P3_123243_199174 | NW_004515956.1 | Scaffold498 | 199174                  | TT                              | CC                | 1946510225               |
| SNP_P3_123244_199186 | NW_004515956.1 | Scaffold498 | 199186                  | CC                              | TT                | 1946510226               |
| SNP_P3_123245_199211 | NW_004515956.1 | Scaffold498 | 199211                  | AA                              | GG                | 1946510227               |
| SNP_P3_123246_205075 | NW_004515956.1 | Scaffold498 | 205075                  | TT                              | CC                | 1946510229               |
| SNP_P3_123247_205121 | NW_004515956.1 | Scaffold498 | 205121                  | GG                              | CC                | 1946510230               |
| SNP_P3_123248_205175 | NW_004515956.1 | Scaffold498 | 205175                  | AA                              | CC                | 1946510232               |
| SNP_P3_123249_205425 | NW_004515956.1 | Scaffold498 | 205425                  | CC                              | TT                | 1946510233               |
| SNP_P3_123250_205619 | NW_004515956.1 | Scaffold498 | 205619                  | GG                              | AA                | 1946510235               |
| SNP_P3_123251_205631 | NW_004515956.1 | Scaffold498 | 205631                  | TT                              | CC                | 1946510236               |
| SNP_P3_123252_205637 | NW_004515956.1 | Scaffold498 | 205637                  | TT                              | CC                | 1946510238               |
| SNP_P3_123253_205803 | NW_004515956.1 | Scaffold498 | 205803                  | AA                              | GG                | 1946510239               |
| SNP_P3_123254_205879 | NW_004515956.1 | Scaffold498 | 205879                  | TT                              | CC                | 1946510241               |
| SNP_P3_123255_205924 | NW_004515956.1 | Scaffold498 | 205924                  | CC                              | TT                | 1946510242               |
| SNP_P3_123258_206660 | NW_004515956.1 | Scaffold498 | 206660                  | TT                              | AA                | 1946510243               |
| SNP_P3_123259_207230 | NW_004515956.1 | Scaffold498 | 207230                  | TT                              | CC                | 1946510245               |
| SNP_P3_123260_211783 | NW_004515956.1 | Scaffold498 | 211783                  | TT                              | CC                | 1946510247               |
| SNP_P3_123262_212162 | NW_004515956.1 | Scaffold498 | 212162                  | AA                              | GG                | 1946510248               |
| SNP_P3_123263_212529 | NW_004515956.1 | Scaffold498 | 212529                  | TT                              | CC                | 1946510251               |
| SNP_P3_123264_212732 | NW_004515956.1 | Scaffold498 | 212732                  | GG                              | AA                | 1946510252               |
| SNP_P3_123265_213287 | NW_004515956.1 | Scaffold498 | 213287                  | GG                              | AA                | 1946510254               |
| SNP_P3_123266_213294 | NW_004515956.1 | Scaffold498 | 213294                  | CC                              | TT                | 1946510255               |
| SNP_P3_123267_213319 | NW_004515956.1 | Scaffold498 | 213319                  | GG                              | AA                | 1946510257               |
| SNP_P3_123268_213430 | NW_004515956.1 | Scaffold498 | 213430                  | AA                              | CC                | 1946510258               |
| SNP_P3_123269_213706 | NW_004515956.1 | Scaffold498 | 213706                  | GG                              | TT                | 1946510259               |
| SNP_P3_123270_213900 | NW_004515956.1 | Scaffold498 | 213900                  | TT                              | CC                | 1946510261               |
| SNP_P3_123271_213949 | NW_004515956.1 | Scaffold498 | 213949                  | GG                              | AA                | 1946510262               |
| SNP_P3_123275_214320 | NW_004515956.1 | Scaffold498 | 214320                  | CC                              | TT                | 1946510264               |
| SNP_P3_123276_214452 | NW_004515956.1 | Scaffold498 | 214452                  | CC                              | TT                | 1946510265               |

| SNPs IDs             | Chromosome IDs | Chromosomes | Physical positions (bp) | CDC Frontier (Reference genome) | (Pusa 256 & HPNB) | NCBI SNPdb Accession IDs |
|----------------------|----------------|-------------|-------------------------|---------------------------------|-------------------|--------------------------|
| SNP_P3_123278_214627 | NW_004515956.1 | Scaffold498 | 214627                  | GG                              | AA                | 1946510267               |
| SNP_P3_123279_214678 | NW_004515956.1 | Scaffold498 | 214678                  | CC                              | AA                | 1946510268               |
| SNP_P3_123280_214742 | NW_004515956.1 | Scaffold498 | 214742                  | TT                              | CC                | 1946510270               |
| SNP_P3_123281_214827 | NW_004515956.1 | Scaffold498 | 214827                  | AA                              | GG                | 1946510271               |
| SNP_P3_123282_214988 | NW_004515956.1 | Scaffold498 | 214988                  | GG                              | CC                | 1946510273               |
| SNP_P3_123283_215037 | NW_004515956.1 | Scaffold498 | 215037                  | AA                              | GG                | 1946510274               |
| SNP_P3_123284_215043 | NW_004515956.1 | Scaffold498 | 215043                  | AA                              | GG                | 1946510276               |
| SNP_P3_123285_215101 | NW_004515956.1 | Scaffold498 | 215101                  | AA                              | CC                | 1946510277               |
| SNP_P3_123286_215250 | NW_004515956.1 | Scaffold498 | 215250                  | GG                              | AA                | 1946510279               |
| SNP_P3_123287_215258 | NW_004515956.1 | Scaffold498 | 215258                  | CC                              | AA                | 1946510280               |
| SNP_P3_123288_215506 | NW_004515956.1 | Scaffold498 | 215506                  | AA                              | GG                | 1946510282               |
| SNP_P3_123289_215521 | NW_004515956.1 | Scaffold498 | 215521                  | AA                              | GG                | 1946510283               |
| SNP_P3_123290_215559 | NW_004515956.1 | Scaffold498 | 215559                  | GG                              | AA                | 1946510285               |
| SNP_P3_123291_215825 | NW_004515956.1 | Scaffold498 | 215825                  | CC                              | AA                | 1946510286               |
| SNP_P3_123292_215864 | NW_004515956.1 | Scaffold498 | 215864                  | CC                              | TT                | 1946510288               |
| SNP_P3_123293_215878 | NW_004515956.1 | Scaffold498 | 215878                  | AA                              | GG                | 1946510289               |
| SNP_P3_123294_215903 | NW_004515956.1 | Scaffold498 | 215903                  | CC                              | GG                | 1946510291               |
| SNP_P3_123295_216067 | NW_004515956.1 | Scaffold498 | 216067                  | CC                              | AA                | 1946510292               |
| SNP_P3_123296_216171 | NW_004515956.1 | Scaffold498 | 216171                  | AA                              | GG                | 1946510294               |
| SNP_P3_123297_216210 | NW_004515956.1 | Scaffold498 | 216210                  | CC                              | TT                | 1946510295               |
| SNP_P3_123298_216254 | NW_004515956.1 | Scaffold498 | 216254                  | TT                              | CC                | 1946510296               |
| SNP_P3_123299_216372 | NW_004515956.1 | Scaffold498 | 216372                  | TT                              | AA                | 1946510298               |
| SNP_P3_123300_216375 | NW_004515956.1 | Scaffold498 | 216375                  | GG                              | AA                | 1946510299               |
| SNP_P3_123301_216460 | NW_004515956.1 | Scaffold498 | 216460                  | CC                              | TT                | 1946510301               |
| SNP_P3_123302_216634 | NW_004515956.1 | Scaffold498 | 216634                  | AA                              | GG                | 1946510302               |
| SNP_P3_123303_216798 | NW_004515956.1 | Scaffold498 | 216798                  | CC                              | TT                | 1946510304               |
| SNP_P3_123304_1199   | NW_004515958.1 | Scaffold501 | 1199                    | CC                              | TT                | 1946510305               |
| SNP_P3_123305_1207   | NW_004515958.1 | Scaffold501 | 1207                    | CC                              | TT                | 1946510307               |
| SNP_P3_123306_1581   | NW_004515958.1 | Scaffold501 | 1581                    | AA                              | TT                | 1946510308               |
| SNP_P3_123307_1772   | NW_004515958.1 | Scaffold501 | 1772                    | CC                              | AA                | 1946510310               |
| SNP_P3_123308_1797   | NW_004515958.1 | Scaffold501 | 1797                    | TT                              | CC                | 1946510311               |
| SNP_P3_123309_9279   | NW_004515958.1 | Scaffold501 | 9279                    | AA                              | CC                | 1946510313               |
| SNP_P3_123310_10896  | NW_004515958.1 | Scaffold501 | 10896                   | AA                              | CC                | 1946510314               |
| SNP_P3_123311_10914  | NW_004515958.1 | Scaffold501 | 10914                   | GG                              | AA                | 1946510316               |
| SNP_P3_123312_10953  | NW_004515958.1 | Scaffold501 | 10953                   | CC                              | TT                | 1946510317               |
| SNP_P3_123313_11045  | NW_004515958.1 | Scaffold501 | 11045                   | GG                              | CC                | 1946510319               |
| SNP_P3_123314_11050  | NW_004515958.1 | Scaffold501 | 11050                   | AA                              | CC                | 1946510320               |
| SNP_P3_123315_11055  | NW_004515958.1 | Scaffold501 | 11055                   | TT                              | GG                | 1946510322               |
| SNP_P3_123316_11159  | NW_004515958.1 | Scaffold501 | 11159                   | CC                              | TT                | 1946510323               |
| SNP_P3_123317_11259  | NW_004515958.1 | Scaffold501 | 11259                   | CC                              | TT                | 1946510325               |
| SNP_P3_123318_11395  | NW_004515958.1 | Scaffold501 | 11395                   | GG                              | AA                | 1946510326               |
| SNP_P3_123319_11497  | NW_004515958.1 | Scaffold501 | 11497                   | AA                              | CC                | 1946510328               |



| SNPs IDs            | Chromosome IDs | Chromosomes | Physical positions (bp) | CDC Frontier (Reference genome) | (Pusa 256 & HPNB) | NCBI SNPdb Accession IDs |
|---------------------|----------------|-------------|-------------------------|---------------------------------|-------------------|--------------------------|
| SNP_P3_123320_11584 | NW_004515958.1 | Scaffold501 | 11584                   | AA                              | GG                | 1946510329               |
| SNP_P3_123321_11653 | NW_004515958.1 | Scaffold501 | 11653                   | GG                              | AA                | 1946510330               |
| SNP_P3_123322_11686 | NW_004515958.1 | Scaffold501 | 11686                   | TT                              | AA                | 1946510332               |
| SNP_P3_123323_11694 | NW_004515958.1 | Scaffold501 | 11694                   | AA                              | GG                | 1946510333               |
| SNP_P3_123324_13791 | NW_004515958.1 | Scaffold501 | 13791                   | CC                              | GG                | 1946510335               |
| SNP_P3_123325_13794 | NW_004515958.1 | Scaffold501 | 13794                   | CC                              | TT                | 1946510336               |
| SNP_P3_123326_13878 | NW_004515958.1 | Scaffold501 | 13878                   | AA                              | TT                | 1946510338               |
| SNP_P3_123327_13892 | NW_004515958.1 | Scaffold501 | 13892                   | GG                              | AA                | 1946510339               |
| SNP_P3_123328_13922 | NW_004515958.1 | Scaffold501 | 13922                   | GG                              | AA                | 1946510341               |
| SNP_P3_123329_13960 | NW_004515958.1 | Scaffold501 | 13960                   | CC                              | GG                | 1946510342               |
| SNP_P3_123330_14131 | NW_004515958.1 | Scaffold501 | 14131                   | TT                              | CC                | 1946510344               |
| SNP_P3_123331_14141 | NW_004515958.1 | Scaffold501 | 14141                   | GG                              | AA                | 1946510345               |
| SNP_P3_123332_14151 | NW_004515958.1 | Scaffold501 | 14151                   | GG                              | AA                | 1946510347               |
| SNP_P3_123333_14191 | NW_004515958.1 | Scaffold501 | 14191                   | AA                              | GG                | 1946510348               |
| SNP_P3_123334_15534 | NW_004515958.1 | Scaffold501 | 15534                   | GG                              | CC                | 1946510349               |
| SNP_P3_123335_23169 | NW_004515958.1 | Scaffold501 | 23169                   | AA                              | TT                | 1946510351               |
| SNP_P3_123336_23178 | NW_004515958.1 | Scaffold501 | 23178                   | TT                              | CC                | 1946510352               |
| SNP_P3_123337_23609 | NW_004515958.1 | Scaffold501 | 23609                   | CC                              | AA                | 1946510354               |
| SNP_P3_123338_23956 | NW_004515958.1 | Scaffold501 | 23956                   | TT                              | CC                | 1946510355               |
| SNP_P3_123339_29856 | NW_004515958.1 | Scaffold501 | 29856                   | GG                              | AA                | 1946510357               |
| SNP_P3_123340_33617 | NW_004515958.1 | Scaffold501 | 33617                   | TT                              | CC                | 1946510358               |
| SNP_P3_123341_33914 | NW_004515958.1 | Scaffold501 | 33914                   | AA                              | CC                | 1946510360               |
| SNP_P3_123343_50557 | NW_004515958.1 | Scaffold501 | 50557                   | AA                              | CC                | 1946510361               |
| SNP_P3_123344_50558 | NW_004515958.1 | Scaffold501 | 50558                   | GG                              | AA                | 1946510363               |
| SNP_P3_123345_60602 | NW_004515958.1 | Scaffold501 | 60602                   | TT                              | AA                | 1946510364               |
| SNP_P3_123346_60625 | NW_004515958.1 | Scaffold501 | 60625                   | CC                              | TT                | 1946510366               |
| SNP_P3_123347_60881 | NW_004515958.1 | Scaffold501 | 60881                   | CC                              | TT                | 1946510367               |
| SNP_P3_123348_61575 | NW_004515958.1 | Scaffold501 | 61575                   | AA                              | GG                | 1946510369               |
| SNP_P3_123349_69064 | NW_004515958.1 | Scaffold501 | 69064                   | CC                              | TT                | 1946510370               |
| SNP_P3_123350_77436 | NW_004515958.1 | Scaffold501 | 77436                   | CC                              | TT                | 1946510372               |
| SNP_P3_123351_78426 | NW_004515958.1 | Scaffold501 | 78426                   | TT                              | AA                | 1946510373               |
| SNP_P3_123352_78440 | NW_004515958.1 | Scaffold501 | 78440                   | TT                              | CC                | 1946510375               |
| SNP_P3_123353_78456 | NW_004515958.1 | Scaffold501 | 78456                   | AA                              | GG                | 1946510376               |
| SNP_P3_123354_78476 | NW_004515958.1 | Scaffold501 | 78476                   | AA                              | GG                | 1946510378               |
| SNP_P3_123355_80493 | NW_004515958.1 | Scaffold501 | 80493                   | GG                              | AA                | 1946510379               |
| SNP_P3_123357_88199 | NW_004515958.1 | Scaffold501 | 88199                   | AA                              | TT                | 1946510381               |
| SNP_P3_123358_88323 | NW_004515958.1 | Scaffold501 | 88323                   | TT                              | AA                | 1946510382               |
| SNP_P3_123359_88718 | NW_004515958.1 | Scaffold501 | 88718                   | TT                              | AA                | 1946510384               |
| SNP_P3_123360_88949 | NW_004515958.1 | Scaffold501 | 88949                   | AA                              | CC                | 1946510385               |
| SNP_P3_123361_89042 | NW_004515958.1 | Scaffold501 | 89042                   | AA                              | GG                | 1946510387               |
| SNP_P3_123362_89296 | NW_004515958.1 | Scaffold501 | 89296                   | TT                              | GG                | 1946510388               |
| SNP_P3_123363_89313 | NW_004515958.1 | Scaffold501 | 89313                   | TT                              | GG                | 1946510390               |

| SNPs IDs             | Chromosome IDs | Chromosomes | Physical positions (bp) | CDC Frontier (Reference genome) | (Pusa 256 & HPNB) | NCBI SNPdb Accession IDs |
|----------------------|----------------|-------------|-------------------------|---------------------------------|-------------------|--------------------------|
| SNP_P3_123364_89405  | NW_004515958.1 | Scaffold501 | 89405                   | TT                              | CC                | 1946510391               |
| SNP_P3_123365_89432  | NW_004515958.1 | Scaffold501 | 89432                   | CC                              | AA                | 1946510393               |
| SNP_P3_123366_89455  | NW_004515958.1 | Scaffold501 | 89455                   | GG                              | AA                | 1946510394               |
| SNP_P3_123367_89495  | NW_004515958.1 | Scaffold501 | 89495                   | GG                              | TT                | 1946510396               |
| SNP_P3_123368_89604  | NW_004515958.1 | Scaffold501 | 89604                   | CC                              | AA                | 1946510397               |
| SNP_P3_123369_89658  | NW_004515958.1 | Scaffold501 | 89658                   | AA                              | TT                | 1946510399               |
| SNP_P3_123370_89694  | NW_004515958.1 | Scaffold501 | 89694                   | AA                              | GG                | 1946510400               |
| SNP_P3_123371_89724  | NW_004515958.1 | Scaffold501 | 89724                   | TT                              | CC                | 1946510401               |
| SNP_P3_123372_89818  | NW_004515958.1 | Scaffold501 | 89818                   | CC                              | AA                | 1946510403               |
| SNP_P3_123373_89925  | NW_004515958.1 | Scaffold501 | 89925                   | AA                              | GG                | 1946510405               |
| SNP_P3_123374_89933  | NW_004515958.1 | Scaffold501 | 89933                   | AA                              | TT                | 1946510406               |
| SNP_P3_123375_89967  | NW_004515958.1 | Scaffold501 | 89967                   | AA                              | TT                | 1946510408               |
| SNP_P3_123376_89999  | NW_004515958.1 | Scaffold501 | 89999                   | AA                              | TT                | 1946510409               |
| SNP_P3_123377_90002  | NW_004515958.1 | Scaffold501 | 90002                   | GG                              | AA                | 1946510411               |
| SNP_P3_123378_92646  | NW_004515958.1 | Scaffold501 | 92646                   | TT                              | GG                | 1946510412               |
| SNP_P3_123379_94041  | NW_004515958.1 | Scaffold501 | 94041                   | GG                              | CC                | 1946510414               |
| SNP_P3_123380_94083  | NW_004515958.1 | Scaffold501 | 94083                   | CC                              | TT                | 1946510415               |
| SNP_P3_123381_94176  | NW_004515958.1 | Scaffold501 | 94176                   | TT                              | GG                | 1946510417               |
| SNP_P3_123382_94220  | NW_004515958.1 | Scaffold501 | 94220                   | TT                              | AA                | 1946510418               |
| SNP_P3_123383_94321  | NW_004515958.1 | Scaffold501 | 94321                   | TT                              | CC                | 1946510420               |
| SNP_P3_123384_94569  | NW_004515958.1 | Scaffold501 | 94569                   | CC                              | TT                | 1946510421               |
| SNP_P3_123385_95449  | NW_004515958.1 | Scaffold501 | 95449                   | TT                              | CC                | 1946510423               |
| SNP_P3_123386_96732  | NW_004515958.1 | Scaffold501 | 96732                   | AA                              | GG                | 1946510424               |
| SNP_P3_123387_96750  | NW_004515958.1 | Scaffold501 | 96750                   | TT                              | GG                | 1946510425               |
| SNP_P3_123388_96823  | NW_004515958.1 | Scaffold501 | 96823                   | AA                              | CC                | 1946510427               |
| SNP_P3_123389_96840  | NW_004515958.1 | Scaffold501 | 96840                   | CC                              | TT                | 1946510429               |
| SNP_P3_123390_96841  | NW_004515958.1 | Scaffold501 | 96841                   | AA                              | GG                | 1946510430               |
| SNP_P3_123391_96842  | NW_004515958.1 | Scaffold501 | 96842                   | AA                              | TT                | 1946510432               |
| SNP_P3_123392_96844  | NW_004515958.1 | Scaffold501 | 96844                   | CC                              | TT                | 1946510433               |
| SNP_P3_123393_101596 | NW_004515958.1 | Scaffold501 | 101596                  | TT                              | CC                | 1946510435               |
| SNP_P3_123394_101879 | NW_004515958.1 | Scaffold501 | 101879                  | TT                              | CC                | 1946510436               |
| SNP_P3_123396_102085 | NW_004515958.1 | Scaffold501 | 102085                  | GG                              | AA                | 1946510437               |
| SNP_P3_123397_102086 | NW_004515958.1 | Scaffold501 | 102086                  | GG                              | AA                | 1946510439               |
| SNP_P3_123398_102097 | NW_004515958.1 | Scaffold501 | 102097                  | CC                              | AA                | 1946510440               |
| SNP_P3_123399_102505 | NW_004515958.1 | Scaffold501 | 102505                  | TT                              | GG                | 1946510442               |
| SNP_P3_123400_102508 | NW_004515958.1 | Scaffold501 | 102508                  | CC                              | TT                | 1946510443               |
| SNP_P3_123401_103872 | NW_004515958.1 | Scaffold501 | 103872                  | CC                              | GG                | 1946510445               |
| SNP_P3_123402_103936 | NW_004515958.1 | Scaffold501 | 103936                  | TT                              | AA                | 1946510446               |
| SNP_P3_123403_104243 | NW_004515958.1 | Scaffold501 | 104243                  | CC                              | GG                | 1946510448               |
| SNP_P3_123404_104386 | NW_004515958.1 | Scaffold501 | 104386                  | TT                              | CC                | 1946510449               |
| SNP_P3_123405_104518 | NW_004515958.1 | Scaffold501 | 104518                  | GG                              | AA                | 1946510451               |
| SNP_P3_123406_106665 | NW_004515958.1 | Scaffold501 | 106665                  | TT                              | AA                | 1946510452               |

| SNPs IDs             | Chromosome IDs | Chromosomes | Physical positions (bp) | CDC Frontier (Reference genome) | (Pusa 256 & HPNB) | NCBI SNPdb Accession IDs |
|----------------------|----------------|-------------|-------------------------|---------------------------------|-------------------|--------------------------|
| SNP_P3_123407_108601 | NW_004515958.1 | Scaffold501 | 108601                  | AA                              | GG                | 1946510454               |
| SNP_P3_123408_108608 | NW_004515958.1 | Scaffold501 | 108608                  | TT                              | AA                | 1946510455               |
| SNP_P3_123409_108943 | NW_004515958.1 | Scaffold501 | 108943                  | CC                              | GG                | 1946510457               |
| SNP_P3_123410_108951 | NW_004515958.1 | Scaffold501 | 108951                  | GG                              | TT                | 1946510458               |
| SNP_P3_123411_108969 | NW_004515958.1 | Scaffold501 | 108969                  | GG                              | CC                | 1946510460               |
| SNP_P3_123412_110173 | NW_004515958.1 | Scaffold501 | 110173                  | AA                              | TT                | 1946510461               |
| SNP_P3_123413_110320 | NW_004515958.1 | Scaffold501 | 110320                  | TT                              | CC                | 1946510463               |
| SNP_P3_123414_110370 | NW_004515958.1 | Scaffold501 | 110370                  | CC                              | TT                | 1946510464               |
| SNP_P3_123415_110415 | NW_004515958.1 | Scaffold501 | 110415                  | AA                              | GG                | 1946510466               |
| SNP_P3_123416_110539 | NW_004515958.1 | Scaffold501 | 110539                  | TT                              | CC                | 1946510467               |
| SNP_P3_123417_110562 | NW_004515958.1 | Scaffold501 | 110562                  | TT                              | AA                | 1946510469               |
| SNP_P3_123418_110564 | NW_004515958.1 | Scaffold501 | 110564                  | AA                              | TT                | 1946510470               |
| SNP_P3_123419_110592 | NW_004515958.1 | Scaffold501 | 110592                  | AA                              | CC                | 1946510472               |
| SNP_P3_123420_110665 | NW_004515958.1 | Scaffold501 | 110665                  | TT                              | GG                | 1946510473               |
| SNP_P3_123421_110666 | NW_004515958.1 | Scaffold501 | 110666                  | TT                              | CC                | 1946510475               |
| SNP_P3_123422_111632 | NW_004515958.1 | Scaffold501 | 111632                  | CC                              | TT                | 1946510476               |
| SNP_P3_123423_111643 | NW_004515958.1 | Scaffold501 | 111643                  | GG                              | CC                | 1946510477               |
| SNP_P3_123424_111655 | NW_004515958.1 | Scaffold501 | 111655                  | AA                              | GG                | 1946510479               |
| SNP_P3_123425_111682 | NW_004515958.1 | Scaffold501 | 111682                  | AA                              | TT                | 1946510480               |
| SNP_P3_123426_111686 | NW_004515958.1 | Scaffold501 | 111686                  | TT                              | CC                | 1946510482               |
| SNP_P3_123427_111733 | NW_004515958.1 | Scaffold501 | 111733                  | TT                              | CC                | 1946510483               |
| SNP_P3_123428_111999 | NW_004515958.1 | Scaffold501 | 111999                  | AA                              | TT                | 1946510485               |
| SNP_P3_123429_115845 | NW_004515958.1 | Scaffold501 | 115845                  | AA                              | TT                | 1946510486               |
| SNP_P3_123430_116164 | NW_004515958.1 | Scaffold501 | 116164                  | GG                              | AA                | 1946510488               |
| SNP_P3_123431_116191 | NW_004515958.1 | Scaffold501 | 116191                  | AA                              | CC                | 1946510489               |
| SNP_P3_123432_116263 | NW_004515958.1 | Scaffold501 | 116263                  | AA                              | GG                | 1946510491               |
| SNP_P3_123434_116506 | NW_004515958.1 | Scaffold501 | 116506                  | GG                              | AA                | 1946510492               |
| SNP_P3_123435_116532 | NW_004515958.1 | Scaffold501 | 116532                  | TT                              | GG                | 1946510494               |
| SNP_P3_123436_116535 | NW_004515958.1 | Scaffold501 | 116535                  | TT                              | CC                | 1946510495               |
| SNP_P3_123437_116548 | NW_004515958.1 | Scaffold501 | 116548                  | CC                              | TT                | 1946510497               |
| SNP_P3_123438_117571 | NW_004515958.1 | Scaffold501 | 117571                  | CC                              | TT                | 1946510498               |
| SNP_P3_123439_117613 | NW_004515958.1 | Scaffold501 | 117613                  | CC                              | AA                | 1946510499               |
| SNP_P3_123440_117655 | NW_004515958.1 | Scaffold501 | 117655                  | CC                              | AA                | 1946510501               |
| SNP_P3_123441_117668 | NW_004515958.1 | Scaffold501 | 117668                  | CC                              | AA                | 1946510502               |
| SNP_P3_123442_117686 | NW_004515958.1 | Scaffold501 | 117686                  | CC                              | TT                | 1946510504               |
| SNP_P3_123443_117702 | NW_004515958.1 | Scaffold501 | 117702                  | CC                              | TT                | 1946510505               |
| SNP_P3_123444_117729 | NW_004515958.1 | Scaffold501 | 117729                  | TT                              | CC                | 1946510507               |
| SNP_P3_123445_117861 | NW_004515958.1 | Scaffold501 | 117861                  | GG                              | CC                | 1946510509               |
| SNP_P3_123446_117866 | NW_004515958.1 | Scaffold501 | 117866                  | TT                              | CC                | 1946510510               |
| SNP_P3_123447_117873 | NW_004515958.1 | Scaffold501 | 117873                  | AA                              | GG                | 1946510512               |
| SNP_P3_123449_1294   | NW_004515959.1 | Scaffold505 | 1294                    | TT                              | CC                | 1946510513               |
| SNP_P3_123450_1360   | NW_004515959.1 | Scaffold505 | 1360                    | CC                              | AA                | 1946510515               |

| SNPs IDs            | Chromosome IDs | Chromosomes | Physical positions (bp) | CDC Frontier (Reference genome) | (Pusa 256 & HPNB) | NCBI SNPdb Accession IDs |
|---------------------|----------------|-------------|-------------------------|---------------------------------|-------------------|--------------------------|
| SNP_P3_123451_2596  | NW_004515959.1 | Scaffold505 | 2596                    | AA                              | CC                | 1946510516               |
| SNP_P3_123452_2664  | NW_004515959.1 | Scaffold505 | 2664                    | TT                              | AA                | 1946510518               |
| SNP_P3_123453_2753  | NW_004515959.1 | Scaffold505 | 2753                    | AA                              | GG                | 1946510519               |
| SNP_P3_123454_2796  | NW_004515959.1 | Scaffold505 | 2796                    | GG                              | CC                | 1946510521               |
| SNP_P3_123455_2824  | NW_004515959.1 | Scaffold505 | 2824                    | AA                              | GG                | 1946510522               |
| SNP_P3_123456_3047  | NW_004515959.1 | Scaffold505 | 3047                    | GG                              | TT                | 1946510524               |
| SNP_P3_123457_10208 | NW_004515959.1 | Scaffold505 | 10208                   | AA                              | GG                | 1946510525               |
| SNP_P3_123458_10210 | NW_004515959.1 | Scaffold505 | 10210                   | TT                              | CC                | 1946510527               |
| SNP_P3_123459_14631 | NW_004515959.1 | Scaffold505 | 14631                   | AA                              | TT                | 1946510528               |
| SNP_P3_123460_18989 | NW_004515959.1 | Scaffold505 | 18989                   | CC                              | TT                | 1946510530               |
| SNP_P3_123461_18996 | NW_004515959.1 | Scaffold505 | 18996                   | TT                              | GG                | 1946510531               |
| SNP_P3_123462_18998 | NW_004515959.1 | Scaffold505 | 18998                   | CC                              | TT                | 1946510533               |
| SNP_P3_123463_19008 | NW_004515959.1 | Scaffold505 | 19008                   | AA                              | GG                | 1946510535               |
| SNP_P3_123464_19349 | NW_004515959.1 | Scaffold505 | 19349                   | AA                              | GG                | 1946510536               |
| SNP_P3_123465_19357 | NW_004515959.1 | Scaffold505 | 19357                   | TT                              | AA                | 1946510538               |
| SNP_P3_123466_19414 | NW_004515959.1 | Scaffold505 | 19414                   | CC                              | TT                | 1946510539               |
| SNP_P3_123467_20897 | NW_004515959.1 | Scaffold505 | 20897                   | TT                              | CC                | 1946510540               |
| SNP_P3_123468_20922 | NW_004515959.1 | Scaffold505 | 20922                   | AA                              | GG                | 1946510542               |
| SNP_P3_123469_28004 | NW_004515959.1 | Scaffold505 | 28004                   | AA                              | GG                | 1946510543               |
| SNP_P3_123470_29540 | NW_004515959.1 | Scaffold505 | 29540                   | AA                              | TT                | 1946510545               |
| SNP_P3_123471_29543 | NW_004515959.1 | Scaffold505 | 29543                   | GG                              | CC                | 1946510546               |
| SNP_P3_123472_29546 | NW_004515959.1 | Scaffold505 | 29546                   | AA                              | GG                | 1946510548               |
| SNP_P3_123473_29548 | NW_004515959.1 | Scaffold505 | 29548                   | TT                              | CC                | 1946510549               |
| SNP_P3_123474_29556 | NW_004515959.1 | Scaffold505 | 29556                   | AA                              | TT                | 1946510551               |
| SNP_P3_123475_29599 | NW_004515959.1 | Scaffold505 | 29599                   | GG                              | TT                | 1946510552               |
| SNP_P3_123476_29600 | NW_004515959.1 | Scaffold505 | 29600                   | TT                              | CC                | 1946510554               |
| SNP_P3_123477_29601 | NW_004515959.1 | Scaffold505 | 29601                   | GG                              | AA                | 1946510555               |
| SNP_P3_123478_29810 | NW_004515959.1 | Scaffold505 | 29810                   | AA                              | GG                | 1946510557               |
| SNP_P3_123479_40623 | NW_004515959.1 | Scaffold505 | 40623                   | CC                              | TT                | 1946510558               |
| SNP_P3_123480_41013 | NW_004515959.1 | Scaffold505 | 41013                   | TT                              | GG                | 1946510560               |
| SNP_P3_123481_41016 | NW_004515959.1 | Scaffold505 | 41016                   | TT                              | CC                | 1946510561               |
| SNP_P3_123482_41053 | NW_004515959.1 | Scaffold505 | 41053                   | AA                              | GG                | 1946510563               |
| SNP_P3_123483_41087 | NW_004515959.1 | Scaffold505 | 41087                   | CC                              | TT                | 1946510564               |
| SNP_P3_123484_41101 | NW_004515959.1 | Scaffold505 | 41101                   | TT                              | AA                | 1946510566               |
| SNP_P3_123485_41108 | NW_004515959.1 | Scaffold505 | 41108                   | AA                              | TT                | 1946510567               |
| SNP_P3_123486_43171 | NW_004515959.1 | Scaffold505 | 43171                   | AA                              | GG                | 1946510569               |
| SNP_P3_123487_43286 | NW_004515959.1 | Scaffold505 | 43286                   | AA                              | CC                | 1946510570               |
| SNP_P3_123488_52062 | NW_004515959.1 | Scaffold505 | 52062                   | AA                              | GG                | 1946510571               |
| SNP_P3_123490_1511  | NW_004515960.1 | Scaffold506 | 1511                    | GG                              | TT                | 1946510573               |
| SNP_P3_123491_1579  | NW_004515960.1 | Scaffold506 | 1579                    | CC                              | TT                | 1946510574               |
| SNP_P3_123492_1969  | NW_004515960.1 | Scaffold506 | 1969                    | AA                              | GG                | 1946510576               |
| SNP_P3_123493_1972  | NW_004515960.1 | Scaffold506 | 1972                    | AA                              | TT                | 1946510577               |

| SNPs IDs            | Chromosome IDs | Chromosomes | Physical positions (bp) | CDC Frontier (Reference genome) | (Pusa 256 & HPNB) | NCBI SNPdb Accession IDs |
|---------------------|----------------|-------------|-------------------------|---------------------------------|-------------------|--------------------------|
| SNP_P3_123494_6452  | NW_004515960.1 | Scaffold506 | 6452                    | CC                              | TT                | 1946510579               |
| SNP_P3_123495_6534  | NW_004515960.1 | Scaffold506 | 6534                    | AA                              | GG                | 1946510580               |
| SNP_P3_123496_6739  | NW_004515960.1 | Scaffold506 | 6739                    | CC                              | AA                | 1946510582               |
| SNP_P3_123497_8571  | NW_004515960.1 | Scaffold506 | 8571                    | CC                              | AA                | 1946510583               |
| SNP_P3_123498_8660  | NW_004515960.1 | Scaffold506 | 8660                    | GG                              | AA                | 1946510585               |
| SNP_P3_123499_9020  | NW_004515960.1 | Scaffold506 | 9020                    | AA                              | TT                | 1946510586               |
| SNP_P3_123500_9071  | NW_004515960.1 | Scaffold506 | 9071                    | AA                              | GG                | 1946510587               |
| SNP_P3_123501_9290  | NW_004515960.1 | Scaffold506 | 9290                    | CC                              | TT                | 1946510589               |
| SNP_P3_123502_9897  | NW_004515960.1 | Scaffold506 | 9897                    | GG                              | AA                | 1946510590               |
| SNP_P3_123503_10520 | NW_004515960.1 | Scaffold506 | 10520                   | GG                              | AA                | 1946510592               |
| SNP_P3_123504_10867 | NW_004515960.1 | Scaffold506 | 10867                   | AA                              | CC                | 1946510593               |
| SNP_P3_123505_15685 | NW_004515960.1 | Scaffold506 | 15685                   | TT                              | CC                | 1946510595               |
| SNP_P3_123506_17676 | NW_004515960.1 | Scaffold506 | 17676                   | TT                              | CC                | 1946510596               |
| SNP_P3_123507_17945 | NW_004515960.1 | Scaffold506 | 17945                   | TT                              | AA                | 1946510598               |
| SNP_P3_123508_18397 | NW_004515960.1 | Scaffold506 | 18397                   | AA                              | GG                | 1946510599               |
| SNP_P3_123509_18820 | NW_004515960.1 | Scaffold506 | 18820                   | GG                              | TT                | 1946510601               |
| SNP_P3_123511_19149 | NW_004515960.1 | Scaffold506 | 19149                   | GG                              | AA                | 1946510602               |
| SNP_P3_123512_19322 | NW_004515960.1 | Scaffold506 | 19322                   | TT                              | CC                | 1946510604               |
| SNP_P3_123513_19326 | NW_004515960.1 | Scaffold506 | 19326                   | CC                              | TT                | 1946510605               |
| SNP_P3_123514_20191 | NW_004515960.1 | Scaffold506 | 20191                   | TT                              | CC                | 1946510607               |
| SNP_P3_123515_20581 | NW_004515960.1 | Scaffold506 | 20581                   | CC                              | GG                | 1946510608               |
| SNP_P3_123516_20616 | NW_004515960.1 | Scaffold506 | 20616                   | TT                              | CC                | 1946510610               |
| SNP_P3_123517_23961 | NW_004515960.1 | Scaffold506 | 23961                   | AA                              | CC                | 1946510611               |
| SNP_P3_123518_24323 | NW_004515960.1 | Scaffold506 | 24323                   | CC                              | TT                | 1946510613               |
| SNP_P3_123519_24641 | NW_004515960.1 | Scaffold506 | 24641                   | TT                              | AA                | 1946510614               |
| SNP_P3_123520_24959 | NW_004515960.1 | Scaffold506 | 24959                   | GG                              | CC                | 1946510616               |
| SNP_P3_123522_25599 | NW_004515960.1 | Scaffold506 | 25599                   | GG                              | CC                | 1946510617               |
| SNP_P3_123523_26658 | NW_004515960.1 | Scaffold506 | 26658                   | GG                              | AA                | 1946510619               |
| SNP_P3_123524_26682 | NW_004515960.1 | Scaffold506 | 26682                   | TT                              | CC                | 1946510620               |
| SNP_P3_123525_26983 | NW_004515960.1 | Scaffold506 | 26983                   | TT                              | CC                | 1946510622               |
| SNP_P3_123526_27130 | NW_004515960.1 | Scaffold506 | 27130                   | TT                              | CC                | 1946510623               |
| SNP_P3_123527_28144 | NW_004515960.1 | Scaffold506 | 28144                   | GG                              | AA                | 1946510625               |
| SNP_P3_123528_28363 | NW_004515960.1 | Scaffold506 | 28363                   | TT                              | CC                | 1946510626               |
| SNP_P3_123529_28611 | NW_004515960.1 | Scaffold506 | 28611                   | CC                              | TT                | 1946510628               |
| SNP_P3_123530_30225 | NW_004515960.1 | Scaffold506 | 30225                   | CC                              | GG                | 1946510629               |
| SNP_P3_123531_30332 | NW_004515960.1 | Scaffold506 | 30332                   | AA                              | GG                | 1946510631               |
| SNP_P3_123532_31189 | NW_004515960.1 | Scaffold506 | 31189                   | GG                              | AA                | 1946510632               |
| SNP_P3_123533_31836 | NW_004515960.1 | Scaffold506 | 31836                   | GG                              | AA                | 1946510634               |
| SNP_P3_123535_35260 | NW_004515960.1 | Scaffold506 | 35260                   | TT                              | AA                | 1946510635               |
| SNP_P3_123536_35371 | NW_004515960.1 | Scaffold506 | 35371                   | TT                              | AA                | 1946510637               |
| SNP_P3_123537_35372 | NW_004515960.1 | Scaffold506 | 35372                   | AA                              | CC                | 1946510638               |
| SNP_P3_123538_36875 | NW_004515960.1 | Scaffold506 | 36875                   | TT                              | CC                | 1946510640               |

| SNPs IDs            | Chromosome IDs | Chromosomes | Physical positions (bp) | CDC Frontier (Reference genome) | (Pusa 256 & HPNB) | NCBI SNPdb Accession IDs |
|---------------------|----------------|-------------|-------------------------|---------------------------------|-------------------|--------------------------|
| SNP_P3_123539_36886 | NW_004515960.1 | Scaffold506 | 36886                   | TT                              | AA                | 1946510641               |
| SNP_P3_123540_37335 | NW_004515960.1 | Scaffold506 | 37335                   | CC                              | TT                | 1946510643               |
| SNP_P3_123543_2296  | NW_004515961.1 | Scaffold507 | 2296                    | AA                              | CC                | 1946510644               |
| SNP_P3_123544_2310  | NW_004515961.1 | Scaffold507 | 2310                    | GG                              | CC                | 1946510646               |
| SNP_P3_123545_2338  | NW_004515961.1 | Scaffold507 | 2338                    | CC                              | AA                | 1946510647               |
| SNP_P3_123546_11526 | NW_004515961.1 | Scaffold507 | 11526                   | AA                              | TT                | 1946510649               |
| SNP_P3_123547_11810 | NW_004515961.1 | Scaffold507 | 11810                   | GG                              | TT                | 1946510650               |
| SNP_P3_123548_11811 | NW_004515961.1 | Scaffold507 | 11811                   | TT                              | GG                | 1946510652               |
| SNP_P3_123549_11827 | NW_004515961.1 | Scaffold507 | 11827                   | GG                              | AA                | 1946510653               |
| SNP_P3_123550_11835 | NW_004515961.1 | Scaffold507 | 11835                   | TT                              | CC                | 1946510655               |
| SNP_P3_123551_11972 | NW_004515961.1 | Scaffold507 | 11972                   | TT                              | AA                | 1946510657               |
| SNP_P3_123552_12273 | NW_004515961.1 | Scaffold507 | 12273                   | GG                              | CC                | 1946510658               |
| SNP_P3_123553_12548 | NW_004515961.1 | Scaffold507 | 12548                   | TT                              | AA                | 1946510660               |
| SNP_P3_123554_12569 | NW_004515961.1 | Scaffold507 | 12569                   | CC                              | TT                | 1946510661               |
| SNP_P3_123555_18736 | NW_004515961.1 | Scaffold507 | 18736                   | TT                              | CC                | 1946510663               |
| SNP_P3_123556_19155 | NW_004515961.1 | Scaffold507 | 19155                   | GG                              | TT                | 1946510664               |
| SNP_P3_123557_13152 | NW_004515962.1 | Scaffold509 | 13152                   | GG                              | AA                | 1946510666               |
| SNP_P3_123558_13181 | NW_004515962.1 | Scaffold509 | 13181                   | CC                              | TT                | 1946510667               |
| SNP_P3_123559_13247 | NW_004515962.1 | Scaffold509 | 13247                   | TT                              | GG                | 1946510669               |
| SNP_P3_123560_13680 | NW_004515962.1 | Scaffold509 | 13680                   | CC                              | TT                | 1946510670               |
| SNP_P3_123561_17419 | NW_004515962.1 | Scaffold509 | 17419                   | AA                              | GG                | 1946510672               |
| SNP_P3_123562_17420 | NW_004515962.1 | Scaffold509 | 17420                   | AA                              | GG                | 1946510673               |
| SNP_P3_123563_38005 | NW_004515962.1 | Scaffold509 | 38005                   | GG                              | AA                | 1946510675               |
| SNP_P3_123564_42057 | NW_004515962.1 | Scaffold509 | 42057                   | TT                              | CC                | 1946510676               |
| SNP_P3_123565_43215 | NW_004515962.1 | Scaffold509 | 43215                   | CC                              | TT                | 1946510678               |
| SNP_P3_123566_46037 | NW_004515962.1 | Scaffold509 | 46037                   | TT                              | AA                | 1946510679               |
| SNP_P3_123568_50733 | NW_004515962.1 | Scaffold509 | 50733                   | TT                              | CC                | 1946510681               |
| SNP_P3_123569_51248 | NW_004515962.1 | Scaffold509 | 51248                   | AA                              | TT                | 1946510682               |
| SNP_P3_123570_51725 | NW_004515962.1 | Scaffold509 | 51725                   | GG                              | AA                | 1946510684               |
| SNP_P3_123571_51738 | NW_004515962.1 | Scaffold509 | 51738                   | AA                              | TT                | 1946510685               |
| SNP_P3_123572_51742 | NW_004515962.1 | Scaffold509 | 51742                   | TT                              | AA                | 1946510687               |
| SNP_P3_123573_55604 | NW_004515962.1 | Scaffold509 | 55604                   | AA                              | TT                | 1946510688               |
| SNP_P3_123574_70694 | NW_004515962.1 | Scaffold509 | 70694                   | CC                              | TT                | 1946510690               |
| SNP_P3_123575_70701 | NW_004515962.1 | Scaffold509 | 70701                   | AA                              | CC                | 1946510691               |
| SNP_P3_123576_70702 | NW_004515962.1 | Scaffold509 | 70702                   | GG                              | AA                | 1946510693               |
| SNP_P3_123577_70706 | NW_004515962.1 | Scaffold509 | 70706                   | AA                              | GG                | 1946510695               |
| SNP_P3_123578_70712 | NW_004515962.1 | Scaffold509 | 70712                   | AA                              | GG                | 1946510697               |
| SNP_P3_123579_70716 | NW_004515962.1 | Scaffold509 | 70716                   | CC                              | TT                | 1946510699               |
| SNP_P3_123580_75725 | NW_004515962.1 | Scaffold509 | 75725                   | AA                              | GG                | 1946510701               |
| SNP_P3_123581_75963 | NW_004515962.1 | Scaffold509 | 75963                   | AA                              | GG                | 1946510702               |
| SNP_P3_123582_78534 | NW_004515962.1 | Scaffold509 | 78534                   | GG                              | CC                | 1946510704               |
| SNP_P3_123583_85111 | NW_004515962.1 | Scaffold509 | 85111                   | CC                              | AA                | 1946510705               |

| SNPs IDs             | Chromosome IDs | Chromosomes | Physical positions (bp) | CDC Frontier (Reference genome) | (Pusa 256 & HPNB) | NCBI SNPdb Accession IDs |
|----------------------|----------------|-------------|-------------------------|---------------------------------|-------------------|--------------------------|
| SNP_P3_123584_88232  | NW_004515962.1 | Scaffold509 | 88232                   | GG                              | AA                | 1946510707               |
| SNP_P3_123585_97758  | NW_004515962.1 | Scaffold509 | 97758                   | TT                              | CC                | 1946510708               |
| SNP_P3_123586_118765 | NW_004515962.1 | Scaffold509 | 118765                  | GG                              | TT                | 1946510710               |
| SNP_P3_123587_122404 | NW_004515962.1 | Scaffold509 | 122404                  | TT                              | CC                | 1946510711               |
| SNP_P3_123588_122410 | NW_004515962.1 | Scaffold509 | 122410                  | CC                              | TT                | 1946510712               |
| SNP_P3_123589_122586 | NW_004515962.1 | Scaffold509 | 122586                  | AA                              | GG                | 1946510714               |
| SNP_P3_123590_122690 | NW_004515962.1 | Scaffold509 | 122690                  | TT                              | CC                | 1946510715               |
| SNP_P3_123591_125786 | NW_004515962.1 | Scaffold509 | 125786                  | AA                              | GG                | 1946510717               |
| SNP_P3_123592_125791 | NW_004515962.1 | Scaffold509 | 125791                  | CC                              | TT                | 1946510718               |
| SNP_P3_123593_129085 | NW_004515962.1 | Scaffold509 | 129085                  | TT                              | AA                | 1946510720               |
| SNP_P3_123594_129098 | NW_004515962.1 | Scaffold509 | 129098                  | TT                              | GG                | 1946510721               |
| SNP_P3_123595_129164 | NW_004515962.1 | Scaffold509 | 129164                  | TT                              | AA                | 1946510723               |
| SNP_P3_123596_129222 | NW_004515962.1 | Scaffold509 | 129222                  | GG                              | CC                | 1946510724               |
| SNP_P3_123597_132541 | NW_004515962.1 | Scaffold509 | 132541                  | TT                              | AA                | 1946510726               |
| SNP_P3_123598_147512 | NW_004515962.1 | Scaffold509 | 147512                  | GG                              | AA                | 1946510727               |
| SNP_P3_123599_154224 | NW_004515962.1 | Scaffold509 | 154224                  | GG                              | CC                | 1946510728               |
| SNP_P3_123600_154226 | NW_004515962.1 | Scaffold509 | 154226                  | CC                              | TT                | 1946510730               |
| SNP_P3_123601_157608 | NW_004515962.1 | Scaffold509 | 157608                  | GG                              | AA                | 1946510731               |
| SNP_P3_123602_157967 | NW_004515962.1 | Scaffold509 | 157967                  | AA                              | GG                | 1946510733               |
| SNP_P3_123603_158083 | NW_004515962.1 | Scaffold509 | 158083                  | TT                              | AA                | 1946510734               |
| SNP_P3_123604_158088 | NW_004515962.1 | Scaffold509 | 158088                  | GG                              | TT                | 1946510736               |
| SNP_P3_123605_163745 | NW_004515962.1 | Scaffold509 | 163745                  | GG                              | AA                | 1946510737               |
| SNP_P3_123606_163747 | NW_004515962.1 | Scaffold509 | 163747                  | CC                              | TT                | 1946510739               |
| SNP_P3_123608_163755 | NW_004515962.1 | Scaffold509 | 163755                  | AA                              | GG                | 1946510741               |
| SNP_P3_123609_170444 | NW_004515962.1 | Scaffold509 | 170444                  | GG                              | AA                | 1946510742               |
| SNP_P3_123610_173508 | NW_004515962.1 | Scaffold509 | 173508                  | AA                              | TT                | 1946510744               |
| SNP_P3_123611_173525 | NW_004515962.1 | Scaffold509 | 173525                  | CC                              | TT                | 1946510745               |
| SNP_P3_123612_173757 | NW_004515962.1 | Scaffold509 | 173757                  | GG                              | AA                | 1946510747               |
| SNP_P3_123613_173865 | NW_004515962.1 | Scaffold509 | 173865                  | GG                              | AA                | 1946510748               |
| SNP_P3_123614_173877 | NW_004515962.1 | Scaffold509 | 173877                  | CC                              | TT                | 1946510749               |
| SNP_P3_123615_175382 | NW_004515962.1 | Scaffold509 | 175382                  | CC                              | TT                | 1946510751               |
| SNP_P3_123616_175406 | NW_004515962.1 | Scaffold509 | 175406                  | CC                              | TT                | 1946510752               |
| SNP_P3_123617_175416 | NW_004515962.1 | Scaffold509 | 175416                  | AA                              | GG                | 1946510754               |
| SNP_P3_123618_175431 | NW_004515962.1 | Scaffold509 | 175431                  | TT                              | CC                | 1946510756               |
| SNP_P3_123619_175525 | NW_004515962.1 | Scaffold509 | 175525                  | AA                              | GG                | 1946510757               |
| SNP_P3_123620_175575 | NW_004515962.1 | Scaffold509 | 175575                  | CC                              | TT                | 1946510759               |
| SNP_P3_123621_176936 | NW_004515962.1 | Scaffold509 | 176936                  | AA                              | GG                | 1946510760               |
| SNP_P3_123622_178154 | NW_004515962.1 | Scaffold509 | 178154                  | TT                              | AA                | 1946510762               |
| SNP_P3_123623_179734 | NW_004515962.1 | Scaffold509 | 179734                  | TT                              | CC                | 1946510764               |
| SNP_P3_123624_179886 | NW_004515962.1 | Scaffold509 | 179886                  | CC                              | AA                | 1946510765               |
| SNP_P3_123625_179924 | NW_004515962.1 | Scaffold509 | 179924                  | CC                              | TT                | 1946510767               |
| SNP_P3_123626_179945 | NW_004515962.1 | Scaffold509 | 179945                  | TT                              | CC                | 1946510768               |

| SNPs IDs             | Chromosome IDs | Chromosomes | Physical positions (bp) | CDC Frontier (Reference genome) | (Pusa 256 & HPNB) | NCBI SNPdb Accession IDs |
|----------------------|----------------|-------------|-------------------------|---------------------------------|-------------------|--------------------------|
| SNP_P3_123627_180007 | NW_004515962.1 | Scaffold509 | 180007                  | AA                              | CC                | 1946510770               |
| SNP_P3_123628_180085 | NW_004515962.1 | Scaffold509 | 180085                  | CC                              | GG                | 1946510772               |
| SNP_P3_123629_180098 | NW_004515962.1 | Scaffold509 | 180098                  | AA                              | CC                | 1946510773               |
| SNP_P3_123630_180332 | NW_004515962.1 | Scaffold509 | 180332                  | GG                              | TT                | 1946510775               |
| SNP_P3_123631_180347 | NW_004515962.1 | Scaffold509 | 180347                  | GG                              | AA                | 1946510776               |
| SNP_P3_123632_180604 | NW_004515962.1 | Scaffold509 | 180604                  | AA                              | TT                | 1946510778               |
| SNP_P3_123633_180711 | NW_004515962.1 | Scaffold509 | 180711                  | TT                              | CC                | 1946510779               |
| SNP_P3_123634_181136 | NW_004515962.1 | Scaffold509 | 181136                  | AA                              | CC                | 1946510781               |
| SNP_P3_123635_181150 | NW_004515962.1 | Scaffold509 | 181150                  | AA                              | GG                | 1946510782               |
| SNP_P3_123636_181386 | NW_004515962.1 | Scaffold509 | 181386                  | CC                              | TT                | 1946510784               |
| SNP_P3_123637_187541 | NW_004515962.1 | Scaffold509 | 187541                  | CC                              | TT                | 1946510785               |
| SNP_P3_123638_187894 | NW_004515962.1 | Scaffold509 | 187894                  | TT                              | CC                | 1946510787               |
| SNP_P3_123639_188509 | NW_004515962.1 | Scaffold509 | 188509                  | TT                              | GG                | 1946510788               |
| SNP_P3_123640_188731 | NW_004515962.1 | Scaffold509 | 188731                  | GG                              | AA                | 1946510790               |
| SNP_P3_123641_189040 | NW_004515962.1 | Scaffold509 | 189040                  | AA                              | GG                | 1946510791               |
| SNP_P3_123642_189107 | NW_004515962.1 | Scaffold509 | 189107                  | CC                              | TT                | 1946510793               |
| SNP_P3_123643_189156 | NW_004515962.1 | Scaffold509 | 189156                  | CC                              | AA                | 1946510794               |
| SNP_P3_123644_216357 | NW_004515962.1 | Scaffold509 | 216357                  | TT                              | CC                | 1946510796               |
| SNP_P3_123645_218779 | NW_004515962.1 | Scaffold509 | 218779                  | CC                              | GG                | 1946510797               |
| SNP_P3_123646_218810 | NW_004515962.1 | Scaffold509 | 218810                  | TT                              | GG                | 1946510799               |
| SNP_P3_123647_218813 | NW_004515962.1 | Scaffold509 | 218813                  | TT                              | CC                | 1946510800               |
| SNP_P3_123648_218819 | NW_004515962.1 | Scaffold509 | 218819                  | TT                              | GG                | 1946510802               |
| SNP_P3_123649_218844 | NW_004515962.1 | Scaffold509 | 218844                  | GG                              | AA                | 1946510804               |
| SNP_P3_123650_218855 | NW_004515962.1 | Scaffold509 | 218855                  | TT                              | AA                | 1946510805               |
| SNP_P3_123651_218877 | NW_004515962.1 | Scaffold509 | 218877                  | TT                              | GG                | 1946510806               |
| SNP_P3_123652_218906 | NW_004515962.1 | Scaffold509 | 218906                  | TT                              | GG                | 1946510808               |
| SNP_P3_123653_218924 | NW_004515962.1 | Scaffold509 | 218924                  | CC                              | TT                | 1946510809               |
| SNP_P3_123654_218925 | NW_004515962.1 | Scaffold509 | 218925                  | GG                              | TT                | 1946510811               |
| SNP_P3_123655_218929 | NW_004515962.1 | Scaffold509 | 218929                  | TT                              | GG                | 1946510812               |
| SNP_P3_123656_219019 | NW_004515962.1 | Scaffold509 | 219019                  | CC                              | AA                | 1946510814               |
| SNP_P3_123657_219021 | NW_004515962.1 | Scaffold509 | 219021                  | CC                              | TT                | 1946510815               |
| SNP_P3_123659_225200 | NW_004515962.1 | Scaffold509 | 225200                  | AA                              | GG                | 1946510817               |
| SNP_P3_123660_225203 | NW_004515962.1 | Scaffold509 | 225203                  | AA                              | TT                | 1946510818               |
| SNP_P3_123661_225204 | NW_004515962.1 | Scaffold509 | 225204                  | AA                              | GG                | 1946510820               |
| SNP_P3_123662_225206 | NW_004515962.1 | Scaffold509 | 225206                  | CC                              | GG                | 1946510821               |
| SNP_P3_123663_225208 | NW_004515962.1 | Scaffold509 | 225208                  | CC                              | GG                | 1946510823               |
| SNP_P3_123664_225211 | NW_004515962.1 | Scaffold509 | 225211                  | TT                              | AA                | 1946510824               |
| SNP_P3_123665_225215 | NW_004515962.1 | Scaffold509 | 225215                  | CC                              | TT                | 1946510826               |
| SNP_P3_123666_225219 | NW_004515962.1 | Scaffold509 | 225219                  | TT                              | CC                | 1946510827               |
| SNP_P3_123667_225225 | NW_004515962.1 | Scaffold509 | 225225                  | AA                              | GG                | 1946510829               |
| SNP_P3_123668_225235 | NW_004515962.1 | Scaffold509 | 225235                  | AA                              | GG                | 1946510830               |
| SNP_P3_123669_225473 | NW_004515962.1 | Scaffold509 | 225473                  | TT                              | AA                | 1946510832               |



| SNPs IDs             | Chromosome IDs | Chromosomes | Physical positions (bp) | CDC Frontier (Reference genome) | (Pusa 256 & HPNB) | NCBI SNPdb Accession IDs |
|----------------------|----------------|-------------|-------------------------|---------------------------------|-------------------|--------------------------|
| SNP_P3_123670_228797 | NW_004515962.1 | Scaffold509 | 228797                  | AA                              | GG                | 1946510833               |
| SNP_P3_123671_228834 | NW_004515962.1 | Scaffold509 | 228834                  | AA                              | CC                | 1946510835               |
| SNP_P3_123672_228883 | NW_004515962.1 | Scaffold509 | 228883                  | TT                              | CC                | 1946510836               |
| SNP_P3_123673_228913 | NW_004515962.1 | Scaffold509 | 228913                  | GG                              | CC                | 1946510838               |
| SNP_P3_123674_230354 | NW_004515962.1 | Scaffold509 | 230354                  | AA                              | TT                | 1946510839               |
| SNP_P3_123675_238733 | NW_004515962.1 | Scaffold509 | 238733                  | TT                              | AA                | 1946510841               |
| SNP_P3_123676_240043 | NW_004515962.1 | Scaffold509 | 240043                  | CC                              | AA                | 1946510842               |
| SNP_P3_123677_240125 | NW_004515962.1 | Scaffold509 | 240125                  | TT                              | GG                | 1946510843               |
| SNP_P3_123678_240139 | NW_004515962.1 | Scaffold509 | 240139                  | TT                              | GG                | 1946510845               |
| SNP_P3_123680_240211 | NW_004515962.1 | Scaffold509 | 240211                  | CC                              | TT                | 1946510846               |
| SNP_P3_123681_241198 | NW_004515962.1 | Scaffold509 | 241198                  | TT                              | CC                | 1946510848               |
| SNP_P3_123682_241218 | NW_004515962.1 | Scaffold509 | 241218                  | CC                              | TT                | 1946510849               |
| SNP_P3_123683_241220 | NW_004515962.1 | Scaffold509 | 241220                  | TT                              | CC                | 1946510851               |
| SNP_P3_123684_241475 | NW_004515962.1 | Scaffold509 | 241475                  | TT                              | AA                | 1946510852               |
| SNP_P3_123685_244575 | NW_004515962.1 | Scaffold509 | 244575                  | AA                              | GG                | 1946510854               |
| SNP_P3_123686_246608 | NW_004515962.1 | Scaffold509 | 246608                  | GG                              | AA                | 1946510855               |
| SNP_P3_123688_250879 | NW_004515962.1 | Scaffold509 | 250879                  | AA                              | GG                | 1946510857               |
| SNP_P3_123689_266392 | NW_004515962.1 | Scaffold509 | 266392                  | TT                              | CC                | 1946510858               |
| SNP_P3_123690_266429 | NW_004515962.1 | Scaffold509 | 266429                  | TT                              | AA                | 1946510860               |
| SNP_P3_123691_266475 | NW_004515962.1 | Scaffold509 | 266475                  | GG                              | CC                | 1946510861               |
| SNP_P3_123692_266605 | NW_004515962.1 | Scaffold509 | 266605                  | AA                              | GG                | 1946510863               |
| SNP_P3_123693_266717 | NW_004515962.1 | Scaffold509 | 266717                  | TT                              | CC                | 1946510864               |
| SNP_P3_123694_266778 | NW_004515962.1 | Scaffold509 | 266778                  | GG                              | TT                | 1946510866               |
| SNP_P3_123695_273487 | NW_004515962.1 | Scaffold509 | 273487                  | AA                              | GG                | 1946510867               |
| SNP_P3_123696_273968 | NW_004515962.1 | Scaffold509 | 273968                  | AA                              | CC                | 1946510869               |
| SNP_P3_123697_290251 | NW_004515962.1 | Scaffold509 | 290251                  | TT                              | CC                | 1946510870               |
| SNP_P3_123698_291227 | NW_004515962.1 | Scaffold509 | 291227                  | CC                              | TT                | 1946510872               |
| SNP_P3_123699_323535 | NW_004515962.1 | Scaffold509 | 323535                  | CC                              | TT                | 1946510874               |
| SNP_P3_123700_384    | NW_004515963.1 | Scaffold510 | 384                     | TT                              | CC                | 1946510876               |
| SNP_P3_123701_414    | NW_004515963.1 | Scaffold510 | 414                     | GG                              | TT                | 1946510877               |
| SNP_P3_123702_415    | NW_004515963.1 | Scaffold510 | 415                     | GG                              | AA                | 1946510879               |
| SNP_P3_123703_2163   | NW_004515963.1 | Scaffold510 | 2163                    | AA                              | TT                | 1946510880               |
| SNP_P3_123704_2526   | NW_004515963.1 | Scaffold510 | 2526                    | TT                              | CC                | 1946510882               |
| SNP_P3_123705_9239   | NW_004515963.1 | Scaffold510 | 9239                    | TT                              | GG                | 1946510883               |
| SNP_P3_123706_9242   | NW_004515963.1 | Scaffold510 | 9242                    | AA                              | GG                | 1946510885               |
| SNP_P3_123707_9255   | NW_004515963.1 | Scaffold510 | 9255                    | CC                              | TT                | 1946510886               |
| SNP_P3_123709_24268  | NW_004515963.1 | Scaffold510 | 24268                   | CC                              | TT                | 1946510888               |
| SNP_P3_123710_24279  | NW_004515963.1 | Scaffold510 | 24279                   | CC                              | TT                | 1946510889               |
| SNP_P3_123711_24282  | NW_004515963.1 | Scaffold510 | 24282                   | GG                              | TT                | 1946510891               |
| SNP_P3_123712_24633  | NW_004515963.1 | Scaffold510 | 24633                   | TT                              | CC                | 1946510892               |
| SNP_P3_123713_24706  | NW_004515963.1 | Scaffold510 | 24706                   | AA                              | GG                | 1946510895               |
| SNP_P3_123714_24856  | NW_004515963.1 | Scaffold510 | 24856                   | AA                              | TT                | 1946510896               |

| SNPs IDs            | Chromosome IDs | Chromosomes | Physical positions (bp) | CDC Frontier (Reference genome) | (Pusa 256 & HPNB) | NCBI SNPdb Accession IDs |
|---------------------|----------------|-------------|-------------------------|---------------------------------|-------------------|--------------------------|
| SNP_P3_123715_24873 | NW_004515963.1 | Scaffold510 | 24873                   | TT                              | AA                | 1946510898               |
| SNP_P3_123716_25091 | NW_004515963.1 | Scaffold510 | 25091                   | TT                              | CC                | 1946510899               |
| SNP_P3_123717_25149 | NW_004515963.1 | Scaffold510 | 25149                   | CC                              | TT                | 1946510901               |
| SNP_P3_123718_27824 | NW_004515963.1 | Scaffold510 | 27824                   | TT                              | CC                | 1946510902               |
| SNP_P3_123719_27914 | NW_004515963.1 | Scaffold510 | 27914                   | CC                              | TT                | 1946510904               |
| SNP_P3_123720_30278 | NW_004515963.1 | Scaffold510 | 30278                   | TT                              | GG                | 1946510906               |
| SNP_P3_123721_40044 | NW_004515963.1 | Scaffold510 | 40044                   | AA                              | GG                | 1946510907               |
| SNP_P3_123722_40049 | NW_004515963.1 | Scaffold510 | 40049                   | GG                              | CC                | 1946510909               |
| SNP_P3_123723_40371 | NW_004515963.1 | Scaffold510 | 40371                   | AA                              | GG                | 1946510910               |
| SNP_P3_123724_40379 | NW_004515963.1 | Scaffold510 | 40379                   | GG                              | TT                | 1946510912               |
| SNP_P3_123725_40884 | NW_004515963.1 | Scaffold510 | 40884                   | AA                              | GG                | 1946510913               |
| SNP_P3_123726_40889 | NW_004515963.1 | Scaffold510 | 40889                   | AA                              | TT                | 1946510915               |
| SNP_P3_123727_40946 | NW_004515963.1 | Scaffold510 | 40946                   | AA                              | TT                | 1946510916               |
| SNP_P3_123728_40967 | NW_004515963.1 | Scaffold510 | 40967                   | TT                              | AA                | 1946510918               |
| SNP_P3_123729_40973 | NW_004515963.1 | Scaffold510 | 40973                   | AA                              | GG                | 1946510919               |
| SNP_P3_123730_40980 | NW_004515963.1 | Scaffold510 | 40980                   | TT                              | CC                | 1946510921               |
| SNP_P3_123731_47376 | NW_004515963.1 | Scaffold510 | 47376                   | AA                              | GG                | 1946510923               |
| SNP_P3_123732_47989 | NW_004515963.1 | Scaffold510 | 47989                   | AA                              | TT                | 1946510924               |
| SNP_P3_123733_48064 | NW_004515963.1 | Scaffold510 | 48064                   | TT                              | GG                | 1946510926               |
| SNP_P3_123734_48089 | NW_004515963.1 | Scaffold510 | 48089                   | TT                              | AA                | 1946510927               |
| SNP_P3_123735_48141 | NW_004515963.1 | Scaffold510 | 48141                   | AA                              | TT                | 1946510929               |
| SNP_P3_123736_48444 | NW_004515963.1 | Scaffold510 | 48444                   | AA                              | TT                | 1946510930               |
| SNP_P3_123737_58998 | NW_004515963.1 | Scaffold510 | 58998                   | TT                              | GG                | 1946510932               |
| SNP_P3_123738_59163 | NW_004515963.1 | Scaffold510 | 59163                   | TT                              | CC                | 1946510934               |
| SNP_P3_123739_59192 | NW_004515963.1 | Scaffold510 | 59192                   | CC                              | TT                | 1946510935               |
| SNP_P3_123740_71183 | NW_004515963.1 | Scaffold510 | 71183                   | AA                              | TT                | 1946510937               |
| SNP_P3_123741_79038 | NW_004515963.1 | Scaffold510 | 79038                   | CC                              | TT                | 1946510938               |
| SNP_P3_123742_79322 | NW_004515963.1 | Scaffold510 | 79322                   | AA                              | GG                | 1946510940               |
| SNP_P3_123743_80368 | NW_004515963.1 | Scaffold510 | 80368                   | CC                              | TT                | 1946510941               |
| SNP_P3_123744_80370 | NW_004515963.1 | Scaffold510 | 80370                   | CC                              | TT                | 1946510943               |
| SNP_P3_123745_80383 | NW_004515963.1 | Scaffold510 | 80383                   | TT                              | GG                | 1946510944               |
| SNP_P3_123746_80385 | NW_004515963.1 | Scaffold510 | 80385                   | TT                              | GG                | 1946510946               |
| SNP_P3_123747_80389 | NW_004515963.1 | Scaffold510 | 80389                   | TT                              | GG                | 1946510947               |
| SNP_P3_123748_80394 | NW_004515963.1 | Scaffold510 | 80394                   | GG                              | TT                | 1946510949               |
| SNP_P3_123749_80436 | NW_004515963.1 | Scaffold510 | 80436                   | GG                              | TT                | 1946510950               |
| SNP_P3_123750_80662 | NW_004515963.1 | Scaffold510 | 80662                   | CC                              | TT                | 1946510952               |
| SNP_P3_123751_81055 | NW_004515963.1 | Scaffold510 | 81055                   | TT                              | GG                | 1946510953               |
| SNP_P3_123752_81057 | NW_004515963.1 | Scaffold510 | 81057                   | TT                              | CC                | 1946510955               |
| SNP_P3_123753_81079 | NW_004515963.1 | Scaffold510 | 81079                   | AA                              | GG                | 1946510956               |
| SNP_P3_123754_85592 | NW_004515963.1 | Scaffold510 | 85592                   | AA                              | CC                | 1946510958               |
| SNP_P3_123756_85654 | NW_004515963.1 | Scaffold510 | 85654                   | TT                              | GG                | 1946510959               |
| SNP_P3_123757_85666 | NW_004515963.1 | Scaffold510 | 85666                   | CC                              | GG                | 1946510961               |

| SNPs IDs            | Chromosome IDs | Chromosomes | Physical positions (bp) | CDC Frontier (Reference genome) | (Pusa 256 & HPNB) | NCBI SNPdb Accession IDs |
|---------------------|----------------|-------------|-------------------------|---------------------------------|-------------------|--------------------------|
| SNP_P3_123758_85711 | NW_004515963.1 | Scaffold510 | 85711                   | AA                              | GG                | 1946510962               |
| SNP_P3_123759_85718 | NW_004515963.1 | Scaffold510 | 85718                   | AA                              | TT                | 1946510964               |
| SNP_P3_123760_85719 | NW_004515963.1 | Scaffold510 | 85719                   | GG                              | AA                | 1946510965               |
| SNP_P3_123761_85720 | NW_004515963.1 | Scaffold510 | 85720                   | AA                              | TT                | 1946510967               |
| SNP_P3_123762_85729 | NW_004515963.1 | Scaffold510 | 85729                   | AA                              | TT                | 1946510968               |
| SNP_P3_123763_85789 | NW_004515963.1 | Scaffold510 | 85789                   | AA                              | CC                | 1946510970               |
| SNP_P3_123764_85831 | NW_004515963.1 | Scaffold510 | 85831                   | CC                              | TT                | 1946510971               |
| SNP_P3_123765_85852 | NW_004515963.1 | Scaffold510 | 85852                   | TT                              | CC                | 1946510973               |
| SNP_P3_123766_85867 | NW_004515963.1 | Scaffold510 | 85867                   | CC                              | TT                | 1946510975               |
| SNP_P3_123767_85936 | NW_004515963.1 | Scaffold510 | 85936                   | TT                              | AA                | 1946510976               |
| SNP_P3_123768_85937 | NW_004515963.1 | Scaffold510 | 85937                   | AA                              | GG                | 1946510979               |
| SNP_P3_123769_85958 | NW_004515963.1 | Scaffold510 | 85958                   | TT                              | CC                | 1946510980               |
| SNP_P3_123770_85977 | NW_004515963.1 | Scaffold510 | 85977                   | CC                              | GG                | 1946510981               |
| SNP_P3_123771_85981 | NW_004515963.1 | Scaffold510 | 85981                   | CC                              | AA                | 1946510983               |
| SNP_P3_123772_85987 | NW_004515963.1 | Scaffold510 | 85987                   | CC                              | GG                | 1946510984               |
| SNP_P3_123773_86002 | NW_004515963.1 | Scaffold510 | 86002                   | TT                              | GG                | 1946510986               |
| SNP_P3_123774_86027 | NW_004515963.1 | Scaffold510 | 86027                   | CC                              | AA                | 1946510987               |
| SNP_P3_123775_86035 | NW_004515963.1 | Scaffold510 | 86035                   | CC                              | GG                | 1946510989               |
| SNP_P3_123776_86036 | NW_004515963.1 | Scaffold510 | 86036                   | TT                              | AA                | 1946510990               |
| SNP_P3_123777_86059 | NW_004515963.1 | Scaffold510 | 86059                   | AA                              | GG                | 1946510992               |
| SNP_P3_123778_86062 | NW_004515963.1 | Scaffold510 | 86062                   | TT                              | CC                | 1946510994               |
| SNP_P3_123779_86084 | NW_004515963.1 | Scaffold510 | 86084                   | CC                              | TT                | 1946510995               |
| SNP_P3_123780_86107 | NW_004515963.1 | Scaffold510 | 86107                   | TT                              | GG                | 1946510997               |
| SNP_P3_123781_86113 | NW_004515963.1 | Scaffold510 | 86113                   | AA                              | TT                | 1946510999               |
| SNP_P3_123782_86127 | NW_004515963.1 | Scaffold510 | 86127                   | GG                              | TT                | 1946511000               |
| SNP_P3_123783_86146 | NW_004515963.1 | Scaffold510 | 86146                   | AA                              | CC                | 1946511002               |
| SNP_P3_123784_86148 | NW_004515963.1 | Scaffold510 | 86148                   | AA                              | TT                | 1946511004               |
| SNP_P3_123785_86203 | NW_004515963.1 | Scaffold510 | 86203                   | CC                              | AA                | 1946511006               |
| SNP_P3_123786_86237 | NW_004515963.1 | Scaffold510 | 86237                   | GG                              | TT                | 1946511007               |
| SNP_P3_123787_86327 | NW_004515963.1 | Scaffold510 | 86327                   | TT                              | AA                | 1946511009               |
| SNP_P3_123788_86335 | NW_004515963.1 | Scaffold510 | 86335                   | AA                              | TT                | 1946511010               |
| SNP_P3_123789_86371 | NW_004515963.1 | Scaffold510 | 86371                   | TT                              | GG                | 1946511012               |
| SNP_P3_123790_86393 | NW_004515963.1 | Scaffold510 | 86393                   | TT                              | GG                | 1946511013               |
| SNP_P3_123791_86564 | NW_004515963.1 | Scaffold510 | 86564                   | CC                              | TT                | 1946511015               |
| SNP_P3_123792_86750 | NW_004515963.1 | Scaffold510 | 86750                   | TT                              | CC                | 1946511016               |
| SNP_P3_123793_86858 | NW_004515963.1 | Scaffold510 | 86858                   | TT                              | CC                | 1946511018               |
| SNP_P3_123794_90793 | NW_004515963.1 | Scaffold510 | 90793                   | TT                              | GG                | 1946511019               |
| SNP_P3_123795_92176 | NW_004515963.1 | Scaffold510 | 92176                   | TT                              | AA                | 1946511021               |
| SNP_P3_123796_1530  | NW_004515964.1 | Scaffold511 | 1530                    | TT                              | GG                | 1946511022               |
| SNP_P3_123797_1594  | NW_004515964.1 | Scaffold511 | 1594                    | CC                              | AA                | 1946511024               |
| SNP_P3_123798_1888  | NW_004515964.1 | Scaffold511 | 1888                    | CC                              | TT                | 1946511025               |
| SNP_P3_123799_1892  | NW_004515964.1 | Scaffold511 | 1892                    | CC                              | TT                | 1946511027               |

| SNPs IDs             | Chromosome IDs | Chromosomes | Physical positions (bp) | CDC Frontier (Reference genome) | (Pusa 256 & HPNB) | NCBI SNPdb Accession IDs |
|----------------------|----------------|-------------|-------------------------|---------------------------------|-------------------|--------------------------|
| SNP_P3_123800_1952   | NW_004515964.1 | Scaffold511 | 1952                    | AA                              | GG                | 1946511028               |
| SNP_P3_123801_1995   | NW_004515964.1 | Scaffold511 | 1995                    | AA                              | TT                | 1946511030               |
| SNP_P3_123802_2012   | NW_004515964.1 | Scaffold511 | 2012                    | TT                              | CC                | 1946511031               |
| SNP_P3_123803_2013   | NW_004515964.1 | Scaffold511 | 2013                    | GG                              | AA                | 1946511033               |
| SNP_P3_123804_2036   | NW_004515964.1 | Scaffold511 | 2036                    | GG                              | AA                | 1946511034               |
| SNP_P3_123805_2095   | NW_004515964.1 | Scaffold511 | 2095                    | AA                              | TT                | 1946511036               |
| SNP_P3_123807_2229   | NW_004515964.1 | Scaffold511 | 2229                    | GG                              | AA                | 1946511037               |
| SNP_P3_123808_2293   | NW_004515964.1 | Scaffold511 | 2293                    | GG                              | AA                | 1946511039               |
| SNP_P3_123809_2473   | NW_004515964.1 | Scaffold511 | 2473                    | AA                              | CC                | 1946511040               |
| SNP_P3_123810_3298   | NW_004515964.1 | Scaffold511 | 3298                    | CC                              | AA                | 1946511042               |
| SNP_P3_123811_3305   | NW_004515964.1 | Scaffold511 | 3305                    | TT                              | CC                | 1946511043               |
| SNP_P3_123812_3314   | NW_004515964.1 | Scaffold511 | 3314                    | AA                              | GG                | 1946511045               |
| SNP_P3_123813_3336   | NW_004515964.1 | Scaffold511 | 3336                    | AA                              | CC                | 1946511047               |
| SNP_P3_123814_3358   | NW_004515964.1 | Scaffold511 | 3358                    | TT                              | CC                | 1946511048               |
| SNP_P3_123815_3393   | NW_004515964.1 | Scaffold511 | 3393                    | AA                              | TT                | 1946511049               |
| SNP_P3_123816_3674   | NW_004515964.1 | Scaffold511 | 3674                    | AA                              | TT                | 1946511051               |
| SNP_P3_123817_14118  | NW_004515964.1 | Scaffold511 | 14118                   | AA                              | GG                | 1946511053               |
| SNP_P3_123818_14406  | NW_004515964.1 | Scaffold511 | 14406                   | AA                              | TT                | 1946511054               |
| SNP_P3_123819_14410  | NW_004515964.1 | Scaffold511 | 14410                   | AA                              | GG                | 1946511056               |
| SNP_P3_123820_14417  | NW_004515964.1 | Scaffold511 | 14417                   | GG                              | AA                | 1946511057               |
| SNP_P3_123821_14433  | NW_004515964.1 | Scaffold511 | 14433                   | AA                              | GG                | 1946511059               |
| SNP_P3_123822_14586  | NW_004515964.1 | Scaffold511 | 14586                   | GG                              | AA                | 1946511060               |
| SNP_P3_123823_40319  | NW_004515964.1 | Scaffold511 | 40319                   | CC                              | TT                | 1946511062               |
| SNP_P3_123824_40342  | NW_004515964.1 | Scaffold511 | 40342                   | AA                              | GG                | 1946511063               |
| SNP_P3_123825_40582  | NW_004515964.1 | Scaffold511 | 40582                   | TT                              | CC                | 1946511065               |
| SNP_P3_123826_42738  | NW_004515964.1 | Scaffold511 | 42738                   | GG                              | CC                | 1946511066               |
| SNP_P3_123827_42945  | NW_004515964.1 | Scaffold511 | 42945                   | AA                              | GG                | 1946511068               |
| SNP_P3_123828_43029  | NW_004515964.1 | Scaffold511 | 43029                   | AA                              | GG                | 1946511069               |
| SNP_P3_123829_43062  | NW_004515964.1 | Scaffold511 | 43062                   | AA                              | CC                | 1946511071               |
| SNP_P3_123831_75266  | NW_004515964.1 | Scaffold511 | 75266                   | GG                              | AA                | 1946511072               |
| SNP_P3_123832_80362  | NW_004515964.1 | Scaffold511 | 80362                   | CC                              | AA                | 1946511074               |
| SNP_P3_123833_83777  | NW_004515964.1 | Scaffold511 | 83777                   | CC                              | GG                | 1946511075               |
| SNP_P3_123834_97085  | NW_004515964.1 | Scaffold511 | 97085                   | AA                              | GG                | 1946511077               |
| SNP_P3_123835_97303  | NW_004515964.1 | Scaffold511 | 97303                   | AA                              | TT                | 1946511078               |
| SNP_P3_123836_97314  | NW_004515964.1 | Scaffold511 | 97314                   | CC                              | TT                | 1946511080               |
| SNP_P3_123837_97513  | NW_004515964.1 | Scaffold511 | 97513                   | AA                              | GG                | 1946511081               |
| SNP_P3_123838_102830 | NW_004515964.1 | Scaffold511 | 102830                  | GG                              | AA                | 1946511083               |
| SNP_P3_123839_102855 | NW_004515964.1 | Scaffold511 | 102855                  | AA                              | TT                | 1946511084               |
| SNP_P3_123840_102926 | NW_004515964.1 | Scaffold511 | 102926                  | AA                              | GG                | 1946511086               |
| SNP_P3_123841_103015 | NW_004515964.1 | Scaffold511 | 103015                  | GG                              | AA                | 1946511087               |
| SNP_P3_123842_103294 | NW_004515964.1 | Scaffold511 | 103294                  | GG                              | AA                | 1946511089               |
| SNP_P3_123843_103323 | NW_004515964.1 | Scaffold511 | 103323                  | CC                              | AA                | 1946511090               |

| SNPs IDs             | Chromosome IDs | Chromosomes | Physical positions (bp) | CDC Frontier (Reference genome) | (Pusa 256 & HPNB) | NCBI SNPdb Accession IDs |
|----------------------|----------------|-------------|-------------------------|---------------------------------|-------------------|--------------------------|
| SNP_P3_123844_103378 | NW_004515964.1 | Scaffold511 | 103378                  | GG                              | AA                | 1946511092               |
| SNP_P3_123845_113615 | NW_004515964.1 | Scaffold511 | 113615                  | CC                              | AA                | 1946511093               |
| SNP_P3_123846_115576 | NW_004515964.1 | Scaffold511 | 115576                  | TT                              | CC                | 1946511095               |
| SNP_P3_123847_121777 | NW_004515964.1 | Scaffold511 | 121777                  | TT                              | CC                | 1946511096               |
| SNP_P3_123848_121786 | NW_004515964.1 | Scaffold511 | 121786                  | AA                              | TT                | 1946511098               |
| SNP_P3_123849_121824 | NW_004515964.1 | Scaffold511 | 121824                  | TT                              | CC                | 1946511099               |
| SNP_P3_123850_123861 | NW_004515964.1 | Scaffold511 | 123861                  | AA                              | TT                | 1946511100               |
| SNP_P3_123851_126024 | NW_004515964.1 | Scaffold511 | 126024                  | AA                              | GG                | 1946511102               |
| SNP_P3_123852_129715 | NW_004515964.1 | Scaffold511 | 129715                  | TT                              | CC                | 1946511103               |
| SNP_P3_123853_140121 | NW_004515964.1 | Scaffold511 | 140121                  | AA                              | GG                | 1946511105               |
| SNP_P3_123854_140143 | NW_004515964.1 | Scaffold511 | 140143                  | TT                              | AA                | 1946511106               |
| SNP_P3_123856_147974 | NW_004515964.1 | Scaffold511 | 147974                  | AA                              | GG                | 1946511108               |
| SNP_P3_123857_148194 | NW_004515964.1 | Scaffold511 | 148194                  | CC                              | GG                | 1946511109               |
| SNP_P3_123858_148217 | NW_004515964.1 | Scaffold511 | 148217                  | AA                              | CC                | 1946511110               |
| SNP_P3_123859_148226 | NW_004515964.1 | Scaffold511 | 148226                  | CC                              | TT                | 1946511112               |
| SNP_P3_123860_148233 | NW_004515964.1 | Scaffold511 | 148233                  | CC                              | GG                | 1946511113               |
| SNP_P3_123861_148245 | NW_004515964.1 | Scaffold511 | 148245                  | TT                              | AA                | 1946511115               |
| SNP_P3_123862_148246 | NW_004515964.1 | Scaffold511 | 148246                  | CC                              | TT                | 1946511116               |
| SNP_P3_123863_148248 | NW_004515964.1 | Scaffold511 | 148248                  | AA                              | TT                | 1946511118               |
| SNP_P3_123864_148278 | NW_004515964.1 | Scaffold511 | 148278                  | TT                              | CC                | 1946511119               |
| SNP_P3_123865_148299 | NW_004515964.1 | Scaffold511 | 148299                  | TT                              | CC                | 1946511121               |
| SNP_P3_123866_149861 | NW_004515964.1 | Scaffold511 | 149861                  | TT                              | GG                | 1946511122               |
| SNP_P3_123867_149898 | NW_004515964.1 | Scaffold511 | 149898                  | AA                              | GG                | 1946511123               |
| SNP_P3_123868_149950 | NW_004515964.1 | Scaffold511 | 149950                  | TT                              | CC                | 1946511125               |
| SNP_P3_123869_151949 | NW_004515964.1 | Scaffold511 | 151949                  | AA                              | GG                | 1946511126               |
| SNP_P3_123870_152199 | NW_004515964.1 | Scaffold511 | 152199                  | CC                              | TT                | 1946511128               |
| SNP_P3_123871_162091 | NW_004515964.1 | Scaffold511 | 162091                  | CC                              | TT                | 1946511129               |
| SNP_P3_123872_185687 | NW_004515964.1 | Scaffold511 | 185687                  | CC                              | TT                | 1946511131               |
| SNP_P3_123873_185775 | NW_004515964.1 | Scaffold511 | 185775                  | AA                              | CC                | 1946511132               |
| SNP_P3_123874_186117 | NW_004515964.1 | Scaffold511 | 186117                  | GG                              | TT                | 1946511134               |
| SNP_P3_123875_186260 | NW_004515964.1 | Scaffold511 | 186260                  | TT                              | CC                | 1946511135               |
| SNP_P3_123876_191001 | NW_004515964.1 | Scaffold511 | 191001                  | CC                              | TT                | 1946511137               |
| SNP_P3_123877_192867 | NW_004515964.1 | Scaffold511 | 192867                  | TT                              | AA                | 1946511138               |
| SNP_P3_123878_192912 | NW_004515964.1 | Scaffold511 | 192912                  | AA                              | GG                | 1946511140               |
| SNP_P3_123879_192925 | NW_004515964.1 | Scaffold511 | 192925                  | AA                              | GG                | 1946511141               |
| SNP_P3_123880_192980 | NW_004515964.1 | Scaffold511 | 192980                  | GG                              | AA                | 1946511143               |
| SNP_P3_123881_192994 | NW_004515964.1 | Scaffold511 | 192994                  | TT                              | CC                | 1946511144               |
| SNP_P3_123883_193141 | NW_004515964.1 | Scaffold511 | 193141                  | AA                              | TT                | 1946511146               |
| SNP_P3_123884_193179 | NW_004515964.1 | Scaffold511 | 193179                  | TT                              | GG                | 1946511147               |
| SNP_P3_123885_193242 | NW_004515964.1 | Scaffold511 | 193242                  | CC                              | TT                | 1946511149               |
| SNP_P3_123886_193286 | NW_004515964.1 | Scaffold511 | 193286                  | GG                              | AA                | 1946511150               |
| SNP_P3_123887_193308 | NW_004515964.1 | Scaffold511 | 193308                  | TT                              | GG                | 1946511152               |

| SNPs IDs             | Chromosome IDs | Chromosomes | Physical positions (bp) | CDC Frontier (Reference genome) | (Pusa 256 & HPNB) | NCBI SNPdb Accession IDs |
|----------------------|----------------|-------------|-------------------------|---------------------------------|-------------------|--------------------------|
| SNP_P3_123888_193317 | NW_004515964.1 | Scaffold511 | 193317                  | GG                              | AA                | 1946511153               |
| SNP_P3_123889_193344 | NW_004515964.1 | Scaffold511 | 193344                  | GG                              | AA                | 1946511155               |
| SNP_P3_123890_193355 | NW_004515964.1 | Scaffold511 | 193355                  | TT                              | GG                | 1946511156               |
| SNP_P3_123891_193374 | NW_004515964.1 | Scaffold511 | 193374                  | AA                              | CC                | 1946511158               |
| SNP_P3_123892_194329 | NW_004515964.1 | Scaffold511 | 194329                  | AA                              | TT                | 1946511159               |
| SNP_P3_123893_194365 | NW_004515964.1 | Scaffold511 | 194365                  | AA                              | GG                | 1946511161               |
| SNP_P3_123894_194369 | NW_004515964.1 | Scaffold511 | 194369                  | CC                              | TT                | 1946511162               |
| SNP_P3_123895_194402 | NW_004515964.1 | Scaffold511 | 194402                  | TT                              | CC                | 1946511164               |
| SNP_P3_123896_194423 | NW_004515964.1 | Scaffold511 | 194423                  | TT                              | CC                | 1946511165               |
| SNP_P3_123897_194443 | NW_004515964.1 | Scaffold511 | 194443                  | AA                              | GG                | 1946511167               |
| SNP_P3_123898_194475 | NW_004515964.1 | Scaffold511 | 194475                  | TT                              | AA                | 1946511168               |
| SNP_P3_123899_194479 | NW_004515964.1 | Scaffold511 | 194479                  | TT                              | GG                | 1946511170               |
| SNP_P3_123900_194504 | NW_004515964.1 | Scaffold511 | 194504                  | AA                              | CC                | 1946511171               |
| SNP_P3_123902_194545 | NW_004515964.1 | Scaffold511 | 194545                  | GG                              | AA                | 1946511173               |
| SNP_P3_123903_194562 | NW_004515964.1 | Scaffold511 | 194562                  | AA                              | CC                | 1946511174               |
| SNP_P3_123905_194660 | NW_004515964.1 | Scaffold511 | 194660                  | TT                              | CC                | 1946511176               |
| SNP_P3_123906_194700 | NW_004515964.1 | Scaffold511 | 194700                  | CC                              | TT                | 1946511177               |
| SNP_P3_123907_194707 | NW_004515964.1 | Scaffold511 | 194707                  | TT                              | CC                | 1946511178               |
| SNP_P3_123908_194830 | NW_004515964.1 | Scaffold511 | 194830                  | CC                              | TT                | 1946511180               |
| SNP_P3_123909_194860 | NW_004515964.1 | Scaffold511 | 194860                  | GG                              | AA                | 1946511181               |
| SNP_P3_123910_224513 | NW_004515964.1 | Scaffold511 | 224513                  | GG                              | TT                | 1946511183               |
| SNP_P3_123911_224528 | NW_004515964.1 | Scaffold511 | 224528                  | TT                              | CC                | 1946511184               |
| SNP_P3_123912_224531 | NW_004515964.1 | Scaffold511 | 224531                  | CC                              | GG                | 1946511186               |
| SNP_P3_123913_224625 | NW_004515964.1 | Scaffold511 | 224625                  | AA                              | GG                | 1946511187               |
| SNP_P3_123914_224659 | NW_004515964.1 | Scaffold511 | 224659                  | AA                              | GG                | 1946511189               |
| SNP_P3_123915_226416 | NW_004515964.1 | Scaffold511 | 226416                  | AA                              | TT                | 1946511190               |
| SNP_P3_123916_226585 | NW_004515964.1 | Scaffold511 | 226585                  | AA                              | GG                | 1946511192               |
| SNP_P3_123917_235758 | NW_004515964.1 | Scaffold511 | 235758                  | AA                              | GG                | 1946511193               |
| SNP_P3_123918_238695 | NW_004515964.1 | Scaffold511 | 238695                  | CC                              | GG                | 1946511194               |
| SNP_P3_123919_238774 | NW_004515964.1 | Scaffold511 | 238774                  | CC                              | TT                | 1946511196               |
| SNP_P3_123920_238783 | NW_004515964.1 | Scaffold511 | 238783                  | GG                              | AA                | 1946511197               |
| SNP_P3_123921_238828 | NW_004515964.1 | Scaffold511 | 238828                  | CC                              | TT                | 1946511199               |
| SNP_P3_123922_687    | NW_004515965.1 | Scaffold512 | 687                     | AA                              | GG                | 1946511200               |
| SNP_P3_123923_690    | NW_004515965.1 | Scaffold512 | 690                     | TT                              | AA                | 1946511202               |
| SNP_P3_123924_703    | NW_004515965.1 | Scaffold512 | 703                     | TT                              | AA                | 1946511203               |
| SNP_P3_123925_718    | NW_004515965.1 | Scaffold512 | 718                     | TT                              | CC                | 1946511205               |
| SNP_P3_123926_732    | NW_004515965.1 | Scaffold512 | 732                     | TT                              | GG                | 1946511206               |
| SNP_P3_123927_931    | NW_004515965.1 | Scaffold512 | 931                     | AA                              | TT                | 1946511208               |
| SNP_P3_123928_959    | NW_004515965.1 | Scaffold512 | 959                     | CC                              | TT                | 1946511209               |
| SNP_P3_123929_1041   | NW_004515965.1 | Scaffold512 | 1041                    | GG                              | TT                | 1946511210               |
| SNP_P3_123930_1078   | NW_004515965.1 | Scaffold512 | 1078                    | CC                              | TT                | 1946511212               |
| SNP_P3_123931_9452   | NW_004515965.1 | Scaffold512 | 9452                    | TT                              | GG                | 1946511214               |

| SNPs IDs             | Chromosome IDs | Chromosomes | Physical positions (bp) | CDC Frontier (Reference genome) | (Pusa 256 & HPNB) | NCBI SNPdb Accession IDs |
|----------------------|----------------|-------------|-------------------------|---------------------------------|-------------------|--------------------------|
| SNP_P3_123932_21429  | NW_004515965.1 | Scaffold512 | 21429                   | AA                              | CC                | 1946511215               |
| SNP_P3_123933_21504  | NW_004515965.1 | Scaffold512 | 21504                   | AA                              | GG                | 1946511217               |
| SNP_P3_123934_21530  | NW_004515965.1 | Scaffold512 | 21530                   | GG                              | AA                | 1946511218               |
| SNP_P3_123935_21626  | NW_004515965.1 | Scaffold512 | 21626                   | AA                              | TT                | 1946511220               |
| SNP_P3_123936_21726  | NW_004515965.1 | Scaffold512 | 21726                   | GG                              | AA                | 1946511221               |
| SNP_P3_123937_21816  | NW_004515965.1 | Scaffold512 | 21816                   | CC                              | TT                | 1946511222               |
| SNP_P3_123938_21824  | NW_004515965.1 | Scaffold512 | 21824                   | GG                              | CC                | 1946511224               |
| SNP_P3_123939_22514  | NW_004515965.1 | Scaffold512 | 22514                   | CC                              | TT                | 1946511226               |
| SNP_P3_123940_34039  | NW_004515965.1 | Scaffold512 | 34039                   | GG                              | AA                | 1946511227               |
| SNP_P3_123941_34110  | NW_004515965.1 | Scaffold512 | 34110                   | AA                              | TT                | 1946511228               |
| SNP_P3_123942_34112  | NW_004515965.1 | Scaffold512 | 34112                   | TT                              | AA                | 1946511230               |
| SNP_P3_123943_48486  | NW_004515965.1 | Scaffold512 | 48486                   | GG                              | TT                | 1946511231               |
| SNP_P3_123944_48522  | NW_004515965.1 | Scaffold512 | 48522                   | AA                              | GG                | 1946511233               |
| SNP_P3_123945_48527  | NW_004515965.1 | Scaffold512 | 48527                   | AA                              | GG                | 1946511234               |
| SNP_P3_123946_48928  | NW_004515965.1 | Scaffold512 | 48928                   | TT                              | GG                | 1946511236               |
| SNP_P3_123947_59702  | NW_004515965.1 | Scaffold512 | 59702                   | TT                              | AA                | 1946511237               |
| SNP_P3_123948_60171  | NW_004515965.1 | Scaffold512 | 60171                   | TT                              | CC                | 1946511239               |
| SNP_P3_123949_60223  | NW_004515965.1 | Scaffold512 | 60223                   | TT                              | CC                | 1946511240               |
| SNP_P3_123950_78944  | NW_004515965.1 | Scaffold512 | 78944                   | AA                              | GG                | 1946511242               |
| SNP_P3_123951_83265  | NW_004515965.1 | Scaffold512 | 83265                   | TT                              | CC                | 1946511243               |
| SNP_P3_123952_83283  | NW_004515965.1 | Scaffold512 | 83283                   | TT                              | GG                | 1946511245               |
| SNP_P3_123953_83369  | NW_004515965.1 | Scaffold512 | 83369                   | CC                              | TT                | 1946511246               |
| SNP_P3_123954_84237  | NW_004515965.1 | Scaffold512 | 84237                   | CC                              | TT                | 1946511247               |
| SNP_P3_123955_84256  | NW_004515965.1 | Scaffold512 | 84256                   | AA                              | GG                | 1946511249               |
| SNP_P3_123956_84262  | NW_004515965.1 | Scaffold512 | 84262                   | CC                              | TT                | 1946511250               |
| SNP_P3_123957_84310  | NW_004515965.1 | Scaffold512 | 84310                   | AA                              | TT                | 1946511252               |
| SNP_P3_123958_85109  | NW_004515965.1 | Scaffold512 | 85109                   | TT                              | CC                | 1946511253               |
| SNP_P3_123959_88349  | NW_004515965.1 | Scaffold512 | 88349                   | TT                              | GG                | 1946511255               |
| SNP_P3_123960_88693  | NW_004515965.1 | Scaffold512 | 88693                   | GG                              | AA                | 1946511256               |
| SNP_P3_123961_88803  | NW_004515965.1 | Scaffold512 | 88803                   | CC                              | TT                | 1946511258               |
| SNP_P3_123962_98433  | NW_004515965.1 | Scaffold512 | 98433                   | CC                              | GG                | 1946511259               |
| SNP_P3_123963_98735  | NW_004515965.1 | Scaffold512 | 98735                   | TT                              | CC                | 1946511261               |
| SNP_P3_123964_98749  | NW_004515965.1 | Scaffold512 | 98749                   | AA                              | TT                | 1946511262               |
| SNP_P3_123965_98770  | NW_004515965.1 | Scaffold512 | 98770                   | AA                              | TT                | 1946511264               |
| SNP_P3_123966_102520 | NW_004515965.1 | Scaffold512 | 102520                  | TT                              | CC                | 1946511265               |
| SNP_P3_123967_102523 | NW_004515965.1 | Scaffold512 | 102523                  | GG                              | CC                | 1946511267               |
| SNP_P3_123968_104179 | NW_004515965.1 | Scaffold512 | 104179                  | AA                              | TT                | 1946511268               |
| SNP_P3_123969_105479 | NW_004515965.1 | Scaffold512 | 105479                  | GG                              | AA                | 1946511270               |
| SNP_P3_123971_105489 | NW_004515965.1 | Scaffold512 | 105489                  | GG                              | AA                | 1946511271               |
| SNP_P3_123972_105490 | NW_004515965.1 | Scaffold512 | 105490                  | AA                              | GG                | 1946511272               |
| SNP_P3_123973_105505 | NW_004515965.1 | Scaffold512 | 105505                  | TT                              | GG                | 1946511274               |
| SNP_P3_123974_105530 | NW_004515965.1 | Scaffold512 | 105530                  | AA                              | GG                | 1946511275               |

| SNPs IDs             | Chromosome IDs | Chromosomes | Physical positions (bp) | CDC Frontier (Reference genome) | (Pusa 256 & HPNB) | NCBI SNPdb Accession IDs |
|----------------------|----------------|-------------|-------------------------|---------------------------------|-------------------|--------------------------|
| SNP_P3_123975_105773 | NW_004515965.1 | Scaffold512 | 105773                  | TT                              | GG                | 1946511277               |
| SNP_P3_123976_105811 | NW_004515965.1 | Scaffold512 | 105811                  | TT                              | AA                | 1946511278               |
| SNP_P3_123977_106772 | NW_004515965.1 | Scaffold512 | 106772                  | TT                              | CC                | 1946511280               |
| SNP_P3_123978_107657 | NW_004515965.1 | Scaffold512 | 107657                  | CC                              | TT                | 1946511281               |
| SNP_P3_123979_115677 | NW_004515965.1 | Scaffold512 | 115677                  | AA                              | TT                | 1946511283               |
| SNP_P3_123980_116106 | NW_004515965.1 | Scaffold512 | 116106                  | GG                              | TT                | 1946511284               |
| SNP_P3_123981_119256 | NW_004515965.1 | Scaffold512 | 119256                  | CC                              | AA                | 1946511286               |
| SNP_P3_123982_125966 | NW_004515965.1 | Scaffold512 | 125966                  | AA                              | GG                | 1946511287               |
| SNP_P3_123983_126011 | NW_004515965.1 | Scaffold512 | 126011                  | CC                              | TT                | 1946511289               |
| SNP_P3_123984_126056 | NW_004515965.1 | Scaffold512 | 126056                  | GG                              | AA                | 1946511290               |
| SNP_P3_123985_126062 | NW_004515965.1 | Scaffold512 | 126062                  | GG                              | AA                | 1946511292               |
| SNP_P3_123986_126068 | NW_004515965.1 | Scaffold512 | 126068                  | CC                              | TT                | 1946511293               |
| SNP_P3_123987_126119 | NW_004515965.1 | Scaffold512 | 126119                  | AA                              | CC                | 1946511295               |
| SNP_P3_123988_126125 | NW_004515965.1 | Scaffold512 | 126125                  | TT                              | CC                | 1946511296               |
| SNP_P3_123989_126131 | NW_004515965.1 | Scaffold512 | 126131                  | AA                              | TT                | 1946511298               |
| SNP_P3_123990_126137 | NW_004515965.1 | Scaffold512 | 126137                  | AA                              | CC                | 1946511299               |
| SNP_P3_123991_126149 | NW_004515965.1 | Scaffold512 | 126149                  | TT                              | CC                | 1946511301               |
| SNP_P3_123992_126155 | NW_004515965.1 | Scaffold512 | 126155                  | GG                              | TT                | 1946511302               |
| SNP_P3_123993_126158 | NW_004515965.1 | Scaffold512 | 126158                  | CC                              | TT                | 1946511304               |
| SNP_P3_123994_126167 | NW_004515965.1 | Scaffold512 | 126167                  | AA                              | TT                | 1946511305               |
| SNP_P3_123995_126182 | NW_004515965.1 | Scaffold512 | 126182                  | AA                              | TT                | 1946511307               |
| SNP_P3_123996_126230 | NW_004515965.1 | Scaffold512 | 126230                  | GG                              | AA                | 1946511308               |
| SNP_P3_123997_126246 | NW_004515965.1 | Scaffold512 | 126246                  | TT                              | CC                | 1946511310               |
| SNP_P3_123998_126249 | NW_004515965.1 | Scaffold512 | 126249                  | GG                              | AA                | 1946511311               |
| SNP_P3_123999_126288 | NW_004515965.1 | Scaffold512 | 126288                  | GG                              | AA                | 1946511313               |
| SNP_P3_124000_126320 | NW_004515965.1 | Scaffold512 | 126320                  | GG                              | CC                | 1946511314               |
| SNP_P3_124001_126333 | NW_004515965.1 | Scaffold512 | 126333                  | CC                              | TT                | 1946511319               |
| SNP_P3_124002_126348 | NW_004515965.1 | Scaffold512 | 126348                  | TT                              | CC                | 1946511320               |
| SNP_P3_124003_126354 | NW_004515965.1 | Scaffold512 | 126354                  | CC                              | TT                | 1946511322               |
| SNP_P3_124004_126360 | NW_004515965.1 | Scaffold512 | 126360                  | AA                              | TT                | 1946511324               |
| SNP_P3_124005_126367 | NW_004515965.1 | Scaffold512 | 126367                  | AA                              | TT                | 1946511325               |
| SNP_P3_124006_126390 | NW_004515965.1 | Scaffold512 | 126390                  | AA                              | GG                | 1946511327               |
| SNP_P3_124007_126446 | NW_004515965.1 | Scaffold512 | 126446                  | AA                              | TT                | 1946511328               |
| SNP_P3_124008_126453 | NW_004515965.1 | Scaffold512 | 126453                  | AA                              | GG                | 1946511330               |
| SNP_P3_124009_126465 | NW_004515965.1 | Scaffold512 | 126465                  | CC                              | AA                | 1946511331               |
| SNP_P3_124010_126522 | NW_004515965.1 | Scaffold512 | 126522                  | CC                              | TT                | 1946511333               |
| SNP_P3_124011_126525 | NW_004515965.1 | Scaffold512 | 126525                  | CC                              | TT                | 1946511334               |
| SNP_P3_124012_128819 | NW_004515965.1 | Scaffold512 | 128819                  | GG                              | TT                | 1946511336               |
| SNP_P3_124013_137936 | NW_004515965.1 | Scaffold512 | 137936                  | TT                              | CC                | 1946511337               |
| SNP_P3_124014_137950 | NW_004515965.1 | Scaffold512 | 137950                  | AA                              | GG                | 1946511339               |
| SNP_P3_124015_137960 | NW_004515965.1 | Scaffold512 | 137960                  | AA                              | TT                | 1946511340               |
| SNP_P3_124016_138167 | NW_004515965.1 | Scaffold512 | 138167                  | AA                              | TT                | 1946511342               |



| SNPs IDs             | Chromosome IDs | Chromosomes | Physical positions (bp) | CDC Frontier (Reference genome) | (Pusa 256 & HPNB) | NCBI SNPdb Accession IDs |
|----------------------|----------------|-------------|-------------------------|---------------------------------|-------------------|--------------------------|
| SNP_P3_124017_138199 | NW_004515965.1 | Scaffold512 | 138199                  | GG                              | CC                | 1946511344               |
| SNP_P3_124018_138248 | NW_004515965.1 | Scaffold512 | 138248                  | TT                              | AA                | 1946511345               |
| SNP_P3_124019_138399 | NW_004515965.1 | Scaffold512 | 138399                  | TT                              | GG                | 1946511347               |
| SNP_P3_124020_138498 | NW_004515965.1 | Scaffold512 | 138498                  | AA                              | TT                | 1946511348               |
| SNP_P3_124021_138511 | NW_004515965.1 | Scaffold512 | 138511                  | CC                              | TT                | 1946511350               |
| SNP_P3_124022_138553 | NW_004515965.1 | Scaffold512 | 138553                  | GG                              | AA                | 1946511351               |
| SNP_P3_124023_138792 | NW_004515965.1 | Scaffold512 | 138792                  | CC                              | GG                | 1946511353               |
| SNP_P3_124024_139112 | NW_004515965.1 | Scaffold512 | 139112                  | TT                              | GG                | 1946511354               |
| SNP_P3_124025_139593 | NW_004515965.1 | Scaffold512 | 139593                  | CC                              | TT                | 1946511356               |
| SNP_P3_124026_139628 | NW_004515965.1 | Scaffold512 | 139628                  | GG                              | AA                | 1946511357               |
| SNP_P3_124027_139642 | NW_004515965.1 | Scaffold512 | 139642                  | CC                              | GG                | 1946511359               |
| SNP_P3_124028_139703 | NW_004515965.1 | Scaffold512 | 139703                  | GG                              | TT                | 1946511360               |
| SNP_P3_124029_139739 | NW_004515965.1 | Scaffold512 | 139739                  | CC                              | AA                | 1946511362               |
| SNP_P3_124030_139879 | NW_004515965.1 | Scaffold512 | 139879                  | AA                              | GG                | 1946511363               |
| SNP_P3_124031_140004 | NW_004515965.1 | Scaffold512 | 140004                  | GG                              | CC                | 1946511365               |
| SNP_P3_124032_141679 | NW_004515965.1 | Scaffold512 | 141679                  | TT                              | CC                | 1946511366               |
| SNP_P3_124033_141696 | NW_004515965.1 | Scaffold512 | 141696                  | TT                              | CC                | 1946511368               |
| SNP_P3_124034_142440 | NW_004515965.1 | Scaffold512 | 142440                  | TT                              | CC                | 1946511369               |
| SNP_P3_124035_142699 | NW_004515965.1 | Scaffold512 | 142699                  | TT                              | CC                | 1946511371               |
| SNP_P3_124036_148290 | NW_004515965.1 | Scaffold512 | 148290                  | CC                              | TT                | 1946511372               |
| SNP_P3_124037_148304 | NW_004515965.1 | Scaffold512 | 148304                  | GG                              | TT                | 1946511374               |
| SNP_P3_124038_148346 | NW_004515965.1 | Scaffold512 | 148346                  | CC                              | AA                | 1946511375               |
| SNP_P3_124039_155701 | NW_004515965.1 | Scaffold512 | 155701                  | TT                              | AA                | 1946511377               |
| SNP_P3_124040_155762 | NW_004515965.1 | Scaffold512 | 155762                  | AA                              | GG                | 1946511378               |
| SNP_P3_124041_155785 | NW_004515965.1 | Scaffold512 | 155785                  | GG                              | AA                | 1946511380               |
| SNP_P3_124042_156088 | NW_004515965.1 | Scaffold512 | 156088                  | AA                              | GG                | 1946511381               |
| SNP_P3_124043_161678 | NW_004515965.1 | Scaffold512 | 161678                  | TT                              | CC                | 1946511383               |
| SNP_P3_124044_162088 | NW_004515965.1 | Scaffold512 | 162088                  | AA                              | GG                | 1946511385               |
| SNP_P3_124045_162215 | NW_004515965.1 | Scaffold512 | 162215                  | AA                              | TT                | 1946511386               |
| SNP_P3_124046_162349 | NW_004515965.1 | Scaffold512 | 162349                  | GG                              | TT                | 1946511388               |
| SNP_P3_124047_162366 | NW_004515965.1 | Scaffold512 | 162366                  | TT                              | AA                | 1946511389               |
| SNP_P3_124048_162392 | NW_004515965.1 | Scaffold512 | 162392                  | GG                              | TT                | 1946511391               |
| SNP_P3_124049_163314 | NW_004515965.1 | Scaffold512 | 163314                  | TT                              | AA                | 1946511392               |
| SNP_P3_124050_163476 | NW_004515965.1 | Scaffold512 | 163476                  | AA                              | GG                | 1946511394               |
| SNP_P3_124051_163477 | NW_004515965.1 | Scaffold512 | 163477                  | GG                              | TT                | 1946511395               |
| SNP_P3_124052_163644 | NW_004515965.1 | Scaffold512 | 163644                  | AA                              | GG                | 1946511397               |
| SNP_P3_124053_166690 | NW_004515965.1 | Scaffold512 | 166690                  | CC                              | AA                | 1946511398               |
| SNP_P3_124054_169982 | NW_004515965.1 | Scaffold512 | 169982                  | CC                              | GG                | 1946511400               |
| SNP_P3_124055_173556 | NW_004515965.1 | Scaffold512 | 173556                  | CC                              | AA                | 1946511401               |
| SNP_P3_124056_180157 | NW_004515965.1 | Scaffold512 | 180157                  | CC                              | TT                | 1946511403               |
| SNP_P3_124057_180197 | NW_004515965.1 | Scaffold512 | 180197                  | CC                              | TT                | 1946511404               |
| SNP_P3_124058_180334 | NW_004515965.1 | Scaffold512 | 180334                  | CC                              | TT                | 1946511406               |

| SNPs IDs             | Chromosome IDs | Chromosomes | Physical positions (bp) | CDC Frontier (Reference genome) | (Pusa 256 & HPNB) | NCBI SNPdb Accession IDs |
|----------------------|----------------|-------------|-------------------------|---------------------------------|-------------------|--------------------------|
| SNP_P3_124059_180335 | NW_004515965.1 | Scaffold512 | 180335                  | CC                              | AA                | 1946511407               |
| SNP_P3_124060_180645 | NW_004515965.1 | Scaffold512 | 180645                  | AA                              | GG                | 1946511409               |
| SNP_P3_124061_180771 | NW_004515965.1 | Scaffold512 | 180771                  | GG                              | TT                | 1946511411               |
| SNP_P3_124062_194060 | NW_004515965.1 | Scaffold512 | 194060                  | GG                              | TT                | 1946511412               |
| SNP_P3_124063_194080 | NW_004515965.1 | Scaffold512 | 194080                  | TT                              | AA                | 1946511414               |
| SNP_P3_124064_194204 | NW_004515965.1 | Scaffold512 | 194204                  | CC                              | TT                | 1946511415               |
| SNP_P3_124065_194268 | NW_004515965.1 | Scaffold512 | 194268                  | CC                              | AA                | 1946511417               |
| SNP_P3_124066_197214 | NW_004515965.1 | Scaffold512 | 197214                  | GG                              | TT                | 1946511418               |
| SNP_P3_124067_202    | NW_004515966.1 | Scaffold513 | 202                     | TT                              | CC                | 1946511420               |
| SNP_P3_124068_297    | NW_004515966.1 | Scaffold513 | 297                     | AA                              | GG                | 1946511421               |
| SNP_P3_124069_299    | NW_004515966.1 | Scaffold513 | 299                     | AA                              | CC                | 1946511423               |
| SNP_P3_124070_300    | NW_004515966.1 | Scaffold513 | 300                     | AA                              | TT                | 1946511424               |
| SNP_P3_124071_429    | NW_004515966.1 | Scaffold513 | 429                     | AA                              | GG                | 1946511426               |
| SNP_P3_124072_584    | NW_004515966.1 | Scaffold513 | 584                     | TT                              | CC                | 1946511427               |
| SNP_P3_124073_644    | NW_004515966.1 | Scaffold513 | 644                     | AA                              | GG                | 1946511429               |
| SNP_P3_124074_1452   | NW_004515966.1 | Scaffold513 | 1452                    | GG                              | AA                | 1946511430               |
| SNP_P3_124075_1466   | NW_004515966.1 | Scaffold513 | 1466                    | AA                              | TT                | 1946511432               |
| SNP_P3_124076_3062   | NW_004515966.1 | Scaffold513 | 3062                    | AA                              | TT                | 1946511433               |
| SNP_P3_124077_5848   | NW_004515966.1 | Scaffold513 | 5848                    | TT                              | CC                | 1946511435               |
| SNP_P3_124078_7241   | NW_004515966.1 | Scaffold513 | 7241                    | TT                              | CC                | 1946511436               |
| SNP_P3_124079_7296   | NW_004515966.1 | Scaffold513 | 7296                    | GG                              | AA                | 1946511438               |
| SNP_P3_124080_9330   | NW_004515966.1 | Scaffold513 | 9330                    | TT                              | GG                | 1946511439               |
| SNP_P3_124081_16907  | NW_004515966.1 | Scaffold513 | 16907                   | TT                              | GG                | 1946511441               |
| SNP_P3_124082_16908  | NW_004515966.1 | Scaffold513 | 16908                   | AA                              | GG                | 1946511442               |
| SNP_P3_124083_17096  | NW_004515966.1 | Scaffold513 | 17096                   | CC                              | TT                | 1946511444               |
| SNP_P3_124084_17155  | NW_004515966.1 | Scaffold513 | 17155                   | GG                              | AA                | 1946511445               |
| SNP_P3_124085_17324  | NW_004515966.1 | Scaffold513 | 17324                   | CC                              | AA                | 1946511447               |
| SNP_P3_124086_17381  | NW_004515966.1 | Scaffold513 | 17381                   | AA                              | GG                | 1946511448               |
| SNP_P3_124087_105    | NW_004515967.1 | Scaffold515 | 105                     | TT                              | CC                | 1946511450               |
| SNP_P3_124088_177    | NW_004515967.1 | Scaffold515 | 177                     | AA                              | GG                | 1946511451               |
| SNP_P3_124089_408    | NW_004515967.1 | Scaffold515 | 408                     | TT                              | CC                | 1946511453               |
| SNP_P3_124090_430    | NW_004515967.1 | Scaffold515 | 430                     | AA                              | GG                | 1946511454               |
| SNP_P3_124091_523    | NW_004515967.1 | Scaffold515 | 523                     | CC                              | AA                | 1946511456               |
| SNP_P3_124092_1108   | NW_004515967.1 | Scaffold515 | 1108                    | GG                              | AA                | 1946511460               |
| SNP_P3_124093_1132   | NW_004515967.1 | Scaffold515 | 1132                    | AA                              | TT                | 1946511461               |
| SNP_P3_124094_1179   | NW_004515967.1 | Scaffold515 | 1179                    | TT                              | AA                | 1946511463               |
| SNP_P3_124095_1326   | NW_004515967.1 | Scaffold515 | 1326                    | AA                              | GG                | 1946511464               |
| SNP_P3_124096_1373   | NW_004515967.1 | Scaffold515 | 1373                    | GG                              | TT                | 1946511466               |
| SNP_P3_124097_1453   | NW_004515967.1 | Scaffold515 | 1453                    | GG                              | AA                | 1946511467               |
| SNP_P3_124098_1497   | NW_004515967.1 | Scaffold515 | 1497                    | CC                              | AA                | 1946511469               |
| SNP_P3_124099_1511   | NW_004515967.1 | Scaffold515 | 1511                    | CC                              | AA                | 1946511470               |
| SNP_P3_124100_1535   | NW_004515967.1 | Scaffold515 | 1535                    | AA                              | CC                | 1946511472               |

| SNPs IDs            | Chromosome IDs | Chromosomes | Physical positions (bp) | CDC Frontier (Reference genome) | (Pusa 256 & HPNB) | NCBI SNPdb Accession IDs |
|---------------------|----------------|-------------|-------------------------|---------------------------------|-------------------|--------------------------|
| SNP_P3_124101_8625  | NW_004515967.1 | Scaffold515 | 8625                    | CC                              | GG                | 1946511473               |
| SNP_P3_124102_8631  | NW_004515967.1 | Scaffold515 | 8631                    | TT                              | CC                | 1946511475               |
| SNP_P3_124103_8713  | NW_004515967.1 | Scaffold515 | 8713                    | TT                              | GG                | 1946511476               |
| SNP_P3_124104_8747  | NW_004515967.1 | Scaffold515 | 8747                    | TT                              | CC                | 1946511478               |
| SNP_P3_124105_8935  | NW_004515967.1 | Scaffold515 | 8935                    | GG                              | CC                | 1946511479               |
| SNP_P3_124106_8987  | NW_004515967.1 | Scaffold515 | 8987                    | TT                              | GG                | 1946511481               |
| SNP_P3_124107_9034  | NW_004515967.1 | Scaffold515 | 9034                    | GG                              | TT                | 1946511483               |
| SNP_P3_124108_9036  | NW_004515967.1 | Scaffold515 | 9036                    | CC                              | AA                | 1946511485               |
| SNP_P3_124109_9148  | NW_004515967.1 | Scaffold515 | 9148                    | CC                              | AA                | 1946511486               |
| SNP_P3_124110_9153  | NW_004515967.1 | Scaffold515 | 9153                    | GG                              | CC                | 1946511488               |
| SNP_P3_124111_9218  | NW_004515967.1 | Scaffold515 | 9218                    | GG                              | AA                | 1946511489               |
| SNP_P3_124112_9266  | NW_004515967.1 | Scaffold515 | 9266                    | CC                              | TT                | 1946511491               |
| SNP_P3_124113_9376  | NW_004515967.1 | Scaffold515 | 9376                    | TT                              | AA                | 1946511492               |
| SNP_P3_124114_9403  | NW_004515967.1 | Scaffold515 | 9403                    | AA                              | GG                | 1946511494               |
| SNP_P3_124115_9440  | NW_004515967.1 | Scaffold515 | 9440                    | CC                              | TT                | 1946511495               |
| SNP_P3_124116_9524  | NW_004515967.1 | Scaffold515 | 9524                    | AA                              | GG                | 1946511497               |
| SNP_P3_124117_9551  | NW_004515967.1 | Scaffold515 | 9551                    | TT                              | CC                | 1946511499               |
| SNP_P3_124118_9592  | NW_004515967.1 | Scaffold515 | 9592                    | TT                              | GG                | 1946511500               |
| SNP_P3_124119_9593  | NW_004515967.1 | Scaffold515 | 9593                    | GG                              | AA                | 1946511502               |
| SNP_P3_124120_9609  | NW_004515967.1 | Scaffold515 | 9609                    | TT                              | CC                | 1946511503               |
| SNP_P3_124121_9667  | NW_004515967.1 | Scaffold515 | 9667                    | GG                              | CC                | 1946511505               |
| SNP_P3_124122_9716  | NW_004515967.1 | Scaffold515 | 9716                    | AA                              | CC                | 1946511506               |
| SNP_P3_124123_9782  | NW_004515967.1 | Scaffold515 | 9782                    | CC                              | AA                | 1946511508               |
| SNP_P3_124124_9811  | NW_004515967.1 | Scaffold515 | 9811                    | AA                              | GG                | 1946511510               |
| SNP_P3_124125_9835  | NW_004515967.1 | Scaffold515 | 9835                    | GG                              | TT                | 1946511512               |
| SNP_P3_124126_9861  | NW_004515967.1 | Scaffold515 | 9861                    | AA                              | GG                | 1946511514               |
| SNP_P3_124127_9866  | NW_004515967.1 | Scaffold515 | 9866                    | TT                              | CC                | 1946511515               |
| SNP_P3_124128_9985  | NW_004515967.1 | Scaffold515 | 9985                    | GG                              | AA                | 1946511517               |
| SNP_P3_124129_9998  | NW_004515967.1 | Scaffold515 | 9998                    | CC                              | GG                | 1946511518               |
| SNP_P3_124130_10015 | NW_004515967.1 | Scaffold515 | 10015                   | TT                              | AA                | 1946511520               |
| SNP_P3_124131_10099 | NW_004515967.1 | Scaffold515 | 10099                   | TT                              | GG                | 1946511522               |
| SNP_P3_124132_10114 | NW_004515967.1 | Scaffold515 | 10114                   | AA                              | GG                | 1946511523               |
| SNP_P3_124133_10174 | NW_004515967.1 | Scaffold515 | 10174                   | GG                              | TT                | 1946511525               |
| SNP_P3_124134_10192 | NW_004515967.1 | Scaffold515 | 10192                   | TT                              | AA                | 1946511526               |
| SNP_P3_124135_10264 | NW_004515967.1 | Scaffold515 | 10264                   | CC                              | TT                | 1946511528               |
| SNP_P3_124136_10535 | NW_004515967.1 | Scaffold515 | 10535                   | GG                              | CC                | 1946511529               |
| SNP_P3_124137_10677 | NW_004515967.1 | Scaffold515 | 10677                   | AA                              | GG                | 1946511531               |
| SNP_P3_124138_10678 | NW_004515967.1 | Scaffold515 | 10678                   | AA                              | TT                | 1946511532               |
| SNP_P3_124139_10723 | NW_004515967.1 | Scaffold515 | 10723                   | GG                              | TT                | 1946511534               |
| SNP_P3_124140_10791 | NW_004515967.1 | Scaffold515 | 10791                   | TT                              | CC                | 1946511535               |
| SNP_P3_124141_10812 | NW_004515967.1 | Scaffold515 | 10812                   | GG                              | AA                | 1946511537               |
| SNP_P3_124142_10893 | NW_004515967.1 | Scaffold515 | 10893                   | CC                              | TT                | 1946511538               |

| SNPs IDs            | Chromosome IDs | Chromosomes | Physical positions (bp) | CDC Frontier (Reference genome) | (Pusa 256 & HPNB) | NCBI SNPdb Accession IDs |
|---------------------|----------------|-------------|-------------------------|---------------------------------|-------------------|--------------------------|
| SNP_P3_124143_10907 | NW_004515967.1 | Scaffold515 | 10907                   | AA                              | GG                | 1946511540               |
| SNP_P3_124144_10931 | NW_004515967.1 | Scaffold515 | 10931                   | TT                              | CC                | 1946511541               |
| SNP_P3_124145_10950 | NW_004515967.1 | Scaffold515 | 10950                   | CC                              | GG                | 1946511543               |
| SNP_P3_124146_10974 | NW_004515967.1 | Scaffold515 | 10974                   | GG                              | AA                | 1946511544               |
| SNP_P3_124147_10990 | NW_004515967.1 | Scaffold515 | 10990                   | TT                              | CC                | 1946511546               |
| SNP_P3_124148_11016 | NW_004515967.1 | Scaffold515 | 11016                   | CC                              | TT                | 1946511547               |
| SNP_P3_124149_11018 | NW_004515967.1 | Scaffold515 | 11018                   | AA                              | TT                | 1946511549               |
| SNP_P3_124150_11180 | NW_004515967.1 | Scaffold515 | 11180                   | GG                              | AA                | 1946511551               |
| SNP_P3_124151_11295 | NW_004515967.1 | Scaffold515 | 11295                   | GG                              | AA                | 1946511552               |
| SNP_P3_124152_11980 | NW_004515967.1 | Scaffold515 | 11980                   | GG                              | AA                | 1946511555               |
| SNP_P3_124153_12032 | NW_004515967.1 | Scaffold515 | 12032                   | GG                              | AA                | 1946511556               |
| SNP_P3_124155_12206 | NW_004515967.1 | Scaffold515 | 12206                   | TT                              | AA                | 1946511557               |
| SNP_P3_124156_12314 | NW_004515967.1 | Scaffold515 | 12314                   | CC                              | TT                | 1946511558               |
| SNP_P3_124157_12635 | NW_004515967.1 | Scaffold515 | 12635                   | TT                              | CC                | 1946511559               |
| SNP_P3_124158_12687 | NW_004515967.1 | Scaffold515 | 12687                   | CC                              | GG                | 1946511560               |
| SNP_P3_124159_12742 | NW_004515967.1 | Scaffold515 | 12742                   | CC                              | AA                | 1946511561               |
| SNP_P3_124160_12807 | NW_004515967.1 | Scaffold515 | 12807                   | CC                              | AA                | 1946511562               |
| SNP_P3_124161_12819 | NW_004515967.1 | Scaffold515 | 12819                   | AA                              | GG                | 1946511563               |
| SNP_P3_124162_12878 | NW_004515967.1 | Scaffold515 | 12878                   | GG                              | CC                | 1946511564               |
| SNP_P3_124163_12917 | NW_004515967.1 | Scaffold515 | 12917                   | GG                              | TT                | 1946511565               |
| SNP_P3_124164_13044 | NW_004515967.1 | Scaffold515 | 13044                   | TT                              | CC                | 1946511566               |
| SNP_P3_124165_13091 | NW_004515967.1 | Scaffold515 | 13091                   | GG                              | AA                | 1946511567               |
| SNP_P3_124166_13301 | NW_004515967.1 | Scaffold515 | 13301                   | AA                              | GG                | 1946511568               |
| SNP_P3_124167_13333 | NW_004515967.1 | Scaffold515 | 13333                   | CC                              | TT                | 1946511569               |
| SNP_P3_124168_13362 | NW_004515967.1 | Scaffold515 | 13362                   | AA                              | CC                | 1946511570               |
| SNP_P3_124169_15399 | NW_004515967.1 | Scaffold515 | 15399                   | TT                              | AA                | 1946511571               |
| SNP_P3_124170_15601 | NW_004515967.1 | Scaffold515 | 15601                   | TT                              | GG                | 1946511572               |
| SNP_P3_124171_15623 | NW_004515967.1 | Scaffold515 | 15623                   | GG                              | TT                | 1946511573               |
| SNP_P3_124172_16176 | NW_004515967.1 | Scaffold515 | 16176                   | GG                              | TT                | 1946511574               |
| SNP_P3_124173_16208 | NW_004515967.1 | Scaffold515 | 16208                   | GG                              | CC                | 1946511575               |
| SNP_P3_124174_16216 | NW_004515967.1 | Scaffold515 | 16216                   | CC                              | AA                | 1946511576               |
| SNP_P3_124175_16918 | NW_004515967.1 | Scaffold515 | 16918                   | AA                              | GG                | 1946511577               |
| SNP_P3_124176_17163 | NW_004515967.1 | Scaffold515 | 17163                   | TT                              | CC                | 1946511578               |
| SNP_P3_124177_17230 | NW_004515967.1 | Scaffold515 | 17230                   | TT                              | CC                | 1946511579               |
| SNP_P3_124178_19603 | NW_004515967.1 | Scaffold515 | 19603                   | CC                              | TT                | 1946511580               |
| SNP_P3_124179_19607 | NW_004515967.1 | Scaffold515 | 19607                   | TT                              | AA                | 1946511581               |
| SNP_P3_124180_19622 | NW_004515967.1 | Scaffold515 | 19622                   | AA                              | TT                | 1946511582               |
| SNP_P3_124181_19650 | NW_004515967.1 | Scaffold515 | 19650                   | TT                              | GG                | 1946511583               |
| SNP_P3_124182_19653 | NW_004515967.1 | Scaffold515 | 19653                   | TT                              | CC                | 1946511584               |
| SNP_P3_124183_19664 | NW_004515967.1 | Scaffold515 | 19664                   | GG                              | TT                | 1946511585               |
| SNP_P3_124184_19679 | NW_004515967.1 | Scaffold515 | 19679                   | AA                              | CC                | 1946511586               |
| SNP_P3_124185_19779 | NW_004515967.1 | Scaffold515 | 19779                   | TT                              | AA                | 1946511587               |

| SNPs IDs            | Chromosome IDs | Chromosomes | Physical positions (bp) | CDC Frontier (Reference genome) | (Pusa 256 & HPNB) | NCBI SNPdb Accession IDs |
|---------------------|----------------|-------------|-------------------------|---------------------------------|-------------------|--------------------------|
| SNP_P3_124186_19993 | NW_004515967.1 | Scaffold515 | 19993                   | AA                              | CC                | 1946511588               |
| SNP_P3_124187_21809 | NW_004515967.1 | Scaffold515 | 21809                   | TT                              | CC                | 1946511589               |
| SNP_P3_124188_21839 | NW_004515967.1 | Scaffold515 | 21839                   | AA                              | CC                | 1946511590               |
| SNP_P3_124189_21855 | NW_004515967.1 | Scaffold515 | 21855                   | AA                              | GG                | 1946511591               |
| SNP_P3_124190_21860 | NW_004515967.1 | Scaffold515 | 21860                   | GG                              | AA                | 1946511592               |
| SNP_P3_124191_21866 | NW_004515967.1 | Scaffold515 | 21866                   | GG                              | AA                | 1946511593               |
| SNP_P3_124192_22191 | NW_004515967.1 | Scaffold515 | 22191                   | AA                              | GG                | 1946511594               |
| SNP_P3_124193_22429 | NW_004515967.1 | Scaffold515 | 22429                   | GG                              | AA                | 1946511595               |
| SNP_P3_124194_22430 | NW_004515967.1 | Scaffold515 | 22430                   | CC                              | TT                | 1946511596               |
| SNP_P3_124195_24086 | NW_004515967.1 | Scaffold515 | 24086                   | TT                              | CC                | 1946511597               |
| SNP_P3_124196_24109 | NW_004515967.1 | Scaffold515 | 24109                   | CC                              | TT                | 1946511598               |
| SNP_P3_124197_24135 | NW_004515967.1 | Scaffold515 | 24135                   | TT                              | GG                | 1946511599               |
| SNP_P3_124198_24307 | NW_004515967.1 | Scaffold515 | 24307                   | CC                              | TT                | 1946511600               |
| SNP_P3_124199_24383 | NW_004515967.1 | Scaffold515 | 24383                   | TT                              | AA                | 1946511601               |
| SNP_P3_124200_24396 | NW_004515967.1 | Scaffold515 | 24396                   | CC                              | AA                | 1946511602               |
| SNP_P3_124201_26076 | NW_004515967.1 | Scaffold515 | 26076                   | TT                              | AA                | 1946511603               |
| SNP_P3_124202_26189 | NW_004515967.1 | Scaffold515 | 26189                   | CC                              | TT                | 1946511604               |
| SNP_P3_124203_27274 | NW_004515967.1 | Scaffold515 | 27274                   | TT                              | CC                | 1946511605               |
| SNP_P3_124204_27917 | NW_004515967.1 | Scaffold515 | 27917                   | GG                              | TT                | 1946511606               |
| SNP_P3_124205_27944 | NW_004515967.1 | Scaffold515 | 27944                   | TT                              | CC                | 1946511607               |
| SNP_P3_124206_28068 | NW_004515967.1 | Scaffold515 | 28068                   | AA                              | GG                | 1946511608               |
| SNP_P3_124208_28305 | NW_004515967.1 | Scaffold515 | 28305                   | TT                              | GG                | 1946511609               |
| SNP_P3_124209_28327 | NW_004515967.1 | Scaffold515 | 28327                   | GG                              | AA                | 1946511610               |
| SNP_P3_124210_28423 | NW_004515967.1 | Scaffold515 | 28423                   | AA                              | GG                | 1946511611               |
| SNP_P3_124211_28463 | NW_004515967.1 | Scaffold515 | 28463                   | GG                              | AA                | 1946511612               |
| SNP_P3_124212_28473 | NW_004515967.1 | Scaffold515 | 28473                   | TT                              | CC                | 1946511613               |
| SNP_P3_124213_28510 | NW_004515967.1 | Scaffold515 | 28510                   | CC                              | GG                | 1946511614               |
| SNP_P3_124214_28524 | NW_004515967.1 | Scaffold515 | 28524                   | AA                              | GG                | 1946511615               |
| SNP_P3_124215_28678 | NW_004515967.1 | Scaffold515 | 28678                   | TT                              | GG                | 1946511616               |
| SNP_P3_124216_28713 | NW_004515967.1 | Scaffold515 | 28713                   | GG                              | AA                | 1946511617               |
| SNP_P3_124217_28915 | NW_004515967.1 | Scaffold515 | 28915                   | CC                              | TT                | 1946511618               |
| SNP_P3_124218_29002 | NW_004515967.1 | Scaffold515 | 29002                   | TT                              | CC                | 1946511619               |
| SNP_P3_124219_29031 | NW_004515967.1 | Scaffold515 | 29031                   | CC                              | TT                | 1946511620               |
| SNP_P3_124220_29043 | NW_004515967.1 | Scaffold515 | 29043                   | AA                              | GG                | 1946511621               |
| SNP_P3_124221_29173 | NW_004515967.1 | Scaffold515 | 29173                   | CC                              | TT                | 1946511622               |
| SNP_P3_124222_29374 | NW_004515967.1 | Scaffold515 | 29374                   | GG                              | CC                | 1946511623               |
| SNP_P3_124223_29432 | NW_004515967.1 | Scaffold515 | 29432                   | AA                              | GG                | 1946511624               |
| SNP_P3_124224_29729 | NW_004515967.1 | Scaffold515 | 29729                   | TT                              | CC                | 1946511625               |
| SNP_P3_124225_29736 | NW_004515967.1 | Scaffold515 | 29736                   | CC                              | TT                | 1946511626               |
| SNP_P3_124226_29772 | NW_004515967.1 | Scaffold515 | 29772                   | AA                              | CC                | 1946511627               |
| SNP_P3_124227_29790 | NW_004515967.1 | Scaffold515 | 29790                   | TT                              | CC                | 1946511628               |
| SNP_P3_124228_29791 | NW_004515967.1 | Scaffold515 | 29791                   | TT                              | CC                | 1946511629               |

| SNPs IDs            | Chromosome IDs | Chromosomes | Physical positions (bp) | CDC Frontier (Reference genome) | (Pusa 256 & HPNB) | NCBI SNPdb Accession IDs |
|---------------------|----------------|-------------|-------------------------|---------------------------------|-------------------|--------------------------|
| SNP_P3_124229_29969 | NW_004515967.1 | Scaffold515 | 29969                   | AA                              | GG                | 1946511631               |
| SNP_P3_124230_30287 | NW_004515967.1 | Scaffold515 | 30287                   | AA                              | GG                | 1946511632               |
| SNP_P3_124231_30302 | NW_004515967.1 | Scaffold515 | 30302                   | CC                              | AA                | 1946511633               |
| SNP_P3_124232_30346 | NW_004515967.1 | Scaffold515 | 30346                   | CC                              | TT                | 1946511634               |
| SNP_P3_124233_30351 | NW_004515967.1 | Scaffold515 | 30351                   | AA                              | CC                | 1946511635               |
| SNP_P3_124234_30356 | NW_004515967.1 | Scaffold515 | 30356                   | GG                              | TT                | 1946511636               |
| SNP_P3_124235_30414 | NW_004515967.1 | Scaffold515 | 30414                   | CC                              | TT                | 1946511637               |
| SNP_P3_124236_30417 | NW_004515967.1 | Scaffold515 | 30417                   | CC                              | TT                | 1946511638               |
| SNP_P3_124237_30419 | NW_004515967.1 | Scaffold515 | 30419                   | AA                              | GG                | 1946511640               |
| SNP_P3_124238_30497 | NW_004515967.1 | Scaffold515 | 30497                   | TT                              | CC                | 1946511641               |
| SNP_P3_124239_30498 | NW_004515967.1 | Scaffold515 | 30498                   | CC                              | TT                | 1946511643               |
| SNP_P3_124240_30544 | NW_004515967.1 | Scaffold515 | 30544                   | CC                              | AA                | 1946511644               |
| SNP_P3_124241_30578 | NW_004515967.1 | Scaffold515 | 30578                   | GG                              | AA                | 1946511646               |
| SNP_P3_124242_30580 | NW_004515967.1 | Scaffold515 | 30580                   | AA                              | CC                | 1946511647               |
| SNP_P3_124243_30587 | NW_004515967.1 | Scaffold515 | 30587                   | GG                              | AA                | 1946511649               |
| SNP_P3_124244_30655 | NW_004515967.1 | Scaffold515 | 30655                   | GG                              | AA                | 1946511651               |
| SNP_P3_124245_30684 | NW_004515967.1 | Scaffold515 | 30684                   | TT                              | CC                | 1946511652               |
| SNP_P3_124246_30708 | NW_004515967.1 | Scaffold515 | 30708                   | GG                              | TT                | 1946511654               |
| SNP_P3_124247_30759 | NW_004515967.1 | Scaffold515 | 30759                   | AA                              | GG                | 1946511655               |
| SNP_P3_124248_30788 | NW_004515967.1 | Scaffold515 | 30788                   | AA                              | TT                | 1946511657               |
| SNP_P3_124249_30796 | NW_004515967.1 | Scaffold515 | 30796                   | AA                              | CC                | 1946511658               |
| SNP_P3_124250_30799 | NW_004515967.1 | Scaffold515 | 30799                   | CC                              | GG                | 1946511660               |
| SNP_P3_124251_30800 | NW_004515967.1 | Scaffold515 | 30800                   | GG                              | AA                | 1946511661               |
| SNP_P3_124252_30819 | NW_004515967.1 | Scaffold515 | 30819                   | AA                              | CC                | 1946511663               |
| SNP_P3_124253_30868 | NW_004515967.1 | Scaffold515 | 30868                   | AA                              | GG                | 1946511664               |
| SNP_P3_124254_30872 | NW_004515967.1 | Scaffold515 | 30872                   | GG                              | TT                | 1946511666               |
| SNP_P3_124255_30882 | NW_004515967.1 | Scaffold515 | 30882                   | AA                              | GG                | 1946511667               |
| SNP_P3_124256_30994 | NW_004515967.1 | Scaffold515 | 30994                   | TT                              | CC                | 1946511669               |
| SNP_P3_124257_31072 | NW_004515967.1 | Scaffold515 | 31072                   | CC                              | TT                | 1946511670               |
| SNP_P3_124258_31125 | NW_004515967.1 | Scaffold515 | 31125                   | CC                              | TT                | 1946511672               |
| SNP_P3_124259_31126 | NW_004515967.1 | Scaffold515 | 31126                   | GG                              | AA                | 1946511673               |
| SNP_P3_124260_31237 | NW_004515967.1 | Scaffold515 | 31237                   | GG                              | TT                | 1946511675               |
| SNP_P3_124261_31279 | NW_004515967.1 | Scaffold515 | 31279                   | CC                              | TT                | 1946511676               |
| SNP_P3_124262_31314 | NW_004515967.1 | Scaffold515 | 31314                   | CC                              | TT                | 1946511678               |
| SNP_P3_124263_31376 | NW_004515967.1 | Scaffold515 | 31376                   | GG                              | AA                | 1946511679               |
| SNP_P3_124264_31390 | NW_004515967.1 | Scaffold515 | 31390                   | AA                              | GG                | 1946511681               |
| SNP_P3_124265_31531 | NW_004515967.1 | Scaffold515 | 31531                   | AA                              | CC                | 1946511682               |
| SNP_P3_124266_31564 | NW_004515967.1 | Scaffold515 | 31564                   | GG                              | CC                | 1946511683               |
| SNP_P3_124267_31600 | NW_004515967.1 | Scaffold515 | 31600                   | AA                              | GG                | 1946511685               |
| SNP_P3_124268_31671 | NW_004515967.1 | Scaffold515 | 31671                   | AA                              | TT                | 1946511686               |
| SNP_P3_124269_31698 | NW_004515967.1 | Scaffold515 | 31698                   | AA                              | GG                | 1946511688               |
| SNP_P3_124270_31712 | NW_004515967.1 | Scaffold515 | 31712                   | CC                              | TT                | 1946511689               |

| SNPs IDs            | Chromosome IDs | Chromosomes | Physical positions (bp) | CDC Frontier (Reference genome) | (Pusa 256 & HPNB) | NCBI SNPdb Accession IDs |
|---------------------|----------------|-------------|-------------------------|---------------------------------|-------------------|--------------------------|
| SNP_P3_124271_31723 | NW_004515967.1 | Scaffold515 | 31723                   | CC                              | TT                | 1946511691               |
| SNP_P3_124272_31848 | NW_004515967.1 | Scaffold515 | 31848                   | TT                              | CC                | 1946511692               |
| SNP_P3_124273_31865 | NW_004515967.1 | Scaffold515 | 31865                   | CC                              | GG                | 1946511694               |
| SNP_P3_124274_31976 | NW_004515967.1 | Scaffold515 | 31976                   | AA                              | GG                | 1946511695               |
| SNP_P3_124275_32272 | NW_004515967.1 | Scaffold515 | 32272                   | AA                              | TT                | 1946511696               |
| SNP_P3_124276_32350 | NW_004515967.1 | Scaffold515 | 32350                   | CC                              | GG                | 1946511698               |
| SNP_P3_124277_32364 | NW_004515967.1 | Scaffold515 | 32364                   | GG                              | CC                | 1946511699               |
| SNP_P3_124278_32568 | NW_004515967.1 | Scaffold515 | 32568                   | GG                              | CC                | 1946511701               |
| SNP_P3_124279_32588 | NW_004515967.1 | Scaffold515 | 32588                   | CC                              | AA                | 1946511702               |
| SNP_P3_124280_32611 | NW_004515967.1 | Scaffold515 | 32611                   | AA                              | TT                | 1946511704               |
| SNP_P3_124281_32632 | NW_004515967.1 | Scaffold515 | 32632                   | TT                              | GG                | 1946511705               |
| SNP_P3_124282_33059 | NW_004515967.1 | Scaffold515 | 33059                   | CC                              | AA                | 1946511707               |
| SNP_P3_124283_33093 | NW_004515967.1 | Scaffold515 | 33093                   | AA                              | TT                | 1946511708               |
| SNP_P3_124284_33147 | NW_004515967.1 | Scaffold515 | 33147                   | TT                              | CC                | 1946511709               |
| SNP_P3_124285_33155 | NW_004515967.1 | Scaffold515 | 33155                   | AA                              | GG                | 1946511711               |
| SNP_P3_124286_33186 | NW_004515967.1 | Scaffold515 | 33186                   | TT                              | CC                | 1946511712               |
| SNP_P3_124287_33216 | NW_004515967.1 | Scaffold515 | 33216                   | TT                              | CC                | 1946511714               |
| SNP_P3_124288_33244 | NW_004515967.1 | Scaffold515 | 33244                   | AA                              | GG                | 1946511715               |
| SNP_P3_124289_33308 | NW_004515967.1 | Scaffold515 | 33308                   | GG                              | CC                | 1946511717               |
| SNP_P3_124290_33320 | NW_004515967.1 | Scaffold515 | 33320                   | GG                              | AA                | 1946511718               |
| SNP_P3_124291_33342 | NW_004515967.1 | Scaffold515 | 33342                   | AA                              | TT                | 1946511720               |
| SNP_P3_124292_33391 | NW_004515967.1 | Scaffold515 | 33391                   | TT                              | CC                | 1946511721               |
| SNP_P3_124293_33397 | NW_004515967.1 | Scaffold515 | 33397                   | AA                              | TT                | 1946511722               |
| SNP_P3_124294_33423 | NW_004515967.1 | Scaffold515 | 33423                   | GG                              | AA                | 1946511724               |
| SNP_P3_124295_33483 | NW_004515967.1 | Scaffold515 | 33483                   | GG                              | AA                | 1946511725               |
| SNP_P3_124296_33496 | NW_004515967.1 | Scaffold515 | 33496                   | TT                              | AA                | 1946511727               |
| SNP_P3_124297_33718 | NW_004515967.1 | Scaffold515 | 33718                   | GG                              | CC                | 1946511729               |
| SNP_P3_124298_33879 | NW_004515967.1 | Scaffold515 | 33879                   | CC                              | AA                | 1946511730               |
| SNP_P3_124299_33953 | NW_004515967.1 | Scaffold515 | 33953                   | TT                              | AA                | 1946511732               |
| SNP_P3_124300_33968 | NW_004515967.1 | Scaffold515 | 33968                   | TT                              | CC                | 1946511734               |
| SNP_P3_124301_34131 | NW_004515967.1 | Scaffold515 | 34131                   | CC                              | AA                | 1946511736               |
| SNP_P3_124302_34168 | NW_004515967.1 | Scaffold515 | 34168                   | CC                              | AA                | 1946511737               |
| SNP_P3_124303_34300 | NW_004515967.1 | Scaffold515 | 34300                   | GG                              | AA                | 1946511739               |
| SNP_P3_124304_34319 | NW_004515967.1 | Scaffold515 | 34319                   | TT                              | CC                | 1946511740               |
| SNP_P3_124305_34360 | NW_004515967.1 | Scaffold515 | 34360                   | CC                              | AA                | 1946511742               |
| SNP_P3_124306_34368 | NW_004515967.1 | Scaffold515 | 34368                   | TT                              | CC                | 1946511743               |
| SNP_P3_124307_34501 | NW_004515967.1 | Scaffold515 | 34501                   | TT                              | GG                | 1946511745               |
| SNP_P3_124308_34519 | NW_004515967.1 | Scaffold515 | 34519                   | TT                              | CC                | 1946511746               |
| SNP_P3_124309_34603 | NW_004515967.1 | Scaffold515 | 34603                   | CC                              | GG                | 1946511748               |
| SNP_P3_124310_34609 | NW_004515967.1 | Scaffold515 | 34609                   | GG                              | AA                | 1946511749               |
| SNP_P3_124311_34685 | NW_004515967.1 | Scaffold515 | 34685                   | CC                              | AA                | 1946511751               |
| SNP_P3_124312_34722 | NW_004515967.1 | Scaffold515 | 34722                   | TT                              | AA                | 1946511752               |

| SNPs IDs            | Chromosome IDs | Chromosomes | Physical positions (bp) | CDC Frontier (Reference genome) | (Pusa 256 & HPNB) | NCBI SNPdb Accession IDs |
|---------------------|----------------|-------------|-------------------------|---------------------------------|-------------------|--------------------------|
| SNP_P3_124313_36307 | NW_004515967.1 | Scaffold515 | 36307                   | GG                              | AA                | 1946511753               |
| SNP_P3_124314_36422 | NW_004515967.1 | Scaffold515 | 36422                   | TT                              | CC                | 1946511755               |
| SNP_P3_124315_36425 | NW_004515967.1 | Scaffold515 | 36425                   | TT                              | CC                | 1946511756               |
| SNP_P3_124316_36460 | NW_004515967.1 | Scaffold515 | 36460                   | TT                              | CC                | 1946511758               |
| SNP_P3_124317_36565 | NW_004515967.1 | Scaffold515 | 36565                   | GG                              | TT                | 1946511759               |
| SNP_P3_124318_36587 | NW_004515967.1 | Scaffold515 | 36587                   | TT                              | CC                | 1946511761               |
| SNP_P3_124319_36602 | NW_004515967.1 | Scaffold515 | 36602                   | TT                              | CC                | 1946511762               |
| SNP_P3_124320_36611 | NW_004515967.1 | Scaffold515 | 36611                   | AA                              | GG                | 1946511763               |
| SNP_P3_124321_36618 | NW_004515967.1 | Scaffold515 | 36618                   | GG                              | TT                | 1946511765               |
| SNP_P3_124322_36622 | NW_004515967.1 | Scaffold515 | 36622                   | GG                              | CC                | 1946511766               |
| SNP_P3_124323_36666 | NW_004515967.1 | Scaffold515 | 36666                   | TT                              | CC                | 1946511768               |
| SNP_P3_124324_36670 | NW_004515967.1 | Scaffold515 | 36670                   | TT                              | AA                | 1946511769               |
| SNP_P3_124325_36672 | NW_004515967.1 | Scaffold515 | 36672                   | AA                              | TT                | 1946511771               |
| SNP_P3_124326_38532 | NW_004515967.1 | Scaffold515 | 38532                   | GG                              | CC                | 1946511772               |
| SNP_P3_124327_38600 | NW_004515967.1 | Scaffold515 | 38600                   | GG                              | TT                | 1946511774               |
| SNP_P3_124328_38639 | NW_004515967.1 | Scaffold515 | 38639                   | AA                              | CC                | 1946511775               |
| SNP_P3_124329_38887 | NW_004515967.1 | Scaffold515 | 38887                   | AA                              | GG                | 1946511777               |
| SNP_P3_124330_38909 | NW_004515967.1 | Scaffold515 | 38909                   | TT                              | CC                | 1946511778               |
| SNP_P3_124331_38994 | NW_004515967.1 | Scaffold515 | 38994                   | AA                              | TT                | 1946511779               |
| SNP_P3_124332_39160 | NW_004515967.1 | Scaffold515 | 39160                   | GG                              | AA                | 1946511781               |
| SNP_P3_124333_39278 | NW_004515967.1 | Scaffold515 | 39278                   | TT                              | AA                | 1946511782               |
| SNP_P3_124334_39488 | NW_004515967.1 | Scaffold515 | 39488                   | TT                              | AA                | 1946511784               |
| SNP_P3_124335_39507 | NW_004515967.1 | Scaffold515 | 39507                   | AA                              | CC                | 1946511785               |
| SNP_P3_124336_40848 | NW_004515967.1 | Scaffold515 | 40848                   | AA                              | GG                | 1946511787               |
| SNP_P3_124337_41099 | NW_004515967.1 | Scaffold515 | 41099                   | CC                              | TT                | 1946511788               |
| SNP_P3_124338_41884 | NW_004515967.1 | Scaffold515 | 41884                   | GG                              | TT                | 1946511789               |
| SNP_P3_124339_42056 | NW_004515967.1 | Scaffold515 | 42056                   | TT                              | AA                | 1946511791               |
| SNP_P3_124340_42087 | NW_004515967.1 | Scaffold515 | 42087                   | AA                              | CC                | 1946511792               |
| SNP_P3_124341_42144 | NW_004515967.1 | Scaffold515 | 42144                   | AA                              | TT                | 1946511794               |
| SNP_P3_124342_42175 | NW_004515967.1 | Scaffold515 | 42175                   | GG                              | AA                | 1946511795               |
| SNP_P3_124344_42569 | NW_004515967.1 | Scaffold515 | 42569                   | CC                              | AA                | 1946511797               |
| SNP_P3_124345_42671 | NW_004515967.1 | Scaffold515 | 42671                   | TT                              | CC                | 1946511798               |
| SNP_P3_124346_42699 | NW_004515967.1 | Scaffold515 | 42699                   | AA                              | GG                | 1946511800               |
| SNP_P3_124347_42731 | NW_004515967.1 | Scaffold515 | 42731                   | CC                              | TT                | 1946511801               |
| SNP_P3_124348_42749 | NW_004515967.1 | Scaffold515 | 42749                   | AA                              | GG                | 1946511803               |
| SNP_P3_124350_42789 | NW_004515967.1 | Scaffold515 | 42789                   | CC                              | TT                | 1946511804               |
| SNP_P3_124351_42843 | NW_004515967.1 | Scaffold515 | 42843                   | AA                              | GG                | 1946511806               |
| SNP_P3_124352_42851 | NW_004515967.1 | Scaffold515 | 42851                   | TT                              | CC                | 1946511807               |
| SNP_P3_124353_42885 | NW_004515967.1 | Scaffold515 | 42885                   | TT                              | CC                | 1946511808               |
| SNP_P3_124354_42968 | NW_004515967.1 | Scaffold515 | 42968                   | TT                              | CC                | 1946511810               |
| SNP_P3_124355_42992 | NW_004515967.1 | Scaffold515 | 42992                   | CC                              | TT                | 1946511811               |
| SNP_P3_124357_43058 | NW_004515967.1 | Scaffold515 | 43058                   | GG                              | TT                | 1946511813               |



| SNPs IDs            | Chromosome IDs | Chromosomes | Physical positions (bp) | CDC Frontier (Reference genome) | (Pusa 256 & HPNB) | NCBI SNPdb Accession IDs |
|---------------------|----------------|-------------|-------------------------|---------------------------------|-------------------|--------------------------|
| SNP_P3_124358_43131 | NW_004515967.1 | Scaffold515 | 43131                   | CC                              | TT                | 1946511814               |
| SNP_P3_124359_43196 | NW_004515967.1 | Scaffold515 | 43196                   | GG                              | TT                | 1946511816               |
| SNP_P3_124360_43271 | NW_004515967.1 | Scaffold515 | 43271                   | TT                              | CC                | 1946511817               |
| SNP_P3_124362_43506 | NW_004515967.1 | Scaffold515 | 43506                   | GG                              | AA                | 1946511819               |
| SNP_P3_124363_43581 | NW_004515967.1 | Scaffold515 | 43581                   | TT                              | GG                | 1946511820               |
| SNP_P3_124364_43594 | NW_004515967.1 | Scaffold515 | 43594                   | TT                              | CC                | 1946511822               |
| SNP_P3_124365_43636 | NW_004515967.1 | Scaffold515 | 43636                   | CC                              | TT                | 1946511823               |
| SNP_P3_124366_43699 | NW_004515967.1 | Scaffold515 | 43699                   | GG                              | TT                | 1946511825               |
| SNP_P3_124367_44010 | NW_004515967.1 | Scaffold515 | 44010                   | AA                              | CC                | 1946511826               |
| SNP_P3_124368_44328 | NW_004515967.1 | Scaffold515 | 44328                   | GG                              | AA                | 1946511828               |
| SNP_P3_124369_44624 | NW_004515967.1 | Scaffold515 | 44624                   | AA                              | GG                | 1946511829               |
| SNP_P3_124370_44632 | NW_004515967.1 | Scaffold515 | 44632                   | GG                              | TT                | 1946511831               |
| SNP_P3_124371_44640 | NW_004515967.1 | Scaffold515 | 44640                   | AA                              | CC                | 1946511832               |
| SNP_P3_124372_44644 | NW_004515967.1 | Scaffold515 | 44644                   | TT                              | CC                | 1946511834               |
| SNP_P3_124373_44692 | NW_004515967.1 | Scaffold515 | 44692                   | GG                              | CC                | 1946511835               |
| SNP_P3_124374_44751 | NW_004515967.1 | Scaffold515 | 44751                   | AA                              | TT                | 1946511837               |
| SNP_P3_124375_44756 | NW_004515967.1 | Scaffold515 | 44756                   | CC                              | TT                | 1946511838               |
| SNP_P3_124376_44762 | NW_004515967.1 | Scaffold515 | 44762                   | TT                              | AA                | 1946511840               |
| SNP_P3_124377_44777 | NW_004515967.1 | Scaffold515 | 44777                   | CC                              | TT                | 1946511841               |
| SNP_P3_124378_44779 | NW_004515967.1 | Scaffold515 | 44779                   | AA                              | GG                | 1946511843               |
| SNP_P3_124379_44961 | NW_004515967.1 | Scaffold515 | 44961                   | AA                              | CC                | 1946511844               |
| SNP_P3_124380_45022 | NW_004515967.1 | Scaffold515 | 45022                   | CC                              | TT                | 1946511846               |
| SNP_P3_124381_45033 | NW_004515967.1 | Scaffold515 | 45033                   | GG                              | TT                | 1946511847               |
| SNP_P3_124382_45097 | NW_004515967.1 | Scaffold515 | 45097                   | AA                              | TT                | 1946511849               |
| SNP_P3_124383_45126 | NW_004515967.1 | Scaffold515 | 45126                   | TT                              | CC                | 1946511850               |
| SNP_P3_124384_45265 | NW_004515967.1 | Scaffold515 | 45265                   | CC                              | GG                | 1946511852               |
| SNP_P3_124385_45463 | NW_004515967.1 | Scaffold515 | 45463                   | AA                              | GG                | 1946511853               |
| SNP_P3_124386_45476 | NW_004515967.1 | Scaffold515 | 45476                   | GG                              | AA                | 1946511855               |
| SNP_P3_124387_45513 | NW_004515967.1 | Scaffold515 | 45513                   | GG                              | AA                | 1946511857               |
| SNP_P3_124388_45545 | NW_004515967.1 | Scaffold515 | 45545                   | AA                              | TT                | 1946511860               |
| SNP_P3_124389_45654 | NW_004515967.1 | Scaffold515 | 45654                   | TT                              | CC                | 1946511862               |
| SNP_P3_124390_45789 | NW_004515967.1 | Scaffold515 | 45789                   | AA                              | GG                | 1946511863               |
| SNP_P3_124391_45989 | NW_004515967.1 | Scaffold515 | 45989                   | CC                              | TT                | 1946511865               |
| SNP_P3_124392_45994 | NW_004515967.1 | Scaffold515 | 45994                   | CC                              | TT                | 1946511866               |
| SNP_P3_124393_46020 | NW_004515967.1 | Scaffold515 | 46020                   | GG                              | CC                | 1946511868               |
| SNP_P3_124394_46106 | NW_004515967.1 | Scaffold515 | 46106                   | CC                              | AA                | 1946511869               |
| SNP_P3_124395_46114 | NW_004515967.1 | Scaffold515 | 46114                   | AA                              | GG                | 1946511871               |
| SNP_P3_124396_46299 | NW_004515967.1 | Scaffold515 | 46299                   | AA                              | CC                | 1946511872               |
| SNP_P3_124397_46326 | NW_004515967.1 | Scaffold515 | 46326                   | CC                              | TT                | 1946511874               |
| SNP_P3_124398_46332 | NW_004515967.1 | Scaffold515 | 46332                   | TT                              | GG                | 1946511875               |
| SNP_P3_124399_46358 | NW_004515967.1 | Scaffold515 | 46358                   | TT                              | CC                | 1946511877               |
| SNP_P3_124400_46374 | NW_004515967.1 | Scaffold515 | 46374                   | AA                              | GG                | 1946511878               |

| SNPs IDs            | Chromosome IDs | Chromosomes | Physical positions (bp) | CDC Frontier (Reference genome) | (Pusa 256 & HPNB) | NCBI SNPdb Accession IDs |
|---------------------|----------------|-------------|-------------------------|---------------------------------|-------------------|--------------------------|
| SNP_P3_124401_46398 | NW_004515967.1 | Scaffold515 | 46398                   | TT                              | CC                | 1946511880               |
| SNP_P3_124402_46421 | NW_004515967.1 | Scaffold515 | 46421                   | CC                              | AA                | 1946511881               |
| SNP_P3_124403_46452 | NW_004515967.1 | Scaffold515 | 46452                   | CC                              | TT                | 1946511883               |
| SNP_P3_124404_46465 | NW_004515967.1 | Scaffold515 | 46465                   | GG                              | CC                | 1946511884               |
| SNP_P3_124405_46496 | NW_004515967.1 | Scaffold515 | 46496                   | AA                              | CC                | 1946511886               |
| SNP_P3_124406_46861 | NW_004515967.1 | Scaffold515 | 46861                   | CC                              | AA                | 1946511887               |
| SNP_P3_124407_47215 | NW_004515967.1 | Scaffold515 | 47215                   | CC                              | TT                | 1946511889               |
| SNP_P3_124408_47326 | NW_004515967.1 | Scaffold515 | 47326                   | TT                              | GG                | 1946511890               |
| SNP_P3_124409_47356 | NW_004515967.1 | Scaffold515 | 47356                   | AA                              | GG                | 1946511892               |
| SNP_P3_124410_47434 | NW_004515967.1 | Scaffold515 | 47434                   | CC                              | GG                | 1946511893               |
| SNP_P3_124411_47499 | NW_004515967.1 | Scaffold515 | 47499                   | TT                              | CC                | 1946511895               |
| SNP_P3_124412_47500 | NW_004515967.1 | Scaffold515 | 47500                   | GG                              | AA                | 1946511896               |
| SNP_P3_124413_47565 | NW_004515967.1 | Scaffold515 | 47565                   | GG                              | AA                | 1946511898               |
| SNP_P3_124414_47620 | NW_004515967.1 | Scaffold515 | 47620                   | CC                              | TT                | 1946511899               |
| SNP_P3_124415_47683 | NW_004515967.1 | Scaffold515 | 47683                   | AA                              | GG                | 1946511901               |
| SNP_P3_124416_47734 | NW_004515967.1 | Scaffold515 | 47734                   | CC                              | TT                | 1946511902               |
| SNP_P3_124417_61043 | NW_004515967.1 | Scaffold515 | 61043                   | TT                              | GG                | 1946511904               |
| SNP_P3_124418_61084 | NW_004515967.1 | Scaffold515 | 61084                   | AA                              | GG                | 1946511905               |
| SNP_P3_124419_61129 | NW_004515967.1 | Scaffold515 | 61129                   | TT                              | AA                | 1946511907               |
| SNP_P3_124420_61134 | NW_004515967.1 | Scaffold515 | 61134                   | TT                              | AA                | 1946511908               |
| SNP_P3_124421_61186 | NW_004515967.1 | Scaffold515 | 61186                   | TT                              | AA                | 1946511910               |
| SNP_P3_124423_61285 | NW_004515967.1 | Scaffold515 | 61285                   | GG                              | AA                | 1946511911               |
| SNP_P3_124424_61480 | NW_004515967.1 | Scaffold515 | 61480                   | TT                              | AA                | 1946511913               |
| SNP_P3_124425_61521 | NW_004515967.1 | Scaffold515 | 61521                   | GG                              | CC                | 1946511914               |
| SNP_P3_124426_61578 | NW_004515967.1 | Scaffold515 | 61578                   | TT                              | CC                | 1946511916               |
| SNP_P3_124427_61585 | NW_004515967.1 | Scaffold515 | 61585                   | AA                              | CC                | 1946511918               |
| SNP_P3_124428_61624 | NW_004515967.1 | Scaffold515 | 61624                   | TT                              | GG                | 1946511919               |
| SNP_P3_124429_61675 | NW_004515967.1 | Scaffold515 | 61675                   | CC                              | AA                | 1946511921               |
| SNP_P3_124431_61835 | NW_004515967.1 | Scaffold515 | 61835                   | GG                              | AA                | 1946511922               |
| SNP_P3_124432_61917 | NW_004515967.1 | Scaffold515 | 61917                   | CC                              | AA                | 1946511924               |
| SNP_P3_124433_61959 | NW_004515967.1 | Scaffold515 | 61959                   | GG                              | TT                | 1946511925               |
| SNP_P3_124434_62034 | NW_004515967.1 | Scaffold515 | 62034                   | AA                              | GG                | 1946511927               |
| SNP_P3_124435_62055 | NW_004515967.1 | Scaffold515 | 62055                   | CC                              | TT                | 1946511928               |
| SNP_P3_124436_62056 | NW_004515967.1 | Scaffold515 | 62056                   | TT                              | CC                | 1946511930               |
| SNP_P3_124437_62090 | NW_004515967.1 | Scaffold515 | 62090                   | AA                              | GG                | 1946511932               |
| SNP_P3_124438_62138 | NW_004515967.1 | Scaffold515 | 62138                   | AA                              | TT                | 1946511933               |
| SNP_P3_124439_62139 | NW_004515967.1 | Scaffold515 | 62139                   | CC                              | TT                | 1946511935               |
| SNP_P3_124440_62152 | NW_004515967.1 | Scaffold515 | 62152                   | GG                              | AA                | 1946511936               |
| SNP_P3_124441_62296 | NW_004515967.1 | Scaffold515 | 62296                   | TT                              | AA                | 1946511938               |
| SNP_P3_124442_62311 | NW_004515967.1 | Scaffold515 | 62311                   | CC                              | GG                | 1946511939               |
| SNP_P3_124443_62354 | NW_004515967.1 | Scaffold515 | 62354                   | AA                              | TT                | 1946511941               |
| SNP_P3_124444_62381 | NW_004515967.1 | Scaffold515 | 62381                   | CC                              | GG                | 1946511943               |

| SNPs IDs             | Chromosome IDs | Chromosomes | Physical positions (bp) | CDC Frontier (Reference genome) | (Pusa 256 & HPNB) | NCBI SNPdb Accession IDs |
|----------------------|----------------|-------------|-------------------------|---------------------------------|-------------------|--------------------------|
| SNP_P3_124445_62820  | NW_004515967.1 | Scaffold515 | 62820                   | AA                              | CC                | 1946511944               |
| SNP_P3_124446_62879  | NW_004515967.1 | Scaffold515 | 62879                   | CC                              | AA                | 1946511946               |
| SNP_P3_124447_63066  | NW_004515967.1 | Scaffold515 | 63066                   | CC                              | GG                | 1946511947               |
| SNP_P3_124448_63126  | NW_004515967.1 | Scaffold515 | 63126                   | AA                              | TT                | 1946511949               |
| SNP_P3_124449_63358  | NW_004515967.1 | Scaffold515 | 63358                   | CC                              | AA                | 1946511950               |
| SNP_P3_124450_68384  | NW_004515967.1 | Scaffold515 | 68384                   | TT                              | AA                | 1946511952               |
| SNP_P3_124451_71949  | NW_004515967.1 | Scaffold515 | 71949                   | TT                              | CC                | 1946511953               |
| SNP_P3_124452_72300  | NW_004515967.1 | Scaffold515 | 72300                   | GG                              | AA                | 1946511955               |
| SNP_P3_124453_72678  | NW_004515967.1 | Scaffold515 | 72678                   | AA                              | CC                | 1946511956               |
| SNP_P3_124454_72680  | NW_004515967.1 | Scaffold515 | 72680                   | GG                              | AA                | 1946511958               |
| SNP_P3_124455_72685  | NW_004515967.1 | Scaffold515 | 72685                   | GG                              | AA                | 1946511959               |
| SNP_P3_124456_72686  | NW_004515967.1 | Scaffold515 | 72686                   | AA                              | GG                | 1946511961               |
| SNP_P3_124457_72718  | NW_004515967.1 | Scaffold515 | 72718                   | TT                              | GG                | 1946511962               |
| SNP_P3_124458_72722  | NW_004515967.1 | Scaffold515 | 72722                   | CC                              | AA                | 1946511964               |
| SNP_P3_124459_72733  | NW_004515967.1 | Scaffold515 | 72733                   | TT                              | CC                | 1946511965               |
| SNP_P3_124460_72736  | NW_004515967.1 | Scaffold515 | 72736                   | GG                              | AA                | 1946511967               |
| SNP_P3_124461_72756  | NW_004515967.1 | Scaffold515 | 72756                   | TT                              | CC                | 1946511968               |
| SNP_P3_124462_72786  | NW_004515967.1 | Scaffold515 | 72786                   | AA                              | CC                | 1946511970               |
| SNP_P3_124463_72806  | NW_004515967.1 | Scaffold515 | 72806                   | TT                              | CC                | 1946511971               |
| SNP_P3_124464_72843  | NW_004515967.1 | Scaffold515 | 72843                   | TT                              | GG                | 1946511973               |
| SNP_P3_124465_73028  | NW_004515967.1 | Scaffold515 | 73028                   | CC                              | TT                | 1946511975               |
| SNP_P3_124466_74881  | NW_004515967.1 | Scaffold515 | 74881                   | GG                              | AA                | 1946511976               |
| SNP_P3_124467_75223  | NW_004515967.1 | Scaffold515 | 75223                   | AA                              | TT                | 1946511978               |
| SNP_P3_124468_77695  | NW_004515967.1 | Scaffold515 | 77695                   | GG                              | AA                | 1946511980               |
| SNP_P3_124469_80794  | NW_004515967.1 | Scaffold515 | 80794                   | AA                              | CC                | 1946511982               |
| SNP_P3_124470_80795  | NW_004515967.1 | Scaffold515 | 80795                   | TT                              | GG                | 1946511983               |
| SNP_P3_124471_80809  | NW_004515967.1 | Scaffold515 | 80809                   | CC                              | AA                | 1946511985               |
| SNP_P3_124472_80814  | NW_004515967.1 | Scaffold515 | 80814                   | TT                              | CC                | 1946511986               |
| SNP_P3_124473_80866  | NW_004515967.1 | Scaffold515 | 80866                   | AA                              | TT                | 1946511988               |
| SNP_P3_124474_80914  | NW_004515967.1 | Scaffold515 | 80914                   | AA                              | TT                | 1946511989               |
| SNP_P3_124475_81214  | NW_004515967.1 | Scaffold515 | 81214                   | AA                              | CC                | 1946511991               |
| SNP_P3_124476_82317  | NW_004515967.1 | Scaffold515 | 82317                   | CC                              | TT                | 1946511992               |
| SNP_P3_124477_82556  | NW_004515967.1 | Scaffold515 | 82556                   | TT                              | CC                | 1946511994               |
| SNP_P3_124478_89350  | NW_004515967.1 | Scaffold515 | 89350                   | AA                              | GG                | 1946511995               |
| SNP_P3_124479_130572 | NW_004515967.1 | Scaffold515 | 130572                  | GG                              | TT                | 1946511997               |
| SNP_P3_124480_132468 | NW_004515967.1 | Scaffold515 | 132468                  | CC                              | TT                | 1946511998               |
| SNP_P3_124481_152323 | NW_004515967.1 | Scaffold515 | 152323                  | GG                              | AA                | 1946512000               |
| SNP_P3_124483_152463 | NW_004515967.1 | Scaffold515 | 152463                  | GG                              | CC                | 1946512001               |
| SNP_P3_124484_152497 | NW_004515967.1 | Scaffold515 | 152497                  | GG                              | TT                | 1946512003               |
| SNP_P3_124485_152500 | NW_004515967.1 | Scaffold515 | 152500                  | GG                              | AA                | 1946512004               |
| SNP_P3_124486_160566 | NW_004515967.1 | Scaffold515 | 160566                  | GG                              | AA                | 1946512006               |
| SNP_P3_124487_171192 | NW_004515967.1 | Scaffold515 | 171192                  | TT                              | AA                | 1946512007               |

| SNPs IDs             | Chromosome IDs | Chromosomes | Physical positions (bp) | CDC Frontier (Reference genome) | (Pusa 256 & HPNB) | NCBI SNPdb Accession IDs |
|----------------------|----------------|-------------|-------------------------|---------------------------------|-------------------|--------------------------|
| SNP_P3_124488_171216 | NW_004515967.1 | Scaffold515 | 171216                  | AA                              | GG                | 1946512008               |
| SNP_P3_124489_174441 | NW_004515967.1 | Scaffold515 | 174441                  | TT                              | CC                | 1946512010               |
| SNP_P3_124490_182722 | NW_004515967.1 | Scaffold515 | 182722                  | TT                              | AA                | 1946512011               |
| SNP_P3_124491_182723 | NW_004515967.1 | Scaffold515 | 182723                  | TT                              | CC                | 1946512013               |
| SNP_P3_124492_182724 | NW_004515967.1 | Scaffold515 | 182724                  | GG                              | TT                | 1946512014               |
| SNP_P3_124493_187146 | NW_004515967.1 | Scaffold515 | 187146                  | TT                              | CC                | 1946512016               |
| SNP_P3_124494_187154 | NW_004515967.1 | Scaffold515 | 187154                  | AA                              | CC                | 1946512017               |
| SNP_P3_124495_187238 | NW_004515967.1 | Scaffold515 | 187238                  | GG                              | CC                | 1946512019               |
| SNP_P3_124496_187404 | NW_004515967.1 | Scaffold515 | 187404                  | AA                              | TT                | 1946512020               |
| SNP_P3_124497_187504 | NW_004515967.1 | Scaffold515 | 187504                  | CC                              | AA                | 1946512022               |
| SNP_P3_124498_187547 | NW_004515967.1 | Scaffold515 | 187547                  | GG                              | CC                | 1946512023               |
| SNP_P3_124499_187551 | NW_004515967.1 | Scaffold515 | 187551                  | TT                              | CC                | 1946512025               |
| SNP_P3_124500_194615 | NW_004515967.1 | Scaffold515 | 194615                  | CC                              | AA                | 1946512026               |
| SNP_P3_124501_194689 | NW_004515967.1 | Scaffold515 | 194689                  | AA                              | CC                | 1946512028               |
| SNP_P3_124502_194934 | NW_004515967.1 | Scaffold515 | 194934                  | TT                              | GG                | 1946512029               |
| SNP_P3_124503_195030 | NW_004515967.1 | Scaffold515 | 195030                  | AA                              | CC                | 1946512030               |
| SNP_P3_124504_198071 | NW_004515967.1 | Scaffold515 | 198071                  | TT                              | AA                | 1946512032               |
| SNP_P3_124505_198085 | NW_004515967.1 | Scaffold515 | 198085                  | AA                              | GG                | 1946512034               |
| SNP_P3_124506_198375 | NW_004515967.1 | Scaffold515 | 198375                  | CC                              | TT                | 1946512035               |
| SNP_P3_124507_198504 | NW_004515967.1 | Scaffold515 | 198504                  | CC                              | TT                | 1946512037               |
| SNP_P3_124508_208751 | NW_004515967.1 | Scaffold515 | 208751                  | CC                              | TT                | 1946512038               |
| SNP_P3_124509_215145 | NW_004515967.1 | Scaffold515 | 215145                  | AA                              | CC                | 1946512039               |
| SNP_P3_124510_215263 | NW_004515967.1 | Scaffold515 | 215263                  | TT                              | CC                | 1946512041               |
| SNP_P3_124511_215478 | NW_004515967.1 | Scaffold515 | 215478                  | TT                              | CC                | 1946512042               |
| SNP_P3_124513_217073 | NW_004515967.1 | Scaffold515 | 217073                  | GG                              | AA                | 1946512044               |
| SNP_P3_124514_225135 | NW_004515967.1 | Scaffold515 | 225135                  | CC                              | TT                | 1946512045               |
| SNP_P3_124515_233097 | NW_004515967.1 | Scaffold515 | 233097                  | AA                              | TT                | 1946512047               |
| SNP_P3_124516_233158 | NW_004515967.1 | Scaffold515 | 233158                  | TT                              | CC                | 1946512048               |
| SNP_P3_124517_233189 | NW_004515967.1 | Scaffold515 | 233189                  | CC                              | TT                | 1946512050               |
| SNP_P3_124518_233283 | NW_004515967.1 | Scaffold515 | 233283                  | TT                              | CC                | 1946512051               |
| SNP_P3_124519_233380 | NW_004515967.1 | Scaffold515 | 233380                  | CC                              | AA                | 1946512053               |
| SNP_P3_124520_233505 | NW_004515967.1 | Scaffold515 | 233505                  | TT                              | GG                | 1946512054               |
| SNP_P3_124521_233586 | NW_004515967.1 | Scaffold515 | 233586                  | AA                              | TT                | 1946512056               |
| SNP_P3_124522_234979 | NW_004515967.1 | Scaffold515 | 234979                  | GG                              | AA                | 1946512057               |
| SNP_P3_124523_235053 | NW_004515967.1 | Scaffold515 | 235053                  | AA                              | GG                | 1946512059               |
| SNP_P3_124524_235066 | NW_004515967.1 | Scaffold515 | 235066                  | GG                              | AA                | 1946512060               |
| SNP_P3_124525_235393 | NW_004515967.1 | Scaffold515 | 235393                  | AA                              | TT                | 1946512062               |
| SNP_P3_124526_235429 | NW_004515967.1 | Scaffold515 | 235429                  | TT                              | AA                | 1946512063               |
| SNP_P3_124527_235439 | NW_004515967.1 | Scaffold515 | 235439                  | AA                              | GG                | 1946512065               |
| SNP_P3_124528_235449 | NW_004515967.1 | Scaffold515 | 235449                  | AA                              | CC                | 1946512066               |
| SNP_P3_124529_235534 | NW_004515967.1 | Scaffold515 | 235534                  | GG                              | AA                | 1946512068               |
| SNP_P3_124530_242002 | NW_004515967.1 | Scaffold515 | 242002                  | AA                              | TT                | 1946512070               |

| SNPs IDs             | Chromosome IDs | Chromosomes | Physical positions (bp) | CDC Frontier (Reference genome) | (Pusa 256 & HPNB) | NCBI SNPdb Accession IDs |
|----------------------|----------------|-------------|-------------------------|---------------------------------|-------------------|--------------------------|
| SNP_P3_124531_242009 | NW_004515967.1 | Scaffold515 | 242009                  | TT                              | CC                | 1946512071               |
| SNP_P3_124532_242099 | NW_004515967.1 | Scaffold515 | 242099                  | TT                              | CC                | 1946512073               |
| SNP_P3_124533_242154 | NW_004515967.1 | Scaffold515 | 242154                  | GG                              | AA                | 1946512074               |
| SNP_P3_124534_242426 | NW_004515967.1 | Scaffold515 | 242426                  | AA                              | GG                | 1946512076               |
| SNP_P3_124535_242483 | NW_004515967.1 | Scaffold515 | 242483                  | AA                              | CC                | 1946512077               |
| SNP_P3_124536_253380 | NW_004515967.1 | Scaffold515 | 253380                  | AA                              | CC                | 1946512078               |
| SNP_P3_124537_253407 | NW_004515967.1 | Scaffold515 | 253407                  | CC                              | TT                | 1946512080               |
| SNP_P3_124538_253418 | NW_004515967.1 | Scaffold515 | 253418                  | AA                              | TT                | 1946512081               |
| SNP_P3_124539_266007 | NW_004515967.1 | Scaffold515 | 266007                  | GG                              | AA                | 1946512083               |
| SNP_P3_124540_266108 | NW_004515967.1 | Scaffold515 | 266108                  | GG                              | TT                | 1946512084               |
| SNP_P3_124541_266178 | NW_004515967.1 | Scaffold515 | 266178                  | AA                              | TT                | 1946512086               |
| SNP_P3_124542_266468 | NW_004515967.1 | Scaffold515 | 266468                  | GG                              | AA                | 1946512087               |
| SNP_P3_124543_270545 | NW_004515967.1 | Scaffold515 | 270545                  | AA                              | GG                | 1946512089               |
| SNP_P3_124544_270768 | NW_004515967.1 | Scaffold515 | 270768                  | AA                              | CC                | 1946512090               |
| SNP_P3_124545_272459 | NW_004515967.1 | Scaffold515 | 272459                  | GG                              | TT                | 1946512092               |
| SNP_P3_124546_272474 | NW_004515967.1 | Scaffold515 | 272474                  | AA                              | GG                | 1946512093               |
| SNP_P3_124547_272482 | NW_004515967.1 | Scaffold515 | 272482                  | TT                              | CC                | 1946512095               |
| SNP_P3_124548_272628 | NW_004515967.1 | Scaffold515 | 272628                  | CC                              | AA                | 1946512096               |
| SNP_P3_124549_272641 | NW_004515967.1 | Scaffold515 | 272641                  | AA                              | GG                | 1946512098               |
| SNP_P3_124550_272665 | NW_004515967.1 | Scaffold515 | 272665                  | AA                              | CC                | 1946512099               |
| SNP_P3_124551_276985 | NW_004515967.1 | Scaffold515 | 276985                  | GG                              | AA                | 1946512101               |
| SNP_P3_124552_277188 | NW_004515967.1 | Scaffold515 | 277188                  | CC                              | TT                | 1946512102               |
| SNP_P3_124553_277258 | NW_004515967.1 | Scaffold515 | 277258                  | TT                              | CC                | 1946512104               |
| SNP_P3_124554_277323 | NW_004515967.1 | Scaffold515 | 277323                  | TT                              | GG                | 1946512105               |
| SNP_P3_124555_277374 | NW_004515967.1 | Scaffold515 | 277374                  | AA                              | GG                | 1946512107               |
| SNP_P3_124556_277378 | NW_004515967.1 | Scaffold515 | 277378                  | AA                              | CC                | 1946512108               |
| SNP_P3_124557_280433 | NW_004515967.1 | Scaffold515 | 280433                  | CC                              | AA                | 1946512110               |
| SNP_P3_124558_280764 | NW_004515967.1 | Scaffold515 | 280764                  | TT                              | CC                | 1946512111               |
| SNP_P3_124559_281074 | NW_004515967.1 | Scaffold515 | 281074                  | CC                              | GG                | 1946512113               |
| SNP_P3_124560_281094 | NW_004515967.1 | Scaffold515 | 281094                  | CC                              | AA                | 1946512114               |
| SNP_P3_124561_169    | NW_004515968.1 | Scaffold520 | 169                     | AA                              | GG                | 1946512116               |
| SNP_P3_124562_186    | NW_004515968.1 | Scaffold520 | 186                     | CC                              | TT                | 1946512117               |
| SNP_P3_124563_293    | NW_004515968.1 | Scaffold520 | 293                     | AA                              | GG                | 1946512119               |
| SNP_P3_124564_368    | NW_004515968.1 | Scaffold520 | 368                     | CC                              | TT                | 1946512120               |
| SNP_P3_124565_700    | NW_004515968.1 | Scaffold520 | 700                     | CC                              | AA                | 1946512122               |
| SNP_P3_124566_717    | NW_004515968.1 | Scaffold520 | 717                     | TT                              | GG                | 1946512123               |
| SNP_P3_124567_718    | NW_004515968.1 | Scaffold520 | 718                     | AA                              | TT                | 1946512125               |
| SNP_P3_124568_738    | NW_004515968.1 | Scaffold520 | 738                     | AA                              | GG                | 1946512126               |
| SNP_P3_124569_917    | NW_004515968.1 | Scaffold520 | 917                     | GG                              | AA                | 1946512127               |
| SNP_P3_124570_1022   | NW_004515968.1 | Scaffold520 | 1022                    | TT                              | AA                | 1946512128               |
| SNP_P3_124571_21619  | NW_004515968.1 | Scaffold520 | 21619                   | AA                              | GG                | 1946512129               |
| SNP_P3_124572_21621  | NW_004515968.1 | Scaffold520 | 21621                   | TT                              | GG                | 1946512130               |

| SNPs IDs            | Chromosome IDs | Chromosomes | Physical positions (bp) | CDC Frontier (Reference genome) | (Pusa 256 & HPNB) | NCBI SNPdb Accession IDs |
|---------------------|----------------|-------------|-------------------------|---------------------------------|-------------------|--------------------------|
| SNP_P3_124573_22039 | NW_004515968.1 | Scaffold520 | 22039                   | CC                              | GG                | 1946512131               |
| SNP_P3_124574_22057 | NW_004515968.1 | Scaffold520 | 22057                   | AA                              | CC                | 1946512132               |
| SNP_P3_124575_22087 | NW_004515968.1 | Scaffold520 | 22087                   | CC                              | TT                | 1946512133               |
| SNP_P3_124576_22117 | NW_004515968.1 | Scaffold520 | 22117                   | TT                              | GG                | 1946512134               |
| SNP_P3_124577_22159 | NW_004515968.1 | Scaffold520 | 22159                   | GG                              | AA                | 1946512135               |
| SNP_P3_124578_22162 | NW_004515968.1 | Scaffold520 | 22162                   | TT                              | CC                | 1946512136               |
| SNP_P3_124579_22194 | NW_004515968.1 | Scaffold520 | 22194                   | AA                              | GG                | 1946512137               |
| SNP_P3_124580_22197 | NW_004515968.1 | Scaffold520 | 22197                   | GG                              | TT                | 1946512138               |
| SNP_P3_124582_25514 | NW_004515968.1 | Scaffold520 | 25514                   | AA                              | GG                | 1946512139               |
| SNP_P3_124583_25803 | NW_004515968.1 | Scaffold520 | 25803                   | TT                              | GG                | 1946512140               |
| SNP_P3_124584_26319 | NW_004515968.1 | Scaffold520 | 26319                   | AA                              | GG                | 1946512141               |
| SNP_P3_124585_26320 | NW_004515968.1 | Scaffold520 | 26320                   | AA                              | TT                | 1946512142               |
| SNP_P3_124586_31338 | NW_004515968.1 | Scaffold520 | 31338                   | CC                              | TT                | 1946512143               |
| SNP_P3_124587_34242 | NW_004515968.1 | Scaffold520 | 34242                   | TT                              | CC                | 1946512144               |
| SNP_P3_124588_34245 | NW_004515968.1 | Scaffold520 | 34245                   | TT                              | GG                | 1946512145               |
| SNP_P3_124589_34273 | NW_004515968.1 | Scaffold520 | 34273                   | GG                              | TT                | 1946512146               |
| SNP_P3_124590_34649 | NW_004515968.1 | Scaffold520 | 34649                   | CC                              | AA                | 1946512147               |
| SNP_P3_124591_34657 | NW_004515968.1 | Scaffold520 | 34657                   | CC                              | GG                | 1946512148               |
| SNP_P3_124592_36919 | NW_004515968.1 | Scaffold520 | 36919                   | TT                              | GG                | 1946512149               |
| SNP_P3_124593_36982 | NW_004515968.1 | Scaffold520 | 36982                   | AA                              | GG                | 1946512150               |
| SNP_P3_124594_36994 | NW_004515968.1 | Scaffold520 | 36994                   | AA                              | TT                | 1946512151               |
| SNP_P3_124595_37305 | NW_004515968.1 | Scaffold520 | 37305                   | TT                              | AA                | 1946512153               |
| SNP_P3_124596_37950 | NW_004515968.1 | Scaffold520 | 37950                   | AA                              | CC                | 1946512154               |
| SNP_P3_124597_45382 | NW_004515968.1 | Scaffold520 | 45382                   | AA                              | TT                | 1946512156               |
| SNP_P3_124598_45424 | NW_004515968.1 | Scaffold520 | 45424                   | AA                              | GG                | 1946512157               |
| SNP_P3_124599_45437 | NW_004515968.1 | Scaffold520 | 45437                   | CC                              | AA                | 1946512159               |
| SNP_P3_124600_60440 | NW_004515968.1 | Scaffold520 | 60440                   | TT                              | CC                | 1946512161               |
| SNP_P3_124601_60645 | NW_004515968.1 | Scaffold520 | 60645                   | CC                              | AA                | 1946512163               |
| SNP_P3_124602_60910 | NW_004515968.1 | Scaffold520 | 60910                   | GG                              | TT                | 1946512164               |
| SNP_P3_124603_65546 | NW_004515968.1 | Scaffold520 | 65546                   | AA                              | CC                | 1946512166               |
| SNP_P3_124604_66621 | NW_004515968.1 | Scaffold520 | 66621                   | CC                              | TT                | 1946512167               |
| SNP_P3_124605_66653 | NW_004515968.1 | Scaffold520 | 66653                   | CC                              | TT                | 1946512168               |
| SNP_P3_124606_66659 | NW_004515968.1 | Scaffold520 | 66659                   | GG                              | AA                | 1946512170               |
| SNP_P3_124607_71627 | NW_004515968.1 | Scaffold520 | 71627                   | TT                              | AA                | 1946512171               |
| SNP_P3_124608_71973 | NW_004515968.1 | Scaffold520 | 71973                   | AA                              | TT                | 1946512173               |
| SNP_P3_124609_77339 | NW_004515968.1 | Scaffold520 | 77339                   | CC                              | TT                | 1946512174               |
| SNP_P3_124610_77524 | NW_004515968.1 | Scaffold520 | 77524                   | TT                              | GG                | 1946512176               |
| SNP_P3_124611_77632 | NW_004515968.1 | Scaffold520 | 77632                   | GG                              | CC                | 1946512177               |
| SNP_P3_124612_85861 | NW_004515968.1 | Scaffold520 | 85861                   | CC                              | TT                | 1946512178               |
| SNP_P3_124613_87436 | NW_004515968.1 | Scaffold520 | 87436                   | TT                              | AA                | 1946512180               |
| SNP_P3_124614_87437 | NW_004515968.1 | Scaffold520 | 87437                   | AA                              | TT                | 1946512181               |
| SNP_P3_124616_96117 | NW_004515968.1 | Scaffold520 | 96117                   | AA                              | CC                | 1946512183               |

| SNPs IDs             | Chromosome IDs | Chromosomes | Physical positions (bp) | CDC Frontier (Reference genome) | (Pusa 256 & HPNB) | NCBI SNPdb Accession IDs |
|----------------------|----------------|-------------|-------------------------|---------------------------------|-------------------|--------------------------|
| SNP_P3_124617_96165  | NW_004515968.1 | Scaffold520 | 96165                   | AA                              | GG                | 1946512184               |
| SNP_P3_124618_96196  | NW_004515968.1 | Scaffold520 | 96196                   | AA                              | GG                | 1946512186               |
| SNP_P3_124619_100329 | NW_004515968.1 | Scaffold520 | 100329                  | AA                              | TT                | 1946512187               |
| SNP_P3_124620_105402 | NW_004515968.1 | Scaffold520 | 105402                  | GG                              | TT                | 1946512188               |
| SNP_P3_124621_109003 | NW_004515968.1 | Scaffold520 | 109003                  | TT                              | AA                | 1946512190               |
| SNP_P3_124622_109269 | NW_004515968.1 | Scaffold520 | 109269                  | AA                              | CC                | 1946512191               |
| SNP_P3_124623_109822 | NW_004515968.1 | Scaffold520 | 109822                  | CC                              | AA                | 1946512193               |
| SNP_P3_124624_109842 | NW_004515968.1 | Scaffold520 | 109842                  | CC                              | TT                | 1946512194               |
| SNP_P3_124625_110018 | NW_004515968.1 | Scaffold520 | 110018                  | CC                              | TT                | 1946512196               |
| SNP_P3_124626_111604 | NW_004515968.1 | Scaffold520 | 111604                  | TT                              | CC                | 1946512197               |
| SNP_P3_124627_113708 | NW_004515968.1 | Scaffold520 | 113708                  | CC                              | TT                | 1946512199               |
| SNP_P3_124628_113878 | NW_004515968.1 | Scaffold520 | 113878                  | TT                              | GG                | 1946512200               |
| SNP_P3_124629_120399 | NW_004515968.1 | Scaffold520 | 120399                  | AA                              | GG                | 1946512201               |
| SNP_P3_124630_120422 | NW_004515968.1 | Scaffold520 | 120422                  | CC                              | TT                | 1946512203               |
| SNP_P3_124631_120436 | NW_004515968.1 | Scaffold520 | 120436                  | TT                              | CC                | 1946512204               |
| SNP_P3_124632_120504 | NW_004515968.1 | Scaffold520 | 120504                  | AA                              | TT                | 1946512206               |
| SNP_P3_124633_120511 | NW_004515968.1 | Scaffold520 | 120511                  | TT                              | CC                | 1946512207               |
| SNP_P3_124634_125432 | NW_004515968.1 | Scaffold520 | 125432                  | TT                              | GG                | 1946512209               |
| SNP_P3_124635_125457 | NW_004515968.1 | Scaffold520 | 125457                  | GG                              | AA                | 1946512210               |
| SNP_P3_124636_129703 | NW_004515968.1 | Scaffold520 | 129703                  | TT                              | AA                | 1946512212               |
| SNP_P3_124637_129893 | NW_004515968.1 | Scaffold520 | 129893                  | TT                              | AA                | 1946512213               |
| SNP_P3_124638_130000 | NW_004515968.1 | Scaffold520 | 130000                  | CC                              | TT                | 1946512215               |
| SNP_P3_124639_130018 | NW_004515968.1 | Scaffold520 | 130018                  | CC                              | TT                | 1946512216               |
| SNP_P3_124640_131535 | NW_004515968.1 | Scaffold520 | 131535                  | TT                              | CC                | 1946512217               |
| SNP_P3_124641_138750 | NW_004515968.1 | Scaffold520 | 138750                  | TT                              | AA                | 1946512219               |
| SNP_P3_124642_138751 | NW_004515968.1 | Scaffold520 | 138751                  | CC                              | TT                | 1946512220               |
| SNP_P3_124643_142698 | NW_004515968.1 | Scaffold520 | 142698                  | GG                              | AA                | 1946512222               |
| SNP_P3_124644_142722 | NW_004515968.1 | Scaffold520 | 142722                  | CC                              | AA                | 1946512223               |
| SNP_P3_124645_142804 | NW_004515968.1 | Scaffold520 | 142804                  | GG                              | CC                | 1946512225               |
| SNP_P3_124646_142888 | NW_004515968.1 | Scaffold520 | 142888                  | TT                              | CC                | 1946512226               |
| SNP_P3_124647_142926 | NW_004515968.1 | Scaffold520 | 142926                  | TT                              | CC                | 1946512228               |
| SNP_P3_124648_142997 | NW_004515968.1 | Scaffold520 | 142997                  | GG                              | AA                | 1946512229               |
| SNP_P3_124649_143120 | NW_004515968.1 | Scaffold520 | 143120                  | TT                              | CC                | 1946512231               |
| SNP_P3_124650_143128 | NW_004515968.1 | Scaffold520 | 143128                  | TT                              | CC                | 1946512232               |
| SNP_P3_124651_143149 | NW_004515968.1 | Scaffold520 | 143149                  | TT                              | CC                | 1946512233               |
| SNP_P3_124652_143231 | NW_004515968.1 | Scaffold520 | 143231                  | TT                              | CC                | 1946512235               |
| SNP_P3_124653_143294 | NW_004515968.1 | Scaffold520 | 143294                  | GG                              | AA                | 1946512236               |
| SNP_P3_124654_143317 | NW_004515968.1 | Scaffold520 | 143317                  | TT                              | AA                | 1946512238               |
| SNP_P3_124655_143339 | NW_004515968.1 | Scaffold520 | 143339                  | AA                              | GG                | 1946512239               |
| SNP_P3_124656_143366 | NW_004515968.1 | Scaffold520 | 143366                  | GG                              | AA                | 1946512241               |
| SNP_P3_124657_143367 | NW_004515968.1 | Scaffold520 | 143367                  | AA                              | GG                | 1946512242               |
| SNP_P3_124658_143377 | NW_004515968.1 | Scaffold520 | 143377                  | TT                              | CC                | 1946512244               |

| SNPs IDs             | Chromosome IDs | Chromosomes | Physical positions (bp) | CDC Frontier (Reference genome) | (Pusa 256 & HPNB) | NCBI SNPdb Accession IDs |
|----------------------|----------------|-------------|-------------------------|---------------------------------|-------------------|--------------------------|
| SNP_P3_124659_143424 | NW_004515968.1 | Scaffold520 | 143424                  | CC                              | GG                | 1946512245               |
| SNP_P3_124660_153763 | NW_004515968.1 | Scaffold520 | 153763                  | AA                              | GG                | 1946512247               |
| SNP_P3_124661_154183 | NW_004515968.1 | Scaffold520 | 154183                  | AA                              | GG                | 1946512248               |
| SNP_P3_124663_160972 | NW_004515968.1 | Scaffold520 | 160972                  | TT                              | GG                | 1946512249               |
| SNP_P3_124664_161296 | NW_004515968.1 | Scaffold520 | 161296                  | TT                              | CC                | 1946512251               |
| SNP_P3_124665_161302 | NW_004515968.1 | Scaffold520 | 161302                  | CC                              | GG                | 1946512252               |
| SNP_P3_124666_161303 | NW_004515968.1 | Scaffold520 | 161303                  | TT                              | GG                | 1946512254               |
| SNP_P3_124667_161349 | NW_004515968.1 | Scaffold520 | 161349                  | TT                              | GG                | 1946512255               |
| SNP_P3_124668_161523 | NW_004515968.1 | Scaffold520 | 161523                  | CC                              | TT                | 1946512257               |
| SNP_P3_124669_161551 | NW_004515968.1 | Scaffold520 | 161551                  | CC                              | TT                | 1946512258               |
| SNP_P3_124670_161666 | NW_004515968.1 | Scaffold520 | 161666                  | GG                              | AA                | 1946512260               |
| SNP_P3_124671_165417 | NW_004515968.1 | Scaffold520 | 165417                  | TT                              | CC                | 1946512261               |
| SNP_P3_124672_165489 | NW_004515968.1 | Scaffold520 | 165489                  | TT                              | CC                | 1946512263               |
| SNP_P3_124673_165495 | NW_004515968.1 | Scaffold520 | 165495                  | TT                              | CC                | 1946512264               |
| SNP_P3_124674_165497 | NW_004515968.1 | Scaffold520 | 165497                  | AA                              | GG                | 1946512266               |
| SNP_P3_124675_165695 | NW_004515968.1 | Scaffold520 | 165695                  | TT                              | GG                | 1946512267               |
| SNP_P3_124676_165729 | NW_004515968.1 | Scaffold520 | 165729                  | GG                              | CC                | 1946512269               |
| SNP_P3_124677_165835 | NW_004515968.1 | Scaffold520 | 165835                  | TT                              | AA                | 1946512271               |
| SNP_P3_124678_167828 | NW_004515968.1 | Scaffold520 | 167828                  | AA                              | GG                | 1946512273               |
| SNP_P3_124679_168150 | NW_004515968.1 | Scaffold520 | 168150                  | CC                              | AA                | 1946512274               |
| SNP_P3_124680_194778 | NW_004515968.1 | Scaffold520 | 194778                  | AA                              | GG                | 1946512276               |
| SNP_P3_124681_194815 | NW_004515968.1 | Scaffold520 | 194815                  | CC                              | TT                | 1946512278               |
| SNP_P3_124682_195006 | NW_004515968.1 | Scaffold520 | 195006                  | CC                              | TT                | 1946512280               |
| SNP_P3_124683_195013 | NW_004515968.1 | Scaffold520 | 195013                  | GG                              | AA                | 1946512281               |
| SNP_P3_124684_195049 | NW_004515968.1 | Scaffold520 | 195049                  | TT                              | CC                | 1946512283               |
| SNP_P3_124685_195099 | NW_004515968.1 | Scaffold520 | 195099                  | TT                              | CC                | 1946512284               |
| SNP_P3_124686_195425 | NW_004515968.1 | Scaffold520 | 195425                  | CC                              | TT                | 1946512286               |
| SNP_P3_124687_204226 | NW_004515968.1 | Scaffold520 | 204226                  | AA                              | GG                | 1946512287               |
| SNP_P3_124688_204510 | NW_004515968.1 | Scaffold520 | 204510                  | TT                              | CC                | 1946512289               |
| SNP_P3_124689_204665 | NW_004515968.1 | Scaffold520 | 204665                  | GG                              | AA                | 1946512290               |
| SNP_P3_124690_214328 | NW_004515968.1 | Scaffold520 | 214328                  | CC                              | TT                | 1946512291               |
| SNP_P3_124691_229848 | NW_004515968.1 | Scaffold520 | 229848                  | TT                              | CC                | 1946512293               |
| SNP_P3_124692_229857 | NW_004515968.1 | Scaffold520 | 229857                  | TT                              | CC                | 1946512294               |
| SNP_P3_124693_229860 | NW_004515968.1 | Scaffold520 | 229860                  | AA                              | GG                | 1946512296               |
| SNP_P3_124694_229870 | NW_004515968.1 | Scaffold520 | 229870                  | AA                              | CC                | 1946512297               |
| SNP_P3_124695_229872 | NW_004515968.1 | Scaffold520 | 229872                  | GG                              | AA                | 1946512299               |
| SNP_P3_124696_230720 | NW_004515968.1 | Scaffold520 | 230720                  | TT                              | CC                | 1946512300               |
| SNP_P3_124697_230726 | NW_004515968.1 | Scaffold520 | 230726                  | AA                              | TT                | 1946512302               |
| SNP_P3_124698_230748 | NW_004515968.1 | Scaffold520 | 230748                  | GG                              | AA                | 1946512303               |
| SNP_P3_124699_230969 | NW_004515968.1 | Scaffold520 | 230969                  | GG                              | AA                | 1946512305               |
| SNP_P3_124700_231841 | NW_004515968.1 | Scaffold520 | 231841                  | AA                              | GG                | 1946512306               |
| SNP_P3_124701_231856 | NW_004515968.1 | Scaffold520 | 231856                  | GG                              | AA                | 1946512307               |



| SNPs IDs             | Chromosome IDs | Chromosomes | Physical positions (bp) | CDC Frontier (Reference genome) | (Pusa 256 & HPNB) | NCBI SNPdb Accession IDs |
|----------------------|----------------|-------------|-------------------------|---------------------------------|-------------------|--------------------------|
| SNP_P3_124702_231930 | NW_004515968.1 | Scaffold520 | 231930                  | CC                              | GG                | 1946512309               |
| SNP_P3_124703_12632  | NW_004515969.1 | Scaffold523 | 12632                   | CC                              | AA                | 1946512310               |
| SNP_P3_124704_14235  | NW_004515969.1 | Scaffold523 | 14235                   | AA                              | GG                | 1946512312               |
| SNP_P3_124705_14261  | NW_004515969.1 | Scaffold523 | 14261                   | AA                              | CC                | 1946512313               |
| SNP_P3_124706_14300  | NW_004515969.1 | Scaffold523 | 14300                   | CC                              | AA                | 1946512315               |
| SNP_P3_124707_14589  | NW_004515969.1 | Scaffold523 | 14589                   | GG                              | AA                | 1946512316               |
| SNP_P3_124708_14604  | NW_004515969.1 | Scaffold523 | 14604                   | TT                              | CC                | 1946512318               |
| SNP_P3_124709_14606  | NW_004515969.1 | Scaffold523 | 14606                   | AA                              | CC                | 1946512319               |
| SNP_P3_124710_14617  | NW_004515969.1 | Scaffold523 | 14617                   | AA                              | GG                | 1946512321               |
| SNP_P3_124711_17171  | NW_004515969.1 | Scaffold523 | 17171                   | CC                              | TT                | 1946512322               |
| SNP_P3_124712_18223  | NW_004515969.1 | Scaffold523 | 18223                   | AA                              | TT                | 1946512324               |
| SNP_P3_124713_51289  | NW_004515969.1 | Scaffold523 | 51289                   | AA                              | GG                | 1946512325               |
| SNP_P3_124714_1052   | NW_004515971.1 | Scaffold526 | 1052                    | TT                              | CC                | 1946512327               |
| SNP_P3_124715_13147  | NW_004515971.1 | Scaffold526 | 13147                   | GG                              | AA                | 1946512328               |
| SNP_P3_124716_13640  | NW_004515971.1 | Scaffold526 | 13640                   | AA                              | TT                | 1946512330               |
| SNP_P3_124718_21068  | NW_004515971.1 | Scaffold526 | 21068                   | AA                              | TT                | 1946512331               |
| SNP_P3_124719_22903  | NW_004515971.1 | Scaffold526 | 22903                   | CC                              | TT                | 1946512333               |
| SNP_P3_124720_26819  | NW_004515971.1 | Scaffold526 | 26819                   | TT                              | AA                | 1946512335               |
| SNP_P3_124721_27231  | NW_004515971.1 | Scaffold526 | 27231                   | GG                              | AA                | 1946512337               |
| SNP_P3_124722_31190  | NW_004515971.1 | Scaffold526 | 31190                   | CC                              | GG                | 1946512338               |
| SNP_P3_124723_31457  | NW_004515971.1 | Scaffold526 | 31457                   | GG                              | AA                | 1946512340               |
| SNP_P3_124724_31458  | NW_004515971.1 | Scaffold526 | 31458                   | TT                              | GG                | 1946512341               |
| SNP_P3_124725_31465  | NW_004515971.1 | Scaffold526 | 31465                   | AA                              | CC                | 1946512343               |
| SNP_P3_124726_31475  | NW_004515971.1 | Scaffold526 | 31475                   | GG                              | TT                | 1946512344               |
| SNP_P3_124727_32884  | NW_004515971.1 | Scaffold526 | 32884                   | CC                              | AA                | 1946512346               |
| SNP_P3_124728_32890  | NW_004515971.1 | Scaffold526 | 32890                   | TT                              | AA                | 1946512347               |
| SNP_P3_124729_33153  | NW_004515971.1 | Scaffold526 | 33153                   | GG                              | AA                | 1946512349               |
| SNP_P3_124730_33181  | NW_004515971.1 | Scaffold526 | 33181                   | TT                              | GG                | 1946512350               |
| SNP_P3_124731_33182  | NW_004515971.1 | Scaffold526 | 33182                   | AA                              | GG                | 1946512352               |
| SNP_P3_124732_47623  | NW_004515971.1 | Scaffold526 | 47623                   | TT                              | CC                | 1946512353               |
| SNP_P3_124733_51752  | NW_004515971.1 | Scaffold526 | 51752                   | CC                              | GG                | 1946512355               |
| SNP_P3_124735_52011  | NW_004515971.1 | Scaffold526 | 52011                   | GG                              | CC                | 1946512356               |
| SNP_P3_124736_55370  | NW_004515971.1 | Scaffold526 | 55370                   | GG                              | TT                | 1946512357               |
| SNP_P3_124737_58798  | NW_004515971.1 | Scaffold526 | 58798                   | GG                              | AA                | 1946512359               |
| SNP_P3_124738_58805  | NW_004515971.1 | Scaffold526 | 58805                   | TT                              | CC                | 1946512360               |
| SNP_P3_124739_58831  | NW_004515971.1 | Scaffold526 | 58831                   | AA                              | TT                | 1946512362               |
| SNP_P3_124740_58837  | NW_004515971.1 | Scaffold526 | 58837                   | AA                              | TT                | 1946512363               |
| SNP_P3_124741_58848  | NW_004515971.1 | Scaffold526 | 58848                   | AA                              | GG                | 1946512365               |
| SNP_P3_124742_58852  | NW_004515971.1 | Scaffold526 | 58852                   | CC                              | GG                | 1946512366               |
| SNP_P3_124743_58882  | NW_004515971.1 | Scaffold526 | 58882                   | AA                              | GG                | 1946512368               |
| SNP_P3_124744_58933  | NW_004515971.1 | Scaffold526 | 58933                   | TT                              | CC                | 1946512369               |
| SNP_P3_124745_58980  | NW_004515971.1 | Scaffold526 | 58980                   | TT                              | AA                | 1946512371               |

| SNPs IDs             | Chromosome IDs | Chromosomes | Physical positions (bp) | CDC Frontier (Reference genome) | (Pusa 256 & HPNB) | NCBI SNPdb Accession IDs |
|----------------------|----------------|-------------|-------------------------|---------------------------------|-------------------|--------------------------|
| SNP_P3_124746_58984  | NW_004515971.1 | Scaffold526 | 58984                   | AA                              | GG                | 1946512372               |
| SNP_P3_124747_59245  | NW_004515971.1 | Scaffold526 | 59245                   | CC                              | TT                | 1946512374               |
| SNP_P3_124748_59287  | NW_004515971.1 | Scaffold526 | 59287                   | CC                              | TT                | 1946512375               |
| SNP_P3_124749_59305  | NW_004515971.1 | Scaffold526 | 59305                   | AA                              | CC                | 1946512377               |
| SNP_P3_124752_70282  | NW_004515971.1 | Scaffold526 | 70282                   | AA                              | TT                | 1946512378               |
| SNP_P3_124753_70287  | NW_004515971.1 | Scaffold526 | 70287                   | CC                              | TT                | 1946512380               |
| SNP_P3_124754_70520  | NW_004515971.1 | Scaffold526 | 70520                   | TT                              | AA                | 1946512381               |
| SNP_P3_124755_71051  | NW_004515971.1 | Scaffold526 | 71051                   | TT                              | AA                | 1946512383               |
| SNP_P3_124756_71286  | NW_004515971.1 | Scaffold526 | 71286                   | GG                              | AA                | 1946512384               |
| SNP_P3_124757_71288  | NW_004515971.1 | Scaffold526 | 71288                   | TT                              | CC                | 1946512386               |
| SNP_P3_124758_71328  | NW_004515971.1 | Scaffold526 | 71328                   | CC                              | TT                | 1946512387               |
| SNP_P3_124759_71341  | NW_004515971.1 | Scaffold526 | 71341                   | AA                              | TT                | 1946512389               |
| SNP_P3_124760_71540  | NW_004515971.1 | Scaffold526 | 71540                   | TT                              | AA                | 1946512390               |
| SNP_P3_124761_71551  | NW_004515971.1 | Scaffold526 | 71551                   | AA                              | GG                | 1946512391               |
| SNP_P3_124762_71791  | NW_004515971.1 | Scaffold526 | 71791                   | AA                              | TT                | 1946512392               |
| SNP_P3_124763_71854  | NW_004515971.1 | Scaffold526 | 71854                   | GG                              | AA                | 1946512393               |
| SNP_P3_124765_73126  | NW_004515971.1 | Scaffold526 | 73126                   | AA                              | GG                | 1946512394               |
| SNP_P3_124766_73127  | NW_004515971.1 | Scaffold526 | 73127                   | AA                              | TT                | 1946512395               |
| SNP_P3_124767_76478  | NW_004515971.1 | Scaffold526 | 76478                   | GG                              | CC                | 1946512396               |
| SNP_P3_124768_79628  | NW_004515971.1 | Scaffold526 | 79628                   | AA                              | TT                | 1946512397               |
| SNP_P3_124769_79756  | NW_004515971.1 | Scaffold526 | 79756                   | CC                              | TT                | 1946512398               |
| SNP_P3_124770_84365  | NW_004515971.1 | Scaffold526 | 84365                   | AA                              | TT                | 1946512399               |
| SNP_P3_124771_84630  | NW_004515971.1 | Scaffold526 | 84630                   | TT                              | AA                | 1946512401               |
| SNP_P3_124772_90867  | NW_004515971.1 | Scaffold526 | 90867                   | CC                              | AA                | 1946512403               |
| SNP_P3_124773_91115  | NW_004515971.1 | Scaffold526 | 91115                   | GG                              | AA                | 1946512405               |
| SNP_P3_124774_91154  | NW_004515971.1 | Scaffold526 | 91154                   | AA                              | TT                | 1946512407               |
| SNP_P3_124775_92872  | NW_004515971.1 | Scaffold526 | 92872                   | CC                              | TT                | 1946512409               |
| SNP_P3_124776_92925  | NW_004515971.1 | Scaffold526 | 92925                   | TT                              | CC                | 1946512410               |
| SNP_P3_124777_93003  | NW_004515971.1 | Scaffold526 | 93003                   | AA                              | GG                | 1946512412               |
| SNP_P3_124778_93008  | NW_004515971.1 | Scaffold526 | 93008                   | CC                              | GG                | 1946512413               |
| SNP_P3_124779_93302  | NW_004515971.1 | Scaffold526 | 93302                   | AA                              | CC                | 1946512415               |
| SNP_P3_124780_101130 | NW_004515971.1 | Scaffold526 | 101130                  | AA                              | TT                | 1946512416               |
| SNP_P3_124781_102795 | NW_004515971.1 | Scaffold526 | 102795                  | CC                              | GG                | 1946512418               |
| SNP_P3_124782_104900 | NW_004515971.1 | Scaffold526 | 104900                  | GG                              | TT                | 1946512419               |
| SNP_P3_124783_105653 | NW_004515971.1 | Scaffold526 | 105653                  | TT                              | CC                | 1946512421               |
| SNP_P3_124784_105660 | NW_004515971.1 | Scaffold526 | 105660                  | CC                              | AA                | 1946512422               |
| SNP_P3_124785_105745 | NW_004515971.1 | Scaffold526 | 105745                  | GG                              | AA                | 1946512424               |
| SNP_P3_124786_108001 | NW_004515971.1 | Scaffold526 | 108001                  | AA                              | GG                | 1946512425               |
| SNP_P3_124787_108456 | NW_004515971.1 | Scaffold526 | 108456                  | TT                              | CC                | 1946512426               |
| SNP_P3_124788_117995 | NW_004515971.1 | Scaffold526 | 117995                  | GG                              | AA                | 1946512428               |
| SNP_P3_124789_129142 | NW_004515971.1 | Scaffold526 | 129142                  | CC                              | TT                | 1946512429               |
| SNP_P3_124790_129793 | NW_004515971.1 | Scaffold526 | 129793                  | AA                              | CC                | 1946512431               |

| SNPs IDs           | Chromosome IDs | Chromosomes | Physical positions (bp) | CDC Frontier (Reference genome) | (Pusa 256 & HPNB) | NCBI SNPdb Accession IDs |
|--------------------|----------------|-------------|-------------------------|---------------------------------|-------------------|--------------------------|
| SNP_P3_124791_379  | NW_004515972.1 | Scaffold527 | 379                     | AA                              | GG                | 1946512432               |
| SNP_P3_124792_672  | NW_004515972.1 | Scaffold527 | 672                     | GG                              | CC                | 1946512434               |
| SNP_P3_124793_690  | NW_004515972.1 | Scaffold527 | 690                     | GG                              | AA                | 1946512435               |
| SNP_P3_124795_846  | NW_004515972.1 | Scaffold527 | 846                     | CC                              | TT                | 1946512437               |
| SNP_P3_124796_1057 | NW_004515972.1 | Scaffold527 | 1057                    | CC                              | TT                | 1946512438               |
| SNP_P3_124797_1161 | NW_004515972.1 | Scaffold527 | 1161                    | CC                              | TT                | 1946512439               |
| SNP_P3_124798_1179 | NW_004515972.1 | Scaffold527 | 1179                    | GG                              | AA                | 1946512441               |
| SNP_P3_124799_1267 | NW_004515972.1 | Scaffold527 | 1267                    | AA                              | CC                | 1946512443               |
| SNP_P3_124800_1744 | NW_004515972.1 | Scaffold527 | 1744                    | TT                              | CC                | 1946512444               |
| SNP_P3_124801_1753 | NW_004515972.1 | Scaffold527 | 1753                    | AA                              | TT                | 1946512446               |
| SNP_P3_124802_1984 | NW_004515972.1 | Scaffold527 | 1984                    | CC                              | AA                | 1946512447               |
| SNP_P3_124803_2041 | NW_004515972.1 | Scaffold527 | 2041                    | GG                              | AA                | 1946512449               |
| SNP_P3_124805_2104 | NW_004515972.1 | Scaffold527 | 2104                    | TT                              | GG                | 1946512450               |
| SNP_P3_124806_2110 | NW_004515972.1 | Scaffold527 | 2110                    | GG                              | AA                | 1946512452               |
| SNP_P3_124807_2121 | NW_004515972.1 | Scaffold527 | 2121                    | TT                              | CC                | 1946512453               |
| SNP_P3_124808_2126 | NW_004515972.1 | Scaffold527 | 2126                    | CC                              | TT                | 1946512455               |
| SNP_P3_124809_2154 | NW_004515972.1 | Scaffold527 | 2154                    | CC                              | GG                | 1946512456               |
| SNP_P3_124810_2304 | NW_004515972.1 | Scaffold527 | 2304                    | CC                              | GG                | 1946512458               |
| SNP_P3_124811_2455 | NW_004515972.1 | Scaffold527 | 2455                    | GG                              | AA                | 1946512459               |
| SNP_P3_124812_2457 | NW_004515972.1 | Scaffold527 | 2457                    | GG                              | AA                | 1946512461               |
| SNP_P3_124813_2502 | NW_004515972.1 | Scaffold527 | 2502                    | AA                              | TT                | 1946512463               |
| SNP_P3_124814_2520 | NW_004515972.1 | Scaffold527 | 2520                    | TT                              | GG                | 1946512464               |
| SNP_P3_124815_2549 | NW_004515972.1 | Scaffold527 | 2549                    | TT                              | AA                | 1946512466               |
| SNP_P3_124816_2554 | NW_004515972.1 | Scaffold527 | 2554                    | TT                              | CC                | 1946512467               |
| SNP_P3_124817_2688 | NW_004515972.1 | Scaffold527 | 2688                    | GG                              | AA                | 1946512469               |
| SNP_P3_124818_2708 | NW_004515972.1 | Scaffold527 | 2708                    | CC                              | TT                | 1946512471               |
| SNP_P3_124819_2773 | NW_004515972.1 | Scaffold527 | 2773                    | CC                              | TT                | 1946512472               |
| SNP_P3_124820_2781 | NW_004515972.1 | Scaffold527 | 2781                    | GG                              | TT                | 1946512474               |
| SNP_P3_124821_2804 | NW_004515972.1 | Scaffold527 | 2804                    | AA                              | CC                | 1946512475               |
| SNP_P3_124822_2811 | NW_004515972.1 | Scaffold527 | 2811                    | GG                              | AA                | 1946512477               |
| SNP_P3_124823_2869 | NW_004515972.1 | Scaffold527 | 2869                    | TT                              | CC                | 1946512478               |
| SNP_P3_124824_2989 | NW_004515972.1 | Scaffold527 | 2989                    | CC                              | AA                | 1946512480               |
| SNP_P3_124825_3166 | NW_004515972.1 | Scaffold527 | 3166                    | CC                              | AA                | 1946512481               |
| SNP_P3_124826_3182 | NW_004515972.1 | Scaffold527 | 3182                    | CC                              | TT                | 1946512483               |
| SNP_P3_124828_3224 | NW_004515972.1 | Scaffold527 | 3224                    | AA                              | TT                | 1946512484               |
| SNP_P3_124829_3225 | NW_004515972.1 | Scaffold527 | 3225                    | AA                              | GG                | 1946512486               |
| SNP_P3_124830_3356 | NW_004515972.1 | Scaffold527 | 3356                    | CC                              | TT                | 1946512487               |
| SNP_P3_124831_3377 | NW_004515972.1 | Scaffold527 | 3377                    | AA                              | TT                | 1946512489               |
| SNP_P3_124832_3391 | NW_004515972.1 | Scaffold527 | 3391                    | AA                              | TT                | 1946512490               |
| SNP_P3_124833_3619 | NW_004515972.1 | Scaffold527 | 3619                    | CC                              | TT                | 1946512492               |
| SNP_P3_124834_3621 | NW_004515972.1 | Scaffold527 | 3621                    | TT                              | CC                | 1946512493               |
| SNP_P3_124835_3720 | NW_004515972.1 | Scaffold527 | 3720                    | CC                              | TT                | 1946512495               |

| SNPs IDs             | Chromosome IDs | Chromosomes | Physical positions (bp) | CDC Frontier (Reference genome) | (Pusa 256 & HPNB) | NCBI SNPdb Accession IDs |
|----------------------|----------------|-------------|-------------------------|---------------------------------|-------------------|--------------------------|
| SNP_P3_124836_3816   | NW_004515972.1 | Scaffold527 | 3816                    | TT                              | CC                | 1946512496               |
| SNP_P3_124837_3848   | NW_004515972.1 | Scaffold527 | 3848                    | GG                              | AA                | 1946512498               |
| SNP_P3_124838_3919   | NW_004515972.1 | Scaffold527 | 3919                    | CC                              | TT                | 1946512499               |
| SNP_P3_124839_3962   | NW_004515972.1 | Scaffold527 | 3962                    | CC                              | TT                | 1946512501               |
| SNP_P3_124840_3976   | NW_004515972.1 | Scaffold527 | 3976                    | CC                              | TT                | 1946512502               |
| SNP_P3_124841_4016   | NW_004515972.1 | Scaffold527 | 4016                    | AA                              | CC                | 1946512504               |
| SNP_P3_124842_4024   | NW_004515972.1 | Scaffold527 | 4024                    | GG                              | AA                | 1946512505               |
| SNP_P3_124843_4046   | NW_004515972.1 | Scaffold527 | 4046                    | TT                              | GG                | 1946512507               |
| SNP_P3_124844_4077   | NW_004515972.1 | Scaffold527 | 4077                    | AA                              | TT                | 1946512508               |
| SNP_P3_124845_4103   | NW_004515972.1 | Scaffold527 | 4103                    | AA                              | CC                | 1946512510               |
| SNP_P3_124846_4121   | NW_004515972.1 | Scaffold527 | 4121                    | TT                              | CC                | 1946512511               |
| SNP_P3_124847_4185   | NW_004515972.1 | Scaffold527 | 4185                    | AA                              | CC                | 1946512513               |
| SNP_P3_124848_4200   | NW_004515972.1 | Scaffold527 | 4200                    | CC                              | TT                | 1946512514               |
| SNP_P3_124849_4224   | NW_004515972.1 | Scaffold527 | 4224                    | TT                              | GG                | 1946512516               |
| SNP_P3_124850_4340   | NW_004515972.1 | Scaffold527 | 4340                    | AA                              | CC                | 1946512517               |
| SNP_P3_124851_4364   | NW_004515972.1 | Scaffold527 | 4364                    | CC                              | TT                | 1946512518               |
| SNP_P3_124852_4557   | NW_004515972.1 | Scaffold527 | 4557                    | GG                              | CC                | 1946512520               |
| SNP_P3_124853_4569   | NW_004515972.1 | Scaffold527 | 4569                    | TT                              | CC                | 1946512521               |
| SNP_P3_124854_4755   | NW_004515972.1 | Scaffold527 | 4755                    | AA                              | GG                | 1946512523               |
| SNP_P3_124855_4772   | NW_004515972.1 | Scaffold527 | 4772                    | TT                              | AA                | 1946512524               |
| SNP_P3_124857_4865   | NW_004515972.1 | Scaffold527 | 4865                    | AA                              | TT                | 1946512526               |
| SNP_P3_124858_4866   | NW_004515972.1 | Scaffold527 | 4866                    | GG                              | TT                | 1946512527               |
| SNP_P3_124859_4952   | NW_004515972.1 | Scaffold527 | 4952                    | GG                              | TT                | 1946512529               |
| SNP_P3_124860_4989   | NW_004515972.1 | Scaffold527 | 4989                    | CC                              | AA                | 1946512530               |
| SNP_P3_124861_5068   | NW_004515972.1 | Scaffold527 | 5068                    | TT                              | AA                | 1946512532               |
| SNP_P3_124862_5074   | NW_004515972.1 | Scaffold527 | 5074                    | GG                              | AA                | 1946512533               |
| SNP_P3_124863_5136   | NW_004515972.1 | Scaffold527 | 5136                    | GG                              | TT                | 1946512535               |
| SNP_P3_124865_6382   | NW_004515972.1 | Scaffold527 | 6382                    | TT                              | CC                | 1946512536               |
| SNP_P3_124866_18575  | NW_004515972.1 | Scaffold527 | 18575                   | CC                              | GG                | 1946512538               |
| SNP_P3_124867_23842  | NW_004515972.1 | Scaffold527 | 23842                   | TT                              | AA                | 1946512540               |
| SNP_P3_124868_42898  | NW_004515972.1 | Scaffold527 | 42898                   | GG                              | TT                | 1946512541               |
| SNP_P3_124869_42906  | NW_004515972.1 | Scaffold527 | 42906                   | TT                              | GG                | 1946512543               |
| SNP_P3_124872_82442  | NW_004515972.1 | Scaffold527 | 82442                   | TT                              | CC                | 1946512544               |
| SNP_P3_124873_82469  | NW_004515972.1 | Scaffold527 | 82469                   | CC                              | TT                | 1946512546               |
| SNP_P3_124874_87425  | NW_004515972.1 | Scaffold527 | 87425                   | TT                              | AA                | 1946512548               |
| SNP_P3_124876_120380 | NW_004515972.1 | Scaffold527 | 120380                  | AA                              | GG                | 1946512549               |
| SNP_P3_124877_120441 | NW_004515972.1 | Scaffold527 | 120441                  | AA                              | GG                | 1946512551               |
| SNP_P3_124878_121990 | NW_004515972.1 | Scaffold527 | 121990                  | TT                              | CC                | 1946512552               |
| SNP_P3_124879_148703 | NW_004515972.1 | Scaffold527 | 148703                  | AA                              | GG                | 1946512554               |
| SNP_P3_124880_148737 | NW_004515972.1 | Scaffold527 | 148737                  | TT                              | CC                | 1946512555               |
| SNP_P3_124881_148757 | NW_004515972.1 | Scaffold527 | 148757                  | GG                              | TT                | 1946512557               |
| SNP_P3_124882_148758 | NW_004515972.1 | Scaffold527 | 148758                  | AA                              | TT                | 1946512558               |

| SNPs IDs             | Chromosome IDs | Chromosomes | Physical positions (bp) | CDC Frontier (Reference genome) | (Pusa 256 & HPNB) | NCBI SNPdb Accession IDs |
|----------------------|----------------|-------------|-------------------------|---------------------------------|-------------------|--------------------------|
| SNP_P3_124883_148778 | NW_004515972.1 | Scaffold527 | 148778                  | CC                              | AA                | 1946512559               |
| SNP_P3_124884_148854 | NW_004515972.1 | Scaffold527 | 148854                  | GG                              | TT                | 1946512561               |
| SNP_P3_124886_34513  | NW_004515973.1 | Scaffold528 | 34513                   | CC                              | TT                | 1946512562               |
| SNP_P3_124888_57874  | NW_004515973.1 | Scaffold528 | 57874                   | CC                              | TT                | 1946512564               |
| SNP_P3_124889_57926  | NW_004515973.1 | Scaffold528 | 57926                   | CC                              | GG                | 1946512565               |
| SNP_P3_124890_58532  | NW_004515973.1 | Scaffold528 | 58532                   | CC                              | TT                | 1946512567               |
| SNP_P3_124891_65216  | NW_004515973.1 | Scaffold528 | 65216                   | GG                              | AA                | 1946512568               |
| SNP_P3_124892_68156  | NW_004515973.1 | Scaffold528 | 68156                   | AA                              | CC                | 1946512570               |
| SNP_P3_124894_70753  | NW_004515973.1 | Scaffold528 | 70753                   | GG                              | AA                | 1946512571               |
| SNP_P3_124895_72182  | NW_004515973.1 | Scaffold528 | 72182                   | CC                              | TT                | 1946512572               |
| SNP_P3_124896_72187  | NW_004515973.1 | Scaffold528 | 72187                   | CC                              | AA                | 1946512574               |
| SNP_P3_124897_72370  | NW_004515973.1 | Scaffold528 | 72370                   | TT                              | CC                | 1946512575               |
| SNP_P3_124898_72417  | NW_004515973.1 | Scaffold528 | 72417                   | GG                              | AA                | 1946512577               |
| SNP_P3_124899_72422  | NW_004515973.1 | Scaffold528 | 72422                   | CC                              | GG                | 1946512578               |
| SNP_P3_124900_74716  | NW_004515973.1 | Scaffold528 | 74716                   | AA                              | CC                | 1946512580               |
| SNP_P3_124901_74727  | NW_004515973.1 | Scaffold528 | 74727                   | TT                              | GG                | 1946512581               |
| SNP_P3_124902_74731  | NW_004515973.1 | Scaffold528 | 74731                   | CC                              | TT                | 1946512583               |
| SNP_P3_124903_104292 | NW_004515973.1 | Scaffold528 | 104292                  | GG                              | TT                | 1946512584               |
| SNP_P3_124904_126566 | NW_004515973.1 | Scaffold528 | 126566                  | AA                              | CC                | 1946512586               |
| SNP_P3_124905_126728 | NW_004515973.1 | Scaffold528 | 126728                  | TT                              | CC                | 1946512587               |
| SNP_P3_124906_126772 | NW_004515973.1 | Scaffold528 | 126772                  | TT                              | GG                | 1946512589               |
| SNP_P3_124907_126798 | NW_004515973.1 | Scaffold528 | 126798                  | GG                              | CC                | 1946512590               |
| SNP_P3_124908_126954 | NW_004515973.1 | Scaffold528 | 126954                  | CC                              | TT                | 1946512592               |
| SNP_P3_124909_126956 | NW_004515973.1 | Scaffold528 | 126956                  | AA                              | GG                | 1946512593               |
| SNP_P3_124910_127148 | NW_004515973.1 | Scaffold528 | 127148                  | AA                              | TT                | 1946512595               |
| SNP_P3_124911_129947 | NW_004515973.1 | Scaffold528 | 129947                  | CC                              | TT                | 1946512596               |
| SNP_P3_124912_132688 | NW_004515973.1 | Scaffold528 | 132688                  | AA                              | GG                | 1946512597               |
| SNP_P3_124913_143831 | NW_004515973.1 | Scaffold528 | 143831                  | CC                              | TT                | 1946512599               |
| SNP_P3_124914_145829 | NW_004515973.1 | Scaffold528 | 145829                  | AA                              | GG                | 1946512600               |
| SNP_P3_124915_147798 | NW_004515973.1 | Scaffold528 | 147798                  | CC                              | AA                | 1946512602               |
| SNP_P3_124916_155264 | NW_004515973.1 | Scaffold528 | 155264                  | GG                              | CC                | 1946512604               |
| SNP_P3_124917_156040 | NW_004515973.1 | Scaffold528 | 156040                  | AA                              | TT                | 1946512605               |
| SNP_P3_124918_156388 | NW_004515973.1 | Scaffold528 | 156388                  | AA                              | CC                | 1946512607               |
| SNP_P3_124919_159155 | NW_004515973.1 | Scaffold528 | 159155                  | GG                              | AA                | 1946512608               |
| SNP_P3_124920_165201 | NW_004515973.1 | Scaffold528 | 165201                  | TT                              | CC                | 1946512610               |
| SNP_P3_124922_215008 | NW_004515973.1 | Scaffold528 | 215008                  | GG                              | TT                | 1946512611               |
| SNP_P3_124923_215715 | NW_004515973.1 | Scaffold528 | 215715                  | CC                              | AA                | 1946512613               |
| SNP_P3_124924_221845 | NW_004515973.1 | Scaffold528 | 221845                  | CC                              | TT                | 1946512614               |
| SNP_P3_124926_249378 | NW_004515973.1 | Scaffold528 | 249378                  | TT                              | CC                | 1946512616               |
| SNP_P3_124928_285735 | NW_004515973.1 | Scaffold528 | 285735                  | TT                              | GG                | 1946512617               |
| SNP_P3_124929_285738 | NW_004515973.1 | Scaffold528 | 285738                  | TT                              | CC                | 1946512619               |
| SNP_P3_124930_285749 | NW_004515973.1 | Scaffold528 | 285749                  | GG                              | AA                | 1946512621               |

| SNPs IDs             | Chromosome IDs | Chromosomes | Physical positions (bp) | CDC Frontier (Reference genome) | (Pusa 256 & HPNB) | NCBI SNPdb Accession IDs |
|----------------------|----------------|-------------|-------------------------|---------------------------------|-------------------|--------------------------|
| SNP_P3_124931_285758 | NW_004515973.1 | Scaffold528 | 285758                  | GG                              | AA                | 1946512622               |
| SNP_P3_124932_285794 | NW_004515973.1 | Scaffold528 | 285794                  | CC                              | AA                | 1946512624               |
| SNP_P3_124933_285803 | NW_004515973.1 | Scaffold528 | 285803                  | TT                              | AA                | 1946512625               |
| SNP_P3_124934_285990 | NW_004515973.1 | Scaffold528 | 285990                  | GG                              | TT                | 1946512627               |
| SNP_P3_124936_286042 | NW_004515973.1 | Scaffold528 | 286042                  | GG                              | AA                | 1946512629               |
| SNP_P3_124937_286270 | NW_004515973.1 | Scaffold528 | 286270                  | GG                              | AA                | 1946512630               |
| SNP_P3_124938_287616 | NW_004515973.1 | Scaffold528 | 287616                  | GG                              | AA                | 1946512632               |
| SNP_P3_124939_287747 | NW_004515973.1 | Scaffold528 | 287747                  | GG                              | AA                | 1946512633               |
| SNP_P3_124940_287813 | NW_004515973.1 | Scaffold528 | 287813                  | CC                              | AA                | 1946512636               |
| SNP_P3_124941_292393 | NW_004515973.1 | Scaffold528 | 292393                  | GG                              | AA                | 1946512637               |
| SNP_P3_124942_293858 | NW_004515973.1 | Scaffold528 | 293858                  | AA                              | GG                | 1946512639               |
| SNP_P3_124943_293875 | NW_004515973.1 | Scaffold528 | 293875                  | TT                              | CC                | 1946512641               |
| SNP_P3_124944_293908 | NW_004515973.1 | Scaffold528 | 293908                  | CC                              | TT                | 1946512642               |
| SNP_P3_124945_293911 | NW_004515973.1 | Scaffold528 | 293911                  | TT                              | GG                | 1946512644               |
| SNP_P3_124946_294541 | NW_004515973.1 | Scaffold528 | 294541                  | GG                              | AA                | 1946512645               |
| SNP_P3_124947_294542 | NW_004515973.1 | Scaffold528 | 294542                  | TT                              | CC                | 1946512647               |
| SNP_P3_124948_294543 | NW_004515973.1 | Scaffold528 | 294543                  | TT                              | CC                | 1946512648               |
| SNP_P3_124949_294811 | NW_004515973.1 | Scaffold528 | 294811                  | CC                              | TT                | 1946512650               |
| SNP_P3_124950_294892 | NW_004515973.1 | Scaffold528 | 294892                  | CC                              | TT                | 1946512651               |
| SNP_P3_124951_304874 | NW_004515973.1 | Scaffold528 | 304874                  | TT                              | AA                | 1946512653               |
| SNP_P3_124952_311160 | NW_004515973.1 | Scaffold528 | 311160                  | TT                              | AA                | 1946512654               |
| SNP_P3_124954_311532 | NW_004515973.1 | Scaffold528 | 311532                  | AA                              | TT                | 1946512656               |
| SNP_P3_124955_311551 | NW_004515973.1 | Scaffold528 | 311551                  | CC                              | AA                | 1946512658               |
| SNP_P3_124956_311561 | NW_004515973.1 | Scaffold528 | 311561                  | TT                              | CC                | 1946512659               |
| SNP_P3_124957_319849 | NW_004515973.1 | Scaffold528 | 319849                  | AA                              | GG                | 1946512661               |
| SNP_P3_124958_321393 | NW_004515973.1 | Scaffold528 | 321393                  | CC                              | TT                | 1946512662               |
| SNP_P3_124960_329492 | NW_004515973.1 | Scaffold528 | 329492                  | CC                              | TT                | 1946512664               |
| SNP_P3_124961_329725 | NW_004515973.1 | Scaffold528 | 329725                  | TT                              | GG                | 1946512665               |
| SNP_P3_124962_159    | NW_004515974.1 | Scaffold530 | 159                     | CC                              | GG                | 1946512667               |
| SNP_P3_124963_330    | NW_004515974.1 | Scaffold530 | 330                     | CC                              | TT                | 1946512668               |
| SNP_P3_124965_558    | NW_004515974.1 | Scaffold530 | 558                     | TT                              | CC                | 1946512670               |
| SNP_P3_124966_609    | NW_004515974.1 | Scaffold530 | 609                     | CC                              | AA                | 1946512671               |
| SNP_P3_124967_1098   | NW_004515974.1 | Scaffold530 | 1098                    | AA                              | GG                | 1946512673               |
| SNP_P3_124968_1108   | NW_004515974.1 | Scaffold530 | 1108                    | AA                              | GG                | 1946512674               |
| SNP_P3_124969_1112   | NW_004515974.1 | Scaffold530 | 1112                    | GG                              | TT                | 1946512675               |
| SNP_P3_124970_1123   | NW_004515974.1 | Scaffold530 | 1123                    | AA                              | TT                | 1946512677               |
| SNP_P3_124971_1125   | NW_004515974.1 | Scaffold530 | 1125                    | GG                              | AA                | 1946512678               |
| SNP_P3_124972_4155   | NW_004515974.1 | Scaffold530 | 4155                    | AA                              | GG                | 1946512680               |
| SNP_P3_124973_4159   | NW_004515974.1 | Scaffold530 | 4159                    | TT                              | GG                | 1946512681               |
| SNP_P3_124974_4180   | NW_004515974.1 | Scaffold530 | 4180                    | AA                              | TT                | 1946512683               |
| SNP_P3_124975_4188   | NW_004515974.1 | Scaffold530 | 4188                    | GG                              | AA                | 1946512684               |
| SNP_P3_124976_4201   | NW_004515974.1 | Scaffold530 | 4201                    | GG                              | AA                | 1946512686               |

| SNPs IDs            | Chromosome IDs | Chromosomes | Physical positions (bp) | CDC Frontier (Reference genome) | (Pusa 256 & HPNB) | NCBI SNPdb Accession IDs |
|---------------------|----------------|-------------|-------------------------|---------------------------------|-------------------|--------------------------|
| SNP_P3_124977_4222  | NW_004515974.1 | Scaffold530 | 4222                    | CC                              | GG                | 1946512687               |
| SNP_P3_124978_4229  | NW_004515974.1 | Scaffold530 | 4229                    | TT                              | AA                | 1946512689               |
| SNP_P3_124979_4232  | NW_004515974.1 | Scaffold530 | 4232                    | AA                              | CC                | 1946512690               |
| SNP_P3_124980_4245  | NW_004515974.1 | Scaffold530 | 4245                    | GG                              | AA                | 1946512691               |
| SNP_P3_124981_4252  | NW_004515974.1 | Scaffold530 | 4252                    | AA                              | CC                | 1946512693               |
| SNP_P3_124982_4269  | NW_004515974.1 | Scaffold530 | 4269                    | GG                              | CC                | 1946512694               |
| SNP_P3_124983_4282  | NW_004515974.1 | Scaffold530 | 4282                    | GG                              | AA                | 1946512696               |
| SNP_P3_124984_4297  | NW_004515974.1 | Scaffold530 | 4297                    | CC                              | GG                | 1946512697               |
| SNP_P3_124985_4310  | NW_004515974.1 | Scaffold530 | 4310                    | TT                              | AA                | 1946512699               |
| SNP_P3_124986_8986  | NW_004515974.1 | Scaffold530 | 8986                    | CC                              | TT                | 1946512700               |
| SNP_P3_124987_9047  | NW_004515974.1 | Scaffold530 | 9047                    | GG                              | AA                | 1946512702               |
| SNP_P3_124988_9064  | NW_004515974.1 | Scaffold530 | 9064                    | GG                              | CC                | 1946512703               |
| SNP_P3_124990_10684 | NW_004515974.1 | Scaffold530 | 10684                   | GG                              | AA                | 1946512704               |
| SNP_P3_124991_10773 | NW_004515974.1 | Scaffold530 | 10773                   | AA                              | GG                | 1946512706               |
| SNP_P3_124992_11063 | NW_004515974.1 | Scaffold530 | 11063                   | AA                              | CC                | 1946512707               |
| SNP_P3_124993_11298 | NW_004515974.1 | Scaffold530 | 11298                   | GG                              | AA                | 1946512709               |
| SNP_P3_124994_11337 | NW_004515974.1 | Scaffold530 | 11337                   | TT                              | CC                | 1946512710               |
| SNP_P3_124995_22619 | NW_004515974.1 | Scaffold530 | 22619                   | CC                              | TT                | 1946512712               |
| SNP_P3_124996_33116 | NW_004515974.1 | Scaffold530 | 33116                   | GG                              | TT                | 1946512713               |
| SNP_P3_124997_33139 | NW_004515974.1 | Scaffold530 | 33139                   | AA                              | GG                | 1946512715               |
| SNP_P3_124998_44578 | NW_004515974.1 | Scaffold530 | 44578                   | AA                              | CC                | 1946512716               |
| SNP_P3_124999_44607 | NW_004515974.1 | Scaffold530 | 44607                   | GG                              | TT                | 1946512718               |
| SNP_P3_125000_44634 | NW_004515974.1 | Scaffold530 | 44634                   | GG                              | AA                | 1946512719               |
| SNP_P3_125001_50371 | NW_004515974.1 | Scaffold530 | 50371                   | AA                              | GG                | 1946512721               |
| SNP_P3_125002_50381 | NW_004515974.1 | Scaffold530 | 50381                   | TT                              | CC                | 1946512722               |
| SNP_P3_125003_53275 | NW_004515974.1 | Scaffold530 | 53275                   | CC                              | TT                | 1946512724               |
| SNP_P3_125004_54217 | NW_004515974.1 | Scaffold530 | 54217                   | CC                              | GG                | 1946512725               |
| SNP_P3_125005_1236  | NW_004515975.1 | Scaffold531 | 1236                    | GG                              | AA                | 1946512726               |
| SNP_P3_125006_4781  | NW_004515975.1 | Scaffold531 | 4781                    | TT                              | CC                | 1946512728               |
| SNP_P3_125007_5578  | NW_004515975.1 | Scaffold531 | 5578                    | AA                              | CC                | 1946512729               |
| SNP_P3_125008_7377  | NW_004515975.1 | Scaffold531 | 7377                    | CC                              | TT                | 1946512731               |
| SNP_P3_125009_7631  | NW_004515975.1 | Scaffold531 | 7631                    | AA                              | GG                | 1946512732               |
| SNP_P3_125010_7632  | NW_004515975.1 | Scaffold531 | 7632                    | AA                              | CC                | 1946512734               |
| SNP_P3_125011_11735 | NW_004515975.1 | Scaffold531 | 11735                   | TT                              | CC                | 1946512735               |
| SNP_P3_125012_11840 | NW_004515975.1 | Scaffold531 | 11840                   | TT                              | CC                | 1946512737               |
| SNP_P3_125013_11868 | NW_004515975.1 | Scaffold531 | 11868                   | AA                              | TT                | 1946512738               |
| SNP_P3_125015_11926 | NW_004515975.1 | Scaffold531 | 11926                   | CC                              | GG                | 1946512739               |
| SNP_P3_125016_11961 | NW_004515975.1 | Scaffold531 | 11961                   | AA                              | GG                | 1946512741               |
| SNP_P3_125017_11979 | NW_004515975.1 | Scaffold531 | 11979                   | GG                              | TT                | 1946512742               |
| SNP_P3_125018_12206 | NW_004515975.1 | Scaffold531 | 12206                   | AA                              | GG                | 1946512744               |
| SNP_P3_125019_12295 | NW_004515975.1 | Scaffold531 | 12295                   | CC                              | TT                | 1946512745               |
| SNP_P3_125020_12307 | NW_004515975.1 | Scaffold531 | 12307                   | CC                              | TT                | 1946512747               |

| SNPs IDs             | Chromosome IDs | Chromosomes | Physical positions (bp) | CDC Frontier (Reference genome) | (Pusa 256 & HPNB) | NCBI SNPdb Accession IDs |
|----------------------|----------------|-------------|-------------------------|---------------------------------|-------------------|--------------------------|
| SNP_P3_125021_12530  | NW_004515975.1 | Scaffold531 | 12530                   | TT                              | AA                | 1946512748               |
| SNP_P3_125023_12601  | NW_004515975.1 | Scaffold531 | 12601                   | GG                              | AA                | 1946512750               |
| SNP_P3_125024_12626  | NW_004515975.1 | Scaffold531 | 12626                   | AA                              | CC                | 1946512751               |
| SNP_P3_125025_12637  | NW_004515975.1 | Scaffold531 | 12637                   | TT                              | CC                | 1946512753               |
| SNP_P3_125026_12663  | NW_004515975.1 | Scaffold531 | 12663                   | GG                              | TT                | 1946512754               |
| SNP_P3_125027_13051  | NW_004515975.1 | Scaffold531 | 13051                   | CC                              | GG                | 1946512756               |
| SNP_P3_125028_13134  | NW_004515975.1 | Scaffold531 | 13134                   | GG                              | TT                | 1946512757               |
| SNP_P3_125029_13207  | NW_004515975.1 | Scaffold531 | 13207                   | CC                              | GG                | 1946512759               |
| SNP_P3_125030_13369  | NW_004515975.1 | Scaffold531 | 13369                   | TT                              | AA                | 1946512761               |
| SNP_P3_125031_13379  | NW_004515975.1 | Scaffold531 | 13379                   | TT                              | CC                | 1946512762               |
| SNP_P3_125032_13442  | NW_004515975.1 | Scaffold531 | 13442                   | TT                              | CC                | 1946512764               |
| SNP_P3_125034_13660  | NW_004515975.1 | Scaffold531 | 13660                   | TT                              | GG                | 1946512765               |
| SNP_P3_125035_13664  | NW_004515975.1 | Scaffold531 | 13664                   | TT                              | CC                | 1946512767               |
| SNP_P3_125036_26129  | NW_004515975.1 | Scaffold531 | 26129                   | TT                              | GG                | 1946512768               |
| SNP_P3_125037_29640  | NW_004515975.1 | Scaffold531 | 29640                   | TT                              | CC                | 1946512769               |
| SNP_P3_125038_48912  | NW_004515975.1 | Scaffold531 | 48912                   | GG                              | TT                | 1946512771               |
| SNP_P3_125039_51611  | NW_004515975.1 | Scaffold531 | 51611                   | CC                              | AA                | 1946512772               |
| SNP_P3_125040_56353  | NW_004515975.1 | Scaffold531 | 56353                   | AA                              | GG                | 1946512774               |
| SNP_P3_125041_58086  | NW_004515975.1 | Scaffold531 | 58086                   | TT                              | CC                | 1946512775               |
| SNP_P3_125042_58324  | NW_004515975.1 | Scaffold531 | 58324                   | TT                              | CC                | 1946512777               |
| SNP_P3_125043_58544  | NW_004515975.1 | Scaffold531 | 58544                   | CC                              | GG                | 1946512778               |
| SNP_P3_125044_58758  | NW_004515975.1 | Scaffold531 | 58758                   | AA                              | CC                | 1946512780               |
| SNP_P3_125045_60522  | NW_004515975.1 | Scaffold531 | 60522                   | AA                              | GG                | 1946512781               |
| SNP_P3_125046_73190  | NW_004515975.1 | Scaffold531 | 73190                   | TT                              | CC                | 1946512783               |
| SNP_P3_125047_78028  | NW_004515975.1 | Scaffold531 | 78028                   | AA                              | GG                | 1946512784               |
| SNP_P3_125049_92638  | NW_004515975.1 | Scaffold531 | 92638                   | TT                              | CC                | 1946512786               |
| SNP_P3_125050_92741  | NW_004515975.1 | Scaffold531 | 92741                   | AA                              | TT                | 1946512787               |
| SNP_P3_125051_114731 | NW_004515975.1 | Scaffold531 | 114731                  | GG                              | AA                | 1946512789               |
| SNP_P3_125052_129677 | NW_004515975.1 | Scaffold531 | 129677                  | CC                              | AA                | 1946512790               |
| SNP_P3_125053_142689 | NW_004515975.1 | Scaffold531 | 142689                  | CC                              | GG                | 1946512791               |
| SNP_P3_125054_160242 | NW_004515975.1 | Scaffold531 | 160242                  | TT                              | AA                | 1946512793               |
| SNP_P3_125055_163981 | NW_004515975.1 | Scaffold531 | 163981                  | CC                              | TT                | 1946512794               |
| SNP_P3_125056_167060 | NW_004515975.1 | Scaffold531 | 167060                  | GG                              | AA                | 1946512796               |
| SNP_P3_125057_190435 | NW_004515975.1 | Scaffold531 | 190435                  | GG                              | TT                | 1946512797               |
| SNP_P3_125058_190488 | NW_004515975.1 | Scaffold531 | 190488                  | CC                              | TT                | 1946512799               |
| SNP_P3_125059_196528 | NW_004515975.1 | Scaffold531 | 196528                  | CC                              | AA                | 1946512800               |
| SNP_P3_125061_206301 | NW_004515975.1 | Scaffold531 | 206301                  | TT                              | CC                | 1946512802               |
| SNP_P3_125062_206309 | NW_004515975.1 | Scaffold531 | 206309                  | CC                              | TT                | 1946512803               |
| SNP_P3_125063_206319 | NW_004515975.1 | Scaffold531 | 206319                  | AA                              | TT                | 1946512805               |
| SNP_P3_125064_206338 | NW_004515975.1 | Scaffold531 | 206338                  | CC                              | TT                | 1946512806               |
| SNP_P3_125065_206342 | NW_004515975.1 | Scaffold531 | 206342                  | TT                              | AA                | 1946512807               |
| SNP_P3_125066_206362 | NW_004515975.1 | Scaffold531 | 206362                  | AA                              | TT                | 1946512809               |



| SNPs IDs             | Chromosome IDs | Chromosomes | Physical positions (bp) | CDC Frontier (Reference genome) | (Pusa 256 & HPNB) | NCBI SNPdb Accession IDs |
|----------------------|----------------|-------------|-------------------------|---------------------------------|-------------------|--------------------------|
| SNP_P3_125067_206369 | NW_004515975.1 | Scaffold531 | 206369                  | TT                              | AA                | 1946512810               |
| SNP_P3_125068_206393 | NW_004515975.1 | Scaffold531 | 206393                  | AA                              | TT                | 1946512812               |
| SNP_P3_125069_206454 | NW_004515975.1 | Scaffold531 | 206454                  | AA                              | TT                | 1946512813               |
| SNP_P3_125070_206611 | NW_004515975.1 | Scaffold531 | 206611                  | CC                              | TT                | 1946512814               |
| SNP_P3_125071_1798   | NW_004515976.1 | Scaffold532 | 1798                    | TT                              | GG                | 1946512816               |
| SNP_P3_125072_1829   | NW_004515976.1 | Scaffold532 | 1829                    | TT                              | CC                | 1946512817               |
| SNP_P3_125073_1873   | NW_004515976.1 | Scaffold532 | 1873                    | AA                              | GG                | 1946512819               |
| SNP_P3_125074_7152   | NW_004515977.1 | Scaffold533 | 7152                    | GG                              | TT                | 1946512820               |
| SNP_P3_125075_7158   | NW_004515977.1 | Scaffold533 | 7158                    | AA                              | TT                | 1946512822               |
| SNP_P3_125076_7874   | NW_004515977.1 | Scaffold533 | 7874                    | GG                              | CC                | 1946512823               |
| SNP_P3_125077_7893   | NW_004515977.1 | Scaffold533 | 7893                    | GG                              | AA                | 1946512825               |
| SNP_P3_125078_7903   | NW_004515977.1 | Scaffold533 | 7903                    | AA                              | CC                | 1946512826               |
| SNP_P3_125079_7923   | NW_004515977.1 | Scaffold533 | 7923                    | CC                              | GG                | 1946512828               |
| SNP_P3_125080_8762   | NW_004515977.1 | Scaffold533 | 8762                    | GG                              | CC                | 1946512829               |
| SNP_P3_125081_8777   | NW_004515977.1 | Scaffold533 | 8777                    | TT                              | GG                | 1946512831               |
| SNP_P3_125082_8904   | NW_004515977.1 | Scaffold533 | 8904                    | AA                              | TT                | 1946512832               |
| SNP_P3_125083_8919   | NW_004515977.1 | Scaffold533 | 8919                    | CC                              | GG                | 1946512833               |
| SNP_P3_125084_8927   | NW_004515977.1 | Scaffold533 | 8927                    | CC                              | TT                | 1946512835               |
| SNP_P3_125085_8953   | NW_004515977.1 | Scaffold533 | 8953                    | AA                              | CC                | 1946512837               |
| SNP_P3_125086_8992   | NW_004515977.1 | Scaffold533 | 8992                    | CC                              | TT                | 1946512838               |
| SNP_P3_125087_9002   | NW_004515977.1 | Scaffold533 | 9002                    | AA                              | CC                | 1946512840               |
| SNP_P3_125088_9015   | NW_004515977.1 | Scaffold533 | 9015                    | AA                              | CC                | 1946512841               |
| SNP_P3_125089_21382  | NW_004515977.1 | Scaffold533 | 21382                   | GG                              | AA                | 1946512843               |
| SNP_P3_125090_23636  | NW_004515977.1 | Scaffold533 | 23636                   | AA                              | GG                | 1946512844               |
| SNP_P3_125091_23645  | NW_004515977.1 | Scaffold533 | 23645                   | AA                              | TT                | 1946512846               |
| SNP_P3_125092_23711  | NW_004515977.1 | Scaffold533 | 23711                   | CC                              | TT                | 1946512847               |
| SNP_P3_125093_23715  | NW_004515977.1 | Scaffold533 | 23715                   | AA                              | GG                | 1946512849               |
| SNP_P3_125094_24201  | NW_004515977.1 | Scaffold533 | 24201                   | TT                              | AA                | 1946512851               |
| SNP_P3_125095_24570  | NW_004515977.1 | Scaffold533 | 24570                   | TT                              | CC                | 1946512853               |
| SNP_P3_125096_24582  | NW_004515977.1 | Scaffold533 | 24582                   | GG                              | CC                | 1946512854               |
| SNP_P3_125097_24655  | NW_004515977.1 | Scaffold533 | 24655                   | TT                              | AA                | 1946512856               |
| SNP_P3_125098_24811  | NW_004515977.1 | Scaffold533 | 24811                   | CC                              | GG                | 1946512857               |
| SNP_P3_125099_13341  | NW_004515978.1 | Scaffold535 | 13341                   | GG                              | AA                | 1946512859               |
| SNP_P3_125100_22611  | NW_004515978.1 | Scaffold535 | 22611                   | CC                              | TT                | 1946512860               |
| SNP_P3_125101_49296  | NW_004515978.1 | Scaffold535 | 49296                   | TT                              | GG                | 1946512862               |
| SNP_P3_125102_50111  | NW_004515978.1 | Scaffold535 | 50111                   | GG                              | CC                | 1946512863               |
| SNP_P3_125103_68639  | NW_004515978.1 | Scaffold535 | 68639                   | AA                              | CC                | 1946512865               |
| SNP_P3_125104_68645  | NW_004515978.1 | Scaffold535 | 68645                   | TT                              | CC                | 1946512866               |
| SNP_P3_125105_68683  | NW_004515978.1 | Scaffold535 | 68683                   | TT                              | CC                | 1946512868               |
| SNP_P3_125106_68938  | NW_004515978.1 | Scaffold535 | 68938                   | AA                              | GG                | 1946512870               |
| SNP_P3_125107_68976  | NW_004515978.1 | Scaffold535 | 68976                   | TT                              | GG                | 1946512871               |
| SNP_P3_125108_69069  | NW_004515978.1 | Scaffold535 | 69069                   | CC                              | AA                | 1946512873               |

| SNPs IDs             | Chromosome IDs | Chromosomes | Physical positions (bp) | CDC Frontier (Reference genome) | (Pusa 256 & HPNB) | NCBI SNPdb Accession IDs |
|----------------------|----------------|-------------|-------------------------|---------------------------------|-------------------|--------------------------|
| SNP_P3_125109_69375  | NW_004515978.1 | Scaffold535 | 69375                   | CC                              | AA                | 1946512874               |
| SNP_P3_125110_69785  | NW_004515978.1 | Scaffold535 | 69785                   | TT                              | CC                | 1946512876               |
| SNP_P3_125111_70131  | NW_004515978.1 | Scaffold535 | 70131                   | AA                              | GG                | 1946512877               |
| SNP_P3_125112_94518  | NW_004515978.1 | Scaffold535 | 94518                   | AA                              | GG                | 1946512879               |
| SNP_P3_125114_94845  | NW_004515978.1 | Scaffold535 | 94845                   | TT                              | CC                | 1946512881               |
| SNP_P3_125115_96773  | NW_004515978.1 | Scaffold535 | 96773                   | TT                              | CC                | 1946512882               |
| SNP_P3_125116_125735 | NW_004515978.1 | Scaffold535 | 125735                  | GG                              | AA                | 1946512884               |
| SNP_P3_125117_154139 | NW_004515978.1 | Scaffold535 | 154139                  | GG                              | AA                | 1946512886               |
| SNP_P3_125118_1547   | NW_004515979.1 | Scaffold536 | 1547                    | TT                              | CC                | 1946512887               |
| SNP_P3_125119_1622   | NW_004515979.1 | Scaffold536 | 1622                    | TT                              | AA                | 1946512889               |
| SNP_P3_125120_2140   | NW_004515979.1 | Scaffold536 | 2140                    | CC                              | TT                | 1946512890               |
| SNP_P3_125121_2141   | NW_004515979.1 | Scaffold536 | 2141                    | AA                              | GG                | 1946512892               |
| SNP_P3_125122_2159   | NW_004515979.1 | Scaffold536 | 2159                    | TT                              | AA                | 1946512893               |
| SNP_P3_125123_2243   | NW_004515979.1 | Scaffold536 | 2243                    | GG                              | AA                | 1946512895               |
| SNP_P3_125124_2615   | NW_004515979.1 | Scaffold536 | 2615                    | CC                              | AA                | 1946512896               |
| SNP_P3_125125_3683   | NW_004515979.1 | Scaffold536 | 3683                    | CC                              | AA                | 1946512898               |
| SNP_P3_125126_14524  | NW_004515980.1 | Scaffold537 | 14524                   | TT                              | GG                | 1946512899               |
| SNP_P3_125127_14840  | NW_004515980.1 | Scaffold537 | 14840                   | GG                              | AA                | 1946512901               |
| SNP_P3_125128_14846  | NW_004515980.1 | Scaffold537 | 14846                   | AA                              | GG                | 1946512903               |
| SNP_P3_125129_17659  | NW_004515980.1 | Scaffold537 | 17659                   | AA                              | CC                | 1946512904               |
| SNP_P3_125130_17687  | NW_004515980.1 | Scaffold537 | 17687                   | AA                              | GG                | 1946512906               |
| SNP_P3_125131_17714  | NW_004515980.1 | Scaffold537 | 17714                   | AA                              | TT                | 1946512907               |
| SNP_P3_125132_31458  | NW_004515980.1 | Scaffold537 | 31458                   | AA                              | TT                | 1946512908               |
| SNP_P3_125133_31464  | NW_004515980.1 | Scaffold537 | 31464                   | AA                              | CC                | 1946512910               |
| SNP_P3_125134_31491  | NW_004515980.1 | Scaffold537 | 31491                   | TT                              | GG                | 1946512911               |
| SNP_P3_125135_31568  | NW_004515980.1 | Scaffold537 | 31568                   | AA                              | GG                | 1946512913               |
| SNP_P3_125136_31584  | NW_004515980.1 | Scaffold537 | 31584                   | TT                              | GG                | 1946512914               |
| SNP_P3_125137_31585  | NW_004515980.1 | Scaffold537 | 31585                   | GG                              | TT                | 1946512916               |
| SNP_P3_125138_31885  | NW_004515980.1 | Scaffold537 | 31885                   | TT                              | CC                | 1946512917               |
| SNP_P3_125139_31944  | NW_004515980.1 | Scaffold537 | 31944                   | GG                              | CC                | 1946512919               |
| SNP_P3_125140_32015  | NW_004515980.1 | Scaffold537 | 32015                   | AA                              | GG                | 1946512920               |
| SNP_P3_125141_32048  | NW_004515980.1 | Scaffold537 | 32048                   | CC                              | TT                | 1946512922               |
| SNP_P3_125142_35364  | NW_004515980.1 | Scaffold537 | 35364                   | GG                              | TT                | 1946512923               |
| SNP_P3_125143_35731  | NW_004515980.1 | Scaffold537 | 35731                   | CC                              | GG                | 1946512925               |
| SNP_P3_125144_35744  | NW_004515980.1 | Scaffold537 | 35744                   | TT                              | GG                | 1946512926               |
| SNP_P3_125145_35769  | NW_004515980.1 | Scaffold537 | 35769                   | AA                              | TT                | 1946512928               |
| SNP_P3_125146_35770  | NW_004515980.1 | Scaffold537 | 35770                   | AA                              | CC                | 1946512929               |
| SNP_P3_125147_46606  | NW_004515980.1 | Scaffold537 | 46606                   | GG                              | AA                | 1946512930               |
| SNP_P3_125148_58790  | NW_004515980.1 | Scaffold537 | 58790                   | AA                              | GG                | 1946512932               |
| SNP_P3_125149_72681  | NW_004515980.1 | Scaffold537 | 72681                   | AA                              | GG                | 1946512933               |
| SNP_P3_125150_78562  | NW_004515980.1 | Scaffold537 | 78562                   | TT                              | CC                | 1946512935               |
| SNP_P3_125151_78641  | NW_004515980.1 | Scaffold537 | 78641                   | AA                              | CC                | 1946512936               |

| SNPs IDs             | Chromosome IDs | Chromosomes | Physical positions (bp) | CDC Frontier (Reference genome) | (Pusa 256 & HPNB) | NCBI SNPdb Accession IDs |
|----------------------|----------------|-------------|-------------------------|---------------------------------|-------------------|--------------------------|
| SNP_P3_125152_78771  | NW_004515980.1 | Scaffold537 | 78771                   | AA                              | CC                | 1946512938               |
| SNP_P3_125153_78856  | NW_004515980.1 | Scaffold537 | 78856                   | AA                              | GG                | 1946512939               |
| SNP_P3_125154_78860  | NW_004515980.1 | Scaffold537 | 78860                   | AA                              | GG                | 1946512941               |
| SNP_P3_125155_78877  | NW_004515980.1 | Scaffold537 | 78877                   | AA                              | GG                | 1946512942               |
| SNP_P3_125156_78882  | NW_004515980.1 | Scaffold537 | 78882                   | TT                              | AA                | 1946512944               |
| SNP_P3_125157_78904  | NW_004515980.1 | Scaffold537 | 78904                   | AA                              | CC                | 1946512945               |
| SNP_P3_125158_78942  | NW_004515980.1 | Scaffold537 | 78942                   | TT                              | CC                | 1946512946               |
| SNP_P3_125159_78972  | NW_004515980.1 | Scaffold537 | 78972                   | AA                              | GG                | 1946512948               |
| SNP_P3_125160_78985  | NW_004515980.1 | Scaffold537 | 78985                   | AA                              | CC                | 1946512949               |
| SNP_P3_125161_78986  | NW_004515980.1 | Scaffold537 | 78986                   | AA                              | GG                | 1946512951               |
| SNP_P3_125162_78988  | NW_004515980.1 | Scaffold537 | 78988                   | AA                              | CC                | 1946512953               |
| SNP_P3_125163_78996  | NW_004515980.1 | Scaffold537 | 78996                   | AA                              | GG                | 1946512954               |
| SNP_P3_125164_79002  | NW_004515980.1 | Scaffold537 | 79002                   | TT                              | GG                | 1946512956               |
| SNP_P3_125165_79006  | NW_004515980.1 | Scaffold537 | 79006                   | TT                              | CC                | 1946512957               |
| SNP_P3_125166_79049  | NW_004515980.1 | Scaffold537 | 79049                   | TT                              | AA                | 1946512959               |
| SNP_P3_125167_79054  | NW_004515980.1 | Scaffold537 | 79054                   | AA                              | GG                | 1946512961               |
| SNP_P3_125168_79085  | NW_004515980.1 | Scaffold537 | 79085                   | AA                              | GG                | 1946512962               |
| SNP_P3_125169_79103  | NW_004515980.1 | Scaffold537 | 79103                   | TT                              | CC                | 1946512964               |
| SNP_P3_125170_80944  | NW_004515980.1 | Scaffold537 | 80944                   | TT                              | CC                | 1946512965               |
| SNP_P3_125171_81093  | NW_004515980.1 | Scaffold537 | 81093                   | GG                              | AA                | 1946512967               |
| SNP_P3_125172_82318  | NW_004515980.1 | Scaffold537 | 82318                   | AA                              | TT                | 1946512968               |
| SNP_P3_125173_82346  | NW_004515980.1 | Scaffold537 | 82346                   | CC                              | TT                | 1946512970               |
| SNP_P3_125174_82393  | NW_004515980.1 | Scaffold537 | 82393                   | AA                              | GG                | 1946512971               |
| SNP_P3_125175_84656  | NW_004515980.1 | Scaffold537 | 84656                   | TT                              | AA                | 1946512973               |
| SNP_P3_125176_84676  | NW_004515980.1 | Scaffold537 | 84676                   | CC                              | TT                | 1946512974               |
| SNP_P3_125177_85150  | NW_004515980.1 | Scaffold537 | 85150                   | TT                              | AA                | 1946512976               |
| SNP_P3_125178_85172  | NW_004515980.1 | Scaffold537 | 85172                   | TT                              | CC                | 1946512977               |
| SNP_P3_125179_85178  | NW_004515980.1 | Scaffold537 | 85178                   | AA                              | GG                | 1946512979               |
| SNP_P3_125180_85183  | NW_004515980.1 | Scaffold537 | 85183                   | CC                              | AA                | 1946512980               |
| SNP_P3_125181_85230  | NW_004515980.1 | Scaffold537 | 85230                   | TT                              | GG                | 1946512982               |
| SNP_P3_125182_85258  | NW_004515980.1 | Scaffold537 | 85258                   | CC                              | TT                | 1946512983               |
| SNP_P3_125183_85259  | NW_004515980.1 | Scaffold537 | 85259                   | GG                              | AA                | 1946512985               |
| SNP_P3_125184_85308  | NW_004515980.1 | Scaffold537 | 85308                   | TT                              | AA                | 1946512986               |
| SNP_P3_125185_85349  | NW_004515980.1 | Scaffold537 | 85349                   | AA                              | GG                | 1946512988               |
| SNP_P3_125186_85692  | NW_004515980.1 | Scaffold537 | 85692                   | AA                              | TT                | 1946512989               |
| SNP_P3_125188_102520 | NW_004515980.1 | Scaffold537 | 102520                  | AA                              | GG                | 1946512991               |
| SNP_P3_125189_106235 | NW_004515980.1 | Scaffold537 | 106235                  | TT                              | AA                | 1946512992               |
| SNP_P3_125190_144173 | NW_004515980.1 | Scaffold537 | 144173                  | TT                              | GG                | 1946512994               |
| SNP_P3_125191_167092 | NW_004515980.1 | Scaffold537 | 167092                  | AA                              | CC                | 1946512995               |
| SNP_P3_125193_189790 | NW_004515980.1 | Scaffold537 | 189790                  | CC                              | TT                | 1946512997               |
| SNP_P3_125194_200310 | NW_004515980.1 | Scaffold537 | 200310                  | GG                              | TT                | 1946512998               |
| SNP_P3_125196_269967 | NW_004515980.1 | Scaffold537 | 269967                  | CC                              | AA                | 1946512999               |

| SNPs IDs             | Chromosome IDs | Chromosomes | Physical positions (bp) | CDC Frontier (Reference genome) | (Pusa 256 & HPNB) | NCBI SNPdb Accession IDs |
|----------------------|----------------|-------------|-------------------------|---------------------------------|-------------------|--------------------------|
| SNP_P3_125197_270308 | NW_004515980.1 | Scaffold537 | 270308                  | GG                              | AA                | 1946513001               |
| SNP_P3_125198_270800 | NW_004515980.1 | Scaffold537 | 270800                  | AA                              | GG                | 1946513002               |
| SNP_P3_125199_271014 | NW_004515980.1 | Scaffold537 | 271014                  | TT                              | GG                | 1946513004               |
| SNP_P3_125200_271190 | NW_004515980.1 | Scaffold537 | 271190                  | GG                              | TT                | 1946513005               |
| SNP_P3_125201_271207 | NW_004515980.1 | Scaffold537 | 271207                  | CC                              | TT                | 1946513007               |
| SNP_P3_125202_20486  | NW_004515983.1 | Scaffold543 | 20486                   | GG                              | AA                | 1946513008               |
| SNP_P3_125203_20526  | NW_004515983.1 | Scaffold543 | 20526                   | TT                              | GG                | 1946513010               |
| SNP_P3_125204_20569  | NW_004515983.1 | Scaffold543 | 20569                   | AA                              | TT                | 1946513011               |
| SNP_P3_125205_20572  | NW_004515983.1 | Scaffold543 | 20572                   | CC                              | AA                | 1946513013               |
| SNP_P3_125206_20577  | NW_004515983.1 | Scaffold543 | 20577                   | AA                              | CC                | 1946513014               |
| SNP_P3_125207_20606  | NW_004515983.1 | Scaffold543 | 20606                   | GG                              | AA                | 1946513016               |
| SNP_P3_125208_20913  | NW_004515983.1 | Scaffold543 | 20913                   | AA                              | TT                | 1946513017               |
| SNP_P3_125209_20914  | NW_004515983.1 | Scaffold543 | 20914                   | AA                              | TT                | 1946513019               |
| SNP_P3_125210_20944  | NW_004515983.1 | Scaffold543 | 20944                   | AA                              | CC                | 1946513020               |
| SNP_P3_125211_23266  | NW_004515983.1 | Scaffold543 | 23266                   | CC                              | TT                | 1946513022               |
| SNP_P3_125212_28162  | NW_004515983.1 | Scaffold543 | 28162                   | GG                              | AA                | 1946513023               |
| SNP_P3_125213_28206  | NW_004515983.1 | Scaffold543 | 28206                   | TT                              | CC                | 1946513025               |
| SNP_P3_125214_28275  | NW_004515983.1 | Scaffold543 | 28275                   | AA                              | GG                | 1946513026               |
| SNP_P3_125216_28638  | NW_004515983.1 | Scaffold543 | 28638                   | AA                              | GG                | 1946513028               |
| SNP_P3_125217_28674  | NW_004515983.1 | Scaffold543 | 28674                   | AA                              | CC                | 1946513029               |
| SNP_P3_125218_31226  | NW_004515983.1 | Scaffold543 | 31226                   | AA                              | GG                | 1946513031               |
| SNP_P3_125219_31246  | NW_004515983.1 | Scaffold543 | 31246                   | TT                              | GG                | 1946513032               |
| SNP_P3_125220_31255  | NW_004515983.1 | Scaffold543 | 31255                   | AA                              | TT                | 1946513034               |
| SNP_P3_125221_31277  | NW_004515983.1 | Scaffold543 | 31277                   | TT                              | CC                | 1946513035               |
| SNP_P3_125222_31658  | NW_004515983.1 | Scaffold543 | 31658                   | AA                              | CC                | 1946513037               |
| SNP_P3_125223_31796  | NW_004515983.1 | Scaffold543 | 31796                   | AA                              | GG                | 1946513038               |
| SNP_P3_125224_31799  | NW_004515983.1 | Scaffold543 | 31799                   | GG                              | AA                | 1946513040               |
| SNP_P3_125225_31807  | NW_004515983.1 | Scaffold543 | 31807                   | AA                              | TT                | 1946513041               |
| SNP_P3_125227_68503  | NW_004515983.1 | Scaffold543 | 68503                   | CC                              | TT                | 1946513044               |
| SNP_P3_125228_68869  | NW_004515983.1 | Scaffold543 | 68869                   | AA                              | CC                | 1946513045               |
| SNP_P3_125229_68884  | NW_004515983.1 | Scaffold543 | 68884                   | TT                              | CC                | 1946513047               |
| SNP_P3_125230_68922  | NW_004515983.1 | Scaffold543 | 68922                   | TT                              | GG                | 1946513048               |
| SNP_P3_125231_68932  | NW_004515983.1 | Scaffold543 | 68932                   | CC                              | AA                | 1946513050               |
| SNP_P3_125232_68947  | NW_004515983.1 | Scaffold543 | 68947                   | CC                              | TT                | 1946513051               |
| SNP_P3_125234_69038  | NW_004515983.1 | Scaffold543 | 69038                   | AA                              | GG                | 1946513053               |
| SNP_P3_125237_100431 | NW_004515983.1 | Scaffold543 | 100431                  | CC                              | AA                | 1946513054               |
| SNP_P3_125238_100456 | NW_004515983.1 | Scaffold543 | 100456                  | CC                              | TT                | 1946513056               |
| SNP_P3_125239_100788 | NW_004515983.1 | Scaffold543 | 100788                  | AA                              | GG                | 1946513057               |
| SNP_P3_125240_100806 | NW_004515983.1 | Scaffold543 | 100806                  | CC                              | TT                | 1946513059               |
| SNP_P3_125241_100845 | NW_004515983.1 | Scaffold543 | 100845                  | TT                              | CC                | 1946513060               |
| SNP_P3_125242_100873 | NW_004515983.1 | Scaffold543 | 100873                  | CC                              | TT                | 1946513062               |
| SNP_P3_125243_139155 | NW_004515983.1 | Scaffold543 | 139155                  | CC                              | TT                | 1946513063               |

| SNPs IDs             | Chromosome IDs | Chromosomes | Physical positions (bp) | CDC Frontier (Reference genome) | (Pusa 256 & HPNB) | NCBI SNPdb Accession IDs |
|----------------------|----------------|-------------|-------------------------|---------------------------------|-------------------|--------------------------|
| SNP_P3_125244_143866 | NW_004515983.1 | Scaffold543 | 143866                  | AA                              | GG                | 1946513065               |
| SNP_P3_125245_145967 | NW_004515983.1 | Scaffold543 | 145967                  | AA                              | CC                | 1946513066               |
| SNP_P3_125246_159499 | NW_004515983.1 | Scaffold543 | 159499                  | CC                              | TT                | 1946513068               |
| SNP_P3_125247_159927 | NW_004515983.1 | Scaffold543 | 159927                  | TT                              | CC                | 1946513069               |
| SNP_P3_125248_159950 | NW_004515983.1 | Scaffold543 | 159950                  | AA                              | GG                | 1946513071               |
| SNP_P3_125249_159953 | NW_004515983.1 | Scaffold543 | 159953                  | CC                              | TT                | 1946513072               |
| SNP_P3_125250_159966 | NW_004515983.1 | Scaffold543 | 159966                  | CC                              | GG                | 1946513073               |
| SNP_P3_125251_160045 | NW_004515983.1 | Scaffold543 | 160045                  | AA                              | GG                | 1946513075               |
| SNP_P3_125252_160112 | NW_004515983.1 | Scaffold543 | 160112                  | CC                              | TT                | 1946513076               |
| SNP_P3_125253_160286 | NW_004515983.1 | Scaffold543 | 160286                  | GG                              | AA                | 1946513078               |
| SNP_P3_125254_160297 | NW_004515983.1 | Scaffold543 | 160297                  | TT                              | CC                | 1946513079               |
| SNP_P3_125255_160320 | NW_004515983.1 | Scaffold543 | 160320                  | GG                              | AA                | 1946513081               |
| SNP_P3_125256_160360 | NW_004515983.1 | Scaffold543 | 160360                  | GG                              | AA                | 1946513082               |
| SNP_P3_125257_160418 | NW_004515983.1 | Scaffold543 | 160418                  | CC                              | TT                | 1946513084               |
| SNP_P3_125258_187156 | NW_004515983.1 | Scaffold543 | 187156                  | GG                              | AA                | 1946513085               |
| SNP_P3_125259_188055 | NW_004515983.1 | Scaffold543 | 188055                  | AA                              | GG                | 1946513087               |
| SNP_P3_125260_188103 | NW_004515983.1 | Scaffold543 | 188103                  | CC                              | TT                | 1946513088               |
| SNP_P3_125261_217113 | NW_004515983.1 | Scaffold543 | 217113                  | CC                              | TT                | 1946513090               |
| SNP_P3_125263_220806 | NW_004515983.1 | Scaffold543 | 220806                  | AA                              | GG                | 1946513091               |
| SNP_P3_125264_223514 | NW_004515983.1 | Scaffold543 | 223514                  | AA                              | GG                | 1946513092               |
| SNP_P3_125265_223552 | NW_004515983.1 | Scaffold543 | 223552                  | CC                              | AA                | 1946513094               |
| SNP_P3_125266_224187 | NW_004515983.1 | Scaffold543 | 224187                  | GG                              | TT                | 1946513095               |
| SNP_P3_125267_224450 | NW_004515983.1 | Scaffold543 | 224450                  | TT                              | CC                | 1946513097               |
| SNP_P3_125268_224484 | NW_004515983.1 | Scaffold543 | 224484                  | AA                              | GG                | 1946513098               |
| SNP_P3_125269_224497 | NW_004515983.1 | Scaffold543 | 224497                  | CC                              | TT                | 1946513100               |
| SNP_P3_125270_224524 | NW_004515983.1 | Scaffold543 | 224524                  | TT                              | CC                | 1946513101               |
| SNP_P3_125271_224538 | NW_004515983.1 | Scaffold543 | 224538                  | TT                              | CC                | 1946513103               |
| SNP_P3_125272_224541 | NW_004515983.1 | Scaffold543 | 224541                  | AA                              | GG                | 1946513104               |
| SNP_P3_125273_225626 | NW_004515983.1 | Scaffold543 | 225626                  | CC                              | GG                | 1946513106               |
| SNP_P3_125274_226088 | NW_004515983.1 | Scaffold543 | 226088                  | AA                              | TT                | 1946513107               |
| SNP_P3_125275_226091 | NW_004515983.1 | Scaffold543 | 226091                  | CC                              | AA                | 1946513109               |
| SNP_P3_125276_226101 | NW_004515983.1 | Scaffold543 | 226101                  | AA                              | GG                | 1946513110               |
| SNP_P3_125277_226115 | NW_004515983.1 | Scaffold543 | 226115                  | AA                              | TT                | 1946513112               |
| SNP_P3_125278_226130 | NW_004515983.1 | Scaffold543 | 226130                  | TT                              | AA                | 1946513113               |
| SNP_P3_125279_226152 | NW_004515983.1 | Scaffold543 | 226152                  | TT                              | GG                | 1946513115               |
| SNP_P3_125280_226178 | NW_004515983.1 | Scaffold543 | 226178                  | GG                              | AA                | 1946513116               |
| SNP_P3_125281_226205 | NW_004515983.1 | Scaffold543 | 226205                  | CC                              | TT                | 1946513118               |
| SNP_P3_125282_226209 | NW_004515983.1 | Scaffold543 | 226209                  | GG                              | CC                | 1946513119               |
| SNP_P3_125283_226295 | NW_004515983.1 | Scaffold543 | 226295                  | AA                              | GG                | 1946513121               |
| SNP_P3_125284_226544 | NW_004515983.1 | Scaffold543 | 226544                  | AA                              | TT                | 1946513122               |
| SNP_P3_125285_226579 | NW_004515983.1 | Scaffold543 | 226579                  | TT                              | CC                | 1946513124               |
| SNP_P3_125286_226604 | NW_004515983.1 | Scaffold543 | 226604                  | GG                              | AA                | 1946513125               |

| SNPs IDs             | Chromosome IDs | Chromosomes | Physical positions (bp) | CDC Frontier (Reference genome) | (Pusa 256 & HPNB) | NCBI SNPdb Accession IDs |
|----------------------|----------------|-------------|-------------------------|---------------------------------|-------------------|--------------------------|
| SNP_P3_125287_229399 | NW_004515983.1 | Scaffold543 | 229399                  | CC                              | TT                | 1946513127               |
| SNP_P3_125288_229401 | NW_004515983.1 | Scaffold543 | 229401                  | AA                              | TT                | 1946513128               |
| SNP_P3_125290_229617 | NW_004515983.1 | Scaffold543 | 229617                  | AA                              | CC                | 1946513135               |
| SNP_P3_125291_229661 | NW_004515983.1 | Scaffold543 | 229661                  | GG                              | AA                | 1946513136               |
| SNP_P3_125292_229662 | NW_004515983.1 | Scaffold543 | 229662                  | AA                              | TT                | 1946513138               |
| SNP_P3_125293_229664 | NW_004515983.1 | Scaffold543 | 229664                  | TT                              | CC                | 1946513140               |
| SNP_P3_125294_229811 | NW_004515983.1 | Scaffold543 | 229811                  | AA                              | TT                | 1946513141               |
| SNP_P3_125295_242893 | NW_004515983.1 | Scaffold543 | 242893                  | TT                              | GG                | 1946513143               |
| SNP_P3_125296_242960 | NW_004515983.1 | Scaffold543 | 242960                  | GG                              | AA                | 1946513144               |
| SNP_P3_125297_243070 | NW_004515983.1 | Scaffold543 | 243070                  | AA                              | CC                | 1946513146               |
| SNP_P3_125298_243079 | NW_004515983.1 | Scaffold543 | 243079                  | TT                              | GG                | 1946513147               |
| SNP_P3_125299_243140 | NW_004515983.1 | Scaffold543 | 243140                  | TT                              | CC                | 1946513149               |
| SNP_P3_125300_243189 | NW_004515983.1 | Scaffold543 | 243189                  | AA                              | GG                | 1946513150               |
| SNP_P3_125301_243275 | NW_004515983.1 | Scaffold543 | 243275                  | TT                              | CC                | 1946513152               |
| SNP_P3_125302_243302 | NW_004515983.1 | Scaffold543 | 243302                  | CC                              | TT                | 1946513153               |
| SNP_P3_125303_243402 | NW_004515983.1 | Scaffold543 | 243402                  | GG                              | AA                | 1946513155               |
| SNP_P3_125304_243414 | NW_004515983.1 | Scaffold543 | 243414                  | TT                              | CC                | 1946513156               |
| SNP_P3_125305_243452 | NW_004515983.1 | Scaffold543 | 243452                  | AA                              | GG                | 1946513158               |
| SNP_P3_125306_243539 | NW_004515983.1 | Scaffold543 | 243539                  | TT                              | GG                | 1946513159               |
| SNP_P3_125307_244007 | NW_004515983.1 | Scaffold543 | 244007                  | AA                              | GG                | 1946513161               |
| SNP_P3_125308_244014 | NW_004515983.1 | Scaffold543 | 244014                  | AA                              | TT                | 1946513162               |
| SNP_P3_125309_244019 | NW_004515983.1 | Scaffold543 | 244019                  | GG                              | AA                | 1946513164               |
| SNP_P3_125310_244046 | NW_004515983.1 | Scaffold543 | 244046                  | GG                              | CC                | 1946513165               |
| SNP_P3_125311_244047 | NW_004515983.1 | Scaffold543 | 244047                  | TT                              | CC                | 1946513167               |
| SNP_P3_125312_254739 | NW_004515983.1 | Scaffold543 | 254739                  | GG                              | AA                | 1946513168               |
| SNP_P3_125313_280285 | NW_004515983.1 | Scaffold543 | 280285                  | AA                              | GG                | 1946513169               |
| SNP_P3_125314_298401 | NW_004515983.1 | Scaffold543 | 298401                  | AA                              | GG                | 1946513171               |
| SNP_P3_125315_298635 | NW_004515983.1 | Scaffold543 | 298635                  | TT                              | CC                | 1946513172               |
| SNP_P3_125316_299476 | NW_004515983.1 | Scaffold543 | 299476                  | AA                              | GG                | 1946513174               |
| SNP_P3_125317_299501 | NW_004515983.1 | Scaffold543 | 299501                  | TT                              | GG                | 1946513175               |
| SNP_P3_125318_299524 | NW_004515983.1 | Scaffold543 | 299524                  | GG                              | TT                | 1946513177               |
| SNP_P3_125319_1196   | NW_004515984.1 | Scaffold544 | 1196                    | TT                              | AA                | 1946513178               |
| SNP_P3_125320_1226   | NW_004515984.1 | Scaffold544 | 1226                    | TT                              | AA                | 1946513180               |
| SNP_P3_125321_1512   | NW_004515984.1 | Scaffold544 | 1512                    | TT                              | CC                | 1946513181               |
| SNP_P3_125322_1785   | NW_004515984.1 | Scaffold544 | 1785                    | AA                              | TT                | 1946513183               |
| SNP_P3_125323_1787   | NW_004515984.1 | Scaffold544 | 1787                    | CC                              | TT                | 1946513184               |
| SNP_P3_125324_4778   | NW_004515984.1 | Scaffold544 | 4778                    | GG                              | CC                | 1946513186               |
| SNP_P3_125325_6717   | NW_004515984.1 | Scaffold544 | 6717                    | TT                              | AA                | 1946513187               |
| SNP_P3_125326_7148   | NW_004515984.1 | Scaffold544 | 7148                    | AA                              | CC                | 1946513189               |
| SNP_P3_125327_7231   | NW_004515984.1 | Scaffold544 | 7231                    | CC                              | TT                | 1946513190               |
| SNP_P3_125328_8037   | NW_004515984.1 | Scaffold544 | 8037                    | CC                              | AA                | 1946513192               |
| SNP_P3_125329_11752  | NW_004515984.1 | Scaffold544 | 11752                   | AA                              | GG                | 1946513193               |

| SNPs IDs            | Chromosome IDs | Chromosomes | Physical positions (bp) | CDC Frontier (Reference genome) | (Pusa 256 & HPNB) | NCBI SNPdb Accession IDs |
|---------------------|----------------|-------------|-------------------------|---------------------------------|-------------------|--------------------------|
| SNP_P3_125330_14541 | NW_004515984.1 | Scaffold544 | 14541                   | AA                              | GG                | 1946513195               |
| SNP_P3_125331_16359 | NW_004515984.1 | Scaffold544 | 16359                   | AA                              | TT                | 1946513196               |
| SNP_P3_125332_16442 | NW_004515984.1 | Scaffold544 | 16442                   | TT                              | GG                | 1946513198               |
| SNP_P3_125333_16453 | NW_004515984.1 | Scaffold544 | 16453                   | TT                              | CC                | 1946513199               |
| SNP_P3_125334_17100 | NW_004515984.1 | Scaffold544 | 17100                   | CC                              | GG                | 1946513201               |
| SNP_P3_125335_18867 | NW_004515984.1 | Scaffold544 | 18867                   | CC                              | TT                | 1946513202               |
| SNP_P3_125336_20395 | NW_004515984.1 | Scaffold544 | 20395                   | GG                              | TT                | 1946513204               |
| SNP_P3_125337_21155 | NW_004515984.1 | Scaffold544 | 21155                   | AA                              | TT                | 1946513205               |
| SNP_P3_125338_21995 | NW_004515984.1 | Scaffold544 | 21995                   | TT                              | CC                | 1946513207               |
| SNP_P3_125339_22703 | NW_004515984.1 | Scaffold544 | 22703                   | AA                              | TT                | 1946513208               |
| SNP_P3_125340_22743 | NW_004515984.1 | Scaffold544 | 22743                   | GG                              | TT                | 1946513210               |
| SNP_P3_125341_22877 | NW_004515984.1 | Scaffold544 | 22877                   | TT                              | CC                | 1946513212               |
| SNP_P3_125342_30789 | NW_004515984.1 | Scaffold544 | 30789                   | TT                              | GG                | 1946513213               |
| SNP_P3_125343_35003 | NW_004515984.1 | Scaffold544 | 35003                   | CC                              | TT                | 1946513214               |
| SNP_P3_125344_35395 | NW_004515984.1 | Scaffold544 | 35395                   | AA                              | GG                | 1946513216               |
| SNP_P3_125345_35616 | NW_004515984.1 | Scaffold544 | 35616                   | AA                              | GG                | 1946513218               |
| SNP_P3_125346_42381 | NW_004515984.1 | Scaffold544 | 42381                   | CC                              | TT                | 1946513219               |
| SNP_P3_125347_42746 | NW_004515984.1 | Scaffold544 | 42746                   | TT                              | GG                | 1946513221               |
| SNP_P3_125348_46220 | NW_004515984.1 | Scaffold544 | 46220                   | GG                              | AA                | 1946513222               |
| SNP_P3_125349_46375 | NW_004515984.1 | Scaffold544 | 46375                   | CC                              | TT                | 1946513224               |
| SNP_P3_125350_46901 | NW_004515984.1 | Scaffold544 | 46901                   | CC                              | TT                | 1946513225               |
| SNP_P3_125351_46911 | NW_004515984.1 | Scaffold544 | 46911                   | GG                              | CC                | 1946513227               |
| SNP_P3_125352_46961 | NW_004515984.1 | Scaffold544 | 46961                   | AA                              | TT                | 1946513228               |
| SNP_P3_125353_47175 | NW_004515984.1 | Scaffold544 | 47175                   | GG                              | CC                | 1946513230               |
| SNP_P3_125354_47961 | NW_004515984.1 | Scaffold544 | 47961                   | GG                              | TT                | 1946513231               |
| SNP_P3_125355_48338 | NW_004515984.1 | Scaffold544 | 48338                   | TT                              | AA                | 1946513233               |
| SNP_P3_125356_48342 | NW_004515984.1 | Scaffold544 | 48342                   | TT                              | CC                | 1946513234               |
| SNP_P3_125357_48540 | NW_004515984.1 | Scaffold544 | 48540                   | TT                              | CC                | 1946513236               |
| SNP_P3_125358_50184 | NW_004515984.1 | Scaffold544 | 50184                   | TT                              | AA                | 1946513237               |
| SNP_P3_125359_50913 | NW_004515984.1 | Scaffold544 | 50913                   | CC                              | GG                | 1946513239               |
| SNP_P3_125360_51277 | NW_004515984.1 | Scaffold544 | 51277                   | TT                              | GG                | 1946513240               |
| SNP_P3_125361_51302 | NW_004515984.1 | Scaffold544 | 51302                   | AA                              | GG                | 1946513242               |
| SNP_P3_125362_51782 | NW_004515984.1 | Scaffold544 | 51782                   | GG                              | AA                | 1946513243               |
| SNP_P3_125363_51878 | NW_004515984.1 | Scaffold544 | 51878                   | AA                              | TT                | 1946513245               |
| SNP_P3_125364_51973 | NW_004515984.1 | Scaffold544 | 51973                   | GG                              | CC                | 1946513246               |
| SNP_P3_125365_52750 | NW_004515984.1 | Scaffold544 | 52750                   | TT                              | GG                | 1946513247               |
| SNP_P3_125366_53016 | NW_004515984.1 | Scaffold544 | 53016                   | AA                              | GG                | 1946513249               |
| SNP_P3_125367_53972 | NW_004515984.1 | Scaffold544 | 53972                   | TT                              | CC                | 1946513250               |
| SNP_P3_125368_54716 | NW_004515984.1 | Scaffold544 | 54716                   | AA                              | GG                | 1946513252               |
| SNP_P3_125369_54772 | NW_004515984.1 | Scaffold544 | 54772                   | GG                              | TT                | 1946513253               |
| SNP_P3_125370_55233 | NW_004515984.1 | Scaffold544 | 55233                   | AA                              | GG                | 1946513255               |
| SNP_P3_125371_55436 | NW_004515984.1 | Scaffold544 | 55436                   | TT                              | CC                | 1946513256               |

| SNPs IDs            | Chromosome IDs | Chromosomes | Physical positions (bp) | CDC Frontier (Reference genome) | (Pusa 256 & HPNB) | NCBI SNPdb Accession IDs |
|---------------------|----------------|-------------|-------------------------|---------------------------------|-------------------|--------------------------|
| SNP_P3_125372_56072 | NW_004515984.1 | Scaffold544 | 56072                   | GG                              | AA                | 1946513258               |
| SNP_P3_125373_56579 | NW_004515984.1 | Scaffold544 | 56579                   | GG                              | AA                | 1946513259               |
| SNP_P3_125374_56745 | NW_004515984.1 | Scaffold544 | 56745                   | AA                              | CC                | 1946513261               |
| SNP_P3_125375_56763 | NW_004515984.1 | Scaffold544 | 56763                   | TT                              | CC                | 1946513262               |
| SNP_P3_125376_56783 | NW_004515984.1 | Scaffold544 | 56783                   | GG                              | TT                | 1946513263               |
| SNP_P3_125377_56827 | NW_004515984.1 | Scaffold544 | 56827                   | GG                              | AA                | 1946513265               |
| SNP_P3_125378_56979 | NW_004515984.1 | Scaffold544 | 56979                   | AA                              | TT                | 1946513266               |
| SNP_P3_125379_56990 | NW_004515984.1 | Scaffold544 | 56990                   | GG                              | AA                | 1946513268               |
| SNP_P3_125380_57046 | NW_004515984.1 | Scaffold544 | 57046                   | TT                              | AA                | 1946513269               |
| SNP_P3_125381_57187 | NW_004515984.1 | Scaffold544 | 57187                   | AA                              | CC                | 1946513271               |
| SNP_P3_125382_58198 | NW_004515984.1 | Scaffold544 | 58198                   | CC                              | AA                | 1946513272               |
| SNP_P3_125383_58444 | NW_004515984.1 | Scaffold544 | 58444                   | TT                              | CC                | 1946513274               |
| SNP_P3_125384_58647 | NW_004515984.1 | Scaffold544 | 58647                   | AA                              | TT                | 1946513275               |
| SNP_P3_125385_58742 | NW_004515984.1 | Scaffold544 | 58742                   | GG                              | CC                | 1946513277               |
| SNP_P3_125386_58769 | NW_004515984.1 | Scaffold544 | 58769                   | TT                              | AA                | 1946513278               |
| SNP_P3_125387_59155 | NW_004515984.1 | Scaffold544 | 59155                   | TT                              | AA                | 1946513280               |
| SNP_P3_125388_59597 | NW_004515984.1 | Scaffold544 | 59597                   | CC                              | TT                | 1946513281               |
| SNP_P3_125389_59836 | NW_004515984.1 | Scaffold544 | 59836                   | CC                              | GG                | 1946513283               |
| SNP_P3_125390_59938 | NW_004515984.1 | Scaffold544 | 59938                   | AA                              | TT                | 1946513284               |
| SNP_P3_125391_59955 | NW_004515984.1 | Scaffold544 | 59955                   | TT                              | AA                | 1946513286               |
| SNP_P3_125392_60052 | NW_004515984.1 | Scaffold544 | 60052                   | GG                              | AA                | 1946513287               |
| SNP_P3_125393_60152 | NW_004515984.1 | Scaffold544 | 60152                   | GG                              | AA                | 1946513289               |
| SNP_P3_125394_60196 | NW_004515984.1 | Scaffold544 | 60196                   | TT                              | GG                | 1946513290               |
| SNP_P3_125395_60264 | NW_004515984.1 | Scaffold544 | 60264                   | AA                              | GG                | 1946513292               |
| SNP_P3_125396_60497 | NW_004515984.1 | Scaffold544 | 60497                   | GG                              | AA                | 1946513293               |
| SNP_P3_125397_60568 | NW_004515984.1 | Scaffold544 | 60568                   | AA                              | GG                | 1946513295               |
| SNP_P3_125398_60649 | NW_004515984.1 | Scaffold544 | 60649                   | AA                              | GG                | 1946513296               |
| SNP_P3_125399_60651 | NW_004515984.1 | Scaffold544 | 60651                   | TT                              | AA                | 1946513298               |
| SNP_P3_125400_60913 | NW_004515984.1 | Scaffold544 | 60913                   | CC                              | GG                | 1946513299               |
| SNP_P3_125401_61062 | NW_004515984.1 | Scaffold544 | 61062                   | AA                              | GG                | 1946513301               |
| SNP_P3_125402_61167 | NW_004515984.1 | Scaffold544 | 61167                   | GG                              | TT                | 1946513302               |
| SNP_P3_125403_61225 | NW_004515984.1 | Scaffold544 | 61225                   | TT                              | GG                | 1946513304               |
| SNP_P3_125404_61403 | NW_004515984.1 | Scaffold544 | 61403                   | AA                              | GG                | 1946513305               |
| SNP_P3_125405_61422 | NW_004515984.1 | Scaffold544 | 61422                   | AA                              | TT                | 1946513307               |
| SNP_P3_125406_61611 | NW_004515984.1 | Scaffold544 | 61611                   | AA                              | GG                | 1946513309               |
| SNP_P3_125407_62209 | NW_004515984.1 | Scaffold544 | 62209                   | GG                              | AA                | 1946513310               |
| SNP_P3_125408_62489 | NW_004515984.1 | Scaffold544 | 62489                   | TT                              | AA                | 1946513312               |
| SNP_P3_125409_62600 | NW_004515984.1 | Scaffold544 | 62600                   | AA                              | TT                | 1946513313               |
| SNP_P3_125410_62715 | NW_004515984.1 | Scaffold544 | 62715                   | CC                              | TT                | 1946513315               |
| SNP_P3_125411_63057 | NW_004515984.1 | Scaffold544 | 63057                   | TT                              | AA                | 1946513317               |
| SNP_P3_125412_63062 | NW_004515984.1 | Scaffold544 | 63062                   | TT                              | GG                | 1946513318               |
| SNP_P3_125413_63114 | NW_004515984.1 | Scaffold544 | 63114                   | AA                              | GG                | 1946513320               |



| SNPs IDs            | Chromosome IDs | Chromosomes | Physical positions (bp) | CDC Frontier (Reference genome) | (Pusa 256 & HPNB) | NCBI SNPdb Accession IDs |
|---------------------|----------------|-------------|-------------------------|---------------------------------|-------------------|--------------------------|
| SNP_P3_125414_63148 | NW_004515984.1 | Scaffold544 | 63148                   | CC                              | GG                | 1946513321               |
| SNP_P3_125415_63161 | NW_004515984.1 | Scaffold544 | 63161                   | AA                              | GG                | 1946513323               |
| SNP_P3_125416_63190 | NW_004515984.1 | Scaffold544 | 63190                   | AA                              | GG                | 1946513324               |
| SNP_P3_125417_63341 | NW_004515984.1 | Scaffold544 | 63341                   | CC                              | TT                | 1946513326               |
| SNP_P3_125418_63343 | NW_004515984.1 | Scaffold544 | 63343                   | AA                              | CC                | 1946513328               |
| SNP_P3_125419_63397 | NW_004515984.1 | Scaffold544 | 63397                   | AA                              | GG                | 1946513329               |
| SNP_P3_125420_63408 | NW_004515984.1 | Scaffold544 | 63408                   | TT                              | AA                | 1946513331               |
| SNP_P3_125421_63430 | NW_004515984.1 | Scaffold544 | 63430                   | TT                              | CC                | 1946513332               |
| SNP_P3_125422_64730 | NW_004515984.1 | Scaffold544 | 64730                   | GG                              | AA                | 1946513334               |
| SNP_P3_125423_66539 | NW_004515984.1 | Scaffold544 | 66539                   | GG                              | TT                | 1946513335               |
| SNP_P3_125424_66553 | NW_004515984.1 | Scaffold544 | 66553                   | GG                              | CC                | 1946513337               |
| SNP_P3_125425_66564 | NW_004515984.1 | Scaffold544 | 66564                   | CC                              | AA                | 1946513338               |
| SNP_P3_125426_66609 | NW_004515984.1 | Scaffold544 | 66609                   | TT                              | AA                | 1946513340               |
| SNP_P3_125427_66754 | NW_004515984.1 | Scaffold544 | 66754                   | GG                              | AA                | 1946513341               |
| SNP_P3_125428_66892 | NW_004515984.1 | Scaffold544 | 66892                   | GG                              | TT                | 1946513343               |
| SNP_P3_125429_66947 | NW_004515984.1 | Scaffold544 | 66947                   | TT                              | CC                | 1946513344               |
| SNP_P3_125430_66956 | NW_004515984.1 | Scaffold544 | 66956                   | CC                              | AA                | 1946513346               |
| SNP_P3_125431_66966 | NW_004515984.1 | Scaffold544 | 66966                   | AA                              | TT                | 1946513347               |
| SNP_P3_125432_67016 | NW_004515984.1 | Scaffold544 | 67016                   | TT                              | AA                | 1946513349               |
| SNP_P3_125433_67020 | NW_004515984.1 | Scaffold544 | 67020                   | AA                              | GG                | 1946513351               |
| SNP_P3_125434_67079 | NW_004515984.1 | Scaffold544 | 67079                   | CC                              | GG                | 1946513352               |
| SNP_P3_125435_67094 | NW_004515984.1 | Scaffold544 | 67094                   | CC                              | GG                | 1946513354               |
| SNP_P3_125436_67100 | NW_004515984.1 | Scaffold544 | 67100                   | TT                              | CC                | 1946513355               |
| SNP_P3_125437_67252 | NW_004515984.1 | Scaffold544 | 67252                   | TT                              | GG                | 1946513357               |
| SNP_P3_125438_67389 | NW_004515984.1 | Scaffold544 | 67389                   | TT                              | CC                | 1946513358               |
| SNP_P3_125439_67556 | NW_004515984.1 | Scaffold544 | 67556                   | GG                              | CC                | 1946513360               |
| SNP_P3_125440_67681 | NW_004515984.1 | Scaffold544 | 67681                   | TT                              | GG                | 1946513361               |
| SNP_P3_125441_67746 | NW_004515984.1 | Scaffold544 | 67746                   | CC                              | AA                | 1946513363               |
| SNP_P3_125442_67844 | NW_004515984.1 | Scaffold544 | 67844                   | TT                              | CC                | 1946513364               |
| SNP_P3_125443_67994 | NW_004515984.1 | Scaffold544 | 67994                   | CC                              | AA                | 1946513366               |
| SNP_P3_125444_68239 | NW_004515984.1 | Scaffold544 | 68239                   | AA                              | GG                | 1946513368               |
| SNP_P3_125445_68349 | NW_004515984.1 | Scaffold544 | 68349                   | AA                              | GG                | 1946513369               |
| SNP_P3_125446_69139 | NW_004515984.1 | Scaffold544 | 69139                   | CC                              | GG                | 1946513371               |
| SNP_P3_125447_69653 | NW_004515984.1 | Scaffold544 | 69653                   | TT                              | AA                | 1946513372               |
| SNP_P3_125448_69732 | NW_004515984.1 | Scaffold544 | 69732                   | AA                              | GG                | 1946513374               |
| SNP_P3_125449_69765 | NW_004515984.1 | Scaffold544 | 69765                   | CC                              | TT                | 1946513375               |
| SNP_P3_125450_69808 | NW_004515984.1 | Scaffold544 | 69808                   | TT                              | CC                | 1946513376               |
| SNP_P3_125451_70030 | NW_004515984.1 | Scaffold544 | 70030                   | GG                              | TT                | 1946513378               |
| SNP_P3_125452_70337 | NW_004515984.1 | Scaffold544 | 70337                   | TT                              | AA                | 1946513379               |
| SNP_P3_125454_70446 | NW_004515984.1 | Scaffold544 | 70446                   | TT                              | AA                | 1946513381               |
| SNP_P3_125455_70517 | NW_004515984.1 | Scaffold544 | 70517                   | TT                              | GG                | 1946513383               |
| SNP_P3_125456_70521 | NW_004515984.1 | Scaffold544 | 70521                   | AA                              | TT                | 1946513384               |

| SNPs IDs            | Chromosome IDs | Chromosomes | Physical positions (bp) | CDC Frontier (Reference genome) | (Pusa 256 & HPNB) | NCBI SNPdb Accession IDs |
|---------------------|----------------|-------------|-------------------------|---------------------------------|-------------------|--------------------------|
| SNP_P3_125457_70522 | NW_004515984.1 | Scaffold544 | 70522                   | AA                              | CC                | 1946513386               |
| SNP_P3_125458_70527 | NW_004515984.1 | Scaffold544 | 70527                   | TT                              | GG                | 1946513387               |
| SNP_P3_125459_70561 | NW_004515984.1 | Scaffold544 | 70561                   | TT                              | GG                | 1946513389               |
| SNP_P3_125460_70568 | NW_004515984.1 | Scaffold544 | 70568                   | CC                              | AA                | 1946513390               |
| SNP_P3_125461_70597 | NW_004515984.1 | Scaffold544 | 70597                   | GG                              | CC                | 1946513392               |
| SNP_P3_125462_75640 | NW_004515984.1 | Scaffold544 | 75640                   | AA                              | GG                | 1946513393               |
| SNP_P3_125463_76539 | NW_004515984.1 | Scaffold544 | 76539                   | CC                              | GG                | 1946513395               |
| SNP_P3_125464_76575 | NW_004515984.1 | Scaffold544 | 76575                   | AA                              | TT                | 1946513397               |
| SNP_P3_125465_76629 | NW_004515984.1 | Scaffold544 | 76629                   | TT                              | GG                | 1946513398               |
| SNP_P3_125466_76701 | NW_004515984.1 | Scaffold544 | 76701                   | TT                              | CC                | 1946513400               |
| SNP_P3_125467_76761 | NW_004515984.1 | Scaffold544 | 76761                   | AA                              | CC                | 1946513447               |
| SNP_P3_125468_76802 | NW_004515984.1 | Scaffold544 | 76802                   | AA                              | CC                | 1946513448               |
| SNP_P3_125469_76843 | NW_004515984.1 | Scaffold544 | 76843                   | CC                              | TT                | 1946513450               |
| SNP_P3_125470_77345 | NW_004515984.1 | Scaffold544 | 77345                   | TT                              | AA                | 1946513451               |
| SNP_P3_125471_81671 | NW_004515984.1 | Scaffold544 | 81671                   | AA                              | GG                | 1946513453               |
| SNP_P3_125472_81732 | NW_004515984.1 | Scaffold544 | 81732                   | TT                              | AA                | 1946513454               |
| SNP_P3_125473_81749 | NW_004515984.1 | Scaffold544 | 81749                   | TT                              | AA                | 1946513456               |
| SNP_P3_125474_81856 | NW_004515984.1 | Scaffold544 | 81856                   | CC                              | GG                | 1946513457               |
| SNP_P3_125475_82305 | NW_004515984.1 | Scaffold544 | 82305                   | CC                              | AA                | 1946513459               |
| SNP_P3_125476_82836 | NW_004515984.1 | Scaffold544 | 82836                   | TT                              | CC                | 1946513460               |
| SNP_P3_125477_82857 | NW_004515984.1 | Scaffold544 | 82857                   | CC                              | TT                | 1946513462               |
| SNP_P3_125478_84138 | NW_004515984.1 | Scaffold544 | 84138                   | CC                              | TT                | 1946513463               |
| SNP_P3_125479_84622 | NW_004515984.1 | Scaffold544 | 84622                   | GG                              | AA                | 1946513465               |
| SNP_P3_125480_84739 | NW_004515984.1 | Scaffold544 | 84739                   | AA                              | CC                | 1946513466               |
| SNP_P3_125481_84749 | NW_004515984.1 | Scaffold544 | 84749                   | TT                              | CC                | 1946513468               |
| SNP_P3_125482_84760 | NW_004515984.1 | Scaffold544 | 84760                   | TT                              | AA                | 1946513469               |
| SNP_P3_125483_84769 | NW_004515984.1 | Scaffold544 | 84769                   | CC                              | AA                | 1946513471               |
| SNP_P3_125484_85055 | NW_004515984.1 | Scaffold544 | 85055                   | AA                              | GG                | 1946513472               |
| SNP_P3_125485_85538 | NW_004515984.1 | Scaffold544 | 85538                   | AA                              | CC                | 1946513474               |
| SNP_P3_125487_85796 | NW_004515984.1 | Scaffold544 | 85796                   | CC                              | TT                | 1946513475               |
| SNP_P3_125488_86007 | NW_004515984.1 | Scaffold544 | 86007                   | GG                              | CC                | 1946513477               |
| SNP_P3_125489_86816 | NW_004515984.1 | Scaffold544 | 86816                   | TT                              | CC                | 1946513478               |
| SNP_P3_125490_87367 | NW_004515984.1 | Scaffold544 | 87367                   | TT                              | CC                | 1946513480               |
| SNP_P3_125491_87930 | NW_004515984.1 | Scaffold544 | 87930                   | GG                              | AA                | 1946513481               |
| SNP_P3_125492_88599 | NW_004515984.1 | Scaffold544 | 88599                   | AA                              | GG                | 1946513483               |
| SNP_P3_125493_88834 | NW_004515984.1 | Scaffold544 | 88834                   | TT                              | CC                | 1946513484               |
| SNP_P3_125494_89966 | NW_004515984.1 | Scaffold544 | 89966                   | GG                              | CC                | 1946513486               |
| SNP_P3_125495_90748 | NW_004515984.1 | Scaffold544 | 90748                   | TT                              | AA                | 1946513488               |
| SNP_P3_125496_90766 | NW_004515984.1 | Scaffold544 | 90766                   | GG                              | CC                | 1946513489               |
| SNP_P3_125497_93066 | NW_004515984.1 | Scaffold544 | 93066                   | AA                              | GG                | 1946513491               |
| SNP_P3_125498_93119 | NW_004515984.1 | Scaffold544 | 93119                   | AA                              | CC                | 1946513492               |
| SNP_P3_125499_93443 | NW_004515984.1 | Scaffold544 | 93443                   | AA                              | GG                | 1946513494               |

| SNPs IDs             | Chromosome IDs | Chromosomes | Physical positions (bp) | CDC Frontier (Reference genome) | (Pusa 256 & HPNB) | NCBI SNPdb Accession IDs |
|----------------------|----------------|-------------|-------------------------|---------------------------------|-------------------|--------------------------|
| SNP_P3_125500_93444  | NW_004515984.1 | Scaffold544 | 93444                   | CC                              | GG                | 1946513495               |
| SNP_P3_125501_96372  | NW_004515984.1 | Scaffold544 | 96372                   | AA                              | TT                | 1946513497               |
| SNP_P3_125502_96496  | NW_004515984.1 | Scaffold544 | 96496                   | TT                              | GG                | 1946513498               |
| SNP_P3_125503_96504  | NW_004515984.1 | Scaffold544 | 96504                   | TT                              | CC                | 1946513500               |
| SNP_P3_125504_96507  | NW_004515984.1 | Scaffold544 | 96507                   | TT                              | AA                | 1946513502               |
| SNP_P3_125505_96786  | NW_004515984.1 | Scaffold544 | 96786                   | AA                              | GG                | 1946513503               |
| SNP_P3_125506_99976  | NW_004515984.1 | Scaffold544 | 99976                   | AA                              | TT                | 1946513505               |
| SNP_P3_125507_100123 | NW_004515984.1 | Scaffold544 | 100123                  | AA                              | TT                | 1946513506               |
| SNP_P3_125508_100377 | NW_004515984.1 | Scaffold544 | 100377                  | AA                              | TT                | 1946513508               |
| SNP_P3_125509_100379 | NW_004515984.1 | Scaffold544 | 100379                  | AA                              | CC                | 1946513509               |
| SNP_P3_125510_100398 | NW_004515984.1 | Scaffold544 | 100398                  | AA                              | TT                | 1946513511               |
| SNP_P3_125511_100403 | NW_004515984.1 | Scaffold544 | 100403                  | AA                              | TT                | 1946513512               |
| SNP_P3_125512_100408 | NW_004515984.1 | Scaffold544 | 100408                  | TT                              | AA                | 1946513514               |
| SNP_P3_125513_100412 | NW_004515984.1 | Scaffold544 | 100412                  | CC                              | TT                | 1946513515               |
| SNP_P3_125515_101153 | NW_004515984.1 | Scaffold544 | 101153                  | CC                              | TT                | 1946513517               |
| SNP_P3_125516_103710 | NW_004515984.1 | Scaffold544 | 103710                  | CC                              | TT                | 1946513519               |
| SNP_P3_125517_103714 | NW_004515984.1 | Scaffold544 | 103714                  | GG                              | AA                | 1946513521               |
| SNP_P3_125518_104921 | NW_004515984.1 | Scaffold544 | 104921                  | AA                              | GG                | 1946513523               |
| SNP_P3_125520_105485 | NW_004515984.1 | Scaffold544 | 105485                  | TT                              | CC                | 1946513525               |
| SNP_P3_125521_105804 | NW_004515984.1 | Scaffold544 | 105804                  | AA                              | CC                | 1946513526               |
| SNP_P3_125522_106429 | NW_004515984.1 | Scaffold544 | 106429                  | GG                              | AA                | 1946513528               |
| SNP_P3_125524_111076 | NW_004515984.1 | Scaffold544 | 111076                  | CC                              | AA                | 1946513529               |
| SNP_P3_125525_111655 | NW_004515984.1 | Scaffold544 | 111655                  | AA                              | CC                | 1946513531               |
| SNP_P3_125526_112552 | NW_004515984.1 | Scaffold544 | 112552                  | GG                              | CC                | 1946513532               |
| SNP_P3_125527_118052 | NW_004515984.1 | Scaffold544 | 118052                  | TT                              | CC                | 1946513534               |
| SNP_P3_125528_123360 | NW_004515984.1 | Scaffold544 | 123360                  | GG                              | AA                | 1946513535               |
| SNP_P3_125529_123365 | NW_004515984.1 | Scaffold544 | 123365                  | GG                              | AA                | 1946513537               |
| SNP_P3_125530_123370 | NW_004515984.1 | Scaffold544 | 123370                  | AA                              | GG                | 1946513538               |
| SNP_P3_125531_123459 | NW_004515984.1 | Scaffold544 | 123459                  | AA                              | TT                | 1946513540               |
| SNP_P3_125532_123466 | NW_004515984.1 | Scaffold544 | 123466                  | AA                              | GG                | 1946513541               |
| SNP_P3_125533_123468 | NW_004515984.1 | Scaffold544 | 123468                  | CC                              | GG                | 1946513543               |
| SNP_P3_125534_123469 | NW_004515984.1 | Scaffold544 | 123469                  | GG                              | AA                | 1946513544               |
| SNP_P3_125535_123470 | NW_004515984.1 | Scaffold544 | 123470                  | AA                              | GG                | 1946513545               |
| SNP_P3_125536_123479 | NW_004515984.1 | Scaffold544 | 123479                  | TT                              | AA                | 1946513547               |
| SNP_P3_125537_123502 | NW_004515984.1 | Scaffold544 | 123502                  | AA                              | CC                | 1946513548               |
| SNP_P3_125538_125394 | NW_004515984.1 | Scaffold544 | 125394                  | CC                              | TT                | 1946513550               |
| SNP_P3_125539_125609 | NW_004515984.1 | Scaffold544 | 125609                  | TT                              | AA                | 1946513551               |
| SNP_P3_125540_125694 | NW_004515984.1 | Scaffold544 | 125694                  | AA                              | GG                | 1946513553               |
| SNP_P3_125541_125707 | NW_004515984.1 | Scaffold544 | 125707                  | GG                              | TT                | 1946513554               |
| SNP_P3_125542_125923 | NW_004515984.1 | Scaffold544 | 125923                  | AA                              | GG                | 1946513556               |
| SNP_P3_125543_125978 | NW_004515984.1 | Scaffold544 | 125978                  | AA                              | GG                | 1946513557               |
| SNP_P3_125544_126139 | NW_004515984.1 | Scaffold544 | 126139                  | GG                              | AA                | 1946513559               |

| SNPs IDs             | Chromosome IDs | Chromosomes | Physical positions (bp) | CDC Frontier (Reference genome) | (Pusa 256 & HPNB) | NCBI SNPdb Accession IDs |
|----------------------|----------------|-------------|-------------------------|---------------------------------|-------------------|--------------------------|
| SNP_P3_125545_126197 | NW_004515984.1 | Scaffold544 | 126197                  | CC                              | TT                | 1946513560               |
| SNP_P3_125546_126207 | NW_004515984.1 | Scaffold544 | 126207                  | GG                              | CC                | 1946513561               |
| SNP_P3_125547_126266 | NW_004515984.1 | Scaffold544 | 126266                  | CC                              | AA                | 1946513563               |
| SNP_P3_125548_126373 | NW_004515984.1 | Scaffold544 | 126373                  | CC                              | GG                | 1946513564               |
| SNP_P3_125549_127464 | NW_004515984.1 | Scaffold544 | 127464                  | CC                              | TT                | 1946513566               |
| SNP_P3_125550_127474 | NW_004515984.1 | Scaffold544 | 127474                  | CC                              | GG                | 1946513567               |
| SNP_P3_125551_127475 | NW_004515984.1 | Scaffold544 | 127475                  | AA                              | CC                | 1946513569               |
| SNP_P3_125552_127476 | NW_004515984.1 | Scaffold544 | 127476                  | AA                              | TT                | 1946513570               |
| SNP_P3_125553_128362 | NW_004515984.1 | Scaffold544 | 128362                  | TT                              | AA                | 1946513572               |
| SNP_P3_125554_129126 | NW_004515984.1 | Scaffold544 | 129126                  | TT                              | AA                | 1946513573               |
| SNP_P3_125555_129509 | NW_004515984.1 | Scaffold544 | 129509                  | TT                              | AA                | 1946513575               |
| SNP_P3_125556_130657 | NW_004515984.1 | Scaffold544 | 130657                  | CC                              | TT                | 1946513576               |
| SNP_P3_125557_130684 | NW_004515984.1 | Scaffold544 | 130684                  | CC                              | TT                | 1946513578               |
| SNP_P3_125558_130712 | NW_004515984.1 | Scaffold544 | 130712                  | TT                              | AA                | 1946513579               |
| SNP_P3_125559_130940 | NW_004515984.1 | Scaffold544 | 130940                  | AA                              | GG                | 1946513581               |
| SNP_P3_125560_131055 | NW_004515984.1 | Scaffold544 | 131055                  | GG                              | CC                | 1946513582               |
| SNP_P3_125562_132673 | NW_004515984.1 | Scaffold544 | 132673                  | CC                              | TT                | 1946513584               |
| SNP_P3_125563_132699 | NW_004515984.1 | Scaffold544 | 132699                  | CC                              | GG                | 1946513585               |
| SNP_P3_125564_132856 | NW_004515984.1 | Scaffold544 | 132856                  | AA                              | CC                | 1946513587               |
| SNP_P3_125565_132953 | NW_004515984.1 | Scaffold544 | 132953                  | GG                              | CC                | 1946513588               |
| SNP_P3_125566_133109 | NW_004515984.1 | Scaffold544 | 133109                  | CC                              | TT                | 1946513590               |
| SNP_P3_125567_133132 | NW_004515984.1 | Scaffold544 | 133132                  | CC                              | AA                | 1946513591               |
| SNP_P3_125568_133155 | NW_004515984.1 | Scaffold544 | 133155                  | CC                              | GG                | 1946513593               |
| SNP_P3_125569_133654 | NW_004515984.1 | Scaffold544 | 133654                  | CC                              | TT                | 1946513594               |
| SNP_P3_125570_134609 | NW_004515984.1 | Scaffold544 | 134609                  | AA                              | CC                | 1946513596               |
| SNP_P3_125571_134656 | NW_004515984.1 | Scaffold544 | 134656                  | TT                              | CC                | 1946513597               |
| SNP_P3_125572_135520 | NW_004515984.1 | Scaffold544 | 135520                  | AA                              | CC                | 1946513599               |
| SNP_P3_125573_135562 | NW_004515984.1 | Scaffold544 | 135562                  | GG                              | AA                | 1946513600               |
| SNP_P3_125574_137171 | NW_004515984.1 | Scaffold544 | 137171                  | AA                              | TT                | 1946513602               |
| SNP_P3_125576_137545 | NW_004515984.1 | Scaffold544 | 137545                  | TT                              | GG                | 1946513604               |
| SNP_P3_125577_137617 | NW_004515984.1 | Scaffold544 | 137617                  | GG                              | CC                | 1946513605               |
| SNP_P3_125579_143452 | NW_004515984.1 | Scaffold544 | 143452                  | TT                              | GG                | 1946513607               |
| SNP_P3_125580_144256 | NW_004515984.1 | Scaffold544 | 144256                  | GG                              | TT                | 1946513608               |
| SNP_P3_125581_144425 | NW_004515984.1 | Scaffold544 | 144425                  | AA                              | CC                | 1946513610               |
| SNP_P3_125582_144427 | NW_004515984.1 | Scaffold544 | 144427                  | TT                              | AA                | 1946513611               |
| SNP_P3_125583_144449 | NW_004515984.1 | Scaffold544 | 144449                  | AA                              | TT                | 1946513613               |
| SNP_P3_125584_146173 | NW_004515984.1 | Scaffold544 | 146173                  | AA                              | GG                | 1946513614               |
| SNP_P3_125585_146316 | NW_004515984.1 | Scaffold544 | 146316                  | GG                              | AA                | 1946513616               |
| SNP_P3_125588_167321 | NW_004515984.1 | Scaffold544 | 167321                  | GG                              | TT                | 1946513617               |
| SNP_P3_125589_167374 | NW_004515984.1 | Scaffold544 | 167374                  | CC                              | TT                | 1946513619               |
| SNP_P3_125590_167853 | NW_004515984.1 | Scaffold544 | 167853                  | GG                              | AA                | 1946513620               |
| SNP_P3_125591_167855 | NW_004515984.1 | Scaffold544 | 167855                  | CC                              | AA                | 1946513621               |

| SNPs IDs             | Chromosome IDs | Chromosomes | Physical positions (bp) | CDC Frontier (Reference genome) | (Pusa 256 & HPNB) | NCBI SNPdb Accession IDs |
|----------------------|----------------|-------------|-------------------------|---------------------------------|-------------------|--------------------------|
| SNP_P3_125592_168192 | NW_004515984.1 | Scaffold544 | 168192                  | AA                              | GG                | 1946513623               |
| SNP_P3_125593_168301 | NW_004515984.1 | Scaffold544 | 168301                  | GG                              | CC                | 1946513624               |
| SNP_P3_125594_169856 | NW_004515984.1 | Scaffold544 | 169856                  | CC                              | TT                | 1946513626               |
| SNP_P3_125595_175304 | NW_004515984.1 | Scaffold544 | 175304                  | GG                              | TT                | 1946513627               |
| SNP_P3_125596_176412 | NW_004515984.1 | Scaffold544 | 176412                  | GG                              | AA                | 1946513629               |
| SNP_P3_125597_176733 | NW_004515984.1 | Scaffold544 | 176733                  | AA                              | TT                | 1946513630               |
| SNP_P3_125598_176904 | NW_004515984.1 | Scaffold544 | 176904                  | CC                              | TT                | 1946513632               |
| SNP_P3_125599_177029 | NW_004515984.1 | Scaffold544 | 177029                  | AA                              | CC                | 1946513633               |
| SNP_P3_125600_177055 | NW_004515984.1 | Scaffold544 | 177055                  | AA                              | GG                | 1946513635               |
| SNP_P3_125601_180900 | NW_004515984.1 | Scaffold544 | 180900                  | TT                              | CC                | 1946513636               |
| SNP_P3_125602_181200 | NW_004515984.1 | Scaffold544 | 181200                  | CC                              | GG                | 1946513638               |
| SNP_P3_125603_181201 | NW_004515984.1 | Scaffold544 | 181201                  | CC                              | TT                | 1946513639               |
| SNP_P3_125604_181230 | NW_004515984.1 | Scaffold544 | 181230                  | CC                              | TT                | 1946513640               |
| SNP_P3_125605_181260 | NW_004515984.1 | Scaffold544 | 181260                  | CC                              | TT                | 1946513642               |
| SNP_P3_125606_181318 | NW_004515984.1 | Scaffold544 | 181318                  | TT                              | CC                | 1946513643               |
| SNP_P3_125607_181703 | NW_004515984.1 | Scaffold544 | 181703                  | AA                              | CC                | 1946513645               |
| SNP_P3_125608_181945 | NW_004515984.1 | Scaffold544 | 181945                  | AA                              | TT                | 1946513646               |
| SNP_P3_125609_182054 | NW_004515984.1 | Scaffold544 | 182054                  | GG                              | AA                | 1946513648               |
| SNP_P3_125610_182089 | NW_004515984.1 | Scaffold544 | 182089                  | GG                              | AA                | 1946513649               |
| SNP_P3_125611_189954 | NW_004515984.1 | Scaffold544 | 189954                  | AA                              | GG                | 1946513651               |
| SNP_P3_125612_190349 | NW_004515984.1 | Scaffold544 | 190349                  | GG                              | TT                | 1946513652               |
| SNP_P3_125613_190476 | NW_004515984.1 | Scaffold544 | 190476                  | CC                              | GG                | 1946513654               |
| SNP_P3_125614_190486 | NW_004515984.1 | Scaffold544 | 190486                  | AA                              | TT                | 1946513655               |
| SNP_P3_125616_193582 | NW_004515984.1 | Scaffold544 | 193582                  | AA                              | GG                | 1946513657               |
| SNP_P3_125617_193786 | NW_004515984.1 | Scaffold544 | 193786                  | GG                              | TT                | 1946513658               |
| SNP_P3_125618_194879 | NW_004515984.1 | Scaffold544 | 194879                  | AA                              | TT                | 1946513660               |
| SNP_P3_125619_195078 | NW_004515984.1 | Scaffold544 | 195078                  | AA                              | GG                | 1946513661               |
| SNP_P3_125620_195134 | NW_004515984.1 | Scaffold544 | 195134                  | AA                              | TT                | 1946513663               |
| SNP_P3_125621_195251 | NW_004515984.1 | Scaffold544 | 195251                  | CC                              | AA                | 1946513665               |
| SNP_P3_125622_195257 | NW_004515984.1 | Scaffold544 | 195257                  | AA                              | GG                | 1946513666               |
| SNP_P3_125623_196248 | NW_004515984.1 | Scaffold544 | 196248                  | AA                              | CC                | 1946513668               |
| SNP_P3_125624_205821 | NW_004515984.1 | Scaffold544 | 205821                  | GG                              | TT                | 1946513669               |
| SNP_P3_125625_205850 | NW_004515984.1 | Scaffold544 | 205850                  | GG                              | AA                | 1946513671               |
| SNP_P3_125626_205858 | NW_004515984.1 | Scaffold544 | 205858                  | AA                              | TT                | 1946513672               |
| SNP_P3_125627_206229 | NW_004515984.1 | Scaffold544 | 206229                  | AA                              | CC                | 1946513674               |
| SNP_P3_125628_206289 | NW_004515984.1 | Scaffold544 | 206289                  | GG                              | CC                | 1946513675               |
| SNP_P3_125629_206291 | NW_004515984.1 | Scaffold544 | 206291                  | AA                              | TT                | 1946513677               |
| SNP_P3_125630_208448 | NW_004515984.1 | Scaffold544 | 208448                  | TT                              | AA                | 1946513678               |
| SNP_P3_125631_208648 | NW_004515984.1 | Scaffold544 | 208648                  | AA                              | GG                | 1946513680               |
| SNP_P3_125632_208890 | NW_004515984.1 | Scaffold544 | 208890                  | CC                              | TT                | 1946513681               |
| SNP_P3_125633_211161 | NW_004515984.1 | Scaffold544 | 211161                  | AA                              | TT                | 1946513683               |
| SNP_P3_125634_211334 | NW_004515984.1 | Scaffold544 | 211334                  | TT                              | GG                | 1946513684               |

| SNPs IDs             | Chromosome IDs | Chromosomes | Physical positions (bp) | CDC Frontier (Reference genome) | (Pusa 256 & HPNB) | NCBI SNPdb Accession IDs |
|----------------------|----------------|-------------|-------------------------|---------------------------------|-------------------|--------------------------|
| SNP_P3_125635_211638 | NW_004515984.1 | Scaffold544 | 211638                  | GG                              | AA                | 1946513686               |
| SNP_P3_125636_211834 | NW_004515984.1 | Scaffold544 | 211834                  | GG                              | AA                | 1946513687               |
| SNP_P3_125637_211896 | NW_004515984.1 | Scaffold544 | 211896                  | GG                              | CC                | 1946513689               |
| SNP_P3_125638_212349 | NW_004515984.1 | Scaffold544 | 212349                  | AA                              | TT                | 1946513690               |
| SNP_P3_125639_212480 | NW_004515984.1 | Scaffold544 | 212480                  | TT                              | AA                | 1946513692               |
| SNP_P3_125640_212481 | NW_004515984.1 | Scaffold544 | 212481                  | AA                              | TT                | 1946513693               |
| SNP_P3_125641_212748 | NW_004515984.1 | Scaffold544 | 212748                  | AA                              | TT                | 1946513695               |
| SNP_P3_125642_213387 | NW_004515984.1 | Scaffold544 | 213387                  | AA                              | CC                | 1946513696               |
| SNP_P3_125643_214295 | NW_004515984.1 | Scaffold544 | 214295                  | GG                              | AA                | 1946513698               |
| SNP_P3_125644_214311 | NW_004515984.1 | Scaffold544 | 214311                  | CC                              | TT                | 1946513699               |
| SNP_P3_125645_214535 | NW_004515984.1 | Scaffold544 | 214535                  | AA                              | CC                | 1946513701               |
| SNP_P3_125646_214965 | NW_004515984.1 | Scaffold544 | 214965                  | TT                              | CC                | 1946513702               |
| SNP_P3_125647_215321 | NW_004515984.1 | Scaffold544 | 215321                  | CC                              | GG                | 1946513704               |
| SNP_P3_125648_217025 | NW_004515984.1 | Scaffold544 | 217025                  | TT                              | GG                | 1946513705               |
| SNP_P3_125649_217099 | NW_004515984.1 | Scaffold544 | 217099                  | AA                              | TT                | 1946513707               |
| SNP_P3_125650_220083 | NW_004515984.1 | Scaffold544 | 220083                  | CC                              | GG                | 1946513709               |
| SNP_P3_125651_221548 | NW_004515984.1 | Scaffold544 | 221548                  | AA                              | GG                | 1946513710               |
| SNP_P3_125653_225536 | NW_004515984.1 | Scaffold544 | 225536                  | GG                              | AA                | 1946513712               |
| SNP_P3_125654_225537 | NW_004515984.1 | Scaffold544 | 225537                  | AA                              | GG                | 1946513713               |
| SNP_P3_125655_228197 | NW_004515984.1 | Scaffold544 | 228197                  | CC                              | TT                | 1946513715               |
| SNP_P3_125656_228598 | NW_004515984.1 | Scaffold544 | 228598                  | AA                              | GG                | 1946513716               |
| SNP_P3_125657_230916 | NW_004515984.1 | Scaffold544 | 230916                  | AA                              | GG                | 1946513718               |
| SNP_P3_125658_231905 | NW_004515984.1 | Scaffold544 | 231905                  | GG                              | CC                | 1946513719               |
| SNP_P3_125659_231937 | NW_004515984.1 | Scaffold544 | 231937                  | CC                              | GG                | 1946513721               |
| SNP_P3_125660_231944 | NW_004515984.1 | Scaffold544 | 231944                  | GG                              | TT                | 1946513722               |
| SNP_P3_125661_231974 | NW_004515984.1 | Scaffold544 | 231974                  | AA                              | GG                | 1946513724               |
| SNP_P3_125662_232595 | NW_004515984.1 | Scaffold544 | 232595                  | TT                              | AA                | 1946513725               |
| SNP_P3_125663_233161 | NW_004515984.1 | Scaffold544 | 233161                  | AA                              | CC                | 1946513727               |
| SNP_P3_125664_233936 | NW_004515984.1 | Scaffold544 | 233936                  | TT                              | CC                | 1946513728               |
| SNP_P3_125665_234460 | NW_004515984.1 | Scaffold544 | 234460                  | GG                              | AA                | 1946513730               |
| SNP_P3_125666_237220 | NW_004515984.1 | Scaffold544 | 237220                  | CC                              | TT                | 1946513731               |
| SNP_P3_125667_237321 | NW_004515984.1 | Scaffold544 | 237321                  | TT                              | CC                | 1946513733               |
| SNP_P3_125668_237593 | NW_004515984.1 | Scaffold544 | 237593                  | CC                              | AA                | 1946513734               |
| SNP_P3_125669_237637 | NW_004515984.1 | Scaffold544 | 237637                  | GG                              | AA                | 1946513736               |
| SNP_P3_125670_238091 | NW_004515984.1 | Scaffold544 | 238091                  | TT                              | CC                | 1946513737               |
| SNP_P3_125671_238477 | NW_004515984.1 | Scaffold544 | 238477                  | CC                              | TT                | 1946513739               |
| SNP_P3_125672_238949 | NW_004515984.1 | Scaffold544 | 238949                  | AA                              | CC                | 1946513740               |
| SNP_P3_125673_238999 | NW_004515984.1 | Scaffold544 | 238999                  | TT                              | CC                | 1946513742               |
| SNP_P3_125674_239373 | NW_004515984.1 | Scaffold544 | 239373                  | CC                              | GG                | 1946513743               |
| SNP_P3_125676_240026 | NW_004515984.1 | Scaffold544 | 240026                  | AA                              | GG                | 1946513745               |
| SNP_P3_125677_240517 | NW_004515984.1 | Scaffold544 | 240517                  | CC                              | AA                | 1946513746               |
| SNP_P3_125678_241136 | NW_004515984.1 | Scaffold544 | 241136                  | GG                              | TT                | 1946513748               |

| SNPs IDs             | Chromosome IDs | Chromosomes | Physical positions (bp) | CDC Frontier (Reference genome) | (Pusa 256 & HPNB) | NCBI SNPdb Accession IDs |
|----------------------|----------------|-------------|-------------------------|---------------------------------|-------------------|--------------------------|
| SNP_P3_125679_241261 | NW_004515984.1 | Scaffold544 | 241261                  | CC                              | TT                | 1946513749               |
| SNP_P3_125680_241345 | NW_004515984.1 | Scaffold544 | 241345                  | TT                              | GG                | 1946513751               |
| SNP_P3_125681_241432 | NW_004515984.1 | Scaffold544 | 241432                  | CC                              | AA                | 1946513752               |
| SNP_P3_125682_241591 | NW_004515984.1 | Scaffold544 | 241591                  | CC                              | TT                | 1946513754               |
| SNP_P3_125683_241649 | NW_004515984.1 | Scaffold544 | 241649                  | TT                              | CC                | 1946513755               |
| SNP_P3_125684_243111 | NW_004515984.1 | Scaffold544 | 243111                  | AA                              | GG                | 1946513757               |
| SNP_P3_125685_243116 | NW_004515984.1 | Scaffold544 | 243116                  | GG                              | TT                | 1946513758               |
| SNP_P3_125686_243123 | NW_004515984.1 | Scaffold544 | 243123                  | CC                              | TT                | 1946513760               |
| SNP_P3_125687_244178 | NW_004515984.1 | Scaffold544 | 244178                  | GG                              | AA                | 1946513761               |
| SNP_P3_125688_248219 | NW_004515984.1 | Scaffold544 | 248219                  | CC                              | TT                | 1946513763               |
| SNP_P3_125689_248542 | NW_004515984.1 | Scaffold544 | 248542                  | GG                              | AA                | 1946513764               |
| SNP_P3_125690_248555 | NW_004515984.1 | Scaffold544 | 248555                  | TT                              | CC                | 1946513766               |
| SNP_P3_125691_248741 | NW_004515984.1 | Scaffold544 | 248741                  | GG                              | AA                | 1946513767               |
| SNP_P3_125693_261791 | NW_004515984.1 | Scaffold544 | 261791                  | AA                              | GG                | 1946513769               |
| SNP_P3_125695_266228 | NW_004515984.1 | Scaffold544 | 266228                  | AA                              | TT                | 1946513770               |
| SNP_P3_125696_266924 | NW_004515984.1 | Scaffold544 | 266924                  | GG                              | TT                | 1946513772               |
| SNP_P3_125698_269360 | NW_004515984.1 | Scaffold544 | 269360                  | AA                              | GG                | 1946513773               |
| SNP_P3_125700_269701 | NW_004515984.1 | Scaffold544 | 269701                  | CC                              | GG                | 1946513775               |
| SNP_P3_125701_276180 | NW_004515984.1 | Scaffold544 | 276180                  | GG                              | TT                | 1946513776               |
| SNP_P3_125702_278349 | NW_004515984.1 | Scaffold544 | 278349                  | TT                              | CC                | 1946513778               |
| SNP_P3_125703_278412 | NW_004515984.1 | Scaffold544 | 278412                  | GG                              | AA                | 1946513779               |
| SNP_P3_125704_278630 | NW_004515984.1 | Scaffold544 | 278630                  | CC                              | GG                | 1946513781               |
| SNP_P3_125705_278631 | NW_004515984.1 | Scaffold544 | 278631                  | TT                              | GG                | 1946513782               |
| SNP_P3_125707_286902 | NW_004515984.1 | Scaffold544 | 286902                  | CC                              | TT                | 1946513784               |
| SNP_P3_125708_287527 | NW_004515984.1 | Scaffold544 | 287527                  | CC                              | AA                | 1946513785               |
| SNP_P3_125710_296465 | NW_004515984.1 | Scaffold544 | 296465                  | TT                              | CC                | 1946513787               |
| SNP_P3_125711_296498 | NW_004515984.1 | Scaffold544 | 296498                  | GG                              | AA                | 1946513788               |
| SNP_P3_125712_296573 | NW_004515984.1 | Scaffold544 | 296573                  | CC                              | TT                | 1946513790               |
| SNP_P3_125713_296847 | NW_004515984.1 | Scaffold544 | 296847                  | TT                              | AA                | 1946513791               |
| SNP_P3_125714_296850 | NW_004515984.1 | Scaffold544 | 296850                  | TT                              | CC                | 1946513793               |
| SNP_P3_125715_296887 | NW_004515984.1 | Scaffold544 | 296887                  | GG                              | TT                | 1946513794               |
| SNP_P3_125716_303959 | NW_004515984.1 | Scaffold544 | 303959                  | TT                              | AA                | 1946513796               |
| SNP_P3_125717_304009 | NW_004515984.1 | Scaffold544 | 304009                  | CC                              | TT                | 1946513797               |
| SNP_P3_125718_304019 | NW_004515984.1 | Scaffold544 | 304019                  | AA                              | CC                | 1946513799               |
| SNP_P3_125719_304352 | NW_004515984.1 | Scaffold544 | 304352                  | CC                              | GG                | 1946513800               |
| SNP_P3_125720_304378 | NW_004515984.1 | Scaffold544 | 304378                  | CC                              | TT                | 1946513802               |
| SNP_P3_125721_310827 | NW_004515984.1 | Scaffold544 | 310827                  | GG                              | AA                | 1946513803               |
| SNP_P3_125722_310851 | NW_004515984.1 | Scaffold544 | 310851                  | TT                              | CC                | 1946513805               |
| SNP_P3_125723_318317 | NW_004515984.1 | Scaffold544 | 318317                  | GG                              | AA                | 1946513806               |
| SNP_P3_125724_318338 | NW_004515984.1 | Scaffold544 | 318338                  | AA                              | CC                | 1946513808               |
| SNP_P3_125725_318435 | NW_004515984.1 | Scaffold544 | 318435                  | TT                              | AA                | 1946513809               |
| SNP_P3_125726_318573 | NW_004515984.1 | Scaffold544 | 318573                  | TT                              | CC                | 1946513811               |

| SNPs IDs             | Chromosome IDs | Chromosomes | Physical positions (bp) | CDC Frontier (Reference genome) | (Pusa 256 & HPNB) | NCBI SNPdb Accession IDs |
|----------------------|----------------|-------------|-------------------------|---------------------------------|-------------------|--------------------------|
| SNP_P3_125727_318662 | NW_004515984.1 | Scaffold544 | 318662                  | TT                              | CC                | 1946513812               |
| SNP_P3_125728_318787 | NW_004515984.1 | Scaffold544 | 318787                  | CC                              | TT                | 1946513813               |
| SNP_P3_125729_318832 | NW_004515984.1 | Scaffold544 | 318832                  | AA                              | CC                | 1946513815               |
| SNP_P3_125730_320233 | NW_004515984.1 | Scaffold544 | 320233                  | GG                              | AA                | 1946513816               |
| SNP_P3_125731_323952 | NW_004515984.1 | Scaffold544 | 323952                  | AA                              | TT                | 1946513818               |
| SNP_P3_125732_325131 | NW_004515984.1 | Scaffold544 | 325131                  | TT                              | CC                | 1946513819               |
| SNP_P3_125733_325262 | NW_004515984.1 | Scaffold544 | 325262                  | TT                              | AA                | 1946513821               |
| SNP_P3_125734_328206 | NW_004515984.1 | Scaffold544 | 328206                  | AA                              | GG                | 1946513822               |
| SNP_P3_125735_328223 | NW_004515984.1 | Scaffold544 | 328223                  | GG                              | AA                | 1946513823               |
| SNP_P3_125736_329108 | NW_004515984.1 | Scaffold544 | 329108                  | TT                              | GG                | 1946513825               |
| SNP_P3_125737_329115 | NW_004515984.1 | Scaffold544 | 329115                  | CC                              | TT                | 1946513826               |
| SNP_P3_125738_329179 | NW_004515984.1 | Scaffold544 | 329179                  | GG                              | TT                | 1946513828               |
| SNP_P3_125739_330797 | NW_004515984.1 | Scaffold544 | 330797                  | AA                              | GG                | 1946513829               |
| SNP_P3_125740_331981 | NW_004515984.1 | Scaffold544 | 331981                  | GG                              | AA                | 1946513831               |
| SNP_P3_125741_332004 | NW_004515984.1 | Scaffold544 | 332004                  | TT                              | AA                | 1946513832               |
| SNP_P3_125742_332066 | NW_004515984.1 | Scaffold544 | 332066                  | CC                              | TT                | 1946513834               |
| SNP_P3_125743_332071 | NW_004515984.1 | Scaffold544 | 332071                  | TT                              | AA                | 1946513835               |
| SNP_P3_125744_336886 | NW_004515984.1 | Scaffold544 | 336886                  | AA                              | GG                | 1946513836               |
| SNP_P3_125745_338581 | NW_004515984.1 | Scaffold544 | 338581                  | CC                              | GG                | 1946513838               |
| SNP_P3_125746_338606 | NW_004515984.1 | Scaffold544 | 338606                  | GG                              | CC                | 1946513839               |
| SNP_P3_125747_342252 | NW_004515984.1 | Scaffold544 | 342252                  | GG                              | AA                | 1946513841               |
| SNP_P3_125750_11444  | NW_004515985.1 | Scaffold545 | 11444                   | GG                              | AA                | 1946513842               |
| SNP_P3_125751_11453  | NW_004515985.1 | Scaffold545 | 11453                   | TT                              | CC                | 1946513844               |
| SNP_P3_125752_11462  | NW_004515985.1 | Scaffold545 | 11462                   | AA                              | GG                | 1946513845               |
| SNP_P3_125753_11477  | NW_004515985.1 | Scaffold545 | 11477                   | CC                              | TT                | 1946513847               |
| SNP_P3_125754_11485  | NW_004515985.1 | Scaffold545 | 11485                   | AA                              | CC                | 1946513848               |
| SNP_P3_125755_11568  | NW_004515985.1 | Scaffold545 | 11568                   | AA                              | GG                | 1946513849               |
| SNP_P3_125756_11828  | NW_004515985.1 | Scaffold545 | 11828                   | TT                              | CC                | 1946513851               |
| SNP_P3_125757_11881  | NW_004515985.1 | Scaffold545 | 11881                   | CC                              | TT                | 1946513852               |
| SNP_P3_125758_11917  | NW_004515985.1 | Scaffold545 | 11917                   | AA                              | GG                | 1946513854               |
| SNP_P3_125759_12186  | NW_004515985.1 | Scaffold545 | 12186                   | TT                              | CC                | 1946513855               |
| SNP_P3_125760_12780  | NW_004515985.1 | Scaffold545 | 12780                   | AA                              | GG                | 1946513857               |
| SNP_P3_125762_12909  | NW_004515985.1 | Scaffold545 | 12909                   | AA                              | TT                | 1946513858               |
| SNP_P3_125763_12944  | NW_004515985.1 | Scaffold545 | 12944                   | TT                              | CC                | 1946513860               |
| SNP_P3_125764_12983  | NW_004515985.1 | Scaffold545 | 12983                   | TT                              | AA                | 1946513861               |
| SNP_P3_125765_12985  | NW_004515985.1 | Scaffold545 | 12985                   | GG                              | AA                | 1946513863               |
| SNP_P3_125766_12993  | NW_004515985.1 | Scaffold545 | 12993                   | CC                              | TT                | 1946513864               |
| SNP_P3_125767_30252  | NW_004515985.1 | Scaffold545 | 30252                   | CC                              | AA                | 1946513865               |
| SNP_P3_125769_106268 | NW_004515985.1 | Scaffold545 | 106268                  | GG                              | AA                | 1946513867               |
| SNP_P3_125771_155804 | NW_004515985.1 | Scaffold545 | 155804                  | TT                              | CC                | 1946513868               |
| SNP_P3_125772_172234 | NW_004515985.1 | Scaffold545 | 172234                  | GG                              | AA                | 1946513870               |
| SNP_P3_125773_172246 | NW_004515985.1 | Scaffold545 | 172246                  | TT                              | AA                | 1946513871               |



| SNPs IDs             | Chromosome IDs | Chromosomes | Physical positions (bp) | CDC Frontier (Reference genome) | (Pusa 256 & HPNB) | NCBI SNPdb Accession IDs |
|----------------------|----------------|-------------|-------------------------|---------------------------------|-------------------|--------------------------|
| SNP_P3_125775_179762 | NW_004515985.1 | Scaffold545 | 179762                  | GG                              | AA                | 1946513873               |
| SNP_P3_125776_183768 | NW_004515985.1 | Scaffold545 | 183768                  | TT                              | CC                | 1946513874               |
| SNP_P3_125777_183948 | NW_004515985.1 | Scaffold545 | 183948                  | CC                              | AA                | 1946513876               |
| SNP_P3_125778_183954 | NW_004515985.1 | Scaffold545 | 183954                  | CC                              | TT                | 1946513877               |
| SNP_P3_125779_192264 | NW_004515985.1 | Scaffold545 | 192264                  | GG                              | TT                | 1946513878               |
| SNP_P3_125780_192272 | NW_004515985.1 | Scaffold545 | 192272                  | AA                              | GG                | 1946513880               |
| SNP_P3_125781_192709 | NW_004515985.1 | Scaffold545 | 192709                  | AA                              | TT                | 1946513881               |
| SNP_P3_125783_193144 | NW_004515985.1 | Scaffold545 | 193144                  | TT                              | CC                | 1946513883               |
| SNP_P3_125784_196417 | NW_004515985.1 | Scaffold545 | 196417                  | TT                              | GG                | 1946513884               |
| SNP_P3_125785_197496 | NW_004515985.1 | Scaffold545 | 197496                  | AA                              | TT                | 1946513886               |
| SNP_P3_125786_200384 | NW_004515985.1 | Scaffold545 | 200384                  | CC                              | TT                | 1946513887               |
| SNP_P3_125787_254995 | NW_004515985.1 | Scaffold545 | 254995                  | GG                              | TT                | 1946513889               |
| SNP_P3_125788_256956 | NW_004515985.1 | Scaffold545 | 256956                  | AA                              | CC                | 1946513890               |
| SNP_P3_125789_261132 | NW_004515985.1 | Scaffold545 | 261132                  | GG                              | AA                | 1946513891               |
| SNP_P3_125790_262935 | NW_004515985.1 | Scaffold545 | 262935                  | CC                              | TT                | 1946513893               |
| SNP_P3_125791_279505 | NW_004515985.1 | Scaffold545 | 279505                  | AA                              | GG                | 1946513894               |
| SNP_P3_125792_279530 | NW_004515985.1 | Scaffold545 | 279530                  | GG                              | AA                | 1946513896               |
| SNP_P3_125793_279532 | NW_004515985.1 | Scaffold545 | 279532                  | GG                              | AA                | 1946513897               |
| SNP_P3_125794_279568 | NW_004515985.1 | Scaffold545 | 279568                  | GG                              | AA                | 1946513899               |
| SNP_P3_125795_279584 | NW_004515985.1 | Scaffold545 | 279584                  | GG                              | TT                | 1946513900               |
| SNP_P3_125796_279687 | NW_004515985.1 | Scaffold545 | 279687                  | TT                              | CC                | 1946513902               |
| SNP_P3_125797_279700 | NW_004515985.1 | Scaffold545 | 279700                  | AA                              | CC                | 1946513903               |
| SNP_P3_125798_279706 | NW_004515985.1 | Scaffold545 | 279706                  | AA                              | GG                | 1946513905               |
| SNP_P3_125799_279739 | NW_004515985.1 | Scaffold545 | 279739                  | TT                              | CC                | 1946513906               |
| SNP_P3_125800_279759 | NW_004515985.1 | Scaffold545 | 279759                  | TT                              | CC                | 1946513908               |
| SNP_P3_125801_279775 | NW_004515985.1 | Scaffold545 | 279775                  | AA                              | GG                | 1946513909               |
| SNP_P3_125802_281268 | NW_004515985.1 | Scaffold545 | 281268                  | TT                              | CC                | 1946513911               |
| SNP_P3_125803_281269 | NW_004515985.1 | Scaffold545 | 281269                  | CC                              | TT                | 1946513912               |
| SNP_P3_125804_281365 | NW_004515985.1 | Scaffold545 | 281365                  | AA                              | TT                | 1946513914               |
| SNP_P3_125805_4557   | NW_004515986.1 | Scaffold546 | 4557                    | GG                              | CC                | 1946513915               |
| SNP_P3_125807_11257  | NW_004515986.1 | Scaffold546 | 11257                   | GG                              | AA                | 1946513917               |
| SNP_P3_125808_14288  | NW_004515986.1 | Scaffold546 | 14288                   | AA                              | GG                | 1946513918               |
| SNP_P3_125809_16856  | NW_004515986.1 | Scaffold546 | 16856                   | TT                              | GG                | 1946513919               |
| SNP_P3_125810_40614  | NW_004515986.1 | Scaffold546 | 40614                   | AA                              | TT                | 1946513921               |
| SNP_P3_125811_40623  | NW_004515986.1 | Scaffold546 | 40623                   | TT                              | AA                | 1946513922               |
| SNP_P3_125812_54983  | NW_004515986.1 | Scaffold546 | 54983                   | AA                              | CC                | 1946513924               |
| SNP_P3_125813_54990  | NW_004515986.1 | Scaffold546 | 54990                   | CC                              | TT                | 1946513925               |
| SNP_P3_125814_55185  | NW_004515986.1 | Scaffold546 | 55185                   | TT                              | AA                | 1946513927               |
| SNP_P3_125815_55190  | NW_004515986.1 | Scaffold546 | 55190                   | GG                              | TT                | 1946513928               |
| SNP_P3_125816_55229  | NW_004515986.1 | Scaffold546 | 55229                   | TT                              | GG                | 1946513930               |
| SNP_P3_125817_55273  | NW_004515986.1 | Scaffold546 | 55273                   | CC                              | GG                | 1946513931               |
| SNP_P3_125818_55274  | NW_004515986.1 | Scaffold546 | 55274                   | CC                              | TT                | 1946513933               |

| SNPs IDs            | Chromosome IDs | Chromosomes | Physical positions (bp) | CDC Frontier (Reference genome) | (Pusa 256 & HPNB) | NCBI SNPdb Accession IDs |
|---------------------|----------------|-------------|-------------------------|---------------------------------|-------------------|--------------------------|
| SNP_P3_125819_55304 | NW_004515986.1 | Scaffold546 | 55304                   | GG                              | AA                | 1946513934               |
| SNP_P3_125820_55305 | NW_004515986.1 | Scaffold546 | 55305                   | TT                              | AA                | 1946513936               |
| SNP_P3_125821_55337 | NW_004515986.1 | Scaffold546 | 55337                   | CC                              | GG                | 1946513937               |
| SNP_P3_125822_55413 | NW_004515986.1 | Scaffold546 | 55413                   | GG                              | AA                | 1946513939               |
| SNP_P3_125823_55421 | NW_004515986.1 | Scaffold546 | 55421                   | CC                              | TT                | 1946513940               |
| SNP_P3_125824_55451 | NW_004515986.1 | Scaffold546 | 55451                   | GG                              | TT                | 1946513942               |
| SNP_P3_125825_55465 | NW_004515986.1 | Scaffold546 | 55465                   | CC                              | AA                | 1946513943               |
| SNP_P3_125826_55469 | NW_004515986.1 | Scaffold546 | 55469                   | TT                              | GG                | 1946513945               |
| SNP_P3_125827_55475 | NW_004515986.1 | Scaffold546 | 55475                   | TT                              | CC                | 1946513946               |
| SNP_P3_125828_55490 | NW_004515986.1 | Scaffold546 | 55490                   | CC                              | AA                | 1946513948               |
| SNP_P3_125829_55511 | NW_004515986.1 | Scaffold546 | 55511                   | CC                              | GG                | 1946513949               |
| SNP_P3_125830_55544 | NW_004515986.1 | Scaffold546 | 55544                   | AA                              | TT                | 1946513951               |
| SNP_P3_125831_55548 | NW_004515986.1 | Scaffold546 | 55548                   | AA                              | TT                | 1946513952               |
| SNP_P3_125832_55561 | NW_004515986.1 | Scaffold546 | 55561                   | CC                              | AA                | 1946513954               |
| SNP_P3_125833_55580 | NW_004515986.1 | Scaffold546 | 55580                   | CC                              | GG                | 1946513956               |
| SNP_P3_125834_55625 | NW_004515986.1 | Scaffold546 | 55625                   | AA                              | CC                | 1946513957               |
| SNP_P3_125835_55632 | NW_004515986.1 | Scaffold546 | 55632                   | GG                              | CC                | 1946513959               |
| SNP_P3_125836_55633 | NW_004515986.1 | Scaffold546 | 55633                   | TT                              | AA                | 1946513960               |
| SNP_P3_125837_55708 | NW_004515986.1 | Scaffold546 | 55708                   | AA                              | TT                | 1946513962               |
| SNP_P3_125838_55709 | NW_004515986.1 | Scaffold546 | 55709                   | AA                              | CC                | 1946513963               |
| SNP_P3_125839_55713 | NW_004515986.1 | Scaffold546 | 55713                   | GG                              | CC                | 1946513965               |
| SNP_P3_125840_55777 | NW_004515986.1 | Scaffold546 | 55777                   | CC                              | AA                | 1946513966               |
| SNP_P3_125841_55805 | NW_004515986.1 | Scaffold546 | 55805                   | AA                              | CC                | 1946513968               |
| SNP_P3_125842_55811 | NW_004515986.1 | Scaffold546 | 55811                   | GG                              | AA                | 1946513969               |
| SNP_P3_125843_67543 | NW_004515986.1 | Scaffold546 | 67543                   | GG                              | AA                | 1946513971               |
| SNP_P3_125844_67864 | NW_004515986.1 | Scaffold546 | 67864                   | TT                              | CC                | 1946513973               |
| SNP_P3_125845_67865 | NW_004515986.1 | Scaffold546 | 67865                   | AA                              | TT                | 1946513974               |
| SNP_P3_125846_67893 | NW_004515986.1 | Scaffold546 | 67893                   | GG                              | TT                | 1946513976               |
| SNP_P3_125848_68037 | NW_004515986.1 | Scaffold546 | 68037                   | TT                              | AA                | 1946513977               |
| SNP_P3_125849_68061 | NW_004515986.1 | Scaffold546 | 68061                   | CC                              | TT                | 1946513979               |
| SNP_P3_125850_70157 | NW_004515986.1 | Scaffold546 | 70157                   | TT                              | GG                | 1946513980               |
| SNP_P3_125851_70170 | NW_004515986.1 | Scaffold546 | 70170                   | AA                              | GG                | 1946513982               |
| SNP_P3_125852_72777 | NW_004515986.1 | Scaffold546 | 72777                   | CC                              | TT                | 1946513983               |
| SNP_P3_125853_72851 | NW_004515986.1 | Scaffold546 | 72851                   | CC                              | TT                | 1946513985               |
| SNP_P3_125854_72887 | NW_004515986.1 | Scaffold546 | 72887                   | GG                              | CC                | 1946513986               |
| SNP_P3_125855_73043 | NW_004515986.1 | Scaffold546 | 73043                   | GG                              | AA                | 1946513988               |
| SNP_P3_125856_73066 | NW_004515986.1 | Scaffold546 | 73066                   | GG                              | TT                | 1946513989               |
| SNP_P3_125857_73067 | NW_004515986.1 | Scaffold546 | 73067                   | GG                              | AA                | 1946513991               |
| SNP_P3_125858_73117 | NW_004515986.1 | Scaffold546 | 73117                   | TT                              | GG                | 1946513992               |
| SNP_P3_125859_74767 | NW_004515986.1 | Scaffold546 | 74767                   | GG                              | AA                | 1946513994               |
| SNP_P3_125860_75083 | NW_004515986.1 | Scaffold546 | 75083                   | CC                              | TT                | 1946513995               |
| SNP_P3_125861_75132 | NW_004515986.1 | Scaffold546 | 75132                   | AA                              | GG                | 1946513997               |

| SNPs IDs            | Chromosome IDs | Chromosomes | Physical positions (bp) | CDC Frontier (Reference genome) | (Pusa 256 & HPNB) | NCBI SNPdb Accession IDs |
|---------------------|----------------|-------------|-------------------------|---------------------------------|-------------------|--------------------------|
| SNP_P3_125862_76348 | NW_004515986.1 | Scaffold546 | 76348                   | CC                              | AA                | 1946513998               |
| SNP_P3_125863_82176 | NW_004515986.1 | Scaffold546 | 82176                   | TT                              | CC                | 1946514000               |
| SNP_P3_125864_82247 | NW_004515986.1 | Scaffold546 | 82247                   | GG                              | AA                | 1946514001               |
| SNP_P3_125865_82269 | NW_004515986.1 | Scaffold546 | 82269                   | TT                              | AA                | 1946514003               |
| SNP_P3_125866_82514 | NW_004515986.1 | Scaffold546 | 82514                   | GG                              | AA                | 1946514004               |
| SNP_P3_125867_82529 | NW_004515986.1 | Scaffold546 | 82529                   | GG                              | AA                | 1946514006               |
| SNP_P3_125868_83457 | NW_004515986.1 | Scaffold546 | 83457                   | GG                              | AA                | 1946514007               |
| SNP_P3_125869_84482 | NW_004515986.1 | Scaffold546 | 84482                   | GG                              | AA                | 1946514009               |
| SNP_P3_125870_84535 | NW_004515986.1 | Scaffold546 | 84535                   | TT                              | GG                | 1946514010               |
| SNP_P3_125871_85053 | NW_004515986.1 | Scaffold546 | 85053                   | GG                              | AA                | 1946514012               |
| SNP_P3_125872_86119 | NW_004515986.1 | Scaffold546 | 86119                   | TT                              | CC                | 1946514013               |
| SNP_P3_125873_86120 | NW_004515986.1 | Scaffold546 | 86120                   | GG                              | AA                | 1946514015               |
| SNP_P3_125875_86210 | NW_004515986.1 | Scaffold546 | 86210                   | TT                              | GG                | 1946514017               |
| SNP_P3_125876_86434 | NW_004515986.1 | Scaffold546 | 86434                   | AA                              | GG                | 1946514018               |
| SNP_P3_125877_86491 | NW_004515986.1 | Scaffold546 | 86491                   | TT                              | CC                | 1946514019               |
| SNP_P3_125878_86602 | NW_004515986.1 | Scaffold546 | 86602                   | TT                              | CC                | 1946514021               |
| SNP_P3_125879_86604 | NW_004515986.1 | Scaffold546 | 86604                   | GG                              | AA                | 1946514022               |
| SNP_P3_125880_86658 | NW_004515986.1 | Scaffold546 | 86658                   | AA                              | CC                | 1946514024               |
| SNP_P3_125881_86789 | NW_004515986.1 | Scaffold546 | 86789                   | CC                              | TT                | 1946514025               |
| SNP_P3_125882_86869 | NW_004515986.1 | Scaffold546 | 86869                   | TT                              | CC                | 1946514027               |
| SNP_P3_125883_86999 | NW_004515986.1 | Scaffold546 | 86999                   | AA                              | CC                | 1946514028               |
| SNP_P3_125884_87121 | NW_004515986.1 | Scaffold546 | 87121                   | AA                              | GG                | 1946514030               |
| SNP_P3_125885_87161 | NW_004515986.1 | Scaffold546 | 87161                   | TT                              | CC                | 1946514032               |
| SNP_P3_125886_87184 | NW_004515986.1 | Scaffold546 | 87184                   | AA                              | GG                | 1946514033               |
| SNP_P3_125887_87186 | NW_004515986.1 | Scaffold546 | 87186                   | TT                              | GG                | 1946514035               |
| SNP_P3_125888_87385 | NW_004515986.1 | Scaffold546 | 87385                   | TT                              | CC                | 1946514036               |
| SNP_P3_125889_1215  | NW_004515987.1 | Scaffold547 | 1215                    | CC                              | GG                | 1946514038               |
| SNP_P3_125890_1242  | NW_004515987.1 | Scaffold547 | 1242                    | TT                              | CC                | 1946514039               |
| SNP_P3_125891_1275  | NW_004515987.1 | Scaffold547 | 1275                    | TT                              | GG                | 1946514041               |
| SNP_P3_125892_1870  | NW_004515987.1 | Scaffold547 | 1870                    | TT                              | CC                | 1946514042               |
| SNP_P3_125893_1924  | NW_004515987.1 | Scaffold547 | 1924                    | TT                              | CC                | 1946514044               |
| SNP_P3_125894_1946  | NW_004515987.1 | Scaffold547 | 1946                    | CC                              | TT                | 1946514045               |
| SNP_P3_125895_2013  | NW_004515987.1 | Scaffold547 | 2013                    | TT                              | AA                | 1946514047               |
| SNP_P3_125896_2045  | NW_004515987.1 | Scaffold547 | 2045                    | GG                              | AA                | 1946514049               |
| SNP_P3_125897_2061  | NW_004515987.1 | Scaffold547 | 2061                    | TT                              | CC                | 1946514050               |
| SNP_P3_125898_2382  | NW_004515987.1 | Scaffold547 | 2382                    | AA                              | TT                | 1946514052               |
| SNP_P3_125899_2433  | NW_004515987.1 | Scaffold547 | 2433                    | TT                              | CC                | 1946514053               |
| SNP_P3_125900_2515  | NW_004515987.1 | Scaffold547 | 2515                    | AA                              | CC                | 1946514055               |
| SNP_P3_125901_2520  | NW_004515987.1 | Scaffold547 | 2520                    | AA                              | GG                | 1946514057               |
| SNP_P3_125902_6830  | NW_004515987.1 | Scaffold547 | 6830                    | AA                              | TT                | 1946514058               |
| SNP_P3_125903_6831  | NW_004515987.1 | Scaffold547 | 6831                    | GG                              | AA                | 1946514060               |
| SNP_P3_125904_11648 | NW_004515987.1 | Scaffold547 | 11648                   | CC                              | TT                | 1946514061               |

| SNPs IDs            | Chromosome IDs | Chromosomes | Physical positions (bp) | CDC Frontier (Reference genome) | (Pusa 256 & HPNB) | NCBI SNPdb Accession IDs |
|---------------------|----------------|-------------|-------------------------|---------------------------------|-------------------|--------------------------|
| SNP_P3_125905_11662 | NW_004515987.1 | Scaffold547 | 11662                   | CC                              | AA                | 1946514063               |
| SNP_P3_125906_11714 | NW_004515987.1 | Scaffold547 | 11714                   | GG                              | AA                | 1946514064               |
| SNP_P3_125907_12151 | NW_004515987.1 | Scaffold547 | 12151                   | AA                              | GG                | 1946514066               |
| SNP_P3_125908_12156 | NW_004515987.1 | Scaffold547 | 12156                   | GG                              | TT                | 1946514068               |
| SNP_P3_125909_12157 | NW_004515987.1 | Scaffold547 | 12157                   | GG                              | AA                | 1946514069               |
| SNP_P3_125910_12175 | NW_004515987.1 | Scaffold547 | 12175                   | AA                              | GG                | 1946514071               |
| SNP_P3_125911_12422 | NW_004515987.1 | Scaffold547 | 12422                   | AA                              | GG                | 1946514072               |
| SNP_P3_125912_12432 | NW_004515987.1 | Scaffold547 | 12432                   | TT                              | AA                | 1946514074               |
| SNP_P3_125913_12436 | NW_004515987.1 | Scaffold547 | 12436                   | TT                              | AA                | 1946514075               |
| SNP_P3_125915_12442 | NW_004515987.1 | Scaffold547 | 12442                   | GG                              | CC                | 1946514077               |
| SNP_P3_125917_12465 | NW_004515987.1 | Scaffold547 | 12465                   | CC                              | AA                | 1946514078               |
| SNP_P3_125918_12477 | NW_004515987.1 | Scaffold547 | 12477                   | AA                              | CC                | 1946514080               |
| SNP_P3_125919_12505 | NW_004515987.1 | Scaffold547 | 12505                   | CC                              | TT                | 1946514081               |
| SNP_P3_125920_12534 | NW_004515987.1 | Scaffold547 | 12534                   | AA                              | TT                | 1946514083               |
| SNP_P3_125921_12732 | NW_004515987.1 | Scaffold547 | 12732                   | GG                              | CC                | 1946514084               |
| SNP_P3_125922_12865 | NW_004515987.1 | Scaffold547 | 12865                   | AA                              | GG                | 1946514086               |
| SNP_P3_125923_12879 | NW_004515987.1 | Scaffold547 | 12879                   | AA                              | TT                | 1946514087               |
| SNP_P3_125924_12895 | NW_004515987.1 | Scaffold547 | 12895                   | GG                              | AA                | 1946514089               |
| SNP_P3_125925_13373 | NW_004515987.1 | Scaffold547 | 13373                   | AA                              | GG                | 1946514090               |
| SNP_P3_125926_13615 | NW_004515987.1 | Scaffold547 | 13615                   | AA                              | CC                | 1946514092               |
| SNP_P3_125927_13659 | NW_004515987.1 | Scaffold547 | 13659                   | TT                              | CC                | 1946514094               |
| SNP_P3_125928_13690 | NW_004515987.1 | Scaffold547 | 13690                   | TT                              | GG                | 1946514095               |
| SNP_P3_125929_13968 | NW_004515987.1 | Scaffold547 | 13968                   | TT                              | AA                | 1946514097               |
| SNP_P3_125930_13996 | NW_004515987.1 | Scaffold547 | 13996                   | GG                              | AA                | 1946514098               |
| SNP_P3_125931_14138 | NW_004515987.1 | Scaffold547 | 14138                   | GG                              | TT                | 1946514100               |
| SNP_P3_125932_14163 | NW_004515987.1 | Scaffold547 | 14163                   | AA                              | GG                | 1946514101               |
| SNP_P3_125933_20970 | NW_004515987.1 | Scaffold547 | 20970                   | AA                              | CC                | 1946514103               |
| SNP_P3_125934_21037 | NW_004515987.1 | Scaffold547 | 21037                   | TT                              | CC                | 1946514104               |
| SNP_P3_125935_21094 | NW_004515987.1 | Scaffold547 | 21094                   | AA                              | TT                | 1946514106               |
| SNP_P3_125936_26908 | NW_004515987.1 | Scaffold547 | 26908                   | CC                              | AA                | 1946514107               |
| SNP_P3_125937_26912 | NW_004515987.1 | Scaffold547 | 26912                   | GG                              | TT                | 1946514109               |
| SNP_P3_125938_27448 | NW_004515987.1 | Scaffold547 | 27448                   | TT                              | CC                | 1946514110               |
| SNP_P3_125939_27460 | NW_004515987.1 | Scaffold547 | 27460                   | TT                              | GG                | 1946514112               |
| SNP_P3_125940_27465 | NW_004515987.1 | Scaffold547 | 27465                   | GG                              | AA                | 1946514113               |
| SNP_P3_125941_27488 | NW_004515987.1 | Scaffold547 | 27488                   | CC                              | TT                | 1946514115               |
| SNP_P3_125942_28134 | NW_004515987.1 | Scaffold547 | 28134                   | TT                              | CC                | 1946514116               |
| SNP_P3_125943_28173 | NW_004515987.1 | Scaffold547 | 28173                   | TT                              | AA                | 1946514118               |
| SNP_P3_125944_30914 | NW_004515987.1 | Scaffold547 | 30914                   | GG                              | AA                | 1946514119               |
| SNP_P3_125945_30933 | NW_004515987.1 | Scaffold547 | 30933                   | TT                              | GG                | 1946514120               |
| SNP_P3_125946_32096 | NW_004515987.1 | Scaffold547 | 32096                   | AA                              | GG                | 1946514122               |
| SNP_P3_125947_46651 | NW_004515987.1 | Scaffold547 | 46651                   | TT                              | GG                | 1946514123               |
| SNP_P3_125948_49660 | NW_004515987.1 | Scaffold547 | 49660                   | CC                              | AA                | 1946514125               |

| SNPs IDs             | Chromosome IDs | Chromosomes | Physical positions (bp) | CDC Frontier (Reference genome) | (Pusa 256 & HPNB) | NCBI SNPdb Accession IDs |
|----------------------|----------------|-------------|-------------------------|---------------------------------|-------------------|--------------------------|
| SNP_P3_125949_60741  | NW_004515987.1 | Scaffold547 | 60741                   | GG                              | AA                | 1946514126               |
| SNP_P3_125950_74383  | NW_004515987.1 | Scaffold547 | 74383                   | TT                              | CC                | 1946514128               |
| SNP_P3_125951_74791  | NW_004515987.1 | Scaffold547 | 74791                   | CC                              | TT                | 1946514129               |
| SNP_P3_125952_74799  | NW_004515987.1 | Scaffold547 | 74799                   | TT                              | CC                | 1946514131               |
| SNP_P3_125953_79055  | NW_004515987.1 | Scaffold547 | 79055                   | GG                              | TT                | 1946514132               |
| SNP_P3_125954_79076  | NW_004515987.1 | Scaffold547 | 79076                   | TT                              | GG                | 1946514134               |
| SNP_P3_125955_81896  | NW_004515987.1 | Scaffold547 | 81896                   | AA                              | GG                | 1946514135               |
| SNP_P3_125956_81994  | NW_004515987.1 | Scaffold547 | 81994                   | AA                              | GG                | 1946514137               |
| SNP_P3_125957_82183  | NW_004515987.1 | Scaffold547 | 82183                   | CC                              | TT                | 1946514138               |
| SNP_P3_125958_82187  | NW_004515987.1 | Scaffold547 | 82187                   | CC                              | TT                | 1946514140               |
| SNP_P3_125959_82237  | NW_004515987.1 | Scaffold547 | 82237                   | AA                              | TT                | 1946514142               |
| SNP_P3_125960_82239  | NW_004515987.1 | Scaffold547 | 82239                   | GG                              | TT                | 1946514143               |
| SNP_P3_125961_82347  | NW_004515987.1 | Scaffold547 | 82347                   | GG                              | CC                | 1946514145               |
| SNP_P3_125962_82584  | NW_004515987.1 | Scaffold547 | 82584                   | TT                              | CC                | 1946514146               |
| SNP_P3_125963_83150  | NW_004515987.1 | Scaffold547 | 83150                   | GG                              | TT                | 1946514148               |
| SNP_P3_125964_83164  | NW_004515987.1 | Scaffold547 | 83164                   | CC                              | GG                | 1946514149               |
| SNP_P3_125965_84203  | NW_004515987.1 | Scaffold547 | 84203                   | GG                              | AA                | 1946514151               |
| SNP_P3_125966_84317  | NW_004515987.1 | Scaffold547 | 84317                   | AA                              | GG                | 1946514152               |
| SNP_P3_125967_95927  | NW_004515987.1 | Scaffold547 | 95927                   | AA                              | GG                | 1946514154               |
| SNP_P3_125968_96375  | NW_004515987.1 | Scaffold547 | 96375                   | GG                              | TT                | 1946514155               |
| SNP_P3_125969_96532  | NW_004515987.1 | Scaffold547 | 96532                   | CC                              | GG                | 1946514157               |
| SNP_P3_125970_96537  | NW_004515987.1 | Scaffold547 | 96537                   | TT                              | CC                | 1946514158               |
| SNP_P3_125972_96766  | NW_004515987.1 | Scaffold547 | 96766                   | TT                              | CC                | 1946514160               |
| SNP_P3_125973_96918  | NW_004515987.1 | Scaffold547 | 96918                   | TT                              | AA                | 1946514161               |
| SNP_P3_125974_96930  | NW_004515987.1 | Scaffold547 | 96930                   | TT                              | AA                | 1946514163               |
| SNP_P3_125975_96972  | NW_004515987.1 | Scaffold547 | 96972                   | CC                              | TT                | 1946514164               |
| SNP_P3_125977_97047  | NW_004515987.1 | Scaffold547 | 97047                   | AA                              | GG                | 1946514166               |
| SNP_P3_125978_97058  | NW_004515987.1 | Scaffold547 | 97058                   | AA                              | CC                | 1946514167               |
| SNP_P3_125979_97082  | NW_004515987.1 | Scaffold547 | 97082                   | GG                              | AA                | 1946514169               |
| SNP_P3_125980_97162  | NW_004515987.1 | Scaffold547 | 97162                   | AA                              | TT                | 1946514170               |
| SNP_P3_125981_97306  | NW_004515987.1 | Scaffold547 | 97306                   | GG                              | AA                | 1946514172               |
| SNP_P3_125982_97688  | NW_004515987.1 | Scaffold547 | 97688                   | AA                              | TT                | 1946514173               |
| SNP_P3_125983_99397  | NW_004515987.1 | Scaffold547 | 99397                   | GG                              | CC                | 1946514175               |
| SNP_P3_125984_104532 | NW_004515987.1 | Scaffold547 | 104532                  | TT                              | CC                | 1946514177               |
| SNP_P3_125985_110651 | NW_004515987.1 | Scaffold547 | 110651                  | GG                              | AA                | 1946514178               |
| SNP_P3_125986_113667 | NW_004515987.1 | Scaffold547 | 113667                  | AA                              | GG                | 1946514180               |
| SNP_P3_125987_114788 | NW_004515987.1 | Scaffold547 | 114788                  | TT                              | AA                | 1946514181               |
| SNP_P3_125988_115023 | NW_004515987.1 | Scaffold547 | 115023                  | TT                              | AA                | 1946514183               |
| SNP_P3_125989_115111 | NW_004515987.1 | Scaffold547 | 115111                  | GG                              | AA                | 1946514184               |
| SNP_P3_125990_115129 | NW_004515987.1 | Scaffold547 | 115129                  | CC                              | AA                | 1946514186               |
| SNP_P3_125991_117202 | NW_004515987.1 | Scaffold547 | 117202                  | AA                              | TT                | 1946514187               |
| SNP_P3_125992_121504 | NW_004515987.1 | Scaffold547 | 121504                  | TT                              | CC                | 1946514189               |

| SNPs IDs             | Chromosome IDs | Chromosomes | Physical positions (bp) | CDC Frontier (Reference genome) | (Pusa 256 & HPNB) | NCBI SNPdb Accession IDs |
|----------------------|----------------|-------------|-------------------------|---------------------------------|-------------------|--------------------------|
| SNP_P3_125993_122907 | NW_004515987.1 | Scaffold547 | 122907                  | AA                              | TT                | 1946514190               |
| SNP_P3_125994_124201 | NW_004515987.1 | Scaffold547 | 124201                  | TT                              | GG                | 1946514192               |
| SNP_P3_125995_124382 | NW_004515987.1 | Scaffold547 | 124382                  | TT                              | GG                | 1946514194               |
| SNP_P3_125996_124837 | NW_004515987.1 | Scaffold547 | 124837                  | CC                              | TT                | 1946514195               |
| SNP_P3_125998_128360 | NW_004515987.1 | Scaffold547 | 128360                  | TT                              | AA                | 1946514197               |
| SNP_P3_125999_128362 | NW_004515987.1 | Scaffold547 | 128362                  | GG                              | AA                | 1946514198               |
| SNP_P3_126000_133082 | NW_004515987.1 | Scaffold547 | 133082                  | AA                              | GG                | 1946514200               |
| SNP_P3_126001_133110 | NW_004515987.1 | Scaffold547 | 133110                  | TT                              | AA                | 1946514201               |
| SNP_P3_126002_133111 | NW_004515987.1 | Scaffold547 | 133111                  | GG                              | TT                | 1946514203               |
| SNP_P3_126003_134081 | NW_004515987.1 | Scaffold547 | 134081                  | CC                              | TT                | 1946514204               |
| SNP_P3_126004_135975 | NW_004515987.1 | Scaffold547 | 135975                  | CC                              | TT                | 1946514206               |
| SNP_P3_126005_139112 | NW_004515987.1 | Scaffold547 | 139112                  | CC                              | AA                | 1946514207               |
| SNP_P3_126006_147817 | NW_004515987.1 | Scaffold547 | 147817                  | GG                              | TT                | 1946514209               |
| SNP_P3_126007_148063 | NW_004515987.1 | Scaffold547 | 148063                  | TT                              | CC                | 1946514210               |
| SNP_P3_126008_148070 | NW_004515987.1 | Scaffold547 | 148070                  | TT                              | CC                | 1946514212               |
| SNP_P3_126009_150645 | NW_004515987.1 | Scaffold547 | 150645                  | TT                              | CC                | 1946514213               |
| SNP_P3_126010_150818 | NW_004515987.1 | Scaffold547 | 150818                  | TT                              | GG                | 1946514215               |
| SNP_P3_126011_155882 | NW_004515987.1 | Scaffold547 | 155882                  | TT                              | GG                | 1946514216               |
| SNP_P3_126013_155947 | NW_004515987.1 | Scaffold547 | 155947                  | AA                              | TT                | 1946514218               |
| SNP_P3_126014_156064 | NW_004515987.1 | Scaffold547 | 156064                  | TT                              | CC                | 1946514219               |
| SNP_P3_126016_163116 | NW_004515987.1 | Scaffold547 | 163116                  | GG                              | CC                | 1946514221               |
| SNP_P3_126017_163125 | NW_004515987.1 | Scaffold547 | 163125                  | AA                              | GG                | 1946514222               |
| SNP_P3_126018_163131 | NW_004515987.1 | Scaffold547 | 163131                  | CC                              | TT                | 1946514224               |
| SNP_P3_126019_163135 | NW_004515987.1 | Scaffold547 | 163135                  | CC                              | TT                | 1946514226               |
| SNP_P3_126020_163144 | NW_004515987.1 | Scaffold547 | 163144                  | AA                              | CC                | 1946514228               |
| SNP_P3_126021_163199 | NW_004515987.1 | Scaffold547 | 163199                  | TT                              | CC                | 1946514229               |
| SNP_P3_126022_163208 | NW_004515987.1 | Scaffold547 | 163208                  | TT                              | GG                | 1946514231               |
| SNP_P3_126023_165032 | NW_004515987.1 | Scaffold547 | 165032                  | TT                              | AA                | 1946514232               |
| SNP_P3_126024_165329 | NW_004515987.1 | Scaffold547 | 165329                  | CC                              | TT                | 1946514234               |
| SNP_P3_126025_168254 | NW_004515987.1 | Scaffold547 | 168254                  | TT                              | CC                | 1946514235               |
| SNP_P3_126026_182140 | NW_004515987.1 | Scaffold547 | 182140                  | GG                              | AA                | 1946514237               |
| SNP_P3_126027_182332 | NW_004515987.1 | Scaffold547 | 182332                  | CC                              | TT                | 1946514238               |
| SNP_P3_126028_182476 | NW_004515987.1 | Scaffold547 | 182476                  | TT                              | CC                | 1946514240               |
| SNP_P3_126029_182842 | NW_004515987.1 | Scaffold547 | 182842                  | GG                              | TT                | 1946514241               |
| SNP_P3_126030_185129 | NW_004515987.1 | Scaffold547 | 185129                  | TT                              | CC                | 1946514243               |
| SNP_P3_126031_185452 | NW_004515987.1 | Scaffold547 | 185452                  | AA                              | GG                | 1946514244               |
| SNP_P3_126032_185576 | NW_004515987.1 | Scaffold547 | 185576                  | AA                              | GG                | 1946514246               |
| SNP_P3_126033_185595 | NW_004515987.1 | Scaffold547 | 185595                  | AA                              | GG                | 1946514247               |
| SNP_P3_126034_185823 | NW_004515987.1 | Scaffold547 | 185823                  | TT                              | CC                | 1946514249               |
| SNP_P3_126035_185861 | NW_004515987.1 | Scaffold547 | 185861                  | TT                              | CC                | 1946514250               |
| SNP_P3_126036_185901 | NW_004515987.1 | Scaffold547 | 185901                  | TT                              | AA                | 1946514252               |
| SNP_P3_126038_17540  | NW_004515988.1 | Scaffold548 | 17540                   | GG                              | AA                | 1946514253               |

| SNPs IDs             | Chromosome IDs | Chromosomes | Physical positions (bp) | CDC Frontier (Reference genome) | (Pusa 256 & HPNB) | NCBI SNPdb Accession IDs |
|----------------------|----------------|-------------|-------------------------|---------------------------------|-------------------|--------------------------|
| SNP_P3_126039_17883  | NW_004515988.1 | Scaffold548 | 17883                   | GG                              | AA                | 1946514255               |
| SNP_P3_126040_18047  | NW_004515988.1 | Scaffold548 | 18047                   | CC                              | GG                | 1946514256               |
| SNP_P3_126041_46197  | NW_004515988.1 | Scaffold548 | 46197                   | TT                              | CC                | 1946514258               |
| SNP_P3_126042_46204  | NW_004515988.1 | Scaffold548 | 46204                   | TT                              | CC                | 1946514259               |
| SNP_P3_126043_46555  | NW_004515988.1 | Scaffold548 | 46555                   | CC                              | TT                | 1946514261               |
| SNP_P3_126044_60009  | NW_004515988.1 | Scaffold548 | 60009                   | AA                              | CC                | 1946514262               |
| SNP_P3_126045_60027  | NW_004515988.1 | Scaffold548 | 60027                   | AA                              | GG                | 1946514264               |
| SNP_P3_126046_73288  | NW_004515988.1 | Scaffold548 | 73288                   | CC                              | TT                | 1946514265               |
| SNP_P3_126047_80790  | NW_004515988.1 | Scaffold548 | 80790                   | CC                              | TT                | 1946514267               |
| SNP_P3_126049_108101 | NW_004515988.1 | Scaffold548 | 108101                  | CC                              | TT                | 1946514269               |
| SNP_P3_126050_108634 | NW_004515988.1 | Scaffold548 | 108634                  | CC                              | TT                | 1946514270               |
| SNP_P3_126052_152501 | NW_004515988.1 | Scaffold548 | 152501                  | GG                              | TT                | 1946514272               |
| SNP_P3_126053_160152 | NW_004515988.1 | Scaffold548 | 160152                  | AA                              | TT                | 1946514273               |
| SNP_P3_126054_169771 | NW_004515988.1 | Scaffold548 | 169771                  | TT                              | CC                | 1946514275               |
| SNP_P3_126055_169878 | NW_004515988.1 | Scaffold548 | 169878                  | AA                              | CC                | 1946514276               |
| SNP_P3_126056_169945 | NW_004515988.1 | Scaffold548 | 169945                  | TT                              | AA                | 1946514278               |
| SNP_P3_126057_169952 | NW_004515988.1 | Scaffold548 | 169952                  | AA                              | GG                | 1946514279               |
| SNP_P3_126058_169953 | NW_004515988.1 | Scaffold548 | 169953                  | TT                              | CC                | 1946514281               |
| SNP_P3_126059_169986 | NW_004515988.1 | Scaffold548 | 169986                  | TT                              | CC                | 1946514282               |
| SNP_P3_126060_170000 | NW_004515988.1 | Scaffold548 | 170000                  | CC                              | TT                | 1946514284               |
| SNP_P3_126061_170342 | NW_004515988.1 | Scaffold548 | 170342                  | AA                              | GG                | 1946514285               |
| SNP_P3_126062_177844 | NW_004515988.1 | Scaffold548 | 177844                  | CC                              | AA                | 1946514287               |
| SNP_P3_126063_194791 | NW_004515988.1 | Scaffold548 | 194791                  | CC                              | TT                | 1946514288               |
| SNP_P3_126064_194797 | NW_004515988.1 | Scaffold548 | 194797                  | AA                              | CC                | 1946514290               |
| SNP_P3_126065_211870 | NW_004515988.1 | Scaffold548 | 211870                  | GG                              | AA                | 1946514292               |
| SNP_P3_126067_212742 | NW_004515988.1 | Scaffold548 | 212742                  | GG                              | TT                | 1946514294               |
| SNP_P3_126068_212826 | NW_004515988.1 | Scaffold548 | 212826                  | AA                              | CC                | 1946514295               |
| SNP_P3_126069_213237 | NW_004515988.1 | Scaffold548 | 213237                  | GG                              | TT                | 1946514297               |
| SNP_P3_126070_213318 | NW_004515988.1 | Scaffold548 | 213318                  | TT                              | CC                | 1946514298               |
| SNP_P3_126071_213364 | NW_004515988.1 | Scaffold548 | 213364                  | GG                              | TT                | 1946514300               |
| SNP_P3_126072_233092 | NW_004515988.1 | Scaffold548 | 233092                  | GG                              | AA                | 1946514301               |
| SNP_P3_126074_240914 | NW_004515988.1 | Scaffold548 | 240914                  | CC                              | TT                | 1946514303               |
| SNP_P3_126075_245028 | NW_004515988.1 | Scaffold548 | 245028                  | CC                              | AA                | 1946514304               |
| SNP_P3_126076_245406 | NW_004515988.1 | Scaffold548 | 245406                  | TT                              | CC                | 1946514306               |
| SNP_P3_126077_245409 | NW_004515988.1 | Scaffold548 | 245409                  | TT                              | GG                | 1946514307               |
| SNP_P3_126078_245425 | NW_004515988.1 | Scaffold548 | 245425                  | GG                              | AA                | 1946514309               |
| SNP_P3_126079_245543 | NW_004515988.1 | Scaffold548 | 245543                  | AA                              | GG                | 1946514310               |
| SNP_P3_126080_245566 | NW_004515988.1 | Scaffold548 | 245566                  | CC                              | TT                | 1946514312               |
| SNP_P3_126081_245588 | NW_004515988.1 | Scaffold548 | 245588                  | AA                              | GG                | 1946514314               |
| SNP_P3_126082_245591 | NW_004515988.1 | Scaffold548 | 245591                  | AA                              | GG                | 1946514315               |
| SNP_P3_126084_323527 | NW_004515988.1 | Scaffold548 | 323527                  | CC                              | TT                | 1946514317               |
| SNP_P3_126085_323539 | NW_004515988.1 | Scaffold548 | 323539                  | CC                              | TT                | 1946514318               |

| SNPs IDs             | Chromosome IDs | Chromosomes | Physical positions (bp) | CDC Frontier (Reference genome) | (Pusa 256 & HPNB) | NCBI SNPdb Accession IDs |
|----------------------|----------------|-------------|-------------------------|---------------------------------|-------------------|--------------------------|
| SNP_P3_126086_329378 | NW_004515988.1 | Scaffold548 | 329378                  | GG                              | AA                | 1946514320               |
| SNP_P3_126087_329403 | NW_004515988.1 | Scaffold548 | 329403                  | AA                              | GG                | 1946514321               |
| SNP_P3_126088_329448 | NW_004515988.1 | Scaffold548 | 329448                  | TT                              | CC                | 1946514323               |
| SNP_P3_126089_329814 | NW_004515988.1 | Scaffold548 | 329814                  | AA                              | GG                | 1946514324               |
| SNP_P3_126090_340580 | NW_004515988.1 | Scaffold548 | 340580                  | GG                              | AA                | 1946514326               |
| SNP_P3_126091_358327 | NW_004515988.1 | Scaffold548 | 358327                  | CC                              | AA                | 1946514327               |
| SNP_P3_126092_381533 | NW_004515988.1 | Scaffold548 | 381533                  | AA                              | GG                | 1946514329               |
| SNP_P3_126093_382538 | NW_004515988.1 | Scaffold548 | 382538                  | CC                              | TT                | 1946514330               |
| SNP_P3_126094_384072 | NW_004515988.1 | Scaffold548 | 384072                  | TT                              | CC                | 1946514332               |
| SNP_P3_126095_405295 | NW_004515988.1 | Scaffold548 | 405295                  | GG                              | TT                | 1946514333               |
| SNP_P3_126096_428681 | NW_004515988.1 | Scaffold548 | 428681                  | GG                              | TT                | 1946514335               |
| SNP_P3_126097_464345 | NW_004515988.1 | Scaffold548 | 464345                  | TT                              | GG                | 1946514336               |
| SNP_P3_126098_464347 | NW_004515988.1 | Scaffold548 | 464347                  | GG                              | AA                | 1946514338               |
| SNP_P3_126099_464350 | NW_004515988.1 | Scaffold548 | 464350                  | TT                              | AA                | 1946514339               |
| SNP_P3_126100_479978 | NW_004515988.1 | Scaffold548 | 479978                  | TT                              | GG                | 1946514341               |
| SNP_P3_126101_480512 | NW_004515988.1 | Scaffold548 | 480512                  | TT                              | GG                | 1946514342               |
| SNP_P3_126102_480522 | NW_004515988.1 | Scaffold548 | 480522                  | TT                              | CC                | 1946514344               |
| SNP_P3_126103_480808 | NW_004515988.1 | Scaffold548 | 480808                  | CC                              | GG                | 1946514345               |
| SNP_P3_126104_480817 | NW_004515988.1 | Scaffold548 | 480817                  | TT                              | GG                | 1946514347               |
| SNP_P3_126105_480880 | NW_004515988.1 | Scaffold548 | 480880                  | TT                              | CC                | 1946514348               |
| SNP_P3_126106_480890 | NW_004515988.1 | Scaffold548 | 480890                  | AA                              | GG                | 1946514349               |
| SNP_P3_126107_480896 | NW_004515988.1 | Scaffold548 | 480896                  | TT                              | CC                | 1946514351               |
| SNP_P3_126108_480937 | NW_004515988.1 | Scaffold548 | 480937                  | CC                              | TT                | 1946514352               |
| SNP_P3_126109_480947 | NW_004515988.1 | Scaffold548 | 480947                  | CC                              | TT                | 1946514354               |
| SNP_P3_126110_480967 | NW_004515988.1 | Scaffold548 | 480967                  | TT                              | GG                | 1946514355               |
| SNP_P3_126111_481366 | NW_004515988.1 | Scaffold548 | 481366                  | TT                              | CC                | 1946514357               |
| SNP_P3_126112_481428 | NW_004515988.1 | Scaffold548 | 481428                  | CC                              | TT                | 1946514358               |
| SNP_P3_126113_488981 | NW_004515988.1 | Scaffold548 | 488981                  | AA                              | GG                | 1946514360               |
| SNP_P3_126114_489172 | NW_004515988.1 | Scaffold548 | 489172                  | CC                              | AA                | 1946514361               |
| SNP_P3_126115_490580 | NW_004515988.1 | Scaffold548 | 490580                  | TT                              | CC                | 1946514363               |
| SNP_P3_126116_490604 | NW_004515988.1 | Scaffold548 | 490604                  | CC                              | TT                | 1946514364               |
| SNP_P3_126117_490610 | NW_004515988.1 | Scaffold548 | 490610                  | AA                              | GG                | 1946514366               |
| SNP_P3_126118_490615 | NW_004515988.1 | Scaffold548 | 490615                  | AA                              | TT                | 1946514367               |
| SNP_P3_126119_491177 | NW_004515988.1 | Scaffold548 | 491177                  | CC                              | TT                | 1946514369               |
| SNP_P3_126120_491250 | NW_004515988.1 | Scaffold548 | 491250                  | TT                              | CC                | 1946514370               |
| SNP_P3_126121_491477 | NW_004515988.1 | Scaffold548 | 491477                  | CC                              | TT                | 1946514372               |
| SNP_P3_126122_491515 | NW_004515988.1 | Scaffold548 | 491515                  | CC                              | TT                | 1946514373               |
| SNP_P3_126123_491540 | NW_004515988.1 | Scaffold548 | 491540                  | GG                              | AA                | 1946514375               |
| SNP_P3_126124_491563 | NW_004515988.1 | Scaffold548 | 491563                  | AA                              | TT                | 1946514376               |
| SNP_P3_126125_491567 | NW_004515988.1 | Scaffold548 | 491567                  | CC                              | TT                | 1946514378               |
| SNP_P3_126126_491576 | NW_004515988.1 | Scaffold548 | 491576                  | TT                              | CC                | 1946514379               |
| SNP_P3_126127_491648 | NW_004515988.1 | Scaffold548 | 491648                  | GG                              | TT                | 1946514381               |



| SNPs IDs             | Chromosome IDs | Chromosomes | Physical positions (bp) | CDC Frontier (Reference genome) | (Pusa 256 & HPNB) | NCBI SNPdb Accession IDs |
|----------------------|----------------|-------------|-------------------------|---------------------------------|-------------------|--------------------------|
| SNP_P3_126128_511161 | NW_004515988.1 | Scaffold548 | 511161                  | GG                              | AA                | 1946514382               |
| SNP_P3_126129_588969 | NW_004515988.1 | Scaffold548 | 588969                  | TT                              | GG                | 1946514384               |
| SNP_P3_126130_593246 | NW_004515988.1 | Scaffold548 | 593246                  | GG                              | CC                | 1946514385               |
| SNP_P3_126131_593474 | NW_004515988.1 | Scaffold548 | 593474                  | CC                              | TT                | 1946514387               |
| SNP_P3_126132_593489 | NW_004515988.1 | Scaffold548 | 593489                  | TT                              | AA                | 1946514388               |
| SNP_P3_126133_593514 | NW_004515988.1 | Scaffold548 | 593514                  | AA                              | GG                | 1946514390               |
| SNP_P3_126134_593519 | NW_004515988.1 | Scaffold548 | 593519                  | TT                              | CC                | 1946514391               |
| SNP_P3_126135_593542 | NW_004515988.1 | Scaffold548 | 593542                  | TT                              | CC                | 1946514393               |
| SNP_P3_126136_593606 | NW_004515988.1 | Scaffold548 | 593606                  | TT                              | CC                | 1946514394               |
| SNP_P3_126137_593643 | NW_004515988.1 | Scaffold548 | 593643                  | AA                              | CC                | 1946514396               |
| SNP_P3_126138_609925 | NW_004515988.1 | Scaffold548 | 609925                  | CC                              | TT                | 1946514397               |
| SNP_P3_126139_610004 | NW_004515988.1 | Scaffold548 | 610004                  | TT                              | AA                | 1946514399               |
| SNP_P3_126140_610059 | NW_004515988.1 | Scaffold548 | 610059                  | CC                              | TT                | 1946514400               |
| SNP_P3_126141_610061 | NW_004515988.1 | Scaffold548 | 610061                  | CC                              | GG                | 1946514402               |
| SNP_P3_126142_612105 | NW_004515988.1 | Scaffold548 | 612105                  | TT                              | CC                | 1946514403               |
| SNP_P3_126143_612109 | NW_004515988.1 | Scaffold548 | 612109                  | GG                              | AA                | 1946514405               |
| SNP_P3_126144_612116 | NW_004515988.1 | Scaffold548 | 612116                  | AA                              | TT                | 1946514406               |
| SNP_P3_126145_612118 | NW_004515988.1 | Scaffold548 | 612118                  | CC                              | TT                | 1946514408               |
| SNP_P3_126146_612464 | NW_004515988.1 | Scaffold548 | 612464                  | CC                              | TT                | 1946514409               |
| SNP_P3_126147_612469 | NW_004515988.1 | Scaffold548 | 612469                  | AA                              | TT                | 1946514411               |
| SNP_P3_126148_612477 | NW_004515988.1 | Scaffold548 | 612477                  | GG                              | TT                | 1946514412               |
| SNP_P3_126149_612730 | NW_004515988.1 | Scaffold548 | 612730                  | AA                              | GG                | 1946514414               |
| SNP_P3_126150_612732 | NW_004515988.1 | Scaffold548 | 612732                  | CC                              | TT                | 1946514415               |
| SNP_P3_126151_612858 | NW_004515988.1 | Scaffold548 | 612858                  | AA                              | TT                | 1946514417               |
| SNP_P3_126152_612896 | NW_004515988.1 | Scaffold548 | 612896                  | TT                              | CC                | 1946514418               |
| SNP_P3_126153_616410 | NW_004515988.1 | Scaffold548 | 616410                  | TT                              | CC                | 1946514420               |
| SNP_P3_126154_616454 | NW_004515988.1 | Scaffold548 | 616454                  | AA                              | GG                | 1946514421               |
| SNP_P3_126155_616805 | NW_004515988.1 | Scaffold548 | 616805                  | GG                              | AA                | 1946514423               |
| SNP_P3_126156_616814 | NW_004515988.1 | Scaffold548 | 616814                  | AA                              | GG                | 1946514424               |
| SNP_P3_126157_616848 | NW_004515988.1 | Scaffold548 | 616848                  | TT                              | GG                | 1946514426               |
| SNP_P3_126158_616872 | NW_004515988.1 | Scaffold548 | 616872                  | TT                              | CC                | 1946514427               |
| SNP_P3_126159_616891 | NW_004515988.1 | Scaffold548 | 616891                  | AA                              | GG                | 1946514429               |
| SNP_P3_126160_616936 | NW_004515988.1 | Scaffold548 | 616936                  | GG                              | AA                | 1946514431               |
| SNP_P3_126161_621169 | NW_004515988.1 | Scaffold548 | 621169                  | GG                              | CC                | 1946514432               |
| SNP_P3_126162_623955 | NW_004515988.1 | Scaffold548 | 623955                  | TT                              | CC                | 1946514434               |
| SNP_P3_126163_625867 | NW_004515988.1 | Scaffold548 | 625867                  | TT                              | CC                | 1946514435               |
| SNP_P3_126164_635410 | NW_004515988.1 | Scaffold548 | 635410                  | AA                              | GG                | 1946514437               |
| SNP_P3_126165_635749 | NW_004515988.1 | Scaffold548 | 635749                  | TT                              | CC                | 1946514439               |
| SNP_P3_126166_653671 | NW_004515988.1 | Scaffold548 | 653671                  | CC                              | AA                | 1946514440               |
| SNP_P3_126167_666575 | NW_004515988.1 | Scaffold548 | 666575                  | GG                              | TT                | 1946514442               |
| SNP_P3_126168_683896 | NW_004515988.1 | Scaffold548 | 683896                  | TT                              | GG                | 1946514443               |
| SNP_P3_126169_684169 | NW_004515988.1 | Scaffold548 | 684169                  | CC                              | TT                | 1946514445               |

| SNPs IDs            | Chromosome IDs | Chromosomes | Physical positions (bp) | CDC Frontier (Reference genome) | (Pusa 256 & HPNB) | NCBI SNPdb Accession IDs |
|---------------------|----------------|-------------|-------------------------|---------------------------------|-------------------|--------------------------|
| SNP_P3_126170_1317  | NW_004515989.1 | Scaffold549 | 1317                    | GG                              | AA                | 1946514446               |
| SNP_P3_126171_12602 | NW_004515989.1 | Scaffold549 | 12602                   | CC                              | GG                | 1946514448               |
| SNP_P3_126172_16048 | NW_004515989.1 | Scaffold549 | 16048                   | CC                              | TT                | 1946514449               |
| SNP_P3_126173_21520 | NW_004515989.1 | Scaffold549 | 21520                   | GG                              | AA                | 1946514451               |
| SNP_P3_126176_41965 | NW_004515989.1 | Scaffold549 | 41965                   | GG                              | TT                | 1946514452               |
| SNP_P3_126177_42078 | NW_004515989.1 | Scaffold549 | 42078                   | CC                              | GG                | 1946514454               |
| SNP_P3_126178_44649 | NW_004515989.1 | Scaffold549 | 44649                   | AA                              | GG                | 1946514455               |
| SNP_P3_126179_44857 | NW_004515989.1 | Scaffold549 | 44857                   | TT                              | GG                | 1946514457               |
| SNP_P3_126180_45930 | NW_004515989.1 | Scaffold549 | 45930                   | AA                              | GG                | 1946514458               |
| SNP_P3_126181_45954 | NW_004515989.1 | Scaffold549 | 45954                   | TT                              | CC                | 1946514460               |
| SNP_P3_126182_51488 | NW_004515989.1 | Scaffold549 | 51488                   | AA                              | GG                | 1946514461               |
| SNP_P3_126183_51503 | NW_004515989.1 | Scaffold549 | 51503                   | TT                              | GG                | 1946514463               |
| SNP_P3_126184_51655 | NW_004515989.1 | Scaffold549 | 51655                   | AA                              | CC                | 1946514464               |
| SNP_P3_126185_51687 | NW_004515989.1 | Scaffold549 | 51687                   | AA                              | GG                | 1946514466               |
| SNP_P3_126186_51740 | NW_004515989.1 | Scaffold549 | 51740                   | TT                              | CC                | 1946514467               |
| SNP_P3_126187_55557 | NW_004515989.1 | Scaffold549 | 55557                   | CC                              | AA                | 1946514469               |
| SNP_P3_126188_55566 | NW_004515989.1 | Scaffold549 | 55566                   | TT                              | GG                | 1946514470               |
| SNP_P3_126189_58164 | NW_004515989.1 | Scaffold549 | 58164                   | AA                              | GG                | 1946514472               |
| SNP_P3_126190_60473 | NW_004515989.1 | Scaffold549 | 60473                   | CC                              | TT                | 1946514473               |
| SNP_P3_126192_61028 | NW_004515989.1 | Scaffold549 | 61028                   | TT                              | CC                | 1946514475               |
| SNP_P3_126193_967   | NW_004515991.1 | Scaffold553 | 967                     | AA                              | GG                | 1946514476               |
| SNP_P3_126194_970   | NW_004515991.1 | Scaffold553 | 970                     | TT                              | GG                | 1946514478               |
| SNP_P3_126195_2609  | NW_004515991.1 | Scaffold553 | 2609                    | AA                              | GG                | 1946514479               |
| SNP_P3_126198_2966  | NW_004515991.1 | Scaffold553 | 2966                    | TT                              | GG                | 1946514481               |
| SNP_P3_126199_3244  | NW_004515991.1 | Scaffold553 | 3244                    | AA                              | CC                | 1946514482               |
| SNP_P3_126200_3408  | NW_004515991.1 | Scaffold553 | 3408                    | TT                              | GG                | 1946514484               |
| SNP_P3_126201_3496  | NW_004515991.1 | Scaffold553 | 3496                    | CC                              | AA                | 1946514486               |
| SNP_P3_126202_4880  | NW_004515991.1 | Scaffold553 | 4880                    | GG                              | AA                | 1946514487               |
| SNP_P3_126203_5146  | NW_004515991.1 | Scaffold553 | 5146                    | TT                              | CC                | 1946514489               |
| SNP_P3_126204_5296  | NW_004515991.1 | Scaffold553 | 5296                    | CC                              | AA                | 1946514490               |
| SNP_P3_126205_20895 | NW_004515991.1 | Scaffold553 | 20895                   | TT                              | CC                | 1946514492               |
| SNP_P3_126206_24221 | NW_004515991.1 | Scaffold553 | 24221                   | TT                              | CC                | 1946514493               |
| SNP_P3_126207_25032 | NW_004515991.1 | Scaffold553 | 25032                   | AA                              | GG                | 1946514495               |
| SNP_P3_126208_25049 | NW_004515991.1 | Scaffold553 | 25049                   | CC                              | GG                | 1946514496               |
| SNP_P3_126209_25295 | NW_004515991.1 | Scaffold553 | 25295                   | AA                              | GG                | 1946514498               |
| SNP_P3_126210_25314 | NW_004515991.1 | Scaffold553 | 25314                   | AA                              | TT                | 1946514499               |
| SNP_P3_126211_25333 | NW_004515991.1 | Scaffold553 | 25333                   | TT                              | CC                | 1946514501               |
| SNP_P3_126212_25364 | NW_004515991.1 | Scaffold553 | 25364                   | GG                              | AA                | 1946514502               |
| SNP_P3_126213_33542 | NW_004515991.1 | Scaffold553 | 33542                   | TT                              | CC                | 1946514504               |
| SNP_P3_126214_33566 | NW_004515991.1 | Scaffold553 | 33566                   | AA                              | GG                | 1946514505               |
| SNP_P3_126215_33575 | NW_004515991.1 | Scaffold553 | 33575                   | GG                              | AA                | 1946514507               |
| SNP_P3_126216_33596 | NW_004515991.1 | Scaffold553 | 33596                   | CC                              | TT                | 1946514508               |

| SNPs IDs             | Chromosome IDs | Chromosomes | Physical positions (bp) | CDC Frontier (Reference genome) | (Pusa 256 & HPNB) | NCBI SNPdb Accession IDs |
|----------------------|----------------|-------------|-------------------------|---------------------------------|-------------------|--------------------------|
| SNP_P3_126217_33617  | NW_004515991.1 | Scaffold553 | 33617                   | GG                              | AA                | 1946514510               |
| SNP_P3_126218_33618  | NW_004515991.1 | Scaffold553 | 33618                   | CC                              | TT                | 1946514511               |
| SNP_P3_126219_33626  | NW_004515991.1 | Scaffold553 | 33626                   | TT                              | CC                | 1946514513               |
| SNP_P3_126220_33629  | NW_004515991.1 | Scaffold553 | 33629                   | TT                              | CC                | 1946514514               |
| SNP_P3_126221_33632  | NW_004515991.1 | Scaffold553 | 33632                   | CC                              | TT                | 1946514516               |
| SNP_P3_126222_33641  | NW_004515991.1 | Scaffold553 | 33641                   | GG                              | TT                | 1946514517               |
| SNP_P3_126223_33644  | NW_004515991.1 | Scaffold553 | 33644                   | TT                              | CC                | 1946514519               |
| SNP_P3_126224_33652  | NW_004515991.1 | Scaffold553 | 33652                   | AA                              | GG                | 1946514520               |
| SNP_P3_126225_33659  | NW_004515991.1 | Scaffold553 | 33659                   | AA                              | TT                | 1946514522               |
| SNP_P3_126226_39329  | NW_004515991.1 | Scaffold553 | 39329                   | TT                              | CC                | 1946514523               |
| SNP_P3_126227_41896  | NW_004515991.1 | Scaffold553 | 41896                   | CC                              | TT                | 1946514525               |
| SNP_P3_126228_46010  | NW_004515991.1 | Scaffold553 | 46010                   | TT                              | CC                | 1946514526               |
| SNP_P3_126229_46298  | NW_004515991.1 | Scaffold553 | 46298                   | TT                              | AA                | 1946514528               |
| SNP_P3_126230_46942  | NW_004515991.1 | Scaffold553 | 46942                   | AA                              | CC                | 1946514529               |
| SNP_P3_126231_52622  | NW_004515991.1 | Scaffold553 | 52622                   | AA                              | TT                | 1946514531               |
| SNP_P3_126232_59304  | NW_004515991.1 | Scaffold553 | 59304                   | GG                              | AA                | 1946514532               |
| SNP_P3_126233_69768  | NW_004515991.1 | Scaffold553 | 69768                   | CC                              | AA                | 1946514534               |
| SNP_P3_126234_73479  | NW_004515991.1 | Scaffold553 | 73479                   | GG                              | AA                | 1946514535               |
| SNP_P3_126235_76120  | NW_004515991.1 | Scaffold553 | 76120                   | AA                              | GG                | 1946514537               |
| SNP_P3_126236_76125  | NW_004515991.1 | Scaffold553 | 76125                   | AA                              | GG                | 1946514538               |
| SNP_P3_126237_76482  | NW_004515991.1 | Scaffold553 | 76482                   | AA                              | GG                | 1946514540               |
| SNP_P3_126238_76509  | NW_004515991.1 | Scaffold553 | 76509                   | GG                              | TT                | 1946514541               |
| SNP_P3_126239_76514  | NW_004515991.1 | Scaffold553 | 76514                   | GG                              | AA                | 1946514543               |
| SNP_P3_126240_76534  | NW_004515991.1 | Scaffold553 | 76534                   | CC                              | TT                | 1946514544               |
| SNP_P3_126242_92367  | NW_004515991.1 | Scaffold553 | 92367                   | GG                              | AA                | 1946514546               |
| SNP_P3_126243_92856  | NW_004515991.1 | Scaffold553 | 92856                   | AA                              | GG                | 1946514547               |
| SNP_P3_126244_94216  | NW_004515991.1 | Scaffold553 | 94216                   | CC                              | TT                | 1946514549               |
| SNP_P3_126245_140968 | NW_004515991.1 | Scaffold553 | 140968                  | TT                              | GG                | 1946514550               |
| SNP_P3_126246_166233 | NW_004515991.1 | Scaffold553 | 166233                  | AA                              | GG                | 1946514552               |
| SNP_P3_126247_166235 | NW_004515991.1 | Scaffold553 | 166235                  | TT                              | CC                | 1946514553               |
| SNP_P3_126248_197785 | NW_004515991.1 | Scaffold553 | 197785                  | GG                              | AA                | 1946514555               |
| SNP_P3_126249_200843 | NW_004515991.1 | Scaffold553 | 200843                  | TT                              | CC                | 1946514556               |
| SNP_P3_126250_200924 | NW_004515991.1 | Scaffold553 | 200924                  | TT                              | CC                | 1946514558               |
| SNP_P3_126251_219857 | NW_004515991.1 | Scaffold553 | 219857                  | TT                              | AA                | 1946514559               |
| SNP_P3_126253_259732 | NW_004515991.1 | Scaffold553 | 259732                  | CC                              | TT                | 1946514561               |
| SNP_P3_126254_276524 | NW_004515991.1 | Scaffold553 | 276524                  | AA                              | GG                | 1946514562               |
| SNP_P3_126255_276531 | NW_004515991.1 | Scaffold553 | 276531                  | CC                              | TT                | 1946514564               |
| SNP_P3_126256_276675 | NW_004515991.1 | Scaffold553 | 276675                  | AA                              | GG                | 1946514565               |
| SNP_P3_126257_276906 | NW_004515991.1 | Scaffold553 | 276906                  | AA                              | CC                | 1946514567               |
| SNP_P3_126258_276989 | NW_004515991.1 | Scaffold553 | 276989                  | TT                              | CC                | 1946514568               |
| SNP_P3_126259_277009 | NW_004515991.1 | Scaffold553 | 277009                  | AA                              | GG                | 1946514570               |
| SNP_P3_126260_277018 | NW_004515991.1 | Scaffold553 | 277018                  | TT                              | CC                | 1946514571               |

| SNPs IDs             | Chromosome IDs | Chromosomes | Physical positions (bp) | CDC Frontier (Reference genome) | (Pusa 256 & HPNB) | NCBI SNPdb Accession IDs |
|----------------------|----------------|-------------|-------------------------|---------------------------------|-------------------|--------------------------|
| SNP_P3_126261_277051 | NW_004515991.1 | Scaffold553 | 277051                  | AA                              | GG                | 1946514573               |
| SNP_P3_126262_277069 | NW_004515991.1 | Scaffold553 | 277069                  | AA                              | GG                | 1946514575               |
| SNP_P3_126263_277077 | NW_004515991.1 | Scaffold553 | 277077                  | GG                              | AA                | 1946514576               |
| SNP_P3_126264_277085 | NW_004515991.1 | Scaffold553 | 277085                  | TT                              | CC                | 1946514578               |
| SNP_P3_126265_277101 | NW_004515991.1 | Scaffold553 | 277101                  | TT                              | CC                | 1946514579               |
| SNP_P3_126266_277121 | NW_004515991.1 | Scaffold553 | 277121                  | AA                              | GG                | 1946514581               |
| SNP_P3_126267_280883 | NW_004515991.1 | Scaffold553 | 280883                  | AA                              | GG                | 1946514582               |
| SNP_P3_126269_325202 | NW_004515991.1 | Scaffold553 | 325202                  | AA                              | GG                | 1946514584               |
| SNP_P3_126271_325577 | NW_004515991.1 | Scaffold553 | 325577                  | AA                              | CC                | 1946514585               |
| SNP_P3_126272_325602 | NW_004515991.1 | Scaffold553 | 325602                  | CC                              | GG                | 1946514586               |
| SNP_P3_126273_327335 | NW_004515991.1 | Scaffold553 | 327335                  | CC                              | TT                | 1946514588               |
| SNP_P3_126274_386533 | NW_004515991.1 | Scaffold553 | 386533                  | AA                              | GG                | 1946514589               |
| SNP_P3_126275_386534 | NW_004515991.1 | Scaffold553 | 386534                  | TT                              | CC                | 1946514591               |
| SNP_P3_126276_386535 | NW_004515991.1 | Scaffold553 | 386535                  | TT                              | AA                | 1946514592               |
| SNP_P3_126277_386536 | NW_004515991.1 | Scaffold553 | 386536                  | CC                              | TT                | 1946514594               |
| SNP_P3_126278_386537 | NW_004515991.1 | Scaffold553 | 386537                  | TT                              | CC                | 1946514595               |
| SNP_P3_126280_403346 | NW_004515991.1 | Scaffold553 | 403346                  | TT                              | GG                | 1946514597               |
| SNP_P3_126281_403389 | NW_004515991.1 | Scaffold553 | 403389                  | AA                              | CC                | 1946514598               |
| SNP_P3_126282_403416 | NW_004515991.1 | Scaffold553 | 403416                  | GG                              | AA                | 1946514600               |
| SNP_P3_126283_403491 | NW_004515991.1 | Scaffold553 | 403491                  | GG                              | AA                | 1946514601               |
| SNP_P3_126284_403627 | NW_004515991.1 | Scaffold553 | 403627                  | GG                              | AA                | 1946514602               |
| SNP_P3_126285_403638 | NW_004515991.1 | Scaffold553 | 403638                  | TT                              | GG                | 1946514604               |
| SNP_P3_126286_403672 | NW_004515991.1 | Scaffold553 | 403672                  | TT                              | AA                | 1946514606               |
| SNP_P3_126287_403766 | NW_004515991.1 | Scaffold553 | 403766                  | AA                              | CC                | 1946514607               |
| SNP_P3_126288_403786 | NW_004515991.1 | Scaffold553 | 403786                  | TT                              | GG                | 1946514608               |
| SNP_P3_126289_403878 | NW_004515991.1 | Scaffold553 | 403878                  | GG                              | CC                | 1946514610               |
| SNP_P3_126290_406753 | NW_004515991.1 | Scaffold553 | 406753                  | TT                              | CC                | 1946514611               |
| SNP_P3_126292_456459 | NW_004515991.1 | Scaffold553 | 456459                  | CC                              | TT                | 1946514613               |
| SNP_P3_126293_456767 | NW_004515991.1 | Scaffold553 | 456767                  | GG                              | AA                | 1946514614               |
| SNP_P3_126294_463996 | NW_004515991.1 | Scaffold553 | 463996                  | TT                              | GG                | 1946514616               |
| SNP_P3_126295_464008 | NW_004515991.1 | Scaffold553 | 464008                  | TT                              | AA                | 1946514617               |
| SNP_P3_126296_464052 | NW_004515991.1 | Scaffold553 | 464052                  | AA                              | GG                | 1946514619               |
| SNP_P3_126297_464055 | NW_004515991.1 | Scaffold553 | 464055                  | TT                              | GG                | 1946514620               |
| SNP_P3_126298_464119 | NW_004515991.1 | Scaffold553 | 464119                  | CC                              | TT                | 1946514622               |
| SNP_P3_126299_464245 | NW_004515991.1 | Scaffold553 | 464245                  | GG                              | TT                | 1946514623               |
| SNP_P3_126300_464269 | NW_004515991.1 | Scaffold553 | 464269                  | AA                              | GG                | 1946514624               |
| SNP_P3_126301_464305 | NW_004515991.1 | Scaffold553 | 464305                  | GG                              | TT                | 1946514626               |
| SNP_P3_126302_464362 | NW_004515991.1 | Scaffold553 | 464362                  | AA                              | TT                | 1946514627               |
| SNP_P3_126303_470779 | NW_004515991.1 | Scaffold553 | 470779                  | TT                              | CC                | 1946514629               |
| SNP_P3_126304_476026 | NW_004515991.1 | Scaffold553 | 476026                  | TT                              | GG                | 1946514630               |
| SNP_P3_126305_476174 | NW_004515991.1 | Scaffold553 | 476174                  | AA                              | GG                | 1946514632               |
| SNP_P3_126306_476175 | NW_004515991.1 | Scaffold553 | 476175                  | CC                              | TT                | 1946514633               |

| SNPs IDs             | Chromosome IDs | Chromosomes | Physical positions (bp) | CDC Frontier (Reference genome) | (Pusa 256 & HPNB) | NCBI SNPdb Accession IDs |
|----------------------|----------------|-------------|-------------------------|---------------------------------|-------------------|--------------------------|
| SNP_P3_126307_476193 | NW_004515991.1 | Scaffold553 | 476193                  | AA                              | GG                | 1946514635               |
| SNP_P3_126308_476239 | NW_004515991.1 | Scaffold553 | 476239                  | TT                              | CC                | 1946514636               |
| SNP_P3_126309_476352 | NW_004515991.1 | Scaffold553 | 476352                  | AA                              | CC                | 1946514638               |
| SNP_P3_126310_476385 | NW_004515991.1 | Scaffold553 | 476385                  | AA                              | TT                | 1946514639               |
| SNP_P3_126311_476386 | NW_004515991.1 | Scaffold553 | 476386                  | AA                              | CC                | 1946514641               |
| SNP_P3_126312_476521 | NW_004515991.1 | Scaffold553 | 476521                  | TT                              | GG                | 1946514642               |
| SNP_P3_126313_476553 | NW_004515991.1 | Scaffold553 | 476553                  | AA                              | GG                | 1946514643               |
| SNP_P3_126314_476562 | NW_004515991.1 | Scaffold553 | 476562                  | AA                              | GG                | 1946514645               |
| SNP_P3_126315_476704 | NW_004515991.1 | Scaffold553 | 476704                  | TT                              | CC                | 1946514646               |
| SNP_P3_126316_480177 | NW_004515991.1 | Scaffold553 | 480177                  | GG                              | AA                | 1946514648               |
| SNP_P3_126317_480236 | NW_004515991.1 | Scaffold553 | 480236                  | AA                              | GG                | 1946514649               |
| SNP_P3_126318_480270 | NW_004515991.1 | Scaffold553 | 480270                  | AA                              | GG                | 1946514651               |
| SNP_P3_126319_480502 | NW_004515991.1 | Scaffold553 | 480502                  | AA                              | GG                | 1946514652               |
| SNP_P3_126320_503495 | NW_004515991.1 | Scaffold553 | 503495                  | GG                              | AA                | 1946514654               |
| SNP_P3_126321_515452 | NW_004515991.1 | Scaffold553 | 515452                  | AA                              | GG                | 1946514655               |
| SNP_P3_126322_522530 | NW_004515991.1 | Scaffold553 | 522530                  | CC                              | TT                | 1946514657               |
| SNP_P3_126323_526980 | NW_004515991.1 | Scaffold553 | 526980                  | CC                              | TT                | 1946514658               |
| SNP_P3_126324_527036 | NW_004515991.1 | Scaffold553 | 527036                  | TT                              | CC                | 1946514660               |
| SNP_P3_126326_528331 | NW_004515991.1 | Scaffold553 | 528331                  | AA                              | GG                | 1946514661               |
| SNP_P3_126327_537378 | NW_004515991.1 | Scaffold553 | 537378                  | GG                              | CC                | 1946514663               |
| SNP_P3_126328_552369 | NW_004515991.1 | Scaffold553 | 552369                  | AA                              | TT                | 1946514664               |
| SNP_P3_126329_583454 | NW_004515991.1 | Scaffold553 | 583454                  | TT                              | GG                | 1946514666               |
| SNP_P3_126331_583476 | NW_004515991.1 | Scaffold553 | 583476                  | AA                              | CC                | 1946514667               |
| SNP_P3_126332_583480 | NW_004515991.1 | Scaffold553 | 583480                  | GG                              | TT                | 1946514668               |
| SNP_P3_126333_583494 | NW_004515991.1 | Scaffold553 | 583494                  | TT                              | AA                | 1946514670               |
| SNP_P3_126334_584822 | NW_004515991.1 | Scaffold553 | 584822                  | CC                              | TT                | 1946514671               |
| SNP_P3_126336_613164 | NW_004515991.1 | Scaffold553 | 613164                  | TT                              | CC                | 1946514673               |
| SNP_P3_126337_629367 | NW_004515991.1 | Scaffold553 | 629367                  | TT                              | AA                | 1946514674               |
| SNP_P3_126338_680726 | NW_004515991.1 | Scaffold553 | 680726                  | TT                              | CC                | 1946514676               |
| SNP_P3_126339_687558 | NW_004515991.1 | Scaffold553 | 687558                  | TT                              | CC                | 1946514677               |
| SNP_P3_126340_687561 | NW_004515991.1 | Scaffold553 | 687561                  | AA                              | GG                | 1946514679               |
| SNP_P3_126341_692007 | NW_004515991.1 | Scaffold553 | 692007                  | TT                              | AA                | 1946514680               |
| SNP_P3_126342_692983 | NW_004515991.1 | Scaffold553 | 692983                  | AA                              | TT                | 1946514682               |
| SNP_P3_126343_705868 | NW_004515991.1 | Scaffold553 | 705868                  | CC                              | TT                | 1946514684               |
| SNP_P3_126344_754630 | NW_004515991.1 | Scaffold553 | 754630                  | TT                              | CC                | 1946514685               |
| SNP_P3_126345_766770 | NW_004515991.1 | Scaffold553 | 766770                  | AA                              | GG                | 1946514687               |
| SNP_P3_126346_766771 | NW_004515991.1 | Scaffold553 | 766771                  | GG                              | CC                | 1946514688               |
| SNP_P3_126347_766924 | NW_004515991.1 | Scaffold553 | 766924                  | AA                              | GG                | 1946514690               |
| SNP_P3_126348_766946 | NW_004515991.1 | Scaffold553 | 766946                  | AA                              | GG                | 1946514691               |
| SNP_P3_126349_766984 | NW_004515991.1 | Scaffold553 | 766984                  | TT                              | CC                | 1946514693               |
| SNP_P3_126350_766985 | NW_004515991.1 | Scaffold553 | 766985                  | CC                              | TT                | 1946514694               |
| SNP_P3_126351_766986 | NW_004515991.1 | Scaffold553 | 766986                  | CC                              | TT                | 1946514696               |

| SNPs IDs             | Chromosome IDs | Chromosomes | Physical positions (bp) | CDC Frontier (Reference genome) | (Pusa 256 & HPNB) | NCBI SNPdb Accession IDs |
|----------------------|----------------|-------------|-------------------------|---------------------------------|-------------------|--------------------------|
| SNP_P3_126352_776556 | NW_004515991.1 | Scaffold553 | 776556                  | GG                              | AA                | 1946514697               |
| SNP_P3_126353_779157 | NW_004515991.1 | Scaffold553 | 779157                  | AA                              | GG                | 1946514698               |
| SNP_P3_126355_790908 | NW_004515991.1 | Scaffold553 | 790908                  | GG                              | AA                | 1946514700               |
| SNP_P3_126357_801881 | NW_004515991.1 | Scaffold553 | 801881                  | CC                              | TT                | 1946514701               |
| SNP_P3_126358_801916 | NW_004515991.1 | Scaffold553 | 801916                  | GG                              | AA                | 1946514703               |
| SNP_P3_126359_801976 | NW_004515991.1 | Scaffold553 | 801976                  | AA                              | GG                | 1946514704               |
| SNP_P3_126360_818888 | NW_004515991.1 | Scaffold553 | 818888                  | GG                              | AA                | 1946514706               |
| SNP_P3_126361_822521 | NW_004515991.1 | Scaffold553 | 822521                  | AA                              | CC                | 1946514707               |
| SNP_P3_126362_823310 | NW_004515991.1 | Scaffold553 | 823310                  | GG                              | AA                | 1946514709               |
| SNP_P3_126364_838482 | NW_004515991.1 | Scaffold553 | 838482                  | AA                              | CC                | 1946514710               |
| SNP_P3_126365_839053 | NW_004515991.1 | Scaffold553 | 839053                  | AA                              | CC                | 1946514712               |
| SNP_P3_126366_839443 | NW_004515991.1 | Scaffold553 | 839443                  | AA                              | CC                | 1946514713               |
| SNP_P3_126367_839460 | NW_004515991.1 | Scaffold553 | 839460                  | TT                              | CC                | 1946514715               |
| SNP_P3_126368_839480 | NW_004515991.1 | Scaffold553 | 839480                  | TT                              | CC                | 1946514716               |
| SNP_P3_126369_841212 | NW_004515991.1 | Scaffold553 | 841212                  | TT                              | CC                | 1946514718               |
| SNP_P3_126370_841264 | NW_004515991.1 | Scaffold553 | 841264                  | TT                              | CC                | 1946514719               |
| SNP_P3_126371_841296 | NW_004515991.1 | Scaffold553 | 841296                  | AA                              | GG                | 1946514721               |
| SNP_P3_126372_841308 | NW_004515991.1 | Scaffold553 | 841308                  | AA                              | GG                | 1946514722               |
| SNP_P3_126373_842152 | NW_004515991.1 | Scaffold553 | 842152                  | TT                              | CC                | 1946514724               |
| SNP_P3_126374_842197 | NW_004515991.1 | Scaffold553 | 842197                  | TT                              | CC                | 1946514725               |
| SNP_P3_126375_842203 | NW_004515991.1 | Scaffold553 | 842203                  | AA                              | TT                | 1946514727               |
| SNP_P3_126376_842215 | NW_004515991.1 | Scaffold553 | 842215                  | GG                              | CC                | 1946514728               |
| SNP_P3_126377_842452 | NW_004515991.1 | Scaffold553 | 842452                  | AA                              | GG                | 1946514730               |
| SNP_P3_126379_865864 | NW_004515991.1 | Scaffold553 | 865864                  | GG                              | AA                | 1946514731               |
| SNP_P3_126382_907047 | NW_004515991.1 | Scaffold553 | 907047                  | GG                              | CC                | 1946514733               |
| SNP_P3_126383_907065 | NW_004515991.1 | Scaffold553 | 907065                  | TT                              | CC                | 1946514735               |
| SNP_P3_126384_907726 | NW_004515991.1 | Scaffold553 | 907726                  | TT                              | GG                | 1946514736               |
| SNP_P3_126385_907776 | NW_004515991.1 | Scaffold553 | 907776                  | GG                              | CC                | 1946514738               |
| SNP_P3_126386_907942 | NW_004515991.1 | Scaffold553 | 907942                  | AA                              | GG                | 1946514739               |
| SNP_P3_126387_915219 | NW_004515991.1 | Scaffold553 | 915219                  | CC                              | TT                | 1946514740               |
| SNP_P3_126388_923824 | NW_004515991.1 | Scaffold553 | 923824                  | TT                              | AA                | 1946514742               |
| SNP_P3_126389_924171 | NW_004515991.1 | Scaffold553 | 924171                  | CC                              | TT                | 1946514743               |
| SNP_P3_126390_924183 | NW_004515991.1 | Scaffold553 | 924183                  | GG                              | AA                | 1946514745               |
| SNP_P3_126391_925740 | NW_004515991.1 | Scaffold553 | 925740                  | TT                              | GG                | 1946514746               |
| SNP_P3_126392_927298 | NW_004515991.1 | Scaffold553 | 927298                  | AA                              | GG                | 1946514748               |
| SNP_P3_126393_927331 | NW_004515991.1 | Scaffold553 | 927331                  | AA                              | CC                | 1946514749               |
| SNP_P3_126395_824    | NW_004515992.1 | Scaffold556 | 824                     | TT                              | AA                | 1946514751               |
| SNP_P3_126396_863    | NW_004515992.1 | Scaffold556 | 863                     | TT                              | AA                | 1946514752               |
| SNP_P3_126397_885    | NW_004515992.1 | Scaffold556 | 885                     | TT                              | CC                | 1946514754               |
| SNP_P3_126398_902    | NW_004515992.1 | Scaffold556 | 902                     | CC                              | TT                | 1946514756               |
| SNP_P3_126399_905    | NW_004515992.1 | Scaffold556 | 905                     | AA                              | CC                | 1946514758               |
| SNP_P3_126400_906    | NW_004515992.1 | Scaffold556 | 906                     | AA                              | CC                | 1946514759               |

| SNPs IDs            | Chromosome IDs | Chromosomes | Physical positions (bp) | CDC Frontier (Reference genome) | (Pusa 256 & HPNB) | NCBI SNPdb Accession IDs |
|---------------------|----------------|-------------|-------------------------|---------------------------------|-------------------|--------------------------|
| SNP_P3_126401_948   | NW_004515992.1 | Scaffold556 | 948                     | AA                              | TT                | 1946514761               |
| SNP_P3_126402_960   | NW_004515992.1 | Scaffold556 | 960                     | TT                              | GG                | 1946514762               |
| SNP_P3_126403_1059  | NW_004515992.1 | Scaffold556 | 1059                    | TT                              | AA                | 1946514764               |
| SNP_P3_126404_1105  | NW_004515992.1 | Scaffold556 | 1105                    | CC                              | GG                | 1946514765               |
| SNP_P3_126405_1109  | NW_004515992.1 | Scaffold556 | 1109                    | GG                              | TT                | 1946514767               |
| SNP_P3_126406_1120  | NW_004515992.1 | Scaffold556 | 1120                    | TT                              | GG                | 1946514768               |
| SNP_P3_126407_1123  | NW_004515992.1 | Scaffold556 | 1123                    | AA                              | GG                | 1946514770               |
| SNP_P3_126408_1129  | NW_004515992.1 | Scaffold556 | 1129                    | TT                              | GG                | 1946514771               |
| SNP_P3_126409_1182  | NW_004515992.1 | Scaffold556 | 1182                    | AA                              | TT                | 1946514773               |
| SNP_P3_126410_1199  | NW_004515992.1 | Scaffold556 | 1199                    | GG                              | AA                | 1946514774               |
| SNP_P3_126411_1290  | NW_004515992.1 | Scaffold556 | 1290                    | AA                              | GG                | 1946514776               |
| SNP_P3_126412_1666  | NW_004515992.1 | Scaffold556 | 1666                    | GG                              | TT                | 1946514777               |
| SNP_P3_126413_1784  | NW_004515992.1 | Scaffold556 | 1784                    | AA                              | GG                | 1946514779               |
| SNP_P3_126415_1810  | NW_004515992.1 | Scaffold556 | 1810                    | TT                              | CC                | 1946514780               |
| SNP_P3_126416_1821  | NW_004515992.1 | Scaffold556 | 1821                    | CC                              | GG                | 1946514782               |
| SNP_P3_126417_1868  | NW_004515992.1 | Scaffold556 | 1868                    | TT                              | CC                | 1946514783               |
| SNP_P3_126418_1951  | NW_004515992.1 | Scaffold556 | 1951                    | TT                              | AA                | 1946514785               |
| SNP_P3_126419_1977  | NW_004515992.1 | Scaffold556 | 1977                    | TT                              | AA                | 1946514786               |
| SNP_P3_126420_1984  | NW_004515992.1 | Scaffold556 | 1984                    | AA                              | TT                | 1946514788               |
| SNP_P3_126421_2614  | NW_004515992.1 | Scaffold556 | 2614                    | GG                              | CC                | 1946514789               |
| SNP_P3_126422_2852  | NW_004515992.1 | Scaffold556 | 2852                    | AA                              | GG                | 1946514791               |
| SNP_P3_126423_2858  | NW_004515992.1 | Scaffold556 | 2858                    | GG                              | CC                | 1946514792               |
| SNP_P3_126424_2901  | NW_004515992.1 | Scaffold556 | 2901                    | AA                              | TT                | 1946514794               |
| SNP_P3_126425_2931  | NW_004515992.1 | Scaffold556 | 2931                    | AA                              | TT                | 1946514795               |
| SNP_P3_126426_2934  | NW_004515992.1 | Scaffold556 | 2934                    | TT                              | GG                | 1946514797               |
| SNP_P3_126427_2946  | NW_004515992.1 | Scaffold556 | 2946                    | TT                              | AA                | 1946514798               |
| SNP_P3_126428_3010  | NW_004515992.1 | Scaffold556 | 3010                    | TT                              | CC                | 1946514800               |
| SNP_P3_126429_3083  | NW_004515992.1 | Scaffold556 | 3083                    | TT                              | AA                | 1946514801               |
| SNP_P3_126430_3153  | NW_004515992.1 | Scaffold556 | 3153                    | TT                              | CC                | 1946514803               |
| SNP_P3_126431_3171  | NW_004515992.1 | Scaffold556 | 3171                    | TT                              | GG                | 1946514804               |
| SNP_P3_126432_3218  | NW_004515992.1 | Scaffold556 | 3218                    | TT                              | GG                | 1946514806               |
| SNP_P3_126433_3225  | NW_004515992.1 | Scaffold556 | 3225                    | GG                              | TT                | 1946514807               |
| SNP_P3_126434_3368  | NW_004515992.1 | Scaffold556 | 3368                    | AA                              | TT                | 1946514809               |
| SNP_P3_126435_3369  | NW_004515992.1 | Scaffold556 | 3369                    | TT                              | GG                | 1946514810               |
| SNP_P3_126436_3404  | NW_004515992.1 | Scaffold556 | 3404                    | AA                              | TT                | 1946514812               |
| SNP_P3_126437_3405  | NW_004515992.1 | Scaffold556 | 3405                    | TT                              | CC                | 1946514813               |
| SNP_P3_126438_1496  | NW_004515993.1 | Scaffold557 | 1496                    | TT                              | GG                | 1946514815               |
| SNP_P3_126439_4929  | NW_004515993.1 | Scaffold557 | 4929                    | TT                              | CC                | 1946514816               |
| SNP_P3_126440_769   | NW_004515994.1 | Scaffold558 | 769                     | CC                              | TT                | 1946514818               |
| SNP_P3_126441_23068 | NW_004515995.1 | Scaffold559 | 23068                   | GG                              | TT                | 1946514819               |
| SNP_P3_126442_28639 | NW_004515995.1 | Scaffold559 | 28639                   | AA                              | GG                | 1946514821               |
| SNP_P3_126443_29080 | NW_004515995.1 | Scaffold559 | 29080                   | AA                              | GG                | 1946514822               |

| SNPs IDs            | Chromosome IDs | Chromosomes | Physical positions (bp) | CDC Frontier (Reference genome) | (Pusa 256 & HPNB) | NCBI SNPdb Accession IDs |
|---------------------|----------------|-------------|-------------------------|---------------------------------|-------------------|--------------------------|
| SNP_P3_126444_29081 | NW_004515995.1 | Scaffold559 | 29081                   | GG                              | TT                | 1946514824               |
| SNP_P3_126445_29097 | NW_004515995.1 | Scaffold559 | 29097                   | CC                              | AA                | 1946514825               |
| SNP_P3_126446_29100 | NW_004515995.1 | Scaffold559 | 29100                   | GG                              | TT                | 1946514826               |
| SNP_P3_126447_35236 | NW_004515995.1 | Scaffold559 | 35236                   | CC                              | AA                | 1946514828               |
| SNP_P3_126448_35249 | NW_004515995.1 | Scaffold559 | 35249                   | CC                              | TT                | 1946514829               |
| SNP_P3_126449_35294 | NW_004515995.1 | Scaffold559 | 35294                   | CC                              | TT                | 1946514831               |
| SNP_P3_126450_51767 | NW_004515995.1 | Scaffold559 | 51767                   | TT                              | GG                | 1946514832               |
| SNP_P3_126451_52784 | NW_004515995.1 | Scaffold559 | 52784                   | TT                              | CC                | 1946514834               |
| SNP_P3_126452_52788 | NW_004515995.1 | Scaffold559 | 52788                   | AA                              | GG                | 1946514835               |
| SNP_P3_126453_52977 | NW_004515995.1 | Scaffold559 | 52977                   | TT                              | GG                | 1946514837               |
| SNP_P3_126454_61655 | NW_004515995.1 | Scaffold559 | 61655                   | CC                              | TT                | 1946514838               |
| SNP_P3_126455_61657 | NW_004515995.1 | Scaffold559 | 61657                   | CC                              | TT                | 1946514840               |
| SNP_P3_126456_61710 | NW_004515995.1 | Scaffold559 | 61710                   | GG                              | AA                | 1946514841               |
| SNP_P3_126457_61714 | NW_004515995.1 | Scaffold559 | 61714                   | GG                              | CC                | 1946514843               |
| SNP_P3_126458_61748 | NW_004515995.1 | Scaffold559 | 61748                   | CC                              | GG                | 1946514844               |
| SNP_P3_126459_61992 | NW_004515995.1 | Scaffold559 | 61992                   | AA                              | TT                | 1946514846               |
| SNP_P3_126460_62011 | NW_004515995.1 | Scaffold559 | 62011                   | CC                              | TT                | 1946514847               |
| SNP_P3_126461_62432 | NW_004515995.1 | Scaffold559 | 62432                   | TT                              | CC                | 1946514849               |
| SNP_P3_126462_62453 | NW_004515995.1 | Scaffold559 | 62453                   | TT                              | CC                | 1946514850               |
| SNP_P3_126463_62457 | NW_004515995.1 | Scaffold559 | 62457                   | AA                              | GG                | 1946514852               |
| SNP_P3_126464_62694 | NW_004515995.1 | Scaffold559 | 62694                   | TT                              | AA                | 1946514853               |
| SNP_P3_126465_62701 | NW_004515995.1 | Scaffold559 | 62701                   | CC                              | TT                | 1946514855               |
| SNP_P3_126466_62751 | NW_004515995.1 | Scaffold559 | 62751                   | AA                              | TT                | 1946514856               |
| SNP_P3_126467_62758 | NW_004515995.1 | Scaffold559 | 62758                   | GG                              | TT                | 1946514858               |
| SNP_P3_126468_62794 | NW_004515995.1 | Scaffold559 | 62794                   | TT                              | AA                | 1946514859               |
| SNP_P3_126469_62813 | NW_004515995.1 | Scaffold559 | 62813                   | GG                              | CC                | 1946514861               |
| SNP_P3_126470_62831 | NW_004515995.1 | Scaffold559 | 62831                   | GG                              | AA                | 1946514862               |
| SNP_P3_126471_62848 | NW_004515995.1 | Scaffold559 | 62848                   | GG                              | AA                | 1946514864               |
| SNP_P3_126472_62854 | NW_004515995.1 | Scaffold559 | 62854                   | TT                              | CC                | 1946514865               |
| SNP_P3_126473_62932 | NW_004515995.1 | Scaffold559 | 62932                   | GG                              | TT                | 1946514867               |
| SNP_P3_126474_62999 | NW_004515995.1 | Scaffold559 | 62999                   | AA                              | GG                | 1946514868               |
| SNP_P3_126475_63013 | NW_004515995.1 | Scaffold559 | 63013                   | GG                              | TT                | 1946514870               |
| SNP_P3_126476_63017 | NW_004515995.1 | Scaffold559 | 63017                   | GG                              | AA                | 1946514871               |
| SNP_P3_126477_63032 | NW_004515995.1 | Scaffold559 | 63032                   | TT                              | CC                | 1946514873               |
| SNP_P3_126478_63036 | NW_004515995.1 | Scaffold559 | 63036                   | TT                              | AA                | 1946514874               |
| SNP_P3_126479_63049 | NW_004515995.1 | Scaffold559 | 63049                   | TT                              | AA                | 1946514876               |
| SNP_P3_126480_63958 | NW_004515995.1 | Scaffold559 | 63958                   | GG                              | AA                | 1946514877               |
| SNP_P3_126481_66922 | NW_004515995.1 | Scaffold559 | 66922                   | CC                              | AA                | 1946514879               |
| SNP_P3_126482_74715 | NW_004515995.1 | Scaffold559 | 74715                   | AA                              | CC                | 1946514880               |
| SNP_P3_126483_74716 | NW_004515995.1 | Scaffold559 | 74716                   | TT                              | AA                | 1946514882               |
| SNP_P3_126484_74720 | NW_004515995.1 | Scaffold559 | 74720                   | GG                              | CC                | 1946514884               |
| SNP_P3_126485_75006 | NW_004515995.1 | Scaffold559 | 75006                   | GG                              | TT                | 1946514885               |



| SNPs IDs             | Chromosome IDs | Chromosomes | Physical positions (bp) | CDC Frontier (Reference genome) | (Pusa 256 & HPNB) | NCBI SNPdb Accession IDs |
|----------------------|----------------|-------------|-------------------------|---------------------------------|-------------------|--------------------------|
| SNP_P3_126486_77435  | NW_004515995.1 | Scaffold559 | 77435                   | AA                              | GG                | 1946514887               |
| SNP_P3_126487_89942  | NW_004515995.1 | Scaffold559 | 89942                   | AA                              | CC                | 1946514888               |
| SNP_P3_126488_92847  | NW_004515995.1 | Scaffold559 | 92847                   | AA                              | CC                | 1946514890               |
| SNP_P3_126489_92848  | NW_004515995.1 | Scaffold559 | 92848                   | GG                              | TT                | 1946514891               |
| SNP_P3_126490_92887  | NW_004515995.1 | Scaffold559 | 92887                   | TT                              | AA                | 1946514893               |
| SNP_P3_126491_92890  | NW_004515995.1 | Scaffold559 | 92890                   | AA                              | TT                | 1946514894               |
| SNP_P3_126492_92943  | NW_004515995.1 | Scaffold559 | 92943                   | CC                              | TT                | 1946514896               |
| SNP_P3_126493_92953  | NW_004515995.1 | Scaffold559 | 92953                   | CC                              | TT                | 1946514897               |
| SNP_P3_126495_93260  | NW_004515995.1 | Scaffold559 | 93260                   | AA                              | GG                | 1946514899               |
| SNP_P3_126496_5722   | NW_004515996.1 | Scaffold560 | 5722                    | TT                              | AA                | 1946514900               |
| SNP_P3_126497_5739   | NW_004515996.1 | Scaffold560 | 5739                    | TT                              | AA                | 1946514901               |
| SNP_P3_126498_5752   | NW_004515996.1 | Scaffold560 | 5752                    | AA                              | TT                | 1946514903               |
| SNP_P3_126499_5821   | NW_004515996.1 | Scaffold560 | 5821                    | TT                              | GG                | 1946514904               |
| SNP_P3_126500_5976   | NW_004515996.1 | Scaffold560 | 5976                    | AA                              | TT                | 1946514906               |
| SNP_P3_126501_6000   | NW_004515996.1 | Scaffold560 | 6000                    | AA                              | TT                | 1946514907               |
| SNP_P3_126502_6013   | NW_004515996.1 | Scaffold560 | 6013                    | TT                              | CC                | 1946514909               |
| SNP_P3_126503_16255  | NW_004515996.1 | Scaffold560 | 16255                   | CC                              | TT                | 1946514910               |
| SNP_P3_126504_16369  | NW_004515996.1 | Scaffold560 | 16369                   | AA                              | TT                | 1946514912               |
| SNP_P3_126505_16560  | NW_004515996.1 | Scaffold560 | 16560                   | CC                              | TT                | 1946514913               |
| SNP_P3_126506_16582  | NW_004515996.1 | Scaffold560 | 16582                   | GG                              | TT                | 1946514915               |
| SNP_P3_126507_16604  | NW_004515996.1 | Scaffold560 | 16604                   | AA                              | TT                | 1946514916               |
| SNP_P3_126508_16614  | NW_004515996.1 | Scaffold560 | 16614                   | AA                              | TT                | 1946514917               |
| SNP_P3_126510_28894  | NW_004515996.1 | Scaffold560 | 28894                   | TT                              | CC                | 1946514919               |
| SNP_P3_126511_28945  | NW_004515996.1 | Scaffold560 | 28945                   | TT                              | CC                | 1946514920               |
| SNP_P3_126513_35835  | NW_004515996.1 | Scaffold560 | 35835                   | CC                              | TT                | 1946514922               |
| SNP_P3_126514_35866  | NW_004515996.1 | Scaffold560 | 35866                   | AA                              | GG                | 1946514923               |
| SNP_P3_126515_55047  | NW_004515996.1 | Scaffold560 | 55047                   | CC                              | AA                | 1946514925               |
| SNP_P3_126516_55055  | NW_004515996.1 | Scaffold560 | 55055                   | GG                              | AA                | 1946514926               |
| SNP_P3_126517_55073  | NW_004515996.1 | Scaffold560 | 55073                   | AA                              | CC                | 1946514928               |
| SNP_P3_126518_55080  | NW_004515996.1 | Scaffold560 | 55080                   | TT                              | AA                | 1946514929               |
| SNP_P3_126519_60746  | NW_004515996.1 | Scaffold560 | 60746                   | CC                              | TT                | 1946514931               |
| SNP_P3_126520_61271  | NW_004515996.1 | Scaffold560 | 61271                   | AA                              | CC                | 1946514932               |
| SNP_P3_126522_93484  | NW_004515996.1 | Scaffold560 | 93484                   | AA                              | TT                | 1946514934               |
| SNP_P3_126524_93877  | NW_004515996.1 | Scaffold560 | 93877                   | TT                              | CC                | 1946514935               |
| SNP_P3_126525_97324  | NW_004515996.1 | Scaffold560 | 97324                   | GG                              | AA                | 1946514937               |
| SNP_P3_126526_100438 | NW_004515996.1 | Scaffold560 | 100438                  | AA                              | GG                | 1946514938               |
| SNP_P3_126527_117502 | NW_004515996.1 | Scaffold560 | 117502                  | GG                              | AA                | 1946514939               |
| SNP_P3_126528_117505 | NW_004515996.1 | Scaffold560 | 117505                  | TT                              | CC                | 1946514941               |
| SNP_P3_126529_117511 | NW_004515996.1 | Scaffold560 | 117511                  | CC                              | TT                | 1946514942               |
| SNP_P3_126530_117523 | NW_004515996.1 | Scaffold560 | 117523                  | TT                              | CC                | 1946514944               |
| SNP_P3_126531_117529 | NW_004515996.1 | Scaffold560 | 117529                  | CC                              | TT                | 1946514945               |
| SNP_P3_126532_117532 | NW_004515996.1 | Scaffold560 | 117532                  | CC                              | TT                | 1946514947               |

| SNPs IDs             | Chromosome IDs | Chromosomes | Physical positions (bp) | CDC Frontier (Reference genome) | (Pusa 256 & HPNB) | NCBI SNPdb Accession IDs |
|----------------------|----------------|-------------|-------------------------|---------------------------------|-------------------|--------------------------|
| SNP_P3_126533_117535 | NW_004515996.1 | Scaffold560 | 117535                  | GG                              | AA                | 1946514948               |
| SNP_P3_126534_117584 | NW_004515996.1 | Scaffold560 | 117584                  | CC                              | AA                | 1946514949               |
| SNP_P3_126535_117593 | NW_004515996.1 | Scaffold560 | 117593                  | TT                              | CC                | 1946514951               |
| SNP_P3_126536_117595 | NW_004515996.1 | Scaffold560 | 117595                  | AA                              | GG                | 1946514952               |
| SNP_P3_126537_117596 | NW_004515996.1 | Scaffold560 | 117596                  | GG                              | AA                | 1946514954               |
| SNP_P3_126538_117598 | NW_004515996.1 | Scaffold560 | 117598                  | GG                              | TT                | 1946514955               |
| SNP_P3_126539_117601 | NW_004515996.1 | Scaffold560 | 117601                  | TT                              | GG                | 1946514957               |
| SNP_P3_126540_117613 | NW_004515996.1 | Scaffold560 | 117613                  | TT                              | CC                | 1946514958               |
| SNP_P3_126541_117628 | NW_004515996.1 | Scaffold560 | 117628                  | AA                              | GG                | 1946514959               |
| SNP_P3_126542_117650 | NW_004515996.1 | Scaffold560 | 117650                  | AA                              | GG                | 1946514962               |
| SNP_P3_126543_117652 | NW_004515996.1 | Scaffold560 | 117652                  | TT                              | AA                | 1946514963               |
| SNP_P3_126544_117653 | NW_004515996.1 | Scaffold560 | 117653                  | AA                              | GG                | 1946514965               |
| SNP_P3_126545_117670 | NW_004515996.1 | Scaffold560 | 117670                  | TT                              | CC                | 1946514966               |
| SNP_P3_126546_117677 | NW_004515996.1 | Scaffold560 | 117677                  | AA                              | GG                | 1946514968               |
| SNP_P3_126547_123764 | NW_004515996.1 | Scaffold560 | 123764                  | GG                              | AA                | 1946514969               |
| SNP_P3_126548_124020 | NW_004515996.1 | Scaffold560 | 124020                  | GG                              | CC                | 1946514971               |
| SNP_P3_126549_132126 | NW_004515996.1 | Scaffold560 | 132126                  | AA                              | TT                | 1946514972               |
| SNP_P3_126550_132172 | NW_004515996.1 | Scaffold560 | 132172                  | AA                              | TT                | 1946514973               |
| SNP_P3_126551_132173 | NW_004515996.1 | Scaffold560 | 132173                  | TT                              | AA                | 1946514975               |
| SNP_P3_126554_160479 | NW_004515996.1 | Scaffold560 | 160479                  | AA                              | TT                | 1946514976               |
| SNP_P3_126555_160510 | NW_004515996.1 | Scaffold560 | 160510                  | TT                              | CC                | 1946514978               |
| SNP_P3_126556_160692 | NW_004515996.1 | Scaffold560 | 160692                  | TT                              | AA                | 1946514979               |
| SNP_P3_126558_25167  | NW_004515997.1 | Scaffold561 | 25167                   | TT                              | CC                | 1946514981               |
| SNP_P3_126559_25380  | NW_004515997.1 | Scaffold561 | 25380                   | AA                              | CC                | 1946514982               |
| SNP_P3_126561_28620  | NW_004515997.1 | Scaffold561 | 28620                   | CC                              | GG                | 1946514984               |
| SNP_P3_126562_28651  | NW_004515997.1 | Scaffold561 | 28651                   | CC                              | TT                | 1946514985               |
| SNP_P3_126563_30947  | NW_004515997.1 | Scaffold561 | 30947                   | CC                              | GG                | 1946514987               |
| SNP_P3_126564_31365  | NW_004515997.1 | Scaffold561 | 31365                   | TT                              | AA                | 1946514988               |
| SNP_P3_126565_31802  | NW_004515997.1 | Scaffold561 | 31802                   | AA                              | GG                | 1946514990               |
| SNP_P3_126566_33660  | NW_004515997.1 | Scaffold561 | 33660                   | CC                              | TT                | 1946514991               |
| SNP_P3_126567_39396  | NW_004515997.1 | Scaffold561 | 39396                   | TT                              | CC                | 1946514992               |
| SNP_P3_126568_39578  | NW_004515997.1 | Scaffold561 | 39578                   | TT                              | CC                | 1946514994               |
| SNP_P3_126569_39759  | NW_004515997.1 | Scaffold561 | 39759                   | AA                              | GG                | 1946514995               |
| SNP_P3_126570_39764  | NW_004515997.1 | Scaffold561 | 39764                   | AA                              | GG                | 1946514997               |
| SNP_P3_126572_77327  | NW_004515997.1 | Scaffold561 | 77327                   | TT                              | CC                | 1946514998               |
| SNP_P3_126573_84074  | NW_004515997.1 | Scaffold561 | 84074                   | TT                              | CC                | 1946515005               |
| SNP_P3_126574_84078  | NW_004515997.1 | Scaffold561 | 84078                   | TT                              | GG                | 1946515006               |
| SNP_P3_126575_84129  | NW_004515997.1 | Scaffold561 | 84129                   | AA                              | GG                | 1946515008               |
| SNP_P3_126577_84205  | NW_004515997.1 | Scaffold561 | 84205                   | GG                              | TT                | 1946515009               |
| SNP_P3_126578_84542  | NW_004515997.1 | Scaffold561 | 84542                   | AA                              | TT                | 1946515011               |
| SNP_P3_126580_117166 | NW_004515997.1 | Scaffold561 | 117166                  | TT                              | CC                | 1946515013               |
| SNP_P3_126581_145809 | NW_004515997.1 | Scaffold561 | 145809                  | AA                              | CC                | 1946515014               |

| SNPs IDs             | Chromosome IDs | Chromosomes | Physical positions (bp) | CDC Frontier (Reference genome) | (Pusa 256 & HPNB) | NCBI SNPdb Accession IDs |
|----------------------|----------------|-------------|-------------------------|---------------------------------|-------------------|--------------------------|
| SNP_P3_126582_158457 | NW_004515997.1 | Scaffold561 | 158457                  | GG                              | AA                | 1946515016               |
| SNP_P3_126583_176800 | NW_004515997.1 | Scaffold561 | 176800                  | GG                              | AA                | 1946515017               |
| SNP_P3_126584_183380 | NW_004515997.1 | Scaffold561 | 183380                  | TT                              | AA                | 1946515019               |
| SNP_P3_126585_183392 | NW_004515997.1 | Scaffold561 | 183392                  | TT                              | AA                | 1946515020               |
| SNP_P3_126586_183396 | NW_004515997.1 | Scaffold561 | 183396                  | GG                              | AA                | 1946515022               |
| SNP_P3_126587_183458 | NW_004515997.1 | Scaffold561 | 183458                  | CC                              | TT                | 1946515024               |
| SNP_P3_126588_208485 | NW_004515997.1 | Scaffold561 | 208485                  | CC                              | TT                | 1946515025               |
| SNP_P3_126589_11289  | NW_004515998.1 | Scaffold562 | 11289                   | AA                              | GG                | 1946515027               |
| SNP_P3_126590_11359  | NW_004515998.1 | Scaffold562 | 11359                   | TT                              | GG                | 1946515028               |
| SNP_P3_126591_32277  | NW_004515998.1 | Scaffold562 | 32277                   | TT                              | AA                | 1946515030               |
| SNP_P3_126592_79946  | NW_004515998.1 | Scaffold562 | 79946                   | TT                              | CC                | 1946515031               |
| SNP_P3_126593_90137  | NW_004515998.1 | Scaffold562 | 90137                   | TT                              | GG                | 1946515033               |
| SNP_P3_126594_90141  | NW_004515998.1 | Scaffold562 | 90141                   | AA                              | GG                | 1946515034               |
| SNP_P3_126595_90153  | NW_004515998.1 | Scaffold562 | 90153                   | AA                              | GG                | 1946515036               |
| SNP_P3_126596_90160  | NW_004515998.1 | Scaffold562 | 90160                   | AA                              | TT                | 1946515037               |
| SNP_P3_126597_90167  | NW_004515998.1 | Scaffold562 | 90167                   | TT                              | CC                | 1946515039               |
| SNP_P3_126598_90171  | NW_004515998.1 | Scaffold562 | 90171                   | AA                              | TT                | 1946515041               |
| SNP_P3_126599_197475 | NW_004515998.1 | Scaffold562 | 197475                  | TT                              | CC                | 1946515042               |
| SNP_P3_126600_197479 | NW_004515998.1 | Scaffold562 | 197479                  | AA                              | GG                | 1946515044               |
| SNP_P3_126601_214404 | NW_004515998.1 | Scaffold562 | 214404                  | GG                              | CC                | 1946515045               |
| SNP_P3_126602_214429 | NW_004515998.1 | Scaffold562 | 214429                  | AA                              | GG                | 1946515047               |
| SNP_P3_126603_219459 | NW_004515998.1 | Scaffold562 | 219459                  | TT                              | CC                | 1946515048               |
| SNP_P3_126604_219483 | NW_004515998.1 | Scaffold562 | 219483                  | TT                              | CC                | 1946515050               |
| SNP_P3_126605_219876 | NW_004515998.1 | Scaffold562 | 219876                  | AA                              | CC                | 1946515051               |
| SNP_P3_126606_221395 | NW_004515998.1 | Scaffold562 | 221395                  | TT                              | CC                | 1946515053               |
| SNP_P3_126607_221429 | NW_004515998.1 | Scaffold562 | 221429                  | TT                              | GG                | 1946515054               |
| SNP_P3_126608_221452 | NW_004515998.1 | Scaffold562 | 221452                  | TT                              | CC                | 1946515056               |
| SNP_P3_126609_221475 | NW_004515998.1 | Scaffold562 | 221475                  | AA                              | GG                | 1946515058               |
| SNP_P3_126610_221482 | NW_004515998.1 | Scaffold562 | 221482                  | CC                              | TT                | 1946515059               |
| SNP_P3_126611_221709 | NW_004515998.1 | Scaffold562 | 221709                  | AA                              | GG                | 1946515061               |
| SNP_P3_126612_221777 | NW_004515998.1 | Scaffold562 | 221777                  | AA                              | GG                | 1946515063               |
| SNP_P3_126613_221923 | NW_004515998.1 | Scaffold562 | 221923                  | AA                              | GG                | 1946515064               |
| SNP_P3_126614_222928 | NW_004515998.1 | Scaffold562 | 222928                  | AA                              | CC                | 1946515066               |
| SNP_P3_126615_223106 | NW_004515998.1 | Scaffold562 | 223106                  | TT                              | AA                | 1946515067               |
| SNP_P3_126616_223120 | NW_004515998.1 | Scaffold562 | 223120                  | TT                              | CC                | 1946515069               |
| SNP_P3_126618_223226 | NW_004515998.1 | Scaffold562 | 223226                  | GG                              | AA                | 1946515070               |
| SNP_P3_126619_223263 | NW_004515998.1 | Scaffold562 | 223263                  | AA                              | GG                | 1946515072               |
| SNP_P3_126620_256797 | NW_004515998.1 | Scaffold562 | 256797                  | CC                              | TT                | 1946515073               |
| SNP_P3_126621_256813 | NW_004515998.1 | Scaffold562 | 256813                  | TT                              | CC                | 1946515075               |
| SNP_P3_126622_256878 | NW_004515998.1 | Scaffold562 | 256878                  | TT                              | CC                | 1946515076               |
| SNP_P3_126623_256881 | NW_004515998.1 | Scaffold562 | 256881                  | CC                              | TT                | 1946515078               |
| SNP_P3_126624_256902 | NW_004515998.1 | Scaffold562 | 256902                  | TT                              | AA                | 1946515079               |

| SNPs IDs             | Chromosome IDs | Chromosomes | Physical positions (bp) | CDC Frontier (Reference genome) | (Pusa 256 & HPNB) | NCBI SNPdb Accession IDs |
|----------------------|----------------|-------------|-------------------------|---------------------------------|-------------------|--------------------------|
| SNP_P3_126625_256912 | NW_004515998.1 | Scaffold562 | 256912                  | TT                              | CC                | 1946515081               |
| SNP_P3_126626_256932 | NW_004515998.1 | Scaffold562 | 256932                  | GG                              | CC                | 1946515083               |
| SNP_P3_126627_257009 | NW_004515998.1 | Scaffold562 | 257009                  | TT                              | AA                | 1946515084               |
| SNP_P3_126628_257031 | NW_004515998.1 | Scaffold562 | 257031                  | GG                              | TT                | 1946515086               |
| SNP_P3_126630_257105 | NW_004515998.1 | Scaffold562 | 257105                  | GG                              | AA                | 1946515087               |
| SNP_P3_126631_257237 | NW_004515998.1 | Scaffold562 | 257237                  | CC                              | AA                | 1946515089               |
| SNP_P3_126632_257238 | NW_004515998.1 | Scaffold562 | 257238                  | AA                              | CC                | 1946515090               |
| SNP_P3_126633_257244 | NW_004515998.1 | Scaffold562 | 257244                  | TT                              | AA                | 1946515091               |
| SNP_P3_126634_257255 | NW_004515998.1 | Scaffold562 | 257255                  | TT                              | GG                | 1946515093               |
| SNP_P3_126635_257260 | NW_004515998.1 | Scaffold562 | 257260                  | TT                              | CC                | 1946515094               |
| SNP_P3_126636_257288 | NW_004515998.1 | Scaffold562 | 257288                  | GG                              | CC                | 1946515096               |
| SNP_P3_126637_257318 | NW_004515998.1 | Scaffold562 | 257318                  | CC                              | GG                | 1946515097               |
| SNP_P3_126639_257353 | NW_004515998.1 | Scaffold562 | 257353                  | CC                              | AA                | 1946515099               |
| SNP_P3_126640_257367 | NW_004515998.1 | Scaffold562 | 257367                  | CC                              | AA                | 1946515100               |
| SNP_P3_126641_257403 | NW_004515998.1 | Scaffold562 | 257403                  | AA                              | TT                | 1946515102               |
| SNP_P3_126642_294603 | NW_004515998.1 | Scaffold562 | 294603                  | TT                              | GG                | 1946515103               |
| SNP_P3_126643_294913 | NW_004515998.1 | Scaffold562 | 294913                  | TT                              | CC                | 1946515105               |
| SNP_P3_126644_294924 | NW_004515998.1 | Scaffold562 | 294924                  | TT                              | AA                | 1946515106               |
| SNP_P3_126645_294940 | NW_004515998.1 | Scaffold562 | 294940                  | CC                              | TT                | 1946515108               |
| SNP_P3_126646_298388 | NW_004515998.1 | Scaffold562 | 298388                  | TT                              | CC                | 1946515109               |
| SNP_P3_126648_302948 | NW_004515998.1 | Scaffold562 | 302948                  | TT                              | CC                | 1946515111               |
| SNP_P3_126649_303091 | NW_004515998.1 | Scaffold562 | 303091                  | CC                              | TT                | 1946515112               |
| SNP_P3_126650_332701 | NW_004515998.1 | Scaffold562 | 332701                  | CC                              | GG                | 1946515114               |
| SNP_P3_126652_10084  | NW_004515999.1 | Scaffold563 | 10084                   | AA                              | GG                | 1946515115               |
| SNP_P3_126653_15838  | NW_004515999.1 | Scaffold563 | 15838                   | AA                              | TT                | 1946515117               |
| SNP_P3_126654_18534  | NW_004515999.1 | Scaffold563 | 18534                   | AA                              | TT                | 1946515118               |
| SNP_P3_126655_22750  | NW_004515999.1 | Scaffold563 | 22750                   | AA                              | CC                | 1946515120               |
| SNP_P3_126656_22789  | NW_004515999.1 | Scaffold563 | 22789                   | TT                              | CC                | 1946515121               |
| SNP_P3_126657_22842  | NW_004515999.1 | Scaffold563 | 22842                   | CC                              | TT                | 1946515123               |
| SNP_P3_126658_22870  | NW_004515999.1 | Scaffold563 | 22870                   | TT                              | AA                | 1946515125               |
| SNP_P3_126659_23031  | NW_004515999.1 | Scaffold563 | 23031                   | AA                              | TT                | 1946515126               |
| SNP_P3_126660_23054  | NW_004515999.1 | Scaffold563 | 23054                   | AA                              | GG                | 1946515128               |
| SNP_P3_126661_23059  | NW_004515999.1 | Scaffold563 | 23059                   | TT                              | CC                | 1946515129               |
| SNP_P3_126662_23125  | NW_004515999.1 | Scaffold563 | 23125                   | AA                              | GG                | 1946515131               |
| SNP_P3_126663_23150  | NW_004515999.1 | Scaffold563 | 23150                   | CC                              | AA                | 1946515132               |
| SNP_P3_126664_23171  | NW_004515999.1 | Scaffold563 | 23171                   | CC                              | AA                | 1946515134               |
| SNP_P3_126665_2076   | NW_004516000.1 | Scaffold564 | 2076                    | AA                              | TT                | 1946515135               |
| SNP_P3_126666_2239   | NW_004516000.1 | Scaffold564 | 2239                    | TT                              | CC                | 1946515136               |
| SNP_P3_126667_2386   | NW_004516000.1 | Scaffold564 | 2386                    | AA                              | GG                | 1946515138               |
| SNP_P3_126668_2620   | NW_004516000.1 | Scaffold564 | 2620                    | AA                              | TT                | 1946515140               |
| SNP_P3_126669_3207   | NW_004516000.1 | Scaffold564 | 3207                    | GG                              | AA                | 1946515141               |
| SNP_P3_126670_3267   | NW_004516000.1 | Scaffold564 | 3267                    | GG                              | AA                | 1946515143               |

| SNPs IDs           | Chromosome IDs | Chromosomes | Physical positions (bp) | CDC Frontier (Reference genome) | (Pusa 256 & HPNB) | NCBI SNPdb Accession IDs |
|--------------------|----------------|-------------|-------------------------|---------------------------------|-------------------|--------------------------|
| SNP_P3_126671_3279 | NW_004516000.1 | Scaffold564 | 3279                    | TT                              | CC                | 1946515144               |
| SNP_P3_126672_3332 | NW_004516000.1 | Scaffold564 | 3332                    | TT                              | CC                | 1946515146               |
| SNP_P3_126673_3347 | NW_004516000.1 | Scaffold564 | 3347                    | AA                              | GG                | 1946515147               |
| SNP_P3_126674_3390 | NW_004516000.1 | Scaffold564 | 3390                    | AA                              | GG                | 1946515149               |
| SNP_P3_126675_3440 | NW_004516000.1 | Scaffold564 | 3440                    | CC                              | TT                | 1946515150               |
| SNP_P3_126676_3449 | NW_004516000.1 | Scaffold564 | 3449                    | TT                              | GG                | 1946515152               |
| SNP_P3_126677_3457 | NW_004516000.1 | Scaffold564 | 3457                    | AA                              | GG                | 1946515153               |
| SNP_P3_126678_3468 | NW_004516000.1 | Scaffold564 | 3468                    | TT                              | CC                | 1946515155               |
| SNP_P3_126679_3469 | NW_004516000.1 | Scaffold564 | 3469                    | CC                              | TT                | 1946515156               |
| SNP_P3_126680_3480 | NW_004516000.1 | Scaffold564 | 3480                    | GG                              | CC                | 1946515158               |
| SNP_P3_126681_3541 | NW_004516000.1 | Scaffold564 | 3541                    | CC                              | GG                | 1946515159               |
| SNP_P3_126682_3586 | NW_004516000.1 | Scaffold564 | 3586                    | GG                              | AA                | 1946515161               |
| SNP_P3_126683_3659 | NW_004516000.1 | Scaffold564 | 3659                    | TT                              | CC                | 1946515162               |
| SNP_P3_126684_3717 | NW_004516000.1 | Scaffold564 | 3717                    | AA                              | TT                | 1946515164               |
| SNP_P3_126685_3722 | NW_004516000.1 | Scaffold564 | 3722                    | AA                              | GG                | 1946515165               |
| SNP_P3_126686_3770 | NW_004516000.1 | Scaffold564 | 3770                    | CC                              | TT                | 1946515167               |
| SNP_P3_126687_3943 | NW_004516000.1 | Scaffold564 | 3943                    | GG                              | CC                | 1946515168               |
| SNP_P3_126688_3991 | NW_004516000.1 | Scaffold564 | 3991                    | AA                              | CC                | 1946515170               |
| SNP_P3_126689_4137 | NW_004516000.1 | Scaffold564 | 4137                    | TT                              | CC                | 1946515171               |
| SNP_P3_126690_4188 | NW_004516000.1 | Scaffold564 | 4188                    | GG                              | CC                | 1946515173               |
| SNP_P3_126691_4873 | NW_004516000.1 | Scaffold564 | 4873                    | AA                              | GG                | 1946515174               |
| SNP_P3_126692_5069 | NW_004516000.1 | Scaffold564 | 5069                    | AA                              | CC                | 1946515176               |
| SNP_P3_126693_5084 | NW_004516000.1 | Scaffold564 | 5084                    | CC                              | TT                | 1946515177               |
| SNP_P3_126694_5104 | NW_004516000.1 | Scaffold564 | 5104                    | TT                              | AA                | 1946515179               |
| SNP_P3_126695_5105 | NW_004516000.1 | Scaffold564 | 5105                    | TT                              | AA                | 1946515180               |
| SNP_P3_126696_5108 | NW_004516000.1 | Scaffold564 | 5108                    | TT                              | CC                | 1946515182               |
| SNP_P3_126697_5127 | NW_004516000.1 | Scaffold564 | 5127                    | TT                              | AA                | 1946515183               |
| SNP_P3_126698_5186 | NW_004516000.1 | Scaffold564 | 5186                    | CC                              | TT                | 1946515185               |
| SNP_P3_126700_5235 | NW_004516000.1 | Scaffold564 | 5235                    | AA                              | GG                | 1946515186               |
| SNP_P3_126701_5290 | NW_004516000.1 | Scaffold564 | 5290                    | AA                              | TT                | 1946515188               |
| SNP_P3_126702_5299 | NW_004516000.1 | Scaffold564 | 5299                    | AA                              | TT                | 1946515189               |
| SNP_P3_126703_5314 | NW_004516000.1 | Scaffold564 | 5314                    | AA                              | CC                | 1946515191               |
| SNP_P3_126704_5401 | NW_004516000.1 | Scaffold564 | 5401                    | GG                              | TT                | 1946515192               |
| SNP_P3_126705_5451 | NW_004516000.1 | Scaffold564 | 5451                    | TT                              | CC                | 1946515194               |
| SNP_P3_126706_5539 | NW_004516000.1 | Scaffold564 | 5539                    | GG                              | AA                | 1946515195               |
| SNP_P3_126707_5564 | NW_004516000.1 | Scaffold564 | 5564                    | GG                              | CC                | 1946515197               |
| SNP_P3_126708_5758 | NW_004516000.1 | Scaffold564 | 5758                    | AA                              | GG                | 1946515198               |
| SNP_P3_126709_5850 | NW_004516000.1 | Scaffold564 | 5850                    | TT                              | CC                | 1946515200               |
| SNP_P3_126710_6190 | NW_004516000.1 | Scaffold564 | 6190                    | TT                              | GG                | 1946515201               |
| SNP_P3_126711_6195 | NW_004516000.1 | Scaffold564 | 6195                    | GG                              | CC                | 1946515203               |
| SNP_P3_126712_7199 | NW_004516000.1 | Scaffold564 | 7199                    | AA                              | TT                | 1946515204               |
| SNP_P3_126713_7237 | NW_004516000.1 | Scaffold564 | 7237                    | AA                              | GG                | 1946515206               |

| SNPs IDs            | Chromosome IDs | Chromosomes | Physical positions (bp) | CDC Frontier (Reference genome) | (Pusa 256 & HPNB) | NCBI SNPdb Accession IDs |
|---------------------|----------------|-------------|-------------------------|---------------------------------|-------------------|--------------------------|
| SNP_P3_126714_7275  | NW_004516000.1 | Scaffold564 | 7275                    | TT                              | CC                | 1946515207               |
| SNP_P3_126715_7367  | NW_004516000.1 | Scaffold564 | 7367                    | GG                              | AA                | 1946515209               |
| SNP_P3_126716_7384  | NW_004516000.1 | Scaffold564 | 7384                    | AA                              | CC                | 1946515210               |
| SNP_P3_126717_7402  | NW_004516000.1 | Scaffold564 | 7402                    | TT                              | CC                | 1946515212               |
| SNP_P3_126718_7420  | NW_004516000.1 | Scaffold564 | 7420                    | CC                              | GG                | 1946515213               |
| SNP_P3_126719_7447  | NW_004516000.1 | Scaffold564 | 7447                    | AA                              | GG                | 1946515215               |
| SNP_P3_126720_7562  | NW_004516000.1 | Scaffold564 | 7562                    | CC                              | TT                | 1946515216               |
| SNP_P3_126721_7580  | NW_004516000.1 | Scaffold564 | 7580                    | AA                              | TT                | 1946515218               |
| SNP_P3_126723_8541  | NW_004516000.1 | Scaffold564 | 8541                    | AA                              | TT                | 1946515219               |
| SNP_P3_126724_9386  | NW_004516000.1 | Scaffold564 | 9386                    | CC                              | TT                | 1946515221               |
| SNP_P3_126725_10285 | NW_004516000.1 | Scaffold564 | 10285                   | AA                              | GG                | 1946515222               |
| SNP_P3_126726_10339 | NW_004516000.1 | Scaffold564 | 10339                   | TT                              | CC                | 1946515224               |
| SNP_P3_126727_10341 | NW_004516000.1 | Scaffold564 | 10341                   | GG                              | AA                | 1946515225               |
| SNP_P3_126728_10437 | NW_004516000.1 | Scaffold564 | 10437                   | TT                              | CC                | 1946515227               |
| SNP_P3_126729_10516 | NW_004516000.1 | Scaffold564 | 10516                   | AA                              | GG                | 1946515229               |
| SNP_P3_126730_10519 | NW_004516000.1 | Scaffold564 | 10519                   | GG                              | TT                | 1946515230               |
| SNP_P3_126731_10546 | NW_004516000.1 | Scaffold564 | 10546                   | GG                              | AA                | 1946515232               |
| SNP_P3_126732_10819 | NW_004516000.1 | Scaffold564 | 10819                   | GG                              | AA                | 1946515233               |
| SNP_P3_126733_10885 | NW_004516000.1 | Scaffold564 | 10885                   | CC                              | TT                | 1946515235               |
| SNP_P3_126734_10951 | NW_004516000.1 | Scaffold564 | 10951                   | CC                              | TT                | 1946515236               |
| SNP_P3_126735_11067 | NW_004516000.1 | Scaffold564 | 11067                   | GG                              | CC                | 1946515238               |
| SNP_P3_126736_11095 | NW_004516000.1 | Scaffold564 | 11095                   | AA                              | CC                | 1946515239               |
| SNP_P3_126737_11161 | NW_004516000.1 | Scaffold564 | 11161                   | CC                              | TT                | 1946515241               |
| SNP_P3_126738_11342 | NW_004516000.1 | Scaffold564 | 11342                   | GG                              | AA                | 1946515242               |
| SNP_P3_126739_11347 | NW_004516000.1 | Scaffold564 | 11347                   | GG                              | TT                | 1946515244               |
| SNP_P3_126740_11646 | NW_004516000.1 | Scaffold564 | 11646                   | GG                              | CC                | 1946515246               |
| SNP_P3_126741_11904 | NW_004516000.1 | Scaffold564 | 11904                   | TT                              | CC                | 1946515247               |
| SNP_P3_126743_12317 | NW_004516000.1 | Scaffold564 | 12317                   | CC                              | TT                | 1946515249               |
| SNP_P3_126744_12363 | NW_004516000.1 | Scaffold564 | 12363                   | CC                              | AA                | 1946515250               |
| SNP_P3_126745_12831 | NW_004516000.1 | Scaffold564 | 12831                   | AA                              | CC                | 1946515252               |
| SNP_P3_126746_12928 | NW_004516000.1 | Scaffold564 | 12928                   | AA                              | GG                | 1946515253               |
| SNP_P3_126747_13405 | NW_004516000.1 | Scaffold564 | 13405                   | TT                              | CC                | 1946515255               |
| SNP_P3_126748_13521 | NW_004516000.1 | Scaffold564 | 13521                   | TT                              | CC                | 1946515256               |
| SNP_P3_126749_13580 | NW_004516000.1 | Scaffold564 | 13580                   | AA                              | GG                | 1946515258               |
| SNP_P3_126750_13742 | NW_004516000.1 | Scaffold564 | 13742                   | AA                              | TT                | 1946515259               |
| SNP_P3_126752_13934 | NW_004516000.1 | Scaffold564 | 13934                   | TT                              | AA                | 1946515261               |
| SNP_P3_126753_14168 | NW_004516000.1 | Scaffold564 | 14168                   | GG                              | AA                | 1946515262               |
| SNP_P3_126754_14202 | NW_004516000.1 | Scaffold564 | 14202                   | GG                              | AA                | 1946515264               |
| SNP_P3_126756_14553 | NW_004516000.1 | Scaffold564 | 14553                   | TT                              | AA                | 1946515271               |
| SNP_P3_126757_14575 | NW_004516000.1 | Scaffold564 | 14575                   | TT                              | GG                | 1946515272               |
| SNP_P3_126758_14985 | NW_004516000.1 | Scaffold564 | 14985                   | TT                              | GG                | 1946515274               |
| SNP_P3_126759_15176 | NW_004516000.1 | Scaffold564 | 15176                   | GG                              | AA                | 1946515275               |

| SNPs IDs            | Chromosome IDs | Chromosomes | Physical positions (bp) | CDC Frontier (Reference genome) | (Pusa 256 & HPNB) | NCBI SNPdb Accession IDs |
|---------------------|----------------|-------------|-------------------------|---------------------------------|-------------------|--------------------------|
| SNP_P3_126760_15186 | NW_004516000.1 | Scaffold564 | 15186                   | CC                              | GG                | 1946515277               |
| SNP_P3_126762_15264 | NW_004516000.1 | Scaffold564 | 15264                   | TT                              | CC                | 1946515278               |
| SNP_P3_126763_15341 | NW_004516000.1 | Scaffold564 | 15341                   | AA                              | GG                | 1946515280               |
| SNP_P3_126764_15450 | NW_004516000.1 | Scaffold564 | 15450                   | AA                              | TT                | 1946515281               |
| SNP_P3_126765_15800 | NW_004516000.1 | Scaffold564 | 15800                   | AA                              | GG                | 1946515283               |
| SNP_P3_126766_23599 | NW_004516000.1 | Scaffold564 | 23599                   | AA                              | GG                | 1946515284               |
| SNP_P3_126767_23617 | NW_004516000.1 | Scaffold564 | 23617                   | AA                              | TT                | 1946515286               |
| SNP_P3_126768_23687 | NW_004516000.1 | Scaffold564 | 23687                   | AA                              | GG                | 1946515287               |
| SNP_P3_126769_24297 | NW_004516000.1 | Scaffold564 | 24297                   | AA                              | GG                | 1946515289               |
| SNP_P3_126770_25801 | NW_004516000.1 | Scaffold564 | 25801                   | GG                              | CC                | 1946515290               |
| SNP_P3_126771_25890 | NW_004516000.1 | Scaffold564 | 25890                   | GG                              | AA                | 1946515292               |
| SNP_P3_126772_26003 | NW_004516000.1 | Scaffold564 | 26003                   | TT                              | AA                | 1946515293               |
| SNP_P3_126774_26166 | NW_004516000.1 | Scaffold564 | 26166                   | GG                              | AA                | 1946515295               |
| SNP_P3_126775_26212 | NW_004516000.1 | Scaffold564 | 26212                   | GG                              | AA                | 1946515297               |
| SNP_P3_126776_26247 | NW_004516000.1 | Scaffold564 | 26247                   | TT                              | AA                | 1946515298               |
| SNP_P3_126777_26249 | NW_004516000.1 | Scaffold564 | 26249                   | AA                              | TT                | 1946515300               |
| SNP_P3_126778_26433 | NW_004516000.1 | Scaffold564 | 26433                   | AA                              | GG                | 1946515301               |
| SNP_P3_126779_26444 | NW_004516000.1 | Scaffold564 | 26444                   | AA                              | TT                | 1946515303               |
| SNP_P3_126780_26457 | NW_004516000.1 | Scaffold564 | 26457                   | GG                              | TT                | 1946515304               |
| SNP_P3_126781_26489 | NW_004516000.1 | Scaffold564 | 26489                   | TT                              | CC                | 1946515306               |
| SNP_P3_126782_26493 | NW_004516000.1 | Scaffold564 | 26493                   | AA                              | TT                | 1946515307               |
| SNP_P3_126783_26518 | NW_004516000.1 | Scaffold564 | 26518                   | TT                              | AA                | 1946515309               |
| SNP_P3_126784_30076 | NW_004516000.1 | Scaffold564 | 30076                   | GG                              | AA                | 1946515310               |
| SNP_P3_126785_30151 | NW_004516000.1 | Scaffold564 | 30151                   | TT                              | CC                | 1946515311               |
| SNP_P3_126786_4106  | NW_004516002.1 | Scaffold568 | 4106                    | GG                              | TT                | 1946515312               |
| SNP_P3_126787_4170  | NW_004516002.1 | Scaffold568 | 4170                    | TT                              | CC                | 1946515313               |
| SNP_P3_126788_4588  | NW_004516002.1 | Scaffold568 | 4588                    | TT                              | GG                | 1946515314               |
| SNP_P3_126789_4604  | NW_004516002.1 | Scaffold568 | 4604                    | TT                              | AA                | 1946515315               |
| SNP_P3_126790_4671  | NW_004516002.1 | Scaffold568 | 4671                    | CC                              | GG                | 1946515316               |
| SNP_P3_126792_6573  | NW_004516002.1 | Scaffold568 | 6573                    | CC                              | GG                | 1946515317               |
| SNP_P3_126793_6803  | NW_004516002.1 | Scaffold568 | 6803                    | GG                              | AA                | 1946515318               |
| SNP_P3_126794_6843  | NW_004516002.1 | Scaffold568 | 6843                    | AA                              | GG                | 1946515319               |
| SNP_P3_126795_7136  | NW_004516002.1 | Scaffold568 | 7136                    | AA                              | TT                | 1946515320               |
| SNP_P3_126796_7221  | NW_004516002.1 | Scaffold568 | 7221                    | AA                              | TT                | 1946515321               |
| SNP_P3_126797_7240  | NW_004516002.1 | Scaffold568 | 7240                    | TT                              | CC                | 1946515322               |
| SNP_P3_126798_7253  | NW_004516002.1 | Scaffold568 | 7253                    | AA                              | GG                | 1946515323               |
| SNP_P3_126799_9569  | NW_004516002.1 | Scaffold568 | 9569                    | CC                              | GG                | 1946515324               |
| SNP_P3_126800_12470 | NW_004516002.1 | Scaffold568 | 12470                   | CC                              | TT                | 1946515325               |
| SNP_P3_126801_17390 | NW_004516002.1 | Scaffold568 | 17390                   | TT                              | CC                | 1946515326               |
| SNP_P3_126802_17395 | NW_004516002.1 | Scaffold568 | 17395                   | CC                              | GG                | 1946515327               |
| SNP_P3_126803_17402 | NW_004516002.1 | Scaffold568 | 17402                   | GG                              | AA                | 1946515328               |
| SNP_P3_126804_17405 | NW_004516002.1 | Scaffold568 | 17405                   | TT                              | CC                | 1946515329               |

| SNPs IDs            | Chromosome IDs | Chromosomes | Physical positions (bp) | CDC Frontier (Reference genome) | (Pusa 256 & HPNB) | NCBI SNPdb Accession IDs |
|---------------------|----------------|-------------|-------------------------|---------------------------------|-------------------|--------------------------|
| SNP_P3_126805_18620 | NW_004516002.1 | Scaffold568 | 18620                   | AA                              | TT                | 1946515330               |
| SNP_P3_126806_19571 | NW_004516002.1 | Scaffold568 | 19571                   | TT                              | AA                | 1946515331               |
| SNP_P3_126807_19916 | NW_004516002.1 | Scaffold568 | 19916                   | TT                              | CC                | 1946515332               |
| SNP_P3_126808_28773 | NW_004516002.1 | Scaffold568 | 28773                   | AA                              | GG                | 1946515333               |
| SNP_P3_126809_28818 | NW_004516002.1 | Scaffold568 | 28818                   | GG                              | TT                | 1946515334               |
| SNP_P3_126810_29407 | NW_004516002.1 | Scaffold568 | 29407                   | AA                              | GG                | 1946515335               |
| SNP_P3_126811_29503 | NW_004516002.1 | Scaffold568 | 29503                   | TT                              | CC                | 1946515336               |
| SNP_P3_126812_29508 | NW_004516002.1 | Scaffold568 | 29508                   | TT                              | CC                | 1946515337               |
| SNP_P3_126813_31896 | NW_004516002.1 | Scaffold568 | 31896                   | CC                              | TT                | 1946515338               |
| SNP_P3_126814_32005 | NW_004516002.1 | Scaffold568 | 32005                   | AA                              | TT                | 1946515339               |
| SNP_P3_126815_32216 | NW_004516002.1 | Scaffold568 | 32216                   | GG                              | CC                | 1946515340               |
| SNP_P3_126816_32371 | NW_004516002.1 | Scaffold568 | 32371                   | TT                              | CC                | 1946515341               |
| SNP_P3_126817_32680 | NW_004516002.1 | Scaffold568 | 32680                   | TT                              | CC                | 1946515342               |
| SNP_P3_126818_33449 | NW_004516002.1 | Scaffold568 | 33449                   | GG                              | TT                | 1946515343               |
| SNP_P3_126819_34465 | NW_004516002.1 | Scaffold568 | 34465                   | GG                              | AA                | 1946515344               |
| SNP_P3_126820_34505 | NW_004516002.1 | Scaffold568 | 34505                   | CC                              | GG                | 1946515345               |
| SNP_P3_126821_34506 | NW_004516002.1 | Scaffold568 | 34506                   | AA                              | GG                | 1946515346               |
| SNP_P3_126822_34599 | NW_004516002.1 | Scaffold568 | 34599                   | CC                              | AA                | 1946515348               |
| SNP_P3_126823_34730 | NW_004516002.1 | Scaffold568 | 34730                   | AA                              | GG                | 1946515349               |
| SNP_P3_126824_34735 | NW_004516002.1 | Scaffold568 | 34735                   | GG                              | AA                | 1946515351               |
| SNP_P3_126825_34740 | NW_004516002.1 | Scaffold568 | 34740                   | GG                              | CC                | 1946515352               |
| SNP_P3_126826_34875 | NW_004516002.1 | Scaffold568 | 34875                   | AA                              | GG                | 1946515354               |
| SNP_P3_126827_34881 | NW_004516002.1 | Scaffold568 | 34881                   | AA                              | CC                | 1946515355               |
| SNP_P3_126828_34936 | NW_004516002.1 | Scaffold568 | 34936                   | AA                              | GG                | 1946515357               |
| SNP_P3_126829_36041 | NW_004516002.1 | Scaffold568 | 36041                   | AA                              | GG                | 1946515358               |
| SNP_P3_126830_36520 | NW_004516002.1 | Scaffold568 | 36520                   | AA                              | TT                | 1946515360               |
| SNP_P3_126831_36583 | NW_004516002.1 | Scaffold568 | 36583                   | GG                              | AA                | 1946515362               |
| SNP_P3_126832_36928 | NW_004516002.1 | Scaffold568 | 36928                   | AA                              | TT                | 1946515363               |
| SNP_P3_126833_36997 | NW_004516002.1 | Scaffold568 | 36997                   | TT                              | CC                | 1946515365               |
| SNP_P3_126834_37024 | NW_004516002.1 | Scaffold568 | 37024                   | CC                              | AA                | 1946515366               |
| SNP_P3_126835_37313 | NW_004516002.1 | Scaffold568 | 37313                   | AA                              | TT                | 1946515368               |
| SNP_P3_126836_37328 | NW_004516002.1 | Scaffold568 | 37328                   | TT                              | CC                | 1946515369               |
| SNP_P3_126837_37357 | NW_004516002.1 | Scaffold568 | 37357                   | GG                              | CC                | 1946515371               |
| SNP_P3_126838_38028 | NW_004516002.1 | Scaffold568 | 38028                   | TT                              | AA                | 1946515372               |
| SNP_P3_126839_38058 | NW_004516002.1 | Scaffold568 | 38058                   | TT                              | AA                | 1946515374               |
| SNP_P3_126840_38294 | NW_004516002.1 | Scaffold568 | 38294                   | CC                              | TT                | 1946515376               |
| SNP_P3_126841_38314 | NW_004516002.1 | Scaffold568 | 38314                   | TT                              | GG                | 1946515377               |
| SNP_P3_126842_844   | NW_004516004.1 | Scaffold571 | 844                     | TT                              | AA                | 1946515379               |
| SNP_P3_126843_4694  | NW_004516004.1 | Scaffold571 | 4694                    | GG                              | AA                | 1946515380               |
| SNP_P3_126844_11784 | NW_004516004.1 | Scaffold571 | 11784                   | AA                              | CC                | 1946515382               |
| SNP_P3_126845_11794 | NW_004516004.1 | Scaffold571 | 11794                   | GG                              | TT                | 1946515384               |
| SNP_P3_126846_11833 | NW_004516004.1 | Scaffold571 | 11833                   | AA                              | TT                | 1946515385               |



| SNPs IDs            | Chromosome IDs | Chromosomes | Physical positions (bp) | CDC Frontier (Reference genome) | (Pusa 256 & HPNB) | NCBI SNPdb Accession IDs |
|---------------------|----------------|-------------|-------------------------|---------------------------------|-------------------|--------------------------|
| SNP_P3_126847_11845 | NW_004516004.1 | Scaffold571 | 11845                   | AA                              | CC                | 1946515387               |
| SNP_P3_126848_11851 | NW_004516004.1 | Scaffold571 | 11851                   | TT                              | CC                | 1946515388               |
| SNP_P3_126850_11918 | NW_004516004.1 | Scaffold571 | 11918                   | AA                              | GG                | 1946515390               |
| SNP_P3_126851_11924 | NW_004516004.1 | Scaffold571 | 11924                   | GG                              | AA                | 1946515391               |
| SNP_P3_126852_11988 | NW_004516004.1 | Scaffold571 | 11988                   | AA                              | CC                | 1946515393               |
| SNP_P3_126853_12038 | NW_004516004.1 | Scaffold571 | 12038                   | AA                              | GG                | 1946515394               |
| SNP_P3_126854_12201 | NW_004516004.1 | Scaffold571 | 12201                   | CC                              | TT                | 1946515396               |
| SNP_P3_126855_12235 | NW_004516004.1 | Scaffold571 | 12235                   | CC                              | AA                | 1946515398               |
| SNP_P3_126857_17764 | NW_004516004.1 | Scaffold571 | 17764                   | AA                              | TT                | 1946515399               |
| SNP_P3_126858_17784 | NW_004516004.1 | Scaffold571 | 17784                   | CC                              | TT                | 1946515401               |
| SNP_P3_126859_17812 | NW_004516004.1 | Scaffold571 | 17812                   | TT                              | CC                | 1946515402               |
| SNP_P3_126860_18072 | NW_004516004.1 | Scaffold571 | 18072                   | AA                              | TT                | 1946515404               |
| SNP_P3_126861_18095 | NW_004516004.1 | Scaffold571 | 18095                   | GG                              | TT                | 1946515405               |
| SNP_P3_126862_18118 | NW_004516004.1 | Scaffold571 | 18118                   | GG                              | AA                | 1946515407               |
| SNP_P3_126864_18182 | NW_004516004.1 | Scaffold571 | 18182                   | CC                              | TT                | 1946515408               |
| SNP_P3_126865_18211 | NW_004516004.1 | Scaffold571 | 18211                   | CC                              | TT                | 1946515410               |
| SNP_P3_126866_18302 | NW_004516004.1 | Scaffold571 | 18302                   | CC                              | TT                | 1946515412               |
| SNP_P3_126867_18371 | NW_004516004.1 | Scaffold571 | 18371                   | AA                              | TT                | 1946515414               |
| SNP_P3_126868_24471 | NW_004516004.1 | Scaffold571 | 24471                   | TT                              | CC                | 1946515416               |
| SNP_P3_126869_26556 | NW_004516004.1 | Scaffold571 | 26556                   | CC                              | TT                | 1946515417               |
| SNP_P3_126870_26933 | NW_004516004.1 | Scaffold571 | 26933                   | AA                              | GG                | 1946515419               |
| SNP_P3_126871_31023 | NW_004516004.1 | Scaffold571 | 31023                   | AA                              | GG                | 1946515420               |
| SNP_P3_126872_31026 | NW_004516004.1 | Scaffold571 | 31026                   | TT                              | CC                | 1946515422               |
| SNP_P3_126874_31157 | NW_004516004.1 | Scaffold571 | 31157                   | CC                              | TT                | 1946515423               |
| SNP_P3_126875_31168 | NW_004516004.1 | Scaffold571 | 31168                   | AA                              | GG                | 1946515425               |
| SNP_P3_126876_31199 | NW_004516004.1 | Scaffold571 | 31199                   | GG                              | TT                | 1946515426               |
| SNP_P3_126877_31450 | NW_004516004.1 | Scaffold571 | 31450                   | GG                              | CC                | 1946515428               |
| SNP_P3_126878_31457 | NW_004516004.1 | Scaffold571 | 31457                   | TT                              | CC                | 1946515429               |
| SNP_P3_126879_31477 | NW_004516004.1 | Scaffold571 | 31477                   | TT                              | CC                | 1946515431               |
| SNP_P3_126880_31487 | NW_004516004.1 | Scaffold571 | 31487                   | TT                              | AA                | 1946515432               |
| SNP_P3_126881_31500 | NW_004516004.1 | Scaffold571 | 31500                   | GG                              | AA                | 1946515434               |
| SNP_P3_126882_31512 | NW_004516004.1 | Scaffold571 | 31512                   | AA                              | TT                | 1946515435               |
| SNP_P3_126883_31531 | NW_004516004.1 | Scaffold571 | 31531                   | TT                              | GG                | 1946515437               |
| SNP_P3_126884_32335 | NW_004516004.1 | Scaffold571 | 32335                   | TT                              | CC                | 1946515438               |
| SNP_P3_126885_37916 | NW_004516004.1 | Scaffold571 | 37916                   | CC                              | TT                | 1946515440               |
| SNP_P3_126886_40413 | NW_004516004.1 | Scaffold571 | 40413                   | GG                              | TT                | 1946515441               |
| SNP_P3_126887_40583 | NW_004516004.1 | Scaffold571 | 40583                   | GG                              | AA                | 1946515443               |
| SNP_P3_126888_40624 | NW_004516004.1 | Scaffold571 | 40624                   | TT                              | GG                | 1946515444               |
| SNP_P3_126889_40626 | NW_004516004.1 | Scaffold571 | 40626                   | GG                              | CC                | 1946515446               |
| SNP_P3_126890_40778 | NW_004516004.1 | Scaffold571 | 40778                   | TT                              | CC                | 1946515447               |
| SNP_P3_126891_40780 | NW_004516004.1 | Scaffold571 | 40780                   | AA                              | GG                | 1946515448               |
| SNP_P3_126892_40786 | NW_004516004.1 | Scaffold571 | 40786                   | GG                              | AA                | 1946515450               |

| SNPs IDs             | Chromosome IDs | Chromosomes | Physical positions (bp) | CDC Frontier (Reference genome) | (Pusa 256 & HPNB) | NCBI SNPdb Accession IDs |
|----------------------|----------------|-------------|-------------------------|---------------------------------|-------------------|--------------------------|
| SNP_P3_126893_40825  | NW_004516004.1 | Scaffold571 | 40825                   | GG                              | TT                | 1946515451               |
| SNP_P3_126894_40857  | NW_004516004.1 | Scaffold571 | 40857                   | TT                              | CC                | 1946515453               |
| SNP_P3_126895_40858  | NW_004516004.1 | Scaffold571 | 40858                   | CC                              | TT                | 1946515454               |
| SNP_P3_126896_40922  | NW_004516004.1 | Scaffold571 | 40922                   | AA                              | GG                | 1946515456               |
| SNP_P3_126897_41171  | NW_004516004.1 | Scaffold571 | 41171                   | CC                              | TT                | 1946515457               |
| SNP_P3_126898_41226  | NW_004516004.1 | Scaffold571 | 41226                   | GG                              | AA                | 1946515459               |
| SNP_P3_126899_41244  | NW_004516004.1 | Scaffold571 | 41244                   | GG                              | TT                | 1946515460               |
| SNP_P3_126900_53858  | NW_004516004.1 | Scaffold571 | 53858                   | GG                              | TT                | 1946515462               |
| SNP_P3_126901_53868  | NW_004516004.1 | Scaffold571 | 53868                   | AA                              | GG                | 1946515463               |
| SNP_P3_126902_54010  | NW_004516004.1 | Scaffold571 | 54010                   | TT                              | CC                | 1946515465               |
| SNP_P3_126903_61559  | NW_004516004.1 | Scaffold571 | 61559                   | TT                              | GG                | 1946515466               |
| SNP_P3_126904_61566  | NW_004516004.1 | Scaffold571 | 61566                   | CC                              | TT                | 1946515468               |
| SNP_P3_126905_61634  | NW_004516004.1 | Scaffold571 | 61634                   | TT                              | CC                | 1946515469               |
| SNP_P3_126906_62585  | NW_004516004.1 | Scaffold571 | 62585                   | AA                              | CC                | 1946515471               |
| SNP_P3_126907_62645  | NW_004516004.1 | Scaffold571 | 62645                   | CC                              | AA                | 1946515472               |
| SNP_P3_126908_62673  | NW_004516004.1 | Scaffold571 | 62673                   | AA                              | TT                | 1946515474               |
| SNP_P3_126909_62680  | NW_004516004.1 | Scaffold571 | 62680                   | AA                              | CC                | 1946515475               |
| SNP_P3_126910_62711  | NW_004516004.1 | Scaffold571 | 62711                   | CC                              | TT                | 1946515477               |
| SNP_P3_126911_62736  | NW_004516004.1 | Scaffold571 | 62736                   | AA                              | GG                | 1946515478               |
| SNP_P3_126912_62782  | NW_004516004.1 | Scaffold571 | 62782                   | CC                              | TT                | 1946515480               |
| SNP_P3_126913_62950  | NW_004516004.1 | Scaffold571 | 62950                   | TT                              | GG                | 1946515481               |
| SNP_P3_126914_63088  | NW_004516004.1 | Scaffold571 | 63088                   | GG                              | AA                | 1946515483               |
| SNP_P3_126915_63166  | NW_004516004.1 | Scaffold571 | 63166                   | AA                              | GG                | 1946515484               |
| SNP_P3_126917_83552  | NW_004516004.1 | Scaffold571 | 83552                   | AA                              | GG                | 1946515486               |
| SNP_P3_126919_104314 | NW_004516004.1 | Scaffold571 | 104314                  | TT                              | GG                | 1946515488               |
| SNP_P3_126920_104322 | NW_004516004.1 | Scaffold571 | 104322                  | TT                              | CC                | 1946515489               |
| SNP_P3_126921_104392 | NW_004516004.1 | Scaffold571 | 104392                  | AA                              | GG                | 1946515491               |
| SNP_P3_126922_104505 | NW_004516004.1 | Scaffold571 | 104505                  | CC                              | TT                | 1946515492               |
| SNP_P3_126923_104685 | NW_004516004.1 | Scaffold571 | 104685                  | TT                              | AA                | 1946515494               |
| SNP_P3_126924_106173 | NW_004516004.1 | Scaffold571 | 106173                  | AA                              | GG                | 1946515495               |
| SNP_P3_126925_106708 | NW_004516004.1 | Scaffold571 | 106708                  | GG                              | AA                | 1946515497               |
| SNP_P3_126926_106721 | NW_004516004.1 | Scaffold571 | 106721                  | AA                              | GG                | 1946515498               |
| SNP_P3_126927_106777 | NW_004516004.1 | Scaffold571 | 106777                  | CC                              | TT                | 1946515500               |
| SNP_P3_126928_106958 | NW_004516004.1 | Scaffold571 | 106958                  | TT                              | GG                | 1946515501               |
| SNP_P3_126929_107012 | NW_004516004.1 | Scaffold571 | 107012                  | CC                              | AA                | 1946515503               |
| SNP_P3_126930_107026 | NW_004516004.1 | Scaffold571 | 107026                  | CC                              | TT                | 1946515504               |
| SNP_P3_126931_125500 | NW_004516004.1 | Scaffold571 | 125500                  | TT                              | CC                | 1946515506               |
| SNP_P3_126932_125516 | NW_004516004.1 | Scaffold571 | 125516                  | AA                              | GG                | 1946515507               |
| SNP_P3_126933_55     | NW_004516006.1 | Scaffold573 | 55                      | AA                              | TT                | 1946515509               |
| SNP_P3_126934_75     | NW_004516006.1 | Scaffold573 | 75                      | TT                              | GG                | 1946515510               |
| SNP_P3_126935_293    | NW_004516006.1 | Scaffold573 | 293                     | CC                              | TT                | 1946515512               |
| SNP_P3_126936_13681  | NW_004516007.1 | Scaffold574 | 13681                   | CC                              | AA                | 1946515513               |

| SNPs IDs            | Chromosome IDs | Chromosomes | Physical positions (bp) | CDC Frontier (Reference genome) | (Pusa 256 & HPNB) | NCBI SNPdb Accession IDs |
|---------------------|----------------|-------------|-------------------------|---------------------------------|-------------------|--------------------------|
| SNP_P3_126937_32058 | NW_004516007.1 | Scaffold574 | 32058                   | TT                              | GG                | 1946515515               |
| SNP_P3_126938_32079 | NW_004516007.1 | Scaffold574 | 32079                   | GG                              | TT                | 1946515516               |
| SNP_P3_126939_32738 | NW_004516007.1 | Scaffold574 | 32738                   | AA                              | GG                | 1946515518               |
| SNP_P3_126940_32848 | NW_004516007.1 | Scaffold574 | 32848                   | AA                              | TT                | 1946515519               |
| SNP_P3_126941_33666 | NW_004516007.1 | Scaffold574 | 33666                   | CC                              | TT                | 1946515521               |
| SNP_P3_126942_33672 | NW_004516007.1 | Scaffold574 | 33672                   | GG                              | AA                | 1946515522               |
| SNP_P3_126943_43886 | NW_004516007.1 | Scaffold574 | 43886                   | TT                              | AA                | 1946515524               |
| SNP_P3_126944_43906 | NW_004516007.1 | Scaffold574 | 43906                   | CC                              | TT                | 1946515525               |
| SNP_P3_126945_79758 | NW_004516007.1 | Scaffold574 | 79758                   | CC                              | TT                | 1946515527               |
| SNP_P3_126946_79824 | NW_004516007.1 | Scaffold574 | 79824                   | CC                              | TT                | 1946515528               |
| SNP_P3_126947_80166 | NW_004516007.1 | Scaffold574 | 80166                   | AA                              | GG                | 1946515530               |
| SNP_P3_126948_80195 | NW_004516007.1 | Scaffold574 | 80195                   | AA                              | GG                | 1946515531               |
| SNP_P3_126949_80218 | NW_004516007.1 | Scaffold574 | 80218                   | AA                              | GG                | 1946515533               |
| SNP_P3_126950_91745 | NW_004516007.1 | Scaffold574 | 91745                   | CC                              | TT                | 1946515534               |
| SNP_P3_126951_93740 | NW_004516007.1 | Scaffold574 | 93740                   | GG                              | TT                | 1946515536               |
| SNP_P3_126952_93823 | NW_004516007.1 | Scaffold574 | 93823                   | AA                              | TT                | 1946515537               |
| SNP_P3_126953_94485 | NW_004516007.1 | Scaffold574 | 94485                   | AA                              | GG                | 1946515539               |
| SNP_P3_126954_94506 | NW_004516007.1 | Scaffold574 | 94506                   | AA                              | GG                | 1946515540               |
| SNP_P3_126955_94518 | NW_004516007.1 | Scaffold574 | 94518                   | AA                              | GG                | 1946515542               |
| SNP_P3_126957_94530 | NW_004516007.1 | Scaffold574 | 94530                   | GG                              | TT                | 1946515543               |
| SNP_P3_126958_94532 | NW_004516007.1 | Scaffold574 | 94532                   | TT                              | AA                | 1946515545               |
| SNP_P3_126959_6093  | NW_004516008.1 | Scaffold575 | 6093                    | AA                              | GG                | 1946515546               |
| SNP_P3_126960_47286 | NW_004516008.1 | Scaffold575 | 47286                   | TT                              | CC                | 1946515548               |
| SNP_P3_126961_47707 | NW_004516008.1 | Scaffold575 | 47707                   | AA                              | GG                | 1946515549               |
| SNP_P3_126962_64946 | NW_004516008.1 | Scaffold575 | 64946                   | AA                              | GG                | 1946515551               |
| SNP_P3_126963_65002 | NW_004516008.1 | Scaffold575 | 65002                   | GG                              | AA                | 1946515552               |
| SNP_P3_126964_65101 | NW_004516008.1 | Scaffold575 | 65101                   | GG                              | TT                | 1946515554               |
| SNP_P3_126966_65168 | NW_004516008.1 | Scaffold575 | 65168                   | GG                              | AA                | 1946515555               |
| SNP_P3_126967_65182 | NW_004516008.1 | Scaffold575 | 65182                   | TT                              | GG                | 1946515557               |
| SNP_P3_126968_65237 | NW_004516008.1 | Scaffold575 | 65237                   | TT                              | GG                | 1946515558               |
| SNP_P3_126969_65246 | NW_004516008.1 | Scaffold575 | 65246                   | TT                              | CC                | 1946515560               |
| SNP_P3_126970_65375 | NW_004516008.1 | Scaffold575 | 65375                   | AA                              | GG                | 1946515561               |
| SNP_P3_126971_65442 | NW_004516008.1 | Scaffold575 | 65442                   | GG                              | AA                | 1946515563               |
| SNP_P3_126972_65466 | NW_004516008.1 | Scaffold575 | 65466                   | TT                              | GG                | 1946515564               |
| SNP_P3_126973_65563 | NW_004516008.1 | Scaffold575 | 65563                   | GG                              | AA                | 1946515566               |
| SNP_P3_126974_65696 | NW_004516008.1 | Scaffold575 | 65696                   | CC                              | AA                | 1946515567               |
| SNP_P3_126975_65784 | NW_004516008.1 | Scaffold575 | 65784                   | CC                              | TT                | 1946515569               |
| SNP_P3_126976_65832 | NW_004516008.1 | Scaffold575 | 65832                   | GG                              | AA                | 1946515570               |
| SNP_P3_126977_65842 | NW_004516008.1 | Scaffold575 | 65842                   | AA                              | CC                | 1946515571               |
| SNP_P3_126978_65847 | NW_004516008.1 | Scaffold575 | 65847                   | TT                              | GG                | 1946515573               |
| SNP_P3_126979_65882 | NW_004516008.1 | Scaffold575 | 65882                   | TT                              | CC                | 1946515574               |
| SNP_P3_126980_65973 | NW_004516008.1 | Scaffold575 | 65973                   | CC                              | AA                | 1946515576               |

| SNPs IDs            | Chromosome IDs | Chromosomes | Physical positions (bp) | CDC Frontier (Reference genome) | (Pusa 256 & HPNB) | NCBI SNPdb Accession IDs |
|---------------------|----------------|-------------|-------------------------|---------------------------------|-------------------|--------------------------|
| SNP_P3_126981_65992 | NW_004516008.1 | Scaffold575 | 65992                   | AA                              | CC                | 1946515577               |
| SNP_P3_126982_66388 | NW_004516008.1 | Scaffold575 | 66388                   | CC                              | TT                | 1946515579               |
| SNP_P3_126983_66415 | NW_004516008.1 | Scaffold575 | 66415                   | AA                              | CC                | 1946515581               |
| SNP_P3_126984_66450 | NW_004516008.1 | Scaffold575 | 66450                   | AA                              | CC                | 1946515582               |
| SNP_P3_126985_66494 | NW_004516008.1 | Scaffold575 | 66494                   | CC                              | TT                | 1946515584               |
| SNP_P3_126986_66529 | NW_004516008.1 | Scaffold575 | 66529                   | TT                              | GG                | 1946515585               |
| SNP_P3_126987_66593 | NW_004516008.1 | Scaffold575 | 66593                   | TT                              | CC                | 1946515587               |
| SNP_P3_126988_66624 | NW_004516008.1 | Scaffold575 | 66624                   | AA                              | GG                | 1946515588               |
| SNP_P3_126989_66626 | NW_004516008.1 | Scaffold575 | 66626                   | TT                              | GG                | 1946515590               |
| SNP_P3_126990_66644 | NW_004516008.1 | Scaffold575 | 66644                   | CC                              | TT                | 1946515591               |
| SNP_P3_126991_66685 | NW_004516008.1 | Scaffold575 | 66685                   | GG                              | AA                | 1946515593               |
| SNP_P3_126992_66697 | NW_004516008.1 | Scaffold575 | 66697                   | TT                              | CC                | 1946515594               |
| SNP_P3_126993_66729 | NW_004516008.1 | Scaffold575 | 66729                   | AA                              | GG                | 1946515596               |
| SNP_P3_126994_66764 | NW_004516008.1 | Scaffold575 | 66764                   | TT                              | CC                | 1946515598               |
| SNP_P3_126995_66775 | NW_004516008.1 | Scaffold575 | 66775                   | AA                              | GG                | 1946515599               |
| SNP_P3_126997_66864 | NW_004516008.1 | Scaffold575 | 66864                   | GG                              | AA                | 1946515601               |
| SNP_P3_126999_67047 | NW_004516008.1 | Scaffold575 | 67047                   | TT                              | GG                | 1946515602               |
| SNP_P3_127000_67272 | NW_004516008.1 | Scaffold575 | 67272                   | TT                              | GG                | 1946515604               |
| SNP_P3_127001_67296 | NW_004516008.1 | Scaffold575 | 67296                   | GG                              | TT                | 1946515605               |
| SNP_P3_127002_67327 | NW_004516008.1 | Scaffold575 | 67327                   | TT                              | CC                | 1946515607               |
| SNP_P3_127003_67333 | NW_004516008.1 | Scaffold575 | 67333                   | GG                              | TT                | 1946515608               |
| SNP_P3_127004_67363 | NW_004516008.1 | Scaffold575 | 67363                   | AA                              | GG                | 1946515610               |
| SNP_P3_127005_67375 | NW_004516008.1 | Scaffold575 | 67375                   | AA                              | GG                | 1946515611               |
| SNP_P3_127006_67580 | NW_004516008.1 | Scaffold575 | 67580                   | GG                              | TT                | 1946515613               |
| SNP_P3_127007_67611 | NW_004516008.1 | Scaffold575 | 67611                   | TT                              | CC                | 1946515614               |
| SNP_P3_127008_67617 | NW_004516008.1 | Scaffold575 | 67617                   | GG                              | TT                | 1946515616               |
| SNP_P3_127009_67636 | NW_004516008.1 | Scaffold575 | 67636                   | TT                              | GG                | 1946515617               |
| SNP_P3_127010_67637 | NW_004516008.1 | Scaffold575 | 67637                   | GG                              | AA                | 1946515619               |
| SNP_P3_127011_67724 | NW_004516008.1 | Scaffold575 | 67724                   | CC                              | TT                | 1946515620               |
| SNP_P3_127012_67751 | NW_004516008.1 | Scaffold575 | 67751                   | TT                              | AA                | 1946515622               |
| SNP_P3_127013_67766 | NW_004516008.1 | Scaffold575 | 67766                   | AA                              | GG                | 1946515623               |
| SNP_P3_127014_67790 | NW_004516008.1 | Scaffold575 | 67790                   | AA                              | GG                | 1946515626               |
| SNP_P3_127016_67889 | NW_004516008.1 | Scaffold575 | 67889                   | TT                              | GG                | 1946515627               |
| SNP_P3_127017_67932 | NW_004516008.1 | Scaffold575 | 67932                   | TT                              | CC                | 1946515629               |
| SNP_P3_127018_67973 | NW_004516008.1 | Scaffold575 | 67973                   | AA                              | GG                | 1946515631               |
| SNP_P3_127019_68015 | NW_004516008.1 | Scaffold575 | 68015                   | CC                              | AA                | 1946515632               |
| SNP_P3_127020_68048 | NW_004516008.1 | Scaffold575 | 68048                   | CC                              | AA                | 1946515634               |
| SNP_P3_127021_68062 | NW_004516008.1 | Scaffold575 | 68062                   | AA                              | GG                | 1946515635               |
| SNP_P3_127022_68063 | NW_004516008.1 | Scaffold575 | 68063                   | AA                              | GG                | 1946515637               |
| SNP_P3_127023_68088 | NW_004516008.1 | Scaffold575 | 68088                   | TT                              | AA                | 1946515638               |
| SNP_P3_127024_68105 | NW_004516008.1 | Scaffold575 | 68105                   | AA                              | TT                | 1946515640               |
| SNP_P3_127025_68127 | NW_004516008.1 | Scaffold575 | 68127                   | CC                              | TT                | 1946515641               |

| SNPs IDs            | Chromosome IDs | Chromosomes | Physical positions (bp) | CDC Frontier (Reference genome) | (Pusa 256 & HPNB) | NCBI SNPdb Accession IDs |
|---------------------|----------------|-------------|-------------------------|---------------------------------|-------------------|--------------------------|
| SNP_P3_127026_68154 | NW_004516008.1 | Scaffold575 | 68154                   | GG                              | AA                | 1946515643               |
| SNP_P3_127027_68156 | NW_004516008.1 | Scaffold575 | 68156                   | CC                              | AA                | 1946515644               |
| SNP_P3_127028_68160 | NW_004516008.1 | Scaffold575 | 68160                   | TT                              | AA                | 1946515646               |
| SNP_P3_127029_68169 | NW_004516008.1 | Scaffold575 | 68169                   | GG                              | TT                | 1946515647               |
| SNP_P3_127030_68261 | NW_004516008.1 | Scaffold575 | 68261                   | GG                              | AA                | 1946515649               |
| SNP_P3_127031_68264 | NW_004516008.1 | Scaffold575 | 68264                   | AA                              | GG                | 1946515650               |
| SNP_P3_127032_69569 | NW_004516008.1 | Scaffold575 | 69569                   | CC                              | TT                | 1946515652               |
| SNP_P3_127033_69584 | NW_004516008.1 | Scaffold575 | 69584                   | AA                              | CC                | 1946515653               |
| SNP_P3_127035_69781 | NW_004516008.1 | Scaffold575 | 69781                   | GG                              | AA                | 1946515654               |
| SNP_P3_127036_69966 | NW_004516008.1 | Scaffold575 | 69966                   | AA                              | CC                | 1946515656               |
| SNP_P3_127037_71009 | NW_004516008.1 | Scaffold575 | 71009                   | TT                              | GG                | 1946515658               |
| SNP_P3_127038_71592 | NW_004516008.1 | Scaffold575 | 71592                   | CC                              | TT                | 1946515659               |
| SNP_P3_127039_71665 | NW_004516008.1 | Scaffold575 | 71665                   | GG                              | AA                | 1946515661               |
| SNP_P3_127040_73662 | NW_004516008.1 | Scaffold575 | 73662                   | CC                              | TT                | 1946515662               |
| SNP_P3_127041_73677 | NW_004516008.1 | Scaffold575 | 73677                   | CC                              | AA                | 1946515664               |
| SNP_P3_127042_80327 | NW_004516008.1 | Scaffold575 | 80327                   | TT                              | CC                | 1946515665               |
| SNP_P3_127043_80720 | NW_004516008.1 | Scaffold575 | 80720                   | TT                              | GG                | 1946515667               |
| SNP_P3_127044_80763 | NW_004516008.1 | Scaffold575 | 80763                   | CC                              | TT                | 1946515668               |
| SNP_P3_127046_82372 | NW_004516008.1 | Scaffold575 | 82372                   | GG                              | AA                | 1946515670               |
| SNP_P3_127047_82540 | NW_004516008.1 | Scaffold575 | 82540                   | GG                              | AA                | 1946515671               |
| SNP_P3_127048_82597 | NW_004516008.1 | Scaffold575 | 82597                   | AA                              | CC                | 1946515673               |
| SNP_P3_127049_82643 | NW_004516008.1 | Scaffold575 | 82643                   | AA                              | GG                | 1946515674               |
| SNP_P3_127050_82655 | NW_004516008.1 | Scaffold575 | 82655                   | CC                              | TT                | 1946515676               |
| SNP_P3_127051_82667 | NW_004516008.1 | Scaffold575 | 82667                   | AA                              | GG                | 1946515677               |
| SNP_P3_127052_82772 | NW_004516008.1 | Scaffold575 | 82772                   | AA                              | GG                | 1946515679               |
| SNP_P3_127053_82776 | NW_004516008.1 | Scaffold575 | 82776                   | CC                              | GG                | 1946515680               |
| SNP_P3_127054_82789 | NW_004516008.1 | Scaffold575 | 82789                   | AA                              | GG                | 1946515682               |
| SNP_P3_127057_82856 | NW_004516008.1 | Scaffold575 | 82856                   | GG                              | CC                | 1946515683               |
| SNP_P3_127060_82943 | NW_004516008.1 | Scaffold575 | 82943                   | AA                              | GG                | 1946515685               |
| SNP_P3_127061_82973 | NW_004516008.1 | Scaffold575 | 82973                   | AA                              | TT                | 1946515686               |
| SNP_P3_127063_83191 | NW_004516008.1 | Scaffold575 | 83191                   | GG                              | AA                | 1946515688               |
| SNP_P3_127064_83203 | NW_004516008.1 | Scaffold575 | 83203                   | GG                              | AA                | 1946515689               |
| SNP_P3_127066_83934 | NW_004516008.1 | Scaffold575 | 83934                   | CC                              | GG                | 1946515691               |
| SNP_P3_127067_83947 | NW_004516008.1 | Scaffold575 | 83947                   | AA                              | CC                | 1946515692               |
| SNP_P3_127069_88343 | NW_004516008.1 | Scaffold575 | 88343                   | AA                              | TT                | 1946515694               |
| SNP_P3_127070_88871 | NW_004516008.1 | Scaffold575 | 88871                   | AA                              | GG                | 1946515695               |
| SNP_P3_127071_89711 | NW_004516008.1 | Scaffold575 | 89711                   | GG                              | TT                | 1946515697               |
| SNP_P3_127072_89843 | NW_004516008.1 | Scaffold575 | 89843                   | GG                              | AA                | 1946515698               |
| SNP_P3_127073_89854 | NW_004516008.1 | Scaffold575 | 89854                   | TT                              | CC                | 1946515700               |
| SNP_P3_127074_89883 | NW_004516008.1 | Scaffold575 | 89883                   | TT                              | GG                | 1946515702               |
| SNP_P3_127075_89903 | NW_004516008.1 | Scaffold575 | 89903                   | TT                              | AA                | 1946515703               |
| SNP_P3_127077_90084 | NW_004516008.1 | Scaffold575 | 90084                   | GG                              | AA                | 1946515705               |

| SNPs IDs            | Chromosome IDs | Chromosomes | Physical positions (bp) | CDC Frontier (Reference genome) | (Pusa 256 & HPNB) | NCBI SNPdb Accession IDs |
|---------------------|----------------|-------------|-------------------------|---------------------------------|-------------------|--------------------------|
| SNP_P3_127078_90115 | NW_004516008.1 | Scaffold575 | 90115                   | TT                              | GG                | 1946515706               |
| SNP_P3_127079_90151 | NW_004516008.1 | Scaffold575 | 90151                   | TT                              | CC                | 1946515708               |
| SNP_P3_127081_90365 | NW_004516008.1 | Scaffold575 | 90365                   | TT                              | CC                | 1946515709               |
| SNP_P3_127082_90491 | NW_004516008.1 | Scaffold575 | 90491                   | TT                              | CC                | 1946515711               |
| SNP_P3_127083_90653 | NW_004516008.1 | Scaffold575 | 90653                   | GG                              | AA                | 1946515712               |
| SNP_P3_127085_90926 | NW_004516008.1 | Scaffold575 | 90926                   | GG                              | AA                | 1946515714               |
| SNP_P3_127086_90959 | NW_004516008.1 | Scaffold575 | 90959                   | TT                              | AA                | 1946515715               |
| SNP_P3_127088_91063 | NW_004516008.1 | Scaffold575 | 91063                   | CC                              | TT                | 1946515717               |
| SNP_P3_127089_91159 | NW_004516008.1 | Scaffold575 | 91159                   | GG                              | AA                | 1946515718               |
| SNP_P3_127090_91197 | NW_004516008.1 | Scaffold575 | 91197                   | GG                              | AA                | 1946515720               |
| SNP_P3_127091_91247 | NW_004516008.1 | Scaffold575 | 91247                   | TT                              | AA                | 1946515721               |
| SNP_P3_127092_91253 | NW_004516008.1 | Scaffold575 | 91253                   | CC                              | AA                | 1946515723               |
| SNP_P3_127093_91326 | NW_004516008.1 | Scaffold575 | 91326                   | CC                              | TT                | 1946515724               |
| SNP_P3_127095_92155 | NW_004516008.1 | Scaffold575 | 92155                   | AA                              | GG                | 1946515726               |
| SNP_P3_127096_92157 | NW_004516008.1 | Scaffold575 | 92157                   | AA                              | GG                | 1946515727               |
| SNP_P3_127097_92163 | NW_004516008.1 | Scaffold575 | 92163                   | TT                              | GG                | 1946515729               |
| SNP_P3_127098_92184 | NW_004516008.1 | Scaffold575 | 92184                   | GG                              | CC                | 1946515730               |
| SNP_P3_127099_92202 | NW_004516008.1 | Scaffold575 | 92202                   | TT                              | CC                | 1946515732               |
| SNP_P3_127100_92211 | NW_004516008.1 | Scaffold575 | 92211                   | GG                              | AA                | 1946515733               |
| SNP_P3_127101_92748 | NW_004516008.1 | Scaffold575 | 92748                   | TT                              | GG                | 1946515734               |
| SNP_P3_127102_92798 | NW_004516008.1 | Scaffold575 | 92798                   | AA                              | TT                | 1946515736               |
| SNP_P3_127103_92804 | NW_004516008.1 | Scaffold575 | 92804                   | TT                              | CC                | 1946515737               |
| SNP_P3_127104_92840 | NW_004516008.1 | Scaffold575 | 92840                   | TT                              | CC                | 1946515739               |
| SNP_P3_127105_92864 | NW_004516008.1 | Scaffold575 | 92864                   | TT                              | GG                | 1946515740               |
| SNP_P3_127107_92982 | NW_004516008.1 | Scaffold575 | 92982                   | GG                              | TT                | 1946515742               |
| SNP_P3_127108_92985 | NW_004516008.1 | Scaffold575 | 92985                   | TT                              | CC                | 1946515743               |
| SNP_P3_127109_92998 | NW_004516008.1 | Scaffold575 | 92998                   | AA                              | GG                | 1946515745               |
| SNP_P3_127110_92999 | NW_004516008.1 | Scaffold575 | 92999                   | TT                              | CC                | 1946515747               |
| SNP_P3_127111_93012 | NW_004516008.1 | Scaffold575 | 93012                   | TT                              | CC                | 1946515748               |
| SNP_P3_127112_93030 | NW_004516008.1 | Scaffold575 | 93030                   | AA                              | GG                | 1946515750               |
| SNP_P3_127113_96165 | NW_004516008.1 | Scaffold575 | 96165                   | TT                              | CC                | 1946515751               |
| SNP_P3_127114_96180 | NW_004516008.1 | Scaffold575 | 96180                   | CC                              | TT                | 1946515753               |
| SNP_P3_127115_96284 | NW_004516008.1 | Scaffold575 | 96284                   | AA                              | GG                | 1946515754               |
| SNP_P3_127116_96353 | NW_004516008.1 | Scaffold575 | 96353                   | CC                              | TT                | 1946515755               |
| SNP_P3_127117_96361 | NW_004516008.1 | Scaffold575 | 96361                   | CC                              | TT                | 1946515757               |
| SNP_P3_127118_96366 | NW_004516008.1 | Scaffold575 | 96366                   | GG                              | AA                | 1946515758               |
| SNP_P3_127119_96561 | NW_004516008.1 | Scaffold575 | 96561                   | AA                              | CC                | 1946515760               |
| SNP_P3_127120_96575 | NW_004516008.1 | Scaffold575 | 96575                   | AA                              | GG                | 1946515762               |
| SNP_P3_127121_98323 | NW_004516008.1 | Scaffold575 | 98323                   | AA                              | GG                | 1946515763               |
| SNP_P3_127122_98447 | NW_004516008.1 | Scaffold575 | 98447                   | GG                              | AA                | 1946515765               |
| SNP_P3_127123_98481 | NW_004516008.1 | Scaffold575 | 98481                   | AA                              | GG                | 1946515767               |
| SNP_P3_127124_98491 | NW_004516008.1 | Scaffold575 | 98491                   | GG                              | AA                | 1946515768               |

| SNPs IDs            | Chromosome IDs | Chromosomes | Physical positions (bp) | CDC Frontier (Reference genome) | (Pusa 256 & HPNB) | NCBI SNPdb Accession IDs |
|---------------------|----------------|-------------|-------------------------|---------------------------------|-------------------|--------------------------|
| SNP_P3_127125_98557 | NW_004516008.1 | Scaffold575 | 98557                   | CC                              | TT                | 1946515770               |
| SNP_P3_127126_98560 | NW_004516008.1 | Scaffold575 | 98560                   | GG                              | TT                | 1946515771               |
| SNP_P3_127127_98598 | NW_004516008.1 | Scaffold575 | 98598                   | TT                              | GG                | 1946515773               |
| SNP_P3_127128_98610 | NW_004516008.1 | Scaffold575 | 98610                   | AA                              | GG                | 1946515774               |
| SNP_P3_127129_98734 | NW_004516008.1 | Scaffold575 | 98734                   | GG                              | AA                | 1946515776               |
| SNP_P3_127130_98754 | NW_004516008.1 | Scaffold575 | 98754                   | AA                              | GG                | 1946515778               |
| SNP_P3_127132_98815 | NW_004516008.1 | Scaffold575 | 98815                   | CC                              | TT                | 1946515779               |
| SNP_P3_127133_98888 | NW_004516008.1 | Scaffold575 | 98888                   | AA                              | TT                | 1946515781               |
| SNP_P3_127134_98901 | NW_004516008.1 | Scaffold575 | 98901                   | AA                              | GG                | 1946515782               |
| SNP_P3_127135_98910 | NW_004516008.1 | Scaffold575 | 98910                   | TT                              | GG                | 1946515784               |
| SNP_P3_127136_98965 | NW_004516008.1 | Scaffold575 | 98965                   | GG                              | TT                | 1946515785               |
| SNP_P3_127137_98969 | NW_004516008.1 | Scaffold575 | 98969                   | AA                              | GG                | 1946515787               |
| SNP_P3_127138_99040 | NW_004516008.1 | Scaffold575 | 99040                   | AA                              | GG                | 1946515788               |
| SNP_P3_127139_99070 | NW_004516008.1 | Scaffold575 | 99070                   | TT                              | CC                | 1946515790               |
| SNP_P3_127140_99119 | NW_004516008.1 | Scaffold575 | 99119                   | TT                              | AA                | 1946515791               |
| SNP_P3_127141_99120 | NW_004516008.1 | Scaffold575 | 99120                   | TT                              | GG                | 1946515793               |
| SNP_P3_127142_99124 | NW_004516008.1 | Scaffold575 | 99124                   | AA                              | CC                | 1946515794               |
| SNP_P3_127143_99129 | NW_004516008.1 | Scaffold575 | 99129                   | TT                              | CC                | 1946515796               |
| SNP_P3_127144_99133 | NW_004516008.1 | Scaffold575 | 99133                   | CC                              | TT                | 1946515798               |
| SNP_P3_127145_99155 | NW_004516008.1 | Scaffold575 | 99155                   | TT                              | CC                | 1946515799               |
| SNP_P3_127146_99173 | NW_004516008.1 | Scaffold575 | 99173                   | TT                              | CC                | 1946515801               |
| SNP_P3_127148_99205 | NW_004516008.1 | Scaffold575 | 99205                   | AA                              | GG                | 1946515802               |
| SNP_P3_127149_99320 | NW_004516008.1 | Scaffold575 | 99320                   | AA                              | GG                | 1946515804               |
| SNP_P3_127150_99375 | NW_004516008.1 | Scaffold575 | 99375                   | AA                              | GG                | 1946515806               |
| SNP_P3_127151_99378 | NW_004516008.1 | Scaffold575 | 99378                   | CC                              | TT                | 1946515807               |
| SNP_P3_127152_99381 | NW_004516008.1 | Scaffold575 | 99381                   | CC                              | TT                | 1946515809               |
| SNP_P3_127153_99447 | NW_004516008.1 | Scaffold575 | 99447                   | CC                              | AA                | 1946515810               |
| SNP_P3_127154_99449 | NW_004516008.1 | Scaffold575 | 99449                   | GG                              | AA                | 1946515812               |
| SNP_P3_127155_99481 | NW_004516008.1 | Scaffold575 | 99481                   | GG                              | TT                | 1946515814               |
| SNP_P3_127157_99668 | NW_004516008.1 | Scaffold575 | 99668                   | TT                              | CC                | 1946515815               |
| SNP_P3_127158_99728 | NW_004516008.1 | Scaffold575 | 99728                   | AA                              | GG                | 1946515817               |
| SNP_P3_127159_99762 | NW_004516008.1 | Scaffold575 | 99762                   | GG                              | CC                | 1946515818               |
| SNP_P3_127160_99809 | NW_004516008.1 | Scaffold575 | 99809                   | AA                              | GG                | 1946515820               |
| SNP_P3_127161_99810 | NW_004516008.1 | Scaffold575 | 99810                   | AA                              | GG                | 1946515821               |
| SNP_P3_127162_99825 | NW_004516008.1 | Scaffold575 | 99825                   | AA                              | GG                | 1946515823               |
| SNP_P3_127163_99867 | NW_004516008.1 | Scaffold575 | 99867                   | GG                              | AA                | 1946515825               |
| SNP_P3_127164_99882 | NW_004516008.1 | Scaffold575 | 99882                   | AA                              | CC                | 1946515826               |
| SNP_P3_127165_99924 | NW_004516008.1 | Scaffold575 | 99924                   | TT                              | GG                | 1946515828               |
| SNP_P3_127166_99925 | NW_004516008.1 | Scaffold575 | 99925                   | AA                              | CC                | 1946515829               |
| SNP_P3_127167_99955 | NW_004516008.1 | Scaffold575 | 99955                   | CC                              | TT                | 1946515831               |
| SNP_P3_127168_99959 | NW_004516008.1 | Scaffold575 | 99959                   | AA                              | GG                | 1946515833               |
| SNP_P3_127169_99980 | NW_004516008.1 | Scaffold575 | 99980                   | TT                              | AA                | 1946515835               |

| SNPs IDs             | Chromosome IDs | Chromosomes | Physical positions (bp) | CDC Frontier (Reference genome) | (Pusa 256 & HPNB) | NCBI SNPdb Accession IDs |
|----------------------|----------------|-------------|-------------------------|---------------------------------|-------------------|--------------------------|
| SNP_P3_127170_100001 | NW_004516008.1 | Scaffold575 | 100001                  | AA                              | CC                | 1946515836               |
| SNP_P3_127171_100023 | NW_004516008.1 | Scaffold575 | 100023                  | AA                              | GG                | 1946515838               |
| SNP_P3_127172_100034 | NW_004516008.1 | Scaffold575 | 100034                  | GG                              | TT                | 1946515839               |
| SNP_P3_127173_100064 | NW_004516008.1 | Scaffold575 | 100064                  | CC                              | TT                | 1946515841               |
| SNP_P3_127174_100070 | NW_004516008.1 | Scaffold575 | 100070                  | CC                              | GG                | 1946515843               |
| SNP_P3_127175_100097 | NW_004516008.1 | Scaffold575 | 100097                  | TT                              | CC                | 1946515844               |
| SNP_P3_127176_100175 | NW_004516008.1 | Scaffold575 | 100175                  | AA                              | GG                | 1946515846               |
| SNP_P3_127177_100191 | NW_004516008.1 | Scaffold575 | 100191                  | AA                              | CC                | 1946515847               |
| SNP_P3_127178_100197 | NW_004516008.1 | Scaffold575 | 100197                  | TT                              | CC                | 1946515849               |
| SNP_P3_127179_100200 | NW_004516008.1 | Scaffold575 | 100200                  | AA                              | GG                | 1946515851               |
| SNP_P3_127180_100227 | NW_004516008.1 | Scaffold575 | 100227                  | CC                              | AA                | 1946515853               |
| SNP_P3_127181_100278 | NW_004516008.1 | Scaffold575 | 100278                  | AA                              | CC                | 1946515854               |
| SNP_P3_127182_100297 | NW_004516008.1 | Scaffold575 | 100297                  | AA                              | CC                | 1946515856               |
| SNP_P3_127183_100353 | NW_004516008.1 | Scaffold575 | 100353                  | TT                              | GG                | 1946515858               |
| SNP_P3_127184_100391 | NW_004516008.1 | Scaffold575 | 100391                  | AA                              | CC                | 1946515859               |
| SNP_P3_127185_100481 | NW_004516008.1 | Scaffold575 | 100481                  | TT                              | CC                | 1946515861               |
| SNP_P3_127186_100551 | NW_004516008.1 | Scaffold575 | 100551                  | TT                              | CC                | 1946515863               |
| SNP_P3_127187_100576 | NW_004516008.1 | Scaffold575 | 100576                  | GG                              | AA                | 1946515864               |
| SNP_P3_127188_100603 | NW_004516008.1 | Scaffold575 | 100603                  | AA                              | GG                | 1946515866               |
| SNP_P3_127189_100611 | NW_004516008.1 | Scaffold575 | 100611                  | TT                              | GG                | 1946515867               |
| SNP_P3_127190_100619 | NW_004516008.1 | Scaffold575 | 100619                  | TT                              | GG                | 1946515869               |
| SNP_P3_127191_100632 | NW_004516008.1 | Scaffold575 | 100632                  | AA                              | GG                | 1946515870               |
| SNP_P3_127192_100639 | NW_004516008.1 | Scaffold575 | 100639                  | AA                              | GG                | 1946515872               |
| SNP_P3_127193_100648 | NW_004516008.1 | Scaffold575 | 100648                  | AA                              | GG                | 1946515874               |
| SNP_P3_127194_100709 | NW_004516008.1 | Scaffold575 | 100709                  | CC                              | AA                | 1946515875               |
| SNP_P3_127195_100983 | NW_004516008.1 | Scaffold575 | 100983                  | AA                              | GG                | 1946515877               |
| SNP_P3_127196_101000 | NW_004516008.1 | Scaffold575 | 101000                  | AA                              | CC                | 1946515878               |
| SNP_P3_127197_101011 | NW_004516008.1 | Scaffold575 | 101011                  | AA                              | GG                | 1946515880               |
| SNP_P3_127198_101032 | NW_004516008.1 | Scaffold575 | 101032                  | TT                              | CC                | 1946515881               |
| SNP_P3_127199_101056 | NW_004516008.1 | Scaffold575 | 101056                  | TT                              | AA                | 1946515883               |
| SNP_P3_127200_101129 | NW_004516008.1 | Scaffold575 | 101129                  | AA                              | CC                | 1946515885               |
| SNP_P3_127201_101132 | NW_004516008.1 | Scaffold575 | 101132                  | GG                              | CC                | 1946515888               |
| SNP_P3_127202_101175 | NW_004516008.1 | Scaffold575 | 101175                  | AA                              | GG                | 1946515889               |
| SNP_P3_127203_101180 | NW_004516008.1 | Scaffold575 | 101180                  | AA                              | CC                | 1946515891               |
| SNP_P3_127204_101188 | NW_004516008.1 | Scaffold575 | 101188                  | AA                              | GG                | 1946515893               |
| SNP_P3_127205_101340 | NW_004516008.1 | Scaffold575 | 101340                  | TT                              | CC                | 1946515895               |
| SNP_P3_127206_101439 | NW_004516008.1 | Scaffold575 | 101439                  | AA                              | GG                | 1946515896               |
| SNP_P3_127207_101443 | NW_004516008.1 | Scaffold575 | 101443                  | CC                              | TT                | 1946515898               |
| SNP_P3_127208_101492 | NW_004516008.1 | Scaffold575 | 101492                  | AA                              | CC                | 1946515900               |
| SNP_P3_127209_101530 | NW_004516008.1 | Scaffold575 | 101530                  | AA                              | CC                | 1946515901               |
| SNP_P3_127210_101539 | NW_004516008.1 | Scaffold575 | 101539                  | TT                              | CC                | 1946515903               |
| SNP_P3_127211_101540 | NW_004516008.1 | Scaffold575 | 101540                  | TT                              | GG                | 1946515905               |



| SNPs IDs             | Chromosome IDs | Chromosomes | Physical positions (bp) | CDC Frontier (Reference genome) | (Pusa 256 & HPNB) | NCBI SNPdb Accession IDs |
|----------------------|----------------|-------------|-------------------------|---------------------------------|-------------------|--------------------------|
| SNP_P3_127212_101544 | NW_004516008.1 | Scaffold575 | 101544                  | AA                              | GG                | 1946515906               |
| SNP_P3_127213_101546 | NW_004516008.1 | Scaffold575 | 101546                  | AA                              | GG                | 1946515908               |
| SNP_P3_127214_101565 | NW_004516008.1 | Scaffold575 | 101565                  | TT                              | AA                | 1946515910               |
| SNP_P3_127215_101586 | NW_004516008.1 | Scaffold575 | 101586                  | AA                              | GG                | 1946515911               |
| SNP_P3_127216_101595 | NW_004516008.1 | Scaffold575 | 101595                  | GG                              | CC                | 1946515913               |
| SNP_P3_127217_101598 | NW_004516008.1 | Scaffold575 | 101598                  | TT                              | CC                | 1946515914               |
| SNP_P3_127218_101640 | NW_004516008.1 | Scaffold575 | 101640                  | AA                              | GG                | 1946515916               |
| SNP_P3_127219_101643 | NW_004516008.1 | Scaffold575 | 101643                  | TT                              | GG                | 1946515918               |
| SNP_P3_127220_101654 | NW_004516008.1 | Scaffold575 | 101654                  | AA                              | GG                | 1946515919               |
| SNP_P3_127221_101711 | NW_004516008.1 | Scaffold575 | 101711                  | AA                              | CC                | 1946515921               |
| SNP_P3_127222_101718 | NW_004516008.1 | Scaffold575 | 101718                  | TT                              | CC                | 1946515923               |
| SNP_P3_127223_101737 | NW_004516008.1 | Scaffold575 | 101737                  | TT                              | GG                | 1946515925               |
| SNP_P3_127224_101744 | NW_004516008.1 | Scaffold575 | 101744                  | AA                              | GG                | 1946515926               |
| SNP_P3_127225_101755 | NW_004516008.1 | Scaffold575 | 101755                  | TT                              | CC                | 1946515928               |
| SNP_P3_127226_101760 | NW_004516008.1 | Scaffold575 | 101760                  | TT                              | CC                | 1946515930               |
| SNP_P3_127227_101836 | NW_004516008.1 | Scaffold575 | 101836                  | TT                              | CC                | 1946515931               |
| SNP_P3_127228_101851 | NW_004516008.1 | Scaffold575 | 101851                  | AA                              | GG                | 1946515933               |
| SNP_P3_127229_101899 | NW_004516008.1 | Scaffold575 | 101899                  | AA                              | GG                | 1946515934               |
| SNP_P3_127230_102097 | NW_004516008.1 | Scaffold575 | 102097                  | TT                              | CC                | 1946515936               |
| SNP_P3_127231_102108 | NW_004516008.1 | Scaffold575 | 102108                  | TT                              | GG                | 1946515938               |
| SNP_P3_127232_102122 | NW_004516008.1 | Scaffold575 | 102122                  | GG                              | AA                | 1946515940               |
| SNP_P3_127233_102155 | NW_004516008.1 | Scaffold575 | 102155                  | GG                              | CC                | 1946515941               |
| SNP_P3_127234_102204 | NW_004516008.1 | Scaffold575 | 102204                  | TT                              | GG                | 1946515943               |
| SNP_P3_127235_102213 | NW_004516008.1 | Scaffold575 | 102213                  | AA                              | GG                | 1946515945               |
| SNP_P3_127236_102725 | NW_004516008.1 | Scaffold575 | 102725                  | TT                              | CC                | 1946515946               |
| SNP_P3_127237_102880 | NW_004516008.1 | Scaffold575 | 102880                  | AA                              | GG                | 1946515948               |
| SNP_P3_127238_102904 | NW_004516008.1 | Scaffold575 | 102904                  | AA                              | GG                | 1946515950               |
| SNP_P3_127239_102908 | NW_004516008.1 | Scaffold575 | 102908                  | TT                              | CC                | 1946515951               |
| SNP_P3_127240_102922 | NW_004516008.1 | Scaffold575 | 102922                  | AA                              | GG                | 1946515953               |
| SNP_P3_127241_103125 | NW_004516008.1 | Scaffold575 | 103125                  | CC                              | TT                | 1946515955               |
| SNP_P3_127242_103144 | NW_004516008.1 | Scaffold575 | 103144                  | AA                              | TT                | 1946515956               |
| SNP_P3_127243_103153 | NW_004516008.1 | Scaffold575 | 103153                  | AA                              | GG                | 1946515958               |
| SNP_P3_127244_103227 | NW_004516008.1 | Scaffold575 | 103227                  | AA                              | GG                | 1946515960               |
| SNP_P3_127246_103301 | NW_004516008.1 | Scaffold575 | 103301                  | TT                              | CC                | 1946515961               |
| SNP_P3_127247_103318 | NW_004516008.1 | Scaffold575 | 103318                  | AA                              | GG                | 1946515963               |
| SNP_P3_127248_103428 | NW_004516008.1 | Scaffold575 | 103428                  | AA                              | CC                | 1946515964               |
| SNP_P3_127249_103456 | NW_004516008.1 | Scaffold575 | 103456                  | TT                              | CC                | 1946515966               |
| SNP_P3_127250_103457 | NW_004516008.1 | Scaffold575 | 103457                  | AA                              | GG                | 1946515967               |
| SNP_P3_127251_103565 | NW_004516008.1 | Scaffold575 | 103565                  | AA                              | GG                | 1946515969               |
| SNP_P3_127252_103567 | NW_004516008.1 | Scaffold575 | 103567                  | CC                              | TT                | 1946515971               |
| SNP_P3_127253_103629 | NW_004516008.1 | Scaffold575 | 103629                  | TT                              | CC                | 1946515972               |
| SNP_P3_127255_103696 | NW_004516008.1 | Scaffold575 | 103696                  | TT                              | CC                | 1946515974               |

| SNPs IDs             | Chromosome IDs | Chromosomes | Physical positions (bp) | CDC Frontier (Reference genome) | (Pusa 256 & HPNB) | NCBI SNPdb Accession IDs |
|----------------------|----------------|-------------|-------------------------|---------------------------------|-------------------|--------------------------|
| SNP_P3_127256_103706 | NW_004516008.1 | Scaffold575 | 103706                  | GG                              | TT                | 1946515975               |
| SNP_P3_127257_103708 | NW_004516008.1 | Scaffold575 | 103708                  | AA                              | CC                | 1946515977               |
| SNP_P3_127258_103711 | NW_004516008.1 | Scaffold575 | 103711                  | TT                              | CC                | 1946515979               |
| SNP_P3_127259_103750 | NW_004516008.1 | Scaffold575 | 103750                  | AA                              | GG                | 1946515980               |
| SNP_P3_127260_103799 | NW_004516008.1 | Scaffold575 | 103799                  | TT                              | GG                | 1946515982               |
| SNP_P3_127262_103825 | NW_004516008.1 | Scaffold575 | 103825                  | TT                              | GG                | 1946515983               |
| SNP_P3_127263_103834 | NW_004516008.1 | Scaffold575 | 103834                  | AA                              | GG                | 1946515985               |
| SNP_P3_127264_104015 | NW_004516008.1 | Scaffold575 | 104015                  | AA                              | GG                | 1946515987               |
| SNP_P3_127265_104035 | NW_004516008.1 | Scaffold575 | 104035                  | TT                              | CC                | 1946515988               |
| SNP_P3_127266_104076 | NW_004516008.1 | Scaffold575 | 104076                  | TT                              | CC                | 1946515990               |
| SNP_P3_127267_104125 | NW_004516008.1 | Scaffold575 | 104125                  | TT                              | CC                | 1946515992               |
| SNP_P3_127268_104131 | NW_004516008.1 | Scaffold575 | 104131                  | AA                              | CC                | 1946515993               |
| SNP_P3_127269_104161 | NW_004516008.1 | Scaffold575 | 104161                  | AA                              | CC                | 1946515995               |
| SNP_P3_127270_104170 | NW_004516008.1 | Scaffold575 | 104170                  | TT                              | CC                | 1946515996               |
| SNP_P3_127271_104196 | NW_004516008.1 | Scaffold575 | 104196                  | TT                              | CC                | 1946515998               |
| SNP_P3_127272_104278 | NW_004516008.1 | Scaffold575 | 104278                  | TT                              | GG                | 1946516000               |
| SNP_P3_127273_104337 | NW_004516008.1 | Scaffold575 | 104337                  | AA                              | CC                | 1946516002               |
| SNP_P3_127274_104355 | NW_004516008.1 | Scaffold575 | 104355                  | TT                              | GG                | 1946516003               |
| SNP_P3_127275_104365 | NW_004516008.1 | Scaffold575 | 104365                  | TT                              | CC                | 1946516005               |
| SNP_P3_127276_104372 | NW_004516008.1 | Scaffold575 | 104372                  | TT                              | CC                | 1946516007               |
| SNP_P3_127277_104384 | NW_004516008.1 | Scaffold575 | 104384                  | AA                              | GG                | 1946516008               |
| SNP_P3_127278_104398 | NW_004516008.1 | Scaffold575 | 104398                  | CC                              | TT                | 1946516010               |
| SNP_P3_127279_104417 | NW_004516008.1 | Scaffold575 | 104417                  | AA                              | GG                | 1946516012               |
| SNP_P3_127280_104437 | NW_004516008.1 | Scaffold575 | 104437                  | AA                              | CC                | 1946516014               |
| SNP_P3_127281_104441 | NW_004516008.1 | Scaffold575 | 104441                  | AA                              | GG                | 1946516016               |
| SNP_P3_127282_104456 | NW_004516008.1 | Scaffold575 | 104456                  | AA                              | CC                | 1946516017               |
| SNP_P3_127283_104668 | NW_004516008.1 | Scaffold575 | 104668                  | GG                              | CC                | 1946516019               |
| SNP_P3_127284_105830 | NW_004516008.1 | Scaffold575 | 105830                  | AA                              | GG                | 1946516021               |
| SNP_P3_127285_105931 | NW_004516008.1 | Scaffold575 | 105931                  | TT                              | CC                | 1946516022               |
| SNP_P3_127286_107137 | NW_004516008.1 | Scaffold575 | 107137                  | CC                              | TT                | 1946516024               |
| SNP_P3_127287_107143 | NW_004516008.1 | Scaffold575 | 107143                  | AA                              | CC                | 1946516026               |
| SNP_P3_127288_107306 | NW_004516008.1 | Scaffold575 | 107306                  | TT                              | GG                | 1946516028               |
| SNP_P3_127289_107307 | NW_004516008.1 | Scaffold575 | 107307                  | GG                              | AA                | 1946516030               |
| SNP_P3_127290_107340 | NW_004516008.1 | Scaffold575 | 107340                  | TT                              | GG                | 1946516031               |
| SNP_P3_127291_108917 | NW_004516008.1 | Scaffold575 | 108917                  | TT                              | CC                | 1946516033               |
| SNP_P3_127292_108931 | NW_004516008.1 | Scaffold575 | 108931                  | AA                              | GG                | 1946516035               |
| SNP_P3_127293_108939 | NW_004516008.1 | Scaffold575 | 108939                  | AA                              | GG                | 1946516037               |
| SNP_P3_127294_108968 | NW_004516008.1 | Scaffold575 | 108968                  | TT                              | CC                | 1946516039               |
| SNP_P3_127295_109318 | NW_004516008.1 | Scaffold575 | 109318                  | GG                              | AA                | 1946516040               |
| SNP_P3_127296_109335 | NW_004516008.1 | Scaffold575 | 109335                  | AA                              | GG                | 1946516042               |
| SNP_P3_127297_109442 | NW_004516008.1 | Scaffold575 | 109442                  | AA                              | GG                | 1946516044               |
| SNP_P3_127298_109787 | NW_004516008.1 | Scaffold575 | 109787                  | CC                              | TT                | 1946516045               |

| SNPs IDs             | Chromosome IDs | Chromosomes | Physical positions (bp) | CDC Frontier (Reference genome) | (Pusa 256 & HPNB) | NCBI SNPdb Accession IDs |
|----------------------|----------------|-------------|-------------------------|---------------------------------|-------------------|--------------------------|
| SNP_P3_127299_109890 | NW_004516008.1 | Scaffold575 | 109890                  | TT                              | AA                | 1946516047               |
| SNP_P3_127300_109941 | NW_004516008.1 | Scaffold575 | 109941                  | TT                              | CC                | 1946516048               |
| SNP_P3_127301_109949 | NW_004516008.1 | Scaffold575 | 109949                  | TT                              | GG                | 1946516050               |
| SNP_P3_127302_109969 | NW_004516008.1 | Scaffold575 | 109969                  | AA                              | TT                | 1946516051               |
| SNP_P3_127303_109987 | NW_004516008.1 | Scaffold575 | 109987                  | CC                              | TT                | 1946516053               |
| SNP_P3_127304_110006 | NW_004516008.1 | Scaffold575 | 110006                  | CC                              | AA                | 1946516054               |
| SNP_P3_127305_110068 | NW_004516008.1 | Scaffold575 | 110068                  | AA                              | CC                | 1946516056               |
| SNP_P3_127306_110156 | NW_004516008.1 | Scaffold575 | 110156                  | TT                              | CC                | 1946516058               |
| SNP_P3_127307_110229 | NW_004516008.1 | Scaffold575 | 110229                  | CC                              | TT                | 1946516060               |
| SNP_P3_127308_110239 | NW_004516008.1 | Scaffold575 | 110239                  | TT                              | CC                | 1946516061               |
| SNP_P3_127309_110242 | NW_004516008.1 | Scaffold575 | 110242                  | TT                              | CC                | 1946516063               |
| SNP_P3_127310_110280 | NW_004516008.1 | Scaffold575 | 110280                  | AA                              | CC                | 1946516065               |
| SNP_P3_127311_110308 | NW_004516008.1 | Scaffold575 | 110308                  | AA                              | CC                | 1946516066               |
| SNP_P3_127312_110362 | NW_004516008.1 | Scaffold575 | 110362                  | AA                              | GG                | 1946516068               |
| SNP_P3_127313_110442 | NW_004516008.1 | Scaffold575 | 110442                  | AA                              | CC                | 1946516070               |
| SNP_P3_127314_110466 | NW_004516008.1 | Scaffold575 | 110466                  | AA                              | CC                | 1946516071               |
| SNP_P3_127315_110481 | NW_004516008.1 | Scaffold575 | 110481                  | AA                              | GG                | 1946516073               |
| SNP_P3_127316_110505 | NW_004516008.1 | Scaffold575 | 110505                  | TT                              | GG                | 1946516075               |
| SNP_P3_127318_110519 | NW_004516008.1 | Scaffold575 | 110519                  | TT                              | CC                | 1946516077               |
| SNP_P3_127319_110521 | NW_004516008.1 | Scaffold575 | 110521                  | TT                              | AA                | 1946516078               |
| SNP_P3_127320_110581 | NW_004516008.1 | Scaffold575 | 110581                  | AA                              | CC                | 1946516080               |
| SNP_P3_127321_110605 | NW_004516008.1 | Scaffold575 | 110605                  | AA                              | CC                | 1946516081               |
| SNP_P3_127322_110620 | NW_004516008.1 | Scaffold575 | 110620                  | AA                              | GG                | 1946516083               |
| SNP_P3_127323_110644 | NW_004516008.1 | Scaffold575 | 110644                  | TT                              | GG                | 1946516085               |
| SNP_P3_127324_110660 | NW_004516008.1 | Scaffold575 | 110660                  | TT                              | CC                | 1946516087               |
| SNP_P3_127325_110663 | NW_004516008.1 | Scaffold575 | 110663                  | TT                              | CC                | 1946516088               |
| SNP_P3_127326_110753 | NW_004516008.1 | Scaffold575 | 110753                  | AA                              | GG                | 1946516090               |
| SNP_P3_127327_110759 | NW_004516008.1 | Scaffold575 | 110759                  | TT                              | CC                | 1946516091               |
| SNP_P3_127328_110765 | NW_004516008.1 | Scaffold575 | 110765                  | TT                              | CC                | 1946516093               |
| SNP_P3_127329_110772 | NW_004516008.1 | Scaffold575 | 110772                  | TT                              | GG                | 1946516095               |
| SNP_P3_127330_110830 | NW_004516008.1 | Scaffold575 | 110830                  | TT                              | AA                | 1946516097               |
| SNP_P3_127331_110886 | NW_004516008.1 | Scaffold575 | 110886                  | TT                              | CC                | 1946516099               |
| SNP_P3_127332_110910 | NW_004516008.1 | Scaffold575 | 110910                  | TT                              | CC                | 1946516101               |
| SNP_P3_127333_110920 | NW_004516008.1 | Scaffold575 | 110920                  | CC                              | GG                | 1946516102               |
| SNP_P3_127334_110949 | NW_004516008.1 | Scaffold575 | 110949                  | CC                              | TT                | 1946516104               |
| SNP_P3_127335_111000 | NW_004516008.1 | Scaffold575 | 111000                  | TT                              | CC                | 1946516106               |
| SNP_P3_127336_111030 | NW_004516008.1 | Scaffold575 | 111030                  | TT                              | CC                | 1946516108               |
| SNP_P3_127337_111035 | NW_004516008.1 | Scaffold575 | 111035                  | TT                              | CC                | 1946516110               |
| SNP_P3_127338_111056 | NW_004516008.1 | Scaffold575 | 111056                  | AA                              | GG                | 1946516111               |
| SNP_P3_127339_111135 | NW_004516008.1 | Scaffold575 | 111135                  | AA                              | GG                | 1946516113               |
| SNP_P3_127340_111178 | NW_004516008.1 | Scaffold575 | 111178                  | CC                              | AA                | 1946516115               |
| SNP_P3_127341_111188 | NW_004516008.1 | Scaffold575 | 111188                  | TT                              | CC                | 1946516116               |

| SNPs IDs             | Chromosome IDs | Chromosomes | Physical positions (bp) | CDC Frontier (Reference genome) | (Pusa 256 & HPNB) | NCBI SNPdb Accession IDs |
|----------------------|----------------|-------------|-------------------------|---------------------------------|-------------------|--------------------------|
| SNP_P3_127342_111193 | NW_004516008.1 | Scaffold575 | 111193                  | AA                              | GG                | 1946516118               |
| SNP_P3_127343_111205 | NW_004516008.1 | Scaffold575 | 111205                  | AA                              | GG                | 1946516120               |
| SNP_P3_127344_111235 | NW_004516008.1 | Scaffold575 | 111235                  | GG                              | TT                | 1946516121               |
| SNP_P3_127345_111239 | NW_004516008.1 | Scaffold575 | 111239                  | TT                              | CC                | 1946516123               |
| SNP_P3_127346_111295 | NW_004516008.1 | Scaffold575 | 111295                  | TT                              | CC                | 1946516126               |
| SNP_P3_127347_111313 | NW_004516008.1 | Scaffold575 | 111313                  | GG                              | CC                | 1946516128               |
| SNP_P3_127348_111338 | NW_004516008.1 | Scaffold575 | 111338                  | AA                              | CC                | 1946516130               |
| SNP_P3_127349_111354 | NW_004516008.1 | Scaffold575 | 111354                  | GG                              | AA                | 1946516132               |
| SNP_P3_127350_111356 | NW_004516008.1 | Scaffold575 | 111356                  | TT                              | GG                | 1946516133               |
| SNP_P3_127351_111381 | NW_004516008.1 | Scaffold575 | 111381                  | GG                              | AA                | 1946516135               |
| SNP_P3_127352_111396 | NW_004516008.1 | Scaffold575 | 111396                  | AA                              | GG                | 1946516136               |
| SNP_P3_127353_111408 | NW_004516008.1 | Scaffold575 | 111408                  | TT                              | CC                | 1946516138               |
| SNP_P3_127354_111454 | NW_004516008.1 | Scaffold575 | 111454                  | AA                              | CC                | 1946516139               |
| SNP_P3_127355_111507 | NW_004516008.1 | Scaffold575 | 111507                  | TT                              | AA                | 1946516141               |
| SNP_P3_127356_111513 | NW_004516008.1 | Scaffold575 | 111513                  | AA                              | CC                | 1946516143               |
| SNP_P3_127357_111527 | NW_004516008.1 | Scaffold575 | 111527                  | GG                              | CC                | 1946516144               |
| SNP_P3_127358_111556 | NW_004516008.1 | Scaffold575 | 111556                  | CC                              | TT                | 1946516146               |
| SNP_P3_127359_111586 | NW_004516008.1 | Scaffold575 | 111586                  | AA                              | GG                | 1946516147               |
| SNP_P3_127360_111698 | NW_004516008.1 | Scaffold575 | 111698                  | AA                              | GG                | 1946516149               |
| SNP_P3_127361_111711 | NW_004516008.1 | Scaffold575 | 111711                  | CC                              | AA                | 1946516150               |
| SNP_P3_127362_111725 | NW_004516008.1 | Scaffold575 | 111725                  | TT                              | CC                | 1946516152               |
| SNP_P3_127363_111743 | NW_004516008.1 | Scaffold575 | 111743                  | AA                              | CC                | 1946516153               |
| SNP_P3_127364_111796 | NW_004516008.1 | Scaffold575 | 111796                  | TT                              | AA                | 1946516155               |
| SNP_P3_127365_111831 | NW_004516008.1 | Scaffold575 | 111831                  | TT                              | CC                | 1946516157               |
| SNP_P3_127366_111856 | NW_004516008.1 | Scaffold575 | 111856                  | TT                              | GG                | 1946516158               |
| SNP_P3_127367_111861 | NW_004516008.1 | Scaffold575 | 111861                  | AA                              | GG                | 1946516160               |
| SNP_P3_127368_111875 | NW_004516008.1 | Scaffold575 | 111875                  | AA                              | GG                | 1946516162               |
| SNP_P3_127369_111907 | NW_004516008.1 | Scaffold575 | 111907                  | AA                              | GG                | 1946516163               |
| SNP_P3_127370_111923 | NW_004516008.1 | Scaffold575 | 111923                  | CC                              | GG                | 1946516165               |
| SNP_P3_127371_111945 | NW_004516008.1 | Scaffold575 | 111945                  | AA                              | GG                | 1946516166               |
| SNP_P3_127372_111950 | NW_004516008.1 | Scaffold575 | 111950                  | TT                              | CC                | 1946516168               |
| SNP_P3_127373_111999 | NW_004516008.1 | Scaffold575 | 111999                  | TT                              | CC                | 1946516169               |
| SNP_P3_127374_112004 | NW_004516008.1 | Scaffold575 | 112004                  | AA                              | CC                | 1946516171               |
| SNP_P3_127375_112060 | NW_004516008.1 | Scaffold575 | 112060                  | TT                              | CC                | 1946516172               |
| SNP_P3_127376_112145 | NW_004516008.1 | Scaffold575 | 112145                  | AA                              | CC                | 1946516175               |
| SNP_P3_127377_112166 | NW_004516008.1 | Scaffold575 | 112166                  | AA                              | GG                | 1946516176               |
| SNP_P3_127378_112172 | NW_004516008.1 | Scaffold575 | 112172                  | TT                              | GG                | 1946516178               |
| SNP_P3_127379_112198 | NW_004516008.1 | Scaffold575 | 112198                  | AA                              | GG                | 1946516180               |
| SNP_P3_127380_112212 | NW_004516008.1 | Scaffold575 | 112212                  | TT                              | GG                | 1946516181               |
| SNP_P3_127381_112237 | NW_004516008.1 | Scaffold575 | 112237                  | GG                              | AA                | 1946516183               |
| SNP_P3_127382_112241 | NW_004516008.1 | Scaffold575 | 112241                  | AA                              | GG                | 1946516184               |
| SNP_P3_127384_112326 | NW_004516008.1 | Scaffold575 | 112326                  | CC                              | TT                | 1946516186               |

| SNPs IDs             | Chromosome IDs | Chromosomes | Physical positions (bp) | CDC Frontier (Reference genome) | (Pusa 256 & HPNB) | NCBI SNPdb Accession IDs |
|----------------------|----------------|-------------|-------------------------|---------------------------------|-------------------|--------------------------|
| SNP_P3_127385_112328 | NW_004516008.1 | Scaffold575 | 112328                  | TT                              | GG                | 1946516187               |
| SNP_P3_127386_112341 | NW_004516008.1 | Scaffold575 | 112341                  | TT                              | CC                | 1946516189               |
| SNP_P3_127387_112365 | NW_004516008.1 | Scaffold575 | 112365                  | CC                              | TT                | 1946516191               |
| SNP_P3_127388_112383 | NW_004516008.1 | Scaffold575 | 112383                  | AA                              | GG                | 1946516193               |
| SNP_P3_127389_112400 | NW_004516008.1 | Scaffold575 | 112400                  | CC                              | AA                | 1946516194               |
| SNP_P3_127390_112424 | NW_004516008.1 | Scaffold575 | 112424                  | AA                              | GG                | 1946516196               |
| SNP_P3_127391_112451 | NW_004516008.1 | Scaffold575 | 112451                  | GG                              | AA                | 1946516198               |
| SNP_P3_127392_112523 | NW_004516008.1 | Scaffold575 | 112523                  | TT                              | CC                | 1946516199               |
| SNP_P3_127393_112535 | NW_004516008.1 | Scaffold575 | 112535                  | TT                              | CC                | 1946516201               |
| SNP_P3_127394_112557 | NW_004516008.1 | Scaffold575 | 112557                  | AA                              | CC                | 1946516203               |
| SNP_P3_127395_112589 | NW_004516008.1 | Scaffold575 | 112589                  | TT                              | CC                | 1946516204               |
| SNP_P3_127396_112618 | NW_004516008.1 | Scaffold575 | 112618                  | CC                              | TT                | 1946516206               |
| SNP_P3_127397_112629 | NW_004516008.1 | Scaffold575 | 112629                  | TT                              | CC                | 1946516207               |
| SNP_P3_127398_112725 | NW_004516008.1 | Scaffold575 | 112725                  | CC                              | AA                | 1946516209               |
| SNP_P3_127399_112848 | NW_004516008.1 | Scaffold575 | 112848                  | CC                              | GG                | 1946516211               |
| SNP_P3_127400_112865 | NW_004516008.1 | Scaffold575 | 112865                  | TT                              | CC                | 1946516212               |
| SNP_P3_127401_112869 | NW_004516008.1 | Scaffold575 | 112869                  | GG                              | AA                | 1946516214               |
| SNP_P3_127403_113131 | NW_004516008.1 | Scaffold575 | 113131                  | GG                              | AA                | 1946516216               |
| SNP_P3_127404_113132 | NW_004516008.1 | Scaffold575 | 113132                  | CC                              | TT                | 1946516217               |
| SNP_P3_127405_113134 | NW_004516008.1 | Scaffold575 | 113134                  | AA                              | GG                | 1946516219               |
| SNP_P3_127406_113141 | NW_004516008.1 | Scaffold575 | 113141                  | GG                              | AA                | 1946516220               |
| SNP_P3_127407_113147 | NW_004516008.1 | Scaffold575 | 113147                  | AA                              | GG                | 1946516222               |
| SNP_P3_127408_113215 | NW_004516008.1 | Scaffold575 | 113215                  | AA                              | GG                | 1946516224               |
| SNP_P3_127409_113240 | NW_004516008.1 | Scaffold575 | 113240                  | CC                              | AA                | 1946516225               |
| SNP_P3_127412_113364 | NW_004516008.1 | Scaffold575 | 113364                  | TT                              | GG                | 1946516227               |
| SNP_P3_127413_113367 | NW_004516008.1 | Scaffold575 | 113367                  | GG                              | TT                | 1946516228               |
| SNP_P3_127414_113369 | NW_004516008.1 | Scaffold575 | 113369                  | TT                              | CC                | 1946516230               |
| SNP_P3_127415_113373 | NW_004516008.1 | Scaffold575 | 113373                  | AA                              | GG                | 1946516231               |
| SNP_P3_127416_113374 | NW_004516008.1 | Scaffold575 | 113374                  | CC                              | GG                | 1946516233               |
| SNP_P3_127417_113404 | NW_004516008.1 | Scaffold575 | 113404                  | TT                              | CC                | 1946516235               |
| SNP_P3_127418_113413 | NW_004516008.1 | Scaffold575 | 113413                  | GG                              | TT                | 1946516236               |
| SNP_P3_127419_113439 | NW_004516008.1 | Scaffold575 | 113439                  | GG                              | AA                | 1946516238               |
| SNP_P3_127420_113444 | NW_004516008.1 | Scaffold575 | 113444                  | AA                              | GG                | 1946516239               |
| SNP_P3_127422_113465 | NW_004516008.1 | Scaffold575 | 113465                  | GG                              | AA                | 1946516241               |
| SNP_P3_127423_113533 | NW_004516008.1 | Scaffold575 | 113533                  | GG                              | AA                | 1946516243               |
| SNP_P3_127425_113944 | NW_004516008.1 | Scaffold575 | 113944                  | AA                              | GG                | 1946516244               |
| SNP_P3_127426_113961 | NW_004516008.1 | Scaffold575 | 113961                  | TT                              | GG                | 1946516246               |
| SNP_P3_127427_113971 | NW_004516008.1 | Scaffold575 | 113971                  | TT                              | GG                | 1946516248               |
| SNP_P3_127428_113977 | NW_004516008.1 | Scaffold575 | 113977                  | GG                              | CC                | 1946516249               |
| SNP_P3_127429_114004 | NW_004516008.1 | Scaffold575 | 114004                  | TT                              | GG                | 1946516251               |
| SNP_P3_127430_114022 | NW_004516008.1 | Scaffold575 | 114022                  | AA                              | GG                | 1946516252               |
| SNP_P3_127432_114148 | NW_004516008.1 | Scaffold575 | 114148                  | AA                              | GG                | 1946516254               |

| SNPs IDs             | Chromosome IDs | Chromosomes | Physical positions (bp) | CDC Frontier (Reference genome) | (Pusa 256 & HPNB) | NCBI SNPdb Accession IDs |
|----------------------|----------------|-------------|-------------------------|---------------------------------|-------------------|--------------------------|
| SNP_P3_127433_114200 | NW_004516008.1 | Scaffold575 | 114200                  | TT                              | CC                | 1946516256               |
| SNP_P3_127434_114231 | NW_004516008.1 | Scaffold575 | 114231                  | TT                              | CC                | 1946516257               |
| SNP_P3_127435_114275 | NW_004516008.1 | Scaffold575 | 114275                  | TT                              | CC                | 1946516259               |
| SNP_P3_127436_114285 | NW_004516008.1 | Scaffold575 | 114285                  | GG                              | TT                | 1946516261               |
| SNP_P3_127437_114314 | NW_004516008.1 | Scaffold575 | 114314                  | TT                              | GG                | 1946516262               |
| SNP_P3_127438_114341 | NW_004516008.1 | Scaffold575 | 114341                  | AA                              | GG                | 1946516264               |
| SNP_P3_127439_114356 | NW_004516008.1 | Scaffold575 | 114356                  | AA                              | CC                | 1946516266               |
| SNP_P3_127440_114403 | NW_004516008.1 | Scaffold575 | 114403                  | TT                              | CC                | 1946516267               |
| SNP_P3_127441_114419 | NW_004516008.1 | Scaffold575 | 114419                  | AA                              | GG                | 1946516269               |
| SNP_P3_127442_114425 | NW_004516008.1 | Scaffold575 | 114425                  | AA                              | GG                | 1946516270               |
| SNP_P3_127444_114751 | NW_004516008.1 | Scaffold575 | 114751                  | AA                              | CC                | 1946516272               |
| SNP_P3_127445_114798 | NW_004516008.1 | Scaffold575 | 114798                  | TT                              | CC                | 1946516274               |
| SNP_P3_127446_114814 | NW_004516008.1 | Scaffold575 | 114814                  | AA                              | GG                | 1946516275               |
| SNP_P3_127447_114820 | NW_004516008.1 | Scaffold575 | 114820                  | AA                              | GG                | 1946516277               |
| SNP_P3_127448_114882 | NW_004516008.1 | Scaffold575 | 114882                  | CC                              | TT                | 1946516279               |
| SNP_P3_127449_114919 | NW_004516008.1 | Scaffold575 | 114919                  | AA                              | GG                | 1946516280               |
| SNP_P3_127450_114937 | NW_004516008.1 | Scaffold575 | 114937                  | TT                              | CC                | 1946516282               |
| SNP_P3_127451_115113 | NW_004516008.1 | Scaffold575 | 115113                  | AA                              | CC                | 1946516284               |
| SNP_P3_127452_115117 | NW_004516008.1 | Scaffold575 | 115117                  | AA                              | GG                | 1946516285               |
| SNP_P3_127453_115163 | NW_004516008.1 | Scaffold575 | 115163                  | TT                              | AA                | 1946516287               |
| SNP_P3_127454_115171 | NW_004516008.1 | Scaffold575 | 115171                  | AA                              | GG                | 1946516288               |
| SNP_P3_127455_115239 | NW_004516008.1 | Scaffold575 | 115239                  | AA                              | GG                | 1946516291               |
| SNP_P3_127456_115250 | NW_004516008.1 | Scaffold575 | 115250                  | AA                              | GG                | 1946516292               |
| SNP_P3_127457_115255 | NW_004516008.1 | Scaffold575 | 115255                  | TT                              | CC                | 1946516294               |
| SNP_P3_127458_115269 | NW_004516008.1 | Scaffold575 | 115269                  | TT                              | CC                | 1946516295               |
| SNP_P3_127459_115273 | NW_004516008.1 | Scaffold575 | 115273                  | AA                              | GG                | 1946516297               |
| SNP_P3_127460_115298 | NW_004516008.1 | Scaffold575 | 115298                  | TT                              | GG                | 1946516299               |
| SNP_P3_127461_115608 | NW_004516008.1 | Scaffold575 | 115608                  | AA                              | GG                | 1946516300               |
| SNP_P3_127462_115675 | NW_004516008.1 | Scaffold575 | 115675                  | AA                              | GG                | 1946516302               |
| SNP_P3_127463_115693 | NW_004516008.1 | Scaffold575 | 115693                  | TT                              | GG                | 1946516303               |
| SNP_P3_127464_115727 | NW_004516008.1 | Scaffold575 | 115727                  | TT                              | AA                | 1946516305               |
| SNP_P3_127465_115766 | NW_004516008.1 | Scaffold575 | 115766                  | TT                              | GG                | 1946516306               |
| SNP_P3_127466_115770 | NW_004516008.1 | Scaffold575 | 115770                  | TT                              | CC                | 1946516308               |
| SNP_P3_127467_115787 | NW_004516008.1 | Scaffold575 | 115787                  | GG                              | TT                | 1946516309               |
| SNP_P3_127468_115836 | NW_004516008.1 | Scaffold575 | 115836                  | TT                              | CC                | 1946516311               |
| SNP_P3_127469_115844 | NW_004516008.1 | Scaffold575 | 115844                  | TT                              | GG                | 1946516312               |
| SNP_P3_127470_115868 | NW_004516008.1 | Scaffold575 | 115868                  | CC                              | TT                | 1946516314               |
| SNP_P3_127471_115874 | NW_004516008.1 | Scaffold575 | 115874                  | TT                              | CC                | 1946516316               |
| SNP_P3_127472_115940 | NW_004516008.1 | Scaffold575 | 115940                  | TT                              | CC                | 1946516317               |
| SNP_P3_127473_115990 | NW_004516008.1 | Scaffold575 | 115990                  | AA                              | TT                | 1946516319               |
| SNP_P3_127474_116019 | NW_004516008.1 | Scaffold575 | 116019                  | AA                              | CC                | 1946516320               |
| SNP_P3_127475_116070 | NW_004516008.1 | Scaffold575 | 116070                  | AA                              | GG                | 1946516322               |

| SNPs IDs             | Chromosome IDs | Chromosomes | Physical positions (bp) | CDC Frontier (Reference genome) | (Pusa 256 & HPNB) | NCBI SNPdb Accession IDs |
|----------------------|----------------|-------------|-------------------------|---------------------------------|-------------------|--------------------------|
| SNP_P3_127476_116086 | NW_004516008.1 | Scaffold575 | 116086                  | AA                              | CC                | 1946516324               |
| SNP_P3_127477_116139 | NW_004516008.1 | Scaffold575 | 116139                  | CC                              | TT                | 1946516325               |
| SNP_P3_127478_116157 | NW_004516008.1 | Scaffold575 | 116157                  | AA                              | GG                | 1946516327               |
| SNP_P3_127479_116228 | NW_004516008.1 | Scaffold575 | 116228                  | TT                              | GG                | 1946516328               |
| SNP_P3_127480_116236 | NW_004516008.1 | Scaffold575 | 116236                  | AA                              | TT                | 1946516330               |
| SNP_P3_127481_116260 | NW_004516008.1 | Scaffold575 | 116260                  | CC                              | GG                | 1946516331               |
| SNP_P3_127482_116320 | NW_004516008.1 | Scaffold575 | 116320                  | TT                              | GG                | 1946516333               |
| SNP_P3_127483_116364 | NW_004516008.1 | Scaffold575 | 116364                  | TT                              | CC                | 1946516334               |
| SNP_P3_127484_116365 | NW_004516008.1 | Scaffold575 | 116365                  | AA                              | GG                | 1946516336               |
| SNP_P3_127485_116381 | NW_004516008.1 | Scaffold575 | 116381                  | AA                              | GG                | 1946516337               |
| SNP_P3_127486_116391 | NW_004516008.1 | Scaffold575 | 116391                  | CC                              | TT                | 1946516339               |
| SNP_P3_127487_116432 | NW_004516008.1 | Scaffold575 | 116432                  | TT                              | AA                | 1946516340               |
| SNP_P3_127488_116451 | NW_004516008.1 | Scaffold575 | 116451                  | AA                              | GG                | 1946516342               |
| SNP_P3_127489_116466 | NW_004516008.1 | Scaffold575 | 116466                  | AA                              | CC                | 1946516343               |
| SNP_P3_127490_116467 | NW_004516008.1 | Scaffold575 | 116467                  | CC                              | AA                | 1946516345               |
| SNP_P3_127491_116499 | NW_004516008.1 | Scaffold575 | 116499                  | CC                              | AA                | 1946516347               |
| SNP_P3_127492_116500 | NW_004516008.1 | Scaffold575 | 116500                  | TT                              | GG                | 1946516349               |
| SNP_P3_127493_116502 | NW_004516008.1 | Scaffold575 | 116502                  | CC                              | TT                | 1946516350               |
| SNP_P3_127494_116508 | NW_004516008.1 | Scaffold575 | 116508                  | TT                              | CC                | 1946516352               |
| SNP_P3_127495_116509 | NW_004516008.1 | Scaffold575 | 116509                  | TT                              | CC                | 1946516353               |
| SNP_P3_127496_116846 | NW_004516008.1 | Scaffold575 | 116846                  | TT                              | CC                | 1946516355               |
| SNP_P3_127497_116864 | NW_004516008.1 | Scaffold575 | 116864                  | TT                              | CC                | 1946516357               |
| SNP_P3_127498_116879 | NW_004516008.1 | Scaffold575 | 116879                  | CC                              | TT                | 1946516359               |
| SNP_P3_127499_116880 | NW_004516008.1 | Scaffold575 | 116880                  | AA                              | GG                | 1946516360               |
| SNP_P3_127500_116925 | NW_004516008.1 | Scaffold575 | 116925                  | AA                              | GG                | 1946516362               |
| SNP_P3_127501_116957 | NW_004516008.1 | Scaffold575 | 116957                  | AA                              | CC                | 1946516364               |
| SNP_P3_127502_116972 | NW_004516008.1 | Scaffold575 | 116972                  | AA                              | TT                | 1946516365               |
| SNP_P3_127503_116978 | NW_004516008.1 | Scaffold575 | 116978                  | TT                              | CC                | 1946516367               |
| SNP_P3_127504_116989 | NW_004516008.1 | Scaffold575 | 116989                  | TT                              | GG                | 1946516368               |
| SNP_P3_127505_117063 | NW_004516008.1 | Scaffold575 | 117063                  | AA                              | GG                | 1946516370               |
| SNP_P3_127506_117080 | NW_004516008.1 | Scaffold575 | 117080                  | TT                              | CC                | 1946516372               |
| SNP_P3_127507_117098 | NW_004516008.1 | Scaffold575 | 117098                  | CC                              | TT                | 1946516373               |
| SNP_P3_127508_117144 | NW_004516008.1 | Scaffold575 | 117144                  | AA                              | GG                | 1946516375               |
| SNP_P3_127509_117167 | NW_004516008.1 | Scaffold575 | 117167                  | TT                              | CC                | 1946516376               |
| SNP_P3_127510_117186 | NW_004516008.1 | Scaffold575 | 117186                  | AA                              | GG                | 1946516378               |
| SNP_P3_127511_117187 | NW_004516008.1 | Scaffold575 | 117187                  | AA                              | TT                | 1946516379               |
| SNP_P3_127512_117213 | NW_004516008.1 | Scaffold575 | 117213                  | AA                              | GG                | 1946516381               |
| SNP_P3_127513_117221 | NW_004516008.1 | Scaffold575 | 117221                  | AA                              | GG                | 1946516383               |
| SNP_P3_127514_117249 | NW_004516008.1 | Scaffold575 | 117249                  | CC                              | TT                | 1946516384               |
| SNP_P3_127515_117282 | NW_004516008.1 | Scaffold575 | 117282                  | AA                              | CC                | 1946516386               |
| SNP_P3_127516_117305 | NW_004516008.1 | Scaffold575 | 117305                  | GG                              | AA                | 1946516387               |
| SNP_P3_127517_117333 | NW_004516008.1 | Scaffold575 | 117333                  | AA                              | GG                | 1946516389               |

| SNPs IDs             | Chromosome IDs | Chromosomes | Physical positions (bp) | CDC Frontier (Reference genome) | (Pusa 256 & HPNB) | NCBI SNPdb Accession IDs |
|----------------------|----------------|-------------|-------------------------|---------------------------------|-------------------|--------------------------|
| SNP_P3_127518_117338 | NW_004516008.1 | Scaffold575 | 117338                  | TT                              | CC                | 1946516391               |
| SNP_P3_127519_117357 | NW_004516008.1 | Scaffold575 | 117357                  | CC                              | TT                | 1946516392               |
| SNP_P3_127520_117379 | NW_004516008.1 | Scaffold575 | 117379                  | TT                              | AA                | 1946516394               |
| SNP_P3_127521_117386 | NW_004516008.1 | Scaffold575 | 117386                  | AA                              | GG                | 1946516395               |
| SNP_P3_127522_117399 | NW_004516008.1 | Scaffold575 | 117399                  | AA                              | GG                | 1946516397               |
| SNP_P3_127523_117424 | NW_004516008.1 | Scaffold575 | 117424                  | AA                              | TT                | 1946516398               |
| SNP_P3_127524_117437 | NW_004516008.1 | Scaffold575 | 117437                  | TT                              | CC                | 1946516400               |
| SNP_P3_127525_117466 | NW_004516008.1 | Scaffold575 | 117466                  | TT                              | GG                | 1946516402               |
| SNP_P3_127526_117475 | NW_004516008.1 | Scaffold575 | 117475                  | TT                              | GG                | 1946516403               |
| SNP_P3_127527_117532 | NW_004516008.1 | Scaffold575 | 117532                  | AA                              | GG                | 1946516405               |
| SNP_P3_127528_117603 | NW_004516008.1 | Scaffold575 | 117603                  | GG                              | AA                | 1946516407               |
| SNP_P3_127529_117616 | NW_004516008.1 | Scaffold575 | 117616                  | AA                              | GG                | 1946516408               |
| SNP_P3_127530_117628 | NW_004516008.1 | Scaffold575 | 117628                  | TT                              | GG                | 1946516410               |
| SNP_P3_127531_117692 | NW_004516008.1 | Scaffold575 | 117692                  | AA                              | CC                | 1946516411               |
| SNP_P3_127532_117701 | NW_004516008.1 | Scaffold575 | 117701                  | TT                              | CC                | 1946516413               |
| SNP_P3_127533_117720 | NW_004516008.1 | Scaffold575 | 117720                  | AA                              | CC                | 1946516415               |
| SNP_P3_127534_117732 | NW_004516008.1 | Scaffold575 | 117732                  | TT                              | GG                | 1946516416               |
| SNP_P3_127535_117752 | NW_004516008.1 | Scaffold575 | 117752                  | TT                              | CC                | 1946516418               |
| SNP_P3_127536_117763 | NW_004516008.1 | Scaffold575 | 117763                  | TT                              | CC                | 1946516419               |
| SNP_P3_127537_117775 | NW_004516008.1 | Scaffold575 | 117775                  | AA                              | TT                | 1946516421               |
| SNP_P3_127538_117834 | NW_004516008.1 | Scaffold575 | 117834                  | TT                              | CC                | 1946516423               |
| SNP_P3_127539_117865 | NW_004516008.1 | Scaffold575 | 117865                  | TT                              | GG                | 1946516424               |
| SNP_P3_127540_117900 | NW_004516008.1 | Scaffold575 | 117900                  | AA                              | GG                | 1946516426               |
| SNP_P3_127541_117964 | NW_004516008.1 | Scaffold575 | 117964                  | AA                              | CC                | 1946516428               |
| SNP_P3_127542_117999 | NW_004516008.1 | Scaffold575 | 117999                  | AA                              | CC                | 1946516429               |
| SNP_P3_127543_118014 | NW_004516008.1 | Scaffold575 | 118014                  | AA                              | GG                | 1946516431               |
| SNP_P3_127544_118141 | NW_004516008.1 | Scaffold575 | 118141                  | AA                              | GG                | 1946516433               |
| SNP_P3_127545_118153 | NW_004516008.1 | Scaffold575 | 118153                  | TT                              | CC                | 1946516435               |
| SNP_P3_127546_118180 | NW_004516008.1 | Scaffold575 | 118180                  | AA                              | GG                | 1946516436               |
| SNP_P3_127547_118188 | NW_004516008.1 | Scaffold575 | 118188                  | AA                              | GG                | 1946516438               |
| SNP_P3_127548_118286 | NW_004516008.1 | Scaffold575 | 118286                  | TT                              | AA                | 1946516440               |
| SNP_P3_127549_118299 | NW_004516008.1 | Scaffold575 | 118299                  | AA                              | CC                | 1946516442               |
| SNP_P3_127550_118335 | NW_004516008.1 | Scaffold575 | 118335                  | TT                              | CC                | 1946516443               |
| SNP_P3_127551_118338 | NW_004516008.1 | Scaffold575 | 118338                  | TT                              | CC                | 1946516445               |
| SNP_P3_127552_118352 | NW_004516008.1 | Scaffold575 | 118352                  | AA                              | GG                | 1946516446               |
| SNP_P3_127553_118374 | NW_004516008.1 | Scaffold575 | 118374                  | TT                              | GG                | 1946516448               |
| SNP_P3_127554_118409 | NW_004516008.1 | Scaffold575 | 118409                  | TT                              | CC                | 1946516450               |
| SNP_P3_127555_118414 | NW_004516008.1 | Scaffold575 | 118414                  | AA                              | GG                | 1946516452               |
| SNP_P3_127557_118525 | NW_004516008.1 | Scaffold575 | 118525                  | AA                              | GG                | 1946516453               |
| SNP_P3_127558_119764 | NW_004516008.1 | Scaffold575 | 119764                  | AA                              | GG                | 1946516455               |
| SNP_P3_127559_119776 | NW_004516008.1 | Scaffold575 | 119776                  | AA                              | GG                | 1946516456               |
| SNP_P3_127560_119850 | NW_004516008.1 | Scaffold575 | 119850                  | AA                              | GG                | 1946516458               |



| SNPs IDs             | Chromosome IDs | Chromosomes | Physical positions (bp) | CDC Frontier (Reference genome) | (Pusa 256 & HPNB) | NCBI SNPdb Accession IDs |
|----------------------|----------------|-------------|-------------------------|---------------------------------|-------------------|--------------------------|
| SNP_P3_127561_119933 | NW_004516008.1 | Scaffold575 | 119933                  | TT                              | CC                | 1946516460               |
| SNP_P3_127562_119951 | NW_004516008.1 | Scaffold575 | 119951                  | AA                              | GG                | 1946516461               |
| SNP_P3_127563_119956 | NW_004516008.1 | Scaffold575 | 119956                  | AA                              | GG                | 1946516463               |
| SNP_P3_127564_119961 | NW_004516008.1 | Scaffold575 | 119961                  | TT                              | GG                | 1946516464               |
| SNP_P3_127565_119990 | NW_004516008.1 | Scaffold575 | 119990                  | AA                              | GG                | 1946516466               |
| SNP_P3_127566_120005 | NW_004516008.1 | Scaffold575 | 120005                  | TT                              | CC                | 1946516467               |
| SNP_P3_127567_120111 | NW_004516008.1 | Scaffold575 | 120111                  | AA                              | GG                | 1946516469               |
| SNP_P3_127568_120184 | NW_004516008.1 | Scaffold575 | 120184                  | AA                              | GG                | 1946516471               |
| SNP_P3_127569_120187 | NW_004516008.1 | Scaffold575 | 120187                  | TT                              | GG                | 1946516472               |
| SNP_P3_127570_120201 | NW_004516008.1 | Scaffold575 | 120201                  | AA                              | CC                | 1946516474               |
| SNP_P3_127571_120203 | NW_004516008.1 | Scaffold575 | 120203                  | TT                              | CC                | 1946516475               |
| SNP_P3_127572_120270 | NW_004516008.1 | Scaffold575 | 120270                  | AA                              | CC                | 1946516477               |
| SNP_P3_127573_120501 | NW_004516008.1 | Scaffold575 | 120501                  | TT                              | CC                | 1946516479               |
| SNP_P3_127574_121393 | NW_004516008.1 | Scaffold575 | 121393                  | CC                              | TT                | 1946516480               |
| SNP_P3_127575_121403 | NW_004516008.1 | Scaffold575 | 121403                  | CC                              | AA                | 1946516482               |
| SNP_P3_127576_121595 | NW_004516008.1 | Scaffold575 | 121595                  | GG                              | AA                | 1946516484               |
| SNP_P3_127577_121613 | NW_004516008.1 | Scaffold575 | 121613                  | TT                              | CC                | 1946516485               |
| SNP_P3_127578_121624 | NW_004516008.1 | Scaffold575 | 121624                  | GG                              | AA                | 1946516487               |
| SNP_P3_127579_121629 | NW_004516008.1 | Scaffold575 | 121629                  | TT                              | AA                | 1946516488               |
| SNP_P3_127580_121689 | NW_004516008.1 | Scaffold575 | 121689                  | CC                              | AA                | 1946516490               |
| SNP_P3_127581_121717 | NW_004516008.1 | Scaffold575 | 121717                  | CC                              | TT                | 1946516491               |
| SNP_P3_127582_121728 | NW_004516008.1 | Scaffold575 | 121728                  | AA                              | GG                | 1946516493               |
| SNP_P3_127583_121741 | NW_004516008.1 | Scaffold575 | 121741                  | GG                              | AA                | 1946516494               |
| SNP_P3_127584_121759 | NW_004516008.1 | Scaffold575 | 121759                  | TT                              | CC                | 1946516496               |
| SNP_P3_127585_121777 | NW_004516008.1 | Scaffold575 | 121777                  | CC                              | TT                | 1946516498               |
| SNP_P3_127586_121867 | NW_004516008.1 | Scaffold575 | 121867                  | GG                              | TT                | 1946516499               |
| SNP_P3_127587_121874 | NW_004516008.1 | Scaffold575 | 121874                  | TT                              | CC                | 1946516501               |
| SNP_P3_127588_121879 | NW_004516008.1 | Scaffold575 | 121879                  | CC                              | TT                | 1946516503               |
| SNP_P3_127589_121910 | NW_004516008.1 | Scaffold575 | 121910                  | CC                              | AA                | 1946516504               |
| SNP_P3_127590_121914 | NW_004516008.1 | Scaffold575 | 121914                  | TT                              | CC                | 1946516506               |
| SNP_P3_127591_121944 | NW_004516008.1 | Scaffold575 | 121944                  | CC                              | GG                | 1946516508               |
| SNP_P3_127592_121963 | NW_004516008.1 | Scaffold575 | 121963                  | TT                              | AA                | 1946516509               |
| SNP_P3_127593_121985 | NW_004516008.1 | Scaffold575 | 121985                  | TT                              | AA                | 1946516511               |
| SNP_P3_127594_122019 | NW_004516008.1 | Scaffold575 | 122019                  | AA                              | GG                | 1946516513               |
| SNP_P3_127595_122024 | NW_004516008.1 | Scaffold575 | 122024                  | GG                              | TT                | 1946516514               |
| SNP_P3_127596_122038 | NW_004516008.1 | Scaffold575 | 122038                  | AA                              | GG                | 1946516516               |
| SNP_P3_127597_122056 | NW_004516008.1 | Scaffold575 | 122056                  | AA                              | CC                | 1946516517               |
| SNP_P3_127598_122059 | NW_004516008.1 | Scaffold575 | 122059                  | TT                              | CC                | 1946516519               |
| SNP_P3_127599_122061 | NW_004516008.1 | Scaffold575 | 122061                  | TT                              | CC                | 1946516521               |
| SNP_P3_127600_122067 | NW_004516008.1 | Scaffold575 | 122067                  | TT                              | GG                | 1946516522               |
| SNP_P3_127601_122081 | NW_004516008.1 | Scaffold575 | 122081                  | GG                              | CC                | 1946516524               |
| SNP_P3_127602_122102 | NW_004516008.1 | Scaffold575 | 122102                  | AA                              | GG                | 1946516525               |

| SNPs IDs             | Chromosome IDs | Chromosomes | Physical positions (bp) | CDC Frontier (Reference genome) | (Pusa 256 & HPNB) | NCBI SNPdb Accession IDs |
|----------------------|----------------|-------------|-------------------------|---------------------------------|-------------------|--------------------------|
| SNP_P3_127603_122121 | NW_004516008.1 | Scaffold575 | 122121                  | TT                              | CC                | 1946516527               |
| SNP_P3_127604_122126 | NW_004516008.1 | Scaffold575 | 122126                  | GG                              | TT                | 1946516529               |
| SNP_P3_127605_122138 | NW_004516008.1 | Scaffold575 | 122138                  | AA                              | GG                | 1946516530               |
| SNP_P3_127606_122151 | NW_004516008.1 | Scaffold575 | 122151                  | CC                              | AA                | 1946516532               |
| SNP_P3_127607_122167 | NW_004516008.1 | Scaffold575 | 122167                  | TT                              | CC                | 1946516534               |
| SNP_P3_127608_122203 | NW_004516008.1 | Scaffold575 | 122203                  | AA                              | CC                | 1946516535               |
| SNP_P3_127609_122312 | NW_004516008.1 | Scaffold575 | 122312                  | TT                              | CC                | 1946516537               |
| SNP_P3_127610_122409 | NW_004516008.1 | Scaffold575 | 122409                  | TT                              | CC                | 1946516539               |
| SNP_P3_127611_122473 | NW_004516008.1 | Scaffold575 | 122473                  | GG                              | CC                | 1946516540               |
| SNP_P3_127612_122480 | NW_004516008.1 | Scaffold575 | 122480                  | TT                              | CC                | 1946516542               |
| SNP_P3_127613_122487 | NW_004516008.1 | Scaffold575 | 122487                  | AA                              | GG                | 1946516544               |
| SNP_P3_127614_122518 | NW_004516008.1 | Scaffold575 | 122518                  | AA                              | CC                | 1946516545               |
| SNP_P3_127615_122574 | NW_004516008.1 | Scaffold575 | 122574                  | TT                              | GG                | 1946516547               |
| SNP_P3_127616_123990 | NW_004516008.1 | Scaffold575 | 123990                  | TT                              | GG                | 1946516549               |
| SNP_P3_127617_124018 | NW_004516008.1 | Scaffold575 | 124018                  | AA                              | GG                | 1946516551               |
| SNP_P3_127618_124053 | NW_004516008.1 | Scaffold575 | 124053                  | CC                              | AA                | 1946516552               |
| SNP_P3_127619_124064 | NW_004516008.1 | Scaffold575 | 124064                  | TT                              | CC                | 1946516554               |
| SNP_P3_127620_124076 | NW_004516008.1 | Scaffold575 | 124076                  | CC                              | AA                | 1946516556               |
| SNP_P3_127621_124324 | NW_004516008.1 | Scaffold575 | 124324                  | CC                              | TT                | 1946516557               |
| SNP_P3_127622_124344 | NW_004516008.1 | Scaffold575 | 124344                  | AA                              | CC                | 1946516559               |
| SNP_P3_127623_124353 | NW_004516008.1 | Scaffold575 | 124353                  | GG                              | AA                | 1946516560               |
| SNP_P3_127624_124354 | NW_004516008.1 | Scaffold575 | 124354                  | GG                              | AA                | 1946516562               |
| SNP_P3_127625_124420 | NW_004516008.1 | Scaffold575 | 124420                  | GG                              | AA                | 1946516563               |
| SNP_P3_127626_124427 | NW_004516008.1 | Scaffold575 | 124427                  | AA                              | CC                | 1946516565               |
| SNP_P3_127627_124445 | NW_004516008.1 | Scaffold575 | 124445                  | GG                              | CC                | 1946516566               |
| SNP_P3_127628_124484 | NW_004516008.1 | Scaffold575 | 124484                  | AA                              | GG                | 1946516568               |
| SNP_P3_127629_124505 | NW_004516008.1 | Scaffold575 | 124505                  | TT                              | CC                | 1946516570               |
| SNP_P3_127630_124536 | NW_004516008.1 | Scaffold575 | 124536                  | GG                              | AA                | 1946516571               |
| SNP_P3_127631_124548 | NW_004516008.1 | Scaffold575 | 124548                  | CC                              | AA                | 1946516573               |
| SNP_P3_127632_124584 | NW_004516008.1 | Scaffold575 | 124584                  | AA                              | GG                | 1946516575               |
| SNP_P3_127633_124593 | NW_004516008.1 | Scaffold575 | 124593                  | CC                              | TT                | 1946516576               |
| SNP_P3_127634_124632 | NW_004516008.1 | Scaffold575 | 124632                  | AA                              | GG                | 1946516578               |
| SNP_P3_127635_124651 | NW_004516008.1 | Scaffold575 | 124651                  | TT                              | CC                | 1946516579               |
| SNP_P3_127636_124783 | NW_004516008.1 | Scaffold575 | 124783                  | AA                              | GG                | 1946516581               |
| SNP_P3_127637_124800 | NW_004516008.1 | Scaffold575 | 124800                  | AA                              | GG                | 1946516583               |
| SNP_P3_127638_124853 | NW_004516008.1 | Scaffold575 | 124853                  | CC                              | TT                | 1946516584               |
| SNP_P3_127639_124856 | NW_004516008.1 | Scaffold575 | 124856                  | TT                              | CC                | 1946516586               |
| SNP_P3_127640_124862 | NW_004516008.1 | Scaffold575 | 124862                  | TT                              | CC                | 1946516588               |
| SNP_P3_127641_124886 | NW_004516008.1 | Scaffold575 | 124886                  | TT                              | CC                | 1946516589               |
| SNP_P3_127642_124888 | NW_004516008.1 | Scaffold575 | 124888                  | AA                              | CC                | 1946516591               |
| SNP_P3_127643_124895 | NW_004516008.1 | Scaffold575 | 124895                  | GG                              | AA                | 1946516592               |
| SNP_P3_127644_124921 | NW_004516008.1 | Scaffold575 | 124921                  | TT                              | CC                | 1946516594               |

| SNPs IDs             | Chromosome IDs | Chromosomes | Physical positions (bp) | CDC Frontier (Reference genome) | (Pusa 256 & HPNB) | NCBI SNPdb Accession IDs |
|----------------------|----------------|-------------|-------------------------|---------------------------------|-------------------|--------------------------|
| SNP_P3_127645_124940 | NW_004516008.1 | Scaffold575 | 124940                  | GG                              | AA                | 1946516596               |
| SNP_P3_127646_124983 | NW_004516008.1 | Scaffold575 | 124983                  | GG                              | CC                | 1946516597               |
| SNP_P3_127647_124998 | NW_004516008.1 | Scaffold575 | 124998                  | TT                              | CC                | 1946516599               |
| SNP_P3_127648_125005 | NW_004516008.1 | Scaffold575 | 125005                  | AA                              | GG                | 1946516601               |
| SNP_P3_127649_125083 | NW_004516008.1 | Scaffold575 | 125083                  | AA                              | CC                | 1946516602               |
| SNP_P3_127650_125174 | NW_004516008.1 | Scaffold575 | 125174                  | TT                              | CC                | 1946516604               |
| SNP_P3_127651_125191 | NW_004516008.1 | Scaffold575 | 125191                  | TT                              | CC                | 1946516605               |
| SNP_P3_127652_125193 | NW_004516008.1 | Scaffold575 | 125193                  | TT                              | CC                | 1946516607               |
| SNP_P3_127653_125217 | NW_004516008.1 | Scaffold575 | 125217                  | TT                              | AA                | 1946516608               |
| SNP_P3_127654_125245 | NW_004516008.1 | Scaffold575 | 125245                  | TT                              | CC                | 1946516610               |
| SNP_P3_127655_125299 | NW_004516008.1 | Scaffold575 | 125299                  | AA                              | GG                | 1946516612               |
| SNP_P3_127656_125301 | NW_004516008.1 | Scaffold575 | 125301                  | GG                              | TT                | 1946516613               |
| SNP_P3_127657_125327 | NW_004516008.1 | Scaffold575 | 125327                  | AA                              | GG                | 1946516615               |
| SNP_P3_127658_125342 | NW_004516008.1 | Scaffold575 | 125342                  | TT                              | AA                | 1946516616               |
| SNP_P3_127659_125368 | NW_004516008.1 | Scaffold575 | 125368                  | GG                              | AA                | 1946516618               |
| SNP_P3_127660_125384 | NW_004516008.1 | Scaffold575 | 125384                  | TT                              | CC                | 1946516620               |
| SNP_P3_127661_125400 | NW_004516008.1 | Scaffold575 | 125400                  | TT                              | CC                | 1946516621               |
| SNP_P3_127662_125413 | NW_004516008.1 | Scaffold575 | 125413                  | AA                              | GG                | 1946516623               |
| SNP_P3_127663_125448 | NW_004516008.1 | Scaffold575 | 125448                  | AA                              | GG                | 1946516625               |
| SNP_P3_127664_125449 | NW_004516008.1 | Scaffold575 | 125449                  | TT                              | GG                | 1946516627               |
| SNP_P3_127665_125466 | NW_004516008.1 | Scaffold575 | 125466                  | AA                              | TT                | 1946516628               |
| SNP_P3_127666_125492 | NW_004516008.1 | Scaffold575 | 125492                  | TT                              | CC                | 1946516630               |
| SNP_P3_127667_125518 | NW_004516008.1 | Scaffold575 | 125518                  | TT                              | CC                | 1946516632               |
| SNP_P3_127668_125519 | NW_004516008.1 | Scaffold575 | 125519                  | TT                              | CC                | 1946516633               |
| SNP_P3_127669_125543 | NW_004516008.1 | Scaffold575 | 125543                  | GG                              | CC                | 1946516635               |
| SNP_P3_127670_125561 | NW_004516008.1 | Scaffold575 | 125561                  | AA                              | GG                | 1946516637               |
| SNP_P3_127671_125582 | NW_004516008.1 | Scaffold575 | 125582                  | AA                              | GG                | 1946516639               |
| SNP_P3_127672_125595 | NW_004516008.1 | Scaffold575 | 125595                  | AA                              | TT                | 1946516640               |
| SNP_P3_127673_125599 | NW_004516008.1 | Scaffold575 | 125599                  | TT                              | CC                | 1946516642               |
| SNP_P3_127674_125604 | NW_004516008.1 | Scaffold575 | 125604                  | AA                              | GG                | 1946516644               |
| SNP_P3_127675_125612 | NW_004516008.1 | Scaffold575 | 125612                  | TT                              | GG                | 1946516646               |
| SNP_P3_127676_125654 | NW_004516008.1 | Scaffold575 | 125654                  | TT                              | CC                | 1946516647               |
| SNP_P3_127677_125684 | NW_004516008.1 | Scaffold575 | 125684                  | TT                              | CC                | 1946516649               |
| SNP_P3_127678_125742 | NW_004516008.1 | Scaffold575 | 125742                  | TT                              | CC                | 1946516651               |
| SNP_P3_127679_125748 | NW_004516008.1 | Scaffold575 | 125748                  | CC                              | TT                | 1946516652               |
| SNP_P3_127680_125760 | NW_004516008.1 | Scaffold575 | 125760                  | AA                              | GG                | 1946516654               |
| SNP_P3_127681_125762 | NW_004516008.1 | Scaffold575 | 125762                  | AA                              | GG                | 1946516655               |
| SNP_P3_127682_125802 | NW_004516008.1 | Scaffold575 | 125802                  | CC                              | TT                | 1946516657               |
| SNP_P3_127683_125841 | NW_004516008.1 | Scaffold575 | 125841                  | TT                              | CC                | 1946516658               |
| SNP_P3_127684_125866 | NW_004516008.1 | Scaffold575 | 125866                  | TT                              | GG                | 1946516660               |
| SNP_P3_127685_125876 | NW_004516008.1 | Scaffold575 | 125876                  | TT                              | CC                | 1946516662               |
| SNP_P3_127686_125905 | NW_004516008.1 | Scaffold575 | 125905                  | AA                              | GG                | 1946516663               |

| SNPs IDs             | Chromosome IDs | Chromosomes | Physical positions (bp) | CDC Frontier (Reference genome) | (Pusa 256 & HPNB) | NCBI SNPdb Accession IDs |
|----------------------|----------------|-------------|-------------------------|---------------------------------|-------------------|--------------------------|
| SNP_P3_127688_125914 | NW_004516008.1 | Scaffold575 | 125914                  | AA                              | GG                | 1946516665               |
| SNP_P3_127689_125985 | NW_004516008.1 | Scaffold575 | 125985                  | AA                              | GG                | 1946516667               |
| SNP_P3_127691_126000 | NW_004516008.1 | Scaffold575 | 126000                  | AA                              | GG                | 1946516669               |
| SNP_P3_127692_126042 | NW_004516008.1 | Scaffold575 | 126042                  | AA                              | CC                | 1946516670               |
| SNP_P3_127693_126053 | NW_004516008.1 | Scaffold575 | 126053                  | GG                              | TT                | 1946516672               |
| SNP_P3_127694_126058 | NW_004516008.1 | Scaffold575 | 126058                  | CC                              | TT                | 1946516673               |
| SNP_P3_127695_126118 | NW_004516008.1 | Scaffold575 | 126118                  | TT                              | CC                | 1946516675               |
| SNP_P3_127696_126155 | NW_004516008.1 | Scaffold575 | 126155                  | TT                              | CC                | 1946516677               |
| SNP_P3_127697_126164 | NW_004516008.1 | Scaffold575 | 126164                  | CC                              | GG                | 1946516678               |
| SNP_P3_127698_126175 | NW_004516008.1 | Scaffold575 | 126175                  | GG                              | AA                | 1946516680               |
| SNP_P3_127699_126255 | NW_004516008.1 | Scaffold575 | 126255                  | TT                              | CC                | 1946516681               |
| SNP_P3_127700_126258 | NW_004516008.1 | Scaffold575 | 126258                  | AA                              | TT                | 1946516683               |
| SNP_P3_127701_126260 | NW_004516008.1 | Scaffold575 | 126260                  | TT                              | GG                | 1946516685               |
| SNP_P3_127703_126345 | NW_004516008.1 | Scaffold575 | 126345                  | TT                              | CC                | 1946516687               |
| SNP_P3_127704_126379 | NW_004516008.1 | Scaffold575 | 126379                  | TT                              | CC                | 1946516689               |
| SNP_P3_127705_126393 | NW_004516008.1 | Scaffold575 | 126393                  | AA                              | GG                | 1946516691               |
| SNP_P3_127706_126407 | NW_004516008.1 | Scaffold575 | 126407                  | TT                              | CC                | 1946516692               |
| SNP_P3_127707_126409 | NW_004516008.1 | Scaffold575 | 126409                  | GG                              | AA                | 1946516694               |
| SNP_P3_127708_126517 | NW_004516008.1 | Scaffold575 | 126517                  | TT                              | CC                | 1946516696               |
| SNP_P3_127709_126518 | NW_004516008.1 | Scaffold575 | 126518                  | TT                              | CC                | 1946516697               |
| SNP_P3_127710_126549 | NW_004516008.1 | Scaffold575 | 126549                  | AA                              | CC                | 1946516699               |
| SNP_P3_127711_126582 | NW_004516008.1 | Scaffold575 | 126582                  | AA                              | GG                | 1946516701               |
| SNP_P3_127712_126604 | NW_004516008.1 | Scaffold575 | 126604                  | GG                              | TT                | 1946516703               |
| SNP_P3_127713_126609 | NW_004516008.1 | Scaffold575 | 126609                  | TT                              | CC                | 1946516705               |
| SNP_P3_127714_126651 | NW_004516008.1 | Scaffold575 | 126651                  | TT                              | GG                | 1946516706               |
| SNP_P3_127715_126718 | NW_004516008.1 | Scaffold575 | 126718                  | TT                              | AA                | 1946516708               |
| SNP_P3_127716_126759 | NW_004516008.1 | Scaffold575 | 126759                  | GG                              | AA                | 1946516710               |
| SNP_P3_127717_126803 | NW_004516008.1 | Scaffold575 | 126803                  | AA                              | GG                | 1946516711               |
| SNP_P3_127718_126809 | NW_004516008.1 | Scaffold575 | 126809                  | AA                              | GG                | 1946516713               |
| SNP_P3_127719_126816 | NW_004516008.1 | Scaffold575 | 126816                  | AA                              | CC                | 1946516715               |
| SNP_P3_127720_126819 | NW_004516008.1 | Scaffold575 | 126819                  | AA                              | GG                | 1946516717               |
| SNP_P3_127721_126846 | NW_004516008.1 | Scaffold575 | 126846                  | AA                              | GG                | 1946516718               |
| SNP_P3_127722_126860 | NW_004516008.1 | Scaffold575 | 126860                  | TT                              | CC                | 1946516720               |
| SNP_P3_127723_126875 | NW_004516008.1 | Scaffold575 | 126875                  | TT                              | CC                | 1946516722               |
| SNP_P3_127724_126882 | NW_004516008.1 | Scaffold575 | 126882                  | TT                              | GG                | 1946516723               |
| SNP_P3_127725_126886 | NW_004516008.1 | Scaffold575 | 126886                  | AA                              | GG                | 1946516725               |
| SNP_P3_127726_126937 | NW_004516008.1 | Scaffold575 | 126937                  | AA                              | CC                | 1946516727               |
| SNP_P3_127727_127005 | NW_004516008.1 | Scaffold575 | 127005                  | AA                              | CC                | 1946516729               |
| SNP_P3_127728_127027 | NW_004516008.1 | Scaffold575 | 127027                  | TT                              | CC                | 1946516731               |
| SNP_P3_127729_127030 | NW_004516008.1 | Scaffold575 | 127030                  | AA                              | GG                | 1946516732               |
| SNP_P3_127730_127031 | NW_004516008.1 | Scaffold575 | 127031                  | AA                              | CC                | 1946516734               |
| SNP_P3_127731_127077 | NW_004516008.1 | Scaffold575 | 127077                  | AA                              | GG                | 1946516735               |

| SNPs IDs             | Chromosome IDs | Chromosomes | Physical positions (bp) | CDC Frontier (Reference genome) | (Pusa 256 & HPNB) | NCBI SNPdb Accession IDs |
|----------------------|----------------|-------------|-------------------------|---------------------------------|-------------------|--------------------------|
| SNP_P3_127732_127124 | NW_004516008.1 | Scaffold575 | 127124                  | TT                              | GG                | 1946516737               |
| SNP_P3_127733_127135 | NW_004516008.1 | Scaffold575 | 127135                  | TT                              | AA                | 1946516739               |
| SNP_P3_127734_127245 | NW_004516008.1 | Scaffold575 | 127245                  | CC                              | GG                | 1946516740               |
| SNP_P3_127735_127256 | NW_004516008.1 | Scaffold575 | 127256                  | AA                              | CC                | 1946516742               |
| SNP_P3_127736_127291 | NW_004516008.1 | Scaffold575 | 127291                  | AA                              | GG                | 1946516744               |
| SNP_P3_127737_133851 | NW_004516008.1 | Scaffold575 | 133851                  | CC                              | TT                | 1946516747               |
| SNP_P3_127738_524    | NW_004516009.1 | Scaffold577 | 524                     | GG                              | AA                | 1946516748               |
| SNP_P3_127739_718    | NW_004516009.1 | Scaffold577 | 718                     | TT                              | CC                | 1946516750               |
| SNP_P3_127740_4131   | NW_004516009.1 | Scaffold577 | 4131                    | CC                              | TT                | 1946516752               |
| SNP_P3_127741_4132   | NW_004516009.1 | Scaffold577 | 4132                    | AA                              | GG                | 1946516753               |
| SNP_P3_127742_4241   | NW_004516009.1 | Scaffold577 | 4241                    | GG                              | CC                | 1946516755               |
| SNP_P3_127743_4381   | NW_004516009.1 | Scaffold577 | 4381                    | CC                              | AA                | 1946516757               |
| SNP_P3_127744_4680   | NW_004516009.1 | Scaffold577 | 4680                    | GG                              | AA                | 1946516758               |
| SNP_P3_127745_8609   | NW_004516009.1 | Scaffold577 | 8609                    | CC                              | AA                | 1946516760               |
| SNP_P3_127747_16555  | NW_004516009.1 | Scaffold577 | 16555                   | CC                              | GG                | 1946516762               |
| SNP_P3_127748_16652  | NW_004516009.1 | Scaffold577 | 16652                   | CC                              | TT                | 1946516763               |
| SNP_P3_127749_16675  | NW_004516009.1 | Scaffold577 | 16675                   | CC                              | TT                | 1946516765               |
| SNP_P3_127750_16779  | NW_004516009.1 | Scaffold577 | 16779                   | GG                              | AA                | 1946516767               |
| SNP_P3_127751_16818  | NW_004516009.1 | Scaffold577 | 16818                   | AA                              | GG                | 1946516768               |
| SNP_P3_127752_17146  | NW_004516009.1 | Scaffold577 | 17146                   | GG                              | AA                | 1946516770               |
| SNP_P3_127753_22493  | NW_004516009.1 | Scaffold577 | 22493                   | TT                              | CC                | 1946516772               |
| SNP_P3_127754_26858  | NW_004516009.1 | Scaffold577 | 26858                   | CC                              | AA                | 1946516773               |
| SNP_P3_127755_31778  | NW_004516009.1 | Scaffold577 | 31778                   | TT                              | AA                | 1946516775               |
| SNP_P3_127756_31832  | NW_004516009.1 | Scaffold577 | 31832                   | CC                              | TT                | 1946516777               |
| SNP_P3_127758_41147  | NW_004516009.1 | Scaffold577 | 41147                   | CC                              | TT                | 1946516778               |
| SNP_P3_127759_41529  | NW_004516009.1 | Scaffold577 | 41529                   | CC                              | TT                | 1946516780               |
| SNP_P3_127760_41531  | NW_004516009.1 | Scaffold577 | 41531                   | AA                              | GG                | 1946516781               |
| SNP_P3_127761_41532  | NW_004516009.1 | Scaffold577 | 41532                   | GG                              | TT                | 1946516783               |
| SNP_P3_127762_41533  | NW_004516009.1 | Scaffold577 | 41533                   | CC                              | GG                | 1946516785               |
| SNP_P3_127763_41549  | NW_004516009.1 | Scaffold577 | 41549                   | TT                              | GG                | 1946516786               |
| SNP_P3_127764_41559  | NW_004516009.1 | Scaffold577 | 41559                   | TT                              | CC                | 1946516788               |
| SNP_P3_127765_41660  | NW_004516009.1 | Scaffold577 | 41660                   | CC                              | AA                | 1946516790               |
| SNP_P3_127766_41901  | NW_004516009.1 | Scaffold577 | 41901                   | AA                              | GG                | 1946516791               |
| SNP_P3_127767_42120  | NW_004516009.1 | Scaffold577 | 42120                   | AA                              | GG                | 1946516793               |
| SNP_P3_127768_42220  | NW_004516009.1 | Scaffold577 | 42220                   | GG                              | AA                | 1946516794               |
| SNP_P3_127769_42253  | NW_004516009.1 | Scaffold577 | 42253                   | GG                              | AA                | 1946516796               |
| SNP_P3_127770_42366  | NW_004516009.1 | Scaffold577 | 42366                   | TT                              | CC                | 1946516797               |
| SNP_P3_127771_47052  | NW_004516009.1 | Scaffold577 | 47052                   | TT                              | AA                | 1946516799               |
| SNP_P3_127772_47059  | NW_004516009.1 | Scaffold577 | 47059                   | CC                              | GG                | 1946516801               |
| SNP_P3_127773_55424  | NW_004516009.1 | Scaffold577 | 55424                   | CC                              | TT                | 1946516803               |
| SNP_P3_127774_55433  | NW_004516009.1 | Scaffold577 | 55433                   | AA                              | TT                | 1946516804               |
| SNP_P3_127775_56043  | NW_004516009.1 | Scaffold577 | 56043                   | AA                              | TT                | 1946516806               |

| SNPs IDs             | Chromosome IDs | Chromosomes | Physical positions (bp) | CDC Frontier (Reference genome) | (Pusa 256 & HPNB) | NCBI SNPdb Accession IDs |
|----------------------|----------------|-------------|-------------------------|---------------------------------|-------------------|--------------------------|
| SNP_P3_127776_56054  | NW_004516009.1 | Scaffold577 | 56054                   | GG                              | AA                | 1946516807               |
| SNP_P3_127777_56089  | NW_004516009.1 | Scaffold577 | 56089                   | CC                              | AA                | 1946516809               |
| SNP_P3_127778_64924  | NW_004516009.1 | Scaffold577 | 64924                   | CC                              | GG                | 1946516811               |
| SNP_P3_127779_64957  | NW_004516009.1 | Scaffold577 | 64957                   | CC                              | GG                | 1946516812               |
| SNP_P3_127780_65037  | NW_004516009.1 | Scaffold577 | 65037                   | AA                              | GG                | 1946516814               |
| SNP_P3_127781_65134  | NW_004516009.1 | Scaffold577 | 65134                   | GG                              | CC                | 1946516816               |
| SNP_P3_127782_65199  | NW_004516009.1 | Scaffold577 | 65199                   | GG                              | AA                | 1946516817               |
| SNP_P3_127784_65434  | NW_004516009.1 | Scaffold577 | 65434                   | CC                              | TT                | 1946516819               |
| SNP_P3_127785_65445  | NW_004516009.1 | Scaffold577 | 65445                   | GG                              | CC                | 1946516820               |
| SNP_P3_127786_65591  | NW_004516009.1 | Scaffold577 | 65591                   | TT                              | AA                | 1946516822               |
| SNP_P3_127787_66005  | NW_004516009.1 | Scaffold577 | 66005                   | AA                              | GG                | 1946516824               |
| SNP_P3_127788_66256  | NW_004516009.1 | Scaffold577 | 66256                   | AA                              | CC                | 1946516825               |
| SNP_P3_127789_69949  | NW_004516009.1 | Scaffold577 | 69949                   | TT                              | CC                | 1946516827               |
| SNP_P3_127790_69974  | NW_004516009.1 | Scaffold577 | 69974                   | CC                              | TT                | 1946516829               |
| SNP_P3_127791_70004  | NW_004516009.1 | Scaffold577 | 70004                   | AA                              | CC                | 1946516830               |
| SNP_P3_127792_70293  | NW_004516009.1 | Scaffold577 | 70293                   | AA                              | GG                | 1946516832               |
| SNP_P3_127793_70745  | NW_004516009.1 | Scaffold577 | 70745                   | CC                              | AA                | 1946516834               |
| SNP_P3_127794_70769  | NW_004516009.1 | Scaffold577 | 70769                   | AA                              | GG                | 1946516836               |
| SNP_P3_127795_71064  | NW_004516009.1 | Scaffold577 | 71064                   | TT                              | GG                | 1946516837               |
| SNP_P3_127796_74091  | NW_004516009.1 | Scaffold577 | 74091                   | GG                              | TT                | 1946516839               |
| SNP_P3_127797_74646  | NW_004516009.1 | Scaffold577 | 74646                   | AA                              | CC                | 1946516841               |
| SNP_P3_127798_74665  | NW_004516009.1 | Scaffold577 | 74665                   | GG                              | AA                | 1946516842               |
| SNP_P3_127799_74795  | NW_004516009.1 | Scaffold577 | 74795                   | AA                              | CC                | 1946516844               |
| SNP_P3_127800_82838  | NW_004516009.1 | Scaffold577 | 82838                   | TT                              | CC                | 1946516846               |
| SNP_P3_127801_83063  | NW_004516009.1 | Scaffold577 | 83063                   | CC                              | TT                | 1946516847               |
| SNP_P3_127802_83064  | NW_004516009.1 | Scaffold577 | 83064                   | AA                              | TT                | 1946516849               |
| SNP_P3_127803_84337  | NW_004516009.1 | Scaffold577 | 84337                   | AA                              | TT                | 1946516851               |
| SNP_P3_127804_84382  | NW_004516009.1 | Scaffold577 | 84382                   | GG                              | CC                | 1946516853               |
| SNP_P3_127805_84386  | NW_004516009.1 | Scaffold577 | 84386                   | GG                              | CC                | 1946516855               |
| SNP_P3_127806_84402  | NW_004516009.1 | Scaffold577 | 84402                   | GG                              | TT                | 1946516857               |
| SNP_P3_127808_85034  | NW_004516009.1 | Scaffold577 | 85034                   | TT                              | AA                | 1946516858               |
| SNP_P3_127809_87505  | NW_004516009.1 | Scaffold577 | 87505                   | GG                              | TT                | 1946516860               |
| SNP_P3_127810_87508  | NW_004516009.1 | Scaffold577 | 87508                   | CC                              | TT                | 1946516862               |
| SNP_P3_127811_87509  | NW_004516009.1 | Scaffold577 | 87509                   | GG                              | AA                | 1946516864               |
| SNP_P3_127812_87510  | NW_004516009.1 | Scaffold577 | 87510                   | AA                              | GG                | 1946516865               |
| SNP_P3_127813_95644  | NW_004516009.1 | Scaffold577 | 95644                   | GG                              | TT                | 1946516867               |
| SNP_P3_127814_106267 | NW_004516009.1 | Scaffold577 | 106267                  | AA                              | TT                | 1946516869               |
| SNP_P3_127815_111520 | NW_004516009.1 | Scaffold577 | 111520                  | AA                              | TT                | 1946516870               |
| SNP_P3_127816_111759 | NW_004516009.1 | Scaffold577 | 111759                  | CC                              | TT                | 1946516872               |
| SNP_P3_127817_111830 | NW_004516009.1 | Scaffold577 | 111830                  | TT                              | CC                | 1946516874               |
| SNP_P3_127818_111894 | NW_004516009.1 | Scaffold577 | 111894                  | AA                              | GG                | 1946516875               |
| SNP_P3_127819_118957 | NW_004516009.1 | Scaffold577 | 118957                  | GG                              | AA                | 1946516877               |

| SNPs IDs             | Chromosome IDs | Chromosomes | Physical positions (bp) | CDC Frontier (Reference genome) | (Pusa 256 & HPNB) | NCBI SNPdb Accession IDs |
|----------------------|----------------|-------------|-------------------------|---------------------------------|-------------------|--------------------------|
| SNP_P3_127820_120980 | NW_004516009.1 | Scaffold577 | 120980                  | CC                              | TT                | 1946516879               |
| SNP_P3_127821_121022 | NW_004516009.1 | Scaffold577 | 121022                  | TT                              | CC                | 1946516880               |
| SNP_P3_127822_121615 | NW_004516009.1 | Scaffold577 | 121615                  | AA                              | GG                | 1946516882               |
| SNP_P3_127823_121945 | NW_004516009.1 | Scaffold577 | 121945                  | TT                              | GG                | 1946516883               |
| SNP_P3_127824_2392   | NW_004516010.1 | Scaffold578 | 2392                    | TT                              | CC                | 1946516885               |
| SNP_P3_127825_2569   | NW_004516010.1 | Scaffold578 | 2569                    | TT                              | CC                | 1946516887               |
| SNP_P3_127826_3852   | NW_004516010.1 | Scaffold578 | 3852                    | CC                              | AA                | 1946516889               |
| SNP_P3_127827_4286   | NW_004516010.1 | Scaffold578 | 4286                    | CC                              | AA                | 1946516890               |
| SNP_P3_127828_4305   | NW_004516010.1 | Scaffold578 | 4305                    | GG                              | CC                | 1946516892               |
| SNP_P3_127829_7951   | NW_004516010.1 | Scaffold578 | 7951                    | CC                              | GG                | 1946516893               |
| SNP_P3_127830_7959   | NW_004516010.1 | Scaffold578 | 7959                    | AA                              | GG                | 1946516895               |
| SNP_P3_127831_8183   | NW_004516010.1 | Scaffold578 | 8183                    | TT                              | AA                | 1946516897               |
| SNP_P3_127832_10145  | NW_004516010.1 | Scaffold578 | 10145                   | AA                              | GG                | 1946516898               |
| SNP_P3_127833_11329  | NW_004516010.1 | Scaffold578 | 11329                   | GG                              | TT                | 1946516900               |
| SNP_P3_127834_11334  | NW_004516010.1 | Scaffold578 | 11334                   | TT                              | AA                | 1946516902               |
| SNP_P3_127835_11396  | NW_004516010.1 | Scaffold578 | 11396                   | TT                              | CC                | 1946516904               |
| SNP_P3_127836_11607  | NW_004516010.1 | Scaffold578 | 11607                   | GG                              | AA                | 1946516905               |
| SNP_P3_127838_11684  | NW_004516010.1 | Scaffold578 | 11684                   | TT                              | AA                | 1946516907               |
| SNP_P3_127839_11716  | NW_004516010.1 | Scaffold578 | 11716                   | GG                              | CC                | 1946516908               |
| SNP_P3_127840_11747  | NW_004516010.1 | Scaffold578 | 11747                   | TT                              | AA                | 1946516910               |
| SNP_P3_127841_11775  | NW_004516010.1 | Scaffold578 | 11775                   | TT                              | GG                | 1946516912               |
| SNP_P3_127842_11904  | NW_004516010.1 | Scaffold578 | 11904                   | AA                              | GG                | 1946516913               |
| SNP_P3_127843_11924  | NW_004516010.1 | Scaffold578 | 11924                   | CC                              | TT                | 1946516915               |
| SNP_P3_127844_11948  | NW_004516010.1 | Scaffold578 | 11948                   | TT                              | GG                | 1946516916               |
| SNP_P3_127845_11952  | NW_004516010.1 | Scaffold578 | 11952                   | CC                              | GG                | 1946516918               |
| SNP_P3_127846_11988  | NW_004516010.1 | Scaffold578 | 11988                   | GG                              | AA                | 1946516920               |
| SNP_P3_127847_12043  | NW_004516010.1 | Scaffold578 | 12043                   | GG                              | AA                | 1946516921               |
| SNP_P3_127848_12131  | NW_004516010.1 | Scaffold578 | 12131                   | AA                              | TT                | 1946516923               |
| SNP_P3_127849_14102  | NW_004516010.1 | Scaffold578 | 14102                   | TT                              | AA                | 1946516925               |
| SNP_P3_127850_14114  | NW_004516010.1 | Scaffold578 | 14114                   | GG                              | AA                | 1946516926               |
| SNP_P3_127851_14129  | NW_004516010.1 | Scaffold578 | 14129                   | AA                              | TT                | 1946516928               |
| SNP_P3_127852_15565  | NW_004516010.1 | Scaffold578 | 15565                   | AA                              | GG                | 1946516929               |
| SNP_P3_127853_15577  | NW_004516010.1 | Scaffold578 | 15577                   | TT                              | CC                | 1946516931               |
| SNP_P3_127854_19673  | NW_004516010.1 | Scaffold578 | 19673                   | GG                              | CC                | 1946516932               |
| SNP_P3_127855_19761  | NW_004516010.1 | Scaffold578 | 19761                   | GG                              | AA                | 1946516934               |
| SNP_P3_127856_19768  | NW_004516010.1 | Scaffold578 | 19768                   | GG                              | CC                | 1946516935               |
| SNP_P3_127857_19783  | NW_004516010.1 | Scaffold578 | 19783                   | AA                              | TT                | 1946516937               |
| SNP_P3_127858_19922  | NW_004516010.1 | Scaffold578 | 19922                   | CC                              | GG                | 1946516939               |
| SNP_P3_127859_19932  | NW_004516010.1 | Scaffold578 | 19932                   | AA                              | CC                | 1946516940               |
| SNP_P3_127860_20112  | NW_004516010.1 | Scaffold578 | 20112                   | GG                              | AA                | 1946516942               |
| SNP_P3_127861_20620  | NW_004516010.1 | Scaffold578 | 20620                   | TT                              | AA                | 1946516944               |
| SNP_P3_127862_20861  | NW_004516010.1 | Scaffold578 | 20861                   | CC                              | GG                | 1946516945               |

| SNPs IDs            | Chromosome IDs | Chromosomes | Physical positions (bp) | CDC Frontier (Reference genome) | (Pusa 256 & HPNB) | NCBI SNPdb Accession IDs |
|---------------------|----------------|-------------|-------------------------|---------------------------------|-------------------|--------------------------|
| SNP_P3_127863_20923 | NW_004516010.1 | Scaffold578 | 20923                   | CC                              | TT                | 1946516947               |
| SNP_P3_127864_20931 | NW_004516010.1 | Scaffold578 | 20931                   | TT                              | GG                | 1946516948               |
| SNP_P3_127865_20945 | NW_004516010.1 | Scaffold578 | 20945                   | AA                              | GG                | 1946516949               |
| SNP_P3_127866_20967 | NW_004516010.1 | Scaffold578 | 20967                   | CC                              | GG                | 1946516951               |
| SNP_P3_127867_21282 | NW_004516010.1 | Scaffold578 | 21282                   | AA                              | TT                | 1946516953               |
| SNP_P3_127868_33275 | NW_004516010.1 | Scaffold578 | 33275                   | AA                              | GG                | 1946516954               |
| SNP_P3_127869_33482 | NW_004516010.1 | Scaffold578 | 33482                   | TT                              | CC                | 1946516956               |
| SNP_P3_127870_33501 | NW_004516010.1 | Scaffold578 | 33501                   | AA                              | GG                | 1946516957               |
| SNP_P3_127871_37252 | NW_004516010.1 | Scaffold578 | 37252                   | TT                              | GG                | 1946516959               |
| SNP_P3_127872_37422 | NW_004516010.1 | Scaffold578 | 37422                   | TT                              | CC                | 1946516960               |
| SNP_P3_127873_37569 | NW_004516010.1 | Scaffold578 | 37569                   | TT                              | CC                | 1946516962               |
| SNP_P3_127874_37887 | NW_004516010.1 | Scaffold578 | 37887                   | CC                              | GG                | 1946516963               |
| SNP_P3_127875_37987 | NW_004516010.1 | Scaffold578 | 37987                   | GG                              | CC                | 1946516965               |
| SNP_P3_127876_38225 | NW_004516010.1 | Scaffold578 | 38225                   | TT                              | CC                | 1946516966               |
| SNP_P3_127878_53657 | NW_004516010.1 | Scaffold578 | 53657                   | AA                              | TT                | 1946516968               |
| SNP_P3_127879_53658 | NW_004516010.1 | Scaffold578 | 53658                   | GG                              | AA                | 1946516970               |
| SNP_P3_127880_53691 | NW_004516010.1 | Scaffold578 | 53691                   | TT                              | GG                | 1946516971               |
| SNP_P3_127881_53696 | NW_004516010.1 | Scaffold578 | 53696                   | TT                              | CC                | 1946516973               |
| SNP_P3_127882_53706 | NW_004516010.1 | Scaffold578 | 53706                   | GG                              | AA                | 1946516974               |
| SNP_P3_127883_63641 | NW_004516010.1 | Scaffold578 | 63641                   | AA                              | GG                | 1946516976               |
| SNP_P3_127884_63652 | NW_004516010.1 | Scaffold578 | 63652                   | GG                              | AA                | 1946516977               |
| SNP_P3_127885_63670 | NW_004516010.1 | Scaffold578 | 63670                   | TT                              | GG                | 1946516979               |
| SNP_P3_127886_63721 | NW_004516010.1 | Scaffold578 | 63721                   | TT                              | AA                | 1946516980               |
| SNP_P3_127887_63794 | NW_004516010.1 | Scaffold578 | 63794                   | AA                              | GG                | 1946516982               |
| SNP_P3_127888_63863 | NW_004516010.1 | Scaffold578 | 63863                   | AA                              | TT                | 1946516984               |
| SNP_P3_127889_63877 | NW_004516010.1 | Scaffold578 | 63877                   | AA                              | GG                | 1946516985               |
| SNP_P3_127890_63897 | NW_004516010.1 | Scaffold578 | 63897                   | AA                              | CC                | 1946516987               |
| SNP_P3_127891_63919 | NW_004516010.1 | Scaffold578 | 63919                   | AA                              | GG                | 1946516988               |
| SNP_P3_127892_63922 | NW_004516010.1 | Scaffold578 | 63922                   | CC                              | AA                | 1946516990               |
| SNP_P3_127893_64324 | NW_004516010.1 | Scaffold578 | 64324                   | GG                              | TT                | 1946516992               |
| SNP_P3_127894_460   | NW_004516011.1 | Scaffold580 | 460                     | CC                              | GG                | 1946516993               |
| SNP_P3_127895_1057  | NW_004516012.1 | Scaffold582 | 1057                    | AA                              | TT                | 1946516995               |
| SNP_P3_127896_1150  | NW_004516012.1 | Scaffold582 | 1150                    | AA                              | CC                | 1946516997               |
| SNP_P3_127897_1177  | NW_004516012.1 | Scaffold582 | 1177                    | TT                              | CC                | 1946516999               |
| SNP_P3_127898_13445 | NW_004516012.1 | Scaffold582 | 13445                   | CC                              | TT                | 1946517000               |
| SNP_P3_127899_13517 | NW_004516012.1 | Scaffold582 | 13517                   | TT                              | CC                | 1946517002               |
| SNP_P3_127900_13526 | NW_004516012.1 | Scaffold582 | 13526                   | AA                              | GG                | 1946517003               |
| SNP_P3_127901_13535 | NW_004516012.1 | Scaffold582 | 13535                   | TT                              | CC                | 1946517005               |
| SNP_P3_127902_13556 | NW_004516012.1 | Scaffold582 | 13556                   | GG                              | AA                | 1946517006               |
| SNP_P3_127903_16327 | NW_004516012.1 | Scaffold582 | 16327                   | TT                              | CC                | 1946517008               |
| SNP_P3_127904_16347 | NW_004516012.1 | Scaffold582 | 16347                   | AA                              | CC                | 1946517010               |
| SNP_P3_127905_16397 | NW_004516012.1 | Scaffold582 | 16397                   | AA                              | CC                | 1946517011               |



| SNPs IDs            | Chromosome IDs | Chromosomes | Physical positions (bp) | CDC Frontier (Reference genome) | (Pusa 256 & HPNB) | NCBI SNPdb Accession IDs |
|---------------------|----------------|-------------|-------------------------|---------------------------------|-------------------|--------------------------|
| SNP_P3_127906_24078 | NW_004516012.1 | Scaffold582 | 24078                   | TT                              | GG                | 1946517013               |
| SNP_P3_127907_24185 | NW_004516012.1 | Scaffold582 | 24185                   | GG                              | TT                | 1946517015               |
| SNP_P3_127908_24201 | NW_004516012.1 | Scaffold582 | 24201                   | AA                              | GG                | 1946517016               |
| SNP_P3_127909_24937 | NW_004516012.1 | Scaffold582 | 24937                   | AA                              | TT                | 1946517018               |
| SNP_P3_127910_24962 | NW_004516012.1 | Scaffold582 | 24962                   | CC                              | AA                | 1946517019               |
| SNP_P3_127911_24965 | NW_004516012.1 | Scaffold582 | 24965                   | GG                              | CC                | 1946517021               |
| SNP_P3_127912_25209 | NW_004516012.1 | Scaffold582 | 25209                   | CC                              | TT                | 1946517022               |
| SNP_P3_127913_25212 | NW_004516012.1 | Scaffold582 | 25212                   | AA                              | TT                | 1946517024               |
| SNP_P3_127914_29752 | NW_004516012.1 | Scaffold582 | 29752                   | TT                              | CC                | 1946517026               |
| SNP_P3_127915_29954 | NW_004516012.1 | Scaffold582 | 29954                   | AA                              | GG                | 1946517027               |
| SNP_P3_127916_30387 | NW_004516012.1 | Scaffold582 | 30387                   | CC                              | GG                | 1946517029               |
| SNP_P3_127917_30448 | NW_004516012.1 | Scaffold582 | 30448                   | AA                              | CC                | 1946517030               |
| SNP_P3_127918_30515 | NW_004516012.1 | Scaffold582 | 30515                   | CC                              | GG                | 1946517032               |
| SNP_P3_127919_30568 | NW_004516012.1 | Scaffold582 | 30568                   | CC                              | TT                | 1946517034               |
| SNP_P3_127920_30690 | NW_004516012.1 | Scaffold582 | 30690                   | AA                              | TT                | 1946517035               |
| SNP_P3_127921_30748 | NW_004516012.1 | Scaffold582 | 30748                   | TT                              | GG                | 1946517036               |
| SNP_P3_127922_377   | NW_004516013.1 | Scaffold583 | 377                     | AA                              | GG                | 1946517038               |
| SNP_P3_127923_378   | NW_004516013.1 | Scaffold583 | 378                     | AA                              | TT                | 1946517040               |
| SNP_P3_127924_472   | NW_004516013.1 | Scaffold583 | 472                     | AA                              | CC                | 1946517041               |
| SNP_P3_127925_478   | NW_004516013.1 | Scaffold583 | 478                     | CC                              | TT                | 1946517043               |
| SNP_P3_127926_566   | NW_004516013.1 | Scaffold583 | 566                     | AA                              | GG                | 1946517044               |
| SNP_P3_127927_639   | NW_004516013.1 | Scaffold583 | 639                     | AA                              | GG                | 1946517046               |
| SNP_P3_127928_3848  | NW_004516013.1 | Scaffold583 | 3848                    | AA                              | CC                | 1946517047               |
| SNP_P3_127929_3854  | NW_004516013.1 | Scaffold583 | 3854                    | TT                              | CC                | 1946517049               |
| SNP_P3_127930_3863  | NW_004516013.1 | Scaffold583 | 3863                    | TT                              | CC                | 1946517050               |
| SNP_P3_127931_3878  | NW_004516013.1 | Scaffold583 | 3878                    | CC                              | AA                | 1946517052               |
| SNP_P3_127932_4006  | NW_004516013.1 | Scaffold583 | 4006                    | GG                              | AA                | 1946517053               |
| SNP_P3_127933_4032  | NW_004516013.1 | Scaffold583 | 4032                    | CC                              | TT                | 1946517055               |
| SNP_P3_127934_4069  | NW_004516013.1 | Scaffold583 | 4069                    | GG                              | AA                | 1946517057               |
| SNP_P3_127935_4097  | NW_004516013.1 | Scaffold583 | 4097                    | AA                              | GG                | 1946517058               |
| SNP_P3_127937_4168  | NW_004516013.1 | Scaffold583 | 4168                    | AA                              | CC                | 1946517060               |
| SNP_P3_127938_4187  | NW_004516013.1 | Scaffold583 | 4187                    | GG                              | AA                | 1946517061               |
| SNP_P3_127939_4188  | NW_004516013.1 | Scaffold583 | 4188                    | CC                              | AA                | 1946517063               |
| SNP_P3_127940_4302  | NW_004516013.1 | Scaffold583 | 4302                    | TT                              | CC                | 1946517065               |
| SNP_P3_127941_4400  | NW_004516013.1 | Scaffold583 | 4400                    | TT                              | CC                | 1946517066               |
| SNP_P3_127942_4458  | NW_004516013.1 | Scaffold583 | 4458                    | AA                              | TT                | 1946517068               |
| SNP_P3_127943_7087  | NW_004516013.1 | Scaffold583 | 7087                    | CC                              | TT                | 1946517069               |
| SNP_P3_127944_7088  | NW_004516013.1 | Scaffold583 | 7088                    | TT                              | CC                | 1946517071               |
| SNP_P3_127945_7142  | NW_004516013.1 | Scaffold583 | 7142                    | TT                              | GG                | 1946517072               |
| SNP_P3_127946_7429  | NW_004516013.1 | Scaffold583 | 7429                    | AA                              | TT                | 1946517074               |
| SNP_P3_127947_9891  | NW_004516013.1 | Scaffold583 | 9891                    | TT                              | AA                | 1946517076               |
| SNP_P3_127948_11263 | NW_004516013.1 | Scaffold583 | 11263                   | TT                              | CC                | 1946517077               |

| SNPs IDs            | Chromosome IDs | Chromosomes | Physical positions (bp) | CDC Frontier (Reference genome) | (Pusa 256 & HPNB) | NCBI SNPdb Accession IDs |
|---------------------|----------------|-------------|-------------------------|---------------------------------|-------------------|--------------------------|
| SNP_P3_127949_11289 | NW_004516013.1 | Scaffold583 | 11289                   | GG                              | AA                | 1946517079               |
| SNP_P3_127950_11300 | NW_004516013.1 | Scaffold583 | 11300                   | TT                              | CC                | 1946517080               |
| SNP_P3_127951_11302 | NW_004516013.1 | Scaffold583 | 11302                   | AA                              | GG                | 1946517082               |
| SNP_P3_127952_11382 | NW_004516013.1 | Scaffold583 | 11382                   | AA                              | GG                | 1946517083               |
| SNP_P3_127953_11390 | NW_004516013.1 | Scaffold583 | 11390                   | CC                              | TT                | 1946517085               |
| SNP_P3_127954_11410 | NW_004516013.1 | Scaffold583 | 11410                   | GG                              | AA                | 1946517086               |
| SNP_P3_127955_11465 | NW_004516013.1 | Scaffold583 | 11465                   | CC                              | TT                | 1946517088               |
| SNP_P3_127956_11543 | NW_004516013.1 | Scaffold583 | 11543                   | GG                              | AA                | 1946517089               |
| SNP_P3_127957_11814 | NW_004516013.1 | Scaffold583 | 11814                   | TT                              | CC                | 1946517091               |
| SNP_P3_127958_12132 | NW_004516013.1 | Scaffold583 | 12132                   | AA                              | TT                | 1946517092               |
| SNP_P3_127959_15229 | NW_004516013.1 | Scaffold583 | 15229                   | TT                              | AA                | 1946517094               |
| SNP_P3_127960_17355 | NW_004516013.1 | Scaffold583 | 17355                   | TT                              | CC                | 1946517096               |
| SNP_P3_127961_17670 | NW_004516013.1 | Scaffold583 | 17670                   | CC                              | TT                | 1946517097               |
| SNP_P3_127962_18458 | NW_004516013.1 | Scaffold583 | 18458                   | TT                              | CC                | 1946517099               |
| SNP_P3_127963_18686 | NW_004516013.1 | Scaffold583 | 18686                   | AA                              | GG                | 1946517100               |
| SNP_P3_127964_26301 | NW_004516013.1 | Scaffold583 | 26301                   | GG                              | TT                | 1946517102               |
| SNP_P3_127965_26321 | NW_004516013.1 | Scaffold583 | 26321                   | AA                              | GG                | 1946517103               |
| SNP_P3_127966_26386 | NW_004516013.1 | Scaffold583 | 26386                   | AA                              | GG                | 1946517105               |
| SNP_P3_127967_31156 | NW_004516013.1 | Scaffold583 | 31156                   | GG                              | AA                | 1946517106               |
| SNP_P3_127968_35913 | NW_004516013.1 | Scaffold583 | 35913                   | AA                              | GG                | 1946517108               |
| SNP_P3_127969_35948 | NW_004516013.1 | Scaffold583 | 35948                   | AA                              | GG                | 1946517109               |
| SNP_P3_127970_37393 | NW_004516013.1 | Scaffold583 | 37393                   | TT                              | AA                | 1946517111               |
| SNP_P3_127971_37410 | NW_004516013.1 | Scaffold583 | 37410                   | TT                              | AA                | 1946517112               |
| SNP_P3_127972_45978 | NW_004516013.1 | Scaffold583 | 45978                   | TT                              | CC                | 1946517114               |
| SNP_P3_127973_45993 | NW_004516013.1 | Scaffold583 | 45993                   | AA                              | GG                | 1946517116               |
| SNP_P3_127974_45994 | NW_004516013.1 | Scaffold583 | 45994                   | GG                              | AA                | 1946517117               |
| SNP_P3_127975_46068 | NW_004516013.1 | Scaffold583 | 46068                   | TT                              | CC                | 1946517119               |
| SNP_P3_127976_46086 | NW_004516013.1 | Scaffold583 | 46086                   | CC                              | TT                | 1946517120               |
| SNP_P3_127977_46093 | NW_004516013.1 | Scaffold583 | 46093                   | GG                              | CC                | 1946517122               |
| SNP_P3_127978_46105 | NW_004516013.1 | Scaffold583 | 46105                   | CC                              | TT                | 1946517123               |
| SNP_P3_127979_46121 | NW_004516013.1 | Scaffold583 | 46121                   | AA                              | TT                | 1946517125               |
| SNP_P3_127980_46328 | NW_004516013.1 | Scaffold583 | 46328                   | TT                              | AA                | 1946517126               |
| SNP_P3_127981_46360 | NW_004516013.1 | Scaffold583 | 46360                   | AA                              | TT                | 1946517127               |
| SNP_P3_127982_46405 | NW_004516013.1 | Scaffold583 | 46405                   | TT                              | AA                | 1946517129               |
| SNP_P3_127983_46457 | NW_004516013.1 | Scaffold583 | 46457                   | TT                              | AA                | 1946517130               |
| SNP_P3_127984_51819 | NW_004516013.1 | Scaffold583 | 51819                   | TT                              | GG                | 1946517132               |
| SNP_P3_127985_51825 | NW_004516013.1 | Scaffold583 | 51825                   | AA                              | GG                | 1946517133               |
| SNP_P3_127986_51829 | NW_004516013.1 | Scaffold583 | 51829                   | CC                              | AA                | 1946517135               |
| SNP_P3_127987_51832 | NW_004516013.1 | Scaffold583 | 51832                   | GG                              | AA                | 1946517137               |
| SNP_P3_127988_66032 | NW_004516013.1 | Scaffold583 | 66032                   | TT                              | CC                | 1946517138               |
| SNP_P3_127989_72289 | NW_004516013.1 | Scaffold583 | 72289                   | CC                              | TT                | 1946517140               |
| SNP_P3_127991_80974 | NW_004516013.1 | Scaffold583 | 80974                   | GG                              | AA                | 1946517141               |

| SNPs IDs             | Chromosome IDs | Chromosomes | Physical positions (bp) | CDC Frontier (Reference genome) | (Pusa 256 & HPNB) | NCBI SNPdb Accession IDs |
|----------------------|----------------|-------------|-------------------------|---------------------------------|-------------------|--------------------------|
| SNP_P3_127993_94760  | NW_004516013.1 | Scaffold583 | 94760                   | CC                              | TT                | 1946517143               |
| SNP_P3_127994_100180 | NW_004516013.1 | Scaffold583 | 100180                  | CC                              | AA                | 1946517145               |
| SNP_P3_127995_100181 | NW_004516013.1 | Scaffold583 | 100181                  | AA                              | CC                | 1946517146               |
| SNP_P3_127996_105723 | NW_004516013.1 | Scaffold583 | 105723                  | AA                              | GG                | 1946517148               |
| SNP_P3_127997_105729 | NW_004516013.1 | Scaffold583 | 105729                  | CC                              | TT                | 1946517149               |
| SNP_P3_127998_105765 | NW_004516013.1 | Scaffold583 | 105765                  | GG                              | AA                | 1946517151               |
| SNP_P3_127999_105936 | NW_004516013.1 | Scaffold583 | 105936                  | CC                              | TT                | 1946517153               |
| SNP_P3_128000_105957 | NW_004516013.1 | Scaffold583 | 105957                  | GG                              | AA                | 1946517154               |
| SNP_P3_128001_105975 | NW_004516013.1 | Scaffold583 | 105975                  | CC                              | TT                | 1946517156               |
| SNP_P3_128002_105990 | NW_004516013.1 | Scaffold583 | 105990                  | CC                              | TT                | 1946517157               |
| SNP_P3_128003_106183 | NW_004516013.1 | Scaffold583 | 106183                  | AA                              | GG                | 1946517159               |
| SNP_P3_128004_106347 | NW_004516013.1 | Scaffold583 | 106347                  | AA                              | CC                | 1946517160               |
| SNP_P3_128005_106480 | NW_004516013.1 | Scaffold583 | 106480                  | AA                              | CC                | 1946517162               |
| SNP_P3_128006_106557 | NW_004516013.1 | Scaffold583 | 106557                  | TT                              | CC                | 1946517163               |
| SNP_P3_128007_106880 | NW_004516013.1 | Scaffold583 | 106880                  | AA                              | GG                | 1946517165               |
| SNP_P3_128009_119346 | NW_004516013.1 | Scaffold583 | 119346                  | CC                              | AA                | 1946517167               |
| SNP_P3_128010_119486 | NW_004516013.1 | Scaffold583 | 119486                  | AA                              | GG                | 1946517168               |
| SNP_P3_128011_119921 | NW_004516013.1 | Scaffold583 | 119921                  | CC                              | TT                | 1946517170               |
| SNP_P3_128013_135407 | NW_004516013.1 | Scaffold583 | 135407                  | AA                              | CC                | 1946517172               |
| SNP_P3_128014_136362 | NW_004516013.1 | Scaffold583 | 136362                  | TT                              | AA                | 1946517174               |
| SNP_P3_128015_136369 | NW_004516013.1 | Scaffold583 | 136369                  | GG                              | TT                | 1946517175               |
| SNP_P3_128016_136382 | NW_004516013.1 | Scaffold583 | 136382                  | TT                              | CC                | 1946517177               |
| SNP_P3_128017_136470 | NW_004516013.1 | Scaffold583 | 136470                  | TT                              | AA                | 1946517178               |
| SNP_P3_128018_136654 | NW_004516013.1 | Scaffold583 | 136654                  | CC                              | TT                | 1946517180               |
| SNP_P3_128019_136697 | NW_004516013.1 | Scaffold583 | 136697                  | AA                              | GG                | 1946517181               |
| SNP_P3_128020_136761 | NW_004516013.1 | Scaffold583 | 136761                  | TT                              | GG                | 1946517183               |
| SNP_P3_128021_136769 | NW_004516013.1 | Scaffold583 | 136769                  | GG                              | AA                | 1946517184               |
| SNP_P3_128022_136787 | NW_004516013.1 | Scaffold583 | 136787                  | GG                              | AA                | 1946517186               |
| SNP_P3_128023_136853 | NW_004516013.1 | Scaffold583 | 136853                  | AA                              | GG                | 1946517188               |
| SNP_P3_128024_136870 | NW_004516013.1 | Scaffold583 | 136870                  | GG                              | TT                | 1946517189               |
| SNP_P3_128025_156446 | NW_004516013.1 | Scaffold583 | 156446                  | CC                              | TT                | 1946517191               |
| SNP_P3_128026_168286 | NW_004516013.1 | Scaffold583 | 168286                  | TT                              | AA                | 1946517193               |
| SNP_P3_128027_168884 | NW_004516013.1 | Scaffold583 | 168884                  | CC                              | GG                | 1946517194               |
| SNP_P3_128028_168929 | NW_004516013.1 | Scaffold583 | 168929                  | TT                              | AA                | 1946517196               |
| SNP_P3_128029_168951 | NW_004516013.1 | Scaffold583 | 168951                  | AA                              | GG                | 1946517197               |
| SNP_P3_128030_168952 | NW_004516013.1 | Scaffold583 | 168952                  | CC                              | TT                | 1946517199               |
| SNP_P3_128031_168955 | NW_004516013.1 | Scaffold583 | 168955                  | AA                              | GG                | 1946517200               |
| SNP_P3_128032_168961 | NW_004516013.1 | Scaffold583 | 168961                  | TT                              | AA                | 1946517202               |
| SNP_P3_128033_168964 | NW_004516013.1 | Scaffold583 | 168964                  | TT                              | CC                | 1946517204               |
| SNP_P3_128034_170016 | NW_004516013.1 | Scaffold583 | 170016                  | AA                              | GG                | 1946517205               |
| SNP_P3_128035_468    | NW_004516014.1 | Scaffold584 | 468                     | AA                              | GG                | 1946517207               |
| SNP_P3_128036_972    | NW_004516014.1 | Scaffold584 | 972                     | AA                              | CC                | 1946517208               |

| SNPs IDs             | Chromosome IDs | Chromosomes | Physical positions (bp) | CDC Frontier (Reference genome) | (Pusa 256 & HPNB) | NCBI SNPdb Accession IDs |
|----------------------|----------------|-------------|-------------------------|---------------------------------|-------------------|--------------------------|
| SNP_P3_128037_993    | NW_004516014.1 | Scaffold584 | 993                     | GG                              | CC                | 1946517210               |
| SNP_P3_128038_1011   | NW_004516014.1 | Scaffold584 | 1011                    | GG                              | AA                | 1946517211               |
| SNP_P3_128039_5597   | NW_004516014.1 | Scaffold584 | 5597                    | TT                              | CC                | 1946517213               |
| SNP_P3_128040_5810   | NW_004516014.1 | Scaffold584 | 5810                    | TT                              | GG                | 1946517216               |
| SNP_P3_128041_7875   | NW_004516014.1 | Scaffold584 | 7875                    | AA                              | GG                | 1946517217               |
| SNP_P3_128042_11792  | NW_004516014.1 | Scaffold584 | 11792                   | AA                              | GG                | 1946517219               |
| SNP_P3_128043_11984  | NW_004516014.1 | Scaffold584 | 11984                   | AA                              | CC                | 1946517220               |
| SNP_P3_128044_11993  | NW_004516014.1 | Scaffold584 | 11993                   | TT                              | CC                | 1946517222               |
| SNP_P3_128045_12014  | NW_004516014.1 | Scaffold584 | 12014                   | CC                              | AA                | 1946517224               |
| SNP_P3_128046_12030  | NW_004516014.1 | Scaffold584 | 12030                   | GG                              | CC                | 1946517225               |
| SNP_P3_128048_12047  | NW_004516014.1 | Scaffold584 | 12047                   | AA                              | GG                | 1946517236               |
| SNP_P3_128049_12102  | NW_004516014.1 | Scaffold584 | 12102                   | GG                              | TT                | 1946517238               |
| SNP_P3_128050_12104  | NW_004516014.1 | Scaffold584 | 12104                   | CC                              | TT                | 1946517239               |
| SNP_P3_128051_12144  | NW_004516014.1 | Scaffold584 | 12144                   | AA                              | TT                | 1946517241               |
| SNP_P3_128052_12150  | NW_004516014.1 | Scaffold584 | 12150                   | AA                              | GG                | 1946517243               |
| SNP_P3_128053_12156  | NW_004516014.1 | Scaffold584 | 12156                   | TT                              | AA                | 1946517245               |
| SNP_P3_128054_12169  | NW_004516014.1 | Scaffold584 | 12169                   | TT                              | CC                | 1946517246               |
| SNP_P3_128055_12171  | NW_004516014.1 | Scaffold584 | 12171                   | GG                              | CC                | 1946517248               |
| SNP_P3_128056_12184  | NW_004516014.1 | Scaffold584 | 12184                   | GG                              | AA                | 1946517249               |
| SNP_P3_128057_12187  | NW_004516014.1 | Scaffold584 | 12187                   | CC                              | GG                | 1946517251               |
| SNP_P3_128058_12193  | NW_004516014.1 | Scaffold584 | 12193                   | AA                              | GG                | 1946517252               |
| SNP_P3_128059_12257  | NW_004516014.1 | Scaffold584 | 12257                   | CC                              | AA                | 1946517254               |
| SNP_P3_128060_12271  | NW_004516014.1 | Scaffold584 | 12271                   | GG                              | CC                | 1946517255               |
| SNP_P3_128061_12285  | NW_004516014.1 | Scaffold584 | 12285                   | AA                              | GG                | 1946517257               |
| SNP_P3_128062_12289  | NW_004516014.1 | Scaffold584 | 12289                   | CC                              | AA                | 1946517259               |
| SNP_P3_128064_32840  | NW_004516014.1 | Scaffold584 | 32840                   | GG                              | AA                | 1946517260               |
| SNP_P3_128065_34268  | NW_004516014.1 | Scaffold584 | 34268                   | TT                              | GG                | 1946517262               |
| SNP_P3_128066_50032  | NW_004516014.1 | Scaffold584 | 50032                   | CC                              | TT                | 1946517263               |
| SNP_P3_128067_74398  | NW_004516014.1 | Scaffold584 | 74398                   | CC                              | AA                | 1946517265               |
| SNP_P3_128068_74439  | NW_004516014.1 | Scaffold584 | 74439                   | TT                              | CC                | 1946517266               |
| SNP_P3_128069_74459  | NW_004516014.1 | Scaffold584 | 74459                   | CC                              | GG                | 1946517268               |
| SNP_P3_128070_74658  | NW_004516014.1 | Scaffold584 | 74658                   | GG                              | AA                | 1946517270               |
| SNP_P3_128071_74683  | NW_004516014.1 | Scaffold584 | 74683                   | AA                              | GG                | 1946517271               |
| SNP_P3_128072_74685  | NW_004516014.1 | Scaffold584 | 74685                   | CC                              | TT                | 1946517273               |
| SNP_P3_128073_74701  | NW_004516014.1 | Scaffold584 | 74701                   | CC                              | TT                | 1946517274               |
| SNP_P3_128074_74710  | NW_004516014.1 | Scaffold584 | 74710                   | AA                              | GG                | 1946517276               |
| SNP_P3_128076_76055  | NW_004516014.1 | Scaffold584 | 76055                   | GG                              | TT                | 1946517277               |
| SNP_P3_128077_76070  | NW_004516014.1 | Scaffold584 | 76070                   | AA                              | CC                | 1946517279               |
| SNP_P3_128078_76071  | NW_004516014.1 | Scaffold584 | 76071                   | TT                              | CC                | 1946517280               |
| SNP_P3_128079_81825  | NW_004516014.1 | Scaffold584 | 81825                   | GG                              | AA                | 1946517282               |
| SNP_P3_128080_82349  | NW_004516014.1 | Scaffold584 | 82349                   | AA                              | TT                | 1946517283               |
| SNP_P3_128081_119767 | NW_004516014.1 | Scaffold584 | 119767                  | AA                              | TT                | 1946517285               |

| SNPs IDs             | Chromosome IDs | Chromosomes | Physical positions (bp) | CDC Frontier (Reference genome) | (Pusa 256 & HPNB) | NCBI SNPdb Accession IDs |
|----------------------|----------------|-------------|-------------------------|---------------------------------|-------------------|--------------------------|
| SNP_P3_128082_120430 | NW_004516014.1 | Scaffold584 | 120430                  | TT                              | CC                | 1946517286               |
| SNP_P3_128083_120469 | NW_004516014.1 | Scaffold584 | 120469                  | CC                              | AA                | 1946517288               |
| SNP_P3_128084_120622 | NW_004516014.1 | Scaffold584 | 120622                  | TT                              | CC                | 1946517290               |
| SNP_P3_128086_129072 | NW_004516014.1 | Scaffold584 | 129072                  | AA                              | TT                | 1946517291               |
| SNP_P3_128087_129139 | NW_004516014.1 | Scaffold584 | 129139                  | GG                              | TT                | 1946517293               |
| SNP_P3_128088_129149 | NW_004516014.1 | Scaffold584 | 129149                  | GG                              | AA                | 1946517294               |
| SNP_P3_128089_129166 | NW_004516014.1 | Scaffold584 | 129166                  | AA                              | GG                | 1946517296               |
| SNP_P3_128090_129185 | NW_004516014.1 | Scaffold584 | 129185                  | CC                              | TT                | 1946517297               |
| SNP_P3_128092_132879 | NW_004516014.1 | Scaffold584 | 132879                  | GG                              | AA                | 1946517299               |
| SNP_P3_128093_133613 | NW_004516014.1 | Scaffold584 | 133613                  | AA                              | CC                | 1946517300               |
| SNP_P3_128094_133968 | NW_004516014.1 | Scaffold584 | 133968                  | TT                              | GG                | 1946517302               |
| SNP_P3_128095_136378 | NW_004516014.1 | Scaffold584 | 136378                  | CC                              | TT                | 1946517303               |
| SNP_P3_128096_136379 | NW_004516014.1 | Scaffold584 | 136379                  | CC                              | AA                | 1946517305               |
| SNP_P3_128097_143414 | NW_004516014.1 | Scaffold584 | 143414                  | GG                              | AA                | 1946517306               |
| SNP_P3_128099_144347 | NW_004516014.1 | Scaffold584 | 144347                  | CC                              | AA                | 1946517307               |
| SNP_P3_128100_144354 | NW_004516014.1 | Scaffold584 | 144354                  | TT                              | CC                | 1946517309               |
| SNP_P3_128101_144374 | NW_004516014.1 | Scaffold584 | 144374                  | TT                              | AA                | 1946517310               |
| SNP_P3_128102_144515 | NW_004516014.1 | Scaffold584 | 144515                  | AA                              | TT                | 1946517312               |
| SNP_P3_128103_145814 | NW_004516014.1 | Scaffold584 | 145814                  | TT                              | CC                | 1946517314               |
| SNP_P3_128104_155839 | NW_004516014.1 | Scaffold584 | 155839                  | GG                              | AA                | 1946517315               |
| SNP_P3_128105_179035 | NW_004516014.1 | Scaffold584 | 179035                  | TT                              | GG                | 1946517317               |
| SNP_P3_128106_197050 | NW_004516014.1 | Scaffold584 | 197050                  | AA                              | CC                | 1946517318               |
| SNP_P3_128107_203484 | NW_004516014.1 | Scaffold584 | 203484                  | AA                              | TT                | 1946517320               |
| SNP_P3_128108_204682 | NW_004516014.1 | Scaffold584 | 204682                  | TT                              | AA                | 1946517322               |
| SNP_P3_128109_204729 | NW_004516014.1 | Scaffold584 | 204729                  | TT                              | CC                | 1946517323               |
| SNP_P3_128110_205585 | NW_004516014.1 | Scaffold584 | 205585                  | AA                              | GG                | 1946517325               |
| SNP_P3_128111_213573 | NW_004516014.1 | Scaffold584 | 213573                  | TT                              | CC                | 1946517326               |
| SNP_P3_128112_222901 | NW_004516014.1 | Scaffold584 | 222901                  | TT                              | CC                | 1946517327               |
| SNP_P3_128113_222933 | NW_004516014.1 | Scaffold584 | 222933                  | CC                              | AA                | 1946517329               |
| SNP_P3_128115_223845 | NW_004516014.1 | Scaffold584 | 223845                  | GG                              | TT                | 1946517330               |
| SNP_P3_128116_223883 | NW_004516014.1 | Scaffold584 | 223883                  | TT                              | GG                | 1946517332               |
| SNP_P3_128117_223904 | NW_004516014.1 | Scaffold584 | 223904                  | TT                              | CC                | 1946517333               |
| SNP_P3_128118_223913 | NW_004516014.1 | Scaffold584 | 223913                  | TT                              | AA                | 1946517335               |
| SNP_P3_128119_223915 | NW_004516014.1 | Scaffold584 | 223915                  | AA                              | GG                | 1946517336               |
| SNP_P3_128120_223936 | NW_004516014.1 | Scaffold584 | 223936                  | CC                              | TT                | 1946517337               |
| SNP_P3_128121_224305 | NW_004516014.1 | Scaffold584 | 224305                  | TT                              | CC                | 1946517338               |
| SNP_P3_128122_224545 | NW_004516014.1 | Scaffold584 | 224545                  | CC                              | AA                | 1946517339               |
| SNP_P3_128124_247661 | NW_004516014.1 | Scaffold584 | 247661                  | AA                              | TT                | 1946517341               |
| SNP_P3_128125_249436 | NW_004516014.1 | Scaffold584 | 249436                  | TT                              | AA                | 1946517342               |
| SNP_P3_128126_265565 | NW_004516014.1 | Scaffold584 | 265565                  | GG                              | AA                | 1946517344               |
| SNP_P3_128127_266045 | NW_004516014.1 | Scaffold584 | 266045                  | CC                              | AA                | 1946517346               |
| SNP_P3_128128_266373 | NW_004516014.1 | Scaffold584 | 266373                  | TT                              | GG                | 1946517347               |

| SNPs IDs             | Chromosome IDs | Chromosomes | Physical positions (bp) | CDC Frontier (Reference genome) | (Pusa 256 & HPNB) | NCBI SNPdb Accession IDs |
|----------------------|----------------|-------------|-------------------------|---------------------------------|-------------------|--------------------------|
| SNP_P3_128129_266773 | NW_004516014.1 | Scaffold584 | 266773                  | GG                              | TT                | 1946517349               |
| SNP_P3_128130_272803 | NW_004516014.1 | Scaffold584 | 272803                  | GG                              | TT                | 1946517350               |
| SNP_P3_128131_272857 | NW_004516014.1 | Scaffold584 | 272857                  | TT                              | GG                | 1946517352               |
| SNP_P3_128132_295780 | NW_004516014.1 | Scaffold584 | 295780                  | GG                              | AA                | 1946517354               |
| SNP_P3_128133_296349 | NW_004516014.1 | Scaffold584 | 296349                  | TT                              | AA                | 1946517355               |
| SNP_P3_128134_296446 | NW_004516014.1 | Scaffold584 | 296446                  | AA                              | TT                | 1946517357               |
| SNP_P3_128135_330045 | NW_004516014.1 | Scaffold584 | 330045                  | GG                              | AA                | 1946517358               |
| SNP_P3_128136_330048 | NW_004516014.1 | Scaffold584 | 330048                  | GG                              | AA                | 1946517360               |
| SNP_P3_128137_330050 | NW_004516014.1 | Scaffold584 | 330050                  | GG                              | AA                | 1946517361               |
| SNP_P3_128138_330542 | NW_004516014.1 | Scaffold584 | 330542                  | TT                              | GG                | 1946517363               |
| SNP_P3_128139_332703 | NW_004516014.1 | Scaffold584 | 332703                  | TT                              | GG                | 1946517364               |
| SNP_P3_128140_332911 | NW_004516014.1 | Scaffold584 | 332911                  | TT                              | CC                | 1946517366               |
| SNP_P3_128141_332944 | NW_004516014.1 | Scaffold584 | 332944                  | CC                              | TT                | 1946517367               |
| SNP_P3_128142_332949 | NW_004516014.1 | Scaffold584 | 332949                  | TT                              | CC                | 1946517369               |
| SNP_P3_128143_332964 | NW_004516014.1 | Scaffold584 | 332964                  | GG                              | AA                | 1946517375               |
| SNP_P3_128144_335211 | NW_004516014.1 | Scaffold584 | 335211                  | AA                              | CC                | 1946517376               |
| SNP_P3_128145_335216 | NW_004516014.1 | Scaffold584 | 335216                  | AA                              | CC                | 1946517378               |
| SNP_P3_128146_335362 | NW_004516014.1 | Scaffold584 | 335362                  | TT                              | AA                | 1946517379               |
| SNP_P3_128147_335385 | NW_004516014.1 | Scaffold584 | 335385                  | TT                              | CC                | 1946517381               |
| SNP_P3_128148_565    | NW_004516016.1 | Scaffold586 | 565                     | GG                              | AA                | 1946517383               |
| SNP_P3_128149_5032   | NW_004516016.1 | Scaffold586 | 5032                    | TT                              | AA                | 1946517384               |
| SNP_P3_128150_5807   | NW_004516016.1 | Scaffold586 | 5807                    | AA                              | GG                | 1946517386               |
| SNP_P3_128151_5877   | NW_004516016.1 | Scaffold586 | 5877                    | TT                              | CC                | 1946517388               |
| SNP_P3_128152_6844   | NW_004516016.1 | Scaffold586 | 6844                    | TT                              | GG                | 1946517390               |
| SNP_P3_128153_6940   | NW_004516016.1 | Scaffold586 | 6940                    | AA                              | GG                | 1946517391               |
| SNP_P3_128154_6941   | NW_004516016.1 | Scaffold586 | 6941                    | GG                              | TT                | 1946517393               |
| SNP_P3_128155_7144   | NW_004516016.1 | Scaffold586 | 7144                    | CC                              | TT                | 1946517394               |
| SNP_P3_128156_7177   | NW_004516016.1 | Scaffold586 | 7177                    | TT                              | GG                | 1946517396               |
| SNP_P3_128157_7259   | NW_004516016.1 | Scaffold586 | 7259                    | GG                              | TT                | 1946517397               |
| SNP_P3_128158_7264   | NW_004516016.1 | Scaffold586 | 7264                    | GG                              | AA                | 1946517399               |
| SNP_P3_128159_7327   | NW_004516016.1 | Scaffold586 | 7327                    | CC                              | GG                | 1946517401               |
| SNP_P3_128160_7356   | NW_004516016.1 | Scaffold586 | 7356                    | AA                              | TT                | 1946517402               |
| SNP_P3_128161_7422   | NW_004516016.1 | Scaffold586 | 7422                    | GG                              | AA                | 1946517404               |
| SNP_P3_128162_7443   | NW_004516016.1 | Scaffold586 | 7443                    | CC                              | TT                | 1946517405               |
| SNP_P3_128163_7444   | NW_004516016.1 | Scaffold586 | 7444                    | AA                              | GG                | 1946517407               |
| SNP_P3_128164_7624   | NW_004516016.1 | Scaffold586 | 7624                    | TT                              | AA                | 1946517408               |
| SNP_P3_128165_7633   | NW_004516016.1 | Scaffold586 | 7633                    | AA                              | GG                | 1946517410               |
| SNP_P3_128166_7693   | NW_004516016.1 | Scaffold586 | 7693                    | CC                              | GG                | 1946517411               |
| SNP_P3_128167_7700   | NW_004516016.1 | Scaffold586 | 7700                    | GG                              | CC                | 1946517413               |
| SNP_P3_128168_7707   | NW_004516016.1 | Scaffold586 | 7707                    | TT                              | CC                | 1946517414               |
| SNP_P3_128169_7709   | NW_004516016.1 | Scaffold586 | 7709                    | AA                              | CC                | 1946517416               |
| SNP_P3_128170_7749   | NW_004516016.1 | Scaffold586 | 7749                    | AA                              | GG                | 1946517418               |

| SNPs IDs            | Chromosome IDs | Chromosomes | Physical positions (bp) | CDC Frontier (Reference genome) | (Pusa 256 & HPNB) | NCBI SNPdb Accession IDs |
|---------------------|----------------|-------------|-------------------------|---------------------------------|-------------------|--------------------------|
| SNP_P3_128171_7792  | NW_004516016.1 | Scaffold586 | 7792                    | GG                              | AA                | 1946517419               |
| SNP_P3_128172_7801  | NW_004516016.1 | Scaffold586 | 7801                    | TT                              | AA                | 1946517421               |
| SNP_P3_128174_20696 | NW_004516016.1 | Scaffold586 | 20696                   | AA                              | GG                | 1946517422               |
| SNP_P3_128175_20756 | NW_004516016.1 | Scaffold586 | 20756                   | TT                              | CC                | 1946517424               |
| SNP_P3_128176_21757 | NW_004516016.1 | Scaffold586 | 21757                   | CC                              | TT                | 1946517425               |
| SNP_P3_128177_21904 | NW_004516016.1 | Scaffold586 | 21904                   | CC                              | TT                | 1946517427               |
| SNP_P3_128178_21909 | NW_004516016.1 | Scaffold586 | 21909                   | GG                              | AA                | 1946517428               |
| SNP_P3_128179_21943 | NW_004516016.1 | Scaffold586 | 21943                   | CC                              | AA                | 1946517430               |
| SNP_P3_128180_21967 | NW_004516016.1 | Scaffold586 | 21967                   | GG                              | AA                | 1946517432               |
| SNP_P3_128181_21976 | NW_004516016.1 | Scaffold586 | 21976                   | GG                              | AA                | 1946517433               |
| SNP_P3_128182_21981 | NW_004516016.1 | Scaffold586 | 21981                   | TT                              | AA                | 1946517435               |
| SNP_P3_128183_22210 | NW_004516016.1 | Scaffold586 | 22210                   | AA                              | GG                | 1946517437               |
| SNP_P3_128184_22320 | NW_004516016.1 | Scaffold586 | 22320                   | TT                              | CC                | 1946517438               |
| SNP_P3_128185_22324 | NW_004516016.1 | Scaffold586 | 22324                   | TT                              | CC                | 1946517440               |
| SNP_P3_128186_22796 | NW_004516016.1 | Scaffold586 | 22796                   | CC                              | TT                | 1946517441               |
| SNP_P3_128187_22802 | NW_004516016.1 | Scaffold586 | 22802                   | CC                              | AA                | 1946517443               |
| SNP_P3_128188_22848 | NW_004516016.1 | Scaffold586 | 22848                   | GG                              | AA                | 1946517445               |
| SNP_P3_128189_22922 | NW_004516016.1 | Scaffold586 | 22922                   | TT                              | GG                | 1946517446               |
| SNP_P3_128190_23007 | NW_004516016.1 | Scaffold586 | 23007                   | CC                              | TT                | 1946517448               |
| SNP_P3_128191_23468 | NW_004516016.1 | Scaffold586 | 23468                   | CC                              | GG                | 1946517449               |
| SNP_P3_128192_23615 | NW_004516016.1 | Scaffold586 | 23615                   | CC                              | AA                | 1946517451               |
| SNP_P3_128193_23643 | NW_004516016.1 | Scaffold586 | 23643                   | AA                              | CC                | 1946517453               |
| SNP_P3_128194_23838 | NW_004516016.1 | Scaffold586 | 23838                   | TT                              | CC                | 1946517455               |
| SNP_P3_128195_663   | NW_004516017.1 | Scaffold587 | 663                     | CC                              | AA                | 1946517456               |
| SNP_P3_128196_738   | NW_004516017.1 | Scaffold587 | 738                     | TT                              | CC                | 1946517458               |
| SNP_P3_128197_740   | NW_004516017.1 | Scaffold587 | 740                     | GG                              | AA                | 1946517460               |
| SNP_P3_128198_815   | NW_004516017.1 | Scaffold587 | 815                     | GG                              | AA                | 1946517461               |
| SNP_P3_128199_979   | NW_004516017.1 | Scaffold587 | 979                     | AA                              | GG                | 1946517463               |
| SNP_P3_128200_3746  | NW_004516017.1 | Scaffold587 | 3746                    | TT                              | CC                | 1946517465               |
| SNP_P3_128201_3787  | NW_004516017.1 | Scaffold587 | 3787                    | CC                              | AA                | 1946517466               |
| SNP_P3_128202_4222  | NW_004516017.1 | Scaffold587 | 4222                    | AA                              | TT                | 1946517468               |
| SNP_P3_128203_4454  | NW_004516017.1 | Scaffold587 | 4454                    | AA                              | GG                | 1946517469               |
| SNP_P3_128204_4573  | NW_004516017.1 | Scaffold587 | 4573                    | TT                              | CC                | 1946517471               |
| SNP_P3_128205_4576  | NW_004516017.1 | Scaffold587 | 4576                    | TT                              | AA                | 1946517473               |
| SNP_P3_128206_4850  | NW_004516017.1 | Scaffold587 | 4850                    | TT                              | CC                | 1946517474               |
| SNP_P3_128207_5006  | NW_004516017.1 | Scaffold587 | 5006                    | TT                              | CC                | 1946517476               |
| SNP_P3_128208_5049  | NW_004516017.1 | Scaffold587 | 5049                    | AA                              | GG                | 1946517478               |
| SNP_P3_128209_5119  | NW_004516017.1 | Scaffold587 | 5119                    | AA                              | GG                | 1946517479               |
| SNP_P3_128210_5226  | NW_004516017.1 | Scaffold587 | 5226                    | AA                              | GG                | 1946517481               |
| SNP_P3_128211_5244  | NW_004516017.1 | Scaffold587 | 5244                    | TT                              | AA                | 1946517483               |
| SNP_P3_128212_5304  | NW_004516017.1 | Scaffold587 | 5304                    | GG                              | AA                | 1946517484               |
| SNP_P3_128213_5325  | NW_004516017.1 | Scaffold587 | 5325                    | AA                              | GG                | 1946517486               |

| SNPs IDs            | Chromosome IDs | Chromosomes | Physical positions (bp) | CDC Frontier (Reference genome) | (Pusa 256 & HPNB) | NCBI SNPdb Accession IDs |
|---------------------|----------------|-------------|-------------------------|---------------------------------|-------------------|--------------------------|
| SNP_P3_128215_6825  | NW_004516017.1 | Scaffold587 | 6825                    | CC                              | GG                | 1946517487               |
| SNP_P3_128216_6839  | NW_004516017.1 | Scaffold587 | 6839                    | GG                              | AA                | 1946517489               |
| SNP_P3_128217_7506  | NW_004516017.1 | Scaffold587 | 7506                    | GG                              | CC                | 1946517491               |
| SNP_P3_128218_7586  | NW_004516017.1 | Scaffold587 | 7586                    | GG                              | TT                | 1946517492               |
| SNP_P3_128219_7630  | NW_004516017.1 | Scaffold587 | 7630                    | AA                              | TT                | 1946517494               |
| SNP_P3_128220_8069  | NW_004516017.1 | Scaffold587 | 8069                    | TT                              | AA                | 1946517496               |
| SNP_P3_128221_8111  | NW_004516017.1 | Scaffold587 | 8111                    | AA                              | TT                | 1946517497               |
| SNP_P3_128222_8173  | NW_004516017.1 | Scaffold587 | 8173                    | CC                              | AA                | 1946517499               |
| SNP_P3_128223_9032  | NW_004516017.1 | Scaffold587 | 9032                    | AA                              | TT                | 1946517500               |
| SNP_P3_128224_9034  | NW_004516017.1 | Scaffold587 | 9034                    | AA                              | CC                | 1946517502               |
| SNP_P3_128225_9077  | NW_004516017.1 | Scaffold587 | 9077                    | AA                              | GG                | 1946517504               |
| SNP_P3_128226_9078  | NW_004516017.1 | Scaffold587 | 9078                    | GG                              | TT                | 1946517505               |
| SNP_P3_128227_9099  | NW_004516017.1 | Scaffold587 | 9099                    | CC                              | TT                | 1946517507               |
| SNP_P3_128228_9101  | NW_004516017.1 | Scaffold587 | 9101                    | AA                              | TT                | 1946517509               |
| SNP_P3_128229_9103  | NW_004516017.1 | Scaffold587 | 9103                    | AA                              | TT                | 1946517510               |
| SNP_P3_128230_9122  | NW_004516017.1 | Scaffold587 | 9122                    | AA                              | GG                | 1946517512               |
| SNP_P3_128231_9126  | NW_004516017.1 | Scaffold587 | 9126                    | GG                              | AA                | 1946517513               |
| SNP_P3_128232_9137  | NW_004516017.1 | Scaffold587 | 9137                    | GG                              | TT                | 1946517515               |
| SNP_P3_128233_9140  | NW_004516017.1 | Scaffold587 | 9140                    | TT                              | GG                | 1946517518               |
| SNP_P3_128234_9224  | NW_004516017.1 | Scaffold587 | 9224                    | GG                              | TT                | 1946517519               |
| SNP_P3_128235_9352  | NW_004516017.1 | Scaffold587 | 9352                    | TT                              | CC                | 1946517521               |
| SNP_P3_128236_9712  | NW_004516017.1 | Scaffold587 | 9712                    | GG                              | AA                | 1946517522               |
| SNP_P3_128237_9749  | NW_004516017.1 | Scaffold587 | 9749                    | TT                              | AA                | 1946517524               |
| SNP_P3_128238_9808  | NW_004516017.1 | Scaffold587 | 9808                    | AA                              | TT                | 1946517525               |
| SNP_P3_128239_9905  | NW_004516017.1 | Scaffold587 | 9905                    | CC                              | TT                | 1946517527               |
| SNP_P3_128240_9941  | NW_004516017.1 | Scaffold587 | 9941                    | TT                              | CC                | 1946517529               |
| SNP_P3_128241_9943  | NW_004516017.1 | Scaffold587 | 9943                    | TT                              | GG                | 1946517530               |
| SNP_P3_128242_10103 | NW_004516017.1 | Scaffold587 | 10103                   | GG                              | AA                | 1946517532               |
| SNP_P3_128243_10106 | NW_004516017.1 | Scaffold587 | 10106                   | CC                              | AA                | 1946517534               |
| SNP_P3_128244_10213 | NW_004516017.1 | Scaffold587 | 10213                   | AA                              | GG                | 1946517535               |
| SNP_P3_128245_10266 | NW_004516017.1 | Scaffold587 | 10266                   | TT                              | CC                | 1946517537               |
| SNP_P3_128246_10286 | NW_004516017.1 | Scaffold587 | 10286                   | GG                              | AA                | 1946517538               |
| SNP_P3_128247_10330 | NW_004516017.1 | Scaffold587 | 10330                   | AA                              | CC                | 1946517540               |
| SNP_P3_128248_10652 | NW_004516017.1 | Scaffold587 | 10652                   | AA                              | CC                | 1946517541               |
| SNP_P3_128249_10665 | NW_004516017.1 | Scaffold587 | 10665                   | AA                              | GG                | 1946517543               |
| SNP_P3_128250_10677 | NW_004516017.1 | Scaffold587 | 10677                   | TT                              | AA                | 1946517545               |
| SNP_P3_128251_10956 | NW_004516017.1 | Scaffold587 | 10956                   | CC                              | TT                | 1946517546               |
| SNP_P3_128252_10998 | NW_004516017.1 | Scaffold587 | 10998                   | TT                              | CC                | 1946517548               |
| SNP_P3_128253_13173 | NW_004516017.1 | Scaffold587 | 13173                   | GG                              | TT                | 1946517549               |
| SNP_P3_128254_13487 | NW_004516017.1 | Scaffold587 | 13487                   | AA                              | GG                | 1946517551               |
| SNP_P3_128255_13539 | NW_004516017.1 | Scaffold587 | 13539                   | TT                              | GG                | 1946517552               |
| SNP_P3_128256_13589 | NW_004516017.1 | Scaffold587 | 13589                   | AA                              | CC                | 1946517554               |



| SNPs IDs            | Chromosome IDs | Chromosomes | Physical positions (bp) | CDC Frontier (Reference genome) | (Pusa 256 & HPNB) | NCBI SNPdb Accession IDs |
|---------------------|----------------|-------------|-------------------------|---------------------------------|-------------------|--------------------------|
| SNP_P3_128257_13949 | NW_004516017.1 | Scaffold587 | 13949                   | TT                              | AA                | 1946517555               |
| SNP_P3_128258_15050 | NW_004516017.1 | Scaffold587 | 15050                   | TT                              | AA                | 1946517557               |
| SNP_P3_128259_15144 | NW_004516017.1 | Scaffold587 | 15144                   | GG                              | AA                | 1946517558               |
| SNP_P3_128260_15223 | NW_004516017.1 | Scaffold587 | 15223                   | AA                              | CC                | 1946517560               |
| SNP_P3_128261_15224 | NW_004516017.1 | Scaffold587 | 15224                   | AA                              | TT                | 1946517561               |
| SNP_P3_128262_15232 | NW_004516017.1 | Scaffold587 | 15232                   | GG                              | TT                | 1946517563               |
| SNP_P3_128263_15233 | NW_004516017.1 | Scaffold587 | 15233                   | TT                              | GG                | 1946517565               |
| SNP_P3_128264_15234 | NW_004516017.1 | Scaffold587 | 15234                   | AA                              | GG                | 1946517566               |
| SNP_P3_128265_15235 | NW_004516017.1 | Scaffold587 | 15235                   | TT                              | CC                | 1946517568               |
| SNP_P3_128266_15236 | NW_004516017.1 | Scaffold587 | 15236                   | CC                              | AA                | 1946517569               |
| SNP_P3_128267_15238 | NW_004516017.1 | Scaffold587 | 15238                   | TT                              | AA                | 1946517571               |
| SNP_P3_128268_15431 | NW_004516017.1 | Scaffold587 | 15431                   | AA                              | CC                | 1946517573               |
| SNP_P3_128269_15797 | NW_004516017.1 | Scaffold587 | 15797                   | CC                              | TT                | 1946517574               |
| SNP_P3_128270_16027 | NW_004516017.1 | Scaffold587 | 16027                   | CC                              | GG                | 1946517576               |
| SNP_P3_128271_16091 | NW_004516017.1 | Scaffold587 | 16091                   | GG                              | AA                | 1946517577               |
| SNP_P3_128272_16096 | NW_004516017.1 | Scaffold587 | 16096                   | TT                              | CC                | 1946517579               |
| SNP_P3_128273_16143 | NW_004516017.1 | Scaffold587 | 16143                   | TT                              | GG                | 1946517580               |
| SNP_P3_128274_16218 | NW_004516017.1 | Scaffold587 | 16218                   | TT                              | CC                | 1946517582               |
| SNP_P3_128275_16227 | NW_004516017.1 | Scaffold587 | 16227                   | AA                              | GG                | 1946517583               |
| SNP_P3_128276_16290 | NW_004516017.1 | Scaffold587 | 16290                   | CC                              | AA                | 1946517585               |
| SNP_P3_128277_16362 | NW_004516017.1 | Scaffold587 | 16362                   | AA                              | CC                | 1946517586               |
| SNP_P3_128278_16495 | NW_004516017.1 | Scaffold587 | 16495                   | CC                              | GG                | 1946517588               |
| SNP_P3_128279_16525 | NW_004516017.1 | Scaffold587 | 16525                   | AA                              | CC                | 1946517590               |
| SNP_P3_128280_16662 | NW_004516017.1 | Scaffold587 | 16662                   | TT                              | CC                | 1946517591               |
| SNP_P3_128281_16754 | NW_004516017.1 | Scaffold587 | 16754                   | TT                              | AA                | 1946517593               |
| SNP_P3_128282_16766 | NW_004516017.1 | Scaffold587 | 16766                   | TT                              | CC                | 1946517594               |
| SNP_P3_128283_16792 | NW_004516017.1 | Scaffold587 | 16792                   | TT                              | CC                | 1946517596               |
| SNP_P3_128284_17052 | NW_004516017.1 | Scaffold587 | 17052                   | TT                              | CC                | 1946517597               |
| SNP_P3_128285_17131 | NW_004516017.1 | Scaffold587 | 17131                   | TT                              | CC                | 1946517599               |
| SNP_P3_128286_17150 | NW_004516017.1 | Scaffold587 | 17150                   | CC                              | TT                | 1946517601               |
| SNP_P3_128288_17190 | NW_004516017.1 | Scaffold587 | 17190                   | TT                              | AA                | 1946517602               |
| SNP_P3_128289_17249 | NW_004516017.1 | Scaffold587 | 17249                   | CC                              | TT                | 1946517604               |
| SNP_P3_128290_17298 | NW_004516017.1 | Scaffold587 | 17298                   | TT                              | CC                | 1946517605               |
| SNP_P3_128291_17307 | NW_004516017.1 | Scaffold587 | 17307                   | GG                              | AA                | 1946517607               |
| SNP_P3_128292_17334 | NW_004516017.1 | Scaffold587 | 17334                   | GG                              | TT                | 1946517609               |
| SNP_P3_128293_17462 | NW_004516017.1 | Scaffold587 | 17462                   | CC                              | TT                | 1946517610               |
| SNP_P3_128294_17515 | NW_004516017.1 | Scaffold587 | 17515                   | GG                              | AA                | 1946517612               |
| SNP_P3_128295_17529 | NW_004516017.1 | Scaffold587 | 17529                   | GG                              | CC                | 1946517613               |
| SNP_P3_128296_17537 | NW_004516017.1 | Scaffold587 | 17537                   | TT                              | GG                | 1946517615               |
| SNP_P3_128297_17570 | NW_004516017.1 | Scaffold587 | 17570                   | AA                              | CC                | 1946517616               |
| SNP_P3_128298_17591 | NW_004516017.1 | Scaffold587 | 17591                   | CC                              | TT                | 1946517618               |
| SNP_P3_128299_17603 | NW_004516017.1 | Scaffold587 | 17603                   | CC                              | TT                | 1946517619               |

| SNPs IDs            | Chromosome IDs | Chromosomes | Physical positions (bp) | CDC Frontier (Reference genome) | (Pusa 256 & HPNB) | NCBI SNPdb Accession IDs |
|---------------------|----------------|-------------|-------------------------|---------------------------------|-------------------|--------------------------|
| SNP_P3_128300_17625 | NW_004516017.1 | Scaffold587 | 17625                   | AA                              | GG                | 1946517621               |
| SNP_P3_128301_17777 | NW_004516017.1 | Scaffold587 | 17777                   | CC                              | GG                | 1946517623               |
| SNP_P3_128302_17965 | NW_004516017.1 | Scaffold587 | 17965                   | CC                              | GG                | 1946517624               |
| SNP_P3_128303_18045 | NW_004516017.1 | Scaffold587 | 18045                   | GG                              | TT                | 1946517626               |
| SNP_P3_128304_18046 | NW_004516017.1 | Scaffold587 | 18046                   | AA                              | GG                | 1946517627               |
| SNP_P3_128306_19303 | NW_004516017.1 | Scaffold587 | 19303                   | AA                              | GG                | 1946517629               |
| SNP_P3_128307_19600 | NW_004516017.1 | Scaffold587 | 19600                   | TT                              | AA                | 1946517630               |
| SNP_P3_128308_19638 | NW_004516017.1 | Scaffold587 | 19638                   | AA                              | CC                | 1946517632               |
| SNP_P3_128309_19641 | NW_004516017.1 | Scaffold587 | 19641                   | AA                              | TT                | 1946517633               |
| SNP_P3_128310_19702 | NW_004516017.1 | Scaffold587 | 19702                   | TT                              | CC                | 1946517635               |
| SNP_P3_128311_19755 | NW_004516017.1 | Scaffold587 | 19755                   | CC                              | TT                | 1946517636               |
| SNP_P3_128312_19757 | NW_004516017.1 | Scaffold587 | 19757                   | AA                              | GG                | 1946517638               |
| SNP_P3_128313_19841 | NW_004516017.1 | Scaffold587 | 19841                   | AA                              | GG                | 1946517639               |
| SNP_P3_128314_19854 | NW_004516017.1 | Scaffold587 | 19854                   | GG                              | AA                | 1946517641               |
| SNP_P3_128315_19860 | NW_004516017.1 | Scaffold587 | 19860                   | CC                              | TT                | 1946517643               |
| SNP_P3_128316_19868 | NW_004516017.1 | Scaffold587 | 19868                   | CC                              | AA                | 1946517644               |
| SNP_P3_128317_19869 | NW_004516017.1 | Scaffold587 | 19869                   | AA                              | CC                | 1946517646               |
| SNP_P3_128318_19930 | NW_004516017.1 | Scaffold587 | 19930                   | TT                              | GG                | 1946517647               |
| SNP_P3_128319_20800 | NW_004516017.1 | Scaffold587 | 20800                   | TT                              | AA                | 1946517649               |
| SNP_P3_128320_20815 | NW_004516017.1 | Scaffold587 | 20815                   | GG                              | AA                | 1946517650               |
| SNP_P3_128321_21170 | NW_004516017.1 | Scaffold587 | 21170                   | GG                              | AA                | 1946517652               |
| SNP_P3_128322_21239 | NW_004516017.1 | Scaffold587 | 21239                   | TT                              | GG                | 1946517653               |
| SNP_P3_128323_21289 | NW_004516017.1 | Scaffold587 | 21289                   | TT                              | AA                | 1946517655               |
| SNP_P3_128324_21319 | NW_004516017.1 | Scaffold587 | 21319                   | CC                              | TT                | 1946517656               |
| SNP_P3_128325_22430 | NW_004516017.1 | Scaffold587 | 22430                   | GG                              | TT                | 1946517658               |
| SNP_P3_128326_22442 | NW_004516017.1 | Scaffold587 | 22442                   | GG                              | AA                | 1946517659               |
| SNP_P3_128327_22486 | NW_004516017.1 | Scaffold587 | 22486                   | CC                              | TT                | 1946517661               |
| SNP_P3_128328_22508 | NW_004516017.1 | Scaffold587 | 22508                   | AA                              | TT                | 1946517663               |
| SNP_P3_128329_22544 | NW_004516017.1 | Scaffold587 | 22544                   | CC                              | TT                | 1946517664               |
| SNP_P3_128330_22611 | NW_004516017.1 | Scaffold587 | 22611                   | AA                              | GG                | 1946517666               |
| SNP_P3_128331_22699 | NW_004516017.1 | Scaffold587 | 22699                   | TT                              | GG                | 1946517667               |
| SNP_P3_128332_22718 | NW_004516017.1 | Scaffold587 | 22718                   | TT                              | GG                | 1946517669               |
| SNP_P3_128333_22726 | NW_004516017.1 | Scaffold587 | 22726                   | AA                              | GG                | 1946517670               |
| SNP_P3_128334_22820 | NW_004516017.1 | Scaffold587 | 22820                   | GG                              | AA                | 1946517672               |
| SNP_P3_128335_22821 | NW_004516017.1 | Scaffold587 | 22821                   | GG                              | AA                | 1946517673               |
| SNP_P3_128336_22837 | NW_004516017.1 | Scaffold587 | 22837                   | CC                              | TT                | 1946517675               |
| SNP_P3_128337_22934 | NW_004516017.1 | Scaffold587 | 22934                   | GG                              | AA                | 1946517676               |
| SNP_P3_128339_23109 | NW_004516017.1 | Scaffold587 | 23109                   | AA                              | CC                | 1946517678               |
| SNP_P3_128340_24147 | NW_004516017.1 | Scaffold587 | 24147                   | GG                              | AA                | 1946517679               |
| SNP_P3_128341_24148 | NW_004516017.1 | Scaffold587 | 24148                   | TT                              | AA                | 1946517681               |
| SNP_P3_128342_25729 | NW_004516017.1 | Scaffold587 | 25729                   | AA                              | CC                | 1946517682               |
| SNP_P3_128343_27767 | NW_004516017.1 | Scaffold587 | 27767                   | AA                              | GG                | 1946517683               |

| SNPs IDs            | Chromosome IDs | Chromosomes | Physical positions (bp) | CDC Frontier (Reference genome) | (Pusa 256 & HPNB) | NCBI SNPdb Accession IDs |
|---------------------|----------------|-------------|-------------------------|---------------------------------|-------------------|--------------------------|
| SNP_P3_128344_27868 | NW_004516017.1 | Scaffold587 | 27868                   | GG                              | AA                | 1946517685               |
| SNP_P3_128345_27946 | NW_004516017.1 | Scaffold587 | 27946                   | AA                              | TT                | 1946517686               |
| SNP_P3_128346_27960 | NW_004516017.1 | Scaffold587 | 27960                   | GG                              | AA                | 1946517688               |
| SNP_P3_128347_28052 | NW_004516017.1 | Scaffold587 | 28052                   | AA                              | CC                | 1946517690               |
| SNP_P3_128348_28611 | NW_004516017.1 | Scaffold587 | 28611                   | AA                              | GG                | 1946517691               |
| SNP_P3_128349_29026 | NW_004516017.1 | Scaffold587 | 29026                   | GG                              | AA                | 1946517693               |
| SNP_P3_128350_29157 | NW_004516017.1 | Scaffold587 | 29157                   | CC                              | AA                | 1946517694               |
| SNP_P3_128351_29179 | NW_004516017.1 | Scaffold587 | 29179                   | CC                              | TT                | 1946517696               |
| SNP_P3_128352_29236 | NW_004516017.1 | Scaffold587 | 29236                   | TT                              | CC                | 1946517697               |
| SNP_P3_128353_29265 | NW_004516017.1 | Scaffold587 | 29265                   | GG                              | AA                | 1946517699               |
| SNP_P3_128354_29401 | NW_004516017.1 | Scaffold587 | 29401                   | GG                              | TT                | 1946517700               |
| SNP_P3_128355_29404 | NW_004516017.1 | Scaffold587 | 29404                   | TT                              | AA                | 1946517702               |
| SNP_P3_128356_29409 | NW_004516017.1 | Scaffold587 | 29409                   | TT                              | AA                | 1946517703               |
| SNP_P3_128357_29465 | NW_004516017.1 | Scaffold587 | 29465                   | AA                              | GG                | 1946517705               |
| SNP_P3_128358_29489 | NW_004516017.1 | Scaffold587 | 29489                   | AA                              | GG                | 1946517706               |
| SNP_P3_128359_29823 | NW_004516017.1 | Scaffold587 | 29823                   | TT                              | CC                | 1946517708               |
| SNP_P3_128360_30618 | NW_004516017.1 | Scaffold587 | 30618                   | CC                              | TT                | 1946517710               |
| SNP_P3_128361_30915 | NW_004516017.1 | Scaffold587 | 30915                   | GG                              | CC                | 1946517711               |
| SNP_P3_128362_30944 | NW_004516017.1 | Scaffold587 | 30944                   | GG                              | AA                | 1946517713               |
| SNP_P3_128363_30994 | NW_004516017.1 | Scaffold587 | 30994                   | CC                              | GG                | 1946517714               |
| SNP_P3_128364_31024 | NW_004516017.1 | Scaffold587 | 31024                   | AA                              | GG                | 1946517716               |
| SNP_P3_128365_31073 | NW_004516017.1 | Scaffold587 | 31073                   | CC                              | TT                | 1946517717               |
| SNP_P3_128366_31297 | NW_004516017.1 | Scaffold587 | 31297                   | AA                              | GG                | 1946517719               |
| SNP_P3_128367_31637 | NW_004516017.1 | Scaffold587 | 31637                   | AA                              | TT                | 1946517720               |
| SNP_P3_128368_31669 | NW_004516017.1 | Scaffold587 | 31669                   | AA                              | CC                | 1946517722               |
| SNP_P3_128369_31828 | NW_004516017.1 | Scaffold587 | 31828                   | AA                              | TT                | 1946517723               |
| SNP_P3_128370_31874 | NW_004516017.1 | Scaffold587 | 31874                   | AA                              | GG                | 1946517725               |
| SNP_P3_128371_31885 | NW_004516017.1 | Scaffold587 | 31885                   | CC                              | TT                | 1946517726               |
| SNP_P3_128372_31894 | NW_004516017.1 | Scaffold587 | 31894                   | CC                              | GG                | 1946517728               |
| SNP_P3_128373_31972 | NW_004516017.1 | Scaffold587 | 31972                   | TT                              | GG                | 1946517729               |
| SNP_P3_128374_32018 | NW_004516017.1 | Scaffold587 | 32018                   | TT                              | CC                | 1946517731               |
| SNP_P3_128375_32062 | NW_004516017.1 | Scaffold587 | 32062                   | TT                              | CC                | 1946517733               |
| SNP_P3_128376_32258 | NW_004516017.1 | Scaffold587 | 32258                   | CC                              | TT                | 1946517734               |
| SNP_P3_128377_32261 | NW_004516017.1 | Scaffold587 | 32261                   | AA                              | TT                | 1946517736               |
| SNP_P3_128378_34659 | NW_004516017.1 | Scaffold587 | 34659                   | CC                              | TT                | 1946517737               |
| SNP_P3_128379_34975 | NW_004516017.1 | Scaffold587 | 34975                   | TT                              | CC                | 1946517739               |
| SNP_P3_128380_34979 | NW_004516017.1 | Scaffold587 | 34979                   | CC                              | TT                | 1946517740               |
| SNP_P3_128381_34994 | NW_004516017.1 | Scaffold587 | 34994                   | TT                              | CC                | 1946517742               |
| SNP_P3_128382_35064 | NW_004516017.1 | Scaffold587 | 35064                   | TT                              | CC                | 1946517743               |
| SNP_P3_128384_35309 | NW_004516017.1 | Scaffold587 | 35309                   | CC                              | GG                | 1946517745               |
| SNP_P3_128385_35401 | NW_004516017.1 | Scaffold587 | 35401                   | TT                              | GG                | 1946517746               |
| SNP_P3_128386_35403 | NW_004516017.1 | Scaffold587 | 35403                   | TT                              | GG                | 1946517748               |

| SNPs IDs            | Chromosome IDs | Chromosomes | Physical positions (bp) | CDC Frontier (Reference genome) | (Pusa 256 & HPNB) | NCBI SNPdb Accession IDs |
|---------------------|----------------|-------------|-------------------------|---------------------------------|-------------------|--------------------------|
| SNP_P3_128387_35496 | NW_004516017.1 | Scaffold587 | 35496                   | TT                              | CC                | 1946517749               |
| SNP_P3_128388_36276 | NW_004516017.1 | Scaffold587 | 36276                   | AA                              | TT                | 1946517751               |
| SNP_P3_128389_36290 | NW_004516017.1 | Scaffold587 | 36290                   | CC                              | AA                | 1946517752               |
| SNP_P3_128390_36342 | NW_004516017.1 | Scaffold587 | 36342                   | TT                              | AA                | 1946517754               |
| SNP_P3_128391_36462 | NW_004516017.1 | Scaffold587 | 36462                   | TT                              | GG                | 1946517755               |
| SNP_P3_128392_36475 | NW_004516017.1 | Scaffold587 | 36475                   | AA                              | GG                | 1946517757               |
| SNP_P3_128393_36549 | NW_004516017.1 | Scaffold587 | 36549                   | TT                              | CC                | 1946517758               |
| SNP_P3_128394_36652 | NW_004516017.1 | Scaffold587 | 36652                   | TT                              | GG                | 1946517760               |
| SNP_P3_128395_36854 | NW_004516017.1 | Scaffold587 | 36854                   | GG                              | AA                | 1946517762               |
| SNP_P3_128396_36904 | NW_004516017.1 | Scaffold587 | 36904                   | AA                              | GG                | 1946517763               |
| SNP_P3_128397_37301 | NW_004516017.1 | Scaffold587 | 37301                   | TT                              | AA                | 1946517765               |
| SNP_P3_128398_38403 | NW_004516017.1 | Scaffold587 | 38403                   | TT                              | CC                | 1946517766               |
| SNP_P3_128399_38683 | NW_004516017.1 | Scaffold587 | 38683                   | AA                              | GG                | 1946517768               |
| SNP_P3_128400_38703 | NW_004516017.1 | Scaffold587 | 38703                   | TT                              | GG                | 1946517769               |
| SNP_P3_128401_38744 | NW_004516017.1 | Scaffold587 | 38744                   | AA                              | GG                | 1946517770               |
| SNP_P3_128402_38894 | NW_004516017.1 | Scaffold587 | 38894                   | AA                              | GG                | 1946517771               |
| SNP_P3_128403_38935 | NW_004516017.1 | Scaffold587 | 38935                   | AA                              | GG                | 1946517773               |
| SNP_P3_128404_40532 | NW_004516017.1 | Scaffold587 | 40532                   | CC                              | GG                | 1946517774               |
| SNP_P3_128405_40601 | NW_004516017.1 | Scaffold587 | 40601                   | AA                              | GG                | 1946517775               |
| SNP_P3_128406_40712 | NW_004516017.1 | Scaffold587 | 40712                   | AA                              | CC                | 1946517777               |
| SNP_P3_128407_40812 | NW_004516017.1 | Scaffold587 | 40812                   | CC                              | AA                | 1946517778               |
| SNP_P3_128408_40813 | NW_004516017.1 | Scaffold587 | 40813                   | TT                              | CC                | 1946517780               |
| SNP_P3_128409_40836 | NW_004516017.1 | Scaffold587 | 40836                   | AA                              | GG                | 1946517781               |
| SNP_P3_128410_40940 | NW_004516017.1 | Scaffold587 | 40940                   | TT                              | AA                | 1946517783               |
| SNP_P3_128411_40990 | NW_004516017.1 | Scaffold587 | 40990                   | GG                              | TT                | 1946517784               |
| SNP_P3_128412_41073 | NW_004516017.1 | Scaffold587 | 41073                   | AA                              | GG                | 1946517786               |
| SNP_P3_128413_41177 | NW_004516017.1 | Scaffold587 | 41177                   | AA                              | GG                | 1946517787               |
| SNP_P3_128414_41214 | NW_004516017.1 | Scaffold587 | 41214                   | CC                              | TT                | 1946517789               |
| SNP_P3_128415_41215 | NW_004516017.1 | Scaffold587 | 41215                   | GG                              | AA                | 1946517790               |
| SNP_P3_128416_41221 | NW_004516017.1 | Scaffold587 | 41221                   | CC                              | TT                | 1946517792               |
| SNP_P3_128417_41277 | NW_004516017.1 | Scaffold587 | 41277                   | AA                              | GG                | 1946517794               |
| SNP_P3_128418_41294 | NW_004516017.1 | Scaffold587 | 41294                   | TT                              | CC                | 1946517795               |
| SNP_P3_128419_41301 | NW_004516017.1 | Scaffold587 | 41301                   | TT                              | CC                | 1946517797               |
| SNP_P3_128420_41333 | NW_004516017.1 | Scaffold587 | 41333                   | TT                              | CC                | 1946517799               |
| SNP_P3_128421_41617 | NW_004516017.1 | Scaffold587 | 41617                   | AA                              | GG                | 1946517800               |
| SNP_P3_128422_41967 | NW_004516017.1 | Scaffold587 | 41967                   | AA                              | TT                | 1946517802               |
| SNP_P3_128423_41973 | NW_004516017.1 | Scaffold587 | 41973                   | AA                              | TT                | 1946517803               |
| SNP_P3_128424_42979 | NW_004516017.1 | Scaffold587 | 42979                   | GG                              | AA                | 1946517805               |
| SNP_P3_128425_43021 | NW_004516017.1 | Scaffold587 | 43021                   | CC                              | TT                | 1946517806               |
| SNP_P3_128426_43517 | NW_004516017.1 | Scaffold587 | 43517                   | TT                              | CC                | 1946517808               |
| SNP_P3_128427_44545 | NW_004516017.1 | Scaffold587 | 44545                   | GG                              | AA                | 1946517809               |
| SNP_P3_128428_45268 | NW_004516017.1 | Scaffold587 | 45268                   | GG                              | TT                | 1946517811               |

| SNPs IDs            | Chromosome IDs | Chromosomes | Physical positions (bp) | CDC Frontier (Reference genome) | (Pusa 256 & HPNB) | NCBI SNPdb Accession IDs |
|---------------------|----------------|-------------|-------------------------|---------------------------------|-------------------|--------------------------|
| SNP_P3_128429_45288 | NW_004516017.1 | Scaffold587 | 45288                   | TT                              | AA                | 1946517813               |
| SNP_P3_128430_45303 | NW_004516017.1 | Scaffold587 | 45303                   | AA                              | GG                | 1946517814               |
| SNP_P3_128431_45663 | NW_004516017.1 | Scaffold587 | 45663                   | GG                              | TT                | 1946517816               |
| SNP_P3_128432_46881 | NW_004516017.1 | Scaffold587 | 46881                   | AA                              | CC                | 1946517817               |
| SNP_P3_128433_47166 | NW_004516017.1 | Scaffold587 | 47166                   | CC                              | TT                | 1946517819               |
| SNP_P3_128434_47168 | NW_004516017.1 | Scaffold587 | 47168                   | CC                              | TT                | 1946517820               |
| SNP_P3_128435_47234 | NW_004516017.1 | Scaffold587 | 47234                   | TT                              | CC                | 1946517822               |
| SNP_P3_128436_47277 | NW_004516017.1 | Scaffold587 | 47277                   | AA                              | GG                | 1946517823               |
| SNP_P3_128437_47295 | NW_004516017.1 | Scaffold587 | 47295                   | CC                              | AA                | 1946517824               |
| SNP_P3_128438_47306 | NW_004516017.1 | Scaffold587 | 47306                   | TT                              | CC                | 1946517825               |
| SNP_P3_128439_47321 | NW_004516017.1 | Scaffold587 | 47321                   | TT                              | CC                | 1946517826               |
| SNP_P3_128440_47325 | NW_004516017.1 | Scaffold587 | 47325                   | TT                              | GG                | 1946517827               |
| SNP_P3_128441_47339 | NW_004516017.1 | Scaffold587 | 47339                   | AA                              | CC                | 1946517828               |
| SNP_P3_128442_47340 | NW_004516017.1 | Scaffold587 | 47340                   | TT                              | CC                | 1946517830               |
| SNP_P3_128443_47364 | NW_004516017.1 | Scaffold587 | 47364                   | AA                              | GG                | 1946517831               |
| SNP_P3_128444_47405 | NW_004516017.1 | Scaffold587 | 47405                   | AA                              | GG                | 1946517833               |
| SNP_P3_128445_47569 | NW_004516017.1 | Scaffold587 | 47569                   | AA                              | GG                | 1946517835               |
| SNP_P3_128446_47666 | NW_004516017.1 | Scaffold587 | 47666                   | TT                              | AA                | 1946517836               |
| SNP_P3_128447_48563 | NW_004516017.1 | Scaffold587 | 48563                   | GG                              | AA                | 1946517837               |
| SNP_P3_128448_48604 | NW_004516017.1 | Scaffold587 | 48604                   | GG                              | CC                | 1946517839               |
| SNP_P3_128449_48688 | NW_004516017.1 | Scaffold587 | 48688                   | CC                              | TT                | 1946517841               |
| SNP_P3_128450_48799 | NW_004516017.1 | Scaffold587 | 48799                   | AA                              | GG                | 1946517842               |
| SNP_P3_128451_48852 | NW_004516017.1 | Scaffold587 | 48852                   | AA                              | GG                | 1946517844               |
| SNP_P3_128452_48865 | NW_004516017.1 | Scaffold587 | 48865                   | AA                              | TT                | 1946517845               |
| SNP_P3_128453_48943 | NW_004516017.1 | Scaffold587 | 48943                   | GG                              | CC                | 1946517847               |
| SNP_P3_128454_49049 | NW_004516017.1 | Scaffold587 | 49049                   | AA                              | GG                | 1946517849               |
| SNP_P3_128455_49291 | NW_004516017.1 | Scaffold587 | 49291                   | AA                              | TT                | 1946517850               |
| SNP_P3_128456_49301 | NW_004516017.1 | Scaffold587 | 49301                   | TT                              | AA                | 1946517852               |
| SNP_P3_128457_49341 | NW_004516017.1 | Scaffold587 | 49341                   | CC                              | TT                | 1946517853               |
| SNP_P3_128458_49368 | NW_004516017.1 | Scaffold587 | 49368                   | AA                              | GG                | 1946517855               |
| SNP_P3_128459_49403 | NW_004516017.1 | Scaffold587 | 49403                   | CC                              | TT                | 1946517856               |
| SNP_P3_128460_49564 | NW_004516017.1 | Scaffold587 | 49564                   | GG                              | AA                | 1946517858               |
| SNP_P3_128461_49576 | NW_004516017.1 | Scaffold587 | 49576                   | TT                              | CC                | 1946517859               |
| SNP_P3_128462_50467 | NW_004516017.1 | Scaffold587 | 50467                   | TT                              | GG                | 1946517861               |
| SNP_P3_128463_50507 | NW_004516017.1 | Scaffold587 | 50507                   | TT                              | GG                | 1946517862               |
| SNP_P3_128464_50512 | NW_004516017.1 | Scaffold587 | 50512                   | GG                              | AA                | 1946517864               |
| SNP_P3_128465_50529 | NW_004516017.1 | Scaffold587 | 50529                   | AA                              | TT                | 1946517865               |
| SNP_P3_128466_50530 | NW_004516017.1 | Scaffold587 | 50530                   | AA                              | TT                | 1946517867               |
| SNP_P3_128467_50590 | NW_004516017.1 | Scaffold587 | 50590                   | GG                              | AA                | 1946517868               |
| SNP_P3_128468_50673 | NW_004516017.1 | Scaffold587 | 50673                   | AA                              | GG                | 1946517870               |
| SNP_P3_128469_50710 | NW_004516017.1 | Scaffold587 | 50710                   | AA                              | GG                | 1946517871               |
| SNP_P3_128470_50760 | NW_004516017.1 | Scaffold587 | 50760                   | AA                              | GG                | 1946517873               |

| SNPs IDs            | Chromosome IDs | Chromosomes | Physical positions (bp) | CDC Frontier (Reference genome) | (Pusa 256 & HPNB) | NCBI SNPdb Accession IDs |
|---------------------|----------------|-------------|-------------------------|---------------------------------|-------------------|--------------------------|
| SNP_P3_128471_50763 | NW_004516017.1 | Scaffold587 | 50763                   | GG                              | AA                | 1946517875               |
| SNP_P3_128472_50771 | NW_004516017.1 | Scaffold587 | 50771                   | GG                              | AA                | 1946517876               |
| SNP_P3_128474_50883 | NW_004516017.1 | Scaffold587 | 50883                   | AA                              | TT                | 1946517878               |
| SNP_P3_128475_50913 | NW_004516017.1 | Scaffold587 | 50913                   | CC                              | TT                | 1946517879               |
| SNP_P3_128476_50929 | NW_004516017.1 | Scaffold587 | 50929                   | TT                              | GG                | 1946517881               |
| SNP_P3_128477_50966 | NW_004516017.1 | Scaffold587 | 50966                   | CC                              | TT                | 1946517883               |
| SNP_P3_128478_50984 | NW_004516017.1 | Scaffold587 | 50984                   | AA                              | GG                | 1946517885               |
| SNP_P3_128480_51085 | NW_004516017.1 | Scaffold587 | 51085                   | CC                              | TT                | 1946517886               |
| SNP_P3_128481_51095 | NW_004516017.1 | Scaffold587 | 51095                   | AA                              | GG                | 1946517888               |
| SNP_P3_128482_51151 | NW_004516017.1 | Scaffold587 | 51151                   | AA                              | GG                | 1946517890               |
| SNP_P3_128483_51181 | NW_004516017.1 | Scaffold587 | 51181                   | TT                              | CC                | 1946517891               |
| SNP_P3_128484_51213 | NW_004516017.1 | Scaffold587 | 51213                   | GG                              | AA                | 1946517893               |
| SNP_P3_128485_51258 | NW_004516017.1 | Scaffold587 | 51258                   | AA                              | GG                | 1946517894               |
| SNP_P3_128486_52638 | NW_004516017.1 | Scaffold587 | 52638                   | GG                              | AA                | 1946517896               |
| SNP_P3_128487_52660 | NW_004516017.1 | Scaffold587 | 52660                   | AA                              | GG                | 1946517897               |
| SNP_P3_128488_52705 | NW_004516017.1 | Scaffold587 | 52705                   | CC                              | TT                | 1946517899               |
| SNP_P3_128489_52735 | NW_004516017.1 | Scaffold587 | 52735                   | AA                              | GG                | 1946517900               |
| SNP_P3_128490_52871 | NW_004516017.1 | Scaffold587 | 52871                   | CC                              | TT                | 1946517902               |
| SNP_P3_128491_52952 | NW_004516017.1 | Scaffold587 | 52952                   | AA                              | TT                | 1946517903               |
| SNP_P3_128492_53010 | NW_004516017.1 | Scaffold587 | 53010                   | TT                              | CC                | 1946517905               |
| SNP_P3_128494_53152 | NW_004516017.1 | Scaffold587 | 53152                   | CC                              | TT                | 1946517906               |
| SNP_P3_128495_53581 | NW_004516017.1 | Scaffold587 | 53581                   | AA                              | GG                | 1946517908               |
| SNP_P3_128496_53585 | NW_004516017.1 | Scaffold587 | 53585                   | CC                              | TT                | 1946517909               |
| SNP_P3_128497_53587 | NW_004516017.1 | Scaffold587 | 53587                   | AA                              | GG                | 1946517911               |
| SNP_P3_128498_53589 | NW_004516017.1 | Scaffold587 | 53589                   | AA                              | CC                | 1946517912               |
| SNP_P3_128499_53624 | NW_004516017.1 | Scaffold587 | 53624                   | AA                              | CC                | 1946517914               |
| SNP_P3_128500_53664 | NW_004516017.1 | Scaffold587 | 53664                   | CC                              | TT                | 1946517915               |
| SNP_P3_128501_53669 | NW_004516017.1 | Scaffold587 | 53669                   | AA                              | GG                | 1946517917               |
| SNP_P3_128502_53670 | NW_004516017.1 | Scaffold587 | 53670                   | GG                              | AA                | 1946517918               |
| SNP_P3_128503_53697 | NW_004516017.1 | Scaffold587 | 53697                   | CC                              | AA                | 1946517920               |
| SNP_P3_128504_53705 | NW_004516017.1 | Scaffold587 | 53705                   | GG                              | AA                | 1946517921               |
| SNP_P3_128505_53728 | NW_004516017.1 | Scaffold587 | 53728                   | CC                              | GG                | 1946517923               |
| SNP_P3_128506_53925 | NW_004516017.1 | Scaffold587 | 53925                   | AA                              | CC                | 1946517924               |
| SNP_P3_128507_53968 | NW_004516017.1 | Scaffold587 | 53968                   | AA                              | GG                | 1946517926               |
| SNP_P3_128508_54005 | NW_004516017.1 | Scaffold587 | 54005                   | TT                              | GG                | 1946517927               |
| SNP_P3_128509_54311 | NW_004516017.1 | Scaffold587 | 54311                   | GG                              | TT                | 1946517929               |
| SNP_P3_128510_54330 | NW_004516017.1 | Scaffold587 | 54330                   | CC                              | TT                | 1946517930               |
| SNP_P3_128511_54331 | NW_004516017.1 | Scaffold587 | 54331                   | TT                              | CC                | 1946517932               |
| SNP_P3_128512_54358 | NW_004516017.1 | Scaffold587 | 54358                   | CC                              | TT                | 1946517933               |
| SNP_P3_128513_54359 | NW_004516017.1 | Scaffold587 | 54359                   | AA                              | GG                | 1946517935               |
| SNP_P3_128514_54594 | NW_004516017.1 | Scaffold587 | 54594                   | AA                              | GG                | 1946517936               |
| SNP_P3_128515_54635 | NW_004516017.1 | Scaffold587 | 54635                   | TT                              | CC                | 1946517938               |

| SNPs IDs            | Chromosome IDs | Chromosomes | Physical positions (bp) | CDC Frontier (Reference genome) | (Pusa 256 & HPNB) | NCBI SNPdb Accession IDs |
|---------------------|----------------|-------------|-------------------------|---------------------------------|-------------------|--------------------------|
| SNP_P3_128516_54649 | NW_004516017.1 | Scaffold587 | 54649                   | GG                              | AA                | 1946517939               |
| SNP_P3_128517_54685 | NW_004516017.1 | Scaffold587 | 54685                   | TT                              | CC                | 1946517941               |
| SNP_P3_128519_54955 | NW_004516017.1 | Scaffold587 | 54955                   | AA                              | TT                | 1946517942               |
| SNP_P3_128520_55015 | NW_004516017.1 | Scaffold587 | 55015                   | GG                              | AA                | 1946517944               |
| SNP_P3_128521_55223 | NW_004516017.1 | Scaffold587 | 55223                   | GG                              | TT                | 1946517945               |
| SNP_P3_128522_55260 | NW_004516017.1 | Scaffold587 | 55260                   | GG                              | AA                | 1946517946               |
| SNP_P3_128523_55435 | NW_004516017.1 | Scaffold587 | 55435                   | GG                              | TT                | 1946517948               |
| SNP_P3_128526_55645 | NW_004516017.1 | Scaffold587 | 55645                   | TT                              | GG                | 1946517949               |
| SNP_P3_128527_55671 | NW_004516017.1 | Scaffold587 | 55671                   | CC                              | TT                | 1946517951               |
| SNP_P3_128528_55747 | NW_004516017.1 | Scaffold587 | 55747                   | CC                              | TT                | 1946517952               |
| SNP_P3_128529_55963 | NW_004516017.1 | Scaffold587 | 55963                   | AA                              | GG                | 1946517954               |
| SNP_P3_128530_56042 | NW_004516017.1 | Scaffold587 | 56042                   | GG                              | AA                | 1946517955               |
| SNP_P3_128532_61439 | NW_004516017.1 | Scaffold587 | 61439                   | AA                              | TT                | 1946517957               |
| SNP_P3_128533_70223 | NW_004516017.1 | Scaffold587 | 70223                   | AA                              | TT                | 1946517959               |
| SNP_P3_128534_70337 | NW_004516017.1 | Scaffold587 | 70337                   | GG                              | CC                | 1946517960               |
| SNP_P3_128535_70386 | NW_004516017.1 | Scaffold587 | 70386                   | GG                              | TT                | 1946517962               |
| SNP_P3_128536_70447 | NW_004516017.1 | Scaffold587 | 70447                   | AA                              | GG                | 1946517963               |
| SNP_P3_128538_70522 | NW_004516017.1 | Scaffold587 | 70522                   | GG                              | AA                | 1946517964               |
| SNP_P3_128539_70658 | NW_004516017.1 | Scaffold587 | 70658                   | CC                              | GG                | 1946517966               |
| SNP_P3_128540_70681 | NW_004516017.1 | Scaffold587 | 70681                   | CC                              | GG                | 1946517967               |
| SNP_P3_128541_70978 | NW_004516017.1 | Scaffold587 | 70978                   | AA                              | GG                | 1946517969               |
| SNP_P3_128542_7749  | NW_004516018.1 | Scaffold588 | 7749                    | TT                              | AA                | 1946517970               |
| SNP_P3_128543_7769  | NW_004516018.1 | Scaffold588 | 7769                    | AA                              | GG                | 1946517972               |
| SNP_P3_128544_7778  | NW_004516018.1 | Scaffold588 | 7778                    | CC                              | GG                | 1946517974               |
| SNP_P3_128545_13809 | NW_004516018.1 | Scaffold588 | 13809                   | AA                              | TT                | 1946517975               |
| SNP_P3_128546_13844 | NW_004516018.1 | Scaffold588 | 13844                   | CC                              | TT                | 1946517977               |
| SNP_P3_128547_14337 | NW_004516018.1 | Scaffold588 | 14337                   | AA                              | GG                | 1946517978               |
| SNP_P3_128548_14354 | NW_004516018.1 | Scaffold588 | 14354                   | GG                              | AA                | 1946517980               |
| SNP_P3_128549_14415 | NW_004516018.1 | Scaffold588 | 14415                   | CC                              | TT                | 1946517981               |
| SNP_P3_128550_14436 | NW_004516018.1 | Scaffold588 | 14436                   | CC                              | GG                | 1946517983               |
| SNP_P3_128551_14474 | NW_004516018.1 | Scaffold588 | 14474                   | TT                              | CC                | 1946517985               |
| SNP_P3_128552_14482 | NW_004516018.1 | Scaffold588 | 14482                   | TT                              | GG                | 1946517986               |
| SNP_P3_128553_14581 | NW_004516018.1 | Scaffold588 | 14581                   | GG                              | AA                | 1946517987               |
| SNP_P3_128554_16027 | NW_004516018.1 | Scaffold588 | 16027                   | CC                              | TT                | 1946517989               |
| SNP_P3_128555_24197 | NW_004516019.1 | Scaffold589 | 24197                   | GG                              | AA                | 1946517990               |
| SNP_P3_128557_25520 | NW_004516019.1 | Scaffold589 | 25520                   | CC                              | AA                | 1946517992               |
| SNP_P3_128558_49029 | NW_004516019.1 | Scaffold589 | 49029                   | CC                              | TT                | 1946517993               |
| SNP_P3_128559_49031 | NW_004516019.1 | Scaffold589 | 49031                   | TT                              | GG                | 1946517995               |
| SNP_P3_128560_49112 | NW_004516019.1 | Scaffold589 | 49112                   | TT                              | CC                | 1946517996               |
| SNP_P3_128561_49156 | NW_004516019.1 | Scaffold589 | 49156                   | TT                              | CC                | 1946517998               |
| SNP_P3_128562_49165 | NW_004516019.1 | Scaffold589 | 49165                   | AA                              | GG                | 1946517999               |
| SNP_P3_128563_49185 | NW_004516019.1 | Scaffold589 | 49185                   | CC                              | TT                | 1946518000               |

| SNPs IDs            | Chromosome IDs | Chromosomes | Physical positions (bp) | CDC Frontier (Reference genome) | (Pusa 256 & HPNB) | NCBI SNPdb Accession IDs |
|---------------------|----------------|-------------|-------------------------|---------------------------------|-------------------|--------------------------|
| SNP_P3_128564_49197 | NW_004516019.1 | Scaffold589 | 49197                   | AA                              | GG                | 1946518002               |
| SNP_P3_128565_49238 | NW_004516019.1 | Scaffold589 | 49238                   | GG                              | AA                | 1946518003               |
| SNP_P3_128566_49241 | NW_004516019.1 | Scaffold589 | 49241                   | AA                              | CC                | 1946518005               |
| SNP_P3_128567_49302 | NW_004516019.1 | Scaffold589 | 49302                   | AA                              | TT                | 1946518006               |
| SNP_P3_128568_49414 | NW_004516019.1 | Scaffold589 | 49414                   | AA                              | TT                | 1946518008               |
| SNP_P3_128569_49439 | NW_004516019.1 | Scaffold589 | 49439                   | TT                              | CC                | 1946518010               |
| SNP_P3_128570_51421 | NW_004516019.1 | Scaffold589 | 51421                   | AA                              | TT                | 1946518011               |
| SNP_P3_128571_54083 | NW_004516019.1 | Scaffold589 | 54083                   | GG                              | AA                | 1946518013               |
| SNP_P3_128572_56936 | NW_004516019.1 | Scaffold589 | 56936                   | TT                              | CC                | 1946518014               |
| SNP_P3_128573_56951 | NW_004516019.1 | Scaffold589 | 56951                   | AA                              | CC                | 1946518016               |
| SNP_P3_128574_57331 | NW_004516019.1 | Scaffold589 | 57331                   | TT                              | GG                | 1946518017               |
| SNP_P3_128575_59422 | NW_004516019.1 | Scaffold589 | 59422                   | AA                              | TT                | 1946518019               |
| SNP_P3_128576_62126 | NW_004516019.1 | Scaffold589 | 62126                   | AA                              | GG                | 1946518021               |
| SNP_P3_128577_65410 | NW_004516019.1 | Scaffold589 | 65410                   | CC                              | TT                | 1946518022               |
| SNP_P3_128578_65417 | NW_004516019.1 | Scaffold589 | 65417                   | CC                              | TT                | 1946518024               |
| SNP_P3_128579_65440 | NW_004516019.1 | Scaffold589 | 65440                   | CC                              | TT                | 1946518025               |
| SNP_P3_128580_65442 | NW_004516019.1 | Scaffold589 | 65442                   | TT                              | AA                | 1946518027               |
| SNP_P3_128581_65567 | NW_004516019.1 | Scaffold589 | 65567                   | AA                              | GG                | 1946518028               |
| SNP_P3_128582_80202 | NW_004516019.1 | Scaffold589 | 80202                   | TT                              | CC                | 1946518030               |
| SNP_P3_128583_80203 | NW_004516019.1 | Scaffold589 | 80203                   | GG                              | AA                | 1946518033               |
| SNP_P3_128584_80222 | NW_004516019.1 | Scaffold589 | 80222                   | AA                              | GG                | 1946518034               |
| SNP_P3_128585_80228 | NW_004516019.1 | Scaffold589 | 80228                   | AA                              | GG                | 1946518036               |
| SNP_P3_128586_80251 | NW_004516019.1 | Scaffold589 | 80251                   | TT                              | CC                | 1946518038               |
| SNP_P3_128587_80395 | NW_004516019.1 | Scaffold589 | 80395                   | GG                              | AA                | 1946518039               |
| SNP_P3_128588_80406 | NW_004516019.1 | Scaffold589 | 80406                   | GG                              | AA                | 1946518041               |
| SNP_P3_128589_82063 | NW_004516019.1 | Scaffold589 | 82063                   | TT                              | CC                | 1946518042               |
| SNP_P3_128590_82312 | NW_004516019.1 | Scaffold589 | 82312                   | TT                              | GG                | 1946518044               |
| SNP_P3_128591_82321 | NW_004516019.1 | Scaffold589 | 82321                   | AA                              | TT                | 1946518045               |
| SNP_P3_128592_82345 | NW_004516019.1 | Scaffold589 | 82345                   | TT                              | CC                | 1946518047               |
| SNP_P3_128593_82502 | NW_004516019.1 | Scaffold589 | 82502                   | AA                              | CC                | 1946518048               |
| SNP_P3_128594_82671 | NW_004516019.1 | Scaffold589 | 82671                   | TT                              | CC                | 1946518050               |
| SNP_P3_128595_82684 | NW_004516019.1 | Scaffold589 | 82684                   | TT                              | CC                | 1946518052               |
| SNP_P3_128596_83283 | NW_004516019.1 | Scaffold589 | 83283                   | AA                              | GG                | 1946518053               |
| SNP_P3_128597_83467 | NW_004516019.1 | Scaffold589 | 83467                   | GG                              | AA                | 1946518055               |
| SNP_P3_128598_83474 | NW_004516019.1 | Scaffold589 | 83474                   | TT                              | CC                | 1946518056               |
| SNP_P3_128600_83500 | NW_004516019.1 | Scaffold589 | 83500                   | AA                              | GG                | 1946518058               |
| SNP_P3_128601_83551 | NW_004516019.1 | Scaffold589 | 83551                   | CC                              | TT                | 1946518060               |
| SNP_P3_128602_83554 | NW_004516019.1 | Scaffold589 | 83554                   | TT                              | CC                | 1946518061               |
| SNP_P3_128603_83566 | NW_004516019.1 | Scaffold589 | 83566                   | TT                              | CC                | 1946518063               |
| SNP_P3_128604_83599 | NW_004516019.1 | Scaffold589 | 83599                   | CC                              | TT                | 1946518064               |
| SNP_P3_128605_83602 | NW_004516019.1 | Scaffold589 | 83602                   | AA                              | CC                | 1946518066               |
| SNP_P3_128606_83640 | NW_004516019.1 | Scaffold589 | 83640                   | AA                              | CC                | 1946518067               |



| SNPs IDs             | Chromosome IDs | Chromosomes | Physical positions (bp) | CDC Frontier (Reference genome) | (Pusa 256 & HPNB) | NCBI SNPdb Accession IDs |
|----------------------|----------------|-------------|-------------------------|---------------------------------|-------------------|--------------------------|
| SNP_P3_128607_83665  | NW_004516019.1 | Scaffold589 | 83665                   | TT                              | AA                | 1946518069               |
| SNP_P3_128608_92476  | NW_004516019.1 | Scaffold589 | 92476                   | GG                              | AA                | 1946518071               |
| SNP_P3_128609_100265 | NW_004516019.1 | Scaffold589 | 100265                  | CC                              | TT                | 1946518072               |
| SNP_P3_128610_100673 | NW_004516019.1 | Scaffold589 | 100673                  | TT                              | AA                | 1946518074               |
| SNP_P3_128611_100814 | NW_004516019.1 | Scaffold589 | 100814                  | AA                              | CC                | 1946518075               |
| SNP_P3_128612_100827 | NW_004516019.1 | Scaffold589 | 100827                  | GG                              | TT                | 1946518077               |
| SNP_P3_128613_100831 | NW_004516019.1 | Scaffold589 | 100831                  | CC                              | TT                | 1946518079               |
| SNP_P3_128614_103657 | NW_004516019.1 | Scaffold589 | 103657                  | CC                              | TT                | 1946518080               |
| SNP_P3_128615_103673 | NW_004516019.1 | Scaffold589 | 103673                  | GG                              | AA                | 1946518082               |
| SNP_P3_128616_103732 | NW_004516019.1 | Scaffold589 | 103732                  | CC                              | TT                | 1946518083               |
| SNP_P3_128617_116530 | NW_004516019.1 | Scaffold589 | 116530                  | CC                              | AA                | 1946518085               |
| SNP_P3_128618_116649 | NW_004516019.1 | Scaffold589 | 116649                  | GG                              | CC                | 1946518087               |
| SNP_P3_128619_127922 | NW_004516019.1 | Scaffold589 | 127922                  | AA                              | TT                | 1946518088               |
| SNP_P3_128620_128139 | NW_004516019.1 | Scaffold589 | 128139                  | CC                              | AA                | 1946518090               |
| SNP_P3_128622_128712 | NW_004516019.1 | Scaffold589 | 128712                  | CC                              | GG                | 1946518091               |
| SNP_P3_128623_128757 | NW_004516019.1 | Scaffold589 | 128757                  | AA                              | GG                | 1946518093               |
| SNP_P3_128624_128796 | NW_004516019.1 | Scaffold589 | 128796                  | TT                              | AA                | 1946518095               |
| SNP_P3_128625_138690 | NW_004516019.1 | Scaffold589 | 138690                  | CC                              | TT                | 1946518096               |
| SNP_P3_128626_176829 | NW_004516019.1 | Scaffold589 | 176829                  | CC                              | TT                | 1946518098               |
| SNP_P3_128627_176889 | NW_004516019.1 | Scaffold589 | 176889                  | TT                              | AA                | 1946518099               |
| SNP_P3_128628_177182 | NW_004516019.1 | Scaffold589 | 177182                  | AA                              | GG                | 1946518101               |
| SNP_P3_128629_188958 | NW_004516019.1 | Scaffold589 | 188958                  | TT                              | GG                | 1946518102               |
| SNP_P3_128630_208939 | NW_004516019.1 | Scaffold589 | 208939                  | AA                              | CC                | 1946518141               |
| SNP_P3_128631_208971 | NW_004516019.1 | Scaffold589 | 208971                  | TT                              | CC                | 1946518143               |
| SNP_P3_128632_209355 | NW_004516019.1 | Scaffold589 | 209355                  | TT                              | GG                | 1946518144               |
| SNP_P3_128633_210608 | NW_004516019.1 | Scaffold589 | 210608                  | AA                              | GG                | 1946518146               |
| SNP_P3_128634_210615 | NW_004516019.1 | Scaffold589 | 210615                  | CC                              | TT                | 1946518147               |
| SNP_P3_128635_231445 | NW_004516019.1 | Scaffold589 | 231445                  | CC                              | TT                | 1946518149               |
| SNP_P3_128637_238978 | NW_004516019.1 | Scaffold589 | 238978                  | TT                              | CC                | 1946518150               |
| SNP_P3_128638_238983 | NW_004516019.1 | Scaffold589 | 238983                  | TT                              | GG                | 1946518152               |
| SNP_P3_128639_238989 | NW_004516019.1 | Scaffold589 | 238989                  | CC                              | GG                | 1946518153               |
| SNP_P3_128640_239298 | NW_004516019.1 | Scaffold589 | 239298                  | GG                              | AA                | 1946518155               |
| SNP_P3_128641_245152 | NW_004516019.1 | Scaffold589 | 245152                  | CC                              | TT                | 1946518156               |
| SNP_P3_128642_245214 | NW_004516019.1 | Scaffold589 | 245214                  | CC                              | TT                | 1946518158               |
| SNP_P3_128643_245223 | NW_004516019.1 | Scaffold589 | 245223                  | TT                              | AA                | 1946518159               |
| SNP_P3_128644_245278 | NW_004516019.1 | Scaffold589 | 245278                  | CC                              | AA                | 1946518161               |
| SNP_P3_128645_245382 | NW_004516019.1 | Scaffold589 | 245382                  | CC                              | TT                | 1946518162               |
| SNP_P3_128646_245390 | NW_004516019.1 | Scaffold589 | 245390                  | AA                              | GG                | 1946518163               |
| SNP_P3_128647_245429 | NW_004516019.1 | Scaffold589 | 245429                  | AA                              | GG                | 1946518165               |
| SNP_P3_128648_245457 | NW_004516019.1 | Scaffold589 | 245457                  | TT                              | CC                | 1946518166               |
| SNP_P3_128649_245494 | NW_004516019.1 | Scaffold589 | 245494                  | GG                              | AA                | 1946518168               |
| SNP_P3_128650_245544 | NW_004516019.1 | Scaffold589 | 245544                  | AA                              | GG                | 1946518169               |

| SNPs IDs             | Chromosome IDs | Chromosomes | Physical positions (bp) | CDC Frontier (Reference genome) | (Pusa 256 & HPNB) | NCBI SNPdb Accession IDs |
|----------------------|----------------|-------------|-------------------------|---------------------------------|-------------------|--------------------------|
| SNP_P3_128651_245587 | NW_004516019.1 | Scaffold589 | 245587                  | AA                              | GG                | 1946518170               |
| SNP_P3_128652_245594 | NW_004516019.1 | Scaffold589 | 245594                  | AA                              | GG                | 1946518172               |
| SNP_P3_128653_245634 | NW_004516019.1 | Scaffold589 | 245634                  | TT                              | GG                | 1946518173               |
| SNP_P3_128654_256178 | NW_004516019.1 | Scaffold589 | 256178                  | CC                              | TT                | 1946518175               |
| SNP_P3_128655_277179 | NW_004516019.1 | Scaffold589 | 277179                  | GG                              | AA                | 1946518176               |
| SNP_P3_128656_292841 | NW_004516019.1 | Scaffold589 | 292841                  | GG                              | AA                | 1946518178               |
| SNP_P3_128657_304809 | NW_004516019.1 | Scaffold589 | 304809                  | TT                              | GG                | 1946518179               |
| SNP_P3_128658_322923 | NW_004516019.1 | Scaffold589 | 322923                  | CC                              | GG                | 1946518180               |
| SNP_P3_128659_322943 | NW_004516019.1 | Scaffold589 | 322943                  | AA                              | GG                | 1946518182               |
| SNP_P3_128660_323153 | NW_004516019.1 | Scaffold589 | 323153                  | AA                              | GG                | 1946518183               |
| SNP_P3_128661_323278 | NW_004516019.1 | Scaffold589 | 323278                  | CC                              | TT                | 1946518185               |
| SNP_P3_128662_323308 | NW_004516019.1 | Scaffold589 | 323308                  | TT                              | CC                | 1946518186               |
| SNP_P3_128663_323323 | NW_004516019.1 | Scaffold589 | 323323                  | GG                              | AA                | 1946518188               |
| SNP_P3_128664_323440 | NW_004516019.1 | Scaffold589 | 323440                  | TT                              | CC                | 1946518189               |
| SNP_P3_128665_323507 | NW_004516019.1 | Scaffold589 | 323507                  | AA                              | CC                | 1946518191               |
| SNP_P3_128666_323527 | NW_004516019.1 | Scaffold589 | 323527                  | TT                              | AA                | 1946518193               |
| SNP_P3_128667_323537 | NW_004516019.1 | Scaffold589 | 323537                  | CC                              | GG                | 1946518194               |
| SNP_P3_128668_323550 | NW_004516019.1 | Scaffold589 | 323550                  | GG                              | AA                | 1946518196               |
| SNP_P3_128669_332419 | NW_004516019.1 | Scaffold589 | 332419                  | TT                              | GG                | 1946518197               |
| SNP_P3_128670_171    | NW_004516020.1 | Scaffold590 | 171                     | GG                              | AA                | 1946518198               |
| SNP_P3_128672_3194   | NW_004516020.1 | Scaffold590 | 3194                    | AA                              | GG                | 1946518200               |
| SNP_P3_128673_3244   | NW_004516020.1 | Scaffold590 | 3244                    | CC                              | AA                | 1946518201               |
| SNP_P3_128674_3259   | NW_004516020.1 | Scaffold590 | 3259                    | CC                              | TT                | 1946518203               |
| SNP_P3_128675_3600   | NW_004516020.1 | Scaffold590 | 3600                    | AA                              | CC                | 1946518204               |
| SNP_P3_128676_3643   | NW_004516020.1 | Scaffold590 | 3643                    | TT                              | CC                | 1946518206               |
| SNP_P3_128677_3646   | NW_004516020.1 | Scaffold590 | 3646                    | TT                              | AA                | 1946518207               |
| SNP_P3_128678_3723   | NW_004516020.1 | Scaffold590 | 3723                    | GG                              | AA                | 1946518209               |
| SNP_P3_128679_3737   | NW_004516020.1 | Scaffold590 | 3737                    | GG                              | AA                | 1946518210               |
| SNP_P3_128680_3771   | NW_004516020.1 | Scaffold590 | 3771                    | GG                              | AA                | 1946518212               |
| SNP_P3_128681_3784   | NW_004516020.1 | Scaffold590 | 3784                    | GG                              | TT                | 1946518213               |
| SNP_P3_128682_3786   | NW_004516020.1 | Scaffold590 | 3786                    | CC                              | AA                | 1946518214               |
| SNP_P3_128683_3988   | NW_004516020.1 | Scaffold590 | 3988                    | CC                              | TT                | 1946518216               |
| SNP_P3_128684_5321   | NW_004516020.1 | Scaffold590 | 5321                    | TT                              | CC                | 1946518217               |
| SNP_P3_128686_10518  | NW_004516020.1 | Scaffold590 | 10518                   | GG                              | AA                | 1946518219               |
| SNP_P3_128687_10945  | NW_004516020.1 | Scaffold590 | 10945                   | AA                              | GG                | 1946518220               |
| SNP_P3_128688_16816  | NW_004516020.1 | Scaffold590 | 16816                   | AA                              | CC                | 1946518222               |
| SNP_P3_128689_16887  | NW_004516020.1 | Scaffold590 | 16887                   | CC                              | AA                | 1946518223               |
| SNP_P3_128690_19016  | NW_004516020.1 | Scaffold590 | 19016                   | TT                              | CC                | 1946518225               |
| SNP_P3_128691_19057  | NW_004516020.1 | Scaffold590 | 19057                   | AA                              | CC                | 1946518226               |
| SNP_P3_128692_19098  | NW_004516020.1 | Scaffold590 | 19098                   | CC                              | TT                | 1946518228               |
| SNP_P3_128693_19173  | NW_004516020.1 | Scaffold590 | 19173                   | TT                              | CC                | 1946518229               |
| SNP_P3_128695_19347  | NW_004516020.1 | Scaffold590 | 19347                   | TT                              | GG                | 1946518231               |

| SNPs IDs             | Chromosome IDs | Chromosomes | Physical positions (bp) | CDC Frontier (Reference genome) | (Pusa 256 & HPNB) | NCBI SNPdb Accession IDs |
|----------------------|----------------|-------------|-------------------------|---------------------------------|-------------------|--------------------------|
| SNP_P3_128696_19399  | NW_004516020.1 | Scaffold590 | 19399                   | GG                              | AA                | 1946518232               |
| SNP_P3_128697_19440  | NW_004516020.1 | Scaffold590 | 19440                   | TT                              | CC                | 1946518233               |
| SNP_P3_128698_19443  | NW_004516020.1 | Scaffold590 | 19443                   | AA                              | CC                | 1946518235               |
| SNP_P3_128699_19448  | NW_004516020.1 | Scaffold590 | 19448                   | TT                              | AA                | 1946518237               |
| SNP_P3_128701_19480  | NW_004516020.1 | Scaffold590 | 19480                   | AA                              | TT                | 1946518238               |
| SNP_P3_128702_19552  | NW_004516020.1 | Scaffold590 | 19552                   | AA                              | GG                | 1946518240               |
| SNP_P3_128703_19572  | NW_004516020.1 | Scaffold590 | 19572                   | GG                              | CC                | 1946518241               |
| SNP_P3_128704_19619  | NW_004516020.1 | Scaffold590 | 19619                   | AA                              | CC                | 1946518242               |
| SNP_P3_128705_19681  | NW_004516020.1 | Scaffold590 | 19681                   | TT                              | AA                | 1946518244               |
| SNP_P3_128707_39605  | NW_004516020.1 | Scaffold590 | 39605                   | GG                              | AA                | 1946518246               |
| SNP_P3_128708_40598  | NW_004516020.1 | Scaffold590 | 40598                   | AA                              | GG                | 1946518247               |
| SNP_P3_128709_40600  | NW_004516020.1 | Scaffold590 | 40600                   | TT                              | AA                | 1946518249               |
| SNP_P3_128710_42938  | NW_004516020.1 | Scaffold590 | 42938                   | CC                              | TT                | 1946518250               |
| SNP_P3_128711_44762  | NW_004516020.1 | Scaffold590 | 44762                   | TT                              | GG                | 1946518253               |
| SNP_P3_128712_45102  | NW_004516020.1 | Scaffold590 | 45102                   | CC                              | TT                | 1946518256               |
| SNP_P3_128714_47021  | NW_004516020.1 | Scaffold590 | 47021                   | TT                              | CC                | 1946518257               |
| SNP_P3_128715_61241  | NW_004516020.1 | Scaffold590 | 61241                   | TT                              | CC                | 1946518258               |
| SNP_P3_128716_61249  | NW_004516020.1 | Scaffold590 | 61249                   | TT                              | AA                | 1946518260               |
| SNP_P3_128717_61269  | NW_004516020.1 | Scaffold590 | 61269                   | AA                              | GG                | 1946518261               |
| SNP_P3_128718_61272  | NW_004516020.1 | Scaffold590 | 61272                   | TT                              | CC                | 1946518263               |
| SNP_P3_128719_61273  | NW_004516020.1 | Scaffold590 | 61273                   | AA                              | CC                | 1946518264               |
| SNP_P3_128720_61332  | NW_004516020.1 | Scaffold590 | 61332                   | TT                              | CC                | 1946518266               |
| SNP_P3_128721_61335  | NW_004516020.1 | Scaffold590 | 61335                   | GG                              | TT                | 1946518267               |
| SNP_P3_128722_80534  | NW_004516020.1 | Scaffold590 | 80534                   | AA                              | GG                | 1946518269               |
| SNP_P3_128723_106353 | NW_004516020.1 | Scaffold590 | 106353                  | GG                              | AA                | 1946518270               |
| SNP_P3_128724_107514 | NW_004516020.1 | Scaffold590 | 107514                  | CC                              | TT                | 1946518272               |
| SNP_P3_128725_107835 | NW_004516020.1 | Scaffold590 | 107835                  | AA                              | GG                | 1946518273               |
| SNP_P3_128726_109046 | NW_004516020.1 | Scaffold590 | 109046                  | GG                              | AA                | 1946518274               |
| SNP_P3_128727_112515 | NW_004516020.1 | Scaffold590 | 112515                  | GG                              | AA                | 1946518276               |
| SNP_P3_128728_114957 | NW_004516020.1 | Scaffold590 | 114957                  | AA                              | CC                | 1946518277               |
| SNP_P3_128729_115913 | NW_004516020.1 | Scaffold590 | 115913                  | TT                              | CC                | 1946518279               |
| SNP_P3_128730_121584 | NW_004516020.1 | Scaffold590 | 121584                  | TT                              | CC                | 1946518280               |
| SNP_P3_128731_134363 | NW_004516020.1 | Scaffold590 | 134363                  | TT                              | GG                | 1946518282               |
| SNP_P3_128732_134977 | NW_004516020.1 | Scaffold590 | 134977                  | AA                              | GG                | 1946518283               |
| SNP_P3_128733_135011 | NW_004516020.1 | Scaffold590 | 135011                  | CC                              | TT                | 1946518285               |
| SNP_P3_128734_135188 | NW_004516020.1 | Scaffold590 | 135188                  | CC                              | GG                | 1946518286               |
| SNP_P3_128735_139163 | NW_004516020.1 | Scaffold590 | 139163                  | GG                              | AA                | 1946518288               |
| SNP_P3_128736_139177 | NW_004516020.1 | Scaffold590 | 139177                  | GG                              | CC                | 1946518289               |
| SNP_P3_128737_139181 | NW_004516020.1 | Scaffold590 | 139181                  | GG                              | AA                | 1946518291               |
| SNP_P3_128738_143576 | NW_004516020.1 | Scaffold590 | 143576                  | GG                              | AA                | 1946518292               |
| SNP_P3_128739_175400 | NW_004516020.1 | Scaffold590 | 175400                  | TT                              | AA                | 1946518294               |
| SNP_P3_128740_175668 | NW_004516020.1 | Scaffold590 | 175668                  | AA                              | CC                | 1946518295               |

| SNPs IDs             | Chromosome IDs | Chromosomes | Physical positions (bp) | CDC Frontier (Reference genome) | (Pusa 256 & HPNB) | NCBI SNPdb Accession IDs |
|----------------------|----------------|-------------|-------------------------|---------------------------------|-------------------|--------------------------|
| SNP_P3_128741_175763 | NW_004516020.1 | Scaffold590 | 175763                  | TT                              | CC                | 1946518297               |
| SNP_P3_128742_175791 | NW_004516020.1 | Scaffold590 | 175791                  | AA                              | CC                | 1946518298               |
| SNP_P3_128743_175809 | NW_004516020.1 | Scaffold590 | 175809                  | TT                              | CC                | 1946518300               |
| SNP_P3_128744_175831 | NW_004516020.1 | Scaffold590 | 175831                  | TT                              | CC                | 1946518301               |
| SNP_P3_128745_176033 | NW_004516020.1 | Scaffold590 | 176033                  | TT                              | CC                | 1946518303               |
| SNP_P3_128746_176818 | NW_004516020.1 | Scaffold590 | 176818                  | TT                              | AA                | 1946518304               |
| SNP_P3_128747_176824 | NW_004516020.1 | Scaffold590 | 176824                  | GG                              | TT                | 1946518306               |
| SNP_P3_128748_176841 | NW_004516020.1 | Scaffold590 | 176841                  | AA                              | CC                | 1946518307               |
| SNP_P3_128749_176905 | NW_004516020.1 | Scaffold590 | 176905                  | TT                              | CC                | 1946518308               |
| SNP_P3_128750_176908 | NW_004516020.1 | Scaffold590 | 176908                  | TT                              | AA                | 1946518310               |
| SNP_P3_128751_176911 | NW_004516020.1 | Scaffold590 | 176911                  | CC                              | TT                | 1946518311               |
| SNP_P3_128752_181274 | NW_004516020.1 | Scaffold590 | 181274                  | CC                              | GG                | 1946518313               |
| SNP_P3_128753_182002 | NW_004516020.1 | Scaffold590 | 182002                  | TT                              | AA                | 1946518314               |
| SNP_P3_128754_182011 | NW_004516020.1 | Scaffold590 | 182011                  | CC                              | TT                | 1946518316               |
| SNP_P3_128755_182044 | NW_004516020.1 | Scaffold590 | 182044                  | GG                              | AA                | 1946518317               |
| SNP_P3_128756_182046 | NW_004516020.1 | Scaffold590 | 182046                  | AA                              | GG                | 1946518319               |
| SNP_P3_128757_182048 | NW_004516020.1 | Scaffold590 | 182048                  | CC                              | TT                | 1946518320               |
| SNP_P3_128758_182056 | NW_004516020.1 | Scaffold590 | 182056                  | TT                              | GG                | 1946518321               |
| SNP_P3_128759_182064 | NW_004516020.1 | Scaffold590 | 182064                  | AA                              | TT                | 1946518323               |
| SNP_P3_128760_182065 | NW_004516020.1 | Scaffold590 | 182065                  | CC                              | TT                | 1946518325               |
| SNP_P3_128761_195737 | NW_004516020.1 | Scaffold590 | 195737                  | AA                              | GG                | 1946518326               |
| SNP_P3_128763_220689 | NW_004516020.1 | Scaffold590 | 220689                  | AA                              | GG                | 1946518328               |
| SNP_P3_128764_220723 | NW_004516020.1 | Scaffold590 | 220723                  | CC                              | TT                | 1946518329               |
| SNP_P3_128765_220754 | NW_004516020.1 | Scaffold590 | 220754                  | TT                              | CC                | 1946518331               |
| SNP_P3_128766_220760 | NW_004516020.1 | Scaffold590 | 220760                  | TT                              | CC                | 1946518332               |
| SNP_P3_128767_220809 | NW_004516020.1 | Scaffold590 | 220809                  | AA                              | GG                | 1946518334               |
| SNP_P3_128768_220981 | NW_004516020.1 | Scaffold590 | 220981                  | GG                              | AA                | 1946518335               |
| SNP_P3_128769_221001 | NW_004516020.1 | Scaffold590 | 221001                  | CC                              | TT                | 1946518337               |
| SNP_P3_128770_221007 | NW_004516020.1 | Scaffold590 | 221007                  | AA                              | GG                | 1946518338               |
| SNP_P3_128771_221011 | NW_004516020.1 | Scaffold590 | 221011                  | TT                              | CC                | 1946518340               |
| SNP_P3_128772_221033 | NW_004516020.1 | Scaffold590 | 221033                  | GG                              | AA                | 1946518341               |
| SNP_P3_128773_222064 | NW_004516020.1 | Scaffold590 | 222064                  | GG                              | AA                | 1946518343               |
| SNP_P3_128774_222160 | NW_004516020.1 | Scaffold590 | 222160                  | CC                              | TT                | 1946518344               |
| SNP_P3_128775_222259 | NW_004516020.1 | Scaffold590 | 222259                  | CC                              | TT                | 1946518346               |
| SNP_P3_128776_222265 | NW_004516020.1 | Scaffold590 | 222265                  | CC                              | TT                | 1946518347               |
| SNP_P3_128777_222418 | NW_004516020.1 | Scaffold590 | 222418                  | CC                              | TT                | 1946518349               |
| SNP_P3_128778_222421 | NW_004516020.1 | Scaffold590 | 222421                  | TT                              | CC                | 1946518350               |
| SNP_P3_128779_222439 | NW_004516020.1 | Scaffold590 | 222439                  | AA                              | TT                | 1946518352               |
| SNP_P3_128780_222451 | NW_004516020.1 | Scaffold590 | 222451                  | AA                              | TT                | 1946518353               |
| SNP_P3_128781_222457 | NW_004516020.1 | Scaffold590 | 222457                  | AA                              | GG                | 1946518355               |
| SNP_P3_128782_222473 | NW_004516020.1 | Scaffold590 | 222473                  | AA                              | GG                | 1946518356               |
| SNP_P3_128783_222474 | NW_004516020.1 | Scaffold590 | 222474                  | CC                              | TT                | 1946518358               |

| SNPs IDs             | Chromosome IDs | Chromosomes | Physical positions (bp) | CDC Frontier (Reference genome) | (Pusa 256 & HPNB) | NCBI SNPdb Accession IDs |
|----------------------|----------------|-------------|-------------------------|---------------------------------|-------------------|--------------------------|
| SNP_P3_128784_222514 | NW_004516020.1 | Scaffold590 | 222514                  | CC                              | TT                | 1946518359               |
| SNP_P3_128785_222516 | NW_004516020.1 | Scaffold590 | 222516                  | AA                              | TT                | 1946518361               |
| SNP_P3_128787_222532 | NW_004516020.1 | Scaffold590 | 222532                  | TT                              | AA                | 1946518362               |
| SNP_P3_128788_222681 | NW_004516020.1 | Scaffold590 | 222681                  | TT                              | GG                | 1946518363               |
| SNP_P3_128789_233763 | NW_004516020.1 | Scaffold590 | 233763                  | AA                              | CC                | 1946518365               |
| SNP_P3_128790_235966 | NW_004516020.1 | Scaffold590 | 235966                  | TT                              | CC                | 1946518366               |
| SNP_P3_128791_240925 | NW_004516020.1 | Scaffold590 | 240925                  | GG                              | AA                | 1946518368               |
| SNP_P3_128792_265279 | NW_004516020.1 | Scaffold590 | 265279                  | AA                              | CC                | 1946518369               |
| SNP_P3_128793_285680 | NW_004516020.1 | Scaffold590 | 285680                  | CC                              | TT                | 1946518370               |
| SNP_P3_128794_295295 | NW_004516020.1 | Scaffold590 | 295295                  | GG                              | TT                | 1946518372               |
| SNP_P3_128795_8129   | NW_004516022.1 | Scaffold592 | 8129                    | CC                              | TT                | 1946518373               |
| SNP_P3_128796_8148   | NW_004516022.1 | Scaffold592 | 8148                    | TT                              | CC                | 1946518375               |
| SNP_P3_128797_8174   | NW_004516022.1 | Scaffold592 | 8174                    | AA                              | GG                | 1946518376               |
| SNP_P3_128798_8245   | NW_004516022.1 | Scaffold592 | 8245                    | CC                              | GG                | 1946518378               |
| SNP_P3_128799_8267   | NW_004516022.1 | Scaffold592 | 8267                    | AA                              | TT                | 1946518379               |
| SNP_P3_128800_8317   | NW_004516022.1 | Scaffold592 | 8317                    | TT                              | CC                | 1946518381               |
| SNP_P3_128801_8337   | NW_004516022.1 | Scaffold592 | 8337                    | CC                              | TT                | 1946518382               |
| SNP_P3_128802_8355   | NW_004516022.1 | Scaffold592 | 8355                    | TT                              | CC                | 1946518383               |
| SNP_P3_128803_8425   | NW_004516022.1 | Scaffold592 | 8425                    | GG                              | AA                | 1946518385               |
| SNP_P3_128804_8504   | NW_004516022.1 | Scaffold592 | 8504                    | GG                              | TT                | 1946518387               |
| SNP_P3_128805_8548   | NW_004516022.1 | Scaffold592 | 8548                    | CC                              | GG                | 1946518388               |
| SNP_P3_128806_8575   | NW_004516022.1 | Scaffold592 | 8575                    | TT                              | CC                | 1946518389               |
| SNP_P3_128807_8578   | NW_004516022.1 | Scaffold592 | 8578                    | TT                              | CC                | 1946518391               |
| SNP_P3_128808_8614   | NW_004516022.1 | Scaffold592 | 8614                    | CC                              | TT                | 1946518392               |
| SNP_P3_128809_8707   | NW_004516022.1 | Scaffold592 | 8707                    | AA                              | TT                | 1946518394               |
| SNP_P3_128810_8816   | NW_004516022.1 | Scaffold592 | 8816                    | CC                              | TT                | 1946518395               |
| SNP_P3_128811_8891   | NW_004516022.1 | Scaffold592 | 8891                    | CC                              | TT                | 1946518397               |
| SNP_P3_128812_8950   | NW_004516022.1 | Scaffold592 | 8950                    | TT                              | AA                | 1946518398               |
| SNP_P3_128813_8964   | NW_004516022.1 | Scaffold592 | 8964                    | GG                              | TT                | 1946518399               |
| SNP_P3_128814_10883  | NW_004516022.1 | Scaffold592 | 10883                   | TT                              | GG                | 1946518401               |
| SNP_P3_128815_11014  | NW_004516022.1 | Scaffold592 | 11014                   | TT                              | AA                | 1946518402               |
| SNP_P3_128816_15567  | NW_004516022.1 | Scaffold592 | 15567                   | TT                              | CC                | 1946518404               |
| SNP_P3_128817_16012  | NW_004516022.1 | Scaffold592 | 16012                   | CC                              | GG                | 1946518405               |
| SNP_P3_128818_16940  | NW_004516022.1 | Scaffold592 | 16940                   | CC                              | TT                | 1946518407               |
| SNP_P3_128820_21364  | NW_004516022.1 | Scaffold592 | 21364                   | GG                              | AA                | 1946518408               |
| SNP_P3_128821_21698  | NW_004516022.1 | Scaffold592 | 21698                   | GG                              | AA                | 1946518410               |
| SNP_P3_128823_23086  | NW_004516022.1 | Scaffold592 | 23086                   | CC                              | TT                | 1946518412               |
| SNP_P3_128824_23091  | NW_004516022.1 | Scaffold592 | 23091                   | GG                              | TT                | 1946518413               |
| SNP_P3_128825_23617  | NW_004516022.1 | Scaffold592 | 23617                   | TT                              | GG                | 1946518415               |
| SNP_P3_128826_38443  | NW_004516022.1 | Scaffold592 | 38443                   | AA                              | GG                | 1946518416               |
| SNP_P3_128827_42309  | NW_004516022.1 | Scaffold592 | 42309                   | TT                              | GG                | 1946518418               |
| SNP_P3_128828_42427  | NW_004516022.1 | Scaffold592 | 42427                   | CC                              | TT                | 1946518419               |

| SNPs IDs             | Chromosome IDs | Chromosomes | Physical positions (bp) | CDC Frontier (Reference genome) | (Pusa 256 & HPNB) | NCBI SNPdb Accession IDs |
|----------------------|----------------|-------------|-------------------------|---------------------------------|-------------------|--------------------------|
| SNP_P3_128829_42459  | NW_004516022.1 | Scaffold592 | 42459                   | CC                              | GG                | 1946518421               |
| SNP_P3_128830_42513  | NW_004516022.1 | Scaffold592 | 42513                   | AA                              | GG                | 1946518422               |
| SNP_P3_128831_42525  | NW_004516022.1 | Scaffold592 | 42525                   | AA                              | GG                | 1946518424               |
| SNP_P3_128833_10477  | NW_004516023.1 | Scaffold593 | 10477                   | TT                              | GG                | 1946518425               |
| SNP_P3_128834_10609  | NW_004516023.1 | Scaffold593 | 10609                   | CC                              | TT                | 1946518427               |
| SNP_P3_128835_10638  | NW_004516023.1 | Scaffold593 | 10638                   | CC                              | TT                | 1946518428               |
| SNP_P3_128836_10641  | NW_004516023.1 | Scaffold593 | 10641                   | GG                              | AA                | 1946518430               |
| SNP_P3_128837_10667  | NW_004516023.1 | Scaffold593 | 10667                   | AA                              | GG                | 1946518431               |
| SNP_P3_128838_10680  | NW_004516023.1 | Scaffold593 | 10680                   | CC                              | TT                | 1946518433               |
| SNP_P3_128839_10682  | NW_004516023.1 | Scaffold593 | 10682                   | AA                              | GG                | 1946518434               |
| SNP_P3_128840_10840  | NW_004516023.1 | Scaffold593 | 10840                   | AA                              | GG                | 1946518436               |
| SNP_P3_128841_10998  | NW_004516023.1 | Scaffold593 | 10998                   | TT                              | AA                | 1946518437               |
| SNP_P3_128842_11016  | NW_004516023.1 | Scaffold593 | 11016                   | AA                              | CC                | 1946518439               |
| SNP_P3_128843_11029  | NW_004516023.1 | Scaffold593 | 11029                   | AA                              | GG                | 1946518440               |
| SNP_P3_128845_70317  | NW_004516023.1 | Scaffold593 | 70317                   | CC                              | TT                | 1946518442               |
| SNP_P3_128846_75465  | NW_004516023.1 | Scaffold593 | 75465                   | AA                              | TT                | 1946518443               |
| SNP_P3_128847_90717  | NW_004516023.1 | Scaffold593 | 90717                   | CC                              | TT                | 1946518445               |
| SNP_P3_128849_127107 | NW_004516023.1 | Scaffold593 | 127107                  | GG                              | TT                | 1946518446               |
| SNP_P3_128850_186079 | NW_004516023.1 | Scaffold593 | 186079                  | TT                              | CC                | 1946518448               |
| SNP_P3_128851_186085 | NW_004516023.1 | Scaffold593 | 186085                  | GG                              | AA                | 1946518449               |
| SNP_P3_128852_186112 | NW_004516023.1 | Scaffold593 | 186112                  | TT                              | CC                | 1946518450               |
| SNP_P3_128853_186216 | NW_004516023.1 | Scaffold593 | 186216                  | TT                              | CC                | 1946518452               |
| SNP_P3_128854_186249 | NW_004516023.1 | Scaffold593 | 186249                  | TT                              | AA                | 1946518453               |
| SNP_P3_128855_186393 | NW_004516023.1 | Scaffold593 | 186393                  | CC                              | TT                | 1946518455               |
| SNP_P3_128856_186421 | NW_004516023.1 | Scaffold593 | 186421                  | GG                              | AA                | 1946518457               |
| SNP_P3_128857_186435 | NW_004516023.1 | Scaffold593 | 186435                  | CC                              | AA                | 1946518458               |
| SNP_P3_128858_186442 | NW_004516023.1 | Scaffold593 | 186442                  | TT                              | CC                | 1946518460               |
| SNP_P3_128859_186448 | NW_004516023.1 | Scaffold593 | 186448                  | CC                              | TT                | 1946518461               |
| SNP_P3_128860_186459 | NW_004516023.1 | Scaffold593 | 186459                  | CC                              | AA                | 1946518463               |
| SNP_P3_128861_187944 | NW_004516023.1 | Scaffold593 | 187944                  | TT                              | CC                | 1946518464               |
| SNP_P3_128862_192585 | NW_004516023.1 | Scaffold593 | 192585                  | AA                              | GG                | 1946518466               |
| SNP_P3_128863_194875 | NW_004516023.1 | Scaffold593 | 194875                  | GG                              | AA                | 1946518467               |
| SNP_P3_128864_194880 | NW_004516023.1 | Scaffold593 | 194880                  | CC                              | AA                | 1946518469               |
| SNP_P3_128865_194935 | NW_004516023.1 | Scaffold593 | 194935                  | AA                              | GG                | 1946518470               |
| SNP_P3_128866_194946 | NW_004516023.1 | Scaffold593 | 194946                  | CC                              | TT                | 1946518472               |
| SNP_P3_128867_195246 | NW_004516023.1 | Scaffold593 | 195246                  | GG                              | AA                | 1946518473               |
| SNP_P3_128868_195258 | NW_004516023.1 | Scaffold593 | 195258                  | CC                              | TT                | 1946518475               |
| SNP_P3_128869_195274 | NW_004516023.1 | Scaffold593 | 195274                  | AA                              | GG                | 1946518477               |
| SNP_P3_128870_195316 | NW_004516023.1 | Scaffold593 | 195316                  | AA                              | TT                | 1946518478               |
| SNP_P3_128871_195331 | NW_004516023.1 | Scaffold593 | 195331                  | GG                              | AA                | 1946518479               |
| SNP_P3_128872_197941 | NW_004516023.1 | Scaffold593 | 197941                  | AA                              | GG                | 1946518480               |
| SNP_P3_128873_202889 | NW_004516023.1 | Scaffold593 | 202889                  | TT                              | CC                | 1946518481               |

| SNPs IDs             | Chromosome IDs | Chromosomes | Physical positions (bp) | CDC Frontier (Reference genome) | (Pusa 256 & HPNB) | NCBI SNPdb Accession IDs |
|----------------------|----------------|-------------|-------------------------|---------------------------------|-------------------|--------------------------|
| SNP_P3_128874_202911 | NW_004516023.1 | Scaffold593 | 202911                  | TT                              | CC                | 1946518482               |
| SNP_P3_128875_208876 | NW_004516023.1 | Scaffold593 | 208876                  | TT                              | GG                | 1946518483               |
| SNP_P3_128876_208927 | NW_004516023.1 | Scaffold593 | 208927                  | TT                              | CC                | 1946518484               |
| SNP_P3_128877_208960 | NW_004516023.1 | Scaffold593 | 208960                  | CC                              | TT                | 1946518485               |
| SNP_P3_128878_208980 | NW_004516023.1 | Scaffold593 | 208980                  | GG                              | CC                | 1946518486               |
| SNP_P3_128879_209018 | NW_004516023.1 | Scaffold593 | 209018                  | AA                              | TT                | 1946518487               |
| SNP_P3_128880_209024 | NW_004516023.1 | Scaffold593 | 209024                  | TT                              | CC                | 1946518488               |
| SNP_P3_128881_209043 | NW_004516023.1 | Scaffold593 | 209043                  | TT                              | CC                | 1946518489               |
| SNP_P3_128882_209071 | NW_004516023.1 | Scaffold593 | 209071                  | CC                              | AA                | 1946518490               |
| SNP_P3_128883_209093 | NW_004516023.1 | Scaffold593 | 209093                  | GG                              | AA                | 1946518491               |
| SNP_P3_128884_209096 | NW_004516023.1 | Scaffold593 | 209096                  | AA                              | GG                | 1946518493               |
| SNP_P3_128885_209100 | NW_004516023.1 | Scaffold593 | 209100                  | TT                              | CC                | 1946518494               |
| SNP_P3_128886_209102 | NW_004516023.1 | Scaffold593 | 209102                  | GG                              | AA                | 1946518496               |
| SNP_P3_128887_209121 | NW_004516023.1 | Scaffold593 | 209121                  | CC                              | AA                | 1946518497               |
| SNP_P3_128888_209152 | NW_004516023.1 | Scaffold593 | 209152                  | TT                              | CC                | 1946518499               |
| SNP_P3_128889_209211 | NW_004516023.1 | Scaffold593 | 209211                  | CC                              | TT                | 1946518500               |
| SNP_P3_128891_209312 | NW_004516023.1 | Scaffold593 | 209312                  | AA                              | TT                | 1946518502               |
| SNP_P3_128892_209326 | NW_004516023.1 | Scaffold593 | 209326                  | AA                              | TT                | 1946518503               |
| SNP_P3_128893_209366 | NW_004516023.1 | Scaffold593 | 209366                  | GG                              | AA                | 1946518505               |
| SNP_P3_128894_209368 | NW_004516023.1 | Scaffold593 | 209368                  | AA                              | GG                | 1946518506               |
| SNP_P3_128895_209463 | NW_004516023.1 | Scaffold593 | 209463                  | GG                              | AA                | 1946518508               |
| SNP_P3_128897_209483 | NW_004516023.1 | Scaffold593 | 209483                  | CC                              | TT                | 1946518509               |
| SNP_P3_128898_209509 | NW_004516023.1 | Scaffold593 | 209509                  | CC                              | AA                | 1946518511               |
| SNP_P3_128899_209513 | NW_004516023.1 | Scaffold593 | 209513                  | TT                              | GG                | 1946518512               |
| SNP_P3_128900_209551 | NW_004516023.1 | Scaffold593 | 209551                  | AA                              | TT                | 1946518514               |
| SNP_P3_128901_209608 | NW_004516023.1 | Scaffold593 | 209608                  | GG                              | AA                | 1946518515               |
| SNP_P3_128902_209633 | NW_004516023.1 | Scaffold593 | 209633                  | CC                              | AA                | 1946518517               |
| SNP_P3_128903_209661 | NW_004516023.1 | Scaffold593 | 209661                  | TT                              | CC                | 1946518518               |
| SNP_P3_128904_209684 | NW_004516023.1 | Scaffold593 | 209684                  | CC                              | TT                | 1946518520               |
| SNP_P3_128906_209718 | NW_004516023.1 | Scaffold593 | 209718                  | TT                              | CC                | 1946518521               |
| SNP_P3_128907_209735 | NW_004516023.1 | Scaffold593 | 209735                  | AA                              | CC                | 1946518522               |
| SNP_P3_128908_209927 | NW_004516023.1 | Scaffold593 | 209927                  | GG                              | AA                | 1946518524               |
| SNP_P3_128909_209934 | NW_004516023.1 | Scaffold593 | 209934                  | AA                              | TT                | 1946518525               |
| SNP_P3_128910_209936 | NW_004516023.1 | Scaffold593 | 209936                  | GG                              | AA                | 1946518527               |
| SNP_P3_128911_209989 | NW_004516023.1 | Scaffold593 | 209989                  | TT                              | CC                | 1946518528               |
| SNP_P3_128913_210112 | NW_004516023.1 | Scaffold593 | 210112                  | AA                              | GG                | 1946518530               |
| SNP_P3_128914_210127 | NW_004516023.1 | Scaffold593 | 210127                  | CC                              | TT                | 1946518531               |
| SNP_P3_128915_210149 | NW_004516023.1 | Scaffold593 | 210149                  | AA                              | GG                | 1946518533               |
| SNP_P3_128916_210156 | NW_004516023.1 | Scaffold593 | 210156                  | CC                              | TT                | 1946518534               |
| SNP_P3_128917_210192 | NW_004516023.1 | Scaffold593 | 210192                  | TT                              | AA                | 1946518535               |
| SNP_P3_128918_210217 | NW_004516023.1 | Scaffold593 | 210217                  | CC                              | AA                | 1946518537               |
| SNP_P3_128919_210235 | NW_004516023.1 | Scaffold593 | 210235                  | AA                              | GG                | 1946518538               |

| SNPs IDs             | Chromosome IDs | Chromosomes | Physical positions (bp) | CDC Frontier (Reference genome) | (Pusa 256 & HPNB) | NCBI SNPdb Accession IDs |
|----------------------|----------------|-------------|-------------------------|---------------------------------|-------------------|--------------------------|
| SNP_P3_128920_210290 | NW_004516023.1 | Scaffold593 | 210290                  | GG                              | CC                | 1946518540               |
| SNP_P3_128921_210315 | NW_004516023.1 | Scaffold593 | 210315                  | GG                              | CC                | 1946518542               |
| SNP_P3_128922_210347 | NW_004516023.1 | Scaffold593 | 210347                  | AA                              | GG                | 1946518543               |
| SNP_P3_128923_210498 | NW_004516023.1 | Scaffold593 | 210498                  | CC                              | AA                | 1946518544               |
| SNP_P3_128924_210642 | NW_004516023.1 | Scaffold593 | 210642                  | AA                              | CC                | 1946518546               |
| SNP_P3_128925_211521 | NW_004516023.1 | Scaffold593 | 211521                  | AA                              | TT                | 1946518547               |
| SNP_P3_128926_211834 | NW_004516023.1 | Scaffold593 | 211834                  | AA                              | GG                | 1946518549               |
| SNP_P3_128927_2285   | NW_004516024.1 | Scaffold594 | 2285                    | GG                              | CC                | 1946518550               |
| SNP_P3_128928_26631  | NW_004516025.1 | Scaffold595 | 26631                   | CC                              | AA                | 1946518552               |
| SNP_P3_128930_4852   | NW_004516028.1 | Scaffold598 | 4852                    | TT                              | GG                | 1946518554               |
| SNP_P3_128931_7369   | NW_004516028.1 | Scaffold598 | 7369                    | CC                              | AA                | 1946518555               |
| SNP_P3_128932_19882  | NW_004516028.1 | Scaffold598 | 19882                   | AA                              | TT                | 1946518557               |
| SNP_P3_128933_21895  | NW_004516028.1 | Scaffold598 | 21895                   | AA                              | TT                | 1946518558               |
| SNP_P3_128934_21968  | NW_004516028.1 | Scaffold598 | 21968                   | GG                              | TT                | 1946518560               |
| SNP_P3_128935_21991  | NW_004516028.1 | Scaffold598 | 21991                   | CC                              | TT                | 1946518561               |
| SNP_P3_128936_21993  | NW_004516028.1 | Scaffold598 | 21993                   | TT                              | AA                | 1946518563               |
| SNP_P3_128937_22032  | NW_004516028.1 | Scaffold598 | 22032                   | CC                              | TT                | 1946518564               |
| SNP_P3_128938_22039  | NW_004516028.1 | Scaffold598 | 22039                   | AA                              | CC                | 1946518566               |
| SNP_P3_128939_22041  | NW_004516028.1 | Scaffold598 | 22041                   | CC                              | AA                | 1946518567               |
| SNP_P3_128940_22045  | NW_004516028.1 | Scaffold598 | 22045                   | AA                              | TT                | 1946518569               |
| SNP_P3_128941_22129  | NW_004516028.1 | Scaffold598 | 22129                   | GG                              | TT                | 1946518570               |
| SNP_P3_128942_26609  | NW_004516028.1 | Scaffold598 | 26609                   | GG                              | AA                | 1946518572               |
| SNP_P3_128943_26620  | NW_004516028.1 | Scaffold598 | 26620                   | TT                              | GG                | 1946518573               |
| SNP_P3_128944_27358  | NW_004516028.1 | Scaffold598 | 27358                   | GG                              | CC                | 1946518575               |
| SNP_P3_128945_38065  | NW_004516028.1 | Scaffold598 | 38065                   | GG                              | AA                | 1946518576               |
| SNP_P3_128946_38202  | NW_004516028.1 | Scaffold598 | 38202                   | GG                              | AA                | 1946518578               |
| SNP_P3_128948_78631  | NW_004516028.1 | Scaffold598 | 78631                   | GG                              | TT                | 1946518579               |
| SNP_P3_128949_79003  | NW_004516028.1 | Scaffold598 | 79003                   | TT                              | GG                | 1946518580               |
| SNP_P3_128950_83711  | NW_004516028.1 | Scaffold598 | 83711                   | CC                              | GG                | 1946518582               |
| SNP_P3_128951_83715  | NW_004516028.1 | Scaffold598 | 83715                   | CC                              | TT                | 1946518583               |
| SNP_P3_128952_83718  | NW_004516028.1 | Scaffold598 | 83718                   | CC                              | TT                | 1946518585               |
| SNP_P3_128953_83724  | NW_004516028.1 | Scaffold598 | 83724                   | TT                              | CC                | 1946518586               |
| SNP_P3_128954_83727  | NW_004516028.1 | Scaffold598 | 83727                   | CC                              | GG                | 1946518588               |
| SNP_P3_128955_84135  | NW_004516028.1 | Scaffold598 | 84135                   | TT                              | AA                | 1946518589               |
| SNP_P3_128956_84160  | NW_004516028.1 | Scaffold598 | 84160                   | GG                              | CC                | 1946518590               |
| SNP_P3_128957_93907  | NW_004516028.1 | Scaffold598 | 93907                   | GG                              | AA                | 1946518592               |
| SNP_P3_128965_124760 | NW_004516028.1 | Scaffold598 | 124760                  | GG                              | CC                | 1946518593               |
| SNP_P3_128966_124790 | NW_004516028.1 | Scaffold598 | 124790                  | TT                              | CC                | 1946518595               |
| SNP_P3_128967_125484 | NW_004516028.1 | Scaffold598 | 125484                  | CC                              | TT                | 1946518596               |
| SNP_P3_128968_125584 | NW_004516028.1 | Scaffold598 | 125584                  | TT                              | CC                | 1946518598               |
| SNP_P3_128969_126025 | NW_004516028.1 | Scaffold598 | 126025                  | CC                              | TT                | 1946518599               |
| SNP_P3_128970_126078 | NW_004516028.1 | Scaffold598 | 126078                  | TT                              | CC                | 1946518601               |



| SNPs IDs             | Chromosome IDs | Chromosomes | Physical positions (bp) | CDC Frontier (Reference genome) | (Pusa 256 & HPNB) | NCBI SNPdb Accession IDs |
|----------------------|----------------|-------------|-------------------------|---------------------------------|-------------------|--------------------------|
| SNP_P3_128971_126090 | NW_004516028.1 | Scaffold598 | 126090                  | AA                              | TT                | 1946518602               |
| SNP_P3_128972_126091 | NW_004516028.1 | Scaffold598 | 126091                  | TT                              | AA                | 1946518604               |
| SNP_P3_128973_126104 | NW_004516028.1 | Scaffold598 | 126104                  | CC                              | AA                | 1946518605               |
| SNP_P3_128974_126290 | NW_004516028.1 | Scaffold598 | 126290                  | GG                              | AA                | 1946518607               |
| SNP_P3_128976_131884 | NW_004516028.1 | Scaffold598 | 131884                  | TT                              | CC                | 1946518608               |
| SNP_P3_128977_131902 | NW_004516028.1 | Scaffold598 | 131902                  | GG                              | CC                | 1946518610               |
| SNP_P3_128978_135836 | NW_004516028.1 | Scaffold598 | 135836                  | TT                              | AA                | 1946518611               |
| SNP_P3_128979_154829 | NW_004516028.1 | Scaffold598 | 154829                  | TT                              | CC                | 1946518612               |
| SNP_P3_128980_154834 | NW_004516028.1 | Scaffold598 | 154834                  | TT                              | GG                | 1946518614               |
| SNP_P3_128981_154843 | NW_004516028.1 | Scaffold598 | 154843                  | AA                              | GG                | 1946518615               |
| SNP_P3_128982_155929 | NW_004516028.1 | Scaffold598 | 155929                  | GG                              | AA                | 1946518617               |
| SNP_P3_128984_183254 | NW_004516028.1 | Scaffold598 | 183254                  | GG                              | AA                | 1946518618               |
| SNP_P3_128985_183575 | NW_004516028.1 | Scaffold598 | 183575                  | GG                              | AA                | 1946518620               |
| SNP_P3_128986_210635 | NW_004516028.1 | Scaffold598 | 210635                  | GG                              | TT                | 1946518621               |
| SNP_P3_128988_215365 | NW_004516028.1 | Scaffold598 | 215365                  | GG                              | AA                | 1946518623               |
| SNP_P3_128989_215575 | NW_004516028.1 | Scaffold598 | 215575                  | AA                              | CC                | 1946518624               |
| SNP_P3_128990_219052 | NW_004516028.1 | Scaffold598 | 219052                  | CC                              | TT                | 1946518626               |
| SNP_P3_128991_220587 | NW_004516028.1 | Scaffold598 | 220587                  | CC                              | TT                | 1946518627               |
| SNP_P3_128992_229758 | NW_004516028.1 | Scaffold598 | 229758                  | TT                              | GG                | 1946518629               |
| SNP_P3_128993_231064 | NW_004516028.1 | Scaffold598 | 231064                  | GG                              | AA                | 1946518630               |
| SNP_P3_128994_231232 | NW_004516028.1 | Scaffold598 | 231232                  | CC                              | TT                | 1946518632               |
| SNP_P3_128995_231246 | NW_004516028.1 | Scaffold598 | 231246                  | AA                              | TT                | 1946518633               |
| SNP_P3_128996_231288 | NW_004516028.1 | Scaffold598 | 231288                  | TT                              | CC                | 1946518635               |
| SNP_P3_128997_231342 | NW_004516028.1 | Scaffold598 | 231342                  | CC                              | GG                | 1946518636               |
| SNP_P3_128998_231380 | NW_004516028.1 | Scaffold598 | 231380                  | AA                              | GG                | 1946518637               |
| SNP_P3_128999_231425 | NW_004516028.1 | Scaffold598 | 231425                  | TT                              | CC                | 1946518639               |
| SNP_P3_129000_231429 | NW_004516028.1 | Scaffold598 | 231429                  | AA                              | CC                | 1946518641               |
| SNP_P3_129001_231454 | NW_004516028.1 | Scaffold598 | 231454                  | AA                              | CC                | 1946518642               |
| SNP_P3_129002_231521 | NW_004516028.1 | Scaffold598 | 231521                  | TT                              | CC                | 1946518644               |
| SNP_P3_129003_231549 | NW_004516028.1 | Scaffold598 | 231549                  | AA                              | GG                | 1946518645               |
| SNP_P3_129004_231551 | NW_004516028.1 | Scaffold598 | 231551                  | AA                              | GG                | 1946518647               |
| SNP_P3_129005_232989 | NW_004516028.1 | Scaffold598 | 232989                  | CC                              | TT                | 1946518648               |
| SNP_P3_129006_256734 | NW_004516028.1 | Scaffold598 | 256734                  | CC                              | TT                | 1946518649               |
| SNP_P3_129007_261682 | NW_004516028.1 | Scaffold598 | 261682                  | GG                              | TT                | 1946518651               |
| SNP_P3_129008_268438 | NW_004516028.1 | Scaffold598 | 268438                  | CC                              | TT                | 1946518652               |
| SNP_P3_129009_268805 | NW_004516028.1 | Scaffold598 | 268805                  | TT                              | CC                | 1946518654               |
| SNP_P3_129010_274416 | NW_004516028.1 | Scaffold598 | 274416                  | GG                              | AA                | 1946518655               |
| SNP_P3_129011_284168 | NW_004516028.1 | Scaffold598 | 284168                  | GG                              | AA                | 1946518657               |
| SNP_P3_129013_302579 | NW_004516028.1 | Scaffold598 | 302579                  | AA                              | TT                | 1946518658               |
| SNP_P3_129015_315097 | NW_004516028.1 | Scaffold598 | 315097                  | CC                              | AA                | 1946518660               |
| SNP_P3_129016_315216 | NW_004516028.1 | Scaffold598 | 315216                  | TT                              | CC                | 1946518661               |
| SNP_P3_129017_315335 | NW_004516028.1 | Scaffold598 | 315335                  | GG                              | CC                | 1946518663               |

| SNPs IDs             | Chromosome IDs | Chromosomes | Physical positions (bp) | CDC Frontier (Reference genome) | (Pusa 256 & HPNB) | NCBI SNPdb Accession IDs |
|----------------------|----------------|-------------|-------------------------|---------------------------------|-------------------|--------------------------|
| SNP_P3_129018_315355 | NW_004516028.1 | Scaffold598 | 315355                  | AA                              | TT                | 1946518664               |
| SNP_P3_129020_315578 | NW_004516028.1 | Scaffold598 | 315578                  | TT                              | CC                | 1946518666               |
| SNP_P3_129021_315581 | NW_004516028.1 | Scaffold598 | 315581                  | AA                              | GG                | 1946518667               |
| SNP_P3_129022_316784 | NW_004516028.1 | Scaffold598 | 316784                  | GG                              | AA                | 1946518668               |
| SNP_P3_129023_318845 | NW_004516028.1 | Scaffold598 | 318845                  | AA                              | GG                | 1946518670               |
| SNP_P3_129024_319355 | NW_004516028.1 | Scaffold598 | 319355                  | AA                              | GG                | 1946518671               |
| SNP_P3_129025_364195 | NW_004516028.1 | Scaffold598 | 364195                  | CC                              | TT                | 1946518673               |
| SNP_P3_129026_365794 | NW_004516028.1 | Scaffold598 | 365794                  | GG                              | AA                | 1946518674               |
| SNP_P3_129027_368138 | NW_004516028.1 | Scaffold598 | 368138                  | AA                              | GG                | 1946518676               |
| SNP_P3_129028_368502 | NW_004516028.1 | Scaffold598 | 368502                  | GG                              | AA                | 1946518677               |
| SNP_P3_129029_368525 | NW_004516028.1 | Scaffold598 | 368525                  | GG                              | TT                | 1946518679               |
| SNP_P3_129030_368529 | NW_004516028.1 | Scaffold598 | 368529                  | CC                              | AA                | 1946518680               |
| SNP_P3_129031_371362 | NW_004516028.1 | Scaffold598 | 371362                  | CC                              | AA                | 1946518682               |
| SNP_P3_129032_371378 | NW_004516028.1 | Scaffold598 | 371378                  | GG                              | TT                | 1946518683               |
| SNP_P3_129033_371735 | NW_004516028.1 | Scaffold598 | 371735                  | TT                              | CC                | 1946518685               |
| SNP_P3_129034_371737 | NW_004516028.1 | Scaffold598 | 371737                  | GG                              | AA                | 1946518686               |
| SNP_P3_129035_371791 | NW_004516028.1 | Scaffold598 | 371791                  | TT                              | AA                | 1946518688               |
| SNP_P3_129036_371825 | NW_004516028.1 | Scaffold598 | 371825                  | GG                              | AA                | 1946518689               |
| SNP_P3_129037_372255 | NW_004516028.1 | Scaffold598 | 372255                  | TT                              | CC                | 1946518691               |
| SNP_P3_129039_380756 | NW_004516028.1 | Scaffold598 | 380756                  | TT                              | CC                | 1946518692               |
| SNP_P3_129040_380798 | NW_004516028.1 | Scaffold598 | 380798                  | TT                              | CC                | 1946518694               |
| SNP_P3_129041_383272 | NW_004516028.1 | Scaffold598 | 383272                  | AA                              | TT                | 1946518695               |
| SNP_P3_129043_402423 | NW_004516028.1 | Scaffold598 | 402423                  | CC                              | TT                | 1946518697               |
| SNP_P3_129047_423734 | NW_004516028.1 | Scaffold598 | 423734                  | CC                              | AA                | 1946518698               |
| SNP_P3_129048_423779 | NW_004516028.1 | Scaffold598 | 423779                  | GG                              | TT                | 1946518700               |
| SNP_P3_129049_424459 | NW_004516028.1 | Scaffold598 | 424459                  | TT                              | AA                | 1946518701               |
| SNP_P3_129050_434183 | NW_004516028.1 | Scaffold598 | 434183                  | TT                              | CC                | 1946518702               |
| SNP_P3_129051_434231 | NW_004516028.1 | Scaffold598 | 434231                  | GG                              | AA                | 1946518704               |
| SNP_P3_129052_434253 | NW_004516028.1 | Scaffold598 | 434253                  | AA                              | TT                | 1946518705               |
| SNP_P3_129053_436569 | NW_004516028.1 | Scaffold598 | 436569                  | TT                              | CC                | 1946518707               |
| SNP_P3_129054_436840 | NW_004516028.1 | Scaffold598 | 436840                  | CC                              | TT                | 1946518708               |
| SNP_P3_129055_436896 | NW_004516028.1 | Scaffold598 | 436896                  | AA                              | TT                | 1946518710               |
| SNP_P3_129056_445266 | NW_004516028.1 | Scaffold598 | 445266                  | TT                              | AA                | 1946518711               |
| SNP_P3_129057_445378 | NW_004516028.1 | Scaffold598 | 445378                  | TT                              | CC                | 1946518713               |
| SNP_P3_129058_445449 | NW_004516028.1 | Scaffold598 | 445449                  | TT                              | CC                | 1946518714               |
| SNP_P3_129059_445495 | NW_004516028.1 | Scaffold598 | 445495                  | AA                              | GG                | 1946518716               |
| SNP_P3_129060_445592 | NW_004516028.1 | Scaffold598 | 445592                  | TT                              | GG                | 1946518717               |
| SNP_P3_129061_455163 | NW_004516028.1 | Scaffold598 | 455163                  | AA                              | TT                | 1946518718               |
| SNP_P3_129062_455166 | NW_004516028.1 | Scaffold598 | 455166                  | TT                              | AA                | 1946518720               |
| SNP_P3_129063_455172 | NW_004516028.1 | Scaffold598 | 455172                  | AA                              | GG                | 1946518721               |
| SNP_P3_129065_455307 | NW_004516028.1 | Scaffold598 | 455307                  | TT                              | AA                | 1946518723               |
| SNP_P3_129066_455415 | NW_004516028.1 | Scaffold598 | 455415                  | CC                              | TT                | 1946518724               |

| SNPs IDs             | Chromosome IDs | Chromosomes | Physical positions (bp) | CDC Frontier (Reference genome) | (Pusa 256 & HPNB) | NCBI SNPdb Accession IDs |
|----------------------|----------------|-------------|-------------------------|---------------------------------|-------------------|--------------------------|
| SNP_P3_129067_455427 | NW_004516028.1 | Scaffold598 | 455427                  | AA                              | TT                | 1946518726               |
| SNP_P3_129068_455433 | NW_004516028.1 | Scaffold598 | 455433                  | TT                              | CC                | 1946518727               |
| SNP_P3_129069_455445 | NW_004516028.1 | Scaffold598 | 455445                  | TT                              | CC                | 1946518729               |
| SNP_P3_129070_455457 | NW_004516028.1 | Scaffold598 | 455457                  | CC                              | TT                | 1946518730               |
| SNP_P3_129071_455460 | NW_004516028.1 | Scaffold598 | 455460                  | AA                              | CC                | 1946518732               |
| SNP_P3_129072_455466 | NW_004516028.1 | Scaffold598 | 455466                  | TT                              | AA                | 1946518733               |
| SNP_P3_129073_455511 | NW_004516028.1 | Scaffold598 | 455511                  | AA                              | GG                | 1946518735               |
| SNP_P3_129074_455599 | NW_004516028.1 | Scaffold598 | 455599                  | CC                              | AA                | 1946518736               |
| SNP_P3_129075_459054 | NW_004516028.1 | Scaffold598 | 459054                  | CC                              | TT                | 1946518737               |
| SNP_P3_129076_465599 | NW_004516028.1 | Scaffold598 | 465599                  | GG                              | CC                | 1946518739               |
| SNP_P3_129077_465624 | NW_004516028.1 | Scaffold598 | 465624                  | TT                              | AA                | 1946518740               |
| SNP_P3_129078_465625 | NW_004516028.1 | Scaffold598 | 465625                  | AA                              | TT                | 1946518742               |
| SNP_P3_129079_466034 | NW_004516028.1 | Scaffold598 | 466034                  | AA                              | GG                | 1946518743               |
| SNP_P3_129080_472624 | NW_004516028.1 | Scaffold598 | 472624                  | GG                              | TT                | 1946518745               |
| SNP_P3_129081_473071 | NW_004516028.1 | Scaffold598 | 473071                  | AA                              | CC                | 1946518746               |
| SNP_P3_129082_476107 | NW_004516028.1 | Scaffold598 | 476107                  | AA                              | TT                | 1946518747               |
| SNP_P3_129084_478492 | NW_004516028.1 | Scaffold598 | 478492                  | TT                              | CC                | 1946518749               |
| SNP_P3_129086_487873 | NW_004516028.1 | Scaffold598 | 487873                  | AA                              | GG                | 1946518750               |
| SNP_P3_129087_522814 | NW_004516028.1 | Scaffold598 | 522814                  | CC                              | GG                | 1946518752               |
| SNP_P3_129088_533190 | NW_004516028.1 | Scaffold598 | 533190                  | GG                              | TT                | 1946518753               |
| SNP_P3_129089_541251 | NW_004516028.1 | Scaffold598 | 541251                  | AA                              | TT                | 1946518755               |
| SNP_P3_129090_547593 | NW_004516028.1 | Scaffold598 | 547593                  | TT                              | AA                | 1946518756               |
| SNP_P3_129091_547594 | NW_004516028.1 | Scaffold598 | 547594                  | TT                              | AA                | 1946518757               |
| SNP_P3_129092_548907 | NW_004516028.1 | Scaffold598 | 548907                  | CC                              | TT                | 1946518759               |
| SNP_P3_129094_556145 | NW_004516028.1 | Scaffold598 | 556145                  | TT                              | AA                | 1946518760               |
| SNP_P3_129095_561325 | NW_004516028.1 | Scaffold598 | 561325                  | TT                              | AA                | 1946518762               |
| SNP_P3_129096_563088 | NW_004516028.1 | Scaffold598 | 563088                  | CC                              | TT                | 1946518763               |
| SNP_P3_129097_563965 | NW_004516028.1 | Scaffold598 | 563965                  | TT                              | CC                | 1946518765               |
| SNP_P3_129098_565308 | NW_004516028.1 | Scaffold598 | 565308                  | CC                              | TT                | 1946518766               |
| SNP_P3_129099_565340 | NW_004516028.1 | Scaffold598 | 565340                  | GG                              | AA                | 1946518767               |
| SNP_P3_129100_565946 | NW_004516028.1 | Scaffold598 | 565946                  | GG                              | AA                | 1946518769               |
| SNP_P3_129101_568491 | NW_004516028.1 | Scaffold598 | 568491                  | TT                              | CC                | 1946518770               |
| SNP_P3_129103_5422   | NW_004516029.1 | Scaffold599 | 5422                    | TT                              | AA                | 1946518772               |
| SNP_P3_129104_5782   | NW_004516029.1 | Scaffold599 | 5782                    | TT                              | AA                | 1946518773               |
| SNP_P3_129105_7248   | NW_004516029.1 | Scaffold599 | 7248                    | GG                              | TT                | 1946518774               |
| SNP_P3_129106_7260   | NW_004516029.1 | Scaffold599 | 7260                    | GG                              | AA                | 1946518776               |
| SNP_P3_129107_7281   | NW_004516029.1 | Scaffold599 | 7281                    | AA                              | TT                | 1946518777               |
| SNP_P3_129108_7971   | NW_004516029.1 | Scaffold599 | 7971                    | CC                              | GG                | 1946518779               |
| SNP_P3_129109_9749   | NW_004516029.1 | Scaffold599 | 9749                    | CC                              | AA                | 1946518780               |
| SNP_P3_129110_9980   | NW_004516029.1 | Scaffold599 | 9980                    | CC                              | AA                | 1946518781               |
| SNP_P3_129111_9983   | NW_004516029.1 | Scaffold599 | 9983                    | CC                              | TT                | 1946518783               |
| SNP_P3_129112_10084  | NW_004516029.1 | Scaffold599 | 10084                   | TT                              | AA                | 1946518784               |

| SNPs IDs            | Chromosome IDs | Chromosomes | Physical positions (bp) | CDC Frontier (Reference genome) | (Pusa 256 & HPNB) | NCBI SNPdb Accession IDs |
|---------------------|----------------|-------------|-------------------------|---------------------------------|-------------------|--------------------------|
| SNP_P3_129113_10097 | NW_004516029.1 | Scaffold599 | 10097                   | GG                              | AA                | 1946518786               |
| SNP_P3_129114_10167 | NW_004516029.1 | Scaffold599 | 10167                   | CC                              | GG                | 1946518787               |
| SNP_P3_129115_10170 | NW_004516029.1 | Scaffold599 | 10170                   | GG                              | CC                | 1946518789               |
| SNP_P3_129116_10262 | NW_004516029.1 | Scaffold599 | 10262                   | TT                              | AA                | 1946518790               |
| SNP_P3_129117_10524 | NW_004516029.1 | Scaffold599 | 10524                   | CC                              | TT                | 1946518791               |
| SNP_P3_129118_10731 | NW_004516029.1 | Scaffold599 | 10731                   | GG                              | AA                | 1946518793               |
| SNP_P3_129119_11125 | NW_004516029.1 | Scaffold599 | 11125                   | GG                              | AA                | 1946518794               |
| SNP_P3_129120_11309 | NW_004516029.1 | Scaffold599 | 11309                   | AA                              | TT                | 1946518796               |
| SNP_P3_129121_12722 | NW_004516029.1 | Scaffold599 | 12722                   | TT                              | AA                | 1946518797               |
| SNP_P3_129122_12806 | NW_004516029.1 | Scaffold599 | 12806                   | CC                              | TT                | 1946518799               |
| SNP_P3_129123_12968 | NW_004516029.1 | Scaffold599 | 12968                   | CC                              | TT                | 1946518800               |
| SNP_P3_129124_21911 | NW_004516029.1 | Scaffold599 | 21911                   | GG                              | TT                | 1946518802               |
| SNP_P3_129125_22133 | NW_004516029.1 | Scaffold599 | 22133                   | TT                              | AA                | 1946518803               |
| SNP_P3_129126_22365 | NW_004516029.1 | Scaffold599 | 22365                   | TT                              | CC                | 1946518805               |
| SNP_P3_129127_23825 | NW_004516029.1 | Scaffold599 | 23825                   | GG                              | AA                | 1946518806               |
| SNP_P3_129128_24089 | NW_004516029.1 | Scaffold599 | 24089                   | AA                              | CC                | 1946518808               |
| SNP_P3_129129_24098 | NW_004516029.1 | Scaffold599 | 24098                   | TT                              | CC                | 1946518809               |
| SNP_P3_129130_24103 | NW_004516029.1 | Scaffold599 | 24103                   | GG                              | AA                | 1946518811               |
| SNP_P3_129131_24656 | NW_004516029.1 | Scaffold599 | 24656                   | CC                              | AA                | 1946518813               |
| SNP_P3_129132_25072 | NW_004516029.1 | Scaffold599 | 25072                   | TT                              | GG                | 1946518814               |
| SNP_P3_129133_25562 | NW_004516029.1 | Scaffold599 | 25562                   | GG                              | AA                | 1946518816               |
| SNP_P3_129134_25845 | NW_004516029.1 | Scaffold599 | 25845                   | AA                              | GG                | 1946518817               |
| SNP_P3_129135_26151 | NW_004516029.1 | Scaffold599 | 26151                   | TT                              | AA                | 1946518819               |
| SNP_P3_129136_26155 | NW_004516029.1 | Scaffold599 | 26155                   | CC                              | AA                | 1946518820               |
| SNP_P3_129137_26156 | NW_004516029.1 | Scaffold599 | 26156                   | TT                              | GG                | 1946518822               |
| SNP_P3_129138_26776 | NW_004516029.1 | Scaffold599 | 26776                   | AA                              | CC                | 1946518824               |
| SNP_P3_129139_26833 | NW_004516029.1 | Scaffold599 | 26833                   | TT                              | CC                | 1946518825               |
| SNP_P3_129140_26992 | NW_004516029.1 | Scaffold599 | 26992                   | TT                              | CC                | 1946518827               |
| SNP_P3_129141_27801 | NW_004516029.1 | Scaffold599 | 27801                   | CC                              | TT                | 1946518828               |
| SNP_P3_129142_29267 | NW_004516029.1 | Scaffold599 | 29267                   | CC                              | AA                | 1946518829               |
| SNP_P3_129143_39279 | NW_004516029.1 | Scaffold599 | 39279                   | CC                              | TT                | 1946518831               |
| SNP_P3_129144_39283 | NW_004516029.1 | Scaffold599 | 39283                   | AA                              | GG                | 1946518832               |
| SNP_P3_129145_39395 | NW_004516029.1 | Scaffold599 | 39395                   | AA                              | TT                | 1946518834               |
| SNP_P3_129146_39423 | NW_004516029.1 | Scaffold599 | 39423                   | AA                              | TT                | 1946518835               |
| SNP_P3_129147_39424 | NW_004516029.1 | Scaffold599 | 39424                   | TT                              | GG                | 1946518837               |
| SNP_P3_129148_39441 | NW_004516029.1 | Scaffold599 | 39441                   | AA                              | GG                | 1946518838               |
| SNP_P3_129149_39448 | NW_004516029.1 | Scaffold599 | 39448                   | AA                              | TT                | 1946518840               |
| SNP_P3_129150_40107 | NW_004516029.1 | Scaffold599 | 40107                   | CC                              | AA                | 1946518841               |
| SNP_P3_129151_40142 | NW_004516029.1 | Scaffold599 | 40142                   | AA                              | GG                | 1946518843               |
| SNP_P3_129152_40147 | NW_004516029.1 | Scaffold599 | 40147                   | GG                              | CC                | 1946518844               |
| SNP_P3_129153_40152 | NW_004516029.1 | Scaffold599 | 40152                   | AA                              | GG                | 1946518845               |
| SNP_P3_129154_40154 | NW_004516029.1 | Scaffold599 | 40154                   | AA                              | CC                | 1946518847               |

| SNPs IDs            | Chromosome IDs | Chromosomes | Physical positions (bp) | CDC Frontier (Reference genome) | (Pusa 256 & HPNB) | NCBI SNPdb Accession IDs |
|---------------------|----------------|-------------|-------------------------|---------------------------------|-------------------|--------------------------|
| SNP_P3_129155_40158 | NW_004516029.1 | Scaffold599 | 40158                   | GG                              | TT                | 1946518848               |
| SNP_P3_129156_40162 | NW_004516029.1 | Scaffold599 | 40162                   | AA                              | TT                | 1946518850               |
| SNP_P3_129157_40303 | NW_004516029.1 | Scaffold599 | 40303                   | CC                              | TT                | 1946518851               |
| SNP_P3_129158_40313 | NW_004516029.1 | Scaffold599 | 40313                   | AA                              | GG                | 1946518853               |
| SNP_P3_129159_41811 | NW_004516029.1 | Scaffold599 | 41811                   | AA                              | GG                | 1946518854               |
| SNP_P3_129160_42686 | NW_004516029.1 | Scaffold599 | 42686                   | TT                              | AA                | 1946518856               |
| SNP_P3_129161_42770 | NW_004516029.1 | Scaffold599 | 42770                   | CC                              | AA                | 1946518858               |
| SNP_P3_129162_43361 | NW_004516029.1 | Scaffold599 | 43361                   | GG                              | CC                | 1946518859               |
| SNP_P3_129163_45394 | NW_004516029.1 | Scaffold599 | 45394                   | TT                              | CC                | 1946518861               |
| SNP_P3_129164_50685 | NW_004516029.1 | Scaffold599 | 50685                   | CC                              | AA                | 1946518862               |
| SNP_P3_129166_51234 | NW_004516029.1 | Scaffold599 | 51234                   | GG                              | TT                | 1946518864               |
| SNP_P3_129167_52443 | NW_004516029.1 | Scaffold599 | 52443                   | TT                              | GG                | 1946518865               |
| SNP_P3_129168_52492 | NW_004516029.1 | Scaffold599 | 52492                   | AA                              | TT                | 1946518867               |
| SNP_P3_129169_52793 | NW_004516029.1 | Scaffold599 | 52793                   | TT                              | CC                | 1946518868               |
| SNP_P3_129170_53749 | NW_004516029.1 | Scaffold599 | 53749                   | CC                              | TT                | 1946518870               |
| SNP_P3_129171_54334 | NW_004516029.1 | Scaffold599 | 54334                   | CC                              | AA                | 1946518871               |
| SNP_P3_129172_55940 | NW_004516029.1 | Scaffold599 | 55940                   | TT                              | AA                | 1946518872               |
| SNP_P3_129173_55951 | NW_004516029.1 | Scaffold599 | 55951                   | TT                              | CC                | 1946518874               |
| SNP_P3_129174_56213 | NW_004516029.1 | Scaffold599 | 56213                   | TT                              | AA                | 1946518875               |
| SNP_P3_129175_56239 | NW_004516029.1 | Scaffold599 | 56239                   | CC                              | AA                | 1946518877               |
| SNP_P3_129176_57011 | NW_004516029.1 | Scaffold599 | 57011                   | GG                              | AA                | 1946518878               |
| SNP_P3_129177_57012 | NW_004516029.1 | Scaffold599 | 57012                   | TT                              | GG                | 1946518880               |
| SNP_P3_129178_57016 | NW_004516029.1 | Scaffold599 | 57016                   | TT                              | CC                | 1946518881               |
| SNP_P3_129179_57025 | NW_004516029.1 | Scaffold599 | 57025                   | AA                              | GG                | 1946518883               |
| SNP_P3_129180_57027 | NW_004516029.1 | Scaffold599 | 57027                   | TT                              | CC                | 1946518884               |
| SNP_P3_129181_57069 | NW_004516029.1 | Scaffold599 | 57069                   | AA                              | GG                | 1946518886               |
| SNP_P3_129183_57422 | NW_004516029.1 | Scaffold599 | 57422                   | GG                              | AA                | 1946518887               |
| SNP_P3_129184_58380 | NW_004516029.1 | Scaffold599 | 58380                   | GG                              | TT                | 1946518889               |
| SNP_P3_129185_58576 | NW_004516029.1 | Scaffold599 | 58576                   | GG                              | AA                | 1946518890               |
| SNP_P3_129187_58902 | NW_004516029.1 | Scaffold599 | 58902                   | TT                              | GG                | 1946518892               |
| SNP_P3_129188_59085 | NW_004516029.1 | Scaffold599 | 59085                   | TT                              | AA                | 1946518893               |
| SNP_P3_129189_67301 | NW_004516029.1 | Scaffold599 | 67301                   | TT                              | AA                | 1946518894               |
| SNP_P3_129190_67775 | NW_004516029.1 | Scaffold599 | 67775                   | GG                              | CC                | 1946518896               |
| SNP_P3_129191_73287 | NW_004516029.1 | Scaffold599 | 73287                   | TT                              | CC                | 1946518897               |
| SNP_P3_129192_76898 | NW_004516029.1 | Scaffold599 | 76898                   | AA                              | TT                | 1946518899               |
| SNP_P3_129193_78079 | NW_004516029.1 | Scaffold599 | 78079                   | GG                              | AA                | 1946518900               |
| SNP_P3_129194_80154 | NW_004516029.1 | Scaffold599 | 80154                   | TT                              | AA                | 1946518902               |
| SNP_P3_129195_86558 | NW_004516029.1 | Scaffold599 | 86558                   | TT                              | AA                | 1946518903               |
| SNP_P3_129196_88387 | NW_004516029.1 | Scaffold599 | 88387                   | TT                              | GG                | 1946518905               |
| SNP_P3_129197_89525 | NW_004516029.1 | Scaffold599 | 89525                   | AA                              | GG                | 1946518906               |
| SNP_P3_129198_91439 | NW_004516029.1 | Scaffold599 | 91439                   | AA                              | TT                | 1946518908               |
| SNP_P3_129199_93491 | NW_004516029.1 | Scaffold599 | 93491                   | TT                              | AA                | 1946518909               |

| SNPs IDs             | Chromosome IDs | Chromosomes | Physical positions (bp) | CDC Frontier (Reference genome) | (Pusa 256 & HPNB) | NCBI SNPdb Accession IDs |
|----------------------|----------------|-------------|-------------------------|---------------------------------|-------------------|--------------------------|
| SNP_P3_129200_93511  | NW_004516029.1 | Scaffold599 | 93511                   | TT                              | CC                | 1946518911               |
| SNP_P3_129202_95525  | NW_004516029.1 | Scaffold599 | 95525                   | AA                              | CC                | 1946518912               |
| SNP_P3_129203_95553  | NW_004516029.1 | Scaffold599 | 95553                   | AA                              | GG                | 1946518914               |
| SNP_P3_129205_97620  | NW_004516029.1 | Scaffold599 | 97620                   | AA                              | CC                | 1946518915               |
| SNP_P3_129206_98092  | NW_004516029.1 | Scaffold599 | 98092                   | AA                              | GG                | 1946518917               |
| SNP_P3_129207_100678 | NW_004516029.1 | Scaffold599 | 100678                  | CC                              | TT                | 1946518918               |
| SNP_P3_129208_103023 | NW_004516029.1 | Scaffold599 | 103023                  | AA                              | GG                | 1946518920               |
| SNP_P3_129209_103271 | NW_004516029.1 | Scaffold599 | 103271                  | TT                              | CC                | 1946518921               |
| SNP_P3_129210_103885 | NW_004516029.1 | Scaffold599 | 103885                  | CC                              | TT                | 1946518923               |
| SNP_P3_129211_108452 | NW_004516029.1 | Scaffold599 | 108452                  | CC                              | TT                | 1946518924               |
| SNP_P3_129212_115870 | NW_004516029.1 | Scaffold599 | 115870                  | GG                              | AA                | 1946518926               |
| SNP_P3_129214_120968 | NW_004516029.1 | Scaffold599 | 120968                  | AA                              | GG                | 1946518927               |
| SNP_P3_129216_126137 | NW_004516029.1 | Scaffold599 | 126137                  | AA                              | GG                | 1946518929               |
| SNP_P3_129217_133678 | NW_004516029.1 | Scaffold599 | 133678                  | AA                              | CC                | 1946518930               |
| SNP_P3_129218_138909 | NW_004516029.1 | Scaffold599 | 138909                  | CC                              | TT                | 1946518932               |
| SNP_P3_129223_159189 | NW_004516029.1 | Scaffold599 | 159189                  | AA                              | TT                | 1946518933               |
| SNP_P3_129224_169396 | NW_004516029.1 | Scaffold599 | 169396                  | AA                              | CC                | 1946518935               |
| SNP_P3_129225_169637 | NW_004516029.1 | Scaffold599 | 169637                  | GG                              | AA                | 1946518936               |
| SNP_P3_129228_172384 | NW_004516029.1 | Scaffold599 | 172384                  | TT                              | CC                | 1946518938               |
| SNP_P3_129229_174114 | NW_004516029.1 | Scaffold599 | 174114                  | TT                              | GG                | 1946518939               |
| SNP_P3_129230_175632 | NW_004516029.1 | Scaffold599 | 175632                  | GG                              | CC                | 1946518941               |
| SNP_P3_129233_181092 | NW_004516029.1 | Scaffold599 | 181092                  | TT                              | CC                | 1946518942               |
| SNP_P3_129234_185455 | NW_004516029.1 | Scaffold599 | 185455                  | GG                              | TT                | 1946518944               |
| SNP_P3_129235_187808 | NW_004516029.1 | Scaffold599 | 187808                  | GG                              | AA                | 1946518945               |
| SNP_P3_129236_188176 | NW_004516029.1 | Scaffold599 | 188176                  | AA                              | GG                | 1946518946               |
| SNP_P3_129237_188211 | NW_004516029.1 | Scaffold599 | 188211                  | GG                              | AA                | 1946518948               |
| SNP_P3_129238_188800 | NW_004516029.1 | Scaffold599 | 188800                  | GG                              | AA                | 1946518950               |
| SNP_P3_129239_191218 | NW_004516029.1 | Scaffold599 | 191218                  | GG                              | AA                | 1946518951               |
| SNP_P3_129240_193380 | NW_004516029.1 | Scaffold599 | 193380                  | CC                              | AA                | 1946518953               |
| SNP_P3_129241_194056 | NW_004516029.1 | Scaffold599 | 194056                  | AA                              | TT                | 1946518954               |
| SNP_P3_129242_194825 | NW_004516029.1 | Scaffold599 | 194825                  | TT                              | AA                | 1946518956               |
| SNP_P3_129243_205142 | NW_004516029.1 | Scaffold599 | 205142                  | GG                              | AA                | 1946518957               |
| SNP_P3_129244_209807 | NW_004516029.1 | Scaffold599 | 209807                  | GG                              | CC                | 1946518958               |
| SNP_P3_129245_230328 | NW_004516029.1 | Scaffold599 | 230328                  | AA                              | GG                | 1946518960               |
| SNP_P3_129246_234613 | NW_004516029.1 | Scaffold599 | 234613                  | AA                              | CC                | 1946518961               |
| SNP_P3_129247_240905 | NW_004516029.1 | Scaffold599 | 240905                  | TT                              | CC                | 1946518963               |
| SNP_P3_129248_241290 | NW_004516029.1 | Scaffold599 | 241290                  | GG                              | AA                | 1946518964               |
| SNP_P3_129249_242433 | NW_004516029.1 | Scaffold599 | 242433                  | TT                              | CC                | 1946518966               |
| SNP_P3_129250_242472 | NW_004516029.1 | Scaffold599 | 242472                  | CC                              | TT                | 1946518967               |
| SNP_P3_129251_242834 | NW_004516029.1 | Scaffold599 | 242834                  | AA                              | GG                | 1946518968               |
| SNP_P3_129252_246822 | NW_004516029.1 | Scaffold599 | 246822                  | GG                              | AA                | 1946518970               |
| SNP_P3_129253_248817 | NW_004516029.1 | Scaffold599 | 248817                  | CC                              | AA                | 1946518971               |

| SNPs IDs             | Chromosome IDs | Chromosomes | Physical positions (bp) | CDC Frontier (Reference genome) | (Pusa 256 & HPNB) | NCBI SNPdb Accession IDs |
|----------------------|----------------|-------------|-------------------------|---------------------------------|-------------------|--------------------------|
| SNP_P3_129255_249752 | NW_004516029.1 | Scaffold599 | 249752                  | TT                              | CC                | 1946518973               |
| SNP_P3_129256_251266 | NW_004516029.1 | Scaffold599 | 251266                  | CC                              | TT                | 1946518974               |
| SNP_P3_129257_253657 | NW_004516029.1 | Scaffold599 | 253657                  | AA                              | GG                | 1946518976               |
| SNP_P3_129259_265656 | NW_004516029.1 | Scaffold599 | 265656                  | AA                              | CC                | 1946518977               |
| SNP_P3_129260_273030 | NW_004516029.1 | Scaffold599 | 273030                  | AA                              | TT                | 1946518978               |
| SNP_P3_129261_279759 | NW_004516029.1 | Scaffold599 | 279759                  | TT                              | CC                | 1946518980               |
| SNP_P3_129262_281690 | NW_004516029.1 | Scaffold599 | 281690                  | GG                              | AA                | 1946518981               |
| SNP_P3_129264_284709 | NW_004516029.1 | Scaffold599 | 284709                  | CC                              | TT                | 1946518983               |
| SNP_P3_129265_285955 | NW_004516029.1 | Scaffold599 | 285955                  | TT                              | GG                | 1946518984               |
| SNP_P3_129266_286324 | NW_004516029.1 | Scaffold599 | 286324                  | GG                              | CC                | 1946518985               |
| SNP_P3_129267_286894 | NW_004516029.1 | Scaffold599 | 286894                  | AA                              | GG                | 1946518987               |
| SNP_P3_129268_286982 | NW_004516029.1 | Scaffold599 | 286982                  | CC                              | AA                | 1946518988               |
| SNP_P3_129269_291347 | NW_004516029.1 | Scaffold599 | 291347                  | GG                              | AA                | 1946518990               |
| SNP_P3_129270_291775 | NW_004516029.1 | Scaffold599 | 291775                  | AA                              | GG                | 1946518991               |
| SNP_P3_129271_292547 | NW_004516029.1 | Scaffold599 | 292547                  | AA                              | GG                | 1946518993               |
| SNP_P3_129273_293519 | NW_004516029.1 | Scaffold599 | 293519                  | TT                              | CC                | 1946518994               |
| SNP_P3_129274_293520 | NW_004516029.1 | Scaffold599 | 293520                  | CC                              | AA                | 1946518996               |
| SNP_P3_129275_293976 | NW_004516029.1 | Scaffold599 | 293976                  | TT                              | AA                | 1946518997               |
| SNP_P3_129276_294511 | NW_004516029.1 | Scaffold599 | 294511                  | TT                              | CC                | 1946518998               |
| SNP_P3_129277_296785 | NW_004516029.1 | Scaffold599 | 296785                  | AA                              | GG                | 1946519000               |
| SNP_P3_129278_296851 | NW_004516029.1 | Scaffold599 | 296851                  | CC                              | TT                | 1946519001               |
| SNP_P3_129279_297364 | NW_004516029.1 | Scaffold599 | 297364                  | AA                              | CC                | 1946519003               |
| SNP_P3_129280_299351 | NW_004516029.1 | Scaffold599 | 299351                  | GG                              | AA                | 1946519004               |
| SNP_P3_129281_299395 | NW_004516029.1 | Scaffold599 | 299395                  | AA                              | GG                | 1946519006               |
| SNP_P3_129282_300980 | NW_004516029.1 | Scaffold599 | 300980                  | CC                              | TT                | 1946519007               |
| SNP_P3_129283_302485 | NW_004516029.1 | Scaffold599 | 302485                  | TT                              | GG                | 1946519009               |
| SNP_P3_129284_302989 | NW_004516029.1 | Scaffold599 | 302989                  | GG                              | TT                | 1946519010               |
| SNP_P3_129285_303328 | NW_004516029.1 | Scaffold599 | 303328                  | TT                              | CC                | 1946519012               |
| SNP_P3_129286_303721 | NW_004516029.1 | Scaffold599 | 303721                  | GG                              | AA                | 1946519013               |
| SNP_P3_129287_305149 | NW_004516029.1 | Scaffold599 | 305149                  | CC                              | TT                | 1946519014               |
| SNP_P3_129288_306296 | NW_004516029.1 | Scaffold599 | 306296                  | AA                              | GG                | 1946519016               |
| SNP_P3_129289_306304 | NW_004516029.1 | Scaffold599 | 306304                  | GG                              | TT                | 1946519017               |
| SNP_P3_129290_306387 | NW_004516029.1 | Scaffold599 | 306387                  | AA                              | TT                | 1946519019               |
| SNP_P3_129291_306533 | NW_004516029.1 | Scaffold599 | 306533                  | CC                              | TT                | 1946519020               |
| SNP_P3_129292_306761 | NW_004516029.1 | Scaffold599 | 306761                  | CC                              | TT                | 1946519022               |
| SNP_P3_129293_306774 | NW_004516029.1 | Scaffold599 | 306774                  | TT                              | GG                | 1946519023               |
| SNP_P3_129297_307731 | NW_004516029.1 | Scaffold599 | 307731                  | CC                              | AA                | 1946519025               |
| SNP_P3_129299_308421 | NW_004516029.1 | Scaffold599 | 308421                  | GG                              | TT                | 1946519026               |
| SNP_P3_129300_308834 | NW_004516029.1 | Scaffold599 | 308834                  | AA                              | TT                | 1946519028               |
| SNP_P3_129301_310875 | NW_004516029.1 | Scaffold599 | 310875                  | GG                              | AA                | 1946519029               |
| SNP_P3_129302_310878 | NW_004516029.1 | Scaffold599 | 310878                  | CC                              | AA                | 1946519031               |
| SNP_P3_129303_310903 | NW_004516029.1 | Scaffold599 | 310903                  | TT                              | CC                | 1946519032               |

| SNPs IDs             | Chromosome IDs | Chromosomes | Physical positions (bp) | CDC Frontier (Reference genome) | (Pusa 256 & HPNB) | NCBI SNPdb Accession IDs |
|----------------------|----------------|-------------|-------------------------|---------------------------------|-------------------|--------------------------|
| SNP_P3_129304_310940 | NW_004516029.1 | Scaffold599 | 310940                  | GG                              | AA                | 1946519034               |
| SNP_P3_129305_310973 | NW_004516029.1 | Scaffold599 | 310973                  | AA                              | GG                | 1946519035               |
| SNP_P3_129306_311421 | NW_004516029.1 | Scaffold599 | 311421                  | AA                              | TT                | 1946519036               |
| SNP_P3_129307_311822 | NW_004516029.1 | Scaffold599 | 311822                  | TT                              | AA                | 1946519038               |
| SNP_P3_129309_315058 | NW_004516029.1 | Scaffold599 | 315058                  | TT                              | AA                | 1946519039               |
| SNP_P3_129310_315699 | NW_004516029.1 | Scaffold599 | 315699                  | TT                              | GG                | 1946519041               |
| SNP_P3_129311_315792 | NW_004516029.1 | Scaffold599 | 315792                  | AA                              | GG                | 1946519042               |
| SNP_P3_129312_315815 | NW_004516029.1 | Scaffold599 | 315815                  | AA                              | GG                | 1946519044               |
| SNP_P3_129313_316144 | NW_004516029.1 | Scaffold599 | 316144                  | AA                              | CC                | 1946519045               |
| SNP_P3_129316_316525 | NW_004516029.1 | Scaffold599 | 316525                  | TT                              | AA                | 1946519047               |
| SNP_P3_129317_316717 | NW_004516029.1 | Scaffold599 | 316717                  | AA                              | GG                | 1946519048               |
| SNP_P3_129318_316791 | NW_004516029.1 | Scaffold599 | 316791                  | CC                              | TT                | 1946519050               |
| SNP_P3_129319_317351 | NW_004516029.1 | Scaffold599 | 317351                  | TT                              | GG                | 1946519051               |
| SNP_P3_129320_317387 | NW_004516029.1 | Scaffold599 | 317387                  | AA                              | TT                | 1946519052               |
| SNP_P3_129321_317393 | NW_004516029.1 | Scaffold599 | 317393                  | AA                              | TT                | 1946519054               |
| SNP_P3_129322_317399 | NW_004516029.1 | Scaffold599 | 317399                  | AA                              | TT                | 1946519055               |
| SNP_P3_129323_317405 | NW_004516029.1 | Scaffold599 | 317405                  | AA                              | TT                | 1946519057               |
| SNP_P3_129324_317411 | NW_004516029.1 | Scaffold599 | 317411                  | AA                              | TT                | 1946519058               |
| SNP_P3_129325_317438 | NW_004516029.1 | Scaffold599 | 317438                  | AA                              | TT                | 1946519060               |
| SNP_P3_129326_317444 | NW_004516029.1 | Scaffold599 | 317444                  | AA                              | TT                | 1946519061               |
| SNP_P3_129327_318533 | NW_004516029.1 | Scaffold599 | 318533                  | CC                              | TT                | 1946519062               |
| SNP_P3_129329_320224 | NW_004516029.1 | Scaffold599 | 320224                  | CC                              | AA                | 1946519064               |
| SNP_P3_129330_320413 | NW_004516029.1 | Scaffold599 | 320413                  | TT                              | CC                | 1946519065               |
| SNP_P3_129331_320834 | NW_004516029.1 | Scaffold599 | 320834                  | TT                              | AA                | 1946519067               |
| SNP_P3_129332_321498 | NW_004516029.1 | Scaffold599 | 321498                  | GG                              | AA                | 1946519068               |
| SNP_P3_129334_322874 | NW_004516029.1 | Scaffold599 | 322874                  | AA                              | TT                | 1946519070               |
| SNP_P3_129335_323209 | NW_004516029.1 | Scaffold599 | 323209                  | GG                              | AA                | 1946519071               |
| SNP_P3_129338_324397 | NW_004516029.1 | Scaffold599 | 324397                  | GG                              | AA                | 1946519073               |
| SNP_P3_129339_324549 | NW_004516029.1 | Scaffold599 | 324549                  | GG                              | TT                | 1946519074               |
| SNP_P3_129340_327319 | NW_004516029.1 | Scaffold599 | 327319                  | CC                              | TT                | 1946519076               |
| SNP_P3_129341_327605 | NW_004516029.1 | Scaffold599 | 327605                  | TT                              | CC                | 1946519077               |
| SNP_P3_129342_329046 | NW_004516029.1 | Scaffold599 | 329046                  | GG                              | AA                | 1946519078               |
| SNP_P3_129343_329145 | NW_004516029.1 | Scaffold599 | 329145                  | TT                              | CC                | 1946519080               |
| SNP_P3_129344_329222 | NW_004516029.1 | Scaffold599 | 329222                  | AA                              | TT                | 1946519082               |
| SNP_P3_129346_329444 | NW_004516029.1 | Scaffold599 | 329444                  | CC                              | AA                | 1946519083               |
| SNP_P3_129347_330142 | NW_004516029.1 | Scaffold599 | 330142                  | CC                              | TT                | 1946519085               |
| SNP_P3_129349_330489 | NW_004516029.1 | Scaffold599 | 330489                  | AA                              | TT                | 1946519086               |
| SNP_P3_129350_330602 | NW_004516029.1 | Scaffold599 | 330602                  | TT                              | CC                | 1946519088               |
| SNP_P3_129351_331001 | NW_004516029.1 | Scaffold599 | 331001                  | GG                              | AA                | 1946519089               |
| SNP_P3_129352_331507 | NW_004516029.1 | Scaffold599 | 331507                  | TT                              | GG                | 1946519092               |
| SNP_P3_129353_331711 | NW_004516029.1 | Scaffold599 | 331711                  | GG                              | AA                | 1946519094               |
| SNP_P3_129354_333481 | NW_004516029.1 | Scaffold599 | 333481                  | CC                              | TT                | 1946519135               |



| SNPs IDs             | Chromosome IDs | Chromosomes | Physical positions (bp) | CDC Frontier (Reference genome) | (Pusa 256 & HPNB) | NCBI SNPdb Accession IDs |
|----------------------|----------------|-------------|-------------------------|---------------------------------|-------------------|--------------------------|
| SNP_P3_129355_333792 | NW_004516029.1 | Scaffold599 | 333792                  | TT                              | CC                | 1946519136               |
| SNP_P3_129356_333793 | NW_004516029.1 | Scaffold599 | 333793                  | CC                              | TT                | 1946519137               |
| SNP_P3_129357_335120 | NW_004516029.1 | Scaffold599 | 335120                  | AA                              | GG                | 1946519139               |
| SNP_P3_129358_335187 | NW_004516029.1 | Scaffold599 | 335187                  | TT                              | GG                | 1946519140               |
| SNP_P3_129360_335665 | NW_004516029.1 | Scaffold599 | 335665                  | TT                              | AA                | 1946519142               |
| SNP_P3_129361_335675 | NW_004516029.1 | Scaffold599 | 335675                  | AA                              | GG                | 1946519143               |
| SNP_P3_129362_337426 | NW_004516029.1 | Scaffold599 | 337426                  | TT                              | CC                | 1946519145               |
| SNP_P3_129363_337481 | NW_004516029.1 | Scaffold599 | 337481                  | CC                              | AA                | 1946519146               |
| SNP_P3_129364_338098 | NW_004516029.1 | Scaffold599 | 338098                  | GG                              | AA                | 1946519148               |
| SNP_P3_129366_338964 | NW_004516029.1 | Scaffold599 | 338964                  | AA                              | TT                | 1946519149               |
| SNP_P3_129367_339234 | NW_004516029.1 | Scaffold599 | 339234                  | TT                              | AA                | 1946519151               |
| SNP_P3_129368_341883 | NW_004516029.1 | Scaffold599 | 341883                  | CC                              | TT                | 1946519153               |
| SNP_P3_129369_342635 | NW_004516029.1 | Scaffold599 | 342635                  | AA                              | GG                | 1946519154               |
| SNP_P3_129371_346689 | NW_004516029.1 | Scaffold599 | 346689                  | AA                              | CC                | 1946519155               |
| SNP_P3_129373_350767 | NW_004516029.1 | Scaffold599 | 350767                  | GG                              | CC                | 1946519157               |
| SNP_P3_129375_351567 | NW_004516029.1 | Scaffold599 | 351567                  | GG                              | AA                | 1946519158               |
| SNP_P3_129376_352302 | NW_004516029.1 | Scaffold599 | 352302                  | AA                              | CC                | 1946519160               |
| SNP_P3_129378_352492 | NW_004516029.1 | Scaffold599 | 352492                  | CC                              | TT                | 1946519161               |
| SNP_P3_129379_352801 | NW_004516029.1 | Scaffold599 | 352801                  | CC                              | TT                | 1946519163               |
| SNP_P3_129380_353342 | NW_004516029.1 | Scaffold599 | 353342                  | GG                              | AA                | 1946519164               |
| SNP_P3_129381_353375 | NW_004516029.1 | Scaffold599 | 353375                  | CC                              | TT                | 1946519165               |
| SNP_P3_129382_354269 | NW_004516029.1 | Scaffold599 | 354269                  | TT                              | AA                | 1946519166               |
| SNP_P3_129383_354866 | NW_004516029.1 | Scaffold599 | 354866                  | AA                              | GG                | 1946519167               |
| SNP_P3_129384_355180 | NW_004516029.1 | Scaffold599 | 355180                  | GG                              | TT                | 1946519168               |
| SNP_P3_129385_355547 | NW_004516029.1 | Scaffold599 | 355547                  | CC                              | GG                | 1946519169               |
| SNP_P3_129386_355853 | NW_004516029.1 | Scaffold599 | 355853                  | AA                              | GG                | 1946519170               |
| SNP_P3_129387_356119 | NW_004516029.1 | Scaffold599 | 356119                  | GG                              | AA                | 1946519171               |
| SNP_P3_129388_357014 | NW_004516029.1 | Scaffold599 | 357014                  | GG                              | AA                | 1946519172               |
| SNP_P3_129389_358497 | NW_004516029.1 | Scaffold599 | 358497                  | AA                              | TT                | 1946519173               |
| SNP_P3_129390_358637 | NW_004516029.1 | Scaffold599 | 358637                  | TT                              | CC                | 1946519174               |
| SNP_P3_129391_359630 | NW_004516029.1 | Scaffold599 | 359630                  | TT                              | AA                | 1946519175               |
| SNP_P3_129392_359746 | NW_004516029.1 | Scaffold599 | 359746                  | GG                              | TT                | 1946519176               |
| SNP_P3_129393_360016 | NW_004516029.1 | Scaffold599 | 360016                  | CC                              | TT                | 1946519177               |
| SNP_P3_129394_360019 | NW_004516029.1 | Scaffold599 | 360019                  | AA                              | GG                | 1946519178               |
| SNP_P3_129395_361301 | NW_004516029.1 | Scaffold599 | 361301                  | CC                              | TT                | 1946519179               |
| SNP_P3_129396_361821 | NW_004516029.1 | Scaffold599 | 361821                  | TT                              | CC                | 1946519180               |
| SNP_P3_129397_362090 | NW_004516029.1 | Scaffold599 | 362090                  | AA                              | GG                | 1946519182               |
| SNP_P3_129398_362115 | NW_004516029.1 | Scaffold599 | 362115                  | GG                              | CC                | 1946519183               |
| SNP_P3_129399_363515 | NW_004516029.1 | Scaffold599 | 363515                  | TT                              | CC                | 1946519185               |
| SNP_P3_129400_363794 | NW_004516029.1 | Scaffold599 | 363794                  | TT                              | CC                | 1946519186               |
| SNP_P3_129401_363798 | NW_004516029.1 | Scaffold599 | 363798                  | TT                              | AA                | 1946519188               |
| SNP_P3_129403_365964 | NW_004516029.1 | Scaffold599 | 365964                  | AA                              | TT                | 1946519189               |

| SNPs IDs             | Chromosome IDs | Chromosomes | Physical positions (bp) | CDC Frontier (Reference genome) | (Pusa 256 & HPNB) | NCBI SNPdb Accession IDs |
|----------------------|----------------|-------------|-------------------------|---------------------------------|-------------------|--------------------------|
| SNP_P3_129405_366890 | NW_004516029.1 | Scaffold599 | 366890                  | TT                              | CC                | 1946519191               |
| SNP_P3_129406_368147 | NW_004516029.1 | Scaffold599 | 368147                  | AA                              | CC                | 1946519192               |
| SNP_P3_129407_368492 | NW_004516029.1 | Scaffold599 | 368492                  | AA                              | CC                | 1946519194               |
| SNP_P3_129408_368888 | NW_004516029.1 | Scaffold599 | 368888                  | GG                              | CC                | 1946519195               |
| SNP_P3_129409_369108 | NW_004516029.1 | Scaffold599 | 369108                  | GG                              | AA                | 1946519196               |
| SNP_P3_129410_369198 | NW_004516029.1 | Scaffold599 | 369198                  | GG                              | AA                | 1946519198               |
| SNP_P3_129411_369270 | NW_004516029.1 | Scaffold599 | 369270                  | AA                              | TT                | 1946519199               |
| SNP_P3_129412_369371 | NW_004516029.1 | Scaffold599 | 369371                  | TT                              | CC                | 1946519201               |
| SNP_P3_129413_369439 | NW_004516029.1 | Scaffold599 | 369439                  | TT                              | CC                | 1946519202               |
| SNP_P3_129414_369440 | NW_004516029.1 | Scaffold599 | 369440                  | GG                              | AA                | 1946519204               |
| SNP_P3_129415_369469 | NW_004516029.1 | Scaffold599 | 369469                  | GG                              | AA                | 1946519205               |
| SNP_P3_129416_369513 | NW_004516029.1 | Scaffold599 | 369513                  | CC                              | TT                | 1946519206               |
| SNP_P3_129417_369557 | NW_004516029.1 | Scaffold599 | 369557                  | CC                              | AA                | 1946519208               |
| SNP_P3_129418_369565 | NW_004516029.1 | Scaffold599 | 369565                  | CC                              | TT                | 1946519209               |
| SNP_P3_129420_369611 | NW_004516029.1 | Scaffold599 | 369611                  | CC                              | TT                | 1946519211               |
| SNP_P3_129421_369809 | NW_004516029.1 | Scaffold599 | 369809                  | TT                              | CC                | 1946519212               |
| SNP_P3_129422_369913 | NW_004516029.1 | Scaffold599 | 369913                  | GG                              | AA                | 1946519214               |
| SNP_P3_129424_372305 | NW_004516029.1 | Scaffold599 | 372305                  | AA                              | TT                | 1946519215               |
| SNP_P3_129425_373318 | NW_004516029.1 | Scaffold599 | 373318                  | AA                              | GG                | 1946519216               |
| SNP_P3_129427_374269 | NW_004516029.1 | Scaffold599 | 374269                  | TT                              | CC                | 1946519218               |
| SNP_P3_129428_375401 | NW_004516029.1 | Scaffold599 | 375401                  | CC                              | TT                | 1946519219               |
| SNP_P3_129429_375446 | NW_004516029.1 | Scaffold599 | 375446                  | GG                              | TT                | 1946519221               |
| SNP_P3_129430_375501 | NW_004516029.1 | Scaffold599 | 375501                  | AA                              | GG                | 1946519222               |
| SNP_P3_129431_384783 | NW_004516029.1 | Scaffold599 | 384783                  | AA                              | TT                | 1946519224               |
| SNP_P3_129432_385378 | NW_004516029.1 | Scaffold599 | 385378                  | GG                              | CC                | 1946519225               |
| SNP_P3_129433_386616 | NW_004516029.1 | Scaffold599 | 386616                  | TT                              | GG                | 1946519227               |
| SNP_P3_129434_386801 | NW_004516029.1 | Scaffold599 | 386801                  | TT                              | CC                | 1946519228               |
| SNP_P3_129435_387537 | NW_004516029.1 | Scaffold599 | 387537                  | TT                              | AA                | 1946519230               |
| SNP_P3_129436_387627 | NW_004516029.1 | Scaffold599 | 387627                  | TT                              | GG                | 1946519231               |
| SNP_P3_129437_387677 | NW_004516029.1 | Scaffold599 | 387677                  | GG                              | AA                | 1946519233               |
| SNP_P3_129438_387820 | NW_004516029.1 | Scaffold599 | 387820                  | GG                              | AA                | 1946519234               |
| SNP_P3_129439_387826 | NW_004516029.1 | Scaffold599 | 387826                  | CC                              | TT                | 1946519236               |
| SNP_P3_129440_387846 | NW_004516029.1 | Scaffold599 | 387846                  | AA                              | CC                | 1946519237               |
| SNP_P3_129441_387855 | NW_004516029.1 | Scaffold599 | 387855                  | GG                              | TT                | 1946519239               |
| SNP_P3_129443_389558 | NW_004516029.1 | Scaffold599 | 389558                  | TT                              | CC                | 1946519240               |
| SNP_P3_129444_390843 | NW_004516029.1 | Scaffold599 | 390843                  | TT                              | CC                | 1946519241               |
| SNP_P3_129445_390898 | NW_004516029.1 | Scaffold599 | 390898                  | CC                              | TT                | 1946519243               |
| SNP_P3_129446_391315 | NW_004516029.1 | Scaffold599 | 391315                  | GG                              | AA                | 1946519244               |
| SNP_P3_129447_391899 | NW_004516029.1 | Scaffold599 | 391899                  | GG                              | TT                | 1946519246               |
| SNP_P3_129449_392773 | NW_004516029.1 | Scaffold599 | 392773                  | AA                              | TT                | 1946519247               |
| SNP_P3_129450_393849 | NW_004516029.1 | Scaffold599 | 393849                  | TT                              | CC                | 1946519249               |
| SNP_P3_129451_394426 | NW_004516029.1 | Scaffold599 | 394426                  | CC                              | TT                | 1946519250               |

| SNPs IDs             | Chromosome IDs | Chromosomes | Physical positions (bp) | CDC Frontier (Reference genome) | (Pusa 256 & HPNB) | NCBI SNPdb Accession IDs |
|----------------------|----------------|-------------|-------------------------|---------------------------------|-------------------|--------------------------|
| SNP_P3_129452_394637 | NW_004516029.1 | Scaffold599 | 394637                  | AA                              | CC                | 1946519252               |
| SNP_P3_129453_395121 | NW_004516029.1 | Scaffold599 | 395121                  | TT                              | CC                | 1946519253               |
| SNP_P3_129454_395321 | NW_004516029.1 | Scaffold599 | 395321                  | TT                              | CC                | 1946519255               |
| SNP_P3_129455_396304 | NW_004516029.1 | Scaffold599 | 396304                  | AA                              | GG                | 1946519256               |
| SNP_P3_129457_396484 | NW_004516029.1 | Scaffold599 | 396484                  | CC                              | AA                | 1946519258               |
| SNP_P3_129458_396581 | NW_004516029.1 | Scaffold599 | 396581                  | GG                              | AA                | 1946519259               |
| SNP_P3_129459_396664 | NW_004516029.1 | Scaffold599 | 396664                  | AA                              | TT                | 1946519261               |
| SNP_P3_129460_397024 | NW_004516029.1 | Scaffold599 | 397024                  | TT                              | CC                | 1946519262               |
| SNP_P3_129461_397782 | NW_004516029.1 | Scaffold599 | 397782                  | CC                              | TT                | 1946519264               |
| SNP_P3_129462_398416 | NW_004516029.1 | Scaffold599 | 398416                  | TT                              | CC                | 1946519265               |
| SNP_P3_129463_398742 | NW_004516029.1 | Scaffold599 | 398742                  | CC                              | TT                | 1946519267               |
| SNP_P3_129464_398919 | NW_004516029.1 | Scaffold599 | 398919                  | AA                              | GG                | 1946519269               |
| SNP_P3_129465_399162 | NW_004516029.1 | Scaffold599 | 399162                  | AA                              | CC                | 1946519270               |
| SNP_P3_129466_400034 | NW_004516029.1 | Scaffold599 | 400034                  | CC                              | AA                | 1946519272               |
| SNP_P3_129467_401604 | NW_004516029.1 | Scaffold599 | 401604                  | CC                              | TT                | 1946519273               |
| SNP_P3_129468_401886 | NW_004516029.1 | Scaffold599 | 401886                  | GG                              | AA                | 1946519275               |
| SNP_P3_129469_401890 | NW_004516029.1 | Scaffold599 | 401890                  | TT                              | GG                | 1946519276               |
| SNP_P3_129470_402042 | NW_004516029.1 | Scaffold599 | 402042                  | AA                              | GG                | 1946519277               |
| SNP_P3_129471_402481 | NW_004516029.1 | Scaffold599 | 402481                  | TT                              | GG                | 1946519279               |
| SNP_P3_129472_402756 | NW_004516029.1 | Scaffold599 | 402756                  | CC                              | TT                | 1946519280               |
| SNP_P3_129473_403129 | NW_004516029.1 | Scaffold599 | 403129                  | TT                              | GG                | 1946519282               |
| SNP_P3_129474_403260 | NW_004516029.1 | Scaffold599 | 403260                  | GG                              | TT                | 1946519283               |
| SNP_P3_129475_403447 | NW_004516029.1 | Scaffold599 | 403447                  | AA                              | TT                | 1946519285               |
| SNP_P3_129476_403716 | NW_004516029.1 | Scaffold599 | 403716                  | TT                              | AA                | 1946519286               |
| SNP_P3_129477_404158 | NW_004516029.1 | Scaffold599 | 404158                  | CC                              | AA                | 1946519288               |
| SNP_P3_129478_404253 | NW_004516029.1 | Scaffold599 | 404253                  | AA                              | CC                | 1946519289               |
| SNP_P3_129479_404742 | NW_004516029.1 | Scaffold599 | 404742                  | AA                              | CC                | 1946519291               |
| SNP_P3_129480_405497 | NW_004516029.1 | Scaffold599 | 405497                  | CC                              | AA                | 1946519293               |
| SNP_P3_129481_406095 | NW_004516029.1 | Scaffold599 | 406095                  | CC                              | TT                | 1946519294               |
| SNP_P3_129482_406102 | NW_004516029.1 | Scaffold599 | 406102                  | GG                              | AA                | 1946519296               |
| SNP_P3_129483_406159 | NW_004516029.1 | Scaffold599 | 406159                  | CC                              | AA                | 1946519297               |
| SNP_P3_129484_406169 | NW_004516029.1 | Scaffold599 | 406169                  | TT                              | GG                | 1946519298               |
| SNP_P3_129485_406586 | NW_004516029.1 | Scaffold599 | 406586                  | TT                              | GG                | 1946519300               |
| SNP_P3_129486_407602 | NW_004516029.1 | Scaffold599 | 407602                  | CC                              | TT                | 1946519301               |
| SNP_P3_129487_407684 | NW_004516029.1 | Scaffold599 | 407684                  | AA                              | GG                | 1946519303               |
| SNP_P3_129488_408368 | NW_004516029.1 | Scaffold599 | 408368                  | CC                              | TT                | 1946519304               |
| SNP_P3_129489_409570 | NW_004516029.1 | Scaffold599 | 409570                  | TT                              | GG                | 1946519306               |
| SNP_P3_129490_409572 | NW_004516029.1 | Scaffold599 | 409572                  | CC                              | AA                | 1946519307               |
| SNP_P3_129492_410095 | NW_004516029.1 | Scaffold599 | 410095                  | CC                              | AA                | 1946519309               |
| SNP_P3_129493_411642 | NW_004516029.1 | Scaffold599 | 411642                  | AA                              | TT                | 1946519310               |
| SNP_P3_129494_411766 | NW_004516029.1 | Scaffold599 | 411766                  | GG                              | AA                | 1946519312               |
| SNP_P3_129495_12066  | NW_004516030.1 | Scaffold601 | 12066                   | TT                              | GG                | 1946519313               |

| SNPs IDs             | Chromosome IDs | Chromosomes | Physical positions (bp) | CDC Frontier (Reference genome) | (Pusa 256 & HPNB) | NCBI SNPdb Accession IDs |
|----------------------|----------------|-------------|-------------------------|---------------------------------|-------------------|--------------------------|
| SNP_P3_129496_12098  | NW_004516030.1 | Scaffold601 | 12098                   | CC                              | TT                | 1946519315               |
| SNP_P3_129497_12110  | NW_004516030.1 | Scaffold601 | 12110                   | CC                              | TT                | 1946519316               |
| SNP_P3_129498_12238  | NW_004516030.1 | Scaffold601 | 12238                   | GG                              | TT                | 1946519318               |
| SNP_P3_129499_14765  | NW_004516030.1 | Scaffold601 | 14765                   | TT                              | AA                | 1946519319               |
| SNP_P3_129500_29276  | NW_004516030.1 | Scaffold601 | 29276                   | AA                              | GG                | 1946519321               |
| SNP_P3_129501_39993  | NW_004516030.1 | Scaffold601 | 39993                   | AA                              | GG                | 1946519322               |
| SNP_P3_129502_40038  | NW_004516030.1 | Scaffold601 | 40038                   | TT                              | CC                | 1946519324               |
| SNP_P3_129503_40330  | NW_004516030.1 | Scaffold601 | 40330                   | GG                              | AA                | 1946519325               |
| SNP_P3_129504_44206  | NW_004516030.1 | Scaffold601 | 44206                   | TT                              | AA                | 1946519326               |
| SNP_P3_129506_52366  | NW_004516030.1 | Scaffold601 | 52366                   | TT                              | GG                | 1946519328               |
| SNP_P3_129507_52384  | NW_004516030.1 | Scaffold601 | 52384                   | GG                              | AA                | 1946519329               |
| SNP_P3_129508_52415  | NW_004516030.1 | Scaffold601 | 52415                   | TT                              | GG                | 1946519331               |
| SNP_P3_129509_52433  | NW_004516030.1 | Scaffold601 | 52433                   | GG                              | CC                | 1946519332               |
| SNP_P3_129510_52763  | NW_004516030.1 | Scaffold601 | 52763                   | AA                              | GG                | 1946519333               |
| SNP_P3_129511_93730  | NW_004516030.1 | Scaffold601 | 93730                   | TT                              | AA                | 1946519335               |
| SNP_P3_129512_94048  | NW_004516030.1 | Scaffold601 | 94048                   | CC                              | TT                | 1946519336               |
| SNP_P3_129513_96691  | NW_004516030.1 | Scaffold601 | 96691                   | AA                              | GG                | 1946519338               |
| SNP_P3_129514_96697  | NW_004516030.1 | Scaffold601 | 96697                   | TT                              | AA                | 1946519339               |
| SNP_P3_129515_97975  | NW_004516030.1 | Scaffold601 | 97975                   | TT                              | AA                | 1946519341               |
| SNP_P3_129516_100719 | NW_004516030.1 | Scaffold601 | 100719                  | TT                              | GG                | 1946519342               |
| SNP_P3_129517_109292 | NW_004516030.1 | Scaffold601 | 109292                  | TT                              | CC                | 1946519344               |
| SNP_P3_129518_110153 | NW_004516030.1 | Scaffold601 | 110153                  | AA                              | TT                | 1946519345               |
| SNP_P3_129519_110200 | NW_004516030.1 | Scaffold601 | 110200                  | TT                              | CC                | 1946519347               |
| SNP_P3_129520_110204 | NW_004516030.1 | Scaffold601 | 110204                  | CC                              | TT                | 1946519348               |
| SNP_P3_129521_110208 | NW_004516030.1 | Scaffold601 | 110208                  | AA                              | GG                | 1946519349               |
| SNP_P3_129522_110218 | NW_004516030.1 | Scaffold601 | 110218                  | GG                              | CC                | 1946519351               |
| SNP_P3_129523_110229 | NW_004516030.1 | Scaffold601 | 110229                  | TT                              | CC                | 1946519353               |
| SNP_P3_129524_110230 | NW_004516030.1 | Scaffold601 | 110230                  | TT                              | CC                | 1946519354               |
| SNP_P3_129525_110231 | NW_004516030.1 | Scaffold601 | 110231                  | TT                              | CC                | 1946519356               |
| SNP_P3_129526_110237 | NW_004516030.1 | Scaffold601 | 110237                  | TT                              | CC                | 1946519358               |
| SNP_P3_129527_110262 | NW_004516030.1 | Scaffold601 | 110262                  | GG                              | AA                | 1946519359               |
| SNP_P3_129528_110265 | NW_004516030.1 | Scaffold601 | 110265                  | GG                              | AA                | 1946519360               |
| SNP_P3_129529_110275 | NW_004516030.1 | Scaffold601 | 110275                  | TT                              | CC                | 1946519362               |
| SNP_P3_129530_110300 | NW_004516030.1 | Scaffold601 | 110300                  | AA                              | GG                | 1946519363               |
| SNP_P3_129531_110312 | NW_004516030.1 | Scaffold601 | 110312                  | TT                              | CC                | 1946519365               |
| SNP_P3_129532_110318 | NW_004516030.1 | Scaffold601 | 110318                  | AA                              | GG                | 1946519366               |
| SNP_P3_129533_110696 | NW_004516030.1 | Scaffold601 | 110696                  | AA                              | GG                | 1946519368               |
| SNP_P3_129534_110706 | NW_004516030.1 | Scaffold601 | 110706                  | GG                              | AA                | 1946519369               |
| SNP_P3_129535_125673 | NW_004516030.1 | Scaffold601 | 125673                  | CC                              | TT                | 1946519371               |
| SNP_P3_129536_129361 | NW_004516030.1 | Scaffold601 | 129361                  | CC                              | AA                | 1946519372               |
| SNP_P3_129538_143293 | NW_004516030.1 | Scaffold601 | 143293                  | AA                              | GG                | 1946519374               |
| SNP_P3_129539_143334 | NW_004516030.1 | Scaffold601 | 143334                  | TT                              | AA                | 1946519375               |

| SNPs IDs             | Chromosome IDs | Chromosomes | Physical positions (bp) | CDC Frontier (Reference genome) | (Pusa 256 & HPNB) | NCBI SNPdb Accession IDs |
|----------------------|----------------|-------------|-------------------------|---------------------------------|-------------------|--------------------------|
| SNP_P3_129540_143367 | NW_004516030.1 | Scaffold601 | 143367                  | TT                              | CC                | 1946519377               |
| SNP_P3_129541_143368 | NW_004516030.1 | Scaffold601 | 143368                  | AA                              | CC                | 1946519378               |
| SNP_P3_129542_143381 | NW_004516030.1 | Scaffold601 | 143381                  | AA                              | GG                | 1946519379               |
| SNP_P3_129543_143394 | NW_004516030.1 | Scaffold601 | 143394                  | AA                              | GG                | 1946519381               |
| SNP_P3_129544_143634 | NW_004516030.1 | Scaffold601 | 143634                  | TT                              | AA                | 1946519382               |
| SNP_P3_129545_146105 | NW_004516030.1 | Scaffold601 | 146105                  | TT                              | AA                | 1946519384               |
| SNP_P3_129546_146168 | NW_004516030.1 | Scaffold601 | 146168                  | AA                              | TT                | 1946519385               |
| SNP_P3_129547_1268   | NW_004516031.1 | Scaffold602 | 1268                    | AA                              | GG                | 1946519387               |
| SNP_P3_129548_1683   | NW_004516031.1 | Scaffold602 | 1683                    | AA                              | GG                | 1946519388               |
| SNP_P3_129549_7400   | NW_004516032.1 | Scaffold604 | 7400                    | GG                              | AA                | 1946519389               |
| SNP_P3_129550_7557   | NW_004516032.1 | Scaffold604 | 7557                    | CC                              | GG                | 1946519391               |
| SNP_P3_129551_7614   | NW_004516032.1 | Scaffold604 | 7614                    | GG                              | AA                | 1946519392               |
| SNP_P3_129552_7615   | NW_004516032.1 | Scaffold604 | 7615                    | GG                              | AA                | 1946519394               |
| SNP_P3_129553_7624   | NW_004516032.1 | Scaffold604 | 7624                    | GG                              | AA                | 1946519395               |
| SNP_P3_129554_7835   | NW_004516032.1 | Scaffold604 | 7835                    | GG                              | AA                | 1946519397               |
| SNP_P3_129555_7870   | NW_004516032.1 | Scaffold604 | 7870                    | TT                              | GG                | 1946519398               |
| SNP_P3_129556_8150   | NW_004516032.1 | Scaffold604 | 8150                    | AA                              | TT                | 1946519400               |
| SNP_P3_129557_8190   | NW_004516032.1 | Scaffold604 | 8190                    | AA                              | GG                | 1946519401               |
| SNP_P3_129558_8490   | NW_004516032.1 | Scaffold604 | 8490                    | GG                              | AA                | 1946519403               |
| SNP_P3_129559_8956   | NW_004516032.1 | Scaffold604 | 8956                    | GG                              | TT                | 1946519404               |
| SNP_P3_129560_8997   | NW_004516032.1 | Scaffold604 | 8997                    | TT                              | CC                | 1946519407               |
| SNP_P3_129561_9040   | NW_004516032.1 | Scaffold604 | 9040                    | CC                              | AA                | 1946519408               |
| SNP_P3_129562_9055   | NW_004516032.1 | Scaffold604 | 9055                    | AA                              | TT                | 1946519410               |
| SNP_P3_129563_9084   | NW_004516032.1 | Scaffold604 | 9084                    | TT                              | AA                | 1946519412               |
| SNP_P3_129564_9112   | NW_004516032.1 | Scaffold604 | 9112                    | AA                              | TT                | 1946519413               |
| SNP_P3_129565_9237   | NW_004516032.1 | Scaffold604 | 9237                    | TT                              | CC                | 1946519415               |
| SNP_P3_129566_9698   | NW_004516032.1 | Scaffold604 | 9698                    | GG                              | AA                | 1946519416               |
| SNP_P3_129569_14647  | NW_004516032.1 | Scaffold604 | 14647                   | AA                              | GG                | 1946519418               |
| SNP_P3_129570_14667  | NW_004516032.1 | Scaffold604 | 14667                   | CC                              | TT                | 1946519419               |
| SNP_P3_129571_15113  | NW_004516032.1 | Scaffold604 | 15113                   | AA                              | GG                | 1946519421               |
| SNP_P3_129572_15186  | NW_004516032.1 | Scaffold604 | 15186                   | AA                              | TT                | 1946519422               |
| SNP_P3_129573_15857  | NW_004516032.1 | Scaffold604 | 15857                   | CC                              | TT                | 1946519424               |
| SNP_P3_129575_15866  | NW_004516032.1 | Scaffold604 | 15866                   | AA                              | TT                | 1946519425               |
| SNP_P3_129576_16641  | NW_004516032.1 | Scaffold604 | 16641                   | AA                              | CC                | 1946519427               |
| SNP_P3_129577_16682  | NW_004516032.1 | Scaffold604 | 16682                   | CC                              | GG                | 1946519428               |
| SNP_P3_129578_16830  | NW_004516032.1 | Scaffold604 | 16830                   | TT                              | CC                | 1946519429               |
| SNP_P3_129579_17195  | NW_004516032.1 | Scaffold604 | 17195                   | GG                              | AA                | 1946519431               |
| SNP_P3_129581_19175  | NW_004516032.1 | Scaffold604 | 19175                   | AA                              | GG                | 1946519432               |
| SNP_P3_129582_19179  | NW_004516032.1 | Scaffold604 | 19179                   | AA                              | GG                | 1946519434               |
| SNP_P3_129583_19186  | NW_004516032.1 | Scaffold604 | 19186                   | TT                              | CC                | 1946519435               |
| SNP_P3_129584_19276  | NW_004516032.1 | Scaffold604 | 19276                   | TT                              | CC                | 1946519437               |
| SNP_P3_129585_19417  | NW_004516032.1 | Scaffold604 | 19417                   | CC                              | TT                | 1946519439               |

| SNPs IDs            | Chromosome IDs | Chromosomes | Physical positions (bp) | CDC Frontier (Reference genome) | (Pusa 256 & HPNB) | NCBI SNPdb Accession IDs |
|---------------------|----------------|-------------|-------------------------|---------------------------------|-------------------|--------------------------|
| SNP_P3_129586_19581 | NW_004516032.1 | Scaffold604 | 19581                   | TT                              | CC                | 1946519440               |
| SNP_P3_129587_19614 | NW_004516032.1 | Scaffold604 | 19614                   | AA                              | GG                | 1946519441               |
| SNP_P3_129588_19619 | NW_004516032.1 | Scaffold604 | 19619                   | CC                              | TT                | 1946519443               |
| SNP_P3_129589_19620 | NW_004516032.1 | Scaffold604 | 19620                   | AA                              | GG                | 1946519444               |
| SNP_P3_129590_22588 | NW_004516032.1 | Scaffold604 | 22588                   | TT                              | CC                | 1946519446               |
| SNP_P3_129591_22650 | NW_004516032.1 | Scaffold604 | 22650                   | CC                              | GG                | 1946519448               |
| SNP_P3_129592_22669 | NW_004516032.1 | Scaffold604 | 22669                   | CC                              | AA                | 1946519449               |
| SNP_P3_129593_28919 | NW_004516032.1 | Scaffold604 | 28919                   | CC                              | TT                | 1946519451               |
| SNP_P3_129594_29289 | NW_004516032.1 | Scaffold604 | 29289                   | GG                              | TT                | 1946519452               |
| SNP_P3_129595_29354 | NW_004516032.1 | Scaffold604 | 29354                   | AA                              | GG                | 1946519454               |
| SNP_P3_129596_29366 | NW_004516032.1 | Scaffold604 | 29366                   | AA                              | GG                | 1946519455               |
| SNP_P3_129597_38422 | NW_004516032.1 | Scaffold604 | 38422                   | CC                              | TT                | 1946519457               |
| SNP_P3_129599_46316 | NW_004516032.1 | Scaffold604 | 46316                   | GG                              | AA                | 1946519458               |
| SNP_P3_129600_55989 | NW_004516032.1 | Scaffold604 | 55989                   | GG                              | AA                | 1946519460               |
| SNP_P3_129601_55996 | NW_004516032.1 | Scaffold604 | 55996                   | GG                              | AA                | 1946519461               |
| SNP_P3_129602_55997 | NW_004516032.1 | Scaffold604 | 55997                   | AA                              | TT                | 1946519463               |
| SNP_P3_129603_58136 | NW_004516032.1 | Scaffold604 | 58136                   | AA                              | TT                | 1946519466               |
| SNP_P3_129604_59755 | NW_004516032.1 | Scaffold604 | 59755                   | CC                              | GG                | 1946519468               |
| SNP_P3_129605_66377 | NW_004516032.1 | Scaffold604 | 66377                   | TT                              | GG                | 1946519470               |
| SNP_P3_129606_70253 | NW_004516032.1 | Scaffold604 | 70253                   | GG                              | AA                | 1946519471               |
| SNP_P3_129608_72039 | NW_004516032.1 | Scaffold604 | 72039                   | GG                              | AA                | 1946519473               |
| SNP_P3_129609_75366 | NW_004516032.1 | Scaffold604 | 75366                   | CC                              | TT                | 1946519474               |
| SNP_P3_129610_76441 | NW_004516032.1 | Scaffold604 | 76441                   | CC                              | TT                | 1946519476               |
| SNP_P3_129611_76768 | NW_004516032.1 | Scaffold604 | 76768                   | GG                              | TT                | 1946519477               |
| SNP_P3_129612_76790 | NW_004516032.1 | Scaffold604 | 76790                   | GG                              | CC                | 1946519479               |
| SNP_P3_129613_1173  | NW_004516033.1 | Scaffold605 | 1173                    | TT                              | GG                | 1946519480               |
| SNP_P3_129614_1613  | NW_004516033.1 | Scaffold605 | 1613                    | GG                              | AA                | 1946519482               |
| SNP_P3_129615_18852 | NW_004516033.1 | Scaffold605 | 18852                   | CC                              | AA                | 1946519483               |
| SNP_P3_129616_18869 | NW_004516033.1 | Scaffold605 | 18869                   | CC                              | TT                | 1946519484               |
| SNP_P3_129617_18896 | NW_004516033.1 | Scaffold605 | 18896                   | TT                              | GG                | 1946519486               |
| SNP_P3_129618_19056 | NW_004516033.1 | Scaffold605 | 19056                   | CC                              | TT                | 1946519487               |
| SNP_P3_129619_19574 | NW_004516033.1 | Scaffold605 | 19574                   | GG                              | AA                | 1946519489               |
| SNP_P3_129620_24781 | NW_004516033.1 | Scaffold605 | 24781                   | TT                              | CC                | 1946519490               |
| SNP_P3_129622_25808 | NW_004516033.1 | Scaffold605 | 25808                   | TT                              | CC                | 1946519492               |
| SNP_P3_129623_38385 | NW_004516033.1 | Scaffold605 | 38385                   | TT                              | AA                | 1946519493               |
| SNP_P3_129624_53742 | NW_004516033.1 | Scaffold605 | 53742                   | AA                              | GG                | 1946519495               |
| SNP_P3_129625_71320 | NW_004516033.1 | Scaffold605 | 71320                   | TT                              | AA                | 1946519496               |
| SNP_P3_129626_71324 | NW_004516033.1 | Scaffold605 | 71324                   | CC                              | AA                | 1946519498               |
| SNP_P3_129627_73969 | NW_004516033.1 | Scaffold605 | 73969                   | TT                              | CC                | 1946519499               |
| SNP_P3_129628_875   | NW_004516034.1 | Scaffold607 | 875                     | AA                              | CC                | 1946519501               |
| SNP_P3_129629_1005  | NW_004516034.1 | Scaffold607 | 1005                    | AA                              | TT                | 1946519502               |
| SNP_P3_129630_3998  | NW_004516034.1 | Scaffold607 | 3998                    | GG                              | AA                | 1946519503               |

| SNPs IDs            | Chromosome IDs | Chromosomes | Physical positions (bp) | CDC Frontier (Reference genome) | (Pusa 256 & HPNB) | NCBI SNPdb Accession IDs |
|---------------------|----------------|-------------|-------------------------|---------------------------------|-------------------|--------------------------|
| SNP_P3_129631_4008  | NW_004516034.1 | Scaffold607 | 4008                    | AA                              | GG                | 1946519505               |
| SNP_P3_129632_1869  | NW_004516036.1 | Scaffold611 | 1869                    | TT                              | CC                | 1946519506               |
| SNP_P3_129633_2855  | NW_004516036.1 | Scaffold611 | 2855                    | TT                              | AA                | 1946519508               |
| SNP_P3_129634_4178  | NW_004516036.1 | Scaffold611 | 4178                    | TT                              | CC                | 1946519509               |
| SNP_P3_129635_4439  | NW_004516036.1 | Scaffold611 | 4439                    | CC                              | TT                | 1946519511               |
| SNP_P3_129636_4711  | NW_004516036.1 | Scaffold611 | 4711                    | GG                              | AA                | 1946519512               |
| SNP_P3_129638_6738  | NW_004516036.1 | Scaffold611 | 6738                    | TT                              | AA                | 1946519513               |
| SNP_P3_129639_6763  | NW_004516036.1 | Scaffold611 | 6763                    | GG                              | AA                | 1946519515               |
| SNP_P3_129640_2023  | NW_004516037.1 | Scaffold612 | 2023                    | CC                              | TT                | 1946519516               |
| SNP_P3_129641_2031  | NW_004516037.1 | Scaffold612 | 2031                    | TT                              | AA                | 1946519518               |
| SNP_P3_129642_2096  | NW_004516037.1 | Scaffold612 | 2096                    | TT                              | AA                | 1946519519               |
| SNP_P3_129643_2119  | NW_004516037.1 | Scaffold612 | 2119                    | CC                              | TT                | 1946519521               |
| SNP_P3_129644_2121  | NW_004516037.1 | Scaffold612 | 2121                    | CC                              | GG                | 1946519522               |
| SNP_P3_129645_2130  | NW_004516037.1 | Scaffold612 | 2130                    | TT                              | AA                | 1946519524               |
| SNP_P3_129646_2964  | NW_004516037.1 | Scaffold612 | 2964                    | CC                              | TT                | 1946519525               |
| SNP_P3_129647_2979  | NW_004516037.1 | Scaffold612 | 2979                    | CC                              | AA                | 1946519527               |
| SNP_P3_129648_3015  | NW_004516037.1 | Scaffold612 | 3015                    | AA                              | GG                | 1946519529               |
| SNP_P3_129649_3022  | NW_004516037.1 | Scaffold612 | 3022                    | TT                              | AA                | 1946519530               |
| SNP_P3_129650_3040  | NW_004516037.1 | Scaffold612 | 3040                    | CC                              | TT                | 1946519531               |
| SNP_P3_129651_3097  | NW_004516037.1 | Scaffold612 | 3097                    | CC                              | TT                | 1946519533               |
| SNP_P3_129652_3120  | NW_004516037.1 | Scaffold612 | 3120                    | CC                              | GG                | 1946519534               |
| SNP_P3_129653_3194  | NW_004516037.1 | Scaffold612 | 3194                    | GG                              | AA                | 1946519536               |
| SNP_P3_129654_3195  | NW_004516037.1 | Scaffold612 | 3195                    | TT                              | CC                | 1946519538               |
| SNP_P3_129655_3297  | NW_004516037.1 | Scaffold612 | 3297                    | GG                              | AA                | 1946519539               |
| SNP_P3_129656_3429  | NW_004516037.1 | Scaffold612 | 3429                    | AA                              | TT                | 1946519541               |
| SNP_P3_129657_3455  | NW_004516037.1 | Scaffold612 | 3455                    | GG                              | AA                | 1946519543               |
| SNP_P3_129658_3512  | NW_004516037.1 | Scaffold612 | 3512                    | TT                              | GG                | 1946519544               |
| SNP_P3_129659_3548  | NW_004516037.1 | Scaffold612 | 3548                    | TT                              | CC                | 1946519546               |
| SNP_P3_129660_3552  | NW_004516037.1 | Scaffold612 | 3552                    | CC                              | GG                | 1946519547               |
| SNP_P3_129661_17439 | NW_004516037.1 | Scaffold612 | 17439                   | AA                              | TT                | 1946519549               |
| SNP_P3_129662_17944 | NW_004516037.1 | Scaffold612 | 17944                   | GG                              | TT                | 1946519550               |
| SNP_P3_129663_17950 | NW_004516037.1 | Scaffold612 | 17950                   | CC                              | GG                | 1946519551               |
| SNP_P3_129664_17952 | NW_004516037.1 | Scaffold612 | 17952                   | TT                              | AA                | 1946519553               |
| SNP_P3_129665_17976 | NW_004516037.1 | Scaffold612 | 17976                   | TT                              | AA                | 1946519554               |
| SNP_P3_129667_18613 | NW_004516037.1 | Scaffold612 | 18613                   | TT                              | AA                | 1946519556               |
| SNP_P3_129668_18622 | NW_004516037.1 | Scaffold612 | 18622                   | GG                              | TT                | 1946519557               |
| SNP_P3_129669_20219 | NW_004516037.1 | Scaffold612 | 20219                   | CC                              | TT                | 1946519558               |
| SNP_P3_129670_20222 | NW_004516037.1 | Scaffold612 | 20222                   | AA                              | CC                | 1946519559               |
| SNP_P3_129671_20243 | NW_004516037.1 | Scaffold612 | 20243                   | AA                              | GG                | 1946519560               |
| SNP_P3_129672_20271 | NW_004516037.1 | Scaffold612 | 20271                   | CC                              | AA                | 1946519561               |
| SNP_P3_129673_20273 | NW_004516037.1 | Scaffold612 | 20273                   | AA                              | GG                | 1946519562               |
| SNP_P3_129674_22047 | NW_004516037.1 | Scaffold612 | 22047                   | CC                              | TT                | 1946519563               |

| SNPs IDs            | Chromosome IDs | Chromosomes | Physical positions (bp) | CDC Frontier (Reference genome) | (Pusa 256 & HPNB) | NCBI SNPdb Accession IDs |
|---------------------|----------------|-------------|-------------------------|---------------------------------|-------------------|--------------------------|
| SNP_P3_129675_22400 | NW_004516037.1 | Scaffold612 | 22400                   | GG                              | TT                | 1946519564               |
| SNP_P3_129676_22549 | NW_004516037.1 | Scaffold612 | 22549                   | AA                              | GG                | 1946519565               |
| SNP_P3_129677_22674 | NW_004516037.1 | Scaffold612 | 22674                   | GG                              | CC                | 1946519566               |
| SNP_P3_129678_22779 | NW_004516037.1 | Scaffold612 | 22779                   | TT                              | GG                | 1946519567               |
| SNP_P3_129679_22786 | NW_004516037.1 | Scaffold612 | 22786                   | GG                              | TT                | 1946519568               |
| SNP_P3_129680_22970 | NW_004516037.1 | Scaffold612 | 22970                   | AA                              | CC                | 1946519569               |
| SNP_P3_129681_23052 | NW_004516037.1 | Scaffold612 | 23052                   | AA                              | GG                | 1946519570               |
| SNP_P3_129682_23066 | NW_004516037.1 | Scaffold612 | 23066                   | GG                              | AA                | 1946519571               |
| SNP_P3_129683_23073 | NW_004516037.1 | Scaffold612 | 23073                   | AA                              | TT                | 1946519572               |
| SNP_P3_129684_25277 | NW_004516037.1 | Scaffold612 | 25277                   | GG                              | AA                | 1946519574               |
| SNP_P3_129685_25749 | NW_004516037.1 | Scaffold612 | 25749                   | AA                              | GG                | 1946519575               |
| SNP_P3_129686_25808 | NW_004516037.1 | Scaffold612 | 25808                   | AA                              | CC                | 1946519576               |
| SNP_P3_129687_27984 | NW_004516037.1 | Scaffold612 | 27984                   | AA                              | GG                | 1946519578               |
| SNP_P3_129688_27999 | NW_004516037.1 | Scaffold612 | 27999                   | GG                              | CC                | 1946519579               |
| SNP_P3_129689_28238 | NW_004516037.1 | Scaffold612 | 28238                   | AA                              | GG                | 1946519581               |
| SNP_P3_129690_28455 | NW_004516037.1 | Scaffold612 | 28455                   | GG                              | AA                | 1946519582               |
| SNP_P3_129691_28543 | NW_004516037.1 | Scaffold612 | 28543                   | CC                              | TT                | 1946519584               |
| SNP_P3_129693_28609 | NW_004516037.1 | Scaffold612 | 28609                   | TT                              | CC                | 1946519585               |
| SNP_P3_129694_28742 | NW_004516037.1 | Scaffold612 | 28742                   | AA                              | GG                | 1946519586               |
| SNP_P3_129695_28852 | NW_004516037.1 | Scaffold612 | 28852                   | AA                              | GG                | 1946519588               |
| SNP_P3_129696_28927 | NW_004516037.1 | Scaffold612 | 28927                   | AA                              | CC                | 1946519589               |
| SNP_P3_129697_29090 | NW_004516037.1 | Scaffold612 | 29090                   | GG                              | AA                | 1946519591               |
| SNP_P3_129698_29390 | NW_004516037.1 | Scaffold612 | 29390                   | AA                              | GG                | 1946519592               |
| SNP_P3_129699_29412 | NW_004516037.1 | Scaffold612 | 29412                   | CC                              | GG                | 1946519593               |
| SNP_P3_129700_29547 | NW_004516037.1 | Scaffold612 | 29547                   | TT                              | GG                | 1946519594               |
| SNP_P3_129701_38624 | NW_004516037.1 | Scaffold612 | 38624                   | AA                              | GG                | 1946519596               |
| SNP_P3_129702_38732 | NW_004516037.1 | Scaffold612 | 38732                   | CC                              | TT                | 1946519597               |
| SNP_P3_129703_38739 | NW_004516037.1 | Scaffold612 | 38739                   | AA                              | GG                | 1946519602               |
| SNP_P3_129704_38770 | NW_004516037.1 | Scaffold612 | 38770                   | GG                              | TT                | 1946519604               |
| SNP_P3_129705_38774 | NW_004516037.1 | Scaffold612 | 38774                   | CC                              | GG                | 1946519605               |
| SNP_P3_129706_38921 | NW_004516037.1 | Scaffold612 | 38921                   | CC                              | TT                | 1946519606               |
| SNP_P3_129707_38960 | NW_004516037.1 | Scaffold612 | 38960                   | GG                              | CC                | 1946519608               |
| SNP_P3_129708_38973 | NW_004516037.1 | Scaffold612 | 38973                   | AA                              | TT                | 1946519609               |
| SNP_P3_129709_39551 | NW_004516037.1 | Scaffold612 | 39551                   | TT                              | AA                | 1946519611               |
| SNP_P3_129710_1139  | NW_004516038.1 | Scaffold613 | 1139                    | TT                              | AA                | 1946519612               |
| SNP_P3_129711_5346  | NW_004516038.1 | Scaffold613 | 5346                    | AA                              | TT                | 1946519614               |
| SNP_P3_129712_5824  | NW_004516038.1 | Scaffold613 | 5824                    | CC                              | GG                | 1946519615               |
| SNP_P3_129713_18284 | NW_004516038.1 | Scaffold613 | 18284                   | CC                              | GG                | 1946519616               |
| SNP_P3_129714_18293 | NW_004516038.1 | Scaffold613 | 18293                   | AA                              | CC                | 1946519618               |
| SNP_P3_129715_24694 | NW_004516038.1 | Scaffold613 | 24694                   | GG                              | AA                | 1946519619               |
| SNP_P3_129716_24724 | NW_004516038.1 | Scaffold613 | 24724                   | GG                              | TT                | 1946519621               |
| SNP_P3_129717_36077 | NW_004516038.1 | Scaffold613 | 36077                   | AA                              | CC                | 1946519622               |



| SNPs IDs            | Chromosome IDs | Chromosomes | Physical positions (bp) | CDC Frontier (Reference genome) | (Pusa 256 & HPNB) | NCBI SNPdb Accession IDs |
|---------------------|----------------|-------------|-------------------------|---------------------------------|-------------------|--------------------------|
| SNP_P3_129718_36786 | NW_004516038.1 | Scaffold613 | 36786                   | CC                              | TT                | 1946519624               |
| SNP_P3_129720_79388 | NW_004516038.1 | Scaffold613 | 79388                   | TT                              | CC                | 1946519625               |
| SNP_P3_129721_79801 | NW_004516038.1 | Scaffold613 | 79801                   | TT                              | CC                | 1946519627               |
| SNP_P3_129722_79882 | NW_004516038.1 | Scaffold613 | 79882                   | CC                              | TT                | 1946519628               |
| SNP_P3_129723_322   | NW_004516039.1 | Scaffold614 | 322                     | GG                              | TT                | 1946519629               |
| SNP_P3_129724_457   | NW_004516039.1 | Scaffold614 | 457                     | TT                              | GG                | 1946519631               |
| SNP_P3_129725_1031  | NW_004516041.1 | Scaffold617 | 1031                    | TT                              | AA                | 1946519632               |
| SNP_P3_129726_1060  | NW_004516041.1 | Scaffold617 | 1060                    | GG                              | CC                | 1946519634               |
| SNP_P3_129727_1092  | NW_004516041.1 | Scaffold617 | 1092                    | TT                              | GG                | 1946519635               |
| SNP_P3_129728_1191  | NW_004516041.1 | Scaffold617 | 1191                    | AA                              | GG                | 1946519637               |
| SNP_P3_129729_1498  | NW_004516041.1 | Scaffold617 | 1498                    | CC                              | TT                | 1946519638               |
| SNP_P3_129731_1636  | NW_004516041.1 | Scaffold617 | 1636                    | GG                              | AA                | 1946519639               |
| SNP_P3_129732_1640  | NW_004516041.1 | Scaffold617 | 1640                    | AA                              | TT                | 1946519641               |
| SNP_P3_129733_1975  | NW_004516041.1 | Scaffold617 | 1975                    | CC                              | AA                | 1946519642               |
| SNP_P3_129734_1991  | NW_004516041.1 | Scaffold617 | 1991                    | TT                              | GG                | 1946519644               |
| SNP_P3_129735_2019  | NW_004516041.1 | Scaffold617 | 2019                    | CC                              | TT                | 1946519650               |
| SNP_P3_129736_2026  | NW_004516041.1 | Scaffold617 | 2026                    | CC                              | TT                | 1946519651               |
| SNP_P3_129737_8351  | NW_004516041.1 | Scaffold617 | 8351                    | GG                              | TT                | 1946519653               |
| SNP_P3_129738_8439  | NW_004516041.1 | Scaffold617 | 8439                    | GG                              | TT                | 1946519654               |
| SNP_P3_129739_8565  | NW_004516041.1 | Scaffold617 | 8565                    | CC                              | TT                | 1946519656               |
| SNP_P3_129740_8702  | NW_004516041.1 | Scaffold617 | 8702                    | TT                              | CC                | 1946519657               |
| SNP_P3_129741_8805  | NW_004516041.1 | Scaffold617 | 8805                    | CC                              | AA                | 1946519659               |
| SNP_P3_129742_8869  | NW_004516041.1 | Scaffold617 | 8869                    | CC                              | AA                | 1946519660               |
| SNP_P3_129743_8876  | NW_004516041.1 | Scaffold617 | 8876                    | AA                              | CC                | 1946519662               |
| SNP_P3_129745_8901  | NW_004516041.1 | Scaffold617 | 8901                    | CC                              | TT                | 1946519663               |
| SNP_P3_129746_8908  | NW_004516041.1 | Scaffold617 | 8908                    | CC                              | AA                | 1946519665               |
| SNP_P3_129747_8984  | NW_004516041.1 | Scaffold617 | 8984                    | AA                              | GG                | 1946519666               |
| SNP_P3_129748_9181  | NW_004516041.1 | Scaffold617 | 9181                    | GG                              | CC                | 1946519668               |
| SNP_P3_129749_9247  | NW_004516041.1 | Scaffold617 | 9247                    | AA                              | TT                | 1946519669               |
| SNP_P3_129750_9342  | NW_004516041.1 | Scaffold617 | 9342                    | TT                              | CC                | 1946519670               |
| SNP_P3_129751_1173  | NW_004516042.1 | Scaffold618 | 1173                    | AA                              | TT                | 1946519672               |
| SNP_P3_129753_6110  | NW_004516042.1 | Scaffold618 | 6110                    | CC                              | AA                | 1946519673               |
| SNP_P3_129754_6150  | NW_004516042.1 | Scaffold618 | 6150                    | GG                              | AA                | 1946519675               |
| SNP_P3_129755_7669  | NW_004516042.1 | Scaffold618 | 7669                    | TT                              | CC                | 1946519676               |
| SNP_P3_129756_13249 | NW_004516042.1 | Scaffold618 | 13249                   | CC                              | AA                | 1946519678               |
| SNP_P3_129757_13613 | NW_004516042.1 | Scaffold618 | 13613                   | GG                              | CC                | 1946519679               |
| SNP_P3_129758_13884 | NW_004516042.1 | Scaffold618 | 13884                   | TT                              | CC                | 1946519681               |
| SNP_P3_129759_13901 | NW_004516042.1 | Scaffold618 | 13901                   | GG                              | AA                | 1946519682               |
| SNP_P3_129760_14219 | NW_004516042.1 | Scaffold618 | 14219                   | GG                              | AA                | 1946519683               |
| SNP_P3_129761_14225 | NW_004516042.1 | Scaffold618 | 14225                   | TT                              | AA                | 1946519685               |
| SNP_P3_129762_14227 | NW_004516042.1 | Scaffold618 | 14227                   | GG                              | AA                | 1946519686               |
| SNP_P3_129764_27419 | NW_004516042.1 | Scaffold618 | 27419                   | CC                              | TT                | 1946519688               |

| SNPs IDs             | Chromosome IDs | Chromosomes | Physical positions (bp) | CDC Frontier (Reference genome) | (Pusa 256 & HPNB) | NCBI SNPdb Accession IDs |
|----------------------|----------------|-------------|-------------------------|---------------------------------|-------------------|--------------------------|
| SNP_P3_129765_27440  | NW_004516042.1 | Scaffold618 | 27440                   | AA                              | GG                | 1946519689               |
| SNP_P3_129766_55213  | NW_004516042.1 | Scaffold618 | 55213                   | AA                              | GG                | 1946519691               |
| SNP_P3_129767_55215  | NW_004516042.1 | Scaffold618 | 55215                   | GG                              | AA                | 1946519692               |
| SNP_P3_129768_55232  | NW_004516042.1 | Scaffold618 | 55232                   | AA                              | GG                | 1946519693               |
| SNP_P3_129769_55237  | NW_004516042.1 | Scaffold618 | 55237                   | AA                              | GG                | 1946519695               |
| SNP_P3_129770_55264  | NW_004516042.1 | Scaffold618 | 55264                   | AA                              | GG                | 1946519696               |
| SNP_P3_129771_57991  | NW_004516042.1 | Scaffold618 | 57991                   | CC                              | TT                | 1946519698               |
| SNP_P3_129772_58112  | NW_004516042.1 | Scaffold618 | 58112                   | GG                              | CC                | 1946519699               |
| SNP_P3_129773_58954  | NW_004516042.1 | Scaffold618 | 58954                   | TT                              | CC                | 1946519700               |
| SNP_P3_129774_58965  | NW_004516042.1 | Scaffold618 | 58965                   | AA                              | GG                | 1946519702               |
| SNP_P3_129775_58973  | NW_004516042.1 | Scaffold618 | 58973                   | TT                              | CC                | 1946519703               |
| SNP_P3_129776_58989  | NW_004516042.1 | Scaffold618 | 58989                   | AA                              | GG                | 1946519705               |
| SNP_P3_129777_59010  | NW_004516042.1 | Scaffold618 | 59010                   | AA                              | GG                | 1946519706               |
| SNP_P3_129778_59084  | NW_004516042.1 | Scaffold618 | 59084                   | GG                              | AA                | 1946519708               |
| SNP_P3_129779_59130  | NW_004516042.1 | Scaffold618 | 59130                   | CC                              | AA                | 1946519709               |
| SNP_P3_129781_59434  | NW_004516042.1 | Scaffold618 | 59434                   | AA                              | TT                | 1946519711               |
| SNP_P3_129783_59447  | NW_004516042.1 | Scaffold618 | 59447                   | TT                              | AA                | 1946519712               |
| SNP_P3_129784_59471  | NW_004516042.1 | Scaffold618 | 59471                   | CC                              | TT                | 1946519713               |
| SNP_P3_129785_59502  | NW_004516042.1 | Scaffold618 | 59502                   | TT                              | CC                | 1946519715               |
| SNP_P3_129786_59506  | NW_004516042.1 | Scaffold618 | 59506                   | TT                              | CC                | 1946519717               |
| SNP_P3_129787_59559  | NW_004516042.1 | Scaffold618 | 59559                   | AA                              | GG                | 1946519718               |
| SNP_P3_129788_59778  | NW_004516042.1 | Scaffold618 | 59778                   | CC                              | TT                | 1946519719               |
| SNP_P3_129789_60608  | NW_004516042.1 | Scaffold618 | 60608                   | TT                              | CC                | 1946519721               |
| SNP_P3_129790_60641  | NW_004516042.1 | Scaffold618 | 60641                   | CC                              | AA                | 1946519722               |
| SNP_P3_129791_60685  | NW_004516042.1 | Scaffold618 | 60685                   | AA                              | GG                | 1946519724               |
| SNP_P3_129792_61134  | NW_004516042.1 | Scaffold618 | 61134                   | TT                              | AA                | 1946519725               |
| SNP_P3_129793_61413  | NW_004516042.1 | Scaffold618 | 61413                   | TT                              | CC                | 1946519727               |
| SNP_P3_129794_61563  | NW_004516042.1 | Scaffold618 | 61563                   | GG                              | TT                | 1946519728               |
| SNP_P3_129795_61639  | NW_004516042.1 | Scaffold618 | 61639                   | GG                              | AA                | 1946519729               |
| SNP_P3_129796_62934  | NW_004516042.1 | Scaffold618 | 62934                   | TT                              | CC                | 1946519731               |
| SNP_P3_129797_62982  | NW_004516042.1 | Scaffold618 | 62982                   | AA                              | TT                | 1946519732               |
| SNP_P3_129799_147474 | NW_004516042.1 | Scaffold618 | 147474                  | GG                              | AA                | 1946519734               |
| SNP_P3_129800_147489 | NW_004516042.1 | Scaffold618 | 147489                  | AA                              | GG                | 1946519735               |
| SNP_P3_129801_147492 | NW_004516042.1 | Scaffold618 | 147492                  | AA                              | TT                | 1946519737               |
| SNP_P3_129802_147514 | NW_004516042.1 | Scaffold618 | 147514                  | AA                              | CC                | 1946519738               |
| SNP_P3_129803_147535 | NW_004516042.1 | Scaffold618 | 147535                  | TT                              | GG                | 1946519740               |
| SNP_P3_129804_152893 | NW_004516042.1 | Scaffold618 | 152893                  | TT                              | CC                | 1946519741               |
| SNP_P3_129805_172451 | NW_004516042.1 | Scaffold618 | 172451                  | AA                              | GG                | 1946519743               |
| SNP_P3_129806_197058 | NW_004516042.1 | Scaffold618 | 197058                  | AA                              | TT                | 1946519744               |
| SNP_P3_129807_216482 | NW_004516042.1 | Scaffold618 | 216482                  | GG                              | TT                | 1946519745               |
| SNP_P3_129808_216646 | NW_004516042.1 | Scaffold618 | 216646                  | AA                              | GG                | 1946519747               |
| SNP_P3_129809_34488  | NW_004516043.1 | Scaffold619 | 34488                   | TT                              | CC                | 1946519748               |

| SNPs IDs            | Chromosome IDs | Chromosomes | Physical positions (bp) | CDC Frontier (Reference genome) | (Pusa 256 & HPNB) | NCBI SNPdb Accession IDs |
|---------------------|----------------|-------------|-------------------------|---------------------------------|-------------------|--------------------------|
| SNP_P3_129810_46871 | NW_004516043.1 | Scaffold619 | 46871                   | AA                              | CC                | 1946519750               |
| SNP_P3_129811_47128 | NW_004516043.1 | Scaffold619 | 47128                   | GG                              | CC                | 1946519751               |
| SNP_P3_129812_47140 | NW_004516043.1 | Scaffold619 | 47140                   | AA                              | CC                | 1946519753               |
| SNP_P3_129813_88    | NW_004516044.1 | Scaffold620 | 88                      | AA                              | TT                | 1946519754               |
| SNP_P3_129814_1001  | NW_004516045.1 | Scaffold622 | 1001                    | AA                              | GG                | 1946519756               |
| SNP_P3_129815_1134  | NW_004516045.1 | Scaffold622 | 1134                    | GG                              | CC                | 1946519757               |
| SNP_P3_129816_4669  | NW_004516045.1 | Scaffold622 | 4669                    | CC                              | TT                | 1946519758               |
| SNP_P3_129817_4789  | NW_004516045.1 | Scaffold622 | 4789                    | TT                              | GG                | 1946519760               |
| SNP_P3_129818_5036  | NW_004516045.1 | Scaffold622 | 5036                    | CC                              | GG                | 1946519761               |
| SNP_P3_129819_6955  | NW_004516045.1 | Scaffold622 | 6955                    | TT                              | GG                | 1946519763               |
| SNP_P3_129820_7544  | NW_004516045.1 | Scaffold622 | 7544                    | AA                              | GG                | 1946519764               |
| SNP_P3_129821_7739  | NW_004516045.1 | Scaffold622 | 7739                    | TT                              | GG                | 1946519766               |
| SNP_P3_129822_8028  | NW_004516045.1 | Scaffold622 | 8028                    | CC                              | TT                | 1946519767               |
| SNP_P3_129823_8108  | NW_004516045.1 | Scaffold622 | 8108                    | TT                              | GG                | 1946519768               |
| SNP_P3_129824_8119  | NW_004516045.1 | Scaffold622 | 8119                    | GG                              | CC                | 1946519770               |
| SNP_P3_129825_8150  | NW_004516045.1 | Scaffold622 | 8150                    | CC                              | TT                | 1946519771               |
| SNP_P3_129826_8163  | NW_004516045.1 | Scaffold622 | 8163                    | GG                              | TT                | 1946519773               |
| SNP_P3_129827_8165  | NW_004516045.1 | Scaffold622 | 8165                    | AA                              | TT                | 1946519774               |
| SNP_P3_129828_8254  | NW_004516045.1 | Scaffold622 | 8254                    | GG                              | AA                | 1946519776               |
| SNP_P3_129829_9069  | NW_004516045.1 | Scaffold622 | 9069                    | AA                              | TT                | 1946519777               |
| SNP_P3_129830_9073  | NW_004516045.1 | Scaffold622 | 9073                    | CC                              | TT                | 1946519778               |
| SNP_P3_129831_9806  | NW_004516045.1 | Scaffold622 | 9806                    | TT                              | GG                | 1946519780               |
| SNP_P3_129833_10481 | NW_004516045.1 | Scaffold622 | 10481                   | GG                              | CC                | 1946519781               |
| SNP_P3_129834_10496 | NW_004516045.1 | Scaffold622 | 10496                   | CC                              | TT                | 1946519783               |
| SNP_P3_129835_10552 | NW_004516045.1 | Scaffold622 | 10552                   | CC                              | GG                | 1946519784               |
| SNP_P3_129836_10763 | NW_004516045.1 | Scaffold622 | 10763                   | CC                              | AA                | 1946519785               |
| SNP_P3_129839_22074 | NW_004516045.1 | Scaffold622 | 22074                   | AA                              | GG                | 1946519787               |
| SNP_P3_129840_22096 | NW_004516045.1 | Scaffold622 | 22096                   | AA                              | TT                | 1946519788               |
| SNP_P3_129841_22106 | NW_004516045.1 | Scaffold622 | 22106                   | CC                              | TT                | 1946519790               |
| SNP_P3_129842_22495 | NW_004516045.1 | Scaffold622 | 22495                   | CC                              | GG                | 1946519791               |
| SNP_P3_129843_22501 | NW_004516045.1 | Scaffold622 | 22501                   | CC                              | AA                | 1946519793               |
| SNP_P3_129844_22565 | NW_004516045.1 | Scaffold622 | 22565                   | AA                              | TT                | 1946519794               |
| SNP_P3_129845_23185 | NW_004516045.1 | Scaffold622 | 23185                   | AA                              | GG                | 1946519795               |
| SNP_P3_129846_23413 | NW_004516045.1 | Scaffold622 | 23413                   | CC                              | AA                | 1946519797               |
| SNP_P3_129848_24165 | NW_004516045.1 | Scaffold622 | 24165                   | GG                              | AA                | 1946519798               |
| SNP_P3_129849_24186 | NW_004516045.1 | Scaffold622 | 24186                   | GG                              | TT                | 1946519800               |
| SNP_P3_129850_24200 | NW_004516045.1 | Scaffold622 | 24200                   | TT                              | CC                | 1946519801               |
| SNP_P3_129851_24455 | NW_004516045.1 | Scaffold622 | 24455                   | AA                              | GG                | 1946519803               |
| SNP_P3_129852_24560 | NW_004516045.1 | Scaffold622 | 24560                   | TT                              | CC                | 1946519804               |
| SNP_P3_129853_24598 | NW_004516045.1 | Scaffold622 | 24598                   | AA                              | GG                | 1946519806               |
| SNP_P3_129854_24639 | NW_004516045.1 | Scaffold622 | 24639                   | GG                              | CC                | 1946519807               |
| SNP_P3_129855_24737 | NW_004516045.1 | Scaffold622 | 24737                   | AA                              | GG                | 1946519808               |

| SNPs IDs            | Chromosome IDs | Chromosomes | Physical positions (bp) | CDC Frontier (Reference genome) | (Pusa 256 & HPNB) | NCBI SNPdb Accession IDs |
|---------------------|----------------|-------------|-------------------------|---------------------------------|-------------------|--------------------------|
| SNP_P3_129856_24745 | NW_004516045.1 | Scaffold622 | 24745                   | AA                              | CC                | 1946519810               |
| SNP_P3_129857_24928 | NW_004516045.1 | Scaffold622 | 24928                   | AA                              | TT                | 1946519811               |
| SNP_P3_129858_24930 | NW_004516045.1 | Scaffold622 | 24930                   | AA                              | GG                | 1946519813               |
| SNP_P3_129859_24962 | NW_004516045.1 | Scaffold622 | 24962                   | CC                              | AA                | 1946519814               |
| SNP_P3_129860_25331 | NW_004516045.1 | Scaffold622 | 25331                   | TT                              | AA                | 1946519816               |
| SNP_P3_129861_25698 | NW_004516045.1 | Scaffold622 | 25698                   | GG                              | TT                | 1946519817               |
| SNP_P3_129862_26069 | NW_004516045.1 | Scaffold622 | 26069                   | AA                              | GG                | 1946519818               |
| SNP_P3_129863_26304 | NW_004516045.1 | Scaffold622 | 26304                   | TT                              | CC                | 1946519820               |
| SNP_P3_129864_26326 | NW_004516045.1 | Scaffold622 | 26326                   | AA                              | CC                | 1946519821               |
| SNP_P3_129865_26353 | NW_004516045.1 | Scaffold622 | 26353                   | CC                              | AA                | 1946519823               |
| SNP_P3_129866_26375 | NW_004516045.1 | Scaffold622 | 26375                   | TT                              | AA                | 1946519824               |
| SNP_P3_129867_26443 | NW_004516045.1 | Scaffold622 | 26443                   | CC                              | GG                | 1946519826               |
| SNP_P3_129868_26605 | NW_004516045.1 | Scaffold622 | 26605                   | CC                              | AA                | 1946519827               |
| SNP_P3_129869_26613 | NW_004516045.1 | Scaffold622 | 26613                   | CC                              | TT                | 1946519828               |
| SNP_P3_129870_26713 | NW_004516045.1 | Scaffold622 | 26713                   | TT                              | GG                | 1946519830               |
| SNP_P3_129871_26860 | NW_004516045.1 | Scaffold622 | 26860                   | TT                              | CC                | 1946519831               |
| SNP_P3_129872_26885 | NW_004516045.1 | Scaffold622 | 26885                   | TT                              | AA                | 1946519833               |
| SNP_P3_129873_26888 | NW_004516045.1 | Scaffold622 | 26888                   | AA                              | CC                | 1946519834               |
| SNP_P3_129874_26896 | NW_004516045.1 | Scaffold622 | 26896                   | TT                              | CC                | 1946519836               |
| SNP_P3_129875_30704 | NW_004516045.1 | Scaffold622 | 30704                   | TT                              | AA                | 1946519837               |
| SNP_P3_129877_30918 | NW_004516045.1 | Scaffold622 | 30918                   | TT                              | CC                | 1946519838               |
| SNP_P3_129878_31042 | NW_004516045.1 | Scaffold622 | 31042                   | TT                              | GG                | 1946519840               |
| SNP_P3_129879_31199 | NW_004516045.1 | Scaffold622 | 31199                   | GG                              | CC                | 1946519842               |
| SNP_P3_129880_31288 | NW_004516045.1 | Scaffold622 | 31288                   | CC                              | AA                | 1946519843               |
| SNP_P3_129881_31309 | NW_004516045.1 | Scaffold622 | 31309                   | TT                              | GG                | 1946519845               |
| SNP_P3_129882_31322 | NW_004516045.1 | Scaffold622 | 31322                   | TT                              | AA                | 1946519846               |
| SNP_P3_129883_31583 | NW_004516045.1 | Scaffold622 | 31583                   | TT                              | AA                | 1946519848               |
| SNP_P3_129884_35823 | NW_004516045.1 | Scaffold622 | 35823                   | TT                              | CC                | 1946519849               |
| SNP_P3_129885_35894 | NW_004516045.1 | Scaffold622 | 35894                   | AA                              | CC                | 1946519851               |
| SNP_P3_129886_35984 | NW_004516045.1 | Scaffold622 | 35984                   | CC                              | TT                | 1946519852               |
| SNP_P3_129887_36082 | NW_004516045.1 | Scaffold622 | 36082                   | CC                              | GG                | 1946519853               |
| SNP_P3_129888_36091 | NW_004516045.1 | Scaffold622 | 36091                   | AA                              | TT                | 1946519855               |
| SNP_P3_129889_36135 | NW_004516045.1 | Scaffold622 | 36135                   | TT                              | CC                | 1946519856               |
| SNP_P3_129890_36138 | NW_004516045.1 | Scaffold622 | 36138                   | GG                              | TT                | 1946519858               |
| SNP_P3_129891_36187 | NW_004516045.1 | Scaffold622 | 36187                   | GG                              | CC                | 1946519860               |
| SNP_P3_129892_36278 | NW_004516045.1 | Scaffold622 | 36278                   | GG                              | CC                | 1946519861               |
| SNP_P3_129893_36621 | NW_004516045.1 | Scaffold622 | 36621                   | GG                              | AA                | 1946519863               |
| SNP_P3_129894_36641 | NW_004516045.1 | Scaffold622 | 36641                   | AA                              | TT                | 1946519864               |
| SNP_P3_129895_36772 | NW_004516045.1 | Scaffold622 | 36772                   | AA                              | GG                | 1946519865               |
| SNP_P3_129896_36823 | NW_004516045.1 | Scaffold622 | 36823                   | AA                              | CC                | 1946519867               |
| SNP_P3_129897_36832 | NW_004516045.1 | Scaffold622 | 36832                   | GG                              | AA                | 1946519868               |
| SNP_P3_129898_38886 | NW_004516045.1 | Scaffold622 | 38886                   | TT                              | CC                | 1946519870               |

| SNPs IDs            | Chromosome IDs | Chromosomes | Physical positions (bp) | CDC Frontier (Reference genome) | (Pusa 256 & HPNB) | NCBI SNPdb Accession IDs |
|---------------------|----------------|-------------|-------------------------|---------------------------------|-------------------|--------------------------|
| SNP_P3_129899_38891 | NW_004516045.1 | Scaffold622 | 38891                   | AA                              | TT                | 1946519871               |
| SNP_P3_129900_40596 | NW_004516045.1 | Scaffold622 | 40596                   | CC                              | TT                | 1946519873               |
| SNP_P3_129901_40747 | NW_004516045.1 | Scaffold622 | 40747                   | GG                              | AA                | 1946519874               |
| SNP_P3_129902_40780 | NW_004516045.1 | Scaffold622 | 40780                   | CC                              | AA                | 1946519876               |
| SNP_P3_129903_40980 | NW_004516045.1 | Scaffold622 | 40980                   | CC                              | TT                | 1946519877               |
| SNP_P3_129904_40981 | NW_004516045.1 | Scaffold622 | 40981                   | TT                              | AA                | 1946519879               |
| SNP_P3_129905_41230 | NW_004516045.1 | Scaffold622 | 41230                   | CC                              | TT                | 1946519880               |
| SNP_P3_129906_41323 | NW_004516045.1 | Scaffold622 | 41323                   | TT                              | GG                | 1946519881               |
| SNP_P3_129907_41344 | NW_004516045.1 | Scaffold622 | 41344                   | CC                              | TT                | 1946519883               |
| SNP_P3_129908_41402 | NW_004516045.1 | Scaffold622 | 41402                   | CC                              | GG                | 1946519884               |
| SNP_P3_129909_41460 | NW_004516045.1 | Scaffold622 | 41460                   | AA                              | GG                | 1946519885               |
| SNP_P3_129910_41599 | NW_004516045.1 | Scaffold622 | 41599                   | AA                              | TT                | 1946519887               |
| SNP_P3_129911_41601 | NW_004516045.1 | Scaffold622 | 41601                   | CC                              | AA                | 1946519888               |
| SNP_P3_129912_41674 | NW_004516045.1 | Scaffold622 | 41674                   | TT                              | GG                | 1946519890               |
| SNP_P3_129913_41853 | NW_004516045.1 | Scaffold622 | 41853                   | AA                              | CC                | 1946519891               |
| SNP_P3_129914_44083 | NW_004516045.1 | Scaffold622 | 44083                   | CC                              | AA                | 1946519893               |
| SNP_P3_129915_44506 | NW_004516045.1 | Scaffold622 | 44506                   | TT                              | AA                | 1946519894               |
| SNP_P3_129916_44968 | NW_004516045.1 | Scaffold622 | 44968                   | TT                              | AA                | 1946519896               |
| SNP_P3_129917_45300 | NW_004516045.1 | Scaffold622 | 45300                   | AA                              | TT                | 1946519897               |
| SNP_P3_129918_45308 | NW_004516045.1 | Scaffold622 | 45308                   | TT                              | CC                | 1946519899               |
| SNP_P3_129920_46210 | NW_004516045.1 | Scaffold622 | 46210                   | CC                              | TT                | 1946519900               |
| SNP_P3_129921_47827 | NW_004516045.1 | Scaffold622 | 47827                   | AA                              | GG                | 1946519901               |
| SNP_P3_129922_47878 | NW_004516045.1 | Scaffold622 | 47878                   | AA                              | TT                | 1946519903               |
| SNP_P3_129923_47999 | NW_004516045.1 | Scaffold622 | 47999                   | CC                              | AA                | 1946519904               |
| SNP_P3_129924_48012 | NW_004516045.1 | Scaffold622 | 48012                   | TT                              | AA                | 1946519906               |
| SNP_P3_129925_48048 | NW_004516045.1 | Scaffold622 | 48048                   | CC                              | GG                | 1946519907               |
| SNP_P3_129926_48085 | NW_004516045.1 | Scaffold622 | 48085                   | GG                              | AA                | 1946519909               |
| SNP_P3_129927_48180 | NW_004516045.1 | Scaffold622 | 48180                   | GG                              | AA                | 1946519910               |
| SNP_P3_129929_48306 | NW_004516045.1 | Scaffold622 | 48306                   | TT                              | AA                | 1946519911               |
| SNP_P3_129930_48714 | NW_004516045.1 | Scaffold622 | 48714                   | AA                              | GG                | 1946519913               |
| SNP_P3_129931_48909 | NW_004516045.1 | Scaffold622 | 48909                   | GG                              | CC                | 1946519914               |
| SNP_P3_129932_48925 | NW_004516045.1 | Scaffold622 | 48925                   | CC                              | AA                | 1946519916               |
| SNP_P3_129933_56386 | NW_004516045.1 | Scaffold622 | 56386                   | AA                              | CC                | 1946519917               |
| SNP_P3_129934_56408 | NW_004516045.1 | Scaffold622 | 56408                   | AA                              | TT                | 1946519919               |
| SNP_P3_129935_56563 | NW_004516045.1 | Scaffold622 | 56563                   | AA                              | GG                | 1946519920               |
| SNP_P3_129936_56577 | NW_004516045.1 | Scaffold622 | 56577                   | AA                              | CC                | 1946519922               |
| SNP_P3_129937_56706 | NW_004516045.1 | Scaffold622 | 56706                   | AA                              | GG                | 1946519923               |
| SNP_P3_129938_56846 | NW_004516045.1 | Scaffold622 | 56846                   | CC                              | TT                | 1946519924               |
| SNP_P3_129939_56869 | NW_004516045.1 | Scaffold622 | 56869                   | CC                              | GG                | 1946519926               |
| SNP_P3_129940_57062 | NW_004516045.1 | Scaffold622 | 57062                   | GG                              | TT                | 1946519927               |
| SNP_P3_129941_57087 | NW_004516045.1 | Scaffold622 | 57087                   | AA                              | TT                | 1946519929               |
| SNP_P3_129942_57101 | NW_004516045.1 | Scaffold622 | 57101                   | CC                              | GG                | 1946519930               |

| SNPs IDs            | Chromosome IDs | Chromosomes | Physical positions (bp) | CDC Frontier (Reference genome) | (Pusa 256 & HPNB) | NCBI SNPdb Accession IDs |
|---------------------|----------------|-------------|-------------------------|---------------------------------|-------------------|--------------------------|
| SNP_P3_129943_57121 | NW_004516045.1 | Scaffold622 | 57121                   | AA                              | TT                | 1946519932               |
| SNP_P3_129944_57125 | NW_004516045.1 | Scaffold622 | 57125                   | AA                              | CC                | 1946519933               |
| SNP_P3_129945_57207 | NW_004516045.1 | Scaffold622 | 57207                   | TT                              | GG                | 1946519934               |
| SNP_P3_129946_57277 | NW_004516045.1 | Scaffold622 | 57277                   | CC                              | TT                | 1946519936               |
| SNP_P3_129947_57279 | NW_004516045.1 | Scaffold622 | 57279                   | AA                              | GG                | 1946519937               |
| SNP_P3_129948_57291 | NW_004516045.1 | Scaffold622 | 57291                   | GG                              | AA                | 1946519939               |
| SNP_P3_129949_59774 | NW_004516045.1 | Scaffold622 | 59774                   | TT                              | AA                | 1946519940               |
| SNP_P3_129950_59799 | NW_004516045.1 | Scaffold622 | 59799                   | AA                              | GG                | 1946519942               |
| SNP_P3_129951_59838 | NW_004516045.1 | Scaffold622 | 59838                   | AA                              | GG                | 1946519943               |
| SNP_P3_129952_59973 | NW_004516045.1 | Scaffold622 | 59973                   | AA                              | TT                | 1946519945               |
| SNP_P3_129953_61628 | NW_004516045.1 | Scaffold622 | 61628                   | TT                              | CC                | 1946519946               |
| SNP_P3_129954_61629 | NW_004516045.1 | Scaffold622 | 61629                   | GG                              | TT                | 1946519948               |
| SNP_P3_129955_61637 | NW_004516045.1 | Scaffold622 | 61637                   | CC                              | TT                | 1946519949               |
| SNP_P3_129956_61698 | NW_004516045.1 | Scaffold622 | 61698                   | CC                              | TT                | 1946519951               |
| SNP_P3_129958_63438 | NW_004516045.1 | Scaffold622 | 63438                   | AA                              | GG                | 1946519952               |
| SNP_P3_129959_63863 | NW_004516045.1 | Scaffold622 | 63863                   | AA                              | GG                | 1946519953               |
| SNP_P3_129960_63889 | NW_004516045.1 | Scaffold622 | 63889                   | GG                              | AA                | 1946519955               |
| SNP_P3_129961_64090 | NW_004516045.1 | Scaffold622 | 64090                   | AA                              | GG                | 1946519956               |
| SNP_P3_129962_64352 | NW_004516045.1 | Scaffold622 | 64352                   | GG                              | CC                | 1946519958               |
| SNP_P3_129963_64439 | NW_004516045.1 | Scaffold622 | 64439                   | GG                              | CC                | 1946519959               |
| SNP_P3_129964_64484 | NW_004516045.1 | Scaffold622 | 64484                   | GG                              | AA                | 1946519961               |
| SNP_P3_129965_65829 | NW_004516045.1 | Scaffold622 | 65829                   | GG                              | CC                | 1946519962               |
| SNP_P3_129966_68627 | NW_004516045.1 | Scaffold622 | 68627                   | TT                              | CC                | 1946519963               |
| SNP_P3_129967_68912 | NW_004516045.1 | Scaffold622 | 68912                   | AA                              | TT                | 1946519965               |
| SNP_P3_129968_71732 | NW_004516045.1 | Scaffold622 | 71732                   | AA                              | GG                | 1946519966               |
| SNP_P3_129969_73322 | NW_004516045.1 | Scaffold622 | 73322                   | CC                              | AA                | 1946519968               |
| SNP_P3_129970_73350 | NW_004516045.1 | Scaffold622 | 73350                   | AA                              | GG                | 1946519969               |
| SNP_P3_129971_73818 | NW_004516045.1 | Scaffold622 | 73818                   | AA                              | TT                | 1946519971               |
| SNP_P3_129972_73819 | NW_004516045.1 | Scaffold622 | 73819                   | GG                              | TT                | 1946519972               |
| SNP_P3_129973_74626 | NW_004516045.1 | Scaffold622 | 74626                   | CC                              | TT                | 1946519973               |
| SNP_P3_129974_75996 | NW_004516045.1 | Scaffold622 | 75996                   | TT                              | AA                | 1946519975               |
| SNP_P3_129975_76197 | NW_004516045.1 | Scaffold622 | 76197                   | TT                              | GG                | 1946519976               |
| SNP_P3_129976_76204 | NW_004516045.1 | Scaffold622 | 76204                   | AA                              | TT                | 1946519978               |
| SNP_P3_129977_76205 | NW_004516045.1 | Scaffold622 | 76205                   | CC                              | TT                | 1946519979               |
| SNP_P3_129978_76577 | NW_004516045.1 | Scaffold622 | 76577                   | TT                              | GG                | 1946519981               |
| SNP_P3_129979_76723 | NW_004516045.1 | Scaffold622 | 76723                   | TT                              | CC                | 1946519982               |
| SNP_P3_129980_76762 | NW_004516045.1 | Scaffold622 | 76762                   | TT                              | CC                | 1946519983               |
| SNP_P3_129981_77360 | NW_004516045.1 | Scaffold622 | 77360                   | TT                              | AA                | 1946519985               |
| SNP_P3_129982_78798 | NW_004516045.1 | Scaffold622 | 78798                   | CC                              | TT                | 1946519986               |
| SNP_P3_129985_82014 | NW_004516045.1 | Scaffold622 | 82014                   | CC                              | GG                | 1946519988               |
| SNP_P3_129986_82199 | NW_004516045.1 | Scaffold622 | 82199                   | GG                              | CC                | 1946519989               |
| SNP_P3_129987_82406 | NW_004516045.1 | Scaffold622 | 82406                   | CC                              | AA                | 1946519991               |

| SNPs IDs             | Chromosome IDs | Chromosomes | Physical positions (bp) | CDC Frontier (Reference genome) | (Pusa 256 & HPNB) | NCBI SNPdb Accession IDs |
|----------------------|----------------|-------------|-------------------------|---------------------------------|-------------------|--------------------------|
| SNP_P3_129988_84185  | NW_004516045.1 | Scaffold622 | 84185                   | AA                              | TT                | 1946519992               |
| SNP_P3_129989_84689  | NW_004516045.1 | Scaffold622 | 84689                   | TT                              | CC                | 1946519993               |
| SNP_P3_129990_84990  | NW_004516045.1 | Scaffold622 | 84990                   | GG                              | AA                | 1946519995               |
| SNP_P3_129991_85000  | NW_004516045.1 | Scaffold622 | 85000                   | TT                              | AA                | 1946519996               |
| SNP_P3_129993_86370  | NW_004516045.1 | Scaffold622 | 86370                   | CC                              | AA                | 1946519998               |
| SNP_P3_129994_86712  | NW_004516045.1 | Scaffold622 | 86712                   | CC                              | AA                | 1946519999               |
| SNP_P3_129995_87311  | NW_004516045.1 | Scaffold622 | 87311                   | AA                              | TT                | 1946520000               |
| SNP_P3_129996_88283  | NW_004516045.1 | Scaffold622 | 88283                   | CC                              | GG                | 1946520002               |
| SNP_P3_129997_88658  | NW_004516045.1 | Scaffold622 | 88658                   | GG                              | CC                | 1946520003               |
| SNP_P3_129998_88873  | NW_004516045.1 | Scaffold622 | 88873                   | TT                              | AA                | 1946520005               |
| SNP_P3_129999_89090  | NW_004516045.1 | Scaffold622 | 89090                   | TT                              | GG                | 1946520006               |
| SNP_P3_130000_89658  | NW_004516045.1 | Scaffold622 | 89658                   | AA                              | TT                | 1946520008               |
| SNP_P3_130001_9899   | NW_004516047.1 | Scaffold624 | 9899                    | CC                              | GG                | 1946520009               |
| SNP_P3_130002_9916   | NW_004516047.1 | Scaffold624 | 9916                    | AA                              | GG                | 1946520011               |
| SNP_P3_130003_9917   | NW_004516047.1 | Scaffold624 | 9917                    | AA                              | TT                | 1946520012               |
| SNP_P3_130004_9921   | NW_004516047.1 | Scaffold624 | 9921                    | TT                              | CC                | 1946520013               |
| SNP_P3_130005_9927   | NW_004516047.1 | Scaffold624 | 9927                    | AA                              | GG                | 1946520015               |
| SNP_P3_130006_9930   | NW_004516047.1 | Scaffold624 | 9930                    | AA                              | GG                | 1946520016               |
| SNP_P3_130007_9940   | NW_004516047.1 | Scaffold624 | 9940                    | TT                              | CC                | 1946520018               |
| SNP_P3_130008_9949   | NW_004516047.1 | Scaffold624 | 9949                    | CC                              | TT                | 1946520019               |
| SNP_P3_130009_14982  | NW_004516047.1 | Scaffold624 | 14982                   | TT                              | CC                | 1946520021               |
| SNP_P3_130010_14991  | NW_004516047.1 | Scaffold624 | 14991                   | AA                              | CC                | 1946520022               |
| SNP_P3_130011_35578  | NW_004516047.1 | Scaffold624 | 35578                   | AA                              | CC                | 1946520023               |
| SNP_P3_130012_47451  | NW_004516047.1 | Scaffold624 | 47451                   | CC                              | AA                | 1946520025               |
| SNP_P3_130013_66983  | NW_004516047.1 | Scaffold624 | 66983                   | AA                              | GG                | 1946520026               |
| SNP_P3_130014_67971  | NW_004516047.1 | Scaffold624 | 67971                   | CC                              | TT                | 1946520028               |
| SNP_P3_130015_68481  | NW_004516047.1 | Scaffold624 | 68481                   | TT                              | CC                | 1946520029               |
| SNP_P3_130016_69912  | NW_004516047.1 | Scaffold624 | 69912                   | CC                              | AA                | 1946520030               |
| SNP_P3_130017_69913  | NW_004516047.1 | Scaffold624 | 69913                   | GG                              | TT                | 1946520032               |
| SNP_P3_130018_69984  | NW_004516047.1 | Scaffold624 | 69984                   | AA                              | GG                | 1946520033               |
| SNP_P3_130019_70055  | NW_004516047.1 | Scaffold624 | 70055                   | AA                              | CC                | 1946520035               |
| SNP_P3_130020_70057  | NW_004516047.1 | Scaffold624 | 70057                   | GG                              | CC                | 1946520036               |
| SNP_P3_130021_70232  | NW_004516047.1 | Scaffold624 | 70232                   | AA                              | CC                | 1946520038               |
| SNP_P3_130022_97016  | NW_004516047.1 | Scaffold624 | 97016                   | CC                              | AA                | 1946520039               |
| SNP_P3_130023_107304 | NW_004516047.1 | Scaffold624 | 107304                  | AA                              | CC                | 1946520041               |
| SNP_P3_130025_107666 | NW_004516047.1 | Scaffold624 | 107666                  | AA                              | TT                | 1946520042               |
| SNP_P3_130026_112251 | NW_004516047.1 | Scaffold624 | 112251                  | CC                              | AA                | 1946520043               |
| SNP_P3_130027_112337 | NW_004516047.1 | Scaffold624 | 112337                  | GG                              | AA                | 1946520045               |
| SNP_P3_130028_112355 | NW_004516047.1 | Scaffold624 | 112355                  | CC                              | AA                | 1946520046               |
| SNP_P3_130029_112386 | NW_004516047.1 | Scaffold624 | 112386                  | TT                              | CC                | 1946520048               |
| SNP_P3_130030_112419 | NW_004516047.1 | Scaffold624 | 112419                  | GG                              | AA                | 1946520049               |
| SNP_P3_130031_112450 | NW_004516047.1 | Scaffold624 | 112450                  | TT                              | CC                | 1946520051               |

| SNPs IDs             | Chromosome IDs | Chromosomes | Physical positions (bp) | CDC Frontier (Reference genome) | (Pusa 256 & HPNB) | NCBI SNPdb Accession IDs |
|----------------------|----------------|-------------|-------------------------|---------------------------------|-------------------|--------------------------|
| SNP_P3_130032_112523 | NW_004516047.1 | Scaffold624 | 112523                  | AA                              | GG                | 1946520052               |
| SNP_P3_130033_112596 | NW_004516047.1 | Scaffold624 | 112596                  | CC                              | TT                | 1946520053               |
| SNP_P3_130034_112597 | NW_004516047.1 | Scaffold624 | 112597                  | AA                              | GG                | 1946520055               |
| SNP_P3_130035_112598 | NW_004516047.1 | Scaffold624 | 112598                  | CC                              | TT                | 1946520056               |
| SNP_P3_130036_130660 | NW_004516047.1 | Scaffold624 | 130660                  | TT                              | CC                | 1946520058               |
| SNP_P3_130037_136886 | NW_004516047.1 | Scaffold624 | 136886                  | GG                              | CC                | 1946520059               |
| SNP_P3_130038_136887 | NW_004516047.1 | Scaffold624 | 136887                  | AA                              | CC                | 1946520061               |
| SNP_P3_130039_136904 | NW_004516047.1 | Scaffold624 | 136904                  | CC                              | TT                | 1946520062               |
| SNP_P3_130040_141006 | NW_004516047.1 | Scaffold624 | 141006                  | GG                              | TT                | 1946520063               |
| SNP_P3_130041_147699 | NW_004516047.1 | Scaffold624 | 147699                  | GG                              | AA                | 1946520065               |
| SNP_P3_130042_159713 | NW_004516047.1 | Scaffold624 | 159713                  | GG                              | TT                | 1946520066               |
| SNP_P3_130043_171955 | NW_004516047.1 | Scaffold624 | 171955                  | CC                              | GG                | 1946520068               |
| SNP_P3_130044_171966 | NW_004516047.1 | Scaffold624 | 171966                  | AA                              | GG                | 1946520069               |
| SNP_P3_130045_171969 | NW_004516047.1 | Scaffold624 | 171969                  | GG                              | AA                | 1946520071               |
| SNP_P3_130046_171988 | NW_004516047.1 | Scaffold624 | 171988                  | TT                              | GG                | 1946520072               |
| SNP_P3_130048_188070 | NW_004516047.1 | Scaffold624 | 188070                  | GG                              | AA                | 1946520074               |
| SNP_P3_130049_188201 | NW_004516047.1 | Scaffold624 | 188201                  | GG                              | AA                | 1946520075               |
| SNP_P3_130050_189358 | NW_004516047.1 | Scaffold624 | 189358                  | TT                              | CC                | 1946520077               |
| SNP_P3_130051_240644 | NW_004516047.1 | Scaffold624 | 240644                  | TT                              | CC                | 1946520078               |
| SNP_P3_130052_241016 | NW_004516047.1 | Scaffold624 | 241016                  | TT                              | AA                | 1946520079               |
| SNP_P3_130053_255334 | NW_004516047.1 | Scaffold624 | 255334                  | AA                              | GG                | 1946520081               |
| SNP_P3_130054_255402 | NW_004516047.1 | Scaffold624 | 255402                  | AA                              | GG                | 1946520082               |
| SNP_P3_130055_255431 | NW_004516047.1 | Scaffold624 | 255431                  | GG                              | CC                | 1946520084               |
| SNP_P3_130056_255440 | NW_004516047.1 | Scaffold624 | 255440                  | GG                              | AA                | 1946520085               |
| SNP_P3_130057_255452 | NW_004516047.1 | Scaffold624 | 255452                  | AA                              | GG                | 1946520087               |
| SNP_P3_130058_255772 | NW_004516047.1 | Scaffold624 | 255772                  | AA                              | GG                | 1946520088               |
| SNP_P3_130059_255818 | NW_004516047.1 | Scaffold624 | 255818                  | TT                              | CC                | 1946520090               |
| SNP_P3_130060_255835 | NW_004516047.1 | Scaffold624 | 255835                  | CC                              | AA                | 1946520091               |
| SNP_P3_130061_255848 | NW_004516047.1 | Scaffold624 | 255848                  | AA                              | CC                | 1946520093               |
| SNP_P3_130062_255878 | NW_004516047.1 | Scaffold624 | 255878                  | AA                              | GG                | 1946520094               |
| SNP_P3_130063_255885 | NW_004516047.1 | Scaffold624 | 255885                  | GG                              | AA                | 1946520095               |
| SNP_P3_130065_265989 | NW_004516047.1 | Scaffold624 | 265989                  | AA                              | GG                | 1946520097               |
| SNP_P3_130066_307855 | NW_004516047.1 | Scaffold624 | 307855                  | AA                              | CC                | 1946520098               |
| SNP_P3_130067_307920 | NW_004516047.1 | Scaffold624 | 307920                  | AA                              | CC                | 1946520100               |
| SNP_P3_130069_310377 | NW_004516047.1 | Scaffold624 | 310377                  | CC                              | AA                | 1946520101               |
| SNP_P3_130070_310390 | NW_004516047.1 | Scaffold624 | 310390                  | AA                              | TT                | 1946520103               |
| SNP_P3_130071_310513 | NW_004516047.1 | Scaffold624 | 310513                  | TT                              | AA                | 1946520104               |
| SNP_P3_130072_310519 | NW_004516047.1 | Scaffold624 | 310519                  | GG                              | TT                | 1946520106               |
| SNP_P3_130073_310547 | NW_004516047.1 | Scaffold624 | 310547                  | AA                              | TT                | 1946520107               |
| SNP_P3_130074_310558 | NW_004516047.1 | Scaffold624 | 310558                  | AA                              | GG                | 1946520108               |
| SNP_P3_130075_311767 | NW_004516047.1 | Scaffold624 | 311767                  | GG                              | AA                | 1946520110               |
| SNP_P3_130076_7289   | NW_004516048.1 | Scaffold625 | 7289                    | GG                              | AA                | 1946520111               |



| SNPs IDs            | Chromosome IDs | Chromosomes | Physical positions (bp) | CDC Frontier (Reference genome) | (Pusa 256 & HPNB) | NCBI SNPdb Accession IDs |
|---------------------|----------------|-------------|-------------------------|---------------------------------|-------------------|--------------------------|
| SNP_P3_130077_7592  | NW_004516048.1 | Scaffold625 | 7592                    | AA                              | GG                | 1946520113               |
| SNP_P3_130078_7610  | NW_004516048.1 | Scaffold625 | 7610                    | GG                              | CC                | 1946520114               |
| SNP_P3_130079_7643  | NW_004516048.1 | Scaffold625 | 7643                    | AA                              | GG                | 1946520115               |
| SNP_P3_130080_7661  | NW_004516048.1 | Scaffold625 | 7661                    | AA                              | CC                | 1946520117               |
| SNP_P3_130081_8251  | NW_004516048.1 | Scaffold625 | 8251                    | AA                              | GG                | 1946520118               |
| SNP_P3_130082_8278  | NW_004516048.1 | Scaffold625 | 8278                    | AA                              | TT                | 1946520120               |
| SNP_P3_130083_8318  | NW_004516048.1 | Scaffold625 | 8318                    | AA                              | TT                | 1946520121               |
| SNP_P3_130084_24898 | NW_004516048.1 | Scaffold625 | 24898                   | GG                              | AA                | 1946520123               |
| SNP_P3_130085_25161 | NW_004516048.1 | Scaffold625 | 25161                   | CC                              | TT                | 1946520124               |
| SNP_P3_130086_25167 | NW_004516048.1 | Scaffold625 | 25167                   | AA                              | TT                | 1946520125               |
| SNP_P3_130087_25169 | NW_004516048.1 | Scaffold625 | 25169                   | TT                              | GG                | 1946520127               |
| SNP_P3_130088_6009  | NW_004516049.1 | Scaffold626 | 6009                    | AA                              | GG                | 1946520128               |
| SNP_P3_130089_6102  | NW_004516049.1 | Scaffold626 | 6102                    | AA                              | TT                | 1946520130               |
| SNP_P3_130090_18222 | NW_004516049.1 | Scaffold626 | 18222                   | GG                              | AA                | 1946520131               |
| SNP_P3_130091_18324 | NW_004516049.1 | Scaffold626 | 18324                   | GG                              | CC                | 1946520133               |
| SNP_P3_130092_18688 | NW_004516049.1 | Scaffold626 | 18688                   | CC                              | GG                | 1946520134               |
| SNP_P3_130093_21335 | NW_004516049.1 | Scaffold626 | 21335                   | TT                              | AA                | 1946520135               |
| SNP_P3_130094_23788 | NW_004516049.1 | Scaffold626 | 23788                   | AA                              | GG                | 1946520137               |
| SNP_P3_130095_23815 | NW_004516049.1 | Scaffold626 | 23815                   | TT                              | CC                | 1946520138               |
| SNP_P3_130096_24073 | NW_004516049.1 | Scaffold626 | 24073                   | TT                              | CC                | 1946520140               |
| SNP_P3_130097_37539 | NW_004516049.1 | Scaffold626 | 37539                   | AA                              | TT                | 1946520141               |
| SNP_P3_130098_48267 | NW_004516049.1 | Scaffold626 | 48267                   | TT                              | CC                | 1946520143               |
| SNP_P3_130099_48282 | NW_004516049.1 | Scaffold626 | 48282                   | TT                              | AA                | 1946520144               |
| SNP_P3_130100_48653 | NW_004516049.1 | Scaffold626 | 48653                   | GG                              | TT                | 1946520145               |
| SNP_P3_130102_55619 | NW_004516049.1 | Scaffold626 | 55619                   | AA                              | CC                | 1946520147               |
| SNP_P3_130103_55652 | NW_004516049.1 | Scaffold626 | 55652                   | AA                              | GG                | 1946520148               |
| SNP_P3_130105_55846 | NW_004516049.1 | Scaffold626 | 55846                   | GG                              | AA                | 1946520150               |
| SNP_P3_130106_55852 | NW_004516049.1 | Scaffold626 | 55852                   | AA                              | GG                | 1946520151               |
| SNP_P3_130107_55915 | NW_004516049.1 | Scaffold626 | 55915                   | AA                              | TT                | 1946520152               |
| SNP_P3_130108_56017 | NW_004516049.1 | Scaffold626 | 56017                   | AA                              | CC                | 1946520154               |
| SNP_P3_130109_63014 | NW_004516049.1 | Scaffold626 | 63014                   | GG                              | AA                | 1946520155               |
| SNP_P3_130111_70818 | NW_004516049.1 | Scaffold626 | 70818                   | CC                              | TT                | 1946520157               |
| SNP_P3_130112_72261 | NW_004516049.1 | Scaffold626 | 72261                   | AA                              | CC                | 1946520158               |
| SNP_P3_130113_72271 | NW_004516049.1 | Scaffold626 | 72271                   | AA                              | GG                | 1946520159               |
| SNP_P3_130114_72276 | NW_004516049.1 | Scaffold626 | 72276                   | TT                              | CC                | 1946520161               |
| SNP_P3_130115_79237 | NW_004516049.1 | Scaffold626 | 79237                   | AA                              | CC                | 1946520162               |
| SNP_P3_130116_79243 | NW_004516049.1 | Scaffold626 | 79243                   | TT                              | AA                | 1946520164               |
| SNP_P3_130117_79246 | NW_004516049.1 | Scaffold626 | 79246                   | TT                              | CC                | 1946520165               |
| SNP_P3_130118_79597 | NW_004516049.1 | Scaffold626 | 79597                   | GG                              | CC                | 1946520166               |
| SNP_P3_130119_82117 | NW_004516049.1 | Scaffold626 | 82117                   | GG                              | TT                | 1946520168               |
| SNP_P3_130120_88303 | NW_004516049.1 | Scaffold626 | 88303                   | GG                              | CC                | 1946520169               |
| SNP_P3_130121_92919 | NW_004516049.1 | Scaffold626 | 92919                   | CC                              | TT                | 1946520171               |

| SNPs IDs             | Chromosome IDs | Chromosomes | Physical positions (bp) | CDC Frontier (Reference genome) | (Pusa 256 & HPNB) | NCBI SNPdb Accession IDs |
|----------------------|----------------|-------------|-------------------------|---------------------------------|-------------------|--------------------------|
| SNP_P3_130122_100915 | NW_004516049.1 | Scaffold626 | 100915                  | AA                              | TT                | 1946520172               |
| SNP_P3_130123_117403 | NW_004516049.1 | Scaffold626 | 117403                  | AA                              | TT                | 1946520173               |
| SNP_P3_130124_129039 | NW_004516049.1 | Scaffold626 | 129039                  | GG                              | AA                | 1946520175               |
| SNP_P3_130125_133524 | NW_004516049.1 | Scaffold626 | 133524                  | TT                              | AA                | 1946520176               |
| SNP_P3_130126_135674 | NW_004516049.1 | Scaffold626 | 135674                  | AA                              | TT                | 1946520178               |
| SNP_P3_130127_135675 | NW_004516049.1 | Scaffold626 | 135675                  | TT                              | GG                | 1946520179               |
| SNP_P3_130128_135677 | NW_004516049.1 | Scaffold626 | 135677                  | GG                              | AA                | 1946520181               |
| SNP_P3_130129_135717 | NW_004516049.1 | Scaffold626 | 135717                  | GG                              | AA                | 1946520182               |
| SNP_P3_130130_136024 | NW_004516049.1 | Scaffold626 | 136024                  | GG                              | AA                | 1946520183               |
| SNP_P3_130131_137152 | NW_004516049.1 | Scaffold626 | 137152                  | AA                              | GG                | 1946520185               |
| SNP_P3_130132_137669 | NW_004516049.1 | Scaffold626 | 137669                  | TT                              | GG                | 1946520186               |
| SNP_P3_130133_137687 | NW_004516049.1 | Scaffold626 | 137687                  | TT                              | GG                | 1946520188               |
| SNP_P3_130134_137782 | NW_004516049.1 | Scaffold626 | 137782                  | GG                              | TT                | 1946520189               |
| SNP_P3_130135_137799 | NW_004516049.1 | Scaffold626 | 137799                  | TT                              | CC                | 1946520190               |
| SNP_P3_130136_138049 | NW_004516049.1 | Scaffold626 | 138049                  | CC                              | TT                | 1946520192               |
| SNP_P3_130137_145411 | NW_004516049.1 | Scaffold626 | 145411                  | CC                              | AA                | 1946520193               |
| SNP_P3_130138_145426 | NW_004516049.1 | Scaffold626 | 145426                  | GG                              | AA                | 1946520195               |
| SNP_P3_130139_148031 | NW_004516049.1 | Scaffold626 | 148031                  | TT                              | CC                | 1946520196               |
| SNP_P3_130140_150366 | NW_004516049.1 | Scaffold626 | 150366                  | GG                              | CC                | 1946520198               |
| SNP_P3_130141_150628 | NW_004516049.1 | Scaffold626 | 150628                  | CC                              | TT                | 1946520199               |
| SNP_P3_130142_151297 | NW_004516049.1 | Scaffold626 | 151297                  | AA                              | CC                | 1946520200               |
| SNP_P3_130143_154877 | NW_004516049.1 | Scaffold626 | 154877                  | TT                              | AA                | 1946520202               |
| SNP_P3_130144_157031 | NW_004516049.1 | Scaffold626 | 157031                  | CC                              | AA                | 1946520203               |
| SNP_P3_130145_165958 | NW_004516049.1 | Scaffold626 | 165958                  | GG                              | CC                | 1946520205               |
| SNP_P3_130146_166010 | NW_004516049.1 | Scaffold626 | 166010                  | AA                              | GG                | 1946520206               |
| SNP_P3_130147_171763 | NW_004516049.1 | Scaffold626 | 171763                  | TT                              | CC                | 1946520208               |
| SNP_P3_130148_172204 | NW_004516049.1 | Scaffold626 | 172204                  | AA                              | GG                | 1946520209               |
| SNP_P3_130150_172623 | NW_004516049.1 | Scaffold626 | 172623                  | GG                              | AA                | 1946520211               |
| SNP_P3_130151_172713 | NW_004516049.1 | Scaffold626 | 172713                  | CC                              | TT                | 1946520212               |
| SNP_P3_130153_172789 | NW_004516049.1 | Scaffold626 | 172789                  | AA                              | GG                | 1946520214               |
| SNP_P3_130154_173147 | NW_004516049.1 | Scaffold626 | 173147                  | GG                              | AA                | 1946520215               |
| SNP_P3_130155_173228 | NW_004516049.1 | Scaffold626 | 173228                  | AA                              | CC                | 1946520217               |
| SNP_P3_130156_174140 | NW_004516049.1 | Scaffold626 | 174140                  | GG                              | TT                | 1946520218               |
| SNP_P3_130157_174165 | NW_004516049.1 | Scaffold626 | 174165                  | GG                              | AA                | 1946520219               |
| SNP_P3_130158_190014 | NW_004516049.1 | Scaffold626 | 190014                  | TT                              | AA                | 1946520221               |
| SNP_P3_130159_194131 | NW_004516049.1 | Scaffold626 | 194131                  | GG                              | TT                | 1946520222               |
| SNP_P3_130160_200836 | NW_004516049.1 | Scaffold626 | 200836                  | TT                              | GG                | 1946520224               |
| SNP_P3_130161_205568 | NW_004516049.1 | Scaffold626 | 205568                  | CC                              | TT                | 1946520225               |
| SNP_P3_130162_208395 | NW_004516049.1 | Scaffold626 | 208395                  | GG                              | AA                | 1946520227               |
| SNP_P3_130163_208774 | NW_004516049.1 | Scaffold626 | 208774                  | TT                              | AA                | 1946520228               |
| SNP_P3_130164_208789 | NW_004516049.1 | Scaffold626 | 208789                  | GG                              | AA                | 1946520229               |
| SNP_P3_130165_208790 | NW_004516049.1 | Scaffold626 | 208790                  | CC                              | GG                | 1946520231               |

| SNPs IDs             | Chromosome IDs | Chromosomes | Physical positions (bp) | CDC Frontier (Reference genome) | (Pusa 256 & HPNB) | NCBI SNPdb Accession IDs |
|----------------------|----------------|-------------|-------------------------|---------------------------------|-------------------|--------------------------|
| SNP_P3_130166_209560 | NW_004516049.1 | Scaffold626 | 209560                  | CC                              | TT                | 1946520232               |
| SNP_P3_130167_209618 | NW_004516049.1 | Scaffold626 | 209618                  | GG                              | AA                | 1946520234               |
| SNP_P3_130168_209828 | NW_004516049.1 | Scaffold626 | 209828                  | GG                              | TT                | 1946520235               |
| SNP_P3_130169_210182 | NW_004516049.1 | Scaffold626 | 210182                  | AA                              | GG                | 1946520237               |
| SNP_P3_130170_210183 | NW_004516049.1 | Scaffold626 | 210183                  | TT                              | AA                | 1946520238               |
| SNP_P3_130171_210254 | NW_004516049.1 | Scaffold626 | 210254                  | AA                              | CC                | 1946520240               |
| SNP_P3_130172_210509 | NW_004516049.1 | Scaffold626 | 210509                  | CC                              | TT                | 1946520241               |
| SNP_P3_130173_210759 | NW_004516049.1 | Scaffold626 | 210759                  | CC                              | TT                | 1946520242               |
| SNP_P3_130174_211005 | NW_004516049.1 | Scaffold626 | 211005                  | TT                              | GG                | 1946520244               |
| SNP_P3_130175_213029 | NW_004516049.1 | Scaffold626 | 213029                  | AA                              | GG                | 1946520245               |
| SNP_P3_130176_213230 | NW_004516049.1 | Scaffold626 | 213230                  | AA                              | CC                | 1946520247               |
| SNP_P3_130177_213243 | NW_004516049.1 | Scaffold626 | 213243                  | GG                              | CC                | 1946520248               |
| SNP_P3_130178_213381 | NW_004516049.1 | Scaffold626 | 213381                  | CC                              | TT                | 1946520249               |
| SNP_P3_130179_214139 | NW_004516049.1 | Scaffold626 | 214139                  | AA                              | TT                | 1946520251               |
| SNP_P3_130180_216954 | NW_004516049.1 | Scaffold626 | 216954                  | AA                              | TT                | 1946520252               |
| SNP_P3_130181_216984 | NW_004516049.1 | Scaffold626 | 216984                  | AA                              | CC                | 1946520254               |
| SNP_P3_130182_218510 | NW_004516049.1 | Scaffold626 | 218510                  | TT                              | AA                | 1946520255               |
| SNP_P3_130183_218715 | NW_004516049.1 | Scaffold626 | 218715                  | TT                              | CC                | 1946520257               |
| SNP_P3_130184_218871 | NW_004516049.1 | Scaffold626 | 218871                  | TT                              | CC                | 1946520258               |
| SNP_P3_130185_218899 | NW_004516049.1 | Scaffold626 | 218899                  | TT                              | GG                | 1946520259               |
| SNP_P3_130186_218989 | NW_004516049.1 | Scaffold626 | 218989                  | AA                              | TT                | 1946520261               |
| SNP_P3_130188_219303 | NW_004516049.1 | Scaffold626 | 219303                  | TT                              | GG                | 1946520262               |
| SNP_P3_130189_219444 | NW_004516049.1 | Scaffold626 | 219444                  | TT                              | AA                | 1946520264               |
| SNP_P3_130190_219481 | NW_004516049.1 | Scaffold626 | 219481                  | AA                              | GG                | 1946520265               |
| SNP_P3_130191_219544 | NW_004516049.1 | Scaffold626 | 219544                  | TT                              | AA                | 1946520267               |
| SNP_P3_130192_219547 | NW_004516049.1 | Scaffold626 | 219547                  | AA                              | TT                | 1946520268               |
| SNP_P3_130193_219578 | NW_004516049.1 | Scaffold626 | 219578                  | TT                              | CC                | 1946520270               |
| SNP_P3_130194_219681 | NW_004516049.1 | Scaffold626 | 219681                  | CC                              | AA                | 1946520271               |
| SNP_P3_130195_219791 | NW_004516049.1 | Scaffold626 | 219791                  | AA                              | GG                | 1946520273               |
| SNP_P3_130196_219807 | NW_004516049.1 | Scaffold626 | 219807                  | AA                              | GG                | 1946520274               |
| SNP_P3_130197_219881 | NW_004516049.1 | Scaffold626 | 219881                  | AA                              | GG                | 1946520275               |
| SNP_P3_130198_220078 | NW_004516049.1 | Scaffold626 | 220078                  | TT                              | AA                | 1946520277               |
| SNP_P3_130199_220110 | NW_004516049.1 | Scaffold626 | 220110                  | TT                              | CC                | 1946520278               |
| SNP_P3_130200_220181 | NW_004516049.1 | Scaffold626 | 220181                  | TT                              | CC                | 1946520280               |
| SNP_P3_130201_220250 | NW_004516049.1 | Scaffold626 | 220250                  | GG                              | TT                | 1946520281               |
| SNP_P3_130202_220467 | NW_004516049.1 | Scaffold626 | 220467                  | CC                              | TT                | 1946520283               |
| SNP_P3_130203_220600 | NW_004516049.1 | Scaffold626 | 220600                  | GG                              | CC                | 1946520284               |
| SNP_P3_130204_220789 | NW_004516049.1 | Scaffold626 | 220789                  | TT                              | CC                | 1946520285               |
| SNP_P3_130205_221177 | NW_004516049.1 | Scaffold626 | 221177                  | GG                              | AA                | 1946520287               |
| SNP_P3_130206_222190 | NW_004516049.1 | Scaffold626 | 222190                  | GG                              | AA                | 1946520288               |
| SNP_P3_130207_222214 | NW_004516049.1 | Scaffold626 | 222214                  | TT                              | CC                | 1946520290               |
| SNP_P3_130209_223745 | NW_004516049.1 | Scaffold626 | 223745                  | TT                              | GG                | 1946520291               |

| SNPs IDs             | Chromosome IDs | Chromosomes | Physical positions (bp) | CDC Frontier (Reference genome) | (Pusa 256 & HPNB) | NCBI SNPdb Accession IDs |
|----------------------|----------------|-------------|-------------------------|---------------------------------|-------------------|--------------------------|
| SNP_P3_130210_224142 | NW_004516049.1 | Scaffold626 | 224142                  | CC                              | GG                | 1946520293               |
| SNP_P3_130211_224202 | NW_004516049.1 | Scaffold626 | 224202                  | TT                              | GG                | 1946520294               |
| SNP_P3_130212_224482 | NW_004516049.1 | Scaffold626 | 224482                  | TT                              | GG                | 1946520295               |
| SNP_P3_130213_224627 | NW_004516049.1 | Scaffold626 | 224627                  | TT                              | CC                | 1946520297               |
| SNP_P3_130214_224768 | NW_004516049.1 | Scaffold626 | 224768                  | AA                              | TT                | 1946520298               |
| SNP_P3_130215_224794 | NW_004516049.1 | Scaffold626 | 224794                  | GG                              | AA                | 1946520300               |
| SNP_P3_130216_224803 | NW_004516049.1 | Scaffold626 | 224803                  | AA                              | GG                | 1946520301               |
| SNP_P3_130218_225211 | NW_004516049.1 | Scaffold626 | 225211                  | GG                              | AA                | 1946520303               |
| SNP_P3_130219_225250 | NW_004516049.1 | Scaffold626 | 225250                  | CC                              | TT                | 1946520304               |
| SNP_P3_130220_225604 | NW_004516049.1 | Scaffold626 | 225604                  | CC                              | AA                | 1946520307               |
| SNP_P3_130221_225696 | NW_004516049.1 | Scaffold626 | 225696                  | AA                              | GG                | 1946520308               |
| SNP_P3_130222_226388 | NW_004516049.1 | Scaffold626 | 226388                  | CC                              | AA                | 1946520309               |
| SNP_P3_130223_227034 | NW_004516049.1 | Scaffold626 | 227034                  | GG                              | AA                | 1946520311               |
| SNP_P3_130224_227243 | NW_004516049.1 | Scaffold626 | 227243                  | TT                              | GG                | 1946520312               |
| SNP_P3_130225_227538 | NW_004516049.1 | Scaffold626 | 227538                  | AA                              | CC                | 1946520314               |
| SNP_P3_130226_227578 | NW_004516049.1 | Scaffold626 | 227578                  | TT                              | GG                | 1946520315               |
| SNP_P3_130227_227607 | NW_004516049.1 | Scaffold626 | 227607                  | GG                              | AA                | 1946520317               |
| SNP_P3_130228_227799 | NW_004516049.1 | Scaffold626 | 227799                  | TT                              | CC                | 1946520318               |
| SNP_P3_130229_227875 | NW_004516049.1 | Scaffold626 | 227875                  | GG                              | CC                | 1946520320               |
| SNP_P3_130230_227909 | NW_004516049.1 | Scaffold626 | 227909                  | CC                              | AA                | 1946520321               |
| SNP_P3_130231_227921 | NW_004516049.1 | Scaffold626 | 227921                  | GG                              | AA                | 1946520322               |
| SNP_P3_130232_227964 | NW_004516049.1 | Scaffold626 | 227964                  | AA                              | TT                | 1946520324               |
| SNP_P3_130233_228029 | NW_004516049.1 | Scaffold626 | 228029                  | CC                              | AA                | 1946520325               |
| SNP_P3_130234_228046 | NW_004516049.1 | Scaffold626 | 228046                  | TT                              | CC                | 1946520327               |
| SNP_P3_130235_228479 | NW_004516049.1 | Scaffold626 | 228479                  | TT                              | CC                | 1946520328               |
| SNP_P3_130236_228521 | NW_004516049.1 | Scaffold626 | 228521                  | TT                              | CC                | 1946520330               |
| SNP_P3_130237_228535 | NW_004516049.1 | Scaffold626 | 228535                  | TT                              | GG                | 1946520331               |
| SNP_P3_130238_228614 | NW_004516049.1 | Scaffold626 | 228614                  | GG                              | AA                | 1946520332               |
| SNP_P3_130239_228746 | NW_004516049.1 | Scaffold626 | 228746                  | CC                              | AA                | 1946520334               |
| SNP_P3_130240_228749 | NW_004516049.1 | Scaffold626 | 228749                  | TT                              | AA                | 1946520335               |
| SNP_P3_130241_228972 | NW_004516049.1 | Scaffold626 | 228972                  | GG                              | AA                | 1946520337               |
| SNP_P3_130242_229059 | NW_004516049.1 | Scaffold626 | 229059                  | CC                              | AA                | 1946520338               |
| SNP_P3_130243_229306 | NW_004516049.1 | Scaffold626 | 229306                  | CC                              | TT                | 1946520340               |
| SNP_P3_130244_231284 | NW_004516049.1 | Scaffold626 | 231284                  | AA                              | GG                | 1946520341               |
| SNP_P3_130245_231619 | NW_004516049.1 | Scaffold626 | 231619                  | AA                              | CC                | 1946520342               |
| SNP_P3_130246_231633 | NW_004516049.1 | Scaffold626 | 231633                  | TT                              | GG                | 1946520344               |
| SNP_P3_130247_234361 | NW_004516049.1 | Scaffold626 | 234361                  | CC                              | AA                | 1946520345               |
| SNP_P3_130248_234717 | NW_004516049.1 | Scaffold626 | 234717                  | GG                              | AA                | 1946520347               |
| SNP_P3_130249_235647 | NW_004516049.1 | Scaffold626 | 235647                  | TT                              | CC                | 1946520348               |
| SNP_P3_130250_235732 | NW_004516049.1 | Scaffold626 | 235732                  | GG                              | CC                | 1946520350               |
| SNP_P3_130251_235895 | NW_004516049.1 | Scaffold626 | 235895                  | TT                              | CC                | 1946520351               |
| SNP_P3_130252_236055 | NW_004516049.1 | Scaffold626 | 236055                  | TT                              | AA                | 1946520352               |

| SNPs IDs             | Chromosome IDs | Chromosomes | Physical positions (bp) | CDC Frontier (Reference genome) | (Pusa 256 & HPNB) | NCBI SNPdb Accession IDs |
|----------------------|----------------|-------------|-------------------------|---------------------------------|-------------------|--------------------------|
| SNP_P3_130253_236065 | NW_004516049.1 | Scaffold626 | 236065                  | AA                              | GG                | 1946520354               |
| SNP_P3_130254_236232 | NW_004516049.1 | Scaffold626 | 236232                  | CC                              | GG                | 1946520355               |
| SNP_P3_130255_236233 | NW_004516049.1 | Scaffold626 | 236233                  | TT                              | AA                | 1946520357               |
| SNP_P3_130256_236437 | NW_004516049.1 | Scaffold626 | 236437                  | CC                              | TT                | 1946520358               |
| SNP_P3_130257_236458 | NW_004516049.1 | Scaffold626 | 236458                  | GG                              | AA                | 1946520360               |
| SNP_P3_130258_236623 | NW_004516049.1 | Scaffold626 | 236623                  | CC                              | TT                | 1946520361               |
| SNP_P3_130259_236711 | NW_004516049.1 | Scaffold626 | 236711                  | TT                              | GG                | 1946520362               |
| SNP_P3_130260_236763 | NW_004516049.1 | Scaffold626 | 236763                  | TT                              | CC                | 1946520364               |
| SNP_P3_130261_236785 | NW_004516049.1 | Scaffold626 | 236785                  | CC                              | TT                | 1946520365               |
| SNP_P3_130263_236956 | NW_004516049.1 | Scaffold626 | 236956                  | CC                              | GG                | 1946520367               |
| SNP_P3_130264_236994 | NW_004516049.1 | Scaffold626 | 236994                  | TT                              | GG                | 1946520368               |
| SNP_P3_130265_237099 | NW_004516049.1 | Scaffold626 | 237099                  | TT                              | AA                | 1946520369               |
| SNP_P3_130266_237112 | NW_004516049.1 | Scaffold626 | 237112                  | GG                              | CC                | 1946520371               |
| SNP_P3_130267_237129 | NW_004516049.1 | Scaffold626 | 237129                  | GG                              | AA                | 1946520372               |
| SNP_P3_130268_237145 | NW_004516049.1 | Scaffold626 | 237145                  | CC                              | GG                | 1946520374               |
| SNP_P3_130269_237290 | NW_004516049.1 | Scaffold626 | 237290                  | TT                              | CC                | 1946520375               |
| SNP_P3_130270_237397 | NW_004516049.1 | Scaffold626 | 237397                  | GG                              | AA                | 1946520377               |
| SNP_P3_130271_237490 | NW_004516049.1 | Scaffold626 | 237490                  | AA                              | GG                | 1946520378               |
| SNP_P3_130272_237632 | NW_004516049.1 | Scaffold626 | 237632                  | CC                              | TT                | 1946520379               |
| SNP_P3_130273_237798 | NW_004516049.1 | Scaffold626 | 237798                  | TT                              | AA                | 1946520381               |
| SNP_P3_130274_237875 | NW_004516049.1 | Scaffold626 | 237875                  | TT                              | GG                | 1946520382               |
| SNP_P3_130275_237962 | NW_004516049.1 | Scaffold626 | 237962                  | AA                              | GG                | 1946520384               |
| SNP_P3_130276_238225 | NW_004516049.1 | Scaffold626 | 238225                  | CC                              | TT                | 1946520385               |
| SNP_P3_130277_238331 | NW_004516049.1 | Scaffold626 | 238331                  | TT                              | CC                | 1946520387               |
| SNP_P3_130278_239336 | NW_004516049.1 | Scaffold626 | 239336                  | AA                              | TT                | 1946520388               |
| SNP_P3_130279_239732 | NW_004516049.1 | Scaffold626 | 239732                  | GG                              | AA                | 1946520390               |
| SNP_P3_130280_239916 | NW_004516049.1 | Scaffold626 | 239916                  | TT                              | AA                | 1946520391               |
| SNP_P3_130282_240566 | NW_004516049.1 | Scaffold626 | 240566                  | TT                              | CC                | 1946520392               |
| SNP_P3_130283_240799 | NW_004516049.1 | Scaffold626 | 240799                  | GG                              | AA                | 1946520394               |
| SNP_P3_130284_240822 | NW_004516049.1 | Scaffold626 | 240822                  | TT                              | AA                | 1946520396               |
| SNP_P3_130285_240912 | NW_004516049.1 | Scaffold626 | 240912                  | TT                              | CC                | 1946520397               |
| SNP_P3_130286_240914 | NW_004516049.1 | Scaffold626 | 240914                  | TT                              | AA                | 1946520399               |
| SNP_P3_130287_241011 | NW_004516049.1 | Scaffold626 | 241011                  | AA                              | CC                | 1946520400               |
| SNP_P3_130288_241098 | NW_004516049.1 | Scaffold626 | 241098                  | TT                              | CC                | 1946520401               |
| SNP_P3_130289_241130 | NW_004516049.1 | Scaffold626 | 241130                  | AA                              | GG                | 1946520403               |
| SNP_P3_130290_241252 | NW_004516049.1 | Scaffold626 | 241252                  | TT                              | GG                | 1946520404               |
| SNP_P3_130291_241350 | NW_004516049.1 | Scaffold626 | 241350                  | CC                              | TT                | 1946520406               |
| SNP_P3_130292_241790 | NW_004516049.1 | Scaffold626 | 241790                  | GG                              | CC                | 1946520407               |
| SNP_P3_130293_242072 | NW_004516049.1 | Scaffold626 | 242072                  | AA                              | CC                | 1946520409               |
| SNP_P3_130294_242086 | NW_004516049.1 | Scaffold626 | 242086                  | TT                              | CC                | 1946520410               |
| SNP_P3_130296_251933 | NW_004516049.1 | Scaffold626 | 251933                  | AA                              | GG                | 1946520411               |
| SNP_P3_130298_253927 | NW_004516049.1 | Scaffold626 | 253927                  | GG                              | AA                | 1946520413               |

| SNPs IDs             | Chromosome IDs | Chromosomes | Physical positions (bp) | CDC Frontier (Reference genome) | (Pusa 256 & HPNB) | NCBI SNPdb Accession IDs |
|----------------------|----------------|-------------|-------------------------|---------------------------------|-------------------|--------------------------|
| SNP_P3_130299_254331 | NW_004516049.1 | Scaffold626 | 254331                  | AA                              | TT                | 1946520414               |
| SNP_P3_130300_255024 | NW_004516049.1 | Scaffold626 | 255024                  | AA                              | CC                | 1946520416               |
| SNP_P3_130301_256281 | NW_004516049.1 | Scaffold626 | 256281                  | TT                              | CC                | 1946520417               |
| SNP_P3_130302_256315 | NW_004516049.1 | Scaffold626 | 256315                  | GG                              | AA                | 1946520419               |
| SNP_P3_130303_257397 | NW_004516049.1 | Scaffold626 | 257397                  | AA                              | TT                | 1946520420               |
| SNP_P3_130304_257428 | NW_004516049.1 | Scaffold626 | 257428                  | CC                              | TT                | 1946520422               |
| SNP_P3_130305_257626 | NW_004516049.1 | Scaffold626 | 257626                  | CC                              | TT                | 1946520423               |
| SNP_P3_130306_257753 | NW_004516049.1 | Scaffold626 | 257753                  | GG                              | TT                | 1946520425               |
| SNP_P3_130307_257757 | NW_004516049.1 | Scaffold626 | 257757                  | TT                              | GG                | 1946520426               |
| SNP_P3_130308_257876 | NW_004516049.1 | Scaffold626 | 257876                  | TT                              | CC                | 1946520428               |
| SNP_P3_130309_257908 | NW_004516049.1 | Scaffold626 | 257908                  | TT                              | CC                | 1946520429               |
| SNP_P3_130310_257928 | NW_004516049.1 | Scaffold626 | 257928                  | GG                              | AA                | 1946520431               |
| SNP_P3_130311_257943 | NW_004516049.1 | Scaffold626 | 257943                  | CC                              | TT                | 1946520432               |
| SNP_P3_130312_258080 | NW_004516049.1 | Scaffold626 | 258080                  | CC                              | TT                | 1946520434               |
| SNP_P3_130313_258136 | NW_004516049.1 | Scaffold626 | 258136                  | AA                              | TT                | 1946520436               |
| SNP_P3_130314_258223 | NW_004516049.1 | Scaffold626 | 258223                  | GG                              | TT                | 1946520437               |
| SNP_P3_130315_258339 | NW_004516049.1 | Scaffold626 | 258339                  | TT                              | CC                | 1946520439               |
| SNP_P3_130316_258352 | NW_004516049.1 | Scaffold626 | 258352                  | GG                              | TT                | 1946520440               |
| SNP_P3_130317_258376 | NW_004516049.1 | Scaffold626 | 258376                  | AA                              | GG                | 1946520442               |
| SNP_P3_130318_258423 | NW_004516049.1 | Scaffold626 | 258423                  | TT                              | CC                | 1946520443               |
| SNP_P3_130319_258998 | NW_004516049.1 | Scaffold626 | 258998                  | CC                              | TT                | 1946520445               |
| SNP_P3_130320_259176 | NW_004516049.1 | Scaffold626 | 259176                  | GG                              | TT                | 1946520446               |
| SNP_P3_130321_259187 | NW_004516049.1 | Scaffold626 | 259187                  | CC                              | AA                | 1946520448               |
| SNP_P3_130322_259207 | NW_004516049.1 | Scaffold626 | 259207                  | CC                              | TT                | 1946520449               |
| SNP_P3_130323_259342 | NW_004516049.1 | Scaffold626 | 259342                  | AA                              | TT                | 1946520451               |
| SNP_P3_130324_259372 | NW_004516049.1 | Scaffold626 | 259372                  | AA                              | GG                | 1946520452               |
| SNP_P3_130325_259433 | NW_004516049.1 | Scaffold626 | 259433                  | GG                              | TT                | 1946520454               |
| SNP_P3_130326_259688 | NW_004516049.1 | Scaffold626 | 259688                  | CC                              | TT                | 1946520455               |
| SNP_P3_130327_260651 | NW_004516049.1 | Scaffold626 | 260651                  | TT                              | CC                | 1946520457               |
| SNP_P3_130328_260744 | NW_004516049.1 | Scaffold626 | 260744                  | AA                              | GG                | 1946520458               |
| SNP_P3_130329_260826 | NW_004516049.1 | Scaffold626 | 260826                  | TT                              | CC                | 1946520460               |
| SNP_P3_130330_260947 | NW_004516049.1 | Scaffold626 | 260947                  | CC                              | TT                | 1946520461               |
| SNP_P3_130331_260974 | NW_004516049.1 | Scaffold626 | 260974                  | GG                              | AA                | 1946520463               |
| SNP_P3_130332_261054 | NW_004516049.1 | Scaffold626 | 261054                  | TT                              | AA                | 1946520464               |
| SNP_P3_130333_268265 | NW_004516049.1 | Scaffold626 | 268265                  | GG                              | TT                | 1946520466               |
| SNP_P3_130334_268401 | NW_004516049.1 | Scaffold626 | 268401                  | AA                              | CC                | 1946520467               |
| SNP_P3_130335_268477 | NW_004516049.1 | Scaffold626 | 268477                  | AA                              | GG                | 1946520469               |
| SNP_P3_130336_268602 | NW_004516049.1 | Scaffold626 | 268602                  | GG                              | AA                | 1946520470               |
| SNP_P3_130337_268669 | NW_004516049.1 | Scaffold626 | 268669                  | GG                              | AA                | 1946520472               |
| SNP_P3_130338_268864 | NW_004516049.1 | Scaffold626 | 268864                  | CC                              | GG                | 1946520473               |
| SNP_P3_130339_270224 | NW_004516049.1 | Scaffold626 | 270224                  | TT                              | AA                | 1946520475               |
| SNP_P3_130340_270302 | NW_004516049.1 | Scaffold626 | 270302                  | GG                              | TT                | 1946520476               |

| SNPs IDs             | Chromosome IDs | Chromosomes | Physical positions (bp) | CDC Frontier (Reference genome) | (Pusa 256 & HPNB) | NCBI SNPdb Accession IDs |
|----------------------|----------------|-------------|-------------------------|---------------------------------|-------------------|--------------------------|
| SNP_P3_130341_270450 | NW_004516049.1 | Scaffold626 | 270450                  | GG                              | AA                | 1946520478               |
| SNP_P3_130342_270475 | NW_004516049.1 | Scaffold626 | 270475                  | GG                              | CC                | 1946520479               |
| SNP_P3_130343_270544 | NW_004516049.1 | Scaffold626 | 270544                  | GG                              | AA                | 1946520481               |
| SNP_P3_130344_270568 | NW_004516049.1 | Scaffold626 | 270568                  | AA                              | GG                | 1946520482               |
| SNP_P3_130345_270613 | NW_004516049.1 | Scaffold626 | 270613                  | TT                              | AA                | 1946520484               |
| SNP_P3_130346_270614 | NW_004516049.1 | Scaffold626 | 270614                  | AA                              | TT                | 1946520485               |
| SNP_P3_130347_271219 | NW_004516049.1 | Scaffold626 | 271219                  | AA                              | GG                | 1946520487               |
| SNP_P3_130348_271541 | NW_004516049.1 | Scaffold626 | 271541                  | CC                              | TT                | 1946520488               |
| SNP_P3_130349_271542 | NW_004516049.1 | Scaffold626 | 271542                  | TT                              | GG                | 1946520489               |
| SNP_P3_130350_271670 | NW_004516049.1 | Scaffold626 | 271670                  | AA                              | TT                | 1946520491               |
| SNP_P3_130351_271736 | NW_004516049.1 | Scaffold626 | 271736                  | CC                              | GG                | 1946520492               |
| SNP_P3_130352_273439 | NW_004516049.1 | Scaffold626 | 273439                  | CC                              | TT                | 1946520494               |
| SNP_P3_130353_273800 | NW_004516049.1 | Scaffold626 | 273800                  | GG                              | AA                | 1946520495               |
| SNP_P3_130354_274268 | NW_004516049.1 | Scaffold626 | 274268                  | TT                              | GG                | 1946520497               |
| SNP_P3_130355_275234 | NW_004516049.1 | Scaffold626 | 275234                  | TT                              | AA                | 1946520499               |
| SNP_P3_130356_275393 | NW_004516049.1 | Scaffold626 | 275393                  | GG                              | AA                | 1946520500               |
| SNP_P3_130357_275484 | NW_004516049.1 | Scaffold626 | 275484                  | GG                              | AA                | 1946520501               |
| SNP_P3_130358_275494 | NW_004516049.1 | Scaffold626 | 275494                  | TT                              | GG                | 1946520503               |
| SNP_P3_130359_275719 | NW_004516049.1 | Scaffold626 | 275719                  | AA                              | GG                | 1946520504               |
| SNP_P3_130360_275745 | NW_004516049.1 | Scaffold626 | 275745                  | AA                              | GG                | 1946520506               |
| SNP_P3_130361_275971 | NW_004516049.1 | Scaffold626 | 275971                  | CC                              | TT                | 1946520507               |
| SNP_P3_130362_276028 | NW_004516049.1 | Scaffold626 | 276028                  | AA                              | TT                | 1946520509               |
| SNP_P3_130363_276065 | NW_004516049.1 | Scaffold626 | 276065                  | GG                              | CC                | 1946520510               |
| SNP_P3_130364_276385 | NW_004516049.1 | Scaffold626 | 276385                  | GG                              | CC                | 1946520512               |
| SNP_P3_130365_279899 | NW_004516049.1 | Scaffold626 | 279899                  | AA                              | CC                | 1946520513               |
| SNP_P3_130366_280240 | NW_004516049.1 | Scaffold626 | 280240                  | CC                              | GG                | 1946520515               |
| SNP_P3_130367_280281 | NW_004516049.1 | Scaffold626 | 280281                  | TT                              | CC                | 1946520516               |
| SNP_P3_130368_281026 | NW_004516049.1 | Scaffold626 | 281026                  | GG                              | AA                | 1946520517               |
| SNP_P3_130369_281218 | NW_004516049.1 | Scaffold626 | 281218                  | TT                              | AA                | 1946520519               |
| SNP_P3_130370_281247 | NW_004516049.1 | Scaffold626 | 281247                  | AA                              | GG                | 1946520520               |
| SNP_P3_130371_281429 | NW_004516049.1 | Scaffold626 | 281429                  | GG                              | AA                | 1946520522               |
| SNP_P3_130372_281468 | NW_004516049.1 | Scaffold626 | 281468                  | CC                              | AA                | 1946520523               |
| SNP_P3_130373_281476 | NW_004516049.1 | Scaffold626 | 281476                  | AA                              | CC                | 1946520525               |
| SNP_P3_130374_281478 | NW_004516049.1 | Scaffold626 | 281478                  | GG                              | AA                | 1946520526               |
| SNP_P3_130375_281570 | NW_004516049.1 | Scaffold626 | 281570                  | AA                              | TT                | 1946520528               |
| SNP_P3_130376_281612 | NW_004516049.1 | Scaffold626 | 281612                  | CC                              | TT                | 1946520529               |
| SNP_P3_130377_281623 | NW_004516049.1 | Scaffold626 | 281623                  | TT                              | AA                | 1946520530               |
| SNP_P3_130378_281636 | NW_004516049.1 | Scaffold626 | 281636                  | AA                              | GG                | 1946520532               |
| SNP_P3_130379_281728 | NW_004516049.1 | Scaffold626 | 281728                  | AA                              | CC                | 1946520533               |
| SNP_P3_130380_281898 | NW_004516049.1 | Scaffold626 | 281898                  | CC                              | GG                | 1946520535               |
| SNP_P3_130381_281914 | NW_004516049.1 | Scaffold626 | 281914                  | AA                              | GG                | 1946520536               |
| SNP_P3_130382_281977 | NW_004516049.1 | Scaffold626 | 281977                  | AA                              | TT                | 1946520538               |

| SNPs IDs             | Chromosome IDs | Chromosomes | Physical positions (bp) | CDC Frontier (Reference genome) | (Pusa 256 & HPNB) | NCBI SNPdb Accession IDs |
|----------------------|----------------|-------------|-------------------------|---------------------------------|-------------------|--------------------------|
| SNP_P3_130383_282001 | NW_004516049.1 | Scaffold626 | 282001                  | TT                              | GG                | 1946520539               |
| SNP_P3_130384_282809 | NW_004516049.1 | Scaffold626 | 282809                  | TT                              | AA                | 1946520541               |
| SNP_P3_130385_283121 | NW_004516049.1 | Scaffold626 | 283121                  | AA                              | TT                | 1946520542               |
| SNP_P3_130386_285560 | NW_004516049.1 | Scaffold626 | 285560                  | AA                              | CC                | 1946520543               |
| SNP_P3_130387_285576 | NW_004516049.1 | Scaffold626 | 285576                  | TT                              | GG                | 1946520545               |
| SNP_P3_130388_285684 | NW_004516049.1 | Scaffold626 | 285684                  | AA                              | GG                | 1946520546               |
| SNP_P3_130389_296059 | NW_004516049.1 | Scaffold626 | 296059                  | CC                              | TT                | 1946520548               |
| SNP_P3_130390_296083 | NW_004516049.1 | Scaffold626 | 296083                  | CC                              | TT                | 1946520549               |
| SNP_P3_130391_296095 | NW_004516049.1 | Scaffold626 | 296095                  | CC                              | TT                | 1946520551               |
| SNP_P3_130392_296160 | NW_004516049.1 | Scaffold626 | 296160                  | TT                              | GG                | 1946520552               |
| SNP_P3_130393_296179 | NW_004516049.1 | Scaffold626 | 296179                  | AA                              | GG                | 1946520554               |
| SNP_P3_130394_296396 | NW_004516049.1 | Scaffold626 | 296396                  | TT                              | CC                | 1946520555               |
| SNP_P3_130395_296401 | NW_004516049.1 | Scaffold626 | 296401                  | GG                              | AA                | 1946520557               |
| SNP_P3_130396_296405 | NW_004516049.1 | Scaffold626 | 296405                  | GG                              | AA                | 1946520558               |
| SNP_P3_130397_296448 | NW_004516049.1 | Scaffold626 | 296448                  | TT                              | CC                | 1946520560               |
| SNP_P3_130398_296479 | NW_004516049.1 | Scaffold626 | 296479                  | CC                              | TT                | 1946520561               |
| SNP_P3_130399_296484 | NW_004516049.1 | Scaffold626 | 296484                  | GG                              | CC                | 1946520563               |
| SNP_P3_130400_296504 | NW_004516049.1 | Scaffold626 | 296504                  | CC                              | TT                | 1946520564               |
| SNP_P3_130401_299455 | NW_004516049.1 | Scaffold626 | 299455                  | TT                              | CC                | 1946520566               |
| SNP_P3_130402_302544 | NW_004516049.1 | Scaffold626 | 302544                  | CC                              | TT                | 1946520567               |
| SNP_P3_130403_302569 | NW_004516049.1 | Scaffold626 | 302569                  | CC                              | TT                | 1946520568               |
| SNP_P3_130404_309309 | NW_004516049.1 | Scaffold626 | 309309                  | AA                              | CC                | 1946520570               |
| SNP_P3_130405_326971 | NW_004516049.1 | Scaffold626 | 326971                  | TT                              | AA                | 1946520571               |
| SNP_P3_130406_340581 | NW_004516049.1 | Scaffold626 | 340581                  | CC                              | TT                | 1946520573               |
| SNP_P3_130407_340638 | NW_004516049.1 | Scaffold626 | 340638                  | GG                              | AA                | 1946520574               |
| SNP_P3_130408_340926 | NW_004516049.1 | Scaffold626 | 340926                  | CC                              | TT                | 1946520575               |
| SNP_P3_130409_340933 | NW_004516049.1 | Scaffold626 | 340933                  | TT                              | CC                | 1946520577               |
| SNP_P3_130410_340960 | NW_004516049.1 | Scaffold626 | 340960                  | CC                              | TT                | 1946520578               |
| SNP_P3_130411_347589 | NW_004516049.1 | Scaffold626 | 347589                  | CC                              | TT                | 1946520580               |
| SNP_P3_130412_351024 | NW_004516049.1 | Scaffold626 | 351024                  | AA                              | TT                | 1946520581               |
| SNP_P3_130413_351725 | NW_004516049.1 | Scaffold626 | 351725                  | TT                              | CC                | 1946520583               |
| SNP_P3_130414_351752 | NW_004516049.1 | Scaffold626 | 351752                  | AA                              | GG                | 1946520584               |
| SNP_P3_130416_351808 | NW_004516049.1 | Scaffold626 | 351808                  | CC                              | AA                | 1946520585               |
| SNP_P3_130417_352112 | NW_004516049.1 | Scaffold626 | 352112                  | CC                              | TT                | 1946520586               |
| SNP_P3_130418_352145 | NW_004516049.1 | Scaffold626 | 352145                  | TT                              | AA                | 1946520587               |
| SNP_P3_130420_356106 | NW_004516049.1 | Scaffold626 | 356106                  | GG                              | AA                | 1946520589               |
| SNP_P3_130421_364319 | NW_004516049.1 | Scaffold626 | 364319                  | CC                              | AA                | 1946520590               |
| SNP_P3_130422_364535 | NW_004516049.1 | Scaffold626 | 364535                  | TT                              | CC                | 1946520592               |
| SNP_P3_130423_364609 | NW_004516049.1 | Scaffold626 | 364609                  | CC                              | GG                | 1946520593               |
| SNP_P3_130424_365752 | NW_004516049.1 | Scaffold626 | 365752                  | AA                              | GG                | 1946520595               |
| SNP_P3_130425_365753 | NW_004516049.1 | Scaffold626 | 365753                  | AA                              | GG                | 1946520596               |
| SNP_P3_130426_366181 | NW_004516049.1 | Scaffold626 | 366181                  | GG                              | AA                | 1946520597               |



| SNPs IDs             | Chromosome IDs | Chromosomes | Physical positions (bp) | CDC Frontier (Reference genome) | (Pusa 256 & HPNB) | NCBI SNPdb Accession IDs |
|----------------------|----------------|-------------|-------------------------|---------------------------------|-------------------|--------------------------|
| SNP_P3_130427_368053 | NW_004516049.1 | Scaffold626 | 368053                  | GG                              | TT                | 1946520599               |
| SNP_P3_130428_371611 | NW_004516049.1 | Scaffold626 | 371611                  | GG                              | TT                | 1946520600               |
| SNP_P3_130429_371624 | NW_004516049.1 | Scaffold626 | 371624                  | GG                              | TT                | 1946520602               |
| SNP_P3_130430_374477 | NW_004516049.1 | Scaffold626 | 374477                  | AA                              | TT                | 1946520603               |
| SNP_P3_130431_375689 | NW_004516049.1 | Scaffold626 | 375689                  | TT                              | CC                | 1946520605               |
| SNP_P3_130432_377046 | NW_004516049.1 | Scaffold626 | 377046                  | GG                              | TT                | 1946520606               |
| SNP_P3_130433_377108 | NW_004516049.1 | Scaffold626 | 377108                  | GG                              | AA                | 1946520607               |
| SNP_P3_130434_383990 | NW_004516049.1 | Scaffold626 | 383990                  | CC                              | AA                | 1946520609               |
| SNP_P3_130435_385976 | NW_004516049.1 | Scaffold626 | 385976                  | CC                              | GG                | 1946520610               |
| SNP_P3_130436_386051 | NW_004516049.1 | Scaffold626 | 386051                  | AA                              | CC                | 1946520612               |
| SNP_P3_130437_386096 | NW_004516049.1 | Scaffold626 | 386096                  | TT                              | CC                | 1946520613               |
| SNP_P3_130438_386268 | NW_004516049.1 | Scaffold626 | 386268                  | AA                              | GG                | 1946520615               |
| SNP_P3_130439_386307 | NW_004516049.1 | Scaffold626 | 386307                  | TT                              | CC                | 1946520616               |
| SNP_P3_130440_386312 | NW_004516049.1 | Scaffold626 | 386312                  | TT                              | AA                | 1946520617               |
| SNP_P3_130441_386374 | NW_004516049.1 | Scaffold626 | 386374                  | AA                              | GG                | 1946520619               |
| SNP_P3_130442_386377 | NW_004516049.1 | Scaffold626 | 386377                  | GG                              | TT                | 1946520620               |
| SNP_P3_130443_387794 | NW_004516049.1 | Scaffold626 | 387794                  | GG                              | TT                | 1946520622               |
| SNP_P3_130444_387817 | NW_004516049.1 | Scaffold626 | 387817                  | AA                              | TT                | 1946520623               |
| SNP_P3_130445_387840 | NW_004516049.1 | Scaffold626 | 387840                  | AA                              | TT                | 1946520625               |
| SNP_P3_130446_387876 | NW_004516049.1 | Scaffold626 | 387876                  | GG                              | AA                | 1946520626               |
| SNP_P3_130447_387916 | NW_004516049.1 | Scaffold626 | 387916                  | AA                              | TT                | 1946520628               |
| SNP_P3_130448_387917 | NW_004516049.1 | Scaffold626 | 387917                  | TT                              | AA                | 1946520629               |
| SNP_P3_130450_387925 | NW_004516049.1 | Scaffold626 | 387925                  | TT                              | AA                | 1946520630               |
| SNP_P3_130451_388151 | NW_004516049.1 | Scaffold626 | 388151                  | TT                              | AA                | 1946520632               |
| SNP_P3_130452_388211 | NW_004516049.1 | Scaffold626 | 388211                  | CC                              | GG                | 1946520633               |
| SNP_P3_130453_388360 | NW_004516049.1 | Scaffold626 | 388360                  | AA                              | CC                | 1946520635               |
| SNP_P3_130454_388458 | NW_004516049.1 | Scaffold626 | 388458                  | GG                              | AA                | 1946520636               |
| SNP_P3_130455_390547 | NW_004516049.1 | Scaffold626 | 390547                  | TT                              | AA                | 1946520638               |
| SNP_P3_130456_392109 | NW_004516049.1 | Scaffold626 | 392109                  | TT                              | GG                | 1946520639               |
| SNP_P3_130457_396249 | NW_004516049.1 | Scaffold626 | 396249                  | AA                              | GG                | 1946520640               |
| SNP_P3_130458_411797 | NW_004516049.1 | Scaffold626 | 411797                  | CC                              | TT                | 1946520642               |
| SNP_P3_130459_411947 | NW_004516049.1 | Scaffold626 | 411947                  | TT                              | CC                | 1946520643               |
| SNP_P3_130460_420714 | NW_004516049.1 | Scaffold626 | 420714                  | AA                              | CC                | 1946520645               |
| SNP_P3_130461_420740 | NW_004516049.1 | Scaffold626 | 420740                  | AA                              | GG                | 1946520647               |
| SNP_P3_130462_423233 | NW_004516049.1 | Scaffold626 | 423233                  | CC                              | TT                | 1946520648               |
| SNP_P3_130463_424212 | NW_004516049.1 | Scaffold626 | 424212                  | AA                              | GG                | 1946520650               |
| SNP_P3_130464_424519 | NW_004516049.1 | Scaffold626 | 424519                  | TT                              | CC                | 1946520651               |
| SNP_P3_130465_424547 | NW_004516049.1 | Scaffold626 | 424547                  | AA                              | GG                | 1946520652               |
| SNP_P3_130466_431027 | NW_004516049.1 | Scaffold626 | 431027                  | AA                              | GG                | 1946520654               |
| SNP_P3_130467_431063 | NW_004516049.1 | Scaffold626 | 431063                  | TT                              | AA                | 1946520655               |
| SNP_P3_130468_431410 | NW_004516049.1 | Scaffold626 | 431410                  | GG                              | AA                | 1946520657               |
| SNP_P3_130469_449934 | NW_004516049.1 | Scaffold626 | 449934                  | AA                              | CC                | 1946520658               |

| SNPs IDs             | Chromosome IDs | Chromosomes | Physical positions (bp) | CDC Frontier (Reference genome) | (Pusa 256 & HPNB) | NCBI SNPdb Accession IDs |
|----------------------|----------------|-------------|-------------------------|---------------------------------|-------------------|--------------------------|
| SNP_P3_130471_450309 | NW_004516049.1 | Scaffold626 | 450309                  | GG                              | TT                | 1946520660               |
| SNP_P3_130472_451100 | NW_004516049.1 | Scaffold626 | 451100                  | TT                              | CC                | 1946520661               |
| SNP_P3_130473_451114 | NW_004516049.1 | Scaffold626 | 451114                  | CC                              | AA                | 1946520663               |
| SNP_P3_130474_451599 | NW_004516049.1 | Scaffold626 | 451599                  | CC                              | GG                | 1946520664               |
| SNP_P3_130475_451601 | NW_004516049.1 | Scaffold626 | 451601                  | GG                              | TT                | 1946520666               |
| SNP_P3_130476_451642 | NW_004516049.1 | Scaffold626 | 451642                  | CC                              | TT                | 1946520667               |
| SNP_P3_130477_451660 | NW_004516049.1 | Scaffold626 | 451660                  | CC                              | GG                | 1946520668               |
| SNP_P3_130478_451724 | NW_004516049.1 | Scaffold626 | 451724                  | GG                              | CC                | 1946520670               |
| SNP_P3_130479_451807 | NW_004516049.1 | Scaffold626 | 451807                  | GG                              | AA                | 1946520671               |
| SNP_P3_130480_451929 | NW_004516049.1 | Scaffold626 | 451929                  | AA                              | TT                | 1946520673               |
| SNP_P3_130481_451936 | NW_004516049.1 | Scaffold626 | 451936                  | GG                              | TT                | 1946520674               |
| SNP_P3_130483_452145 | NW_004516049.1 | Scaffold626 | 452145                  | TT                              | CC                | 1946520676               |
| SNP_P3_130484_452288 | NW_004516049.1 | Scaffold626 | 452288                  | GG                              | AA                | 1946520677               |
| SNP_P3_130485_452325 | NW_004516049.1 | Scaffold626 | 452325                  | TT                              | AA                | 1946520679               |
| SNP_P3_130486_452379 | NW_004516049.1 | Scaffold626 | 452379                  | TT                              | AA                | 1946520680               |
| SNP_P3_130487_452390 | NW_004516049.1 | Scaffold626 | 452390                  | CC                              | TT                | 1946520681               |
| SNP_P3_130488_452401 | NW_004516049.1 | Scaffold626 | 452401                  | TT                              | GG                | 1946520683               |
| SNP_P3_130489_452506 | NW_004516049.1 | Scaffold626 | 452506                  | TT                              | CC                | 1946520684               |
| SNP_P3_130490_452573 | NW_004516049.1 | Scaffold626 | 452573                  | AA                              | GG                | 1946520686               |
| SNP_P3_130493_453066 | NW_004516049.1 | Scaffold626 | 453066                  | AA                              | GG                | 1946520687               |
| SNP_P3_130494_453234 | NW_004516049.1 | Scaffold626 | 453234                  | AA                              | TT                | 1946520689               |
| SNP_P3_130495_453334 | NW_004516049.1 | Scaffold626 | 453334                  | GG                              | TT                | 1946520690               |
| SNP_P3_130496_453366 | NW_004516049.1 | Scaffold626 | 453366                  | AA                              | GG                | 1946520692               |
| SNP_P3_130497_453456 | NW_004516049.1 | Scaffold626 | 453456                  | CC                              | TT                | 1946520693               |
| SNP_P3_130498_453615 | NW_004516049.1 | Scaffold626 | 453615                  | CC                              | TT                | 1946520694               |
| SNP_P3_130499_453658 | NW_004516049.1 | Scaffold626 | 453658                  | CC                              | TT                | 1946520696               |
| SNP_P3_130500_453711 | NW_004516049.1 | Scaffold626 | 453711                  | GG                              | AA                | 1946520697               |
| SNP_P3_130501_453753 | NW_004516049.1 | Scaffold626 | 453753                  | CC                              | TT                | 1946520699               |
| SNP_P3_130502_453761 | NW_004516049.1 | Scaffold626 | 453761                  | GG                              | AA                | 1946520700               |
| SNP_P3_130503_453811 | NW_004516049.1 | Scaffold626 | 453811                  | TT                              | CC                | 1946520702               |
| SNP_P3_130504_453854 | NW_004516049.1 | Scaffold626 | 453854                  | GG                              | TT                | 1946520703               |
| SNP_P3_130505_453913 | NW_004516049.1 | Scaffold626 | 453913                  | AA                              | GG                | 1946520705               |
| SNP_P3_130506_453936 | NW_004516049.1 | Scaffold626 | 453936                  | AA                              | TT                | 1946520706               |
| SNP_P3_130507_453997 | NW_004516049.1 | Scaffold626 | 453997                  | CC                              | GG                | 1946520708               |
| SNP_P3_130508_454100 | NW_004516049.1 | Scaffold626 | 454100                  | GG                              | CC                | 1946520709               |
| SNP_P3_130509_454113 | NW_004516049.1 | Scaffold626 | 454113                  | CC                              | TT                | 1946520711               |
| SNP_P3_130510_454170 | NW_004516049.1 | Scaffold626 | 454170                  | AA                              | GG                | 1946520712               |
| SNP_P3_130511_454224 | NW_004516049.1 | Scaffold626 | 454224                  | AA                              | GG                | 1946520714               |
| SNP_P3_130512_454264 | NW_004516049.1 | Scaffold626 | 454264                  | AA                              | TT                | 1946520715               |
| SNP_P3_130513_454430 | NW_004516049.1 | Scaffold626 | 454430                  | AA                              | TT                | 1946520717               |
| SNP_P3_130514_460441 | NW_004516049.1 | Scaffold626 | 460441                  | CC                              | AA                | 1946520718               |
| SNP_P3_130515_460443 | NW_004516049.1 | Scaffold626 | 460443                  | AA                              | CC                | 1946520720               |

| SNPs IDs             | Chromosome IDs | Chromosomes | Physical positions (bp) | CDC Frontier (Reference genome) | (Pusa 256 & HPNB) | NCBI SNPdb Accession IDs |
|----------------------|----------------|-------------|-------------------------|---------------------------------|-------------------|--------------------------|
| SNP_P3_130516_460444 | NW_004516049.1 | Scaffold626 | 460444                  | GG                              | AA                | 1946520721               |
| SNP_P3_130517_460448 | NW_004516049.1 | Scaffold626 | 460448                  | AA                              | TT                | 1946520723               |
| SNP_P3_130518_460449 | NW_004516049.1 | Scaffold626 | 460449                  | AA                              | TT                | 1946520724               |
| SNP_P3_130519_460450 | NW_004516049.1 | Scaffold626 | 460450                  | AA                              | TT                | 1946520726               |
| SNP_P3_130520_460544 | NW_004516049.1 | Scaffold626 | 460544                  | TT                              | AA                | 1946520727               |
| SNP_P3_130521_460611 | NW_004516049.1 | Scaffold626 | 460611                  | CC                              | AA                | 1946520728               |
| SNP_P3_130522_460620 | NW_004516049.1 | Scaffold626 | 460620                  | GG                              | CC                | 1946520730               |
| SNP_P3_130523_460657 | NW_004516049.1 | Scaffold626 | 460657                  | GG                              | AA                | 1946520731               |
| SNP_P3_130524_461051 | NW_004516049.1 | Scaffold626 | 461051                  | TT                              | AA                | 1946520733               |
| SNP_P3_130525_461477 | NW_004516049.1 | Scaffold626 | 461477                  | AA                              | GG                | 1946520735               |
| SNP_P3_130526_461629 | NW_004516049.1 | Scaffold626 | 461629                  | TT                              | CC                | 1946520736               |
| SNP_P3_130527_462036 | NW_004516049.1 | Scaffold626 | 462036                  | TT                              | CC                | 1946520738               |
| SNP_P3_130528_463243 | NW_004516049.1 | Scaffold626 | 463243                  | AA                              | TT                | 1946520739               |
| SNP_P3_130529_463270 | NW_004516049.1 | Scaffold626 | 463270                  | TT                              | AA                | 1946520741               |
| SNP_P3_130530_463272 | NW_004516049.1 | Scaffold626 | 463272                  | TT                              | AA                | 1946520747               |
| SNP_P3_130531_463306 | NW_004516049.1 | Scaffold626 | 463306                  | TT                              | GG                | 1946520748               |
| SNP_P3_130532_463450 | NW_004516049.1 | Scaffold626 | 463450                  | GG                              | TT                | 1946520750               |
| SNP_P3_130533_463459 | NW_004516049.1 | Scaffold626 | 463459                  | GG                              | AA                | 1946520751               |
| SNP_P3_130534_463656 | NW_004516049.1 | Scaffold626 | 463656                  | AA                              | CC                | 1946520753               |
| SNP_P3_130535_463757 | NW_004516049.1 | Scaffold626 | 463757                  | CC                              | TT                | 1946520754               |
| SNP_P3_130536_463829 | NW_004516049.1 | Scaffold626 | 463829                  | GG                              | AA                | 1946520756               |
| SNP_P3_130537_463845 | NW_004516049.1 | Scaffold626 | 463845                  | AA                              | GG                | 1946520757               |
| SNP_P3_130538_463930 | NW_004516049.1 | Scaffold626 | 463930                  | AA                              | GG                | 1946520759               |
| SNP_P3_130539_464062 | NW_004516049.1 | Scaffold626 | 464062                  | CC                              | AA                | 1946520760               |
| SNP_P3_130540_464081 | NW_004516049.1 | Scaffold626 | 464081                  | TT                              | CC                | 1946520762               |
| SNP_P3_130541_464088 | NW_004516049.1 | Scaffold626 | 464088                  | CC                              | TT                | 1946520763               |
| SNP_P3_130542_464195 | NW_004516049.1 | Scaffold626 | 464195                  | GG                              | AA                | 1946520765               |
| SNP_P3_130543_464387 | NW_004516049.1 | Scaffold626 | 464387                  | CC                              | TT                | 1946520766               |
| SNP_P3_130544_464499 | NW_004516049.1 | Scaffold626 | 464499                  | AA                              | CC                | 1946520768               |
| SNP_P3_130546_464698 | NW_004516049.1 | Scaffold626 | 464698                  | CC                              | TT                | 1946520769               |
| SNP_P3_130547_464743 | NW_004516049.1 | Scaffold626 | 464743                  | AA                              | GG                | 1946520771               |
| SNP_P3_130548_464749 | NW_004516049.1 | Scaffold626 | 464749                  | GG                              | TT                | 1946520772               |
| SNP_P3_130549_465312 | NW_004516049.1 | Scaffold626 | 465312                  | CC                              | TT                | 1946520773               |
| SNP_P3_130550_467162 | NW_004516049.1 | Scaffold626 | 467162                  | GG                              | AA                | 1946520775               |
| SNP_P3_130551_467171 | NW_004516049.1 | Scaffold626 | 467171                  | AA                              | GG                | 1946520776               |
| SNP_P3_130552_467206 | NW_004516049.1 | Scaffold626 | 467206                  | AA                              | TT                | 1946520778               |
| SNP_P3_130553_467377 | NW_004516049.1 | Scaffold626 | 467377                  | AA                              | TT                | 1946520779               |
| SNP_P3_130554_467489 | NW_004516049.1 | Scaffold626 | 467489                  | AA                              | CC                | 1946520781               |
| SNP_P3_130555_467567 | NW_004516049.1 | Scaffold626 | 467567                  | TT                              | CC                | 1946520782               |
| SNP_P3_130556_467674 | NW_004516049.1 | Scaffold626 | 467674                  | CC                              | AA                | 1946520783               |
| SNP_P3_130557_467677 | NW_004516049.1 | Scaffold626 | 467677                  | CC                              | AA                | 1946520785               |
| SNP_P3_130558_467679 | NW_004516049.1 | Scaffold626 | 467679                  | CC                              | TT                | 1946520786               |

| SNPs IDs             | Chromosome IDs | Chromosomes | Physical positions (bp) | CDC Frontier (Reference genome) | (Pusa 256 & HPNB) | NCBI SNPdb Accession IDs |
|----------------------|----------------|-------------|-------------------------|---------------------------------|-------------------|--------------------------|
| SNP_P3_130559_470190 | NW_004516049.1 | Scaffold626 | 470190                  | CC                              | AA                | 1946520788               |
| SNP_P3_130560_470368 | NW_004516049.1 | Scaffold626 | 470368                  | CC                              | TT                | 1946520789               |
| SNP_P3_130561_470571 | NW_004516049.1 | Scaffold626 | 470571                  | AA                              | GG                | 1946520791               |
| SNP_P3_130562_470573 | NW_004516049.1 | Scaffold626 | 470573                  | GG                              | TT                | 1946520792               |
| SNP_P3_130563_470626 | NW_004516049.1 | Scaffold626 | 470626                  | GG                              | AA                | 1946520794               |
| SNP_P3_130564_470878 | NW_004516049.1 | Scaffold626 | 470878                  | TT                              | CC                | 1946520795               |
| SNP_P3_130565_475473 | NW_004516049.1 | Scaffold626 | 475473                  | AA                              | GG                | 1946520797               |
| SNP_P3_130566_476333 | NW_004516049.1 | Scaffold626 | 476333                  | TT                              | GG                | 1946520798               |
| SNP_P3_130567_476413 | NW_004516049.1 | Scaffold626 | 476413                  | TT                              | CC                | 1946520800               |
| SNP_P3_130568_476511 | NW_004516049.1 | Scaffold626 | 476511                  | GG                              | TT                | 1946520801               |
| SNP_P3_130569_476512 | NW_004516049.1 | Scaffold626 | 476512                  | CC                              | AA                | 1946520803               |
| SNP_P3_130570_476524 | NW_004516049.1 | Scaffold626 | 476524                  | AA                              | CC                | 1946520804               |
| SNP_P3_130571_477437 | NW_004516049.1 | Scaffold626 | 477437                  | CC                              | TT                | 1946520806               |
| SNP_P3_130572_477458 | NW_004516049.1 | Scaffold626 | 477458                  | GG                              | TT                | 1946520808               |
| SNP_P3_130573_477815 | NW_004516049.1 | Scaffold626 | 477815                  | GG                              | AA                | 1946520809               |
| SNP_P3_130574_477890 | NW_004516049.1 | Scaffold626 | 477890                  | GG                              | AA                | 1946520810               |
| SNP_P3_130575_478906 | NW_004516049.1 | Scaffold626 | 478906                  | TT                              | GG                | 1946520812               |
| SNP_P3_130576_479022 | NW_004516049.1 | Scaffold626 | 479022                  | CC                              | TT                | 1946520813               |
| SNP_P3_130577_479915 | NW_004516049.1 | Scaffold626 | 479915                  | AA                              | GG                | 1946520815               |
| SNP_P3_130578_480045 | NW_004516049.1 | Scaffold626 | 480045                  | AA                              | GG                | 1946520816               |
| SNP_P3_130579_480075 | NW_004516049.1 | Scaffold626 | 480075                  | CC                              | AA                | 1946520818               |
| SNP_P3_130580_480120 | NW_004516049.1 | Scaffold626 | 480120                  | CC                              | TT                | 1946520819               |
| SNP_P3_130581_480397 | NW_004516049.1 | Scaffold626 | 480397                  | CC                              | TT                | 1946520821               |
| SNP_P3_130582_480618 | NW_004516049.1 | Scaffold626 | 480618                  | AA                              | TT                | 1946520822               |
| SNP_P3_130584_483010 | NW_004516049.1 | Scaffold626 | 483010                  | CC                              | AA                | 1946520824               |
| SNP_P3_130585_483102 | NW_004516049.1 | Scaffold626 | 483102                  | AA                              | TT                | 1946520825               |
| SNP_P3_130586_483525 | NW_004516049.1 | Scaffold626 | 483525                  | GG                              | CC                | 1946520827               |
| SNP_P3_130587_483580 | NW_004516049.1 | Scaffold626 | 483580                  | AA                              | CC                | 1946520828               |
| SNP_P3_130588_483942 | NW_004516049.1 | Scaffold626 | 483942                  | AA                              | GG                | 1946520830               |
| SNP_P3_130589_483957 | NW_004516049.1 | Scaffold626 | 483957                  | GG                              | AA                | 1946520831               |
| SNP_P3_130590_484010 | NW_004516049.1 | Scaffold626 | 484010                  | CC                              | TT                | 1946520832               |
| SNP_P3_130591_484032 | NW_004516049.1 | Scaffold626 | 484032                  | AA                              | GG                | 1946520834               |
| SNP_P3_130592_484233 | NW_004516049.1 | Scaffold626 | 484233                  | GG                              | AA                | 1946520836               |
| SNP_P3_130593_484305 | NW_004516049.1 | Scaffold626 | 484305                  | GG                              | AA                | 1946520837               |
| SNP_P3_130594_484839 | NW_004516049.1 | Scaffold626 | 484839                  | TT                              | AA                | 1946520839               |
| SNP_P3_130595_484851 | NW_004516049.1 | Scaffold626 | 484851                  | CC                              | AA                | 1946520840               |
| SNP_P3_130596_484915 | NW_004516049.1 | Scaffold626 | 484915                  | CC                              | TT                | 1946520841               |
| SNP_P3_130597_484923 | NW_004516049.1 | Scaffold626 | 484923                  | CC                              | AA                | 1946520843               |
| SNP_P3_130598_485063 | NW_004516049.1 | Scaffold626 | 485063                  | CC                              | AA                | 1946520844               |
| SNP_P3_130599_485143 | NW_004516049.1 | Scaffold626 | 485143                  | CC                              | AA                | 1946520846               |
| SNP_P3_130600_485183 | NW_004516049.1 | Scaffold626 | 485183                  | GG                              | TT                | 1946520847               |
| SNP_P3_130601_485383 | NW_004516049.1 | Scaffold626 | 485383                  | GG                              | AA                | 1946520849               |

| SNPs IDs             | Chromosome IDs | Chromosomes | Physical positions (bp) | CDC Frontier (Reference genome) | (Pusa 256 & HPNB) | NCBI SNPdb Accession IDs |
|----------------------|----------------|-------------|-------------------------|---------------------------------|-------------------|--------------------------|
| SNP_P3_130602_485496 | NW_004516049.1 | Scaffold626 | 485496                  | GG                              | TT                | 1946520850               |
| SNP_P3_130603_485596 | NW_004516049.1 | Scaffold626 | 485596                  | TT                              | AA                | 1946520852               |
| SNP_P3_130605_486056 | NW_004516049.1 | Scaffold626 | 486056                  | AA                              | GG                | 1946520853               |
| SNP_P3_130607_487625 | NW_004516049.1 | Scaffold626 | 487625                  | CC                              | AA                | 1946520855               |
| SNP_P3_130608_488616 | NW_004516049.1 | Scaffold626 | 488616                  | TT                              | CC                | 1946520856               |
| SNP_P3_130609_488619 | NW_004516049.1 | Scaffold626 | 488619                  | GG                              | CC                | 1946520858               |
| SNP_P3_130610_488688 | NW_004516049.1 | Scaffold626 | 488688                  | AA                              | TT                | 1946520859               |
| SNP_P3_130611_488696 | NW_004516049.1 | Scaffold626 | 488696                  | CC                              | TT                | 1946520861               |
| SNP_P3_130612_488705 | NW_004516049.1 | Scaffold626 | 488705                  | GG                              | TT                | 1946520862               |
| SNP_P3_130613_488731 | NW_004516049.1 | Scaffold626 | 488731                  | TT                              | GG                | 1946520864               |
| SNP_P3_130614_488732 | NW_004516049.1 | Scaffold626 | 488732                  | CC                              | TT                | 1946520865               |
| SNP_P3_130615_488782 | NW_004516049.1 | Scaffold626 | 488782                  | TT                              | GG                | 1946520867               |
| SNP_P3_130616_488893 | NW_004516049.1 | Scaffold626 | 488893                  | AA                              | TT                | 1946520868               |
| SNP_P3_130617_488932 | NW_004516049.1 | Scaffold626 | 488932                  | TT                              | AA                | 1946520870               |
| SNP_P3_130618_489030 | NW_004516049.1 | Scaffold626 | 489030                  | CC                              | TT                | 1946520871               |
| SNP_P3_130619_489031 | NW_004516049.1 | Scaffold626 | 489031                  | CC                              | TT                | 1946520873               |
| SNP_P3_130620_490135 | NW_004516049.1 | Scaffold626 | 490135                  | TT                              | AA                | 1946520874               |
| SNP_P3_130621_490715 | NW_004516049.1 | Scaffold626 | 490715                  | GG                              | AA                | 1946520876               |
| SNP_P3_130622_491138 | NW_004516049.1 | Scaffold626 | 491138                  | GG                              | AA                | 1946520877               |
| SNP_P3_130623_496515 | NW_004516049.1 | Scaffold626 | 496515                  | GG                              | AA                | 1946520878               |
| SNP_P3_130624_499161 | NW_004516049.1 | Scaffold626 | 499161                  | TT                              | GG                | 1946520880               |
| SNP_P3_130626_504936 | NW_004516049.1 | Scaffold626 | 504936                  | AA                              | GG                | 1946520881               |
| SNP_P3_130627_505256 | NW_004516049.1 | Scaffold626 | 505256                  | AA                              | GG                | 1946520883               |
| SNP_P3_130628_505273 | NW_004516049.1 | Scaffold626 | 505273                  | GG                              | CC                | 1946520884               |
| SNP_P3_130629_505334 | NW_004516049.1 | Scaffold626 | 505334                  | AA                              | GG                | 1946520886               |
| SNP_P3_130630_505521 | NW_004516049.1 | Scaffold626 | 505521                  | GG                              | AA                | 1946520887               |
| SNP_P3_130631_505694 | NW_004516049.1 | Scaffold626 | 505694                  | CC                              | TT                | 1946520889               |
| SNP_P3_130632_505746 | NW_004516049.1 | Scaffold626 | 505746                  | GG                              | TT                | 1946520890               |
| SNP_P3_130633_505839 | NW_004516049.1 | Scaffold626 | 505839                  | CC                              | GG                | 1946520891               |
| SNP_P3_130634_505854 | NW_004516049.1 | Scaffold626 | 505854                  | GG                              | TT                | 1946520893               |
| SNP_P3_130635_507390 | NW_004516049.1 | Scaffold626 | 507390                  | AA                              | GG                | 1946520894               |
| SNP_P3_130636_507403 | NW_004516049.1 | Scaffold626 | 507403                  | TT                              | CC                | 1946520896               |
| SNP_P3_130637_507617 | NW_004516049.1 | Scaffold626 | 507617                  | CC                              | TT                | 1946520897               |
| SNP_P3_130638_509286 | NW_004516049.1 | Scaffold626 | 509286                  | TT                              | GG                | 1946520899               |
| SNP_P3_130639_509390 | NW_004516049.1 | Scaffold626 | 509390                  | CC                              | AA                | 1946520900               |
| SNP_P3_130640_509398 | NW_004516049.1 | Scaffold626 | 509398                  | AA                              | TT                | 1946520902               |
| SNP_P3_130641_509449 | NW_004516049.1 | Scaffold626 | 509449                  | TT                              | AA                | 1946520903               |
| SNP_P3_130642_509470 | NW_004516049.1 | Scaffold626 | 509470                  | TT                              | AA                | 1946520905               |
| SNP_P3_130643_509485 | NW_004516049.1 | Scaffold626 | 509485                  | AA                              | TT                | 1946520906               |
| SNP_P3_130644_509686 | NW_004516049.1 | Scaffold626 | 509686                  | GG                              | CC                | 1946520908               |
| SNP_P3_130645_509952 | NW_004516049.1 | Scaffold626 | 509952                  | GG                              | AA                | 1946520909               |
| SNP_P3_130646_509989 | NW_004516049.1 | Scaffold626 | 509989                  | AA                              | GG                | 1946520911               |

| SNPs IDs             | Chromosome IDs | Chromosomes | Physical positions (bp) | CDC Frontier (Reference genome) | (Pusa 256 & HPNB) | NCBI SNPdb Accession IDs |
|----------------------|----------------|-------------|-------------------------|---------------------------------|-------------------|--------------------------|
| SNP_P3_130647_510003 | NW_004516049.1 | Scaffold626 | 510003                  | CC                              | TT                | 1946520912               |
| SNP_P3_130648_511425 | NW_004516049.1 | Scaffold626 | 511425                  | AA                              | GG                | 1946520914               |
| SNP_P3_130649_512521 | NW_004516049.1 | Scaffold626 | 512521                  | TT                              | AA                | 1946520915               |
| SNP_P3_130651_512674 | NW_004516049.1 | Scaffold626 | 512674                  | CC                              | TT                | 1946520917               |
| SNP_P3_130652_512721 | NW_004516049.1 | Scaffold626 | 512721                  | AA                              | TT                | 1946520918               |
| SNP_P3_130653_512978 | NW_004516049.1 | Scaffold626 | 512978                  | TT                              | CC                | 1946520920               |
| SNP_P3_130654_515238 | NW_004516049.1 | Scaffold626 | 515238                  | AA                              | CC                | 1946520921               |
| SNP_P3_130655_515264 | NW_004516049.1 | Scaffold626 | 515264                  | CC                              | AA                | 1946520923               |
| SNP_P3_130656_515268 | NW_004516049.1 | Scaffold626 | 515268                  | AA                              | CC                | 1946520924               |
| SNP_P3_130657_515271 | NW_004516049.1 | Scaffold626 | 515271                  | TT                              | CC                | 1946520926               |
| SNP_P3_130658_515412 | NW_004516049.1 | Scaffold626 | 515412                  | AA                              | GG                | 1946520927               |
| SNP_P3_130659_515605 | NW_004516049.1 | Scaffold626 | 515605                  | AA                              | CC                | 1946520929               |
| SNP_P3_130660_515662 | NW_004516049.1 | Scaffold626 | 515662                  | TT                              | CC                | 1946520930               |
| SNP_P3_130661_515666 | NW_004516049.1 | Scaffold626 | 515666                  | AA                              | GG                | 1946520932               |
| SNP_P3_130662_515683 | NW_004516049.1 | Scaffold626 | 515683                  | CC                              | TT                | 1946520933               |
| SNP_P3_130663_515719 | NW_004516049.1 | Scaffold626 | 515719                  | CC                              | TT                | 1946520935               |
| SNP_P3_130664_515798 | NW_004516049.1 | Scaffold626 | 515798                  | TT                              | CC                | 1946520936               |
| SNP_P3_130665_515817 | NW_004516049.1 | Scaffold626 | 515817                  | CC                              | TT                | 1946520938               |
| SNP_P3_130666_516036 | NW_004516049.1 | Scaffold626 | 516036                  | AA                              | CC                | 1946520939               |
| SNP_P3_130667_516073 | NW_004516049.1 | Scaffold626 | 516073                  | CC                              | TT                | 1946520941               |
| SNP_P3_130668_516955 | NW_004516049.1 | Scaffold626 | 516955                  | AA                              | GG                | 1946520942               |
| SNP_P3_130669_517053 | NW_004516049.1 | Scaffold626 | 517053                  | GG                              | AA                | 1946520944               |
| SNP_P3_130670_517125 | NW_004516049.1 | Scaffold626 | 517125                  | GG                              | AA                | 1946520945               |
| SNP_P3_130671_517291 | NW_004516049.1 | Scaffold626 | 517291                  | AA                              | GG                | 1946520947               |
| SNP_P3_130672_517406 | NW_004516049.1 | Scaffold626 | 517406                  | GG                              | AA                | 1946520948               |
| SNP_P3_130673_517501 | NW_004516049.1 | Scaffold626 | 517501                  | CC                              | GG                | 1946520950               |
| SNP_P3_130674_517528 | NW_004516049.1 | Scaffold626 | 517528                  | CC                              | TT                | 1946520951               |
| SNP_P3_130675_517531 | NW_004516049.1 | Scaffold626 | 517531                  | AA                              | TT                | 1946520953               |
| SNP_P3_130676_517654 | NW_004516049.1 | Scaffold626 | 517654                  | CC                              | AA                | 1946520954               |
| SNP_P3_130677_518086 | NW_004516049.1 | Scaffold626 | 518086                  | AA                              | CC                | 1946520956               |
| SNP_P3_130678_519189 | NW_004516049.1 | Scaffold626 | 519189                  | CC                              | AA                | 1946520957               |
| SNP_P3_130679_519221 | NW_004516049.1 | Scaffold626 | 519221                  | AA                              | CC                | 1946520959               |
| SNP_P3_130680_519227 | NW_004516049.1 | Scaffold626 | 519227                  | CC                              | GG                | 1946520961               |
| SNP_P3_130681_519409 | NW_004516049.1 | Scaffold626 | 519409                  | GG                              | TT                | 1946520962               |
| SNP_P3_130682_519428 | NW_004516049.1 | Scaffold626 | 519428                  | TT                              | CC                | 1946520963               |
| SNP_P3_130683_519541 | NW_004516049.1 | Scaffold626 | 519541                  | AA                              | CC                | 1946520965               |
| SNP_P3_130684_519574 | NW_004516049.1 | Scaffold626 | 519574                  | AA                              | CC                | 1946520966               |
| SNP_P3_130685_519603 | NW_004516049.1 | Scaffold626 | 519603                  | TT                              | AA                | 1946520968               |
| SNP_P3_130686_519613 | NW_004516049.1 | Scaffold626 | 519613                  | CC                              | GG                | 1946520969               |
| SNP_P3_130687_520426 | NW_004516049.1 | Scaffold626 | 520426                  | AA                              | TT                | 1946520971               |
| SNP_P3_130688_520454 | NW_004516049.1 | Scaffold626 | 520454                  | TT                              | CC                | 1946520972               |
| SNP_P3_130689_520594 | NW_004516049.1 | Scaffold626 | 520594                  | TT                              | CC                | 1946520974               |

| SNPs IDs             | Chromosome IDs | Chromosomes | Physical positions (bp) | CDC Frontier (Reference genome) | (Pusa 256 & HPNB) | NCBI SNPdb Accession IDs |
|----------------------|----------------|-------------|-------------------------|---------------------------------|-------------------|--------------------------|
| SNP_P3_130690_520599 | NW_004516049.1 | Scaffold626 | 520599                  | CC                              | TT                | 1946520975               |
| SNP_P3_130691_521011 | NW_004516049.1 | Scaffold626 | 521011                  | CC                              | GG                | 1946520977               |
| SNP_P3_130692_521077 | NW_004516049.1 | Scaffold626 | 521077                  | AA                              | CC                | 1946520979               |
| SNP_P3_130693_521180 | NW_004516049.1 | Scaffold626 | 521180                  | GG                              | AA                | 1946520980               |
| SNP_P3_130694_521192 | NW_004516049.1 | Scaffold626 | 521192                  | TT                              | GG                | 1946520982               |
| SNP_P3_130695_521359 | NW_004516049.1 | Scaffold626 | 521359                  | TT                              | AA                | 1946520983               |
| SNP_P3_130696_521412 | NW_004516049.1 | Scaffold626 | 521412                  | TT                              | GG                | 1946520985               |
| SNP_P3_130697_521470 | NW_004516049.1 | Scaffold626 | 521470                  | TT                              | AA                | 1946520987               |
| SNP_P3_130698_522226 | NW_004516049.1 | Scaffold626 | 522226                  | AA                              | TT                | 1946520988               |
| SNP_P3_130699_522327 | NW_004516049.1 | Scaffold626 | 522327                  | AA                              | GG                | 1946520990               |
| SNP_P3_130701_522582 | NW_004516049.1 | Scaffold626 | 522582                  | TT                              | CC                | 1946520992               |
| SNP_P3_130702_522616 | NW_004516049.1 | Scaffold626 | 522616                  | CC                              | TT                | 1946520993               |
| SNP_P3_130703_522892 | NW_004516049.1 | Scaffold626 | 522892                  | GG                              | AA                | 1946520995               |
| SNP_P3_130704_522970 | NW_004516049.1 | Scaffold626 | 522970                  | TT                              | GG                | 1946520997               |
| SNP_P3_130705_522994 | NW_004516049.1 | Scaffold626 | 522994                  | TT                              | CC                | 1946520998               |
| SNP_P3_130706_523844 | NW_004516049.1 | Scaffold626 | 523844                  | CC                              | TT                | 1946520999               |
| SNP_P3_130707_523856 | NW_004516049.1 | Scaffold626 | 523856                  | AA                              | GG                | 1946521001               |
| SNP_P3_130708_523900 | NW_004516049.1 | Scaffold626 | 523900                  | GG                              | AA                | 1946521002               |
| SNP_P3_130709_523937 | NW_004516049.1 | Scaffold626 | 523937                  | GG                              | AA                | 1946521004               |
| SNP_P3_130710_523973 | NW_004516049.1 | Scaffold626 | 523973                  | TT                              | CC                | 1946521005               |
| SNP_P3_130711_524134 | NW_004516049.1 | Scaffold626 | 524134                  | TT                              | GG                | 1946521007               |
| SNP_P3_130712_524135 | NW_004516049.1 | Scaffold626 | 524135                  | GG                              | AA                | 1946521008               |
| SNP_P3_130713_524231 | NW_004516049.1 | Scaffold626 | 524231                  | TT                              | CC                | 1946521009               |
| SNP_P3_130714_524239 | NW_004516049.1 | Scaffold626 | 524239                  | AA                              | TT                | 1946521011               |
| SNP_P3_130715_524283 | NW_004516049.1 | Scaffold626 | 524283                  | TT                              | GG                | 1946521012               |
| SNP_P3_130716_524287 | NW_004516049.1 | Scaffold626 | 524287                  | AA                              | GG                | 1946521014               |
| SNP_P3_130717_524312 | NW_004516049.1 | Scaffold626 | 524312                  | CC                              | TT                | 1946521016               |
| SNP_P3_130718_524347 | NW_004516049.1 | Scaffold626 | 524347                  | TT                              | AA                | 1946521017               |
| SNP_P3_130719_524364 | NW_004516049.1 | Scaffold626 | 524364                  | TT                              | CC                | 1946521019               |
| SNP_P3_130720_524495 | NW_004516049.1 | Scaffold626 | 524495                  | TT                              | CC                | 1946521021               |
| SNP_P3_130721_524512 | NW_004516049.1 | Scaffold626 | 524512                  | GG                              | AA                | 1946521022               |
| SNP_P3_130722_524559 | NW_004516049.1 | Scaffold626 | 524559                  | GG                              | TT                | 1946521024               |
| SNP_P3_130724_524763 | NW_004516049.1 | Scaffold626 | 524763                  | CC                              | TT                | 1946521025               |
| SNP_P3_130725_525038 | NW_004516049.1 | Scaffold626 | 525038                  | AA                              | GG                | 1946521027               |
| SNP_P3_130726_525736 | NW_004516049.1 | Scaffold626 | 525736                  | GG                              | TT                | 1946521028               |
| SNP_P3_130727_525765 | NW_004516049.1 | Scaffold626 | 525765                  | TT                              | CC                | 1946521030               |
| SNP_P3_130728_525837 | NW_004516049.1 | Scaffold626 | 525837                  | GG                              | AA                | 1946521031               |
| SNP_P3_130729_525891 | NW_004516049.1 | Scaffold626 | 525891                  | TT                              | GG                | 1946521032               |
| SNP_P3_130730_525999 | NW_004516049.1 | Scaffold626 | 525999                  | TT                              | GG                | 1946521034               |
| SNP_P3_130731_526963 | NW_004516049.1 | Scaffold626 | 526963                  | CC                              | TT                | 1946521036               |
| SNP_P3_130732_527003 | NW_004516049.1 | Scaffold626 | 527003                  | GG                              | CC                | 1946521038               |
| SNP_P3_130733_527024 | NW_004516049.1 | Scaffold626 | 527024                  | TT                              | CC                | 1946521039               |

| SNPs IDs             | Chromosome IDs | Chromosomes | Physical positions (bp) | CDC Frontier (Reference genome) | (Pusa 256 & HPNB) | NCBI SNPdb Accession IDs |
|----------------------|----------------|-------------|-------------------------|---------------------------------|-------------------|--------------------------|
| SNP_P3_130734_527063 | NW_004516049.1 | Scaffold626 | 527063                  | GG                              | AA                | 1946521041               |
| SNP_P3_130735_527065 | NW_004516049.1 | Scaffold626 | 527065                  | GG                              | AA                | 1946521042               |
| SNP_P3_130736_527079 | NW_004516049.1 | Scaffold626 | 527079                  | AA                              | GG                | 1946521044               |
| SNP_P3_130737_527228 | NW_004516049.1 | Scaffold626 | 527228                  | TT                              | GG                | 1946521045               |
| SNP_P3_130738_527231 | NW_004516049.1 | Scaffold626 | 527231                  | GG                              | AA                | 1946521046               |
| SNP_P3_130739_527236 | NW_004516049.1 | Scaffold626 | 527236                  | AA                              | CC                | 1946521048               |
| SNP_P3_130740_527434 | NW_004516049.1 | Scaffold626 | 527434                  | CC                              | GG                | 1946521049               |
| SNP_P3_130741_527514 | NW_004516049.1 | Scaffold626 | 527514                  | GG                              | CC                | 1946521050               |
| SNP_P3_130743_527853 | NW_004516049.1 | Scaffold626 | 527853                  | GG                              | AA                | 1946521052               |
| SNP_P3_130744_528309 | NW_004516049.1 | Scaffold626 | 528309                  | AA                              | CC                | 1946521053               |
| SNP_P3_130745_528815 | NW_004516049.1 | Scaffold626 | 528815                  | AA                              | TT                | 1946521055               |
| SNP_P3_130746_528867 | NW_004516049.1 | Scaffold626 | 528867                  | CC                              | AA                | 1946521056               |
| SNP_P3_130747_529307 | NW_004516049.1 | Scaffold626 | 529307                  | AA                              | CC                | 1946521058               |
| SNP_P3_130748_529956 | NW_004516049.1 | Scaffold626 | 529956                  | TT                              | GG                | 1946521059               |
| SNP_P3_130749_530127 | NW_004516049.1 | Scaffold626 | 530127                  | AA                              | GG                | 1946521060               |
| SNP_P3_130750_530274 | NW_004516049.1 | Scaffold626 | 530274                  | TT                              | CC                | 1946521062               |
| SNP_P3_130751_530593 | NW_004516049.1 | Scaffold626 | 530593                  | GG                              | TT                | 1946521063               |
| SNP_P3_130752_531195 | NW_004516049.1 | Scaffold626 | 531195                  | CC                              | TT                | 1946521065               |
| SNP_P3_130753_531200 | NW_004516049.1 | Scaffold626 | 531200                  | CC                              | AA                | 1946521066               |
| SNP_P3_130754_531257 | NW_004516049.1 | Scaffold626 | 531257                  | CC                              | AA                | 1946521067               |
| SNP_P3_130755_531319 | NW_004516049.1 | Scaffold626 | 531319                  | CC                              | AA                | 1946521069               |
| SNP_P3_130756_531329 | NW_004516049.1 | Scaffold626 | 531329                  | AA                              | GG                | 1946521070               |
| SNP_P3_130757_531421 | NW_004516049.1 | Scaffold626 | 531421                  | CC                              | TT                | 1946521071               |
| SNP_P3_130758_531422 | NW_004516049.1 | Scaffold626 | 531422                  | AA                              | GG                | 1946521073               |
| SNP_P3_130759_531556 | NW_004516049.1 | Scaffold626 | 531556                  | GG                              | CC                | 1946521074               |
| SNP_P3_130760_532666 | NW_004516049.1 | Scaffold626 | 532666                  | CC                              | TT                | 1946521076               |
| SNP_P3_130761_533127 | NW_004516049.1 | Scaffold626 | 533127                  | GG                              | AA                | 1946521077               |
| SNP_P3_130762_533151 | NW_004516049.1 | Scaffold626 | 533151                  | TT                              | AA                | 1946521079               |
| SNP_P3_130763_533605 | NW_004516049.1 | Scaffold626 | 533605                  | CC                              | GG                | 1946521080               |
| SNP_P3_130764_533765 | NW_004516049.1 | Scaffold626 | 533765                  | GG                              | CC                | 1946521082               |
| SNP_P3_130765_533950 | NW_004516049.1 | Scaffold626 | 533950                  | GG                              | TT                | 1946521083               |
| SNP_P3_130766_535360 | NW_004516049.1 | Scaffold626 | 535360                  | AA                              | GG                | 1946521084               |
| SNP_P3_130767_542339 | NW_004516049.1 | Scaffold626 | 542339                  | GG                              | AA                | 1946521086               |
| SNP_P3_130768_542727 | NW_004516049.1 | Scaffold626 | 542727                  | TT                              | CC                | 1946521087               |
| SNP_P3_130769_542978 | NW_004516049.1 | Scaffold626 | 542978                  | CC                              | TT                | 1946521088               |
| SNP_P3_130770_542980 | NW_004516049.1 | Scaffold626 | 542980                  | GG                              | CC                | 1946521090               |
| SNP_P3_130771_543236 | NW_004516049.1 | Scaffold626 | 543236                  | AA                              | GG                | 1946521091               |
| SNP_P3_130772_543266 | NW_004516049.1 | Scaffold626 | 543266                  | CC                              | GG                | 1946521092               |
| SNP_P3_130773_544565 | NW_004516049.1 | Scaffold626 | 544565                  | CC                              | GG                | 1946521094               |
| SNP_P3_130774_544758 | NW_004516049.1 | Scaffold626 | 544758                  | GG                              | AA                | 1946521095               |
| SNP_P3_130775_544759 | NW_004516049.1 | Scaffold626 | 544759                  | CC                              | AA                | 1946521097               |
| SNP_P3_130776_544905 | NW_004516049.1 | Scaffold626 | 544905                  | TT                              | CC                | 1946521098               |



| SNPs IDs             | Chromosome IDs | Chromosomes | Physical positions (bp) | CDC Frontier (Reference genome) | (Pusa 256 & HPNB) | NCBI SNPdb Accession IDs |
|----------------------|----------------|-------------|-------------------------|---------------------------------|-------------------|--------------------------|
| SNP_P3_130777_544946 | NW_004516049.1 | Scaffold626 | 544946                  | TT                              | GG                | 1946521099               |
| SNP_P3_130778_544948 | NW_004516049.1 | Scaffold626 | 544948                  | CC                              | TT                | 1946521101               |
| SNP_P3_130779_544981 | NW_004516049.1 | Scaffold626 | 544981                  | CC                              | TT                | 1946521102               |
| SNP_P3_130780_546181 | NW_004516049.1 | Scaffold626 | 546181                  | CC                              | AA                | 1946521103               |
| SNP_P3_130781_546186 | NW_004516049.1 | Scaffold626 | 546186                  | AA                              | GG                | 1946521105               |
| SNP_P3_130782_546207 | NW_004516049.1 | Scaffold626 | 546207                  | AA                              | TT                | 1946521106               |
| SNP_P3_130783_546286 | NW_004516049.1 | Scaffold626 | 546286                  | TT                              | AA                | 1946521108               |
| SNP_P3_130784_546572 | NW_004516049.1 | Scaffold626 | 546572                  | CC                              | TT                | 1946521109               |
| SNP_P3_130785_546576 | NW_004516049.1 | Scaffold626 | 546576                  | CC                              | AA                | 1946521110               |
| SNP_P3_130786_549736 | NW_004516049.1 | Scaffold626 | 549736                  | AA                              | GG                | 1946521112               |
| SNP_P3_130787_549832 | NW_004516049.1 | Scaffold626 | 549832                  | TT                              | CC                | 1946521113               |
| SNP_P3_130788_550338 | NW_004516049.1 | Scaffold626 | 550338                  | TT                              | GG                | 1946521115               |
| SNP_P3_130789_551496 | NW_004516049.1 | Scaffold626 | 551496                  | GG                              | AA                | 1946521116               |
| SNP_P3_130790_551912 | NW_004516049.1 | Scaffold626 | 551912                  | TT                              | CC                | 1946521117               |
| SNP_P3_130791_551925 | NW_004516049.1 | Scaffold626 | 551925                  | CC                              | TT                | 1946521119               |
| SNP_P3_130792_552130 | NW_004516049.1 | Scaffold626 | 552130                  | TT                              | CC                | 1946521120               |
| SNP_P3_130793_552189 | NW_004516049.1 | Scaffold626 | 552189                  | TT                              | GG                | 1946521121               |
| SNP_P3_130794_552193 | NW_004516049.1 | Scaffold626 | 552193                  | TT                              | CC                | 1946521123               |
| SNP_P3_130795_552209 | NW_004516049.1 | Scaffold626 | 552209                  | GG                              | CC                | 1946521124               |
| SNP_P3_130796_552241 | NW_004516049.1 | Scaffold626 | 552241                  | CC                              | AA                | 1946521126               |
| SNP_P3_130797_552275 | NW_004516049.1 | Scaffold626 | 552275                  | TT                              | CC                | 1946521127               |
| SNP_P3_130798_552316 | NW_004516049.1 | Scaffold626 | 552316                  | GG                              | TT                | 1946521128               |
| SNP_P3_130799_552435 | NW_004516049.1 | Scaffold626 | 552435                  | GG                              | CC                | 1946521130               |
| SNP_P3_130800_552457 | NW_004516049.1 | Scaffold626 | 552457                  | GG                              | TT                | 1946521131               |
| SNP_P3_130801_552459 | NW_004516049.1 | Scaffold626 | 552459                  | TT                              | AA                | 1946521133               |
| SNP_P3_130802_552537 | NW_004516049.1 | Scaffold626 | 552537                  | CC                              | GG                | 1946521134               |
| SNP_P3_130803_552547 | NW_004516049.1 | Scaffold626 | 552547                  | GG                              | CC                | 1946521135               |
| SNP_P3_130804_552572 | NW_004516049.1 | Scaffold626 | 552572                  | AA                              | CC                | 1946521137               |
| SNP_P3_130805_552578 | NW_004516049.1 | Scaffold626 | 552578                  | TT                              | GG                | 1946521138               |
| SNP_P3_130806_552682 | NW_004516049.1 | Scaffold626 | 552682                  | GG                              | AA                | 1946521140               |
| SNP_P3_130807_552960 | NW_004516049.1 | Scaffold626 | 552960                  | TT                              | CC                | 1946521141               |
| SNP_P3_130808_552995 | NW_004516049.1 | Scaffold626 | 552995                  | AA                              | TT                | 1946521143               |
| SNP_P3_130809_553027 | NW_004516049.1 | Scaffold626 | 553027                  | TT                              | AA                | 1946521144               |
| SNP_P3_130810_553045 | NW_004516049.1 | Scaffold626 | 553045                  | AA                              | GG                | 1946521146               |
| SNP_P3_130811_553311 | NW_004516049.1 | Scaffold626 | 553311                  | TT                              | CC                | 1946521147               |
| SNP_P3_130812_553515 | NW_004516049.1 | Scaffold626 | 553515                  | AA                              | GG                | 1946521149               |
| SNP_P3_130813_553673 | NW_004516049.1 | Scaffold626 | 553673                  | AA                              | GG                | 1946521150               |
| SNP_P3_130814_553717 | NW_004516049.1 | Scaffold626 | 553717                  | TT                              | CC                | 1946521151               |
| SNP_P3_130815_553862 | NW_004516049.1 | Scaffold626 | 553862                  | TT                              | AA                | 1946521153               |
| SNP_P3_130816_554140 | NW_004516049.1 | Scaffold626 | 554140                  | TT                              | CC                | 1946521154               |
| SNP_P3_130817_554258 | NW_004516049.1 | Scaffold626 | 554258                  | AA                              | GG                | 1946521156               |
| SNP_P3_130818_554277 | NW_004516049.1 | Scaffold626 | 554277                  | GG                              | AA                | 1946521157               |

| SNPs IDs             | Chromosome IDs | Chromosomes | Physical positions (bp) | CDC Frontier (Reference genome) | (Pusa 256 & HPNB) | NCBI SNPdb Accession IDs |
|----------------------|----------------|-------------|-------------------------|---------------------------------|-------------------|--------------------------|
| SNP_P3_130819_554372 | NW_004516049.1 | Scaffold626 | 554372                  | GG                              | AA                | 1946521159               |
| SNP_P3_130820_554502 | NW_004516049.1 | Scaffold626 | 554502                  | TT                              | CC                | 1946521160               |
| SNP_P3_130821_554554 | NW_004516049.1 | Scaffold626 | 554554                  | CC                              | AA                | 1946521161               |
| SNP_P3_130822_554748 | NW_004516049.1 | Scaffold626 | 554748                  | TT                              | CC                | 1946521163               |
| SNP_P3_130823_554794 | NW_004516049.1 | Scaffold626 | 554794                  | GG                              | AA                | 1946521164               |
| SNP_P3_130824_555043 | NW_004516049.1 | Scaffold626 | 555043                  | GG                              | AA                | 1946521166               |
| SNP_P3_130825_555108 | NW_004516049.1 | Scaffold626 | 555108                  | TT                              | GG                | 1946521167               |
| SNP_P3_130826_555365 | NW_004516049.1 | Scaffold626 | 555365                  | AA                              | GG                | 1946521168               |
| SNP_P3_130827_555416 | NW_004516049.1 | Scaffold626 | 555416                  | GG                              | CC                | 1946521170               |
| SNP_P3_130828_555821 | NW_004516049.1 | Scaffold626 | 555821                  | GG                              | TT                | 1946521171               |
| SNP_P3_130829_555995 | NW_004516049.1 | Scaffold626 | 555995                  | TT                              | CC                | 1946521173               |
| SNP_P3_130830_556027 | NW_004516049.1 | Scaffold626 | 556027                  | TT                              | GG                | 1946521174               |
| SNP_P3_130831_556028 | NW_004516049.1 | Scaffold626 | 556028                  | AA                              | GG                | 1946521175               |
| SNP_P3_130832_556472 | NW_004516049.1 | Scaffold626 | 556472                  | AA                              | TT                | 1946521177               |
| SNP_P3_130833_556713 | NW_004516049.1 | Scaffold626 | 556713                  | CC                              | TT                | 1946521178               |
| SNP_P3_130834_557923 | NW_004516049.1 | Scaffold626 | 557923                  | AA                              | CC                | 1946521180               |
| SNP_P3_130835_558920 | NW_004516049.1 | Scaffold626 | 558920                  | TT                              | AA                | 1946521181               |
| SNP_P3_130836_559159 | NW_004516049.1 | Scaffold626 | 559159                  | TT                              | AA                | 1946521182               |
| SNP_P3_130837_559222 | NW_004516049.1 | Scaffold626 | 559222                  | TT                              | GG                | 1946521184               |
| SNP_P3_130838_559279 | NW_004516049.1 | Scaffold626 | 559279                  | AA                              | GG                | 1946521185               |
| SNP_P3_130839_559437 | NW_004516049.1 | Scaffold626 | 559437                  | GG                              | AA                | 1946521186               |
| SNP_P3_130840_559566 | NW_004516049.1 | Scaffold626 | 559566                  | CC                              | TT                | 1946521188               |
| SNP_P3_130841_561295 | NW_004516049.1 | Scaffold626 | 561295                  | AA                              | GG                | 1946521189               |
| SNP_P3_130842_561348 | NW_004516049.1 | Scaffold626 | 561348                  | TT                              | AA                | 1946521191               |
| SNP_P3_130843_561371 | NW_004516049.1 | Scaffold626 | 561371                  | AA                              | GG                | 1946521192               |
| SNP_P3_130844_561382 | NW_004516049.1 | Scaffold626 | 561382                  | AA                              | TT                | 1946521193               |
| SNP_P3_130845_561474 | NW_004516049.1 | Scaffold626 | 561474                  | GG                              | CC                | 1946521195               |
| SNP_P3_130846_561654 | NW_004516049.1 | Scaffold626 | 561654                  | CC                              | TT                | 1946521196               |
| SNP_P3_130847_561747 | NW_004516049.1 | Scaffold626 | 561747                  | GG                              | TT                | 1946521198               |
| SNP_P3_130848_561794 | NW_004516049.1 | Scaffold626 | 561794                  | CC                              | TT                | 1946521199               |
| SNP_P3_130849_561837 | NW_004516049.1 | Scaffold626 | 561837                  | CC                              | TT                | 1946521200               |
| SNP_P3_130850_561847 | NW_004516049.1 | Scaffold626 | 561847                  | TT                              | CC                | 1946521202               |
| SNP_P3_130851_561868 | NW_004516049.1 | Scaffold626 | 561868                  | GG                              | AA                | 1946521203               |
| SNP_P3_130852_562035 | NW_004516049.1 | Scaffold626 | 562035                  | TT                              | GG                | 1946521205               |
| SNP_P3_130853_562118 | NW_004516049.1 | Scaffold626 | 562118                  | TT                              | GG                | 1946521206               |
| SNP_P3_130854_562159 | NW_004516049.1 | Scaffold626 | 562159                  | AA                              | GG                | 1946521207               |
| SNP_P3_130855_562186 | NW_004516049.1 | Scaffold626 | 562186                  | TT                              | GG                | 1946521209               |
| SNP_P3_130856_563158 | NW_004516049.1 | Scaffold626 | 563158                  | CC                              | TT                | 1946521210               |
| SNP_P3_130857_569875 | NW_004516049.1 | Scaffold626 | 569875                  | GG                              | CC                | 1946521212               |
| SNP_P3_130858_569878 | NW_004516049.1 | Scaffold626 | 569878                  | TT                              | AA                | 1946521213               |
| SNP_P3_130859_569915 | NW_004516049.1 | Scaffold626 | 569915                  | AA                              | TT                | 1946521214               |
| SNP_P3_130860_570189 | NW_004516049.1 | Scaffold626 | 570189                  | CC                              | TT                | 1946521216               |

| SNPs IDs             | Chromosome IDs | Chromosomes | Physical positions (bp) | CDC Frontier (Reference genome) | (Pusa 256 & HPNB) | NCBI SNPdb Accession IDs |
|----------------------|----------------|-------------|-------------------------|---------------------------------|-------------------|--------------------------|
| SNP_P3_130861_571973 | NW_004516049.1 | Scaffold626 | 571973                  | GG                              | AA                | 1946521217               |
| SNP_P3_130862_571980 | NW_004516049.1 | Scaffold626 | 571980                  | AA                              | GG                | 1946521219               |
| SNP_P3_130863_571998 | NW_004516049.1 | Scaffold626 | 571998                  | GG                              | AA                | 1946521220               |
| SNP_P3_130864_572307 | NW_004516049.1 | Scaffold626 | 572307                  | TT                              | GG                | 1946521221               |
| SNP_P3_130865_572498 | NW_004516049.1 | Scaffold626 | 572498                  | CC                              | AA                | 1946521223               |
| SNP_P3_130866_573058 | NW_004516049.1 | Scaffold626 | 573058                  | TT                              | CC                | 1946521224               |
| SNP_P3_130867_574231 | NW_004516049.1 | Scaffold626 | 574231                  | TT                              | CC                | 1946521226               |
| SNP_P3_130868_574233 | NW_004516049.1 | Scaffold626 | 574233                  | GG                              | TT                | 1946521227               |
| SNP_P3_130869_574319 | NW_004516049.1 | Scaffold626 | 574319                  | AA                              | GG                | 1946521228               |
| SNP_P3_130870_574595 | NW_004516049.1 | Scaffold626 | 574595                  | AA                              | CC                | 1946521230               |
| SNP_P3_130871_574895 | NW_004516049.1 | Scaffold626 | 574895                  | CC                              | TT                | 1946521232               |
| SNP_P3_130872_575002 | NW_004516049.1 | Scaffold626 | 575002                  | GG                              | TT                | 1946521233               |
| SNP_P3_130873_575141 | NW_004516049.1 | Scaffold626 | 575141                  | GG                              | AA                | 1946521235               |
| SNP_P3_130874_575146 | NW_004516049.1 | Scaffold626 | 575146                  | CC                              | AA                | 1946521236               |
| SNP_P3_130875_575147 | NW_004516049.1 | Scaffold626 | 575147                  | GG                              | TT                | 1946521238               |
| SNP_P3_130876_575228 | NW_004516049.1 | Scaffold626 | 575228                  | GG                              | AA                | 1946521239               |
| SNP_P3_130877_576163 | NW_004516049.1 | Scaffold626 | 576163                  | TT                              | AA                | 1946521241               |
| SNP_P3_130878_576218 | NW_004516049.1 | Scaffold626 | 576218                  | TT                              | GG                | 1946521242               |
| SNP_P3_130879_576441 | NW_004516049.1 | Scaffold626 | 576441                  | GG                              | AA                | 1946521244               |
| SNP_P3_130880_578952 | NW_004516049.1 | Scaffold626 | 578952                  | TT                              | CC                | 1946521245               |
| SNP_P3_130881_579188 | NW_004516049.1 | Scaffold626 | 579188                  | TT                              | CC                | 1946521247               |
| SNP_P3_130882_581811 | NW_004516049.1 | Scaffold626 | 581811                  | CC                              | TT                | 1946521248               |
| SNP_P3_130883_582038 | NW_004516049.1 | Scaffold626 | 582038                  | GG                              | CC                | 1946521250               |
| SNP_P3_130884_584186 | NW_004516049.1 | Scaffold626 | 584186                  | GG                              | AA                | 1946521251               |
| SNP_P3_130885_584782 | NW_004516049.1 | Scaffold626 | 584782                  | AA                              | GG                | 1946521252               |
| SNP_P3_130886_589763 | NW_004516049.1 | Scaffold626 | 589763                  | TT                              | AA                | 1946521254               |
| SNP_P3_130887_589773 | NW_004516049.1 | Scaffold626 | 589773                  | CC                              | AA                | 1946521256               |
| SNP_P3_130888_590089 | NW_004516049.1 | Scaffold626 | 590089                  | TT                              | AA                | 1946521257               |
| SNP_P3_130889_590445 | NW_004516049.1 | Scaffold626 | 590445                  | CC                              | TT                | 1946521258               |
| SNP_P3_130890_590448 | NW_004516049.1 | Scaffold626 | 590448                  | AA                              | GG                | 1946521260               |
| SNP_P3_130891_590486 | NW_004516049.1 | Scaffold626 | 590486                  | AA                              | TT                | 1946521261               |
| SNP_P3_130892_591085 | NW_004516049.1 | Scaffold626 | 591085                  | AA                              | GG                | 1946521263               |
| SNP_P3_130893_591182 | NW_004516049.1 | Scaffold626 | 591182                  | AA                              | GG                | 1946521264               |
| SNP_P3_130894_591213 | NW_004516049.1 | Scaffold626 | 591213                  | CC                              | TT                | 1946521265               |
| SNP_P3_130895_591242 | NW_004516049.1 | Scaffold626 | 591242                  | CC                              | TT                | 1946521267               |
| SNP_P3_130896_591898 | NW_004516049.1 | Scaffold626 | 591898                  | CC                              | TT                | 1946521268               |
| SNP_P3_130897_592206 | NW_004516049.1 | Scaffold626 | 592206                  | GG                              | CC                | 1946521270               |
| SNP_P3_130898_592208 | NW_004516049.1 | Scaffold626 | 592208                  | GG                              | TT                | 1946521271               |
| SNP_P3_130899_594976 | NW_004516049.1 | Scaffold626 | 594976                  | AA                              | TT                | 1946521272               |
| SNP_P3_130900_605809 | NW_004516049.1 | Scaffold626 | 605809                  | AA                              | TT                | 1946521273               |
| SNP_P3_130901_605816 | NW_004516049.1 | Scaffold626 | 605816                  | AA                              | GG                | 1946521275               |
| SNP_P3_130902_629857 | NW_004516049.1 | Scaffold626 | 629857                  | AA                              | GG                | 1946521276               |

| SNPs IDs             | Chromosome IDs | Chromosomes | Physical positions (bp) | CDC Frontier (Reference genome) | (Pusa 256 & HPNB) | NCBI SNPdb Accession IDs |
|----------------------|----------------|-------------|-------------------------|---------------------------------|-------------------|--------------------------|
| SNP_P3_130903_631288 | NW_004516049.1 | Scaffold626 | 631288                  | TT                              | AA                | 1946521278               |
| SNP_P3_130904_631365 | NW_004516049.1 | Scaffold626 | 631365                  | AA                              | TT                | 1946521279               |
| SNP_P3_130905_634218 | NW_004516049.1 | Scaffold626 | 634218                  | AA                              | GG                | 1946521280               |
| SNP_P3_130906_634234 | NW_004516049.1 | Scaffold626 | 634234                  | CC                              | AA                | 1946521282               |
| SNP_P3_130907_634534 | NW_004516049.1 | Scaffold626 | 634534                  | GG                              | AA                | 1946521283               |
| SNP_P3_130908_634697 | NW_004516049.1 | Scaffold626 | 634697                  | CC                              | AA                | 1946521285               |
| SNP_P3_130909_43478  | NW_004516050.1 | Scaffold627 | 43478                   | AA                              | GG                | 1946521286               |
| SNP_P3_130910_43481  | NW_004516050.1 | Scaffold627 | 43481                   | AA                              | GG                | 1946521288               |
| SNP_P3_130911_45160  | NW_004516050.1 | Scaffold627 | 45160                   | CC                              | TT                | 1946521289               |
| SNP_P3_130912_50338  | NW_004516050.1 | Scaffold627 | 50338                   | AA                              | GG                | 1946521291               |
| SNP_P3_130913_50339  | NW_004516050.1 | Scaffold627 | 50339                   | AA                              | GG                | 1946521292               |
| SNP_P3_130914_50345  | NW_004516050.1 | Scaffold627 | 50345                   | AA                              | GG                | 1946521293               |
| SNP_P3_130915_57833  | NW_004516050.1 | Scaffold627 | 57833                   | AA                              | GG                | 1946521295               |
| SNP_P3_130916_57866  | NW_004516050.1 | Scaffold627 | 57866                   | TT                              | GG                | 1946521296               |
| SNP_P3_130917_60833  | NW_004516050.1 | Scaffold627 | 60833                   | TT                              | CC                | 1946521298               |
| SNP_P3_130918_60960  | NW_004516050.1 | Scaffold627 | 60960                   | CC                              | AA                | 1946521299               |
| SNP_P3_130919_60962  | NW_004516050.1 | Scaffold627 | 60962                   | AA                              | CC                | 1946521300               |
| SNP_P3_130920_61020  | NW_004516050.1 | Scaffold627 | 61020                   | GG                              | AA                | 1946521302               |
| SNP_P3_130921_61045  | NW_004516050.1 | Scaffold627 | 61045                   | AA                              | TT                | 1946521303               |
| SNP_P3_130922_61050  | NW_004516050.1 | Scaffold627 | 61050                   | TT                              | CC                | 1946521305               |
| SNP_P3_130923_61068  | NW_004516050.1 | Scaffold627 | 61068                   | TT                              | AA                | 1946521306               |
| SNP_P3_130924_61074  | NW_004516050.1 | Scaffold627 | 61074                   | TT                              | CC                | 1946521308               |
| SNP_P3_130925_61113  | NW_004516050.1 | Scaffold627 | 61113                   | TT                              | GG                | 1946521309               |
| SNP_P3_130926_61128  | NW_004516050.1 | Scaffold627 | 61128                   | CC                              | TT                | 1946521310               |
| SNP_P3_130927_61129  | NW_004516050.1 | Scaffold627 | 61129                   | GG                              | AA                | 1946521312               |
| SNP_P3_130928_61130  | NW_004516050.1 | Scaffold627 | 61130                   | TT                              | CC                | 1946521313               |
| SNP_P3_130929_61133  | NW_004516050.1 | Scaffold627 | 61133                   | TT                              | AA                | 1946521315               |
| SNP_P3_130930_61160  | NW_004516050.1 | Scaffold627 | 61160                   | TT                              | CC                | 1946521316               |
| SNP_P3_130931_61515  | NW_004516050.1 | Scaffold627 | 61515                   | CC                              | AA                | 1946521317               |
| SNP_P3_130932_64560  | NW_004516050.1 | Scaffold627 | 64560                   | GG                              | AA                | 1946521319               |
| SNP_P3_130933_65482  | NW_004516050.1 | Scaffold627 | 65482                   | TT                              | CC                | 1946521320               |
| SNP_P3_130934_66277  | NW_004516050.1 | Scaffold627 | 66277                   | GG                              | TT                | 1946521322               |
| SNP_P3_130935_84219  | NW_004516050.1 | Scaffold627 | 84219                   | CC                              | TT                | 1946521323               |
| SNP_P3_130936_84224  | NW_004516050.1 | Scaffold627 | 84224                   | TT                              | CC                | 1946521325               |
| SNP_P3_130937_92678  | NW_004516050.1 | Scaffold627 | 92678                   | AA                              | GG                | 1946521326               |
| SNP_P3_130938_92699  | NW_004516050.1 | Scaffold627 | 92699                   | TT                              | CC                | 1946521327               |
| SNP_P3_130939_92712  | NW_004516050.1 | Scaffold627 | 92712                   | CC                              | TT                | 1946521329               |
| SNP_P3_130940_92724  | NW_004516050.1 | Scaffold627 | 92724                   | TT                              | CC                | 1946521330               |
| SNP_P3_130941_92726  | NW_004516050.1 | Scaffold627 | 92726                   | TT                              | AA                | 1946521332               |
| SNP_P3_130942_92729  | NW_004516050.1 | Scaffold627 | 92729                   | CC                              | AA                | 1946521333               |
| SNP_P3_130943_92738  | NW_004516050.1 | Scaffold627 | 92738                   | CC                              | TT                | 1946521334               |
| SNP_P3_130944_1191   | NW_004516051.1 | Scaffold629 | 1191                    | CC                              | TT                | 1946521336               |

| SNPs IDs            | Chromosome IDs | Chromosomes | Physical positions (bp) | CDC Frontier (Reference genome) | (Pusa 256 & HPNB) | NCBI SNPdb Accession IDs |
|---------------------|----------------|-------------|-------------------------|---------------------------------|-------------------|--------------------------|
| SNP_P3_130945_12593 | NW_004516051.1 | Scaffold629 | 12593                   | CC                              | TT                | 1946521337               |
| SNP_P3_130946_12626 | NW_004516051.1 | Scaffold629 | 12626                   | AA                              | GG                | 1946521339               |
| SNP_P3_130948_12648 | NW_004516051.1 | Scaffold629 | 12648                   | TT                              | AA                | 1946521340               |
| SNP_P3_130949_12657 | NW_004516051.1 | Scaffold629 | 12657                   | TT                              | GG                | 1946521342               |
| SNP_P3_130950_13036 | NW_004516051.1 | Scaffold629 | 13036                   | AA                              | TT                | 1946521343               |
| SNP_P3_130951_15007 | NW_004516051.1 | Scaffold629 | 15007                   | TT                              | AA                | 1946521344               |
| SNP_P3_130952_15303 | NW_004516051.1 | Scaffold629 | 15303                   | TT                              | CC                | 1946521346               |
| SNP_P3_130954_30653 | NW_004516051.1 | Scaffold629 | 30653                   | CC                              | TT                | 1946521347               |
| SNP_P3_130955_30734 | NW_004516051.1 | Scaffold629 | 30734                   | GG                              | AA                | 1946521349               |
| SNP_P3_130956_30968 | NW_004516051.1 | Scaffold629 | 30968                   | TT                              | AA                | 1946521350               |
| SNP_P3_130957_39063 | NW_004516051.1 | Scaffold629 | 39063                   | AA                              | GG                | 1946521352               |
| SNP_P3_130958_39156 | NW_004516051.1 | Scaffold629 | 39156                   | AA                              | CC                | 1946521353               |
| SNP_P3_130959_39232 | NW_004516051.1 | Scaffold629 | 39232                   | AA                              | GG                | 1946521354               |
| SNP_P3_130960_39416 | NW_004516051.1 | Scaffold629 | 39416                   | CC                              | TT                | 1946521356               |
| SNP_P3_130961_39507 | NW_004516051.1 | Scaffold629 | 39507                   | TT                              | CC                | 1946521357               |
| SNP_P3_130962_39508 | NW_004516051.1 | Scaffold629 | 39508                   | AA                              | CC                | 1946521359               |
| SNP_P3_130963_39629 | NW_004516051.1 | Scaffold629 | 39629                   | TT                              | CC                | 1946521360               |
| SNP_P3_130964_39958 | NW_004516051.1 | Scaffold629 | 39958                   | CC                              | TT                | 1946521361               |
| SNP_P3_130965_39997 | NW_004516051.1 | Scaffold629 | 39997                   | AA                              | CC                | 1946521363               |
| SNP_P3_130966_56206 | NW_004516051.1 | Scaffold629 | 56206                   | GG                              | AA                | 1946521364               |
| SNP_P3_130967_56593 | NW_004516051.1 | Scaffold629 | 56593                   | TT                              | CC                | 1946521366               |
| SNP_P3_130968_58493 | NW_004516051.1 | Scaffold629 | 58493                   | GG                              | AA                | 1946521367               |
| SNP_P3_130969_58535 | NW_004516051.1 | Scaffold629 | 58535                   | AA                              | GG                | 1946521368               |
| SNP_P3_130970_58567 | NW_004516051.1 | Scaffold629 | 58567                   | AA                              | GG                | 1946521370               |
| SNP_P3_130971_58865 | NW_004516051.1 | Scaffold629 | 58865                   | AA                              | CC                | 1946521371               |
| SNP_P3_130972_58866 | NW_004516051.1 | Scaffold629 | 58866                   | AA                              | GG                | 1946521373               |
| SNP_P3_130973_86548 | NW_004516051.1 | Scaffold629 | 86548                   | TT                              | GG                | 1946521374               |
| SNP_P3_130974_91015 | NW_004516051.1 | Scaffold629 | 91015                   | TT                              | AA                | 1946521376               |
| SNP_P3_130975_1378  | NW_004516052.1 | Scaffold631 | 1378                    | CC                              | TT                | 1946521377               |
| SNP_P3_130976_11582 | NW_004516052.1 | Scaffold631 | 11582                   | AA                              | GG                | 1946521378               |
| SNP_P3_130977_11986 | NW_004516052.1 | Scaffold631 | 11986                   | AA                              | TT                | 1946521380               |
| SNP_P3_130978_12936 | NW_004516052.1 | Scaffold631 | 12936                   | CC                              | AA                | 1946521381               |
| SNP_P3_130979_12962 | NW_004516052.1 | Scaffold631 | 12962                   | AA                              | GG                | 1946521383               |
| SNP_P3_130980_13141 | NW_004516052.1 | Scaffold631 | 13141                   | AA                              | GG                | 1946521384               |
| SNP_P3_130981_13170 | NW_004516052.1 | Scaffold631 | 13170                   | AA                              | GG                | 1946521385               |
| SNP_P3_130982_21390 | NW_004516052.1 | Scaffold631 | 21390                   | TT                              | AA                | 1946521387               |
| SNP_P3_130983_21739 | NW_004516052.1 | Scaffold631 | 21739                   | GG                              | AA                | 1946521388               |
| SNP_P3_130984_22416 | NW_004516052.1 | Scaffold631 | 22416                   | AA                              | CC                | 1946521390               |
| SNP_P3_130985_22429 | NW_004516052.1 | Scaffold631 | 22429                   | AA                              | GG                | 1946521391               |
| SNP_P3_130986_22518 | NW_004516052.1 | Scaffold631 | 22518                   | GG                              | TT                | 1946521392               |
| SNP_P3_130987_22519 | NW_004516052.1 | Scaffold631 | 22519                   | GG                              | CC                | 1946521394               |
| SNP_P3_130988_22690 | NW_004516052.1 | Scaffold631 | 22690                   | TT                              | AA                | 1946521395               |

| SNPs IDs            | Chromosome IDs | Chromosomes | Physical positions (bp) | CDC Frontier (Reference genome) | (Pusa 256 & HPNB) | NCBI SNPdb Accession IDs |
|---------------------|----------------|-------------|-------------------------|---------------------------------|-------------------|--------------------------|
| SNP_P3_130989_22729 | NW_004516052.1 | Scaffold631 | 22729                   | TT                              | GG                | 1946521397               |
| SNP_P3_130990_22767 | NW_004516052.1 | Scaffold631 | 22767                   | TT                              | CC                | 1946521398               |
| SNP_P3_130991_34554 | NW_004516052.1 | Scaffold631 | 34554                   | AA                              | CC                | 1946521400               |
| SNP_P3_130992_35730 | NW_004516052.1 | Scaffold631 | 35730                   | TT                              | CC                | 1946521401               |
| SNP_P3_130993_42771 | NW_004516052.1 | Scaffold631 | 42771                   | CC                              | TT                | 1946521403               |
| SNP_P3_130994_46428 | NW_004516052.1 | Scaffold631 | 46428                   | TT                              | AA                | 1946521404               |
| SNP_P3_130995_46436 | NW_004516052.1 | Scaffold631 | 46436                   | AA                              | GG                | 1946521405               |
| SNP_P3_130996_46442 | NW_004516052.1 | Scaffold631 | 46442                   | GG                              | TT                | 1946521407               |
| SNP_P3_130997_52730 | NW_004516052.1 | Scaffold631 | 52730                   | TT                              | AA                | 1946521408               |
| SNP_P3_130998_52750 | NW_004516052.1 | Scaffold631 | 52750                   | AA                              | GG                | 1946521410               |
| SNP_P3_130999_52968 | NW_004516052.1 | Scaffold631 | 52968                   | TT                              | CC                | 1946521411               |
| SNP_P3_131000_53286 | NW_004516052.1 | Scaffold631 | 53286                   | TT                              | CC                | 1946521412               |
| SNP_P3_131002_53770 | NW_004516052.1 | Scaffold631 | 53770                   | CC                              | AA                | 1946521414               |
| SNP_P3_131003_53788 | NW_004516052.1 | Scaffold631 | 53788                   | CC                              | AA                | 1946521415               |
| SNP_P3_131004_53841 | NW_004516052.1 | Scaffold631 | 53841                   | AA                              | CC                | 1946521417               |
| SNP_P3_131005_53881 | NW_004516052.1 | Scaffold631 | 53881                   | CC                              | AA                | 1946521418               |
| SNP_P3_131006_54115 | NW_004516052.1 | Scaffold631 | 54115                   | AA                              | GG                | 1946521419               |
| SNP_P3_131007_54145 | NW_004516052.1 | Scaffold631 | 54145                   | CC                              | TT                | 1946521421               |
| SNP_P3_131008_54193 | NW_004516052.1 | Scaffold631 | 54193                   | CC                              | TT                | 1946521422               |
| SNP_P3_131009_56909 | NW_004516052.1 | Scaffold631 | 56909                   | AA                              | CC                | 1946521423               |
| SNP_P3_131010_56910 | NW_004516052.1 | Scaffold631 | 56910                   | TT                              | CC                | 1946521425               |
| SNP_P3_131011_58607 | NW_004516052.1 | Scaffold631 | 58607                   | GG                              | CC                | 1946521426               |
| SNP_P3_131012_59029 | NW_004516052.1 | Scaffold631 | 59029                   | TT                              | AA                | 1946521428               |
| SNP_P3_131014_67771 | NW_004516052.1 | Scaffold631 | 67771                   | TT                              | CC                | 1946521429               |
| SNP_P3_131015_67777 | NW_004516052.1 | Scaffold631 | 67777                   | TT                              | AA                | 1946521430               |
| SNP_P3_131016_67876 | NW_004516052.1 | Scaffold631 | 67876                   | GG                              | AA                | 1946521432               |
| SNP_P3_131017_67914 | NW_004516052.1 | Scaffold631 | 67914                   | CC                              | TT                | 1946521433               |
| SNP_P3_131018_67992 | NW_004516052.1 | Scaffold631 | 67992                   | GG                              | TT                | 1946521435               |
| SNP_P3_131019_68188 | NW_004516052.1 | Scaffold631 | 68188                   | AA                              | TT                | 1946521436               |
| SNP_P3_131020_68191 | NW_004516052.1 | Scaffold631 | 68191                   | GG                              | TT                | 1946521438               |
| SNP_P3_131021_68399 | NW_004516052.1 | Scaffold631 | 68399                   | GG                              | CC                | 1946521439               |
| SNP_P3_131022_68404 | NW_004516052.1 | Scaffold631 | 68404                   | AA                              | TT                | 1946521440               |
| SNP_P3_131023_68463 | NW_004516052.1 | Scaffold631 | 68463                   | CC                              | GG                | 1946521442               |
| SNP_P3_131024_68606 | NW_004516052.1 | Scaffold631 | 68606                   | CC                              | TT                | 1946521443               |
| SNP_P3_131025_68641 | NW_004516052.1 | Scaffold631 | 68641                   | GG                              | AA                | 1946521444               |
| SNP_P3_131026_68725 | NW_004516052.1 | Scaffold631 | 68725                   | CC                              | TT                | 1946521446               |
| SNP_P3_131027_69050 | NW_004516052.1 | Scaffold631 | 69050                   | AA                              | CC                | 1946521447               |
| SNP_P3_131028_69218 | NW_004516052.1 | Scaffold631 | 69218                   | AA                              | TT                | 1946521449               |
| SNP_P3_131029_69609 | NW_004516052.1 | Scaffold631 | 69609                   | TT                              | CC                | 1946521450               |
| SNP_P3_131030_69654 | NW_004516052.1 | Scaffold631 | 69654                   | AA                              | CC                | 1946521452               |
| SNP_P3_131031_69785 | NW_004516052.1 | Scaffold631 | 69785                   | AA                              | GG                | 1946521453               |
| SNP_P3_131032_70141 | NW_004516052.1 | Scaffold631 | 70141                   | TT                              | CC                | 1946521455               |

| SNPs IDs            | Chromosome IDs | Chromosomes | Physical positions (bp) | CDC Frontier (Reference genome) | (Pusa 256 & HPNB) | NCBI SNPdb Accession IDs |
|---------------------|----------------|-------------|-------------------------|---------------------------------|-------------------|--------------------------|
| SNP_P3_131033_70274 | NW_004516052.1 | Scaffold631 | 70274                   | CC                              | AA                | 1946521456               |
| SNP_P3_131034_70359 | NW_004516052.1 | Scaffold631 | 70359                   | AA                              | GG                | 1946521457               |
| SNP_P3_131035_70567 | NW_004516052.1 | Scaffold631 | 70567                   | CC                              | GG                | 1946521459               |
| SNP_P3_131036_70574 | NW_004516052.1 | Scaffold631 | 70574                   | TT                              | CC                | 1946521460               |
| SNP_P3_131037_70584 | NW_004516052.1 | Scaffold631 | 70584                   | AA                              | TT                | 1946521462               |
| SNP_P3_131038_70886 | NW_004516052.1 | Scaffold631 | 70886                   | GG                              | AA                | 1946521463               |
| SNP_P3_131039_70890 | NW_004516052.1 | Scaffold631 | 70890                   | GG                              | AA                | 1946521464               |
| SNP_P3_131040_71111 | NW_004516052.1 | Scaffold631 | 71111                   | AA                              | CC                | 1946521466               |
| SNP_P3_131041_71400 | NW_004516052.1 | Scaffold631 | 71400                   | TT                              | GG                | 1946521467               |
| SNP_P3_131042_71413 | NW_004516052.1 | Scaffold631 | 71413                   | TT                              | AA                | 1946521469               |
| SNP_P3_131043_73729 | NW_004516052.1 | Scaffold631 | 73729                   | AA                              | CC                | 1946521470               |
| SNP_P3_131044_73864 | NW_004516052.1 | Scaffold631 | 73864                   | AA                              | GG                | 1946521471               |
| SNP_P3_131045_74221 | NW_004516052.1 | Scaffold631 | 74221                   | TT                              | AA                | 1946521473               |
| SNP_P3_131046_74265 | NW_004516052.1 | Scaffold631 | 74265                   | TT                              | CC                | 1946521474               |
| SNP_P3_131047_74473 | NW_004516052.1 | Scaffold631 | 74473                   | GG                              | TT                | 1946521476               |
| SNP_P3_131048_74719 | NW_004516052.1 | Scaffold631 | 74719                   | AA                              | TT                | 1946521477               |
| SNP_P3_131049_74806 | NW_004516052.1 | Scaffold631 | 74806                   | CC                              | TT                | 1946521478               |
| SNP_P3_131050_74911 | NW_004516052.1 | Scaffold631 | 74911                   | CC                              | AA                | 1946521480               |
| SNP_P3_131051_74958 | NW_004516052.1 | Scaffold631 | 74958                   | CC                              | TT                | 1946521481               |
| SNP_P3_131052_75022 | NW_004516052.1 | Scaffold631 | 75022                   | AA                              | TT                | 1946521483               |
| SNP_P3_131053_75381 | NW_004516052.1 | Scaffold631 | 75381                   | AA                              | CC                | 1946521484               |
| SNP_P3_131054_75731 | NW_004516052.1 | Scaffold631 | 75731                   | CC                              | TT                | 1946521485               |
| SNP_P3_131055_79254 | NW_004516052.1 | Scaffold631 | 79254                   | AA                              | GG                | 1946521487               |
| SNP_P3_131056_80504 | NW_004516052.1 | Scaffold631 | 80504                   | GG                              | AA                | 1946521488               |
| SNP_P3_131057_80531 | NW_004516052.1 | Scaffold631 | 80531                   | TT                              | CC                | 1946521490               |
| SNP_P3_131058_80543 | NW_004516052.1 | Scaffold631 | 80543                   | GG                              | TT                | 1946521491               |
| SNP_P3_131059_423   | NW_004516053.1 | Scaffold632 | 423                     | GG                              | CC                | 1946521493               |
| SNP_P3_131060_426   | NW_004516053.1 | Scaffold632 | 426                     | CC                              | AA                | 1946521494               |
| SNP_P3_131061_435   | NW_004516053.1 | Scaffold632 | 435                     | AA                              | TT                | 1946521496               |
| SNP_P3_131062_449   | NW_004516053.1 | Scaffold632 | 449                     | GG                              | AA                | 1946521497               |
| SNP_P3_131063_453   | NW_004516053.1 | Scaffold632 | 453                     | AA                              | GG                | 1946521499               |
| SNP_P3_131064_543   | NW_004516053.1 | Scaffold632 | 543                     | TT                              | CC                | 1946521500               |
| SNP_P3_131065_546   | NW_004516053.1 | Scaffold632 | 546                     | GG                              | TT                | 1946521501               |
| SNP_P3_131066_742   | NW_004516053.1 | Scaffold632 | 742                     | AA                              | GG                | 1946521503               |
| SNP_P3_131067_787   | NW_004516053.1 | Scaffold632 | 787                     | TT                              | CC                | 1946521504               |
| SNP_P3_131068_805   | NW_004516053.1 | Scaffold632 | 805                     | AA                              | TT                | 1946521506               |
| SNP_P3_131069_812   | NW_004516053.1 | Scaffold632 | 812                     | TT                              | AA                | 1946521507               |
| SNP_P3_131070_4578  | NW_004516053.1 | Scaffold632 | 4578                    | AA                              | GG                | 1946521509               |
| SNP_P3_131071_4586  | NW_004516053.1 | Scaffold632 | 4586                    | GG                              | AA                | 1946521510               |
| SNP_P3_131072_4987  | NW_004516053.1 | Scaffold632 | 4987                    | CC                              | AA                | 1946521511               |
| SNP_P3_131073_5167  | NW_004516053.1 | Scaffold632 | 5167                    | TT                              | AA                | 1946521513               |
| SNP_P3_131074_6768  | NW_004516053.1 | Scaffold632 | 6768                    | CC                              | AA                | 1946521514               |

| SNPs IDs             | Chromosome IDs | Chromosomes | Physical positions (bp) | CDC Frontier (Reference genome) | (Pusa 256 & HPNB) | NCBI SNPdb Accession IDs |
|----------------------|----------------|-------------|-------------------------|---------------------------------|-------------------|--------------------------|
| SNP_P3_131075_10060  | NW_004516053.1 | Scaffold632 | 10060                   | GG                              | TT                | 1946521516               |
| SNP_P3_131076_10062  | NW_004516053.1 | Scaffold632 | 10062                   | CC                              | TT                | 1946521517               |
| SNP_P3_131077_13777  | NW_004516053.1 | Scaffold632 | 13777                   | CC                              | AA                | 1946521519               |
| SNP_P3_131078_14111  | NW_004516053.1 | Scaffold632 | 14111                   | AA                              | GG                | 1946521520               |
| SNP_P3_131079_17591  | NW_004516053.1 | Scaffold632 | 17591                   | AA                              | GG                | 1946521522               |
| SNP_P3_131080_17599  | NW_004516053.1 | Scaffold632 | 17599                   | CC                              | AA                | 1946521523               |
| SNP_P3_131081_17603  | NW_004516053.1 | Scaffold632 | 17603                   | AA                              | TT                | 1946521525               |
| SNP_P3_131082_17614  | NW_004516053.1 | Scaffold632 | 17614                   | GG                              | TT                | 1946521526               |
| SNP_P3_131083_17625  | NW_004516053.1 | Scaffold632 | 17625                   | GG                              | TT                | 1946521527               |
| SNP_P3_131084_17652  | NW_004516053.1 | Scaffold632 | 17652                   | GG                              | AA                | 1946521529               |
| SNP_P3_131085_17778  | NW_004516053.1 | Scaffold632 | 17778                   | GG                              | AA                | 1946521530               |
| SNP_P3_131086_17791  | NW_004516053.1 | Scaffold632 | 17791                   | GG                              | CC                | 1946521532               |
| SNP_P3_131087_17819  | NW_004516053.1 | Scaffold632 | 17819                   | AA                              | TT                | 1946521533               |
| SNP_P3_131088_17837  | NW_004516053.1 | Scaffold632 | 17837                   | AA                              | TT                | 1946521534               |
| SNP_P3_131089_17855  | NW_004516053.1 | Scaffold632 | 17855                   | TT                              | AA                | 1946521536               |
| SNP_P3_131090_18149  | NW_004516053.1 | Scaffold632 | 18149                   | AA                              | GG                | 1946521537               |
| SNP_P3_131091_18349  | NW_004516053.1 | Scaffold632 | 18349                   | CC                              | TT                | 1946521539               |
| SNP_P3_131092_18390  | NW_004516053.1 | Scaffold632 | 18390                   | GG                              | TT                | 1946521540               |
| SNP_P3_131093_371    | NW_004516054.1 | Scaffold633 | 371                     | GG                              | AA                | 1946521542               |
| SNP_P3_131094_448    | NW_004516054.1 | Scaffold633 | 448                     | AA                              | GG                | 1946521543               |
| SNP_P3_131095_711    | NW_004516054.1 | Scaffold633 | 711                     | AA                              | TT                | 1946521545               |
| SNP_P3_131096_812    | NW_004516057.1 | Scaffold637 | 812                     | CC                              | TT                | 1946521546               |
| SNP_P3_131097_9621   | NW_004516057.1 | Scaffold637 | 9621                    | CC                              | TT                | 1946521548               |
| SNP_P3_131098_9692   | NW_004516057.1 | Scaffold637 | 9692                    | CC                              | GG                | 1946521549               |
| SNP_P3_131100_14643  | NW_004516057.1 | Scaffold637 | 14643                   | CC                              | TT                | 1946521551               |
| SNP_P3_131102_67723  | NW_004516057.1 | Scaffold637 | 67723                   | AA                              | GG                | 1946521552               |
| SNP_P3_131103_67789  | NW_004516057.1 | Scaffold637 | 67789                   | TT                              | AA                | 1946521554               |
| SNP_P3_131104_67790  | NW_004516057.1 | Scaffold637 | 67790                   | TT                              | CC                | 1946521555               |
| SNP_P3_131105_68046  | NW_004516057.1 | Scaffold637 | 68046                   | CC                              | TT                | 1946521557               |
| SNP_P3_131106_69443  | NW_004516057.1 | Scaffold637 | 69443                   | TT                              | CC                | 1946521558               |
| SNP_P3_131107_69451  | NW_004516057.1 | Scaffold637 | 69451                   | CC                              | AA                | 1946521560               |
| SNP_P3_131108_69700  | NW_004516057.1 | Scaffold637 | 69700                   | CC                              | AA                | 1946521561               |
| SNP_P3_131109_69712  | NW_004516057.1 | Scaffold637 | 69712                   | AA                              | TT                | 1946521563               |
| SNP_P3_131111_123990 | NW_004516057.1 | Scaffold637 | 123990                  | GG                              | AA                | 1946521564               |
| SNP_P3_131112_124236 | NW_004516057.1 | Scaffold637 | 124236                  | GG                              | AA                | 1946521566               |
| SNP_P3_131113_124483 | NW_004516057.1 | Scaffold637 | 124483                  | GG                              | AA                | 1946521567               |
| SNP_P3_131115_145264 | NW_004516057.1 | Scaffold637 | 145264                  | TT                              | CC                | 1946521569               |
| SNP_P3_131116_145265 | NW_004516057.1 | Scaffold637 | 145265                  | CC                              | TT                | 1946521570               |
| SNP_P3_131117_160610 | NW_004516057.1 | Scaffold637 | 160610                  | TT                              | GG                | 1946521572               |
| SNP_P3_131118_163005 | NW_004516057.1 | Scaffold637 | 163005                  | GG                              | CC                | 1946521573               |
| SNP_P3_131119_169935 | NW_004516057.1 | Scaffold637 | 169935                  | AA                              | GG                | 1946521575               |
| SNP_P3_131120_170221 | NW_004516057.1 | Scaffold637 | 170221                  | GG                              | CC                | 1946521576               |



| SNPs IDs             | Chromosome IDs | Chromosomes | Physical positions (bp) | CDC Frontier (Reference genome) | (Pusa 256 & HPNB) | NCBI SNPdb Accession IDs |
|----------------------|----------------|-------------|-------------------------|---------------------------------|-------------------|--------------------------|
| SNP_P3_131121_183090 | NW_004516057.1 | Scaffold637 | 183090                  | GG                              | AA                | 1946521578               |
| SNP_P3_131122_188012 | NW_004516057.1 | Scaffold637 | 188012                  | TT                              | AA                | 1946521579               |
| SNP_P3_131123_188045 | NW_004516057.1 | Scaffold637 | 188045                  | CC                              | AA                | 1946521581               |
| SNP_P3_131124_188072 | NW_004516057.1 | Scaffold637 | 188072                  | CC                              | GG                | 1946521582               |
| SNP_P3_131126_191857 | NW_004516057.1 | Scaffold637 | 191857                  | TT                              | CC                | 1946521583               |
| SNP_P3_131127_193438 | NW_004516057.1 | Scaffold637 | 193438                  | GG                              | AA                | 1946521585               |
| SNP_P3_131128_4040   | NW_004516058.1 | Scaffold639 | 4040                    | GG                              | AA                | 1946521586               |
| SNP_P3_131129_6832   | NW_004516058.1 | Scaffold639 | 6832                    | CC                              | TT                | 1946521588               |
| SNP_P3_131130_7013   | NW_004516058.1 | Scaffold639 | 7013                    | GG                              | AA                | 1946521589               |
| SNP_P3_131131_7066   | NW_004516058.1 | Scaffold639 | 7066                    | CC                              | TT                | 1946521591               |
| SNP_P3_131132_7081   | NW_004516058.1 | Scaffold639 | 7081                    | GG                              | TT                | 1946521592               |
| SNP_P3_131133_7082   | NW_004516058.1 | Scaffold639 | 7082                    | TT                              | CC                | 1946521594               |
| SNP_P3_131134_7138   | NW_004516058.1 | Scaffold639 | 7138                    | GG                              | CC                | 1946521595               |
| SNP_P3_131135_8154   | NW_004516058.1 | Scaffold639 | 8154                    | CC                              | TT                | 1946521597               |
| SNP_P3_131136_8853   | NW_004516058.1 | Scaffold639 | 8853                    | AA                              | GG                | 1946521598               |
| SNP_P3_131137_9001   | NW_004516058.1 | Scaffold639 | 9001                    | CC                              | TT                | 1946521600               |
| SNP_P3_131138_9203   | NW_004516058.1 | Scaffold639 | 9203                    | TT                              | AA                | 1946521601               |
| SNP_P3_131139_9274   | NW_004516058.1 | Scaffold639 | 9274                    | GG                              | TT                | 1946521603               |
| SNP_P3_131140_9309   | NW_004516058.1 | Scaffold639 | 9309                    | TT                              | AA                | 1946521604               |
| SNP_P3_131141_9355   | NW_004516058.1 | Scaffold639 | 9355                    | TT                              | AA                | 1946521606               |
| SNP_P3_131142_9387   | NW_004516058.1 | Scaffold639 | 9387                    | GG                              | AA                | 1946521607               |
| SNP_P3_131143_9409   | NW_004516058.1 | Scaffold639 | 9409                    | CC                              | AA                | 1946521609               |
| SNP_P3_131146_11686  | NW_004516058.1 | Scaffold639 | 11686                   | AA                              | TT                | 1946521610               |
| SNP_P3_131147_11928  | NW_004516058.1 | Scaffold639 | 11928                   | GG                              | TT                | 1946521612               |
| SNP_P3_131148_11930  | NW_004516058.1 | Scaffold639 | 11930                   | AA                              | CC                | 1946521613               |
| SNP_P3_131149_18609  | NW_004516058.1 | Scaffold639 | 18609                   | GG                              | AA                | 1946521615               |
| SNP_P3_131150_18614  | NW_004516058.1 | Scaffold639 | 18614                   | TT                              | AA                | 1946521616               |
| SNP_P3_131151_18694  | NW_004516058.1 | Scaffold639 | 18694                   | TT                              | CC                | 1946521617               |
| SNP_P3_131152_18698  | NW_004516058.1 | Scaffold639 | 18698                   | TT                              | GG                | 1946521619               |
| SNP_P3_131153_18967  | NW_004516058.1 | Scaffold639 | 18967                   | GG                              | AA                | 1946521620               |
| SNP_P3_131154_18970  | NW_004516058.1 | Scaffold639 | 18970                   | AA                              | TT                | 1946521622               |
| SNP_P3_131155_19026  | NW_004516058.1 | Scaffold639 | 19026                   | AA                              | GG                | 1946521623               |
| SNP_P3_131156_19066  | NW_004516058.1 | Scaffold639 | 19066                   | TT                              | CC                | 1946521625               |
| SNP_P3_131157_22362  | NW_004516058.1 | Scaffold639 | 22362                   | AA                              | GG                | 1946521626               |
| SNP_P3_131158_22437  | NW_004516058.1 | Scaffold639 | 22437                   | TT                              | GG                | 1946521627               |
| SNP_P3_131159_23343  | NW_004516058.1 | Scaffold639 | 23343                   | CC                              | AA                | 1946521629               |
| SNP_P3_131160_26115  | NW_004516058.1 | Scaffold639 | 26115                   | CC                              | TT                | 1946521630               |
| SNP_P3_131161_26530  | NW_004516058.1 | Scaffold639 | 26530                   | CC                              | TT                | 1946521632               |
| SNP_P3_131162_26725  | NW_004516058.1 | Scaffold639 | 26725                   | AA                              | GG                | 1946521633               |
| SNP_P3_131163_26740  | NW_004516058.1 | Scaffold639 | 26740                   | AA                              | GG                | 1946521634               |
| SNP_P3_131164_26752  | NW_004516058.1 | Scaffold639 | 26752                   | GG                              | TT                | 1946521636               |
| SNP_P3_131165_26790  | NW_004516058.1 | Scaffold639 | 26790                   | CC                              | TT                | 1946521637               |

| SNPs IDs             | Chromosome IDs | Chromosomes | Physical positions (bp) | CDC Frontier (Reference genome) | (Pusa 256 & HPNB) | NCBI SNPdb Accession IDs |
|----------------------|----------------|-------------|-------------------------|---------------------------------|-------------------|--------------------------|
| SNP_P3_131166_26798  | NW_004516058.1 | Scaffold639 | 26798                   | TT                              | CC                | 1946521639               |
| SNP_P3_131167_31985  | NW_004516058.1 | Scaffold639 | 31985                   | GG                              | AA                | 1946521640               |
| SNP_P3_131168_33195  | NW_004516058.1 | Scaffold639 | 33195                   | TT                              | GG                | 1946521642               |
| SNP_P3_131169_34244  | NW_004516058.1 | Scaffold639 | 34244                   | AA                              | TT                | 1946521643               |
| SNP_P3_131170_34264  | NW_004516058.1 | Scaffold639 | 34264                   | TT                              | CC                | 1946521644               |
| SNP_P3_131171_43384  | NW_004516058.1 | Scaffold639 | 43384                   | CC                              | TT                | 1946521646               |
| SNP_P3_131172_43408  | NW_004516058.1 | Scaffold639 | 43408                   | AA                              | GG                | 1946521647               |
| SNP_P3_131173_43422  | NW_004516058.1 | Scaffold639 | 43422                   | GG                              | AA                | 1946521649               |
| SNP_P3_131174_44250  | NW_004516058.1 | Scaffold639 | 44250                   | CC                              | AA                | 1946521650               |
| SNP_P3_131175_44296  | NW_004516058.1 | Scaffold639 | 44296                   | TT                              | AA                | 1946521651               |
| SNP_P3_131176_47788  | NW_004516058.1 | Scaffold639 | 47788                   | AA                              | GG                | 1946521653               |
| SNP_P3_131178_54081  | NW_004516058.1 | Scaffold639 | 54081                   | GG                              | CC                | 1946521654               |
| SNP_P3_131179_58450  | NW_004516058.1 | Scaffold639 | 58450                   | GG                              | AA                | 1946521656               |
| SNP_P3_131180_69646  | NW_004516058.1 | Scaffold639 | 69646                   | CC                              | AA                | 1946521657               |
| SNP_P3_131181_69804  | NW_004516058.1 | Scaffold639 | 69804                   | TT                              | CC                | 1946521659               |
| SNP_P3_131182_69817  | NW_004516058.1 | Scaffold639 | 69817                   | AA                              | GG                | 1946521660               |
| SNP_P3_131183_69833  | NW_004516058.1 | Scaffold639 | 69833                   | GG                              | AA                | 1946521661               |
| SNP_P3_131184_72074  | NW_004516058.1 | Scaffold639 | 72074                   | GG                              | AA                | 1946521663               |
| SNP_P3_131185_73563  | NW_004516058.1 | Scaffold639 | 73563                   | AA                              | GG                | 1946521664               |
| SNP_P3_131186_75548  | NW_004516058.1 | Scaffold639 | 75548                   | GG                              | AA                | 1946521666               |
| SNP_P3_131187_75881  | NW_004516058.1 | Scaffold639 | 75881                   | AA                              | GG                | 1946521667               |
| SNP_P3_131188_75886  | NW_004516058.1 | Scaffold639 | 75886                   | CC                              | AA                | 1946521668               |
| SNP_P3_131189_80882  | NW_004516058.1 | Scaffold639 | 80882                   | CC                              | TT                | 1946521670               |
| SNP_P3_131190_92121  | NW_004516058.1 | Scaffold639 | 92121                   | GG                              | AA                | 1946521671               |
| SNP_P3_131191_92143  | NW_004516058.1 | Scaffold639 | 92143                   | TT                              | CC                | 1946521673               |
| SNP_P3_131192_92453  | NW_004516058.1 | Scaffold639 | 92453                   | TT                              | CC                | 1946521674               |
| SNP_P3_131193_92473  | NW_004516058.1 | Scaffold639 | 92473                   | AA                              | CC                | 1946521676               |
| SNP_P3_131194_99875  | NW_004516058.1 | Scaffold639 | 99875                   | AA                              | TT                | 1946521677               |
| SNP_P3_131195_100307 | NW_004516058.1 | Scaffold639 | 100307                  | CC                              | AA                | 1946521679               |
| SNP_P3_131196_100315 | NW_004516058.1 | Scaffold639 | 100315                  | CC                              | TT                | 1946521680               |
| SNP_P3_131197_102581 | NW_004516058.1 | Scaffold639 | 102581                  | GG                              | AA                | 1946521681               |
| SNP_P3_131198_102604 | NW_004516058.1 | Scaffold639 | 102604                  | TT                              | CC                | 1946521683               |
| SNP_P3_131199_102613 | NW_004516058.1 | Scaffold639 | 102613                  | GG                              | AA                | 1946521684               |
| SNP_P3_131200_102631 | NW_004516058.1 | Scaffold639 | 102631                  | TT                              | AA                | 1946521686               |
| SNP_P3_131201_102651 | NW_004516058.1 | Scaffold639 | 102651                  | GG                              | TT                | 1946521687               |
| SNP_P3_131202_102672 | NW_004516058.1 | Scaffold639 | 102672                  | AA                              | CC                | 1946521689               |
| SNP_P3_131203_102675 | NW_004516058.1 | Scaffold639 | 102675                  | AA                              | GG                | 1946521690               |
| SNP_P3_131204_102685 | NW_004516058.1 | Scaffold639 | 102685                  | GG                              | AA                | 1946521691               |
| SNP_P3_131205_104990 | NW_004516058.1 | Scaffold639 | 104990                  | GG                              | CC                | 1946521693               |
| SNP_P3_131206_113576 | NW_004516058.1 | Scaffold639 | 113576                  | AA                              | GG                | 1946521694               |
| SNP_P3_131207_113718 | NW_004516058.1 | Scaffold639 | 113718                  | GG                              | AA                | 1946521696               |
| SNP_P3_131208_113733 | NW_004516058.1 | Scaffold639 | 113733                  | AA                              | GG                | 1946521697               |

| SNPs IDs             | Chromosome IDs | Chromosomes | Physical positions (bp) | CDC Frontier (Reference genome) | (Pusa 256 & HPNB) | NCBI SNPdb Accession IDs |
|----------------------|----------------|-------------|-------------------------|---------------------------------|-------------------|--------------------------|
| SNP_P3_131209_113735 | NW_004516058.1 | Scaffold639 | 113735                  | AA                              | GG                | 1946521699               |
| SNP_P3_131210_113754 | NW_004516058.1 | Scaffold639 | 113754                  | AA                              | TT                | 1946521700               |
| SNP_P3_131211_113769 | NW_004516058.1 | Scaffold639 | 113769                  | GG                              | TT                | 1946521701               |
| SNP_P3_131212_113773 | NW_004516058.1 | Scaffold639 | 113773                  | GG                              | AA                | 1946521703               |
| SNP_P3_131213_113822 | NW_004516058.1 | Scaffold639 | 113822                  | GG                              | TT                | 1946521704               |
| SNP_P3_131214_113937 | NW_004516058.1 | Scaffold639 | 113937                  | GG                              | AA                | 1946521706               |
| SNP_P3_131215_114136 | NW_004516058.1 | Scaffold639 | 114136                  | AA                              | GG                | 1946521707               |
| SNP_P3_131216_114279 | NW_004516058.1 | Scaffold639 | 114279                  | AA                              | GG                | 1946521708               |
| SNP_P3_131217_114341 | NW_004516058.1 | Scaffold639 | 114341                  | AA                              | CC                | 1946521710               |
| SNP_P3_131218_114346 | NW_004516058.1 | Scaffold639 | 114346                  | GG                              | TT                | 1946521711               |
| SNP_P3_131219_114355 | NW_004516058.1 | Scaffold639 | 114355                  | TT                              | CC                | 1946521713               |
| SNP_P3_131220_114430 | NW_004516058.1 | Scaffold639 | 114430                  | GG                              | TT                | 1946521714               |
| SNP_P3_131221_114506 | NW_004516058.1 | Scaffold639 | 114506                  | GG                              | AA                | 1946521716               |
| SNP_P3_131222_114518 | NW_004516058.1 | Scaffold639 | 114518                  | AA                              | TT                | 1946521717               |
| SNP_P3_131223_119961 | NW_004516058.1 | Scaffold639 | 119961                  | GG                              | AA                | 1946521718               |
| SNP_P3_131224_120191 | NW_004516058.1 | Scaffold639 | 120191                  | AA                              | GG                | 1946521720               |
| SNP_P3_131225_125402 | NW_004516058.1 | Scaffold639 | 125402                  | CC                              | GG                | 1946521722               |
| SNP_P3_131226_133720 | NW_004516058.1 | Scaffold639 | 133720                  | GG                              | AA                | 1946521724               |
| SNP_P3_131227_154397 | NW_004516058.1 | Scaffold639 | 154397                  | CC                              | TT                | 1946521725               |
| SNP_P3_131228_154433 | NW_004516058.1 | Scaffold639 | 154433                  | CC                              | AA                | 1946521726               |
| SNP_P3_131229_154437 | NW_004516058.1 | Scaffold639 | 154437                  | TT                              | CC                | 1946521728               |
| SNP_P3_131230_154444 | NW_004516058.1 | Scaffold639 | 154444                  | GG                              | AA                | 1946521729               |
| SNP_P3_131232_162808 | NW_004516058.1 | Scaffold639 | 162808                  | TT                              | CC                | 1946521731               |
| SNP_P3_131233_172448 | NW_004516058.1 | Scaffold639 | 172448                  | CC                              | AA                | 1946521732               |
| SNP_P3_131234_172790 | NW_004516058.1 | Scaffold639 | 172790                  | AA                              | CC                | 1946521733               |
| SNP_P3_131235_172808 | NW_004516058.1 | Scaffold639 | 172808                  | GG                              | TT                | 1946521735               |
| SNP_P3_131236_172841 | NW_004516058.1 | Scaffold639 | 172841                  | TT                              | CC                | 1946521736               |
| SNP_P3_131237_172871 | NW_004516058.1 | Scaffold639 | 172871                  | GG                              | TT                | 1946521738               |
| SNP_P3_131238_172940 | NW_004516058.1 | Scaffold639 | 172940                  | CC                              | TT                | 1946521739               |
| SNP_P3_131239_172944 | NW_004516058.1 | Scaffold639 | 172944                  | TT                              | CC                | 1946521741               |
| SNP_P3_131240_172954 | NW_004516058.1 | Scaffold639 | 172954                  | CC                              | TT                | 1946521742               |
| SNP_P3_131241_172955 | NW_004516058.1 | Scaffold639 | 172955                  | GG                              | TT                | 1946521744               |
| SNP_P3_131242_172958 | NW_004516058.1 | Scaffold639 | 172958                  | GG                              | AA                | 1946521745               |
| SNP_P3_131243_173048 | NW_004516058.1 | Scaffold639 | 173048                  | GG                              | AA                | 1946521746               |
| SNP_P3_131244_173076 | NW_004516058.1 | Scaffold639 | 173076                  | GG                              | AA                | 1946521748               |
| SNP_P3_131245_173078 | NW_004516058.1 | Scaffold639 | 173078                  | CC                              | TT                | 1946521749               |
| SNP_P3_131246_173112 | NW_004516058.1 | Scaffold639 | 173112                  | GG                              | AA                | 1946521751               |
| SNP_P3_131247_173306 | NW_004516058.1 | Scaffold639 | 173306                  | AA                              | TT                | 1946521752               |
| SNP_P3_131248_173341 | NW_004516058.1 | Scaffold639 | 173341                  | TT                              | CC                | 1946521754               |
| SNP_P3_131249_173389 | NW_004516058.1 | Scaffold639 | 173389                  | CC                              | TT                | 1946521755               |
| SNP_P3_131250_174708 | NW_004516058.1 | Scaffold639 | 174708                  | CC                              | TT                | 1946521756               |
| SNP_P3_131251_183335 | NW_004516058.1 | Scaffold639 | 183335                  | TT                              | CC                | 1946521758               |

| SNPs IDs             | Chromosome IDs | Chromosomes | Physical positions (bp) | CDC Frontier (Reference genome) | (Pusa 256 & HPNB) | NCBI SNPdb Accession IDs |
|----------------------|----------------|-------------|-------------------------|---------------------------------|-------------------|--------------------------|
| SNP_P3_131252_184318 | NW_004516058.1 | Scaffold639 | 184318                  | TT                              | GG                | 1946521759               |
| SNP_P3_131253_184361 | NW_004516058.1 | Scaffold639 | 184361                  | TT                              | AA                | 1946521761               |
| SNP_P3_131254_533    | NW_004516059.1 | Scaffold641 | 533                     | AA                              | CC                | 1946521762               |
| SNP_P3_131255_577    | NW_004516059.1 | Scaffold641 | 577                     | CC                              | TT                | 1946521765               |
| SNP_P3_131256_3120   | NW_004516059.1 | Scaffold641 | 3120                    | TT                              | AA                | 1946521766               |
| SNP_P3_131257_3132   | NW_004516059.1 | Scaffold641 | 3132                    | CC                              | GG                | 1946521767               |
| SNP_P3_131258_3136   | NW_004516059.1 | Scaffold641 | 3136                    | GG                              | AA                | 1946521769               |
| SNP_P3_131259_3147   | NW_004516059.1 | Scaffold641 | 3147                    | TT                              | CC                | 1946521770               |
| SNP_P3_131260_3364   | NW_004516059.1 | Scaffold641 | 3364                    | GG                              | TT                | 1946521772               |
| SNP_P3_131261_5534   | NW_004516059.1 | Scaffold641 | 5534                    | AA                              | TT                | 1946521773               |
| SNP_P3_131263_7780   | NW_004516060.1 | Scaffold642 | 7780                    | AA                              | GG                | 1946521775               |
| SNP_P3_131264_12739  | NW_004516060.1 | Scaffold642 | 12739                   | AA                              | TT                | 1946521776               |
| SNP_P3_131265_12759  | NW_004516060.1 | Scaffold642 | 12759                   | CC                              | TT                | 1946521778               |
| SNP_P3_131266_12766  | NW_004516060.1 | Scaffold642 | 12766                   | AA                              | CC                | 1946521779               |
| SNP_P3_131268_17390  | NW_004516060.1 | Scaffold642 | 17390                   | GG                              | AA                | 1946521780               |
| SNP_P3_131269_20650  | NW_004516060.1 | Scaffold642 | 20650                   | GG                              | AA                | 1946521782               |
| SNP_P3_131272_27496  | NW_004516060.1 | Scaffold642 | 27496                   | AA                              | GG                | 1946521783               |
| SNP_P3_131273_52576  | NW_004516060.1 | Scaffold642 | 52576                   | CC                              | AA                | 1946521785               |
| SNP_P3_131274_52602  | NW_004516060.1 | Scaffold642 | 52602                   | GG                              | AA                | 1946521786               |
| SNP_P3_131275_52691  | NW_004516060.1 | Scaffold642 | 52691                   | TT                              | CC                | 1946521787               |
| SNP_P3_131276_58563  | NW_004516060.1 | Scaffold642 | 58563                   | AA                              | GG                | 1946521789               |
| SNP_P3_131278_61859  | NW_004516060.1 | Scaffold642 | 61859                   | TT                              | CC                | 1946521790               |
| SNP_P3_131279_62014  | NW_004516060.1 | Scaffold642 | 62014                   | GG                              | TT                | 1946521792               |
| SNP_P3_131280_62072  | NW_004516060.1 | Scaffold642 | 62072                   | TT                              | CC                | 1946521793               |
| SNP_P3_131281_62496  | NW_004516060.1 | Scaffold642 | 62496                   | CC                              | AA                | 1946521795               |
| SNP_P3_131282_62711  | NW_004516060.1 | Scaffold642 | 62711                   | GG                              | AA                | 1946521796               |
| SNP_P3_131283_62804  | NW_004516060.1 | Scaffold642 | 62804                   | GG                              | CC                | 1946521797               |
| SNP_P3_131286_74994  | NW_004516060.1 | Scaffold642 | 74994                   | GG                              | AA                | 1946521799               |
| SNP_P3_131288_84228  | NW_004516060.1 | Scaffold642 | 84228                   | TT                              | AA                | 1946521800               |
| SNP_P3_131289_86953  | NW_004516060.1 | Scaffold642 | 86953                   | GG                              | TT                | 1946521802               |
| SNP_P3_131290_91454  | NW_004516060.1 | Scaffold642 | 91454                   | CC                              | TT                | 1946521803               |
| SNP_P3_131291_114915 | NW_004516060.1 | Scaffold642 | 114915                  | CC                              | TT                | 1946521804               |
| SNP_P3_131292_119744 | NW_004516060.1 | Scaffold642 | 119744                  | AA                              | GG                | 1946521806               |
| SNP_P3_131293_140871 | NW_004516060.1 | Scaffold642 | 140871                  | AA                              | TT                | 1946521807               |
| SNP_P3_131294_140896 | NW_004516060.1 | Scaffold642 | 140896                  | CC                              | AA                | 1946521808               |
| SNP_P3_131295_141249 | NW_004516060.1 | Scaffold642 | 141249                  | TT                              | CC                | 1946521810               |
| SNP_P3_131296_141304 | NW_004516060.1 | Scaffold642 | 141304                  | TT                              | CC                | 1946521811               |
| SNP_P3_131297_141673 | NW_004516060.1 | Scaffold642 | 141673                  | TT                              | AA                | 1946521813               |
| SNP_P3_131298_147548 | NW_004516060.1 | Scaffold642 | 147548                  | AA                              | GG                | 1946521814               |
| SNP_P3_131299_147697 | NW_004516060.1 | Scaffold642 | 147697                  | GG                              | AA                | 1946521816               |
| SNP_P3_131300_147711 | NW_004516060.1 | Scaffold642 | 147711                  | TT                              | GG                | 1946521817               |
| SNP_P3_131301_148015 | NW_004516060.1 | Scaffold642 | 148015                  | AA                              | CC                | 1946521818               |

| SNPs IDs             | Chromosome IDs | Chromosomes | Physical positions (bp) | CDC Frontier (Reference genome) | (Pusa 256 & HPNB) | NCBI SNPdb Accession IDs |
|----------------------|----------------|-------------|-------------------------|---------------------------------|-------------------|--------------------------|
| SNP_P3_131302_154140 | NW_004516060.1 | Scaffold642 | 154140                  | AA                              | CC                | 1946521820               |
| SNP_P3_131304_173907 | NW_004516060.1 | Scaffold642 | 173907                  | TT                              | CC                | 1946521821               |
| SNP_P3_131305_179018 | NW_004516060.1 | Scaffold642 | 179018                  | AA                              | GG                | 1946521822               |
| SNP_P3_131306_179092 | NW_004516060.1 | Scaffold642 | 179092                  | TT                              | GG                | 1946521824               |
| SNP_P3_131307_179104 | NW_004516060.1 | Scaffold642 | 179104                  | TT                              | GG                | 1946521825               |
| SNP_P3_131308_182343 | NW_004516060.1 | Scaffold642 | 182343                  | TT                              | CC                | 1946521827               |
| SNP_P3_131309_182413 | NW_004516060.1 | Scaffold642 | 182413                  | GG                              | AA                | 1946521828               |
| SNP_P3_131310_191550 | NW_004516060.1 | Scaffold642 | 191550                  | TT                              | GG                | 1946521829               |
| SNP_P3_131311_194639 | NW_004516060.1 | Scaffold642 | 194639                  | AA                              | GG                | 1946521831               |
| SNP_P3_131312_194645 | NW_004516060.1 | Scaffold642 | 194645                  | CC                              | TT                | 1946521832               |
| SNP_P3_131313_194705 | NW_004516060.1 | Scaffold642 | 194705                  | CC                              | TT                | 1946521833               |
| SNP_P3_131314_195062 | NW_004516060.1 | Scaffold642 | 195062                  | AA                              | GG                | 1946521835               |
| SNP_P3_131315_205242 | NW_004516060.1 | Scaffold642 | 205242                  | GG                              | TT                | 1946521836               |
| SNP_P3_131316_212740 | NW_004516060.1 | Scaffold642 | 212740                  | CC                              | TT                | 1946521838               |
| SNP_P3_131318_222711 | NW_004516060.1 | Scaffold642 | 222711                  | TT                              | CC                | 1946521839               |
| SNP_P3_131321_288563 | NW_004516060.1 | Scaffold642 | 288563                  | AA                              | CC                | 1946521840               |
| SNP_P3_131323_320472 | NW_004516060.1 | Scaffold642 | 320472                  | GG                              | AA                | 1946521842               |
| SNP_P3_131324_320743 | NW_004516060.1 | Scaffold642 | 320743                  | TT                              | CC                | 1946521843               |
| SNP_P3_131325_326266 | NW_004516060.1 | Scaffold642 | 326266                  | CC                              | GG                | 1946521844               |
| SNP_P3_131326_331500 | NW_004516060.1 | Scaffold642 | 331500                  | CC                              | AA                | 1946521846               |
| SNP_P3_131327_334208 | NW_004516060.1 | Scaffold642 | 334208                  | GG                              | AA                | 1946521847               |
| SNP_P3_131329_337907 | NW_004516060.1 | Scaffold642 | 337907                  | GG                              | TT                | 1946521849               |
| SNP_P3_131330_350804 | NW_004516060.1 | Scaffold642 | 350804                  | AA                              | GG                | 1946521850               |
| SNP_P3_131331_350977 | NW_004516060.1 | Scaffold642 | 350977                  | CC                              | TT                | 1946521851               |
| SNP_P3_131332_351283 | NW_004516060.1 | Scaffold642 | 351283                  | CC                              | TT                | 1946521853               |
| SNP_P3_131333_351301 | NW_004516060.1 | Scaffold642 | 351301                  | TT                              | CC                | 1946521854               |
| SNP_P3_131334_351304 | NW_004516060.1 | Scaffold642 | 351304                  | CC                              | TT                | 1946521855               |
| SNP_P3_131335_351324 | NW_004516060.1 | Scaffold642 | 351324                  | TT                              | CC                | 1946521857               |
| SNP_P3_131336_351412 | NW_004516060.1 | Scaffold642 | 351412                  | CC                              | TT                | 1946521858               |
| SNP_P3_131337_351432 | NW_004516060.1 | Scaffold642 | 351432                  | GG                              | TT                | 1946521860               |
| SNP_P3_131338_352126 | NW_004516060.1 | Scaffold642 | 352126                  | AA                              | TT                | 1946521861               |
| SNP_P3_131339_352133 | NW_004516060.1 | Scaffold642 | 352133                  | CC                              | GG                | 1946521862               |
| SNP_P3_131340_352602 | NW_004516060.1 | Scaffold642 | 352602                  | AA                              | GG                | 1946521864               |
| SNP_P3_131341_352876 | NW_004516060.1 | Scaffold642 | 352876                  | GG                              | TT                | 1946521865               |
| SNP_P3_131342_363294 | NW_004516060.1 | Scaffold642 | 363294                  | AA                              | GG                | 1946521867               |
| SNP_P3_131343_363310 | NW_004516060.1 | Scaffold642 | 363310                  | CC                              | AA                | 1946521868               |
| SNP_P3_131344_363312 | NW_004516060.1 | Scaffold642 | 363312                  | AA                              | GG                | 1946521870               |
| SNP_P3_131345_363363 | NW_004516060.1 | Scaffold642 | 363363                  | GG                              | AA                | 1946521871               |
| SNP_P3_131346_363366 | NW_004516060.1 | Scaffold642 | 363366                  | AA                              | GG                | 1946521873               |
| SNP_P3_131347_377760 | NW_004516060.1 | Scaffold642 | 377760                  | AA                              | TT                | 1946521874               |
| SNP_P3_131348_377761 | NW_004516060.1 | Scaffold642 | 377761                  | AA                              | TT                | 1946521875               |
| SNP_P3_131349_377766 | NW_004516060.1 | Scaffold642 | 377766                  | GG                              | AA                | 1946521877               |

| SNPs IDs             | Chromosome IDs | Chromosomes | Physical positions (bp) | CDC Frontier (Reference genome) | (Pusa 256 & HPNB) | NCBI SNPdb Accession IDs |
|----------------------|----------------|-------------|-------------------------|---------------------------------|-------------------|--------------------------|
| SNP_P3_131350_386685 | NW_004516060.1 | Scaffold642 | 386685                  | TT                              | AA                | 1946521878               |
| SNP_P3_131351_388471 | NW_004516060.1 | Scaffold642 | 388471                  | TT                              | CC                | 1946521880               |
| SNP_P3_131352_420965 | NW_004516060.1 | Scaffold642 | 420965                  | AA                              | GG                | 1946521881               |
| SNP_P3_131353_422462 | NW_004516060.1 | Scaffold642 | 422462                  | GG                              | AA                | 1946521883               |
| SNP_P3_131354_423147 | NW_004516060.1 | Scaffold642 | 423147                  | TT                              | GG                | 1946521884               |
| SNP_P3_131355_423929 | NW_004516060.1 | Scaffold642 | 423929                  | TT                              | AA                | 1946521885               |
| SNP_P3_131356_432982 | NW_004516060.1 | Scaffold642 | 432982                  | AA                              | GG                | 1946521887               |
| SNP_P3_131357_436165 | NW_004516060.1 | Scaffold642 | 436165                  | GG                              | TT                | 1946521888               |
| SNP_P3_131358_473172 | NW_004516060.1 | Scaffold642 | 473172                  | GG                              | AA                | 1946521889               |
| SNP_P3_131360_533720 | NW_004516060.1 | Scaffold642 | 533720                  | AA                              | GG                | 1946521891               |
| SNP_P3_131361_533725 | NW_004516060.1 | Scaffold642 | 533725                  | AA                              | GG                | 1946521892               |
| SNP_P3_131363_552502 | NW_004516060.1 | Scaffold642 | 552502                  | CC                              | TT                | 1946521894               |
| SNP_P3_131364_565764 | NW_004516060.1 | Scaffold642 | 565764                  | TT                              | AA                | 1946521895               |
| SNP_P3_131367_612148 | NW_004516060.1 | Scaffold642 | 612148                  | TT                              | CC                | 1946521896               |
| SNP_P3_131369_629524 | NW_004516060.1 | Scaffold642 | 629524                  | AA                              | GG                | 1946521898               |
| SNP_P3_131370_629530 | NW_004516060.1 | Scaffold642 | 629530                  | AA                              | GG                | 1946521899               |
| SNP_P3_131371_629535 | NW_004516060.1 | Scaffold642 | 629535                  | CC                              | TT                | 1946521901               |
| SNP_P3_131372_629571 | NW_004516060.1 | Scaffold642 | 629571                  | GG                              | TT                | 1946521902               |
| SNP_P3_131373_629590 | NW_004516060.1 | Scaffold642 | 629590                  | CC                              | AA                | 1946521903               |
| SNP_P3_131374_640649 | NW_004516060.1 | Scaffold642 | 640649                  | CC                              | TT                | 1946521905               |
| SNP_P3_131375_640693 | NW_004516060.1 | Scaffold642 | 640693                  | GG                              | AA                | 1946521906               |
| SNP_P3_131376_640715 | NW_004516060.1 | Scaffold642 | 640715                  | CC                              | TT                | 1946521908               |
| SNP_P3_131377_640917 | NW_004516060.1 | Scaffold642 | 640917                  | AA                              | GG                | 1946521909               |
| SNP_P3_131378_640922 | NW_004516060.1 | Scaffold642 | 640922                  | CC                              | TT                | 1946521910               |
| SNP_P3_131379_640988 | NW_004516060.1 | Scaffold642 | 640988                  | CC                              | AA                | 1946521912               |
| SNP_P3_131380_649003 | NW_004516060.1 | Scaffold642 | 649003                  | GG                              | AA                | 1946521913               |
| SNP_P3_131381_667436 | NW_004516060.1 | Scaffold642 | 667436                  | CC                              | GG                | 1946521915               |
| SNP_P3_131382_677656 | NW_004516060.1 | Scaffold642 | 677656                  | TT                              | AA                | 1946521916               |
| SNP_P3_131383_677924 | NW_004516060.1 | Scaffold642 | 677924                  | TT                              | CC                | 1946521917               |
| SNP_P3_131384_683421 | NW_004516060.1 | Scaffold642 | 683421                  | TT                              | CC                | 1946521919               |
| SNP_P3_131385_683611 | NW_004516060.1 | Scaffold642 | 683611                  | AA                              | TT                | 1946521920               |
| SNP_P3_131386_683632 | NW_004516060.1 | Scaffold642 | 683632                  | GG                              | TT                | 1946521922               |
| SNP_P3_131387_683638 | NW_004516060.1 | Scaffold642 | 683638                  | AA                              | GG                | 1946521923               |
| SNP_P3_131388_683656 | NW_004516060.1 | Scaffold642 | 683656                  | AA                              | GG                | 1946521924               |
| SNP_P3_131389_698144 | NW_004516060.1 | Scaffold642 | 698144                  | TT                              | CC                | 1946521926               |
| SNP_P3_131390_1973   | NW_004516061.1 | Scaffold643 | 1973                    | GG                              | AA                | 1946521927               |
| SNP_P3_131391_1980   | NW_004516061.1 | Scaffold643 | 1980                    | CC                              | TT                | 1946521929               |
| SNP_P3_131392_15036  | NW_004516061.1 | Scaffold643 | 15036                   | AA                              | GG                | 1946521930               |
| SNP_P3_131393_26527  | NW_004516061.1 | Scaffold643 | 26527                   | CC                              | TT                | 1946521932               |
| SNP_P3_131394_39280  | NW_004516061.1 | Scaffold643 | 39280                   | AA                              | GG                | 1946521933               |
| SNP_P3_131396_56524  | NW_004516061.1 | Scaffold643 | 56524                   | GG                              | AA                | 1946521934               |
| SNP_P3_131397_61987  | NW_004516061.1 | Scaffold643 | 61987                   | GG                              | AA                | 1946521936               |

| SNPs IDs            | Chromosome IDs | Chromosomes | Physical positions (bp) | CDC Frontier (Reference genome) | (Pusa 256 & HPNB) | NCBI SNPdb Accession IDs |
|---------------------|----------------|-------------|-------------------------|---------------------------------|-------------------|--------------------------|
| SNP_P3_131398_65376 | NW_004516061.1 | Scaffold643 | 65376                   | TT                              | GG                | 1946521937               |
| SNP_P3_131399_69159 | NW_004516061.1 | Scaffold643 | 69159                   | AA                              | CC                | 1946521938               |
| SNP_P3_131400_69174 | NW_004516061.1 | Scaffold643 | 69174                   | GG                              | AA                | 1946521940               |
| SNP_P3_131402_71258 | NW_004516061.1 | Scaffold643 | 71258                   | GG                              | AA                | 1946521941               |
| SNP_P3_131403_71269 | NW_004516061.1 | Scaffold643 | 71269                   | TT                              | CC                | 1946521943               |
| SNP_P3_131404_71308 | NW_004516061.1 | Scaffold643 | 71308                   | TT                              | CC                | 1946521944               |
| SNP_P3_131405_71315 | NW_004516061.1 | Scaffold643 | 71315                   | TT                              | CC                | 1946521945               |
| SNP_P3_131406_71349 | NW_004516061.1 | Scaffold643 | 71349                   | AA                              | GG                | 1946521947               |
| SNP_P3_131407_71374 | NW_004516061.1 | Scaffold643 | 71374                   | GG                              | AA                | 1946521948               |
| SNP_P3_131408_71388 | NW_004516061.1 | Scaffold643 | 71388                   | CC                              | TT                | 1946521949               |
| SNP_P3_131409_71396 | NW_004516061.1 | Scaffold643 | 71396                   | AA                              | GG                | 1946521951               |
| SNP_P3_131410_71411 | NW_004516061.1 | Scaffold643 | 71411                   | AA                              | GG                | 1946521952               |
| SNP_P3_131411_71572 | NW_004516061.1 | Scaffold643 | 71572                   | CC                              | TT                | 1946521953               |
| SNP_P3_131412_71621 | NW_004516061.1 | Scaffold643 | 71621                   | AA                              | CC                | 1946521955               |
| SNP_P3_131413_71635 | NW_004516061.1 | Scaffold643 | 71635                   | GG                              | AA                | 1946521956               |
| SNP_P3_131414_71661 | NW_004516061.1 | Scaffold643 | 71661                   | TT                              | GG                | 1946521958               |
| SNP_P3_131415_71671 | NW_004516061.1 | Scaffold643 | 71671                   | TT                              | CC                | 1946521959               |
| SNP_P3_131416_75534 | NW_004516061.1 | Scaffold643 | 75534                   | CC                              | TT                | 1946521960               |
| SNP_P3_131417_77336 | NW_004516061.1 | Scaffold643 | 77336                   | TT                              | CC                | 1946521962               |
| SNP_P3_131418_1127  | NW_004516062.1 | Scaffold645 | 1127                    | TT                              | GG                | 1946521963               |
| SNP_P3_131420_12489 | NW_004516062.1 | Scaffold645 | 12489                   | TT                              | AA                | 1946521965               |
| SNP_P3_131421_14024 | NW_004516062.1 | Scaffold645 | 14024                   | AA                              | TT                | 1946521966               |
| SNP_P3_131422_23648 | NW_004516062.1 | Scaffold645 | 23648                   | TT                              | AA                | 1946521967               |
| SNP_P3_131423_23853 | NW_004516062.1 | Scaffold645 | 23853                   | AA                              | TT                | 1946521969               |
| SNP_P3_131424_23864 | NW_004516062.1 | Scaffold645 | 23864                   | TT                              | AA                | 1946521970               |
| SNP_P3_131425_23873 | NW_004516062.1 | Scaffold645 | 23873                   | TT                              | CC                | 1946521971               |
| SNP_P3_131426_23876 | NW_004516062.1 | Scaffold645 | 23876                   | AA                              | TT                | 1946521973               |
| SNP_P3_131427_23877 | NW_004516062.1 | Scaffold645 | 23877                   | TT                              | AA                | 1946521974               |
| SNP_P3_131428_23942 | NW_004516062.1 | Scaffold645 | 23942                   | TT                              | GG                | 1946521976               |
| SNP_P3_131429_23943 | NW_004516062.1 | Scaffold645 | 23943                   | GG                              | TT                | 1946521977               |
| SNP_P3_131430_32191 | NW_004516062.1 | Scaffold645 | 32191                   | CC                              | GG                | 1946521979               |
| SNP_P3_131431_32228 | NW_004516062.1 | Scaffold645 | 32228                   | AA                              | TT                | 1946521980               |
| SNP_P3_131432_37842 | NW_004516062.1 | Scaffold645 | 37842                   | TT                              | AA                | 1946521981               |
| SNP_P3_131433_45913 | NW_004516062.1 | Scaffold645 | 45913                   | AA                              | TT                | 1946521983               |
| SNP_P3_131435_63078 | NW_004516062.1 | Scaffold645 | 63078                   | TT                              | CC                | 1946521984               |
| SNP_P3_131436_66280 | NW_004516062.1 | Scaffold645 | 66280                   | CC                              | TT                | 1946521986               |
| SNP_P3_131437_71961 | NW_004516062.1 | Scaffold645 | 71961                   | AA                              | TT                | 1946521987               |
| SNP_P3_131438_71968 | NW_004516062.1 | Scaffold645 | 71968                   | CC                              | TT                | 1946521988               |
| SNP_P3_131439_72100 | NW_004516062.1 | Scaffold645 | 72100                   | AA                              | CC                | 1946521990               |
| SNP_P3_131440_72129 | NW_004516062.1 | Scaffold645 | 72129                   | TT                              | AA                | 1946521991               |
| SNP_P3_131441_72138 | NW_004516062.1 | Scaffold645 | 72138                   | GG                              | AA                | 1946521993               |
| SNP_P3_131442_72147 | NW_004516062.1 | Scaffold645 | 72147                   | TT                              | CC                | 1946521994               |

| SNPs IDs             | Chromosome IDs | Chromosomes | Physical positions (bp) | CDC Frontier (Reference genome) | (Pusa 256 & HPNB) | NCBI SNPdb Accession IDs |
|----------------------|----------------|-------------|-------------------------|---------------------------------|-------------------|--------------------------|
| SNP_P3_131443_72160  | NW_004516062.1 | Scaffold645 | 72160                   | GG                              | AA                | 1946521995               |
| SNP_P3_131444_73193  | NW_004516062.1 | Scaffold645 | 73193                   | GG                              | AA                | 1946521997               |
| SNP_P3_131445_73199  | NW_004516062.1 | Scaffold645 | 73199                   | CC                              | AA                | 1946521998               |
| SNP_P3_131446_73209  | NW_004516062.1 | Scaffold645 | 73209                   | GG                              | AA                | 1946522000               |
| SNP_P3_131447_73247  | NW_004516062.1 | Scaffold645 | 73247                   | AA                              | CC                | 1946522001               |
| SNP_P3_131448_73505  | NW_004516062.1 | Scaffold645 | 73505                   | AA                              | GG                | 1946522002               |
| SNP_P3_131449_73590  | NW_004516062.1 | Scaffold645 | 73590                   | CC                              | TT                | 1946522004               |
| SNP_P3_131450_73665  | NW_004516062.1 | Scaffold645 | 73665                   | AA                              | CC                | 1946522005               |
| SNP_P3_131451_73698  | NW_004516062.1 | Scaffold645 | 73698                   | AA                              | GG                | 1946522007               |
| SNP_P3_131452_73711  | NW_004516062.1 | Scaffold645 | 73711                   | AA                              | GG                | 1946522008               |
| SNP_P3_131453_73785  | NW_004516062.1 | Scaffold645 | 73785                   | AA                              | CC                | 1946522010               |
| SNP_P3_131454_73835  | NW_004516062.1 | Scaffold645 | 73835                   | CC                              | AA                | 1946522011               |
| SNP_P3_131455_73864  | NW_004516062.1 | Scaffold645 | 73864                   | AA                              | CC                | 1946522013               |
| SNP_P3_131456_73991  | NW_004516062.1 | Scaffold645 | 73991                   | TT                              | AA                | 1946522014               |
| SNP_P3_131457_77031  | NW_004516062.1 | Scaffold645 | 77031                   | TT                              | AA                | 1946522015               |
| SNP_P3_131458_81511  | NW_004516062.1 | Scaffold645 | 81511                   | TT                              | GG                | 1946522017               |
| SNP_P3_131459_84584  | NW_004516062.1 | Scaffold645 | 84584                   | GG                              | AA                | 1946522018               |
| SNP_P3_131460_84604  | NW_004516062.1 | Scaffold645 | 84604                   | GG                              | AA                | 1946522020               |
| SNP_P3_131462_93810  | NW_004516062.1 | Scaffold645 | 93810                   | AA                              | CC                | 1946522021               |
| SNP_P3_131463_93949  | NW_004516062.1 | Scaffold645 | 93949                   | GG                              | CC                | 1946522022               |
| SNP_P3_131464_93977  | NW_004516062.1 | Scaffold645 | 93977                   | TT                              | CC                | 1946522024               |
| SNP_P3_131465_93998  | NW_004516062.1 | Scaffold645 | 93998                   | TT                              | CC                | 1946522025               |
| SNP_P3_131466_94012  | NW_004516062.1 | Scaffold645 | 94012                   | AA                              | TT                | 1946522027               |
| SNP_P3_131467_94016  | NW_004516062.1 | Scaffold645 | 94016                   | CC                              | TT                | 1946522028               |
| SNP_P3_131468_94047  | NW_004516062.1 | Scaffold645 | 94047                   | AA                              | TT                | 1946522029               |
| SNP_P3_131469_94360  | NW_004516062.1 | Scaffold645 | 94360                   | GG                              | TT                | 1946522031               |
| SNP_P3_131470_95520  | NW_004516062.1 | Scaffold645 | 95520                   | TT                              | CC                | 1946522032               |
| SNP_P3_131471_95521  | NW_004516062.1 | Scaffold645 | 95521                   | AA                              | GG                | 1946522033               |
| SNP_P3_131472_98808  | NW_004516062.1 | Scaffold645 | 98808                   | AA                              | TT                | 1946522035               |
| SNP_P3_131473_99124  | NW_004516062.1 | Scaffold645 | 99124                   | CC                              | TT                | 1946522036               |
| SNP_P3_131474_99144  | NW_004516062.1 | Scaffold645 | 99144                   | AA                              | GG                | 1946522038               |
| SNP_P3_131475_147351 | NW_004516062.1 | Scaffold645 | 147351                  | AA                              | TT                | 1946522039               |
| SNP_P3_131476_147373 | NW_004516062.1 | Scaffold645 | 147373                  | AA                              | GG                | 1946522041               |
| SNP_P3_131477_148236 | NW_004516062.1 | Scaffold645 | 148236                  | AA                              | TT                | 1946522042               |
| SNP_P3_131478_150800 | NW_004516062.1 | Scaffold645 | 150800                  | AA                              | CC                | 1946522044               |
| SNP_P3_131479_160617 | NW_004516062.1 | Scaffold645 | 160617                  | CC                              | TT                | 1946522045               |
| SNP_P3_131480_160633 | NW_004516062.1 | Scaffold645 | 160633                  | TT                              | CC                | 1946522046               |
| SNP_P3_131481_160864 | NW_004516062.1 | Scaffold645 | 160864                  | TT                              | CC                | 1946522048               |
| SNP_P3_131482_160881 | NW_004516062.1 | Scaffold645 | 160881                  | CC                              | TT                | 1946522049               |
| SNP_P3_131483_162789 | NW_004516062.1 | Scaffold645 | 162789                  | CC                              | TT                | 1946522051               |
| SNP_P3_131484_162907 | NW_004516062.1 | Scaffold645 | 162907                  | CC                              | TT                | 1946522052               |
| SNP_P3_131485_163125 | NW_004516062.1 | Scaffold645 | 163125                  | GG                              | TT                | 1946522053               |



| SNPs IDs             | Chromosome IDs | Chromosomes | Physical positions (bp) | CDC Frontier (Reference genome) | (Pusa 256 & HPNB) | NCBI SNPdb Accession IDs |
|----------------------|----------------|-------------|-------------------------|---------------------------------|-------------------|--------------------------|
| SNP_P3_131486_163221 | NW_004516062.1 | Scaffold645 | 163221                  | TT                              | CC                | 1946522055               |
| SNP_P3_131487_163224 | NW_004516062.1 | Scaffold645 | 163224                  | GG                              | TT                | 1946522056               |
| SNP_P3_131488_192667 | NW_004516062.1 | Scaffold645 | 192667                  | AA                              | GG                | 1946522057               |
| SNP_P3_131489_192815 | NW_004516062.1 | Scaffold645 | 192815                  | CC                              | TT                | 1946522059               |
| SNP_P3_131490_192825 | NW_004516062.1 | Scaffold645 | 192825                  | TT                              | CC                | 1946522060               |
| SNP_P3_131492_193244 | NW_004516062.1 | Scaffold645 | 193244                  | AA                              | GG                | 1946522062               |
| SNP_P3_131493_193261 | NW_004516062.1 | Scaffold645 | 193261                  | AA                              | GG                | 1946522063               |
| SNP_P3_131494_193277 | NW_004516062.1 | Scaffold645 | 193277                  | CC                              | TT                | 1946522064               |
| SNP_P3_131496_250745 | NW_004516062.1 | Scaffold645 | 250745                  | AA                              | GG                | 1946522066               |
| SNP_P3_131497_269605 | NW_004516062.1 | Scaffold645 | 269605                  | CC                              | AA                | 1946522067               |
| SNP_P3_131498_269625 | NW_004516062.1 | Scaffold645 | 269625                  | GG                              | CC                | 1946522069               |
| SNP_P3_131499_272677 | NW_004516062.1 | Scaffold645 | 272677                  | AA                              | CC                | 1946522070               |
| SNP_P3_131500_272678 | NW_004516062.1 | Scaffold645 | 272678                  | CC                              | AA                | 1946522072               |
| SNP_P3_131501_274265 | NW_004516062.1 | Scaffold645 | 274265                  | GG                              | TT                | 1946522073               |
| SNP_P3_131502_274266 | NW_004516062.1 | Scaffold645 | 274266                  | TT                              | GG                | 1946522074               |
| SNP_P3_131503_275946 | NW_004516062.1 | Scaffold645 | 275946                  | AA                              | CC                | 1946522076               |
| SNP_P3_131504_275947 | NW_004516062.1 | Scaffold645 | 275947                  | TT                              | AA                | 1946522077               |
| SNP_P3_131505_275948 | NW_004516062.1 | Scaffold645 | 275948                  | TT                              | AA                | 1946522079               |
| SNP_P3_131506_275963 | NW_004516062.1 | Scaffold645 | 275963                  | TT                              | AA                | 1946522080               |
| SNP_P3_131507_275981 | NW_004516062.1 | Scaffold645 | 275981                  | TT                              | AA                | 1946522081               |
| SNP_P3_131508_277224 | NW_004516062.1 | Scaffold645 | 277224                  | GG                              | AA                | 1946522083               |
| SNP_P3_131509_277342 | NW_004516062.1 | Scaffold645 | 277342                  | TT                              | AA                | 1946522084               |
| SNP_P3_131510_279931 | NW_004516062.1 | Scaffold645 | 279931                  | AA                              | TT                | 1946522089               |
| SNP_P3_131511_279935 | NW_004516062.1 | Scaffold645 | 279935                  | CC                              | TT                | 1946522090               |
| SNP_P3_131512_285142 | NW_004516062.1 | Scaffold645 | 285142                  | GG                              | CC                | 1946522092               |
| SNP_P3_131513_285336 | NW_004516062.1 | Scaffold645 | 285336                  | GG                              | CC                | 1946522093               |
| SNP_P3_131514_285583 | NW_004516062.1 | Scaffold645 | 285583                  | CC                              | AA                | 1946522094               |
| SNP_P3_131515_285619 | NW_004516062.1 | Scaffold645 | 285619                  | TT                              | AA                | 1946522096               |
| SNP_P3_131516_285625 | NW_004516062.1 | Scaffold645 | 285625                  | AA                              | GG                | 1946522097               |
| SNP_P3_131517_285804 | NW_004516062.1 | Scaffold645 | 285804                  | TT                              | AA                | 1946522099               |
| SNP_P3_131518_286415 | NW_004516062.1 | Scaffold645 | 286415                  | AA                              | GG                | 1946522100               |
| SNP_P3_131519_286976 | NW_004516062.1 | Scaffold645 | 286976                  | AA                              | TT                | 1946522102               |
| SNP_P3_131520_286980 | NW_004516062.1 | Scaffold645 | 286980                  | TT                              | CC                | 1946522103               |
| SNP_P3_131521_287061 | NW_004516062.1 | Scaffold645 | 287061                  | TT                              | GG                | 1946522104               |
| SNP_P3_131522_287294 | NW_004516062.1 | Scaffold645 | 287294                  | AA                              | TT                | 1946522106               |
| SNP_P3_131523_287312 | NW_004516062.1 | Scaffold645 | 287312                  | AA                              | CC                | 1946522107               |
| SNP_P3_131524_287317 | NW_004516062.1 | Scaffold645 | 287317                  | GG                              | CC                | 1946522109               |
| SNP_P3_131525_287380 | NW_004516062.1 | Scaffold645 | 287380                  | AA                              | CC                | 1946522110               |
| SNP_P3_131526_287464 | NW_004516062.1 | Scaffold645 | 287464                  | CC                              | AA                | 1946522111               |
| SNP_P3_131527_287465 | NW_004516062.1 | Scaffold645 | 287465                  | AA                              | TT                | 1946522113               |
| SNP_P3_131528_287603 | NW_004516062.1 | Scaffold645 | 287603                  | TT                              | AA                | 1946522114               |
| SNP_P3_131529_287651 | NW_004516062.1 | Scaffold645 | 287651                  | CC                              | TT                | 1946522116               |

| SNPs IDs             | Chromosome IDs | Chromosomes | Physical positions (bp) | CDC Frontier (Reference genome) | (Pusa 256 & HPNB) | NCBI SNPdb Accession IDs |
|----------------------|----------------|-------------|-------------------------|---------------------------------|-------------------|--------------------------|
| SNP_P3_131532_287866 | NW_004516062.1 | Scaffold645 | 287866                  | TT                              | GG                | 1946522117               |
| SNP_P3_131533_287893 | NW_004516062.1 | Scaffold645 | 287893                  | GG                              | TT                | 1946522118               |
| SNP_P3_131534_287906 | NW_004516062.1 | Scaffold645 | 287906                  | GG                              | CC                | 1946522120               |
| SNP_P3_131536_288208 | NW_004516062.1 | Scaffold645 | 288208                  | GG                              | TT                | 1946522121               |
| SNP_P3_131537_288303 | NW_004516062.1 | Scaffold645 | 288303                  | GG                              | TT                | 1946522123               |
| SNP_P3_131538_288750 | NW_004516062.1 | Scaffold645 | 288750                  | CC                              | TT                | 1946522124               |
| SNP_P3_131539_288979 | NW_004516062.1 | Scaffold645 | 288979                  | CC                              | TT                | 1946522126               |
| SNP_P3_131540_289827 | NW_004516062.1 | Scaffold645 | 289827                  | AA                              | GG                | 1946522127               |
| SNP_P3_131541_290062 | NW_004516062.1 | Scaffold645 | 290062                  | AA                              | GG                | 1946522129               |
| SNP_P3_131542_290134 | NW_004516062.1 | Scaffold645 | 290134                  | GG                              | AA                | 1946522130               |
| SNP_P3_131543_290138 | NW_004516062.1 | Scaffold645 | 290138                  | GG                              | AA                | 1946522131               |
| SNP_P3_131544_300165 | NW_004516062.1 | Scaffold645 | 300165                  | GG                              | AA                | 1946522133               |
| SNP_P3_131545_301221 | NW_004516062.1 | Scaffold645 | 301221                  | AA                              | GG                | 1946522134               |
| SNP_P3_131546_302579 | NW_004516062.1 | Scaffold645 | 302579                  | TT                              | AA                | 1946522136               |
| SNP_P3_131547_302641 | NW_004516062.1 | Scaffold645 | 302641                  | TT                              | CC                | 1946522137               |
| SNP_P3_131548_303912 | NW_004516062.1 | Scaffold645 | 303912                  | TT                              | CC                | 1946522139               |
| SNP_P3_131549_303924 | NW_004516062.1 | Scaffold645 | 303924                  | TT                              | GG                | 1946522140               |
| SNP_P3_131550_489    | NW_004516064.1 | Scaffold647 | 489                     | AA                              | TT                | 1946522142               |
| SNP_P3_131551_634    | NW_004516064.1 | Scaffold647 | 634                     | TT                              | CC                | 1946522143               |
| SNP_P3_131552_723    | NW_004516064.1 | Scaffold647 | 723                     | GG                              | CC                | 1946522144               |
| SNP_P3_131553_752    | NW_004516064.1 | Scaffold647 | 752                     | CC                              | TT                | 1946522146               |
| SNP_P3_131554_773    | NW_004516064.1 | Scaffold647 | 773                     | TT                              | CC                | 1946522147               |
| SNP_P3_131555_774    | NW_004516064.1 | Scaffold647 | 774                     | AA                              | CC                | 1946522149               |
| SNP_P3_131556_780    | NW_004516064.1 | Scaffold647 | 780                     | TT                              | CC                | 1946522150               |
| SNP_P3_131557_984    | NW_004516064.1 | Scaffold647 | 984                     | TT                              | GG                | 1946522151               |
| SNP_P3_131558_1032   | NW_004516064.1 | Scaffold647 | 1032                    | CC                              | GG                | 1946522153               |
| SNP_P3_131559_1047   | NW_004516064.1 | Scaffold647 | 1047                    | TT                              | CC                | 1946522154               |
| SNP_P3_131560_7259   | NW_004516064.1 | Scaffold647 | 7259                    | GG                              | AA                | 1946522156               |
| SNP_P3_131561_7273   | NW_004516064.1 | Scaffold647 | 7273                    | GG                              | AA                | 1946522157               |
| SNP_P3_131562_7292   | NW_004516064.1 | Scaffold647 | 7292                    | TT                              | GG                | 1946522158               |
| SNP_P3_131563_7329   | NW_004516064.1 | Scaffold647 | 7329                    | TT                              | CC                | 1946522160               |
| SNP_P3_131564_7367   | NW_004516064.1 | Scaffold647 | 7367                    | TT                              | AA                | 1946522161               |
| SNP_P3_131565_7540   | NW_004516064.1 | Scaffold647 | 7540                    | AA                              | CC                | 1946522163               |
| SNP_P3_131566_7574   | NW_004516064.1 | Scaffold647 | 7574                    | AA                              | GG                | 1946522164               |
| SNP_P3_131567_7637   | NW_004516064.1 | Scaffold647 | 7637                    | AA                              | GG                | 1946522165               |
| SNP_P3_131568_7674   | NW_004516064.1 | Scaffold647 | 7674                    | GG                              | AA                | 1946522167               |
| SNP_P3_131569_7677   | NW_004516064.1 | Scaffold647 | 7677                    | TT                              | CC                | 1946522168               |
| SNP_P3_131570_9296   | NW_004516064.1 | Scaffold647 | 9296                    | GG                              | TT                | 1946522170               |
| SNP_P3_131571_15626  | NW_004516064.1 | Scaffold647 | 15626                   | CC                              | AA                | 1946522171               |
| SNP_P3_131572_15918  | NW_004516064.1 | Scaffold647 | 15918                   | GG                              | AA                | 1946522173               |
| SNP_P3_131573_21371  | NW_004516064.1 | Scaffold647 | 21371                   | GG                              | AA                | 1946522174               |
| SNP_P3_131574_22975  | NW_004516064.1 | Scaffold647 | 22975                   | CC                              | TT                | 1946522176               |

| SNPs IDs            | Chromosome IDs | Chromosomes | Physical positions (bp) | CDC Frontier (Reference genome) | (Pusa 256 & HPNB) | NCBI SNPdb Accession IDs |
|---------------------|----------------|-------------|-------------------------|---------------------------------|-------------------|--------------------------|
| SNP_P3_131575_26727 | NW_004516064.1 | Scaffold647 | 26727                   | GG                              | AA                | 1946522177               |
| SNP_P3_131576_30151 | NW_004516064.1 | Scaffold647 | 30151                   | TT                              | CC                | 1946522178               |
| SNP_P3_131577_30265 | NW_004516064.1 | Scaffold647 | 30265                   | CC                              | TT                | 1946522180               |
| SNP_P3_131578_30923 | NW_004516064.1 | Scaffold647 | 30923                   | GG                              | CC                | 1946522181               |
| SNP_P3_131579_35968 | NW_004516064.1 | Scaffold647 | 35968                   | TT                              | AA                | 1946522183               |
| SNP_P3_131580_36017 | NW_004516064.1 | Scaffold647 | 36017                   | CC                              | AA                | 1946522184               |
| SNP_P3_131581_40439 | NW_004516064.1 | Scaffold647 | 40439                   | GG                              | CC                | 1946522185               |
| SNP_P3_131582_40442 | NW_004516064.1 | Scaffold647 | 40442                   | GG                              | AA                | 1946522187               |
| SNP_P3_131583_40466 | NW_004516064.1 | Scaffold647 | 40466                   | GG                              | AA                | 1946522188               |
| SNP_P3_131584_40477 | NW_004516064.1 | Scaffold647 | 40477                   | TT                              | GG                | 1946522189               |
| SNP_P3_131585_40572 | NW_004516064.1 | Scaffold647 | 40572                   | AA                              | GG                | 1946522191               |
| SNP_P3_131586_40583 | NW_004516064.1 | Scaffold647 | 40583                   | TT                              | GG                | 1946522192               |
| SNP_P3_131587_40604 | NW_004516064.1 | Scaffold647 | 40604                   | CC                              | AA                | 1946522194               |
| SNP_P3_131588_46851 | NW_004516064.1 | Scaffold647 | 46851                   | GG                              | AA                | 1946522195               |
| SNP_P3_131589_46921 | NW_004516064.1 | Scaffold647 | 46921                   | CC                              | TT                | 1946522197               |
| SNP_P3_131590_46978 | NW_004516064.1 | Scaffold647 | 46978                   | AA                              | GG                | 1946522198               |
| SNP_P3_131591_47167 | NW_004516064.1 | Scaffold647 | 47167                   | AA                              | GG                | 1946522199               |
| SNP_P3_131592_47232 | NW_004516064.1 | Scaffold647 | 47232                   | GG                              | AA                | 1946522201               |
| SNP_P3_131593_47259 | NW_004516064.1 | Scaffold647 | 47259                   | CC                              | TT                | 1946522202               |
| SNP_P3_131594_47268 | NW_004516064.1 | Scaffold647 | 47268                   | AA                              | TT                | 1946522204               |
| SNP_P3_131595_48972 | NW_004516064.1 | Scaffold647 | 48972                   | CC                              | TT                | 1946522205               |
| SNP_P3_131596_49945 | NW_004516064.1 | Scaffold647 | 49945                   | TT                              | CC                | 1946522206               |
| SNP_P3_131597_62114 | NW_004516064.1 | Scaffold647 | 62114                   | AA                              | GG                | 1946522208               |
| SNP_P3_131598_62119 | NW_004516064.1 | Scaffold647 | 62119                   | GG                              | CC                | 1946522209               |
| SNP_P3_131599_67924 | NW_004516064.1 | Scaffold647 | 67924                   | GG                              | AA                | 1946522211               |
| SNP_P3_131600_71274 | NW_004516064.1 | Scaffold647 | 71274                   | TT                              | CC                | 1946522212               |
| SNP_P3_131601_71419 | NW_004516064.1 | Scaffold647 | 71419                   | TT                              | CC                | 1946522213               |
| SNP_P3_131602_71691 | NW_004516064.1 | Scaffold647 | 71691                   | TT                              | CC                | 1946522215               |
| SNP_P3_131603_71764 | NW_004516064.1 | Scaffold647 | 71764                   | AA                              | CC                | 1946522216               |
| SNP_P3_131604_71827 | NW_004516064.1 | Scaffold647 | 71827                   | TT                              | GG                | 1946522218               |
| SNP_P3_131605_71844 | NW_004516064.1 | Scaffold647 | 71844                   | TT                              | AA                | 1946522219               |
| SNP_P3_131606_71855 | NW_004516064.1 | Scaffold647 | 71855                   | CC                              | GG                | 1946522220               |
| SNP_P3_131607_71870 | NW_004516064.1 | Scaffold647 | 71870                   | GG                              | TT                | 1946522222               |
| SNP_P3_131608_71891 | NW_004516064.1 | Scaffold647 | 71891                   | TT                              | CC                | 1946522223               |
| SNP_P3_131609_71911 | NW_004516064.1 | Scaffold647 | 71911                   | TT                              | CC                | 1946522225               |
| SNP_P3_131610_72635 | NW_004516064.1 | Scaffold647 | 72635                   | GG                              | AA                | 1946522226               |
| SNP_P3_131611_72649 | NW_004516064.1 | Scaffold647 | 72649                   | AA                              | GG                | 1946522228               |
| SNP_P3_131612_72664 | NW_004516064.1 | Scaffold647 | 72664                   | TT                              | CC                | 1946522229               |
| SNP_P3_131613_72976 | NW_004516064.1 | Scaffold647 | 72976                   | TT                              | GG                | 1946522231               |
| SNP_P3_131614_72977 | NW_004516064.1 | Scaffold647 | 72977                   | GG                              | AA                | 1946522232               |
| SNP_P3_131615_85477 | NW_004516064.1 | Scaffold647 | 85477                   | AA                              | GG                | 1946522233               |
| SNP_P3_131616_85505 | NW_004516064.1 | Scaffold647 | 85505                   | TT                              | CC                | 1946522235               |

| SNPs IDs             | Chromosome IDs | Chromosomes | Physical positions (bp) | CDC Frontier (Reference genome) | (Pusa 256 & HPNB) | NCBI SNPdb Accession IDs |
|----------------------|----------------|-------------|-------------------------|---------------------------------|-------------------|--------------------------|
| SNP_P3_131617_86437  | NW_004516064.1 | Scaffold647 | 86437                   | AA                              | GG                | 1946522236               |
| SNP_P3_131618_86444  | NW_004516064.1 | Scaffold647 | 86444                   | CC                              | TT                | 1946522238               |
| SNP_P3_131619_86462  | NW_004516064.1 | Scaffold647 | 86462                   | AA                              | TT                | 1946522239               |
| SNP_P3_131620_86502  | NW_004516064.1 | Scaffold647 | 86502                   | TT                              | AA                | 1946522241               |
| SNP_P3_131621_86628  | NW_004516064.1 | Scaffold647 | 86628                   | AA                              | CC                | 1946522242               |
| SNP_P3_131622_86738  | NW_004516064.1 | Scaffold647 | 86738                   | TT                              | CC                | 1946522243               |
| SNP_P3_131623_86815  | NW_004516064.1 | Scaffold647 | 86815                   | TT                              | CC                | 1946522245               |
| SNP_P3_131624_89941  | NW_004516064.1 | Scaffold647 | 89941                   | TT                              | AA                | 1946522246               |
| SNP_P3_131625_90001  | NW_004516064.1 | Scaffold647 | 90001                   | AA                              | TT                | 1946522248               |
| SNP_P3_131626_93246  | NW_004516064.1 | Scaffold647 | 93246                   | AA                              | TT                | 1946522249               |
| SNP_P3_131627_93301  | NW_004516064.1 | Scaffold647 | 93301                   | CC                              | GG                | 1946522250               |
| SNP_P3_131628_93587  | NW_004516064.1 | Scaffold647 | 93587                   | TT                              | CC                | 1946522252               |
| SNP_P3_131629_94157  | NW_004516064.1 | Scaffold647 | 94157                   | AA                              | GG                | 1946522253               |
| SNP_P3_131630_94232  | NW_004516064.1 | Scaffold647 | 94232                   | TT                              | GG                | 1946522255               |
| SNP_P3_131631_100353 | NW_004516064.1 | Scaffold647 | 100353                  | GG                              | AA                | 1946522256               |
| SNP_P3_131632_109983 | NW_004516064.1 | Scaffold647 | 109983                  | AA                              | TT                | 1946522257               |
| SNP_P3_131633_110000 | NW_004516064.1 | Scaffold647 | 110000                  | TT                              | CC                | 1946522259               |
| SNP_P3_131634_120049 | NW_004516064.1 | Scaffold647 | 120049                  | TT                              | AA                | 1946522260               |
| SNP_P3_131635_120567 | NW_004516064.1 | Scaffold647 | 120567                  | CC                              | TT                | 1946522262               |
| SNP_P3_131636_129140 | NW_004516064.1 | Scaffold647 | 129140                  | TT                              | CC                | 1946522263               |
| SNP_P3_131637_129143 | NW_004516064.1 | Scaffold647 | 129143                  | GG                              | AA                | 1946522265               |
| SNP_P3_131638_129180 | NW_004516064.1 | Scaffold647 | 129180                  | AA                              | TT                | 1946522266               |
| SNP_P3_131639_132964 | NW_004516064.1 | Scaffold647 | 132964                  | CC                              | TT                | 1946522267               |
| SNP_P3_131640_140581 | NW_004516064.1 | Scaffold647 | 140581                  | TT                              | GG                | 1946522269               |
| SNP_P3_131641_147050 | NW_004516064.1 | Scaffold647 | 147050                  | GG                              | AA                | 1946522270               |
| SNP_P3_131642_147055 | NW_004516064.1 | Scaffold647 | 147055                  | TT                              | CC                | 1946522272               |
| SNP_P3_131643_162341 | NW_004516064.1 | Scaffold647 | 162341                  | AA                              | GG                | 1946522273               |
| SNP_P3_131644_168981 | NW_004516064.1 | Scaffold647 | 168981                  | GG                              | AA                | 1946522275               |
| SNP_P3_131645_168991 | NW_004516064.1 | Scaffold647 | 168991                  | CC                              | TT                | 1946522276               |
| SNP_P3_131646_169009 | NW_004516064.1 | Scaffold647 | 169009                  | CC                              | AA                | 1946522278               |
| SNP_P3_131647_169186 | NW_004516064.1 | Scaffold647 | 169186                  | TT                              | AA                | 1946522279               |
| SNP_P3_131648_169774 | NW_004516064.1 | Scaffold647 | 169774                  | CC                              | TT                | 1946522280               |
| SNP_P3_131649_186984 | NW_004516064.1 | Scaffold647 | 186984                  | AA                              | GG                | 1946522282               |
| SNP_P3_131650_189861 | NW_004516064.1 | Scaffold647 | 189861                  | TT                              | CC                | 1946522283               |
| SNP_P3_131651_190120 | NW_004516064.1 | Scaffold647 | 190120                  | AA                              | CC                | 1946522285               |
| SNP_P3_131652_191363 | NW_004516064.1 | Scaffold647 | 191363                  | TT                              | CC                | 1946522286               |
| SNP_P3_131653_191692 | NW_004516064.1 | Scaffold647 | 191692                  | TT                              | CC                | 1946522287               |
| SNP_P3_131654_191714 | NW_004516064.1 | Scaffold647 | 191714                  | TT                              | CC                | 1946522289               |
| SNP_P3_131655_193238 | NW_004516064.1 | Scaffold647 | 193238                  | TT                              | AA                | 1946522290               |
| SNP_P3_131656_193239 | NW_004516064.1 | Scaffold647 | 193239                  | GG                              | AA                | 1946522292               |
| SNP_P3_131658_201328 | NW_004516064.1 | Scaffold647 | 201328                  | GG                              | AA                | 1946522293               |
| SNP_P3_131659_201749 | NW_004516064.1 | Scaffold647 | 201749                  | AA                              | TT                | 1946522295               |

| SNPs IDs             | Chromosome IDs | Chromosomes | Physical positions (bp) | CDC Frontier (Reference genome) | (Pusa 256 & HPNB) | NCBI SNPdb Accession IDs |
|----------------------|----------------|-------------|-------------------------|---------------------------------|-------------------|--------------------------|
| SNP_P3_131660_201762 | NW_004516064.1 | Scaffold647 | 201762                  | GG                              | AA                | 1946522296               |
| SNP_P3_131661_201779 | NW_004516064.1 | Scaffold647 | 201779                  | TT                              | CC                | 1946522297               |
| SNP_P3_131662_201781 | NW_004516064.1 | Scaffold647 | 201781                  | AA                              | GG                | 1946522299               |
| SNP_P3_131663_201786 | NW_004516064.1 | Scaffold647 | 201786                  | GG                              | AA                | 1946522300               |
| SNP_P3_131664_201789 | NW_004516064.1 | Scaffold647 | 201789                  | CC                              | TT                | 1946522302               |
| SNP_P3_131665_201850 | NW_004516064.1 | Scaffold647 | 201850                  | TT                              | GG                | 1946522303               |
| SNP_P3_131666_212415 | NW_004516064.1 | Scaffold647 | 212415                  | TT                              | CC                | 1946522305               |
| SNP_P3_131667_212477 | NW_004516064.1 | Scaffold647 | 212477                  | CC                              | AA                | 1946522306               |
| SNP_P3_131668_212569 | NW_004516064.1 | Scaffold647 | 212569                  | TT                              | CC                | 1946522307               |
| SNP_P3_131669_212602 | NW_004516064.1 | Scaffold647 | 212602                  | TT                              | GG                | 1946522309               |
| SNP_P3_131670_212606 | NW_004516064.1 | Scaffold647 | 212606                  | TT                              | CC                | 1946522310               |
| SNP_P3_131671_212627 | NW_004516064.1 | Scaffold647 | 212627                  | TT                              | GG                | 1946522312               |
| SNP_P3_131672_212699 | NW_004516064.1 | Scaffold647 | 212699                  | AA                              | GG                | 1946522313               |
| SNP_P3_131673_212735 | NW_004516064.1 | Scaffold647 | 212735                  | TT                              | CC                | 1946522314               |
| SNP_P3_131674_212769 | NW_004516064.1 | Scaffold647 | 212769                  | TT                              | CC                | 1946522316               |
| SNP_P3_131675_212778 | NW_004516064.1 | Scaffold647 | 212778                  | GG                              | CC                | 1946522317               |
| SNP_P3_131676_212800 | NW_004516064.1 | Scaffold647 | 212800                  | CC                              | TT                | 1946522319               |
| SNP_P3_131677_212938 | NW_004516064.1 | Scaffold647 | 212938                  | GG                              | AA                | 1946522320               |
| SNP_P3_131678_526    | NW_004516065.1 | Scaffold648 | 526                     | GG                              | TT                | 1946522321               |
| SNP_P3_131679_730    | NW_004516065.1 | Scaffold648 | 730                     | AA                              | CC                | 1946522323               |
| SNP_P3_131680_904    | NW_004516065.1 | Scaffold648 | 904                     | CC                              | TT                | 1946522324               |
| SNP_P3_131681_908    | NW_004516065.1 | Scaffold648 | 908                     | GG                              | TT                | 1946522326               |
| SNP_P3_131682_937    | NW_004516065.1 | Scaffold648 | 937                     | GG                              | CC                | 1946522327               |
| SNP_P3_131683_1319   | NW_004516065.1 | Scaffold648 | 1319                    | GG                              | AA                | 1946522329               |
| SNP_P3_131684_1337   | NW_004516065.1 | Scaffold648 | 1337                    | TT                              | AA                | 1946522330               |
| SNP_P3_131685_1563   | NW_004516065.1 | Scaffold648 | 1563                    | CC                              | AA                | 1946522331               |
| SNP_P3_131686_1659   | NW_004516065.1 | Scaffold648 | 1659                    | AA                              | GG                | 1946522333               |
| SNP_P3_131687_1843   | NW_004516065.1 | Scaffold648 | 1843                    | AA                              | TT                | 1946522335               |
| SNP_P3_131688_1879   | NW_004516065.1 | Scaffold648 | 1879                    | AA                              | GG                | 1946522336               |
| SNP_P3_131689_2497   | NW_004516065.1 | Scaffold648 | 2497                    | TT                              | AA                | 1946522337               |
| SNP_P3_131690_2999   | NW_004516065.1 | Scaffold648 | 2999                    | GG                              | CC                | 1946522339               |
| SNP_P3_131692_4235   | NW_004516065.1 | Scaffold648 | 4235                    | AA                              | GG                | 1946522340               |
| SNP_P3_131693_4257   | NW_004516065.1 | Scaffold648 | 4257                    | TT                              | GG                | 1946522342               |
| SNP_P3_131694_4294   | NW_004516065.1 | Scaffold648 | 4294                    | AA                              | GG                | 1946522343               |
| SNP_P3_131695_4314   | NW_004516065.1 | Scaffold648 | 4314                    | TT                              | CC                | 1946522345               |
| SNP_P3_131696_4333   | NW_004516065.1 | Scaffold648 | 4333                    | TT                              | CC                | 1946522346               |
| SNP_P3_131697_4557   | NW_004516065.1 | Scaffold648 | 4557                    | GG                              | TT                | 1946522347               |
| SNP_P3_131698_12600  | NW_004516065.1 | Scaffold648 | 12600                   | AA                              | TT                | 1946522349               |
| SNP_P3_131699_19771  | NW_004516065.1 | Scaffold648 | 19771                   | GG                              | AA                | 1946522350               |
| SNP_P3_131700_19783  | NW_004516065.1 | Scaffold648 | 19783                   | AA                              | GG                | 1946522352               |
| SNP_P3_131701_25761  | NW_004516065.1 | Scaffold648 | 25761                   | GG                              | AA                | 1946522353               |
| SNP_P3_131702_29562  | NW_004516065.1 | Scaffold648 | 29562                   | AA                              | GG                | 1946522355               |

| SNPs IDs             | Chromosome IDs | Chromosomes | Physical positions (bp) | CDC Frontier (Reference genome) | (Pusa 256 & HPNB) | NCBI SNPdb Accession IDs |
|----------------------|----------------|-------------|-------------------------|---------------------------------|-------------------|--------------------------|
| SNP_P3_131704_2230   | NW_004516067.1 | Scaffold651 | 2230                    | TT                              | CC                | 1946522356               |
| SNP_P3_131705_2270   | NW_004516067.1 | Scaffold651 | 2270                    | TT                              | CC                | 1946522358               |
| SNP_P3_131706_2412   | NW_004516067.1 | Scaffold651 | 2412                    | GG                              | AA                | 1946522359               |
| SNP_P3_131707_2598   | NW_004516067.1 | Scaffold651 | 2598                    | AA                              | TT                | 1946522360               |
| SNP_P3_131708_3357   | NW_004516067.1 | Scaffold651 | 3357                    | AA                              | TT                | 1946522362               |
| SNP_P3_131709_7595   | NW_004516067.1 | Scaffold651 | 7595                    | AA                              | CC                | 1946522363               |
| SNP_P3_131710_7780   | NW_004516067.1 | Scaffold651 | 7780                    | TT                              | AA                | 1946522365               |
| SNP_P3_131711_7833   | NW_004516067.1 | Scaffold651 | 7833                    | CC                              | TT                | 1946522366               |
| SNP_P3_131712_7843   | NW_004516067.1 | Scaffold651 | 7843                    | TT                              | AA                | 1946522367               |
| SNP_P3_131713_7917   | NW_004516067.1 | Scaffold651 | 7917                    | TT                              | GG                | 1946522369               |
| SNP_P3_131714_7934   | NW_004516067.1 | Scaffold651 | 7934                    | TT                              | AA                | 1946522370               |
| SNP_P3_131715_16931  | NW_004516067.1 | Scaffold651 | 16931                   | GG                              | AA                | 1946522372               |
| SNP_P3_131716_27591  | NW_004516067.1 | Scaffold651 | 27591                   | CC                              | TT                | 1946522373               |
| SNP_P3_131717_27609  | NW_004516067.1 | Scaffold651 | 27609                   | CC                              | TT                | 1946522375               |
| SNP_P3_131719_35480  | NW_004516067.1 | Scaffold651 | 35480                   | GG                              | CC                | 1946522376               |
| SNP_P3_131720_35586  | NW_004516067.1 | Scaffold651 | 35586                   | AA                              | CC                | 1946522377               |
| SNP_P3_131722_38999  | NW_004516067.1 | Scaffold651 | 38999                   | GG                              | TT                | 1946522379               |
| SNP_P3_131723_41249  | NW_004516067.1 | Scaffold651 | 41249                   | GG                              | CC                | 1946522380               |
| SNP_P3_131724_41366  | NW_004516067.1 | Scaffold651 | 41366                   | GG                              | CC                | 1946522382               |
| SNP_P3_131725_41416  | NW_004516067.1 | Scaffold651 | 41416                   | AA                              | GG                | 1946522383               |
| SNP_P3_131726_41436  | NW_004516067.1 | Scaffold651 | 41436                   | AA                              | GG                | 1946522384               |
| SNP_P3_131727_42283  | NW_004516067.1 | Scaffold651 | 42283                   | GG                              | AA                | 1946522386               |
| SNP_P3_131728_46456  | NW_004516067.1 | Scaffold651 | 46456                   | AA                              | TT                | 1946522387               |
| SNP_P3_131729_46652  | NW_004516067.1 | Scaffold651 | 46652                   | AA                              | GG                | 1946522389               |
| SNP_P3_131730_47561  | NW_004516067.1 | Scaffold651 | 47561                   | CC                              | TT                | 1946522390               |
| SNP_P3_131731_58904  | NW_004516067.1 | Scaffold651 | 58904                   | TT                              | AA                | 1946522391               |
| SNP_P3_131732_58910  | NW_004516067.1 | Scaffold651 | 58910                   | GG                              | CC                | 1946522393               |
| SNP_P3_131733_58969  | NW_004516067.1 | Scaffold651 | 58969                   | AA                              | TT                | 1946522395               |
| SNP_P3_131734_65048  | NW_004516067.1 | Scaffold651 | 65048                   | GG                              | AA                | 1946522396               |
| SNP_P3_131735_65098  | NW_004516067.1 | Scaffold651 | 65098                   | TT                              | AA                | 1946522397               |
| SNP_P3_131736_72631  | NW_004516067.1 | Scaffold651 | 72631                   | TT                              | CC                | 1946522399               |
| SNP_P3_131737_72649  | NW_004516067.1 | Scaffold651 | 72649                   | TT                              | AA                | 1946522400               |
| SNP_P3_131738_55     | NW_004516068.1 | Scaffold652 | 55                      | TT                              | GG                | 1946522402               |
| SNP_P3_131739_75     | NW_004516068.1 | Scaffold652 | 75                      | CC                              | TT                | 1946522403               |
| SNP_P3_131740_485    | NW_004516068.1 | Scaffold652 | 485                     | TT                              | CC                | 1946522405               |
| SNP_P3_131741_9801   | NW_004516069.1 | Scaffold653 | 9801                    | CC                              | TT                | 1946522406               |
| SNP_P3_131744_140787 | NW_004516069.1 | Scaffold653 | 140787                  | CC                              | TT                | 1946522407               |
| SNP_P3_131745_171120 | NW_004516069.1 | Scaffold653 | 171120                  | GG                              | AA                | 1946522409               |
| SNP_P3_131747_172593 | NW_004516069.1 | Scaffold653 | 172593                  | GG                              | AA                | 1946522410               |
| SNP_P3_131748_172671 | NW_004516069.1 | Scaffold653 | 172671                  | GG                              | AA                | 1946522412               |
| SNP_P3_131749_172688 | NW_004516069.1 | Scaffold653 | 172688                  | CC                              | TT                | 1946522413               |
| SNP_P3_131750_172732 | NW_004516069.1 | Scaffold653 | 172732                  | AA                              | GG                | 1946522414               |

| SNPs IDs             | Chromosome IDs | Chromosomes | Physical positions (bp) | CDC Frontier (Reference genome) | (Pusa 256 & HPNB) | NCBI SNPdb Accession IDs |
|----------------------|----------------|-------------|-------------------------|---------------------------------|-------------------|--------------------------|
| SNP_P3_131751_172840 | NW_004516069.1 | Scaffold653 | 172840                  | AA                              | GG                | 1946522416               |
| SNP_P3_131752_172998 | NW_004516069.1 | Scaffold653 | 172998                  | TT                              | AA                | 1946522417               |
| SNP_P3_131753_173042 | NW_004516069.1 | Scaffold653 | 173042                  | CC                              | TT                | 1946522419               |
| SNP_P3_131754_173340 | NW_004516069.1 | Scaffold653 | 173340                  | CC                              | AA                | 1946522420               |
| SNP_P3_131755_173611 | NW_004516069.1 | Scaffold653 | 173611                  | GG                              | TT                | 1946522421               |
| SNP_P3_131756_173673 | NW_004516069.1 | Scaffold653 | 173673                  | CC                              | TT                | 1946522423               |
| SNP_P3_131757_173736 | NW_004516069.1 | Scaffold653 | 173736                  | TT                              | CC                | 1946522424               |
| SNP_P3_131758_174361 | NW_004516069.1 | Scaffold653 | 174361                  | CC                              | TT                | 1946522426               |
| SNP_P3_131759_174368 | NW_004516069.1 | Scaffold653 | 174368                  | TT                              | CC                | 1946522427               |
| SNP_P3_131760_174492 | NW_004516069.1 | Scaffold653 | 174492                  | AA                              | GG                | 1946522429               |
| SNP_P3_131761_174605 | NW_004516069.1 | Scaffold653 | 174605                  | CC                              | GG                | 1946522430               |
| SNP_P3_131762_174650 | NW_004516069.1 | Scaffold653 | 174650                  | GG                              | AA                | 1946522432               |
| SNP_P3_131763_174819 | NW_004516069.1 | Scaffold653 | 174819                  | AA                              | GG                | 1946522433               |
| SNP_P3_131764_174873 | NW_004516069.1 | Scaffold653 | 174873                  | GG                              | AA                | 1946522434               |
| SNP_P3_131765_174875 | NW_004516069.1 | Scaffold653 | 174875                  | AA                              | GG                | 1946522436               |
| SNP_P3_131766_175078 | NW_004516069.1 | Scaffold653 | 175078                  | TT                              | AA                | 1946522437               |
| SNP_P3_131767_176821 | NW_004516069.1 | Scaffold653 | 176821                  | TT                              | AA                | 1946522439               |
| SNP_P3_131768_176983 | NW_004516069.1 | Scaffold653 | 176983                  | AA                              | GG                | 1946522440               |
| SNP_P3_131769_176994 | NW_004516069.1 | Scaffold653 | 176994                  | TT                              | AA                | 1946522441               |
| SNP_P3_131770_177070 | NW_004516069.1 | Scaffold653 | 177070                  | TT                              | CC                | 1946522443               |
| SNP_P3_131771_177218 | NW_004516069.1 | Scaffold653 | 177218                  | CC                              | TT                | 1946522444               |
| SNP_P3_131772_177307 | NW_004516069.1 | Scaffold653 | 177307                  | AA                              | GG                | 1946522446               |
| SNP_P3_131773_177318 | NW_004516069.1 | Scaffold653 | 177318                  | GG                              | AA                | 1946522447               |
| SNP_P3_131774_177347 | NW_004516069.1 | Scaffold653 | 177347                  | AA                              | TT                | 1946522448               |
| SNP_P3_131775_177535 | NW_004516069.1 | Scaffold653 | 177535                  | GG                              | AA                | 1946522450               |
| SNP_P3_131776_177538 | NW_004516069.1 | Scaffold653 | 177538                  | CC                              | TT                | 1946522451               |
| SNP_P3_131778_177799 | NW_004516069.1 | Scaffold653 | 177799                  | AA                              | CC                | 1946522453               |
| SNP_P3_131779_177832 | NW_004516069.1 | Scaffold653 | 177832                  | TT                              | CC                | 1946522454               |
| SNP_P3_131780_177897 | NW_004516069.1 | Scaffold653 | 177897                  | GG                              | AA                | 1946522456               |
| SNP_P3_131781_177902 | NW_004516069.1 | Scaffold653 | 177902                  | GG                              | AA                | 1946522457               |
| SNP_P3_131782_178096 | NW_004516069.1 | Scaffold653 | 178096                  | CC                              | TT                | 1946522459               |
| SNP_P3_131783_178105 | NW_004516069.1 | Scaffold653 | 178105                  | AA                              | TT                | 1946522460               |
| SNP_P3_131784_178137 | NW_004516069.1 | Scaffold653 | 178137                  | CC                              | TT                | 1946522462               |
| SNP_P3_131785_178828 | NW_004516069.1 | Scaffold653 | 178828                  | TT                              | GG                | 1946522463               |
| SNP_P3_131786_178841 | NW_004516069.1 | Scaffold653 | 178841                  | CC                              | TT                | 1946522465               |
| SNP_P3_131787_179048 | NW_004516069.1 | Scaffold653 | 179048                  | TT                              | GG                | 1946522466               |
| SNP_P3_131788_179121 | NW_004516069.1 | Scaffold653 | 179121                  | CC                              | AA                | 1946522468               |
| SNP_P3_131789_179149 | NW_004516069.1 | Scaffold653 | 179149                  | TT                              | CC                | 1946522469               |
| SNP_P3_131790_179379 | NW_004516069.1 | Scaffold653 | 179379                  | TT                              | CC                | 1946522470               |
| SNP_P3_131791_179512 | NW_004516069.1 | Scaffold653 | 179512                  | AA                              | GG                | 1946522472               |
| SNP_P3_131792_180297 | NW_004516069.1 | Scaffold653 | 180297                  | GG                              | CC                | 1946522473               |
| SNP_P3_131793_181898 | NW_004516069.1 | Scaffold653 | 181898                  | CC                              | GG                | 1946522475               |

| SNPs IDs             | Chromosome IDs | Chromosomes | Physical positions (bp) | CDC Frontier (Reference genome) | (Pusa 256 & HPNB) | NCBI SNPdb Accession IDs |
|----------------------|----------------|-------------|-------------------------|---------------------------------|-------------------|--------------------------|
| SNP_P3_131794_181899 | NW_004516069.1 | Scaffold653 | 181899                  | GG                              | AA                | 1946522476               |
| SNP_P3_131795_181902 | NW_004516069.1 | Scaffold653 | 181902                  | TT                              | GG                | 1946522478               |
| SNP_P3_131796_182374 | NW_004516069.1 | Scaffold653 | 182374                  | TT                              | CC                | 1946522479               |
| SNP_P3_131797_182378 | NW_004516069.1 | Scaffold653 | 182378                  | AA                              | CC                | 1946522481               |
| SNP_P3_131798_182396 | NW_004516069.1 | Scaffold653 | 182396                  | GG                              | AA                | 1946522482               |
| SNP_P3_131799_182407 | NW_004516069.1 | Scaffold653 | 182407                  | TT                              | CC                | 1946522483               |
| SNP_P3_131800_182513 | NW_004516069.1 | Scaffold653 | 182513                  | CC                              | TT                | 1946522485               |
| SNP_P3_131801_182524 | NW_004516069.1 | Scaffold653 | 182524                  | CC                              | AA                | 1946522486               |
| SNP_P3_131802_182709 | NW_004516069.1 | Scaffold653 | 182709                  | CC                              | TT                | 1946522488               |
| SNP_P3_131803_182744 | NW_004516069.1 | Scaffold653 | 182744                  | AA                              | TT                | 1946522489               |
| SNP_P3_131804_182861 | NW_004516069.1 | Scaffold653 | 182861                  | AA                              | CC                | 1946522491               |
| SNP_P3_131805_182877 | NW_004516069.1 | Scaffold653 | 182877                  | GG                              | CC                | 1946522492               |
| SNP_P3_131806_183112 | NW_004516069.1 | Scaffold653 | 183112                  | TT                              | CC                | 1946522494               |
| SNP_P3_131807_183135 | NW_004516069.1 | Scaffold653 | 183135                  | TT                              | CC                | 1946522495               |
| SNP_P3_131808_183143 | NW_004516069.1 | Scaffold653 | 183143                  | TT                              | AA                | 1946522497               |
| SNP_P3_131809_189129 | NW_004516069.1 | Scaffold653 | 189129                  | CC                              | TT                | 1946522498               |
| SNP_P3_131810_200882 | NW_004516069.1 | Scaffold653 | 200882                  | AA                              | GG                | 1946522499               |
| SNP_P3_131811_201098 | NW_004516069.1 | Scaffold653 | 201098                  | CC                              | GG                | 1946522501               |
| SNP_P3_131812_202731 | NW_004516069.1 | Scaffold653 | 202731                  | GG                              | AA                | 1946522502               |
| SNP_P3_131813_938    | NW_004516070.1 | Scaffold654 | 938                     | CC                              | TT                | 1946522504               |
| SNP_P3_131814_977    | NW_004516070.1 | Scaffold654 | 977                     | AA                              | TT                | 1946522505               |
| SNP_P3_131815_1280   | NW_004516070.1 | Scaffold654 | 1280                    | AA                              | TT                | 1946522506               |
| SNP_P3_131816_1309   | NW_004516070.1 | Scaffold654 | 1309                    | AA                              | GG                | 1946522508               |
| SNP_P3_131817_1393   | NW_004516070.1 | Scaffold654 | 1393                    | TT                              | CC                | 1946522509               |
| SNP_P3_131818_1395   | NW_004516070.1 | Scaffold654 | 1395                    | TT                              | GG                | 1946522511               |
| SNP_P3_131819_11347  | NW_004516070.1 | Scaffold654 | 11347                   | TT                              | GG                | 1946522512               |
| SNP_P3_131820_20869  | NW_004516070.1 | Scaffold654 | 20869                   | AA                              | GG                | 1946522514               |
| SNP_P3_131821_21239  | NW_004516070.1 | Scaffold654 | 21239                   | AA                              | GG                | 1946522515               |
| SNP_P3_131822_21315  | NW_004516070.1 | Scaffold654 | 21315                   | GG                              | TT                | 1946522516               |
| SNP_P3_131823_21325  | NW_004516070.1 | Scaffold654 | 21325                   | TT                              | AA                | 1946522518               |
| SNP_P3_131824_44560  | NW_004516070.1 | Scaffold654 | 44560                   | CC                              | AA                | 1946522520               |
| SNP_P3_131825_48357  | NW_004516070.1 | Scaffold654 | 48357                   | TT                              | CC                | 1946522522               |
| SNP_P3_131826_49537  | NW_004516070.1 | Scaffold654 | 49537                   | AA                              | GG                | 1946522523               |
| SNP_P3_131827_14964  | NW_004516075.1 | Scaffold661 | 14964                   | GG                              | AA                | 1946522525               |
| SNP_P3_131828_15035  | NW_004516075.1 | Scaffold661 | 15035                   | AA                              | GG                | 1946522526               |
| SNP_P3_131829_24563  | NW_004516075.1 | Scaffold661 | 24563                   | CC                              | TT                | 1946522528               |
| SNP_P3_131830_24565  | NW_004516075.1 | Scaffold661 | 24565                   | AA                              | TT                | 1946522529               |
| SNP_P3_131831_26023  | NW_004516075.1 | Scaffold661 | 26023                   | CC                              | AA                | 1946522531               |
| SNP_P3_131832_26025  | NW_004516075.1 | Scaffold661 | 26025                   | CC                              | TT                | 1946522532               |
| SNP_P3_131833_26611  | NW_004516075.1 | Scaffold661 | 26611                   | GG                              | AA                | 1946522534               |
| SNP_P3_131834_30451  | NW_004516075.1 | Scaffold661 | 30451                   | CC                              | TT                | 1946522535               |
| SNP_P3_131835_63212  | NW_004516075.1 | Scaffold661 | 63212                   | GG                              | CC                | 1946522536               |



| SNPs IDs             | Chromosome IDs | Chromosomes | Physical positions (bp) | CDC Frontier (Reference genome) | (Pusa 256 & HPNB) | NCBI SNPdb Accession IDs |
|----------------------|----------------|-------------|-------------------------|---------------------------------|-------------------|--------------------------|
| SNP_P3_131837_97316  | NW_004516075.1 | Scaffold661 | 97316                   | AA                              | GG                | 1946522538               |
| SNP_P3_131838_105994 | NW_004516075.1 | Scaffold661 | 105994                  | GG                              | AA                | 1946522539               |
| SNP_P3_131839_131549 | NW_004516075.1 | Scaffold661 | 131549                  | TT                              | CC                | 1946522541               |
| SNP_P3_131840_131629 | NW_004516075.1 | Scaffold661 | 131629                  | GG                              | CC                | 1946522542               |
| SNP_P3_131841_131981 | NW_004516075.1 | Scaffold661 | 131981                  | AA                              | TT                | 1946522543               |
| SNP_P3_131842_132026 | NW_004516075.1 | Scaffold661 | 132026                  | AA                              | CC                | 1946522545               |
| SNP_P3_131843_133164 | NW_004516075.1 | Scaffold661 | 133164                  | AA                              | GG                | 1946522546               |
| SNP_P3_131844_133184 | NW_004516075.1 | Scaffold661 | 133184                  | TT                              | GG                | 1946522548               |
| SNP_P3_131845_133188 | NW_004516075.1 | Scaffold661 | 133188                  | TT                              | AA                | 1946522549               |
| SNP_P3_131846_157574 | NW_004516075.1 | Scaffold661 | 157574                  | TT                              | GG                | 1946522551               |
| SNP_P3_131847_157666 | NW_004516075.1 | Scaffold661 | 157666                  | TT                              | CC                | 1946522552               |
| SNP_P3_131848_157727 | NW_004516075.1 | Scaffold661 | 157727                  | TT                              | AA                | 1946522553               |
| SNP_P3_131849_157820 | NW_004516075.1 | Scaffold661 | 157820                  | TT                              | GG                | 1946522555               |
| SNP_P3_131850_159992 | NW_004516075.1 | Scaffold661 | 159992                  | CC                              | AA                | 1946522556               |
| SNP_P3_131851_160020 | NW_004516075.1 | Scaffold661 | 160020                  | GG                              | AA                | 1946522558               |
| SNP_P3_131852_160366 | NW_004516075.1 | Scaffold661 | 160366                  | TT                              | AA                | 1946522559               |
| SNP_P3_131853_160408 | NW_004516075.1 | Scaffold661 | 160408                  | TT                              | CC                | 1946522561               |
| SNP_P3_131854_160415 | NW_004516075.1 | Scaffold661 | 160415                  | AA                              | CC                | 1946522562               |
| SNP_P3_131855_160424 | NW_004516075.1 | Scaffold661 | 160424                  | TT                              | CC                | 1946522563               |
| SNP_P3_131856_175713 | NW_004516075.1 | Scaffold661 | 175713                  | AA                              | TT                | 1946522565               |
| SNP_P3_131857_175714 | NW_004516075.1 | Scaffold661 | 175714                  | CC                              | AA                | 1946522566               |
| SNP_P3_131858_175748 | NW_004516075.1 | Scaffold661 | 175748                  | GG                              | AA                | 1946522568               |
| SNP_P3_131859_175752 | NW_004516075.1 | Scaffold661 | 175752                  | CC                              | TT                | 1946522569               |
| SNP_P3_131860_175835 | NW_004516075.1 | Scaffold661 | 175835                  | GG                              | CC                | 1946522570               |
| SNP_P3_131861_176111 | NW_004516075.1 | Scaffold661 | 176111                  | AA                              | GG                | 1946522572               |
| SNP_P3_131862_176123 | NW_004516075.1 | Scaffold661 | 176123                  | AA                              | GG                | 1946522573               |
| SNP_P3_131863_176126 | NW_004516075.1 | Scaffold661 | 176126                  | AA                              | GG                | 1946522575               |
| SNP_P3_131864_176132 | NW_004516075.1 | Scaffold661 | 176132                  | GG                              | AA                | 1946522576               |
| SNP_P3_131865_176145 | NW_004516075.1 | Scaffold661 | 176145                  | GG                              | CC                | 1946522578               |
| SNP_P3_131866_176159 | NW_004516075.1 | Scaffold661 | 176159                  | TT                              | CC                | 1946522579               |
| SNP_P3_131867_176188 | NW_004516075.1 | Scaffold661 | 176188                  | TT                              | CC                | 1946522580               |
| SNP_P3_131868_176198 | NW_004516075.1 | Scaffold661 | 176198                  | TT                              | CC                | 1946522582               |
| SNP_P3_131869_176213 | NW_004516075.1 | Scaffold661 | 176213                  | AA                              | GG                | 1946522584               |
| SNP_P3_131870_177850 | NW_004516075.1 | Scaffold661 | 177850                  | AA                              | CC                | 1946522585               |
| SNP_P3_131871_177854 | NW_004516075.1 | Scaffold661 | 177854                  | CC                              | TT                | 1946522586               |
| SNP_P3_131873_190750 | NW_004516075.1 | Scaffold661 | 190750                  | TT                              | GG                | 1946522588               |
| SNP_P3_131874_195421 | NW_004516075.1 | Scaffold661 | 195421                  | AA                              | GG                | 1946522589               |
| SNP_P3_131875_195548 | NW_004516075.1 | Scaffold661 | 195548                  | TT                              | CC                | 1946522591               |
| SNP_P3_131876_195551 | NW_004516075.1 | Scaffold661 | 195551                  | TT                              | CC                | 1946522592               |
| SNP_P3_131877_195553 | NW_004516075.1 | Scaffold661 | 195553                  | TT                              | GG                | 1946522593               |
| SNP_P3_131878_195852 | NW_004516075.1 | Scaffold661 | 195852                  | CC                              | TT                | 1946522595               |
| SNP_P3_131879_195855 | NW_004516075.1 | Scaffold661 | 195855                  | GG                              | AA                | 1946522596               |

| SNPs IDs             | Chromosome IDs | Chromosomes | Physical positions (bp) | CDC Frontier (Reference genome) | (Pusa 256 & HPNB) | NCBI SNPdb Accession IDs |
|----------------------|----------------|-------------|-------------------------|---------------------------------|-------------------|--------------------------|
| SNP_P3_131880_195890 | NW_004516075.1 | Scaffold661 | 195890                  | TT                              | AA                | 1946522598               |
| SNP_P3_131881_195894 | NW_004516075.1 | Scaffold661 | 195894                  | GG                              | AA                | 1946522599               |
| SNP_P3_131882_195897 | NW_004516075.1 | Scaffold661 | 195897                  | AA                              | GG                | 1946522601               |
| SNP_P3_131883_195927 | NW_004516075.1 | Scaffold661 | 195927                  | CC                              | AA                | 1946522602               |
| SNP_P3_131884_195956 | NW_004516075.1 | Scaffold661 | 195956                  | AA                              | GG                | 1946522603               |
| SNP_P3_131885_200992 | NW_004516075.1 | Scaffold661 | 200992                  | GG                              | TT                | 1946522605               |
| SNP_P3_131887_201397 | NW_004516075.1 | Scaffold661 | 201397                  | CC                              | GG                | 1946522606               |
| SNP_P3_131889_229629 | NW_004516075.1 | Scaffold661 | 229629                  | GG                              | TT                | 1946522607               |
| SNP_P3_131890_232653 | NW_004516075.1 | Scaffold661 | 232653                  | AA                              | GG                | 1946522609               |
| SNP_P3_131891_239398 | NW_004516075.1 | Scaffold661 | 239398                  | TT                              | GG                | 1946522610               |
| SNP_P3_131892_272044 | NW_004516075.1 | Scaffold661 | 272044                  | AA                              | GG                | 1946522612               |
| SNP_P3_131893_272172 | NW_004516075.1 | Scaffold661 | 272172                  | CC                              | TT                | 1946522613               |
| SNP_P3_131894_272173 | NW_004516075.1 | Scaffold661 | 272173                  | CC                              | TT                | 1946522615               |
| SNP_P3_131895_272443 | NW_004516075.1 | Scaffold661 | 272443                  | TT                              | CC                | 1946522616               |
| SNP_P3_131896_272525 | NW_004516075.1 | Scaffold661 | 272525                  | CC                              | TT                | 1946522617               |
| SNP_P3_131897_272536 | NW_004516075.1 | Scaffold661 | 272536                  | CC                              | TT                | 1946522619               |
| SNP_P3_131898_272572 | NW_004516075.1 | Scaffold661 | 272572                  | CC                              | TT                | 1946522620               |
| SNP_P3_131899_272642 | NW_004516075.1 | Scaffold661 | 272642                  | GG                              | AA                | 1946522622               |
| SNP_P3_131900_276886 | NW_004516075.1 | Scaffold661 | 276886                  | GG                              | AA                | 1946522623               |
| SNP_P3_131901_276930 | NW_004516075.1 | Scaffold661 | 276930                  | GG                              | AA                | 1946522624               |
| SNP_P3_131902_276951 | NW_004516075.1 | Scaffold661 | 276951                  | CC                              | TT                | 1946522626               |
| SNP_P3_131903_276967 | NW_004516075.1 | Scaffold661 | 276967                  | GG                              | TT                | 1946522627               |
| SNP_P3_131904_276982 | NW_004516075.1 | Scaffold661 | 276982                  | GG                              | AA                | 1946522629               |
| SNP_P3_131905_277003 | NW_004516075.1 | Scaffold661 | 277003                  | TT                              | CC                | 1946522630               |
| SNP_P3_131906_277025 | NW_004516075.1 | Scaffold661 | 277025                  | TT                              | CC                | 1946522631               |
| SNP_P3_131907_277046 | NW_004516075.1 | Scaffold661 | 277046                  | AA                              | GG                | 1946522633               |
| SNP_P3_131908_277113 | NW_004516075.1 | Scaffold661 | 277113                  | AA                              | CC                | 1946522634               |
| SNP_P3_131909_277291 | NW_004516075.1 | Scaffold661 | 277291                  | TT                              | GG                | 1946522636               |
| SNP_P3_131910_277381 | NW_004516075.1 | Scaffold661 | 277381                  | GG                              | AA                | 1946522637               |
| SNP_P3_131911_277384 | NW_004516075.1 | Scaffold661 | 277384                  | GG                              | CC                | 1946522638               |
| SNP_P3_131912_277411 | NW_004516075.1 | Scaffold661 | 277411                  | AA                              | GG                | 1946522640               |
| SNP_P3_131913_277465 | NW_004516075.1 | Scaffold661 | 277465                  | TT                              | CC                | 1946522641               |
| SNP_P3_131914_277489 | NW_004516075.1 | Scaffold661 | 277489                  | AA                              | GG                | 1946522643               |
| SNP_P3_131915_283003 | NW_004516075.1 | Scaffold661 | 283003                  | CC                              | TT                | 1946522644               |
| SNP_P3_131916_283007 | NW_004516075.1 | Scaffold661 | 283007                  | CC                              | TT                | 1946522646               |
| SNP_P3_131917_283045 | NW_004516075.1 | Scaffold661 | 283045                  | CC                              | TT                | 1946522647               |
| SNP_P3_131919_297702 | NW_004516075.1 | Scaffold661 | 297702                  | TT                              | CC                | 1946522648               |
| SNP_P3_131920_297707 | NW_004516075.1 | Scaffold661 | 297707                  | CC                              | GG                | 1946522650               |
| SNP_P3_131921_326781 | NW_004516075.1 | Scaffold661 | 326781                  | CC                              | AA                | 1946522651               |
| SNP_P3_131922_326791 | NW_004516075.1 | Scaffold661 | 326791                  | CC                              | TT                | 1946522653               |
| SNP_P3_131923_326902 | NW_004516075.1 | Scaffold661 | 326902                  | TT                              | CC                | 1946522654               |
| SNP_P3_131924_327232 | NW_004516075.1 | Scaffold661 | 327232                  | AA                              | GG                | 1946522656               |

| SNPs IDs             | Chromosome IDs | Chromosomes | Physical positions (bp) | CDC Frontier (Reference genome) | (Pusa 256 & HPNB) | NCBI SNPdb Accession IDs |
|----------------------|----------------|-------------|-------------------------|---------------------------------|-------------------|--------------------------|
| SNP_P3_131925_340364 | NW_004516075.1 | Scaffold661 | 340364                  | TT                              | CC                | 1946522657               |
| SNP_P3_131926_340365 | NW_004516075.1 | Scaffold661 | 340365                  | TT                              | AA                | 1946522658               |
| SNP_P3_131927_340456 | NW_004516075.1 | Scaffold661 | 340456                  | AA                              | TT                | 1946522660               |
| SNP_P3_131928_340612 | NW_004516075.1 | Scaffold661 | 340612                  | AA                              | CC                | 1946522661               |
| SNP_P3_131929_340644 | NW_004516075.1 | Scaffold661 | 340644                  | AA                              | GG                | 1946522663               |
| SNP_P3_131930_340675 | NW_004516075.1 | Scaffold661 | 340675                  | CC                              | TT                | 1946522664               |
| SNP_P3_131931_340726 | NW_004516075.1 | Scaffold661 | 340726                  | AA                              | GG                | 1946522666               |
| SNP_P3_131932_340734 | NW_004516075.1 | Scaffold661 | 340734                  | CC                              | GG                | 1946522667               |
| SNP_P3_131933_340852 | NW_004516075.1 | Scaffold661 | 340852                  | AA                              | TT                | 1946522668               |
| SNP_P3_131934_358821 | NW_004516075.1 | Scaffold661 | 358821                  | AA                              | GG                | 1946522670               |
| SNP_P3_131935_401322 | NW_004516075.1 | Scaffold661 | 401322                  | GG                              | AA                | 1946522671               |
| SNP_P3_131936_418295 | NW_004516075.1 | Scaffold661 | 418295                  | AA                              | GG                | 1946522673               |
| SNP_P3_131937_418301 | NW_004516075.1 | Scaffold661 | 418301                  | CC                              | AA                | 1946522674               |
| SNP_P3_131938_418339 | NW_004516075.1 | Scaffold661 | 418339                  | GG                              | AA                | 1946522675               |
| SNP_P3_131939_445422 | NW_004516075.1 | Scaffold661 | 445422                  | CC                              | AA                | 1946522677               |
| SNP_P3_131940_445458 | NW_004516075.1 | Scaffold661 | 445458                  | CC                              | TT                | 1946522678               |
| SNP_P3_131941_445576 | NW_004516075.1 | Scaffold661 | 445576                  | TT                              | CC                | 1946522680               |
| SNP_P3_131942_445800 | NW_004516075.1 | Scaffold661 | 445800                  | TT                              | CC                | 1946522681               |
| SNP_P3_131943_445821 | NW_004516075.1 | Scaffold661 | 445821                  | GG                              | AA                | 1946522683               |
| SNP_P3_131944_445826 | NW_004516075.1 | Scaffold661 | 445826                  | TT                              | CC                | 1946522684               |
| SNP_P3_131945_473905 | NW_004516075.1 | Scaffold661 | 473905                  | CC                              | AA                | 1946522685               |
| SNP_P3_131946_474435 | NW_004516075.1 | Scaffold661 | 474435                  | AA                              | CC                | 1946522687               |
| SNP_P3_131948_476869 | NW_004516075.1 | Scaffold661 | 476869                  | AA                              | GG                | 1946522688               |
| SNP_P3_131949_480471 | NW_004516075.1 | Scaffold661 | 480471                  | TT                              | CC                | 1946522690               |
| SNP_P3_131950_480516 | NW_004516075.1 | Scaffold661 | 480516                  | AA                              | GG                | 1946522691               |
| SNP_P3_131951_480809 | NW_004516075.1 | Scaffold661 | 480809                  | AA                              | CC                | 1946522693               |
| SNP_P3_131952_480815 | NW_004516075.1 | Scaffold661 | 480815                  | TT                              | CC                | 1946522694               |
| SNP_P3_131953_481745 | NW_004516075.1 | Scaffold661 | 481745                  | GG                              | TT                | 1946522695               |
| SNP_P3_131954_526110 | NW_004516075.1 | Scaffold661 | 526110                  | CC                              | TT                | 1946522697               |
| SNP_P3_131956_562586 | NW_004516075.1 | Scaffold661 | 562586                  | GG                              | AA                | 1946522698               |
| SNP_P3_131957_608681 | NW_004516075.1 | Scaffold661 | 608681                  | GG                              | AA                | 1946522699               |
| SNP_P3_131958_641332 | NW_004516075.1 | Scaffold661 | 641332                  | GG                              | AA                | 1946522701               |
| SNP_P3_131959_647768 | NW_004516075.1 | Scaffold661 | 647768                  | AA                              | TT                | 1946522702               |
| SNP_P3_131960_648820 | NW_004516075.1 | Scaffold661 | 648820                  | TT                              | AA                | 1946522704               |
| SNP_P3_131961_648859 | NW_004516075.1 | Scaffold661 | 648859                  | CC                              | TT                | 1946522705               |
| SNP_P3_131962_649296 | NW_004516075.1 | Scaffold661 | 649296                  | GG                              | AA                | 1946522706               |
| SNP_P3_131963_650084 | NW_004516075.1 | Scaffold661 | 650084                  | GG                              | AA                | 1946522708               |
| SNP_P3_131964_656391 | NW_004516075.1 | Scaffold661 | 656391                  | AA                              | GG                | 1946522709               |
| SNP_P3_131965_656410 | NW_004516075.1 | Scaffold661 | 656410                  | CC                              | TT                | 1946522711               |
| SNP_P3_131966_656448 | NW_004516075.1 | Scaffold661 | 656448                  | AA                              | GG                | 1946522712               |
| SNP_P3_131967_656627 | NW_004516075.1 | Scaffold661 | 656627                  | AA                              | CC                | 1946522713               |
| SNP_P3_131968_666558 | NW_004516075.1 | Scaffold661 | 666558                  | GG                              | AA                | 1946522715               |

| SNPs IDs             | Chromosome IDs | Chromosomes | Physical positions (bp) | CDC Frontier (Reference genome) | (Pusa 256 & HPNB) | NCBI SNPdb Accession IDs |
|----------------------|----------------|-------------|-------------------------|---------------------------------|-------------------|--------------------------|
| SNP_P3_131969_666850 | NW_004516075.1 | Scaffold661 | 666850                  | AA                              | CC                | 1946522716               |
| SNP_P3_131970_671757 | NW_004516075.1 | Scaffold661 | 671757                  | AA                              | GG                | 1946522718               |
| SNP_P3_131971_671780 | NW_004516075.1 | Scaffold661 | 671780                  | CC                              | TT                | 1946522719               |
| SNP_P3_131972_671783 | NW_004516075.1 | Scaffold661 | 671783                  | AA                              | GG                | 1946522720               |
| SNP_P3_131973_671798 | NW_004516075.1 | Scaffold661 | 671798                  | TT                              | CC                | 1946522722               |
| SNP_P3_131974_671801 | NW_004516075.1 | Scaffold661 | 671801                  | AA                              | GG                | 1946522723               |
| SNP_P3_131975_671837 | NW_004516075.1 | Scaffold661 | 671837                  | CC                              | GG                | 1946522725               |
| SNP_P3_131976_671869 | NW_004516075.1 | Scaffold661 | 671869                  | AA                              | GG                | 1946522726               |
| SNP_P3_131977_671871 | NW_004516075.1 | Scaffold661 | 671871                  | CC                              | TT                | 1946522728               |
| SNP_P3_131978_671884 | NW_004516075.1 | Scaffold661 | 671884                  | TT                              | CC                | 1946522729               |
| SNP_P3_131979_672053 | NW_004516075.1 | Scaffold661 | 672053                  | GG                              | AA                | 1946522730               |
| SNP_P3_131980_672117 | NW_004516075.1 | Scaffold661 | 672117                  | TT                              | AA                | 1946522732               |
| SNP_P3_131981_672147 | NW_004516075.1 | Scaffold661 | 672147                  | GG                              | AA                | 1946522733               |
| SNP_P3_131982_707482 | NW_004516075.1 | Scaffold661 | 707482                  | TT                              | AA                | 1946522734               |
| SNP_P3_131983_707814 | NW_004516075.1 | Scaffold661 | 707814                  | TT                              | CC                | 1946522736               |
| SNP_P3_131984_707856 | NW_004516075.1 | Scaffold661 | 707856                  | AA                              | GG                | 1946522737               |
| SNP_P3_131985_707975 | NW_004516075.1 | Scaffold661 | 707975                  | AA                              | TT                | 1946522739               |
| SNP_P3_131986_707996 | NW_004516075.1 | Scaffold661 | 707996                  | AA                              | GG                | 1946522740               |
| SNP_P3_131987_708015 | NW_004516075.1 | Scaffold661 | 708015                  | AA                              | GG                | 1946522742               |
| SNP_P3_131988_710427 | NW_004516075.1 | Scaffold661 | 710427                  | TT                              | CC                | 1946522743               |
| SNP_P3_131989_719003 | NW_004516075.1 | Scaffold661 | 719003                  | GG                              | AA                | 1946522744               |
| SNP_P3_131990_724821 | NW_004516075.1 | Scaffold661 | 724821                  | TT                              | GG                | 1946522746               |
| SNP_P3_131991_726396 | NW_004516075.1 | Scaffold661 | 726396                  | GG                              | CC                | 1946522747               |
| SNP_P3_131992_726397 | NW_004516075.1 | Scaffold661 | 726397                  | TT                              | CC                | 1946522749               |
| SNP_P3_131993_726976 | NW_004516075.1 | Scaffold661 | 726976                  | TT                              | GG                | 1946522752               |
| SNP_P3_131994_726984 | NW_004516075.1 | Scaffold661 | 726984                  | AA                              | CC                | 1946522755               |
| SNP_P3_131995_727001 | NW_004516075.1 | Scaffold661 | 727001                  | TT                              | CC                | 1946522757               |
| SNP_P3_131996_727050 | NW_004516075.1 | Scaffold661 | 727050                  | TT                              | CC                | 1946522760               |
| SNP_P3_131997_727146 | NW_004516075.1 | Scaffold661 | 727146                  | TT                              | CC                | 1946522764               |
| SNP_P3_131998_727191 | NW_004516075.1 | Scaffold661 | 727191                  | GG                              | TT                | 1946522766               |
| SNP_P3_131999_727225 | NW_004516075.1 | Scaffold661 | 727225                  | CC                              | GG                | 1946522768               |
| SNP_P3_132000_727245 | NW_004516075.1 | Scaffold661 | 727245                  | TT                              | CC                | 1946522769               |
| SNP_P3_132001_727384 | NW_004516075.1 | Scaffold661 | 727384                  | AA                              | GG                | 1946522771               |
| SNP_P3_132002_727411 | NW_004516075.1 | Scaffold661 | 727411                  | GG                              | TT                | 1946522773               |
| SNP_P3_132003_727476 | NW_004516075.1 | Scaffold661 | 727476                  | CC                              | TT                | 1946522774               |
| SNP_P3_132004_727526 | NW_004516075.1 | Scaffold661 | 727526                  | GG                              | CC                | 1946522776               |
| SNP_P3_132005_727568 | NW_004516075.1 | Scaffold661 | 727568                  | CC                              | TT                | 1946522777               |
| SNP_P3_132008_16213  | NW_004516076.1 | Scaffold662 | 16213                   | CC                              | AA                | 1946522779               |
| SNP_P3_132009_16573  | NW_004516076.1 | Scaffold662 | 16573                   | TT                              | CC                | 1946522781               |
| SNP_P3_132010_16640  | NW_004516076.1 | Scaffold662 | 16640                   | CC                              | AA                | 1946522782               |
| SNP_P3_132011_16699  | NW_004516076.1 | Scaffold662 | 16699                   | GG                              | AA                | 1946522784               |
| SNP_P3_132012_16720  | NW_004516076.1 | Scaffold662 | 16720                   | CC                              | TT                | 1946522785               |

| SNPs IDs             | Chromosome IDs | Chromosomes | Physical positions (bp) | CDC Frontier (Reference genome) | (Pusa 256 & HPNB) | NCBI SNPdb Accession IDs |
|----------------------|----------------|-------------|-------------------------|---------------------------------|-------------------|--------------------------|
| SNP_P3_132013_16788  | NW_004516076.1 | Scaffold662 | 16788                   | TT                              | CC                | 1946522787               |
| SNP_P3_132014_16849  | NW_004516076.1 | Scaffold662 | 16849                   | TT                              | GG                | 1946522788               |
| SNP_P3_132015_16886  | NW_004516076.1 | Scaffold662 | 16886                   | AA                              | GG                | 1946522790               |
| SNP_P3_132016_16950  | NW_004516076.1 | Scaffold662 | 16950                   | CC                              | TT                | 1946522791               |
| SNP_P3_132017_18628  | NW_004516076.1 | Scaffold662 | 18628                   | GG                              | AA                | 1946522793               |
| SNP_P3_132018_18937  | NW_004516076.1 | Scaffold662 | 18937                   | GG                              | AA                | 1946522794               |
| SNP_P3_132019_26308  | NW_004516076.1 | Scaffold662 | 26308                   | TT                              | AA                | 1946522795               |
| SNP_P3_132020_26331  | NW_004516076.1 | Scaffold662 | 26331                   | GG                              | AA                | 1946522797               |
| SNP_P3_132021_26678  | NW_004516076.1 | Scaffold662 | 26678                   | TT                              | CC                | 1946522798               |
| SNP_P3_132022_32291  | NW_004516076.1 | Scaffold662 | 32291                   | TT                              | GG                | 1946522800               |
| SNP_P3_132023_32301  | NW_004516076.1 | Scaffold662 | 32301                   | TT                              | CC                | 1946522801               |
| SNP_P3_132024_32315  | NW_004516076.1 | Scaffold662 | 32315                   | GG                              | AA                | 1946522803               |
| SNP_P3_132025_32318  | NW_004516076.1 | Scaffold662 | 32318                   | TT                              | GG                | 1946522804               |
| SNP_P3_132026_43296  | NW_004516076.1 | Scaffold662 | 43296                   | GG                              | CC                | 1946522806               |
| SNP_P3_132027_43677  | NW_004516076.1 | Scaffold662 | 43677                   | TT                              | CC                | 1946522808               |
| SNP_P3_132029_98556  | NW_004516076.1 | Scaffold662 | 98556                   | AA                              | TT                | 1946522809               |
| SNP_P3_132030_98971  | NW_004516076.1 | Scaffold662 | 98971                   | GG                              | AA                | 1946522811               |
| SNP_P3_132031_108135 | NW_004516076.1 | Scaffold662 | 108135                  | CC                              | TT                | 1946522812               |
| SNP_P3_132032_133509 | NW_004516076.1 | Scaffold662 | 133509                  | CC                              | TT                | 1946522814               |
| SNP_P3_132033_143888 | NW_004516076.1 | Scaffold662 | 143888                  | CC                              | AA                | 1946522815               |
| SNP_P3_132034_148902 | NW_004516076.1 | Scaffold662 | 148902                  | AA                              | GG                | 1946522817               |
| SNP_P3_132035_148908 | NW_004516076.1 | Scaffold662 | 148908                  | AA                              | GG                | 1946522818               |
| SNP_P3_132036_148919 | NW_004516076.1 | Scaffold662 | 148919                  | AA                              | GG                | 1946522819               |
| SNP_P3_132037_166113 | NW_004516076.1 | Scaffold662 | 166113                  | CC                              | TT                | 1946522821               |
| SNP_P3_132038_10382  | NW_004516077.1 | Scaffold663 | 10382                   | GG                              | AA                | 1946522823               |
| SNP_P3_132039_23178  | NW_004516077.1 | Scaffold663 | 23178                   | AA                              | GG                | 1946522824               |
| SNP_P3_132040_23212  | NW_004516077.1 | Scaffold663 | 23212                   | AA                              | GG                | 1946522825               |
| SNP_P3_132041_23309  | NW_004516077.1 | Scaffold663 | 23309                   | TT                              | CC                | 1946522827               |
| SNP_P3_132042_23573  | NW_004516077.1 | Scaffold663 | 23573                   | AA                              | GG                | 1946522828               |
| SNP_P3_132043_63480  | NW_004516077.1 | Scaffold663 | 63480                   | AA                              | GG                | 1946522830               |
| SNP_P3_132044_63550  | NW_004516077.1 | Scaffold663 | 63550                   | CC                              | TT                | 1946522831               |
| SNP_P3_132045_64746  | NW_004516077.1 | Scaffold663 | 64746                   | AA                              | CC                | 1946522832               |
| SNP_P3_132046_67482  | NW_004516077.1 | Scaffold663 | 67482                   | AA                              | GG                | 1946522834               |
| SNP_P3_132047_82332  | NW_004516077.1 | Scaffold663 | 82332                   | GG                              | AA                | 1946522835               |
| SNP_P3_132048_92692  | NW_004516077.1 | Scaffold663 | 92692                   | TT                              | CC                | 1946522837               |
| SNP_P3_132049_99686  | NW_004516077.1 | Scaffold663 | 99686                   | TT                              | CC                | 1946522838               |
| SNP_P3_132050_105106 | NW_004516077.1 | Scaffold663 | 105106                  | GG                              | TT                | 1946522840               |
| SNP_P3_132051_107055 | NW_004516077.1 | Scaffold663 | 107055                  | AA                              | GG                | 1946522841               |
| SNP_P3_132052_107057 | NW_004516077.1 | Scaffold663 | 107057                  | AA                              | GG                | 1946522842               |
| SNP_P3_132053_108293 | NW_004516077.1 | Scaffold663 | 108293                  | TT                              | CC                | 1946522844               |
| SNP_P3_132054_108835 | NW_004516077.1 | Scaffold663 | 108835                  | TT                              | GG                | 1946522845               |
| SNP_P3_132055_108991 | NW_004516077.1 | Scaffold663 | 108991                  | AA                              | CC                | 1946522847               |

| SNPs IDs             | Chromosome IDs | Chromosomes | Physical positions (bp) | CDC Frontier (Reference genome) | (Pusa 256 & HPNB) | NCBI SNPdb Accession IDs |
|----------------------|----------------|-------------|-------------------------|---------------------------------|-------------------|--------------------------|
| SNP_P3_132056_108997 | NW_004516077.1 | Scaffold663 | 108997                  | CC                              | TT                | 1946522848               |
| SNP_P3_132057_109018 | NW_004516077.1 | Scaffold663 | 109018                  | TT                              | GG                | 1946522849               |
| SNP_P3_132058_109021 | NW_004516077.1 | Scaffold663 | 109021                  | GG                              | AA                | 1946522851               |
| SNP_P3_132059_109022 | NW_004516077.1 | Scaffold663 | 109022                  | CC                              | TT                | 1946522852               |
| SNP_P3_132060_109023 | NW_004516077.1 | Scaffold663 | 109023                  | GG                              | CC                | 1946522854               |
| SNP_P3_132061_109036 | NW_004516077.1 | Scaffold663 | 109036                  | GG                              | AA                | 1946522855               |
| SNP_P3_132062_109081 | NW_004516077.1 | Scaffold663 | 109081                  | TT                              | AA                | 1946522856               |
| SNP_P3_132063_109083 | NW_004516077.1 | Scaffold663 | 109083                  | GG                              | TT                | 1946522858               |
| SNP_P3_132064_109096 | NW_004516077.1 | Scaffold663 | 109096                  | AA                              | TT                | 1946522859               |
| SNP_P3_132065_109098 | NW_004516077.1 | Scaffold663 | 109098                  | TT                              | GG                | 1946522861               |
| SNP_P3_132066_109114 | NW_004516077.1 | Scaffold663 | 109114                  | GG                              | AA                | 1946522862               |
| SNP_P3_132067_109129 | NW_004516077.1 | Scaffold663 | 109129                  | TT                              | GG                | 1946522863               |
| SNP_P3_132068_109171 | NW_004516077.1 | Scaffold663 | 109171                  | CC                              | GG                | 1946522865               |
| SNP_P3_132069_109182 | NW_004516077.1 | Scaffold663 | 109182                  | AA                              | GG                | 1946522866               |
| SNP_P3_132070_109189 | NW_004516077.1 | Scaffold663 | 109189                  | TT                              | GG                | 1946522868               |
| SNP_P3_132071_109192 | NW_004516077.1 | Scaffold663 | 109192                  | TT                              | CC                | 1946522869               |
| SNP_P3_132072_109198 | NW_004516077.1 | Scaffold663 | 109198                  | CC                              | TT                | 1946522870               |
| SNP_P3_132073_109207 | NW_004516077.1 | Scaffold663 | 109207                  | GG                              | AA                | 1946522872               |
| SNP_P3_132074_109247 | NW_004516077.1 | Scaffold663 | 109247                  | TT                              | GG                | 1946522873               |
| SNP_P3_132075_109271 | NW_004516077.1 | Scaffold663 | 109271                  | GG                              | AA                | 1946522875               |
| SNP_P3_132076_120167 | NW_004516077.1 | Scaffold663 | 120167                  | AA                              | GG                | 1946522876               |
| SNP_P3_132077_152866 | NW_004516077.1 | Scaffold663 | 152866                  | TT                              | CC                | 1946522877               |
| SNP_P3_132078_166937 | NW_004516077.1 | Scaffold663 | 166937                  | AA                              | TT                | 1946522879               |
| SNP_P3_132079_166938 | NW_004516077.1 | Scaffold663 | 166938                  | CC                              | TT                | 1946522880               |
| SNP_P3_132080_166995 | NW_004516077.1 | Scaffold663 | 166995                  | AA                              | GG                | 1946522882               |
| SNP_P3_132081_167137 | NW_004516077.1 | Scaffold663 | 167137                  | AA                              | GG                | 1946522883               |
| SNP_P3_132082_167176 | NW_004516077.1 | Scaffold663 | 167176                  | AA                              | TT                | 1946522884               |
| SNP_P3_132083_167200 | NW_004516077.1 | Scaffold663 | 167200                  | GG                              | AA                | 1946522886               |
| SNP_P3_132084_442    | NW_004516079.1 | Scaffold665 | 442                     | AA                              | GG                | 1946522887               |
| SNP_P3_132085_711    | NW_004516079.1 | Scaffold665 | 711                     | AA                              | CC                | 1946522889               |
| SNP_P3_132086_2144   | NW_004516079.1 | Scaffold665 | 2144                    | GG                              | TT                | 1946522890               |
| SNP_P3_132087_2498   | NW_004516079.1 | Scaffold665 | 2498                    | AA                              | GG                | 1946522892               |
| SNP_P3_132088_2582   | NW_004516079.1 | Scaffold665 | 2582                    | CC                              | GG                | 1946522893               |
| SNP_P3_132089_2649   | NW_004516079.1 | Scaffold665 | 2649                    | GG                              | CC                | 1946522894               |
| SNP_P3_132090_3407   | NW_004516079.1 | Scaffold665 | 3407                    | AA                              | GG                | 1946522896               |
| SNP_P3_132091_3425   | NW_004516079.1 | Scaffold665 | 3425                    | AA                              | CC                | 1946522898               |
| SNP_P3_132092_3428   | NW_004516079.1 | Scaffold665 | 3428                    | GG                              | CC                | 1946522899               |
| SNP_P3_132093_3448   | NW_004516079.1 | Scaffold665 | 3448                    | TT                              | CC                | 1946522900               |
| SNP_P3_132094_16062  | NW_004516079.1 | Scaffold665 | 16062                   | CC                              | GG                | 1946522902               |
| SNP_P3_132096_16435  | NW_004516079.1 | Scaffold665 | 16435                   | TT                              | CC                | 1946522903               |
| SNP_P3_132097_16619  | NW_004516079.1 | Scaffold665 | 16619                   | AA                              | GG                | 1946522905               |
| SNP_P3_132098_17547  | NW_004516079.1 | Scaffold665 | 17547                   | CC                              | GG                | 1946522906               |

| SNPs IDs            | Chromosome IDs | Chromosomes | Physical positions (bp) | CDC Frontier (Reference genome) | (Pusa 256 & HPNB) | NCBI SNPdb Accession IDs |
|---------------------|----------------|-------------|-------------------------|---------------------------------|-------------------|--------------------------|
| SNP_P3_132099_17603 | NW_004516079.1 | Scaffold665 | 17603                   | GG                              | AA                | 1946522907               |
| SNP_P3_132100_64    | NW_004516080.1 | Scaffold666 | 64                      | AA                              | TT                | 1946522909               |
| SNP_P3_132101_69    | NW_004516080.1 | Scaffold666 | 69                      | TT                              | GG                | 1946522910               |
| SNP_P3_132102_83    | NW_004516080.1 | Scaffold666 | 83                      | TT                              | CC                | 1946522912               |
| SNP_P3_132103_85    | NW_004516080.1 | Scaffold666 | 85                      | TT                              | CC                | 1946522913               |
| SNP_P3_132104_87    | NW_004516080.1 | Scaffold666 | 87                      | TT                              | AA                | 1946522914               |
| SNP_P3_132105_123   | NW_004516080.1 | Scaffold666 | 123                     | GG                              | CC                | 1946522916               |
| SNP_P3_132106_1616  | NW_004516080.1 | Scaffold666 | 1616                    | GG                              | TT                | 1946522917               |
| SNP_P3_132107_2317  | NW_004516080.1 | Scaffold666 | 2317                    | GG                              | AA                | 1946522919               |
| SNP_P3_132108_3972  | NW_004516080.1 | Scaffold666 | 3972                    | TT                              | GG                | 1946522920               |
| SNP_P3_132109_3973  | NW_004516080.1 | Scaffold666 | 3973                    | TT                              | AA                | 1946522922               |
| SNP_P3_132110_4325  | NW_004516080.1 | Scaffold666 | 4325                    | AA                              | TT                | 1946522923               |
| SNP_P3_132111_4444  | NW_004516080.1 | Scaffold666 | 4444                    | TT                              | CC                | 1946522924               |
| SNP_P3_132112_11276 | NW_004516080.1 | Scaffold666 | 11276                   | GG                              | CC                | 1946522926               |
| SNP_P3_132113_2369  | NW_004516081.1 | Scaffold667 | 2369                    | AA                              | TT                | 1946522927               |
| SNP_P3_132114_2417  | NW_004516081.1 | Scaffold667 | 2417                    | CC                              | TT                | 1946522929               |
| SNP_P3_132115_2567  | NW_004516081.1 | Scaffold667 | 2567                    | GG                              | CC                | 1946522930               |
| SNP_P3_132116_2685  | NW_004516081.1 | Scaffold667 | 2685                    | AA                              | TT                | 1946522931               |
| SNP_P3_132117_2707  | NW_004516081.1 | Scaffold667 | 2707                    | CC                              | TT                | 1946522933               |
| SNP_P3_132118_2871  | NW_004516081.1 | Scaffold667 | 2871                    | CC                              | TT                | 1946522934               |
| SNP_P3_132119_771   | NW_004516083.1 | Scaffold669 | 771                     | TT                              | CC                | 1946522936               |
| SNP_P3_132120_772   | NW_004516083.1 | Scaffold669 | 772                     | CC                              | TT                | 1946522937               |
| SNP_P3_132121_6393  | NW_004516084.1 | Scaffold670 | 6393                    | AA                              | GG                | 1946522938               |
| SNP_P3_132122_13343 | NW_004516084.1 | Scaffold670 | 13343                   | TT                              | CC                | 1946522940               |
| SNP_P3_132123_13670 | NW_004516084.1 | Scaffold670 | 13670                   | TT                              | CC                | 1946522941               |
| SNP_P3_132124_17462 | NW_004516084.1 | Scaffold670 | 17462                   | TT                              | AA                | 1946522943               |
| SNP_P3_132125_17483 | NW_004516084.1 | Scaffold670 | 17483                   | CC                              | TT                | 1946522944               |
| SNP_P3_132126_17501 | NW_004516084.1 | Scaffold670 | 17501                   | TT                              | AA                | 1946522945               |
| SNP_P3_132127_17522 | NW_004516084.1 | Scaffold670 | 17522                   | GG                              | AA                | 1946522947               |
| SNP_P3_132128_17583 | NW_004516084.1 | Scaffold670 | 17583                   | AA                              | CC                | 1946522948               |
| SNP_P3_132129_17772 | NW_004516084.1 | Scaffold670 | 17772                   | TT                              | CC                | 1946522949               |
| SNP_P3_132130_17797 | NW_004516084.1 | Scaffold670 | 17797                   | CC                              | AA                | 1946522951               |
| SNP_P3_132131_21740 | NW_004516084.1 | Scaffold670 | 21740                   | TT                              | CC                | 1946522952               |
| SNP_P3_132132_21999 | NW_004516084.1 | Scaffold670 | 21999                   | GG                              | TT                | 1946522953               |
| SNP_P3_132133_27896 | NW_004516084.1 | Scaffold670 | 27896                   | AA                              | GG                | 1946522955               |
| SNP_P3_132134_27965 | NW_004516084.1 | Scaffold670 | 27965                   | CC                              | TT                | 1946522956               |
| SNP_P3_132135_34659 | NW_004516084.1 | Scaffold670 | 34659                   | GG                              | TT                | 1946522958               |
| SNP_P3_132136_45833 | NW_004516084.1 | Scaffold670 | 45833                   | TT                              | AA                | 1946522959               |
| SNP_P3_132137_45939 | NW_004516084.1 | Scaffold670 | 45939                   | CC                              | AA                | 1946522961               |
| SNP_P3_132138_50914 | NW_004516084.1 | Scaffold670 | 50914                   | TT                              | AA                | 1946522962               |
| SNP_P3_132139_68615 | NW_004516084.1 | Scaffold670 | 68615                   | AA                              | TT                | 1946522964               |
| SNP_P3_132140_78505 | NW_004516084.1 | Scaffold670 | 78505                   | CC                              | GG                | 1946522965               |

| SNPs IDs             | Chromosome IDs | Chromosomes | Physical positions (bp) | CDC Frontier (Reference genome) | (Pusa 256 & HPNB) | NCBI SNPdb Accession IDs |
|----------------------|----------------|-------------|-------------------------|---------------------------------|-------------------|--------------------------|
| SNP_P3_132141_78528  | NW_004516084.1 | Scaffold670 | 78528                   | TT                              | CC                | 1946522967               |
| SNP_P3_132142_78543  | NW_004516084.1 | Scaffold670 | 78543                   | AA                              | GG                | 1946522968               |
| SNP_P3_132143_100102 | NW_004516084.1 | Scaffold670 | 100102                  | AA                              | GG                | 1946522969               |
| SNP_P3_132144_103253 | NW_004516084.1 | Scaffold670 | 103253                  | AA                              | CC                | 1946522971               |
| SNP_P3_132145_104132 | NW_004516084.1 | Scaffold670 | 104132                  | AA                              | TT                | 1946522972               |
| SNP_P3_132146_108620 | NW_004516084.1 | Scaffold670 | 108620                  | CC                              | GG                | 1946522974               |
| SNP_P3_132147_108729 | NW_004516084.1 | Scaffold670 | 108729                  | TT                              | CC                | 1946522975               |
| SNP_P3_132148_111840 | NW_004516084.1 | Scaffold670 | 111840                  | GG                              | AA                | 1946522976               |
| SNP_P3_132149_115852 | NW_004516084.1 | Scaffold670 | 115852                  | CC                              | TT                | 1946522978               |
| SNP_P3_132150_115899 | NW_004516084.1 | Scaffold670 | 115899                  | TT                              | GG                | 1946522979               |
| SNP_P3_132151_116278 | NW_004516084.1 | Scaffold670 | 116278                  | CC                              | TT                | 1946522981               |
| SNP_P3_132152_127846 | NW_004516084.1 | Scaffold670 | 127846                  | TT                              | AA                | 1946522982               |
| SNP_P3_132153_127887 | NW_004516084.1 | Scaffold670 | 127887                  | TT                              | AA                | 1946522984               |
| SNP_P3_132154_127907 | NW_004516084.1 | Scaffold670 | 127907                  | AA                              | GG                | 1946522985               |
| SNP_P3_132155_128273 | NW_004516084.1 | Scaffold670 | 128273                  | TT                              | AA                | 1946522986               |
| SNP_P3_132156_128655 | NW_004516084.1 | Scaffold670 | 128655                  | CC                              | TT                | 1946522988               |
| SNP_P3_132157_128692 | NW_004516084.1 | Scaffold670 | 128692                  | CC                              | TT                | 1946522989               |
| SNP_P3_132158_128884 | NW_004516084.1 | Scaffold670 | 128884                  | GG                              | TT                | 1946522990               |
| SNP_P3_132159_129111 | NW_004516084.1 | Scaffold670 | 129111                  | AA                              | GG                | 1946522992               |
| SNP_P3_132160_129193 | NW_004516084.1 | Scaffold670 | 129193                  | GG                              | TT                | 1946522993               |
| SNP_P3_132161_129197 | NW_004516084.1 | Scaffold670 | 129197                  | TT                              | AA                | 1946522995               |
| SNP_P3_132162_129198 | NW_004516084.1 | Scaffold670 | 129198                  | TT                              | AA                | 1946522996               |
| SNP_P3_132163_129203 | NW_004516084.1 | Scaffold670 | 129203                  | GG                              | AA                | 1946522998               |
| SNP_P3_132164_129473 | NW_004516084.1 | Scaffold670 | 129473                  | TT                              | AA                | 1946522999               |
| SNP_P3_132165_129477 | NW_004516084.1 | Scaffold670 | 129477                  | GG                              | AA                | 1946523001               |
| SNP_P3_132166_129484 | NW_004516084.1 | Scaffold670 | 129484                  | CC                              | TT                | 1946523002               |
| SNP_P3_132167_129502 | NW_004516084.1 | Scaffold670 | 129502                  | TT                              | AA                | 1946523003               |
| SNP_P3_132168_129577 | NW_004516084.1 | Scaffold670 | 129577                  | AA                              | GG                | 1946523005               |
| SNP_P3_132169_129616 | NW_004516084.1 | Scaffold670 | 129616                  | AA                              | TT                | 1946523006               |
| SNP_P3_132170_129643 | NW_004516084.1 | Scaffold670 | 129643                  | CC                              | TT                | 1946523007               |
| SNP_P3_132171_129652 | NW_004516084.1 | Scaffold670 | 129652                  | AA                              | GG                | 1946523009               |
| SNP_P3_132172_129863 | NW_004516084.1 | Scaffold670 | 129863                  | AA                              | TT                | 1946523010               |
| SNP_P3_132173_129899 | NW_004516084.1 | Scaffold670 | 129899                  | AA                              | GG                | 1946523012               |
| SNP_P3_132174_130038 | NW_004516084.1 | Scaffold670 | 130038                  | AA                              | GG                | 1946523013               |
| SNP_P3_132175_130130 | NW_004516084.1 | Scaffold670 | 130130                  | GG                              | AA                | 1946523015               |
| SNP_P3_132176_130159 | NW_004516084.1 | Scaffold670 | 130159                  | TT                              | GG                | 1946523016               |
| SNP_P3_132177_130621 | NW_004516084.1 | Scaffold670 | 130621                  | AA                              | CC                | 1946523017               |
| SNP_P3_132178_130758 | NW_004516084.1 | Scaffold670 | 130758                  | CC                              | AA                | 1946523019               |
| SNP_P3_132179_131022 | NW_004516084.1 | Scaffold670 | 131022                  | GG                              | TT                | 1946523020               |
| SNP_P3_132180_147869 | NW_004516084.1 | Scaffold670 | 147869                  | GG                              | TT                | 1946523022               |
| SNP_P3_132181_148063 | NW_004516084.1 | Scaffold670 | 148063                  | TT                              | CC                | 1946523023               |
| SNP_P3_132182_148376 | NW_004516084.1 | Scaffold670 | 148376                  | AA                              | GG                | 1946523024               |



| SNPs IDs             | Chromosome IDs | Chromosomes | Physical positions (bp) | CDC Frontier (Reference genome) | (Pusa 256 & HPNB) | NCBI SNPdb Accession IDs |
|----------------------|----------------|-------------|-------------------------|---------------------------------|-------------------|--------------------------|
| SNP_P3_132183_148414 | NW_004516084.1 | Scaffold670 | 148414                  | CC                              | GG                | 1946523026               |
| SNP_P3_132184_154020 | NW_004516084.1 | Scaffold670 | 154020                  | AA                              | CC                | 1946523027               |
| SNP_P3_132185_154042 | NW_004516084.1 | Scaffold670 | 154042                  | GG                              | CC                | 1946523029               |
| SNP_P3_132186_154057 | NW_004516084.1 | Scaffold670 | 154057                  | GG                              | CC                | 1946523030               |
| SNP_P3_132187_154075 | NW_004516084.1 | Scaffold670 | 154075                  | AA                              | GG                | 1946523032               |
| SNP_P3_132188_154081 | NW_004516084.1 | Scaffold670 | 154081                  | AA                              | TT                | 1946523033               |
| SNP_P3_132189_154094 | NW_004516084.1 | Scaffold670 | 154094                  | AA                              | CC                | 1946523035               |
| SNP_P3_132190_154392 | NW_004516084.1 | Scaffold670 | 154392                  | TT                              | CC                | 1946523036               |
| SNP_P3_132191_156166 | NW_004516084.1 | Scaffold670 | 156166                  | AA                              | GG                | 1946523037               |
| SNP_P3_132192_161948 | NW_004516084.1 | Scaffold670 | 161948                  | TT                              | AA                | 1946523039               |
| SNP_P3_132193_163423 | NW_004516084.1 | Scaffold670 | 163423                  | CC                              | TT                | 1946523040               |
| SNP_P3_132194_163463 | NW_004516084.1 | Scaffold670 | 163463                  | TT                              | AA                | 1946523042               |
| SNP_P3_132195_163841 | NW_004516084.1 | Scaffold670 | 163841                  | GG                              | AA                | 1946523043               |
| SNP_P3_132196_164441 | NW_004516084.1 | Scaffold670 | 164441                  | GG                              | AA                | 1946523045               |
| SNP_P3_132197_164476 | NW_004516084.1 | Scaffold670 | 164476                  | TT                              | AA                | 1946523046               |
| SNP_P3_132199_164686 | NW_004516084.1 | Scaffold670 | 164686                  | TT                              | CC                | 1946523048               |
| SNP_P3_132200_183903 | NW_004516084.1 | Scaffold670 | 183903                  | CC                              | TT                | 1946523049               |
| SNP_P3_132201_185915 | NW_004516084.1 | Scaffold670 | 185915                  | TT                              | GG                | 1946523050               |
| SNP_P3_132203_185957 | NW_004516084.1 | Scaffold670 | 185957                  | AA                              | GG                | 1946523052               |
| SNP_P3_132204_185979 | NW_004516084.1 | Scaffold670 | 185979                  | AA                              | TT                | 1946523053               |
| SNP_P3_132206_186373 | NW_004516084.1 | Scaffold670 | 186373                  | CC                              | TT                | 1946523055               |
| SNP_P3_132207_187309 | NW_004516084.1 | Scaffold670 | 187309                  | TT                              | CC                | 1946523056               |
| SNP_P3_132208_190147 | NW_004516084.1 | Scaffold670 | 190147                  | CC                              | TT                | 1946523058               |
| SNP_P3_132209_190248 | NW_004516084.1 | Scaffold670 | 190248                  | GG                              | AA                | 1946523059               |
| SNP_P3_132210_194947 | NW_004516084.1 | Scaffold670 | 194947                  | AA                              | GG                | 1946523061               |
| SNP_P3_132211_194953 | NW_004516084.1 | Scaffold670 | 194953                  | AA                              | GG                | 1946523062               |
| SNP_P3_132212_194954 | NW_004516084.1 | Scaffold670 | 194954                  | AA                              | GG                | 1946523063               |
| SNP_P3_132213_194997 | NW_004516084.1 | Scaffold670 | 194997                  | TT                              | GG                | 1946523065               |
| SNP_P3_132214_195331 | NW_004516084.1 | Scaffold670 | 195331                  | GG                              | TT                | 1946523066               |
| SNP_P3_132215_197738 | NW_004516084.1 | Scaffold670 | 197738                  | GG                              | AA                | 1946523068               |
| SNP_P3_132217_197842 | NW_004516084.1 | Scaffold670 | 197842                  | TT                              | AA                | 1946523069               |
| SNP_P3_132219_198151 | NW_004516084.1 | Scaffold670 | 198151                  | TT                              | CC                | 1946523071               |
| SNP_P3_132220_200806 | NW_004516084.1 | Scaffold670 | 200806                  | CC                              | TT                | 1946523072               |
| SNP_P3_132221_200854 | NW_004516084.1 | Scaffold670 | 200854                  | AA                              | GG                | 1946523074               |
| SNP_P3_132222_200967 | NW_004516084.1 | Scaffold670 | 200967                  | AA                              | GG                | 1946523075               |
| SNP_P3_132223_201204 | NW_004516084.1 | Scaffold670 | 201204                  | TT                              | CC                | 1946523077               |
| SNP_P3_132224_201295 | NW_004516084.1 | Scaffold670 | 201295                  | TT                              | CC                | 1946523079               |
| SNP_P3_132225_201318 | NW_004516084.1 | Scaffold670 | 201318                  | AA                              | CC                | 1946523080               |
| SNP_P3_132226_201370 | NW_004516084.1 | Scaffold670 | 201370                  | AA                              | GG                | 1946523082               |
| SNP_P3_132227_202067 | NW_004516084.1 | Scaffold670 | 202067                  | TT                              | AA                | 1946523083               |
| SNP_P3_132228_202079 | NW_004516084.1 | Scaffold670 | 202079                  | AA                              | TT                | 1946523084               |
| SNP_P3_132229_202373 | NW_004516084.1 | Scaffold670 | 202373                  | TT                              | AA                | 1946523086               |

| SNPs IDs             | Chromosome IDs | Chromosomes | Physical positions (bp) | CDC Frontier (Reference genome) | (Pusa 256 & HPNB) | NCBI SNPdb Accession IDs |
|----------------------|----------------|-------------|-------------------------|---------------------------------|-------------------|--------------------------|
| SNP_P3_132230_202390 | NW_004516084.1 | Scaffold670 | 202390                  | AA                              | TT                | 1946523087               |
| SNP_P3_132231_202395 | NW_004516084.1 | Scaffold670 | 202395                  | CC                              | AA                | 1946523089               |
| SNP_P3_132232_202401 | NW_004516084.1 | Scaffold670 | 202401                  | AA                              | CC                | 1946523090               |
| SNP_P3_132233_211317 | NW_004516084.1 | Scaffold670 | 211317                  | GG                              | CC                | 1946523091               |
| SNP_P3_132234_220567 | NW_004516084.1 | Scaffold670 | 220567                  | TT                              | GG                | 1946523093               |
| SNP_P3_132235_220574 | NW_004516084.1 | Scaffold670 | 220574                  | AA                              | GG                | 1946523094               |
| SNP_P3_132236_227657 | NW_004516084.1 | Scaffold670 | 227657                  | TT                              | AA                | 1946523096               |
| SNP_P3_132237_227915 | NW_004516084.1 | Scaffold670 | 227915                  | TT                              | GG                | 1946523097               |
| SNP_P3_132238_227956 | NW_004516084.1 | Scaffold670 | 227956                  | GG                              | AA                | 1946523098               |
| SNP_P3_132239_230250 | NW_004516084.1 | Scaffold670 | 230250                  | TT                              | AA                | 1946523100               |
| SNP_P3_132240_231146 | NW_004516084.1 | Scaffold670 | 231146                  | AA                              | GG                | 1946523101               |
| SNP_P3_132241_232287 | NW_004516084.1 | Scaffold670 | 232287                  | CC                              | AA                | 1946523103               |
| SNP_P3_132242_232303 | NW_004516084.1 | Scaffold670 | 232303                  | CC                              | AA                | 1946523104               |
| SNP_P3_132243_232391 | NW_004516084.1 | Scaffold670 | 232391                  | AA                              | CC                | 1946523106               |
| SNP_P3_132244_233569 | NW_004516084.1 | Scaffold670 | 233569                  | CC                              | AA                | 1946523107               |
| SNP_P3_132245_264003 | NW_004516084.1 | Scaffold670 | 264003                  | AA                              | GG                | 1946523108               |
| SNP_P3_132246_264026 | NW_004516084.1 | Scaffold670 | 264026                  | GG                              | AA                | 1946523110               |
| SNP_P3_132247_264041 | NW_004516084.1 | Scaffold670 | 264041                  | TT                              | AA                | 1946523111               |
| SNP_P3_132248_264052 | NW_004516084.1 | Scaffold670 | 264052                  | TT                              | AA                | 1946523113               |
| SNP_P3_132249_264056 | NW_004516084.1 | Scaffold670 | 264056                  | TT                              | GG                | 1946523114               |
| SNP_P3_132250_264269 | NW_004516084.1 | Scaffold670 | 264269                  | AA                              | GG                | 1946523116               |
| SNP_P3_132252_34059  | NW_004516085.1 | Scaffold672 | 34059                   | TT                              | CC                | 1946523117               |
| SNP_P3_132253_34070  | NW_004516085.1 | Scaffold672 | 34070                   | CC                              | TT                | 1946523118               |
| SNP_P3_132254_34075  | NW_004516085.1 | Scaffold672 | 34075                   | CC                              | GG                | 1946523120               |
| SNP_P3_132255_34081  | NW_004516085.1 | Scaffold672 | 34081                   | TT                              | AA                | 1946523121               |
| SNP_P3_132256_86799  | NW_004516085.1 | Scaffold672 | 86799                   | AA                              | TT                | 1946523122               |
| SNP_P3_132257_93247  | NW_004516085.1 | Scaffold672 | 93247                   | AA                              | GG                | 1946523124               |
| SNP_P3_132258_93299  | NW_004516085.1 | Scaffold672 | 93299                   | TT                              | CC                | 1946523125               |
| SNP_P3_132259_93310  | NW_004516085.1 | Scaffold672 | 93310                   | AA                              | CC                | 1946523127               |
| SNP_P3_132260_93340  | NW_004516085.1 | Scaffold672 | 93340                   | GG                              | AA                | 1946523128               |
| SNP_P3_132261_93882  | NW_004516085.1 | Scaffold672 | 93882                   | CC                              | GG                | 1946523129               |
| SNP_P3_132262_95295  | NW_004516085.1 | Scaffold672 | 95295                   | GG                              | AA                | 1946523131               |
| SNP_P3_132263_95315  | NW_004516085.1 | Scaffold672 | 95315                   | TT                              | CC                | 1946523132               |
| SNP_P3_132264_95462  | NW_004516085.1 | Scaffold672 | 95462                   | TT                              | CC                | 1946523134               |
| SNP_P3_132265_101807 | NW_004516085.1 | Scaffold672 | 101807                  | TT                              | CC                | 1946523135               |
| SNP_P3_132266_101942 | NW_004516085.1 | Scaffold672 | 101942                  | AA                              | CC                | 1946523136               |
| SNP_P3_132267_102003 | NW_004516085.1 | Scaffold672 | 102003                  | GG                              | AA                | 1946523138               |
| SNP_P3_132268_102403 | NW_004516085.1 | Scaffold672 | 102403                  | GG                              | TT                | 1946523139               |
| SNP_P3_132269_102446 | NW_004516085.1 | Scaffold672 | 102446                  | TT                              | CC                | 1946523141               |
| SNP_P3_132270_102798 | NW_004516085.1 | Scaffold672 | 102798                  | AA                              | GG                | 1946523142               |
| SNP_P3_132271_104213 | NW_004516085.1 | Scaffold672 | 104213                  | AA                              | CC                | 1946523143               |
| SNP_P3_132272_104254 | NW_004516085.1 | Scaffold672 | 104254                  | AA                              | GG                | 1946523145               |

| SNPs IDs             | Chromosome IDs | Chromosomes | Physical positions (bp) | CDC Frontier (Reference genome) | (Pusa 256 & HPNB) | NCBI SNPdb Accession IDs |
|----------------------|----------------|-------------|-------------------------|---------------------------------|-------------------|--------------------------|
| SNP_P3_132273_104264 | NW_004516085.1 | Scaffold672 | 104264                  | CC                              | TT                | 1946523146               |
| SNP_P3_132274_111158 | NW_004516085.1 | Scaffold672 | 111158                  | GG                              | AA                | 1946523148               |
| SNP_P3_132275_111201 | NW_004516085.1 | Scaffold672 | 111201                  | CC                              | GG                | 1946523149               |
| SNP_P3_132276_111732 | NW_004516085.1 | Scaffold672 | 111732                  | TT                              | CC                | 1946523150               |
| SNP_P3_132277_112047 | NW_004516085.1 | Scaffold672 | 112047                  | AA                              | GG                | 1946523152               |
| SNP_P3_132278_161455 | NW_004516085.1 | Scaffold672 | 161455                  | CC                              | GG                | 1946523153               |
| SNP_P3_132279_161822 | NW_004516085.1 | Scaffold672 | 161822                  | GG                              | AA                | 1946523155               |
| SNP_P3_132280_190201 | NW_004516085.1 | Scaffold672 | 190201                  | CC                              | TT                | 1946523156               |
| SNP_P3_132281_191941 | NW_004516085.1 | Scaffold672 | 191941                  | CC                              | TT                | 1946523158               |
| SNP_P3_132282_191985 | NW_004516085.1 | Scaffold672 | 191985                  | CC                              | TT                | 1946523159               |
| SNP_P3_132283_192011 | NW_004516085.1 | Scaffold672 | 192011                  | CC                              | AA                | 1946523160               |
| SNP_P3_132284_192521 | NW_004516085.1 | Scaffold672 | 192521                  | CC                              | TT                | 1946523162               |
| SNP_P3_132286_202288 | NW_004516085.1 | Scaffold672 | 202288                  | GG                              | TT                | 1946523163               |
| SNP_P3_132287_202303 | NW_004516085.1 | Scaffold672 | 202303                  | TT                              | GG                | 1946523165               |
| SNP_P3_132288_202688 | NW_004516085.1 | Scaffold672 | 202688                  | TT                              | AA                | 1946523166               |
| SNP_P3_132289_203209 | NW_004516085.1 | Scaffold672 | 203209                  | AA                              | GG                | 1946523168               |
| SNP_P3_132290_203346 | NW_004516085.1 | Scaffold672 | 203346                  | AA                              | GG                | 1946523169               |
| SNP_P3_132291_206686 | NW_004516085.1 | Scaffold672 | 206686                  | AA                              | TT                | 1946523170               |
| SNP_P3_132292_206810 | NW_004516085.1 | Scaffold672 | 206810                  | CC                              | AA                | 1946523172               |
| SNP_P3_132293_206822 | NW_004516085.1 | Scaffold672 | 206822                  | AA                              | TT                | 1946523173               |
| SNP_P3_132294_207041 | NW_004516085.1 | Scaffold672 | 207041                  | CC                              | GG                | 1946523175               |
| SNP_P3_132297_215815 | NW_004516085.1 | Scaffold672 | 215815                  | AA                              | GG                | 1946523176               |
| SNP_P3_132298_216465 | NW_004516085.1 | Scaffold672 | 216465                  | TT                              | AA                | 1946523177               |
| SNP_P3_132299_218666 | NW_004516085.1 | Scaffold672 | 218666                  | AA                              | GG                | 1946523179               |
| SNP_P3_132300_223608 | NW_004516085.1 | Scaffold672 | 223608                  | CC                              | GG                | 1946523180               |
| SNP_P3_132301_231863 | NW_004516085.1 | Scaffold672 | 231863                  | CC                              | AA                | 1946523182               |
| SNP_P3_132302_232955 | NW_004516085.1 | Scaffold672 | 232955                  | GG                              | AA                | 1946523183               |
| SNP_P3_132303_1192   | NW_004516086.1 | Scaffold673 | 1192                    | GG                              | TT                | 1946523184               |
| SNP_P3_132304_1896   | NW_004516086.1 | Scaffold673 | 1896                    | GG                              | AA                | 1946523186               |
| SNP_P3_132305_4734   | NW_004516086.1 | Scaffold673 | 4734                    | AA                              | TT                | 1946523187               |
| SNP_P3_132306_10912  | NW_004516086.1 | Scaffold673 | 10912                   | AA                              | CC                | 1946523189               |
| SNP_P3_132307_17303  | NW_004516086.1 | Scaffold673 | 17303                   | TT                              | CC                | 1946523190               |
| SNP_P3_132308_17686  | NW_004516086.1 | Scaffold673 | 17686                   | AA                              | TT                | 1946523192               |
| SNP_P3_132309_1668   | NW_004516087.1 | Scaffold674 | 1668                    | CC                              | TT                | 1946523193               |
| SNP_P3_132310_1740   | NW_004516087.1 | Scaffold674 | 1740                    | CC                              | TT                | 1946523195               |
| SNP_P3_132311_8015   | NW_004516087.1 | Scaffold674 | 8015                    | TT                              | AA                | 1946523196               |
| SNP_P3_132312_13122  | NW_004516087.1 | Scaffold674 | 13122                   | AA                              | GG                | 1946523198               |
| SNP_P3_132313_13189  | NW_004516087.1 | Scaffold674 | 13189                   | TT                              | CC                | 1946523199               |
| SNP_P3_132314_13388  | NW_004516087.1 | Scaffold674 | 13388                   | CC                              | TT                | 1946523201               |
| SNP_P3_132315_13718  | NW_004516087.1 | Scaffold674 | 13718                   | AA                              | TT                | 1946523209               |
| SNP_P3_132316_18545  | NW_004516087.1 | Scaffold674 | 18545                   | TT                              | CC                | 1946523211               |
| SNP_P3_132318_18553  | NW_004516087.1 | Scaffold674 | 18553                   | TT                              | CC                | 1946523212               |

| SNPs IDs            | Chromosome IDs | Chromosomes | Physical positions (bp) | CDC Frontier (Reference genome) | (Pusa 256 & HPNB) | NCBI SNPdb Accession IDs |
|---------------------|----------------|-------------|-------------------------|---------------------------------|-------------------|--------------------------|
| SNP_P3_132319_18557 | NW_004516087.1 | Scaffold674 | 18557                   | AA                              | GG                | 1946523213               |
| SNP_P3_132320_18569 | NW_004516087.1 | Scaffold674 | 18569                   | TT                              | GG                | 1946523215               |
| SNP_P3_132321_18578 | NW_004516087.1 | Scaffold674 | 18578                   | TT                              | CC                | 1946523216               |
| SNP_P3_132322_18602 | NW_004516087.1 | Scaffold674 | 18602                   | GG                              | AA                | 1946523218               |
| SNP_P3_132323_18603 | NW_004516087.1 | Scaffold674 | 18603                   | GG                              | AA                | 1946523219               |
| SNP_P3_132324_18611 | NW_004516087.1 | Scaffold674 | 18611                   | CC                              | TT                | 1946523220               |
| SNP_P3_132325_18614 | NW_004516087.1 | Scaffold674 | 18614                   | AA                              | TT                | 1946523222               |
| SNP_P3_132326_18626 | NW_004516087.1 | Scaffold674 | 18626                   | AA                              | GG                | 1946523223               |
| SNP_P3_132327_18631 | NW_004516087.1 | Scaffold674 | 18631                   | AA                              | GG                | 1946523225               |
| SNP_P3_132328_18645 | NW_004516087.1 | Scaffold674 | 18645                   | AA                              | GG                | 1946523227               |
| SNP_P3_132329_18654 | NW_004516087.1 | Scaffold674 | 18654                   | TT                              | CC                | 1946523228               |
| SNP_P3_132330_18659 | NW_004516087.1 | Scaffold674 | 18659                   | AA                              | GG                | 1946523230               |
| SNP_P3_132331_18686 | NW_004516087.1 | Scaffold674 | 18686                   | AA                              | GG                | 1946523231               |
| SNP_P3_132332_18695 | NW_004516087.1 | Scaffold674 | 18695                   | AA                              | GG                | 1946523233               |
| SNP_P3_132333_18703 | NW_004516087.1 | Scaffold674 | 18703                   | TT                              | CC                | 1946523234               |
| SNP_P3_132334_18707 | NW_004516087.1 | Scaffold674 | 18707                   | TT                              | CC                | 1946523235               |
| SNP_P3_132335_18902 | NW_004516087.1 | Scaffold674 | 18902                   | TT                              | CC                | 1946523237               |
| SNP_P3_132336_19284 | NW_004516087.1 | Scaffold674 | 19284                   | AA                              | GG                | 1946523238               |
| SNP_P3_132338_31657 | NW_004516087.1 | Scaffold674 | 31657                   | GG                              | AA                | 1946523240               |
| SNP_P3_132339_32086 | NW_004516087.1 | Scaffold674 | 32086                   | GG                              | AA                | 1946523241               |
| SNP_P3_132340_32293 | NW_004516087.1 | Scaffold674 | 32293                   | AA                              | GG                | 1946523243               |
| SNP_P3_132341_32418 | NW_004516087.1 | Scaffold674 | 32418                   | TT                              | CC                | 1946523244               |
| SNP_P3_132342_32454 | NW_004516087.1 | Scaffold674 | 32454                   | AA                              | GG                | 1946523246               |
| SNP_P3_132343_36533 | NW_004516087.1 | Scaffold674 | 36533                   | GG                              | AA                | 1946523247               |
| SNP_P3_132344_36639 | NW_004516087.1 | Scaffold674 | 36639                   | GG                              | AA                | 1946523248               |
| SNP_P3_132346_44355 | NW_004516087.1 | Scaffold674 | 44355                   | TT                              | CC                | 1946523250               |
| SNP_P3_132347_44978 | NW_004516087.1 | Scaffold674 | 44978                   | GG                              | TT                | 1946523251               |
| SNP_P3_132348_45029 | NW_004516087.1 | Scaffold674 | 45029                   | AA                              | GG                | 1946523253               |
| SNP_P3_132349_45205 | NW_004516087.1 | Scaffold674 | 45205                   | CC                              | TT                | 1946523254               |
| SNP_P3_132350_58432 | NW_004516087.1 | Scaffold674 | 58432                   | TT                              | AA                | 1946523256               |
| SNP_P3_132352_65279 | NW_004516087.1 | Scaffold674 | 65279                   | AA                              | GG                | 1946523257               |
| SNP_P3_132353_66740 | NW_004516087.1 | Scaffold674 | 66740                   | CC                              | TT                | 1946523258               |
| SNP_P3_132354_75600 | NW_004516087.1 | Scaffold674 | 75600                   | AA                              | GG                | 1946523260               |
| SNP_P3_132355_76285 | NW_004516087.1 | Scaffold674 | 76285                   | AA                              | GG                | 1946523261               |
| SNP_P3_132356_79549 | NW_004516087.1 | Scaffold674 | 79549                   | CC                              | TT                | 1946523263               |
| SNP_P3_132357_82432 | NW_004516087.1 | Scaffold674 | 82432                   | TT                              | AA                | 1946523264               |
| SNP_P3_132358_82950 | NW_004516087.1 | Scaffold674 | 82950                   | TT                              | CC                | 1946523265               |
| SNP_P3_132359_85430 | NW_004516087.1 | Scaffold674 | 85430                   | CC                              | TT                | 1946523267               |
| SNP_P3_132360_87077 | NW_004516087.1 | Scaffold674 | 87077                   | AA                              | GG                | 1946523269               |
| SNP_P3_132361_87139 | NW_004516087.1 | Scaffold674 | 87139                   | TT                              | CC                | 1946523270               |
| SNP_P3_132362_87145 | NW_004516087.1 | Scaffold674 | 87145                   | TT                              | CC                | 1946523272               |
| SNP_P3_132363_87170 | NW_004516087.1 | Scaffold674 | 87170                   | AA                              | GG                | 1946523273               |

| SNPs IDs             | Chromosome IDs | Chromosomes | Physical positions (bp) | CDC Frontier (Reference genome) | (Pusa 256 & HPNB) | NCBI SNPdb Accession IDs |
|----------------------|----------------|-------------|-------------------------|---------------------------------|-------------------|--------------------------|
| SNP_P3_132364_87227  | NW_004516087.1 | Scaffold674 | 87227                   | CC                              | AA                | 1946523275               |
| SNP_P3_132366_98097  | NW_004516087.1 | Scaffold674 | 98097                   | AA                              | GG                | 1946523276               |
| SNP_P3_132367_98914  | NW_004516087.1 | Scaffold674 | 98914                   | AA                              | GG                | 1946523278               |
| SNP_P3_132368_100278 | NW_004516087.1 | Scaffold674 | 100278                  | GG                              | AA                | 1946523279               |
| SNP_P3_132370_101981 | NW_004516087.1 | Scaffold674 | 101981                  | CC                              | GG                | 1946523281               |
| SNP_P3_132372_115471 | NW_004516087.1 | Scaffold674 | 115471                  | GG                              | AA                | 1946523282               |
| SNP_P3_132373_124356 | NW_004516087.1 | Scaffold674 | 124356                  | TT                              | CC                | 1946523284               |
| SNP_P3_132374_124689 | NW_004516087.1 | Scaffold674 | 124689                  | GG                              | AA                | 1946523285               |
| SNP_P3_132375_125216 | NW_004516087.1 | Scaffold674 | 125216                  | TT                              | CC                | 1946523287               |
| SNP_P3_132376_126273 | NW_004516087.1 | Scaffold674 | 126273                  | AA                              | GG                | 1946523288               |
| SNP_P3_132377_127593 | NW_004516087.1 | Scaffold674 | 127593                  | TT                              | AA                | 1946523290               |
| SNP_P3_132378_138506 | NW_004516087.1 | Scaffold674 | 138506                  | GG                              | AA                | 1946523291               |
| SNP_P3_132379_140953 | NW_004516087.1 | Scaffold674 | 140953                  | TT                              | AA                | 1946523293               |
| SNP_P3_132382_151360 | NW_004516087.1 | Scaffold674 | 151360                  | CC                              | AA                | 1946523294               |
| SNP_P3_132384_153023 | NW_004516087.1 | Scaffold674 | 153023                  | CC                              | GG                | 1946523296               |
| SNP_P3_132386_157728 | NW_004516087.1 | Scaffold674 | 157728                  | GG                              | CC                | 1946523297               |
| SNP_P3_132388_175939 | NW_004516087.1 | Scaffold674 | 175939                  | GG                              | TT                | 1946523299               |
| SNP_P3_132389_178151 | NW_004516087.1 | Scaffold674 | 178151                  | GG                              | CC                | 1946523300               |
| SNP_P3_132390_179704 | NW_004516087.1 | Scaffold674 | 179704                  | TT                              | CC                | 1946523302               |
| SNP_P3_132391_179835 | NW_004516087.1 | Scaffold674 | 179835                  | TT                              | CC                | 1946523303               |
| SNP_P3_132392_180991 | NW_004516087.1 | Scaffold674 | 180991                  | CC                              | AA                | 1946523305               |
| SNP_P3_132393_181105 | NW_004516087.1 | Scaffold674 | 181105                  | AA                              | GG                | 1946523306               |
| SNP_P3_132394_181257 | NW_004516087.1 | Scaffold674 | 181257                  | GG                              | AA                | 1946523308               |
| SNP_P3_132395_181270 | NW_004516087.1 | Scaffold674 | 181270                  | TT                              | AA                | 1946523309               |
| SNP_P3_132396_181522 | NW_004516087.1 | Scaffold674 | 181522                  | GG                              | AA                | 1946523310               |
| SNP_P3_132397_181558 | NW_004516087.1 | Scaffold674 | 181558                  | GG                              | AA                | 1946523312               |
| SNP_P3_132398_181559 | NW_004516087.1 | Scaffold674 | 181559                  | GG                              | TT                | 1946523313               |
| SNP_P3_132399_181561 | NW_004516087.1 | Scaffold674 | 181561                  | GG                              | AA                | 1946523315               |
| SNP_P3_132400_181593 | NW_004516087.1 | Scaffold674 | 181593                  | TT                              | CC                | 1946523316               |
| SNP_P3_132401_181601 | NW_004516087.1 | Scaffold674 | 181601                  | TT                              | CC                | 1946523409               |
| SNP_P3_132402_181623 | NW_004516087.1 | Scaffold674 | 181623                  | GG                              | AA                | 1946523410               |
| SNP_P3_132403_181754 | NW_004516087.1 | Scaffold674 | 181754                  | TT                              | CC                | 1946523411               |
| SNP_P3_132404_181837 | NW_004516087.1 | Scaffold674 | 181837                  | CC                              | GG                | 1946523413               |
| SNP_P3_132405_181953 | NW_004516087.1 | Scaffold674 | 181953                  | CC                              | TT                | 1946523414               |
| SNP_P3_132406_184370 | NW_004516087.1 | Scaffold674 | 184370                  | AA                              | CC                | 1946523416               |
| SNP_P3_132407_184393 | NW_004516087.1 | Scaffold674 | 184393                  | CC                              | TT                | 1946523417               |
| SNP_P3_132408_187117 | NW_004516087.1 | Scaffold674 | 187117                  | TT                              | GG                | 1946523418               |
| SNP_P3_132409_189687 | NW_004516087.1 | Scaffold674 | 189687                  | GG                              | AA                | 1946523420               |
| SNP_P3_132410_199149 | NW_004516087.1 | Scaffold674 | 199149                  | AA                              | GG                | 1946523421               |
| SNP_P3_132411_201989 | NW_004516087.1 | Scaffold674 | 201989                  | AA                              | GG                | 1946523423               |
| SNP_P3_132412_213487 | NW_004516087.1 | Scaffold674 | 213487                  | TT                              | CC                | 1946523424               |
| SNP_P3_132413_218701 | NW_004516087.1 | Scaffold674 | 218701                  | TT                              | AA                | 1946523426               |

| SNPs IDs             | Chromosome IDs | Chromosomes | Physical positions (bp) | CDC Frontier (Reference genome) | (Pusa 256 & HPNB) | NCBI SNPdb Accession IDs |
|----------------------|----------------|-------------|-------------------------|---------------------------------|-------------------|--------------------------|
| SNP_P3_132414_219128 | NW_004516087.1 | Scaffold674 | 219128                  | GG                              | AA                | 1946523427               |
| SNP_P3_132415_219185 | NW_004516087.1 | Scaffold674 | 219185                  | AA                              | CC                | 1946523429               |
| SNP_P3_132416_219970 | NW_004516087.1 | Scaffold674 | 219970                  | TT                              | CC                | 1946523430               |
| SNP_P3_132417_219972 | NW_004516087.1 | Scaffold674 | 219972                  | GG                              | AA                | 1946523431               |
| SNP_P3_132418_220297 | NW_004516087.1 | Scaffold674 | 220297                  | CC                              | TT                | 1946523433               |
| SNP_P3_132419_220370 | NW_004516087.1 | Scaffold674 | 220370                  | TT                              | GG                | 1946523434               |
| SNP_P3_132421_222305 | NW_004516087.1 | Scaffold674 | 222305                  | GG                              | AA                | 1946523436               |
| SNP_P3_132422_237260 | NW_004516087.1 | Scaffold674 | 237260                  | GG                              | AA                | 1946523437               |
| SNP_P3_132423_237302 | NW_004516087.1 | Scaffold674 | 237302                  | TT                              | GG                | 1946523438               |
| SNP_P3_132427_246474 | NW_004516087.1 | Scaffold674 | 246474                  | GG                              | TT                | 1946523440               |
| SNP_P3_132428_248051 | NW_004516087.1 | Scaffold674 | 248051                  | AA                              | GG                | 1946523442               |
| SNP_P3_132430_248764 | NW_004516087.1 | Scaffold674 | 248764                  | GG                              | AA                | 1946523443               |
| SNP_P3_132431_248883 | NW_004516087.1 | Scaffold674 | 248883                  | CC                              | TT                | 1946523444               |
| SNP_P3_132432_249213 | NW_004516087.1 | Scaffold674 | 249213                  | GG                              | AA                | 1946523446               |
| SNP_P3_132433_250220 | NW_004516087.1 | Scaffold674 | 250220                  | AA                              | GG                | 1946523447               |
| SNP_P3_132435_253989 | NW_004516087.1 | Scaffold674 | 253989                  | GG                              | AA                | 1946523449               |
| SNP_P3_132436_256148 | NW_004516087.1 | Scaffold674 | 256148                  | TT                              | GG                | 1946523450               |
| SNP_P3_132437_278480 | NW_004516087.1 | Scaffold674 | 278480                  | CC                              | GG                | 1946523451               |
| SNP_P3_132438_288116 | NW_004516087.1 | Scaffold674 | 288116                  | AA                              | CC                | 1946523453               |
| SNP_P3_132439_291168 | NW_004516087.1 | Scaffold674 | 291168                  | GG                              | AA                | 1946523454               |
| SNP_P3_132440_291218 | NW_004516087.1 | Scaffold674 | 291218                  | TT                              | AA                | 1946523455               |
| SNP_P3_132441_292336 | NW_004516087.1 | Scaffold674 | 292336                  | GG                              | TT                | 1946523457               |
| SNP_P3_132442_316295 | NW_004516087.1 | Scaffold674 | 316295                  | AA                              | GG                | 1946523458               |
| SNP_P3_132443_316301 | NW_004516087.1 | Scaffold674 | 316301                  | AA                              | GG                | 1946523460               |
| SNP_P3_132444_316303 | NW_004516087.1 | Scaffold674 | 316303                  | GG                              | TT                | 1946523461               |
| SNP_P3_132445_317124 | NW_004516087.1 | Scaffold674 | 317124                  | CC                              | TT                | 1946523462               |
| SNP_P3_132446_321559 | NW_004516087.1 | Scaffold674 | 321559                  | CC                              | AA                | 1946523464               |
| SNP_P3_132447_328137 | NW_004516087.1 | Scaffold674 | 328137                  | GG                              | AA                | 1946523465               |
| SNP_P3_132448_331754 | NW_004516087.1 | Scaffold674 | 331754                  | CC                              | AA                | 1946523466               |
| SNP_P3_132449_337474 | NW_004516087.1 | Scaffold674 | 337474                  | AA                              | GG                | 1946523468               |
| SNP_P3_132450_352548 | NW_004516087.1 | Scaffold674 | 352548                  | TT                              | CC                | 1946523469               |
| SNP_P3_132451_352562 | NW_004516087.1 | Scaffold674 | 352562                  | CC                              | AA                | 1946523470               |
| SNP_P3_132453_355027 | NW_004516087.1 | Scaffold674 | 355027                  | TT                              | AA                | 1946523472               |
| SNP_P3_132454_357159 | NW_004516087.1 | Scaffold674 | 357159                  | AA                              | GG                | 1946523473               |
| SNP_P3_132455_359015 | NW_004516087.1 | Scaffold674 | 359015                  | CC                              | AA                | 1946523475               |
| SNP_P3_132456_363275 | NW_004516087.1 | Scaffold674 | 363275                  | CC                              | AA                | 1946523476               |
| SNP_P3_132457_363679 | NW_004516087.1 | Scaffold674 | 363679                  | GG                              | CC                | 1946523477               |
| SNP_P3_132458_368741 | NW_004516087.1 | Scaffold674 | 368741                  | AA                              | CC                | 1946523479               |
| SNP_P3_132459_369743 | NW_004516087.1 | Scaffold674 | 369743                  | CC                              | TT                | 1946523480               |
| SNP_P3_132460_369797 | NW_004516087.1 | Scaffold674 | 369797                  | TT                              | CC                | 1946523481               |
| SNP_P3_132461_369889 | NW_004516087.1 | Scaffold674 | 369889                  | AA                              | GG                | 1946523483               |
| SNP_P3_132462_372766 | NW_004516087.1 | Scaffold674 | 372766                  | CC                              | TT                | 1946523484               |

| SNPs IDs             | Chromosome IDs | Chromosomes | Physical positions (bp) | CDC Frontier (Reference genome) | (Pusa 256 & HPNB) | NCBI SNPdb Accession IDs |
|----------------------|----------------|-------------|-------------------------|---------------------------------|-------------------|--------------------------|
| SNP_P3_132463_373198 | NW_004516087.1 | Scaffold674 | 373198                  | CC                              | TT                | 1946523486               |
| SNP_P3_132464_377802 | NW_004516087.1 | Scaffold674 | 377802                  | TT                              | CC                | 1946523487               |
| SNP_P3_132465_391099 | NW_004516087.1 | Scaffold674 | 391099                  | AA                              | CC                | 1946523488               |
| SNP_P3_132466_391718 | NW_004516087.1 | Scaffold674 | 391718                  | TT                              | CC                | 1946523490               |
| SNP_P3_132467_392076 | NW_004516087.1 | Scaffold674 | 392076                  | CC                              | AA                | 1946523491               |
| SNP_P3_132468_394268 | NW_004516087.1 | Scaffold674 | 394268                  | AA                              | GG                | 1946523492               |
| SNP_P3_132470_395279 | NW_004516087.1 | Scaffold674 | 395279                  | GG                              | AA                | 1946523494               |
| SNP_P3_132471_396773 | NW_004516087.1 | Scaffold674 | 396773                  | AA                              | GG                | 1946523495               |
| SNP_P3_132472_396982 | NW_004516087.1 | Scaffold674 | 396982                  | AA                              | CC                | 1946523496               |
| SNP_P3_132473_401039 | NW_004516087.1 | Scaffold674 | 401039                  | AA                              | TT                | 1946523498               |
| SNP_P3_132474_401140 | NW_004516087.1 | Scaffold674 | 401140                  | GG                              | AA                | 1946523499               |
| SNP_P3_132475_401149 | NW_004516087.1 | Scaffold674 | 401149                  | TT                              | CC                | 1946523501               |
| SNP_P3_132476_401155 | NW_004516087.1 | Scaffold674 | 401155                  | CC                              | TT                | 1946523502               |
| SNP_P3_132477_401161 | NW_004516087.1 | Scaffold674 | 401161                  | AA                              | TT                | 1946523504               |
| SNP_P3_132478_401163 | NW_004516087.1 | Scaffold674 | 401163                  | CC                              | TT                | 1946523505               |
| SNP_P3_132480_401314 | NW_004516087.1 | Scaffold674 | 401314                  | AA                              | GG                | 1946523507               |
| SNP_P3_132481_401328 | NW_004516087.1 | Scaffold674 | 401328                  | CC                              | AA                | 1946523508               |
| SNP_P3_132482_401330 | NW_004516087.1 | Scaffold674 | 401330                  | AA                              | CC                | 1946523509               |
| SNP_P3_132483_401338 | NW_004516087.1 | Scaffold674 | 401338                  | TT                              | GG                | 1946523511               |
| SNP_P3_132484_401343 | NW_004516087.1 | Scaffold674 | 401343                  | CC                              | AA                | 1946523512               |
| SNP_P3_132485_401385 | NW_004516087.1 | Scaffold674 | 401385                  | TT                              | GG                | 1946523514               |
| SNP_P3_132486_401414 | NW_004516087.1 | Scaffold674 | 401414                  | GG                              | TT                | 1946523515               |
| SNP_P3_132487_401430 | NW_004516087.1 | Scaffold674 | 401430                  | AA                              | GG                | 1946523517               |
| SNP_P3_132489_401523 | NW_004516087.1 | Scaffold674 | 401523                  | GG                              | TT                | 1946523518               |
| SNP_P3_132490_401590 | NW_004516087.1 | Scaffold674 | 401590                  | TT                              | CC                | 1946523519               |
| SNP_P3_132491_404877 | NW_004516087.1 | Scaffold674 | 404877                  | GG                              | AA                | 1946523521               |
| SNP_P3_132492_404897 | NW_004516087.1 | Scaffold674 | 404897                  | TT                              | CC                | 1946523522               |
| SNP_P3_132494_404952 | NW_004516087.1 | Scaffold674 | 404952                  | CC                              | TT                | 1946523524               |
| SNP_P3_132495_405016 | NW_004516087.1 | Scaffold674 | 405016                  | CC                              | AA                | 1946523525               |
| SNP_P3_132496_405426 | NW_004516087.1 | Scaffold674 | 405426                  | GG                              | CC                | 1946523527               |
| SNP_P3_132497_405759 | NW_004516087.1 | Scaffold674 | 405759                  | TT                              | AA                | 1946523528               |
| SNP_P3_132500_406299 | NW_004516087.1 | Scaffold674 | 406299                  | AA                              | GG                | 1946523529               |
| SNP_P3_132501_413048 | NW_004516087.1 | Scaffold674 | 413048                  | GG                              | AA                | 1946523531               |
| SNP_P3_132503_414343 | NW_004516087.1 | Scaffold674 | 414343                  | AA                              | GG                | 1946523532               |
| SNP_P3_132504_416132 | NW_004516087.1 | Scaffold674 | 416132                  | TT                              | CC                | 1946523534               |
| SNP_P3_132505_426127 | NW_004516087.1 | Scaffold674 | 426127                  | AA                              | TT                | 1946523535               |
| SNP_P3_132506_426701 | NW_004516087.1 | Scaffold674 | 426701                  | AA                              | GG                | 1946523536               |
| SNP_P3_132507_430466 | NW_004516087.1 | Scaffold674 | 430466                  | TT                              | GG                | 1946523538               |
| SNP_P3_132509_436506 | NW_004516087.1 | Scaffold674 | 436506                  | GG                              | AA                | 1946523539               |
| SNP_P3_132510_436511 | NW_004516087.1 | Scaffold674 | 436511                  | CC                              | AA                | 1946523540               |
| SNP_P3_132511_437197 | NW_004516087.1 | Scaffold674 | 437197                  | AA                              | GG                | 1946523542               |
| SNP_P3_132512_437940 | NW_004516087.1 | Scaffold674 | 437940                  | TT                              | AA                | 1946523544               |

| SNPs IDs             | Chromosome IDs | Chromosomes | Physical positions (bp) | CDC Frontier (Reference genome) | (Pusa 256 & HPNB) | NCBI SNPdb Accession IDs |
|----------------------|----------------|-------------|-------------------------|---------------------------------|-------------------|--------------------------|
| SNP_P3_132514_438266 | NW_004516087.1 | Scaffold674 | 438266                  | AA                              | GG                | 1946523545               |
| SNP_P3_132516_445190 | NW_004516087.1 | Scaffold674 | 445190                  | TT                              | GG                | 1946523547               |
| SNP_P3_132517_450497 | NW_004516087.1 | Scaffold674 | 450497                  | GG                              | AA                | 1946523548               |
| SNP_P3_132519_457357 | NW_004516087.1 | Scaffold674 | 457357                  | AA                              | GG                | 1946523549               |
| SNP_P3_132520_457372 | NW_004516087.1 | Scaffold674 | 457372                  | AA                              | GG                | 1946523551               |
| SNP_P3_132521_458772 | NW_004516087.1 | Scaffold674 | 458772                  | GG                              | AA                | 1946523552               |
| SNP_P3_132522_459088 | NW_004516087.1 | Scaffold674 | 459088                  | GG                              | CC                | 1946523554               |
| SNP_P3_132523_463665 | NW_004516087.1 | Scaffold674 | 463665                  | AA                              | GG                | 1946523555               |
| SNP_P3_132524_467056 | NW_004516087.1 | Scaffold674 | 467056                  | TT                              | CC                | 1946523556               |
| SNP_P3_132525_475955 | NW_004516087.1 | Scaffold674 | 475955                  | AA                              | CC                | 1946523558               |
| SNP_P3_132528_476620 | NW_004516087.1 | Scaffold674 | 476620                  | GG                              | AA                | 1946523559               |
| SNP_P3_132529_478480 | NW_004516087.1 | Scaffold674 | 478480                  | TT                              | CC                | 1946523561               |
| SNP_P3_132530_478701 | NW_004516087.1 | Scaffold674 | 478701                  | GG                              | AA                | 1946523562               |
| SNP_P3_132531_480184 | NW_004516087.1 | Scaffold674 | 480184                  | CC                              | TT                | 1946523564               |
| SNP_P3_132532_480297 | NW_004516087.1 | Scaffold674 | 480297                  | GG                              | AA                | 1946523565               |
| SNP_P3_132533_483207 | NW_004516087.1 | Scaffold674 | 483207                  | GG                              | AA                | 1946523566               |
| SNP_P3_132534_488819 | NW_004516087.1 | Scaffold674 | 488819                  | AA                              | GG                | 1946523568               |
| SNP_P3_132535_499132 | NW_004516087.1 | Scaffold674 | 499132                  | GG                              | AA                | 1946523569               |
| SNP_P3_132536_499406 | NW_004516087.1 | Scaffold674 | 499406                  | TT                              | CC                | 1946523570               |
| SNP_P3_132537_500787 | NW_004516087.1 | Scaffold674 | 500787                  | TT                              | CC                | 1946523572               |
| SNP_P3_132538_500799 | NW_004516087.1 | Scaffold674 | 500799                  | AA                              | TT                | 1946523573               |
| SNP_P3_132539_501846 | NW_004516087.1 | Scaffold674 | 501846                  | TT                              | CC                | 1946523575               |
| SNP_P3_132540_503960 | NW_004516087.1 | Scaffold674 | 503960                  | AA                              | GG                | 1946523576               |
| SNP_P3_132541_504185 | NW_004516087.1 | Scaffold674 | 504185                  | TT                              | CC                | 1946523577               |
| SNP_P3_132542_504331 | NW_004516087.1 | Scaffold674 | 504331                  | AA                              | CC                | 1946523579               |
| SNP_P3_132543_506366 | NW_004516087.1 | Scaffold674 | 506366                  | CC                              | TT                | 1946523580               |
| SNP_P3_132544_522135 | NW_004516087.1 | Scaffold674 | 522135                  | CC                              | TT                | 1946523582               |
| SNP_P3_132546_525440 | NW_004516087.1 | Scaffold674 | 525440                  | AA                              | GG                | 1946523583               |
| SNP_P3_132547_528031 | NW_004516087.1 | Scaffold674 | 528031                  | GG                              | AA                | 1946523585               |
| SNP_P3_132549_530339 | NW_004516087.1 | Scaffold674 | 530339                  | TT                              | GG                | 1946523586               |
| SNP_P3_132550_530811 | NW_004516087.1 | Scaffold674 | 530811                  | AA                              | GG                | 1946523587               |
| SNP_P3_132552_533155 | NW_004516087.1 | Scaffold674 | 533155                  | AA                              | GG                | 1946523589               |
| SNP_P3_132553_534774 | NW_004516087.1 | Scaffold674 | 534774                  | TT                              | CC                | 1946523590               |
| SNP_P3_132554_536088 | NW_004516087.1 | Scaffold674 | 536088                  | AA                              | TT                | 1946523592               |
| SNP_P3_132555_538127 | NW_004516087.1 | Scaffold674 | 538127                  | CC                              | TT                | 1946523593               |
| SNP_P3_132556_543854 | NW_004516087.1 | Scaffold674 | 543854                  | AA                              | TT                | 1946523594               |
| SNP_P3_132557_546615 | NW_004516087.1 | Scaffold674 | 546615                  | AA                              | GG                | 1946523596               |
| SNP_P3_132558_551089 | NW_004516087.1 | Scaffold674 | 551089                  | CC                              | TT                | 1946523597               |
| SNP_P3_132559_551417 | NW_004516087.1 | Scaffold674 | 551417                  | TT                              | GG                | 1946523598               |
| SNP_P3_132560_554910 | NW_004516087.1 | Scaffold674 | 554910                  | GG                              | TT                | 1946523600               |
| SNP_P3_132561_554969 | NW_004516087.1 | Scaffold674 | 554969                  | AA                              | GG                | 1946523601               |
| SNP_P3_132562_557205 | NW_004516087.1 | Scaffold674 | 557205                  | CC                              | TT                | 1946523602               |



| SNPs IDs             | Chromosome IDs | Chromosomes | Physical positions (bp) | CDC Frontier (Reference genome) | (Pusa 256 & HPNB) | NCBI SNPdb Accession IDs |
|----------------------|----------------|-------------|-------------------------|---------------------------------|-------------------|--------------------------|
| SNP_P3_132563_559487 | NW_004516087.1 | Scaffold674 | 559487                  | AA                              | GG                | 1946523604               |
| SNP_P3_132564_566891 | NW_004516087.1 | Scaffold674 | 566891                  | CC                              | TT                | 1946523605               |
| SNP_P3_132565_566971 | NW_004516087.1 | Scaffold674 | 566971                  | TT                              | CC                | 1946523607               |
| SNP_P3_132566_569041 | NW_004516087.1 | Scaffold674 | 569041                  | TT                              | CC                | 1946523608               |
| SNP_P3_132567_569209 | NW_004516087.1 | Scaffold674 | 569209                  | GG                              | TT                | 1946523609               |
| SNP_P3_132568_569495 | NW_004516087.1 | Scaffold674 | 569495                  | TT                              | GG                | 1946523611               |
| SNP_P3_132569_571768 | NW_004516087.1 | Scaffold674 | 571768                  | TT                              | CC                | 1946523612               |
| SNP_P3_132570_574494 | NW_004516087.1 | Scaffold674 | 574494                  | CC                              | TT                | 1946523614               |
| SNP_P3_132571_575262 | NW_004516087.1 | Scaffold674 | 575262                  | CC                              | TT                | 1946523615               |
| SNP_P3_132573_580588 | NW_004516087.1 | Scaffold674 | 580588                  | CC                              | GG                | 1946523616               |
| SNP_P3_132574_582768 | NW_004516087.1 | Scaffold674 | 582768                  | TT                              | CC                | 1946523618               |
| SNP_P3_132575_582851 | NW_004516087.1 | Scaffold674 | 582851                  | AA                              | TT                | 1946523619               |
| SNP_P3_132576_584786 | NW_004516087.1 | Scaffold674 | 584786                  | GG                              | AA                | 1946523620               |
| SNP_P3_132577_601955 | NW_004516087.1 | Scaffold674 | 601955                  | AA                              | GG                | 1946523622               |
| SNP_P3_132578_603030 | NW_004516087.1 | Scaffold674 | 603030                  | AA                              | CC                | 1946523623               |
| SNP_P3_132579_613523 | NW_004516087.1 | Scaffold674 | 613523                  | AA                              | TT                | 1946523625               |
| SNP_P3_132581_617892 | NW_004516087.1 | Scaffold674 | 617892                  | TT                              | AA                | 1946523626               |
| SNP_P3_132584_624278 | NW_004516087.1 | Scaffold674 | 624278                  | GG                              | CC                | 1946523627               |
| SNP_P3_132585_625821 | NW_004516087.1 | Scaffold674 | 625821                  | AA                              | GG                | 1946523629               |
| SNP_P3_132587_638403 | NW_004516087.1 | Scaffold674 | 638403                  | CC                              | TT                | 1946523630               |
| SNP_P3_132589_650029 | NW_004516087.1 | Scaffold674 | 650029                  | TT                              | CC                | 1946523632               |
| SNP_P3_132590_650048 | NW_004516087.1 | Scaffold674 | 650048                  | AA                              | GG                | 1946523633               |
| SNP_P3_132591_651571 | NW_004516087.1 | Scaffold674 | 651571                  | TT                              | GG                | 1946523635               |
| SNP_P3_132592_651585 | NW_004516087.1 | Scaffold674 | 651585                  | GG                              | AA                | 1946523636               |
| SNP_P3_132593_653357 | NW_004516087.1 | Scaffold674 | 653357                  | GG                              | AA                | 1946523637               |
| SNP_P3_132594_653629 | NW_004516087.1 | Scaffold674 | 653629                  | GG                              | AA                | 1946523639               |
| SNP_P3_132595_657580 | NW_004516087.1 | Scaffold674 | 657580                  | AA                              | GG                | 1946523640               |
| SNP_P3_132596_658083 | NW_004516087.1 | Scaffold674 | 658083                  | CC                              | GG                | 1946523642               |
| SNP_P3_132597_659589 | NW_004516087.1 | Scaffold674 | 659589                  | AA                              | TT                | 1946523643               |
| SNP_P3_132598_659847 | NW_004516087.1 | Scaffold674 | 659847                  | CC                              | AA                | 1946523644               |
| SNP_P3_132599_665772 | NW_004516087.1 | Scaffold674 | 665772                  | CC                              | TT                | 1946523646               |
| SNP_P3_132600_668370 | NW_004516087.1 | Scaffold674 | 668370                  | TT                              | CC                | 1946523647               |
| SNP_P3_132601_668475 | NW_004516087.1 | Scaffold674 | 668475                  | AA                              | GG                | 1946523649               |
| SNP_P3_132603_670973 | NW_004516087.1 | Scaffold674 | 670973                  | CC                              | TT                | 1946523650               |
| SNP_P3_132604_672332 | NW_004516087.1 | Scaffold674 | 672332                  | AA                              | GG                | 1946523651               |
| SNP_P3_132605_676297 | NW_004516087.1 | Scaffold674 | 676297                  | TT                              | AA                | 1946523653               |
| SNP_P3_132606_676307 | NW_004516087.1 | Scaffold674 | 676307                  | TT                              | CC                | 1946523654               |
| SNP_P3_132607_679780 | NW_004516087.1 | Scaffold674 | 679780                  | GG                              | CC                | 1946523655               |
| SNP_P3_132608_681455 | NW_004516087.1 | Scaffold674 | 681455                  | AA                              | CC                | 1946523657               |
| SNP_P3_132609_681503 | NW_004516087.1 | Scaffold674 | 681503                  | CC                              | TT                | 1946523658               |
| SNP_P3_132610_682522 | NW_004516087.1 | Scaffold674 | 682522                  | AA                              | TT                | 1946523660               |
| SNP_P3_132611_683559 | NW_004516087.1 | Scaffold674 | 683559                  | CC                              | AA                | 1946523661               |

| SNPs IDs             | Chromosome IDs | Chromosomes | Physical positions (bp) | CDC Frontier (Reference genome) | (Pusa 256 & HPNB) | NCBI SNPdb Accession IDs |
|----------------------|----------------|-------------|-------------------------|---------------------------------|-------------------|--------------------------|
| SNP_P3_132612_684178 | NW_004516087.1 | Scaffold674 | 684178                  | CC                              | TT                | 1946523663               |
| SNP_P3_132613_689039 | NW_004516087.1 | Scaffold674 | 689039                  | AA                              | CC                | 1946523664               |
| SNP_P3_132614_689649 | NW_004516087.1 | Scaffold674 | 689649                  | TT                              | CC                | 1946523665               |
| SNP_P3_132615_690327 | NW_004516087.1 | Scaffold674 | 690327                  | CC                              | TT                | 1946523667               |
| SNP_P3_132616_690541 | NW_004516087.1 | Scaffold674 | 690541                  | AA                              | GG                | 1946523668               |
| SNP_P3_132617_690875 | NW_004516087.1 | Scaffold674 | 690875                  | TT                              | CC                | 1946523670               |
| SNP_P3_132618_691502 | NW_004516087.1 | Scaffold674 | 691502                  | AA                              | CC                | 1946523671               |
| SNP_P3_132619_703556 | NW_004516087.1 | Scaffold674 | 703556                  | AA                              | GG                | 1946523672               |
| SNP_P3_132620_704943 | NW_004516087.1 | Scaffold674 | 704943                  | TT                              | AA                | 1946523674               |
| SNP_P3_132621_705930 | NW_004516087.1 | Scaffold674 | 705930                  | AA                              | GG                | 1946523675               |
| SNP_P3_132622_711894 | NW_004516087.1 | Scaffold674 | 711894                  | GG                              | AA                | 1946523676               |
| SNP_P3_132623_720293 | NW_004516087.1 | Scaffold674 | 720293                  | AA                              | GG                | 1946523678               |
| SNP_P3_132624_720874 | NW_004516087.1 | Scaffold674 | 720874                  | TT                              | CC                | 1946523679               |
| SNP_P3_132625_726953 | NW_004516087.1 | Scaffold674 | 726953                  | TT                              | AA                | 1946523681               |
| SNP_P3_132626_728260 | NW_004516087.1 | Scaffold674 | 728260                  | CC                              | AA                | 1946523682               |
| SNP_P3_132627_728371 | NW_004516087.1 | Scaffold674 | 728371                  | CC                              | AA                | 1946523684               |
| SNP_P3_132628_728536 | NW_004516087.1 | Scaffold674 | 728536                  | GG                              | AA                | 1946523685               |
| SNP_P3_132629_729239 | NW_004516087.1 | Scaffold674 | 729239                  | TT                              | GG                | 1946523687               |
| SNP_P3_132630_729638 | NW_004516087.1 | Scaffold674 | 729638                  | CC                              | TT                | 1946523688               |
| SNP_P3_132631_732746 | NW_004516087.1 | Scaffold674 | 732746                  | CC                              | TT                | 1946523689               |
| SNP_P3_132632_733075 | NW_004516087.1 | Scaffold674 | 733075                  | TT                              | CC                | 1946523691               |
| SNP_P3_132633_734773 | NW_004516087.1 | Scaffold674 | 734773                  | CC                              | TT                | 1946523692               |
| SNP_P3_132634_740486 | NW_004516087.1 | Scaffold674 | 740486                  | GG                              | AA                | 1946523694               |
| SNP_P3_132635_741672 | NW_004516087.1 | Scaffold674 | 741672                  | CC                              | TT                | 1946523695               |
| SNP_P3_132636_747180 | NW_004516087.1 | Scaffold674 | 747180                  | GG                              | AA                | 1946523697               |
| SNP_P3_132638_758454 | NW_004516087.1 | Scaffold674 | 758454                  | GG                              | AA                | 1946523698               |
| SNP_P3_132639_758461 | NW_004516087.1 | Scaffold674 | 758461                  | GG                              | AA                | 1946523699               |
| SNP_P3_132640_764715 | NW_004516087.1 | Scaffold674 | 764715                  | TT                              | CC                | 1946523701               |
| SNP_P3_132641_765639 | NW_004516087.1 | Scaffold674 | 765639                  | CC                              | GG                | 1946523702               |
| SNP_P3_132642_773484 | NW_004516087.1 | Scaffold674 | 773484                  | AA                              | GG                | 1946523703               |
| SNP_P3_132643_773490 | NW_004516087.1 | Scaffold674 | 773490                  | AA                              | CC                | 1946523705               |
| SNP_P3_132645_774927 | NW_004516087.1 | Scaffold674 | 774927                  | TT                              | CC                | 1946523706               |
| SNP_P3_132646_776778 | NW_004516087.1 | Scaffold674 | 776778                  | TT                              | GG                | 1946523708               |
| SNP_P3_132648_784664 | NW_004516087.1 | Scaffold674 | 784664                  | TT                              | CC                | 1946523709               |
| SNP_P3_132649_785648 | NW_004516087.1 | Scaffold674 | 785648                  | GG                              | AA                | 1946523710               |
| SNP_P3_132650_788512 | NW_004516087.1 | Scaffold674 | 788512                  | GG                              | AA                | 1946523712               |
| SNP_P3_132651_788513 | NW_004516087.1 | Scaffold674 | 788513                  | CC                              | TT                | 1946523713               |
| SNP_P3_132652_788704 | NW_004516087.1 | Scaffold674 | 788704                  | TT                              | CC                | 1946523714               |
| SNP_P3_132653_788777 | NW_004516087.1 | Scaffold674 | 788777                  | GG                              | AA                | 1946523716               |
| SNP_P3_132654_793392 | NW_004516087.1 | Scaffold674 | 793392                  | TT                              | AA                | 1946523717               |
| SNP_P3_132655_793998 | NW_004516087.1 | Scaffold674 | 793998                  | AA                              | GG                | 1946523718               |
| SNP_P3_132656_797909 | NW_004516087.1 | Scaffold674 | 797909                  | AA                              | GG                | 1946523720               |

| SNPs IDs             | Chromosome IDs | Chromosomes | Physical positions (bp) | CDC Frontier (Reference genome) | (Pusa 256 & HPNB) | NCBI SNPdb Accession IDs |
|----------------------|----------------|-------------|-------------------------|---------------------------------|-------------------|--------------------------|
| SNP_P3_132657_798597 | NW_004516087.1 | Scaffold674 | 798597                  | CC                              | GG                | 1946523721               |
| SNP_P3_132658_800040 | NW_004516087.1 | Scaffold674 | 800040                  | CC                              | GG                | 1946523723               |
| SNP_P3_132659_800454 | NW_004516087.1 | Scaffold674 | 800454                  | TT                              | AA                | 1946523724               |
| SNP_P3_132661_813462 | NW_004516087.1 | Scaffold674 | 813462                  | AA                              | TT                | 1946523725               |
| SNP_P3_132662_829432 | NW_004516087.1 | Scaffold674 | 829432                  | CC                              | AA                | 1946523727               |
| SNP_P3_132663_829548 | NW_004516087.1 | Scaffold674 | 829548                  | CC                              | AA                | 1946523728               |
| SNP_P3_132664_829590 | NW_004516087.1 | Scaffold674 | 829590                  | AA                              | GG                | 1946523730               |
| SNP_P3_132665_829605 | NW_004516087.1 | Scaffold674 | 829605                  | GG                              | AA                | 1946523731               |
| SNP_P3_132666_829637 | NW_004516087.1 | Scaffold674 | 829637                  | AA                              | GG                | 1946523732               |
| SNP_P3_132667_829641 | NW_004516087.1 | Scaffold674 | 829641                  | AA                              | GG                | 1946523734               |
| SNP_P3_132668_829679 | NW_004516087.1 | Scaffold674 | 829679                  | GG                              | TT                | 1946523735               |
| SNP_P3_132669_829682 | NW_004516087.1 | Scaffold674 | 829682                  | TT                              | GG                | 1946523736               |
| SNP_P3_132670_829882 | NW_004516087.1 | Scaffold674 | 829882                  | CC                              | TT                | 1946523738               |
| SNP_P3_132671_829894 | NW_004516087.1 | Scaffold674 | 829894                  | TT                              | AA                | 1946523739               |
| SNP_P3_132672_829909 | NW_004516087.1 | Scaffold674 | 829909                  | TT                              | CC                | 1946523741               |
| SNP_P3_132673_829918 | NW_004516087.1 | Scaffold674 | 829918                  | CC                              | TT                | 1946523742               |
| SNP_P3_132674_829971 | NW_004516087.1 | Scaffold674 | 829971                  | AA                              | GG                | 1946523743               |
| SNP_P3_132675_841029 | NW_004516087.1 | Scaffold674 | 841029                  | CC                              | TT                | 1946523745               |
| SNP_P3_132676_841211 | NW_004516087.1 | Scaffold674 | 841211                  | AA                              | GG                | 1946523746               |
| SNP_P3_132677_841307 | NW_004516087.1 | Scaffold674 | 841307                  | TT                              | CC                | 1946523747               |
| SNP_P3_132678_842070 | NW_004516087.1 | Scaffold674 | 842070                  | CC                              | TT                | 1946523749               |
| SNP_P3_132679_842309 | NW_004516087.1 | Scaffold674 | 842309                  | CC                              | AA                | 1946523750               |
| SNP_P3_132680_842370 | NW_004516087.1 | Scaffold674 | 842370                  | CC                              | TT                | 1946523752               |
| SNP_P3_132681_842477 | NW_004516087.1 | Scaffold674 | 842477                  | AA                              | GG                | 1946523754               |
| SNP_P3_132682_842534 | NW_004516087.1 | Scaffold674 | 842534                  | AA                              | GG                | 1946523755               |
| SNP_P3_132683_842728 | NW_004516087.1 | Scaffold674 | 842728                  | AA                              | TT                | 1946523757               |
| SNP_P3_132684_842845 | NW_004516087.1 | Scaffold674 | 842845                  | CC                              | GG                | 1946523758               |
| SNP_P3_132685_842884 | NW_004516087.1 | Scaffold674 | 842884                  | AA                              | GG                | 1946523760               |
| SNP_P3_132686_843024 | NW_004516087.1 | Scaffold674 | 843024                  | CC                              | AA                | 1946523761               |
| SNP_P3_132687_843163 | NW_004516087.1 | Scaffold674 | 843163                  | AA                              | GG                | 1946523763               |
| SNP_P3_132688_843199 | NW_004516087.1 | Scaffold674 | 843199                  | TT                              | GG                | 1946523764               |
| SNP_P3_132689_843201 | NW_004516087.1 | Scaffold674 | 843201                  | TT                              | CC                | 1946523766               |
| SNP_P3_132690_843276 | NW_004516087.1 | Scaffold674 | 843276                  | GG                              | TT                | 1946523767               |
| SNP_P3_132691_843280 | NW_004516087.1 | Scaffold674 | 843280                  | TT                              | CC                | 1946523769               |
| SNP_P3_132692_843281 | NW_004516087.1 | Scaffold674 | 843281                  | AA                              | TT                | 1946523770               |
| SNP_P3_132693_843892 | NW_004516087.1 | Scaffold674 | 843892                  | CC                              | TT                | 1946523771               |
| SNP_P3_132694_848609 | NW_004516087.1 | Scaffold674 | 848609                  | CC                              | AA                | 1946523773               |
| SNP_P3_132695_852030 | NW_004516087.1 | Scaffold674 | 852030                  | TT                              | CC                | 1946523774               |
| SNP_P3_132696_861534 | NW_004516087.1 | Scaffold674 | 861534                  | TT                              | GG                | 1946523776               |
| SNP_P3_132697_862729 | NW_004516087.1 | Scaffold674 | 862729                  | CC                              | TT                | 1946523777               |
| SNP_P3_132698_863755 | NW_004516087.1 | Scaffold674 | 863755                  | AA                              | TT                | 1946523778               |
| SNP_P3_132699_871622 | NW_004516087.1 | Scaffold674 | 871622                  | TT                              | AA                | 1946523780               |

| SNPs IDs             | Chromosome IDs | Chromosomes | Physical positions (bp) | CDC Frontier (Reference genome) | (Pusa 256 & HPNB) | NCBI SNPdb Accession IDs |
|----------------------|----------------|-------------|-------------------------|---------------------------------|-------------------|--------------------------|
| SNP_P3_132700_871674 | NW_004516087.1 | Scaffold674 | 871674                  | AA                              | GG                | 1946523781               |
| SNP_P3_132701_887591 | NW_004516087.1 | Scaffold674 | 887591                  | AA                              | TT                | 1946523783               |
| SNP_P3_132702_887603 | NW_004516087.1 | Scaffold674 | 887603                  | GG                              | AA                | 1946523784               |
| SNP_P3_132703_887678 | NW_004516087.1 | Scaffold674 | 887678                  | CC                              | TT                | 1946523786               |
| SNP_P3_132704_888272 | NW_004516087.1 | Scaffold674 | 888272                  | TT                              | AA                | 1946523787               |
| SNP_P3_132705_890613 | NW_004516087.1 | Scaffold674 | 890613                  | CC                              | TT                | 1946523788               |
| SNP_P3_132706_890650 | NW_004516087.1 | Scaffold674 | 890650                  | TT                              | CC                | 1946523790               |
| SNP_P3_132707_890833 | NW_004516087.1 | Scaffold674 | 890833                  | AA                              | GG                | 1946523791               |
| SNP_P3_132708_891327 | NW_004516087.1 | Scaffold674 | 891327                  | AA                              | GG                | 1946523793               |
| SNP_P3_132709_891400 | NW_004516087.1 | Scaffold674 | 891400                  | CC                              | TT                | 1946523794               |
| SNP_P3_132710_891413 | NW_004516087.1 | Scaffold674 | 891413                  | CC                              | TT                | 1946523795               |
| SNP_P3_132711_891415 | NW_004516087.1 | Scaffold674 | 891415                  | AA                              | TT                | 1946523797               |
| SNP_P3_132712_891483 | NW_004516087.1 | Scaffold674 | 891483                  | AA                              | TT                | 1946523798               |
| SNP_P3_132713_891508 | NW_004516087.1 | Scaffold674 | 891508                  | GG                              | AA                | 1946523800               |
| SNP_P3_132714_891585 | NW_004516087.1 | Scaffold674 | 891585                  | AA                              | TT                | 1946523801               |
| SNP_P3_132715_891926 | NW_004516087.1 | Scaffold674 | 891926                  | GG                              | TT                | 1946523803               |
| SNP_P3_132716_897456 | NW_004516087.1 | Scaffold674 | 897456                  | TT                              | AA                | 1946523804               |
| SNP_P3_132717_897467 | NW_004516087.1 | Scaffold674 | 897467                  | TT                              | CC                | 1946523805               |
| SNP_P3_132718_898231 | NW_004516087.1 | Scaffold674 | 898231                  | GG                              | CC                | 1946523807               |
| SNP_P3_132719_898331 | NW_004516087.1 | Scaffold674 | 898331                  | CC                              | TT                | 1946523808               |
| SNP_P3_132720_898578 | NW_004516087.1 | Scaffold674 | 898578                  | CC                              | TT                | 1946523809               |
| SNP_P3_132721_900151 | NW_004516087.1 | Scaffold674 | 900151                  | TT                              | CC                | 1946523811               |
| SNP_P3_132722_900259 | NW_004516087.1 | Scaffold674 | 900259                  | TT                              | AA                | 1946523812               |
| SNP_P3_132723_301    | NW_004516088.1 | Scaffold675 | 301                     | TT                              | CC                | 1946523814               |
| SNP_P3_132724_15263  | NW_004516088.1 | Scaffold675 | 15263                   | CC                              | TT                | 1946523815               |
| SNP_P3_132725_15366  | NW_004516088.1 | Scaffold675 | 15366                   | AA                              | GG                | 1946523817               |
| SNP_P3_132726_15428  | NW_004516088.1 | Scaffold675 | 15428                   | TT                              | AA                | 1946523818               |
| SNP_P3_132727_15451  | NW_004516088.1 | Scaffold675 | 15451                   | GG                              | TT                | 1946523819               |
| SNP_P3_132729_15722  | NW_004516088.1 | Scaffold675 | 15722                   | GG                              | CC                | 1946523821               |
| SNP_P3_132730_20111  | NW_004516088.1 | Scaffold675 | 20111                   | GG                              | TT                | 1946523822               |
| SNP_P3_132731_20140  | NW_004516088.1 | Scaffold675 | 20140                   | CC                              | TT                | 1946523824               |
| SNP_P3_132732_60937  | NW_004516088.1 | Scaffold675 | 60937                   | TT                              | GG                | 1946523825               |
| SNP_P3_132733_60940  | NW_004516088.1 | Scaffold675 | 60940                   | CC                              | TT                | 1946523827               |
| SNP_P3_132734_60951  | NW_004516088.1 | Scaffold675 | 60951                   | TT                              | CC                | 1946523828               |
| SNP_P3_132736_82270  | NW_004516088.1 | Scaffold675 | 82270                   | AA                              | CC                | 1946523829               |
| SNP_P3_132738_82585  | NW_004516088.1 | Scaffold675 | 82585                   | CC                              | TT                | 1946523831               |
| SNP_P3_132739_82597  | NW_004516088.1 | Scaffold675 | 82597                   | GG                              | AA                | 1946523832               |
| SNP_P3_132740_82603  | NW_004516088.1 | Scaffold675 | 82603                   | TT                              | GG                | 1946523834               |
| SNP_P3_132741_89675  | NW_004516088.1 | Scaffold675 | 89675                   | TT                              | GG                | 1946523835               |
| SNP_P3_132742_89697  | NW_004516088.1 | Scaffold675 | 89697                   | TT                              | GG                | 1946523836               |
| SNP_P3_132744_89816  | NW_004516088.1 | Scaffold675 | 89816                   | GG                              | AA                | 1946523838               |
| SNP_P3_132745_89851  | NW_004516088.1 | Scaffold675 | 89851                   | TT                              | CC                | 1946523839               |

| SNPs IDs             | Chromosome IDs | Chromosomes | Physical positions (bp) | CDC Frontier (Reference genome) | (Pusa 256 & HPNB) | NCBI SNPdb Accession IDs |
|----------------------|----------------|-------------|-------------------------|---------------------------------|-------------------|--------------------------|
| SNP_P3_132746_89879  | NW_004516088.1 | Scaffold675 | 89879                   | AA                              | GG                | 1946523841               |
| SNP_P3_132747_89997  | NW_004516088.1 | Scaffold675 | 89997                   | CC                              | TT                | 1946523842               |
| SNP_P3_132748_90024  | NW_004516088.1 | Scaffold675 | 90024                   | TT                              | GG                | 1946523844               |
| SNP_P3_132749_90025  | NW_004516088.1 | Scaffold675 | 90025                   | CC                              | TT                | 1946523845               |
| SNP_P3_132750_90038  | NW_004516088.1 | Scaffold675 | 90038                   | AA                              | TT                | 1946523846               |
| SNP_P3_132751_90075  | NW_004516088.1 | Scaffold675 | 90075                   | CC                              | TT                | 1946523848               |
| SNP_P3_132752_90200  | NW_004516088.1 | Scaffold675 | 90200                   | AA                              | GG                | 1946523849               |
| SNP_P3_132753_90227  | NW_004516088.1 | Scaffold675 | 90227                   | TT                              | CC                | 1946523851               |
| SNP_P3_132754_90244  | NW_004516088.1 | Scaffold675 | 90244                   | CC                              | AA                | 1946523852               |
| SNP_P3_132755_90740  | NW_004516088.1 | Scaffold675 | 90740                   | TT                              | CC                | 1946523854               |
| SNP_P3_132756_90744  | NW_004516088.1 | Scaffold675 | 90744                   | AA                              | GG                | 1946523855               |
| SNP_P3_132757_91141  | NW_004516088.1 | Scaffold675 | 91141                   | TT                              | CC                | 1946523857               |
| SNP_P3_132758_93067  | NW_004516088.1 | Scaffold675 | 93067                   | GG                              | AA                | 1946523858               |
| SNP_P3_132759_95913  | NW_004516088.1 | Scaffold675 | 95913                   | TT                              | CC                | 1946523860               |
| SNP_P3_132760_104207 | NW_004516088.1 | Scaffold675 | 104207                  | AA                              | GG                | 1946523861               |
| SNP_P3_132761_126133 | NW_004516088.1 | Scaffold675 | 126133                  | CC                              | TT                | 1946523862               |
| SNP_P3_132762_129143 | NW_004516088.1 | Scaffold675 | 129143                  | TT                              | CC                | 1946523864               |
| SNP_P3_132763_131822 | NW_004516088.1 | Scaffold675 | 131822                  | CC                              | AA                | 1946523865               |
| SNP_P3_132764_148180 | NW_004516088.1 | Scaffold675 | 148180                  | CC                              | TT                | 1946523867               |
| SNP_P3_132765_158990 | NW_004516088.1 | Scaffold675 | 158990                  | AA                              | CC                | 1946523868               |
| SNP_P3_132766_1895   | NW_004516089.1 | Scaffold676 | 1895                    | TT                              | AA                | 1946523870               |
| SNP_P3_132767_4174   | NW_004516089.1 | Scaffold676 | 4174                    | CC                              | GG                | 1946523871               |
| SNP_P3_132768_14401  | NW_004516089.1 | Scaffold676 | 14401                   | AA                              | GG                | 1946523872               |
| SNP_P3_132769_14505  | NW_004516089.1 | Scaffold676 | 14505                   | GG                              | AA                | 1946523874               |
| SNP_P3_132770_14525  | NW_004516089.1 | Scaffold676 | 14525                   | AA                              | GG                | 1946523875               |
| SNP_P3_132771_14575  | NW_004516089.1 | Scaffold676 | 14575                   | CC                              | GG                | 1946523877               |
| SNP_P3_132773_14887  | NW_004516089.1 | Scaffold676 | 14887                   | CC                              | GG                | 1946523878               |
| SNP_P3_132774_14931  | NW_004516089.1 | Scaffold676 | 14931                   | CC                              | TT                | 1946523880               |
| SNP_P3_132775_19218  | NW_004516089.1 | Scaffold676 | 19218                   | CC                              | TT                | 1946523881               |
| SNP_P3_132776_20142  | NW_004516089.1 | Scaffold676 | 20142                   | CC                              | AA                | 1946523882               |
| SNP_P3_132777_20153  | NW_004516089.1 | Scaffold676 | 20153                   | CC                              | TT                | 1946523884               |
| SNP_P3_132778_20175  | NW_004516089.1 | Scaffold676 | 20175                   | TT                              | AA                | 1946523885               |
| SNP_P3_132779_23589  | NW_004516089.1 | Scaffold676 | 23589                   | CC                              | TT                | 1946523887               |
| SNP_P3_132780_26837  | NW_004516089.1 | Scaffold676 | 26837                   | AA                              | GG                | 1946523888               |
| SNP_P3_132781_27031  | NW_004516089.1 | Scaffold676 | 27031                   | GG                              | AA                | 1946523890               |
| SNP_P3_132782_27043  | NW_004516089.1 | Scaffold676 | 27043                   | AA                              | GG                | 1946523891               |
| SNP_P3_132783_27053  | NW_004516089.1 | Scaffold676 | 27053                   | CC                              | AA                | 1946523893               |
| SNP_P3_132784_27378  | NW_004516089.1 | Scaffold676 | 27378                   | TT                              | AA                | 1946523894               |
| SNP_P3_132785_49646  | NW_004516089.1 | Scaffold676 | 49646                   | TT                              | AA                | 1946523896               |
| SNP_P3_132786_49796  | NW_004516089.1 | Scaffold676 | 49796                   | CC                              | TT                | 1946523897               |
| SNP_P3_132787_49941  | NW_004516089.1 | Scaffold676 | 49941                   | CC                              | GG                | 1946523899               |
| SNP_P3_132788_50070  | NW_004516089.1 | Scaffold676 | 50070                   | CC                              | TT                | 1946523900               |

| SNPs IDs            | Chromosome IDs | Chromosomes | Physical positions (bp) | CDC Frontier (Reference genome) | (Pusa 256 & HPNB) | NCBI SNPdb Accession IDs |
|---------------------|----------------|-------------|-------------------------|---------------------------------|-------------------|--------------------------|
| SNP_P3_132789_50143 | NW_004516089.1 | Scaffold676 | 50143                   | AA                              | CC                | 1946523902               |
| SNP_P3_132790_50159 | NW_004516089.1 | Scaffold676 | 50159                   | GG                              | CC                | 1946523903               |
| SNP_P3_132791_50395 | NW_004516089.1 | Scaffold676 | 50395                   | GG                              | AA                | 1946523904               |
| SNP_P3_132792_50430 | NW_004516089.1 | Scaffold676 | 50430                   | AA                              | CC                | 1946523906               |
| SNP_P3_132793_50434 | NW_004516089.1 | Scaffold676 | 50434                   | TT                              | CC                | 1946523907               |
| SNP_P3_132794_50457 | NW_004516089.1 | Scaffold676 | 50457                   | CC                              | GG                | 1946523909               |
| SNP_P3_132795_50476 | NW_004516089.1 | Scaffold676 | 50476                   | AA                              | CC                | 1946523911               |
| SNP_P3_132796_50935 | NW_004516089.1 | Scaffold676 | 50935                   | TT                              | CC                | 1946523912               |
| SNP_P3_132797_50975 | NW_004516089.1 | Scaffold676 | 50975                   | GG                              | TT                | 1946523914               |
| SNP_P3_132798_50979 | NW_004516089.1 | Scaffold676 | 50979                   | CC                              | TT                | 1946523915               |
| SNP_P3_132799_51045 | NW_004516089.1 | Scaffold676 | 51045                   | AA                              | GG                | 1946523917               |
| SNP_P3_132800_51278 | NW_004516089.1 | Scaffold676 | 51278                   | GG                              | AA                | 1946523918               |
| SNP_P3_132802_52019 | NW_004516089.1 | Scaffold676 | 52019                   | CC                              | TT                | 1946523920               |
| SNP_P3_132803_52030 | NW_004516089.1 | Scaffold676 | 52030                   | CC                              | AA                | 1946523921               |
| SNP_P3_132804_52274 | NW_004516089.1 | Scaffold676 | 52274                   | TT                              | GG                | 1946523922               |
| SNP_P3_132805_52337 | NW_004516089.1 | Scaffold676 | 52337                   | CC                              | AA                | 1946523924               |
| SNP_P3_132806_52339 | NW_004516089.1 | Scaffold676 | 52339                   | AA                              | GG                | 1946523925               |
| SNP_P3_132807_52763 | NW_004516089.1 | Scaffold676 | 52763                   | TT                              | AA                | 1946523927               |
| SNP_P3_132808_53102 | NW_004516089.1 | Scaffold676 | 53102                   | GG                              | AA                | 1946523928               |
| SNP_P3_132809_53105 | NW_004516089.1 | Scaffold676 | 53105                   | CC                              | TT                | 1946523929               |
| SNP_P3_132810_53304 | NW_004516089.1 | Scaffold676 | 53304                   | CC                              | TT                | 1946523931               |
| SNP_P3_132811_54566 | NW_004516089.1 | Scaffold676 | 54566                   | GG                              | AA                | 1946523932               |
| SNP_P3_132812_54574 | NW_004516089.1 | Scaffold676 | 54574                   | GG                              | CC                | 1946523934               |
| SNP_P3_132813_54598 | NW_004516089.1 | Scaffold676 | 54598                   | CC                              | TT                | 1946523935               |
| SNP_P3_132814_54607 | NW_004516089.1 | Scaffold676 | 54607                   | AA                              | GG                | 1946523937               |
| SNP_P3_132815_54613 | NW_004516089.1 | Scaffold676 | 54613                   | AA                              | TT                | 1946523938               |
| SNP_P3_132816_54618 | NW_004516089.1 | Scaffold676 | 54618                   | TT                              | CC                | 1946523939               |
| SNP_P3_132817_54672 | NW_004516089.1 | Scaffold676 | 54672                   | AA                              | GG                | 1946523941               |
| SNP_P3_132818_54677 | NW_004516089.1 | Scaffold676 | 54677                   | CC                              | TT                | 1946523942               |
| SNP_P3_132819_54821 | NW_004516089.1 | Scaffold676 | 54821                   | AA                              | GG                | 1946523944               |
| SNP_P3_132820_54828 | NW_004516089.1 | Scaffold676 | 54828                   | CC                              | GG                | 1946523945               |
| SNP_P3_132821_55201 | NW_004516089.1 | Scaffold676 | 55201                   | AA                              | GG                | 1946523946               |
| SNP_P3_132822_55279 | NW_004516089.1 | Scaffold676 | 55279                   | TT                              | AA                | 1946523948               |
| SNP_P3_132823_55404 | NW_004516089.1 | Scaffold676 | 55404                   | CC                              | AA                | 1946523949               |
| SNP_P3_132824_55408 | NW_004516089.1 | Scaffold676 | 55408                   | AA                              | TT                | 1946523951               |
| SNP_P3_132825_55640 | NW_004516089.1 | Scaffold676 | 55640                   | TT                              | CC                | 1946523952               |
| SNP_P3_132826_55867 | NW_004516089.1 | Scaffold676 | 55867                   | AA                              | GG                | 1946523954               |
| SNP_P3_132827_55900 | NW_004516089.1 | Scaffold676 | 55900                   | AA                              | CC                | 1946523955               |
| SNP_P3_132828_56110 | NW_004516089.1 | Scaffold676 | 56110                   | GG                              | CC                | 1946523956               |
| SNP_P3_132829_56144 | NW_004516089.1 | Scaffold676 | 56144                   | CC                              | TT                | 1946523958               |
| SNP_P3_132830_56173 | NW_004516089.1 | Scaffold676 | 56173                   | GG                              | TT                | 1946523959               |
| SNP_P3_132831_56315 | NW_004516089.1 | Scaffold676 | 56315                   | GG                              | AA                | 1946523961               |

| SNPs IDs            | Chromosome IDs | Chromosomes | Physical positions (bp) | CDC Frontier (Reference genome) | (Pusa 256 & HPNB) | NCBI SNPdb Accession IDs |
|---------------------|----------------|-------------|-------------------------|---------------------------------|-------------------|--------------------------|
| SNP_P3_132832_56323 | NW_004516089.1 | Scaffold676 | 56323                   | AA                              | GG                | 1946523962               |
| SNP_P3_132833_56448 | NW_004516089.1 | Scaffold676 | 56448                   | GG                              | CC                | 1946523964               |
| SNP_P3_132834_56554 | NW_004516089.1 | Scaffold676 | 56554                   | TT                              | AA                | 1946523965               |
| SNP_P3_132835_56580 | NW_004516089.1 | Scaffold676 | 56580                   | GG                              | AA                | 1946523966               |
| SNP_P3_132836_56611 | NW_004516089.1 | Scaffold676 | 56611                   | TT                              | GG                | 1946523968               |
| SNP_P3_132837_56613 | NW_004516089.1 | Scaffold676 | 56613                   | GG                              | TT                | 1946523969               |
| SNP_P3_132838_56637 | NW_004516089.1 | Scaffold676 | 56637                   | TT                              | GG                | 1946523971               |
| SNP_P3_132839_56695 | NW_004516089.1 | Scaffold676 | 56695                   | CC                              | TT                | 1946523972               |
| SNP_P3_132840_56696 | NW_004516089.1 | Scaffold676 | 56696                   | GG                              | AA                | 1946523973               |
| SNP_P3_132841_56702 | NW_004516089.1 | Scaffold676 | 56702                   | TT                              | CC                | 1946523975               |
| SNP_P3_132842_56738 | NW_004516089.1 | Scaffold676 | 56738                   | GG                              | AA                | 1946523976               |
| SNP_P3_132843_56754 | NW_004516089.1 | Scaffold676 | 56754                   | AA                              | GG                | 1946523978               |
| SNP_P3_132844_56808 | NW_004516089.1 | Scaffold676 | 56808                   | GG                              | CC                | 1946523979               |
| SNP_P3_132845_56832 | NW_004516089.1 | Scaffold676 | 56832                   | TT                              | AA                | 1946523980               |
| SNP_P3_132846_56857 | NW_004516089.1 | Scaffold676 | 56857                   | AA                              | TT                | 1946523982               |
| SNP_P3_132847_56949 | NW_004516089.1 | Scaffold676 | 56949                   | GG                              | CC                | 1946523983               |
| SNP_P3_132848_57064 | NW_004516089.1 | Scaffold676 | 57064                   | GG                              | AA                | 1946523985               |
| SNP_P3_132849_57091 | NW_004516089.1 | Scaffold676 | 57091                   | CC                              | TT                | 1946523986               |
| SNP_P3_132850_57302 | NW_004516089.1 | Scaffold676 | 57302                   | TT                              | GG                | 1946523988               |
| SNP_P3_132851_57345 | NW_004516089.1 | Scaffold676 | 57345                   | TT                              | CC                | 1946523989               |
| SNP_P3_132853_59217 | NW_004516089.1 | Scaffold676 | 59217                   | AA                              | GG                | 1946523990               |
| SNP_P3_132854_59219 | NW_004516089.1 | Scaffold676 | 59219                   | CC                              | GG                | 1946523991               |
| SNP_P3_132855_59252 | NW_004516089.1 | Scaffold676 | 59252                   | CC                              | GG                | 1946523993               |
| SNP_P3_132856_64233 | NW_004516089.1 | Scaffold676 | 64233                   | TT                              | CC                | 1946523994               |
| SNP_P3_132857_64254 | NW_004516089.1 | Scaffold676 | 64254                   | CC                              | TT                | 1946523996               |
| SNP_P3_132858_64258 | NW_004516089.1 | Scaffold676 | 64258                   | AA                              | GG                | 1946523997               |
| SNP_P3_132859_66424 | NW_004516089.1 | Scaffold676 | 66424                   | AA                              | GG                | 1946523998               |
| SNP_P3_132860_66444 | NW_004516089.1 | Scaffold676 | 66444                   | AA                              | GG                | 1946524000               |
| SNP_P3_132861_66574 | NW_004516089.1 | Scaffold676 | 66574                   | GG                              | CC                | 1946524001               |
| SNP_P3_132862_67027 | NW_004516089.1 | Scaffold676 | 67027                   | AA                              | TT                | 1946524003               |
| SNP_P3_132863_67170 | NW_004516089.1 | Scaffold676 | 67170                   | AA                              | GG                | 1946524004               |
| SNP_P3_132864_67206 | NW_004516089.1 | Scaffold676 | 67206                   | CC                              | AA                | 1946524006               |
| SNP_P3_132865_67213 | NW_004516089.1 | Scaffold676 | 67213                   | GG                              | AA                | 1946524007               |
| SNP_P3_132866_67317 | NW_004516089.1 | Scaffold676 | 67317                   | AA                              | TT                | 1946524008               |
| SNP_P3_132867_68340 | NW_004516089.1 | Scaffold676 | 68340                   | AA                              | TT                | 1946524010               |
| SNP_P3_132868_68638 | NW_004516089.1 | Scaffold676 | 68638                   | AA                              | TT                | 1946524011               |
| SNP_P3_132869_68716 | NW_004516089.1 | Scaffold676 | 68716                   | CC                              | GG                | 1946524013               |
| SNP_P3_132870_68736 | NW_004516089.1 | Scaffold676 | 68736                   | AA                              | GG                | 1946524014               |
| SNP_P3_132871_68745 | NW_004516089.1 | Scaffold676 | 68745                   | CC                              | TT                | 1946524016               |
| SNP_P3_132872_68760 | NW_004516089.1 | Scaffold676 | 68760                   | TT                              | CC                | 1946524017               |
| SNP_P3_132873_68802 | NW_004516089.1 | Scaffold676 | 68802                   | AA                              | GG                | 1946524018               |
| SNP_P3_132874_69041 | NW_004516089.1 | Scaffold676 | 69041                   | AA                              | CC                | 1946524020               |

| SNPs IDs            | Chromosome IDs | Chromosomes | Physical positions (bp) | CDC Frontier (Reference genome) | (Pusa 256 & HPNB) | NCBI SNPdb Accession IDs |
|---------------------|----------------|-------------|-------------------------|---------------------------------|-------------------|--------------------------|
| SNP_P3_132875_69061 | NW_004516089.1 | Scaffold676 | 69061                   | CC                              | AA                | 1946524021               |
| SNP_P3_132876_69211 | NW_004516089.1 | Scaffold676 | 69211                   | GG                              | AA                | 1946524023               |
| SNP_P3_132877_69263 | NW_004516089.1 | Scaffold676 | 69263                   | CC                              | TT                | 1946524024               |
| SNP_P3_132878_69580 | NW_004516089.1 | Scaffold676 | 69580                   | CC                              | AA                | 1946524026               |
| SNP_P3_132879_69657 | NW_004516089.1 | Scaffold676 | 69657                   | CC                              | TT                | 1946524027               |
| SNP_P3_132880_69679 | NW_004516089.1 | Scaffold676 | 69679                   | AA                              | GG                | 1946524028               |
| SNP_P3_132881_69871 | NW_004516089.1 | Scaffold676 | 69871                   | AA                              | TT                | 1946524030               |
| SNP_P3_132882_69874 | NW_004516089.1 | Scaffold676 | 69874                   | GG                              | AA                | 1946524031               |
| SNP_P3_132883_69880 | NW_004516089.1 | Scaffold676 | 69880                   | TT                              | GG                | 1946524033               |
| SNP_P3_132884_69936 | NW_004516089.1 | Scaffold676 | 69936                   | CC                              | TT                | 1946524034               |
| SNP_P3_132885_71064 | NW_004516089.1 | Scaffold676 | 71064                   | GG                              | AA                | 1946524035               |
| SNP_P3_132886_71303 | NW_004516089.1 | Scaffold676 | 71303                   | GG                              | AA                | 1946524037               |
| SNP_P3_132887_72626 | NW_004516089.1 | Scaffold676 | 72626                   | CC                              | TT                | 1946524038               |
| SNP_P3_132889_73178 | NW_004516089.1 | Scaffold676 | 73178                   | TT                              | AA                | 1946524040               |
| SNP_P3_132890_73621 | NW_004516089.1 | Scaffold676 | 73621                   | TT                              | CC                | 1946524041               |
| SNP_P3_132891_73663 | NW_004516089.1 | Scaffold676 | 73663                   | CC                              | AA                | 1946524042               |
| SNP_P3_132892_73668 | NW_004516089.1 | Scaffold676 | 73668                   | TT                              | CC                | 1946524044               |
| SNP_P3_132893_73796 | NW_004516089.1 | Scaffold676 | 73796                   | GG                              | CC                | 1946524045               |
| SNP_P3_132894_73899 | NW_004516089.1 | Scaffold676 | 73899                   | AA                              | TT                | 1946524047               |
| SNP_P3_132895_73926 | NW_004516089.1 | Scaffold676 | 73926                   | TT                              | CC                | 1946524048               |
| SNP_P3_132896_74122 | NW_004516089.1 | Scaffold676 | 74122                   | TT                              | CC                | 1946524050               |
| SNP_P3_132897_74212 | NW_004516089.1 | Scaffold676 | 74212                   | AA                              | CC                | 1946524051               |
| SNP_P3_132898_74241 | NW_004516089.1 | Scaffold676 | 74241                   | GG                              | AA                | 1946524053               |
| SNP_P3_132899_74337 | NW_004516089.1 | Scaffold676 | 74337                   | GG                              | TT                | 1946524054               |
| SNP_P3_132900_74512 | NW_004516089.1 | Scaffold676 | 74512                   | TT                              | CC                | 1946524056               |
| SNP_P3_132901_74550 | NW_004516089.1 | Scaffold676 | 74550                   | AA                              | GG                | 1946524057               |
| SNP_P3_132902_74568 | NW_004516089.1 | Scaffold676 | 74568                   | GG                              | AA                | 1946524058               |
| SNP_P3_132903_74591 | NW_004516089.1 | Scaffold676 | 74591                   | CC                              | AA                | 1946524060               |
| SNP_P3_132904_74826 | NW_004516089.1 | Scaffold676 | 74826                   | AA                              | GG                | 1946524062               |
| SNP_P3_132905_77733 | NW_004516089.1 | Scaffold676 | 77733                   | CC                              | AA                | 1946524063               |
| SNP_P3_132906_78006 | NW_004516089.1 | Scaffold676 | 78006                   | CC                              | AA                | 1946524064               |
| SNP_P3_132907_78015 | NW_004516089.1 | Scaffold676 | 78015                   | TT                              | CC                | 1946524066               |
| SNP_P3_132908_78589 | NW_004516089.1 | Scaffold676 | 78589                   | AA                              | CC                | 1946524067               |
| SNP_P3_132909_78666 | NW_004516089.1 | Scaffold676 | 78666                   | GG                              | TT                | 1946524069               |
| SNP_P3_132910_78823 | NW_004516089.1 | Scaffold676 | 78823                   | AA                              | CC                | 1946524070               |
| SNP_P3_132911_78842 | NW_004516089.1 | Scaffold676 | 78842                   | AA                              | GG                | 1946524072               |
| SNP_P3_132912_78879 | NW_004516089.1 | Scaffold676 | 78879                   | TT                              | CC                | 1946524073               |
| SNP_P3_132913_78887 | NW_004516089.1 | Scaffold676 | 78887                   | TT                              | GG                | 1946524074               |
| SNP_P3_132914_78896 | NW_004516089.1 | Scaffold676 | 78896                   | CC                              | TT                | 1946524076               |
| SNP_P3_132915_78902 | NW_004516089.1 | Scaffold676 | 78902                   | TT                              | AA                | 1946524077               |
| SNP_P3_132916_79511 | NW_004516089.1 | Scaffold676 | 79511                   | CC                              | TT                | 1946524079               |
| SNP_P3_132917_84091 | NW_004516089.1 | Scaffold676 | 84091                   | GG                              | CC                | 1946524081               |



| SNPs IDs             | Chromosome IDs | Chromosomes | Physical positions (bp) | CDC Frontier (Reference genome) | (Pusa 256 & HPNB) | NCBI SNPdb Accession IDs |
|----------------------|----------------|-------------|-------------------------|---------------------------------|-------------------|--------------------------|
| SNP_P3_132918_84140  | NW_004516089.1 | Scaffold676 | 84140                   | TT                              | CC                | 1946524082               |
| SNP_P3_132919_84172  | NW_004516089.1 | Scaffold676 | 84172                   | TT                              | GG                | 1946524083               |
| SNP_P3_132920_84373  | NW_004516089.1 | Scaffold676 | 84373                   | AA                              | GG                | 1946524085               |
| SNP_P3_132921_84427  | NW_004516089.1 | Scaffold676 | 84427                   | GG                              | CC                | 1946524086               |
| SNP_P3_132922_84434  | NW_004516089.1 | Scaffold676 | 84434                   | CC                              | GG                | 1946524088               |
| SNP_P3_132923_84495  | NW_004516089.1 | Scaffold676 | 84495                   | GG                              | AA                | 1946524089               |
| SNP_P3_132925_84582  | NW_004516089.1 | Scaffold676 | 84582                   | AA                              | CC                | 1946524091               |
| SNP_P3_132926_84620  | NW_004516089.1 | Scaffold676 | 84620                   | TT                              | CC                | 1946524092               |
| SNP_P3_132927_84623  | NW_004516089.1 | Scaffold676 | 84623                   | AA                              | GG                | 1946524093               |
| SNP_P3_132928_84640  | NW_004516089.1 | Scaffold676 | 84640                   | CC                              | TT                | 1946524095               |
| SNP_P3_132929_85386  | NW_004516089.1 | Scaffold676 | 85386                   | AA                              | CC                | 1946524096               |
| SNP_P3_132930_85594  | NW_004516089.1 | Scaffold676 | 85594                   | AA                              | TT                | 1946524098               |
| SNP_P3_132931_85641  | NW_004516089.1 | Scaffold676 | 85641                   | TT                              | CC                | 1946524099               |
| SNP_P3_132932_85646  | NW_004516089.1 | Scaffold676 | 85646                   | AA                              | TT                | 1946524100               |
| SNP_P3_132933_85660  | NW_004516089.1 | Scaffold676 | 85660                   | TT                              | GG                | 1946524102               |
| SNP_P3_132934_85748  | NW_004516089.1 | Scaffold676 | 85748                   | TT                              | CC                | 1946524103               |
| SNP_P3_132935_87351  | NW_004516089.1 | Scaffold676 | 87351                   | CC                              | TT                | 1946524105               |
| SNP_P3_132936_87698  | NW_004516089.1 | Scaffold676 | 87698                   | AA                              | TT                | 1946524106               |
| SNP_P3_132937_89794  | NW_004516089.1 | Scaffold676 | 89794                   | AA                              | GG                | 1946524107               |
| SNP_P3_132938_90132  | NW_004516089.1 | Scaffold676 | 90132                   | AA                              | CC                | 1946524109               |
| SNP_P3_132939_90195  | NW_004516089.1 | Scaffold676 | 90195                   | AA                              | TT                | 1946524110               |
| SNP_P3_132940_90196  | NW_004516089.1 | Scaffold676 | 90196                   | TT                              | AA                | 1946524112               |
| SNP_P3_132941_90214  | NW_004516089.1 | Scaffold676 | 90214                   | AA                              | GG                | 1946524113               |
| SNP_P3_132942_90531  | NW_004516089.1 | Scaffold676 | 90531                   | AA                              | GG                | 1946524115               |
| SNP_P3_132943_90555  | NW_004516089.1 | Scaffold676 | 90555                   | TT                              | AA                | 1946524116               |
| SNP_P3_132944_90560  | NW_004516089.1 | Scaffold676 | 90560                   | AA                              | GG                | 1946524117               |
| SNP_P3_132945_90832  | NW_004516089.1 | Scaffold676 | 90832                   | AA                              | TT                | 1946524119               |
| SNP_P3_132946_91456  | NW_004516089.1 | Scaffold676 | 91456                   | CC                              | AA                | 1946524120               |
| SNP_P3_132947_91499  | NW_004516089.1 | Scaffold676 | 91499                   | AA                              | TT                | 1946524122               |
| SNP_P3_132948_91788  | NW_004516089.1 | Scaffold676 | 91788                   | AA                              | TT                | 1946524123               |
| SNP_P3_132949_91794  | NW_004516089.1 | Scaffold676 | 91794                   | AA                              | TT                | 1946524125               |
| SNP_P3_132950_91801  | NW_004516089.1 | Scaffold676 | 91801                   | AA                              | CC                | 1946524126               |
| SNP_P3_132951_91805  | NW_004516089.1 | Scaffold676 | 91805                   | CC                              | AA                | 1946524127               |
| SNP_P3_132952_92698  | NW_004516089.1 | Scaffold676 | 92698                   | TT                              | GG                | 1946524129               |
| SNP_P3_132953_93307  | NW_004516089.1 | Scaffold676 | 93307                   | CC                              | TT                | 1946524130               |
| SNP_P3_132954_93795  | NW_004516089.1 | Scaffold676 | 93795                   | CC                              | TT                | 1946524132               |
| SNP_P3_132955_93812  | NW_004516089.1 | Scaffold676 | 93812                   | GG                              | TT                | 1946524133               |
| SNP_P3_132956_97391  | NW_004516089.1 | Scaffold676 | 97391                   | AA                              | GG                | 1946524135               |
| SNP_P3_132957_97439  | NW_004516089.1 | Scaffold676 | 97439                   | TT                              | CC                | 1946524136               |
| SNP_P3_132958_101212 | NW_004516089.1 | Scaffold676 | 101212                  | CC                              | TT                | 1946524138               |
| SNP_P3_132959_101249 | NW_004516089.1 | Scaffold676 | 101249                  | TT                              | CC                | 1946524139               |
| SNP_P3_132960_101511 | NW_004516089.1 | Scaffold676 | 101511                  | GG                              | AA                | 1946524140               |

| SNPs IDs             | Chromosome IDs | Chromosomes | Physical positions (bp) | CDC Frontier (Reference genome) | (Pusa 256 & HPNB) | NCBI SNPdb Accession IDs |
|----------------------|----------------|-------------|-------------------------|---------------------------------|-------------------|--------------------------|
| SNP_P3_132961_101530 | NW_004516089.1 | Scaffold676 | 101530                  | TT                              | CC                | 1946524142               |
| SNP_P3_132962_101599 | NW_004516089.1 | Scaffold676 | 101599                  | CC                              | TT                | 1946524144               |
| SNP_P3_132963_101601 | NW_004516089.1 | Scaffold676 | 101601                  | AA                              | GG                | 1946524145               |
| SNP_P3_132964_101607 | NW_004516089.1 | Scaffold676 | 101607                  | CC                              | GG                | 1946524146               |
| SNP_P3_132965_101932 | NW_004516089.1 | Scaffold676 | 101932                  | TT                              | CC                | 1946524147               |
| SNP_P3_132966_102045 | NW_004516089.1 | Scaffold676 | 102045                  | GG                              | CC                | 1946524148               |
| SNP_P3_132967_102470 | NW_004516089.1 | Scaffold676 | 102470                  | TT                              | CC                | 1946524149               |
| SNP_P3_132968_103273 | NW_004516089.1 | Scaffold676 | 103273                  | AA                              | CC                | 1946524150               |
| SNP_P3_132969_103510 | NW_004516089.1 | Scaffold676 | 103510                  | GG                              | TT                | 1946524151               |
| SNP_P3_132970_103519 | NW_004516089.1 | Scaffold676 | 103519                  | CC                              | TT                | 1946524152               |
| SNP_P3_132971_103529 | NW_004516089.1 | Scaffold676 | 103529                  | GG                              | TT                | 1946524154               |
| SNP_P3_132972_104086 | NW_004516089.1 | Scaffold676 | 104086                  | TT                              | GG                | 1946524155               |
| SNP_P3_132973_104264 | NW_004516089.1 | Scaffold676 | 104264                  | GG                              | CC                | 1946524156               |
| SNP_P3_132974_104286 | NW_004516089.1 | Scaffold676 | 104286                  | TT                              | CC                | 1946524158               |
| SNP_P3_132976_104293 | NW_004516089.1 | Scaffold676 | 104293                  | TT                              | AA                | 1946524159               |
| SNP_P3_132977_104366 | NW_004516089.1 | Scaffold676 | 104366                  | TT                              | GG                | 1946524161               |
| SNP_P3_132978_104374 | NW_004516089.1 | Scaffold676 | 104374                  | CC                              | TT                | 1946524162               |
| SNP_P3_132980_104878 | NW_004516089.1 | Scaffold676 | 104878                  | AA                              | TT                | 1946524164               |
| SNP_P3_132981_105322 | NW_004516089.1 | Scaffold676 | 105322                  | GG                              | AA                | 1946524165               |
| SNP_P3_132982_105370 | NW_004516089.1 | Scaffold676 | 105370                  | TT                              | CC                | 1946524166               |
| SNP_P3_132983_105403 | NW_004516089.1 | Scaffold676 | 105403                  | TT                              | GG                | 1946524168               |
| SNP_P3_132984_105513 | NW_004516089.1 | Scaffold676 | 105513                  | TT                              | CC                | 1946524169               |
| SNP_P3_132985_105557 | NW_004516089.1 | Scaffold676 | 105557                  | CC                              | TT                | 1946524171               |
| SNP_P3_132986_109258 | NW_004516089.1 | Scaffold676 | 109258                  | GG                              | TT                | 1946524172               |
| SNP_P3_132987_109359 | NW_004516089.1 | Scaffold676 | 109359                  | GG                              | TT                | 1946524174               |
| SNP_P3_132988_109449 | NW_004516089.1 | Scaffold676 | 109449                  | TT                              | AA                | 1946524175               |
| SNP_P3_132989_109594 | NW_004516089.1 | Scaffold676 | 109594                  | AA                              | TT                | 1946524176               |
| SNP_P3_132990_109820 | NW_004516089.1 | Scaffold676 | 109820                  | TT                              | GG                | 1946524178               |
| SNP_P3_132991_110221 | NW_004516089.1 | Scaffold676 | 110221                  | AA                              | CC                | 1946524179               |
| SNP_P3_132992_110224 | NW_004516089.1 | Scaffold676 | 110224                  | TT                              | CC                | 1946524181               |
| SNP_P3_132993_111270 | NW_004516089.1 | Scaffold676 | 111270                  | AA                              | CC                | 1946524182               |
| SNP_P3_132994_113042 | NW_004516089.1 | Scaffold676 | 113042                  | AA                              | CC                | 1946524184               |
| SNP_P3_132995_113043 | NW_004516089.1 | Scaffold676 | 113043                  | TT                              | CC                | 1946524185               |
| SNP_P3_132996_115086 | NW_004516089.1 | Scaffold676 | 115086                  | CC                              | AA                | 1946524186               |
| SNP_P3_132997_115273 | NW_004516089.1 | Scaffold676 | 115273                  | GG                              | CC                | 1946524188               |
| SNP_P3_132998_115507 | NW_004516089.1 | Scaffold676 | 115507                  | GG                              | TT                | 1946524189               |
| SNP_P3_132999_121261 | NW_004516089.1 | Scaffold676 | 121261                  | AA                              | TT                | 1946524191               |
| SNP_P3_133000_121292 | NW_004516089.1 | Scaffold676 | 121292                  | TT                              | AA                | 1946524192               |
| SNP_P3_133002_136784 | NW_004516089.1 | Scaffold676 | 136784                  | TT                              | AA                | 1946524194               |
| SNP_P3_133003_137048 | NW_004516089.1 | Scaffold676 | 137048                  | AA                              | TT                | 1946524195               |
| SNP_P3_133004_137119 | NW_004516089.1 | Scaffold676 | 137119                  | TT                              | CC                | 1946524197               |
| SNP_P3_133005_137360 | NW_004516089.1 | Scaffold676 | 137360                  | CC                              | GG                | 1946524198               |

| SNPs IDs             | Chromosome IDs | Chromosomes | Physical positions (bp) | CDC Frontier (Reference genome) | (Pusa 256 & HPNB) | NCBI SNPdb Accession IDs |
|----------------------|----------------|-------------|-------------------------|---------------------------------|-------------------|--------------------------|
| SNP_P3_133006_137416 | NW_004516089.1 | Scaffold676 | 137416                  | AA                              | GG                | 1946524199               |
| SNP_P3_133007_137503 | NW_004516089.1 | Scaffold676 | 137503                  | TT                              | AA                | 1946524201               |
| SNP_P3_133008_137504 | NW_004516089.1 | Scaffold676 | 137504                  | GG                              | AA                | 1946524202               |
| SNP_P3_133009_145841 | NW_004516089.1 | Scaffold676 | 145841                  | AA                              | CC                | 1946524204               |
| SNP_P3_133010_146124 | NW_004516089.1 | Scaffold676 | 146124                  | TT                              | AA                | 1946524205               |
| SNP_P3_133011_146150 | NW_004516089.1 | Scaffold676 | 146150                  | TT                              | CC                | 1946524206               |
| SNP_P3_133012_146167 | NW_004516089.1 | Scaffold676 | 146167                  | CC                              | AA                | 1946524208               |
| SNP_P3_133013_146215 | NW_004516089.1 | Scaffold676 | 146215                  | TT                              | CC                | 1946524209               |
| SNP_P3_133014_146237 | NW_004516089.1 | Scaffold676 | 146237                  | GG                              | AA                | 1946524211               |
| SNP_P3_133015_146241 | NW_004516089.1 | Scaffold676 | 146241                  | TT                              | AA                | 1946524212               |
| SNP_P3_133016_146258 | NW_004516089.1 | Scaffold676 | 146258                  | GG                              | AA                | 1946524214               |
| SNP_P3_133019_146663 | NW_004516089.1 | Scaffold676 | 146663                  | TT                              | GG                | 1946524215               |
| SNP_P3_133020_149267 | NW_004516089.1 | Scaffold676 | 149267                  | AA                              | TT                | 1946524216               |
| SNP_P3_133021_149367 | NW_004516089.1 | Scaffold676 | 149367                  | GG                              | AA                | 1946524218               |
| SNP_P3_133022_149434 | NW_004516089.1 | Scaffold676 | 149434                  | AA                              | TT                | 1946524219               |
| SNP_P3_133023_149579 | NW_004516089.1 | Scaffold676 | 149579                  | GG                              | CC                | 1946524221               |
| SNP_P3_133024_150082 | NW_004516089.1 | Scaffold676 | 150082                  | CC                              | TT                | 1946524222               |
| SNP_P3_133025_151634 | NW_004516089.1 | Scaffold676 | 151634                  | AA                              | TT                | 1946524224               |
| SNP_P3_133026_151856 | NW_004516089.1 | Scaffold676 | 151856                  | AA                              | GG                | 1946524225               |
| SNP_P3_133027_151901 | NW_004516089.1 | Scaffold676 | 151901                  | CC                              | TT                | 1946524226               |
| SNP_P3_133028_152014 | NW_004516089.1 | Scaffold676 | 152014                  | TT                              | AA                | 1946524228               |
| SNP_P3_133030_157600 | NW_004516089.1 | Scaffold676 | 157600                  | AA                              | GG                | 1946524229               |
| SNP_P3_133031_157676 | NW_004516089.1 | Scaffold676 | 157676                  | TT                              | CC                | 1946524231               |
| SNP_P3_133032_157690 | NW_004516089.1 | Scaffold676 | 157690                  | AA                              | GG                | 1946524232               |
| SNP_P3_133033_157732 | NW_004516089.1 | Scaffold676 | 157732                  | CC                              | GG                | 1946524233               |
| SNP_P3_133034_158274 | NW_004516089.1 | Scaffold676 | 158274                  | AA                              | GG                | 1946524235               |
| SNP_P3_133035_158368 | NW_004516089.1 | Scaffold676 | 158368                  | CC                              | TT                | 1946524236               |
| SNP_P3_133036_158435 | NW_004516089.1 | Scaffold676 | 158435                  | GG                              | CC                | 1946524238               |
| SNP_P3_133037_161768 | NW_004516089.1 | Scaffold676 | 161768                  | CC                              | TT                | 1946524239               |
| SNP_P3_133038_161795 | NW_004516089.1 | Scaffold676 | 161795                  | GG                              | AA                | 1946524241               |
| SNP_P3_133039_161954 | NW_004516089.1 | Scaffold676 | 161954                  | TT                              | AA                | 1946524242               |
| SNP_P3_133040_347    | NW_004516091.1 | Scaffold678 | 347                     | TT                              | GG                | 1946524243               |
| SNP_P3_133041_742    | NW_004516091.1 | Scaffold678 | 742                     | AA                              | GG                | 1946524245               |
| SNP_P3_133043_8263   | NW_004516091.1 | Scaffold678 | 8263                    | GG                              | CC                | 1946524246               |
| SNP_P3_133044_8682   | NW_004516091.1 | Scaffold678 | 8682                    | GG                              | CC                | 1946524248               |
| SNP_P3_133045_12414  | NW_004516091.1 | Scaffold678 | 12414                   | TT                              | AA                | 1946524249               |
| SNP_P3_133046_12424  | NW_004516091.1 | Scaffold678 | 12424                   | GG                              | AA                | 1946524250               |
| SNP_P3_133047_12451  | NW_004516091.1 | Scaffold678 | 12451                   | AA                              | TT                | 1946524252               |
| SNP_P3_133048_12476  | NW_004516091.1 | Scaffold678 | 12476                   | TT                              | AA                | 1946524253               |
| SNP_P3_133049_12493  | NW_004516091.1 | Scaffold678 | 12493                   | CC                              | AA                | 1946524255               |
| SNP_P3_133050_12516  | NW_004516091.1 | Scaffold678 | 12516                   | CC                              | AA                | 1946524256               |
| SNP_P3_133051_12553  | NW_004516091.1 | Scaffold678 | 12553                   | TT                              | AA                | 1946524258               |

| SNPs IDs            | Chromosome IDs | Chromosomes | Physical positions (bp) | CDC Frontier (Reference genome) | (Pusa 256 & HPNB) | NCBI SNPdb Accession IDs |
|---------------------|----------------|-------------|-------------------------|---------------------------------|-------------------|--------------------------|
| SNP_P3_133052_12554 | NW_004516091.1 | Scaffold678 | 12554                   | TT                              | CC                | 1946524259               |
| SNP_P3_133053_12573 | NW_004516091.1 | Scaffold678 | 12573                   | CC                              | TT                | 1946524261               |
| SNP_P3_133054_12680 | NW_004516091.1 | Scaffold678 | 12680                   | GG                              | AA                | 1946524262               |
| SNP_P3_133055_12702 | NW_004516091.1 | Scaffold678 | 12702                   | TT                              | GG                | 1946524263               |
| SNP_P3_133056_12738 | NW_004516091.1 | Scaffold678 | 12738                   | AA                              | CC                | 1946524265               |
| SNP_P3_133057_12768 | NW_004516091.1 | Scaffold678 | 12768                   | AA                              | CC                | 1946524266               |
| SNP_P3_133059_12842 | NW_004516091.1 | Scaffold678 | 12842                   | TT                              | CC                | 1946524268               |
| SNP_P3_133060_25709 | NW_004516091.1 | Scaffold678 | 25709                   | GG                              | AA                | 1946524269               |
| SNP_P3_133061_26009 | NW_004516091.1 | Scaffold678 | 26009                   | AA                              | GG                | 1946524271               |
| SNP_P3_133062_26017 | NW_004516091.1 | Scaffold678 | 26017                   | AA                              | CC                | 1946524272               |
| SNP_P3_133063_39163 | NW_004516091.1 | Scaffold678 | 39163                   | AA                              | CC                | 1946524274               |
| SNP_P3_133064_39172 | NW_004516091.1 | Scaffold678 | 39172                   | TT                              | CC                | 1946524275               |
| SNP_P3_133065_39277 | NW_004516091.1 | Scaffold678 | 39277                   | AA                              | GG                | 1946524276               |
| SNP_P3_133066_39280 | NW_004516091.1 | Scaffold678 | 39280                   | GG                              | AA                | 1946524278               |
| SNP_P3_133067_39285 | NW_004516091.1 | Scaffold678 | 39285                   | CC                              | TT                | 1946524279               |
| SNP_P3_133068_39297 | NW_004516091.1 | Scaffold678 | 39297                   | AA                              | TT                | 1946524281               |
| SNP_P3_133069_39415 | NW_004516091.1 | Scaffold678 | 39415                   | GG                              | AA                | 1946524282               |
| SNP_P3_133070_39507 | NW_004516091.1 | Scaffold678 | 39507                   | AA                              | GG                | 1946524284               |
| SNP_P3_133071_39529 | NW_004516091.1 | Scaffold678 | 39529                   | CC                              | TT                | 1946524285               |
| SNP_P3_133072_39552 | NW_004516091.1 | Scaffold678 | 39552                   | GG                              | AA                | 1946524286               |
| SNP_P3_133073_39565 | NW_004516091.1 | Scaffold678 | 39565                   | CC                              | TT                | 1946524288               |
| SNP_P3_133074_39571 | NW_004516091.1 | Scaffold678 | 39571                   | GG                              | AA                | 1946524289               |
| SNP_P3_133075_39572 | NW_004516091.1 | Scaffold678 | 39572                   | CC                              | GG                | 1946524291               |
| SNP_P3_133076_39577 | NW_004516091.1 | Scaffold678 | 39577                   | CC                              | AA                | 1946524292               |
| SNP_P3_133077_39595 | NW_004516091.1 | Scaffold678 | 39595                   | CC                              | AA                | 1946524294               |
| SNP_P3_133078_39607 | NW_004516091.1 | Scaffold678 | 39607                   | AA                              | GG                | 1946524295               |
| SNP_P3_133079_39612 | NW_004516091.1 | Scaffold678 | 39612                   | CC                              | AA                | 1946524297               |
| SNP_P3_133080_39627 | NW_004516091.1 | Scaffold678 | 39627                   | TT                              | GG                | 1946524298               |
| SNP_P3_133081_39632 | NW_004516091.1 | Scaffold678 | 39632                   | AA                              | TT                | 1946524299               |
| SNP_P3_133082_39643 | NW_004516091.1 | Scaffold678 | 39643                   | GG                              | TT                | 1946524301               |
| SNP_P3_133083_39671 | NW_004516091.1 | Scaffold678 | 39671                   | CC                              | AA                | 1946524302               |
| SNP_P3_133084_39707 | NW_004516091.1 | Scaffold678 | 39707                   | GG                              | CC                | 1946524304               |
| SNP_P3_133085_39719 | NW_004516091.1 | Scaffold678 | 39719                   | CC                              | AA                | 1946524305               |
| SNP_P3_133086_39729 | NW_004516091.1 | Scaffold678 | 39729                   | AA                              | GG                | 1946524307               |
| SNP_P3_133088_39839 | NW_004516091.1 | Scaffold678 | 39839                   | CC                              | TT                | 1946524308               |
| SNP_P3_133089_39858 | NW_004516091.1 | Scaffold678 | 39858                   | AA                              | GG                | 1946524309               |
| SNP_P3_133090_39860 | NW_004516091.1 | Scaffold678 | 39860                   | CC                              | TT                | 1946524311               |
| SNP_P3_133091_39888 | NW_004516091.1 | Scaffold678 | 39888                   | CC                              | GG                | 1946524312               |
| SNP_P3_133092_40846 | NW_004516091.1 | Scaffold678 | 40846                   | GG                              | TT                | 1946524314               |
| SNP_P3_133093_40897 | NW_004516091.1 | Scaffold678 | 40897                   | TT                              | CC                | 1946524315               |
| SNP_P3_133094_41024 | NW_004516091.1 | Scaffold678 | 41024                   | AA                              | CC                | 1946524317               |
| SNP_P3_133095_41042 | NW_004516091.1 | Scaffold678 | 41042                   | TT                              | GG                | 1946524318               |

| SNPs IDs             | Chromosome IDs | Chromosomes | Physical positions (bp) | CDC Frontier (Reference genome) | (Pusa 256 & HPNB) | NCBI SNPdb Accession IDs |
|----------------------|----------------|-------------|-------------------------|---------------------------------|-------------------|--------------------------|
| SNP_P3_133096_41053  | NW_004516091.1 | Scaffold678 | 41053                   | TT                              | CC                | 1946524320               |
| SNP_P3_133097_41059  | NW_004516091.1 | Scaffold678 | 41059                   | AA                              | TT                | 1946524321               |
| SNP_P3_133098_41071  | NW_004516091.1 | Scaffold678 | 41071                   | AA                              | TT                | 1946524323               |
| SNP_P3_133099_41072  | NW_004516091.1 | Scaffold678 | 41072                   | TT                              | GG                | 1946524324               |
| SNP_P3_133100_41215  | NW_004516091.1 | Scaffold678 | 41215                   | GG                              | CC                | 1946524325               |
| SNP_P3_133101_41269  | NW_004516091.1 | Scaffold678 | 41269                   | AA                              | TT                | 1946524327               |
| SNP_P3_133102_41321  | NW_004516091.1 | Scaffold678 | 41321                   | TT                              | GG                | 1946524328               |
| SNP_P3_133103_41323  | NW_004516091.1 | Scaffold678 | 41323                   | GG                              | AA                | 1946524330               |
| SNP_P3_133104_41440  | NW_004516091.1 | Scaffold678 | 41440                   | CC                              | TT                | 1946524331               |
| SNP_P3_133106_42476  | NW_004516091.1 | Scaffold678 | 42476                   | AA                              | CC                | 1946524333               |
| SNP_P3_133107_42533  | NW_004516091.1 | Scaffold678 | 42533                   | TT                              | CC                | 1946524334               |
| SNP_P3_133108_42704  | NW_004516091.1 | Scaffold678 | 42704                   | TT                              | AA                | 1946524336               |
| SNP_P3_133109_42747  | NW_004516091.1 | Scaffold678 | 42747                   | TT                              | CC                | 1946524337               |
| SNP_P3_133110_42761  | NW_004516091.1 | Scaffold678 | 42761                   | AA                              | CC                | 1946524339               |
| SNP_P3_133111_60298  | NW_004516091.1 | Scaffold678 | 60298                   | TT                              | AA                | 1946524340               |
| SNP_P3_133112_60375  | NW_004516091.1 | Scaffold678 | 60375                   | AA                              | TT                | 1946524342               |
| SNP_P3_133114_71502  | NW_004516091.1 | Scaffold678 | 71502                   | AA                              | GG                | 1946524343               |
| SNP_P3_133115_78222  | NW_004516091.1 | Scaffold678 | 78222                   | CC                              | GG                | 1946524345               |
| SNP_P3_133117_111288 | NW_004516091.1 | Scaffold678 | 111288                  | TT                              | CC                | 1946524346               |
| SNP_P3_133118_112460 | NW_004516091.1 | Scaffold678 | 112460                  | AA                              | CC                | 1946524348               |
| SNP_P3_133119_112549 | NW_004516091.1 | Scaffold678 | 112549                  | GG                              | TT                | 1946524349               |
| SNP_P3_133120_112792 | NW_004516091.1 | Scaffold678 | 112792                  | AA                              | GG                | 1946524351               |
| SNP_P3_133121_112851 | NW_004516091.1 | Scaffold678 | 112851                  | TT                              | CC                | 1946524352               |
| SNP_P3_133122_112892 | NW_004516091.1 | Scaffold678 | 112892                  | TT                              | CC                | 1946524354               |
| SNP_P3_133123_112914 | NW_004516091.1 | Scaffold678 | 112914                  | AA                              | CC                | 1946524355               |
| SNP_P3_133124_118107 | NW_004516091.1 | Scaffold678 | 118107                  | CC                              | TT                | 1946524357               |
| SNP_P3_133125_118119 | NW_004516091.1 | Scaffold678 | 118119                  | CC                              | TT                | 1946524358               |
| SNP_P3_133126_119077 | NW_004516091.1 | Scaffold678 | 119077                  | CC                              | AA                | 1946524360               |
| SNP_P3_133127_120403 | NW_004516091.1 | Scaffold678 | 120403                  | GG                              | AA                | 1946524361               |
| SNP_P3_133128_120535 | NW_004516091.1 | Scaffold678 | 120535                  | CC                              | TT                | 1946524362               |
| SNP_P3_133129_120536 | NW_004516091.1 | Scaffold678 | 120536                  | AA                              | GG                | 1946524364               |
| SNP_P3_133130_120541 | NW_004516091.1 | Scaffold678 | 120541                  | TT                              | CC                | 1946524365               |
| SNP_P3_133131_120676 | NW_004516091.1 | Scaffold678 | 120676                  | GG                              | AA                | 1946524367               |
| SNP_P3_133132_11745  | NW_004516093.1 | Scaffold681 | 11745                   | CC                              | TT                | 1946524368               |
| SNP_P3_133133_11748  | NW_004516093.1 | Scaffold681 | 11748                   | TT                              | CC                | 1946524370               |
| SNP_P3_133134_12108  | NW_004516093.1 | Scaffold681 | 12108                   | GG                              | AA                | 1946524371               |
| SNP_P3_133135_12109  | NW_004516093.1 | Scaffold681 | 12109                   | AA                              | GG                | 1946524373               |
| SNP_P3_133136_12141  | NW_004516093.1 | Scaffold681 | 12141                   | TT                              | CC                | 1946524374               |
| SNP_P3_133138_25454  | NW_004516093.1 | Scaffold681 | 25454                   | CC                              | TT                | 1946524376               |
| SNP_P3_133139_48207  | NW_004516093.1 | Scaffold681 | 48207                   | TT                              | GG                | 1946524377               |
| SNP_P3_133140_48901  | NW_004516093.1 | Scaffold681 | 48901                   | AA                              | CC                | 1946524379               |
| SNP_P3_133141_49770  | NW_004516093.1 | Scaffold681 | 49770                   | CC                              | TT                | 1946524380               |

| SNPs IDs             | Chromosome IDs | Chromosomes | Physical positions (bp) | CDC Frontier (Reference genome) | (Pusa 256 & HPNB) | NCBI SNPdb Accession IDs |
|----------------------|----------------|-------------|-------------------------|---------------------------------|-------------------|--------------------------|
| SNP_P3_133142_49772  | NW_004516093.1 | Scaffold681 | 49772                   | GG                              | AA                | 1946524382               |
| SNP_P3_133143_49792  | NW_004516093.1 | Scaffold681 | 49792                   | AA                              | GG                | 1946524383               |
| SNP_P3_133144_50044  | NW_004516093.1 | Scaffold681 | 50044                   | AA                              | TT                | 1946524385               |
| SNP_P3_133145_50049  | NW_004516093.1 | Scaffold681 | 50049                   | CC                              | TT                | 1946524386               |
| SNP_P3_133147_50053  | NW_004516093.1 | Scaffold681 | 50053                   | GG                              | AA                | 1946524388               |
| SNP_P3_133148_50085  | NW_004516093.1 | Scaffold681 | 50085                   | TT                              | CC                | 1946524389               |
| SNP_P3_133149_50098  | NW_004516093.1 | Scaffold681 | 50098                   | TT                              | CC                | 1946524390               |
| SNP_P3_133150_9522   | NW_004516094.1 | Scaffold682 | 9522                    | TT                              | AA                | 1946524392               |
| SNP_P3_133151_9539   | NW_004516094.1 | Scaffold682 | 9539                    | TT                              | CC                | 1946524393               |
| SNP_P3_133152_9809   | NW_004516094.1 | Scaffold682 | 9809                    | TT                              | CC                | 1946524395               |
| SNP_P3_133153_11161  | NW_004516094.1 | Scaffold682 | 11161                   | AA                              | TT                | 1946524396               |
| SNP_P3_133154_11205  | NW_004516094.1 | Scaffold682 | 11205                   | CC                              | AA                | 1946524398               |
| SNP_P3_133155_15771  | NW_004516094.1 | Scaffold682 | 15771                   | CC                              | TT                | 1946524399               |
| SNP_P3_133156_15775  | NW_004516094.1 | Scaffold682 | 15775                   | GG                              | TT                | 1946524401               |
| SNP_P3_133158_17850  | NW_004516094.1 | Scaffold682 | 17850                   | TT                              | GG                | 1946524402               |
| SNP_P3_133159_23654  | NW_004516094.1 | Scaffold682 | 23654                   | CC                              | TT                | 1946524404               |
| SNP_P3_133160_24268  | NW_004516094.1 | Scaffold682 | 24268                   | CC                              | TT                | 1946524405               |
| SNP_P3_133161_33599  | NW_004516094.1 | Scaffold682 | 33599                   | TT                              | GG                | 1946524407               |
| SNP_P3_133163_78067  | NW_004516094.1 | Scaffold682 | 78067                   | AA                              | GG                | 1946524408               |
| SNP_P3_133164_78073  | NW_004516094.1 | Scaffold682 | 78073                   | TT                              | CC                | 1946524410               |
| SNP_P3_133165_78362  | NW_004516094.1 | Scaffold682 | 78362                   | GG                              | AA                | 1946524411               |
| SNP_P3_133166_78388  | NW_004516094.1 | Scaffold682 | 78388                   | TT                              | CC                | 1946524413               |
| SNP_P3_133167_78401  | NW_004516094.1 | Scaffold682 | 78401                   | GG                              | AA                | 1946524414               |
| SNP_P3_133168_78414  | NW_004516094.1 | Scaffold682 | 78414                   | CC                              | TT                | 1946524416               |
| SNP_P3_133169_78682  | NW_004516094.1 | Scaffold682 | 78682                   | TT                              | AA                | 1946524417               |
| SNP_P3_133170_82823  | NW_004516094.1 | Scaffold682 | 82823                   | CC                              | TT                | 1946524419               |
| SNP_P3_133171_82826  | NW_004516094.1 | Scaffold682 | 82826                   | CC                              | TT                | 1946524420               |
| SNP_P3_133172_82838  | NW_004516094.1 | Scaffold682 | 82838                   | TT                              | GG                | 1946524422               |
| SNP_P3_133173_82839  | NW_004516094.1 | Scaffold682 | 82839                   | AA                              | TT                | 1946524423               |
| SNP_P3_133174_82855  | NW_004516094.1 | Scaffold682 | 82855                   | AA                              | GG                | 1946524425               |
| SNP_P3_133175_82858  | NW_004516094.1 | Scaffold682 | 82858                   | TT                              | AA                | 1946524426               |
| SNP_P3_133176_82917  | NW_004516094.1 | Scaffold682 | 82917                   | TT                              | CC                | 1946524428               |
| SNP_P3_133177_82930  | NW_004516094.1 | Scaffold682 | 82930                   | TT                              | CC                | 1946524429               |
| SNP_P3_133178_82937  | NW_004516094.1 | Scaffold682 | 82937                   | TT                              | CC                | 1946524431               |
| SNP_P3_133180_97656  | NW_004516094.1 | Scaffold682 | 97656                   | AA                              | GG                | 1946524432               |
| SNP_P3_133181_134740 | NW_004516094.1 | Scaffold682 | 134740                  | TT                              | AA                | 1946524434               |
| SNP_P3_133182_134761 | NW_004516094.1 | Scaffold682 | 134761                  | AA                              | GG                | 1946524435               |
| SNP_P3_133183_134768 | NW_004516094.1 | Scaffold682 | 134768                  | GG                              | AA                | 1946524437               |
| SNP_P3_133184_176730 | NW_004516094.1 | Scaffold682 | 176730                  | AA                              | TT                | 1946524438               |
| SNP_P3_133185_177111 | NW_004516094.1 | Scaffold682 | 177111                  | TT                              | CC                | 1946524440               |
| SNP_P3_133186_177825 | NW_004516094.1 | Scaffold682 | 177825                  | GG                              | AA                | 1946524441               |
| SNP_P3_133187_183789 | NW_004516094.1 | Scaffold682 | 183789                  | CC                              | GG                | 1946524443               |

| SNPs IDs             | Chromosome IDs | Chromosomes | Physical positions (bp) | CDC Frontier (Reference genome) | (Pusa 256 & HPNB) | NCBI SNPdb Accession IDs |
|----------------------|----------------|-------------|-------------------------|---------------------------------|-------------------|--------------------------|
| SNP_P3_133188_190888 | NW_004516094.1 | Scaffold682 | 190888                  | CC                              | TT                | 1946524444               |
| SNP_P3_133189_190899 | NW_004516094.1 | Scaffold682 | 190899                  | GG                              | AA                | 1946524446               |
| SNP_P3_133190_190902 | NW_004516094.1 | Scaffold682 | 190902                  | CC                              | TT                | 1946524447               |
| SNP_P3_133191_196562 | NW_004516094.1 | Scaffold682 | 196562                  | GG                              | AA                | 1946524449               |
| SNP_P3_133192_208669 | NW_004516094.1 | Scaffold682 | 208669                  | CC                              | AA                | 1946524450               |
| SNP_P3_133193_208878 | NW_004516094.1 | Scaffold682 | 208878                  | GG                              | AA                | 1946524452               |
| SNP_P3_133194_208974 | NW_004516094.1 | Scaffold682 | 208974                  | GG                              | AA                | 1946524453               |
| SNP_P3_133195_209091 | NW_004516094.1 | Scaffold682 | 209091                  | TT                              | CC                | 1946524455               |
| SNP_P3_133196_216589 | NW_004516094.1 | Scaffold682 | 216589                  | AA                              | GG                | 1946524456               |
| SNP_P3_133197_220216 | NW_004516094.1 | Scaffold682 | 220216                  | CC                              | AA                | 1946524458               |
| SNP_P3_133198_220447 | NW_004516094.1 | Scaffold682 | 220447                  | AA                              | GG                | 1946524459               |
| SNP_P3_133199_222232 | NW_004516094.1 | Scaffold682 | 222232                  | GG                              | AA                | 1946524461               |
| SNP_P3_133200_223515 | NW_004516094.1 | Scaffold682 | 223515                  | AA                              | GG                | 1946524462               |
| SNP_P3_133201_225036 | NW_004516094.1 | Scaffold682 | 225036                  | GG                              | TT                | 1946524464               |
| SNP_P3_133202_225150 | NW_004516094.1 | Scaffold682 | 225150                  | TT                              | CC                | 1946524465               |
| SNP_P3_133203_225669 | NW_004516094.1 | Scaffold682 | 225669                  | TT                              | AA                | 1946524467               |
| SNP_P3_133204_232206 | NW_004516094.1 | Scaffold682 | 232206                  | CC                              | TT                | 1946524468               |
| SNP_P3_133205_232219 | NW_004516094.1 | Scaffold682 | 232219                  | GG                              | TT                | 1946524470               |
| SNP_P3_133206_232501 | NW_004516094.1 | Scaffold682 | 232501                  | TT                              | CC                | 1946524471               |
| SNP_P3_133207_232512 | NW_004516094.1 | Scaffold682 | 232512                  | CC                              | AA                | 1946524473               |
| SNP_P3_133208_232603 | NW_004516094.1 | Scaffold682 | 232603                  | AA                              | GG                | 1946524474               |
| SNP_P3_133209_239079 | NW_004516094.1 | Scaffold682 | 239079                  | TT                              | CC                | 1946524476               |
| SNP_P3_133210_239113 | NW_004516094.1 | Scaffold682 | 239113                  | GG                              | CC                | 1946524477               |
| SNP_P3_133212_239256 | NW_004516094.1 | Scaffold682 | 239256                  | TT                              | CC                | 1946524479               |
| SNP_P3_133213_239267 | NW_004516094.1 | Scaffold682 | 239267                  | AA                              | GG                | 1946524480               |
| SNP_P3_133215_239342 | NW_004516094.1 | Scaffold682 | 239342                  | TT                              | CC                | 1946524482               |
| SNP_P3_133216_239601 | NW_004516094.1 | Scaffold682 | 239601                  | GG                              | AA                | 1946524483               |
| SNP_P3_133217_239663 | NW_004516094.1 | Scaffold682 | 239663                  | TT                              | CC                | 1946524485               |
| SNP_P3_133218_240767 | NW_004516094.1 | Scaffold682 | 240767                  | GG                              | AA                | 1946524486               |
| SNP_P3_133219_240843 | NW_004516094.1 | Scaffold682 | 240843                  | AA                              | GG                | 1946524488               |
| SNP_P3_133220_240901 | NW_004516094.1 | Scaffold682 | 240901                  | AA                              | GG                | 1946524489               |
| SNP_P3_133221_240932 | NW_004516094.1 | Scaffold682 | 240932                  | AA                              | GG                | 1946524491               |
| SNP_P3_133222_240943 | NW_004516094.1 | Scaffold682 | 240943                  | GG                              | AA                | 1946524492               |
| SNP_P3_133223_240952 | NW_004516094.1 | Scaffold682 | 240952                  | TT                              | CC                | 1946524494               |
| SNP_P3_133224_240953 | NW_004516094.1 | Scaffold682 | 240953                  | AA                              | CC                | 1946524496               |
| SNP_P3_133225_240973 | NW_004516094.1 | Scaffold682 | 240973                  | TT                              | AA                | 1946524498               |
| SNP_P3_133226_240987 | NW_004516094.1 | Scaffold682 | 240987                  | TT                              | GG                | 1946524499               |
| SNP_P3_133227_240997 | NW_004516094.1 | Scaffold682 | 240997                  | CC                              | AA                | 1946524501               |
| SNP_P3_133228_241038 | NW_004516094.1 | Scaffold682 | 241038                  | CC                              | TT                | 1946524502               |
| SNP_P3_133229_241058 | NW_004516094.1 | Scaffold682 | 241058                  | GG                              | AA                | 1946524504               |
| SNP_P3_133230_241085 | NW_004516094.1 | Scaffold682 | 241085                  | AA                              | TT                | 1946524505               |
| SNP_P3_133231_241117 | NW_004516094.1 | Scaffold682 | 241117                  | TT                              | GG                | 1946524507               |

| SNPs IDs             | Chromosome IDs | Chromosomes | Physical positions (bp) | CDC Frontier (Reference genome) | (Pusa 256 & HPNB) | NCBI SNPdb Accession IDs |
|----------------------|----------------|-------------|-------------------------|---------------------------------|-------------------|--------------------------|
| SNP_P3_133232_241139 | NW_004516094.1 | Scaffold682 | 241139                  | TT                              | CC                | 1946524508               |
| SNP_P3_133233_252676 | NW_004516094.1 | Scaffold682 | 252676                  | TT                              | GG                | 1946524510               |
| SNP_P3_133235_253056 | NW_004516094.1 | Scaffold682 | 253056                  | TT                              | AA                | 1946524511               |
| SNP_P3_133236_264895 | NW_004516094.1 | Scaffold682 | 264895                  | GG                              | CC                | 1946524513               |
| SNP_P3_133237_272386 | NW_004516094.1 | Scaffold682 | 272386                  | GG                              | CC                | 1946524514               |
| SNP_P3_133238_284673 | NW_004516094.1 | Scaffold682 | 284673                  | AA                              | GG                | 1946524516               |
| SNP_P3_133240_315280 | NW_004516094.1 | Scaffold682 | 315280                  | AA                              | GG                | 1946524517               |
| SNP_P3_133241_334453 | NW_004516094.1 | Scaffold682 | 334453                  | CC                              | TT                | 1946524519               |
| SNP_P3_133242_347681 | NW_004516094.1 | Scaffold682 | 347681                  | GG                              | CC                | 1946524520               |
| SNP_P3_133243_347725 | NW_004516094.1 | Scaffold682 | 347725                  | TT                              | CC                | 1946524522               |
| SNP_P3_133244_347743 | NW_004516094.1 | Scaffold682 | 347743                  | GG                              | AA                | 1946524523               |
| SNP_P3_133245_347768 | NW_004516094.1 | Scaffold682 | 347768                  | GG                              | AA                | 1946524525               |
| SNP_P3_133246_347951 | NW_004516094.1 | Scaffold682 | 347951                  | TT                              | CC                | 1946524526               |
| SNP_P3_133247_347974 | NW_004516094.1 | Scaffold682 | 347974                  | AA                              | GG                | 1946524528               |
| SNP_P3_133248_348661 | NW_004516094.1 | Scaffold682 | 348661                  | AA                              | GG                | 1946524529               |
| SNP_P3_133249_357299 | NW_004516094.1 | Scaffold682 | 357299                  | GG                              | CC                | 1946524531               |
| SNP_P3_133250_369730 | NW_004516094.1 | Scaffold682 | 369730                  | TT                              | CC                | 1946524532               |
| SNP_P3_133251_369736 | NW_004516094.1 | Scaffold682 | 369736                  | CC                              | TT                | 1946524534               |
| SNP_P3_133252_369740 | NW_004516094.1 | Scaffold682 | 369740                  | TT                              | CC                | 1946524535               |
| SNP_P3_133253_369799 | NW_004516094.1 | Scaffold682 | 369799                  | AA                              | TT                | 1946524537               |
| SNP_P3_133254_369808 | NW_004516094.1 | Scaffold682 | 369808                  | GG                              | AA                | 1946524538               |
| SNP_P3_133255_371498 | NW_004516094.1 | Scaffold682 | 371498                  | GG                              | AA                | 1946524540               |
| SNP_P3_133256_373599 | NW_004516094.1 | Scaffold682 | 373599                  | CC                              | AA                | 1946524541               |
| SNP_P3_133257_373682 | NW_004516094.1 | Scaffold682 | 373682                  | GG                              | TT                | 1946524543               |
| SNP_P3_133258_374826 | NW_004516094.1 | Scaffold682 | 374826                  | TT                              | CC                | 1946524544               |
| SNP_P3_133259_375045 | NW_004516094.1 | Scaffold682 | 375045                  | GG                              | AA                | 1946524546               |
| SNP_P3_133260_375089 | NW_004516094.1 | Scaffold682 | 375089                  | AA                              | GG                | 1946524547               |
| SNP_P3_133261_375102 | NW_004516094.1 | Scaffold682 | 375102                  | CC                              | TT                | 1946524549               |
| SNP_P3_133262_375206 | NW_004516094.1 | Scaffold682 | 375206                  | GG                              | AA                | 1946524550               |
| SNP_P3_133263_375248 | NW_004516094.1 | Scaffold682 | 375248                  | AA                              | TT                | 1946524551               |
| SNP_P3_133264_375616 | NW_004516094.1 | Scaffold682 | 375616                  | AA                              | GG                | 1946524553               |
| SNP_P3_133265_376239 | NW_004516094.1 | Scaffold682 | 376239                  | GG                              | TT                | 1946524554               |
| SNP_P3_133266_402807 | NW_004516094.1 | Scaffold682 | 402807                  | CC                              | TT                | 1946524556               |
| SNP_P3_133267_425657 | NW_004516094.1 | Scaffold682 | 425657                  | AA                              | TT                | 1946524557               |
| SNP_P3_133268_432588 | NW_004516094.1 | Scaffold682 | 432588                  | CC                              | TT                | 1946524559               |
| SNP_P3_133269_432594 | NW_004516094.1 | Scaffold682 | 432594                  | GG                              | TT                | 1946524560               |
| SNP_P3_133270_432869 | NW_004516094.1 | Scaffold682 | 432869                  | TT                              | CC                | 1946524561               |
| SNP_P3_133271_432905 | NW_004516094.1 | Scaffold682 | 432905                  | GG                              | TT                | 1946524563               |
| SNP_P3_133272_432906 | NW_004516094.1 | Scaffold682 | 432906                  | CC                              | AA                | 1946524565               |
| SNP_P3_133273_432931 | NW_004516094.1 | Scaffold682 | 432931                  | AA                              | TT                | 1946524566               |
| SNP_P3_133274_463012 | NW_004516094.1 | Scaffold682 | 463012                  | AA                              | TT                | 1946524567               |
| SNP_P3_133275_463021 | NW_004516094.1 | Scaffold682 | 463021                  | TT                              | CC                | 1946524569               |



| SNPs IDs             | Chromosome IDs | Chromosomes | Physical positions (bp) | CDC Frontier (Reference genome) | (Pusa 256 & HPNB) | NCBI SNPdb Accession IDs |
|----------------------|----------------|-------------|-------------------------|---------------------------------|-------------------|--------------------------|
| SNP_P3_133276_463032 | NW_004516094.1 | Scaffold682 | 463032                  | GG                              | AA                | 1946524570               |
| SNP_P3_133277_463042 | NW_004516094.1 | Scaffold682 | 463042                  | TT                              | CC                | 1946524572               |
| SNP_P3_133278_463044 | NW_004516094.1 | Scaffold682 | 463044                  | CC                              | TT                | 1946524573               |
| SNP_P3_133279_463057 | NW_004516094.1 | Scaffold682 | 463057                  | TT                              | CC                | 1946524575               |
| SNP_P3_133280_463087 | NW_004516094.1 | Scaffold682 | 463087                  | TT                              | CC                | 1946524576               |
| SNP_P3_133281_463096 | NW_004516094.1 | Scaffold682 | 463096                  | TT                              | CC                | 1946524577               |
| SNP_P3_133282_463115 | NW_004516094.1 | Scaffold682 | 463115                  | AA                              | TT                | 1946524579               |
| SNP_P3_133283_463135 | NW_004516094.1 | Scaffold682 | 463135                  | TT                              | CC                | 1946524580               |
| SNP_P3_133284_463145 | NW_004516094.1 | Scaffold682 | 463145                  | AA                              | TT                | 1946524582               |
| SNP_P3_133285_463160 | NW_004516094.1 | Scaffold682 | 463160                  | AA                              | GG                | 1946524583               |
| SNP_P3_133286_463168 | NW_004516094.1 | Scaffold682 | 463168                  | AA                              | GG                | 1946524585               |
| SNP_P3_133287_463180 | NW_004516094.1 | Scaffold682 | 463180                  | TT                              | CC                | 1946524586               |
| SNP_P3_133288_463216 | NW_004516094.1 | Scaffold682 | 463216                  | TT                              | CC                | 1946524587               |
| SNP_P3_133289_463221 | NW_004516094.1 | Scaffold682 | 463221                  | AA                              | GG                | 1946524589               |
| SNP_P3_133290_463273 | NW_004516094.1 | Scaffold682 | 463273                  | CC                              | TT                | 1946524590               |
| SNP_P3_133291_463297 | NW_004516094.1 | Scaffold682 | 463297                  | AA                              | GG                | 1946524592               |
| SNP_P3_133292_463309 | NW_004516094.1 | Scaffold682 | 463309                  | TT                              | CC                | 1946524593               |
| SNP_P3_133293_466973 | NW_004516094.1 | Scaffold682 | 466973                  | TT                              | CC                | 1946524595               |
| SNP_P3_133294_482118 | NW_004516094.1 | Scaffold682 | 482118                  | AA                              | GG                | 1946524596               |
| SNP_P3_133295_498185 | NW_004516094.1 | Scaffold682 | 498185                  | GG                              | CC                | 1946524598               |
| SNP_P3_133296_498280 | NW_004516094.1 | Scaffold682 | 498280                  | AA                              | CC                | 1946524599               |
| SNP_P3_133297_498339 | NW_004516094.1 | Scaffold682 | 498339                  | CC                              | AA                | 1946524600               |
| SNP_P3_133298_498344 | NW_004516094.1 | Scaffold682 | 498344                  | AA                              | CC                | 1946524602               |
| SNP_P3_133299_498353 | NW_004516094.1 | Scaffold682 | 498353                  | TT                              | CC                | 1946524603               |
| SNP_P3_133300_498546 | NW_004516094.1 | Scaffold682 | 498546                  | GG                              | AA                | 1946524605               |
| SNP_P3_133303_510343 | NW_004516094.1 | Scaffold682 | 510343                  | TT                              | CC                | 1946524606               |
| SNP_P3_133304_524563 | NW_004516094.1 | Scaffold682 | 524563                  | AA                              | GG                | 1946524607               |
| SNP_P3_133305_524576 | NW_004516094.1 | Scaffold682 | 524576                  | GG                              | AA                | 1946524609               |
| SNP_P3_133306_524611 | NW_004516094.1 | Scaffold682 | 524611                  | TT                              | CC                | 1946524610               |
| SNP_P3_133307_524787 | NW_004516094.1 | Scaffold682 | 524787                  | AA                              | GG                | 1946524612               |
| SNP_P3_133308_525737 | NW_004516094.1 | Scaffold682 | 525737                  | AA                              | GG                | 1946524613               |
| SNP_P3_133309_525770 | NW_004516094.1 | Scaffold682 | 525770                  | AA                              | CC                | 1946524614               |
| SNP_P3_133310_526564 | NW_004516094.1 | Scaffold682 | 526564                  | AA                              | CC                | 1946524616               |
| SNP_P3_133312_526816 | NW_004516094.1 | Scaffold682 | 526816                  | AA                              | TT                | 1946524617               |
| SNP_P3_133313_526878 | NW_004516094.1 | Scaffold682 | 526878                  | TT                              | CC                | 1946524619               |
| SNP_P3_133314_526901 | NW_004516094.1 | Scaffold682 | 526901                  | CC                              | GG                | 1946524620               |
| SNP_P3_133315_526903 | NW_004516094.1 | Scaffold682 | 526903                  | TT                              | GG                | 1946524622               |
| SNP_P3_133316_526935 | NW_004516094.1 | Scaffold682 | 526935                  | GG                              | AA                | 1946524623               |
| SNP_P3_133317_526976 | NW_004516094.1 | Scaffold682 | 526976                  | AA                              | GG                | 1946524625               |
| SNP_P3_133318_527001 | NW_004516094.1 | Scaffold682 | 527001                  | TT                              | AA                | 1946524626               |
| SNP_P3_133319_533613 | NW_004516094.1 | Scaffold682 | 533613                  | CC                              | GG                | 1946524628               |
| SNP_P3_133320_535776 | NW_004516094.1 | Scaffold682 | 535776                  | AA                              | TT                | 1946524629               |

| SNPs IDs             | Chromosome IDs | Chromosomes | Physical positions (bp) | CDC Frontier (Reference genome) | (Pusa 256 & HPNB) | NCBI SNPdb Accession IDs |
|----------------------|----------------|-------------|-------------------------|---------------------------------|-------------------|--------------------------|
| SNP_P3_133321_535785 | NW_004516094.1 | Scaffold682 | 535785                  | GG                              | AA                | 1946524630               |
| SNP_P3_133322_536080 | NW_004516094.1 | Scaffold682 | 536080                  | AA                              | CC                | 1946524632               |
| SNP_P3_133323_536098 | NW_004516094.1 | Scaffold682 | 536098                  | TT                              | CC                | 1946524633               |
| SNP_P3_133324_536174 | NW_004516094.1 | Scaffold682 | 536174                  | TT                              | CC                | 1946524635               |
| SNP_P3_133325_539823 | NW_004516094.1 | Scaffold682 | 539823                  | GG                              | AA                | 1946524636               |
| SNP_P3_133326_539849 | NW_004516094.1 | Scaffold682 | 539849                  | TT                              | CC                | 1946524638               |
| SNP_P3_133328_539945 | NW_004516094.1 | Scaffold682 | 539945                  | GG                              | TT                | 1946524639               |
| SNP_P3_133329_539961 | NW_004516094.1 | Scaffold682 | 539961                  | AA                              | CC                | 1946524640               |
| SNP_P3_133330_540071 | NW_004516094.1 | Scaffold682 | 540071                  | CC                              | TT                | 1946524642               |
| SNP_P3_133331_540093 | NW_004516094.1 | Scaffold682 | 540093                  | AA                              | GG                | 1946524643               |
| SNP_P3_133332_540126 | NW_004516094.1 | Scaffold682 | 540126                  | GG                              | AA                | 1946524645               |
| SNP_P3_133333_540141 | NW_004516094.1 | Scaffold682 | 540141                  | TT                              | CC                | 1946524646               |
| SNP_P3_133334_540168 | NW_004516094.1 | Scaffold682 | 540168                  | CC                              | TT                | 1946524648               |
| SNP_P3_133335_540210 | NW_004516094.1 | Scaffold682 | 540210                  | AA                              | CC                | 1946524649               |
| SNP_P3_133336_540221 | NW_004516094.1 | Scaffold682 | 540221                  | AA                              | GG                | 1946524650               |
| SNP_P3_133337_540308 | NW_004516094.1 | Scaffold682 | 540308                  | AA                              | GG                | 1946524652               |
| SNP_P3_133338_540319 | NW_004516094.1 | Scaffold682 | 540319                  | GG                              | AA                | 1946524653               |
| SNP_P3_133339_540388 | NW_004516094.1 | Scaffold682 | 540388                  | CC                              | AA                | 1946524655               |
| SNP_P3_133341_540476 | NW_004516094.1 | Scaffold682 | 540476                  | TT                              | GG                | 1946524656               |
| SNP_P3_133342_540483 | NW_004516094.1 | Scaffold682 | 540483                  | TT                              | AA                | 1946524658               |
| SNP_P3_133343_540491 | NW_004516094.1 | Scaffold682 | 540491                  | GG                              | AA                | 1946524659               |
| SNP_P3_133344_540569 | NW_004516094.1 | Scaffold682 | 540569                  | GG                              | CC                | 1946524661               |
| SNP_P3_133345_540587 | NW_004516094.1 | Scaffold682 | 540587                  | TT                              | CC                | 1946524662               |
| SNP_P3_133347_540634 | NW_004516094.1 | Scaffold682 | 540634                  | TT                              | AA                | 1946524664               |
| SNP_P3_133349_540815 | NW_004516094.1 | Scaffold682 | 540815                  | TT                              | CC                | 1946524665               |
| SNP_P3_133350_540841 | NW_004516094.1 | Scaffold682 | 540841                  | TT                              | GG                | 1946524666               |
| SNP_P3_133352_540851 | NW_004516094.1 | Scaffold682 | 540851                  | AA                              | GG                | 1946524668               |
| SNP_P3_133353_540864 | NW_004516094.1 | Scaffold682 | 540864                  | GG                              | AA                | 1946524669               |
| SNP_P3_133354_540896 | NW_004516094.1 | Scaffold682 | 540896                  | CC                              | TT                | 1946524671               |
| SNP_P3_133355_540897 | NW_004516094.1 | Scaffold682 | 540897                  | GG                              | AA                | 1946524672               |
| SNP_P3_133356_540920 | NW_004516094.1 | Scaffold682 | 540920                  | TT                              | GG                | 1946524673               |
| SNP_P3_133357_540930 | NW_004516094.1 | Scaffold682 | 540930                  | CC                              | TT                | 1946524675               |
| SNP_P3_133359_541079 | NW_004516094.1 | Scaffold682 | 541079                  | AA                              | GG                | 1946524676               |
| SNP_P3_133360_541106 | NW_004516094.1 | Scaffold682 | 541106                  | TT                              | CC                | 1946524678               |
| SNP_P3_133361_541112 | NW_004516094.1 | Scaffold682 | 541112                  | AA                              | TT                | 1946524679               |
| SNP_P3_133362_541114 | NW_004516094.1 | Scaffold682 | 541114                  | TT                              | CC                | 1946524681               |
| SNP_P3_133363_541153 | NW_004516094.1 | Scaffold682 | 541153                  | GG                              | AA                | 1946524682               |
| SNP_P3_133364_541187 | NW_004516094.1 | Scaffold682 | 541187                  | TT                              | CC                | 1946524684               |
| SNP_P3_133365_541213 | NW_004516094.1 | Scaffold682 | 541213                  | CC                              | TT                | 1946524685               |
| SNP_P3_133366_541270 | NW_004516094.1 | Scaffold682 | 541270                  | TT                              | AA                | 1946524687               |
| SNP_P3_133367_541362 | NW_004516094.1 | Scaffold682 | 541362                  | GG                              | CC                | 1946524688               |
| SNP_P3_133368_541439 | NW_004516094.1 | Scaffold682 | 541439                  | AA                              | TT                | 1946524690               |

| SNPs IDs             | Chromosome IDs | Chromosomes | Physical positions (bp) | CDC Frontier (Reference genome) | (Pusa 256 & HPNB) | NCBI SNPdb Accession IDs |
|----------------------|----------------|-------------|-------------------------|---------------------------------|-------------------|--------------------------|
| SNP_P3_133369_541441 | NW_004516094.1 | Scaffold682 | 541441                  | AA                              | CC                | 1946524691               |
| SNP_P3_133370_541473 | NW_004516094.1 | Scaffold682 | 541473                  | GG                              | AA                | 1946524693               |
| SNP_P3_133371_541499 | NW_004516094.1 | Scaffold682 | 541499                  | GG                              | AA                | 1946524694               |
| SNP_P3_133372_541505 | NW_004516094.1 | Scaffold682 | 541505                  | TT                              | GG                | 1946524695               |
| SNP_P3_133373_541532 | NW_004516094.1 | Scaffold682 | 541532                  | CC                              | TT                | 1946524697               |
| SNP_P3_133374_541556 | NW_004516094.1 | Scaffold682 | 541556                  | AA                              | CC                | 1946524698               |
| SNP_P3_133375_541591 | NW_004516094.1 | Scaffold682 | 541591                  | TT                              | AA                | 1946524700               |
| SNP_P3_133376_541597 | NW_004516094.1 | Scaffold682 | 541597                  | CC                              | TT                | 1946524701               |
| SNP_P3_133377_541612 | NW_004516094.1 | Scaffold682 | 541612                  | TT                              | AA                | 1946524703               |
| SNP_P3_133378_541624 | NW_004516094.1 | Scaffold682 | 541624                  | GG                              | AA                | 1946524704               |
| SNP_P3_133379_541629 | NW_004516094.1 | Scaffold682 | 541629                  | AA                              | CC                | 1946524706               |
| SNP_P3_133380_541678 | NW_004516094.1 | Scaffold682 | 541678                  | AA                              | GG                | 1946524707               |
| SNP_P3_133381_541684 | NW_004516094.1 | Scaffold682 | 541684                  | GG                              | CC                | 1946524709               |
| SNP_P3_133382_541696 | NW_004516094.1 | Scaffold682 | 541696                  | GG                              | AA                | 1946524710               |
| SNP_P3_133383_541712 | NW_004516094.1 | Scaffold682 | 541712                  | GG                              | CC                | 1946524711               |
| SNP_P3_133384_541730 | NW_004516094.1 | Scaffold682 | 541730                  | AA                              | GG                | 1946524713               |
| SNP_P3_133385_541750 | NW_004516094.1 | Scaffold682 | 541750                  | AA                              | CC                | 1946524714               |
| SNP_P3_133386_541752 | NW_004516094.1 | Scaffold682 | 541752                  | TT                              | CC                | 1946524716               |
| SNP_P3_133387_541840 | NW_004516094.1 | Scaffold682 | 541840                  | GG                              | AA                | 1946524717               |
| SNP_P3_133388_541994 | NW_004516094.1 | Scaffold682 | 541994                  | TT                              | AA                | 1946524719               |
| SNP_P3_133389_544053 | NW_004516094.1 | Scaffold682 | 544053                  | AA                              | TT                | 1946524720               |
| SNP_P3_133390_544107 | NW_004516094.1 | Scaffold682 | 544107                  | CC                              | TT                | 1946524722               |
| SNP_P3_133391_544111 | NW_004516094.1 | Scaffold682 | 544111                  | CC                              | GG                | 1946524723               |
| SNP_P3_133392_555886 | NW_004516094.1 | Scaffold682 | 555886                  | AA                              | GG                | 1946524724               |
| SNP_P3_133393_565525 | NW_004516094.1 | Scaffold682 | 565525                  | AA                              | GG                | 1946524726               |
| SNP_P3_133394_565542 | NW_004516094.1 | Scaffold682 | 565542                  | AA                              | TT                | 1946524727               |
| SNP_P3_133395_579061 | NW_004516094.1 | Scaffold682 | 579061                  | GG                              | AA                | 1946524729               |
| SNP_P3_133396_580814 | NW_004516094.1 | Scaffold682 | 580814                  | CC                              | TT                | 1946524730               |
| SNP_P3_133397_203    | NW_004516095.1 | Scaffold683 | 203                     | CC                              | GG                | 1946524732               |
| SNP_P3_133398_427    | NW_004516095.1 | Scaffold683 | 427                     | AA                              | CC                | 1946524733               |
| SNP_P3_133399_712    | NW_004516095.1 | Scaffold683 | 712                     | GG                              | CC                | 1946524735               |
| SNP_P3_133400_815    | NW_004516095.1 | Scaffold683 | 815                     | CC                              | GG                | 1946524736               |
| SNP_P3_133401_901    | NW_004516095.1 | Scaffold683 | 901                     | AA                              | CC                | 1946524737               |
| SNP_P3_133402_903    | NW_004516095.1 | Scaffold683 | 903                     | GG                              | AA                | 1946524738               |
| SNP_P3_133403_2870   | NW_004516095.1 | Scaffold683 | 2870                    | GG                              | TT                | 1946524739               |
| SNP_P3_133404_3330   | NW_004516095.1 | Scaffold683 | 3330                    | CC                              | GG                | 1946524740               |
| SNP_P3_133405_3345   | NW_004516095.1 | Scaffold683 | 3345                    | TT                              | AA                | 1946524741               |
| SNP_P3_133406_5883   | NW_004516095.1 | Scaffold683 | 5883                    | TT                              | CC                | 1946524743               |
| SNP_P3_133407_15561  | NW_004516095.1 | Scaffold683 | 15561                   | CC                              | AA                | 1946524744               |
| SNP_P3_133408_15737  | NW_004516095.1 | Scaffold683 | 15737                   | TT                              | CC                | 1946524745               |
| SNP_P3_133409_15758  | NW_004516095.1 | Scaffold683 | 15758                   | CC                              | AA                | 1946524746               |
| SNP_P3_133410_15851  | NW_004516095.1 | Scaffold683 | 15851                   | CC                              | TT                | 1946524747               |

| SNPs IDs            | Chromosome IDs | Chromosomes | Physical positions (bp) | CDC Frontier (Reference genome) | (Pusa 256 & HPNB) | NCBI SNPdb Accession IDs |
|---------------------|----------------|-------------|-------------------------|---------------------------------|-------------------|--------------------------|
| SNP_P3_133411_15985 | NW_004516095.1 | Scaffold683 | 15985                   | AA                              | TT                | 1946524748               |
| SNP_P3_133412_16018 | NW_004516095.1 | Scaffold683 | 16018                   | AA                              | TT                | 1946524750               |
| SNP_P3_133413_16214 | NW_004516095.1 | Scaffold683 | 16214                   | AA                              | GG                | 1946524751               |
| SNP_P3_133414_16226 | NW_004516095.1 | Scaffold683 | 16226                   | CC                              | TT                | 1946524753               |
| SNP_P3_133415_20260 | NW_004516095.1 | Scaffold683 | 20260                   | TT                              | CC                | 1946524754               |
| SNP_P3_133416_20479 | NW_004516095.1 | Scaffold683 | 20479                   | GG                              | AA                | 1946524755               |
| SNP_P3_133417_20501 | NW_004516095.1 | Scaffold683 | 20501                   | TT                              | CC                | 1946524757               |
| SNP_P3_133418_20505 | NW_004516095.1 | Scaffold683 | 20505                   | TT                              | GG                | 1946524758               |
| SNP_P3_133419_20536 | NW_004516095.1 | Scaffold683 | 20536                   | TT                              | GG                | 1946524760               |
| SNP_P3_133420_20543 | NW_004516095.1 | Scaffold683 | 20543                   | CC                              | GG                | 1946524761               |
| SNP_P3_133421_20566 | NW_004516095.1 | Scaffold683 | 20566                   | TT                              | CC                | 1946524763               |
| SNP_P3_133422_20585 | NW_004516095.1 | Scaffold683 | 20585                   | GG                              | AA                | 1946524765               |
| SNP_P3_133423_20617 | NW_004516095.1 | Scaffold683 | 20617                   | AA                              | CC                | 1946524766               |
| SNP_P3_133424_20651 | NW_004516095.1 | Scaffold683 | 20651                   | GG                              | TT                | 1946524768               |
| SNP_P3_133425_20673 | NW_004516095.1 | Scaffold683 | 20673                   | TT                              | AA                | 1946524769               |
| SNP_P3_133427_20705 | NW_004516095.1 | Scaffold683 | 20705                   | CC                              | GG                | 1946524771               |
| SNP_P3_133428_20739 | NW_004516095.1 | Scaffold683 | 20739                   | AA                              | TT                | 1946524772               |
| SNP_P3_133429_20781 | NW_004516095.1 | Scaffold683 | 20781                   | AA                              | GG                | 1946524773               |
| SNP_P3_133430_20812 | NW_004516095.1 | Scaffold683 | 20812                   | TT                              | GG                | 1946524775               |
| SNP_P3_133431_20817 | NW_004516095.1 | Scaffold683 | 20817                   | TT                              | CC                | 1946524776               |
| SNP_P3_133432_20943 | NW_004516095.1 | Scaffold683 | 20943                   | GG                              | TT                | 1946524778               |
| SNP_P3_133433_20958 | NW_004516095.1 | Scaffold683 | 20958                   | CC                              | TT                | 1946524779               |
| SNP_P3_133434_21010 | NW_004516095.1 | Scaffold683 | 21010                   | TT                              | CC                | 1946524781               |
| SNP_P3_133435_22538 | NW_004516095.1 | Scaffold683 | 22538                   | TT                              | CC                | 1946524782               |
| SNP_P3_133436_22539 | NW_004516095.1 | Scaffold683 | 22539                   | GG                              | AA                | 1946524784               |
| SNP_P3_133437_24084 | NW_004516095.1 | Scaffold683 | 24084                   | CC                              | TT                | 1946524785               |
| SNP_P3_133438_24467 | NW_004516095.1 | Scaffold683 | 24467                   | CC                              | AA                | 1946524787               |
| SNP_P3_133439_24474 | NW_004516095.1 | Scaffold683 | 24474                   | TT                              | GG                | 1946524788               |
| SNP_P3_133440_24488 | NW_004516095.1 | Scaffold683 | 24488                   | AA                              | GG                | 1946524790               |
| SNP_P3_133441_24500 | NW_004516095.1 | Scaffold683 | 24500                   | TT                              | CC                | 1946524791               |
| SNP_P3_133442_25188 | NW_004516095.1 | Scaffold683 | 25188                   | GG                              | TT                | 1946524793               |
| SNP_P3_133443_25230 | NW_004516095.1 | Scaffold683 | 25230                   | TT                              | GG                | 1946524794               |
| SNP_P3_133444_25350 | NW_004516095.1 | Scaffold683 | 25350                   | AA                              | TT                | 1946524796               |
| SNP_P3_133445_25467 | NW_004516095.1 | Scaffold683 | 25467                   | CC                              | TT                | 1946524797               |
| SNP_P3_133446_25472 | NW_004516095.1 | Scaffold683 | 25472                   | GG                              | AA                | 1946524799               |
| SNP_P3_133447_25512 | NW_004516095.1 | Scaffold683 | 25512                   | TT                              | GG                | 1946524800               |
| SNP_P3_133448_25514 | NW_004516095.1 | Scaffold683 | 25514                   | TT                              | CC                | 1946524802               |
| SNP_P3_133449_25523 | NW_004516095.1 | Scaffold683 | 25523                   | TT                              | AA                | 1946524803               |
| SNP_P3_133450_25556 | NW_004516095.1 | Scaffold683 | 25556                   | CC                              | TT                | 1946524805               |
| SNP_P3_133451_25882 | NW_004516095.1 | Scaffold683 | 25882                   | AA                              | GG                | 1946524806               |
| SNP_P3_133452_25946 | NW_004516095.1 | Scaffold683 | 25946                   | AA                              | TT                | 1946524807               |
| SNP_P3_133453_26127 | NW_004516095.1 | Scaffold683 | 26127                   | TT                              | GG                | 1946524809               |

| SNPs IDs            | Chromosome IDs | Chromosomes | Physical positions (bp) | CDC Frontier (Reference genome) | (Pusa 256 & HPNB) | NCBI SNPdb Accession IDs |
|---------------------|----------------|-------------|-------------------------|---------------------------------|-------------------|--------------------------|
| SNP_P3_133454_26157 | NW_004516095.1 | Scaffold683 | 26157                   | GG                              | CC                | 1946524810               |
| SNP_P3_133455_26158 | NW_004516095.1 | Scaffold683 | 26158                   | CC                              | TT                | 1946524813               |
| SNP_P3_133456_26159 | NW_004516095.1 | Scaffold683 | 26159                   | GG                              | AA                | 1946524815               |
| SNP_P3_133457_26160 | NW_004516095.1 | Scaffold683 | 26160                   | TT                              | GG                | 1946524816               |
| SNP_P3_133458_26178 | NW_004516095.1 | Scaffold683 | 26178                   | AA                              | TT                | 1946524818               |
| SNP_P3_133459_26194 | NW_004516095.1 | Scaffold683 | 26194                   | TT                              | GG                | 1946524819               |
| SNP_P3_133460_26202 | NW_004516095.1 | Scaffold683 | 26202                   | CC                              | TT                | 1946524820               |
| SNP_P3_133461_26203 | NW_004516095.1 | Scaffold683 | 26203                   | AA                              | GG                | 1946524822               |
| SNP_P3_133462_26204 | NW_004516095.1 | Scaffold683 | 26204                   | CC                              | AA                | 1946524823               |
| SNP_P3_133463_26247 | NW_004516095.1 | Scaffold683 | 26247                   | TT                              | AA                | 1946524825               |
| SNP_P3_133464_26276 | NW_004516095.1 | Scaffold683 | 26276                   | GG                              | CC                | 1946524826               |
| SNP_P3_133465_3403  | NW_004516096.1 | Scaffold684 | 3403                    | TT                              | CC                | 1946524828               |
| SNP_P3_133466_3409  | NW_004516096.1 | Scaffold684 | 3409                    | AA                              | GG                | 1946524829               |
| SNP_P3_133467_4686  | NW_004516096.1 | Scaffold684 | 4686                    | AA                              | GG                | 1946524831               |
| SNP_P3_133468_4704  | NW_004516096.1 | Scaffold684 | 4704                    | AA                              | GG                | 1946524832               |
| SNP_P3_133469_5008  | NW_004516096.1 | Scaffold684 | 5008                    | CC                              | AA                | 1946524834               |
| SNP_P3_133470_15424 | NW_004516096.1 | Scaffold684 | 15424                   | TT                              | AA                | 1946524835               |
| SNP_P3_133471_16015 | NW_004516096.1 | Scaffold684 | 16015                   | TT                              | CC                | 1946524837               |
| SNP_P3_133472_16108 | NW_004516096.1 | Scaffold684 | 16108                   | TT                              | CC                | 1946524838               |
| SNP_P3_133474_48352 | NW_004516096.1 | Scaffold684 | 48352                   | CC                              | GG                | 1946524839               |
| SNP_P3_133475_48386 | NW_004516096.1 | Scaffold684 | 48386                   | TT                              | GG                | 1946524841               |
| SNP_P3_133476_48419 | NW_004516096.1 | Scaffold684 | 48419                   | TT                              | CC                | 1946524842               |
| SNP_P3_133477_48608 | NW_004516096.1 | Scaffold684 | 48608                   | CC                              | AA                | 1946524844               |
| SNP_P3_133478_48620 | NW_004516096.1 | Scaffold684 | 48620                   | AA                              | GG                | 1946524845               |
| SNP_P3_133479_48624 | NW_004516096.1 | Scaffold684 | 48624                   | CC                              | AA                | 1946524847               |
| SNP_P3_133480_48643 | NW_004516096.1 | Scaffold684 | 48643                   | GG                              | AA                | 1946524848               |
| SNP_P3_133481_48659 | NW_004516096.1 | Scaffold684 | 48659                   | TT                              | CC                | 1946524850               |
| SNP_P3_133482_48665 | NW_004516096.1 | Scaffold684 | 48665                   | CC                              | AA                | 1946524851               |
| SNP_P3_133483_48666 | NW_004516096.1 | Scaffold684 | 48666                   | CC                              | AA                | 1946524853               |
| SNP_P3_133484_48693 | NW_004516096.1 | Scaffold684 | 48693                   | AA                              | GG                | 1946524854               |
| SNP_P3_133485_49589 | NW_004516096.1 | Scaffold684 | 49589                   | AA                              | GG                | 1946524856               |
| SNP_P3_133486_62707 | NW_004516096.1 | Scaffold684 | 62707                   | CC                              | TT                | 1946524857               |
| SNP_P3_133487_62712 | NW_004516096.1 | Scaffold684 | 62712                   | CC                              | AA                | 1946524858               |
| SNP_P3_133488_62727 | NW_004516096.1 | Scaffold684 | 62727                   | TT                              | CC                | 1946524860               |
| SNP_P3_133489_72172 | NW_004516096.1 | Scaffold684 | 72172                   | TT                              | CC                | 1946524861               |
| SNP_P3_133490_81676 | NW_004516096.1 | Scaffold684 | 81676                   | AA                              | TT                | 1946524863               |
| SNP_P3_133491_81705 | NW_004516096.1 | Scaffold684 | 81705                   | GG                              | AA                | 1946524864               |
| SNP_P3_133492_81718 | NW_004516096.1 | Scaffold684 | 81718                   | GG                              | AA                | 1946524866               |
| SNP_P3_133493_91208 | NW_004516096.1 | Scaffold684 | 91208                   | AA                              | CC                | 1946524867               |
| SNP_P3_133494_95378 | NW_004516096.1 | Scaffold684 | 95378                   | CC                              | TT                | 1946524869               |
| SNP_P3_133495_64    | NW_004516098.1 | Scaffold686 | 64                      | CC                              | TT                | 1946524870               |
| SNP_P3_133496_81    | NW_004516098.1 | Scaffold686 | 81                      | GG                              | AA                | 1946524871               |

| SNPs IDs             | Chromosome IDs | Chromosomes | Physical positions (bp) | CDC Frontier (Reference genome) | (Pusa 256 & HPNB) | NCBI SNPdb Accession IDs |
|----------------------|----------------|-------------|-------------------------|---------------------------------|-------------------|--------------------------|
| SNP_P3_133497_171    | NW_004516098.1 | Scaffold686 | 171                     | GG                              | AA                | 1946524873               |
| SNP_P3_133498_213    | NW_004516098.1 | Scaffold686 | 213                     | CC                              | TT                | 1946524874               |
| SNP_P3_133499_352    | NW_004516098.1 | Scaffold686 | 352                     | GG                              | AA                | 1946524876               |
| SNP_P3_133500_458    | NW_004516098.1 | Scaffold686 | 458                     | GG                              | AA                | 1946524877               |
| SNP_P3_133501_618    | NW_004516098.1 | Scaffold686 | 618                     | TT                              | AA                | 1946524879               |
| SNP_P3_133502_740    | NW_004516098.1 | Scaffold686 | 740                     | TT                              | AA                | 1946524880               |
| SNP_P3_133503_769    | NW_004516098.1 | Scaffold686 | 769                     | AA                              | CC                | 1946524882               |
| SNP_P3_133504_772    | NW_004516098.1 | Scaffold686 | 772                     | AA                              | TT                | 1946524883               |
| SNP_P3_133505_783    | NW_004516098.1 | Scaffold686 | 783                     | AA                              | GG                | 1946524885               |
| SNP_P3_133506_789    | NW_004516098.1 | Scaffold686 | 789                     | CC                              | TT                | 1946524886               |
| SNP_P3_133507_11321  | NW_004516098.1 | Scaffold686 | 11321                   | CC                              | AA                | 1946524888               |
| SNP_P3_133508_25746  | NW_004516098.1 | Scaffold686 | 25746                   | CC                              | GG                | 1946524889               |
| SNP_P3_133509_25875  | NW_004516098.1 | Scaffold686 | 25875                   | TT                              | CC                | 1946524890               |
| SNP_P3_133510_46940  | NW_004516098.1 | Scaffold686 | 46940                   | AA                              | GG                | 1946524892               |
| SNP_P3_133511_59516  | NW_004516098.1 | Scaffold686 | 59516                   | AA                              | GG                | 1946524893               |
| SNP_P3_133512_59533  | NW_004516098.1 | Scaffold686 | 59533                   | CC                              | AA                | 1946524895               |
| SNP_P3_133514_59714  | NW_004516098.1 | Scaffold686 | 59714                   | AA                              | CC                | 1946524896               |
| SNP_P3_133515_59994  | NW_004516098.1 | Scaffold686 | 59994                   | TT                              | CC                | 1946524898               |
| SNP_P3_133516_60020  | NW_004516098.1 | Scaffold686 | 60020                   | TT                              | CC                | 1946524899               |
| SNP_P3_133517_60025  | NW_004516098.1 | Scaffold686 | 60025                   | CC                              | TT                | 1946524900               |
| SNP_P3_133518_60345  | NW_004516098.1 | Scaffold686 | 60345                   | AA                              | TT                | 1946524902               |
| SNP_P3_133519_69162  | NW_004516098.1 | Scaffold686 | 69162                   | GG                              | TT                | 1946524903               |
| SNP_P3_133520_74289  | NW_004516098.1 | Scaffold686 | 74289                   | TT                              | CC                | 1946524905               |
| SNP_P3_133521_85517  | NW_004516098.1 | Scaffold686 | 85517                   | TT                              | CC                | 1946524906               |
| SNP_P3_133523_85596  | NW_004516098.1 | Scaffold686 | 85596                   | AA                              | CC                | 1946524908               |
| SNP_P3_133524_90611  | NW_004516098.1 | Scaffold686 | 90611                   | TT                              | CC                | 1946524909               |
| SNP_P3_133525_90755  | NW_004516098.1 | Scaffold686 | 90755                   | AA                              | GG                | 1946524911               |
| SNP_P3_133526_90971  | NW_004516098.1 | Scaffold686 | 90971                   | GG                              | AA                | 1946524912               |
| SNP_P3_133527_97236  | NW_004516098.1 | Scaffold686 | 97236                   | CC                              | TT                | 1946524913               |
| SNP_P3_133528_104083 | NW_004516098.1 | Scaffold686 | 104083                  | GG                              | TT                | 1946524915               |
| SNP_P3_133529_104722 | NW_004516098.1 | Scaffold686 | 104722                  | AA                              | GG                | 1946524916               |
| SNP_P3_133530_105185 | NW_004516098.1 | Scaffold686 | 105185                  | AA                              | GG                | 1946524918               |
| SNP_P3_133531_108353 | NW_004516098.1 | Scaffold686 | 108353                  | CC                              | TT                | 1946524919               |
| SNP_P3_133532_108717 | NW_004516098.1 | Scaffold686 | 108717                  | TT                              | GG                | 1946524921               |
| SNP_P3_133534_108784 | NW_004516098.1 | Scaffold686 | 108784                  | GG                              | AA                | 1946524922               |
| SNP_P3_133535_108855 | NW_004516098.1 | Scaffold686 | 108855                  | TT                              | CC                | 1946524924               |
| SNP_P3_133536_108924 | NW_004516098.1 | Scaffold686 | 108924                  | AA                              | TT                | 1946524925               |
| SNP_P3_133538_109128 | NW_004516098.1 | Scaffold686 | 109128                  | CC                              | TT                | 1946524926               |
| SNP_P3_133539_109132 | NW_004516098.1 | Scaffold686 | 109132                  | AA                              | TT                | 1946524928               |
| SNP_P3_133540_109134 | NW_004516098.1 | Scaffold686 | 109134                  | AA                              | GG                | 1946524929               |
| SNP_P3_133541_109137 | NW_004516098.1 | Scaffold686 | 109137                  | GG                              | AA                | 1946524931               |
| SNP_P3_133542_109194 | NW_004516098.1 | Scaffold686 | 109194                  | TT                              | GG                | 1946524932               |

| SNPs IDs             | Chromosome IDs | Chromosomes | Physical positions (bp) | CDC Frontier (Reference genome) | (Pusa 256 & HPNB) | NCBI SNPdb Accession IDs |
|----------------------|----------------|-------------|-------------------------|---------------------------------|-------------------|--------------------------|
| SNP_P3_133543_111861 | NW_004516098.1 | Scaffold686 | 111861                  | TT                              | CC                | 1946524934               |
| SNP_P3_133544_111876 | NW_004516098.1 | Scaffold686 | 111876                  | CC                              | TT                | 1946524935               |
| SNP_P3_133545_111936 | NW_004516098.1 | Scaffold686 | 111936                  | GG                              | AA                | 1946524937               |
| SNP_P3_133546_112318 | NW_004516098.1 | Scaffold686 | 112318                  | AA                              | GG                | 1946524938               |
| SNP_P3_133547_112321 | NW_004516098.1 | Scaffold686 | 112321                  | TT                              | CC                | 1946524940               |
| SNP_P3_133548_112348 | NW_004516098.1 | Scaffold686 | 112348                  | TT                              | CC                | 1946524941               |
| SNP_P3_133549_112355 | NW_004516098.1 | Scaffold686 | 112355                  | CC                              | AA                | 1946524943               |
| SNP_P3_133550_112393 | NW_004516098.1 | Scaffold686 | 112393                  | GG                              | AA                | 1946524944               |
| SNP_P3_133551_112398 | NW_004516098.1 | Scaffold686 | 112398                  | AA                              | GG                | 1946524946               |
| SNP_P3_133552_112411 | NW_004516098.1 | Scaffold686 | 112411                  | TT                              | CC                | 1946524947               |
| SNP_P3_133553_112413 | NW_004516098.1 | Scaffold686 | 112413                  | GG                              | AA                | 1946524948               |
| SNP_P3_133554_132744 | NW_004516098.1 | Scaffold686 | 132744                  | GG                              | AA                | 1946524950               |
| SNP_P3_133556_145255 | NW_004516098.1 | Scaffold686 | 145255                  | TT                              | AA                | 1946524951               |
| SNP_P3_133560_177848 | NW_004516098.1 | Scaffold686 | 177848                  | CC                              | TT                | 1946524953               |
| SNP_P3_133561_177896 | NW_004516098.1 | Scaffold686 | 177896                  | AA                              | GG                | 1946524954               |
| SNP_P3_133562_178050 | NW_004516098.1 | Scaffold686 | 178050                  | CC                              | TT                | 1946524956               |
| SNP_P3_133564_180855 | NW_004516098.1 | Scaffold686 | 180855                  | AA                              | TT                | 1946524957               |
| SNP_P3_133565_181199 | NW_004516098.1 | Scaffold686 | 181199                  | TT                              | CC                | 1946524959               |
| SNP_P3_133566_181407 | NW_004516098.1 | Scaffold686 | 181407                  | AA                              | GG                | 1946524960               |
| SNP_P3_133567_182141 | NW_004516098.1 | Scaffold686 | 182141                  | CC                              | TT                | 1946524961               |
| SNP_P3_133568_182167 | NW_004516098.1 | Scaffold686 | 182167                  | TT                              | AA                | 1946524963               |
| SNP_P3_133571_183542 | NW_004516098.1 | Scaffold686 | 183542                  | TT                              | CC                | 1946524965               |
| SNP_P3_133572_183720 | NW_004516098.1 | Scaffold686 | 183720                  | GG                              | TT                | 1946524968               |
| SNP_P3_133574_184111 | NW_004516098.1 | Scaffold686 | 184111                  | TT                              | AA                | 1946524970               |
| SNP_P3_133575_186124 | NW_004516098.1 | Scaffold686 | 186124                  | GG                              | CC                | 1946524971               |
| SNP_P3_133576_186196 | NW_004516098.1 | Scaffold686 | 186196                  | GG                              | AA                | 1946525296               |
| SNP_P3_133577_186280 | NW_004516098.1 | Scaffold686 | 186280                  | TT                              | GG                | 1946525297               |
| SNP_P3_133578_186427 | NW_004516098.1 | Scaffold686 | 186427                  | CC                              | TT                | 1946525299               |
| SNP_P3_133579_186482 | NW_004516098.1 | Scaffold686 | 186482                  | GG                              | TT                | 1946525300               |
| SNP_P3_133580_204721 | NW_004516098.1 | Scaffold686 | 204721                  | AA                              | CC                | 1946525302               |
| SNP_P3_133581_211369 | NW_004516098.1 | Scaffold686 | 211369                  | TT                              | CC                | 1946525303               |
| SNP_P3_133582_211410 | NW_004516098.1 | Scaffold686 | 211410                  | CC                              | TT                | 1946525305               |
| SNP_P3_133583_212495 | NW_004516098.1 | Scaffold686 | 212495                  | CC                              | TT                | 1946525306               |
| SNP_P3_133584_212507 | NW_004516098.1 | Scaffold686 | 212507                  | TT                              | AA                | 1946525308               |
| SNP_P3_133585_215669 | NW_004516098.1 | Scaffold686 | 215669                  | TT                              | CC                | 1946525309               |
| SNP_P3_133586_215672 | NW_004516098.1 | Scaffold686 | 215672                  | AA                              | TT                | 1946525312               |
| SNP_P3_133587_215675 | NW_004516098.1 | Scaffold686 | 215675                  | AA                              | GG                | 1946525313               |
| SNP_P3_133588_215702 | NW_004516098.1 | Scaffold686 | 215702                  | CC                              | AA                | 1946525315               |
| SNP_P3_133589_215762 | NW_004516098.1 | Scaffold686 | 215762                  | TT                              | CC                | 1946525316               |
| SNP_P3_133590_215918 | NW_004516098.1 | Scaffold686 | 215918                  | GG                              | AA                | 1946525317               |
| SNP_P3_133591_215924 | NW_004516098.1 | Scaffold686 | 215924                  | AA                              | GG                | 1946525319               |
| SNP_P3_133592_216040 | NW_004516098.1 | Scaffold686 | 216040                  | CC                              | TT                | 1946525320               |

| SNPs IDs             | Chromosome IDs | Chromosomes | Physical positions (bp) | CDC Frontier (Reference genome) | (Pusa 256 & HPNB) | NCBI SNPdb Accession IDs |
|----------------------|----------------|-------------|-------------------------|---------------------------------|-------------------|--------------------------|
| SNP_P3_133593_216054 | NW_004516098.1 | Scaffold686 | 216054                  | GG                              | AA                | 1946525322               |
| SNP_P3_133594_216094 | NW_004516098.1 | Scaffold686 | 216094                  | CC                              | TT                | 1946525323               |
| SNP_P3_133595_216099 | NW_004516098.1 | Scaffold686 | 216099                  | TT                              | CC                | 1946525325               |
| SNP_P3_133596_216105 | NW_004516098.1 | Scaffold686 | 216105                  | TT                              | CC                | 1946525326               |
| SNP_P3_133597_216106 | NW_004516098.1 | Scaffold686 | 216106                  | GG                              | AA                | 1946525328               |
| SNP_P3_133598_216111 | NW_004516098.1 | Scaffold686 | 216111                  | GG                              | CC                | 1946525329               |
| SNP_P3_133599_216121 | NW_004516098.1 | Scaffold686 | 216121                  | AA                              | GG                | 1946525330               |
| SNP_P3_133600_216139 | NW_004516098.1 | Scaffold686 | 216139                  | GG                              | AA                | 1946525332               |
| SNP_P3_133601_216177 | NW_004516098.1 | Scaffold686 | 216177                  | AA                              | GG                | 1946525333               |
| SNP_P3_133602_216180 | NW_004516098.1 | Scaffold686 | 216180                  | AA                              | TT                | 1946525335               |
| SNP_P3_133603_216202 | NW_004516098.1 | Scaffold686 | 216202                  | TT                              | AA                | 1946525336               |
| SNP_P3_133604_216231 | NW_004516098.1 | Scaffold686 | 216231                  | AA                              | GG                | 1946525338               |
| SNP_P3_133605_216241 | NW_004516098.1 | Scaffold686 | 216241                  | AA                              | GG                | 1946525339               |
| SNP_P3_133606_216244 | NW_004516098.1 | Scaffold686 | 216244                  | CC                              | TT                | 1946525341               |
| SNP_P3_133607_216247 | NW_004516098.1 | Scaffold686 | 216247                  | AA                              | CC                | 1946525342               |
| SNP_P3_133608_216271 | NW_004516098.1 | Scaffold686 | 216271                  | CC                              | TT                | 1946525344               |
| SNP_P3_133609_216273 | NW_004516098.1 | Scaffold686 | 216273                  | TT                              | CC                | 1946525345               |
| SNP_P3_133610_216275 | NW_004516098.1 | Scaffold686 | 216275                  | CC                              | AA                | 1946525346               |
| SNP_P3_133611_220971 | NW_004516098.1 | Scaffold686 | 220971                  | GG                              | AA                | 1946525348               |
| SNP_P3_133612_220975 | NW_004516098.1 | Scaffold686 | 220975                  | GG                              | TT                | 1946525349               |
| SNP_P3_133613_223425 | NW_004516098.1 | Scaffold686 | 223425                  | CC                              | TT                | 1946525351               |
| SNP_P3_133614_223741 | NW_004516098.1 | Scaffold686 | 223741                  | AA                              | GG                | 1946525352               |
| SNP_P3_133615_223753 | NW_004516098.1 | Scaffold686 | 223753                  | AA                              | GG                | 1946525354               |
| SNP_P3_133616_229622 | NW_004516098.1 | Scaffold686 | 229622                  | CC                              | TT                | 1946525355               |
| SNP_P3_133617_229628 | NW_004516098.1 | Scaffold686 | 229628                  | AA                              | GG                | 1946525357               |
| SNP_P3_133618_229652 | NW_004516098.1 | Scaffold686 | 229652                  | TT                              | CC                | 1946525358               |
| SNP_P3_133619_229891 | NW_004516098.1 | Scaffold686 | 229891                  | TT                              | CC                | 1946525359               |
| SNP_P3_133621_249752 | NW_004516098.1 | Scaffold686 | 249752                  | TT                              | CC                | 1946525361               |
| SNP_P3_133622_250037 | NW_004516098.1 | Scaffold686 | 250037                  | CC                              | TT                | 1946525362               |
| SNP_P3_133623_250053 | NW_004516098.1 | Scaffold686 | 250053                  | CC                              | AA                | 1946525364               |
| SNP_P3_133624_254274 | NW_004516098.1 | Scaffold686 | 254274                  | AA                              | GG                | 1946525365               |
| SNP_P3_133625_1185   | NW_004516099.1 | Scaffold688 | 1185                    | CC                              | GG                | 1946525367               |
| SNP_P3_133626_1237   | NW_004516099.1 | Scaffold688 | 1237                    | CC                              | AA                | 1946525368               |
| SNP_P3_133627_1548   | NW_004516099.1 | Scaffold688 | 1548                    | CC                              | AA                | 1946525370               |
| SNP_P3_133628_1549   | NW_004516099.1 | Scaffold688 | 1549                    | AA                              | TT                | 1946525371               |
| SNP_P3_133629_1961   | NW_004516099.1 | Scaffold688 | 1961                    | AA                              | CC                | 1946525373               |
| SNP_P3_133631_2434   | NW_004516099.1 | Scaffold688 | 2434                    | GG                              | TT                | 1946525374               |
| SNP_P3_133632_2605   | NW_004516099.1 | Scaffold688 | 2605                    | CC                              | GG                | 1946525376               |
| SNP_P3_133633_2646   | NW_004516099.1 | Scaffold688 | 2646                    | AA                              | TT                | 1946525377               |
| SNP_P3_133634_2678   | NW_004516099.1 | Scaffold688 | 2678                    | AA                              | TT                | 1946525379               |
| SNP_P3_133635_2732   | NW_004516099.1 | Scaffold688 | 2732                    | AA                              | GG                | 1946525380               |
| SNP_P3_133636_2967   | NW_004516099.1 | Scaffold688 | 2967                    | GG                              | AA                | 1946525381               |



| SNPs IDs            | Chromosome IDs | Chromosomes | Physical positions (bp) | CDC Frontier (Reference genome) | (Pusa 256 & HPNB) | NCBI SNPdb Accession IDs |
|---------------------|----------------|-------------|-------------------------|---------------------------------|-------------------|--------------------------|
| SNP_P3_133637_3001  | NW_004516099.1 | Scaffold688 | 3001                    | TT                              | AA                | 1946525383               |
| SNP_P3_133638_3058  | NW_004516099.1 | Scaffold688 | 3058                    | CC                              | GG                | 1946525384               |
| SNP_P3_133639_3071  | NW_004516099.1 | Scaffold688 | 3071                    | TT                              | AA                | 1946525386               |
| SNP_P3_133640_3227  | NW_004516099.1 | Scaffold688 | 3227                    | CC                              | GG                | 1946525387               |
| SNP_P3_133641_494   | NW_004516100.1 | Scaffold689 | 494                     | TT                              | CC                | 1946525389               |
| SNP_P3_133642_8045  | NW_004516102.1 | Scaffold692 | 8045                    | CC                              | GG                | 1946525390               |
| SNP_P3_133643_8076  | NW_004516102.1 | Scaffold692 | 8076                    | TT                              | CC                | 1946525391               |
| SNP_P3_133644_17240 | NW_004516102.1 | Scaffold692 | 17240                   | AA                              | GG                | 1946525393               |
| SNP_P3_133645_17261 | NW_004516102.1 | Scaffold692 | 17261                   | TT                              | GG                | 1946525394               |
| SNP_P3_133646_50404 | NW_004516102.1 | Scaffold692 | 50404                   | AA                              | GG                | 1946525396               |
| SNP_P3_133647_50539 | NW_004516102.1 | Scaffold692 | 50539                   | CC                              | TT                | 1946525397               |
| SNP_P3_133648_50639 | NW_004516102.1 | Scaffold692 | 50639                   | AA                              | TT                | 1946525399               |
| SNP_P3_133649_50669 | NW_004516102.1 | Scaffold692 | 50669                   | TT                              | CC                | 1946525400               |
| SNP_P3_133650_50806 | NW_004516102.1 | Scaffold692 | 50806                   | TT                              | CC                | 1946525401               |
| SNP_P3_133651_50839 | NW_004516102.1 | Scaffold692 | 50839                   | AA                              | TT                | 1946525403               |
| SNP_P3_133652_68902 | NW_004516102.1 | Scaffold692 | 68902                   | GG                              | AA                | 1946525405               |
| SNP_P3_133653_83698 | NW_004516102.1 | Scaffold692 | 83698                   | CC                              | TT                | 1946525406               |
| SNP_P3_133654_52    | NW_004516104.1 | Scaffold694 | 52                      | CC                              | TT                | 1946525408               |
| SNP_P3_133655_97    | NW_004516104.1 | Scaffold694 | 97                      | GG                              | TT                | 1946525409               |
| SNP_P3_133656_305   | NW_004516104.1 | Scaffold694 | 305                     | AA                              | TT                | 1946525410               |
| SNP_P3_133657_307   | NW_004516104.1 | Scaffold694 | 307                     | TT                              | CC                | 1946525412               |
| SNP_P3_133658_312   | NW_004516104.1 | Scaffold694 | 312                     | CC                              | TT                | 1946525413               |
| SNP_P3_133659_338   | NW_004516104.1 | Scaffold694 | 338                     | GG                              | AA                | 1946525415               |
| SNP_P3_133660_401   | NW_004516104.1 | Scaffold694 | 401                     | GG                              | AA                | 1946525416               |
| SNP_P3_133661_405   | NW_004516104.1 | Scaffold694 | 405                     | TT                              | CC                | 1946525418               |
| SNP_P3_133662_415   | NW_004516104.1 | Scaffold694 | 415                     | AA                              | GG                | 1946525421               |
| SNP_P3_133663_420   | NW_004516104.1 | Scaffold694 | 420                     | TT                              | CC                | 1946525425               |
| SNP_P3_133664_438   | NW_004516104.1 | Scaffold694 | 438                     | GG                              | CC                | 1946525427               |
| SNP_P3_133665_454   | NW_004516104.1 | Scaffold694 | 454                     | TT                              | CC                | 1946525428               |
| SNP_P3_133666_1706  | NW_004516104.1 | Scaffold694 | 1706                    | CC                              | TT                | 1946525430               |
| SNP_P3_133667_2038  | NW_004516104.1 | Scaffold694 | 2038                    | TT                              | CC                | 1946525431               |
| SNP_P3_133668_2086  | NW_004516104.1 | Scaffold694 | 2086                    | CC                              | TT                | 1946525433               |
| SNP_P3_133669_4637  | NW_004516104.1 | Scaffold694 | 4637                    | GG                              | AA                | 1946525434               |
| SNP_P3_133670_4674  | NW_004516104.1 | Scaffold694 | 4674                    | TT                              | CC                | 1946525436               |
| SNP_P3_133671_4682  | NW_004516104.1 | Scaffold694 | 4682                    | TT                              | AA                | 1946525437               |
| SNP_P3_133672_4749  | NW_004516104.1 | Scaffold694 | 4749                    | GG                              | TT                | 1946525439               |
| SNP_P3_133673_4865  | NW_004516104.1 | Scaffold694 | 4865                    | AA                              | GG                | 1946525440               |
| SNP_P3_133674_5013  | NW_004516104.1 | Scaffold694 | 5013                    | TT                              | CC                | 1946525441               |
| SNP_P3_133675_5023  | NW_004516104.1 | Scaffold694 | 5023                    | GG                              | CC                | 1946525443               |
| SNP_P3_133676_5029  | NW_004516104.1 | Scaffold694 | 5029                    | GG                              | TT                | 1946525444               |
| SNP_P3_133677_5088  | NW_004516104.1 | Scaffold694 | 5088                    | GG                              | AA                | 1946525446               |
| SNP_P3_133678_6841  | NW_004516104.1 | Scaffold694 | 6841                    | CC                              | TT                | 1946525447               |

| SNPs IDs           | Chromosome IDs | Chromosomes | Physical positions (bp) | CDC Frontier (Reference genome) | (Pusa 256 & HPNB) | NCBI SNPdb Accession IDs |
|--------------------|----------------|-------------|-------------------------|---------------------------------|-------------------|--------------------------|
| SNP_P3_133679_6906 | NW_004516104.1 | Scaffold694 | 6906                    | TT                              | CC                | 1946525449               |
| SNP_P3_133680_7072 | NW_004516104.1 | Scaffold694 | 7072                    | CC                              | AA                | 1946525450               |
| SNP_P3_133681_7073 | NW_004516104.1 | Scaffold694 | 7073                    | GG                              | TT                | 1946525452               |
| SNP_P3_133682_7074 | NW_004516104.1 | Scaffold694 | 7074                    | GG                              | AA                | 1946525453               |
| SNP_P3_133683_7102 | NW_004516104.1 | Scaffold694 | 7102                    | AA                              | CC                | 1946525455               |
| SNP_P3_133684_7147 | NW_004516104.1 | Scaffold694 | 7147                    | CC                              | TT                | 1946525456               |
| SNP_P3_133685_7168 | NW_004516104.1 | Scaffold694 | 7168                    | CC                              | TT                | 1946525458               |
| SNP_P3_133686_7182 | NW_004516104.1 | Scaffold694 | 7182                    | CC                              | GG                | 1946525459               |
| SNP_P3_133687_7211 | NW_004516104.1 | Scaffold694 | 7211                    | CC                              | AA                | 1946525461               |
| SNP_P3_133688_7233 | NW_004516104.1 | Scaffold694 | 7233                    | TT                              | CC                | 1946525462               |
| SNP_P3_133689_7280 | NW_004516104.1 | Scaffold694 | 7280                    | AA                              | CC                | 1946525464               |
| SNP_P3_133690_7282 | NW_004516104.1 | Scaffold694 | 7282                    | CC                              | AA                | 1946525465               |
| SNP_P3_133691_7296 | NW_004516104.1 | Scaffold694 | 7296                    | GG                              | AA                | 1946525467               |
| SNP_P3_133692_7371 | NW_004516104.1 | Scaffold694 | 7371                    | TT                              | AA                | 1946525468               |
| SNP_P3_133693_7392 | NW_004516104.1 | Scaffold694 | 7392                    | AA                              | TT                | 1946525470               |
| SNP_P3_133694_7397 | NW_004516104.1 | Scaffold694 | 7397                    | GG                              | AA                | 1946525471               |
| SNP_P3_133695_7415 | NW_004516104.1 | Scaffold694 | 7415                    | CC                              | TT                | 1946525473               |
| SNP_P3_133696_7451 | NW_004516104.1 | Scaffold694 | 7451                    | GG                              | AA                | 1946525474               |
| SNP_P3_133697_7470 | NW_004516104.1 | Scaffold694 | 7470                    | TT                              | CC                | 1946525475               |
| SNP_P3_133698_7550 | NW_004516104.1 | Scaffold694 | 7550                    | AA                              | CC                | 1946525477               |
| SNP_P3_133699_7582 | NW_004516104.1 | Scaffold694 | 7582                    | AA                              | GG                | 1946525478               |
| SNP_P3_133700_7660 | NW_004516104.1 | Scaffold694 | 7660                    | TT                              | CC                | 1946525480               |
| SNP_P3_133701_7684 | NW_004516104.1 | Scaffold694 | 7684                    | AA                              | GG                | 1946525481               |
| SNP_P3_133702_7698 | NW_004516104.1 | Scaffold694 | 7698                    | TT                              | CC                | 1946525483               |
| SNP_P3_133703_7714 | NW_004516104.1 | Scaffold694 | 7714                    | CC                              | TT                | 1946525484               |
| SNP_P3_133704_7727 | NW_004516104.1 | Scaffold694 | 7727                    | CC                              | TT                | 1946525486               |
| SNP_P3_133705_7761 | NW_004516104.1 | Scaffold694 | 7761                    | GG                              | CC                | 1946525487               |
| SNP_P3_133706_7846 | NW_004516104.1 | Scaffold694 | 7846                    | GG                              | AA                | 1946525489               |
| SNP_P3_133707_7869 | NW_004516104.1 | Scaffold694 | 7869                    | CC                              | AA                | 1946525490               |
| SNP_P3_133708_8074 | NW_004516104.1 | Scaffold694 | 8074                    | GG                              | AA                | 1946525491               |
| SNP_P3_133709_8132 | NW_004516104.1 | Scaffold694 | 8132                    | CC                              | TT                | 1946525493               |
| SNP_P3_133710_8133 | NW_004516104.1 | Scaffold694 | 8133                    | AA                              | GG                | 1946525494               |
| SNP_P3_133711_8139 | NW_004516104.1 | Scaffold694 | 8139                    | AA                              | GG                | 1946525496               |
| SNP_P3_133712_8141 | NW_004516104.1 | Scaffold694 | 8141                    | AA                              | CC                | 1946525497               |
| SNP_P3_133713_8588 | NW_004516104.1 | Scaffold694 | 8588                    | AA                              | TT                | 1946525499               |
| SNP_P3_133714_8607 | NW_004516104.1 | Scaffold694 | 8607                    | TT                              | CC                | 1946525500               |
| SNP_P3_133715_8628 | NW_004516104.1 | Scaffold694 | 8628                    | GG                              | AA                | 1946525502               |
| SNP_P3_133716_8685 | NW_004516104.1 | Scaffold694 | 8685                    | GG                              | TT                | 1946525503               |
| SNP_P3_133717_8705 | NW_004516104.1 | Scaffold694 | 8705                    | TT                              | AA                | 1946525505               |
| SNP_P3_133718_8872 | NW_004516104.1 | Scaffold694 | 8872                    | AA                              | GG                | 1946525507               |
| SNP_P3_133719_8916 | NW_004516104.1 | Scaffold694 | 8916                    | AA                              | GG                | 1946525508               |
| SNP_P3_133720_8928 | NW_004516104.1 | Scaffold694 | 8928                    | GG                              | CC                | 1946525509               |

| SNPs IDs            | Chromosome IDs | Chromosomes | Physical positions (bp) | CDC Frontier (Reference genome) | (Pusa 256 & HPNB) | NCBI SNPdb Accession IDs |
|---------------------|----------------|-------------|-------------------------|---------------------------------|-------------------|--------------------------|
| SNP_P3_133721_9002  | NW_004516104.1 | Scaffold694 | 9002                    | GG                              | AA                | 1946525511               |
| SNP_P3_133722_9010  | NW_004516104.1 | Scaffold694 | 9010                    | TT                              | CC                | 1946525512               |
| SNP_P3_133723_9038  | NW_004516104.1 | Scaffold694 | 9038                    | GG                              | AA                | 1946525514               |
| SNP_P3_133724_9054  | NW_004516104.1 | Scaffold694 | 9054                    | AA                              | TT                | 1946525515               |
| SNP_P3_133725_9120  | NW_004516104.1 | Scaffold694 | 9120                    | AA                              | GG                | 1946525517               |
| SNP_P3_133726_9123  | NW_004516104.1 | Scaffold694 | 9123                    | GG                              | TT                | 1946525518               |
| SNP_P3_133727_9136  | NW_004516104.1 | Scaffold694 | 9136                    | AA                              | GG                | 1946525520               |
| SNP_P3_133728_9196  | NW_004516104.1 | Scaffold694 | 9196                    | CC                              | TT                | 1946525521               |
| SNP_P3_133729_9269  | NW_004516104.1 | Scaffold694 | 9269                    | GG                              | TT                | 1946525522               |
| SNP_P3_133730_9468  | NW_004516104.1 | Scaffold694 | 9468                    | CC                              | TT                | 1946525524               |
| SNP_P3_133731_9596  | NW_004516104.1 | Scaffold694 | 9596                    | TT                              | AA                | 1946525525               |
| SNP_P3_133732_9645  | NW_004516104.1 | Scaffold694 | 9645                    | TT                              | CC                | 1946525527               |
| SNP_P3_133733_64    | NW_004516105.1 | Scaffold695 | 64                      | TT                              | CC                | 1946525528               |
| SNP_P3_133734_65    | NW_004516105.1 | Scaffold695 | 65                      | TT                              | CC                | 1946525530               |
| SNP_P3_133735_80    | NW_004516105.1 | Scaffold695 | 80                      | GG                              | AA                | 1946525531               |
| SNP_P3_133736_84    | NW_004516105.1 | Scaffold695 | 84                      | GG                              | CC                | 1946525533               |
| SNP_P3_133737_98    | NW_004516105.1 | Scaffold695 | 98                      | GG                              | AA                | 1946525534               |
| SNP_P3_133738_296   | NW_004516105.1 | Scaffold695 | 296                     | CC                              | TT                | 1946525535               |
| SNP_P3_133739_364   | NW_004516105.1 | Scaffold695 | 364                     | TT                              | GG                | 1946525537               |
| SNP_P3_133740_372   | NW_004516105.1 | Scaffold695 | 372                     | GG                              | CC                | 1946525539               |
| SNP_P3_133741_423   | NW_004516105.1 | Scaffold695 | 423                     | TT                              | GG                | 1946525540               |
| SNP_P3_133742_480   | NW_004516105.1 | Scaffold695 | 480                     | CC                              | AA                | 1946525541               |
| SNP_P3_133743_481   | NW_004516105.1 | Scaffold695 | 481                     | GG                              | TT                | 1946525543               |
| SNP_P3_133744_545   | NW_004516105.1 | Scaffold695 | 545                     | GG                              | TT                | 1946525544               |
| SNP_P3_133745_598   | NW_004516105.1 | Scaffold695 | 598                     | CC                              | TT                | 1946525546               |
| SNP_P3_133747_796   | NW_004516105.1 | Scaffold695 | 796                     | GG                              | TT                | 1946525547               |
| SNP_P3_133748_853   | NW_004516105.1 | Scaffold695 | 853                     | AA                              | CC                | 1946525549               |
| SNP_P3_133749_854   | NW_004516105.1 | Scaffold695 | 854                     | TT                              | GG                | 1946525550               |
| SNP_P3_133750_918   | NW_004516105.1 | Scaffold695 | 918                     | TT                              | GG                | 1946525552               |
| SNP_P3_133751_1201  | NW_004516105.1 | Scaffold695 | 1201                    | TT                              | CC                | 1946525553               |
| SNP_P3_133752_1218  | NW_004516105.1 | Scaffold695 | 1218                    | GG                              | AA                | 1946525554               |
| SNP_P3_133753_4597  | NW_004516106.1 | Scaffold696 | 4597                    | AA                              | GG                | 1946525556               |
| SNP_P3_133754_6295  | NW_004516106.1 | Scaffold696 | 6295                    | CC                              | TT                | 1946525557               |
| SNP_P3_133756_12243 | NW_004516106.1 | Scaffold696 | 12243                   | AA                              | GG                | 1946525559               |
| SNP_P3_133757_12342 | NW_004516106.1 | Scaffold696 | 12342                   | AA                              | GG                | 1946525560               |
| SNP_P3_133758_12454 | NW_004516106.1 | Scaffold696 | 12454                   | AA                              | CC                | 1946525562               |
| SNP_P3_133759_12510 | NW_004516106.1 | Scaffold696 | 12510                   | AA                              | CC                | 1946525563               |
| SNP_P3_133760_12516 | NW_004516106.1 | Scaffold696 | 12516                   | CC                              | TT                | 1946525565               |
| SNP_P3_133761_12705 | NW_004516106.1 | Scaffold696 | 12705                   | CC                              | TT                | 1946525566               |
| SNP_P3_133762_12802 | NW_004516106.1 | Scaffold696 | 12802                   | GG                              | AA                | 1946525567               |
| SNP_P3_133763_12836 | NW_004516106.1 | Scaffold696 | 12836                   | TT                              | AA                | 1946525569               |
| SNP_P3_133764_12845 | NW_004516106.1 | Scaffold696 | 12845                   | AA                              | GG                | 1946525570               |

| SNPs IDs            | Chromosome IDs | Chromosomes | Physical positions (bp) | CDC Frontier (Reference genome) | (Pusa 256 & HPNB) | NCBI SNPdb Accession IDs |
|---------------------|----------------|-------------|-------------------------|---------------------------------|-------------------|--------------------------|
| SNP_P3_133765_12875 | NW_004516106.1 | Scaffold696 | 12875                   | TT                              | CC                | 1946525572               |
| SNP_P3_133766_12888 | NW_004516106.1 | Scaffold696 | 12888                   | TT                              | CC                | 1946525573               |
| SNP_P3_133767_12919 | NW_004516106.1 | Scaffold696 | 12919                   | TT                              | CC                | 1946525575               |
| SNP_P3_133768_13080 | NW_004516106.1 | Scaffold696 | 13080                   | CC                              | AA                | 1946525576               |
| SNP_P3_133769_13395 | NW_004516106.1 | Scaffold696 | 13395                   | GG                              | TT                | 1946525578               |
| SNP_P3_133770_13423 | NW_004516106.1 | Scaffold696 | 13423                   | TT                              | CC                | 1946525579               |
| SNP_P3_133771_13466 | NW_004516106.1 | Scaffold696 | 13466                   | AA                              | GG                | 1946525581               |
| SNP_P3_133772_13557 | NW_004516106.1 | Scaffold696 | 13557                   | TT                              | CC                | 1946525582               |
| SNP_P3_133774_13995 | NW_004516106.1 | Scaffold696 | 13995                   | AA                              | CC                | 1946525583               |
| SNP_P3_133775_24246 | NW_004516106.1 | Scaffold696 | 24246                   | CC                              | AA                | 1946525585               |
| SNP_P3_133776_24294 | NW_004516106.1 | Scaffold696 | 24294                   | AA                              | GG                | 1946525586               |
| SNP_P3_133778_27778 | NW_004516106.1 | Scaffold696 | 27778                   | GG                              | AA                | 1946525588               |
| SNP_P3_133779_27855 | NW_004516106.1 | Scaffold696 | 27855                   | CC                              | AA                | 1946525589               |
| SNP_P3_133780_27898 | NW_004516106.1 | Scaffold696 | 27898                   | GG                              | TT                | 1946525591               |
| SNP_P3_133781_27900 | NW_004516106.1 | Scaffold696 | 27900                   | AA                              | GG                | 1946525592               |
| SNP_P3_133782_27901 | NW_004516106.1 | Scaffold696 | 27901                   | GG                              | TT                | 1946525594               |
| SNP_P3_133783_28092 | NW_004516106.1 | Scaffold696 | 28092                   | AA                              | TT                | 1946525595               |
| SNP_P3_133784_28588 | NW_004516106.1 | Scaffold696 | 28588                   | CC                              | AA                | 1946525597               |
| SNP_P3_133785_29020 | NW_004516106.1 | Scaffold696 | 29020                   | TT                              | CC                | 1946525598               |
| SNP_P3_133786_29128 | NW_004516106.1 | Scaffold696 | 29128                   | GG                              | AA                | 1946525599               |
| SNP_P3_133787_29172 | NW_004516106.1 | Scaffold696 | 29172                   | AA                              | GG                | 1946525601               |
| SNP_P3_133788_29179 | NW_004516106.1 | Scaffold696 | 29179                   | GG                              | AA                | 1946525603               |
| SNP_P3_133789_29180 | NW_004516106.1 | Scaffold696 | 29180                   | GG                              | AA                | 1946525604               |
| SNP_P3_133790_29186 | NW_004516106.1 | Scaffold696 | 29186                   | GG                              | AA                | 1946525606               |
| SNP_P3_133791_32960 | NW_004516106.1 | Scaffold696 | 32960                   | TT                              | CC                | 1946525607               |
| SNP_P3_133792_33009 | NW_004516106.1 | Scaffold696 | 33009                   | TT                              | GG                | 1946525609               |
| SNP_P3_133793_33055 | NW_004516106.1 | Scaffold696 | 33055                   | AA                              | GG                | 1946525610               |
| SNP_P3_133794_33096 | NW_004516106.1 | Scaffold696 | 33096                   | AA                              | GG                | 1946525612               |
| SNP_P3_133795_33321 | NW_004516106.1 | Scaffold696 | 33321                   | AA                              | GG                | 1946525613               |
| SNP_P3_133796_33463 | NW_004516106.1 | Scaffold696 | 33463                   | GG                              | AA                | 1946525614               |
| SNP_P3_133797_39454 | NW_004516106.1 | Scaffold696 | 39454                   | CC                              | TT                | 1946525616               |
| SNP_P3_133798_39892 | NW_004516106.1 | Scaffold696 | 39892                   | GG                              | CC                | 1946525618               |
| SNP_P3_133799_43223 | NW_004516106.1 | Scaffold696 | 43223                   | GG                              | AA                | 1946525619               |
| SNP_P3_133800_43243 | NW_004516106.1 | Scaffold696 | 43243                   | AA                              | TT                | 1946525621               |
| SNP_P3_133801_43310 | NW_004516106.1 | Scaffold696 | 43310                   | TT                              | CC                | 1946525622               |
| SNP_P3_133802_43325 | NW_004516106.1 | Scaffold696 | 43325                   | CC                              | TT                | 1946525623               |
| SNP_P3_133803_43355 | NW_004516106.1 | Scaffold696 | 43355                   | CC                              | TT                | 1946525625               |
| SNP_P3_133804_43439 | NW_004516106.1 | Scaffold696 | 43439                   | GG                              | TT                | 1946525626               |
| SNP_P3_133805_43491 | NW_004516106.1 | Scaffold696 | 43491                   | AA                              | GG                | 1946525628               |
| SNP_P3_133806_43589 | NW_004516106.1 | Scaffold696 | 43589                   | TT                              | CC                | 1946525629               |
| SNP_P3_133807_51729 | NW_004516106.1 | Scaffold696 | 51729                   | AA                              | CC                | 1946525631               |
| SNP_P3_133808_51741 | NW_004516106.1 | Scaffold696 | 51741                   | TT                              | CC                | 1946525632               |

| SNPs IDs             | Chromosome IDs | Chromosomes | Physical positions (bp) | CDC Frontier (Reference genome) | (Pusa 256 & HPNB) | NCBI SNPdb Accession IDs |
|----------------------|----------------|-------------|-------------------------|---------------------------------|-------------------|--------------------------|
| SNP_P3_133809_51823  | NW_004516106.1 | Scaffold696 | 51823                   | TT                              | CC                | 1946525634               |
| SNP_P3_133810_52159  | NW_004516106.1 | Scaffold696 | 52159                   | AA                              | CC                | 1946525635               |
| SNP_P3_133811_52169  | NW_004516106.1 | Scaffold696 | 52169                   | TT                              | GG                | 1946525637               |
| SNP_P3_133812_52184  | NW_004516106.1 | Scaffold696 | 52184                   | CC                              | TT                | 1946525638               |
| SNP_P3_133813_52232  | NW_004516106.1 | Scaffold696 | 52232                   | TT                              | CC                | 1946525640               |
| SNP_P3_133814_52293  | NW_004516106.1 | Scaffold696 | 52293                   | AA                              | TT                | 1946525641               |
| SNP_P3_133815_53408  | NW_004516106.1 | Scaffold696 | 53408                   | GG                              | AA                | 1946525643               |
| SNP_P3_133816_53930  | NW_004516106.1 | Scaffold696 | 53930                   | AA                              | GG                | 1946525644               |
| SNP_P3_133817_53971  | NW_004516106.1 | Scaffold696 | 53971                   | CC                              | TT                | 1946525645               |
| SNP_P3_133818_58995  | NW_004516106.1 | Scaffold696 | 58995                   | TT                              | AA                | 1946525647               |
| SNP_P3_133819_58998  | NW_004516106.1 | Scaffold696 | 58998                   | TT                              | GG                | 1946525648               |
| SNP_P3_133820_69332  | NW_004516106.1 | Scaffold696 | 69332                   | CC                              | AA                | 1946525650               |
| SNP_P3_133821_103640 | NW_004516106.1 | Scaffold696 | 103640                  | AA                              | CC                | 1946525651               |
| SNP_P3_133822_153880 | NW_004516106.1 | Scaffold696 | 153880                  | CC                              | TT                | 1946525653               |
| SNP_P3_133823_153881 | NW_004516106.1 | Scaffold696 | 153881                  | GG                              | CC                | 1946525654               |
| SNP_P3_133824_153886 | NW_004516106.1 | Scaffold696 | 153886                  | GG                              | AA                | 1946525656               |
| SNP_P3_133825_153887 | NW_004516106.1 | Scaffold696 | 153887                  | TT                              | AA                | 1946525657               |
| SNP_P3_133826_153891 | NW_004516106.1 | Scaffold696 | 153891                  | TT                              | AA                | 1946525659               |
| SNP_P3_133827_153893 | NW_004516106.1 | Scaffold696 | 153893                  | GG                              | TT                | 1946525660               |
| SNP_P3_133828_153912 | NW_004516106.1 | Scaffold696 | 153912                  | CC                              | TT                | 1946525662               |
| SNP_P3_133829_179313 | NW_004516106.1 | Scaffold696 | 179313                  | TT                              | CC                | 1946525663               |
| SNP_P3_133830_179385 | NW_004516106.1 | Scaffold696 | 179385                  | AA                              | CC                | 1946525664               |
| SNP_P3_133831_179605 | NW_004516106.1 | Scaffold696 | 179605                  | TT                              | CC                | 1946525666               |
| SNP_P3_133833_420    | NW_004516107.1 | Scaffold698 | 420                     | AA                              | GG                | 1946525667               |
| SNP_P3_133834_82     | NW_004516108.1 | Scaffold702 | 82                      | AA                              | GG                | 1946525669               |
| SNP_P3_133835_569    | NW_004516108.1 | Scaffold702 | 569                     | TT                              | AA                | 1946525966               |
| SNP_P3_133836_1173   | NW_004516108.1 | Scaffold702 | 1173                    | AA                              | GG                | 1946526185               |
| SNP_P3_133837_1259   | NW_004516108.1 | Scaffold702 | 1259                    | TT                              | CC                | 1946526402               |
| SNP_P3_133838_1530   | NW_004516108.1 | Scaffold702 | 1530                    | AA                              | GG                | 1946526565               |
| SNP_P3_133839_8698   | NW_004516108.1 | Scaffold702 | 8698                    | TT                              | CC                | 1946526769               |
| SNP_P3_133840_19589  | NW_004516108.1 | Scaffold702 | 19589                   | GG                              | AA                | 1946526973               |
| SNP_P3_133841_27462  | NW_004516108.1 | Scaffold702 | 27462                   | CC                              | TT                | 1946527171               |
| SNP_P3_133842_35028  | NW_004516108.1 | Scaffold702 | 35028                   | TT                              | CC                | 1946527371               |
| SNP_P3_133843_41139  | NW_004516108.1 | Scaffold702 | 41139                   | AA                              | GG                | 1946527581               |
| SNP_P3_133845_54908  | NW_004516108.1 | Scaffold702 | 54908                   | TT                              | AA                | 1946527793               |
| SNP_P3_133847_57845  | NW_004516108.1 | Scaffold702 | 57845                   | CC                              | AA                | 1946528003               |
| SNP_P3_133848_58359  | NW_004516108.1 | Scaffold702 | 58359                   | CC                              | AA                | 1946528214               |
| SNP_P3_133850_58992  | NW_004516108.1 | Scaffold702 | 58992                   | AA                              | GG                | 1946528428               |
| SNP_P3_133851_72221  | NW_004516108.1 | Scaffold702 | 72221                   | GG                              | TT                | 1946528644               |
| SNP_P3_133852_72338  | NW_004516108.1 | Scaffold702 | 72338                   | CC                              | TT                | 1946528855               |
| SNP_P3_133853_72340  | NW_004516108.1 | Scaffold702 | 72340                   | TT                              | CC                | 1946529056               |
| SNP_P3_133854_73147  | NW_004516108.1 | Scaffold702 | 73147                   | GG                              | AA                | 1946529264               |

| SNPs IDs             | Chromosome IDs | Chromosomes | Physical positions (bp) | CDC Frontier (Reference genome) | (Pusa 256 & HPNB) | NCBI SNPdb Accession IDs |
|----------------------|----------------|-------------|-------------------------|---------------------------------|-------------------|--------------------------|
| SNP_P3_133855_73159  | NW_004516108.1 | Scaffold702 | 73159                   | GG                              | AA                | 1946529469               |
| SNP_P3_133856_73196  | NW_004516108.1 | Scaffold702 | 73196                   | CC                              | TT                | 1946529671               |
| SNP_P3_133857_73277  | NW_004516108.1 | Scaffold702 | 73277                   | CC                              | TT                | 1946529866               |
| SNP_P3_133858_77284  | NW_004516108.1 | Scaffold702 | 77284                   | AA                              | TT                | 1946530049               |
| SNP_P3_133859_99536  | NW_004516108.1 | Scaffold702 | 99536                   | TT                              | AA                | 1946530257               |
| SNP_P3_133861_99706  | NW_004516108.1 | Scaffold702 | 99706                   | TT                              | CC                | 1946530474               |
| SNP_P3_133862_99740  | NW_004516108.1 | Scaffold702 | 99740                   | TT                              | CC                | 1946530683               |
| SNP_P3_133863_99778  | NW_004516108.1 | Scaffold702 | 99778                   | AA                              | GG                | 1946530903               |
| SNP_P3_133865_99826  | NW_004516108.1 | Scaffold702 | 99826                   | CC                              | TT                | 1946531109               |
| SNP_P3_133866_104799 | NW_004516108.1 | Scaffold702 | 104799                  | TT                              | CC                | 1946531303               |
| SNP_P3_133867_105990 | NW_004516108.1 | Scaffold702 | 105990                  | AA                              | GG                | 1946531512               |
| SNP_P3_133868_105993 | NW_004516108.1 | Scaffold702 | 105993                  | TT                              | GG                | 1946531722               |
| SNP_P3_133869_106338 | NW_004516108.1 | Scaffold702 | 106338                  | TT                              | GG                | 1946531876               |
| SNP_P3_133870_107956 | NW_004516108.1 | Scaffold702 | 107956                  | TT                              | CC                | 1946532035               |
| SNP_P3_133871_110496 | NW_004516108.1 | Scaffold702 | 110496                  | GG                              | AA                | 1946532163               |
| SNP_P3_133872_112490 | NW_004516108.1 | Scaffold702 | 112490                  | AA                              | GG                | 1946532369               |
| SNP_P3_133873_118899 | NW_004516108.1 | Scaffold702 | 118899                  | GG                              | CC                | 1946532574               |
| SNP_P3_133874_124841 | NW_004516108.1 | Scaffold702 | 124841                  | TT                              | CC                | 1946532769               |
| SNP_P3_133875_125152 | NW_004516108.1 | Scaffold702 | 125152                  | GG                              | AA                | 1946532976               |
| SNP_P3_133876_133251 | NW_004516108.1 | Scaffold702 | 133251                  | GG                              | TT                | 1946533173               |
| SNP_P3_133877_133550 | NW_004516108.1 | Scaffold702 | 133550                  | TT                              | CC                | 1946533372               |
| SNP_P3_133878_138421 | NW_004516108.1 | Scaffold702 | 138421                  | AA                              | GG                | 1946533580               |
| SNP_P3_133879_141029 | NW_004516108.1 | Scaffold702 | 141029                  | GG                              | AA                | 1946533781               |
| SNP_P3_133880_141718 | NW_004516108.1 | Scaffold702 | 141718                  | AA                              | GG                | 1946533992               |
| SNP_P3_133881_153292 | NW_004516108.1 | Scaffold702 | 153292                  | CC                              | GG                | 1946534198               |
| SNP_P3_133884_154709 | NW_004516108.1 | Scaffold702 | 154709                  | CC                              | AA                | 1946534398               |
| SNP_P3_133885_164063 | NW_004516108.1 | Scaffold702 | 164063                  | TT                              | CC                | 1946534443               |
| SNP_P3_133886_169726 | NW_004516108.1 | Scaffold702 | 169726                  | AA                              | GG                | 1946534652               |
| SNP_P3_133887_171244 | NW_004516108.1 | Scaffold702 | 171244                  | AA                              | GG                | 1946534850               |
| SNP_P3_133888_175159 | NW_004516108.1 | Scaffold702 | 175159                  | AA                              | TT                | 1946535000               |
| SNP_P3_133889_175251 | NW_004516108.1 | Scaffold702 | 175251                  | TT                              | CC                | 1946535200               |
| SNP_P3_133890_182214 | NW_004516108.1 | Scaffold702 | 182214                  | TT                              | CC                | 1946535253               |
| SNP_P3_133891_182410 | NW_004516108.1 | Scaffold702 | 182410                  | TT                              | GG                | 1946535451               |
| SNP_P3_133892_183559 | NW_004516108.1 | Scaffold702 | 183559                  | CC                              | TT                | 1946535664               |
| SNP_P3_133893_184817 | NW_004516108.1 | Scaffold702 | 184817                  | GG                              | TT                | 1946535867               |
| SNP_P3_133894_185000 | NW_004516108.1 | Scaffold702 | 185000                  | GG                              | AA                | 1946536069               |
| SNP_P3_133896_193933 | NW_004516108.1 | Scaffold702 | 193933                  | TT                              | CC                | 1946536275               |
| SNP_P3_133897_194383 | NW_004516108.1 | Scaffold702 | 194383                  | GG                              | TT                | 1946536489               |
| SNP_P3_133898_194451 | NW_004516108.1 | Scaffold702 | 194451                  | AA                              | TT                | 1946536703               |
| SNP_P3_133899_194456 | NW_004516108.1 | Scaffold702 | 194456                  | AA                              | TT                | 1946536913               |
| SNP_P3_133900_194466 | NW_004516108.1 | Scaffold702 | 194466                  | CC                              | TT                | 1946537097               |
| SNP_P3_133901_203682 | NW_004516108.1 | Scaffold702 | 203682                  | CC                              | AA                | 1946537125               |

| SNPs IDs             | Chromosome IDs | Chromosomes | Physical positions (bp) | CDC Frontier (Reference genome) | (Pusa 256 & HPNB) | NCBI SNPdb Accession IDs |
|----------------------|----------------|-------------|-------------------------|---------------------------------|-------------------|--------------------------|
| SNP_P3_133902_205479 | NW_004516108.1 | Scaffold702 | 205479                  | AA                              | CC                | 1946537343               |
| SNP_P3_133903_206134 | NW_004516108.1 | Scaffold702 | 206134                  | GG                              | TT                | 1946537553               |
| SNP_P3_133904_206251 | NW_004516108.1 | Scaffold702 | 206251                  | AA                              | GG                | 1946537762               |
| SNP_P3_133905_206342 | NW_004516108.1 | Scaffold702 | 206342                  | AA                              | CC                | 1946537968               |
| SNP_P3_133906_207562 | NW_004516108.1 | Scaffold702 | 207562                  | CC                              | AA                | 1946538181               |
| SNP_P3_133907_207578 | NW_004516108.1 | Scaffold702 | 207578                  | AA                              | GG                | 1946538392               |
| SNP_P3_133908_207585 | NW_004516108.1 | Scaffold702 | 207585                  | AA                              | GG                | 1946538599               |
| SNP_P3_133909_207635 | NW_004516108.1 | Scaffold702 | 207635                  | AA                              | GG                | 1946538810               |
| SNP_P3_133910_207644 | NW_004516108.1 | Scaffold702 | 207644                  | AA                              | GG                | 1946538986               |
| SNP_P3_133911_207672 | NW_004516108.1 | Scaffold702 | 207672                  | AA                              | GG                | 1946539201               |
| SNP_P3_133912_207853 | NW_004516108.1 | Scaffold702 | 207853                  | AA                              | TT                | 1946539424               |
| SNP_P3_133913_207901 | NW_004516108.1 | Scaffold702 | 207901                  | AA                              | TT                | 1946539615               |
| SNP_P3_133914_208661 | NW_004516108.1 | Scaffold702 | 208661                  | AA                              | GG                | 1946539794               |
| SNP_P3_133915_214412 | NW_004516108.1 | Scaffold702 | 214412                  | TT                              | CC                | 1946539986               |
| SNP_P3_133917_216573 | NW_004516108.1 | Scaffold702 | 216573                  | TT                              | CC                | 1946540180               |
| SNP_P3_133918_216584 | NW_004516108.1 | Scaffold702 | 216584                  | GG                              | CC                | 1946540365               |
| SNP_P3_133919_216623 | NW_004516108.1 | Scaffold702 | 216623                  | TT                              | GG                | 1946540539               |
| SNP_P3_133920_216939 | NW_004516108.1 | Scaffold702 | 216939                  | AA                              | CC                | 1946540754               |
| SNP_P3_133923_229251 | NW_004516108.1 | Scaffold702 | 229251                  | CC                              | GG                | 1946540961               |
| SNP_P3_133925_248052 | NW_004516108.1 | Scaffold702 | 248052                  | CC                              | TT                | 1946541153               |
| SNP_P3_133926_248954 | NW_004516108.1 | Scaffold702 | 248954                  | GG                              | AA                | 1946541228               |
| SNP_P3_133927_250431 | NW_004516108.1 | Scaffold702 | 250431                  | GG                              | AA                | 1946541425               |
| SNP_P3_133928_250532 | NW_004516108.1 | Scaffold702 | 250532                  | AA                              | GG                | 1946541514               |
| SNP_P3_133929_252522 | NW_004516108.1 | Scaffold702 | 252522                  | CC                              | TT                | 1946541693               |
| SNP_P3_133930_253477 | NW_004516108.1 | Scaffold702 | 253477                  | CC                              | TT                | 1946541915               |
| SNP_P3_133931_253499 | NW_004516108.1 | Scaffold702 | 253499                  | TT                              | CC                | 1946542127               |
| SNP_P3_133932_254059 | NW_004516108.1 | Scaffold702 | 254059                  | AA                              | TT                | 1946542325               |
| SNP_P3_133933_254209 | NW_004516108.1 | Scaffold702 | 254209                  | AA                              | GG                | 1946542527               |
| SNP_P3_133934_254221 | NW_004516108.1 | Scaffold702 | 254221                  | AA                              | GG                | 1946542739               |
| SNP_P3_133936_255305 | NW_004516108.1 | Scaffold702 | 255305                  | CC                              | TT                | 1946542950               |
| SNP_P3_133937_255693 | NW_004516108.1 | Scaffold702 | 255693                  | GG                              | AA                | 1946543161               |
| SNP_P3_133938_255920 | NW_004516108.1 | Scaffold702 | 255920                  | GG                              | AA                | 1946543359               |
| SNP_P3_133939_257684 | NW_004516108.1 | Scaffold702 | 257684                  | AA                              | TT                | 1946543552               |
| SNP_P3_133940_257991 | NW_004516108.1 | Scaffold702 | 257991                  | AA                              | GG                | 1946543747               |
| SNP_P3_133941_260909 | NW_004516108.1 | Scaffold702 | 260909                  | TT                              | GG                | 1946543862               |
| SNP_P3_133942_262119 | NW_004516108.1 | Scaffold702 | 262119                  | CC                              | AA                | 1946544056               |
| SNP_P3_133943_262381 | NW_004516108.1 | Scaffold702 | 262381                  | TT                              | AA                | 1946544119               |
| SNP_P3_133944_262430 | NW_004516108.1 | Scaffold702 | 262430                  | CC                              | TT                | 1946544329               |
| SNP_P3_133945_262432 | NW_004516108.1 | Scaffold702 | 262432                  | TT                              | AA                | 1946544522               |
| SNP_P3_133946_262463 | NW_004516108.1 | Scaffold702 | 262463                  | TT                              | GG                | 1946544726               |
| SNP_P3_133947_262487 | NW_004516108.1 | Scaffold702 | 262487                  | CC                              | TT                | 1946544933               |
| SNP_P3_133948_262563 | NW_004516108.1 | Scaffold702 | 262563                  | AA                              | CC                | 1946545126               |

| SNPs IDs             | Chromosome IDs | Chromosomes | Physical positions (bp) | CDC Frontier (Reference genome) | (Pusa 256 & HPNB) | NCBI SNPdb Accession IDs |
|----------------------|----------------|-------------|-------------------------|---------------------------------|-------------------|--------------------------|
| SNP_P3_133949_262749 | NW_004516108.1 | Scaffold702 | 262749                  | AA                              | GG                | 1946545310               |
| SNP_P3_133950_262771 | NW_004516108.1 | Scaffold702 | 262771                  | CC                              | TT                | 1946545500               |
| SNP_P3_133951_262775 | NW_004516108.1 | Scaffold702 | 262775                  | AA                              | GG                | 1946545692               |
| SNP_P3_133952_262837 | NW_004516108.1 | Scaffold702 | 262837                  | TT                              | CC                | 1946545879               |
| SNP_P3_133953_262880 | NW_004516108.1 | Scaffold702 | 262880                  | AA                              | TT                | 1946546074               |
| SNP_P3_133954_262892 | NW_004516108.1 | Scaffold702 | 262892                  | GG                              | AA                | 1946546301               |
| SNP_P3_133955_262975 | NW_004516108.1 | Scaffold702 | 262975                  | TT                              | GG                | 1946546522               |
| SNP_P3_133956_262995 | NW_004516108.1 | Scaffold702 | 262995                  | TT                              | CC                | 1946546725               |
| SNP_P3_133957_263000 | NW_004516108.1 | Scaffold702 | 263000                  | CC                              | TT                | 1946546940               |
| SNP_P3_133958_263028 | NW_004516108.1 | Scaffold702 | 263028                  | TT                              | AA                | 1946547167               |
| SNP_P3_133959_263031 | NW_004516108.1 | Scaffold702 | 263031                  | CC                              | TT                | 1946547388               |
| SNP_P3_133960_263052 | NW_004516108.1 | Scaffold702 | 263052                  | AA                              | TT                | 1946547590               |
| SNP_P3_133961_263063 | NW_004516108.1 | Scaffold702 | 263063                  | TT                              | CC                | 1946547796               |
| SNP_P3_133962_263087 | NW_004516108.1 | Scaffold702 | 263087                  | AA                              | CC                | 1946548010               |
| SNP_P3_133963_263134 | NW_004516108.1 | Scaffold702 | 263134                  | GG                              | AA                | 1946548189               |
| SNP_P3_133964_263701 | NW_004516108.1 | Scaffold702 | 263701                  | TT                              | CC                | 1946548390               |
| SNP_P3_133965_263745 | NW_004516108.1 | Scaffold702 | 263745                  | AA                              | GG                | 1946548573               |
| SNP_P3_133966_263807 | NW_004516108.1 | Scaffold702 | 263807                  | AA                              | CC                | 1946548775               |
| SNP_P3_133967_263821 | NW_004516108.1 | Scaffold702 | 263821                  | TT                              | CC                | 1946548979               |
| SNP_P3_133968_264187 | NW_004516108.1 | Scaffold702 | 264187                  | GG                              | CC                | 1946549126               |
| SNP_P3_133970_273213 | NW_004516108.1 | Scaffold702 | 273213                  | AA                              | TT                | 1946549343               |
| SNP_P3_133971_273657 | NW_004516108.1 | Scaffold702 | 273657                  | CC                              | GG                | 1946549556               |
| SNP_P3_133972_275041 | NW_004516108.1 | Scaffold702 | 275041                  | GG                              | AA                | 1946549765               |
| SNP_P3_133973_276027 | NW_004516108.1 | Scaffold702 | 276027                  | CC                              | TT                | 1946549961               |
| SNP_P3_133974_276802 | NW_004516108.1 | Scaffold702 | 276802                  | TT                              | AA                | 1946550167               |
| SNP_P3_133975_278833 | NW_004516108.1 | Scaffold702 | 278833                  | AA                              | TT                | 1946550364               |
| SNP_P3_133976_280982 | NW_004516108.1 | Scaffold702 | 280982                  | GG                              | AA                | 1946550577               |
| SNP_P3_133978_281104 | NW_004516108.1 | Scaffold702 | 281104                  | GG                              | TT                | 1946550791               |
| SNP_P3_133979_281229 | NW_004516108.1 | Scaffold702 | 281229                  | TT                              | GG                | 1946550998               |
| SNP_P3_133980_281343 | NW_004516108.1 | Scaffold702 | 281343                  | AA                              | GG                | 1946551209               |
| SNP_P3_133981_281561 | NW_004516108.1 | Scaffold702 | 281561                  | AA                              | GG                | 1946551396               |
| SNP_P3_133982_283295 | NW_004516108.1 | Scaffold702 | 283295                  | TT                              | CC                | 1946551588               |
| SNP_P3_133983_283940 | NW_004516108.1 | Scaffold702 | 283940                  | AA                              | GG                | 1946551788               |
| SNP_P3_133984_284382 | NW_004516108.1 | Scaffold702 | 284382                  | CC                              | GG                | 1946551992               |
| SNP_P3_133985_288920 | NW_004516108.1 | Scaffold702 | 288920                  | CC                              | TT                | 1946552194               |
| SNP_P3_133986_288932 | NW_004516108.1 | Scaffold702 | 288932                  | AA                              | CC                | 1946552374               |
| SNP_P3_133987_290052 | NW_004516108.1 | Scaffold702 | 290052                  | TT                              | GG                | 1946552556               |
| SNP_P3_133988_290817 | NW_004516108.1 | Scaffold702 | 290817                  | AA                              | CC                | 1946552736               |
| SNP_P3_133989_291529 | NW_004516108.1 | Scaffold702 | 291529                  | AA                              | GG                | 1946552928               |
| SNP_P3_133990_301740 | NW_004516108.1 | Scaffold702 | 301740                  | CC                              | TT                | 1946553105               |
| SNP_P3_133991_302836 | NW_004516108.1 | Scaffold702 | 302836                  | TT                              | GG                | 1946553316               |
| SNP_P3_133992_5520   | NW_004516109.1 | Scaffold705 | 5520                    | CC                              | TT                | 1946553527               |



| SNPs IDs            | Chromosome IDs | Chromosomes | Physical positions (bp) | CDC Frontier (Reference genome) | (Pusa 256 & HPNB) | NCBI SNPdb Accession IDs |
|---------------------|----------------|-------------|-------------------------|---------------------------------|-------------------|--------------------------|
| SNP_P3_133993_5538  | NW_004516109.1 | Scaffold705 | 5538                    | AA                              | TT                | 1946553700               |
| SNP_P3_133994_5641  | NW_004516109.1 | Scaffold705 | 5641                    | CC                              | TT                | 1946553915               |
| SNP_P3_133995_5660  | NW_004516109.1 | Scaffold705 | 5660                    | AA                              | TT                | 1946554133               |
| SNP_P3_133996_6325  | NW_004516109.1 | Scaffold705 | 6325                    | TT                              | CC                | 1946554359               |
| SNP_P3_133997_6413  | NW_004516109.1 | Scaffold705 | 6413                    | AA                              | TT                | 1946554582               |
| SNP_P3_133998_6417  | NW_004516109.1 | Scaffold705 | 6417                    | TT                              | AA                | 1946554775               |
| SNP_P3_133999_6496  | NW_004516109.1 | Scaffold705 | 6496                    | TT                              | CC                | 1946555000               |
| SNP_P3_134000_12893 | NW_004516109.1 | Scaffold705 | 12893                   | TT                              | AA                | 1946555220               |
| SNP_P3_134001_12900 | NW_004516109.1 | Scaffold705 | 12900                   | AA                              | GG                | 1946555428               |
| SNP_P3_134003_13108 | NW_004516109.1 | Scaffold705 | 13108                   | TT                              | AA                | 1946555650               |
| SNP_P3_134004_13767 | NW_004516109.1 | Scaffold705 | 13767                   | AA                              | GG                | 1946555879               |
| SNP_P3_134005_13800 | NW_004516109.1 | Scaffold705 | 13800                   | TT                              | AA                | 1946556105               |
| SNP_P3_134006_13875 | NW_004516109.1 | Scaffold705 | 13875                   | GG                              | AA                | 1946556330               |
| SNP_P3_134007_13881 | NW_004516109.1 | Scaffold705 | 13881                   | TT                              | CC                | 1946556541               |
| SNP_P3_134008_13907 | NW_004516109.1 | Scaffold705 | 13907                   | AA                              | GG                | 1946556751               |
| SNP_P3_134009_15550 | NW_004516109.1 | Scaffold705 | 15550                   | CC                              | TT                | 1946556959               |
| SNP_P3_134010_16147 | NW_004516109.1 | Scaffold705 | 16147                   | AA                              | GG                | 1946557171               |
| SNP_P3_134011_16156 | NW_004516109.1 | Scaffold705 | 16156                   | GG                              | TT                | 1946557377               |
| SNP_P3_134012_16173 | NW_004516109.1 | Scaffold705 | 16173                   | TT                              | CC                | 1946557578               |
| SNP_P3_134013_16308 | NW_004516109.1 | Scaffold705 | 16308                   | TT                              | CC                | 1946557780               |
| SNP_P3_134014_16476 | NW_004516109.1 | Scaffold705 | 16476                   | CC                              | GG                | 1946557986               |
| SNP_P3_134015_16516 | NW_004516109.1 | Scaffold705 | 16516                   | CC                              | GG                | 1946558161               |
| SNP_P3_134016_16586 | NW_004516109.1 | Scaffold705 | 16586                   | GG                              | TT                | 1946558372               |
| SNP_P3_134017_16625 | NW_004516109.1 | Scaffold705 | 16625                   | CC                              | TT                | 1946558584               |
| SNP_P3_134018_16627 | NW_004516109.1 | Scaffold705 | 16627                   | CC                              | TT                | 1946558800               |
| SNP_P3_134019_16655 | NW_004516109.1 | Scaffold705 | 16655                   | GG                              | AA                | 1946559010               |
| SNP_P3_134020_16745 | NW_004516109.1 | Scaffold705 | 16745                   | CC                              | AA                | 1946559218               |
| SNP_P3_134021_16761 | NW_004516109.1 | Scaffold705 | 16761                   | GG                              | AA                | 1946559428               |
| SNP_P3_134022_16775 | NW_004516109.1 | Scaffold705 | 16775                   | GG                              | TT                | 1946559631               |
| SNP_P3_134023_17218 | NW_004516109.1 | Scaffold705 | 17218                   | GG                              | AA                | 1946559831               |
| SNP_P3_134024_17393 | NW_004516109.1 | Scaffold705 | 17393                   | CC                              | TT                | 1946560037               |
| SNP_P3_134025_17404 | NW_004516109.1 | Scaffold705 | 17404                   | AA                              | GG                | 1946560261               |
| SNP_P3_134026_25152 | NW_004516109.1 | Scaffold705 | 25152                   | GG                              | AA                | 1946560876               |
| SNP_P3_134027_25174 | NW_004516109.1 | Scaffold705 | 25174                   | AA                              | GG                | 1946561505               |
| SNP_P3_134028_25257 | NW_004516109.1 | Scaffold705 | 25257                   | AA                              | TT                | 1946562080               |
| SNP_P3_134029_25263 | NW_004516109.1 | Scaffold705 | 25263                   | CC                              | GG                | 1946562644               |
| SNP_P3_134030_25270 | NW_004516109.1 | Scaffold705 | 25270                   | CC                              | GG                | 1946563179               |
| SNP_P3_134031_25377 | NW_004516109.1 | Scaffold705 | 25377                   | CC                              | TT                | 1946563756               |
| SNP_P3_134032_25696 | NW_004516109.1 | Scaffold705 | 25696                   | GG                              | CC                | 1946564247               |
| SNP_P3_134033_25746 | NW_004516109.1 | Scaffold705 | 25746                   | AA                              | GG                | 1946564706               |
| SNP_P3_134035_26925 | NW_004516109.1 | Scaffold705 | 26925                   | AA                              | GG                | 1946565308               |
| SNP_P3_134036_29900 | NW_004516109.1 | Scaffold705 | 29900                   | TT                              | AA                | 1946565847               |

| SNPs IDs            | Chromosome IDs | Chromosomes | Physical positions (bp) | CDC Frontier (Reference genome) | (Pusa 256 & HPNB) | NCBI SNPdb Accession IDs |
|---------------------|----------------|-------------|-------------------------|---------------------------------|-------------------|--------------------------|
| SNP_P3_134037_30307 | NW_004516109.1 | Scaffold705 | 30307                   | AA                              | GG                | 1946566500               |
| SNP_P3_134038_30388 | NW_004516109.1 | Scaffold705 | 30388                   | AA                              | GG                | 1946567056               |
| SNP_P3_134039_30393 | NW_004516109.1 | Scaffold705 | 30393                   | TT                              | AA                | 1946567672               |
| SNP_P3_134040_30400 | NW_004516109.1 | Scaffold705 | 30400                   | CC                              | TT                | 1946568308               |
| SNP_P3_134042_30634 | NW_004516109.1 | Scaffold705 | 30634                   | TT                              | GG                | 1946568953               |
| SNP_P3_134043_30806 | NW_004516109.1 | Scaffold705 | 30806                   | GG                              | AA                | 1946569613               |
| SNP_P3_134045_31105 | NW_004516109.1 | Scaffold705 | 31105                   | TT                              | AA                | 1946570225               |
| SNP_P3_134046_32761 | NW_004516109.1 | Scaffold705 | 32761                   | AA                              | GG                | 1946570873               |
| SNP_P3_134048_33725 | NW_004516109.1 | Scaffold705 | 33725                   | AA                              | CC                | 1946571540               |
| SNP_P3_134049_33886 | NW_004516109.1 | Scaffold705 | 33886                   | TT                              | CC                | 1946572168               |
| SNP_P3_134050_34371 | NW_004516109.1 | Scaffold705 | 34371                   | AA                              | TT                | 1946572756               |
| SNP_P3_134051_34448 | NW_004516109.1 | Scaffold705 | 34448                   | CC                              | GG                | 1946573358               |
| SNP_P3_134052_34712 | NW_004516109.1 | Scaffold705 | 34712                   | TT                              | AA                | 1946573965               |
| SNP_P3_134054_34802 | NW_004516109.1 | Scaffold705 | 34802                   | AA                              | CC                | 1946574571               |
| SNP_P3_134055_34810 | NW_004516109.1 | Scaffold705 | 34810                   | GG                              | CC                | 1946575195               |
| SNP_P3_134056_34836 | NW_004516109.1 | Scaffold705 | 34836                   | GG                              | AA                | 1946575849               |
| SNP_P3_134057_34884 | NW_004516109.1 | Scaffold705 | 34884                   | GG                              | AA                | 1946576463               |
| SNP_P3_134058_34901 | NW_004516109.1 | Scaffold705 | 34901                   | AA                              | TT                | 1946576950               |
| SNP_P3_134059_34964 | NW_004516109.1 | Scaffold705 | 34964                   | CC                              | TT                | 1946577448               |
| SNP_P3_134060_34980 | NW_004516109.1 | Scaffold705 | 34980                   | CC                              | TT                | 1946578092               |
| SNP_P3_134061_34996 | NW_004516109.1 | Scaffold705 | 34996                   | AA                              | CC                | 1946578736               |
| SNP_P3_134062_34999 | NW_004516109.1 | Scaffold705 | 34999                   | TT                              | CC                | 1946579389               |
| SNP_P3_134063_35020 | NW_004516109.1 | Scaffold705 | 35020                   | TT                              | CC                | 1946579912               |
| SNP_P3_134064_35099 | NW_004516109.1 | Scaffold705 | 35099                   | TT                              | AA                | 1946580545               |
| SNP_P3_134065_35431 | NW_004516109.1 | Scaffold705 | 35431                   | GG                              | AA                | 1946581187               |
| SNP_P3_134066_37396 | NW_004516109.1 | Scaffold705 | 37396                   | AA                              | TT                | 1946581831               |
| SNP_P3_134067_37816 | NW_004516109.1 | Scaffold705 | 37816                   | GG                              | AA                | 1946582476               |
| SNP_P3_134068_44697 | NW_004516109.1 | Scaffold705 | 44697                   | TT                              | GG                | 1946583046               |
| SNP_P3_134069_45154 | NW_004516109.1 | Scaffold705 | 45154                   | TT                              | AA                | 1946583671               |
| SNP_P3_134071_45283 | NW_004516109.1 | Scaffold705 | 45283                   | GG                              | AA                | 1946584316               |
| SNP_P3_134073_45332 | NW_004516109.1 | Scaffold705 | 45332                   | CC                              | TT                | 1946584964               |
| SNP_P3_134074_45350 | NW_004516109.1 | Scaffold705 | 45350                   | AA                              | GG                | 1946585622               |
| SNP_P3_134075_45368 | NW_004516109.1 | Scaffold705 | 45368                   | AA                              | TT                | 1946586285               |
| SNP_P3_134076_45474 | NW_004516109.1 | Scaffold705 | 45474                   | CC                              | AA                | 1946586958               |
| SNP_P3_134077_45546 | NW_004516109.1 | Scaffold705 | 45546                   | GG                              | AA                | 1946587546               |
| SNP_P3_134078_45656 | NW_004516109.1 | Scaffold705 | 45656                   | AA                              | TT                | 1946588221               |
| SNP_P3_134079_45746 | NW_004516109.1 | Scaffold705 | 45746                   | GG                              | AA                | 1946588903               |
| SNP_P3_134080_46603 | NW_004516109.1 | Scaffold705 | 46603                   | CC                              | TT                | 1946589592               |
| SNP_P3_134081_46623 | NW_004516109.1 | Scaffold705 | 46623                   | TT                              | AA                | 1946590257               |
| SNP_P3_134082_46646 | NW_004516109.1 | Scaffold705 | 46646                   | GG                              | AA                | 1946590866               |
| SNP_P3_134083_46674 | NW_004516109.1 | Scaffold705 | 46674                   | CC                              | AA                | 1946591468               |
| SNP_P3_134084_48313 | NW_004516109.1 | Scaffold705 | 48313                   | TT                              | GG                | 1946592052               |

| SNPs IDs             | Chromosome IDs | Chromosomes | Physical positions (bp) | CDC Frontier (Reference genome) | (Pusa 256 & HPNB) | NCBI SNPdb Accession IDs |
|----------------------|----------------|-------------|-------------------------|---------------------------------|-------------------|--------------------------|
| SNP_P3_134085_50018  | NW_004516109.1 | Scaffold705 | 50018                   | AA                              | GG                | 1946592664               |
| SNP_P3_134086_55801  | NW_004516109.1 | Scaffold705 | 55801                   | AA                              | GG                | 1946593295               |
| SNP_P3_134087_56034  | NW_004516109.1 | Scaffold705 | 56034                   | AA                              | GG                | 1946593885               |
| SNP_P3_134088_56154  | NW_004516109.1 | Scaffold705 | 56154                   | CC                              | TT                | 1946594543               |
| SNP_P3_134089_56155  | NW_004516109.1 | Scaffold705 | 56155                   | TT                              | AA                | 1946595182               |
| SNP_P3_134090_56256  | NW_004516109.1 | Scaffold705 | 56256                   | AA                              | TT                | 1946595826               |
| SNP_P3_134091_57367  | NW_004516109.1 | Scaffold705 | 57367                   | TT                              | AA                | 1946596504               |
| SNP_P3_134092_57424  | NW_004516109.1 | Scaffold705 | 57424                   | AA                              | GG                | 1946597250               |
| SNP_P3_134093_57454  | NW_004516109.1 | Scaffold705 | 57454                   | AA                              | GG                | 1946597906               |
| SNP_P3_134094_57869  | NW_004516109.1 | Scaffold705 | 57869                   | TT                              | CC                | 1946598595               |
| SNP_P3_134095_60016  | NW_004516109.1 | Scaffold705 | 60016                   | TT                              | CC                | 1946599333               |
| SNP_P3_134096_64956  | NW_004516109.1 | Scaffold705 | 64956                   | CC                              | TT                | 1946599993               |
| SNP_P3_134097_64958  | NW_004516109.1 | Scaffold705 | 64958                   | CC                              | AA                | 1946600639               |
| SNP_P3_134098_65152  | NW_004516109.1 | Scaffold705 | 65152                   | GG                              | AA                | 1946601294               |
| SNP_P3_134099_410    | NW_004516110.1 | Scaffold707 | 410                     | CC                              | GG                | 1946601965               |
| SNP_P3_134100_1502   | NW_004516110.1 | Scaffold707 | 1502                    | AA                              | GG                | 1946602620               |
| SNP_P3_134101_5120   | NW_004516110.1 | Scaffold707 | 5120                    | GG                              | AA                | 1946603261               |
| SNP_P3_134102_5393   | NW_004516110.1 | Scaffold707 | 5393                    | TT                              | CC                | 1946603885               |
| SNP_P3_134103_5500   | NW_004516110.1 | Scaffold707 | 5500                    | CC                              | TT                | 1946604319               |
| SNP_P3_134104_5550   | NW_004516110.1 | Scaffold707 | 5550                    | AA                              | GG                | 1946604779               |
| SNP_P3_134105_17936  | NW_004516110.1 | Scaffold707 | 17936                   | TT                              | AA                | 1946605186               |
| SNP_P3_134106_18092  | NW_004516110.1 | Scaffold707 | 18092                   | TT                              | CC                | 1946605676               |
| SNP_P3_134107_18203  | NW_004516110.1 | Scaffold707 | 18203                   | CC                              | TT                | 1946606142               |
| SNP_P3_134108_18223  | NW_004516110.1 | Scaffold707 | 18223                   | TT                              | CC                | 1946606631               |
| SNP_P3_134109_18245  | NW_004516110.1 | Scaffold707 | 18245                   | AA                              | TT                | 1946607109               |
| SNP_P3_134110_55126  | NW_004516110.1 | Scaffold707 | 55126                   | TT                              | CC                | 1946607565               |
| SNP_P3_134111_55483  | NW_004516110.1 | Scaffold707 | 55483                   | AA                              | TT                | 1946608025               |
| SNP_P3_134112_55519  | NW_004516110.1 | Scaffold707 | 55519                   | CC                              | TT                | 1946608491               |
| SNP_P3_134113_55550  | NW_004516110.1 | Scaffold707 | 55550                   | AA                              | CC                | 1946608960               |
| SNP_P3_134114_59670  | NW_004516110.1 | Scaffold707 | 59670                   | TT                              | CC                | 1946609432               |
| SNP_P3_134115_81352  | NW_004516110.1 | Scaffold707 | 81352                   | TT                              | GG                | 1946609892               |
| SNP_P3_134116_81403  | NW_004516110.1 | Scaffold707 | 81403                   | CC                              | TT                | 1946610357               |
| SNP_P3_134117_81547  | NW_004516110.1 | Scaffold707 | 81547                   | GG                              | TT                | 1946610825               |
| SNP_P3_134118_81847  | NW_004516110.1 | Scaffold707 | 81847                   | GG                              | AA                | 1946611278               |
| SNP_P3_134119_82798  | NW_004516110.1 | Scaffold707 | 82798                   | GG                              | AA                | 1946611741               |
| SNP_P3_134120_82854  | NW_004516110.1 | Scaffold707 | 82854                   | TT                              | GG                | 1946612172               |
| SNP_P3_134121_104027 | NW_004516110.1 | Scaffold707 | 104027                  | GG                              | AA                | 1946612606               |
| SNP_P3_134122_106850 | NW_004516110.1 | Scaffold707 | 106850                  | GG                              | TT                | 1946613050               |
| SNP_P3_134123_119940 | NW_004516110.1 | Scaffold707 | 119940                  | AA                              | TT                | 1946613508               |
| SNP_P3_134124_121560 | NW_004516110.1 | Scaffold707 | 121560                  | AA                              | GG                | 1946613982               |
| SNP_P3_134125_121701 | NW_004516110.1 | Scaffold707 | 121701                  | TT                              | GG                | 1946614457               |
| SNP_P3_134126_121707 | NW_004516110.1 | Scaffold707 | 121707                  | CC                              | TT                | 1946614929               |

| SNPs IDs             | Chromosome IDs | Chromosomes | Physical positions (bp) | CDC Frontier (Reference genome) | (Pusa 256 & HPNB) | NCBI SNPdb Accession IDs |
|----------------------|----------------|-------------|-------------------------|---------------------------------|-------------------|--------------------------|
| SNP_P3_134127_121763 | NW_004516110.1 | Scaffold707 | 121763                  | GG                              | TT                | 1946615380               |
| SNP_P3_134128_121814 | NW_004516110.1 | Scaffold707 | 121814                  | TT                              | AA                | 1946615850               |
| SNP_P3_134129_121931 | NW_004516110.1 | Scaffold707 | 121931                  | AA                              | CC                | 1946616689               |
| SNP_P3_134130_135490 | NW_004516110.1 | Scaffold707 | 135490                  | AA                              | CC                | 1946616692               |
| SNP_P3_134131_135894 | NW_004516110.1 | Scaffold707 | 135894                  | TT                              | CC                | 1946616695               |
| SNP_P3_134132_135954 | NW_004516110.1 | Scaffold707 | 135954                  | AA                              | CC                | 1946616697               |
| SNP_P3_134133_136719 | NW_004516110.1 | Scaffold707 | 136719                  | CC                              | TT                | 1946616699               |
| SNP_P3_134134_136813 | NW_004516110.1 | Scaffold707 | 136813                  | AA                              | GG                | 1946616701               |
| SNP_P3_134135_143636 | NW_004516110.1 | Scaffold707 | 143636                  | TT                              | AA                | 1946616703               |
| SNP_P3_134136_148828 | NW_004516110.1 | Scaffold707 | 148828                  | TT                              | CC                | 1946616705               |
| SNP_P3_134137_148958 | NW_004516110.1 | Scaffold707 | 148958                  | TT                              | AA                | 1946616707               |
| SNP_P3_134138_153781 | NW_004516110.1 | Scaffold707 | 153781                  | TT                              | AA                | 1946616709               |
| SNP_P3_134139_154104 | NW_004516110.1 | Scaffold707 | 154104                  | AA                              | GG                | 1946616711               |
| SNP_P3_134140_10927  | NW_004516111.1 | Scaffold708 | 10927                   | TT                              | CC                | 1946616713               |
| SNP_P3_134141_10987  | NW_004516111.1 | Scaffold708 | 10987                   | TT                              | CC                | 1946616715               |
| SNP_P3_134142_10998  | NW_004516111.1 | Scaffold708 | 10998                   | CC                              | AA                | 1946616718               |
| SNP_P3_134143_11014  | NW_004516111.1 | Scaffold708 | 11014                   | TT                              | CC                | 1946616720               |
| SNP_P3_134144_11020  | NW_004516111.1 | Scaffold708 | 11020                   | GG                              | AA                | 1946616722               |
| SNP_P3_134145_11049  | NW_004516111.1 | Scaffold708 | 11049                   | AA                              | GG                | 1946616725               |
| SNP_P3_134146_11083  | NW_004516111.1 | Scaffold708 | 11083                   | GG                              | AA                | 1946616727               |
| SNP_P3_134147_11089  | NW_004516111.1 | Scaffold708 | 11089                   | AA                              | GG                | 1946616729               |
| SNP_P3_134148_11155  | NW_004516111.1 | Scaffold708 | 11155                   | AA                              | GG                | 1946616731               |
| SNP_P3_134149_11200  | NW_004516111.1 | Scaffold708 | 11200                   | TT                              | AA                | 1946616733               |
| SNP_P3_134150_11229  | NW_004516111.1 | Scaffold708 | 11229                   | AA                              | GG                | 1946616735               |
| SNP_P3_134151_11230  | NW_004516111.1 | Scaffold708 | 11230                   | CC                              | AA                | 1946616737               |
| SNP_P3_134152_11239  | NW_004516111.1 | Scaffold708 | 11239                   | AA                              | GG                | 1946616739               |
| SNP_P3_134153_11263  | NW_004516111.1 | Scaffold708 | 11263                   | TT                              | CC                | 1946616741               |
| SNP_P3_134154_11269  | NW_004516111.1 | Scaffold708 | 11269                   | CC                              | TT                | 1946616743               |
| SNP_P3_134155_11271  | NW_004516111.1 | Scaffold708 | 11271                   | TT                              | CC                | 1946616745               |
| SNP_P3_134156_11273  | NW_004516111.1 | Scaffold708 | 11273                   | CC                              | AA                | 1946616754               |
| SNP_P3_134157_11287  | NW_004516111.1 | Scaffold708 | 11287                   | CC                              | TT                | 1946616756               |
| SNP_P3_134158_11318  | NW_004516111.1 | Scaffold708 | 11318                   | AA                              | TT                | 1946616758               |
| SNP_P3_134159_12563  | NW_004516111.1 | Scaffold708 | 12563                   | GG                              | AA                | 1946616760               |
| SNP_P3_134160_12884  | NW_004516111.1 | Scaffold708 | 12884                   | AA                              | GG                | 1946616762               |
| SNP_P3_134161_12904  | NW_004516111.1 | Scaffold708 | 12904                   | TT                              | CC                | 1946616764               |
| SNP_P3_134162_12968  | NW_004516111.1 | Scaffold708 | 12968                   | AA                              | CC                | 1946616766               |
| SNP_P3_134163_12991  | NW_004516111.1 | Scaffold708 | 12991                   | AA                              | CC                | 1946616768               |
| SNP_P3_134164_13003  | NW_004516111.1 | Scaffold708 | 13003                   | TT                              | CC                | 1946616770               |
| SNP_P3_134165_13107  | NW_004516111.1 | Scaffold708 | 13107                   | AA                              | GG                | 1946616772               |
| SNP_P3_134166_13117  | NW_004516111.1 | Scaffold708 | 13117                   | AA                              | CC                | 1946616774               |
| SNP_P3_134167_13119  | NW_004516111.1 | Scaffold708 | 13119                   | TT                              | AA                | 1946616776               |
| SNP_P3_134168_13145  | NW_004516111.1 | Scaffold708 | 13145                   | GG                              | AA                | 1946616778               |

| SNPs IDs            | Chromosome IDs | Chromosomes | Physical positions (bp) | CDC Frontier (Reference genome) | (Pusa 256 & HPNB) | NCBI SNPdb Accession IDs |
|---------------------|----------------|-------------|-------------------------|---------------------------------|-------------------|--------------------------|
| SNP_P3_134169_13172 | NW_004516111.1 | Scaffold708 | 13172                   | AA                              | GG                | 1946616780               |
| SNP_P3_134170_14584 | NW_004516111.1 | Scaffold708 | 14584                   | GG                              | AA                | 1946616782               |
| SNP_P3_134171_16900 | NW_004516111.1 | Scaffold708 | 16900                   | AA                              | GG                | 1946616784               |
| SNP_P3_134172_19468 | NW_004516111.1 | Scaffold708 | 19468                   | TT                              | CC                | 1946616786               |
| SNP_P3_134173_50077 | NW_004516111.1 | Scaffold708 | 50077                   | CC                              | TT                | 1946616788               |
| SNP_P3_134174_50137 | NW_004516111.1 | Scaffold708 | 50137                   | TT                              | CC                | 1946616791               |
| SNP_P3_134175_50234 | NW_004516111.1 | Scaffold708 | 50234                   | TT                              | CC                | 1946616793               |
| SNP_P3_134176_50293 | NW_004516111.1 | Scaffold708 | 50293                   | TT                              | CC                | 1946616795               |
| SNP_P3_134177_50311 | NW_004516111.1 | Scaffold708 | 50311                   | TT                              | CC                | 1946616797               |
| SNP_P3_134178_50401 | NW_004516111.1 | Scaffold708 | 50401                   | AA                              | GG                | 1946616799               |
| SNP_P3_134179_50662 | NW_004516111.1 | Scaffold708 | 50662                   | TT                              | GG                | 1946616801               |
| SNP_P3_134180_50702 | NW_004516111.1 | Scaffold708 | 50702                   | CC                              | AA                | 1946616803               |
| SNP_P3_134181_1971  | NW_004516112.1 | Scaffold709 | 1971                    | TT                              | AA                | 1946616805               |
| SNP_P3_134182_2009  | NW_004516112.1 | Scaffold709 | 2009                    | AA                              | TT                | 1946616807               |
| SNP_P3_134183_2014  | NW_004516112.1 | Scaffold709 | 2014                    | AA                              | GG                | 1946616809               |
| SNP_P3_134184_2046  | NW_004516112.1 | Scaffold709 | 2046                    | AA                              | TT                | 1946616812               |
| SNP_P3_134185_2172  | NW_004516112.1 | Scaffold709 | 2172                    | TT                              | CC                | 1946616814               |
| SNP_P3_134186_2188  | NW_004516112.1 | Scaffold709 | 2188                    | AA                              | GG                | 1946616816               |
| SNP_P3_134187_2189  | NW_004516112.1 | Scaffold709 | 2189                    | TT                              | CC                | 1946616818               |
| SNP_P3_134188_2243  | NW_004516112.1 | Scaffold709 | 2243                    | AA                              | GG                | 1946616820               |
| SNP_P3_134189_2285  | NW_004516112.1 | Scaffold709 | 2285                    | AA                              | GG                | 1946616822               |
| SNP_P3_134190_2291  | NW_004516112.1 | Scaffold709 | 2291                    | AA                              | GG                | 1946616824               |
| SNP_P3_134191_2293  | NW_004516112.1 | Scaffold709 | 2293                    | CC                              | GG                | 1946616826               |
| SNP_P3_134192_2331  | NW_004516112.1 | Scaffold709 | 2331                    | TT                              | CC                | 1946616828               |
| SNP_P3_134193_2335  | NW_004516112.1 | Scaffold709 | 2335                    | AA                              | GG                | 1946616830               |
| SNP_P3_134194_2342  | NW_004516112.1 | Scaffold709 | 2342                    | AA                              | GG                | 1946616832               |
| SNP_P3_134195_2408  | NW_004516112.1 | Scaffold709 | 2408                    | GG                              | TT                | 1946616834               |
| SNP_P3_134196_4004  | NW_004516112.1 | Scaffold709 | 4004                    | TT                              | GG                | 1946616836               |
| SNP_P3_134198_7064  | NW_004516112.1 | Scaffold709 | 7064                    | AA                              | GG                | 1946616838               |
| SNP_P3_134199_7082  | NW_004516112.1 | Scaffold709 | 7082                    | TT                              | AA                | 1946616840               |
| SNP_P3_134200_7154  | NW_004516112.1 | Scaffold709 | 7154                    | AA                              | TT                | 1946616842               |
| SNP_P3_134201_7309  | NW_004516112.1 | Scaffold709 | 7309                    | GG                              | CC                | 1946616844               |
| SNP_P3_134202_7356  | NW_004516112.1 | Scaffold709 | 7356                    | GG                              | AA                | 1946616846               |
| SNP_P3_134203_7395  | NW_004516112.1 | Scaffold709 | 7395                    | CC                              | TT                | 1946616848               |
| SNP_P3_134204_7399  | NW_004516112.1 | Scaffold709 | 7399                    | GG                              | AA                | 1946616850               |
| SNP_P3_134205_7414  | NW_004516112.1 | Scaffold709 | 7414                    | TT                              | GG                | 1946616852               |
| SNP_P3_134206_7421  | NW_004516112.1 | Scaffold709 | 7421                    | GG                              | TT                | 1946616854               |
| SNP_P3_134207_7448  | NW_004516112.1 | Scaffold709 | 7448                    | CC                              | AA                | 1946616856               |
| SNP_P3_134209_7528  | NW_004516112.1 | Scaffold709 | 7528                    | GG                              | TT                | 1946616858               |
| SNP_P3_134210_7542  | NW_004516112.1 | Scaffold709 | 7542                    | CC                              | TT                | 1946616861               |
| SNP_P3_134211_7588  | NW_004516112.1 | Scaffold709 | 7588                    | GG                              | TT                | 1946616863               |
| SNP_P3_134212_7726  | NW_004516112.1 | Scaffold709 | 7726                    | GG                              | AA                | 1946616865               |

| SNPs IDs             | Chromosome IDs | Chromosomes | Physical positions (bp) | CDC Frontier (Reference genome) | (Pusa 256 & HPNB) | NCBI SNPdb Accession IDs |
|----------------------|----------------|-------------|-------------------------|---------------------------------|-------------------|--------------------------|
| SNP_P3_134213_7780   | NW_004516112.1 | Scaffold709 | 7780                    | GG                              | AA                | 1946616867               |
| SNP_P3_134214_7799   | NW_004516112.1 | Scaffold709 | 7799                    | CC                              | TT                | 1946616869               |
| SNP_P3_134215_34221  | NW_004516113.1 | Scaffold711 | 34221                   | GG                              | AA                | 1946616871               |
| SNP_P3_134216_35946  | NW_004516113.1 | Scaffold711 | 35946                   | TT                              | CC                | 1946616873               |
| SNP_P3_134217_36019  | NW_004516113.1 | Scaffold711 | 36019                   | CC                              | TT                | 1946616875               |
| SNP_P3_134218_36031  | NW_004516113.1 | Scaffold711 | 36031                   | AA                              | CC                | 1946616877               |
| SNP_P3_134219_36052  | NW_004516113.1 | Scaffold711 | 36052                   | AA                              | TT                | 1946616879               |
| SNP_P3_134220_36085  | NW_004516113.1 | Scaffold711 | 36085                   | GG                              | AA                | 1946616881               |
| SNP_P3_134221_36115  | NW_004516113.1 | Scaffold711 | 36115                   | CC                              | TT                | 1946616883               |
| SNP_P3_134222_36230  | NW_004516113.1 | Scaffold711 | 36230                   | GG                              | AA                | 1946616885               |
| SNP_P3_134223_36300  | NW_004516113.1 | Scaffold711 | 36300                   | AA                              | GG                | 1946616887               |
| SNP_P3_134224_36313  | NW_004516113.1 | Scaffold711 | 36313                   | GG                              | AA                | 1946616889               |
| SNP_P3_134225_36331  | NW_004516113.1 | Scaffold711 | 36331                   | CC                              | AA                | 1946616891               |
| SNP_P3_134226_36337  | NW_004516113.1 | Scaffold711 | 36337                   | CC                              | AA                | 1946616892               |
| SNP_P3_134227_36349  | NW_004516113.1 | Scaffold711 | 36349                   | CC                              | TT                | 1946616894               |
| SNP_P3_134228_36372  | NW_004516113.1 | Scaffold711 | 36372                   | GG                              | AA                | 1946616896               |
| SNP_P3_134229_36440  | NW_004516113.1 | Scaffold711 | 36440                   | AA                              | GG                | 1946616898               |
| SNP_P3_134230_36447  | NW_004516113.1 | Scaffold711 | 36447                   | TT                              | AA                | 1946616900               |
| SNP_P3_134231_36523  | NW_004516113.1 | Scaffold711 | 36523                   | CC                              | GG                | 1946616902               |
| SNP_P3_134233_49437  | NW_004516113.1 | Scaffold711 | 49437                   | CC                              | TT                | 1946616904               |
| SNP_P3_134234_50594  | NW_004516113.1 | Scaffold711 | 50594                   | AA                              | TT                | 1946616906               |
| SNP_P3_134235_50695  | NW_004516113.1 | Scaffold711 | 50695                   | AA                              | CC                | 1946616908               |
| SNP_P3_134236_57079  | NW_004516113.1 | Scaffold711 | 57079                   | TT                              | GG                | 1946616910               |
| SNP_P3_134237_57080  | NW_004516113.1 | Scaffold711 | 57080                   | TT                              | CC                | 1946616912               |
| SNP_P3_134239_75650  | NW_004516113.1 | Scaffold711 | 75650                   | GG                              | AA                | 1946616914               |
| SNP_P3_134240_105399 | NW_004516113.1 | Scaffold711 | 105399                  | GG                              | AA                | 1946616916               |
| SNP_P3_134241_115550 | NW_004516113.1 | Scaffold711 | 115550                  | AA                              | TT                | 1946616918               |
| SNP_P3_134243_149335 | NW_004516113.1 | Scaffold711 | 149335                  | TT                              | GG                | 1946616920               |
| SNP_P3_134244_151262 | NW_004516113.1 | Scaffold711 | 151262                  | CC                              | AA                | 1946616922               |
| SNP_P3_134245_152450 | NW_004516113.1 | Scaffold711 | 152450                  | AA                              | TT                | 1946616924               |
| SNP_P3_134246_152524 | NW_004516113.1 | Scaffold711 | 152524                  | CC                              | TT                | 1946616926               |
| SNP_P3_134247_152664 | NW_004516113.1 | Scaffold711 | 152664                  | TT                              | GG                | 1946616928               |
| SNP_P3_134250_217609 | NW_004516113.1 | Scaffold711 | 217609                  | GG                              | AA                | 1946616930               |
| SNP_P3_134251_218787 | NW_004516113.1 | Scaffold711 | 218787                  | CC                              | TT                | 1946616931               |
| SNP_P3_134252_229601 | NW_004516113.1 | Scaffold711 | 229601                  | AA                              | TT                | 1946616933               |
| SNP_P3_134253_235189 | NW_004516113.1 | Scaffold711 | 235189                  | TT                              | CC                | 1946616935               |
| SNP_P3_134254_243108 | NW_004516113.1 | Scaffold711 | 243108                  | TT                              | GG                | 1946616937               |
| SNP_P3_134255_1287   | NW_004516114.1 | Scaffold712 | 1287                    | CC                              | GG                | 1946616940               |
| SNP_P3_134256_4222   | NW_004516114.1 | Scaffold712 | 4222                    | GG                              | TT                | 1946616942               |
| SNP_P3_134257_4547   | NW_004516114.1 | Scaffold712 | 4547                    | TT                              | GG                | 1946616944               |
| SNP_P3_134258_5327   | NW_004516114.1 | Scaffold712 | 5327                    | CC                              | AA                | 1946616946               |
| SNP_P3_134259_8291   | NW_004516114.1 | Scaffold712 | 8291                    | GG                              | CC                | 1946616948               |

| SNPs IDs            | Chromosome IDs | Chromosomes | Physical positions (bp) | CDC Frontier (Reference genome) | (Pusa 256 & HPNB) | NCBI SNPdb Accession IDs |
|---------------------|----------------|-------------|-------------------------|---------------------------------|-------------------|--------------------------|
| SNP_P3_134260_1540  | NW_004516115.1 | Scaffold715 | 1540                    | CC                              | AA                | 1946616950               |
| SNP_P3_134261_2436  | NW_004516115.1 | Scaffold715 | 2436                    | TT                              | CC                | 1946616952               |
| SNP_P3_134262_5483  | NW_004516115.1 | Scaffold715 | 5483                    | CC                              | TT                | 1946616954               |
| SNP_P3_134263_5514  | NW_004516115.1 | Scaffold715 | 5514                    | GG                              | AA                | 1946616956               |
| SNP_P3_134264_5284  | NW_004516116.1 | Scaffold716 | 5284                    | AA                              | GG                | 1946616958               |
| SNP_P3_134265_5314  | NW_004516116.1 | Scaffold716 | 5314                    | CC                              | AA                | 1946616960               |
| SNP_P3_134266_12679 | NW_004516116.1 | Scaffold716 | 12679                   | TT                              | CC                | 1946616962               |
| SNP_P3_134267_12722 | NW_004516116.1 | Scaffold716 | 12722                   | TT                              | CC                | 1946616963               |
| SNP_P3_134268_12736 | NW_004516116.1 | Scaffold716 | 12736                   | AA                              | GG                | 1946616965               |
| SNP_P3_134269_13508 | NW_004516116.1 | Scaffold716 | 13508                   | AA                              | TT                | 1946616967               |
| SNP_P3_134270_21726 | NW_004516116.1 | Scaffold716 | 21726                   | AA                              | GG                | 1946616969               |
| SNP_P3_134271_22191 | NW_004516116.1 | Scaffold716 | 22191                   | GG                              | AA                | 1946616971               |
| SNP_P3_134272_22255 | NW_004516116.1 | Scaffold716 | 22255                   | AA                              | GG                | 1946616973               |
| SNP_P3_134273_22258 | NW_004516116.1 | Scaffold716 | 22258                   | TT                              | CC                | 1946616975               |
| SNP_P3_134274_23279 | NW_004516116.1 | Scaffold716 | 23279                   | GG                              | AA                | 1946616977               |
| SNP_P3_134275_23340 | NW_004516116.1 | Scaffold716 | 23340                   | CC                              | TT                | 1946616980               |
| SNP_P3_134276_23436 | NW_004516116.1 | Scaffold716 | 23436                   | TT                              | CC                | 1946616981               |
| SNP_P3_134277_23553 | NW_004516116.1 | Scaffold716 | 23553                   | TT                              | CC                | 1946616983               |
| SNP_P3_134278_23580 | NW_004516116.1 | Scaffold716 | 23580                   | AA                              | GG                | 1946616985               |
| SNP_P3_134279_23592 | NW_004516116.1 | Scaffold716 | 23592                   | AA                              | GG                | 1946616987               |
| SNP_P3_134280_23622 | NW_004516116.1 | Scaffold716 | 23622                   | AA                              | GG                | 1946616989               |
| SNP_P3_134281_23755 | NW_004516116.1 | Scaffold716 | 23755                   | TT                              | CC                | 1946616991               |
| SNP_P3_134282_23764 | NW_004516116.1 | Scaffold716 | 23764                   | AA                              | TT                | 1946616993               |
| SNP_P3_134283_23963 | NW_004516116.1 | Scaffold716 | 23963                   | CC                              | AA                | 1946616995               |
| SNP_P3_134284_32779 | NW_004516116.1 | Scaffold716 | 32779                   | TT                              | GG                | 1946616997               |
| SNP_P3_134285_33226 | NW_004516116.1 | Scaffold716 | 33226                   | AA                              | GG                | 1946616999               |
| SNP_P3_134286_33228 | NW_004516116.1 | Scaffold716 | 33228                   | AA                              | GG                | 1946617001               |
| SNP_P3_134287_46031 | NW_004516116.1 | Scaffold716 | 46031                   | TT                              | CC                | 1946617003               |
| SNP_P3_134288_46042 | NW_004516116.1 | Scaffold716 | 46042                   | AA                              | GG                | 1946617005               |
| SNP_P3_134289_46043 | NW_004516116.1 | Scaffold716 | 46043                   | AA                              | GG                | 1946617007               |
| SNP_P3_134290_46053 | NW_004516116.1 | Scaffold716 | 46053                   | AA                              | TT                | 1946617009               |
| SNP_P3_134291_46217 | NW_004516116.1 | Scaffold716 | 46217                   | TT                              | GG                | 1946617011               |
| SNP_P3_134292_46419 | NW_004516116.1 | Scaffold716 | 46419                   | TT                              | AA                | 1946617013               |
| SNP_P3_134293_52673 | NW_004516116.1 | Scaffold716 | 52673                   | TT                              | AA                | 1946617015               |
| SNP_P3_134294_55932 | NW_004516116.1 | Scaffold716 | 55932                   | CC                              | TT                | 1946617017               |
| SNP_P3_134295_64519 | NW_004516116.1 | Scaffold716 | 64519                   | CC                              | TT                | 1946617019               |
| SNP_P3_134296_64905 | NW_004516116.1 | Scaffold716 | 64905                   | GG                              | TT                | 1946617021               |
| SNP_P3_134297_66133 | NW_004516116.1 | Scaffold716 | 66133                   | TT                              | CC                | 1946617023               |
| SNP_P3_134298_66145 | NW_004516116.1 | Scaffold716 | 66145                   | TT                              | CC                | 1946617025               |
| SNP_P3_134299_66199 | NW_004516116.1 | Scaffold716 | 66199                   | CC                              | TT                | 1946617027               |
| SNP_P3_134300_66201 | NW_004516116.1 | Scaffold716 | 66201                   | AA                              | GG                | 1946617029               |
| SNP_P3_134301_66206 | NW_004516116.1 | Scaffold716 | 66206                   | AA                              | GG                | 1946617031               |

| SNPs IDs             | Chromosome IDs | Chromosomes | Physical positions (bp) | CDC Frontier (Reference genome) | (Pusa 256 & HPNB) | NCBI SNPdb Accession IDs |
|----------------------|----------------|-------------|-------------------------|---------------------------------|-------------------|--------------------------|
| SNP_P3_134302_66211  | NW_004516116.1 | Scaffold716 | 66211                   | AA                              | TT                | 1946617033               |
| SNP_P3_134303_66349  | NW_004516116.1 | Scaffold716 | 66349                   | TT                              | CC                | 1946617035               |
| SNP_P3_134304_66358  | NW_004516116.1 | Scaffold716 | 66358                   | AA                              | GG                | 1946617037               |
| SNP_P3_134305_66409  | NW_004516116.1 | Scaffold716 | 66409                   | CC                              | TT                | 1946617039               |
| SNP_P3_134306_76804  | NW_004516116.1 | Scaffold716 | 76804                   | GG                              | AA                | 1946617041               |
| SNP_P3_134307_76811  | NW_004516116.1 | Scaffold716 | 76811                   | TT                              | CC                | 1946617043               |
| SNP_P3_134308_76830  | NW_004516116.1 | Scaffold716 | 76830                   | AA                              | GG                | 1946617045               |
| SNP_P3_134310_83237  | NW_004516116.1 | Scaffold716 | 83237                   | TT                              | AA                | 1946617047               |
| SNP_P3_134311_83735  | NW_004516116.1 | Scaffold716 | 83735                   | GG                              | TT                | 1946617049               |
| SNP_P3_134312_88149  | NW_004516116.1 | Scaffold716 | 88149                   | AA                              | TT                | 1946617051               |
| SNP_P3_134313_88221  | NW_004516116.1 | Scaffold716 | 88221                   | TT                              | AA                | 1946617053               |
| SNP_P3_134314_109576 | NW_004516116.1 | Scaffold716 | 109576                  | TT                              | CC                | 1946617055               |
| SNP_P3_134315_109618 | NW_004516116.1 | Scaffold716 | 109618                  | GG                              | TT                | 1946617058               |
| SNP_P3_134316_109648 | NW_004516116.1 | Scaffold716 | 109648                  | CC                              | TT                | 1946617060               |
| SNP_P3_134317_109663 | NW_004516116.1 | Scaffold716 | 109663                  | CC                              | TT                | 1946617062               |
| SNP_P3_134318_109733 | NW_004516116.1 | Scaffold716 | 109733                  | AA                              | GG                | 1946617064               |
| SNP_P3_134319_110772 | NW_004516116.1 | Scaffold716 | 110772                  | AA                              | TT                | 1946617066               |
| SNP_P3_134320_110793 | NW_004516116.1 | Scaffold716 | 110793                  | CC                              | TT                | 1946617068               |
| SNP_P3_134321_111653 | NW_004516116.1 | Scaffold716 | 111653                  | AA                              | CC                | 1946617070               |
| SNP_P3_134322_112005 | NW_004516116.1 | Scaffold716 | 112005                  | TT                              | CC                | 1946617072               |
| SNP_P3_134323_116851 | NW_004516116.1 | Scaffold716 | 116851                  | TT                              | CC                | 1946617074               |
| SNP_P3_134325_117783 | NW_004516116.1 | Scaffold716 | 117783                  | TT                              | CC                | 1946617076               |
| SNP_P3_134326_117794 | NW_004516116.1 | Scaffold716 | 117794                  | TT                              | CC                | 1946617078               |
| SNP_P3_134327_117848 | NW_004516116.1 | Scaffold716 | 117848                  | AA                              | GG                | 1946617080               |
| SNP_P3_134328_117855 | NW_004516116.1 | Scaffold716 | 117855                  | TT                              | CC                | 1946617082               |
| SNP_P3_134329_117864 | NW_004516116.1 | Scaffold716 | 117864                  | GG                              | CC                | 1946617084               |
| SNP_P3_134330_117890 | NW_004516116.1 | Scaffold716 | 117890                  | TT                              | CC                | 1946617086               |
| SNP_P3_134331_117956 | NW_004516116.1 | Scaffold716 | 117956                  | TT                              | CC                | 1946617088               |
| SNP_P3_134332_118189 | NW_004516116.1 | Scaffold716 | 118189                  | TT                              | GG                | 1946617090               |
| SNP_P3_134333_118264 | NW_004516116.1 | Scaffold716 | 118264                  | TT                              | GG                | 1946617092               |
| SNP_P3_134334_119749 | NW_004516116.1 | Scaffold716 | 119749                  | GG                              | AA                | 1946617094               |
| SNP_P3_134335_121181 | NW_004516116.1 | Scaffold716 | 121181                  | GG                              | AA                | 1946617096               |
| SNP_P3_134336_121616 | NW_004516116.1 | Scaffold716 | 121616                  | GG                              | AA                | 1946617098               |
| SNP_P3_134337_131595 | NW_004516116.1 | Scaffold716 | 131595                  | CC                              | TT                | 1946617100               |
| SNP_P3_134339_136311 | NW_004516116.1 | Scaffold716 | 136311                  | GG                              | AA                | 1946617102               |
| SNP_P3_134340_137919 | NW_004516116.1 | Scaffold716 | 137919                  | CC                              | AA                | 1946617104               |
| SNP_P3_134341_138169 | NW_004516116.1 | Scaffold716 | 138169                  | CC                              | TT                | 1946617106               |
| SNP_P3_134342_155934 | NW_004516116.1 | Scaffold716 | 155934                  | TT                              | CC                | 1946617108               |
| SNP_P3_134343_159908 | NW_004516116.1 | Scaffold716 | 159908                  | AA                              | CC                | 1946617110               |
| SNP_P3_134344_163506 | NW_004516116.1 | Scaffold716 | 163506                  | AA                              | GG                | 1946617112               |
| SNP_P3_134345_164942 | NW_004516116.1 | Scaffold716 | 164942                  | GG                              | AA                | 1946617114               |
| SNP_P3_134346_168556 | NW_004516116.1 | Scaffold716 | 168556                  | GG                              | CC                | 1946617116               |



| SNPs IDs             | Chromosome IDs | Chromosomes | Physical positions (bp) | CDC Frontier (Reference genome) | (Pusa 256 & HPNB) | NCBI SNPdb Accession IDs |
|----------------------|----------------|-------------|-------------------------|---------------------------------|-------------------|--------------------------|
| SNP_P3_134347_171071 | NW_004516116.1 | Scaffold716 | 171071                  | GG                              | TT                | 1946617117               |
| SNP_P3_134349_181428 | NW_004516116.1 | Scaffold716 | 181428                  | AA                              | TT                | 1946617119               |
| SNP_P3_134350_181435 | NW_004516116.1 | Scaffold716 | 181435                  | TT                              | CC                | 1946617121               |
| SNP_P3_134351_181438 | NW_004516116.1 | Scaffold716 | 181438                  | AA                              | TT                | 1946617123               |
| SNP_P3_134352_181450 | NW_004516116.1 | Scaffold716 | 181450                  | GG                              | TT                | 1946617125               |
| SNP_P3_134353_182741 | NW_004516116.1 | Scaffold716 | 182741                  | GG                              | AA                | 1946617127               |
| SNP_P3_134354_184873 | NW_004516116.1 | Scaffold716 | 184873                  | CC                              | TT                | 1946617129               |
| SNP_P3_134355_185897 | NW_004516116.1 | Scaffold716 | 185897                  | AA                              | GG                | 1946617131               |
| SNP_P3_134356_186277 | NW_004516116.1 | Scaffold716 | 186277                  | AA                              | GG                | 1946617133               |
| SNP_P3_134357_187106 | NW_004516116.1 | Scaffold716 | 187106                  | TT                              | CC                | 1946617134               |
| SNP_P3_134359_191163 | NW_004516116.1 | Scaffold716 | 191163                  | CC                              | AA                | 1946617136               |
| SNP_P3_134361_193477 | NW_004516116.1 | Scaffold716 | 193477                  | CC                              | AA                | 1946617138               |
| SNP_P3_134362_194617 | NW_004516116.1 | Scaffold716 | 194617                  | CC                              | AA                | 1946617140               |
| SNP_P3_134364_201175 | NW_004516116.1 | Scaffold716 | 201175                  | AA                              | GG                | 1946617142               |
| SNP_P3_134365_201604 | NW_004516116.1 | Scaffold716 | 201604                  | GG                              | AA                | 1946617144               |
| SNP_P3_134366_202821 | NW_004516116.1 | Scaffold716 | 202821                  | TT                              | GG                | 1946617146               |
| SNP_P3_134367_203208 | NW_004516116.1 | Scaffold716 | 203208                  | AA                              | GG                | 1946617148               |
| SNP_P3_134368_205571 | NW_004516116.1 | Scaffold716 | 205571                  | GG                              | AA                | 1946617150               |
| SNP_P3_134369_215657 | NW_004516116.1 | Scaffold716 | 215657                  | AA                              | GG                | 1946617152               |
| SNP_P3_134370_228761 | NW_004516116.1 | Scaffold716 | 228761                  | AA                              | GG                | 1946617154               |
| SNP_P3_134372_244842 | NW_004516116.1 | Scaffold716 | 244842                  | CC                              | TT                | 1946617156               |
| SNP_P3_134373_245395 | NW_004516116.1 | Scaffold716 | 245395                  | CC                              | TT                | 1946617158               |
| SNP_P3_134374_246281 | NW_004516116.1 | Scaffold716 | 246281                  | CC                              | GG                | 1946617160               |
| SNP_P3_134375_247898 | NW_004516116.1 | Scaffold716 | 247898                  | AA                              | TT                | 1946617162               |
| SNP_P3_134376_248082 | NW_004516116.1 | Scaffold716 | 248082                  | TT                              | GG                | 1946617164               |
| SNP_P3_134377_248084 | NW_004516116.1 | Scaffold716 | 248084                  | CC                              | TT                | 1946617166               |
| SNP_P3_134379_248115 | NW_004516116.1 | Scaffold716 | 248115                  | AA                              | GG                | 1946617168               |
| SNP_P3_134380_248119 | NW_004516116.1 | Scaffold716 | 248119                  | CC                              | TT                | 1946617170               |
| SNP_P3_134381_248147 | NW_004516116.1 | Scaffold716 | 248147                  | CC                              | TT                | 1946617172               |
| SNP_P3_134382_248150 | NW_004516116.1 | Scaffold716 | 248150                  | CC                              | AA                | 1946617174               |
| SNP_P3_134383_263466 | NW_004516116.1 | Scaffold716 | 263466                  | GG                              | TT                | 1946617176               |
| SNP_P3_134384_263587 | NW_004516116.1 | Scaffold716 | 263587                  | TT                              | GG                | 1946617178               |
| SNP_P3_134385_263629 | NW_004516116.1 | Scaffold716 | 263629                  | TT                              | AA                | 1946617180               |
| SNP_P3_134386_263663 | NW_004516116.1 | Scaffold716 | 263663                  | CC                              | TT                | 1946617182               |
| SNP_P3_134387_263670 | NW_004516116.1 | Scaffold716 | 263670                  | GG                              | AA                | 1946617184               |
| SNP_P3_134388_263739 | NW_004516116.1 | Scaffold716 | 263739                  | CC                              | TT                | 1946617186               |
| SNP_P3_134389_263740 | NW_004516116.1 | Scaffold716 | 263740                  | AA                              | GG                | 1946617188               |
| SNP_P3_134390_263889 | NW_004516116.1 | Scaffold716 | 263889                  | TT                              | CC                | 1946617190               |
| SNP_P3_134391_272974 | NW_004516116.1 | Scaffold716 | 272974                  | CC                              | TT                | 1946617192               |
| SNP_P3_134392_273095 | NW_004516116.1 | Scaffold716 | 273095                  | CC                              | AA                | 1946617194               |
| SNP_P3_134393_280828 | NW_004516116.1 | Scaffold716 | 280828                  | AA                              | TT                | 1946617196               |
| SNP_P3_134394_281085 | NW_004516116.1 | Scaffold716 | 281085                  | TT                              | AA                | 1946617198               |

| SNPs IDs             | Chromosome IDs | Chromosomes | Physical positions (bp) | CDC Frontier (Reference genome) | (Pusa 256 & HPNB) | NCBI SNPdb Accession IDs |
|----------------------|----------------|-------------|-------------------------|---------------------------------|-------------------|--------------------------|
| SNP_P3_134395_281087 | NW_004516116.1 | Scaffold716 | 281087                  | TT                              | AA                | 1946617200               |
| SNP_P3_134396_312659 | NW_004516116.1 | Scaffold716 | 312659                  | GG                              | AA                | 1946617202               |
| SNP_P3_134397_312698 | NW_004516116.1 | Scaffold716 | 312698                  | GG                              | AA                | 1946617204               |
| SNP_P3_134398_312725 | NW_004516116.1 | Scaffold716 | 312725                  | TT                              | GG                | 1946617205               |
| SNP_P3_134399_313049 | NW_004516116.1 | Scaffold716 | 313049                  | GG                              | TT                | 1946617207               |
| SNP_P3_134400_313050 | NW_004516116.1 | Scaffold716 | 313050                  | TT                              | GG                | 1946617209               |
| SNP_P3_134401_313108 | NW_004516116.1 | Scaffold716 | 313108                  | TT                              | CC                | 1946617212               |
| SNP_P3_134402_313785 | NW_004516116.1 | Scaffold716 | 313785                  | CC                              | GG                | 1946617214               |
| SNP_P3_134403_314939 | NW_004516116.1 | Scaffold716 | 314939                  | AA                              | GG                | 1946617216               |
| SNP_P3_134404_314940 | NW_004516116.1 | Scaffold716 | 314940                  | AA                              | GG                | 1946617217               |
| SNP_P3_134405_314976 | NW_004516116.1 | Scaffold716 | 314976                  | AA                              | TT                | 1946617219               |
| SNP_P3_134406_314998 | NW_004516116.1 | Scaffold716 | 314998                  | TT                              | CC                | 1946617221               |
| SNP_P3_134407_315009 | NW_004516116.1 | Scaffold716 | 315009                  | AA                              | GG                | 1946617223               |
| SNP_P3_134408_315022 | NW_004516116.1 | Scaffold716 | 315022                  | AA                              | TT                | 1946617225               |
| SNP_P3_134409_315032 | NW_004516116.1 | Scaffold716 | 315032                  | AA                              | GG                | 1946617227               |
| SNP_P3_134410_315481 | NW_004516116.1 | Scaffold716 | 315481                  | CC                              | TT                | 1946617229               |
| SNP_P3_134411_340501 | NW_004516116.1 | Scaffold716 | 340501                  | CC                              | AA                | 1946617231               |
| SNP_P3_134412_340502 | NW_004516116.1 | Scaffold716 | 340502                  | AA                              | GG                | 1946617233               |
| SNP_P3_134414_395090 | NW_004516116.1 | Scaffold716 | 395090                  | GG                              | AA                | 1946617235               |
| SNP_P3_134415_397208 | NW_004516116.1 | Scaffold716 | 397208                  | TT                              | CC                | 1946617237               |
| SNP_P3_134416_397276 | NW_004516116.1 | Scaffold716 | 397276                  | TT                              | GG                | 1946617239               |
| SNP_P3_134417_397344 | NW_004516116.1 | Scaffold716 | 397344                  | GG                              | AA                | 1946617241               |
| SNP_P3_134418_397361 | NW_004516116.1 | Scaffold716 | 397361                  | GG                              | TT                | 1946617242               |
| SNP_P3_134419_397425 | NW_004516116.1 | Scaffold716 | 397425                  | CC                              | AA                | 1946617244               |
| SNP_P3_134420_397526 | NW_004516116.1 | Scaffold716 | 397526                  | CC                              | TT                | 1946617246               |
| SNP_P3_134421_397561 | NW_004516116.1 | Scaffold716 | 397561                  | TT                              | AA                | 1946617248               |
| SNP_P3_134422_397562 | NW_004516116.1 | Scaffold716 | 397562                  | AA                              | TT                | 1946617250               |
| SNP_P3_134423_397574 | NW_004516116.1 | Scaffold716 | 397574                  | TT                              | CC                | 1946617253               |
| SNP_P3_134424_397601 | NW_004516116.1 | Scaffold716 | 397601                  | CC                              | TT                | 1946617255               |
| SNP_P3_134425_397603 | NW_004516116.1 | Scaffold716 | 397603                  | GG                              | CC                | 1946617256               |
| SNP_P3_134426_397608 | NW_004516116.1 | Scaffold716 | 397608                  | GG                              | TT                | 1946617258               |
| SNP_P3_134427_397611 | NW_004516116.1 | Scaffold716 | 397611                  | GG                              | AA                | 1946617260               |
| SNP_P3_134428_397640 | NW_004516116.1 | Scaffold716 | 397640                  | TT                              | CC                | 1946617262               |
| SNP_P3_134429_397641 | NW_004516116.1 | Scaffold716 | 397641                  | TT                              | CC                | 1946617264               |
| SNP_P3_134430_397659 | NW_004516116.1 | Scaffold716 | 397659                  | AA                              | GG                | 1946617266               |
| SNP_P3_134431_397774 | NW_004516116.1 | Scaffold716 | 397774                  | TT                              | CC                | 1946617268               |
| SNP_P3_134432_397823 | NW_004516116.1 | Scaffold716 | 397823                  | TT                              | CC                | 1946617270               |
| SNP_P3_134433_397824 | NW_004516116.1 | Scaffold716 | 397824                  | AA                              | GG                | 1946617271               |
| SNP_P3_134434_405108 | NW_004516116.1 | Scaffold716 | 405108                  | CC                              | TT                | 1946617273               |
| SNP_P3_134435_405109 | NW_004516116.1 | Scaffold716 | 405109                  | GG                              | TT                | 1946617275               |
| SNP_P3_134436_405178 | NW_004516116.1 | Scaffold716 | 405178                  | GG                              | TT                | 1946617277               |
| SNP_P3_134437_405231 | NW_004516116.1 | Scaffold716 | 405231                  | TT                              | AA                | 1946617279               |

| SNPs IDs             | Chromosome IDs | Chromosomes | Physical positions (bp) | CDC Frontier (Reference genome) | (Pusa 256 & HPNB) | NCBI SNPdb Accession IDs |
|----------------------|----------------|-------------|-------------------------|---------------------------------|-------------------|--------------------------|
| SNP_P3_134438_405871 | NW_004516116.1 | Scaffold716 | 405871                  | TT                              | AA                | 1946617281               |
| SNP_P3_134439_416185 | NW_004516116.1 | Scaffold716 | 416185                  | TT                              | GG                | 1946617283               |
| SNP_P3_134440_422072 | NW_004516116.1 | Scaffold716 | 422072                  | CC                              | GG                | 1946617285               |
| SNP_P3_134441_427128 | NW_004516116.1 | Scaffold716 | 427128                  | AA                              | TT                | 1946617286               |
| SNP_P3_134442_431187 | NW_004516116.1 | Scaffold716 | 431187                  | CC                              | TT                | 1946617288               |
| SNP_P3_134443_2862   | NW_004516117.1 | Scaffold717 | 2862                    | AA                              | GG                | 1946617290               |
| SNP_P3_134444_2871   | NW_004516117.1 | Scaffold717 | 2871                    | CC                              | GG                | 1946617293               |
| SNP_P3_134445_2872   | NW_004516117.1 | Scaffold717 | 2872                    | CC                              | AA                | 1946617295               |
| SNP_P3_134446_2874   | NW_004516117.1 | Scaffold717 | 2874                    | TT                              | AA                | 1946617297               |
| SNP_P3_134447_3998   | NW_004516117.1 | Scaffold717 | 3998                    | CC                              | AA                | 1946617299               |
| SNP_P3_134448_1235   | NW_004516118.1 | Scaffold719 | 1235                    | AA                              | CC                | 1946617301               |
| SNP_P3_134449_1243   | NW_004516118.1 | Scaffold719 | 1243                    | TT                              | CC                | 1946617303               |
| SNP_P3_134450_1276   | NW_004516118.1 | Scaffold719 | 1276                    | GG                              | AA                | 1946617305               |
| SNP_P3_134451_1284   | NW_004516118.1 | Scaffold719 | 1284                    | GG                              | AA                | 1946617307               |
| SNP_P3_134452_1300   | NW_004516118.1 | Scaffold719 | 1300                    | TT                              | CC                | 1946617309               |
| SNP_P3_134453_1304   | NW_004516118.1 | Scaffold719 | 1304                    | AA                              | GG                | 1946617310               |
| SNP_P3_134454_2324   | NW_004516118.1 | Scaffold719 | 2324                    | TT                              | CC                | 1946617312               |
| SNP_P3_134455_5176   | NW_004516118.1 | Scaffold719 | 5176                    | AA                              | TT                | 1946617314               |
| SNP_P3_134456_5547   | NW_004516118.1 | Scaffold719 | 5547                    | AA                              | TT                | 1946617316               |
| SNP_P3_134457_8031   | NW_004516118.1 | Scaffold719 | 8031                    | CC                              | TT                | 1946617318               |
| SNP_P3_134458_8039   | NW_004516118.1 | Scaffold719 | 8039                    | CC                              | TT                | 1946617320               |
| SNP_P3_134459_8310   | NW_004516118.1 | Scaffold719 | 8310                    | TT                              | AA                | 1946617322               |
| SNP_P3_134460_8921   | NW_004516118.1 | Scaffold719 | 8921                    | GG                              | AA                | 1946617324               |
| SNP_P3_134461_9528   | NW_004516118.1 | Scaffold719 | 9528                    | AA                              | GG                | 1946617326               |
| SNP_P3_134462_9750   | NW_004516118.1 | Scaffold719 | 9750                    | AA                              | GG                | 1946617328               |
| SNP_P3_134463_9873   | NW_004516118.1 | Scaffold719 | 9873                    | GG                              | TT                | 1946617330               |
| SNP_P3_134464_10035  | NW_004516118.1 | Scaffold719 | 10035                   | GG                              | AA                | 1946617332               |
| SNP_P3_134465_10038  | NW_004516118.1 | Scaffold719 | 10038                   | AA                              | TT                | 1946617334               |
| SNP_P3_134466_12135  | NW_004516118.1 | Scaffold719 | 12135                   | GG                              | TT                | 1946617336               |
| SNP_P3_134467_12139  | NW_004516118.1 | Scaffold719 | 12139                   | TT                              | GG                | 1946617338               |
| SNP_P3_134468_12164  | NW_004516118.1 | Scaffold719 | 12164                   | CC                              | AA                | 1946617340               |
| SNP_P3_134469_12204  | NW_004516118.1 | Scaffold719 | 12204                   | TT                              | AA                | 1946617342               |
| SNP_P3_134470_12488  | NW_004516118.1 | Scaffold719 | 12488                   | GG                              | AA                | 1946617344               |
| SNP_P3_134471_12495  | NW_004516118.1 | Scaffold719 | 12495                   | TT                              | GG                | 1946617346               |
| SNP_P3_134472_12498  | NW_004516118.1 | Scaffold719 | 12498                   | AA                              | GG                | 1946617348               |
| SNP_P3_134473_12499  | NW_004516118.1 | Scaffold719 | 12499                   | TT                              | CC                | 1946617350               |
| SNP_P3_134474_12519  | NW_004516118.1 | Scaffold719 | 12519                   | AA                              | CC                | 1946617352               |
| SNP_P3_134475_12577  | NW_004516118.1 | Scaffold719 | 12577                   | TT                              | CC                | 1946617354               |
| SNP_P3_134476_12656  | NW_004516118.1 | Scaffold719 | 12656                   | AA                              | GG                | 1946617356               |
| SNP_P3_134477_12675  | NW_004516118.1 | Scaffold719 | 12675                   | GG                              | AA                | 1946617358               |
| SNP_P3_134478_12746  | NW_004516118.1 | Scaffold719 | 12746                   | GG                              | TT                | 1946617360               |
| SNP_P3_134479_14756  | NW_004516118.1 | Scaffold719 | 14756                   | AA                              | GG                | 1946617362               |

| SNPs IDs             | Chromosome IDs | Chromosomes | Physical positions (bp) | CDC Frontier (Reference genome) | (Pusa 256 & HPNB) | NCBI SNPdb Accession IDs |
|----------------------|----------------|-------------|-------------------------|---------------------------------|-------------------|--------------------------|
| SNP_P3_134480_14849  | NW_004516118.1 | Scaffold719 | 14849                   | GG                              | AA                | 1946617364               |
| SNP_P3_134481_14922  | NW_004516118.1 | Scaffold719 | 14922                   | GG                              | TT                | 1946617366               |
| SNP_P3_134482_14924  | NW_004516118.1 | Scaffold719 | 14924                   | TT                              | GG                | 1946617368               |
| SNP_P3_134485_31756  | NW_004516118.1 | Scaffold719 | 31756                   | GG                              | AA                | 1946617370               |
| SNP_P3_134486_32264  | NW_004516118.1 | Scaffold719 | 32264                   | AA                              | CC                | 1946617372               |
| SNP_P3_134487_41821  | NW_004516118.1 | Scaffold719 | 41821                   | CC                              | GG                | 1946617374               |
| SNP_P3_134488_44995  | NW_004516118.1 | Scaffold719 | 44995                   | CC                              | GG                | 1946617376               |
| SNP_P3_134490_49868  | NW_004516118.1 | Scaffold719 | 49868                   | GG                              | AA                | 1946617378               |
| SNP_P3_134491_64248  | NW_004516118.1 | Scaffold719 | 64248                   | TT                              | AA                | 1946617380               |
| SNP_P3_134492_77570  | NW_004516118.1 | Scaffold719 | 77570                   | GG                              | CC                | 1946617382               |
| SNP_P3_134493_85076  | NW_004516118.1 | Scaffold719 | 85076                   | CC                              | TT                | 1946617384               |
| SNP_P3_134494_85091  | NW_004516118.1 | Scaffold719 | 85091                   | TT                              | AA                | 1946617386               |
| SNP_P3_134495_85093  | NW_004516118.1 | Scaffold719 | 85093                   | TT                              | CC                | 1946617388               |
| SNP_P3_134496_85107  | NW_004516118.1 | Scaffold719 | 85107                   | TT                              | CC                | 1946617390               |
| SNP_P3_134497_85280  | NW_004516118.1 | Scaffold719 | 85280                   | GG                              | AA                | 1946617392               |
| SNP_P3_134498_98414  | NW_004516118.1 | Scaffold719 | 98414                   | AA                              | TT                | 1946617394               |
| SNP_P3_134499_101210 | NW_004516118.1 | Scaffold719 | 101210                  | AA                              | GG                | 1946617396               |
| SNP_P3_134500_108775 | NW_004516118.1 | Scaffold719 | 108775                  | TT                              | GG                | 1946617398               |
| SNP_P3_134501_108776 | NW_004516118.1 | Scaffold719 | 108776                  | GG                              | TT                | 1946617400               |
| SNP_P3_134502_108780 | NW_004516118.1 | Scaffold719 | 108780                  | GG                              | AA                | 1946617402               |
| SNP_P3_134503_108799 | NW_004516118.1 | Scaffold719 | 108799                  | GG                              | AA                | 1946617404               |
| SNP_P3_134504_108837 | NW_004516118.1 | Scaffold719 | 108837                  | CC                              | TT                | 1946617406               |
| SNP_P3_134505_108847 | NW_004516118.1 | Scaffold719 | 108847                  | AA                              | GG                | 1946617408               |
| SNP_P3_134506_108851 | NW_004516118.1 | Scaffold719 | 108851                  | GG                              | AA                | 1946617410               |
| SNP_P3_134509_108893 | NW_004516118.1 | Scaffold719 | 108893                  | AA                              | GG                | 1946617412               |
| SNP_P3_134510_108894 | NW_004516118.1 | Scaffold719 | 108894                  | CC                              | TT                | 1946617414               |
| SNP_P3_134511_109186 | NW_004516118.1 | Scaffold719 | 109186                  | GG                              | AA                | 1946617416               |
| SNP_P3_134512_110034 | NW_004516118.1 | Scaffold719 | 110034                  | TT                              | CC                | 1946617418               |
| SNP_P3_134513_110601 | NW_004516118.1 | Scaffold719 | 110601                  | TT                              | CC                | 1946617420               |
| SNP_P3_134514_110603 | NW_004516118.1 | Scaffold719 | 110603                  | TT                              | AA                | 1946617422               |
| SNP_P3_134515_110604 | NW_004516118.1 | Scaffold719 | 110604                  | AA                              | GG                | 1946617424               |
| SNP_P3_134516_110644 | NW_004516118.1 | Scaffold719 | 110644                  | TT                              | GG                | 1946617426               |
| SNP_P3_134517_110755 | NW_004516118.1 | Scaffold719 | 110755                  | AA                              | TT                | 1946617428               |
| SNP_P3_134518_111051 | NW_004516118.1 | Scaffold719 | 111051                  | CC                              | TT                | 1946617430               |
| SNP_P3_134519_112071 | NW_004516118.1 | Scaffold719 | 112071                  | GG                              | CC                | 1946617432               |
| SNP_P3_134520_114589 | NW_004516118.1 | Scaffold719 | 114589                  | GG                              | TT                | 1946617434               |
| SNP_P3_134521_114592 | NW_004516118.1 | Scaffold719 | 114592                  | GG                              | AA                | 1946617436               |
| SNP_P3_134522_116581 | NW_004516118.1 | Scaffold719 | 116581                  | GG                              | TT                | 1946617438               |
| SNP_P3_134523_116641 | NW_004516118.1 | Scaffold719 | 116641                  | AA                              | TT                | 1946617440               |
| SNP_P3_134524_121629 | NW_004516118.1 | Scaffold719 | 121629                  | TT                              | AA                | 1946617442               |
| SNP_P3_134525_121691 | NW_004516118.1 | Scaffold719 | 121691                  | AA                              | GG                | 1946617444               |
| SNP_P3_134526_121815 | NW_004516118.1 | Scaffold719 | 121815                  | AA                              | TT                | 1946617446               |

| SNPs IDs             | Chromosome IDs | Chromosomes | Physical positions (bp) | CDC Frontier (Reference genome) | (Pusa 256 & HPNB) | NCBI SNPdb Accession IDs |
|----------------------|----------------|-------------|-------------------------|---------------------------------|-------------------|--------------------------|
| SNP_P3_134527_121986 | NW_004516118.1 | Scaffold719 | 121986                  | CC                              | TT                | 1946617449               |
| SNP_P3_134528_122022 | NW_004516118.1 | Scaffold719 | 122022                  | AA                              | CC                | 1946617451               |
| SNP_P3_134529_122030 | NW_004516118.1 | Scaffold719 | 122030                  | CC                              | GG                | 1946617453               |
| SNP_P3_134530_122040 | NW_004516118.1 | Scaffold719 | 122040                  | TT                              | AA                | 1946617455               |
| SNP_P3_134531_122041 | NW_004516118.1 | Scaffold719 | 122041                  | AA                              | GG                | 1946617457               |
| SNP_P3_134532_123289 | NW_004516118.1 | Scaffold719 | 123289                  | TT                              | CC                | 1946617459               |
| SNP_P3_134533_123432 | NW_004516118.1 | Scaffold719 | 123432                  | TT                              | CC                | 1946617461               |
| SNP_P3_134534_123491 | NW_004516118.1 | Scaffold719 | 123491                  | CC                              | GG                | 1946617463               |
| SNP_P3_134535_123492 | NW_004516118.1 | Scaffold719 | 123492                  | TT                              | CC                | 1946617465               |
| SNP_P3_134536_123532 | NW_004516118.1 | Scaffold719 | 123532                  | TT                              | AA                | 1946617467               |
| SNP_P3_134537_123702 | NW_004516118.1 | Scaffold719 | 123702                  | AA                              | GG                | 1946617469               |
| SNP_P3_134539_123770 | NW_004516118.1 | Scaffold719 | 123770                  | CC                              | AA                | 1946617471               |
| SNP_P3_134540_123785 | NW_004516118.1 | Scaffold719 | 123785                  | AA                              | TT                | 1946617473               |
| SNP_P3_134541_123813 | NW_004516118.1 | Scaffold719 | 123813                  | GG                              | AA                | 1946617475               |
| SNP_P3_134542_124392 | NW_004516118.1 | Scaffold719 | 124392                  | GG                              | AA                | 1946617477               |
| SNP_P3_134543_124500 | NW_004516118.1 | Scaffold719 | 124500                  | CC                              | GG                | 1946617479               |
| SNP_P3_134544_125428 | NW_004516118.1 | Scaffold719 | 125428                  | TT                              | AA                | 1946617481               |
| SNP_P3_134545_125431 | NW_004516118.1 | Scaffold719 | 125431                  | CC                              | TT                | 1946617483               |
| SNP_P3_134546_127492 | NW_004516118.1 | Scaffold719 | 127492                  | CC                              | GG                | 1946617485               |
| SNP_P3_134547_127493 | NW_004516118.1 | Scaffold719 | 127493                  | AA                              | GG                | 1946617487               |
| SNP_P3_134548_127562 | NW_004516118.1 | Scaffold719 | 127562                  | AA                              | GG                | 1946617489               |
| SNP_P3_134550_127895 | NW_004516118.1 | Scaffold719 | 127895                  | TT                              | CC                | 1946617491               |
| SNP_P3_134551_128504 | NW_004516118.1 | Scaffold719 | 128504                  | TT                              | CC                | 1946617493               |
| SNP_P3_134552_128526 | NW_004516118.1 | Scaffold719 | 128526                  | TT                              | CC                | 1946617495               |
| SNP_P3_134553_128594 | NW_004516118.1 | Scaffold719 | 128594                  | TT                              | CC                | 1946617497               |
| SNP_P3_134554_128616 | NW_004516118.1 | Scaffold719 | 128616                  | AA                              | TT                | 1946617499               |
| SNP_P3_134555_128639 | NW_004516118.1 | Scaffold719 | 128639                  | CC                              | TT                | 1946617501               |
| SNP_P3_134556_128679 | NW_004516118.1 | Scaffold719 | 128679                  | TT                              | GG                | 1946617503               |
| SNP_P3_134557_128685 | NW_004516118.1 | Scaffold719 | 128685                  | AA                              | TT                | 1946617504               |
| SNP_P3_134558_128702 | NW_004516118.1 | Scaffold719 | 128702                  | GG                              | CC                | 1946617506               |
| SNP_P3_134559_128735 | NW_004516118.1 | Scaffold719 | 128735                  | AA                              | TT                | 1946617508               |
| SNP_P3_134560_128743 | NW_004516118.1 | Scaffold719 | 128743                  | AA                              | CC                | 1946617510               |
| SNP_P3_134561_961    | NW_004516119.1 | Scaffold720 | 961                     | CC                              | TT                | 1946617512               |
| SNP_P3_134562_963    | NW_004516119.1 | Scaffold720 | 963                     | AA                              | GG                | 1946617514               |
| SNP_P3_134563_1277   | NW_004516119.1 | Scaffold720 | 1277                    | TT                              | AA                | 1946617516               |
| SNP_P3_134564_1278   | NW_004516119.1 | Scaffold720 | 1278                    | TT                              | AA                | 1946617518               |
| SNP_P3_134565_1313   | NW_004516119.1 | Scaffold720 | 1313                    | AA                              | GG                | 1946617521               |
| SNP_P3_134566_1314   | NW_004516119.1 | Scaffold720 | 1314                    | AA                              | TT                | 1946617523               |
| SNP_P3_134567_1335   | NW_004516119.1 | Scaffold720 | 1335                    | GG                              | TT                | 1946617525               |
| SNP_P3_134568_1371   | NW_004516119.1 | Scaffold720 | 1371                    | CC                              | TT                | 1946617527               |
| SNP_P3_134569_18906  | NW_004516119.1 | Scaffold720 | 18906                   | CC                              | TT                | 1946617529               |
| SNP_P3_134570_26573  | NW_004516119.1 | Scaffold720 | 26573                   | AA                              | CC                | 1946617531               |

| SNPs IDs             | Chromosome IDs | Chromosomes | Physical positions (bp) | CDC Frontier (Reference genome) | (Pusa 256 & HPNB) | NCBI SNPdb Accession IDs |
|----------------------|----------------|-------------|-------------------------|---------------------------------|-------------------|--------------------------|
| SNP_P3_134571_53725  | NW_004516119.1 | Scaffold720 | 53725                   | AA                              | GG                | 1946617533               |
| SNP_P3_134572_57556  | NW_004516119.1 | Scaffold720 | 57556                   | AA                              | GG                | 1946617535               |
| SNP_P3_134574_68279  | NW_004516119.1 | Scaffold720 | 68279                   | CC                              | AA                | 1946617537               |
| SNP_P3_134575_76938  | NW_004516119.1 | Scaffold720 | 76938                   | AA                              | GG                | 1946617539               |
| SNP_P3_134576_77019  | NW_004516119.1 | Scaffold720 | 77019                   | CC                              | GG                | 1946617541               |
| SNP_P3_134577_77066  | NW_004516119.1 | Scaffold720 | 77066                   | TT                              | AA                | 1946617543               |
| SNP_P3_134578_77071  | NW_004516119.1 | Scaffold720 | 77071                   | CC                              | TT                | 1946617545               |
| SNP_P3_134579_77073  | NW_004516119.1 | Scaffold720 | 77073                   | TT                              | CC                | 1946617547               |
| SNP_P3_134580_77108  | NW_004516119.1 | Scaffold720 | 77108                   | CC                              | GG                | 1946617549               |
| SNP_P3_134581_118371 | NW_004516119.1 | Scaffold720 | 118371                  | GG                              | AA                | 1946617551               |
| SNP_P3_134582_121859 | NW_004516119.1 | Scaffold720 | 121859                  | TT                              | AA                | 1946617553               |
| SNP_P3_134583_122208 | NW_004516119.1 | Scaffold720 | 122208                  | GG                              | AA                | 1946617555               |
| SNP_P3_134584_129723 | NW_004516119.1 | Scaffold720 | 129723                  | AA                              | CC                | 1946617558               |
| SNP_P3_134585_153197 | NW_004516119.1 | Scaffold720 | 153197                  | TT                              | CC                | 1946617560               |
| SNP_P3_134586_167742 | NW_004516119.1 | Scaffold720 | 167742                  | GG                              | AA                | 1946617562               |
| SNP_P3_134587_170335 | NW_004516119.1 | Scaffold720 | 170335                  | AA                              | GG                | 1946617564               |
| SNP_P3_134588_179269 | NW_004516119.1 | Scaffold720 | 179269                  | TT                              | AA                | 1946617566               |
| SNP_P3_134589_179581 | NW_004516119.1 | Scaffold720 | 179581                  | CC                              | TT                | 1946617568               |
| SNP_P3_134590_221334 | NW_004516119.1 | Scaffold720 | 221334                  | TT                              | CC                | 1946617570               |
| SNP_P3_134592_221345 | NW_004516119.1 | Scaffold720 | 221345                  | AA                              | TT                | 1946617572               |
| SNP_P3_134593_221348 | NW_004516119.1 | Scaffold720 | 221348                  | TT                              | CC                | 1946617574               |
| SNP_P3_134594_221394 | NW_004516119.1 | Scaffold720 | 221394                  | TT                              | CC                | 1946617576               |
| SNP_P3_134595_221409 | NW_004516119.1 | Scaffold720 | 221409                  | TT                              | CC                | 1946617578               |
| SNP_P3_134597_221420 | NW_004516119.1 | Scaffold720 | 221420                  | TT                              | CC                | 1946617580               |
| SNP_P3_134598_221881 | NW_004516119.1 | Scaffold720 | 221881                  | TT                              | GG                | 1946617582               |
| SNP_P3_134599_222537 | NW_004516119.1 | Scaffold720 | 222537                  | TT                              | GG                | 1946617584               |
| SNP_P3_134600_223198 | NW_004516119.1 | Scaffold720 | 223198                  | GG                              | CC                | 1946617586               |
| SNP_P3_134601_252570 | NW_004516119.1 | Scaffold720 | 252570                  | AA                              | GG                | 1946617588               |
| SNP_P3_134603_278633 | NW_004516119.1 | Scaffold720 | 278633                  | TT                              | CC                | 1946617590               |
| SNP_P3_134604_296566 | NW_004516119.1 | Scaffold720 | 296566                  | AA                              | TT                | 1946617592               |
| SNP_P3_134605_296610 | NW_004516119.1 | Scaffold720 | 296610                  | GG                              | AA                | 1946617594               |
| SNP_P3_134606_296689 | NW_004516119.1 | Scaffold720 | 296689                  | TT                              | AA                | 1946617596               |
| SNP_P3_134607_296865 | NW_004516119.1 | Scaffold720 | 296865                  | AA                              | GG                | 1946617598               |
| SNP_P3_134608_296871 | NW_004516119.1 | Scaffold720 | 296871                  | TT                              | GG                | 1946617600               |
| SNP_P3_134609_297034 | NW_004516119.1 | Scaffold720 | 297034                  | CC                              | AA                | 1946617602               |
| SNP_P3_134610_297071 | NW_004516119.1 | Scaffold720 | 297071                  | TT                              | CC                | 1946617604               |
| SNP_P3_134611_297131 | NW_004516119.1 | Scaffold720 | 297131                  | AA                              | CC                | 1946617606               |
| SNP_P3_134612_297195 | NW_004516119.1 | Scaffold720 | 297195                  | AA                              | GG                | 1946617608               |
| SNP_P3_134613_297250 | NW_004516119.1 | Scaffold720 | 297250                  | AA                              | CC                | 1946617610               |
| SNP_P3_134614_297268 | NW_004516119.1 | Scaffold720 | 297268                  | AA                              | GG                | 1946617612               |
| SNP_P3_134615_297281 | NW_004516119.1 | Scaffold720 | 297281                  | GG                              | AA                | 1946617614               |
| SNP_P3_134616_297341 | NW_004516119.1 | Scaffold720 | 297341                  | AA                              | CC                | 1946617616               |

| SNPs IDs             | Chromosome IDs | Chromosomes | Physical positions (bp) | CDC Frontier (Reference genome) | (Pusa 256 & HPNB) | NCBI SNPdb Accession IDs |
|----------------------|----------------|-------------|-------------------------|---------------------------------|-------------------|--------------------------|
| SNP_P3_134617_297342 | NW_004516119.1 | Scaffold720 | 297342                  | GG                              | AA                | 1946617618               |
| SNP_P3_134618_297452 | NW_004516119.1 | Scaffold720 | 297452                  | CC                              | TT                | 1946617620               |
| SNP_P3_134619_297522 | NW_004516119.1 | Scaffold720 | 297522                  | AA                              | CC                | 1946617621               |
| SNP_P3_134620_297529 | NW_004516119.1 | Scaffold720 | 297529                  | AA                              | GG                | 1946617623               |
| SNP_P3_134621_297652 | NW_004516119.1 | Scaffold720 | 297652                  | GG                              | AA                | 1946617625               |
| SNP_P3_134622_297690 | NW_004516119.1 | Scaffold720 | 297690                  | GG                              | AA                | 1946617627               |
| SNP_P3_134623_297729 | NW_004516119.1 | Scaffold720 | 297729                  | CC                              | AA                | 1946617629               |
| SNP_P3_134624_297747 | NW_004516119.1 | Scaffold720 | 297747                  | AA                              | GG                | 1946617631               |
| SNP_P3_134625_297797 | NW_004516119.1 | Scaffold720 | 297797                  | AA                              | CC                | 1946617633               |
| SNP_P3_134626_297886 | NW_004516119.1 | Scaffold720 | 297886                  | TT                              | GG                | 1946617635               |
| SNP_P3_134628_298098 | NW_004516119.1 | Scaffold720 | 298098                  | CC                              | TT                | 1946617638               |
| SNP_P3_134629_298128 | NW_004516119.1 | Scaffold720 | 298128                  | CC                              | AA                | 1946617640               |
| SNP_P3_134630_298216 | NW_004516119.1 | Scaffold720 | 298216                  | GG                              | AA                | 1946617642               |
| SNP_P3_134631_298283 | NW_004516119.1 | Scaffold720 | 298283                  | TT                              | CC                | 1946617644               |
| SNP_P3_134632_298927 | NW_004516119.1 | Scaffold720 | 298927                  | AA                              | GG                | 1946617646               |
| SNP_P3_134633_299143 | NW_004516119.1 | Scaffold720 | 299143                  | AA                              | TT                | 1946617648               |
| SNP_P3_134634_302556 | NW_004516119.1 | Scaffold720 | 302556                  | CC                              | TT                | 1946617650               |
| SNP_P3_134635_329815 | NW_004516119.1 | Scaffold720 | 329815                  | AA                              | GG                | 1946617652               |
| SNP_P3_134636_329866 | NW_004516119.1 | Scaffold720 | 329866                  | CC                              | TT                | 1946617654               |
| SNP_P3_134638_330049 | NW_004516119.1 | Scaffold720 | 330049                  | TT                              | CC                | 1946617656               |
| SNP_P3_134640_330266 | NW_004516119.1 | Scaffold720 | 330266                  | GG                              | CC                | 1946617658               |
| SNP_P3_134641_330270 | NW_004516119.1 | Scaffold720 | 330270                  | TT                              | CC                | 1946617660               |
| SNP_P3_134642_330278 | NW_004516119.1 | Scaffold720 | 330278                  | TT                              | CC                | 1946617662               |
| SNP_P3_134643_330297 | NW_004516119.1 | Scaffold720 | 330297                  | CC                              | AA                | 1946617664               |
| SNP_P3_134644_330346 | NW_004516119.1 | Scaffold720 | 330346                  | TT                              | AA                | 1946617667               |
| SNP_P3_134645_330900 | NW_004516119.1 | Scaffold720 | 330900                  | AA                              | GG                | 1946617669               |
| SNP_P3_134646_330903 | NW_004516119.1 | Scaffold720 | 330903                  | GG                              | TT                | 1946617671               |
| SNP_P3_134647_330926 | NW_004516119.1 | Scaffold720 | 330926                  | TT                              | AA                | 1946617673               |
| SNP_P3_134648_331016 | NW_004516119.1 | Scaffold720 | 331016                  | GG                              | TT                | 1946617676               |
| SNP_P3_134649_331025 | NW_004516119.1 | Scaffold720 | 331025                  | AA                              | TT                | 1946617678               |
| SNP_P3_134650_331170 | NW_004516119.1 | Scaffold720 | 331170                  | CC                              | TT                | 1946617680               |
| SNP_P3_134651_331171 | NW_004516119.1 | Scaffold720 | 331171                  | AA                              | GG                | 1946617682               |
| SNP_P3_134652_331172 | NW_004516119.1 | Scaffold720 | 331172                  | GG                              | AA                | 1946617684               |
| SNP_P3_134653_331182 | NW_004516119.1 | Scaffold720 | 331182                  | CC                              | TT                | 1946617686               |
| SNP_P3_134654_331286 | NW_004516119.1 | Scaffold720 | 331286                  | AA                              | GG                | 1946617687               |
| SNP_P3_134655_332778 | NW_004516119.1 | Scaffold720 | 332778                  | GG                              | AA                | 1946617689               |
| SNP_P3_134656_333005 | NW_004516119.1 | Scaffold720 | 333005                  | TT                              | CC                | 1946617691               |
| SNP_P3_134657_333020 | NW_004516119.1 | Scaffold720 | 333020                  | CC                              | TT                | 1946617693               |
| SNP_P3_134658_333026 | NW_004516119.1 | Scaffold720 | 333026                  | GG                              | AA                | 1946617695               |
| SNP_P3_134659_333312 | NW_004516119.1 | Scaffold720 | 333312                  | GG                              | TT                | 1946617697               |
| SNP_P3_134661_336874 | NW_004516119.1 | Scaffold720 | 336874                  | AA                              | GG                | 1946617699               |
| SNP_P3_134662_336931 | NW_004516119.1 | Scaffold720 | 336931                  | TT                              | GG                | 1946617701               |

| SNPs IDs             | Chromosome IDs | Chromosomes | Physical positions (bp) | CDC Frontier (Reference genome) | (Pusa 256 & HPNB) | NCBI SNPdb Accession IDs |
|----------------------|----------------|-------------|-------------------------|---------------------------------|-------------------|--------------------------|
| SNP_P3_134663_336949 | NW_004516119.1 | Scaffold720 | 336949                  | GG                              | TT                | 1946617703               |
| SNP_P3_134664_337210 | NW_004516119.1 | Scaffold720 | 337210                  | CC                              | TT                | 1946617705               |
| SNP_P3_134665_337262 | NW_004516119.1 | Scaffold720 | 337262                  | AA                              | TT                | 1946617707               |
| SNP_P3_134666_337332 | NW_004516119.1 | Scaffold720 | 337332                  | AA                              | CC                | 1946617709               |
| SNP_P3_134667_337391 | NW_004516119.1 | Scaffold720 | 337391                  | TT                              | CC                | 1946617711               |
| SNP_P3_134668_337456 | NW_004516119.1 | Scaffold720 | 337456                  | AA                              | GG                | 1946617713               |
| SNP_P3_134669_337546 | NW_004516119.1 | Scaffold720 | 337546                  | CC                              | TT                | 1946617716               |
| SNP_P3_134670_337607 | NW_004516119.1 | Scaffold720 | 337607                  | AA                              | TT                | 1946617718               |
| SNP_P3_134671_337616 | NW_004516119.1 | Scaffold720 | 337616                  | CC                              | TT                | 1946617720               |
| SNP_P3_134672_337691 | NW_004516119.1 | Scaffold720 | 337691                  | AA                              | CC                | 1946617722               |
| SNP_P3_134673_337735 | NW_004516119.1 | Scaffold720 | 337735                  | AA                              | GG                | 1946617724               |
| SNP_P3_134674_337844 | NW_004516119.1 | Scaffold720 | 337844                  | TT                              | CC                | 1946617726               |
| SNP_P3_134675_337890 | NW_004516119.1 | Scaffold720 | 337890                  | GG                              | TT                | 1946617728               |
| SNP_P3_134676_338192 | NW_004516119.1 | Scaffold720 | 338192                  | TT                              | GG                | 1946617730               |
| SNP_P3_134677_341651 | NW_004516119.1 | Scaffold720 | 341651                  | AA                              | TT                | 1946617732               |
| SNP_P3_134678_342062 | NW_004516119.1 | Scaffold720 | 342062                  | AA                              | GG                | 1946617734               |
| SNP_P3_134679_344828 | NW_004516119.1 | Scaffold720 | 344828                  | GG                              | AA                | 1946617735               |
| SNP_P3_134680_344858 | NW_004516119.1 | Scaffold720 | 344858                  | GG                              | CC                | 1946617737               |
| SNP_P3_134681_344946 | NW_004516119.1 | Scaffold720 | 344946                  | CC                              | TT                | 1946617739               |
| SNP_P3_134682_345062 | NW_004516119.1 | Scaffold720 | 345062                  | GG                              | AA                | 1946617741               |
| SNP_P3_134683_345138 | NW_004516119.1 | Scaffold720 | 345138                  | GG                              | TT                | 1946617743               |
| SNP_P3_134684_345201 | NW_004516119.1 | Scaffold720 | 345201                  | TT                              | CC                | 1946617745               |
| SNP_P3_134685_345202 | NW_004516119.1 | Scaffold720 | 345202                  | AA                              | GG                | 1946617747               |
| SNP_P3_134686_345389 | NW_004516119.1 | Scaffold720 | 345389                  | TT                              | CC                | 1946617749               |
| SNP_P3_134687_346768 | NW_004516119.1 | Scaffold720 | 346768                  | TT                              | CC                | 1946617751               |
| SNP_P3_134688_346804 | NW_004516119.1 | Scaffold720 | 346804                  | TT                              | AA                | 1946617753               |
| SNP_P3_134689_353464 | NW_004516119.1 | Scaffold720 | 353464                  | TT                              | AA                | 1946617756               |
| SNP_P3_134690_360595 | NW_004516119.1 | Scaffold720 | 360595                  | TT                              | CC                | 1946617758               |
| SNP_P3_134691_360820 | NW_004516119.1 | Scaffold720 | 360820                  | CC                              | AA                | 1946617760               |
| SNP_P3_134692_360863 | NW_004516119.1 | Scaffold720 | 360863                  | GG                              | AA                | 1946617762               |
| SNP_P3_134693_361895 | NW_004516119.1 | Scaffold720 | 361895                  | CC                              | AA                | 1946617764               |
| SNP_P3_134694_361897 | NW_004516119.1 | Scaffold720 | 361897                  | GG                              | CC                | 1946617766               |
| SNP_P3_134695_362943 | NW_004516119.1 | Scaffold720 | 362943                  | AA                              | GG                | 1946617768               |
| SNP_P3_134696_363110 | NW_004516119.1 | Scaffold720 | 363110                  | TT                              | CC                | 1946617770               |
| SNP_P3_134697_364535 | NW_004516119.1 | Scaffold720 | 364535                  | GG                              | TT                | 1946617772               |
| SNP_P3_134698_364807 | NW_004516119.1 | Scaffold720 | 364807                  | AA                              | GG                | 1946617774               |
| SNP_P3_134699_370011 | NW_004516119.1 | Scaffold720 | 370011                  | GG                              | TT                | 1946617776               |
| SNP_P3_134700_370067 | NW_004516119.1 | Scaffold720 | 370067                  | AA                              | TT                | 1946617778               |
| SNP_P3_134701_370070 | NW_004516119.1 | Scaffold720 | 370070                  | AA                              | GG                | 1946617780               |
| SNP_P3_134702_370137 | NW_004516119.1 | Scaffold720 | 370137                  | TT                              | CC                | 1946617782               |
| SNP_P3_134703_370223 | NW_004516119.1 | Scaffold720 | 370223                  | GG                              | AA                | 1946617784               |
| SNP_P3_134704_370224 | NW_004516119.1 | Scaffold720 | 370224                  | AA                              | GG                | 1946617786               |



| SNPs IDs             | Chromosome IDs | Chromosomes | Physical positions (bp) | CDC Frontier (Reference genome) | (Pusa 256 & HPNB) | NCBI SNPdb Accession IDs |
|----------------------|----------------|-------------|-------------------------|---------------------------------|-------------------|--------------------------|
| SNP_P3_134705_370229 | NW_004516119.1 | Scaffold720 | 370229                  | AA                              | CC                | 1946617788               |
| SNP_P3_134707_370297 | NW_004516119.1 | Scaffold720 | 370297                  | CC                              | TT                | 1946617790               |
| SNP_P3_134708_370374 | NW_004516119.1 | Scaffold720 | 370374                  | TT                              | CC                | 1946617792               |
| SNP_P3_134709_370465 | NW_004516119.1 | Scaffold720 | 370465                  | TT                              | AA                | 1946617794               |
| SNP_P3_134710_370559 | NW_004516119.1 | Scaffold720 | 370559                  | GG                              | CC                | 1946617796               |
| SNP_P3_134711_370639 | NW_004516119.1 | Scaffold720 | 370639                  | TT                              | AA                | 1946617798               |
| SNP_P3_134713_370725 | NW_004516119.1 | Scaffold720 | 370725                  | AA                              | GG                | 1946617800               |
| SNP_P3_134714_370814 | NW_004516119.1 | Scaffold720 | 370814                  | GG                              | AA                | 1946617802               |
| SNP_P3_134715_370924 | NW_004516119.1 | Scaffold720 | 370924                  | CC                              | AA                | 1946617804               |
| SNP_P3_134716_371463 | NW_004516119.1 | Scaffold720 | 371463                  | AA                              | TT                | 1946617806               |
| SNP_P3_134717_371609 | NW_004516119.1 | Scaffold720 | 371609                  | TT                              | CC                | 1946617808               |
| SNP_P3_134718_371637 | NW_004516119.1 | Scaffold720 | 371637                  | GG                              | AA                | 1946617810               |
| SNP_P3_134719_371886 | NW_004516119.1 | Scaffold720 | 371886                  | GG                              | AA                | 1946617812               |
| SNP_P3_134721_14073  | NW_004516120.1 | Scaffold721 | 14073                   | GG                              | AA                | 1946617814               |
| SNP_P3_134722_14130  | NW_004516120.1 | Scaffold721 | 14130                   | CC                              | GG                | 1946617815               |
| SNP_P3_134723_15672  | NW_004516120.1 | Scaffold721 | 15672                   | TT                              | AA                | 1946617817               |
| SNP_P3_134724_28898  | NW_004516120.1 | Scaffold721 | 28898                   | TT                              | CC                | 1946617819               |
| SNP_P3_134725_35609  | NW_004516120.1 | Scaffold721 | 35609                   | GG                              | AA                | 1946617821               |
| SNP_P3_134726_39630  | NW_004516120.1 | Scaffold721 | 39630                   | AA                              | GG                | 1946617823               |
| SNP_P3_134727_39808  | NW_004516120.1 | Scaffold721 | 39808                   | CC                              | AA                | 1946617825               |
| SNP_P3_134728_39820  | NW_004516120.1 | Scaffold721 | 39820                   | AA                              | GG                | 1946617827               |
| SNP_P3_134729_39835  | NW_004516120.1 | Scaffold721 | 39835                   | GG                              | AA                | 1946617829               |
| SNP_P3_134730_39840  | NW_004516120.1 | Scaffold721 | 39840                   | AA                              | CC                | 1946617831               |
| SNP_P3_134731_39868  | NW_004516120.1 | Scaffold721 | 39868                   | GG                              | AA                | 1946617833               |
| SNP_P3_134732_39871  | NW_004516120.1 | Scaffold721 | 39871                   | GG                              | TT                | 1946617835               |
| SNP_P3_134733_39876  | NW_004516120.1 | Scaffold721 | 39876                   | TT                              | CC                | 1946617836               |
| SNP_P3_134734_39877  | NW_004516120.1 | Scaffold721 | 39877                   | TT                              | AA                | 1946617838               |
| SNP_P3_134735_39892  | NW_004516120.1 | Scaffold721 | 39892                   | AA                              | GG                | 1946617840               |
| SNP_P3_134736_39895  | NW_004516120.1 | Scaffold721 | 39895                   | GG                              | AA                | 1946617843               |
| SNP_P3_134737_40043  | NW_004516120.1 | Scaffold721 | 40043                   | GG                              | TT                | 1946617845               |
| SNP_P3_134738_40045  | NW_004516120.1 | Scaffold721 | 40045                   | TT                              | AA                | 1946617847               |
| SNP_P3_134740_57125  | NW_004516120.1 | Scaffold721 | 57125                   | CC                              | GG                | 1946617849               |
| SNP_P3_134742_58555  | NW_004516120.1 | Scaffold721 | 58555                   | AA                              | GG                | 1946617851               |
| SNP_P3_134743_58556  | NW_004516120.1 | Scaffold721 | 58556                   | CC                              | TT                | 1946617853               |
| SNP_P3_134744_58557  | NW_004516120.1 | Scaffold721 | 58557                   | AA                              | TT                | 1946617855               |
| SNP_P3_134745_58564  | NW_004516120.1 | Scaffold721 | 58564                   | GG                              | TT                | 1946617857               |
| SNP_P3_134746_63135  | NW_004516120.1 | Scaffold721 | 63135                   | AA                              | TT                | 1946617860               |
| SNP_P3_134747_66722  | NW_004516120.1 | Scaffold721 | 66722                   | CC                              | TT                | 1946617862               |
| SNP_P3_134748_70944  | NW_004516120.1 | Scaffold721 | 70944                   | TT                              | CC                | 1946617864               |
| SNP_P3_134749_77274  | NW_004516120.1 | Scaffold721 | 77274                   | CC                              | AA                | 1946617866               |
| SNP_P3_134750_77608  | NW_004516120.1 | Scaffold721 | 77608                   | TT                              | CC                | 1946617868               |
| SNP_P3_134751_77615  | NW_004516120.1 | Scaffold721 | 77615                   | CC                              | TT                | 1946617870               |

| SNPs IDs             | Chromosome IDs | Chromosomes | Physical positions (bp) | CDC Frontier (Reference genome) | (Pusa 256 & HPNB) | NCBI SNPdb Accession IDs |
|----------------------|----------------|-------------|-------------------------|---------------------------------|-------------------|--------------------------|
| SNP_P3_134752_77641  | NW_004516120.1 | Scaffold721 | 77641                   | TT                              | AA                | 1946617872               |
| SNP_P3_134753_77872  | NW_004516120.1 | Scaffold721 | 77872                   | TT                              | GG                | 1946617874               |
| SNP_P3_134754_77888  | NW_004516120.1 | Scaffold721 | 77888                   | CC                              | GG                | 1946617876               |
| SNP_P3_134755_77906  | NW_004516120.1 | Scaffold721 | 77906                   | AA                              | GG                | 1946617878               |
| SNP_P3_134756_78897  | NW_004516120.1 | Scaffold721 | 78897                   | TT                              | CC                | 1946617880               |
| SNP_P3_134757_78898  | NW_004516120.1 | Scaffold721 | 78898                   | GG                              | AA                | 1946617882               |
| SNP_P3_134758_79253  | NW_004516120.1 | Scaffold721 | 79253                   | AA                              | CC                | 1946617884               |
| SNP_P3_134759_80744  | NW_004516120.1 | Scaffold721 | 80744                   | CC                              | TT                | 1946617886               |
| SNP_P3_134760_80760  | NW_004516120.1 | Scaffold721 | 80760                   | CC                              | TT                | 1946617888               |
| SNP_P3_134761_106546 | NW_004516120.1 | Scaffold721 | 106546                  | CC                              | TT                | 1946617890               |
| SNP_P3_134762_106828 | NW_004516120.1 | Scaffold721 | 106828                  | AA                              | CC                | 1946617892               |
| SNP_P3_134763_107367 | NW_004516120.1 | Scaffold721 | 107367                  | GG                              | AA                | 1946617894               |
| SNP_P3_134764_110819 | NW_004516120.1 | Scaffold721 | 110819                  | AA                              | GG                | 1946617896               |
| SNP_P3_134765_110825 | NW_004516120.1 | Scaffold721 | 110825                  | GG                              | TT                | 1946617898               |
| SNP_P3_134766_111133 | NW_004516120.1 | Scaffold721 | 111133                  | AA                              | GG                | 1946617900               |
| SNP_P3_134767_111143 | NW_004516120.1 | Scaffold721 | 111143                  | TT                              | GG                | 1946617902               |
| SNP_P3_134768_123797 | NW_004516120.1 | Scaffold721 | 123797                  | GG                              | CC                | 1946617904               |
| SNP_P3_134769_123802 | NW_004516120.1 | Scaffold721 | 123802                  | GG                              | TT                | 1946617906               |
| SNP_P3_134770_123806 | NW_004516120.1 | Scaffold721 | 123806                  | CC                              | TT                | 1946617907               |
| SNP_P3_134771_123822 | NW_004516120.1 | Scaffold721 | 123822                  | AA                              | GG                | 1946617909               |
| SNP_P3_134772_126136 | NW_004516120.1 | Scaffold721 | 126136                  | TT                              | AA                | 1946617911               |
| SNP_P3_134773_160780 | NW_004516120.1 | Scaffold721 | 160780                  | CC                              | TT                | 1946617913               |
| SNP_P3_134774_163637 | NW_004516120.1 | Scaffold721 | 163637                  | TT                              | CC                | 1946617915               |
| SNP_P3_134775_163638 | NW_004516120.1 | Scaffold721 | 163638                  | TT                              | CC                | 1946617917               |
| SNP_P3_134776_165388 | NW_004516120.1 | Scaffold721 | 165388                  | AA                              | CC                | 1946617919               |
| SNP_P3_134777_174444 | NW_004516120.1 | Scaffold721 | 174444                  | AA                              | GG                | 1946617921               |
| SNP_P3_134778_187782 | NW_004516120.1 | Scaffold721 | 187782                  | CC                              | GG                | 1946617923               |
| SNP_P3_134779_187844 | NW_004516120.1 | Scaffold721 | 187844                  | TT                              | CC                | 1946617925               |
| SNP_P3_134780_188131 | NW_004516120.1 | Scaffold721 | 188131                  | AA                              | CC                | 1946617927               |
| SNP_P3_134781_188177 | NW_004516120.1 | Scaffold721 | 188177                  | GG                              | AA                | 1946617929               |
| SNP_P3_134782_188202 | NW_004516120.1 | Scaffold721 | 188202                  | GG                              | AA                | 1946617931               |
| SNP_P3_134783_190681 | NW_004516120.1 | Scaffold721 | 190681                  | CC                              | TT                | 1946617933               |
| SNP_P3_134784_190695 | NW_004516120.1 | Scaffold721 | 190695                  | TT                              | CC                | 1946617935               |
| SNP_P3_134785_190701 | NW_004516120.1 | Scaffold721 | 190701                  | TT                              | AA                | 1946617937               |
| SNP_P3_134786_190704 | NW_004516120.1 | Scaffold721 | 190704                  | CC                              | AA                | 1946617939               |
| SNP_P3_134787_191042 | NW_004516120.1 | Scaffold721 | 191042                  | TT                              | AA                | 1946617941               |
| SNP_P3_134788_191055 | NW_004516120.1 | Scaffold721 | 191055                  | TT                              | GG                | 1946617943               |
| SNP_P3_134789_191430 | NW_004516120.1 | Scaffold721 | 191430                  | GG                              | CC                | 1946617945               |
| SNP_P3_134790_191783 | NW_004516120.1 | Scaffold721 | 191783                  | CC                              | GG                | 1946617947               |
| SNP_P3_134791_191792 | NW_004516120.1 | Scaffold721 | 191792                  | TT                              | AA                | 1946617949               |
| SNP_P3_134792_192111 | NW_004516120.1 | Scaffold721 | 192111                  | GG                              | TT                | 1946617951               |
| SNP_P3_134793_192143 | NW_004516120.1 | Scaffold721 | 192143                  | TT                              | AA                | 1946617953               |

| SNPs IDs             | Chromosome IDs | Chromosomes | Physical positions (bp) | CDC Frontier (Reference genome) | (Pusa 256 & HPNB) | NCBI SNPdb Accession IDs |
|----------------------|----------------|-------------|-------------------------|---------------------------------|-------------------|--------------------------|
| SNP_P3_134794_192158 | NW_004516120.1 | Scaffold721 | 192158                  | TT                              | AA                | 1946617954               |
| SNP_P3_134795_192159 | NW_004516120.1 | Scaffold721 | 192159                  | GG                              | AA                | 1946617956               |
| SNP_P3_134796_192171 | NW_004516120.1 | Scaffold721 | 192171                  | AA                              | CC                | 1946617958               |
| SNP_P3_134797_192174 | NW_004516120.1 | Scaffold721 | 192174                  | TT                              | CC                | 1946617960               |
| SNP_P3_134798_192177 | NW_004516120.1 | Scaffold721 | 192177                  | GG                              | AA                | 1946617962               |
| SNP_P3_134799_192185 | NW_004516120.1 | Scaffold721 | 192185                  | GG                              | TT                | 1946617965               |
| SNP_P3_134800_1314   | NW_004516121.1 | Scaffold723 | 1314                    | TT                              | CC                | 1946617967               |
| SNP_P3_134801_10731  | NW_004516121.1 | Scaffold723 | 10731                   | AA                              | GG                | 1946617969               |
| SNP_P3_134802_10788  | NW_004516121.1 | Scaffold723 | 10788                   | AA                              | CC                | 1946617971               |
| SNP_P3_134803_10791  | NW_004516121.1 | Scaffold723 | 10791                   | GG                              | CC                | 1946617973               |
| SNP_P3_134804_10803  | NW_004516121.1 | Scaffold723 | 10803                   | TT                              | GG                | 1946617975               |
| SNP_P3_134805_10845  | NW_004516121.1 | Scaffold723 | 10845                   | CC                              | AA                | 1946617977               |
| SNP_P3_134807_17693  | NW_004516122.1 | Scaffold724 | 17693                   | AA                              | GG                | 1946617979               |
| SNP_P3_134809_41016  | NW_004516122.1 | Scaffold724 | 41016                   | TT                              | CC                | 1946617981               |
| SNP_P3_134810_57243  | NW_004516122.1 | Scaffold724 | 57243                   | TT                              | GG                | 1946617982               |
| SNP_P3_134811_57598  | NW_004516122.1 | Scaffold724 | 57598                   | TT                              | CC                | 1946617984               |
| SNP_P3_134812_74379  | NW_004516122.1 | Scaffold724 | 74379                   | AA                              | TT                | 1946617986               |
| SNP_P3_134813_76467  | NW_004516122.1 | Scaffold724 | 76467                   | AA                              | GG                | 1946617988               |
| SNP_P3_134814_76487  | NW_004516122.1 | Scaffold724 | 76487                   | GG                              | TT                | 1946617990               |
| SNP_P3_134815_76529  | NW_004516122.1 | Scaffold724 | 76529                   | TT                              | GG                | 1946617992               |
| SNP_P3_134816_76826  | NW_004516122.1 | Scaffold724 | 76826                   | TT                              | GG                | 1946617994               |
| SNP_P3_134817_82758  | NW_004516122.1 | Scaffold724 | 82758                   | CC                              | TT                | 1946617996               |
| SNP_P3_134818_83061  | NW_004516122.1 | Scaffold724 | 83061                   | TT                              | CC                | 1946617998               |
| SNP_P3_134819_99614  | NW_004516122.1 | Scaffold724 | 99614                   | TT                              | CC                | 1946618000               |
| SNP_P3_134820_99654  | NW_004516122.1 | Scaffold724 | 99654                   | AA                              | TT                | 1946618002               |
| SNP_P3_134821_99720  | NW_004516122.1 | Scaffold724 | 99720                   | TT                              | AA                | 1946618004               |
| SNP_P3_134822_99758  | NW_004516122.1 | Scaffold724 | 99758                   | TT                              | GG                | 1946618006               |
| SNP_P3_134823_100070 | NW_004516122.1 | Scaffold724 | 100070                  | GG                              | AA                | 1946618008               |
| SNP_P3_134826_100270 | NW_004516122.1 | Scaffold724 | 100270                  | TT                              | AA                | 1946618010               |
| SNP_P3_134828_100364 | NW_004516122.1 | Scaffold724 | 100364                  | CC                              | GG                | 1946618011               |
| SNP_P3_134829_100430 | NW_004516122.1 | Scaffold724 | 100430                  | TT                              | CC                | 1946618013               |
| SNP_P3_134830_100443 | NW_004516122.1 | Scaffold724 | 100443                  | AA                              | GG                | 1946618015               |
| SNP_P3_134831_100456 | NW_004516122.1 | Scaffold724 | 100456                  | AA                              | CC                | 1946618017               |
| SNP_P3_134832_100461 | NW_004516122.1 | Scaffold724 | 100461                  | AA                              | TT                | 1946618019               |
| SNP_P3_134834_101189 | NW_004516122.1 | Scaffold724 | 101189                  | TT                              | CC                | 1946618021               |
| SNP_P3_134836_101491 | NW_004516122.1 | Scaffold724 | 101491                  | CC                              | TT                | 1946618023               |
| SNP_P3_134837_101623 | NW_004516122.1 | Scaffold724 | 101623                  | TT                              | AA                | 1946618025               |
| SNP_P3_134838_101633 | NW_004516122.1 | Scaffold724 | 101633                  | AA                              | GG                | 1946618027               |
| SNP_P3_134839_103413 | NW_004516122.1 | Scaffold724 | 103413                  | AA                              | CC                | 1946618029               |
| SNP_P3_134840_103720 | NW_004516122.1 | Scaffold724 | 103720                  | AA                              | CC                | 1946618031               |
| SNP_P3_134841_106540 | NW_004516122.1 | Scaffold724 | 106540                  | CC                              | TT                | 1946618032               |
| SNP_P3_134843_108596 | NW_004516122.1 | Scaffold724 | 108596                  | TT                              | AA                | 1946618035               |

| SNPs IDs             | Chromosome IDs | Chromosomes | Physical positions (bp) | CDC Frontier (Reference genome) | (Pusa 256 & HPNB) | NCBI SNPdb Accession IDs |
|----------------------|----------------|-------------|-------------------------|---------------------------------|-------------------|--------------------------|
| SNP_P3_134844_108984 | NW_004516122.1 | Scaffold724 | 108984                  | AA                              | GG                | 1946618037               |
| SNP_P3_134845_112415 | NW_004516122.1 | Scaffold724 | 112415                  | CC                              | TT                | 1946618039               |
| SNP_P3_134846_112451 | NW_004516122.1 | Scaffold724 | 112451                  | CC                              | TT                | 1946618041               |
| SNP_P3_134847_126324 | NW_004516122.1 | Scaffold724 | 126324                  | GG                              | AA                | 1946618042               |
| SNP_P3_134848_126335 | NW_004516122.1 | Scaffold724 | 126335                  | AA                              | GG                | 1946618044               |
| SNP_P3_134849_126346 | NW_004516122.1 | Scaffold724 | 126346                  | AA                              | CC                | 1946618046               |
| SNP_P3_134850_126354 | NW_004516122.1 | Scaffold724 | 126354                  | CC                              | TT                | 1946618048               |
| SNP_P3_134851_126458 | NW_004516122.1 | Scaffold724 | 126458                  | TT                              | CC                | 1946618050               |
| SNP_P3_134852_126732 | NW_004516122.1 | Scaffold724 | 126732                  | TT                              | CC                | 1946618052               |
| SNP_P3_134853_126733 | NW_004516122.1 | Scaffold724 | 126733                  | CC                              | TT                | 1946618054               |
| SNP_P3_134855_126831 | NW_004516122.1 | Scaffold724 | 126831                  | GG                              | AA                | 1946618056               |
| SNP_P3_134856_126992 | NW_004516122.1 | Scaffold724 | 126992                  | CC                              | TT                | 1946618058               |
| SNP_P3_134857_127017 | NW_004516122.1 | Scaffold724 | 127017                  | CC                              | AA                | 1946618060               |
| SNP_P3_134858_127280 | NW_004516122.1 | Scaffold724 | 127280                  | CC                              | TT                | 1946618062               |
| SNP_P3_134859_127497 | NW_004516122.1 | Scaffold724 | 127497                  | AA                              | GG                | 1946618064               |
| SNP_P3_134860_127517 | NW_004516122.1 | Scaffold724 | 127517                  | AA                              | GG                | 1946618066               |
| SNP_P3_134861_128022 | NW_004516122.1 | Scaffold724 | 128022                  | TT                              | CC                | 1946618068               |
| SNP_P3_134862_128800 | NW_004516122.1 | Scaffold724 | 128800                  | GG                              | CC                | 1946618070               |
| SNP_P3_134863_75     | NW_004516123.1 | Scaffold725 | 75                      | GG                              | AA                | 1946618072               |
| SNP_P3_134864_94     | NW_004516123.1 | Scaffold725 | 94                      | AA                              | GG                | 1946618074               |
| SNP_P3_134865_98     | NW_004516123.1 | Scaffold725 | 98                      | AA                              | GG                | 1946618076               |
| SNP_P3_134866_122    | NW_004516123.1 | Scaffold725 | 122                     | AA                              | CC                | 1946618078               |
| SNP_P3_134867_567    | NW_004516123.1 | Scaffold725 | 567                     | TT                              | AA                | 1946618080               |
| SNP_P3_134868_922    | NW_004516123.1 | Scaffold725 | 922                     | GG                              | AA                | 1946618082               |
| SNP_P3_134869_923    | NW_004516123.1 | Scaffold725 | 923                     | AA                              | TT                | 1946618084               |
| SNP_P3_134870_1315   | NW_004516123.1 | Scaffold725 | 1315                    | CC                              | AA                | 1946618085               |
| SNP_P3_134871_24505  | NW_004516124.1 | Scaffold728 | 24505                   | AA                              | GG                | 1946618087               |
| SNP_P3_134872_24513  | NW_004516124.1 | Scaffold728 | 24513                   | AA                              | GG                | 1946618089               |
| SNP_P3_134873_24558  | NW_004516124.1 | Scaffold728 | 24558                   | CC                              | GG                | 1946618091               |
| SNP_P3_134875_42206  | NW_004516124.1 | Scaffold728 | 42206                   | TT                              | GG                | 1946618093               |
| SNP_P3_134876_42257  | NW_004516124.1 | Scaffold728 | 42257                   | TT                              | CC                | 1946618095               |
| SNP_P3_134877_42401  | NW_004516124.1 | Scaffold728 | 42401                   | AA                              | CC                | 1946618098               |
| SNP_P3_134878_42650  | NW_004516124.1 | Scaffold728 | 42650                   | GG                              | AA                | 1946618100               |
| SNP_P3_134879_42853  | NW_004516124.1 | Scaffold728 | 42853                   | GG                              | AA                | 1946618102               |
| SNP_P3_134880_42866  | NW_004516124.1 | Scaffold728 | 42866                   | GG                              | AA                | 1946618104               |
| SNP_P3_134881_42872  | NW_004516124.1 | Scaffold728 | 42872                   | CC                              | TT                | 1946618106               |
| SNP_P3_134882_42883  | NW_004516124.1 | Scaffold728 | 42883                   | CC                              | TT                | 1946618108               |
| SNP_P3_134883_42921  | NW_004516124.1 | Scaffold728 | 42921                   | TT                              | CC                | 1946618110               |
| SNP_P3_134884_42971  | NW_004516124.1 | Scaffold728 | 42971                   | TT                              | CC                | 1946618112               |
| SNP_P3_134885_42974  | NW_004516124.1 | Scaffold728 | 42974                   | TT                              | CC                | 1946618114               |
| SNP_P3_134886_43259  | NW_004516124.1 | Scaffold728 | 43259                   | CC                              | TT                | 1946618116               |
| SNP_P3_134887_43260  | NW_004516124.1 | Scaffold728 | 43260                   | CC                              | TT                | 1946618118               |

| SNPs IDs             | Chromosome IDs | Chromosomes | Physical positions (bp) | CDC Frontier (Reference genome) | (Pusa 256 & HPNB) | NCBI SNPdb Accession IDs |
|----------------------|----------------|-------------|-------------------------|---------------------------------|-------------------|--------------------------|
| SNP_P3_134888_43271  | NW_004516124.1 | Scaffold728 | 43271                   | GG                              | TT                | 1946618120               |
| SNP_P3_134889_43279  | NW_004516124.1 | Scaffold728 | 43279                   | GG                              | CC                | 1946618122               |
| SNP_P3_134890_44962  | NW_004516124.1 | Scaffold728 | 44962                   | CC                              | TT                | 1946618124               |
| SNP_P3_134891_811    | NW_004516125.1 | Scaffold731 | 811                     | AA                              | GG                | 1946618126               |
| SNP_P3_134892_825    | NW_004516125.1 | Scaffold731 | 825                     | GG                              | TT                | 1946618128               |
| SNP_P3_134893_10089  | NW_004516125.1 | Scaffold731 | 10089                   | CC                              | TT                | 1946618130               |
| SNP_P3_134894_11545  | NW_004516125.1 | Scaffold731 | 11545                   | AA                              | GG                | 1946618132               |
| SNP_P3_134895_26338  | NW_004516125.1 | Scaffold731 | 26338                   | CC                              | AA                | 1946618134               |
| SNP_P3_134896_27127  | NW_004516125.1 | Scaffold731 | 27127                   | AA                              | TT                | 1946618136               |
| SNP_P3_134897_27384  | NW_004516125.1 | Scaffold731 | 27384                   | TT                              | CC                | 1946618137               |
| SNP_P3_134898_27395  | NW_004516125.1 | Scaffold731 | 27395                   | CC                              | TT                | 1946618139               |
| SNP_P3_134899_27417  | NW_004516125.1 | Scaffold731 | 27417                   | GG                              | CC                | 1946618141               |
| SNP_P3_134900_27426  | NW_004516125.1 | Scaffold731 | 27426                   | TT                              | CC                | 1946618143               |
| SNP_P3_134901_28081  | NW_004516125.1 | Scaffold731 | 28081                   | AA                              | GG                | 1946618145               |
| SNP_P3_134902_44691  | NW_004516125.1 | Scaffold731 | 44691                   | GG                              | AA                | 1946618147               |
| SNP_P3_134903_46260  | NW_004516125.1 | Scaffold731 | 46260                   | AA                              | GG                | 1946618149               |
| SNP_P3_134904_46484  | NW_004516125.1 | Scaffold731 | 46484                   | GG                              | AA                | 1946618151               |
| SNP_P3_134905_46528  | NW_004516125.1 | Scaffold731 | 46528                   | AA                              | TT                | 1946618153               |
| SNP_P3_134907_48991  | NW_004516125.1 | Scaffold731 | 48991                   | GG                              | AA                | 1946618156               |
| SNP_P3_134908_48995  | NW_004516125.1 | Scaffold731 | 48995                   | TT                              | GG                | 1946618158               |
| SNP_P3_134909_48997  | NW_004516125.1 | Scaffold731 | 48997                   | AA                              | GG                | 1946618160               |
| SNP_P3_134910_49009  | NW_004516125.1 | Scaffold731 | 49009                   | TT                              | CC                | 1946618162               |
| SNP_P3_134911_49010  | NW_004516125.1 | Scaffold731 | 49010                   | GG                              | AA                | 1946618164               |
| SNP_P3_134912_49022  | NW_004516125.1 | Scaffold731 | 49022                   | AA                              | GG                | 1946618165               |
| SNP_P3_134913_49047  | NW_004516125.1 | Scaffold731 | 49047                   | TT                              | AA                | 1946618167               |
| SNP_P3_134914_49264  | NW_004516125.1 | Scaffold731 | 49264                   | CC                              | TT                | 1946618169               |
| SNP_P3_134915_49483  | NW_004516125.1 | Scaffold731 | 49483                   | AA                              | GG                | 1946618171               |
| SNP_P3_134916_49519  | NW_004516125.1 | Scaffold731 | 49519                   | TT                              | CC                | 1946618173               |
| SNP_P3_134917_49569  | NW_004516125.1 | Scaffold731 | 49569                   | GG                              | TT                | 1946618175               |
| SNP_P3_134918_49573  | NW_004516125.1 | Scaffold731 | 49573                   | CC                              | TT                | 1946618177               |
| SNP_P3_134919_49595  | NW_004516125.1 | Scaffold731 | 49595                   | GG                              | AA                | 1946618179               |
| SNP_P3_134920_80625  | NW_004516125.1 | Scaffold731 | 80625                   | CC                              | TT                | 1946618181               |
| SNP_P3_134922_93534  | NW_004516125.1 | Scaffold731 | 93534                   | TT                              | GG                | 1946618183               |
| SNP_P3_134924_94777  | NW_004516125.1 | Scaffold731 | 94777                   | TT                              | CC                | 1946618184               |
| SNP_P3_134925_98447  | NW_004516125.1 | Scaffold731 | 98447                   | CC                              | TT                | 1946618186               |
| SNP_P3_134926_98722  | NW_004516125.1 | Scaffold731 | 98722                   | GG                              | TT                | 1946618188               |
| SNP_P3_134927_100116 | NW_004516125.1 | Scaffold731 | 100116                  | AA                              | CC                | 1946618190               |
| SNP_P3_134929_133439 | NW_004516125.1 | Scaffold731 | 133439                  | AA                              | GG                | 1946618192               |
| SNP_P3_134930_135753 | NW_004516125.1 | Scaffold731 | 135753                  | TT                              | CC                | 1946618194               |
| SNP_P3_134931_135759 | NW_004516125.1 | Scaffold731 | 135759                  | GG                              | AA                | 1946618196               |
| SNP_P3_134932_135768 | NW_004516125.1 | Scaffold731 | 135768                  | CC                              | AA                | 1946618199               |
| SNP_P3_134933_135868 | NW_004516125.1 | Scaffold731 | 135868                  | CC                              | TT                | 1946618200               |

| SNPs IDs             | Chromosome IDs | Chromosomes | Physical positions (bp) | CDC Frontier (Reference genome) | (Pusa 256 & HPNB) | NCBI SNPdb Accession IDs |
|----------------------|----------------|-------------|-------------------------|---------------------------------|-------------------|--------------------------|
| SNP_P3_134934_135890 | NW_004516125.1 | Scaffold731 | 135890                  | CC                              | AA                | 1946618202               |
| SNP_P3_134935_135967 | NW_004516125.1 | Scaffold731 | 135967                  | GG                              | AA                | 1946618204               |
| SNP_P3_134936_136119 | NW_004516125.1 | Scaffold731 | 136119                  | AA                              | GG                | 1946618206               |
| SNP_P3_134937_136301 | NW_004516125.1 | Scaffold731 | 136301                  | AA                              | TT                | 1946618208               |
| SNP_P3_134938_139554 | NW_004516125.1 | Scaffold731 | 139554                  | TT                              | CC                | 1946618210               |
| SNP_P3_134939_143158 | NW_004516125.1 | Scaffold731 | 143158                  | TT                              | AA                | 1946618212               |
| SNP_P3_134940_143163 | NW_004516125.1 | Scaffold731 | 143163                  | GG                              | AA                | 1946618214               |
| SNP_P3_134941_145614 | NW_004516125.1 | Scaffold731 | 145614                  | CC                              | AA                | 1946618216               |
| SNP_P3_134942_145761 | NW_004516125.1 | Scaffold731 | 145761                  | AA                              | GG                | 1946618217               |
| SNP_P3_134943_145765 | NW_004516125.1 | Scaffold731 | 145765                  | CC                              | TT                | 1946618219               |
| SNP_P3_134944_148640 | NW_004516125.1 | Scaffold731 | 148640                  | TT                              | CC                | 1946618221               |
| SNP_P3_134946_169607 | NW_004516125.1 | Scaffold731 | 169607                  | TT                              | CC                | 1946618223               |
| SNP_P3_134947_169608 | NW_004516125.1 | Scaffold731 | 169608                  | AA                              | TT                | 1946618225               |
| SNP_P3_134948_169613 | NW_004516125.1 | Scaffold731 | 169613                  | GG                              | AA                | 1946618227               |
| SNP_P3_134949_169646 | NW_004516125.1 | Scaffold731 | 169646                  | TT                              | GG                | 1946618229               |
| SNP_P3_134950_169671 | NW_004516125.1 | Scaffold731 | 169671                  | TT                              | GG                | 1946618231               |
| SNP_P3_134951_170128 | NW_004516125.1 | Scaffold731 | 170128                  | AA                              | GG                | 1946618232               |
| SNP_P3_134952_170385 | NW_004516125.1 | Scaffold731 | 170385                  | TT                              | CC                | 1946618234               |
| SNP_P3_134953_171037 | NW_004516125.1 | Scaffold731 | 171037                  | GG                              | AA                | 1946618236               |
| SNP_P3_134954_171040 | NW_004516125.1 | Scaffold731 | 171040                  | CC                              | TT                | 1946618239               |
| SNP_P3_134955_175372 | NW_004516125.1 | Scaffold731 | 175372                  | CC                              | TT                | 1946618241               |
| SNP_P3_134956_183655 | NW_004516125.1 | Scaffold731 | 183655                  | CC                              | GG                | 1946618243               |
| SNP_P3_134957_197835 | NW_004516125.1 | Scaffold731 | 197835                  | GG                              | AA                | 1946618245               |
| SNP_P3_134959_205692 | NW_004516125.1 | Scaffold731 | 205692                  | TT                              | GG                | 1946618247               |
| SNP_P3_134960_206128 | NW_004516125.1 | Scaffold731 | 206128                  | TT                              | CC                | 1946618249               |
| SNP_P3_134961_216856 | NW_004516125.1 | Scaffold731 | 216856                  | AA                              | GG                | 1946618251               |
| SNP_P3_134962_224594 | NW_004516125.1 | Scaffold731 | 224594                  | GG                              | TT                | 1946618253               |
| SNP_P3_134963_224857 | NW_004516125.1 | Scaffold731 | 224857                  | AA                              | CC                | 1946618255               |
| SNP_P3_134964_225259 | NW_004516125.1 | Scaffold731 | 225259                  | AA                              | CC                | 1946618257               |
| SNP_P3_134965_225530 | NW_004516125.1 | Scaffold731 | 225530                  | AA                              | GG                | 1946618259               |
| SNP_P3_134966_225546 | NW_004516125.1 | Scaffold731 | 225546                  | CC                              | TT                | 1946618261               |
| SNP_P3_134967_225550 | NW_004516125.1 | Scaffold731 | 225550                  | AA                              | GG                | 1946618263               |
| SNP_P3_134968_225580 | NW_004516125.1 | Scaffold731 | 225580                  | GG                              | AA                | 1946618265               |
| SNP_P3_134969_225581 | NW_004516125.1 | Scaffold731 | 225581                  | AA                              | GG                | 1946618267               |
| SNP_P3_134970_233619 | NW_004516125.1 | Scaffold731 | 233619                  | CC                              | TT                | 1946618269               |
| SNP_P3_134972_277636 | NW_004516125.1 | Scaffold731 | 277636                  | CC                              | AA                | 1946618271               |
| SNP_P3_134973_300660 | NW_004516125.1 | Scaffold731 | 300660                  | CC                              | TT                | 1946618273               |
| SNP_P3_134974_300679 | NW_004516125.1 | Scaffold731 | 300679                  | TT                              | CC                | 1946618274               |
| SNP_P3_134975_300985 | NW_004516125.1 | Scaffold731 | 300985                  | GG                              | TT                | 1946618276               |
| SNP_P3_134976_300990 | NW_004516125.1 | Scaffold731 | 300990                  | AA                              | GG                | 1946618279               |
| SNP_P3_134977_301065 | NW_004516125.1 | Scaffold731 | 301065                  | GG                              | CC                | 1946618281               |
| SNP_P3_134978_301067 | NW_004516125.1 | Scaffold731 | 301067                  | GG                              | AA                | 1946618283               |

| SNPs IDs             | Chromosome IDs | Chromosomes | Physical positions (bp) | CDC Frontier (Reference genome) | (Pusa 256 & HPNB) | NCBI SNPdb Accession IDs |
|----------------------|----------------|-------------|-------------------------|---------------------------------|-------------------|--------------------------|
| SNP_P3_134979_301938 | NW_004516125.1 | Scaffold731 | 301938                  | CC                              | TT                | 1946618285               |
| SNP_P3_134980_301939 | NW_004516125.1 | Scaffold731 | 301939                  | TT                              | CC                | 1946618287               |
| SNP_P3_134981_302969 | NW_004516125.1 | Scaffold731 | 302969                  | TT                              | GG                | 1946618289               |
| SNP_P3_134982_310900 | NW_004516125.1 | Scaffold731 | 310900                  | TT                              | CC                | 1946618291               |
| SNP_P3_134983_310923 | NW_004516125.1 | Scaffold731 | 310923                  | AA                              | GG                | 1946618293               |
| SNP_P3_134985_313056 | NW_004516125.1 | Scaffold731 | 313056                  | GG                              | AA                | 1946618295               |
| SNP_P3_134986_313093 | NW_004516125.1 | Scaffold731 | 313093                  | AA                              | GG                | 1946618297               |
| SNP_P3_134988_315329 | NW_004516125.1 | Scaffold731 | 315329                  | AA                              | CC                | 1946618299               |
| SNP_P3_134989_315344 | NW_004516125.1 | Scaffold731 | 315344                  | TT                              | CC                | 1946618301               |
| SNP_P3_134990_315398 | NW_004516125.1 | Scaffold731 | 315398                  | TT                              | GG                | 1946618303               |
| SNP_P3_134991_315530 | NW_004516125.1 | Scaffold731 | 315530                  | AA                              | CC                | 1946618305               |
| SNP_P3_134992_315563 | NW_004516125.1 | Scaffold731 | 315563                  | TT                              | CC                | 1946618306               |
| SNP_P3_134993_315575 | NW_004516125.1 | Scaffold731 | 315575                  | GG                              | TT                | 1946618308               |
| SNP_P3_134994_315859 | NW_004516125.1 | Scaffold731 | 315859                  | CC                              | AA                | 1946618310               |
| SNP_P3_134996_315913 | NW_004516125.1 | Scaffold731 | 315913                  | GG                              | AA                | 1946618312               |
| SNP_P3_134997_315925 | NW_004516125.1 | Scaffold731 | 315925                  | TT                              | GG                | 1946618314               |
| SNP_P3_134998_315953 | NW_004516125.1 | Scaffold731 | 315953                  | TT                              | GG                | 1946618316               |
| SNP_P3_134999_315987 | NW_004516125.1 | Scaffold731 | 315987                  | GG                              | AA                | 1946618318               |
| SNP_P3_135000_316013 | NW_004516125.1 | Scaffold731 | 316013                  | TT                              | GG                | 1946618320               |
| SNP_P3_135001_322323 | NW_004516125.1 | Scaffold731 | 322323                  | GG                              | TT                | 1946618322               |
| SNP_P3_135002_322711 | NW_004516125.1 | Scaffold731 | 322711                  | TT                              | GG                | 1946618324               |
| SNP_P3_135004_322834 | NW_004516125.1 | Scaffold731 | 322834                  | AA                              | TT                | 1946618326               |
| SNP_P3_135005_323161 | NW_004516125.1 | Scaffold731 | 323161                  | TT                              | AA                | 1946618328               |
| SNP_P3_135007_323252 | NW_004516125.1 | Scaffold731 | 323252                  | TT                              | AA                | 1946618330               |
| SNP_P3_135008_323308 | NW_004516125.1 | Scaffold731 | 323308                  | GG                              | TT                | 1946618332               |
| SNP_P3_135009_323326 | NW_004516125.1 | Scaffold731 | 323326                  | TT                              | CC                | 1946618334               |
| SNP_P3_135010_323546 | NW_004516125.1 | Scaffold731 | 323546                  | GG                              | AA                | 1946618336               |
| SNP_P3_135011_323652 | NW_004516125.1 | Scaffold731 | 323652                  | CC                              | GG                | 1946618338               |
| SNP_P3_135012_323699 | NW_004516125.1 | Scaffold731 | 323699                  | AA                              | GG                | 1946618339               |
| SNP_P3_135015_324483 | NW_004516125.1 | Scaffold731 | 324483                  | TT                              | GG                | 1946618341               |
| SNP_P3_135016_324506 | NW_004516125.1 | Scaffold731 | 324506                  | GG                              | CC                | 1946618343               |
| SNP_P3_135018_324604 | NW_004516125.1 | Scaffold731 | 324604                  | TT                              | GG                | 1946618345               |
| SNP_P3_135020_334925 | NW_004516125.1 | Scaffold731 | 334925                  | GG                              | AA                | 1946618347               |
| SNP_P3_135022_335021 | NW_004516125.1 | Scaffold731 | 335021                  | AA                              | GG                | 1946618349               |
| SNP_P3_135023_335072 | NW_004516125.1 | Scaffold731 | 335072                  | GG                              | TT                | 1946618351               |
| SNP_P3_135024_339389 | NW_004516125.1 | Scaffold731 | 339389                  | AA                              | GG                | 1946618353               |
| SNP_P3_135025_339423 | NW_004516125.1 | Scaffold731 | 339423                  | GG                              | AA                | 1946618355               |
| SNP_P3_135027_339479 | NW_004516125.1 | Scaffold731 | 339479                  | AA                              | TT                | 1946618357               |
| SNP_P3_135028_340744 | NW_004516125.1 | Scaffold731 | 340744                  | TT                              | CC                | 1946618359               |
| SNP_P3_135029_340893 | NW_004516125.1 | Scaffold731 | 340893                  | TT                              | GG                | 1946618362               |
| SNP_P3_135030_340929 | NW_004516125.1 | Scaffold731 | 340929                  | AA                              | GG                | 1946618364               |
| SNP_P3_135031_340951 | NW_004516125.1 | Scaffold731 | 340951                  | AA                              | GG                | 1946618366               |

| SNPs IDs             | Chromosome IDs | Chromosomes | Physical positions (bp) | CDC Frontier (Reference genome) | (Pusa 256 & HPNB) | NCBI SNPdb Accession IDs |
|----------------------|----------------|-------------|-------------------------|---------------------------------|-------------------|--------------------------|
| SNP_P3_135032_340986 | NW_004516125.1 | Scaffold731 | 340986                  | TT                              | AA                | 1946618368               |
| SNP_P3_135033_341071 | NW_004516125.1 | Scaffold731 | 341071                  | TT                              | CC                | 1946618370               |
| SNP_P3_135034_341129 | NW_004516125.1 | Scaffold731 | 341129                  | AA                              | TT                | 1946618372               |
| SNP_P3_135035_341265 | NW_004516125.1 | Scaffold731 | 341265                  | GG                              | AA                | 1946618374               |
| SNP_P3_135036_341304 | NW_004516125.1 | Scaffold731 | 341304                  | AA                              | GG                | 1946618376               |
| SNP_P3_135037_341323 | NW_004516125.1 | Scaffold731 | 341323                  | TT                              | CC                | 1946618378               |
| SNP_P3_135038_342054 | NW_004516125.1 | Scaffold731 | 342054                  | GG                              | TT                | 1946618380               |
| SNP_P3_135039_342062 | NW_004516125.1 | Scaffold731 | 342062                  | TT                              | CC                | 1946618382               |
| SNP_P3_135040_342074 | NW_004516125.1 | Scaffold731 | 342074                  | AA                              | GG                | 1946618384               |
| SNP_P3_135042_343859 | NW_004516125.1 | Scaffold731 | 343859                  | CC                              | TT                | 1946618386               |
| SNP_P3_135043_343901 | NW_004516125.1 | Scaffold731 | 343901                  | GG                              | TT                | 1946618388               |
| SNP_P3_135044_345107 | NW_004516125.1 | Scaffold731 | 345107                  | GG                              | AA                | 1946618390               |
| SNP_P3_135045_348066 | NW_004516125.1 | Scaffold731 | 348066                  | GG                              | CC                | 1946618391               |
| SNP_P3_135046_348098 | NW_004516125.1 | Scaffold731 | 348098                  | TT                              | CC                | 1946618393               |
| SNP_P3_135047_348814 | NW_004516125.1 | Scaffold731 | 348814                  | GG                              | CC                | 1946618395               |
| SNP_P3_135048_349108 | NW_004516125.1 | Scaffold731 | 349108                  | CC                              | AA                | 1946618397               |
| SNP_P3_135049_349611 | NW_004516125.1 | Scaffold731 | 349611                  | AA                              | GG                | 1946618399               |
| SNP_P3_135051_361202 | NW_004516125.1 | Scaffold731 | 361202                  | TT                              | CC                | 1946618401               |
| SNP_P3_135052_361238 | NW_004516125.1 | Scaffold731 | 361238                  | AA                              | GG                | 1946618403               |
| SNP_P3_135053_361553 | NW_004516125.1 | Scaffold731 | 361553                  | CC                              | AA                | 1946618405               |
| SNP_P3_135055_361626 | NW_004516125.1 | Scaffold731 | 361626                  | GG                              | TT                | 1946618407               |
| SNP_P3_135056_361644 | NW_004516125.1 | Scaffold731 | 361644                  | TT                              | AA                | 1946618409               |
| SNP_P3_135057_361786 | NW_004516125.1 | Scaffold731 | 361786                  | TT                              | GG                | 1946618411               |
| SNP_P3_135058_361818 | NW_004516125.1 | Scaffold731 | 361818                  | TT                              | CC                | 1946618413               |
| SNP_P3_135059_361834 | NW_004516125.1 | Scaffold731 | 361834                  | AA                              | GG                | 1946618415               |
| SNP_P3_135060_361877 | NW_004516125.1 | Scaffold731 | 361877                  | AA                              | GG                | 1946618417               |
| SNP_P3_135061_365644 | NW_004516125.1 | Scaffold731 | 365644                  | CC                              | TT                | 1946618419               |
| SNP_P3_135062_366011 | NW_004516125.1 | Scaffold731 | 366011                  | TT                              | CC                | 1946618421               |
| SNP_P3_135063_366051 | NW_004516125.1 | Scaffold731 | 366051                  | TT                              | CC                | 1946618423               |
| SNP_P3_135065_366126 | NW_004516125.1 | Scaffold731 | 366126                  | GG                              | CC                | 1946618425               |
| SNP_P3_135066_366156 | NW_004516125.1 | Scaffold731 | 366156                  | AA                              | GG                | 1946618427               |
| SNP_P3_135067_367380 | NW_004516125.1 | Scaffold731 | 367380                  | AA                              | TT                | 1946618429               |
| SNP_P3_135069_369529 | NW_004516125.1 | Scaffold731 | 369529                  | GG                              | AA                | 1946618431               |
| SNP_P3_135070_369646 | NW_004516125.1 | Scaffold731 | 369646                  | TT                              | CC                | 1946618432               |
| SNP_P3_135071_369674 | NW_004516125.1 | Scaffold731 | 369674                  | AA                              | GG                | 1946618433               |
| SNP_P3_135072_369686 | NW_004516125.1 | Scaffold731 | 369686                  | CC                              | TT                | 1946618434               |
| SNP_P3_135073_369696 | NW_004516125.1 | Scaffold731 | 369696                  | TT                              | CC                | 1946618435               |
| SNP_P3_135074_369697 | NW_004516125.1 | Scaffold731 | 369697                  | TT                              | CC                | 1946618437               |
| SNP_P3_135075_369725 | NW_004516125.1 | Scaffold731 | 369725                  | AA                              | GG                | 1946618439               |
| SNP_P3_135076_369729 | NW_004516125.1 | Scaffold731 | 369729                  | AA                              | CC                | 1946618441               |
| SNP_P3_135080_390566 | NW_004516125.1 | Scaffold731 | 390566                  | CC                              | AA                | 1946618443               |
| SNP_P3_135081_391657 | NW_004516125.1 | Scaffold731 | 391657                  | AA                              | GG                | 1946618445               |



| SNPs IDs             | Chromosome IDs | Chromosomes | Physical positions (bp) | CDC Frontier (Reference genome) | (Pusa 256 & HPNB) | NCBI SNPdb Accession IDs |
|----------------------|----------------|-------------|-------------------------|---------------------------------|-------------------|--------------------------|
| SNP_P3_135083_412372 | NW_004516125.1 | Scaffold731 | 412372                  | TT                              | CC                | 1946618447               |
| SNP_P3_135085_396    | NW_004516127.1 | Scaffold735 | 396                     | AA                              | TT                | 1946618449               |
| SNP_P3_135086_397    | NW_004516127.1 | Scaffold735 | 397                     | TT                              | AA                | 1946618451               |
| SNP_P3_135087_433    | NW_004516127.1 | Scaffold735 | 433                     | GG                              | AA                | 1946618453               |
| SNP_P3_135088_451    | NW_004516127.1 | Scaffold735 | 451                     | TT                              | CC                | 1946618455               |
| SNP_P3_135089_452    | NW_004516127.1 | Scaffold735 | 452                     | CC                              | TT                | 1946618457               |
| SNP_P3_135090_460    | NW_004516127.1 | Scaffold735 | 460                     | TT                              | AA                | 1946618459               |
| SNP_P3_135091_489    | NW_004516127.1 | Scaffold735 | 489                     | GG                              | TT                | 1946618461               |
| SNP_P3_135092_13992  | NW_004516127.1 | Scaffold735 | 13992                   | AA                              | GG                | 1946618463               |
| SNP_P3_135093_13997  | NW_004516127.1 | Scaffold735 | 13997                   | CC                              | GG                | 1946618465               |
| SNP_P3_135094_14016  | NW_004516127.1 | Scaffold735 | 14016                   | AA                              | GG                | 1946618467               |
| SNP_P3_135095_15560  | NW_004516127.1 | Scaffold735 | 15560                   | TT                              | CC                | 1946618469               |
| SNP_P3_135096_32236  | NW_004516127.1 | Scaffold735 | 32236                   | AA                              | TT                | 1946618471               |
| SNP_P3_135098_54176  | NW_004516127.1 | Scaffold735 | 54176                   | CC                              | AA                | 1946618473               |
| SNP_P3_135099_54213  | NW_004516127.1 | Scaffold735 | 54213                   | CC                              | TT                | 1946618475               |
| SNP_P3_135100_54469  | NW_004516127.1 | Scaffold735 | 54469                   | GG                              | AA                | 1946618477               |
| SNP_P3_135101_54872  | NW_004516127.1 | Scaffold735 | 54872                   | GG                              | CC                | 1946618479               |
| SNP_P3_135102_54913  | NW_004516127.1 | Scaffold735 | 54913                   | CC                              | TT                | 1946618481               |
| SNP_P3_135103_55473  | NW_004516127.1 | Scaffold735 | 55473                   | AA                              | TT                | 1946618483               |
| SNP_P3_135104_56899  | NW_004516127.1 | Scaffold735 | 56899                   | TT                              | CC                | 1946618485               |
| SNP_P3_135105_56957  | NW_004516127.1 | Scaffold735 | 56957                   | AA                              | CC                | 1946618487               |
| SNP_P3_135107_70025  | NW_004516127.1 | Scaffold735 | 70025                   | AA                              | GG                | 1946618489               |
| SNP_P3_135108_70035  | NW_004516127.1 | Scaffold735 | 70035                   | GG                              | AA                | 1946618491               |
| SNP_P3_135109_89810  | NW_004516127.1 | Scaffold735 | 89810                   | TT                              | AA                | 1946618493               |
| SNP_P3_135110_122210 | NW_004516127.1 | Scaffold735 | 122210                  | AA                              | GG                | 1946618495               |
| SNP_P3_135111_125280 | NW_004516127.1 | Scaffold735 | 125280                  | CC                              | TT                | 1946618497               |
| SNP_P3_135112_130648 | NW_004516127.1 | Scaffold735 | 130648                  | AA                              | GG                | 1946618499               |
| SNP_P3_135113_134846 | NW_004516127.1 | Scaffold735 | 134846                  | AA                              | TT                | 1946618501               |
| SNP_P3_135114_149772 | NW_004516127.1 | Scaffold735 | 149772                  | TT                              | AA                | 1946618503               |
| SNP_P3_135115_150078 | NW_004516127.1 | Scaffold735 | 150078                  | AA                              | CC                | 1946618504               |
| SNP_P3_135116_150097 | NW_004516127.1 | Scaffold735 | 150097                  | AA                              | CC                | 1946618506               |
| SNP_P3_135117_177052 | NW_004516127.1 | Scaffold735 | 177052                  | CC                              | TT                | 1946618508               |
| SNP_P3_135118_186757 | NW_004516127.1 | Scaffold735 | 186757                  | CC                              | TT                | 1946618510               |
| SNP_P3_135119_186893 | NW_004516127.1 | Scaffold735 | 186893                  | TT                              | CC                | 1946618512               |
| SNP_P3_135120_187103 | NW_004516127.1 | Scaffold735 | 187103                  | AA                              | GG                | 1946618514               |
| SNP_P3_135121_187182 | NW_004516127.1 | Scaffold735 | 187182                  | CC                              | TT                | 1946618516               |
| SNP_P3_135122_187196 | NW_004516127.1 | Scaffold735 | 187196                  | CC                              | TT                | 1946618518               |
| SNP_P3_135123_187213 | NW_004516127.1 | Scaffold735 | 187213                  | GG                              | AA                | 1946618520               |
| SNP_P3_135124_187235 | NW_004516127.1 | Scaffold735 | 187235                  | AA                              | GG                | 1946618523               |
| SNP_P3_135125_187247 | NW_004516127.1 | Scaffold735 | 187247                  | GG                              | AA                | 1946618525               |
| SNP_P3_135126_187799 | NW_004516127.1 | Scaffold735 | 187799                  | GG                              | AA                | 1946618527               |
| SNP_P3_135127_193843 | NW_004516127.1 | Scaffold735 | 193843                  | CC                              | TT                | 1946618529               |

| SNPs IDs             | Chromosome IDs | Chromosomes | Physical positions (bp) | CDC Frontier (Reference genome) | (Pusa 256 & HPNB) | NCBI SNPdb Accession IDs |
|----------------------|----------------|-------------|-------------------------|---------------------------------|-------------------|--------------------------|
| SNP_P3_135128_197472 | NW_004516127.1 | Scaffold735 | 197472                  | TT                              | CC                | 1946618531               |
| SNP_P3_135129_1794   | NW_004516128.1 | Scaffold736 | 1794                    | TT                              | CC                | 1946618533               |
| SNP_P3_135130_1813   | NW_004516128.1 | Scaffold736 | 1813                    | TT                              | GG                | 1946618535               |
| SNP_P3_135131_1823   | NW_004516128.1 | Scaffold736 | 1823                    | TT                              | CC                | 1946618537               |
| SNP_P3_135132_5939   | NW_004516128.1 | Scaffold736 | 5939                    | CC                              | GG                | 1946618539               |
| SNP_P3_135133_5950   | NW_004516128.1 | Scaffold736 | 5950                    | TT                              | CC                | 1946618541               |
| SNP_P3_135134_2093   | NW_004516129.1 | Scaffold737 | 2093                    | AA                              | TT                | 1946618543               |
| SNP_P3_135135_82     | NW_004516130.1 | Scaffold738 | 82                      | GG                              | AA                | 1946618545               |
| SNP_P3_135136_127    | NW_004516130.1 | Scaffold738 | 127                     | TT                              | CC                | 1946618547               |
| SNP_P3_135137_275    | NW_004516130.1 | Scaffold738 | 275                     | GG                              | TT                | 1946618548               |
| SNP_P3_135138_277    | NW_004516130.1 | Scaffold738 | 277                     | CC                              | TT                | 1946618550               |
| SNP_P3_135139_286    | NW_004516130.1 | Scaffold738 | 286                     | TT                              | CC                | 1946618552               |
| SNP_P3_135140_331    | NW_004516130.1 | Scaffold738 | 331                     | AA                              | TT                | 1946618555               |
| SNP_P3_135141_401    | NW_004516130.1 | Scaffold738 | 401                     | AA                              | GG                | 1946618557               |
| SNP_P3_135142_442    | NW_004516130.1 | Scaffold738 | 442                     | CC                              | TT                | 1946618558               |
| SNP_P3_135143_474    | NW_004516130.1 | Scaffold738 | 474                     | GG                              | TT                | 1946618560               |
| SNP_P3_135144_578    | NW_004516130.1 | Scaffold738 | 578                     | AA                              | GG                | 1946618562               |
| SNP_P3_135146_742    | NW_004516130.1 | Scaffold738 | 742                     | CC                              | AA                | 1946618564               |
| SNP_P3_135147_881    | NW_004516130.1 | Scaffold738 | 881                     | AA                              | TT                | 1946618566               |
| SNP_P3_135148_895    | NW_004516130.1 | Scaffold738 | 895                     | GG                              | TT                | 1946618568               |
| SNP_P3_135149_899    | NW_004516130.1 | Scaffold738 | 899                     | AA                              | CC                | 1946618570               |
| SNP_P3_135150_980    | NW_004516130.1 | Scaffold738 | 980                     | TT                              | CC                | 1946618572               |
| SNP_P3_135151_1010   | NW_004516130.1 | Scaffold738 | 1010                    | CC                              | AA                | 1946618574               |
| SNP_P3_135152_1071   | NW_004516130.1 | Scaffold738 | 1071                    | GG                              | AA                | 1946618576               |
| SNP_P3_135153_1078   | NW_004516130.1 | Scaffold738 | 1078                    | GG                              | CC                | 1946618579               |
| SNP_P3_135154_1101   | NW_004516130.1 | Scaffold738 | 1101                    | AA                              | CC                | 1946618581               |
| SNP_P3_135155_1456   | NW_004516130.1 | Scaffold738 | 1456                    | GG                              | AA                | 1946618583               |
| SNP_P3_135156_1586   | NW_004516130.1 | Scaffold738 | 1586                    | GG                              | AA                | 1946618585               |
| SNP_P3_135157_1889   | NW_004516130.1 | Scaffold738 | 1889                    | TT                              | AA                | 1946618586               |
| SNP_P3_135158_2010   | NW_004516130.1 | Scaffold738 | 2010                    | TT                              | AA                | 1946618588               |
| SNP_P3_135159_2043   | NW_004516130.1 | Scaffold738 | 2043                    | TT                              | CC                | 1946618590               |
| SNP_P3_135160_2120   | NW_004516130.1 | Scaffold738 | 2120                    | GG                              | CC                | 1946618592               |
| SNP_P3_135162_2188   | NW_004516130.1 | Scaffold738 | 2188                    | GG                              | AA                | 1946618604               |
| SNP_P3_135163_2327   | NW_004516130.1 | Scaffold738 | 2327                    | CC                              | GG                | 1946618606               |
| SNP_P3_135164_2358   | NW_004516130.1 | Scaffold738 | 2358                    | AA                              | GG                | 1946618608               |
| SNP_P3_135165_2388   | NW_004516130.1 | Scaffold738 | 2388                    | GG                              | TT                | 1946618610               |
| SNP_P3_135166_2400   | NW_004516130.1 | Scaffold738 | 2400                    | TT                              | CC                | 1946618613               |
| SNP_P3_135167_2421   | NW_004516130.1 | Scaffold738 | 2421                    | AA                              | CC                | 1946618615               |
| SNP_P3_135168_2470   | NW_004516130.1 | Scaffold738 | 2470                    | GG                              | AA                | 1946618617               |
| SNP_P3_135169_2498   | NW_004516130.1 | Scaffold738 | 2498                    | TT                              | CC                | 1946618619               |
| SNP_P3_135170_4469   | NW_004516130.1 | Scaffold738 | 4469                    | GG                              | AA                | 1946618621               |
| SNP_P3_135171_4569   | NW_004516130.1 | Scaffold738 | 4569                    | TT                              | CC                | 1946618623               |

| SNPs IDs            | Chromosome IDs | Chromosomes | Physical positions (bp) | CDC Frontier (Reference genome) | (Pusa 256 & HPNB) | NCBI SNPdb Accession IDs |
|---------------------|----------------|-------------|-------------------------|---------------------------------|-------------------|--------------------------|
| SNP_P3_135172_4601  | NW_004516130.1 | Scaffold738 | 4601                    | CC                              | TT                | 1946618625               |
| SNP_P3_135173_4846  | NW_004516130.1 | Scaffold738 | 4846                    | AA                              | GG                | 1946618627               |
| SNP_P3_135174_4901  | NW_004516130.1 | Scaffold738 | 4901                    | CC                              | TT                | 1946618629               |
| SNP_P3_135175_4924  | NW_004516130.1 | Scaffold738 | 4924                    | AA                              | GG                | 1946618631               |
| SNP_P3_135176_4928  | NW_004516130.1 | Scaffold738 | 4928                    | CC                              | AA                | 1946618632               |
| SNP_P3_135177_5045  | NW_004516130.1 | Scaffold738 | 5045                    | TT                              | GG                | 1946618633               |
| SNP_P3_135179_5199  | NW_004516130.1 | Scaffold738 | 5199                    | CC                              | TT                | 1946618634               |
| SNP_P3_135180_5526  | NW_004516130.1 | Scaffold738 | 5526                    | CC                              | TT                | 1946618635               |
| SNP_P3_135181_5566  | NW_004516130.1 | Scaffold738 | 5566                    | AA                              | GG                | 1946618636               |
| SNP_P3_135182_5581  | NW_004516130.1 | Scaffold738 | 5581                    | TT                              | CC                | 1946618638               |
| SNP_P3_135183_5803  | NW_004516130.1 | Scaffold738 | 5803                    | GG                              | AA                | 1946618640               |
| SNP_P3_135184_5831  | NW_004516130.1 | Scaffold738 | 5831                    | TT                              | CC                | 1946618642               |
| SNP_P3_135185_6266  | NW_004516130.1 | Scaffold738 | 6266                    | TT                              | GG                | 1946618644               |
| SNP_P3_135186_7273  | NW_004516130.1 | Scaffold738 | 7273                    | AA                              | TT                | 1946618646               |
| SNP_P3_135187_7284  | NW_004516130.1 | Scaffold738 | 7284                    | AA                              | GG                | 1946618648               |
| SNP_P3_135188_7306  | NW_004516130.1 | Scaffold738 | 7306                    | CC                              | AA                | 1946618651               |
| SNP_P3_135189_7331  | NW_004516130.1 | Scaffold738 | 7331                    | CC                              | TT                | 1946618653               |
| SNP_P3_135190_7591  | NW_004516130.1 | Scaffold738 | 7591                    | CC                              | GG                | 1946618655               |
| SNP_P3_135191_7621  | NW_004516130.1 | Scaffold738 | 7621                    | AA                              | GG                | 1946618657               |
| SNP_P3_135192_7654  | NW_004516130.1 | Scaffold738 | 7654                    | TT                              | AA                | 1946618659               |
| SNP_P3_135193_7860  | NW_004516130.1 | Scaffold738 | 7860                    | TT                              | AA                | 1946618661               |
| SNP_P3_135194_8198  | NW_004516130.1 | Scaffold738 | 8198                    | TT                              | AA                | 1946618663               |
| SNP_P3_135195_8202  | NW_004516130.1 | Scaffold738 | 8202                    | TT                              | CC                | 1946618665               |
| SNP_P3_135196_8536  | NW_004516130.1 | Scaffold738 | 8536                    | AA                              | GG                | 1946618667               |
| SNP_P3_135197_8708  | NW_004516130.1 | Scaffold738 | 8708                    | CC                              | TT                | 1946618669               |
| SNP_P3_135198_8760  | NW_004516130.1 | Scaffold738 | 8760                    | CC                              | GG                | 1946618671               |
| SNP_P3_135199_8877  | NW_004516130.1 | Scaffold738 | 8877                    | TT                              | CC                | 1946618673               |
| SNP_P3_135200_8878  | NW_004516130.1 | Scaffold738 | 8878                    | CC                              | TT                | 1946618675               |
| SNP_P3_135201_9158  | NW_004516130.1 | Scaffold738 | 9158                    | TT                              | AA                | 1946618677               |
| SNP_P3_135202_9247  | NW_004516130.1 | Scaffold738 | 9247                    | TT                              | CC                | 1946618679               |
| SNP_P3_135203_9265  | NW_004516130.1 | Scaffold738 | 9265                    | AA                              | CC                | 1946618681               |
| SNP_P3_135204_9299  | NW_004516130.1 | Scaffold738 | 9299                    | AA                              | GG                | 1946618683               |
| SNP_P3_135205_9362  | NW_004516130.1 | Scaffold738 | 9362                    | GG                              | TT                | 1946618685               |
| SNP_P3_135206_9404  | NW_004516130.1 | Scaffold738 | 9404                    | CC                              | TT                | 1946618687               |
| SNP_P3_135207_9423  | NW_004516130.1 | Scaffold738 | 9423                    | GG                              | CC                | 1946618689               |
| SNP_P3_135208_9429  | NW_004516130.1 | Scaffold738 | 9429                    | GG                              | CC                | 1946618692               |
| SNP_P3_135209_10646 | NW_004516130.1 | Scaffold738 | 10646                   | TT                              | CC                | 1946618694               |
| SNP_P3_135210_10825 | NW_004516130.1 | Scaffold738 | 10825                   | AA                              | GG                | 1946618696               |
| SNP_P3_135211_10826 | NW_004516130.1 | Scaffold738 | 10826                   | AA                              | GG                | 1946618698               |
| SNP_P3_135212_10840 | NW_004516130.1 | Scaffold738 | 10840                   | AA                              | GG                | 1946618700               |
| SNP_P3_135213_10846 | NW_004516130.1 | Scaffold738 | 10846                   | TT                              | AA                | 1946618702               |
| SNP_P3_135214_10851 | NW_004516130.1 | Scaffold738 | 10851                   | CC                              | TT                | 1946618704               |

| SNPs IDs            | Chromosome IDs | Chromosomes | Physical positions (bp) | CDC Frontier (Reference genome) | (Pusa 256 & HPNB) | NCBI SNPdb Accession IDs |
|---------------------|----------------|-------------|-------------------------|---------------------------------|-------------------|--------------------------|
| SNP_P3_135215_11373 | NW_004516130.1 | Scaffold738 | 11373                   | TT                              | GG                | 1946618705               |
| SNP_P3_135216_5162  | NW_004516131.1 | Scaffold739 | 5162                    | TT                              | AA                | 1946618707               |
| SNP_P3_135217_12693 | NW_004516131.1 | Scaffold739 | 12693                   | GG                              | AA                | 1946618709               |
| SNP_P3_135218_111   | NW_004516133.1 | Scaffold741 | 111                     | CC                              | AA                | 1946618711               |
| SNP_P3_135219_340   | NW_004516133.1 | Scaffold741 | 340                     | TT                              | GG                | 1946618713               |
| SNP_P3_135221_17584 | NW_004516133.1 | Scaffold741 | 17584                   | CC                              | TT                | 1946618715               |
| SNP_P3_135222_32268 | NW_004516133.1 | Scaffold741 | 32268                   | AA                              | GG                | 1946618717               |
| SNP_P3_135223_32283 | NW_004516133.1 | Scaffold741 | 32283                   | AA                              | TT                | 1946618719               |
| SNP_P3_135224_32284 | NW_004516133.1 | Scaffold741 | 32284                   | CC                              | TT                | 1946618721               |
| SNP_P3_135225_3405  | NW_004516135.1 | Scaffold743 | 3405                    | CC                              | TT                | 1946618723               |
| SNP_P3_135226_3450  | NW_004516135.1 | Scaffold743 | 3450                    | TT                              | GG                | 1946618725               |
| SNP_P3_135227_3469  | NW_004516135.1 | Scaffold743 | 3469                    | AA                              | TT                | 1946618727               |
| SNP_P3_135228_3818  | NW_004516135.1 | Scaffold743 | 3818                    | AA                              | TT                | 1946618729               |
| SNP_P3_135229_3824  | NW_004516135.1 | Scaffold743 | 3824                    | AA                              | TT                | 1946618731               |
| SNP_P3_135230_6097  | NW_004516135.1 | Scaffold743 | 6097                    | TT                              | CC                | 1946618733               |
| SNP_P3_135231_6866  | NW_004516135.1 | Scaffold743 | 6866                    | TT                              | AA                | 1946618735               |
| SNP_P3_135232_7930  | NW_004516135.1 | Scaffold743 | 7930                    | CC                              | GG                | 1946618737               |
| SNP_P3_135233_9051  | NW_004516135.1 | Scaffold743 | 9051                    | AA                              | TT                | 1946618739               |
| SNP_P3_135234_9414  | NW_004516135.1 | Scaffold743 | 9414                    | CC                              | AA                | 1946618741               |
| SNP_P3_135235_9753  | NW_004516135.1 | Scaffold743 | 9753                    | TT                              | GG                | 1946618743               |
| SNP_P3_135237_13884 | NW_004516135.1 | Scaffold743 | 13884                   | GG                              | TT                | 1946618745               |
| SNP_P3_135238_13917 | NW_004516135.1 | Scaffold743 | 13917                   | TT                              | GG                | 1946618747               |
| SNP_P3_135240_14284 | NW_004516135.1 | Scaffold743 | 14284                   | TT                              | CC                | 1946618749               |
| SNP_P3_135241_14357 | NW_004516135.1 | Scaffold743 | 14357                   | CC                              | AA                | 1946618751               |
| SNP_P3_135242_29605 | NW_004516135.1 | Scaffold743 | 29605                   | CC                              | GG                | 1946618753               |
| SNP_P3_135243_1644  | NW_004516136.1 | Scaffold745 | 1644                    | TT                              | CC                | 1946618755               |
| SNP_P3_135245_5439  | NW_004516137.1 | Scaffold746 | 5439                    | AA                              | CC                | 1946618757               |
| SNP_P3_135246_5463  | NW_004516137.1 | Scaffold746 | 5463                    | CC                              | TT                | 1946618759               |
| SNP_P3_135247_5497  | NW_004516137.1 | Scaffold746 | 5497                    | CC                              | TT                | 1946618761               |
| SNP_P3_135248_5501  | NW_004516137.1 | Scaffold746 | 5501                    | GG                              | AA                | 1946618763               |
| SNP_P3_135251_2169  | NW_004516138.1 | Scaffold749 | 2169                    | CC                              | TT                | 1946618765               |
| SNP_P3_135252_2449  | NW_004516138.1 | Scaffold749 | 2449                    | GG                              | AA                | 1946618767               |
| SNP_P3_135253_2627  | NW_004516138.1 | Scaffold749 | 2627                    | GG                              | CC                | 1946618769               |
| SNP_P3_135254_4266  | NW_004516138.1 | Scaffold749 | 4266                    | CC                              | TT                | 1946618771               |
| SNP_P3_135255_4270  | NW_004516138.1 | Scaffold749 | 4270                    | TT                              | GG                | 1946618773               |
| SNP_P3_135256_4438  | NW_004516138.1 | Scaffold749 | 4438                    | AA                              | TT                | 1946618776               |
| SNP_P3_135257_4516  | NW_004516138.1 | Scaffold749 | 4516                    | TT                              | GG                | 1946618778               |
| SNP_P3_135258_4600  | NW_004516138.1 | Scaffold749 | 4600                    | AA                              | GG                | 1946618780               |
| SNP_P3_135260_4720  | NW_004516138.1 | Scaffold749 | 4720                    | CC                              | TT                | 1946618782               |
| SNP_P3_135261_4746  | NW_004516138.1 | Scaffold749 | 4746                    | TT                              | CC                | 1946618784               |
| SNP_P3_135262_4779  | NW_004516138.1 | Scaffold749 | 4779                    | CC                              | TT                | 1946618786               |
| SNP_P3_135263_4932  | NW_004516138.1 | Scaffold749 | 4932                    | CC                              | TT                | 1946618788               |

| SNPs IDs            | Chromosome IDs | Chromosomes | Physical positions (bp) | CDC Frontier (Reference genome) | (Pusa 256 & HPNB) | NCBI SNPdb Accession IDs |
|---------------------|----------------|-------------|-------------------------|---------------------------------|-------------------|--------------------------|
| SNP_P3_135264_5011  | NW_004516138.1 | Scaffold749 | 5011                    | AA                              | CC                | 1946618790               |
| SNP_P3_135265_5012  | NW_004516138.1 | Scaffold749 | 5012                    | CC                              | AA                | 1946618792               |
| SNP_P3_135266_5021  | NW_004516138.1 | Scaffold749 | 5021                    | TT                              | CC                | 1946618794               |
| SNP_P3_135267_9167  | NW_004516138.1 | Scaffold749 | 9167                    | TT                              | GG                | 1946618796               |
| SNP_P3_135268_13821 | NW_004516138.1 | Scaffold749 | 13821                   | AA                              | GG                | 1946618799               |
| SNP_P3_135269_13903 | NW_004516138.1 | Scaffold749 | 13903                   | CC                              | TT                | 1946618801               |
| SNP_P3_135270_13932 | NW_004516138.1 | Scaffold749 | 13932                   | AA                              | CC                | 1946618803               |
| SNP_P3_135271_13961 | NW_004516138.1 | Scaffold749 | 13961                   | TT                              | CC                | 1946618805               |
| SNP_P3_135272_13962 | NW_004516138.1 | Scaffold749 | 13962                   | TT                              | AA                | 1946618807               |
| SNP_P3_135273_14036 | NW_004516138.1 | Scaffold749 | 14036                   | AA                              | TT                | 1946618809               |
| SNP_P3_135274_14124 | NW_004516138.1 | Scaffold749 | 14124                   | AA                              | GG                | 1946618811               |
| SNP_P3_135275_14131 | NW_004516138.1 | Scaffold749 | 14131                   | AA                              | GG                | 1946618813               |
| SNP_P3_135276_14194 | NW_004516138.1 | Scaffold749 | 14194                   | TT                              | AA                | 1946618815               |
| SNP_P3_135277_14203 | NW_004516138.1 | Scaffold749 | 14203                   | GG                              | AA                | 1946618817               |
| SNP_P3_135278_14236 | NW_004516138.1 | Scaffold749 | 14236                   | GG                              | AA                | 1946618819               |
| SNP_P3_135279_14283 | NW_004516138.1 | Scaffold749 | 14283                   | TT                              | GG                | 1946618821               |
| SNP_P3_135280_14301 | NW_004516138.1 | Scaffold749 | 14301                   | AA                              | CC                | 1946618823               |
| SNP_P3_135281_14302 | NW_004516138.1 | Scaffold749 | 14302                   | GG                              | AA                | 1946618825               |
| SNP_P3_135282_14305 | NW_004516138.1 | Scaffold749 | 14305                   | TT                              | CC                | 1946618827               |
| SNP_P3_135283_14324 | NW_004516138.1 | Scaffold749 | 14324                   | CC                              | TT                | 1946618829               |
| SNP_P3_135284_14356 | NW_004516138.1 | Scaffold749 | 14356                   | CC                              | TT                | 1946618831               |
| SNP_P3_135285_14508 | NW_004516138.1 | Scaffold749 | 14508                   | GG                              | TT                | 1946618833               |
| SNP_P3_135286_14625 | NW_004516138.1 | Scaffold749 | 14625                   | GG                              | CC                | 1946618835               |
| SNP_P3_135287_14672 | NW_004516138.1 | Scaffold749 | 14672                   | AA                              | CC                | 1946618837               |
| SNP_P3_135288_16414 | NW_004516138.1 | Scaffold749 | 16414                   | TT                              | GG                | 1946618839               |
| SNP_P3_135289_29355 | NW_004516138.1 | Scaffold749 | 29355                   | GG                              | AA                | 1946618841               |
| SNP_P3_135290_30294 | NW_004516138.1 | Scaffold749 | 30294                   | TT                              | GG                | 1946618843               |
| SNP_P3_135291_30831 | NW_004516138.1 | Scaffold749 | 30831                   | GG                              | TT                | 1946618845               |
| SNP_P3_135292_35398 | NW_004516138.1 | Scaffold749 | 35398                   | AA                              | TT                | 1946618847               |
| SNP_P3_135293_35559 | NW_004516138.1 | Scaffold749 | 35559                   | CC                              | TT                | 1946618849               |
| SNP_P3_135294_38096 | NW_004516138.1 | Scaffold749 | 38096                   | CC                              | AA                | 1946618851               |
| SNP_P3_135295_38098 | NW_004516138.1 | Scaffold749 | 38098                   | GG                              | TT                | 1946618853               |
| SNP_P3_135296_38244 | NW_004516138.1 | Scaffold749 | 38244                   | TT                              | AA                | 1946618855               |
| SNP_P3_135297_38511 | NW_004516138.1 | Scaffold749 | 38511                   | TT                              | GG                | 1946618858               |
| SNP_P3_135298_38540 | NW_004516138.1 | Scaffold749 | 38540                   | AA                              | CC                | 1946618860               |
| SNP_P3_135299_38544 | NW_004516138.1 | Scaffold749 | 38544                   | CC                              | TT                | 1946618862               |
| SNP_P3_135300_38761 | NW_004516138.1 | Scaffold749 | 38761                   | TT                              | GG                | 1946618864               |
| SNP_P3_135301_38763 | NW_004516138.1 | Scaffold749 | 38763                   | TT                              | AA                | 1946618866               |
| SNP_P3_135302_52310 | NW_004516138.1 | Scaffold749 | 52310                   | CC                              | TT                | 1946618868               |
| SNP_P3_135303_52808 | NW_004516138.1 | Scaffold749 | 52808                   | GG                              | TT                | 1946618870               |
| SNP_P3_135304_53316 | NW_004516138.1 | Scaffold749 | 53316                   | CC                              | GG                | 1946618872               |
| SNP_P3_135305_55172 | NW_004516138.1 | Scaffold749 | 55172                   | CC                              | TT                | 1946618874               |

| SNPs IDs            | Chromosome IDs | Chromosomes | Physical positions (bp) | CDC Frontier (Reference genome) | (Pusa 256 & HPNB) | NCBI SNPdb Accession IDs |
|---------------------|----------------|-------------|-------------------------|---------------------------------|-------------------|--------------------------|
| SNP_P3_135306_55615 | NW_004516138.1 | Scaffold749 | 55615                   | CC                              | AA                | 1946618876               |
| SNP_P3_135307_55802 | NW_004516138.1 | Scaffold749 | 55802                   | GG                              | TT                | 1946618878               |
| SNP_P3_135308_59300 | NW_004516138.1 | Scaffold749 | 59300                   | TT                              | AA                | 1946618880               |
| SNP_P3_135309_59335 | NW_004516138.1 | Scaffold749 | 59335                   | AA                              | TT                | 1946618882               |
| SNP_P3_135310_59524 | NW_004516138.1 | Scaffold749 | 59524                   | AA                              | TT                | 1946618884               |
| SNP_P3_135311_59557 | NW_004516138.1 | Scaffold749 | 59557                   | TT                              | GG                | 1946618886               |
| SNP_P3_135312_59673 | NW_004516138.1 | Scaffold749 | 59673                   | TT                              | AA                | 1946618888               |
| SNP_P3_135313_59732 | NW_004516138.1 | Scaffold749 | 59732                   | GG                              | AA                | 1946618890               |
| SNP_P3_135314_59764 | NW_004516138.1 | Scaffold749 | 59764                   | TT                              | AA                | 1946618892               |
| SNP_P3_135315_59792 | NW_004516138.1 | Scaffold749 | 59792                   | AA                              | CC                | 1946618894               |
| SNP_P3_135316_59862 | NW_004516138.1 | Scaffold749 | 59862                   | TT                              | GG                | 1946618896               |
| SNP_P3_135317_60063 | NW_004516138.1 | Scaffold749 | 60063                   | GG                              | AA                | 1946618899               |
| SNP_P3_135318_61388 | NW_004516138.1 | Scaffold749 | 61388                   | CC                              | TT                | 1946618901               |
| SNP_P3_135319_10061 | NW_004516139.1 | Scaffold750 | 10061                   | GG                              | TT                | 1946618903               |
| SNP_P3_135320_10474 | NW_004516139.1 | Scaffold750 | 10474                   | TT                              | CC                | 1946618905               |
| SNP_P3_135321_19557 | NW_004516139.1 | Scaffold750 | 19557                   | TT                              | GG                | 1946618907               |
| SNP_P3_135322_20004 | NW_004516139.1 | Scaffold750 | 20004                   | TT                              | CC                | 1946618909               |
| SNP_P3_135323_20154 | NW_004516139.1 | Scaffold750 | 20154                   | TT                              | CC                | 1946618911               |
| SNP_P3_135324_23099 | NW_004516139.1 | Scaffold750 | 23099                   | AA                              | GG                | 1946618913               |
| SNP_P3_135325_23126 | NW_004516139.1 | Scaffold750 | 23126                   | AA                              | GG                | 1946618915               |
| SNP_P3_135326_30379 | NW_004516139.1 | Scaffold750 | 30379                   | GG                              | AA                | 1946618917               |
| SNP_P3_135327_30411 | NW_004516139.1 | Scaffold750 | 30411                   | AA                              | TT                | 1946618919               |
| SNP_P3_135328_30413 | NW_004516139.1 | Scaffold750 | 30413                   | CC                              | GG                | 1946618921               |
| SNP_P3_135329_30574 | NW_004516139.1 | Scaffold750 | 30574                   | TT                              | CC                | 1946618923               |
| SNP_P3_135330_30633 | NW_004516139.1 | Scaffold750 | 30633                   | GG                              | AA                | 1946618925               |
| SNP_P3_135331_30637 | NW_004516139.1 | Scaffold750 | 30637                   | AA                              | TT                | 1946618927               |
| SNP_P3_135332_30677 | NW_004516139.1 | Scaffold750 | 30677                   | TT                              | CC                | 1946618929               |
| SNP_P3_135333_30750 | NW_004516139.1 | Scaffold750 | 30750                   | CC                              | AA                | 1946618931               |
| SNP_P3_135334_30811 | NW_004516139.1 | Scaffold750 | 30811                   | CC                              | AA                | 1946618932               |
| SNP_P3_135335_30817 | NW_004516139.1 | Scaffold750 | 30817                   | CC                              | TT                | 1946618934               |
| SNP_P3_135336_30819 | NW_004516139.1 | Scaffold750 | 30819                   | AA                              | GG                | 1946618937               |
| SNP_P3_135337_30844 | NW_004516139.1 | Scaffold750 | 30844                   | AA                              | TT                | 1946618939               |
| SNP_P3_135338_30886 | NW_004516139.1 | Scaffold750 | 30886                   | AA                              | GG                | 1946618941               |
| SNP_P3_135339_31014 | NW_004516139.1 | Scaffold750 | 31014                   | TT                              | GG                | 1946618943               |
| SNP_P3_135340_31069 | NW_004516139.1 | Scaffold750 | 31069                   | CC                              | TT                | 1946618945               |
| SNP_P3_135341_31086 | NW_004516139.1 | Scaffold750 | 31086                   | TT                              | CC                | 1946618947               |
| SNP_P3_135342_31126 | NW_004516139.1 | Scaffold750 | 31126                   | AA                              | GG                | 1946618949               |
| SNP_P3_135343_31287 | NW_004516139.1 | Scaffold750 | 31287                   | AA                              | GG                | 1946618951               |
| SNP_P3_135344_31395 | NW_004516139.1 | Scaffold750 | 31395                   | TT                              | CC                | 1946618953               |
| SNP_P3_135345_31525 | NW_004516139.1 | Scaffold750 | 31525                   | AA                              | GG                | 1946618955               |
| SNP_P3_135346_31552 | NW_004516139.1 | Scaffold750 | 31552                   | GG                              | AA                | 1946618957               |
| SNP_P3_135347_31576 | NW_004516139.1 | Scaffold750 | 31576                   | AA                              | GG                | 1946618959               |

| SNPs IDs            | Chromosome IDs | Chromosomes | Physical positions (bp) | CDC Frontier (Reference genome) | (Pusa 256 & HPNB) | NCBI SNPdb Accession IDs |
|---------------------|----------------|-------------|-------------------------|---------------------------------|-------------------|--------------------------|
| SNP_P3_135348_31731 | NW_004516139.1 | Scaffold750 | 31731                   | TT                              | GG                | 1946618961               |
| SNP_P3_135349_31752 | NW_004516139.1 | Scaffold750 | 31752                   | CC                              | AA                | 1946618963               |
| SNP_P3_135350_31756 | NW_004516139.1 | Scaffold750 | 31756                   | TT                              | CC                | 1946618965               |
| SNP_P3_135351_31797 | NW_004516139.1 | Scaffold750 | 31797                   | TT                              | CC                | 1946618967               |
| SNP_P3_135352_31817 | NW_004516139.1 | Scaffold750 | 31817                   | AA                              | TT                | 1946618969               |
| SNP_P3_135354_31899 | NW_004516139.1 | Scaffold750 | 31899                   | AA                              | GG                | 1946618971               |
| SNP_P3_135355_31981 | NW_004516139.1 | Scaffold750 | 31981                   | CC                              | TT                | 1946618973               |
| SNP_P3_135356_32003 | NW_004516139.1 | Scaffold750 | 32003                   | AA                              | GG                | 1946618975               |
| SNP_P3_135357_32040 | NW_004516139.1 | Scaffold750 | 32040                   | TT                              | AA                | 1946618977               |
| SNP_P3_135358_32114 | NW_004516139.1 | Scaffold750 | 32114                   | AA                              | TT                | 1946618978               |
| SNP_P3_135359_32139 | NW_004516139.1 | Scaffold750 | 32139                   | CC                              | TT                | 1946618979               |
| SNP_P3_135360_32347 | NW_004516139.1 | Scaffold750 | 32347                   | TT                              | AA                | 1946618980               |
| SNP_P3_135361_32349 | NW_004516139.1 | Scaffold750 | 32349                   | TT                              | AA                | 1946618981               |
| SNP_P3_135362_32355 | NW_004516139.1 | Scaffold750 | 32355                   | TT                              | GG                | 1946618982               |
| SNP_P3_135363_32369 | NW_004516139.1 | Scaffold750 | 32369                   | AA                              | CC                | 1946618983               |
| SNP_P3_135364_32425 | NW_004516139.1 | Scaffold750 | 32425                   | TT                              | CC                | 1946618984               |
| SNP_P3_135365_32649 | NW_004516139.1 | Scaffold750 | 32649                   | CC                              | GG                | 1946618986               |
| SNP_P3_135366_32769 | NW_004516139.1 | Scaffold750 | 32769                   | TT                              | GG                | 1946618988               |
| SNP_P3_135367_33007 | NW_004516139.1 | Scaffold750 | 33007                   | TT                              | GG                | 1946618990               |
| SNP_P3_135368_33068 | NW_004516139.1 | Scaffold750 | 33068                   | GG                              | TT                | 1946618992               |
| SNP_P3_135369_33082 | NW_004516139.1 | Scaffold750 | 33082                   | AA                              | GG                | 1946618994               |
| SNP_P3_135370_33106 | NW_004516139.1 | Scaffold750 | 33106                   | AA                              | CC                | 1946618996               |
| SNP_P3_135371_33205 | NW_004516139.1 | Scaffold750 | 33205                   | GG                              | AA                | 1946618998               |
| SNP_P3_135372_33337 | NW_004516139.1 | Scaffold750 | 33337                   | TT                              | AA                | 1946619000               |
| SNP_P3_135373_33352 | NW_004516139.1 | Scaffold750 | 33352                   | AA                              | GG                | 1946619002               |
| SNP_P3_135374_33356 | NW_004516139.1 | Scaffold750 | 33356                   | AA                              | TT                | 1946619004               |
| SNP_P3_135375_33602 | NW_004516139.1 | Scaffold750 | 33602                   | CC                              | TT                | 1946619006               |
| SNP_P3_135376_33646 | NW_004516139.1 | Scaffold750 | 33646                   | TT                              | CC                | 1946619008               |
| SNP_P3_135377_33667 | NW_004516139.1 | Scaffold750 | 33667                   | GG                              | AA                | 1946619011               |
| SNP_P3_135378_33760 | NW_004516139.1 | Scaffold750 | 33760                   | GG                              | CC                | 1946619013               |
| SNP_P3_135379_33960 | NW_004516139.1 | Scaffold750 | 33960                   | AA                              | TT                | 1946619015               |
| SNP_P3_135380_33997 | NW_004516139.1 | Scaffold750 | 33997                   | GG                              | TT                | 1946619017               |
| SNP_P3_135381_34018 | NW_004516139.1 | Scaffold750 | 34018                   | GG                              | AA                | 1946619019               |
| SNP_P3_135382_34023 | NW_004516139.1 | Scaffold750 | 34023                   | TT                              | CC                | 1946619021               |
| SNP_P3_135383_34065 | NW_004516139.1 | Scaffold750 | 34065                   | AA                              | GG                | 1946619023               |
| SNP_P3_135384_34117 | NW_004516139.1 | Scaffold750 | 34117                   | CC                              | AA                | 1946619025               |
| SNP_P3_135385_34187 | NW_004516139.1 | Scaffold750 | 34187                   | GG                              | AA                | 1946619027               |
| SNP_P3_135386_34264 | NW_004516139.1 | Scaffold750 | 34264                   | TT                              | GG                | 1946619029               |
| SNP_P3_135387_34357 | NW_004516139.1 | Scaffold750 | 34357                   | GG                              | TT                | 1946619031               |
| SNP_P3_135388_34489 | NW_004516139.1 | Scaffold750 | 34489                   | AA                              | GG                | 1946619033               |
| SNP_P3_135389_34576 | NW_004516139.1 | Scaffold750 | 34576                   | CC                              | TT                | 1946619035               |
| SNP_P3_135390_34628 | NW_004516139.1 | Scaffold750 | 34628                   | GG                              | AA                | 1946619037               |

| SNPs IDs            | Chromosome IDs | Chromosomes | Physical positions (bp) | CDC Frontier (Reference genome) | (Pusa 256 & HPNB) | NCBI SNPdb Accession IDs |
|---------------------|----------------|-------------|-------------------------|---------------------------------|-------------------|--------------------------|
| SNP_P3_135391_34650 | NW_004516139.1 | Scaffold750 | 34650                   | GG                              | AA                | 1946619039               |
| SNP_P3_135392_34685 | NW_004516139.1 | Scaffold750 | 34685                   | GG                              | AA                | 1946619041               |
| SNP_P3_135393_34754 | NW_004516139.1 | Scaffold750 | 34754                   | TT                              | AA                | 1946619043               |
| SNP_P3_135394_34787 | NW_004516139.1 | Scaffold750 | 34787                   | TT                              | CC                | 1946619045               |
| SNP_P3_135395_34792 | NW_004516139.1 | Scaffold750 | 34792                   | CC                              | TT                | 1946619047               |
| SNP_P3_135396_34939 | NW_004516139.1 | Scaffold750 | 34939                   | TT                              | CC                | 1946619049               |
| SNP_P3_135397_34955 | NW_004516139.1 | Scaffold750 | 34955                   | TT                              | CC                | 1946619051               |
| SNP_P3_135398_34966 | NW_004516139.1 | Scaffold750 | 34966                   | CC                              | GG                | 1946619053               |
| SNP_P3_135399_34985 | NW_004516139.1 | Scaffold750 | 34985                   | GG                              | AA                | 1946619055               |
| SNP_P3_135400_34987 | NW_004516139.1 | Scaffold750 | 34987                   | TT                              | CC                | 1946619057               |
| SNP_P3_135401_34998 | NW_004516139.1 | Scaffold750 | 34998                   | AA                              | GG                | 1946619059               |
| SNP_P3_135402_35039 | NW_004516139.1 | Scaffold750 | 35039                   | AA                              | GG                | 1946619061               |
| SNP_P3_135403_35045 | NW_004516139.1 | Scaffold750 | 35045                   | GG                              | TT                | 1946619064               |
| SNP_P3_135404_35052 | NW_004516139.1 | Scaffold750 | 35052                   | CC                              | GG                | 1946619066               |
| SNP_P3_135405_35061 | NW_004516139.1 | Scaffold750 | 35061                   | CC                              | TT                | 1946619068               |
| SNP_P3_135406_35093 | NW_004516139.1 | Scaffold750 | 35093                   | TT                              | AA                | 1946619070               |
| SNP_P3_135407_35125 | NW_004516139.1 | Scaffold750 | 35125                   | AA                              | TT                | 1946619072               |
| SNP_P3_135408_35147 | NW_004516139.1 | Scaffold750 | 35147                   | TT                              | CC                | 1946619074               |
| SNP_P3_135409_35247 | NW_004516139.1 | Scaffold750 | 35247                   | GG                              | AA                | 1946619076               |
| SNP_P3_135410_35282 | NW_004516139.1 | Scaffold750 | 35282                   | GG                              | CC                | 1946619078               |
| SNP_P3_135411_35491 | NW_004516139.1 | Scaffold750 | 35491                   | GG                              | AA                | 1946619080               |
| SNP_P3_135412_35523 | NW_004516139.1 | Scaffold750 | 35523                   | GG                              | CC                | 1946619082               |
| SNP_P3_135413_36796 | NW_004516139.1 | Scaffold750 | 36796                   | TT                              | CC                | 1946619084               |
| SNP_P3_135414_36923 | NW_004516139.1 | Scaffold750 | 36923                   | AA                              | TT                | 1946619086               |
| SNP_P3_135415_36925 | NW_004516139.1 | Scaffold750 | 36925                   | GG                              | AA                | 1946619089               |
| SNP_P3_135416_36930 | NW_004516139.1 | Scaffold750 | 36930                   | GG                              | AA                | 1946619091               |
| SNP_P3_135417_36933 | NW_004516139.1 | Scaffold750 | 36933                   | TT                              | CC                | 1946619093               |
| SNP_P3_135418_36935 | NW_004516139.1 | Scaffold750 | 36935                   | GG                              | AA                | 1946619095               |
| SNP_P3_135419_36986 | NW_004516139.1 | Scaffold750 | 36986                   | CC                              | TT                | 1946619097               |
| SNP_P3_135420_37008 | NW_004516139.1 | Scaffold750 | 37008                   | AA                              | TT                | 1946619099               |
| SNP_P3_135421_37036 | NW_004516139.1 | Scaffold750 | 37036                   | AA                              | GG                | 1946619101               |
| SNP_P3_135422_37051 | NW_004516139.1 | Scaffold750 | 37051                   | AA                              | GG                | 1946619103               |
| SNP_P3_135423_37062 | NW_004516139.1 | Scaffold750 | 37062                   | GG                              | TT                | 1946619106               |
| SNP_P3_135424_37106 | NW_004516139.1 | Scaffold750 | 37106                   | AA                              | GG                | 1946619108               |
| SNP_P3_135425_37158 | NW_004516139.1 | Scaffold750 | 37158                   | TT                              | GG                | 1946619110               |
| SNP_P3_135426_37232 | NW_004516139.1 | Scaffold750 | 37232                   | GG                              | AA                | 1946619112               |
| SNP_P3_135427_37392 | NW_004516139.1 | Scaffold750 | 37392                   | GG                              | AA                | 1946619114               |
| SNP_P3_135428_37399 | NW_004516139.1 | Scaffold750 | 37399                   | TT                              | CC                | 1946619116               |
| SNP_P3_135429_37401 | NW_004516139.1 | Scaffold750 | 37401                   | GG                              | AA                | 1946619119               |
| SNP_P3_135430_37593 | NW_004516139.1 | Scaffold750 | 37593                   | AA                              | TT                | 1946619121               |
| SNP_P3_135431_37599 | NW_004516139.1 | Scaffold750 | 37599                   | TT                              | CC                | 1946619123               |
| SNP_P3_135432_37600 | NW_004516139.1 | Scaffold750 | 37600                   | GG                              | TT                | 1946619125               |



| SNPs IDs            | Chromosome IDs | Chromosomes | Physical positions (bp) | CDC Frontier (Reference genome) | (Pusa 256 & HPNB) | NCBI SNPdb Accession IDs |
|---------------------|----------------|-------------|-------------------------|---------------------------------|-------------------|--------------------------|
| SNP_P3_135433_37601 | NW_004516139.1 | Scaffold750 | 37601                   | TT                              | CC                | 1946619127               |
| SNP_P3_135434_37602 | NW_004516139.1 | Scaffold750 | 37602                   | CC                              | TT                | 1946619129               |
| SNP_P3_135435_37649 | NW_004516139.1 | Scaffold750 | 37649                   | AA                              | CC                | 1946619131               |
| SNP_P3_135436_37727 | NW_004516139.1 | Scaffold750 | 37727                   | GG                              | TT                | 1946619133               |
| SNP_P3_135437_37926 | NW_004516139.1 | Scaffold750 | 37926                   | GG                              | AA                | 1946619135               |
| SNP_P3_135438_38090 | NW_004516139.1 | Scaffold750 | 38090                   | CC                              | TT                | 1946619137               |
| SNP_P3_135439_38204 | NW_004516139.1 | Scaffold750 | 38204                   | CC                              | TT                | 1946619139               |
| SNP_P3_135440_38341 | NW_004516139.1 | Scaffold750 | 38341                   | CC                              | AA                | 1946619142               |
| SNP_P3_135441_38344 | NW_004516139.1 | Scaffold750 | 38344                   | AA                              | GG                | 1946619144               |
| SNP_P3_135442_38354 | NW_004516139.1 | Scaffold750 | 38354                   | CC                              | TT                | 1946619147               |
| SNP_P3_135443_38370 | NW_004516139.1 | Scaffold750 | 38370                   | GG                              | AA                | 1946619149               |
| SNP_P3_135444_38374 | NW_004516139.1 | Scaffold750 | 38374                   | AA                              | GG                | 1946619151               |
| SNP_P3_135445_38431 | NW_004516139.1 | Scaffold750 | 38431                   | GG                              | TT                | 1946619153               |
| SNP_P3_135446_38462 | NW_004516139.1 | Scaffold750 | 38462                   | AA                              | TT                | 1946619155               |
| SNP_P3_135447_38496 | NW_004516139.1 | Scaffold750 | 38496                   | TT                              | AA                | 1946619157               |
| SNP_P3_135448_38573 | NW_004516139.1 | Scaffold750 | 38573                   | GG                              | TT                | 1946619159               |
| SNP_P3_135449_38648 | NW_004516139.1 | Scaffold750 | 38648                   | TT                              | CC                | 1946619161               |
| SNP_P3_135450_38663 | NW_004516139.1 | Scaffold750 | 38663                   | GG                              | TT                | 1946619164               |
| SNP_P3_135451_38666 | NW_004516139.1 | Scaffold750 | 38666                   | GG                              | AA                | 1946619166               |
| SNP_P3_135452_38757 | NW_004516139.1 | Scaffold750 | 38757                   | TT                              | AA                | 1946619168               |
| SNP_P3_135453_38839 | NW_004516139.1 | Scaffold750 | 38839                   | AA                              | CC                | 1946619170               |
| SNP_P3_135454_38932 | NW_004516139.1 | Scaffold750 | 38932                   | AA                              | CC                | 1946619172               |
| SNP_P3_135455_38934 | NW_004516139.1 | Scaffold750 | 38934                   | GG                              | TT                | 1946619174               |
| SNP_P3_135457_39195 | NW_004516139.1 | Scaffold750 | 39195                   | TT                              | AA                | 1946619176               |
| SNP_P3_135458_39201 | NW_004516139.1 | Scaffold750 | 39201                   | AA                              | CC                | 1946619178               |
| SNP_P3_135459_39214 | NW_004516139.1 | Scaffold750 | 39214                   | TT                              | CC                | 1946619180               |
| SNP_P3_135460_39224 | NW_004516139.1 | Scaffold750 | 39224                   | AA                              | TT                | 1946619182               |
| SNP_P3_135461_39263 | NW_004516139.1 | Scaffold750 | 39263                   | TT                              | CC                | 1946619184               |
| SNP_P3_135462_39270 | NW_004516139.1 | Scaffold750 | 39270                   | CC                              | GG                | 1946619186               |
| SNP_P3_135463_39296 | NW_004516139.1 | Scaffold750 | 39296                   | GG                              | TT                | 1946619189               |
| SNP_P3_135464_39304 | NW_004516139.1 | Scaffold750 | 39304                   | CC                              | AA                | 1946619191               |
| SNP_P3_135465_39597 | NW_004516139.1 | Scaffold750 | 39597                   | GG                              | TT                | 1946619193               |
| SNP_P3_135466_44526 | NW_004516139.1 | Scaffold750 | 44526                   | GG                              | AA                | 1946619195               |
| SNP_P3_135467_58038 | NW_004516139.1 | Scaffold750 | 58038                   | CC                              | TT                | 1946619197               |
| SNP_P3_135468_58067 | NW_004516139.1 | Scaffold750 | 58067                   | GG                              | TT                | 1946619199               |
| SNP_P3_135469_58145 | NW_004516139.1 | Scaffold750 | 58145                   | CC                              | TT                | 1946619201               |
| SNP_P3_135470_58238 | NW_004516139.1 | Scaffold750 | 58238                   | CC                              | GG                | 1946619203               |
| SNP_P3_135471_58243 | NW_004516139.1 | Scaffold750 | 58243                   | GG                              | CC                | 1946619205               |
| SNP_P3_135472_58248 | NW_004516139.1 | Scaffold750 | 58248                   | TT                              | CC                | 1946619207               |
| SNP_P3_135473_58308 | NW_004516139.1 | Scaffold750 | 58308                   | GG                              | AA                | 1946619209               |
| SNP_P3_135474_58311 | NW_004516139.1 | Scaffold750 | 58311                   | AA                              | GG                | 1946619211               |
| SNP_P3_135475_58352 | NW_004516139.1 | Scaffold750 | 58352                   | TT                              | CC                | 1946619213               |

| SNPs IDs             | Chromosome IDs | Chromosomes | Physical positions (bp) | CDC Frontier (Reference genome) | (Pusa 256 & HPNB) | NCBI SNPdb Accession IDs |
|----------------------|----------------|-------------|-------------------------|---------------------------------|-------------------|--------------------------|
| SNP_P3_135476_58435  | NW_004516139.1 | Scaffold750 | 58435                   | AA                              | TT                | 1946619215               |
| SNP_P3_135477_58447  | NW_004516139.1 | Scaffold750 | 58447                   | GG                              | CC                | 1946619217               |
| SNP_P3_135478_58526  | NW_004516139.1 | Scaffold750 | 58526                   | CC                              | GG                | 1946619219               |
| SNP_P3_135479_58541  | NW_004516139.1 | Scaffold750 | 58541                   | GG                              | AA                | 1946619221               |
| SNP_P3_135480_58562  | NW_004516139.1 | Scaffold750 | 58562                   | CC                              | TT                | 1946619223               |
| SNP_P3_135481_58887  | NW_004516139.1 | Scaffold750 | 58887                   | TT                              | GG                | 1946619225               |
| SNP_P3_135482_58906  | NW_004516139.1 | Scaffold750 | 58906                   | TT                              | CC                | 1946619228               |
| SNP_P3_135484_59118  | NW_004516139.1 | Scaffold750 | 59118                   | CC                              | GG                | 1946619230               |
| SNP_P3_135485_59203  | NW_004516139.1 | Scaffold750 | 59203                   | GG                              | AA                | 1946619232               |
| SNP_P3_135486_59212  | NW_004516139.1 | Scaffold750 | 59212                   | CC                              | GG                | 1946619234               |
| SNP_P3_135487_59314  | NW_004516139.1 | Scaffold750 | 59314                   | TT                              | AA                | 1946619235               |
| SNP_P3_135488_59453  | NW_004516139.1 | Scaffold750 | 59453                   | GG                              | TT                | 1946619237               |
| SNP_P3_135489_59530  | NW_004516139.1 | Scaffold750 | 59530                   | GG                              | TT                | 1946619239               |
| SNP_P3_135490_59590  | NW_004516139.1 | Scaffold750 | 59590                   | AA                              | TT                | 1946619241               |
| SNP_P3_135491_59877  | NW_004516139.1 | Scaffold750 | 59877                   | GG                              | TT                | 1946619243               |
| SNP_P3_135492_59917  | NW_004516139.1 | Scaffold750 | 59917                   | TT                              | AA                | 1946619245               |
| SNP_P3_135493_60010  | NW_004516139.1 | Scaffold750 | 60010                   | GG                              | TT                | 1946619247               |
| SNP_P3_135494_60028  | NW_004516139.1 | Scaffold750 | 60028                   | CC                              | TT                | 1946619249               |
| SNP_P3_135495_60066  | NW_004516139.1 | Scaffold750 | 60066                   | CC                              | TT                | 1946619251               |
| SNP_P3_135496_60075  | NW_004516139.1 | Scaffold750 | 60075                   | CC                              | TT                | 1946619253               |
| SNP_P3_135497_60092  | NW_004516139.1 | Scaffold750 | 60092                   | CC                              | AA                | 1946619255               |
| SNP_P3_135498_60131  | NW_004516139.1 | Scaffold750 | 60131                   | GG                              | TT                | 1946619257               |
| SNP_P3_135499_60161  | NW_004516139.1 | Scaffold750 | 60161                   | CC                              | TT                | 1946619259               |
| SNP_P3_135500_60175  | NW_004516139.1 | Scaffold750 | 60175                   | AA                              | TT                | 1946619261               |
| SNP_P3_135501_60192  | NW_004516139.1 | Scaffold750 | 60192                   | GG                              | AA                | 1946619263               |
| SNP_P3_135502_60199  | NW_004516139.1 | Scaffold750 | 60199                   | AA                              | GG                | 1946619266               |
| SNP_P3_135503_60275  | NW_004516139.1 | Scaffold750 | 60275                   | TT                              | GG                | 1946619268               |
| SNP_P3_135504_60407  | NW_004516139.1 | Scaffold750 | 60407                   | TT                              | AA                | 1946619270               |
| SNP_P3_135506_68000  | NW_004516139.1 | Scaffold750 | 68000                   | GG                              | TT                | 1946619272               |
| SNP_P3_135507_69057  | NW_004516139.1 | Scaffold750 | 69057                   | AA                              | GG                | 1946619274               |
| SNP_P3_135508_69063  | NW_004516139.1 | Scaffold750 | 69063                   | AA                              | CC                | 1946619276               |
| SNP_P3_135509_84816  | NW_004516139.1 | Scaffold750 | 84816                   | AA                              | GG                | 1946619278               |
| SNP_P3_135510_90142  | NW_004516139.1 | Scaffold750 | 90142                   | GG                              | AA                | 1946619280               |
| SNP_P3_135511_96436  | NW_004516139.1 | Scaffold750 | 96436                   | CC                              | GG                | 1946619282               |
| SNP_P3_135512_96437  | NW_004516139.1 | Scaffold750 | 96437                   | AA                              | CC                | 1946619284               |
| SNP_P3_135513_96455  | NW_004516139.1 | Scaffold750 | 96455                   | AA                              | GG                | 1946619286               |
| SNP_P3_135514_96457  | NW_004516139.1 | Scaffold750 | 96457                   | AA                              | CC                | 1946619288               |
| SNP_P3_135515_105845 | NW_004516139.1 | Scaffold750 | 105845                  | TT                              | GG                | 1946619290               |
| SNP_P3_135516_105853 | NW_004516139.1 | Scaffold750 | 105853                  | AA                              | GG                | 1946619292               |
| SNP_P3_135517_106147 | NW_004516139.1 | Scaffold750 | 106147                  | AA                              | TT                | 1946619294               |
| SNP_P3_135518_106550 | NW_004516139.1 | Scaffold750 | 106550                  | AA                              | CC                | 1946619296               |
| SNP_P3_135519_106889 | NW_004516139.1 | Scaffold750 | 106889                  | GG                              | AA                | 1946619298               |

| SNPs IDs             | Chromosome IDs | Chromosomes | Physical positions (bp) | CDC Frontier (Reference genome) | (Pusa 256 & HPNB) | NCBI SNPdb Accession IDs |
|----------------------|----------------|-------------|-------------------------|---------------------------------|-------------------|--------------------------|
| SNP_P3_135520_106895 | NW_004516139.1 | Scaffold750 | 106895                  | GG                              | CC                | 1946619300               |
| SNP_P3_135521_106922 | NW_004516139.1 | Scaffold750 | 106922                  | TT                              | CC                | 1946619302               |
| SNP_P3_135522_106984 | NW_004516139.1 | Scaffold750 | 106984                  | TT                              | GG                | 1946619304               |
| SNP_P3_135523_119127 | NW_004516139.1 | Scaffold750 | 119127                  | AA                              | TT                | 1946619306               |
| SNP_P3_135524_121853 | NW_004516139.1 | Scaffold750 | 121853                  | CC                              | TT                | 1946619308               |
| SNP_P3_135525_141447 | NW_004516139.1 | Scaffold750 | 141447                  | CC                              | TT                | 1946619310               |
| SNP_P3_135526_141464 | NW_004516139.1 | Scaffold750 | 141464                  | AA                              | CC                | 1946619312               |
| SNP_P3_135527_142793 | NW_004516139.1 | Scaffold750 | 142793                  | AA                              | GG                | 1946619314               |
| SNP_P3_135528_158900 | NW_004516139.1 | Scaffold750 | 158900                  | CC                              | TT                | 1946619316               |
| SNP_P3_135529_158903 | NW_004516139.1 | Scaffold750 | 158903                  | GG                              | AA                | 1946619318               |
| SNP_P3_135530_158932 | NW_004516139.1 | Scaffold750 | 158932                  | TT                              | GG                | 1946619320               |
| SNP_P3_135531_168372 | NW_004516139.1 | Scaffold750 | 168372                  | CC                              | TT                | 1946619322               |
| SNP_P3_135532_185311 | NW_004516139.1 | Scaffold750 | 185311                  | TT                              | CC                | 1946619324               |
| SNP_P3_135533_190485 | NW_004516139.1 | Scaffold750 | 190485                  | AA                              | GG                | 1946619326               |
| SNP_P3_135534_190499 | NW_004516139.1 | Scaffold750 | 190499                  | TT                              | CC                | 1946619329               |
| SNP_P3_135535_190518 | NW_004516139.1 | Scaffold750 | 190518                  | AA                              | TT                | 1946619331               |
| SNP_P3_135536_190521 | NW_004516139.1 | Scaffold750 | 190521                  | AA                              | GG                | 1946619333               |
| SNP_P3_135538_190862 | NW_004516139.1 | Scaffold750 | 190862                  | AA                              | GG                | 1946619335               |
| SNP_P3_135539_190927 | NW_004516139.1 | Scaffold750 | 190927                  | CC                              | TT                | 1946619337               |
| SNP_P3_135540_221724 | NW_004516139.1 | Scaffold750 | 221724                  | AA                              | GG                | 1946619339               |
| SNP_P3_135541_226493 | NW_004516139.1 | Scaffold750 | 226493                  | AA                              | GG                | 1946619341               |
| SNP_P3_135542_228517 | NW_004516139.1 | Scaffold750 | 228517                  | GG                              | AA                | 1946619343               |
| SNP_P3_135543_228848 | NW_004516139.1 | Scaffold750 | 228848                  | AA                              | CC                | 1946619346               |
| SNP_P3_135544_228896 | NW_004516139.1 | Scaffold750 | 228896                  | TT                              | CC                | 1946619348               |
| SNP_P3_135545_239656 | NW_004516139.1 | Scaffold750 | 239656                  | TT                              | CC                | 1946619350               |
| SNP_P3_135546_242937 | NW_004516139.1 | Scaffold750 | 242937                  | AA                              | GG                | 1946619352               |
| SNP_P3_135547_243198 | NW_004516139.1 | Scaffold750 | 243198                  | TT                              | CC                | 1946619354               |
| SNP_P3_135548_243212 | NW_004516139.1 | Scaffold750 | 243212                  | AA                              | TT                | 1946619356               |
| SNP_P3_135549_243235 | NW_004516139.1 | Scaffold750 | 243235                  | AA                              | GG                | 1946619358               |
| SNP_P3_135550_245268 | NW_004516139.1 | Scaffold750 | 245268                  | AA                              | TT                | 1946619360               |
| SNP_P3_135551_245318 | NW_004516139.1 | Scaffold750 | 245318                  | AA                              | CC                | 1946619362               |
| SNP_P3_135552_245341 | NW_004516139.1 | Scaffold750 | 245341                  | CC                              | GG                | 1946619364               |
| SNP_P3_135553_245636 | NW_004516139.1 | Scaffold750 | 245636                  | GG                              | AA                | 1946619366               |
| SNP_P3_135554_248429 | NW_004516139.1 | Scaffold750 | 248429                  | GG                              | TT                | 1946619368               |
| SNP_P3_135555_256801 | NW_004516139.1 | Scaffold750 | 256801                  | TT                              | AA                | 1946619370               |
| SNP_P3_135556_256926 | NW_004516139.1 | Scaffold750 | 256926                  | TT                              | CC                | 1946619372               |
| SNP_P3_135558_257102 | NW_004516139.1 | Scaffold750 | 257102                  | AA                              | GG                | 1946619374               |
| SNP_P3_135559_257110 | NW_004516139.1 | Scaffold750 | 257110                  | TT                              | CC                | 1946619376               |
| SNP_P3_135560_257249 | NW_004516139.1 | Scaffold750 | 257249                  | TT                              | CC                | 1946619378               |
| SNP_P3_135561_258258 | NW_004516139.1 | Scaffold750 | 258258                  | TT                              | AA                | 1946619380               |
| SNP_P3_135562_265983 | NW_004516139.1 | Scaffold750 | 265983                  | GG                              | TT                | 1946619382               |
| SNP_P3_135563_265993 | NW_004516139.1 | Scaffold750 | 265993                  | TT                              | CC                | 1946619384               |

| SNPs IDs             | Chromosome IDs | Chromosomes | Physical positions (bp) | CDC Frontier (Reference genome) | (Pusa 256 & HPNB) | NCBI SNPdb Accession IDs |
|----------------------|----------------|-------------|-------------------------|---------------------------------|-------------------|--------------------------|
| SNP_P3_135564_266268 | NW_004516139.1 | Scaffold750 | 266268                  | TT                              | CC                | 1946619386               |
| SNP_P3_135565_266314 | NW_004516139.1 | Scaffold750 | 266314                  | GG                              | AA                | 1946619388               |
| SNP_P3_135566_268839 | NW_004516139.1 | Scaffold750 | 268839                  | GG                              | AA                | 1946619390               |
| SNP_P3_135567_268861 | NW_004516139.1 | Scaffold750 | 268861                  | TT                              | CC                | 1946619392               |
| SNP_P3_135568_268882 | NW_004516139.1 | Scaffold750 | 268882                  | TT                              | CC                | 1946619394               |
| SNP_P3_135569_268923 | NW_004516139.1 | Scaffold750 | 268923                  | TT                              | AA                | 1946619396               |
| SNP_P3_135570_272048 | NW_004516139.1 | Scaffold750 | 272048                  | TT                              | AA                | 1946619398               |
| SNP_P3_135571_272072 | NW_004516139.1 | Scaffold750 | 272072                  | CC                              | AA                | 1946619400               |
| SNP_P3_135572_272375 | NW_004516139.1 | Scaffold750 | 272375                  | AA                              | GG                | 1946619402               |
| SNP_P3_135573_273597 | NW_004516139.1 | Scaffold750 | 273597                  | CC                              | AA                | 1946619404               |
| SNP_P3_135574_273792 | NW_004516139.1 | Scaffold750 | 273792                  | CC                              | TT                | 1946619406               |
| SNP_P3_135575_278472 | NW_004516139.1 | Scaffold750 | 278472                  | TT                              | AA                | 1946619408               |
| SNP_P3_135576_278491 | NW_004516139.1 | Scaffold750 | 278491                  | TT                              | CC                | 1946619410               |
| SNP_P3_135577_278514 | NW_004516139.1 | Scaffold750 | 278514                  | TT                              | CC                | 1946619412               |
| SNP_P3_135578_278789 | NW_004516139.1 | Scaffold750 | 278789                  | TT                              | CC                | 1946619414               |
| SNP_P3_135579_278799 | NW_004516139.1 | Scaffold750 | 278799                  | AA                              | CC                | 1946619416               |
| SNP_P3_135580_313683 | NW_004516139.1 | Scaffold750 | 313683                  | AA                              | CC                | 1946619418               |
| SNP_P3_135581_318158 | NW_004516139.1 | Scaffold750 | 318158                  | AA                              | GG                | 1946619420               |
| SNP_P3_135582_348124 | NW_004516139.1 | Scaffold750 | 348124                  | GG                              | TT                | 1946619422               |
| SNP_P3_135583_348287 | NW_004516139.1 | Scaffold750 | 348287                  | CC                              | TT                | 1946619424               |
| SNP_P3_135584_360163 | NW_004516139.1 | Scaffold750 | 360163                  | CC                              | TT                | 1946619426               |
| SNP_P3_135585_360252 | NW_004516139.1 | Scaffold750 | 360252                  | CC                              | TT                | 1946619428               |
| SNP_P3_135587_360503 | NW_004516139.1 | Scaffold750 | 360503                  | TT                              | CC                | 1946619430               |
| SNP_P3_135588_360521 | NW_004516139.1 | Scaffold750 | 360521                  | AA                              | TT                | 1946619432               |
| SNP_P3_135589_360544 | NW_004516139.1 | Scaffold750 | 360544                  | AA                              | TT                | 1946619434               |
| SNP_P3_135590_360560 | NW_004516139.1 | Scaffold750 | 360560                  | AA                              | CC                | 1946619436               |
| SNP_P3_135591_360623 | NW_004516139.1 | Scaffold750 | 360623                  | GG                              | AA                | 1946619438               |
| SNP_P3_135592_360629 | NW_004516139.1 | Scaffold750 | 360629                  | GG                              | TT                | 1946619440               |
| SNP_P3_135593_360630 | NW_004516139.1 | Scaffold750 | 360630                  | CC                              | AA                | 1946619442               |
| SNP_P3_135594_360896 | NW_004516139.1 | Scaffold750 | 360896                  | GG                              | AA                | 1946619444               |
| SNP_P3_135595_362230 | NW_004516139.1 | Scaffold750 | 362230                  | TT                              | CC                | 1946619446               |
| SNP_P3_135596_362244 | NW_004516139.1 | Scaffold750 | 362244                  | AA                              | GG                | 1946619448               |
| SNP_P3_135597_362276 | NW_004516139.1 | Scaffold750 | 362276                  | TT                              | CC                | 1946619450               |
| SNP_P3_135598_362293 | NW_004516139.1 | Scaffold750 | 362293                  | TT                              | GG                | 1946619452               |
| SNP_P3_135599_362295 | NW_004516139.1 | Scaffold750 | 362295                  | TT                              | AA                | 1946619454               |
| SNP_P3_135600_362321 | NW_004516139.1 | Scaffold750 | 362321                  | TT                              | AA                | 1946619456               |
| SNP_P3_135601_362349 | NW_004516139.1 | Scaffold750 | 362349                  | CC                              | TT                | 1946619458               |
| SNP_P3_135602_362359 | NW_004516139.1 | Scaffold750 | 362359                  | GG                              | TT                | 1946619460               |
| SNP_P3_135603_362480 | NW_004516139.1 | Scaffold750 | 362480                  | TT                              | CC                | 1946619462               |
| SNP_P3_135604_13569  | NW_004516140.1 | Scaffold752 | 13569                   | GG                              | AA                | 1946619464               |
| SNP_P3_135605_30427  | NW_004516140.1 | Scaffold752 | 30427                   | TT                              | AA                | 1946619466               |
| SNP_P3_135606_46093  | NW_004516140.1 | Scaffold752 | 46093                   | TT                              | CC                | 1946619468               |

| SNPs IDs             | Chromosome IDs | Chromosomes | Physical positions (bp) | CDC Frontier (Reference genome) | (Pusa 256 & HPNB) | NCBI SNPdb Accession IDs |
|----------------------|----------------|-------------|-------------------------|---------------------------------|-------------------|--------------------------|
| SNP_P3_135607_50188  | NW_004516140.1 | Scaffold752 | 50188                   | GG                              | AA                | 1946619470               |
| SNP_P3_135608_50482  | NW_004516140.1 | Scaffold752 | 50482                   | AA                              | GG                | 1946619472               |
| SNP_P3_135609_50503  | NW_004516140.1 | Scaffold752 | 50503                   | TT                              | CC                | 1946619474               |
| SNP_P3_135610_50581  | NW_004516140.1 | Scaffold752 | 50581                   | GG                              | AA                | 1946619476               |
| SNP_P3_135611_50611  | NW_004516140.1 | Scaffold752 | 50611                   | AA                              | CC                | 1946619478               |
| SNP_P3_135612_50640  | NW_004516140.1 | Scaffold752 | 50640                   | AA                              | TT                | 1946619480               |
| SNP_P3_135613_76225  | NW_004516140.1 | Scaffold752 | 76225                   | AA                              | GG                | 1946619482               |
| SNP_P3_135614_79497  | NW_004516140.1 | Scaffold752 | 79497                   | GG                              | AA                | 1946619484               |
| SNP_P3_135615_79513  | NW_004516140.1 | Scaffold752 | 79513                   | AA                              | GG                | 1946619486               |
| SNP_P3_135617_99166  | NW_004516140.1 | Scaffold752 | 99166                   | GG                              | AA                | 1946619488               |
| SNP_P3_135618_99199  | NW_004516140.1 | Scaffold752 | 99199                   | AA                              | GG                | 1946619490               |
| SNP_P3_135619_99231  | NW_004516140.1 | Scaffold752 | 99231                   | AA                              | GG                | 1946619492               |
| SNP_P3_135620_99416  | NW_004516140.1 | Scaffold752 | 99416                   | TT                              | CC                | 1946619494               |
| SNP_P3_135621_99498  | NW_004516140.1 | Scaffold752 | 99498                   | CC                              | GG                | 1946619496               |
| SNP_P3_135622_99510  | NW_004516140.1 | Scaffold752 | 99510                   | TT                              | CC                | 1946619498               |
| SNP_P3_135623_112775 | NW_004516140.1 | Scaffold752 | 112775                  | AA                              | TT                | 1946619500               |
| SNP_P3_135624_119058 | NW_004516140.1 | Scaffold752 | 119058                  | CC                              | TT                | 1946619502               |
| SNP_P3_135625_137561 | NW_004516140.1 | Scaffold752 | 137561                  | GG                              | AA                | 1946619504               |
| SNP_P3_135626_137570 | NW_004516140.1 | Scaffold752 | 137570                  | TT                              | CC                | 1946619506               |
| SNP_P3_135627_137579 | NW_004516140.1 | Scaffold752 | 137579                  | AA                              | CC                | 1946619508               |
| SNP_P3_135628_137628 | NW_004516140.1 | Scaffold752 | 137628                  | CC                              | TT                | 1946619510               |
| SNP_P3_135629_137634 | NW_004516140.1 | Scaffold752 | 137634                  | GG                              | AA                | 1946619512               |
| SNP_P3_135630_137643 | NW_004516140.1 | Scaffold752 | 137643                  | CC                              | TT                | 1946619514               |
| SNP_P3_135631_137648 | NW_004516140.1 | Scaffold752 | 137648                  | TT                              | AA                | 1946619517               |
| SNP_P3_135632_137967 | NW_004516140.1 | Scaffold752 | 137967                  | TT                              | CC                | 1946619519               |
| SNP_P3_135633_137990 | NW_004516140.1 | Scaffold752 | 137990                  | AA                              | GG                | 1946619521               |
| SNP_P3_135634_138011 | NW_004516140.1 | Scaffold752 | 138011                  | GG                              | AA                | 1946619523               |
| SNP_P3_135635_138021 | NW_004516140.1 | Scaffold752 | 138021                  | AA                              | GG                | 1946619525               |
| SNP_P3_135636_138440 | NW_004516140.1 | Scaffold752 | 138440                  | GG                              | CC                | 1946619527               |
| SNP_P3_135637_138461 | NW_004516140.1 | Scaffold752 | 138461                  | GG                              | AA                | 1946619529               |
| SNP_P3_135638_150369 | NW_004516140.1 | Scaffold752 | 150369                  | TT                              | GG                | 1946619531               |
| SNP_P3_135639_150442 | NW_004516140.1 | Scaffold752 | 150442                  | AA                              | GG                | 1946619533               |
| SNP_P3_135640_152249 | NW_004516140.1 | Scaffold752 | 152249                  | TT                              | AA                | 1946619535               |
| SNP_P3_135641_152515 | NW_004516140.1 | Scaffold752 | 152515                  | CC                              | AA                | 1946619537               |
| SNP_P3_135642_152917 | NW_004516140.1 | Scaffold752 | 152917                  | CC                              | TT                | 1946619539               |
| SNP_P3_135643_188226 | NW_004516140.1 | Scaffold752 | 188226                  | CC                              | AA                | 1946619541               |
| SNP_P3_135644_188227 | NW_004516140.1 | Scaffold752 | 188227                  | TT                              | GG                | 1946619543               |
| SNP_P3_135646_202008 | NW_004516140.1 | Scaffold752 | 202008                  | CC                              | TT                | 1946619545               |
| SNP_P3_135647_209976 | NW_004516140.1 | Scaffold752 | 209976                  | AA                              | GG                | 1946619547               |
| SNP_P3_135648_213752 | NW_004516140.1 | Scaffold752 | 213752                  | CC                              | TT                | 1946619549               |
| SNP_P3_135649_213798 | NW_004516140.1 | Scaffold752 | 213798                  | GG                              | CC                | 1946619551               |
| SNP_P3_135650_214142 | NW_004516140.1 | Scaffold752 | 214142                  | CC                              | AA                | 1946619553               |

| SNPs IDs             | Chromosome IDs | Chromosomes | Physical positions (bp) | CDC Frontier (Reference genome) | (Pusa 256 & HPNB) | NCBI SNPdb Accession IDs |
|----------------------|----------------|-------------|-------------------------|---------------------------------|-------------------|--------------------------|
| SNP_P3_135651_214288 | NW_004516140.1 | Scaffold752 | 214288                  | TT                              | GG                | 1946619555               |
| SNP_P3_135652_214293 | NW_004516140.1 | Scaffold752 | 214293                  | TT                              | CC                | 1946619557               |
| SNP_P3_135653_214338 | NW_004516140.1 | Scaffold752 | 214338                  | TT                              | CC                | 1946619559               |
| SNP_P3_135654_216377 | NW_004516140.1 | Scaffold752 | 216377                  | GG                              | CC                | 1946619561               |
| SNP_P3_135655_227747 | NW_004516140.1 | Scaffold752 | 227747                  | AA                              | GG                | 1946619563               |
| SNP_P3_135656_227748 | NW_004516140.1 | Scaffold752 | 227748                  | TT                              | AA                | 1946619565               |
| SNP_P3_135657_227807 | NW_004516140.1 | Scaffold752 | 227807                  | AA                              | CC                | 1946619567               |
| SNP_P3_135658_228146 | NW_004516140.1 | Scaffold752 | 228146                  | TT                              | CC                | 1946619569               |
| SNP_P3_135659_228153 | NW_004516140.1 | Scaffold752 | 228153                  | CC                              | GG                | 1946619571               |
| SNP_P3_135660_231073 | NW_004516140.1 | Scaffold752 | 231073                  | GG                              | AA                | 1946619574               |
| SNP_P3_135661_231077 | NW_004516140.1 | Scaffold752 | 231077                  | CC                              | GG                | 1946619576               |
| SNP_P3_135662_231148 | NW_004516140.1 | Scaffold752 | 231148                  | AA                              | CC                | 1946619578               |
| SNP_P3_135663_231149 | NW_004516140.1 | Scaffold752 | 231149                  | CC                              | TT                | 1946619580               |
| SNP_P3_135664_231210 | NW_004516140.1 | Scaffold752 | 231210                  | GG                              | CC                | 1946619582               |
| SNP_P3_135665_231220 | NW_004516140.1 | Scaffold752 | 231220                  | AA                              | GG                | 1946619584               |
| SNP_P3_135666_231238 | NW_004516140.1 | Scaffold752 | 231238                  | GG                              | AA                | 1946619586               |
| SNP_P3_135667_231259 | NW_004516140.1 | Scaffold752 | 231259                  | AA                              | GG                | 1946619588               |
| SNP_P3_135668_231264 | NW_004516140.1 | Scaffold752 | 231264                  | AA                              | GG                | 1946619589               |
| SNP_P3_135669_231289 | NW_004516140.1 | Scaffold752 | 231289                  | TT                              | CC                | 1946619591               |
| SNP_P3_135670_231298 | NW_004516140.1 | Scaffold752 | 231298                  | CC                              | TT                | 1946619593               |
| SNP_P3_135671_231310 | NW_004516140.1 | Scaffold752 | 231310                  | CC                              | TT                | 1946619595               |
| SNP_P3_135672_231343 | NW_004516140.1 | Scaffold752 | 231343                  | AA                              | TT                | 1946619597               |
| SNP_P3_135673_231458 | NW_004516140.1 | Scaffold752 | 231458                  | TT                              | CC                | 1946619599               |
| SNP_P3_135674_231467 | NW_004516140.1 | Scaffold752 | 231467                  | GG                              | AA                | 1946619601               |
| SNP_P3_135675_231477 | NW_004516140.1 | Scaffold752 | 231477                  | CC                              | TT                | 1946619603               |
| SNP_P3_135676_231484 | NW_004516140.1 | Scaffold752 | 231484                  | AA                              | CC                | 1946619605               |
| SNP_P3_135677_231499 | NW_004516140.1 | Scaffold752 | 231499                  | TT                              | GG                | 1946619607               |
| SNP_P3_135678_231500 | NW_004516140.1 | Scaffold752 | 231500                  | AA                              | GG                | 1946619609               |
| SNP_P3_135679_231509 | NW_004516140.1 | Scaffold752 | 231509                  | GG                              | AA                | 1946619611               |
| SNP_P3_135680_231542 | NW_004516140.1 | Scaffold752 | 231542                  | GG                              | AA                | 1946619614               |
| SNP_P3_135681_231551 | NW_004516140.1 | Scaffold752 | 231551                  | GG                              | AA                | 1946619616               |
| SNP_P3_135682_231554 | NW_004516140.1 | Scaffold752 | 231554                  | AA                              | GG                | 1946619618               |
| SNP_P3_135683_231611 | NW_004516140.1 | Scaffold752 | 231611                  | GG                              | AA                | 1946619620               |
| SNP_P3_135684_232154 | NW_004516140.1 | Scaffold752 | 232154                  | AA                              | GG                | 1946619622               |
| SNP_P3_135685_232448 | NW_004516140.1 | Scaffold752 | 232448                  | GG                              | TT                | 1946619624               |
| SNP_P3_135686_232511 | NW_004516140.1 | Scaffold752 | 232511                  | TT                              | GG                | 1946619626               |
| SNP_P3_135689_269446 | NW_004516140.1 | Scaffold752 | 269446                  | CC                              | TT                | 1946619628               |
| SNP_P3_135690_269485 | NW_004516140.1 | Scaffold752 | 269485                  | TT                              | CC                | 1946619630               |
| SNP_P3_135692_269613 | NW_004516140.1 | Scaffold752 | 269613                  | TT                              | GG                | 1946619632               |
| SNP_P3_135693_269644 | NW_004516140.1 | Scaffold752 | 269644                  | AA                              | CC                | 1946619634               |
| SNP_P3_135694_269712 | NW_004516140.1 | Scaffold752 | 269712                  | AA                              | GG                | 1946619636               |
| SNP_P3_135695_269932 | NW_004516140.1 | Scaffold752 | 269932                  | GG                              | AA                | 1946619638               |

| SNPs IDs             | Chromosome IDs | Chromosomes | Physical positions (bp) | CDC Frontier (Reference genome) | (Pusa 256 & HPNB) | NCBI SNPdb Accession IDs |
|----------------------|----------------|-------------|-------------------------|---------------------------------|-------------------|--------------------------|
| SNP_P3_135696_293949 | NW_004516140.1 | Scaffold752 | 293949                  | GG                              | AA                | 1946619640               |
| SNP_P3_135697_294033 | NW_004516140.1 | Scaffold752 | 294033                  | CC                              | AA                | 1946619642               |
| SNP_P3_135698_326476 | NW_004516140.1 | Scaffold752 | 326476                  | AA                              | GG                | 1946619644               |
| SNP_P3_135699_326488 | NW_004516140.1 | Scaffold752 | 326488                  | CC                              | TT                | 1946619646               |
| SNP_P3_135701_369624 | NW_004516140.1 | Scaffold752 | 369624                  | GG                              | CC                | 1946619648               |
| SNP_P3_135702_397150 | NW_004516140.1 | Scaffold752 | 397150                  | TT                              | GG                | 1946619650               |
| SNP_P3_135703_417630 | NW_004516140.1 | Scaffold752 | 417630                  | CC                              | TT                | 1946619652               |
| SNP_P3_135705_449129 | NW_004516140.1 | Scaffold752 | 449129                  | GG                              | AA                | 1946619654               |
| SNP_P3_135706_451242 | NW_004516140.1 | Scaffold752 | 451242                  | TT                              | CC                | 1946619656               |
| SNP_P3_135708_504791 | NW_004516140.1 | Scaffold752 | 504791                  | CC                              | TT                | 1946619658               |
| SNP_P3_135709_504807 | NW_004516140.1 | Scaffold752 | 504807                  | CC                              | TT                | 1946619660               |
| SNP_P3_135710_505027 | NW_004516140.1 | Scaffold752 | 505027                  | CC                              | TT                | 1946619662               |
| SNP_P3_135711_505082 | NW_004516140.1 | Scaffold752 | 505082                  | GG                              | CC                | 1946619664               |
| SNP_P3_135712_505096 | NW_004516140.1 | Scaffold752 | 505096                  | CC                              | TT                | 1946619666               |
| SNP_P3_135714_505290 | NW_004516140.1 | Scaffold752 | 505290                  | AA                              | GG                | 1946619668               |
| SNP_P3_135715_505401 | NW_004516140.1 | Scaffold752 | 505401                  | AA                              | CC                | 1946619670               |
| SNP_P3_135716_3873   | NW_004516141.1 | Scaffold753 | 3873                    | TT                              | GG                | 1946619672               |
| SNP_P3_135719_47980  | NW_004516141.1 | Scaffold753 | 47980                   | GG                              | AA                | 1946619675               |
| SNP_P3_135720_84324  | NW_004516141.1 | Scaffold753 | 84324                   | TT                              | CC                | 1946619677               |
| SNP_P3_135721_84329  | NW_004516141.1 | Scaffold753 | 84329                   | TT                              | GG                | 1946619679               |
| SNP_P3_135722_84341  | NW_004516141.1 | Scaffold753 | 84341                   | AA                              | GG                | 1946619681               |
| SNP_P3_135723_84356  | NW_004516141.1 | Scaffold753 | 84356                   | AA                              | CC                | 1946619683               |
| SNP_P3_135724_84387  | NW_004516141.1 | Scaffold753 | 84387                   | AA                              | CC                | 1946619685               |
| SNP_P3_135725_84403  | NW_004516141.1 | Scaffold753 | 84403                   | AA                              | GG                | 1946619687               |
| SNP_P3_135726_84406  | NW_004516141.1 | Scaffold753 | 84406                   | TT                              | CC                | 1946619689               |
| SNP_P3_135727_84471  | NW_004516141.1 | Scaffold753 | 84471                   | CC                              | AA                | 1946619691               |
| SNP_P3_135728_110558 | NW_004516141.1 | Scaffold753 | 110558                  | TT                              | CC                | 1946619693               |
| SNP_P3_135729_118106 | NW_004516141.1 | Scaffold753 | 118106                  | CC                              | TT                | 1946619695               |
| SNP_P3_135730_120488 | NW_004516141.1 | Scaffold753 | 120488                  | CC                              | TT                | 1946619697               |
| SNP_P3_135731_123070 | NW_004516141.1 | Scaffold753 | 123070                  | CC                              | TT                | 1946619699               |
| SNP_P3_135732_123085 | NW_004516141.1 | Scaffold753 | 123085                  | GG                              | AA                | 1946619701               |
| SNP_P3_135733_123100 | NW_004516141.1 | Scaffold753 | 123100                  | TT                              | CC                | 1946619703               |
| SNP_P3_135734_123127 | NW_004516141.1 | Scaffold753 | 123127                  | TT                              | CC                | 1946619705               |
| SNP_P3_135735_123158 | NW_004516141.1 | Scaffold753 | 123158                  | GG                              | AA                | 1946619707               |
| SNP_P3_135736_123169 | NW_004516141.1 | Scaffold753 | 123169                  | TT                              | CC                | 1946619709               |
| SNP_P3_135737_124131 | NW_004516141.1 | Scaffold753 | 124131                  | TT                              | CC                | 1946619711               |
| SNP_P3_135738_146411 | NW_004516141.1 | Scaffold753 | 146411                  | TT                              | CC                | 1946619713               |
| SNP_P3_135739_150068 | NW_004516141.1 | Scaffold753 | 150068                  | AA                              | TT                | 1946619715               |
| SNP_P3_135740_150167 | NW_004516141.1 | Scaffold753 | 150167                  | TT                              | CC                | 1946619717               |
| SNP_P3_135741_150759 | NW_004516141.1 | Scaffold753 | 150759                  | AA                              | GG                | 1946619719               |
| SNP_P3_135742_151068 | NW_004516141.1 | Scaffold753 | 151068                  | CC                              | TT                | 1946619721               |
| SNP_P3_135743_222708 | NW_004516141.1 | Scaffold753 | 222708                  | TT                              | CC                | 1946619723               |

| SNPs IDs             | Chromosome IDs | Chromosomes | Physical positions (bp) | CDC Frontier (Reference genome) | (Pusa 256 & HPNB) | NCBI SNPdb Accession IDs |
|----------------------|----------------|-------------|-------------------------|---------------------------------|-------------------|--------------------------|
| SNP_P3_135744_227663 | NW_004516141.1 | Scaffold753 | 227663                  | TT                              | AA                | 1946619725               |
| SNP_P3_135745_228714 | NW_004516141.1 | Scaffold753 | 228714                  | AA                              | GG                | 1946619727               |
| SNP_P3_135746_228884 | NW_004516141.1 | Scaffold753 | 228884                  | TT                              | CC                | 1946619729               |
| SNP_P3_135747_229213 | NW_004516141.1 | Scaffold753 | 229213                  | CC                              | TT                | 1946619731               |
| SNP_P3_135748_229273 | NW_004516141.1 | Scaffold753 | 229273                  | CC                              | TT                | 1946619733               |
| SNP_P3_135749_276256 | NW_004516141.1 | Scaffold753 | 276256                  | AA                              | CC                | 1946619735               |
| SNP_P3_135750_276449 | NW_004516141.1 | Scaffold753 | 276449                  | AA                              | CC                | 1946619737               |
| SNP_P3_135751_286744 | NW_004516141.1 | Scaffold753 | 286744                  | GG                              | CC                | 1946619739               |
| SNP_P3_135752_287079 | NW_004516141.1 | Scaffold753 | 287079                  | AA                              | CC                | 1946619741               |
| SNP_P3_135753_330626 | NW_004516141.1 | Scaffold753 | 330626                  | CC                              | TT                | 1946619743               |
| SNP_P3_135754_334173 | NW_004516141.1 | Scaffold753 | 334173                  | AA                              | TT                | 1946619745               |
| SNP_P3_135755_334175 | NW_004516141.1 | Scaffold753 | 334175                  | TT                              | AA                | 1946619747               |
| SNP_P3_135756_13391  | NW_004516142.1 | Scaffold754 | 13391                   | AA                              | GG                | 1946619749               |
| SNP_P3_135757_14476  | NW_004516142.1 | Scaffold754 | 14476                   | GG                              | TT                | 1946619751               |
| SNP_P3_135758_15354  | NW_004516142.1 | Scaffold754 | 15354                   | AA                              | GG                | 1946619753               |
| SNP_P3_135759_25536  | NW_004516142.1 | Scaffold754 | 25536                   | AA                              | CC                | 1946619755               |
| SNP_P3_135760_25731  | NW_004516142.1 | Scaffold754 | 25731                   | GG                              | AA                | 1946619757               |
| SNP_P3_135761_25734  | NW_004516142.1 | Scaffold754 | 25734                   | TT                              | GG                | 1946619760               |
| SNP_P3_135762_25801  | NW_004516142.1 | Scaffold754 | 25801                   | GG                              | CC                | 1946619762               |
| SNP_P3_135763_25957  | NW_004516142.1 | Scaffold754 | 25957                   | AA                              | CC                | 1946619764               |
| SNP_P3_135764_26193  | NW_004516142.1 | Scaffold754 | 26193                   | AA                              | CC                | 1946619766               |
| SNP_P3_135765_26194  | NW_004516142.1 | Scaffold754 | 26194                   | TT                              | AA                | 1946619768               |
| SNP_P3_135766_29646  | NW_004516144.1 | Scaffold757 | 29646                   | AA                              | TT                | 1946619770               |
| SNP_P3_135767_29860  | NW_004516144.1 | Scaffold757 | 29860                   | GG                              | AA                | 1946619772               |
| SNP_P3_135768_29864  | NW_004516144.1 | Scaffold757 | 29864                   | CC                              | TT                | 1946619774               |
| SNP_P3_135769_29902  | NW_004516144.1 | Scaffold757 | 29902                   | TT                              | AA                | 1946619776               |
| SNP_P3_135770_38945  | NW_004516144.1 | Scaffold757 | 38945                   | TT                              | CC                | 1946619778               |
| SNP_P3_135771_38958  | NW_004516144.1 | Scaffold757 | 38958                   | AA                              | GG                | 1946619779               |
| SNP_P3_135772_38959  | NW_004516144.1 | Scaffold757 | 38959                   | CC                              | TT                | 1946619781               |
| SNP_P3_135773_39270  | NW_004516144.1 | Scaffold757 | 39270                   | TT                              | AA                | 1946619783               |
| SNP_P3_135774_39337  | NW_004516144.1 | Scaffold757 | 39337                   | GG                              | AA                | 1946619785               |
| SNP_P3_135775_39341  | NW_004516144.1 | Scaffold757 | 39341                   | CC                              | AA                | 1946619788               |
| SNP_P3_135776_51594  | NW_004516144.1 | Scaffold757 | 51594                   | CC                              | GG                | 1946619790               |
| SNP_P3_135777_52365  | NW_004516144.1 | Scaffold757 | 52365                   | AA                              | GG                | 1946619792               |
| SNP_P3_135778_52381  | NW_004516144.1 | Scaffold757 | 52381                   | CC                              | GG                | 1946619794               |
| SNP_P3_135779_52498  | NW_004516144.1 | Scaffold757 | 52498                   | CC                              | TT                | 1946619795               |
| SNP_P3_135780_72824  | NW_004516144.1 | Scaffold757 | 72824                   | CC                              | TT                | 1946619797               |
| SNP_P3_135781_72867  | NW_004516144.1 | Scaffold757 | 72867                   | AA                              | GG                | 1946619799               |
| SNP_P3_135782_72937  | NW_004516144.1 | Scaffold757 | 72937                   | GG                              | AA                | 1946619801               |
| SNP_P3_135783_72985  | NW_004516144.1 | Scaffold757 | 72985                   | CC                              | TT                | 1946619803               |
| SNP_P3_135784_72988  | NW_004516144.1 | Scaffold757 | 72988                   | GG                              | AA                | 1946619805               |
| SNP_P3_135785_73004  | NW_004516144.1 | Scaffold757 | 73004                   | GG                              | AA                | 1946619807               |



| SNPs IDs             | Chromosome IDs | Chromosomes | Physical positions (bp) | CDC Frontier (Reference genome) | (Pusa 256 & HPNB) | NCBI SNPdb Accession IDs |
|----------------------|----------------|-------------|-------------------------|---------------------------------|-------------------|--------------------------|
| SNP_P3_135786_73122  | NW_004516144.1 | Scaffold757 | 73122                   | AA                              | GG                | 1946619809               |
| SNP_P3_135787_73123  | NW_004516144.1 | Scaffold757 | 73123                   | AA                              | GG                | 1946619811               |
| SNP_P3_135788_2130   | NW_004516145.1 | Scaffold758 | 2130                    | TT                              | CC                | 1946619813               |
| SNP_P3_135790_3975   | NW_004516145.1 | Scaffold758 | 3975                    | CC                              | TT                | 1946619814               |
| SNP_P3_135791_4205   | NW_004516145.1 | Scaffold758 | 4205                    | AA                              | GG                | 1946619816               |
| SNP_P3_135792_5015   | NW_004516145.1 | Scaffold758 | 5015                    | TT                              | CC                | 1946619818               |
| SNP_P3_135793_11072  | NW_004516145.1 | Scaffold758 | 11072                   | GG                              | TT                | 1946619820               |
| SNP_P3_135794_11096  | NW_004516145.1 | Scaffold758 | 11096                   | GG                              | TT                | 1946619822               |
| SNP_P3_135795_12009  | NW_004516145.1 | Scaffold758 | 12009                   | CC                              | GG                | 1946619824               |
| SNP_P3_135796_12017  | NW_004516145.1 | Scaffold758 | 12017                   | AA                              | TT                | 1946619826               |
| SNP_P3_135797_12138  | NW_004516145.1 | Scaffold758 | 12138                   | CC                              | TT                | 1946619829               |
| SNP_P3_135798_12604  | NW_004516145.1 | Scaffold758 | 12604                   | AA                              | GG                | 1946619831               |
| SNP_P3_135799_13233  | NW_004516145.1 | Scaffold758 | 13233                   | GG                              | AA                | 1946619833               |
| SNP_P3_135801_19559  | NW_004516145.1 | Scaffold758 | 19559                   | TT                              | GG                | 1946619835               |
| SNP_P3_135802_22121  | NW_004516145.1 | Scaffold758 | 22121                   | AA                              | TT                | 1946619836               |
| SNP_P3_135803_22122  | NW_004516145.1 | Scaffold758 | 22122                   | CC                              | AA                | 1946619838               |
| SNP_P3_135804_22138  | NW_004516145.1 | Scaffold758 | 22138                   | GG                              | AA                | 1946619840               |
| SNP_P3_135805_22392  | NW_004516145.1 | Scaffold758 | 22392                   | CC                              | TT                | 1946619842               |
| SNP_P3_135806_22561  | NW_004516145.1 | Scaffold758 | 22561                   | TT                              | AA                | 1946619844               |
| SNP_P3_135807_22606  | NW_004516145.1 | Scaffold758 | 22606                   | TT                              | CC                | 1946619846               |
| SNP_P3_135808_22623  | NW_004516145.1 | Scaffold758 | 22623                   | TT                              | CC                | 1946619848               |
| SNP_P3_135809_22627  | NW_004516145.1 | Scaffold758 | 22627                   | AA                              | CC                | 1946619850               |
| SNP_P3_135810_22631  | NW_004516145.1 | Scaffold758 | 22631                   | AA                              | GG                | 1946619852               |
| SNP_P3_135811_54342  | NW_004516145.1 | Scaffold758 | 54342                   | GG                              | AA                | 1946619854               |
| SNP_P3_135812_56887  | NW_004516145.1 | Scaffold758 | 56887                   | CC                              | TT                | 1946619856               |
| SNP_P3_135813_60470  | NW_004516145.1 | Scaffold758 | 60470                   | AA                              | GG                | 1946619858               |
| SNP_P3_135814_60523  | NW_004516145.1 | Scaffold758 | 60523                   | CC                              | TT                | 1946619860               |
| SNP_P3_135815_60537  | NW_004516145.1 | Scaffold758 | 60537                   | GG                              | AA                | 1946619862               |
| SNP_P3_135816_115653 | NW_004516145.1 | Scaffold758 | 115653                  | CC                              | AA                | 1946619864               |
| SNP_P3_135817_115663 | NW_004516145.1 | Scaffold758 | 115663                  | CC                              | AA                | 1946619866               |
| SNP_P3_135818_116324 | NW_004516145.1 | Scaffold758 | 116324                  | TT                              | CC                | 1946619867               |
| SNP_P3_135819_116460 | NW_004516145.1 | Scaffold758 | 116460                  | GG                              | AA                | 1946619870               |
| SNP_P3_135820_116511 | NW_004516145.1 | Scaffold758 | 116511                  | GG                              | CC                | 1946619872               |
| SNP_P3_135821_119608 | NW_004516145.1 | Scaffold758 | 119608                  | CC                              | TT                | 1946619874               |
| SNP_P3_135822_119624 | NW_004516145.1 | Scaffold758 | 119624                  | CC                              | TT                | 1946619876               |
| SNP_P3_135823_119733 | NW_004516145.1 | Scaffold758 | 119733                  | CC                              | AA                | 1946619878               |
| SNP_P3_135824_119828 | NW_004516145.1 | Scaffold758 | 119828                  | TT                              | CC                | 1946619880               |
| SNP_P3_135825_119834 | NW_004516145.1 | Scaffold758 | 119834                  | TT                              | CC                | 1946619882               |
| SNP_P3_135826_120004 | NW_004516145.1 | Scaffold758 | 120004                  | AA                              | GG                | 1946619884               |
| SNP_P3_135827_120047 | NW_004516145.1 | Scaffold758 | 120047                  | TT                              | CC                | 1946619886               |
| SNP_P3_135828_120057 | NW_004516145.1 | Scaffold758 | 120057                  | AA                              | GG                | 1946619887               |
| SNP_P3_135829_3313   | NW_004516146.1 | Scaffold759 | 3313                    | AA                              | TT                | 1946619889               |

| SNPs IDs             | Chromosome IDs | Chromosomes | Physical positions (bp) | CDC Frontier (Reference genome) | (Pusa 256 & HPNB) | NCBI SNPdb Accession IDs |
|----------------------|----------------|-------------|-------------------------|---------------------------------|-------------------|--------------------------|
| SNP_P3_135830_3728   | NW_004516146.1 | Scaffold759 | 3728                    | GG                              | AA                | 1946619891               |
| SNP_P3_135831_6089   | NW_004516146.1 | Scaffold759 | 6089                    | TT                              | CC                | 1946619893               |
| SNP_P3_135832_6113   | NW_004516146.1 | Scaffold759 | 6113                    | TT                              | GG                | 1946619895               |
| SNP_P3_135833_6120   | NW_004516146.1 | Scaffold759 | 6120                    | CC                              | TT                | 1946619897               |
| SNP_P3_135834_6122   | NW_004516146.1 | Scaffold759 | 6122                    | CC                              | TT                | 1946619899               |
| SNP_P3_135835_6160   | NW_004516146.1 | Scaffold759 | 6160                    | TT                              | GG                | 1946619901               |
| SNP_P3_135836_6193   | NW_004516146.1 | Scaffold759 | 6193                    | AA                              | CC                | 1946619903               |
| SNP_P3_135837_6250   | NW_004516146.1 | Scaffold759 | 6250                    | AA                              | CC                | 1946619905               |
| SNP_P3_135838_6921   | NW_004516146.1 | Scaffold759 | 6921                    | TT                              | CC                | 1946619906               |
| SNP_P3_135839_6937   | NW_004516146.1 | Scaffold759 | 6937                    | AA                              | GG                | 1946619908               |
| SNP_P3_135840_6943   | NW_004516146.1 | Scaffold759 | 6943                    | TT                              | CC                | 1946619910               |
| SNP_P3_135841_6991   | NW_004516146.1 | Scaffold759 | 6991                    | AA                              | GG                | 1946619913               |
| SNP_P3_135842_6998   | NW_004516146.1 | Scaffold759 | 6998                    | GG                              | AA                | 1946619915               |
| SNP_P3_135843_7066   | NW_004516146.1 | Scaffold759 | 7066                    | AA                              | CC                | 1946619917               |
| SNP_P3_135844_7185   | NW_004516146.1 | Scaffold759 | 7185                    | TT                              | CC                | 1946619919               |
| SNP_P3_135845_7261   | NW_004516146.1 | Scaffold759 | 7261                    | GG                              | AA                | 1946619921               |
| SNP_P3_135846_7297   | NW_004516146.1 | Scaffold759 | 7297                    | TT                              | CC                | 1946619923               |
| SNP_P3_135847_7336   | NW_004516146.1 | Scaffold759 | 7336                    | TT                              | CC                | 1946619924               |
| SNP_P3_135848_7369   | NW_004516146.1 | Scaffold759 | 7369                    | GG                              | AA                | 1946619926               |
| SNP_P3_135849_7402   | NW_004516146.1 | Scaffold759 | 7402                    | CC                              | TT                | 1946619928               |
| SNP_P3_135850_7458   | NW_004516146.1 | Scaffold759 | 7458                    | TT                              | CC                | 1946619930               |
| SNP_P3_135851_8608   | NW_004516146.1 | Scaffold759 | 8608                    | GG                              | TT                | 1946619932               |
| SNP_P3_135852_20631  | NW_004516146.1 | Scaffold759 | 20631                   | AA                              | TT                | 1946619934               |
| SNP_P3_135853_40130  | NW_004516146.1 | Scaffold759 | 40130                   | TT                              | CC                | 1946619936               |
| SNP_P3_135854_66808  | NW_004516146.1 | Scaffold759 | 66808                   | CC                              | TT                | 1946619938               |
| SNP_P3_135855_66810  | NW_004516146.1 | Scaffold759 | 66810                   | AA                              | GG                | 1946619940               |
| SNP_P3_135856_66845  | NW_004516146.1 | Scaffold759 | 66845                   | AA                              | GG                | 1946619942               |
| SNP_P3_135857_66981  | NW_004516146.1 | Scaffold759 | 66981                   | AA                              | TT                | 1946619944               |
| SNP_P3_135858_67207  | NW_004516146.1 | Scaffold759 | 67207                   | AA                              | GG                | 1946619946               |
| SNP_P3_135859_68150  | NW_004516146.1 | Scaffold759 | 68150                   | TT                              | CC                | 1946619948               |
| SNP_P3_135860_73090  | NW_004516146.1 | Scaffold759 | 73090                   | GG                              | AA                | 1946619950               |
| SNP_P3_135861_77069  | NW_004516146.1 | Scaffold759 | 77069                   | AA                              | GG                | 1946619952               |
| SNP_P3_135862_77203  | NW_004516146.1 | Scaffold759 | 77203                   | AA                              | TT                | 1946619955               |
| SNP_P3_135863_107186 | NW_004516146.1 | Scaffold759 | 107186                  | GG                              | TT                | 1946619957               |
| SNP_P3_135864_126838 | NW_004516146.1 | Scaffold759 | 126838                  | CC                              | TT                | 1946619958               |
| SNP_P3_135865_128839 | NW_004516146.1 | Scaffold759 | 128839                  | AA                              | TT                | 1946619960               |
| SNP_P3_135866_138397 | NW_004516146.1 | Scaffold759 | 138397                  | TT                              | AA                | 1946619962               |
| SNP_P3_135867_138400 | NW_004516146.1 | Scaffold759 | 138400                  | CC                              | AA                | 1946619964               |
| SNP_P3_135868_138600 | NW_004516146.1 | Scaffold759 | 138600                  | AA                              | GG                | 1946619966               |
| SNP_P3_135869_138619 | NW_004516146.1 | Scaffold759 | 138619                  | AA                              | TT                | 1946619968               |
| SNP_P3_135870_138622 | NW_004516146.1 | Scaffold759 | 138622                  | AA                              | GG                | 1946619970               |
| SNP_P3_135871_138658 | NW_004516146.1 | Scaffold759 | 138658                  | CC                              | TT                | 1946619972               |

| SNPs IDs             | Chromosome IDs | Chromosomes | Physical positions (bp) | CDC Frontier (Reference genome) | (Pusa 256 & HPNB) | NCBI SNPdb Accession IDs |
|----------------------|----------------|-------------|-------------------------|---------------------------------|-------------------|--------------------------|
| SNP_P3_135872_138691 | NW_004516146.1 | Scaffold759 | 138691                  | AA                              | CC                | 1946619974               |
| SNP_P3_135873_139753 | NW_004516146.1 | Scaffold759 | 139753                  | CC                              | TT                | 1946619976               |
| SNP_P3_135874_139958 | NW_004516146.1 | Scaffold759 | 139958                  | GG                              | TT                | 1946619978               |
| SNP_P3_135877_145096 | NW_004516146.1 | Scaffold759 | 145096                  | CC                              | AA                | 1946619980               |
| SNP_P3_135878_145422 | NW_004516146.1 | Scaffold759 | 145422                  | TT                              | CC                | 1946619982               |
| SNP_P3_135879_145468 | NW_004516146.1 | Scaffold759 | 145468                  | AA                              | GG                | 1946619983               |
| SNP_P3_135880_160009 | NW_004516146.1 | Scaffold759 | 160009                  | GG                              | TT                | 1946619985               |
| SNP_P3_135881_160044 | NW_004516146.1 | Scaffold759 | 160044                  | AA                              | GG                | 1946619987               |
| SNP_P3_135882_160059 | NW_004516146.1 | Scaffold759 | 160059                  | TT                              | CC                | 1946619989               |
| SNP_P3_135883_160115 | NW_004516146.1 | Scaffold759 | 160115                  | TT                              | CC                | 1946619991               |
| SNP_P3_135884_160349 | NW_004516146.1 | Scaffold759 | 160349                  | GG                              | CC                | 1946619993               |
| SNP_P3_135885_160398 | NW_004516146.1 | Scaffold759 | 160398                  | TT                              | GG                | 1946619996               |
| SNP_P3_135886_160401 | NW_004516146.1 | Scaffold759 | 160401                  | TT                              | CC                | 1946619998               |
| SNP_P3_135887_160950 | NW_004516146.1 | Scaffold759 | 160950                  | TT                              | CC                | 1946620000               |
| SNP_P3_135888_161778 | NW_004516146.1 | Scaffold759 | 161778                  | CC                              | TT                | 1946620002               |
| SNP_P3_135889_161792 | NW_004516146.1 | Scaffold759 | 161792                  | AA                              | GG                | 1946620004               |
| SNP_P3_135890_161808 | NW_004516146.1 | Scaffold759 | 161808                  | GG                              | AA                | 1946620006               |
| SNP_P3_135891_161814 | NW_004516146.1 | Scaffold759 | 161814                  | TT                              | CC                | 1946620008               |
| SNP_P3_135892_161818 | NW_004516146.1 | Scaffold759 | 161818                  | GG                              | AA                | 1946620010               |
| SNP_P3_135893_161819 | NW_004516146.1 | Scaffold759 | 161819                  | GG                              | AA                | 1946620012               |
| SNP_P3_135894_485    | NW_004516147.1 | Scaffold760 | 485                     | AA                              | GG                | 1946620014               |
| SNP_P3_135895_506    | NW_004516147.1 | Scaffold760 | 506                     | GG                              | AA                | 1946620015               |
| SNP_P3_135896_543    | NW_004516147.1 | Scaffold760 | 543                     | TT                              | CC                | 1946620017               |
| SNP_P3_135897_6183   | NW_004516147.1 | Scaffold760 | 6183                    | TT                              | CC                | 1946620019               |
| SNP_P3_135898_8630   | NW_004516147.1 | Scaffold760 | 8630                    | GG                              | AA                | 1946620021               |
| SNP_P3_135899_8683   | NW_004516147.1 | Scaffold760 | 8683                    | CC                              | GG                | 1946620023               |
| SNP_P3_135900_8846   | NW_004516147.1 | Scaffold760 | 8846                    | GG                              | AA                | 1946620025               |
| SNP_P3_135901_8968   | NW_004516147.1 | Scaffold760 | 8968                    | GG                              | CC                | 1946620027               |
| SNP_P3_135902_9053   | NW_004516147.1 | Scaffold760 | 9053                    | TT                              | CC                | 1946620029               |
| SNP_P3_135903_11241  | NW_004516147.1 | Scaffold760 | 11241                   | GG                              | CC                | 1946620031               |
| SNP_P3_135904_11258  | NW_004516147.1 | Scaffold760 | 11258                   | AA                              | GG                | 1946620033               |
| SNP_P3_135905_11261  | NW_004516147.1 | Scaffold760 | 11261                   | CC                              | TT                | 1946620035               |
| SNP_P3_135906_11355  | NW_004516147.1 | Scaffold760 | 11355                   | GG                              | AA                | 1946620037               |
| SNP_P3_135907_11642  | NW_004516147.1 | Scaffold760 | 11642                   | GG                              | TT                | 1946620039               |
| SNP_P3_135908_12185  | NW_004516147.1 | Scaffold760 | 12185                   | CC                              | AA                | 1946620041               |
| SNP_P3_135909_12506  | NW_004516147.1 | Scaffold760 | 12506                   | CC                              | TT                | 1946620042               |
| SNP_P3_135910_12520  | NW_004516147.1 | Scaffold760 | 12520                   | GG                              | AA                | 1946620044               |
| SNP_P3_135911_12555  | NW_004516147.1 | Scaffold760 | 12555                   | CC                              | TT                | 1946620046               |
| SNP_P3_135912_12660  | NW_004516147.1 | Scaffold760 | 12660                   | AA                              | GG                | 1946620048               |
| SNP_P3_135913_12846  | NW_004516147.1 | Scaffold760 | 12846                   | TT                              | AA                | 1946620050               |
| SNP_P3_135914_12850  | NW_004516147.1 | Scaffold760 | 12850                   | CC                              | GG                | 1946620052               |
| SNP_P3_135915_13033  | NW_004516147.1 | Scaffold760 | 13033                   | GG                              | AA                | 1946620054               |

| SNPs IDs            | Chromosome IDs | Chromosomes | Physical positions (bp) | CDC Frontier (Reference genome) | (Pusa 256 & HPNB) | NCBI SNPdb Accession IDs |
|---------------------|----------------|-------------|-------------------------|---------------------------------|-------------------|--------------------------|
| SNP_P3_135916_13074 | NW_004516147.1 | Scaffold760 | 13074                   | AA                              | GG                | 1946620056               |
| SNP_P3_135917_13091 | NW_004516147.1 | Scaffold760 | 13091                   | GG                              | AA                | 1946620058               |
| SNP_P3_135918_13342 | NW_004516147.1 | Scaffold760 | 13342                   | CC                              | TT                | 1946620061               |
| SNP_P3_135919_13402 | NW_004516147.1 | Scaffold760 | 13402                   | CC                              | GG                | 1946620063               |
| SNP_P3_135920_15436 | NW_004516147.1 | Scaffold760 | 15436                   | AA                              | TT                | 1946620065               |
| SNP_P3_135921_16047 | NW_004516147.1 | Scaffold760 | 16047                   | CC                              | TT                | 1946620067               |
| SNP_P3_135922_16056 | NW_004516147.1 | Scaffold760 | 16056                   | GG                              | TT                | 1946620069               |
| SNP_P3_135923_16076 | NW_004516147.1 | Scaffold760 | 16076                   | CC                              | GG                | 1946620071               |
| SNP_P3_135924_16151 | NW_004516147.1 | Scaffold760 | 16151                   | CC                              | TT                | 1946620073               |
| SNP_P3_135925_16193 | NW_004516147.1 | Scaffold760 | 16193                   | CC                              | TT                | 1946620075               |
| SNP_P3_135926_16771 | NW_004516147.1 | Scaffold760 | 16771                   | AA                              | CC                | 1946620077               |
| SNP_P3_135927_16797 | NW_004516147.1 | Scaffold760 | 16797                   | AA                              | GG                | 1946620079               |
| SNP_P3_135928_16817 | NW_004516147.1 | Scaffold760 | 16817                   | AA                              | GG                | 1946620081               |
| SNP_P3_135929_2912  | NW_004516151.1 | Scaffold766 | 2912                    | CC                              | TT                | 1946620083               |
| SNP_P3_135930_2925  | NW_004516151.1 | Scaffold766 | 2925                    | TT                              | CC                | 1946620085               |
| SNP_P3_135931_2954  | NW_004516151.1 | Scaffold766 | 2954                    | AA                              | CC                | 1946620087               |
| SNP_P3_135932_2991  | NW_004516151.1 | Scaffold766 | 2991                    | CC                              | TT                | 1946620089               |
| SNP_P3_135933_2994  | NW_004516151.1 | Scaffold766 | 2994                    | AA                              | GG                | 1946620091               |
| SNP_P3_135934_3003  | NW_004516151.1 | Scaffold766 | 3003                    | CC                              | TT                | 1946620093               |
| SNP_P3_135936_3199  | NW_004516151.1 | Scaffold766 | 3199                    | GG                              | AA                | 1946620095               |
| SNP_P3_135937_3257  | NW_004516151.1 | Scaffold766 | 3257                    | AA                              | GG                | 1946620097               |
| SNP_P3_135938_3279  | NW_004516151.1 | Scaffold766 | 3279                    | GG                              | AA                | 1946620099               |
| SNP_P3_135939_3284  | NW_004516151.1 | Scaffold766 | 3284                    | CC                              | TT                | 1946620101               |
| SNP_P3_135940_3289  | NW_004516151.1 | Scaffold766 | 3289                    | GG                              | AA                | 1946620104               |
| SNP_P3_135941_3312  | NW_004516151.1 | Scaffold766 | 3312                    | AA                              | GG                | 1946620106               |
| SNP_P3_135942_3336  | NW_004516151.1 | Scaffold766 | 3336                    | AA                              | GG                | 1946620108               |
| SNP_P3_135943_3341  | NW_004516151.1 | Scaffold766 | 3341                    | AA                              | GG                | 1946620110               |
| SNP_P3_135944_3383  | NW_004516151.1 | Scaffold766 | 3383                    | CC                              | TT                | 1946620112               |
| SNP_P3_135945_4491  | NW_004516151.1 | Scaffold766 | 4491                    | AA                              | TT                | 1946620114               |
| SNP_P3_135946_4924  | NW_004516151.1 | Scaffold766 | 4924                    | TT                              | AA                | 1946620116               |
| SNP_P3_135947_4925  | NW_004516151.1 | Scaffold766 | 4925                    | TT                              | CC                | 1946620118               |
| SNP_P3_135948_4953  | NW_004516151.1 | Scaffold766 | 4953                    | TT                              | CC                | 1946620121               |
| SNP_P3_135949_4979  | NW_004516151.1 | Scaffold766 | 4979                    | AA                              | TT                | 1946620123               |
| SNP_P3_135950_4994  | NW_004516151.1 | Scaffold766 | 4994                    | TT                              | CC                | 1946620125               |
| SNP_P3_135951_5010  | NW_004516151.1 | Scaffold766 | 5010                    | CC                              | AA                | 1946620127               |
| SNP_P3_135952_5177  | NW_004516151.1 | Scaffold766 | 5177                    | TT                              | GG                | 1946620129               |
| SNP_P3_135953_5185  | NW_004516151.1 | Scaffold766 | 5185                    | TT                              | CC                | 1946620131               |
| SNP_P3_135954_5387  | NW_004516151.1 | Scaffold766 | 5387                    | CC                              | TT                | 1946620133               |
| SNP_P3_135955_5473  | NW_004516151.1 | Scaffold766 | 5473                    | AA                              | TT                | 1946620135               |
| SNP_P3_135956_18259 | NW_004516151.1 | Scaffold766 | 18259                   | AA                              | CC                | 1946620137               |
| SNP_P3_135957_18269 | NW_004516151.1 | Scaffold766 | 18269                   | GG                              | AA                | 1946620140               |
| SNP_P3_135958_21047 | NW_004516151.1 | Scaffold766 | 21047                   | AA                              | GG                | 1946620142               |

| SNPs IDs             | Chromosome IDs | Chromosomes | Physical positions (bp) | CDC Frontier (Reference genome) | (Pusa 256 & HPNB) | NCBI SNPdb Accession IDs |
|----------------------|----------------|-------------|-------------------------|---------------------------------|-------------------|--------------------------|
| SNP_P3_135959_27448  | NW_004516151.1 | Scaffold766 | 27448                   | TT                              | CC                | 1946620144               |
| SNP_P3_135960_27539  | NW_004516151.1 | Scaffold766 | 27539                   | GG                              | TT                | 1946620146               |
| SNP_P3_135961_50669  | NW_004516151.1 | Scaffold766 | 50669                   | TT                              | CC                | 1946620148               |
| SNP_P3_135962_78381  | NW_004516151.1 | Scaffold766 | 78381                   | AA                              | GG                | 1946620150               |
| SNP_P3_135964_79584  | NW_004516151.1 | Scaffold766 | 79584                   | CC                              | TT                | 1946620153               |
| SNP_P3_135965_98366  | NW_004516151.1 | Scaffold766 | 98366                   | GG                              | CC                | 1946620155               |
| SNP_P3_135966_130822 | NW_004516151.1 | Scaffold766 | 130822                  | CC                              | GG                | 1946620157               |
| SNP_P3_135967_138344 | NW_004516151.1 | Scaffold766 | 138344                  | GG                              | AA                | 1946620159               |
| SNP_P3_135968_138482 | NW_004516151.1 | Scaffold766 | 138482                  | AA                              | TT                | 1946620161               |
| SNP_P3_135969_140078 | NW_004516151.1 | Scaffold766 | 140078                  | GG                              | CC                | 1946620163               |
| SNP_P3_135970_142066 | NW_004516151.1 | Scaffold766 | 142066                  | TT                              | AA                | 1946620165               |
| SNP_P3_135971_142525 | NW_004516151.1 | Scaffold766 | 142525                  | TT                              | CC                | 1946620167               |
| SNP_P3_135972_144810 | NW_004516151.1 | Scaffold766 | 144810                  | AA                              | CC                | 1946620169               |
| SNP_P3_135973_158206 | NW_004516151.1 | Scaffold766 | 158206                  | TT                              | GG                | 1946620171               |
| SNP_P3_135974_178580 | NW_004516151.1 | Scaffold766 | 178580                  | CC                              | AA                | 1946620173               |
| SNP_P3_135976_184219 | NW_004516151.1 | Scaffold766 | 184219                  | AA                              | CC                | 1946620176               |
| SNP_P3_135977_184228 | NW_004516151.1 | Scaffold766 | 184228                  | TT                              | GG                | 1946620178               |
| SNP_P3_135978_184230 | NW_004516151.1 | Scaffold766 | 184230                  | CC                              | TT                | 1946620180               |
| SNP_P3_135980_188534 | NW_004516151.1 | Scaffold766 | 188534                  | AA                              | GG                | 1946620182               |
| SNP_P3_135981_189463 | NW_004516151.1 | Scaffold766 | 189463                  | AA                              | CC                | 1946620184               |
| SNP_P3_135982_189590 | NW_004516151.1 | Scaffold766 | 189590                  | CC                              | TT                | 1946620186               |
| SNP_P3_135983_189608 | NW_004516151.1 | Scaffold766 | 189608                  | GG                              | AA                | 1946620188               |
| SNP_P3_135984_189853 | NW_004516151.1 | Scaffold766 | 189853                  | TT                              | CC                | 1946620190               |
| SNP_P3_135985_189902 | NW_004516151.1 | Scaffold766 | 189902                  | TT                              | CC                | 1946620192               |
| SNP_P3_135986_192474 | NW_004516151.1 | Scaffold766 | 192474                  | AA                              | CC                | 1946620194               |
| SNP_P3_135987_194344 | NW_004516151.1 | Scaffold766 | 194344                  | CC                              | TT                | 1946620197               |
| SNP_P3_135988_200303 | NW_004516151.1 | Scaffold766 | 200303                  | AA                              | GG                | 1946620199               |
| SNP_P3_135989_200331 | NW_004516151.1 | Scaffold766 | 200331                  | TT                              | CC                | 1946620201               |
| SNP_P3_135990_214790 | NW_004516151.1 | Scaffold766 | 214790                  | AA                              | CC                | 1946620203               |
| SNP_P3_135991_214835 | NW_004516151.1 | Scaffold766 | 214835                  | GG                              | AA                | 1946620205               |
| SNP_P3_135992_214957 | NW_004516151.1 | Scaffold766 | 214957                  | TT                              | CC                | 1946620207               |
| SNP_P3_135995_236376 | NW_004516151.1 | Scaffold766 | 236376                  | GG                              | AA                | 1946620209               |
| SNP_P3_135996_237202 | NW_004516151.1 | Scaffold766 | 237202                  | GG                              | AA                | 1946620211               |
| SNP_P3_135997_238846 | NW_004516151.1 | Scaffold766 | 238846                  | TT                              | AA                | 1946620213               |
| SNP_P3_135998_238851 | NW_004516151.1 | Scaffold766 | 238851                  | GG                              | CC                | 1946620215               |
| SNP_P3_135999_238854 | NW_004516151.1 | Scaffold766 | 238854                  | GG                              | TT                | 1946620217               |
| SNP_P3_136000_243046 | NW_004516151.1 | Scaffold766 | 243046                  | TT                              | GG                | 1946620219               |
| SNP_P3_136001_243055 | NW_004516151.1 | Scaffold766 | 243055                  | GG                              | AA                | 1946620221               |
| SNP_P3_136002_243503 | NW_004516151.1 | Scaffold766 | 243503                  | AA                              | TT                | 1946620223               |
| SNP_P3_136004_243854 | NW_004516151.1 | Scaffold766 | 243854                  | AA                              | GG                | 1946620225               |
| SNP_P3_136005_243954 | NW_004516151.1 | Scaffold766 | 243954                  | GG                              | AA                | 1946620227               |
| SNP_P3_136006_253647 | NW_004516151.1 | Scaffold766 | 253647                  | CC                              | AA                | 1946620229               |

| SNPs IDs             | Chromosome IDs | Chromosomes | Physical positions (bp) | CDC Frontier (Reference genome) | (Pusa 256 & HPNB) | NCBI SNPdb Accession IDs |
|----------------------|----------------|-------------|-------------------------|---------------------------------|-------------------|--------------------------|
| SNP_P3_136007_268899 | NW_004516151.1 | Scaffold766 | 268899                  | TT                              | GG                | 1946620231               |
| SNP_P3_136008_268920 | NW_004516151.1 | Scaffold766 | 268920                  | AA                              | GG                | 1946620233               |
| SNP_P3_136009_268995 | NW_004516151.1 | Scaffold766 | 268995                  | AA                              | GG                | 1946620236               |
| SNP_P3_136010_269199 | NW_004516151.1 | Scaffold766 | 269199                  | TT                              | AA                | 1946620238               |
| SNP_P3_136011_269203 | NW_004516151.1 | Scaffold766 | 269203                  | GG                              | AA                | 1946620240               |
| SNP_P3_136012_269243 | NW_004516151.1 | Scaffold766 | 269243                  | CC                              | TT                | 1946620242               |
| SNP_P3_136013_269279 | NW_004516151.1 | Scaffold766 | 269279                  | TT                              | GG                | 1946620244               |
| SNP_P3_136014_269299 | NW_004516151.1 | Scaffold766 | 269299                  | TT                              | GG                | 1946620246               |
| SNP_P3_136015_269316 | NW_004516151.1 | Scaffold766 | 269316                  | CC                              | AA                | 1946620247               |
| SNP_P3_136016_269317 | NW_004516151.1 | Scaffold766 | 269317                  | AA                              | CC                | 1946620249               |
| SNP_P3_136017_272941 | NW_004516151.1 | Scaffold766 | 272941                  | CC                              | TT                | 1946620251               |
| SNP_P3_136018_273061 | NW_004516151.1 | Scaffold766 | 273061                  | TT                              | CC                | 1946620253               |
| SNP_P3_136019_273232 | NW_004516151.1 | Scaffold766 | 273232                  | GG                              | AA                | 1946620255               |
| SNP_P3_136020_273246 | NW_004516151.1 | Scaffold766 | 273246                  | GG                              | AA                | 1946620257               |
| SNP_P3_136021_273330 | NW_004516151.1 | Scaffold766 | 273330                  | GG                              | TT                | 1946620259               |
| SNP_P3_136022_274615 | NW_004516151.1 | Scaffold766 | 274615                  | GG                              | AA                | 1946620261               |
| SNP_P3_136023_36     | NW_004516153.1 | Scaffold768 | 36                      | CC                              | AA                | 1946620263               |
| SNP_P3_136024_57     | NW_004516153.1 | Scaffold768 | 57                      | GG                              | TT                | 1946620265               |
| SNP_P3_136025_64     | NW_004516153.1 | Scaffold768 | 64                      | TT                              | AA                | 1946620267               |
| SNP_P3_136026_76     | NW_004516153.1 | Scaffold768 | 76                      | GG                              | AA                | 1946620269               |
| SNP_P3_136027_208    | NW_004516153.1 | Scaffold768 | 208                     | TT                              | AA                | 1946620271               |
| SNP_P3_136028_251    | NW_004516153.1 | Scaffold768 | 251                     | AA                              | GG                | 1946620273               |
| SNP_P3_136029_256    | NW_004516153.1 | Scaffold768 | 256                     | AA                              | TT                | 1946620275               |
| SNP_P3_136030_341    | NW_004516153.1 | Scaffold768 | 341                     | CC                              | GG                | 1946620277               |
| SNP_P3_136031_413    | NW_004516153.1 | Scaffold768 | 413                     | CC                              | TT                | 1946620279               |
| SNP_P3_136032_478    | NW_004516153.1 | Scaffold768 | 478                     | TT                              | CC                | 1946620281               |
| SNP_P3_136033_483    | NW_004516153.1 | Scaffold768 | 483                     | AA                              | GG                | 1946620283               |
| SNP_P3_136034_525    | NW_004516153.1 | Scaffold768 | 525                     | CC                              | GG                | 1946620285               |
| SNP_P3_136036_618    | NW_004516153.1 | Scaffold768 | 618                     | CC                              | AA                | 1946620287               |
| SNP_P3_136037_765    | NW_004516153.1 | Scaffold768 | 765                     | GG                              | AA                | 1946620289               |
| SNP_P3_136038_894    | NW_004516153.1 | Scaffold768 | 894                     | AA                              | GG                | 1946620291               |
| SNP_P3_136039_1007   | NW_004516153.1 | Scaffold768 | 1007                    | TT                              | AA                | 1946620293               |
| SNP_P3_136040_1057   | NW_004516153.1 | Scaffold768 | 1057                    | CC                              | TT                | 1946620295               |
| SNP_P3_136042_64     | NW_004516154.1 | Scaffold769 | 64                      | GG                              | TT                | 1946620297               |
| SNP_P3_136043_81     | NW_004516154.1 | Scaffold769 | 81                      | AA                              | TT                | 1946620299               |
| SNP_P3_136045_177    | NW_004516154.1 | Scaffold769 | 177                     | GG                              | TT                | 1946620301               |
| SNP_P3_136046_209    | NW_004516154.1 | Scaffold769 | 209                     | AA                              | GG                | 1946620303               |
| SNP_P3_136047_260    | NW_004516154.1 | Scaffold769 | 260                     | AA                              | GG                | 1946620305               |
| SNP_P3_136048_359    | NW_004516154.1 | Scaffold769 | 359                     | AA                              | TT                | 1946620307               |
| SNP_P3_136049_429    | NW_004516154.1 | Scaffold769 | 429                     | TT                              | AA                | 1946620309               |
| SNP_P3_136050_542    | NW_004516154.1 | Scaffold769 | 542                     | TT                              | GG                | 1946620311               |
| SNP_P3_136051_930    | NW_004516154.1 | Scaffold769 | 930                     | TT                              | GG                | 1946620312               |

| SNPs IDs             | Chromosome IDs | Chromosomes | Physical positions (bp) | CDC Frontier (Reference genome) | (Pusa 256 & HPNB) | NCBI SNPdb Accession IDs |
|----------------------|----------------|-------------|-------------------------|---------------------------------|-------------------|--------------------------|
| SNP_P3_136053_1476   | NW_004516154.1 | Scaffold769 | 1476                    | GG                              | AA                | 1946620314               |
| SNP_P3_136054_1618   | NW_004516154.1 | Scaffold769 | 1618                    | TT                              | AA                | 1946620316               |
| SNP_P3_136055_1681   | NW_004516154.1 | Scaffold769 | 1681                    | AA                              | TT                | 1946620318               |
| SNP_P3_136056_1808   | NW_004516154.1 | Scaffold769 | 1808                    | TT                              | GG                | 1946620320               |
| SNP_P3_136058_2824   | NW_004516154.1 | Scaffold769 | 2824                    | CC                              | GG                | 1946620323               |
| SNP_P3_136059_2918   | NW_004516154.1 | Scaffold769 | 2918                    | AA                              | GG                | 1946620325               |
| SNP_P3_136060_2921   | NW_004516154.1 | Scaffold769 | 2921                    | GG                              | CC                | 1946620327               |
| SNP_P3_136061_3050   | NW_004516154.1 | Scaffold769 | 3050                    | GG                              | TT                | 1946620329               |
| SNP_P3_136062_3147   | NW_004516154.1 | Scaffold769 | 3147                    | GG                              | AA                | 1946620331               |
| SNP_P3_136063_3183   | NW_004516154.1 | Scaffold769 | 3183                    | CC                              | AA                | 1946620333               |
| SNP_P3_136065_3523   | NW_004516154.1 | Scaffold769 | 3523                    | CC                              | AA                | 1946620335               |
| SNP_P3_136066_3553   | NW_004516154.1 | Scaffold769 | 3553                    | CC                              | TT                | 1946620336               |
| SNP_P3_136067_5308   | NW_004516154.1 | Scaffold769 | 5308                    | TT                              | CC                | 1946620338               |
| SNP_P3_136069_5963   | NW_004516154.1 | Scaffold769 | 5963                    | TT                              | AA                | 1946620340               |
| SNP_P3_136070_27304  | NW_004516154.1 | Scaffold769 | 27304                   | AA                              | GG                | 1946620342               |
| SNP_P3_136071_27673  | NW_004516154.1 | Scaffold769 | 27673                   | TT                              | GG                | 1946620344               |
| SNP_P3_136073_28914  | NW_004516154.1 | Scaffold769 | 28914                   | AA                              | GG                | 1946620346               |
| SNP_P3_136074_28958  | NW_004516154.1 | Scaffold769 | 28958                   | CC                              | TT                | 1946620348               |
| SNP_P3_136075_29244  | NW_004516154.1 | Scaffold769 | 29244                   | AA                              | CC                | 1946620350               |
| SNP_P3_136077_29473  | NW_004516154.1 | Scaffold769 | 29473                   | AA                              | GG                | 1946620352               |
| SNP_P3_136078_29699  | NW_004516154.1 | Scaffold769 | 29699                   | CC                              | TT                | 1946620354               |
| SNP_P3_136079_29828  | NW_004516154.1 | Scaffold769 | 29828                   | AA                              | GG                | 1946620356               |
| SNP_P3_136080_29951  | NW_004516154.1 | Scaffold769 | 29951                   | AA                              | GG                | 1946620358               |
| SNP_P3_136081_38133  | NW_004516154.1 | Scaffold769 | 38133                   | CC                              | TT                | 1946620360               |
| SNP_P3_136082_92121  | NW_004516154.1 | Scaffold769 | 92121                   | AA                              | CC                | 1946620362               |
| SNP_P3_136083_104999 | NW_004516154.1 | Scaffold769 | 104999                  | AA                              | GG                | 1946620364               |
| SNP_P3_136084_108568 | NW_004516154.1 | Scaffold769 | 108568                  | GG                              | TT                | 1946620366               |
| SNP_P3_136085_116677 | NW_004516154.1 | Scaffold769 | 116677                  | AA                              | TT                | 1946620368               |
| SNP_P3_136086_116715 | NW_004516154.1 | Scaffold769 | 116715                  | TT                              | AA                | 1946620370               |
| SNP_P3_136087_116778 | NW_004516154.1 | Scaffold769 | 116778                  | GG                              | AA                | 1946620372               |
| SNP_P3_136088_117045 | NW_004516154.1 | Scaffold769 | 117045                  | CC                              | TT                | 1946620374               |
| SNP_P3_136089_117048 | NW_004516154.1 | Scaffold769 | 117048                  | TT                              | CC                | 1946620376               |
| SNP_P3_136090_117141 | NW_004516154.1 | Scaffold769 | 117141                  | TT                              | CC                | 1946620378               |
| SNP_P3_136091_119891 | NW_004516154.1 | Scaffold769 | 119891                  | CC                              | TT                | 1946620380               |
| SNP_P3_136092_120102 | NW_004516154.1 | Scaffold769 | 120102                  | AA                              | GG                | 1946620382               |
| SNP_P3_136093_81     | NW_004516155.1 | Scaffold771 | 81                      | TT                              | GG                | 1946620384               |
| SNP_P3_136094_342    | NW_004516155.1 | Scaffold771 | 342                     | CC                              | TT                | 1946620386               |
| SNP_P3_136095_11190  | NW_004516155.1 | Scaffold771 | 11190                   | TT                              | AA                | 1946620388               |
| SNP_P3_136096_13972  | NW_004516155.1 | Scaffold771 | 13972                   | CC                              | TT                | 1946620390               |
| SNP_P3_136097_14102  | NW_004516155.1 | Scaffold771 | 14102                   | GG                              | AA                | 1946620392               |
| SNP_P3_136098_14113  | NW_004516155.1 | Scaffold771 | 14113                   | GG                              | TT                | 1946620394               |
| SNP_P3_136099_19825  | NW_004516155.1 | Scaffold771 | 19825                   | AA                              | GG                | 1946620396               |

| SNPs IDs            | Chromosome IDs | Chromosomes | Physical positions (bp) | CDC Frontier (Reference genome) | (Pusa 256 & HPNB) | NCBI SNPdb Accession IDs |
|---------------------|----------------|-------------|-------------------------|---------------------------------|-------------------|--------------------------|
| SNP_P3_136100_25325 | NW_004516155.1 | Scaffold771 | 25325                   | CC                              | TT                | 1946620398               |
| SNP_P3_136101_25746 | NW_004516155.1 | Scaffold771 | 25746                   | AA                              | GG                | 1946620399               |
| SNP_P3_136102_25767 | NW_004516155.1 | Scaffold771 | 25767                   | GG                              | AA                | 1946620401               |
| SNP_P3_136103_35168 | NW_004516155.1 | Scaffold771 | 35168                   | TT                              | CC                | 1946620404               |
| SNP_P3_136104_35195 | NW_004516155.1 | Scaffold771 | 35195                   | AA                              | GG                | 1946620406               |
| SNP_P3_136105_35208 | NW_004516155.1 | Scaffold771 | 35208                   | GG                              | AA                | 1946620408               |
| SNP_P3_136106_36412 | NW_004516155.1 | Scaffold771 | 36412                   | TT                              | CC                | 1946620410               |
| SNP_P3_136108_53600 | NW_004516155.1 | Scaffold771 | 53600                   | TT                              | AA                | 1946620412               |
| SNP_P3_136109_57502 | NW_004516155.1 | Scaffold771 | 57502                   | TT                              | CC                | 1946620414               |
| SNP_P3_136110_58302 | NW_004516155.1 | Scaffold771 | 58302                   | GG                              | AA                | 1946620416               |
| SNP_P3_136111_58320 | NW_004516155.1 | Scaffold771 | 58320                   | TT                              | CC                | 1946620418               |
| SNP_P3_136112_58335 | NW_004516155.1 | Scaffold771 | 58335                   | GG                              | AA                | 1946620420               |
| SNP_P3_136113_58336 | NW_004516155.1 | Scaffold771 | 58336                   | GG                              | CC                | 1946620422               |
| SNP_P3_136114_58344 | NW_004516155.1 | Scaffold771 | 58344                   | AA                              | TT                | 1946620424               |
| SNP_P3_136115_58355 | NW_004516155.1 | Scaffold771 | 58355                   | CC                              | AA                | 1946620426               |
| SNP_P3_136116_58404 | NW_004516155.1 | Scaffold771 | 58404                   | CC                              | TT                | 1946620428               |
| SNP_P3_136117_58769 | NW_004516155.1 | Scaffold771 | 58769                   | GG                              | AA                | 1946620430               |
| SNP_P3_136118_62389 | NW_004516155.1 | Scaffold771 | 62389                   | GG                              | AA                | 1946620432               |
| SNP_P3_136119_66411 | NW_004516155.1 | Scaffold771 | 66411                   | TT                              | CC                | 1946620434               |
| SNP_P3_136120_69254 | NW_004516155.1 | Scaffold771 | 69254                   | AA                              | GG                | 1946620436               |
| SNP_P3_136121_69290 | NW_004516155.1 | Scaffold771 | 69290                   | CC                              | TT                | 1946620437               |
| SNP_P3_136122_69294 | NW_004516155.1 | Scaffold771 | 69294                   | TT                              | GG                | 1946620439               |
| SNP_P3_136123_69295 | NW_004516155.1 | Scaffold771 | 69295                   | TT                              | AA                | 1946620441               |
| SNP_P3_136124_78081 | NW_004516155.1 | Scaffold771 | 78081                   | AA                              | GG                | 1946620443               |
| SNP_P3_136125_86144 | NW_004516155.1 | Scaffold771 | 86144                   | TT                              | GG                | 1946620446               |
| SNP_P3_136126_86152 | NW_004516155.1 | Scaffold771 | 86152                   | CC                              | AA                | 1946620448               |
| SNP_P3_136127_86372 | NW_004516155.1 | Scaffold771 | 86372                   | AA                              | GG                | 1946620450               |
| SNP_P3_136128_7562  | NW_004516156.1 | Scaffold772 | 7562                    | CC                              | TT                | 1946620452               |
| SNP_P3_136129_7582  | NW_004516156.1 | Scaffold772 | 7582                    | CC                              | TT                | 1946620454               |
| SNP_P3_136130_8420  | NW_004516156.1 | Scaffold772 | 8420                    | CC                              | TT                | 1946620456               |
| SNP_P3_136131_8627  | NW_004516156.1 | Scaffold772 | 8627                    | CC                              | TT                | 1946620457               |
| SNP_P3_136132_9106  | NW_004516156.1 | Scaffold772 | 9106                    | GG                              | AA                | 1946620459               |
| SNP_P3_136133_9191  | NW_004516156.1 | Scaffold772 | 9191                    | AA                              | TT                | 1946620461               |
| SNP_P3_136134_11443 | NW_004516156.1 | Scaffold772 | 11443                   | CC                              | AA                | 1946620463               |
| SNP_P3_136136_12163 | NW_004516156.1 | Scaffold772 | 12163                   | GG                              | TT                | 1946620465               |
| SNP_P3_136137_17117 | NW_004516156.1 | Scaffold772 | 17117                   | TT                              | CC                | 1946620467               |
| SNP_P3_136138_17335 | NW_004516156.1 | Scaffold772 | 17335                   | TT                              | AA                | 1946620469               |
| SNP_P3_136139_17369 | NW_004516156.1 | Scaffold772 | 17369                   | AA                              | GG                | 1946620471               |
| SNP_P3_136140_17376 | NW_004516156.1 | Scaffold772 | 17376                   | GG                              | AA                | 1946620473               |
| SNP_P3_136141_17416 | NW_004516156.1 | Scaffold772 | 17416                   | TT                              | CC                | 1946620476               |
| SNP_P3_136142_18161 | NW_004516156.1 | Scaffold772 | 18161                   | TT                              | CC                | 1946620478               |
| SNP_P3_136143_18178 | NW_004516156.1 | Scaffold772 | 18178                   | TT                              | CC                | 1946620480               |



| SNPs IDs             | Chromosome IDs | Chromosomes | Physical positions (bp) | CDC Frontier (Reference genome) | (Pusa 256 & HPNB) | NCBI SNPdb Accession IDs |
|----------------------|----------------|-------------|-------------------------|---------------------------------|-------------------|--------------------------|
| SNP_P3_136144_18186  | NW_004516156.1 | Scaffold772 | 18186                   | TT                              | CC                | 1946620482               |
| SNP_P3_136145_18197  | NW_004516156.1 | Scaffold772 | 18197                   | AA                              | GG                | 1946620484               |
| SNP_P3_136146_18204  | NW_004516156.1 | Scaffold772 | 18204                   | CC                              | TT                | 1946620486               |
| SNP_P3_136147_18240  | NW_004516156.1 | Scaffold772 | 18240                   | AA                              | GG                | 1946620488               |
| SNP_P3_136148_18281  | NW_004516156.1 | Scaffold772 | 18281                   | AA                              | CC                | 1946620490               |
| SNP_P3_136149_18296  | NW_004516156.1 | Scaffold772 | 18296                   | AA                              | GG                | 1946620492               |
| SNP_P3_136150_18345  | NW_004516156.1 | Scaffold772 | 18345                   | AA                              | GG                | 1946620493               |
| SNP_P3_136151_18467  | NW_004516156.1 | Scaffold772 | 18467                   | AA                              | GG                | 1946620495               |
| SNP_P3_136152_18554  | NW_004516156.1 | Scaffold772 | 18554                   | TT                              | GG                | 1946620497               |
| SNP_P3_136153_18599  | NW_004516156.1 | Scaffold772 | 18599                   | TT                              | CC                | 1946620499               |
| SNP_P3_136154_18624  | NW_004516156.1 | Scaffold772 | 18624                   | CC                              | TT                | 1946620501               |
| SNP_P3_136155_18632  | NW_004516156.1 | Scaffold772 | 18632                   | CC                              | TT                | 1946620503               |
| SNP_P3_136156_18637  | NW_004516156.1 | Scaffold772 | 18637                   | GG                              | AA                | 1946620505               |
| SNP_P3_136157_18642  | NW_004516156.1 | Scaffold772 | 18642                   | AA                              | CC                | 1946620507               |
| SNP_P3_136159_24463  | NW_004516156.1 | Scaffold772 | 24463                   | AA                              | GG                | 1946620509               |
| SNP_P3_136160_33944  | NW_004516156.1 | Scaffold772 | 33944                   | TT                              | CC                | 1946620511               |
| SNP_P3_136161_102634 | NW_004516156.1 | Scaffold772 | 102634                  | CC                              | TT                | 1946620513               |
| SNP_P3_136162_105567 | NW_004516156.1 | Scaffold772 | 105567                  | CC                              | AA                | 1946620515               |
| SNP_P3_136163_108717 | NW_004516156.1 | Scaffold772 | 108717                  | TT                              | CC                | 1946620517               |
| SNP_P3_136164_110302 | NW_004516156.1 | Scaffold772 | 110302                  | AA                              | GG                | 1946620519               |
| SNP_P3_136165_120425 | NW_004516156.1 | Scaffold772 | 120425                  | AA                              | GG                | 1946620521               |
| SNP_P3_136166_120681 | NW_004516156.1 | Scaffold772 | 120681                  | TT                              | AA                | 1946620523               |
| SNP_P3_136167_132466 | NW_004516156.1 | Scaffold772 | 132466                  | AA                              | GG                | 1946620525               |
| SNP_P3_136168_137167 | NW_004516156.1 | Scaffold772 | 137167                  | GG                              | CC                | 1946620527               |
| SNP_P3_136169_137193 | NW_004516156.1 | Scaffold772 | 137193                  | GG                              | AA                | 1946620529               |
| SNP_P3_136170_137211 | NW_004516156.1 | Scaffold772 | 137211                  | AA                              | CC                | 1946620531               |
| SNP_P3_136171_137315 | NW_004516156.1 | Scaffold772 | 137315                  | TT                              | AA                | 1946620533               |
| SNP_P3_136172_139398 | NW_004516156.1 | Scaffold772 | 139398                  | GG                              | AA                | 1946620535               |
| SNP_P3_136173_139480 | NW_004516156.1 | Scaffold772 | 139480                  | TT                              | CC                | 1946620537               |
| SNP_P3_136174_143015 | NW_004516156.1 | Scaffold772 | 143015                  | GG                              | AA                | 1946620539               |
| SNP_P3_136175_143078 | NW_004516156.1 | Scaffold772 | 143078                  | AA                              | CC                | 1946620540               |
| SNP_P3_136176_144711 | NW_004516156.1 | Scaffold772 | 144711                  | TT                              | CC                | 1946620542               |
| SNP_P3_136177_144728 | NW_004516156.1 | Scaffold772 | 144728                  | TT                              | CC                | 1946620544               |
| SNP_P3_136178_145543 | NW_004516156.1 | Scaffold772 | 145543                  | AA                              | GG                | 1946620546               |
| SNP_P3_136179_145717 | NW_004516156.1 | Scaffold772 | 145717                  | GG                              | AA                | 1946620548               |
| SNP_P3_136180_145811 | NW_004516156.1 | Scaffold772 | 145811                  | TT                              | CC                | 1946620550               |
| SNP_P3_136181_145914 | NW_004516156.1 | Scaffold772 | 145914                  | TT                              | AA                | 1946620552               |
| SNP_P3_136184_163268 | NW_004516156.1 | Scaffold772 | 163268                  | GG                              | TT                | 1946620554               |
| SNP_P3_136185_178735 | NW_004516156.1 | Scaffold772 | 178735                  | AA                              | CC                | 1946620556               |
| SNP_P3_136187_196447 | NW_004516156.1 | Scaffold772 | 196447                  | AA                              | CC                | 1946620559               |
| SNP_P3_136188_196696 | NW_004516156.1 | Scaffold772 | 196696                  | GG                              | AA                | 1946620561               |
| SNP_P3_136189_197249 | NW_004516156.1 | Scaffold772 | 197249                  | TT                              | GG                | 1946620563               |

| SNPs IDs             | Chromosome IDs | Chromosomes | Physical positions (bp) | CDC Frontier (Reference genome) | (Pusa 256 & HPNB) | NCBI SNPdb Accession IDs |
|----------------------|----------------|-------------|-------------------------|---------------------------------|-------------------|--------------------------|
| SNP_P3_136190_205636 | NW_004516156.1 | Scaffold772 | 205636                  | AA                              | GG                | 1946620564               |
| SNP_P3_136191_205846 | NW_004516156.1 | Scaffold772 | 205846                  | TT                              | CC                | 1946620566               |
| SNP_P3_136192_209659 | NW_004516156.1 | Scaffold772 | 209659                  | AA                              | GG                | 1946620568               |
| SNP_P3_136193_211480 | NW_004516156.1 | Scaffold772 | 211480                  | AA                              | CC                | 1946620570               |
| SNP_P3_136194_211497 | NW_004516156.1 | Scaffold772 | 211497                  | AA                              | GG                | 1946620572               |
| SNP_P3_136196_213555 | NW_004516156.1 | Scaffold772 | 213555                  | GG                              | AA                | 1946620574               |
| SNP_P3_136197_213565 | NW_004516156.1 | Scaffold772 | 213565                  | AA                              | GG                | 1946620576               |
| SNP_P3_136198_213588 | NW_004516156.1 | Scaffold772 | 213588                  | AA                              | GG                | 1946620578               |
| SNP_P3_136199_213601 | NW_004516156.1 | Scaffold772 | 213601                  | TT                              | CC                | 1946620580               |
| SNP_P3_136200_213631 | NW_004516156.1 | Scaffold772 | 213631                  | TT                              | CC                | 1946620582               |
| SNP_P3_136202_213670 | NW_004516156.1 | Scaffold772 | 213670                  | GG                              | AA                | 1946620584               |
| SNP_P3_136203_213730 | NW_004516156.1 | Scaffold772 | 213730                  | GG                              | AA                | 1946620586               |
| SNP_P3_136204_213740 | NW_004516156.1 | Scaffold772 | 213740                  | AA                              | TT                | 1946620588               |
| SNP_P3_136205_213744 | NW_004516156.1 | Scaffold772 | 213744                  | AA                              | CC                | 1946620589               |
| SNP_P3_136206_213851 | NW_004516156.1 | Scaffold772 | 213851                  | GG                              | TT                | 1946620591               |
| SNP_P3_136207_213948 | NW_004516156.1 | Scaffold772 | 213948                  | GG                              | TT                | 1946620594               |
| SNP_P3_136208_240375 | NW_004516156.1 | Scaffold772 | 240375                  | TT                              | GG                | 1946620596               |
| SNP_P3_136209_248568 | NW_004516156.1 | Scaffold772 | 248568                  | TT                              | AA                | 1946620599               |
| SNP_P3_136210_248589 | NW_004516156.1 | Scaffold772 | 248589                  | CC                              | TT                | 1946620601               |
| SNP_P3_136211_3074   | NW_004516157.1 | Scaffold774 | 3074                    | GG                              | AA                | 1946620604               |
| SNP_P3_136212_5821   | NW_004516157.1 | Scaffold774 | 5821                    | GG                              | TT                | 1946620606               |
| SNP_P3_136213_16616  | NW_004516157.1 | Scaffold774 | 16616                   | AA                              | GG                | 1946620609               |
| SNP_P3_136214_16686  | NW_004516157.1 | Scaffold774 | 16686                   | TT                              | CC                | 1946620611               |
| SNP_P3_136215_16961  | NW_004516157.1 | Scaffold774 | 16961                   | TT                              | GG                | 1946620614               |
| SNP_P3_136216_17198  | NW_004516157.1 | Scaffold774 | 17198                   | CC                              | AA                | 1946620616               |
| SNP_P3_136217_17201  | NW_004516157.1 | Scaffold774 | 17201                   | GG                              | TT                | 1946620618               |
| SNP_P3_136218_17207  | NW_004516157.1 | Scaffold774 | 17207                   | GG                              | AA                | 1946620620               |
| SNP_P3_136219_17260  | NW_004516157.1 | Scaffold774 | 17260                   | AA                              | GG                | 1946620622               |
| SNP_P3_136220_17272  | NW_004516157.1 | Scaffold774 | 17272                   | TT                              | AA                | 1946620624               |
| SNP_P3_136221_17284  | NW_004516157.1 | Scaffold774 | 17284                   | GG                              | AA                | 1946620626               |
| SNP_P3_136222_17325  | NW_004516157.1 | Scaffold774 | 17325                   | TT                              | AA                | 1946620628               |
| SNP_P3_136223_17790  | NW_004516157.1 | Scaffold774 | 17790                   | AA                              | TT                | 1946620630               |
| SNP_P3_136224_21056  | NW_004516157.1 | Scaffold774 | 21056                   | AA                              | GG                | 1946620633               |
| SNP_P3_136225_21060  | NW_004516157.1 | Scaffold774 | 21060                   | TT                              | CC                | 1946620635               |
| SNP_P3_136226_21064  | NW_004516157.1 | Scaffold774 | 21064                   | CC                              | TT                | 1946620636               |
| SNP_P3_136227_21065  | NW_004516157.1 | Scaffold774 | 21065                   | AA                              | GG                | 1946620639               |
| SNP_P3_136228_21066  | NW_004516157.1 | Scaffold774 | 21066                   | CC                              | AA                | 1946620641               |
| SNP_P3_136229_21069  | NW_004516157.1 | Scaffold774 | 21069                   | CC                              | TT                | 1946620643               |
| SNP_P3_136230_22276  | NW_004516157.1 | Scaffold774 | 22276                   | CC                              | GG                | 1946620645               |
| SNP_P3_136231_22336  | NW_004516157.1 | Scaffold774 | 22336                   | TT                              | GG                | 1946620647               |
| SNP_P3_136232_22426  | NW_004516157.1 | Scaffold774 | 22426                   | AA                              | GG                | 1946620649               |
| SNP_P3_136233_22448  | NW_004516157.1 | Scaffold774 | 22448                   | AA                              | CC                | 1946620651               |

| SNPs IDs             | Chromosome IDs | Chromosomes | Physical positions (bp) | CDC Frontier (Reference genome) | (Pusa 256 & HPNB) | NCBI SNPdb Accession IDs |
|----------------------|----------------|-------------|-------------------------|---------------------------------|-------------------|--------------------------|
| SNP_P3_136234_22786  | NW_004516157.1 | Scaffold774 | 22786                   | AA                              | TT                | 1946620653               |
| SNP_P3_136235_654    | NW_004516158.1 | Scaffold775 | 654                     | TT                              | GG                | 1946620655               |
| SNP_P3_136236_678    | NW_004516158.1 | Scaffold775 | 678                     | GG                              | AA                | 1946620657               |
| SNP_P3_136237_680    | NW_004516158.1 | Scaffold775 | 680                     | TT                              | AA                | 1946620659               |
| SNP_P3_136238_688    | NW_004516158.1 | Scaffold775 | 688                     | AA                              | GG                | 1946620661               |
| SNP_P3_136239_800    | NW_004516158.1 | Scaffold775 | 800                     | CC                              | TT                | 1946620663               |
| SNP_P3_136240_818    | NW_004516158.1 | Scaffold775 | 818                     | CC                              | TT                | 1946620665               |
| SNP_P3_136241_957    | NW_004516158.1 | Scaffold775 | 957                     | GG                              | CC                | 1946620667               |
| SNP_P3_136242_1001   | NW_004516158.1 | Scaffold775 | 1001                    | TT                              | GG                | 1946620669               |
| SNP_P3_136243_1040   | NW_004516158.1 | Scaffold775 | 1040                    | AA                              | GG                | 1946620671               |
| SNP_P3_136244_1047   | NW_004516158.1 | Scaffold775 | 1047                    | TT                              | AA                | 1946620674               |
| SNP_P3_136245_1107   | NW_004516158.1 | Scaffold775 | 1107                    | TT                              | CC                | 1946620676               |
| SNP_P3_136246_10950  | NW_004516158.1 | Scaffold775 | 10950                   | CC                              | TT                | 1946620678               |
| SNP_P3_136247_12103  | NW_004516158.1 | Scaffold775 | 12103                   | TT                              | CC                | 1946620680               |
| SNP_P3_136248_12446  | NW_004516158.1 | Scaffold775 | 12446                   | TT                              | CC                | 1946620682               |
| SNP_P3_136249_12833  | NW_004516158.1 | Scaffold775 | 12833                   | TT                              | GG                | 1946620684               |
| SNP_P3_136250_12844  | NW_004516158.1 | Scaffold775 | 12844                   | AA                              | CC                | 1946620686               |
| SNP_P3_136251_12869  | NW_004516158.1 | Scaffold775 | 12869                   | GG                              | AA                | 1946620688               |
| SNP_P3_136252_12880  | NW_004516158.1 | Scaffold775 | 12880                   | TT                              | CC                | 1946620690               |
| SNP_P3_136253_13187  | NW_004516158.1 | Scaffold775 | 13187                   | AA                              | TT                | 1946620693               |
| SNP_P3_136254_15420  | NW_004516158.1 | Scaffold775 | 15420                   | CC                              | TT                | 1946620695               |
| SNP_P3_136255_15870  | NW_004516158.1 | Scaffold775 | 15870                   | AA                              | GG                | 1946620697               |
| SNP_P3_136256_16198  | NW_004516158.1 | Scaffold775 | 16198                   | GG                              | CC                | 1946620699               |
| SNP_P3_136257_16532  | NW_004516158.1 | Scaffold775 | 16532                   | TT                              | AA                | 1946620701               |
| SNP_P3_136258_16769  | NW_004516158.1 | Scaffold775 | 16769                   | GG                              | TT                | 1946620703               |
| SNP_P3_136259_16785  | NW_004516158.1 | Scaffold775 | 16785                   | CC                              | TT                | 1946620705               |
| SNP_P3_136260_19876  | NW_004516158.1 | Scaffold775 | 19876                   | TT                              | AA                | 1946620706               |
| SNP_P3_136261_22727  | NW_004516158.1 | Scaffold775 | 22727                   | CC                              | TT                | 1946620707               |
| SNP_P3_136262_88636  | NW_004516158.1 | Scaffold775 | 88636                   | GG                              | AA                | 1946620709               |
| SNP_P3_136263_99346  | NW_004516158.1 | Scaffold775 | 99346                   | CC                              | AA                | 1946620711               |
| SNP_P3_136264_99357  | NW_004516158.1 | Scaffold775 | 99357                   | AA                              | GG                | 1946620713               |
| SNP_P3_136265_99749  | NW_004516158.1 | Scaffold775 | 99749                   | CC                              | TT                | 1946620714               |
| SNP_P3_136266_99766  | NW_004516158.1 | Scaffold775 | 99766                   | AA                              | GG                | 1946620716               |
| SNP_P3_136267_100838 | NW_004516158.1 | Scaffold775 | 100838                  | TT                              | CC                | 1946620718               |
| SNP_P3_136269_119484 | NW_004516158.1 | Scaffold775 | 119484                  | TT                              | CC                | 1946620720               |
| SNP_P3_136270_125876 | NW_004516158.1 | Scaffold775 | 125876                  | AA                              | CC                | 1946620722               |
| SNP_P3_136271_125886 | NW_004516158.1 | Scaffold775 | 125886                  | AA                              | GG                | 1946620724               |
| SNP_P3_136272_128527 | NW_004516158.1 | Scaffold775 | 128527                  | AA                              | TT                | 1946620727               |
| SNP_P3_136273_137276 | NW_004516158.1 | Scaffold775 | 137276                  | GG                              | AA                | 1946620729               |
| SNP_P3_136276_178128 | NW_004516158.1 | Scaffold775 | 178128                  | GG                              | AA                | 1946620731               |
| SNP_P3_136277_223424 | NW_004516158.1 | Scaffold775 | 223424                  | TT                              | CC                | 1946620733               |
| SNP_P3_136278_223495 | NW_004516158.1 | Scaffold775 | 223495                  | GG                              | AA                | 1946620735               |

| SNPs IDs             | Chromosome IDs | Chromosomes | Physical positions (bp) | CDC Frontier (Reference genome) | (Pusa 256 & HPNB) | NCBI SNPdb Accession IDs |
|----------------------|----------------|-------------|-------------------------|---------------------------------|-------------------|--------------------------|
| SNP_P3_136279_223520 | NW_004516158.1 | Scaffold775 | 223520                  | TT                              | GG                | 1946620737               |
| SNP_P3_136280_223552 | NW_004516158.1 | Scaffold775 | 223552                  | TT                              | GG                | 1946620739               |
| SNP_P3_136281_223570 | NW_004516158.1 | Scaffold775 | 223570                  | GG                              | AA                | 1946620741               |
| SNP_P3_136282_223616 | NW_004516158.1 | Scaffold775 | 223616                  | AA                              | GG                | 1946620743               |
| SNP_P3_136283_223807 | NW_004516158.1 | Scaffold775 | 223807                  | AA                              | CC                | 1946620745               |
| SNP_P3_136284_224005 | NW_004516158.1 | Scaffold775 | 224005                  | CC                              | GG                | 1946620748               |
| SNP_P3_136285_225820 | NW_004516158.1 | Scaffold775 | 225820                  | AA                              | GG                | 1946620750               |
| SNP_P3_136286_226139 | NW_004516158.1 | Scaffold775 | 226139                  | CC                              | TT                | 1946620752               |
| SNP_P3_136287_226149 | NW_004516158.1 | Scaffold775 | 226149                  | AA                              | CC                | 1946620754               |
| SNP_P3_136288_226180 | NW_004516158.1 | Scaffold775 | 226180                  | GG                              | TT                | 1946620756               |
| SNP_P3_136289_226184 | NW_004516158.1 | Scaffold775 | 226184                  | CC                              | TT                | 1946620758               |
| SNP_P3_136290_233752 | NW_004516158.1 | Scaffold775 | 233752                  | CC                              | AA                | 1946620760               |
| SNP_P3_136292_237252 | NW_004516158.1 | Scaffold775 | 237252                  | AA                              | CC                | 1946620762               |
| SNP_P3_136293_237259 | NW_004516158.1 | Scaffold775 | 237259                  | GG                              | AA                | 1946620764               |
| SNP_P3_136294_237260 | NW_004516158.1 | Scaffold775 | 237260                  | AA                              | CC                | 1946620766               |
| SNP_P3_136295_237281 | NW_004516158.1 | Scaffold775 | 237281                  | AA                              | GG                | 1946620768               |
| SNP_P3_136296_267227 | NW_004516158.1 | Scaffold775 | 267227                  | CC                              | TT                | 1946620770               |
| SNP_P3_136297_267279 | NW_004516158.1 | Scaffold775 | 267279                  | AA                              | GG                | 1946620772               |
| SNP_P3_136298_267415 | NW_004516158.1 | Scaffold775 | 267415                  | CC                              | AA                | 1946620774               |
| SNP_P3_136299_267485 | NW_004516158.1 | Scaffold775 | 267485                  | TT                              | CC                | 1946620776               |
| SNP_P3_136300_267624 | NW_004516158.1 | Scaffold775 | 267624                  | AA                              | TT                | 1946620778               |
| SNP_P3_136301_267629 | NW_004516158.1 | Scaffold775 | 267629                  | AA                              | TT                | 1946620780               |
| SNP_P3_136302_267636 | NW_004516158.1 | Scaffold775 | 267636                  | AA                              | GG                | 1946620782               |
| SNP_P3_136303_267839 | NW_004516158.1 | Scaffold775 | 267839                  | TT                              | CC                | 1946620785               |
| SNP_P3_136304_267861 | NW_004516158.1 | Scaffold775 | 267861                  | AA                              | CC                | 1946620787               |
| SNP_P3_136305_267873 | NW_004516158.1 | Scaffold775 | 267873                  | TT                              | CC                | 1946620789               |
| SNP_P3_136306_277184 | NW_004516158.1 | Scaffold775 | 277184                  | TT                              | GG                | 1946620791               |
| SNP_P3_136307_303637 | NW_004516158.1 | Scaffold775 | 303637                  | CC                              | AA                | 1946620793               |
| SNP_P3_136308_303757 | NW_004516158.1 | Scaffold775 | 303757                  | TT                              | GG                | 1946620795               |
| SNP_P3_136309_334214 | NW_004516158.1 | Scaffold775 | 334214                  | TT                              | CC                | 1946620797               |
| SNP_P3_136310_334460 | NW_004516158.1 | Scaffold775 | 334460                  | AA                              | GG                | 1946620799               |
| SNP_P3_136311_335539 | NW_004516158.1 | Scaffold775 | 335539                  | TT                              | CC                | 1946620801               |
| SNP_P3_136313_337405 | NW_004516158.1 | Scaffold775 | 337405                  | GG                              | TT                | 1946620804               |
| SNP_P3_136314_337443 | NW_004516158.1 | Scaffold775 | 337443                  | AA                              | GG                | 1946620806               |
| SNP_P3_136315_342211 | NW_004516158.1 | Scaffold775 | 342211                  | AA                              | GG                | 1946620808               |
| SNP_P3_136316_342213 | NW_004516158.1 | Scaffold775 | 342213                  | AA                              | TT                | 1946620810               |
| SNP_P3_136317_356391 | NW_004516158.1 | Scaffold775 | 356391                  | TT                              | CC                | 1946620812               |
| SNP_P3_136318_381619 | NW_004516158.1 | Scaffold775 | 381619                  | CC                              | TT                | 1946620814               |
| SNP_P3_136319_381646 | NW_004516158.1 | Scaffold775 | 381646                  | TT                              | AA                | 1946620816               |
| SNP_P3_136320_381649 | NW_004516158.1 | Scaffold775 | 381649                  | GG                              | CC                | 1946620818               |
| SNP_P3_136321_381652 | NW_004516158.1 | Scaffold775 | 381652                  | AA                              | CC                | 1946620821               |
| SNP_P3_136322_381743 | NW_004516158.1 | Scaffold775 | 381743                  | AA                              | TT                | 1946620823               |

| SNPs IDs             | Chromosome IDs | Chromosomes | Physical positions (bp) | CDC Frontier (Reference genome) | (Pusa 256 & HPNB) | NCBI SNPdb Accession IDs |
|----------------------|----------------|-------------|-------------------------|---------------------------------|-------------------|--------------------------|
| SNP_P3_136323_383664 | NW_004516158.1 | Scaffold775 | 383664                  | TT                              | CC                | 1946620825               |
| SNP_P3_136324_383680 | NW_004516158.1 | Scaffold775 | 383680                  | TT                              | CC                | 1946620827               |
| SNP_P3_136325_383699 | NW_004516158.1 | Scaffold775 | 383699                  | CC                              | TT                | 1946620829               |
| SNP_P3_136326_388120 | NW_004516158.1 | Scaffold775 | 388120                  | GG                              | AA                | 1946620831               |
| SNP_P3_136327_388183 | NW_004516158.1 | Scaffold775 | 388183                  | TT                              | CC                | 1946620833               |
| SNP_P3_136328_388903 | NW_004516158.1 | Scaffold775 | 388903                  | TT                              | CC                | 1946620835               |
| SNP_P3_136329_409964 | NW_004516158.1 | Scaffold775 | 409964                  | TT                              | CC                | 1946620837               |
| SNP_P3_136331_441004 | NW_004516158.1 | Scaffold775 | 441004                  | AA                              | GG                | 1946620839               |
| SNP_P3_136332_441349 | NW_004516158.1 | Scaffold775 | 441349                  | GG                              | AA                | 1946620841               |
| SNP_P3_136333_442736 | NW_004516158.1 | Scaffold775 | 442736                  | TT                              | GG                | 1946620842               |
| SNP_P3_136335_446940 | NW_004516158.1 | Scaffold775 | 446940                  | TT                              | AA                | 1946620844               |
| SNP_P3_136336_447641 | NW_004516158.1 | Scaffold775 | 447641                  | TT                              | CC                | 1946620846               |
| SNP_P3_136337_448361 | NW_004516158.1 | Scaffold775 | 448361                  | TT                              | CC                | 1946620848               |
| SNP_P3_136338_449388 | NW_004516158.1 | Scaffold775 | 449388                  | CC                              | TT                | 1946620850               |
| SNP_P3_136340_449872 | NW_004516158.1 | Scaffold775 | 449872                  | CC                              | TT                | 1946620852               |
| SNP_P3_136341_450548 | NW_004516158.1 | Scaffold775 | 450548                  | TT                              | CC                | 1946620854               |
| SNP_P3_136342_450610 | NW_004516158.1 | Scaffold775 | 450610                  | TT                              | CC                | 1946620856               |
| SNP_P3_136343_450659 | NW_004516158.1 | Scaffold775 | 450659                  | GG                              | AA                | 1946620858               |
| SNP_P3_136344_473810 | NW_004516158.1 | Scaffold775 | 473810                  | TT                              | CC                | 1946620860               |
| SNP_P3_136345_475304 | NW_004516158.1 | Scaffold775 | 475304                  | TT                              | CC                | 1946620861               |
| SNP_P3_136346_475306 | NW_004516158.1 | Scaffold775 | 475306                  | GG                              | AA                | 1946620863               |
| SNP_P3_136347_475697 | NW_004516158.1 | Scaffold775 | 475697                  | AA                              | GG                | 1946620865               |
| SNP_P3_136348_476026 | NW_004516158.1 | Scaffold775 | 476026                  | AA                              | CC                | 1946620867               |
| SNP_P3_136349_476139 | NW_004516158.1 | Scaffold775 | 476139                  | TT                              | CC                | 1946620869               |
| SNP_P3_136350_476181 | NW_004516158.1 | Scaffold775 | 476181                  | CC                              | TT                | 1946620871               |
| SNP_P3_136351_476189 | NW_004516158.1 | Scaffold775 | 476189                  | TT                              | CC                | 1946620873               |
| SNP_P3_136352_476281 | NW_004516158.1 | Scaffold775 | 476281                  | AA                              | GG                | 1946620875               |
| SNP_P3_136353_476302 | NW_004516158.1 | Scaffold775 | 476302                  | CC                              | GG                | 1946620877               |
| SNP_P3_136354_476389 | NW_004516158.1 | Scaffold775 | 476389                  | GG                              | AA                | 1946620879               |
| SNP_P3_136355_484410 | NW_004516158.1 | Scaffold775 | 484410                  | GG                              | TT                | 1946620881               |
| SNP_P3_136356_484431 | NW_004516158.1 | Scaffold775 | 484431                  | CC                              | AA                | 1946620883               |
| SNP_P3_136357_484848 | NW_004516158.1 | Scaffold775 | 484848                  | AA                              | CC                | 1946620885               |
| SNP_P3_136358_23649  | NW_004516159.1 | Scaffold776 | 23649                   | AA                              | TT                | 1946620887               |
| SNP_P3_136359_23850  | NW_004516159.1 | Scaffold776 | 23850                   | AA                              | GG                | 1946620889               |
| SNP_P3_136360_23858  | NW_004516159.1 | Scaffold776 | 23858                   | CC                              | TT                | 1946620891               |
| SNP_P3_136361_23925  | NW_004516159.1 | Scaffold776 | 23925                   | AA                              | TT                | 1946620893               |
| SNP_P3_136362_26947  | NW_004516159.1 | Scaffold776 | 26947                   | AA                              | GG                | 1946620895               |
| SNP_P3_136363_26952  | NW_004516159.1 | Scaffold776 | 26952                   | GG                              | CC                | 1946620897               |
| SNP_P3_136364_26975  | NW_004516159.1 | Scaffold776 | 26975                   | AA                              | CC                | 1946620899               |
| SNP_P3_136365_26978  | NW_004516159.1 | Scaffold776 | 26978                   | AA                              | GG                | 1946620902               |
| SNP_P3_136366_26987  | NW_004516159.1 | Scaffold776 | 26987                   | TT                              | AA                | 1946620904               |
| SNP_P3_136367_27223  | NW_004516159.1 | Scaffold776 | 27223                   | TT                              | CC                | 1946620906               |

| SNPs IDs             | Chromosome IDs | Chromosomes | Physical positions (bp) | CDC Frontier (Reference genome) | (Pusa 256 & HPNB) | NCBI SNPdb Accession IDs |
|----------------------|----------------|-------------|-------------------------|---------------------------------|-------------------|--------------------------|
| SNP_P3_136368_55859  | NW_004516159.1 | Scaffold776 | 55859                   | AA                              | CC                | 1946620908               |
| SNP_P3_136369_69927  | NW_004516159.1 | Scaffold776 | 69927                   | GG                              | AA                | 1946620911               |
| SNP_P3_136370_71609  | NW_004516159.1 | Scaffold776 | 71609                   | GG                              | AA                | 1946620913               |
| SNP_P3_136371_71725  | NW_004516159.1 | Scaffold776 | 71725                   | AA                              | GG                | 1946620915               |
| SNP_P3_136372_71912  | NW_004516159.1 | Scaffold776 | 71912                   | TT                              | AA                | 1946620918               |
| SNP_P3_136373_72024  | NW_004516159.1 | Scaffold776 | 72024                   | TT                              | AA                | 1946620920               |
| SNP_P3_136374_73730  | NW_004516159.1 | Scaffold776 | 73730                   | TT                              | CC                | 1946620922               |
| SNP_P3_136375_73756  | NW_004516159.1 | Scaffold776 | 73756                   | GG                              | TT                | 1946620924               |
| SNP_P3_136376_74795  | NW_004516159.1 | Scaffold776 | 74795                   | AA                              | CC                | 1946620926               |
| SNP_P3_136377_74800  | NW_004516159.1 | Scaffold776 | 74800                   | CC                              | TT                | 1946620928               |
| SNP_P3_136378_74817  | NW_004516159.1 | Scaffold776 | 74817                   | GG                              | AA                | 1946620930               |
| SNP_P3_136379_78287  | NW_004516159.1 | Scaffold776 | 78287                   | CC                              | TT                | 1946620932               |
| SNP_P3_136380_78346  | NW_004516159.1 | Scaffold776 | 78346                   | CC                              | AA                | 1946620934               |
| SNP_P3_136381_78734  | NW_004516159.1 | Scaffold776 | 78734                   | TT                              | CC                | 1946620936               |
| SNP_P3_136382_113580 | NW_004516159.1 | Scaffold776 | 113580                  | CC                              | TT                | 1946620938               |
| SNP_P3_136383_113942 | NW_004516159.1 | Scaffold776 | 113942                  | TT                              | CC                | 1946620940               |
| SNP_P3_136384_113964 | NW_004516159.1 | Scaffold776 | 113964                  | AA                              | GG                | 1946620942               |
| SNP_P3_136385_113978 | NW_004516159.1 | Scaffold776 | 113978                  | GG                              | TT                | 1946620945               |
| SNP_P3_136386_113979 | NW_004516159.1 | Scaffold776 | 113979                  | CC                              | TT                | 1946620947               |
| SNP_P3_136387_121855 | NW_004516159.1 | Scaffold776 | 121855                  | TT                              | CC                | 1946620949               |
| SNP_P3_136388_123715 | NW_004516159.1 | Scaffold776 | 123715                  | TT                              | CC                | 1946620951               |
| SNP_P3_136389_132537 | NW_004516159.1 | Scaffold776 | 132537                  | AA                              | GG                | 1946620953               |
| SNP_P3_136390_132565 | NW_004516159.1 | Scaffold776 | 132565                  | GG                              | TT                | 1946620955               |
| SNP_P3_136391_144216 | NW_004516159.1 | Scaffold776 | 144216                  | CC                              | TT                | 1946620957               |
| SNP_P3_136392_144217 | NW_004516159.1 | Scaffold776 | 144217                  | TT                              | AA                | 1946620959               |
| SNP_P3_136393_156172 | NW_004516159.1 | Scaffold776 | 156172                  | AA                              | GG                | 1946620962               |
| SNP_P3_136395_172959 | NW_004516159.1 | Scaffold776 | 172959                  | AA                              | TT                | 1946620964               |
| SNP_P3_136396_176062 | NW_004516159.1 | Scaffold776 | 176062                  | TT                              | AA                | 1946620966               |
| SNP_P3_136397_177904 | NW_004516159.1 | Scaffold776 | 177904                  | GG                              | AA                | 1946620968               |
| SNP_P3_136398_177906 | NW_004516159.1 | Scaffold776 | 177906                  | AA                              | GG                | 1946620970               |
| SNP_P3_136399_206689 | NW_004516159.1 | Scaffold776 | 206689                  | AA                              | GG                | 1946620972               |
| SNP_P3_136400_206701 | NW_004516159.1 | Scaffold776 | 206701                  | AA                              | GG                | 1946620974               |
| SNP_P3_136401_206702 | NW_004516159.1 | Scaffold776 | 206702                  | TT                              | AA                | 1946620976               |
| SNP_P3_136402_207169 | NW_004516159.1 | Scaffold776 | 207169                  | CC                              | AA                | 1946620978               |
| SNP_P3_136403_212364 | NW_004516159.1 | Scaffold776 | 212364                  | AA                              | GG                | 1946620980               |
| SNP_P3_136404_212740 | NW_004516159.1 | Scaffold776 | 212740                  | CC                              | TT                | 1946620982               |
| SNP_P3_136405_212744 | NW_004516159.1 | Scaffold776 | 212744                  | TT                              | CC                | 1946620984               |
| SNP_P3_136406_216198 | NW_004516159.1 | Scaffold776 | 216198                  | TT                              | GG                | 1946620986               |
| SNP_P3_136407_216473 | NW_004516159.1 | Scaffold776 | 216473                  | TT                              | CC                | 1946620988               |
| SNP_P3_136408_218816 | NW_004516159.1 | Scaffold776 | 218816                  | AA                              | GG                | 1946620990               |
| SNP_P3_136409_218836 | NW_004516159.1 | Scaffold776 | 218836                  | CC                              | GG                | 1946620992               |
| SNP_P3_136410_218888 | NW_004516159.1 | Scaffold776 | 218888                  | CC                              | TT                | 1946620994               |

| SNPs IDs             | Chromosome IDs | Chromosomes | Physical positions (bp) | CDC Frontier (Reference genome) | (Pusa 256 & HPNB) | NCBI SNPdb Accession IDs |
|----------------------|----------------|-------------|-------------------------|---------------------------------|-------------------|--------------------------|
| SNP_P3_136411_218898 | NW_004516159.1 | Scaffold776 | 218898                  | GG                              | AA                | 1946620996               |
| SNP_P3_136412_218909 | NW_004516159.1 | Scaffold776 | 218909                  | AA                              | GG                | 1946620998               |
| SNP_P3_136413_219010 | NW_004516159.1 | Scaffold776 | 219010                  | TT                              | GG                | 1946621000               |
| SNP_P3_136414_219019 | NW_004516159.1 | Scaffold776 | 219019                  | GG                              | CC                | 1946621003               |
| SNP_P3_136415_219208 | NW_004516159.1 | Scaffold776 | 219208                  | CC                              | AA                | 1946621005               |
| SNP_P3_136416_219212 | NW_004516159.1 | Scaffold776 | 219212                  | AA                              | GG                | 1946621006               |
| SNP_P3_136417_219331 | NW_004516159.1 | Scaffold776 | 219331                  | TT                              | GG                | 1946621008               |
| SNP_P3_136418_219344 | NW_004516159.1 | Scaffold776 | 219344                  | TT                              | GG                | 1946621010               |
| SNP_P3_136419_219358 | NW_004516159.1 | Scaffold776 | 219358                  | CC                              | AA                | 1946621012               |
| SNP_P3_136420_219368 | NW_004516159.1 | Scaffold776 | 219368                  | TT                              | CC                | 1946621014               |
| SNP_P3_136421_219938 | NW_004516159.1 | Scaffold776 | 219938                  | AA                              | GG                | 1946621016               |
| SNP_P3_136422_220248 | NW_004516159.1 | Scaffold776 | 220248                  | AA                              | GG                | 1946621018               |
| SNP_P3_136423_220272 | NW_004516159.1 | Scaffold776 | 220272                  | GG                              | AA                | 1946621020               |
| SNP_P3_136424_220308 | NW_004516159.1 | Scaffold776 | 220308                  | AA                              | CC                | 1946621022               |
| SNP_P3_136425_220309 | NW_004516159.1 | Scaffold776 | 220309                  | TT                              | GG                | 1946621024               |
| SNP_P3_136426_220318 | NW_004516159.1 | Scaffold776 | 220318                  | TT                              | GG                | 1946621026               |
| SNP_P3_136427_220322 | NW_004516159.1 | Scaffold776 | 220322                  | TT                              | CC                | 1946621028               |
| SNP_P3_136428_220345 | NW_004516159.1 | Scaffold776 | 220345                  | AA                              | GG                | 1946621030               |
| SNP_P3_136429_220375 | NW_004516159.1 | Scaffold776 | 220375                  | TT                              | GG                | 1946621032               |
| SNP_P3_136430_220472 | NW_004516159.1 | Scaffold776 | 220472                  | GG                              | CC                | 1946621033               |
| SNP_P3_136432_241939 | NW_004516159.1 | Scaffold776 | 241939                  | TT                              | AA                | 1946621035               |
| SNP_P3_136433_256413 | NW_004516159.1 | Scaffold776 | 256413                  | AA                              | TT                | 1946621037               |
| SNP_P3_136434_572    | NW_004516160.1 | Scaffold778 | 572                     | GG                              | AA                | 1946621039               |
| SNP_P3_136435_448    | NW_004516161.1 | Scaffold779 | 448                     | GG                              | TT                | 1946621042               |
| SNP_P3_136436_943    | NW_004516161.1 | Scaffold779 | 943                     | TT                              | AA                | 1946621044               |
| SNP_P3_136437_971    | NW_004516161.1 | Scaffold779 | 971                     | GG                              | TT                | 1946621046               |
| SNP_P3_136438_994    | NW_004516161.1 | Scaffold779 | 994                     | CC                              | AA                | 1946621048               |
| SNP_P3_136439_1087   | NW_004516161.1 | Scaffold779 | 1087                    | AA                              | CC                | 1946621050               |
| SNP_P3_136440_1090   | NW_004516161.1 | Scaffold779 | 1090                    | AA                              | TT                | 1946621052               |
| SNP_P3_136441_1199   | NW_004516161.1 | Scaffold779 | 1199                    | GG                              | CC                | 1946621054               |
| SNP_P3_136442_1211   | NW_004516161.1 | Scaffold779 | 1211                    | AA                              | GG                | 1946621056               |
| SNP_P3_136443_1253   | NW_004516161.1 | Scaffold779 | 1253                    | GG                              | TT                | 1946621057               |
| SNP_P3_136444_1271   | NW_004516161.1 | Scaffold779 | 1271                    | AA                              | GG                | 1946621059               |
| SNP_P3_136445_1291   | NW_004516161.1 | Scaffold779 | 1291                    | TT                              | GG                | 1946621061               |
| SNP_P3_136446_1339   | NW_004516161.1 | Scaffold779 | 1339                    | TT                              | AA                | 1946621063               |
| SNP_P3_136447_1345   | NW_004516161.1 | Scaffold779 | 1345                    | TT                              | CC                | 1946621065               |
| SNP_P3_136448_1377   | NW_004516161.1 | Scaffold779 | 1377                    | CC                              | TT                | 1946621067               |
| SNP_P3_136449_1412   | NW_004516161.1 | Scaffold779 | 1412                    | AA                              | GG                | 1946621069               |
| SNP_P3_136450_1417   | NW_004516161.1 | Scaffold779 | 1417                    | AA                              | GG                | 1946621071               |
| SNP_P3_136451_1425   | NW_004516161.1 | Scaffold779 | 1425                    | TT                              | AA                | 1946621073               |
| SNP_P3_136454_1569   | NW_004516161.1 | Scaffold779 | 1569                    | GG                              | AA                | 1946621075               |
| SNP_P3_136455_1586   | NW_004516161.1 | Scaffold779 | 1586                    | TT                              | CC                | 1946621077               |

| SNPs IDs             | Chromosome IDs | Chromosomes | Physical positions (bp) | CDC Frontier (Reference genome) | (Pusa 256 & HPNB) | NCBI SNPdb Accession IDs |
|----------------------|----------------|-------------|-------------------------|---------------------------------|-------------------|--------------------------|
| SNP_P3_136456_1607   | NW_004516161.1 | Scaffold779 | 1607                    | CC                              | TT                | 1946621079               |
| SNP_P3_136457_1635   | NW_004516161.1 | Scaffold779 | 1635                    | TT                              | AA                | 1946621081               |
| SNP_P3_136458_1667   | NW_004516161.1 | Scaffold779 | 1667                    | CC                              | GG                | 1946621082               |
| SNP_P3_136459_1724   | NW_004516161.1 | Scaffold779 | 1724                    | TT                              | GG                | 1946621084               |
| SNP_P3_136460_1744   | NW_004516161.1 | Scaffold779 | 1744                    | CC                              | AA                | 1946621086               |
| SNP_P3_136461_1762   | NW_004516161.1 | Scaffold779 | 1762                    | AA                              | GG                | 1946621088               |
| SNP_P3_136462_5962   | NW_004516161.1 | Scaffold779 | 5962                    | CC                              | TT                | 1946621090               |
| SNP_P3_136463_6014   | NW_004516161.1 | Scaffold779 | 6014                    | AA                              | TT                | 1946621092               |
| SNP_P3_136464_6070   | NW_004516161.1 | Scaffold779 | 6070                    | AA                              | GG                | 1946621094               |
| SNP_P3_136465_6191   | NW_004516161.1 | Scaffold779 | 6191                    | AA                              | GG                | 1946621096               |
| SNP_P3_136466_6339   | NW_004516161.1 | Scaffold779 | 6339                    | AA                              | CC                | 1946621098               |
| SNP_P3_136467_9033   | NW_004516161.1 | Scaffold779 | 9033                    | TT                              | CC                | 1946621100               |
| SNP_P3_136468_2484   | NW_004516162.1 | Scaffold781 | 2484                    | GG                              | AA                | 1946621102               |
| SNP_P3_136469_2492   | NW_004516162.1 | Scaffold781 | 2492                    | TT                              | GG                | 1946621104               |
| SNP_P3_136470_3447   | NW_004516162.1 | Scaffold781 | 3447                    | CC                              | AA                | 1946621106               |
| SNP_P3_136471_3448   | NW_004516162.1 | Scaffold781 | 3448                    | AA                              | TT                | 1946621108               |
| SNP_P3_136472_3652   | NW_004516162.1 | Scaffold781 | 3652                    | TT                              | AA                | 1946621110               |
| SNP_P3_136473_3808   | NW_004516162.1 | Scaffold781 | 3808                    | AA                              | GG                | 1946621112               |
| SNP_P3_136474_30409  | NW_004516162.1 | Scaffold781 | 30409                   | CC                              | TT                | 1946621114               |
| SNP_P3_136476_30708  | NW_004516162.1 | Scaffold781 | 30708                   | TT                              | CC                | 1946621117               |
| SNP_P3_136477_48     | NW_004516164.1 | Scaffold783 | 48                      | AA                              | GG                | 1946621119               |
| SNP_P3_136478_98     | NW_004516164.1 | Scaffold783 | 98                      | GG                              | AA                | 1946621121               |
| SNP_P3_136479_329    | NW_004516164.1 | Scaffold783 | 329                     | CC                              | TT                | 1946621123               |
| SNP_P3_136480_2210   | NW_004516164.1 | Scaffold783 | 2210                    | GG                              | AA                | 1946621125               |
| SNP_P3_136481_8693   | NW_004516164.1 | Scaffold783 | 8693                    | AA                              | TT                | 1946621127               |
| SNP_P3_136482_40498  | NW_004516164.1 | Scaffold783 | 40498                   | GG                              | AA                | 1946621129               |
| SNP_P3_136483_52153  | NW_004516164.1 | Scaffold783 | 52153                   | CC                              | GG                | 1946621131               |
| SNP_P3_136485_92766  | NW_004516164.1 | Scaffold783 | 92766                   | AA                              | CC                | 1946621133               |
| SNP_P3_136486_95479  | NW_004516164.1 | Scaffold783 | 95479                   | TT                              | CC                | 1946621135               |
| SNP_P3_136487_99089  | NW_004516164.1 | Scaffold783 | 99089                   | AA                              | GG                | 1946621137               |
| SNP_P3_136488_99097  | NW_004516164.1 | Scaffold783 | 99097                   | CC                              | TT                | 1946621138               |
| SNP_P3_136490_103228 | NW_004516164.1 | Scaffold783 | 103228                  | TT                              | CC                | 1946621140               |
| SNP_P3_136491_103509 | NW_004516164.1 | Scaffold783 | 103509                  | CC                              | TT                | 1946621142               |
| SNP_P3_136492_104297 | NW_004516164.1 | Scaffold783 | 104297                  | GG                              | TT                | 1946621144               |
| SNP_P3_136493_104787 | NW_004516164.1 | Scaffold783 | 104787                  | CC                              | TT                | 1946621146               |
| SNP_P3_136494_104887 | NW_004516164.1 | Scaffold783 | 104887                  | GG                              | AA                | 1946621148               |
| SNP_P3_136495_106566 | NW_004516164.1 | Scaffold783 | 106566                  | CC                              | TT                | 1946621150               |
| SNP_P3_136497_120414 | NW_004516164.1 | Scaffold783 | 120414                  | GG                              | TT                | 1946621151               |
| SNP_P3_136498_120578 | NW_004516164.1 | Scaffold783 | 120578                  | GG                              | TT                | 1946621153               |
| SNP_P3_136499_120584 | NW_004516164.1 | Scaffold783 | 120584                  | AA                              | GG                | 1946621156               |
| SNP_P3_136500_120588 | NW_004516164.1 | Scaffold783 | 120588                  | GG                              | AA                | 1946621158               |
| SNP_P3_136501_120616 | NW_004516164.1 | Scaffold783 | 120616                  | AA                              | CC                | 1946621160               |



| SNPs IDs             | Chromosome IDs | Chromosomes | Physical positions (bp) | CDC Frontier (Reference genome) | (Pusa 256 & HPNB) | NCBI SNPdb Accession IDs |
|----------------------|----------------|-------------|-------------------------|---------------------------------|-------------------|--------------------------|
| SNP_P3_136502_120642 | NW_004516164.1 | Scaffold783 | 120642                  | AA                              | GG                | 1946621162               |
| SNP_P3_136503_128543 | NW_004516164.1 | Scaffold783 | 128543                  | TT                              | GG                | 1946621164               |
| SNP_P3_136504_128899 | NW_004516164.1 | Scaffold783 | 128899                  | AA                              | GG                | 1946621166               |
| SNP_P3_136505_128921 | NW_004516164.1 | Scaffold783 | 128921                  | TT                              | GG                | 1946621168               |
| SNP_P3_136506_128972 | NW_004516164.1 | Scaffold783 | 128972                  | CC                              | TT                | 1946621169               |
| SNP_P3_136507_137915 | NW_004516164.1 | Scaffold783 | 137915                  | AA                              | CC                | 1946621171               |
| SNP_P3_136508_143469 | NW_004516164.1 | Scaffold783 | 143469                  | AA                              | TT                | 1946621173               |
| SNP_P3_136509_179860 | NW_004516164.1 | Scaffold783 | 179860                  | TT                              | CC                | 1946621176               |
| SNP_P3_136510_179889 | NW_004516164.1 | Scaffold783 | 179889                  | TT                              | GG                | 1946621178               |
| SNP_P3_136511_179954 | NW_004516164.1 | Scaffold783 | 179954                  | TT                              | CC                | 1946621180               |
| SNP_P3_136512_180001 | NW_004516164.1 | Scaffold783 | 180001                  | AA                              | GG                | 1946621182               |
| SNP_P3_136513_180056 | NW_004516164.1 | Scaffold783 | 180056                  | AA                              | GG                | 1946621184               |
| SNP_P3_136514_180057 | NW_004516164.1 | Scaffold783 | 180057                  | GG                              | TT                | 1946621186               |
| SNP_P3_136515_208130 | NW_004516164.1 | Scaffold783 | 208130                  | GG                              | AA                | 1946621188               |
| SNP_P3_136516_208155 | NW_004516164.1 | Scaffold783 | 208155                  | GG                              | TT                | 1946621190               |
| SNP_P3_136517_208156 | NW_004516164.1 | Scaffold783 | 208156                  | GG                              | TT                | 1946621191               |
| SNP_P3_136518_208197 | NW_004516164.1 | Scaffold783 | 208197                  | TT                              | AA                | 1946621194               |
| SNP_P3_136519_208324 | NW_004516164.1 | Scaffold783 | 208324                  | TT                              | CC                | 1946621196               |
| SNP_P3_136520_208339 | NW_004516164.1 | Scaffold783 | 208339                  | CC                              | GG                | 1946621198               |
| SNP_P3_136521_208341 | NW_004516164.1 | Scaffold783 | 208341                  | GG                              | AA                | 1946621199               |
| SNP_P3_136522_208485 | NW_004516164.1 | Scaffold783 | 208485                  | TT                              | CC                | 1946621201               |
| SNP_P3_136523_208488 | NW_004516164.1 | Scaffold783 | 208488                  | GG                              | AA                | 1946621203               |
| SNP_P3_136524_208545 | NW_004516164.1 | Scaffold783 | 208545                  | AA                              | GG                | 1946621205               |
| SNP_P3_136525_208557 | NW_004516164.1 | Scaffold783 | 208557                  | CC                              | TT                | 1946621207               |
| SNP_P3_136526_208563 | NW_004516164.1 | Scaffold783 | 208563                  | GG                              | AA                | 1946621209               |
| SNP_P3_136527_208608 | NW_004516164.1 | Scaffold783 | 208608                  | CC                              | TT                | 1946621211               |
| SNP_P3_136528_222218 | NW_004516164.1 | Scaffold783 | 222218                  | CC                              | GG                | 1946621213               |
| SNP_P3_136529_222269 | NW_004516164.1 | Scaffold783 | 222269                  | AA                              | GG                | 1946621215               |
| SNP_P3_136530_222295 | NW_004516164.1 | Scaffold783 | 222295                  | CC                              | TT                | 1946621217               |
| SNP_P3_136531_254192 | NW_004516164.1 | Scaffold783 | 254192                  | TT                              | AA                | 1946621219               |
| SNP_P3_136532_265430 | NW_004516164.1 | Scaffold783 | 265430                  | AA                              | CC                | 1946621220               |
| SNP_P3_136534_1502   | NW_004516168.1 | Scaffold787 | 1502                    | AA                              | GG                | 1946621222               |
| SNP_P3_136536_16945  | NW_004516168.1 | Scaffold787 | 16945                   | GG                              | AA                | 1946621224               |
| SNP_P3_136537_18461  | NW_004516168.1 | Scaffold787 | 18461                   | TT                              | GG                | 1946621226               |
| SNP_P3_136538_19224  | NW_004516168.1 | Scaffold787 | 19224                   | TT                              | AA                | 1946621228               |
| SNP_P3_136539_20752  | NW_004516168.1 | Scaffold787 | 20752                   | TT                              | CC                | 1946621230               |
| SNP_P3_136540_20982  | NW_004516168.1 | Scaffold787 | 20982                   | GG                              | CC                | 1946621232               |
| SNP_P3_136541_21478  | NW_004516168.1 | Scaffold787 | 21478                   | AA                              | GG                | 1946621234               |
| SNP_P3_136542_22017  | NW_004516168.1 | Scaffold787 | 22017                   | AA                              | GG                | 1946621237               |
| SNP_P3_136544_22699  | NW_004516168.1 | Scaffold787 | 22699                   | TT                              | CC                | 1946621238               |
| SNP_P3_136545_24555  | NW_004516168.1 | Scaffold787 | 24555                   | AA                              | GG                | 1946621240               |
| SNP_P3_136546_24758  | NW_004516168.1 | Scaffold787 | 24758                   | TT                              | GG                | 1946621242               |

| SNPs IDs            | Chromosome IDs | Chromosomes | Physical positions (bp) | CDC Frontier (Reference genome) | (Pusa 256 & HPNB) | NCBI SNPdb Accession IDs |
|---------------------|----------------|-------------|-------------------------|---------------------------------|-------------------|--------------------------|
| SNP_P3_136547_25048 | NW_004516168.1 | Scaffold787 | 25048                   | TT                              | CC                | 1946621244               |
| SNP_P3_136548_25059 | NW_004516168.1 | Scaffold787 | 25059                   | CC                              | AA                | 1946621246               |
| SNP_P3_136549_25116 | NW_004516168.1 | Scaffold787 | 25116                   | GG                              | CC                | 1946621248               |
| SNP_P3_136551_29130 | NW_004516168.1 | Scaffold787 | 29130                   | CC                              | TT                | 1946621250               |
| SNP_P3_136552_29261 | NW_004516168.1 | Scaffold787 | 29261                   | CC                              | TT                | 1946621252               |
| SNP_P3_136553_29275 | NW_004516168.1 | Scaffold787 | 29275                   | GG                              | AA                | 1946621254               |
| SNP_P3_136554_30784 | NW_004516168.1 | Scaffold787 | 30784                   | TT                              | CC                | 1946621256               |
| SNP_P3_136555_31073 | NW_004516168.1 | Scaffold787 | 31073                   | AA                              | TT                | 1946621258               |
| SNP_P3_136556_40624 | NW_004516168.1 | Scaffold787 | 40624                   | TT                              | AA                | 1946621260               |
| SNP_P3_136557_40761 | NW_004516168.1 | Scaffold787 | 40761                   | AA                              | CC                | 1946621261               |
| SNP_P3_136558_40944 | NW_004516168.1 | Scaffold787 | 40944                   | TT                              | CC                | 1946621263               |
| SNP_P3_136559_41347 | NW_004516168.1 | Scaffold787 | 41347                   | TT                              | GG                | 1946621265               |
| SNP_P3_136560_41728 | NW_004516168.1 | Scaffold787 | 41728                   | TT                              | CC                | 1946621267               |
| SNP_P3_136561_42096 | NW_004516168.1 | Scaffold787 | 42096                   | CC                              | TT                | 1946621269               |
| SNP_P3_136562_44020 | NW_004516168.1 | Scaffold787 | 44020                   | AA                              | CC                | 1946621271               |
| SNP_P3_136563_48203 | NW_004516168.1 | Scaffold787 | 48203                   | GG                              | AA                | 1946621273               |
| SNP_P3_136564_50684 | NW_004516168.1 | Scaffold787 | 50684                   | TT                              | GG                | 1946621276               |
| SNP_P3_136565_50942 | NW_004516168.1 | Scaffold787 | 50942                   | GG                              | AA                | 1946621278               |
| SNP_P3_136566_52488 | NW_004516168.1 | Scaffold787 | 52488                   | AA                              | GG                | 1946621280               |
| SNP_P3_136567_53395 | NW_004516168.1 | Scaffold787 | 53395                   | TT                              | CC                | 1946621282               |
| SNP_P3_136568_54188 | NW_004516168.1 | Scaffold787 | 54188                   | TT                              | CC                | 1946621284               |
| SNP_P3_136569_57612 | NW_004516168.1 | Scaffold787 | 57612                   | TT                              | CC                | 1946621286               |
| SNP_P3_136570_58401 | NW_004516168.1 | Scaffold787 | 58401                   | AA                              | TT                | 1946621287               |
| SNP_P3_136571_58403 | NW_004516168.1 | Scaffold787 | 58403                   | TT                              | GG                | 1946621289               |
| SNP_P3_136572_58765 | NW_004516168.1 | Scaffold787 | 58765                   | CC                              | TT                | 1946621291               |
| SNP_P3_136573_60030 | NW_004516168.1 | Scaffold787 | 60030                   | GG                              | TT                | 1946621293               |
| SNP_P3_136574_60225 | NW_004516168.1 | Scaffold787 | 60225                   | AA                              | TT                | 1946621295               |
| SNP_P3_136575_61271 | NW_004516168.1 | Scaffold787 | 61271                   | CC                              | AA                | 1946621297               |
| SNP_P3_136576_61424 | NW_004516168.1 | Scaffold787 | 61424                   | AA                              | CC                | 1946621299               |
| SNP_P3_136577_61783 | NW_004516168.1 | Scaffold787 | 61783                   | CC                              | TT                | 1946621301               |
| SNP_P3_136578_62296 | NW_004516168.1 | Scaffold787 | 62296                   | AA                              | TT                | 1946621303               |
| SNP_P3_136580_66128 | NW_004516168.1 | Scaffold787 | 66128                   | GG                              | AA                | 1946621305               |
| SNP_P3_136581_66235 | NW_004516168.1 | Scaffold787 | 66235                   | CC                              | TT                | 1946621307               |
| SNP_P3_136582_66269 | NW_004516168.1 | Scaffold787 | 66269                   | TT                              | CC                | 1946621309               |
| SNP_P3_136583_66354 | NW_004516168.1 | Scaffold787 | 66354                   | AA                              | CC                | 1946621311               |
| SNP_P3_136584_67133 | NW_004516168.1 | Scaffold787 | 67133                   | CC                              | TT                | 1946621313               |
| SNP_P3_136585_67147 | NW_004516168.1 | Scaffold787 | 67147                   | TT                              | AA                | 1946621314               |
| SNP_P3_136586_67148 | NW_004516168.1 | Scaffold787 | 67148                   | TT                              | AA                | 1946621316               |
| SNP_P3_136587_67959 | NW_004516168.1 | Scaffold787 | 67959                   | GG                              | AA                | 1946621319               |
| SNP_P3_136588_68151 | NW_004516168.1 | Scaffold787 | 68151                   | AA                              | GG                | 1946621321               |
| SNP_P3_136589_68803 | NW_004516168.1 | Scaffold787 | 68803                   | TT                              | GG                | 1946621323               |
| SNP_P3_136590_69211 | NW_004516168.1 | Scaffold787 | 69211                   | GG                              | CC                | 1946621325               |

| SNPs IDs             | Chromosome IDs | Chromosomes | Physical positions (bp) | CDC Frontier (Reference genome) | (Pusa 256 & HPNB) | NCBI SNPdb Accession IDs |
|----------------------|----------------|-------------|-------------------------|---------------------------------|-------------------|--------------------------|
| SNP_P3_136591_69409  | NW_004516168.1 | Scaffold787 | 69409                   | AA                              | CC                | 1946621327               |
| SNP_P3_136592_69562  | NW_004516168.1 | Scaffold787 | 69562                   | AA                              | TT                | 1946621329               |
| SNP_P3_136593_69834  | NW_004516168.1 | Scaffold787 | 69834                   | AA                              | TT                | 1946621330               |
| SNP_P3_136594_69873  | NW_004516168.1 | Scaffold787 | 69873                   | TT                              | GG                | 1946621332               |
| SNP_P3_136595_70589  | NW_004516168.1 | Scaffold787 | 70589                   | GG                              | CC                | 1946621334               |
| SNP_P3_136596_74940  | NW_004516168.1 | Scaffold787 | 74940                   | CC                              | TT                | 1946621336               |
| SNP_P3_136597_75920  | NW_004516168.1 | Scaffold787 | 75920                   | TT                              | AA                | 1946621338               |
| SNP_P3_136599_75975  | NW_004516168.1 | Scaffold787 | 75975                   | CC                              | TT                | 1946621340               |
| SNP_P3_136600_76821  | NW_004516168.1 | Scaffold787 | 76821                   | CC                              | TT                | 1946621342               |
| SNP_P3_136601_77529  | NW_004516168.1 | Scaffold787 | 77529                   | CC                              | GG                | 1946621344               |
| SNP_P3_136602_78990  | NW_004516168.1 | Scaffold787 | 78990                   | AA                              | CC                | 1946621346               |
| SNP_P3_136603_79093  | NW_004516168.1 | Scaffold787 | 79093                   | AA                              | CC                | 1946621348               |
| SNP_P3_136604_79176  | NW_004516168.1 | Scaffold787 | 79176                   | TT                              | AA                | 1946621350               |
| SNP_P3_136605_79191  | NW_004516168.1 | Scaffold787 | 79191                   | TT                              | CC                | 1946621352               |
| SNP_P3_136606_79197  | NW_004516168.1 | Scaffold787 | 79197                   | AA                              | GG                | 1946621354               |
| SNP_P3_136607_79207  | NW_004516168.1 | Scaffold787 | 79207                   | CC                              | TT                | 1946621356               |
| SNP_P3_136608_79569  | NW_004516168.1 | Scaffold787 | 79569                   | CC                              | TT                | 1946621358               |
| SNP_P3_136609_87039  | NW_004516168.1 | Scaffold787 | 87039                   | AA                              | CC                | 1946621360               |
| SNP_P3_136610_90397  | NW_004516168.1 | Scaffold787 | 90397                   | AA                              | CC                | 1946621362               |
| SNP_P3_136611_91581  | NW_004516168.1 | Scaffold787 | 91581                   | GG                              | AA                | 1946621364               |
| SNP_P3_136612_91599  | NW_004516168.1 | Scaffold787 | 91599                   | GG                              | AA                | 1946621366               |
| SNP_P3_136613_91871  | NW_004516168.1 | Scaffold787 | 91871                   | GG                              | TT                | 1946621368               |
| SNP_P3_136614_92458  | NW_004516168.1 | Scaffold787 | 92458                   | AA                              | TT                | 1946621370               |
| SNP_P3_136616_92839  | NW_004516168.1 | Scaffold787 | 92839                   | GG                              | AA                | 1946621372               |
| SNP_P3_136617_94402  | NW_004516168.1 | Scaffold787 | 94402                   | AA                              | CC                | 1946621374               |
| SNP_P3_136618_94549  | NW_004516168.1 | Scaffold787 | 94549                   | GG                              | AA                | 1946621376               |
| SNP_P3_136619_96028  | NW_004516168.1 | Scaffold787 | 96028                   | GG                              | AA                | 1946621377               |
| SNP_P3_136620_96294  | NW_004516168.1 | Scaffold787 | 96294                   | AA                              | CC                | 1946621379               |
| SNP_P3_136621_102455 | NW_004516168.1 | Scaffold787 | 102455                  | CC                              | GG                | 1946621381               |
| SNP_P3_136622_102835 | NW_004516168.1 | Scaffold787 | 102835                  | CC                              | TT                | 1946621383               |
| SNP_P3_136623_104832 | NW_004516168.1 | Scaffold787 | 104832                  | AA                              | CC                | 1946621385               |
| SNP_P3_136624_104844 | NW_004516168.1 | Scaffold787 | 104844                  | TT                              | CC                | 1946621387               |
| SNP_P3_136625_104846 | NW_004516168.1 | Scaffold787 | 104846                  | TT                              | AA                | 1946621389               |
| SNP_P3_136626_104849 | NW_004516168.1 | Scaffold787 | 104849                  | TT                              | GG                | 1946621391               |
| SNP_P3_136627_104880 | NW_004516168.1 | Scaffold787 | 104880                  | AA                              | GG                | 1946621393               |
| SNP_P3_136628_104887 | NW_004516168.1 | Scaffold787 | 104887                  | TT                              | CC                | 1946621395               |
| SNP_P3_136629_104889 | NW_004516168.1 | Scaffold787 | 104889                  | AA                              | TT                | 1946621397               |
| SNP_P3_136630_108523 | NW_004516168.1 | Scaffold787 | 108523                  | GG                              | AA                | 1946621399               |
| SNP_P3_136631_108583 | NW_004516168.1 | Scaffold787 | 108583                  | TT                              | CC                | 1946621401               |
| SNP_P3_136632_108729 | NW_004516168.1 | Scaffold787 | 108729                  | AA                              | TT                | 1946621403               |
| SNP_P3_136633_108754 | NW_004516168.1 | Scaffold787 | 108754                  | GG                              | CC                | 1946621405               |
| SNP_P3_136634_109823 | NW_004516168.1 | Scaffold787 | 109823                  | AA                              | CC                | 1946621407               |

| SNPs IDs             | Chromosome IDs | Chromosomes | Physical positions (bp) | CDC Frontier (Reference genome) | (Pusa 256 & HPNB) | NCBI SNPdb Accession IDs |
|----------------------|----------------|-------------|-------------------------|---------------------------------|-------------------|--------------------------|
| SNP_P3_136635_111225 | NW_004516168.1 | Scaffold787 | 111225                  | GG                              | TT                | 1946621409               |
| SNP_P3_136636_111266 | NW_004516168.1 | Scaffold787 | 111266                  | CC                              | AA                | 1946621411               |
| SNP_P3_136637_111377 | NW_004516168.1 | Scaffold787 | 111377                  | AA                              | GG                | 1946621413               |
| SNP_P3_136638_111394 | NW_004516168.1 | Scaffold787 | 111394                  | GG                              | TT                | 1946621415               |
| SNP_P3_136639_112529 | NW_004516168.1 | Scaffold787 | 112529                  | CC                              | TT                | 1946621417               |
| SNP_P3_136640_113450 | NW_004516168.1 | Scaffold787 | 113450                  | AA                              | TT                | 1946621418               |
| SNP_P3_136641_113456 | NW_004516168.1 | Scaffold787 | 113456                  | CC                              | TT                | 1946621420               |
| SNP_P3_136642_113812 | NW_004516168.1 | Scaffold787 | 113812                  | GG                              | CC                | 1946621422               |
| SNP_P3_136643_113908 | NW_004516168.1 | Scaffold787 | 113908                  | TT                              | AA                | 1946621424               |
| SNP_P3_136644_125523 | NW_004516168.1 | Scaffold787 | 125523                  | AA                              | GG                | 1946621426               |
| SNP_P3_136645_126103 | NW_004516168.1 | Scaffold787 | 126103                  | GG                              | CC                | 1946621428               |
| SNP_P3_136646_128501 | NW_004516168.1 | Scaffold787 | 128501                  | TT                              | CC                | 1946621430               |
| SNP_P3_136649_131328 | NW_004516168.1 | Scaffold787 | 131328                  | CC                              | AA                | 1946621432               |
| SNP_P3_136651_132011 | NW_004516168.1 | Scaffold787 | 132011                  | GG                              | AA                | 1946621434               |
| SNP_P3_136652_141047 | NW_004516168.1 | Scaffold787 | 141047                  | CC                              | AA                | 1946621436               |
| SNP_P3_136654_147963 | NW_004516168.1 | Scaffold787 | 147963                  | GG                              | AA                | 1946621438               |
| SNP_P3_136655_149437 | NW_004516168.1 | Scaffold787 | 149437                  | TT                              | CC                | 1946621440               |
| SNP_P3_136656_149438 | NW_004516168.1 | Scaffold787 | 149438                  | TT                              | AA                | 1946621442               |
| SNP_P3_136657_149473 | NW_004516168.1 | Scaffold787 | 149473                  | AA                              | GG                | 1946621444               |
| SNP_P3_136659_149747 | NW_004516168.1 | Scaffold787 | 149747                  | GG                              | AA                | 1946621446               |
| SNP_P3_136660_149833 | NW_004516168.1 | Scaffold787 | 149833                  | GG                              | AA                | 1946621448               |
| SNP_P3_136661_149848 | NW_004516168.1 | Scaffold787 | 149848                  | TT                              | AA                | 1946621450               |
| SNP_P3_136662_151556 | NW_004516168.1 | Scaffold787 | 151556                  | AA                              | CC                | 1946621451               |
| SNP_P3_136663_154120 | NW_004516168.1 | Scaffold787 | 154120                  | CC                              | TT                | 1946621453               |
| SNP_P3_136664_155206 | NW_004516168.1 | Scaffold787 | 155206                  | GG                              | AA                | 1946621455               |
| SNP_P3_136665_237276 | NW_004516168.1 | Scaffold787 | 237276                  | CC                              | TT                | 1946621457               |
| SNP_P3_136667_272625 | NW_004516168.1 | Scaffold787 | 272625                  | AA                              | GG                | 1946621459               |
| SNP_P3_136668_272889 | NW_004516168.1 | Scaffold787 | 272889                  | AA                              | GG                | 1946621461               |
| SNP_P3_136669_272893 | NW_004516168.1 | Scaffold787 | 272893                  | AA                              | GG                | 1946621463               |
| SNP_P3_136670_272899 | NW_004516168.1 | Scaffold787 | 272899                  | TT                              | CC                | 1946621464               |
| SNP_P3_136671_272937 | NW_004516168.1 | Scaffold787 | 272937                  | TT                              | GG                | 1946621466               |
| SNP_P3_136672_273955 | NW_004516168.1 | Scaffold787 | 273955                  | GG                              | AA                | 1946621468               |
| SNP_P3_136673_274747 | NW_004516168.1 | Scaffold787 | 274747                  | TT                              | CC                | 1946621470               |
| SNP_P3_136674_275330 | NW_004516168.1 | Scaffold787 | 275330                  | GG                              | AA                | 1946621472               |
| SNP_P3_136675_281988 | NW_004516168.1 | Scaffold787 | 281988                  | GG                              | AA                | 1946621474               |
| SNP_P3_136676_282263 | NW_004516168.1 | Scaffold787 | 282263                  | GG                              | AA                | 1946621476               |
| SNP_P3_136677_284566 | NW_004516168.1 | Scaffold787 | 284566                  | TT                              | AA                | 1946621478               |
| SNP_P3_136678_285358 | NW_004516168.1 | Scaffold787 | 285358                  | AA                              | GG                | 1946621480               |
| SNP_P3_136680_287440 | NW_004516168.1 | Scaffold787 | 287440                  | CC                              | AA                | 1946621482               |
| SNP_P3_136681_292158 | NW_004516168.1 | Scaffold787 | 292158                  | GG                              | AA                | 1946621484               |
| SNP_P3_136683_294321 | NW_004516168.1 | Scaffold787 | 294321                  | GG                              | TT                | 1946621486               |
| SNP_P3_136684_299479 | NW_004516168.1 | Scaffold787 | 299479                  | CC                              | AA                | 1946621488               |

| SNPs IDs             | Chromosome IDs | Chromosomes | Physical positions (bp) | CDC Frontier (Reference genome) | (Pusa 256 & HPNB) | NCBI SNPdb Accession IDs |
|----------------------|----------------|-------------|-------------------------|---------------------------------|-------------------|--------------------------|
| SNP_P3_136685_304106 | NW_004516168.1 | Scaffold787 | 304106                  | GG                              | AA                | 1946621490               |
| SNP_P3_136686_304876 | NW_004516168.1 | Scaffold787 | 304876                  | GG                              | TT                | 1946621492               |
| SNP_P3_136687_305863 | NW_004516168.1 | Scaffold787 | 305863                  | AA                              | GG                | 1946621494               |
| SNP_P3_136688_306640 | NW_004516168.1 | Scaffold787 | 306640                  | CC                              | TT                | 1946621496               |
| SNP_P3_136689_306811 | NW_004516168.1 | Scaffold787 | 306811                  | AA                              | CC                | 1946621497               |
| SNP_P3_136690_306844 | NW_004516168.1 | Scaffold787 | 306844                  | AA                              | GG                | 1946621499               |
| SNP_P3_136691_307672 | NW_004516168.1 | Scaffold787 | 307672                  | CC                              | TT                | 1946621501               |
| SNP_P3_136692_309978 | NW_004516168.1 | Scaffold787 | 309978                  | TT                              | GG                | 1946621503               |
| SNP_P3_136693_312191 | NW_004516168.1 | Scaffold787 | 312191                  | TT                              | CC                | 1946621505               |
| SNP_P3_136694_315262 | NW_004516168.1 | Scaffold787 | 315262                  | CC                              | TT                | 1946621507               |
| SNP_P3_136695_315292 | NW_004516168.1 | Scaffold787 | 315292                  | CC                              | TT                | 1946621509               |
| SNP_P3_136696_315314 | NW_004516168.1 | Scaffold787 | 315314                  | GG                              | CC                | 1946621511               |
| SNP_P3_136697_316330 | NW_004516168.1 | Scaffold787 | 316330                  | AA                              | GG                | 1946621513               |
| SNP_P3_136698_318667 | NW_004516168.1 | Scaffold787 | 318667                  | TT                              | GG                | 1946621515               |
| SNP_P3_136699_318937 | NW_004516168.1 | Scaffold787 | 318937                  | GG                              | AA                | 1946621517               |
| SNP_P3_136700_319700 | NW_004516168.1 | Scaffold787 | 319700                  | TT                              | CC                | 1946621519               |
| SNP_P3_136701_319716 | NW_004516168.1 | Scaffold787 | 319716                  | GG                              | AA                | 1946621520               |
| SNP_P3_136702_322929 | NW_004516168.1 | Scaffold787 | 322929                  | CC                              | AA                | 1946621523               |
| SNP_P3_136703_327833 | NW_004516168.1 | Scaffold787 | 327833                  | CC                              | TT                | 1946621525               |
| SNP_P3_136704_333420 | NW_004516168.1 | Scaffold787 | 333420                  | CC                              | AA                | 1946621527               |
| SNP_P3_136705_334171 | NW_004516168.1 | Scaffold787 | 334171                  | GG                              | AA                | 1946621529               |
| SNP_P3_136707_337269 | NW_004516168.1 | Scaffold787 | 337269                  | GG                              | TT                | 1946621531               |
| SNP_P3_136709_340712 | NW_004516168.1 | Scaffold787 | 340712                  | AA                              | GG                | 1946621533               |
| SNP_P3_136711_346340 | NW_004516168.1 | Scaffold787 | 346340                  | AA                              | GG                | 1946621535               |
| SNP_P3_136713_353573 | NW_004516168.1 | Scaffold787 | 353573                  | CC                              | TT                | 1946621537               |
| SNP_P3_136714_356301 | NW_004516168.1 | Scaffold787 | 356301                  | AA                              | GG                | 1946621538               |
| SNP_P3_136715_356329 | NW_004516168.1 | Scaffold787 | 356329                  | CC                              | TT                | 1946621540               |
| SNP_P3_136716_359437 | NW_004516168.1 | Scaffold787 | 359437                  | GG                              | TT                | 1946621542               |
| SNP_P3_136718_359577 | NW_004516168.1 | Scaffold787 | 359577                  | GG                              | AA                | 1946621544               |
| SNP_P3_136719_363151 | NW_004516168.1 | Scaffold787 | 363151                  | AA                              | GG                | 1946621546               |
| SNP_P3_136720_363152 | NW_004516168.1 | Scaffold787 | 363152                  | CC                              | AA                | 1946621548               |
| SNP_P3_136721_363503 | NW_004516168.1 | Scaffold787 | 363503                  | AA                              | GG                | 1946621550               |
| SNP_P3_136722_365142 | NW_004516168.1 | Scaffold787 | 365142                  | CC                              | TT                | 1946621552               |
| SNP_P3_136724_397437 | NW_004516168.1 | Scaffold787 | 397437                  | TT                              | GG                | 1946621554               |
| SNP_P3_136725_399113 | NW_004516168.1 | Scaffold787 | 399113                  | TT                              | AA                | 1946621556               |
| SNP_P3_136726_399371 | NW_004516168.1 | Scaffold787 | 399371                  | TT                              | CC                | 1946621558               |
| SNP_P3_136728_399705 | NW_004516168.1 | Scaffold787 | 399705                  | AA                              | GG                | 1946621560               |
| SNP_P3_136729_405354 | NW_004516168.1 | Scaffold787 | 405354                  | AA                              | TT                | 1946621562               |
| SNP_P3_136730_405545 | NW_004516168.1 | Scaffold787 | 405545                  | TT                              | CC                | 1946621564               |
| SNP_P3_136731_405553 | NW_004516168.1 | Scaffold787 | 405553                  | TT                              | CC                | 1946621566               |
| SNP_P3_136732_406021 | NW_004516168.1 | Scaffold787 | 406021                  | CC                              | TT                | 1946621568               |
| SNP_P3_136733_408181 | NW_004516168.1 | Scaffold787 | 408181                  | GG                              | CC                | 1946621570               |

| SNPs IDs             | Chromosome IDs | Chromosomes | Physical positions (bp) | CDC Frontier (Reference genome) | (Pusa 256 & HPNB) | NCBI SNPdb Accession IDs |
|----------------------|----------------|-------------|-------------------------|---------------------------------|-------------------|--------------------------|
| SNP_P3_136734_410087 | NW_004516168.1 | Scaffold787 | 410087                  | GG                              | AA                | 1946621572               |
| SNP_P3_136735_413027 | NW_004516168.1 | Scaffold787 | 413027                  | AA                              | GG                | 1946621574               |
| SNP_P3_136736_434197 | NW_004516168.1 | Scaffold787 | 434197                  | TT                              | AA                | 1946621581               |
| SNP_P3_136737_434859 | NW_004516168.1 | Scaffold787 | 434859                  | GG                              | CC                | 1946621583               |
| SNP_P3_136738_434922 | NW_004516168.1 | Scaffold787 | 434922                  | TT                              | GG                | 1946621585               |
| SNP_P3_136740_446622 | NW_004516168.1 | Scaffold787 | 446622                  | TT                              | GG                | 1946621587               |
| SNP_P3_136741_449193 | NW_004516168.1 | Scaffold787 | 449193                  | AA                              | CC                | 1946621589               |
| SNP_P3_136742_450434 | NW_004516168.1 | Scaffold787 | 450434                  | AA                              | GG                | 1946621591               |
| SNP_P3_136743_459642 | NW_004516168.1 | Scaffold787 | 459642                  | AA                              | GG                | 1946621593               |
| SNP_P3_136744_460119 | NW_004516168.1 | Scaffold787 | 460119                  | AA                              | GG                | 1946621596               |
| SNP_P3_136745_460171 | NW_004516168.1 | Scaffold787 | 460171                  | GG                              | AA                | 1946621598               |
| SNP_P3_136746_460205 | NW_004516168.1 | Scaffold787 | 460205                  | GG                              | AA                | 1946621600               |
| SNP_P3_136747_460249 | NW_004516168.1 | Scaffold787 | 460249                  | CC                              | AA                | 1946621602               |
| SNP_P3_136748_460259 | NW_004516168.1 | Scaffold787 | 460259                  | TT                              | CC                | 1946621604               |
| SNP_P3_136749_460367 | NW_004516168.1 | Scaffold787 | 460367                  | AA                              | TT                | 1946621606               |
| SNP_P3_136750_460382 | NW_004516168.1 | Scaffold787 | 460382                  | TT                              | AA                | 1946621608               |
| SNP_P3_136751_460406 | NW_004516168.1 | Scaffold787 | 460406                  | GG                              | AA                | 1946621610               |
| SNP_P3_136752_460455 | NW_004516168.1 | Scaffold787 | 460455                  | AA                              | TT                | 1946621612               |
| SNP_P3_136753_460579 | NW_004516168.1 | Scaffold787 | 460579                  | TT                              | CC                | 1946621614               |
| SNP_P3_136754_460580 | NW_004516168.1 | Scaffold787 | 460580                  | TT                              | CC                | 1946621616               |
| SNP_P3_136756_461586 | NW_004516168.1 | Scaffold787 | 461586                  | GG                              | AA                | 1946621618               |
| SNP_P3_136757_461959 | NW_004516168.1 | Scaffold787 | 461959                  | TT                              | CC                | 1946621620               |
| SNP_P3_136758_462525 | NW_004516168.1 | Scaffold787 | 462525                  | GG                              | AA                | 1946621622               |
| SNP_P3_136759_462556 | NW_004516168.1 | Scaffold787 | 462556                  | AA                              | GG                | 1946621624               |
| SNP_P3_136761_463282 | NW_004516168.1 | Scaffold787 | 463282                  | CC                              | TT                | 1946621626               |
| SNP_P3_136762_464295 | NW_004516168.1 | Scaffold787 | 464295                  | AA                              | TT                | 1946621628               |
| SNP_P3_136763_464800 | NW_004516168.1 | Scaffold787 | 464800                  | GG                              | AA                | 1946621630               |
| SNP_P3_136764_465633 | NW_004516168.1 | Scaffold787 | 465633                  | GG                              | AA                | 1946621632               |
| SNP_P3_136765_466544 | NW_004516168.1 | Scaffold787 | 466544                  | AA                              | TT                | 1946621634               |
| SNP_P3_136766_469377 | NW_004516168.1 | Scaffold787 | 469377                  | AA                              | GG                | 1946621636               |
| SNP_P3_136767_469378 | NW_004516168.1 | Scaffold787 | 469378                  | CC                              | TT                | 1946621638               |
| SNP_P3_136769_469442 | NW_004516168.1 | Scaffold787 | 469442                  | CC                              | TT                | 1946621640               |
| SNP_P3_136770_469588 | NW_004516168.1 | Scaffold787 | 469588                  | CC                              | GG                | 1946621642               |
| SNP_P3_136771_469683 | NW_004516168.1 | Scaffold787 | 469683                  | CC                              | TT                | 1946621644               |
| SNP_P3_136772_469768 | NW_004516168.1 | Scaffold787 | 469768                  | GG                              | AA                | 1946621646               |
| SNP_P3_136773_470152 | NW_004516168.1 | Scaffold787 | 470152                  | CC                              | AA                | 1946621648               |
| SNP_P3_136774_470156 | NW_004516168.1 | Scaffold787 | 470156                  | AA                              | GG                | 1946621650               |
| SNP_P3_136776_2377   | NW_004516169.1 | Scaffold789 | 2377                    | AA                              | GG                | 1946621652               |
| SNP_P3_136778_8993   | NW_004516169.1 | Scaffold789 | 8993                    | GG                              | AA                | 1946621654               |
| SNP_P3_136779_13761  | NW_004516169.1 | Scaffold789 | 13761                   | TT                              | GG                | 1946621656               |
| SNP_P3_136780_13771  | NW_004516169.1 | Scaffold789 | 13771                   | TT                              | CC                | 1946621658               |
| SNP_P3_136781_13799  | NW_004516169.1 | Scaffold789 | 13799                   | AA                              | GG                | 1946621660               |

| SNPs IDs            | Chromosome IDs | Chromosomes | Physical positions (bp) | CDC Frontier (Reference genome) | (Pusa 256 & HPNB) | NCBI SNPdb Accession IDs |
|---------------------|----------------|-------------|-------------------------|---------------------------------|-------------------|--------------------------|
| SNP_P3_136782_13833 | NW_004516169.1 | Scaffold789 | 13833                   | AA                              | GG                | 1946621662               |
| SNP_P3_136783_13872 | NW_004516169.1 | Scaffold789 | 13872                   | CC                              | TT                | 1946621664               |
| SNP_P3_136784_13904 | NW_004516169.1 | Scaffold789 | 13904                   | TT                              | GG                | 1946621666               |
| SNP_P3_136785_13954 | NW_004516169.1 | Scaffold789 | 13954                   | GG                              | AA                | 1946621668               |
| SNP_P3_136786_14115 | NW_004516169.1 | Scaffold789 | 14115                   | AA                              | CC                | 1946621670               |
| SNP_P3_136787_14171 | NW_004516169.1 | Scaffold789 | 14171                   | TT                              | CC                | 1946621672               |
| SNP_P3_136788_14248 | NW_004516169.1 | Scaffold789 | 14248                   | GG                              | AA                | 1946621674               |
| SNP_P3_136789_17323 | NW_004516169.1 | Scaffold789 | 17323                   | TT                              | CC                | 1946621676               |
| SNP_P3_136790_17599 | NW_004516169.1 | Scaffold789 | 17599                   | TT                              | CC                | 1946621678               |
| SNP_P3_136791_17643 | NW_004516169.1 | Scaffold789 | 17643                   | CC                              | GG                | 1946621680               |
| SNP_P3_136792_17652 | NW_004516169.1 | Scaffold789 | 17652                   | TT                              | GG                | 1946621682               |
| SNP_P3_136793_17693 | NW_004516169.1 | Scaffold789 | 17693                   | AA                              | TT                | 1946621684               |
| SNP_P3_136794_23121 | NW_004516169.1 | Scaffold789 | 23121                   | GG                              | TT                | 1946621686               |
| SNP_P3_136795_24351 | NW_004516169.1 | Scaffold789 | 24351                   | TT                              | AA                | 1946621688               |
| SNP_P3_136796_26824 | NW_004516169.1 | Scaffold789 | 26824                   | AA                              | GG                | 1946621690               |
| SNP_P3_136797_26855 | NW_004516169.1 | Scaffold789 | 26855                   | TT                              | GG                | 1946621692               |
| SNP_P3_136798_28580 | NW_004516169.1 | Scaffold789 | 28580                   | TT                              | GG                | 1946621694               |
| SNP_P3_136799_34099 | NW_004516169.1 | Scaffold789 | 34099                   | CC                              | TT                | 1946621696               |
| SNP_P3_136800_34112 | NW_004516169.1 | Scaffold789 | 34112                   | GG                              | AA                | 1946621698               |
| SNP_P3_136801_34121 | NW_004516169.1 | Scaffold789 | 34121                   | AA                              | TT                | 1946621700               |
| SNP_P3_136802_34192 | NW_004516169.1 | Scaffold789 | 34192                   | TT                              | GG                | 1946621702               |
| SNP_P3_136803_35039 | NW_004516169.1 | Scaffold789 | 35039                   | TT                              | AA                | 1946621703               |
| SNP_P3_136804_35040 | NW_004516169.1 | Scaffold789 | 35040                   | TT                              | CC                | 1946621705               |
| SNP_P3_136805_41275 | NW_004516169.1 | Scaffold789 | 41275                   | GG                              | TT                | 1946621707               |
| SNP_P3_136806_41794 | NW_004516169.1 | Scaffold789 | 41794                   | TT                              | CC                | 1946621709               |
| SNP_P3_136807_41807 | NW_004516169.1 | Scaffold789 | 41807                   | AA                              | GG                | 1946621711               |
| SNP_P3_136808_42170 | NW_004516169.1 | Scaffold789 | 42170                   | TT                              | AA                | 1946621713               |
| SNP_P3_136809_42201 | NW_004516169.1 | Scaffold789 | 42201                   | GG                              | CC                | 1946621715               |
| SNP_P3_136810_42278 | NW_004516169.1 | Scaffold789 | 42278                   | CC                              | TT                | 1946621717               |
| SNP_P3_136811_42289 | NW_004516169.1 | Scaffold789 | 42289                   | CC                              | TT                | 1946621719               |
| SNP_P3_136812_62993 | NW_004516169.1 | Scaffold789 | 62993                   | TT                              | AA                | 1946621721               |
| SNP_P3_136813_62994 | NW_004516169.1 | Scaffold789 | 62994                   | CC                              | TT                | 1946621723               |
| SNP_P3_136814_63474 | NW_004516169.1 | Scaffold789 | 63474                   | CC                              | TT                | 1946621725               |
| SNP_P3_136815_63478 | NW_004516169.1 | Scaffold789 | 63478                   | AA                              | CC                | 1946621727               |
| SNP_P3_136816_63485 | NW_004516169.1 | Scaffold789 | 63485                   | TT                              | AA                | 1946621729               |
| SNP_P3_136818_35894 | NW_004516170.1 | Scaffold793 | 35894                   | CC                              | TT                | 1946621731               |
| SNP_P3_136819_38998 | NW_004516170.1 | Scaffold793 | 38998                   | TT                              | AA                | 1946621733               |
| SNP_P3_136820_39007 | NW_004516170.1 | Scaffold793 | 39007                   | TT                              | GG                | 1946621735               |
| SNP_P3_136821_39055 | NW_004516170.1 | Scaffold793 | 39055                   | CC                              | AA                | 1946621736               |
| SNP_P3_136822_39105 | NW_004516170.1 | Scaffold793 | 39105                   | TT                              | AA                | 1946621738               |
| SNP_P3_136823_39145 | NW_004516170.1 | Scaffold793 | 39145                   | CC                              | TT                | 1946621740               |
| SNP_P3_136824_39298 | NW_004516170.1 | Scaffold793 | 39298                   | AA                              | GG                | 1946621742               |

| SNPs IDs             | Chromosome IDs | Chromosomes | Physical positions (bp) | CDC Frontier (Reference genome) | (Pusa 256 & HPNB) | NCBI SNPdb Accession IDs |
|----------------------|----------------|-------------|-------------------------|---------------------------------|-------------------|--------------------------|
| SNP_P3_136825_39305  | NW_004516170.1 | Scaffold793 | 39305                   | CC                              | TT                | 1946621744               |
| SNP_P3_136826_39379  | NW_004516170.1 | Scaffold793 | 39379                   | TT                              | CC                | 1946621746               |
| SNP_P3_136827_56923  | NW_004516170.1 | Scaffold793 | 56923                   | GG                              | AA                | 1946621748               |
| SNP_P3_136828_57056  | NW_004516170.1 | Scaffold793 | 57056                   | CC                              | TT                | 1946621750               |
| SNP_P3_136829_78609  | NW_004516170.1 | Scaffold793 | 78609                   | CC                              | TT                | 1946621752               |
| SNP_P3_136830_78610  | NW_004516170.1 | Scaffold793 | 78610                   | AA                              | GG                | 1946621754               |
| SNP_P3_136831_78626  | NW_004516170.1 | Scaffold793 | 78626                   | TT                              | AA                | 1946621756               |
| SNP_P3_136832_87374  | NW_004516170.1 | Scaffold793 | 87374                   | TT                              | CC                | 1946621758               |
| SNP_P3_136833_87478  | NW_004516170.1 | Scaffold793 | 87478                   | TT                              | AA                | 1946621760               |
| SNP_P3_136834_88215  | NW_004516170.1 | Scaffold793 | 88215                   | GG                              | AA                | 1946621762               |
| SNP_P3_136835_94159  | NW_004516170.1 | Scaffold793 | 94159                   | GG                              | AA                | 1946621764               |
| SNP_P3_136836_94294  | NW_004516170.1 | Scaffold793 | 94294                   | AA                              | GG                | 1946621766               |
| SNP_P3_136837_101573 | NW_004516170.1 | Scaffold793 | 101573                  | AA                              | GG                | 1946621768               |
| SNP_P3_136838_101575 | NW_004516170.1 | Scaffold793 | 101575                  | TT                              | CC                | 1946621770               |
| SNP_P3_136839_101814 | NW_004516170.1 | Scaffold793 | 101814                  | TT                              | CC                | 1946621772               |
| SNP_P3_136840_101816 | NW_004516170.1 | Scaffold793 | 101816                  | GG                              | AA                | 1946621774               |
| SNP_P3_136841_101834 | NW_004516170.1 | Scaffold793 | 101834                  | CC                              | TT                | 1946621776               |
| SNP_P3_136842_103841 | NW_004516170.1 | Scaffold793 | 103841                  | TT                              | AA                | 1946621777               |
| SNP_P3_136843_107854 | NW_004516170.1 | Scaffold793 | 107854                  | AA                              | CC                | 1946621779               |
| SNP_P3_136844_108112 | NW_004516170.1 | Scaffold793 | 108112                  | AA                              | GG                | 1946621781               |
| SNP_P3_136845_108131 | NW_004516170.1 | Scaffold793 | 108131                  | TT                              | CC                | 1946621783               |
| SNP_P3_136846_108277 | NW_004516170.1 | Scaffold793 | 108277                  | AA                              | TT                | 1946621785               |
| SNP_P3_136847_108285 | NW_004516170.1 | Scaffold793 | 108285                  | GG                              | AA                | 1946621787               |
| SNP_P3_136848_108438 | NW_004516170.1 | Scaffold793 | 108438                  | TT                              | CC                | 1946621789               |
| SNP_P3_136849_108447 | NW_004516170.1 | Scaffold793 | 108447                  | CC                              | TT                | 1946621791               |
| SNP_P3_136850_126954 | NW_004516170.1 | Scaffold793 | 126954                  | AA                              | TT                | 1946621793               |
| SNP_P3_136851_127110 | NW_004516170.1 | Scaffold793 | 127110                  | TT                              | CC                | 1946621795               |
| SNP_P3_136852_127181 | NW_004516170.1 | Scaffold793 | 127181                  | GG                              | AA                | 1946621797               |
| SNP_P3_136853_127185 | NW_004516170.1 | Scaffold793 | 127185                  | AA                              | TT                | 1946621799               |
| SNP_P3_136854_127239 | NW_004516170.1 | Scaffold793 | 127239                  | TT                              | CC                | 1946621802               |
| SNP_P3_136855_127461 | NW_004516170.1 | Scaffold793 | 127461                  | TT                              | AA                | 1946621804               |
| SNP_P3_136856_127559 | NW_004516170.1 | Scaffold793 | 127559                  | CC                              | TT                | 1946621806               |
| SNP_P3_136857_128215 | NW_004516170.1 | Scaffold793 | 128215                  | GG                              | AA                | 1946621808               |
| SNP_P3_136858_128327 | NW_004516170.1 | Scaffold793 | 128327                  | GG                              | CC                | 1946621810               |
| SNP_P3_136859_128331 | NW_004516170.1 | Scaffold793 | 128331                  | AA                              | GG                | 1946621812               |
| SNP_P3_136860_128386 | NW_004516170.1 | Scaffold793 | 128386                  | TT                              | CC                | 1946621814               |
| SNP_P3_136861_152784 | NW_004516170.1 | Scaffold793 | 152784                  | CC                              | TT                | 1946621816               |
| SNP_P3_136862_158258 | NW_004516170.1 | Scaffold793 | 158258                  | AA                              | GG                | 1946621818               |
| SNP_P3_136863_158259 | NW_004516170.1 | Scaffold793 | 158259                  | TT                              | AA                | 1946621820               |
| SNP_P3_136864_158298 | NW_004516170.1 | Scaffold793 | 158298                  | AA                              | GG                | 1946621822               |
| SNP_P3_136865_172745 | NW_004516170.1 | Scaffold793 | 172745                  | AA                              | GG                | 1946621824               |
| SNP_P3_136866_178633 | NW_004516170.1 | Scaffold793 | 178633                  | TT                              | CC                | 1946621826               |



| SNPs IDs             | Chromosome IDs | Chromosomes | Physical positions (bp) | CDC Frontier (Reference genome) | (Pusa 256 & HPNB) | NCBI SNPdb Accession IDs |
|----------------------|----------------|-------------|-------------------------|---------------------------------|-------------------|--------------------------|
| SNP_P3_136867_184951 | NW_004516170.1 | Scaffold793 | 184951                  | TT                              | AA                | 1946621828               |
| SNP_P3_136868_192634 | NW_004516170.1 | Scaffold793 | 192634                  | CC                              | TT                | 1946621830               |
| SNP_P3_136869_193099 | NW_004516170.1 | Scaffold793 | 193099                  | AA                              | GG                | 1946621832               |
| SNP_P3_136870_193158 | NW_004516170.1 | Scaffold793 | 193158                  | TT                              | CC                | 1946621834               |
| SNP_P3_136871_194190 | NW_004516170.1 | Scaffold793 | 194190                  | CC                              | TT                | 1946621836               |
| SNP_P3_136872_194270 | NW_004516170.1 | Scaffold793 | 194270                  | CC                              | TT                | 1946621838               |
| SNP_P3_136873_194271 | NW_004516170.1 | Scaffold793 | 194271                  | AA                              | CC                | 1946621840               |
| SNP_P3_136874_194289 | NW_004516170.1 | Scaffold793 | 194289                  | TT                              | CC                | 1946621843               |
| SNP_P3_136875_194294 | NW_004516170.1 | Scaffold793 | 194294                  | AA                              | TT                | 1946621845               |
| SNP_P3_136876_194301 | NW_004516170.1 | Scaffold793 | 194301                  | TT                              | CC                | 1946621847               |
| SNP_P3_136877_194355 | NW_004516170.1 | Scaffold793 | 194355                  | CC                              | TT                | 1946621849               |
| SNP_P3_136878_194357 | NW_004516170.1 | Scaffold793 | 194357                  | AA                              | GG                | 1946621851               |
| SNP_P3_136879_194362 | NW_004516170.1 | Scaffold793 | 194362                  | AA                              | GG                | 1946621853               |
| SNP_P3_136881_248509 | NW_004516170.1 | Scaffold793 | 248509                  | CC                              | GG                | 1946621854               |
| SNP_P3_136885_59960  | NW_004516171.1 | Scaffold794 | 59960                   | AA                              | GG                | 1946621855               |
| SNP_P3_136886_79649  | NW_004516171.1 | Scaffold794 | 79649                   | TT                              | CC                | 1946621857               |
| SNP_P3_136887_128389 | NW_004516171.1 | Scaffold794 | 128389                  | TT                              | AA                | 1946621859               |
| SNP_P3_136888_137091 | NW_004516171.1 | Scaffold794 | 137091                  | AA                              | TT                | 1946621861               |
| SNP_P3_136889_137778 | NW_004516171.1 | Scaffold794 | 137778                  | TT                              | CC                | 1946621863               |
| SNP_P3_136890_137917 | NW_004516171.1 | Scaffold794 | 137917                  | CC                              | TT                | 1946621865               |
| SNP_P3_136891_137943 | NW_004516171.1 | Scaffold794 | 137943                  | TT                              | CC                | 1946621867               |
| SNP_P3_136892_138064 | NW_004516171.1 | Scaffold794 | 138064                  | GG                              | CC                | 1946621869               |
| SNP_P3_136893_138126 | NW_004516171.1 | Scaffold794 | 138126                  | GG                              | AA                | 1946621871               |
| SNP_P3_136895_138149 | NW_004516171.1 | Scaffold794 | 138149                  | GG                              | AA                | 1946621872               |
| SNP_P3_136896_138195 | NW_004516171.1 | Scaffold794 | 138195                  | TT                              | CC                | 1946621874               |
| SNP_P3_136897_138215 | NW_004516171.1 | Scaffold794 | 138215                  | GG                              | AA                | 1946621876               |
| SNP_P3_136898_138281 | NW_004516171.1 | Scaffold794 | 138281                  | TT                              | CC                | 1946621877               |
| SNP_P3_136899_138338 | NW_004516171.1 | Scaffold794 | 138338                  | TT                              | CC                | 1946621878               |
| SNP_P3_136900_138367 | NW_004516171.1 | Scaffold794 | 138367                  | GG                              | AA                | 1946621879               |
| SNP_P3_136901_138370 | NW_004516171.1 | Scaffold794 | 138370                  | GG                              | AA                | 1946621880               |
| SNP_P3_136902_138445 | NW_004516171.1 | Scaffold794 | 138445                  | GG                              | CC                | 1946621882               |
| SNP_P3_136903_138502 | NW_004516171.1 | Scaffold794 | 138502                  | TT                              | GG                | 1946621883               |
| SNP_P3_136904_138532 | NW_004516171.1 | Scaffold794 | 138532                  | CC                              | TT                | 1946621884               |
| SNP_P3_136905_138548 | NW_004516171.1 | Scaffold794 | 138548                  | CC                              | TT                | 1946621885               |
| SNP_P3_136906_138562 | NW_004516171.1 | Scaffold794 | 138562                  | TT                              | CC                | 1946621886               |
| SNP_P3_136907_138587 | NW_004516171.1 | Scaffold794 | 138587                  | GG                              | TT                | 1946621887               |
| SNP_P3_136908_138611 | NW_004516171.1 | Scaffold794 | 138611                  | AA                              | TT                | 1946621888               |
| SNP_P3_136909_138626 | NW_004516171.1 | Scaffold794 | 138626                  | CC                              | TT                | 1946621889               |
| SNP_P3_136911_139656 | NW_004516171.1 | Scaffold794 | 139656                  | GG                              | CC                | 1946621891               |
| SNP_P3_136912_139667 | NW_004516171.1 | Scaffold794 | 139667                  | CC                              | AA                | 1946621892               |
| SNP_P3_136913_139672 | NW_004516171.1 | Scaffold794 | 139672                  | AA                              | GG                | 1946621893               |
| SNP_P3_136914_159916 | NW_004516171.1 | Scaffold794 | 159916                  | AA                              | GG                | 1946621894               |

| SNPs IDs             | Chromosome IDs | Chromosomes | Physical positions (bp) | CDC Frontier (Reference genome) | (Pusa 256 & HPNB) | NCBI SNPdb Accession IDs |
|----------------------|----------------|-------------|-------------------------|---------------------------------|-------------------|--------------------------|
| SNP_P3_136915_168960 | NW_004516171.1 | Scaffold794 | 168960                  | AA                              | GG                | 1946621895               |
| SNP_P3_136916_168977 | NW_004516171.1 | Scaffold794 | 168977                  | CC                              | TT                | 1946621896               |
| SNP_P3_136917_169062 | NW_004516171.1 | Scaffold794 | 169062                  | TT                              | AA                | 1946621898               |
| SNP_P3_136918_169269 | NW_004516171.1 | Scaffold794 | 169269                  | AA                              | GG                | 1946621900               |
| SNP_P3_136919_169281 | NW_004516171.1 | Scaffold794 | 169281                  | AA                              | GG                | 1946621902               |
| SNP_P3_136920_169354 | NW_004516171.1 | Scaffold794 | 169354                  | AA                              | CC                | 1946621904               |
| SNP_P3_136921_169376 | NW_004516171.1 | Scaffold794 | 169376                  | AA                              | CC                | 1946621905               |
| SNP_P3_136922_169415 | NW_004516171.1 | Scaffold794 | 169415                  | GG                              | TT                | 1946621907               |
| SNP_P3_136923_194866 | NW_004516171.1 | Scaffold794 | 194866                  | CC                              | TT                | 1946621909               |
| SNP_P3_136924_194868 | NW_004516171.1 | Scaffold794 | 194868                  | TT                              | GG                | 1946621912               |
| SNP_P3_136925_194916 | NW_004516171.1 | Scaffold794 | 194916                  | AA                              | TT                | 1946621914               |
| SNP_P3_136926_197088 | NW_004516171.1 | Scaffold794 | 197088                  | TT                              | CC                | 1946621916               |
| SNP_P3_136927_197102 | NW_004516171.1 | Scaffold794 | 197102                  | TT                              | AA                | 1946621918               |
| SNP_P3_136928_197204 | NW_004516171.1 | Scaffold794 | 197204                  | AA                              | GG                | 1946621920               |
| SNP_P3_136929_197216 | NW_004516171.1 | Scaffold794 | 197216                  | GG                              | CC                | 1946621922               |
| SNP_P3_136930_197289 | NW_004516171.1 | Scaffold794 | 197289                  | CC                              | AA                | 1946621924               |
| SNP_P3_136931_197312 | NW_004516171.1 | Scaffold794 | 197312                  | CC                              | AA                | 1946621926               |
| SNP_P3_136932_197398 | NW_004516171.1 | Scaffold794 | 197398                  | CC                              | TT                | 1946621928               |
| SNP_P3_136933_206209 | NW_004516171.1 | Scaffold794 | 206209                  | TT                              | AA                | 1946621930               |
| SNP_P3_136935_206230 | NW_004516171.1 | Scaffold794 | 206230                  | AA                              | CC                | 1946621932               |
| SNP_P3_136936_210176 | NW_004516171.1 | Scaffold794 | 210176                  | CC                              | TT                | 1946621934               |
| SNP_P3_136937_210207 | NW_004516171.1 | Scaffold794 | 210207                  | AA                              | TT                | 1946621936               |
| SNP_P3_136938_218191 | NW_004516171.1 | Scaffold794 | 218191                  | CC                              | TT                | 1946621938               |
| SNP_P3_136939_220540 | NW_004516171.1 | Scaffold794 | 220540                  | TT                              | AA                | 1946621940               |
| SNP_P3_136940_221870 | NW_004516171.1 | Scaffold794 | 221870                  | TT                              | CC                | 1946621942               |
| SNP_P3_136941_225992 | NW_004516171.1 | Scaffold794 | 225992                  | CC                              | AA                | 1946621944               |
| SNP_P3_136942_225995 | NW_004516171.1 | Scaffold794 | 225995                  | TT                              | AA                | 1946621946               |
| SNP_P3_136943_226215 | NW_004516171.1 | Scaffold794 | 226215                  | AA                              | TT                | 1946621948               |
| SNP_P3_136944_243190 | NW_004516171.1 | Scaffold794 | 243190                  | GG                              | TT                | 1946621950               |
| SNP_P3_136945_243192 | NW_004516171.1 | Scaffold794 | 243192                  | TT                              | GG                | 1946621951               |
| SNP_P3_136946_243264 | NW_004516171.1 | Scaffold794 | 243264                  | TT                              | AA                | 1946621953               |
| SNP_P3_136947_243286 | NW_004516171.1 | Scaffold794 | 243286                  | CC                              | AA                | 1946621955               |
| SNP_P3_136948_243289 | NW_004516171.1 | Scaffold794 | 243289                  | GG                              | TT                | 1946621957               |
| SNP_P3_136949_243514 | NW_004516171.1 | Scaffold794 | 243514                  | TT                              | GG                | 1946621959               |
| SNP_P3_136950_243586 | NW_004516171.1 | Scaffold794 | 243586                  | GG                              | CC                | 1946621961               |
| SNP_P3_136951_243699 | NW_004516171.1 | Scaffold794 | 243699                  | CC                              | AA                | 1946621963               |
| SNP_P3_136952_243814 | NW_004516171.1 | Scaffold794 | 243814                  | AA                              | GG                | 1946621965               |
| SNP_P3_136953_243980 | NW_004516171.1 | Scaffold794 | 243980                  | GG                              | AA                | 1946621967               |
| SNP_P3_136954_243991 | NW_004516171.1 | Scaffold794 | 243991                  | AA                              | TT                | 1946621969               |
| SNP_P3_136955_244328 | NW_004516171.1 | Scaffold794 | 244328                  | CC                              | AA                | 1946621971               |
| SNP_P3_136956_245235 | NW_004516171.1 | Scaffold794 | 245235                  | TT                              | CC                | 1946621973               |
| SNP_P3_136957_245250 | NW_004516171.1 | Scaffold794 | 245250                  | CC                              | AA                | 1946621975               |

| SNPs IDs             | Chromosome IDs | Chromosomes | Physical positions (bp) | CDC Frontier (Reference genome) | (Pusa 256 & HPNB) | NCBI SNPdb Accession IDs |
|----------------------|----------------|-------------|-------------------------|---------------------------------|-------------------|--------------------------|
| SNP_P3_136958_245539 | NW_004516171.1 | Scaffold794 | 245539                  | TT                              | GG                | 1946621976               |
| SNP_P3_136959_245686 | NW_004516171.1 | Scaffold794 | 245686                  | AA                              | GG                | 1946621977               |
| SNP_P3_136960_245696 | NW_004516171.1 | Scaffold794 | 245696                  | TT                              | CC                | 1946621978               |
| SNP_P3_136961_245698 | NW_004516171.1 | Scaffold794 | 245698                  | CC                              | AA                | 1946621980               |
| SNP_P3_136962_245902 | NW_004516171.1 | Scaffold794 | 245902                  | GG                              | AA                | 1946621982               |
| SNP_P3_136963_245989 | NW_004516171.1 | Scaffold794 | 245989                  | AA                              | TT                | 1946621984               |
| SNP_P3_136964_246022 | NW_004516171.1 | Scaffold794 | 246022                  | CC                              | TT                | 1946621987               |
| SNP_P3_136965_252293 | NW_004516171.1 | Scaffold794 | 252293                  | GG                              | AA                | 1946621989               |
| SNP_P3_136966_258826 | NW_004516171.1 | Scaffold794 | 258826                  | AA                              | CC                | 1946621991               |
| SNP_P3_136967_258829 | NW_004516171.1 | Scaffold794 | 258829                  | CC                              | TT                | 1946621993               |
| SNP_P3_136968_258973 | NW_004516171.1 | Scaffold794 | 258973                  | AA                              | GG                | 1946621995               |
| SNP_P3_136969_259238 | NW_004516171.1 | Scaffold794 | 259238                  | AA                              | GG                | 1946621997               |
| SNP_P3_136970_259352 | NW_004516171.1 | Scaffold794 | 259352                  | AA                              | GG                | 1946621999               |
| SNP_P3_136971_7349   | NW_004516173.1 | Scaffold796 | 7349                    | TT                              | AA                | 1946622001               |
| SNP_P3_136972_7387   | NW_004516173.1 | Scaffold796 | 7387                    | AA                              | GG                | 1946622003               |
| SNP_P3_136973_7407   | NW_004516173.1 | Scaffold796 | 7407                    | TT                              | GG                | 1946622005               |
| SNP_P3_136974_7536   | NW_004516173.1 | Scaffold796 | 7536                    | TT                              | CC                | 1946622007               |
| SNP_P3_136975_11471  | NW_004516173.1 | Scaffold796 | 11471                   | CC                              | TT                | 1946622009               |
| SNP_P3_136977_16076  | NW_004516173.1 | Scaffold796 | 16076                   | AA                              | TT                | 1946622011               |
| SNP_P3_136978_17749  | NW_004516173.1 | Scaffold796 | 17749                   | AA                              | TT                | 1946622012               |
| SNP_P3_136979_18116  | NW_004516173.1 | Scaffold796 | 18116                   | TT                              | GG                | 1946622013               |
| SNP_P3_136980_22604  | NW_004516173.1 | Scaffold796 | 22604                   | GG                              | TT                | 1946622014               |
| SNP_P3_136982_32576  | NW_004516173.1 | Scaffold796 | 32576                   | GG                              | CC                | 1946622016               |
| SNP_P3_136983_32952  | NW_004516173.1 | Scaffold796 | 32952                   | CC                              | AA                | 1946622017               |
| SNP_P3_136984_902    | NW_004516174.1 | Scaffold797 | 902                     | CC                              | TT                | 1946622018               |
| SNP_P3_136985_8935   | NW_004516174.1 | Scaffold797 | 8935                    | CC                              | TT                | 1946622019               |
| SNP_P3_136986_8952   | NW_004516174.1 | Scaffold797 | 8952                    | TT                              | GG                | 1946622020               |
| SNP_P3_136987_8982   | NW_004516174.1 | Scaffold797 | 8982                    | GG                              | AA                | 1946622021               |
| SNP_P3_136988_8999   | NW_004516174.1 | Scaffold797 | 8999                    | TT                              | AA                | 1946622022               |
| SNP_P3_136989_9412   | NW_004516174.1 | Scaffold797 | 9412                    | CC                              | TT                | 1946622023               |
| SNP_P3_136990_9415   | NW_004516174.1 | Scaffold797 | 9415                    | CC                              | GG                | 1946622024               |
| SNP_P3_136991_14797  | NW_004516174.1 | Scaffold797 | 14797                   | AA                              | TT                | 1946622025               |
| SNP_P3_136992_14925  | NW_004516174.1 | Scaffold797 | 14925                   | GG                              | AA                | 1946622026               |
| SNP_P3_136993_14969  | NW_004516174.1 | Scaffold797 | 14969                   | AA                              | GG                | 1946622027               |
| SNP_P3_136995_52852  | NW_004516174.1 | Scaffold797 | 52852                   | TT                              | CC                | 1946622029               |
| SNP_P3_136996_53424  | NW_004516174.1 | Scaffold797 | 53424                   | GG                              | AA                | 1946622030               |
| SNP_P3_136997_53626  | NW_004516174.1 | Scaffold797 | 53626                   | CC                              | AA                | 1946622032               |
| SNP_P3_136998_53639  | NW_004516174.1 | Scaffold797 | 53639                   | CC                              | AA                | 1946622035               |
| SNP_P3_136999_53714  | NW_004516174.1 | Scaffold797 | 53714                   | TT                              | AA                | 1946622037               |
| SNP_P3_137000_53717  | NW_004516174.1 | Scaffold797 | 53717                   | GG                              | CC                | 1946622039               |
| SNP_P3_137001_53721  | NW_004516174.1 | Scaffold797 | 53721                   | CC                              | GG                | 1946622041               |
| SNP_P3_137002_53904  | NW_004516174.1 | Scaffold797 | 53904                   | GG                              | CC                | 1946622043               |

| SNPs IDs            | Chromosome IDs | Chromosomes | Physical positions (bp) | CDC Frontier (Reference genome) | (Pusa 256 & HPNB) | NCBI SNPdb Accession IDs |
|---------------------|----------------|-------------|-------------------------|---------------------------------|-------------------|--------------------------|
| SNP_P3_137003_53911 | NW_004516174.1 | Scaffold797 | 53911                   | TT                              | GG                | 1946622045               |
| SNP_P3_137004_54008 | NW_004516174.1 | Scaffold797 | 54008                   | AA                              | GG                | 1946622047               |
| SNP_P3_137005_54019 | NW_004516174.1 | Scaffold797 | 54019                   | AA                              | TT                | 1946622049               |
| SNP_P3_137006_54043 | NW_004516174.1 | Scaffold797 | 54043                   | CC                              | AA                | 1946622051               |
| SNP_P3_137007_58204 | NW_004516174.1 | Scaffold797 | 58204                   | TT                              | CC                | 1946622052               |
| SNP_P3_137008_1256  | NW_004516175.1 | Scaffold798 | 1256                    | TT                              | CC                | 1946622054               |
| SNP_P3_137010_1308  | NW_004516175.1 | Scaffold798 | 1308                    | GG                              | TT                | 1946622056               |
| SNP_P3_137011_1309  | NW_004516175.1 | Scaffold798 | 1309                    | TT                              | CC                | 1946622058               |
| SNP_P3_137012_1328  | NW_004516175.1 | Scaffold798 | 1328                    | CC                              | AA                | 1946622060               |
| SNP_P3_137013_1346  | NW_004516175.1 | Scaffold798 | 1346                    | AA                              | CC                | 1946622062               |
| SNP_P3_137014_1643  | NW_004516175.1 | Scaffold798 | 1643                    | CC                              | TT                | 1946622064               |
| SNP_P3_137015_5679  | NW_004516175.1 | Scaffold798 | 5679                    | AA                              | TT                | 1946622066               |
| SNP_P3_137017_29525 | NW_004516175.1 | Scaffold798 | 29525                   | CC                              | TT                | 1946622068               |
| SNP_P3_137018_32029 | NW_004516175.1 | Scaffold798 | 32029                   | AA                              | CC                | 1946622070               |
| SNP_P3_137019_32223 | NW_004516175.1 | Scaffold798 | 32223                   | GG                              | AA                | 1946622072               |
| SNP_P3_137020_32244 | NW_004516175.1 | Scaffold798 | 32244                   | TT                              | CC                | 1946622074               |
| SNP_P3_137021_54154 | NW_004516175.1 | Scaffold798 | 54154                   | TT                              | AA                | 1946622076               |
| SNP_P3_137022_54260 | NW_004516175.1 | Scaffold798 | 54260                   | TT                              | AA                | 1946622078               |
| SNP_P3_137023_60497 | NW_004516175.1 | Scaffold798 | 60497                   | CC                              | TT                | 1946622080               |
| SNP_P3_137024_60561 | NW_004516175.1 | Scaffold798 | 60561                   | TT                              | AA                | 1946622082               |
| SNP_P3_137025_60785 | NW_004516175.1 | Scaffold798 | 60785                   | CC                              | AA                | 1946622084               |
| SNP_P3_137026_63958 | NW_004516175.1 | Scaffold798 | 63958                   | AA                              | TT                | 1946622086               |
| SNP_P3_137027_63963 | NW_004516175.1 | Scaffold798 | 63963                   | TT                              | AA                | 1946622088               |
| SNP_P3_137028_63967 | NW_004516175.1 | Scaffold798 | 63967                   | AA                              | GG                | 1946622090               |
| SNP_P3_137029_64015 | NW_004516175.1 | Scaffold798 | 64015                   | AA                              | CC                | 1946622092               |
| SNP_P3_137030_64021 | NW_004516175.1 | Scaffold798 | 64021                   | TT                              | AA                | 1946622094               |
| SNP_P3_137031_1117  | NW_004516176.1 | Scaffold799 | 1117                    | TT                              | CC                | 1946622096               |
| SNP_P3_137033_12451 | NW_004516176.1 | Scaffold799 | 12451                   | CC                              | TT                | 1946622098               |
| SNP_P3_137034_12468 | NW_004516176.1 | Scaffold799 | 12468                   | GG                              | AA                | 1946622100               |
| SNP_P3_137036_19623 | NW_004516176.1 | Scaffold799 | 19623                   | GG                              | AA                | 1946622102               |
| SNP_P3_137037_4345  | NW_004516178.1 | Scaffold801 | 4345                    | GG                              | TT                | 1946622104               |
| SNP_P3_137038_8869  | NW_004516178.1 | Scaffold801 | 8869                    | GG                              | AA                | 1946622107               |
| SNP_P3_137040_11443 | NW_004516178.1 | Scaffold801 | 11443                   | AA                              | GG                | 1946622109               |
| SNP_P3_137041_11479 | NW_004516178.1 | Scaffold801 | 11479                   | TT                              | CC                | 1946622111               |
| SNP_P3_137042_11509 | NW_004516178.1 | Scaffold801 | 11509                   | GG                              | AA                | 1946622113               |
| SNP_P3_137043_13169 | NW_004516178.1 | Scaffold801 | 13169                   | CC                              | TT                | 1946622115               |
| SNP_P3_137044_24468 | NW_004516178.1 | Scaffold801 | 24468                   | AA                              | CC                | 1946622117               |
| SNP_P3_137045_25122 | NW_004516178.1 | Scaffold801 | 25122                   | AA                              | GG                | 1946622119               |
| SNP_P3_137046_25179 | NW_004516178.1 | Scaffold801 | 25179                   | TT                              | CC                | 1946622121               |
| SNP_P3_137047_25187 | NW_004516178.1 | Scaffold801 | 25187                   | AA                              | CC                | 1946622123               |
| SNP_P3_137048_34411 | NW_004516178.1 | Scaffold801 | 34411                   | CC                              | AA                | 1946622125               |
| SNP_P3_137049_37978 | NW_004516178.1 | Scaffold801 | 37978                   | CC                              | AA                | 1946622127               |

| SNPs IDs            | Chromosome IDs | Chromosomes | Physical positions (bp) | CDC Frontier (Reference genome) | (Pusa 256 & HPNB) | NCBI SNPdb Accession IDs |
|---------------------|----------------|-------------|-------------------------|---------------------------------|-------------------|--------------------------|
| SNP_P3_137050_38182 | NW_004516178.1 | Scaffold801 | 38182                   | AA                              | CC                | 1946622129               |
| SNP_P3_137051_38195 | NW_004516178.1 | Scaffold801 | 38195                   | AA                              | GG                | 1946622130               |
| SNP_P3_137052_38203 | NW_004516178.1 | Scaffold801 | 38203                   | CC                              | AA                | 1946622132               |
| SNP_P3_137053_38206 | NW_004516178.1 | Scaffold801 | 38206                   | AA                              | GG                | 1946622134               |
| SNP_P3_137054_38208 | NW_004516178.1 | Scaffold801 | 38208                   | GG                              | AA                | 1946622136               |
| SNP_P3_137055_38212 | NW_004516178.1 | Scaffold801 | 38212                   | CC                              | TT                | 1946622138               |
| SNP_P3_137056_38221 | NW_004516178.1 | Scaffold801 | 38221                   | AA                              | GG                | 1946622140               |
| SNP_P3_137057_38224 | NW_004516178.1 | Scaffold801 | 38224                   | CC                              | TT                | 1946622142               |
| SNP_P3_137058_38235 | NW_004516178.1 | Scaffold801 | 38235                   | TT                              | GG                | 1946622145               |
| SNP_P3_137059_38237 | NW_004516178.1 | Scaffold801 | 38237                   | GG                              | AA                | 1946622147               |
| SNP_P3_137060_38260 | NW_004516178.1 | Scaffold801 | 38260                   | CC                              | AA                | 1946622149               |
| SNP_P3_137061_38290 | NW_004516178.1 | Scaffold801 | 38290                   | AA                              | CC                | 1946622151               |
| SNP_P3_137062_38326 | NW_004516178.1 | Scaffold801 | 38326                   | CC                              | AA                | 1946622153               |
| SNP_P3_137063_38327 | NW_004516178.1 | Scaffold801 | 38327                   | AA                              | TT                | 1946622156               |
| SNP_P3_137064_38350 | NW_004516178.1 | Scaffold801 | 38350                   | AA                              | GG                | 1946622158               |
| SNP_P3_137065_38359 | NW_004516178.1 | Scaffold801 | 38359                   | TT                              | CC                | 1946622160               |
| SNP_P3_137066_38375 | NW_004516178.1 | Scaffold801 | 38375                   | CC                              | TT                | 1946622162               |
| SNP_P3_137067_39256 | NW_004516178.1 | Scaffold801 | 39256                   | TT                              | CC                | 1946622164               |
| SNP_P3_137068_40645 | NW_004516178.1 | Scaffold801 | 40645                   | AA                              | GG                | 1946622166               |
| SNP_P3_137069_40664 | NW_004516178.1 | Scaffold801 | 40664                   | TT                              | CC                | 1946622168               |
| SNP_P3_137070_41027 | NW_004516178.1 | Scaffold801 | 41027                   | GG                              | TT                | 1946622170               |
| SNP_P3_137071_41089 | NW_004516178.1 | Scaffold801 | 41089                   | AA                              | GG                | 1946622172               |
| SNP_P3_137072_41242 | NW_004516178.1 | Scaffold801 | 41242                   | AA                              | GG                | 1946622174               |
| SNP_P3_137073_41261 | NW_004516178.1 | Scaffold801 | 41261                   | CC                              | TT                | 1946622175               |
| SNP_P3_137075_45148 | NW_004516178.1 | Scaffold801 | 45148                   | GG                              | AA                | 1946622177               |
| SNP_P3_137076_45677 | NW_004516178.1 | Scaffold801 | 45677                   | AA                              | CC                | 1946622179               |
| SNP_P3_137078_47901 | NW_004516178.1 | Scaffold801 | 47901                   | CC                              | TT                | 1946622181               |
| SNP_P3_137079_48071 | NW_004516178.1 | Scaffold801 | 48071                   | TT                              | CC                | 1946622184               |
| SNP_P3_137080_51813 | NW_004516178.1 | Scaffold801 | 51813                   | CC                              | GG                | 1946622186               |
| SNP_P3_137081_53265 | NW_004516178.1 | Scaffold801 | 53265                   | AA                              | TT                | 1946622188               |
| SNP_P3_137082_53301 | NW_004516178.1 | Scaffold801 | 53301                   | CC                              | AA                | 1946622190               |
| SNP_P3_137083_53440 | NW_004516178.1 | Scaffold801 | 53440                   | AA                              | GG                | 1946622192               |
| SNP_P3_137084_53452 | NW_004516178.1 | Scaffold801 | 53452                   | AA                              | GG                | 1946622194               |
| SNP_P3_137089_76579 | NW_004516178.1 | Scaffold801 | 76579                   | AA                              | GG                | 1946622196               |
| SNP_P3_137090_76594 | NW_004516178.1 | Scaffold801 | 76594                   | GG                              | AA                | 1946622198               |
| SNP_P3_137092_81847 | NW_004516178.1 | Scaffold801 | 81847                   | TT                              | CC                | 1946622200               |
| SNP_P3_137093_81869 | NW_004516178.1 | Scaffold801 | 81869                   | GG                              | AA                | 1946622202               |
| SNP_P3_137094_81873 | NW_004516178.1 | Scaffold801 | 81873                   | GG                              | AA                | 1946622204               |
| SNP_P3_137096_95496 | NW_004516178.1 | Scaffold801 | 95496                   | AA                              | TT                | 1946622206               |
| SNP_P3_137097_95672 | NW_004516178.1 | Scaffold801 | 95672                   | CC                              | TT                | 1946622208               |
| SNP_P3_137098_95875 | NW_004516178.1 | Scaffold801 | 95875                   | TT                              | CC                | 1946622210               |
| SNP_P3_137099_96046 | NW_004516178.1 | Scaffold801 | 96046                   | TT                              | CC                | 1946622212               |

| SNPs IDs             | Chromosome IDs | Chromosomes | Physical positions (bp) | CDC Frontier (Reference genome) | (Pusa 256 & HPNB) | NCBI SNPdb Accession IDs |
|----------------------|----------------|-------------|-------------------------|---------------------------------|-------------------|--------------------------|
| SNP_P3_137100_96116  | NW_004516178.1 | Scaffold801 | 96116                   | GG                              | CC                | 1946622214               |
| SNP_P3_137101_96217  | NW_004516178.1 | Scaffold801 | 96217                   | CC                              | TT                | 1946622216               |
| SNP_P3_137102_96419  | NW_004516178.1 | Scaffold801 | 96419                   | AA                              | CC                | 1946622218               |
| SNP_P3_137103_96421  | NW_004516178.1 | Scaffold801 | 96421                   | TT                              | CC                | 1946622220               |
| SNP_P3_137104_96468  | NW_004516178.1 | Scaffold801 | 96468                   | CC                              | GG                | 1946622222               |
| SNP_P3_137105_96477  | NW_004516178.1 | Scaffold801 | 96477                   | TT                              | CC                | 1946622224               |
| SNP_P3_137106_96826  | NW_004516178.1 | Scaffold801 | 96826                   | TT                              | CC                | 1946622226               |
| SNP_P3_137107_96866  | NW_004516178.1 | Scaffold801 | 96866                   | TT                              | CC                | 1946622228               |
| SNP_P3_137108_96885  | NW_004516178.1 | Scaffold801 | 96885                   | TT                              | CC                | 1946622230               |
| SNP_P3_137109_96968  | NW_004516178.1 | Scaffold801 | 96968                   | AA                              | GG                | 1946622232               |
| SNP_P3_137110_97116  | NW_004516178.1 | Scaffold801 | 97116                   | TT                              | CC                | 1946622234               |
| SNP_P3_137111_111338 | NW_004516178.1 | Scaffold801 | 111338                  | GG                              | AA                | 1946622236               |
| SNP_P3_137112_111993 | NW_004516178.1 | Scaffold801 | 111993                  | GG                              | AA                | 1946622238               |
| SNP_P3_137113_112906 | NW_004516178.1 | Scaffold801 | 112906                  | CC                              | TT                | 1946622240               |
| SNP_P3_137115_124319 | NW_004516178.1 | Scaffold801 | 124319                  | CC                              | TT                | 1946622242               |
| SNP_P3_137116_126634 | NW_004516178.1 | Scaffold801 | 126634                  | TT                              | AA                | 1946622244               |
| SNP_P3_137117_138344 | NW_004516178.1 | Scaffold801 | 138344                  | TT                              | AA                | 1946622246               |
| SNP_P3_137118_139137 | NW_004516178.1 | Scaffold801 | 139137                  | AA                              | GG                | 1946622248               |
| SNP_P3_137119_144012 | NW_004516178.1 | Scaffold801 | 144012                  | TT                              | GG                | 1946622250               |
| SNP_P3_137120_144288 | NW_004516178.1 | Scaffold801 | 144288                  | GG                              | AA                | 1946622252               |
| SNP_P3_137121_149845 | NW_004516178.1 | Scaffold801 | 149845                  | TT                              | GG                | 1946622254               |
| SNP_P3_137122_151134 | NW_004516178.1 | Scaffold801 | 151134                  | AA                              | GG                | 1946622256               |
| SNP_P3_137123_174092 | NW_004516178.1 | Scaffold801 | 174092                  | TT                              | GG                | 1946622258               |
| SNP_P3_137124_186278 | NW_004516178.1 | Scaffold801 | 186278                  | AA                              | CC                | 1946622260               |
| SNP_P3_137125_186289 | NW_004516178.1 | Scaffold801 | 186289                  | AA                              | GG                | 1946622261               |
| SNP_P3_137127_193432 | NW_004516178.1 | Scaffold801 | 193432                  | TT                              | CC                | 1946622264               |
| SNP_P3_137128_193436 | NW_004516178.1 | Scaffold801 | 193436                  | TT                              | GG                | 1946622266               |
| SNP_P3_137129_196771 | NW_004516178.1 | Scaffold801 | 196771                  | AA                              | GG                | 1946622268               |
| SNP_P3_137130_201267 | NW_004516178.1 | Scaffold801 | 201267                  | AA                              | GG                | 1946622270               |
| SNP_P3_137131_203121 | NW_004516178.1 | Scaffold801 | 203121                  | TT                              | CC                | 1946622272               |
| SNP_P3_137133_209015 | NW_004516178.1 | Scaffold801 | 209015                  | AA                              | GG                | 1946622274               |
| SNP_P3_137134_218512 | NW_004516178.1 | Scaffold801 | 218512                  | CC                              | TT                | 1946622276               |
| SNP_P3_137136_221957 | NW_004516178.1 | Scaffold801 | 221957                  | TT                              | CC                | 1946622278               |
| SNP_P3_137137_222655 | NW_004516178.1 | Scaffold801 | 222655                  | TT                              | AA                | 1946622280               |
| SNP_P3_137138_228098 | NW_004516178.1 | Scaffold801 | 228098                  | TT                              | CC                | 1946622282               |
| SNP_P3_137142_830    | NW_004516179.1 | Scaffold802 | 830                     | TT                              | CC                | 1946622284               |
| SNP_P3_137143_1081   | NW_004516179.1 | Scaffold802 | 1081                    | GG                              | TT                | 1946622285               |
| SNP_P3_137144_1373   | NW_004516179.1 | Scaffold802 | 1373                    | AA                              | TT                | 1946622287               |
| SNP_P3_137145_1401   | NW_004516179.1 | Scaffold802 | 1401                    | AA                              | GG                | 1946622289               |
| SNP_P3_137146_1425   | NW_004516179.1 | Scaffold802 | 1425                    | AA                              | GG                | 1946622291               |
| SNP_P3_137147_1490   | NW_004516179.1 | Scaffold802 | 1490                    | AA                              | GG                | 1946622293               |
| SNP_P3_137148_27709  | NW_004516179.1 | Scaffold802 | 27709                   | CC                              | AA                | 1946622295               |

| SNPs IDs            | Chromosome IDs | Chromosomes | Physical positions (bp) | CDC Frontier (Reference genome) | (Pusa 256 & HPNB) | NCBI SNPdb Accession IDs |
|---------------------|----------------|-------------|-------------------------|---------------------------------|-------------------|--------------------------|
| SNP_P3_137149_27974 | NW_004516179.1 | Scaffold802 | 27974                   | AA                              | TT                | 1946622297               |
| SNP_P3_137150_27995 | NW_004516179.1 | Scaffold802 | 27995                   | TT                              | AA                | 1946622299               |
| SNP_P3_137151_22506 | NW_004516180.1 | Scaffold803 | 22506                   | TT                              | AA                | 1946622301               |
| SNP_P3_137152_22523 | NW_004516180.1 | Scaffold803 | 22523                   | TT                              | CC                | 1946622303               |
| SNP_P3_137153_38914 | NW_004516180.1 | Scaffold803 | 38914                   | AA                              | GG                | 1946622306               |
| SNP_P3_137154_38919 | NW_004516180.1 | Scaffold803 | 38919                   | TT                              | AA                | 1946622308               |
| SNP_P3_137156_39004 | NW_004516180.1 | Scaffold803 | 39004                   | TT                              | GG                | 1946622309               |
| SNP_P3_137157_39256 | NW_004516180.1 | Scaffold803 | 39256                   | CC                              | TT                | 1946622311               |
| SNP_P3_137158_39257 | NW_004516180.1 | Scaffold803 | 39257                   | TT                              | CC                | 1946622313               |
| SNP_P3_137159_47696 | NW_004516180.1 | Scaffold803 | 47696                   | AA                              | CC                | 1946622315               |
| SNP_P3_137160_47980 | NW_004516180.1 | Scaffold803 | 47980                   | AA                              | TT                | 1946622317               |
| SNP_P3_137161_48029 | NW_004516180.1 | Scaffold803 | 48029                   | AA                              | GG                | 1946622319               |
| SNP_P3_137163_52231 | NW_004516180.1 | Scaffold803 | 52231                   | GG                              | CC                | 1946622321               |
| SNP_P3_137164_64223 | NW_004516180.1 | Scaffold803 | 64223                   | GG                              | CC                | 1946622323               |
| SNP_P3_137165_67232 | NW_004516180.1 | Scaffold803 | 67232                   | CC                              | TT                | 1946622325               |
| SNP_P3_137166_67629 | NW_004516180.1 | Scaffold803 | 67629                   | AA                              | CC                | 1946622326               |
| SNP_P3_137167_67631 | NW_004516180.1 | Scaffold803 | 67631                   | GG                              | AA                | 1946622328               |
| SNP_P3_137168_71298 | NW_004516180.1 | Scaffold803 | 71298                   | TT                              | CC                | 1946622330               |
| SNP_P3_137169_705   | NW_004516181.1 | Scaffold806 | 705                     | AA                              | GG                | 1946622333               |
| SNP_P3_137170_899   | NW_004516181.1 | Scaffold806 | 899                     | AA                              | TT                | 1946622334               |
| SNP_P3_137171_926   | NW_004516181.1 | Scaffold806 | 926                     | AA                              | GG                | 1946622336               |
| SNP_P3_137172_1004  | NW_004516181.1 | Scaffold806 | 1004                    | CC                              | TT                | 1946622338               |
| SNP_P3_137173_1204  | NW_004516181.1 | Scaffold806 | 1204                    | CC                              | TT                | 1946622340               |
| SNP_P3_137174_2228  | NW_004516181.1 | Scaffold806 | 2228                    | GG                              | AA                | 1946622342               |
| SNP_P3_137175_2232  | NW_004516181.1 | Scaffold806 | 2232                    | AA                              | TT                | 1946622344               |
| SNP_P3_137176_10996 | NW_004516181.1 | Scaffold806 | 10996                   | CC                              | TT                | 1946622347               |
| SNP_P3_137178_14352 | NW_004516181.1 | Scaffold806 | 14352                   | TT                              | CC                | 1946622349               |
| SNP_P3_137180_26386 | NW_004516181.1 | Scaffold806 | 26386                   | CC                              | TT                | 1946622351               |
| SNP_P3_137181_28276 | NW_004516181.1 | Scaffold806 | 28276                   | TT                              | AA                | 1946622353               |
| SNP_P3_137182_28939 | NW_004516181.1 | Scaffold806 | 28939                   | AA                              | GG                | 1946622355               |
| SNP_P3_137183_36957 | NW_004516181.1 | Scaffold806 | 36957                   | TT                              | CC                | 1946622357               |
| SNP_P3_137184_45394 | NW_004516181.1 | Scaffold806 | 45394                   | TT                              | CC                | 1946622358               |
| SNP_P3_137185_49222 | NW_004516181.1 | Scaffold806 | 49222                   | GG                              | TT                | 1946622360               |
| SNP_P3_137186_49543 | NW_004516181.1 | Scaffold806 | 49543                   | TT                              | CC                | 1946622362               |
| SNP_P3_137187_49547 | NW_004516181.1 | Scaffold806 | 49547                   | TT                              | CC                | 1946622364               |
| SNP_P3_137188_49721 | NW_004516181.1 | Scaffold806 | 49721                   | TT                              | CC                | 1946622366               |
| SNP_P3_137189_51037 | NW_004516181.1 | Scaffold806 | 51037                   | CC                              | TT                | 1946622368               |
| SNP_P3_137190_54286 | NW_004516181.1 | Scaffold806 | 54286                   | TT                              | CC                | 1946622370               |
| SNP_P3_137192_68694 | NW_004516181.1 | Scaffold806 | 68694                   | AA                              | TT                | 1946622372               |
| SNP_P3_137193_81716 | NW_004516181.1 | Scaffold806 | 81716                   | AA                              | CC                | 1946622374               |
| SNP_P3_137194_81718 | NW_004516181.1 | Scaffold806 | 81718                   | CC                              | TT                | 1946622376               |
| SNP_P3_137195_81911 | NW_004516181.1 | Scaffold806 | 81911                   | TT                              | CC                | 1946622378               |

| SNPs IDs             | Chromosome IDs | Chromosomes | Physical positions (bp) | CDC Frontier (Reference genome) | (Pusa 256 & HPNB) | NCBI SNPdb Accession IDs |
|----------------------|----------------|-------------|-------------------------|---------------------------------|-------------------|--------------------------|
| SNP_P3_137196_81968  | NW_004516181.1 | Scaffold806 | 81968                   | TT                              | CC                | 1946622380               |
| SNP_P3_137197_81974  | NW_004516181.1 | Scaffold806 | 81974                   | CC                              | AA                | 1946622382               |
| SNP_P3_137198_82121  | NW_004516181.1 | Scaffold806 | 82121                   | TT                              | GG                | 1946622384               |
| SNP_P3_137199_82127  | NW_004516181.1 | Scaffold806 | 82127                   | TT                              | CC                | 1946622386               |
| SNP_P3_137200_82255  | NW_004516181.1 | Scaffold806 | 82255                   | TT                              | AA                | 1946622388               |
| SNP_P3_137201_84971  | NW_004516181.1 | Scaffold806 | 84971                   | CC                              | TT                | 1946622390               |
| SNP_P3_137202_95286  | NW_004516181.1 | Scaffold806 | 95286                   | GG                              | CC                | 1946622392               |
| SNP_P3_137203_95455  | NW_004516181.1 | Scaffold806 | 95455                   | CC                              | AA                | 1946622394               |
| SNP_P3_137204_95470  | NW_004516181.1 | Scaffold806 | 95470                   | AA                              | GG                | 1946622396               |
| SNP_P3_137205_95538  | NW_004516181.1 | Scaffold806 | 95538                   | CC                              | TT                | 1946622398               |
| SNP_P3_137206_96513  | NW_004516181.1 | Scaffold806 | 96513                   | GG                              | AA                | 1946622400               |
| SNP_P3_137207_98746  | NW_004516181.1 | Scaffold806 | 98746                   | AA                              | GG                | 1946622402               |
| SNP_P3_137208_98764  | NW_004516181.1 | Scaffold806 | 98764                   | AA                              | GG                | 1946622403               |
| SNP_P3_137209_98770  | NW_004516181.1 | Scaffold806 | 98770                   | AA                              | GG                | 1946622405               |
| SNP_P3_137210_98773  | NW_004516181.1 | Scaffold806 | 98773                   | AA                              | GG                | 1946622407               |
| SNP_P3_137211_99126  | NW_004516181.1 | Scaffold806 | 99126                   | CC                              | TT                | 1946622409               |
| SNP_P3_137212_103448 | NW_004516181.1 | Scaffold806 | 103448                  | AA                              | CC                | 1946622411               |
| SNP_P3_137213_104112 | NW_004516181.1 | Scaffold806 | 104112                  | AA                              | GG                | 1946622413               |
| SNP_P3_137214_130584 | NW_004516181.1 | Scaffold806 | 130584                  | GG                              | AA                | 1946622415               |
| SNP_P3_137215_130836 | NW_004516181.1 | Scaffold806 | 130836                  | AA                              | GG                | 1946622417               |
| SNP_P3_137216_130838 | NW_004516181.1 | Scaffold806 | 130838                  | AA                              | GG                | 1946622419               |
| SNP_P3_137217_130852 | NW_004516181.1 | Scaffold806 | 130852                  | AA                              | GG                | 1946622421               |
| SNP_P3_137218_130996 | NW_004516181.1 | Scaffold806 | 130996                  | GG                              | AA                | 1946622423               |
| SNP_P3_137219_131083 | NW_004516181.1 | Scaffold806 | 131083                  | CC                              | TT                | 1946622425               |
| SNP_P3_137220_131457 | NW_004516181.1 | Scaffold806 | 131457                  | TT                              | CC                | 1946622427               |
| SNP_P3_137221_131464 | NW_004516181.1 | Scaffold806 | 131464                  | TT                              | CC                | 1946622429               |
| SNP_P3_137222_131501 | NW_004516181.1 | Scaffold806 | 131501                  | TT                              | GG                | 1946622431               |
| SNP_P3_137223_131537 | NW_004516181.1 | Scaffold806 | 131537                  | TT                              | AA                | 1946622433               |
| SNP_P3_137224_131543 | NW_004516181.1 | Scaffold806 | 131543                  | CC                              | AA                | 1946622435               |
| SNP_P3_137225_131583 | NW_004516181.1 | Scaffold806 | 131583                  | TT                              | GG                | 1946622437               |
| SNP_P3_137226_131673 | NW_004516181.1 | Scaffold806 | 131673                  | CC                              | AA                | 1946622439               |
| SNP_P3_137227_131704 | NW_004516181.1 | Scaffold806 | 131704                  | CC                              | TT                | 1946622441               |
| SNP_P3_137228_131752 | NW_004516181.1 | Scaffold806 | 131752                  | AA                              | CC                | 1946622443               |
| SNP_P3_137229_131773 | NW_004516181.1 | Scaffold806 | 131773                  | TT                              | CC                | 1946622445               |
| SNP_P3_137230_131807 | NW_004516181.1 | Scaffold806 | 131807                  | TT                              | CC                | 1946622446               |
| SNP_P3_137231_131817 | NW_004516181.1 | Scaffold806 | 131817                  | AA                              | CC                | 1946622448               |
| SNP_P3_137232_131843 | NW_004516181.1 | Scaffold806 | 131843                  | TT                              | GG                | 1946622451               |
| SNP_P3_137233_131899 | NW_004516181.1 | Scaffold806 | 131899                  | TT                              | CC                | 1946622453               |
| SNP_P3_137234_131964 | NW_004516181.1 | Scaffold806 | 131964                  | GG                              | TT                | 1946622455               |
| SNP_P3_137235_131971 | NW_004516181.1 | Scaffold806 | 131971                  | TT                              | CC                | 1946622457               |
| SNP_P3_137236_131980 | NW_004516181.1 | Scaffold806 | 131980                  | AA                              | CC                | 1946622459               |
| SNP_P3_137237_132020 | NW_004516181.1 | Scaffold806 | 132020                  | AA                              | CC                | 1946622461               |



| SNPs IDs             | Chromosome IDs | Chromosomes | Physical positions (bp) | CDC Frontier (Reference genome) | (Pusa 256 & HPNB) | NCBI SNPdb Accession IDs |
|----------------------|----------------|-------------|-------------------------|---------------------------------|-------------------|--------------------------|
| SNP_P3_137238_133312 | NW_004516181.1 | Scaffold806 | 133312                  | TT                              | GG                | 1946622463               |
| SNP_P3_137239_133338 | NW_004516181.1 | Scaffold806 | 133338                  | AA                              | GG                | 1946622465               |
| SNP_P3_137240_133344 | NW_004516181.1 | Scaffold806 | 133344                  | TT                              | CC                | 1946622467               |
| SNP_P3_137241_133353 | NW_004516181.1 | Scaffold806 | 133353                  | TT                              | CC                | 1946622469               |
| SNP_P3_137242_133542 | NW_004516181.1 | Scaffold806 | 133542                  | TT                              | CC                | 1946622471               |
| SNP_P3_137243_133547 | NW_004516181.1 | Scaffold806 | 133547                  | CC                              | TT                | 1946622473               |
| SNP_P3_137244_133628 | NW_004516181.1 | Scaffold806 | 133628                  | AA                              | GG                | 1946622475               |
| SNP_P3_137245_133665 | NW_004516181.1 | Scaffold806 | 133665                  | CC                              | TT                | 1946622477               |
| SNP_P3_137246_133719 | NW_004516181.1 | Scaffold806 | 133719                  | CC                              | TT                | 1946622479               |
| SNP_P3_137247_3331   | NW_004516182.1 | Scaffold808 | 3331                    | TT                              | AA                | 1946622481               |
| SNP_P3_137248_3346   | NW_004516182.1 | Scaffold808 | 3346                    | GG                              | AA                | 1946622483               |
| SNP_P3_137249_4960   | NW_004516182.1 | Scaffold808 | 4960                    | TT                              | GG                | 1946622485               |
| SNP_P3_137250_4992   | NW_004516182.1 | Scaffold808 | 4992                    | GG                              | AA                | 1946622487               |
| SNP_P3_137251_5010   | NW_004516182.1 | Scaffold808 | 5010                    | GG                              | AA                | 1946622489               |
| SNP_P3_137252_5019   | NW_004516182.1 | Scaffold808 | 5019                    | CC                              | TT                | 1946622491               |
| SNP_P3_137253_5085   | NW_004516182.1 | Scaffold808 | 5085                    | GG                              | AA                | 1946622492               |
| SNP_P3_137254_5109   | NW_004516182.1 | Scaffold808 | 5109                    | AA                              | GG                | 1946622494               |
| SNP_P3_137255_5579   | NW_004516182.1 | Scaffold808 | 5579                    | AA                              | TT                | 1946622496               |
| SNP_P3_137256_5853   | NW_004516182.1 | Scaffold808 | 5853                    | GG                              | TT                | 1946622498               |
| SNP_P3_137257_89209  | NW_004516183.1 | Scaffold809 | 89209                   | AA                              | TT                | 1946622500               |
| SNP_P3_137258_89518  | NW_004516183.1 | Scaffold809 | 89518                   | CC                              | TT                | 1946622502               |
| SNP_P3_137259_108498 | NW_004516183.1 | Scaffold809 | 108498                  | CC                              | AA                | 1946622504               |
| SNP_P3_137260_115075 | NW_004516183.1 | Scaffold809 | 115075                  | TT                              | CC                | 1946622506               |
| SNP_P3_137261_115143 | NW_004516183.1 | Scaffold809 | 115143                  | AA                              | GG                | 1946622508               |
| SNP_P3_137262_115165 | NW_004516183.1 | Scaffold809 | 115165                  | TT                              | CC                | 1946622510               |
| SNP_P3_137263_115391 | NW_004516183.1 | Scaffold809 | 115391                  | TT                              | AA                | 1946622512               |
| SNP_P3_137264_115422 | NW_004516183.1 | Scaffold809 | 115422                  | AA                              | GG                | 1946622514               |
| SNP_P3_137265_115479 | NW_004516183.1 | Scaffold809 | 115479                  | AA                              | GG                | 1946622517               |
| SNP_P3_137266_115534 | NW_004516183.1 | Scaffold809 | 115534                  | AA                              | TT                | 1946622519               |
| SNP_P3_137268_139669 | NW_004516183.1 | Scaffold809 | 139669                  | CC                              | AA                | 1946622521               |
| SNP_P3_137269_139692 | NW_004516183.1 | Scaffold809 | 139692                  | GG                              | TT                | 1946622523               |
| SNP_P3_137270_154120 | NW_004516183.1 | Scaffold809 | 154120                  | CC                              | TT                | 1946622525               |
| SNP_P3_137274_86517  | NW_004516184.1 | Scaffold811 | 86517                   | AA                              | GG                | 1946622527               |
| SNP_P3_137275_86567  | NW_004516184.1 | Scaffold811 | 86567                   | TT                              | CC                | 1946622529               |
| SNP_P3_137276_86579  | NW_004516184.1 | Scaffold811 | 86579                   | AA                              | GG                | 1946622531               |
| SNP_P3_137277_86665  | NW_004516184.1 | Scaffold811 | 86665                   | AA                              | GG                | 1946622533               |
| SNP_P3_137278_86961  | NW_004516184.1 | Scaffold811 | 86961                   | TT                              | CC                | 1946622535               |
| SNP_P3_137279_87087  | NW_004516184.1 | Scaffold811 | 87087                   | TT                              | CC                | 1946622537               |
| SNP_P3_137280_109472 | NW_004516184.1 | Scaffold811 | 109472                  | AA                              | GG                | 1946622539               |
| SNP_P3_137281_109474 | NW_004516184.1 | Scaffold811 | 109474                  | TT                              | CC                | 1946622541               |
| SNP_P3_137282_109793 | NW_004516184.1 | Scaffold811 | 109793                  | TT                              | AA                | 1946622543               |
| SNP_P3_137283_109809 | NW_004516184.1 | Scaffold811 | 109809                  | CC                              | TT                | 1946622545               |

| SNPs IDs             | Chromosome IDs | Chromosomes | Physical positions (bp) | CDC Frontier (Reference genome) | (Pusa 256 & HPNB) | NCBI SNPdb Accession IDs |
|----------------------|----------------|-------------|-------------------------|---------------------------------|-------------------|--------------------------|
| SNP_P3_137284_112075 | NW_004516184.1 | Scaffold811 | 112075                  | AA                              | TT                | 1946622547               |
| SNP_P3_137285_112271 | NW_004516184.1 | Scaffold811 | 112271                  | CC                              | GG                | 1946622549               |
| SNP_P3_137286_112300 | NW_004516184.1 | Scaffold811 | 112300                  | AA                              | GG                | 1946622551               |
| SNP_P3_137287_112320 | NW_004516184.1 | Scaffold811 | 112320                  | TT                              | AA                | 1946622553               |
| SNP_P3_137288_112325 | NW_004516184.1 | Scaffold811 | 112325                  | CC                              | AA                | 1946622555               |
| SNP_P3_137289_112356 | NW_004516184.1 | Scaffold811 | 112356                  | GG                              | AA                | 1946622558               |
| SNP_P3_137290_112359 | NW_004516184.1 | Scaffold811 | 112359                  | GG                              | AA                | 1946622560               |
| SNP_P3_137291_112371 | NW_004516184.1 | Scaffold811 | 112371                  | GG                              | AA                | 1946622561               |
| SNP_P3_137292_115069 | NW_004516184.1 | Scaffold811 | 115069                  | AA                              | GG                | 1946622563               |
| SNP_P3_137293_115100 | NW_004516184.1 | Scaffold811 | 115100                  | AA                              | GG                | 1946622565               |
| SNP_P3_137294_120768 | NW_004516184.1 | Scaffold811 | 120768                  | AA                              | GG                | 1946622567               |
| SNP_P3_137296_127678 | NW_004516184.1 | Scaffold811 | 127678                  | GG                              | TT                | 1946622569               |
| SNP_P3_137297_127998 | NW_004516184.1 | Scaffold811 | 127998                  | GG                              | TT                | 1946622571               |
| SNP_P3_137298_128002 | NW_004516184.1 | Scaffold811 | 128002                  | CC                              | GG                | 1946622573               |
| SNP_P3_137299_128006 | NW_004516184.1 | Scaffold811 | 128006                  | AA                              | GG                | 1946622575               |
| SNP_P3_137300_128021 | NW_004516184.1 | Scaffold811 | 128021                  | TT                              | CC                | 1946622577               |
| SNP_P3_137301_128046 | NW_004516184.1 | Scaffold811 | 128046                  | GG                              | AA                | 1946622578               |
| SNP_P3_137302_128051 | NW_004516184.1 | Scaffold811 | 128051                  | TT                              | CC                | 1946622579               |
| SNP_P3_137303_128069 | NW_004516184.1 | Scaffold811 | 128069                  | TT                              | CC                | 1946622580               |
| SNP_P3_137304_128100 | NW_004516184.1 | Scaffold811 | 128100                  | AA                              | TT                | 1946622581               |
| SNP_P3_137305_128110 | NW_004516184.1 | Scaffold811 | 128110                  | AA                              | TT                | 1946622583               |
| SNP_P3_137306_128119 | NW_004516184.1 | Scaffold811 | 128119                  | TT                              | AA                | 1946622585               |
| SNP_P3_137308_146947 | NW_004516184.1 | Scaffold811 | 146947                  | CC                              | AA                | 1946622587               |
| SNP_P3_137309_158851 | NW_004516184.1 | Scaffold811 | 158851                  | AA                              | TT                | 1946622589               |
| SNP_P3_137311_176203 | NW_004516184.1 | Scaffold811 | 176203                  | GG                              | AA                | 1946622591               |
| SNP_P3_137312_176428 | NW_004516184.1 | Scaffold811 | 176428                  | AA                              | TT                | 1946622593               |
| SNP_P3_137313_176430 | NW_004516184.1 | Scaffold811 | 176430                  | TT                              | CC                | 1946622595               |
| SNP_P3_137314_177116 | NW_004516184.1 | Scaffold811 | 177116                  | CC                              | TT                | 1946622597               |
| SNP_P3_137315_184402 | NW_004516184.1 | Scaffold811 | 184402                  | GG                              | AA                | 1946622599               |
| SNP_P3_137316_184682 | NW_004516184.1 | Scaffold811 | 184682                  | AA                              | GG                | 1946622601               |
| SNP_P3_137317_184698 | NW_004516184.1 | Scaffold811 | 184698                  | CC                              | TT                | 1946622603               |
| SNP_P3_137318_184705 | NW_004516184.1 | Scaffold811 | 184705                  | CC                              | TT                | 1946622605               |
| SNP_P3_137319_184706 | NW_004516184.1 | Scaffold811 | 184706                  | AA                              | TT                | 1946622607               |
| SNP_P3_137320_184708 | NW_004516184.1 | Scaffold811 | 184708                  | TT                              | CC                | 1946622609               |
| SNP_P3_137322_186316 | NW_004516184.1 | Scaffold811 | 186316                  | TT                              | AA                | 1946622611               |
| SNP_P3_137323_186341 | NW_004516184.1 | Scaffold811 | 186341                  | AA                              | TT                | 1946622612               |
| SNP_P3_137324_195440 | NW_004516184.1 | Scaffold811 | 195440                  | AA                              | TT                | 1946622614               |
| SNP_P3_137325_195885 | NW_004516184.1 | Scaffold811 | 195885                  | CC                              | AA                | 1946622616               |
| SNP_P3_137327_219502 | NW_004516184.1 | Scaffold811 | 219502                  | AA                              | TT                | 1946622618               |
| SNP_P3_137328_245216 | NW_004516184.1 | Scaffold811 | 245216                  | AA                              | GG                | 1946622620               |
| SNP_P3_137329_245672 | NW_004516184.1 | Scaffold811 | 245672                  | AA                              | GG                | 1946622622               |
| SNP_P3_137330_245674 | NW_004516184.1 | Scaffold811 | 245674                  | AA                              | GG                | 1946622624               |

| SNPs IDs             | Chromosome IDs | Chromosomes | Physical positions (bp) | CDC Frontier (Reference genome) | (Pusa 256 & HPNB) | NCBI SNPdb Accession IDs |
|----------------------|----------------|-------------|-------------------------|---------------------------------|-------------------|--------------------------|
| SNP_P3_137331_246449 | NW_004516184.1 | Scaffold811 | 246449                  | AA                              | TT                | 1946622626               |
| SNP_P3_137332_248346 | NW_004516184.1 | Scaffold811 | 248346                  | AA                              | TT                | 1946622629               |
| SNP_P3_137333_248708 | NW_004516184.1 | Scaffold811 | 248708                  | AA                              | TT                | 1946622631               |
| SNP_P3_137334_249590 | NW_004516184.1 | Scaffold811 | 249590                  | TT                              | CC                | 1946622632               |
| SNP_P3_137335_251317 | NW_004516184.1 | Scaffold811 | 251317                  | GG                              | AA                | 1946622634               |
| SNP_P3_137336_251686 | NW_004516184.1 | Scaffold811 | 251686                  | CC                              | GG                | 1946622636               |
| SNP_P3_137337_251698 | NW_004516184.1 | Scaffold811 | 251698                  | GG                              | TT                | 1946622638               |
| SNP_P3_137338_251714 | NW_004516184.1 | Scaffold811 | 251714                  | GG                              | AA                | 1946622640               |
| SNP_P3_137339_258308 | NW_004516184.1 | Scaffold811 | 258308                  | CC                              | AA                | 1946622642               |
| SNP_P3_137340_258785 | NW_004516184.1 | Scaffold811 | 258785                  | AA                              | GG                | 1946622644               |
| SNP_P3_137341_276592 | NW_004516184.1 | Scaffold811 | 276592                  | CC                              | TT                | 1946622646               |
| SNP_P3_137342_276664 | NW_004516184.1 | Scaffold811 | 276664                  | CC                              | AA                | 1946622648               |
| SNP_P3_137343_279069 | NW_004516184.1 | Scaffold811 | 279069                  | CC                              | AA                | 1946622650               |
| SNP_P3_137344_286812 | NW_004516184.1 | Scaffold811 | 286812                  | TT                              | CC                | 1946622652               |
| SNP_P3_137346_303572 | NW_004516184.1 | Scaffold811 | 303572                  | GG                              | TT                | 1946622654               |
| SNP_P3_137347_306779 | NW_004516184.1 | Scaffold811 | 306779                  | TT                              | CC                | 1946622656               |
| SNP_P3_137348_306780 | NW_004516184.1 | Scaffold811 | 306780                  | TT                              | GG                | 1946622658               |
| SNP_P3_137349_306782 | NW_004516184.1 | Scaffold811 | 306782                  | TT                              | CC                | 1946622660               |
| SNP_P3_137350_306788 | NW_004516184.1 | Scaffold811 | 306788                  | CC                              | AA                | 1946622662               |
| SNP_P3_137351_306801 | NW_004516184.1 | Scaffold811 | 306801                  | CC                              | TT                | 1946622664               |
| SNP_P3_137352_306803 | NW_004516184.1 | Scaffold811 | 306803                  | AA                              | GG                | 1946622666               |
| SNP_P3_137353_306942 | NW_004516184.1 | Scaffold811 | 306942                  | TT                              | CC                | 1946622668               |
| SNP_P3_137354_307177 | NW_004516184.1 | Scaffold811 | 307177                  | GG                              | TT                | 1946622670               |
| SNP_P3_137355_307230 | NW_004516184.1 | Scaffold811 | 307230                  | TT                              | CC                | 1946622672               |
| SNP_P3_137356_307233 | NW_004516184.1 | Scaffold811 | 307233                  | CC                              | TT                | 1946622674               |
| SNP_P3_137357_307254 | NW_004516184.1 | Scaffold811 | 307254                  | TT                              | GG                | 1946622676               |
| SNP_P3_137358_308067 | NW_004516184.1 | Scaffold811 | 308067                  | CC                              | TT                | 1946622678               |
| SNP_P3_137359_308170 | NW_004516184.1 | Scaffold811 | 308170                  | GG                              | AA                | 1946622679               |
| SNP_P3_137360_308474 | NW_004516184.1 | Scaffold811 | 308474                  | AA                              | GG                | 1946622681               |
| SNP_P3_137361_321201 | NW_004516184.1 | Scaffold811 | 321201                  | AA                              | GG                | 1946622683               |
| SNP_P3_137362_321208 | NW_004516184.1 | Scaffold811 | 321208                  | GG                              | AA                | 1946622685               |
| SNP_P3_137363_321333 | NW_004516184.1 | Scaffold811 | 321333                  | GG                              | TT                | 1946622687               |
| SNP_P3_137364_451    | NW_004516185.1 | Scaffold812 | 451                     | CC                              | AA                | 1946622689               |
| SNP_P3_137365_16770  | NW_004516185.1 | Scaffold812 | 16770                   | CC                              | TT                | 1946622691               |
| SNP_P3_137366_16771  | NW_004516185.1 | Scaffold812 | 16771                   | TT                              | AA                | 1946622693               |
| SNP_P3_137367_30212  | NW_004516185.1 | Scaffold812 | 30212                   | CC                              | GG                | 1946622695               |
| SNP_P3_137368_33474  | NW_004516185.1 | Scaffold812 | 33474                   | AA                              | GG                | 1946622697               |
| SNP_P3_137369_33848  | NW_004516185.1 | Scaffold812 | 33848                   | GG                              | TT                | 1946622699               |
| SNP_P3_137370_33858  | NW_004516185.1 | Scaffold812 | 33858                   | GG                              | AA                | 1946622700               |
| SNP_P3_137371_52478  | NW_004516185.1 | Scaffold812 | 52478                   | AA                              | GG                | 1946622702               |
| SNP_P3_137372_60487  | NW_004516185.1 | Scaffold812 | 60487                   | TT                              | AA                | 1946622704               |
| SNP_P3_137373_61379  | NW_004516185.1 | Scaffold812 | 61379                   | AA                              | GG                | 1946622706               |

| SNPs IDs             | Chromosome IDs | Chromosomes | Physical positions (bp) | CDC Frontier (Reference genome) | (Pusa 256 & HPNB) | NCBI SNPdb Accession IDs |
|----------------------|----------------|-------------|-------------------------|---------------------------------|-------------------|--------------------------|
| SNP_P3_137375_66503  | NW_004516185.1 | Scaffold812 | 66503                   | AA                              | GG                | 1946622708               |
| SNP_P3_137376_71045  | NW_004516185.1 | Scaffold812 | 71045                   | TT                              | GG                | 1946622710               |
| SNP_P3_137377_71101  | NW_004516185.1 | Scaffold812 | 71101                   | GG                              | AA                | 1946622712               |
| SNP_P3_137378_71366  | NW_004516185.1 | Scaffold812 | 71366                   | GG                              | AA                | 1946622714               |
| SNP_P3_137379_71745  | NW_004516185.1 | Scaffold812 | 71745                   | GG                              | TT                | 1946622716               |
| SNP_P3_137380_74771  | NW_004516185.1 | Scaffold812 | 74771                   | GG                              | AA                | 1946622718               |
| SNP_P3_137381_82117  | NW_004516185.1 | Scaffold812 | 82117                   | CC                              | TT                | 1946622720               |
| SNP_P3_137382_82414  | NW_004516185.1 | Scaffold812 | 82414                   | TT                              | GG                | 1946622722               |
| SNP_P3_137383_82742  | NW_004516185.1 | Scaffold812 | 82742                   | TT                              | GG                | 1946622724               |
| SNP_P3_137384_82753  | NW_004516185.1 | Scaffold812 | 82753                   | GG                              | AA                | 1946622726               |
| SNP_P3_137385_92074  | NW_004516185.1 | Scaffold812 | 92074                   | GG                              | TT                | 1946622728               |
| SNP_P3_137386_92079  | NW_004516185.1 | Scaffold812 | 92079                   | CC                              | AA                | 1946622730               |
| SNP_P3_137387_92080  | NW_004516185.1 | Scaffold812 | 92080                   | TT                              | CC                | 1946622732               |
| SNP_P3_137388_92159  | NW_004516185.1 | Scaffold812 | 92159                   | AA                              | TT                | 1946622734               |
| SNP_P3_137389_92197  | NW_004516185.1 | Scaffold812 | 92197                   | TT                              | CC                | 1946622736               |
| SNP_P3_137390_92200  | NW_004516185.1 | Scaffold812 | 92200                   | TT                              | CC                | 1946622738               |
| SNP_P3_137391_92208  | NW_004516185.1 | Scaffold812 | 92208                   | AA                              | TT                | 1946622740               |
| SNP_P3_137392_92532  | NW_004516185.1 | Scaffold812 | 92532                   | TT                              | AA                | 1946622742               |
| SNP_P3_137393_105766 | NW_004516185.1 | Scaffold812 | 105766                  | CC                              | AA                | 1946622744               |
| SNP_P3_137394_105779 | NW_004516185.1 | Scaffold812 | 105779                  | GG                              | AA                | 1946622746               |
| SNP_P3_137395_105817 | NW_004516185.1 | Scaffold812 | 105817                  | CC                              | TT                | 1946622748               |
| SNP_P3_137396_106066 | NW_004516185.1 | Scaffold812 | 106066                  | CC                              | GG                | 1946622750               |
| SNP_P3_137397_106085 | NW_004516185.1 | Scaffold812 | 106085                  | AA                              | TT                | 1946622752               |
| SNP_P3_137398_106172 | NW_004516185.1 | Scaffold812 | 106172                  | CC                              | AA                | 1946622754               |
| SNP_P3_137399_106214 | NW_004516185.1 | Scaffold812 | 106214                  | TT                              | GG                | 1946622756               |
| SNP_P3_137400_106759 | NW_004516185.1 | Scaffold812 | 106759                  | TT                              | GG                | 1946622758               |
| SNP_P3_137401_106784 | NW_004516185.1 | Scaffold812 | 106784                  | AA                              | TT                | 1946622760               |
| SNP_P3_137402_106866 | NW_004516185.1 | Scaffold812 | 106866                  | GG                              | TT                | 1946622762               |
| SNP_P3_137403_106872 | NW_004516185.1 | Scaffold812 | 106872                  | TT                              | GG                | 1946622764               |
| SNP_P3_137404_106905 | NW_004516185.1 | Scaffold812 | 106905                  | CC                              | TT                | 1946622766               |
| SNP_P3_137405_112029 | NW_004516185.1 | Scaffold812 | 112029                  | GG                              | TT                | 1946622768               |
| SNP_P3_137406_112077 | NW_004516185.1 | Scaffold812 | 112077                  | GG                              | TT                | 1946622770               |
| SNP_P3_137407_112084 | NW_004516185.1 | Scaffold812 | 112084                  | AA                              | TT                | 1946622772               |
| SNP_P3_137408_112085 | NW_004516185.1 | Scaffold812 | 112085                  | TT                              | GG                | 1946622774               |
| SNP_P3_137409_112363 | NW_004516185.1 | Scaffold812 | 112363                  | TT                              | GG                | 1946622776               |
| SNP_P3_137410_112372 | NW_004516185.1 | Scaffold812 | 112372                  | GG                              | TT                | 1946622778               |
| SNP_P3_137411_112423 | NW_004516185.1 | Scaffold812 | 112423                  | CC                              | TT                | 1946622780               |
| SNP_P3_137412_124490 | NW_004516185.1 | Scaffold812 | 124490                  | AA                              | CC                | 1946622782               |
| SNP_P3_137413_124606 | NW_004516185.1 | Scaffold812 | 124606                  | CC                              | TT                | 1946622784               |
| SNP_P3_137414_144335 | NW_004516185.1 | Scaffold812 | 144335                  | AA                              | GG                | 1946622786               |
| SNP_P3_137415_174274 | NW_004516185.1 | Scaffold812 | 174274                  | AA                              | GG                | 1946622788               |
| SNP_P3_137416_175230 | NW_004516185.1 | Scaffold812 | 175230                  | CC                              | TT                | 1946622790               |

| SNPs IDs             | Chromosome IDs | Chromosomes | Physical positions (bp) | CDC Frontier (Reference genome) | (Pusa 256 & HPNB) | NCBI SNPdb Accession IDs |
|----------------------|----------------|-------------|-------------------------|---------------------------------|-------------------|--------------------------|
| SNP_P3_137417_176632 | NW_004516185.1 | Scaffold812 | 176632                  | GG                              | AA                | 1946622792               |
| SNP_P3_137418_176643 | NW_004516185.1 | Scaffold812 | 176643                  | TT                              | CC                | 1946622794               |
| SNP_P3_137419_176668 | NW_004516185.1 | Scaffold812 | 176668                  | AA                              | GG                | 1946622796               |
| SNP_P3_137420_176689 | NW_004516185.1 | Scaffold812 | 176689                  | GG                              | AA                | 1946622798               |
| SNP_P3_137421_201528 | NW_004516185.1 | Scaffold812 | 201528                  | TT                              | CC                | 1946622800               |
| SNP_P3_137424_207013 | NW_004516185.1 | Scaffold812 | 207013                  | AA                              | TT                | 1946622802               |
| SNP_P3_137425_209911 | NW_004516185.1 | Scaffold812 | 209911                  | CC                              | TT                | 1946622804               |
| SNP_P3_137427_215173 | NW_004516185.1 | Scaffold812 | 215173                  | GG                              | AA                | 1946622806               |
| SNP_P3_137430_215958 | NW_004516185.1 | Scaffold812 | 215958                  | TT                              | CC                | 1946622808               |
| SNP_P3_137431_218011 | NW_004516185.1 | Scaffold812 | 218011                  | AA                              | CC                | 1946622810               |
| SNP_P3_137432_219087 | NW_004516185.1 | Scaffold812 | 219087                  | CC                              | TT                | 1946622812               |
| SNP_P3_137435_223568 | NW_004516185.1 | Scaffold812 | 223568                  | TT                              | GG                | 1946622814               |
| SNP_P3_137436_224386 | NW_004516185.1 | Scaffold812 | 224386                  | GG                              | TT                | 1946622816               |
| SNP_P3_137438_235759 | NW_004516185.1 | Scaffold812 | 235759                  | AA                              | GG                | 1946622818               |
| SNP_P3_137440_242290 | NW_004516185.1 | Scaffold812 | 242290                  | AA                              | CC                | 1946622820               |
| SNP_P3_137442_257430 | NW_004516185.1 | Scaffold812 | 257430                  | AA                              | CC                | 1946622822               |
| SNP_P3_137443_257654 | NW_004516185.1 | Scaffold812 | 257654                  | TT                              | GG                | 1946622824               |
| SNP_P3_137444_260975 | NW_004516185.1 | Scaffold812 | 260975                  | AA                              | GG                | 1946622826               |
| SNP_P3_137445_261243 | NW_004516185.1 | Scaffold812 | 261243                  | CC                              | TT                | 1946622828               |
| SNP_P3_137446_262133 | NW_004516185.1 | Scaffold812 | 262133                  | CC                              | TT                | 1946622830               |
| SNP_P3_137447_262711 | NW_004516185.1 | Scaffold812 | 262711                  | TT                              | CC                | 1946622832               |
| SNP_P3_137448_265270 | NW_004516185.1 | Scaffold812 | 265270                  | AA                              | GG                | 1946622834               |
| SNP_P3_137449_269464 | NW_004516185.1 | Scaffold812 | 269464                  | CC                              | GG                | 1946622836               |
| SNP_P3_137450_269572 | NW_004516185.1 | Scaffold812 | 269572                  | GG                              | AA                | 1946622838               |
| SNP_P3_137451_271702 | NW_004516185.1 | Scaffold812 | 271702                  | CC                              | GG                | 1946622840               |
| SNP_P3_137452_273094 | NW_004516185.1 | Scaffold812 | 273094                  | TT                              | CC                | 1946622842               |
| SNP_P3_137453_274359 | NW_004516185.1 | Scaffold812 | 274359                  | GG                              | CC                | 1946622844               |
| SNP_P3_137454_274884 | NW_004516185.1 | Scaffold812 | 274884                  | TT                              | AA                | 1946622845               |
| SNP_P3_137455_276787 | NW_004516185.1 | Scaffold812 | 276787                  | AA                              | GG                | 1946622847               |
| SNP_P3_137456_276803 | NW_004516185.1 | Scaffold812 | 276803                  | CC                              | GG                | 1946622849               |
| SNP_P3_137457_279319 | NW_004516185.1 | Scaffold812 | 279319                  | GG                              | AA                | 1946622851               |
| SNP_P3_137458_282666 | NW_004516185.1 | Scaffold812 | 282666                  | TT                              | AA                | 1946622853               |
| SNP_P3_137460_283601 | NW_004516185.1 | Scaffold812 | 283601                  | GG                              | TT                | 1946622855               |
| SNP_P3_137461_295114 | NW_004516185.1 | Scaffold812 | 295114                  | AA                              | TT                | 1946622857               |
| SNP_P3_137462_297551 | NW_004516185.1 | Scaffold812 | 297551                  | TT                              | CC                | 1946622859               |
| SNP_P3_137463_297555 | NW_004516185.1 | Scaffold812 | 297555                  | TT                              | GG                | 1946622862               |
| SNP_P3_137464_297820 | NW_004516185.1 | Scaffold812 | 297820                  | CC                              | TT                | 1946622864               |
| SNP_P3_137465_302571 | NW_004516185.1 | Scaffold812 | 302571                  | GG                              | AA                | 1946622865               |
| SNP_P3_137466_310747 | NW_004516185.1 | Scaffold812 | 310747                  | TT                              | CC                | 1946622867               |
| SNP_P3_137468_315760 | NW_004516185.1 | Scaffold812 | 315760                  | AA                              | GG                | 1946622869               |
| SNP_P3_137470_323487 | NW_004516185.1 | Scaffold812 | 323487                  | GG                              | CC                | 1946622871               |
| SNP_P3_137472_325988 | NW_004516185.1 | Scaffold812 | 325988                  | CC                              | TT                | 1946622873               |

| SNPs IDs             | Chromosome IDs | Chromosomes | Physical positions (bp) | CDC Frontier (Reference genome) | (Pusa 256 & HPNB) | NCBI SNPdb Accession IDs |
|----------------------|----------------|-------------|-------------------------|---------------------------------|-------------------|--------------------------|
| SNP_P3_137473_326398 | NW_004516185.1 | Scaffold812 | 326398                  | GG                              | TT                | 1946622875               |
| SNP_P3_137474_327319 | NW_004516185.1 | Scaffold812 | 327319                  | CC                              | TT                | 1946622877               |
| SNP_P3_137475_333156 | NW_004516185.1 | Scaffold812 | 333156                  | CC                              | GG                | 1946622879               |
| SNP_P3_137476_334476 | NW_004516185.1 | Scaffold812 | 334476                  | TT                              | CC                | 1946622881               |
| SNP_P3_137479_350050 | NW_004516185.1 | Scaffold812 | 350050                  | CC                              | TT                | 1946622883               |
| SNP_P3_137480_352165 | NW_004516185.1 | Scaffold812 | 352165                  | TT                              | CC                | 1946622885               |
| SNP_P3_137481_354063 | NW_004516185.1 | Scaffold812 | 354063                  | GG                              | AA                | 1946622887               |
| SNP_P3_137483_356838 | NW_004516185.1 | Scaffold812 | 356838                  | GG                              | AA                | 1946622889               |
| SNP_P3_137484_358450 | NW_004516185.1 | Scaffold812 | 358450                  | AA                              | TT                | 1946622891               |
| SNP_P3_137485_358472 | NW_004516185.1 | Scaffold812 | 358472                  | GG                              | TT                | 1946622893               |
| SNP_P3_137486_358497 | NW_004516185.1 | Scaffold812 | 358497                  | TT                              | CC                | 1946622896               |
| SNP_P3_137487_358523 | NW_004516185.1 | Scaffold812 | 358523                  | AA                              | TT                | 1946622898               |
| SNP_P3_137488_358708 | NW_004516185.1 | Scaffold812 | 358708                  | AA                              | TT                | 1946622900               |
| SNP_P3_137489_367487 | NW_004516185.1 | Scaffold812 | 367487                  | CC                              | TT                | 1946622902               |
| SNP_P3_137490_368697 | NW_004516185.1 | Scaffold812 | 368697                  | AA                              | GG                | 1946622904               |
| SNP_P3_137491_371546 | NW_004516185.1 | Scaffold812 | 371546                  | CC                              | AA                | 1946622906               |
| SNP_P3_137492_371560 | NW_004516185.1 | Scaffold812 | 371560                  | AA                              | TT                | 1946622907               |
| SNP_P3_137493_371583 | NW_004516185.1 | Scaffold812 | 371583                  | AA                              | TT                | 1946622909               |
| SNP_P3_137495_376018 | NW_004516185.1 | Scaffold812 | 376018                  | AA                              | GG                | 1946622911               |
| SNP_P3_137496_392646 | NW_004516185.1 | Scaffold812 | 392646                  | GG                              | AA                | 1946622913               |
| SNP_P3_137497_414603 | NW_004516185.1 | Scaffold812 | 414603                  | TT                              | CC                | 1946622915               |
| SNP_P3_137498_415705 | NW_004516185.1 | Scaffold812 | 415705                  | TT                              | AA                | 1946622917               |
| SNP_P3_137499_415739 | NW_004516185.1 | Scaffold812 | 415739                  | AA                              | GG                | 1946622919               |
| SNP_P3_137500_416125 | NW_004516185.1 | Scaffold812 | 416125                  | AA                              | GG                | 1946622921               |
| SNP_P3_137501_416529 | NW_004516185.1 | Scaffold812 | 416529                  | TT                              | CC                | 1946622923               |
| SNP_P3_137502_416815 | NW_004516185.1 | Scaffold812 | 416815                  | TT                              | CC                | 1946622925               |
| SNP_P3_137503_422066 | NW_004516185.1 | Scaffold812 | 422066                  | AA                              | CC                | 1946622927               |
| SNP_P3_137504_422481 | NW_004516185.1 | Scaffold812 | 422481                  | AA                              | GG                | 1946622929               |
| SNP_P3_137505_422554 | NW_004516185.1 | Scaffold812 | 422554                  | TT                              | CC                | 1946622931               |
| SNP_P3_137507_428627 | NW_004516185.1 | Scaffold812 | 428627                  | GG                              | TT                | 1946622933               |
| SNP_P3_137508_449720 | NW_004516185.1 | Scaffold812 | 449720                  | GG                              | AA                | 1946622935               |
| SNP_P3_137510_469760 | NW_004516185.1 | Scaffold812 | 469760                  | AA                              | GG                | 1946622937               |
| SNP_P3_137511_470357 | NW_004516185.1 | Scaffold812 | 470357                  | AA                              | GG                | 1946622939               |
| SNP_P3_137512_470369 | NW_004516185.1 | Scaffold812 | 470369                  | AA                              | TT                | 1946622941               |
| SNP_P3_137513_470707 | NW_004516185.1 | Scaffold812 | 470707                  | TT                              | GG                | 1946622943               |
| SNP_P3_137514_470717 | NW_004516185.1 | Scaffold812 | 470717                  | CC                              | GG                | 1946622945               |
| SNP_P3_137515_470747 | NW_004516185.1 | Scaffold812 | 470747                  | TT                              | AA                | 1946622947               |
| SNP_P3_137516_470752 | NW_004516185.1 | Scaffold812 | 470752                  | GG                              | AA                | 1946622949               |
| SNP_P3_137517_470755 | NW_004516185.1 | Scaffold812 | 470755                  | TT                              | GG                | 1946622951               |
| SNP_P3_137518_470765 | NW_004516185.1 | Scaffold812 | 470765                  | CC                              | AA                | 1946622953               |
| SNP_P3_137519_470770 | NW_004516185.1 | Scaffold812 | 470770                  | AA                              | GG                | 1946622955               |
| SNP_P3_137521_471519 | NW_004516185.1 | Scaffold812 | 471519                  | TT                              | GG                | 1946622957               |

| SNPs IDs             | Chromosome IDs | Chromosomes | Physical positions (bp) | CDC Frontier (Reference genome) | (Pusa 256 & HPNB) | NCBI SNPdb Accession IDs |
|----------------------|----------------|-------------|-------------------------|---------------------------------|-------------------|--------------------------|
| SNP_P3_137522_475082 | NW_004516185.1 | Scaffold812 | 475082                  | GG                              | TT                | 1946622959               |
| SNP_P3_137523_480922 | NW_004516185.1 | Scaffold812 | 480922                  | AA                              | GG                | 1946622961               |
| SNP_P3_137524_486981 | NW_004516185.1 | Scaffold812 | 486981                  | GG                              | CC                | 1946622963               |
| SNP_P3_137525_487058 | NW_004516185.1 | Scaffold812 | 487058                  | TT                              | CC                | 1946622965               |
| SNP_P3_137526_487067 | NW_004516185.1 | Scaffold812 | 487067                  | GG                              | AA                | 1946622967               |
| SNP_P3_137527_487068 | NW_004516185.1 | Scaffold812 | 487068                  | TT                              | CC                | 1946622969               |
| SNP_P3_137528_487198 | NW_004516185.1 | Scaffold812 | 487198                  | TT                              | CC                | 1946622971               |
| SNP_P3_137529_487318 | NW_004516185.1 | Scaffold812 | 487318                  | CC                              | GG                | 1946622973               |
| SNP_P3_137530_487327 | NW_004516185.1 | Scaffold812 | 487327                  | TT                              | CC                | 1946622975               |
| SNP_P3_137532_487375 | NW_004516185.1 | Scaffold812 | 487375                  | TT                              | AA                | 1946622977               |
| SNP_P3_137533_487403 | NW_004516185.1 | Scaffold812 | 487403                  | GG                              | AA                | 1946622982               |
| SNP_P3_137534_489548 | NW_004516185.1 | Scaffold812 | 489548                  | GG                              | AA                | 1946622984               |
| SNP_P3_137536_494428 | NW_004516185.1 | Scaffold812 | 494428                  | TT                              | CC                | 1946622987               |
| SNP_P3_137537_499484 | NW_004516185.1 | Scaffold812 | 499484                  | GG                              | AA                | 1946622989               |
| SNP_P3_137538_499486 | NW_004516185.1 | Scaffold812 | 499486                  | CC                              | AA                | 1946622991               |
| SNP_P3_137539_521086 | NW_004516185.1 | Scaffold812 | 521086                  | GG                              | TT                | 1946622994               |
| SNP_P3_137541_525800 | NW_004516185.1 | Scaffold812 | 525800                  | GG                              | AA                | 1946622997               |
| SNP_P3_137542_525899 | NW_004516185.1 | Scaffold812 | 525899                  | CC                              | TT                | 1946622999               |
| SNP_P3_137544_525993 | NW_004516185.1 | Scaffold812 | 525993                  | CC                              | TT                | 1946623002               |
| SNP_P3_137545_526012 | NW_004516185.1 | Scaffold812 | 526012                  | TT                              | CC                | 1946623004               |
| SNP_P3_137547_526056 | NW_004516185.1 | Scaffold812 | 526056                  | CC                              | TT                | 1946623006               |
| SNP_P3_137548_526118 | NW_004516185.1 | Scaffold812 | 526118                  | TT                              | CC                | 1946623008               |
| SNP_P3_137549_526260 | NW_004516185.1 | Scaffold812 | 526260                  | AA                              | TT                | 1946623010               |
| SNP_P3_137550_526344 | NW_004516185.1 | Scaffold812 | 526344                  | AA                              | TT                | 1946623012               |
| SNP_P3_137551_530388 | NW_004516185.1 | Scaffold812 | 530388                  | AA                              | CC                | 1946623014               |
| SNP_P3_137552_539233 | NW_004516185.1 | Scaffold812 | 539233                  | AA                              | TT                | 1946623016               |
| SNP_P3_137554_544290 | NW_004516185.1 | Scaffold812 | 544290                  | CC                              | TT                | 1946623018               |
| SNP_P3_137555_544690 | NW_004516185.1 | Scaffold812 | 544690                  | CC                              | AA                | 1946623020               |
| SNP_P3_137556_547809 | NW_004516185.1 | Scaffold812 | 547809                  | TT                              | CC                | 1946623022               |
| SNP_P3_137557_548328 | NW_004516185.1 | Scaffold812 | 548328                  | TT                              | CC                | 1946623025               |
| SNP_P3_137558_548873 | NW_004516185.1 | Scaffold812 | 548873                  | CC                              | TT                | 1946623027               |
| SNP_P3_137559_548963 | NW_004516185.1 | Scaffold812 | 548963                  | GG                              | TT                | 1946623030               |
| SNP_P3_137560_554119 | NW_004516185.1 | Scaffold812 | 554119                  | AA                              | CC                | 1946623032               |
| SNP_P3_137561_556440 | NW_004516185.1 | Scaffold812 | 556440                  | AA                              | GG                | 1946623034               |
| SNP_P3_137562_3015   | NW_004516186.1 | Scaffold814 | 3015                    | TT                              | CC                | 1946623036               |
| SNP_P3_137563_3030   | NW_004516186.1 | Scaffold814 | 3030                    | TT                              | CC                | 1946623038               |
| SNP_P3_137564_3033   | NW_004516186.1 | Scaffold814 | 3033                    | CC                              | TT                | 1946623041               |
| SNP_P3_137565_3083   | NW_004516186.1 | Scaffold814 | 3083                    | AA                              | GG                | 1946623043               |
| SNP_P3_137566_3321   | NW_004516186.1 | Scaffold814 | 3321                    | TT                              | AA                | 1946623046               |
| SNP_P3_137567_3431   | NW_004516186.1 | Scaffold814 | 3431                    | CC                              | TT                | 1946623048               |
| SNP_P3_137568_3510   | NW_004516186.1 | Scaffold814 | 3510                    | GG                              | TT                | 1946623051               |
| SNP_P3_137569_3532   | NW_004516186.1 | Scaffold814 | 3532                    | GG                              | TT                | 1946623053               |

| SNPs IDs            | Chromosome IDs | Chromosomes | Physical positions (bp) | CDC Frontier (Reference genome) | (Pusa 256 & HPNB) | NCBI SNPdb Accession IDs |
|---------------------|----------------|-------------|-------------------------|---------------------------------|-------------------|--------------------------|
| SNP_P3_137571_20239 | NW_004516186.1 | Scaffold814 | 20239                   | AA                              | CC                | 1946623055               |
| SNP_P3_137572_20476 | NW_004516186.1 | Scaffold814 | 20476                   | AA                              | TT                | 1946623057               |
| SNP_P3_137573_20484 | NW_004516186.1 | Scaffold814 | 20484                   | GG                              | TT                | 1946623059               |
| SNP_P3_137574_20485 | NW_004516186.1 | Scaffold814 | 20485                   | GG                              | TT                | 1946623062               |
| SNP_P3_137576_22784 | NW_004516186.1 | Scaffold814 | 22784                   | GG                              | TT                | 1946623064               |
| SNP_P3_137577_25951 | NW_004516186.1 | Scaffold814 | 25951                   | GG                              | AA                | 1946623066               |
| SNP_P3_137578_26273 | NW_004516186.1 | Scaffold814 | 26273                   | CC                              | TT                | 1946623068               |
| SNP_P3_137579_27641 | NW_004516186.1 | Scaffold814 | 27641                   | AA                              | TT                | 1946623070               |
| SNP_P3_137580_28721 | NW_004516186.1 | Scaffold814 | 28721                   | CC                              | TT                | 1946623072               |
| SNP_P3_137581_39755 | NW_004516186.1 | Scaffold814 | 39755                   | AA                              | CC                | 1946623074               |
| SNP_P3_137582_39946 | NW_004516186.1 | Scaffold814 | 39946                   | TT                              | CC                | 1946623077               |
| SNP_P3_137583_40067 | NW_004516186.1 | Scaffold814 | 40067                   | AA                              | TT                | 1946623079               |
| SNP_P3_137584_40146 | NW_004516186.1 | Scaffold814 | 40146                   | CC                              | TT                | 1946623081               |
| SNP_P3_137585_40421 | NW_004516186.1 | Scaffold814 | 40421                   | TT                              | GG                | 1946623083               |
| SNP_P3_137586_41055 | NW_004516186.1 | Scaffold814 | 41055                   | TT                              | AA                | 1946623085               |
| SNP_P3_137587_41240 | NW_004516186.1 | Scaffold814 | 41240                   | AA                              | CC                | 1946623087               |
| SNP_P3_137588_41241 | NW_004516186.1 | Scaffold814 | 41241                   | GG                              | CC                | 1946623089               |
| SNP_P3_137589_41260 | NW_004516186.1 | Scaffold814 | 41260                   | AA                              | GG                | 1946623091               |
| SNP_P3_137590_41290 | NW_004516186.1 | Scaffold814 | 41290                   | AA                              | TT                | 1946623094               |
| SNP_P3_137591_41351 | NW_004516186.1 | Scaffold814 | 41351                   | GG                              | AA                | 1946623096               |
| SNP_P3_137592_41456 | NW_004516186.1 | Scaffold814 | 41456                   | GG                              | AA                | 1946623099               |
| SNP_P3_137593_41594 | NW_004516186.1 | Scaffold814 | 41594                   | AA                              | TT                | 1946623101               |
| SNP_P3_137594_41754 | NW_004516186.1 | Scaffold814 | 41754                   | TT                              | GG                | 1946623103               |
| SNP_P3_137595_41915 | NW_004516186.1 | Scaffold814 | 41915                   | GG                              | TT                | 1946623105               |
| SNP_P3_137596_42077 | NW_004516186.1 | Scaffold814 | 42077                   | GG                              | TT                | 1946623107               |
| SNP_P3_137597_42516 | NW_004516186.1 | Scaffold814 | 42516                   | CC                              | TT                | 1946623109               |
| SNP_P3_137598_46460 | NW_004516186.1 | Scaffold814 | 46460                   | GG                              | AA                | 1946623111               |
| SNP_P3_137599_46718 | NW_004516186.1 | Scaffold814 | 46718                   | GG                              | CC                | 1946623113               |
| SNP_P3_137600_46790 | NW_004516186.1 | Scaffold814 | 46790                   | AA                              | GG                | 1946623115               |
| SNP_P3_137601_4710  | NW_004516188.1 | Scaffold817 | 4710                    | TT                              | CC                | 1946623117               |
| SNP_P3_137602_4711  | NW_004516188.1 | Scaffold817 | 4711                    | GG                              | AA                | 1946623119               |
| SNP_P3_137603_5351  | NW_004516188.1 | Scaffold817 | 5351                    | CC                              | GG                | 1946623121               |
| SNP_P3_137604_6927  | NW_004516188.1 | Scaffold817 | 6927                    | CC                              | TT                | 1946623123               |
| SNP_P3_137605_6962  | NW_004516188.1 | Scaffold817 | 6962                    | GG                              | AA                | 1946623125               |
| SNP_P3_137606_15457 | NW_004516188.1 | Scaffold817 | 15457                   | GG                              | TT                | 1946623127               |
| SNP_P3_137607_1276  | NW_004516189.1 | Scaffold818 | 1276                    | CC                              | GG                | 1946623129               |
| SNP_P3_137608_1491  | NW_004516189.1 | Scaffold818 | 1491                    | CC                              | AA                | 1946623132               |
| SNP_P3_137609_1892  | NW_004516189.1 | Scaffold818 | 1892                    | CC                              | GG                | 1946623134               |
| SNP_P3_137610_1997  | NW_004516189.1 | Scaffold818 | 1997                    | GG                              | TT                | 1946623136               |
| SNP_P3_137611_2007  | NW_004516189.1 | Scaffold818 | 2007                    | CC                              | TT                | 1946623138               |
| SNP_P3_137612_2067  | NW_004516189.1 | Scaffold818 | 2067                    | CC                              | TT                | 1946623139               |
| SNP_P3_137613_2230  | NW_004516189.1 | Scaffold818 | 2230                    | GG                              | CC                | 1946623142               |



| SNPs IDs            | Chromosome IDs | Chromosomes | Physical positions (bp) | CDC Frontier (Reference genome) | (Pusa 256 & HPNB) | NCBI SNPdb Accession IDs |
|---------------------|----------------|-------------|-------------------------|---------------------------------|-------------------|--------------------------|
| SNP_P3_137614_13758 | NW_004516191.1 | Scaffold820 | 13758                   | GG                              | AA                | 1946623144               |
| SNP_P3_137615_13789 | NW_004516191.1 | Scaffold820 | 13789                   | CC                              | GG                | 1946623146               |
| SNP_P3_137617_15270 | NW_004516191.1 | Scaffold820 | 15270                   | AA                              | GG                | 1946623148               |
| SNP_P3_137618_15854 | NW_004516191.1 | Scaffold820 | 15854                   | TT                              | CC                | 1946623150               |
| SNP_P3_137619_15867 | NW_004516191.1 | Scaffold820 | 15867                   | TT                              | CC                | 1946623152               |
| SNP_P3_137620_15871 | NW_004516191.1 | Scaffold820 | 15871                   | AA                              | CC                | 1946623154               |
| SNP_P3_137621_16405 | NW_004516191.1 | Scaffold820 | 16405                   | CC                              | GG                | 1946623156               |
| SNP_P3_137622_16430 | NW_004516191.1 | Scaffold820 | 16430                   | TT                              | GG                | 1946623158               |
| SNP_P3_137623_22105 | NW_004516191.1 | Scaffold820 | 22105                   | GG                              | AA                | 1946623160               |
| SNP_P3_137624_25318 | NW_004516191.1 | Scaffold820 | 25318                   | GG                              | AA                | 1946623163               |
| SNP_P3_137626_30402 | NW_004516191.1 | Scaffold820 | 30402                   | CC                              | GG                | 1946623169               |
| SNP_P3_137627_30417 | NW_004516191.1 | Scaffold820 | 30417                   | GG                              | AA                | 1946623171               |
| SNP_P3_137628_35334 | NW_004516191.1 | Scaffold820 | 35334                   | TT                              | CC                | 1946623173               |
| SNP_P3_137629_35727 | NW_004516191.1 | Scaffold820 | 35727                   | CC                              | AA                | 1946623176               |
| SNP_P3_137630_35748 | NW_004516191.1 | Scaffold820 | 35748                   | AA                              | TT                | 1946623178               |
| SNP_P3_137631_35752 | NW_004516191.1 | Scaffold820 | 35752                   | CC                              | TT                | 1946623180               |
| SNP_P3_137632_36759 | NW_004516191.1 | Scaffold820 | 36759                   | AA                              | GG                | 1946623182               |
| SNP_P3_137633_37445 | NW_004516191.1 | Scaffold820 | 37445                   | AA                              | CC                | 1946623184               |
| SNP_P3_137634_37486 | NW_004516191.1 | Scaffold820 | 37486                   | TT                              | CC                | 1946623186               |
| SNP_P3_137635_37490 | NW_004516191.1 | Scaffold820 | 37490                   | GG                              | AA                | 1946623188               |
| SNP_P3_137636_37494 | NW_004516191.1 | Scaffold820 | 37494                   | TT                              | AA                | 1946623190               |
| SNP_P3_137637_37526 | NW_004516191.1 | Scaffold820 | 37526                   | AA                              | GG                | 1946623192               |
| SNP_P3_137638_37553 | NW_004516191.1 | Scaffold820 | 37553                   | GG                              | AA                | 1946623194               |
| SNP_P3_137639_37584 | NW_004516191.1 | Scaffold820 | 37584                   | TT                              | GG                | 1946623196               |
| SNP_P3_137640_37606 | NW_004516191.1 | Scaffold820 | 37606                   | CC                              | TT                | 1946623198               |
| SNP_P3_137641_37839 | NW_004516191.1 | Scaffold820 | 37839                   | GG                              | AA                | 1946623200               |
| SNP_P3_137642_39936 | NW_004516191.1 | Scaffold820 | 39936                   | GG                              | AA                | 1946623203               |
| SNP_P3_137644_41188 | NW_004516191.1 | Scaffold820 | 41188                   | TT                              | AA                | 1946623205               |
| SNP_P3_137645_60166 | NW_004516191.1 | Scaffold820 | 60166                   | GG                              | TT                | 1946623207               |
| SNP_P3_137646_60167 | NW_004516191.1 | Scaffold820 | 60167                   | AA                              | CC                | 1946623209               |
| SNP_P3_137648_16034 | NW_004516194.1 | Scaffold823 | 16034                   | AA                              | TT                | 1946623211               |
| SNP_P3_137649_21925 | NW_004516194.1 | Scaffold823 | 21925                   | CC                              | TT                | 1946623212               |
| SNP_P3_137650_22758 | NW_004516194.1 | Scaffold823 | 22758                   | TT                              | GG                | 1946623213               |
| SNP_P3_137651_22826 | NW_004516194.1 | Scaffold823 | 22826                   | GG                              | AA                | 1946623214               |
| SNP_P3_137652_22833 | NW_004516194.1 | Scaffold823 | 22833                   | CC                              | TT                | 1946623215               |
| SNP_P3_137653_23973 | NW_004516194.1 | Scaffold823 | 23973                   | AA                              | TT                | 1946623216               |
| SNP_P3_137654_23983 | NW_004516194.1 | Scaffold823 | 23983                   | AA                              | GG                | 1946623217               |
| SNP_P3_137655_24535 | NW_004516194.1 | Scaffold823 | 24535                   | CC                              | GG                | 1946623218               |
| SNP_P3_137656_24547 | NW_004516194.1 | Scaffold823 | 24547                   | AA                              | CC                | 1946623219               |
| SNP_P3_137657_24589 | NW_004516194.1 | Scaffold823 | 24589                   | CC                              | AA                | 1946623220               |
| SNP_P3_137658_24618 | NW_004516194.1 | Scaffold823 | 24618                   | AA                              | GG                | 1946623221               |
| SNP_P3_137659_24635 | NW_004516194.1 | Scaffold823 | 24635                   | AA                              | TT                | 1946623222               |

| SNPs IDs            | Chromosome IDs | Chromosomes | Physical positions (bp) | CDC Frontier (Reference genome) | (Pusa 256 & HPNB) | NCBI SNPdb Accession IDs |
|---------------------|----------------|-------------|-------------------------|---------------------------------|-------------------|--------------------------|
| SNP_P3_137660_24718 | NW_004516194.1 | Scaffold823 | 24718                   | CC                              | TT                | 1946623223               |
| SNP_P3_137661_24744 | NW_004516194.1 | Scaffold823 | 24744                   | TT                              | AA                | 1946623224               |
| SNP_P3_137662_24746 | NW_004516194.1 | Scaffold823 | 24746                   | AA                              | GG                | 1946623226               |
| SNP_P3_137664_28088 | NW_004516194.1 | Scaffold823 | 28088                   | GG                              | AA                | 1946623228               |
| SNP_P3_137665_28092 | NW_004516194.1 | Scaffold823 | 28092                   | CC                              | TT                | 1946623230               |
| SNP_P3_137666_28296 | NW_004516194.1 | Scaffold823 | 28296                   | TT                              | CC                | 1946623232               |
| SNP_P3_137667_28344 | NW_004516194.1 | Scaffold823 | 28344                   | AA                              | CC                | 1946623234               |
| SNP_P3_137668_28358 | NW_004516194.1 | Scaffold823 | 28358                   | TT                              | CC                | 1946623236               |
| SNP_P3_137669_28360 | NW_004516194.1 | Scaffold823 | 28360                   | CC                              | TT                | 1946623238               |
| SNP_P3_137670_28386 | NW_004516194.1 | Scaffold823 | 28386                   | CC                              | TT                | 1946623240               |
| SNP_P3_137671_28415 | NW_004516194.1 | Scaffold823 | 28415                   | CC                              | AA                | 1946623241               |
| SNP_P3_137672_28439 | NW_004516194.1 | Scaffold823 | 28439                   | CC                              | AA                | 1946623243               |
| SNP_P3_137673_28464 | NW_004516194.1 | Scaffold823 | 28464                   | CC                              | AA                | 1946623245               |
| SNP_P3_137674_28507 | NW_004516194.1 | Scaffold823 | 28507                   | TT                              | CC                | 1946623247               |
| SNP_P3_137675_28509 | NW_004516194.1 | Scaffold823 | 28509                   | AA                              | GG                | 1946623249               |
| SNP_P3_137676_28514 | NW_004516194.1 | Scaffold823 | 28514                   | TT                              | CC                | 1946623251               |
| SNP_P3_137677_28613 | NW_004516194.1 | Scaffold823 | 28613                   | GG                              | AA                | 1946623253               |
| SNP_P3_137678_28628 | NW_004516194.1 | Scaffold823 | 28628                   | CC                              | AA                | 1946623255               |
| SNP_P3_137679_28661 | NW_004516194.1 | Scaffold823 | 28661                   | TT                              | GG                | 1946623258               |
| SNP_P3_137680_28682 | NW_004516194.1 | Scaffold823 | 28682                   | CC                              | AA                | 1946623260               |
| SNP_P3_137681_28716 | NW_004516194.1 | Scaffold823 | 28716                   | GG                              | AA                | 1946623262               |
| SNP_P3_137682_28717 | NW_004516194.1 | Scaffold823 | 28717                   | GG                              | TT                | 1946623264               |
| SNP_P3_137683_28769 | NW_004516194.1 | Scaffold823 | 28769                   | GG                              | CC                | 1946623266               |
| SNP_P3_137684_28790 | NW_004516194.1 | Scaffold823 | 28790                   | TT                              | CC                | 1946623268               |
| SNP_P3_137685_28792 | NW_004516194.1 | Scaffold823 | 28792                   | GG                              | TT                | 1946623270               |
| SNP_P3_137686_47551 | NW_004516194.1 | Scaffold823 | 47551                   | AA                              | TT                | 1946623272               |
| SNP_P3_137687_47632 | NW_004516194.1 | Scaffold823 | 47632                   | CC                              | GG                | 1946623274               |
| SNP_P3_137688_47654 | NW_004516194.1 | Scaffold823 | 47654                   | GG                              | CC                | 1946623276               |
| SNP_P3_137689_47683 | NW_004516194.1 | Scaffold823 | 47683                   | TT                              | CC                | 1946623278               |
| SNP_P3_137690_47691 | NW_004516194.1 | Scaffold823 | 47691                   | TT                              | CC                | 1946623279               |
| SNP_P3_137691_47817 | NW_004516194.1 | Scaffold823 | 47817                   | TT                              | CC                | 1946623281               |
| SNP_P3_137692_47837 | NW_004516194.1 | Scaffold823 | 47837                   | AA                              | CC                | 1946623283               |
| SNP_P3_137693_48128 | NW_004516194.1 | Scaffold823 | 48128                   | TT                              | CC                | 1946623285               |
| SNP_P3_137694_48208 | NW_004516194.1 | Scaffold823 | 48208                   | AA                              | TT                | 1946623288               |
| SNP_P3_137695_48216 | NW_004516194.1 | Scaffold823 | 48216                   | AA                              | CC                | 1946623290               |
| SNP_P3_137696_49401 | NW_004516194.1 | Scaffold823 | 49401                   | TT                              | GG                | 1946623292               |
| SNP_P3_137697_49547 | NW_004516194.1 | Scaffold823 | 49547                   | GG                              | AA                | 1946623294               |
| SNP_P3_137698_49601 | NW_004516194.1 | Scaffold823 | 49601                   | AA                              | TT                | 1946623295               |
| SNP_P3_137699_49643 | NW_004516194.1 | Scaffold823 | 49643                   | AA                              | GG                | 1946623297               |
| SNP_P3_137700_49731 | NW_004516194.1 | Scaffold823 | 49731                   | CC                              | TT                | 1946623299               |
| SNP_P3_137701_49958 | NW_004516194.1 | Scaffold823 | 49958                   | TT                              | CC                | 1946623301               |
| SNP_P3_137702_49976 | NW_004516194.1 | Scaffold823 | 49976                   | AA                              | GG                | 1946623303               |

| SNPs IDs            | Chromosome IDs | Chromosomes | Physical positions (bp) | CDC Frontier (Reference genome) | (Pusa 256 & HPNB) | NCBI SNPdb Accession IDs |
|---------------------|----------------|-------------|-------------------------|---------------------------------|-------------------|--------------------------|
| SNP_P3_137703_49984 | NW_004516194.1 | Scaffold823 | 49984                   | CC                              | TT                | 1946623305               |
| SNP_P3_137704_53437 | NW_004516194.1 | Scaffold823 | 53437                   | CC                              | GG                | 1946623307               |
| SNP_P3_137705_53442 | NW_004516194.1 | Scaffold823 | 53442                   | GG                              | TT                | 1946623309               |
| SNP_P3_137706_53794 | NW_004516194.1 | Scaffold823 | 53794                   | TT                              | CC                | 1946623311               |
| SNP_P3_137707_53868 | NW_004516194.1 | Scaffold823 | 53868                   | TT                              | AA                | 1946623313               |
| SNP_P3_137708_53932 | NW_004516194.1 | Scaffold823 | 53932                   | AA                              | TT                | 1946623315               |
| SNP_P3_137709_53939 | NW_004516194.1 | Scaffold823 | 53939                   | TT                              | CC                | 1946623317               |
| SNP_P3_137710_53970 | NW_004516194.1 | Scaffold823 | 53970                   | GG                              | AA                | 1946623319               |
| SNP_P3_137711_53989 | NW_004516194.1 | Scaffold823 | 53989                   | TT                              | CC                | 1946623322               |
| SNP_P3_137712_53990 | NW_004516194.1 | Scaffold823 | 53990                   | AA                              | GG                | 1946623324               |
| SNP_P3_137713_54489 | NW_004516194.1 | Scaffold823 | 54489                   | GG                              | AA                | 1946623326               |
| SNP_P3_137714_54522 | NW_004516194.1 | Scaffold823 | 54522                   | TT                              | AA                | 1946623328               |
| SNP_P3_137715_58544 | NW_004516194.1 | Scaffold823 | 58544                   | CC                              | TT                | 1946623330               |
| SNP_P3_137716_60166 | NW_004516194.1 | Scaffold823 | 60166                   | TT                              | CC                | 1946623332               |
| SNP_P3_137717_60461 | NW_004516194.1 | Scaffold823 | 60461                   | TT                              | CC                | 1946623333               |
| SNP_P3_137718_60481 | NW_004516194.1 | Scaffold823 | 60481                   | TT                              | CC                | 1946623335               |
| SNP_P3_137719_60509 | NW_004516194.1 | Scaffold823 | 60509                   | TT                              | AA                | 1946623337               |
| SNP_P3_137720_61732 | NW_004516194.1 | Scaffold823 | 61732                   | TT                              | AA                | 1946623339               |
| SNP_P3_137721_61969 | NW_004516194.1 | Scaffold823 | 61969                   | CC                              | TT                | 1946623341               |
| SNP_P3_137722_62011 | NW_004516194.1 | Scaffold823 | 62011                   | TT                              | AA                | 1946623343               |
| SNP_P3_137723_62073 | NW_004516194.1 | Scaffold823 | 62073                   | AA                              | GG                | 1946623345               |
| SNP_P3_137724_62131 | NW_004516194.1 | Scaffold823 | 62131                   | GG                              | AA                | 1946623347               |
| SNP_P3_137725_62138 | NW_004516194.1 | Scaffold823 | 62138                   | CC                              | TT                | 1946623349               |
| SNP_P3_137726_62402 | NW_004516194.1 | Scaffold823 | 62402                   | AA                              | CC                | 1946623351               |
| SNP_P3_137727_62412 | NW_004516194.1 | Scaffold823 | 62412                   | CC                              | TT                | 1946623352               |
| SNP_P3_137728_62432 | NW_004516194.1 | Scaffold823 | 62432                   | CC                              | TT                | 1946623354               |
| SNP_P3_137729_62507 | NW_004516194.1 | Scaffold823 | 62507                   | AA                              | CC                | 1946623357               |
| SNP_P3_137730_62826 | NW_004516194.1 | Scaffold823 | 62826                   | AA                              | TT                | 1946623359               |
| SNP_P3_137731_62839 | NW_004516194.1 | Scaffold823 | 62839                   | AA                              | GG                | 1946623361               |
| SNP_P3_137732_62933 | NW_004516194.1 | Scaffold823 | 62933                   | TT                              | CC                | 1946623363               |
| SNP_P3_137733_63040 | NW_004516194.1 | Scaffold823 | 63040                   | GG                              | AA                | 1946623365               |
| SNP_P3_137734_63157 | NW_004516194.1 | Scaffold823 | 63157                   | TT                              | AA                | 1946623367               |
| SNP_P3_137735_63320 | NW_004516194.1 | Scaffold823 | 63320                   | CC                              | GG                | 1946623369               |
| SNP_P3_137736_63434 | NW_004516194.1 | Scaffold823 | 63434                   | AA                              | GG                | 1946623371               |
| SNP_P3_137737_63541 | NW_004516194.1 | Scaffold823 | 63541                   | TT                              | AA                | 1946623373               |
| SNP_P3_137739_4616  | NW_004516195.1 | Scaffold824 | 4616                    | AA                              | TT                | 1946623375               |
| SNP_P3_137741_6345  | NW_004516195.1 | Scaffold824 | 6345                    | CC                              | AA                | 1946623377               |
| SNP_P3_137742_7112  | NW_004516195.1 | Scaffold824 | 7112                    | AA                              | TT                | 1946623379               |
| SNP_P3_137744_7136  | NW_004516195.1 | Scaffold824 | 7136                    | GG                              | TT                | 1946623380               |
| SNP_P3_137746_7156  | NW_004516195.1 | Scaffold824 | 7156                    | CC                              | TT                | 1946623382               |
| SNP_P3_137747_7219  | NW_004516195.1 | Scaffold824 | 7219                    | AA                              | GG                | 1946623384               |
| SNP_P3_137748_7224  | NW_004516195.1 | Scaffold824 | 7224                    | GG                              | TT                | 1946623386               |

| SNPs IDs            | Chromosome IDs | Chromosomes | Physical positions (bp) | CDC Frontier (Reference genome) | (Pusa 256 & HPNB) | NCBI SNPdb Accession IDs |
|---------------------|----------------|-------------|-------------------------|---------------------------------|-------------------|--------------------------|
| SNP_P3_137749_7281  | NW_004516195.1 | Scaffold824 | 7281                    | AA                              | TT                | 1946623388               |
| SNP_P3_137750_7289  | NW_004516195.1 | Scaffold824 | 7289                    | GG                              | TT                | 1946623390               |
| SNP_P3_137751_7290  | NW_004516195.1 | Scaffold824 | 7290                    | TT                              | GG                | 1946623392               |
| SNP_P3_137752_7316  | NW_004516195.1 | Scaffold824 | 7316                    | GG                              | TT                | 1946623395               |
| SNP_P3_137753_7460  | NW_004516195.1 | Scaffold824 | 7460                    | CC                              | TT                | 1946623397               |
| SNP_P3_137754_7652  | NW_004516195.1 | Scaffold824 | 7652                    | TT                              | CC                | 1946623399               |
| SNP_P3_137755_10322 | NW_004516195.1 | Scaffold824 | 10322                   | CC                              | GG                | 1946623401               |
| SNP_P3_137756_11445 | NW_004516195.1 | Scaffold824 | 11445                   | GG                              | TT                | 1946623403               |
| SNP_P3_137757_11447 | NW_004516195.1 | Scaffold824 | 11447                   | TT                              | AA                | 1946623405               |
| SNP_P3_137758_11465 | NW_004516195.1 | Scaffold824 | 11465                   | CC                              | AA                | 1946623407               |
| SNP_P3_137759_11781 | NW_004516195.1 | Scaffold824 | 11781                   | CC                              | TT                | 1946623408               |
| SNP_P3_137760_11788 | NW_004516195.1 | Scaffold824 | 11788                   | GG                              | AA                | 1946623410               |
| SNP_P3_137761_11795 | NW_004516195.1 | Scaffold824 | 11795                   | TT                              | AA                | 1946623412               |
| SNP_P3_137762_11822 | NW_004516195.1 | Scaffold824 | 11822                   | AA                              | TT                | 1946623414               |
| SNP_P3_137763_11880 | NW_004516195.1 | Scaffold824 | 11880                   | AA                              | TT                | 1946623416               |
| SNP_P3_137765_15866 | NW_004516195.1 | Scaffold824 | 15866                   | GG                              | AA                | 1946623418               |
| SNP_P3_137766_20326 | NW_004516195.1 | Scaffold824 | 20326                   | AA                              | GG                | 1946623420               |
| SNP_P3_137767_20632 | NW_004516195.1 | Scaffold824 | 20632                   | AA                              | TT                | 1946623422               |
| SNP_P3_137768_20850 | NW_004516195.1 | Scaffold824 | 20850                   | AA                              | GG                | 1946623424               |
| SNP_P3_137769_21226 | NW_004516195.1 | Scaffold824 | 21226                   | CC                              | TT                | 1946623426               |
| SNP_P3_137770_21302 | NW_004516195.1 | Scaffold824 | 21302                   | TT                              | GG                | 1946623428               |
| SNP_P3_137771_21311 | NW_004516195.1 | Scaffold824 | 21311                   | CC                              | TT                | 1946623431               |
| SNP_P3_137772_21351 | NW_004516195.1 | Scaffold824 | 21351                   | TT                              | CC                | 1946623433               |
| SNP_P3_137773_4464  | NW_004516196.1 | Scaffold825 | 4464                    | AA                              | GG                | 1946623435               |
| SNP_P3_137774_4716  | NW_004516196.1 | Scaffold825 | 4716                    | TT                              | AA                | 1946623437               |
| SNP_P3_137775_7343  | NW_004516196.1 | Scaffold825 | 7343                    | AA                              | GG                | 1946623439               |
| SNP_P3_137776_2388  | NW_004516198.1 | Scaffold829 | 2388                    | AA                              | TT                | 1946623441               |
| SNP_P3_137777_5381  | NW_004516198.1 | Scaffold829 | 5381                    | GG                              | AA                | 1946623443               |
| SNP_P3_137778_8049  | NW_004516198.1 | Scaffold829 | 8049                    | GG                              | AA                | 1946623445               |
| SNP_P3_137780_8357  | NW_004516198.1 | Scaffold829 | 8357                    | GG                              | TT                | 1946623447               |
| SNP_P3_137781_8378  | NW_004516198.1 | Scaffold829 | 8378                    | GG                              | AA                | 1946623449               |
| SNP_P3_137782_8409  | NW_004516198.1 | Scaffold829 | 8409                    | CC                              | TT                | 1946623451               |
| SNP_P3_137783_8619  | NW_004516198.1 | Scaffold829 | 8619                    | AA                              | GG                | 1946623453               |
| SNP_P3_137784_8671  | NW_004516198.1 | Scaffold829 | 8671                    | TT                              | CC                | 1946623455               |
| SNP_P3_137785_8680  | NW_004516198.1 | Scaffold829 | 8680                    | TT                              | CC                | 1946623457               |
| SNP_P3_137786_8749  | NW_004516198.1 | Scaffold829 | 8749                    | GG                              | AA                | 1946623459               |
| SNP_P3_137787_8774  | NW_004516198.1 | Scaffold829 | 8774                    | CC                              | TT                | 1946623461               |
| SNP_P3_137788_8778  | NW_004516198.1 | Scaffold829 | 8778                    | GG                              | AA                | 1946623464               |
| SNP_P3_137789_8783  | NW_004516198.1 | Scaffold829 | 8783                    | CC                              | TT                | 1946623466               |
| SNP_P3_137790_8845  | NW_004516198.1 | Scaffold829 | 8845                    | CC                              | TT                | 1946623468               |
| SNP_P3_137791_8935  | NW_004516198.1 | Scaffold829 | 8935                    | GG                              | CC                | 1946623470               |
| SNP_P3_137792_8976  | NW_004516198.1 | Scaffold829 | 8976                    | AA                              | CC                | 1946623472               |

| SNPs IDs            | Chromosome IDs | Chromosomes | Physical positions (bp) | CDC Frontier (Reference genome) | (Pusa 256 & HPNB) | NCBI SNPdb Accession IDs |
|---------------------|----------------|-------------|-------------------------|---------------------------------|-------------------|--------------------------|
| SNP_P3_137793_9026  | NW_004516198.1 | Scaffold829 | 9026                    | AA                              | CC                | 1946623474               |
| SNP_P3_137794_9041  | NW_004516198.1 | Scaffold829 | 9041                    | AA                              | GG                | 1946623476               |
| SNP_P3_137795_9045  | NW_004516198.1 | Scaffold829 | 9045                    | CC                              | GG                | 1946623478               |
| SNP_P3_137796_9145  | NW_004516198.1 | Scaffold829 | 9145                    | GG                              | CC                | 1946623480               |
| SNP_P3_137797_9148  | NW_004516198.1 | Scaffold829 | 9148                    | AA                              | GG                | 1946623482               |
| SNP_P3_137798_9151  | NW_004516198.1 | Scaffold829 | 9151                    | TT                              | AA                | 1946623484               |
| SNP_P3_137799_9256  | NW_004516198.1 | Scaffold829 | 9256                    | TT                              | CC                | 1946623486               |
| SNP_P3_137800_9263  | NW_004516198.1 | Scaffold829 | 9263                    | AA                              | GG                | 1946623488               |
| SNP_P3_137801_9287  | NW_004516198.1 | Scaffold829 | 9287                    | AA                              | GG                | 1946623490               |
| SNP_P3_137802_9300  | NW_004516198.1 | Scaffold829 | 9300                    | CC                              | TT                | 1946623492               |
| SNP_P3_137803_9496  | NW_004516198.1 | Scaffold829 | 9496                    | AA                              | GG                | 1946623494               |
| SNP_P3_137804_10623 | NW_004516198.1 | Scaffold829 | 10623                   | GG                              | AA                | 1946623496               |
| SNP_P3_137805_10624 | NW_004516198.1 | Scaffold829 | 10624                   | TT                              | AA                | 1946623498               |
| SNP_P3_137806_10738 | NW_004516198.1 | Scaffold829 | 10738                   | AA                              | GG                | 1946623500               |
| SNP_P3_137807_10773 | NW_004516198.1 | Scaffold829 | 10773                   | TT                              | GG                | 1946623502               |
| SNP_P3_137808_10779 | NW_004516198.1 | Scaffold829 | 10779                   | TT                              | GG                | 1946623504               |
| SNP_P3_137809_10818 | NW_004516198.1 | Scaffold829 | 10818                   | CC                              | TT                | 1946623506               |
| SNP_P3_137810_10855 | NW_004516198.1 | Scaffold829 | 10855                   | TT                              | CC                | 1946623508               |
| SNP_P3_137811_10904 | NW_004516198.1 | Scaffold829 | 10904                   | TT                              | AA                | 1946623510               |
| SNP_P3_137813_11096 | NW_004516198.1 | Scaffold829 | 11096                   | GG                              | AA                | 1946623512               |
| SNP_P3_137814_11253 | NW_004516198.1 | Scaffold829 | 11253                   | TT                              | GG                | 1946623513               |
| SNP_P3_137815_11504 | NW_004516198.1 | Scaffold829 | 11504                   | GG                              | AA                | 1946623515               |
| SNP_P3_137816_11512 | NW_004516198.1 | Scaffold829 | 11512                   | AA                              | GG                | 1946623517               |
| SNP_P3_137817_12295 | NW_004516198.1 | Scaffold829 | 12295                   | TT                              | AA                | 1946623520               |
| SNP_P3_137818_12375 | NW_004516198.1 | Scaffold829 | 12375                   | CC                              | TT                | 1946623522               |
| SNP_P3_137819_12529 | NW_004516198.1 | Scaffold829 | 12529                   | TT                              | GG                | 1946623524               |
| SNP_P3_137820_12630 | NW_004516198.1 | Scaffold829 | 12630                   | TT                              | AA                | 1946623526               |
| SNP_P3_137821_12702 | NW_004516198.1 | Scaffold829 | 12702                   | CC                              | TT                | 1946623528               |
| SNP_P3_137822_16706 | NW_004516198.1 | Scaffold829 | 16706                   | CC                              | TT                | 1946623530               |
| SNP_P3_137823_18593 | NW_004516198.1 | Scaffold829 | 18593                   | GG                              | AA                | 1946623532               |
| SNP_P3_137824_18676 | NW_004516198.1 | Scaffold829 | 18676                   | TT                              | CC                | 1946623534               |
| SNP_P3_137825_8417  | NW_004516199.1 | Scaffold831 | 8417                    | AA                              | GG                | 1946623535               |
| SNP_P3_137826_8482  | NW_004516199.1 | Scaffold831 | 8482                    | AA                              | GG                | 1946623537               |
| SNP_P3_137827_20348 | NW_004516199.1 | Scaffold831 | 20348                   | AA                              | GG                | 1946623539               |
| SNP_P3_137828_34655 | NW_004516199.1 | Scaffold831 | 34655                   | TT                              | CC                | 1946623541               |
| SNP_P3_137829_35005 | NW_004516199.1 | Scaffold831 | 35005                   | TT                              | AA                | 1946623543               |
| SNP_P3_137830_39149 | NW_004516199.1 | Scaffold831 | 39149                   | CC                              | GG                | 1946623545               |
| SNP_P3_137831_43625 | NW_004516199.1 | Scaffold831 | 43625                   | AA                              | TT                | 1946623547               |
| SNP_P3_137832_43881 | NW_004516199.1 | Scaffold831 | 43881                   | GG                              | TT                | 1946623549               |
| SNP_P3_137833_43912 | NW_004516199.1 | Scaffold831 | 43912                   | TT                              | GG                | 1946623551               |
| SNP_P3_137834_43969 | NW_004516199.1 | Scaffold831 | 43969                   | TT                              | CC                | 1946623553               |
| SNP_P3_137835_43980 | NW_004516199.1 | Scaffold831 | 43980                   | CC                              | AA                | 1946623555               |

| SNPs IDs            | Chromosome IDs | Chromosomes | Physical positions (bp) | CDC Frontier (Reference genome) | (Pusa 256 & HPNB) | NCBI SNPdb Accession IDs |
|---------------------|----------------|-------------|-------------------------|---------------------------------|-------------------|--------------------------|
| SNP_P3_137836_50798 | NW_004516199.1 | Scaffold831 | 50798                   | CC                              | TT                | 1946623557               |
| SNP_P3_137837_51585 | NW_004516199.1 | Scaffold831 | 51585                   | AA                              | CC                | 1946623558               |
| SNP_P3_137838_51797 | NW_004516199.1 | Scaffold831 | 51797                   | CC                              | GG                | 1946623560               |
| SNP_P3_137839_52432 | NW_004516199.1 | Scaffold831 | 52432                   | GG                              | TT                | 1946623563               |
| SNP_P3_137840_52463 | NW_004516199.1 | Scaffold831 | 52463                   | GG                              | AA                | 1946623564               |
| SNP_P3_137841_52525 | NW_004516199.1 | Scaffold831 | 52525                   | TT                              | CC                | 1946623566               |
| SNP_P3_137842_52910 | NW_004516199.1 | Scaffold831 | 52910                   | TT                              | AA                | 1946623568               |
| SNP_P3_137843_53765 | NW_004516199.1 | Scaffold831 | 53765                   | TT                              | CC                | 1946623570               |
| SNP_P3_137844_54105 | NW_004516199.1 | Scaffold831 | 54105                   | CC                              | AA                | 1946623572               |
| SNP_P3_137845_54143 | NW_004516199.1 | Scaffold831 | 54143                   | AA                              | GG                | 1946623574               |
| SNP_P3_137846_56896 | NW_004516199.1 | Scaffold831 | 56896                   | TT                              | AA                | 1946623576               |
| SNP_P3_137847_56906 | NW_004516199.1 | Scaffold831 | 56906                   | CC                              | AA                | 1946623578               |
| SNP_P3_137848_56920 | NW_004516199.1 | Scaffold831 | 56920                   | CC                              | GG                | 1946623580               |
| SNP_P3_137849_65384 | NW_004516199.1 | Scaffold831 | 65384                   | GG                              | AA                | 1946623582               |
| SNP_P3_137850_74965 | NW_004516199.1 | Scaffold831 | 74965                   | CC                              | AA                | 1946623584               |
| SNP_P3_137851_87991 | NW_004516199.1 | Scaffold831 | 87991                   | CC                              | TT                | 1946623586               |
| SNP_P3_137852_93126 | NW_004516199.1 | Scaffold831 | 93126                   | AA                              | TT                | 1946623588               |
| SNP_P3_137853_826   | NW_004516200.1 | Scaffold833 | 826                     | CC                              | TT                | 1946623590               |
| SNP_P3_137854_12126 | NW_004516200.1 | Scaffold833 | 12126                   | TT                              | AA                | 1946623592               |
| SNP_P3_137855_18452 | NW_004516200.1 | Scaffold833 | 18452                   | AA                              | CC                | 1946623593               |
| SNP_P3_137856_21175 | NW_004516203.1 | Scaffold837 | 21175                   | AA                              | GG                | 1946623596               |
| SNP_P3_137857_546   | NW_004516205.1 | Scaffold840 | 546                     | GG                              | AA                | 1946623598               |
| SNP_P3_137858_548   | NW_004516205.1 | Scaffold840 | 548                     | TT                              | GG                | 1946623600               |
| SNP_P3_137859_64    | NW_004516206.1 | Scaffold841 | 64                      | AA                              | GG                | 1946623602               |
| SNP_P3_137860_65    | NW_004516206.1 | Scaffold841 | 65                      | CC                              | TT                | 1946623604               |
| SNP_P3_137861_140   | NW_004516206.1 | Scaffold841 | 140                     | TT                              | GG                | 1946623605               |
| SNP_P3_137863_200   | NW_004516206.1 | Scaffold841 | 200                     | TT                              | CC                | 1946623607               |
| SNP_P3_137865_351   | NW_004516206.1 | Scaffold841 | 351                     | AA                              | GG                | 1946623609               |
| SNP_P3_137866_428   | NW_004516206.1 | Scaffold841 | 428                     | GG                              | TT                | 1946623611               |
| SNP_P3_137868_491   | NW_004516206.1 | Scaffold841 | 491                     | TT                              | AA                | 1946623613               |
| SNP_P3_137869_541   | NW_004516206.1 | Scaffold841 | 541                     | CC                              | TT                | 1946623615               |
| SNP_P3_137870_1189  | NW_004516206.1 | Scaffold841 | 1189                    | CC                              | TT                | 1946623617               |
| SNP_P3_137871_1430  | NW_004516206.1 | Scaffold841 | 1430                    | AA                              | TT                | 1946623619               |
| SNP_P3_137872_1444  | NW_004516206.1 | Scaffold841 | 1444                    | CC                              | TT                | 1946623621               |
| SNP_P3_137873_2464  | NW_004516206.1 | Scaffold841 | 2464                    | GG                              | TT                | 1946623623               |
| SNP_P3_137874_2605  | NW_004516206.1 | Scaffold841 | 2605                    | GG                              | AA                | 1946623625               |
| SNP_P3_137875_2636  | NW_004516206.1 | Scaffold841 | 2636                    | CC                              | TT                | 1946623627               |
| SNP_P3_137876_2860  | NW_004516206.1 | Scaffold841 | 2860                    | CC                              | TT                | 1946623630               |
| SNP_P3_137877_3123  | NW_004516206.1 | Scaffold841 | 3123                    | GG                              | AA                | 1946623632               |
| SNP_P3_137878_3498  | NW_004516206.1 | Scaffold841 | 3498                    | TT                              | CC                | 1946623633               |
| SNP_P3_137879_3514  | NW_004516206.1 | Scaffold841 | 3514                    | GG                              | CC                | 1946623635               |
| SNP_P3_137880_3537  | NW_004516206.1 | Scaffold841 | 3537                    | GG                              | AA                | 1946623637               |

| SNPs IDs            | Chromosome IDs | Chromosomes | Physical positions (bp) | CDC Frontier (Reference genome) | (Pusa 256 & HPNB) | NCBI SNPdb Accession IDs |
|---------------------|----------------|-------------|-------------------------|---------------------------------|-------------------|--------------------------|
| SNP_P3_137881_23721 | NW_004516206.1 | Scaffold841 | 23721                   | GG                              | TT                | 1946623639               |
| SNP_P3_137882_36179 | NW_004516206.1 | Scaffold841 | 36179                   | AA                              | TT                | 1946623641               |
| SNP_P3_137883_36185 | NW_004516206.1 | Scaffold841 | 36185                   | TT                              | CC                | 1946623643               |
| SNP_P3_137884_37034 | NW_004516206.1 | Scaffold841 | 37034                   | GG                              | AA                | 1946623645               |
| SNP_P3_137885_37098 | NW_004516206.1 | Scaffold841 | 37098                   | GG                              | TT                | 1946623647               |
| SNP_P3_137886_37439 | NW_004516206.1 | Scaffold841 | 37439                   | CC                              | AA                | 1946623649               |
| SNP_P3_137887_37647 | NW_004516206.1 | Scaffold841 | 37647                   | CC                              | GG                | 1946623651               |
| SNP_P3_137888_39580 | NW_004516206.1 | Scaffold841 | 39580                   | TT                              | CC                | 1946623653               |
| SNP_P3_137889_39595 | NW_004516206.1 | Scaffold841 | 39595                   | CC                              | AA                | 1946623655               |
| SNP_P3_137890_214   | NW_004516207.1 | Scaffold842 | 214                     | CC                              | TT                | 1946623657               |
| SNP_P3_137891_225   | NW_004516207.1 | Scaffold842 | 225                     | GG                              | AA                | 1946623659               |
| SNP_P3_137892_232   | NW_004516207.1 | Scaffold842 | 232                     | AA                              | CC                | 1946623661               |
| SNP_P3_137893_233   | NW_004516207.1 | Scaffold842 | 233                     | TT                              | CC                | 1946623663               |
| SNP_P3_137894_263   | NW_004516207.1 | Scaffold842 | 263                     | TT                              | GG                | 1946623665               |
| SNP_P3_137895_568   | NW_004516207.1 | Scaffold842 | 568                     | TT                              | CC                | 1946623667               |
| SNP_P3_137896_5342  | NW_004516207.1 | Scaffold842 | 5342                    | GG                              | AA                | 1946623669               |
| SNP_P3_137897_5387  | NW_004516207.1 | Scaffold842 | 5387                    | TT                              | AA                | 1946623671               |
| SNP_P3_137898_5391  | NW_004516207.1 | Scaffold842 | 5391                    | GG                              | AA                | 1946623673               |
| SNP_P3_137899_5399  | NW_004516207.1 | Scaffold842 | 5399                    | GG                              | CC                | 1946623675               |
| SNP_P3_137900_5400  | NW_004516207.1 | Scaffold842 | 5400                    | CC                              | TT                | 1946623677               |
| SNP_P3_137901_5437  | NW_004516207.1 | Scaffold842 | 5437                    | AA                              | TT                | 1946623679               |
| SNP_P3_137902_7684  | NW_004516207.1 | Scaffold842 | 7684                    | TT                              | AA                | 1946623680               |
| SNP_P3_137903_7762  | NW_004516207.1 | Scaffold842 | 7762                    | GG                              | AA                | 1946623682               |
| SNP_P3_137904_7771  | NW_004516207.1 | Scaffold842 | 7771                    | AA                              | GG                | 1946623684               |
| SNP_P3_137905_15166 | NW_004516207.1 | Scaffold842 | 15166                   | GG                              | AA                | 1946623686               |
| SNP_P3_137906_15234 | NW_004516207.1 | Scaffold842 | 15234                   | TT                              | CC                | 1946623688               |
| SNP_P3_137907_15508 | NW_004516207.1 | Scaffold842 | 15508                   | CC                              | AA                | 1946623690               |
| SNP_P3_137908_15524 | NW_004516207.1 | Scaffold842 | 15524                   | TT                              | GG                | 1946623692               |
| SNP_P3_137909_15526 | NW_004516207.1 | Scaffold842 | 15526                   | TT                              | AA                | 1946623694               |
| SNP_P3_137910_15535 | NW_004516207.1 | Scaffold842 | 15535                   | CC                              | TT                | 1946623696               |
| SNP_P3_137911_15689 | NW_004516207.1 | Scaffold842 | 15689                   | AA                              | GG                | 1946623698               |
| SNP_P3_137912_15715 | NW_004516207.1 | Scaffold842 | 15715                   | CC                              | TT                | 1946623700               |
| SNP_P3_137913_16017 | NW_004516207.1 | Scaffold842 | 16017                   | CC                              | TT                | 1946623702               |
| SNP_P3_137914_16160 | NW_004516207.1 | Scaffold842 | 16160                   | CC                              | TT                | 1946623704               |
| SNP_P3_137915_16207 | NW_004516207.1 | Scaffold842 | 16207                   | GG                              | AA                | 1946623706               |
| SNP_P3_137916_20356 | NW_004516207.1 | Scaffold842 | 20356                   | TT                              | GG                | 1946623708               |
| SNP_P3_137917_20371 | NW_004516207.1 | Scaffold842 | 20371                   | AA                              | GG                | 1946623710               |
| SNP_P3_137918_20546 | NW_004516207.1 | Scaffold842 | 20546                   | GG                              | TT                | 1946623712               |
| SNP_P3_137919_20547 | NW_004516207.1 | Scaffold842 | 20547                   | GG                              | AA                | 1946623714               |
| SNP_P3_137920_20559 | NW_004516207.1 | Scaffold842 | 20559                   | GG                              | CC                | 1946623716               |
| SNP_P3_137921_20584 | NW_004516207.1 | Scaffold842 | 20584                   | GG                              | CC                | 1946623718               |
| SNP_P3_137923_29925 | NW_004516207.1 | Scaffold842 | 29925                   | CC                              | AA                | 1946623720               |

| SNPs IDs            | Chromosome IDs | Chromosomes | Physical positions (bp) | CDC Frontier (Reference genome) | (Pusa 256 & HPNB) | NCBI SNPdb Accession IDs |
|---------------------|----------------|-------------|-------------------------|---------------------------------|-------------------|--------------------------|
| SNP_P3_137924_1448  | NW_004516208.1 | Scaffold843 | 1448                    | GG                              | CC                | 1946623722               |
| SNP_P3_137925_1747  | NW_004516208.1 | Scaffold843 | 1747                    | CC                              | TT                | 1946623724               |
| SNP_P3_137926_1817  | NW_004516208.1 | Scaffold843 | 1817                    | CC                              | TT                | 1946623726               |
| SNP_P3_137928_2198  | NW_004516208.1 | Scaffold843 | 2198                    | TT                              | CC                | 1946623728               |
| SNP_P3_137929_2350  | NW_004516208.1 | Scaffold843 | 2350                    | GG                              | AA                | 1946623730               |
| SNP_P3_137930_2484  | NW_004516208.1 | Scaffold843 | 2484                    | GG                              | AA                | 1946623732               |
| SNP_P3_137931_2945  | NW_004516208.1 | Scaffold843 | 2945                    | CC                              | AA                | 1946623734               |
| SNP_P3_137932_3092  | NW_004516208.1 | Scaffold843 | 3092                    | CC                              | AA                | 1946623735               |
| SNP_P3_137933_3118  | NW_004516208.1 | Scaffold843 | 3118                    | GG                              | AA                | 1946623737               |
| SNP_P3_137934_4133  | NW_004516208.1 | Scaffold843 | 4133                    | AA                              | GG                | 1946623739               |
| SNP_P3_137935_4155  | NW_004516208.1 | Scaffold843 | 4155                    | TT                              | AA                | 1946623741               |
| SNP_P3_137936_4215  | NW_004516208.1 | Scaffold843 | 4215                    | TT                              | CC                | 1946623743               |
| SNP_P3_137937_4235  | NW_004516208.1 | Scaffold843 | 4235                    | TT                              | AA                | 1946623745               |
| SNP_P3_137938_4565  | NW_004516208.1 | Scaffold843 | 4565                    | AA                              | TT                | 1946623747               |
| SNP_P3_137939_6079  | NW_004516208.1 | Scaffold843 | 6079                    | TT                              | GG                | 1946623749               |
| SNP_P3_137940_6160  | NW_004516208.1 | Scaffold843 | 6160                    | TT                              | AA                | 1946623750               |
| SNP_P3_137941_6417  | NW_004516208.1 | Scaffold843 | 6417                    | CC                              | TT                | 1946623752               |
| SNP_P3_137942_7446  | NW_004516208.1 | Scaffold843 | 7446                    | TT                              | AA                | 1946623754               |
| SNP_P3_137943_25736 | NW_004516208.1 | Scaffold843 | 25736                   | AA                              | GG                | 1946623756               |
| SNP_P3_137944_757   | NW_004516209.1 | Scaffold844 | 757                     | TT                              | CC                | 1946623758               |
| SNP_P3_137949_5709  | NW_004516210.1 | Scaffold845 | 5709                    | TT                              | CC                | 1946623760               |
| SNP_P3_137950_7286  | NW_004516210.1 | Scaffold845 | 7286                    | TT                              | AA                | 1946623762               |
| SNP_P3_137951_7300  | NW_004516210.1 | Scaffold845 | 7300                    | GG                              | CC                | 1946623764               |
| SNP_P3_137952_11886 | NW_004516210.1 | Scaffold845 | 11886                   | TT                              | CC                | 1946623767               |
| SNP_P3_137954_11917 | NW_004516210.1 | Scaffold845 | 11917                   | AA                              | TT                | 1946623769               |
| SNP_P3_137955_17049 | NW_004516210.1 | Scaffold845 | 17049                   | CC                              | AA                | 1946623771               |
| SNP_P3_137956_17085 | NW_004516210.1 | Scaffold845 | 17085                   | AA                              | TT                | 1946623773               |
| SNP_P3_137957_17247 | NW_004516210.1 | Scaffold845 | 17247                   | TT                              | AA                | 1946623775               |
| SNP_P3_137958_17396 | NW_004516210.1 | Scaffold845 | 17396                   | CC                              | AA                | 1946623777               |
| SNP_P3_137959_17443 | NW_004516210.1 | Scaffold845 | 17443                   | TT                              | AA                | 1946623779               |
| SNP_P3_137960_17568 | NW_004516210.1 | Scaffold845 | 17568                   | AA                              | GG                | 1946623781               |
| SNP_P3_137961_17811 | NW_004516210.1 | Scaffold845 | 17811                   | GG                              | CC                | 1946623783               |
| SNP_P3_137964_18081 | NW_004516210.1 | Scaffold845 | 18081                   | AA                              | TT                | 1946623785               |
| SNP_P3_137965_18530 | NW_004516210.1 | Scaffold845 | 18530                   | TT                              | GG                | 1946623787               |
| SNP_P3_137966_18531 | NW_004516210.1 | Scaffold845 | 18531                   | CC                              | AA                | 1946623789               |
| SNP_P3_137967_18532 | NW_004516210.1 | Scaffold845 | 18532                   | TT                              | CC                | 1946623791               |
| SNP_P3_137968_18554 | NW_004516210.1 | Scaffold845 | 18554                   | GG                              | AA                | 1946623793               |
| SNP_P3_137970_18920 | NW_004516210.1 | Scaffold845 | 18920                   | CC                              | TT                | 1946623794               |
| SNP_P3_137971_21734 | NW_004516210.1 | Scaffold845 | 21734                   | CC                              | TT                | 1946623796               |
| SNP_P3_137974_22058 | NW_004516210.1 | Scaffold845 | 22058                   | AA                              | TT                | 1946623799               |
| SNP_P3_137976_22557 | NW_004516210.1 | Scaffold845 | 22557                   | TT                              | CC                | 1946623801               |
| SNP_P3_137977_23407 | NW_004516210.1 | Scaffold845 | 23407                   | CC                              | AA                | 1946623803               |



| SNPs IDs            | Chromosome IDs | Chromosomes | Physical positions (bp) | CDC Frontier (Reference genome) | (Pusa 256 & HPNB) | NCBI SNPdb Accession IDs |
|---------------------|----------------|-------------|-------------------------|---------------------------------|-------------------|--------------------------|
| SNP_P3_137978_24688 | NW_004516210.1 | Scaffold845 | 24688                   | CC                              | TT                | 1946623805               |
| SNP_P3_137979_24690 | NW_004516210.1 | Scaffold845 | 24690                   | AA                              | GG                | 1946623807               |
| SNP_P3_137981_27812 | NW_004516210.1 | Scaffold845 | 27812                   | GG                              | CC                | 1946623808               |
| SNP_P3_137984_28525 | NW_004516210.1 | Scaffold845 | 28525                   | TT                              | AA                | 1946623810               |
| SNP_P3_137985_28528 | NW_004516210.1 | Scaffold845 | 28528                   | AA                              | GG                | 1946623812               |
| SNP_P3_137986_28551 | NW_004516210.1 | Scaffold845 | 28551                   | GG                              | CC                | 1946623814               |
| SNP_P3_137987_28566 | NW_004516210.1 | Scaffold845 | 28566                   | GG                              | TT                | 1946623816               |
| SNP_P3_137988_32085 | NW_004516210.1 | Scaffold845 | 32085                   | TT                              | GG                | 1946623818               |
| SNP_P3_137989_32220 | NW_004516210.1 | Scaffold845 | 32220                   | CC                              | AA                | 1946623820               |
| SNP_P3_137990_32305 | NW_004516210.1 | Scaffold845 | 32305                   | TT                              | AA                | 1946623822               |
| SNP_P3_137991_32316 | NW_004516210.1 | Scaffold845 | 32316                   | CC                              | AA                | 1946623824               |
| SNP_P3_137992_32334 | NW_004516210.1 | Scaffold845 | 32334                   | CC                              | TT                | 1946623826               |
| SNP_P3_137993_36143 | NW_004516210.1 | Scaffold845 | 36143                   | TT                              | CC                | 1946623828               |
| SNP_P3_137994_36360 | NW_004516210.1 | Scaffold845 | 36360                   | CC                              | GG                | 1946623830               |
| SNP_P3_137995_36366 | NW_004516210.1 | Scaffold845 | 36366                   | TT                              | GG                | 1946623832               |
| SNP_P3_137996_36383 | NW_004516210.1 | Scaffold845 | 36383                   | CC                              | AA                | 1946623834               |
| SNP_P3_137997_36385 | NW_004516210.1 | Scaffold845 | 36385                   | CC                              | TT                | 1946623836               |
| SNP_P3_137998_36391 | NW_004516210.1 | Scaffold845 | 36391                   | CC                              | TT                | 1946623838               |
| SNP_P3_137999_38890 | NW_004516210.1 | Scaffold845 | 38890                   | AA                              | CC                | 1946623840               |
| SNP_P3_138001_39122 | NW_004516210.1 | Scaffold845 | 39122                   | GG                              | TT                | 1946623842               |
| SNP_P3_138002_39137 | NW_004516210.1 | Scaffold845 | 39137                   | TT                              | CC                | 1946623844               |
| SNP_P3_138003_40073 | NW_004516210.1 | Scaffold845 | 40073                   | TT                              | GG                | 1946623846               |
| SNP_P3_138005_41393 | NW_004516210.1 | Scaffold845 | 41393                   | GG                              | AA                | 1946623848               |
| SNP_P3_138006_41517 | NW_004516210.1 | Scaffold845 | 41517                   | CC                              | TT                | 1946623850               |
| SNP_P3_138008_41735 | NW_004516210.1 | Scaffold845 | 41735                   | AA                              | TT                | 1946623852               |
| SNP_P3_138009_41738 | NW_004516210.1 | Scaffold845 | 41738                   | TT                              | AA                | 1946623854               |
| SNP_P3_138010_41991 | NW_004516210.1 | Scaffold845 | 41991                   | TT                              | AA                | 1946623856               |
| SNP_P3_138012_48005 | NW_004516210.1 | Scaffold845 | 48005                   | AA                              | GG                | 1946623858               |
| SNP_P3_138013_48013 | NW_004516210.1 | Scaffold845 | 48013                   | AA                              | TT                | 1946623859               |
| SNP_P3_138014_48041 | NW_004516210.1 | Scaffold845 | 48041                   | TT                              | CC                | 1946623861               |
| SNP_P3_138016_51369 | NW_004516210.1 | Scaffold845 | 51369                   | AA                              | TT                | 1946623863               |
| SNP_P3_138018_51465 | NW_004516210.1 | Scaffold845 | 51465                   | CC                              | TT                | 1946623866               |
| SNP_P3_138019_51722 | NW_004516210.1 | Scaffold845 | 51722                   | TT                              | CC                | 1946623868               |
| SNP_P3_138021_51901 | NW_004516210.1 | Scaffold845 | 51901                   | CC                              | AA                | 1946623870               |
| SNP_P3_138023_52148 | NW_004516210.1 | Scaffold845 | 52148                   | CC                              | AA                | 1946623871               |
| SNP_P3_138024_52207 | NW_004516210.1 | Scaffold845 | 52207                   | AA                              | CC                | 1946623873               |
| SNP_P3_138025_52236 | NW_004516210.1 | Scaffold845 | 52236                   | GG                              | AA                | 1946623875               |
| SNP_P3_138026_52385 | NW_004516210.1 | Scaffold845 | 52385                   | CC                              | TT                | 1946623877               |
| SNP_P3_138027_52421 | NW_004516210.1 | Scaffold845 | 52421                   | GG                              | AA                | 1946623879               |
| SNP_P3_138029_53324 | NW_004516210.1 | Scaffold845 | 53324                   | CC                              | AA                | 1946623881               |
| SNP_P3_138030_53554 | NW_004516210.1 | Scaffold845 | 53554                   | CC                              | GG                | 1946623882               |
| SNP_P3_138031_53555 | NW_004516210.1 | Scaffold845 | 53555                   | CC                              | AA                | 1946623884               |

| SNPs IDs            | Chromosome IDs | Chromosomes | Physical positions (bp) | CDC Frontier (Reference genome) | (Pusa 256 & HPNB) | NCBI SNPdb Accession IDs |
|---------------------|----------------|-------------|-------------------------|---------------------------------|-------------------|--------------------------|
| SNP_P3_138032_54473 | NW_004516210.1 | Scaffold845 | 54473                   | CC                              | AA                | 1946623886               |
| SNP_P3_138034_54512 | NW_004516210.1 | Scaffold845 | 54512                   | GG                              | AA                | 1946623888               |
| SNP_P3_138035_56127 | NW_004516210.1 | Scaffold845 | 56127                   | CC                              | AA                | 1946623890               |
| SNP_P3_138036_57417 | NW_004516210.1 | Scaffold845 | 57417                   | CC                              | TT                | 1946623892               |
| SNP_P3_138037_58667 | NW_004516210.1 | Scaffold845 | 58667                   | TT                              | GG                | 1946623894               |
| SNP_P3_138038_60441 | NW_004516210.1 | Scaffold845 | 60441                   | AA                              | GG                | 1946623895               |
| SNP_P3_138039_60444 | NW_004516210.1 | Scaffold845 | 60444                   | TT                              | GG                | 1946623897               |
| SNP_P3_138040_60451 | NW_004516210.1 | Scaffold845 | 60451                   | TT                              | AA                | 1946623900               |
| SNP_P3_138041_60456 | NW_004516210.1 | Scaffold845 | 60456                   | TT                              | CC                | 1946623902               |
| SNP_P3_138042_60505 | NW_004516210.1 | Scaffold845 | 60505                   | TT                              | CC                | 1946623904               |
| SNP_P3_138043_60517 | NW_004516210.1 | Scaffold845 | 60517                   | GG                              | AA                | 1946623906               |
| SNP_P3_138044_60760 | NW_004516210.1 | Scaffold845 | 60760                   | TT                              | AA                | 1946623908               |
| SNP_P3_138045_60770 | NW_004516210.1 | Scaffold845 | 60770                   | CC                              | TT                | 1946623910               |
| SNP_P3_138046_60775 | NW_004516210.1 | Scaffold845 | 60775                   | GG                              | TT                | 1946623912               |
| SNP_P3_138047_61236 | NW_004516210.1 | Scaffold845 | 61236                   | AA                              | CC                | 1946623914               |
| SNP_P3_138048_61277 | NW_004516210.1 | Scaffold845 | 61277                   | GG                              | AA                | 1946623916               |
| SNP_P3_138049_61634 | NW_004516210.1 | Scaffold845 | 61634                   | GG                              | AA                | 1946623918               |
| SNP_P3_138050_61642 | NW_004516210.1 | Scaffold845 | 61642                   | CC                              | TT                | 1946623919               |
| SNP_P3_138051_61826 | NW_004516210.1 | Scaffold845 | 61826                   | CC                              | AA                | 1946623921               |
| SNP_P3_138052_61892 | NW_004516210.1 | Scaffold845 | 61892                   | CC                              | TT                | 1946623923               |
| SNP_P3_138053_63402 | NW_004516210.1 | Scaffold845 | 63402                   | GG                              | AA                | 1946623925               |
| SNP_P3_138054_63622 | NW_004516210.1 | Scaffold845 | 63622                   | TT                              | AA                | 1946623927               |
| SNP_P3_138055_63685 | NW_004516210.1 | Scaffold845 | 63685                   | CC                              | TT                | 1946623929               |
| SNP_P3_138058_69038 | NW_004516210.1 | Scaffold845 | 69038                   | GG                              | AA                | 1946623931               |
| SNP_P3_138059_69086 | NW_004516210.1 | Scaffold845 | 69086                   | GG                              | CC                | 1946623933               |
| SNP_P3_138061_71993 | NW_004516210.1 | Scaffold845 | 71993                   | CC                              | AA                | 1946623935               |
| SNP_P3_138062_72200 | NW_004516210.1 | Scaffold845 | 72200                   | AA                              | CC                | 1946623937               |
| SNP_P3_138064_72681 | NW_004516210.1 | Scaffold845 | 72681                   | CC                              | GG                | 1946623939               |
| SNP_P3_138065_72689 | NW_004516210.1 | Scaffold845 | 72689                   | TT                              | CC                | 1946623941               |
| SNP_P3_138066_72879 | NW_004516210.1 | Scaffold845 | 72879                   | AA                              | GG                | 1946623943               |
| SNP_P3_138067_72959 | NW_004516210.1 | Scaffold845 | 72959                   | AA                              | CC                | 1946623945               |
| SNP_P3_138068_72977 | NW_004516210.1 | Scaffold845 | 72977                   | CC                              | TT                | 1946623947               |
| SNP_P3_138069_81277 | NW_004516210.1 | Scaffold845 | 81277                   | TT                              | CC                | 1946623949               |
| SNP_P3_138070_81506 | NW_004516210.1 | Scaffold845 | 81506                   | AA                              | GG                | 1946623951               |
| SNP_P3_138071_81663 | NW_004516210.1 | Scaffold845 | 81663                   | CC                              | TT                | 1946623952               |
| SNP_P3_138072_81791 | NW_004516210.1 | Scaffold845 | 81791                   | TT                              | CC                | 1946623955               |
| SNP_P3_138073_81969 | NW_004516210.1 | Scaffold845 | 81969                   | CC                              | TT                | 1946623957               |
| SNP_P3_138074_82013 | NW_004516210.1 | Scaffold845 | 82013                   | TT                              | GG                | 1946623959               |
| SNP_P3_138075_82069 | NW_004516210.1 | Scaffold845 | 82069                   | AA                              | GG                | 1946623960               |
| SNP_P3_138076_82147 | NW_004516210.1 | Scaffold845 | 82147                   | TT                              | GG                | 1946623962               |
| SNP_P3_138077_82176 | NW_004516210.1 | Scaffold845 | 82176                   | CC                              | TT                | 1946623965               |
| SNP_P3_138078_82259 | NW_004516210.1 | Scaffold845 | 82259                   | TT                              | CC                | 1946623967               |

| SNPs IDs             | Chromosome IDs | Chromosomes | Physical positions (bp) | CDC Frontier (Reference genome) | (Pusa 256 & HPNB) | NCBI SNPdb Accession IDs |
|----------------------|----------------|-------------|-------------------------|---------------------------------|-------------------|--------------------------|
| SNP_P3_138079_82272  | NW_004516210.1 | Scaffold845 | 82272                   | GG                              | CC                | 1946623969               |
| SNP_P3_138080_82337  | NW_004516210.1 | Scaffold845 | 82337                   | AA                              | TT                | 1946623971               |
| SNP_P3_138081_82341  | NW_004516210.1 | Scaffold845 | 82341                   | AA                              | GG                | 1946623973               |
| SNP_P3_138082_82422  | NW_004516210.1 | Scaffold845 | 82422                   | CC                              | TT                | 1946623974               |
| SNP_P3_138083_82451  | NW_004516210.1 | Scaffold845 | 82451                   | AA                              | CC                | 1946623976               |
| SNP_P3_138084_82824  | NW_004516210.1 | Scaffold845 | 82824                   | AA                              | GG                | 1946623978               |
| SNP_P3_138085_84660  | NW_004516210.1 | Scaffold845 | 84660                   | CC                              | AA                | 1946623980               |
| SNP_P3_138086_85363  | NW_004516210.1 | Scaffold845 | 85363                   | AA                              | GG                | 1946623982               |
| SNP_P3_138087_85453  | NW_004516210.1 | Scaffold845 | 85453                   | GG                              | CC                | 1946623984               |
| SNP_P3_138089_86870  | NW_004516210.1 | Scaffold845 | 86870                   | TT                              | AA                | 1946623986               |
| SNP_P3_138090_86872  | NW_004516210.1 | Scaffold845 | 86872                   | GG                              | AA                | 1946623988               |
| SNP_P3_138092_100380 | NW_004516210.1 | Scaffold845 | 100380                  | GG                              | AA                | 1946623990               |
| SNP_P3_138093_100568 | NW_004516210.1 | Scaffold845 | 100568                  | TT                              | GG                | 1946623992               |
| SNP_P3_138094_100578 | NW_004516210.1 | Scaffold845 | 100578                  | CC                              | TT                | 1946623994               |
| SNP_P3_138095_100646 | NW_004516210.1 | Scaffold845 | 100646                  | TT                              | CC                | 1946623996               |
| SNP_P3_138096_100879 | NW_004516210.1 | Scaffold845 | 100879                  | CC                              | TT                | 1946623999               |
| SNP_P3_138097_100936 | NW_004516210.1 | Scaffold845 | 100936                  | TT                              | AA                | 1946624001               |
| SNP_P3_138098_101068 | NW_004516210.1 | Scaffold845 | 101068                  | CC                              | TT                | 1946624002               |
| SNP_P3_138099_101075 | NW_004516210.1 | Scaffold845 | 101075                  | CC                              | GG                | 1946624004               |
| SNP_P3_138100_101199 | NW_004516210.1 | Scaffold845 | 101199                  | AA                              | GG                | 1946624006               |
| SNP_P3_138101_101670 | NW_004516210.1 | Scaffold845 | 101670                  | GG                              | TT                | 1946624008               |
| SNP_P3_138102_101705 | NW_004516210.1 | Scaffold845 | 101705                  | TT                              | CC                | 1946624010               |
| SNP_P3_138103_102579 | NW_004516210.1 | Scaffold845 | 102579                  | AA                              | GG                | 1946624012               |
| SNP_P3_138105_103134 | NW_004516210.1 | Scaffold845 | 103134                  | AA                              | TT                | 1946624014               |
| SNP_P3_138106_103583 | NW_004516210.1 | Scaffold845 | 103583                  | CC                              | TT                | 1946624016               |
| SNP_P3_138107_103739 | NW_004516210.1 | Scaffold845 | 103739                  | AA                              | TT                | 1946624018               |
| SNP_P3_138108_103863 | NW_004516210.1 | Scaffold845 | 103863                  | CC                              | AA                | 1946624020               |
| SNP_P3_138109_104450 | NW_004516210.1 | Scaffold845 | 104450                  | CC                              | GG                | 1946624022               |
| SNP_P3_138110_104499 | NW_004516210.1 | Scaffold845 | 104499                  | CC                              | AA                | 1946624024               |
| SNP_P3_138111_104534 | NW_004516210.1 | Scaffold845 | 104534                  | TT                              | GG                | 1946624026               |
| SNP_P3_138112_105792 | NW_004516210.1 | Scaffold845 | 105792                  | CC                              | GG                | 1946624028               |
| SNP_P3_138113_105896 | NW_004516210.1 | Scaffold845 | 105896                  | AA                              | GG                | 1946624030               |
| SNP_P3_138114_105958 | NW_004516210.1 | Scaffold845 | 105958                  | CC                              | TT                | 1946624032               |
| SNP_P3_138115_105961 | NW_004516210.1 | Scaffold845 | 105961                  | TT                              | GG                | 1946624034               |
| SNP_P3_138116_106006 | NW_004516210.1 | Scaffold845 | 106006                  | GG                              | AA                | 1946624036               |
| SNP_P3_138117_106040 | NW_004516210.1 | Scaffold845 | 106040                  | CC                              | AA                | 1946624038               |
| SNP_P3_138118_106054 | NW_004516210.1 | Scaffold845 | 106054                  | TT                              | CC                | 1946624039               |
| SNP_P3_138119_106071 | NW_004516210.1 | Scaffold845 | 106071                  | AA                              | CC                | 1946624041               |
| SNP_P3_138120_106078 | NW_004516210.1 | Scaffold845 | 106078                  | CC                              | TT                | 1946624043               |
| SNP_P3_138121_106176 | NW_004516210.1 | Scaffold845 | 106176                  | GG                              | TT                | 1946624045               |
| SNP_P3_138122_106240 | NW_004516210.1 | Scaffold845 | 106240                  | CC                              | GG                | 1946624047               |
| SNP_P3_138123_106268 | NW_004516210.1 | Scaffold845 | 106268                  | AA                              | CC                | 1946624049               |

| SNPs IDs             | Chromosome IDs | Chromosomes | Physical positions (bp) | CDC Frontier (Reference genome) | (Pusa 256 & HPNB) | NCBI SNPdb Accession IDs |
|----------------------|----------------|-------------|-------------------------|---------------------------------|-------------------|--------------------------|
| SNP_P3_138124_106470 | NW_004516210.1 | Scaffold845 | 106470                  | TT                              | AA                | 1946624051               |
| SNP_P3_138125_106533 | NW_004516210.1 | Scaffold845 | 106533                  | TT                              | CC                | 1946624053               |
| SNP_P3_138126_111219 | NW_004516210.1 | Scaffold845 | 111219                  | GG                              | AA                | 1946624055               |
| SNP_P3_138127_115124 | NW_004516210.1 | Scaffold845 | 115124                  | GG                              | AA                | 1946624057               |
| SNP_P3_138128_115353 | NW_004516210.1 | Scaffold845 | 115353                  | AA                              | GG                | 1946624059               |
| SNP_P3_138130_116273 | NW_004516210.1 | Scaffold845 | 116273                  | AA                              | GG                | 1946624061               |
| SNP_P3_138132_116840 | NW_004516210.1 | Scaffold845 | 116840                  | GG                              | AA                | 1946624063               |
| SNP_P3_138133_116911 | NW_004516210.1 | Scaffold845 | 116911                  | TT                              | AA                | 1946624065               |
| SNP_P3_138134_116925 | NW_004516210.1 | Scaffold845 | 116925                  | TT                              | CC                | 1946624066               |
| SNP_P3_138135_117180 | NW_004516210.1 | Scaffold845 | 117180                  | AA                              | GG                | 1946624069               |
| SNP_P3_138136_118243 | NW_004516210.1 | Scaffold845 | 118243                  | CC                              | TT                | 1946624071               |
| SNP_P3_138138_120218 | NW_004516210.1 | Scaffold845 | 120218                  | GG                              | AA                | 1946624073               |
| SNP_P3_138140_122289 | NW_004516210.1 | Scaffold845 | 122289                  | AA                              | CC                | 1946624075               |
| SNP_P3_138141_126563 | NW_004516210.1 | Scaffold845 | 126563                  | GG                              | AA                | 1946624077               |
| SNP_P3_138142_132480 | NW_004516210.1 | Scaffold845 | 132480                  | CC                              | TT                | 1946624079               |
| SNP_P3_138143_132521 | NW_004516210.1 | Scaffold845 | 132521                  | GG                              | CC                | 1946624081               |
| SNP_P3_138144_132645 | NW_004516210.1 | Scaffold845 | 132645                  | TT                              | CC                | 1946624083               |
| SNP_P3_138145_132669 | NW_004516210.1 | Scaffold845 | 132669                  | CC                              | TT                | 1946624085               |
| SNP_P3_138148_133339 | NW_004516210.1 | Scaffold845 | 133339                  | AA                              | GG                | 1946624087               |
| SNP_P3_138149_133917 | NW_004516210.1 | Scaffold845 | 133917                  | CC                              | AA                | 1946624089               |
| SNP_P3_138150_134194 | NW_004516210.1 | Scaffold845 | 134194                  | TT                              | CC                | 1946624091               |
| SNP_P3_138151_135023 | NW_004516210.1 | Scaffold845 | 135023                  | TT                              | CC                | 1946624093               |
| SNP_P3_138152_135024 | NW_004516210.1 | Scaffold845 | 135024                  | GG                              | AA                | 1946624095               |
| SNP_P3_138154_137618 | NW_004516210.1 | Scaffold845 | 137618                  | CC                              | AA                | 1946624097               |
| SNP_P3_138155_137823 | NW_004516210.1 | Scaffold845 | 137823                  | TT                              | GG                | 1946624098               |
| SNP_P3_138156_139268 | NW_004516210.1 | Scaffold845 | 139268                  | AA                              | GG                | 1946624100               |
| SNP_P3_138157_139575 | NW_004516210.1 | Scaffold845 | 139575                  | CC                              | TT                | 1946624103               |
| SNP_P3_138158_140810 | NW_004516210.1 | Scaffold845 | 140810                  | CC                              | TT                | 1946624105               |
| SNP_P3_138159_142435 | NW_004516210.1 | Scaffold845 | 142435                  | CC                              | TT                | 1946624107               |
| SNP_P3_138160_147123 | NW_004516210.1 | Scaffold845 | 147123                  | AA                              | GG                | 1946624109               |
| SNP_P3_138161_148270 | NW_004516210.1 | Scaffold845 | 148270                  | TT                              | CC                | 1946624111               |
| SNP_P3_138162_149336 | NW_004516210.1 | Scaffold845 | 149336                  | GG                              | TT                | 1946624113               |
| SNP_P3_138164_151425 | NW_004516210.1 | Scaffold845 | 151425                  | AA                              | GG                | 1946624115               |
| SNP_P3_138166_151571 | NW_004516210.1 | Scaffold845 | 151571                  | AA                              | GG                | 1946624117               |
| SNP_P3_138170_155767 | NW_004516210.1 | Scaffold845 | 155767                  | TT                              | CC                | 1946624119               |
| SNP_P3_138171_161419 | NW_004516210.1 | Scaffold845 | 161419                  | CC                              | TT                | 1946624121               |
| SNP_P3_138172_161931 | NW_004516210.1 | Scaffold845 | 161931                  | GG                              | AA                | 1946624123               |
| SNP_P3_138173_162233 | NW_004516210.1 | Scaffold845 | 162233                  | AA                              | GG                | 1946624125               |
| SNP_P3_138174_163114 | NW_004516210.1 | Scaffold845 | 163114                  | AA                              | TT                | 1946624127               |
| SNP_P3_138175_163122 | NW_004516210.1 | Scaffold845 | 163122                  | CC                              | TT                | 1946624131               |
| SNP_P3_138176_163139 | NW_004516210.1 | Scaffold845 | 163139                  | TT                              | AA                | 1946624134               |
| SNP_P3_138179_170646 | NW_004516210.1 | Scaffold845 | 170646                  | AA                              | TT                | 1946624136               |

| SNPs IDs             | Chromosome IDs | Chromosomes | Physical positions (bp) | CDC Frontier (Reference genome) | (Pusa 256 & HPNB) | NCBI SNPdb Accession IDs |
|----------------------|----------------|-------------|-------------------------|---------------------------------|-------------------|--------------------------|
| SNP_P3_138180_170652 | NW_004516210.1 | Scaffold845 | 170652                  | CC                              | TT                | 1946624138               |
| SNP_P3_138181_171895 | NW_004516210.1 | Scaffold845 | 171895                  | CC                              | TT                | 1946624140               |
| SNP_P3_138182_172303 | NW_004516210.1 | Scaffold845 | 172303                  | CC                              | TT                | 1946624142               |
| SNP_P3_138183_172398 | NW_004516210.1 | Scaffold845 | 172398                  | AA                              | GG                | 1946624144               |
| SNP_P3_138184_172761 | NW_004516210.1 | Scaffold845 | 172761                  | TT                              | CC                | 1946624146               |
| SNP_P3_138186_172825 | NW_004516210.1 | Scaffold845 | 172825                  | CC                              | TT                | 1946624148               |
| SNP_P3_138187_172849 | NW_004516210.1 | Scaffold845 | 172849                  | GG                              | AA                | 1946624150               |
| SNP_P3_138188_172855 | NW_004516210.1 | Scaffold845 | 172855                  | AA                              | GG                | 1946624151               |
| SNP_P3_138189_174333 | NW_004516210.1 | Scaffold845 | 174333                  | AA                              | CC                | 1946624153               |
| SNP_P3_138192_175377 | NW_004516210.1 | Scaffold845 | 175377                  | AA                              | TT                | 1946624155               |
| SNP_P3_138193_175855 | NW_004516210.1 | Scaffold845 | 175855                  | GG                              | CC                | 1946624157               |
| SNP_P3_138195_194447 | NW_004516210.1 | Scaffold845 | 194447                  | AA                              | GG                | 1946624159               |
| SNP_P3_138196_194455 | NW_004516210.1 | Scaffold845 | 194455                  | CC                              | GG                | 1946624161               |
| SNP_P3_138197_194753 | NW_004516210.1 | Scaffold845 | 194753                  | TT                              | CC                | 1946624163               |
| SNP_P3_138200_228297 | NW_004516210.1 | Scaffold845 | 228297                  | CC                              | TT                | 1946624165               |
| SNP_P3_138201_230609 | NW_004516210.1 | Scaffold845 | 230609                  | GG                              | TT                | 1946624167               |
| SNP_P3_138202_231000 | NW_004516210.1 | Scaffold845 | 231000                  | TT                              | GG                | 1946624169               |
| SNP_P3_138203_244980 | NW_004516210.1 | Scaffold845 | 244980                  | AA                              | TT                | 1946624171               |
| SNP_P3_138204_245481 | NW_004516210.1 | Scaffold845 | 245481                  | CC                              | AA                | 1946624173               |
| SNP_P3_138205_246275 | NW_004516210.1 | Scaffold845 | 246275                  | AA                              | GG                | 1946624175               |
| SNP_P3_138206_246402 | NW_004516210.1 | Scaffold845 | 246402                  | TT                              | CC                | 1946624177               |
| SNP_P3_138207_255902 | NW_004516210.1 | Scaffold845 | 255902                  | GG                              | AA                | 1946624179               |
| SNP_P3_138208_258766 | NW_004516210.1 | Scaffold845 | 258766                  | AA                              | GG                | 1946624181               |
| SNP_P3_138209_259948 | NW_004516210.1 | Scaffold845 | 259948                  | GG                              | AA                | 1946624183               |
| SNP_P3_138210_265179 | NW_004516210.1 | Scaffold845 | 265179                  | CC                              | TT                | 1946624185               |
| SNP_P3_138211_265768 | NW_004516210.1 | Scaffold845 | 265768                  | TT                              | CC                | 1946624187               |
| SNP_P3_138212_266194 | NW_004516210.1 | Scaffold845 | 266194                  | CC                              | TT                | 1946624189               |
| SNP_P3_138213_266217 | NW_004516210.1 | Scaffold845 | 266217                  | TT                              | CC                | 1946624190               |
| SNP_P3_138214_266232 | NW_004516210.1 | Scaffold845 | 266232                  | AA                              | GG                | 1946624196               |
| SNP_P3_138215_266246 | NW_004516210.1 | Scaffold845 | 266246                  | AA                              | GG                | 1946624198               |
| SNP_P3_138219_330092 | NW_004516210.1 | Scaffold845 | 330092                  | AA                              | GG                | 1946624200               |
| SNP_P3_138220_330559 | NW_004516210.1 | Scaffold845 | 330559                  | CC                              | TT                | 1946624202               |
| SNP_P3_138221_330702 | NW_004516210.1 | Scaffold845 | 330702                  | CC                              | TT                | 1946624204               |
| SNP_P3_138222_330741 | NW_004516210.1 | Scaffold845 | 330741                  | CC                              | GG                | 1946624206               |
| SNP_P3_138223_331215 | NW_004516210.1 | Scaffold845 | 331215                  | TT                              | AA                | 1946624208               |
| SNP_P3_138224_331886 | NW_004516210.1 | Scaffold845 | 331886                  | AA                              | GG                | 1946624210               |
| SNP_P3_138226_331991 | NW_004516210.1 | Scaffold845 | 331991                  | CC                              | GG                | 1946624212               |
| SNP_P3_138227_332163 | NW_004516210.1 | Scaffold845 | 332163                  | TT                              | CC                | 1946624214               |
| SNP_P3_138228_332193 | NW_004516210.1 | Scaffold845 | 332193                  | TT                              | CC                | 1946624216               |
| SNP_P3_138229_332518 | NW_004516210.1 | Scaffold845 | 332518                  | TT                              | GG                | 1946624218               |
| SNP_P3_138230_335165 | NW_004516210.1 | Scaffold845 | 335165                  | TT                              | GG                | 1946624220               |
| SNP_P3_138231_343794 | NW_004516210.1 | Scaffold845 | 343794                  | TT                              | CC                | 1946624222               |

| SNPs IDs             | Chromosome IDs | Chromosomes | Physical positions (bp) | CDC Frontier (Reference genome) | (Pusa 256 & HPNB) | NCBI SNPdb Accession IDs |
|----------------------|----------------|-------------|-------------------------|---------------------------------|-------------------|--------------------------|
| SNP_P3_138232_347505 | NW_004516210.1 | Scaffold845 | 347505                  | AA                              | GG                | 1946624227               |
| SNP_P3_138233_375277 | NW_004516210.1 | Scaffold845 | 375277                  | CC                              | GG                | 1946624229               |
| SNP_P3_138234_384593 | NW_004516210.1 | Scaffold845 | 384593                  | CC                              | TT                | 1946624231               |
| SNP_P3_138235_384604 | NW_004516210.1 | Scaffold845 | 384604                  | CC                              | TT                | 1946624233               |
| SNP_P3_138236_31614  | NW_004516211.1 | Scaffold847 | 31614                   | TT                              | CC                | 1946624235               |
| SNP_P3_138237_31623  | NW_004516211.1 | Scaffold847 | 31623                   | TT                              | CC                | 1946624237               |
| SNP_P3_138238_31632  | NW_004516211.1 | Scaffold847 | 31632                   | TT                              | CC                | 1946624239               |
| SNP_P3_138239_31634  | NW_004516211.1 | Scaffold847 | 31634                   | GG                              | AA                | 1946624241               |
| SNP_P3_138240_31667  | NW_004516211.1 | Scaffold847 | 31667                   | GG                              | AA                | 1946624243               |
| SNP_P3_138241_31676  | NW_004516211.1 | Scaffold847 | 31676                   | CC                              | TT                | 1946624245               |
| SNP_P3_138242_31706  | NW_004516211.1 | Scaffold847 | 31706                   | TT                              | CC                | 1946624247               |
| SNP_P3_138243_31712  | NW_004516211.1 | Scaffold847 | 31712                   | TT                              | AA                | 1946624249               |
| SNP_P3_138244_32053  | NW_004516211.1 | Scaffold847 | 32053                   | GG                              | AA                | 1946624251               |
| SNP_P3_138245_32094  | NW_004516211.1 | Scaffold847 | 32094                   | GG                              | AA                | 1946624253               |
| SNP_P3_138246_32231  | NW_004516211.1 | Scaffold847 | 32231                   | AA                              | TT                | 1946624256               |
| SNP_P3_138247_32495  | NW_004516211.1 | Scaffold847 | 32495                   | AA                              | GG                | 1946624258               |
| SNP_P3_138248_36173  | NW_004516211.1 | Scaffold847 | 36173                   | TT                              | AA                | 1946624260               |
| SNP_P3_138249_44268  | NW_004516211.1 | Scaffold847 | 44268                   | CC                              | TT                | 1946624261               |
| SNP_P3_138250_52850  | NW_004516211.1 | Scaffold847 | 52850                   | TT                              | GG                | 1946624263               |
| SNP_P3_138251_63911  | NW_004516211.1 | Scaffold847 | 63911                   | AA                              | GG                | 1946624265               |
| SNP_P3_138252_69870  | NW_004516211.1 | Scaffold847 | 69870                   | GG                              | CC                | 1946624267               |
| SNP_P3_138253_71674  | NW_004516211.1 | Scaffold847 | 71674                   | CC                              | TT                | 1946624269               |
| SNP_P3_138254_75721  | NW_004516211.1 | Scaffold847 | 75721                   | TT                              | CC                | 1946624271               |
| SNP_P3_138255_75762  | NW_004516211.1 | Scaffold847 | 75762                   | CC                              | TT                | 1946624273               |
| SNP_P3_138256_75777  | NW_004516211.1 | Scaffold847 | 75777                   | AA                              | CC                | 1946624275               |
| SNP_P3_138257_76023  | NW_004516211.1 | Scaffold847 | 76023                   | CC                              | TT                | 1946624277               |
| SNP_P3_138258_76109  | NW_004516211.1 | Scaffold847 | 76109                   | CC                              | TT                | 1946624279               |
| SNP_P3_138259_82180  | NW_004516211.1 | Scaffold847 | 82180                   | GG                              | AA                | 1946624281               |
| SNP_P3_138260_85715  | NW_004516211.1 | Scaffold847 | 85715                   | TT                              | CC                | 1946624283               |
| SNP_P3_138261_91512  | NW_004516211.1 | Scaffold847 | 91512                   | TT                              | GG                | 1946624285               |
| SNP_P3_138262_91570  | NW_004516211.1 | Scaffold847 | 91570                   | AA                              | CC                | 1946624287               |
| SNP_P3_138263_91696  | NW_004516211.1 | Scaffold847 | 91696                   | AA                              | CC                | 1946624290               |
| SNP_P3_138264_91716  | NW_004516211.1 | Scaffold847 | 91716                   | AA                              | GG                | 1946624292               |
| SNP_P3_138265_91746  | NW_004516211.1 | Scaffold847 | 91746                   | CC                              | GG                | 1946624294               |
| SNP_P3_138266_91771  | NW_004516211.1 | Scaffold847 | 91771                   | AA                              | CC                | 1946624296               |
| SNP_P3_138267_91792  | NW_004516211.1 | Scaffold847 | 91792                   | TT                              | GG                | 1946624298               |
| SNP_P3_138268_91828  | NW_004516211.1 | Scaffold847 | 91828                   | TT                              | CC                | 1946624299               |
| SNP_P3_138269_95645  | NW_004516211.1 | Scaffold847 | 95645                   | AA                              | GG                | 1946624301               |
| SNP_P3_138270_113644 | NW_004516211.1 | Scaffold847 | 113644                  | CC                              | TT                | 1946624304               |
| SNP_P3_138271_117004 | NW_004516211.1 | Scaffold847 | 117004                  | CC                              | TT                | 1946624306               |
| SNP_P3_138273_117214 | NW_004516211.1 | Scaffold847 | 117214                  | CC                              | TT                | 1946624308               |
| SNP_P3_138274_121170 | NW_004516211.1 | Scaffold847 | 121170                  | AA                              | TT                | 1946624309               |

| SNPs IDs             | Chromosome IDs | Chromosomes | Physical positions (bp) | CDC Frontier (Reference genome) | (Pusa 256 & HPNB) | NCBI SNPdb Accession IDs |
|----------------------|----------------|-------------|-------------------------|---------------------------------|-------------------|--------------------------|
| SNP_P3_138275_121173 | NW_004516211.1 | Scaffold847 | 121173                  | TT                              | AA                | 1946624311               |
| SNP_P3_138276_123084 | NW_004516211.1 | Scaffold847 | 123084                  | GG                              | AA                | 1946624313               |
| SNP_P3_138277_129702 | NW_004516211.1 | Scaffold847 | 129702                  | AA                              | GG                | 1946624315               |
| SNP_P3_138278_129906 | NW_004516211.1 | Scaffold847 | 129906                  | AA                              | GG                | 1946624317               |
| SNP_P3_138279_130019 | NW_004516211.1 | Scaffold847 | 130019                  | GG                              | AA                | 1946624319               |
| SNP_P3_138280_130029 | NW_004516211.1 | Scaffold847 | 130029                  | AA                              | GG                | 1946624322               |
| SNP_P3_138281_130048 | NW_004516211.1 | Scaffold847 | 130048                  | TT                              | CC                | 1946624324               |
| SNP_P3_138282_130062 | NW_004516211.1 | Scaffold847 | 130062                  | GG                              | AA                | 1946624326               |
| SNP_P3_138283_130090 | NW_004516211.1 | Scaffold847 | 130090                  | AA                              | TT                | 1946624328               |
| SNP_P3_138284_153998 | NW_004516211.1 | Scaffold847 | 153998                  | TT                              | CC                | 1946624330               |
| SNP_P3_138285_221158 | NW_004516211.1 | Scaffold847 | 221158                  | GG                              | TT                | 1946624332               |
| SNP_P3_138286_224943 | NW_004516211.1 | Scaffold847 | 224943                  | AA                              | GG                | 1946624334               |
| SNP_P3_138287_225271 | NW_004516211.1 | Scaffold847 | 225271                  | GG                              | AA                | 1946624336               |
| SNP_P3_138288_225273 | NW_004516211.1 | Scaffold847 | 225273                  | GG                              | TT                | 1946624338               |
| SNP_P3_138290_248590 | NW_004516211.1 | Scaffold847 | 248590                  | TT                              | CC                | 1946624340               |
| SNP_P3_138291_248591 | NW_004516211.1 | Scaffold847 | 248591                  | GG                              | TT                | 1946624342               |
| SNP_P3_138292_249457 | NW_004516211.1 | Scaffold847 | 249457                  | TT                              | CC                | 1946624343               |
| SNP_P3_138293_251623 | NW_004516211.1 | Scaffold847 | 251623                  | TT                              | CC                | 1946624345               |
| SNP_P3_138295_302482 | NW_004516211.1 | Scaffold847 | 302482                  | AA                              | GG                | 1946624347               |
| SNP_P3_138296_302575 | NW_004516211.1 | Scaffold847 | 302575                  | CC                              | TT                | 1946624349               |
| SNP_P3_138297_302990 | NW_004516211.1 | Scaffold847 | 302990                  | AA                              | GG                | 1946624351               |
| SNP_P3_138298_303083 | NW_004516211.1 | Scaffold847 | 303083                  | TT                              | AA                | 1946624353               |
| SNP_P3_138299_303093 | NW_004516211.1 | Scaffold847 | 303093                  | TT                              | GG                | 1946624355               |
| SNP_P3_138300_303097 | NW_004516211.1 | Scaffold847 | 303097                  | CC                              | GG                | 1946624357               |
| SNP_P3_138302_6400   | NW_004516212.1 | Scaffold848 | 6400                    | AA                              | GG                | 1946624358               |
| SNP_P3_138303_6410   | NW_004516212.1 | Scaffold848 | 6410                    | CC                              | AA                | 1946624360               |
| SNP_P3_138304_23771  | NW_004516212.1 | Scaffold848 | 23771                   | TT                              | GG                | 1946624362               |
| SNP_P3_138305_23811  | NW_004516212.1 | Scaffold848 | 23811                   | AA                              | TT                | 1946624364               |
| SNP_P3_138306_23836  | NW_004516212.1 | Scaffold848 | 23836                   | AA                              | TT                | 1946624366               |
| SNP_P3_138308_23934  | NW_004516212.1 | Scaffold848 | 23934                   | AA                              | TT                | 1946624368               |
| SNP_P3_138309_23937  | NW_004516212.1 | Scaffold848 | 23937                   | CC                              | TT                | 1946624370               |
| SNP_P3_138310_24094  | NW_004516212.1 | Scaffold848 | 24094                   | CC                              | TT                | 1946624372               |
| SNP_P3_138311_24161  | NW_004516212.1 | Scaffold848 | 24161                   | CC                              | TT                | 1946624374               |
| SNP_P3_138312_24165  | NW_004516212.1 | Scaffold848 | 24165                   | AA                              | CC                | 1946624376               |
| SNP_P3_138313_24201  | NW_004516212.1 | Scaffold848 | 24201                   | TT                              | CC                | 1946624378               |
| SNP_P3_138314_43862  | NW_004516212.1 | Scaffold848 | 43862                   | TT                              | AA                | 1946624380               |
| SNP_P3_138315_60118  | NW_004516212.1 | Scaffold848 | 60118                   | CC                              | TT                | 1946624382               |
| SNP_P3_138316_94128  | NW_004516212.1 | Scaffold848 | 94128                   | TT                              | CC                | 1946624383               |
| SNP_P3_138317_96377  | NW_004516212.1 | Scaffold848 | 96377                   | GG                              | TT                | 1946624385               |
| SNP_P3_138318_143514 | NW_004516212.1 | Scaffold848 | 143514                  | CC                              | TT                | 1946624388               |
| SNP_P3_138319_155978 | NW_004516212.1 | Scaffold848 | 155978                  | TT                              | AA                | 1946624390               |
| SNP_P3_138320_158927 | NW_004516212.1 | Scaffold848 | 158927                  | GG                              | AA                | 1946624392               |

| SNPs IDs             | Chromosome IDs | Chromosomes | Physical positions (bp) | CDC Frontier (Reference genome) | (Pusa 256 & HPNB) | NCBI SNPdb Accession IDs |
|----------------------|----------------|-------------|-------------------------|---------------------------------|-------------------|--------------------------|
| SNP_P3_138321_158967 | NW_004516212.1 | Scaffold848 | 158967                  | TT                              | AA                | 1946624394               |
| SNP_P3_138322_180504 | NW_004516212.1 | Scaffold848 | 180504                  | AA                              | GG                | 1946624396               |
| SNP_P3_138323_180507 | NW_004516212.1 | Scaffold848 | 180507                  | TT                              | CC                | 1946624398               |
| SNP_P3_138324_180726 | NW_004516212.1 | Scaffold848 | 180726                  | AA                              | CC                | 1946624400               |
| SNP_P3_138325_180751 | NW_004516212.1 | Scaffold848 | 180751                  | AA                              | GG                | 1946624402               |
| SNP_P3_138326_180769 | NW_004516212.1 | Scaffold848 | 180769                  | AA                              | GG                | 1946624404               |
| SNP_P3_138327_180803 | NW_004516212.1 | Scaffold848 | 180803                  | AA                              | GG                | 1946624406               |
| SNP_P3_138328_180811 | NW_004516212.1 | Scaffold848 | 180811                  | GG                              | AA                | 1946624407               |
| SNP_P3_138329_181142 | NW_004516212.1 | Scaffold848 | 181142                  | TT                              | AA                | 1946624409               |
| SNP_P3_138330_181144 | NW_004516212.1 | Scaffold848 | 181144                  | GG                              | AA                | 1946624411               |
| SNP_P3_138331_181231 | NW_004516212.1 | Scaffold848 | 181231                  | TT                              | CC                | 1946624413               |
| SNP_P3_138332_181532 | NW_004516212.1 | Scaffold848 | 181532                  | CC                              | AA                | 1946624415               |
| SNP_P3_138333_181663 | NW_004516212.1 | Scaffold848 | 181663                  | AA                              | TT                | 1946624417               |
| SNP_P3_138334_181978 | NW_004516212.1 | Scaffold848 | 181978                  | AA                              | GG                | 1946624419               |
| SNP_P3_138335_230369 | NW_004516212.1 | Scaffold848 | 230369                  | GG                              | TT                | 1946624421               |
| SNP_P3_138337_234587 | NW_004516212.1 | Scaffold848 | 234587                  | TT                              | GG                | 1946624423               |
| SNP_P3_138338_266675 | NW_004516212.1 | Scaffold848 | 266675                  | TT                              | CC                | 1946624425               |
| SNP_P3_138339_1204   | NW_004516213.1 | Scaffold850 | 1204                    | GG                              | AA                | 1946624427               |
| SNP_P3_138340_1830   | NW_004516213.1 | Scaffold850 | 1830                    | GG                              | TT                | 1946624429               |
| SNP_P3_138341_2292   | NW_004516213.1 | Scaffold850 | 2292                    | AA                              | TT                | 1946624431               |
| SNP_P3_138342_2293   | NW_004516213.1 | Scaffold850 | 2293                    | CC                              | GG                | 1946624433               |
| SNP_P3_138343_580    | NW_004516215.1 | Scaffold853 | 580                     | GG                              | CC                | 1946624435               |
| SNP_P3_138344_6239   | NW_004516215.1 | Scaffold853 | 6239                    | TT                              | CC                | 1946624437               |
| SNP_P3_138345_7615   | NW_004516215.1 | Scaffold853 | 7615                    | TT                              | CC                | 1946624439               |
| SNP_P3_138346_7634   | NW_004516215.1 | Scaffold853 | 7634                    | GG                              | CC                | 1946624440               |
| SNP_P3_138347_11668  | NW_004516215.1 | Scaffold853 | 11668                   | CC                              | TT                | 1946624442               |
| SNP_P3_138348_11669  | NW_004516215.1 | Scaffold853 | 11669                   | TT                              | AA                | 1946624444               |
| SNP_P3_138349_1295   | NW_004516216.1 | Scaffold854 | 1295                    | CC                              | TT                | 1946624446               |
| SNP_P3_138351_1313   | NW_004516216.1 | Scaffold854 | 1313                    | GG                              | AA                | 1946624448               |
| SNP_P3_138352_5529   | NW_004516216.1 | Scaffold854 | 5529                    | CC                              | TT                | 1946624450               |
| SNP_P3_138353_17397  | NW_004516217.1 | Scaffold855 | 17397                   | CC                              | TT                | 1946624452               |
| SNP_P3_138354_19167  | NW_004516217.1 | Scaffold855 | 19167                   | TT                              | AA                | 1946624454               |
| SNP_P3_138355_27078  | NW_004516217.1 | Scaffold855 | 27078                   | TT                              | CC                | 1946624456               |
| SNP_P3_138358_30940  | NW_004516217.1 | Scaffold855 | 30940                   | TT                              | AA                | 1946624458               |
| SNP_P3_138359_30944  | NW_004516217.1 | Scaffold855 | 30944                   | CC                              | TT                | 1946624460               |
| SNP_P3_138360_30980  | NW_004516217.1 | Scaffold855 | 30980                   | TT                              | CC                | 1946624462               |
| SNP_P3_138361_31035  | NW_004516217.1 | Scaffold855 | 31035                   | AA                              | TT                | 1946624464               |
| SNP_P3_138362_31043  | NW_004516217.1 | Scaffold855 | 31043                   | AA                              | GG                | 1946624466               |
| SNP_P3_138363_31066  | NW_004516217.1 | Scaffold855 | 31066                   | TT                              | CC                | 1946624468               |
| SNP_P3_138364_31084  | NW_004516217.1 | Scaffold855 | 31084                   | GG                              | CC                | 1946624470               |
| SNP_P3_138365_31111  | NW_004516217.1 | Scaffold855 | 31111                   | CC                              | TT                | 1946624472               |
| SNP_P3_138366_31124  | NW_004516217.1 | Scaffold855 | 31124                   | GG                              | TT                | 1946624474               |



| SNPs IDs            | Chromosome IDs | Chromosomes | Physical positions (bp) | CDC Frontier (Reference genome) | (Pusa 256 & HPNB) | NCBI SNPdb Accession IDs |
|---------------------|----------------|-------------|-------------------------|---------------------------------|-------------------|--------------------------|
| SNP_P3_138367_31143 | NW_004516217.1 | Scaffold855 | 31143                   | AA                              | GG                | 1946624476               |
| SNP_P3_138369_31223 | NW_004516217.1 | Scaffold855 | 31223                   | TT                              | CC                | 1946624478               |
| SNP_P3_138370_31228 | NW_004516217.1 | Scaffold855 | 31228                   | CC                              | TT                | 1946624480               |
| SNP_P3_138371_31264 | NW_004516217.1 | Scaffold855 | 31264                   | GG                              | CC                | 1946624482               |
| SNP_P3_138372_31272 | NW_004516217.1 | Scaffold855 | 31272                   | CC                              | TT                | 1946624484               |
| SNP_P3_138373_31289 | NW_004516217.1 | Scaffold855 | 31289                   | AA                              | GG                | 1946624486               |
| SNP_P3_138374_31304 | NW_004516217.1 | Scaffold855 | 31304                   | AA                              | CC                | 1946624488               |
| SNP_P3_138375_31335 | NW_004516217.1 | Scaffold855 | 31335                   | CC                              | TT                | 1946624489               |
| SNP_P3_138376_31367 | NW_004516217.1 | Scaffold855 | 31367                   | AA                              | GG                | 1946624491               |
| SNP_P3_138378_31486 | NW_004516217.1 | Scaffold855 | 31486                   | TT                              | CC                | 1946624493               |
| SNP_P3_138380_31533 | NW_004516217.1 | Scaffold855 | 31533                   | CC                              | TT                | 1946624495               |
| SNP_P3_138381_31555 | NW_004516217.1 | Scaffold855 | 31555                   | TT                              | CC                | 1946624497               |
| SNP_P3_138382_31696 | NW_004516217.1 | Scaffold855 | 31696                   | GG                              | TT                | 1946624498               |
| SNP_P3_138384_31753 | NW_004516217.1 | Scaffold855 | 31753                   | GG                              | TT                | 1946624500               |
| SNP_P3_138385_38060 | NW_004516217.1 | Scaffold855 | 38060                   | GG                              | AA                | 1946624502               |
| SNP_P3_138386_54972 | NW_004516217.1 | Scaffold855 | 54972                   | GG                              | AA                | 1946624504               |
| SNP_P3_138387_119   | NW_004516219.1 | Scaffold857 | 119                     | TT                              | AA                | 1946624506               |
| SNP_P3_138389_461   | NW_004516219.1 | Scaffold857 | 461                     | TT                              | CC                | 1946624508               |
| SNP_P3_138390_578   | NW_004516219.1 | Scaffold857 | 578                     | AA                              | CC                | 1946624510               |
| SNP_P3_138391_605   | NW_004516219.1 | Scaffold857 | 605                     | GG                              | AA                | 1946624512               |
| SNP_P3_138392_624   | NW_004516219.1 | Scaffold857 | 624                     | CC                              | TT                | 1946624514               |
| SNP_P3_138393_3778  | NW_004516219.1 | Scaffold857 | 3778                    | TT                              | CC                | 1946624516               |
| SNP_P3_138394_4117  | NW_004516219.1 | Scaffold857 | 4117                    | AA                              | GG                | 1946624518               |
| SNP_P3_138395_4139  | NW_004516219.1 | Scaffold857 | 4139                    | TT                              | AA                | 1946624520               |
| SNP_P3_138396_4149  | NW_004516219.1 | Scaffold857 | 4149                    | TT                              | CC                | 1946624522               |
| SNP_P3_138397_4304  | NW_004516219.1 | Scaffold857 | 4304                    | TT                              | CC                | 1946624524               |
| SNP_P3_138398_8577  | NW_004516219.1 | Scaffold857 | 8577                    | TT                              | GG                | 1946624526               |
| SNP_P3_138400_17973 | NW_004516219.1 | Scaffold857 | 17973                   | GG                              | TT                | 1946624528               |
| SNP_P3_138401_24118 | NW_004516219.1 | Scaffold857 | 24118                   | GG                              | AA                | 1946624530               |
| SNP_P3_138402_24138 | NW_004516219.1 | Scaffold857 | 24138                   | AA                              | GG                | 1946624531               |
| SNP_P3_138403_24221 | NW_004516219.1 | Scaffold857 | 24221                   | GG                              | AA                | 1946624533               |
| SNP_P3_138404_24244 | NW_004516219.1 | Scaffold857 | 24244                   | CC                              | TT                | 1946624535               |
| SNP_P3_138405_24250 | NW_004516219.1 | Scaffold857 | 24250                   | CC                              | GG                | 1946624537               |
| SNP_P3_138406_24415 | NW_004516219.1 | Scaffold857 | 24415                   | GG                              | TT                | 1946624539               |
| SNP_P3_138407_24420 | NW_004516219.1 | Scaffold857 | 24420                   | AA                              | TT                | 1946624541               |
| SNP_P3_138409_24455 | NW_004516219.1 | Scaffold857 | 24455                   | AA                              | GG                | 1946624543               |
| SNP_P3_138410_24528 | NW_004516219.1 | Scaffold857 | 24528                   | AA                              | GG                | 1946624545               |
| SNP_P3_138411_26524 | NW_004516219.1 | Scaffold857 | 26524                   | AA                              | CC                | 1946624547               |
| SNP_P3_138412_26553 | NW_004516219.1 | Scaffold857 | 26553                   | AA                              | GG                | 1946624549               |
| SNP_P3_138413_26579 | NW_004516219.1 | Scaffold857 | 26579                   | TT                              | CC                | 1946624551               |
| SNP_P3_138415_26703 | NW_004516219.1 | Scaffold857 | 26703                   | TT                              | CC                | 1946624553               |
| SNP_P3_138416_26884 | NW_004516219.1 | Scaffold857 | 26884                   | AA                              | CC                | 1946624555               |

| SNPs IDs             | Chromosome IDs | Chromosomes | Physical positions (bp) | CDC Frontier (Reference genome) | (Pusa 256 & HPNB) | NCBI SNPdb Accession IDs |
|----------------------|----------------|-------------|-------------------------|---------------------------------|-------------------|--------------------------|
| SNP_P3_138417_26928  | NW_004516219.1 | Scaffold857 | 26928                   | TT                              | GG                | 1946624557               |
| SNP_P3_138418_27081  | NW_004516219.1 | Scaffold857 | 27081                   | TT                              | GG                | 1946624559               |
| SNP_P3_138420_24554  | NW_004516221.1 | Scaffold859 | 24554                   | AA                              | CC                | 1946624561               |
| SNP_P3_138421_26063  | NW_004516221.1 | Scaffold859 | 26063                   | CC                              | AA                | 1946624563               |
| SNP_P3_138422_26121  | NW_004516221.1 | Scaffold859 | 26121                   | GG                              | AA                | 1946624565               |
| SNP_P3_138423_26131  | NW_004516221.1 | Scaffold859 | 26131                   | AA                              | GG                | 1946624566               |
| SNP_P3_138424_26639  | NW_004516221.1 | Scaffold859 | 26639                   | GG                              | AA                | 1946624568               |
| SNP_P3_138425_26988  | NW_004516221.1 | Scaffold859 | 26988                   | GG                              | TT                | 1946624570               |
| SNP_P3_138427_27281  | NW_004516221.1 | Scaffold859 | 27281                   | AA                              | GG                | 1946624572               |
| SNP_P3_138428_27332  | NW_004516221.1 | Scaffold859 | 27332                   | AA                              | TT                | 1946624574               |
| SNP_P3_138429_27516  | NW_004516221.1 | Scaffold859 | 27516                   | AA                              | GG                | 1946624576               |
| SNP_P3_138430_27589  | NW_004516221.1 | Scaffold859 | 27589                   | CC                              | TT                | 1946624578               |
| SNP_P3_138431_27629  | NW_004516221.1 | Scaffold859 | 27629                   | AA                              | GG                | 1946624580               |
| SNP_P3_138432_27670  | NW_004516221.1 | Scaffold859 | 27670                   | GG                              | TT                | 1946624582               |
| SNP_P3_138433_32965  | NW_004516221.1 | Scaffold859 | 32965                   | TT                              | AA                | 1946624584               |
| SNP_P3_138434_63280  | NW_004516221.1 | Scaffold859 | 63280                   | GG                              | AA                | 1946624586               |
| SNP_P3_138435_63281  | NW_004516221.1 | Scaffold859 | 63281                   | AA                              | TT                | 1946624588               |
| SNP_P3_138436_63573  | NW_004516221.1 | Scaffold859 | 63573                   | AA                              | GG                | 1946624590               |
| SNP_P3_138438_68597  | NW_004516221.1 | Scaffold859 | 68597                   | AA                              | GG                | 1946624592               |
| SNP_P3_138439_68976  | NW_004516221.1 | Scaffold859 | 68976                   | TT                              | CC                | 1946624594               |
| SNP_P3_138440_75828  | NW_004516221.1 | Scaffold859 | 75828                   | GG                              | TT                | 1946624596               |
| SNP_P3_138441_85448  | NW_004516221.1 | Scaffold859 | 85448                   | TT                              | GG                | 1946624598               |
| SNP_P3_138442_85673  | NW_004516221.1 | Scaffold859 | 85673                   | GG                              | AA                | 1946624600               |
| SNP_P3_138443_86308  | NW_004516221.1 | Scaffold859 | 86308                   | GG                              | TT                | 1946624602               |
| SNP_P3_138444_86310  | NW_004516221.1 | Scaffold859 | 86310                   | AA                              | CC                | 1946624604               |
| SNP_P3_138445_86699  | NW_004516221.1 | Scaffold859 | 86699                   | AA                              | GG                | 1946624606               |
| SNP_P3_138446_111170 | NW_004516221.1 | Scaffold859 | 111170                  | CC                              | AA                | 1946624608               |
| SNP_P3_138447_3447   | NW_004516222.1 | Scaffold860 | 3447                    | CC                              | TT                | 1946624610               |
| SNP_P3_138448_3546   | NW_004516222.1 | Scaffold860 | 3546                    | AA                              | CC                | 1946624612               |
| SNP_P3_138449_3588   | NW_004516222.1 | Scaffold860 | 3588                    | TT                              | CC                | 1946624614               |
| SNP_P3_138450_3609   | NW_004516222.1 | Scaffold860 | 3609                    | AA                              | TT                | 1946624616               |
| SNP_P3_138451_4197   | NW_004516222.1 | Scaffold860 | 4197                    | GG                              | CC                | 1946624618               |
| SNP_P3_138452_4446   | NW_004516222.1 | Scaffold860 | 4446                    | CC                              | TT                | 1946624620               |
| SNP_P3_138453_1675   | NW_004516223.1 | Scaffold861 | 1675                    | TT                              | AA                | 1946624622               |
| SNP_P3_138454_170    | NW_004516224.1 | Scaffold862 | 170                     | AA                              | GG                | 1946624624               |
| SNP_P3_138455_196    | NW_004516224.1 | Scaffold862 | 196                     | CC                              | TT                | 1946624626               |
| SNP_P3_138456_259    | NW_004516224.1 | Scaffold862 | 259                     | GG                              | AA                | 1946624628               |
| SNP_P3_138457_264    | NW_004516224.1 | Scaffold862 | 264                     | AA                              | CC                | 1946624630               |
| SNP_P3_138458_309    | NW_004516224.1 | Scaffold862 | 309                     | AA                              | GG                | 1946624632               |
| SNP_P3_138459_337    | NW_004516224.1 | Scaffold862 | 337                     | AA                              | CC                | 1946624634               |
| SNP_P3_138460_389    | NW_004516224.1 | Scaffold862 | 389                     | TT                              | AA                | 1946624636               |
| SNP_P3_138461_18043  | NW_004516224.1 | Scaffold862 | 18043                   | TT                              | CC                | 1946624638               |

| SNPs IDs            | Chromosome IDs | Chromosomes | Physical positions (bp) | CDC Frontier (Reference genome) | (Pusa 256 & HPNB) | NCBI SNPdb Accession IDs |
|---------------------|----------------|-------------|-------------------------|---------------------------------|-------------------|--------------------------|
| SNP_P3_138462_18291 | NW_004516224.1 | Scaffold862 | 18291                   | CC                              | TT                | 1946624640               |
| SNP_P3_138463_18673 | NW_004516224.1 | Scaffold862 | 18673                   | GG                              | AA                | 1946624641               |
| SNP_P3_138464_19231 | NW_004516224.1 | Scaffold862 | 19231                   | TT                              | AA                | 1946624642               |
| SNP_P3_138465_19233 | NW_004516224.1 | Scaffold862 | 19233                   | AA                              | TT                | 1946624643               |
| SNP_P3_138466_19248 | NW_004516224.1 | Scaffold862 | 19248                   | TT                              | GG                | 1946624644               |
| SNP_P3_138467_19947 | NW_004516224.1 | Scaffold862 | 19947                   | CC                              | TT                | 1946624645               |
| SNP_P3_138468_22380 | NW_004516224.1 | Scaffold862 | 22380                   | TT                              | CC                | 1946624646               |
| SNP_P3_138469_22403 | NW_004516224.1 | Scaffold862 | 22403                   | CC                              | AA                | 1946624647               |
| SNP_P3_138470_22638 | NW_004516224.1 | Scaffold862 | 22638                   | CC                              | AA                | 1946624648               |
| SNP_P3_138471_22699 | NW_004516224.1 | Scaffold862 | 22699                   | AA                              | GG                | 1946624649               |
| SNP_P3_138472_22726 | NW_004516224.1 | Scaffold862 | 22726                   | AA                              | TT                | 1946624650               |
| SNP_P3_138473_22787 | NW_004516224.1 | Scaffold862 | 22787                   | AA                              | CC                | 1946624652               |
| SNP_P3_138474_22862 | NW_004516224.1 | Scaffold862 | 22862                   | AA                              | GG                | 1946624654               |
| SNP_P3_138475_22946 | NW_004516224.1 | Scaffold862 | 22946                   | CC                              | TT                | 1946624656               |
| SNP_P3_138476_23160 | NW_004516224.1 | Scaffold862 | 23160                   | GG                              | AA                | 1946624658               |
| SNP_P3_138477_23186 | NW_004516224.1 | Scaffold862 | 23186                   | GG                              | AA                | 1946624660               |
| SNP_P3_138478_26893 | NW_004516224.1 | Scaffold862 | 26893                   | TT                              | CC                | 1946624662               |
| SNP_P3_138479_27608 | NW_004516224.1 | Scaffold862 | 27608                   | TT                              | GG                | 1946624664               |
| SNP_P3_138480_28164 | NW_004516224.1 | Scaffold862 | 28164                   | AA                              | GG                | 1946624665               |
| SNP_P3_138481_28421 | NW_004516224.1 | Scaffold862 | 28421                   | GG                              | AA                | 1946624667               |
| SNP_P3_138482_28926 | NW_004516224.1 | Scaffold862 | 28926                   | AA                              | GG                | 1946624669               |
| SNP_P3_138483_29004 | NW_004516224.1 | Scaffold862 | 29004                   | TT                              | CC                | 1946624671               |
| SNP_P3_138484_29013 | NW_004516224.1 | Scaffold862 | 29013                   | GG                              | TT                | 1946624673               |
| SNP_P3_138485_29141 | NW_004516224.1 | Scaffold862 | 29141                   | TT                              | CC                | 1946624675               |
| SNP_P3_138486_29169 | NW_004516224.1 | Scaffold862 | 29169                   | AA                              | GG                | 1946624677               |
| SNP_P3_138487_29171 | NW_004516224.1 | Scaffold862 | 29171                   | GG                              | CC                | 1946624679               |
| SNP_P3_138488_29186 | NW_004516224.1 | Scaffold862 | 29186                   | AA                              | CC                | 1946624681               |
| SNP_P3_138489_29191 | NW_004516224.1 | Scaffold862 | 29191                   | CC                              | AA                | 1946624683               |
| SNP_P3_138490_29307 | NW_004516224.1 | Scaffold862 | 29307                   | CC                              | TT                | 1946624685               |
| SNP_P3_138491_29324 | NW_004516224.1 | Scaffold862 | 29324                   | AA                              | CC                | 1946624687               |
| SNP_P3_138492_32487 | NW_004516224.1 | Scaffold862 | 32487                   | CC                              | TT                | 1946624689               |
| SNP_P3_138493_32490 | NW_004516224.1 | Scaffold862 | 32490                   | TT                              | CC                | 1946624691               |
| SNP_P3_138494_32501 | NW_004516224.1 | Scaffold862 | 32501                   | AA                              | GG                | 1946624693               |
| SNP_P3_138495_32508 | NW_004516224.1 | Scaffold862 | 32508                   | TT                              | AA                | 1946624695               |
| SNP_P3_138496_32509 | NW_004516224.1 | Scaffold862 | 32509                   | TT                              | CC                | 1946624696               |
| SNP_P3_138497_32551 | NW_004516224.1 | Scaffold862 | 32551                   | AA                              | GG                | 1946624698               |
| SNP_P3_138498_32617 | NW_004516224.1 | Scaffold862 | 32617                   | CC                              | TT                | 1946624700               |
| SNP_P3_138499_32687 | NW_004516224.1 | Scaffold862 | 32687                   | AA                              | CC                | 1946624702               |
| SNP_P3_138500_32980 | NW_004516224.1 | Scaffold862 | 32980                   | CC                              | TT                | 1946624704               |
| SNP_P3_138501_33257 | NW_004516224.1 | Scaffold862 | 33257                   | TT                              | GG                | 1946624706               |
| SNP_P3_138502_34603 | NW_004516224.1 | Scaffold862 | 34603                   | CC                              | TT                | 1946624708               |
| SNP_P3_138503_34615 | NW_004516224.1 | Scaffold862 | 34615                   | AA                              | TT                | 1946624709               |

| SNPs IDs            | Chromosome IDs | Chromosomes | Physical positions (bp) | CDC Frontier (Reference genome) | (Pusa 256 & HPNB) | NCBI SNPdb Accession IDs |
|---------------------|----------------|-------------|-------------------------|---------------------------------|-------------------|--------------------------|
| SNP_P3_138504_34733 | NW_004516224.1 | Scaffold862 | 34733                   | TT                              | CC                | 1946624711               |
| SNP_P3_138505_34741 | NW_004516224.1 | Scaffold862 | 34741                   | CC                              | GG                | 1946624713               |
| SNP_P3_138506_34747 | NW_004516224.1 | Scaffold862 | 34747                   | TT                              | GG                | 1946624715               |
| SNP_P3_138507_34787 | NW_004516224.1 | Scaffold862 | 34787                   | GG                              | TT                | 1946624717               |
| SNP_P3_138508_34794 | NW_004516224.1 | Scaffold862 | 34794                   | GG                              | AA                | 1946624719               |
| SNP_P3_138509_34865 | NW_004516224.1 | Scaffold862 | 34865                   | AA                              | GG                | 1946624721               |
| SNP_P3_138510_35019 | NW_004516224.1 | Scaffold862 | 35019                   | TT                              | GG                | 1946624723               |
| SNP_P3_138511_35058 | NW_004516224.1 | Scaffold862 | 35058                   | CC                              | TT                | 1946624725               |
| SNP_P3_138512_35059 | NW_004516224.1 | Scaffold862 | 35059                   | TT                              | CC                | 1946624726               |
| SNP_P3_138513_35060 | NW_004516224.1 | Scaffold862 | 35060                   | GG                              | TT                | 1946624727               |
| SNP_P3_138514_35147 | NW_004516224.1 | Scaffold862 | 35147                   | CC                              | TT                | 1946624728               |
| SNP_P3_138515_35186 | NW_004516224.1 | Scaffold862 | 35186                   | GG                              | AA                | 1946624729               |
| SNP_P3_138516_35218 | NW_004516224.1 | Scaffold862 | 35218                   | AA                              | GG                | 1946624731               |
| SNP_P3_138517_35221 | NW_004516224.1 | Scaffold862 | 35221                   | CC                              | TT                | 1946624733               |
| SNP_P3_138518_35233 | NW_004516224.1 | Scaffold862 | 35233                   | TT                              | AA                | 1946624735               |
| SNP_P3_138519_35280 | NW_004516224.1 | Scaffold862 | 35280                   | AA                              | CC                | 1946624737               |
| SNP_P3_138520_35862 | NW_004516224.1 | Scaffold862 | 35862                   | GG                              | AA                | 1946624739               |
| SNP_P3_138521_35940 | NW_004516224.1 | Scaffold862 | 35940                   | AA                              | GG                | 1946624741               |
| SNP_P3_138522_35943 | NW_004516224.1 | Scaffold862 | 35943                   | CC                              | TT                | 1946624743               |
| SNP_P3_138523_36078 | NW_004516224.1 | Scaffold862 | 36078                   | TT                              | AA                | 1946624745               |
| SNP_P3_138524_36132 | NW_004516224.1 | Scaffold862 | 36132                   | AA                              | CC                | 1946624747               |
| SNP_P3_138525_36137 | NW_004516224.1 | Scaffold862 | 36137                   | AA                              | TT                | 1946624749               |
| SNP_P3_138526_36226 | NW_004516224.1 | Scaffold862 | 36226                   | AA                              | GG                | 1946624751               |
| SNP_P3_138527_40021 | NW_004516224.1 | Scaffold862 | 40021                   | CC                              | AA                | 1946624753               |
| SNP_P3_138528_40047 | NW_004516224.1 | Scaffold862 | 40047                   | TT                              | CC                | 1946624755               |
| SNP_P3_138529_44225 | NW_004516224.1 | Scaffold862 | 44225                   | GG                              | CC                | 1946624757               |
| SNP_P3_138530_44245 | NW_004516224.1 | Scaffold862 | 44245                   | CC                              | AA                | 1946624759               |
| SNP_P3_138531_44268 | NW_004516224.1 | Scaffold862 | 44268                   | AA                              | TT                | 1946624761               |
| SNP_P3_138532_44289 | NW_004516224.1 | Scaffold862 | 44289                   | TT                              | GG                | 1946624763               |
| SNP_P3_138533_44306 | NW_004516224.1 | Scaffold862 | 44306                   | CC                              | AA                | 1946624765               |
| SNP_P3_138534_44308 | NW_004516224.1 | Scaffold862 | 44308                   | TT                              | CC                | 1946624767               |
| SNP_P3_138535_44403 | NW_004516224.1 | Scaffold862 | 44403                   | TT                              | AA                | 1946624769               |
| SNP_P3_138536_44556 | NW_004516224.1 | Scaffold862 | 44556                   | AA                              | GG                | 1946624771               |
| SNP_P3_138537_44659 | NW_004516224.1 | Scaffold862 | 44659                   | GG                              | AA                | 1946624773               |
| SNP_P3_138538_44772 | NW_004516224.1 | Scaffold862 | 44772                   | TT                              | GG                | 1946624775               |
| SNP_P3_138539_48881 | NW_004516224.1 | Scaffold862 | 48881                   | TT                              | CC                | 1946624777               |
| SNP_P3_138540_48888 | NW_004516224.1 | Scaffold862 | 48888                   | GG                              | TT                | 1946624779               |
| SNP_P3_138541_48916 | NW_004516224.1 | Scaffold862 | 48916                   | AA                              | CC                | 1946624781               |
| SNP_P3_138542_48949 | NW_004516224.1 | Scaffold862 | 48949                   | CC                              | TT                | 1946624783               |
| SNP_P3_138543_49026 | NW_004516224.1 | Scaffold862 | 49026                   | AA                              | GG                | 1946624785               |
| SNP_P3_138544_49027 | NW_004516224.1 | Scaffold862 | 49027                   | CC                              | TT                | 1946624788               |
| SNP_P3_138545_49250 | NW_004516224.1 | Scaffold862 | 49250                   | CC                              | AA                | 1946624790               |

| SNPs IDs            | Chromosome IDs | Chromosomes | Physical positions (bp) | CDC Frontier (Reference genome) | (Pusa 256 & HPNB) | NCBI SNPdb Accession IDs |
|---------------------|----------------|-------------|-------------------------|---------------------------------|-------------------|--------------------------|
| SNP_P3_138546_49264 | NW_004516224.1 | Scaffold862 | 49264                   | CC                              | GG                | 1946624792               |
| SNP_P3_138547_50928 | NW_004516224.1 | Scaffold862 | 50928                   | AA                              | TT                | 1946624794               |
| SNP_P3_138548_51094 | NW_004516224.1 | Scaffold862 | 51094                   | TT                              | AA                | 1946624796               |
| SNP_P3_138549_51105 | NW_004516224.1 | Scaffold862 | 51105                   | GG                              | TT                | 1946624798               |
| SNP_P3_138550_51170 | NW_004516224.1 | Scaffold862 | 51170                   | AA                              | GG                | 1946624800               |
| SNP_P3_138551_51182 | NW_004516224.1 | Scaffold862 | 51182                   | TT                              | GG                | 1946624802               |
| SNP_P3_138552_51183 | NW_004516224.1 | Scaffold862 | 51183                   | GG                              | TT                | 1946624804               |
| SNP_P3_138553_51305 | NW_004516224.1 | Scaffold862 | 51305                   | TT                              | AA                | 1946624806               |
| SNP_P3_138554_51410 | NW_004516224.1 | Scaffold862 | 51410                   | AA                              | GG                | 1946624808               |
| SNP_P3_138555_51631 | NW_004516224.1 | Scaffold862 | 51631                   | GG                              | AA                | 1946624810               |
| SNP_P3_138556_51741 | NW_004516224.1 | Scaffold862 | 51741                   | GG                              | CC                | 1946624812               |
| SNP_P3_138557_55754 | NW_004516224.1 | Scaffold862 | 55754                   | TT                              | CC                | 1946624814               |
| SNP_P3_138558_56561 | NW_004516224.1 | Scaffold862 | 56561                   | GG                              | AA                | 1946624816               |
| SNP_P3_138559_56602 | NW_004516224.1 | Scaffold862 | 56602                   | GG                              | AA                | 1946624818               |
| SNP_P3_138561_59702 | NW_004516224.1 | Scaffold862 | 59702                   | AA                              | GG                | 1946624820               |
| SNP_P3_138562_59838 | NW_004516224.1 | Scaffold862 | 59838                   | CC                              | TT                | 1946624822               |
| SNP_P3_138563_59842 | NW_004516224.1 | Scaffold862 | 59842                   | CC                              | TT                | 1946624824               |
| SNP_P3_138564_59853 | NW_004516224.1 | Scaffold862 | 59853                   | TT                              | GG                | 1946624826               |
| SNP_P3_138565_59865 | NW_004516224.1 | Scaffold862 | 59865                   | CC                              | TT                | 1946624828               |
| SNP_P3_138566_59897 | NW_004516224.1 | Scaffold862 | 59897                   | GG                              | CC                | 1946624830               |
| SNP_P3_138567_59898 | NW_004516224.1 | Scaffold862 | 59898                   | TT                              | GG                | 1946624832               |
| SNP_P3_138568_59957 | NW_004516224.1 | Scaffold862 | 59957                   | GG                              | TT                | 1946624834               |
| SNP_P3_138569_60085 | NW_004516224.1 | Scaffold862 | 60085                   | AA                              | CC                | 1946624836               |
| SNP_P3_138570_60100 | NW_004516224.1 | Scaffold862 | 60100                   | GG                              | TT                | 1946624838               |
| SNP_P3_138571_60101 | NW_004516224.1 | Scaffold862 | 60101                   | AA                              | GG                | 1946624840               |
| SNP_P3_138572_60121 | NW_004516224.1 | Scaffold862 | 60121                   | TT                              | GG                | 1946624842               |
| SNP_P3_138573_60156 | NW_004516224.1 | Scaffold862 | 60156                   | AA                              | GG                | 1946624844               |
| SNP_P3_138574_60300 | NW_004516224.1 | Scaffold862 | 60300                   | GG                              | AA                | 1946624846               |
| SNP_P3_138575_60304 | NW_004516224.1 | Scaffold862 | 60304                   | CC                              | TT                | 1946624848               |
| SNP_P3_138576_60350 | NW_004516224.1 | Scaffold862 | 60350                   | GG                              | AA                | 1946624850               |
| SNP_P3_138577_927   | NW_004516225.1 | Scaffold863 | 927                     | AA                              | GG                | 1946624852               |
| SNP_P3_138578_964   | NW_004516225.1 | Scaffold863 | 964                     | TT                              | CC                | 1946624854               |
| SNP_P3_138579_979   | NW_004516225.1 | Scaffold863 | 979                     | CC                              | GG                | 1946624856               |
| SNP_P3_138580_40440 | NW_004516226.1 | Scaffold864 | 40440                   | TT                              | CC                | 1946624859               |
| SNP_P3_138581_40602 | NW_004516226.1 | Scaffold864 | 40602                   | TT                              | AA                | 1946624861               |
| SNP_P3_138582_40638 | NW_004516226.1 | Scaffold864 | 40638                   | CC                              | TT                | 1946624863               |
| SNP_P3_138583_40648 | NW_004516226.1 | Scaffold864 | 40648                   | GG                              | AA                | 1946624866               |
| SNP_P3_138584_40679 | NW_004516226.1 | Scaffold864 | 40679                   | AA                              | GG                | 1946624868               |
| SNP_P3_138585_40686 | NW_004516226.1 | Scaffold864 | 40686                   | TT                              | AA                | 1946624870               |
| SNP_P3_138586_40714 | NW_004516226.1 | Scaffold864 | 40714                   | GG                              | AA                | 1946624873               |
| SNP_P3_138588_55531 | NW_004516226.1 | Scaffold864 | 55531                   | GG                              | AA                | 1946624875               |
| SNP_P3_138589_66706 | NW_004516226.1 | Scaffold864 | 66706                   | TT                              | AA                | 1946624877               |

| SNPs IDs             | Chromosome IDs | Chromosomes | Physical positions (bp) | CDC Frontier (Reference genome) | (Pusa 256 & HPNB) | NCBI SNPdb Accession IDs |
|----------------------|----------------|-------------|-------------------------|---------------------------------|-------------------|--------------------------|
| SNP_P3_138590_66735  | NW_004516226.1 | Scaffold864 | 66735                   | TT                              | CC                | 1946624880               |
| SNP_P3_138591_70529  | NW_004516226.1 | Scaffold864 | 70529                   | GG                              | CC                | 1946624882               |
| SNP_P3_138592_71608  | NW_004516226.1 | Scaffold864 | 71608                   | CC                              | AA                | 1946624884               |
| SNP_P3_138593_77109  | NW_004516226.1 | Scaffold864 | 77109                   | GG                              | AA                | 1946624887               |
| SNP_P3_138594_77120  | NW_004516226.1 | Scaffold864 | 77120                   | AA                              | GG                | 1946624889               |
| SNP_P3_138595_77274  | NW_004516226.1 | Scaffold864 | 77274                   | AA                              | TT                | 1946624891               |
| SNP_P3_138596_77319  | NW_004516226.1 | Scaffold864 | 77319                   | AA                              | GG                | 1946624893               |
| SNP_P3_138597_88187  | NW_004516226.1 | Scaffold864 | 88187                   | TT                              | CC                | 1946624895               |
| SNP_P3_138598_94654  | NW_004516226.1 | Scaffold864 | 94654                   | TT                              | CC                | 1946624897               |
| SNP_P3_138599_94670  | NW_004516226.1 | Scaffold864 | 94670                   | CC                              | TT                | 1946624901               |
| SNP_P3_138600_105759 | NW_004516226.1 | Scaffold864 | 105759                  | CC                              | AA                | 1946624903               |
| SNP_P3_138601_105801 | NW_004516226.1 | Scaffold864 | 105801                  | CC                              | TT                | 1946624905               |
| SNP_P3_138602_105810 | NW_004516226.1 | Scaffold864 | 105810                  | CC                              | TT                | 1946624908               |
| SNP_P3_138603_119943 | NW_004516226.1 | Scaffold864 | 119943                  | CC                              | GG                | 1946624909               |
| SNP_P3_138604_120916 | NW_004516226.1 | Scaffold864 | 120916                  | GG                              | CC                | 1946624911               |
| SNP_P3_138606_142547 | NW_004516226.1 | Scaffold864 | 142547                  | TT                              | GG                | 1946624913               |
| SNP_P3_138607_168637 | NW_004516226.1 | Scaffold864 | 168637                  | TT                              | CC                | 1946624915               |
| SNP_P3_138608_168665 | NW_004516226.1 | Scaffold864 | 168665                  | GG                              | TT                | 1946624917               |
| SNP_P3_138609_191908 | NW_004516226.1 | Scaffold864 | 191908                  | GG                              | AA                | 1946624919               |
| SNP_P3_138611_228363 | NW_004516226.1 | Scaffold864 | 228363                  | AA                              | CC                | 1946624921               |
| SNP_P3_138612_228366 | NW_004516226.1 | Scaffold864 | 228366                  | AA                              | TT                | 1946624923               |
| SNP_P3_138614_240787 | NW_004516226.1 | Scaffold864 | 240787                  | AA                              | TT                | 1946624925               |
| SNP_P3_138615_240835 | NW_004516226.1 | Scaffold864 | 240835                  | GG                              | AA                | 1946624927               |
| SNP_P3_138616_241020 | NW_004516226.1 | Scaffold864 | 241020                  | AA                              | TT                | 1946624929               |
| SNP_P3_138617_241030 | NW_004516226.1 | Scaffold864 | 241030                  | TT                              | GG                | 1946624932               |
| SNP_P3_138619_248138 | NW_004516226.1 | Scaffold864 | 248138                  | CC                              | GG                | 1946624934               |
| SNP_P3_138620_248165 | NW_004516226.1 | Scaffold864 | 248165                  | GG                              | TT                | 1946624936               |
| SNP_P3_138621_248177 | NW_004516226.1 | Scaffold864 | 248177                  | AA                              | CC                | 1946624938               |
| SNP_P3_138622_248243 | NW_004516226.1 | Scaffold864 | 248243                  | AA                              | CC                | 1946624941               |
| SNP_P3_138623_248259 | NW_004516226.1 | Scaffold864 | 248259                  | TT                              | AA                | 1946624943               |
| SNP_P3_138624_248269 | NW_004516226.1 | Scaffold864 | 248269                  | AA                              | GG                | 1946624945               |
| SNP_P3_138625_248528 | NW_004516226.1 | Scaffold864 | 248528                  | TT                              | GG                | 1946624947               |
| SNP_P3_138626_248579 | NW_004516226.1 | Scaffold864 | 248579                  | CC                              | TT                | 1946624949               |
| SNP_P3_138627_248686 | NW_004516226.1 | Scaffold864 | 248686                  | AA                              | CC                | 1946624951               |
| SNP_P3_138628_248707 | NW_004516226.1 | Scaffold864 | 248707                  | TT                              | CC                | 1946624953               |
| SNP_P3_138629_283115 | NW_004516226.1 | Scaffold864 | 283115                  | GG                              | CC                | 1946624955               |
| SNP_P3_138630_290579 | NW_004516226.1 | Scaffold864 | 290579                  | AA                              | CC                | 1946624957               |
| SNP_P3_138631_290589 | NW_004516226.1 | Scaffold864 | 290589                  | TT                              | AA                | 1946624959               |
| SNP_P3_138632_290626 | NW_004516226.1 | Scaffold864 | 290626                  | AA                              | GG                | 1946624961               |
| SNP_P3_138633_290641 | NW_004516226.1 | Scaffold864 | 290641                  | TT                              | CC                | 1946624963               |
| SNP_P3_138634_290883 | NW_004516226.1 | Scaffold864 | 290883                  | TT                              | AA                | 1946624965               |
| SNP_P3_138635_290905 | NW_004516226.1 | Scaffold864 | 290905                  | CC                              | TT                | 1946624967               |

| SNPs IDs             | Chromosome IDs | Chromosomes | Physical positions (bp) | CDC Frontier (Reference genome) | (Pusa 256 & HPNB) | NCBI SNPdb Accession IDs |
|----------------------|----------------|-------------|-------------------------|---------------------------------|-------------------|--------------------------|
| SNP_P3_138636_290958 | NW_004516226.1 | Scaffold864 | 290958                  | CC                              | TT                | 1946624970               |
| SNP_P3_138637_290969 | NW_004516226.1 | Scaffold864 | 290969                  | TT                              | CC                | 1946624972               |
| SNP_P3_138638_291045 | NW_004516226.1 | Scaffold864 | 291045                  | GG                              | AA                | 1946624974               |
| SNP_P3_138639_291053 | NW_004516226.1 | Scaffold864 | 291053                  | AA                              | GG                | 1946624976               |
| SNP_P3_138640_291061 | NW_004516226.1 | Scaffold864 | 291061                  | AA                              | GG                | 1946624978               |
| SNP_P3_138641_291065 | NW_004516226.1 | Scaffold864 | 291065                  | AA                              | GG                | 1946624980               |
| SNP_P3_138642_291073 | NW_004516226.1 | Scaffold864 | 291073                  | AA                              | CC                | 1946624982               |
| SNP_P3_138644_294423 | NW_004516226.1 | Scaffold864 | 294423                  | GG                              | TT                | 1946624984               |
| SNP_P3_138645_294657 | NW_004516226.1 | Scaffold864 | 294657                  | TT                              | AA                | 1946624986               |
| SNP_P3_138646_294755 | NW_004516226.1 | Scaffold864 | 294755                  | CC                              | TT                | 1946624988               |
| SNP_P3_138647_323047 | NW_004516226.1 | Scaffold864 | 323047                  | CC                              | TT                | 1946624990               |
| SNP_P3_138648_323085 | NW_004516226.1 | Scaffold864 | 323085                  | AA                              | GG                | 1946624992               |
| SNP_P3_138649_323086 | NW_004516226.1 | Scaffold864 | 323086                  | AA                              | GG                | 1946624994               |
| SNP_P3_138650_323089 | NW_004516226.1 | Scaffold864 | 323089                  | GG                              | AA                | 1946624996               |
| SNP_P3_138651_323463 | NW_004516226.1 | Scaffold864 | 323463                  | GG                              | AA                | 1946624999               |
| SNP_P3_138652_323735 | NW_004516226.1 | Scaffold864 | 323735                  | GG                              | AA                | 1946625001               |
| SNP_P3_138653_323806 | NW_004516226.1 | Scaffold864 | 323806                  | TT                              | AA                | 1946625003               |
| SNP_P3_138654_323867 | NW_004516226.1 | Scaffold864 | 323867                  | GG                              | TT                | 1946625005               |
| SNP_P3_138655_323875 | NW_004516226.1 | Scaffold864 | 323875                  | TT                              | CC                | 1946625007               |
| SNP_P3_138656_324253 | NW_004516226.1 | Scaffold864 | 324253                  | TT                              | CC                | 1946625009               |
| SNP_P3_138657_337089 | NW_004516226.1 | Scaffold864 | 337089                  | GG                              | AA                | 1946625011               |
| SNP_P3_138658_337437 | NW_004516226.1 | Scaffold864 | 337437                  | GG                              | AA                | 1946625013               |
| SNP_P3_138659_339903 | NW_004516226.1 | Scaffold864 | 339903                  | CC                              | AA                | 1946625016               |
| SNP_P3_138660_1282   | NW_004516227.1 | Scaffold865 | 1282                    | TT                              | CC                | 1946625018               |
| SNP_P3_138661_2359   | NW_004516227.1 | Scaffold865 | 2359                    | AA                              | GG                | 1946625020               |
| SNP_P3_138662_5467   | NW_004516227.1 | Scaffold865 | 5467                    | AA                              | GG                | 1946625022               |
| SNP_P3_138663_6323   | NW_004516227.1 | Scaffold865 | 6323                    | CC                              | TT                | 1946625024               |
| SNP_P3_138664_7502   | NW_004516227.1 | Scaffold865 | 7502                    | GG                              | TT                | 1946625026               |
| SNP_P3_138665_11813  | NW_004516227.1 | Scaffold865 | 11813                   | AA                              | GG                | 1946625028               |
| SNP_P3_138666_11817  | NW_004516227.1 | Scaffold865 | 11817                   | GG                              | TT                | 1946625032               |
| SNP_P3_138667_11867  | NW_004516227.1 | Scaffold865 | 11867                   | AA                              | GG                | 1946625034               |
| SNP_P3_138668_11872  | NW_004516227.1 | Scaffold865 | 11872                   | TT                              | CC                | 1946625036               |
| SNP_P3_138669_11915  | NW_004516227.1 | Scaffold865 | 11915                   | CC                              | TT                | 1946625038               |
| SNP_P3_138670_12148  | NW_004516227.1 | Scaffold865 | 12148                   | CC                              | TT                | 1946625041               |
| SNP_P3_138671_12265  | NW_004516227.1 | Scaffold865 | 12265                   | TT                              | GG                | 1946625043               |
| SNP_P3_138672_27799  | NW_004516228.1 | Scaffold866 | 27799                   | TT                              | CC                | 1946625045               |
| SNP_P3_138673_28517  | NW_004516228.1 | Scaffold866 | 28517                   | TT                              | CC                | 1946625048               |
| SNP_P3_138674_28647  | NW_004516228.1 | Scaffold866 | 28647                   | CC                              | TT                | 1946625050               |
| SNP_P3_138675_28648  | NW_004516228.1 | Scaffold866 | 28648                   | GG                              | TT                | 1946625052               |
| SNP_P3_138677_28654  | NW_004516228.1 | Scaffold866 | 28654                   | GG                              | AA                | 1946625053               |
| SNP_P3_138678_28819  | NW_004516228.1 | Scaffold866 | 28819                   | CC                              | AA                | 1946625055               |
| SNP_P3_138679_28864  | NW_004516228.1 | Scaffold866 | 28864                   | TT                              | AA                | 1946625057               |

| SNPs IDs             | Chromosome IDs | Chromosomes | Physical positions (bp) | CDC Frontier (Reference genome) | (Pusa 256 & HPNB) | NCBI SNPdb Accession IDs |
|----------------------|----------------|-------------|-------------------------|---------------------------------|-------------------|--------------------------|
| SNP_P3_138680_28873  | NW_004516228.1 | Scaffold866 | 28873                   | AA                              | GG                | 1946625059               |
| SNP_P3_138681_28888  | NW_004516228.1 | Scaffold866 | 28888                   | GG                              | AA                | 1946625061               |
| SNP_P3_138682_35960  | NW_004516228.1 | Scaffold866 | 35960                   | GG                              | AA                | 1946625063               |
| SNP_P3_138685_37142  | NW_004516228.1 | Scaffold866 | 37142                   | TT                              | AA                | 1946625065               |
| SNP_P3_138686_63563  | NW_004516228.1 | Scaffold866 | 63563                   | GG                              | AA                | 1946625067               |
| SNP_P3_138687_64065  | NW_004516228.1 | Scaffold866 | 64065                   | TT                              | CC                | 1946625069               |
| SNP_P3_138688_64113  | NW_004516228.1 | Scaffold866 | 64113                   | CC                              | TT                | 1946625071               |
| SNP_P3_138690_67907  | NW_004516228.1 | Scaffold866 | 67907                   | GG                              | AA                | 1946625074               |
| SNP_P3_138691_69431  | NW_004516228.1 | Scaffold866 | 69431                   | GG                              | AA                | 1946625075               |
| SNP_P3_138692_72736  | NW_004516228.1 | Scaffold866 | 72736                   | CC                              | TT                | 1946625077               |
| SNP_P3_138693_87593  | NW_004516228.1 | Scaffold866 | 87593                   | TT                              | GG                | 1946625079               |
| SNP_P3_138694_87781  | NW_004516228.1 | Scaffold866 | 87781                   | GG                              | TT                | 1946625081               |
| SNP_P3_138695_87824  | NW_004516228.1 | Scaffold866 | 87824                   | AA                              | GG                | 1946625083               |
| SNP_P3_138696_87834  | NW_004516228.1 | Scaffold866 | 87834                   | AA                              | CC                | 1946625085               |
| SNP_P3_138697_113665 | NW_004516228.1 | Scaffold866 | 113665                  | TT                              | CC                | 1946625087               |
| SNP_P3_138698_114122 | NW_004516228.1 | Scaffold866 | 114122                  | CC                              | GG                | 1946625089               |
| SNP_P3_138699_128529 | NW_004516228.1 | Scaffold866 | 128529                  | CC                              | GG                | 1946625091               |
| SNP_P3_138700_142412 | NW_004516228.1 | Scaffold866 | 142412                  | GG                              | AA                | 1946625093               |
| SNP_P3_138701_142415 | NW_004516228.1 | Scaffold866 | 142415                  | TT                              | CC                | 1946625095               |
| SNP_P3_138702_142445 | NW_004516228.1 | Scaffold866 | 142445                  | GG                              | TT                | 1946625097               |
| SNP_P3_138703_142464 | NW_004516228.1 | Scaffold866 | 142464                  | TT                              | CC                | 1946625099               |
| SNP_P3_138704_142472 | NW_004516228.1 | Scaffold866 | 142472                  | GG                              | CC                | 1946625100               |
| SNP_P3_138706_142649 | NW_004516228.1 | Scaffold866 | 142649                  | AA                              | TT                | 1946625102               |
| SNP_P3_138707_142781 | NW_004516228.1 | Scaffold866 | 142781                  | TT                              | CC                | 1946625104               |
| SNP_P3_138708_142806 | NW_004516228.1 | Scaffold866 | 142806                  | TT                              | AA                | 1946625107               |
| SNP_P3_138709_142858 | NW_004516228.1 | Scaffold866 | 142858                  | AA                              | GG                | 1946625109               |
| SNP_P3_138710_142894 | NW_004516228.1 | Scaffold866 | 142894                  | GG                              | TT                | 1946625111               |
| SNP_P3_138711_142895 | NW_004516228.1 | Scaffold866 | 142895                  | TT                              | CC                | 1946625113               |
| SNP_P3_138712_142940 | NW_004516228.1 | Scaffold866 | 142940                  | CC                              | AA                | 1946625115               |
| SNP_P3_138714_142984 | NW_004516228.1 | Scaffold866 | 142984                  | CC                              | TT                | 1946625117               |
| SNP_P3_138715_143010 | NW_004516228.1 | Scaffold866 | 143010                  | AA                              | GG                | 1946625119               |
| SNP_P3_138716_143013 | NW_004516228.1 | Scaffold866 | 143013                  | CC                              | GG                | 1946625121               |
| SNP_P3_138717_161474 | NW_004516228.1 | Scaffold866 | 161474                  | TT                              | AA                | 1946625122               |
| SNP_P3_138718_161475 | NW_004516228.1 | Scaffold866 | 161475                  | AA                              | TT                | 1946625124               |
| SNP_P3_138719_172925 | NW_004516228.1 | Scaffold866 | 172925                  | GG                              | AA                | 1946625126               |
| SNP_P3_138720_172926 | NW_004516228.1 | Scaffold866 | 172926                  | AA                              | GG                | 1946625128               |
| SNP_P3_138721_172950 | NW_004516228.1 | Scaffold866 | 172950                  | TT                              | GG                | 1946625130               |
| SNP_P3_138722_174048 | NW_004516228.1 | Scaffold866 | 174048                  | GG                              | AA                | 1946625132               |
| SNP_P3_138723_5663   | NW_004516229.1 | Scaffold868 | 5663                    | AA                              | GG                | 1946625134               |
| SNP_P3_138724_5673   | NW_004516229.1 | Scaffold868 | 5673                    | TT                              | AA                | 1946625136               |
| SNP_P3_138725_5688   | NW_004516229.1 | Scaffold868 | 5688                    | GG                              | AA                | 1946625138               |
| SNP_P3_138726_5781   | NW_004516229.1 | Scaffold868 | 5781                    | CC                              | TT                | 1946625140               |



| SNPs IDs            | Chromosome IDs | Chromosomes | Physical positions (bp) | CDC Frontier (Reference genome) | (Pusa 256 & HPNB) | NCBI SNPdb Accession IDs |
|---------------------|----------------|-------------|-------------------------|---------------------------------|-------------------|--------------------------|
| SNP_P3_138727_6088  | NW_004516229.1 | Scaffold868 | 6088                    | GG                              | AA                | 1946625142               |
| SNP_P3_138728_6092  | NW_004516229.1 | Scaffold868 | 6092                    | GG                              | AA                | 1946625145               |
| SNP_P3_138729_20611 | NW_004516229.1 | Scaffold868 | 20611                   | TT                              | GG                | 1946625147               |
| SNP_P3_138730_21216 | NW_004516229.1 | Scaffold868 | 21216                   | GG                              | AA                | 1946625149               |
| SNP_P3_138731_21567 | NW_004516229.1 | Scaffold868 | 21567                   | CC                              | TT                | 1946625151               |
| SNP_P3_138732_21585 | NW_004516229.1 | Scaffold868 | 21585                   | GG                              | AA                | 1946625153               |
| SNP_P3_138733_22074 | NW_004516229.1 | Scaffold868 | 22074                   | TT                              | AA                | 1946625155               |
| SNP_P3_138734_22083 | NW_004516229.1 | Scaffold868 | 22083                   | CC                              | TT                | 1946625157               |
| SNP_P3_138735_22088 | NW_004516229.1 | Scaffold868 | 22088                   | TT                              | GG                | 1946625159               |
| SNP_P3_138736_22091 | NW_004516229.1 | Scaffold868 | 22091                   | AA                              | GG                | 1946625161               |
| SNP_P3_138737_22092 | NW_004516229.1 | Scaffold868 | 22092                   | GG                              | TT                | 1946625163               |
| SNP_P3_138738_22363 | NW_004516229.1 | Scaffold868 | 22363                   | AA                              | TT                | 1946625165               |
| SNP_P3_138739_24802 | NW_004516229.1 | Scaffold868 | 24802                   | AA                              | TT                | 1946625167               |
| SNP_P3_138740_24804 | NW_004516229.1 | Scaffold868 | 24804                   | CC                              | GG                | 1946625169               |
| SNP_P3_138741_24868 | NW_004516229.1 | Scaffold868 | 24868                   | CC                              | TT                | 1946625171               |
| SNP_P3_138742_24873 | NW_004516229.1 | Scaffold868 | 24873                   | GG                              | CC                | 1946625173               |
| SNP_P3_138743_25210 | NW_004516229.1 | Scaffold868 | 25210                   | TT                              | CC                | 1946625175               |
| SNP_P3_138744_25443 | NW_004516229.1 | Scaffold868 | 25443                   | GG                              | TT                | 1946625177               |
| SNP_P3_138745_25542 | NW_004516229.1 | Scaffold868 | 25542                   | AA                              | GG                | 1946625179               |
| SNP_P3_138746_27297 | NW_004516229.1 | Scaffold868 | 27297                   | GG                              | CC                | 1946625181               |
| SNP_P3_138747_27362 | NW_004516229.1 | Scaffold868 | 27362                   | AA                              | TT                | 1946625184               |
| SNP_P3_138748_27721 | NW_004516229.1 | Scaffold868 | 27721                   | CC                              | AA                | 1946625185               |
| SNP_P3_138749_28505 | NW_004516229.1 | Scaffold868 | 28505                   | TT                              | CC                | 1946625187               |
| SNP_P3_138750_30331 | NW_004516229.1 | Scaffold868 | 30331                   | GG                              | AA                | 1946625189               |
| SNP_P3_138751_30365 | NW_004516229.1 | Scaffold868 | 30365                   | CC                              | TT                | 1946625191               |
| SNP_P3_138752_30381 | NW_004516229.1 | Scaffold868 | 30381                   | AA                              | GG                | 1946625193               |
| SNP_P3_138753_30423 | NW_004516229.1 | Scaffold868 | 30423                   | AA                              | TT                | 1946625195               |
| SNP_P3_138754_30433 | NW_004516229.1 | Scaffold868 | 30433                   | TT                              | CC                | 1946625197               |
| SNP_P3_138755_30469 | NW_004516229.1 | Scaffold868 | 30469                   | CC                              | TT                | 1946625199               |
| SNP_P3_138756_30591 | NW_004516229.1 | Scaffold868 | 30591                   | AA                              | GG                | 1946625201               |
| SNP_P3_138757_30655 | NW_004516229.1 | Scaffold868 | 30655                   | CC                              | GG                | 1946625203               |
| SNP_P3_138758_30672 | NW_004516229.1 | Scaffold868 | 30672                   | TT                              | CC                | 1946625205               |
| SNP_P3_138760_31259 | NW_004516229.1 | Scaffold868 | 31259                   | GG                              | AA                | 1946625207               |
| SNP_P3_138761_31359 | NW_004516229.1 | Scaffold868 | 31359                   | GG                              | TT                | 1946625209               |
| SNP_P3_138762_31621 | NW_004516229.1 | Scaffold868 | 31621                   | CC                              | GG                | 1946625211               |
| SNP_P3_138764_31684 | NW_004516229.1 | Scaffold868 | 31684                   | TT                              | CC                | 1946625213               |
| SNP_P3_138765_31692 | NW_004516229.1 | Scaffold868 | 31692                   | TT                              | AA                | 1946625215               |
| SNP_P3_138766_31693 | NW_004516229.1 | Scaffold868 | 31693                   | TT                              | CC                | 1946625217               |
| SNP_P3_138767_31944 | NW_004516229.1 | Scaffold868 | 31944                   | CC                              | GG                | 1946625219               |
| SNP_P3_138768_31947 | NW_004516229.1 | Scaffold868 | 31947                   | AA                              | TT                | 1946625221               |
| SNP_P3_138770_46581 | NW_004516229.1 | Scaffold868 | 46581                   | TT                              | AA                | 1946625223               |
| SNP_P3_138771_46594 | NW_004516229.1 | Scaffold868 | 46594                   | CC                              | AA                | 1946625225               |

| SNPs IDs            | Chromosome IDs | Chromosomes | Physical positions (bp) | CDC Frontier (Reference genome) | (Pusa 256 & HPNB) | NCBI SNPdb Accession IDs |
|---------------------|----------------|-------------|-------------------------|---------------------------------|-------------------|--------------------------|
| SNP_P3_138772_46597 | NW_004516229.1 | Scaffold868 | 46597                   | TT                              | CC                | 1946625227               |
| SNP_P3_138773_46681 | NW_004516229.1 | Scaffold868 | 46681                   | TT                              | CC                | 1946625229               |
| SNP_P3_138774_46725 | NW_004516229.1 | Scaffold868 | 46725                   | TT                              | AA                | 1946625231               |
| SNP_P3_138775_46741 | NW_004516229.1 | Scaffold868 | 46741                   | AA                              | TT                | 1946625233               |
| SNP_P3_138776_46922 | NW_004516229.1 | Scaffold868 | 46922                   | AA                              | TT                | 1946625235               |
| SNP_P3_138777_46964 | NW_004516229.1 | Scaffold868 | 46964                   | AA                              | GG                | 1946625237               |
| SNP_P3_138778_47014 | NW_004516229.1 | Scaffold868 | 47014                   | CC                              | TT                | 1946625239               |
| SNP_P3_138779_47037 | NW_004516229.1 | Scaffold868 | 47037                   | AA                              | CC                | 1946625241               |
| SNP_P3_138780_47067 | NW_004516229.1 | Scaffold868 | 47067                   | CC                              | GG                | 1946625243               |
| SNP_P3_138781_47119 | NW_004516229.1 | Scaffold868 | 47119                   | TT                              | GG                | 1946625245               |
| SNP_P3_138782_47120 | NW_004516229.1 | Scaffold868 | 47120                   | TT                              | CC                | 1946625246               |
| SNP_P3_138783_47129 | NW_004516229.1 | Scaffold868 | 47129                   | GG                              | CC                | 1946625248               |
| SNP_P3_138784_47163 | NW_004516229.1 | Scaffold868 | 47163                   | GG                              | AA                | 1946625250               |
| SNP_P3_138785_47263 | NW_004516229.1 | Scaffold868 | 47263                   | GG                              | AA                | 1946625252               |
| SNP_P3_138786_47317 | NW_004516229.1 | Scaffold868 | 47317                   | AA                              | CC                | 1946625254               |
| SNP_P3_138787_47353 | NW_004516229.1 | Scaffold868 | 47353                   | TT                              | CC                | 1946625256               |
| SNP_P3_138788_47392 | NW_004516229.1 | Scaffold868 | 47392                   | CC                              | AA                | 1946625258               |
| SNP_P3_138789_47398 | NW_004516229.1 | Scaffold868 | 47398                   | GG                              | AA                | 1946625260               |
| SNP_P3_138790_47439 | NW_004516229.1 | Scaffold868 | 47439                   | AA                              | TT                | 1946625262               |
| SNP_P3_138791_47463 | NW_004516229.1 | Scaffold868 | 47463                   | GG                              | AA                | 1946625264               |
| SNP_P3_138792_47503 | NW_004516229.1 | Scaffold868 | 47503                   | AA                              | CC                | 1946625266               |
| SNP_P3_138793_47505 | NW_004516229.1 | Scaffold868 | 47505                   | CC                              | AA                | 1946625268               |
| SNP_P3_138794_47524 | NW_004516229.1 | Scaffold868 | 47524                   | TT                              | AA                | 1946625270               |
| SNP_P3_138795_47623 | NW_004516229.1 | Scaffold868 | 47623                   | AA                              | TT                | 1946625272               |
| SNP_P3_138796_47699 | NW_004516229.1 | Scaffold868 | 47699                   | AA                              | GG                | 1946625274               |
| SNP_P3_138797_47768 | NW_004516229.1 | Scaffold868 | 47768                   | GG                              | AA                | 1946625276               |
| SNP_P3_138798_47778 | NW_004516229.1 | Scaffold868 | 47778                   | AA                              | TT                | 1946625278               |
| SNP_P3_138799_47779 | NW_004516229.1 | Scaffold868 | 47779                   | TT                              | GG                | 1946625280               |
| SNP_P3_138800_47789 | NW_004516229.1 | Scaffold868 | 47789                   | AA                              | CC                | 1946625282               |
| SNP_P3_138801_47835 | NW_004516229.1 | Scaffold868 | 47835                   | AA                              | GG                | 1946625284               |
| SNP_P3_138802_47856 | NW_004516229.1 | Scaffold868 | 47856                   | CC                              | TT                | 1946625286               |
| SNP_P3_138803_47917 | NW_004516229.1 | Scaffold868 | 47917                   | TT                              | AA                | 1946625289               |
| SNP_P3_138804_47978 | NW_004516229.1 | Scaffold868 | 47978                   | AA                              | GG                | 1946625291               |
| SNP_P3_138805_51521 | NW_004516229.1 | Scaffold868 | 51521                   | AA                              | GG                | 1946625293               |
| SNP_P3_138806_58932 | NW_004516229.1 | Scaffold868 | 58932                   | CC                              | GG                | 1946625295               |
| SNP_P3_138807_65882 | NW_004516229.1 | Scaffold868 | 65882                   | GG                              | AA                | 1946625297               |
| SNP_P3_138808_1037  | NW_004516230.1 | Scaffold869 | 1037                    | GG                              | AA                | 1946625298               |
| SNP_P3_138809_15991 | NW_004516230.1 | Scaffold869 | 15991                   | GG                              | AA                | 1946625300               |
| SNP_P3_138810_16507 | NW_004516230.1 | Scaffold869 | 16507                   | CC                              | TT                | 1946625302               |
| SNP_P3_138811_18330 | NW_004516230.1 | Scaffold869 | 18330                   | CC                              | AA                | 1946625304               |
| SNP_P3_138814_28728 | NW_004516230.1 | Scaffold869 | 28728                   | TT                              | AA                | 1946625306               |
| SNP_P3_138815_29496 | NW_004516230.1 | Scaffold869 | 29496                   | TT                              | CC                | 1946625308               |

| SNPs IDs             | Chromosome IDs | Chromosomes | Physical positions (bp) | CDC Frontier (Reference genome) | (Pusa 256 & HPNB) | NCBI SNPdb Accession IDs |
|----------------------|----------------|-------------|-------------------------|---------------------------------|-------------------|--------------------------|
| SNP_P3_138816_29848  | NW_004516230.1 | Scaffold869 | 29848                   | TT                              | CC                | 1946625310               |
| SNP_P3_138817_38773  | NW_004516230.1 | Scaffold869 | 38773                   | CC                              | GG                | 1946625312               |
| SNP_P3_138820_59802  | NW_004516230.1 | Scaffold869 | 59802                   | CC                              | GG                | 1946625314               |
| SNP_P3_138821_69213  | NW_004516230.1 | Scaffold869 | 69213                   | TT                              | CC                | 1946625316               |
| SNP_P3_138822_69460  | NW_004516230.1 | Scaffold869 | 69460                   | TT                              | GG                | 1946625318               |
| SNP_P3_138823_73155  | NW_004516230.1 | Scaffold869 | 73155                   | GG                              | CC                | 1946625320               |
| SNP_P3_138824_73192  | NW_004516230.1 | Scaffold869 | 73192                   | GG                              | AA                | 1946625322               |
| SNP_P3_138825_73229  | NW_004516230.1 | Scaffold869 | 73229                   | CC                              | TT                | 1946625324               |
| SNP_P3_138826_73272  | NW_004516230.1 | Scaffold869 | 73272                   | GG                              | AA                | 1946625326               |
| SNP_P3_138827_73493  | NW_004516230.1 | Scaffold869 | 73493                   | TT                              | AA                | 1946625328               |
| SNP_P3_138828_73565  | NW_004516230.1 | Scaffold869 | 73565                   | AA                              | CC                | 1946625330               |
| SNP_P3_138829_77112  | NW_004516230.1 | Scaffold869 | 77112                   | TT                              | GG                | 1946625332               |
| SNP_P3_138832_77603  | NW_004516230.1 | Scaffold869 | 77603                   | TT                              | GG                | 1946625334               |
| SNP_P3_138834_88689  | NW_004516230.1 | Scaffold869 | 88689                   | GG                              | AA                | 1946625336               |
| SNP_P3_138835_89539  | NW_004516230.1 | Scaffold869 | 89539                   | AA                              | TT                | 1946625338               |
| SNP_P3_138836_90341  | NW_004516230.1 | Scaffold869 | 90341                   | GG                              | AA                | 1946625340               |
| SNP_P3_138837_90594  | NW_004516230.1 | Scaffold869 | 90594                   | TT                              | GG                | 1946625342               |
| SNP_P3_138838_95059  | NW_004516230.1 | Scaffold869 | 95059                   | CC                              | AA                | 1946625344               |
| SNP_P3_138839_96716  | NW_004516230.1 | Scaffold869 | 96716                   | AA                              | GG                | 1946625346               |
| SNP_P3_138840_97003  | NW_004516230.1 | Scaffold869 | 97003                   | TT                              | GG                | 1946625348               |
| SNP_P3_138841_97014  | NW_004516230.1 | Scaffold869 | 97014                   | CC                              | TT                | 1946625350               |
| SNP_P3_138842_100278 | NW_004516230.1 | Scaffold869 | 100278                  | CC                              | TT                | 1946625352               |
| SNP_P3_138843_106183 | NW_004516230.1 | Scaffold869 | 106183                  | GG                              | TT                | 1946625354               |
| SNP_P3_138844_108693 | NW_004516230.1 | Scaffold869 | 108693                  | CC                              | TT                | 1946625356               |
| SNP_P3_138846_111907 | NW_004516230.1 | Scaffold869 | 111907                  | GG                              | AA                | 1946625359               |
| SNP_P3_138847_113719 | NW_004516230.1 | Scaffold869 | 113719                  | AA                              | GG                | 1946625360               |
| SNP_P3_138848_115253 | NW_004516230.1 | Scaffold869 | 115253                  | GG                              | AA                | 1946625362               |
| SNP_P3_138849_118224 | NW_004516230.1 | Scaffold869 | 118224                  | AA                              | GG                | 1946625364               |
| SNP_P3_138850_141532 | NW_004516230.1 | Scaffold869 | 141532                  | GG                              | AA                | 1946625366               |
| SNP_P3_138851_141533 | NW_004516230.1 | Scaffold869 | 141533                  | AA                              | GG                | 1946625368               |
| SNP_P3_138852_142893 | NW_004516230.1 | Scaffold869 | 142893                  | GG                              | AA                | 1946625370               |
| SNP_P3_138853_146949 | NW_004516230.1 | Scaffold869 | 146949                  | TT                              | CC                | 1946625372               |
| SNP_P3_138854_151619 | NW_004516230.1 | Scaffold869 | 151619                  | TT                              | CC                | 1946625374               |
| SNP_P3_138856_151638 | NW_004516230.1 | Scaffold869 | 151638                  | AA                              | GG                | 1946625376               |
| SNP_P3_138857_1277   | NW_004516231.1 | Scaffold870 | 1277                    | TT                              | GG                | 1946625378               |
| SNP_P3_138858_1668   | NW_004516231.1 | Scaffold870 | 1668                    | AA                              | CC                | 1946625379               |
| SNP_P3_138859_1934   | NW_004516231.1 | Scaffold870 | 1934                    | TT                              | CC                | 1946625381               |
| SNP_P3_138860_1979   | NW_004516231.1 | Scaffold870 | 1979                    | TT                              | GG                | 1946625383               |
| SNP_P3_138861_10525  | NW_004516231.1 | Scaffold870 | 10525                   | TT                              | CC                | 1946625385               |
| SNP_P3_138862_16879  | NW_004516231.1 | Scaffold870 | 16879                   | AA                              | TT                | 1946625387               |
| SNP_P3_138863_22227  | NW_004516231.1 | Scaffold870 | 22227                   | TT                              | GG                | 1946625389               |
| SNP_P3_138864_22454  | NW_004516231.1 | Scaffold870 | 22454                   | AA                              | GG                | 1946625392               |

| SNPs IDs             | Chromosome IDs | Chromosomes | Physical positions (bp) | CDC Frontier (Reference genome) | (Pusa 256 & HPNB) | NCBI SNPdb Accession IDs |
|----------------------|----------------|-------------|-------------------------|---------------------------------|-------------------|--------------------------|
| SNP_P3_138865_22479  | NW_004516231.1 | Scaffold870 | 22479                   | TT                              | CC                | 1946625394               |
| SNP_P3_138867_32608  | NW_004516231.1 | Scaffold870 | 32608                   | CC                              | TT                | 1946625397               |
| SNP_P3_138869_46149  | NW_004516231.1 | Scaffold870 | 46149                   | AA                              | GG                | 1946625399               |
| SNP_P3_138870_46187  | NW_004516231.1 | Scaffold870 | 46187                   | GG                              | CC                | 1946625401               |
| SNP_P3_138871_46211  | NW_004516231.1 | Scaffold870 | 46211                   | TT                              | AA                | 1946625403               |
| SNP_P3_138873_57803  | NW_004516231.1 | Scaffold870 | 57803                   | GG                              | AA                | 1946625404               |
| SNP_P3_138874_58120  | NW_004516231.1 | Scaffold870 | 58120                   | AA                              | GG                | 1946625406               |
| SNP_P3_138875_58182  | NW_004516231.1 | Scaffold870 | 58182                   | AA                              | TT                | 1946625408               |
| SNP_P3_138876_73257  | NW_004516231.1 | Scaffold870 | 73257                   | TT                              | AA                | 1946625410               |
| SNP_P3_138877_73263  | NW_004516231.1 | Scaffold870 | 73263                   | AA                              | GG                | 1946625412               |
| SNP_P3_138878_73436  | NW_004516231.1 | Scaffold870 | 73436                   | TT                              | AA                | 1946625414               |
| SNP_P3_138879_73442  | NW_004516231.1 | Scaffold870 | 73442                   | AA                              | GG                | 1946625416               |
| SNP_P3_138880_73561  | NW_004516231.1 | Scaffold870 | 73561                   | TT                              | AA                | 1946625418               |
| SNP_P3_138881_73802  | NW_004516231.1 | Scaffold870 | 73802                   | AA                              | TT                | 1946625420               |
| SNP_P3_138882_76953  | NW_004516231.1 | Scaffold870 | 76953                   | TT                              | AA                | 1946625422               |
| SNP_P3_138883_78245  | NW_004516231.1 | Scaffold870 | 78245                   | CC                              | TT                | 1946625424               |
| SNP_P3_138884_82179  | NW_004516231.1 | Scaffold870 | 82179                   | TT                              | AA                | 1946625426               |
| SNP_P3_138886_82477  | NW_004516231.1 | Scaffold870 | 82477                   | CC                              | TT                | 1946625428               |
| SNP_P3_138887_82489  | NW_004516231.1 | Scaffold870 | 82489                   | GG                              | AA                | 1946625430               |
| SNP_P3_138888_82638  | NW_004516231.1 | Scaffold870 | 82638                   | AA                              | GG                | 1946625432               |
| SNP_P3_138889_1262   | NW_004516232.1 | Scaffold872 | 1262                    | TT                              | CC                | 1946625434               |
| SNP_P3_138890_5590   | NW_004516232.1 | Scaffold872 | 5590                    | AA                              | GG                | 1946625436               |
| SNP_P3_138891_15936  | NW_004516232.1 | Scaffold872 | 15936                   | GG                              | TT                | 1946625438               |
| SNP_P3_138892_16886  | NW_004516232.1 | Scaffold872 | 16886                   | AA                              | CC                | 1946625440               |
| SNP_P3_138893_69     | NW_004516233.1 | Scaffold873 | 69                      | CC                              | TT                | 1946625442               |
| SNP_P3_138894_116    | NW_004516233.1 | Scaffold873 | 116                     | TT                              | CC                | 1946625444               |
| SNP_P3_138895_132    | NW_004516233.1 | Scaffold873 | 132                     | TT                              | CC                | 1946625446               |
| SNP_P3_138896_182    | NW_004516233.1 | Scaffold873 | 182                     | GG                              | CC                | 1946625448               |
| SNP_P3_138897_266    | NW_004516233.1 | Scaffold873 | 266                     | TT                              | GG                | 1946625450               |
| SNP_P3_138898_320    | NW_004516233.1 | Scaffold873 | 320                     | TT                              | CC                | 1946625452               |
| SNP_P3_138899_477    | NW_004516233.1 | Scaffold873 | 477                     | TT                              | GG                | 1946625454               |
| SNP_P3_138900_9544   | NW_004516233.1 | Scaffold873 | 9544                    | GG                              | AA                | 1946625455               |
| SNP_P3_138901_9553   | NW_004516233.1 | Scaffold873 | 9553                    | AA                              | CC                | 1946625457               |
| SNP_P3_138902_9556   | NW_004516233.1 | Scaffold873 | 9556                    | TT                              | GG                | 1946625460               |
| SNP_P3_138906_82451  | NW_004516233.1 | Scaffold873 | 82451                   | AA                              | CC                | 1946625461               |
| SNP_P3_138907_155627 | NW_004516233.1 | Scaffold873 | 155627                  | AA                              | TT                | 1946625462               |
| SNP_P3_138908_155641 | NW_004516233.1 | Scaffold873 | 155641                  | GG                              | TT                | 1946625463               |
| SNP_P3_138909_162743 | NW_004516233.1 | Scaffold873 | 162743                  | GG                              | AA                | 1946625464               |
| SNP_P3_138910_162804 | NW_004516233.1 | Scaffold873 | 162804                  | GG                              | AA                | 1946625465               |
| SNP_P3_138911_215356 | NW_004516233.1 | Scaffold873 | 215356                  | CC                              | AA                | 1946625466               |
| SNP_P3_138912_228066 | NW_004516233.1 | Scaffold873 | 228066                  | TT                              | GG                | 1946625467               |
| SNP_P3_138913_241951 | NW_004516233.1 | Scaffold873 | 241951                  | AA                              | GG                | 1946625468               |

| SNPs IDs             | Chromosome IDs | Chromosomes | Physical positions (bp) | CDC Frontier (Reference genome) | (Pusa 256 & HPNB) | NCBI SNPdb Accession IDs |
|----------------------|----------------|-------------|-------------------------|---------------------------------|-------------------|--------------------------|
| SNP_P3_138914_241987 | NW_004516233.1 | Scaffold873 | 241987                  | AA                              | CC                | 1946625470               |
| SNP_P3_138916_242639 | NW_004516233.1 | Scaffold873 | 242639                  | CC                              | TT                | 1946625472               |
| SNP_P3_138917_242643 | NW_004516233.1 | Scaffold873 | 242643                  | AA                              | CC                | 1946625474               |
| SNP_P3_138918_242693 | NW_004516233.1 | Scaffold873 | 242693                  | TT                              | CC                | 1946625476               |
| SNP_P3_138919_242697 | NW_004516233.1 | Scaffold873 | 242697                  | TT                              | CC                | 1946625477               |
| SNP_P3_138921_242756 | NW_004516233.1 | Scaffold873 | 242756                  | AA                              | GG                | 1946625479               |
| SNP_P3_138922_242760 | NW_004516233.1 | Scaffold873 | 242760                  | CC                              | AA                | 1946625481               |
| SNP_P3_138923_242761 | NW_004516233.1 | Scaffold873 | 242761                  | AA                              | CC                | 1946625483               |
| SNP_P3_138924_242788 | NW_004516233.1 | Scaffold873 | 242788                  | CC                              | TT                | 1946625485               |
| SNP_P3_138925_242811 | NW_004516233.1 | Scaffold873 | 242811                  | GG                              | AA                | 1946625487               |
| SNP_P3_138927_242884 | NW_004516233.1 | Scaffold873 | 242884                  | AA                              | TT                | 1946625489               |
| SNP_P3_138928_242939 | NW_004516233.1 | Scaffold873 | 242939                  | TT                              | AA                | 1946625491               |
| SNP_P3_138929_242940 | NW_004516233.1 | Scaffold873 | 242940                  | AA                              | TT                | 1946625493               |
| SNP_P3_138930_252707 | NW_004516233.1 | Scaffold873 | 252707                  | CC                              | AA                | 1946625495               |
| SNP_P3_138931_252737 | NW_004516233.1 | Scaffold873 | 252737                  | AA                              | GG                | 1946625497               |
| SNP_P3_138932_252994 | NW_004516233.1 | Scaffold873 | 252994                  | TT                              | CC                | 1946625499               |
| SNP_P3_138933_253013 | NW_004516233.1 | Scaffold873 | 253013                  | TT                              | CC                | 1946625501               |
| SNP_P3_138934_253014 | NW_004516233.1 | Scaffold873 | 253014                  | CC                              | AA                | 1946625503               |
| SNP_P3_138935_262476 | NW_004516233.1 | Scaffold873 | 262476                  | AA                              | CC                | 1946625504               |
| SNP_P3_138936_262736 | NW_004516233.1 | Scaffold873 | 262736                  | GG                              | AA                | 1946625506               |
| SNP_P3_138937_262924 | NW_004516233.1 | Scaffold873 | 262924                  | TT                              | AA                | 1946625508               |
| SNP_P3_138938_262954 | NW_004516233.1 | Scaffold873 | 262954                  | TT                              | AA                | 1946625510               |
| SNP_P3_138939_279002 | NW_004516233.1 | Scaffold873 | 279002                  | AA                              | CC                | 1946625512               |
| SNP_P3_138940_286699 | NW_004516233.1 | Scaffold873 | 286699                  | TT                              | CC                | 1946625514               |
| SNP_P3_138941_286700 | NW_004516233.1 | Scaffold873 | 286700                  | CC                              | TT                | 1946625516               |
| SNP_P3_138942_286864 | NW_004516233.1 | Scaffold873 | 286864                  | CC                              | TT                | 1946625518               |
| SNP_P3_138943_286968 | NW_004516233.1 | Scaffold873 | 286968                  | TT                              | GG                | 1946625520               |
| SNP_P3_138944_286970 | NW_004516233.1 | Scaffold873 | 286970                  | CC                              | TT                | 1946625523               |
| SNP_P3_138945_286983 | NW_004516233.1 | Scaffold873 | 286983                  | TT                              | GG                | 1946625525               |
| SNP_P3_138946_287328 | NW_004516233.1 | Scaffold873 | 287328                  | CC                              | TT                | 1946625527               |
| SNP_P3_138947_287356 | NW_004516233.1 | Scaffold873 | 287356                  | CC                              | AA                | 1946625528               |
| SNP_P3_138948_287357 | NW_004516233.1 | Scaffold873 | 287357                  | TT                              | CC                | 1946625530               |
| SNP_P3_138949_287361 | NW_004516233.1 | Scaffold873 | 287361                  | TT                              | CC                | 1946625532               |
| SNP_P3_138951_315620 | NW_004516233.1 | Scaffold873 | 315620                  | TT                              | CC                | 1946625534               |
| SNP_P3_138952_318491 | NW_004516233.1 | Scaffold873 | 318491                  | AA                              | TT                | 1946625536               |
| SNP_P3_138953_318494 | NW_004516233.1 | Scaffold873 | 318494                  | GG                              | AA                | 1946625538               |
| SNP_P3_138954_318657 | NW_004516233.1 | Scaffold873 | 318657                  | TT                              | CC                | 1946625540               |
| SNP_P3_138955_318677 | NW_004516233.1 | Scaffold873 | 318677                  | AA                              | CC                | 1946625542               |
| SNP_P3_138956_334567 | NW_004516233.1 | Scaffold873 | 334567                  | AA                              | CC                | 1946625544               |
| SNP_P3_138957_334680 | NW_004516233.1 | Scaffold873 | 334680                  | GG                              | AA                | 1946625546               |
| SNP_P3_138958_344960 | NW_004516233.1 | Scaffold873 | 344960                  | AA                              | GG                | 1946625548               |
| SNP_P3_138959_344967 | NW_004516233.1 | Scaffold873 | 344967                  | AA                              | TT                | 1946625550               |

| SNPs IDs             | Chromosome IDs | Chromosomes | Physical positions (bp) | CDC Frontier (Reference genome) | (Pusa 256 & HPNB) | NCBI SNPdb Accession IDs |
|----------------------|----------------|-------------|-------------------------|---------------------------------|-------------------|--------------------------|
| SNP_P3_138960_344982 | NW_004516233.1 | Scaffold873 | 344982                  | AA                              | GG                | 1946625551               |
| SNP_P3_138961_344983 | NW_004516233.1 | Scaffold873 | 344983                  | CC                              | AA                | 1946625553               |
| SNP_P3_138962_345021 | NW_004516233.1 | Scaffold873 | 345021                  | AA                              | GG                | 1946625555               |
| SNP_P3_138963_345239 | NW_004516233.1 | Scaffold873 | 345239                  | GG                              | AA                | 1946625558               |
| SNP_P3_138964_345278 | NW_004516233.1 | Scaffold873 | 345278                  | TT                              | AA                | 1946625560               |
| SNP_P3_138965_345308 | NW_004516233.1 | Scaffold873 | 345308                  | AA                              | GG                | 1946625561               |
| SNP_P3_138966_345313 | NW_004516233.1 | Scaffold873 | 345313                  | AA                              | GG                | 1946625563               |
| SNP_P3_138967_345400 | NW_004516233.1 | Scaffold873 | 345400                  | CC                              | TT                | 1946625565               |
| SNP_P3_138968_345920 | NW_004516233.1 | Scaffold873 | 345920                  | GG                              | AA                | 1946625567               |
| SNP_P3_138970_86533  | NW_004516234.1 | Scaffold875 | 86533                   | CC                              | TT                | 1946625569               |
| SNP_P3_138971_102892 | NW_004516234.1 | Scaffold875 | 102892                  | AA                              | GG                | 1946625571               |
| SNP_P3_138972_107859 | NW_004516234.1 | Scaffold875 | 107859                  | AA                              | GG                | 1946625573               |
| SNP_P3_138973_107957 | NW_004516234.1 | Scaffold875 | 107957                  | CC                              | TT                | 1946625575               |
| SNP_P3_138975_108160 | NW_004516234.1 | Scaffold875 | 108160                  | AA                              | GG                | 1946625576               |
| SNP_P3_138976_108210 | NW_004516234.1 | Scaffold875 | 108210                  | AA                              | GG                | 1946625578               |
| SNP_P3_138977_108216 | NW_004516234.1 | Scaffold875 | 108216                  | TT                              | CC                | 1946625580               |
| SNP_P3_138978_108229 | NW_004516234.1 | Scaffold875 | 108229                  | CC                              | TT                | 1946625582               |
| SNP_P3_138979_108331 | NW_004516234.1 | Scaffold875 | 108331                  | CC                              | GG                | 1946625584               |
| SNP_P3_138980_108344 | NW_004516234.1 | Scaffold875 | 108344                  | AA                              | TT                | 1946625586               |
| SNP_P3_138981_108407 | NW_004516234.1 | Scaffold875 | 108407                  | TT                              | GG                | 1946625588               |
| SNP_P3_138982_108429 | NW_004516234.1 | Scaffold875 | 108429                  | CC                              | TT                | 1946625590               |
| SNP_P3_138983_108539 | NW_004516234.1 | Scaffold875 | 108539                  | CC                              | AA                | 1946625592               |
| SNP_P3_138984_108867 | NW_004516234.1 | Scaffold875 | 108867                  | CC                              | TT                | 1946625594               |
| SNP_P3_138985_111635 | NW_004516234.1 | Scaffold875 | 111635                  | TT                              | AA                | 1946625596               |
| SNP_P3_138986_3766   | NW_004516235.1 | Scaffold876 | 3766                    | GG                              | AA                | 1946625598               |
| SNP_P3_138988_5202   | NW_004516235.1 | Scaffold876 | 5202                    | AA                              | GG                | 1946625600               |
| SNP_P3_138990_5478   | NW_004516235.1 | Scaffold876 | 5478                    | AA                              | GG                | 1946625602               |
| SNP_P3_138991_5487   | NW_004516235.1 | Scaffold876 | 5487                    | AA                              | GG                | 1946625604               |
| SNP_P3_138992_5506   | NW_004516235.1 | Scaffold876 | 5506                    | CC                              | TT                | 1946625606               |
| SNP_P3_138993_10543  | NW_004516235.1 | Scaffold876 | 10543                   | AA                              | GG                | 1946625608               |
| SNP_P3_138994_26054  | NW_004516235.1 | Scaffold876 | 26054                   | AA                              | GG                | 1946625609               |
| SNP_P3_138995_34006  | NW_004516235.1 | Scaffold876 | 34006                   | AA                              | CC                | 1946625611               |
| SNP_P3_138996_42669  | NW_004516235.1 | Scaffold876 | 42669                   | TT                              | AA                | 1946625613               |
| SNP_P3_138997_53242  | NW_004516235.1 | Scaffold876 | 53242                   | AA                              | CC                | 1946625615               |
| SNP_P3_138998_53521  | NW_004516235.1 | Scaffold876 | 53521                   | CC                              | TT                | 1946625617               |
| SNP_P3_138999_54229  | NW_004516235.1 | Scaffold876 | 54229                   | CC                              | TT                | 1946625619               |
| SNP_P3_139000_59893  | NW_004516235.1 | Scaffold876 | 59893                   | AA                              | TT                | 1946625621               |
| SNP_P3_139001_59900  | NW_004516235.1 | Scaffold876 | 59900                   | CC                              | TT                | 1946625623               |
| SNP_P3_139002_65361  | NW_004516235.1 | Scaffold876 | 65361                   | TT                              | AA                | 1946625625               |
| SNP_P3_139003_65408  | NW_004516235.1 | Scaffold876 | 65408                   | TT                              | CC                | 1946625627               |
| SNP_P3_139004_65462  | NW_004516235.1 | Scaffold876 | 65462                   | GG                              | AA                | 1946625629               |
| SNP_P3_139006_66909  | NW_004516235.1 | Scaffold876 | 66909                   | GG                              | TT                | 1946625631               |

| SNPs IDs             | Chromosome IDs | Chromosomes | Physical positions (bp) | CDC Frontier (Reference genome) | (Pusa 256 & HPNB) | NCBI SNPdb Accession IDs |
|----------------------|----------------|-------------|-------------------------|---------------------------------|-------------------|--------------------------|
| SNP_P3_139007_79369  | NW_004516235.1 | Scaffold876 | 79369                   | TT                              | CC                | 1946625633               |
| SNP_P3_139008_85501  | NW_004516235.1 | Scaffold876 | 85501                   | CC                              | GG                | 1946625635               |
| SNP_P3_139009_85529  | NW_004516235.1 | Scaffold876 | 85529                   | GG                              | AA                | 1946625637               |
| SNP_P3_139010_97538  | NW_004516235.1 | Scaffold876 | 97538                   | TT                              | GG                | 1946625639               |
| SNP_P3_139011_97612  | NW_004516235.1 | Scaffold876 | 97612                   | TT                              | CC                | 1946625641               |
| SNP_P3_139012_97654  | NW_004516235.1 | Scaffold876 | 97654                   | TT                              | CC                | 1946625642               |
| SNP_P3_139013_101078 | NW_004516235.1 | Scaffold876 | 101078                  | AA                              | GG                | 1946625644               |
| SNP_P3_139014_101080 | NW_004516235.1 | Scaffold876 | 101080                  | AA                              | GG                | 1946625646               |
| SNP_P3_139015_101092 | NW_004516235.1 | Scaffold876 | 101092                  | AA                              | GG                | 1946625648               |
| SNP_P3_139016_101109 | NW_004516235.1 | Scaffold876 | 101109                  | AA                              | GG                | 1946625650               |
| SNP_P3_139017_101506 | NW_004516235.1 | Scaffold876 | 101506                  | CC                              | TT                | 1946625652               |
| SNP_P3_139018_101507 | NW_004516235.1 | Scaffold876 | 101507                  | TT                              | CC                | 1946625654               |
| SNP_P3_139019_105256 | NW_004516235.1 | Scaffold876 | 105256                  | AA                              | TT                | 1946625656               |
| SNP_P3_139020_105257 | NW_004516235.1 | Scaffold876 | 105257                  | TT                              | CC                | 1946625658               |
| SNP_P3_139021_105304 | NW_004516235.1 | Scaffold876 | 105304                  | CC                              | TT                | 1946625660               |
| SNP_P3_139022_105563 | NW_004516235.1 | Scaffold876 | 105563                  | AA                              | GG                | 1946625661               |
| SNP_P3_139023_152094 | NW_004516235.1 | Scaffold876 | 152094                  | TT                              | CC                | 1946625663               |
| SNP_P3_139024_152169 | NW_004516235.1 | Scaffold876 | 152169                  | CC                              | AA                | 1946625665               |
| SNP_P3_139025_152172 | NW_004516235.1 | Scaffold876 | 152172                  | AA                              | GG                | 1946625667               |
| SNP_P3_139026_152211 | NW_004516235.1 | Scaffold876 | 152211                  | GG                              | AA                | 1946625669               |
| SNP_P3_139027_154137 | NW_004516235.1 | Scaffold876 | 154137                  | CC                              | AA                | 1946625671               |
| SNP_P3_139028_198298 | NW_004516235.1 | Scaffold876 | 198298                  | GG                              | AA                | 1946625673               |
| SNP_P3_139030_248385 | NW_004516235.1 | Scaffold876 | 248385                  | AA                              | CC                | 1946625675               |
| SNP_P3_139031_274875 | NW_004516235.1 | Scaffold876 | 274875                  | TT                              | AA                | 1946625677               |
| SNP_P3_139032_279597 | NW_004516235.1 | Scaffold876 | 279597                  | CC                              | GG                | 1946625679               |
| SNP_P3_139033_279826 | NW_004516235.1 | Scaffold876 | 279826                  | TT                              | AA                | 1946625681               |
| SNP_P3_139034_279850 | NW_004516235.1 | Scaffold876 | 279850                  | GG                              | AA                | 1946625683               |
| SNP_P3_139035_279928 | NW_004516235.1 | Scaffold876 | 279928                  | AA                              | TT                | 1946625685               |
| SNP_P3_139036_280160 | NW_004516235.1 | Scaffold876 | 280160                  | CC                              | TT                | 1946625687               |
| SNP_P3_139037_280167 | NW_004516235.1 | Scaffold876 | 280167                  | AA                              | GG                | 1946625689               |
| SNP_P3_139038_281279 | NW_004516235.1 | Scaffold876 | 281279                  | TT                              | CC                | 1946625691               |
| SNP_P3_139039_281319 | NW_004516235.1 | Scaffold876 | 281319                  | AA                              | GG                | 1946625692               |
| SNP_P3_139040_298239 | NW_004516235.1 | Scaffold876 | 298239                  | TT                              | GG                | 1946625694               |
| SNP_P3_139041_301593 | NW_004516235.1 | Scaffold876 | 301593                  | GG                              | AA                | 1946625696               |
| SNP_P3_139042_302114 | NW_004516235.1 | Scaffold876 | 302114                  | CC                              | TT                | 1946625698               |
| SNP_P3_139043_302590 | NW_004516235.1 | Scaffold876 | 302590                  | CC                              | TT                | 1946625700               |
| SNP_P3_139044_302690 | NW_004516235.1 | Scaffold876 | 302690                  | AA                              | GG                | 1946625702               |
| SNP_P3_139045_302701 | NW_004516235.1 | Scaffold876 | 302701                  | CC                              | TT                | 1946625704               |
| SNP_P3_139047_339323 | NW_004516235.1 | Scaffold876 | 339323                  | GG                              | TT                | 1946625706               |
| SNP_P3_139048_339398 | NW_004516235.1 | Scaffold876 | 339398                  | TT                              | GG                | 1946625708               |
| SNP_P3_139049_339475 | NW_004516235.1 | Scaffold876 | 339475                  | AA                              | GG                | 1946625710               |
| SNP_P3_139050_339509 | NW_004516235.1 | Scaffold876 | 339509                  | TT                              | CC                | 1946625712               |

| SNPs IDs             | Chromosome IDs | Chromosomes | Physical positions (bp) | CDC Frontier (Reference genome) | (Pusa 256 & HPNB) | NCBI SNPdb Accession IDs |
|----------------------|----------------|-------------|-------------------------|---------------------------------|-------------------|--------------------------|
| SNP_P3_139051_339839 | NW_004516235.1 | Scaffold876 | 339839                  | CC                              | TT                | 1946625714               |
| SNP_P3_139052_343245 | NW_004516235.1 | Scaffold876 | 343245                  | CC                              | AA                | 1946625716               |
| SNP_P3_139054_347022 | NW_004516235.1 | Scaffold876 | 347022                  | TT                              | GG                | 1946625718               |
| SNP_P3_139055_355198 | NW_004516235.1 | Scaffold876 | 355198                  | TT                              | GG                | 1946625720               |
| SNP_P3_139056_355274 | NW_004516235.1 | Scaffold876 | 355274                  | AA                              | CC                | 1946625722               |
| SNP_P3_139057_355476 | NW_004516235.1 | Scaffold876 | 355476                  | CC                              | TT                | 1946625724               |
| SNP_P3_139058_369429 | NW_004516235.1 | Scaffold876 | 369429                  | CC                              | TT                | 1946625726               |
| SNP_P3_139059_369454 | NW_004516235.1 | Scaffold876 | 369454                  | AA                              | GG                | 1946625728               |
| SNP_P3_139060_369587 | NW_004516235.1 | Scaffold876 | 369587                  | TT                              | CC                | 1946625730               |
| SNP_P3_139061_369633 | NW_004516235.1 | Scaffold876 | 369633                  | AA                              | TT                | 1946625732               |
| SNP_P3_139062_369637 | NW_004516235.1 | Scaffold876 | 369637                  | AA                              | GG                | 1946625734               |
| SNP_P3_139064_369862 | NW_004516235.1 | Scaffold876 | 369862                  | AA                              | GG                | 1946625736               |
| SNP_P3_139065_369881 | NW_004516235.1 | Scaffold876 | 369881                  | CC                              | AA                | 1946625738               |
| SNP_P3_139066_369888 | NW_004516235.1 | Scaffold876 | 369888                  | AA                              | CC                | 1946625739               |
| SNP_P3_139068_376766 | NW_004516235.1 | Scaffold876 | 376766                  | CC                              | TT                | 1946625741               |
| SNP_P3_139069_391971 | NW_004516235.1 | Scaffold876 | 391971                  | CC                              | AA                | 1946625744               |
| SNP_P3_139070_392008 | NW_004516235.1 | Scaffold876 | 392008                  | CC                              | TT                | 1946625746               |
| SNP_P3_139071_392031 | NW_004516235.1 | Scaffold876 | 392031                  | TT                              | AA                | 1946625748               |
| SNP_P3_139072_392033 | NW_004516235.1 | Scaffold876 | 392033                  | CC                              | TT                | 1946625750               |
| SNP_P3_139073_392500 | NW_004516235.1 | Scaffold876 | 392500                  | GG                              | AA                | 1946625752               |
| SNP_P3_139074_392524 | NW_004516235.1 | Scaffold876 | 392524                  | TT                              | CC                | 1946625754               |
| SNP_P3_139075_392660 | NW_004516235.1 | Scaffold876 | 392660                  | CC                              | TT                | 1946625756               |
| SNP_P3_139076_392695 | NW_004516235.1 | Scaffold876 | 392695                  | TT                              | AA                | 1946625758               |
| SNP_P3_139077_394045 | NW_004516235.1 | Scaffold876 | 394045                  | CC                              | TT                | 1946625760               |
| SNP_P3_139078_394051 | NW_004516235.1 | Scaffold876 | 394051                  | GG                              | CC                | 1946625762               |
| SNP_P3_139079_397291 | NW_004516235.1 | Scaffold876 | 397291                  | AA                              | GG                | 1946625764               |
| SNP_P3_139080_397460 | NW_004516235.1 | Scaffold876 | 397460                  | TT                              | CC                | 1946625766               |
| SNP_P3_139081_397525 | NW_004516235.1 | Scaffold876 | 397525                  | TT                              | CC                | 1946625767               |
| SNP_P3_139082_397551 | NW_004516235.1 | Scaffold876 | 397551                  | TT                              | CC                | 1946625769               |
| SNP_P3_139083_405421 | NW_004516235.1 | Scaffold876 | 405421                  | TT                              | CC                | 1946625771               |
| SNP_P3_139084_429275 | NW_004516235.1 | Scaffold876 | 429275                  | CC                              | TT                | 1946625773               |
| SNP_P3_139086_437719 | NW_004516235.1 | Scaffold876 | 437719                  | TT                              | CC                | 1946625775               |
| SNP_P3_139087_437740 | NW_004516235.1 | Scaffold876 | 437740                  | AA                              | GG                | 1946625777               |
| SNP_P3_139088_438116 | NW_004516235.1 | Scaffold876 | 438116                  | TT                              | CC                | 1946625780               |
| SNP_P3_139089_438457 | NW_004516235.1 | Scaffold876 | 438457                  | CC                              | AA                | 1946625782               |
| SNP_P3_139090_438463 | NW_004516235.1 | Scaffold876 | 438463                  | AA                              | TT                | 1946625784               |
| SNP_P3_139091_438464 | NW_004516235.1 | Scaffold876 | 438464                  | CC                              | TT                | 1946625786               |
| SNP_P3_139092_438635 | NW_004516235.1 | Scaffold876 | 438635                  | TT                              | CC                | 1946625788               |
| SNP_P3_139093_438747 | NW_004516235.1 | Scaffold876 | 438747                  | TT                              | CC                | 1946625789               |
| SNP_P3_139094_438800 | NW_004516235.1 | Scaffold876 | 438800                  | CC                              | AA                | 1946625791               |
| SNP_P3_139095_438810 | NW_004516235.1 | Scaffold876 | 438810                  | TT                              | CC                | 1946625793               |
| SNP_P3_139096_438813 | NW_004516235.1 | Scaffold876 | 438813                  | AA                              | TT                | 1946625795               |



| SNPs IDs             | Chromosome IDs | Chromosomes | Physical positions (bp) | CDC Frontier (Reference genome) | (Pusa 256 & HPNB) | NCBI SNPdb Accession IDs |
|----------------------|----------------|-------------|-------------------------|---------------------------------|-------------------|--------------------------|
| SNP_P3_139097_442034 | NW_004516235.1 | Scaffold876 | 442034                  | AA                              | GG                | 1946625797               |
| SNP_P3_139098_442073 | NW_004516235.1 | Scaffold876 | 442073                  | AA                              | CC                | 1946625799               |
| SNP_P3_139099_442147 | NW_004516235.1 | Scaffold876 | 442147                  | TT                              | GG                | 1946625801               |
| SNP_P3_139100_442371 | NW_004516235.1 | Scaffold876 | 442371                  | TT                              | CC                | 1946625803               |
| SNP_P3_139101_442379 | NW_004516235.1 | Scaffold876 | 442379                  | AA                              | GG                | 1946625809               |
| SNP_P3_139102_442380 | NW_004516235.1 | Scaffold876 | 442380                  | GG                              | AA                | 1946625811               |
| SNP_P3_139103_442654 | NW_004516235.1 | Scaffold876 | 442654                  | TT                              | CC                | 1946625814               |
| SNP_P3_139104_442806 | NW_004516235.1 | Scaffold876 | 442806                  | CC                              | GG                | 1946625816               |
| SNP_P3_139105_442808 | NW_004516235.1 | Scaffold876 | 442808                  | TT                              | CC                | 1946625818               |
| SNP_P3_139106_442933 | NW_004516235.1 | Scaffold876 | 442933                  | TT                              | AA                | 1946625820               |
| SNP_P3_139107_443144 | NW_004516235.1 | Scaffold876 | 443144                  | GG                              | AA                | 1946625821               |
| SNP_P3_139108_443147 | NW_004516235.1 | Scaffold876 | 443147                  | CC                              | TT                | 1946625823               |
| SNP_P3_139109_443148 | NW_004516235.1 | Scaffold876 | 443148                  | GG                              | AA                | 1946625825               |
| SNP_P3_139110_443334 | NW_004516235.1 | Scaffold876 | 443334                  | CC                              | GG                | 1946625827               |
| SNP_P3_139111_443341 | NW_004516235.1 | Scaffold876 | 443341                  | CC                              | AA                | 1946625829               |
| SNP_P3_139112_446410 | NW_004516235.1 | Scaffold876 | 446410                  | AA                              | CC                | 1946625831               |
| SNP_P3_139113_446474 | NW_004516235.1 | Scaffold876 | 446474                  | CC                              | AA                | 1946625833               |
| SNP_P3_139114_446689 | NW_004516235.1 | Scaffold876 | 446689                  | AA                              | CC                | 1946625835               |
| SNP_P3_139115_446699 | NW_004516235.1 | Scaffold876 | 446699                  | TT                              | CC                | 1946625836               |
| SNP_P3_139116_446720 | NW_004516235.1 | Scaffold876 | 446720                  | AA                              | TT                | 1946625838               |
| SNP_P3_139117_446920 | NW_004516235.1 | Scaffold876 | 446920                  | TT                              | GG                | 1946625841               |
| SNP_P3_139118_447143 | NW_004516235.1 | Scaffold876 | 447143                  | AA                              | GG                | 1946625843               |
| SNP_P3_139119_447217 | NW_004516235.1 | Scaffold876 | 447217                  | AA                              | GG                | 1946625844               |
| SNP_P3_139120_447220 | NW_004516235.1 | Scaffold876 | 447220                  | AA                              | GG                | 1946625846               |
| SNP_P3_139121_447544 | NW_004516235.1 | Scaffold876 | 447544                  | CC                              | TT                | 1946625848               |
| SNP_P3_139122_447681 | NW_004516235.1 | Scaffold876 | 447681                  | GG                              | AA                | 1946625850               |
| SNP_P3_139123_451024 | NW_004516235.1 | Scaffold876 | 451024                  | AA                              | TT                | 1946625852               |
| SNP_P3_139124_451124 | NW_004516235.1 | Scaffold876 | 451124                  | CC                              | TT                | 1946625854               |
| SNP_P3_139125_451131 | NW_004516235.1 | Scaffold876 | 451131                  | GG                              | AA                | 1946625856               |
| SNP_P3_139126_451204 | NW_004516235.1 | Scaffold876 | 451204                  | GG                              | AA                | 1946625858               |
| SNP_P3_139127_452898 | NW_004516235.1 | Scaffold876 | 452898                  | CC                              | TT                | 1946625860               |
| SNP_P3_139128_453010 | NW_004516235.1 | Scaffold876 | 453010                  | TT                              | AA                | 1946625862               |
| SNP_P3_139129_453031 | NW_004516235.1 | Scaffold876 | 453031                  | GG                              | AA                | 1946625864               |
| SNP_P3_139130_457388 | NW_004516235.1 | Scaffold876 | 457388                  | TT                              | CC                | 1946625866               |
| SNP_P3_139131_458228 | NW_004516235.1 | Scaffold876 | 458228                  | TT                              | CC                | 1946625868               |
| SNP_P3_139132_460742 | NW_004516235.1 | Scaffold876 | 460742                  | CC                              | TT                | 1946625870               |
| SNP_P3_139133_464334 | NW_004516235.1 | Scaffold876 | 464334                  | GG                              | AA                | 1946625872               |
| SNP_P3_139134_469014 | NW_004516235.1 | Scaffold876 | 469014                  | CC                              | AA                | 1946625874               |
| SNP_P3_139135_469027 | NW_004516235.1 | Scaffold876 | 469027                  | AA                              | TT                | 1946625875               |
| SNP_P3_139136_469084 | NW_004516235.1 | Scaffold876 | 469084                  | TT                              | AA                | 1946625878               |
| SNP_P3_139137_469889 | NW_004516235.1 | Scaffold876 | 469889                  | TT                              | AA                | 1946625879               |
| SNP_P3_139138_475016 | NW_004516235.1 | Scaffold876 | 475016                  | TT                              | CC                | 1946625881               |

| SNPs IDs             | Chromosome IDs | Chromosomes | Physical positions (bp) | CDC Frontier (Reference genome) | (Pusa 256 & HPNB) | NCBI SNPdb Accession IDs |
|----------------------|----------------|-------------|-------------------------|---------------------------------|-------------------|--------------------------|
| SNP_P3_139139_475028 | NW_004516235.1 | Scaffold876 | 475028                  | TT                              | AA                | 1946625883               |
| SNP_P3_139140_475493 | NW_004516235.1 | Scaffold876 | 475493                  | TT                              | AA                | 1946625885               |
| SNP_P3_139141_475528 | NW_004516235.1 | Scaffold876 | 475528                  | GG                              | CC                | 1946625887               |
| SNP_P3_139142_475956 | NW_004516235.1 | Scaffold876 | 475956                  | AA                              | GG                | 1946625889               |
| SNP_P3_139143_501522 | NW_004516235.1 | Scaffold876 | 501522                  | AA                              | GG                | 1946625891               |
| SNP_P3_139144_509738 | NW_004516235.1 | Scaffold876 | 509738                  | CC                              | AA                | 1946625893               |
| SNP_P3_139145_509759 | NW_004516235.1 | Scaffold876 | 509759                  | GG                              | AA                | 1946625895               |
| SNP_P3_139146_509788 | NW_004516235.1 | Scaffold876 | 509788                  | CC                              | TT                | 1946625897               |
| SNP_P3_139147_509824 | NW_004516235.1 | Scaffold876 | 509824                  | CC                              | TT                | 1946625899               |
| SNP_P3_139148_509914 | NW_004516235.1 | Scaffold876 | 509914                  | CC                              | TT                | 1946625901               |
| SNP_P3_139149_509917 | NW_004516235.1 | Scaffold876 | 509917                  | GG                              | AA                | 1946625903               |
| SNP_P3_139150_524223 | NW_004516235.1 | Scaffold876 | 524223                  | GG                              | TT                | 1946625905               |
| SNP_P3_139151_545996 | NW_004516235.1 | Scaffold876 | 545996                  | GG                              | TT                | 1946625907               |
| SNP_P3_139152_553268 | NW_004516235.1 | Scaffold876 | 553268                  | AA                              | TT                | 1946625908               |
| SNP_P3_139153_556631 | NW_004516235.1 | Scaffold876 | 556631                  | AA                              | GG                | 1946625910               |
| SNP_P3_139154_556663 | NW_004516235.1 | Scaffold876 | 556663                  | TT                              | GG                | 1946625912               |
| SNP_P3_139155_556690 | NW_004516235.1 | Scaffold876 | 556690                  | AA                              | GG                | 1946625914               |
| SNP_P3_139156_558476 | NW_004516235.1 | Scaffold876 | 558476                  | CC                              | TT                | 1946625916               |
| SNP_P3_139158_559100 | NW_004516235.1 | Scaffold876 | 559100                  | TT                              | AA                | 1946625919               |
| SNP_P3_139159_563237 | NW_004516235.1 | Scaffold876 | 563237                  | AA                              | GG                | 1946625921               |
| SNP_P3_139160_563413 | NW_004516235.1 | Scaffold876 | 563413                  | AA                              | GG                | 1946625923               |
| SNP_P3_139161_563738 | NW_004516235.1 | Scaffold876 | 563738                  | TT                              | AA                | 1946625925               |
| SNP_P3_139163_574892 | NW_004516235.1 | Scaffold876 | 574892                  | AA                              | CC                | 1946625927               |
| SNP_P3_139164_575207 | NW_004516235.1 | Scaffold876 | 575207                  | AA                              | GG                | 1946625929               |
| SNP_P3_139165_575236 | NW_004516235.1 | Scaffold876 | 575236                  | AA                              | CC                | 1946625931               |
| SNP_P3_139166_575247 | NW_004516235.1 | Scaffold876 | 575247                  | TT                              | CC                | 1946625933               |
| SNP_P3_139167_575343 | NW_004516235.1 | Scaffold876 | 575343                  | GG                              | AA                | 1946625935               |
| SNP_P3_139168_575494 | NW_004516235.1 | Scaffold876 | 575494                  | CC                              | AA                | 1946625936               |
| SNP_P3_139169_575503 | NW_004516235.1 | Scaffold876 | 575503                  | GG                              | AA                | 1946625938               |
| SNP_P3_139170_575537 | NW_004516235.1 | Scaffold876 | 575537                  | AA                              | GG                | 1946625940               |
| SNP_P3_139171_589059 | NW_004516235.1 | Scaffold876 | 589059                  | AA                              | GG                | 1946625942               |
| SNP_P3_139172_607882 | NW_004516235.1 | Scaffold876 | 607882                  | AA                              | TT                | 1946625944               |
| SNP_P3_139173_608176 | NW_004516235.1 | Scaffold876 | 608176                  | CC                              | TT                | 1946625946               |
| SNP_P3_139174_613590 | NW_004516235.1 | Scaffold876 | 613590                  | TT                              | CC                | 1946625948               |
| SNP_P3_139175_614069 | NW_004516235.1 | Scaffold876 | 614069                  | TT                              | CC                | 1946625950               |
| SNP_P3_139176_617807 | NW_004516235.1 | Scaffold876 | 617807                  | GG                              | AA                | 1946625952               |
| SNP_P3_139178_622820 | NW_004516235.1 | Scaffold876 | 622820                  | GG                              | AA                | 1946625954               |
| SNP_P3_139179_235    | NW_004516236.1 | Scaffold877 | 235                     | AA                              | GG                | 1946625956               |
| SNP_P3_139180_272    | NW_004516236.1 | Scaffold877 | 272                     | AA                              | GG                | 1946625958               |
| SNP_P3_139181_279    | NW_004516236.1 | Scaffold877 | 279                     | GG                              | CC                | 1946625960               |
| SNP_P3_139182_390    | NW_004516236.1 | Scaffold877 | 390                     | CC                              | TT                | 1946625962               |
| SNP_P3_139183_692    | NW_004516236.1 | Scaffold877 | 692                     | TT                              | CC                | 1946625964               |

| SNPs IDs            | Chromosome IDs | Chromosomes | Physical positions (bp) | CDC Frontier (Reference genome) | (Pusa 256 & HPNB) | NCBI SNPdb Accession IDs |
|---------------------|----------------|-------------|-------------------------|---------------------------------|-------------------|--------------------------|
| SNP_P3_139184_2565  | NW_004516236.1 | Scaffold877 | 2565                    | AA                              | GG                | 1946625966               |
| SNP_P3_139185_2566  | NW_004516236.1 | Scaffold877 | 2566                    | GG                              | CC                | 1946625968               |
| SNP_P3_139186_3376  | NW_004516236.1 | Scaffold877 | 3376                    | CC                              | GG                | 1946625970               |
| SNP_P3_139187_10711 | NW_004516236.1 | Scaffold877 | 10711                   | AA                              | CC                | 1946625972               |
| SNP_P3_139188_10783 | NW_004516236.1 | Scaffold877 | 10783                   | AA                              | GG                | 1946625974               |
| SNP_P3_139190_10925 | NW_004516236.1 | Scaffold877 | 10925                   | TT                              | CC                | 1946625976               |
| SNP_P3_139191_11050 | NW_004516236.1 | Scaffold877 | 11050                   | AA                              | GG                | 1946625978               |
| SNP_P3_139193_11296 | NW_004516236.1 | Scaffold877 | 11296                   | AA                              | GG                | 1946625980               |
| SNP_P3_139194_11332 | NW_004516236.1 | Scaffold877 | 11332                   | AA                              | GG                | 1946625982               |
| SNP_P3_139195_11432 | NW_004516236.1 | Scaffold877 | 11432                   | CC                              | TT                | 1946625984               |
| SNP_P3_139196_11470 | NW_004516236.1 | Scaffold877 | 11470                   | GG                              | TT                | 1946625986               |
| SNP_P3_139197_11596 | NW_004516236.1 | Scaffold877 | 11596                   | TT                              | CC                | 1946625988               |
| SNP_P3_139198_11607 | NW_004516236.1 | Scaffold877 | 11607                   | AA                              | TT                | 1946625990               |
| SNP_P3_139199_11683 | NW_004516236.1 | Scaffold877 | 11683                   | AA                              | CC                | 1946625992               |
| SNP_P3_139200_11692 | NW_004516236.1 | Scaffold877 | 11692                   | AA                              | TT                | 1946625994               |
| SNP_P3_139201_11927 | NW_004516236.1 | Scaffold877 | 11927                   | TT                              | CC                | 1946625996               |
| SNP_P3_139202_11965 | NW_004516236.1 | Scaffold877 | 11965                   | AA                              | GG                | 1946625998               |
| SNP_P3_139203_12655 | NW_004516236.1 | Scaffold877 | 12655                   | AA                              | GG                | 1946626000               |
| SNP_P3_139204_12688 | NW_004516236.1 | Scaffold877 | 12688                   | AA                              | GG                | 1946626003               |
| SNP_P3_139205_12891 | NW_004516236.1 | Scaffold877 | 12891                   | TT                              | AA                | 1946626005               |
| SNP_P3_139206_12966 | NW_004516236.1 | Scaffold877 | 12966                   | GG                              | TT                | 1946626007               |
| SNP_P3_139207_14489 | NW_004516236.1 | Scaffold877 | 14489                   | TT                              | AA                | 1946626009               |
| SNP_P3_139208_14530 | NW_004516236.1 | Scaffold877 | 14530                   | AA                              | GG                | 1946626011               |
| SNP_P3_139209_14688 | NW_004516236.1 | Scaffold877 | 14688                   | CC                              | TT                | 1946626013               |
| SNP_P3_139210_14692 | NW_004516236.1 | Scaffold877 | 14692                   | TT                              | GG                | 1946626015               |
| SNP_P3_139211_14701 | NW_004516236.1 | Scaffold877 | 14701                   | GG                              | AA                | 1946626017               |
| SNP_P3_139213_16395 | NW_004516236.1 | Scaffold877 | 16395                   | GG                              | CC                | 1946626018               |
| SNP_P3_139214_16839 | NW_004516236.1 | Scaffold877 | 16839                   | TT                              | GG                | 1946626020               |
| SNP_P3_139215_16884 | NW_004516236.1 | Scaffold877 | 16884                   | AA                              | GG                | 1946626022               |
| SNP_P3_139216_16941 | NW_004516236.1 | Scaffold877 | 16941                   | GG                              | AA                | 1946626024               |
| SNP_P3_139217_17049 | NW_004516236.1 | Scaffold877 | 17049                   | GG                              | AA                | 1946626026               |
| SNP_P3_139218_17062 | NW_004516236.1 | Scaffold877 | 17062                   | AA                              | TT                | 1946626028               |
| SNP_P3_139219_17107 | NW_004516236.1 | Scaffold877 | 17107                   | TT                              | CC                | 1946626030               |
| SNP_P3_139220_17167 | NW_004516236.1 | Scaffold877 | 17167                   | GG                              | AA                | 1946626032               |
| SNP_P3_139222_17392 | NW_004516236.1 | Scaffold877 | 17392                   | AA                              | GG                | 1946626034               |
| SNP_P3_139223_17433 | NW_004516236.1 | Scaffold877 | 17433                   | GG                              | AA                | 1946626036               |
| SNP_P3_139224_17472 | NW_004516236.1 | Scaffold877 | 17472                   | CC                              | AA                | 1946626038               |
| SNP_P3_139225_17525 | NW_004516236.1 | Scaffold877 | 17525                   | AA                              | CC                | 1946626040               |
| SNP_P3_139226_14119 | NW_004516237.1 | Scaffold878 | 14119                   | AA                              | GG                | 1946626042               |
| SNP_P3_139227_25208 | NW_004516237.1 | Scaffold878 | 25208                   | AA                              | GG                | 1946626045               |
| SNP_P3_139228_25236 | NW_004516237.1 | Scaffold878 | 25236                   | GG                              | AA                | 1946626047               |
| SNP_P3_139229_25265 | NW_004516237.1 | Scaffold878 | 25265                   | GG                              | AA                | 1946626049               |

| SNPs IDs             | Chromosome IDs | Chromosomes | Physical positions (bp) | CDC Frontier (Reference genome) | (Pusa 256 & HPNB) | NCBI SNPdb Accession IDs |
|----------------------|----------------|-------------|-------------------------|---------------------------------|-------------------|--------------------------|
| SNP_P3_139230_25466  | NW_004516237.1 | Scaffold878 | 25466                   | CC                              | TT                | 1946626051               |
| SNP_P3_139231_28124  | NW_004516237.1 | Scaffold878 | 28124                   | AA                              | GG                | 1946626053               |
| SNP_P3_139232_43054  | NW_004516237.1 | Scaffold878 | 43054                   | TT                              | AA                | 1946626055               |
| SNP_P3_139233_43055  | NW_004516237.1 | Scaffold878 | 43055                   | AA                              | TT                | 1946626057               |
| SNP_P3_139234_43087  | NW_004516237.1 | Scaffold878 | 43087                   | CC                              | AA                | 1946626059               |
| SNP_P3_139235_43176  | NW_004516237.1 | Scaffold878 | 43176                   | CC                              | TT                | 1946626061               |
| SNP_P3_139237_43207  | NW_004516237.1 | Scaffold878 | 43207                   | GG                              | AA                | 1946626063               |
| SNP_P3_139238_43383  | NW_004516237.1 | Scaffold878 | 43383                   | TT                              | GG                | 1946626065               |
| SNP_P3_139239_43519  | NW_004516237.1 | Scaffold878 | 43519                   | TT                              | CC                | 1946626068               |
| SNP_P3_139240_43530  | NW_004516237.1 | Scaffold878 | 43530                   | AA                              | GG                | 1946626070               |
| SNP_P3_139241_43555  | NW_004516237.1 | Scaffold878 | 43555                   | CC                              | GG                | 1946626072               |
| SNP_P3_139243_43720  | NW_004516237.1 | Scaffold878 | 43720                   | TT                              | CC                | 1946626074               |
| SNP_P3_139244_49920  | NW_004516237.1 | Scaffold878 | 49920                   | TT                              | GG                | 1946626076               |
| SNP_P3_139245_66491  | NW_004516237.1 | Scaffold878 | 66491                   | CC                              | TT                | 1946626078               |
| SNP_P3_139246_74934  | NW_004516237.1 | Scaffold878 | 74934                   | CC                              | TT                | 1946626080               |
| SNP_P3_139247_75001  | NW_004516237.1 | Scaffold878 | 75001                   | AA                              | GG                | 1946626082               |
| SNP_P3_139248_75018  | NW_004516237.1 | Scaffold878 | 75018                   | GG                              | AA                | 1946626084               |
| SNP_P3_139249_75028  | NW_004516237.1 | Scaffold878 | 75028                   | TT                              | CC                | 1946626086               |
| SNP_P3_139250_75052  | NW_004516237.1 | Scaffold878 | 75052                   | CC                              | GG                | 1946626089               |
| SNP_P3_139251_75063  | NW_004516237.1 | Scaffold878 | 75063                   | CC                              | TT                | 1946626091               |
| SNP_P3_139252_75076  | NW_004516237.1 | Scaffold878 | 75076                   | AA                              | GG                | 1946626093               |
| SNP_P3_139253_75281  | NW_004516237.1 | Scaffold878 | 75281                   | AA                              | GG                | 1946626095               |
| SNP_P3_139254_75337  | NW_004516237.1 | Scaffold878 | 75337                   | CC                              | TT                | 1946626097               |
| SNP_P3_139255_75364  | NW_004516237.1 | Scaffold878 | 75364                   | GG                              | AA                | 1946626099               |
| SNP_P3_139256_76018  | NW_004516237.1 | Scaffold878 | 76018                   | AA                              | CC                | 1946626101               |
| SNP_P3_139257_79135  | NW_004516237.1 | Scaffold878 | 79135                   | AA                              | GG                | 1946626103               |
| SNP_P3_139258_82782  | NW_004516237.1 | Scaffold878 | 82782                   | TT                              | AA                | 1946626105               |
| SNP_P3_139259_90512  | NW_004516237.1 | Scaffold878 | 90512                   | GG                              | AA                | 1946626107               |
| SNP_P3_139260_93522  | NW_004516237.1 | Scaffold878 | 93522                   | AA                              | GG                | 1946626109               |
| SNP_P3_139261_95411  | NW_004516237.1 | Scaffold878 | 95411                   | CC                              | AA                | 1946626111               |
| SNP_P3_139262_118199 | NW_004516237.1 | Scaffold878 | 118199                  | TT                              | CC                | 1946626113               |
| SNP_P3_139263_118269 | NW_004516237.1 | Scaffold878 | 118269                  | AA                              | GG                | 1946626115               |
| SNP_P3_139264_118300 | NW_004516237.1 | Scaffold878 | 118300                  | GG                              | AA                | 1946626116               |
| SNP_P3_139265_118340 | NW_004516237.1 | Scaffold878 | 118340                  | CC                              | TT                | 1946626118               |
| SNP_P3_139266_118473 | NW_004516237.1 | Scaffold878 | 118473                  | GG                              | AA                | 1946626120               |
| SNP_P3_139267_118538 | NW_004516237.1 | Scaffold878 | 118538                  | GG                              | AA                | 1946626122               |
| SNP_P3_139268_118565 | NW_004516237.1 | Scaffold878 | 118565                  | AA                              | GG                | 1946626124               |
| SNP_P3_139269_118604 | NW_004516237.1 | Scaffold878 | 118604                  | CC                              | TT                | 1946626126               |
| SNP_P3_139270_118608 | NW_004516237.1 | Scaffold878 | 118608                  | CC                              | AA                | 1946626128               |
| SNP_P3_139271_118759 | NW_004516237.1 | Scaffold878 | 118759                  | AA                              | CC                | 1946626130               |
| SNP_P3_139272_118761 | NW_004516237.1 | Scaffold878 | 118761                  | TT                              | CC                | 1946626132               |
| SNP_P3_139273_118833 | NW_004516237.1 | Scaffold878 | 118833                  | GG                              | AA                | 1946626134               |

| SNPs IDs             | Chromosome IDs | Chromosomes | Physical positions (bp) | CDC Frontier (Reference genome) | (Pusa 256 & HPNB) | NCBI SNPdb Accession IDs |
|----------------------|----------------|-------------|-------------------------|---------------------------------|-------------------|--------------------------|
| SNP_P3_139274_118839 | NW_004516237.1 | Scaffold878 | 118839                  | TT                              | CC                | 1946626136               |
| SNP_P3_139275_118846 | NW_004516237.1 | Scaffold878 | 118846                  | AA                              | GG                | 1946626138               |
| SNP_P3_139276_118897 | NW_004516237.1 | Scaffold878 | 118897                  | CC                              | AA                | 1946626140               |
| SNP_P3_139277_118957 | NW_004516237.1 | Scaffold878 | 118957                  | AA                              | TT                | 1946626142               |
| SNP_P3_139278_119045 | NW_004516237.1 | Scaffold878 | 119045                  | GG                              | TT                | 1946626144               |
| SNP_P3_139279_119168 | NW_004516237.1 | Scaffold878 | 119168                  | GG                              | AA                | 1946626146               |
| SNP_P3_139280_119265 | NW_004516237.1 | Scaffold878 | 119265                  | AA                              | GG                | 1946626148               |
| SNP_P3_139281_119267 | NW_004516237.1 | Scaffold878 | 119267                  | AA                              | TT                | 1946626150               |
| SNP_P3_139282_5054   | NW_004516239.1 | Scaffold882 | 5054                    | GG                              | AA                | 1946626152               |
| SNP_P3_139283_5351   | NW_004516239.1 | Scaffold882 | 5351                    | GG                              | AA                | 1946626154               |
| SNP_P3_139284_5362   | NW_004516239.1 | Scaffold882 | 5362                    | AA                              | GG                | 1946626156               |
| SNP_P3_139285_8309   | NW_004516239.1 | Scaffold882 | 8309                    | TT                              | CC                | 1946626158               |
| SNP_P3_139286_8318   | NW_004516239.1 | Scaffold882 | 8318                    | GG                              | TT                | 1946626160               |
| SNP_P3_139287_8417   | NW_004516239.1 | Scaffold882 | 8417                    | CC                              | TT                | 1946626162               |
| SNP_P3_139288_8648   | NW_004516239.1 | Scaffold882 | 8648                    | AA                              | GG                | 1946626164               |
| SNP_P3_139289_8663   | NW_004516239.1 | Scaffold882 | 8663                    | TT                              | CC                | 1946626166               |
| SNP_P3_139290_8692   | NW_004516239.1 | Scaffold882 | 8692                    | CC                              | AA                | 1946626168               |
| SNP_P3_139291_8714   | NW_004516239.1 | Scaffold882 | 8714                    | GG                              | TT                | 1946626169               |
| SNP_P3_139292_8762   | NW_004516239.1 | Scaffold882 | 8762                    | CC                              | TT                | 1946626171               |
| SNP_P3_139293_10312  | NW_004516239.1 | Scaffold882 | 10312                   | TT                              | CC                | 1946626173               |
| SNP_P3_139294_10393  | NW_004516239.1 | Scaffold882 | 10393                   | AA                              | GG                | 1946626175               |
| SNP_P3_139295_39675  | NW_004516239.1 | Scaffold882 | 39675                   | CC                              | TT                | 1946626177               |
| SNP_P3_139296_39698  | NW_004516239.1 | Scaffold882 | 39698                   | CC                              | TT                | 1946626179               |
| SNP_P3_139297_41629  | NW_004516239.1 | Scaffold882 | 41629                   | AA                              | CC                | 1946626181               |
| SNP_P3_139299_58822  | NW_004516239.1 | Scaffold882 | 58822                   | TT                              | GG                | 1946626183               |
| SNP_P3_139300_65982  | NW_004516239.1 | Scaffold882 | 65982                   | CC                              | TT                | 1946626185               |
| SNP_P3_139302_70563  | NW_004516239.1 | Scaffold882 | 70563                   | GG                              | AA                | 1946626187               |
| SNP_P3_139303_74378  | NW_004516239.1 | Scaffold882 | 74378                   | AA                              | CC                | 1946626189               |
| SNP_P3_139304_100422 | NW_004516239.1 | Scaffold882 | 100422                  | AA                              | CC                | 1946626191               |
| SNP_P3_139305_100486 | NW_004516239.1 | Scaffold882 | 100486                  | CC                              | TT                | 1946626193               |
| SNP_P3_139306_100551 | NW_004516239.1 | Scaffold882 | 100551                  | TT                              | CC                | 1946626195               |
| SNP_P3_139307_100555 | NW_004516239.1 | Scaffold882 | 100555                  | AA                              | TT                | 1946626197               |
| SNP_P3_139308_100588 | NW_004516239.1 | Scaffold882 | 100588                  | CC                              | AA                | 1946626199               |
| SNP_P3_139309_100823 | NW_004516239.1 | Scaffold882 | 100823                  | GG                              | AA                | 1946626201               |
| SNP_P3_139310_100833 | NW_004516239.1 | Scaffold882 | 100833                  | CC                              | TT                | 1946626203               |
| SNP_P3_139311_100842 | NW_004516239.1 | Scaffold882 | 100842                  | GG                              | AA                | 1946626205               |
| SNP_P3_139312_100873 | NW_004516239.1 | Scaffold882 | 100873                  | TT                              | CC                | 1946626207               |
| SNP_P3_139313_190474 | NW_004516239.1 | Scaffold882 | 190474                  | AA                              | TT                | 1946626209               |
| SNP_P3_139314_238149 | NW_004516239.1 | Scaffold882 | 238149                  | TT                              | CC                | 1946626211               |
| SNP_P3_139315_244168 | NW_004516239.1 | Scaffold882 | 244168                  | AA                              | CC                | 1946626213               |
| SNP_P3_139316_244498 | NW_004516239.1 | Scaffold882 | 244498                  | AA                              | GG                | 1946626215               |
| SNP_P3_139317_245238 | NW_004516239.1 | Scaffold882 | 245238                  | TT                              | GG                | 1946626217               |

| SNPs IDs             | Chromosome IDs | Chromosomes | Physical positions (bp) | CDC Frontier (Reference genome) | (Pusa 256 & HPNB) | NCBI SNPdb Accession IDs |
|----------------------|----------------|-------------|-------------------------|---------------------------------|-------------------|--------------------------|
| SNP_P3_139318_266218 | NW_004516239.1 | Scaffold882 | 266218                  | GG                              | AA                | 1946626219               |
| SNP_P3_139319_266278 | NW_004516239.1 | Scaffold882 | 266278                  | AA                              | CC                | 1946626221               |
| SNP_P3_139321_266509 | NW_004516239.1 | Scaffold882 | 266509                  | TT                              | CC                | 1946626223               |
| SNP_P3_139322_347238 | NW_004516239.1 | Scaffold882 | 347238                  | GG                              | CC                | 1946626224               |
| SNP_P3_139323_347249 | NW_004516239.1 | Scaffold882 | 347249                  | TT                              | GG                | 1946626226               |
| SNP_P3_139324_347290 | NW_004516239.1 | Scaffold882 | 347290                  | AA                              | TT                | 1946626228               |
| SNP_P3_139325_347413 | NW_004516239.1 | Scaffold882 | 347413                  | CC                              | TT                | 1946626230               |
| SNP_P3_139326_347713 | NW_004516239.1 | Scaffold882 | 347713                  | TT                              | CC                | 1946626232               |
| SNP_P3_139327_347747 | NW_004516239.1 | Scaffold882 | 347747                  | TT                              | CC                | 1946626234               |
| SNP_P3_139328_349193 | NW_004516239.1 | Scaffold882 | 349193                  | AA                              | GG                | 1946626236               |
| SNP_P3_139329_349194 | NW_004516239.1 | Scaffold882 | 349194                  | TT                              | GG                | 1946626238               |
| SNP_P3_139330_366163 | NW_004516239.1 | Scaffold882 | 366163                  | AA                              | CC                | 1946626240               |
| SNP_P3_139331_379515 | NW_004516239.1 | Scaffold882 | 379515                  | AA                              | GG                | 1946626242               |
| SNP_P3_139332_389425 | NW_004516239.1 | Scaffold882 | 389425                  | GG                              | TT                | 1946626244               |
| SNP_P3_139333_389431 | NW_004516239.1 | Scaffold882 | 389431                  | AA                              | GG                | 1946626246               |
| SNP_P3_139334_389443 | NW_004516239.1 | Scaffold882 | 389443                  | TT                              | CC                | 1946626248               |
| SNP_P3_139335_389521 | NW_004516239.1 | Scaffold882 | 389521                  | CC                              | TT                | 1946626250               |
| SNP_P3_139336_389524 | NW_004516239.1 | Scaffold882 | 389524                  | CC                              | GG                | 1946626252               |
| SNP_P3_139337_389846 | NW_004516239.1 | Scaffold882 | 389846                  | TT                              | CC                | 1946626254               |
| SNP_P3_139338_389849 | NW_004516239.1 | Scaffold882 | 389849                  | AA                              | GG                | 1946626256               |
| SNP_P3_139339_389852 | NW_004516239.1 | Scaffold882 | 389852                  | GG                              | AA                | 1946626258               |
| SNP_P3_139340_389855 | NW_004516239.1 | Scaffold882 | 389855                  | GG                              | AA                | 1946626260               |
| SNP_P3_139341_389861 | NW_004516239.1 | Scaffold882 | 389861                  | GG                              | AA                | 1946626262               |
| SNP_P3_139342_426790 | NW_004516239.1 | Scaffold882 | 426790                  | GG                              | AA                | 1946626264               |
| SNP_P3_139343_427232 | NW_004516239.1 | Scaffold882 | 427232                  | GG                              | AA                | 1946626266               |
| SNP_P3_139344_428115 | NW_004516239.1 | Scaffold882 | 428115                  | CC                              | TT                | 1946626269               |
| SNP_P3_139345_428187 | NW_004516239.1 | Scaffold882 | 428187                  | TT                              | CC                | 1946626271               |
| SNP_P3_139346_428861 | NW_004516239.1 | Scaffold882 | 428861                  | AA                              | GG                | 1946626274               |
| SNP_P3_139347_429605 | NW_004516239.1 | Scaffold882 | 429605                  | CC                              | GG                | 1946626276               |
| SNP_P3_139348_430625 | NW_004516239.1 | Scaffold882 | 430625                  | GG                              | CC                | 1946626278               |
| SNP_P3_139349_430701 | NW_004516239.1 | Scaffold882 | 430701                  | CC                              | GG                | 1946626280               |
| SNP_P3_139350_431694 | NW_004516239.1 | Scaffold882 | 431694                  | CC                              | GG                | 1946626282               |
| SNP_P3_139351_431971 | NW_004516239.1 | Scaffold882 | 431971                  | GG                              | TT                | 1946626285               |
| SNP_P3_139352_432226 | NW_004516239.1 | Scaffold882 | 432226                  | TT                              | GG                | 1946626287               |
| SNP_P3_139353_432229 | NW_004516239.1 | Scaffold882 | 432229                  | GG                              | TT                | 1946626289               |
| SNP_P3_139354_434547 | NW_004516239.1 | Scaffold882 | 434547                  | TT                              | GG                | 1946626291               |
| SNP_P3_139355_435782 | NW_004516239.1 | Scaffold882 | 435782                  | CC                              | TT                | 1946626293               |
| SNP_P3_139356_436494 | NW_004516239.1 | Scaffold882 | 436494                  | GG                              | CC                | 1946626295               |
| SNP_P3_139357_436497 | NW_004516239.1 | Scaffold882 | 436497                  | AA                              | GG                | 1946626297               |
| SNP_P3_139359_437604 | NW_004516239.1 | Scaffold882 | 437604                  | CC                              | TT                | 1946626299               |
| SNP_P3_139360_438431 | NW_004516239.1 | Scaffold882 | 438431                  | CC                              | TT                | 1946626301               |
| SNP_P3_139361_438519 | NW_004516239.1 | Scaffold882 | 438519                  | GG                              | AA                | 1946626303               |

| SNPs IDs             | Chromosome IDs | Chromosomes | Physical positions (bp) | CDC Frontier (Reference genome) | (Pusa 256 & HPNB) | NCBI SNPdb Accession IDs |
|----------------------|----------------|-------------|-------------------------|---------------------------------|-------------------|--------------------------|
| SNP_P3_139362_438647 | NW_004516239.1 | Scaffold882 | 438647                  | TT                              | CC                | 1946626305               |
| SNP_P3_139363_439019 | NW_004516239.1 | Scaffold882 | 439019                  | AA                              | GG                | 1946626307               |
| SNP_P3_139364_439062 | NW_004516239.1 | Scaffold882 | 439062                  | TT                              | CC                | 1946626309               |
| SNP_P3_139366_446972 | NW_004516239.1 | Scaffold882 | 446972                  | CC                              | AA                | 1946626310               |
| SNP_P3_139367_448346 | NW_004516239.1 | Scaffold882 | 448346                  | GG                              | TT                | 1946626312               |
| SNP_P3_139368_476585 | NW_004516239.1 | Scaffold882 | 476585                  | GG                              | AA                | 1946626314               |
| SNP_P3_139369_476884 | NW_004516239.1 | Scaffold882 | 476884                  | CC                              | AA                | 1946626316               |
| SNP_P3_139370_477904 | NW_004516239.1 | Scaffold882 | 477904                  | TT                              | CC                | 1946626318               |
| SNP_P3_139371_479264 | NW_004516239.1 | Scaffold882 | 479264                  | TT                              | AA                | 1946626320               |
| SNP_P3_139372_481107 | NW_004516239.1 | Scaffold882 | 481107                  | AA                              | TT                | 1946626322               |
| SNP_P3_139374_517749 | NW_004516239.1 | Scaffold882 | 517749                  | TT                              | GG                | 1946626324               |
| SNP_P3_139375_519495 | NW_004516239.1 | Scaffold882 | 519495                  | TT                              | AA                | 1946626326               |
| SNP_P3_139376_519507 | NW_004516239.1 | Scaffold882 | 519507                  | AA                              | GG                | 1946626328               |
| SNP_P3_139377_519509 | NW_004516239.1 | Scaffold882 | 519509                  | AA                              | GG                | 1946626330               |
| SNP_P3_139378_520183 | NW_004516239.1 | Scaffold882 | 520183                  | CC                              | TT                | 1946626332               |
| SNP_P3_139379_522951 | NW_004516239.1 | Scaffold882 | 522951                  | AA                              | TT                | 1946626334               |
| SNP_P3_139380_523007 | NW_004516239.1 | Scaffold882 | 523007                  | CC                              | TT                | 1946626336               |
| SNP_P3_139381_523371 | NW_004516239.1 | Scaffold882 | 523371                  | AA                              | GG                | 1946626337               |
| SNP_P3_139382_523449 | NW_004516239.1 | Scaffold882 | 523449                  | TT                              | CC                | 1946626339               |
| SNP_P3_139383_523478 | NW_004516239.1 | Scaffold882 | 523478                  | AA                              | GG                | 1946626341               |
| SNP_P3_139384_523493 | NW_004516239.1 | Scaffold882 | 523493                  | AA                              | GG                | 1946626343               |
| SNP_P3_139385_526163 | NW_004516239.1 | Scaffold882 | 526163                  | AA                              | CC                | 1946626345               |
| SNP_P3_139386_526173 | NW_004516239.1 | Scaffold882 | 526173                  | CC                              | TT                | 1946626347               |
| SNP_P3_139387_532691 | NW_004516239.1 | Scaffold882 | 532691                  | TT                              | GG                | 1946626349               |
| SNP_P3_139388_532692 | NW_004516239.1 | Scaffold882 | 532692                  | AA                              | GG                | 1946626352               |
| SNP_P3_139389_532702 | NW_004516239.1 | Scaffold882 | 532702                  | CC                              | GG                | 1946626354               |
| SNP_P3_139391_553028 | NW_004516239.1 | Scaffold882 | 553028                  | GG                              | AA                | 1946626356               |
| SNP_P3_139392_583185 | NW_004516239.1 | Scaffold882 | 583185                  | TT                              | CC                | 1946626358               |
| SNP_P3_139393_584120 | NW_004516239.1 | Scaffold882 | 584120                  | CC                              | AA                | 1946626360               |
| SNP_P3_139394_584580 | NW_004516239.1 | Scaffold882 | 584580                  | GG                              | CC                | 1946626362               |
| SNP_P3_139395_584586 | NW_004516239.1 | Scaffold882 | 584586                  | TT                              | CC                | 1946626364               |
| SNP_P3_139396_584604 | NW_004516239.1 | Scaffold882 | 584604                  | AA                              | GG                | 1946626366               |
| SNP_P3_139397_584617 | NW_004516239.1 | Scaffold882 | 584617                  | TT                              | CC                | 1946626367               |
| SNP_P3_139398_598810 | NW_004516239.1 | Scaffold882 | 598810                  | GG                              | TT                | 1946626369               |
| SNP_P3_139399_607325 | NW_004516239.1 | Scaffold882 | 607325                  | AA                              | GG                | 1946626371               |
| SNP_P3_139400_607345 | NW_004516239.1 | Scaffold882 | 607345                  | TT                              | CC                | 1946626373               |
| SNP_P3_139401_607467 | NW_004516239.1 | Scaffold882 | 607467                  | AA                              | GG                | 1946626375               |
| SNP_P3_139402_607494 | NW_004516239.1 | Scaffold882 | 607494                  | CC                              | TT                | 1946626377               |
| SNP_P3_139403_607506 | NW_004516239.1 | Scaffold882 | 607506                  | TT                              | CC                | 1946626379               |
| SNP_P3_139404_607533 | NW_004516239.1 | Scaffold882 | 607533                  | AA                              | GG                | 1946626381               |
| SNP_P3_139405_607562 | NW_004516239.1 | Scaffold882 | 607562                  | TT                              | CC                | 1946626382               |
| SNP_P3_139406_607571 | NW_004516239.1 | Scaffold882 | 607571                  | GG                              | TT                | 1946626384               |

| SNPs IDs             | Chromosome IDs | Chromosomes | Physical positions (bp) | CDC Frontier (Reference genome) | (Pusa 256 & HPNB) | NCBI SNPdb Accession IDs |
|----------------------|----------------|-------------|-------------------------|---------------------------------|-------------------|--------------------------|
| SNP_P3_139407_607680 | NW_004516239.1 | Scaffold882 | 607680                  | GG                              | TT                | 1946626386               |
| SNP_P3_139408_607734 | NW_004516239.1 | Scaffold882 | 607734                  | TT                              | CC                | 1946626388               |
| SNP_P3_139409_607740 | NW_004516239.1 | Scaffold882 | 607740                  | TT                              | CC                | 1946626390               |
| SNP_P3_139410_607762 | NW_004516239.1 | Scaffold882 | 607762                  | TT                              | GG                | 1946626392               |
| SNP_P3_139411_607783 | NW_004516239.1 | Scaffold882 | 607783                  | TT                              | CC                | 1946626394               |
| SNP_P3_139412_607789 | NW_004516239.1 | Scaffold882 | 607789                  | AA                              | GG                | 1946626396               |
| SNP_P3_139413_607888 | NW_004516239.1 | Scaffold882 | 607888                  | TT                              | GG                | 1946626398               |
| SNP_P3_139414_608298 | NW_004516239.1 | Scaffold882 | 608298                  | AA                              | GG                | 1946626400               |
| SNP_P3_139415_608687 | NW_004516239.1 | Scaffold882 | 608687                  | AA                              | CC                | 1946626402               |
| SNP_P3_139416_608868 | NW_004516239.1 | Scaffold882 | 608868                  | CC                              | TT                | 1946626405               |
| SNP_P3_139417_608874 | NW_004516239.1 | Scaffold882 | 608874                  | GG                              | AA                | 1946626407               |
| SNP_P3_139418_608904 | NW_004516239.1 | Scaffold882 | 608904                  | CC                              | TT                | 1946626409               |
| SNP_P3_139419_608912 | NW_004516239.1 | Scaffold882 | 608912                  | TT                              | CC                | 1946626411               |
| SNP_P3_139420_608913 | NW_004516239.1 | Scaffold882 | 608913                  | TT                              | AA                | 1946626413               |
| SNP_P3_139421_615958 | NW_004516239.1 | Scaffold882 | 615958                  | GG                              | AA                | 1946626415               |
| SNP_P3_139422_615959 | NW_004516239.1 | Scaffold882 | 615959                  | TT                              | AA                | 1946626417               |
| SNP_P3_139424_621366 | NW_004516239.1 | Scaffold882 | 621366                  | TT                              | CC                | 1946626419               |
| SNP_P3_139425_621493 | NW_004516239.1 | Scaffold882 | 621493                  | AA                              | CC                | 1946626421               |
| SNP_P3_139426_621720 | NW_004516239.1 | Scaffold882 | 621720                  | TT                              | GG                | 1946626423               |
| SNP_P3_139427_621751 | NW_004516239.1 | Scaffold882 | 621751                  | CC                              | TT                | 1946626425               |
| SNP_P3_139428_635630 | NW_004516239.1 | Scaffold882 | 635630                  | CC                              | TT                | 1946626427               |
| SNP_P3_139429_23849  | NW_004516241.1 | Scaffold884 | 23849                   | GG                              | TT                | 1946626429               |
| SNP_P3_139430_34498  | NW_004516241.1 | Scaffold884 | 34498                   | TT                              | AA                | 1946626431               |
| SNP_P3_139431_43061  | NW_004516241.1 | Scaffold884 | 43061                   | TT                              | CC                | 1946626433               |
| SNP_P3_139432_43070  | NW_004516241.1 | Scaffold884 | 43070                   | CC                              | TT                | 1946626435               |
| SNP_P3_139433_52525  | NW_004516241.1 | Scaffold884 | 52525                   | TT                              | GG                | 1946626437               |
| SNP_P3_139434_65819  | NW_004516241.1 | Scaffold884 | 65819                   | AA                              | CC                | 1946626439               |
| SNP_P3_139435_67880  | NW_004516241.1 | Scaffold884 | 67880                   | GG                              | AA                | 1946626441               |
| SNP_P3_139436_93324  | NW_004516241.1 | Scaffold884 | 93324                   | CC                              | TT                | 1946626443               |
| SNP_P3_139437_94499  | NW_004516241.1 | Scaffold884 | 94499                   | CC                              | TT                | 1946626445               |
| SNP_P3_139438_110544 | NW_004516241.1 | Scaffold884 | 110544                  | TT                              | CC                | 1946626447               |
| SNP_P3_139439_110817 | NW_004516241.1 | Scaffold884 | 110817                  | CC                              | TT                | 1946626449               |
| SNP_P3_139440_135329 | NW_004516241.1 | Scaffold884 | 135329                  | GG                              | AA                | 1946626451               |
| SNP_P3_139441_135527 | NW_004516241.1 | Scaffold884 | 135527                  | GG                              | TT                | 1946626453               |
| SNP_P3_139442_135688 | NW_004516241.1 | Scaffold884 | 135688                  | AA                              | GG                | 1946626455               |
| SNP_P3_139443_135693 | NW_004516241.1 | Scaffold884 | 135693                  | TT                              | CC                | 1946626457               |
| SNP_P3_139444_135694 | NW_004516241.1 | Scaffold884 | 135694                  | AA                              | GG                | 1946626459               |
| SNP_P3_139445_140336 | NW_004516241.1 | Scaffold884 | 140336                  | TT                              | CC                | 1946626461               |
| SNP_P3_139446_144049 | NW_004516241.1 | Scaffold884 | 144049                  | TT                              | CC                | 1946626463               |
| SNP_P3_139447_157573 | NW_004516241.1 | Scaffold884 | 157573                  | TT                              | CC                | 1946626465               |
| SNP_P3_139448_157742 | NW_004516241.1 | Scaffold884 | 157742                  | AA                              | GG                | 1946626467               |
| SNP_P3_139449_157779 | NW_004516241.1 | Scaffold884 | 157779                  | TT                              | CC                | 1946626469               |



| SNPs IDs             | Chromosome IDs | Chromosomes | Physical positions (bp) | CDC Frontier (Reference genome) | (Pusa 256 & HPNB) | NCBI SNPdb Accession IDs |
|----------------------|----------------|-------------|-------------------------|---------------------------------|-------------------|--------------------------|
| SNP_P3_139450_157781 | NW_004516241.1 | Scaffold884 | 157781                  | GG                              | AA                | 1946626471               |
| SNP_P3_139451_157794 | NW_004516241.1 | Scaffold884 | 157794                  | TT                              | CC                | 1946626472               |
| SNP_P3_139452_157797 | NW_004516241.1 | Scaffold884 | 157797                  | GG                              | AA                | 1946626474               |
| SNP_P3_139453_157815 | NW_004516241.1 | Scaffold884 | 157815                  | AA                              | CC                | 1946626476               |
| SNP_P3_139454_474    | NW_004516242.1 | Scaffold886 | 474                     | GG                              | TT                | 1946626478               |
| SNP_P3_139455_487    | NW_004516242.1 | Scaffold886 | 487                     | CC                              | TT                | 1946626480               |
| SNP_P3_139456_14509  | NW_004516242.1 | Scaffold886 | 14509                   | GG                              | AA                | 1946626482               |
| SNP_P3_139457_42841  | NW_004516242.1 | Scaffold886 | 42841                   | AA                              | GG                | 1946626484               |
| SNP_P3_139458_116184 | NW_004516242.1 | Scaffold886 | 116184                  | CC                              | TT                | 1946626487               |
| SNP_P3_139459_150709 | NW_004516242.1 | Scaffold886 | 150709                  | GG                              | TT                | 1946626489               |
| SNP_P3_139460_151120 | NW_004516242.1 | Scaffold886 | 151120                  | AA                              | CC                | 1946626491               |
| SNP_P3_139461_151209 | NW_004516242.1 | Scaffold886 | 151209                  | GG                              | AA                | 1946626493               |
| SNP_P3_139463_151317 | NW_004516242.1 | Scaffold886 | 151317                  | TT                              | GG                | 1946626495               |
| SNP_P3_139464_151410 | NW_004516242.1 | Scaffold886 | 151410                  | CC                              | AA                | 1946626497               |
| SNP_P3_139465_151416 | NW_004516242.1 | Scaffold886 | 151416                  | GG                              | AA                | 1946626499               |
| SNP_P3_139466_151479 | NW_004516242.1 | Scaffold886 | 151479                  | TT                              | GG                | 1946626501               |
| SNP_P3_139467_151519 | NW_004516242.1 | Scaffold886 | 151519                  | CC                              | TT                | 1946626503               |
| SNP_P3_139468_151520 | NW_004516242.1 | Scaffold886 | 151520                  | AA                              | GG                | 1946626505               |
| SNP_P3_139469_151563 | NW_004516242.1 | Scaffold886 | 151563                  | AA                              | CC                | 1946626507               |
| SNP_P3_139471_151591 | NW_004516242.1 | Scaffold886 | 151591                  | GG                              | AA                | 1946626509               |
| SNP_P3_139472_151659 | NW_004516242.1 | Scaffold886 | 151659                  | TT                              | AA                | 1946626511               |
| SNP_P3_139473_151673 | NW_004516242.1 | Scaffold886 | 151673                  | CC                              | AA                | 1946626513               |
| SNP_P3_139475_151707 | NW_004516242.1 | Scaffold886 | 151707                  | TT                              | AA                | 1946626515               |
| SNP_P3_139476_152929 | NW_004516242.1 | Scaffold886 | 152929                  | TT                              | CC                | 1946626517               |
| SNP_P3_139477_152989 | NW_004516242.1 | Scaffold886 | 152989                  | GG                              | AA                | 1946626519               |
| SNP_P3_139478_153001 | NW_004516242.1 | Scaffold886 | 153001                  | AA                              | TT                | 1946626521               |
| SNP_P3_139479_153006 | NW_004516242.1 | Scaffold886 | 153006                  | AA                              | GG                | 1946626523               |
| SNP_P3_139480_153591 | NW_004516242.1 | Scaffold886 | 153591                  | TT                              | CC                | 1946626525               |
| SNP_P3_139481_154459 | NW_004516242.1 | Scaffold886 | 154459                  | TT                              | GG                | 1946626527               |
| SNP_P3_139482_154541 | NW_004516242.1 | Scaffold886 | 154541                  | CC                              | GG                | 1946626529               |
| SNP_P3_139483_154569 | NW_004516242.1 | Scaffold886 | 154569                  | TT                              | GG                | 1946626531               |
| SNP_P3_139484_154582 | NW_004516242.1 | Scaffold886 | 154582                  | AA                              | TT                | 1946626533               |
| SNP_P3_139485_154725 | NW_004516242.1 | Scaffold886 | 154725                  | CC                              | AA                | 1946626535               |
| SNP_P3_139486_154734 | NW_004516242.1 | Scaffold886 | 154734                  | CC                              | AA                | 1946626537               |
| SNP_P3_139487_154738 | NW_004516242.1 | Scaffold886 | 154738                  | CC                              | TT                | 1946626539               |
| SNP_P3_139488_154752 | NW_004516242.1 | Scaffold886 | 154752                  | CC                              | TT                | 1946626541               |
| SNP_P3_139489_154756 | NW_004516242.1 | Scaffold886 | 154756                  | AA                              | CC                | 1946626543               |
| SNP_P3_139490_154777 | NW_004516242.1 | Scaffold886 | 154777                  | TT                              | CC                | 1946626545               |
| SNP_P3_139491_154781 | NW_004516242.1 | Scaffold886 | 154781                  | TT                              | AA                | 1946626547               |
| SNP_P3_139492_154789 | NW_004516242.1 | Scaffold886 | 154789                  | AA                              | TT                | 1946626549               |
| SNP_P3_139493_154793 | NW_004516242.1 | Scaffold886 | 154793                  | CC                              | AA                | 1946626551               |
| SNP_P3_139494_154829 | NW_004516242.1 | Scaffold886 | 154829                  | GG                              | TT                | 1946626553               |

| SNPs IDs             | Chromosome IDs | Chromosomes   | Physical positions (bp) | CDC Frontier (Reference genome) | (Pusa 256 & HPNB) | NCBI SNPdb Accession IDs |
|----------------------|----------------|---------------|-------------------------|---------------------------------|-------------------|--------------------------|
| SNP_P3_139495_154841 | NW_004516242.1 | Scaffold886   | 154841                  | GG                              | TT                | 1946626555               |
| SNP_P3_139496_154915 | NW_004516242.1 | Scaffold886   | 154915                  | GG                              | TT                | 1946626557               |
| SNP_P3_139497_155540 | NW_004516242.1 | Scaffold886   | 155540                  | CC                              | AA                | 1946626559               |
| SNP_P3_139498_155541 | NW_004516242.1 | Scaffold886   | 155541                  | AA                              | CC                | 1946626561               |
| SNP_P3_139499_158761 | NW_004516242.1 | Scaffold886   | 158761                  | TT                              | CC                | 1946626563               |
| SNP_P3_139500_160641 | NW_004516242.1 | Scaffold886   | 160641                  | TT                              | AA                | 1946626565               |
| SNP_P3_139501_160683 | NW_004516242.1 | Scaffold886   | 160683                  | TT                              | AA                | 1946626567               |
| SNP_P3_139502_160988 | NW_004516242.1 | Scaffold886   | 160988                  | TT                              | GG                | 1946626569               |
| SNP_P3_139503_160999 | NW_004516242.1 | Scaffold886   | 160999                  | CC                              | TT                | 1946626571               |
| SNP_P3_139504_161010 | NW_004516242.1 | Scaffold886   | 161010                  | TT                              | GG                | 1946626573               |
| SNP_P3_139505_161031 | NW_004516242.1 | Scaffold886   | 161031                  | CC                              | GG                | 1946626575               |
| SNP_P3_139506_161401 | NW_004516242.1 | Scaffold886   | 161401                  | TT                              | CC                | 1946626577               |
| SNP_P3_139507_164494 | NW_004516242.1 | Scaffold886   | 164494                  | GG                              | AA                | 1946626579               |
| SNP_P3_139508_164706 | NW_004516242.1 | Scaffold886   | 164706                  | TT                              | CC                | 1946626581               |
| SNP_P3_139509_164708 | NW_004516242.1 | Scaffold886   | 164708                  | CC                              | TT                | 1946626583               |
| SNP_P3_139510_164746 | NW_004516242.1 | Scaffold886   | 164746                  | AA                              | TT                | 1946626585               |
| SNP_P3_139511_164877 | NW_004516242.1 | Scaffold886   | 164877                  | AA                              | GG                | 1946626587               |
| SNP_P3_139512_164884 | NW_004516242.1 | Scaffold886   | 164884                  | AA                              | GG                | 1946626589               |
| SNP_P3_139513_164898 | NW_004516242.1 | Scaffold886   | 164898                  | TT                              | CC                | 1946626591               |
| SNP_P3_139514_164923 | NW_004516242.1 | Scaffold886   | 164923                  | TT                              | CC                | 1946626593               |
| SNP_P3_139516_165030 | NW_004516242.1 | Scaffold886   | 165030                  | GG                              | AA                | 1946626595               |
| SNP_P3_139517_165092 | NW_004516242.1 | Scaffold886   | 165092                  | TT                              | CC                | 1946626597               |
| SNP_P3_139518_165113 | NW_004516242.1 | Scaffold886   | 165113                  | AA                              | GG                | 1946626599               |
| SNP_P3_139519_171209 | NW_004516242.1 | Scaffold886   | 171209                  | GG                              | AA                | 1946626601               |
| SNP_P3_139520_171232 | NW_004516242.1 | Scaffold886   | 171232                  | TT                              | GG                | 1946626603               |
| SNP_P3_139521_172311 | NW_004516242.1 | Scaffold886   | 172311                  | CC                              | TT                | 1946626605               |
| SNP_P3_139522_172416 | NW_004516242.1 | Scaffold886   | 172416                  | AA                              | GG                | 1946626607               |
| SNP_P3_139523_172480 | NW_004516242.1 | Scaffold886   | 172480                  | GG                              | TT                | 1946626609               |
| SNP_P3_139524_172524 | NW_004516242.1 | Scaffold886   | 172524                  | CC                              | AA                | 1946626611               |
| SNP_P3_139525_172532 | NW_004516242.1 | Scaffold886   | 172532                  | GG                              | AA                | 1946626613               |
| SNP_P3_139526_172688 | NW_004516242.1 | Scaffold886   | 172688                  | AA                              | TT                | 1946626615               |
| SNP_P3_139527_172906 | NW_004516242.1 | Scaffold886   | 172906                  | AA                              | GG                | 1946626617               |
| SNP_P3_139528_40652  | NW_004516243.1 | Scaffold887_1 | 40652                   | GG                              | AA                | 1946626619               |
| SNP_P3_139529_40656  | NW_004516243.1 | Scaffold887_1 | 40656                   | TT                              | CC                | 1946626621               |
| SNP_P3_139530_40661  | NW_004516243.1 | Scaffold887_1 | 40661                   | GG                              | AA                | 1946626623               |
| SNP_P3_139531_40679  | NW_004516243.1 | Scaffold887_1 | 40679                   | CC                              | TT                | 1946626625               |
| SNP_P3_139532_40712  | NW_004516243.1 | Scaffold887_1 | 40712                   | AA                              | GG                | 1946626627               |
| SNP_P3_139533_40728  | NW_004516243.1 | Scaffold887_1 | 40728                   | TT                              | CC                | 1946626629               |
| SNP_P3_139534_40739  | NW_004516243.1 | Scaffold887_1 | 40739                   | GG                              | AA                | 1946626631               |
| SNP_P3_139535_69821  | NW_004516243.1 | Scaffold887_1 | 69821                   | AA                              | CC                | 1946626633               |
| SNP_P3_139536_69848  | NW_004516243.1 | Scaffold887_1 | 69848                   | AA                              | CC                | 1946626635               |
| SNP_P3_139537_69884  | NW_004516243.1 | Scaffold887_1 | 69884                   | GG                              | TT                | 1946626637               |

| SNPs IDs             | Chromosome IDs | Chromosomes   | Physical positions (bp) | CDC Frontier (Reference genome) | (Pusa 256 & HPNB) | NCBI SNPdb Accession IDs |
|----------------------|----------------|---------------|-------------------------|---------------------------------|-------------------|--------------------------|
| SNP_P3_139538_69890  | NW_004516243.1 | Scaffold887_1 | 69890                   | AA                              | GG                | 1946626639               |
| SNP_P3_139539_69906  | NW_004516243.1 | Scaffold887_1 | 69906                   | AA                              | GG                | 1946626642               |
| SNP_P3_139540_69916  | NW_004516243.1 | Scaffold887_1 | 69916                   | TT                              | CC                | 1946626643               |
| SNP_P3_139541_69923  | NW_004516243.1 | Scaffold887_1 | 69923                   | TT                              | CC                | 1946626645               |
| SNP_P3_139542_69924  | NW_004516243.1 | Scaffold887_1 | 69924                   | CC                              | TT                | 1946626647               |
| SNP_P3_139543_69944  | NW_004516243.1 | Scaffold887_1 | 69944                   | TT                              | CC                | 1946626649               |
| SNP_P3_139544_70025  | NW_004516243.1 | Scaffold887_1 | 70025                   | AA                              | CC                | 1946626651               |
| SNP_P3_139545_70033  | NW_004516243.1 | Scaffold887_1 | 70033                   | AA                              | GG                | 1946626653               |
| SNP_P3_139546_70044  | NW_004516243.1 | Scaffold887_1 | 70044                   | TT                              | AA                | 1946626655               |
| SNP_P3_139547_70045  | NW_004516243.1 | Scaffold887_1 | 70045                   | CC                              | TT                | 1946626657               |
| SNP_P3_139548_70054  | NW_004516243.1 | Scaffold887_1 | 70054                   | AA                              | TT                | 1946626659               |
| SNP_P3_139549_70060  | NW_004516243.1 | Scaffold887_1 | 70060                   | AA                              | GG                | 1946626660               |
| SNP_P3_139550_70077  | NW_004516243.1 | Scaffold887_1 | 70077                   | AA                              | CC                | 1946626662               |
| SNP_P3_139551_70102  | NW_004516243.1 | Scaffold887_1 | 70102                   | AA                              | GG                | 1946626664               |
| SNP_P3_139552_70108  | NW_004516243.1 | Scaffold887_1 | 70108                   | AA                              | GG                | 1946626666               |
| SNP_P3_139553_70138  | NW_004516243.1 | Scaffold887_1 | 70138                   | TT                              | AA                | 1946626668               |
| SNP_P3_139554_70161  | NW_004516243.1 | Scaffold887_1 | 70161                   | GG                              | AA                | 1946626670               |
| SNP_P3_139555_70164  | NW_004516243.1 | Scaffold887_1 | 70164                   | AA                              | CC                | 1946626672               |
| SNP_P3_139556_70184  | NW_004516243.1 | Scaffold887_1 | 70184                   | AA                              | CC                | 1946626674               |
| SNP_P3_139557_70214  | NW_004516243.1 | Scaffold887_1 | 70214                   | AA                              | GG                | 1946626676               |
| SNP_P3_139558_70238  | NW_004516243.1 | Scaffold887_1 | 70238                   | TT                              | CC                | 1946626678               |
| SNP_P3_139559_70246  | NW_004516243.1 | Scaffold887_1 | 70246                   | GG                              | AA                | 1946626680               |
| SNP_P3_139560_70263  | NW_004516243.1 | Scaffold887_1 | 70263                   | AA                              | CC                | 1946626682               |
| SNP_P3_139561_70279  | NW_004516243.1 | Scaffold887_1 | 70279                   | AA                              | GG                | 1946626684               |
| SNP_P3_139562_70311  | NW_004516243.1 | Scaffold887_1 | 70311                   | AA                              | GG                | 1946626686               |
| SNP_P3_139563_70314  | NW_004516243.1 | Scaffold887_1 | 70314                   | TT                              | GG                | 1946626688               |
| SNP_P3_139564_70363  | NW_004516243.1 | Scaffold887_1 | 70363                   | AA                              | TT                | 1946626690               |
| SNP_P3_139565_73081  | NW_004516243.1 | Scaffold887_1 | 73081                   | AA                              | GG                | 1946626692               |
| SNP_P3_139568_94206  | NW_004516243.1 | Scaffold887_1 | 94206                   | TT                              | CC                | 1946626694               |
| SNP_P3_139569_131608 | NW_004516243.1 | Scaffold887_1 | 131608                  | TT                              | CC                | 1946626696               |
| SNP_P3_139570_131611 | NW_004516243.1 | Scaffold887_1 | 131611                  | TT                              | CC                | 1946626697               |
| SNP_P3_139571_133216 | NW_004516243.1 | Scaffold887_1 | 133216                  | TT                              | CC                | 1946626699               |
| SNP_P3_139572_133560 | NW_004516243.1 | Scaffold887_1 | 133560                  | TT                              | CC                | 1946626701               |
| SNP_P3_139574_200800 | NW_004516243.1 | Scaffold887_1 | 200800                  | AA                              | GG                | 1946626703               |
| SNP_P3_139575_200911 | NW_004516243.1 | Scaffold887_1 | 200911                  | TT                              | GG                | 1946626705               |
| SNP_P3_139576_200956 | NW_004516243.1 | Scaffold887_1 | 200956                  | CC                              | GG                | 1946626707               |
| SNP_P3_139577_200985 | NW_004516243.1 | Scaffold887_1 | 200985                  | AA                              | CC                | 1946626709               |
| SNP_P3_139578_200994 | NW_004516243.1 | Scaffold887_1 | 200994                  | CC                              | TT                | 1946626711               |
| SNP_P3_139579_200996 | NW_004516243.1 | Scaffold887_1 | 200996                  | AA                              | GG                | 1946626713               |
| SNP_P3_139580_201178 | NW_004516243.1 | Scaffold887_1 | 201178                  | AA                              | GG                | 1946626715               |
| SNP_P3_139581_201187 | NW_004516243.1 | Scaffold887_1 | 201187                  | TT                              | CC                | 1946626717               |
| SNP_P3_139583_208139 | NW_004516243.1 | Scaffold887_1 | 208139                  | AA                              | TT                | 1946626719               |

| SNPs IDs             | Chromosome IDs | Chromosomes   | Physical positions (bp) | CDC Frontier (Reference genome) | (Pusa 256 & HPNB) | NCBI SNPdb Accession IDs |
|----------------------|----------------|---------------|-------------------------|---------------------------------|-------------------|--------------------------|
| SNP_P3_139584_208437 | NW_004516243.1 | Scaffold887_1 | 208437                  | AA                              | GG                | 1946626721               |
| SNP_P3_139585_208551 | NW_004516243.1 | Scaffold887_1 | 208551                  | TT                              | CC                | 1946626723               |
| SNP_P3_139586_208572 | NW_004516243.1 | Scaffold887_1 | 208572                  | GG                              | AA                | 1946626725               |
| SNP_P3_139587_220595 | NW_004516243.1 | Scaffold887_1 | 220595                  | AA                              | GG                | 1946626726               |
| SNP_P3_139589_239299 | NW_004516243.1 | Scaffold887_1 | 239299                  | TT                              | AA                | 1946626728               |
| SNP_P3_139590_239326 | NW_004516243.1 | Scaffold887_1 | 239326                  | AA                              | TT                | 1946626730               |
| SNP_P3_139591_244032 | NW_004516243.1 | Scaffold887_1 | 244032                  | TT                              | AA                | 1946626732               |
| SNP_P3_139592_246176 | NW_004516243.1 | Scaffold887_1 | 246176                  | GG                              | AA                | 1946626734               |
| SNP_P3_139593_246200 | NW_004516243.1 | Scaffold887_1 | 246200                  | AA                              | GG                | 1946626736               |
| SNP_P3_139594_246214 | NW_004516243.1 | Scaffold887_1 | 246214                  | TT                              | CC                | 1946626738               |
| SNP_P3_139595_247038 | NW_004516243.1 | Scaffold887_1 | 247038                  | AA                              | GG                | 1946626740               |
| SNP_P3_139596_247322 | NW_004516243.1 | Scaffold887_1 | 247322                  | TT                              | CC                | 1946626742               |
| SNP_P3_139597_247358 | NW_004516243.1 | Scaffold887_1 | 247358                  | AA                              | GG                | 1946626744               |
| SNP_P3_139598_247388 | NW_004516243.1 | Scaffold887_1 | 247388                  | TT                              | AA                | 1946626745               |
| SNP_P3_139599_247390 | NW_004516243.1 | Scaffold887_1 | 247390                  | GG                              | CC                | 1946626747               |
| SNP_P3_139600_247395 | NW_004516243.1 | Scaffold887_1 | 247395                  | AA                              | CC                | 1946626750               |
| SNP_P3_139601_247400 | NW_004516243.1 | Scaffold887_1 | 247400                  | CC                              | TT                | 1946626752               |
| SNP_P3_139602_247407 | NW_004516243.1 | Scaffold887_1 | 247407                  | CC                              | TT                | 1946626753               |
| SNP_P3_139603_258715 | NW_004516243.1 | Scaffold887_1 | 258715                  | GG                              | TT                | 1946626755               |
| SNP_P3_139604_266    | NW_004516245.1 | Scaffold890   | 266                     | GG                              | CC                | 1946626757               |
| SNP_P3_139605_308    | NW_004516245.1 | Scaffold890   | 308                     | GG                              | AA                | 1946626759               |
| SNP_P3_139607_414    | NW_004516245.1 | Scaffold890   | 414                     | CC                              | TT                | 1946626761               |
| SNP_P3_139608_415    | NW_004516245.1 | Scaffold890   | 415                     | AA                              | GG                | 1946626763               |
| SNP_P3_139609_430    | NW_004516245.1 | Scaffold890   | 430                     | AA                              | TT                | 1946626765               |
| SNP_P3_139610_470    | NW_004516245.1 | Scaffold890   | 470                     | GG                              | AA                | 1946626767               |
| SNP_P3_139611_482    | NW_004516245.1 | Scaffold890   | 482                     | AA                              | GG                | 1946626769               |
| SNP_P3_139612_538    | NW_004516245.1 | Scaffold890   | 538                     | AA                              | TT                | 1946626771               |
| SNP_P3_139613_546    | NW_004516245.1 | Scaffold890   | 546                     | TT                              | AA                | 1946626773               |
| SNP_P3_139614_653    | NW_004516245.1 | Scaffold890   | 653                     | AA                              | CC                | 1946626775               |
| SNP_P3_139615_705    | NW_004516245.1 | Scaffold890   | 705                     | AA                              | GG                | 1946626777               |
| SNP_P3_139616_826    | NW_004516245.1 | Scaffold890   | 826                     | AA                              | TT                | 1946626779               |
| SNP_P3_139617_872    | NW_004516245.1 | Scaffold890   | 872                     | GG                              | AA                | 1946626781               |
| SNP_P3_139618_1008   | NW_004516245.1 | Scaffold890   | 1008                    | TT                              | CC                | 1946626783               |
| SNP_P3_139619_1013   | NW_004516245.1 | Scaffold890   | 1013                    | TT                              | CC                | 1946626785               |
| SNP_P3_139620_1031   | NW_004516245.1 | Scaffold890   | 1031                    | AA                              | GG                | 1946626787               |
| SNP_P3_139621_1326   | NW_004516245.1 | Scaffold890   | 1326                    | AA                              | TT                | 1946626789               |
| SNP_P3_139622_1407   | NW_004516245.1 | Scaffold890   | 1407                    | CC                              | AA                | 1946626791               |
| SNP_P3_139623_209    | NW_004516246.1 | Scaffold891   | 209                     | TT                              | CC                | 1946626793               |
| SNP_P3_139624_3023   | NW_004516246.1 | Scaffold891   | 3023                    | AA                              | GG                | 1946626795               |
| SNP_P3_139625_13596  | NW_004516246.1 | Scaffold891   | 13596                   | CC                              | AA                | 1946626797               |
| SNP_P3_139626_5788   | NW_004516247.1 | Scaffold892   | 5788                    | AA                              | TT                | 1946626799               |
| SNP_P3_139627_5818   | NW_004516247.1 | Scaffold892   | 5818                    | GG                              | TT                | 1946626801               |

| SNPs IDs            | Chromosome IDs | Chromosomes | Physical positions (bp) | CDC Frontier (Reference genome) | (Pusa 256 & HPNB) | NCBI SNPdb Accession IDs |
|---------------------|----------------|-------------|-------------------------|---------------------------------|-------------------|--------------------------|
| SNP_P3_139628_6008  | NW_004516247.1 | Scaffold892 | 6008                    | CC                              | TT                | 1946626803               |
| SNP_P3_139629_6325  | NW_004516247.1 | Scaffold892 | 6325                    | AA                              | TT                | 1946626805               |
| SNP_P3_139630_6439  | NW_004516247.1 | Scaffold892 | 6439                    | GG                              | AA                | 1946626807               |
| SNP_P3_139631_6559  | NW_004516247.1 | Scaffold892 | 6559                    | AA                              | GG                | 1946626809               |
| SNP_P3_139632_24888 | NW_004516247.1 | Scaffold892 | 24888                   | AA                              | GG                | 1946626811               |
| SNP_P3_139633_24948 | NW_004516247.1 | Scaffold892 | 24948                   | GG                              | AA                | 1946626813               |
| SNP_P3_139634_24982 | NW_004516247.1 | Scaffold892 | 24982                   | CC                              | TT                | 1946626816               |
| SNP_P3_139635_24991 | NW_004516247.1 | Scaffold892 | 24991                   | TT                              | AA                | 1946626818               |
| SNP_P3_139636_25182 | NW_004516247.1 | Scaffold892 | 25182                   | TT                              | AA                | 1946626820               |
| SNP_P3_139637_25207 | NW_004516247.1 | Scaffold892 | 25207                   | GG                              | AA                | 1946626822               |
| SNP_P3_139638_25209 | NW_004516247.1 | Scaffold892 | 25209                   | TT                              | CC                | 1946626824               |
| SNP_P3_139639_25256 | NW_004516247.1 | Scaffold892 | 25256                   | TT                              | AA                | 1946626826               |
| SNP_P3_139640_25258 | NW_004516247.1 | Scaffold892 | 25258                   | AA                              | TT                | 1946626828               |
| SNP_P3_139641_25260 | NW_004516247.1 | Scaffold892 | 25260                   | TT                              | GG                | 1946626830               |
| SNP_P3_139642_25264 | NW_004516247.1 | Scaffold892 | 25264                   | AA                              | TT                | 1946626832               |
| SNP_P3_139643_25272 | NW_004516247.1 | Scaffold892 | 25272                   | AA                              | GG                | 1946626833               |
| SNP_P3_139644_26350 | NW_004516247.1 | Scaffold892 | 26350                   | TT                              | CC                | 1946626835               |
| SNP_P3_139645_26357 | NW_004516247.1 | Scaffold892 | 26357                   | GG                              | CC                | 1946626837               |
| SNP_P3_139646_26493 | NW_004516247.1 | Scaffold892 | 26493                   | AA                              | CC                | 1946626839               |
| SNP_P3_139647_26500 | NW_004516247.1 | Scaffold892 | 26500                   | TT                              | AA                | 1946626841               |
| SNP_P3_139648_26583 | NW_004516247.1 | Scaffold892 | 26583                   | AA                              | GG                | 1946626843               |
| SNP_P3_139649_26640 | NW_004516247.1 | Scaffold892 | 26640                   | CC                              | TT                | 1946626845               |
| SNP_P3_139650_26678 | NW_004516247.1 | Scaffold892 | 26678                   | GG                              | TT                | 1946626847               |
| SNP_P3_139651_26679 | NW_004516247.1 | Scaffold892 | 26679                   | AA                              | TT                | 1946626849               |
| SNP_P3_139653_26725 | NW_004516247.1 | Scaffold892 | 26725                   | CC                              | AA                | 1946626851               |
| SNP_P3_139654_26800 | NW_004516247.1 | Scaffold892 | 26800                   | TT                              | AA                | 1946626853               |
| SNP_P3_139655_26856 | NW_004516247.1 | Scaffold892 | 26856                   | TT                              | GG                | 1946626855               |
| SNP_P3_139656_26871 | NW_004516247.1 | Scaffold892 | 26871                   | TT                              | CC                | 1946626857               |
| SNP_P3_139657_26890 | NW_004516247.1 | Scaffold892 | 26890                   | CC                              | TT                | 1946626859               |
| SNP_P3_139658_26964 | NW_004516247.1 | Scaffold892 | 26964                   | CC                              | GG                | 1946626861               |
| SNP_P3_139659_26975 | NW_004516247.1 | Scaffold892 | 26975                   | GG                              | AA                | 1946626863               |
| SNP_P3_139660_27181 | NW_004516247.1 | Scaffold892 | 27181                   | TT                              | GG                | 1946626866               |
| SNP_P3_139661_27270 | NW_004516247.1 | Scaffold892 | 27270                   | TT                              | CC                | 1946626868               |
| SNP_P3_139662_27315 | NW_004516247.1 | Scaffold892 | 27315                   | TT                              | GG                | 1946626870               |
| SNP_P3_139663_27376 | NW_004516247.1 | Scaffold892 | 27376                   | CC                              | TT                | 1946626872               |
| SNP_P3_139664_27389 | NW_004516247.1 | Scaffold892 | 27389                   | TT                              | AA                | 1946626874               |
| SNP_P3_139665_27431 | NW_004516247.1 | Scaffold892 | 27431                   | AA                              | CC                | 1946626876               |
| SNP_P3_139666_27491 | NW_004516247.1 | Scaffold892 | 27491                   | CC                              | GG                | 1946626878               |
| SNP_P3_139667_27603 | NW_004516247.1 | Scaffold892 | 27603                   | AA                              | TT                | 1946626880               |
| SNP_P3_139668_27605 | NW_004516247.1 | Scaffold892 | 27605                   | CC                              | TT                | 1946626883               |
| SNP_P3_139669_27680 | NW_004516247.1 | Scaffold892 | 27680                   | AA                              | GG                | 1946626885               |
| SNP_P3_139670_27719 | NW_004516247.1 | Scaffold892 | 27719                   | AA                              | TT                | 1946626887               |

| SNPs IDs            | Chromosome IDs | Chromosomes | Physical positions (bp) | CDC Frontier (Reference genome) | (Pusa 256 & HPNB) | NCBI SNPdb Accession IDs |
|---------------------|----------------|-------------|-------------------------|---------------------------------|-------------------|--------------------------|
| SNP_P3_139672_27980 | NW_004516247.1 | Scaffold892 | 27980                   | GG                              | TT                | 1946626889               |
| SNP_P3_139673_28212 | NW_004516247.1 | Scaffold892 | 28212                   | TT                              | AA                | 1946626891               |
| SNP_P3_139674_28262 | NW_004516247.1 | Scaffold892 | 28262                   | TT                              | CC                | 1946626894               |
| SNP_P3_139675_28291 | NW_004516247.1 | Scaffold892 | 28291                   | CC                              | TT                | 1946626896               |
| SNP_P3_139676_28419 | NW_004516247.1 | Scaffold892 | 28419                   | TT                              | CC                | 1946626898               |
| SNP_P3_139677_28538 | NW_004516247.1 | Scaffold892 | 28538                   | AA                              | TT                | 1946626900               |
| SNP_P3_139678_28569 | NW_004516247.1 | Scaffold892 | 28569                   | AA                              | CC                | 1946626902               |
| SNP_P3_139679_29190 | NW_004516247.1 | Scaffold892 | 29190                   | GG                              | TT                | 1946626904               |
| SNP_P3_139680_29425 | NW_004516247.1 | Scaffold892 | 29425                   | GG                              | CC                | 1946626906               |
| SNP_P3_139681_29661 | NW_004516247.1 | Scaffold892 | 29661                   | CC                              | AA                | 1946626909               |
| SNP_P3_139683_29905 | NW_004516247.1 | Scaffold892 | 29905                   | TT                              | GG                | 1946626911               |
| SNP_P3_139684_29952 | NW_004516247.1 | Scaffold892 | 29952                   | GG                              | AA                | 1946626913               |
| SNP_P3_139685_29982 | NW_004516247.1 | Scaffold892 | 29982                   | GG                              | TT                | 1946626915               |
| SNP_P3_139686_30254 | NW_004516247.1 | Scaffold892 | 30254                   | TT                              | AA                | 1946626917               |
| SNP_P3_139687_30275 | NW_004516247.1 | Scaffold892 | 30275                   | AA                              | TT                | 1946626919               |
| SNP_P3_139688_30278 | NW_004516247.1 | Scaffold892 | 30278                   | AA                              | TT                | 1946626921               |
| SNP_P3_139689_30331 | NW_004516247.1 | Scaffold892 | 30331                   | TT                              | CC                | 1946626924               |
| SNP_P3_139690_30352 | NW_004516247.1 | Scaffold892 | 30352                   | AA                              | GG                | 1946626926               |
| SNP_P3_139691_30377 | NW_004516247.1 | Scaffold892 | 30377                   | AA                              | GG                | 1946626928               |
| SNP_P3_139692_30395 | NW_004516247.1 | Scaffold892 | 30395                   | AA                              | TT                | 1946626930               |
| SNP_P3_139693_30565 | NW_004516247.1 | Scaffold892 | 30565                   | GG                              | AA                | 1946626932               |
| SNP_P3_139694_30760 | NW_004516247.1 | Scaffold892 | 30760                   | TT                              | AA                | 1946626934               |
| SNP_P3_139695_30920 | NW_004516247.1 | Scaffold892 | 30920                   | AA                              | TT                | 1946626936               |
| SNP_P3_139696_32554 | NW_004516247.1 | Scaffold892 | 32554                   | TT                              | CC                | 1946626939               |
| SNP_P3_139697_32627 | NW_004516247.1 | Scaffold892 | 32627                   | CC                              | AA                | 1946626941               |
| SNP_P3_139698_32642 | NW_004516247.1 | Scaffold892 | 32642                   | CC                              | TT                | 1946626943               |
| SNP_P3_139699_32663 | NW_004516247.1 | Scaffold892 | 32663                   | TT                              | AA                | 1946626945               |
| SNP_P3_139700_32700 | NW_004516247.1 | Scaffold892 | 32700                   | GG                              | AA                | 1946626947               |
| SNP_P3_139701_32752 | NW_004516247.1 | Scaffold892 | 32752                   | TT                              | GG                | 1946626949               |
| SNP_P3_139702_32804 | NW_004516247.1 | Scaffold892 | 32804                   | TT                              | GG                | 1946626951               |
| SNP_P3_139703_32884 | NW_004516247.1 | Scaffold892 | 32884                   | TT                              | AA                | 1946626953               |
| SNP_P3_139704_32939 | NW_004516247.1 | Scaffold892 | 32939                   | TT                              | CC                | 1946626955               |
| SNP_P3_139705_32969 | NW_004516247.1 | Scaffold892 | 32969                   | TT                              | GG                | 1946626957               |
| SNP_P3_139706_32976 | NW_004516247.1 | Scaffold892 | 32976                   | GG                              | AA                | 1946626959               |
| SNP_P3_139707_32982 | NW_004516247.1 | Scaffold892 | 32982                   | AA                              | TT                | 1946626962               |
| SNP_P3_139708_33008 | NW_004516247.1 | Scaffold892 | 33008                   | CC                              | TT                | 1946626964               |
| SNP_P3_139709_33015 | NW_004516247.1 | Scaffold892 | 33015                   | TT                              | CC                | 1946626966               |
| SNP_P3_139710_33017 | NW_004516247.1 | Scaffold892 | 33017                   | AA                              | CC                | 1946626968               |
| SNP_P3_139711_33137 | NW_004516247.1 | Scaffold892 | 33137                   | TT                              | GG                | 1946626971               |
| SNP_P3_139712_33159 | NW_004516247.1 | Scaffold892 | 33159                   | TT                              | AA                | 1946626973               |
| SNP_P3_139713_33161 | NW_004516247.1 | Scaffold892 | 33161                   | TT                              | GG                | 1946626975               |
| SNP_P3_139714_33178 | NW_004516247.1 | Scaffold892 | 33178                   | TT                              | CC                | 1946626977               |

| SNPs IDs            | Chromosome IDs | Chromosomes | Physical positions (bp) | CDC Frontier (Reference genome) | (Pusa 256 & HPNB) | NCBI SNPdb Accession IDs |
|---------------------|----------------|-------------|-------------------------|---------------------------------|-------------------|--------------------------|
| SNP_P3_139715_33192 | NW_004516247.1 | Scaffold892 | 33192                   | AA                              | GG                | 1946626979               |
| SNP_P3_139716_33216 | NW_004516247.1 | Scaffold892 | 33216                   | GG                              | AA                | 1946626981               |
| SNP_P3_139717_33217 | NW_004516247.1 | Scaffold892 | 33217                   | GG                              | TT                | 1946626983               |
| SNP_P3_139718_33242 | NW_004516247.1 | Scaffold892 | 33242                   | CC                              | AA                | 1946626985               |
| SNP_P3_139719_33261 | NW_004516247.1 | Scaffold892 | 33261                   | TT                              | CC                | 1946626987               |
| SNP_P3_139720_33295 | NW_004516247.1 | Scaffold892 | 33295                   | GG                              | AA                | 1946626989               |
| SNP_P3_139721_33310 | NW_004516247.1 | Scaffold892 | 33310                   | TT                              | CC                | 1946626991               |
| SNP_P3_139722_33391 | NW_004516247.1 | Scaffold892 | 33391                   | TT                              | AA                | 1946626994               |
| SNP_P3_139723_33539 | NW_004516247.1 | Scaffold892 | 33539                   | TT                              | CC                | 1946626996               |
| SNP_P3_139726_33888 | NW_004516247.1 | Scaffold892 | 33888                   | CC                              | TT                | 1946626997               |
| SNP_P3_139727_33923 | NW_004516247.1 | Scaffold892 | 33923                   | CC                              | TT                | 1946626999               |
| SNP_P3_139728_34187 | NW_004516247.1 | Scaffold892 | 34187                   | GG                              | TT                | 1946627001               |
| SNP_P3_139729_34244 | NW_004516247.1 | Scaffold892 | 34244                   | AA                              | TT                | 1946627003               |
| SNP_P3_139730_34329 | NW_004516247.1 | Scaffold892 | 34329                   | TT                              | CC                | 1946627005               |
| SNP_P3_139731_34334 | NW_004516247.1 | Scaffold892 | 34334                   | AA                              | CC                | 1946627008               |
| SNP_P3_139732_34369 | NW_004516247.1 | Scaffold892 | 34369                   | CC                              | TT                | 1946627010               |
| SNP_P3_139733_34412 | NW_004516247.1 | Scaffold892 | 34412                   | GG                              | AA                | 1946627012               |
| SNP_P3_139735_34480 | NW_004516247.1 | Scaffold892 | 34480                   | AA                              | TT                | 1946627014               |
| SNP_P3_139736_34508 | NW_004516247.1 | Scaffold892 | 34508                   | CC                              | GG                | 1946627016               |
| SNP_P3_139737_34581 | NW_004516247.1 | Scaffold892 | 34581                   | AA                              | GG                | 1946627018               |
| SNP_P3_139738_34588 | NW_004516247.1 | Scaffold892 | 34588                   | GG                              | CC                | 1946627020               |
| SNP_P3_139739_34615 | NW_004516247.1 | Scaffold892 | 34615                   | AA                              | GG                | 1946627022               |
| SNP_P3_139740_34630 | NW_004516247.1 | Scaffold892 | 34630                   | TT                              | AA                | 1946627024               |
| SNP_P3_139741_34789 | NW_004516247.1 | Scaffold892 | 34789                   | CC                              | GG                | 1946627026               |
| SNP_P3_139742_34822 | NW_004516247.1 | Scaffold892 | 34822                   | GG                              | AA                | 1946627028               |
| SNP_P3_139743_34931 | NW_004516247.1 | Scaffold892 | 34931                   | TT                              | AA                | 1946627030               |
| SNP_P3_139744_34972 | NW_004516247.1 | Scaffold892 | 34972                   | TT                              | AA                | 1946627032               |
| SNP_P3_139745_35109 | NW_004516247.1 | Scaffold892 | 35109                   | AA                              | CC                | 1946627034               |
| SNP_P3_139746_35219 | NW_004516247.1 | Scaffold892 | 35219                   | GG                              | AA                | 1946627036               |
| SNP_P3_139747_35222 | NW_004516247.1 | Scaffold892 | 35222                   | CC                              | AA                | 1946627039               |
| SNP_P3_139748_36620 | NW_004516247.1 | Scaffold892 | 36620                   | AA                              | GG                | 1946627041               |
| SNP_P3_139749_36674 | NW_004516247.1 | Scaffold892 | 36674                   | GG                              | TT                | 1946627043               |
| SNP_P3_139750_36799 | NW_004516247.1 | Scaffold892 | 36799                   | CC                              | TT                | 1946627045               |
| SNP_P3_139751_36821 | NW_004516247.1 | Scaffold892 | 36821                   | GG                              | AA                | 1946627047               |
| SNP_P3_139752_37080 | NW_004516247.1 | Scaffold892 | 37080                   | CC                              | GG                | 1946627049               |
| SNP_P3_139753_37265 | NW_004516247.1 | Scaffold892 | 37265                   | GG                              | AA                | 1946627051               |
| SNP_P3_139754_37433 | NW_004516247.1 | Scaffold892 | 37433                   | TT                              | GG                | 1946627053               |
| SNP_P3_139755_37659 | NW_004516247.1 | Scaffold892 | 37659                   | GG                              | AA                | 1946627055               |
| SNP_P3_139756_37707 | NW_004516247.1 | Scaffold892 | 37707                   | GG                              | AA                | 1946627057               |
| SNP_P3_139757_37746 | NW_004516247.1 | Scaffold892 | 37746                   | CC                              | TT                | 1946627059               |
| SNP_P3_139758_38045 | NW_004516247.1 | Scaffold892 | 38045                   | GG                              | TT                | 1946627062               |
| SNP_P3_139759_38060 | NW_004516247.1 | Scaffold892 | 38060                   | TT                              | AA                | 1946627063               |

| SNPs IDs            | Chromosome IDs | Chromosomes | Physical positions (bp) | CDC Frontier (Reference genome) | (Pusa 256 & HPNB) | NCBI SNPdb Accession IDs |
|---------------------|----------------|-------------|-------------------------|---------------------------------|-------------------|--------------------------|
| SNP_P3_139760_38103 | NW_004516247.1 | Scaffold892 | 38103                   | GG                              | AA                | 1946627065               |
| SNP_P3_139761_38110 | NW_004516247.1 | Scaffold892 | 38110                   | CC                              | TT                | 1946627067               |
| SNP_P3_139763_38496 | NW_004516247.1 | Scaffold892 | 38496                   | CC                              | TT                | 1946627069               |
| SNP_P3_139764_38793 | NW_004516247.1 | Scaffold892 | 38793                   | TT                              | CC                | 1946627071               |
| SNP_P3_139765_39026 | NW_004516247.1 | Scaffold892 | 39026                   | TT                              | AA                | 1946627073               |
| SNP_P3_139766_40471 | NW_004516247.1 | Scaffold892 | 40471                   | TT                              | CC                | 1946627075               |
| SNP_P3_139768_40713 | NW_004516247.1 | Scaffold892 | 40713                   | TT                              | AA                | 1946627077               |
| SNP_P3_139769_40766 | NW_004516247.1 | Scaffold892 | 40766                   | AA                              | CC                | 1946627079               |
| SNP_P3_139771_43026 | NW_004516247.1 | Scaffold892 | 43026                   | GG                              | TT                | 1946627081               |
| SNP_P3_139772_43058 | NW_004516247.1 | Scaffold892 | 43058                   | TT                              | CC                | 1946627083               |
| SNP_P3_139774_44009 | NW_004516247.1 | Scaffold892 | 44009                   | TT                              | CC                | 1946627085               |
| SNP_P3_139775_44197 | NW_004516247.1 | Scaffold892 | 44197                   | AA                              | TT                | 1946627087               |
| SNP_P3_139776_44289 | NW_004516247.1 | Scaffold892 | 44289                   | GG                              | AA                | 1946627089               |
| SNP_P3_139777_44293 | NW_004516247.1 | Scaffold892 | 44293                   | CC                              | TT                | 1946627091               |
| SNP_P3_139780_44478 | NW_004516247.1 | Scaffold892 | 44478                   | AA                              | GG                | 1946627093               |
| SNP_P3_139781_44534 | NW_004516247.1 | Scaffold892 | 44534                   | GG                              | AA                | 1946627095               |
| SNP_P3_139782_46301 | NW_004516247.1 | Scaffold892 | 46301                   | TT                              | GG                | 1946627097               |
| SNP_P3_139784_46668 | NW_004516247.1 | Scaffold892 | 46668                   | TT                              | CC                | 1946627098               |
| SNP_P3_139785_47267 | NW_004516247.1 | Scaffold892 | 47267                   | AA                              | GG                | 1946627100               |
| SNP_P3_139787_54945 | NW_004516247.1 | Scaffold892 | 54945                   | CC                              | GG                | 1946627102               |
| SNP_P3_139788_59657 | NW_004516247.1 | Scaffold892 | 59657                   | CC                              | TT                | 1946627104               |
| SNP_P3_139789_60589 | NW_004516247.1 | Scaffold892 | 60589                   | TT                              | CC                | 1946627106               |
| SNP_P3_139791_60741 | NW_004516247.1 | Scaffold892 | 60741                   | AA                              | GG                | 1946627108               |
| SNP_P3_139792_60784 | NW_004516247.1 | Scaffold892 | 60784                   | AA                              | GG                | 1946627110               |
| SNP_P3_139793_61000 | NW_004516247.1 | Scaffold892 | 61000                   | AA                              | GG                | 1946627112               |
| SNP_P3_139794_1353  | NW_004516248.1 | Scaffold893 | 1353                    | GG                              | AA                | 1946627113               |
| SNP_P3_139795_1794  | NW_004516248.1 | Scaffold893 | 1794                    | GG                              | AA                | 1946627114               |
| SNP_P3_139796_1849  | NW_004516248.1 | Scaffold893 | 1849                    | AA                              | TT                | 1946627115               |
| SNP_P3_139797_1862  | NW_004516248.1 | Scaffold893 | 1862                    | TT                              | CC                | 1946627116               |
| SNP_P3_139798_1872  | NW_004516248.1 | Scaffold893 | 1872                    | TT                              | AA                | 1946627117               |
| SNP_P3_139799_1884  | NW_004516248.1 | Scaffold893 | 1884                    | GG                              | AA                | 1946627118               |
| SNP_P3_139800_1894  | NW_004516248.1 | Scaffold893 | 1894                    | TT                              | CC                | 1946627119               |
| SNP_P3_139801_1910  | NW_004516248.1 | Scaffold893 | 1910                    | AA                              | GG                | 1946627120               |
| SNP_P3_139802_1914  | NW_004516248.1 | Scaffold893 | 1914                    | CC                              | TT                | 1946627121               |
| SNP_P3_139803_2081  | NW_004516248.1 | Scaffold893 | 2081                    | TT                              | CC                | 1946627122               |
| SNP_P3_139804_2222  | NW_004516248.1 | Scaffold893 | 2222                    | GG                              | AA                | 1946627123               |
| SNP_P3_139805_2247  | NW_004516248.1 | Scaffold893 | 2247                    | TT                              | GG                | 1946627124               |
| SNP_P3_139806_2328  | NW_004516248.1 | Scaffold893 | 2328                    | AA                              | GG                | 1946627125               |
| SNP_P3_139807_2349  | NW_004516248.1 | Scaffold893 | 2349                    | CC                              | TT                | 1946627126               |
| SNP_P3_139808_2361  | NW_004516248.1 | Scaffold893 | 2361                    | GG                              | TT                | 1946627127               |
| SNP_P3_139809_2367  | NW_004516248.1 | Scaffold893 | 2367                    | AA                              | CC                | 1946627128               |
| SNP_P3_139810_2377  | NW_004516248.1 | Scaffold893 | 2377                    | TT                              | CC                | 1946627129               |



| SNPs IDs             | Chromosome IDs | Chromosomes | Physical positions (bp) | CDC Frontier (Reference genome) | (Pusa 256 & HPNB) | NCBI SNPdb Accession IDs |
|----------------------|----------------|-------------|-------------------------|---------------------------------|-------------------|--------------------------|
| SNP_P3_139811_2380   | NW_004516248.1 | Scaffold893 | 2380                    | CC                              | TT                | 1946627131               |
| SNP_P3_139812_2422   | NW_004516248.1 | Scaffold893 | 2422                    | TT                              | AA                | 1946627133               |
| SNP_P3_139813_2426   | NW_004516248.1 | Scaffold893 | 2426                    | AA                              | GG                | 1946627135               |
| SNP_P3_139814_2427   | NW_004516248.1 | Scaffold893 | 2427                    | TT                              | CC                | 1946627136               |
| SNP_P3_139815_2434   | NW_004516248.1 | Scaffold893 | 2434                    | TT                              | CC                | 1946627138               |
| SNP_P3_139816_2459   | NW_004516248.1 | Scaffold893 | 2459                    | TT                              | CC                | 1946627140               |
| SNP_P3_139817_2472   | NW_004516248.1 | Scaffold893 | 2472                    | CC                              | TT                | 1946627142               |
| SNP_P3_139820_7398   | NW_004516248.1 | Scaffold893 | 7398                    | TT                              | CC                | 1946627144               |
| SNP_P3_139821_9443   | NW_004516248.1 | Scaffold893 | 9443                    | TT                              | AA                | 1946627146               |
| SNP_P3_139822_11169  | NW_004516248.1 | Scaffold893 | 11169                   | TT                              | GG                | 1946627148               |
| SNP_P3_139823_11306  | NW_004516248.1 | Scaffold893 | 11306                   | GG                              | AA                | 1946627150               |
| SNP_P3_139824_17922  | NW_004516248.1 | Scaffold893 | 17922                   | CC                              | TT                | 1946627151               |
| SNP_P3_139825_20994  | NW_004516248.1 | Scaffold893 | 20994                   | GG                              | AA                | 1946627153               |
| SNP_P3_139826_21005  | NW_004516248.1 | Scaffold893 | 21005                   | AA                              | CC                | 1946627155               |
| SNP_P3_139827_21052  | NW_004516248.1 | Scaffold893 | 21052                   | TT                              | GG                | 1946627157               |
| SNP_P3_139828_21072  | NW_004516248.1 | Scaffold893 | 21072                   | TT                              | GG                | 1946627160               |
| SNP_P3_139829_21131  | NW_004516248.1 | Scaffold893 | 21131                   | GG                              | AA                | 1946627161               |
| SNP_P3_139830_21427  | NW_004516248.1 | Scaffold893 | 21427                   | CC                              | GG                | 1946627163               |
| SNP_P3_139831_21474  | NW_004516248.1 | Scaffold893 | 21474                   | AA                              | TT                | 1946627165               |
| SNP_P3_139832_5114   | NW_004516249.1 | Scaffold894 | 5114                    | AA                              | CC                | 1946627167               |
| SNP_P3_139833_83689  | NW_004516250.1 | Scaffold895 | 83689                   | TT                              | CC                | 1946627169               |
| SNP_P3_139834_88985  | NW_004516250.1 | Scaffold895 | 88985                   | AA                              | GG                | 1946627171               |
| SNP_P3_139836_105571 | NW_004516250.1 | Scaffold895 | 105571                  | CC                              | AA                | 1946627173               |
| SNP_P3_139837_107670 | NW_004516250.1 | Scaffold895 | 107670                  | GG                              | TT                | 1946627175               |
| SNP_P3_139838_107768 | NW_004516250.1 | Scaffold895 | 107768                  | AA                              | GG                | 1946627177               |
| SNP_P3_139839_114194 | NW_004516250.1 | Scaffold895 | 114194                  | CC                              | AA                | 1946627178               |
| SNP_P3_139841_116598 | NW_004516250.1 | Scaffold895 | 116598                  | TT                              | CC                | 1946627180               |
| SNP_P3_139842_120073 | NW_004516250.1 | Scaffold895 | 120073                  | GG                              | TT                | 1946627182               |
| SNP_P3_139843_127149 | NW_004516250.1 | Scaffold895 | 127149                  | CC                              | TT                | 1946627184               |
| SNP_P3_139844_170644 | NW_004516250.1 | Scaffold895 | 170644                  | AA                              | GG                | 1946627186               |
| SNP_P3_139845_170728 | NW_004516250.1 | Scaffold895 | 170728                  | TT                              | CC                | 1946627188               |
| SNP_P3_139846_10189  | NW_004516251.1 | Scaffold896 | 10189                   | AA                              | CC                | 1946627190               |
| SNP_P3_139847_13602  | NW_004516251.1 | Scaffold896 | 13602                   | TT                              | CC                | 1946627192               |
| SNP_P3_139849_14622  | NW_004516251.1 | Scaffold896 | 14622                   | TT                              | CC                | 1946627194               |
| SNP_P3_139850_14625  | NW_004516251.1 | Scaffold896 | 14625                   | TT                              | CC                | 1946627196               |
| SNP_P3_139852_14668  | NW_004516251.1 | Scaffold896 | 14668                   | CC                              | TT                | 1946627198               |
| SNP_P3_139854_14691  | NW_004516251.1 | Scaffold896 | 14691                   | TT                              | CC                | 1946627200               |
| SNP_P3_139855_14722  | NW_004516251.1 | Scaffold896 | 14722                   | TT                              | CC                | 1946627202               |
| SNP_P3_139856_14800  | NW_004516251.1 | Scaffold896 | 14800                   | CC                              | TT                | 1946627204               |
| SNP_P3_139857_14807  | NW_004516251.1 | Scaffold896 | 14807                   | TT                              | CC                | 1946627206               |
| SNP_P3_139858_14817  | NW_004516251.1 | Scaffold896 | 14817                   | CC                              | GG                | 1946627208               |
| SNP_P3_139859_15580  | NW_004516251.1 | Scaffold896 | 15580                   | GG                              | AA                | 1946627210               |

| SNPs IDs            | Chromosome IDs | Chromosomes | Physical positions (bp) | CDC Frontier (Reference genome) | (Pusa 256 & HPNB) | NCBI SNPdb Accession IDs |
|---------------------|----------------|-------------|-------------------------|---------------------------------|-------------------|--------------------------|
| SNP_P3_139860_15584 | NW_004516251.1 | Scaffold896 | 15584                   | GG                              | AA                | 1946627212               |
| SNP_P3_139861_15595 | NW_004516251.1 | Scaffold896 | 15595                   | GG                              | AA                | 1946627214               |
| SNP_P3_139862_15604 | NW_004516251.1 | Scaffold896 | 15604                   | TT                              | CC                | 1946627216               |
| SNP_P3_139863_15614 | NW_004516251.1 | Scaffold896 | 15614                   | TT                              | CC                | 1946627217               |
| SNP_P3_139864_15665 | NW_004516251.1 | Scaffold896 | 15665                   | CC                              | AA                | 1946627219               |
| SNP_P3_139865_15676 | NW_004516251.1 | Scaffold896 | 15676                   | AA                              | GG                | 1946627221               |
| SNP_P3_139866_15677 | NW_004516251.1 | Scaffold896 | 15677                   | GG                              | AA                | 1946627223               |
| SNP_P3_139867_15682 | NW_004516251.1 | Scaffold896 | 15682                   | TT                              | GG                | 1946627225               |
| SNP_P3_139868_15731 | NW_004516251.1 | Scaffold896 | 15731                   | AA                              | GG                | 1946627227               |
| SNP_P3_139869_15734 | NW_004516251.1 | Scaffold896 | 15734                   | AA                              | GG                | 1946627229               |
| SNP_P3_139870_22148 | NW_004516251.1 | Scaffold896 | 22148                   | TT                              | AA                | 1946627231               |
| SNP_P3_139871_22192 | NW_004516251.1 | Scaffold896 | 22192                   | TT                              | GG                | 1946627233               |
| SNP_P3_139872_22197 | NW_004516251.1 | Scaffold896 | 22197                   | AA                              | TT                | 1946627235               |
| SNP_P3_139873_22546 | NW_004516251.1 | Scaffold896 | 22546                   | AA                              | GG                | 1946627237               |
| SNP_P3_139874_22549 | NW_004516251.1 | Scaffold896 | 22549                   | CC                              | GG                | 1946627239               |
| SNP_P3_139875_22584 | NW_004516251.1 | Scaffold896 | 22584                   | GG                              | TT                | 1946627241               |
| SNP_P3_139876_27814 | NW_004516251.1 | Scaffold896 | 27814                   | GG                              | AA                | 1946627243               |
| SNP_P3_139877_37933 | NW_004516251.1 | Scaffold896 | 37933                   | TT                              | AA                | 1946627245               |
| SNP_P3_139878_37941 | NW_004516251.1 | Scaffold896 | 37941                   | CC                              | TT                | 1946627247               |
| SNP_P3_139879_38176 | NW_004516251.1 | Scaffold896 | 38176                   | AA                              | CC                | 1946627249               |
| SNP_P3_139880_42665 | NW_004516251.1 | Scaffold896 | 42665                   | TT                              | GG                | 1946627251               |
| SNP_P3_139881_46993 | NW_004516251.1 | Scaffold896 | 46993                   | TT                              | GG                | 1946627253               |
| SNP_P3_139883_49258 | NW_004516251.1 | Scaffold896 | 49258                   | AA                              | CC                | 1946627255               |
| SNP_P3_139884_49260 | NW_004516251.1 | Scaffold896 | 49260                   | AA                              | GG                | 1946627257               |
| SNP_P3_139885_49261 | NW_004516251.1 | Scaffold896 | 49261                   | TT                              | AA                | 1946627259               |
| SNP_P3_139886_49274 | NW_004516251.1 | Scaffold896 | 49274                   | GG                              | TT                | 1946627261               |
| SNP_P3_139887_58959 | NW_004516251.1 | Scaffold896 | 58959                   | CC                              | GG                | 1946627262               |
| SNP_P3_139888_62944 | NW_004516251.1 | Scaffold896 | 62944                   | TT                              | CC                | 1946627264               |
| SNP_P3_139889_66419 | NW_004516251.1 | Scaffold896 | 66419                   | AA                              | GG                | 1946627266               |
| SNP_P3_139890_3893  | NW_004516253.1 | Scaffold898 | 3893                    | CC                              | TT                | 1946627268               |
| SNP_P3_139891_6091  | NW_004516253.1 | Scaffold898 | 6091                    | AA                              | GG                | 1946627270               |
| SNP_P3_139892_11788 | NW_004516253.1 | Scaffold898 | 11788                   | AA                              | GG                | 1946627272               |
| SNP_P3_139893_16136 | NW_004516253.1 | Scaffold898 | 16136                   | TT                              | CC                | 1946627274               |
| SNP_P3_139894_16796 | NW_004516253.1 | Scaffold898 | 16796                   | CC                              | TT                | 1946627276               |
| SNP_P3_139895_27653 | NW_004516253.1 | Scaffold898 | 27653                   | TT                              | CC                | 1946627278               |
| SNP_P3_139896_27675 | NW_004516253.1 | Scaffold898 | 27675                   | GG                              | AA                | 1946627280               |
| SNP_P3_139897_27677 | NW_004516253.1 | Scaffold898 | 27677                   | CC                              | TT                | 1946627283               |
| SNP_P3_139898_64    | NW_004516255.1 | Scaffold900 | 64                      | CC                              | TT                | 1946627285               |
| SNP_P3_139899_111   | NW_004516255.1 | Scaffold900 | 111                     | TT                              | CC                | 1946627287               |
| SNP_P3_139900_414   | NW_004516255.1 | Scaffold900 | 414                     | AA                              | GG                | 1946627289               |
| SNP_P3_139901_13499 | NW_004516255.1 | Scaffold900 | 13499                   | TT                              | AA                | 1946627291               |
| SNP_P3_139902_13529 | NW_004516255.1 | Scaffold900 | 13529                   | GG                              | AA                | 1946627293               |

| SNPs IDs            | Chromosome IDs | Chromosomes | Physical positions (bp) | CDC Frontier (Reference genome) | (Pusa 256 & HPNB) | NCBI SNPdb Accession IDs |
|---------------------|----------------|-------------|-------------------------|---------------------------------|-------------------|--------------------------|
| SNP_P3_139903_13785 | NW_004516255.1 | Scaffold900 | 13785                   | CC                              | TT                | 1946627295               |
| SNP_P3_139904_13786 | NW_004516255.1 | Scaffold900 | 13786                   | CC                              | TT                | 1946627297               |
| SNP_P3_139905_13795 | NW_004516255.1 | Scaffold900 | 13795                   | GG                              | AA                | 1946627299               |
| SNP_P3_139906_13812 | NW_004516255.1 | Scaffold900 | 13812                   | AA                              | CC                | 1946627301               |
| SNP_P3_139907_13870 | NW_004516255.1 | Scaffold900 | 13870                   | GG                              | AA                | 1946627303               |
| SNP_P3_139908_14003 | NW_004516255.1 | Scaffold900 | 14003                   | TT                              | AA                | 1946627305               |
| SNP_P3_139909_14880 | NW_004516255.1 | Scaffold900 | 14880                   | TT                              | CC                | 1946627307               |
| SNP_P3_139910_25547 | NW_004516255.1 | Scaffold900 | 25547                   | TT                              | GG                | 1946627309               |
| SNP_P3_139911_29465 | NW_004516255.1 | Scaffold900 | 29465                   | TT                              | AA                | 1946627311               |
| SNP_P3_139912_29466 | NW_004516255.1 | Scaffold900 | 29466                   | CC                              | TT                | 1946627313               |
| SNP_P3_139913_29495 | NW_004516255.1 | Scaffold900 | 29495                   | GG                              | AA                | 1946627315               |
| SNP_P3_139914_29518 | NW_004516255.1 | Scaffold900 | 29518                   | CC                              | TT                | 1946627317               |
| SNP_P3_139915_29543 | NW_004516255.1 | Scaffold900 | 29543                   | TT                              | AA                | 1946627319               |
| SNP_P3_139916_29648 | NW_004516255.1 | Scaffold900 | 29648                   | CC                              | TT                | 1946627321               |
| SNP_P3_139917_29667 | NW_004516255.1 | Scaffold900 | 29667                   | TT                              | CC                | 1946627323               |
| SNP_P3_139918_29686 | NW_004516255.1 | Scaffold900 | 29686                   | TT                              | GG                | 1946627325               |
| SNP_P3_139919_29841 | NW_004516255.1 | Scaffold900 | 29841                   | GG                              | CC                | 1946627327               |
| SNP_P3_139920_29844 | NW_004516255.1 | Scaffold900 | 29844                   | AA                              | TT                | 1946627329               |
| SNP_P3_139921_33094 | NW_004516255.1 | Scaffold900 | 33094                   | TT                              | CC                | 1946627331               |
| SNP_P3_139922_35974 | NW_004516255.1 | Scaffold900 | 35974                   | CC                              | TT                | 1946627333               |
| SNP_P3_139923_36451 | NW_004516255.1 | Scaffold900 | 36451                   | GG                              | CC                | 1946627335               |
| SNP_P3_139924_36453 | NW_004516255.1 | Scaffold900 | 36453                   | CC                              | AA                | 1946627337               |
| SNP_P3_139925_36557 | NW_004516255.1 | Scaffold900 | 36557                   | CC                              | GG                | 1946627339               |
| SNP_P3_139926_36574 | NW_004516255.1 | Scaffold900 | 36574                   | GG                              | CC                | 1946627341               |
| SNP_P3_139927_36605 | NW_004516255.1 | Scaffold900 | 36605                   | TT                              | CC                | 1946627343               |
| SNP_P3_139928_36606 | NW_004516255.1 | Scaffold900 | 36606                   | AA                              | TT                | 1946627345               |
| SNP_P3_139929_36677 | NW_004516255.1 | Scaffold900 | 36677                   | TT                              | CC                | 1946627346               |
| SNP_P3_139930_36680 | NW_004516255.1 | Scaffold900 | 36680                   | AA                              | TT                | 1946627348               |
| SNP_P3_139931_36681 | NW_004516255.1 | Scaffold900 | 36681                   | CC                              | TT                | 1946627350               |
| SNP_P3_139932_36828 | NW_004516255.1 | Scaffold900 | 36828                   | GG                              | AA                | 1946627352               |
| SNP_P3_139933_36968 | NW_004516255.1 | Scaffold900 | 36968                   | AA                              | CC                | 1946627354               |
| SNP_P3_139934_36971 | NW_004516255.1 | Scaffold900 | 36971                   | GG                              | TT                | 1946627356               |
| SNP_P3_139935_36981 | NW_004516255.1 | Scaffold900 | 36981                   | TT                              | AA                | 1946627358               |
| SNP_P3_139936_37025 | NW_004516255.1 | Scaffold900 | 37025                   | GG                              | CC                | 1946627360               |
| SNP_P3_139937_37221 | NW_004516255.1 | Scaffold900 | 37221                   | GG                              | CC                | 1946627362               |
| SNP_P3_139938_37224 | NW_004516255.1 | Scaffold900 | 37224                   | AA                              | GG                | 1946627365               |
| SNP_P3_139939_37226 | NW_004516255.1 | Scaffold900 | 37226                   | GG                              | TT                | 1946627367               |
| SNP_P3_139940_39140 | NW_004516255.1 | Scaffold900 | 39140                   | TT                              | CC                | 1946627369               |
| SNP_P3_139941_40330 | NW_004516255.1 | Scaffold900 | 40330                   | TT                              | AA                | 1946627371               |
| SNP_P3_139942_40342 | NW_004516255.1 | Scaffold900 | 40342                   | TT                              | AA                | 1946627373               |
| SNP_P3_139943_40387 | NW_004516255.1 | Scaffold900 | 40387                   | AA                              | CC                | 1946627374               |
| SNP_P3_139944_40526 | NW_004516255.1 | Scaffold900 | 40526                   | CC                              | TT                | 1946627376               |

| SNPs IDs            | Chromosome IDs | Chromosomes | Physical positions (bp) | CDC Frontier (Reference genome) | (Pusa 256 & HPNB) | NCBI SNPdb Accession IDs |
|---------------------|----------------|-------------|-------------------------|---------------------------------|-------------------|--------------------------|
| SNP_P3_139945_40560 | NW_004516255.1 | Scaffold900 | 40560                   | TT                              | CC                | 1946627378               |
| SNP_P3_139946_40576 | NW_004516255.1 | Scaffold900 | 40576                   | TT                              | CC                | 1946627380               |
| SNP_P3_139947_40586 | NW_004516255.1 | Scaffold900 | 40586                   | CC                              | AA                | 1946627382               |
| SNP_P3_139948_41397 | NW_004516255.1 | Scaffold900 | 41397                   | TT                              | GG                | 1946627384               |
| SNP_P3_139949_41421 | NW_004516255.1 | Scaffold900 | 41421                   | TT                              | CC                | 1946627386               |
| SNP_P3_139950_41442 | NW_004516255.1 | Scaffold900 | 41442                   | CC                              | TT                | 1946627388               |
| SNP_P3_139951_41496 | NW_004516255.1 | Scaffold900 | 41496                   | AA                              | CC                | 1946627390               |
| SNP_P3_139952_41527 | NW_004516255.1 | Scaffold900 | 41527                   | TT                              | AA                | 1946627392               |
| SNP_P3_139953_41616 | NW_004516255.1 | Scaffold900 | 41616                   | TT                              | CC                | 1946627394               |
| SNP_P3_139954_41666 | NW_004516255.1 | Scaffold900 | 41666                   | GG                              | CC                | 1946627395               |
| SNP_P3_139955_41714 | NW_004516255.1 | Scaffold900 | 41714                   | GG                              | CC                | 1946627397               |
| SNP_P3_139956_41740 | NW_004516255.1 | Scaffold900 | 41740                   | TT                              | CC                | 1946627399               |
| SNP_P3_139957_41768 | NW_004516255.1 | Scaffold900 | 41768                   | TT                              | AA                | 1946627401               |
| SNP_P3_139958_41789 | NW_004516255.1 | Scaffold900 | 41789                   | TT                              | CC                | 1946627403               |
| SNP_P3_139959_41821 | NW_004516255.1 | Scaffold900 | 41821                   | TT                              | GG                | 1946627406               |
| SNP_P3_139960_41894 | NW_004516255.1 | Scaffold900 | 41894                   | CC                              | TT                | 1946627408               |
| SNP_P3_139961_41911 | NW_004516255.1 | Scaffold900 | 41911                   | GG                              | AA                | 1946627410               |
| SNP_P3_139962_42089 | NW_004516255.1 | Scaffold900 | 42089                   | CC                              | TT                | 1946627412               |
| SNP_P3_139963_42183 | NW_004516255.1 | Scaffold900 | 42183                   | TT                              | CC                | 1946627414               |
| SNP_P3_139964_42285 | NW_004516255.1 | Scaffold900 | 42285                   | TT                              | AA                | 1946627415               |
| SNP_P3_139965_42349 | NW_004516255.1 | Scaffold900 | 42349                   | TT                              | AA                | 1946627417               |
| SNP_P3_139966_42419 | NW_004516255.1 | Scaffold900 | 42419                   | GG                              | TT                | 1946627419               |
| SNP_P3_139967_42432 | NW_004516255.1 | Scaffold900 | 42432                   | AA                              | TT                | 1946627421               |
| SNP_P3_139968_42536 | NW_004516255.1 | Scaffold900 | 42536                   | AA                              | GG                | 1946627423               |
| SNP_P3_139969_42537 | NW_004516255.1 | Scaffold900 | 42537                   | GG                              | TT                | 1946627425               |
| SNP_P3_139970_42732 | NW_004516255.1 | Scaffold900 | 42732                   | CC                              | TT                | 1946627427               |
| SNP_P3_139971_42734 | NW_004516255.1 | Scaffold900 | 42734                   | GG                              | TT                | 1946627429               |
| SNP_P3_139972_42754 | NW_004516255.1 | Scaffold900 | 42754                   | TT                              | CC                | 1946627431               |
| SNP_P3_139973_42786 | NW_004516255.1 | Scaffold900 | 42786                   | CC                              | GG                | 1946627433               |
| SNP_P3_139974_42824 | NW_004516255.1 | Scaffold900 | 42824                   | TT                              | AA                | 1946627435               |
| SNP_P3_139975_42875 | NW_004516255.1 | Scaffold900 | 42875                   | TT                              | AA                | 1946627437               |
| SNP_P3_139976_42876 | NW_004516255.1 | Scaffold900 | 42876                   | AA                              | GG                | 1946627439               |
| SNP_P3_139977_42986 | NW_004516255.1 | Scaffold900 | 42986                   | GG                              | AA                | 1946627441               |
| SNP_P3_139978_42989 | NW_004516255.1 | Scaffold900 | 42989                   | GG                              | CC                | 1946627443               |
| SNP_P3_139979_43795 | NW_004516255.1 | Scaffold900 | 43795                   | TT                              | AA                | 1946627445               |
| SNP_P3_139980_45223 | NW_004516255.1 | Scaffold900 | 45223                   | GG                              | TT                | 1946627447               |
| SNP_P3_139981_45231 | NW_004516255.1 | Scaffold900 | 45231                   | AA                              | TT                | 1946627449               |
| SNP_P3_139982_45450 | NW_004516255.1 | Scaffold900 | 45450                   | GG                              | AA                | 1946627451               |
| SNP_P3_139983_45462 | NW_004516255.1 | Scaffold900 | 45462                   | TT                              | AA                | 1946627453               |
| SNP_P3_139984_45463 | NW_004516255.1 | Scaffold900 | 45463                   | GG                              | AA                | 1946627455               |
| SNP_P3_139985_45533 | NW_004516255.1 | Scaffold900 | 45533                   | TT                              | GG                | 1946627457               |
| SNP_P3_139986_45795 | NW_004516255.1 | Scaffold900 | 45795                   | TT                              | GG                | 1946627459               |

| SNPs IDs            | Chromosome IDs | Chromosomes | Physical positions (bp) | CDC Frontier (Reference genome) | (Pusa 256 & HPNB) | NCBI SNPdb Accession IDs |
|---------------------|----------------|-------------|-------------------------|---------------------------------|-------------------|--------------------------|
| SNP_P3_139987_45891 | NW_004516255.1 | Scaffold900 | 45891                   | TT                              | GG                | 1946627461               |
| SNP_P3_139988_46542 | NW_004516255.1 | Scaffold900 | 46542                   | AA                              | GG                | 1946627463               |
| SNP_P3_139989_46679 | NW_004516255.1 | Scaffold900 | 46679                   | TT                              | CC                | 1946627464               |
| SNP_P3_139990_46918 | NW_004516255.1 | Scaffold900 | 46918                   | GG                              | TT                | 1946627486               |
| SNP_P3_139991_46935 | NW_004516255.1 | Scaffold900 | 46935                   | CC                              | GG                | 1946627488               |
| SNP_P3_139992_46975 | NW_004516255.1 | Scaffold900 | 46975                   | GG                              | AA                | 1946627490               |
| SNP_P3_139993_46987 | NW_004516255.1 | Scaffold900 | 46987                   | CC                              | TT                | 1946627492               |
| SNP_P3_139994_46989 | NW_004516255.1 | Scaffold900 | 46989                   | CC                              | TT                | 1946627494               |
| SNP_P3_139995_47011 | NW_004516255.1 | Scaffold900 | 47011                   | GG                              | TT                | 1946627496               |
| SNP_P3_139996_47149 | NW_004516255.1 | Scaffold900 | 47149                   | TT                              | CC                | 1946627498               |
| SNP_P3_139997_47407 | NW_004516255.1 | Scaffold900 | 47407                   | GG                              | AA                | 1946627500               |
| SNP_P3_139998_47413 | NW_004516255.1 | Scaffold900 | 47413                   | AA                              | CC                | 1946627502               |
| SNP_P3_139999_47415 | NW_004516255.1 | Scaffold900 | 47415                   | CC                              | AA                | 1946627504               |
| SNP_P3_140000_47428 | NW_004516255.1 | Scaffold900 | 47428                   | CC                              | TT                | 1946627506               |
| SNP_P3_140001_47430 | NW_004516255.1 | Scaffold900 | 47430                   | AA                              | TT                | 1946627508               |
| SNP_P3_140002_47441 | NW_004516255.1 | Scaffold900 | 47441                   | AA                              | CC                | 1946627510               |
| SNP_P3_140003_47491 | NW_004516255.1 | Scaffold900 | 47491                   | AA                              | TT                | 1946627512               |
| SNP_P3_140004_47513 | NW_004516255.1 | Scaffold900 | 47513                   | GG                              | AA                | 1946627514               |
| SNP_P3_140005_47642 | NW_004516255.1 | Scaffold900 | 47642                   | GG                              | AA                | 1946627516               |
| SNP_P3_140006_47643 | NW_004516255.1 | Scaffold900 | 47643                   | TT                              | AA                | 1946627518               |
| SNP_P3_140007_47672 | NW_004516255.1 | Scaffold900 | 47672                   | AA                              | CC                | 1946627520               |
| SNP_P3_140008_47706 | NW_004516255.1 | Scaffold900 | 47706                   | GG                              | TT                | 1946627522               |
| SNP_P3_140009_47769 | NW_004516255.1 | Scaffold900 | 47769                   | GG                              | TT                | 1946627523               |
| SNP_P3_140010_50866 | NW_004516255.1 | Scaffold900 | 50866                   | AA                              | TT                | 1946627525               |
| SNP_P3_140011_51144 | NW_004516255.1 | Scaffold900 | 51144                   | TT                              | GG                | 1946627527               |
| SNP_P3_140012_51241 | NW_004516255.1 | Scaffold900 | 51241                   | TT                              | CC                | 1946627529               |
| SNP_P3_140013_51320 | NW_004516255.1 | Scaffold900 | 51320                   | CC                              | TT                | 1946627531               |
| SNP_P3_140014_51343 | NW_004516255.1 | Scaffold900 | 51343                   | GG                              | TT                | 1946627533               |
| SNP_P3_140015_51375 | NW_004516255.1 | Scaffold900 | 51375                   | TT                              | CC                | 1946627535               |
| SNP_P3_140016_4114  | NW_004516256.1 | Scaffold901 | 4114                    | AA                              | CC                | 1946627537               |
| SNP_P3_140017_4124  | NW_004516256.1 | Scaffold901 | 4124                    | AA                              | GG                | 1946627539               |
| SNP_P3_140018_4380  | NW_004516256.1 | Scaffold901 | 4380                    | TT                              | CC                | 1946627541               |
| SNP_P3_140019_13270 | NW_004516256.1 | Scaffold901 | 13270                   | AA                              | GG                | 1946627543               |
| SNP_P3_140020_19857 | NW_004516256.1 | Scaffold901 | 19857                   | CC                              | TT                | 1946627545               |
| SNP_P3_140021_20250 | NW_004516256.1 | Scaffold901 | 20250                   | GG                              | CC                | 1946627548               |
| SNP_P3_140022_20258 | NW_004516256.1 | Scaffold901 | 20258                   | GG                              | AA                | 1946627550               |
| SNP_P3_140023_20278 | NW_004516256.1 | Scaffold901 | 20278                   | AA                              | GG                | 1946627552               |
| SNP_P3_140024_20348 | NW_004516256.1 | Scaffold901 | 20348                   | CC                              | TT                | 1946627554               |
| SNP_P3_140025_23753 | NW_004516256.1 | Scaffold901 | 23753                   | CC                              | AA                | 1946627556               |
| SNP_P3_140026_23755 | NW_004516256.1 | Scaffold901 | 23755                   | CC                              | AA                | 1946627558               |
| SNP_P3_140027_23757 | NW_004516256.1 | Scaffold901 | 23757                   | CC                              | AA                | 1946627560               |
| SNP_P3_140028_23759 | NW_004516256.1 | Scaffold901 | 23759                   | CC                              | AA                | 1946627562               |

| SNPs IDs             | Chromosome IDs | Chromosomes | Physical positions (bp) | CDC Frontier (Reference genome) | (Pusa 256 & HPNB) | NCBI SNPdb Accession IDs |
|----------------------|----------------|-------------|-------------------------|---------------------------------|-------------------|--------------------------|
| SNP_P3_140029_23765  | NW_004516256.1 | Scaffold901 | 23765                   | AA                              | GG                | 1946627564               |
| SNP_P3_140030_23772  | NW_004516256.1 | Scaffold901 | 23772                   | AA                              | GG                | 1946627566               |
| SNP_P3_140031_23799  | NW_004516256.1 | Scaffold901 | 23799                   | TT                              | AA                | 1946627568               |
| SNP_P3_140032_46297  | NW_004516256.1 | Scaffold901 | 46297                   | GG                              | AA                | 1946627570               |
| SNP_P3_140033_46302  | NW_004516256.1 | Scaffold901 | 46302                   | TT                              | CC                | 1946627572               |
| SNP_P3_140034_46303  | NW_004516256.1 | Scaffold901 | 46303                   | TT                              | CC                | 1946627574               |
| SNP_P3_140035_46352  | NW_004516256.1 | Scaffold901 | 46352                   | GG                              | AA                | 1946627576               |
| SNP_P3_140036_46389  | NW_004516256.1 | Scaffold901 | 46389                   | AA                              | GG                | 1946627578               |
| SNP_P3_140037_53681  | NW_004516256.1 | Scaffold901 | 53681                   | TT                              | AA                | 1946627580               |
| SNP_P3_140039_69555  | NW_004516256.1 | Scaffold901 | 69555                   | GG                              | TT                | 1946627582               |
| SNP_P3_140040_69559  | NW_004516256.1 | Scaffold901 | 69559                   | AA                              | GG                | 1946627584               |
| SNP_P3_140041_69562  | NW_004516256.1 | Scaffold901 | 69562                   | GG                              | TT                | 1946627587               |
| SNP_P3_140042_69585  | NW_004516256.1 | Scaffold901 | 69585                   | TT                              | CC                | 1946627589               |
| SNP_P3_140043_70509  | NW_004516256.1 | Scaffold901 | 70509                   | GG                              | TT                | 1946627591               |
| SNP_P3_140044_97161  | NW_004516256.1 | Scaffold901 | 97161                   | GG                              | AA                | 1946627593               |
| SNP_P3_140045_101036 | NW_004516256.1 | Scaffold901 | 101036                  | TT                              | AA                | 1946627595               |
| SNP_P3_140046_112983 | NW_004516256.1 | Scaffold901 | 112983                  | GG                              | TT                | 1946627597               |
| SNP_P3_140047_136685 | NW_004516256.1 | Scaffold901 | 136685                  | CC                              | TT                | 1946627599               |
| SNP_P3_140048_136782 | NW_004516256.1 | Scaffold901 | 136782                  | GG                              | AA                | 1946627601               |
| SNP_P3_140049_143131 | NW_004516256.1 | Scaffold901 | 143131                  | AA                              | GG                | 1946627603               |
| SNP_P3_140050_143163 | NW_004516256.1 | Scaffold901 | 143163                  | GG                              | TT                | 1946627605               |
| SNP_P3_140051_143164 | NW_004516256.1 | Scaffold901 | 143164                  | AA                              | GG                | 1946627606               |
| SNP_P3_140052_144042 | NW_004516256.1 | Scaffold901 | 144042                  | AA                              | GG                | 1946627608               |
| SNP_P3_140053_144061 | NW_004516256.1 | Scaffold901 | 144061                  | TT                              | CC                | 1946627610               |
| SNP_P3_140054_144094 | NW_004516256.1 | Scaffold901 | 144094                  | CC                              | TT                | 1946627612               |
| SNP_P3_140055_144101 | NW_004516256.1 | Scaffold901 | 144101                  | TT                              | CC                | 1946627614               |
| SNP_P3_140056_155858 | NW_004516256.1 | Scaffold901 | 155858                  | TT                              | CC                | 1946627616               |
| SNP_P3_140057_155911 | NW_004516256.1 | Scaffold901 | 155911                  | TT                              | CC                | 1946627618               |
| SNP_P3_140058_178664 | NW_004516256.1 | Scaffold901 | 178664                  | AA                              | TT                | 1946627620               |
| SNP_P3_140059_199331 | NW_004516256.1 | Scaffold901 | 199331                  | AA                              | TT                | 1946627622               |
| SNP_P3_140060_199370 | NW_004516256.1 | Scaffold901 | 199370                  | AA                              | CC                | 1946627624               |
| SNP_P3_140061_199968 | NW_004516256.1 | Scaffold901 | 199968                  | CC                              | TT                | 1946627627               |
| SNP_P3_140063_213125 | NW_004516256.1 | Scaffold901 | 213125                  | GG                              | AA                | 1946627629               |
| SNP_P3_140064_221877 | NW_004516256.1 | Scaffold901 | 221877                  | AA                              | GG                | 1946627631               |
| SNP_P3_140065_221916 | NW_004516256.1 | Scaffold901 | 221916                  | AA                              | CC                | 1946627632               |
| SNP_P3_140066_221988 | NW_004516256.1 | Scaffold901 | 221988                  | GG                              | TT                | 1946627634               |
| SNP_P3_140067_222304 | NW_004516256.1 | Scaffold901 | 222304                  | AA                              | GG                | 1946627636               |
| SNP_P3_140068_222320 | NW_004516256.1 | Scaffold901 | 222320                  | AA                              | GG                | 1946627638               |
| SNP_P3_140069_222356 | NW_004516256.1 | Scaffold901 | 222356                  | CC                              | TT                | 1946627640               |
| SNP_P3_140070_229453 | NW_004516256.1 | Scaffold901 | 229453                  | CC                              | TT                | 1946627642               |
| SNP_P3_140072_229907 | NW_004516256.1 | Scaffold901 | 229907                  | GG                              | AA                | 1946627644               |
| SNP_P3_140073_233257 | NW_004516256.1 | Scaffold901 | 233257                  | AA                              | GG                | 1946627646               |

| SNPs IDs             | Chromosome IDs | Chromosomes | Physical positions (bp) | CDC Frontier (Reference genome) | (Pusa 256 & HPNB) | NCBI SNPdb Accession IDs |
|----------------------|----------------|-------------|-------------------------|---------------------------------|-------------------|--------------------------|
| SNP_P3_140075_233287 | NW_004516256.1 | Scaffold901 | 233287                  | AA                              | GG                | 1946627648               |
| SNP_P3_140076_233293 | NW_004516256.1 | Scaffold901 | 233293                  | TT                              | CC                | 1946627650               |
| SNP_P3_140077_233559 | NW_004516256.1 | Scaffold901 | 233559                  | TT                              | AA                | 1946627652               |
| SNP_P3_140078_233560 | NW_004516256.1 | Scaffold901 | 233560                  | GG                              | TT                | 1946627654               |
| SNP_P3_140079_239023 | NW_004516256.1 | Scaffold901 | 239023                  | GG                              | AA                | 1946627656               |
| SNP_P3_140080_239045 | NW_004516256.1 | Scaffold901 | 239045                  | TT                              | AA                | 1946627658               |
| SNP_P3_140081_239413 | NW_004516256.1 | Scaffold901 | 239413                  | TT                              | CC                | 1946627660               |
| SNP_P3_140082_239432 | NW_004516256.1 | Scaffold901 | 239432                  | TT                              | CC                | 1946627662               |
| SNP_P3_140083_239457 | NW_004516256.1 | Scaffold901 | 239457                  | CC                              | TT                | 1946627664               |
| SNP_P3_140084_245872 | NW_004516256.1 | Scaffold901 | 245872                  | AA                              | GG                | 1946627666               |
| SNP_P3_140085_245884 | NW_004516256.1 | Scaffold901 | 245884                  | CC                              | TT                | 1946627668               |
| SNP_P3_140086_246171 | NW_004516256.1 | Scaffold901 | 246171                  | AA                              | TT                | 1946627670               |
| SNP_P3_140087_246208 | NW_004516256.1 | Scaffold901 | 246208                  | TT                              | AA                | 1946627672               |
| SNP_P3_140088_246226 | NW_004516256.1 | Scaffold901 | 246226                  | CC                              | TT                | 1946627674               |
| SNP_P3_140090_254105 | NW_004516256.1 | Scaffold901 | 254105                  | AA                              | TT                | 1946627676               |
| SNP_P3_140091_8647   | NW_004516257.1 | Scaffold903 | 8647                    | TT                              | GG                | 1946627677               |
| SNP_P3_140092_8175   | NW_004516258.1 | Scaffold904 | 8175                    | TT                              | GG                | 1946627679               |
| SNP_P3_140093_10707  | NW_004516258.1 | Scaffold904 | 10707                   | CC                              | TT                | 1946627681               |
| SNP_P3_140094_11107  | NW_004516258.1 | Scaffold904 | 11107                   | GG                              | TT                | 1946627683               |
| SNP_P3_140095_11109  | NW_004516258.1 | Scaffold904 | 11109                   | AA                              | GG                | 1946627685               |
| SNP_P3_140096_11112  | NW_004516258.1 | Scaffold904 | 11112                   | AA                              | CC                | 1946627687               |
| SNP_P3_140097_11117  | NW_004516258.1 | Scaffold904 | 11117                   | AA                              | TT                | 1946627689               |
| SNP_P3_140098_11127  | NW_004516258.1 | Scaffold904 | 11127                   | GG                              | AA                | 1946627691               |
| SNP_P3_140099_11632  | NW_004516258.1 | Scaffold904 | 11632                   | CC                              | TT                | 1946627693               |
| SNP_P3_140100_11648  | NW_004516258.1 | Scaffold904 | 11648                   | TT                              | GG                | 1946627695               |
| SNP_P3_140101_11685  | NW_004516258.1 | Scaffold904 | 11685                   | TT                              | AA                | 1946627697               |
| SNP_P3_140102_13729  | NW_004516258.1 | Scaffold904 | 13729                   | TT                              | AA                | 1946627699               |
| SNP_P3_140103_14539  | NW_004516258.1 | Scaffold904 | 14539                   | AA                              | GG                | 1946627701               |
| SNP_P3_140104_14893  | NW_004516258.1 | Scaffold904 | 14893                   | CC                              | TT                | 1946627703               |
| SNP_P3_140105_16474  | NW_004516258.1 | Scaffold904 | 16474                   | AA                              | GG                | 1946627705               |
| SNP_P3_140106_16521  | NW_004516258.1 | Scaffold904 | 16521                   | CC                              | GG                | 1946627707               |
| SNP_P3_140107_16592  | NW_004516258.1 | Scaffold904 | 16592                   | CC                              | TT                | 1946627709               |
| SNP_P3_140108_16610  | NW_004516258.1 | Scaffold904 | 16610                   | TT                              | AA                | 1946627711               |
| SNP_P3_140109_16716  | NW_004516258.1 | Scaffold904 | 16716                   | TT                              | CC                | 1946627713               |
| SNP_P3_140110_16760  | NW_004516258.1 | Scaffold904 | 16760                   | TT                              | CC                | 1946627715               |
| SNP_P3_140111_16761  | NW_004516258.1 | Scaffold904 | 16761                   | AA                              | CC                | 1946627717               |
| SNP_P3_140112_20303  | NW_004516258.1 | Scaffold904 | 20303                   | TT                              | AA                | 1946627719               |
| SNP_P3_140113_3045   | NW_004516260.1 | Scaffold907 | 3045                    | CC                              | TT                | 1946627721               |
| SNP_P3_140114_3049   | NW_004516260.1 | Scaffold907 | 3049                    | AA                              | GG                | 1946627723               |
| SNP_P3_140115_2017   | NW_004516261.1 | Scaffold908 | 2017                    | AA                              | GG                | 1946627724               |
| SNP_P3_140116_6320   | NW_004516261.1 | Scaffold908 | 6320                    | AA                              | TT                | 1946627726               |
| SNP_P3_140117_6322   | NW_004516261.1 | Scaffold908 | 6322                    | TT                              | AA                | 1946627728               |

| SNPs IDs            | Chromosome IDs | Chromosomes | Physical positions (bp) | CDC Frontier (Reference genome) | (Pusa 256 & HPNB) | NCBI SNPdb Accession IDs |
|---------------------|----------------|-------------|-------------------------|---------------------------------|-------------------|--------------------------|
| SNP_P3_140118_11338 | NW_004516261.1 | Scaffold908 | 11338                   | TT                              | CC                | 1946627730               |
| SNP_P3_140119_11341 | NW_004516261.1 | Scaffold908 | 11341                   | CC                              | TT                | 1946627732               |
| SNP_P3_140120_11358 | NW_004516261.1 | Scaffold908 | 11358                   | TT                              | CC                | 1946627734               |
| SNP_P3_140121_11373 | NW_004516261.1 | Scaffold908 | 11373                   | CC                              | AA                | 1946627736               |
| SNP_P3_140122_11419 | NW_004516261.1 | Scaffold908 | 11419                   | CC                              | TT                | 1946627738               |
| SNP_P3_140123_11431 | NW_004516261.1 | Scaffold908 | 11431                   | CC                              | TT                | 1946627740               |
| SNP_P3_140124_11437 | NW_004516261.1 | Scaffold908 | 11437                   | TT                              | AA                | 1946627742               |
| SNP_P3_140125_11439 | NW_004516261.1 | Scaffold908 | 11439                   | CC                              | TT                | 1946627744               |
| SNP_P3_140126_18137 | NW_004516261.1 | Scaffold908 | 18137                   | TT                              | CC                | 1946627747               |
| SNP_P3_140127_18181 | NW_004516261.1 | Scaffold908 | 18181                   | TT                              | AA                | 1946627749               |
| SNP_P3_140128_18227 | NW_004516261.1 | Scaffold908 | 18227                   | GG                              | AA                | 1946627751               |
| SNP_P3_140129_18643 | NW_004516261.1 | Scaffold908 | 18643                   | GG                              | CC                | 1946627753               |
| SNP_P3_140130_18766 | NW_004516261.1 | Scaffold908 | 18766                   | AA                              | GG                | 1946627755               |
| SNP_P3_140131_30029 | NW_004516261.1 | Scaffold908 | 30029                   | AA                              | GG                | 1946627757               |
| SNP_P3_140132_30972 | NW_004516261.1 | Scaffold908 | 30972                   | GG                              | TT                | 1946627759               |
| SNP_P3_140133_31232 | NW_004516261.1 | Scaffold908 | 31232                   | AA                              | GG                | 1946627761               |
| SNP_P3_140134_31267 | NW_004516261.1 | Scaffold908 | 31267                   | CC                              | TT                | 1946627763               |
| SNP_P3_140135_31388 | NW_004516261.1 | Scaffold908 | 31388                   | CC                              | TT                | 1946627765               |
| SNP_P3_140136_31403 | NW_004516261.1 | Scaffold908 | 31403                   | GG                              | TT                | 1946627767               |
| SNP_P3_140137_37053 | NW_004516261.1 | Scaffold908 | 37053                   | AA                              | GG                | 1946627769               |
| SNP_P3_140138_37881 | NW_004516261.1 | Scaffold908 | 37881                   | AA                              | GG                | 1946627771               |
| SNP_P3_140139_38748 | NW_004516261.1 | Scaffold908 | 38748                   | CC                              | TT                | 1946627773               |
| SNP_P3_140140_38780 | NW_004516261.1 | Scaffold908 | 38780                   | AA                              | TT                | 1946627775               |
| SNP_P3_140141_41004 | NW_004516261.1 | Scaffold908 | 41004                   | TT                              | AA                | 1946627777               |
| SNP_P3_140142_41106 | NW_004516261.1 | Scaffold908 | 41106                   | CC                              | TT                | 1946627779               |
| SNP_P3_140143_41207 | NW_004516261.1 | Scaffold908 | 41207                   | TT                              | CC                | 1946627781               |
| SNP_P3_140144_43322 | NW_004516261.1 | Scaffold908 | 43322                   | TT                              | CC                | 1946627783               |
| SNP_P3_140145_589   | NW_004516262.1 | Scaffold909 | 589                     | CC                              | AA                | 1946627786               |
| SNP_P3_140146_1630  | NW_004516262.1 | Scaffold909 | 1630                    | AA                              | GG                | 1946627788               |
| SNP_P3_140147_1711  | NW_004516262.1 | Scaffold909 | 1711                    | CC                              | TT                | 1946627790               |
| SNP_P3_140148_1729  | NW_004516262.1 | Scaffold909 | 1729                    | GG                              | AA                | 1946627792               |
| SNP_P3_140149_1785  | NW_004516262.1 | Scaffold909 | 1785                    | CC                              | GG                | 1946627794               |
| SNP_P3_140150_3824  | NW_004516262.1 | Scaffold909 | 3824                    | AA                              | TT                | 1946627796               |
| SNP_P3_140151_3889  | NW_004516262.1 | Scaffold909 | 3889                    | CC                              | AA                | 1946627798               |
| SNP_P3_140152_3978  | NW_004516262.1 | Scaffold909 | 3978                    | CC                              | TT                | 1946627800               |
| SNP_P3_140153_4540  | NW_004516262.1 | Scaffold909 | 4540                    | TT                              | GG                | 1946627802               |
| SNP_P3_140154_4911  | NW_004516262.1 | Scaffold909 | 4911                    | TT                              | CC                | 1946627804               |
| SNP_P3_140155_4912  | NW_004516262.1 | Scaffold909 | 4912                    | AA                              | GG                | 1946627807               |
| SNP_P3_140156_5037  | NW_004516262.1 | Scaffold909 | 5037                    | GG                              | TT                | 1946627809               |
| SNP_P3_140157_5135  | NW_004516262.1 | Scaffold909 | 5135                    | TT                              | AA                | 1946627811               |
| SNP_P3_140158_5199  | NW_004516262.1 | Scaffold909 | 5199                    | AA                              | GG                | 1946627813               |
| SNP_P3_140159_5269  | NW_004516262.1 | Scaffold909 | 5269                    | CC                              | TT                | 1946627815               |



| SNPs IDs            | Chromosome IDs | Chromosomes | Physical positions (bp) | CDC Frontier (Reference genome) | (Pusa 256 & HPNB) | NCBI SNPdb Accession IDs |
|---------------------|----------------|-------------|-------------------------|---------------------------------|-------------------|--------------------------|
| SNP_P3_140160_5287  | NW_004516262.1 | Scaffold909 | 5287                    | GG                              | AA                | 1946627817               |
| SNP_P3_140161_5649  | NW_004516262.1 | Scaffold909 | 5649                    | CC                              | TT                | 1946627819               |
| SNP_P3_140162_5735  | NW_004516262.1 | Scaffold909 | 5735                    | TT                              | GG                | 1946627821               |
| SNP_P3_140163_5847  | NW_004516262.1 | Scaffold909 | 5847                    | GG                              | AA                | 1946627823               |
| SNP_P3_140164_5848  | NW_004516262.1 | Scaffold909 | 5848                    | AA                              | CC                | 1946627825               |
| SNP_P3_140165_5884  | NW_004516262.1 | Scaffold909 | 5884                    | CC                              | TT                | 1946627827               |
| SNP_P3_140166_6162  | NW_004516262.1 | Scaffold909 | 6162                    | TT                              | CC                | 1946627829               |
| SNP_P3_140167_6397  | NW_004516262.1 | Scaffold909 | 6397                    | TT                              | CC                | 1946627831               |
| SNP_P3_140168_6652  | NW_004516262.1 | Scaffold909 | 6652                    | AA                              | TT                | 1946627834               |
| SNP_P3_140170_6855  | NW_004516262.1 | Scaffold909 | 6855                    | CC                              | TT                | 1946627836               |
| SNP_P3_140171_6901  | NW_004516262.1 | Scaffold909 | 6901                    | AA                              | GG                | 1946627838               |
| SNP_P3_140172_6925  | NW_004516262.1 | Scaffold909 | 6925                    | TT                              | CC                | 1946627840               |
| SNP_P3_140173_6999  | NW_004516262.1 | Scaffold909 | 6999                    | AA                              | CC                | 1946627842               |
| SNP_P3_140174_7585  | NW_004516262.1 | Scaffold909 | 7585                    | TT                              | AA                | 1946627844               |
| SNP_P3_140175_7597  | NW_004516262.1 | Scaffold909 | 7597                    | CC                              | AA                | 1946627846               |
| SNP_P3_140176_7602  | NW_004516262.1 | Scaffold909 | 7602                    | AA                              | GG                | 1946627848               |
| SNP_P3_140177_8044  | NW_004516262.1 | Scaffold909 | 8044                    | AA                              | CC                | 1946627850               |
| SNP_P3_140178_8054  | NW_004516262.1 | Scaffold909 | 8054                    | CC                              | TT                | 1946627852               |
| SNP_P3_140179_8135  | NW_004516262.1 | Scaffold909 | 8135                    | TT                              | CC                | 1946627854               |
| SNP_P3_140180_8162  | NW_004516262.1 | Scaffold909 | 8162                    | AA                              | TT                | 1946627856               |
| SNP_P3_140181_8185  | NW_004516262.1 | Scaffold909 | 8185                    | GG                              | TT                | 1946627858               |
| SNP_P3_140182_8187  | NW_004516262.1 | Scaffold909 | 8187                    | CC                              | TT                | 1946627860               |
| SNP_P3_140183_8213  | NW_004516262.1 | Scaffold909 | 8213                    | TT                              | GG                | 1946627862               |
| SNP_P3_140184_8229  | NW_004516262.1 | Scaffold909 | 8229                    | AA                              | GG                | 1946627864               |
| SNP_P3_140185_8302  | NW_004516262.1 | Scaffold909 | 8302                    | AA                              | GG                | 1946627866               |
| SNP_P3_140186_8304  | NW_004516262.1 | Scaffold909 | 8304                    | GG                              | AA                | 1946627868               |
| SNP_P3_140187_8354  | NW_004516262.1 | Scaffold909 | 8354                    | AA                              | CC                | 1946627870               |
| SNP_P3_140188_8358  | NW_004516262.1 | Scaffold909 | 8358                    | AA                              | GG                | 1946627872               |
| SNP_P3_140189_8454  | NW_004516262.1 | Scaffold909 | 8454                    | CC                              | TT                | 1946627874               |
| SNP_P3_140190_8607  | NW_004516262.1 | Scaffold909 | 8607                    | TT                              | GG                | 1946627876               |
| SNP_P3_140191_8612  | NW_004516262.1 | Scaffold909 | 8612                    | CC                              | AA                | 1946627878               |
| SNP_P3_140192_8621  | NW_004516262.1 | Scaffold909 | 8621                    | GG                              | AA                | 1946627880               |
| SNP_P3_140193_8643  | NW_004516262.1 | Scaffold909 | 8643                    | AA                              | GG                | 1946627882               |
| SNP_P3_140194_8676  | NW_004516262.1 | Scaffold909 | 8676                    | AA                              | GG                | 1946627884               |
| SNP_P3_140195_8685  | NW_004516262.1 | Scaffold909 | 8685                    | GG                              | AA                | 1946627886               |
| SNP_P3_140196_8711  | NW_004516262.1 | Scaffold909 | 8711                    | AA                              | TT                | 1946627888               |
| SNP_P3_140197_8715  | NW_004516262.1 | Scaffold909 | 8715                    | AA                              | GG                | 1946627889               |
| SNP_P3_140198_8723  | NW_004516262.1 | Scaffold909 | 8723                    | TT                              | GG                | 1946627891               |
| SNP_P3_140199_8726  | NW_004516262.1 | Scaffold909 | 8726                    | AA                              | GG                | 1946627893               |
| SNP_P3_140200_8743  | NW_004516262.1 | Scaffold909 | 8743                    | AA                              | GG                | 1946627895               |
| SNP_P3_140201_10162 | NW_004516262.1 | Scaffold909 | 10162                   | GG                              | TT                | 1946627897               |
| SNP_P3_140202_10307 | NW_004516262.1 | Scaffold909 | 10307                   | AA                              | GG                | 1946627899               |

| SNPs IDs            | Chromosome IDs | Chromosomes | Physical positions (bp) | CDC Frontier (Reference genome) | (Pusa 256 & HPNB) | NCBI SNPdb Accession IDs |
|---------------------|----------------|-------------|-------------------------|---------------------------------|-------------------|--------------------------|
| SNP_P3_140203_10384 | NW_004516262.1 | Scaffold909 | 10384                   | GG                              | AA                | 1946627901               |
| SNP_P3_140204_10407 | NW_004516262.1 | Scaffold909 | 10407                   | AA                              | CC                | 1946627903               |
| SNP_P3_140205_10508 | NW_004516262.1 | Scaffold909 | 10508                   | TT                              | CC                | 1946627905               |
| SNP_P3_140206_10510 | NW_004516262.1 | Scaffold909 | 10510                   | CC                              | GG                | 1946627907               |
| SNP_P3_140207_10722 | NW_004516262.1 | Scaffold909 | 10722                   | GG                              | AA                | 1946627909               |
| SNP_P3_140208_11793 | NW_004516262.1 | Scaffold909 | 11793                   | GG                              | AA                | 1946627911               |
| SNP_P3_140209_14019 | NW_004516262.1 | Scaffold909 | 14019                   | CC                              | AA                | 1946627913               |
| SNP_P3_140210_16329 | NW_004516262.1 | Scaffold909 | 16329                   | TT                              | CC                | 1946627915               |
| SNP_P3_140211_16356 | NW_004516262.1 | Scaffold909 | 16356                   | GG                              | CC                | 1946627917               |
| SNP_P3_140212_16672 | NW_004516262.1 | Scaffold909 | 16672                   | CC                              | AA                | 1946627919               |
| SNP_P3_140213_18137 | NW_004516262.1 | Scaffold909 | 18137                   | TT                              | CC                | 1946627921               |
| SNP_P3_140214_18281 | NW_004516262.1 | Scaffold909 | 18281                   | AA                              | GG                | 1946627923               |
| SNP_P3_140215_18294 | NW_004516262.1 | Scaffold909 | 18294                   | GG                              | AA                | 1946627925               |
| SNP_P3_140216_18365 | NW_004516262.1 | Scaffold909 | 18365                   | CC                              | GG                | 1946627927               |
| SNP_P3_140217_18445 | NW_004516262.1 | Scaffold909 | 18445                   | CC                              | TT                | 1946627929               |
| SNP_P3_140218_18453 | NW_004516262.1 | Scaffold909 | 18453                   | TT                              | CC                | 1946627931               |
| SNP_P3_140219_18541 | NW_004516262.1 | Scaffold909 | 18541                   | TT                              | GG                | 1946627934               |
| SNP_P3_140220_18564 | NW_004516262.1 | Scaffold909 | 18564                   | TT                              | AA                | 1946627936               |
| SNP_P3_140221_18567 | NW_004516262.1 | Scaffold909 | 18567                   | AA                              | TT                | 1946627938               |
| SNP_P3_140222_21123 | NW_004516262.1 | Scaffold909 | 21123                   | GG                              | AA                | 1946627940               |
| SNP_P3_140223_21787 | NW_004516262.1 | Scaffold909 | 21787                   | GG                              | AA                | 1946627942               |
| SNP_P3_140224_22128 | NW_004516262.1 | Scaffold909 | 22128                   | AA                              | TT                | 1946627944               |
| SNP_P3_140225_22129 | NW_004516262.1 | Scaffold909 | 22129                   | TT                              | AA                | 1946627946               |
| SNP_P3_140226_22202 | NW_004516262.1 | Scaffold909 | 22202                   | TT                              | CC                | 1946627948               |
| SNP_P3_140227_22481 | NW_004516262.1 | Scaffold909 | 22481                   | AA                              | TT                | 1946627950               |
| SNP_P3_140228_22746 | NW_004516262.1 | Scaffold909 | 22746                   | TT                              | CC                | 1946627952               |
| SNP_P3_140229_23990 | NW_004516262.1 | Scaffold909 | 23990                   | AA                              | GG                | 1946627954               |
| SNP_P3_140230_24797 | NW_004516262.1 | Scaffold909 | 24797                   | GG                              | AA                | 1946627956               |
| SNP_P3_140231_25077 | NW_004516262.1 | Scaffold909 | 25077                   | GG                              | CC                | 1946627958               |
| SNP_P3_140232_26216 | NW_004516262.1 | Scaffold909 | 26216                   | AA                              | GG                | 1946627960               |
| SNP_P3_140233_26313 | NW_004516262.1 | Scaffold909 | 26313                   | CC                              | GG                | 1946627962               |
| SNP_P3_140234_26331 | NW_004516262.1 | Scaffold909 | 26331                   | GG                              | AA                | 1946627964               |
| SNP_P3_140235_26392 | NW_004516262.1 | Scaffold909 | 26392                   | GG                              | AA                | 1946627966               |
| SNP_P3_140236_26541 | NW_004516262.1 | Scaffold909 | 26541                   | TT                              | CC                | 1946627968               |
| SNP_P3_140238_26705 | NW_004516262.1 | Scaffold909 | 26705                   | AA                              | CC                | 1946627970               |
| SNP_P3_140239_26782 | NW_004516262.1 | Scaffold909 | 26782                   | TT                              | CC                | 1946627972               |
| SNP_P3_140240_26846 | NW_004516262.1 | Scaffold909 | 26846                   | GG                              | AA                | 1946627974               |
| SNP_P3_140241_26882 | NW_004516262.1 | Scaffold909 | 26882                   | AA                              | GG                | 1946627976               |
| SNP_P3_140242_26997 | NW_004516262.1 | Scaffold909 | 26997                   | GG                              | AA                | 1946627978               |
| SNP_P3_140243_27056 | NW_004516262.1 | Scaffold909 | 27056                   | CC                              | GG                | 1946627980               |
| SNP_P3_140244_27202 | NW_004516262.1 | Scaffold909 | 27202                   | GG                              | AA                | 1946627982               |
| SNP_P3_140245_27214 | NW_004516262.1 | Scaffold909 | 27214                   | AA                              | GG                | 1946627984               |

| SNPs IDs            | Chromosome IDs | Chromosomes | Physical positions (bp) | CDC Frontier (Reference genome) | (Pusa 256 & HPNB) | NCBI SNPdb Accession IDs |
|---------------------|----------------|-------------|-------------------------|---------------------------------|-------------------|--------------------------|
| SNP_P3_140246_27216 | NW_004516262.1 | Scaffold909 | 27216                   | TT                              | CC                | 1946627986               |
| SNP_P3_140247_27243 | NW_004516262.1 | Scaffold909 | 27243                   | AA                              | CC                | 1946627988               |
| SNP_P3_140248_27269 | NW_004516262.1 | Scaffold909 | 27269                   | CC                              | TT                | 1946627990               |
| SNP_P3_140249_27397 | NW_004516262.1 | Scaffold909 | 27397                   | AA                              | GG                | 1946627992               |
| SNP_P3_140250_27586 | NW_004516262.1 | Scaffold909 | 27586                   | CC                              | TT                | 1946627994               |
| SNP_P3_140251_28947 | NW_004516262.1 | Scaffold909 | 28947                   | AA                              | CC                | 1946627996               |
| SNP_P3_140252_29173 | NW_004516262.1 | Scaffold909 | 29173                   | AA                              | GG                | 1946627998               |
| SNP_P3_140253_29231 | NW_004516262.1 | Scaffold909 | 29231                   | CC                              | AA                | 1946628000               |
| SNP_P3_140254_29415 | NW_004516262.1 | Scaffold909 | 29415                   | CC                              | GG                | 1946628002               |
| SNP_P3_140255_29428 | NW_004516262.1 | Scaffold909 | 29428                   | AA                              | GG                | 1946628004               |
| SNP_P3_140256_29440 | NW_004516262.1 | Scaffold909 | 29440                   | TT                              | AA                | 1946628006               |
| SNP_P3_140257_29445 | NW_004516262.1 | Scaffold909 | 29445                   | TT                              | AA                | 1946628008               |
| SNP_P3_140258_29465 | NW_004516262.1 | Scaffold909 | 29465                   | CC                              | TT                | 1946628010               |
| SNP_P3_140259_31482 | NW_004516262.1 | Scaffold909 | 31482                   | GG                              | AA                | 1946628012               |
| SNP_P3_140260_31491 | NW_004516262.1 | Scaffold909 | 31491                   | GG                              | AA                | 1946628014               |
| SNP_P3_140261_32868 | NW_004516262.1 | Scaffold909 | 32868                   | CC                              | AA                | 1946628016               |
| SNP_P3_140262_33589 | NW_004516262.1 | Scaffold909 | 33589                   | CC                              | TT                | 1946628017               |
| SNP_P3_140263_35811 | NW_004516262.1 | Scaffold909 | 35811                   | CC                              | AA                | 1946628018               |
| SNP_P3_140264_35861 | NW_004516262.1 | Scaffold909 | 35861                   | GG                              | AA                | 1946628019               |
| SNP_P3_140265_35933 | NW_004516262.1 | Scaffold909 | 35933                   | GG                              | AA                | 1946628020               |
| SNP_P3_140266_35975 | NW_004516262.1 | Scaffold909 | 35975                   | TT                              | CC                | 1946628022               |
| SNP_P3_140267_35982 | NW_004516262.1 | Scaffold909 | 35982                   | TT                              | CC                | 1946628024               |
| SNP_P3_140268_35990 | NW_004516262.1 | Scaffold909 | 35990                   | CC                              | TT                | 1946628027               |
| SNP_P3_140269_36043 | NW_004516262.1 | Scaffold909 | 36043                   | AA                              | TT                | 1946628029               |
| SNP_P3_140270_36110 | NW_004516262.1 | Scaffold909 | 36110                   | AA                              | GG                | 1946628031               |
| SNP_P3_140271_36133 | NW_004516262.1 | Scaffold909 | 36133                   | GG                              | TT                | 1946628033               |
| SNP_P3_140272_38483 | NW_004516262.1 | Scaffold909 | 38483                   | GG                              | AA                | 1946628035               |
| SNP_P3_140273_40008 | NW_004516262.1 | Scaffold909 | 40008                   | GG                              | TT                | 1946628037               |
| SNP_P3_140275_41229 | NW_004516262.1 | Scaffold909 | 41229                   | CC                              | TT                | 1946628038               |
| SNP_P3_140276_43506 | NW_004516262.1 | Scaffold909 | 43506                   | GG                              | TT                | 1946628039               |
| SNP_P3_140277_45877 | NW_004516262.1 | Scaffold909 | 45877                   | TT                              | GG                | 1946628040               |
| SNP_P3_140278_53335 | NW_004516262.1 | Scaffold909 | 53335                   | AA                              | GG                | 1946628041               |
| SNP_P3_140279_53362 | NW_004516262.1 | Scaffold909 | 53362                   | GG                              | TT                | 1946628042               |
| SNP_P3_140280_53611 | NW_004516262.1 | Scaffold909 | 53611                   | TT                              | CC                | 1946628043               |
| SNP_P3_140281_53620 | NW_004516262.1 | Scaffold909 | 53620                   | AA                              | GG                | 1946628045               |
| SNP_P3_140282_53886 | NW_004516262.1 | Scaffold909 | 53886                   | CC                              | TT                | 1946628047               |
| SNP_P3_140283_54000 | NW_004516262.1 | Scaffold909 | 54000                   | TT                              | CC                | 1946628049               |
| SNP_P3_140284_54069 | NW_004516262.1 | Scaffold909 | 54069                   | TT                              | CC                | 1946628051               |
| SNP_P3_140285_54103 | NW_004516262.1 | Scaffold909 | 54103                   | GG                              | TT                | 1946628053               |
| SNP_P3_140286_54146 | NW_004516262.1 | Scaffold909 | 54146                   | CC                              | TT                | 1946628055               |
| SNP_P3_140287_54224 | NW_004516262.1 | Scaffold909 | 54224                   | CC                              | TT                | 1946628057               |
| SNP_P3_140288_54430 | NW_004516262.1 | Scaffold909 | 54430                   | AA                              | CC                | 1946628059               |

| SNPs IDs             | Chromosome IDs | Chromosomes | Physical positions (bp) | CDC Frontier (Reference genome) | (Pusa 256 & HPNB) | NCBI SNPdb Accession IDs |
|----------------------|----------------|-------------|-------------------------|---------------------------------|-------------------|--------------------------|
| SNP_P3_140289_54456  | NW_004516262.1 | Scaffold909 | 54456                   | TT                              | AA                | 1946628061               |
| SNP_P3_140290_3938   | NW_004516263.1 | Scaffold910 | 3938                    | TT                              | CC                | 1946628063               |
| SNP_P3_140291_8557   | NW_004516263.1 | Scaffold910 | 8557                    | CC                              | TT                | 1946628065               |
| SNP_P3_140292_8620   | NW_004516263.1 | Scaffold910 | 8620                    | AA                              | GG                | 1946628067               |
| SNP_P3_140293_2231   | NW_004516264.1 | Scaffold913 | 2231                    | TT                              | CC                | 1946628069               |
| SNP_P3_140294_82828  | NW_004516264.1 | Scaffold913 | 82828                   | AA                              | TT                | 1946628071               |
| SNP_P3_140295_82830  | NW_004516264.1 | Scaffold913 | 82830                   | AA                              | CC                | 1946628073               |
| SNP_P3_140296_125373 | NW_004516264.1 | Scaffold913 | 125373                  | TT                              | CC                | 1946628075               |
| SNP_P3_140297_125390 | NW_004516264.1 | Scaffold913 | 125390                  | CC                              | TT                | 1946628077               |
| SNP_P3_140298_125392 | NW_004516264.1 | Scaffold913 | 125392                  | CC                              | TT                | 1946628079               |
| SNP_P3_140299_125397 | NW_004516264.1 | Scaffold913 | 125397                  | GG                              | TT                | 1946628081               |
| SNP_P3_140300_125399 | NW_004516264.1 | Scaffold913 | 125399                  | CC                              | TT                | 1946628083               |
| SNP_P3_140301_139074 | NW_004516264.1 | Scaffold913 | 139074                  | TT                              | GG                | 1946628085               |
| SNP_P3_140302_139166 | NW_004516264.1 | Scaffold913 | 139166                  | AA                              | GG                | 1946628087               |
| SNP_P3_140303_139215 | NW_004516264.1 | Scaffold913 | 139215                  | TT                              | CC                | 1946628089               |
| SNP_P3_140304_139463 | NW_004516264.1 | Scaffold913 | 139463                  | GG                              | AA                | 1946628091               |
| SNP_P3_140305_139831 | NW_004516264.1 | Scaffold913 | 139831                  | CC                              | TT                | 1946628093               |
| SNP_P3_140306_139860 | NW_004516264.1 | Scaffold913 | 139860                  | AA                              | GG                | 1946628095               |
| SNP_P3_140307_140587 | NW_004516264.1 | Scaffold913 | 140587                  | TT                              | CC                | 1946628097               |
| SNP_P3_140308_140658 | NW_004516264.1 | Scaffold913 | 140658                  | GG                              | AA                | 1946628099               |
| SNP_P3_140309_140686 | NW_004516264.1 | Scaffold913 | 140686                  | GG                              | CC                | 1946628101               |
| SNP_P3_140311_140861 | NW_004516264.1 | Scaffold913 | 140861                  | AA                              | GG                | 1946628103               |
| SNP_P3_140312_140862 | NW_004516264.1 | Scaffold913 | 140862                  | TT                              | GG                | 1946628105               |
| SNP_P3_140313_140863 | NW_004516264.1 | Scaffold913 | 140863                  | GG                              | AA                | 1946628107               |
| SNP_P3_140314_140908 | NW_004516264.1 | Scaffold913 | 140908                  | GG                              | AA                | 1946628109               |
| SNP_P3_140315_140923 | NW_004516264.1 | Scaffold913 | 140923                  | CC                              | TT                | 1946628111               |
| SNP_P3_140316_140925 | NW_004516264.1 | Scaffold913 | 140925                  | GG                              | AA                | 1946628113               |
| SNP_P3_140317_140931 | NW_004516264.1 | Scaffold913 | 140931                  | GG                              | AA                | 1946628115               |
| SNP_P3_140318_140957 | NW_004516264.1 | Scaffold913 | 140957                  | CC                              | AA                | 1946628117               |
| SNP_P3_140319_140989 | NW_004516264.1 | Scaffold913 | 140989                  | AA                              | GG                | 1946628119               |
| SNP_P3_140320_141018 | NW_004516264.1 | Scaffold913 | 141018                  | GG                              | AA                | 1946628121               |
| SNP_P3_140321_141045 | NW_004516264.1 | Scaffold913 | 141045                  | AA                              | TT                | 1946628123               |
| SNP_P3_140322_141049 | NW_004516264.1 | Scaffold913 | 141049                  | AA                              | TT                | 1946628126               |
| SNP_P3_140323_141055 | NW_004516264.1 | Scaffold913 | 141055                  | AA                              | TT                | 1946628128               |
| SNP_P3_140324_141101 | NW_004516264.1 | Scaffold913 | 141101                  | AA                              | GG                | 1946628131               |
| SNP_P3_140325_141103 | NW_004516264.1 | Scaffold913 | 141103                  | CC                              | TT                | 1946628133               |
| SNP_P3_140326_141134 | NW_004516264.1 | Scaffold913 | 141134                  | TT                              | AA                | 1946628136               |
| SNP_P3_140327_141147 | NW_004516264.1 | Scaffold913 | 141147                  | TT                              | AA                | 1946628138               |
| SNP_P3_140328_141154 | NW_004516264.1 | Scaffold913 | 141154                  | GG                              | AA                | 1946628140               |
| SNP_P3_140329_141171 | NW_004516264.1 | Scaffold913 | 141171                  | AA                              | GG                | 1946628142               |
| SNP_P3_140330_141263 | NW_004516264.1 | Scaffold913 | 141263                  | CC                              | GG                | 1946628144               |
| SNP_P3_140331_141271 | NW_004516264.1 | Scaffold913 | 141271                  | AA                              | GG                | 1946628146               |

| SNPs IDs             | Chromosome IDs | Chromosomes | Physical positions (bp) | CDC Frontier (Reference genome) | (Pusa 256 & HPNB) | NCBI SNPdb Accession IDs |
|----------------------|----------------|-------------|-------------------------|---------------------------------|-------------------|--------------------------|
| SNP_P3_140332_143824 | NW_004516264.1 | Scaffold913 | 143824                  | AA                              | GG                | 1946628148               |
| SNP_P3_140333_143829 | NW_004516264.1 | Scaffold913 | 143829                  | TT                              | GG                | 1946628150               |
| SNP_P3_140334_145308 | NW_004516264.1 | Scaffold913 | 145308                  | TT                              | CC                | 1946628152               |
| SNP_P3_140335_145314 | NW_004516264.1 | Scaffold913 | 145314                  | GG                              | TT                | 1946628154               |
| SNP_P3_140336_145607 | NW_004516264.1 | Scaffold913 | 145607                  | GG                              | AA                | 1946628156               |
| SNP_P3_140337_146246 | NW_004516264.1 | Scaffold913 | 146246                  | AA                              | TT                | 1946628158               |
| SNP_P3_140338_146256 | NW_004516264.1 | Scaffold913 | 146256                  | AA                              | GG                | 1946628160               |
| SNP_P3_140339_153891 | NW_004516264.1 | Scaffold913 | 153891                  | GG                              | AA                | 1946628162               |
| SNP_P3_140340_153952 | NW_004516264.1 | Scaffold913 | 153952                  | GG                              | TT                | 1946628164               |
| SNP_P3_140341_167264 | NW_004516264.1 | Scaffold913 | 167264                  | AA                              | GG                | 1946628166               |
| SNP_P3_140343_221954 | NW_004516264.1 | Scaffold913 | 221954                  | TT                              | CC                | 1946628168               |
| SNP_P3_140344_227204 | NW_004516264.1 | Scaffold913 | 227204                  | AA                              | TT                | 1946628170               |
| SNP_P3_140345_227366 | NW_004516264.1 | Scaffold913 | 227366                  | GG                              | AA                | 1946628172               |
| SNP_P3_140346_229350 | NW_004516264.1 | Scaffold913 | 229350                  | GG                              | AA                | 1946628174               |
| SNP_P3_140347_230274 | NW_004516264.1 | Scaffold913 | 230274                  | TT                              | CC                | 1946628176               |
| SNP_P3_140348_230299 | NW_004516264.1 | Scaffold913 | 230299                  | TT                              | CC                | 1946628178               |
| SNP_P3_140349_230400 | NW_004516264.1 | Scaffold913 | 230400                  | AA                              | CC                | 1946628180               |
| SNP_P3_140350_230404 | NW_004516264.1 | Scaffold913 | 230404                  | TT                              | CC                | 1946628182               |
| SNP_P3_140351_230783 | NW_004516264.1 | Scaffold913 | 230783                  | TT                              | AA                | 1946628184               |
| SNP_P3_140352_230784 | NW_004516264.1 | Scaffold913 | 230784                  | TT                              | AA                | 1946628186               |
| SNP_P3_140353_230860 | NW_004516264.1 | Scaffold913 | 230860                  | CC                              | AA                | 1946628188               |
| SNP_P3_140354_230970 | NW_004516264.1 | Scaffold913 | 230970                  | AA                              | TT                | 1946628190               |
| SNP_P3_140356_231121 | NW_004516264.1 | Scaffold913 | 231121                  | TT                              | CC                | 1946628192               |
| SNP_P3_140357_231244 | NW_004516264.1 | Scaffold913 | 231244                  | CC                              | GG                | 1946628194               |
| SNP_P3_140358_231272 | NW_004516264.1 | Scaffold913 | 231272                  | CC                              | TT                | 1946628197               |
| SNP_P3_140359_251874 | NW_004516264.1 | Scaffold913 | 251874                  | AA                              | TT                | 1946628199               |
| SNP_P3_140361_276092 | NW_004516264.1 | Scaffold913 | 276092                  | AA                              | GG                | 1946628201               |
| SNP_P3_140362_276128 | NW_004516264.1 | Scaffold913 | 276128                  | AA                              | GG                | 1946628203               |
| SNP_P3_140363_276347 | NW_004516264.1 | Scaffold913 | 276347                  | CC                              | TT                | 1946628205               |
| SNP_P3_140364_276361 | NW_004516264.1 | Scaffold913 | 276361                  | CC                              | TT                | 1946628207               |
| SNP_P3_140365_276400 | NW_004516264.1 | Scaffold913 | 276400                  | TT                              | CC                | 1946628209               |
| SNP_P3_140366_276401 | NW_004516264.1 | Scaffold913 | 276401                  | TT                              | AA                | 1946628211               |
| SNP_P3_140367_276437 | NW_004516264.1 | Scaffold913 | 276437                  | GG                              | AA                | 1946628213               |
| SNP_P3_140369_283469 | NW_004516264.1 | Scaffold913 | 283469                  | AA                              | GG                | 1946628215               |
| SNP_P3_140370_296010 | NW_004516264.1 | Scaffold913 | 296010                  | AA                              | GG                | 1946628217               |
| SNP_P3_140371_304516 | NW_004516264.1 | Scaffold913 | 304516                  | CC                              | GG                | 1946628219               |
| SNP_P3_140372_304933 | NW_004516264.1 | Scaffold913 | 304933                  | CC                              | GG                | 1946628221               |
| SNP_P3_140373_305899 | NW_004516264.1 | Scaffold913 | 305899                  | CC                              | TT                | 1946628223               |
| SNP_P3_140374_305917 | NW_004516264.1 | Scaffold913 | 305917                  | GG                              | AA                | 1946628225               |
| SNP_P3_140375_306028 | NW_004516264.1 | Scaffold913 | 306028                  | CC                              | TT                | 1946628227               |
| SNP_P3_140376_306344 | NW_004516264.1 | Scaffold913 | 306344                  | TT                              | CC                | 1946628229               |
| SNP_P3_140377_306749 | NW_004516264.1 | Scaffold913 | 306749                  | AA                              | GG                | 1946628231               |

| SNPs IDs             | Chromosome IDs | Chromosomes | Physical positions (bp) | CDC Frontier (Reference genome) | (Pusa 256 & HPNB) | NCBI SNPdb Accession IDs |
|----------------------|----------------|-------------|-------------------------|---------------------------------|-------------------|--------------------------|
| SNP_P3_140378_310132 | NW_004516264.1 | Scaffold913 | 310132                  | TT                              | CC                | 1946628233               |
| SNP_P3_140379_310138 | NW_004516264.1 | Scaffold913 | 310138                  | CC                              | GG                | 1946628235               |
| SNP_P3_140380_310310 | NW_004516264.1 | Scaffold913 | 310310                  | AA                              | GG                | 1946628237               |
| SNP_P3_140381_312205 | NW_004516264.1 | Scaffold913 | 312205                  | CC                              | TT                | 1946628240               |
| SNP_P3_140382_318698 | NW_004516264.1 | Scaffold913 | 318698                  | GG                              | AA                | 1946628242               |
| SNP_P3_140383_318878 | NW_004516264.1 | Scaffold913 | 318878                  | CC                              | AA                | 1946628244               |
| SNP_P3_140384_318925 | NW_004516264.1 | Scaffold913 | 318925                  | GG                              | TT                | 1946628246               |
| SNP_P3_140385_357930 | NW_004516264.1 | Scaffold913 | 357930                  | TT                              | CC                | 1946628248               |
| SNP_P3_140386_357961 | NW_004516264.1 | Scaffold913 | 357961                  | AA                              | GG                | 1946628250               |
| SNP_P3_140387_381721 | NW_004516264.1 | Scaffold913 | 381721                  | AA                              | GG                | 1946628252               |
| SNP_P3_140388_396654 | NW_004516264.1 | Scaffold913 | 396654                  | AA                              | GG                | 1946628254               |
| SNP_P3_140389_4821   | NW_004516265.1 | Scaffold914 | 4821                    | TT                              | AA                | 1946628256               |
| SNP_P3_140390_5592   | NW_004516265.1 | Scaffold914 | 5592                    | GG                              | AA                | 1946628258               |
| SNP_P3_140391_6179   | NW_004516265.1 | Scaffold914 | 6179                    | TT                              | CC                | 1946628260               |
| SNP_P3_140392_9091   | NW_004516265.1 | Scaffold914 | 9091                    | AA                              | CC                | 1946628262               |
| SNP_P3_140394_17716  | NW_004516265.1 | Scaffold914 | 17716                   | TT                              | AA                | 1946628264               |
| SNP_P3_140395_20633  | NW_004516265.1 | Scaffold914 | 20633                   | CC                              | TT                | 1946628266               |
| SNP_P3_140396_20635  | NW_004516265.1 | Scaffold914 | 20635                   | AA                              | GG                | 1946628268               |
| SNP_P3_140397_20647  | NW_004516265.1 | Scaffold914 | 20647                   | TT                              | AA                | 1946628270               |
| SNP_P3_140398_20650  | NW_004516265.1 | Scaffold914 | 20650                   | GG                              | AA                | 1946628272               |
| SNP_P3_140399_20664  | NW_004516265.1 | Scaffold914 | 20664                   | TT                              | AA                | 1946628274               |
| SNP_P3_140400_20668  | NW_004516265.1 | Scaffold914 | 20668                   | GG                              | CC                | 1946628276               |
| SNP_P3_140401_20673  | NW_004516265.1 | Scaffold914 | 20673                   | CC                              | TT                | 1946628278               |
| SNP_P3_140402_20680  | NW_004516265.1 | Scaffold914 | 20680                   | AA                              | GG                | 1946628280               |
| SNP_P3_140403_20717  | NW_004516265.1 | Scaffold914 | 20717                   | AA                              | TT                | 1946628282               |
| SNP_P3_140404_20738  | NW_004516265.1 | Scaffold914 | 20738                   | AA                              | GG                | 1946628284               |
| SNP_P3_140405_20806  | NW_004516265.1 | Scaffold914 | 20806                   | TT                              | GG                | 1946628286               |
| SNP_P3_140406_20909  | NW_004516265.1 | Scaffold914 | 20909                   | TT                              | CC                | 1946628288               |
| SNP_P3_140407_21011  | NW_004516265.1 | Scaffold914 | 21011                   | AA                              | CC                | 1946628290               |
| SNP_P3_140408_21033  | NW_004516265.1 | Scaffold914 | 21033                   | TT                              | GG                | 1946628292               |
| SNP_P3_140409_21041  | NW_004516265.1 | Scaffold914 | 21041                   | TT                              | CC                | 1946628294               |
| SNP_P3_140410_21043  | NW_004516265.1 | Scaffold914 | 21043                   | TT                              | CC                | 1946628296               |
| SNP_P3_140411_21055  | NW_004516265.1 | Scaffold914 | 21055                   | GG                              | AA                | 1946628298               |
| SNP_P3_140412_21061  | NW_004516265.1 | Scaffold914 | 21061                   | GG                              | AA                | 1946628300               |
| SNP_P3_140413_22456  | NW_004516265.1 | Scaffold914 | 22456                   | GG                              | AA                | 1946628302               |
| SNP_P3_140414_26777  | NW_004516265.1 | Scaffold914 | 26777                   | GG                              | TT                | 1946628304               |
| SNP_P3_140415_27210  | NW_004516265.1 | Scaffold914 | 27210                   | CC                              | TT                | 1946628306               |
| SNP_P3_140416_27234  | NW_004516265.1 | Scaffold914 | 27234                   | GG                              | TT                | 1946628308               |
| SNP_P3_140417_27254  | NW_004516265.1 | Scaffold914 | 27254                   | CC                              | TT                | 1946628310               |
| SNP_P3_140418_27276  | NW_004516265.1 | Scaffold914 | 27276                   | TT                              | CC                | 1946628312               |
| SNP_P3_140419_27281  | NW_004516265.1 | Scaffold914 | 27281                   | TT                              | AA                | 1946628314               |
| SNP_P3_140420_31748  | NW_004516265.1 | Scaffold914 | 31748                   | AA                              | GG                | 1946628316               |

| SNPs IDs             | Chromosome IDs | Chromosomes | Physical positions (bp) | CDC Frontier (Reference genome) | (Pusa 256 & HPNB) | NCBI SNPdb Accession IDs |
|----------------------|----------------|-------------|-------------------------|---------------------------------|-------------------|--------------------------|
| SNP_P3_140421_31754  | NW_004516265.1 | Scaffold914 | 31754                   | GG                              | AA                | 1946628318               |
| SNP_P3_140422_31763  | NW_004516265.1 | Scaffold914 | 31763                   | AA                              | CC                | 1946628320               |
| SNP_P3_140423_31976  | NW_004516265.1 | Scaffold914 | 31976                   | AA                              | GG                | 1946628322               |
| SNP_P3_140424_32509  | NW_004516265.1 | Scaffold914 | 32509                   | CC                              | AA                | 1946628324               |
| SNP_P3_140425_32720  | NW_004516265.1 | Scaffold914 | 32720                   | AA                              | GG                | 1946628327               |
| SNP_P3_140426_41454  | NW_004516265.1 | Scaffold914 | 41454                   | AA                              | GG                | 1946628329               |
| SNP_P3_140427_41459  | NW_004516265.1 | Scaffold914 | 41459                   | TT                              | CC                | 1946628331               |
| SNP_P3_140428_41502  | NW_004516265.1 | Scaffold914 | 41502                   | GG                              | CC                | 1946628333               |
| SNP_P3_140429_82451  | NW_004516265.1 | Scaffold914 | 82451                   | GG                              | AA                | 1946628335               |
| SNP_P3_140430_82802  | NW_004516265.1 | Scaffold914 | 82802                   | CC                              | TT                | 1946628337               |
| SNP_P3_140431_85871  | NW_004516265.1 | Scaffold914 | 85871                   | AA                              | CC                | 1946628339               |
| SNP_P3_140432_120984 | NW_004516265.1 | Scaffold914 | 120984                  | AA                              | CC                | 1946628341               |
| SNP_P3_140433_125258 | NW_004516265.1 | Scaffold914 | 125258                  | CC                              | TT                | 1946628343               |
| SNP_P3_140434_126229 | NW_004516265.1 | Scaffold914 | 126229                  | AA                              | GG                | 1946628345               |
| SNP_P3_140435_126724 | NW_004516265.1 | Scaffold914 | 126724                  | AA                              | GG                | 1946628347               |
| SNP_P3_140436_126725 | NW_004516265.1 | Scaffold914 | 126725                  | TT                              | AA                | 1946628349               |
| SNP_P3_140437_129455 | NW_004516265.1 | Scaffold914 | 129455                  | CC                              | TT                | 1946628351               |
| SNP_P3_140438_131311 | NW_004516265.1 | Scaffold914 | 131311                  | TT                              | CC                | 1946628353               |
| SNP_P3_140439_131547 | NW_004516265.1 | Scaffold914 | 131547                  | AA                              | GG                | 1946628355               |
| SNP_P3_140440_131589 | NW_004516265.1 | Scaffold914 | 131589                  | GG                              | CC                | 1946628357               |
| SNP_P3_140441_133865 | NW_004516265.1 | Scaffold914 | 133865                  | GG                              | AA                | 1946628359               |
| SNP_P3_140443_152205 | NW_004516265.1 | Scaffold914 | 152205                  | CC                              | TT                | 1946628361               |
| SNP_P3_140444_152214 | NW_004516265.1 | Scaffold914 | 152214                  | GG                              | AA                | 1946628363               |
| SNP_P3_140445_152302 | NW_004516265.1 | Scaffold914 | 152302                  | AA                              | GG                | 1946628365               |
| SNP_P3_140446_158958 | NW_004516265.1 | Scaffold914 | 158958                  | AA                              | TT                | 1946628367               |
| SNP_P3_140448_425    | NW_004516266.1 | Scaffold916 | 425                     | TT                              | CC                | 1946628369               |
| SNP_P3_140449_594    | NW_004516266.1 | Scaffold916 | 594                     | GG                              | AA                | 1946628371               |
| SNP_P3_140450_708    | NW_004516266.1 | Scaffold916 | 708                     | TT                              | CC                | 1946628374               |
| SNP_P3_140451_2178   | NW_004516266.1 | Scaffold916 | 2178                    | AA                              | GG                | 1946628376               |
| SNP_P3_140452_3203   | NW_004516266.1 | Scaffold916 | 3203                    | GG                              | TT                | 1946628378               |
| SNP_P3_140456_3962   | NW_004516266.1 | Scaffold916 | 3962                    | GG                              | AA                | 1946628380               |
| SNP_P3_140457_4026   | NW_004516266.1 | Scaffold916 | 4026                    | CC                              | GG                | 1946628382               |
| SNP_P3_140458_4188   | NW_004516266.1 | Scaffold916 | 4188                    | CC                              | TT                | 1946628384               |
| SNP_P3_140459_4225   | NW_004516266.1 | Scaffold916 | 4225                    | GG                              | AA                | 1946628386               |
| SNP_P3_140460_4266   | NW_004516266.1 | Scaffold916 | 4266                    | AA                              | GG                | 1946628388               |
| SNP_P3_140463_4440   | NW_004516266.1 | Scaffold916 | 4440                    | GG                              | TT                | 1946628390               |
| SNP_P3_140464_4503   | NW_004516266.1 | Scaffold916 | 4503                    | TT                              | AA                | 1946628392               |
| SNP_P3_140465_4582   | NW_004516266.1 | Scaffold916 | 4582                    | TT                              | CC                | 1946628394               |
| SNP_P3_140466_4671   | NW_004516266.1 | Scaffold916 | 4671                    | CC                              | TT                | 1946628396               |
| SNP_P3_140467_4710   | NW_004516266.1 | Scaffold916 | 4710                    | TT                              | GG                | 1946628398               |
| SNP_P3_140468_4719   | NW_004516266.1 | Scaffold916 | 4719                    | GG                              | AA                | 1946628400               |
| SNP_P3_140471_4908   | NW_004516266.1 | Scaffold916 | 4908                    | GG                              | AA                | 1946628402               |

| SNPs IDs           | Chromosome IDs | Chromosomes | Physical positions (bp) | CDC Frontier (Reference genome) | (Pusa 256 & HPNB) | NCBI SNPdb Accession IDs |
|--------------------|----------------|-------------|-------------------------|---------------------------------|-------------------|--------------------------|
| SNP_P3_140472_4935 | NW_004516266.1 | Scaffold916 | 4935                    | AA                              | GG                | 1946628404               |
| SNP_P3_140473_5095 | NW_004516266.1 | Scaffold916 | 5095                    | CC                              | TT                | 1946628406               |
| SNP_P3_140474_5162 | NW_004516266.1 | Scaffold916 | 5162                    | GG                              | CC                | 1946628408               |
| SNP_P3_140475_5286 | NW_004516266.1 | Scaffold916 | 5286                    | TT                              | GG                | 1946628410               |
| SNP_P3_140477_5353 | NW_004516266.1 | Scaffold916 | 5353                    | CC                              | TT                | 1946628412               |
| SNP_P3_140478_5387 | NW_004516266.1 | Scaffold916 | 5387                    | AA                              | GG                | 1946628414               |
| SNP_P3_140479_7624 | NW_004516266.1 | Scaffold916 | 7624                    | CC                              | TT                | 1946628416               |
| SNP_P3_140480_7634 | NW_004516266.1 | Scaffold916 | 7634                    | AA                              | GG                | 1946628419               |
| SNP_P3_140481_7636 | NW_004516266.1 | Scaffold916 | 7636                    | TT                              | AA                | 1946628421               |
| SNP_P3_140482_7654 | NW_004516266.1 | Scaffold916 | 7654                    | CC                              | AA                | 1946628423               |
| SNP_P3_140483_7675 | NW_004516266.1 | Scaffold916 | 7675                    | TT                              | CC                | 1946628425               |
| SNP_P3_140484_7680 | NW_004516266.1 | Scaffold916 | 7680                    | AA                              | TT                | 1946628427               |
| SNP_P3_140485_7744 | NW_004516266.1 | Scaffold916 | 7744                    | TT                              | AA                | 1946628429               |
| SNP_P3_140486_7834 | NW_004516266.1 | Scaffold916 | 7834                    | AA                              | GG                | 1946628431               |
| SNP_P3_140488_7938 | NW_004516266.1 | Scaffold916 | 7938                    | AA                              | GG                | 1946628433               |
| SNP_P3_140489_8073 | NW_004516266.1 | Scaffold916 | 8073                    | CC                              | AA                | 1946628435               |
| SNP_P3_140490_8105 | NW_004516266.1 | Scaffold916 | 8105                    | CC                              | TT                | 1946628437               |
| SNP_P3_140491_8176 | NW_004516266.1 | Scaffold916 | 8176                    | CC                              | TT                | 1946628439               |
| SNP_P3_140494_8323 | NW_004516266.1 | Scaffold916 | 8323                    | GG                              | AA                | 1946628441               |
| SNP_P3_140495_8349 | NW_004516266.1 | Scaffold916 | 8349                    | GG                              | AA                | 1946628443               |
| SNP_P3_140496_8520 | NW_004516266.1 | Scaffold916 | 8520                    | CC                              | GG                | 1946628445               |
| SNP_P3_140497_8535 | NW_004516266.1 | Scaffold916 | 8535                    | AA                              | TT                | 1946628447               |
| SNP_P3_140498_8538 | NW_004516266.1 | Scaffold916 | 8538                    | TT                              | AA                | 1946628449               |
| SNP_P3_140499_8568 | NW_004516266.1 | Scaffold916 | 8568                    | TT                              | CC                | 1946628451               |
| SNP_P3_140500_8570 | NW_004516266.1 | Scaffold916 | 8570                    | GG                              | AA                | 1946628453               |
| SNP_P3_140501_8580 | NW_004516266.1 | Scaffold916 | 8580                    | TT                              | AA                | 1946628455               |
| SNP_P3_140502_8583 | NW_004516266.1 | Scaffold916 | 8583                    | TT                              | CC                | 1946628457               |
| SNP_P3_140503_8605 | NW_004516266.1 | Scaffold916 | 8605                    | TT                              | AA                | 1946628459               |
| SNP_P3_140504_8608 | NW_004516266.1 | Scaffold916 | 8608                    | TT                              | AA                | 1946628461               |
| SNP_P3_140505_8684 | NW_004516266.1 | Scaffold916 | 8684                    | CC                              | TT                | 1946628463               |
| SNP_P3_140506_8713 | NW_004516266.1 | Scaffold916 | 8713                    | TT                              | CC                | 1946628465               |
| SNP_P3_140507_8725 | NW_004516266.1 | Scaffold916 | 8725                    | AA                              | TT                | 1946628467               |
| SNP_P3_140508_8738 | NW_004516266.1 | Scaffold916 | 8738                    | TT                              | AA                | 1946628469               |
| SNP_P3_140509_8745 | NW_004516266.1 | Scaffold916 | 8745                    | TT                              | CC                | 1946628471               |
| SNP_P3_140510_8746 | NW_004516266.1 | Scaffold916 | 8746                    | TT                              | AA                | 1946628473               |
| SNP_P3_140511_8747 | NW_004516266.1 | Scaffold916 | 8747                    | AA                              | TT                | 1946628475               |
| SNP_P3_140512_8752 | NW_004516266.1 | Scaffold916 | 8752                    | TT                              | AA                | 1946628477               |
| SNP_P3_140513_8753 | NW_004516266.1 | Scaffold916 | 8753                    | TT                              | AA                | 1946628479               |
| SNP_P3_140514_8800 | NW_004516266.1 | Scaffold916 | 8800                    | CC                              | AA                | 1946628481               |
| SNP_P3_140515_8802 | NW_004516266.1 | Scaffold916 | 8802                    | CC                              | TT                | 1946628483               |
| SNP_P3_140516_8806 | NW_004516266.1 | Scaffold916 | 8806                    | GG                              | AA                | 1946628485               |
| SNP_P3_140517_8819 | NW_004516266.1 | Scaffold916 | 8819                    | CC                              | GG                | 1946628487               |



| SNPs IDs             | Chromosome IDs | Chromosomes | Physical positions (bp) | CDC Frontier (Reference genome) | (Pusa 256 & HPNB) | NCBI SNPdb Accession IDs |
|----------------------|----------------|-------------|-------------------------|---------------------------------|-------------------|--------------------------|
| SNP_P3_140518_8820   | NW_004516266.1 | Scaffold916 | 8820                    | AA                              | GG                | 1946628489               |
| SNP_P3_140519_8827   | NW_004516266.1 | Scaffold916 | 8827                    | GG                              | AA                | 1946628491               |
| SNP_P3_140520_8833   | NW_004516266.1 | Scaffold916 | 8833                    | GG                              | TT                | 1946628493               |
| SNP_P3_140521_8919   | NW_004516266.1 | Scaffold916 | 8919                    | CC                              | TT                | 1946628495               |
| SNP_P3_140522_8977   | NW_004516266.1 | Scaffold916 | 8977                    | CC                              | AA                | 1946628497               |
| SNP_P3_140523_8979   | NW_004516266.1 | Scaffold916 | 8979                    | AA                              | CC                | 1946628499               |
| SNP_P3_140524_8982   | NW_004516266.1 | Scaffold916 | 8982                    | AA                              | TT                | 1946628501               |
| SNP_P3_140525_9100   | NW_004516266.1 | Scaffold916 | 9100                    | GG                              | CC                | 1946628503               |
| SNP_P3_140527_9298   | NW_004516266.1 | Scaffold916 | 9298                    | CC                              | AA                | 1946628505               |
| SNP_P3_140528_9433   | NW_004516266.1 | Scaffold916 | 9433                    | CC                              | TT                | 1946628508               |
| SNP_P3_140529_9470   | NW_004516266.1 | Scaffold916 | 9470                    | TT                              | CC                | 1946628510               |
| SNP_P3_140531_9538   | NW_004516266.1 | Scaffold916 | 9538                    | AA                              | CC                | 1946628512               |
| SNP_P3_140532_9554   | NW_004516266.1 | Scaffold916 | 9554                    | TT                              | CC                | 1946628514               |
| SNP_P3_140533_9593   | NW_004516266.1 | Scaffold916 | 9593                    | AA                              | GG                | 1946628516               |
| SNP_P3_140534_9621   | NW_004516266.1 | Scaffold916 | 9621                    | AA                              | GG                | 1946628518               |
| SNP_P3_140535_9638   | NW_004516266.1 | Scaffold916 | 9638                    | TT                              | CC                | 1946628520               |
| SNP_P3_140536_9700   | NW_004516266.1 | Scaffold916 | 9700                    | CC                              | TT                | 1946628522               |
| SNP_P3_140537_9708   | NW_004516266.1 | Scaffold916 | 9708                    | AA                              | GG                | 1946628524               |
| SNP_P3_140538_9760   | NW_004516266.1 | Scaffold916 | 9760                    | GG                              | AA                | 1946628526               |
| SNP_P3_140539_9806   | NW_004516266.1 | Scaffold916 | 9806                    | AA                              | GG                | 1946628528               |
| SNP_P3_140540_9862   | NW_004516266.1 | Scaffold916 | 9862                    | TT                              | CC                | 1946628530               |
| SNP_P3_140541_9881   | NW_004516266.1 | Scaffold916 | 9881                    | TT                              | CC                | 1946628532               |
| SNP_P3_140542_9882   | NW_004516266.1 | Scaffold916 | 9882                    | TT                              | CC                | 1946628534               |
| SNP_P3_140544_18593  | NW_004516266.1 | Scaffold916 | 18593                   | TT                              | CC                | 1946628536               |
| SNP_P3_140545_18676  | NW_004516266.1 | Scaffold916 | 18676                   | AA                              | CC                | 1946628538               |
| SNP_P3_140546_22408  | NW_004516266.1 | Scaffold916 | 22408                   | CC                              | TT                | 1946628540               |
| SNP_P3_140547_33976  | NW_004516266.1 | Scaffold916 | 33976                   | CC                              | TT                | 1946628542               |
| SNP_P3_140548_49378  | NW_004516266.1 | Scaffold916 | 49378                   | CC                              | TT                | 1946628544               |
| SNP_P3_140549_80628  | NW_004516266.1 | Scaffold916 | 80628                   | AA                              | GG                | 1946628546               |
| SNP_P3_140551_89296  | NW_004516266.1 | Scaffold916 | 89296                   | TT                              | CC                | 1946628548               |
| SNP_P3_140553_90797  | NW_004516266.1 | Scaffold916 | 90797                   | AA                              | GG                | 1946628550               |
| SNP_P3_140554_101030 | NW_004516266.1 | Scaffold916 | 101030                  | AA                              | GG                | 1946628552               |
| SNP_P3_140555_101075 | NW_004516266.1 | Scaffold916 | 101075                  | GG                              | TT                | 1946628554               |
| SNP_P3_140556_101119 | NW_004516266.1 | Scaffold916 | 101119                  | CC                              | TT                | 1946628556               |
| SNP_P3_140557_101371 | NW_004516266.1 | Scaffold916 | 101371                  | AA                              | TT                | 1946628558               |
| SNP_P3_140558_101410 | NW_004516266.1 | Scaffold916 | 101410                  | GG                              | AA                | 1946628560               |
| SNP_P3_140559_101412 | NW_004516266.1 | Scaffold916 | 101412                  | TT                              | AA                | 1946628562               |
| SNP_P3_140560_101419 | NW_004516266.1 | Scaffold916 | 101419                  | TT                              | CC                | 1946628564               |
| SNP_P3_140561_101437 | NW_004516266.1 | Scaffold916 | 101437                  | TT                              | AA                | 1946628566               |
| SNP_P3_140562_101459 | NW_004516266.1 | Scaffold916 | 101459                  | TT                              | AA                | 1946628568               |
| SNP_P3_140563_101463 | NW_004516266.1 | Scaffold916 | 101463                  | AA                              | GG                | 1946628570               |
| SNP_P3_140564_105293 | NW_004516266.1 | Scaffold916 | 105293                  | TT                              | CC                | 1946628572               |

| SNPs IDs             | Chromosome IDs | Chromosomes | Physical positions (bp) | CDC Frontier (Reference genome) | (Pusa 256 & HPNB) | NCBI SNPdb Accession IDs |
|----------------------|----------------|-------------|-------------------------|---------------------------------|-------------------|--------------------------|
| SNP_P3_140565_105342 | NW_004516266.1 | Scaffold916 | 105342                  | GG                              | AA                | 1946628574               |
| SNP_P3_140566_108155 | NW_004516266.1 | Scaffold916 | 108155                  | GG                              | AA                | 1946628576               |
| SNP_P3_140567_108169 | NW_004516266.1 | Scaffold916 | 108169                  | CC                              | AA                | 1946628578               |
| SNP_P3_140568_110745 | NW_004516266.1 | Scaffold916 | 110745                  | AA                              | GG                | 1946628580               |
| SNP_P3_140569_115128 | NW_004516266.1 | Scaffold916 | 115128                  | GG                              | CC                | 1946628582               |
| SNP_P3_140570_117863 | NW_004516266.1 | Scaffold916 | 117863                  | CC                              | AA                | 1946628584               |
| SNP_P3_140572_117954 | NW_004516266.1 | Scaffold916 | 117954                  | TT                              | AA                | 1946628586               |
| SNP_P3_140573_118326 | NW_004516266.1 | Scaffold916 | 118326                  | CC                              | TT                | 1946628588               |
| SNP_P3_140574_118342 | NW_004516266.1 | Scaffold916 | 118342                  | TT                              | GG                | 1946628590               |
| SNP_P3_140575_118356 | NW_004516266.1 | Scaffold916 | 118356                  | TT                              | CC                | 1946628592               |
| SNP_P3_140576_122011 | NW_004516266.1 | Scaffold916 | 122011                  | AA                              | TT                | 1946628594               |
| SNP_P3_140577_134584 | NW_004516266.1 | Scaffold916 | 134584                  | CC                              | AA                | 1946628596               |
| SNP_P3_140579_134938 | NW_004516266.1 | Scaffold916 | 134938                  | CC                              | TT                | 1946628598               |
| SNP_P3_140580_134956 | NW_004516266.1 | Scaffold916 | 134956                  | TT                              | CC                | 1946628600               |
| SNP_P3_140581_166276 | NW_004516266.1 | Scaffold916 | 166276                  | TT                              | GG                | 1946628602               |
| SNP_P3_140582_166294 | NW_004516266.1 | Scaffold916 | 166294                  | CC                              | TT                | 1946628604               |
| SNP_P3_140583_166341 | NW_004516266.1 | Scaffold916 | 166341                  | CC                              | TT                | 1946628606               |
| SNP_P3_140584_166399 | NW_004516266.1 | Scaffold916 | 166399                  | TT                              | GG                | 1946628608               |
| SNP_P3_140585_166556 | NW_004516266.1 | Scaffold916 | 166556                  | TT                              | AA                | 1946628610               |
| SNP_P3_140586_169637 | NW_004516266.1 | Scaffold916 | 169637                  | GG                              | TT                | 1946628612               |
| SNP_P3_140588_170018 | NW_004516266.1 | Scaffold916 | 170018                  | TT                              | CC                | 1946628614               |
| SNP_P3_140589_170391 | NW_004516266.1 | Scaffold916 | 170391                  | GG                              | TT                | 1946628616               |
| SNP_P3_140590_177485 | NW_004516266.1 | Scaffold916 | 177485                  | AA                              | GG                | 1946628618               |
| SNP_P3_140591_177566 | NW_004516266.1 | Scaffold916 | 177566                  | CC                              | AA                | 1946628620               |
| SNP_P3_140592_179614 | NW_004516266.1 | Scaffold916 | 179614                  | AA                              | GG                | 1946628622               |
| SNP_P3_140593_186877 | NW_004516266.1 | Scaffold916 | 186877                  | TT                              | GG                | 1946628624               |
| SNP_P3_140594_187253 | NW_004516266.1 | Scaffold916 | 187253                  | CC                              | TT                | 1946628626               |
| SNP_P3_140595_192310 | NW_004516266.1 | Scaffold916 | 192310                  | TT                              | GG                | 1946628629               |
| SNP_P3_140596_203760 | NW_004516266.1 | Scaffold916 | 203760                  | GG                              | AA                | 1946628631               |
| SNP_P3_140597_239239 | NW_004516266.1 | Scaffold916 | 239239                  | AA                              | GG                | 1946628633               |
| SNP_P3_140598_269997 | NW_004516266.1 | Scaffold916 | 269997                  | CC                              | TT                | 1946628635               |
| SNP_P3_140599_277103 | NW_004516266.1 | Scaffold916 | 277103                  | CC                              | AA                | 1946628637               |
| SNP_P3_140600_313870 | NW_004516266.1 | Scaffold916 | 313870                  | AA                              | CC                | 1946628639               |
| SNP_P3_140601_324224 | NW_004516266.1 | Scaffold916 | 324224                  | CC                              | AA                | 1946628641               |
| SNP_P3_140603_407162 | NW_004516266.1 | Scaffold916 | 407162                  | AA                              | GG                | 1946628644               |
| SNP_P3_140604_407189 | NW_004516266.1 | Scaffold916 | 407189                  | GG                              | CC                | 1946628646               |
| SNP_P3_140605_455532 | NW_004516266.1 | Scaffold916 | 455532                  | AA                              | CC                | 1946628647               |
| SNP_P3_140606_455535 | NW_004516266.1 | Scaffold916 | 455535                  | TT                              | CC                | 1946628649               |
| SNP_P3_140608_487846 | NW_004516266.1 | Scaffold916 | 487846                  | CC                              | TT                | 1946628651               |
| SNP_P3_140609_488234 | NW_004516266.1 | Scaffold916 | 488234                  | AA                              | GG                | 1946628653               |
| SNP_P3_140610_488240 | NW_004516266.1 | Scaffold916 | 488240                  | TT                              | CC                | 1946628655               |
| SNP_P3_140612_499514 | NW_004516266.1 | Scaffold916 | 499514                  | GG                              | CC                | 1946628657               |

| SNPs IDs             | Chromosome IDs | Chromosomes | Physical positions (bp) | CDC Frontier (Reference genome) | (Pusa 256 & HPNB) | NCBI SNPdb Accession IDs |
|----------------------|----------------|-------------|-------------------------|---------------------------------|-------------------|--------------------------|
| SNP_P3_140613_499559 | NW_004516266.1 | Scaffold916 | 499559                  | TT                              | AA                | 1946628659               |
| SNP_P3_140614_499930 | NW_004516266.1 | Scaffold916 | 499930                  | GG                              | AA                | 1946628661               |
| SNP_P3_140616_2577   | NW_004516268.1 | Scaffold918 | 2577                    | AA                              | CC                | 1946628663               |
| SNP_P3_140617_5240   | NW_004516268.1 | Scaffold918 | 5240                    | TT                              | AA                | 1946628665               |
| SNP_P3_140618_8226   | NW_004516268.1 | Scaffold918 | 8226                    | CC                              | AA                | 1946628667               |
| SNP_P3_140619_8248   | NW_004516268.1 | Scaffold918 | 8248                    | AA                              | TT                | 1946628669               |
| SNP_P3_140620_12418  | NW_004516268.1 | Scaffold918 | 12418                   | AA                              | GG                | 1946628671               |
| SNP_P3_140621_12421  | NW_004516268.1 | Scaffold918 | 12421                   | TT                              | GG                | 1946628673               |
| SNP_P3_140622_16546  | NW_004516268.1 | Scaffold918 | 16546                   | TT                              | AA                | 1946628675               |
| SNP_P3_140623_33844  | NW_004516268.1 | Scaffold918 | 33844                   | AA                              | GG                | 1946628677               |
| SNP_P3_140624_33864  | NW_004516268.1 | Scaffold918 | 33864                   | AA                              | TT                | 1946628679               |
| SNP_P3_140625_43087  | NW_004516268.1 | Scaffold918 | 43087                   | CC                              | AA                | 1946628681               |
| SNP_P3_140626_43102  | NW_004516268.1 | Scaffold918 | 43102                   | CC                              | AA                | 1946628683               |
| SNP_P3_140627_49268  | NW_004516268.1 | Scaffold918 | 49268                   | GG                              | AA                | 1946628686               |
| SNP_P3_140629_49319  | NW_004516268.1 | Scaffold918 | 49319                   | AA                              | CC                | 1946628687               |
| SNP_P3_140630_12910  | NW_004516269.1 | Scaffold919 | 12910                   | AA                              | CC                | 1946628689               |
| SNP_P3_140631_12911  | NW_004516269.1 | Scaffold919 | 12911                   | TT                              | CC                | 1946628691               |
| SNP_P3_140632_12934  | NW_004516269.1 | Scaffold919 | 12934                   | AA                              | TT                | 1946628693               |
| SNP_P3_140633_12935  | NW_004516269.1 | Scaffold919 | 12935                   | TT                              | CC                | 1946628695               |
| SNP_P3_140634_13003  | NW_004516269.1 | Scaffold919 | 13003                   | AA                              | GG                | 1946628697               |
| SNP_P3_140635_13008  | NW_004516269.1 | Scaffold919 | 13008                   | AA                              | GG                | 1946628699               |
| SNP_P3_140636_13220  | NW_004516269.1 | Scaffold919 | 13220                   | GG                              | TT                | 1946628701               |
| SNP_P3_140637_13254  | NW_004516269.1 | Scaffold919 | 13254                   | AA                              | GG                | 1946628703               |
| SNP_P3_140638_13272  | NW_004516269.1 | Scaffold919 | 13272                   | GG                              | AA                | 1946628705               |
| SNP_P3_140639_13293  | NW_004516269.1 | Scaffold919 | 13293                   | AA                              | GG                | 1946628707               |
| SNP_P3_140640_13365  | NW_004516269.1 | Scaffold919 | 13365                   | GG                              | AA                | 1946628709               |
| SNP_P3_140641_13380  | NW_004516269.1 | Scaffold919 | 13380                   | TT                              | CC                | 1946628711               |
| SNP_P3_140642_13410  | NW_004516269.1 | Scaffold919 | 13410                   | TT                              | CC                | 1946628713               |
| SNP_P3_140643_13416  | NW_004516269.1 | Scaffold919 | 13416                   | AA                              | TT                | 1946628715               |
| SNP_P3_140644_13437  | NW_004516269.1 | Scaffold919 | 13437                   | GG                              | AA                | 1946628716               |
| SNP_P3_140645_13441  | NW_004516269.1 | Scaffold919 | 13441                   | AA                              | GG                | 1946628718               |
| SNP_P3_140646_13496  | NW_004516269.1 | Scaffold919 | 13496                   | GG                              | CC                | 1946628720               |
| SNP_P3_140647_13497  | NW_004516269.1 | Scaffold919 | 13497                   | TT                              | CC                | 1946628722               |
| SNP_P3_140648_14861  | NW_004516269.1 | Scaffold919 | 14861                   | CC                              | TT                | 1946628724               |
| SNP_P3_140649_24137  | NW_004516269.1 | Scaffold919 | 24137                   | CC                              | TT                | 1946628726               |
| SNP_P3_140650_24151  | NW_004516269.1 | Scaffold919 | 24151                   | GG                              | TT                | 1946628728               |
| SNP_P3_140651_24194  | NW_004516269.1 | Scaffold919 | 24194                   | GG                              | AA                | 1946628731               |
| SNP_P3_140652_38913  | NW_004516269.1 | Scaffold919 | 38913                   | CC                              | AA                | 1946628733               |
| SNP_P3_140653_38915  | NW_004516269.1 | Scaffold919 | 38915                   | CC                              | TT                | 1946628735               |
| SNP_P3_140654_56014  | NW_004516269.1 | Scaffold919 | 56014                   | TT                              | CC                | 1946628736               |
| SNP_P3_140655_63566  | NW_004516269.1 | Scaffold919 | 63566                   | CC                              | TT                | 1946628738               |
| SNP_P3_140656_63691  | NW_004516269.1 | Scaffold919 | 63691                   | GG                              | TT                | 1946628740               |

| SNPs IDs             | Chromosome IDs | Chromosomes | Physical positions (bp) | CDC Frontier (Reference genome) | (Pusa 256 & HPNB) | NCBI SNPdb Accession IDs |
|----------------------|----------------|-------------|-------------------------|---------------------------------|-------------------|--------------------------|
| SNP_P3_140657_73439  | NW_004516269.1 | Scaffold919 | 73439                   | CC                              | TT                | 1946628742               |
| SNP_P3_140658_73713  | NW_004516269.1 | Scaffold919 | 73713                   | CC                              | AA                | 1946628744               |
| SNP_P3_140659_73728  | NW_004516269.1 | Scaffold919 | 73728                   | TT                              | CC                | 1946628746               |
| SNP_P3_140660_73745  | NW_004516269.1 | Scaffold919 | 73745                   | AA                              | GG                | 1946628748               |
| SNP_P3_140661_73752  | NW_004516269.1 | Scaffold919 | 73752                   | CC                              | TT                | 1946628750               |
| SNP_P3_140662_73753  | NW_004516269.1 | Scaffold919 | 73753                   | CC                              | TT                | 1946628752               |
| SNP_P3_140664_84281  | NW_004516269.1 | Scaffold919 | 84281                   | AA                              | GG                | 1946628754               |
| SNP_P3_140665_84889  | NW_004516269.1 | Scaffold919 | 84889                   | TT                              | AA                | 1946628756               |
| SNP_P3_140666_85150  | NW_004516269.1 | Scaffold919 | 85150                   | GG                              | AA                | 1946628758               |
| SNP_P3_140667_85164  | NW_004516269.1 | Scaffold919 | 85164                   | TT                              | GG                | 1946628760               |
| SNP_P3_140668_85185  | NW_004516269.1 | Scaffold919 | 85185                   | CC                              | TT                | 1946628762               |
| SNP_P3_140669_85231  | NW_004516269.1 | Scaffold919 | 85231                   | TT                              | AA                | 1946628763               |
| SNP_P3_140670_92973  | NW_004516269.1 | Scaffold919 | 92973                   | AA                              | TT                | 1946628765               |
| SNP_P3_140671_94141  | NW_004516269.1 | Scaffold919 | 94141                   | AA                              | TT                | 1946628767               |
| SNP_P3_140672_94349  | NW_004516269.1 | Scaffold919 | 94349                   | CC                              | TT                | 1946628769               |
| SNP_P3_140673_94425  | NW_004516269.1 | Scaffold919 | 94425                   | AA                              | GG                | 1946628772               |
| SNP_P3_140674_94463  | NW_004516269.1 | Scaffold919 | 94463                   | AA                              | GG                | 1946628774               |
| SNP_P3_140675_95936  | NW_004516269.1 | Scaffold919 | 95936                   | AA                              | CC                | 1946628776               |
| SNP_P3_140676_95941  | NW_004516269.1 | Scaffold919 | 95941                   | TT                              | CC                | 1946628778               |
| SNP_P3_140677_97994  | NW_004516269.1 | Scaffold919 | 97994                   | GG                              | TT                | 1946628780               |
| SNP_P3_140678_98001  | NW_004516269.1 | Scaffold919 | 98001                   | TT                              | AA                | 1946628782               |
| SNP_P3_140679_113731 | NW_004516269.1 | Scaffold919 | 113731                  | GG                              | AA                | 1946628784               |
| SNP_P3_140680_114384 | NW_004516269.1 | Scaffold919 | 114384                  | AA                              | TT                | 1946628786               |
| SNP_P3_140681_114664 | NW_004516269.1 | Scaffold919 | 114664                  | AA                              | GG                | 1946628788               |
| SNP_P3_140682_114684 | NW_004516269.1 | Scaffold919 | 114684                  | GG                              | AA                | 1946628790               |
| SNP_P3_140683_114897 | NW_004516269.1 | Scaffold919 | 114897                  | GG                              | TT                | 1946628792               |
| SNP_P3_140684_115023 | NW_004516269.1 | Scaffold919 | 115023                  | GG                              | AA                | 1946628794               |
| SNP_P3_140685_115057 | NW_004516269.1 | Scaffold919 | 115057                  | CC                              | TT                | 1946628797               |
| SNP_P3_140686_115127 | NW_004516269.1 | Scaffold919 | 115127                  | TT                              | CC                | 1946628799               |
| SNP_P3_140687_115139 | NW_004516269.1 | Scaffold919 | 115139                  | TT                              | GG                | 1946628801               |
| SNP_P3_140688_115152 | NW_004516269.1 | Scaffold919 | 115152                  | AA                              | GG                | 1946628803               |
| SNP_P3_140689_115180 | NW_004516269.1 | Scaffold919 | 115180                  | GG                              | TT                | 1946628805               |
| SNP_P3_140690_115208 | NW_004516269.1 | Scaffold919 | 115208                  | AA                              | GG                | 1946628807               |
| SNP_P3_140691_115343 | NW_004516269.1 | Scaffold919 | 115343                  | AA                              | GG                | 1946628809               |
| SNP_P3_140692_116180 | NW_004516269.1 | Scaffold919 | 116180                  | AA                              | GG                | 1946628811               |
| SNP_P3_140693_116221 | NW_004516269.1 | Scaffold919 | 116221                  | TT                              | CC                | 1946628813               |
| SNP_P3_140694_116261 | NW_004516269.1 | Scaffold919 | 116261                  | TT                              | CC                | 1946628816               |
| SNP_P3_140695_137960 | NW_004516269.1 | Scaffold919 | 137960                  | CC                              | AA                | 1946628818               |
| SNP_P3_140696_149186 | NW_004516269.1 | Scaffold919 | 149186                  | TT                              | GG                | 1946628820               |
| SNP_P3_140697_163519 | NW_004516269.1 | Scaffold919 | 163519                  | AA                              | GG                | 1946628822               |
| SNP_P3_140698_169480 | NW_004516269.1 | Scaffold919 | 169480                  | GG                              | AA                | 1946628824               |
| SNP_P3_140699_180822 | NW_004516269.1 | Scaffold919 | 180822                  | AA                              | GG                | 1946628826               |

| SNPs IDs             | Chromosome IDs | Chromosomes | Physical positions (bp) | CDC Frontier (Reference genome) | (Pusa 256 & HPNB) | NCBI SNPdb Accession IDs |
|----------------------|----------------|-------------|-------------------------|---------------------------------|-------------------|--------------------------|
| SNP_P3_140700_180834 | NW_004516269.1 | Scaffold919 | 180834                  | TT                              | CC                | 1946628828               |
| SNP_P3_140701_180849 | NW_004516269.1 | Scaffold919 | 180849                  | GG                              | AA                | 1946628830               |
| SNP_P3_140702_180853 | NW_004516269.1 | Scaffold919 | 180853                  | AA                              | TT                | 1946628832               |
| SNP_P3_140703_180877 | NW_004516269.1 | Scaffold919 | 180877                  | AA                              | CC                | 1946628833               |
| SNP_P3_140704_180879 | NW_004516269.1 | Scaffold919 | 180879                  | GG                              | AA                | 1946628835               |
| SNP_P3_140705_180883 | NW_004516269.1 | Scaffold919 | 180883                  | TT                              | CC                | 1946628837               |
| SNP_P3_140706_180892 | NW_004516269.1 | Scaffold919 | 180892                  | TT                              | AA                | 1946628839               |
| SNP_P3_140707_180894 | NW_004516269.1 | Scaffold919 | 180894                  | AA                              | CC                | 1946628841               |
| SNP_P3_140708_180910 | NW_004516269.1 | Scaffold919 | 180910                  | TT                              | GG                | 1946628843               |
| SNP_P3_140709_182936 | NW_004516269.1 | Scaffold919 | 182936                  | CC                              | TT                | 1946628845               |
| SNP_P3_140710_182949 | NW_004516269.1 | Scaffold919 | 182949                  | TT                              | CC                | 1946628847               |
| SNP_P3_140711_182961 | NW_004516269.1 | Scaffold919 | 182961                  | GG                              | AA                | 1946628849               |
| SNP_P3_140712_182967 | NW_004516269.1 | Scaffold919 | 182967                  | AA                              | GG                | 1946628851               |
| SNP_P3_140713_182983 | NW_004516269.1 | Scaffold919 | 182983                  | CC                              | TT                | 1946628853               |
| SNP_P3_140714_183039 | NW_004516269.1 | Scaffold919 | 183039                  | GG                              | CC                | 1946628855               |
| SNP_P3_140715_183062 | NW_004516269.1 | Scaffold919 | 183062                  | TT                              | CC                | 1946628857               |
| SNP_P3_140716_183063 | NW_004516269.1 | Scaffold919 | 183063                  | GG                              | TT                | 1946628859               |
| SNP_P3_140717_183109 | NW_004516269.1 | Scaffold919 | 183109                  | CC                              | GG                | 1946628861               |
| SNP_P3_140718_183216 | NW_004516269.1 | Scaffold919 | 183216                  | GG                              | AA                | 1946628863               |
| SNP_P3_140719_183363 | NW_004516269.1 | Scaffold919 | 183363                  | GG                              | AA                | 1946628865               |
| SNP_P3_140720_183421 | NW_004516269.1 | Scaffold919 | 183421                  | TT                              | CC                | 1946628867               |
| SNP_P3_140722_183443 | NW_004516269.1 | Scaffold919 | 183443                  | GG                              | AA                | 1946628869               |
| SNP_P3_140723_183458 | NW_004516269.1 | Scaffold919 | 183458                  | AA                              | CC                | 1946628871               |
| SNP_P3_140724_183495 | NW_004516269.1 | Scaffold919 | 183495                  | CC                              | TT                | 1946628873               |
| SNP_P3_140725_183508 | NW_004516269.1 | Scaffold919 | 183508                  | GG                              | TT                | 1946628875               |
| SNP_P3_140726_183509 | NW_004516269.1 | Scaffold919 | 183509                  | TT                              | CC                | 1946628877               |
| SNP_P3_140727_183514 | NW_004516269.1 | Scaffold919 | 183514                  | AA                              | GG                | 1946628879               |
| SNP_P3_140728_183543 | NW_004516269.1 | Scaffold919 | 183543                  | GG                              | AA                | 1946628881               |
| SNP_P3_140729_183549 | NW_004516269.1 | Scaffold919 | 183549                  | CC                              | TT                | 1946628883               |
| SNP_P3_140730_183566 | NW_004516269.1 | Scaffold919 | 183566                  | TT                              | AA                | 1946628885               |
| SNP_P3_140731_183606 | NW_004516269.1 | Scaffold919 | 183606                  | AA                              | GG                | 1946628887               |
| SNP_P3_140732_183750 | NW_004516269.1 | Scaffold919 | 183750                  | AA                              | CC                | 1946628888               |
| SNP_P3_140733_183814 | NW_004516269.1 | Scaffold919 | 183814                  | CC                              | TT                | 1946628890               |
| SNP_P3_140734_186057 | NW_004516269.1 | Scaffold919 | 186057                  | TT                              | AA                | 1946628892               |
| SNP_P3_140735_186060 | NW_004516269.1 | Scaffold919 | 186060                  | AA                              | TT                | 1946628894               |
| SNP_P3_140736_186123 | NW_004516269.1 | Scaffold919 | 186123                  | GG                              | AA                | 1946628897               |
| SNP_P3_140737_186192 | NW_004516269.1 | Scaffold919 | 186192                  | TT                              | CC                | 1946628899               |
| SNP_P3_140738_186195 | NW_004516269.1 | Scaffold919 | 186195                  | TT                              | CC                | 1946628901               |
| SNP_P3_140739_186231 | NW_004516269.1 | Scaffold919 | 186231                  | GG                              | AA                | 1946628903               |
| SNP_P3_140740_186250 | NW_004516269.1 | Scaffold919 | 186250                  | CC                              | TT                | 1946628905               |
| SNP_P3_140741_186261 | NW_004516269.1 | Scaffold919 | 186261                  | AA                              | TT                | 1946628907               |
| SNP_P3_140742_186288 | NW_004516269.1 | Scaffold919 | 186288                  | TT                              | AA                | 1946628909               |

| SNPs IDs             | Chromosome IDs | Chromosomes | Physical positions (bp) | CDC Frontier (Reference genome) | (Pusa 256 & HPNB) | NCBI SNPdb Accession IDs |
|----------------------|----------------|-------------|-------------------------|---------------------------------|-------------------|--------------------------|
| SNP_P3_140743_186303 | NW_004516269.1 | Scaffold919 | 186303                  | TT                              | AA                | 1946628911               |
| SNP_P3_140744_186321 | NW_004516269.1 | Scaffold919 | 186321                  | TT                              | AA                | 1946628913               |
| SNP_P3_140745_186333 | NW_004516269.1 | Scaffold919 | 186333                  | TT                              | AA                | 1946628915               |
| SNP_P3_140746_186337 | NW_004516269.1 | Scaffold919 | 186337                  | GG                              | AA                | 1946628917               |
| SNP_P3_140747_186373 | NW_004516269.1 | Scaffold919 | 186373                  | GG                              | AA                | 1946628918               |
| SNP_P3_140748_186527 | NW_004516269.1 | Scaffold919 | 186527                  | AA                              | GG                | 1946628920               |
| SNP_P3_140749_186532 | NW_004516269.1 | Scaffold919 | 186532                  | TT                              | CC                | 1946628922               |
| SNP_P3_140750_186535 | NW_004516269.1 | Scaffold919 | 186535                  | GG                              | AA                | 1946628924               |
| SNP_P3_140751_186547 | NW_004516269.1 | Scaffold919 | 186547                  | TT                              | GG                | 1946628926               |
| SNP_P3_140752_186554 | NW_004516269.1 | Scaffold919 | 186554                  | GG                              | AA                | 1946628928               |
| SNP_P3_140753_186571 | NW_004516269.1 | Scaffold919 | 186571                  | CC                              | TT                | 1946628930               |
| SNP_P3_140754_186586 | NW_004516269.1 | Scaffold919 | 186586                  | TT                              | AA                | 1946628932               |
| SNP_P3_140755_186594 | NW_004516269.1 | Scaffold919 | 186594                  | GG                              | AA                | 1946628934               |
| SNP_P3_140756_186608 | NW_004516269.1 | Scaffold919 | 186608                  | CC                              | AA                | 1946628936               |
| SNP_P3_140757_186610 | NW_004516269.1 | Scaffold919 | 186610                  | TT                              | CC                | 1946628938               |
| SNP_P3_140758_186668 | NW_004516269.1 | Scaffold919 | 186668                  | AA                              | GG                | 1946628940               |
| SNP_P3_140759_187170 | NW_004516269.1 | Scaffold919 | 187170                  | CC                              | TT                | 1946628942               |
| SNP_P3_140760_187203 | NW_004516269.1 | Scaffold919 | 187203                  | TT                              | CC                | 1946628944               |
| SNP_P3_140761_188597 | NW_004516269.1 | Scaffold919 | 188597                  | GG                              | AA                | 1946628946               |
| SNP_P3_140762_188999 | NW_004516269.1 | Scaffold919 | 188999                  | CC                              | GG                | 1946628948               |
| SNP_P3_140763_189032 | NW_004516269.1 | Scaffold919 | 189032                  | CC                              | TT                | 1946628950               |
| SNP_P3_140764_189097 | NW_004516269.1 | Scaffold919 | 189097                  | AA                              | TT                | 1946628952               |
| SNP_P3_140765_189573 | NW_004516269.1 | Scaffold919 | 189573                  | CC                              | TT                | 1946628954               |
| SNP_P3_140766_190123 | NW_004516269.1 | Scaffold919 | 190123                  | CC                              | GG                | 1946628956               |
| SNP_P3_140767_190192 | NW_004516269.1 | Scaffold919 | 190192                  | TT                              | CC                | 1946628958               |
| SNP_P3_140768_190204 | NW_004516269.1 | Scaffold919 | 190204                  | AA                              | GG                | 1946628960               |
| SNP_P3_140769_190259 | NW_004516269.1 | Scaffold919 | 190259                  | AA                              | GG                | 1946628962               |
| SNP_P3_140770_190429 | NW_004516269.1 | Scaffold919 | 190429                  | AA                              | CC                | 1946628964               |
| SNP_P3_140771_193432 | NW_004516269.1 | Scaffold919 | 193432                  | GG                              | AA                | 1946628966               |
| SNP_P3_140772_194034 | NW_004516269.1 | Scaffold919 | 194034                  | CC                              | TT                | 1946628967               |
| SNP_P3_140773_194241 | NW_004516269.1 | Scaffold919 | 194241                  | AA                              | GG                | 1946628969               |
| SNP_P3_140774_194706 | NW_004516269.1 | Scaffold919 | 194706                  | CC                              | TT                | 1946628971               |
| SNP_P3_140775_194808 | NW_004516269.1 | Scaffold919 | 194808                  | AA                              | TT                | 1946628973               |
| SNP_P3_140776_218042 | NW_004516269.1 | Scaffold919 | 218042                  | CC                              | TT                | 1946628975               |
| SNP_P3_140777_218053 | NW_004516269.1 | Scaffold919 | 218053                  | TT                              | CC                | 1946628977               |
| SNP_P3_140778_239030 | NW_004516269.1 | Scaffold919 | 239030                  | AA                              | TT                | 1946628979               |
| SNP_P3_140779_240131 | NW_004516269.1 | Scaffold919 | 240131                  | AA                              | GG                | 1946628981               |
| SNP_P3_140780_301484 | NW_004516269.1 | Scaffold919 | 301484                  | TT                              | GG                | 1946628983               |
| SNP_P3_140781_301510 | NW_004516269.1 | Scaffold919 | 301510                  | TT                              | CC                | 1946628984               |
| SNP_P3_140782_301538 | NW_004516269.1 | Scaffold919 | 301538                  | TT                              | AA                | 1946628986               |
| SNP_P3_140783_301768 | NW_004516269.1 | Scaffold919 | 301768                  | AA                              | TT                | 1946628988               |
| SNP_P3_140784_301804 | NW_004516269.1 | Scaffold919 | 301804                  | CC                              | AA                | 1946628990               |

| SNPs IDs             | Chromosome IDs | Chromosomes | Physical positions (bp) | CDC Frontier (Reference genome) | (Pusa 256 & HPNB) | NCBI SNPdb Accession IDs |
|----------------------|----------------|-------------|-------------------------|---------------------------------|-------------------|--------------------------|
| SNP_P3_140785_301855 | NW_004516269.1 | Scaffold919 | 301855                  | TT                              | CC                | 1946628992               |
| SNP_P3_140786_301865 | NW_004516269.1 | Scaffold919 | 301865                  | GG                              | TT                | 1946628994               |
| SNP_P3_140787_302036 | NW_004516269.1 | Scaffold919 | 302036                  | CC                              | GG                | 1946628996               |
| SNP_P3_140788_303591 | NW_004516269.1 | Scaffold919 | 303591                  | TT                              | CC                | 1946628998               |
| SNP_P3_140789_303607 | NW_004516269.1 | Scaffold919 | 303607                  | AA                              | GG                | 1946629000               |
| SNP_P3_140790_303677 | NW_004516269.1 | Scaffold919 | 303677                  | GG                              | AA                | 1946629002               |
| SNP_P3_140791_303844 | NW_004516269.1 | Scaffold919 | 303844                  | TT                              | CC                | 1946629004               |
| SNP_P3_140792_304110 | NW_004516269.1 | Scaffold919 | 304110                  | CC                              | AA                | 1946629006               |
| SNP_P3_140793_317391 | NW_004516269.1 | Scaffold919 | 317391                  | GG                              | AA                | 1946629008               |
| SNP_P3_140794_339014 | NW_004516269.1 | Scaffold919 | 339014                  | CC                              | TT                | 1946629010               |
| SNP_P3_140795_353428 | NW_004516269.1 | Scaffold919 | 353428                  | TT                              | AA                | 1946629012               |
| SNP_P3_140797_416957 | NW_004516269.1 | Scaffold919 | 416957                  | TT                              | CC                | 1946629014               |
| SNP_P3_140798_443950 | NW_004516269.1 | Scaffold919 | 443950                  | TT                              | GG                | 1946629016               |
| SNP_P3_140799_443952 | NW_004516269.1 | Scaffold919 | 443952                  | AA                              | TT                | 1946629018               |
| SNP_P3_140800_444498 | NW_004516269.1 | Scaffold919 | 444498                  | GG                              | AA                | 1946629020               |
| SNP_P3_140802_488893 | NW_004516269.1 | Scaffold919 | 488893                  | AA                              | TT                | 1946629022               |
| SNP_P3_140804_504440 | NW_004516269.1 | Scaffold919 | 504440                  | TT                              | CC                | 1946629024               |
| SNP_P3_140805_516971 | NW_004516269.1 | Scaffold919 | 516971                  | AA                              | CC                | 1946629026               |
| SNP_P3_140808_528329 | NW_004516269.1 | Scaffold919 | 528329                  | TT                              | GG                | 1946629028               |
| SNP_P3_140809_532066 | NW_004516269.1 | Scaffold919 | 532066                  | AA                              | CC                | 1946629030               |
| SNP_P3_140810_546276 | NW_004516269.1 | Scaffold919 | 546276                  | CC                              | GG                | 1946629032               |
| SNP_P3_140811_573035 | NW_004516269.1 | Scaffold919 | 573035                  | GG                              | AA                | 1946629034               |
| SNP_P3_140812_573056 | NW_004516269.1 | Scaffold919 | 573056                  | TT                              | GG                | 1946629036               |
| SNP_P3_140813_573071 | NW_004516269.1 | Scaffold919 | 573071                  | GG                              | AA                | 1946629038               |
| SNP_P3_140814_573108 | NW_004516269.1 | Scaffold919 | 573108                  | AA                              | TT                | 1946629040               |
| SNP_P3_140815_573118 | NW_004516269.1 | Scaffold919 | 573118                  | TT                              | CC                | 1946629043               |
| SNP_P3_140816_573122 | NW_004516269.1 | Scaffold919 | 573122                  | GG                              | TT                | 1946629045               |
| SNP_P3_140817_573127 | NW_004516269.1 | Scaffold919 | 573127                  | AA                              | TT                | 1946629047               |
| SNP_P3_140818_573160 | NW_004516269.1 | Scaffold919 | 573160                  | AA                              | TT                | 1946629049               |
| SNP_P3_140819_573177 | NW_004516269.1 | Scaffold919 | 573177                  | TT                              | CC                | 1946629051               |
| SNP_P3_140820_589944 | NW_004516269.1 | Scaffold919 | 589944                  | AA                              | GG                | 1946629053               |
| SNP_P3_140821_589962 | NW_004516269.1 | Scaffold919 | 589962                  | GG                              | AA                | 1946629055               |
| SNP_P3_140822_589983 | NW_004516269.1 | Scaffold919 | 589983                  | GG                              | AA                | 1946629057               |
| SNP_P3_140823_598458 | NW_004516269.1 | Scaffold919 | 598458                  | AA                              | GG                | 1946629059               |
| SNP_P3_140824_603330 | NW_004516269.1 | Scaffold919 | 603330                  | TT                              | CC                | 1946629061               |
| SNP_P3_140826_615552 | NW_004516269.1 | Scaffold919 | 615552                  | TT                              | CC                | 1946629063               |
| SNP_P3_140827_615578 | NW_004516269.1 | Scaffold919 | 615578                  | GG                              | AA                | 1946629065               |
| SNP_P3_140828_615675 | NW_004516269.1 | Scaffold919 | 615675                  | GG                              | AA                | 1946629067               |
| SNP_P3_140829_615725 | NW_004516269.1 | Scaffold919 | 615725                  | TT                              | GG                | 1946629069               |
| SNP_P3_140830_616560 | NW_004516269.1 | Scaffold919 | 616560                  | GG                              | AA                | 1946629071               |
| SNP_P3_140831_616840 | NW_004516269.1 | Scaffold919 | 616840                  | TT                              | CC                | 1946629072               |
| SNP_P3_140832_616847 | NW_004516269.1 | Scaffold919 | 616847                  | TT                              | CC                | 1946629074               |

| SNPs IDs             | Chromosome IDs | Chromosomes | Physical positions (bp) | CDC Frontier (Reference genome) | (Pusa 256 & HPNB) | NCBI SNPdb Accession IDs |
|----------------------|----------------|-------------|-------------------------|---------------------------------|-------------------|--------------------------|
| SNP_P3_140833_626737 | NW_004516269.1 | Scaffold919 | 626737                  | TT                              | CC                | 1946629076               |
| SNP_P3_140834_627181 | NW_004516269.1 | Scaffold919 | 627181                  | AA                              | GG                | 1946629078               |
| SNP_P3_140835_628123 | NW_004516269.1 | Scaffold919 | 628123                  | TT                              | CC                | 1946629080               |
| SNP_P3_140836_635147 | NW_004516269.1 | Scaffold919 | 635147                  | TT                              | CC                | 1946629083               |
| SNP_P3_140838_637101 | NW_004516269.1 | Scaffold919 | 637101                  | TT                              | CC                | 1946629085               |
| SNP_P3_140840_673182 | NW_004516269.1 | Scaffold919 | 673182                  | AA                              | GG                | 1946629087               |
| SNP_P3_140841_673244 | NW_004516269.1 | Scaffold919 | 673244                  | TT                              | CC                | 1946629089               |
| SNP_P3_140842_673293 | NW_004516269.1 | Scaffold919 | 673293                  | TT                              | CC                | 1946629090               |
| SNP_P3_140843_673308 | NW_004516269.1 | Scaffold919 | 673308                  | AA                              | GG                | 1946629092               |
| SNP_P3_140844_682336 | NW_004516269.1 | Scaffold919 | 682336                  | TT                              | GG                | 1946629094               |
| SNP_P3_140845_686110 | NW_004516269.1 | Scaffold919 | 686110                  | CC                              | AA                | 1946629096               |
| SNP_P3_140846_711925 | NW_004516269.1 | Scaffold919 | 711925                  | TT                              | CC                | 1946629098               |
| SNP_P3_140848_724326 | NW_004516269.1 | Scaffold919 | 724326                  | AA                              | GG                | 1946629100               |
| SNP_P3_140849_724477 | NW_004516269.1 | Scaffold919 | 724477                  | CC                              | TT                | 1946629102               |
| SNP_P3_140850_724501 | NW_004516269.1 | Scaffold919 | 724501                  | CC                              | TT                | 1946629104               |
| SNP_P3_140852_2943   | NW_004516271.1 | Scaffold922 | 2943                    | AA                              | GG                | 1946629106               |
| SNP_P3_140853_13448  | NW_004516271.1 | Scaffold922 | 13448                   | AA                              | CC                | 1946629108               |
| SNP_P3_140854_13475  | NW_004516271.1 | Scaffold922 | 13475                   | AA                              | TT                | 1946629110               |
| SNP_P3_140855_13477  | NW_004516271.1 | Scaffold922 | 13477                   | AA                              | GG                | 1946629112               |
| SNP_P3_140856_13523  | NW_004516271.1 | Scaffold922 | 13523                   | AA                              | GG                | 1946629114               |
| SNP_P3_140857_13535  | NW_004516271.1 | Scaffold922 | 13535                   | TT                              | GG                | 1946629116               |
| SNP_P3_140858_19267  | NW_004516271.1 | Scaffold922 | 19267                   | TT                              | CC                | 1946629118               |
| SNP_P3_140859_21483  | NW_004516271.1 | Scaffold922 | 21483                   | AA                              | GG                | 1946629120               |
| SNP_P3_140861_21514  | NW_004516271.1 | Scaffold922 | 21514                   | TT                              | CC                | 1946629122               |
| SNP_P3_140862_21521  | NW_004516271.1 | Scaffold922 | 21521                   | AA                              | TT                | 1946629125               |
| SNP_P3_140863_21522  | NW_004516271.1 | Scaffold922 | 21522                   | GG                              | AA                | 1946629127               |
| SNP_P3_140864_21765  | NW_004516271.1 | Scaffold922 | 21765                   | TT                              | CC                | 1946629129               |
| SNP_P3_140865_21771  | NW_004516271.1 | Scaffold922 | 21771                   | TT                              | CC                | 1946629131               |
| SNP_P3_140866_22347  | NW_004516271.1 | Scaffold922 | 22347                   | AA                              | GG                | 1946629133               |
| SNP_P3_140868_40629  | NW_004516271.1 | Scaffold922 | 40629                   | AA                              | CC                | 1946629135               |
| SNP_P3_140869_40920  | NW_004516271.1 | Scaffold922 | 40920                   | AA                              | GG                | 1946629137               |
| SNP_P3_140870_40932  | NW_004516271.1 | Scaffold922 | 40932                   | TT                              | CC                | 1946629139               |
| SNP_P3_140871_40937  | NW_004516271.1 | Scaffold922 | 40937                   | GG                              | AA                | 1946629141               |
| SNP_P3_140872_40989  | NW_004516271.1 | Scaffold922 | 40989                   | TT                              | CC                | 1946629143               |
| SNP_P3_140873_40991  | NW_004516271.1 | Scaffold922 | 40991                   | GG                              | AA                | 1946629144               |
| SNP_P3_140874_41033  | NW_004516271.1 | Scaffold922 | 41033                   | AA                              | GG                | 1946629146               |
| SNP_P3_140875_41035  | NW_004516271.1 | Scaffold922 | 41035                   | TT                              | CC                | 1946629148               |
| SNP_P3_140876_41060  | NW_004516271.1 | Scaffold922 | 41060                   | GG                              | AA                | 1946629150               |
| SNP_P3_140877_59881  | NW_004516271.1 | Scaffold922 | 59881                   | TT                              | CC                | 1946629152               |
| SNP_P3_140878_60546  | NW_004516271.1 | Scaffold922 | 60546                   | AA                              | GG                | 1946629154               |
| SNP_P3_140879_67827  | NW_004516271.1 | Scaffold922 | 67827                   | AA                              | TT                | 1946629156               |
| SNP_P3_140880_78294  | NW_004516271.1 | Scaffold922 | 78294                   | CC                              | TT                | 1946629158               |



| SNPs IDs             | Chromosome IDs | Chromosomes | Physical positions (bp) | CDC Frontier (Reference genome) | (Pusa 256 & HPNB) | NCBI SNPdb Accession IDs |
|----------------------|----------------|-------------|-------------------------|---------------------------------|-------------------|--------------------------|
| SNP_P3_140881_78342  | NW_004516271.1 | Scaffold922 | 78342                   | TT                              | CC                | 1946629160               |
| SNP_P3_140882_78352  | NW_004516271.1 | Scaffold922 | 78352                   | TT                              | CC                | 1946629162               |
| SNP_P3_140883_78788  | NW_004516271.1 | Scaffold922 | 78788                   | GG                              | AA                | 1946629164               |
| SNP_P3_140884_84822  | NW_004516271.1 | Scaffold922 | 84822                   | GG                              | AA                | 1946629166               |
| SNP_P3_140885_122356 | NW_004516271.1 | Scaffold922 | 122356                  | TT                              | GG                | 1946629169               |
| SNP_P3_140886_122428 | NW_004516271.1 | Scaffold922 | 122428                  | TT                              | CC                | 1946629171               |
| SNP_P3_140887_125274 | NW_004516271.1 | Scaffold922 | 125274                  | TT                              | CC                | 1946629173               |
| SNP_P3_140888_135958 | NW_004516271.1 | Scaffold922 | 135958                  | CC                              | TT                | 1946629175               |
| SNP_P3_140889_136215 | NW_004516271.1 | Scaffold922 | 136215                  | CC                              | TT                | 1946629177               |
| SNP_P3_140890_145404 | NW_004516271.1 | Scaffold922 | 145404                  | GG                              | AA                | 1946629179               |
| SNP_P3_140891_145423 | NW_004516271.1 | Scaffold922 | 145423                  | CC                              | AA                | 1946629181               |
| SNP_P3_140892_145425 | NW_004516271.1 | Scaffold922 | 145425                  | CC                              | TT                | 1946629183               |
| SNP_P3_140893_145437 | NW_004516271.1 | Scaffold922 | 145437                  | AA                              | CC                | 1946629185               |
| SNP_P3_140894_145451 | NW_004516271.1 | Scaffold922 | 145451                  | TT                              | CC                | 1946629187               |
| SNP_P3_140895_145463 | NW_004516271.1 | Scaffold922 | 145463                  | GG                              | CC                | 1946629189               |
| SNP_P3_140896_164347 | NW_004516271.1 | Scaffold922 | 164347                  | GG                              | AA                | 1946629191               |
| SNP_P3_140897_175692 | NW_004516271.1 | Scaffold922 | 175692                  | TT                              | CC                | 1946629192               |
| SNP_P3_140899_11204  | NW_004516272.1 | Scaffold924 | 11204                   | AA                              | GG                | 1946629194               |
| SNP_P3_140900_24098  | NW_004516272.1 | Scaffold924 | 24098                   | GG                              | TT                | 1946629196               |
| SNP_P3_140902_24106  | NW_004516272.1 | Scaffold924 | 24106                   | TT                              | AA                | 1946629198               |
| SNP_P3_140904_56773  | NW_004516272.1 | Scaffold924 | 56773                   | AA                              | GG                | 1946629200               |
| SNP_P3_140905_56780  | NW_004516272.1 | Scaffold924 | 56780                   | CC                              | AA                | 1946629202               |
| SNP_P3_140906_56803  | NW_004516272.1 | Scaffold924 | 56803                   | AA                              | CC                | 1946629204               |
| SNP_P3_140907_59788  | NW_004516272.1 | Scaffold924 | 59788                   | CC                              | TT                | 1946629206               |
| SNP_P3_140908_73303  | NW_004516272.1 | Scaffold924 | 73303                   | AA                              | TT                | 1946629208               |
| SNP_P3_140910_78992  | NW_004516272.1 | Scaffold924 | 78992                   | CC                              | AA                | 1946629210               |
| SNP_P3_140911_78995  | NW_004516272.1 | Scaffold924 | 78995                   | TT                              | GG                | 1946629212               |
| SNP_P3_140912_80496  | NW_004516272.1 | Scaffold924 | 80496                   | GG                              | AA                | 1946629214               |
| SNP_P3_140913_80505  | NW_004516272.1 | Scaffold924 | 80505                   | TT                              | GG                | 1946629216               |
| SNP_P3_140914_81081  | NW_004516272.1 | Scaffold924 | 81081                   | CC                              | TT                | 1946629218               |
| SNP_P3_140915_81135  | NW_004516272.1 | Scaffold924 | 81135                   | TT                              | CC                | 1946629220               |
| SNP_P3_140916_81137  | NW_004516272.1 | Scaffold924 | 81137                   | CC                              | TT                | 1946629222               |
| SNP_P3_140917_81154  | NW_004516272.1 | Scaffold924 | 81154                   | AA                              | CC                | 1946629224               |
| SNP_P3_140918_81157  | NW_004516272.1 | Scaffold924 | 81157                   | CC                              | AA                | 1946629226               |
| SNP_P3_140919_81173  | NW_004516272.1 | Scaffold924 | 81173                   | CC                              | AA                | 1946629228               |
| SNP_P3_140920_96634  | NW_004516272.1 | Scaffold924 | 96634                   | GG                              | AA                | 1946629230               |
| SNP_P3_140921_96693  | NW_004516272.1 | Scaffold924 | 96693                   | AA                              | GG                | 1946629232               |
| SNP_P3_140922_96979  | NW_004516272.1 | Scaffold924 | 96979                   | GG                              | AA                | 1946629234               |
| SNP_P3_140923_96987  | NW_004516272.1 | Scaffold924 | 96987                   | AA                              | CC                | 1946629236               |
| SNP_P3_140924_97009  | NW_004516272.1 | Scaffold924 | 97009                   | AA                              | TT                | 1946629238               |
| SNP_P3_140925_97051  | NW_004516272.1 | Scaffold924 | 97051                   | AA                              | GG                | 1946629240               |
| SNP_P3_140926_101049 | NW_004516272.1 | Scaffold924 | 101049                  | GG                              | CC                | 1946629242               |

| SNPs IDs             | Chromosome IDs | Chromosomes | Physical positions (bp) | CDC Frontier (Reference genome) | (Pusa 256 & HPNB) | NCBI SNPdb Accession IDs |
|----------------------|----------------|-------------|-------------------------|---------------------------------|-------------------|--------------------------|
| SNP_P3_140927_115128 | NW_004516272.1 | Scaffold924 | 115128                  | GG                              | TT                | 1946629243               |
| SNP_P3_140928_120563 | NW_004516272.1 | Scaffold924 | 120563                  | GG                              | CC                | 1946629244               |
| SNP_P3_140929_120596 | NW_004516272.1 | Scaffold924 | 120596                  | AA                              | GG                | 1946629245               |
| SNP_P3_140930_122063 | NW_004516272.1 | Scaffold924 | 122063                  | CC                              | TT                | 1946629246               |
| SNP_P3_140931_122104 | NW_004516272.1 | Scaffold924 | 122104                  | CC                              | AA                | 1946629248               |
| SNP_P3_140932_122226 | NW_004516272.1 | Scaffold924 | 122226                  | GG                              | AA                | 1946629250               |
| SNP_P3_140933_122477 | NW_004516272.1 | Scaffold924 | 122477                  | AA                              | GG                | 1946629252               |
| SNP_P3_140934_122674 | NW_004516272.1 | Scaffold924 | 122674                  | GG                              | AA                | 1946629254               |
| SNP_P3_140935_123147 | NW_004516272.1 | Scaffold924 | 123147                  | CC                              | TT                | 1946629256               |
| SNP_P3_140937_161394 | NW_004516272.1 | Scaffold924 | 161394                  | GG                              | AA                | 1946629257               |
| SNP_P3_140938_173220 | NW_004516272.1 | Scaffold924 | 173220                  | AA                              | GG                | 1946629259               |
| SNP_P3_140939_174925 | NW_004516272.1 | Scaffold924 | 174925                  | GG                              | AA                | 1946629261               |
| SNP_P3_140940_199281 | NW_004516272.1 | Scaffold924 | 199281                  | AA                              | TT                | 1946629263               |
| SNP_P3_140941_202078 | NW_004516272.1 | Scaffold924 | 202078                  | AA                              | GG                | 1946629265               |
| SNP_P3_140943_204005 | NW_004516272.1 | Scaffold924 | 204005                  | AA                              | GG                | 1946629267               |
| SNP_P3_140944_219045 | NW_004516272.1 | Scaffold924 | 219045                  | AA                              | CC                | 1946629269               |
| SNP_P3_140945_219621 | NW_004516272.1 | Scaffold924 | 219621                  | AA                              | CC                | 1946629271               |
| SNP_P3_140946_219624 | NW_004516272.1 | Scaffold924 | 219624                  | TT                              | AA                | 1946629273               |
| SNP_P3_140947_219669 | NW_004516272.1 | Scaffold924 | 219669                  | TT                              | AA                | 1946629275               |
| SNP_P3_140948_219874 | NW_004516272.1 | Scaffold924 | 219874                  | CC                              | TT                | 1946629277               |
| SNP_P3_140949_224913 | NW_004516272.1 | Scaffold924 | 224913                  | AA                              | CC                | 1946629279               |
| SNP_P3_140950_265605 | NW_004516272.1 | Scaffold924 | 265605                  | AA                              | GG                | 1946629281               |
| SNP_P3_140951_265805 | NW_004516272.1 | Scaffold924 | 265805                  | TT                              | GG                | 1946629283               |
| SNP_P3_140952_265916 | NW_004516272.1 | Scaffold924 | 265916                  | TT                              | CC                | 1946629285               |
| SNP_P3_140953_265931 | NW_004516272.1 | Scaffold924 | 265931                  | AA                              | GG                | 1946629287               |
| SNP_P3_140955_265985 | NW_004516272.1 | Scaffold924 | 265985                  | TT                              | CC                | 1946629289               |
| SNP_P3_140956_266006 | NW_004516272.1 | Scaffold924 | 266006                  | AA                              | GG                | 1946629291               |
| SNP_P3_140957_266047 | NW_004516272.1 | Scaffold924 | 266047                  | CC                              | TT                | 1946629293               |
| SNP_P3_140958_266075 | NW_004516272.1 | Scaffold924 | 266075                  | TT                              | CC                | 1946629295               |
| SNP_P3_140959_266089 | NW_004516272.1 | Scaffold924 | 266089                  | GG                              | TT                | 1946629297               |
| SNP_P3_140960_266104 | NW_004516272.1 | Scaffold924 | 266104                  | TT                              | CC                | 1946629299               |
| SNP_P3_140961_266122 | NW_004516272.1 | Scaffold924 | 266122                  | CC                              | TT                | 1946629301               |
| SNP_P3_140962_266167 | NW_004516272.1 | Scaffold924 | 266167                  | GG                              | AA                | 1946629303               |
| SNP_P3_140963_266210 | NW_004516272.1 | Scaffold924 | 266210                  | CC                              | TT                | 1946629305               |
| SNP_P3_140964_280241 | NW_004516272.1 | Scaffold924 | 280241                  | AA                              | GG                | 1946629306               |
| SNP_P3_140965_280246 | NW_004516272.1 | Scaffold924 | 280246                  | CC                              | TT                | 1946629308               |
| SNP_P3_140966_8192   | NW_004516273.1 | Scaffold927 | 8192                    | AA                              | GG                | 1946629310               |
| SNP_P3_140967_8257   | NW_004516273.1 | Scaffold927 | 8257                    | TT                              | GG                | 1946629312               |
| SNP_P3_140968_266    | NW_004516274.1 | Scaffold929 | 266                     | GG                              | TT                | 1946629314               |
| SNP_P3_140969_389    | NW_004516274.1 | Scaffold929 | 389                     | AA                              | GG                | 1946629316               |
| SNP_P3_140970_683    | NW_004516274.1 | Scaffold929 | 683                     | AA                              | GG                | 1946629318               |
| SNP_P3_140971_787    | NW_004516274.1 | Scaffold929 | 787                     | AA                              | GG                | 1946629320               |

| SNPs IDs            | Chromosome IDs | Chromosomes | Physical positions (bp) | CDC Frontier (Reference genome) | (Pusa 256 & HPNB) | NCBI SNPdb Accession IDs |
|---------------------|----------------|-------------|-------------------------|---------------------------------|-------------------|--------------------------|
| SNP_P3_140972_833   | NW_004516274.1 | Scaffold929 | 833                     | CC                              | TT                | 1946629322               |
| SNP_P3_140973_7830  | NW_004516274.1 | Scaffold929 | 7830                    | TT                              | CC                | 1946629325               |
| SNP_P3_140974_7870  | NW_004516274.1 | Scaffold929 | 7870                    | GG                              | AA                | 1946629327               |
| SNP_P3_140975_8109  | NW_004516274.1 | Scaffold929 | 8109                    | AA                              | GG                | 1946629329               |
| SNP_P3_140976_8216  | NW_004516274.1 | Scaffold929 | 8216                    | TT                              | CC                | 1946629331               |
| SNP_P3_140977_8217  | NW_004516274.1 | Scaffold929 | 8217                    | TT                              | CC                | 1946629332               |
| SNP_P3_140978_8284  | NW_004516274.1 | Scaffold929 | 8284                    | TT                              | CC                | 1946629352               |
| SNP_P3_140979_9776  | NW_004516274.1 | Scaffold929 | 9776                    | CC                              | TT                | 1946629354               |
| SNP_P3_140980_9976  | NW_004516274.1 | Scaffold929 | 9976                    | CC                              | AA                | 1946629356               |
| SNP_P3_140981_10050 | NW_004516274.1 | Scaffold929 | 10050                   | TT                              | CC                | 1946629358               |
| SNP_P3_140982_10220 | NW_004516274.1 | Scaffold929 | 10220                   | CC                              | TT                | 1946629360               |
| SNP_P3_140983_10228 | NW_004516274.1 | Scaffold929 | 10228                   | AA                              | GG                | 1946629362               |
| SNP_P3_140984_10260 | NW_004516274.1 | Scaffold929 | 10260                   | TT                              | AA                | 1946629364               |
| SNP_P3_140985_10868 | NW_004516274.1 | Scaffold929 | 10868                   | TT                              | CC                | 1946629366               |
| SNP_P3_140986_11205 | NW_004516274.1 | Scaffold929 | 11205                   | AA                              | GG                | 1946629368               |
| SNP_P3_140987_11235 | NW_004516274.1 | Scaffold929 | 11235                   | AA                              | GG                | 1946629370               |
| SNP_P3_140988_11243 | NW_004516274.1 | Scaffold929 | 11243                   | AA                              | GG                | 1946629372               |
| SNP_P3_140989_11244 | NW_004516274.1 | Scaffold929 | 11244                   | CC                              | AA                | 1946629374               |
| SNP_P3_140990_11276 | NW_004516274.1 | Scaffold929 | 11276                   | AA                              | GG                | 1946629376               |
| SNP_P3_140991_11304 | NW_004516274.1 | Scaffold929 | 11304                   | TT                              | CC                | 1946629378               |
| SNP_P3_140992_15225 | NW_004516274.1 | Scaffold929 | 15225                   | AA                              | GG                | 1946629380               |
| SNP_P3_140993_15288 | NW_004516274.1 | Scaffold929 | 15288                   | AA                              | GG                | 1946629382               |
| SNP_P3_140994_15676 | NW_004516274.1 | Scaffold929 | 15676                   | TT                              | CC                | 1946629384               |
| SNP_P3_140995_15688 | NW_004516274.1 | Scaffold929 | 15688                   | AA                              | CC                | 1946629386               |
| SNP_P3_140996_15750 | NW_004516274.1 | Scaffold929 | 15750                   | TT                              | CC                | 1946629388               |
| SNP_P3_140997_15921 | NW_004516274.1 | Scaffold929 | 15921                   | GG                              | CC                | 1946629390               |
| SNP_P3_140998_16031 | NW_004516274.1 | Scaffold929 | 16031                   | GG                              | TT                | 1946629392               |
| SNP_P3_140999_16263 | NW_004516274.1 | Scaffold929 | 16263                   | AA                              | TT                | 1946629394               |
| SNP_P3_141000_16277 | NW_004516274.1 | Scaffold929 | 16277                   | GG                              | AA                | 1946629396               |
| SNP_P3_141001_16283 | NW_004516274.1 | Scaffold929 | 16283                   | CC                              | TT                | 1946629398               |
| SNP_P3_141002_16514 | NW_004516274.1 | Scaffold929 | 16514                   | AA                              | GG                | 1946629400               |
| SNP_P3_141003_16546 | NW_004516274.1 | Scaffold929 | 16546                   | CC                              | TT                | 1946629402               |
| SNP_P3_141004_16593 | NW_004516274.1 | Scaffold929 | 16593                   | CC                              | TT                | 1946629404               |
| SNP_P3_141005_16869 | NW_004516274.1 | Scaffold929 | 16869                   | TT                              | GG                | 1946629406               |
| SNP_P3_141007_17429 | NW_004516274.1 | Scaffold929 | 17429                   | CC                              | TT                | 1946629407               |
| SNP_P3_141008_21121 | NW_004516274.1 | Scaffold929 | 21121                   | GG                              | AA                | 1946629409               |
| SNP_P3_141009_21184 | NW_004516274.1 | Scaffold929 | 21184                   | TT                              | CC                | 1946629411               |
| SNP_P3_141010_53010 | NW_004516276.1 | Scaffold931 | 53010                   | AA                              | TT                | 1946629413               |
| SNP_P3_141011_65176 | NW_004516276.1 | Scaffold931 | 65176                   | AA                              | TT                | 1946629415               |
| SNP_P3_141012_85756 | NW_004516276.1 | Scaffold931 | 85756                   | GG                              | TT                | 1946629417               |
| SNP_P3_141013_85761 | NW_004516276.1 | Scaffold931 | 85761                   | TT                              | CC                | 1946629419               |
| SNP_P3_141014_85775 | NW_004516276.1 | Scaffold931 | 85775                   | GG                              | CC                | 1946629421               |

| SNPs IDs             | Chromosome IDs | Chromosomes | Physical positions (bp) | CDC Frontier (Reference genome) | (Pusa 256 & HPNB) | NCBI SNPdb Accession IDs |
|----------------------|----------------|-------------|-------------------------|---------------------------------|-------------------|--------------------------|
| SNP_P3_141015_100577 | NW_004516276.1 | Scaffold931 | 100577                  | AA                              | GG                | 1946629423               |
| SNP_P3_141017_102524 | NW_004516276.1 | Scaffold931 | 102524                  | CC                              | TT                | 1946629425               |
| SNP_P3_141018_102745 | NW_004516276.1 | Scaffold931 | 102745                  | GG                              | CC                | 1946629426               |
| SNP_P3_141019_102792 | NW_004516276.1 | Scaffold931 | 102792                  | AA                              | GG                | 1946629428               |
| SNP_P3_141020_102796 | NW_004516276.1 | Scaffold931 | 102796                  | CC                              | TT                | 1946629430               |
| SNP_P3_141021_102838 | NW_004516276.1 | Scaffold931 | 102838                  | TT                              | AA                | 1946629432               |
| SNP_P3_141023_103058 | NW_004516276.1 | Scaffold931 | 103058                  | TT                              | GG                | 1946629434               |
| SNP_P3_141024_103064 | NW_004516276.1 | Scaffold931 | 103064                  | AA                              | GG                | 1946629436               |
| SNP_P3_141025_103103 | NW_004516276.1 | Scaffold931 | 103103                  | TT                              | GG                | 1946629438               |
| SNP_P3_141026_103340 | NW_004516276.1 | Scaffold931 | 103340                  | AA                              | GG                | 1946629440               |
| SNP_P3_141027_105151 | NW_004516276.1 | Scaffold931 | 105151                  | CC                              | GG                | 1946629442               |
| SNP_P3_141028_112226 | NW_004516276.1 | Scaffold931 | 112226                  | AA                              | CC                | 1946629444               |
| SNP_P3_141029_112291 | NW_004516276.1 | Scaffold931 | 112291                  | TT                              | AA                | 1946629446               |
| SNP_P3_141030_112293 | NW_004516276.1 | Scaffold931 | 112293                  | GG                              | AA                | 1946629448               |
| SNP_P3_141031_112322 | NW_004516276.1 | Scaffold931 | 112322                  | TT                              | CC                | 1946629450               |
| SNP_P3_141032_112328 | NW_004516276.1 | Scaffold931 | 112328                  | TT                              | CC                | 1946629452               |
| SNP_P3_141033_112368 | NW_004516276.1 | Scaffold931 | 112368                  | CC                              | TT                | 1946629454               |
| SNP_P3_141034_112372 | NW_004516276.1 | Scaffold931 | 112372                  | AA                              | CC                | 1946629456               |
| SNP_P3_141035_112419 | NW_004516276.1 | Scaffold931 | 112419                  | GG                              | AA                | 1946629458               |
| SNP_P3_141036_112535 | NW_004516276.1 | Scaffold931 | 112535                  | CC                              | AA                | 1946629459               |
| SNP_P3_141037_112548 | NW_004516276.1 | Scaffold931 | 112548                  | GG                              | TT                | 1946629461               |
| SNP_P3_141038_112569 | NW_004516276.1 | Scaffold931 | 112569                  | AA                              | CC                | 1946629463               |
| SNP_P3_141039_112603 | NW_004516276.1 | Scaffold931 | 112603                  | AA                              | TT                | 1946629465               |
| SNP_P3_141040_112805 | NW_004516276.1 | Scaffold931 | 112805                  | CC                              | TT                | 1946629467               |
| SNP_P3_141041_112899 | NW_004516276.1 | Scaffold931 | 112899                  | GG                              | AA                | 1946629469               |
| SNP_P3_141042_113858 | NW_004516276.1 | Scaffold931 | 113858                  | GG                              | AA                | 1946629471               |
| SNP_P3_141043_113968 | NW_004516276.1 | Scaffold931 | 113968                  | GG                              | CC                | 1946629473               |
| SNP_P3_141044_114126 | NW_004516276.1 | Scaffold931 | 114126                  | CC                              | GG                | 1946629475               |
| SNP_P3_141045_114139 | NW_004516276.1 | Scaffold931 | 114139                  | TT                              | CC                | 1946629477               |
| SNP_P3_141046_114143 | NW_004516276.1 | Scaffold931 | 114143                  | TT                              | GG                | 1946629479               |
| SNP_P3_141047_114146 | NW_004516276.1 | Scaffold931 | 114146                  | TT                              | CC                | 1946629481               |
| SNP_P3_141048_114199 | NW_004516276.1 | Scaffold931 | 114199                  | TT                              | GG                | 1946629483               |
| SNP_P3_141049_114448 | NW_004516276.1 | Scaffold931 | 114448                  | TT                              | CC                | 1946629485               |
| SNP_P3_141050_115528 | NW_004516276.1 | Scaffold931 | 115528                  | TT                              | GG                | 1946629486               |
| SNP_P3_141051_115621 | NW_004516276.1 | Scaffold931 | 115621                  | GG                              | TT                | 1946629488               |
| SNP_P3_141052_115673 | NW_004516276.1 | Scaffold931 | 115673                  | CC                              | AA                | 1946629490               |
| SNP_P3_141054_115848 | NW_004516276.1 | Scaffold931 | 115848                  | GG                              | TT                | 1946629492               |
| SNP_P3_141055_115866 | NW_004516276.1 | Scaffold931 | 115866                  | AA                              | GG                | 1946629494               |
| SNP_P3_141056_115872 | NW_004516276.1 | Scaffold931 | 115872                  | GG                              | AA                | 1946629497               |
| SNP_P3_141057_115983 | NW_004516276.1 | Scaffold931 | 115983                  | TT                              | CC                | 1946629499               |
| SNP_P3_141058_116063 | NW_004516276.1 | Scaffold931 | 116063                  | AA                              | GG                | 1946629501               |
| SNP_P3_141059_116107 | NW_004516276.1 | Scaffold931 | 116107                  | GG                              | AA                | 1946629503               |

| SNPs IDs             | Chromosome IDs | Chromosomes | Physical positions (bp) | CDC Frontier (Reference genome) | (Pusa 256 & HPNB) | NCBI SNPdb Accession IDs |
|----------------------|----------------|-------------|-------------------------|---------------------------------|-------------------|--------------------------|
| SNP_P3_141060_116160 | NW_004516276.1 | Scaffold931 | 116160                  | TT                              | GG                | 1946629505               |
| SNP_P3_141061_116277 | NW_004516276.1 | Scaffold931 | 116277                  | GG                              | AA                | 1946629506               |
| SNP_P3_141063_116394 | NW_004516276.1 | Scaffold931 | 116394                  | CC                              | TT                | 1946629508               |
| SNP_P3_141065_116449 | NW_004516276.1 | Scaffold931 | 116449                  | CC                              | GG                | 1946629510               |
| SNP_P3_141067_116845 | NW_004516276.1 | Scaffold931 | 116845                  | TT                              | CC                | 1946629512               |
| SNP_P3_141068_116866 | NW_004516276.1 | Scaffold931 | 116866                  | GG                              | AA                | 1946629514               |
| SNP_P3_141069_116882 | NW_004516276.1 | Scaffold931 | 116882                  | AA                              | GG                | 1946629516               |
| SNP_P3_141071_117138 | NW_004516276.1 | Scaffold931 | 117138                  | CC                              | GG                | 1946629518               |
| SNP_P3_141072_117293 | NW_004516276.1 | Scaffold931 | 117293                  | AA                              | GG                | 1946629520               |
| SNP_P3_141073_117304 | NW_004516276.1 | Scaffold931 | 117304                  | TT                              | GG                | 1946629522               |
| SNP_P3_141074_117429 | NW_004516276.1 | Scaffold931 | 117429                  | CC                              | GG                | 1946629524               |
| SNP_P3_141075_117441 | NW_004516276.1 | Scaffold931 | 117441                  | GG                              | AA                | 1946629526               |
| SNP_P3_141076_117442 | NW_004516276.1 | Scaffold931 | 117442                  | TT                              | CC                | 1946629527               |
| SNP_P3_141077_117450 | NW_004516276.1 | Scaffold931 | 117450                  | AA                              | TT                | 1946629529               |
| SNP_P3_141078_117484 | NW_004516276.1 | Scaffold931 | 117484                  | GG                              | AA                | 1946629531               |
| SNP_P3_141079_117502 | NW_004516276.1 | Scaffold931 | 117502                  | CC                              | TT                | 1946629533               |
| SNP_P3_141080_117510 | NW_004516276.1 | Scaffold931 | 117510                  | TT                              | AA                | 1946629536               |
| SNP_P3_141081_117547 | NW_004516276.1 | Scaffold931 | 117547                  | CC                              | AA                | 1946629538               |
| SNP_P3_141082_117553 | NW_004516276.1 | Scaffold931 | 117553                  | GG                              | TT                | 1946629540               |
| SNP_P3_141083_117712 | NW_004516276.1 | Scaffold931 | 117712                  | GG                              | AA                | 1946629542               |
| SNP_P3_141084_117726 | NW_004516276.1 | Scaffold931 | 117726                  | GG                              | CC                | 1946629544               |
| SNP_P3_141085_117727 | NW_004516276.1 | Scaffold931 | 117727                  | TT                              | AA                | 1946629546               |
| SNP_P3_141086_117730 | NW_004516276.1 | Scaffold931 | 117730                  | GG                              | CC                | 1946629548               |
| SNP_P3_141087_117736 | NW_004516276.1 | Scaffold931 | 117736                  | AA                              | CC                | 1946629550               |
| SNP_P3_141088_117771 | NW_004516276.1 | Scaffold931 | 117771                  | GG                              | AA                | 1946629551               |
| SNP_P3_141089_117776 | NW_004516276.1 | Scaffold931 | 117776                  | AA                              | GG                | 1946629553               |
| SNP_P3_141090_117841 | NW_004516276.1 | Scaffold931 | 117841                  | AA                              | GG                | 1946629555               |
| SNP_P3_141092_118368 | NW_004516276.1 | Scaffold931 | 118368                  | CC                              | AA                | 1946629557               |
| SNP_P3_141093_118459 | NW_004516276.1 | Scaffold931 | 118459                  | CC                              | TT                | 1946629559               |
| SNP_P3_141094_118600 | NW_004516276.1 | Scaffold931 | 118600                  | GG                              | AA                | 1946629561               |
| SNP_P3_141095_118641 | NW_004516276.1 | Scaffold931 | 118641                  | GG                              | TT                | 1946629563               |
| SNP_P3_141096_118952 | NW_004516276.1 | Scaffold931 | 118952                  | CC                              | GG                | 1946629565               |
| SNP_P3_141097_118978 | NW_004516276.1 | Scaffold931 | 118978                  | AA                              | GG                | 1946629567               |
| SNP_P3_141098_118997 | NW_004516276.1 | Scaffold931 | 118997                  | CC                              | TT                | 1946629569               |
| SNP_P3_141100_125320 | NW_004516276.1 | Scaffold931 | 125320                  | AA                              | GG                | 1946629571               |
| SNP_P3_141101_125327 | NW_004516276.1 | Scaffold931 | 125327                  | TT                              | CC                | 1946629573               |
| SNP_P3_141102_125352 | NW_004516276.1 | Scaffold931 | 125352                  | AA                              | GG                | 1946629575               |
| SNP_P3_141103_125391 | NW_004516276.1 | Scaffold931 | 125391                  | TT                              | AA                | 1946629577               |
| SNP_P3_141104_125415 | NW_004516276.1 | Scaffold931 | 125415                  | GG                              | AA                | 1946629579               |
| SNP_P3_141105_125416 | NW_004516276.1 | Scaffold931 | 125416                  | TT                              | CC                | 1946629581               |
| SNP_P3_141106_125660 | NW_004516276.1 | Scaffold931 | 125660                  | AA                              | GG                | 1946629583               |
| SNP_P3_141107_125665 | NW_004516276.1 | Scaffold931 | 125665                  | GG                              | AA                | 1946629585               |

| SNPs IDs             | Chromosome IDs | Chromosomes | Physical positions (bp) | CDC Frontier (Reference genome) | (Pusa 256 & HPNB) | NCBI SNPdb Accession IDs |
|----------------------|----------------|-------------|-------------------------|---------------------------------|-------------------|--------------------------|
| SNP_P3_141108_125723 | NW_004516276.1 | Scaffold931 | 125723                  | AA                              | CC                | 1946629587               |
| SNP_P3_141109_125757 | NW_004516276.1 | Scaffold931 | 125757                  | GG                              | AA                | 1946629589               |
| SNP_P3_141110_125864 | NW_004516276.1 | Scaffold931 | 125864                  | AA                              | GG                | 1946629591               |
| SNP_P3_141111_125877 | NW_004516276.1 | Scaffold931 | 125877                  | AA                              | GG                | 1946629593               |
| SNP_P3_141112_139199 | NW_004516276.1 | Scaffold931 | 139199                  | AA                              | CC                | 1946629595               |
| SNP_P3_141113_144819 | NW_004516276.1 | Scaffold931 | 144819                  | AA                              | GG                | 1946629597               |
| SNP_P3_141114_144835 | NW_004516276.1 | Scaffold931 | 144835                  | GG                              | AA                | 1946629599               |
| SNP_P3_141115_151972 | NW_004516276.1 | Scaffold931 | 151972                  | AA                              | TT                | 1946629601               |
| SNP_P3_141116_152307 | NW_004516276.1 | Scaffold931 | 152307                  | AA                              | GG                | 1946629603               |
| SNP_P3_141117_152621 | NW_004516276.1 | Scaffold931 | 152621                  | CC                              | GG                | 1946629605               |
| SNP_P3_141118_152664 | NW_004516276.1 | Scaffold931 | 152664                  | GG                              | AA                | 1946629608               |
| SNP_P3_141119_152694 | NW_004516276.1 | Scaffold931 | 152694                  | CC                              | TT                | 1946629610               |
| SNP_P3_141120_152723 | NW_004516276.1 | Scaffold931 | 152723                  | GG                              | TT                | 1946629612               |
| SNP_P3_141121_152753 | NW_004516276.1 | Scaffold931 | 152753                  | CC                              | TT                | 1946629614               |
| SNP_P3_141122_152770 | NW_004516276.1 | Scaffold931 | 152770                  | CC                              | GG                | 1946629616               |
| SNP_P3_141123_152793 | NW_004516276.1 | Scaffold931 | 152793                  | GG                              | TT                | 1946629618               |
| SNP_P3_141124_152804 | NW_004516276.1 | Scaffold931 | 152804                  | AA                              | GG                | 1946629619               |
| SNP_P3_141125_152845 | NW_004516276.1 | Scaffold931 | 152845                  | TT                              | CC                | 1946629621               |
| SNP_P3_141126_152864 | NW_004516276.1 | Scaffold931 | 152864                  | AA                              | TT                | 1946629623               |
| SNP_P3_141127_152871 | NW_004516276.1 | Scaffold931 | 152871                  | CC                              | TT                | 1946629625               |
| SNP_P3_141128_152991 | NW_004516276.1 | Scaffold931 | 152991                  | AA                              | GG                | 1946629626               |
| SNP_P3_141129_152998 | NW_004516276.1 | Scaffold931 | 152998                  | AA                              | GG                | 1946629628               |
| SNP_P3_141130_153003 | NW_004516276.1 | Scaffold931 | 153003                  | GG                              | TT                | 1946629630               |
| SNP_P3_141131_156045 | NW_004516276.1 | Scaffold931 | 156045                  | CC                              | AA                | 1946629632               |
| SNP_P3_141132_156152 | NW_004516276.1 | Scaffold931 | 156152                  | GG                              | TT                | 1946629634               |
| SNP_P3_141133_156171 | NW_004516276.1 | Scaffold931 | 156171                  | AA                              | CC                | 1946629636               |
| SNP_P3_141134_156201 | NW_004516276.1 | Scaffold931 | 156201                  | GG                              | TT                | 1946629638               |
| SNP_P3_141135_156227 | NW_004516276.1 | Scaffold931 | 156227                  | TT                              | AA                | 1946629640               |
| SNP_P3_141136_156255 | NW_004516276.1 | Scaffold931 | 156255                  | TT                              | AA                | 1946629642               |
| SNP_P3_141137_156486 | NW_004516276.1 | Scaffold931 | 156486                  | AA                              | GG                | 1946629644               |
| SNP_P3_141138_156806 | NW_004516276.1 | Scaffold931 | 156806                  | GG                              | AA                | 1946629646               |
| SNP_P3_141139_165985 | NW_004516276.1 | Scaffold931 | 165985                  | AA                              | GG                | 1946629648               |
| SNP_P3_141140_166074 | NW_004516276.1 | Scaffold931 | 166074                  | TT                              | CC                | 1946629650               |
| SNP_P3_141141_166162 | NW_004516276.1 | Scaffold931 | 166162                  | AA                              | GG                | 1946629652               |
| SNP_P3_141142_166283 | NW_004516276.1 | Scaffold931 | 166283                  | AA                              | CC                | 1946629654               |
| SNP_P3_141143_166343 | NW_004516276.1 | Scaffold931 | 166343                  | GG                              | AA                | 1946629657               |
| SNP_P3_141144_166369 | NW_004516276.1 | Scaffold931 | 166369                  | CC                              | TT                | 1946629659               |
| SNP_P3_141145_167037 | NW_004516276.1 | Scaffold931 | 167037                  | GG                              | TT                | 1946629661               |
| SNP_P3_141146_167214 | NW_004516276.1 | Scaffold931 | 167214                  | TT                              | AA                | 1946629664               |
| SNP_P3_141147_167277 | NW_004516276.1 | Scaffold931 | 167277                  | AA                              | GG                | 1946629666               |
| SNP_P3_141149_179978 | NW_004516276.1 | Scaffold931 | 179978                  | CC                              | TT                | 1946629668               |
| SNP_P3_141150_180018 | NW_004516276.1 | Scaffold931 | 180018                  | TT                              | CC                | 1946629671               |

| SNPs IDs             | Chromosome IDs | Chromosomes | Physical positions (bp) | CDC Frontier (Reference genome) | (Pusa 256 & HPNB) | NCBI SNPdb Accession IDs |
|----------------------|----------------|-------------|-------------------------|---------------------------------|-------------------|--------------------------|
| SNP_P3_141151_180088 | NW_004516276.1 | Scaffold931 | 180088                  | AA                              | CC                | 1946629673               |
| SNP_P3_141152_180137 | NW_004516276.1 | Scaffold931 | 180137                  | GG                              | TT                | 1946629675               |
| SNP_P3_141153_180220 | NW_004516276.1 | Scaffold931 | 180220                  | AA                              | GG                | 1946629678               |
| SNP_P3_141154_180221 | NW_004516276.1 | Scaffold931 | 180221                  | GG                              | AA                | 1946629680               |
| SNP_P3_141156_180489 | NW_004516276.1 | Scaffold931 | 180489                  | CC                              | TT                | 1946629682               |
| SNP_P3_141157_180498 | NW_004516276.1 | Scaffold931 | 180498                  | AA                              | CC                | 1946629684               |
| SNP_P3_141159_180614 | NW_004516276.1 | Scaffold931 | 180614                  | AA                              | GG                | 1946629686               |
| SNP_P3_141160_180647 | NW_004516276.1 | Scaffold931 | 180647                  | CC                              | AA                | 1946629688               |
| SNP_P3_141161_180668 | NW_004516276.1 | Scaffold931 | 180668                  | TT                              | GG                | 1946629691               |
| SNP_P3_141162_180707 | NW_004516276.1 | Scaffold931 | 180707                  | AA                              | GG                | 1946629693               |
| SNP_P3_141163_180735 | NW_004516276.1 | Scaffold931 | 180735                  | AA                              | CC                | 1946629695               |
| SNP_P3_141164_180741 | NW_004516276.1 | Scaffold931 | 180741                  | CC                              | AA                | 1946629697               |
| SNP_P3_141165_180851 | NW_004516276.1 | Scaffold931 | 180851                  | TT                              | AA                | 1946629699               |
| SNP_P3_141166_181059 | NW_004516276.1 | Scaffold931 | 181059                  | TT                              | AA                | 1946629701               |
| SNP_P3_141167_181067 | NW_004516276.1 | Scaffold931 | 181067                  | CC                              | TT                | 1946629703               |
| SNP_P3_141168_181118 | NW_004516276.1 | Scaffold931 | 181118                  | TT                              | AA                | 1946629706               |
| SNP_P3_141169_181236 | NW_004516276.1 | Scaffold931 | 181236                  | TT                              | AA                | 1946629708               |
| SNP_P3_141171_181336 | NW_004516276.1 | Scaffold931 | 181336                  | CC                              | TT                | 1946629710               |
| SNP_P3_141173_181401 | NW_004516276.1 | Scaffold931 | 181401                  | GG                              | AA                | 1946629712               |
| SNP_P3_141174_181431 | NW_004516276.1 | Scaffold931 | 181431                  | CC                              | AA                | 1946629715               |
| SNP_P3_141175_181468 | NW_004516276.1 | Scaffold931 | 181468                  | AA                              | TT                | 1946629717               |
| SNP_P3_141176_181469 | NW_004516276.1 | Scaffold931 | 181469                  | TT                              | GG                | 1946629719               |
| SNP_P3_141177_181510 | NW_004516276.1 | Scaffold931 | 181510                  | TT                              | AA                | 1946629721               |
| SNP_P3_141178_181633 | NW_004516276.1 | Scaffold931 | 181633                  | GG                              | AA                | 1946629723               |
| SNP_P3_141179_190674 | NW_004516276.1 | Scaffold931 | 190674                  | GG                              | AA                | 1946629725               |
| SNP_P3_141180_190679 | NW_004516276.1 | Scaffold931 | 190679                  | CC                              | TT                | 1946629727               |
| SNP_P3_141181_190681 | NW_004516276.1 | Scaffold931 | 190681                  | CC                              | AA                | 1946629729               |
| SNP_P3_141182_190693 | NW_004516276.1 | Scaffold931 | 190693                  | GG                              | AA                | 1946629731               |
| SNP_P3_141183_190803 | NW_004516276.1 | Scaffold931 | 190803                  | GG                              | AA                | 1946629733               |
| SNP_P3_141184_191312 | NW_004516276.1 | Scaffold931 | 191312                  | CC                              | GG                | 1946629735               |
| SNP_P3_141185_191336 | NW_004516276.1 | Scaffold931 | 191336                  | CC                              | TT                | 1946629737               |
| SNP_P3_141186_191431 | NW_004516276.1 | Scaffold931 | 191431                  | GG                              | AA                | 1946629739               |
| SNP_P3_141187_191498 | NW_004516276.1 | Scaffold931 | 191498                  | TT                              | AA                | 1946629741               |
| SNP_P3_141188_191625 | NW_004516276.1 | Scaffold931 | 191625                  | CC                              | TT                | 1946629743               |
| SNP_P3_141189_204832 | NW_004516276.1 | Scaffold931 | 204832                  | CC                              | TT                | 1946629745               |
| SNP_P3_141190_215633 | NW_004516276.1 | Scaffold931 | 215633                  | GG                              | CC                | 1946629747               |
| SNP_P3_141191_217084 | NW_004516276.1 | Scaffold931 | 217084                  | AA                              | GG                | 1946629748               |
| SNP_P3_141192_217103 | NW_004516276.1 | Scaffold931 | 217103                  | GG                              | AA                | 1946629750               |
| SNP_P3_141193_217113 | NW_004516276.1 | Scaffold931 | 217113                  | AA                              | GG                | 1946629752               |
| SNP_P3_141194_217314 | NW_004516276.1 | Scaffold931 | 217314                  | TT                              | CC                | 1946629755               |
| SNP_P3_141195_217332 | NW_004516276.1 | Scaffold931 | 217332                  | GG                              | TT                | 1946629757               |
| SNP_P3_141196_224889 | NW_004516276.1 | Scaffold931 | 224889                  | CC                              | AA                | 1946629759               |

| SNPs IDs             | Chromosome IDs | Chromosomes | Physical positions (bp) | CDC Frontier (Reference genome) | (Pusa 256 & HPNB) | NCBI SNPdb Accession IDs |
|----------------------|----------------|-------------|-------------------------|---------------------------------|-------------------|--------------------------|
| SNP_P3_141197_229261 | NW_004516276.1 | Scaffold931 | 229261                  | AA                              | CC                | 1946629761               |
| SNP_P3_141199_240682 | NW_004516276.1 | Scaffold931 | 240682                  | TT                              | CC                | 1946629763               |
| SNP_P3_141200_244429 | NW_004516276.1 | Scaffold931 | 244429                  | GG                              | AA                | 1946629765               |
| SNP_P3_141201_244469 | NW_004516276.1 | Scaffold931 | 244469                  | CC                              | AA                | 1946629767               |
| SNP_P3_141202_244562 | NW_004516276.1 | Scaffold931 | 244562                  | CC                              | TT                | 1946629769               |
| SNP_P3_141204_247358 | NW_004516276.1 | Scaffold931 | 247358                  | GG                              | CC                | 1946629772               |
| SNP_P3_141205_247363 | NW_004516276.1 | Scaffold931 | 247363                  | AA                              | GG                | 1946629775               |
| SNP_P3_141206_247371 | NW_004516276.1 | Scaffold931 | 247371                  | AA                              | GG                | 1946629777               |
| SNP_P3_141207_247378 | NW_004516276.1 | Scaffold931 | 247378                  | AA                              | CC                | 1946629779               |
| SNP_P3_141208_248034 | NW_004516276.1 | Scaffold931 | 248034                  | CC                              | TT                | 1946629782               |
| SNP_P3_141209_248074 | NW_004516276.1 | Scaffold931 | 248074                  | GG                              | AA                | 1946629784               |
| SNP_P3_141210_248106 | NW_004516276.1 | Scaffold931 | 248106                  | TT                              | CC                | 1946629786               |
| SNP_P3_141211_249533 | NW_004516276.1 | Scaffold931 | 249533                  | GG                              | TT                | 1946629788               |
| SNP_P3_141213_249706 | NW_004516276.1 | Scaffold931 | 249706                  | TT                              | GG                | 1946629790               |
| SNP_P3_141214_249823 | NW_004516276.1 | Scaffold931 | 249823                  | GG                              | AA                | 1946629793               |
| SNP_P3_141215_250067 | NW_004516276.1 | Scaffold931 | 250067                  | TT                              | AA                | 1946629795               |
| SNP_P3_141217_250305 | NW_004516276.1 | Scaffold931 | 250305                  | CC                              | AA                | 1946629797               |
| SNP_P3_141218_250395 | NW_004516276.1 | Scaffold931 | 250395                  | GG                              | CC                | 1946629799               |
| SNP_P3_141219_1936   | NW_004516277.1 | Scaffold933 | 1936                    | TT                              | CC                | 1946629801               |
| SNP_P3_141220_2531   | NW_004516277.1 | Scaffold933 | 2531                    | TT                              | CC                | 1946629803               |
| SNP_P3_141222_3037   | NW_004516277.1 | Scaffold933 | 3037                    | AA                              | GG                | 1946629805               |
| SNP_P3_141223_3670   | NW_004516277.1 | Scaffold933 | 3670                    | CC                              | TT                | 1946629807               |
| SNP_P3_141224_3865   | NW_004516277.1 | Scaffold933 | 3865                    | TT                              | AA                | 1946629809               |
| SNP_P3_141225_3918   | NW_004516277.1 | Scaffold933 | 3918                    | AA                              | GG                | 1946629811               |
| SNP_P3_141226_3944   | NW_004516277.1 | Scaffold933 | 3944                    | GG                              | AA                | 1946629814               |
| SNP_P3_141228_4788   | NW_004516277.1 | Scaffold933 | 4788                    | AA                              | CC                | 1946629816               |
| SNP_P3_141229_4794   | NW_004516277.1 | Scaffold933 | 4794                    | GG                              | AA                | 1946629818               |
| SNP_P3_141230_4832   | NW_004516277.1 | Scaffold933 | 4832                    | GG                              | AA                | 1946629820               |
| SNP_P3_141231_4924   | NW_004516277.1 | Scaffold933 | 4924                    | AA                              | TT                | 1946629823               |
| SNP_P3_141232_5016   | NW_004516277.1 | Scaffold933 | 5016                    | GG                              | AA                | 1946629825               |
| SNP_P3_141234_1456   | NW_004516278.1 | Scaffold934 | 1456                    | TT                              | GG                | 1946629827               |
| SNP_P3_141235_3331   | NW_004516278.1 | Scaffold934 | 3331                    | GG                              | AA                | 1946629829               |
| SNP_P3_141236_634    | NW_004516279.1 | Scaffold937 | 634                     | TT                              | AA                | 1946629831               |
| SNP_P3_141237_25605  | NW_004516279.1 | Scaffold937 | 25605                   | GG                              | TT                | 1946629833               |
| SNP_P3_141238_25628  | NW_004516279.1 | Scaffold937 | 25628                   | CC                              | TT                | 1946629835               |
| SNP_P3_141239_25789  | NW_004516279.1 | Scaffold937 | 25789                   | AA                              | TT                | 1946629836               |
| SNP_P3_141240_53784  | NW_004516279.1 | Scaffold937 | 53784                   | CC                              | AA                | 1946629837               |
| SNP_P3_141243_116784 | NW_004516279.1 | Scaffold937 | 116784                  | CC                              | AA                | 1946629838               |
| SNP_P3_141244_133208 | NW_004516279.1 | Scaffold937 | 133208                  | AA                              | GG                | 1946629839               |
| SNP_P3_141245_133238 | NW_004516279.1 | Scaffold937 | 133238                  | CC                              | TT                | 1946629840               |
| SNP_P3_141246_165361 | NW_004516279.1 | Scaffold937 | 165361                  | TT                              | GG                | 1946629841               |
| SNP_P3_141247_165371 | NW_004516279.1 | Scaffold937 | 165371                  | TT                              | CC                | 1946629842               |



| SNPs IDs             | Chromosome IDs | Chromosomes | Physical positions (bp) | CDC Frontier (Reference genome) | (Pusa 256 & HPNB) | NCBI SNPdb Accession IDs |
|----------------------|----------------|-------------|-------------------------|---------------------------------|-------------------|--------------------------|
| SNP_P3_141248_165414 | NW_004516279.1 | Scaffold937 | 165414                  | AA                              | GG                | 1946629843               |
| SNP_P3_141250_166090 | NW_004516279.1 | Scaffold937 | 166090                  | CC                              | TT                | 1946629845               |
| SNP_P3_141251_166181 | NW_004516279.1 | Scaffold937 | 166181                  | AA                              | GG                | 1946629847               |
| SNP_P3_141252_166941 | NW_004516279.1 | Scaffold937 | 166941                  | TT                              | AA                | 1946629849               |
| SNP_P3_141253_166968 | NW_004516279.1 | Scaffold937 | 166968                  | GG                              | TT                | 1946629851               |
| SNP_P3_141254_184776 | NW_004516279.1 | Scaffold937 | 184776                  | AA                              | GG                | 1946629853               |
| SNP_P3_141255_184801 | NW_004516279.1 | Scaffold937 | 184801                  | TT                              | CC                | 1946629855               |
| SNP_P3_141256_184860 | NW_004516279.1 | Scaffold937 | 184860                  | TT                              | CC                | 1946629857               |
| SNP_P3_141257_184862 | NW_004516279.1 | Scaffold937 | 184862                  | AA                              | CC                | 1946629859               |
| SNP_P3_141258_185102 | NW_004516279.1 | Scaffold937 | 185102                  | TT                              | CC                | 1946629861               |
| SNP_P3_141259_185175 | NW_004516279.1 | Scaffold937 | 185175                  | GG                              | AA                | 1946629863               |
| SNP_P3_141260_185196 | NW_004516279.1 | Scaffold937 | 185196                  | TT                              | CC                | 1946629866               |
| SNP_P3_141261_185250 | NW_004516279.1 | Scaffold937 | 185250                  | TT                              | GG                | 1946629868               |
| SNP_P3_141262_186205 | NW_004516279.1 | Scaffold937 | 186205                  | AA                              | GG                | 1946629871               |
| SNP_P3_141265_201832 | NW_004516279.1 | Scaffold937 | 201832                  | TT                              | CC                | 1946629873               |
| SNP_P3_141268_206997 | NW_004516279.1 | Scaffold937 | 206997                  | AA                              | TT                | 1946629876               |
| SNP_P3_141269_207142 | NW_004516279.1 | Scaffold937 | 207142                  | AA                              | GG                | 1946629878               |
| SNP_P3_141270_207201 | NW_004516279.1 | Scaffold937 | 207201                  | GG                              | AA                | 1946629881               |
| SNP_P3_141271_207207 | NW_004516279.1 | Scaffold937 | 207207                  | CC                              | TT                | 1946629883               |
| SNP_P3_141272_207230 | NW_004516279.1 | Scaffold937 | 207230                  | GG                              | AA                | 1946629885               |
| SNP_P3_141273_207249 | NW_004516279.1 | Scaffold937 | 207249                  | GG                              | AA                | 1946629887               |
| SNP_P3_141274_207280 | NW_004516279.1 | Scaffold937 | 207280                  | CC                              | TT                | 1946629889               |
| SNP_P3_141275_207307 | NW_004516279.1 | Scaffold937 | 207307                  | CC                              | TT                | 1946629891               |
| SNP_P3_141276_207497 | NW_004516279.1 | Scaffold937 | 207497                  | GG                              | AA                | 1946629894               |
| SNP_P3_141277_207507 | NW_004516279.1 | Scaffold937 | 207507                  | CC                              | TT                | 1946629896               |
| SNP_P3_141278_207563 | NW_004516279.1 | Scaffold937 | 207563                  | CC                              | GG                | 1946629898               |
| SNP_P3_141279_207817 | NW_004516279.1 | Scaffold937 | 207817                  | AA                              | CC                | 1946629900               |
| SNP_P3_141280_207819 | NW_004516279.1 | Scaffold937 | 207819                  | CC                              | TT                | 1946629903               |
| SNP_P3_141281_677    | NW_004516281.1 | Scaffold939 | 677                     | CC                              | TT                | 1946629905               |
| SNP_P3_141282_710    | NW_004516281.1 | Scaffold939 | 710                     | GG                              | TT                | 1946629907               |
| SNP_P3_141283_934    | NW_004516281.1 | Scaffold939 | 934                     | TT                              | GG                | 1946629909               |
| SNP_P3_141284_978    | NW_004516281.1 | Scaffold939 | 978                     | CC                              | TT                | 1946629911               |
| SNP_P3_141286_1169   | NW_004516281.1 | Scaffold939 | 1169                    | AA                              | TT                | 1946629913               |
| SNP_P3_141287_1233   | NW_004516281.1 | Scaffold939 | 1233                    | AA                              | TT                | 1946629915               |
| SNP_P3_141288_1290   | NW_004516281.1 | Scaffold939 | 1290                    | CC                              | TT                | 1946629917               |
| SNP_P3_141289_1306   | NW_004516281.1 | Scaffold939 | 1306                    | AA                              | GG                | 1946629919               |
| SNP_P3_141290_1313   | NW_004516281.1 | Scaffold939 | 1313                    | CC                              | TT                | 1946629920               |
| SNP_P3_141291_1320   | NW_004516281.1 | Scaffold939 | 1320                    | AA                              | TT                | 1946629922               |
| SNP_P3_141292_1346   | NW_004516281.1 | Scaffold939 | 1346                    | AA                              | TT                | 1946629924               |
| SNP_P3_141294_16341  | NW_004516283.1 | Scaffold943 | 16341                   | GG                              | CC                | 1946629926               |
| SNP_P3_141295_42873  | NW_004516283.1 | Scaffold943 | 42873                   | GG                              | AA                | 1946629928               |
| SNP_P3_141296_42915  | NW_004516283.1 | Scaffold943 | 42915                   | AA                              | TT                | 1946629930               |

| SNPs IDs             | Chromosome IDs | Chromosomes | Physical positions (bp) | CDC Frontier (Reference genome) | (Pusa 256 & HPNB) | NCBI SNPdb Accession IDs |
|----------------------|----------------|-------------|-------------------------|---------------------------------|-------------------|--------------------------|
| SNP_P3_141298_42930  | NW_004516283.1 | Scaffold943 | 42930                   | AA                              | TT                | 1946629932               |
| SNP_P3_141299_42938  | NW_004516283.1 | Scaffold943 | 42938                   | TT                              | AA                | 1946629934               |
| SNP_P3_141300_42983  | NW_004516283.1 | Scaffold943 | 42983                   | TT                              | GG                | 1946629936               |
| SNP_P3_141301_42999  | NW_004516283.1 | Scaffold943 | 42999                   | GG                              | AA                | 1946629938               |
| SNP_P3_141302_43000  | NW_004516283.1 | Scaffold943 | 43000                   | TT                              | CC                | 1946629940               |
| SNP_P3_141303_43003  | NW_004516283.1 | Scaffold943 | 43003                   | TT                              | AA                | 1946629943               |
| SNP_P3_141304_43310  | NW_004516283.1 | Scaffold943 | 43310                   | AA                              | TT                | 1946629945               |
| SNP_P3_141305_43354  | NW_004516283.1 | Scaffold943 | 43354                   | CC                              | AA                | 1946629947               |
| SNP_P3_141306_43774  | NW_004516283.1 | Scaffold943 | 43774                   | GG                              | AA                | 1946629949               |
| SNP_P3_141307_46840  | NW_004516283.1 | Scaffold943 | 46840                   | AA                              | CC                | 1946629951               |
| SNP_P3_141308_77437  | NW_004516283.1 | Scaffold943 | 77437                   | CC                              | GG                | 1946629953               |
| SNP_P3_141309_119005 | NW_004516283.1 | Scaffold943 | 119005                  | AA                              | TT                | 1946629955               |
| SNP_P3_141310_119011 | NW_004516283.1 | Scaffold943 | 119011                  | AA                              | GG                | 1946629957               |
| SNP_P3_141311_119789 | NW_004516283.1 | Scaffold943 | 119789                  | AA                              | GG                | 1946629959               |
| SNP_P3_141312_122616 | NW_004516283.1 | Scaffold943 | 122616                  | GG                              | AA                | 1946629961               |
| SNP_P3_141313_125264 | NW_004516283.1 | Scaffold943 | 125264                  | AA                              | GG                | 1946629963               |
| SNP_P3_141314_125268 | NW_004516283.1 | Scaffold943 | 125268                  | CC                              | AA                | 1946629965               |
| SNP_P3_141315_125451 | NW_004516283.1 | Scaffold943 | 125451                  | GG                              | AA                | 1946629967               |
| SNP_P3_141316_125488 | NW_004516283.1 | Scaffold943 | 125488                  | GG                              | AA                | 1946629969               |
| SNP_P3_141317_143914 | NW_004516283.1 | Scaffold943 | 143914                  | CC                              | TT                | 1946629971               |
| SNP_P3_141318_162835 | NW_004516283.1 | Scaffold943 | 162835                  | TT                              | CC                | 1946629973               |
| SNP_P3_141319_162861 | NW_004516283.1 | Scaffold943 | 162861                  | AA                              | GG                | 1946629975               |
| SNP_P3_141320_163031 | NW_004516283.1 | Scaffold943 | 163031                  | CC                              | AA                | 1946629977               |
| SNP_P3_141321_163086 | NW_004516283.1 | Scaffold943 | 163086                  | AA                              | TT                | 1946629979               |
| SNP_P3_141322_163294 | NW_004516283.1 | Scaffold943 | 163294                  | GG                              | AA                | 1946629982               |
| SNP_P3_141323_163406 | NW_004516283.1 | Scaffold943 | 163406                  | TT                              | CC                | 1946629984               |
| SNP_P3_141324_163472 | NW_004516283.1 | Scaffold943 | 163472                  | TT                              | CC                | 1946629986               |
| SNP_P3_141325_163473 | NW_004516283.1 | Scaffold943 | 163473                  | TT                              | AA                | 1946629988               |
| SNP_P3_141326_166075 | NW_004516283.1 | Scaffold943 | 166075                  | TT                              | GG                | 1946629990               |
| SNP_P3_141327_245301 | NW_004516283.1 | Scaffold943 | 245301                  | TT                              | AA                | 1946629992               |
| SNP_P3_141328_253415 | NW_004516283.1 | Scaffold943 | 253415                  | AA                              | TT                | 1946629994               |
| SNP_P3_141329_253425 | NW_004516283.1 | Scaffold943 | 253425                  | TT                              | GG                | 1946629996               |
| SNP_P3_141330_253427 | NW_004516283.1 | Scaffold943 | 253427                  | GG                              | AA                | 1946629998               |
| SNP_P3_141331_253442 | NW_004516283.1 | Scaffold943 | 253442                  | TT                              | GG                | 1946630000               |
| SNP_P3_141332_253483 | NW_004516283.1 | Scaffold943 | 253483                  | CC                              | TT                | 1946630002               |
| SNP_P3_141333_263266 | NW_004516283.1 | Scaffold943 | 263266                  | TT                              | CC                | 1946630004               |
| SNP_P3_141334_263317 | NW_004516283.1 | Scaffold943 | 263317                  | CC                              | TT                | 1946630006               |
| SNP_P3_141335_264121 | NW_004516283.1 | Scaffold943 | 264121                  | GG                              | AA                | 1946630008               |
| SNP_P3_141336_266880 | NW_004516283.1 | Scaffold943 | 266880                  | CC                              | TT                | 1946630010               |
| SNP_P3_141337_267016 | NW_004516283.1 | Scaffold943 | 267016                  | AA                              | GG                | 1946630012               |
| SNP_P3_141338_267017 | NW_004516283.1 | Scaffold943 | 267017                  | TT                              | CC                | 1946630014               |
| SNP_P3_141340_267676 | NW_004516283.1 | Scaffold943 | 267676                  | TT                              | CC                | 1946630016               |

| SNPs IDs             | Chromosome IDs | Chromosomes | Physical positions (bp) | CDC Frontier (Reference genome) | (Pusa 256 & HPNB) | NCBI SNPdb Accession IDs |
|----------------------|----------------|-------------|-------------------------|---------------------------------|-------------------|--------------------------|
| SNP_P3_141341_267728 | NW_004516283.1 | Scaffold943 | 267728                  | GG                              | CC                | 1946630018               |
| SNP_P3_141343_118    | NW_004516284.1 | Scaffold944 | 118                     | AA                              | GG                | 1946630020               |
| SNP_P3_141344_226    | NW_004516284.1 | Scaffold944 | 226                     | GG                              | AA                | 1946630023               |
| SNP_P3_141345_296    | NW_004516284.1 | Scaffold944 | 296                     | GG                              | AA                | 1946630025               |
| SNP_P3_141346_521    | NW_004516284.1 | Scaffold944 | 521                     | GG                              | AA                | 1946630027               |
| SNP_P3_141347_528    | NW_004516284.1 | Scaffold944 | 528                     | TT                              | CC                | 1946630029               |
| SNP_P3_141349_703    | NW_004516284.1 | Scaffold944 | 703                     | CC                              | AA                | 1946630031               |
| SNP_P3_141350_752    | NW_004516284.1 | Scaffold944 | 752                     | CC                              | GG                | 1946630033               |
| SNP_P3_141351_803    | NW_004516284.1 | Scaffold944 | 803                     | GG                              | AA                | 1946630035               |
| SNP_P3_141352_879    | NW_004516284.1 | Scaffold944 | 879                     | GG                              | TT                | 1946630037               |
| SNP_P3_141353_1405   | NW_004516284.1 | Scaffold944 | 1405                    | CC                              | TT                | 1946630039               |
| SNP_P3_141354_1518   | NW_004516284.1 | Scaffold944 | 1518                    | TT                              | CC                | 1946630041               |
| SNP_P3_141355_1724   | NW_004516284.1 | Scaffold944 | 1724                    | TT                              | CC                | 1946630043               |
| SNP_P3_141356_1725   | NW_004516284.1 | Scaffold944 | 1725                    | GG                              | TT                | 1946630045               |
| SNP_P3_141357_1733   | NW_004516284.1 | Scaffold944 | 1733                    | AA                              | GG                | 1946630047               |
| SNP_P3_141358_1849   | NW_004516284.1 | Scaffold944 | 1849                    | AA                              | GG                | 1946630050               |
| SNP_P3_141359_2104   | NW_004516284.1 | Scaffold944 | 2104                    | CC                              | GG                | 1946630052               |
| SNP_P3_141360_2352   | NW_004516284.1 | Scaffold944 | 2352                    | TT                              | AA                | 1946630054               |
| SNP_P3_141362_2442   | NW_004516284.1 | Scaffold944 | 2442                    | AA                              | GG                | 1946630057               |
| SNP_P3_141364_2587   | NW_004516284.1 | Scaffold944 | 2587                    | CC                              | TT                | 1946630059               |
| SNP_P3_141365_2732   | NW_004516284.1 | Scaffold944 | 2732                    | AA                              | TT                | 1946630061               |
| SNP_P3_141366_2803   | NW_004516284.1 | Scaffold944 | 2803                    | TT                              | CC                | 1946630063               |
| SNP_P3_141367_2868   | NW_004516284.1 | Scaffold944 | 2868                    | GG                              | CC                | 1946630065               |
| SNP_P3_141370_3330   | NW_004516284.1 | Scaffold944 | 3330                    | GG                              | AA                | 1946630067               |
| SNP_P3_141372_3358   | NW_004516284.1 | Scaffold944 | 3358                    | TT                              | CC                | 1946630069               |
| SNP_P3_141373_3461   | NW_004516284.1 | Scaffold944 | 3461                    | CC                              | GG                | 1946630071               |
| SNP_P3_141375_2212   | NW_004516285.1 | Scaffold945 | 2212                    | CC                              | GG                | 1946630073               |
| SNP_P3_141377_2539   | NW_004516285.1 | Scaffold945 | 2539                    | AA                              | GG                | 1946630075               |
| SNP_P3_141378_2549   | NW_004516285.1 | Scaffold945 | 2549                    | CC                              | TT                | 1946630077               |
| SNP_P3_141379_2556   | NW_004516285.1 | Scaffold945 | 2556                    | CC                              | AA                | 1946630079               |
| SNP_P3_141380_966    | NW_004516286.1 | Scaffold947 | 966                     | AA                              | GG                | 1946630081               |
| SNP_P3_141381_2135   | NW_004516286.1 | Scaffold947 | 2135                    | TT                              | AA                | 1946630083               |
| SNP_P3_141382_2156   | NW_004516286.1 | Scaffold947 | 2156                    | TT                              | GG                | 1946630085               |
| SNP_P3_141383_2186   | NW_004516286.1 | Scaffold947 | 2186                    | AA                              | CC                | 1946630087               |
| SNP_P3_141384_2187   | NW_004516286.1 | Scaffold947 | 2187                    | CC                              | TT                | 1946630089               |
| SNP_P3_141385_64     | NW_004516287.1 | Scaffold948 | 64                      | CC                              | TT                | 1946630091               |
| SNP_P3_141386_80     | NW_004516287.1 | Scaffold948 | 80                      | CC                              | AA                | 1946630093               |
| SNP_P3_141387_94     | NW_004516287.1 | Scaffold948 | 94                      | AA                              | GG                | 1946630095               |
| SNP_P3_141388_120    | NW_004516287.1 | Scaffold948 | 120                     | AA                              | GG                | 1946630097               |
| SNP_P3_141389_182    | NW_004516287.1 | Scaffold948 | 182                     | AA                              | CC                | 1946630099               |
| SNP_P3_141390_295    | NW_004516287.1 | Scaffold948 | 295                     | AA                              | CC                | 1946630101               |
| SNP_P3_141391_306    | NW_004516287.1 | Scaffold948 | 306                     | TT                              | CC                | 1946630104               |

| SNPs IDs             | Chromosome IDs | Chromosomes | Physical positions (bp) | CDC Frontier (Reference genome) | (Pusa 256 & HPNB) | NCBI SNPdb Accession IDs |
|----------------------|----------------|-------------|-------------------------|---------------------------------|-------------------|--------------------------|
| SNP_P3_141392_329    | NW_004516287.1 | Scaffold948 | 329                     | CC                              | TT                | 1946630106               |
| SNP_P3_141393_429    | NW_004516287.1 | Scaffold948 | 429                     | CC                              | AA                | 1946630108               |
| SNP_P3_141394_504    | NW_004516287.1 | Scaffold948 | 504                     | GG                              | AA                | 1946630110               |
| SNP_P3_141395_506    | NW_004516287.1 | Scaffold948 | 506                     | CC                              | AA                | 1946630112               |
| SNP_P3_141396_533    | NW_004516287.1 | Scaffold948 | 533                     | TT                              | CC                | 1946630114               |
| SNP_P3_141397_576    | NW_004516287.1 | Scaffold948 | 576                     | CC                              | AA                | 1946630116               |
| SNP_P3_141398_593    | NW_004516287.1 | Scaffold948 | 593                     | CC                              | AA                | 1946630118               |
| SNP_P3_141399_741    | NW_004516287.1 | Scaffold948 | 741                     | TT                              | CC                | 1946630120               |
| SNP_P3_141400_750    | NW_004516287.1 | Scaffold948 | 750                     | GG                              | CC                | 1946630122               |
| SNP_P3_141401_809    | NW_004516287.1 | Scaffold948 | 809                     | GG                              | AA                | 1946630124               |
| SNP_P3_141402_892    | NW_004516287.1 | Scaffold948 | 892                     | CC                              | AA                | 1946630126               |
| SNP_P3_141403_988    | NW_004516287.1 | Scaffold948 | 988                     | GG                              | TT                | 1946630128               |
| SNP_P3_141404_1007   | NW_004516287.1 | Scaffold948 | 1007                    | CC                              | TT                | 1946630130               |
| SNP_P3_141405_1652   | NW_004516287.1 | Scaffold948 | 1652                    | CC                              | GG                | 1946630132               |
| SNP_P3_141406_1772   | NW_004516287.1 | Scaffold948 | 1772                    | CC                              | AA                | 1946630134               |
| SNP_P3_141407_1786   | NW_004516287.1 | Scaffold948 | 1786                    | AA                              | GG                | 1946630136               |
| SNP_P3_141408_1821   | NW_004516287.1 | Scaffold948 | 1821                    | TT                              | GG                | 1946630138               |
| SNP_P3_141409_24438  | NW_004516287.1 | Scaffold948 | 24438                   | CC                              | AA                | 1946630140               |
| SNP_P3_141410_30602  | NW_004516287.1 | Scaffold948 | 30602                   | GG                              | AA                | 1946630142               |
| SNP_P3_141412_52358  | NW_004516287.1 | Scaffold948 | 52358                   | AA                              | GG                | 1946630144               |
| SNP_P3_141413_52522  | NW_004516287.1 | Scaffold948 | 52522                   | GG                              | AA                | 1946630146               |
| SNP_P3_141414_52531  | NW_004516287.1 | Scaffold948 | 52531                   | TT                              | AA                | 1946630148               |
| SNP_P3_141415_52702  | NW_004516287.1 | Scaffold948 | 52702                   | CC                              | AA                | 1946630150               |
| SNP_P3_141416_52971  | NW_004516287.1 | Scaffold948 | 52971                   | GG                              | AA                | 1946630152               |
| SNP_P3_141417_52975  | NW_004516287.1 | Scaffold948 | 52975                   | TT                              | CC                | 1946630154               |
| SNP_P3_141418_52981  | NW_004516287.1 | Scaffold948 | 52981                   | GG                              | AA                | 1946630156               |
| SNP_P3_141419_52985  | NW_004516287.1 | Scaffold948 | 52985                   | AA                              | CC                | 1946630158               |
| SNP_P3_141420_53001  | NW_004516287.1 | Scaffold948 | 53001                   | AA                              | CC                | 1946630160               |
| SNP_P3_141421_53033  | NW_004516287.1 | Scaffold948 | 53033                   | GG                              | AA                | 1946630162               |
| SNP_P3_141422_53042  | NW_004516287.1 | Scaffold948 | 53042                   | AA                              | GG                | 1946630164               |
| SNP_P3_141423_53050  | NW_004516287.1 | Scaffold948 | 53050                   | AA                              | GG                | 1946630166               |
| SNP_P3_141425_64363  | NW_004516287.1 | Scaffold948 | 64363                   | CC                              | TT                | 1946630168               |
| SNP_P3_141426_73252  | NW_004516287.1 | Scaffold948 | 73252                   | CC                              | TT                | 1946630170               |
| SNP_P3_141427_76021  | NW_004516287.1 | Scaffold948 | 76021                   | AA                              | CC                | 1946630172               |
| SNP_P3_141428_90847  | NW_004516287.1 | Scaffold948 | 90847                   | TT                              | CC                | 1946630174               |
| SNP_P3_141429_90849  | NW_004516287.1 | Scaffold948 | 90849                   | AA                              | GG                | 1946630176               |
| SNP_P3_141430_90850  | NW_004516287.1 | Scaffold948 | 90850                   | GG                              | AA                | 1946630178               |
| SNP_P3_141431_91173  | NW_004516287.1 | Scaffold948 | 91173                   | GG                              | AA                | 1946630180               |
| SNP_P3_141432_105595 | NW_004516287.1 | Scaffold948 | 105595                  | AA                              | TT                | 1946630182               |
| SNP_P3_141433_106350 | NW_004516287.1 | Scaffold948 | 106350                  | GG                              | CC                | 1946630184               |
| SNP_P3_141434_108863 | NW_004516287.1 | Scaffold948 | 108863                  | TT                              | AA                | 1946630186               |
| SNP_P3_141436_148163 | NW_004516287.1 | Scaffold948 | 148163                  | CC                              | TT                | 1946630188               |

| SNPs IDs             | Chromosome IDs | Chromosomes | Physical positions (bp) | CDC Frontier (Reference genome) | (Pusa 256 & HPNB) | NCBI SNPdb Accession IDs |
|----------------------|----------------|-------------|-------------------------|---------------------------------|-------------------|--------------------------|
| SNP_P3_141437_148206 | NW_004516287.1 | Scaffold948 | 148206                  | GG                              | AA                | 1946630190               |
| SNP_P3_141438_148364 | NW_004516287.1 | Scaffold948 | 148364                  | CC                              | TT                | 1946630192               |
| SNP_P3_141439_148368 | NW_004516287.1 | Scaffold948 | 148368                  | AA                              | GG                | 1946630194               |
| SNP_P3_141440_148435 | NW_004516287.1 | Scaffold948 | 148435                  | GG                              | CC                | 1946630196               |
| SNP_P3_141441_156234 | NW_004516287.1 | Scaffold948 | 156234                  | AA                              | TT                | 1946630198               |
| SNP_P3_141442_157851 | NW_004516287.1 | Scaffold948 | 157851                  | AA                              | TT                | 1946630200               |
| SNP_P3_141443_164171 | NW_004516287.1 | Scaffold948 | 164171                  | TT                              | CC                | 1946630202               |
| SNP_P3_141444_180093 | NW_004516287.1 | Scaffold948 | 180093                  | CC                              | GG                | 1946630204               |
| SNP_P3_141445_180113 | NW_004516287.1 | Scaffold948 | 180113                  | TT                              | GG                | 1946630206               |
| SNP_P3_141446_180263 | NW_004516287.1 | Scaffold948 | 180263                  | GG                              | AA                | 1946630208               |
| SNP_P3_141447_180287 | NW_004516287.1 | Scaffold948 | 180287                  | GG                              | AA                | 1946630210               |
| SNP_P3_141448_180330 | NW_004516287.1 | Scaffold948 | 180330                  | GG                              | AA                | 1946630212               |
| SNP_P3_141449_195722 | NW_004516287.1 | Scaffold948 | 195722                  | AA                              | GG                | 1946630214               |
| SNP_P3_141450_2557   | NW_004516288.1 | Scaffold949 | 2557                    | TT                              | GG                | 1946630216               |
| SNP_P3_141451_2558   | NW_004516288.1 | Scaffold949 | 2558                    | AA                              | GG                | 1946630218               |
| SNP_P3_141452_3625   | NW_004516288.1 | Scaffold949 | 3625                    | GG                              | AA                | 1946630219               |
| SNP_P3_141453_3708   | NW_004516288.1 | Scaffold949 | 3708                    | AA                              | GG                | 1946630221               |
| SNP_P3_141454_3718   | NW_004516288.1 | Scaffold949 | 3718                    | CC                              | GG                | 1946630223               |
| SNP_P3_141456_3850   | NW_004516288.1 | Scaffold949 | 3850                    | TT                              | CC                | 1946630226               |
| SNP_P3_141457_3934   | NW_004516288.1 | Scaffold949 | 3934                    | CC                              | TT                | 1946630228               |
| SNP_P3_141458_3950   | NW_004516288.1 | Scaffold949 | 3950                    | AA                              | TT                | 1946630230               |
| SNP_P3_141459_3983   | NW_004516288.1 | Scaffold949 | 3983                    | AA                              | TT                | 1946630232               |
| SNP_P3_141460_4041   | NW_004516288.1 | Scaffold949 | 4041                    | CC                              | TT                | 1946630235               |
| SNP_P3_141461_4043   | NW_004516288.1 | Scaffold949 | 4043                    | AA                              | GG                | 1946630237               |
| SNP_P3_141462_4098   | NW_004516288.1 | Scaffold949 | 4098                    | CC                              | TT                | 1946630239               |
| SNP_P3_141463_11816  | NW_004516288.1 | Scaffold949 | 11816                   | TT                              | AA                | 1946630241               |
| SNP_P3_141464_11929  | NW_004516288.1 | Scaffold949 | 11929                   | TT                              | AA                | 1946630243               |
| SNP_P3_141465_12165  | NW_004516288.1 | Scaffold949 | 12165                   | GG                              | CC                | 1946630245               |
| SNP_P3_141466_12271  | NW_004516288.1 | Scaffold949 | 12271                   | GG                              | AA                | 1946630247               |
| SNP_P3_141467_12284  | NW_004516288.1 | Scaffold949 | 12284                   | GG                              | AA                | 1946630249               |
| SNP_P3_141468_12285  | NW_004516288.1 | Scaffold949 | 12285                   | GG                              | AA                | 1946630251               |
| SNP_P3_141469_12299  | NW_004516288.1 | Scaffold949 | 12299                   | GG                              | AA                | 1946630253               |
| SNP_P3_141470_12304  | NW_004516288.1 | Scaffold949 | 12304                   | AA                              | GG                | 1946630255               |
| SNP_P3_141471_21249  | NW_004516288.1 | Scaffold949 | 21249                   | AA                              | GG                | 1946630257               |
| SNP_P3_141472_21252  | NW_004516288.1 | Scaffold949 | 21252                   | TT                              | GG                | 1946630258               |
| SNP_P3_141473_21253  | NW_004516288.1 | Scaffold949 | 21253                   | CC                              | TT                | 1946630261               |
| SNP_P3_141474_21254  | NW_004516288.1 | Scaffold949 | 21254                   | AA                              | CC                | 1946630263               |
| SNP_P3_141475_21270  | NW_004516288.1 | Scaffold949 | 21270                   | GG                              | TT                | 1946630265               |
| SNP_P3_141476_21272  | NW_004516288.1 | Scaffold949 | 21272                   | AA                              | CC                | 1946630266               |
| SNP_P3_141477_21274  | NW_004516288.1 | Scaffold949 | 21274                   | AA                              | GG                | 1946630268               |
| SNP_P3_141478_21278  | NW_004516288.1 | Scaffold949 | 21278                   | AA                              | TT                | 1946630270               |
| SNP_P3_141479_25207  | NW_004516288.1 | Scaffold949 | 25207                   | GG                              | TT                | 1946630272               |

| SNPs IDs             | Chromosome IDs | Chromosomes | Physical positions (bp) | CDC Frontier (Reference genome) | (Pusa 256 & HPNB) | NCBI SNPdb Accession IDs |
|----------------------|----------------|-------------|-------------------------|---------------------------------|-------------------|--------------------------|
| SNP_P3_141480_26044  | NW_004516288.1 | Scaffold949 | 26044                   | TT                              | CC                | 1946630274               |
| SNP_P3_141481_26050  | NW_004516288.1 | Scaffold949 | 26050                   | CC                              | AA                | 1946630276               |
| SNP_P3_141482_26178  | NW_004516288.1 | Scaffold949 | 26178                   | AA                              | TT                | 1946630278               |
| SNP_P3_141483_26186  | NW_004516288.1 | Scaffold949 | 26186                   | GG                              | TT                | 1946630280               |
| SNP_P3_141484_26293  | NW_004516288.1 | Scaffold949 | 26293                   | CC                              | TT                | 1946630282               |
| SNP_P3_141485_26295  | NW_004516288.1 | Scaffold949 | 26295                   | CC                              | TT                | 1946630284               |
| SNP_P3_141486_26299  | NW_004516288.1 | Scaffold949 | 26299                   | CC                              | TT                | 1946630286               |
| SNP_P3_141487_26374  | NW_004516288.1 | Scaffold949 | 26374                   | GG                              | TT                | 1946630288               |
| SNP_P3_141488_26403  | NW_004516288.1 | Scaffold949 | 26403                   | TT                              | CC                | 1946630290               |
| SNP_P3_141489_26457  | NW_004516288.1 | Scaffold949 | 26457                   | GG                              | TT                | 1946630292               |
| SNP_P3_141490_26479  | NW_004516288.1 | Scaffold949 | 26479                   | AA                              | CC                | 1946630294               |
| SNP_P3_141491_26485  | NW_004516288.1 | Scaffold949 | 26485                   | TT                              | CC                | 1946630296               |
| SNP_P3_141492_26495  | NW_004516288.1 | Scaffold949 | 26495                   | CC                              | AA                | 1946630298               |
| SNP_P3_141493_26501  | NW_004516288.1 | Scaffold949 | 26501                   | GG                              | CC                | 1946630300               |
| SNP_P3_141494_26528  | NW_004516288.1 | Scaffold949 | 26528                   | TT                              | AA                | 1946630302               |
| SNP_P3_141495_26529  | NW_004516288.1 | Scaffold949 | 26529                   | GG                              | TT                | 1946630304               |
| SNP_P3_141496_26696  | NW_004516288.1 | Scaffold949 | 26696                   | GG                              | CC                | 1946630306               |
| SNP_P3_141497_26718  | NW_004516288.1 | Scaffold949 | 26718                   | CC                              | GG                | 1946630308               |
| SNP_P3_141498_26728  | NW_004516288.1 | Scaffold949 | 26728                   | GG                              | AA                | 1946630310               |
| SNP_P3_141499_26792  | NW_004516288.1 | Scaffold949 | 26792                   | AA                              | TT                | 1946630312               |
| SNP_P3_141500_26794  | NW_004516288.1 | Scaffold949 | 26794                   | AA                              | TT                | 1946630314               |
| SNP_P3_141501_26801  | NW_004516288.1 | Scaffold949 | 26801                   | TT                              | CC                | 1946630316               |
| SNP_P3_141502_27269  | NW_004516288.1 | Scaffold949 | 27269                   | CC                              | TT                | 1946630318               |
| SNP_P3_141503_29615  | NW_004516288.1 | Scaffold949 | 29615                   | TT                              | AA                | 1946630320               |
| SNP_P3_141504_32956  | NW_004516288.1 | Scaffold949 | 32956                   | CC                              | AA                | 1946630322               |
| SNP_P3_141505_33422  | NW_004516288.1 | Scaffold949 | 33422                   | AA                              | GG                | 1946630324               |
| SNP_P3_141506_36889  | NW_004516288.1 | Scaffold949 | 36889                   | CC                              | TT                | 1946630326               |
| SNP_P3_141507_36890  | NW_004516288.1 | Scaffold949 | 36890                   | CC                              | TT                | 1946630328               |
| SNP_P3_141508_54665  | NW_004516288.1 | Scaffold949 | 54665                   | AA                              | TT                | 1946630330               |
| SNP_P3_141509_56746  | NW_004516288.1 | Scaffold949 | 56746                   | TT                              | GG                | 1946630332               |
| SNP_P3_141510_71163  | NW_004516288.1 | Scaffold949 | 71163                   | AA                              | GG                | 1946630334               |
| SNP_P3_141511_87080  | NW_004516288.1 | Scaffold949 | 87080                   | CC                              | TT                | 1946630336               |
| SNP_P3_141512_88307  | NW_004516288.1 | Scaffold949 | 88307                   | AA                              | TT                | 1946630338               |
| SNP_P3_141513_88331  | NW_004516288.1 | Scaffold949 | 88331                   | GG                              | TT                | 1946630340               |
| SNP_P3_141514_88339  | NW_004516288.1 | Scaffold949 | 88339                   | TT                              | GG                | 1946630342               |
| SNP_P3_141515_88374  | NW_004516288.1 | Scaffold949 | 88374                   | GG                              | TT                | 1946630344               |
| SNP_P3_141516_88394  | NW_004516288.1 | Scaffold949 | 88394                   | GG                              | AA                | 1946630346               |
| SNP_P3_141517_102108 | NW_004516288.1 | Scaffold949 | 102108                  | TT                              | CC                | 1946630348               |
| SNP_P3_141518_102185 | NW_004516288.1 | Scaffold949 | 102185                  | AA                              | TT                | 1946630350               |
| SNP_P3_141519_102195 | NW_004516288.1 | Scaffold949 | 102195                  | AA                              | GG                | 1946630352               |
| SNP_P3_141520_102261 | NW_004516288.1 | Scaffold949 | 102261                  | AA                              | GG                | 1946630354               |
| SNP_P3_141521_102355 | NW_004516288.1 | Scaffold949 | 102355                  | GG                              | CC                | 1946630356               |

| SNPs IDs             | Chromosome IDs | Chromosomes | Physical positions (bp) | CDC Frontier (Reference genome) | (Pusa 256 & HPNB) | NCBI SNPdb Accession IDs |
|----------------------|----------------|-------------|-------------------------|---------------------------------|-------------------|--------------------------|
| SNP_P3_141522_103281 | NW_004516288.1 | Scaffold949 | 103281                  | CC                              | GG                | 1946630358               |
| SNP_P3_141523_103608 | NW_004516288.1 | Scaffold949 | 103608                  | TT                              | AA                | 1946630360               |
| SNP_P3_141524_103646 | NW_004516288.1 | Scaffold949 | 103646                  | AA                              | TT                | 1946630362               |
| SNP_P3_141525_103659 | NW_004516288.1 | Scaffold949 | 103659                  | CC                              | GG                | 1946630364               |
| SNP_P3_141526_103829 | NW_004516288.1 | Scaffold949 | 103829                  | CC                              | AA                | 1946630366               |
| SNP_P3_141527_103830 | NW_004516288.1 | Scaffold949 | 103830                  | CC                              | TT                | 1946630368               |
| SNP_P3_141528_103868 | NW_004516288.1 | Scaffold949 | 103868                  | CC                              | TT                | 1946630370               |
| SNP_P3_141529_103977 | NW_004516288.1 | Scaffold949 | 103977                  | TT                              | AA                | 1946630372               |
| SNP_P3_141530_104196 | NW_004516288.1 | Scaffold949 | 104196                  | GG                              | TT                | 1946630374               |
| SNP_P3_141531_104362 | NW_004516288.1 | Scaffold949 | 104362                  | TT                              | AA                | 1946630376               |
| SNP_P3_141532_104484 | NW_004516288.1 | Scaffold949 | 104484                  | GG                              | AA                | 1946630378               |
| SNP_P3_141533_104500 | NW_004516288.1 | Scaffold949 | 104500                  | TT                              | GG                | 1946630380               |
| SNP_P3_141534_104526 | NW_004516288.1 | Scaffold949 | 104526                  | CC                              | GG                | 1946630382               |
| SNP_P3_141535_105373 | NW_004516288.1 | Scaffold949 | 105373                  | AA                              | TT                | 1946630384               |
| SNP_P3_141536_105411 | NW_004516288.1 | Scaffold949 | 105411                  | AA                              | CC                | 1946630386               |
| SNP_P3_141537_105415 | NW_004516288.1 | Scaffold949 | 105415                  | TT                              | AA                | 1946630388               |
| SNP_P3_141538_105443 | NW_004516288.1 | Scaffold949 | 105443                  | GG                              | TT                | 1946630390               |
| SNP_P3_141539_105514 | NW_004516288.1 | Scaffold949 | 105514                  | GG                              | TT                | 1946630391               |
| SNP_P3_141540_105526 | NW_004516288.1 | Scaffold949 | 105526                  | TT                              | CC                | 1946630393               |
| SNP_P3_141541_105528 | NW_004516288.1 | Scaffold949 | 105528                  | TT                              | GG                | 1946630396               |
| SNP_P3_141542_111991 | NW_004516288.1 | Scaffold949 | 111991                  | AA                              | GG                | 1946630398               |
| SNP_P3_141543_117660 | NW_004516288.1 | Scaffold949 | 117660                  | CC                              | AA                | 1946630400               |
| SNP_P3_141544_127918 | NW_004516288.1 | Scaffold949 | 127918                  | AA                              | TT                | 1946630402               |
| SNP_P3_141545_136660 | NW_004516288.1 | Scaffold949 | 136660                  | CC                              | TT                | 1946630404               |
| SNP_P3_141546_142117 | NW_004516288.1 | Scaffold949 | 142117                  | TT                              | CC                | 1946630406               |
| SNP_P3_141547_142322 | NW_004516288.1 | Scaffold949 | 142322                  | GG                              | AA                | 1946630407               |
| SNP_P3_141548_142335 | NW_004516288.1 | Scaffold949 | 142335                  | AA                              | TT                | 1946630409               |
| SNP_P3_141549_142352 | NW_004516288.1 | Scaffold949 | 142352                  | AA                              | TT                | 1946630411               |
| SNP_P3_141550_142368 | NW_004516288.1 | Scaffold949 | 142368                  | TT                              | AA                | 1946630413               |
| SNP_P3_141551_142369 | NW_004516288.1 | Scaffold949 | 142369                  | AA                              | TT                | 1946630415               |
| SNP_P3_141552_142386 | NW_004516288.1 | Scaffold949 | 142386                  | AA                              | TT                | 1946630417               |
| SNP_P3_141553_142400 | NW_004516288.1 | Scaffold949 | 142400                  | TT                              | CC                | 1946630419               |
| SNP_P3_141554_142467 | NW_004516288.1 | Scaffold949 | 142467                  | TT                              | GG                | 1946630421               |
| SNP_P3_141555_142499 | NW_004516288.1 | Scaffold949 | 142499                  | AA                              | CC                | 1946630423               |
| SNP_P3_141556_142535 | NW_004516288.1 | Scaffold949 | 142535                  | GG                              | AA                | 1946630425               |
| SNP_P3_141557_142546 | NW_004516288.1 | Scaffold949 | 142546                  | GG                              | AA                | 1946630427               |
| SNP_P3_141558_142559 | NW_004516288.1 | Scaffold949 | 142559                  | CC                              | TT                | 1946630429               |
| SNP_P3_141559_142562 | NW_004516288.1 | Scaffold949 | 142562                  | CC                              | TT                | 1946630431               |
| SNP_P3_141560_142581 | NW_004516288.1 | Scaffold949 | 142581                  | AA                              | TT                | 1946630433               |
| SNP_P3_141561_142616 | NW_004516288.1 | Scaffold949 | 142616                  | TT                              | CC                | 1946630435               |
| SNP_P3_141562_142656 | NW_004516288.1 | Scaffold949 | 142656                  | GG                              | AA                | 1946630437               |
| SNP_P3_141563_429    | NW_004516289.1 | Scaffold950 | 429                     | GG                              | CC                | 1946630439               |

| SNPs IDs           | Chromosome IDs | Chromosomes | Physical positions (bp) | CDC Frontier (Reference genome) | (Pusa 256 & HPNB) | NCBI SNPdb Accession IDs |
|--------------------|----------------|-------------|-------------------------|---------------------------------|-------------------|--------------------------|
| SNP_P3_141564_635  | NW_004516289.1 | Scaffold950 | 635                     | GG                              | AA                | 1946630441               |
| SNP_P3_141565_868  | NW_004516289.1 | Scaffold950 | 868                     | TT                              | GG                | 1946630443               |
| SNP_P3_141566_1198 | NW_004516289.1 | Scaffold950 | 1198                    | AA                              | CC                | 1946630445               |
| SNP_P3_141567_1199 | NW_004516289.1 | Scaffold950 | 1199                    | TT                              | AA                | 1946630447               |
| SNP_P3_141568_1335 | NW_004516289.1 | Scaffold950 | 1335                    | AA                              | TT                | 1946630449               |
| SNP_P3_141569_1394 | NW_004516289.1 | Scaffold950 | 1394                    | TT                              | GG                | 1946630451               |
| SNP_P3_141570_1503 | NW_004516289.1 | Scaffold950 | 1503                    | GG                              | AA                | 1946630453               |
| SNP_P3_141571_1517 | NW_004516289.1 | Scaffold950 | 1517                    | CC                              | GG                | 1946630455               |
| SNP_P3_141572_1545 | NW_004516289.1 | Scaffold950 | 1545                    | AA                              | GG                | 1946630456               |
| SNP_P3_141573_1546 | NW_004516289.1 | Scaffold950 | 1546                    | GG                              | TT                | 1946630458               |
| SNP_P3_141574_1647 | NW_004516289.1 | Scaffold950 | 1647                    | CC                              | TT                | 1946630460               |
| SNP_P3_141575_1713 | NW_004516289.1 | Scaffold950 | 1713                    | GG                              | CC                | 1946630462               |
| SNP_P3_141576_1733 | NW_004516289.1 | Scaffold950 | 1733                    | CC                              | GG                | 1946630464               |
| SNP_P3_141577_1735 | NW_004516289.1 | Scaffold950 | 1735                    | AA                              | TT                | 1946630466               |
| SNP_P3_141578_1756 | NW_004516289.1 | Scaffold950 | 1756                    | AA                              | GG                | 1946630468               |
| SNP_P3_141579_1776 | NW_004516289.1 | Scaffold950 | 1776                    | GG                              | AA                | 1946630470               |
| SNP_P3_141580_1779 | NW_004516289.1 | Scaffold950 | 1779                    | AA                              | TT                | 1946630472               |
| SNP_P3_141581_1845 | NW_004516289.1 | Scaffold950 | 1845                    | AA                              | GG                | 1946630474               |
| SNP_P3_141582_1923 | NW_004516289.1 | Scaffold950 | 1923                    | AA                              | GG                | 1946630476               |
| SNP_P3_141583_1945 | NW_004516289.1 | Scaffold950 | 1945                    | GG                              | TT                | 1946630478               |
| SNP_P3_141584_2093 | NW_004516289.1 | Scaffold950 | 2093                    | GG                              | AA                | 1946630480               |
| SNP_P3_141585_2154 | NW_004516289.1 | Scaffold950 | 2154                    | CC                              | GG                | 1946630482               |
| SNP_P3_141586_2203 | NW_004516289.1 | Scaffold950 | 2203                    | CC                              | GG                | 1946630484               |
| SNP_P3_141587_2234 | NW_004516289.1 | Scaffold950 | 2234                    | GG                              | AA                | 1946630486               |
| SNP_P3_141588_2252 | NW_004516289.1 | Scaffold950 | 2252                    | AA                              | TT                | 1946630488               |
| SNP_P3_141589_2323 | NW_004516289.1 | Scaffold950 | 2323                    | AA                              | GG                | 1946630490               |
| SNP_P3_141590_2335 | NW_004516289.1 | Scaffold950 | 2335                    | AA                              | GG                | 1946630492               |
| SNP_P3_141591_2355 | NW_004516289.1 | Scaffold950 | 2355                    | AA                              | CC                | 1946630494               |
| SNP_P3_141592_2373 | NW_004516289.1 | Scaffold950 | 2373                    | AA                              | GG                | 1946630496               |
| SNP_P3_141593_2411 | NW_004516289.1 | Scaffold950 | 2411                    | TT                              | CC                | 1946630497               |
| SNP_P3_141594_2476 | NW_004516289.1 | Scaffold950 | 2476                    | CC                              | TT                | 1946630499               |
| SNP_P3_141595_2478 | NW_004516289.1 | Scaffold950 | 2478                    | CC                              | AA                | 1946630501               |
| SNP_P3_141596_2479 | NW_004516289.1 | Scaffold950 | 2479                    | AA                              | GG                | 1946630503               |
| SNP_P3_141597_2500 | NW_004516289.1 | Scaffold950 | 2500                    | AA                              | GG                | 1946630505               |
| SNP_P3_141598_3540 | NW_004516289.1 | Scaffold950 | 3540                    | GG                              | AA                | 1946630507               |
| SNP_P3_141599_3626 | NW_004516289.1 | Scaffold950 | 3626                    | CC                              | TT                | 1946630509               |
| SNP_P3_141600_3632 | NW_004516289.1 | Scaffold950 | 3632                    | TT                              | GG                | 1946630511               |
| SNP_P3_141601_3699 | NW_004516289.1 | Scaffold950 | 3699                    | GG                              | TT                | 1946630513               |
| SNP_P3_141603_3798 | NW_004516289.1 | Scaffold950 | 3798                    | AA                              | GG                | 1946630514               |
| SNP_P3_141604_3929 | NW_004516289.1 | Scaffold950 | 3929                    | AA                              | CC                | 1946630516               |
| SNP_P3_141605_4008 | NW_004516289.1 | Scaffold950 | 4008                    | TT                              | CC                | 1946630519               |
| SNP_P3_141606_4132 | NW_004516289.1 | Scaffold950 | 4132                    | GG                              | AA                | 1946630521               |



| SNPs IDs            | Chromosome IDs | Chromosomes | Physical positions (bp) | CDC Frontier (Reference genome) | (Pusa 256 & HPNB) | NCBI SNPdb Accession IDs |
|---------------------|----------------|-------------|-------------------------|---------------------------------|-------------------|--------------------------|
| SNP_P3_141607_6376  | NW_004516289.1 | Scaffold950 | 6376                    | GG                              | AA                | 1946630523               |
| SNP_P3_141608_6412  | NW_004516289.1 | Scaffold950 | 6412                    | TT                              | CC                | 1946630525               |
| SNP_P3_141609_6469  | NW_004516289.1 | Scaffold950 | 6469                    | TT                              | GG                | 1946630527               |
| SNP_P3_141610_6618  | NW_004516289.1 | Scaffold950 | 6618                    | AA                              | GG                | 1946630529               |
| SNP_P3_141611_6651  | NW_004516289.1 | Scaffold950 | 6651                    | CC                              | TT                | 1946630531               |
| SNP_P3_141612_6807  | NW_004516289.1 | Scaffold950 | 6807                    | AA                              | GG                | 1946630533               |
| SNP_P3_141613_12349 | NW_004516289.1 | Scaffold950 | 12349                   | TT                              | CC                | 1946630535               |
| SNP_P3_141614_13023 | NW_004516289.1 | Scaffold950 | 13023                   | TT                              | AA                | 1946630537               |
| SNP_P3_141615_17799 | NW_004516289.1 | Scaffold950 | 17799                   | GG                              | TT                | 1946630539               |
| SNP_P3_141616_17904 | NW_004516289.1 | Scaffold950 | 17904                   | GG                              | AA                | 1946630541               |
| SNP_P3_141617_17935 | NW_004516289.1 | Scaffold950 | 17935                   | GG                              | AA                | 1946630543               |
| SNP_P3_141618_17959 | NW_004516289.1 | Scaffold950 | 17959                   | GG                              | CC                | 1946630545               |
| SNP_P3_141619_28872 | NW_004516289.1 | Scaffold950 | 28872                   | TT                              | AA                | 1946630546               |
| SNP_P3_141620_35203 | NW_004516289.1 | Scaffold950 | 35203                   | TT                              | CC                | 1946630548               |
| SNP_P3_141621_35439 | NW_004516289.1 | Scaffold950 | 35439                   | AA                              | TT                | 1946630550               |
| SNP_P3_141622_35473 | NW_004516289.1 | Scaffold950 | 35473                   | TT                              | CC                | 1946630552               |
| SNP_P3_141623_35664 | NW_004516289.1 | Scaffold950 | 35664                   | TT                              | CC                | 1946630554               |
| SNP_P3_141624_36807 | NW_004516289.1 | Scaffold950 | 36807                   | CC                              | TT                | 1946630556               |
| SNP_P3_141625_36813 | NW_004516289.1 | Scaffold950 | 36813                   | AA                              | TT                | 1946630559               |
| SNP_P3_141626_36822 | NW_004516289.1 | Scaffold950 | 36822                   | TT                              | CC                | 1946630561               |
| SNP_P3_141627_36951 | NW_004516289.1 | Scaffold950 | 36951                   | TT                              | CC                | 1946630563               |
| SNP_P3_141628_45518 | NW_004516289.1 | Scaffold950 | 45518                   | TT                              | GG                | 1946630565               |
| SNP_P3_141629_18451 | NW_004516290.1 | Scaffold951 | 18451                   | TT                              | AA                | 1946630567               |
| SNP_P3_141630_18844 | NW_004516290.1 | Scaffold951 | 18844                   | AA                              | CC                | 1946630569               |
| SNP_P3_141631_18888 | NW_004516290.1 | Scaffold951 | 18888                   | AA                              | CC                | 1946630571               |
| SNP_P3_141632_18889 | NW_004516290.1 | Scaffold951 | 18889                   | GG                              | AA                | 1946630572               |
| SNP_P3_141633_21714 | NW_004516290.1 | Scaffold951 | 21714                   | GG                              | TT                | 1946630574               |
| SNP_P3_141634_38779 | NW_004516290.1 | Scaffold951 | 38779                   | CC                              | GG                | 1946630576               |
| SNP_P3_141636_17167 | NW_004516291.1 | Scaffold952 | 17167                   | GG                              | TT                | 1946630578               |
| SNP_P3_141637_18589 | NW_004516291.1 | Scaffold952 | 18589                   | AA                              | GG                | 1946630580               |
| SNP_P3_141638_18617 | NW_004516291.1 | Scaffold952 | 18617                   | GG                              | CC                | 1946630582               |
| SNP_P3_141639_18722 | NW_004516291.1 | Scaffold952 | 18722                   | TT                              | CC                | 1946630584               |
| SNP_P3_141640_18839 | NW_004516291.1 | Scaffold952 | 18839                   | CC                              | TT                | 1946630586               |
| SNP_P3_141641_18840 | NW_004516291.1 | Scaffold952 | 18840                   | TT                              | AA                | 1946630588               |
| SNP_P3_141642_18899 | NW_004516291.1 | Scaffold952 | 18899                   | AA                              | TT                | 1946630590               |
| SNP_P3_141643_19019 | NW_004516291.1 | Scaffold952 | 19019                   | TT                              | GG                | 1946630592               |
| SNP_P3_141644_19068 | NW_004516291.1 | Scaffold952 | 19068                   | CC                              | TT                | 1946630594               |
| SNP_P3_141645_19321 | NW_004516291.1 | Scaffold952 | 19321                   | GG                              | CC                | 1946630596               |
| SNP_P3_141646_19336 | NW_004516291.1 | Scaffold952 | 19336                   | AA                              | GG                | 1946630598               |
| SNP_P3_141647_19398 | NW_004516291.1 | Scaffold952 | 19398                   | CC                              | TT                | 1946630600               |
| SNP_P3_141648_20934 | NW_004516291.1 | Scaffold952 | 20934                   | CC                              | TT                | 1946630602               |
| SNP_P3_141649_26963 | NW_004516291.1 | Scaffold952 | 26963                   | TT                              | GG                | 1946630604               |

| SNPs IDs            | Chromosome IDs | Chromosomes | Physical positions (bp) | CDC Frontier (Reference genome) | (Pusa 256 & HPNB) | NCBI SNPdb Accession IDs |
|---------------------|----------------|-------------|-------------------------|---------------------------------|-------------------|--------------------------|
| SNP_P3_141650_27842 | NW_004516291.1 | Scaffold952 | 27842                   | CC                              | TT                | 1946630606               |
| SNP_P3_141651_27843 | NW_004516291.1 | Scaffold952 | 27843                   | AA                              | TT                | 1946630608               |
| SNP_P3_141652_27888 | NW_004516291.1 | Scaffold952 | 27888                   | AA                              | CC                | 1946630610               |
| SNP_P3_141653_27889 | NW_004516291.1 | Scaffold952 | 27889                   | CC                              | AA                | 1946630612               |
| SNP_P3_141654_27890 | NW_004516291.1 | Scaffold952 | 27890                   | AA                              | GG                | 1946630614               |
| SNP_P3_141655_27891 | NW_004516291.1 | Scaffold952 | 27891                   | CC                              | TT                | 1946630616               |
| SNP_P3_141656_27908 | NW_004516291.1 | Scaffold952 | 27908                   | CC                              | TT                | 1946630618               |
| SNP_P3_141657_27915 | NW_004516291.1 | Scaffold952 | 27915                   | AA                              | GG                | 1946630620               |
| SNP_P3_141658_41822 | NW_004516291.1 | Scaffold952 | 41822                   | GG                              | AA                | 1946630622               |
| SNP_P3_141659_42196 | NW_004516291.1 | Scaffold952 | 42196                   | TT                              | CC                | 1946630623               |
| SNP_P3_141660_660   | NW_004516292.1 | Scaffold953 | 660                     | GG                              | AA                | 1946630625               |
| SNP_P3_141661_705   | NW_004516292.1 | Scaffold953 | 705                     | CC                              | GG                | 1946630627               |
| SNP_P3_141662_1085  | NW_004516292.1 | Scaffold953 | 1085                    | GG                              | TT                | 1946630629               |
| SNP_P3_141663_7364  | NW_004516292.1 | Scaffold953 | 7364                    | GG                              | CC                | 1946630631               |
| SNP_P3_141665_7548  | NW_004516292.1 | Scaffold953 | 7548                    | GG                              | TT                | 1946630633               |
| SNP_P3_141666_7574  | NW_004516292.1 | Scaffold953 | 7574                    | CC                              | TT                | 1946630635               |
| SNP_P3_141667_7596  | NW_004516292.1 | Scaffold953 | 7596                    | GG                              | AA                | 1946630637               |
| SNP_P3_141668_7784  | NW_004516292.1 | Scaffold953 | 7784                    | CC                              | TT                | 1946630639               |
| SNP_P3_141669_7870  | NW_004516292.1 | Scaffold953 | 7870                    | CC                              | TT                | 1946630641               |
| SNP_P3_141671_11723 | NW_004516292.1 | Scaffold953 | 11723                   | TT                              | CC                | 1946630643               |
| SNP_P3_141673_14243 | NW_004516292.1 | Scaffold953 | 14243                   | GG                              | AA                | 1946630645               |
| SNP_P3_141674_14485 | NW_004516292.1 | Scaffold953 | 14485                   | CC                              | TT                | 1946630647               |
| SNP_P3_141676_17889 | NW_004516292.1 | Scaffold953 | 17889                   | GG                              | AA                | 1946630649               |
| SNP_P3_141677_18089 | NW_004516292.1 | Scaffold953 | 18089                   | GG                              | AA                | 1946630651               |
| SNP_P3_141678_19412 | NW_004516292.1 | Scaffold953 | 19412                   | CC                              | GG                | 1946630653               |
| SNP_P3_141679_22534 | NW_004516292.1 | Scaffold953 | 22534                   | AA                              | GG                | 1946630655               |
| SNP_P3_141680_25202 | NW_004516292.1 | Scaffold953 | 25202                   | AA                              | GG                | 1946630657               |
| SNP_P3_141681_25204 | NW_004516292.1 | Scaffold953 | 25204                   | TT                              | CC                | 1946630659               |
| SNP_P3_141682_25277 | NW_004516292.1 | Scaffold953 | 25277                   | TT                              | CC                | 1946630661               |
| SNP_P3_141683_25285 | NW_004516292.1 | Scaffold953 | 25285                   | GG                              | CC                | 1946630663               |
| SNP_P3_141684_25449 | NW_004516292.1 | Scaffold953 | 25449                   | TT                              | CC                | 1946630665               |
| SNP_P3_141685_25980 | NW_004516292.1 | Scaffold953 | 25980                   | TT                              | GG                | 1946630667               |
| SNP_P3_141686_27612 | NW_004516292.1 | Scaffold953 | 27612                   | AA                              | TT                | 1946630669               |
| SNP_P3_141687_27623 | NW_004516292.1 | Scaffold953 | 27623                   | CC                              | TT                | 1946630671               |
| SNP_P3_141688_27826 | NW_004516292.1 | Scaffold953 | 27826                   | TT                              | AA                | 1946630673               |
| SNP_P3_141689_28404 | NW_004516292.1 | Scaffold953 | 28404                   | TT                              | CC                | 1946630675               |
| SNP_P3_141690_28458 | NW_004516292.1 | Scaffold953 | 28458                   | TT                              | CC                | 1946630677               |
| SNP_P3_141691_28619 | NW_004516292.1 | Scaffold953 | 28619                   | GG                              | TT                | 1946630679               |
| SNP_P3_141692_28706 | NW_004516292.1 | Scaffold953 | 28706                   | AA                              | GG                | 1946630681               |
| SNP_P3_141693_28719 | NW_004516292.1 | Scaffold953 | 28719                   | GG                              | AA                | 1946630683               |
| SNP_P3_141695_29714 | NW_004516292.1 | Scaffold953 | 29714                   | CC                              | TT                | 1946630685               |
| SNP_P3_141696_29751 | NW_004516292.1 | Scaffold953 | 29751                   | AA                              | CC                | 1946630687               |

| SNPs IDs            | Chromosome IDs | Chromosomes | Physical positions (bp) | CDC Frontier (Reference genome) | (Pusa 256 & HPNB) | NCBI SNPdb Accession IDs |
|---------------------|----------------|-------------|-------------------------|---------------------------------|-------------------|--------------------------|
| SNP_P3_141697_29762 | NW_004516292.1 | Scaffold953 | 29762                   | GG                              | TT                | 1946630689               |
| SNP_P3_141698_29780 | NW_004516292.1 | Scaffold953 | 29780                   | TT                              | CC                | 1946630691               |
| SNP_P3_141699_29934 | NW_004516292.1 | Scaffold953 | 29934                   | TT                              | CC                | 1946630693               |
| SNP_P3_141700_29979 | NW_004516292.1 | Scaffold953 | 29979                   | CC                              | TT                | 1946630695               |
| SNP_P3_141701_30035 | NW_004516292.1 | Scaffold953 | 30035                   | GG                              | AA                | 1946630697               |
| SNP_P3_141702_31023 | NW_004516292.1 | Scaffold953 | 31023                   | CC                              | AA                | 1946630699               |
| SNP_P3_141703_31817 | NW_004516292.1 | Scaffold953 | 31817                   | CC                              | TT                | 1946630701               |
| SNP_P3_141704_31873 | NW_004516292.1 | Scaffold953 | 31873                   | AA                              | GG                | 1946630703               |
| SNP_P3_141705_32084 | NW_004516292.1 | Scaffold953 | 32084                   | GG                              | CC                | 1946630705               |
| SNP_P3_141706_33219 | NW_004516292.1 | Scaffold953 | 33219                   | CC                              | GG                | 1946630707               |
| SNP_P3_141707_38951 | NW_004516292.1 | Scaffold953 | 38951                   | TT                              | AA                | 1946630709               |
| SNP_P3_141708_39108 | NW_004516292.1 | Scaffold953 | 39108                   | GG                              | TT                | 1946630711               |
| SNP_P3_141709_39140 | NW_004516292.1 | Scaffold953 | 39140                   | TT                              | AA                | 1946630713               |
| SNP_P3_141710_40419 | NW_004516292.1 | Scaffold953 | 40419                   | TT                              | CC                | 1946630715               |
| SNP_P3_141712_44780 | NW_004516292.1 | Scaffold953 | 44780                   | AA                              | GG                | 1946630717               |
| SNP_P3_141713_45099 | NW_004516292.1 | Scaffold953 | 45099                   | GG                              | AA                | 1946630719               |
| SNP_P3_141715_45821 | NW_004516292.1 | Scaffold953 | 45821                   | TT                              | GG                | 1946630720               |
| SNP_P3_141716_45862 | NW_004516292.1 | Scaffold953 | 45862                   | AA                              | GG                | 1946630722               |
| SNP_P3_141718_49359 | NW_004516292.1 | Scaffold953 | 49359                   | TT                              | GG                | 1946630724               |
| SNP_P3_141719_51250 | NW_004516292.1 | Scaffold953 | 51250                   | AA                              | TT                | 1946630727               |
| SNP_P3_141720_51487 | NW_004516292.1 | Scaffold953 | 51487                   | CC                              | TT                | 1946630729               |
| SNP_P3_141721_51568 | NW_004516292.1 | Scaffold953 | 51568                   | TT                              | GG                | 1946630731               |
| SNP_P3_141722_51651 | NW_004516292.1 | Scaffold953 | 51651                   | GG                              | AA                | 1946630733               |
| SNP_P3_141723_52215 | NW_004516292.1 | Scaffold953 | 52215                   | TT                              | CC                | 1946630735               |
| SNP_P3_141724_52513 | NW_004516292.1 | Scaffold953 | 52513                   | AA                              | GG                | 1946630737               |
| SNP_P3_141725_52521 | NW_004516292.1 | Scaffold953 | 52521                   | GG                              | AA                | 1946630739               |
| SNP_P3_141726_53984 | NW_004516292.1 | Scaffold953 | 53984                   | CC                              | GG                | 1946630741               |
| SNP_P3_141727_54011 | NW_004516292.1 | Scaffold953 | 54011                   | CC                              | GG                | 1946630742               |
| SNP_P3_141728_56460 | NW_004516292.1 | Scaffold953 | 56460                   | GG                              | AA                | 1946630744               |
| SNP_P3_141729_56640 | NW_004516292.1 | Scaffold953 | 56640                   | AA                              | GG                | 1946630746               |
| SNP_P3_141730_57172 | NW_004516292.1 | Scaffold953 | 57172                   | TT                              | CC                | 1946630748               |
| SNP_P3_141731_62895 | NW_004516292.1 | Scaffold953 | 62895                   | CC                              | TT                | 1946630750               |
| SNP_P3_141732_68625 | NW_004516292.1 | Scaffold953 | 68625                   | AA                              | GG                | 1946630752               |
| SNP_P3_141733_69376 | NW_004516292.1 | Scaffold953 | 69376                   | GG                              | AA                | 1946630754               |
| SNP_P3_141736_74607 | NW_004516292.1 | Scaffold953 | 74607                   | TT                              | GG                | 1946630756               |
| SNP_P3_141737_74822 | NW_004516292.1 | Scaffold953 | 74822                   | TT                              | CC                | 1946630758               |
| SNP_P3_141738_75118 | NW_004516292.1 | Scaffold953 | 75118                   | CC                              | TT                | 1946630760               |
| SNP_P3_141739_75155 | NW_004516292.1 | Scaffold953 | 75155                   | AA                              | GG                | 1946630762               |
| SNP_P3_141741_81213 | NW_004516292.1 | Scaffold953 | 81213                   | TT                              | GG                | 1946630764               |
| SNP_P3_141742_81357 | NW_004516292.1 | Scaffold953 | 81357                   | AA                              | GG                | 1946630766               |
| SNP_P3_141743_81485 | NW_004516292.1 | Scaffold953 | 81485                   | AA                              | GG                | 1946630768               |
| SNP_P3_141744_81643 | NW_004516292.1 | Scaffold953 | 81643                   | TT                              | CC                | 1946630770               |

| SNPs IDs             | Chromosome IDs | Chromosomes | Physical positions (bp) | CDC Frontier (Reference genome) | (Pusa 256 & HPNB) | NCBI SNPdb Accession IDs |
|----------------------|----------------|-------------|-------------------------|---------------------------------|-------------------|--------------------------|
| SNP_P3_141745_81681  | NW_004516292.1 | Scaffold953 | 81681                   | TT                              | CC                | 1946630772               |
| SNP_P3_141746_81687  | NW_004516292.1 | Scaffold953 | 81687                   | AA                              | GG                | 1946630774               |
| SNP_P3_141747_81855  | NW_004516292.1 | Scaffold953 | 81855                   | CC                              | TT                | 1946630776               |
| SNP_P3_141748_81985  | NW_004516292.1 | Scaffold953 | 81985                   | CC                              | TT                | 1946630778               |
| SNP_P3_141749_82086  | NW_004516292.1 | Scaffold953 | 82086                   | CC                              | TT                | 1946630780               |
| SNP_P3_141750_83493  | NW_004516292.1 | Scaffold953 | 83493                   | TT                              | CC                | 1946630782               |
| SNP_P3_141751_83515  | NW_004516292.1 | Scaffold953 | 83515                   | TT                              | CC                | 1946630784               |
| SNP_P3_141752_83525  | NW_004516292.1 | Scaffold953 | 83525                   | TT                              | GG                | 1946630786               |
| SNP_P3_141753_86644  | NW_004516292.1 | Scaffold953 | 86644                   | CC                              | TT                | 1946630788               |
| SNP_P3_141755_87671  | NW_004516292.1 | Scaffold953 | 87671                   | AA                              | CC                | 1946630790               |
| SNP_P3_141756_87695  | NW_004516292.1 | Scaffold953 | 87695                   | AA                              | TT                | 1946630792               |
| SNP_P3_141757_90263  | NW_004516292.1 | Scaffold953 | 90263                   | TT                              | CC                | 1946630794               |
| SNP_P3_141758_91822  | NW_004516292.1 | Scaffold953 | 91822                   | GG                              | AA                | 1946630796               |
| SNP_P3_141759_93149  | NW_004516292.1 | Scaffold953 | 93149                   | TT                              | AA                | 1946630798               |
| SNP_P3_141760_95717  | NW_004516292.1 | Scaffold953 | 95717                   | AA                              | TT                | 1946630800               |
| SNP_P3_141761_95723  | NW_004516292.1 | Scaffold953 | 95723                   | CC                              | TT                | 1946630802               |
| SNP_P3_141762_95791  | NW_004516292.1 | Scaffold953 | 95791                   | TT                              | CC                | 1946630803               |
| SNP_P3_141763_97284  | NW_004516292.1 | Scaffold953 | 97284                   | GG                              | AA                | 1946630805               |
| SNP_P3_141764_97320  | NW_004516292.1 | Scaffold953 | 97320                   | AA                              | GG                | 1946630807               |
| SNP_P3_141766_97795  | NW_004516292.1 | Scaffold953 | 97795                   | TT                              | CC                | 1946630809               |
| SNP_P3_141767_97889  | NW_004516292.1 | Scaffold953 | 97889                   | CC                              | TT                | 1946630811               |
| SNP_P3_141768_98229  | NW_004516292.1 | Scaffold953 | 98229                   | AA                              | TT                | 1946630813               |
| SNP_P3_141769_100084 | NW_004516292.1 | Scaffold953 | 100084                  | AA                              | CC                | 1946630815               |
| SNP_P3_141770_103838 | NW_004516292.1 | Scaffold953 | 103838                  | GG                              | AA                | 1946630817               |
| SNP_P3_141771_106176 | NW_004516292.1 | Scaffold953 | 106176                  | CC                              | AA                | 1946630819               |
| SNP_P3_141772_108167 | NW_004516292.1 | Scaffold953 | 108167                  | CC                              | AA                | 1946630821               |
| SNP_P3_141773_111190 | NW_004516292.1 | Scaffold953 | 111190                  | AA                              | GG                | 1946630823               |
| SNP_P3_141774_111249 | NW_004516292.1 | Scaffold953 | 111249                  | CC                              | GG                | 1946630825               |
| SNP_P3_141775_111708 | NW_004516292.1 | Scaffold953 | 111708                  | AA                              | GG                | 1946630827               |
| SNP_P3_141776_112893 | NW_004516292.1 | Scaffold953 | 112893                  | CC                              | TT                | 1946630829               |
| SNP_P3_141777_112942 | NW_004516292.1 | Scaffold953 | 112942                  | CC                              | TT                | 1946630830               |
| SNP_P3_141778_113903 | NW_004516292.1 | Scaffold953 | 113903                  | AA                              | GG                | 1946630832               |
| SNP_P3_141779_114874 | NW_004516292.1 | Scaffold953 | 114874                  | CC                              | AA                | 1946630834               |
| SNP_P3_141780_114904 | NW_004516292.1 | Scaffold953 | 114904                  | CC                              | TT                | 1946630836               |
| SNP_P3_141781_116157 | NW_004516292.1 | Scaffold953 | 116157                  | AA                              | GG                | 1946630838               |
| SNP_P3_141782_123400 | NW_004516292.1 | Scaffold953 | 123400                  | GG                              | AA                | 1946630840               |
| SNP_P3_141783_123447 | NW_004516292.1 | Scaffold953 | 123447                  | CC                              | TT                | 1946630842               |
| SNP_P3_141784_123688 | NW_004516292.1 | Scaffold953 | 123688                  | GG                              | AA                | 1946630844               |
| SNP_P3_141785_123724 | NW_004516292.1 | Scaffold953 | 123724                  | GG                              | AA                | 1946630846               |
| SNP_P3_141788_125656 | NW_004516292.1 | Scaffold953 | 125656                  | GG                              | TT                | 1946630848               |
| SNP_P3_141789_126906 | NW_004516292.1 | Scaffold953 | 126906                  | TT                              | GG                | 1946630851               |
| SNP_P3_141790_128381 | NW_004516292.1 | Scaffold953 | 128381                  | GG                              | CC                | 1946630852               |

| SNPs IDs             | Chromosome IDs | Chromosomes | Physical positions (bp) | CDC Frontier (Reference genome) | (Pusa 256 & HPNB) | NCBI SNPdb Accession IDs |
|----------------------|----------------|-------------|-------------------------|---------------------------------|-------------------|--------------------------|
| SNP_P3_141791_128503 | NW_004516292.1 | Scaffold953 | 128503                  | AA                              | CC                | 1946630854               |
| SNP_P3_141792_128554 | NW_004516292.1 | Scaffold953 | 128554                  | GG                              | AA                | 1946630856               |
| SNP_P3_141793_134599 | NW_004516292.1 | Scaffold953 | 134599                  | TT                              | CC                | 1946630858               |
| SNP_P3_141794_134601 | NW_004516292.1 | Scaffold953 | 134601                  | GG                              | AA                | 1946630860               |
| SNP_P3_141795_135904 | NW_004516292.1 | Scaffold953 | 135904                  | GG                              | TT                | 1946630862               |
| SNP_P3_141796_137175 | NW_004516292.1 | Scaffold953 | 137175                  | CC                              | TT                | 1946630864               |
| SNP_P3_141797_138993 | NW_004516292.1 | Scaffold953 | 138993                  | CC                              | TT                | 1946630866               |
| SNP_P3_141798_140174 | NW_004516292.1 | Scaffold953 | 140174                  | AA                              | GG                | 1946630868               |
| SNP_P3_141799_140729 | NW_004516292.1 | Scaffold953 | 140729                  | AA                              | TT                | 1946630870               |
| SNP_P3_141800_141134 | NW_004516292.1 | Scaffold953 | 141134                  | AA                              | CC                | 1946630872               |
| SNP_P3_141801_141613 | NW_004516292.1 | Scaffold953 | 141613                  | CC                              | TT                | 1946630874               |
| SNP_P3_141804_142495 | NW_004516292.1 | Scaffold953 | 142495                  | AA                              | TT                | 1946630876               |
| SNP_P3_141805_147309 | NW_004516292.1 | Scaffold953 | 147309                  | AA                              | GG                | 1946630878               |
| SNP_P3_141806_149141 | NW_004516292.1 | Scaffold953 | 149141                  | GG                              | AA                | 1946630880               |
| SNP_P3_141808_155121 | NW_004516292.1 | Scaffold953 | 155121                  | CC                              | GG                | 1946630881               |
| SNP_P3_141809_158248 | NW_004516292.1 | Scaffold953 | 158248                  | TT                              | AA                | 1946630882               |
| SNP_P3_141810_160423 | NW_004516292.1 | Scaffold953 | 160423                  | CC                              | TT                | 1946630883               |
| SNP_P3_141811_313    | NW_004516293.1 | Scaffold954 | 313                     | TT                              | AA                | 1946630884               |
| SNP_P3_141812_522    | NW_004516293.1 | Scaffold954 | 522                     | AA                              | TT                | 1946630885               |
| SNP_P3_141813_570    | NW_004516293.1 | Scaffold954 | 570                     | AA                              | CC                | 1946630887               |
| SNP_P3_141814_640    | NW_004516293.1 | Scaffold954 | 640                     | TT                              | CC                | 1946630890               |
| SNP_P3_141815_3399   | NW_004516293.1 | Scaffold954 | 3399                    | GG                              | TT                | 1946630892               |
| SNP_P3_141816_3417   | NW_004516293.1 | Scaffold954 | 3417                    | AA                              | TT                | 1946630894               |
| SNP_P3_141817_3419   | NW_004516293.1 | Scaffold954 | 3419                    | TT                              | AA                | 1946630896               |
| SNP_P3_141818_3422   | NW_004516293.1 | Scaffold954 | 3422                    | AA                              | TT                | 1946630898               |
| SNP_P3_141819_3873   | NW_004516293.1 | Scaffold954 | 3873                    | TT                              | CC                | 1946630900               |
| SNP_P3_141820_19789  | NW_004516293.1 | Scaffold954 | 19789                   | GG                              | CC                | 1946630901               |
| SNP_P3_141821_19890  | NW_004516293.1 | Scaffold954 | 19890                   | TT                              | AA                | 1946630903               |
| SNP_P3_141822_19977  | NW_004516293.1 | Scaffold954 | 19977                   | AA                              | CC                | 1946630905               |
| SNP_P3_141823_20497  | NW_004516293.1 | Scaffold954 | 20497                   | GG                              | CC                | 1946630907               |
| SNP_P3_141824_22489  | NW_004516293.1 | Scaffold954 | 22489                   | GG                              | AA                | 1946630909               |
| SNP_P3_141825_24258  | NW_004516293.1 | Scaffold954 | 24258                   | TT                              | CC                | 1946630911               |
| SNP_P3_141826_25550  | NW_004516293.1 | Scaffold954 | 25550                   | AA                              | TT                | 1946630913               |
| SNP_P3_141827_27798  | NW_004516293.1 | Scaffold954 | 27798                   | AA                              | CC                | 1946630915               |
| SNP_P3_141828_28410  | NW_004516293.1 | Scaffold954 | 28410                   | GG                              | AA                | 1946630917               |
| SNP_P3_141829_28416  | NW_004516293.1 | Scaffold954 | 28416                   | CC                              | GG                | 1946630919               |
| SNP_P3_141830_28421  | NW_004516293.1 | Scaffold954 | 28421                   | GG                              | AA                | 1946630921               |
| SNP_P3_141831_28429  | NW_004516293.1 | Scaffold954 | 28429                   | AA                              | TT                | 1946630922               |
| SNP_P3_141832_28520  | NW_004516293.1 | Scaffold954 | 28520                   | TT                              | GG                | 1946630924               |
| SNP_P3_141833_28533  | NW_004516293.1 | Scaffold954 | 28533                   | CC                              | TT                | 1946630926               |
| SNP_P3_141834_28626  | NW_004516293.1 | Scaffold954 | 28626                   | AA                              | TT                | 1946630928               |
| SNP_P3_141835_28673  | NW_004516293.1 | Scaffold954 | 28673                   | TT                              | CC                | 1946630930               |

| SNPs IDs            | Chromosome IDs | Chromosomes | Physical positions (bp) | CDC Frontier (Reference genome) | (Pusa 256 & HPNB) | NCBI SNPdb Accession IDs |
|---------------------|----------------|-------------|-------------------------|---------------------------------|-------------------|--------------------------|
| SNP_P3_141836_28689 | NW_004516293.1 | Scaffold954 | 28689                   | GG                              | AA                | 1946630932               |
| SNP_P3_141837_28713 | NW_004516293.1 | Scaffold954 | 28713                   | GG                              | TT                | 1946630934               |
| SNP_P3_141838_28801 | NW_004516293.1 | Scaffold954 | 28801                   | AA                              | CC                | 1946630936               |
| SNP_P3_141839_28802 | NW_004516293.1 | Scaffold954 | 28802                   | TT                              | CC                | 1946630938               |
| SNP_P3_141840_28819 | NW_004516293.1 | Scaffold954 | 28819                   | CC                              | TT                | 1946630940               |
| SNP_P3_141841_28827 | NW_004516293.1 | Scaffold954 | 28827                   | CC                              | TT                | 1946630942               |
| SNP_P3_141842_28871 | NW_004516293.1 | Scaffold954 | 28871                   | AA                              | GG                | 1946630944               |
| SNP_P3_141843_28916 | NW_004516293.1 | Scaffold954 | 28916                   | TT                              | CC                | 1946630946               |
| SNP_P3_141844_28947 | NW_004516293.1 | Scaffold954 | 28947                   | TT                              | CC                | 1946630948               |
| SNP_P3_141845_29431 | NW_004516293.1 | Scaffold954 | 29431                   | GG                              | AA                | 1946630950               |
| SNP_P3_141846_30305 | NW_004516293.1 | Scaffold954 | 30305                   | TT                              | CC                | 1946630952               |
| SNP_P3_141847_30413 | NW_004516293.1 | Scaffold954 | 30413                   | TT                              | CC                | 1946630954               |
| SNP_P3_141848_31031 | NW_004516293.1 | Scaffold954 | 31031                   | CC                              | TT                | 1946630955               |
| SNP_P3_141849_31943 | NW_004516293.1 | Scaffold954 | 31943                   | GG                              | AA                | 1946630957               |
| SNP_P3_141850_36284 | NW_004516293.1 | Scaffold954 | 36284                   | AA                              | GG                | 1946630959               |
| SNP_P3_141852_37887 | NW_004516293.1 | Scaffold954 | 37887                   | AA                              | GG                | 1946630961               |
| SNP_P3_141853_37942 | NW_004516293.1 | Scaffold954 | 37942                   | CC                              | TT                | 1946630963               |
| SNP_P3_141854_37973 | NW_004516293.1 | Scaffold954 | 37973                   | GG                              | CC                | 1946630965               |
| SNP_P3_141855_37980 | NW_004516293.1 | Scaffold954 | 37980                   | AA                              | GG                | 1946630967               |
| SNP_P3_141856_38028 | NW_004516293.1 | Scaffold954 | 38028                   | AA                              | TT                | 1946630969               |
| SNP_P3_141857_39150 | NW_004516293.1 | Scaffold954 | 39150                   | AA                              | GG                | 1946630971               |
| SNP_P3_141858_39190 | NW_004516293.1 | Scaffold954 | 39190                   | CC                              | TT                | 1946630974               |
| SNP_P3_141859_39193 | NW_004516293.1 | Scaffold954 | 39193                   | TT                              | CC                | 1946630976               |
| SNP_P3_141860_39195 | NW_004516293.1 | Scaffold954 | 39195                   | TT                              | GG                | 1946630978               |
| SNP_P3_141861_39207 | NW_004516293.1 | Scaffold954 | 39207                   | GG                              | AA                | 1946630980               |
| SNP_P3_141862_39234 | NW_004516293.1 | Scaffold954 | 39234                   | GG                              | AA                | 1946630982               |
| SNP_P3_141863_39443 | NW_004516293.1 | Scaffold954 | 39443                   | AA                              | GG                | 1946630984               |
| SNP_P3_141864_39602 | NW_004516293.1 | Scaffold954 | 39602                   | AA                              | GG                | 1946630985               |
| SNP_P3_141865_39606 | NW_004516293.1 | Scaffold954 | 39606                   | GG                              | AA                | 1946630988               |
| SNP_P3_141866_39686 | NW_004516293.1 | Scaffold954 | 39686                   | CC                              | TT                | 1946630990               |
| SNP_P3_141867_39708 | NW_004516293.1 | Scaffold954 | 39708                   | GG                              | TT                | 1946630992               |
| SNP_P3_141868_45189 | NW_004516293.1 | Scaffold954 | 45189                   | TT                              | CC                | 1946630994               |
| SNP_P3_141870_45278 | NW_004516293.1 | Scaffold954 | 45278                   | GG                              | CC                | 1946630997               |
| SNP_P3_141871_45372 | NW_004516293.1 | Scaffold954 | 45372                   | AA                              | GG                | 1946630999               |
| SNP_P3_141872_45547 | NW_004516293.1 | Scaffold954 | 45547                   | GG                              | AA                | 1946631001               |
| SNP_P3_141873_577   | NW_004516295.1 | Scaffold956 | 577                     | AA                              | GG                | 1946631003               |
| SNP_P3_141874_822   | NW_004516295.1 | Scaffold956 | 822                     | CC                              | TT                | 1946631005               |
| SNP_P3_141875_4250  | NW_004516295.1 | Scaffold956 | 4250                    | TT                              | CC                | 1946631007               |
| SNP_P3_141876_4278  | NW_004516295.1 | Scaffold956 | 4278                    | CC                              | TT                | 1946631009               |
| SNP_P3_141877_4483  | NW_004516295.1 | Scaffold956 | 4483                    | TT                              | GG                | 1946631011               |
| SNP_P3_141878_4503  | NW_004516295.1 | Scaffold956 | 4503                    | GG                              | CC                | 1946631013               |
| SNP_P3_141879_4561  | NW_004516295.1 | Scaffold956 | 4561                    | CC                              | TT                | 1946631015               |

| SNPs IDs            | Chromosome IDs | Chromosomes | Physical positions (bp) | CDC Frontier (Reference genome) | (Pusa 256 & HPNB) | NCBI SNPdb Accession IDs |
|---------------------|----------------|-------------|-------------------------|---------------------------------|-------------------|--------------------------|
| SNP_P3_141880_4652  | NW_004516295.1 | Scaffold956 | 4652                    | TT                              | AA                | 1946631017               |
| SNP_P3_141881_5883  | NW_004516295.1 | Scaffold956 | 5883                    | AA                              | TT                | 1946631019               |
| SNP_P3_141882_5966  | NW_004516295.1 | Scaffold956 | 5966                    | TT                              | AA                | 1946631021               |
| SNP_P3_141884_6020  | NW_004516295.1 | Scaffold956 | 6020                    | CC                              | TT                | 1946631023               |
| SNP_P3_141885_6027  | NW_004516295.1 | Scaffold956 | 6027                    | GG                              | CC                | 1946631025               |
| SNP_P3_141886_7517  | NW_004516295.1 | Scaffold956 | 7517                    | TT                              | CC                | 1946631027               |
| SNP_P3_141887_7518  | NW_004516295.1 | Scaffold956 | 7518                    | TT                              | CC                | 1946631029               |
| SNP_P3_141888_11969 | NW_004516295.1 | Scaffold956 | 11969                   | CC                              | TT                | 1946631030               |
| SNP_P3_141889_12008 | NW_004516295.1 | Scaffold956 | 12008                   | CC                              | TT                | 1946631032               |
| SNP_P3_141890_12283 | NW_004516295.1 | Scaffold956 | 12283                   | AA                              | CC                | 1946631034               |
| SNP_P3_141891_12291 | NW_004516295.1 | Scaffold956 | 12291                   | GG                              | AA                | 1946631036               |
| SNP_P3_141892_12298 | NW_004516295.1 | Scaffold956 | 12298                   | GG                              | CC                | 1946631038               |
| SNP_P3_141893_12310 | NW_004516295.1 | Scaffold956 | 12310                   | TT                              | CC                | 1946631040               |
| SNP_P3_141894_12344 | NW_004516295.1 | Scaffold956 | 12344                   | CC                              | GG                | 1946631042               |
| SNP_P3_141895_12462 | NW_004516295.1 | Scaffold956 | 12462                   | AA                              | GG                | 1946631044               |
| SNP_P3_141896_12465 | NW_004516295.1 | Scaffold956 | 12465                   | TT                              | GG                | 1946631046               |
| SNP_P3_141897_12565 | NW_004516295.1 | Scaffold956 | 12565                   | AA                              | GG                | 1946631048               |
| SNP_P3_141898_12590 | NW_004516295.1 | Scaffold956 | 12590                   | CC                              | TT                | 1946631050               |
| SNP_P3_141899_12600 | NW_004516295.1 | Scaffold956 | 12600                   | AA                              | CC                | 1946631052               |
| SNP_P3_141900_12601 | NW_004516295.1 | Scaffold956 | 12601                   | TT                              | CC                | 1946631054               |
| SNP_P3_141901_12611 | NW_004516295.1 | Scaffold956 | 12611                   | AA                              | CC                | 1946631056               |
| SNP_P3_141902_12617 | NW_004516295.1 | Scaffold956 | 12617                   | CC                              | TT                | 1946631058               |
| SNP_P3_141903_12700 | NW_004516295.1 | Scaffold956 | 12700                   | TT                              | CC                | 1946631060               |
| SNP_P3_141904_14078 | NW_004516295.1 | Scaffold956 | 14078                   | GG                              | AA                | 1946631062               |
| SNP_P3_141905_14123 | NW_004516295.1 | Scaffold956 | 14123                   | AA                              | TT                | 1946631064               |
| SNP_P3_141906_14157 | NW_004516295.1 | Scaffold956 | 14157                   | TT                              | AA                | 1946631066               |
| SNP_P3_141907_14374 | NW_004516295.1 | Scaffold956 | 14374                   | AA                              | TT                | 1946631068               |
| SNP_P3_141908_14391 | NW_004516295.1 | Scaffold956 | 14391                   | GG                              | AA                | 1946631070               |
| SNP_P3_141909_18153 | NW_004516295.1 | Scaffold956 | 18153                   | TT                              | GG                | 1946631072               |
| SNP_P3_141910_18446 | NW_004516295.1 | Scaffold956 | 18446                   | TT                              | CC                | 1946631074               |
| SNP_P3_141911_18730 | NW_004516295.1 | Scaffold956 | 18730                   | TT                              | CC                | 1946631076               |
| SNP_P3_141912_18873 | NW_004516295.1 | Scaffold956 | 18873                   | TT                              | AA                | 1946631078               |
| SNP_P3_141913_19023 | NW_004516295.1 | Scaffold956 | 19023                   | CC                              | TT                | 1946631080               |
| SNP_P3_141914_19089 | NW_004516295.1 | Scaffold956 | 19089                   | AA                              | GG                | 1946631082               |
| SNP_P3_141915_19091 | NW_004516295.1 | Scaffold956 | 19091                   | AA                              | CC                | 1946631084               |
| SNP_P3_141916_19115 | NW_004516295.1 | Scaffold956 | 19115                   | TT                              | CC                | 1946631086               |
| SNP_P3_141917_19121 | NW_004516295.1 | Scaffold956 | 19121                   | CC                              | AA                | 1946631088               |
| SNP_P3_141918_19255 | NW_004516295.1 | Scaffold956 | 19255                   | TT                              | AA                | 1946631090               |
| SNP_P3_141921_3450  | NW_004516297.1 | Scaffold958 | 3450                    | GG                              | CC                | 1946631092               |
| SNP_P3_141923_3723  | NW_004516297.1 | Scaffold958 | 3723                    | GG                              | CC                | 1946631094               |
| SNP_P3_141924_4249  | NW_004516297.1 | Scaffold958 | 4249                    | CC                              | TT                | 1946631096               |
| SNP_P3_141925_3885  | NW_004516298.1 | Scaffold959 | 3885                    | AA                              | TT                | 1946631098               |

| SNPs IDs            | Chromosome IDs | Chromosomes | Physical positions (bp) | CDC Frontier (Reference genome) | (Pusa 256 & HPNB) | NCBI SNPdb Accession IDs |
|---------------------|----------------|-------------|-------------------------|---------------------------------|-------------------|--------------------------|
| SNP_P3_141926_3909  | NW_004516298.1 | Scaffold959 | 3909                    | CC                              | AA                | 1946631100               |
| SNP_P3_141927_3963  | NW_004516298.1 | Scaffold959 | 3963                    | CC                              | AA                | 1946631102               |
| SNP_P3_141928_4288  | NW_004516298.1 | Scaffold959 | 4288                    | TT                              | CC                | 1946631104               |
| SNP_P3_141929_4433  | NW_004516298.1 | Scaffold959 | 4433                    | TT                              | CC                | 1946631106               |
| SNP_P3_141930_8016  | NW_004516298.1 | Scaffold959 | 8016                    | GG                              | AA                | 1946631108               |
| SNP_P3_141931_8040  | NW_004516298.1 | Scaffold959 | 8040                    | TT                              | CC                | 1946631110               |
| SNP_P3_141932_8089  | NW_004516298.1 | Scaffold959 | 8089                    | TT                              | AA                | 1946631112               |
| SNP_P3_141933_8136  | NW_004516298.1 | Scaffold959 | 8136                    | AA                              | GG                | 1946631114               |
| SNP_P3_141934_8161  | NW_004516298.1 | Scaffold959 | 8161                    | TT                              | AA                | 1946631116               |
| SNP_P3_141935_10538 | NW_004516298.1 | Scaffold959 | 10538                   | AA                              | GG                | 1946631118               |
| SNP_P3_141936_10552 | NW_004516298.1 | Scaffold959 | 10552                   | CC                              | AA                | 1946631119               |
| SNP_P3_141937_10568 | NW_004516298.1 | Scaffold959 | 10568                   | TT                              | CC                | 1946631121               |
| SNP_P3_141938_10571 | NW_004516298.1 | Scaffold959 | 10571                   | AA                              | GG                | 1946631123               |
| SNP_P3_141939_10580 | NW_004516298.1 | Scaffold959 | 10580                   | GG                              | AA                | 1946631125               |
| SNP_P3_141940_10613 | NW_004516298.1 | Scaffold959 | 10613                   | CC                              | TT                | 1946631127               |
| SNP_P3_141941_10644 | NW_004516298.1 | Scaffold959 | 10644                   | CC                              | TT                | 1946631129               |
| SNP_P3_141942_10664 | NW_004516298.1 | Scaffold959 | 10664                   | AA                              | CC                | 1946631131               |
| SNP_P3_141943_11229 | NW_004516298.1 | Scaffold959 | 11229                   | TT                              | AA                | 1946631134               |
| SNP_P3_141944_11237 | NW_004516298.1 | Scaffold959 | 11237                   | AA                              | CC                | 1946631136               |
| SNP_P3_141946_20448 | NW_004516298.1 | Scaffold959 | 20448                   | GG                              | AA                | 1946631138               |
| SNP_P3_141947_20538 | NW_004516298.1 | Scaffold959 | 20538                   | AA                              | CC                | 1946631140               |
| SNP_P3_141948_20802 | NW_004516298.1 | Scaffold959 | 20802                   | TT                              | AA                | 1946631142               |
| SNP_P3_141950_20882 | NW_004516298.1 | Scaffold959 | 20882                   | TT                              | GG                | 1946631144               |
| SNP_P3_141951_20898 | NW_004516298.1 | Scaffold959 | 20898                   | CC                              | TT                | 1946631146               |
| SNP_P3_141952_20958 | NW_004516298.1 | Scaffold959 | 20958                   | GG                              | CC                | 1946631148               |
| SNP_P3_141953_21182 | NW_004516298.1 | Scaffold959 | 21182                   | AA                              | CC                | 1946631150               |
| SNP_P3_141954_21285 | NW_004516298.1 | Scaffold959 | 21285                   | CC                              | AA                | 1946631152               |
| SNP_P3_141955_21955 | NW_004516298.1 | Scaffold959 | 21955                   | GG                              | AA                | 1946631154               |
| SNP_P3_141956_21962 | NW_004516298.1 | Scaffold959 | 21962                   | CC                              | TT                | 1946631156               |
| SNP_P3_141957_22110 | NW_004516298.1 | Scaffold959 | 22110                   | GG                              | AA                | 1946631158               |
| SNP_P3_141960_57572 | NW_004516298.1 | Scaffold959 | 57572                   | AA                              | TT                | 1946631160               |
| SNP_P3_141961_57591 | NW_004516298.1 | Scaffold959 | 57591                   | CC                              | TT                | 1946631162               |
| SNP_P3_141962_57656 | NW_004516298.1 | Scaffold959 | 57656                   | CC                              | TT                | 1946631164               |
| SNP_P3_141964_57788 | NW_004516298.1 | Scaffold959 | 57788                   | TT                              | AA                | 1946631166               |
| SNP_P3_141965_57810 | NW_004516298.1 | Scaffold959 | 57810                   | GG                              | TT                | 1946631168               |
| SNP_P3_141966_57813 | NW_004516298.1 | Scaffold959 | 57813                   | GG                              | AA                | 1946631170               |
| SNP_P3_141967_57928 | NW_004516298.1 | Scaffold959 | 57928                   | AA                              | GG                | 1946631172               |
| SNP_P3_141968_58267 | NW_004516298.1 | Scaffold959 | 58267                   | AA                              | TT                | 1946631174               |
| SNP_P3_141969_58306 | NW_004516298.1 | Scaffold959 | 58306                   | AA                              | TT                | 1946631176               |
| SNP_P3_141970_3996  | NW_004516299.1 | Scaffold960 | 3996                    | CC                              | TT                | 1946631178               |
| SNP_P3_141971_4042  | NW_004516299.1 | Scaffold960 | 4042                    | AA                              | TT                | 1946631180               |
| SNP_P3_141972_4047  | NW_004516299.1 | Scaffold960 | 4047                    | TT                              | AA                | 1946631182               |



| SNPs IDs             | Chromosome IDs | Chromosomes | Physical positions (bp) | CDC Frontier (Reference genome) | (Pusa 256 & HPNB) | NCBI SNPdb Accession IDs |
|----------------------|----------------|-------------|-------------------------|---------------------------------|-------------------|--------------------------|
| SNP_P3_141973_4050   | NW_004516299.1 | Scaffold960 | 4050                    | AA                              | TT                | 1946631184               |
| SNP_P3_141974_4520   | NW_004516299.1 | Scaffold960 | 4520                    | TT                              | AA                | 1946631186               |
| SNP_P3_141975_11141  | NW_004516299.1 | Scaffold960 | 11141                   | TT                              | AA                | 1946631188               |
| SNP_P3_141976_11145  | NW_004516299.1 | Scaffold960 | 11145                   | TT                              | GG                | 1946631190               |
| SNP_P3_141977_11601  | NW_004516299.1 | Scaffold960 | 11601                   | GG                              | AA                | 1946631192               |
| SNP_P3_141978_11673  | NW_004516299.1 | Scaffold960 | 11673                   | TT                              | CC                | 1946631194               |
| SNP_P3_141979_11674  | NW_004516299.1 | Scaffold960 | 11674                   | AA                              | GG                | 1946631196               |
| SNP_P3_141980_11677  | NW_004516299.1 | Scaffold960 | 11677                   | TT                              | AA                | 1946631198               |
| SNP_P3_141981_20183  | NW_004516299.1 | Scaffold960 | 20183                   | AA                              | GG                | 1946631200               |
| SNP_P3_141982_20192  | NW_004516299.1 | Scaffold960 | 20192                   | GG                              | AA                | 1946631202               |
| SNP_P3_141983_20709  | NW_004516299.1 | Scaffold960 | 20709                   | GG                              | AA                | 1946631204               |
| SNP_P3_141985_20802  | NW_004516299.1 | Scaffold960 | 20802                   | TT                              | CC                | 1946631206               |
| SNP_P3_141986_20882  | NW_004516299.1 | Scaffold960 | 20882                   | GG                              | AA                | 1946631208               |
| SNP_P3_141987_20883  | NW_004516299.1 | Scaffold960 | 20883                   | AA                              | GG                | 1946631210               |
| SNP_P3_141988_20885  | NW_004516299.1 | Scaffold960 | 20885                   | CC                              | TT                | 1946631212               |
| SNP_P3_141989_20894  | NW_004516299.1 | Scaffold960 | 20894                   | AA                              | GG                | 1946631214               |
| SNP_P3_141990_20897  | NW_004516299.1 | Scaffold960 | 20897                   | TT                              | CC                | 1946631216               |
| SNP_P3_141991_20906  | NW_004516299.1 | Scaffold960 | 20906                   | TT                              | GG                | 1946631218               |
| SNP_P3_141992_21226  | NW_004516299.1 | Scaffold960 | 21226                   | CC                              | AA                | 1946631220               |
| SNP_P3_141993_29417  | NW_004516299.1 | Scaffold960 | 29417                   | AA                              | CC                | 1946631222               |
| SNP_P3_141994_68109  | NW_004516299.1 | Scaffold960 | 68109                   | CC                              | TT                | 1946631224               |
| SNP_P3_141995_68135  | NW_004516299.1 | Scaffold960 | 68135                   | TT                              | GG                | 1946631226               |
| SNP_P3_141996_68216  | NW_004516299.1 | Scaffold960 | 68216                   | TT                              | GG                | 1946631228               |
| SNP_P3_141997_72771  | NW_004516299.1 | Scaffold960 | 72771                   | TT                              | AA                | 1946631230               |
| SNP_P3_141998_72970  | NW_004516299.1 | Scaffold960 | 72970                   | TT                              | CC                | 1946631232               |
| SNP_P3_141999_72972  | NW_004516299.1 | Scaffold960 | 72972                   | GG                              | AA                | 1946631234               |
| SNP_P3_142000_74094  | NW_004516299.1 | Scaffold960 | 74094                   | GG                              | AA                | 1946631236               |
| SNP_P3_142001_98645  | NW_004516299.1 | Scaffold960 | 98645                   | CC                              | TT                | 1946631238               |
| SNP_P3_142002_104242 | NW_004516299.1 | Scaffold960 | 104242                  | TT                              | GG                | 1946631240               |
| SNP_P3_142003_139143 | NW_004516299.1 | Scaffold960 | 139143                  | AA                              | GG                | 1946631242               |
| SNP_P3_142004_139147 | NW_004516299.1 | Scaffold960 | 139147                  | TT                              | GG                | 1946631244               |
| SNP_P3_142005_139148 | NW_004516299.1 | Scaffold960 | 139148                  | GG                              | TT                | 1946631246               |
| SNP_P3_142006_139208 | NW_004516299.1 | Scaffold960 | 139208                  | TT                              | AA                | 1946631248               |
| SNP_P3_142007_149474 | NW_004516299.1 | Scaffold960 | 149474                  | CC                              | TT                | 1946631250               |
| SNP_P3_142008_157356 | NW_004516299.1 | Scaffold960 | 157356                  | AA                              | GG                | 1946631252               |
| SNP_P3_142009_162259 | NW_004516299.1 | Scaffold960 | 162259                  | AA                              | GG                | 1946631254               |
| SNP_P3_142010_162433 | NW_004516299.1 | Scaffold960 | 162433                  | AA                              | GG                | 1946631256               |
| SNP_P3_142011_162438 | NW_004516299.1 | Scaffold960 | 162438                  | TT                              | CC                | 1946631258               |
| SNP_P3_142012_162439 | NW_004516299.1 | Scaffold960 | 162439                  | AA                              | GG                | 1946631260               |
| SNP_P3_142013_162881 | NW_004516299.1 | Scaffold960 | 162881                  | AA                              | GG                | 1946631262               |
| SNP_P3_142014_163252 | NW_004516299.1 | Scaffold960 | 163252                  | TT                              | GG                | 1946631264               |
| SNP_P3_142015_3812   | NW_004516300.1 | Scaffold962 | 3812                    | GG                              | TT                | 1946631266               |

| SNPs IDs             | Chromosome IDs | Chromosomes | Physical positions (bp) | CDC Frontier (Reference genome) | (Pusa 256 & HPNB) | NCBI SNPdb Accession IDs |
|----------------------|----------------|-------------|-------------------------|---------------------------------|-------------------|--------------------------|
| SNP_P3_142016_13429  | NW_004516300.1 | Scaffold962 | 13429                   | TT                              | CC                | 1946631268               |
| SNP_P3_142017_13750  | NW_004516300.1 | Scaffold962 | 13750                   | CC                              | TT                | 1946631270               |
| SNP_P3_142018_13792  | NW_004516300.1 | Scaffold962 | 13792                   | TT                              | CC                | 1946631272               |
| SNP_P3_142020_14578  | NW_004516300.1 | Scaffold962 | 14578                   | AA                              | GG                | 1946631274               |
| SNP_P3_142021_14604  | NW_004516300.1 | Scaffold962 | 14604                   | CC                              | TT                | 1946631276               |
| SNP_P3_142022_16623  | NW_004516300.1 | Scaffold962 | 16623                   | GG                              | AA                | 1946631278               |
| SNP_P3_142024_32235  | NW_004516300.1 | Scaffold962 | 32235                   | TT                              | AA                | 1946631280               |
| SNP_P3_142026_40575  | NW_004516300.1 | Scaffold962 | 40575                   | CC                              | TT                | 1946631282               |
| SNP_P3_142027_49191  | NW_004516300.1 | Scaffold962 | 49191                   | AA                              | TT                | 1946631284               |
| SNP_P3_142028_49199  | NW_004516300.1 | Scaffold962 | 49199                   | AA                              | TT                | 1946631286               |
| SNP_P3_142029_49258  | NW_004516300.1 | Scaffold962 | 49258                   | TT                              | GG                | 1946631288               |
| SNP_P3_142030_49536  | NW_004516300.1 | Scaffold962 | 49536                   | AA                              | GG                | 1946631290               |
| SNP_P3_142031_49568  | NW_004516300.1 | Scaffold962 | 49568                   | TT                              | CC                | 1946631292               |
| SNP_P3_142032_49595  | NW_004516300.1 | Scaffold962 | 49595                   | CC                              | AA                | 1946631294               |
| SNP_P3_142033_49625  | NW_004516300.1 | Scaffold962 | 49625                   | CC                              | AA                | 1946631296               |
| SNP_P3_142034_63855  | NW_004516300.1 | Scaffold962 | 63855                   | GG                              | AA                | 1946631298               |
| SNP_P3_142035_99170  | NW_004516300.1 | Scaffold962 | 99170                   | TT                              | AA                | 1946631300               |
| SNP_P3_142036_101811 | NW_004516300.1 | Scaffold962 | 101811                  | CC                              | GG                | 1946631302               |
| SNP_P3_142037_103386 | NW_004516300.1 | Scaffold962 | 103386                  | AA                              | TT                | 1946631304               |
| SNP_P3_142038_110749 | NW_004516300.1 | Scaffold962 | 110749                  | AA                              | GG                | 1946631306               |
| SNP_P3_142039_110822 | NW_004516300.1 | Scaffold962 | 110822                  | AA                              | GG                | 1946631308               |
| SNP_P3_142040_111028 | NW_004516300.1 | Scaffold962 | 111028                  | TT                              | CC                | 1946631310               |
| SNP_P3_142041_111751 | NW_004516300.1 | Scaffold962 | 111751                  | CC                              | TT                | 1946631312               |
| SNP_P3_142042_112496 | NW_004516300.1 | Scaffold962 | 112496                  | CC                              | TT                | 1946631314               |
| SNP_P3_142043_124595 | NW_004516300.1 | Scaffold962 | 124595                  | GG                              | AA                | 1946631316               |
| SNP_P3_142044_124628 | NW_004516300.1 | Scaffold962 | 124628                  | TT                              | AA                | 1946631318               |
| SNP_P3_142045_125605 | NW_004516300.1 | Scaffold962 | 125605                  | TT                              | GG                | 1946631320               |
| SNP_P3_142046_125629 | NW_004516300.1 | Scaffold962 | 125629                  | TT                              | AA                | 1946631322               |
| SNP_P3_142049_149180 | NW_004516300.1 | Scaffold962 | 149180                  | GG                              | CC                | 1946631324               |
| SNP_P3_142050_149242 | NW_004516300.1 | Scaffold962 | 149242                  | AA                              | GG                | 1946631326               |
| SNP_P3_142051_149257 | NW_004516300.1 | Scaffold962 | 149257                  | TT                              | CC                | 1946631328               |
| SNP_P3_142052_160714 | NW_004516300.1 | Scaffold962 | 160714                  | AA                              | TT                | 1946631330               |
| SNP_P3_142053_160775 | NW_004516300.1 | Scaffold962 | 160775                  | GG                              | TT                | 1946631332               |
| SNP_P3_142054_161004 | NW_004516300.1 | Scaffold962 | 161004                  | TT                              | CC                | 1946631334               |
| SNP_P3_142055_161026 | NW_004516300.1 | Scaffold962 | 161026                  | AA                              | TT                | 1946631336               |
| SNP_P3_142056_161065 | NW_004516300.1 | Scaffold962 | 161065                  | AA                              | TT                | 1946631337               |
| SNP_P3_142057_164204 | NW_004516300.1 | Scaffold962 | 164204                  | TT                              | GG                | 1946631339               |
| SNP_P3_142058_164532 | NW_004516300.1 | Scaffold962 | 164532                  | GG                              | AA                | 1946631341               |
| SNP_P3_142059_193844 | NW_004516300.1 | Scaffold962 | 193844                  | AA                              | TT                | 1946631343               |
| SNP_P3_142060_194831 | NW_004516300.1 | Scaffold962 | 194831                  | CC                              | TT                | 1946631345               |
| SNP_P3_142061_194881 | NW_004516300.1 | Scaffold962 | 194881                  | CC                              | TT                | 1946631347               |
| SNP_P3_142062_205262 | NW_004516300.1 | Scaffold962 | 205262                  | TT                              | GG                | 1946631349               |

| SNPs IDs             | Chromosome IDs | Chromosomes | Physical positions (bp) | CDC Frontier (Reference genome) | (Pusa 256 & HPNB) | NCBI SNPdb Accession IDs |
|----------------------|----------------|-------------|-------------------------|---------------------------------|-------------------|--------------------------|
| SNP_P3_142063_205271 | NW_004516300.1 | Scaffold962 | 205271                  | GG                              | AA                | 1946631351               |
| SNP_P3_142064_209298 | NW_004516300.1 | Scaffold962 | 209298                  | CC                              | TT                | 1946631353               |
| SNP_P3_142066_463    | NW_004516301.1 | Scaffold963 | 463                     | GG                              | CC                | 1946631355               |
| SNP_P3_142067_487    | NW_004516301.1 | Scaffold963 | 487                     | TT                              | CC                | 1946631357               |
| SNP_P3_142068_678    | NW_004516301.1 | Scaffold963 | 678                     | AA                              | GG                | 1946631359               |
| SNP_P3_142069_1891   | NW_004516301.1 | Scaffold963 | 1891                    | CC                              | TT                | 1946631371               |
| SNP_P3_142070_3741   | NW_004516301.1 | Scaffold963 | 3741                    | TT                              | GG                | 1946631373               |
| SNP_P3_142071_3759   | NW_004516301.1 | Scaffold963 | 3759                    | TT                              | GG                | 1946631375               |
| SNP_P3_142072_3878   | NW_004516301.1 | Scaffold963 | 3878                    | GG                              | AA                | 1946631377               |
| SNP_P3_142073_5273   | NW_004516301.1 | Scaffold963 | 5273                    | AA                              | CC                | 1946631379               |
| SNP_P3_142074_5278   | NW_004516301.1 | Scaffold963 | 5278                    | AA                              | CC                | 1946631381               |
| SNP_P3_142075_5285   | NW_004516301.1 | Scaffold963 | 5285                    | AA                              | TT                | 1946631383               |
| SNP_P3_142076_5290   | NW_004516301.1 | Scaffold963 | 5290                    | AA                              | CC                | 1946631385               |
| SNP_P3_142077_5313   | NW_004516301.1 | Scaffold963 | 5313                    | AA                              | GG                | 1946631387               |
| SNP_P3_142078_5324   | NW_004516301.1 | Scaffold963 | 5324                    | AA                              | TT                | 1946631389               |
| SNP_P3_142079_5337   | NW_004516301.1 | Scaffold963 | 5337                    | TT                              | CC                | 1946631391               |
| SNP_P3_142080_5344   | NW_004516301.1 | Scaffold963 | 5344                    | TT                              | CC                | 1946631393               |
| SNP_P3_142081_5350   | NW_004516301.1 | Scaffold963 | 5350                    | AA                              | GG                | 1946631395               |
| SNP_P3_142082_5389   | NW_004516301.1 | Scaffold963 | 5389                    | AA                              | GG                | 1946631397               |
| SNP_P3_142083_5401   | NW_004516301.1 | Scaffold963 | 5401                    | GG                              | CC                | 1946631399               |
| SNP_P3_142084_5414   | NW_004516301.1 | Scaffold963 | 5414                    | AA                              | GG                | 1946631401               |
| SNP_P3_142085_5444   | NW_004516301.1 | Scaffold963 | 5444                    | TT                              | GG                | 1946631403               |
| SNP_P3_142086_5446   | NW_004516301.1 | Scaffold963 | 5446                    | TT                              | AA                | 1946631404               |
| SNP_P3_142087_5475   | NW_004516301.1 | Scaffold963 | 5475                    | AA                              | GG                | 1946631406               |
| SNP_P3_142088_5478   | NW_004516301.1 | Scaffold963 | 5478                    | AA                              | GG                | 1946631408               |
| SNP_P3_142089_5848   | NW_004516301.1 | Scaffold963 | 5848                    | GG                              | TT                | 1946631410               |
| SNP_P3_142091_5904   | NW_004516301.1 | Scaffold963 | 5904                    | AA                              | CC                | 1946631412               |
| SNP_P3_142092_5914   | NW_004516301.1 | Scaffold963 | 5914                    | GG                              | AA                | 1946631414               |
| SNP_P3_142093_5958   | NW_004516301.1 | Scaffold963 | 5958                    | GG                              | AA                | 1946631416               |
| SNP_P3_142094_6029   | NW_004516301.1 | Scaffold963 | 6029                    | CC                              | GG                | 1946631418               |
| SNP_P3_142095_6084   | NW_004516301.1 | Scaffold963 | 6084                    | TT                              | CC                | 1946631421               |
| SNP_P3_142097_6130   | NW_004516301.1 | Scaffold963 | 6130                    | GG                              | AA                | 1946631423               |
| SNP_P3_142098_6282   | NW_004516301.1 | Scaffold963 | 6282                    | AA                              | TT                | 1946631425               |
| SNP_P3_142099_6294   | NW_004516301.1 | Scaffold963 | 6294                    | TT                              | CC                | 1946631427               |
| SNP_P3_142100_6320   | NW_004516301.1 | Scaffold963 | 6320                    | AA                              | GG                | 1946631429               |
| SNP_P3_142101_6364   | NW_004516301.1 | Scaffold963 | 6364                    | GG                              | AA                | 1946631431               |
| SNP_P3_142102_6374   | NW_004516301.1 | Scaffold963 | 6374                    | AA                              | GG                | 1946631433               |
| SNP_P3_142103_6440   | NW_004516301.1 | Scaffold963 | 6440                    | CC                              | TT                | 1946631435               |
| SNP_P3_142104_6458   | NW_004516301.1 | Scaffold963 | 6458                    | CC                              | TT                | 1946631437               |
| SNP_P3_142105_6496   | NW_004516301.1 | Scaffold963 | 6496                    | GG                              | CC                | 1946631439               |
| SNP_P3_142106_6561   | NW_004516301.1 | Scaffold963 | 6561                    | TT                              | AA                | 1946631440               |
| SNP_P3_142107_6745   | NW_004516301.1 | Scaffold963 | 6745                    | AA                              | GG                | 1946631442               |

| SNPs IDs             | Chromosome IDs | Chromosomes | Physical positions (bp) | CDC Frontier (Reference genome) | (Pusa 256 & HPNB) | NCBI SNPdb Accession IDs |
|----------------------|----------------|-------------|-------------------------|---------------------------------|-------------------|--------------------------|
| SNP_P3_142108_7043   | NW_004516301.1 | Scaffold963 | 7043                    | TT                              | CC                | 1946631444               |
| SNP_P3_142109_7216   | NW_004516301.1 | Scaffold963 | 7216                    | AA                              | GG                | 1946631446               |
| SNP_P3_142110_7265   | NW_004516301.1 | Scaffold963 | 7265                    | TT                              | CC                | 1946631448               |
| SNP_P3_142111_15954  | NW_004516301.1 | Scaffold963 | 15954                   | AA                              | TT                | 1946631450               |
| SNP_P3_142112_17126  | NW_004516301.1 | Scaffold963 | 17126                   | GG                              | TT                | 1946631452               |
| SNP_P3_142113_17190  | NW_004516301.1 | Scaffold963 | 17190                   | AA                              | GG                | 1946631454               |
| SNP_P3_142114_17266  | NW_004516301.1 | Scaffold963 | 17266                   | GG                              | TT                | 1946631456               |
| SNP_P3_142115_17292  | NW_004516301.1 | Scaffold963 | 17292                   | AA                              | TT                | 1946631458               |
| SNP_P3_142117_41423  | NW_004516301.1 | Scaffold963 | 41423                   | GG                              | CC                | 1946631461               |
| SNP_P3_142118_41540  | NW_004516301.1 | Scaffold963 | 41540                   | AA                              | GG                | 1946631463               |
| SNP_P3_142119_50068  | NW_004516301.1 | Scaffold963 | 50068                   | TT                              | CC                | 1946631465               |
| SNP_P3_142120_51941  | NW_004516301.1 | Scaffold963 | 51941                   | GG                              | AA                | 1946631467               |
| SNP_P3_142121_62381  | NW_004516301.1 | Scaffold963 | 62381                   | GG                              | AA                | 1946631469               |
| SNP_P3_142122_89755  | NW_004516301.1 | Scaffold963 | 89755                   | TT                              | CC                | 1946631471               |
| SNP_P3_142123_89760  | NW_004516301.1 | Scaffold963 | 89760                   | AA                              | CC                | 1946631473               |
| SNP_P3_142124_90012  | NW_004516301.1 | Scaffold963 | 90012                   | TT                              | CC                | 1946631475               |
| SNP_P3_142125_91926  | NW_004516301.1 | Scaffold963 | 91926                   | AA                              | TT                | 1946631477               |
| SNP_P3_142126_92441  | NW_004516301.1 | Scaffold963 | 92441                   | AA                              | CC                | 1946631479               |
| SNP_P3_142127_92525  | NW_004516301.1 | Scaffold963 | 92525                   | AA                              | GG                | 1946631480               |
| SNP_P3_142128_93386  | NW_004516301.1 | Scaffold963 | 93386                   | TT                              | CC                | 1946631482               |
| SNP_P3_142129_93611  | NW_004516301.1 | Scaffold963 | 93611                   | CC                              | AA                | 1946631484               |
| SNP_P3_142130_93618  | NW_004516301.1 | Scaffold963 | 93618                   | TT                              | CC                | 1946631486               |
| SNP_P3_142131_93619  | NW_004516301.1 | Scaffold963 | 93619                   | AA                              | GG                | 1946631488               |
| SNP_P3_142133_93716  | NW_004516301.1 | Scaffold963 | 93716                   | TT                              | CC                | 1946631490               |
| SNP_P3_142134_93728  | NW_004516301.1 | Scaffold963 | 93728                   | TT                              | GG                | 1946631492               |
| SNP_P3_142135_93730  | NW_004516301.1 | Scaffold963 | 93730                   | CC                              | AA                | 1946631494               |
| SNP_P3_142136_93744  | NW_004516301.1 | Scaffold963 | 93744                   | GG                              | AA                | 1946631496               |
| SNP_P3_142137_93749  | NW_004516301.1 | Scaffold963 | 93749                   | GG                              | AA                | 1946631498               |
| SNP_P3_142138_93851  | NW_004516301.1 | Scaffold963 | 93851                   | GG                              | AA                | 1946631501               |
| SNP_P3_142139_96115  | NW_004516301.1 | Scaffold963 | 96115                   | TT                              | AA                | 1946631503               |
| SNP_P3_142140_101165 | NW_004516301.1 | Scaffold963 | 101165                  | GG                              | AA                | 1946631505               |
| SNP_P3_142141_101475 | NW_004516301.1 | Scaffold963 | 101475                  | AA                              | TT                | 1946631507               |
| SNP_P3_142142_101506 | NW_004516301.1 | Scaffold963 | 101506                  | GG                              | CC                | 1946631509               |
| SNP_P3_142143_104350 | NW_004516301.1 | Scaffold963 | 104350                  | GG                              | AA                | 1946631511               |
| SNP_P3_142144_636    | NW_004516302.1 | Scaffold964 | 636                     | GG                              | AA                | 1946631513               |
| SNP_P3_142145_680    | NW_004516302.1 | Scaffold964 | 680                     | AA                              | TT                | 1946631515               |
| SNP_P3_142146_5359   | NW_004516302.1 | Scaffold964 | 5359                    | AA                              | GG                | 1946631517               |
| SNP_P3_142147_5452   | NW_004516302.1 | Scaffold964 | 5452                    | TT                              | GG                | 1946631519               |
| SNP_P3_142148_5513   | NW_004516302.1 | Scaffold964 | 5513                    | AA                              | GG                | 1946631521               |
| SNP_P3_142149_5812   | NW_004516302.1 | Scaffold964 | 5812                    | TT                              | CC                | 1946631523               |
| SNP_P3_142150_7084   | NW_004516302.1 | Scaffold964 | 7084                    | TT                              | GG                | 1946631525               |
| SNP_P3_142151_7087   | NW_004516302.1 | Scaffold964 | 7087                    | AA                              | TT                | 1946631527               |

| SNPs IDs            | Chromosome IDs | Chromosomes | Physical positions (bp) | CDC Frontier (Reference genome) | (Pusa 256 & HPNB) | NCBI SNPdb Accession IDs |
|---------------------|----------------|-------------|-------------------------|---------------------------------|-------------------|--------------------------|
| SNP_P3_142152_7090  | NW_004516302.1 | Scaffold964 | 7090                    | TT                              | AA                | 1946631529               |
| SNP_P3_142153_9919  | NW_004516302.1 | Scaffold964 | 9919                    | GG                              | TT                | 1946631531               |
| SNP_P3_142154_10523 | NW_004516302.1 | Scaffold964 | 10523                   | TT                              | GG                | 1946631533               |
| SNP_P3_142155_10993 | NW_004516302.1 | Scaffold964 | 10993                   | GG                              | AA                | 1946631535               |
| SNP_P3_142156_12124 | NW_004516302.1 | Scaffold964 | 12124                   | TT                              | CC                | 1946631537               |
| SNP_P3_142157_12131 | NW_004516302.1 | Scaffold964 | 12131                   | AA                              | GG                | 1946631539               |
| SNP_P3_142158_12543 | NW_004516302.1 | Scaffold964 | 12543                   | GG                              | AA                | 1946631541               |
| SNP_P3_142159_12586 | NW_004516302.1 | Scaffold964 | 12586                   | TT                              | AA                | 1946631543               |
| SNP_P3_142160_12615 | NW_004516302.1 | Scaffold964 | 12615                   | CC                              | AA                | 1946631545               |
| SNP_P3_142161_13236 | NW_004516302.1 | Scaffold964 | 13236                   | TT                              | CC                | 1946631547               |
| SNP_P3_142162_23965 | NW_004516302.1 | Scaffold964 | 23965                   | AA                              | GG                | 1946631549               |
| SNP_P3_142164_32109 | NW_004516302.1 | Scaffold964 | 32109                   | GG                              | TT                | 1946631551               |
| SNP_P3_142165_32122 | NW_004516302.1 | Scaffold964 | 32122                   | AA                              | CC                | 1946631553               |
| SNP_P3_142166_37391 | NW_004516302.1 | Scaffold964 | 37391                   | TT                              | GG                | 1946631555               |
| SNP_P3_142167_45675 | NW_004516302.1 | Scaffold964 | 45675                   | TT                              | AA                | 1946631557               |
| SNP_P3_142168_45808 | NW_004516302.1 | Scaffold964 | 45808                   | CC                              | AA                | 1946631559               |
| SNP_P3_142169_45869 | NW_004516302.1 | Scaffold964 | 45869                   | CC                              | TT                | 1946631561               |
| SNP_P3_142170_45892 | NW_004516302.1 | Scaffold964 | 45892                   | TT                              | GG                | 1946631563               |
| SNP_P3_142171_45933 | NW_004516302.1 | Scaffold964 | 45933                   | TT                              | AA                | 1946631565               |
| SNP_P3_142172_47564 | NW_004516302.1 | Scaffold964 | 47564                   | AA                              | GG                | 1946631567               |
| SNP_P3_142173_47577 | NW_004516302.1 | Scaffold964 | 47577                   | AA                              | GG                | 1946631569               |
| SNP_P3_142174_47780 | NW_004516302.1 | Scaffold964 | 47780                   | AA                              | CC                | 1946631571               |
| SNP_P3_142175_47826 | NW_004516302.1 | Scaffold964 | 47826                   | TT                              | GG                | 1946631573               |
| SNP_P3_142176_48170 | NW_004516302.1 | Scaffold964 | 48170                   | AA                              | TT                | 1946631575               |
| SNP_P3_142177_51744 | NW_004516302.1 | Scaffold964 | 51744                   | GG                              | TT                | 1946631577               |
| SNP_P3_142178_54140 | NW_004516302.1 | Scaffold964 | 54140                   | CC                              | TT                | 1946631579               |
| SNP_P3_142179_55099 | NW_004516302.1 | Scaffold964 | 55099                   | TT                              | GG                | 1946631581               |
| SNP_P3_142180_60809 | NW_004516302.1 | Scaffold964 | 60809                   | TT                              | CC                | 1946631583               |
| SNP_P3_142182_61755 | NW_004516302.1 | Scaffold964 | 61755                   | TT                              | CC                | 1946631585               |
| SNP_P3_142183_62690 | NW_004516302.1 | Scaffold964 | 62690                   | CC                              | GG                | 1946631587               |
| SNP_P3_142184_62698 | NW_004516302.1 | Scaffold964 | 62698                   | GG                              | TT                | 1946631589               |
| SNP_P3_142185_62787 | NW_004516302.1 | Scaffold964 | 62787                   | AA                              | CC                | 1946631591               |
| SNP_P3_142186_62833 | NW_004516302.1 | Scaffold964 | 62833                   | CC                              | TT                | 1946631593               |
| SNP_P3_142187_62834 | NW_004516302.1 | Scaffold964 | 62834                   | GG                              | AA                | 1946631595               |
| SNP_P3_142188_63111 | NW_004516302.1 | Scaffold964 | 63111                   | AA                              | GG                | 1946631597               |
| SNP_P3_142189_71999 | NW_004516302.1 | Scaffold964 | 71999                   | AA                              | TT                | 1946631599               |
| SNP_P3_142190_72004 | NW_004516302.1 | Scaffold964 | 72004                   | CC                              | TT                | 1946631601               |
| SNP_P3_142191_72241 | NW_004516302.1 | Scaffold964 | 72241                   | CC                              | TT                | 1946631603               |
| SNP_P3_142192_74233 | NW_004516302.1 | Scaffold964 | 74233                   | TT                              | AA                | 1946631605               |
| SNP_P3_142193_83354 | NW_004516302.1 | Scaffold964 | 83354                   | AA                              | GG                | 1946631607               |
| SNP_P3_142194_84913 | NW_004516302.1 | Scaffold964 | 84913                   | TT                              | CC                | 1946631609               |
| SNP_P3_142195_3761  | NW_004516303.1 | Scaffold965 | 3761                    | TT                              | GG                | 1946631611               |

| SNPs IDs            | Chromosome IDs | Chromosomes | Physical positions (bp) | CDC Frontier (Reference genome) | (Pusa 256 & HPNB) | NCBI SNPdb Accession IDs |
|---------------------|----------------|-------------|-------------------------|---------------------------------|-------------------|--------------------------|
| SNP_P3_142196_2107  | NW_004516304.1 | Scaffold967 | 2107                    | CC                              | TT                | 1946631612               |
| SNP_P3_142197_1197  | NW_004516306.1 | Scaffold969 | 1197                    | AA                              | GG                | 1946631614               |
| SNP_P3_142198_1366  | NW_004516306.1 | Scaffold969 | 1366                    | CC                              | AA                | 1946631616               |
| SNP_P3_142199_1375  | NW_004516306.1 | Scaffold969 | 1375                    | GG                              | AA                | 1946631618               |
| SNP_P3_142200_1519  | NW_004516306.1 | Scaffold969 | 1519                    | AA                              | GG                | 1946631620               |
| SNP_P3_142201_1623  | NW_004516306.1 | Scaffold969 | 1623                    | GG                              | CC                | 1946631622               |
| SNP_P3_142202_342   | NW_004516307.1 | Scaffold971 | 342                     | CC                              | TT                | 1946631624               |
| SNP_P3_142203_521   | NW_004516307.1 | Scaffold971 | 521                     | GG                              | AA                | 1946631626               |
| SNP_P3_142204_527   | NW_004516307.1 | Scaffold971 | 527                     | TT                              | AA                | 1946631628               |
| SNP_P3_142205_553   | NW_004516307.1 | Scaffold971 | 553                     | TT                              | AA                | 1946631630               |
| SNP_P3_142206_573   | NW_004516307.1 | Scaffold971 | 573                     | GG                              | AA                | 1946631632               |
| SNP_P3_142207_3513  | NW_004516307.1 | Scaffold971 | 3513                    | GG                              | AA                | 1946631634               |
| SNP_P3_142208_3517  | NW_004516307.1 | Scaffold971 | 3517                    | TT                              | AA                | 1946631635               |
| SNP_P3_142209_3539  | NW_004516307.1 | Scaffold971 | 3539                    | AA                              | TT                | 1946631637               |
| SNP_P3_142210_3700  | NW_004516307.1 | Scaffold971 | 3700                    | AA                              | CC                | 1946631639               |
| SNP_P3_142211_3780  | NW_004516307.1 | Scaffold971 | 3780                    | GG                              | AA                | 1946631641               |
| SNP_P3_142212_3991  | NW_004516307.1 | Scaffold971 | 3991                    | GG                              | AA                | 1946631643               |
| SNP_P3_142213_4019  | NW_004516307.1 | Scaffold971 | 4019                    | AA                              | GG                | 1946631645               |
| SNP_P3_142214_4282  | NW_004516307.1 | Scaffold971 | 4282                    | TT                              | CC                | 1946631647               |
| SNP_P3_142215_5177  | NW_004516307.1 | Scaffold971 | 5177                    | GG                              | AA                | 1946631649               |
| SNP_P3_142216_5192  | NW_004516307.1 | Scaffold971 | 5192                    | GG                              | CC                | 1946631651               |
| SNP_P3_142217_5246  | NW_004516307.1 | Scaffold971 | 5246                    | AA                              | GG                | 1946631653               |
| SNP_P3_142218_5374  | NW_004516307.1 | Scaffold971 | 5374                    | TT                              | AA                | 1946631655               |
| SNP_P3_142219_5420  | NW_004516307.1 | Scaffold971 | 5420                    | AA                              | GG                | 1946631657               |
| SNP_P3_142220_7144  | NW_004516307.1 | Scaffold971 | 7144                    | AA                              | GG                | 1946631659               |
| SNP_P3_142221_7469  | NW_004516307.1 | Scaffold971 | 7469                    | AA                              | CC                | 1946631661               |
| SNP_P3_142222_7470  | NW_004516307.1 | Scaffold971 | 7470                    | AA                              | GG                | 1946631663               |
| SNP_P3_142223_7699  | NW_004516307.1 | Scaffold971 | 7699                    | GG                              | TT                | 1946631665               |
| SNP_P3_142224_13559 | NW_004516307.1 | Scaffold971 | 13559                   | GG                              | AA                | 1946631667               |
| SNP_P3_142225_13880 | NW_004516307.1 | Scaffold971 | 13880                   | TT                              | CC                | 1946631669               |
| SNP_P3_142226_14774 | NW_004516307.1 | Scaffold971 | 14774                   | AA                              | TT                | 1946631671               |
| SNP_P3_142227_14796 | NW_004516307.1 | Scaffold971 | 14796                   | GG                              | TT                | 1946631673               |
| SNP_P3_142228_4628  | NW_004516308.1 | Scaffold972 | 4628                    | GG                              | AA                | 1946631675               |
| SNP_P3_142229_12939 | NW_004516308.1 | Scaffold972 | 12939                   | AA                              | CC                | 1946631677               |
| SNP_P3_142230_14538 | NW_004516308.1 | Scaffold972 | 14538                   | AA                              | GG                | 1946631680               |
| SNP_P3_142232_3408  | NW_004516309.1 | Scaffold973 | 3408                    | TT                              | AA                | 1946631682               |
| SNP_P3_142233_3696  | NW_004516309.1 | Scaffold973 | 3696                    | GG                              | AA                | 1946631684               |
| SNP_P3_142234_4137  | NW_004516309.1 | Scaffold973 | 4137                    | AA                              | GG                | 1946631685               |
| SNP_P3_142235_4448  | NW_004516309.1 | Scaffold973 | 4448                    | TT                              | CC                | 1946631687               |
| SNP_P3_142236_4559  | NW_004516309.1 | Scaffold973 | 4559                    | TT                              | GG                | 1946631689               |
| SNP_P3_142237_24395 | NW_004516309.1 | Scaffold973 | 24395                   | TT                              | CC                | 1946631691               |
| SNP_P3_142238_24417 | NW_004516309.1 | Scaffold973 | 24417                   | GG                              | AA                | 1946631693               |

| SNPs IDs            | Chromosome IDs | Chromosomes | Physical positions (bp) | CDC Frontier (Reference genome) | (Pusa 256 & HPNB) | NCBI SNPdb Accession IDs |
|---------------------|----------------|-------------|-------------------------|---------------------------------|-------------------|--------------------------|
| SNP_P3_142239_24431 | NW_004516309.1 | Scaffold973 | 24431                   | AA                              | GG                | 1946631695               |
| SNP_P3_142241_24932 | NW_004516309.1 | Scaffold973 | 24932                   | CC                              | TT                | 1946631697               |
| SNP_P3_142242_25060 | NW_004516309.1 | Scaffold973 | 25060                   | AA                              | GG                | 1946631700               |
| SNP_P3_142243_2747  | NW_004516310.1 | Scaffold974 | 2747                    | CC                              | TT                | 1946631702               |
| SNP_P3_142244_2877  | NW_004516310.1 | Scaffold974 | 2877                    | TT                              | CC                | 1946631704               |
| SNP_P3_142245_2953  | NW_004516310.1 | Scaffold974 | 2953                    | GG                              | TT                | 1946631706               |
| SNP_P3_142246_2962  | NW_004516310.1 | Scaffold974 | 2962                    | AA                              | GG                | 1946631707               |
| SNP_P3_142247_3242  | NW_004516310.1 | Scaffold974 | 3242                    | TT                              | GG                | 1946631709               |
| SNP_P3_142248_3251  | NW_004516310.1 | Scaffold974 | 3251                    | CC                              | TT                | 1946631711               |
| SNP_P3_142249_3289  | NW_004516310.1 | Scaffold974 | 3289                    | AA                              | GG                | 1946631712               |
| SNP_P3_142250_3374  | NW_004516310.1 | Scaffold974 | 3374                    | AA                              | CC                | 1946631713               |
| SNP_P3_142251_3470  | NW_004516310.1 | Scaffold974 | 3470                    | GG                              | CC                | 1946631714               |
| SNP_P3_142252_3491  | NW_004516310.1 | Scaffold974 | 3491                    | CC                              | TT                | 1946631716               |
| SNP_P3_142253_3687  | NW_004516310.1 | Scaffold974 | 3687                    | CC                              | AA                | 1946631717               |
| SNP_P3_142254_3710  | NW_004516310.1 | Scaffold974 | 3710                    | GG                              | AA                | 1946631719               |
| SNP_P3_142255_3843  | NW_004516310.1 | Scaffold974 | 3843                    | TT                              | AA                | 1946631721               |
| SNP_P3_142256_3844  | NW_004516310.1 | Scaffold974 | 3844                    | GG                              | TT                | 1946631723               |
| SNP_P3_142257_3923  | NW_004516310.1 | Scaffold974 | 3923                    | TT                              | CC                | 1946631725               |
| SNP_P3_142258_4112  | NW_004516310.1 | Scaffold974 | 4112                    | CC                              | TT                | 1946631727               |
| SNP_P3_142259_4183  | NW_004516310.1 | Scaffold974 | 4183                    | TT                              | CC                | 1946631729               |
| SNP_P3_142260_4276  | NW_004516310.1 | Scaffold974 | 4276                    | GG                              | TT                | 1946631731               |
| SNP_P3_142261_4340  | NW_004516310.1 | Scaffold974 | 4340                    | GG                              | TT                | 1946631733               |
| SNP_P3_142262_4383  | NW_004516310.1 | Scaffold974 | 4383                    | TT                              | CC                | 1946631735               |
| SNP_P3_142263_4392  | NW_004516310.1 | Scaffold974 | 4392                    | GG                              | AA                | 1946631737               |
| SNP_P3_142264_5279  | NW_004516310.1 | Scaffold974 | 5279                    | TT                              | CC                | 1946631739               |
| SNP_P3_142265_5375  | NW_004516310.1 | Scaffold974 | 5375                    | TT                              | AA                | 1946631741               |
| SNP_P3_142266_13096 | NW_004516310.1 | Scaffold974 | 13096                   | TT                              | CC                | 1946631743               |
| SNP_P3_142267_19723 | NW_004516310.1 | Scaffold974 | 19723                   | CC                              | TT                | 1946631745               |
| SNP_P3_142268_19726 | NW_004516310.1 | Scaffold974 | 19726                   | AA                              | GG                | 1946631747               |
| SNP_P3_142269_33747 | NW_004516310.1 | Scaffold974 | 33747                   | CC                              | AA                | 1946631749               |
| SNP_P3_142270_33867 | NW_004516310.1 | Scaffold974 | 33867                   | CC                              | TT                | 1946631751               |
| SNP_P3_142271_33900 | NW_004516310.1 | Scaffold974 | 33900                   | AA                              | GG                | 1946631753               |
| SNP_P3_142272_33924 | NW_004516310.1 | Scaffold974 | 33924                   | GG                              | TT                | 1946631755               |
| SNP_P3_142273_33932 | NW_004516310.1 | Scaffold974 | 33932                   | TT                              | CC                | 1946631756               |
| SNP_P3_142274_33948 | NW_004516310.1 | Scaffold974 | 33948                   | AA                              | GG                | 1946631758               |
| SNP_P3_142275_34240 | NW_004516310.1 | Scaffold974 | 34240                   | AA                              | GG                | 1946631760               |
| SNP_P3_142276_34263 | NW_004516310.1 | Scaffold974 | 34263                   | GG                              | AA                | 1946631762               |
| SNP_P3_142277_34280 | NW_004516310.1 | Scaffold974 | 34280                   | TT                              | CC                | 1946631764               |
| SNP_P3_142278_37200 | NW_004516310.1 | Scaffold974 | 37200                   | CC                              | TT                | 1946631766               |
| SNP_P3_142279_44704 | NW_004516310.1 | Scaffold974 | 44704                   | GG                              | TT                | 1946631768               |
| SNP_P3_142280_47842 | NW_004516310.1 | Scaffold974 | 47842                   | AA                              | TT                | 1946631770               |
| SNP_P3_142281_394   | NW_004516311.1 | Scaffold977 | 394                     | CC                              | AA                | 1946631772               |

| SNPs IDs           | Chromosome IDs | Chromosomes | Physical positions (bp) | CDC Frontier (Reference genome) | (Pusa 256 & HPNB) | NCBI SNPdb Accession IDs |
|--------------------|----------------|-------------|-------------------------|---------------------------------|-------------------|--------------------------|
| SNP_P3_142282_471  | NW_004516311.1 | Scaffold977 | 471                     | AA                              | GG                | 1946631774               |
| SNP_P3_142283_480  | NW_004516311.1 | Scaffold977 | 480                     | GG                              | AA                | 1946631776               |
| SNP_P3_142284_602  | NW_004516311.1 | Scaffold977 | 602                     | GG                              | AA                | 1946631778               |
| SNP_P3_142285_1556 | NW_004516311.1 | Scaffold977 | 1556                    | AA                              | GG                | 1946631780               |
| SNP_P3_142286_1931 | NW_004516311.1 | Scaffold977 | 1931                    | AA                              | TT                | 1946631782               |
| SNP_P3_142287_3799 | NW_004516311.1 | Scaffold977 | 3799                    | CC                              | AA                | 1946631784               |
| SNP_P3_142288_4494 | NW_004516311.1 | Scaffold977 | 4494                    | AA                              | GG                | 1946631786               |
| SNP_P3_142289_4515 | NW_004516311.1 | Scaffold977 | 4515                    | AA                              | GG                | 1946631788               |
| SNP_P3_142290_4568 | NW_004516311.1 | Scaffold977 | 4568                    | AA                              | GG                | 1946631790               |
| SNP_P3_142291_4572 | NW_004516311.1 | Scaffold977 | 4572                    | TT                              | CC                | 1946631792               |
| SNP_P3_142292_4607 | NW_004516311.1 | Scaffold977 | 4607                    | CC                              | TT                | 1946631794               |
| SNP_P3_142293_4734 | NW_004516311.1 | Scaffold977 | 4734                    | CC                              | TT                | 1946631796               |
| SNP_P3_142294_4755 | NW_004516311.1 | Scaffold977 | 4755                    | TT                              | CC                | 1946631798               |
| SNP_P3_142295_4765 | NW_004516311.1 | Scaffold977 | 4765                    | TT                              | GG                | 1946631800               |
| SNP_P3_142296_4769 | NW_004516311.1 | Scaffold977 | 4769                    | TT                              | GG                | 1946631802               |
| SNP_P3_142297_4840 | NW_004516311.1 | Scaffold977 | 4840                    | CC                              | GG                | 1946631804               |
| SNP_P3_142298_4914 | NW_004516311.1 | Scaffold977 | 4914                    | GG                              | AA                | 1946631806               |
| SNP_P3_142299_4994 | NW_004516311.1 | Scaffold977 | 4994                    | TT                              | CC                | 1946631808               |
| SNP_P3_142300_5019 | NW_004516311.1 | Scaffold977 | 5019                    | GG                              | TT                | 1946631810               |
| SNP_P3_142301_5078 | NW_004516311.1 | Scaffold977 | 5078                    | AA                              | CC                | 1946631812               |
| SNP_P3_142302_5081 | NW_004516311.1 | Scaffold977 | 5081                    | TT                              | CC                | 1946631814               |
| SNP_P3_142303_5128 | NW_004516311.1 | Scaffold977 | 5128                    | AA                              | TT                | 1946631816               |
| SNP_P3_142304_5168 | NW_004516311.1 | Scaffold977 | 5168                    | TT                              | AA                | 1946631818               |
| SNP_P3_142305_5231 | NW_004516311.1 | Scaffold977 | 5231                    | TT                              | AA                | 1946631820               |
| SNP_P3_142306_6192 | NW_004516311.1 | Scaffold977 | 6192                    | TT                              | CC                | 1946631822               |
| SNP_P3_142307_6201 | NW_004516311.1 | Scaffold977 | 6201                    | GG                              | AA                | 1946631824               |
| SNP_P3_142308_6210 | NW_004516311.1 | Scaffold977 | 6210                    | GG                              | TT                | 1946631826               |
| SNP_P3_142309_6230 | NW_004516311.1 | Scaffold977 | 6230                    | AA                              | CC                | 1946631827               |
| SNP_P3_142310_6485 | NW_004516311.1 | Scaffold977 | 6485                    | GG                              | AA                | 1946631829               |
| SNP_P3_142311_6534 | NW_004516311.1 | Scaffold977 | 6534                    | CC                              | TT                | 1946631831               |
| SNP_P3_142312_6569 | NW_004516311.1 | Scaffold977 | 6569                    | CC                              | TT                | 1946631833               |
| SNP_P3_142313_6666 | NW_004516311.1 | Scaffold977 | 6666                    | TT                              | AA                | 1946631835               |
| SNP_P3_142314_6685 | NW_004516311.1 | Scaffold977 | 6685                    | AA                              | TT                | 1946631837               |
| SNP_P3_142315_6773 | NW_004516311.1 | Scaffold977 | 6773                    | CC                              | AA                | 1946631839               |
| SNP_P3_142316_6787 | NW_004516311.1 | Scaffold977 | 6787                    | TT                              | GG                | 1946631841               |
| SNP_P3_142317_6835 | NW_004516311.1 | Scaffold977 | 6835                    | AA                              | GG                | 1946631843               |
| SNP_P3_142318_408  | NW_004516313.1 | Scaffold981 | 408                     | AA                              | GG                | 1946631845               |
| SNP_P3_142319_423  | NW_004516313.1 | Scaffold981 | 423                     | GG                              | AA                | 1946631847               |
| SNP_P3_142320_2141 | NW_004516313.1 | Scaffold981 | 2141                    | AA                              | GG                | 1946631849               |
| SNP_P3_142321_2144 | NW_004516313.1 | Scaffold981 | 2144                    | CC                              | TT                | 1946631851               |
| SNP_P3_142322_2148 | NW_004516313.1 | Scaffold981 | 2148                    | GG                              | AA                | 1946631853               |
| SNP_P3_142323_2330 | NW_004516313.1 | Scaffold981 | 2330                    | CC                              | AA                | 1946631855               |



| SNPs IDs            | Chromosome IDs | Chromosomes | Physical positions (bp) | CDC Frontier (Reference genome) | (Pusa 256 & HPNB) | NCBI SNPdb Accession IDs |
|---------------------|----------------|-------------|-------------------------|---------------------------------|-------------------|--------------------------|
| SNP_P3_142324_2610  | NW_004516313.1 | Scaffold981 | 2610                    | TT                              | AA                | 1946631857               |
| SNP_P3_142325_3374  | NW_004516313.1 | Scaffold981 | 3374                    | AA                              | CC                | 1946631859               |
| SNP_P3_142326_5955  | NW_004516313.1 | Scaffold981 | 5955                    | TT                              | CC                | 1946631861               |
| SNP_P3_142327_6459  | NW_004516313.1 | Scaffold981 | 6459                    | AA                              | CC                | 1946631863               |
| SNP_P3_142328_6594  | NW_004516313.1 | Scaffold981 | 6594                    | TT                              | CC                | 1946631865               |
| SNP_P3_142331_10022 | NW_004516313.1 | Scaffold981 | 10022                   | TT                              | CC                | 1946631867               |
| SNP_P3_142332_10135 | NW_004516313.1 | Scaffold981 | 10135                   | AA                              | GG                | 1946631869               |
| SNP_P3_142333_12411 | NW_004516313.1 | Scaffold981 | 12411                   | CC                              | TT                | 1946631871               |
| SNP_P3_142334_12772 | NW_004516313.1 | Scaffold981 | 12772                   | AA                              | TT                | 1946631873               |
| SNP_P3_142335_13620 | NW_004516313.1 | Scaffold981 | 13620                   | AA                              | GG                | 1946631875               |
| SNP_P3_142336_14231 | NW_004516313.1 | Scaffold981 | 14231                   | CC                              | TT                | 1946631877               |
| SNP_P3_142337_16363 | NW_004516313.1 | Scaffold981 | 16363                   | GG                              | AA                | 1946631879               |
| SNP_P3_142338_18681 | NW_004516313.1 | Scaffold981 | 18681                   | TT                              | CC                | 1946631881               |
| SNP_P3_142339_19949 | NW_004516313.1 | Scaffold981 | 19949                   | AA                              | CC                | 1946631883               |
| SNP_P3_142341_39566 | NW_004516313.1 | Scaffold981 | 39566                   | TT                              | CC                | 1946631885               |
| SNP_P3_142342_39700 | NW_004516313.1 | Scaffold981 | 39700                   | GG                              | AA                | 1946631887               |
| SNP_P3_142343_39758 | NW_004516313.1 | Scaffold981 | 39758                   | AA                              | GG                | 1946631889               |
| SNP_P3_142344_39766 | NW_004516313.1 | Scaffold981 | 39766                   | AA                              | GG                | 1946631891               |
| SNP_P3_142345_48426 | NW_004516313.1 | Scaffold981 | 48426                   | GG                              | CC                | 1946631893               |
| SNP_P3_142347_49714 | NW_004516313.1 | Scaffold981 | 49714                   | TT                              | CC                | 1946631895               |
| SNP_P3_142348_49726 | NW_004516313.1 | Scaffold981 | 49726                   | TT                              | AA                | 1946631897               |
| SNP_P3_142349_49735 | NW_004516313.1 | Scaffold981 | 49735                   | CC                              | GG                | 1946631899               |
| SNP_P3_142350_49740 | NW_004516313.1 | Scaffold981 | 49740                   | CC                              | TT                | 1946631901               |
| SNP_P3_142351_49777 | NW_004516313.1 | Scaffold981 | 49777                   | TT                              | CC                | 1946631903               |
| SNP_P3_142352_49824 | NW_004516313.1 | Scaffold981 | 49824                   | CC                              | AA                | 1946631905               |
| SNP_P3_142353_49926 | NW_004516313.1 | Scaffold981 | 49926                   | TT                              | AA                | 1946631907               |
| SNP_P3_142354_49988 | NW_004516313.1 | Scaffold981 | 49988                   | CC                              | TT                | 1946631909               |
| SNP_P3_142355_50008 | NW_004516313.1 | Scaffold981 | 50008                   | AA                              | CC                | 1946631911               |
| SNP_P3_142356_52891 | NW_004516313.1 | Scaffold981 | 52891                   | CC                              | TT                | 1946631913               |
| SNP_P3_142357_53422 | NW_004516313.1 | Scaffold981 | 53422                   | AA                              | GG                | 1946631915               |
| SNP_P3_142358_53467 | NW_004516313.1 | Scaffold981 | 53467                   | TT                              | AA                | 1946631917               |
| SNP_P3_142359_53849 | NW_004516313.1 | Scaffold981 | 53849                   | GG                              | AA                | 1946631919               |
| SNP_P3_142360_54063 | NW_004516313.1 | Scaffold981 | 54063                   | CC                              | TT                | 1946631922               |
| SNP_P3_142361_63625 | NW_004516313.1 | Scaffold981 | 63625                   | CC                              | GG                | 1946631924               |
| SNP_P3_142362_63633 | NW_004516313.1 | Scaffold981 | 63633                   | GG                              | AA                | 1946631926               |
| SNP_P3_142363_68978 | NW_004516313.1 | Scaffold981 | 68978                   | AA                              | GG                | 1946631928               |
| SNP_P3_142364_69018 | NW_004516313.1 | Scaffold981 | 69018                   | GG                              | AA                | 1946631930               |
| SNP_P3_142365_69022 | NW_004516313.1 | Scaffold981 | 69022                   | AA                              | GG                | 1946631932               |
| SNP_P3_142366_69024 | NW_004516313.1 | Scaffold981 | 69024                   | AA                              | TT                | 1946631933               |
| SNP_P3_142367_69079 | NW_004516313.1 | Scaffold981 | 69079                   | TT                              | CC                | 1946631935               |
| SNP_P3_142368_69088 | NW_004516313.1 | Scaffold981 | 69088                   | AA                              | TT                | 1946631937               |
| SNP_P3_142369_70178 | NW_004516313.1 | Scaffold981 | 70178                   | TT                              | GG                | 1946631939               |

| SNPs IDs            | Chromosome IDs | Chromosomes | Physical positions (bp) | CDC Frontier (Reference genome) | (Pusa 256 & HPNB) | NCBI SNPdb Accession IDs |
|---------------------|----------------|-------------|-------------------------|---------------------------------|-------------------|--------------------------|
| SNP_P3_142370_71340 | NW_004516313.1 | Scaffold981 | 71340                   | TT                              | GG                | 1946631941               |
| SNP_P3_142371_73561 | NW_004516313.1 | Scaffold981 | 73561                   | CC                              | AA                | 1946631943               |
| SNP_P3_142372_74956 | NW_004516313.1 | Scaffold981 | 74956                   | CC                              | TT                | 1946631945               |
| SNP_P3_142373_74999 | NW_004516313.1 | Scaffold981 | 74999                   | CC                              | TT                | 1946631947               |
| SNP_P3_142374_77686 | NW_004516313.1 | Scaffold981 | 77686                   | TT                              | CC                | 1946631949               |
| SNP_P3_142375_77693 | NW_004516313.1 | Scaffold981 | 77693                   | AA                              | GG                | 1946631951               |
| SNP_P3_142376_77882 | NW_004516313.1 | Scaffold981 | 77882                   | TT                              | CC                | 1946631953               |
| SNP_P3_142377_78041 | NW_004516313.1 | Scaffold981 | 78041                   | AA                              | CC                | 1946631955               |
| SNP_P3_142378_78049 | NW_004516313.1 | Scaffold981 | 78049                   | AA                              | GG                | 1946631957               |
| SNP_P3_142379_78235 | NW_004516313.1 | Scaffold981 | 78235                   | AA                              | CC                | 1946631959               |
| SNP_P3_142380_78237 | NW_004516313.1 | Scaffold981 | 78237                   | TT                              | CC                | 1946631961               |
| SNP_P3_142382_78332 | NW_004516313.1 | Scaffold981 | 78332                   | AA                              | CC                | 1946631962               |
| SNP_P3_142384_78396 | NW_004516313.1 | Scaffold981 | 78396                   | TT                              | CC                | 1946631964               |
| SNP_P3_142385_78615 | NW_004516313.1 | Scaffold981 | 78615                   | AA                              | GG                | 1946631966               |
| SNP_P3_142386_78643 | NW_004516313.1 | Scaffold981 | 78643                   | AA                              | GG                | 1946631967               |
| SNP_P3_142387_78647 | NW_004516313.1 | Scaffold981 | 78647                   | AA                              | CC                | 1946631968               |
| SNP_P3_142388_78704 | NW_004516313.1 | Scaffold981 | 78704                   | TT                              | CC                | 1946631969               |
| SNP_P3_142389_78782 | NW_004516313.1 | Scaffold981 | 78782                   | CC                              | TT                | 1946631970               |
| SNP_P3_142390_79028 | NW_004516313.1 | Scaffold981 | 79028                   | AA                              | GG                | 1946631971               |
| SNP_P3_142391_79320 | NW_004516313.1 | Scaffold981 | 79320                   | AA                              | GG                | 1946631973               |
| SNP_P3_142392_79335 | NW_004516313.1 | Scaffold981 | 79335                   | CC                              | TT                | 1946631976               |
| SNP_P3_142393_79359 | NW_004516313.1 | Scaffold981 | 79359                   | AA                              | GG                | 1946631978               |
| SNP_P3_142394_79361 | NW_004516313.1 | Scaffold981 | 79361                   | AA                              | GG                | 1946631980               |
| SNP_P3_142395_83927 | NW_004516313.1 | Scaffold981 | 83927                   | TT                              | CC                | 1946631983               |
| SNP_P3_142396_84237 | NW_004516313.1 | Scaffold981 | 84237                   | TT                              | AA                | 1946631985               |
| SNP_P3_142397_84238 | NW_004516313.1 | Scaffold981 | 84238                   | AA                              | TT                | 1946631987               |
| SNP_P3_142398_84265 | NW_004516313.1 | Scaffold981 | 84265                   | AA                              | GG                | 1946631989               |
| SNP_P3_142399_84314 | NW_004516313.1 | Scaffold981 | 84314                   | AA                              | CC                | 1946631992               |
| SNP_P3_142401_84541 | NW_004516313.1 | Scaffold981 | 84541                   | GG                              | AA                | 1946631994               |
| SNP_P3_142402_84575 | NW_004516313.1 | Scaffold981 | 84575                   | CC                              | TT                | 1946631996               |
| SNP_P3_142403_84598 | NW_004516313.1 | Scaffold981 | 84598                   | AA                              | TT                | 1946631998               |
| SNP_P3_142404_84612 | NW_004516313.1 | Scaffold981 | 84612                   | TT                              | AA                | 1946632000               |
| SNP_P3_142409_2456  | NW_004516314.1 | Scaffold982 | 2456                    | GG                              | TT                | 1946632002               |
| SNP_P3_142410_2781  | NW_004516314.1 | Scaffold982 | 2781                    | AA                              | GG                | 1946632004               |
| SNP_P3_142411_2819  | NW_004516314.1 | Scaffold982 | 2819                    | TT                              | AA                | 1946632006               |
| SNP_P3_142412_2902  | NW_004516314.1 | Scaffold982 | 2902                    | TT                              | CC                | 1946632008               |
| SNP_P3_142413_3235  | NW_004516314.1 | Scaffold982 | 3235                    | TT                              | AA                | 1946632010               |
| SNP_P3_142414_3921  | NW_004516314.1 | Scaffold982 | 3921                    | GG                              | CC                | 1946632012               |
| SNP_P3_142416_7001  | NW_004516314.1 | Scaffold982 | 7001                    | GG                              | AA                | 1946632014               |
| SNP_P3_142417_7466  | NW_004516314.1 | Scaffold982 | 7466                    | AA                              | GG                | 1946632016               |
| SNP_P3_142418_13785 | NW_004516314.1 | Scaffold982 | 13785                   | GG                              | AA                | 1946632018               |
| SNP_P3_142419_14243 | NW_004516314.1 | Scaffold982 | 14243                   | GG                              | CC                | 1946632020               |

| SNPs IDs             | Chromosome IDs | Chromosomes | Physical positions (bp) | CDC Frontier (Reference genome) | (Pusa 256 & HPNB) | NCBI SNPdb Accession IDs |
|----------------------|----------------|-------------|-------------------------|---------------------------------|-------------------|--------------------------|
| SNP_P3_142420_14553  | NW_004516314.1 | Scaffold982 | 14553                   | GG                              | CC                | 1946632023               |
| SNP_P3_142421_14774  | NW_004516314.1 | Scaffold982 | 14774                   | GG                              | TT                | 1946632025               |
| SNP_P3_142422_14806  | NW_004516314.1 | Scaffold982 | 14806                   | TT                              | AA                | 1946632027               |
| SNP_P3_142423_14809  | NW_004516314.1 | Scaffold982 | 14809                   | CC                              | AA                | 1946632029               |
| SNP_P3_142424_14873  | NW_004516314.1 | Scaffold982 | 14873                   | TT                              | AA                | 1946632031               |
| SNP_P3_142425_15039  | NW_004516314.1 | Scaffold982 | 15039                   | AA                              | GG                | 1946632033               |
| SNP_P3_142426_15057  | NW_004516314.1 | Scaffold982 | 15057                   | GG                              | AA                | 1946632035               |
| SNP_P3_142429_15693  | NW_004516314.1 | Scaffold982 | 15693                   | TT                              | GG                | 1946632036               |
| SNP_P3_142430_228    | NW_004516315.1 | Scaffold983 | 228                     | AA                              | GG                | 1946632038               |
| SNP_P3_142431_257    | NW_004516315.1 | Scaffold983 | 257                     | GG                              | TT                | 1946632040               |
| SNP_P3_142432_263    | NW_004516315.1 | Scaffold983 | 263                     | GG                              | AA                | 1946632042               |
| SNP_P3_142433_614    | NW_004516315.1 | Scaffold983 | 614                     | AA                              | GG                | 1946632044               |
| SNP_P3_142434_1008   | NW_004516315.1 | Scaffold983 | 1008                    | GG                              | CC                | 1946632046               |
| SNP_P3_142435_1019   | NW_004516315.1 | Scaffold983 | 1019                    | TT                              | GG                | 1946632048               |
| SNP_P3_142436_1090   | NW_004516315.1 | Scaffold983 | 1090                    | CC                              | TT                | 1946632050               |
| SNP_P3_142437_30190  | NW_004516315.1 | Scaffold983 | 30190                   | TT                              | CC                | 1946632052               |
| SNP_P3_142438_33259  | NW_004516315.1 | Scaffold983 | 33259                   | AA                              | GG                | 1946632054               |
| SNP_P3_142439_33265  | NW_004516315.1 | Scaffold983 | 33265                   | TT                              | AA                | 1946632056               |
| SNP_P3_142441_33288  | NW_004516315.1 | Scaffold983 | 33288                   | AA                              | TT                | 1946632058               |
| SNP_P3_142442_33289  | NW_004516315.1 | Scaffold983 | 33289                   | GG                              | AA                | 1946632060               |
| SNP_P3_142443_33338  | NW_004516315.1 | Scaffold983 | 33338                   | CC                              | TT                | 1946632062               |
| SNP_P3_142444_33343  | NW_004516315.1 | Scaffold983 | 33343                   | TT                              | GG                | 1946632064               |
| SNP_P3_142445_33355  | NW_004516315.1 | Scaffold983 | 33355                   | GG                              | AA                | 1946632066               |
| SNP_P3_142446_33529  | NW_004516315.1 | Scaffold983 | 33529                   | AA                              | TT                | 1946632067               |
| SNP_P3_142447_33537  | NW_004516315.1 | Scaffold983 | 33537                   | AA                              | TT                | 1946632069               |
| SNP_P3_142449_49641  | NW_004516315.1 | Scaffold983 | 49641                   | CC                              | TT                | 1946632072               |
| SNP_P3_142450_65969  | NW_004516315.1 | Scaffold983 | 65969                   | GG                              | AA                | 1946632074               |
| SNP_P3_142451_66567  | NW_004516315.1 | Scaffold983 | 66567                   | AA                              | GG                | 1946632076               |
| SNP_P3_142453_80791  | NW_004516315.1 | Scaffold983 | 80791                   | TT                              | GG                | 1946632078               |
| SNP_P3_142454_88005  | NW_004516315.1 | Scaffold983 | 88005                   | TT                              | AA                | 1946632080               |
| SNP_P3_142455_88021  | NW_004516315.1 | Scaffold983 | 88021                   | AA                              | GG                | 1946632081               |
| SNP_P3_142456_88174  | NW_004516315.1 | Scaffold983 | 88174                   | GG                              | CC                | 1946632083               |
| SNP_P3_142458_88254  | NW_004516315.1 | Scaffold983 | 88254                   | TT                              | CC                | 1946632085               |
| SNP_P3_142459_88296  | NW_004516315.1 | Scaffold983 | 88296                   | CC                              | TT                | 1946632087               |
| SNP_P3_142460_88343  | NW_004516315.1 | Scaffold983 | 88343                   | CC                              | TT                | 1946632089               |
| SNP_P3_142461_88349  | NW_004516315.1 | Scaffold983 | 88349                   | GG                              | AA                | 1946632091               |
| SNP_P3_142464_88683  | NW_004516315.1 | Scaffold983 | 88683                   | TT                              | AA                | 1946632093               |
| SNP_P3_142465_122919 | NW_004516315.1 | Scaffold983 | 122919                  | TT                              | CC                | 1946632094               |
| SNP_P3_142466_122920 | NW_004516315.1 | Scaffold983 | 122920                  | GG                              | TT                | 1946632095               |
| SNP_P3_142467_122926 | NW_004516315.1 | Scaffold983 | 122926                  | AA                              | TT                | 1946632096               |
| SNP_P3_142468_122927 | NW_004516315.1 | Scaffold983 | 122927                  | GG                              | AA                | 1946632097               |
| SNP_P3_142469_122955 | NW_004516315.1 | Scaffold983 | 122955                  | GG                              | AA                | 1946632098               |

| SNPs IDs             | Chromosome IDs | Chromosomes | Physical positions (bp) | CDC Frontier (Reference genome) | (Pusa 256 & HPNB) | NCBI SNPdb Accession IDs |
|----------------------|----------------|-------------|-------------------------|---------------------------------|-------------------|--------------------------|
| SNP_P3_142470_123012 | NW_004516315.1 | Scaffold983 | 123012                  | GG                              | CC                | 1946632099               |
| SNP_P3_142471_128346 | NW_004516315.1 | Scaffold983 | 128346                  | TT                              | AA                | 1946632100               |
| SNP_P3_142472_128632 | NW_004516315.1 | Scaffold983 | 128632                  | TT                              | CC                | 1946632101               |
| SNP_P3_142473_129231 | NW_004516315.1 | Scaffold983 | 129231                  | AA                              | GG                | 1946632103               |
| SNP_P3_142474_129477 | NW_004516315.1 | Scaffold983 | 129477                  | GG                              | TT                | 1946632105               |
| SNP_P3_142475_129500 | NW_004516315.1 | Scaffold983 | 129500                  | TT                              | AA                | 1946632107               |
| SNP_P3_142476_129501 | NW_004516315.1 | Scaffold983 | 129501                  | CC                              | AA                | 1946632109               |
| SNP_P3_142477_141413 | NW_004516315.1 | Scaffold983 | 141413                  | TT                              | GG                | 1946632111               |
| SNP_P3_142478_141458 | NW_004516315.1 | Scaffold983 | 141458                  | GG                              | AA                | 1946632113               |
| SNP_P3_142479_141568 | NW_004516315.1 | Scaffold983 | 141568                  | CC                              | TT                | 1946632115               |
| SNP_P3_142480_141855 | NW_004516315.1 | Scaffold983 | 141855                  | TT                              | AA                | 1946632117               |
| SNP_P3_142483_142338 | NW_004516315.1 | Scaffold983 | 142338                  | CC                              | TT                | 1946632119               |
| SNP_P3_142485_169466 | NW_004516315.1 | Scaffold983 | 169466                  | GG                              | AA                | 1946632121               |
| SNP_P3_142486_169567 | NW_004516315.1 | Scaffold983 | 169567                  | CC                              | TT                | 1946632123               |
| SNP_P3_142487_169580 | NW_004516315.1 | Scaffold983 | 169580                  | CC                              | GG                | 1946632125               |
| SNP_P3_142488_169588 | NW_004516315.1 | Scaffold983 | 169588                  | TT                              | AA                | 1946632127               |
| SNP_P3_142489_169601 | NW_004516315.1 | Scaffold983 | 169601                  | AA                              | CC                | 1946632129               |
| SNP_P3_142490_169611 | NW_004516315.1 | Scaffold983 | 169611                  | AA                              | CC                | 1946632131               |
| SNP_P3_142491_169618 | NW_004516315.1 | Scaffold983 | 169618                  | CC                              | TT                | 1946632133               |
| SNP_P3_142492_169636 | NW_004516315.1 | Scaffold983 | 169636                  | CC                              | TT                | 1946632135               |
| SNP_P3_142493_169664 | NW_004516315.1 | Scaffold983 | 169664                  | TT                              | AA                | 1946632137               |
| SNP_P3_142494_171689 | NW_004516315.1 | Scaffold983 | 171689                  | AA                              | CC                | 1946632139               |
| SNP_P3_142495_174085 | NW_004516315.1 | Scaffold983 | 174085                  | AA                              | TT                | 1946632141               |
| SNP_P3_142496_174130 | NW_004516315.1 | Scaffold983 | 174130                  | AA                              | GG                | 1946632143               |
| SNP_P3_142497_174131 | NW_004516315.1 | Scaffold983 | 174131                  | GG                              | TT                | 1946632145               |
| SNP_P3_142498_174158 | NW_004516315.1 | Scaffold983 | 174158                  | AA                              | GG                | 1946632147               |
| SNP_P3_142499_174279 | NW_004516315.1 | Scaffold983 | 174279                  | AA                              | GG                | 1946632149               |
| SNP_P3_142500_174293 | NW_004516315.1 | Scaffold983 | 174293                  | GG                              | AA                | 1946632151               |
| SNP_P3_142501_174407 | NW_004516315.1 | Scaffold983 | 174407                  | TT                              | CC                | 1946632153               |
| SNP_P3_142502_174421 | NW_004516315.1 | Scaffold983 | 174421                  | TT                              | CC                | 1946632154               |
| SNP_P3_142503_174446 | NW_004516315.1 | Scaffold983 | 174446                  | CC                              | GG                | 1946632156               |
| SNP_P3_142504_174487 | NW_004516315.1 | Scaffold983 | 174487                  | GG                              | AA                | 1946632158               |
| SNP_P3_142505_174515 | NW_004516315.1 | Scaffold983 | 174515                  | AA                              | TT                | 1946632160               |
| SNP_P3_142506_174520 | NW_004516315.1 | Scaffold983 | 174520                  | AA                              | GG                | 1946632162               |
| SNP_P3_142507_174522 | NW_004516315.1 | Scaffold983 | 174522                  | CC                              | AA                | 1946632164               |
| SNP_P3_142508_174523 | NW_004516315.1 | Scaffold983 | 174523                  | TT                              | CC                | 1946632166               |
| SNP_P3_142509_174552 | NW_004516315.1 | Scaffold983 | 174552                  | GG                              | AA                | 1946632168               |
| SNP_P3_142510_174560 | NW_004516315.1 | Scaffold983 | 174560                  | GG                              | AA                | 1946632170               |
| SNP_P3_142511_174632 | NW_004516315.1 | Scaffold983 | 174632                  | AA                              | TT                | 1946632172               |
| SNP_P3_142512_174633 | NW_004516315.1 | Scaffold983 | 174633                  | TT                              | AA                | 1946632174               |
| SNP_P3_142513_184626 | NW_004516315.1 | Scaffold983 | 184626                  | TT                              | GG                | 1946632176               |
| SNP_P3_142515_196400 | NW_004516315.1 | Scaffold983 | 196400                  | CC                              | TT                | 1946632178               |

| SNPs IDs             | Chromosome IDs | Chromosomes | Physical positions (bp) | CDC Frontier (Reference genome) | (Pusa 256 & HPNB) | NCBI SNPdb Accession IDs |
|----------------------|----------------|-------------|-------------------------|---------------------------------|-------------------|--------------------------|
| SNP_P3_142516_196466 | NW_004516315.1 | Scaffold983 | 196466                  | AA                              | GG                | 1946632180               |
| SNP_P3_142517_196541 | NW_004516315.1 | Scaffold983 | 196541                  | TT                              | AA                | 1946632182               |
| SNP_P3_142518_196793 | NW_004516315.1 | Scaffold983 | 196793                  | TT                              | CC                | 1946632185               |
| SNP_P3_142519_196806 | NW_004516315.1 | Scaffold983 | 196806                  | AA                              | GG                | 1946632187               |
| SNP_P3_142520_217410 | NW_004516315.1 | Scaffold983 | 217410                  | GG                              | AA                | 1946632188               |
| SNP_P3_142521_218722 | NW_004516315.1 | Scaffold983 | 218722                  | TT                              | AA                | 1946632190               |
| SNP_P3_142522_218729 | NW_004516315.1 | Scaffold983 | 218729                  | AA                              | GG                | 1946632192               |
| SNP_P3_142523_219136 | NW_004516315.1 | Scaffold983 | 219136                  | AA                              | CC                | 1946632194               |
| SNP_P3_142524_246499 | NW_004516315.1 | Scaffold983 | 246499                  | AA                              | GG                | 1946632196               |
| SNP_P3_142525_246500 | NW_004516315.1 | Scaffold983 | 246500                  | TT                              | AA                | 1946632198               |
| SNP_P3_142526_254924 | NW_004516315.1 | Scaffold983 | 254924                  | CC                              | TT                | 1946632200               |
| SNP_P3_142527_255047 | NW_004516315.1 | Scaffold983 | 255047                  | AA                              | GG                | 1946632202               |
| SNP_P3_142528_255120 | NW_004516315.1 | Scaffold983 | 255120                  | TT                              | GG                | 1946632204               |
| SNP_P3_142529_255170 | NW_004516315.1 | Scaffold983 | 255170                  | AA                              | GG                | 1946632207               |
| SNP_P3_142531_255185 | NW_004516315.1 | Scaffold983 | 255185                  | CC                              | TT                | 1946632209               |
| SNP_P3_142534_287714 | NW_004516315.1 | Scaffold983 | 287714                  | GG                              | TT                | 1946632211               |
| SNP_P3_142535_287716 | NW_004516315.1 | Scaffold983 | 287716                  | AA                              | CC                | 1946632213               |
| SNP_P3_142536_287745 | NW_004516315.1 | Scaffold983 | 287745                  | TT                              | GG                | 1946632215               |
| SNP_P3_142537_287755 | NW_004516315.1 | Scaffold983 | 287755                  | GG                              | TT                | 1946632217               |
| SNP_P3_142538_287771 | NW_004516315.1 | Scaffold983 | 287771                  | TT                              | CC                | 1946632219               |
| SNP_P3_142539_287785 | NW_004516315.1 | Scaffold983 | 287785                  | TT                              | CC                | 1946632221               |
| SNP_P3_142540_287997 | NW_004516315.1 | Scaffold983 | 287997                  | AA                              | TT                | 1946632223               |
| SNP_P3_142541_288017 | NW_004516315.1 | Scaffold983 | 288017                  | AA                              | CC                | 1946632225               |
| SNP_P3_142542_288036 | NW_004516315.1 | Scaffold983 | 288036                  | AA                              | CC                | 1946632228               |
| SNP_P3_142543_288094 | NW_004516315.1 | Scaffold983 | 288094                  | AA                              | GG                | 1946632230               |
| SNP_P3_142544_288107 | NW_004516315.1 | Scaffold983 | 288107                  | AA                              | CC                | 1946632232               |
| SNP_P3_142545_288134 | NW_004516315.1 | Scaffold983 | 288134                  | GG                              | AA                | 1946632234               |
| SNP_P3_142546_288163 | NW_004516315.1 | Scaffold983 | 288163                  | CC                              | TT                | 1946632235               |
| SNP_P3_142547_288173 | NW_004516315.1 | Scaffold983 | 288173                  | AA                              | TT                | 1946632237               |
| SNP_P3_142548_288718 | NW_004516315.1 | Scaffold983 | 288718                  | AA                              | CC                | 1946632239               |
| SNP_P3_142549_290272 | NW_004516315.1 | Scaffold983 | 290272                  | CC                              | TT                | 1946632242               |
| SNP_P3_142550_290273 | NW_004516315.1 | Scaffold983 | 290273                  | AA                              | GG                | 1946632244               |
| SNP_P3_142551_290282 | NW_004516315.1 | Scaffold983 | 290282                  | AA                              | TT                | 1946632246               |
| SNP_P3_142552_290616 | NW_004516315.1 | Scaffold983 | 290616                  | TT                              | CC                | 1946632248               |
| SNP_P3_142553_291011 | NW_004516315.1 | Scaffold983 | 291011                  | AA                              | GG                | 1946632250               |
| SNP_P3_142554_291021 | NW_004516315.1 | Scaffold983 | 291021                  | TT                              | CC                | 1946632252               |
| SNP_P3_142555_292700 | NW_004516315.1 | Scaffold983 | 292700                  | AA                              | GG                | 1946632254               |
| SNP_P3_142557_356743 | NW_004516315.1 | Scaffold983 | 356743                  | TT                              | CC                | 1946632256               |
| SNP_P3_142558_356839 | NW_004516315.1 | Scaffold983 | 356839                  | AA                              | CC                | 1946632258               |
| SNP_P3_142559_1127   | NW_004516316.1 | Scaffold984 | 1127                    | AA                              | CC                | 1946632260               |
| SNP_P3_142561_1314   | NW_004516316.1 | Scaffold984 | 1314                    | AA                              | GG                | 1946632262               |
| SNP_P3_142562_1375   | NW_004516316.1 | Scaffold984 | 1375                    | TT                              | CC                | 1946632264               |

| SNPs IDs            | Chromosome IDs | Chromosomes | Physical positions (bp) | CDC Frontier (Reference genome) | (Pusa 256 & HPNB) | NCBI SNPdb Accession IDs |
|---------------------|----------------|-------------|-------------------------|---------------------------------|-------------------|--------------------------|
| SNP_P3_142563_1382  | NW_004516316.1 | Scaffold984 | 1382                    | TT                              | AA                | 1946632266               |
| SNP_P3_142564_1435  | NW_004516316.1 | Scaffold984 | 1435                    | AA                              | CC                | 1946632268               |
| SNP_P3_142565_1455  | NW_004516316.1 | Scaffold984 | 1455                    | GG                              | TT                | 1946632270               |
| SNP_P3_142566_2655  | NW_004516316.1 | Scaffold984 | 2655                    | AA                              | CC                | 1946632272               |
| SNP_P3_142567_2666  | NW_004516316.1 | Scaffold984 | 2666                    | TT                              | CC                | 1946632274               |
| SNP_P3_142569_2759  | NW_004516316.1 | Scaffold984 | 2759                    | AA                              | TT                | 1946632276               |
| SNP_P3_142570_13113 | NW_004516316.1 | Scaffold984 | 13113                   | GG                              | AA                | 1946632278               |
| SNP_P3_142571_13179 | NW_004516316.1 | Scaffold984 | 13179                   | CC                              | AA                | 1946632280               |
| SNP_P3_142572_13700 | NW_004516316.1 | Scaffold984 | 13700                   | CC                              | AA                | 1946632283               |
| SNP_P3_142573_17253 | NW_004516316.1 | Scaffold984 | 17253                   | CC                              | TT                | 1946632286               |
| SNP_P3_142574_17306 | NW_004516316.1 | Scaffold984 | 17306                   | CC                              | GG                | 1946632288               |
| SNP_P3_142575_17793 | NW_004516316.1 | Scaffold984 | 17793                   | AA                              | GG                | 1946632290               |
| SNP_P3_142576_33113 | NW_004516316.1 | Scaffold984 | 33113                   | GG                              | AA                | 1946632292               |
| SNP_P3_142577_33626 | NW_004516316.1 | Scaffold984 | 33626                   | GG                              | TT                | 1946632294               |
| SNP_P3_142578_33665 | NW_004516316.1 | Scaffold984 | 33665                   | TT                              | CC                | 1946632296               |
| SNP_P3_142579_33666 | NW_004516316.1 | Scaffold984 | 33666                   | AA                              | GG                | 1946632298               |
| SNP_P3_142580_33909 | NW_004516316.1 | Scaffold984 | 33909                   | AA                              | TT                | 1946632300               |
| SNP_P3_142581_35739 | NW_004516316.1 | Scaffold984 | 35739                   | TT                              | CC                | 1946632302               |
| SNP_P3_142582_35759 | NW_004516316.1 | Scaffold984 | 35759                   | GG                              | CC                | 1946632305               |
| SNP_P3_142583_36131 | NW_004516316.1 | Scaffold984 | 36131                   | GG                              | AA                | 1946632307               |
| SNP_P3_142584_36164 | NW_004516316.1 | Scaffold984 | 36164                   | GG                              | AA                | 1946632309               |
| SNP_P3_142585_36181 | NW_004516316.1 | Scaffold984 | 36181                   | AA                              | CC                | 1946632311               |
| SNP_P3_142586_36187 | NW_004516316.1 | Scaffold984 | 36187                   | GG                              | AA                | 1946632313               |
| SNP_P3_142587_36385 | NW_004516316.1 | Scaffold984 | 36385                   | GG                              | AA                | 1946632315               |
| SNP_P3_142588_36424 | NW_004516316.1 | Scaffold984 | 36424                   | AA                              | TT                | 1946632317               |
| SNP_P3_142589_49534 | NW_004516316.1 | Scaffold984 | 49534                   | TT                              | CC                | 1946632319               |
| SNP_P3_142590_49550 | NW_004516316.1 | Scaffold984 | 49550                   | GG                              | AA                | 1946632322               |
| SNP_P3_142591_56459 | NW_004516316.1 | Scaffold984 | 56459                   | AA                              | GG                | 1946632324               |
| SNP_P3_142592_56547 | NW_004516316.1 | Scaffold984 | 56547                   | AA                              | CC                | 1946632325               |
| SNP_P3_142593_58357 | NW_004516316.1 | Scaffold984 | 58357                   | CC                              | GG                | 1946632327               |
| SNP_P3_142594_59221 | NW_004516316.1 | Scaffold984 | 59221                   | GG                              | AA                | 1946632329               |
| SNP_P3_142595_59235 | NW_004516316.1 | Scaffold984 | 59235                   | TT                              | GG                | 1946632331               |
| SNP_P3_142596_59236 | NW_004516316.1 | Scaffold984 | 59236                   | CC                              | AA                | 1946632333               |
| SNP_P3_142597_59241 | NW_004516316.1 | Scaffold984 | 59241                   | TT                              | CC                | 1946632335               |
| SNP_P3_142598_66216 | NW_004516316.1 | Scaffold984 | 66216                   | CC                              | TT                | 1946632337               |
| SNP_P3_142599_66936 | NW_004516316.1 | Scaffold984 | 66936                   | TT                              | GG                | 1946632339               |
| SNP_P3_142600_66954 | NW_004516316.1 | Scaffold984 | 66954                   | AA                              | GG                | 1946632341               |
| SNP_P3_142601_73241 | NW_004516316.1 | Scaffold984 | 73241                   | TT                              | GG                | 1946632343               |
| SNP_P3_142602_77557 | NW_004516316.1 | Scaffold984 | 77557                   | TT                              | AA                | 1946632346               |
| SNP_P3_142603_77778 | NW_004516316.1 | Scaffold984 | 77778                   | TT                              | AA                | 1946632348               |
| SNP_P3_142604_78163 | NW_004516316.1 | Scaffold984 | 78163                   | AA                              | TT                | 1946632350               |
| SNP_P3_142605_78164 | NW_004516316.1 | Scaffold984 | 78164                   | TT                              | GG                | 1946632352               |

| SNPs IDs             | Chromosome IDs | Chromosomes | Physical positions (bp) | CDC Frontier (Reference genome) | (Pusa 256 & HPNB) | NCBI SNPdb Accession IDs |
|----------------------|----------------|-------------|-------------------------|---------------------------------|-------------------|--------------------------|
| SNP_P3_142606_78174  | NW_004516316.1 | Scaffold984 | 78174                   | CC                              | AA                | 1946632354               |
| SNP_P3_142607_78179  | NW_004516316.1 | Scaffold984 | 78179                   | TT                              | CC                | 1946632356               |
| SNP_P3_142608_78261  | NW_004516316.1 | Scaffold984 | 78261                   | CC                              | AA                | 1946632358               |
| SNP_P3_142609_78269  | NW_004516316.1 | Scaffold984 | 78269                   | CC                              | GG                | 1946632360               |
| SNP_P3_142610_78272  | NW_004516316.1 | Scaffold984 | 78272                   | AA                              | GG                | 1946632362               |
| SNP_P3_142611_78309  | NW_004516316.1 | Scaffold984 | 78309                   | AA                              | GG                | 1946632364               |
| SNP_P3_142612_81209  | NW_004516316.1 | Scaffold984 | 81209                   | AA                              | GG                | 1946632367               |
| SNP_P3_142613_87754  | NW_004516316.1 | Scaffold984 | 87754                   | TT                              | AA                | 1946632369               |
| SNP_P3_142614_89223  | NW_004516316.1 | Scaffold984 | 89223                   | AA                              | TT                | 1946632371               |
| SNP_P3_142615_89519  | NW_004516316.1 | Scaffold984 | 89519                   | TT                              | GG                | 1946632373               |
| SNP_P3_142616_92176  | NW_004516316.1 | Scaffold984 | 92176                   | TT                              | CC                | 1946632375               |
| SNP_P3_142617_92257  | NW_004516316.1 | Scaffold984 | 92257                   | AA                              | TT                | 1946632377               |
| SNP_P3_142618_92328  | NW_004516316.1 | Scaffold984 | 92328                   | CC                              | TT                | 1946632379               |
| SNP_P3_142619_94147  | NW_004516316.1 | Scaffold984 | 94147                   | AA                              | CC                | 1946632382               |
| SNP_P3_142620_94183  | NW_004516316.1 | Scaffold984 | 94183                   | GG                              | CC                | 1946632384               |
| SNP_P3_142621_94216  | NW_004516316.1 | Scaffold984 | 94216                   | GG                              | AA                | 1946632386               |
| SNP_P3_142622_94346  | NW_004516316.1 | Scaffold984 | 94346                   | TT                              | CC                | 1946632389               |
| SNP_P3_142623_94354  | NW_004516316.1 | Scaffold984 | 94354                   | AA                              | CC                | 1946632391               |
| SNP_P3_142624_98942  | NW_004516316.1 | Scaffold984 | 98942                   | AA                              | CC                | 1946632393               |
| SNP_P3_142625_100951 | NW_004516316.1 | Scaffold984 | 100951                  | AA                              | TT                | 1946632395               |
| SNP_P3_142626_101269 | NW_004516316.1 | Scaffold984 | 101269                  | TT                              | AA                | 1946632397               |
| SNP_P3_142627_115978 | NW_004516316.1 | Scaffold984 | 115978                  | CC                              | TT                | 1946632399               |
| SNP_P3_142628_116484 | NW_004516316.1 | Scaffold984 | 116484                  | GG                              | CC                | 1946632401               |
| SNP_P3_142629_118548 | NW_004516316.1 | Scaffold984 | 118548                  | GG                              | AA                | 1946632403               |
| SNP_P3_142630_128365 | NW_004516316.1 | Scaffold984 | 128365                  | TT                              | AA                | 1946632405               |
| SNP_P3_142631_128370 | NW_004516316.1 | Scaffold984 | 128370                  | TT                              | GG                | 1946632407               |
| SNP_P3_142632_128423 | NW_004516316.1 | Scaffold984 | 128423                  | CC                              | TT                | 1946632409               |
| SNP_P3_142633_128743 | NW_004516316.1 | Scaffold984 | 128743                  | GG                              | CC                | 1946632411               |
| SNP_P3_142634_130062 | NW_004516316.1 | Scaffold984 | 130062                  | AA                              | TT                | 1946632413               |
| SNP_P3_142635_130063 | NW_004516316.1 | Scaffold984 | 130063                  | TT                              | CC                | 1946632415               |
| SNP_P3_142636_130118 | NW_004516316.1 | Scaffold984 | 130118                  | AA                              | GG                | 1946632417               |
| SNP_P3_142638_131234 | NW_004516316.1 | Scaffold984 | 131234                  | TT                              | GG                | 1946632419               |
| SNP_P3_142640_132634 | NW_004516316.1 | Scaffold984 | 132634                  | TT                              | CC                | 1946632421               |
| SNP_P3_142641_132637 | NW_004516316.1 | Scaffold984 | 132637                  | AA                              | GG                | 1946632423               |
| SNP_P3_142642_132680 | NW_004516316.1 | Scaffold984 | 132680                  | GG                              | TT                | 1946632425               |
| SNP_P3_142643_132685 | NW_004516316.1 | Scaffold984 | 132685                  | TT                              | AA                | 1946632427               |
| SNP_P3_142644_132715 | NW_004516316.1 | Scaffold984 | 132715                  | AA                              | TT                | 1946632429               |
| SNP_P3_142645_132718 | NW_004516316.1 | Scaffold984 | 132718                  | TT                              | GG                | 1946632432               |
| SNP_P3_142646_139419 | NW_004516316.1 | Scaffold984 | 139419                  | GG                              | AA                | 1946632434               |
| SNP_P3_142647_139421 | NW_004516316.1 | Scaffold984 | 139421                  | TT                              | GG                | 1946632436               |
| SNP_P3_142648_157525 | NW_004516316.1 | Scaffold984 | 157525                  | TT                              | CC                | 1946632438               |
| SNP_P3_142649_157531 | NW_004516316.1 | Scaffold984 | 157531                  | CC                              | TT                | 1946632440               |

| SNPs IDs             | Chromosome IDs | Chromosomes | Physical positions (bp) | CDC Frontier (Reference genome) | (Pusa 256 & HPNB) | NCBI SNPdb Accession IDs |
|----------------------|----------------|-------------|-------------------------|---------------------------------|-------------------|--------------------------|
| SNP_P3_142650_160528 | NW_004516316.1 | Scaffold984 | 160528                  | TT                              | GG                | 1946632442               |
| SNP_P3_142651_160576 | NW_004516316.1 | Scaffold984 | 160576                  | TT                              | AA                | 1946632444               |
| SNP_P3_142652_160611 | NW_004516316.1 | Scaffold984 | 160611                  | AA                              | GG                | 1946632446               |
| SNP_P3_142653_160615 | NW_004516316.1 | Scaffold984 | 160615                  | TT                              | CC                | 1946632448               |
| SNP_P3_142654_162148 | NW_004516316.1 | Scaffold984 | 162148                  | CC                              | AA                | 1946632450               |
| SNP_P3_142655_164968 | NW_004516316.1 | Scaffold984 | 164968                  | TT                              | CC                | 1946632452               |
| SNP_P3_142656_165144 | NW_004516316.1 | Scaffold984 | 165144                  | AA                              | TT                | 1946632454               |
| SNP_P3_142657_168508 | NW_004516316.1 | Scaffold984 | 168508                  | CC                              | AA                | 1946632456               |
| SNP_P3_142658_169498 | NW_004516316.1 | Scaffold984 | 169498                  | AA                              | TT                | 1946632458               |
| SNP_P3_142659_174692 | NW_004516316.1 | Scaffold984 | 174692                  | GG                              | TT                | 1946632460               |
| SNP_P3_142660_1863   | NW_004516317.1 | Scaffold986 | 1863                    | AA                              | TT                | 1946632462               |
| SNP_P3_142661_2644   | NW_004516317.1 | Scaffold986 | 2644                    | CC                              | AA                | 1946632464               |
| SNP_P3_142662_2913   | NW_004516317.1 | Scaffold986 | 2913                    | AA                              | GG                | 1946632466               |
| SNP_P3_142663_8140   | NW_004516317.1 | Scaffold986 | 8140                    | GG                              | AA                | 1946632468               |
| SNP_P3_142664_16851  | NW_004516317.1 | Scaffold986 | 16851                   | TT                              | AA                | 1946632470               |
| SNP_P3_142665_16875  | NW_004516317.1 | Scaffold986 | 16875                   | CC                              | TT                | 1946632472               |
| SNP_P3_142666_16878  | NW_004516317.1 | Scaffold986 | 16878                   | GG                              | AA                | 1946632474               |
| SNP_P3_142667_16879  | NW_004516317.1 | Scaffold986 | 16879                   | TT                              | AA                | 1946632476               |
| SNP_P3_142668_16899  | NW_004516317.1 | Scaffold986 | 16899                   | AA                              | GG                | 1946632478               |
| SNP_P3_142669_16942  | NW_004516317.1 | Scaffold986 | 16942                   | GG                              | CC                | 1946632480               |
| SNP_P3_142670_16979  | NW_004516317.1 | Scaffold986 | 16979                   | TT                              | CC                | 1946632482               |
| SNP_P3_142671_17016  | NW_004516317.1 | Scaffold986 | 17016                   | TT                              | CC                | 1946632484               |
| SNP_P3_142672_17033  | NW_004516317.1 | Scaffold986 | 17033                   | CC                              | TT                | 1946632486               |
| SNP_P3_142673_17069  | NW_004516317.1 | Scaffold986 | 17069                   | AA                              | GG                | 1946632488               |
| SNP_P3_142674_17078  | NW_004516317.1 | Scaffold986 | 17078                   | AA                              | TT                | 1946632490               |
| SNP_P3_142675_17147  | NW_004516317.1 | Scaffold986 | 17147                   | TT                              | CC                | 1946632492               |
| SNP_P3_142676_17204  | NW_004516317.1 | Scaffold986 | 17204                   | AA                              | CC                | 1946632494               |
| SNP_P3_142677_18241  | NW_004516317.1 | Scaffold986 | 18241                   | CC                              | TT                | 1946632496               |
| SNP_P3_142678_18250  | NW_004516317.1 | Scaffold986 | 18250                   | GG                              | AA                | 1946632498               |
| SNP_P3_142679_23199  | NW_004516317.1 | Scaffold986 | 23199                   | AA                              | TT                | 1946632500               |
| SNP_P3_142680_23588  | NW_004516317.1 | Scaffold986 | 23588                   | AA                              | TT                | 1946632502               |
| SNP_P3_142681_23608  | NW_004516317.1 | Scaffold986 | 23608                   | AA                              | GG                | 1946632504               |
| SNP_P3_142682_23616  | NW_004516317.1 | Scaffold986 | 23616                   | TT                              | AA                | 1946632506               |
| SNP_P3_142683_23650  | NW_004516317.1 | Scaffold986 | 23650                   | TT                              | GG                | 1946632509               |
| SNP_P3_142684_23662  | NW_004516317.1 | Scaffold986 | 23662                   | CC                              | AA                | 1946632511               |
| SNP_P3_142685_23667  | NW_004516317.1 | Scaffold986 | 23667                   | TT                              | AA                | 1946632513               |
| SNP_P3_142686_23670  | NW_004516317.1 | Scaffold986 | 23670                   | GG                              | AA                | 1946632515               |
| SNP_P3_142687_23683  | NW_004516317.1 | Scaffold986 | 23683                   | TT                              | AA                | 1946632518               |
| SNP_P3_142688_23684  | NW_004516317.1 | Scaffold986 | 23684                   | CC                              | TT                | 1946632521               |
| SNP_P3_142689_23698  | NW_004516317.1 | Scaffold986 | 23698                   | AA                              | GG                | 1946632523               |
| SNP_P3_142690_23721  | NW_004516317.1 | Scaffold986 | 23721                   | TT                              | AA                | 1946632526               |
| SNP_P3_142691_24070  | NW_004516317.1 | Scaffold986 | 24070                   | TT                              | CC                | 1946632528               |



| SNPs IDs            | Chromosome IDs | Chromosomes | Physical positions (bp) | CDC Frontier (Reference genome) | (Pusa 256 & HPNB) | NCBI SNPdb Accession IDs |
|---------------------|----------------|-------------|-------------------------|---------------------------------|-------------------|--------------------------|
| SNP_P3_142692_25978 | NW_004516317.1 | Scaffold986 | 25978                   | TT                              | CC                | 1946632531               |
| SNP_P3_142693_27999 | NW_004516317.1 | Scaffold986 | 27999                   | AA                              | CC                | 1946632534               |
| SNP_P3_142694_36262 | NW_004516317.1 | Scaffold986 | 36262                   | CC                              | AA                | 1946632536               |
| SNP_P3_142695_36442 | NW_004516317.1 | Scaffold986 | 36442                   | GG                              | AA                | 1946632539               |
| SNP_P3_142696_38117 | NW_004516317.1 | Scaffold986 | 38117                   | CC                              | GG                | 1946632541               |
| SNP_P3_142697_39080 | NW_004516317.1 | Scaffold986 | 39080                   | CC                              | AA                | 1946632543               |
| SNP_P3_142698_39123 | NW_004516317.1 | Scaffold986 | 39123                   | GG                              | AA                | 1946632545               |
| SNP_P3_142699_39427 | NW_004516317.1 | Scaffold986 | 39427                   | AA                              | GG                | 1946632547               |
| SNP_P3_142700_39693 | NW_004516317.1 | Scaffold986 | 39693                   | TT                              | AA                | 1946632549               |
| SNP_P3_142701_39725 | NW_004516317.1 | Scaffold986 | 39725                   | TT                              | GG                | 1946632551               |
| SNP_P3_142702_39811 | NW_004516317.1 | Scaffold986 | 39811                   | TT                              | AA                | 1946632553               |
| SNP_P3_142703_40325 | NW_004516317.1 | Scaffold986 | 40325                   | AA                              | GG                | 1946632555               |
| SNP_P3_142704_40335 | NW_004516317.1 | Scaffold986 | 40335                   | TT                              | CC                | 1946632557               |
| SNP_P3_142705_152   | NW_004516318.1 | Scaffold991 | 152                     | CC                              | TT                | 1946632559               |
| SNP_P3_142706_10082 | NW_004516318.1 | Scaffold991 | 10082                   | TT                              | CC                | 1946632561               |
| SNP_P3_142707_12281 | NW_004516318.1 | Scaffold991 | 12281                   | AA                              | TT                | 1946632563               |
| SNP_P3_142708_12366 | NW_004516318.1 | Scaffold991 | 12366                   | CC                              | TT                | 1946632565               |
| SNP_P3_142709_12716 | NW_004516318.1 | Scaffold991 | 12716                   | TT                              | GG                | 1946632567               |
| SNP_P3_142710_13911 | NW_004516318.1 | Scaffold991 | 13911                   | AA                              | TT                | 1946632569               |
| SNP_P3_142711_14075 | NW_004516318.1 | Scaffold991 | 14075                   | TT                              | CC                | 1946632571               |
| SNP_P3_142712_21677 | NW_004516319.1 | Scaffold992 | 21677                   | AA                              | GG                | 1946632573               |
| SNP_P3_142713_24683 | NW_004516319.1 | Scaffold992 | 24683                   | TT                              | AA                | 1946632575               |
| SNP_P3_142714_24867 | NW_004516319.1 | Scaffold992 | 24867                   | AA                              | TT                | 1946632577               |
| SNP_P3_142715_27591 | NW_004516319.1 | Scaffold992 | 27591                   | AA                              | GG                | 1946632580               |
| SNP_P3_142716_27678 | NW_004516319.1 | Scaffold992 | 27678                   | GG                              | AA                | 1946632582               |
| SNP_P3_142717_32767 | NW_004516319.1 | Scaffold992 | 32767                   | CC                              | TT                | 1946632584               |
| SNP_P3_142718_33062 | NW_004516319.1 | Scaffold992 | 33062                   | AA                              | GG                | 1946632586               |
| SNP_P3_142719_33126 | NW_004516319.1 | Scaffold992 | 33126                   | TT                              | CC                | 1946632588               |
| SNP_P3_142720_33132 | NW_004516319.1 | Scaffold992 | 33132                   | GG                              | AA                | 1946632590               |
| SNP_P3_142721_33147 | NW_004516319.1 | Scaffold992 | 33147                   | AA                              | GG                | 1946632592               |
| SNP_P3_142722_33167 | NW_004516319.1 | Scaffold992 | 33167                   | CC                              | GG                | 1946632593               |
| SNP_P3_142723_34638 | NW_004516319.1 | Scaffold992 | 34638                   | AA                              | GG                | 1946632595               |
| SNP_P3_142724_36179 | NW_004516319.1 | Scaffold992 | 36179                   | TT                              | CC                | 1946632597               |
| SNP_P3_142725_36760 | NW_004516319.1 | Scaffold992 | 36760                   | GG                              | TT                | 1946632599               |
| SNP_P3_142726_36970 | NW_004516319.1 | Scaffold992 | 36970                   | CC                              | TT                | 1946632601               |
| SNP_P3_142727_37007 | NW_004516319.1 | Scaffold992 | 37007                   | TT                              | CC                | 1946632603               |
| SNP_P3_142728_37013 | NW_004516319.1 | Scaffold992 | 37013                   | CC                              | TT                | 1946632605               |
| SNP_P3_142730_37561 | NW_004516319.1 | Scaffold992 | 37561                   | GG                              | TT                | 1946632607               |
| SNP_P3_142733_38081 | NW_004516319.1 | Scaffold992 | 38081                   | CC                              | AA                | 1946632609               |
| SNP_P3_142734_38112 | NW_004516319.1 | Scaffold992 | 38112                   | GG                              | AA                | 1946632611               |
| SNP_P3_142735_39897 | NW_004516319.1 | Scaffold992 | 39897                   | CC                              | AA                | 1946632613               |
| SNP_P3_142736_40064 | NW_004516319.1 | Scaffold992 | 40064                   | CC                              | GG                | 1946632615               |

| SNPs IDs            | Chromosome IDs | Chromosomes | Physical positions (bp) | CDC Frontier (Reference genome) | (Pusa 256 & HPNB) | NCBI SNPdb Accession IDs |
|---------------------|----------------|-------------|-------------------------|---------------------------------|-------------------|--------------------------|
| SNP_P3_142737_40243 | NW_004516319.1 | Scaffold992 | 40243                   | AA                              | CC                | 1946632617               |
| SNP_P3_142738_40259 | NW_004516319.1 | Scaffold992 | 40259                   | CC                              | TT                | 1946632619               |
| SNP_P3_142739_40336 | NW_004516319.1 | Scaffold992 | 40336                   | CC                              | GG                | 1946632621               |
| SNP_P3_142740_40349 | NW_004516319.1 | Scaffold992 | 40349                   | TT                              | CC                | 1946632623               |
| SNP_P3_142741_40379 | NW_004516319.1 | Scaffold992 | 40379                   | AA                              | GG                | 1946632625               |
| SNP_P3_142742_40387 | NW_004516319.1 | Scaffold992 | 40387                   | AA                              | CC                | 1946632627               |
| SNP_P3_142743_40401 | NW_004516319.1 | Scaffold992 | 40401                   | AA                              | TT                | 1946632628               |
| SNP_P3_142744_40411 | NW_004516319.1 | Scaffold992 | 40411                   | TT                              | GG                | 1946632630               |
| SNP_P3_142745_40434 | NW_004516319.1 | Scaffold992 | 40434                   | GG                              | CC                | 1946632632               |
| SNP_P3_142746_40468 | NW_004516319.1 | Scaffold992 | 40468                   | GG                              | TT                | 1946632634               |
| SNP_P3_142748_40566 | NW_004516319.1 | Scaffold992 | 40566                   | CC                              | GG                | 1946632636               |
| SNP_P3_142749_40617 | NW_004516319.1 | Scaffold992 | 40617                   | AA                              | GG                | 1946632638               |
| SNP_P3_142750_40638 | NW_004516319.1 | Scaffold992 | 40638                   | GG                              | AA                | 1946632640               |
| SNP_P3_142751_40995 | NW_004516319.1 | Scaffold992 | 40995                   | GG                              | CC                | 1946632642               |
| SNP_P3_142752_41411 | NW_004516319.1 | Scaffold992 | 41411                   | GG                              | AA                | 1946632644               |
| SNP_P3_142753_41456 | NW_004516319.1 | Scaffold992 | 41456                   | TT                              | AA                | 1946632646               |
| SNP_P3_142754_41909 | NW_004516319.1 | Scaffold992 | 41909                   | GG                              | AA                | 1946632648               |
| SNP_P3_142755_41924 | NW_004516319.1 | Scaffold992 | 41924                   | TT                              | AA                | 1946632650               |
| SNP_P3_142756_42061 | NW_004516319.1 | Scaffold992 | 42061                   | AA                              | GG                | 1946632652               |
| SNP_P3_142757_42074 | NW_004516319.1 | Scaffold992 | 42074                   | AA                              | GG                | 1946632654               |
| SNP_P3_142758_42097 | NW_004516319.1 | Scaffold992 | 42097                   | TT                              | CC                | 1946632656               |
| SNP_P3_142759_42140 | NW_004516319.1 | Scaffold992 | 42140                   | CC                              | TT                | 1946632658               |
| SNP_P3_142760_42167 | NW_004516319.1 | Scaffold992 | 42167                   | GG                              | AA                | 1946632660               |
| SNP_P3_142762_42349 | NW_004516319.1 | Scaffold992 | 42349                   | CC                              | TT                | 1946632662               |
| SNP_P3_142763_42398 | NW_004516319.1 | Scaffold992 | 42398                   | TT                              | AA                | 1946632663               |
| SNP_P3_142764_42406 | NW_004516319.1 | Scaffold992 | 42406                   | TT                              | CC                | 1946632665               |
| SNP_P3_142765_42505 | NW_004516319.1 | Scaffold992 | 42505                   | GG                              | AA                | 1946632667               |
| SNP_P3_142766_42543 | NW_004516319.1 | Scaffold992 | 42543                   | AA                              | TT                | 1946632669               |
| SNP_P3_142767_42549 | NW_004516319.1 | Scaffold992 | 42549                   | TT                              | GG                | 1946632671               |
| SNP_P3_142768_42551 | NW_004516319.1 | Scaffold992 | 42551                   | TT                              | GG                | 1946632674               |
| SNP_P3_142769_42666 | NW_004516319.1 | Scaffold992 | 42666                   | CC                              | TT                | 1946632676               |
| SNP_P3_142770_42683 | NW_004516319.1 | Scaffold992 | 42683                   | AA                              | CC                | 1946632678               |
| SNP_P3_142771_42739 | NW_004516319.1 | Scaffold992 | 42739                   | CC                              | AA                | 1946632680               |
| SNP_P3_142772_42742 | NW_004516319.1 | Scaffold992 | 42742                   | TT                              | AA                | 1946632682               |
| SNP_P3_142773_44659 | NW_004516319.1 | Scaffold992 | 44659                   | TT                              | AA                | 1946632684               |
| SNP_P3_142774_44699 | NW_004516319.1 | Scaffold992 | 44699                   | AA                              | GG                | 1946632686               |
| SNP_P3_142776_46521 | NW_004516319.1 | Scaffold992 | 46521                   | TT                              | GG                | 1946632688               |
| SNP_P3_142777_46541 | NW_004516319.1 | Scaffold992 | 46541                   | GG                              | TT                | 1946632689               |
| SNP_P3_142778_47667 | NW_004516319.1 | Scaffold992 | 47667                   | CC                              | TT                | 1946632691               |
| SNP_P3_142779_47709 | NW_004516319.1 | Scaffold992 | 47709                   | GG                              | AA                | 1946632693               |
| SNP_P3_142780_47955 | NW_004516319.1 | Scaffold992 | 47955                   | TT                              | CC                | 1946632695               |
| SNP_P3_142781_48486 | NW_004516319.1 | Scaffold992 | 48486                   | CC                              | TT                | 1946632697               |

| SNPs IDs             | Chromosome IDs | Chromosomes | Physical positions (bp) | CDC Frontier (Reference genome) | (Pusa 256 & HPNB) | NCBI SNPdb Accession IDs |
|----------------------|----------------|-------------|-------------------------|---------------------------------|-------------------|--------------------------|
| SNP_P3_142782_49070  | NW_004516319.1 | Scaffold992 | 49070                   | AA                              | GG                | 1946632699               |
| SNP_P3_142783_49137  | NW_004516319.1 | Scaffold992 | 49137                   | TT                              | GG                | 1946632701               |
| SNP_P3_142784_49467  | NW_004516319.1 | Scaffold992 | 49467                   | AA                              | CC                | 1946632703               |
| SNP_P3_142785_49520  | NW_004516319.1 | Scaffold992 | 49520                   | CC                              | AA                | 1946632705               |
| SNP_P3_142786_49525  | NW_004516319.1 | Scaffold992 | 49525                   | TT                              | CC                | 1946632708               |
| SNP_P3_142787_49601  | NW_004516319.1 | Scaffold992 | 49601                   | GG                              | TT                | 1946632709               |
| SNP_P3_142788_686    | NW_004516320.1 | Scaffold993 | 686                     | AA                              | GG                | 1946632711               |
| SNP_P3_142789_696    | NW_004516320.1 | Scaffold993 | 696                     | TT                              | AA                | 1946632713               |
| SNP_P3_142790_1305   | NW_004516320.1 | Scaffold993 | 1305                    | AA                              | CC                | 1946632715               |
| SNP_P3_142791_1359   | NW_004516320.1 | Scaffold993 | 1359                    | AA                              | GG                | 1946632717               |
| SNP_P3_142792_1567   | NW_004516320.1 | Scaffold993 | 1567                    | AA                              | CC                | 1946632719               |
| SNP_P3_142793_11751  | NW_004516321.1 | Scaffold996 | 11751                   | TT                              | CC                | 1946632721               |
| SNP_P3_142794_34564  | NW_004516321.1 | Scaffold996 | 34564                   | CC                              | TT                | 1946632723               |
| SNP_P3_142795_37053  | NW_004516321.1 | Scaffold996 | 37053                   | CC                              | AA                | 1946632725               |
| SNP_P3_142796_37086  | NW_004516321.1 | Scaffold996 | 37086                   | GG                              | AA                | 1946632727               |
| SNP_P3_142797_37094  | NW_004516321.1 | Scaffold996 | 37094                   | GG                              | TT                | 1946632729               |
| SNP_P3_142798_45414  | NW_004516321.1 | Scaffold996 | 45414                   | TT                              | CC                | 1946632730               |
| SNP_P3_142799_45416  | NW_004516321.1 | Scaffold996 | 45416                   | TT                              | CC                | 1946632732               |
| SNP_P3_142800_54896  | NW_004516321.1 | Scaffold996 | 54896                   | AA                              | CC                | 1946632734               |
| SNP_P3_142801_68439  | NW_004516321.1 | Scaffold996 | 68439                   | GG                              | AA                | 1946632736               |
| SNP_P3_142802_87317  | NW_004516321.1 | Scaffold996 | 87317                   | CC                              | TT                | 1946632738               |
| SNP_P3_142803_87346  | NW_004516321.1 | Scaffold996 | 87346                   | AA                              | GG                | 1946632740               |
| SNP_P3_142804_87354  | NW_004516321.1 | Scaffold996 | 87354                   | TT                              | CC                | 1946632742               |
| SNP_P3_142806_87415  | NW_004516321.1 | Scaffold996 | 87415                   | AA                              | CC                | 1946632744               |
| SNP_P3_142807_87538  | NW_004516321.1 | Scaffold996 | 87538                   | CC                              | TT                | 1946632746               |
| SNP_P3_142808_87701  | NW_004516321.1 | Scaffold996 | 87701                   | AA                              | GG                | 1946632748               |
| SNP_P3_142809_87890  | NW_004516321.1 | Scaffold996 | 87890                   | AA                              | CC                | 1946632750               |
| SNP_P3_142810_88226  | NW_004516321.1 | Scaffold996 | 88226                   | GG                              | AA                | 1946632752               |
| SNP_P3_142811_88425  | NW_004516321.1 | Scaffold996 | 88425                   | CC                              | GG                | 1946632754               |
| SNP_P3_142812_88738  | NW_004516321.1 | Scaffold996 | 88738                   | AA                              | TT                | 1946632756               |
| SNP_P3_142813_89260  | NW_004516321.1 | Scaffold996 | 89260                   | CC                              | TT                | 1946632758               |
| SNP_P3_142814_89262  | NW_004516321.1 | Scaffold996 | 89262                   | AA                              | GG                | 1946632760               |
| SNP_P3_142815_89585  | NW_004516321.1 | Scaffold996 | 89585                   | CC                              | TT                | 1946632762               |
| SNP_P3_142816_89672  | NW_004516321.1 | Scaffold996 | 89672                   | GG                              | AA                | 1946632764               |
| SNP_P3_142817_94718  | NW_004516321.1 | Scaffold996 | 94718                   | TT                              | CC                | 1946632766               |
| SNP_P3_142818_158454 | NW_004516321.1 | Scaffold996 | 158454                  | TT                              | GG                | 1946632767               |
| SNP_P3_142819_178537 | NW_004516321.1 | Scaffold996 | 178537                  | TT                              | CC                | 1946632769               |
| SNP_P3_142820_178799 | NW_004516321.1 | Scaffold996 | 178799                  | GG                              | AA                | 1946632771               |
| SNP_P3_142821_187302 | NW_004516321.1 | Scaffold996 | 187302                  | AA                              | GG                | 1946632773               |
| SNP_P3_142822_192448 | NW_004516321.1 | Scaffold996 | 192448                  | TT                              | GG                | 1946632775               |
| SNP_P3_142823_192743 | NW_004516321.1 | Scaffold996 | 192743                  | AA                              | GG                | 1946632777               |
| SNP_P3_142824_192778 | NW_004516321.1 | Scaffold996 | 192778                  | TT                              | AA                | 1946632779               |

| SNPs IDs             | Chromosome IDs | Chromosomes | Physical positions (bp) | CDC Frontier (Reference genome) | (Pusa 256 & HPNB) | NCBI SNPdb Accession IDs |
|----------------------|----------------|-------------|-------------------------|---------------------------------|-------------------|--------------------------|
| SNP_P3_142825_192779 | NW_004516321.1 | Scaffold996 | 192779                  | CC                              | TT                | 1946632781               |
| SNP_P3_142826_192789 | NW_004516321.1 | Scaffold996 | 192789                  | GG                              | AA                | 1946632783               |
| SNP_P3_142827_192833 | NW_004516321.1 | Scaffold996 | 192833                  | AA                              | GG                | 1946632785               |
| SNP_P3_142828_192835 | NW_004516321.1 | Scaffold996 | 192835                  | AA                              | GG                | 1946632787               |
| SNP_P3_142829_193181 | NW_004516321.1 | Scaffold996 | 193181                  | TT                              | GG                | 1946632789               |
| SNP_P3_142830_193445 | NW_004516321.1 | Scaffold996 | 193445                  | GG                              | TT                | 1946632791               |
| SNP_P3_142831_193455 | NW_004516321.1 | Scaffold996 | 193455                  | AA                              | GG                | 1946632792               |
| SNP_P3_142832_199473 | NW_004516321.1 | Scaffold996 | 199473                  | CC                              | AA                | 1946632794               |
| SNP_P3_142833_200969 | NW_004516321.1 | Scaffold996 | 200969                  | TT                              | GG                | 1946632796               |
| SNP_P3_142834_201045 | NW_004516321.1 | Scaffold996 | 201045                  | GG                              | AA                | 1946632798               |
| SNP_P3_142835_202604 | NW_004516321.1 | Scaffold996 | 202604                  | GG                              | TT                | 1946632800               |
| SNP_P3_142837_1113   | NW_004516322.1 | Scaffold997 | 1113                    | TT                              | AA                | 1946632802               |
| SNP_P3_142838_1123   | NW_004516322.1 | Scaffold997 | 1123                    | CC                              | TT                | 1946632804               |
| SNP_P3_142839_1135   | NW_004516322.1 | Scaffold997 | 1135                    | AA                              | GG                | 1946632806               |
| SNP_P3_142840_2907   | NW_004516322.1 | Scaffold997 | 2907                    | GG                              | TT                | 1946632808               |
| SNP_P3_142841_2909   | NW_004516322.1 | Scaffold997 | 2909                    | AA                              | TT                | 1946632810               |
| SNP_P3_142842_2979   | NW_004516322.1 | Scaffold997 | 2979                    | AA                              | GG                | 1946632812               |
| SNP_P3_142843_3015   | NW_004516322.1 | Scaffold997 | 3015                    | GG                              | AA                | 1946632813               |
| SNP_P3_142844_3018   | NW_004516322.1 | Scaffold997 | 3018                    | GG                              | AA                | 1946632815               |
| SNP_P3_142845_3025   | NW_004516322.1 | Scaffold997 | 3025                    | AA                              | GG                | 1946632817               |
| SNP_P3_142846_3030   | NW_004516322.1 | Scaffold997 | 3030                    | GG                              | AA                | 1946632819               |
| SNP_P3_142848_3110   | NW_004516322.1 | Scaffold997 | 3110                    | TT                              | CC                | 1946632821               |
| SNP_P3_142850_3145   | NW_004516322.1 | Scaffold997 | 3145                    | TT                              | CC                | 1946632823               |
| SNP_P3_142851_3208   | NW_004516322.1 | Scaffold997 | 3208                    | TT                              | CC                | 1946632825               |
| SNP_P3_142852_3212   | NW_004516322.1 | Scaffold997 | 3212                    | AA                              | GG                | 1946632828               |
| SNP_P3_142854_3266   | NW_004516322.1 | Scaffold997 | 3266                    | CC                              | AA                | 1946632830               |
| SNP_P3_142855_12185  | NW_004516322.1 | Scaffold997 | 12185                   | AA                              | TT                | 1946632832               |
| SNP_P3_142856_12208  | NW_004516322.1 | Scaffold997 | 12208                   | TT                              | AA                | 1946632834               |
| SNP_P3_142857_12239  | NW_004516322.1 | Scaffold997 | 12239                   | AA                              | GG                | 1946632836               |
| SNP_P3_142858_12247  | NW_004516322.1 | Scaffold997 | 12247                   | CC                              | TT                | 1946632838               |
| SNP_P3_142859_12525  | NW_004516322.1 | Scaffold997 | 12525                   | CC                              | AA                | 1946632840               |
| SNP_P3_142860_12642  | NW_004516322.1 | Scaffold997 | 12642                   | AA                              | GG                | 1946632842               |
| SNP_P3_142861_12671  | NW_004516322.1 | Scaffold997 | 12671                   | TT                              | AA                | 1946632844               |
| SNP_P3_142863_12785  | NW_004516322.1 | Scaffold997 | 12785                   | AA                              | CC                | 1946632845               |
| SNP_P3_142864_13913  | NW_004516322.1 | Scaffold997 | 13913                   | AA                              | GG                | 1946632847               |
| SNP_P3_142865_13975  | NW_004516322.1 | Scaffold997 | 13975                   | AA                              | TT                | 1946632849               |
| SNP_P3_142866_3164   | NW_004516323.1 | Scaffold998 | 3164                    | AA                              | GG                | 1946632851               |
| SNP_P3_142867_3270   | NW_004516323.1 | Scaffold998 | 3270                    | TT                              | CC                | 1946632853               |
| SNP_P3_142868_3282   | NW_004516323.1 | Scaffold998 | 3282                    | CC                              | TT                | 1946632855               |
| SNP_P3_142869_3307   | NW_004516323.1 | Scaffold998 | 3307                    | TT                              | CC                | 1946632857               |
| SNP_P3_142870_3416   | NW_004516323.1 | Scaffold998 | 3416                    | GG                              | TT                | 1946632859               |
| SNP_P3_142871_3421   | NW_004516323.1 | Scaffold998 | 3421                    | AA                              | TT                | 1946632860               |

| SNPs IDs             | Chromosome IDs | Chromosomes | Physical positions (bp) | CDC Frontier (Reference genome) | (Pusa 256 & HPNB) | NCBI SNPdb Accession IDs |
|----------------------|----------------|-------------|-------------------------|---------------------------------|-------------------|--------------------------|
| SNP_P3_142872_3457   | NW_004516323.1 | Scaffold998 | 3457                    | AA                              | CC                | 1946632862               |
| SNP_P3_142873_3460   | NW_004516323.1 | Scaffold998 | 3460                    | TT                              | CC                | 1946632864               |
| SNP_P3_142874_6389   | NW_004516324.1 | Scaffold999 | 6389                    | TT                              | AA                | 1946632866               |
| SNP_P3_142875_8675   | NW_004516324.1 | Scaffold999 | 8675                    | AA                              | CC                | 1946632868               |
| SNP_P3_142876_36681  | NW_004516324.1 | Scaffold999 | 36681                   | AA                              | TT                | 1946632870               |
| SNP_P3_142877_36687  | NW_004516324.1 | Scaffold999 | 36687                   | AA                              | GG                | 1946632872               |
| SNP_P3_142878_37030  | NW_004516324.1 | Scaffold999 | 37030                   | TT                              | GG                | 1946632874               |
| SNP_P3_142879_37034  | NW_004516324.1 | Scaffold999 | 37034                   | AA                              | GG                | 1946632876               |
| SNP_P3_142880_37060  | NW_004516324.1 | Scaffold999 | 37060                   | GG                              | AA                | 1946632877               |
| SNP_P3_142881_69471  | NW_004516324.1 | Scaffold999 | 69471                   | GG                              | TT                | 1946632879               |
| SNP_P3_142882_69680  | NW_004516324.1 | Scaffold999 | 69680                   | GG                              | AA                | 1946632881               |
| SNP_P3_142883_69719  | NW_004516324.1 | Scaffold999 | 69719                   | CC                              | TT                | 1946632882               |
| SNP_P3_142884_69745  | NW_004516324.1 | Scaffold999 | 69745                   | TT                              | AA                | 1946632883               |
| SNP_P3_142885_69783  | NW_004516324.1 | Scaffold999 | 69783                   | AA                              | TT                | 1946632884               |
| SNP_P3_142886_69825  | NW_004516324.1 | Scaffold999 | 69825                   | TT                              | CC                | 1946632885               |
| SNP_P3_142887_69857  | NW_004516324.1 | Scaffold999 | 69857                   | TT                              | CC                | 1946632886               |
| SNP_P3_142888_69858  | NW_004516324.1 | Scaffold999 | 69858                   | TT                              | CC                | 1946632887               |
| SNP_P3_142889_69905  | NW_004516324.1 | Scaffold999 | 69905                   | GG                              | CC                | 1946632888               |
| SNP_P3_142890_69991  | NW_004516324.1 | Scaffold999 | 69991                   | TT                              | AA                | 1946632890               |
| SNP_P3_142891_70197  | NW_004516324.1 | Scaffold999 | 70197                   | TT                              | GG                | 1946632891               |
| SNP_P3_142892_70432  | NW_004516324.1 | Scaffold999 | 70432                   | CC                              | TT                | 1946632892               |
| SNP_P3_142893_74621  | NW_004516324.1 | Scaffold999 | 74621                   | GG                              | AA                | 1946632893               |
| SNP_P3_142894_74642  | NW_004516324.1 | Scaffold999 | 74642                   | AA                              | GG                | 1946632895               |
| SNP_P3_142895_74645  | NW_004516324.1 | Scaffold999 | 74645                   | TT                              | AA                | 1946632896               |
| SNP_P3_142896_74697  | NW_004516324.1 | Scaffold999 | 74697                   | AA                              | GG                | 1946632897               |
| SNP_P3_142897_74763  | NW_004516324.1 | Scaffold999 | 74763                   | AA                              | CC                | 1946632899               |
| SNP_P3_142898_74983  | NW_004516324.1 | Scaffold999 | 74983                   | AA                              | CC                | 1946632900               |
| SNP_P3_142899_82948  | NW_004516324.1 | Scaffold999 | 82948                   | AA                              | GG                | 1946632902               |
| SNP_P3_142900_82973  | NW_004516324.1 | Scaffold999 | 82973                   | TT                              | CC                | 1946632904               |
| SNP_P3_142901_89181  | NW_004516324.1 | Scaffold999 | 89181                   | TT                              | AA                | 1946632906               |
| SNP_P3_142902_113379 | NW_004516324.1 | Scaffold999 | 113379                  | TT                              | CC                | 1946632909               |
| SNP_P3_142903_113804 | NW_004516324.1 | Scaffold999 | 113804                  | TT                              | CC                | 1946632911               |
| SNP_P3_142904_115645 | NW_004516324.1 | Scaffold999 | 115645                  | CC                              | AA                | 1946632913               |
| SNP_P3_142905_115825 | NW_004516324.1 | Scaffold999 | 115825                  | GG                              | AA                | 1946632915               |
| SNP_P3_142906_118008 | NW_004516324.1 | Scaffold999 | 118008                  | TT                              | CC                | 1946632916               |
| SNP_P3_142907_122419 | NW_004516324.1 | Scaffold999 | 122419                  | AA                              | CC                | 1946632917               |
| SNP_P3_142908_123815 | NW_004516324.1 | Scaffold999 | 123815                  | TT                              | AA                | 1946632918               |
| SNP_P3_142909_123837 | NW_004516324.1 | Scaffold999 | 123837                  | GG                              | AA                | 1946632919               |
| SNP_P3_142910_123838 | NW_004516324.1 | Scaffold999 | 123838                  | CC                              | TT                | 1946632920               |
| SNP_P3_142912_123930 | NW_004516324.1 | Scaffold999 | 123930                  | AA                              | TT                | 1946632921               |
| SNP_P3_142913_124093 | NW_004516324.1 | Scaffold999 | 124093                  | CC                              | TT                | 1946632922               |
| SNP_P3_142914_124098 | NW_004516324.1 | Scaffold999 | 124098                  | TT                              | AA                | 1946632923               |

| SNPs IDs             | Chromosome IDs | Chromosomes  | Physical positions (bp) | CDC Frontier (Reference genome) | (Pusa 256 & HPNB) | NCBI SNPdb Accession IDs |
|----------------------|----------------|--------------|-------------------------|---------------------------------|-------------------|--------------------------|
| SNP_P3_142915_124832 | NW_004516324.1 | Scaffold999  | 124832                  | GG                              | CC                | 1946632925               |
| SNP_P3_142916_127533 | NW_004516324.1 | Scaffold999  | 127533                  | AA                              | CC                | 1946632926               |
| SNP_P3_142917_127900 | NW_004516324.1 | Scaffold999  | 127900                  | AA                              | TT                | 1946632927               |
| SNP_P3_142918_130329 | NW_004516324.1 | Scaffold999  | 130329                  | GG                              | AA                | 1946632928               |
| SNP_P3_142920_130412 | NW_004516324.1 | Scaffold999  | 130412                  | CC                              | TT                | 1946632929               |
| SNP_P3_142921_130436 | NW_004516324.1 | Scaffold999  | 130436                  | TT                              | CC                | 1946632930               |
| SNP_P3_142922_130642 | NW_004516324.1 | Scaffold999  | 130642                  | TT                              | CC                | 1946632931               |
| SNP_P3_142923_131433 | NW_004516324.1 | Scaffold999  | 131433                  | AA                              | TT                | 1946632932               |
| SNP_P3_142924_133897 | NW_004516324.1 | Scaffold999  | 133897                  | TT                              | GG                | 1946632934               |
| SNP_P3_142925_134098 | NW_004516324.1 | Scaffold999  | 134098                  | TT                              | AA                | 1946632935               |
| SNP_P3_142926_134390 | NW_004516324.1 | Scaffold999  | 134390                  | TT                              | CC                | 1946632936               |
| SNP_P3_142927_144257 | NW_004516324.1 | Scaffold999  | 144257                  | TT                              | CC                | 1946632937               |
| SNP_P3_142928_151734 | NW_004516324.1 | Scaffold999  | 151734                  | GG                              | AA                | 1946632939               |
| SNP_P3_142929_152271 | NW_004516324.1 | Scaffold999  | 152271                  | AA                              | GG                | 1946632941               |
| SNP_P3_142930_153451 | NW_004516324.1 | Scaffold999  | 153451                  | TT                              | CC                | 1946632943               |
| SNP_P3_142931_153463 | NW_004516324.1 | Scaffold999  | 153463                  | GG                              | AA                | 1946632945               |
| SNP_P3_142932_155200 | NW_004516324.1 | Scaffold999  | 155200                  | CC                              | TT                | 1946632947               |
| SNP_P3_142933_155255 | NW_004516324.1 | Scaffold999  | 155255                  | GG                              | TT                | 1946632949               |
| SNP_P3_142934_155368 | NW_004516324.1 | Scaffold999  | 155368                  | GG                              | AA                | 1946632951               |
| SNP_P3_142936_156114 | NW_004516324.1 | Scaffold999  | 156114                  | AA                              | GG                | 1946632953               |
| SNP_P3_142937_156119 | NW_004516324.1 | Scaffold999  | 156119                  | GG                              | AA                | 1946632955               |
| SNP_P3_142938_156124 | NW_004516324.1 | Scaffold999  | 156124                  | AA                              | GG                | 1946632957               |
| SNP_P3_142939_156130 | NW_004516324.1 | Scaffold999  | 156130                  | GG                              | AA                | 1946632959               |
| SNP_P3_142940_156142 | NW_004516324.1 | Scaffold999  | 156142                  | TT                              | CC                | 1946632961               |
| SNP_P3_142941_156503 | NW_004516324.1 | Scaffold999  | 156503                  | GG                              | AA                | 1946632963               |
| SNP_P3_142942_9479   | NW_004516326.1 | Scaffold1003 | 9479                    | TT                              | AA                | 1946632965               |
| SNP_P3_142943_9480   | NW_004516326.1 | Scaffold1003 | 9480                    | TT                              | AA                | 1946632967               |
| SNP_P3_142944_11885  | NW_004516326.1 | Scaffold1003 | 11885                   | AA                              | GG                | 1946632969               |
| SNP_P3_142945_12258  | NW_004516326.1 | Scaffold1003 | 12258                   | GG                              | AA                | 1946632971               |
| SNP_P3_142946_12752  | NW_004516326.1 | Scaffold1003 | 12752                   | AA                              | GG                | 1946632973               |
| SNP_P3_142947_12870  | NW_004516326.1 | Scaffold1003 | 12870                   | AA                              | GG                | 1946632975               |
| SNP_P3_142948_12981  | NW_004516326.1 | Scaffold1003 | 12981                   | GG                              | CC                | 1946632977               |
| SNP_P3_142949_13049  | NW_004516326.1 | Scaffold1003 | 13049                   | TT                              | CC                | 1946632979               |
| SNP_P3_142950_13541  | NW_004516326.1 | Scaffold1003 | 13541                   | AA                              | GG                | 1946632982               |
| SNP_P3_142951_13565  | NW_004516326.1 | Scaffold1003 | 13565                   | CC                              | TT                | 1946632984               |
| SNP_P3_142952_13689  | NW_004516326.1 | Scaffold1003 | 13689                   | TT                              | CC                | 1946632987               |
| SNP_P3_142953_13886  | NW_004516326.1 | Scaffold1003 | 13886                   | AA                              | GG                | 1946632989               |
| SNP_P3_142954_13949  | NW_004516326.1 | Scaffold1003 | 13949                   | TT                              | GG                | 1946632991               |
| SNP_P3_142955_13966  | NW_004516326.1 | Scaffold1003 | 13966                   | AA                              | CC                | 1946632993               |
| SNP_P3_142956_14134  | NW_004516326.1 | Scaffold1003 | 14134                   | CC                              | GG                | 1946632995               |
| SNP_P3_142957_14146  | NW_004516326.1 | Scaffold1003 | 14146                   | CC                              | AA                | 1946632997               |
| SNP_P3_142958_14213  | NW_004516326.1 | Scaffold1003 | 14213                   | GG                              | AA                | 1946632999               |

| SNPs IDs             | Chromosome IDs | Chromosomes  | Physical positions (bp) | CDC Frontier (Reference genome) | (Pusa 256 & HPNB) | NCBI SNPdb Accession IDs |
|----------------------|----------------|--------------|-------------------------|---------------------------------|-------------------|--------------------------|
| SNP_P3_142959_14223  | NW_004516326.1 | Scaffold1003 | 14223                   | TT                              | CC                | 1946633001               |
| SNP_P3_142960_14559  | NW_004516326.1 | Scaffold1003 | 14559                   | CC                              | AA                | 1946633003               |
| SNP_P3_142961_15029  | NW_004516326.1 | Scaffold1003 | 15029                   | TT                              | CC                | 1946633005               |
| SNP_P3_142962_15771  | NW_004516326.1 | Scaffold1003 | 15771                   | TT                              | AA                | 1946633007               |
| SNP_P3_142963_16546  | NW_004516326.1 | Scaffold1003 | 16546                   | GG                              | AA                | 1946633009               |
| SNP_P3_142965_25898  | NW_004516326.1 | Scaffold1003 | 25898                   | AA                              | GG                | 1946633011               |
| SNP_P3_142966_41094  | NW_004516326.1 | Scaffold1003 | 41094                   | GG                              | AA                | 1946633013               |
| SNP_P3_142967_41321  | NW_004516326.1 | Scaffold1003 | 41321                   | AA                              | GG                | 1946633015               |
| SNP_P3_142971_41558  | NW_004516326.1 | Scaffold1003 | 41558                   | TT                              | CC                | 1946633017               |
| SNP_P3_142972_41614  | NW_004516326.1 | Scaffold1003 | 41614                   | GG                              | AA                | 1946633019               |
| SNP_P3_142973_41889  | NW_004516326.1 | Scaffold1003 | 41889                   | TT                              | CC                | 1946633021               |
| SNP_P3_142974_49809  | NW_004516326.1 | Scaffold1003 | 49809                   | AA                              | GG                | 1946633024               |
| SNP_P3_142975_49818  | NW_004516326.1 | Scaffold1003 | 49818                   | CC                              | TT                | 1946633026               |
| SNP_P3_142976_49820  | NW_004516326.1 | Scaffold1003 | 49820                   | GG                              | CC                | 1946633028               |
| SNP_P3_142978_409    | NW_004516327.1 | Scaffold1004 | 409                     | CC                              | AA                | 1946633030               |
| SNP_P3_142979_407    | NW_004516328.1 | Scaffold1005 | 407                     | TT                              | CC                | 1946633032               |
| SNP_P3_142980_13443  | NW_004516329.1 | Scaffold1006 | 13443                   | CC                              | AA                | 1946633034               |
| SNP_P3_142981_24733  | NW_004516329.1 | Scaffold1006 | 24733                   | AA                              | GG                | 1946633036               |
| SNP_P3_142982_62388  | NW_004516329.1 | Scaffold1006 | 62388                   | TT                              | AA                | 1946633038               |
| SNP_P3_142983_62436  | NW_004516329.1 | Scaffold1006 | 62436                   | AA                              | GG                | 1946633040               |
| SNP_P3_142984_63476  | NW_004516329.1 | Scaffold1006 | 63476                   | CC                              | AA                | 1946633042               |
| SNP_P3_142985_63490  | NW_004516329.1 | Scaffold1006 | 63490                   | AA                              | CC                | 1946633044               |
| SNP_P3_142986_68011  | NW_004516329.1 | Scaffold1006 | 68011                   | AA                              | GG                | 1946633046               |
| SNP_P3_142987_68281  | NW_004516329.1 | Scaffold1006 | 68281                   | CC                              | GG                | 1946633048               |
| SNP_P3_142988_85378  | NW_004516329.1 | Scaffold1006 | 85378                   | TT                              | GG                | 1946633050               |
| SNP_P3_142989_102580 | NW_004516329.1 | Scaffold1006 | 102580                  | AA                              | TT                | 1946633052               |
| SNP_P3_142990_102581 | NW_004516329.1 | Scaffold1006 | 102581                  | TT                              | AA                | 1946633054               |
| SNP_P3_142991_109438 | NW_004516329.1 | Scaffold1006 | 109438                  | TT                              | AA                | 1946633056               |
| SNP_P3_142992_109441 | NW_004516329.1 | Scaffold1006 | 109441                  | CC                              | AA                | 1946633058               |
| SNP_P3_142994_109503 | NW_004516329.1 | Scaffold1006 | 109503                  | GG                              | AA                | 1946633060               |
| SNP_P3_142995_109658 | NW_004516329.1 | Scaffold1006 | 109658                  | TT                              | CC                | 1946633062               |
| SNP_P3_142996_109753 | NW_004516329.1 | Scaffold1006 | 109753                  | AA                              | GG                | 1946633064               |
| SNP_P3_142997_109765 | NW_004516329.1 | Scaffold1006 | 109765                  | TT                              | CC                | 1946633066               |
| SNP_P3_142998_109793 | NW_004516329.1 | Scaffold1006 | 109793                  | CC                              | TT                | 1946633068               |
| SNP_P3_142999_109794 | NW_004516329.1 | Scaffold1006 | 109794                  | AA                              | TT                | 1946633070               |
| SNP_P3_143000_109836 | NW_004516329.1 | Scaffold1006 | 109836                  | GG                              | AA                | 1946633072               |
| SNP_P3_143001_109878 | NW_004516329.1 | Scaffold1006 | 109878                  | TT                              | GG                | 1946633074               |
| SNP_P3_143002_109912 | NW_004516329.1 | Scaffold1006 | 109912                  | CC                              | TT                | 1946633076               |
| SNP_P3_143003_126132 | NW_004516329.1 | Scaffold1006 | 126132                  | GG                              | AA                | 1946633078               |
| SNP_P3_143004_126207 | NW_004516329.1 | Scaffold1006 | 126207                  | AA                              | GG                | 1946633080               |
| SNP_P3_143005_126249 | NW_004516329.1 | Scaffold1006 | 126249                  | TT                              | CC                | 1946633082               |
| SNP_P3_143006_126274 | NW_004516329.1 | Scaffold1006 | 126274                  | TT                              | AA                | 1946633084               |

| SNPs IDs             | Chromosome IDs | Chromosomes  | Physical positions (bp) | CDC Frontier (Reference genome) | (Pusa 256 & HPNB) | NCBI SNPdb Accession IDs |
|----------------------|----------------|--------------|-------------------------|---------------------------------|-------------------|--------------------------|
| SNP_P3_143007_126420 | NW_004516329.1 | Scaffold1006 | 126420                  | CC                              | TT                | 1946633086               |
| SNP_P3_143008_126545 | NW_004516329.1 | Scaffold1006 | 126545                  | TT                              | CC                | 1946633088               |
| SNP_P3_143009_126547 | NW_004516329.1 | Scaffold1006 | 126547                  | GG                              | CC                | 1946633090               |
| SNP_P3_143010_126840 | NW_004516329.1 | Scaffold1006 | 126840                  | CC                              | TT                | 1946633091               |
| SNP_P3_143011_127012 | NW_004516329.1 | Scaffold1006 | 127012                  | TT                              | AA                | 1946633093               |
| SNP_P3_143012_127083 | NW_004516329.1 | Scaffold1006 | 127083                  | CC                              | TT                | 1946633095               |
| SNP_P3_143013_127476 | NW_004516329.1 | Scaffold1006 | 127476                  | TT                              | CC                | 1946633097               |
| SNP_P3_143014_127567 | NW_004516329.1 | Scaffold1006 | 127567                  | AA                              | GG                | 1946633099               |
| SNP_P3_143015_127569 | NW_004516329.1 | Scaffold1006 | 127569                  | AA                              | GG                | 1946633101               |
| SNP_P3_143016_127639 | NW_004516329.1 | Scaffold1006 | 127639                  | GG                              | AA                | 1946633104               |
| SNP_P3_143017_127705 | NW_004516329.1 | Scaffold1006 | 127705                  | CC                              | TT                | 1946633106               |
| SNP_P3_143018_127829 | NW_004516329.1 | Scaffold1006 | 127829                  | GG                              | TT                | 1946633108               |
| SNP_P3_143019_127838 | NW_004516329.1 | Scaffold1006 | 127838                  | CC                              | AA                | 1946633109               |
| SNP_P3_143020_127846 | NW_004516329.1 | Scaffold1006 | 127846                  | AA                              | TT                | 1946633111               |
| SNP_P3_143021_127891 | NW_004516329.1 | Scaffold1006 | 127891                  | TT                              | GG                | 1946633113               |
| SNP_P3_143022_127911 | NW_004516329.1 | Scaffold1006 | 127911                  | TT                              | CC                | 1946633115               |
| SNP_P3_143023_127971 | NW_004516329.1 | Scaffold1006 | 127971                  | CC                              | TT                | 1946633117               |
| SNP_P3_143024_128048 | NW_004516329.1 | Scaffold1006 | 128048                  | AA                              | GG                | 1946633119               |
| SNP_P3_143025_128096 | NW_004516329.1 | Scaffold1006 | 128096                  | GG                              | TT                | 1946633121               |
| SNP_P3_143026_128106 | NW_004516329.1 | Scaffold1006 | 128106                  | GG                              | TT                | 1946633123               |
| SNP_P3_143027_161702 | NW_004516329.1 | Scaffold1006 | 161702                  | AA                              | GG                | 1946633125               |
| SNP_P3_143028_165451 | NW_004516329.1 | Scaffold1006 | 165451                  | CC                              | TT                | 1946633126               |
| SNP_P3_143029_165479 | NW_004516329.1 | Scaffold1006 | 165479                  | TT                              | CC                | 1946633128               |
| SNP_P3_143030_165502 | NW_004516329.1 | Scaffold1006 | 165502                  | CC                              | AA                | 1946633130               |
| SNP_P3_143031_194842 | NW_004516329.1 | Scaffold1006 | 194842                  | GG                              | CC                | 1946633132               |
| SNP_P3_143032_196847 | NW_004516329.1 | Scaffold1006 | 196847                  | AA                              | GG                | 1946633134               |
| SNP_P3_143033_196865 | NW_004516329.1 | Scaffold1006 | 196865                  | TT                              | CC                | 1946633136               |
| SNP_P3_143034_196876 | NW_004516329.1 | Scaffold1006 | 196876                  | AA                              | GG                | 1946633139               |
| SNP_P3_143035_226835 | NW_004516329.1 | Scaffold1006 | 226835                  | TT                              | CC                | 1946633141               |
| SNP_P3_143036_242732 | NW_004516329.1 | Scaffold1006 | 242732                  | AA                              | TT                | 1946633143               |
| SNP_P3_143038_279846 | NW_004516329.1 | Scaffold1006 | 279846                  | TT                              | CC                | 1946633145               |
| SNP_P3_143040_348014 | NW_004516329.1 | Scaffold1006 | 348014                  | AA                              | GG                | 1946633147               |
| SNP_P3_143041_377834 | NW_004516329.1 | Scaffold1006 | 377834                  | TT                              | CC                | 1946633148               |
| SNP_P3_143043_394069 | NW_004516329.1 | Scaffold1006 | 394069                  | TT                              | GG                | 1946633150               |
| SNP_P3_143044_400007 | NW_004516329.1 | Scaffold1006 | 400007                  | CC                              | AA                | 1946633152               |
| SNP_P3_143045_450490 | NW_004516329.1 | Scaffold1006 | 450490                  | AA                              | GG                | 1946633154               |
| SNP_P3_143046_464474 | NW_004516329.1 | Scaffold1006 | 464474                  | TT                              | AA                | 1946633156               |
| SNP_P3_143047_546828 | NW_004516329.1 | Scaffold1006 | 546828                  | GG                              | TT                | 1946633158               |
| SNP_P3_143048_546829 | NW_004516329.1 | Scaffold1006 | 546829                  | AA                              | GG                | 1946633160               |
| SNP_P3_143050_559116 | NW_004516329.1 | Scaffold1006 | 559116                  | AA                              | GG                | 1946633162               |
| SNP_P3_143051_559210 | NW_004516329.1 | Scaffold1006 | 559210                  | CC                              | TT                | 1946633164               |
| SNP_P3_143052_559403 | NW_004516329.1 | Scaffold1006 | 559403                  | AA                              | GG                | 1946633166               |



| SNPs IDs             | Chromosome IDs | Chromosomes  | Physical positions (bp) | CDC Frontier (Reference genome) | (Pusa 256 & HPNB) | NCBI SNPdb Accession IDs |
|----------------------|----------------|--------------|-------------------------|---------------------------------|-------------------|--------------------------|
| SNP_P3_143053_559480 | NW_004516329.1 | Scaffold1006 | 559480                  | GG                              | TT                | 1946633168               |
| SNP_P3_143054_567566 | NW_004516329.1 | Scaffold1006 | 567566                  | GG                              | AA                | 1946633170               |
| SNP_P3_143055_567575 | NW_004516329.1 | Scaffold1006 | 567575                  | CC                              | TT                | 1946633172               |
| SNP_P3_143056_567867 | NW_004516329.1 | Scaffold1006 | 567867                  | TT                              | CC                | 1946633174               |
| SNP_P3_143057_567972 | NW_004516329.1 | Scaffold1006 | 567972                  | GG                              | AA                | 1946633176               |
| SNP_P3_143058_578296 | NW_004516329.1 | Scaffold1006 | 578296                  | TT                              | CC                | 1946633178               |
| SNP_P3_143059_578298 | NW_004516329.1 | Scaffold1006 | 578298                  | AA                              | TT                | 1946633180               |
| SNP_P3_143060_578299 | NW_004516329.1 | Scaffold1006 | 578299                  | TT                              | CC                | 1946633182               |
| SNP_P3_143061_578359 | NW_004516329.1 | Scaffold1006 | 578359                  | GG                              | AA                | 1946633184               |
| SNP_P3_143062_578512 | NW_004516329.1 | Scaffold1006 | 578512                  | GG                              | CC                | 1946633185               |
| SNP_P3_143063_578610 | NW_004516329.1 | Scaffold1006 | 578610                  | GG                              | AA                | 1946633187               |
| SNP_P3_143064_578655 | NW_004516329.1 | Scaffold1006 | 578655                  | GG                              | AA                | 1946633189               |
| SNP_P3_143065_586292 | NW_004516329.1 | Scaffold1006 | 586292                  | TT                              | CC                | 1946633191               |
| SNP_P3_143068_659097 | NW_004516329.1 | Scaffold1006 | 659097                  | TT                              | CC                | 1946633193               |
| SNP_P3_143069_667489 | NW_004516329.1 | Scaffold1006 | 667489                  | TT                              | CC                | 1946633195               |
| SNP_P3_143072_1264   | NW_004516331.1 | Scaffold1008 | 1264                    | TT                              | AA                | 1946633197               |
| SNP_P3_143073_1273   | NW_004516331.1 | Scaffold1008 | 1273                    | CC                              | GG                | 1946633199               |
| SNP_P3_143074_1344   | NW_004516331.1 | Scaffold1008 | 1344                    | GG                              | AA                | 1946633201               |
| SNP_P3_143075_1372   | NW_004516331.1 | Scaffold1008 | 1372                    | AA                              | GG                | 1946633203               |
| SNP_P3_143076_1414   | NW_004516331.1 | Scaffold1008 | 1414                    | AA                              | GG                | 1946633205               |
| SNP_P3_143077_12134  | NW_004516331.1 | Scaffold1008 | 12134                   | CC                              | TT                | 1946633207               |
| SNP_P3_143078_12186  | NW_004516331.1 | Scaffold1008 | 12186                   | CC                              | GG                | 1946633209               |
| SNP_P3_143079_12327  | NW_004516331.1 | Scaffold1008 | 12327                   | AA                              | GG                | 1946633211               |
| SNP_P3_143080_12349  | NW_004516331.1 | Scaffold1008 | 12349                   | TT                              | CC                | 1946633213               |
| SNP_P3_143081_12366  | NW_004516331.1 | Scaffold1008 | 12366                   | CC                              | TT                | 1946633215               |
| SNP_P3_143082_12385  | NW_004516331.1 | Scaffold1008 | 12385                   | CC                              | TT                | 1946633217               |
| SNP_P3_143083_12584  | NW_004516331.1 | Scaffold1008 | 12584                   | TT                              | CC                | 1946633219               |
| SNP_P3_143084_12626  | NW_004516331.1 | Scaffold1008 | 12626                   | TT                              | GG                | 1946633221               |
| SNP_P3_143086_12723  | NW_004516331.1 | Scaffold1008 | 12723                   | AA                              | GG                | 1946633223               |
| SNP_P3_143087_12734  | NW_004516331.1 | Scaffold1008 | 12734                   | CC                              | AA                | 1946633225               |
| SNP_P3_143088_13040  | NW_004516331.1 | Scaffold1008 | 13040                   | CC                              | TT                | 1946633227               |
| SNP_P3_143089_13148  | NW_004516331.1 | Scaffold1008 | 13148                   | AA                              | GG                | 1946633229               |
| SNP_P3_143090_13314  | NW_004516331.1 | Scaffold1008 | 13314                   | GG                              | AA                | 1946633231               |
| SNP_P3_143091_13398  | NW_004516331.1 | Scaffold1008 | 13398                   | TT                              | AA                | 1946633233               |
| SNP_P3_143092_13414  | NW_004516331.1 | Scaffold1008 | 13414                   | TT                              | CC                | 1946633235               |
| SNP_P3_143093_13428  | NW_004516331.1 | Scaffold1008 | 13428                   | CC                              | AA                | 1946633237               |
| SNP_P3_143094_13433  | NW_004516331.1 | Scaffold1008 | 13433                   | TT                              | CC                | 1946633239               |
| SNP_P3_143095_13436  | NW_004516331.1 | Scaffold1008 | 13436                   | GG                              | TT                | 1946633241               |
| SNP_P3_143096_13459  | NW_004516331.1 | Scaffold1008 | 13459                   | TT                              | CC                | 1946633244               |
| SNP_P3_143097_13469  | NW_004516331.1 | Scaffold1008 | 13469                   | AA                              | GG                | 1946633246               |
| SNP_P3_143098_14642  | NW_004516331.1 | Scaffold1008 | 14642                   | AA                              | GG                | 1946633248               |
| SNP_P3_143099_14646  | NW_004516331.1 | Scaffold1008 | 14646                   | TT                              | CC                | 1946633250               |

| SNPs IDs            | Chromosome IDs | Chromosomes  | Physical positions (bp) | CDC Frontier (Reference genome) | (Pusa 256 & HPNB) | NCBI SNPdb Accession IDs |
|---------------------|----------------|--------------|-------------------------|---------------------------------|-------------------|--------------------------|
| SNP_P3_143100_14667 | NW_004516331.1 | Scaffold1008 | 14667                   | CC                              | TT                | 1946633252               |
| SNP_P3_143101_14680 | NW_004516331.1 | Scaffold1008 | 14680                   | TT                              | CC                | 1946633254               |
| SNP_P3_143102_14738 | NW_004516331.1 | Scaffold1008 | 14738                   | TT                              | CC                | 1946633256               |
| SNP_P3_143103_14763 | NW_004516331.1 | Scaffold1008 | 14763                   | CC                              | TT                | 1946633257               |
| SNP_P3_143104_14816 | NW_004516331.1 | Scaffold1008 | 14816                   | AA                              | GG                | 1946633259               |
| SNP_P3_143105_14836 | NW_004516331.1 | Scaffold1008 | 14836                   | AA                              | TT                | 1946633261               |
| SNP_P3_143106_15051 | NW_004516331.1 | Scaffold1008 | 15051                   | TT                              | GG                | 1946633263               |
| SNP_P3_143107_15151 | NW_004516331.1 | Scaffold1008 | 15151                   | GG                              | AA                | 1946633265               |
| SNP_P3_143108_22997 | NW_004516331.1 | Scaffold1008 | 22997                   | AA                              | GG                | 1946633267               |
| SNP_P3_143109_23023 | NW_004516331.1 | Scaffold1008 | 23023                   | TT                              | GG                | 1946633269               |
| SNP_P3_143110_42259 | NW_004516331.1 | Scaffold1008 | 42259                   | GG                              | AA                | 1946633272               |
| SNP_P3_143111_42260 | NW_004516331.1 | Scaffold1008 | 42260                   | CC                              | TT                | 1946633274               |
| SNP_P3_143112_42269 | NW_004516331.1 | Scaffold1008 | 42269                   | GG                              | AA                | 1946633276               |
| SNP_P3_143113_42303 | NW_004516331.1 | Scaffold1008 | 42303                   | AA                              | CC                | 1946633278               |
| SNP_P3_143114_42331 | NW_004516331.1 | Scaffold1008 | 42331                   | TT                              | CC                | 1946633280               |
| SNP_P3_143115_42506 | NW_004516331.1 | Scaffold1008 | 42506                   | AA                              | CC                | 1946633282               |
| SNP_P3_143116_42531 | NW_004516331.1 | Scaffold1008 | 42531                   | AA                              | GG                | 1946633284               |
| SNP_P3_143117_42661 | NW_004516331.1 | Scaffold1008 | 42661                   | CC                              | TT                | 1946633286               |
| SNP_P3_143118_42754 | NW_004516331.1 | Scaffold1008 | 42754                   | CC                              | TT                | 1946633288               |
| SNP_P3_143119_42769 | NW_004516331.1 | Scaffold1008 | 42769                   | GG                              | TT                | 1946633290               |
| SNP_P3_143120_54397 | NW_004516331.1 | Scaffold1008 | 54397                   | GG                              | CC                | 1946633292               |
| SNP_P3_143121_54398 | NW_004516331.1 | Scaffold1008 | 54398                   | CC                              | TT                | 1946633294               |
| SNP_P3_143122_54791 | NW_004516331.1 | Scaffold1008 | 54791                   | CC                              | TT                | 1946633296               |
| SNP_P3_143123_54803 | NW_004516331.1 | Scaffold1008 | 54803                   | CC                              | AA                | 1946633298               |
| SNP_P3_143124_54823 | NW_004516331.1 | Scaffold1008 | 54823                   | TT                              | AA                | 1946633300               |
| SNP_P3_143125_54834 | NW_004516331.1 | Scaffold1008 | 54834                   | TT                              | AA                | 1946633302               |
| SNP_P3_143126_55832 | NW_004516331.1 | Scaffold1008 | 55832                   | AA                              | TT                | 1946633304               |
| SNP_P3_143127_59822 | NW_004516331.1 | Scaffold1008 | 59822                   | GG                              | TT                | 1946633306               |
| SNP_P3_143128_60510 | NW_004516331.1 | Scaffold1008 | 60510                   | TT                              | CC                | 1946633308               |
| SNP_P3_143129_61671 | NW_004516331.1 | Scaffold1008 | 61671                   | AA                              | TT                | 1946633309               |
| SNP_P3_143130_61681 | NW_004516331.1 | Scaffold1008 | 61681                   | CC                              | AA                | 1946633311               |
| SNP_P3_143131_61722 | NW_004516331.1 | Scaffold1008 | 61722                   | AA                              | GG                | 1946633314               |
| SNP_P3_143132_61836 | NW_004516331.1 | Scaffold1008 | 61836                   | GG                              | TT                | 1946633315               |
| SNP_P3_143133_61852 | NW_004516331.1 | Scaffold1008 | 61852                   | TT                              | CC                | 1946633317               |
| SNP_P3_143134_61882 | NW_004516331.1 | Scaffold1008 | 61882                   | GG                              | AA                | 1946633319               |
| SNP_P3_143135_61912 | NW_004516331.1 | Scaffold1008 | 61912                   | GG                              | TT                | 1946633321               |
| SNP_P3_143136_61975 | NW_004516331.1 | Scaffold1008 | 61975                   | AA                              | TT                | 1946633323               |
| SNP_P3_143137_62025 | NW_004516331.1 | Scaffold1008 | 62025                   | TT                              | CC                | 1946633325               |
| SNP_P3_143138_62043 | NW_004516331.1 | Scaffold1008 | 62043                   | CC                              | AA                | 1946633327               |
| SNP_P3_143139_62058 | NW_004516331.1 | Scaffold1008 | 62058                   | AA                              | GG                | 1946633329               |
| SNP_P3_143140_62077 | NW_004516331.1 | Scaffold1008 | 62077                   | GG                              | AA                | 1946633331               |
| SNP_P3_143141_62100 | NW_004516331.1 | Scaffold1008 | 62100                   | TT                              | CC                | 1946633333               |

| SNPs IDs             | Chromosome IDs | Chromosomes  | Physical positions (bp) | CDC Frontier (Reference genome) | (Pusa 256 & HPNB) | NCBI SNPdb Accession IDs |
|----------------------|----------------|--------------|-------------------------|---------------------------------|-------------------|--------------------------|
| SNP_P3_143142_80685  | NW_004516331.1 | Scaffold1008 | 80685                   | CC                              | TT                | 1946633334               |
| SNP_P3_143143_81075  | NW_004516331.1 | Scaffold1008 | 81075                   | AA                              | TT                | 1946633336               |
| SNP_P3_143144_790    | NW_004516333.1 | Scaffold1010 | 790                     | AA                              | GG                | 1946633338               |
| SNP_P3_143145_827    | NW_004516333.1 | Scaffold1010 | 827                     | AA                              | TT                | 1946633340               |
| SNP_P3_143146_843    | NW_004516333.1 | Scaffold1010 | 843                     | TT                              | CC                | 1946633342               |
| SNP_P3_143147_1357   | NW_004516333.1 | Scaffold1010 | 1357                    | CC                              | TT                | 1946633344               |
| SNP_P3_143148_40817  | NW_004516333.1 | Scaffold1010 | 40817                   | AA                              | GG                | 1946633346               |
| SNP_P3_143149_40856  | NW_004516333.1 | Scaffold1010 | 40856                   | GG                              | AA                | 1946633348               |
| SNP_P3_143150_44753  | NW_004516333.1 | Scaffold1010 | 44753                   | AA                              | GG                | 1946633350               |
| SNP_P3_143151_44803  | NW_004516333.1 | Scaffold1010 | 44803                   | AA                              | GG                | 1946633352               |
| SNP_P3_143152_52771  | NW_004516333.1 | Scaffold1010 | 52771                   | TT                              | AA                | 1946633354               |
| SNP_P3_143154_53160  | NW_004516333.1 | Scaffold1010 | 53160                   | TT                              | GG                | 1946633356               |
| SNP_P3_143155_82319  | NW_004516333.1 | Scaffold1010 | 82319                   | GG                              | TT                | 1946633358               |
| SNP_P3_143157_93861  | NW_004516333.1 | Scaffold1010 | 93861                   | AA                              | CC                | 1946633360               |
| SNP_P3_143158_93903  | NW_004516333.1 | Scaffold1010 | 93903                   | TT                              | CC                | 1946633362               |
| SNP_P3_143159_94219  | NW_004516333.1 | Scaffold1010 | 94219                   | TT                              | GG                | 1946633364               |
| SNP_P3_143160_94310  | NW_004516333.1 | Scaffold1010 | 94310                   | AA                              | GG                | 1946633366               |
| SNP_P3_143161_94314  | NW_004516333.1 | Scaffold1010 | 94314                   | GG                              | AA                | 1946633368               |
| SNP_P3_143162_94665  | NW_004516333.1 | Scaffold1010 | 94665                   | AA                              | GG                | 1946633370               |
| SNP_P3_143163_155119 | NW_004516333.1 | Scaffold1010 | 155119                  | CC                              | TT                | 1946633371               |
| SNP_P3_143164_155352 | NW_004516333.1 | Scaffold1010 | 155352                  | GG                              | AA                | 1946633373               |
| SNP_P3_143165_155393 | NW_004516333.1 | Scaffold1010 | 155393                  | GG                              | AA                | 1946633375               |
| SNP_P3_143166_155400 | NW_004516333.1 | Scaffold1010 | 155400                  | CC                              | TT                | 1946633377               |
| SNP_P3_143168_155534 | NW_004516333.1 | Scaffold1010 | 155534                  | AA                              | CC                | 1946633379               |
| SNP_P3_143170_155704 | NW_004516333.1 | Scaffold1010 | 155704                  | TT                              | AA                | 1946633381               |
| SNP_P3_143171_155720 | NW_004516333.1 | Scaffold1010 | 155720                  | CC                              | TT                | 1946633383               |
| SNP_P3_143172_155799 | NW_004516333.1 | Scaffold1010 | 155799                  | CC                              | TT                | 1946633385               |
| SNP_P3_143173_157873 | NW_004516333.1 | Scaffold1010 | 157873                  | CC                              | TT                | 1946633387               |
| SNP_P3_143174_158094 | NW_004516333.1 | Scaffold1010 | 158094                  | TT                              | CC                | 1946633389               |
| SNP_P3_143175_158096 | NW_004516333.1 | Scaffold1010 | 158096                  | GG                              | AA                | 1946633391               |
| SNP_P3_143176_158122 | NW_004516333.1 | Scaffold1010 | 158122                  | GG                              | CC                | 1946633393               |
| SNP_P3_143177_158139 | NW_004516333.1 | Scaffold1010 | 158139                  | AA                              | GG                | 1946633395               |
| SNP_P3_143178_158198 | NW_004516333.1 | Scaffold1010 | 158198                  | AA                              | CC                | 1946633397               |
| SNP_P3_143179_158360 | NW_004516333.1 | Scaffold1010 | 158360                  | CC                              | TT                | 1946633399               |
| SNP_P3_143180_160806 | NW_004516333.1 | Scaffold1010 | 160806                  | GG                              | AA                | 1946633401               |
| SNP_P3_143181_161129 | NW_004516333.1 | Scaffold1010 | 161129                  | GG                              | CC                | 1946633403               |
| SNP_P3_143182_161249 | NW_004516333.1 | Scaffold1010 | 161249                  | AA                              | GG                | 1946633405               |
| SNP_P3_143183_60476  | NW_004516335.1 | Scaffold1013 | 60476                   | CC                              | TT                | 1946633407               |
| SNP_P3_143184_60495  | NW_004516335.1 | Scaffold1013 | 60495                   | AA                              | GG                | 1946633408               |
| SNP_P3_143185_60907  | NW_004516335.1 | Scaffold1013 | 60907                   | AA                              | GG                | 1946633410               |
| SNP_P3_143186_60910  | NW_004516335.1 | Scaffold1013 | 60910                   | CC                              | AA                | 1946633412               |
| SNP_P3_143187_61092  | NW_004516335.1 | Scaffold1013 | 61092                   | GG                              | AA                | 1946633414               |

| SNPs IDs            | Chromosome IDs | Chromosomes  | Physical positions (bp) | CDC Frontier (Reference genome) | (Pusa 256 & HPNB) | NCBI SNPdb Accession IDs |
|---------------------|----------------|--------------|-------------------------|---------------------------------|-------------------|--------------------------|
| SNP_P3_143188_61097 | NW_004516335.1 | Scaffold1013 | 61097                   | GG                              | CC                | 1946633416               |
| SNP_P3_143189_61242 | NW_004516335.1 | Scaffold1013 | 61242                   | GG                              | TT                | 1946633418               |
| SNP_P3_143190_61375 | NW_004516335.1 | Scaffold1013 | 61375                   | CC                              | AA                | 1946633420               |
| SNP_P3_143191_61380 | NW_004516335.1 | Scaffold1013 | 61380                   | TT                              | GG                | 1946633422               |
| SNP_P3_143192_85169 | NW_004516335.1 | Scaffold1013 | 85169                   | CC                              | GG                | 1946633423               |
| SNP_P3_143193_89533 | NW_004516335.1 | Scaffold1013 | 89533                   | AA                              | GG                | 1946633425               |
| SNP_P3_143194_559   | NW_004516336.1 | Scaffold1016 | 559                     | TT                              | CC                | 1946633427               |
| SNP_P3_143195_814   | NW_004516336.1 | Scaffold1016 | 814                     | AA                              | TT                | 1946633429               |
| SNP_P3_143196_365   | NW_004516337.1 | Scaffold1017 | 365                     | AA                              | TT                | 1946633432               |
| SNP_P3_143197_409   | NW_004516337.1 | Scaffold1017 | 409                     | GG                              | AA                | 1946633433               |
| SNP_P3_143198_9893  | NW_004516337.1 | Scaffold1017 | 9893                    | GG                              | CC                | 1946633435               |
| SNP_P3_143199_10732 | NW_004516337.1 | Scaffold1017 | 10732                   | TT                              | AA                | 1946633437               |
| SNP_P3_143200_11084 | NW_004516337.1 | Scaffold1017 | 11084                   | TT                              | CC                | 1946633439               |
| SNP_P3_143201_12181 | NW_004516337.1 | Scaffold1017 | 12181                   | AA                              | CC                | 1946633441               |
| SNP_P3_143202_12879 | NW_004516337.1 | Scaffold1017 | 12879                   | GG                              | CC                | 1946633443               |
| SNP_P3_143203_12929 | NW_004516337.1 | Scaffold1017 | 12929                   | CC                              | AA                | 1946633445               |
| SNP_P3_143204_12931 | NW_004516337.1 | Scaffold1017 | 12931                   | TT                              | CC                | 1946633447               |
| SNP_P3_143205_13050 | NW_004516337.1 | Scaffold1017 | 13050                   | GG                              | CC                | 1946633449               |
| SNP_P3_143206_13051 | NW_004516337.1 | Scaffold1017 | 13051                   | CC                              | TT                | 1946633451               |
| SNP_P3_143207_13054 | NW_004516337.1 | Scaffold1017 | 13054                   | CC                              | AA                | 1946633453               |
| SNP_P3_143208_13067 | NW_004516337.1 | Scaffold1017 | 13067                   | TT                              | CC                | 1946633454               |
| SNP_P3_143209_13129 | NW_004516337.1 | Scaffold1017 | 13129                   | TT                              | GG                | 1946633456               |
| SNP_P3_143210_13136 | NW_004516337.1 | Scaffold1017 | 13136                   | AA                              | TT                | 1946633458               |
| SNP_P3_143211_13143 | NW_004516337.1 | Scaffold1017 | 13143                   | CC                              | TT                | 1946633460               |
| SNP_P3_143212_13173 | NW_004516337.1 | Scaffold1017 | 13173                   | CC                              | TT                | 1946633462               |
| SNP_P3_143213_13312 | NW_004516337.1 | Scaffold1017 | 13312                   | TT                              | CC                | 1946633464               |
| SNP_P3_143214_13323 | NW_004516337.1 | Scaffold1017 | 13323                   | AA                              | GG                | 1946633466               |
| SNP_P3_143215_13449 | NW_004516337.1 | Scaffold1017 | 13449                   | GG                              | AA                | 1946633468               |
| SNP_P3_143216_13532 | NW_004516337.1 | Scaffold1017 | 13532                   | AA                              | CC                | 1946633470               |
| SNP_P3_143217_13603 | NW_004516337.1 | Scaffold1017 | 13603                   | GG                              | CC                | 1946633472               |
| SNP_P3_143218_13668 | NW_004516337.1 | Scaffold1017 | 13668                   | AA                              | GG                | 1946633474               |
| SNP_P3_143219_13686 | NW_004516337.1 | Scaffold1017 | 13686                   | CC                              | TT                | 1946633476               |
| SNP_P3_143220_13704 | NW_004516337.1 | Scaffold1017 | 13704                   | GG                              | AA                | 1946633478               |
| SNP_P3_143221_13776 | NW_004516337.1 | Scaffold1017 | 13776                   | GG                              | CC                | 1946633480               |
| SNP_P3_143222_13811 | NW_004516337.1 | Scaffold1017 | 13811                   | CC                              | TT                | 1946633482               |
| SNP_P3_143223_13831 | NW_004516337.1 | Scaffold1017 | 13831                   | GG                              | TT                | 1946633484               |
| SNP_P3_143224_13879 | NW_004516337.1 | Scaffold1017 | 13879                   | CC                              | TT                | 1946633486               |
| SNP_P3_143225_13881 | NW_004516337.1 | Scaffold1017 | 13881                   | GG                              | AA                | 1946633488               |
| SNP_P3_143226_13984 | NW_004516337.1 | Scaffold1017 | 13984                   | TT                              | CC                | 1946633490               |
| SNP_P3_143227_14007 | NW_004516337.1 | Scaffold1017 | 14007                   | CC                              | TT                | 1946633492               |
| SNP_P3_143228_14050 | NW_004516337.1 | Scaffold1017 | 14050                   | GG                              | TT                | 1946633494               |
| SNP_P3_143229_14067 | NW_004516337.1 | Scaffold1017 | 14067                   | CC                              | TT                | 1946633496               |

| SNPs IDs            | Chromosome IDs | Chromosomes  | Physical positions (bp) | CDC Frontier (Reference genome) | (Pusa 256 & HPNB) | NCBI SNPdb Accession IDs |
|---------------------|----------------|--------------|-------------------------|---------------------------------|-------------------|--------------------------|
| SNP_P3_143230_14106 | NW_004516337.1 | Scaffold1017 | 14106                   | TT                              | CC                | 1946633498               |
| SNP_P3_143231_14119 | NW_004516337.1 | Scaffold1017 | 14119                   | GG                              | AA                | 1946633500               |
| SNP_P3_143232_14232 | NW_004516337.1 | Scaffold1017 | 14232                   | AA                              | CC                | 1946633502               |
| SNP_P3_143233_14252 | NW_004516337.1 | Scaffold1017 | 14252                   | AA                              | GG                | 1946633504               |
| SNP_P3_143234_14266 | NW_004516337.1 | Scaffold1017 | 14266                   | AA                              | GG                | 1946633506               |
| SNP_P3_143235_14272 | NW_004516337.1 | Scaffold1017 | 14272                   | GG                              | AA                | 1946633508               |
| SNP_P3_143236_14304 | NW_004516337.1 | Scaffold1017 | 14304                   | TT                              | CC                | 1946633510               |
| SNP_P3_143237_14373 | NW_004516337.1 | Scaffold1017 | 14373                   | AA                              | GG                | 1946633512               |
| SNP_P3_143238_14396 | NW_004516337.1 | Scaffold1017 | 14396                   | CC                              | AA                | 1946633514               |
| SNP_P3_143239_14429 | NW_004516337.1 | Scaffold1017 | 14429                   | CC                              | TT                | 1946633516               |
| SNP_P3_143240_14469 | NW_004516337.1 | Scaffold1017 | 14469                   | GG                              | CC                | 1946633518               |
| SNP_P3_143241_19224 | NW_004516337.1 | Scaffold1017 | 19224                   | CC                              | AA                | 1946633520               |
| SNP_P3_143242_19303 | NW_004516337.1 | Scaffold1017 | 19303                   | CC                              | AA                | 1946633522               |
| SNP_P3_143243_19516 | NW_004516337.1 | Scaffold1017 | 19516                   | CC                              | GG                | 1946633524               |
| SNP_P3_143244_19557 | NW_004516337.1 | Scaffold1017 | 19557                   | TT                              | GG                | 1946633526               |
| SNP_P3_143245_19577 | NW_004516337.1 | Scaffold1017 | 19577                   | TT                              | GG                | 1946633527               |
| SNP_P3_143246_19621 | NW_004516337.1 | Scaffold1017 | 19621                   | TT                              | CC                | 1946633529               |
| SNP_P3_143247_19623 | NW_004516337.1 | Scaffold1017 | 19623                   | GG                              | AA                | 1946633531               |
| SNP_P3_143248_19642 | NW_004516337.1 | Scaffold1017 | 19642                   | CC                              | AA                | 1946633533               |
| SNP_P3_143249_19717 | NW_004516337.1 | Scaffold1017 | 19717                   | CC                              | AA                | 1946633535               |
| SNP_P3_143250_19925 | NW_004516337.1 | Scaffold1017 | 19925                   | AA                              | CC                | 1946633537               |
| SNP_P3_143251_20244 | NW_004516337.1 | Scaffold1017 | 20244                   | GG                              | TT                | 1946633539               |
| SNP_P3_143252_20256 | NW_004516337.1 | Scaffold1017 | 20256                   | GG                              | AA                | 1946633541               |
| SNP_P3_143253_20525 | NW_004516337.1 | Scaffold1017 | 20525                   | TT                              | AA                | 1946633543               |
| SNP_P3_143254_20846 | NW_004516337.1 | Scaffold1017 | 20846                   | AA                              | TT                | 1946633545               |
| SNP_P3_143255_20912 | NW_004516337.1 | Scaffold1017 | 20912                   | AA                              | CC                | 1946633547               |
| SNP_P3_143256_21235 | NW_004516337.1 | Scaffold1017 | 21235                   | CC                              | TT                | 1946633556               |
| SNP_P3_143257_26988 | NW_004516337.1 | Scaffold1017 | 26988                   | CC                              | TT                | 1946633557               |
| SNP_P3_143258_27322 | NW_004516337.1 | Scaffold1017 | 27322                   | GG                              | TT                | 1946633559               |
| SNP_P3_143259_27976 | NW_004516337.1 | Scaffold1017 | 27976                   | TT                              | CC                | 1946633561               |
| SNP_P3_143260_28022 | NW_004516337.1 | Scaffold1017 | 28022                   | GG                              | AA                | 1946633563               |
| SNP_P3_143261_28367 | NW_004516337.1 | Scaffold1017 | 28367                   | TT                              | AA                | 1946633565               |
| SNP_P3_143262_28478 | NW_004516337.1 | Scaffold1017 | 28478                   | GG                              | AA                | 1946633567               |
| SNP_P3_143263_29649 | NW_004516337.1 | Scaffold1017 | 29649                   | CC                              | GG                | 1946633570               |
| SNP_P3_143264_29722 | NW_004516337.1 | Scaffold1017 | 29722                   | CC                              | TT                | 1946633572               |
| SNP_P3_143265_29731 | NW_004516337.1 | Scaffold1017 | 29731                   | GG                              | TT                | 1946633574               |
| SNP_P3_143266_29947 | NW_004516337.1 | Scaffold1017 | 29947                   | CC                              | AA                | 1946633576               |
| SNP_P3_143267_30015 | NW_004516337.1 | Scaffold1017 | 30015                   | AA                              | GG                | 1946633578               |
| SNP_P3_143268_30025 | NW_004516337.1 | Scaffold1017 | 30025                   | AA                              | CC                | 1946633580               |
| SNP_P3_143269_30070 | NW_004516337.1 | Scaffold1017 | 30070                   | AA                              | CC                | 1946633582               |
| SNP_P3_143270_30094 | NW_004516337.1 | Scaffold1017 | 30094                   | AA                              | TT                | 1946633584               |
| SNP_P3_143271_30266 | NW_004516337.1 | Scaffold1017 | 30266                   | AA                              | TT                | 1946633586               |

| SNPs IDs            | Chromosome IDs | Chromosomes  | Physical positions (bp) | CDC Frontier (Reference genome) | (Pusa 256 & HPNB) | NCBI SNPdb Accession IDs |
|---------------------|----------------|--------------|-------------------------|---------------------------------|-------------------|--------------------------|
| SNP_P3_143272_30320 | NW_004516337.1 | Scaffold1017 | 30320                   | CC                              | GG                | 1946633588               |
| SNP_P3_143273_32303 | NW_004516337.1 | Scaffold1017 | 32303                   | TT                              | GG                | 1946633590               |
| SNP_P3_143274_32306 | NW_004516337.1 | Scaffold1017 | 32306                   | CC                              | TT                | 1946633592               |
| SNP_P3_143275_32319 | NW_004516337.1 | Scaffold1017 | 32319                   | CC                              | AA                | 1946633594               |
| SNP_P3_143276_32500 | NW_004516337.1 | Scaffold1017 | 32500                   | AA                              | GG                | 1946633596               |
| SNP_P3_143277_32501 | NW_004516337.1 | Scaffold1017 | 32501                   | AA                              | TT                | 1946633598               |
| SNP_P3_143278_32584 | NW_004516337.1 | Scaffold1017 | 32584                   | AA                              | TT                | 1946633600               |
| SNP_P3_143279_32658 | NW_004516337.1 | Scaffold1017 | 32658                   | AA                              | GG                | 1946633602               |
| SNP_P3_143280_32922 | NW_004516337.1 | Scaffold1017 | 32922                   | TT                              | CC                | 1946633604               |
| SNP_P3_143282_38262 | NW_004516337.1 | Scaffold1017 | 38262                   | TT                              | CC                | 1946633606               |
| SNP_P3_143283_38563 | NW_004516337.1 | Scaffold1017 | 38563                   | CC                              | AA                | 1946633608               |
| SNP_P3_143284_38578 | NW_004516337.1 | Scaffold1017 | 38578                   | GG                              | AA                | 1946633610               |
| SNP_P3_143285_38606 | NW_004516337.1 | Scaffold1017 | 38606                   | GG                              | AA                | 1946633612               |
| SNP_P3_143286_38728 | NW_004516337.1 | Scaffold1017 | 38728                   | AA                              | CC                | 1946633614               |
| SNP_P3_143287_38729 | NW_004516337.1 | Scaffold1017 | 38729                   | TT                              | AA                | 1946633616               |
| SNP_P3_143288_39022 | NW_004516337.1 | Scaffold1017 | 39022                   | CC                              | TT                | 1946633618               |
| SNP_P3_143289_39939 | NW_004516337.1 | Scaffold1017 | 39939                   | AA                              | CC                | 1946633620               |
| SNP_P3_143290_39959 | NW_004516337.1 | Scaffold1017 | 39959                   | CC                              | AA                | 1946633622               |
| SNP_P3_143291_40479 | NW_004516337.1 | Scaffold1017 | 40479                   | GG                              | AA                | 1946633624               |
| SNP_P3_143292_42383 | NW_004516337.1 | Scaffold1017 | 42383                   | AA                              | CC                | 1946633626               |
| SNP_P3_143293_42450 | NW_004516337.1 | Scaffold1017 | 42450                   | AA                              | TT                | 1946633627               |
| SNP_P3_143294_42574 | NW_004516337.1 | Scaffold1017 | 42574                   | GG                              | AA                | 1946633629               |
| SNP_P3_143295_42581 | NW_004516337.1 | Scaffold1017 | 42581                   | GG                              | AA                | 1946633631               |
| SNP_P3_143296_42773 | NW_004516337.1 | Scaffold1017 | 42773                   | AA                              | TT                | 1946633633               |
| SNP_P3_143297_42864 | NW_004516337.1 | Scaffold1017 | 42864                   | TT                              | AA                | 1946633635               |
| SNP_P3_143298_42959 | NW_004516337.1 | Scaffold1017 | 42959                   | CC                              | TT                | 1946633637               |
| SNP_P3_143299_43400 | NW_004516337.1 | Scaffold1017 | 43400                   | GG                              | TT                | 1946633639               |
| SNP_P3_143300_43450 | NW_004516337.1 | Scaffold1017 | 43450                   | CC                              | TT                | 1946633641               |
| SNP_P3_143301_43557 | NW_004516337.1 | Scaffold1017 | 43557                   | CC                              | GG                | 1946633643               |
| SNP_P3_143302_43971 | NW_004516337.1 | Scaffold1017 | 43971                   | TT                              | AA                | 1946633645               |
| SNP_P3_143303_50381 | NW_004516337.1 | Scaffold1017 | 50381                   | CC                              | TT                | 1946633647               |
| SNP_P3_143304_51087 | NW_004516337.1 | Scaffold1017 | 51087                   | TT                              | CC                | 1946633649               |
| SNP_P3_143305_767   | NW_004516338.1 | Scaffold1020 | 767                     | AA                              | GG                | 1946633651               |
| SNP_P3_143306_1225  | NW_004516338.1 | Scaffold1020 | 1225                    | GG                              | CC                | 1946633653               |
| SNP_P3_143307_1372  | NW_004516338.1 | Scaffold1020 | 1372                    | AA                              | GG                | 1946633655               |
| SNP_P3_143308_1374  | NW_004516338.1 | Scaffold1020 | 1374                    | GG                              | AA                | 1946633657               |
| SNP_P3_143309_1402  | NW_004516338.1 | Scaffold1020 | 1402                    | AA                              | GG                | 1946633659               |
| SNP_P3_143310_1572  | NW_004516338.1 | Scaffold1020 | 1572                    | AA                              | GG                | 1946633661               |
| SNP_P3_143311_1785  | NW_004516338.1 | Scaffold1020 | 1785                    | AA                              | CC                | 1946633663               |
| SNP_P3_143312_1813  | NW_004516338.1 | Scaffold1020 | 1813                    | GG                              | AA                | 1946633665               |
| SNP_P3_143313_2008  | NW_004516338.1 | Scaffold1020 | 2008                    | TT                              | CC                | 1946633667               |
| SNP_P3_143314_21967 | NW_004516338.1 | Scaffold1020 | 21967                   | GG                              | CC                | 1946633669               |

| SNPs IDs             | Chromosome IDs | Chromosomes  | Physical positions (bp) | CDC Frontier (Reference genome) | (Pusa 256 & HPNB) | NCBI SNPdb Accession IDs |
|----------------------|----------------|--------------|-------------------------|---------------------------------|-------------------|--------------------------|
| SNP_P3_143315_42022  | NW_004516338.1 | Scaffold1020 | 42022                   | TT                              | CC                | 1946633671               |
| SNP_P3_143316_54346  | NW_004516338.1 | Scaffold1020 | 54346                   | AA                              | CC                | 1946633674               |
| SNP_P3_143317_72535  | NW_004516338.1 | Scaffold1020 | 72535                   | CC                              | AA                | 1946633676               |
| SNP_P3_143318_72738  | NW_004516338.1 | Scaffold1020 | 72738                   | CC                              | TT                | 1946633678               |
| SNP_P3_143319_72750  | NW_004516338.1 | Scaffold1020 | 72750                   | CC                              | GG                | 1946633681               |
| SNP_P3_143320_91580  | NW_004516338.1 | Scaffold1020 | 91580                   | AA                              | CC                | 1946633683               |
| SNP_P3_143321_91827  | NW_004516338.1 | Scaffold1020 | 91827                   | CC                              | AA                | 1946633685               |
| SNP_P3_143322_92189  | NW_004516338.1 | Scaffold1020 | 92189                   | AA                              | GG                | 1946633688               |
| SNP_P3_143323_93302  | NW_004516338.1 | Scaffold1020 | 93302                   | GG                              | AA                | 1946633690               |
| SNP_P3_143324_93437  | NW_004516338.1 | Scaffold1020 | 93437                   | CC                              | TT                | 1946633693               |
| SNP_P3_143325_93443  | NW_004516338.1 | Scaffold1020 | 93443                   | GG                              | TT                | 1946633695               |
| SNP_P3_143327_93693  | NW_004516338.1 | Scaffold1020 | 93693                   | AA                              | GG                | 1946633697               |
| SNP_P3_143328_93701  | NW_004516338.1 | Scaffold1020 | 93701                   | CC                              | TT                | 1946633700               |
| SNP_P3_143329_93713  | NW_004516338.1 | Scaffold1020 | 93713                   | AA                              | GG                | 1946633702               |
| SNP_P3_143330_93743  | NW_004516338.1 | Scaffold1020 | 93743                   | GG                              | AA                | 1946633704               |
| SNP_P3_143331_102058 | NW_004516338.1 | Scaffold1020 | 102058                  | GG                              | AA                | 1946633706               |
| SNP_P3_143332_121949 | NW_004516338.1 | Scaffold1020 | 121949                  | AA                              | GG                | 1946633708               |
| SNP_P3_143333_122038 | NW_004516338.1 | Scaffold1020 | 122038                  | CC                              | GG                | 1946633710               |
| SNP_P3_143334_124325 | NW_004516338.1 | Scaffold1020 | 124325                  | TT                              | CC                | 1946633712               |
| SNP_P3_143335_126095 | NW_004516338.1 | Scaffold1020 | 126095                  | CC                              | TT                | 1946633714               |
| SNP_P3_143336_126817 | NW_004516338.1 | Scaffold1020 | 126817                  | AA                              | GG                | 1946633716               |
| SNP_P3_143337_126819 | NW_004516338.1 | Scaffold1020 | 126819                  | GG                              | AA                | 1946633718               |
| SNP_P3_143338_126831 | NW_004516338.1 | Scaffold1020 | 126831                  | CC                              | TT                | 1946633720               |
| SNP_P3_143339_126843 | NW_004516338.1 | Scaffold1020 | 126843                  | GG                              | TT                | 1946633722               |
| SNP_P3_143340_126845 | NW_004516338.1 | Scaffold1020 | 126845                  | CC                              | AA                | 1946633724               |
| SNP_P3_143341_126847 | NW_004516338.1 | Scaffold1020 | 126847                  | CC                              | TT                | 1946633726               |
| SNP_P3_143342_127815 | NW_004516338.1 | Scaffold1020 | 127815                  | TT                              | CC                | 1946633728               |
| SNP_P3_143343_127824 | NW_004516338.1 | Scaffold1020 | 127824                  | AA                              | CC                | 1946633730               |
| SNP_P3_143344_127825 | NW_004516338.1 | Scaffold1020 | 127825                  | TT                              | CC                | 1946633731               |
| SNP_P3_143345_127843 | NW_004516338.1 | Scaffold1020 | 127843                  | TT                              | CC                | 1946633733               |
| SNP_P3_143346_127855 | NW_004516338.1 | Scaffold1020 | 127855                  | CC                              | TT                | 1946633735               |
| SNP_P3_143347_127864 | NW_004516338.1 | Scaffold1020 | 127864                  | GG                              | AA                | 1946633737               |
| SNP_P3_143350_130292 | NW_004516338.1 | Scaffold1020 | 130292                  | GG                              | AA                | 1946633739               |
| SNP_P3_143351_131246 | NW_004516338.1 | Scaffold1020 | 131246                  | GG                              | AA                | 1946633741               |
| SNP_P3_143352_139875 | NW_004516338.1 | Scaffold1020 | 139875                  | GG                              | AA                | 1946633743               |
| SNP_P3_143353_140253 | NW_004516338.1 | Scaffold1020 | 140253                  | TT                              | CC                | 1946633745               |
| SNP_P3_143354_158399 | NW_004516338.1 | Scaffold1020 | 158399                  | TT                              | CC                | 1946633747               |
| SNP_P3_143355_158475 | NW_004516338.1 | Scaffold1020 | 158475                  | CC                              | AA                | 1946633749               |
| SNP_P3_143356_158518 | NW_004516338.1 | Scaffold1020 | 158518                  | GG                              | AA                | 1946633751               |
| SNP_P3_143357_158524 | NW_004516338.1 | Scaffold1020 | 158524                  | AA                              | GG                | 1946633753               |
| SNP_P3_143358_158822 | NW_004516338.1 | Scaffold1020 | 158822                  | CC                              | TT                | 1946633755               |
| SNP_P3_143359_171459 | NW_004516338.1 | Scaffold1020 | 171459                  | CC                              | TT                | 1946633757               |

| SNPs IDs             | Chromosome IDs | Chromosomes  | Physical positions (bp) | CDC Frontier (Reference genome) | (Pusa 256 & HPNB) | NCBI SNPdb Accession IDs |
|----------------------|----------------|--------------|-------------------------|---------------------------------|-------------------|--------------------------|
| SNP_P3_143360_172038 | NW_004516338.1 | Scaffold1020 | 172038                  | GG                              | AA                | 1946633759               |
| SNP_P3_143361_175261 | NW_004516338.1 | Scaffold1020 | 175261                  | TT                              | CC                | 1946633761               |
| SNP_P3_143362_175299 | NW_004516338.1 | Scaffold1020 | 175299                  | CC                              | TT                | 1946633763               |
| SNP_P3_143363_175762 | NW_004516338.1 | Scaffold1020 | 175762                  | GG                              | AA                | 1946633764               |
| SNP_P3_143364_175776 | NW_004516338.1 | Scaffold1020 | 175776                  | CC                              | AA                | 1946633766               |
| SNP_P3_143365_177098 | NW_004516338.1 | Scaffold1020 | 177098                  | CC                              | AA                | 1946633768               |
| SNP_P3_143366_177202 | NW_004516338.1 | Scaffold1020 | 177202                  | GG                              | TT                | 1946633770               |
| SNP_P3_143367_177536 | NW_004516338.1 | Scaffold1020 | 177536                  | TT                              | CC                | 1946633772               |
| SNP_P3_143368_177553 | NW_004516338.1 | Scaffold1020 | 177553                  | AA                              | GG                | 1946633774               |
| SNP_P3_143369_177557 | NW_004516338.1 | Scaffold1020 | 177557                  | TT                              | AA                | 1946633776               |
| SNP_P3_143370_177615 | NW_004516338.1 | Scaffold1020 | 177615                  | CC                              | TT                | 1946633778               |
| SNP_P3_143371_177619 | NW_004516338.1 | Scaffold1020 | 177619                  | GG                              | AA                | 1946633780               |
| SNP_P3_143372_177624 | NW_004516338.1 | Scaffold1020 | 177624                  | GG                              | AA                | 1946633782               |
| SNP_P3_143373_177672 | NW_004516338.1 | Scaffold1020 | 177672                  | AA                              | TT                | 1946633784               |
| SNP_P3_143374_184386 | NW_004516338.1 | Scaffold1020 | 184386                  | GG                              | TT                | 1946633786               |
| SNP_P3_143377_226374 | NW_004516338.1 | Scaffold1020 | 226374                  | AA                              | GG                | 1946633788               |
| SNP_P3_143378_229381 | NW_004516338.1 | Scaffold1020 | 229381                  | TT                              | GG                | 1946633790               |
| SNP_P3_143379_237569 | NW_004516338.1 | Scaffold1020 | 237569                  | TT                              | GG                | 1946633792               |
| SNP_P3_143380_246369 | NW_004516338.1 | Scaffold1020 | 246369                  | AA                              | GG                | 1946633794               |
| SNP_P3_143381_246527 | NW_004516338.1 | Scaffold1020 | 246527                  | TT                              | CC                | 1946633796               |
| SNP_P3_143382_246888 | NW_004516338.1 | Scaffold1020 | 246888                  | GG                              | AA                | 1946633797               |
| SNP_P3_143383_246890 | NW_004516338.1 | Scaffold1020 | 246890                  | CC                              | TT                | 1946633799               |
| SNP_P3_143384_273260 | NW_004516338.1 | Scaffold1020 | 273260                  | TT                              | AA                | 1946633801               |
| SNP_P3_143385_273267 | NW_004516338.1 | Scaffold1020 | 273267                  | TT                              | GG                | 1946633803               |
| SNP_P3_143386_273433 | NW_004516338.1 | Scaffold1020 | 273433                  | CC                              | AA                | 1946633805               |
| SNP_P3_143387_275372 | NW_004516338.1 | Scaffold1020 | 275372                  | CC                              | TT                | 1946633807               |
| SNP_P3_143388_275614 | NW_004516338.1 | Scaffold1020 | 275614                  | CC                              | GG                | 1946633809               |
| SNP_P3_143389_276612 | NW_004516338.1 | Scaffold1020 | 276612                  | TT                              | GG                | 1946633811               |
| SNP_P3_143390_276812 | NW_004516338.1 | Scaffold1020 | 276812                  | TT                              | AA                | 1946633813               |
| SNP_P3_143391_276844 | NW_004516338.1 | Scaffold1020 | 276844                  | GG                              | AA                | 1946633815               |
| SNP_P3_143392_276847 | NW_004516338.1 | Scaffold1020 | 276847                  | AA                              | CC                | 1946633817               |
| SNP_P3_143393_276868 | NW_004516338.1 | Scaffold1020 | 276868                  | AA                              | TT                | 1946633819               |
| SNP_P3_143394_279862 | NW_004516338.1 | Scaffold1020 | 279862                  | TT                              | CC                | 1946633821               |
| SNP_P3_143395_298337 | NW_004516338.1 | Scaffold1020 | 298337                  | TT                              | CC                | 1946633823               |
| SNP_P3_143396_298343 | NW_004516338.1 | Scaffold1020 | 298343                  | TT                              | AA                | 1946633825               |
| SNP_P3_143397_310952 | NW_004516338.1 | Scaffold1020 | 310952                  | AA                              | GG                | 1946633827               |
| SNP_P3_143398_318656 | NW_004516338.1 | Scaffold1020 | 318656                  | CC                              | TT                | 1946633829               |
| SNP_P3_143399_332044 | NW_004516338.1 | Scaffold1020 | 332044                  | TT                              | CC                | 1946633831               |
| SNP_P3_143400_332068 | NW_004516338.1 | Scaffold1020 | 332068                  | TT                              | CC                | 1946633833               |
| SNP_P3_143401_337071 | NW_004516338.1 | Scaffold1020 | 337071                  | GG                              | AA                | 1946633834               |
| SNP_P3_143402_337087 | NW_004516338.1 | Scaffold1020 | 337087                  | CC                              | TT                | 1946633836               |
| SNP_P3_143403_337777 | NW_004516338.1 | Scaffold1020 | 337777                  | CC                              | TT                | 1946633838               |



| SNPs IDs             | Chromosome IDs | Chromosomes  | Physical positions (bp) | CDC Frontier (Reference genome) | (Pusa 256 & HPNB) | NCBI SNPdb Accession IDs |
|----------------------|----------------|--------------|-------------------------|---------------------------------|-------------------|--------------------------|
| SNP_P3_143404_342761 | NW_004516338.1 | Scaffold1020 | 342761                  | TT                              | CC                | 1946633840               |
| SNP_P3_143405_23809  | NW_004516343.1 | Scaffold1027 | 23809                   | TT                              | AA                | 1946633842               |
| SNP_P3_143406_31479  | NW_004516343.1 | Scaffold1027 | 31479                   | AA                              | CC                | 1946633844               |
| SNP_P3_143407_77630  | NW_004516343.1 | Scaffold1027 | 77630                   | GG                              | AA                | 1946633846               |
| SNP_P3_143408_77876  | NW_004516343.1 | Scaffold1027 | 77876                   | TT                              | CC                | 1946633848               |
| SNP_P3_143409_77887  | NW_004516343.1 | Scaffold1027 | 77887                   | CC                              | TT                | 1946633850               |
| SNP_P3_143410_77891  | NW_004516343.1 | Scaffold1027 | 77891                   | GG                              | TT                | 1946633852               |
| SNP_P3_143411_77893  | NW_004516343.1 | Scaffold1027 | 77893                   | AA                              | CC                | 1946633854               |
| SNP_P3_143412_77928  | NW_004516343.1 | Scaffold1027 | 77928                   | TT                              | CC                | 1946633856               |
| SNP_P3_143413_77974  | NW_004516343.1 | Scaffold1027 | 77974                   | TT                              | GG                | 1946633858               |
| SNP_P3_143414_78000  | NW_004516343.1 | Scaffold1027 | 78000                   | TT                              | AA                | 1946633860               |
| SNP_P3_143415_99230  | NW_004516343.1 | Scaffold1027 | 99230                   | GG                              | AA                | 1946633862               |
| SNP_P3_143416_108284 | NW_004516343.1 | Scaffold1027 | 108284                  | TT                              | CC                | 1946633864               |
| SNP_P3_143417_108725 | NW_004516343.1 | Scaffold1027 | 108725                  | GG                              | AA                | 1946633866               |
| SNP_P3_143418_109895 | NW_004516343.1 | Scaffold1027 | 109895                  | AA                              | GG                | 1946633867               |
| SNP_P3_143419_110096 | NW_004516343.1 | Scaffold1027 | 110096                  | TT                              | GG                | 1946633869               |
| SNP_P3_143420_136314 | NW_004516343.1 | Scaffold1027 | 136314                  | CC                              | GG                | 1946633871               |
| SNP_P3_143421_137643 | NW_004516343.1 | Scaffold1027 | 137643                  | CC                              | TT                | 1946633873               |
| SNP_P3_143422_144803 | NW_004516343.1 | Scaffold1027 | 144803                  | CC                              | TT                | 1946633875               |
| SNP_P3_143423_148332 | NW_004516343.1 | Scaffold1027 | 148332                  | AA                              | GG                | 1946633876               |
| SNP_P3_143424_148413 | NW_004516343.1 | Scaffold1027 | 148413                  | CC                              | TT                | 1946633877               |
| SNP_P3_143425_148458 | NW_004516343.1 | Scaffold1027 | 148458                  | AA                              | GG                | 1946633878               |
| SNP_P3_143426_148527 | NW_004516343.1 | Scaffold1027 | 148527                  | CC                              | TT                | 1946633880               |
| SNP_P3_143427_148551 | NW_004516343.1 | Scaffold1027 | 148551                  | GG                              | AA                | 1946633882               |
| SNP_P3_143428_148557 | NW_004516343.1 | Scaffold1027 | 148557                  | AA                              | GG                | 1946633884               |
| SNP_P3_143429_148590 | NW_004516343.1 | Scaffold1027 | 148590                  | CC                              | TT                | 1946633886               |
| SNP_P3_143430_148700 | NW_004516343.1 | Scaffold1027 | 148700                  | TT                              | CC                | 1946633888               |
| SNP_P3_143431_148728 | NW_004516343.1 | Scaffold1027 | 148728                  | TT                              | CC                | 1946633890               |
| SNP_P3_143432_148744 | NW_004516343.1 | Scaffold1027 | 148744                  | AA                              | GG                | 1946633892               |
| SNP_P3_143433_148781 | NW_004516343.1 | Scaffold1027 | 148781                  | GG                              | AA                | 1946633894               |
| SNP_P3_143434_148787 | NW_004516343.1 | Scaffold1027 | 148787                  | TT                              | CC                | 1946633896               |
| SNP_P3_143435_148790 | NW_004516343.1 | Scaffold1027 | 148790                  | TT                              | CC                | 1946633898               |
| SNP_P3_143436_148791 | NW_004516343.1 | Scaffold1027 | 148791                  | AA                              | CC                | 1946633900               |
| SNP_P3_143437_148793 | NW_004516343.1 | Scaffold1027 | 148793                  | AA                              | GG                | 1946633902               |
| SNP_P3_143438_148824 | NW_004516343.1 | Scaffold1027 | 148824                  | AA                              | GG                | 1946633904               |
| SNP_P3_143439_148829 | NW_004516343.1 | Scaffold1027 | 148829                  | AA                              | GG                | 1946633906               |
| SNP_P3_143440_148853 | NW_004516343.1 | Scaffold1027 | 148853                  | TT                              | CC                | 1946633908               |
| SNP_P3_143441_148877 | NW_004516343.1 | Scaffold1027 | 148877                  | TT                              | CC                | 1946633910               |
| SNP_P3_143442_148883 | NW_004516343.1 | Scaffold1027 | 148883                  | AA                              | GG                | 1946633912               |
| SNP_P3_143443_148889 | NW_004516343.1 | Scaffold1027 | 148889                  | GG                              | AA                | 1946633914               |
| SNP_P3_143444_148934 | NW_004516343.1 | Scaffold1027 | 148934                  | AA                              | GG                | 1946633916               |
| SNP_P3_143445_148946 | NW_004516343.1 | Scaffold1027 | 148946                  | GG                              | AA                | 1946633917               |

| SNPs IDs             | Chromosome IDs | Chromosomes  | Physical positions (bp) | CDC Frontier (Reference genome) | (Pusa 256 & HPNB) | NCBI SNPdb Accession IDs |
|----------------------|----------------|--------------|-------------------------|---------------------------------|-------------------|--------------------------|
| SNP_P3_143446_148949 | NW_004516343.1 | Scaffold1027 | 148949                  | CC                              | TT                | 1946633919               |
| SNP_P3_143447_148958 | NW_004516343.1 | Scaffold1027 | 148958                  | AA                              | GG                | 1946633921               |
| SNP_P3_143448_148970 | NW_004516343.1 | Scaffold1027 | 148970                  | TT                              | CC                | 1946633923               |
| SNP_P3_143449_148991 | NW_004516343.1 | Scaffold1027 | 148991                  | GG                              | AA                | 1946633925               |
| SNP_P3_143450_149006 | NW_004516343.1 | Scaffold1027 | 149006                  | GG                              | AA                | 1946633927               |
| SNP_P3_143451_149021 | NW_004516343.1 | Scaffold1027 | 149021                  | CC                              | TT                | 1946633929               |
| SNP_P3_143452_149045 | NW_004516343.1 | Scaffold1027 | 149045                  | TT                              | CC                | 1946633930               |
| SNP_P3_143453_149054 | NW_004516343.1 | Scaffold1027 | 149054                  | TT                              | CC                | 1946633933               |
| SNP_P3_143454_150121 | NW_004516343.1 | Scaffold1027 | 150121                  | TT                              | GG                | 1946633934               |
| SNP_P3_143455_150130 | NW_004516343.1 | Scaffold1027 | 150130                  | AA                              | GG                | 1946633937               |
| SNP_P3_143456_150446 | NW_004516343.1 | Scaffold1027 | 150446                  | AA                              | GG                | 1946633939               |
| SNP_P3_143457_150495 | NW_004516343.1 | Scaffold1027 | 150495                  | CC                              | TT                | 1946633940               |
| SNP_P3_143458_154128 | NW_004516343.1 | Scaffold1027 | 154128                  | TT                              | GG                | 1946633942               |
| SNP_P3_143459_154151 | NW_004516343.1 | Scaffold1027 | 154151                  | TT                              | AA                | 1946633944               |
| SNP_P3_143460_154153 | NW_004516343.1 | Scaffold1027 | 154153                  | AA                              | GG                | 1946633946               |
| SNP_P3_143461_154161 | NW_004516343.1 | Scaffold1027 | 154161                  | AA                              | TT                | 1946633948               |
| SNP_P3_143462_154167 | NW_004516343.1 | Scaffold1027 | 154167                  | AA                              | CC                | 1946633950               |
| SNP_P3_143463_154181 | NW_004516343.1 | Scaffold1027 | 154181                  | GG                              | CC                | 1946633952               |
| SNP_P3_143464_154190 | NW_004516343.1 | Scaffold1027 | 154190                  | TT                              | CC                | 1946633954               |
| SNP_P3_143465_159195 | NW_004516343.1 | Scaffold1027 | 159195                  | AA                              | TT                | 1946633955               |
| SNP_P3_143466_159227 | NW_004516343.1 | Scaffold1027 | 159227                  | TT                              | AA                | 1946633957               |
| SNP_P3_143467_181794 | NW_004516343.1 | Scaffold1027 | 181794                  | CC                              | TT                | 1946633959               |
| SNP_P3_143468_190902 | NW_004516343.1 | Scaffold1027 | 190902                  | CC                              | GG                | 1946633961               |
| SNP_P3_143469_193129 | NW_004516343.1 | Scaffold1027 | 193129                  | TT                              | CC                | 1946633963               |
| SNP_P3_143470_193168 | NW_004516343.1 | Scaffold1027 | 193168                  | AA                              | GG                | 1946633965               |
| SNP_P3_143471_193259 | NW_004516343.1 | Scaffold1027 | 193259                  | CC                              | AA                | 1946633967               |
| SNP_P3_143472_193868 | NW_004516343.1 | Scaffold1027 | 193868                  | CC                              | AA                | 1946633969               |
| SNP_P3_143474_202634 | NW_004516343.1 | Scaffold1027 | 202634                  | AA                              | TT                | 1946633971               |
| SNP_P3_143475_202661 | NW_004516343.1 | Scaffold1027 | 202661                  | GG                              | AA                | 1946633973               |
| SNP_P3_143476_202688 | NW_004516343.1 | Scaffold1027 | 202688                  | GG                              | AA                | 1946633975               |
| SNP_P3_143477_203982 | NW_004516343.1 | Scaffold1027 | 203982                  | CC                              | TT                | 1946633977               |
| SNP_P3_143478_203991 | NW_004516343.1 | Scaffold1027 | 203991                  | CC                              | TT                | 1946633979               |
| SNP_P3_143479_203997 | NW_004516343.1 | Scaffold1027 | 203997                  | GG                              | AA                | 1946633981               |
| SNP_P3_143480_204254 | NW_004516343.1 | Scaffold1027 | 204254                  | CC                              | AA                | 1946633983               |
| SNP_P3_143481_204275 | NW_004516343.1 | Scaffold1027 | 204275                  | CC                              | TT                | 1946633985               |
| SNP_P3_143482_204284 | NW_004516343.1 | Scaffold1027 | 204284                  | CC                              | TT                | 1946633987               |
| SNP_P3_143483_208175 | NW_004516343.1 | Scaffold1027 | 208175                  | CC                              | TT                | 1946633989               |
| SNP_P3_143484_210981 | NW_004516343.1 | Scaffold1027 | 210981                  | TT                              | GG                | 1946633991               |
| SNP_P3_143485_210990 | NW_004516343.1 | Scaffold1027 | 210990                  | GG                              | AA                | 1946633992               |
| SNP_P3_143486_210991 | NW_004516343.1 | Scaffold1027 | 210991                  | AA                              | TT                | 1946633994               |
| SNP_P3_143487_210993 | NW_004516343.1 | Scaffold1027 | 210993                  | TT                              | CC                | 1946633996               |
| SNP_P3_143488_212761 | NW_004516343.1 | Scaffold1027 | 212761                  | TT                              | CC                | 1946633998               |

| SNPs IDs             | Chromosome IDs | Chromosomes  | Physical positions (bp) | CDC Frontier (Reference genome) | (Pusa 256 & HPNB) | NCBI SNPdb Accession IDs |
|----------------------|----------------|--------------|-------------------------|---------------------------------|-------------------|--------------------------|
| SNP_P3_143489_219582 | NW_004516343.1 | Scaffold1027 | 219582                  | GG                              | AA                | 1946634000               |
| SNP_P3_143490_219629 | NW_004516343.1 | Scaffold1027 | 219629                  | GG                              | TT                | 1946634002               |
| SNP_P3_143491_223507 | NW_004516343.1 | Scaffold1027 | 223507                  | GG                              | AA                | 1946634004               |
| SNP_P3_143492_223511 | NW_004516343.1 | Scaffold1027 | 223511                  | CC                              | TT                | 1946634006               |
| SNP_P3_143493_241474 | NW_004516343.1 | Scaffold1027 | 241474                  | TT                              | CC                | 1946634008               |
| SNP_P3_143494_113    | NW_004516344.1 | Scaffold1029 | 113                     | GG                              | AA                | 1946634010               |
| SNP_P3_143495_171    | NW_004516344.1 | Scaffold1029 | 171                     | TT                              | CC                | 1946634013               |
| SNP_P3_143496_182    | NW_004516344.1 | Scaffold1029 | 182                     | AA                              | GG                | 1946634015               |
| SNP_P3_143497_184    | NW_004516344.1 | Scaffold1029 | 184                     | TT                              | GG                | 1946634017               |
| SNP_P3_143498_196    | NW_004516344.1 | Scaffold1029 | 196                     | TT                              | CC                | 1946634019               |
| SNP_P3_143499_8425   | NW_004516344.1 | Scaffold1029 | 8425                    | TT                              | CC                | 1946634021               |
| SNP_P3_143500_13698  | NW_004516344.1 | Scaffold1029 | 13698                   | GG                              | CC                | 1946634023               |
| SNP_P3_143501_18575  | NW_004516344.1 | Scaffold1029 | 18575                   | GG                              | AA                | 1946634025               |
| SNP_P3_143502_21016  | NW_004516344.1 | Scaffold1029 | 21016                   | TT                              | AA                | 1946634027               |
| SNP_P3_143503_26909  | NW_004516344.1 | Scaffold1029 | 26909                   | CC                              | TT                | 1946634029               |
| SNP_P3_143504_40491  | NW_004516344.1 | Scaffold1029 | 40491                   | GG                              | AA                | 1946634031               |
| SNP_P3_143505_41756  | NW_004516344.1 | Scaffold1029 | 41756                   | AA                              | GG                | 1946634033               |
| SNP_P3_143506_55140  | NW_004516344.1 | Scaffold1029 | 55140                   | GG                              | CC                | 1946634035               |
| SNP_P3_143507_56618  | NW_004516344.1 | Scaffold1029 | 56618                   | GG                              | CC                | 1946634037               |
| SNP_P3_143508_66642  | NW_004516344.1 | Scaffold1029 | 66642                   | GG                              | TT                | 1946634039               |
| SNP_P3_143509_67795  | NW_004516344.1 | Scaffold1029 | 67795                   | CC                              | TT                | 1946634041               |
| SNP_P3_143510_71933  | NW_004516344.1 | Scaffold1029 | 71933                   | AA                              | CC                | 1946634043               |
| SNP_P3_143511_87034  | NW_004516344.1 | Scaffold1029 | 87034                   | TT                              | CC                | 1946634045               |
| SNP_P3_143512_89420  | NW_004516344.1 | Scaffold1029 | 89420                   | AA                              | CC                | 1946634047               |
| SNP_P3_143513_89669  | NW_004516344.1 | Scaffold1029 | 89669                   | AA                              | GG                | 1946634050               |
| SNP_P3_143514_89701  | NW_004516344.1 | Scaffold1029 | 89701                   | GG                              | AA                | 1946634052               |
| SNP_P3_143515_90753  | NW_004516344.1 | Scaffold1029 | 90753                   | AA                              | GG                | 1946634054               |
| SNP_P3_143516_92048  | NW_004516344.1 | Scaffold1029 | 92048                   | TT                              | GG                | 1946634056               |
| SNP_P3_143517_110318 | NW_004516344.1 | Scaffold1029 | 110318                  | GG                              | TT                | 1946634059               |
| SNP_P3_143518_110361 | NW_004516344.1 | Scaffold1029 | 110361                  | AA                              | TT                | 1946634060               |
| SNP_P3_143519_110631 | NW_004516344.1 | Scaffold1029 | 110631                  | CC                              | TT                | 1946634062               |
| SNP_P3_143520_110685 | NW_004516344.1 | Scaffold1029 | 110685                  | TT                              | CC                | 1946634064               |
| SNP_P3_143521_110686 | NW_004516344.1 | Scaffold1029 | 110686                  | CC                              | TT                | 1946634067               |
| SNP_P3_143522_110702 | NW_004516344.1 | Scaffold1029 | 110702                  | GG                              | AA                | 1946634068               |
| SNP_P3_143523_110706 | NW_004516344.1 | Scaffold1029 | 110706                  | CC                              | TT                | 1946634071               |
| SNP_P3_143524_110707 | NW_004516344.1 | Scaffold1029 | 110707                  | AA                              | GG                | 1946634073               |
| SNP_P3_143525_110720 | NW_004516344.1 | Scaffold1029 | 110720                  | GG                              | CC                | 1946634075               |
| SNP_P3_143526_110724 | NW_004516344.1 | Scaffold1029 | 110724                  | GG                              | AA                | 1946634077               |
| SNP_P3_143527_110733 | NW_004516344.1 | Scaffold1029 | 110733                  | AA                              | TT                | 1946634079               |
| SNP_P3_143528_114168 | NW_004516344.1 | Scaffold1029 | 114168                  | GG                              | AA                | 1946634081               |
| SNP_P3_143529_114323 | NW_004516344.1 | Scaffold1029 | 114323                  | TT                              | CC                | 1946634082               |
| SNP_P3_143530_114365 | NW_004516344.1 | Scaffold1029 | 114365                  | CC                              | AA                | 1946634084               |

| SNPs IDs             | Chromosome IDs | Chromosomes  | Physical positions (bp) | CDC Frontier (Reference genome) | (Pusa 256 & HPNB) | NCBI SNPdb Accession IDs |
|----------------------|----------------|--------------|-------------------------|---------------------------------|-------------------|--------------------------|
| SNP_P3_143531_117410 | NW_004516344.1 | Scaffold1029 | 117410                  | TT                              | AA                | 1946634086               |
| SNP_P3_143532_122548 | NW_004516344.1 | Scaffold1029 | 122548                  | TT                              | GG                | 1946634089               |
| SNP_P3_143534_133940 | NW_004516344.1 | Scaffold1029 | 133940                  | GG                              | AA                | 1946634091               |
| SNP_P3_143535_149860 | NW_004516344.1 | Scaffold1029 | 149860                  | CC                              | TT                | 1946634093               |
| SNP_P3_143537_16173  | NW_004516345.1 | Scaffold1032 | 16173                   | TT                              | AA                | 1946634095               |
| SNP_P3_143538_17238  | NW_004516345.1 | Scaffold1032 | 17238                   | AA                              | TT                | 1946634097               |
| SNP_P3_143539_17240  | NW_004516345.1 | Scaffold1032 | 17240                   | AA                              | GG                | 1946634099               |
| SNP_P3_143540_17242  | NW_004516345.1 | Scaffold1032 | 17242                   | TT                              | GG                | 1946634101               |
| SNP_P3_143541_20396  | NW_004516345.1 | Scaffold1032 | 20396                   | CC                              | AA                | 1946634102               |
| SNP_P3_143542_20639  | NW_004516345.1 | Scaffold1032 | 20639                   | GG                              | AA                | 1946634104               |
| SNP_P3_143543_22585  | NW_004516345.1 | Scaffold1032 | 22585                   | CC                              | AA                | 1946634106               |
| SNP_P3_143544_22669  | NW_004516345.1 | Scaffold1032 | 22669                   | GG                              | AA                | 1946634108               |
| SNP_P3_143545_25355  | NW_004516345.1 | Scaffold1032 | 25355                   | TT                              | AA                | 1946634110               |
| SNP_P3_143546_1175   | NW_004516347.1 | Scaffold1034 | 1175                    | CC                              | GG                | 1946634112               |
| SNP_P3_143547_1209   | NW_004516347.1 | Scaffold1034 | 1209                    | AA                              | TT                | 1946634114               |
| SNP_P3_143548_1235   | NW_004516347.1 | Scaffold1034 | 1235                    | CC                              | GG                | 1946634116               |
| SNP_P3_143549_1244   | NW_004516347.1 | Scaffold1034 | 1244                    | CC                              | TT                | 1946634117               |
| SNP_P3_143550_1245   | NW_004516347.1 | Scaffold1034 | 1245                    | AA                              | GG                | 1946634119               |
| SNP_P3_143551_1266   | NW_004516347.1 | Scaffold1034 | 1266                    | GG                              | AA                | 1946634121               |
| SNP_P3_143552_7180   | NW_004516347.1 | Scaffold1034 | 7180                    | GG                              | CC                | 1946634123               |
| SNP_P3_143553_8827   | NW_004516347.1 | Scaffold1034 | 8827                    | CC                              | AA                | 1946634125               |
| SNP_P3_143555_8941   | NW_004516347.1 | Scaffold1034 | 8941                    | CC                              | TT                | 1946634127               |
| SNP_P3_143556_9111   | NW_004516347.1 | Scaffold1034 | 9111                    | CC                              | AA                | 1946634129               |
| SNP_P3_143557_9192   | NW_004516347.1 | Scaffold1034 | 9192                    | GG                              | AA                | 1946634131               |
| SNP_P3_143558_9204   | NW_004516347.1 | Scaffold1034 | 9204                    | GG                              | AA                | 1946634133               |
| SNP_P3_143559_9276   | NW_004516347.1 | Scaffold1034 | 9276                    | TT                              | GG                | 1946634135               |
| SNP_P3_143560_9291   | NW_004516347.1 | Scaffold1034 | 9291                    | CC                              | TT                | 1946634137               |
| SNP_P3_143561_9657   | NW_004516347.1 | Scaffold1034 | 9657                    | AA                              | GG                | 1946634139               |
| SNP_P3_143562_10178  | NW_004516347.1 | Scaffold1034 | 10178                   | TT                              | CC                | 1946634141               |
| SNP_P3_143563_13977  | NW_004516347.1 | Scaffold1034 | 13977                   | CC                              | TT                | 1946634143               |
| SNP_P3_143564_15566  | NW_004516347.1 | Scaffold1034 | 15566                   | GG                              | AA                | 1946634145               |
| SNP_P3_143565_15743  | NW_004516347.1 | Scaffold1034 | 15743                   | GG                              | AA                | 1946634147               |
| SNP_P3_143566_28381  | NW_004516347.1 | Scaffold1034 | 28381                   | CC                              | TT                | 1946634149               |
| SNP_P3_143567_28567  | NW_004516347.1 | Scaffold1034 | 28567                   | GG                              | AA                | 1946634151               |
| SNP_P3_143568_29606  | NW_004516347.1 | Scaffold1034 | 29606                   | AA                              | CC                | 1946634153               |
| SNP_P3_143569_29636  | NW_004516347.1 | Scaffold1034 | 29636                   | CC                              | TT                | 1946634155               |
| SNP_P3_143570_30486  | NW_004516347.1 | Scaffold1034 | 30486                   | GG                              | AA                | 1946634157               |
| SNP_P3_143571_37561  | NW_004516347.1 | Scaffold1034 | 37561                   | AA                              | GG                | 1946634159               |
| SNP_P3_143572_39457  | NW_004516347.1 | Scaffold1034 | 39457                   | TT                              | GG                | 1946634161               |
| SNP_P3_143573_39469  | NW_004516347.1 | Scaffold1034 | 39469                   | TT                              | AA                | 1946634163               |
| SNP_P3_143574_39496  | NW_004516347.1 | Scaffold1034 | 39496                   | AA                              | GG                | 1946634165               |
| SNP_P3_143575_43491  | NW_004516347.1 | Scaffold1034 | 43491                   | GG                              | TT                | 1946634167               |

| SNPs IDs            | Chromosome IDs | Chromosomes  | Physical positions (bp) | CDC Frontier (Reference genome) | (Pusa 256 & HPNB) | NCBI SNPdb Accession IDs |
|---------------------|----------------|--------------|-------------------------|---------------------------------|-------------------|--------------------------|
| SNP_P3_143576_45639 | NW_004516347.1 | Scaffold1034 | 45639                   | GG                              | AA                | 1946634168               |
| SNP_P3_143577_45860 | NW_004516347.1 | Scaffold1034 | 45860                   | AA                              | GG                | 1946634171               |
| SNP_P3_143578_46122 | NW_004516347.1 | Scaffold1034 | 46122                   | GG                              | TT                | 1946634173               |
| SNP_P3_143579_46156 | NW_004516347.1 | Scaffold1034 | 46156                   | AA                              | TT                | 1946634175               |
| SNP_P3_143580_46205 | NW_004516347.1 | Scaffold1034 | 46205                   | GG                              | TT                | 1946634177               |
| SNP_P3_143581_46533 | NW_004516347.1 | Scaffold1034 | 46533                   | TT                              | CC                | 1946634179               |
| SNP_P3_143582_46534 | NW_004516347.1 | Scaffold1034 | 46534                   | TT                              | CC                | 1946634181               |
| SNP_P3_143583_46722 | NW_004516347.1 | Scaffold1034 | 46722                   | TT                              | CC                | 1946634183               |
| SNP_P3_143584_46899 | NW_004516347.1 | Scaffold1034 | 46899                   | TT                              | CC                | 1946634185               |
| SNP_P3_143585_51437 | NW_004516347.1 | Scaffold1034 | 51437                   | AA                              | GG                | 1946634187               |
| SNP_P3_143586_51736 | NW_004516347.1 | Scaffold1034 | 51736                   | TT                              | CC                | 1946634189               |
| SNP_P3_143587_55181 | NW_004516347.1 | Scaffold1034 | 55181                   | GG                              | AA                | 1946634190               |
| SNP_P3_143588_57319 | NW_004516347.1 | Scaffold1034 | 57319                   | GG                              | AA                | 1946634192               |
| SNP_P3_143589_58609 | NW_004516347.1 | Scaffold1034 | 58609                   | AA                              | GG                | 1946634194               |
| SNP_P3_143590_59264 | NW_004516347.1 | Scaffold1034 | 59264                   | GG                              | AA                | 1946634196               |
| SNP_P3_143591_61074 | NW_004516347.1 | Scaffold1034 | 61074                   | AA                              | GG                | 1946634198               |
| SNP_P3_143592_74000 | NW_004516347.1 | Scaffold1034 | 74000                   | AA                              | CC                | 1946634200               |
| SNP_P3_143593_74029 | NW_004516347.1 | Scaffold1034 | 74029                   | TT                              | GG                | 1946634202               |
| SNP_P3_143594_74065 | NW_004516347.1 | Scaffold1034 | 74065                   | GG                              | AA                | 1946634204               |
| SNP_P3_143595_74106 | NW_004516347.1 | Scaffold1034 | 74106                   | TT                              | AA                | 1946634206               |
| SNP_P3_143596_81649 | NW_004516347.1 | Scaffold1034 | 81649                   | GG                              | AA                | 1946634208               |
| SNP_P3_143597_504   | NW_004516348.1 | Scaffold1035 | 504                     | CC                              | TT                | 1946634210               |
| SNP_P3_143598_517   | NW_004516348.1 | Scaffold1035 | 517                     | AA                              | TT                | 1946634212               |
| SNP_P3_143599_821   | NW_004516348.1 | Scaffold1035 | 821                     | CC                              | TT                | 1946634214               |
| SNP_P3_143600_947   | NW_004516348.1 | Scaffold1035 | 947                     | TT                              | GG                | 1946634216               |
| SNP_P3_143601_1158  | NW_004516348.1 | Scaffold1035 | 1158                    | GG                              | AA                | 1946634218               |
| SNP_P3_143603_6410  | NW_004516349.1 | Scaffold1036 | 6410                    | AA                              | GG                | 1946634220               |
| SNP_P3_143604_6649  | NW_004516349.1 | Scaffold1036 | 6649                    | GG                              | TT                | 1946634222               |
| SNP_P3_143605_6650  | NW_004516349.1 | Scaffold1036 | 6650                    | AA                              | GG                | 1946634224               |
| SNP_P3_143606_9995  | NW_004516349.1 | Scaffold1036 | 9995                    | CC                              | AA                | 1946634226               |
| SNP_P3_143607_10096 | NW_004516349.1 | Scaffold1036 | 10096                   | AA                              | CC                | 1946634228               |
| SNP_P3_143608_10175 | NW_004516349.1 | Scaffold1036 | 10175                   | CC                              | TT                | 1946634230               |
| SNP_P3_143609_10361 | NW_004516349.1 | Scaffold1036 | 10361                   | GG                              | CC                | 1946634231               |
| SNP_P3_143610_22108 | NW_004516349.1 | Scaffold1036 | 22108                   | AA                              | TT                | 1946634233               |
| SNP_P3_143611_24011 | NW_004516349.1 | Scaffold1036 | 24011                   | TT                              | AA                | 1946634235               |
| SNP_P3_143612_24683 | NW_004516349.1 | Scaffold1036 | 24683                   | AA                              | GG                | 1946634237               |
| SNP_P3_143613_37108 | NW_004516349.1 | Scaffold1036 | 37108                   | TT                              | GG                | 1946634239               |
| SNP_P3_143614_37123 | NW_004516349.1 | Scaffold1036 | 37123                   | GG                              | CC                | 1946634241               |
| SNP_P3_143615_37142 | NW_004516349.1 | Scaffold1036 | 37142                   | TT                              | AA                | 1946634243               |
| SNP_P3_143616_37452 | NW_004516349.1 | Scaffold1036 | 37452                   | AA                              | TT                | 1946634245               |
| SNP_P3_143617_43779 | NW_004516349.1 | Scaffold1036 | 43779                   | AA                              | CC                | 1946634247               |
| SNP_P3_143618_45715 | NW_004516349.1 | Scaffold1036 | 45715                   | CC                              | AA                | 1946634249               |

| SNPs IDs             | Chromosome IDs | Chromosomes  | Physical positions (bp) | CDC Frontier (Reference genome) | (Pusa 256 & HPNB) | NCBI SNPdb Accession IDs |
|----------------------|----------------|--------------|-------------------------|---------------------------------|-------------------|--------------------------|
| SNP_P3_143619_46079  | NW_004516349.1 | Scaffold1036 | 46079                   | TT                              | CC                | 1946634251               |
| SNP_P3_143620_46111  | NW_004516349.1 | Scaffold1036 | 46111                   | AA                              | GG                | 1946634253               |
| SNP_P3_143621_46114  | NW_004516349.1 | Scaffold1036 | 46114                   | TT                              | CC                | 1946634255               |
| SNP_P3_143622_46329  | NW_004516349.1 | Scaffold1036 | 46329                   | TT                              | GG                | 1946634257               |
| SNP_P3_143623_60213  | NW_004516349.1 | Scaffold1036 | 60213                   | GG                              | TT                | 1946634259               |
| SNP_P3_143624_60446  | NW_004516349.1 | Scaffold1036 | 60446                   | TT                              | GG                | 1946634261               |
| SNP_P3_143625_60496  | NW_004516349.1 | Scaffold1036 | 60496                   | TT                              | AA                | 1946634263               |
| SNP_P3_143626_66356  | NW_004516349.1 | Scaffold1036 | 66356                   | GG                              | TT                | 1946634265               |
| SNP_P3_143627_74524  | NW_004516349.1 | Scaffold1036 | 74524                   | CC                              | TT                | 1946634267               |
| SNP_P3_143628_75349  | NW_004516349.1 | Scaffold1036 | 75349                   | TT                              | GG                | 1946634269               |
| SNP_P3_143629_75472  | NW_004516349.1 | Scaffold1036 | 75472                   | CC                              | TT                | 1946634271               |
| SNP_P3_143630_75710  | NW_004516349.1 | Scaffold1036 | 75710                   | TT                              | AA                | 1946634273               |
| SNP_P3_143631_77493  | NW_004516349.1 | Scaffold1036 | 77493                   | AA                              | GG                | 1946634275               |
| SNP_P3_143632_77547  | NW_004516349.1 | Scaffold1036 | 77547                   | CC                              | TT                | 1946634276               |
| SNP_P3_143633_77595  | NW_004516349.1 | Scaffold1036 | 77595                   | TT                              | AA                | 1946634279               |
| SNP_P3_143634_77964  | NW_004516349.1 | Scaffold1036 | 77964                   | CC                              | TT                | 1946634281               |
| SNP_P3_143635_78000  | NW_004516349.1 | Scaffold1036 | 78000                   | CC                              | AA                | 1946634283               |
| SNP_P3_143636_86197  | NW_004516349.1 | Scaffold1036 | 86197                   | TT                              | GG                | 1946634285               |
| SNP_P3_143637_86217  | NW_004516349.1 | Scaffold1036 | 86217                   | TT                              | AA                | 1946634287               |
| SNP_P3_143638_86224  | NW_004516349.1 | Scaffold1036 | 86224                   | GG                              | AA                | 1946634289               |
| SNP_P3_143639_86387  | NW_004516349.1 | Scaffold1036 | 86387                   | AA                              | TT                | 1946634291               |
| SNP_P3_143640_86388  | NW_004516349.1 | Scaffold1036 | 86388                   | AA                              | TT                | 1946634293               |
| SNP_P3_143641_86389  | NW_004516349.1 | Scaffold1036 | 86389                   | CC                              | GG                | 1946634295               |
| SNP_P3_143642_86778  | NW_004516349.1 | Scaffold1036 | 86778                   | AA                              | CC                | 1946634297               |
| SNP_P3_143643_86856  | NW_004516349.1 | Scaffold1036 | 86856                   | GG                              | TT                | 1946634299               |
| SNP_P3_143644_86955  | NW_004516349.1 | Scaffold1036 | 86955                   | GG                              | TT                | 1946634301               |
| SNP_P3_143645_87052  | NW_004516349.1 | Scaffold1036 | 87052                   | TT                              | AA                | 1946634303               |
| SNP_P3_143646_87056  | NW_004516349.1 | Scaffold1036 | 87056                   | TT                              | GG                | 1946634305               |
| SNP_P3_143647_87130  | NW_004516349.1 | Scaffold1036 | 87130                   | AA                              | GG                | 1946634307               |
| SNP_P3_143648_87142  | NW_004516349.1 | Scaffold1036 | 87142                   | CC                              | GG                | 1946634309               |
| SNP_P3_143649_87595  | NW_004516349.1 | Scaffold1036 | 87595                   | TT                              | AA                | 1946634311               |
| SNP_P3_143650_87841  | NW_004516349.1 | Scaffold1036 | 87841                   | TT                              | AA                | 1946634313               |
| SNP_P3_143651_87849  | NW_004516349.1 | Scaffold1036 | 87849                   | GG                              | CC                | 1946634316               |
| SNP_P3_143652_88583  | NW_004516349.1 | Scaffold1036 | 88583                   | AA                              | GG                | 1946634318               |
| SNP_P3_143653_89086  | NW_004516349.1 | Scaffold1036 | 89086                   | TT                              | CC                | 1946634320               |
| SNP_P3_143654_89097  | NW_004516349.1 | Scaffold1036 | 89097                   | GG                              | CC                | 1946634322               |
| SNP_P3_143655_94291  | NW_004516349.1 | Scaffold1036 | 94291                   | AA                              | CC                | 1946634324               |
| SNP_P3_143656_99770  | NW_004516349.1 | Scaffold1036 | 99770                   | GG                              | TT                | 1946634325               |
| SNP_P3_143657_99786  | NW_004516349.1 | Scaffold1036 | 99786                   | TT                              | CC                | 1946634327               |
| SNP_P3_143658_99789  | NW_004516349.1 | Scaffold1036 | 99789                   | TT                              | AA                | 1946634329               |
| SNP_P3_143659_99825  | NW_004516349.1 | Scaffold1036 | 99825                   | AA                              | GG                | 1946634331               |
| SNP_P3_143660_100131 | NW_004516349.1 | Scaffold1036 | 100131                  | TT                              | CC                | 1946634333               |

| SNPs IDs             | Chromosome IDs | Chromosomes  | Physical positions (bp) | CDC Frontier (Reference genome) | (Pusa 256 & HPNB) | NCBI SNPdb Accession IDs |
|----------------------|----------------|--------------|-------------------------|---------------------------------|-------------------|--------------------------|
| SNP_P3_143661_100170 | NW_004516349.1 | Scaffold1036 | 100170                  | AA                              | CC                | 1946634335               |
| SNP_P3_143662_102220 | NW_004516349.1 | Scaffold1036 | 102220                  | AA                              | GG                | 1946634337               |
| SNP_P3_143663_102373 | NW_004516349.1 | Scaffold1036 | 102373                  | AA                              | TT                | 1946634339               |
| SNP_P3_143664_102522 | NW_004516349.1 | Scaffold1036 | 102522                  | AA                              | GG                | 1946634341               |
| SNP_P3_143665_102585 | NW_004516349.1 | Scaffold1036 | 102585                  | AA                              | CC                | 1946634343               |
| SNP_P3_143666_102609 | NW_004516349.1 | Scaffold1036 | 102609                  | TT                              | AA                | 1946634345               |
| SNP_P3_143667_102615 | NW_004516349.1 | Scaffold1036 | 102615                  | AA                              | GG                | 1946634347               |
| SNP_P3_143668_102620 | NW_004516349.1 | Scaffold1036 | 102620                  | GG                              | TT                | 1946634349               |
| SNP_P3_143669_102636 | NW_004516349.1 | Scaffold1036 | 102636                  | AA                              | GG                | 1946634351               |
| SNP_P3_143670_102639 | NW_004516349.1 | Scaffold1036 | 102639                  | TT                              | CC                | 1946634353               |
| SNP_P3_143671_102655 | NW_004516349.1 | Scaffold1036 | 102655                  | GG                              | AA                | 1946634355               |
| SNP_P3_143672_102844 | NW_004516349.1 | Scaffold1036 | 102844                  | AA                              | CC                | 1946634357               |
| SNP_P3_143673_102956 | NW_004516349.1 | Scaffold1036 | 102956                  | TT                              | GG                | 1946634359               |
| SNP_P3_143674_103012 | NW_004516349.1 | Scaffold1036 | 103012                  | GG                              | TT                | 1946634361               |
| SNP_P3_143675_103024 | NW_004516349.1 | Scaffold1036 | 103024                  | TT                              | GG                | 1946634363               |
| SNP_P3_143676_103080 | NW_004516349.1 | Scaffold1036 | 103080                  | TT                              | CC                | 1946634365               |
| SNP_P3_143677_103132 | NW_004516349.1 | Scaffold1036 | 103132                  | CC                              | TT                | 1946634367               |
| SNP_P3_143678_103139 | NW_004516349.1 | Scaffold1036 | 103139                  | GG                              | TT                | 1946634369               |
| SNP_P3_143679_103167 | NW_004516349.1 | Scaffold1036 | 103167                  | AA                              | GG                | 1946634371               |
| SNP_P3_143680_103192 | NW_004516349.1 | Scaffold1036 | 103192                  | TT                              | CC                | 1946634374               |
| SNP_P3_143681_114661 | NW_004516349.1 | Scaffold1036 | 114661                  | TT                              | AA                | 1946634376               |
| SNP_P3_143682_115004 | NW_004516349.1 | Scaffold1036 | 115004                  | AA                              | GG                | 1946634378               |
| SNP_P3_143683_139687 | NW_004516349.1 | Scaffold1036 | 139687                  | GG                              | TT                | 1946634380               |
| SNP_P3_143684_140891 | NW_004516349.1 | Scaffold1036 | 140891                  | CC                              | GG                | 1946634381               |
| SNP_P3_143686_156181 | NW_004516349.1 | Scaffold1036 | 156181                  | CC                              | AA                | 1946634384               |
| SNP_P3_143687_157238 | NW_004516349.1 | Scaffold1036 | 157238                  | GG                              | AA                | 1946634386               |
| SNP_P3_143688_157560 | NW_004516349.1 | Scaffold1036 | 157560                  | CC                              | TT                | 1946634388               |
| SNP_P3_143689_169539 | NW_004516349.1 | Scaffold1036 | 169539                  | CC                              | AA                | 1946634389               |
| SNP_P3_143690_169653 | NW_004516349.1 | Scaffold1036 | 169653                  | TT                              | AA                | 1946634391               |
| SNP_P3_143691_171690 | NW_004516349.1 | Scaffold1036 | 171690                  | GG                              | AA                | 1946634393               |
| SNP_P3_143692_173771 | NW_004516349.1 | Scaffold1036 | 173771                  | AA                              | GG                | 1946634395               |
| SNP_P3_143693_196841 | NW_004516349.1 | Scaffold1036 | 196841                  | GG                              | AA                | 1946634397               |
| SNP_P3_143694_199297 | NW_004516349.1 | Scaffold1036 | 199297                  | CC                              | AA                | 1946634399               |
| SNP_P3_143695_204388 | NW_004516349.1 | Scaffold1036 | 204388                  | CC                              | TT                | 1946634401               |
| SNP_P3_143696_204416 | NW_004516349.1 | Scaffold1036 | 204416                  | AA                              | CC                | 1946634403               |
| SNP_P3_143697_204756 | NW_004516349.1 | Scaffold1036 | 204756                  | GG                              | AA                | 1946634405               |
| SNP_P3_143698_204867 | NW_004516349.1 | Scaffold1036 | 204867                  | GG                              | AA                | 1946634407               |
| SNP_P3_143699_204973 | NW_004516349.1 | Scaffold1036 | 204973                  | AA                              | TT                | 1946634409               |
| SNP_P3_143700_204998 | NW_004516349.1 | Scaffold1036 | 204998                  | AA                              | GG                | 1946634411               |
| SNP_P3_143702_207094 | NW_004516349.1 | Scaffold1036 | 207094                  | CC                              | TT                | 1946634413               |
| SNP_P3_143703_213045 | NW_004516349.1 | Scaffold1036 | 213045                  | AA                              | TT                | 1946634415               |
| SNP_P3_143704_213060 | NW_004516349.1 | Scaffold1036 | 213060                  | AA                              | GG                | 1946634417               |

| SNPs IDs             | Chromosome IDs | Chromosomes  | Physical positions (bp) | CDC Frontier (Reference genome) | (Pusa 256 & HPNB) | NCBI SNPdb Accession IDs |
|----------------------|----------------|--------------|-------------------------|---------------------------------|-------------------|--------------------------|
| SNP_P3_143705_213089 | NW_004516349.1 | Scaffold1036 | 213089                  | AA                              | GG                | 1946634419               |
| SNP_P3_143706_213102 | NW_004516349.1 | Scaffold1036 | 213102                  | TT                              | AA                | 1946634421               |
| SNP_P3_143707_213111 | NW_004516349.1 | Scaffold1036 | 213111                  | TT                              | AA                | 1946634424               |
| SNP_P3_143708_213120 | NW_004516349.1 | Scaffold1036 | 213120                  | AA                              | GG                | 1946634426               |
| SNP_P3_143709_221337 | NW_004516349.1 | Scaffold1036 | 221337                  | TT                              | AA                | 1946634428               |
| SNP_P3_143710_223770 | NW_004516349.1 | Scaffold1036 | 223770                  | CC                              | AA                | 1946634430               |
| SNP_P3_143711_223775 | NW_004516349.1 | Scaffold1036 | 223775                  | CC                              | GG                | 1946634432               |
| SNP_P3_143712_223832 | NW_004516349.1 | Scaffold1036 | 223832                  | CC                              | AA                | 1946634434               |
| SNP_P3_143713_224534 | NW_004516349.1 | Scaffold1036 | 224534                  | CC                              | AA                | 1946634436               |
| SNP_P3_143714_224727 | NW_004516349.1 | Scaffold1036 | 224727                  | CC                              | GG                | 1946634438               |
| SNP_P3_143715_225109 | NW_004516349.1 | Scaffold1036 | 225109                  | CC                              | GG                | 1946634440               |
| SNP_P3_143716_225368 | NW_004516349.1 | Scaffold1036 | 225368                  | AA                              | CC                | 1946634442               |
| SNP_P3_143717_225493 | NW_004516349.1 | Scaffold1036 | 225493                  | AA                              | GG                | 1946634445               |
| SNP_P3_143718_225602 | NW_004516349.1 | Scaffold1036 | 225602                  | AA                              | GG                | 1946634447               |
| SNP_P3_143719_225621 | NW_004516349.1 | Scaffold1036 | 225621                  | TT                              | CC                | 1946634449               |
| SNP_P3_143720_233260 | NW_004516349.1 | Scaffold1036 | 233260                  | CC                              | AA                | 1946634451               |
| SNP_P3_143721_233272 | NW_004516349.1 | Scaffold1036 | 233272                  | TT                              | AA                | 1946634453               |
| SNP_P3_143722_236147 | NW_004516349.1 | Scaffold1036 | 236147                  | CC                              | GG                | 1946634455               |
| SNP_P3_143723_236437 | NW_004516349.1 | Scaffold1036 | 236437                  | TT                              | GG                | 1946634458               |
| SNP_P3_143724_236704 | NW_004516349.1 | Scaffold1036 | 236704                  | TT                              | AA                | 1946634460               |
| SNP_P3_143725_236705 | NW_004516349.1 | Scaffold1036 | 236705                  | TT                              | CC                | 1946634462               |
| SNP_P3_143726_240609 | NW_004516349.1 | Scaffold1036 | 240609                  | TT                              | CC                | 1946634464               |
| SNP_P3_143727_52     | NW_004516350.1 | Scaffold1038 | 52                      | AA                              | GG                | 1946634466               |
| SNP_P3_143729_120    | NW_004516350.1 | Scaffold1038 | 120                     | AA                              | GG                | 1946634468               |
| SNP_P3_143730_273    | NW_004516350.1 | Scaffold1038 | 273                     | TT                              | GG                | 1946634470               |
| SNP_P3_143731_345    | NW_004516350.1 | Scaffold1038 | 345                     | TT                              | CC                | 1946634472               |
| SNP_P3_143732_540    | NW_004516350.1 | Scaffold1038 | 540                     | GG                              | AA                | 1946634474               |
| SNP_P3_143733_554    | NW_004516350.1 | Scaffold1038 | 554                     | AA                              | GG                | 1946634476               |
| SNP_P3_143734_589    | NW_004516350.1 | Scaffold1038 | 589                     | TT                              | AA                | 1946634478               |
| SNP_P3_143735_650    | NW_004516350.1 | Scaffold1038 | 650                     | AA                              | TT                | 1946634480               |
| SNP_P3_143737_1346   | NW_004516350.1 | Scaffold1038 | 1346                    | AA                              | GG                | 1946634482               |
| SNP_P3_143738_1510   | NW_004516350.1 | Scaffold1038 | 1510                    | GG                              | AA                | 1946634484               |
| SNP_P3_143739_1593   | NW_004516350.1 | Scaffold1038 | 1593                    | GG                              | AA                | 1946634486               |
| SNP_P3_143740_1634   | NW_004516350.1 | Scaffold1038 | 1634                    | GG                              | TT                | 1946634488               |
| SNP_P3_143741_1664   | NW_004516350.1 | Scaffold1038 | 1664                    | TT                              | GG                | 1946634490               |
| SNP_P3_143742_1683   | NW_004516350.1 | Scaffold1038 | 1683                    | TT                              | CC                | 1946634492               |
| SNP_P3_143743_1699   | NW_004516350.1 | Scaffold1038 | 1699                    | CC                              | TT                | 1946634494               |
| SNP_P3_143744_1731   | NW_004516350.1 | Scaffold1038 | 1731                    | CC                              | GG                | 1946634496               |
| SNP_P3_143745_2105   | NW_004516350.1 | Scaffold1038 | 2105                    | TT                              | GG                | 1946634498               |
| SNP_P3_143746_2134   | NW_004516350.1 | Scaffold1038 | 2134                    | CC                              | AA                | 1946634500               |
| SNP_P3_143747_2268   | NW_004516350.1 | Scaffold1038 | 2268                    | TT                              | GG                | 1946634502               |
| SNP_P3_143748_2297   | NW_004516350.1 | Scaffold1038 | 2297                    | CC                              | AA                | 1946634504               |



| SNPs IDs            | Chromosome IDs | Chromosomes  | Physical positions (bp) | CDC Frontier (Reference genome) | (Pusa 256 & HPNB) | NCBI SNPdb Accession IDs |
|---------------------|----------------|--------------|-------------------------|---------------------------------|-------------------|--------------------------|
| SNP_P3_143749_2348  | NW_004516350.1 | Scaffold1038 | 2348                    | TT                              | GG                | 1946634506               |
| SNP_P3_143750_2444  | NW_004516350.1 | Scaffold1038 | 2444                    | AA                              | CC                | 1946634508               |
| SNP_P3_143751_2445  | NW_004516350.1 | Scaffold1038 | 2445                    | TT                              | GG                | 1946634510               |
| SNP_P3_143753_2566  | NW_004516350.1 | Scaffold1038 | 2566                    | CC                              | TT                | 1946634512               |
| SNP_P3_143754_2772  | NW_004516350.1 | Scaffold1038 | 2772                    | GG                              | AA                | 1946634514               |
| SNP_P3_143755_3282  | NW_004516351.1 | Scaffold1039 | 3282                    | GG                              | AA                | 1946634516               |
| SNP_P3_143756_3509  | NW_004516351.1 | Scaffold1039 | 3509                    | AA                              | CC                | 1946634518               |
| SNP_P3_143757_3649  | NW_004516351.1 | Scaffold1039 | 3649                    | TT                              | AA                | 1946634520               |
| SNP_P3_143758_3804  | NW_004516351.1 | Scaffold1039 | 3804                    | CC                              | TT                | 1946634522               |
| SNP_P3_143759_3939  | NW_004516351.1 | Scaffold1039 | 3939                    | AA                              | GG                | 1946634524               |
| SNP_P3_143760_4084  | NW_004516351.1 | Scaffold1039 | 4084                    | AA                              | GG                | 1946634526               |
| SNP_P3_143761_4245  | NW_004516351.1 | Scaffold1039 | 4245                    | TT                              | GG                | 1946634528               |
| SNP_P3_143762_4293  | NW_004516351.1 | Scaffold1039 | 4293                    | AA                              | TT                | 1946634530               |
| SNP_P3_143763_4336  | NW_004516351.1 | Scaffold1039 | 4336                    | TT                              | CC                | 1946634532               |
| SNP_P3_143764_4339  | NW_004516351.1 | Scaffold1039 | 4339                    | AA                              | TT                | 1946634534               |
| SNP_P3_143765_4374  | NW_004516351.1 | Scaffold1039 | 4374                    | CC                              | TT                | 1946634536               |
| SNP_P3_143767_4498  | NW_004516351.1 | Scaffold1039 | 4498                    | AA                              | GG                | 1946634538               |
| SNP_P3_143768_4558  | NW_004516351.1 | Scaffold1039 | 4558                    | GG                              | AA                | 1946634540               |
| SNP_P3_143769_5207  | NW_004516351.1 | Scaffold1039 | 5207                    | CC                              | TT                | 1946634542               |
| SNP_P3_143770_10133 | NW_004516351.1 | Scaffold1039 | 10133                   | GG                              | AA                | 1946634544               |
| SNP_P3_143771_10383 | NW_004516351.1 | Scaffold1039 | 10383                   | GG                              | AA                | 1946634546               |
| SNP_P3_143772_10391 | NW_004516351.1 | Scaffold1039 | 10391                   | TT                              | CC                | 1946634548               |
| SNP_P3_143773_12751 | NW_004516351.1 | Scaffold1039 | 12751                   | GG                              | AA                | 1946634550               |
| SNP_P3_143774_12795 | NW_004516351.1 | Scaffold1039 | 12795                   | CC                              | AA                | 1946634552               |
| SNP_P3_143775_31070 | NW_004516351.1 | Scaffold1039 | 31070                   | TT                              | CC                | 1946634554               |
| SNP_P3_143776_31420 | NW_004516351.1 | Scaffold1039 | 31420                   | AA                              | GG                | 1946634556               |
| SNP_P3_143777_31904 | NW_004516351.1 | Scaffold1039 | 31904                   | AA                              | GG                | 1946634558               |
| SNP_P3_143778_31934 | NW_004516351.1 | Scaffold1039 | 31934                   | CC                              | TT                | 1946634560               |
| SNP_P3_143779_32243 | NW_004516351.1 | Scaffold1039 | 32243                   | GG                              | AA                | 1946634562               |
| SNP_P3_143780_32298 | NW_004516351.1 | Scaffold1039 | 32298                   | AA                              | CC                | 1946634564               |
| SNP_P3_143781_32318 | NW_004516351.1 | Scaffold1039 | 32318                   | TT                              | AA                | 1946634566               |
| SNP_P3_143782_32327 | NW_004516351.1 | Scaffold1039 | 32327                   | AA                              | CC                | 1946634568               |
| SNP_P3_143783_32525 | NW_004516351.1 | Scaffold1039 | 32525                   | AA                              | GG                | 1946634570               |
| SNP_P3_143784_32546 | NW_004516351.1 | Scaffold1039 | 32546                   | CC                              | GG                | 1946634572               |
| SNP_P3_143785_32627 | NW_004516351.1 | Scaffold1039 | 32627                   | TT                              | GG                | 1946634574               |
| SNP_P3_143786_35383 | NW_004516351.1 | Scaffold1039 | 35383                   | GG                              | TT                | 1946634577               |
| SNP_P3_143787_40051 | NW_004516351.1 | Scaffold1039 | 40051                   | AA                              | GG                | 1946634579               |
| SNP_P3_143788_40083 | NW_004516351.1 | Scaffold1039 | 40083                   | TT                              | CC                | 1946634580               |
| SNP_P3_143789_40105 | NW_004516351.1 | Scaffold1039 | 40105                   | CC                              | TT                | 1946634582               |
| SNP_P3_143790_40132 | NW_004516351.1 | Scaffold1039 | 40132                   | CC                              | TT                | 1946634584               |
| SNP_P3_143791_40163 | NW_004516351.1 | Scaffold1039 | 40163                   | AA                              | GG                | 1946634586               |
| SNP_P3_143792_40165 | NW_004516351.1 | Scaffold1039 | 40165                   | TT                              | CC                | 1946634588               |

| SNPs IDs            | Chromosome IDs | Chromosomes  | Physical positions (bp) | CDC Frontier (Reference genome) | (Pusa 256 & HPNB) | NCBI SNPdb Accession IDs |
|---------------------|----------------|--------------|-------------------------|---------------------------------|-------------------|--------------------------|
| SNP_P3_143793_40168 | NW_004516351.1 | Scaffold1039 | 40168                   | AA                              | GG                | 1946634590               |
| SNP_P3_143794_40177 | NW_004516351.1 | Scaffold1039 | 40177                   | TT                              | CC                | 1946634592               |
| SNP_P3_143795_40208 | NW_004516351.1 | Scaffold1039 | 40208                   | AA                              | GG                | 1946634595               |
| SNP_P3_143796_40240 | NW_004516351.1 | Scaffold1039 | 40240                   | AA                              | GG                | 1946634597               |
| SNP_P3_143797_40249 | NW_004516351.1 | Scaffold1039 | 40249                   | AA                              | GG                | 1946634599               |
| SNP_P3_143798_40288 | NW_004516351.1 | Scaffold1039 | 40288                   | CC                              | TT                | 1946634601               |
| SNP_P3_143799_40297 | NW_004516351.1 | Scaffold1039 | 40297                   | GG                              | AA                | 1946634602               |
| SNP_P3_143800_40309 | NW_004516351.1 | Scaffold1039 | 40309                   | AA                              | GG                | 1946634604               |
| SNP_P3_143801_40425 | NW_004516351.1 | Scaffold1039 | 40425                   | AA                              | GG                | 1946634606               |
| SNP_P3_143802_40497 | NW_004516351.1 | Scaffold1039 | 40497                   | GG                              | AA                | 1946634608               |
| SNP_P3_143803_40650 | NW_004516351.1 | Scaffold1039 | 40650                   | CC                              | TT                | 1946634610               |
| SNP_P3_143804_40908 | NW_004516351.1 | Scaffold1039 | 40908                   | AA                              | GG                | 1946634612               |
| SNP_P3_143805_40917 | NW_004516351.1 | Scaffold1039 | 40917                   | CC                              | TT                | 1946634614               |
| SNP_P3_143806_40920 | NW_004516351.1 | Scaffold1039 | 40920                   | AA                              | GG                | 1946634616               |
| SNP_P3_143807_40932 | NW_004516351.1 | Scaffold1039 | 40932                   | GG                              | AA                | 1946634618               |
| SNP_P3_143808_40953 | NW_004516351.1 | Scaffold1039 | 40953                   | AA                              | GG                | 1946634620               |
| SNP_P3_143809_41085 | NW_004516351.1 | Scaffold1039 | 41085                   | GG                              | AA                | 1946634622               |
| SNP_P3_143810_41124 | NW_004516351.1 | Scaffold1039 | 41124                   | CC                              | AA                | 1946634624               |
| SNP_P3_143811_41179 | NW_004516351.1 | Scaffold1039 | 41179                   | TT                              | GG                | 1946634626               |
| SNP_P3_143812_41200 | NW_004516351.1 | Scaffold1039 | 41200                   | GG                              | AA                | 1946634628               |
| SNP_P3_143813_41245 | NW_004516351.1 | Scaffold1039 | 41245                   | AA                              | GG                | 1946634630               |
| SNP_P3_143814_41260 | NW_004516351.1 | Scaffold1039 | 41260                   | TT                              | CC                | 1946634633               |
| SNP_P3_143815_41262 | NW_004516351.1 | Scaffold1039 | 41262                   | TT                              | CC                | 1946634635               |
| SNP_P3_143816_41275 | NW_004516351.1 | Scaffold1039 | 41275                   | TT                              | CC                | 1946634637               |
| SNP_P3_143817_41299 | NW_004516351.1 | Scaffold1039 | 41299                   | AA                              | GG                | 1946634639               |
| SNP_P3_143818_41302 | NW_004516351.1 | Scaffold1039 | 41302                   | GG                              | AA                | 1946634641               |
| SNP_P3_143819_41312 | NW_004516351.1 | Scaffold1039 | 41312                   | TT                              | CC                | 1946634642               |
| SNP_P3_143820_41317 | NW_004516351.1 | Scaffold1039 | 41317                   | AA                              | GG                | 1946634644               |
| SNP_P3_143821_41332 | NW_004516351.1 | Scaffold1039 | 41332                   | TT                              | CC                | 1946634646               |
| SNP_P3_143822_41362 | NW_004516351.1 | Scaffold1039 | 41362                   | AA                              | GG                | 1946634648               |
| SNP_P3_143823_41392 | NW_004516351.1 | Scaffold1039 | 41392                   | AA                              | GG                | 1946634650               |
| SNP_P3_143824_41395 | NW_004516351.1 | Scaffold1039 | 41395                   | AA                              | GG                | 1946634652               |
| SNP_P3_143825_41396 | NW_004516351.1 | Scaffold1039 | 41396                   | GG                              | AA                | 1946634654               |
| SNP_P3_143826_41432 | NW_004516351.1 | Scaffold1039 | 41432                   | CC                              | TT                | 1946634656               |
| SNP_P3_143827_41476 | NW_004516351.1 | Scaffold1039 | 41476                   | CC                              | TT                | 1946634658               |
| SNP_P3_143828_42146 | NW_004516351.1 | Scaffold1039 | 42146                   | TT                              | CC                | 1946634660               |
| SNP_P3_143829_43740 | NW_004516351.1 | Scaffold1039 | 43740                   | TT                              | GG                | 1946634662               |
| SNP_P3_143830_44001 | NW_004516351.1 | Scaffold1039 | 44001                   | AA                              | TT                | 1946634665               |
| SNP_P3_143832_44730 | NW_004516351.1 | Scaffold1039 | 44730                   | GG                              | AA                | 1946634667               |
| SNP_P3_143833_44736 | NW_004516351.1 | Scaffold1039 | 44736                   | TT                              | CC                | 1946634669               |
| SNP_P3_143834_44824 | NW_004516351.1 | Scaffold1039 | 44824                   | CC                              | TT                | 1946634671               |
| SNP_P3_143835_44916 | NW_004516351.1 | Scaffold1039 | 44916                   | AA                              | TT                | 1946634672               |

| SNPs IDs            | Chromosome IDs | Chromosomes  | Physical positions (bp) | CDC Frontier (Reference genome) | (Pusa 256 & HPNB) | NCBI SNPdb Accession IDs |
|---------------------|----------------|--------------|-------------------------|---------------------------------|-------------------|--------------------------|
| SNP_P3_143836_44950 | NW_004516351.1 | Scaffold1039 | 44950                   | TT                              | CC                | 1946634674               |
| SNP_P3_143837_45027 | NW_004516351.1 | Scaffold1039 | 45027                   | GG                              | AA                | 1946634676               |
| SNP_P3_143838_45254 | NW_004516351.1 | Scaffold1039 | 45254                   | AA                              | GG                | 1946634678               |
| SNP_P3_143839_45256 | NW_004516351.1 | Scaffold1039 | 45256                   | TT                              | GG                | 1946634680               |
| SNP_P3_143840_45260 | NW_004516351.1 | Scaffold1039 | 45260                   | AA                              | TT                | 1946634682               |
| SNP_P3_143841_45344 | NW_004516351.1 | Scaffold1039 | 45344                   | TT                              | AA                | 1946634684               |
| SNP_P3_143842_45357 | NW_004516351.1 | Scaffold1039 | 45357                   | CC                              | TT                | 1946634686               |
| SNP_P3_143843_45437 | NW_004516351.1 | Scaffold1039 | 45437                   | CC                              | AA                | 1946634687               |
| SNP_P3_143844_45501 | NW_004516351.1 | Scaffold1039 | 45501                   | AA                              | GG                | 1946634689               |
| SNP_P3_143845_45545 | NW_004516351.1 | Scaffold1039 | 45545                   | CC                              | TT                | 1946634691               |
| SNP_P3_143846_45604 | NW_004516351.1 | Scaffold1039 | 45604                   | CC                              | TT                | 1946634701               |
| SNP_P3_143847_45809 | NW_004516351.1 | Scaffold1039 | 45809                   | CC                              | AA                | 1946634703               |
| SNP_P3_143848_45966 | NW_004516351.1 | Scaffold1039 | 45966                   | TT                              | GG                | 1946634705               |
| SNP_P3_143849_46003 | NW_004516351.1 | Scaffold1039 | 46003                   | AA                              | TT                | 1946634707               |
| SNP_P3_143850_46028 | NW_004516351.1 | Scaffold1039 | 46028                   | TT                              | CC                | 1946634709               |
| SNP_P3_143851_46079 | NW_004516351.1 | Scaffold1039 | 46079                   | TT                              | AA                | 1946634711               |
| SNP_P3_143852_46104 | NW_004516351.1 | Scaffold1039 | 46104                   | GG                              | AA                | 1946634713               |
| SNP_P3_143853_46147 | NW_004516351.1 | Scaffold1039 | 46147                   | AA                              | TT                | 1946634715               |
| SNP_P3_143854_46149 | NW_004516351.1 | Scaffold1039 | 46149                   | AA                              | TT                | 1946634717               |
| SNP_P3_143855_46239 | NW_004516351.1 | Scaffold1039 | 46239                   | CC                              | GG                | 1946634719               |
| SNP_P3_143856_46301 | NW_004516351.1 | Scaffold1039 | 46301                   | TT                              | AA                | 1946634720               |
| SNP_P3_143857_46306 | NW_004516351.1 | Scaffold1039 | 46306                   | AA                              | TT                | 1946634722               |
| SNP_P3_143858_47606 | NW_004516351.1 | Scaffold1039 | 47606                   | GG                              | TT                | 1946634725               |
| SNP_P3_143859_47715 | NW_004516351.1 | Scaffold1039 | 47715                   | GG                              | AA                | 1946634727               |
| SNP_P3_143860_47724 | NW_004516351.1 | Scaffold1039 | 47724                   | AA                              | GG                | 1946634728               |
| SNP_P3_143861_47762 | NW_004516351.1 | Scaffold1039 | 47762                   | GG                              | AA                | 1946634730               |
| SNP_P3_143862_47786 | NW_004516351.1 | Scaffold1039 | 47786                   | AA                              | GG                | 1946634732               |
| SNP_P3_143863_47824 | NW_004516351.1 | Scaffold1039 | 47824                   | CC                              | TT                | 1946634734               |
| SNP_P3_143864_47860 | NW_004516351.1 | Scaffold1039 | 47860                   | CC                              | TT                | 1946634736               |
| SNP_P3_143865_47947 | NW_004516351.1 | Scaffold1039 | 47947                   | AA                              | GG                | 1946634738               |
| SNP_P3_143866_47973 | NW_004516351.1 | Scaffold1039 | 47973                   | GG                              | AA                | 1946634740               |
| SNP_P3_143867_48009 | NW_004516351.1 | Scaffold1039 | 48009                   | GG                              | AA                | 1946634742               |
| SNP_P3_143868_48030 | NW_004516351.1 | Scaffold1039 | 48030                   | CC                              | TT                | 1946634744               |
| SNP_P3_143869_48036 | NW_004516351.1 | Scaffold1039 | 48036                   | CC                              | TT                | 1946634746               |
| SNP_P3_143870_48039 | NW_004516351.1 | Scaffold1039 | 48039                   | TT                              | CC                | 1946634748               |
| SNP_P3_143871_48046 | NW_004516351.1 | Scaffold1039 | 48046                   | CC                              | TT                | 1946634750               |
| SNP_P3_143872_48056 | NW_004516351.1 | Scaffold1039 | 48056                   | GG                              | TT                | 1946634752               |
| SNP_P3_143873_48057 | NW_004516351.1 | Scaffold1039 | 48057                   | AA                              | GG                | 1946634754               |
| SNP_P3_143874_48073 | NW_004516351.1 | Scaffold1039 | 48073                   | GG                              | AA                | 1946634756               |
| SNP_P3_143875_48075 | NW_004516351.1 | Scaffold1039 | 48075                   | GG                              | TT                | 1946634758               |
| SNP_P3_143876_48081 | NW_004516351.1 | Scaffold1039 | 48081                   | TT                              | GG                | 1946634760               |
| SNP_P3_143877_48114 | NW_004516351.1 | Scaffold1039 | 48114                   | TT                              | GG                | 1946634762               |

| SNPs IDs            | Chromosome IDs | Chromosomes  | Physical positions (bp) | CDC Frontier (Reference genome) | (Pusa 256 & HPNB) | NCBI SNPdb Accession IDs |
|---------------------|----------------|--------------|-------------------------|---------------------------------|-------------------|--------------------------|
| SNP_P3_143878_48153 | NW_004516351.1 | Scaffold1039 | 48153                   | GG                              | AA                | 1946634763               |
| SNP_P3_143879_48159 | NW_004516351.1 | Scaffold1039 | 48159                   | CC                              | AA                | 1946634765               |
| SNP_P3_143880_48184 | NW_004516351.1 | Scaffold1039 | 48184                   | GG                              | AA                | 1946634767               |
| SNP_P3_143881_48206 | NW_004516351.1 | Scaffold1039 | 48206                   | TT                              | AA                | 1946634769               |
| SNP_P3_143882_48222 | NW_004516351.1 | Scaffold1039 | 48222                   | GG                              | AA                | 1946634771               |
| SNP_P3_143883_48249 | NW_004516351.1 | Scaffold1039 | 48249                   | CC                              | TT                | 1946634773               |
| SNP_P3_143884_48355 | NW_004516351.1 | Scaffold1039 | 48355                   | TT                              | CC                | 1946634775               |
| SNP_P3_143885_48382 | NW_004516351.1 | Scaffold1039 | 48382                   | AA                              | CC                | 1946634777               |
| SNP_P3_143886_48404 | NW_004516351.1 | Scaffold1039 | 48404                   | GG                              | AA                | 1946634779               |
| SNP_P3_143887_48416 | NW_004516351.1 | Scaffold1039 | 48416                   | CC                              | TT                | 1946634781               |
| SNP_P3_143888_48460 | NW_004516351.1 | Scaffold1039 | 48460                   | CC                              | TT                | 1946634783               |
| SNP_P3_143889_48507 | NW_004516351.1 | Scaffold1039 | 48507                   | AA                              | TT                | 1946634785               |
| SNP_P3_143890_48541 | NW_004516351.1 | Scaffold1039 | 48541                   | CC                              | AA                | 1946634787               |
| SNP_P3_143891_48579 | NW_004516351.1 | Scaffold1039 | 48579                   | CC                              | AA                | 1946634789               |
| SNP_P3_143892_48620 | NW_004516351.1 | Scaffold1039 | 48620                   | CC                              | AA                | 1946634791               |
| SNP_P3_143893_48704 | NW_004516351.1 | Scaffold1039 | 48704                   | TT                              | AA                | 1946634793               |
| SNP_P3_143895_48935 | NW_004516351.1 | Scaffold1039 | 48935                   | CC                              | TT                | 1946634795               |
| SNP_P3_143896_48985 | NW_004516351.1 | Scaffold1039 | 48985                   | AA                              | GG                | 1946634797               |
| SNP_P3_143897_48993 | NW_004516351.1 | Scaffold1039 | 48993                   | TT                              | GG                | 1946634799               |
| SNP_P3_143898_49034 | NW_004516351.1 | Scaffold1039 | 49034                   | TT                              | CC                | 1946634801               |
| SNP_P3_143899_49109 | NW_004516351.1 | Scaffold1039 | 49109                   | TT                              | AA                | 1946634803               |
| SNP_P3_143900_49165 | NW_004516351.1 | Scaffold1039 | 49165                   | AA                              | TT                | 1946634805               |
| SNP_P3_143901_49177 | NW_004516351.1 | Scaffold1039 | 49177                   | AA                              | CC                | 1946634807               |
| SNP_P3_143902_49220 | NW_004516351.1 | Scaffold1039 | 49220                   | GG                              | TT                | 1946634809               |
| SNP_P3_143903_49407 | NW_004516351.1 | Scaffold1039 | 49407                   | AA                              | GG                | 1946634811               |
| SNP_P3_143904_49416 | NW_004516351.1 | Scaffold1039 | 49416                   | TT                              | CC                | 1946634813               |
| SNP_P3_143905_49724 | NW_004516351.1 | Scaffold1039 | 49724                   | TT                              | CC                | 1946634815               |
| SNP_P3_143906_49736 | NW_004516351.1 | Scaffold1039 | 49736                   | CC                              | GG                | 1946634817               |
| SNP_P3_143907_49807 | NW_004516351.1 | Scaffold1039 | 49807                   | AA                              | CC                | 1946634819               |
| SNP_P3_143909_49880 | NW_004516351.1 | Scaffold1039 | 49880                   | AA                              | TT                | 1946634821               |
| SNP_P3_143910_49881 | NW_004516351.1 | Scaffold1039 | 49881                   | GG                              | AA                | 1946634823               |
| SNP_P3_143911_50769 | NW_004516351.1 | Scaffold1039 | 50769                   | AA                              | GG                | 1946634825               |
| SNP_P3_143912_50827 | NW_004516351.1 | Scaffold1039 | 50827                   | CC                              | TT                | 1946634827               |
| SNP_P3_143913_50948 | NW_004516351.1 | Scaffold1039 | 50948                   | AA                              | TT                | 1946634829               |
| SNP_P3_143914_51033 | NW_004516351.1 | Scaffold1039 | 51033                   | CC                              | TT                | 1946634831               |
| SNP_P3_143915_51076 | NW_004516351.1 | Scaffold1039 | 51076                   | TT                              | CC                | 1946634833               |
| SNP_P3_143916_51161 | NW_004516351.1 | Scaffold1039 | 51161                   | TT                              | AA                | 1946634835               |
| SNP_P3_143917_51248 | NW_004516351.1 | Scaffold1039 | 51248                   | TT                              | CC                | 1946634836               |
| SNP_P3_143918_51264 | NW_004516351.1 | Scaffold1039 | 51264                   | CC                              | TT                | 1946634838               |
| SNP_P3_143919_51321 | NW_004516351.1 | Scaffold1039 | 51321                   | GG                              | TT                | 1946634840               |
| SNP_P3_143920_51346 | NW_004516351.1 | Scaffold1039 | 51346                   | TT                              | AA                | 1946634842               |
| SNP_P3_143921_51389 | NW_004516351.1 | Scaffold1039 | 51389                   | TT                              | GG                | 1946634844               |

| SNPs IDs            | Chromosome IDs | Chromosomes  | Physical positions (bp) | CDC Frontier (Reference genome) | (Pusa 256 & HPNB) | NCBI SNPdb Accession IDs |
|---------------------|----------------|--------------|-------------------------|---------------------------------|-------------------|--------------------------|
| SNP_P3_143922_53921 | NW_004516351.1 | Scaffold1039 | 53921                   | CC                              | TT                | 1946634846               |
| SNP_P3_143923_54020 | NW_004516351.1 | Scaffold1039 | 54020                   | AA                              | GG                | 1946634848               |
| SNP_P3_143924_54156 | NW_004516351.1 | Scaffold1039 | 54156                   | AA                              | GG                | 1946634850               |
| SNP_P3_143925_54285 | NW_004516351.1 | Scaffold1039 | 54285                   | AA                              | GG                | 1946634852               |
| SNP_P3_143926_54354 | NW_004516351.1 | Scaffold1039 | 54354                   | GG                              | AA                | 1946634854               |
| SNP_P3_143927_54380 | NW_004516351.1 | Scaffold1039 | 54380                   | AA                              | GG                | 1946634856               |
| SNP_P3_143928_54395 | NW_004516351.1 | Scaffold1039 | 54395                   | AA                              | GG                | 1946634858               |
| SNP_P3_143929_54401 | NW_004516351.1 | Scaffold1039 | 54401                   | TT                              | CC                | 1946634860               |
| SNP_P3_143930_54440 | NW_004516351.1 | Scaffold1039 | 54440                   | CC                              | TT                | 1946634862               |
| SNP_P3_143931_54516 | NW_004516351.1 | Scaffold1039 | 54516                   | AA                              | GG                | 1946634864               |
| SNP_P3_143932_54539 | NW_004516351.1 | Scaffold1039 | 54539                   | GG                              | AA                | 1946634867               |
| SNP_P3_143933_54630 | NW_004516351.1 | Scaffold1039 | 54630                   | GG                              | TT                | 1946634869               |
| SNP_P3_143934_54637 | NW_004516351.1 | Scaffold1039 | 54637                   | AA                              | GG                | 1946634871               |
| SNP_P3_143935_54714 | NW_004516351.1 | Scaffold1039 | 54714                   | GG                              | AA                | 1946634872               |
| SNP_P3_143936_54887 | NW_004516351.1 | Scaffold1039 | 54887                   | TT                              | CC                | 1946634874               |
| SNP_P3_143937_54953 | NW_004516351.1 | Scaffold1039 | 54953                   | TT                              | GG                | 1946634876               |
| SNP_P3_143938_55005 | NW_004516351.1 | Scaffold1039 | 55005                   | CC                              | GG                | 1946634878               |
| SNP_P3_143939_55153 | NW_004516351.1 | Scaffold1039 | 55153                   | TT                              | CC                | 1946634880               |
| SNP_P3_143940_55155 | NW_004516351.1 | Scaffold1039 | 55155                   | TT                              | CC                | 1946634882               |
| SNP_P3_143941_55172 | NW_004516351.1 | Scaffold1039 | 55172                   | AA                              | GG                | 1946634884               |
| SNP_P3_143942_55218 | NW_004516351.1 | Scaffold1039 | 55218                   | CC                              | TT                | 1946634886               |
| SNP_P3_143943_55270 | NW_004516351.1 | Scaffold1039 | 55270                   | TT                              | CC                | 1946634888               |
| SNP_P3_143944_57596 | NW_004516351.1 | Scaffold1039 | 57596                   | GG                              | AA                | 1946634890               |
| SNP_P3_143945_57602 | NW_004516351.1 | Scaffold1039 | 57602                   | AA                              | GG                | 1946634892               |
| SNP_P3_143946_57621 | NW_004516351.1 | Scaffold1039 | 57621                   | TT                              | CC                | 1946634894               |
| SNP_P3_143947_57638 | NW_004516351.1 | Scaffold1039 | 57638                   | GG                              | TT                | 1946634895               |
| SNP_P3_143948_57642 | NW_004516351.1 | Scaffold1039 | 57642                   | CC                              | GG                | 1946634897               |
| SNP_P3_143949_57646 | NW_004516351.1 | Scaffold1039 | 57646                   | AA                              | GG                | 1946634899               |
| SNP_P3_143950_57680 | NW_004516351.1 | Scaffold1039 | 57680                   | TT                              | CC                | 1946634901               |
| SNP_P3_143951_57691 | NW_004516351.1 | Scaffold1039 | 57691                   | TT                              | CC                | 1946634903               |
| SNP_P3_143952_57723 | NW_004516351.1 | Scaffold1039 | 57723                   | GG                              | AA                | 1946634905               |
| SNP_P3_143953_57725 | NW_004516351.1 | Scaffold1039 | 57725                   | TT                              | CC                | 1946634907               |
| SNP_P3_143954_57741 | NW_004516351.1 | Scaffold1039 | 57741                   | CC                              | TT                | 1946634910               |
| SNP_P3_143955_57762 | NW_004516351.1 | Scaffold1039 | 57762                   | AA                              | TT                | 1946634911               |
| SNP_P3_143956_57763 | NW_004516351.1 | Scaffold1039 | 57763                   | AA                              | GG                | 1946634913               |
| SNP_P3_143957_57772 | NW_004516351.1 | Scaffold1039 | 57772                   | TT                              | CC                | 1946634915               |
| SNP_P3_143958_57840 | NW_004516351.1 | Scaffold1039 | 57840                   | GG                              | CC                | 1946634917               |
| SNP_P3_143959_57841 | NW_004516351.1 | Scaffold1039 | 57841                   | TT                              | CC                | 1946634919               |
| SNP_P3_143960_57856 | NW_004516351.1 | Scaffold1039 | 57856                   | TT                              | CC                | 1946634921               |
| SNP_P3_143961_57947 | NW_004516351.1 | Scaffold1039 | 57947                   | TT                              | CC                | 1946634923               |
| SNP_P3_143962_57964 | NW_004516351.1 | Scaffold1039 | 57964                   | AA                              | GG                | 1946634925               |
| SNP_P3_143963_58676 | NW_004516351.1 | Scaffold1039 | 58676                   | GG                              | TT                | 1946634927               |

| SNPs IDs            | Chromosome IDs | Chromosomes  | Physical positions (bp) | CDC Frontier (Reference genome) | (Pusa 256 & HPNB) | NCBI SNPdb Accession IDs |
|---------------------|----------------|--------------|-------------------------|---------------------------------|-------------------|--------------------------|
| SNP_P3_143964_58685 | NW_004516351.1 | Scaffold1039 | 58685                   | GG                              | AA                | 1946634929               |
| SNP_P3_143965_58727 | NW_004516351.1 | Scaffold1039 | 58727                   | AA                              | GG                | 1946634931               |
| SNP_P3_143966_58825 | NW_004516351.1 | Scaffold1039 | 58825                   | CC                              | AA                | 1946634933               |
| SNP_P3_143967_58837 | NW_004516351.1 | Scaffold1039 | 58837                   | TT                              | CC                | 1946634934               |
| SNP_P3_143968_58861 | NW_004516351.1 | Scaffold1039 | 58861                   | AA                              | GG                | 1946634936               |
| SNP_P3_143969_58977 | NW_004516351.1 | Scaffold1039 | 58977                   | CC                              | TT                | 1946634938               |
| SNP_P3_143970_58995 | NW_004516351.1 | Scaffold1039 | 58995                   | GG                              | AA                | 1946634940               |
| SNP_P3_143971_59031 | NW_004516351.1 | Scaffold1039 | 59031                   | GG                              | TT                | 1946634942               |
| SNP_P3_143972_59040 | NW_004516351.1 | Scaffold1039 | 59040                   | AA                              | TT                | 1946634945               |
| SNP_P3_143973_59146 | NW_004516351.1 | Scaffold1039 | 59146                   | TT                              | CC                | 1946634947               |
| SNP_P3_143974_59161 | NW_004516351.1 | Scaffold1039 | 59161                   | AA                              | TT                | 1946634949               |
| SNP_P3_143975_59216 | NW_004516351.1 | Scaffold1039 | 59216                   | AA                              | CC                | 1946634951               |
| SNP_P3_143976_59241 | NW_004516351.1 | Scaffold1039 | 59241                   | GG                              | AA                | 1946634953               |
| SNP_P3_143977_59436 | NW_004516351.1 | Scaffold1039 | 59436                   | GG                              | AA                | 1946634955               |
| SNP_P3_143978_59534 | NW_004516351.1 | Scaffold1039 | 59534                   | GG                              | AA                | 1946634957               |
| SNP_P3_143979_59554 | NW_004516351.1 | Scaffold1039 | 59554                   | GG                              | CC                | 1946634958               |
| SNP_P3_143980_59565 | NW_004516351.1 | Scaffold1039 | 59565                   | TT                              | AA                | 1946634959               |
| SNP_P3_143981_59849 | NW_004516351.1 | Scaffold1039 | 59849                   | TT                              | GG                | 1946634960               |
| SNP_P3_143982_59855 | NW_004516351.1 | Scaffold1039 | 59855                   | GG                              | AA                | 1946634961               |
| SNP_P3_143983_59907 | NW_004516351.1 | Scaffold1039 | 59907                   | GG                              | AA                | 1946634962               |
| SNP_P3_143984_63473 | NW_004516351.1 | Scaffold1039 | 63473                   | AA                              | TT                | 1946634963               |
| SNP_P3_143985_63518 | NW_004516351.1 | Scaffold1039 | 63518                   | TT                              | CC                | 1946634964               |
| SNP_P3_143986_63533 | NW_004516351.1 | Scaffold1039 | 63533                   | GG                              | CC                | 1946634966               |
| SNP_P3_143987_63541 | NW_004516351.1 | Scaffold1039 | 63541                   | GG                              | CC                | 1946634968               |
| SNP_P3_143988_63552 | NW_004516351.1 | Scaffold1039 | 63552                   | TT                              | CC                | 1946634970               |
| SNP_P3_143989_63608 | NW_004516351.1 | Scaffold1039 | 63608                   | CC                              | TT                | 1946634972               |
| SNP_P3_143990_63690 | NW_004516351.1 | Scaffold1039 | 63690                   | AA                              | GG                | 1946634974               |
| SNP_P3_143991_63697 | NW_004516351.1 | Scaffold1039 | 63697                   | AA                              | TT                | 1946634976               |
| SNP_P3_143992_63724 | NW_004516351.1 | Scaffold1039 | 63724                   | AA                              | TT                | 1946634978               |
| SNP_P3_143993_63905 | NW_004516351.1 | Scaffold1039 | 63905                   | TT                              | CC                | 1946634980               |
| SNP_P3_143994_63966 | NW_004516351.1 | Scaffold1039 | 63966                   | AA                              | GG                | 1946634982               |
| SNP_P3_143995_4535  | NW_004516352.1 | Scaffold1041 | 4535                    | CC                              | GG                | 1946634984               |
| SNP_P3_143996_14608 | NW_004516352.1 | Scaffold1041 | 14608                   | AA                              | GG                | 1946634986               |
| SNP_P3_143999_14612 | NW_004516353.1 | Scaffold1043 | 14612                   | TT                              | CC                | 1946634988               |
| SNP_P3_144000_14640 | NW_004516353.1 | Scaffold1043 | 14640                   | AA                              | GG                | 1946634990               |
| SNP_P3_144001_14655 | NW_004516353.1 | Scaffold1043 | 14655                   | AA                              | GG                | 1946634992               |
| SNP_P3_144002_14665 | NW_004516353.1 | Scaffold1043 | 14665                   | TT                              | GG                | 1946634994               |
| SNP_P3_144003_14846 | NW_004516353.1 | Scaffold1043 | 14846                   | TT                              | CC                | 1946634996               |
| SNP_P3_144004_15025 | NW_004516353.1 | Scaffold1043 | 15025                   | CC                              | TT                | 1946634998               |
| SNP_P3_144005_15082 | NW_004516353.1 | Scaffold1043 | 15082                   | AA                              | GG                | 1946635000               |
| SNP_P3_144006_25563 | NW_004516353.1 | Scaffold1043 | 25563                   | CC                              | TT                | 1946635002               |
| SNP_P3_144007_25869 | NW_004516353.1 | Scaffold1043 | 25869                   | AA                              | GG                | 1946635004               |

| SNPs IDs            | Chromosome IDs | Chromosomes  | Physical positions (bp) | CDC Frontier (Reference genome) | (Pusa 256 & HPNB) | NCBI SNPdb Accession IDs |
|---------------------|----------------|--------------|-------------------------|---------------------------------|-------------------|--------------------------|
| SNP_P3_144008_25975 | NW_004516353.1 | Scaffold1043 | 25975                   | TT                              | GG                | 1946635006               |
| SNP_P3_144009_26013 | NW_004516353.1 | Scaffold1043 | 26013                   | CC                              | TT                | 1946635007               |
| SNP_P3_144010_26014 | NW_004516353.1 | Scaffold1043 | 26014                   | AA                              | GG                | 1946635009               |
| SNP_P3_144012_32629 | NW_004516353.1 | Scaffold1043 | 32629                   | AA                              | CC                | 1946635011               |
| SNP_P3_144013_32651 | NW_004516353.1 | Scaffold1043 | 32651                   | GG                              | AA                | 1946635013               |
| SNP_P3_144014_32913 | NW_004516353.1 | Scaffold1043 | 32913                   | AA                              | TT                | 1946635015               |
| SNP_P3_144016_32932 | NW_004516353.1 | Scaffold1043 | 32932                   | TT                              | AA                | 1946635017               |
| SNP_P3_144017_32939 | NW_004516353.1 | Scaffold1043 | 32939                   | AA                              | CC                | 1946635019               |
| SNP_P3_144018_32961 | NW_004516353.1 | Scaffold1043 | 32961                   | CC                              | AA                | 1946635021               |
| SNP_P3_144019_32971 | NW_004516353.1 | Scaffold1043 | 32971                   | CC                              | AA                | 1946635023               |
| SNP_P3_144020_32990 | NW_004516353.1 | Scaffold1043 | 32990                   | CC                              | TT                | 1946635025               |
| SNP_P3_144021_33002 | NW_004516353.1 | Scaffold1043 | 33002                   | GG                              | AA                | 1946635027               |
| SNP_P3_144022_33016 | NW_004516353.1 | Scaffold1043 | 33016                   | CC                              | TT                | 1946635029               |
| SNP_P3_144023_33028 | NW_004516353.1 | Scaffold1043 | 33028                   | TT                              | AA                | 1946635030               |
| SNP_P3_144024_33043 | NW_004516353.1 | Scaffold1043 | 33043                   | AA                              | GG                | 1946635032               |
| SNP_P3_144025_33047 | NW_004516353.1 | Scaffold1043 | 33047                   | GG                              | TT                | 1946635034               |
| SNP_P3_144026_33092 | NW_004516353.1 | Scaffold1043 | 33092                   | CC                              | TT                | 1946635036               |
| SNP_P3_144027_33097 | NW_004516353.1 | Scaffold1043 | 33097                   | AA                              | TT                | 1946635038               |
| SNP_P3_144028_39377 | NW_004516353.1 | Scaffold1043 | 39377                   | GG                              | AA                | 1946635040               |
| SNP_P3_144029_39434 | NW_004516353.1 | Scaffold1043 | 39434                   | AA                              | CC                | 1946635042               |
| SNP_P3_144030_39528 | NW_004516353.1 | Scaffold1043 | 39528                   | CC                              | TT                | 1946635044               |
| SNP_P3_144031_41111 | NW_004516353.1 | Scaffold1043 | 41111                   | CC                              | TT                | 1946635047               |
| SNP_P3_144032_46745 | NW_004516353.1 | Scaffold1043 | 46745                   | TT                              | GG                | 1946635049               |
| SNP_P3_144033_47416 | NW_004516353.1 | Scaffold1043 | 47416                   | CC                              | TT                | 1946635051               |
| SNP_P3_144034_63021 | NW_004516353.1 | Scaffold1043 | 63021                   | GG                              | TT                | 1946635053               |
| SNP_P3_144035_63085 | NW_004516353.1 | Scaffold1043 | 63085                   | TT                              | CC                | 1946635055               |
| SNP_P3_144036_63303 | NW_004516353.1 | Scaffold1043 | 63303                   | CC                              | TT                | 1946635057               |
| SNP_P3_144038_64639 | NW_004516353.1 | Scaffold1043 | 64639                   | AA                              | GG                | 1946635059               |
| SNP_P3_144039_64852 | NW_004516353.1 | Scaffold1043 | 64852                   | GG                              | TT                | 1946635061               |
| SNP_P3_144040_64867 | NW_004516353.1 | Scaffold1043 | 64867                   | TT                              | AA                | 1946635063               |
| SNP_P3_144041_64935 | NW_004516353.1 | Scaffold1043 | 64935                   | AA                              | GG                | 1946635065               |
| SNP_P3_144042_67836 | NW_004516353.1 | Scaffold1043 | 67836                   | GG                              | AA                | 1946635067               |
| SNP_P3_144043_72293 | NW_004516353.1 | Scaffold1043 | 72293                   | TT                              | CC                | 1946635069               |
| SNP_P3_144044_72489 | NW_004516353.1 | Scaffold1043 | 72489                   | AA                              | GG                | 1946635071               |
| SNP_P3_144045_72492 | NW_004516353.1 | Scaffold1043 | 72492                   | TT                              | CC                | 1946635073               |
| SNP_P3_144046_72519 | NW_004516353.1 | Scaffold1043 | 72519                   | AA                              | GG                | 1946635075               |
| SNP_P3_144047_72534 | NW_004516353.1 | Scaffold1043 | 72534                   | TT                              | CC                | 1946635077               |
| SNP_P3_144048_72543 | NW_004516353.1 | Scaffold1043 | 72543                   | GG                              | TT                | 1946635079               |
| SNP_P3_144049_72558 | NW_004516353.1 | Scaffold1043 | 72558                   | CC                              | TT                | 1946635081               |
| SNP_P3_144050_72581 | NW_004516353.1 | Scaffold1043 | 72581                   | CC                              | AA                | 1946635083               |
| SNP_P3_144051_72596 | NW_004516353.1 | Scaffold1043 | 72596                   | TT                              | GG                | 1946635085               |
| SNP_P3_144052_72597 | NW_004516353.1 | Scaffold1043 | 72597                   | AA                              | GG                | 1946635088               |

| SNPs IDs            | Chromosome IDs | Chromosomes  | Physical positions (bp) | CDC Frontier (Reference genome) | (Pusa 256 & HPNB) | NCBI SNPdb Accession IDs |
|---------------------|----------------|--------------|-------------------------|---------------------------------|-------------------|--------------------------|
| SNP_P3_144053_72598 | NW_004516353.1 | Scaffold1043 | 72598                   | TT                              | GG                | 1946635090               |
| SNP_P3_144054_72615 | NW_004516353.1 | Scaffold1043 | 72615                   | AA                              | GG                | 1946635092               |
| SNP_P3_144055_76155 | NW_004516353.1 | Scaffold1043 | 76155                   | AA                              | TT                | 1946635094               |
| SNP_P3_144056_76345 | NW_004516353.1 | Scaffold1043 | 76345                   | GG                              | AA                | 1946635095               |
| SNP_P3_144057_76399 | NW_004516353.1 | Scaffold1043 | 76399                   | TT                              | CC                | 1946635096               |
| SNP_P3_144058_76482 | NW_004516353.1 | Scaffold1043 | 76482                   | AA                              | GG                | 1946635097               |
| SNP_P3_144059_76486 | NW_004516353.1 | Scaffold1043 | 76486                   | TT                              | CC                | 1946635098               |
| SNP_P3_144060_80658 | NW_004516353.1 | Scaffold1043 | 80658                   | AA                              | GG                | 1946635099               |
| SNP_P3_144061_89599 | NW_004516353.1 | Scaffold1043 | 89599                   | GG                              | AA                | 1946635100               |
| SNP_P3_144062_89797 | NW_004516353.1 | Scaffold1043 | 89797                   | TT                              | CC                | 1946635101               |
| SNP_P3_144063_89901 | NW_004516353.1 | Scaffold1043 | 89901                   | TT                              | CC                | 1946635102               |
| SNP_P3_144064_89976 | NW_004516353.1 | Scaffold1043 | 89976                   | AA                              | CC                | 1946635103               |
| SNP_P3_144065_90004 | NW_004516353.1 | Scaffold1043 | 90004                   | AA                              | GG                | 1946635104               |
| SNP_P3_144066_90017 | NW_004516353.1 | Scaffold1043 | 90017                   | AA                              | GG                | 1946635105               |
| SNP_P3_144067_631   | NW_004516354.1 | Scaffold1044 | 631                     | CC                              | TT                | 1946635106               |
| SNP_P3_144068_632   | NW_004516354.1 | Scaffold1044 | 632                     | CC                              | TT                | 1946635108               |
| SNP_P3_144069_642   | NW_004516354.1 | Scaffold1044 | 642                     | GG                              | CC                | 1946635110               |
| SNP_P3_144070_696   | NW_004516354.1 | Scaffold1044 | 696                     | AA                              | TT                | 1946635112               |
| SNP_P3_144071_705   | NW_004516354.1 | Scaffold1044 | 705                     | TT                              | GG                | 1946635114               |
| SNP_P3_144072_709   | NW_004516354.1 | Scaffold1044 | 709                     | GG                              | CC                | 1946635116               |
| SNP_P3_144073_754   | NW_004516354.1 | Scaffold1044 | 754                     | TT                              | GG                | 1946635119               |
| SNP_P3_144074_872   | NW_004516354.1 | Scaffold1044 | 872                     | GG                              | TT                | 1946635121               |
| SNP_P3_144075_977   | NW_004516354.1 | Scaffold1044 | 977                     | TT                              | GG                | 1946635123               |
| SNP_P3_144076_1025  | NW_004516354.1 | Scaffold1044 | 1025                    | AA                              | GG                | 1946635125               |
| SNP_P3_144077_1052  | NW_004516354.1 | Scaffold1044 | 1052                    | CC                              | TT                | 1946635127               |
| SNP_P3_144078_1084  | NW_004516354.1 | Scaffold1044 | 1084                    | TT                              | CC                | 1946635129               |
| SNP_P3_144079_4757  | NW_004516354.1 | Scaffold1044 | 4757                    | AA                              | CC                | 1946635131               |
| SNP_P3_144080_4929  | NW_004516354.1 | Scaffold1044 | 4929                    | TT                              | CC                | 1946635133               |
| SNP_P3_144081_4937  | NW_004516354.1 | Scaffold1044 | 4937                    | AA                              | TT                | 1946635134               |
| SNP_P3_144082_4959  | NW_004516354.1 | Scaffold1044 | 4959                    | TT                              | AA                | 1946635136               |
| SNP_P3_144083_5003  | NW_004516354.1 | Scaffold1044 | 5003                    | TT                              | CC                | 1946635138               |
| SNP_P3_144084_5038  | NW_004516354.1 | Scaffold1044 | 5038                    | TT                              | CC                | 1946635140               |
| SNP_P3_144085_5289  | NW_004516354.1 | Scaffold1044 | 5289                    | TT                              | CC                | 1946635142               |
| SNP_P3_144086_11866 | NW_004516354.1 | Scaffold1044 | 11866                   | TT                              | CC                | 1946635144               |
| SNP_P3_144087_12108 | NW_004516354.1 | Scaffold1044 | 12108                   | TT                              | GG                | 1946635146               |
| SNP_P3_144088_12894 | NW_004516354.1 | Scaffold1044 | 12894                   | CC                              | AA                | 1946635148               |
| SNP_P3_144089_14040 | NW_004516354.1 | Scaffold1044 | 14040                   | CC                              | TT                | 1946635150               |
| SNP_P3_144090_16080 | NW_004516354.1 | Scaffold1044 | 16080                   | CC                              | GG                | 1946635152               |
| SNP_P3_144091_16234 | NW_004516354.1 | Scaffold1044 | 16234                   | TT                              | AA                | 1946635154               |
| SNP_P3_144092_16241 | NW_004516354.1 | Scaffold1044 | 16241                   | AA                              | GG                | 1946635156               |
| SNP_P3_144093_16247 | NW_004516354.1 | Scaffold1044 | 16247                   | GG                              | CC                | 1946635159               |
| SNP_P3_144094_16842 | NW_004516354.1 | Scaffold1044 | 16842                   | CC                              | TT                | 1946635161               |



| SNPs IDs            | Chromosome IDs | Chromosomes  | Physical positions (bp) | CDC Frontier (Reference genome) | (Pusa 256 & HPNB) | NCBI SNPdb Accession IDs |
|---------------------|----------------|--------------|-------------------------|---------------------------------|-------------------|--------------------------|
| SNP_P3_144095_16844 | NW_004516354.1 | Scaffold1044 | 16844                   | AA                              | GG                | 1946635163               |
| SNP_P3_144096_16874 | NW_004516354.1 | Scaffold1044 | 16874                   | TT                              | CC                | 1946635165               |
| SNP_P3_144097_16987 | NW_004516354.1 | Scaffold1044 | 16987                   | CC                              | AA                | 1946635166               |
| SNP_P3_144098_16998 | NW_004516354.1 | Scaffold1044 | 16998                   | TT                              | AA                | 1946635168               |
| SNP_P3_144099_17018 | NW_004516354.1 | Scaffold1044 | 17018                   | AA                              | CC                | 1946635170               |
| SNP_P3_144100_17139 | NW_004516354.1 | Scaffold1044 | 17139                   | AA                              | GG                | 1946635172               |
| SNP_P3_144101_17271 | NW_004516354.1 | Scaffold1044 | 17271                   | CC                              | GG                | 1946635174               |
| SNP_P3_144102_17275 | NW_004516354.1 | Scaffold1044 | 17275                   | AA                              | TT                | 1946635176               |
| SNP_P3_144103_21618 | NW_004516354.1 | Scaffold1044 | 21618                   | CC                              | GG                | 1946635178               |
| SNP_P3_144104_22180 | NW_004516354.1 | Scaffold1044 | 22180                   | TT                              | GG                | 1946635180               |
| SNP_P3_144105_23636 | NW_004516354.1 | Scaffold1044 | 23636                   | AA                              | TT                | 1946635182               |
| SNP_P3_144106_23660 | NW_004516354.1 | Scaffold1044 | 23660                   | AA                              | TT                | 1946635184               |
| SNP_P3_144107_23674 | NW_004516354.1 | Scaffold1044 | 23674                   | AA                              | GG                | 1946635186               |
| SNP_P3_144108_23807 | NW_004516354.1 | Scaffold1044 | 23807                   | TT                              | CC                | 1946635188               |
| SNP_P3_144109_23828 | NW_004516354.1 | Scaffold1044 | 23828                   | CC                              | GG                | 1946635190               |
| SNP_P3_144110_24097 | NW_004516354.1 | Scaffold1044 | 24097                   | TT                              | AA                | 1946635192               |
| SNP_P3_144111_24600 | NW_004516354.1 | Scaffold1044 | 24600                   | CC                              | AA                | 1946635194               |
| SNP_P3_144112_26865 | NW_004516354.1 | Scaffold1044 | 26865                   | AA                              | TT                | 1946635196               |
| SNP_P3_144113_27233 | NW_004516354.1 | Scaffold1044 | 27233                   | CC                              | GG                | 1946635198               |
| SNP_P3_144114_29596 | NW_004516354.1 | Scaffold1044 | 29596                   | CC                              | AA                | 1946635200               |
| SNP_P3_144115_29598 | NW_004516354.1 | Scaffold1044 | 29598                   | AA                              | TT                | 1946635202               |
| SNP_P3_144116_31245 | NW_004516354.1 | Scaffold1044 | 31245                   | AA                              | TT                | 1946635204               |
| SNP_P3_144117_31796 | NW_004516354.1 | Scaffold1044 | 31796                   | CC                              | TT                | 1946635206               |
| SNP_P3_144118_32048 | NW_004516354.1 | Scaffold1044 | 32048                   | CC                              | TT                | 1946635208               |
| SNP_P3_144119_2298  | NW_004516355.1 | Scaffold1045 | 2298                    | AA                              | GG                | 1946635210               |
| SNP_P3_144120_10770 | NW_004516355.1 | Scaffold1045 | 10770                   | CC                              | GG                | 1946635212               |
| SNP_P3_144121_16134 | NW_004516355.1 | Scaffold1045 | 16134                   | TT                              | AA                | 1946635214               |
| SNP_P3_144122_16138 | NW_004516355.1 | Scaffold1045 | 16138                   | TT                              | AA                | 1946635216               |
| SNP_P3_144123_18026 | NW_004516355.1 | Scaffold1045 | 18026                   | TT                              | CC                | 1946635218               |
| SNP_P3_144124_18027 | NW_004516355.1 | Scaffold1045 | 18027                   | TT                              | CC                | 1946635220               |
| SNP_P3_144125_18032 | NW_004516355.1 | Scaffold1045 | 18032                   | AA                              | TT                | 1946635222               |
| SNP_P3_144126_20230 | NW_004516355.1 | Scaffold1045 | 20230                   | AA                              | CC                | 1946635225               |
| SNP_P3_144127_33424 | NW_004516355.1 | Scaffold1045 | 33424                   | TT                              | GG                | 1946635227               |
| SNP_P3_144128_35656 | NW_004516355.1 | Scaffold1045 | 35656                   | TT                              | GG                | 1946635229               |
| SNP_P3_144129_35835 | NW_004516355.1 | Scaffold1045 | 35835                   | TT                              | CC                | 1946635231               |
| SNP_P3_144130_35968 | NW_004516355.1 | Scaffold1045 | 35968                   | CC                              | TT                | 1946635233               |
| SNP_P3_144131_35971 | NW_004516355.1 | Scaffold1045 | 35971                   | GG                              | AA                | 1946635235               |
| SNP_P3_144132_36000 | NW_004516355.1 | Scaffold1045 | 36000                   | CC                              | TT                | 1946635237               |
| SNP_P3_144133_36101 | NW_004516355.1 | Scaffold1045 | 36101                   | TT                              | CC                | 1946635238               |
| SNP_P3_144134_36160 | NW_004516355.1 | Scaffold1045 | 36160                   | GG                              | CC                | 1946635239               |
| SNP_P3_144135_36183 | NW_004516355.1 | Scaffold1045 | 36183                   | AA                              | GG                | 1946635240               |
| SNP_P3_144136_36191 | NW_004516355.1 | Scaffold1045 | 36191                   | AA                              | TT                | 1946635242               |

| SNPs IDs            | Chromosome IDs | Chromosomes  | Physical positions (bp) | CDC Frontier (Reference genome) | (Pusa 256 & HPNB) | NCBI SNPdb Accession IDs |
|---------------------|----------------|--------------|-------------------------|---------------------------------|-------------------|--------------------------|
| SNP_P3_144137_561   | NW_004516356.1 | Scaffold1046 | 561                     | AA                              | GG                | 1946635244               |
| SNP_P3_144138_610   | NW_004516356.1 | Scaffold1046 | 610                     | AA                              | GG                | 1946635246               |
| SNP_P3_144139_707   | NW_004516356.1 | Scaffold1046 | 707                     | AA                              | GG                | 1946635248               |
| SNP_P3_144140_832   | NW_004516356.1 | Scaffold1046 | 832                     | CC                              | TT                | 1946635250               |
| SNP_P3_144141_3080  | NW_004516356.1 | Scaffold1046 | 3080                    | TT                              | AA                | 1946635252               |
| SNP_P3_144142_4047  | NW_004516356.1 | Scaffold1046 | 4047                    | AA                              | GG                | 1946635254               |
| SNP_P3_144143_4909  | NW_004516356.1 | Scaffold1046 | 4909                    | TT                              | GG                | 1946635256               |
| SNP_P3_144144_4936  | NW_004516356.1 | Scaffold1046 | 4936                    | GG                              | AA                | 1946635258               |
| SNP_P3_144147_5054  | NW_004516356.1 | Scaffold1046 | 5054                    | CC                              | AA                | 1946635261               |
| SNP_P3_144148_5213  | NW_004516356.1 | Scaffold1046 | 5213                    | TT                              | AA                | 1946635263               |
| SNP_P3_144149_5259  | NW_004516356.1 | Scaffold1046 | 5259                    | GG                              | AA                | 1946635265               |
| SNP_P3_144150_6070  | NW_004516356.1 | Scaffold1046 | 6070                    | GG                              | TT                | 1946635266               |
| SNP_P3_144151_6453  | NW_004516356.1 | Scaffold1046 | 6453                    | CC                              | AA                | 1946635268               |
| SNP_P3_144152_7326  | NW_004516356.1 | Scaffold1046 | 7326                    | GG                              | TT                | 1946635270               |
| SNP_P3_144153_7586  | NW_004516356.1 | Scaffold1046 | 7586                    | CC                              | AA                | 1946635272               |
| SNP_P3_144154_7605  | NW_004516356.1 | Scaffold1046 | 7605                    | GG                              | TT                | 1946635274               |
| SNP_P3_144155_8074  | NW_004516356.1 | Scaffold1046 | 8074                    | AA                              | TT                | 1946635276               |
| SNP_P3_144156_8151  | NW_004516356.1 | Scaffold1046 | 8151                    | GG                              | AA                | 1946635279               |
| SNP_P3_144157_8584  | NW_004516356.1 | Scaffold1046 | 8584                    | AA                              | GG                | 1946635281               |
| SNP_P3_144158_8653  | NW_004516356.1 | Scaffold1046 | 8653                    | GG                              | TT                | 1946635283               |
| SNP_P3_144159_8753  | NW_004516356.1 | Scaffold1046 | 8753                    | GG                              | CC                | 1946635285               |
| SNP_P3_144160_8898  | NW_004516356.1 | Scaffold1046 | 8898                    | GG                              | AA                | 1946635287               |
| SNP_P3_144161_8949  | NW_004516356.1 | Scaffold1046 | 8949                    | CC                              | TT                | 1946635289               |
| SNP_P3_144162_9044  | NW_004516356.1 | Scaffold1046 | 9044                    | TT                              | GG                | 1946635291               |
| SNP_P3_144163_9148  | NW_004516356.1 | Scaffold1046 | 9148                    | GG                              | AA                | 1946635293               |
| SNP_P3_144164_9180  | NW_004516356.1 | Scaffold1046 | 9180                    | GG                              | AA                | 1946635295               |
| SNP_P3_144165_9338  | NW_004516356.1 | Scaffold1046 | 9338                    | AA                              | TT                | 1946635297               |
| SNP_P3_144166_9424  | NW_004516356.1 | Scaffold1046 | 9424                    | CC                              | TT                | 1946635299               |
| SNP_P3_144167_9847  | NW_004516356.1 | Scaffold1046 | 9847                    | TT                              | CC                | 1946635300               |
| SNP_P3_144168_9908  | NW_004516356.1 | Scaffold1046 | 9908                    | TT                              | AA                | 1946635302               |
| SNP_P3_144169_10049 | NW_004516356.1 | Scaffold1046 | 10049                   | GG                              | CC                | 1946635304               |
| SNP_P3_144170_10097 | NW_004516356.1 | Scaffold1046 | 10097                   | CC                              | TT                | 1946635306               |
| SNP_P3_144171_10230 | NW_004516356.1 | Scaffold1046 | 10230                   | TT                              | CC                | 1946635308               |
| SNP_P3_144172_10326 | NW_004516356.1 | Scaffold1046 | 10326                   | AA                              | GG                | 1946635310               |
| SNP_P3_144174_10566 | NW_004516356.1 | Scaffold1046 | 10566                   | AA                              | CC                | 1946635312               |
| SNP_P3_144175_10623 | NW_004516356.1 | Scaffold1046 | 10623                   | TT                              | GG                | 1946635314               |
| SNP_P3_144176_10750 | NW_004516356.1 | Scaffold1046 | 10750                   | AA                              | TT                | 1946635316               |
| SNP_P3_144177_10751 | NW_004516356.1 | Scaffold1046 | 10751                   | GG                              | AA                | 1946635317               |
| SNP_P3_144178_10777 | NW_004516356.1 | Scaffold1046 | 10777                   | CC                              | GG                | 1946635320               |
| SNP_P3_144179_10790 | NW_004516356.1 | Scaffold1046 | 10790                   | GG                              | AA                | 1946635322               |
| SNP_P3_144180_10879 | NW_004516356.1 | Scaffold1046 | 10879                   | TT                              | AA                | 1946635324               |
| SNP_P3_144181_10930 | NW_004516356.1 | Scaffold1046 | 10930                   | GG                              | TT                | 1946635326               |

| SNPs IDs            | Chromosome IDs | Chromosomes  | Physical positions (bp) | CDC Frontier (Reference genome) | (Pusa 256 & HPNB) | NCBI SNPdb Accession IDs |
|---------------------|----------------|--------------|-------------------------|---------------------------------|-------------------|--------------------------|
| SNP_P3_144182_10931 | NW_004516356.1 | Scaffold1046 | 10931                   | GG                              | AA                | 1946635327               |
| SNP_P3_144183_10955 | NW_004516356.1 | Scaffold1046 | 10955                   | GG                              | CC                | 1946635329               |
| SNP_P3_144184_10980 | NW_004516356.1 | Scaffold1046 | 10980                   | CC                              | TT                | 1946635331               |
| SNP_P3_144185_10987 | NW_004516356.1 | Scaffold1046 | 10987                   | TT                              | AA                | 1946635333               |
| SNP_P3_144186_11024 | NW_004516356.1 | Scaffold1046 | 11024                   | CC                              | TT                | 1946635335               |
| SNP_P3_144187_11040 | NW_004516356.1 | Scaffold1046 | 11040                   | AA                              | TT                | 1946635337               |
| SNP_P3_144188_11048 | NW_004516356.1 | Scaffold1046 | 11048                   | GG                              | CC                | 1946635339               |
| SNP_P3_144189_11079 | NW_004516356.1 | Scaffold1046 | 11079                   | AA                              | GG                | 1946635341               |
| SNP_P3_144190_11097 | NW_004516356.1 | Scaffold1046 | 11097                   | GG                              | AA                | 1946635343               |
| SNP_P3_144191_11220 | NW_004516356.1 | Scaffold1046 | 11220                   | AA                              | TT                | 1946635345               |
| SNP_P3_144192_11333 | NW_004516356.1 | Scaffold1046 | 11333                   | CC                              | TT                | 1946635347               |
| SNP_P3_144193_11365 | NW_004516356.1 | Scaffold1046 | 11365                   | CC                              | TT                | 1946635349               |
| SNP_P3_144195_11419 | NW_004516356.1 | Scaffold1046 | 11419                   | TT                              | GG                | 1946635351               |
| SNP_P3_144196_11443 | NW_004516356.1 | Scaffold1046 | 11443                   | GG                              | AA                | 1946635353               |
| SNP_P3_144197_11553 | NW_004516356.1 | Scaffold1046 | 11553                   | TT                              | AA                | 1946635355               |
| SNP_P3_144198_11587 | NW_004516356.1 | Scaffold1046 | 11587                   | GG                              | AA                | 1946635357               |
| SNP_P3_144199_11734 | NW_004516356.1 | Scaffold1046 | 11734                   | AA                              | TT                | 1946635359               |
| SNP_P3_144200_11737 | NW_004516356.1 | Scaffold1046 | 11737                   | GG                              | CC                | 1946635361               |
| SNP_P3_144201_11809 | NW_004516356.1 | Scaffold1046 | 11809                   | AA                              | CC                | 1946635363               |
| SNP_P3_144202_11827 | NW_004516356.1 | Scaffold1046 | 11827                   | AA                              | CC                | 1946635365               |
| SNP_P3_144203_11844 | NW_004516356.1 | Scaffold1046 | 11844                   | AA                              | GG                | 1946635367               |
| SNP_P3_144204_11895 | NW_004516356.1 | Scaffold1046 | 11895                   | AA                              | CC                | 1946635369               |
| SNP_P3_144205_11956 | NW_004516356.1 | Scaffold1046 | 11956                   | AA                              | CC                | 1946635371               |
| SNP_P3_144206_12032 | NW_004516356.1 | Scaffold1046 | 12032                   | CC                              | TT                | 1946635373               |
| SNP_P3_144207_12063 | NW_004516356.1 | Scaffold1046 | 12063                   | AA                              | CC                | 1946635375               |
| SNP_P3_144208_12093 | NW_004516356.1 | Scaffold1046 | 12093                   | CC                              | GG                | 1946635377               |
| SNP_P3_144209_12113 | NW_004516356.1 | Scaffold1046 | 12113                   | CC                              | TT                | 1946635379               |
| SNP_P3_144210_12132 | NW_004516356.1 | Scaffold1046 | 12132                   | CC                              | GG                | 1946635381               |
| SNP_P3_144211_12203 | NW_004516356.1 | Scaffold1046 | 12203                   | GG                              | TT                | 1946635383               |
| SNP_P3_144212_12272 | NW_004516356.1 | Scaffold1046 | 12272                   | CC                              | TT                | 1946635385               |
| SNP_P3_144213_12302 | NW_004516356.1 | Scaffold1046 | 12302                   | CC                              | GG                | 1946635387               |
| SNP_P3_144214_12413 | NW_004516356.1 | Scaffold1046 | 12413                   | CC                              | AA                | 1946635389               |
| SNP_P3_144215_12456 | NW_004516356.1 | Scaffold1046 | 12456                   | AA                              | TT                | 1946635391               |
| SNP_P3_144216_12468 | NW_004516356.1 | Scaffold1046 | 12468                   | GG                              | AA                | 1946635393               |
| SNP_P3_144217_12892 | NW_004516356.1 | Scaffold1046 | 12892                   | TT                              | GG                | 1946635395               |
| SNP_P3_144218_12953 | NW_004516356.1 | Scaffold1046 | 12953                   | CC                              | AA                | 1946635397               |
| SNP_P3_144219_13002 | NW_004516356.1 | Scaffold1046 | 13002                   | TT                              | GG                | 1946635399               |
| SNP_P3_144220_13095 | NW_004516356.1 | Scaffold1046 | 13095                   | TT                              | CC                | 1946635401               |
| SNP_P3_144221_13098 | NW_004516356.1 | Scaffold1046 | 13098                   | AA                              | GG                | 1946635403               |
| SNP_P3_144222_13112 | NW_004516356.1 | Scaffold1046 | 13112                   | AA                              | CC                | 1946635405               |
| SNP_P3_144223_13119 | NW_004516356.1 | Scaffold1046 | 13119                   | TT                              | GG                | 1946635407               |
| SNP_P3_144224_14565 | NW_004516356.1 | Scaffold1046 | 14565                   | CC                              | GG                | 1946635409               |

| SNPs IDs            | Chromosome IDs | Chromosomes  | Physical positions (bp) | CDC Frontier (Reference genome) | (Pusa 256 & HPNB) | NCBI SNPdb Accession IDs |
|---------------------|----------------|--------------|-------------------------|---------------------------------|-------------------|--------------------------|
| SNP_P3_144226_14728 | NW_004516356.1 | Scaffold1046 | 14728                   | TT                              | CC                | 1946635411               |
| SNP_P3_144227_15419 | NW_004516356.1 | Scaffold1046 | 15419                   | CC                              | GG                | 1946635412               |
| SNP_P3_144228_15592 | NW_004516356.1 | Scaffold1046 | 15592                   | GG                              | TT                | 1946635414               |
| SNP_P3_144229_15637 | NW_004516356.1 | Scaffold1046 | 15637                   | TT                              | AA                | 1946635416               |
| SNP_P3_144230_15717 | NW_004516356.1 | Scaffold1046 | 15717                   | TT                              | AA                | 1946635418               |
| SNP_P3_144231_15733 | NW_004516356.1 | Scaffold1046 | 15733                   | GG                              | CC                | 1946635420               |
| SNP_P3_144232_15886 | NW_004516356.1 | Scaffold1046 | 15886                   | TT                              | CC                | 1946635422               |
| SNP_P3_144233_16373 | NW_004516356.1 | Scaffold1046 | 16373                   | CC                              | TT                | 1946635424               |
| SNP_P3_144234_17065 | NW_004516356.1 | Scaffold1046 | 17065                   | TT                              | CC                | 1946635426               |
| SNP_P3_144235_17097 | NW_004516356.1 | Scaffold1046 | 17097                   | CC                              | AA                | 1946635428               |
| SNP_P3_144236_17354 | NW_004516356.1 | Scaffold1046 | 17354                   | AA                              | TT                | 1946635430               |
| SNP_P3_144237_17474 | NW_004516356.1 | Scaffold1046 | 17474                   | GG                              | TT                | 1946635432               |
| SNP_P3_144238_17527 | NW_004516356.1 | Scaffold1046 | 17527                   | AA                              | CC                | 1946635434               |
| SNP_P3_144240_18073 | NW_004516356.1 | Scaffold1046 | 18073                   | GG                              | TT                | 1946635436               |
| SNP_P3_144241_18194 | NW_004516356.1 | Scaffold1046 | 18194                   | TT                              | AA                | 1946635438               |
| SNP_P3_144242_19017 | NW_004516356.1 | Scaffold1046 | 19017                   | CC                              | GG                | 1946635440               |
| SNP_P3_144243_19446 | NW_004516356.1 | Scaffold1046 | 19446                   | TT                              | CC                | 1946635442               |
| SNP_P3_144244_19448 | NW_004516356.1 | Scaffold1046 | 19448                   | GG                              | AA                | 1946635444               |
| SNP_P3_144245_19546 | NW_004516356.1 | Scaffold1046 | 19546                   | AA                              | CC                | 1946635446               |
| SNP_P3_144246_19685 | NW_004516356.1 | Scaffold1046 | 19685                   | AA                              | GG                | 1946635449               |
| SNP_P3_144249_20593 | NW_004516356.1 | Scaffold1046 | 20593                   | AA                              | TT                | 1946635451               |
| SNP_P3_144250_21298 | NW_004516356.1 | Scaffold1046 | 21298                   | CC                              | AA                | 1946635453               |
| SNP_P3_144251_21357 | NW_004516356.1 | Scaffold1046 | 21357                   | AA                              | GG                | 1946635454               |
| SNP_P3_144252_21424 | NW_004516356.1 | Scaffold1046 | 21424                   | GG                              | TT                | 1946635456               |
| SNP_P3_144253_21799 | NW_004516356.1 | Scaffold1046 | 21799                   | GG                              | AA                | 1946635458               |
| SNP_P3_144254_22137 | NW_004516356.1 | Scaffold1046 | 22137                   | TT                              | AA                | 1946635460               |
| SNP_P3_144255_22190 | NW_004516356.1 | Scaffold1046 | 22190                   | AA                              | GG                | 1946635462               |
| SNP_P3_144256_22666 | NW_004516356.1 | Scaffold1046 | 22666                   | TT                              | CC                | 1946635464               |
| SNP_P3_144257_22706 | NW_004516356.1 | Scaffold1046 | 22706                   | CC                              | TT                | 1946635466               |
| SNP_P3_144258_25822 | NW_004516356.1 | Scaffold1046 | 25822                   | CC                              | GG                | 1946635468               |
| SNP_P3_144259_31030 | NW_004516356.1 | Scaffold1046 | 31030                   | AA                              | GG                | 1946635470               |
| SNP_P3_144260_31495 | NW_004516356.1 | Scaffold1046 | 31495                   | AA                              | GG                | 1946635472               |
| SNP_P3_144262_32340 | NW_004516356.1 | Scaffold1046 | 32340                   | AA                              | TT                | 1946635474               |
| SNP_P3_144263_32343 | NW_004516356.1 | Scaffold1046 | 32343                   | CC                              | TT                | 1946635476               |
| SNP_P3_144264_4781  | NW_004516357.1 | Scaffold1047 | 4781                    | AA                              | GG                | 1946635478               |
| SNP_P3_144265_10469 | NW_004516357.1 | Scaffold1047 | 10469                   | CC                              | TT                | 1946635480               |
| SNP_P3_144266_13240 | NW_004516357.1 | Scaffold1047 | 13240                   | CC                              | TT                | 1946635482               |
| SNP_P3_144267_23544 | NW_004516357.1 | Scaffold1047 | 23544                   | TT                              | CC                | 1946635484               |
| SNP_P3_144268_23603 | NW_004516357.1 | Scaffold1047 | 23603                   | GG                              | AA                | 1946635486               |
| SNP_P3_144269_24092 | NW_004516357.1 | Scaffold1047 | 24092                   | CC                              | AA                | 1946635488               |
| SNP_P3_144270_24505 | NW_004516357.1 | Scaffold1047 | 24505                   | AA                              | TT                | 1946635490               |
| SNP_P3_144271_24558 | NW_004516357.1 | Scaffold1047 | 24558                   | AA                              | GG                | 1946635492               |

| SNPs IDs             | Chromosome IDs | Chromosomes  | Physical positions (bp) | CDC Frontier (Reference genome) | (Pusa 256 & HPNB) | NCBI SNPdb Accession IDs |
|----------------------|----------------|--------------|-------------------------|---------------------------------|-------------------|--------------------------|
| SNP_P3_144272_34547  | NW_004516357.1 | Scaffold1047 | 34547                   | AA                              | TT                | 1946635494               |
| SNP_P3_144273_35421  | NW_004516357.1 | Scaffold1047 | 35421                   | AA                              | GG                | 1946635496               |
| SNP_P3_144274_35441  | NW_004516357.1 | Scaffold1047 | 35441                   | TT                              | AA                | 1946635498               |
| SNP_P3_144275_45073  | NW_004516357.1 | Scaffold1047 | 45073                   | AA                              | GG                | 1946635500               |
| SNP_P3_144277_52983  | NW_004516357.1 | Scaffold1047 | 52983                   | AA                              | GG                | 1946635502               |
| SNP_P3_144278_63207  | NW_004516357.1 | Scaffold1047 | 63207                   | AA                              | GG                | 1946635504               |
| SNP_P3_144279_63208  | NW_004516357.1 | Scaffold1047 | 63208                   | TT                              | CC                | 1946635506               |
| SNP_P3_144280_63221  | NW_004516357.1 | Scaffold1047 | 63221                   | TT                              | CC                | 1946635508               |
| SNP_P3_144281_102569 | NW_004516357.1 | Scaffold1047 | 102569                  | TT                              | AA                | 1946635510               |
| SNP_P3_144282_104794 | NW_004516357.1 | Scaffold1047 | 104794                  | GG                              | AA                | 1946635512               |
| SNP_P3_144286_163766 | NW_004516357.1 | Scaffold1047 | 163766                  | CC                              | TT                | 1946635514               |
| SNP_P3_144287_175424 | NW_004516357.1 | Scaffold1047 | 175424                  | AA                              | GG                | 1946635516               |
| SNP_P3_144288_197882 | NW_004516357.1 | Scaffold1047 | 197882                  | GG                              | AA                | 1946635518               |
| SNP_P3_144289_199044 | NW_004516357.1 | Scaffold1047 | 199044                  | GG                              | AA                | 1946635520               |
| SNP_P3_144290_208898 | NW_004516357.1 | Scaffold1047 | 208898                  | TT                              | CC                | 1946635522               |
| SNP_P3_144291_218086 | NW_004516357.1 | Scaffold1047 | 218086                  | AA                              | GG                | 1946635524               |
| SNP_P3_144292_242535 | NW_004516357.1 | Scaffold1047 | 242535                  | TT                              | GG                | 1946635526               |
| SNP_P3_144293_242536 | NW_004516357.1 | Scaffold1047 | 242536                  | TT                              | CC                | 1946635528               |
| SNP_P3_144294_264010 | NW_004516357.1 | Scaffold1047 | 264010                  | CC                              | TT                | 1946635529               |
| SNP_P3_144295_275010 | NW_004516357.1 | Scaffold1047 | 275010                  | AA                              | GG                | 1946635531               |
| SNP_P3_144297_280979 | NW_004516357.1 | Scaffold1047 | 280979                  | TT                              | CC                | 1946635533               |
| SNP_P3_144301_360607 | NW_004516357.1 | Scaffold1047 | 360607                  | TT                              | CC                | 1946635535               |
| SNP_P3_144302_378516 | NW_004516357.1 | Scaffold1047 | 378516                  | CC                              | AA                | 1946635537               |
| SNP_P3_144304_383449 | NW_004516357.1 | Scaffold1047 | 383449                  | AA                              | TT                | 1946635540               |
| SNP_P3_144305_385571 | NW_004516357.1 | Scaffold1047 | 385571                  | TT                              | CC                | 1946635542               |
| SNP_P3_144306_385592 | NW_004516357.1 | Scaffold1047 | 385592                  | CC                              | TT                | 1946635544               |
| SNP_P3_144307_385785 | NW_004516357.1 | Scaffold1047 | 385785                  | GG                              | AA                | 1946635546               |
| SNP_P3_144308_385837 | NW_004516357.1 | Scaffold1047 | 385837                  | TT                              | GG                | 1946635548               |
| SNP_P3_144309_386927 | NW_004516357.1 | Scaffold1047 | 386927                  | CC                              | TT                | 1946635550               |
| SNP_P3_144310_386950 | NW_004516357.1 | Scaffold1047 | 386950                  | TT                              | CC                | 1946635552               |
| SNP_P3_144311_387271 | NW_004516357.1 | Scaffold1047 | 387271                  | AA                              | CC                | 1946635554               |
| SNP_P3_144312_399895 | NW_004516357.1 | Scaffold1047 | 399895                  | CC                              | TT                | 1946635556               |
| SNP_P3_144313_412563 | NW_004516357.1 | Scaffold1047 | 412563                  | TT                              | CC                | 1946635558               |
| SNP_P3_144315_419780 | NW_004516357.1 | Scaffold1047 | 419780                  | GG                              | AA                | 1946635560               |
| SNP_P3_144316_419798 | NW_004516357.1 | Scaffold1047 | 419798                  | AA                              | GG                | 1946635562               |
| SNP_P3_144317_419821 | NW_004516357.1 | Scaffold1047 | 419821                  | GG                              | TT                | 1946635564               |
| SNP_P3_144318_419827 | NW_004516357.1 | Scaffold1047 | 419827                  | TT                              | CC                | 1946635566               |
| SNP_P3_144319_419919 | NW_004516357.1 | Scaffold1047 | 419919                  | GG                              | AA                | 1946635567               |
| SNP_P3_144320_424475 | NW_004516357.1 | Scaffold1047 | 424475                  | GG                              | TT                | 1946635569               |
| SNP_P3_144321_431856 | NW_004516357.1 | Scaffold1047 | 431856                  | CC                              | AA                | 1946635571               |
| SNP_P3_144322_455720 | NW_004516357.1 | Scaffold1047 | 455720                  | AA                              | GG                | 1946635573               |
| SNP_P3_144324_496331 | NW_004516357.1 | Scaffold1047 | 496331                  | TT                              | CC                | 1946635575               |

| SNPs IDs             | Chromosome IDs | Chromosomes  | Physical positions (bp) | CDC Frontier (Reference genome) | (Pusa 256 & HPNB) | NCBI SNPdb Accession IDs |
|----------------------|----------------|--------------|-------------------------|---------------------------------|-------------------|--------------------------|
| SNP_P3_144325_496332 | NW_004516357.1 | Scaffold1047 | 496332                  | GG                              | AA                | 1946635577               |
| SNP_P3_144326_496368 | NW_004516357.1 | Scaffold1047 | 496368                  | TT                              | CC                | 1946635579               |
| SNP_P3_144327_496719 | NW_004516357.1 | Scaffold1047 | 496719                  | TT                              | GG                | 1946635581               |
| SNP_P3_144328_498013 | NW_004516357.1 | Scaffold1047 | 498013                  | TT                              | CC                | 1946635584               |
| SNP_P3_144330_503014 | NW_004516357.1 | Scaffold1047 | 503014                  | AA                              | GG                | 1946635586               |
| SNP_P3_144331_509269 | NW_004516357.1 | Scaffold1047 | 509269                  | CC                              | TT                | 1946635588               |
| SNP_P3_144333_570473 | NW_004516357.1 | Scaffold1047 | 570473                  | CC                              | TT                | 1946635590               |
| SNP_P3_144334_594941 | NW_004516357.1 | Scaffold1047 | 594941                  | GG                              | TT                | 1946635592               |
| SNP_P3_144336_595002 | NW_004516357.1 | Scaffold1047 | 595002                  | CC                              | TT                | 1946635594               |
| SNP_P3_144337_200    | NW_004516358.1 | Scaffold1048 | 200                     | CC                              | GG                | 1946635596               |
| SNP_P3_144338_651    | NW_004516358.1 | Scaffold1048 | 651                     | CC                              | TT                | 1946635598               |
| SNP_P3_144340_4955   | NW_004516359.1 | Scaffold1049 | 4955                    | GG                              | CC                | 1946635600               |
| SNP_P3_144341_4957   | NW_004516359.1 | Scaffold1049 | 4957                    | TT                              | AA                | 1946635602               |
| SNP_P3_144342_4960   | NW_004516359.1 | Scaffold1049 | 4960                    | CC                              | TT                | 1946635604               |
| SNP_P3_144343_4962   | NW_004516359.1 | Scaffold1049 | 4962                    | TT                              | CC                | 1946635606               |
| SNP_P3_144344_4967   | NW_004516359.1 | Scaffold1049 | 4967                    | CC                              | TT                | 1946635609               |
| SNP_P3_144345_6699   | NW_004516359.1 | Scaffold1049 | 6699                    | AA                              | GG                | 1946635611               |
| SNP_P3_144346_24142  | NW_004516359.1 | Scaffold1049 | 24142                   | GG                              | CC                | 1946635613               |
| SNP_P3_144347_24143  | NW_004516359.1 | Scaffold1049 | 24143                   | AA                              | CC                | 1946635615               |
| SNP_P3_144348_24544  | NW_004516359.1 | Scaffold1049 | 24544                   | TT                              | GG                | 1946635617               |
| SNP_P3_144349_25731  | NW_004516359.1 | Scaffold1049 | 25731                   | GG                              | AA                | 1946635619               |
| SNP_P3_144350_31233  | NW_004516359.1 | Scaffold1049 | 31233                   | TT                              | CC                | 1946635621               |
| SNP_P3_144351_32856  | NW_004516359.1 | Scaffold1049 | 32856                   | AA                              | CC                | 1946635623               |
| SNP_P3_144352_32896  | NW_004516359.1 | Scaffold1049 | 32896                   | GG                              | CC                | 1946635625               |
| SNP_P3_144353_34498  | NW_004516359.1 | Scaffold1049 | 34498                   | CC                              | TT                | 1946635627               |
| SNP_P3_144354_34557  | NW_004516359.1 | Scaffold1049 | 34557                   | TT                              | CC                | 1946635629               |
| SNP_P3_144355_34562  | NW_004516359.1 | Scaffold1049 | 34562                   | TT                              | CC                | 1946635631               |
| SNP_P3_144357_44946  | NW_004516359.1 | Scaffold1049 | 44946                   | GG                              | AA                | 1946635633               |
| SNP_P3_144358_45135  | NW_004516359.1 | Scaffold1049 | 45135                   | TT                              | CC                | 1946635635               |
| SNP_P3_144359_50712  | NW_004516359.1 | Scaffold1049 | 50712                   | AA                              | CC                | 1946635637               |
| SNP_P3_144360_69779  | NW_004516359.1 | Scaffold1049 | 69779                   | GG                              | AA                | 1946635639               |
| SNP_P3_144361_70103  | NW_004516359.1 | Scaffold1049 | 70103                   | TT                              | AA                | 1946635641               |
| SNP_P3_144362_73065  | NW_004516359.1 | Scaffold1049 | 73065                   | CC                              | TT                | 1946635643               |
| SNP_P3_144363_73262  | NW_004516359.1 | Scaffold1049 | 73262                   | AA                              | GG                | 1946635645               |
| SNP_P3_144364_74457  | NW_004516359.1 | Scaffold1049 | 74457                   | TT                              | CC                | 1946635646               |
| SNP_P3_144365_74752  | NW_004516359.1 | Scaffold1049 | 74752                   | AA                              | GG                | 1946635648               |
| SNP_P3_144366_74930  | NW_004516359.1 | Scaffold1049 | 74930                   | AA                              | GG                | 1946635650               |
| SNP_P3_144367_75000  | NW_004516359.1 | Scaffold1049 | 75000                   | TT                              | AA                | 1946635652               |
| SNP_P3_144369_75311  | NW_004516359.1 | Scaffold1049 | 75311                   | CC                              | TT                | 1946635654               |
| SNP_P3_144370_98915  | NW_004516359.1 | Scaffold1049 | 98915                   | GG                              | AA                | 1946635656               |
| SNP_P3_144371_99703  | NW_004516359.1 | Scaffold1049 | 99703                   | TT                              | GG                | 1946635658               |
| SNP_P3_144372_99936  | NW_004516359.1 | Scaffold1049 | 99936                   | TT                              | AA                | 1946635660               |

| SNPs IDs             | Chromosome IDs | Chromosomes  | Physical positions (bp) | CDC Frontier (Reference genome) | (Pusa 256 & HPNB) | NCBI SNPdb Accession IDs |
|----------------------|----------------|--------------|-------------------------|---------------------------------|-------------------|--------------------------|
| SNP_P3_144373_99944  | NW_004516359.1 | Scaffold1049 | 99944                   | CC                              | TT                | 1946635662               |
| SNP_P3_144374_101915 | NW_004516359.1 | Scaffold1049 | 101915                  | CC                              | TT                | 1946635664               |
| SNP_P3_144375_110915 | NW_004516359.1 | Scaffold1049 | 110915                  | GG                              | TT                | 1946635666               |
| SNP_P3_144376_110943 | NW_004516359.1 | Scaffold1049 | 110943                  | TT                              | CC                | 1946635668               |
| SNP_P3_144377_110979 | NW_004516359.1 | Scaffold1049 | 110979                  | AA                              | CC                | 1946635670               |
| SNP_P3_144378_111182 | NW_004516359.1 | Scaffold1049 | 111182                  | TT                              | CC                | 1946635672               |
| SNP_P3_144379_111247 | NW_004516359.1 | Scaffold1049 | 111247                  | AA                              | GG                | 1946635674               |
| SNP_P3_144380_127969 | NW_004516359.1 | Scaffold1049 | 127969                  | TT                              | GG                | 1946635676               |
| SNP_P3_144381_127987 | NW_004516359.1 | Scaffold1049 | 127987                  | AA                              | GG                | 1946635678               |
| SNP_P3_144382_127988 | NW_004516359.1 | Scaffold1049 | 127988                  | CC                              | GG                | 1946635680               |
| SNP_P3_144383_128019 | NW_004516359.1 | Scaffold1049 | 128019                  | GG                              | AA                | 1946635682               |
| SNP_P3_144384_128098 | NW_004516359.1 | Scaffold1049 | 128098                  | AA                              | GG                | 1946635684               |
| SNP_P3_144385_128253 | NW_004516359.1 | Scaffold1049 | 128253                  | TT                              | CC                | 1946635685               |
| SNP_P3_144386_128463 | NW_004516359.1 | Scaffold1049 | 128463                  | AA                              | CC                | 1946635687               |
| SNP_P3_144387_128466 | NW_004516359.1 | Scaffold1049 | 128466                  | TT                              | CC                | 1946635689               |
| SNP_P3_144388_128475 | NW_004516359.1 | Scaffold1049 | 128475                  | GG                              | AA                | 1946635691               |
| SNP_P3_144389_128487 | NW_004516359.1 | Scaffold1049 | 128487                  | AA                              | GG                | 1946635693               |
| SNP_P3_144390_128580 | NW_004516359.1 | Scaffold1049 | 128580                  | AA                              | GG                | 1946635695               |
| SNP_P3_144391_128587 | NW_004516359.1 | Scaffold1049 | 128587                  | CC                              | TT                | 1946635697               |
| SNP_P3_144392_149704 | NW_004516359.1 | Scaffold1049 | 149704                  | TT                              | CC                | 1946635699               |
| SNP_P3_144393_156180 | NW_004516359.1 | Scaffold1049 | 156180                  | AA                              | TT                | 1946635701               |
| SNP_P3_144394_156183 | NW_004516359.1 | Scaffold1049 | 156183                  | AA                              | GG                | 1946635703               |
| SNP_P3_144395_193914 | NW_004516359.1 | Scaffold1049 | 193914                  | GG                              | AA                | 1946635705               |
| SNP_P3_144397_221701 | NW_004516359.1 | Scaffold1049 | 221701                  | TT                              | CC                | 1946635707               |
| SNP_P3_144398_240387 | NW_004516359.1 | Scaffold1049 | 240387                  | TT                              | GG                | 1946635709               |
| SNP_P3_144399_240392 | NW_004516359.1 | Scaffold1049 | 240392                  | CC                              | TT                | 1946635711               |
| SNP_P3_144400_270025 | NW_004516359.1 | Scaffold1049 | 270025                  | AA                              | GG                | 1946635713               |
| SNP_P3_144401_270048 | NW_004516359.1 | Scaffold1049 | 270048                  | AA                              | GG                | 1946635715               |
| SNP_P3_144402_276438 | NW_004516359.1 | Scaffold1049 | 276438                  | TT                              | CC                | 1946635717               |
| SNP_P3_144403_277314 | NW_004516359.1 | Scaffold1049 | 277314                  | AA                              | GG                | 1946635719               |
| SNP_P3_144404_277334 | NW_004516359.1 | Scaffold1049 | 277334                  | TT                              | CC                | 1946635721               |
| SNP_P3_144405_277473 | NW_004516359.1 | Scaffold1049 | 277473                  | GG                              | TT                | 1946635724               |
| SNP_P3_144407_1076   | NW_004516360.1 | Scaffold1050 | 1076                    | CC                              | TT                | 1946635726               |
| SNP_P3_144408_1195   | NW_004516360.1 | Scaffold1050 | 1195                    | TT                              | CC                | 1946635728               |
| SNP_P3_144410_1603   | NW_004516360.1 | Scaffold1050 | 1603                    | AA                              | CC                | 1946635730               |
| SNP_P3_144411_1869   | NW_004516360.1 | Scaffold1050 | 1869                    | AA                              | GG                | 1946635732               |
| SNP_P3_144412_1938   | NW_004516360.1 | Scaffold1050 | 1938                    | GG                              | AA                | 1946635734               |
| SNP_P3_144413_1954   | NW_004516360.1 | Scaffold1050 | 1954                    | AA                              | GG                | 1946635736               |
| SNP_P3_144414_8296   | NW_004516360.1 | Scaffold1050 | 8296                    | TT                              | CC                | 1946635738               |
| SNP_P3_144415_13200  | NW_004516360.1 | Scaffold1050 | 13200                   | CC                              | TT                | 1946635740               |
| SNP_P3_144416_13211  | NW_004516360.1 | Scaffold1050 | 13211                   | AA                              | GG                | 1946635742               |
| SNP_P3_144417_13226  | NW_004516360.1 | Scaffold1050 | 13226                   | CC                              | TT                | 1946635744               |

| SNPs IDs             | Chromosome IDs | Chromosomes  | Physical positions (bp) | CDC Frontier (Reference genome) | (Pusa 256 & HPNB) | NCBI SNPdb Accession IDs |
|----------------------|----------------|--------------|-------------------------|---------------------------------|-------------------|--------------------------|
| SNP_P3_144418_13286  | NW_004516360.1 | Scaffold1050 | 13286                   | GG                              | AA                | 1946635746               |
| SNP_P3_144419_13310  | NW_004516360.1 | Scaffold1050 | 13310                   | TT                              | CC                | 1946635748               |
| SNP_P3_144420_13313  | NW_004516360.1 | Scaffold1050 | 13313                   | GG                              | AA                | 1946635750               |
| SNP_P3_144421_13429  | NW_004516360.1 | Scaffold1050 | 13429                   | TT                              | CC                | 1946635752               |
| SNP_P3_144422_13430  | NW_004516360.1 | Scaffold1050 | 13430                   | TT                              | CC                | 1946635754               |
| SNP_P3_144423_39009  | NW_004516360.1 | Scaffold1050 | 39009                   | AA                              | GG                | 1946635756               |
| SNP_P3_144424_39184  | NW_004516360.1 | Scaffold1050 | 39184                   | GG                              | AA                | 1946635758               |
| SNP_P3_144425_39441  | NW_004516360.1 | Scaffold1050 | 39441                   | GG                              | TT                | 1946635760               |
| SNP_P3_144426_51540  | NW_004516360.1 | Scaffold1050 | 51540                   | GG                              | AA                | 1946635761               |
| SNP_P3_144427_56519  | NW_004516360.1 | Scaffold1050 | 56519                   | AA                              | GG                | 1946635763               |
| SNP_P3_144428_69006  | NW_004516360.1 | Scaffold1050 | 69006                   | CC                              | TT                | 1946635765               |
| SNP_P3_144429_95258  | NW_004516360.1 | Scaffold1050 | 95258                   | TT                              | AA                | 1946635767               |
| SNP_P3_144430_95636  | NW_004516360.1 | Scaffold1050 | 95636                   | AA                              | CC                | 1946635769               |
| SNP_P3_144431_95676  | NW_004516360.1 | Scaffold1050 | 95676                   | CC                              | TT                | 1946635771               |
| SNP_P3_144432_95694  | NW_004516360.1 | Scaffold1050 | 95694                   | GG                              | AA                | 1946635773               |
| SNP_P3_144433_104576 | NW_004516360.1 | Scaffold1050 | 104576                  | GG                              | TT                | 1946635775               |
| SNP_P3_144434_104579 | NW_004516360.1 | Scaffold1050 | 104579                  | TT                              | AA                | 1946635777               |
| SNP_P3_144435_104580 | NW_004516360.1 | Scaffold1050 | 104580                  | CC                              | TT                | 1946635779               |
| SNP_P3_144436_104662 | NW_004516360.1 | Scaffold1050 | 104662                  | TT                              | GG                | 1946635781               |
| SNP_P3_144437_107595 | NW_004516360.1 | Scaffold1050 | 107595                  | AA                              | GG                | 1946635783               |
| SNP_P3_144440_159604 | NW_004516360.1 | Scaffold1050 | 159604                  | GG                              | AA                | 1946635785               |
| SNP_P3_144441_159616 | NW_004516360.1 | Scaffold1050 | 159616                  | CC                              | AA                | 1946635787               |
| SNP_P3_144442_159695 | NW_004516360.1 | Scaffold1050 | 159695                  | AA                              | CC                | 1946635789               |
| SNP_P3_144443_159703 | NW_004516360.1 | Scaffold1050 | 159703                  | CC                              | TT                | 1946635791               |
| SNP_P3_144444_178511 | NW_004516360.1 | Scaffold1050 | 178511                  | GG                              | AA                | 1946635793               |
| SNP_P3_144445_184890 | NW_004516360.1 | Scaffold1050 | 184890                  | TT                              | GG                | 1946635795               |
| SNP_P3_144446_185084 | NW_004516360.1 | Scaffold1050 | 185084                  | TT                              | CC                | 1946635797               |
| SNP_P3_144447_243554 | NW_004516360.1 | Scaffold1050 | 243554                  | CC                              | AA                | 1946635799               |
| SNP_P3_144448_243559 | NW_004516360.1 | Scaffold1050 | 243559                  | CC                              | TT                | 1946635801               |
| SNP_P3_144449_243568 | NW_004516360.1 | Scaffold1050 | 243568                  | CC                              | AA                | 1946635803               |
| SNP_P3_144450_243580 | NW_004516360.1 | Scaffold1050 | 243580                  | AA                              | GG                | 1946635805               |
| SNP_P3_144451_243584 | NW_004516360.1 | Scaffold1050 | 243584                  | GG                              | AA                | 1946635807               |
| SNP_P3_144452_243605 | NW_004516360.1 | Scaffold1050 | 243605                  | CC                              | TT                | 1946635810               |
| SNP_P3_144453_243615 | NW_004516360.1 | Scaffold1050 | 243615                  | CC                              | TT                | 1946635812               |
| SNP_P3_144454_244218 | NW_004516360.1 | Scaffold1050 | 244218                  | CC                              | TT                | 1946635814               |
| SNP_P3_144455_244513 | NW_004516360.1 | Scaffold1050 | 244513                  | TT                              | CC                | 1946635816               |
| SNP_P3_144456_246568 | NW_004516360.1 | Scaffold1050 | 246568                  | AA                              | GG                | 1946635818               |
| SNP_P3_144457_246627 | NW_004516360.1 | Scaffold1050 | 246627                  | TT                              | CC                | 1946635820               |
| SNP_P3_144458_247140 | NW_004516360.1 | Scaffold1050 | 247140                  | GG                              | AA                | 1946635822               |
| SNP_P3_144459_247143 | NW_004516360.1 | Scaffold1050 | 247143                  | GG                              | AA                | 1946635824               |
| SNP_P3_144460_249853 | NW_004516360.1 | Scaffold1050 | 249853                  | TT                              | CC                | 1946635826               |
| SNP_P3_144461_249874 | NW_004516360.1 | Scaffold1050 | 249874                  | TT                              | GG                | 1946635828               |



| SNPs IDs             | Chromosome IDs | Chromosomes  | Physical positions (bp) | CDC Frontier (Reference genome) | (Pusa 256 & HPNB) | NCBI SNPdb Accession IDs |
|----------------------|----------------|--------------|-------------------------|---------------------------------|-------------------|--------------------------|
| SNP_P3_144462_249891 | NW_004516360.1 | Scaffold1050 | 249891                  | TT                              | AA                | 1946635830               |
| SNP_P3_144463_249892 | NW_004516360.1 | Scaffold1050 | 249892                  | TT                              | CC                | 1946635832               |
| SNP_P3_144464_249906 | NW_004516360.1 | Scaffold1050 | 249906                  | TT                              | GG                | 1946635834               |
| SNP_P3_144465_249923 | NW_004516360.1 | Scaffold1050 | 249923                  | TT                              | CC                | 1946635836               |
| SNP_P3_144466_249951 | NW_004516360.1 | Scaffold1050 | 249951                  | TT                              | GG                | 1946635838               |
| SNP_P3_144467_2004   | NW_004516361.1 | Scaffold1051 | 2004                    | TT                              | GG                | 1946635840               |
| SNP_P3_144468_2302   | NW_004516361.1 | Scaffold1051 | 2302                    | TT                              | GG                | 1946635842               |
| SNP_P3_144469_6066   | NW_004516361.1 | Scaffold1051 | 6066                    | TT                              | CC                | 1946635844               |
| SNP_P3_144470_6100   | NW_004516361.1 | Scaffold1051 | 6100                    | CC                              | AA                | 1946635846               |
| SNP_P3_144471_12076  | NW_004516361.1 | Scaffold1051 | 12076                   | GG                              | AA                | 1946635848               |
| SNP_P3_144472_12077  | NW_004516361.1 | Scaffold1051 | 12077                   | GG                              | AA                | 1946635850               |
| SNP_P3_144473_13712  | NW_004516361.1 | Scaffold1051 | 13712                   | TT                              | CC                | 1946635852               |
| SNP_P3_144474_13726  | NW_004516361.1 | Scaffold1051 | 13726                   | AA                              | GG                | 1946635854               |
| SNP_P3_144475_13800  | NW_004516361.1 | Scaffold1051 | 13800                   | GG                              | TT                | 1946635856               |
| SNP_P3_144476_13803  | NW_004516361.1 | Scaffold1051 | 13803                   | AA                              | GG                | 1946635858               |
| SNP_P3_144477_13827  | NW_004516361.1 | Scaffold1051 | 13827                   | CC                              | TT                | 1946635861               |
| SNP_P3_144478_13833  | NW_004516361.1 | Scaffold1051 | 13833                   | TT                              | AA                | 1946635863               |
| SNP_P3_144479_13872  | NW_004516361.1 | Scaffold1051 | 13872                   | TT                              | CC                | 1946635865               |
| SNP_P3_144480_13878  | NW_004516361.1 | Scaffold1051 | 13878                   | TT                              | CC                | 1946635867               |
| SNP_P3_144481_14051  | NW_004516361.1 | Scaffold1051 | 14051                   | GG                              | TT                | 1946635869               |
| SNP_P3_144482_14268  | NW_004516361.1 | Scaffold1051 | 14268                   | TT                              | CC                | 1946635871               |
| SNP_P3_144483_14282  | NW_004516361.1 | Scaffold1051 | 14282                   | TT                              | CC                | 1946635873               |
| SNP_P3_144484_25610  | NW_004516361.1 | Scaffold1051 | 25610                   | CC                              | TT                | 1946635875               |
| SNP_P3_144485_30559  | NW_004516361.1 | Scaffold1051 | 30559                   | AA                              | GG                | 1946635877               |
| SNP_P3_144488_33821  | NW_004516361.1 | Scaffold1051 | 33821                   | AA                              | TT                | 1946635879               |
| SNP_P3_144489_33824  | NW_004516361.1 | Scaffold1051 | 33824                   | TT                              | CC                | 1946635880               |
| SNP_P3_144490_51645  | NW_004516361.1 | Scaffold1051 | 51645                   | TT                              | AA                | 1946635882               |
| SNP_P3_144491_55972  | NW_004516361.1 | Scaffold1051 | 55972                   | CC                              | TT                | 1946635884               |
| SNP_P3_144492_73789  | NW_004516361.1 | Scaffold1051 | 73789                   | TT                              | GG                | 1946635886               |
| SNP_P3_144493_75024  | NW_004516361.1 | Scaffold1051 | 75024                   | TT                              | CC                | 1946635888               |
| SNP_P3_144494_75512  | NW_004516361.1 | Scaffold1051 | 75512                   | CC                              | GG                | 1946635890               |
| SNP_P3_144495_518    | NW_004516362.1 | Scaffold1052 | 518                     | TT                              | CC                | 1946635892               |
| SNP_P3_144496_6050   | NW_004516362.1 | Scaffold1052 | 6050                    | GG                              | AA                | 1946635894               |
| SNP_P3_144497_6777   | NW_004516362.1 | Scaffold1052 | 6777                    | CC                              | AA                | 1946635896               |
| SNP_P3_144498_10104  | NW_004516362.1 | Scaffold1052 | 10104                   | TT                              | CC                | 1946635898               |
| SNP_P3_144500_11662  | NW_004516362.1 | Scaffold1052 | 11662                   | TT                              | AA                | 1946635900               |
| SNP_P3_144501_14738  | NW_004516362.1 | Scaffold1052 | 14738                   | GG                              | AA                | 1946635902               |
| SNP_P3_144503_16417  | NW_004516362.1 | Scaffold1052 | 16417                   | TT                              | AA                | 1946635903               |
| SNP_P3_144505_16519  | NW_004516362.1 | Scaffold1052 | 16519                   | AA                              | GG                | 1946635906               |
| SNP_P3_144506_16532  | NW_004516362.1 | Scaffold1052 | 16532                   | AA                              | GG                | 1946635908               |
| SNP_P3_144508_16590  | NW_004516362.1 | Scaffold1052 | 16590                   | TT                              | CC                | 1946635910               |
| SNP_P3_144509_17296  | NW_004516362.1 | Scaffold1052 | 17296                   | TT                              | CC                | 1946635912               |

| SNPs IDs             | Chromosome IDs | Chromosomes  | Physical positions (bp) | CDC Frontier (Reference genome) | (Pusa 256 & HPNB) | NCBI SNPdb Accession IDs |
|----------------------|----------------|--------------|-------------------------|---------------------------------|-------------------|--------------------------|
| SNP_P3_144510_17679  | NW_004516362.1 | Scaffold1052 | 17679                   | AA                              | CC                | 1946635914               |
| SNP_P3_144512_42323  | NW_004516362.1 | Scaffold1052 | 42323                   | TT                              | AA                | 1946635916               |
| SNP_P3_144513_42329  | NW_004516362.1 | Scaffold1052 | 42329                   | AA                              | CC                | 1946635918               |
| SNP_P3_144515_50283  | NW_004516362.1 | Scaffold1052 | 50283                   | CC                              | TT                | 1946635919               |
| SNP_P3_144516_50284  | NW_004516362.1 | Scaffold1052 | 50284                   | AA                              | TT                | 1946635921               |
| SNP_P3_144517_50287  | NW_004516362.1 | Scaffold1052 | 50287                   | GG                              | TT                | 1946635924               |
| SNP_P3_144518_50306  | NW_004516362.1 | Scaffold1052 | 50306                   | CC                              | AA                | 1946635925               |
| SNP_P3_144519_50408  | NW_004516362.1 | Scaffold1052 | 50408                   | AA                              | GG                | 1946635927               |
| SNP_P3_144520_50673  | NW_004516362.1 | Scaffold1052 | 50673                   | AA                              | GG                | 1946635929               |
| SNP_P3_144521_50707  | NW_004516362.1 | Scaffold1052 | 50707                   | GG                              | AA                | 1946635931               |
| SNP_P3_144522_50716  | NW_004516362.1 | Scaffold1052 | 50716                   | AA                              | GG                | 1946635933               |
| SNP_P3_144523_52504  | NW_004516362.1 | Scaffold1052 | 52504                   | GG                              | AA                | 1946635935               |
| SNP_P3_144524_54999  | NW_004516362.1 | Scaffold1052 | 54999                   | AA                              | GG                | 1946635937               |
| SNP_P3_144525_55443  | NW_004516362.1 | Scaffold1052 | 55443                   | TT                              | CC                | 1946635939               |
| SNP_P3_144526_57418  | NW_004516362.1 | Scaffold1052 | 57418                   | CC                              | TT                | 1946635941               |
| SNP_P3_144527_57460  | NW_004516362.1 | Scaffold1052 | 57460                   | GG                              | AA                | 1946635943               |
| SNP_P3_144528_57760  | NW_004516362.1 | Scaffold1052 | 57760                   | GG                              | AA                | 1946635945               |
| SNP_P3_144529_58872  | NW_004516362.1 | Scaffold1052 | 58872                   | GG                              | AA                | 1946635946               |
| SNP_P3_144532_76801  | NW_004516362.1 | Scaffold1052 | 76801                   | CC                              | TT                | 1946635949               |
| SNP_P3_144533_76970  | NW_004516362.1 | Scaffold1052 | 76970                   | CC                              | TT                | 1946635951               |
| SNP_P3_144534_77615  | NW_004516362.1 | Scaffold1052 | 77615                   | AA                              | CC                | 1946635953               |
| SNP_P3_144536_81871  | NW_004516362.1 | Scaffold1052 | 81871                   | AA                              | GG                | 1946635955               |
| SNP_P3_144538_110564 | NW_004516362.1 | Scaffold1052 | 110564                  | CC                              | TT                | 1946635957               |
| SNP_P3_144539_134123 | NW_004516362.1 | Scaffold1052 | 134123                  | TT                              | CC                | 1946635959               |
| SNP_P3_144540_134536 | NW_004516362.1 | Scaffold1052 | 134536                  | GG                              | CC                | 1946635961               |
| SNP_P3_144541_140171 | NW_004516362.1 | Scaffold1052 | 140171                  | TT                              | CC                | 1946635963               |
| SNP_P3_144542_166649 | NW_004516362.1 | Scaffold1052 | 166649                  | GG                              | AA                | 1946635966               |
| SNP_P3_144543_171247 | NW_004516362.1 | Scaffold1052 | 171247                  | AA                              | GG                | 1946635974               |
| SNP_P3_144544_171428 | NW_004516362.1 | Scaffold1052 | 171428                  | CC                              | GG                | 1946635976               |
| SNP_P3_144545_171525 | NW_004516362.1 | Scaffold1052 | 171525                  | GG                              | AA                | 1946635978               |
| SNP_P3_144546_171537 | NW_004516362.1 | Scaffold1052 | 171537                  | GG                              | AA                | 1946635980               |
| SNP_P3_144547_174715 | NW_004516362.1 | Scaffold1052 | 174715                  | CC                              | TT                | 1946635982               |
| SNP_P3_144548_175958 | NW_004516362.1 | Scaffold1052 | 175958                  | CC                              | TT                | 1946635984               |
| SNP_P3_144549_175968 | NW_004516362.1 | Scaffold1052 | 175968                  | AA                              | GG                | 1946635986               |
| SNP_P3_144550_175976 | NW_004516362.1 | Scaffold1052 | 175976                  | GG                              | AA                | 1946635988               |
| SNP_P3_144551_183673 | NW_004516362.1 | Scaffold1052 | 183673                  | TT                              | CC                | 1946635990               |
| SNP_P3_144552_183736 | NW_004516362.1 | Scaffold1052 | 183736                  | GG                              | TT                | 1946635992               |
| SNP_P3_144553_186589 | NW_004516362.1 | Scaffold1052 | 186589                  | TT                              | AA                | 1946635994               |
| SNP_P3_144554_186605 | NW_004516362.1 | Scaffold1052 | 186605                  | AA                              | TT                | 1946635996               |
| SNP_P3_144555_195390 | NW_004516362.1 | Scaffold1052 | 195390                  | GG                              | TT                | 1946635998               |
| SNP_P3_144556_215612 | NW_004516362.1 | Scaffold1052 | 215612                  | AA                              | GG                | 1946636000               |
| SNP_P3_144557_215753 | NW_004516362.1 | Scaffold1052 | 215753                  | CC                              | GG                | 1946636002               |

| SNPs IDs             | Chromosome IDs | Chromosomes  | Physical positions (bp) | CDC Frontier (Reference genome) | (Pusa 256 & HPNB) | NCBI SNPdb Accession IDs |
|----------------------|----------------|--------------|-------------------------|---------------------------------|-------------------|--------------------------|
| SNP_P3_144558_216083 | NW_004516362.1 | Scaffold1052 | 216083                  | AA                              | GG                | 1946636003               |
| SNP_P3_144559_216094 | NW_004516362.1 | Scaffold1052 | 216094                  | TT                              | CC                | 1946636005               |
| SNP_P3_144560_216136 | NW_004516362.1 | Scaffold1052 | 216136                  | CC                              | TT                | 1946636007               |
| SNP_P3_144561_216178 | NW_004516362.1 | Scaffold1052 | 216178                  | TT                              | CC                | 1946636009               |
| SNP_P3_144562_216182 | NW_004516362.1 | Scaffold1052 | 216182                  | AA                              | GG                | 1946636011               |
| SNP_P3_144563_216888 | NW_004516362.1 | Scaffold1052 | 216888                  | GG                              | AA                | 1946636013               |
| SNP_P3_144564_225049 | NW_004516362.1 | Scaffold1052 | 225049                  | CC                              | GG                | 1946636015               |
| SNP_P3_144565_225167 | NW_004516362.1 | Scaffold1052 | 225167                  | CC                              | GG                | 1946636017               |
| SNP_P3_144566_226392 | NW_004516362.1 | Scaffold1052 | 226392                  | TT                              | CC                | 1946636019               |
| SNP_P3_144567_226753 | NW_004516362.1 | Scaffold1052 | 226753                  | TT                              | CC                | 1946636021               |
| SNP_P3_144568_232803 | NW_004516362.1 | Scaffold1052 | 232803                  | GG                              | CC                | 1946636023               |
| SNP_P3_144569_233174 | NW_004516362.1 | Scaffold1052 | 233174                  | TT                              | AA                | 1946636025               |
| SNP_P3_144570_233182 | NW_004516362.1 | Scaffold1052 | 233182                  | CC                              | TT                | 1946636027               |
| SNP_P3_144571_233245 | NW_004516362.1 | Scaffold1052 | 233245                  | CC                              | TT                | 1946636029               |
| SNP_P3_144573_233482 | NW_004516362.1 | Scaffold1052 | 233482                  | AA                              | GG                | 1946636031               |
| SNP_P3_144574_233513 | NW_004516362.1 | Scaffold1052 | 233513                  | CC                              | TT                | 1946636033               |
| SNP_P3_144575_244335 | NW_004516362.1 | Scaffold1052 | 244335                  | AA                              | CC                | 1946636035               |
| SNP_P3_144576_252443 | NW_004516362.1 | Scaffold1052 | 252443                  | TT                              | AA                | 1946636037               |
| SNP_P3_144577_259579 | NW_004516362.1 | Scaffold1052 | 259579                  | GG                              | AA                | 1946636039               |
| SNP_P3_144578_259698 | NW_004516362.1 | Scaffold1052 | 259698                  | AA                              | TT                | 1946636041               |
| SNP_P3_144579_267631 | NW_004516362.1 | Scaffold1052 | 267631                  | TT                              | CC                | 1946636043               |
| SNP_P3_144580_275599 | NW_004516362.1 | Scaffold1052 | 275599                  | TT                              | GG                | 1946636045               |
| SNP_P3_144581_278242 | NW_004516362.1 | Scaffold1052 | 278242                  | AA                              | GG                | 1946636047               |
| SNP_P3_144582_278328 | NW_004516362.1 | Scaffold1052 | 278328                  | AA                              | GG                | 1946636049               |
| SNP_P3_144583_278526 | NW_004516362.1 | Scaffold1052 | 278526                  | TT                              | CC                | 1946636051               |
| SNP_P3_144584_278766 | NW_004516362.1 | Scaffold1052 | 278766                  | TT                              | AA                | 1946636053               |
| SNP_P3_144585_280525 | NW_004516362.1 | Scaffold1052 | 280525                  | AA                              | GG                | 1946636055               |
| SNP_P3_144586_303304 | NW_004516362.1 | Scaffold1052 | 303304                  | TT                              | CC                | 1946636057               |
| SNP_P3_144587_303457 | NW_004516362.1 | Scaffold1052 | 303457                  | CC                              | TT                | 1946636059               |
| SNP_P3_144588_305208 | NW_004516362.1 | Scaffold1052 | 305208                  | TT                              | CC                | 1946636061               |
| SNP_P3_144589_305283 | NW_004516362.1 | Scaffold1052 | 305283                  | GG                              | AA                | 1946636063               |
| SNP_P3_144591_315823 | NW_004516362.1 | Scaffold1052 | 315823                  | CC                              | TT                | 1946636066               |
| SNP_P3_144592_319044 | NW_004516362.1 | Scaffold1052 | 319044                  | AA                              | TT                | 1946636068               |
| SNP_P3_144593_334929 | NW_004516362.1 | Scaffold1052 | 334929                  | TT                              | CC                | 1946636070               |
| SNP_P3_144594_334930 | NW_004516362.1 | Scaffold1052 | 334930                  | GG                              | AA                | 1946636071               |
| SNP_P3_144595_334954 | NW_004516362.1 | Scaffold1052 | 334954                  | TT                              | CC                | 1946636073               |
| SNP_P3_144596_335322 | NW_004516362.1 | Scaffold1052 | 335322                  | CC                              | TT                | 1946636075               |
| SNP_P3_144597_338698 | NW_004516362.1 | Scaffold1052 | 338698                  | TT                              | CC                | 1946636077               |
| SNP_P3_144598_214    | NW_004516364.1 | Scaffold1055 | 214                     | TT                              | CC                | 1946636079               |
| SNP_P3_144599_13200  | NW_004516364.1 | Scaffold1055 | 13200                   | GG                              | TT                | 1946636081               |
| SNP_P3_144600_13207  | NW_004516364.1 | Scaffold1055 | 13207                   | GG                              | TT                | 1946636083               |
| SNP_P3_144601_13209  | NW_004516364.1 | Scaffold1055 | 13209                   | AA                              | TT                | 1946636085               |

| SNPs IDs             | Chromosome IDs | Chromosomes  | Physical positions (bp) | CDC Frontier (Reference genome) | (Pusa 256 & HPNB) | NCBI SNPdb Accession IDs |
|----------------------|----------------|--------------|-------------------------|---------------------------------|-------------------|--------------------------|
| SNP_P3_144602_13279  | NW_004516364.1 | Scaffold1055 | 13279                   | TT                              | CC                | 1946636087               |
| SNP_P3_144603_13286  | NW_004516364.1 | Scaffold1055 | 13286                   | TT                              | CC                | 1946636089               |
| SNP_P3_144604_13957  | NW_004516364.1 | Scaffold1055 | 13957                   | TT                              | AA                | 1946636091               |
| SNP_P3_144605_24453  | NW_004516364.1 | Scaffold1055 | 24453                   | CC                              | TT                | 1946636093               |
| SNP_P3_144606_49505  | NW_004516364.1 | Scaffold1055 | 49505                   | GG                              | CC                | 1946636095               |
| SNP_P3_144607_49628  | NW_004516364.1 | Scaffold1055 | 49628                   | GG                              | TT                | 1946636097               |
| SNP_P3_144608_49671  | NW_004516364.1 | Scaffold1055 | 49671                   | TT                              | CC                | 1946636099               |
| SNP_P3_144609_49833  | NW_004516364.1 | Scaffold1055 | 49833                   | AA                              | CC                | 1946636101               |
| SNP_P3_144610_50387  | NW_004516364.1 | Scaffold1055 | 50387                   | TT                              | GG                | 1946636103               |
| SNP_P3_144611_50412  | NW_004516364.1 | Scaffold1055 | 50412                   | TT                              | AA                | 1946636104               |
| SNP_P3_144613_55898  | NW_004516364.1 | Scaffold1055 | 55898                   | TT                              | CC                | 1946636107               |
| SNP_P3_144614_56038  | NW_004516364.1 | Scaffold1055 | 56038                   | CC                              | TT                | 1946636109               |
| SNP_P3_144615_56120  | NW_004516364.1 | Scaffold1055 | 56120                   | AA                              | GG                | 1946636111               |
| SNP_P3_144616_56148  | NW_004516364.1 | Scaffold1055 | 56148                   | AA                              | TT                | 1946636113               |
| SNP_P3_144617_56157  | NW_004516364.1 | Scaffold1055 | 56157                   | AA                              | GG                | 1946636115               |
| SNP_P3_144620_56377  | NW_004516364.1 | Scaffold1055 | 56377                   | GG                              | AA                | 1946636117               |
| SNP_P3_144621_56414  | NW_004516364.1 | Scaffold1055 | 56414                   | TT                              | CC                | 1946636119               |
| SNP_P3_144622_56418  | NW_004516364.1 | Scaffold1055 | 56418                   | CC                              | GG                | 1946636120               |
| SNP_P3_144623_56600  | NW_004516364.1 | Scaffold1055 | 56600                   | GG                              | TT                | 1946636122               |
| SNP_P3_144625_66181  | NW_004516364.1 | Scaffold1055 | 66181                   | AA                              | TT                | 1946636124               |
| SNP_P3_144626_88791  | NW_004516364.1 | Scaffold1055 | 88791                   | AA                              | GG                | 1946636126               |
| SNP_P3_144627_89405  | NW_004516364.1 | Scaffold1055 | 89405                   | CC                              | TT                | 1946636128               |
| SNP_P3_144628_89437  | NW_004516364.1 | Scaffold1055 | 89437                   | TT                              | CC                | 1946636130               |
| SNP_P3_144629_96932  | NW_004516364.1 | Scaffold1055 | 96932                   | TT                              | GG                | 1946636132               |
| SNP_P3_144630_102188 | NW_004516364.1 | Scaffold1055 | 102188                  | AA                              | GG                | 1946636134               |
| SNP_P3_144631_118567 | NW_004516364.1 | Scaffold1055 | 118567                  | AA                              | GG                | 1946636136               |
| SNP_P3_144632_120211 | NW_004516364.1 | Scaffold1055 | 120211                  | CC                              | TT                | 1946636137               |
| SNP_P3_144633_121155 | NW_004516364.1 | Scaffold1055 | 121155                  | AA                              | GG                | 1946636139               |
| SNP_P3_144634_122906 | NW_004516364.1 | Scaffold1055 | 122906                  | GG                              | CC                | 1946636141               |
| SNP_P3_144635_122911 | NW_004516364.1 | Scaffold1055 | 122911                  | TT                              | AA                | 1946636143               |
| SNP_P3_144636_129393 | NW_004516364.1 | Scaffold1055 | 129393                  | TT                              | GG                | 1946636145               |
| SNP_P3_144637_133470 | NW_004516364.1 | Scaffold1055 | 133470                  | AA                              | GG                | 1946636148               |
| SNP_P3_144638_142473 | NW_004516364.1 | Scaffold1055 | 142473                  | TT                              | CC                | 1946636150               |
| SNP_P3_144639_142714 | NW_004516364.1 | Scaffold1055 | 142714                  | GG                              | TT                | 1946636151               |
| SNP_P3_144640_142769 | NW_004516364.1 | Scaffold1055 | 142769                  | CC                              | TT                | 1946636153               |
| SNP_P3_144641_146720 | NW_004516364.1 | Scaffold1055 | 146720                  | GG                              | AA                | 1946636155               |
| SNP_P3_144643_164359 | NW_004516364.1 | Scaffold1055 | 164359                  | AA                              | CC                | 1946636157               |
| SNP_P3_144644_172130 | NW_004516364.1 | Scaffold1055 | 172130                  | AA                              | GG                | 1946636159               |
| SNP_P3_144645_172375 | NW_004516364.1 | Scaffold1055 | 172375                  | AA                              | TT                | 1946636161               |
| SNP_P3_144646_172463 | NW_004516364.1 | Scaffold1055 | 172463                  | TT                              | CC                | 1946636163               |
| SNP_P3_144647_172469 | NW_004516364.1 | Scaffold1055 | 172469                  | AA                              | TT                | 1946636165               |
| SNP_P3_144648_172470 | NW_004516364.1 | Scaffold1055 | 172470                  | TT                              | CC                | 1946636167               |

| SNPs IDs             | Chromosome IDs | Chromosomes  | Physical positions (bp) | CDC Frontier (Reference genome) | (Pusa 256 & HPNB) | NCBI SNPdb Accession IDs |
|----------------------|----------------|--------------|-------------------------|---------------------------------|-------------------|--------------------------|
| SNP_P3_144649_195464 | NW_004516364.1 | Scaffold1055 | 195464                  | AA                              | TT                | 1946636169               |
| SNP_P3_144650_195469 | NW_004516364.1 | Scaffold1055 | 195469                  | TT                              | CC                | 1946636171               |
| SNP_P3_144651_197996 | NW_004516364.1 | Scaffold1055 | 197996                  | CC                              | TT                | 1946636173               |
| SNP_P3_144652_198063 | NW_004516364.1 | Scaffold1055 | 198063                  | GG                              | AA                | 1946636175               |
| SNP_P3_144653_198082 | NW_004516364.1 | Scaffold1055 | 198082                  | CC                              | TT                | 1946636177               |
| SNP_P3_144654_198090 | NW_004516364.1 | Scaffold1055 | 198090                  | CC                              | TT                | 1946636179               |
| SNP_P3_144655_198101 | NW_004516364.1 | Scaffold1055 | 198101                  | CC                              | AA                | 1946636181               |
| SNP_P3_144656_198115 | NW_004516364.1 | Scaffold1055 | 198115                  | TT                              | GG                | 1946636183               |
| SNP_P3_144657_198120 | NW_004516364.1 | Scaffold1055 | 198120                  | GG                              | AA                | 1946636184               |
| SNP_P3_144658_198155 | NW_004516364.1 | Scaffold1055 | 198155                  | TT                              | CC                | 1946636187               |
| SNP_P3_144659_198162 | NW_004516364.1 | Scaffold1055 | 198162                  | CC                              | TT                | 1946636189               |
| SNP_P3_144660_198284 | NW_004516364.1 | Scaffold1055 | 198284                  | CC                              | TT                | 1946636191               |
| SNP_P3_144661_198301 | NW_004516364.1 | Scaffold1055 | 198301                  | GG                              | TT                | 1946636193               |
| SNP_P3_144662_198309 | NW_004516364.1 | Scaffold1055 | 198309                  | TT                              | CC                | 1946636195               |
| SNP_P3_144663_198325 | NW_004516364.1 | Scaffold1055 | 198325                  | CC                              | TT                | 1946636197               |
| SNP_P3_144664_198340 | NW_004516364.1 | Scaffold1055 | 198340                  | TT                              | AA                | 1946636199               |
| SNP_P3_144665_198384 | NW_004516364.1 | Scaffold1055 | 198384                  | CC                              | AA                | 1946636200               |
| SNP_P3_144666_198386 | NW_004516364.1 | Scaffold1055 | 198386                  | GG                              | AA                | 1946636202               |
| SNP_P3_144667_198407 | NW_004516364.1 | Scaffold1055 | 198407                  | TT                              | AA                | 1946636204               |
| SNP_P3_144668_198413 | NW_004516364.1 | Scaffold1055 | 198413                  | CC                              | TT                | 1946636206               |
| SNP_P3_144669_198416 | NW_004516364.1 | Scaffold1055 | 198416                  | GG                              | AA                | 1946636208               |
| SNP_P3_144670_198429 | NW_004516364.1 | Scaffold1055 | 198429                  | CC                              | TT                | 1946636210               |
| SNP_P3_144671_198436 | NW_004516364.1 | Scaffold1055 | 198436                  | TT                              | CC                | 1946636212               |
| SNP_P3_144672_198451 | NW_004516364.1 | Scaffold1055 | 198451                  | CC                              | TT                | 1946636214               |
| SNP_P3_144673_201122 | NW_004516364.1 | Scaffold1055 | 201122                  | CC                              | TT                | 1946636216               |
| SNP_P3_144674_201127 | NW_004516364.1 | Scaffold1055 | 201127                  | TT                              | CC                | 1946636218               |
| SNP_P3_144675_201131 | NW_004516364.1 | Scaffold1055 | 201131                  | AA                              | CC                | 1946636219               |
| SNP_P3_144676_201167 | NW_004516364.1 | Scaffold1055 | 201167                  | CC                              | TT                | 1946636221               |
| SNP_P3_144677_201198 | NW_004516364.1 | Scaffold1055 | 201198                  | TT                              | CC                | 1946636223               |
| SNP_P3_144678_202843 | NW_004516364.1 | Scaffold1055 | 202843                  | GG                              | CC                | 1946636225               |
| SNP_P3_144679_203299 | NW_004516364.1 | Scaffold1055 | 203299                  | AA                              | CC                | 1946636227               |
| SNP_P3_144680_205825 | NW_004516364.1 | Scaffold1055 | 205825                  | CC                              | TT                | 1946636229               |
| SNP_P3_144681_205961 | NW_004516364.1 | Scaffold1055 | 205961                  | AA                              | GG                | 1946636231               |
| SNP_P3_144682_205967 | NW_004516364.1 | Scaffold1055 | 205967                  | AA                              | GG                | 1946636233               |
| SNP_P3_144683_205971 | NW_004516364.1 | Scaffold1055 | 205971                  | TT                              | AA                | 1946636235               |
| SNP_P3_144685_213154 | NW_004516364.1 | Scaffold1055 | 213154                  | GG                              | AA                | 1946636237               |
| SNP_P3_144686_213482 | NW_004516364.1 | Scaffold1055 | 213482                  | TT                              | CC                | 1946636239               |
| SNP_P3_144687_213514 | NW_004516364.1 | Scaffold1055 | 213514                  | AA                              | TT                | 1946636241               |
| SNP_P3_144688_213530 | NW_004516364.1 | Scaffold1055 | 213530                  | AA                              | CC                | 1946636244               |
| SNP_P3_144689_213551 | NW_004516364.1 | Scaffold1055 | 213551                  | CC                              | TT                | 1946636246               |
| SNP_P3_144690_213564 | NW_004516364.1 | Scaffold1055 | 213564                  | TT                              | CC                | 1946636248               |
| SNP_P3_144691_213925 | NW_004516364.1 | Scaffold1055 | 213925                  | AA                              | TT                | 1946636250               |

| SNPs IDs             | Chromosome IDs | Chromosomes  | Physical positions (bp) | CDC Frontier (Reference genome) | (Pusa 256 & HPNB) | NCBI SNPdb Accession IDs |
|----------------------|----------------|--------------|-------------------------|---------------------------------|-------------------|--------------------------|
| SNP_P3_144692_213929 | NW_004516364.1 | Scaffold1055 | 213929                  | CC                              | AA                | 1946636252               |
| SNP_P3_144693_213930 | NW_004516364.1 | Scaffold1055 | 213930                  | AA                              | CC                | 1946636254               |
| SNP_P3_144694_213931 | NW_004516364.1 | Scaffold1055 | 213931                  | AA                              | GG                | 1946636256               |
| SNP_P3_144695_213934 | NW_004516364.1 | Scaffold1055 | 213934                  | CC                              | TT                | 1946636258               |
| SNP_P3_144696_214540 | NW_004516364.1 | Scaffold1055 | 214540                  | AA                              | GG                | 1946636260               |
| SNP_P3_144697_217877 | NW_004516364.1 | Scaffold1055 | 217877                  | TT                              | CC                | 1946636262               |
| SNP_P3_144698_218051 | NW_004516364.1 | Scaffold1055 | 218051                  | TT                              | CC                | 1946636264               |
| SNP_P3_144699_218868 | NW_004516364.1 | Scaffold1055 | 218868                  | CC                              | TT                | 1946636266               |
| SNP_P3_144700_218891 | NW_004516364.1 | Scaffold1055 | 218891                  | TT                              | CC                | 1946636268               |
| SNP_P3_144701_220489 | NW_004516364.1 | Scaffold1055 | 220489                  | CC                              | TT                | 1946636270               |
| SNP_P3_144702_230776 | NW_004516364.1 | Scaffold1055 | 230776                  | TT                              | CC                | 1946636272               |
| SNP_P3_144703_231442 | NW_004516364.1 | Scaffold1055 | 231442                  | GG                              | AA                | 1946636274               |
| SNP_P3_144704_238887 | NW_004516364.1 | Scaffold1055 | 238887                  | CC                              | TT                | 1946636276               |
| SNP_P3_144705_239690 | NW_004516364.1 | Scaffold1055 | 239690                  | TT                              | GG                | 1946636278               |
| SNP_P3_144706_240011 | NW_004516364.1 | Scaffold1055 | 240011                  | TT                              | CC                | 1946636280               |
| SNP_P3_144707_279010 | NW_004516364.1 | Scaffold1055 | 279010                  | CC                              | TT                | 1946636282               |
| SNP_P3_144708_287398 | NW_004516364.1 | Scaffold1055 | 287398                  | TT                              | CC                | 1946636284               |
| SNP_P3_144709_288921 | NW_004516364.1 | Scaffold1055 | 288921                  | TT                              | AA                | 1946636286               |
| SNP_P3_144710_288922 | NW_004516364.1 | Scaffold1055 | 288922                  | TT                              | CC                | 1946636288               |
| SNP_P3_144712_304134 | NW_004516364.1 | Scaffold1055 | 304134                  | TT                              | CC                | 1946636289               |
| SNP_P3_144713_309592 | NW_004516364.1 | Scaffold1055 | 309592                  | GG                              | AA                | 1946636291               |
| SNP_P3_144714_309760 | NW_004516364.1 | Scaffold1055 | 309760                  | CC                              | AA                | 1946636293               |
| SNP_P3_144715_317960 | NW_004516364.1 | Scaffold1055 | 317960                  | TT                              | CC                | 1946636295               |
| SNP_P3_144716_318027 | NW_004516364.1 | Scaffold1055 | 318027                  | AA                              | GG                | 1946636297               |
| SNP_P3_144717_318075 | NW_004516364.1 | Scaffold1055 | 318075                  | GG                              | AA                | 1946636299               |
| SNP_P3_144718_318220 | NW_004516364.1 | Scaffold1055 | 318220                  | GG                              | TT                | 1946636301               |
| SNP_P3_144719_318328 | NW_004516364.1 | Scaffold1055 | 318328                  | AA                              | CC                | 1946636303               |
| SNP_P3_144720_318393 | NW_004516364.1 | Scaffold1055 | 318393                  | TT                              | AA                | 1946636306               |
| SNP_P3_144721_318433 | NW_004516364.1 | Scaffold1055 | 318433                  | AA                              | GG                | 1946636309               |
| SNP_P3_144722_318503 | NW_004516364.1 | Scaffold1055 | 318503                  | TT                              | CC                | 1946636311               |
| SNP_P3_144723_318573 | NW_004516364.1 | Scaffold1055 | 318573                  | CC                              | TT                | 1946636313               |
| SNP_P3_144724_324941 | NW_004516364.1 | Scaffold1055 | 324941                  | AA                              | GG                | 1946636315               |
| SNP_P3_144725_324947 | NW_004516364.1 | Scaffold1055 | 324947                  | GG                              | AA                | 1946636317               |
| SNP_P3_144726_325119 | NW_004516364.1 | Scaffold1055 | 325119                  | AA                              | GG                | 1946636319               |
| SNP_P3_144727_327989 | NW_004516364.1 | Scaffold1055 | 327989                  | AA                              | CC                | 1946636321               |
| SNP_P3_144728_335468 | NW_004516364.1 | Scaffold1055 | 335468                  | CC                              | TT                | 1946636323               |
| SNP_P3_144729_339166 | NW_004516364.1 | Scaffold1055 | 339166                  | GG                              | AA                | 1946636325               |
| SNP_P3_144730_339184 | NW_004516364.1 | Scaffold1055 | 339184                  | AA                              | GG                | 1946636327               |
| SNP_P3_144731_339203 | NW_004516364.1 | Scaffold1055 | 339203                  | AA                              | CC                | 1946636329               |
| SNP_P3_144732_339245 | NW_004516364.1 | Scaffold1055 | 339245                  | CC                              | GG                | 1946636331               |
| SNP_P3_144733_339267 | NW_004516364.1 | Scaffold1055 | 339267                  | CC                              | TT                | 1946636332               |
| SNP_P3_144735_339340 | NW_004516364.1 | Scaffold1055 | 339340                  | TT                              | AA                | 1946636334               |

| SNPs IDs             | Chromosome IDs | Chromosomes  | Physical positions (bp) | CDC Frontier (Reference genome) | (Pusa 256 & HPNB) | NCBI SNPdb Accession IDs |
|----------------------|----------------|--------------|-------------------------|---------------------------------|-------------------|--------------------------|
| SNP_P3_144736_339412 | NW_004516364.1 | Scaffold1055 | 339412                  | TT                              | AA                | 1946636336               |
| SNP_P3_144737_339413 | NW_004516364.1 | Scaffold1055 | 339413                  | TT                              | GG                | 1946636338               |
| SNP_P3_144738_339470 | NW_004516364.1 | Scaffold1055 | 339470                  | AA                              | GG                | 1946636340               |
| SNP_P3_144739_339510 | NW_004516364.1 | Scaffold1055 | 339510                  | TT                              | GG                | 1946636342               |
| SNP_P3_144740_339562 | NW_004516364.1 | Scaffold1055 | 339562                  | GG                              | AA                | 1946636344               |
| SNP_P3_144741_339590 | NW_004516364.1 | Scaffold1055 | 339590                  | CC                              | TT                | 1946636346               |
| SNP_P3_144742_339619 | NW_004516364.1 | Scaffold1055 | 339619                  | GG                              | AA                | 1946636348               |
| SNP_P3_144743_339624 | NW_004516364.1 | Scaffold1055 | 339624                  | AA                              | GG                | 1946636350               |
| SNP_P3_144744_339668 | NW_004516364.1 | Scaffold1055 | 339668                  | AA                              | CC                | 1946636352               |
| SNP_P3_144745_339671 | NW_004516364.1 | Scaffold1055 | 339671                  | AA                              | GG                | 1946636354               |
| SNP_P3_144746_339744 | NW_004516364.1 | Scaffold1055 | 339744                  | CC                              | TT                | 1946636356               |
| SNP_P3_144747_339752 | NW_004516364.1 | Scaffold1055 | 339752                  | CC                              | TT                | 1946636358               |
| SNP_P3_144748_339776 | NW_004516364.1 | Scaffold1055 | 339776                  | AA                              | GG                | 1946636360               |
| SNP_P3_144749_339786 | NW_004516364.1 | Scaffold1055 | 339786                  | GG                              | AA                | 1946636362               |
| SNP_P3_144750_339812 | NW_004516364.1 | Scaffold1055 | 339812                  | AA                              | GG                | 1946636364               |
| SNP_P3_144751_339831 | NW_004516364.1 | Scaffold1055 | 339831                  | TT                              | AA                | 1946636366               |
| SNP_P3_144752_339851 | NW_004516364.1 | Scaffold1055 | 339851                  | AA                              | GG                | 1946636368               |
| SNP_P3_144753_339872 | NW_004516364.1 | Scaffold1055 | 339872                  | GG                              | AA                | 1946636370               |
| SNP_P3_144754_339932 | NW_004516364.1 | Scaffold1055 | 339932                  | AA                              | TT                | 1946636372               |
| SNP_P3_144755_339981 | NW_004516364.1 | Scaffold1055 | 339981                  | CC                              | AA                | 1946636374               |
| SNP_P3_144756_340005 | NW_004516364.1 | Scaffold1055 | 340005                  | TT                              | GG                | 1946636376               |
| SNP_P3_144758_340108 | NW_004516364.1 | Scaffold1055 | 340108                  | TT                              | AA                | 1946636378               |
| SNP_P3_144759_340136 | NW_004516364.1 | Scaffold1055 | 340136                  | AA                              | GG                | 1946636380               |
| SNP_P3_144760_340138 | NW_004516364.1 | Scaffold1055 | 340138                  | CC                              | TT                | 1946636382               |
| SNP_P3_144761_340172 | NW_004516364.1 | Scaffold1055 | 340172                  | CC                              | TT                | 1946636384               |
| SNP_P3_144762_340328 | NW_004516364.1 | Scaffold1055 | 340328                  | GG                              | AA                | 1946636385               |
| SNP_P3_144763_340329 | NW_004516364.1 | Scaffold1055 | 340329                  | AA                              | TT                | 1946636387               |
| SNP_P3_144764_340355 | NW_004516364.1 | Scaffold1055 | 340355                  | AA                              | CC                | 1946636390               |
| SNP_P3_144765_340393 | NW_004516364.1 | Scaffold1055 | 340393                  | CC                              | TT                | 1946636392               |
| SNP_P3_144766_340397 | NW_004516364.1 | Scaffold1055 | 340397                  | AA                              | GG                | 1946636394               |
| SNP_P3_144768_340545 | NW_004516364.1 | Scaffold1055 | 340545                  | TT                              | CC                | 1946636396               |
| SNP_P3_144769_340581 | NW_004516364.1 | Scaffold1055 | 340581                  | TT                              | CC                | 1946636398               |
| SNP_P3_144770_340602 | NW_004516364.1 | Scaffold1055 | 340602                  | TT                              | CC                | 1946636400               |
| SNP_P3_144772_340743 | NW_004516364.1 | Scaffold1055 | 340743                  | TT                              | AA                | 1946636402               |
| SNP_P3_144773_340774 | NW_004516364.1 | Scaffold1055 | 340774                  | TT                              | GG                | 1946636404               |
| SNP_P3_144774_340786 | NW_004516364.1 | Scaffold1055 | 340786                  | AA                              | GG                | 1946636405               |
| SNP_P3_144775_340824 | NW_004516364.1 | Scaffold1055 | 340824                  | TT                              | CC                | 1946636407               |
| SNP_P3_144776_340841 | NW_004516364.1 | Scaffold1055 | 340841                  | TT                              | CC                | 1946636409               |
| SNP_P3_144777_340847 | NW_004516364.1 | Scaffold1055 | 340847                  | CC                              | TT                | 1946636411               |
| SNP_P3_144778_340943 | NW_004516364.1 | Scaffold1055 | 340943                  | TT                              | CC                | 1946636413               |
| SNP_P3_144779_341143 | NW_004516364.1 | Scaffold1055 | 341143                  | AA                              | GG                | 1946636415               |
| SNP_P3_144780_341159 | NW_004516364.1 | Scaffold1055 | 341159                  | CC                              | TT                | 1946636417               |

| SNPs IDs             | Chromosome IDs | Chromosomes  | Physical positions (bp) | CDC Frontier (Reference genome) | (Pusa 256 & HPNB) | NCBI SNPdb Accession IDs |
|----------------------|----------------|--------------|-------------------------|---------------------------------|-------------------|--------------------------|
| SNP_P3_144781_341181 | NW_004516364.1 | Scaffold1055 | 341181                  | GG                              | AA                | 1946636419               |
| SNP_P3_144782_341198 | NW_004516364.1 | Scaffold1055 | 341198                  | TT                              | CC                | 1946636421               |
| SNP_P3_144783_341207 | NW_004516364.1 | Scaffold1055 | 341207                  | GG                              | TT                | 1946636423               |
| SNP_P3_144784_341251 | NW_004516364.1 | Scaffold1055 | 341251                  | AA                              | GG                | 1946636425               |
| SNP_P3_144785_341288 | NW_004516364.1 | Scaffold1055 | 341288                  | TT                              | CC                | 1946636427               |
| SNP_P3_144786_341298 | NW_004516364.1 | Scaffold1055 | 341298                  | TT                              | AA                | 1946636428               |
| SNP_P3_144787_341323 | NW_004516364.1 | Scaffold1055 | 341323                  | GG                              | AA                | 1946636431               |
| SNP_P3_144788_343685 | NW_004516364.1 | Scaffold1055 | 343685                  | GG                              | AA                | 1946636433               |
| SNP_P3_144789_3749   | NW_004516365.1 | Scaffold1056 | 3749                    | GG                              | AA                | 1946636435               |
| SNP_P3_144790_23308  | NW_004516365.1 | Scaffold1056 | 23308                   | AA                              | CC                | 1946636437               |
| SNP_P3_144791_26389  | NW_004516365.1 | Scaffold1056 | 26389                   | GG                              | AA                | 1946636439               |
| SNP_P3_144792_26801  | NW_004516365.1 | Scaffold1056 | 26801                   | AA                              | GG                | 1946636440               |
| SNP_P3_144793_29495  | NW_004516365.1 | Scaffold1056 | 29495                   | CC                              | TT                | 1946636442               |
| SNP_P3_144794_50022  | NW_004516365.1 | Scaffold1056 | 50022                   | GG                              | CC                | 1946636444               |
| SNP_P3_144796_68731  | NW_004516365.1 | Scaffold1056 | 68731                   | AA                              | GG                | 1946636446               |
| SNP_P3_144797_94045  | NW_004516365.1 | Scaffold1056 | 94045                   | CC                              | TT                | 1946636448               |
| SNP_P3_144799_128944 | NW_004516365.1 | Scaffold1056 | 128944                  | TT                              | AA                | 1946636450               |
| SNP_P3_144800_129342 | NW_004516365.1 | Scaffold1056 | 129342                  | CC                              | TT                | 1946636452               |
| SNP_P3_144803_160105 | NW_004516365.1 | Scaffold1056 | 160105                  | CC                              | TT                | 1946636454               |
| SNP_P3_144806_160730 | NW_004516365.1 | Scaffold1056 | 160730                  | AA                              | TT                | 1946636456               |
| SNP_P3_144807_165022 | NW_004516365.1 | Scaffold1056 | 165022                  | TT                              | CC                | 1946636457               |
| SNP_P3_144808_165046 | NW_004516365.1 | Scaffold1056 | 165046                  | AA                              | CC                | 1946636459               |
| SNP_P3_144809_165052 | NW_004516365.1 | Scaffold1056 | 165052                  | GG                              | CC                | 1946636461               |
| SNP_P3_144810_1909   | NW_004516368.1 | Scaffold1059 | 1909                    | GG                              | AA                | 1946636463               |
| SNP_P3_144811_1993   | NW_004516368.1 | Scaffold1059 | 1993                    | TT                              | GG                | 1946636465               |
| SNP_P3_144812_632    | NW_004516369.1 | Scaffold1060 | 632                     | TT                              | CC                | 1946636467               |
| SNP_P3_144813_641    | NW_004516369.1 | Scaffold1060 | 641                     | GG                              | AA                | 1946636469               |
| SNP_P3_144814_650    | NW_004516369.1 | Scaffold1060 | 650                     | TT                              | CC                | 1946636472               |
| SNP_P3_144816_724    | NW_004516369.1 | Scaffold1060 | 724                     | TT                              | CC                | 1946636474               |
| SNP_P3_144817_725    | NW_004516369.1 | Scaffold1060 | 725                     | CC                              | TT                | 1946636475               |
| SNP_P3_144818_731    | NW_004516369.1 | Scaffold1060 | 731                     | TT                              | CC                | 1946636477               |
| SNP_P3_144819_732    | NW_004516369.1 | Scaffold1060 | 732                     | CC                              | TT                | 1946636479               |
| SNP_P3_144820_809    | NW_004516369.1 | Scaffold1060 | 809                     | TT                              | AA                | 1946636481               |
| SNP_P3_144821_810    | NW_004516369.1 | Scaffold1060 | 810                     | CC                              | AA                | 1946636483               |
| SNP_P3_144822_856    | NW_004516369.1 | Scaffold1060 | 856                     | AA                              | GG                | 1946636485               |
| SNP_P3_144823_1115   | NW_004516369.1 | Scaffold1060 | 1115                    | GG                              | CC                | 1946636487               |
| SNP_P3_144824_6569   | NW_004516369.1 | Scaffold1060 | 6569                    | TT                              | GG                | 1946636489               |
| SNP_P3_144825_31156  | NW_004516369.1 | Scaffold1060 | 31156                   | AA                              | GG                | 1946636491               |
| SNP_P3_144826_31182  | NW_004516369.1 | Scaffold1060 | 31182                   | GG                              | AA                | 1946636492               |
| SNP_P3_144827_31202  | NW_004516369.1 | Scaffold1060 | 31202                   | GG                              | AA                | 1946636494               |
| SNP_P3_144828_33274  | NW_004516369.1 | Scaffold1060 | 33274                   | GG                              | AA                | 1946636496               |
| SNP_P3_144829_33333  | NW_004516369.1 | Scaffold1060 | 33333                   | GG                              | AA                | 1946636498               |



| SNPs IDs             | Chromosome IDs | Chromosomes  | Physical positions (bp) | CDC Frontier (Reference genome) | (Pusa 256 & HPNB) | NCBI SNPdb Accession IDs |
|----------------------|----------------|--------------|-------------------------|---------------------------------|-------------------|--------------------------|
| SNP_P3_144830_33859  | NW_004516369.1 | Scaffold1060 | 33859                   | TT                              | CC                | 1946636500               |
| SNP_P3_144834_141826 | NW_004516369.1 | Scaffold1060 | 141826                  | GG                              | TT                | 1946636502               |
| SNP_P3_144835_166584 | NW_004516369.1 | Scaffold1060 | 166584                  | TT                              | AA                | 1946636504               |
| SNP_P3_144836_170070 | NW_004516369.1 | Scaffold1060 | 170070                  | TT                              | CC                | 1946636506               |
| SNP_P3_144837_170224 | NW_004516369.1 | Scaffold1060 | 170224                  | GG                              | TT                | 1946636508               |
| SNP_P3_144838_170228 | NW_004516369.1 | Scaffold1060 | 170228                  | TT                              | GG                | 1946636510               |
| SNP_P3_144839_170252 | NW_004516369.1 | Scaffold1060 | 170252                  | CC                              | AA                | 1946636512               |
| SNP_P3_144840_170273 | NW_004516369.1 | Scaffold1060 | 170273                  | GG                              | AA                | 1946636514               |
| SNP_P3_144841_170344 | NW_004516369.1 | Scaffold1060 | 170344                  | AA                              | GG                | 1946636516               |
| SNP_P3_144842_170347 | NW_004516369.1 | Scaffold1060 | 170347                  | TT                              | CC                | 1946636518               |
| SNP_P3_144843_170398 | NW_004516369.1 | Scaffold1060 | 170398                  | CC                              | TT                | 1946636520               |
| SNP_P3_144844_170469 | NW_004516369.1 | Scaffold1060 | 170469                  | AA                              | GG                | 1946636522               |
| SNP_P3_144845_170480 | NW_004516369.1 | Scaffold1060 | 170480                  | AA                              | GG                | 1946636524               |
| SNP_P3_144846_170533 | NW_004516369.1 | Scaffold1060 | 170533                  | AA                              | CC                | 1946636526               |
| SNP_P3_144847_172525 | NW_004516369.1 | Scaffold1060 | 172525                  | CC                              | TT                | 1946636527               |
| SNP_P3_144848_208077 | NW_004516369.1 | Scaffold1060 | 208077                  | AA                              | CC                | 1946636529               |
| SNP_P3_144849_240335 | NW_004516369.1 | Scaffold1060 | 240335                  | TT                              | CC                | 1946636531               |
| SNP_P3_144850_240615 | NW_004516369.1 | Scaffold1060 | 240615                  | TT                              | CC                | 1946636533               |
| SNP_P3_144851_241749 | NW_004516369.1 | Scaffold1060 | 241749                  | GG                              | AA                | 1946636535               |
| SNP_P3_144852_241750 | NW_004516369.1 | Scaffold1060 | 241750                  | GG                              | CC                | 1946636537               |
| SNP_P3_144853_242436 | NW_004516369.1 | Scaffold1060 | 242436                  | GG                              | CC                | 1946636539               |
| SNP_P3_144854_296027 | NW_004516369.1 | Scaffold1060 | 296027                  | GG                              | CC                | 1946636541               |
| SNP_P3_144855_300199 | NW_004516369.1 | Scaffold1060 | 300199                  | CC                              | AA                | 1946636543               |
| SNP_P3_144856_303126 | NW_004516369.1 | Scaffold1060 | 303126                  | TT                              | AA                | 1946636545               |
| SNP_P3_144857_303300 | NW_004516369.1 | Scaffold1060 | 303300                  | CC                              | AA                | 1946636547               |
| SNP_P3_144858_303519 | NW_004516369.1 | Scaffold1060 | 303519                  | TT                              | CC                | 1946636549               |
| SNP_P3_144859_303542 | NW_004516369.1 | Scaffold1060 | 303542                  | TT                              | CC                | 1946636551               |
| SNP_P3_144861_346747 | NW_004516369.1 | Scaffold1060 | 346747                  | AA                              | GG                | 1946636553               |
| SNP_P3_144862_346751 | NW_004516369.1 | Scaffold1060 | 346751                  | GG                              | CC                | 1946636555               |
| SNP_P3_144864_389439 | NW_004516369.1 | Scaffold1060 | 389439                  | TT                              | CC                | 1946636557               |
| SNP_P3_144865_389524 | NW_004516369.1 | Scaffold1060 | 389524                  | TT                              | CC                | 1946636559               |
| SNP_P3_144866_430688 | NW_004516369.1 | Scaffold1060 | 430688                  | AA                              | GG                | 1946636561               |
| SNP_P3_144867_483027 | NW_004516369.1 | Scaffold1060 | 483027                  | GG                              | AA                | 1946636563               |
| SNP_P3_144868_492889 | NW_004516369.1 | Scaffold1060 | 492889                  | TT                              | GG                | 1946636565               |
| SNP_P3_144870_1580   | NW_004516370.1 | Scaffold1061 | 1580                    | TT                              | CC                | 1946636567               |
| SNP_P3_144871_1598   | NW_004516370.1 | Scaffold1061 | 1598                    | TT                              | AA                | 1946636569               |
| SNP_P3_144872_1909   | NW_004516370.1 | Scaffold1061 | 1909                    | TT                              | CC                | 1946636571               |
| SNP_P3_144873_2014   | NW_004516370.1 | Scaffold1061 | 2014                    | CC                              | GG                | 1946636573               |
| SNP_P3_144874_2015   | NW_004516370.1 | Scaffold1061 | 2015                    | CC                              | GG                | 1946636575               |
| SNP_P3_144875_2069   | NW_004516370.1 | Scaffold1061 | 2069                    | GG                              | AA                | 1946636577               |
| SNP_P3_144876_2355   | NW_004516370.1 | Scaffold1061 | 2355                    | AA                              | GG                | 1946636579               |
| SNP_P3_144877_4280   | NW_004516370.1 | Scaffold1061 | 4280                    | GG                              | AA                | 1946636580               |

| SNPs IDs            | Chromosome IDs | Chromosomes  | Physical positions (bp) | CDC Frontier (Reference genome) | (Pusa 256 & HPNB) | NCBI SNPdb Accession IDs |
|---------------------|----------------|--------------|-------------------------|---------------------------------|-------------------|--------------------------|
| SNP_P3_144878_4292  | NW_004516370.1 | Scaffold1061 | 4292                    | TT                              | CC                | 1946636582               |
| SNP_P3_144879_4295  | NW_004516370.1 | Scaffold1061 | 4295                    | AA                              | GG                | 1946636584               |
| SNP_P3_144880_4298  | NW_004516370.1 | Scaffold1061 | 4298                    | AA                              | TT                | 1946636586               |
| SNP_P3_144881_4299  | NW_004516370.1 | Scaffold1061 | 4299                    | TT                              | CC                | 1946636588               |
| SNP_P3_144882_4921  | NW_004516370.1 | Scaffold1061 | 4921                    | CC                              | TT                | 1946636590               |
| SNP_P3_144883_4975  | NW_004516370.1 | Scaffold1061 | 4975                    | TT                              | AA                | 1946636592               |
| SNP_P3_144884_7193  | NW_004516370.1 | Scaffold1061 | 7193                    | CC                              | AA                | 1946636594               |
| SNP_P3_144885_7256  | NW_004516370.1 | Scaffold1061 | 7256                    | TT                              | CC                | 1946636596               |
| SNP_P3_144886_7568  | NW_004516370.1 | Scaffold1061 | 7568                    | AA                              | GG                | 1946636598               |
| SNP_P3_144887_7588  | NW_004516370.1 | Scaffold1061 | 7588                    | CC                              | TT                | 1946636600               |
| SNP_P3_144888_7605  | NW_004516370.1 | Scaffold1061 | 7605                    | CC                              | GG                | 1946636602               |
| SNP_P3_144889_9644  | NW_004516370.1 | Scaffold1061 | 9644                    | TT                              | GG                | 1946636604               |
| SNP_P3_144890_11488 | NW_004516370.1 | Scaffold1061 | 11488                   | AA                              | TT                | 1946636606               |
| SNP_P3_144891_11525 | NW_004516370.1 | Scaffold1061 | 11525                   | AA                              | GG                | 1946636608               |
| SNP_P3_144892_11530 | NW_004516370.1 | Scaffold1061 | 11530                   | TT                              | CC                | 1946636610               |
| SNP_P3_144893_11550 | NW_004516370.1 | Scaffold1061 | 11550                   | GG                              | CC                | 1946636612               |
| SNP_P3_144894_11681 | NW_004516370.1 | Scaffold1061 | 11681                   | AA                              | GG                | 1946636614               |
| SNP_P3_144895_11686 | NW_004516370.1 | Scaffold1061 | 11686                   | CC                              | TT                | 1946636616               |
| SNP_P3_144896_11698 | NW_004516370.1 | Scaffold1061 | 11698                   | TT                              | CC                | 1946636618               |
| SNP_P3_144897_11700 | NW_004516370.1 | Scaffold1061 | 11700                   | GG                              | TT                | 1946636619               |
| SNP_P3_144898_11721 | NW_004516370.1 | Scaffold1061 | 11721                   | AA                              | TT                | 1946636621               |
| SNP_P3_144899_11732 | NW_004516370.1 | Scaffold1061 | 11732                   | CC                              | TT                | 1946636623               |
| SNP_P3_144900_20844 | NW_004516370.1 | Scaffold1061 | 20844                   | TT                              | CC                | 1946636625               |
| SNP_P3_144901_20892 | NW_004516370.1 | Scaffold1061 | 20892                   | GG                              | AA                | 1946636627               |
| SNP_P3_144902_20910 | NW_004516370.1 | Scaffold1061 | 20910                   | TT                              | CC                | 1946636629               |
| SNP_P3_144903_20952 | NW_004516370.1 | Scaffold1061 | 20952                   | AA                              | CC                | 1946636631               |
| SNP_P3_144904_21078 | NW_004516370.1 | Scaffold1061 | 21078                   | CC                              | TT                | 1946636633               |
| SNP_P3_144906_27636 | NW_004516370.1 | Scaffold1061 | 27636                   | CC                              | TT                | 1946636636               |
| SNP_P3_144907_28578 | NW_004516370.1 | Scaffold1061 | 28578                   | AA                              | GG                | 1946636638               |
| SNP_P3_144908_28678 | NW_004516370.1 | Scaffold1061 | 28678                   | AA                              | GG                | 1946636640               |
| SNP_P3_144909_28829 | NW_004516370.1 | Scaffold1061 | 28829                   | TT                              | GG                | 1946636642               |
| SNP_P3_144910_28859 | NW_004516370.1 | Scaffold1061 | 28859                   | CC                              | AA                | 1946636644               |
| SNP_P3_144911_28872 | NW_004516370.1 | Scaffold1061 | 28872                   | CC                              | TT                | 1946636646               |
| SNP_P3_144912_28948 | NW_004516370.1 | Scaffold1061 | 28948                   | GG                              | AA                | 1946636648               |
| SNP_P3_144914_31628 | NW_004516370.1 | Scaffold1061 | 31628                   | GG                              | AA                | 1946636650               |
| SNP_P3_144915_31633 | NW_004516370.1 | Scaffold1061 | 31633                   | TT                              | CC                | 1946636652               |
| SNP_P3_144916_31722 | NW_004516370.1 | Scaffold1061 | 31722                   | TT                              | CC                | 1946636654               |
| SNP_P3_144917_31732 | NW_004516370.1 | Scaffold1061 | 31732                   | CC                              | GG                | 1946636656               |
| SNP_P3_144918_31880 | NW_004516370.1 | Scaffold1061 | 31880                   | TT                              | CC                | 1946636658               |
| SNP_P3_144919_31888 | NW_004516370.1 | Scaffold1061 | 31888                   | TT                              | GG                | 1946636660               |
| SNP_P3_144920_31900 | NW_004516370.1 | Scaffold1061 | 31900                   | GG                              | TT                | 1946636662               |
| SNP_P3_144921_31954 | NW_004516370.1 | Scaffold1061 | 31954                   | AA                              | CC                | 1946636664               |

| SNPs IDs            | Chromosome IDs | Chromosomes  | Physical positions (bp) | CDC Frontier (Reference genome) | (Pusa 256 & HPNB) | NCBI SNPdb Accession IDs |
|---------------------|----------------|--------------|-------------------------|---------------------------------|-------------------|--------------------------|
| SNP_P3_144922_31959 | NW_004516370.1 | Scaffold1061 | 31959                   | GG                              | CC                | 1946636666               |
| SNP_P3_144923_31969 | NW_004516370.1 | Scaffold1061 | 31969                   | AA                              | TT                | 1946636668               |
| SNP_P3_144924_32089 | NW_004516370.1 | Scaffold1061 | 32089                   | GG                              | TT                | 1946636670               |
| SNP_P3_144925_32234 | NW_004516370.1 | Scaffold1061 | 32234                   | TT                              | GG                | 1946636671               |
| SNP_P3_144926_32858 | NW_004516370.1 | Scaffold1061 | 32858                   | AA                              | GG                | 1946636673               |
| SNP_P3_144928_32907 | NW_004516370.1 | Scaffold1061 | 32907                   | GG                              | TT                | 1946636675               |
| SNP_P3_144929_32935 | NW_004516370.1 | Scaffold1061 | 32935                   | TT                              | CC                | 1946636677               |
| SNP_P3_144930_32941 | NW_004516370.1 | Scaffold1061 | 32941                   | AA                              | GG                | 1946636679               |
| SNP_P3_144931_32972 | NW_004516370.1 | Scaffold1061 | 32972                   | TT                              | CC                | 1946636681               |
| SNP_P3_144932_32975 | NW_004516370.1 | Scaffold1061 | 32975                   | TT                              | AA                | 1946636683               |
| SNP_P3_144934_33022 | NW_004516370.1 | Scaffold1061 | 33022                   | TT                              | CC                | 1946636685               |
| SNP_P3_144935_33049 | NW_004516370.1 | Scaffold1061 | 33049                   | GG                              | CC                | 1946636687               |
| SNP_P3_144936_33192 | NW_004516370.1 | Scaffold1061 | 33192                   | AA                              | GG                | 1946636689               |
| SNP_P3_144937_33230 | NW_004516370.1 | Scaffold1061 | 33230                   | GG                              | TT                | 1946636691               |
| SNP_P3_144938_33278 | NW_004516370.1 | Scaffold1061 | 33278                   | TT                              | CC                | 1946636693               |
| SNP_P3_144939_33347 | NW_004516370.1 | Scaffold1061 | 33347                   | AA                              | TT                | 1946636694               |
| SNP_P3_144940_33379 | NW_004516370.1 | Scaffold1061 | 33379                   | AA                              | GG                | 1946636696               |
| SNP_P3_144941_36056 | NW_004516370.1 | Scaffold1061 | 36056                   | GG                              | AA                | 1946636698               |
| SNP_P3_144942_36091 | NW_004516370.1 | Scaffold1061 | 36091                   | GG                              | AA                | 1946636700               |
| SNP_P3_144943_36106 | NW_004516370.1 | Scaffold1061 | 36106                   | AA                              | TT                | 1946636702               |
| SNP_P3_144944_36161 | NW_004516370.1 | Scaffold1061 | 36161                   | CC                              | TT                | 1946636704               |
| SNP_P3_144945_36162 | NW_004516370.1 | Scaffold1061 | 36162                   | TT                              | CC                | 1946636706               |
| SNP_P3_144946_36198 | NW_004516370.1 | Scaffold1061 | 36198                   | CC                              | TT                | 1946636708               |
| SNP_P3_144947_36231 | NW_004516370.1 | Scaffold1061 | 36231                   | TT                              | AA                | 1946636709               |
| SNP_P3_144948_36289 | NW_004516370.1 | Scaffold1061 | 36289                   | TT                              | AA                | 1946636711               |
| SNP_P3_144949_36337 | NW_004516370.1 | Scaffold1061 | 36337                   | GG                              | AA                | 1946636713               |
| SNP_P3_144950_36381 | NW_004516370.1 | Scaffold1061 | 36381                   | CC                              | GG                | 1946636715               |
| SNP_P3_144951_36469 | NW_004516370.1 | Scaffold1061 | 36469                   | GG                              | AA                | 1946636717               |
| SNP_P3_144952_36477 | NW_004516370.1 | Scaffold1061 | 36477                   | TT                              | CC                | 1946636719               |
| SNP_P3_144953_36478 | NW_004516370.1 | Scaffold1061 | 36478                   | GG                              | AA                | 1946636721               |
| SNP_P3_144954_37941 | NW_004516370.1 | Scaffold1061 | 37941                   | AA                              | GG                | 1946636723               |
| SNP_P3_144955_37950 | NW_004516370.1 | Scaffold1061 | 37950                   | GG                              | AA                | 1946636725               |
| SNP_P3_144956_37969 | NW_004516370.1 | Scaffold1061 | 37969                   | CC                              | AA                | 1946636727               |
| SNP_P3_144957_37970 | NW_004516370.1 | Scaffold1061 | 37970                   | GG                              | AA                | 1946636729               |
| SNP_P3_144958_37979 | NW_004516370.1 | Scaffold1061 | 37979                   | GG                              | TT                | 1946636731               |
| SNP_P3_144959_38271 | NW_004516370.1 | Scaffold1061 | 38271                   | AA                              | GG                | 1946636733               |
| SNP_P3_144960_39834 | NW_004516370.1 | Scaffold1061 | 39834                   | TT                              | CC                | 1946636735               |
| SNP_P3_144961_39884 | NW_004516370.1 | Scaffold1061 | 39884                   | AA                              | GG                | 1946636736               |
| SNP_P3_144962_39947 | NW_004516370.1 | Scaffold1061 | 39947                   | GG                              | TT                | 1946636738               |
| SNP_P3_144963_40079 | NW_004516370.1 | Scaffold1061 | 40079                   | TT                              | CC                | 1946636740               |
| SNP_P3_144964_40105 | NW_004516370.1 | Scaffold1061 | 40105                   | CC                              | TT                | 1946636742               |
| SNP_P3_144965_41200 | NW_004516370.1 | Scaffold1061 | 41200                   | AA                              | CC                | 1946636744               |

| SNPs IDs            | Chromosome IDs | Chromosomes  | Physical positions (bp) | CDC Frontier (Reference genome) | (Pusa 256 & HPNB) | NCBI SNPdb Accession IDs |
|---------------------|----------------|--------------|-------------------------|---------------------------------|-------------------|--------------------------|
| SNP_P3_144966_42650 | NW_004516370.1 | Scaffold1061 | 42650                   | CC                              | GG                | 1946636746               |
| SNP_P3_144967_42726 | NW_004516370.1 | Scaffold1061 | 42726                   | TT                              | CC                | 1946636748               |
| SNP_P3_144968_45910 | NW_004516370.1 | Scaffold1061 | 45910                   | TT                              | AA                | 1946636750               |
| SNP_P3_144969_46224 | NW_004516370.1 | Scaffold1061 | 46224                   | AA                              | GG                | 1946636752               |
| SNP_P3_144970_46439 | NW_004516370.1 | Scaffold1061 | 46439                   | GG                              | TT                | 1946636754               |
| SNP_P3_144971_46693 | NW_004516370.1 | Scaffold1061 | 46693                   | TT                              | GG                | 1946636756               |
| SNP_P3_144972_49599 | NW_004516370.1 | Scaffold1061 | 49599                   | CC                              | AA                | 1946636759               |
| SNP_P3_144973_49638 | NW_004516370.1 | Scaffold1061 | 49638                   | AA                              | GG                | 1946636761               |
| SNP_P3_144974_49665 | NW_004516370.1 | Scaffold1061 | 49665                   | GG                              | TT                | 1946636763               |
| SNP_P3_144975_49674 | NW_004516370.1 | Scaffold1061 | 49674                   | AA                              | TT                | 1946636765               |
| SNP_P3_144976_49683 | NW_004516370.1 | Scaffold1061 | 49683                   | AA                              | TT                | 1946636766               |
| SNP_P3_144978_49805 | NW_004516370.1 | Scaffold1061 | 49805                   | GG                              | TT                | 1946636768               |
| SNP_P3_144979_49942 | NW_004516370.1 | Scaffold1061 | 49942                   | GG                              | AA                | 1946636770               |
| SNP_P3_144980_50448 | NW_004516370.1 | Scaffold1061 | 50448                   | AA                              | TT                | 1946636772               |
| SNP_P3_144981_50968 | NW_004516370.1 | Scaffold1061 | 50968                   | CC                              | AA                | 1946636774               |
| SNP_P3_144982_51011 | NW_004516370.1 | Scaffold1061 | 51011                   | CC                              | TT                | 1946636776               |
| SNP_P3_144983_51033 | NW_004516370.1 | Scaffold1061 | 51033                   | CC                              | TT                | 1946636778               |
| SNP_P3_144984_51273 | NW_004516370.1 | Scaffold1061 | 51273                   | CC                              | TT                | 1946636780               |
| SNP_P3_144985_51378 | NW_004516370.1 | Scaffold1061 | 51378                   | TT                              | GG                | 1946636782               |
| SNP_P3_144986_51466 | NW_004516370.1 | Scaffold1061 | 51466                   | AA                              | TT                | 1946636784               |
| SNP_P3_144987_51479 | NW_004516370.1 | Scaffold1061 | 51479                   | CC                              | TT                | 1946636786               |
| SNP_P3_144988_51746 | NW_004516370.1 | Scaffold1061 | 51746                   | TT                              | CC                | 1946636788               |
| SNP_P3_144989_56925 | NW_004516370.1 | Scaffold1061 | 56925                   | GG                              | CC                | 1946636790               |
| SNP_P3_144990_60138 | NW_004516370.1 | Scaffold1061 | 60138                   | AA                              | CC                | 1946636792               |
| SNP_P3_144991_60171 | NW_004516370.1 | Scaffold1061 | 60171                   | AA                              | CC                | 1946636794               |
| SNP_P3_144992_60187 | NW_004516370.1 | Scaffold1061 | 60187                   | TT                              | AA                | 1946636795               |
| SNP_P3_144993_62047 | NW_004516370.1 | Scaffold1061 | 62047                   | CC                              | GG                | 1946636797               |
| SNP_P3_144994_62122 | NW_004516370.1 | Scaffold1061 | 62122                   | TT                              | GG                | 1946636799               |
| SNP_P3_144995_62138 | NW_004516370.1 | Scaffold1061 | 62138                   | TT                              | AA                | 1946636801               |
| SNP_P3_144996_62377 | NW_004516370.1 | Scaffold1061 | 62377                   | TT                              | CC                | 1946636803               |
| SNP_P3_144997_63358 | NW_004516370.1 | Scaffold1061 | 63358                   | AA                              | GG                | 1946636805               |
| SNP_P3_144998_64079 | NW_004516370.1 | Scaffold1061 | 64079                   | GG                              | CC                | 1946636807               |
| SNP_P3_144999_64115 | NW_004516370.1 | Scaffold1061 | 64115                   | GG                              | AA                | 1946636809               |
| SNP_P3_145000_64145 | NW_004516370.1 | Scaffold1061 | 64145                   | AA                              | TT                | 1946636810               |
| SNP_P3_145001_64149 | NW_004516370.1 | Scaffold1061 | 64149                   | TT                              | CC                | 1946636812               |
| SNP_P3_145002_64423 | NW_004516370.1 | Scaffold1061 | 64423                   | GG                              | AA                | 1946636814               |
| SNP_P3_145003_64499 | NW_004516370.1 | Scaffold1061 | 64499                   | TT                              | CC                | 1946636816               |
| SNP_P3_145004_64860 | NW_004516370.1 | Scaffold1061 | 64860                   | TT                              | AA                | 1946636818               |
| SNP_P3_145005_64869 | NW_004516370.1 | Scaffold1061 | 64869                   | AA                              | CC                | 1946636820               |
| SNP_P3_145006_65006 | NW_004516370.1 | Scaffold1061 | 65006                   | TT                              | GG                | 1946636822               |
| SNP_P3_145007_65025 | NW_004516370.1 | Scaffold1061 | 65025                   | TT                              | GG                | 1946636823               |
| SNP_P3_145008_65072 | NW_004516370.1 | Scaffold1061 | 65072                   | CC                              | TT                | 1946636825               |

| SNPs IDs            | Chromosome IDs | Chromosomes  | Physical positions (bp) | CDC Frontier (Reference genome) | (Pusa 256 & HPNB) | NCBI SNPdb Accession IDs |
|---------------------|----------------|--------------|-------------------------|---------------------------------|-------------------|--------------------------|
| SNP_P3_145009_65178 | NW_004516370.1 | Scaffold1061 | 65178                   | TT                              | CC                | 1946636827               |
| SNP_P3_145010_67146 | NW_004516370.1 | Scaffold1061 | 67146                   | GG                              | AA                | 1946636829               |
| SNP_P3_145011_67173 | NW_004516370.1 | Scaffold1061 | 67173                   | AA                              | TT                | 1946636831               |
| SNP_P3_145012_67176 | NW_004516370.1 | Scaffold1061 | 67176                   | CC                              | AA                | 1946636833               |
| SNP_P3_145013_67187 | NW_004516370.1 | Scaffold1061 | 67187                   | CC                              | TT                | 1946636835               |
| SNP_P3_145014_67430 | NW_004516370.1 | Scaffold1061 | 67430                   | GG                              | AA                | 1946636837               |
| SNP_P3_145015_67438 | NW_004516370.1 | Scaffold1061 | 67438                   | GG                              | AA                | 1946636838               |
| SNP_P3_145016_67497 | NW_004516370.1 | Scaffold1061 | 67497                   | CC                              | TT                | 1946636839               |
| SNP_P3_145017_67710 | NW_004516370.1 | Scaffold1061 | 67710                   | TT                              | CC                | 1946636840               |
| SNP_P3_145018_67720 | NW_004516370.1 | Scaffold1061 | 67720                   | GG                              | CC                | 1946636841               |
| SNP_P3_145019_67749 | NW_004516370.1 | Scaffold1061 | 67749                   | GG                              | AA                | 1946636842               |
| SNP_P3_145020_70031 | NW_004516370.1 | Scaffold1061 | 70031                   | AA                              | CC                | 1946636844               |
| SNP_P3_145021_70043 | NW_004516370.1 | Scaffold1061 | 70043                   | AA                              | GG                | 1946636846               |
| SNP_P3_145022_70666 | NW_004516370.1 | Scaffold1061 | 70666                   | CC                              | GG                | 1946636848               |
| SNP_P3_145023_70793 | NW_004516370.1 | Scaffold1061 | 70793                   | GG                              | AA                | 1946636850               |
| SNP_P3_145024_70842 | NW_004516370.1 | Scaffold1061 | 70842                   | TT                              | GG                | 1946636852               |
| SNP_P3_145025_70872 | NW_004516370.1 | Scaffold1061 | 70872                   | AA                              | GG                | 1946636853               |
| SNP_P3_145026_70961 | NW_004516370.1 | Scaffold1061 | 70961                   | AA                              | TT                | 1946636855               |
| SNP_P3_145027_71016 | NW_004516370.1 | Scaffold1061 | 71016                   | CC                              | TT                | 1946636857               |
| SNP_P3_145028_71029 | NW_004516370.1 | Scaffold1061 | 71029                   | AA                              | CC                | 1946636859               |
| SNP_P3_145029_71206 | NW_004516370.1 | Scaffold1061 | 71206                   | AA                              | GG                | 1946636861               |
| SNP_P3_145030_71265 | NW_004516370.1 | Scaffold1061 | 71265                   | TT                              | AA                | 1946636863               |
| SNP_P3_145031_71270 | NW_004516370.1 | Scaffold1061 | 71270                   | CC                              | AA                | 1946636865               |
| SNP_P3_145032_71327 | NW_004516370.1 | Scaffold1061 | 71327                   | GG                              | CC                | 1946636867               |
| SNP_P3_145033_71335 | NW_004516370.1 | Scaffold1061 | 71335                   | AA                              | CC                | 1946636869               |
| SNP_P3_145034_71463 | NW_004516370.1 | Scaffold1061 | 71463                   | CC                              | GG                | 1946636871               |
| SNP_P3_145035_71464 | NW_004516370.1 | Scaffold1061 | 71464                   | AA                              | GG                | 1946636872               |
| SNP_P3_145036_71487 | NW_004516370.1 | Scaffold1061 | 71487                   | TT                              | AA                | 1946636874               |
| SNP_P3_145037_71497 | NW_004516370.1 | Scaffold1061 | 71497                   | AA                              | TT                | 1946636877               |
| SNP_P3_145038_71507 | NW_004516370.1 | Scaffold1061 | 71507                   | GG                              | AA                | 1946636879               |
| SNP_P3_145039_71627 | NW_004516370.1 | Scaffold1061 | 71627                   | AA                              | GG                | 1946636881               |
| SNP_P3_145040_71650 | NW_004516370.1 | Scaffold1061 | 71650                   | TT                              | AA                | 1946636882               |
| SNP_P3_145041_71660 | NW_004516370.1 | Scaffold1061 | 71660                   | AA                              | TT                | 1946636884               |
| SNP_P3_145042_71670 | NW_004516370.1 | Scaffold1061 | 71670                   | GG                              | AA                | 1946636886               |
| SNP_P3_145043_71719 | NW_004516370.1 | Scaffold1061 | 71719                   | GG                              | CC                | 1946636888               |
| SNP_P3_145044_71721 | NW_004516370.1 | Scaffold1061 | 71721                   | GG                              | TT                | 1946636890               |
| SNP_P3_145045_71932 | NW_004516370.1 | Scaffold1061 | 71932                   | TT                              | AA                | 1946636892               |
| SNP_P3_145046_72036 | NW_004516370.1 | Scaffold1061 | 72036                   | TT                              | CC                | 1946636894               |
| SNP_P3_145047_72056 | NW_004516370.1 | Scaffold1061 | 72056                   | GG                              | AA                | 1946636895               |
| SNP_P3_145048_72139 | NW_004516370.1 | Scaffold1061 | 72139                   | CC                              | AA                | 1946636897               |
| SNP_P3_145049_72150 | NW_004516370.1 | Scaffold1061 | 72150                   | CC                              | TT                | 1946636899               |
| SNP_P3_145050_72166 | NW_004516370.1 | Scaffold1061 | 72166                   | TT                              | GG                | 1946636901               |

| SNPs IDs            | Chromosome IDs | Chromosomes  | Physical positions (bp) | CDC Frontier (Reference genome) | (Pusa 256 & HPNB) | NCBI SNPdb Accession IDs |
|---------------------|----------------|--------------|-------------------------|---------------------------------|-------------------|--------------------------|
| SNP_P3_145051_72167 | NW_004516370.1 | Scaffold1061 | 72167                   | GG                              | AA                | 1946636903               |
| SNP_P3_145052_72171 | NW_004516370.1 | Scaffold1061 | 72171                   | TT                              | AA                | 1946636905               |
| SNP_P3_145053_72224 | NW_004516370.1 | Scaffold1061 | 72224                   | AA                              | CC                | 1946636906               |
| SNP_P3_145054_72273 | NW_004516370.1 | Scaffold1061 | 72273                   | AA                              | GG                | 1946636907               |
| SNP_P3_145055_72599 | NW_004516370.1 | Scaffold1061 | 72599                   | AA                              | GG                | 1946636908               |
| SNP_P3_145056_72604 | NW_004516370.1 | Scaffold1061 | 72604                   | CC                              | TT                | 1946636909               |
| SNP_P3_145057_72670 | NW_004516370.1 | Scaffold1061 | 72670                   | GG                              | CC                | 1946636910               |
| SNP_P3_145058_72674 | NW_004516370.1 | Scaffold1061 | 72674                   | GG                              | TT                | 1946636912               |
| SNP_P3_145059_72700 | NW_004516370.1 | Scaffold1061 | 72700                   | CC                              | GG                | 1946636915               |
| SNP_P3_145060_72958 | NW_004516370.1 | Scaffold1061 | 72958                   | GG                              | AA                | 1946636917               |
| SNP_P3_145061_72962 | NW_004516370.1 | Scaffold1061 | 72962                   | AA                              | GG                | 1946636918               |
| SNP_P3_145062_72979 | NW_004516370.1 | Scaffold1061 | 72979                   | AA                              | GG                | 1946636920               |
| SNP_P3_145063_73021 | NW_004516370.1 | Scaffold1061 | 73021                   | TT                              | GG                | 1946636922               |
| SNP_P3_145064_73060 | NW_004516370.1 | Scaffold1061 | 73060                   | CC                              | GG                | 1946636924               |
| SNP_P3_145065_73086 | NW_004516370.1 | Scaffold1061 | 73086                   | TT                              | CC                | 1946636926               |
| SNP_P3_145066_73197 | NW_004516370.1 | Scaffold1061 | 73197                   | AA                              | GG                | 1946636928               |
| SNP_P3_145067_73500 | NW_004516370.1 | Scaffold1061 | 73500                   | AA                              | TT                | 1946636930               |
| SNP_P3_145068_74120 | NW_004516370.1 | Scaffold1061 | 74120                   | GG                              | AA                | 1946636933               |
| SNP_P3_145069_74190 | NW_004516370.1 | Scaffold1061 | 74190                   | TT                              | CC                | 1946636934               |
| SNP_P3_145070_74407 | NW_004516370.1 | Scaffold1061 | 74407                   | CC                              | AA                | 1946636936               |
| SNP_P3_145071_74410 | NW_004516370.1 | Scaffold1061 | 74410                   | TT                              | CC                | 1946636938               |
| SNP_P3_145072_74444 | NW_004516370.1 | Scaffold1061 | 74444                   | AA                              | TT                | 1946636940               |
| SNP_P3_145073_74552 | NW_004516370.1 | Scaffold1061 | 74552                   | AA                              | TT                | 1946636942               |
| SNP_P3_145074_74565 | NW_004516370.1 | Scaffold1061 | 74565                   | GG                              | CC                | 1946636944               |
| SNP_P3_145075_74578 | NW_004516370.1 | Scaffold1061 | 74578                   | AA                              | CC                | 1946636946               |
| SNP_P3_145076_74668 | NW_004516370.1 | Scaffold1061 | 74668                   | TT                              | GG                | 1946636948               |
| SNP_P3_145077_74676 | NW_004516370.1 | Scaffold1061 | 74676                   | TT                              | CC                | 1946636950               |
| SNP_P3_145078_74687 | NW_004516370.1 | Scaffold1061 | 74687                   | GG                              | AA                | 1946636952               |
| SNP_P3_145079_74725 | NW_004516370.1 | Scaffold1061 | 74725                   | CC                              | TT                | 1946636954               |
| SNP_P3_145080_74796 | NW_004516370.1 | Scaffold1061 | 74796                   | GG                              | AA                | 1946636956               |
| SNP_P3_145081_74802 | NW_004516370.1 | Scaffold1061 | 74802                   | GG                              | AA                | 1946636958               |
| SNP_P3_145082_74816 | NW_004516370.1 | Scaffold1061 | 74816                   | TT                              | CC                | 1946636960               |
| SNP_P3_145083_74825 | NW_004516370.1 | Scaffold1061 | 74825                   | CC                              | GG                | 1946636962               |
| SNP_P3_145084_74847 | NW_004516370.1 | Scaffold1061 | 74847                   | TT                              | AA                | 1946636964               |
| SNP_P3_145085_74850 | NW_004516370.1 | Scaffold1061 | 74850                   | AA                              | TT                | 1946636966               |
| SNP_P3_145086_74871 | NW_004516370.1 | Scaffold1061 | 74871                   | AA                              | GG                | 1946636967               |
| SNP_P3_145087_74933 | NW_004516370.1 | Scaffold1061 | 74933                   | TT                              | CC                | 1946636968               |
| SNP_P3_145088_74946 | NW_004516370.1 | Scaffold1061 | 74946                   | TT                              | AA                | 1946636969               |
| SNP_P3_145089_74966 | NW_004516370.1 | Scaffold1061 | 74966                   | AA                              | TT                | 1946636970               |
| SNP_P3_145090_75000 | NW_004516370.1 | Scaffold1061 | 75000                   | TT                              | GG                | 1946636971               |
| SNP_P3_145091_75026 | NW_004516370.1 | Scaffold1061 | 75026                   | GG                              | AA                | 1946636972               |
| SNP_P3_145092_75037 | NW_004516370.1 | Scaffold1061 | 75037                   | CC                              | TT                | 1946636974               |

| SNPs IDs             | Chromosome IDs | Chromosomes  | Physical positions (bp) | CDC Frontier (Reference genome) | (Pusa 256 & HPNB) | NCBI SNPdb Accession IDs |
|----------------------|----------------|--------------|-------------------------|---------------------------------|-------------------|--------------------------|
| SNP_P3_145093_75055  | NW_004516370.1 | Scaffold1061 | 75055                   | CC                              | AA                | 1946636977               |
| SNP_P3_145094_75093  | NW_004516370.1 | Scaffold1061 | 75093                   | CC                              | AA                | 1946636979               |
| SNP_P3_145095_75168  | NW_004516370.1 | Scaffold1061 | 75168                   | CC                              | TT                | 1946636980               |
| SNP_P3_145096_75172  | NW_004516370.1 | Scaffold1061 | 75172                   | TT                              | CC                | 1946636982               |
| SNP_P3_145097_75338  | NW_004516370.1 | Scaffold1061 | 75338                   | GG                              | CC                | 1946636984               |
| SNP_P3_145098_75341  | NW_004516370.1 | Scaffold1061 | 75341                   | AA                              | TT                | 1946636986               |
| SNP_P3_145099_75361  | NW_004516370.1 | Scaffold1061 | 75361                   | AA                              | TT                | 1946636988               |
| SNP_P3_145100_75400  | NW_004516370.1 | Scaffold1061 | 75400                   | GG                              | TT                | 1946636991               |
| SNP_P3_145101_75404  | NW_004516370.1 | Scaffold1061 | 75404                   | TT                              | CC                | 1946636993               |
| SNP_P3_145102_75438  | NW_004516370.1 | Scaffold1061 | 75438                   | TT                              | GG                | 1946636995               |
| SNP_P3_145103_75562  | NW_004516370.1 | Scaffold1061 | 75562                   | CC                              | TT                | 1946636997               |
| SNP_P3_145104_75566  | NW_004516370.1 | Scaffold1061 | 75566                   | AA                              | GG                | 1946636999               |
| SNP_P3_145106_77003  | NW_004516370.1 | Scaffold1061 | 77003                   | TT                              | CC                | 1946637000               |
| SNP_P3_145107_77066  | NW_004516370.1 | Scaffold1061 | 77066                   | AA                              | CC                | 1946637002               |
| SNP_P3_145108_77108  | NW_004516370.1 | Scaffold1061 | 77108                   | AA                              | CC                | 1946637004               |
| SNP_P3_145109_77177  | NW_004516370.1 | Scaffold1061 | 77177                   | CC                              | GG                | 1946637006               |
| SNP_P3_145110_77197  | NW_004516370.1 | Scaffold1061 | 77197                   | CC                              | TT                | 1946637008               |
| SNP_P3_145111_77208  | NW_004516370.1 | Scaffold1061 | 77208                   | CC                              | AA                | 1946637010               |
| SNP_P3_145112_77248  | NW_004516370.1 | Scaffold1061 | 77248                   | AA                              | CC                | 1946637012               |
| SNP_P3_145113_77300  | NW_004516370.1 | Scaffold1061 | 77300                   | TT                              | GG                | 1946637014               |
| SNP_P3_145115_78219  | NW_004516370.1 | Scaffold1061 | 78219                   | AA                              | CC                | 1946637016               |
| SNP_P3_145116_78241  | NW_004516370.1 | Scaffold1061 | 78241                   | GG                              | TT                | 1946637018               |
| SNP_P3_145117_78402  | NW_004516370.1 | Scaffold1061 | 78402                   | CC                              | TT                | 1946637020               |
| SNP_P3_145118_78410  | NW_004516370.1 | Scaffold1061 | 78410                   | TT                              | CC                | 1946637021               |
| SNP_P3_145119_5939   | NW_004516372.1 | Scaffold1065 | 5939                    | CC                              | TT                | 1946637023               |
| SNP_P3_145120_6470   | NW_004516372.1 | Scaffold1065 | 6470                    | AA                              | GG                | 1946637025               |
| SNP_P3_145121_6475   | NW_004516372.1 | Scaffold1065 | 6475                    | TT                              | AA                | 1946637027               |
| SNP_P3_145122_6483   | NW_004516372.1 | Scaffold1065 | 6483                    | TT                              | CC                | 1946637029               |
| SNP_P3_145123_6793   | NW_004516372.1 | Scaffold1065 | 6793                    | GG                              | TT                | 1946637031               |
| SNP_P3_145124_6850   | NW_004516372.1 | Scaffold1065 | 6850                    | CC                              | TT                | 1946637033               |
| SNP_P3_145125_23552  | NW_004516372.1 | Scaffold1065 | 23552                   | GG                              | TT                | 1946637035               |
| SNP_P3_145126_31303  | NW_004516372.1 | Scaffold1065 | 31303                   | TT                              | AA                | 1946637037               |
| SNP_P3_145127_42673  | NW_004516372.1 | Scaffold1065 | 42673                   | GG                              | TT                | 1946637039               |
| SNP_P3_145128_45460  | NW_004516372.1 | Scaffold1065 | 45460                   | TT                              | CC                | 1946637041               |
| SNP_P3_145129_45461  | NW_004516372.1 | Scaffold1065 | 45461                   | AA                              | GG                | 1946637042               |
| SNP_P3_145130_73268  | NW_004516372.1 | Scaffold1065 | 73268                   | TT                              | CC                | 1946637043               |
| SNP_P3_145131_75315  | NW_004516372.1 | Scaffold1065 | 75315                   | CC                              | TT                | 1946637044               |
| SNP_P3_145132_95566  | NW_004516372.1 | Scaffold1065 | 95566                   | TT                              | CC                | 1946637045               |
| SNP_P3_145133_99804  | NW_004516372.1 | Scaffold1065 | 99804                   | AA                              | TT                | 1946637046               |
| SNP_P3_145134_99805  | NW_004516372.1 | Scaffold1065 | 99805                   | AA                              | TT                | 1946637047               |
| SNP_P3_145135_107717 | NW_004516372.1 | Scaffold1065 | 107717                  | CC                              | AA                | 1946637048               |
| SNP_P3_145136_107737 | NW_004516372.1 | Scaffold1065 | 107737                  | TT                              | AA                | 1946637049               |

| SNPs IDs             | Chromosome IDs | Chromosomes  | Physical positions (bp) | CDC Frontier (Reference genome) | (Pusa 256 & HPNB) | NCBI SNPdb Accession IDs |
|----------------------|----------------|--------------|-------------------------|---------------------------------|-------------------|--------------------------|
| SNP_P3_145137_165252 | NW_004516372.1 | Scaffold1065 | 165252                  | CC                              | AA                | 1946637050               |
| SNP_P3_145138_165284 | NW_004516372.1 | Scaffold1065 | 165284                  | GG                              | TT                | 1946637051               |
| SNP_P3_145139_165487 | NW_004516372.1 | Scaffold1065 | 165487                  | TT                              | CC                | 1946637052               |
| SNP_P3_145140_165503 | NW_004516372.1 | Scaffold1065 | 165503                  | TT                              | GG                | 1946637053               |
| SNP_P3_145141_165648 | NW_004516372.1 | Scaffold1065 | 165648                  | CC                              | TT                | 1946637054               |
| SNP_P3_145142_200060 | NW_004516372.1 | Scaffold1065 | 200060                  | GG                              | TT                | 1946637055               |
| SNP_P3_145143_200067 | NW_004516372.1 | Scaffold1065 | 200067                  | GG                              | AA                | 1946637056               |
| SNP_P3_145144_200068 | NW_004516372.1 | Scaffold1065 | 200068                  | TT                              | CC                | 1946637057               |
| SNP_P3_145145_200151 | NW_004516372.1 | Scaffold1065 | 200151                  | CC                              | GG                | 1946637058               |
| SNP_P3_145146_200493 | NW_004516372.1 | Scaffold1065 | 200493                  | GG                              | CC                | 1946637059               |
| SNP_P3_145147_200497 | NW_004516372.1 | Scaffold1065 | 200497                  | TT                              | CC                | 1946637061               |
| SNP_P3_145148_208265 | NW_004516372.1 | Scaffold1065 | 208265                  | AA                              | GG                | 1946637063               |
| SNP_P3_145149_1097   | NW_004516373.1 | Scaffold1066 | 1097                    | AA                              | GG                | 1946637065               |
| SNP_P3_145150_764    | NW_004516374.1 | Scaffold1067 | 764                     | TT                              | CC                | 1946637067               |
| SNP_P3_145151_819    | NW_004516374.1 | Scaffold1067 | 819                     | AA                              | GG                | 1946637069               |
| SNP_P3_145152_927    | NW_004516374.1 | Scaffold1067 | 927                     | TT                              | CC                | 1946637071               |
| SNP_P3_145153_1097   | NW_004516374.1 | Scaffold1067 | 1097                    | CC                              | TT                | 1946637073               |
| SNP_P3_145154_1099   | NW_004516374.1 | Scaffold1067 | 1099                    | AA                              | GG                | 1946637074               |
| SNP_P3_145155_1100   | NW_004516374.1 | Scaffold1067 | 1100                    | CC                              | TT                | 1946637076               |
| SNP_P3_145156_1180   | NW_004516374.1 | Scaffold1067 | 1180                    | CC                              | AA                | 1946637078               |
| SNP_P3_145157_1409   | NW_004516374.1 | Scaffold1067 | 1409                    | AA                              | GG                | 1946637080               |
| SNP_P3_145158_1420   | NW_004516374.1 | Scaffold1067 | 1420                    | GG                              | TT                | 1946637082               |
| SNP_P3_145159_1540   | NW_004516374.1 | Scaffold1067 | 1540                    | CC                              | TT                | 1946637084               |
| SNP_P3_145160_1617   | NW_004516374.1 | Scaffold1067 | 1617                    | AA                              | TT                | 1946637086               |
| SNP_P3_145161_1731   | NW_004516374.1 | Scaffold1067 | 1731                    | CC                              | TT                | 1946637088               |
| SNP_P3_145162_1748   | NW_004516374.1 | Scaffold1067 | 1748                    | GG                              | AA                | 1946637090               |
| SNP_P3_145163_1935   | NW_004516374.1 | Scaffold1067 | 1935                    | CC                              | AA                | 1946637092               |
| SNP_P3_145164_2149   | NW_004516374.1 | Scaffold1067 | 2149                    | GG                              | AA                | 1946637094               |
| SNP_P3_145165_2397   | NW_004516374.1 | Scaffold1067 | 2397                    | AA                              | GG                | 1946637096               |
| SNP_P3_145166_2427   | NW_004516374.1 | Scaffold1067 | 2427                    | CC                              | TT                | 1946637098               |
| SNP_P3_145167_18762  | NW_004516374.1 | Scaffold1067 | 18762                   | AA                              | CC                | 1946637100               |
| SNP_P3_145168_18782  | NW_004516374.1 | Scaffold1067 | 18782                   | GG                              | AA                | 1946637102               |
| SNP_P3_145169_18803  | NW_004516374.1 | Scaffold1067 | 18803                   | TT                              | CC                | 1946637104               |
| SNP_P3_145170_18891  | NW_004516374.1 | Scaffold1067 | 18891                   | GG                              | AA                | 1946637106               |
| SNP_P3_145171_19055  | NW_004516374.1 | Scaffold1067 | 19055                   | CC                              | TT                | 1946637108               |
| SNP_P3_145172_19061  | NW_004516374.1 | Scaffold1067 | 19061                   | TT                              | CC                | 1946637110               |
| SNP_P3_145173_19099  | NW_004516374.1 | Scaffold1067 | 19099                   | TT                              | CC                | 1946637112               |
| SNP_P3_145174_19110  | NW_004516374.1 | Scaffold1067 | 19110                   | CC                              | TT                | 1946637114               |
| SNP_P3_145175_19120  | NW_004516374.1 | Scaffold1067 | 19120                   | AA                              | TT                | 1946637116               |
| SNP_P3_145176_19127  | NW_004516374.1 | Scaffold1067 | 19127                   | GG                              | AA                | 1946637117               |
| SNP_P3_145177_19198  | NW_004516374.1 | Scaffold1067 | 19198                   | AA                              | GG                | 1946637119               |
| SNP_P3_145178_36594  | NW_004516374.1 | Scaffold1067 | 36594                   | GG                              | AA                | 1946637121               |



| SNPs IDs             | Chromosome IDs | Chromosomes  | Physical positions (bp) | CDC Frontier (Reference genome) | (Pusa 256 & HPNB) | NCBI SNPdb Accession IDs |
|----------------------|----------------|--------------|-------------------------|---------------------------------|-------------------|--------------------------|
| SNP_P3_145179_75497  | NW_004516374.1 | Scaffold1067 | 75497                   | GG                              | AA                | 1946637123               |
| SNP_P3_145180_77636  | NW_004516374.1 | Scaffold1067 | 77636                   | GG                              | AA                | 1946637125               |
| SNP_P3_145181_79878  | NW_004516374.1 | Scaffold1067 | 79878                   | CC                              | GG                | 1946637127               |
| SNP_P3_145182_79880  | NW_004516374.1 | Scaffold1067 | 79880                   | TT                              | GG                | 1946637129               |
| SNP_P3_145183_79890  | NW_004516374.1 | Scaffold1067 | 79890                   | CC                              | TT                | 1946637131               |
| SNP_P3_145184_101564 | NW_004516374.1 | Scaffold1067 | 101564                  | AA                              | TT                | 1946637133               |
| SNP_P3_145185_112661 | NW_004516374.1 | Scaffold1067 | 112661                  | GG                              | AA                | 1946637135               |
| SNP_P3_145186_155326 | NW_004516374.1 | Scaffold1067 | 155326                  | GG                              | CC                | 1946637137               |
| SNP_P3_145187_190612 | NW_004516374.1 | Scaffold1067 | 190612                  | GG                              | AA                | 1946637139               |
| SNP_P3_145189_192052 | NW_004516374.1 | Scaffold1067 | 192052                  | GG                              | AA                | 1946637142               |
| SNP_P3_145190_195980 | NW_004516374.1 | Scaffold1067 | 195980                  | AA                              | TT                | 1946637144               |
| SNP_P3_145191_195996 | NW_004516374.1 | Scaffold1067 | 195996                  | GG                              | TT                | 1946637146               |
| SNP_P3_145192_196033 | NW_004516374.1 | Scaffold1067 | 196033                  | CC                              | TT                | 1946637148               |
| SNP_P3_145193_196147 | NW_004516374.1 | Scaffold1067 | 196147                  | AA                              | GG                | 1946637150               |
| SNP_P3_145194_196201 | NW_004516374.1 | Scaffold1067 | 196201                  | GG                              | AA                | 1946637152               |
| SNP_P3_145195_203031 | NW_004516374.1 | Scaffold1067 | 203031                  | GG                              | CC                | 1946637154               |
| SNP_P3_145196_203038 | NW_004516374.1 | Scaffold1067 | 203038                  | GG                              | TT                | 1946637156               |
| SNP_P3_145197_203042 | NW_004516374.1 | Scaffold1067 | 203042                  | CC                              | TT                | 1946637158               |
| SNP_P3_145198_203043 | NW_004516374.1 | Scaffold1067 | 203043                  | TT                              | CC                | 1946637160               |
| SNP_P3_145200_209167 | NW_004516374.1 | Scaffold1067 | 209167                  | CC                              | TT                | 1946637162               |
| SNP_P3_145201_214022 | NW_004516374.1 | Scaffold1067 | 214022                  | TT                              | GG                | 1946637164               |
| SNP_P3_145202_214039 | NW_004516374.1 | Scaffold1067 | 214039                  | TT                              | CC                | 1946637166               |
| SNP_P3_145203_214070 | NW_004516374.1 | Scaffold1067 | 214070                  | TT                              | CC                | 1946637168               |
| SNP_P3_145204_214071 | NW_004516374.1 | Scaffold1067 | 214071                  | AA                              | GG                | 1946637170               |
| SNP_P3_145205_214104 | NW_004516374.1 | Scaffold1067 | 214104                  | TT                              | GG                | 1946637172               |
| SNP_P3_145206_214142 | NW_004516374.1 | Scaffold1067 | 214142                  | TT                              | GG                | 1946637174               |
| SNP_P3_145207_214158 | NW_004516374.1 | Scaffold1067 | 214158                  | GG                              | AA                | 1946637176               |
| SNP_P3_145208_214197 | NW_004516374.1 | Scaffold1067 | 214197                  | TT                              | CC                | 1946637178               |
| SNP_P3_145209_214243 | NW_004516374.1 | Scaffold1067 | 214243                  | TT                              | CC                | 1946637180               |
| SNP_P3_145210_214283 | NW_004516374.1 | Scaffold1067 | 214283                  | TT                              | AA                | 1946637182               |
| SNP_P3_145211_214286 | NW_004516374.1 | Scaffold1067 | 214286                  | AA                              | GG                | 1946637184               |
| SNP_P3_145212_214306 | NW_004516374.1 | Scaffold1067 | 214306                  | TT                              | GG                | 1946637186               |
| SNP_P3_145213_214314 | NW_004516374.1 | Scaffold1067 | 214314                  | TT                              | GG                | 1946637188               |
| SNP_P3_145214_214383 | NW_004516374.1 | Scaffold1067 | 214383                  | CC                              | GG                | 1946637190               |
| SNP_P3_145215_214475 | NW_004516374.1 | Scaffold1067 | 214475                  | CC                              | AA                | 1946637192               |
| SNP_P3_145216_214724 | NW_004516374.1 | Scaffold1067 | 214724                  | TT                              | CC                | 1946637194               |
| SNP_P3_145217_214738 | NW_004516374.1 | Scaffold1067 | 214738                  | TT                              | CC                | 1946637196               |
| SNP_P3_145218_215008 | NW_004516374.1 | Scaffold1067 | 215008                  | GG                              | CC                | 1946637198               |
| SNP_P3_145220_220993 | NW_004516374.1 | Scaffold1067 | 220993                  | GG                              | CC                | 1946637200               |
| SNP_P3_145221_222204 | NW_004516374.1 | Scaffold1067 | 222204                  | TT                              | CC                | 1946637202               |
| SNP_P3_145222_222214 | NW_004516374.1 | Scaffold1067 | 222214                  | AA                              | GG                | 1946637204               |
| SNP_P3_145223_222226 | NW_004516374.1 | Scaffold1067 | 222226                  | TT                              | CC                | 1946637206               |

| SNPs IDs             | Chromosome IDs | Chromosomes  | Physical positions (bp) | CDC Frontier (Reference genome) | (Pusa 256 & HPNB) | NCBI SNPdb Accession IDs |
|----------------------|----------------|--------------|-------------------------|---------------------------------|-------------------|--------------------------|
| SNP_P3_145224_222290 | NW_004516374.1 | Scaffold1067 | 222290                  | AA                              | TT                | 1946637208               |
| SNP_P3_145225_222305 | NW_004516374.1 | Scaffold1067 | 222305                  | TT                              | GG                | 1946637210               |
| SNP_P3_145226_222311 | NW_004516374.1 | Scaffold1067 | 222311                  | AA                              | GG                | 1946637212               |
| SNP_P3_145227_222332 | NW_004516374.1 | Scaffold1067 | 222332                  | TT                              | CC                | 1946637213               |
| SNP_P3_145228_222338 | NW_004516374.1 | Scaffold1067 | 222338                  | CC                              | TT                | 1946637215               |
| SNP_P3_145229_222362 | NW_004516374.1 | Scaffold1067 | 222362                  | TT                              | CC                | 1946637217               |
| SNP_P3_145230_222370 | NW_004516374.1 | Scaffold1067 | 222370                  | GG                              | CC                | 1946637219               |
| SNP_P3_145231_222391 | NW_004516374.1 | Scaffold1067 | 222391                  | TT                              | GG                | 1946637221               |
| SNP_P3_145232_222395 | NW_004516374.1 | Scaffold1067 | 222395                  | TT                              | GG                | 1946637223               |
| SNP_P3_145233_222396 | NW_004516374.1 | Scaffold1067 | 222396                  | TT                              | CC                | 1946637225               |
| SNP_P3_145234_222399 | NW_004516374.1 | Scaffold1067 | 222399                  | TT                              | CC                | 1946637227               |
| SNP_P3_145235_222402 | NW_004516374.1 | Scaffold1067 | 222402                  | AA                              | GG                | 1946637229               |
| SNP_P3_145237_222506 | NW_004516374.1 | Scaffold1067 | 222506                  | TT                              | GG                | 1946637231               |
| SNP_P3_145238_222568 | NW_004516374.1 | Scaffold1067 | 222568                  | TT                              | GG                | 1946637233               |
| SNP_P3_145239_222574 | NW_004516374.1 | Scaffold1067 | 222574                  | TT                              | CC                | 1946637235               |
| SNP_P3_145240_222584 | NW_004516374.1 | Scaffold1067 | 222584                  | TT                              | CC                | 1946637237               |
| SNP_P3_145241_222626 | NW_004516374.1 | Scaffold1067 | 222626                  | TT                              | CC                | 1946637239               |
| SNP_P3_145242_222628 | NW_004516374.1 | Scaffold1067 | 222628                  | TT                              | GG                | 1946637241               |
| SNP_P3_145243_222652 | NW_004516374.1 | Scaffold1067 | 222652                  | AA                              | GG                | 1946637243               |
| SNP_P3_145244_222685 | NW_004516374.1 | Scaffold1067 | 222685                  | AA                              | GG                | 1946637245               |
| SNP_P3_145245_222695 | NW_004516374.1 | Scaffold1067 | 222695                  | TT                              | GG                | 1946637247               |
| SNP_P3_145246_222696 | NW_004516374.1 | Scaffold1067 | 222696                  | TT                              | CC                | 1946637249               |
| SNP_P3_145247_222698 | NW_004516374.1 | Scaffold1067 | 222698                  | GG                              | AA                | 1946637250               |
| SNP_P3_145248_222791 | NW_004516374.1 | Scaffold1067 | 222791                  | AA                              | GG                | 1946637252               |
| SNP_P3_145249_222848 | NW_004516374.1 | Scaffold1067 | 222848                  | TT                              | CC                | 1946637254               |
| SNP_P3_145250_222849 | NW_004516374.1 | Scaffold1067 | 222849                  | AA                              | GG                | 1946637256               |
| SNP_P3_145251_222855 | NW_004516374.1 | Scaffold1067 | 222855                  | AA                              | GG                | 1946637258               |
| SNP_P3_145252_222872 | NW_004516374.1 | Scaffold1067 | 222872                  | AA                              | GG                | 1946637260               |
| SNP_P3_145254_229216 | NW_004516374.1 | Scaffold1067 | 229216                  | TT                              | CC                | 1946637262               |
| SNP_P3_145255_229548 | NW_004516374.1 | Scaffold1067 | 229548                  | CC                              | TT                | 1946637264               |
| SNP_P3_145256_234905 | NW_004516374.1 | Scaffold1067 | 234905                  | AA                              | GG                | 1946637266               |
| SNP_P3_145257_235117 | NW_004516374.1 | Scaffold1067 | 235117                  | TT                              | GG                | 1946637268               |
| SNP_P3_145258_235124 | NW_004516374.1 | Scaffold1067 | 235124                  | TT                              | GG                | 1946637270               |
| SNP_P3_145259_235130 | NW_004516374.1 | Scaffold1067 | 235130                  | GG                              | AA                | 1946637272               |
| SNP_P3_145260_235166 | NW_004516374.1 | Scaffold1067 | 235166                  | TT                              | CC                | 1946637274               |
| SNP_P3_145261_235171 | NW_004516374.1 | Scaffold1067 | 235171                  | TT                              | CC                | 1946637276               |
| SNP_P3_145262_235173 | NW_004516374.1 | Scaffold1067 | 235173                  | TT                              | CC                | 1946637278               |
| SNP_P3_145263_235179 | NW_004516374.1 | Scaffold1067 | 235179                  | CC                              | AA                | 1946637280               |
| SNP_P3_145264_235247 | NW_004516374.1 | Scaffold1067 | 235247                  | CC                              | AA                | 1946637282               |
| SNP_P3_145265_235248 | NW_004516374.1 | Scaffold1067 | 235248                  | TT                              | CC                | 1946637284               |
| SNP_P3_145266_235264 | NW_004516374.1 | Scaffold1067 | 235264                  | AA                              | CC                | 1946637286               |
| SNP_P3_145267_235275 | NW_004516374.1 | Scaffold1067 | 235275                  | AA                              | TT                | 1946637288               |

| SNPs IDs             | Chromosome IDs | Chromosomes  | Physical positions (bp) | CDC Frontier (Reference genome) | (Pusa 256 & HPNB) | NCBI SNPdb Accession IDs |
|----------------------|----------------|--------------|-------------------------|---------------------------------|-------------------|--------------------------|
| SNP_P3_145268_235279 | NW_004516374.1 | Scaffold1067 | 235279                  | TT                              | CC                | 1946637289               |
| SNP_P3_145269_235283 | NW_004516374.1 | Scaffold1067 | 235283                  | TT                              | CC                | 1946637291               |
| SNP_P3_145270_235291 | NW_004516374.1 | Scaffold1067 | 235291                  | TT                              | AA                | 1946637293               |
| SNP_P3_145271_235310 | NW_004516374.1 | Scaffold1067 | 235310                  | AA                              | GG                | 1946637295               |
| SNP_P3_145272_235319 | NW_004516374.1 | Scaffold1067 | 235319                  | GG                              | AA                | 1946637297               |
| SNP_P3_145273_235365 | NW_004516374.1 | Scaffold1067 | 235365                  | TT                              | CC                | 1946637299               |
| SNP_P3_145274_235372 | NW_004516374.1 | Scaffold1067 | 235372                  | AA                              | GG                | 1946637301               |
| SNP_P3_145275_235459 | NW_004516374.1 | Scaffold1067 | 235459                  | AA                              | GG                | 1946637303               |
| SNP_P3_145276_235463 | NW_004516374.1 | Scaffold1067 | 235463                  | TT                              | GG                | 1946637305               |
| SNP_P3_145277_235467 | NW_004516374.1 | Scaffold1067 | 235467                  | TT                              | CC                | 1946637307               |
| SNP_P3_145278_235487 | NW_004516374.1 | Scaffold1067 | 235487                  | AA                              | GG                | 1946637309               |
| SNP_P3_145279_235496 | NW_004516374.1 | Scaffold1067 | 235496                  | AA                              | GG                | 1946637311               |
| SNP_P3_145280_235501 | NW_004516374.1 | Scaffold1067 | 235501                  | TT                              | CC                | 1946637313               |
| SNP_P3_145281_235554 | NW_004516374.1 | Scaffold1067 | 235554                  | TT                              | AA                | 1946637315               |
| SNP_P3_145282_235570 | NW_004516374.1 | Scaffold1067 | 235570                  | AA                              | GG                | 1946637317               |
| SNP_P3_145283_235595 | NW_004516374.1 | Scaffold1067 | 235595                  | TT                              | CC                | 1946637319               |
| SNP_P3_145284_235616 | NW_004516374.1 | Scaffold1067 | 235616                  | TT                              | CC                | 1946637321               |
| SNP_P3_145285_235664 | NW_004516374.1 | Scaffold1067 | 235664                  | TT                              | CC                | 1946637323               |
| SNP_P3_145286_235668 | NW_004516374.1 | Scaffold1067 | 235668                  | GG                              | CC                | 1946637325               |
| SNP_P3_145287_235681 | NW_004516374.1 | Scaffold1067 | 235681                  | TT                              | CC                | 1946637327               |
| SNP_P3_145288_235702 | NW_004516374.1 | Scaffold1067 | 235702                  | TT                              | CC                | 1946637329               |
| SNP_P3_145289_235728 | NW_004516374.1 | Scaffold1067 | 235728                  | AA                              | GG                | 1946637331               |
| SNP_P3_145290_235748 | NW_004516374.1 | Scaffold1067 | 235748                  | CC                              | GG                | 1946637332               |
| SNP_P3_145291_235771 | NW_004516374.1 | Scaffold1067 | 235771                  | AA                              | CC                | 1946637334               |
| SNP_P3_145292_235818 | NW_004516374.1 | Scaffold1067 | 235818                  | AA                              | TT                | 1946637336               |
| SNP_P3_145293_235830 | NW_004516374.1 | Scaffold1067 | 235830                  | TT                              | CC                | 1946637338               |
| SNP_P3_145294_235832 | NW_004516374.1 | Scaffold1067 | 235832                  | TT                              | CC                | 1946637340               |
| SNP_P3_145295_235852 | NW_004516374.1 | Scaffold1067 | 235852                  | GG                              | CC                | 1946637342               |
| SNP_P3_145296_235861 | NW_004516374.1 | Scaffold1067 | 235861                  | TT                              | AA                | 1946637344               |
| SNP_P3_145297_235882 | NW_004516374.1 | Scaffold1067 | 235882                  | AA                              | CC                | 1946637346               |
| SNP_P3_145298_235907 | NW_004516374.1 | Scaffold1067 | 235907                  | TT                              | CC                | 1946637348               |
| SNP_P3_145299_235918 | NW_004516374.1 | Scaffold1067 | 235918                  | TT                              | CC                | 1946637350               |
| SNP_P3_145300_235953 | NW_004516374.1 | Scaffold1067 | 235953                  | TT                              | CC                | 1946637352               |
| SNP_P3_145301_235954 | NW_004516374.1 | Scaffold1067 | 235954                  | TT                              | GG                | 1946637354               |
| SNP_P3_145302_235982 | NW_004516374.1 | Scaffold1067 | 235982                  | TT                              | CC                | 1946637356               |
| SNP_P3_145303_235991 | NW_004516374.1 | Scaffold1067 | 235991                  | AA                              | GG                | 1946637358               |
| SNP_P3_145304_236026 | NW_004516374.1 | Scaffold1067 | 236026                  | TT                              | AA                | 1946637360               |
| SNP_P3_145305_236035 | NW_004516374.1 | Scaffold1067 | 236035                  | TT                              | GG                | 1946637362               |
| SNP_P3_145306_236058 | NW_004516374.1 | Scaffold1067 | 236058                  | AA                              | GG                | 1946637364               |
| SNP_P3_145307_236079 | NW_004516374.1 | Scaffold1067 | 236079                  | AA                              | GG                | 1946637366               |
| SNP_P3_145308_236134 | NW_004516374.1 | Scaffold1067 | 236134                  | TT                              | CC                | 1946637368               |
| SNP_P3_145309_236137 | NW_004516374.1 | Scaffold1067 | 236137                  | TT                              | CC                | 1946637370               |

| SNPs IDs             | Chromosome IDs | Chromosomes  | Physical positions (bp) | CDC Frontier (Reference genome) | (Pusa 256 & HPNB) | NCBI SNPdb Accession IDs |
|----------------------|----------------|--------------|-------------------------|---------------------------------|-------------------|--------------------------|
| SNP_P3_145310_236198 | NW_004516374.1 | Scaffold1067 | 236198                  | AA                              | GG                | 1946637372               |
| SNP_P3_145311_236209 | NW_004516374.1 | Scaffold1067 | 236209                  | TT                              | CC                | 1946637374               |
| SNP_P3_145312_236270 | NW_004516374.1 | Scaffold1067 | 236270                  | TT                              | CC                | 1946637376               |
| SNP_P3_145313_236320 | NW_004516374.1 | Scaffold1067 | 236320                  | AA                              | GG                | 1946637377               |
| SNP_P3_145314_236326 | NW_004516374.1 | Scaffold1067 | 236326                  | TT                              | GG                | 1946637379               |
| SNP_P3_145315_236416 | NW_004516374.1 | Scaffold1067 | 236416                  | TT                              | GG                | 1946637381               |
| SNP_P3_145316_236419 | NW_004516374.1 | Scaffold1067 | 236419                  | AA                              | GG                | 1946637383               |
| SNP_P3_145317_236482 | NW_004516374.1 | Scaffold1067 | 236482                  | TT                              | GG                | 1946637385               |
| SNP_P3_145318_236503 | NW_004516374.1 | Scaffold1067 | 236503                  | AA                              | CC                | 1946637387               |
| SNP_P3_145319_236550 | NW_004516374.1 | Scaffold1067 | 236550                  | AA                              | CC                | 1946637389               |
| SNP_P3_145320_236574 | NW_004516374.1 | Scaffold1067 | 236574                  | AA                              | GG                | 1946637391               |
| SNP_P3_145321_236576 | NW_004516374.1 | Scaffold1067 | 236576                  | AA                              | GG                | 1946637394               |
| SNP_P3_145322_236584 | NW_004516374.1 | Scaffold1067 | 236584                  | AA                              | GG                | 1946637396               |
| SNP_P3_145323_236585 | NW_004516374.1 | Scaffold1067 | 236585                  | TT                              | CC                | 1946637398               |
| SNP_P3_145324_236597 | NW_004516374.1 | Scaffold1067 | 236597                  | CC                              | AA                | 1946637400               |
| SNP_P3_145325_236612 | NW_004516374.1 | Scaffold1067 | 236612                  | AA                              | GG                | 1946637402               |
| SNP_P3_145326_236650 | NW_004516374.1 | Scaffold1067 | 236650                  | AA                              | GG                | 1946637404               |
| SNP_P3_145327_236657 | NW_004516374.1 | Scaffold1067 | 236657                  | TT                              | CC                | 1946637406               |
| SNP_P3_145328_236675 | NW_004516374.1 | Scaffold1067 | 236675                  | TT                              | GG                | 1946637408               |
| SNP_P3_145329_236690 | NW_004516374.1 | Scaffold1067 | 236690                  | TT                              | GG                | 1946637410               |
| SNP_P3_145330_236691 | NW_004516374.1 | Scaffold1067 | 236691                  | AA                              | GG                | 1946637412               |
| SNP_P3_145331_236713 | NW_004516374.1 | Scaffold1067 | 236713                  | CC                              | TT                | 1946637414               |
| SNP_P3_145332_236715 | NW_004516374.1 | Scaffold1067 | 236715                  | TT                              | CC                | 1946637415               |
| SNP_P3_145333_236727 | NW_004516374.1 | Scaffold1067 | 236727                  | AA                              | CC                | 1946637417               |
| SNP_P3_145334_236749 | NW_004516374.1 | Scaffold1067 | 236749                  | AA                              | GG                | 1946637419               |
| SNP_P3_145335_236757 | NW_004516374.1 | Scaffold1067 | 236757                  | AA                              | CC                | 1946637421               |
| SNP_P3_145336_236801 | NW_004516374.1 | Scaffold1067 | 236801                  | AA                              | GG                | 1946637423               |
| SNP_P3_145337_236804 | NW_004516374.1 | Scaffold1067 | 236804                  | AA                              | GG                | 1946637425               |
| SNP_P3_145338_236814 | NW_004516374.1 | Scaffold1067 | 236814                  | GG                              | AA                | 1946637427               |
| SNP_P3_145339_236834 | NW_004516374.1 | Scaffold1067 | 236834                  | AA                              | CC                | 1946637429               |
| SNP_P3_145340_236871 | NW_004516374.1 | Scaffold1067 | 236871                  | TT                              | CC                | 1946637430               |
| SNP_P3_145341_236903 | NW_004516374.1 | Scaffold1067 | 236903                  | TT                              | CC                | 1946637432               |
| SNP_P3_145342_236951 | NW_004516374.1 | Scaffold1067 | 236951                  | CC                              | GG                | 1946637434               |
| SNP_P3_145343_236952 | NW_004516374.1 | Scaffold1067 | 236952                  | AA                              | TT                | 1946637436               |
| SNP_P3_145344_236989 | NW_004516374.1 | Scaffold1067 | 236989                  | CC                              | TT                | 1946637438               |
| SNP_P3_145345_236992 | NW_004516374.1 | Scaffold1067 | 236992                  | AA                              | GG                | 1946637440               |
| SNP_P3_145346_237022 | NW_004516374.1 | Scaffold1067 | 237022                  | TT                              | CC                | 1946637442               |
| SNP_P3_145347_237055 | NW_004516374.1 | Scaffold1067 | 237055                  | GG                              | TT                | 1946637444               |
| SNP_P3_145348_237071 | NW_004516374.1 | Scaffold1067 | 237071                  | AA                              | GG                | 1946637446               |
| SNP_P3_145349_237106 | NW_004516374.1 | Scaffold1067 | 237106                  | TT                              | AA                | 1946637448               |
| SNP_P3_145350_237109 | NW_004516374.1 | Scaffold1067 | 237109                  | AA                              | CC                | 1946637450               |
| SNP_P3_145351_237127 | NW_004516374.1 | Scaffold1067 | 237127                  | AA                              | GG                | 1946637452               |

| SNPs IDs             | Chromosome IDs | Chromosomes  | Physical positions (bp) | CDC Frontier (Reference genome) | (Pusa 256 & HPNB) | NCBI SNPdb Accession IDs |
|----------------------|----------------|--------------|-------------------------|---------------------------------|-------------------|--------------------------|
| SNP_P3_145352_237152 | NW_004516374.1 | Scaffold1067 | 237152                  | TT                              | AA                | 1946637454               |
| SNP_P3_145353_237154 | NW_004516374.1 | Scaffold1067 | 237154                  | AA                              | GG                | 1946637456               |
| SNP_P3_145354_237188 | NW_004516374.1 | Scaffold1067 | 237188                  | TT                              | CC                | 1946637458               |
| SNP_P3_145355_237240 | NW_004516374.1 | Scaffold1067 | 237240                  | TT                              | CC                | 1946637460               |
| SNP_P3_145356_237269 | NW_004516374.1 | Scaffold1067 | 237269                  | AA                              | CC                | 1946637462               |
| SNP_P3_145357_237306 | NW_004516374.1 | Scaffold1067 | 237306                  | AA                              | CC                | 1946637464               |
| SNP_P3_145358_237311 | NW_004516374.1 | Scaffold1067 | 237311                  | GG                              | AA                | 1946637466               |
| SNP_P3_145359_237325 | NW_004516374.1 | Scaffold1067 | 237325                  | TT                              | CC                | 1946637468               |
| SNP_P3_145360_237334 | NW_004516374.1 | Scaffold1067 | 237334                  | AA                              | GG                | 1946637470               |
| SNP_P3_145361_237339 | NW_004516374.1 | Scaffold1067 | 237339                  | TT                              | CC                | 1946637472               |
| SNP_P3_145362_237340 | NW_004516374.1 | Scaffold1067 | 237340                  | TT                              | AA                | 1946637474               |
| SNP_P3_145363_237395 | NW_004516374.1 | Scaffold1067 | 237395                  | GG                              | AA                | 1946637476               |
| SNP_P3_145364_237506 | NW_004516374.1 | Scaffold1067 | 237506                  | AA                              | GG                | 1946637478               |
| SNP_P3_145365_237509 | NW_004516374.1 | Scaffold1067 | 237509                  | AA                              | CC                | 1946637480               |
| SNP_P3_145366_237510 | NW_004516374.1 | Scaffold1067 | 237510                  | TT                              | CC                | 1946637482               |
| SNP_P3_145367_237518 | NW_004516374.1 | Scaffold1067 | 237518                  | AA                              | GG                | 1946637484               |
| SNP_P3_145368_237528 | NW_004516374.1 | Scaffold1067 | 237528                  | TT                              | AA                | 1946637486               |
| SNP_P3_145369_237536 | NW_004516374.1 | Scaffold1067 | 237536                  | TT                              | CC                | 1946637488               |
| SNP_P3_145370_237537 | NW_004516374.1 | Scaffold1067 | 237537                  | CC                              | TT                | 1946637490               |
| SNP_P3_145371_237569 | NW_004516374.1 | Scaffold1067 | 237569                  | AA                              | GG                | 1946637492               |
| SNP_P3_145372_237597 | NW_004516374.1 | Scaffold1067 | 237597                  | AA                              | CC                | 1946637494               |
| SNP_P3_145373_237637 | NW_004516374.1 | Scaffold1067 | 237637                  | TT                              | CC                | 1946637496               |
| SNP_P3_145374_237645 | NW_004516374.1 | Scaffold1067 | 237645                  | TT                              | AA                | 1946637498               |
| SNP_P3_145375_237655 | NW_004516374.1 | Scaffold1067 | 237655                  | TT                              | CC                | 1946637500               |
| SNP_P3_145376_237669 | NW_004516374.1 | Scaffold1067 | 237669                  | TT                              | GG                | 1946637502               |
| SNP_P3_145377_237701 | NW_004516374.1 | Scaffold1067 | 237701                  | GG                              | TT                | 1946637504               |
| SNP_P3_145378_237769 | NW_004516374.1 | Scaffold1067 | 237769                  | AA                              | GG                | 1946637506               |
| SNP_P3_145379_237789 | NW_004516374.1 | Scaffold1067 | 237789                  | AA                              | GG                | 1946637508               |
| SNP_P3_145380_237793 | NW_004516374.1 | Scaffold1067 | 237793                  | AA                              | GG                | 1946637510               |
| SNP_P3_145381_237871 | NW_004516374.1 | Scaffold1067 | 237871                  | TT                              | CC                | 1946637512               |
| SNP_P3_145382_237893 | NW_004516374.1 | Scaffold1067 | 237893                  | AA                              | TT                | 1946637514               |
| SNP_P3_145383_237948 | NW_004516374.1 | Scaffold1067 | 237948                  | AA                              | GG                | 1946637516               |
| SNP_P3_145384_238009 | NW_004516374.1 | Scaffold1067 | 238009                  | TT                              | GG                | 1946637518               |
| SNP_P3_145385_238078 | NW_004516374.1 | Scaffold1067 | 238078                  | TT                              | GG                | 1946637520               |
| SNP_P3_145386_238087 | NW_004516374.1 | Scaffold1067 | 238087                  | CC                              | AA                | 1946637522               |
| SNP_P3_145387_238139 | NW_004516374.1 | Scaffold1067 | 238139                  | TT                              | CC                | 1946637524               |
| SNP_P3_145388_238163 | NW_004516374.1 | Scaffold1067 | 238163                  | CC                              | AA                | 1946637526               |
| SNP_P3_145389_238208 | NW_004516374.1 | Scaffold1067 | 238208                  | TT                              | AA                | 1946637528               |
| SNP_P3_145390_238222 | NW_004516374.1 | Scaffold1067 | 238222                  | CC                              | GG                | 1946637530               |
| SNP_P3_145391_238238 | NW_004516374.1 | Scaffold1067 | 238238                  | AA                              | CC                | 1946637532               |
| SNP_P3_145392_238263 | NW_004516374.1 | Scaffold1067 | 238263                  | AA                              | CC                | 1946637534               |
| SNP_P3_145393_238282 | NW_004516374.1 | Scaffold1067 | 238282                  | AA                              | GG                | 1946637536               |

| SNPs IDs             | Chromosome IDs | Chromosomes  | Physical positions (bp) | CDC Frontier (Reference genome) | (Pusa 256 & HPNB) | NCBI SNPdb Accession IDs |
|----------------------|----------------|--------------|-------------------------|---------------------------------|-------------------|--------------------------|
| SNP_P3_145394_238324 | NW_004516374.1 | Scaffold1067 | 238324                  | TT                              | CC                | 1946637538               |
| SNP_P3_145395_238331 | NW_004516374.1 | Scaffold1067 | 238331                  | AA                              | GG                | 1946637540               |
| SNP_P3_145396_238411 | NW_004516374.1 | Scaffold1067 | 238411                  | TT                              | GG                | 1946637542               |
| SNP_P3_145397_238429 | NW_004516374.1 | Scaffold1067 | 238429                  | TT                              | GG                | 1946637544               |
| SNP_P3_145398_238442 | NW_004516374.1 | Scaffold1067 | 238442                  | TT                              | CC                | 1946637546               |
| SNP_P3_145399_238473 | NW_004516374.1 | Scaffold1067 | 238473                  | CC                              | GG                | 1946637548               |
| SNP_P3_145400_238546 | NW_004516374.1 | Scaffold1067 | 238546                  | GG                              | AA                | 1946637550               |
| SNP_P3_145401_238547 | NW_004516374.1 | Scaffold1067 | 238547                  | TT                              | CC                | 1946637552               |
| SNP_P3_145402_238576 | NW_004516374.1 | Scaffold1067 | 238576                  | AA                              | GG                | 1946637554               |
| SNP_P3_145404_238614 | NW_004516374.1 | Scaffold1067 | 238614                  | AA                              | CC                | 1946637556               |
| SNP_P3_145406_238944 | NW_004516374.1 | Scaffold1067 | 238944                  | AA                              | CC                | 1946637558               |
| SNP_P3_145407_238965 | NW_004516374.1 | Scaffold1067 | 238965                  | CC                              | AA                | 1946637560               |
| SNP_P3_145408_239002 | NW_004516374.1 | Scaffold1067 | 239002                  | CC                              | AA                | 1946637562               |
| SNP_P3_145409_239043 | NW_004516374.1 | Scaffold1067 | 239043                  | TT                              | CC                | 1946637564               |
| SNP_P3_145410_239045 | NW_004516374.1 | Scaffold1067 | 239045                  | AA                              | GG                | 1946637566               |
| SNP_P3_145411_239047 | NW_004516374.1 | Scaffold1067 | 239047                  | CC                              | GG                | 1946637568               |
| SNP_P3_145412_239064 | NW_004516374.1 | Scaffold1067 | 239064                  | TT                              | CC                | 1946637570               |
| SNP_P3_145413_239100 | NW_004516374.1 | Scaffold1067 | 239100                  | TT                              | CC                | 1946637572               |
| SNP_P3_145414_239150 | NW_004516374.1 | Scaffold1067 | 239150                  | AA                              | CC                | 1946637574               |
| SNP_P3_145415_239157 | NW_004516374.1 | Scaffold1067 | 239157                  | CC                              | AA                | 1946637576               |
| SNP_P3_145416_239234 | NW_004516374.1 | Scaffold1067 | 239234                  | AA                              | CC                | 1946637578               |
| SNP_P3_145417_239253 | NW_004516374.1 | Scaffold1067 | 239253                  | TT                              | CC                | 1946637580               |
| SNP_P3_145418_239302 | NW_004516374.1 | Scaffold1067 | 239302                  | TT                              | CC                | 1946637582               |
| SNP_P3_145419_239304 | NW_004516374.1 | Scaffold1067 | 239304                  | TT                              | CC                | 1946637584               |
| SNP_P3_145420_239339 | NW_004516374.1 | Scaffold1067 | 239339                  | TT                              | CC                | 1946637586               |
| SNP_P3_145421_239395 | NW_004516374.1 | Scaffold1067 | 239395                  | TT                              | GG                | 1946637588               |
| SNP_P3_145422_239396 | NW_004516374.1 | Scaffold1067 | 239396                  | AA                              | GG                | 1946637590               |
| SNP_P3_145423_239434 | NW_004516374.1 | Scaffold1067 | 239434                  | GG                              | CC                | 1946637591               |
| SNP_P3_145424_239450 | NW_004516374.1 | Scaffold1067 | 239450                  | AA                              | GG                | 1946637593               |
| SNP_P3_145425_239492 | NW_004516374.1 | Scaffold1067 | 239492                  | AA                              | CC                | 1946637595               |
| SNP_P3_145426_239493 | NW_004516374.1 | Scaffold1067 | 239493                  | AA                              | CC                | 1946637602               |
| SNP_P3_145427_239552 | NW_004516374.1 | Scaffold1067 | 239552                  | TT                              | GG                | 1946637604               |
| SNP_P3_145428_239553 | NW_004516374.1 | Scaffold1067 | 239553                  | TT                              | CC                | 1946637606               |
| SNP_P3_145429_239595 | NW_004516374.1 | Scaffold1067 | 239595                  | TT                              | AA                | 1946637608               |
| SNP_P3_145430_239647 | NW_004516374.1 | Scaffold1067 | 239647                  | TT                              | GG                | 1946637610               |
| SNP_P3_145431_239688 | NW_004516374.1 | Scaffold1067 | 239688                  | TT                              | CC                | 1946637612               |
| SNP_P3_145432_239706 | NW_004516374.1 | Scaffold1067 | 239706                  | AA                              | GG                | 1946637614               |
| SNP_P3_145433_239742 | NW_004516374.1 | Scaffold1067 | 239742                  | AA                              | GG                | 1946637616               |
| SNP_P3_145434_239844 | NW_004516374.1 | Scaffold1067 | 239844                  | TT                              | CC                | 1946637618               |
| SNP_P3_145435_239845 | NW_004516374.1 | Scaffold1067 | 239845                  | TT                              | CC                | 1946637620               |
| SNP_P3_145436_239852 | NW_004516374.1 | Scaffold1067 | 239852                  | AA                              | CC                | 1946637622               |
| SNP_P3_145437_239857 | NW_004516374.1 | Scaffold1067 | 239857                  | AA                              | CC                | 1946637624               |

| SNPs IDs             | Chromosome IDs | Chromosomes  | Physical positions (bp) | CDC Frontier (Reference genome) | (Pusa 256 & HPNB) | NCBI SNPdb Accession IDs |
|----------------------|----------------|--------------|-------------------------|---------------------------------|-------------------|--------------------------|
| SNP_P3_145438_239884 | NW_004516374.1 | Scaffold1067 | 239884                  | GG                              | CC                | 1946637626               |
| SNP_P3_145439_239891 | NW_004516374.1 | Scaffold1067 | 239891                  | TT                              | GG                | 1946637628               |
| SNP_P3_145440_239895 | NW_004516374.1 | Scaffold1067 | 239895                  | AA                              | GG                | 1946637630               |
| SNP_P3_145441_239952 | NW_004516374.1 | Scaffold1067 | 239952                  | AA                              | CC                | 1946637632               |
| SNP_P3_145442_240002 | NW_004516374.1 | Scaffold1067 | 240002                  | CC                              | TT                | 1946637633               |
| SNP_P3_145443_240035 | NW_004516374.1 | Scaffold1067 | 240035                  | TT                              | GG                | 1946637635               |
| SNP_P3_145444_240039 | NW_004516374.1 | Scaffold1067 | 240039                  | GG                              | TT                | 1946637637               |
| SNP_P3_145445_240049 | NW_004516374.1 | Scaffold1067 | 240049                  | TT                              | GG                | 1946637640               |
| SNP_P3_145446_240054 | NW_004516374.1 | Scaffold1067 | 240054                  | TT                              | GG                | 1946637642               |
| SNP_P3_145447_240062 | NW_004516374.1 | Scaffold1067 | 240062                  | TT                              | CC                | 1946637644               |
| SNP_P3_145448_240087 | NW_004516374.1 | Scaffold1067 | 240087                  | TT                              | CC                | 1946637646               |
| SNP_P3_145449_240106 | NW_004516374.1 | Scaffold1067 | 240106                  | AA                              | GG                | 1946637648               |
| SNP_P3_145450_240122 | NW_004516374.1 | Scaffold1067 | 240122                  | AA                              | GG                | 1946637650               |
| SNP_P3_145451_240144 | NW_004516374.1 | Scaffold1067 | 240144                  | TT                              | GG                | 1946637652               |
| SNP_P3_145452_240145 | NW_004516374.1 | Scaffold1067 | 240145                  | TT                              | CC                | 1946637654               |
| SNP_P3_145453_240150 | NW_004516374.1 | Scaffold1067 | 240150                  | TT                              | CC                | 1946637656               |
| SNP_P3_145454_240249 | NW_004516374.1 | Scaffold1067 | 240249                  | TT                              | CC                | 1946637658               |
| SNP_P3_145455_240262 | NW_004516374.1 | Scaffold1067 | 240262                  | AA                              | TT                | 1946637660               |
| SNP_P3_145456_240320 | NW_004516374.1 | Scaffold1067 | 240320                  | AA                              | GG                | 1946637662               |
| SNP_P3_145457_240329 | NW_004516374.1 | Scaffold1067 | 240329                  | AA                              | GG                | 1946637664               |
| SNP_P3_145458_240347 | NW_004516374.1 | Scaffold1067 | 240347                  | TT                              | CC                | 1946637666               |
| SNP_P3_145459_240368 | NW_004516374.1 | Scaffold1067 | 240368                  | TT                              | GG                | 1946637668               |
| SNP_P3_145460_240401 | NW_004516374.1 | Scaffold1067 | 240401                  | TT                              | GG                | 1946637671               |
| SNP_P3_145461_240412 | NW_004516374.1 | Scaffold1067 | 240412                  | AA                              | GG                | 1946637673               |
| SNP_P3_145462_240468 | NW_004516374.1 | Scaffold1067 | 240468                  | AA                              | GG                | 1946637675               |
| SNP_P3_145463_240483 | NW_004516374.1 | Scaffold1067 | 240483                  | AA                              | GG                | 1946637677               |
| SNP_P3_145464_240513 | NW_004516374.1 | Scaffold1067 | 240513                  | AA                              | GG                | 1946637679               |
| SNP_P3_145465_240521 | NW_004516374.1 | Scaffold1067 | 240521                  | TT                              | CC                | 1946637681               |
| SNP_P3_145466_240527 | NW_004516374.1 | Scaffold1067 | 240527                  | TT                              | CC                | 1946637683               |
| SNP_P3_145467_240539 | NW_004516374.1 | Scaffold1067 | 240539                  | TT                              | CC                | 1946637685               |
| SNP_P3_145468_240575 | NW_004516374.1 | Scaffold1067 | 240575                  | GG                              | TT                | 1946637687               |
| SNP_P3_145469_240588 | NW_004516374.1 | Scaffold1067 | 240588                  | TT                              | GG                | 1946637689               |
| SNP_P3_145470_240607 | NW_004516374.1 | Scaffold1067 | 240607                  | TT                              | GG                | 1946637691               |
| SNP_P3_145471_240640 | NW_004516374.1 | Scaffold1067 | 240640                  | AA                              | GG                | 1946637693               |
| SNP_P3_145472_240647 | NW_004516374.1 | Scaffold1067 | 240647                  | GG                              | AA                | 1946637695               |
| SNP_P3_145473_240658 | NW_004516374.1 | Scaffold1067 | 240658                  | GG                              | CC                | 1946637697               |
| SNP_P3_145474_240688 | NW_004516374.1 | Scaffold1067 | 240688                  | TT                              | CC                | 1946637699               |
| SNP_P3_145475_240704 | NW_004516374.1 | Scaffold1067 | 240704                  | AA                              | GG                | 1946637701               |
| SNP_P3_145476_240718 | NW_004516374.1 | Scaffold1067 | 240718                  | TT                              | CC                | 1946637703               |
| SNP_P3_145477_240749 | NW_004516374.1 | Scaffold1067 | 240749                  | TT                              | AA                | 1946637705               |
| SNP_P3_145478_240779 | NW_004516374.1 | Scaffold1067 | 240779                  | TT                              | CC                | 1946637707               |
| SNP_P3_145479_240790 | NW_004516374.1 | Scaffold1067 | 240790                  | TT                              | CC                | 1946637709               |

| SNPs IDs             | Chromosome IDs | Chromosomes  | Physical positions (bp) | CDC Frontier (Reference genome) | (Pusa 256 & HPNB) | NCBI SNPdb Accession IDs |
|----------------------|----------------|--------------|-------------------------|---------------------------------|-------------------|--------------------------|
| SNP_P3_145480_240856 | NW_004516374.1 | Scaffold1067 | 240856                  | GG                              | CC                | 1946637711               |
| SNP_P3_145481_240862 | NW_004516374.1 | Scaffold1067 | 240862                  | CC                              | AA                | 1946637713               |
| SNP_P3_145482_240869 | NW_004516374.1 | Scaffold1067 | 240869                  | TT                              | CC                | 1946637715               |
| SNP_P3_145483_240876 | NW_004516374.1 | Scaffold1067 | 240876                  | TT                              | CC                | 1946637717               |
| SNP_P3_145484_240879 | NW_004516374.1 | Scaffold1067 | 240879                  | TT                              | CC                | 1946637719               |
| SNP_P3_145485_240913 | NW_004516374.1 | Scaffold1067 | 240913                  | TT                              | CC                | 1946637721               |
| SNP_P3_145486_240923 | NW_004516374.1 | Scaffold1067 | 240923                  | AA                              | GG                | 1946637723               |
| SNP_P3_145487_240927 | NW_004516374.1 | Scaffold1067 | 240927                  | TT                              | CC                | 1946637725               |
| SNP_P3_145488_240936 | NW_004516374.1 | Scaffold1067 | 240936                  | TT                              | CC                | 1946637727               |
| SNP_P3_145489_240938 | NW_004516374.1 | Scaffold1067 | 240938                  | AA                              | GG                | 1946637729               |
| SNP_P3_145490_240951 | NW_004516374.1 | Scaffold1067 | 240951                  | AA                              | GG                | 1946637732               |
| SNP_P3_145491_241018 | NW_004516374.1 | Scaffold1067 | 241018                  | TT                              | CC                | 1946637733               |
| SNP_P3_145492_241106 | NW_004516374.1 | Scaffold1067 | 241106                  | TT                              | CC                | 1946637735               |
| SNP_P3_145493_241112 | NW_004516374.1 | Scaffold1067 | 241112                  | AA                              | GG                | 1946637737               |
| SNP_P3_145494_241132 | NW_004516374.1 | Scaffold1067 | 241132                  | TT                              | CC                | 1946637739               |
| SNP_P3_145495_241162 | NW_004516374.1 | Scaffold1067 | 241162                  | TT                              | GG                | 1946637741               |
| SNP_P3_145496_241166 | NW_004516374.1 | Scaffold1067 | 241166                  | CC                              | GG                | 1946637743               |
| SNP_P3_145497_241170 | NW_004516374.1 | Scaffold1067 | 241170                  | TT                              | CC                | 1946637745               |
| SNP_P3_145498_241442 | NW_004516374.1 | Scaffold1067 | 241442                  | GG                              | AA                | 1946637747               |
| SNP_P3_145499_241469 | NW_004516374.1 | Scaffold1067 | 241469                  | CC                              | GG                | 1946637749               |
| SNP_P3_145500_242762 | NW_004516374.1 | Scaffold1067 | 242762                  | AA                              | CC                | 1946637751               |
| SNP_P3_145501_242798 | NW_004516374.1 | Scaffold1067 | 242798                  | TT                              | GG                | 1946637753               |
| SNP_P3_145502_242876 | NW_004516374.1 | Scaffold1067 | 242876                  | TT                              | CC                | 1946637756               |
| SNP_P3_145503_242926 | NW_004516374.1 | Scaffold1067 | 242926                  | AA                              | GG                | 1946637758               |
| SNP_P3_145504_242983 | NW_004516374.1 | Scaffold1067 | 242983                  | AA                              | GG                | 1946637760               |
| SNP_P3_145505_243023 | NW_004516374.1 | Scaffold1067 | 243023                  | TT                              | CC                | 1946637762               |
| SNP_P3_145506_243091 | NW_004516374.1 | Scaffold1067 | 243091                  | AA                              | GG                | 1946637764               |
| SNP_P3_145507_243228 | NW_004516374.1 | Scaffold1067 | 243228                  | AA                              | GG                | 1946637766               |
| SNP_P3_145509_243306 | NW_004516374.1 | Scaffold1067 | 243306                  | AA                              | CC                | 1946637768               |
| SNP_P3_145510_243315 | NW_004516374.1 | Scaffold1067 | 243315                  | AA                              | GG                | 1946637770               |
| SNP_P3_145512_243352 | NW_004516374.1 | Scaffold1067 | 243352                  | TT                              | GG                | 1946637772               |
| SNP_P3_145513_243363 | NW_004516374.1 | Scaffold1067 | 243363                  | TT                              | GG                | 1946637774               |
| SNP_P3_145514_243452 | NW_004516374.1 | Scaffold1067 | 243452                  | AA                              | GG                | 1946637776               |
| SNP_P3_145515_243464 | NW_004516374.1 | Scaffold1067 | 243464                  | AA                              | GG                | 1946637778               |
| SNP_P3_145517_243494 | NW_004516374.1 | Scaffold1067 | 243494                  | TT                              | CC                | 1946637780               |
| SNP_P3_145519_243718 | NW_004516374.1 | Scaffold1067 | 243718                  | TT                              | CC                | 1946637782               |
| SNP_P3_145520_243768 | NW_004516374.1 | Scaffold1067 | 243768                  | TT                              | GG                | 1946637784               |
| SNP_P3_145521_243790 | NW_004516374.1 | Scaffold1067 | 243790                  | AA                              | GG                | 1946637786               |
| SNP_P3_145523_243821 | NW_004516374.1 | Scaffold1067 | 243821                  | AA                              | GG                | 1946637788               |
| SNP_P3_145524_243866 | NW_004516374.1 | Scaffold1067 | 243866                  | TT                              | GG                | 1946637791               |
| SNP_P3_145525_243917 | NW_004516374.1 | Scaffold1067 | 243917                  | TT                              | CC                | 1946637793               |
| SNP_P3_145526_243943 | NW_004516374.1 | Scaffold1067 | 243943                  | TT                              | CC                | 1946637795               |



| SNPs IDs             | Chromosome IDs | Chromosomes  | Physical positions (bp) | CDC Frontier (Reference genome) | (Pusa 256 & HPNB) | NCBI SNPdb Accession IDs |
|----------------------|----------------|--------------|-------------------------|---------------------------------|-------------------|--------------------------|
| SNP_P3_145527_244015 | NW_004516374.1 | Scaffold1067 | 244015                  | AA                              | GG                | 1946637797               |
| SNP_P3_145528_249054 | NW_004516374.1 | Scaffold1067 | 249054                  | TT                              | CC                | 1946637799               |
| SNP_P3_145529_249081 | NW_004516374.1 | Scaffold1067 | 249081                  | TT                              | AA                | 1946637801               |
| SNP_P3_145530_249109 | NW_004516374.1 | Scaffold1067 | 249109                  | GG                              | AA                | 1946637803               |
| SNP_P3_145531_249114 | NW_004516374.1 | Scaffold1067 | 249114                  | AA                              | GG                | 1946637805               |
| SNP_P3_145532_249213 | NW_004516374.1 | Scaffold1067 | 249213                  | TT                              | GG                | 1946637807               |
| SNP_P3_145533_249239 | NW_004516374.1 | Scaffold1067 | 249239                  | TT                              | CC                | 1946637809               |
| SNP_P3_145534_249253 | NW_004516374.1 | Scaffold1067 | 249253                  | CC                              | AA                | 1946637811               |
| SNP_P3_145535_249277 | NW_004516374.1 | Scaffold1067 | 249277                  | TT                              | CC                | 1946637813               |
| SNP_P3_145536_249301 | NW_004516374.1 | Scaffold1067 | 249301                  | AA                              | GG                | 1946637816               |
| SNP_P3_145537_249318 | NW_004516374.1 | Scaffold1067 | 249318                  | CC                              | TT                | 1946637818               |
| SNP_P3_145538_249478 | NW_004516374.1 | Scaffold1067 | 249478                  | AA                              | GG                | 1946637820               |
| SNP_P3_145539_249483 | NW_004516374.1 | Scaffold1067 | 249483                  | AA                              | GG                | 1946637822               |
| SNP_P3_145540_249535 | NW_004516374.1 | Scaffold1067 | 249535                  | AA                              | GG                | 1946637824               |
| SNP_P3_145541_249572 | NW_004516374.1 | Scaffold1067 | 249572                  | TT                              | CC                | 1946637826               |
| SNP_P3_145542_249600 | NW_004516374.1 | Scaffold1067 | 249600                  | GG                              | CC                | 1946637827               |
| SNP_P3_145543_249631 | NW_004516374.1 | Scaffold1067 | 249631                  | AA                              | CC                | 1946637829               |
| SNP_P3_145544_249633 | NW_004516374.1 | Scaffold1067 | 249633                  | TT                              | CC                | 1946637831               |
| SNP_P3_145545_249651 | NW_004516374.1 | Scaffold1067 | 249651                  | AA                              | GG                | 1946637833               |
| SNP_P3_145546_249653 | NW_004516374.1 | Scaffold1067 | 249653                  | TT                              | GG                | 1946637835               |
| SNP_P3_145547_249664 | NW_004516374.1 | Scaffold1067 | 249664                  | AA                              | GG                | 1946637837               |
| SNP_P3_145548_249671 | NW_004516374.1 | Scaffold1067 | 249671                  | CC                              | AA                | 1946637839               |
| SNP_P3_145549_249783 | NW_004516374.1 | Scaffold1067 | 249783                  | CC                              | GG                | 1946637841               |
| SNP_P3_145550_249785 | NW_004516374.1 | Scaffold1067 | 249785                  | GG                              | CC                | 1946637843               |
| SNP_P3_145551_260134 | NW_004516374.1 | Scaffold1067 | 260134                  | TT                              | AA                | 1946637845               |
| SNP_P3_145552_260561 | NW_004516374.1 | Scaffold1067 | 260561                  | AA                              | GG                | 1946637847               |
| SNP_P3_145553_262995 | NW_004516374.1 | Scaffold1067 | 262995                  | AA                              | GG                | 1946637849               |
| SNP_P3_145554_263035 | NW_004516374.1 | Scaffold1067 | 263035                  | AA                              | GG                | 1946637851               |
| SNP_P3_145555_263134 | NW_004516374.1 | Scaffold1067 | 263134                  | AA                              | TT                | 1946637853               |
| SNP_P3_145556_263142 | NW_004516374.1 | Scaffold1067 | 263142                  | TT                              | CC                | 1946637855               |
| SNP_P3_145557_263143 | NW_004516374.1 | Scaffold1067 | 263143                  | AA                              | GG                | 1946637857               |
| SNP_P3_145558_263248 | NW_004516374.1 | Scaffold1067 | 263248                  | TT                              | CC                | 1946637859               |
| SNP_P3_145559_263253 | NW_004516374.1 | Scaffold1067 | 263253                  | GG                              | CC                | 1946637861               |
| SNP_P3_145560_263414 | NW_004516374.1 | Scaffold1067 | 263414                  | CC                              | TT                | 1946637862               |
| SNP_P3_145561_263420 | NW_004516374.1 | Scaffold1067 | 263420                  | TT                              | CC                | 1946637864               |
| SNP_P3_145562_263479 | NW_004516374.1 | Scaffold1067 | 263479                  | TT                              | CC                | 1946637866               |
| SNP_P3_145563_263497 | NW_004516374.1 | Scaffold1067 | 263497                  | AA                              | GG                | 1946637868               |
| SNP_P3_145565_263591 | NW_004516374.1 | Scaffold1067 | 263591                  | AA                              | GG                | 1946637870               |
| SNP_P3_145566_263645 | NW_004516374.1 | Scaffold1067 | 263645                  | TT                              | AA                | 1946637872               |
| SNP_P3_145567_263664 | NW_004516374.1 | Scaffold1067 | 263664                  | AA                              | GG                | 1946637874               |
| SNP_P3_145568_263866 | NW_004516374.1 | Scaffold1067 | 263866                  | TT                              | CC                | 1946637876               |
| SNP_P3_145569_263867 | NW_004516374.1 | Scaffold1067 | 263867                  | AA                              | GG                | 1946637878               |

| SNPs IDs             | Chromosome IDs | Chromosomes  | Physical positions (bp) | CDC Frontier (Reference genome) | (Pusa 256 & HPNB) | NCBI SNPdb Accession IDs |
|----------------------|----------------|--------------|-------------------------|---------------------------------|-------------------|--------------------------|
| SNP_P3_145570_263899 | NW_004516374.1 | Scaffold1067 | 263899                  | GG                              | AA                | 1946637880               |
| SNP_P3_145571_263935 | NW_004516374.1 | Scaffold1067 | 263935                  | TT                              | CC                | 1946637882               |
| SNP_P3_145572_263971 | NW_004516374.1 | Scaffold1067 | 263971                  | AA                              | GG                | 1946637884               |
| SNP_P3_145573_263998 | NW_004516374.1 | Scaffold1067 | 263998                  | GG                              | AA                | 1946637886               |
| SNP_P3_145575_264033 | NW_004516374.1 | Scaffold1067 | 264033                  | TT                              | CC                | 1946637888               |
| SNP_P3_145576_264302 | NW_004516374.1 | Scaffold1067 | 264302                  | AA                              | CC                | 1946637890               |
| SNP_P3_145577_264305 | NW_004516374.1 | Scaffold1067 | 264305                  | TT                              | CC                | 1946637892               |
| SNP_P3_145578_264332 | NW_004516374.1 | Scaffold1067 | 264332                  | AA                              | GG                | 1946637894               |
| SNP_P3_145579_264375 | NW_004516374.1 | Scaffold1067 | 264375                  | TT                              | CC                | 1946637896               |
| SNP_P3_145580_264394 | NW_004516374.1 | Scaffold1067 | 264394                  | AA                              | CC                | 1946637898               |
| SNP_P3_145581_264743 | NW_004516374.1 | Scaffold1067 | 264743                  | CC                              | AA                | 1946637900               |
| SNP_P3_145582_264748 | NW_004516374.1 | Scaffold1067 | 264748                  | TT                              | CC                | 1946637901               |
| SNP_P3_145583_264776 | NW_004516374.1 | Scaffold1067 | 264776                  | TT                              | CC                | 1946637903               |
| SNP_P3_145584_264805 | NW_004516374.1 | Scaffold1067 | 264805                  | AA                              | CC                | 1946637905               |
| SNP_P3_145585_265364 | NW_004516374.1 | Scaffold1067 | 265364                  | CC                              | TT                | 1946637907               |
| SNP_P3_145586_265388 | NW_004516374.1 | Scaffold1067 | 265388                  | TT                              | CC                | 1946637909               |
| SNP_P3_145587_265408 | NW_004516374.1 | Scaffold1067 | 265408                  | GG                              | AA                | 1946637911               |
| SNP_P3_145588_265412 | NW_004516374.1 | Scaffold1067 | 265412                  | CC                              | TT                | 1946637913               |
| SNP_P3_145589_265426 | NW_004516374.1 | Scaffold1067 | 265426                  | CC                              | AA                | 1946637915               |
| SNP_P3_145590_265444 | NW_004516374.1 | Scaffold1067 | 265444                  | CC                              | TT                | 1946637917               |
| SNP_P3_145592_265634 | NW_004516374.1 | Scaffold1067 | 265634                  | AA                              | TT                | 1946637919               |
| SNP_P3_145593_265730 | NW_004516374.1 | Scaffold1067 | 265730                  | TT                              | CC                | 1946637921               |
| SNP_P3_145594_265732 | NW_004516374.1 | Scaffold1067 | 265732                  | AA                              | GG                | 1946637923               |
| SNP_P3_145595_265761 | NW_004516374.1 | Scaffold1067 | 265761                  | TT                              | CC                | 1946637925               |
| SNP_P3_145596_265779 | NW_004516374.1 | Scaffold1067 | 265779                  | CC                              | GG                | 1946637927               |
| SNP_P3_145597_265785 | NW_004516374.1 | Scaffold1067 | 265785                  | AA                              | GG                | 1946637929               |
| SNP_P3_145598_265792 | NW_004516374.1 | Scaffold1067 | 265792                  | AA                              | GG                | 1946637931               |
| SNP_P3_145599_265902 | NW_004516374.1 | Scaffold1067 | 265902                  | TT                              | CC                | 1946637933               |
| SNP_P3_145600_266037 | NW_004516374.1 | Scaffold1067 | 266037                  | AA                              | GG                | 1946637935               |
| SNP_P3_145602_266096 | NW_004516374.1 | Scaffold1067 | 266096                  | AA                              | GG                | 1946637937               |
| SNP_P3_145604_269603 | NW_004516374.1 | Scaffold1067 | 269603                  | TT                              | CC                | 1946637939               |
| SNP_P3_145605_269626 | NW_004516374.1 | Scaffold1067 | 269626                  | TT                              | GG                | 1946637940               |
| SNP_P3_145606_13178  | NW_004516377.1 | Scaffold1072 | 13178                   | AA                              | CC                | 1946637942               |
| SNP_P3_145607_13567  | NW_004516377.1 | Scaffold1072 | 13567                   | AA                              | TT                | 1946637944               |
| SNP_P3_145608_3722   | NW_004516379.1 | Scaffold1074 | 3722                    | AA                              | CC                | 1946637946               |
| SNP_P3_145609_6034   | NW_004516379.1 | Scaffold1074 | 6034                    | GG                              | CC                | 1946637948               |
| SNP_P3_145610_20642  | NW_004516379.1 | Scaffold1074 | 20642                   | AA                              | CC                | 1946637950               |
| SNP_P3_145611_20657  | NW_004516379.1 | Scaffold1074 | 20657                   | CC                              | GG                | 1946637952               |
| SNP_P3_145612_20670  | NW_004516379.1 | Scaffold1074 | 20670                   | AA                              | CC                | 1946637954               |
| SNP_P3_145613_20696  | NW_004516379.1 | Scaffold1074 | 20696                   | TT                              | CC                | 1946637956               |
| SNP_P3_145614_20701  | NW_004516379.1 | Scaffold1074 | 20701                   | AA                              | TT                | 1946637958               |
| SNP_P3_145615_20706  | NW_004516379.1 | Scaffold1074 | 20706                   | CC                              | TT                | 1946637960               |

| SNPs IDs            | Chromosome IDs | Chromosomes  | Physical positions (bp) | CDC Frontier (Reference genome) | (Pusa 256 & HPNB) | NCBI SNPdb Accession IDs |
|---------------------|----------------|--------------|-------------------------|---------------------------------|-------------------|--------------------------|
| SNP_P3_145616_24649 | NW_004516379.1 | Scaffold1074 | 24649                   | AA                              | GG                | 1946637962               |
| SNP_P3_145617_24650 | NW_004516379.1 | Scaffold1074 | 24650                   | CC                              | TT                | 1946637964               |
| SNP_P3_145618_24665 | NW_004516379.1 | Scaffold1074 | 24665                   | CC                              | TT                | 1946637966               |
| SNP_P3_145619_24666 | NW_004516379.1 | Scaffold1074 | 24666                   | AA                              | TT                | 1946637968               |
| SNP_P3_145620_24668 | NW_004516379.1 | Scaffold1074 | 24668                   | AA                              | GG                | 1946637970               |
| SNP_P3_145621_24675 | NW_004516379.1 | Scaffold1074 | 24675                   | AA                              | TT                | 1946637972               |
| SNP_P3_145622_24680 | NW_004516379.1 | Scaffold1074 | 24680                   | TT                              | AA                | 1946637974               |
| SNP_P3_145623_24715 | NW_004516379.1 | Scaffold1074 | 24715                   | TT                              | GG                | 1946637976               |
| SNP_P3_145624_24743 | NW_004516379.1 | Scaffold1074 | 24743                   | AA                              | CC                | 1946637978               |
| SNP_P3_145625_26305 | NW_004516379.1 | Scaffold1074 | 26305                   | CC                              | TT                | 1946637980               |
| SNP_P3_145626_192   | NW_004516380.1 | Scaffold1076 | 192                     | TT                              | AA                | 1946637982               |
| SNP_P3_145627_442   | NW_004516380.1 | Scaffold1076 | 442                     | GG                              | CC                | 1946637984               |
| SNP_P3_145628_451   | NW_004516380.1 | Scaffold1076 | 451                     | AA                              | TT                | 1946637986               |
| SNP_P3_145629_503   | NW_004516380.1 | Scaffold1076 | 503                     | TT                              | AA                | 1946637988               |
| SNP_P3_145630_2455  | NW_004516380.1 | Scaffold1076 | 2455                    | CC                              | TT                | 1946637990               |
| SNP_P3_145631_7191  | NW_004516380.1 | Scaffold1076 | 7191                    | GG                              | AA                | 1946637992               |
| SNP_P3_145632_7196  | NW_004516380.1 | Scaffold1076 | 7196                    | GG                              | AA                | 1946637994               |
| SNP_P3_145633_7202  | NW_004516380.1 | Scaffold1076 | 7202                    | TT                              | AA                | 1946637996               |
| SNP_P3_145634_7260  | NW_004516380.1 | Scaffold1076 | 7260                    | AA                              | GG                | 1946637998               |
| SNP_P3_145635_7261  | NW_004516380.1 | Scaffold1076 | 7261                    | CC                              | AA                | 1946638000               |
| SNP_P3_145636_7262  | NW_004516380.1 | Scaffold1076 | 7262                    | CC                              | TT                | 1946638002               |
| SNP_P3_145637_7266  | NW_004516380.1 | Scaffold1076 | 7266                    | TT                              | CC                | 1946638004               |
| SNP_P3_145638_7309  | NW_004516380.1 | Scaffold1076 | 7309                    | TT                              | GG                | 1946638006               |
| SNP_P3_145639_7482  | NW_004516380.1 | Scaffold1076 | 7482                    | CC                              | AA                | 1946638008               |
| SNP_P3_145640_7653  | NW_004516380.1 | Scaffold1076 | 7653                    | GG                              | CC                | 1946638010               |
| SNP_P3_145641_7671  | NW_004516380.1 | Scaffold1076 | 7671                    | TT                              | GG                | 1946638012               |
| SNP_P3_145642_8081  | NW_004516380.1 | Scaffold1076 | 8081                    | TT                              | AA                | 1946638014               |
| SNP_P3_145643_10753 | NW_004516380.1 | Scaffold1076 | 10753                   | AA                              | GG                | 1946638016               |
| SNP_P3_145644_10859 | NW_004516380.1 | Scaffold1076 | 10859                   | AA                              | GG                | 1946638018               |
| SNP_P3_145645_10953 | NW_004516380.1 | Scaffold1076 | 10953                   | CC                              | GG                | 1946638020               |
| SNP_P3_145646_10964 | NW_004516380.1 | Scaffold1076 | 10964                   | GG                              | AA                | 1946638022               |
| SNP_P3_145647_11054 | NW_004516380.1 | Scaffold1076 | 11054                   | GG                              | AA                | 1946638024               |
| SNP_P3_145648_11074 | NW_004516380.1 | Scaffold1076 | 11074                   | GG                              | TT                | 1946638026               |
| SNP_P3_145649_23610 | NW_004516380.1 | Scaffold1076 | 23610                   | AA                              | CC                | 1946638028               |
| SNP_P3_145650_23616 | NW_004516380.1 | Scaffold1076 | 23616                   | AA                              | CC                | 1946638030               |
| SNP_P3_145651_23771 | NW_004516380.1 | Scaffold1076 | 23771                   | TT                              | GG                | 1946638032               |
| SNP_P3_145652_24015 | NW_004516380.1 | Scaffold1076 | 24015                   | AA                              | CC                | 1946638034               |
| SNP_P3_145653_33030 | NW_004516380.1 | Scaffold1076 | 33030                   | GG                              | CC                | 1946638036               |
| SNP_P3_145654_33053 | NW_004516380.1 | Scaffold1076 | 33053                   | TT                              | GG                | 1946638038               |
| SNP_P3_145655_2103  | NW_004516382.1 | Scaffold1080 | 2103                    | AA                              | TT                | 1946638040               |
| SNP_P3_145656_2132  | NW_004516382.1 | Scaffold1080 | 2132                    | AA                              | TT                | 1946638042               |
| SNP_P3_145657_2141  | NW_004516382.1 | Scaffold1080 | 2141                    | TT                              | CC                | 1946638044               |

| SNPs IDs             | Chromosome IDs | Chromosomes  | Physical positions (bp) | CDC Frontier (Reference genome) | (Pusa 256 & HPNB) | NCBI SNPdb Accession IDs |
|----------------------|----------------|--------------|-------------------------|---------------------------------|-------------------|--------------------------|
| SNP_P3_145658_2149   | NW_004516382.1 | Scaffold1080 | 2149                    | GG                              | AA                | 1946638045               |
| SNP_P3_145659_2154   | NW_004516382.1 | Scaffold1080 | 2154                    | AA                              | GG                | 1946638047               |
| SNP_P3_145660_2518   | NW_004516382.1 | Scaffold1080 | 2518                    | AA                              | GG                | 1946638049               |
| SNP_P3_145662_5346   | NW_004516382.1 | Scaffold1080 | 5346                    | GG                              | TT                | 1946638051               |
| SNP_P3_145663_6871   | NW_004516382.1 | Scaffold1080 | 6871                    | CC                              | TT                | 1946638053               |
| SNP_P3_145664_15656  | NW_004516382.1 | Scaffold1080 | 15656                   | AA                              | GG                | 1946638055               |
| SNP_P3_145665_15664  | NW_004516382.1 | Scaffold1080 | 15664                   | TT                              | AA                | 1946638057               |
| SNP_P3_145666_24741  | NW_004516382.1 | Scaffold1080 | 24741                   | GG                              | TT                | 1946638059               |
| SNP_P3_145667_26451  | NW_004516382.1 | Scaffold1080 | 26451                   | GG                              | AA                | 1946638061               |
| SNP_P3_145668_32871  | NW_004516382.1 | Scaffold1080 | 32871                   | AA                              | CC                | 1946638063               |
| SNP_P3_145669_33287  | NW_004516382.1 | Scaffold1080 | 33287                   | CC                              | TT                | 1946638064               |
| SNP_P3_145670_29804  | NW_004516383.1 | Scaffold1081 | 29804                   | AA                              | GG                | 1946638067               |
| SNP_P3_145671_61249  | NW_004516383.1 | Scaffold1081 | 61249                   | AA                              | GG                | 1946638069               |
| SNP_P3_145672_67810  | NW_004516383.1 | Scaffold1081 | 67810                   | CC                              | TT                | 1946638071               |
| SNP_P3_145673_83153  | NW_004516383.1 | Scaffold1081 | 83153                   | CC                              | TT                | 1946638073               |
| SNP_P3_145674_86148  | NW_004516383.1 | Scaffold1081 | 86148                   | AA                              | GG                | 1946638075               |
| SNP_P3_145675_86157  | NW_004516383.1 | Scaffold1081 | 86157                   | GG                              | AA                | 1946638077               |
| SNP_P3_145676_86179  | NW_004516383.1 | Scaffold1081 | 86179                   | CC                              | TT                | 1946638079               |
| SNP_P3_145677_86218  | NW_004516383.1 | Scaffold1081 | 86218                   | TT                              | GG                | 1946638081               |
| SNP_P3_145680_86331  | NW_004516383.1 | Scaffold1081 | 86331                   | CC                              | TT                | 1946638083               |
| SNP_P3_145681_86665  | NW_004516383.1 | Scaffold1081 | 86665                   | GG                              | AA                | 1946638085               |
| SNP_P3_145682_87615  | NW_004516383.1 | Scaffold1081 | 87615                   | TT                              | GG                | 1946638087               |
| SNP_P3_145684_89778  | NW_004516383.1 | Scaffold1081 | 89778                   | GG                              | TT                | 1946638089               |
| SNP_P3_145685_109397 | NW_004516383.1 | Scaffold1081 | 109397                  | AA                              | GG                | 1946638090               |
| SNP_P3_145686_111386 | NW_004516383.1 | Scaffold1081 | 111386                  | CC                              | TT                | 1946638092               |
| SNP_P3_145687_806    | NW_004516384.1 | Scaffold1082 | 806                     | CC                              | TT                | 1946638094               |
| SNP_P3_145688_827    | NW_004516384.1 | Scaffold1082 | 827                     | TT                              | AA                | 1946638096               |
| SNP_P3_145689_832    | NW_004516384.1 | Scaffold1082 | 832                     | CC                              | TT                | 1946638098               |
| SNP_P3_145690_859    | NW_004516384.1 | Scaffold1082 | 859                     | TT                              | CC                | 1946638100               |
| SNP_P3_145691_876    | NW_004516384.1 | Scaffold1082 | 876                     | AA                              | GG                | 1946638102               |
| SNP_P3_145692_19585  | NW_004516384.1 | Scaffold1082 | 19585                   | AA                              | GG                | 1946638104               |
| SNP_P3_145693_19588  | NW_004516384.1 | Scaffold1082 | 19588                   | AA                              | TT                | 1946638107               |
| SNP_P3_145694_19777  | NW_004516384.1 | Scaffold1082 | 19777                   | TT                              | CC                | 1946638109               |
| SNP_P3_145695_19794  | NW_004516384.1 | Scaffold1082 | 19794                   | AA                              | TT                | 1946638111               |
| SNP_P3_145697_19949  | NW_004516384.1 | Scaffold1082 | 19949                   | TT                              | CC                | 1946638113               |
| SNP_P3_145698_19950  | NW_004516384.1 | Scaffold1082 | 19950                   | TT                              | GG                | 1946638115               |
| SNP_P3_145699_20012  | NW_004516384.1 | Scaffold1082 | 20012                   | CC                              | AA                | 1946638116               |
| SNP_P3_145700_20062  | NW_004516384.1 | Scaffold1082 | 20062                   | TT                              | GG                | 1946638118               |
| SNP_P3_145701_20112  | NW_004516384.1 | Scaffold1082 | 20112                   | AA                              | TT                | 1946638120               |
| SNP_P3_145702_20870  | NW_004516384.1 | Scaffold1082 | 20870                   | AA                              | TT                | 1946638122               |
| SNP_P3_145704_21009  | NW_004516384.1 | Scaffold1082 | 21009                   | GG                              | CC                | 1946638124               |
| SNP_P3_145705_21096  | NW_004516384.1 | Scaffold1082 | 21096                   | CC                              | GG                | 1946638126               |

| SNPs IDs            | Chromosome IDs | Chromosomes  | Physical positions (bp) | CDC Frontier (Reference genome) | (Pusa 256 & HPNB) | NCBI SNPdb Accession IDs |
|---------------------|----------------|--------------|-------------------------|---------------------------------|-------------------|--------------------------|
| SNP_P3_145707_21238 | NW_004516384.1 | Scaffold1082 | 21238                   | CC                              | AA                | 1946638128               |
| SNP_P3_145708_21240 | NW_004516384.1 | Scaffold1082 | 21240                   | TT                              | CC                | 1946638130               |
| SNP_P3_145709_21350 | NW_004516384.1 | Scaffold1082 | 21350                   | TT                              | CC                | 1946638132               |
| SNP_P3_145710_21354 | NW_004516384.1 | Scaffold1082 | 21354                   | TT                              | AA                | 1946638134               |
| SNP_P3_145711_21356 | NW_004516384.1 | Scaffold1082 | 21356                   | AA                              | TT                | 1946638135               |
| SNP_P3_145712_21379 | NW_004516384.1 | Scaffold1082 | 21379                   | AA                              | CC                | 1946638137               |
| SNP_P3_145713_21392 | NW_004516384.1 | Scaffold1082 | 21392                   | TT                              | AA                | 1946638139               |
| SNP_P3_145714_21435 | NW_004516384.1 | Scaffold1082 | 21435                   | AA                              | CC                | 1946638141               |
| SNP_P3_145715_23104 | NW_004516384.1 | Scaffold1082 | 23104                   | TT                              | CC                | 1946638143               |
| SNP_P3_145716_23238 | NW_004516384.1 | Scaffold1082 | 23238                   | CC                              | TT                | 1946638145               |
| SNP_P3_145717_25032 | NW_004516384.1 | Scaffold1082 | 25032                   | TT                              | AA                | 1946638148               |
| SNP_P3_145718_27036 | NW_004516384.1 | Scaffold1082 | 27036                   | TT                              | CC                | 1946638150               |
| SNP_P3_145720_27410 | NW_004516384.1 | Scaffold1082 | 27410                   | GG                              | AA                | 1946638152               |
| SNP_P3_145721_27442 | NW_004516384.1 | Scaffold1082 | 27442                   | GG                              | AA                | 1946638154               |
| SNP_P3_145722_27597 | NW_004516384.1 | Scaffold1082 | 27597                   | TT                              | AA                | 1946638156               |
| SNP_P3_145723_27630 | NW_004516384.1 | Scaffold1082 | 27630                   | CC                              | TT                | 1946638158               |
| SNP_P3_145724_27659 | NW_004516384.1 | Scaffold1082 | 27659                   | AA                              | TT                | 1946638159               |
| SNP_P3_145725_27708 | NW_004516384.1 | Scaffold1082 | 27708                   | TT                              | AA                | 1946638161               |
| SNP_P3_145726_29485 | NW_004516384.1 | Scaffold1082 | 29485                   | TT                              | CC                | 1946638163               |
| SNP_P3_145727_30885 | NW_004516384.1 | Scaffold1082 | 30885                   | TT                              | AA                | 1946638165               |
| SNP_P3_145728_31787 | NW_004516384.1 | Scaffold1082 | 31787                   | AA                              | GG                | 1946638167               |
| SNP_P3_145729_31857 | NW_004516384.1 | Scaffold1082 | 31857                   | GG                              | AA                | 1946638169               |
| SNP_P3_145730_32097 | NW_004516384.1 | Scaffold1082 | 32097                   | TT                              | CC                | 1946638171               |
| SNP_P3_145731_32162 | NW_004516384.1 | Scaffold1082 | 32162                   | GG                              | AA                | 1946638172               |
| SNP_P3_145732_32166 | NW_004516384.1 | Scaffold1082 | 32166                   | TT                              | AA                | 1946638174               |
| SNP_P3_145733_32200 | NW_004516384.1 | Scaffold1082 | 32200                   | CC                              | AA                | 1946638176               |
| SNP_P3_145734_32966 | NW_004516384.1 | Scaffold1082 | 32966                   | AA                              | CC                | 1946638178               |
| SNP_P3_145735_33279 | NW_004516384.1 | Scaffold1082 | 33279                   | TT                              | AA                | 1946638180               |
| SNP_P3_145736_12705 | NW_004516385.1 | Scaffold1083 | 12705                   | GG                              | AA                | 1946638182               |
| SNP_P3_145737_27304 | NW_004516385.1 | Scaffold1083 | 27304                   | TT                              | GG                | 1946638184               |
| SNP_P3_145738_27369 | NW_004516385.1 | Scaffold1083 | 27369                   | GG                              | AA                | 1946638186               |
| SNP_P3_145739_27386 | NW_004516385.1 | Scaffold1083 | 27386                   | TT                              | CC                | 1946638188               |
| SNP_P3_145740_27390 | NW_004516385.1 | Scaffold1083 | 27390                   | TT                              | CC                | 1946638190               |
| SNP_P3_145741_27445 | NW_004516385.1 | Scaffold1083 | 27445                   | TT                              | AA                | 1946638192               |
| SNP_P3_145742_27450 | NW_004516385.1 | Scaffold1083 | 27450                   | TT                              | AA                | 1946638193               |
| SNP_P3_145744_27516 | NW_004516385.1 | Scaffold1083 | 27516                   | AA                              | GG                | 1946638195               |
| SNP_P3_145745_27522 | NW_004516385.1 | Scaffold1083 | 27522                   | AA                              | GG                | 1946638197               |
| SNP_P3_145746_27986 | NW_004516385.1 | Scaffold1083 | 27986                   | AA                              | CC                | 1946638199               |
| SNP_P3_145747_28096 | NW_004516385.1 | Scaffold1083 | 28096                   | GG                              | AA                | 1946638201               |
| SNP_P3_145748_42204 | NW_004516385.1 | Scaffold1083 | 42204                   | AA                              | TT                | 1946638203               |
| SNP_P3_145749_49357 | NW_004516385.1 | Scaffold1083 | 49357                   | CC                              | GG                | 1946638205               |
| SNP_P3_145750_59019 | NW_004516385.1 | Scaffold1083 | 59019                   | AA                              | GG                | 1946638207               |

| SNPs IDs             | Chromosome IDs | Chromosomes  | Physical positions (bp) | CDC Frontier (Reference genome) | (Pusa 256 & HPNB) | NCBI SNPdb Accession IDs |
|----------------------|----------------|--------------|-------------------------|---------------------------------|-------------------|--------------------------|
| SNP_P3_145751_59093  | NW_004516385.1 | Scaffold1083 | 59093                   | CC                              | TT                | 1946638209               |
| SNP_P3_145752_67845  | NW_004516385.1 | Scaffold1083 | 67845                   | GG                              | TT                | 1946638211               |
| SNP_P3_145753_85253  | NW_004516385.1 | Scaffold1083 | 85253                   | AA                              | GG                | 1946638212               |
| SNP_P3_145754_88754  | NW_004516385.1 | Scaffold1083 | 88754                   | AA                              | GG                | 1946638214               |
| SNP_P3_145755_97158  | NW_004516385.1 | Scaffold1083 | 97158                   | AA                              | GG                | 1946638216               |
| SNP_P3_145756_97238  | NW_004516385.1 | Scaffold1083 | 97238                   | TT                              | AA                | 1946638218               |
| SNP_P3_145757_97250  | NW_004516385.1 | Scaffold1083 | 97250                   | GG                              | AA                | 1946638220               |
| SNP_P3_145758_97254  | NW_004516385.1 | Scaffold1083 | 97254                   | CC                              | AA                | 1946638222               |
| SNP_P3_145759_97262  | NW_004516385.1 | Scaffold1083 | 97262                   | TT                              | GG                | 1946638223               |
| SNP_P3_145760_97496  | NW_004516385.1 | Scaffold1083 | 97496                   | AA                              | GG                | 1946638224               |
| SNP_P3_145761_97547  | NW_004516385.1 | Scaffold1083 | 97547                   | CC                              | TT                | 1946638225               |
| SNP_P3_145762_103052 | NW_004516385.1 | Scaffold1083 | 103052                  | CC                              | AA                | 1946638226               |
| SNP_P3_145763_112382 | NW_004516385.1 | Scaffold1083 | 112382                  | AA                              | TT                | 1946638227               |
| SNP_P3_145764_118643 | NW_004516385.1 | Scaffold1083 | 118643                  | CC                              | AA                | 1946638228               |
| SNP_P3_145765_118648 | NW_004516385.1 | Scaffold1083 | 118648                  | CC                              | TT                | 1946638229               |
| SNP_P3_145766_118664 | NW_004516385.1 | Scaffold1083 | 118664                  | TT                              | CC                | 1946638230               |
| SNP_P3_145767_118668 | NW_004516385.1 | Scaffold1083 | 118668                  | GG                              | CC                | 1946638231               |
| SNP_P3_145768_118673 | NW_004516385.1 | Scaffold1083 | 118673                  | AA                              | CC                | 1946638232               |
| SNP_P3_145770_121941 | NW_004516385.1 | Scaffold1083 | 121941                  | CC                              | TT                | 1946638233               |
| SNP_P3_145772_121952 | NW_004516385.1 | Scaffold1083 | 121952                  | CC                              | TT                | 1946638234               |
| SNP_P3_145773_121953 | NW_004516385.1 | Scaffold1083 | 121953                  | TT                              | AA                | 1946638236               |
| SNP_P3_145774_121963 | NW_004516385.1 | Scaffold1083 | 121963                  | TT                              | CC                | 1946638237               |
| SNP_P3_145775_121970 | NW_004516385.1 | Scaffold1083 | 121970                  | GG                              | TT                | 1946638239               |
| SNP_P3_145776_122036 | NW_004516385.1 | Scaffold1083 | 122036                  | AA                              | TT                | 1946638241               |
| SNP_P3_145778_122113 | NW_004516385.1 | Scaffold1083 | 122113                  | AA                              | GG                | 1946638243               |
| SNP_P3_145779_122240 | NW_004516385.1 | Scaffold1083 | 122240                  | CC                              | TT                | 1946638245               |
| SNP_P3_145780_122279 | NW_004516385.1 | Scaffold1083 | 122279                  | GG                              | CC                | 1946638247               |
| SNP_P3_145781_122294 | NW_004516385.1 | Scaffold1083 | 122294                  | GG                              | AA                | 1946638249               |
| SNP_P3_145782_122309 | NW_004516385.1 | Scaffold1083 | 122309                  | AA                              | TT                | 1946638251               |
| SNP_P3_145783_122362 | NW_004516385.1 | Scaffold1083 | 122362                  | GG                              | AA                | 1946638253               |
| SNP_P3_145784_122365 | NW_004516385.1 | Scaffold1083 | 122365                  | AA                              | GG                | 1946638255               |
| SNP_P3_145785_122479 | NW_004516385.1 | Scaffold1083 | 122479                  | GG                              | CC                | 1946638257               |
| SNP_P3_145786_122485 | NW_004516385.1 | Scaffold1083 | 122485                  | GG                              | TT                | 1946638259               |
| SNP_P3_145787_122558 | NW_004516385.1 | Scaffold1083 | 122558                  | TT                              | AA                | 1946638261               |
| SNP_P3_145788_122623 | NW_004516385.1 | Scaffold1083 | 122623                  | AA                              | GG                | 1946638263               |
| SNP_P3_145789_122629 | NW_004516385.1 | Scaffold1083 | 122629                  | GG                              | AA                | 1946638265               |
| SNP_P3_145790_125718 | NW_004516385.1 | Scaffold1083 | 125718                  | CC                              | TT                | 1946638267               |
| SNP_P3_145791_125793 | NW_004516385.1 | Scaffold1083 | 125793                  | GG                              | AA                | 1946638268               |
| SNP_P3_145792_125796 | NW_004516385.1 | Scaffold1083 | 125796                  | GG                              | CC                | 1946638270               |
| SNP_P3_145793_125859 | NW_004516385.1 | Scaffold1083 | 125859                  | TT                              | AA                | 1946638272               |
| SNP_P3_145794_125868 | NW_004516385.1 | Scaffold1083 | 125868                  | CC                              | AA                | 1946638274               |
| SNP_P3_145795_128916 | NW_004516385.1 | Scaffold1083 | 128916                  | GG                              | AA                | 1946638276               |

| SNPs IDs             | Chromosome IDs | Chromosomes  | Physical positions (bp) | CDC Frontier (Reference genome) | (Pusa 256 & HPNB) | NCBI SNPdb Accession IDs |
|----------------------|----------------|--------------|-------------------------|---------------------------------|-------------------|--------------------------|
| SNP_P3_145796_131819 | NW_004516385.1 | Scaffold1083 | 131819                  | AA                              | GG                | 1946638278               |
| SNP_P3_145797_131843 | NW_004516385.1 | Scaffold1083 | 131843                  | TT                              | CC                | 1946638280               |
| SNP_P3_145798_132024 | NW_004516385.1 | Scaffold1083 | 132024                  | TT                              | AA                | 1946638283               |
| SNP_P3_145799_132242 | NW_004516385.1 | Scaffold1083 | 132242                  | CC                              | AA                | 1946638284               |
| SNP_P3_145800_132268 | NW_004516385.1 | Scaffold1083 | 132268                  | TT                              | AA                | 1946638286               |
| SNP_P3_145801_132348 | NW_004516385.1 | Scaffold1083 | 132348                  | GG                              | AA                | 1946638288               |
| SNP_P3_145802_132356 | NW_004516385.1 | Scaffold1083 | 132356                  | AA                              | GG                | 1946638290               |
| SNP_P3_145803_132504 | NW_004516385.1 | Scaffold1083 | 132504                  | GG                              | TT                | 1946638292               |
| SNP_P3_145804_132657 | NW_004516385.1 | Scaffold1083 | 132657                  | AA                              | TT                | 1946638294               |
| SNP_P3_145805_132668 | NW_004516385.1 | Scaffold1083 | 132668                  | TT                              | CC                | 1946638296               |
| SNP_P3_145806_132669 | NW_004516385.1 | Scaffold1083 | 132669                  | AA                              | TT                | 1946638298               |
| SNP_P3_145807_132781 | NW_004516385.1 | Scaffold1083 | 132781                  | TT                              | AA                | 1946638300               |
| SNP_P3_145808_132944 | NW_004516385.1 | Scaffold1083 | 132944                  | TT                              | AA                | 1946638302               |
| SNP_P3_145809_132953 | NW_004516385.1 | Scaffold1083 | 132953                  | TT                              | CC                | 1946638303               |
| SNP_P3_145810_133385 | NW_004516385.1 | Scaffold1083 | 133385                  | GG                              | AA                | 1946638305               |
| SNP_P3_145811_133678 | NW_004516385.1 | Scaffold1083 | 133678                  | TT                              | CC                | 1946638307               |
| SNP_P3_145812_133754 | NW_004516385.1 | Scaffold1083 | 133754                  | AA                              | CC                | 1946638309               |
| SNP_P3_145813_133789 | NW_004516385.1 | Scaffold1083 | 133789                  | AA                              | TT                | 1946638311               |
| SNP_P3_145814_5796   | NW_004516386.1 | Scaffold1084 | 5796                    | TT                              | AA                | 1946638313               |
| SNP_P3_145815_5810   | NW_004516386.1 | Scaffold1084 | 5810                    | TT                              | GG                | 1946638315               |
| SNP_P3_145816_1112   | NW_004516387.1 | Scaffold1085 | 1112                    | AA                              | TT                | 1946638317               |
| SNP_P3_145817_1161   | NW_004516387.1 | Scaffold1085 | 1161                    | AA                              | CC                | 1946638319               |
| SNP_P3_145818_1162   | NW_004516387.1 | Scaffold1085 | 1162                    | TT                              | CC                | 1946638322               |
| SNP_P3_145819_1180   | NW_004516387.1 | Scaffold1085 | 1180                    | AA                              | GG                | 1946638324               |
| SNP_P3_145820_1300   | NW_004516387.1 | Scaffold1085 | 1300                    | AA                              | CC                | 1946638325               |
| SNP_P3_145821_3789   | NW_004516387.1 | Scaffold1085 | 3789                    | AA                              | TT                | 1946638327               |
| SNP_P3_145822_9120   | NW_004516387.1 | Scaffold1085 | 9120                    | TT                              | CC                | 1946638329               |
| SNP_P3_145823_9127   | NW_004516387.1 | Scaffold1085 | 9127                    | CC                              | TT                | 1946638331               |
| SNP_P3_145824_4454   | NW_004516389.1 | Scaffold1087 | 4454                    | AA                              | TT                | 1946638333               |
| SNP_P3_145825_8296   | NW_004516389.1 | Scaffold1087 | 8296                    | CC                              | TT                | 1946638335               |
| SNP_P3_145826_12360  | NW_004516389.1 | Scaffold1087 | 12360                   | AA                              | GG                | 1946638337               |
| SNP_P3_145827_12386  | NW_004516389.1 | Scaffold1087 | 12386                   | TT                              | GG                | 1946638339               |
| SNP_P3_145828_12420  | NW_004516389.1 | Scaffold1087 | 12420                   | GG                              | AA                | 1946638341               |
| SNP_P3_145829_12421  | NW_004516389.1 | Scaffold1087 | 12421                   | CC                              | TT                | 1946638343               |
| SNP_P3_145830_12451  | NW_004516389.1 | Scaffold1087 | 12451                   | CC                              | TT                | 1946638345               |
| SNP_P3_145831_12498  | NW_004516389.1 | Scaffold1087 | 12498                   | CC                              | TT                | 1946638346               |
| SNP_P3_145832_12525  | NW_004516389.1 | Scaffold1087 | 12525                   | CC                              | TT                | 1946638348               |
| SNP_P3_145834_12688  | NW_004516389.1 | Scaffold1087 | 12688                   | TT                              | GG                | 1946638350               |
| SNP_P3_145835_12704  | NW_004516389.1 | Scaffold1087 | 12704                   | TT                              | CC                | 1946638352               |
| SNP_P3_145836_12707  | NW_004516389.1 | Scaffold1087 | 12707                   | GG                              | AA                | 1946638354               |
| SNP_P3_145837_12708  | NW_004516389.1 | Scaffold1087 | 12708                   | CC                              | GG                | 1946638356               |
| SNP_P3_145838_12870  | NW_004516389.1 | Scaffold1087 | 12870                   | TT                              | CC                | 1946638358               |

| SNPs IDs            | Chromosome IDs | Chromosomes  | Physical positions (bp) | CDC Frontier (Reference genome) | (Pusa 256 & HPNB) | NCBI SNPdb Accession IDs |
|---------------------|----------------|--------------|-------------------------|---------------------------------|-------------------|--------------------------|
| SNP_P3_145839_12874 | NW_004516389.1 | Scaffold1087 | 12874                   | GG                              | AA                | 1946638360               |
| SNP_P3_145840_13032 | NW_004516389.1 | Scaffold1087 | 13032                   | TT                              | CC                | 1946638362               |
| SNP_P3_145841_13038 | NW_004516389.1 | Scaffold1087 | 13038                   | CC                              | TT                | 1946638364               |
| SNP_P3_145842_13068 | NW_004516389.1 | Scaffold1087 | 13068                   | GG                              | CC                | 1946638366               |
| SNP_P3_145843_13146 | NW_004516389.1 | Scaffold1087 | 13146                   | TT                              | CC                | 1946638368               |
| SNP_P3_145844_13172 | NW_004516389.1 | Scaffold1087 | 13172                   | CC                              | TT                | 1946638370               |
| SNP_P3_145845_13211 | NW_004516389.1 | Scaffold1087 | 13211                   | CC                              | TT                | 1946638372               |
| SNP_P3_145846_13246 | NW_004516389.1 | Scaffold1087 | 13246                   | AA                              | GG                | 1946638374               |
| SNP_P3_145847_13270 | NW_004516389.1 | Scaffold1087 | 13270                   | GG                              | CC                | 1946638376               |
| SNP_P3_145848_13276 | NW_004516389.1 | Scaffold1087 | 13276                   | GG                              | AA                | 1946638378               |
| SNP_P3_145849_13306 | NW_004516389.1 | Scaffold1087 | 13306                   | TT                              | CC                | 1946638380               |
| SNP_P3_145850_13321 | NW_004516389.1 | Scaffold1087 | 13321                   | AA                              | TT                | 1946638382               |
| SNP_P3_145851_13368 | NW_004516389.1 | Scaffold1087 | 13368                   | TT                              | CC                | 1946638384               |
| SNP_P3_145852_13386 | NW_004516389.1 | Scaffold1087 | 13386                   | TT                              | AA                | 1946638387               |
| SNP_P3_145853_13402 | NW_004516389.1 | Scaffold1087 | 13402                   | AA                              | GG                | 1946638389               |
| SNP_P3_145854_13461 | NW_004516389.1 | Scaffold1087 | 13461                   | GG                              | AA                | 1946638391               |
| SNP_P3_145856_13585 | NW_004516389.1 | Scaffold1087 | 13585                   | TT                              | AA                | 1946638393               |
| SNP_P3_145857_13646 | NW_004516389.1 | Scaffold1087 | 13646                   | AA                              | GG                | 1946638395               |
| SNP_P3_145858_13662 | NW_004516389.1 | Scaffold1087 | 13662                   | AA                              | GG                | 1946638397               |
| SNP_P3_145859_13867 | NW_004516389.1 | Scaffold1087 | 13867                   | TT                              | CC                | 1946638399               |
| SNP_P3_145860_13868 | NW_004516389.1 | Scaffold1087 | 13868                   | GG                              | AA                | 1946638401               |
| SNP_P3_145861_13931 | NW_004516389.1 | Scaffold1087 | 13931                   | AA                              | CC                | 1946638403               |
| SNP_P3_145862_13979 | NW_004516389.1 | Scaffold1087 | 13979                   | TT                              | AA                | 1946638405               |
| SNP_P3_145863_13980 | NW_004516389.1 | Scaffold1087 | 13980                   | TT                              | AA                | 1946638407               |
| SNP_P3_145864_14073 | NW_004516389.1 | Scaffold1087 | 14073                   | GG                              | AA                | 1946638409               |
| SNP_P3_145865_14082 | NW_004516389.1 | Scaffold1087 | 14082                   | AA                              | GG                | 1946638410               |
| SNP_P3_145866_14086 | NW_004516389.1 | Scaffold1087 | 14086                   | AA                              | TT                | 1946638413               |
| SNP_P3_145867_14142 | NW_004516389.1 | Scaffold1087 | 14142                   | AA                              | TT                | 1946638414               |
| SNP_P3_145868_14291 | NW_004516389.1 | Scaffold1087 | 14291                   | AA                              | TT                | 1946638416               |
| SNP_P3_145869_14373 | NW_004516389.1 | Scaffold1087 | 14373                   | GG                              | AA                | 1946638418               |
| SNP_P3_145871_14411 | NW_004516389.1 | Scaffold1087 | 14411                   | TT                              | CC                | 1946638420               |
| SNP_P3_145872_14523 | NW_004516389.1 | Scaffold1087 | 14523                   | GG                              | TT                | 1946638422               |
| SNP_P3_145873_14567 | NW_004516389.1 | Scaffold1087 | 14567                   | GG                              | AA                | 1946638424               |
| SNP_P3_145874_14724 | NW_004516389.1 | Scaffold1087 | 14724                   | GG                              | AA                | 1946638426               |
| SNP_P3_145875_14747 | NW_004516389.1 | Scaffold1087 | 14747                   | AA                              | TT                | 1946638428               |
| SNP_P3_145876_14782 | NW_004516389.1 | Scaffold1087 | 14782                   | TT                              | AA                | 1946638430               |
| SNP_P3_145877_14793 | NW_004516389.1 | Scaffold1087 | 14793                   | CC                              | AA                | 1946638432               |
| SNP_P3_145878_14796 | NW_004516389.1 | Scaffold1087 | 14796                   | CC                              | TT                | 1946638434               |
| SNP_P3_145880_15169 | NW_004516389.1 | Scaffold1087 | 15169                   | AA                              | TT                | 1946638436               |
| SNP_P3_145881_16414 | NW_004516389.1 | Scaffold1087 | 16414                   | TT                              | AA                | 1946638438               |
| SNP_P3_145883_16489 | NW_004516389.1 | Scaffold1087 | 16489                   | AA                              | GG                | 1946638440               |
| SNP_P3_145886_16649 | NW_004516389.1 | Scaffold1087 | 16649                   | GG                              | TT                | 1946638442               |



| SNPs IDs             | Chromosome IDs | Chromosomes  | Physical positions (bp) | CDC Frontier (Reference genome) | (Pusa 256 & HPNB) | NCBI SNPdb Accession IDs |
|----------------------|----------------|--------------|-------------------------|---------------------------------|-------------------|--------------------------|
| SNP_P3_145887_22768  | NW_004516389.1 | Scaffold1087 | 22768                   | AA                              | CC                | 1946638444               |
| SNP_P3_145888_22796  | NW_004516389.1 | Scaffold1087 | 22796                   | AA                              | GG                | 1946638446               |
| SNP_P3_145889_22797  | NW_004516389.1 | Scaffold1087 | 22797                   | AA                              | GG                | 1946638448               |
| SNP_P3_145890_22811  | NW_004516389.1 | Scaffold1087 | 22811                   | AA                              | GG                | 1946638449               |
| SNP_P3_145891_22851  | NW_004516389.1 | Scaffold1087 | 22851                   | AA                              | GG                | 1946638451               |
| SNP_P3_145892_22889  | NW_004516389.1 | Scaffold1087 | 22889                   | TT                              | CC                | 1946638453               |
| SNP_P3_145893_22935  | NW_004516389.1 | Scaffold1087 | 22935                   | TT                              | CC                | 1946638455               |
| SNP_P3_145894_22938  | NW_004516389.1 | Scaffold1087 | 22938                   | TT                              | AA                | 1946638457               |
| SNP_P3_145895_22976  | NW_004516389.1 | Scaffold1087 | 22976                   | CC                              | TT                | 1946638459               |
| SNP_P3_145896_23005  | NW_004516389.1 | Scaffold1087 | 23005                   | CC                              | TT                | 1946638461               |
| SNP_P3_145898_23046  | NW_004516389.1 | Scaffold1087 | 23046                   | GG                              | AA                | 1946638463               |
| SNP_P3_145899_23095  | NW_004516389.1 | Scaffold1087 | 23095                   | TT                              | AA                | 1946638465               |
| SNP_P3_145900_23096  | NW_004516389.1 | Scaffold1087 | 23096                   | AA                              | TT                | 1946638468               |
| SNP_P3_145902_23242  | NW_004516389.1 | Scaffold1087 | 23242                   | CC                              | TT                | 1946638470               |
| SNP_P3_145903_23320  | NW_004516389.1 | Scaffold1087 | 23320                   | TT                              | CC                | 1946638472               |
| SNP_P3_145904_23335  | NW_004516389.1 | Scaffold1087 | 23335                   | AA                              | GG                | 1946638474               |
| SNP_P3_145905_23412  | NW_004516389.1 | Scaffold1087 | 23412                   | GG                              | TT                | 1946638476               |
| SNP_P3_145906_23528  | NW_004516389.1 | Scaffold1087 | 23528                   | CC                              | TT                | 1946638478               |
| SNP_P3_145907_23620  | NW_004516389.1 | Scaffold1087 | 23620                   | TT                              | AA                | 1946638480               |
| SNP_P3_145908_24043  | NW_004516389.1 | Scaffold1087 | 24043                   | AA                              | CC                | 1946638481               |
| SNP_P3_145909_27762  | NW_004516389.1 | Scaffold1087 | 27762                   | CC                              | GG                | 1946638483               |
| SNP_P3_145910_27855  | NW_004516389.1 | Scaffold1087 | 27855                   | AA                              | CC                | 1946638485               |
| SNP_P3_145911_27960  | NW_004516389.1 | Scaffold1087 | 27960                   | TT                              | AA                | 1946638487               |
| SNP_P3_145912_27993  | NW_004516389.1 | Scaffold1087 | 27993                   | TT                              | CC                | 1946638489               |
| SNP_P3_145913_28246  | NW_004516389.1 | Scaffold1087 | 28246                   | AA                              | GG                | 1946638491               |
| SNP_P3_145914_28682  | NW_004516389.1 | Scaffold1087 | 28682                   | TT                              | CC                | 1946638493               |
| SNP_P3_145915_40041  | NW_004516389.1 | Scaffold1087 | 40041                   | AA                              | GG                | 1946638495               |
| SNP_P3_145916_438    | NW_004516390.1 | Scaffold1089 | 438                     | CC                              | TT                | 1946638497               |
| SNP_P3_145917_3780   | NW_004516390.1 | Scaffold1089 | 3780                    | AA                              | GG                | 1946638498               |
| SNP_P3_145919_45906  | NW_004516390.1 | Scaffold1089 | 45906                   | TT                              | CC                | 1946638500               |
| SNP_P3_145920_52607  | NW_004516390.1 | Scaffold1089 | 52607                   | GG                              | TT                | 1946638502               |
| SNP_P3_145921_58059  | NW_004516390.1 | Scaffold1089 | 58059                   | GG                              | AA                | 1946638504               |
| SNP_P3_145922_58073  | NW_004516390.1 | Scaffold1089 | 58073                   | AA                              | GG                | 1946638507               |
| SNP_P3_145923_58074  | NW_004516390.1 | Scaffold1089 | 58074                   | CC                              | TT                | 1946638509               |
| SNP_P3_145924_58075  | NW_004516390.1 | Scaffold1089 | 58075                   | CC                              | TT                | 1946638511               |
| SNP_P3_145925_58089  | NW_004516390.1 | Scaffold1089 | 58089                   | TT                              | CC                | 1946638513               |
| SNP_P3_145927_117006 | NW_004516390.1 | Scaffold1089 | 117006                  | TT                              | CC                | 1946638515               |
| SNP_P3_145928_121562 | NW_004516390.1 | Scaffold1089 | 121562                  | AA                              | CC                | 1946638517               |
| SNP_P3_145929_188837 | NW_004516390.1 | Scaffold1089 | 188837                  | TT                              | AA                | 1946638519               |
| SNP_P3_145930_189577 | NW_004516390.1 | Scaffold1089 | 189577                  | CC                              | GG                | 1946638521               |
| SNP_P3_145931_189597 | NW_004516390.1 | Scaffold1089 | 189597                  | TT                              | AA                | 1946638523               |
| SNP_P3_145932_189605 | NW_004516390.1 | Scaffold1089 | 189605                  | CC                              | TT                | 1946638525               |

| SNPs IDs             | Chromosome IDs | Chromosomes  | Physical positions (bp) | CDC Frontier (Reference genome) | (Pusa 256 & HPNB) | NCBI SNPdb Accession IDs |
|----------------------|----------------|--------------|-------------------------|---------------------------------|-------------------|--------------------------|
| SNP_P3_145933_189741 | NW_004516390.1 | Scaffold1089 | 189741                  | AA                              | TT                | 1946638527               |
| SNP_P3_145934_189742 | NW_004516390.1 | Scaffold1089 | 189742                  | TT                              | CC                | 1946638529               |
| SNP_P3_145935_189892 | NW_004516390.1 | Scaffold1089 | 189892                  | GG                              | AA                | 1946638530               |
| SNP_P3_145936_189931 | NW_004516390.1 | Scaffold1089 | 189931                  | AA                              | GG                | 1946638532               |
| SNP_P3_145937_197576 | NW_004516390.1 | Scaffold1089 | 197576                  | CC                              | TT                | 1946638534               |
| SNP_P3_145938_200955 | NW_004516390.1 | Scaffold1089 | 200955                  | AA                              | CC                | 1946638536               |
| SNP_P3_145939_200978 | NW_004516390.1 | Scaffold1089 | 200978                  | CC                              | TT                | 1946638538               |
| SNP_P3_145940_201006 | NW_004516390.1 | Scaffold1089 | 201006                  | CC                              | TT                | 1946638540               |
| SNP_P3_145941_201032 | NW_004516390.1 | Scaffold1089 | 201032                  | TT                              | CC                | 1946638542               |
| SNP_P3_145942_201261 | NW_004516390.1 | Scaffold1089 | 201261                  | CC                              | AA                | 1946638545               |
| SNP_P3_145943_215054 | NW_004516390.1 | Scaffold1089 | 215054                  | CC                              | TT                | 1946638547               |
| SNP_P3_145944_226996 | NW_004516390.1 | Scaffold1089 | 226996                  | AA                              | GG                | 1946638549               |
| SNP_P3_145945_227007 | NW_004516390.1 | Scaffold1089 | 227007                  | TT                              | GG                | 1946638551               |
| SNP_P3_145946_233562 | NW_004516390.1 | Scaffold1089 | 233562                  | TT                              | CC                | 1946638553               |
| SNP_P3_145947_243794 | NW_004516390.1 | Scaffold1089 | 243794                  | GG                              | AA                | 1946638555               |
| SNP_P3_145948_243907 | NW_004516390.1 | Scaffold1089 | 243907                  | CC                              | TT                | 1946638557               |
| SNP_P3_145949_243935 | NW_004516390.1 | Scaffold1089 | 243935                  | TT                              | CC                | 1946638559               |
| SNP_P3_145950_259348 | NW_004516390.1 | Scaffold1089 | 259348                  | TT                              | AA                | 1946638560               |
| SNP_P3_145951_259595 | NW_004516390.1 | Scaffold1089 | 259595                  | AA                              | GG                | 1946638562               |
| SNP_P3_145952_259828 | NW_004516390.1 | Scaffold1089 | 259828                  | AA                              | GG                | 1946638564               |
| SNP_P3_145953_259872 | NW_004516390.1 | Scaffold1089 | 259872                  | AA                              | GG                | 1946638566               |
| SNP_P3_145954_267493 | NW_004516390.1 | Scaffold1089 | 267493                  | TT                              | AA                | 1946638568               |
| SNP_P3_145955_267930 | NW_004516390.1 | Scaffold1089 | 267930                  | TT                              | AA                | 1946638570               |
| SNP_P3_145956_267931 | NW_004516390.1 | Scaffold1089 | 267931                  | TT                              | AA                | 1946638572               |
| SNP_P3_145957_215    | NW_004516391.1 | Scaffold1090 | 215                     | TT                              | AA                | 1946638574               |
| SNP_P3_145958_1454   | NW_004516391.1 | Scaffold1090 | 1454                    | CC                              | TT                | 1946638576               |
| SNP_P3_145959_2744   | NW_004516393.1 | Scaffold1092 | 2744                    | AA                              | TT                | 1946638578               |
| SNP_P3_145960_3259   | NW_004516393.1 | Scaffold1092 | 3259                    | AA                              | GG                | 1946638580               |
| SNP_P3_145961_3288   | NW_004516393.1 | Scaffold1092 | 3288                    | TT                              | GG                | 1946638582               |
| SNP_P3_145962_3293   | NW_004516393.1 | Scaffold1092 | 3293                    | TT                              | AA                | 1946638584               |
| SNP_P3_145963_3294   | NW_004516393.1 | Scaffold1092 | 3294                    | TT                              | CC                | 1946638587               |
| SNP_P3_145964_3323   | NW_004516393.1 | Scaffold1092 | 3323                    | CC                              | TT                | 1946638589               |
| SNP_P3_145965_3343   | NW_004516393.1 | Scaffold1092 | 3343                    | AA                              | CC                | 1946638590               |
| SNP_P3_145966_3349   | NW_004516393.1 | Scaffold1092 | 3349                    | GG                              | AA                | 1946638592               |
| SNP_P3_145967_6038   | NW_004516393.1 | Scaffold1092 | 6038                    | AA                              | GG                | 1946638594               |
| SNP_P3_145968_6911   | NW_004516393.1 | Scaffold1092 | 6911                    | CC                              | GG                | 1946638596               |
| SNP_P3_145969_7258   | NW_004516393.1 | Scaffold1092 | 7258                    | CC                              | TT                | 1946638598               |
| SNP_P3_145970_11434  | NW_004516393.1 | Scaffold1092 | 11434                   | CC                              | AA                | 1946638600               |
| SNP_P3_145971_13428  | NW_004516393.1 | Scaffold1092 | 13428                   | AA                              | TT                | 1946638602               |
| SNP_P3_145972_13429  | NW_004516393.1 | Scaffold1092 | 13429                   | AA                              | CC                | 1946638604               |
| SNP_P3_145974_13605  | NW_004516393.1 | Scaffold1092 | 13605                   | AA                              | TT                | 1946638606               |
| SNP_P3_145975_13797  | NW_004516393.1 | Scaffold1092 | 13797                   | CC                              | TT                | 1946638608               |

| SNPs IDs            | Chromosome IDs | Chromosomes  | Physical positions (bp) | CDC Frontier (Reference genome) | (Pusa 256 & HPNB) | NCBI SNPdb Accession IDs |
|---------------------|----------------|--------------|-------------------------|---------------------------------|-------------------|--------------------------|
| SNP_P3_145976_14689 | NW_004516393.1 | Scaffold1092 | 14689                   | GG                              | AA                | 1946638610               |
| SNP_P3_145977_16076 | NW_004516393.1 | Scaffold1092 | 16076                   | CC                              | AA                | 1946638611               |
| SNP_P3_145978_17467 | NW_004516393.1 | Scaffold1092 | 17467                   | AA                              | CC                | 1946638613               |
| SNP_P3_145979_17629 | NW_004516393.1 | Scaffold1092 | 17629                   | AA                              | TT                | 1946638615               |
| SNP_P3_145980_17789 | NW_004516393.1 | Scaffold1092 | 17789                   | CC                              | AA                | 1946638617               |
| SNP_P3_145981_17905 | NW_004516393.1 | Scaffold1092 | 17905                   | AA                              | CC                | 1946638619               |
| SNP_P3_145982_17909 | NW_004516393.1 | Scaffold1092 | 17909                   | CC                              | AA                | 1946638621               |
| SNP_P3_145983_17926 | NW_004516393.1 | Scaffold1092 | 17926                   | GG                              | AA                | 1946638623               |
| SNP_P3_145984_17984 | NW_004516393.1 | Scaffold1092 | 17984                   | TT                              | CC                | 1946638626               |
| SNP_P3_145986_18184 | NW_004516393.1 | Scaffold1092 | 18184                   | GG                              | TT                | 1946638628               |
| SNP_P3_145987_18277 | NW_004516393.1 | Scaffold1092 | 18277                   | GG                              | TT                | 1946638630               |
| SNP_P3_145988_18428 | NW_004516393.1 | Scaffold1092 | 18428                   | TT                              | CC                | 1946638632               |
| SNP_P3_145989_18691 | NW_004516393.1 | Scaffold1092 | 18691                   | CC                              | TT                | 1946638634               |
| SNP_P3_145990_18875 | NW_004516393.1 | Scaffold1092 | 18875                   | AA                              | GG                | 1946638636               |
| SNP_P3_145991_19137 | NW_004516393.1 | Scaffold1092 | 19137                   | CC                              | TT                | 1946638638               |
| SNP_P3_145992_19381 | NW_004516393.1 | Scaffold1092 | 19381                   | GG                              | TT                | 1946638640               |
| SNP_P3_145993_19432 | NW_004516393.1 | Scaffold1092 | 19432                   | TT                              | CC                | 1946638642               |
| SNP_P3_145994_19440 | NW_004516393.1 | Scaffold1092 | 19440                   | AA                              | TT                | 1946638644               |
| SNP_P3_145995_19467 | NW_004516393.1 | Scaffold1092 | 19467                   | GG                              | TT                | 1946638646               |
| SNP_P3_145996_19509 | NW_004516393.1 | Scaffold1092 | 19509                   | AA                              | TT                | 1946638648               |
| SNP_P3_145997_19513 | NW_004516393.1 | Scaffold1092 | 19513                   | TT                              | CC                | 1946638650               |
| SNP_P3_145999_21938 | NW_004516393.1 | Scaffold1092 | 21938                   | GG                              | AA                | 1946638651               |
| SNP_P3_146000_21961 | NW_004516393.1 | Scaffold1092 | 21961                   | TT                              | CC                | 1946638653               |
| SNP_P3_146001_21962 | NW_004516393.1 | Scaffold1092 | 21962                   | CC                              | AA                | 1946638655               |
| SNP_P3_146002_22349 | NW_004516393.1 | Scaffold1092 | 22349                   | TT                              | CC                | 1946638657               |
| SNP_P3_146003_29403 | NW_004516393.1 | Scaffold1092 | 29403                   | GG                              | TT                | 1946638659               |
| SNP_P3_146004_30158 | NW_004516393.1 | Scaffold1092 | 30158                   | TT                              | GG                | 1946638661               |
| SNP_P3_146005_33854 | NW_004516393.1 | Scaffold1092 | 33854                   | AA                              | GG                | 1946638663               |
| SNP_P3_146006_33875 | NW_004516393.1 | Scaffold1092 | 33875                   | TT                              | AA                | 1946638666               |
| SNP_P3_146007_33906 | NW_004516393.1 | Scaffold1092 | 33906                   | GG                              | AA                | 1946638668               |
| SNP_P3_146008_33930 | NW_004516393.1 | Scaffold1092 | 33930                   | TT                              | CC                | 1946638670               |
| SNP_P3_146009_38112 | NW_004516393.1 | Scaffold1092 | 38112                   | GG                              | AA                | 1946638672               |
| SNP_P3_146010_44865 | NW_004516393.1 | Scaffold1092 | 44865                   | AA                              | TT                | 1946638673               |
| SNP_P3_146011_45963 | NW_004516393.1 | Scaffold1092 | 45963                   | CC                              | TT                | 1946638675               |
| SNP_P3_146012_46083 | NW_004516393.1 | Scaffold1092 | 46083                   | GG                              | TT                | 1946638677               |
| SNP_P3_146013_46100 | NW_004516393.1 | Scaffold1092 | 46100                   | GG                              | AA                | 1946638679               |
| SNP_P3_146014_46868 | NW_004516393.1 | Scaffold1092 | 46868                   | TT                              | GG                | 1946638681               |
| SNP_P3_146015_46961 | NW_004516393.1 | Scaffold1092 | 46961                   | AA                              | GG                | 1946638683               |
| SNP_P3_146016_47318 | NW_004516393.1 | Scaffold1092 | 47318                   | AA                              | TT                | 1946638690               |
| SNP_P3_146017_57447 | NW_004516393.1 | Scaffold1092 | 57447                   | GG                              | CC                | 1946638692               |
| SNP_P3_146018_58203 | NW_004516393.1 | Scaffold1092 | 58203                   | TT                              | GG                | 1946638694               |
| SNP_P3_146019_58398 | NW_004516393.1 | Scaffold1092 | 58398                   | AA                              | TT                | 1946638696               |

| SNPs IDs             | Chromosome IDs | Chromosomes  | Physical positions (bp) | CDC Frontier (Reference genome) | (Pusa 256 & HPNB) | NCBI SNPdb Accession IDs |
|----------------------|----------------|--------------|-------------------------|---------------------------------|-------------------|--------------------------|
| SNP_P3_146020_58631  | NW_004516393.1 | Scaffold1092 | 58631                   | AA                              | CC                | 1946638699               |
| SNP_P3_146021_59233  | NW_004516393.1 | Scaffold1092 | 59233                   | CC                              | AA                | 1946638701               |
| SNP_P3_146022_59477  | NW_004516393.1 | Scaffold1092 | 59477                   | AA                              | GG                | 1946638703               |
| SNP_P3_146023_59720  | NW_004516393.1 | Scaffold1092 | 59720                   | TT                              | AA                | 1946638705               |
| SNP_P3_146024_59721  | NW_004516393.1 | Scaffold1092 | 59721                   | AA                              | CC                | 1946638707               |
| SNP_P3_146025_59774  | NW_004516393.1 | Scaffold1092 | 59774                   | CC                              | GG                | 1946638709               |
| SNP_P3_146026_60690  | NW_004516393.1 | Scaffold1092 | 60690                   | AA                              | GG                | 1946638711               |
| SNP_P3_146027_61276  | NW_004516393.1 | Scaffold1092 | 61276                   | CC                              | GG                | 1946638713               |
| SNP_P3_146028_61640  | NW_004516393.1 | Scaffold1092 | 61640                   | TT                              | AA                | 1946638715               |
| SNP_P3_146029_64390  | NW_004516393.1 | Scaffold1092 | 64390                   | AA                              | GG                | 1946638716               |
| SNP_P3_146030_64895  | NW_004516393.1 | Scaffold1092 | 64895                   | AA                              | TT                | 1946638718               |
| SNP_P3_146031_64900  | NW_004516393.1 | Scaffold1092 | 64900                   | TT                              | AA                | 1946638720               |
| SNP_P3_146032_64905  | NW_004516393.1 | Scaffold1092 | 64905                   | AA                              | GG                | 1946638722               |
| SNP_P3_146033_65126  | NW_004516393.1 | Scaffold1092 | 65126                   | TT                              | CC                | 1946638724               |
| SNP_P3_146034_65965  | NW_004516393.1 | Scaffold1092 | 65965                   | AA                              | GG                | 1946638726               |
| SNP_P3_146035_67664  | NW_004516393.1 | Scaffold1092 | 67664                   | GG                              | AA                | 1946638728               |
| SNP_P3_146036_67688  | NW_004516393.1 | Scaffold1092 | 67688                   | TT                              | CC                | 1946638730               |
| SNP_P3_146037_75314  | NW_004516393.1 | Scaffold1092 | 75314                   | AA                              | TT                | 1946638732               |
| SNP_P3_146038_75400  | NW_004516393.1 | Scaffold1092 | 75400                   | TT                              | AA                | 1946638734               |
| SNP_P3_146039_76311  | NW_004516393.1 | Scaffold1092 | 76311                   | TT                              | AA                | 1946638736               |
| SNP_P3_146040_76323  | NW_004516393.1 | Scaffold1092 | 76323                   | GG                              | AA                | 1946638738               |
| SNP_P3_146042_79425  | NW_004516393.1 | Scaffold1092 | 79425                   | TT                              | CC                | 1946638741               |
| SNP_P3_146043_82408  | NW_004516393.1 | Scaffold1092 | 82408                   | CC                              | AA                | 1946638743               |
| SNP_P3_146044_82800  | NW_004516393.1 | Scaffold1092 | 82800                   | TT                              | AA                | 1946638745               |
| SNP_P3_146046_83772  | NW_004516393.1 | Scaffold1092 | 83772                   | CC                              | GG                | 1946638747               |
| SNP_P3_146047_84227  | NW_004516393.1 | Scaffold1092 | 84227                   | TT                              | AA                | 1946638749               |
| SNP_P3_146048_85310  | NW_004516393.1 | Scaffold1092 | 85310                   | AA                              | GG                | 1946638750               |
| SNP_P3_146049_85605  | NW_004516393.1 | Scaffold1092 | 85605                   | CC                              | TT                | 1946638752               |
| SNP_P3_146051_87721  | NW_004516393.1 | Scaffold1092 | 87721                   | CC                              | AA                | 1946638754               |
| SNP_P3_146052_87732  | NW_004516393.1 | Scaffold1092 | 87732                   | TT                              | CC                | 1946638756               |
| SNP_P3_146054_88961  | NW_004516393.1 | Scaffold1092 | 88961                   | CC                              | TT                | 1946638758               |
| SNP_P3_146055_89231  | NW_004516393.1 | Scaffold1092 | 89231                   | CC                              | TT                | 1946638760               |
| SNP_P3_146056_89546  | NW_004516393.1 | Scaffold1092 | 89546                   | GG                              | CC                | 1946638762               |
| SNP_P3_146057_91118  | NW_004516393.1 | Scaffold1092 | 91118                   | TT                              | GG                | 1946638764               |
| SNP_P3_146058_93987  | NW_004516393.1 | Scaffold1092 | 93987                   | TT                              | GG                | 1946638766               |
| SNP_P3_146059_94523  | NW_004516393.1 | Scaffold1092 | 94523                   | AA                              | TT                | 1946638768               |
| SNP_P3_146060_94859  | NW_004516393.1 | Scaffold1092 | 94859                   | TT                              | GG                | 1946638770               |
| SNP_P3_146061_95098  | NW_004516393.1 | Scaffold1092 | 95098                   | TT                              | CC                | 1946638772               |
| SNP_P3_146062_95420  | NW_004516393.1 | Scaffold1092 | 95420                   | AA                              | TT                | 1946638774               |
| SNP_P3_146063_97867  | NW_004516393.1 | Scaffold1092 | 97867                   | GG                              | CC                | 1946638776               |
| SNP_P3_146064_98164  | NW_004516393.1 | Scaffold1092 | 98164                   | CC                              | TT                | 1946638778               |
| SNP_P3_146065_101228 | NW_004516393.1 | Scaffold1092 | 101228                  | CC                              | AA                | 1946638781               |

| SNPs IDs             | Chromosome IDs | Chromosomes  | Physical positions (bp) | CDC Frontier (Reference genome) | (Pusa 256 & HPNB) | NCBI SNPdb Accession IDs |
|----------------------|----------------|--------------|-------------------------|---------------------------------|-------------------|--------------------------|
| SNP_P3_146066_101289 | NW_004516393.1 | Scaffold1092 | 101289                  | TT                              | CC                | 1946638783               |
| SNP_P3_146067_101678 | NW_004516393.1 | Scaffold1092 | 101678                  | AA                              | CC                | 1946638785               |
| SNP_P3_146068_101926 | NW_004516393.1 | Scaffold1092 | 101926                  | CC                              | TT                | 1946638787               |
| SNP_P3_146069_101994 | NW_004516393.1 | Scaffold1092 | 101994                  | GG                              | AA                | 1946638788               |
| SNP_P3_146070_102199 | NW_004516393.1 | Scaffold1092 | 102199                  | CC                              | TT                | 1946638790               |
| SNP_P3_146071_102200 | NW_004516393.1 | Scaffold1092 | 102200                  | AA                              | GG                | 1946638792               |
| SNP_P3_146072_102207 | NW_004516393.1 | Scaffold1092 | 102207                  | TT                              | CC                | 1946638794               |
| SNP_P3_146073_103118 | NW_004516393.1 | Scaffold1092 | 103118                  | TT                              | AA                | 1946638796               |
| SNP_P3_146074_103662 | NW_004516393.1 | Scaffold1092 | 103662                  | CC                              | GG                | 1946638798               |
| SNP_P3_146075_103728 | NW_004516393.1 | Scaffold1092 | 103728                  | AA                              | TT                | 1946638800               |
| SNP_P3_146076_103820 | NW_004516393.1 | Scaffold1092 | 103820                  | CC                              | TT                | 1946638802               |
| SNP_P3_146077_103979 | NW_004516393.1 | Scaffold1092 | 103979                  | AA                              | CC                | 1946638804               |
| SNP_P3_146078_105025 | NW_004516393.1 | Scaffold1092 | 105025                  | TT                              | AA                | 1946638806               |
| SNP_P3_146079_105067 | NW_004516393.1 | Scaffold1092 | 105067                  | GG                              | AA                | 1946638808               |
| SNP_P3_146080_105563 | NW_004516393.1 | Scaffold1092 | 105563                  | CC                              | GG                | 1946638810               |
| SNP_P3_146081_105600 | NW_004516393.1 | Scaffold1092 | 105600                  | GG                              | TT                | 1946638812               |
| SNP_P3_146082_105776 | NW_004516393.1 | Scaffold1092 | 105776                  | AA                              | CC                | 1946638814               |
| SNP_P3_146084_108941 | NW_004516393.1 | Scaffold1092 | 108941                  | CC                              | GG                | 1946638816               |
| SNP_P3_146086_110601 | NW_004516393.1 | Scaffold1092 | 110601                  | CC                              | TT                | 1946638818               |
| SNP_P3_146087_110939 | NW_004516393.1 | Scaffold1092 | 110939                  | CC                              | AA                | 1946638820               |
| SNP_P3_146088_110952 | NW_004516393.1 | Scaffold1092 | 110952                  | GG                              | CC                | 1946638822               |
| SNP_P3_146089_111696 | NW_004516393.1 | Scaffold1092 | 111696                  | TT                              | CC                | 1946638824               |
| SNP_P3_146090_112051 | NW_004516393.1 | Scaffold1092 | 112051                  | AA                              | CC                | 1946638825               |
| SNP_P3_146091_112103 | NW_004516393.1 | Scaffold1092 | 112103                  | AA                              | TT                | 1946638827               |
| SNP_P3_146092_112150 | NW_004516393.1 | Scaffold1092 | 112150                  | GG                              | CC                | 1946638829               |
| SNP_P3_146093_112159 | NW_004516393.1 | Scaffold1092 | 112159                  | AA                              | TT                | 1946638831               |
| SNP_P3_146094_112211 | NW_004516393.1 | Scaffold1092 | 112211                  | CC                              | TT                | 1946638833               |
| SNP_P3_146095_114050 | NW_004516393.1 | Scaffold1092 | 114050                  | CC                              | AA                | 1946638835               |
| SNP_P3_146096_114341 | NW_004516393.1 | Scaffold1092 | 114341                  | GG                              | TT                | 1946638837               |
| SNP_P3_146097_114349 | NW_004516393.1 | Scaffold1092 | 114349                  | CC                              | AA                | 1946638839               |
| SNP_P3_146098_114392 | NW_004516393.1 | Scaffold1092 | 114392                  | GG                              | AA                | 1946638841               |
| SNP_P3_146099_114479 | NW_004516393.1 | Scaffold1092 | 114479                  | AA                              | GG                | 1946638843               |
| SNP_P3_146100_114560 | NW_004516393.1 | Scaffold1092 | 114560                  | TT                              | AA                | 1946638844               |
| SNP_P3_146101_114582 | NW_004516393.1 | Scaffold1092 | 114582                  | TT                              | CC                | 1946638846               |
| SNP_P3_146102_114652 | NW_004516393.1 | Scaffold1092 | 114652                  | GG                              | CC                | 1946638848               |
| SNP_P3_146103_115099 | NW_004516393.1 | Scaffold1092 | 115099                  | AA                              | TT                | 1946638850               |
| SNP_P3_146104_115129 | NW_004516393.1 | Scaffold1092 | 115129                  | TT                              | CC                | 1946638853               |
| SNP_P3_146105_115144 | NW_004516393.1 | Scaffold1092 | 115144                  | GG                              | CC                | 1946638855               |
| SNP_P3_146106_115197 | NW_004516393.1 | Scaffold1092 | 115197                  | TT                              | GG                | 1946638857               |
| SNP_P3_146107_115215 | NW_004516393.1 | Scaffold1092 | 115215                  | TT                              | AA                | 1946638859               |
| SNP_P3_146108_115499 | NW_004516393.1 | Scaffold1092 | 115499                  | AA                              | TT                | 1946638861               |
| SNP_P3_146109_116740 | NW_004516393.1 | Scaffold1092 | 116740                  | AA                              | TT                | 1946638863               |

| SNPs IDs             | Chromosome IDs | Chromosomes  | Physical positions (bp) | CDC Frontier (Reference genome) | (Pusa 256 & HPNB) | NCBI SNPdb Accession IDs |
|----------------------|----------------|--------------|-------------------------|---------------------------------|-------------------|--------------------------|
| SNP_P3_146110_116820 | NW_004516393.1 | Scaffold1092 | 116820                  | TT                              | AA                | 1946638865               |
| SNP_P3_146111_116829 | NW_004516393.1 | Scaffold1092 | 116829                  | TT                              | GG                | 1946638867               |
| SNP_P3_146112_116851 | NW_004516393.1 | Scaffold1092 | 116851                  | TT                              | AA                | 1946638869               |
| SNP_P3_146113_116879 | NW_004516393.1 | Scaffold1092 | 116879                  | AA                              | TT                | 1946638871               |
| SNP_P3_146114_116995 | NW_004516393.1 | Scaffold1092 | 116995                  | AA                              | GG                | 1946638873               |
| SNP_P3_146115_117145 | NW_004516393.1 | Scaffold1092 | 117145                  | AA                              | TT                | 1946638875               |
| SNP_P3_146116_117259 | NW_004516393.1 | Scaffold1092 | 117259                  | GG                              | AA                | 1946638877               |
| SNP_P3_146117_117362 | NW_004516393.1 | Scaffold1092 | 117362                  | TT                              | CC                | 1946638879               |
| SNP_P3_146118_117391 | NW_004516393.1 | Scaffold1092 | 117391                  | AA                              | TT                | 1946638881               |
| SNP_P3_146119_117408 | NW_004516393.1 | Scaffold1092 | 117408                  | TT                              | AA                | 1946638883               |
| SNP_P3_146120_117437 | NW_004516393.1 | Scaffold1092 | 117437                  | TT                              | GG                | 1946638885               |
| SNP_P3_146121_117439 | NW_004516393.1 | Scaffold1092 | 117439                  | CC                              | TT                | 1946638887               |
| SNP_P3_146122_117452 | NW_004516393.1 | Scaffold1092 | 117452                  | TT                              | CC                | 1946638889               |
| SNP_P3_146123_117510 | NW_004516393.1 | Scaffold1092 | 117510                  | GG                              | AA                | 1946638891               |
| SNP_P3_146124_117589 | NW_004516393.1 | Scaffold1092 | 117589                  | TT                              | AA                | 1946638893               |
| SNP_P3_146125_117793 | NW_004516393.1 | Scaffold1092 | 117793                  | TT                              | GG                | 1946638895               |
| SNP_P3_146126_117841 | NW_004516393.1 | Scaffold1092 | 117841                  | GG                              | AA                | 1946638898               |
| SNP_P3_146127_118244 | NW_004516393.1 | Scaffold1092 | 118244                  | TT                              | CC                | 1946638900               |
| SNP_P3_146128_118324 | NW_004516393.1 | Scaffold1092 | 118324                  | CC                              | TT                | 1946638902               |
| SNP_P3_146129_119020 | NW_004516393.1 | Scaffold1092 | 119020                  | AA                              | TT                | 1946638904               |
| SNP_P3_146130_119137 | NW_004516393.1 | Scaffold1092 | 119137                  | AA                              | TT                | 1946638906               |
| SNP_P3_146131_119240 | NW_004516393.1 | Scaffold1092 | 119240                  | AA                              | CC                | 1946638908               |
| SNP_P3_146132_119243 | NW_004516393.1 | Scaffold1092 | 119243                  | TT                              | AA                | 1946638910               |
| SNP_P3_146133_119450 | NW_004516393.1 | Scaffold1092 | 119450                  | TT                              | AA                | 1946638912               |
| SNP_P3_146134_119541 | NW_004516393.1 | Scaffold1092 | 119541                  | CC                              | TT                | 1946638914               |
| SNP_P3_146135_120046 | NW_004516393.1 | Scaffold1092 | 120046                  | TT                              | GG                | 1946638916               |
| SNP_P3_146136_121098 | NW_004516393.1 | Scaffold1092 | 121098                  | AA                              | TT                | 1946638918               |
| SNP_P3_146138_121493 | NW_004516393.1 | Scaffold1092 | 121493                  | GG                              | TT                | 1946638920               |
| SNP_P3_146139_121496 | NW_004516393.1 | Scaffold1092 | 121496                  | CC                              | TT                | 1946638922               |
| SNP_P3_146140_121566 | NW_004516393.1 | Scaffold1092 | 121566                  | TT                              | AA                | 1946638924               |
| SNP_P3_146141_121751 | NW_004516393.1 | Scaffold1092 | 121751                  | AA                              | TT                | 1946638926               |
| SNP_P3_146142_122096 | NW_004516393.1 | Scaffold1092 | 122096                  | TT                              | AA                | 1946638929               |
| SNP_P3_146143_122112 | NW_004516393.1 | Scaffold1092 | 122112                  | TT                              | AA                | 1946638931               |
| SNP_P3_146144_122191 | NW_004516393.1 | Scaffold1092 | 122191                  | AA                              | TT                | 1946638933               |
| SNP_P3_146145_122298 | NW_004516393.1 | Scaffold1092 | 122298                  | TT                              | GG                | 1946638935               |
| SNP_P3_146146_122361 | NW_004516393.1 | Scaffold1092 | 122361                  | GG                              | TT                | 1946638937               |
| SNP_P3_146147_122372 | NW_004516393.1 | Scaffold1092 | 122372                  | TT                              | CC                | 1946638939               |
| SNP_P3_146148_122415 | NW_004516393.1 | Scaffold1092 | 122415                  | CC                              | GG                | 1946638941               |
| SNP_P3_146149_122423 | NW_004516393.1 | Scaffold1092 | 122423                  | TT                              | CC                | 1946638943               |
| SNP_P3_146150_122474 | NW_004516393.1 | Scaffold1092 | 122474                  | CC                              | AA                | 1946638945               |
| SNP_P3_146151_122726 | NW_004516393.1 | Scaffold1092 | 122726                  | AA                              | GG                | 1946638946               |
| SNP_P3_146152_125742 | NW_004516393.1 | Scaffold1092 | 125742                  | AA                              | TT                | 1946638948               |

| SNPs IDs             | Chromosome IDs | Chromosomes  | Physical positions (bp) | CDC Frontier (Reference genome) | (Pusa 256 & HPNB) | NCBI SNPdb Accession IDs |
|----------------------|----------------|--------------|-------------------------|---------------------------------|-------------------|--------------------------|
| SNP_P3_146153_127843 | NW_004516393.1 | Scaffold1092 | 127843                  | GG                              | TT                | 1946638950               |
| SNP_P3_146154_127977 | NW_004516393.1 | Scaffold1092 | 127977                  | AA                              | TT                | 1946638952               |
| SNP_P3_146155_130638 | NW_004516393.1 | Scaffold1092 | 130638                  | AA                              | TT                | 1946638953               |
| SNP_P3_146156_138107 | NW_004516393.1 | Scaffold1092 | 138107                  | TT                              | CC                | 1946638955               |
| SNP_P3_146157_138709 | NW_004516393.1 | Scaffold1092 | 138709                  | GG                              | CC                | 1946638957               |
| SNP_P3_146158_138882 | NW_004516393.1 | Scaffold1092 | 138882                  | GG                              | AA                | 1946638959               |
| SNP_P3_146160_139264 | NW_004516393.1 | Scaffold1092 | 139264                  | CC                              | TT                | 1946638961               |
| SNP_P3_146161_139279 | NW_004516393.1 | Scaffold1092 | 139279                  | TT                              | AA                | 1946638963               |
| SNP_P3_146162_139302 | NW_004516393.1 | Scaffold1092 | 139302                  | GG                              | AA                | 1946638965               |
| SNP_P3_146163_139339 | NW_004516393.1 | Scaffold1092 | 139339                  | CC                              | TT                | 1946638967               |
| SNP_P3_146164_139431 | NW_004516393.1 | Scaffold1092 | 139431                  | AA                              | GG                | 1946638970               |
| SNP_P3_146165_139478 | NW_004516393.1 | Scaffold1092 | 139478                  | TT                              | CC                | 1946638971               |
| SNP_P3_146166_139571 | NW_004516393.1 | Scaffold1092 | 139571                  | TT                              | GG                | 1946638973               |
| SNP_P3_146167_139581 | NW_004516393.1 | Scaffold1092 | 139581                  | TT                              | GG                | 1946638975               |
| SNP_P3_146168_139743 | NW_004516393.1 | Scaffold1092 | 139743                  | TT                              | CC                | 1946638977               |
| SNP_P3_146169_139748 | NW_004516393.1 | Scaffold1092 | 139748                  | AA                              | GG                | 1946638979               |
| SNP_P3_146170_139781 | NW_004516393.1 | Scaffold1092 | 139781                  | GG                              | AA                | 1946638981               |
| SNP_P3_146171_139869 | NW_004516393.1 | Scaffold1092 | 139869                  | AA                              | CC                | 1946638982               |
| SNP_P3_146172_139870 | NW_004516393.1 | Scaffold1092 | 139870                  | TT                              | GG                | 1946638984               |
| SNP_P3_146174_140328 | NW_004516393.1 | Scaffold1092 | 140328                  | CC                              | AA                | 1946638986               |
| SNP_P3_146175_140420 | NW_004516393.1 | Scaffold1092 | 140420                  | AA                              | GG                | 1946638988               |
| SNP_P3_146176_140827 | NW_004516393.1 | Scaffold1092 | 140827                  | CC                              | AA                | 1946638990               |
| SNP_P3_146177_140851 | NW_004516393.1 | Scaffold1092 | 140851                  | CC                              | TT                | 1946638992               |
| SNP_P3_146178_140983 | NW_004516393.1 | Scaffold1092 | 140983                  | TT                              | CC                | 1946638994               |
| SNP_P3_146179_141015 | NW_004516393.1 | Scaffold1092 | 141015                  | TT                              | AA                | 1946638996               |
| SNP_P3_146180_141332 | NW_004516393.1 | Scaffold1092 | 141332                  | AA                              | TT                | 1946638998               |
| SNP_P3_146181_141848 | NW_004516393.1 | Scaffold1092 | 141848                  | CC                              | TT                | 1946639000               |
| SNP_P3_146182_141849 | NW_004516393.1 | Scaffold1092 | 141849                  | GG                              | AA                | 1946639002               |
| SNP_P3_146183_142155 | NW_004516393.1 | Scaffold1092 | 142155                  | GG                              | TT                | 1946639004               |
| SNP_P3_146184_142465 | NW_004516393.1 | Scaffold1092 | 142465                  | TT                              | CC                | 1946639006               |
| SNP_P3_146185_142620 | NW_004516393.1 | Scaffold1092 | 142620                  | CC                              | TT                | 1946639008               |
| SNP_P3_146186_142757 | NW_004516393.1 | Scaffold1092 | 142757                  | CC                              | TT                | 1946639010               |
| SNP_P3_146187_142876 | NW_004516393.1 | Scaffold1092 | 142876                  | CC                              | TT                | 1946639013               |
| SNP_P3_146188_143067 | NW_004516393.1 | Scaffold1092 | 143067                  | CC                              | TT                | 1946639015               |
| SNP_P3_146189_143105 | NW_004516393.1 | Scaffold1092 | 143105                  | TT                              | CC                | 1946639017               |
| SNP_P3_146190_143221 | NW_004516393.1 | Scaffold1092 | 143221                  | GG                              | AA                | 1946639019               |
| SNP_P3_146191_144001 | NW_004516393.1 | Scaffold1092 | 144001                  | GG                              | CC                | 1946639021               |
| SNP_P3_146192_144456 | NW_004516393.1 | Scaffold1092 | 144456                  | TT                              | AA                | 1946639023               |
| SNP_P3_146193_145550 | NW_004516393.1 | Scaffold1092 | 145550                  | CC                              | GG                | 1946639025               |
| SNP_P3_146194_145905 | NW_004516393.1 | Scaffold1092 | 145905                  | TT                              | GG                | 1946639027               |
| SNP_P3_146195_146180 | NW_004516393.1 | Scaffold1092 | 146180                  | CC                              | GG                | 1946639029               |
| SNP_P3_146196_146395 | NW_004516393.1 | Scaffold1092 | 146395                  | TT                              | CC                | 1946639031               |

| SNPs IDs             | Chromosome IDs | Chromosomes  | Physical positions (bp) | CDC Frontier (Reference genome) | (Pusa 256 & HPNB) | NCBI SNPdb Accession IDs |
|----------------------|----------------|--------------|-------------------------|---------------------------------|-------------------|--------------------------|
| SNP_P3_146197_146542 | NW_004516393.1 | Scaffold1092 | 146542                  | AA                              | GG                | 1946639033               |
| SNP_P3_146198_146546 | NW_004516393.1 | Scaffold1092 | 146546                  | CC                              | GG                | 1946639035               |
| SNP_P3_146199_146563 | NW_004516393.1 | Scaffold1092 | 146563                  | GG                              | TT                | 1946639037               |
| SNP_P3_146200_146717 | NW_004516393.1 | Scaffold1092 | 146717                  | CC                              | TT                | 1946639039               |
| SNP_P3_146201_146836 | NW_004516393.1 | Scaffold1092 | 146836                  | CC                              | TT                | 1946639040               |
| SNP_P3_146202_146877 | NW_004516393.1 | Scaffold1092 | 146877                  | CC                              | GG                | 1946639042               |
| SNP_P3_146203_146933 | NW_004516393.1 | Scaffold1092 | 146933                  | AA                              | CC                | 1946639044               |
| SNP_P3_146204_147094 | NW_004516393.1 | Scaffold1092 | 147094                  | TT                              | GG                | 1946639046               |
| SNP_P3_146205_147132 | NW_004516393.1 | Scaffold1092 | 147132                  | TT                              | AA                | 1946639048               |
| SNP_P3_146206_147193 | NW_004516393.1 | Scaffold1092 | 147193                  | AA                              | TT                | 1946639050               |
| SNP_P3_146207_147464 | NW_004516393.1 | Scaffold1092 | 147464                  | GG                              | CC                | 1946639052               |
| SNP_P3_146208_147552 | NW_004516393.1 | Scaffold1092 | 147552                  | GG                              | TT                | 1946639054               |
| SNP_P3_146209_147714 | NW_004516393.1 | Scaffold1092 | 147714                  | TT                              | AA                | 1946639057               |
| SNP_P3_146210_147794 | NW_004516393.1 | Scaffold1092 | 147794                  | AA                              | TT                | 1946639059               |
| SNP_P3_146211_147801 | NW_004516393.1 | Scaffold1092 | 147801                  | GG                              | AA                | 1946639061               |
| SNP_P3_146212_147947 | NW_004516393.1 | Scaffold1092 | 147947                  | AA                              | TT                | 1946639063               |
| SNP_P3_146213_147968 | NW_004516393.1 | Scaffold1092 | 147968                  | CC                              | GG                | 1946639065               |
| SNP_P3_146214_148278 | NW_004516393.1 | Scaffold1092 | 148278                  | GG                              | CC                | 1946639067               |
| SNP_P3_146215_148400 | NW_004516393.1 | Scaffold1092 | 148400                  | AA                              | TT                | 1946639069               |
| SNP_P3_146216_148500 | NW_004516393.1 | Scaffold1092 | 148500                  | AA                              | TT                | 1946639071               |
| SNP_P3_146217_148509 | NW_004516393.1 | Scaffold1092 | 148509                  | TT                              | AA                | 1946639073               |
| SNP_P3_146218_152348 | NW_004516393.1 | Scaffold1092 | 152348                  | CC                              | GG                | 1946639075               |
| SNP_P3_146219_152432 | NW_004516393.1 | Scaffold1092 | 152432                  | TT                              | AA                | 1946639077               |
| SNP_P3_146220_152515 | NW_004516393.1 | Scaffold1092 | 152515                  | CC                              | AA                | 1946639079               |
| SNP_P3_146221_152603 | NW_004516393.1 | Scaffold1092 | 152603                  | TT                              | CC                | 1946639082               |
| SNP_P3_146222_152660 | NW_004516393.1 | Scaffold1092 | 152660                  | CC                              | TT                | 1946639084               |
| SNP_P3_146223_152766 | NW_004516393.1 | Scaffold1092 | 152766                  | TT                              | AA                | 1946639086               |
| SNP_P3_146224_156929 | NW_004516393.1 | Scaffold1092 | 156929                  | AA                              | CC                | 1946639088               |
| SNP_P3_146225_769    | NW_004516394.1 | Scaffold1095 | 769                     | AA                              | TT                | 1946639090               |
| SNP_P3_146226_5727   | NW_004516394.1 | Scaffold1095 | 5727                    | AA                              | GG                | 1946639092               |
| SNP_P3_146227_5751   | NW_004516394.1 | Scaffold1095 | 5751                    | TT                              | AA                | 1946639094               |
| SNP_P3_146228_6147   | NW_004516394.1 | Scaffold1095 | 6147                    | GG                              | AA                | 1946639096               |
| SNP_P3_146229_16158  | NW_004516394.1 | Scaffold1095 | 16158                   | AA                              | TT                | 1946639098               |
| SNP_P3_146230_16757  | NW_004516394.1 | Scaffold1095 | 16757                   | TT                              | CC                | 1946639100               |
| SNP_P3_146231_16774  | NW_004516394.1 | Scaffold1095 | 16774                   | AA                              | GG                | 1946639102               |
| SNP_P3_146232_16803  | NW_004516394.1 | Scaffold1095 | 16803                   | GG                              | TT                | 1946639104               |
| SNP_P3_146233_16814  | NW_004516394.1 | Scaffold1095 | 16814                   | TT                              | GG                | 1946639106               |
| SNP_P3_146234_18067  | NW_004516394.1 | Scaffold1095 | 18067                   | CC                              | TT                | 1946639108               |
| SNP_P3_146235_18238  | NW_004516394.1 | Scaffold1095 | 18238                   | TT                              | CC                | 1946639111               |
| SNP_P3_146236_18282  | NW_004516394.1 | Scaffold1095 | 18282                   | GG                              | TT                | 1946639113               |
| SNP_P3_146237_18293  | NW_004516394.1 | Scaffold1095 | 18293                   | GG                              | TT                | 1946639115               |
| SNP_P3_146238_19721  | NW_004516394.1 | Scaffold1095 | 19721                   | AA                              | GG                | 1946639117               |



| SNPs IDs            | Chromosome IDs | Chromosomes  | Physical positions (bp) | CDC Frontier (Reference genome) | (Pusa 256 & HPNB) | NCBI SNPdb Accession IDs |
|---------------------|----------------|--------------|-------------------------|---------------------------------|-------------------|--------------------------|
| SNP_P3_146239_20079 | NW_004516394.1 | Scaffold1095 | 20079                   | AA                              | GG                | 1946639119               |
| SNP_P3_146240_20092 | NW_004516394.1 | Scaffold1095 | 20092                   | TT                              | AA                | 1946639121               |
| SNP_P3_146241_25175 | NW_004516394.1 | Scaffold1095 | 25175                   | CC                              | TT                | 1946639123               |
| SNP_P3_146242_25485 | NW_004516394.1 | Scaffold1095 | 25485                   | TT                              | CC                | 1946639125               |
| SNP_P3_146243_25527 | NW_004516394.1 | Scaffold1095 | 25527                   | CC                              | GG                | 1946639127               |
| SNP_P3_146244_25544 | NW_004516394.1 | Scaffold1095 | 25544                   | CC                              | GG                | 1946639129               |
| SNP_P3_146245_25579 | NW_004516394.1 | Scaffold1095 | 25579                   | AA                              | GG                | 1946639131               |
| SNP_P3_146246_26213 | NW_004516394.1 | Scaffold1095 | 26213                   | TT                              | CC                | 1946639134               |
| SNP_P3_146247_26510 | NW_004516394.1 | Scaffold1095 | 26510                   | TT                              | AA                | 1946639137               |
| SNP_P3_146248_26512 | NW_004516394.1 | Scaffold1095 | 26512                   | TT                              | CC                | 1946639139               |
| SNP_P3_146249_26610 | NW_004516394.1 | Scaffold1095 | 26610                   | AA                              | GG                | 1946639141               |
| SNP_P3_146250_38410 | NW_004516394.1 | Scaffold1095 | 38410                   | CC                              | TT                | 1946639143               |
| SNP_P3_146251_38876 | NW_004516394.1 | Scaffold1095 | 38876                   | TT                              | AA                | 1946639145               |
| SNP_P3_146252_3375  | NW_004516396.1 | Scaffold1101 | 3375                    | TT                              | CC                | 1946639146               |
| SNP_P3_146254_3845  | NW_004516396.1 | Scaffold1101 | 3845                    | CC                              | TT                | 1946639148               |
| SNP_P3_146255_3956  | NW_004516396.1 | Scaffold1101 | 3956                    | CC                              | GG                | 1946639150               |
| SNP_P3_146256_3967  | NW_004516396.1 | Scaffold1101 | 3967                    | CC                              | GG                | 1946639152               |
| SNP_P3_146257_3977  | NW_004516396.1 | Scaffold1101 | 3977                    | GG                              | TT                | 1946639154               |
| SNP_P3_146258_3991  | NW_004516396.1 | Scaffold1101 | 3991                    | CC                              | AA                | 1946639156               |
| SNP_P3_146259_4006  | NW_004516396.1 | Scaffold1101 | 4006                    | AA                              | GG                | 1946639158               |
| SNP_P3_146260_4015  | NW_004516396.1 | Scaffold1101 | 4015                    | TT                              | CC                | 1946639159               |
| SNP_P3_146261_4016  | NW_004516396.1 | Scaffold1101 | 4016                    | GG                              | TT                | 1946639160               |
| SNP_P3_146263_8247  | NW_004516397.1 | Scaffold1102 | 8247                    | AA                              | GG                | 1946639161               |
| SNP_P3_146264_1710  | NW_004516398.1 | Scaffold1103 | 1710                    | GG                              | AA                | 1946639162               |
| SNP_P3_146265_1869  | NW_004516398.1 | Scaffold1103 | 1869                    | AA                              | GG                | 1946639163               |
| SNP_P3_146266_25202 | NW_004516398.1 | Scaffold1103 | 25202                   | CC                              | AA                | 1946639164               |
| SNP_P3_146267_25982 | NW_004516398.1 | Scaffold1103 | 25982                   | GG                              | AA                | 1946639165               |
| SNP_P3_146268_58382 | NW_004516401.1 | Scaffold1107 | 58382                   | TT                              | GG                | 1946639166               |
| SNP_P3_146269_71291 | NW_004516401.1 | Scaffold1107 | 71291                   | CC                              | TT                | 1946639167               |
| SNP_P3_146270_74862 | NW_004516401.1 | Scaffold1107 | 74862                   | CC                              | TT                | 1946639168               |
| SNP_P3_146272_75920 | NW_004516401.1 | Scaffold1107 | 75920                   | CC                              | TT                | 1946639171               |
| SNP_P3_146273_75931 | NW_004516401.1 | Scaffold1107 | 75931                   | GG                              | AA                | 1946639173               |
| SNP_P3_146274_82080 | NW_004516401.1 | Scaffold1107 | 82080                   | GG                              | AA                | 1946639175               |
| SNP_P3_146275_86264 | NW_004516401.1 | Scaffold1107 | 86264                   | TT                              | CC                | 1946639177               |
| SNP_P3_146276_87015 | NW_004516401.1 | Scaffold1107 | 87015                   | GG                              | TT                | 1946639179               |
| SNP_P3_146277_93946 | NW_004516401.1 | Scaffold1107 | 93946                   | GG                              | TT                | 1946639181               |
| SNP_P3_146278_94046 | NW_004516401.1 | Scaffold1107 | 94046                   | GG                              | TT                | 1946639183               |
| SNP_P3_146279_94067 | NW_004516401.1 | Scaffold1107 | 94067                   | CC                              | AA                | 1946639185               |
| SNP_P3_146280_94153 | NW_004516401.1 | Scaffold1107 | 94153                   | CC                              | AA                | 1946639187               |
| SNP_P3_146281_94158 | NW_004516401.1 | Scaffold1107 | 94158                   | GG                              | AA                | 1946639189               |
| SNP_P3_146282_94160 | NW_004516401.1 | Scaffold1107 | 94160                   | GG                              | TT                | 1946639190               |
| SNP_P3_146283_94203 | NW_004516401.1 | Scaffold1107 | 94203                   | CC                              | AA                | 1946639192               |

| SNPs IDs             | Chromosome IDs | Chromosomes  | Physical positions (bp) | CDC Frontier (Reference genome) | (Pusa 256 & HPNB) | NCBI SNPdb Accession IDs |
|----------------------|----------------|--------------|-------------------------|---------------------------------|-------------------|--------------------------|
| SNP_P3_146284_94205  | NW_004516401.1 | Scaffold1107 | 94205                   | AA                              | GG                | 1946639194               |
| SNP_P3_146285_94216  | NW_004516401.1 | Scaffold1107 | 94216                   | AA                              | CC                | 1946639196               |
| SNP_P3_146286_94241  | NW_004516401.1 | Scaffold1107 | 94241                   | AA                              | TT                | 1946639198               |
| SNP_P3_146287_100268 | NW_004516401.1 | Scaffold1107 | 100268                  | AA                              | TT                | 1946639200               |
| SNP_P3_146288_100305 | NW_004516401.1 | Scaffold1107 | 100305                  | AA                              | TT                | 1946639202               |
| SNP_P3_146289_100338 | NW_004516401.1 | Scaffold1107 | 100338                  | TT                              | CC                | 1946639204               |
| SNP_P3_146290_100714 | NW_004516401.1 | Scaffold1107 | 100714                  | TT                              | GG                | 1946639206               |
| SNP_P3_146291_843    | NW_004516402.1 | Scaffold1108 | 843                     | GG                              | TT                | 1946639208               |
| SNP_P3_146292_13196  | NW_004516403.1 | Scaffold1109 | 13196                   | AA                              | TT                | 1946639210               |
| SNP_P3_146293_13218  | NW_004516403.1 | Scaffold1109 | 13218                   | CC                              | TT                | 1946639213               |
| SNP_P3_146294_13461  | NW_004516403.1 | Scaffold1109 | 13461                   | TT                              | AA                | 1946639215               |
| SNP_P3_146295_13470  | NW_004516403.1 | Scaffold1109 | 13470                   | AA                              | GG                | 1946639216               |
| SNP_P3_146296_13479  | NW_004516403.1 | Scaffold1109 | 13479                   | CC                              | TT                | 1946639218               |
| SNP_P3_146297_13493  | NW_004516403.1 | Scaffold1109 | 13493                   | CC                              | AA                | 1946639220               |
| SNP_P3_146298_13494  | NW_004516403.1 | Scaffold1109 | 13494                   | GG                              | AA                | 1946639222               |
| SNP_P3_146299_13545  | NW_004516403.1 | Scaffold1109 | 13545                   | CC                              | GG                | 1946639224               |
| SNP_P3_146300_13549  | NW_004516403.1 | Scaffold1109 | 13549                   | AA                              | GG                | 1946639226               |
| SNP_P3_146301_13552  | NW_004516403.1 | Scaffold1109 | 13552                   | CC                              | TT                | 1946639228               |
| SNP_P3_146302_13573  | NW_004516403.1 | Scaffold1109 | 13573                   | AA                              | GG                | 1946639230               |
| SNP_P3_146303_13584  | NW_004516403.1 | Scaffold1109 | 13584                   | TT                              | GG                | 1946639232               |
| SNP_P3_146304_13593  | NW_004516403.1 | Scaffold1109 | 13593                   | AA                              | GG                | 1946639234               |
| SNP_P3_146305_13615  | NW_004516403.1 | Scaffold1109 | 13615                   | TT                              | AA                | 1946639236               |
| SNP_P3_146306_13627  | NW_004516403.1 | Scaffold1109 | 13627                   | AA                              | CC                | 1946639238               |
| SNP_P3_146307_13635  | NW_004516403.1 | Scaffold1109 | 13635                   | CC                              | AA                | 1946639240               |
| SNP_P3_146308_13658  | NW_004516403.1 | Scaffold1109 | 13658                   | TT                              | CC                | 1946639242               |
| SNP_P3_146309_13692  | NW_004516403.1 | Scaffold1109 | 13692                   | TT                              | CC                | 1946639244               |
| SNP_P3_146310_13714  | NW_004516403.1 | Scaffold1109 | 13714                   | AA                              | TT                | 1946639246               |
| SNP_P3_146311_13733  | NW_004516403.1 | Scaffold1109 | 13733                   | AA                              | GG                | 1946639248               |
| SNP_P3_146312_13776  | NW_004516403.1 | Scaffold1109 | 13776                   | TT                              | AA                | 1946639251               |
| SNP_P3_146313_13812  | NW_004516403.1 | Scaffold1109 | 13812                   | TT                              | GG                | 1946639253               |
| SNP_P3_146314_13819  | NW_004516403.1 | Scaffold1109 | 13819                   | TT                              | GG                | 1946639255               |
| SNP_P3_146315_13916  | NW_004516403.1 | Scaffold1109 | 13916                   | TT                              | GG                | 1946639257               |
| SNP_P3_146317_14045  | NW_004516403.1 | Scaffold1109 | 14045                   | CC                              | TT                | 1946639259               |
| SNP_P3_146319_14122  | NW_004516403.1 | Scaffold1109 | 14122                   | CC                              | TT                | 1946639261               |
| SNP_P3_146320_14184  | NW_004516403.1 | Scaffold1109 | 14184                   | TT                              | CC                | 1946639262               |
| SNP_P3_146321_14191  | NW_004516403.1 | Scaffold1109 | 14191                   | GG                              | AA                | 1946639264               |
| SNP_P3_146322_15596  | NW_004516403.1 | Scaffold1109 | 15596                   | CC                              | TT                | 1946639266               |
| SNP_P3_146323_21959  | NW_004516403.1 | Scaffold1109 | 21959                   | CC                              | TT                | 1946639268               |
| SNP_P3_146324_24154  | NW_004516403.1 | Scaffold1109 | 24154                   | AA                              | GG                | 1946639270               |
| SNP_P3_146325_24210  | NW_004516403.1 | Scaffold1109 | 24210                   | CC                              | GG                | 1946639272               |
| SNP_P3_146326_24481  | NW_004516403.1 | Scaffold1109 | 24481                   | CC                              | TT                | 1946639274               |
| SNP_P3_146327_26345  | NW_004516403.1 | Scaffold1109 | 26345                   | TT                              | GG                | 1946639276               |

| SNPs IDs             | Chromosome IDs | Chromosomes  | Physical positions (bp) | CDC Frontier (Reference genome) | (Pusa 256 & HPNB) | NCBI SNPdb Accession IDs |
|----------------------|----------------|--------------|-------------------------|---------------------------------|-------------------|--------------------------|
| SNP_P3_146328_26375  | NW_004516403.1 | Scaffold1109 | 26375                   | TT                              | CC                | 1946639278               |
| SNP_P3_146329_26390  | NW_004516403.1 | Scaffold1109 | 26390                   | AA                              | GG                | 1946639280               |
| SNP_P3_146330_26703  | NW_004516403.1 | Scaffold1109 | 26703                   | GG                              | AA                | 1946639282               |
| SNP_P3_146331_30143  | NW_004516403.1 | Scaffold1109 | 30143                   | TT                              | GG                | 1946639283               |
| SNP_P3_146332_37275  | NW_004516403.1 | Scaffold1109 | 37275                   | GG                              | AA                | 1946639285               |
| SNP_P3_146333_43827  | NW_004516403.1 | Scaffold1109 | 43827                   | TT                              | AA                | 1946639287               |
| SNP_P3_146334_97767  | NW_004516403.1 | Scaffold1109 | 97767                   | GG                              | AA                | 1946639289               |
| SNP_P3_146335_97810  | NW_004516403.1 | Scaffold1109 | 97810                   | AA                              | GG                | 1946639292               |
| SNP_P3_146336_97834  | NW_004516403.1 | Scaffold1109 | 97834                   | AA                              | TT                | 1946639294               |
| SNP_P3_146337_107002 | NW_004516403.1 | Scaffold1109 | 107002                  | GG                              | TT                | 1946639296               |
| SNP_P3_146338_107570 | NW_004516403.1 | Scaffold1109 | 107570                  | AA                              | CC                | 1946639298               |
| SNP_P3_146339_107933 | NW_004516403.1 | Scaffold1109 | 107933                  | AA                              | GG                | 1946639300               |
| SNP_P3_146340_107945 | NW_004516403.1 | Scaffold1109 | 107945                  | TT                              | AA                | 1946639302               |
| SNP_P3_146341_114282 | NW_004516403.1 | Scaffold1109 | 114282                  | GG                              | AA                | 1946639303               |
| SNP_P3_146343_120559 | NW_004516403.1 | Scaffold1109 | 120559                  | CC                              | AA                | 1946639305               |
| SNP_P3_146344_124832 | NW_004516403.1 | Scaffold1109 | 124832                  | GG                              | AA                | 1946639307               |
| SNP_P3_146345_149884 | NW_004516403.1 | Scaffold1109 | 149884                  | AA                              | CC                | 1946639309               |
| SNP_P3_146346_149906 | NW_004516403.1 | Scaffold1109 | 149906                  | GG                              | CC                | 1946639311               |
| SNP_P3_146347_149908 | NW_004516403.1 | Scaffold1109 | 149908                  | TT                              | CC                | 1946639313               |
| SNP_P3_146348_150089 | NW_004516403.1 | Scaffold1109 | 150089                  | GG                              | AA                | 1946639315               |
| SNP_P3_146349_150104 | NW_004516403.1 | Scaffold1109 | 150104                  | TT                              | CC                | 1946639317               |
| SNP_P3_146350_150117 | NW_004516403.1 | Scaffold1109 | 150117                  | GG                              | TT                | 1946639319               |
| SNP_P3_146351_150138 | NW_004516403.1 | Scaffold1109 | 150138                  | AA                              | TT                | 1946639321               |
| SNP_P3_146352_150145 | NW_004516403.1 | Scaffold1109 | 150145                  | GG                              | TT                | 1946639323               |
| SNP_P3_146353_150180 | NW_004516403.1 | Scaffold1109 | 150180                  | TT                              | GG                | 1946639325               |
| SNP_P3_146354_153511 | NW_004516403.1 | Scaffold1109 | 153511                  | TT                              | GG                | 1946639327               |
| SNP_P3_146355_160938 | NW_004516403.1 | Scaffold1109 | 160938                  | AA                              | GG                | 1946639329               |
| SNP_P3_146356_4286   | NW_004516405.1 | Scaffold1111 | 4286                    | AA                              | CC                | 1946639330               |
| SNP_P3_146357_4682   | NW_004516405.1 | Scaffold1111 | 4682                    | AA                              | GG                | 1946639333               |
| SNP_P3_146358_4686   | NW_004516405.1 | Scaffold1111 | 4686                    | TT                              | CC                | 1946639335               |
| SNP_P3_146359_4690   | NW_004516405.1 | Scaffold1111 | 4690                    | CC                              | TT                | 1946639337               |
| SNP_P3_146360_4988   | NW_004516405.1 | Scaffold1111 | 4988                    | GG                              | CC                | 1946639339               |
| SNP_P3_146361_6088   | NW_004516405.1 | Scaffold1111 | 6088                    | CC                              | TT                | 1946639341               |
| SNP_P3_146362_6127   | NW_004516405.1 | Scaffold1111 | 6127                    | CC                              | TT                | 1946639343               |
| SNP_P3_146363_22129  | NW_004516405.1 | Scaffold1111 | 22129                   | TT                              | GG                | 1946639345               |
| SNP_P3_146364_26710  | NW_004516405.1 | Scaffold1111 | 26710                   | AA                              | GG                | 1946639347               |
| SNP_P3_146365_26723  | NW_004516405.1 | Scaffold1111 | 26723                   | GG                              | AA                | 1946639349               |
| SNP_P3_146366_26726  | NW_004516405.1 | Scaffold1111 | 26726                   | AA                              | GG                | 1946639351               |
| SNP_P3_146367_26977  | NW_004516405.1 | Scaffold1111 | 26977                   | AA                              | TT                | 1946639352               |
| SNP_P3_146368_27869  | NW_004516405.1 | Scaffold1111 | 27869                   | GG                              | CC                | 1946639354               |
| SNP_P3_146369_27941  | NW_004516405.1 | Scaffold1111 | 27941                   | GG                              | TT                | 1946639356               |
| SNP_P3_146370_28155  | NW_004516405.1 | Scaffold1111 | 28155                   | TT                              | CC                | 1946639358               |

| SNPs IDs             | Chromosome IDs | Chromosomes  | Physical positions (bp) | CDC Frontier (Reference genome) | (Pusa 256 & HPNB) | NCBI SNPdb Accession IDs |
|----------------------|----------------|--------------|-------------------------|---------------------------------|-------------------|--------------------------|
| SNP_P3_146371_28260  | NW_004516405.1 | Scaffold1111 | 28260                   | TT                              | CC                | 1946639360               |
| SNP_P3_146372_28285  | NW_004516405.1 | Scaffold1111 | 28285                   | AA                              | GG                | 1946639362               |
| SNP_P3_146373_28294  | NW_004516405.1 | Scaffold1111 | 28294                   | AA                              | CC                | 1946639364               |
| SNP_P3_146374_11429  | NW_004516406.1 | Scaffold1113 | 11429                   | AA                              | TT                | 1946639366               |
| SNP_P3_146375_11632  | NW_004516406.1 | Scaffold1113 | 11632                   | CC                              | TT                | 1946639368               |
| SNP_P3_146376_11712  | NW_004516406.1 | Scaffold1113 | 11712                   | CC                              | TT                | 1946639370               |
| SNP_P3_146377_11714  | NW_004516406.1 | Scaffold1113 | 11714                   | AA                              | CC                | 1946639372               |
| SNP_P3_146378_17141  | NW_004516407.1 | Scaffold1114 | 17141                   | TT                              | CC                | 1946639375               |
| SNP_P3_146379_55817  | NW_004516407.1 | Scaffold1114 | 55817                   | CC                              | GG                | 1946639377               |
| SNP_P3_146380_71469  | NW_004516407.1 | Scaffold1114 | 71469                   | AA                              | GG                | 1946639379               |
| SNP_P3_146381_72037  | NW_004516407.1 | Scaffold1114 | 72037                   | TT                              | GG                | 1946639381               |
| SNP_P3_146382_72089  | NW_004516407.1 | Scaffold1114 | 72089                   | CC                              | AA                | 1946639383               |
| SNP_P3_146383_72207  | NW_004516407.1 | Scaffold1114 | 72207                   | TT                              | CC                | 1946639385               |
| SNP_P3_146384_72256  | NW_004516407.1 | Scaffold1114 | 72256                   | CC                              | TT                | 1946639387               |
| SNP_P3_146385_72840  | NW_004516407.1 | Scaffold1114 | 72840                   | TT                              | CC                | 1946639389               |
| SNP_P3_146386_82160  | NW_004516407.1 | Scaffold1114 | 82160                   | AA                              | TT                | 1946639390               |
| SNP_P3_146387_96288  | NW_004516407.1 | Scaffold1114 | 96288                   | CC                              | TT                | 1946639392               |
| SNP_P3_146388_101096 | NW_004516407.1 | Scaffold1114 | 101096                  | GG                              | AA                | 1946639394               |
| SNP_P3_146389_104534 | NW_004516407.1 | Scaffold1114 | 104534                  | GG                              | AA                | 1946639396               |
| SNP_P3_146390_104647 | NW_004516407.1 | Scaffold1114 | 104647                  | TT                              | AA                | 1946639398               |
| SNP_P3_146392_105313 | NW_004516407.1 | Scaffold1114 | 105313                  | CC                              | TT                | 1946639400               |
| SNP_P3_146394_814    | NW_004516408.1 | Scaffold1115 | 814                     | GG                              | AA                | 1946639402               |
| SNP_P3_146395_1043   | NW_004516408.1 | Scaffold1115 | 1043                    | AA                              | TT                | 1946639404               |
| SNP_P3_146396_11658  | NW_004516408.1 | Scaffold1115 | 11658                   | CC                              | TT                | 1946639406               |
| SNP_P3_146397_11682  | NW_004516408.1 | Scaffold1115 | 11682                   | TT                              | CC                | 1946639408               |
| SNP_P3_146399_53607  | NW_004516408.1 | Scaffold1115 | 53607                   | TT                              | GG                | 1946639410               |
| SNP_P3_146400_53683  | NW_004516408.1 | Scaffold1115 | 53683                   | GG                              | AA                | 1946639412               |
| SNP_P3_146401_55399  | NW_004516408.1 | Scaffold1115 | 55399                   | TT                              | AA                | 1946639415               |
| SNP_P3_146402_55400  | NW_004516408.1 | Scaffold1115 | 55400                   | AA                              | TT                | 1946639417               |
| SNP_P3_146404_89381  | NW_004516408.1 | Scaffold1115 | 89381                   | CC                              | AA                | 1946639419               |
| SNP_P3_146405_89383  | NW_004516408.1 | Scaffold1115 | 89383                   | GG                              | CC                | 1946639421               |
| SNP_P3_146406_90164  | NW_004516408.1 | Scaffold1115 | 90164                   | TT                              | GG                | 1946639423               |
| SNP_P3_146407_104496 | NW_004516408.1 | Scaffold1115 | 104496                  | GG                              | AA                | 1946639425               |
| SNP_P3_146408_152583 | NW_004516408.1 | Scaffold1115 | 152583                  | GG                              | TT                | 1946639427               |
| SNP_P3_146409_152862 | NW_004516408.1 | Scaffold1115 | 152862                  | GG                              | TT                | 1946639429               |
| SNP_P3_146410_152891 | NW_004516408.1 | Scaffold1115 | 152891                  | TT                              | CC                | 1946639431               |
| SNP_P3_146411_153028 | NW_004516408.1 | Scaffold1115 | 153028                  | CC                              | AA                | 1946639433               |
| SNP_P3_146412_2732   | NW_004516409.1 | Scaffold1116 | 2732                    | CC                              | TT                | 1946639435               |
| SNP_P3_146413_2860   | NW_004516409.1 | Scaffold1116 | 2860                    | TT                              | CC                | 1946639437               |
| SNP_P3_146414_2879   | NW_004516409.1 | Scaffold1116 | 2879                    | AA                              | GG                | 1946639439               |
| SNP_P3_146415_8034   | NW_004516409.1 | Scaffold1116 | 8034                    | CC                              | GG                | 1946639441               |
| SNP_P3_146416_10388  | NW_004516409.1 | Scaffold1116 | 10388                   | GG                              | TT                | 1946639442               |

| SNPs IDs            | Chromosome IDs | Chromosomes  | Physical positions (bp) | CDC Frontier (Reference genome) | (Pusa 256 & HPNB) | NCBI SNPdb Accession IDs |
|---------------------|----------------|--------------|-------------------------|---------------------------------|-------------------|--------------------------|
| SNP_P3_146417_10395 | NW_004516409.1 | Scaffold1116 | 10395                   | GG                              | AA                | 1946639444               |
| SNP_P3_146418_10448 | NW_004516409.1 | Scaffold1116 | 10448                   | AA                              | GG                | 1946639446               |
| SNP_P3_146420_11180 | NW_004516409.1 | Scaffold1116 | 11180                   | GG                              | AA                | 1946639448               |
| SNP_P3_146421_16329 | NW_004516409.1 | Scaffold1116 | 16329                   | CC                              | TT                | 1946639450               |
| SNP_P3_146422_16351 | NW_004516409.1 | Scaffold1116 | 16351                   | AA                              | GG                | 1946639453               |
| SNP_P3_146423_16356 | NW_004516409.1 | Scaffold1116 | 16356                   | TT                              | AA                | 1946639455               |
| SNP_P3_146424_19321 | NW_004516409.1 | Scaffold1116 | 19321                   | CC                              | TT                | 1946639457               |
| SNP_P3_146425_19350 | NW_004516409.1 | Scaffold1116 | 19350                   | CC                              | TT                | 1946639459               |
| SNP_P3_146426_24078 | NW_004516409.1 | Scaffold1116 | 24078                   | GG                              | CC                | 1946639461               |
| SNP_P3_146427_24287 | NW_004516409.1 | Scaffold1116 | 24287                   | CC                              | TT                | 1946639463               |
| SNP_P3_146428_25273 | NW_004516409.1 | Scaffold1116 | 25273                   | GG                              | AA                | 1946639465               |
| SNP_P3_146429_25299 | NW_004516409.1 | Scaffold1116 | 25299                   | GG                              | AA                | 1946639467               |
| SNP_P3_146430_25645 | NW_004516409.1 | Scaffold1116 | 25645                   | CC                              | TT                | 1946639469               |
| SNP_P3_146431_25709 | NW_004516409.1 | Scaffold1116 | 25709                   | CC                              | AA                | 1946639471               |
| SNP_P3_146432_25755 | NW_004516409.1 | Scaffold1116 | 25755                   | TT                              | CC                | 1946639473               |
| SNP_P3_146433_25757 | NW_004516409.1 | Scaffold1116 | 25757                   | AA                              | GG                | 1946639475               |
| SNP_P3_146434_25773 | NW_004516409.1 | Scaffold1116 | 25773                   | GG                              | AA                | 1946639477               |
| SNP_P3_146435_25847 | NW_004516409.1 | Scaffold1116 | 25847                   | AA                              | GG                | 1946639478               |
| SNP_P3_146436_28320 | NW_004516409.1 | Scaffold1116 | 28320                   | GG                              | AA                | 1946639480               |
| SNP_P3_146437_28328 | NW_004516409.1 | Scaffold1116 | 28328                   | CC                              | AA                | 1946639482               |
| SNP_P3_146438_28456 | NW_004516409.1 | Scaffold1116 | 28456                   | GG                              | TT                | 1946639484               |
| SNP_P3_146439_28467 | NW_004516409.1 | Scaffold1116 | 28467                   | AA                              | CC                | 1946639486               |
| SNP_P3_146440_28972 | NW_004516409.1 | Scaffold1116 | 28972                   | GG                              | TT                | 1946639488               |
| SNP_P3_146441_28973 | NW_004516409.1 | Scaffold1116 | 28973                   | AA                              | CC                | 1946639490               |
| SNP_P3_146442_29146 | NW_004516409.1 | Scaffold1116 | 29146                   | TT                              | CC                | 1946639492               |
| SNP_P3_146443_29159 | NW_004516409.1 | Scaffold1116 | 29159                   | TT                              | AA                | 1946639495               |
| SNP_P3_146444_29197 | NW_004516409.1 | Scaffold1116 | 29197                   | CC                              | TT                | 1946639497               |
| SNP_P3_146445_29216 | NW_004516409.1 | Scaffold1116 | 29216                   | CC                              | TT                | 1946639499               |
| SNP_P3_146446_29512 | NW_004516409.1 | Scaffold1116 | 29512                   | TT                              | AA                | 1946639501               |
| SNP_P3_146447_29538 | NW_004516409.1 | Scaffold1116 | 29538                   | CC                              | TT                | 1946639503               |
| SNP_P3_146448_29890 | NW_004516409.1 | Scaffold1116 | 29890                   | AA                              | CC                | 1946639505               |
| SNP_P3_146449_31076 | NW_004516409.1 | Scaffold1116 | 31076                   | AA                              | CC                | 1946639507               |
| SNP_P3_146450_31161 | NW_004516409.1 | Scaffold1116 | 31161                   | TT                              | GG                | 1946639509               |
| SNP_P3_146451_31232 | NW_004516409.1 | Scaffold1116 | 31232                   | CC                              | TT                | 1946639511               |
| SNP_P3_146452_31243 | NW_004516409.1 | Scaffold1116 | 31243                   | CC                              | AA                | 1946639513               |
| SNP_P3_146453_31433 | NW_004516409.1 | Scaffold1116 | 31433                   | TT                              | CC                | 1946639514               |
| SNP_P3_146454_31434 | NW_004516409.1 | Scaffold1116 | 31434                   | GG                              | CC                | 1946639516               |
| SNP_P3_146455_31530 | NW_004516409.1 | Scaffold1116 | 31530                   | GG                              | AA                | 1946639518               |
| SNP_P3_146456_31819 | NW_004516409.1 | Scaffold1116 | 31819                   | AA                              | TT                | 1946639520               |
| SNP_P3_146457_32461 | NW_004516409.1 | Scaffold1116 | 32461                   | TT                              | AA                | 1946639522               |
| SNP_P3_146458_33612 | NW_004516409.1 | Scaffold1116 | 33612                   | TT                              | AA                | 1946639524               |
| SNP_P3_146459_42596 | NW_004516409.1 | Scaffold1116 | 42596                   | CC                              | TT                | 1946639526               |

| SNPs IDs             | Chromosome IDs | Chromosomes  | Physical positions (bp) | CDC Frontier (Reference genome) | (Pusa 256 & HPNB) | NCBI SNPdb Accession IDs |
|----------------------|----------------|--------------|-------------------------|---------------------------------|-------------------|--------------------------|
| SNP_P3_146460_42626  | NW_004516409.1 | Scaffold1116 | 42626                   | AA                              | GG                | 1946639528               |
| SNP_P3_146462_42832  | NW_004516409.1 | Scaffold1116 | 42832                   | TT                              | CC                | 1946639530               |
| SNP_P3_146463_42833  | NW_004516409.1 | Scaffold1116 | 42833                   | AA                              | GG                | 1946639532               |
| SNP_P3_146464_45098  | NW_004516409.1 | Scaffold1116 | 45098                   | GG                              | AA                | 1946639535               |
| SNP_P3_146466_59894  | NW_004516409.1 | Scaffold1116 | 59894                   | GG                              | AA                | 1946639537               |
| SNP_P3_146467_60362  | NW_004516409.1 | Scaffold1116 | 60362                   | GG                              | TT                | 1946639539               |
| SNP_P3_146468_63229  | NW_004516409.1 | Scaffold1116 | 63229                   | CC                              | AA                | 1946639541               |
| SNP_P3_146469_70548  | NW_004516409.1 | Scaffold1116 | 70548                   | GG                              | AA                | 1946639543               |
| SNP_P3_146470_70670  | NW_004516409.1 | Scaffold1116 | 70670                   | CC                              | TT                | 1946639544               |
| SNP_P3_146471_70754  | NW_004516409.1 | Scaffold1116 | 70754                   | CC                              | TT                | 1946639546               |
| SNP_P3_146472_70803  | NW_004516409.1 | Scaffold1116 | 70803                   | GG                              | AA                | 1946639548               |
| SNP_P3_146473_70823  | NW_004516409.1 | Scaffold1116 | 70823                   | AA                              | GG                | 1946639550               |
| SNP_P3_146474_70842  | NW_004516409.1 | Scaffold1116 | 70842                   | AA                              | TT                | 1946639552               |
| SNP_P3_146475_70845  | NW_004516409.1 | Scaffold1116 | 70845                   | TT                              | CC                | 1946639554               |
| SNP_P3_146476_71150  | NW_004516409.1 | Scaffold1116 | 71150                   | AA                              | GG                | 1946639556               |
| SNP_P3_146477_73687  | NW_004516409.1 | Scaffold1116 | 73687                   | CC                              | AA                | 1946639558               |
| SNP_P3_146478_73693  | NW_004516409.1 | Scaffold1116 | 73693                   | CC                              | GG                | 1946639560               |
| SNP_P3_146479_73705  | NW_004516409.1 | Scaffold1116 | 73705                   | GG                              | AA                | 1946639562               |
| SNP_P3_146480_73752  | NW_004516409.1 | Scaffold1116 | 73752                   | CC                              | TT                | 1946639563               |
| SNP_P3_146481_73774  | NW_004516409.1 | Scaffold1116 | 73774                   | TT                              | GG                | 1946639565               |
| SNP_P3_146482_78051  | NW_004516409.1 | Scaffold1116 | 78051                   | GG                              | TT                | 1946639567               |
| SNP_P3_146483_78295  | NW_004516409.1 | Scaffold1116 | 78295                   | TT                              | GG                | 1946639569               |
| SNP_P3_146484_78303  | NW_004516409.1 | Scaffold1116 | 78303                   | TT                              | GG                | 1946639571               |
| SNP_P3_146485_78993  | NW_004516409.1 | Scaffold1116 | 78993                   | AA                              | GG                | 1946639575               |
| SNP_P3_146486_79206  | NW_004516409.1 | Scaffold1116 | 79206                   | AA                              | GG                | 1946639577               |
| SNP_P3_146487_79393  | NW_004516409.1 | Scaffold1116 | 79393                   | AA                              | GG                | 1946639578               |
| SNP_P3_146488_79695  | NW_004516409.1 | Scaffold1116 | 79695                   | CC                              | TT                | 1946639580               |
| SNP_P3_146489_84784  | NW_004516409.1 | Scaffold1116 | 84784                   | GG                              | AA                | 1946639582               |
| SNP_P3_146490_94594  | NW_004516409.1 | Scaffold1116 | 94594                   | TT                              | CC                | 1946639584               |
| SNP_P3_146491_94657  | NW_004516409.1 | Scaffold1116 | 94657                   | CC                              | GG                | 1946639586               |
| SNP_P3_146492_94701  | NW_004516409.1 | Scaffold1116 | 94701                   | TT                              | CC                | 1946639588               |
| SNP_P3_146493_94717  | NW_004516409.1 | Scaffold1116 | 94717                   | AA                              | GG                | 1946639590               |
| SNP_P3_146494_94730  | NW_004516409.1 | Scaffold1116 | 94730                   | TT                              | GG                | 1946639592               |
| SNP_P3_146496_97818  | NW_004516409.1 | Scaffold1116 | 97818                   | AA                              | GG                | 1946639594               |
| SNP_P3_146497_113563 | NW_004516409.1 | Scaffold1116 | 113563                  | AA                              | GG                | 1946639596               |
| SNP_P3_146498_113604 | NW_004516409.1 | Scaffold1116 | 113604                  | AA                              | TT                | 1946639597               |
| SNP_P3_146499_113611 | NW_004516409.1 | Scaffold1116 | 113611                  | GG                              | CC                | 1946639599               |
| SNP_P3_146500_113636 | NW_004516409.1 | Scaffold1116 | 113636                  | AA                              | CC                | 1946639601               |
| SNP_P3_146501_113946 | NW_004516409.1 | Scaffold1116 | 113946                  | AA                              | GG                | 1946639603               |
| SNP_P3_146502_116284 | NW_004516409.1 | Scaffold1116 | 116284                  | CC                              | TT                | 1946639605               |
| SNP_P3_146503_116352 | NW_004516409.1 | Scaffold1116 | 116352                  | TT                              | CC                | 1946639607               |
| SNP_P3_146504_116369 | NW_004516409.1 | Scaffold1116 | 116369                  | AA                              | GG                | 1946639609               |

| SNPs IDs             | Chromosome IDs | Chromosomes  | Physical positions (bp) | CDC Frontier (Reference genome) | (Pusa 256 & HPNB) | NCBI SNPdb Accession IDs |
|----------------------|----------------|--------------|-------------------------|---------------------------------|-------------------|--------------------------|
| SNP_P3_146505_116664 | NW_004516409.1 | Scaffold1116 | 116664                  | AA                              | CC                | 1946639611               |
| SNP_P3_146506_118009 | NW_004516409.1 | Scaffold1116 | 118009                  | TT                              | CC                | 1946639614               |
| SNP_P3_146507_118050 | NW_004516409.1 | Scaffold1116 | 118050                  | CC                              | TT                | 1946639616               |
| SNP_P3_146509_118307 | NW_004516409.1 | Scaffold1116 | 118307                  | GG                              | CC                | 1946639618               |
| SNP_P3_146510_118320 | NW_004516409.1 | Scaffold1116 | 118320                  | TT                              | CC                | 1946639620               |
| SNP_P3_146511_119318 | NW_004516409.1 | Scaffold1116 | 119318                  | TT                              | CC                | 1946639622               |
| SNP_P3_146512_120845 | NW_004516409.1 | Scaffold1116 | 120845                  | GG                              | AA                | 1946639624               |
| SNP_P3_146513_120868 | NW_004516409.1 | Scaffold1116 | 120868                  | AA                              | GG                | 1946639626               |
| SNP_P3_146514_122585 | NW_004516409.1 | Scaffold1116 | 122585                  | GG                              | CC                | 1946639628               |
| SNP_P3_146515_122634 | NW_004516409.1 | Scaffold1116 | 122634                  | TT                              | AA                | 1946639629               |
| SNP_P3_146516_122649 | NW_004516409.1 | Scaffold1116 | 122649                  | AA                              | GG                | 1946639631               |
| SNP_P3_146517_122680 | NW_004516409.1 | Scaffold1116 | 122680                  | AA                              | GG                | 1946639633               |
| SNP_P3_146518_122687 | NW_004516409.1 | Scaffold1116 | 122687                  | AA                              | CC                | 1946639635               |
| SNP_P3_146519_122772 | NW_004516409.1 | Scaffold1116 | 122772                  | GG                              | AA                | 1946639637               |
| SNP_P3_146520_122865 | NW_004516409.1 | Scaffold1116 | 122865                  | TT                              | CC                | 1946639639               |
| SNP_P3_146521_122874 | NW_004516409.1 | Scaffold1116 | 122874                  | AA                              | CC                | 1946639641               |
| SNP_P3_146522_122884 | NW_004516409.1 | Scaffold1116 | 122884                  | AA                              | GG                | 1946639642               |
| SNP_P3_146523_122942 | NW_004516409.1 | Scaffold1116 | 122942                  | TT                              | AA                | 1946639643               |
| SNP_P3_146524_131440 | NW_004516409.1 | Scaffold1116 | 131440                  | GG                              | AA                | 1946639644               |
| SNP_P3_146525_131975 | NW_004516409.1 | Scaffold1116 | 131975                  | CC                              | TT                | 1946639645               |
| SNP_P3_146527_132336 | NW_004516409.1 | Scaffold1116 | 132336                  | CC                              | TT                | 1946639646               |
| SNP_P3_146528_132682 | NW_004516409.1 | Scaffold1116 | 132682                  | CC                              | TT                | 1946639647               |
| SNP_P3_146529_132946 | NW_004516409.1 | Scaffold1116 | 132946                  | CC                              | TT                | 1946639650               |
| SNP_P3_146530_132960 | NW_004516409.1 | Scaffold1116 | 132960                  | GG                              | AA                | 1946639651               |
| SNP_P3_146531_135355 | NW_004516409.1 | Scaffold1116 | 135355                  | AA                              | GG                | 1946639653               |
| SNP_P3_146532_135371 | NW_004516409.1 | Scaffold1116 | 135371                  | AA                              | GG                | 1946639655               |
| SNP_P3_146533_135540 | NW_004516409.1 | Scaffold1116 | 135540                  | AA                              | GG                | 1946639657               |
| SNP_P3_146534_135783 | NW_004516409.1 | Scaffold1116 | 135783                  | AA                              | GG                | 1946639659               |
| SNP_P3_146535_136041 | NW_004516409.1 | Scaffold1116 | 136041                  | TT                              | CC                | 1946639661               |
| SNP_P3_146536_136059 | NW_004516409.1 | Scaffold1116 | 136059                  | TT                              | AA                | 1946639663               |
| SNP_P3_146538_141685 | NW_004516409.1 | Scaffold1116 | 141685                  | TT                              | AA                | 1946639665               |
| SNP_P3_146539_144830 | NW_004516409.1 | Scaffold1116 | 144830                  | GG                              | TT                | 1946639667               |
| SNP_P3_146540_144835 | NW_004516409.1 | Scaffold1116 | 144835                  | CC                              | TT                | 1946639669               |
| SNP_P3_146541_144836 | NW_004516409.1 | Scaffold1116 | 144836                  | AA                              | GG                | 1946639670               |
| SNP_P3_146542_144845 | NW_004516409.1 | Scaffold1116 | 144845                  | AA                              | TT                | 1946639672               |
| SNP_P3_146543_144854 | NW_004516409.1 | Scaffold1116 | 144854                  | AA                              | GG                | 1946639674               |
| SNP_P3_146544_144869 | NW_004516409.1 | Scaffold1116 | 144869                  | TT                              | CC                | 1946639676               |
| SNP_P3_146545_144910 | NW_004516409.1 | Scaffold1116 | 144910                  | CC                              | GG                | 1946639678               |
| SNP_P3_146546_145037 | NW_004516409.1 | Scaffold1116 | 145037                  | AA                              | CC                | 1946639680               |
| SNP_P3_146547_1685   | NW_004516410.1 | Scaffold1118 | 1685                    | AA                              | GG                | 1946639682               |
| SNP_P3_146548_1747   | NW_004516410.1 | Scaffold1118 | 1747                    | GG                              | TT                | 1946639684               |
| SNP_P3_146549_2044   | NW_004516410.1 | Scaffold1118 | 2044                    | TT                              | CC                | 1946639686               |

| SNPs IDs            | Chromosome IDs | Chromosomes  | Physical positions (bp) | CDC Frontier (Reference genome) | (Pusa 256 & HPNB) | NCBI SNPdb Accession IDs |
|---------------------|----------------|--------------|-------------------------|---------------------------------|-------------------|--------------------------|
| SNP_P3_146550_2215  | NW_004516410.1 | Scaffold1118 | 2215                    | TT                              | CC                | 1946639689               |
| SNP_P3_146551_2224  | NW_004516410.1 | Scaffold1118 | 2224                    | TT                              | AA                | 1946639691               |
| SNP_P3_146552_2226  | NW_004516410.1 | Scaffold1118 | 2226                    | TT                              | GG                | 1946639693               |
| SNP_P3_146553_9099  | NW_004516410.1 | Scaffold1118 | 9099                    | GG                              | AA                | 1946639695               |
| SNP_P3_146554_9110  | NW_004516410.1 | Scaffold1118 | 9110                    | AA                              | GG                | 1946639697               |
| SNP_P3_146555_9111  | NW_004516410.1 | Scaffold1118 | 9111                    | CC                              | GG                | 1946639699               |
| SNP_P3_146556_9246  | NW_004516410.1 | Scaffold1118 | 9246                    | AA                              | GG                | 1946639701               |
| SNP_P3_146557_9429  | NW_004516410.1 | Scaffold1118 | 9429                    | CC                              | GG                | 1946639703               |
| SNP_P3_146558_9442  | NW_004516410.1 | Scaffold1118 | 9442                    | GG                              | TT                | 1946639705               |
| SNP_P3_146559_9556  | NW_004516410.1 | Scaffold1118 | 9556                    | CC                              | TT                | 1946639707               |
| SNP_P3_146560_9741  | NW_004516410.1 | Scaffold1118 | 9741                    | TT                              | AA                | 1946639708               |
| SNP_P3_146561_9745  | NW_004516410.1 | Scaffold1118 | 9745                    | AA                              | CC                | 1946639710               |
| SNP_P3_146562_9852  | NW_004516410.1 | Scaffold1118 | 9852                    | CC                              | GG                | 1946639712               |
| SNP_P3_146563_19003 | NW_004516410.1 | Scaffold1118 | 19003                   | TT                              | CC                | 1946639714               |
| SNP_P3_146564_20161 | NW_004516410.1 | Scaffold1118 | 20161                   | CC                              | TT                | 1946639716               |
| SNP_P3_146565_20226 | NW_004516410.1 | Scaffold1118 | 20226                   | AA                              | GG                | 1946639718               |
| SNP_P3_146566_20286 | NW_004516410.1 | Scaffold1118 | 20286                   | TT                              | CC                | 1946639720               |
| SNP_P3_146567_20552 | NW_004516410.1 | Scaffold1118 | 20552                   | GG                              | AA                | 1946639722               |
| SNP_P3_146568_20588 | NW_004516410.1 | Scaffold1118 | 20588                   | CC                              | TT                | 1946639724               |
| SNP_P3_146569_20608 | NW_004516410.1 | Scaffold1118 | 20608                   | TT                              | CC                | 1946639726               |
| SNP_P3_146570_20655 | NW_004516410.1 | Scaffold1118 | 20655                   | GG                              | AA                | 1946639729               |
| SNP_P3_146571_24116 | NW_004516410.1 | Scaffold1118 | 24116                   | CC                              | TT                | 1946639731               |
| SNP_P3_146572_26017 | NW_004516410.1 | Scaffold1118 | 26017                   | CC                              | TT                | 1946639733               |
| SNP_P3_146573_26062 | NW_004516410.1 | Scaffold1118 | 26062                   | GG                              | TT                | 1946639735               |
| SNP_P3_146574_26095 | NW_004516410.1 | Scaffold1118 | 26095                   | GG                              | CC                | 1946639737               |
| SNP_P3_146575_26185 | NW_004516410.1 | Scaffold1118 | 26185                   | AA                              | GG                | 1946639739               |
| SNP_P3_146576_26209 | NW_004516410.1 | Scaffold1118 | 26209                   | TT                              | CC                | 1946639740               |
| SNP_P3_146577_26230 | NW_004516410.1 | Scaffold1118 | 26230                   | TT                              | AA                | 1946639741               |
| SNP_P3_146578_26232 | NW_004516410.1 | Scaffold1118 | 26232                   | AA                              | GG                | 1946639742               |
| SNP_P3_146579_26239 | NW_004516410.1 | Scaffold1118 | 26239                   | GG                              | AA                | 1946639743               |
| SNP_P3_146580_26244 | NW_004516410.1 | Scaffold1118 | 26244                   | AA                              | GG                | 1946639744               |
| SNP_P3_146581_26357 | NW_004516410.1 | Scaffold1118 | 26357                   | TT                              | CC                | 1946639745               |
| SNP_P3_146582_26360 | NW_004516410.1 | Scaffold1118 | 26360                   | CC                              | TT                | 1946639747               |
| SNP_P3_146583_26378 | NW_004516410.1 | Scaffold1118 | 26378                   | AA                              | GG                | 1946639749               |
| SNP_P3_146584_26383 | NW_004516410.1 | Scaffold1118 | 26383                   | GG                              | AA                | 1946639751               |
| SNP_P3_146585_26626 | NW_004516410.1 | Scaffold1118 | 26626                   | GG                              | AA                | 1946639754               |
| SNP_P3_146586_26645 | NW_004516410.1 | Scaffold1118 | 26645                   | AA                              | TT                | 1946639756               |
| SNP_P3_146588_32320 | NW_004516410.1 | Scaffold1118 | 32320                   | AA                              | GG                | 1946639758               |
| SNP_P3_146589_32507 | NW_004516410.1 | Scaffold1118 | 32507                   | TT                              | CC                | 1946639760               |
| SNP_P3_146590_33241 | NW_004516410.1 | Scaffold1118 | 33241                   | GG                              | AA                | 1946639762               |
| SNP_P3_146591_33281 | NW_004516410.1 | Scaffold1118 | 33281                   | TT                              | CC                | 1946639764               |
| SNP_P3_146592_34350 | NW_004516410.1 | Scaffold1118 | 34350                   | GG                              | TT                | 1946639766               |



| SNPs IDs            | Chromosome IDs | Chromosomes  | Physical positions (bp) | CDC Frontier (Reference genome) | (Pusa 256 & HPNB) | NCBI SNPdb Accession IDs |
|---------------------|----------------|--------------|-------------------------|---------------------------------|-------------------|--------------------------|
| SNP_P3_146593_34380 | NW_004516410.1 | Scaffold1118 | 34380                   | AA                              | CC                | 1946639768               |
| SNP_P3_146594_34573 | NW_004516410.1 | Scaffold1118 | 34573                   | AA                              | CC                | 1946639770               |
| SNP_P3_146596_7594  | NW_004516411.1 | Scaffold1120 | 7594                    | CC                              | TT                | 1946639772               |
| SNP_P3_146597_7726  | NW_004516411.1 | Scaffold1120 | 7726                    | AA                              | GG                | 1946639774               |
| SNP_P3_146598_11024 | NW_004516411.1 | Scaffold1120 | 11024                   | AA                              | CC                | 1946639776               |
| SNP_P3_146599_11032 | NW_004516411.1 | Scaffold1120 | 11032                   | AA                              | GG                | 1946639778               |
| SNP_P3_146600_11037 | NW_004516411.1 | Scaffold1120 | 11037                   | CC                              | TT                | 1946639780               |
| SNP_P3_146601_11049 | NW_004516411.1 | Scaffold1120 | 11049                   | AA                              | GG                | 1946639782               |
| SNP_P3_146602_11088 | NW_004516411.1 | Scaffold1120 | 11088                   | GG                              | AA                | 1946639784               |
| SNP_P3_146603_11098 | NW_004516411.1 | Scaffold1120 | 11098                   | TT                              | CC                | 1946639786               |
| SNP_P3_146605_11179 | NW_004516411.1 | Scaffold1120 | 11179                   | TT                              | CC                | 1946639788               |
| SNP_P3_146606_11189 | NW_004516411.1 | Scaffold1120 | 11189                   | CC                              | AA                | 1946639789               |
| SNP_P3_146607_11345 | NW_004516411.1 | Scaffold1120 | 11345                   | CC                              | TT                | 1946639791               |
| SNP_P3_146608_11366 | NW_004516411.1 | Scaffold1120 | 11366                   | AA                              | GG                | 1946639792               |
| SNP_P3_146609_11408 | NW_004516411.1 | Scaffold1120 | 11408                   | GG                              | AA                | 1946639793               |
| SNP_P3_146610_13816 | NW_004516411.1 | Scaffold1120 | 13816                   | TT                              | AA                | 1946639794               |
| SNP_P3_146611_14991 | NW_004516411.1 | Scaffold1120 | 14991                   | CC                              | TT                | 1946639795               |
| SNP_P3_146612_15591 | NW_004516411.1 | Scaffold1120 | 15591                   | TT                              | CC                | 1946639797               |
| SNP_P3_146613_18340 | NW_004516411.1 | Scaffold1120 | 18340                   | CC                              | GG                | 1946639798               |
| SNP_P3_146614_18355 | NW_004516411.1 | Scaffold1120 | 18355                   | AA                              | GG                | 1946639800               |
| SNP_P3_146615_18380 | NW_004516411.1 | Scaffold1120 | 18380                   | CC                              | GG                | 1946639802               |
| SNP_P3_146616_23183 | NW_004516411.1 | Scaffold1120 | 23183                   | AA                              | GG                | 1946639804               |
| SNP_P3_146617_26554 | NW_004516411.1 | Scaffold1120 | 26554                   | CC                              | TT                | 1946639806               |
| SNP_P3_146618_26788 | NW_004516411.1 | Scaffold1120 | 26788                   | GG                              | TT                | 1946639808               |
| SNP_P3_146619_32196 | NW_004516411.1 | Scaffold1120 | 32196                   | TT                              | AA                | 1946639810               |
| SNP_P3_146620_37573 | NW_004516411.1 | Scaffold1120 | 37573                   | GG                              | TT                | 1946639812               |
| SNP_P3_146621_39638 | NW_004516411.1 | Scaffold1120 | 39638                   | GG                              | AA                | 1946639814               |
| SNP_P3_146622_44639 | NW_004516411.1 | Scaffold1120 | 44639                   | AA                              | TT                | 1946639816               |
| SNP_P3_146624_44673 | NW_004516411.1 | Scaffold1120 | 44673                   | TT                              | GG                | 1946639818               |
| SNP_P3_146625_44682 | NW_004516411.1 | Scaffold1120 | 44682                   | CC                              | TT                | 1946639820               |
| SNP_P3_146626_44683 | NW_004516411.1 | Scaffold1120 | 44683                   | AA                              | TT                | 1946639822               |
| SNP_P3_146627_44684 | NW_004516411.1 | Scaffold1120 | 44684                   | CC                              | GG                | 1946639824               |
| SNP_P3_146628_53417 | NW_004516411.1 | Scaffold1120 | 53417                   | CC                              | TT                | 1946639826               |
| SNP_P3_146629_53482 | NW_004516411.1 | Scaffold1120 | 53482                   | TT                              | GG                | 1946639829               |
| SNP_P3_146630_926   | NW_004516412.1 | Scaffold1123 | 926                     | TT                              | AA                | 1946639831               |
| SNP_P3_146631_1012  | NW_004516412.1 | Scaffold1123 | 1012                    | CC                              | AA                | 1946639832               |
| SNP_P3_146632_1047  | NW_004516412.1 | Scaffold1123 | 1047                    | AA                              | GG                | 1946639834               |
| SNP_P3_146633_948   | NW_004516414.1 | Scaffold1126 | 948                     | AA                              | TT                | 1946639836               |
| SNP_P3_146634_3923  | NW_004516414.1 | Scaffold1126 | 3923                    | TT                              | CC                | 1946639838               |
| SNP_P3_146635_4197  | NW_004516414.1 | Scaffold1126 | 4197                    | TT                              | CC                | 1946639840               |
| SNP_P3_146636_4277  | NW_004516414.1 | Scaffold1126 | 4277                    | TT                              | AA                | 1946639842               |
| SNP_P3_146637_4283  | NW_004516414.1 | Scaffold1126 | 4283                    | TT                              | GG                | 1946639844               |

| SNPs IDs             | Chromosome IDs | Chromosomes  | Physical positions (bp) | CDC Frontier (Reference genome) | (Pusa 256 & HPNB) | NCBI SNPdb Accession IDs |
|----------------------|----------------|--------------|-------------------------|---------------------------------|-------------------|--------------------------|
| SNP_P3_146638_5389   | NW_004516414.1 | Scaffold1126 | 5389                    | CC                              | AA                | 1946639846               |
| SNP_P3_146639_5710   | NW_004516414.1 | Scaffold1126 | 5710                    | AA                              | GG                | 1946639848               |
| SNP_P3_146640_5890   | NW_004516414.1 | Scaffold1126 | 5890                    | TT                              | AA                | 1946639850               |
| SNP_P3_146641_5891   | NW_004516414.1 | Scaffold1126 | 5891                    | AA                              | GG                | 1946639851               |
| SNP_P3_146642_9903   | NW_004516414.1 | Scaffold1126 | 9903                    | TT                              | GG                | 1946639853               |
| SNP_P3_146643_10125  | NW_004516414.1 | Scaffold1126 | 10125                   | AA                              | GG                | 1946639855               |
| SNP_P3_146644_122    | NW_004516415.1 | Scaffold1127 | 122                     | TT                              | CC                | 1946639857               |
| SNP_P3_146645_406    | NW_004516415.1 | Scaffold1127 | 406                     | CC                              | AA                | 1946639859               |
| SNP_P3_146646_20852  | NW_004516416.1 | Scaffold1128 | 20852                   | GG                              | CC                | 1946639861               |
| SNP_P3_146647_21167  | NW_004516416.1 | Scaffold1128 | 21167                   | GG                              | AA                | 1946639863               |
| SNP_P3_146648_21526  | NW_004516416.1 | Scaffold1128 | 21526                   | CC                              | TT                | 1946639865               |
| SNP_P3_146649_25385  | NW_004516416.1 | Scaffold1128 | 25385                   | CC                              | TT                | 1946639867               |
| SNP_P3_146651_27854  | NW_004516416.1 | Scaffold1128 | 27854                   | AA                              | CC                | 1946639870               |
| SNP_P3_146652_27902  | NW_004516416.1 | Scaffold1128 | 27902                   | TT                              | CC                | 1946639872               |
| SNP_P3_146653_28123  | NW_004516416.1 | Scaffold1128 | 28123                   | AA                              | GG                | 1946639874               |
| SNP_P3_146654_28144  | NW_004516416.1 | Scaffold1128 | 28144                   | AA                              | GG                | 1946639876               |
| SNP_P3_146655_28155  | NW_004516416.1 | Scaffold1128 | 28155                   | TT                              | AA                | 1946639878               |
| SNP_P3_146656_48970  | NW_004516416.1 | Scaffold1128 | 48970                   | TT                              | CC                | 1946639880               |
| SNP_P3_146657_58067  | NW_004516416.1 | Scaffold1128 | 58067                   | GG                              | AA                | 1946639882               |
| SNP_P3_146658_73954  | NW_004516416.1 | Scaffold1128 | 73954                   | CC                              | TT                | 1946639884               |
| SNP_P3_146659_73956  | NW_004516416.1 | Scaffold1128 | 73956                   | AA                              | CC                | 1946639886               |
| SNP_P3_146660_75564  | NW_004516416.1 | Scaffold1128 | 75564                   | CC                              | TT                | 1946639888               |
| SNP_P3_146661_82225  | NW_004516416.1 | Scaffold1128 | 82225                   | GG                              | AA                | 1946639890               |
| SNP_P3_146662_92764  | NW_004516416.1 | Scaffold1128 | 92764                   | TT                              | AA                | 1946639892               |
| SNP_P3_146663_96030  | NW_004516416.1 | Scaffold1128 | 96030                   | AA                              | GG                | 1946639894               |
| SNP_P3_146664_99724  | NW_004516416.1 | Scaffold1128 | 99724                   | GG                              | AA                | 1946639895               |
| SNP_P3_146665_113791 | NW_004516416.1 | Scaffold1128 | 113791                  | AA                              | TT                | 1946639897               |
| SNP_P3_146666_123449 | NW_004516416.1 | Scaffold1128 | 123449                  | TT                              | CC                | 1946639899               |
| SNP_P3_146668_143349 | NW_004516416.1 | Scaffold1128 | 143349                  | CC                              | TT                | 1946639901               |
| SNP_P3_146669_143350 | NW_004516416.1 | Scaffold1128 | 143350                  | CC                              | AA                | 1946639903               |
| SNP_P3_146671_146108 | NW_004516416.1 | Scaffold1128 | 146108                  | CC                              | TT                | 1946639905               |
| SNP_P3_146672_146176 | NW_004516416.1 | Scaffold1128 | 146176                  | CC                              | TT                | 1946639907               |
| SNP_P3_146673_146382 | NW_004516416.1 | Scaffold1128 | 146382                  | TT                              | CC                | 1946639910               |
| SNP_P3_146674_146451 | NW_004516416.1 | Scaffold1128 | 146451                  | TT                              | CC                | 1946639912               |
| SNP_P3_146675_146453 | NW_004516416.1 | Scaffold1128 | 146453                  | TT                              | GG                | 1946639914               |
| SNP_P3_146676_148704 | NW_004516416.1 | Scaffold1128 | 148704                  | GG                              | TT                | 1946639916               |
| SNP_P3_146678_154182 | NW_004516416.1 | Scaffold1128 | 154182                  | GG                              | AA                | 1946639918               |
| SNP_P3_146679_178100 | NW_004516416.1 | Scaffold1128 | 178100                  | CC                              | TT                | 1946639920               |
| SNP_P3_146681_190525 | NW_004516416.1 | Scaffold1128 | 190525                  | AA                              | GG                | 1946639922               |
| SNP_P3_146682_215600 | NW_004516416.1 | Scaffold1128 | 215600                  | GG                              | AA                | 1946639923               |
| SNP_P3_146684_219836 | NW_004516416.1 | Scaffold1128 | 219836                  | AA                              | TT                | 1946639925               |
| SNP_P3_146685_229104 | NW_004516416.1 | Scaffold1128 | 229104                  | TT                              | AA                | 1946639927               |

| SNPs IDs             | Chromosome IDs | Chromosomes  | Physical positions (bp) | CDC Frontier (Reference genome) | (Pusa 256 & HPNB) | NCBI SNPdb Accession IDs |
|----------------------|----------------|--------------|-------------------------|---------------------------------|-------------------|--------------------------|
| SNP_P3_146686_229865 | NW_004516416.1 | Scaffold1128 | 229865                  | CC                              | TT                | 1946639929               |
| SNP_P3_146687_229993 | NW_004516416.1 | Scaffold1128 | 229993                  | TT                              | GG                | 1946639931               |
| SNP_P3_146688_230087 | NW_004516416.1 | Scaffold1128 | 230087                  | TT                              | AA                | 1946639933               |
| SNP_P3_146689_230165 | NW_004516416.1 | Scaffold1128 | 230165                  | AA                              | GG                | 1946639935               |
| SNP_P3_146690_230172 | NW_004516416.1 | Scaffold1128 | 230172                  | TT                              | GG                | 1946639937               |
| SNP_P3_146691_230263 | NW_004516416.1 | Scaffold1128 | 230263                  | GG                              | AA                | 1946639938               |
| SNP_P3_146692_230277 | NW_004516416.1 | Scaffold1128 | 230277                  | GG                              | TT                | 1946639940               |
| SNP_P3_146694_236394 | NW_004516416.1 | Scaffold1128 | 236394                  | TT                              | GG                | 1946639942               |
| SNP_P3_146695_238107 | NW_004516416.1 | Scaffold1128 | 238107                  | AA                              | GG                | 1946639944               |
| SNP_P3_146696_241602 | NW_004516416.1 | Scaffold1128 | 241602                  | GG                              | AA                | 1946639946               |
| SNP_P3_146697_256142 | NW_004516416.1 | Scaffold1128 | 256142                  | AA                              | GG                | 1946639948               |
| SNP_P3_146698_268034 | NW_004516416.1 | Scaffold1128 | 268034                  | TT                              | AA                | 1946639951               |
| SNP_P3_146699_275083 | NW_004516416.1 | Scaffold1128 | 275083                  | TT                              | CC                | 1946639953               |
| SNP_P3_146700_275214 | NW_004516416.1 | Scaffold1128 | 275214                  | TT                              | AA                | 1946639955               |
| SNP_P3_146701_300831 | NW_004516416.1 | Scaffold1128 | 300831                  | AA                              | GG                | 1946639957               |
| SNP_P3_146702_304021 | NW_004516416.1 | Scaffold1128 | 304021                  | AA                              | TT                | 1946639959               |
| SNP_P3_146703_304022 | NW_004516416.1 | Scaffold1128 | 304022                  | AA                              | TT                | 1946639961               |
| SNP_P3_146704_307688 | NW_004516416.1 | Scaffold1128 | 307688                  | GG                              | AA                | 1946639963               |
| SNP_P3_146705_322953 | NW_004516416.1 | Scaffold1128 | 322953                  | TT                              | AA                | 1946639965               |
| SNP_P3_146706_350692 | NW_004516416.1 | Scaffold1128 | 350692                  | CC                              | AA                | 1946639967               |
| SNP_P3_146707_350734 | NW_004516416.1 | Scaffold1128 | 350734                  | TT                              | CC                | 1946639969               |
| SNP_P3_146708_350939 | NW_004516416.1 | Scaffold1128 | 350939                  | TT                              | CC                | 1946639971               |
| SNP_P3_146709_350977 | NW_004516416.1 | Scaffold1128 | 350977                  | CC                              | AA                | 1946639973               |
| SNP_P3_146710_350979 | NW_004516416.1 | Scaffold1128 | 350979                  | TT                              | CC                | 1946639975               |
| SNP_P3_146711_354492 | NW_004516416.1 | Scaffold1128 | 354492                  | GG                              | AA                | 1946639976               |
| SNP_P3_146713_407685 | NW_004516416.1 | Scaffold1128 | 407685                  | AA                              | GG                | 1946639978               |
| SNP_P3_146714_408703 | NW_004516416.1 | Scaffold1128 | 408703                  | CC                              | TT                | 1946639980               |
| SNP_P3_146718_428107 | NW_004516416.1 | Scaffold1128 | 428107                  | GG                              | AA                | 1946639982               |
| SNP_P3_146719_438618 | NW_004516416.1 | Scaffold1128 | 438618                  | GG                              | TT                | 1946639984               |
| SNP_P3_146721_482377 | NW_004516416.1 | Scaffold1128 | 482377                  | GG                              | CC                | 1946639986               |
| SNP_P3_146722_492346 | NW_004516416.1 | Scaffold1128 | 492346                  | CC                              | GG                | 1946639988               |
| SNP_P3_146723_499326 | NW_004516416.1 | Scaffold1128 | 499326                  | AA                              | GG                | 1946639990               |
| SNP_P3_146725_25975  | NW_004516418.1 | Scaffold1131 | 25975                   | GG                              | TT                | 1946639993               |
| SNP_P3_146726_26134  | NW_004516418.1 | Scaffold1131 | 26134                   | TT                              | GG                | 1946639995               |
| SNP_P3_146727_26319  | NW_004516418.1 | Scaffold1131 | 26319                   | CC                              | GG                | 1946639997               |
| SNP_P3_146728_26343  | NW_004516418.1 | Scaffold1131 | 26343                   | TT                              | CC                | 1946639999               |
| SNP_P3_146729_29661  | NW_004516418.1 | Scaffold1131 | 29661                   | CC                              | AA                | 1946640001               |
| SNP_P3_146730_29725  | NW_004516418.1 | Scaffold1131 | 29725                   | CC                              | TT                | 1946640003               |
| SNP_P3_146731_29755  | NW_004516418.1 | Scaffold1131 | 29755                   | CC                              | TT                | 1946640005               |
| SNP_P3_146732_29814  | NW_004516418.1 | Scaffold1131 | 29814                   | TT                              | CC                | 1946640007               |
| SNP_P3_146733_29848  | NW_004516418.1 | Scaffold1131 | 29848                   | TT                              | CC                | 1946640009               |
| SNP_P3_146735_30070  | NW_004516418.1 | Scaffold1131 | 30070                   | AA                              | TT                | 1946640011               |

| SNPs IDs             | Chromosome IDs | Chromosomes  | Physical positions (bp) | CDC Frontier (Reference genome) | (Pusa 256 & HPNB) | NCBI SNPdb Accession IDs |
|----------------------|----------------|--------------|-------------------------|---------------------------------|-------------------|--------------------------|
| SNP_P3_146736_30110  | NW_004516418.1 | Scaffold1131 | 30110                   | CC                              | AA                | 1946640013               |
| SNP_P3_146737_30117  | NW_004516418.1 | Scaffold1131 | 30117                   | CC                              | TT                | 1946640014               |
| SNP_P3_146738_30136  | NW_004516418.1 | Scaffold1131 | 30136                   | CC                              | GG                | 1946640016               |
| SNP_P3_146739_30154  | NW_004516418.1 | Scaffold1131 | 30154                   | AA                              | GG                | 1946640018               |
| SNP_P3_146740_30175  | NW_004516418.1 | Scaffold1131 | 30175                   | AA                              | GG                | 1946640020               |
| SNP_P3_146741_30179  | NW_004516418.1 | Scaffold1131 | 30179                   | AA                              | GG                | 1946640022               |
| SNP_P3_146742_30244  | NW_004516418.1 | Scaffold1131 | 30244                   | CC                              | GG                | 1946640024               |
| SNP_P3_146743_30294  | NW_004516418.1 | Scaffold1131 | 30294                   | AA                              | CC                | 1946640026               |
| SNP_P3_146744_30297  | NW_004516418.1 | Scaffold1131 | 30297                   | GG                              | AA                | 1946640028               |
| SNP_P3_146745_32668  | NW_004516418.1 | Scaffold1131 | 32668                   | AA                              | GG                | 1946640030               |
| SNP_P3_146746_37604  | NW_004516418.1 | Scaffold1131 | 37604                   | TT                              | CC                | 1946640032               |
| SNP_P3_146747_37614  | NW_004516418.1 | Scaffold1131 | 37614                   | CC                              | TT                | 1946640035               |
| SNP_P3_146748_37624  | NW_004516418.1 | Scaffold1131 | 37624                   | TT                              | CC                | 1946640037               |
| SNP_P3_146749_39220  | NW_004516418.1 | Scaffold1131 | 39220                   | CC                              | TT                | 1946640039               |
| SNP_P3_146750_39221  | NW_004516418.1 | Scaffold1131 | 39221                   | CC                              | TT                | 1946640041               |
| SNP_P3_146751_39268  | NW_004516418.1 | Scaffold1131 | 39268                   | AA                              | GG                | 1946640043               |
| SNP_P3_146752_39311  | NW_004516418.1 | Scaffold1131 | 39311                   | TT                              | GG                | 1946640045               |
| SNP_P3_146753_39349  | NW_004516418.1 | Scaffold1131 | 39349                   | CC                              | TT                | 1946640047               |
| SNP_P3_146754_39462  | NW_004516418.1 | Scaffold1131 | 39462                   | CC                              | TT                | 1946640049               |
| SNP_P3_146756_45298  | NW_004516418.1 | Scaffold1131 | 45298                   | CC                              | TT                | 1946640051               |
| SNP_P3_146757_47595  | NW_004516418.1 | Scaffold1131 | 47595                   | TT                              | CC                | 1946640053               |
| SNP_P3_146758_47647  | NW_004516418.1 | Scaffold1131 | 47647                   | CC                              | AA                | 1946640055               |
| SNP_P3_146759_56297  | NW_004516418.1 | Scaffold1131 | 56297                   | CC                              | TT                | 1946640057               |
| SNP_P3_146760_56333  | NW_004516418.1 | Scaffold1131 | 56333                   | GG                              | AA                | 1946640059               |
| SNP_P3_146761_56356  | NW_004516418.1 | Scaffold1131 | 56356                   | AA                              | TT                | 1946640062               |
| SNP_P3_146762_56357  | NW_004516418.1 | Scaffold1131 | 56357                   | AA                              | CC                | 1946640064               |
| SNP_P3_146763_56360  | NW_004516418.1 | Scaffold1131 | 56360                   | GG                              | AA                | 1946640066               |
| SNP_P3_146764_58760  | NW_004516418.1 | Scaffold1131 | 58760                   | TT                              | GG                | 1946640068               |
| SNP_P3_146765_59198  | NW_004516418.1 | Scaffold1131 | 59198                   | AA                              | TT                | 1946640070               |
| SNP_P3_146766_59264  | NW_004516418.1 | Scaffold1131 | 59264                   | TT                              | AA                | 1946640072               |
| SNP_P3_146767_81684  | NW_004516418.1 | Scaffold1131 | 81684                   | AA                              | GG                | 1946640073               |
| SNP_P3_146768_81751  | NW_004516418.1 | Scaffold1131 | 81751                   | CC                              | TT                | 1946640075               |
| SNP_P3_146769_81840  | NW_004516418.1 | Scaffold1131 | 81840                   | AA                              | GG                | 1946640077               |
| SNP_P3_146770_82004  | NW_004516418.1 | Scaffold1131 | 82004                   | TT                              | GG                | 1946640079               |
| SNP_P3_146771_82036  | NW_004516418.1 | Scaffold1131 | 82036                   | AA                              | CC                | 1946640081               |
| SNP_P3_146772_82128  | NW_004516418.1 | Scaffold1131 | 82128                   | GG                              | TT                | 1946640083               |
| SNP_P3_146773_82151  | NW_004516418.1 | Scaffold1131 | 82151                   | AA                              | TT                | 1946640085               |
| SNP_P3_146774_82550  | NW_004516418.1 | Scaffold1131 | 82550                   | AA                              | CC                | 1946640087               |
| SNP_P3_146775_93478  | NW_004516418.1 | Scaffold1131 | 93478                   | AA                              | GG                | 1946640089               |
| SNP_P3_146776_110452 | NW_004516418.1 | Scaffold1131 | 110452                  | GG                              | TT                | 1946640091               |
| SNP_P3_146777_110483 | NW_004516418.1 | Scaffold1131 | 110483                  | GG                              | CC                | 1946640093               |
| SNP_P3_146778_110509 | NW_004516418.1 | Scaffold1131 | 110509                  | TT                              | CC                | 1946640094               |

| SNPs IDs             | Chromosome IDs | Chromosomes  | Physical positions (bp) | CDC Frontier (Reference genome) | (Pusa 256 & HPNB) | NCBI SNPdb Accession IDs |
|----------------------|----------------|--------------|-------------------------|---------------------------------|-------------------|--------------------------|
| SNP_P3_146779_113964 | NW_004516418.1 | Scaffold1131 | 113964                  | TT                              | CC                | 1946640096               |
| SNP_P3_146780_113988 | NW_004516418.1 | Scaffold1131 | 113988                  | AA                              | GG                | 1946640098               |
| SNP_P3_146781_114002 | NW_004516418.1 | Scaffold1131 | 114002                  | TT                              | CC                | 1946640100               |
| SNP_P3_146782_117880 | NW_004516418.1 | Scaffold1131 | 117880                  | CC                              | TT                | 1946640103               |
| SNP_P3_146783_117904 | NW_004516418.1 | Scaffold1131 | 117904                  | TT                              | CC                | 1946640105               |
| SNP_P3_146784_125498 | NW_004516418.1 | Scaffold1131 | 125498                  | GG                              | AA                | 1946640107               |
| SNP_P3_146786_139901 | NW_004516418.1 | Scaffold1131 | 139901                  | TT                              | CC                | 1946640109               |
| SNP_P3_146787_139915 | NW_004516418.1 | Scaffold1131 | 139915                  | GG                              | AA                | 1946640111               |
| SNP_P3_146788_144076 | NW_004516418.1 | Scaffold1131 | 144076                  | CC                              | TT                | 1946640113               |
| SNP_P3_146789_144206 | NW_004516418.1 | Scaffold1131 | 144206                  | GG                              | TT                | 1946640115               |
| SNP_P3_146790_49522  | NW_004516419.1 | Scaffold1132 | 49522                   | AA                              | GG                | 1946640117               |
| SNP_P3_146792_1091   | NW_004516420.1 | Scaffold1133 | 1091                    | GG                              | AA                | 1946640119               |
| SNP_P3_146793_1183   | NW_004516420.1 | Scaffold1133 | 1183                    | TT                              | CC                | 1946640121               |
| SNP_P3_146794_1342   | NW_004516420.1 | Scaffold1133 | 1342                    | AA                              | CC                | 1946640123               |
| SNP_P3_146795_1361   | NW_004516420.1 | Scaffold1133 | 1361                    | CC                              | TT                | 1946640124               |
| SNP_P3_146796_1420   | NW_004516420.1 | Scaffold1133 | 1420                    | CC                              | AA                | 1946640126               |
| SNP_P3_146797_1632   | NW_004516420.1 | Scaffold1133 | 1632                    | CC                              | GG                | 1946640128               |
| SNP_P3_146798_1666   | NW_004516420.1 | Scaffold1133 | 1666                    | TT                              | CC                | 1946640130               |
| SNP_P3_146799_5585   | NW_004516420.1 | Scaffold1133 | 5585                    | CC                              | AA                | 1946640132               |
| SNP_P3_146800_6901   | NW_004516420.1 | Scaffold1133 | 6901                    | AA                              | TT                | 1946640134               |
| SNP_P3_146801_7813   | NW_004516420.1 | Scaffold1133 | 7813                    | AA                              | GG                | 1946640136               |
| SNP_P3_146802_18551  | NW_004516420.1 | Scaffold1133 | 18551                   | TT                              | CC                | 1946640138               |
| SNP_P3_146803_18630  | NW_004516420.1 | Scaffold1133 | 18630                   | CC                              | TT                | 1946640140               |
| SNP_P3_146804_18686  | NW_004516420.1 | Scaffold1133 | 18686                   | CC                              | GG                | 1946640142               |
| SNP_P3_146805_18828  | NW_004516420.1 | Scaffold1133 | 18828                   | CC                              | TT                | 1946640144               |
| SNP_P3_146806_18897  | NW_004516420.1 | Scaffold1133 | 18897                   | TT                              | GG                | 1946640146               |
| SNP_P3_146807_18904  | NW_004516420.1 | Scaffold1133 | 18904                   | GG                              | AA                | 1946640148               |
| SNP_P3_146808_18944  | NW_004516420.1 | Scaffold1133 | 18944                   | TT                              | GG                | 1946640150               |
| SNP_P3_146809_18952  | NW_004516420.1 | Scaffold1133 | 18952                   | TT                              | AA                | 1946640152               |
| SNP_P3_146810_19126  | NW_004516420.1 | Scaffold1133 | 19126                   | CC                              | AA                | 1946640154               |
| SNP_P3_146811_20037  | NW_004516420.1 | Scaffold1133 | 20037                   | GG                              | AA                | 1946640156               |
| SNP_P3_146812_20215  | NW_004516420.1 | Scaffold1133 | 20215                   | TT                              | AA                | 1946640158               |
| SNP_P3_146813_20242  | NW_004516420.1 | Scaffold1133 | 20242                   | GG                              | AA                | 1946640159               |
| SNP_P3_146814_36819  | NW_004516420.1 | Scaffold1133 | 36819                   | AA                              | GG                | 1946640160               |
| SNP_P3_146815_42067  | NW_004516420.1 | Scaffold1133 | 42067                   | CC                              | AA                | 1946640162               |
| SNP_P3_146816_42114  | NW_004516420.1 | Scaffold1133 | 42114                   | TT                              | CC                | 1946640164               |
| SNP_P3_146817_53131  | NW_004516420.1 | Scaffold1133 | 53131                   | AA                              | GG                | 1946640166               |
| SNP_P3_146818_53145  | NW_004516420.1 | Scaffold1133 | 53145                   | GG                              | TT                | 1946640168               |
| SNP_P3_146819_53426  | NW_004516420.1 | Scaffold1133 | 53426                   | CC                              | AA                | 1946640170               |
| SNP_P3_146820_53434  | NW_004516420.1 | Scaffold1133 | 53434                   | CC                              | TT                | 1946640172               |
| SNP_P3_146821_53873  | NW_004516420.1 | Scaffold1133 | 53873                   | CC                              | TT                | 1946640174               |
| SNP_P3_146822_57144  | NW_004516420.1 | Scaffold1133 | 57144                   | AA                              | CC                | 1946640176               |

| SNPs IDs            | Chromosome IDs | Chromosomes  | Physical positions (bp) | CDC Frontier (Reference genome) | (Pusa 256 & HPNB) | NCBI SNPdb Accession IDs |
|---------------------|----------------|--------------|-------------------------|---------------------------------|-------------------|--------------------------|
| SNP_P3_146823_58031 | NW_004516420.1 | Scaffold1133 | 58031                   | CC                              | TT                | 1946640178               |
| SNP_P3_146824_59475 | NW_004516420.1 | Scaffold1133 | 59475                   | TT                              | GG                | 1946640179               |
| SNP_P3_146825_59476 | NW_004516420.1 | Scaffold1133 | 59476                   | CC                              | TT                | 1946640183               |
| SNP_P3_146826_4200  | NW_004516421.1 | Scaffold1134 | 4200                    | TT                              | CC                | 1946640185               |
| SNP_P3_146827_4564  | NW_004516421.1 | Scaffold1134 | 4564                    | TT                              | AA                | 1946640187               |
| SNP_P3_146828_7009  | NW_004516421.1 | Scaffold1134 | 7009                    | CC                              | TT                | 1946640189               |
| SNP_P3_146829_7130  | NW_004516421.1 | Scaffold1134 | 7130                    | CC                              | TT                | 1946640191               |
| SNP_P3_146830_7131  | NW_004516421.1 | Scaffold1134 | 7131                    | AA                              | CC                | 1946640193               |
| SNP_P3_146831_7144  | NW_004516421.1 | Scaffold1134 | 7144                    | CC                              | TT                | 1946640195               |
| SNP_P3_146832_7598  | NW_004516421.1 | Scaffold1134 | 7598                    | AA                              | CC                | 1946640197               |
| SNP_P3_146833_20649 | NW_004516421.1 | Scaffold1134 | 20649                   | CC                              | AA                | 1946640199               |
| SNP_P3_146834_54248 | NW_004516421.1 | Scaffold1134 | 54248                   | TT                              | AA                | 1946640201               |
| SNP_P3_146835_938   | NW_004516422.1 | Scaffold1135 | 938                     | GG                              | AA                | 1946640203               |
| SNP_P3_146836_1781  | NW_004516422.1 | Scaffold1135 | 1781                    | TT                              | CC                | 1946640205               |
| SNP_P3_146837_9470  | NW_004516422.1 | Scaffold1135 | 9470                    | TT                              | CC                | 1946640206               |
| SNP_P3_146839_9990  | NW_004516422.1 | Scaffold1135 | 9990                    | GG                              | AA                | 1946640208               |
| SNP_P3_146840_10131 | NW_004516422.1 | Scaffold1135 | 10131                   | AA                              | TT                | 1946640210               |
| SNP_P3_146841_10345 | NW_004516422.1 | Scaffold1135 | 10345                   | GG                              | AA                | 1946640211               |
| SNP_P3_146842_10597 | NW_004516422.1 | Scaffold1135 | 10597                   | GG                              | AA                | 1946640212               |
| SNP_P3_146843_10601 | NW_004516422.1 | Scaffold1135 | 10601                   | TT                              | CC                | 1946640213               |
| SNP_P3_146845_10955 | NW_004516422.1 | Scaffold1135 | 10955                   | GG                              | AA                | 1946640214               |
| SNP_P3_146846_11584 | NW_004516422.1 | Scaffold1135 | 11584                   | TT                              | CC                | 1946640215               |
| SNP_P3_146847_11589 | NW_004516422.1 | Scaffold1135 | 11589                   | GG                              | TT                | 1946640216               |
| SNP_P3_146848_12417 | NW_004516422.1 | Scaffold1135 | 12417                   | GG                              | AA                | 1946640217               |
| SNP_P3_146849_12437 | NW_004516422.1 | Scaffold1135 | 12437                   | AA                              | GG                | 1946640218               |
| SNP_P3_146850_13105 | NW_004516422.1 | Scaffold1135 | 13105                   | CC                              | GG                | 1946640219               |
| SNP_P3_146851_13153 | NW_004516422.1 | Scaffold1135 | 13153                   | CC                              | TT                | 1946640220               |
| SNP_P3_146852_13367 | NW_004516422.1 | Scaffold1135 | 13367                   | CC                              | TT                | 1946640221               |
| SNP_P3_146854_14186 | NW_004516422.1 | Scaffold1135 | 14186                   | GG                              | AA                | 1946640222               |
| SNP_P3_146855_14650 | NW_004516422.1 | Scaffold1135 | 14650                   | GG                              | AA                | 1946640223               |
| SNP_P3_146856_14696 | NW_004516422.1 | Scaffold1135 | 14696                   | TT                              | CC                | 1946640224               |
| SNP_P3_146857_15078 | NW_004516422.1 | Scaffold1135 | 15078                   | CC                              | TT                | 1946640225               |
| SNP_P3_146858_15802 | NW_004516422.1 | Scaffold1135 | 15802                   | AA                              | CC                | 1946640226               |
| SNP_P3_146859_15914 | NW_004516422.1 | Scaffold1135 | 15914                   | AA                              | GG                | 1946640227               |
| SNP_P3_146860_16844 | NW_004516422.1 | Scaffold1135 | 16844                   | TT                              | AA                | 1946640228               |
| SNP_P3_146861_17124 | NW_004516422.1 | Scaffold1135 | 17124                   | GG                              | AA                | 1946640229               |
| SNP_P3_146862_17580 | NW_004516422.1 | Scaffold1135 | 17580                   | TT                              | CC                | 1946640230               |
| SNP_P3_146863_18052 | NW_004516422.1 | Scaffold1135 | 18052                   | CC                              | TT                | 1946640231               |
| SNP_P3_146864_18276 | NW_004516422.1 | Scaffold1135 | 18276                   | TT                              | AA                | 1946640232               |
| SNP_P3_146865_18277 | NW_004516422.1 | Scaffold1135 | 18277                   | TT                              | CC                | 1946640233               |
| SNP_P3_146866_18278 | NW_004516422.1 | Scaffold1135 | 18278                   | AA                              | TT                | 1946640234               |
| SNP_P3_146867_25878 | NW_004516422.1 | Scaffold1135 | 25878                   | TT                              | CC                | 1946640235               |

| SNPs IDs            | Chromosome IDs | Chromosomes  | Physical positions (bp) | CDC Frontier (Reference genome) | (Pusa 256 & HPNB) | NCBI SNPdb Accession IDs |
|---------------------|----------------|--------------|-------------------------|---------------------------------|-------------------|--------------------------|
| SNP_P3_146868_25913 | NW_004516422.1 | Scaffold1135 | 25913                   | TT                              | CC                | 1946640236               |
| SNP_P3_146869_26083 | NW_004516422.1 | Scaffold1135 | 26083                   | CC                              | TT                | 1946640237               |
| SNP_P3_146870_32391 | NW_004516422.1 | Scaffold1135 | 32391                   | TT                              | GG                | 1946640238               |
| SNP_P3_146871_32437 | NW_004516422.1 | Scaffold1135 | 32437                   | CC                              | TT                | 1946640239               |
| SNP_P3_146872_32585 | NW_004516422.1 | Scaffold1135 | 32585                   | AA                              | GG                | 1946640240               |
| SNP_P3_146873_32596 | NW_004516422.1 | Scaffold1135 | 32596                   | TT                              | AA                | 1946640241               |
| SNP_P3_146874_32671 | NW_004516422.1 | Scaffold1135 | 32671                   | AA                              | CC                | 1946640242               |
| SNP_P3_146875_60839 | NW_004516422.1 | Scaffold1135 | 60839                   | AA                              | GG                | 1946640244               |
| SNP_P3_146876_60890 | NW_004516422.1 | Scaffold1135 | 60890                   | GG                              | AA                | 1946640245               |
| SNP_P3_146877_60896 | NW_004516422.1 | Scaffold1135 | 60896                   | CC                              | TT                | 1946640247               |
| SNP_P3_146878_60946 | NW_004516422.1 | Scaffold1135 | 60946                   | AA                              | TT                | 1946640249               |
| SNP_P3_146879_60950 | NW_004516422.1 | Scaffold1135 | 60950                   | TT                              | GG                | 1946640251               |
| SNP_P3_146880_60968 | NW_004516422.1 | Scaffold1135 | 60968                   | TT                              | AA                | 1946640253               |
| SNP_P3_146881_60995 | NW_004516422.1 | Scaffold1135 | 60995                   | AA                              | GG                | 1946640255               |
| SNP_P3_146882_61274 | NW_004516422.1 | Scaffold1135 | 61274                   | TT                              | CC                | 1946640257               |
| SNP_P3_146884_62358 | NW_004516422.1 | Scaffold1135 | 62358                   | GG                              | AA                | 1946640259               |
| SNP_P3_146885_71323 | NW_004516422.1 | Scaffold1135 | 71323                   | TT                              | AA                | 1946640261               |
| SNP_P3_146886_71383 | NW_004516422.1 | Scaffold1135 | 71383                   | CC                              | AA                | 1946640263               |
| SNP_P3_146887_71395 | NW_004516422.1 | Scaffold1135 | 71395                   | GG                              | CC                | 1946640265               |
| SNP_P3_146888_71396 | NW_004516422.1 | Scaffold1135 | 71396                   | TT                              | CC                | 1946640267               |
| SNP_P3_146889_71593 | NW_004516422.1 | Scaffold1135 | 71593                   | AA                              | CC                | 1946640269               |
| SNP_P3_146890_71774 | NW_004516422.1 | Scaffold1135 | 71774                   | AA                              | TT                | 1946640272               |
| SNP_P3_146891_71878 | NW_004516422.1 | Scaffold1135 | 71878                   | TT                              | GG                | 1946640274               |
| SNP_P3_146892_71892 | NW_004516422.1 | Scaffold1135 | 71892                   | GG                              | TT                | 1946640276               |
| SNP_P3_146893_71898 | NW_004516422.1 | Scaffold1135 | 71898                   | CC                              | AA                | 1946640278               |
| SNP_P3_146894_71899 | NW_004516422.1 | Scaffold1135 | 71899                   | GG                              | TT                | 1946640280               |
| SNP_P3_146896_73881 | NW_004516422.1 | Scaffold1135 | 73881                   | AA                              | GG                | 1946640282               |
| SNP_P3_146898_74533 | NW_004516422.1 | Scaffold1135 | 74533                   | AA                              | TT                | 1946640284               |
| SNP_P3_146899_74802 | NW_004516422.1 | Scaffold1135 | 74802                   | AA                              | GG                | 1946640285               |
| SNP_P3_146900_74950 | NW_004516422.1 | Scaffold1135 | 74950                   | TT                              | CC                | 1946640288               |
| SNP_P3_146902_75514 | NW_004516422.1 | Scaffold1135 | 75514                   | CC                              | AA                | 1946640290               |
| SNP_P3_146904_806   | NW_004516425.1 | Scaffold1139 | 806                     | AA                              | CC                | 1946640292               |
| SNP_P3_146905_817   | NW_004516425.1 | Scaffold1139 | 817                     | TT                              | CC                | 1946640294               |
| SNP_P3_146906_842   | NW_004516425.1 | Scaffold1139 | 842                     | AA                              | GG                | 1946640295               |
| SNP_P3_146907_874   | NW_004516425.1 | Scaffold1139 | 874                     | GG                              | TT                | 1946640297               |
| SNP_P3_146908_886   | NW_004516425.1 | Scaffold1139 | 886                     | TT                              | CC                | 1946640299               |
| SNP_P3_146909_939   | NW_004516425.1 | Scaffold1139 | 939                     | GG                              | AA                | 1946640301               |
| SNP_P3_146910_1116  | NW_004516425.1 | Scaffold1139 | 1116                    | TT                              | CC                | 1946640303               |
| SNP_P3_146911_1117  | NW_004516425.1 | Scaffold1139 | 1117                    | CC                              | AA                | 1946640305               |
| SNP_P3_146913_1235  | NW_004516425.1 | Scaffold1139 | 1235                    | AA                              | GG                | 1946640307               |
| SNP_P3_146914_1253  | NW_004516425.1 | Scaffold1139 | 1253                    | AA                              | GG                | 1946640311               |
| SNP_P3_146915_1359  | NW_004516425.1 | Scaffold1139 | 1359                    | CC                              | AA                | 1946640313               |

| SNPs IDs            | Chromosome IDs | Chromosomes  | Physical positions (bp) | CDC Frontier (Reference genome) | (Pusa 256 & HPNB) | NCBI SNPdb Accession IDs |
|---------------------|----------------|--------------|-------------------------|---------------------------------|-------------------|--------------------------|
| SNP_P3_146917_1409  | NW_004516425.1 | Scaffold1139 | 1409                    | TT                              | AA                | 1946640314               |
| SNP_P3_146918_1420  | NW_004516425.1 | Scaffold1139 | 1420                    | AA                              | GG                | 1946640316               |
| SNP_P3_146919_1562  | NW_004516425.1 | Scaffold1139 | 1562                    | GG                              | TT                | 1946640318               |
| SNP_P3_146921_1701  | NW_004516425.1 | Scaffold1139 | 1701                    | TT                              | AA                | 1946640320               |
| SNP_P3_146922_1764  | NW_004516425.1 | Scaffold1139 | 1764                    | AA                              | GG                | 1946640322               |
| SNP_P3_146923_1813  | NW_004516425.1 | Scaffold1139 | 1813                    | GG                              | CC                | 1946640324               |
| SNP_P3_146924_1828  | NW_004516425.1 | Scaffold1139 | 1828                    | CC                              | TT                | 1946640326               |
| SNP_P3_146925_1837  | NW_004516425.1 | Scaffold1139 | 1837                    | TT                              | CC                | 1946640328               |
| SNP_P3_146926_1845  | NW_004516425.1 | Scaffold1139 | 1845                    | TT                              | GG                | 1946640330               |
| SNP_P3_146927_1884  | NW_004516425.1 | Scaffold1139 | 1884                    | GG                              | CC                | 1946640332               |
| SNP_P3_146928_1892  | NW_004516425.1 | Scaffold1139 | 1892                    | TT                              | CC                | 1946640334               |
| SNP_P3_146929_1926  | NW_004516425.1 | Scaffold1139 | 1926                    | CC                              | TT                | 1946640335               |
| SNP_P3_146930_1970  | NW_004516425.1 | Scaffold1139 | 1970                    | AA                              | GG                | 1946640337               |
| SNP_P3_146931_1990  | NW_004516425.1 | Scaffold1139 | 1990                    | CC                              | TT                | 1946640339               |
| SNP_P3_146933_5705  | NW_004516427.1 | Scaffold1142 | 5705                    | CC                              | TT                | 1946640341               |
| SNP_P3_146934_16359 | NW_004516427.1 | Scaffold1142 | 16359                   | AA                              | CC                | 1946640343               |
| SNP_P3_146935_16386 | NW_004516427.1 | Scaffold1142 | 16386                   | AA                              | CC                | 1946640345               |
| SNP_P3_146936_16387 | NW_004516427.1 | Scaffold1142 | 16387                   | CC                              | AA                | 1946640347               |
| SNP_P3_146937_16400 | NW_004516427.1 | Scaffold1142 | 16400                   | TT                              | AA                | 1946640349               |
| SNP_P3_146938_18484 | NW_004516427.1 | Scaffold1142 | 18484                   | TT                              | AA                | 1946640352               |
| SNP_P3_146939_18790 | NW_004516427.1 | Scaffold1142 | 18790                   | AA                              | CC                | 1946640354               |
| SNP_P3_146940_18959 | NW_004516427.1 | Scaffold1142 | 18959                   | AA                              | TT                | 1946640356               |
| SNP_P3_146941_19255 | NW_004516427.1 | Scaffold1142 | 19255                   | GG                              | TT                | 1946640358               |
| SNP_P3_146942_19257 | NW_004516427.1 | Scaffold1142 | 19257                   | GG                              | CC                | 1946640360               |
| SNP_P3_146943_2174  | NW_004516428.1 | Scaffold1143 | 2174                    | CC                              | TT                | 1946640361               |
| SNP_P3_146944_2305  | NW_004516428.1 | Scaffold1143 | 2305                    | AA                              | GG                | 1946640363               |
| SNP_P3_146945_2321  | NW_004516428.1 | Scaffold1143 | 2321                    | AA                              | GG                | 1946640365               |
| SNP_P3_146946_2346  | NW_004516428.1 | Scaffold1143 | 2346                    | TT                              | CC                | 1946640367               |
| SNP_P3_146947_1930  | NW_004516429.1 | Scaffold1145 | 1930                    | CC                              | AA                | 1946640369               |
| SNP_P3_146948_1941  | NW_004516429.1 | Scaffold1145 | 1941                    | TT                              | GG                | 1946640371               |
| SNP_P3_146949_1948  | NW_004516429.1 | Scaffold1145 | 1948                    | CC                              | TT                | 1946640373               |
| SNP_P3_146950_1974  | NW_004516429.1 | Scaffold1145 | 1974                    | AA                              | GG                | 1946640375               |
| SNP_P3_146951_2006  | NW_004516429.1 | Scaffold1145 | 2006                    | TT                              | GG                | 1946640377               |
| SNP_P3_146952_2152  | NW_004516429.1 | Scaffold1145 | 2152                    | TT                              | CC                | 1946640379               |
| SNP_P3_146953_2232  | NW_004516429.1 | Scaffold1145 | 2232                    | AA                              | GG                | 1946640381               |
| SNP_P3_146954_2305  | NW_004516429.1 | Scaffold1145 | 2305                    | AA                              | GG                | 1946640383               |
| SNP_P3_146955_2368  | NW_004516429.1 | Scaffold1145 | 2368                    | TT                              | CC                | 1946640385               |
| SNP_P3_146956_2422  | NW_004516429.1 | Scaffold1145 | 2422                    | TT                              | CC                | 1946640386               |
| SNP_P3_146957_2514  | NW_004516429.1 | Scaffold1145 | 2514                    | CC                              | TT                | 1946640388               |
| SNP_P3_146958_2535  | NW_004516429.1 | Scaffold1145 | 2535                    | TT                              | CC                | 1946640392               |
| SNP_P3_146959_2709  | NW_004516429.1 | Scaffold1145 | 2709                    | TT                              | CC                | 1946640394               |
| SNP_P3_146960_2719  | NW_004516429.1 | Scaffold1145 | 2719                    | AA                              | GG                | 1946640396               |



| SNPs IDs            | Chromosome IDs | Chromosomes  | Physical positions (bp) | CDC Frontier (Reference genome) | (Pusa 256 & HPNB) | NCBI SNPdb Accession IDs |
|---------------------|----------------|--------------|-------------------------|---------------------------------|-------------------|--------------------------|
| SNP_P3_146961_2793  | NW_004516429.1 | Scaffold1145 | 2793                    | GG                              | TT                | 1946640398               |
| SNP_P3_146962_2812  | NW_004516429.1 | Scaffold1145 | 2812                    | TT                              | CC                | 1946640401               |
| SNP_P3_146964_3450  | NW_004516429.1 | Scaffold1145 | 3450                    | AA                              | GG                | 1946640404               |
| SNP_P3_146965_3588  | NW_004516429.1 | Scaffold1145 | 3588                    | CC                              | AA                | 1946640406               |
| SNP_P3_146966_3610  | NW_004516429.1 | Scaffold1145 | 3610                    | AA                              | GG                | 1946640408               |
| SNP_P3_146967_3670  | NW_004516429.1 | Scaffold1145 | 3670                    | CC                              | AA                | 1946640410               |
| SNP_P3_146970_4286  | NW_004516429.1 | Scaffold1145 | 4286                    | TT                              | GG                | 1946640412               |
| SNP_P3_146971_4287  | NW_004516429.1 | Scaffold1145 | 4287                    | CC                              | TT                | 1946640414               |
| SNP_P3_146972_4320  | NW_004516429.1 | Scaffold1145 | 4320                    | GG                              | CC                | 1946640416               |
| SNP_P3_146976_7311  | NW_004516429.1 | Scaffold1145 | 7311                    | TT                              | CC                | 1946640418               |
| SNP_P3_146978_13767 | NW_004516429.1 | Scaffold1145 | 13767                   | TT                              | CC                | 1946640419               |
| SNP_P3_146979_13924 | NW_004516429.1 | Scaffold1145 | 13924                   | CC                              | TT                | 1946640421               |
| SNP_P3_146980_13938 | NW_004516429.1 | Scaffold1145 | 13938                   | TT                              | CC                | 1946640423               |
| SNP_P3_146981_13982 | NW_004516429.1 | Scaffold1145 | 13982                   | TT                              | CC                | 1946640425               |
| SNP_P3_146982_14008 | NW_004516429.1 | Scaffold1145 | 14008                   | GG                              | CC                | 1946640428               |
| SNP_P3_146984_15698 | NW_004516429.1 | Scaffold1145 | 15698                   | AA                              | GG                | 1946640430               |
| SNP_P3_146985_15711 | NW_004516429.1 | Scaffold1145 | 15711                   | CC                              | TT                | 1946640432               |
| SNP_P3_146986_15712 | NW_004516429.1 | Scaffold1145 | 15712                   | AA                              | TT                | 1946640434               |
| SNP_P3_146988_16045 | NW_004516429.1 | Scaffold1145 | 16045                   | CC                              | GG                | 1946640436               |
| SNP_P3_146989_16115 | NW_004516429.1 | Scaffold1145 | 16115                   | AA                              | TT                | 1946640437               |
| SNP_P3_146990_16393 | NW_004516429.1 | Scaffold1145 | 16393                   | AA                              | TT                | 1946640439               |
| SNP_P3_146991_16413 | NW_004516429.1 | Scaffold1145 | 16413                   | AA                              | TT                | 1946640441               |
| SNP_P3_146992_16534 | NW_004516429.1 | Scaffold1145 | 16534                   | AA                              | CC                | 1946640443               |
| SNP_P3_146993_16708 | NW_004516429.1 | Scaffold1145 | 16708                   | GG                              | AA                | 1946640445               |
| SNP_P3_146994_17418 | NW_004516429.1 | Scaffold1145 | 17418                   | TT                              | AA                | 1946640447               |
| SNP_P3_146995_17636 | NW_004516429.1 | Scaffold1145 | 17636                   | GG                              | AA                | 1946640449               |
| SNP_P3_146996_18298 | NW_004516429.1 | Scaffold1145 | 18298                   | TT                              | AA                | 1946640451               |
| SNP_P3_146997_26375 | NW_004516429.1 | Scaffold1145 | 26375                   | GG                              | AA                | 1946640453               |
| SNP_P3_146998_26522 | NW_004516429.1 | Scaffold1145 | 26522                   | CC                              | TT                | 1946640455               |
| SNP_P3_146999_26849 | NW_004516429.1 | Scaffold1145 | 26849                   | AA                              | GG                | 1946640457               |
| SNP_P3_147000_38244 | NW_004516429.1 | Scaffold1145 | 38244                   | TT                              | AA                | 1946640459               |
| SNP_P3_147001_68186 | NW_004516429.1 | Scaffold1145 | 68186                   | AA                              | GG                | 1946640460               |
| SNP_P3_147002_68293 | NW_004516429.1 | Scaffold1145 | 68293                   | GG                              | AA                | 1946640462               |
| SNP_P3_147003_71303 | NW_004516429.1 | Scaffold1145 | 71303                   | CC                              | TT                | 1946640464               |
| SNP_P3_147004_81439 | NW_004516429.1 | Scaffold1145 | 81439                   | TT                              | CC                | 1946640466               |
| SNP_P3_147005_81510 | NW_004516429.1 | Scaffold1145 | 81510                   | TT                              | GG                | 1946640468               |
| SNP_P3_147006_81655 | NW_004516429.1 | Scaffold1145 | 81655                   | CC                              | TT                | 1946640470               |
| SNP_P3_147007_81760 | NW_004516429.1 | Scaffold1145 | 81760                   | TT                              | CC                | 1946640472               |
| SNP_P3_147008_81776 | NW_004516429.1 | Scaffold1145 | 81776                   | AA                              | GG                | 1946640474               |
| SNP_P3_147009_81805 | NW_004516429.1 | Scaffold1145 | 81805                   | AA                              | GG                | 1946640476               |
| SNP_P3_147010_81843 | NW_004516429.1 | Scaffold1145 | 81843                   | TT                              | CC                | 1946640478               |
| SNP_P3_147011_81951 | NW_004516429.1 | Scaffold1145 | 81951                   | AA                              | TT                | 1946640480               |

| SNPs IDs             | Chromosome IDs | Chromosomes  | Physical positions (bp) | CDC Frontier (Reference genome) | (Pusa 256 & HPNB) | NCBI SNPdb Accession IDs |
|----------------------|----------------|--------------|-------------------------|---------------------------------|-------------------|--------------------------|
| SNP_P3_147012_100060 | NW_004516429.1 | Scaffold1145 | 100060                  | TT                              | CC                | 1946640482               |
| SNP_P3_147013_100086 | NW_004516429.1 | Scaffold1145 | 100086                  | GG                              | AA                | 1946640484               |
| SNP_P3_147014_100114 | NW_004516429.1 | Scaffold1145 | 100114                  | AA                              | TT                | 1946640486               |
| SNP_P3_147015_100117 | NW_004516429.1 | Scaffold1145 | 100117                  | CC                              | TT                | 1946640488               |
| SNP_P3_147016_100143 | NW_004516429.1 | Scaffold1145 | 100143                  | GG                              | AA                | 1946640490               |
| SNP_P3_147017_100178 | NW_004516429.1 | Scaffold1145 | 100178                  | AA                              | CC                | 1946640492               |
| SNP_P3_147018_100360 | NW_004516429.1 | Scaffold1145 | 100360                  | TT                              | GG                | 1946640494               |
| SNP_P3_147019_100365 | NW_004516429.1 | Scaffold1145 | 100365                  | AA                              | GG                | 1946640496               |
| SNP_P3_147020_100412 | NW_004516429.1 | Scaffold1145 | 100412                  | AA                              | CC                | 1946640498               |
| SNP_P3_147021_100414 | NW_004516429.1 | Scaffold1145 | 100414                  | GG                              | AA                | 1946640501               |
| SNP_P3_147022_100492 | NW_004516429.1 | Scaffold1145 | 100492                  | AA                              | GG                | 1946640503               |
| SNP_P3_147023_100493 | NW_004516429.1 | Scaffold1145 | 100493                  | AA                              | CC                | 1946640505               |
| SNP_P3_147024_100544 | NW_004516429.1 | Scaffold1145 | 100544                  | AA                              | CC                | 1946640507               |
| SNP_P3_147025_8255   | NW_004516430.1 | Scaffold1147 | 8255                    | TT                              | CC                | 1946640509               |
| SNP_P3_147026_8378   | NW_004516430.1 | Scaffold1147 | 8378                    | AA                              | TT                | 1946640511               |
| SNP_P3_147027_8431   | NW_004516430.1 | Scaffold1147 | 8431                    | TT                              | AA                | 1946640513               |
| SNP_P3_147028_8488   | NW_004516430.1 | Scaffold1147 | 8488                    | CC                              | TT                | 1946640515               |
| SNP_P3_147029_11147  | NW_004516430.1 | Scaffold1147 | 11147                   | CC                              | TT                | 1946640517               |
| SNP_P3_147030_28094  | NW_004516430.1 | Scaffold1147 | 28094                   | CC                              | AA                | 1946640519               |
| SNP_P3_147031_28118  | NW_004516430.1 | Scaffold1147 | 28118                   | AA                              | GG                | 1946640521               |
| SNP_P3_147032_1153   | NW_004516431.1 | Scaffold1148 | 1153                    | CC                              | AA                | 1946640523               |
| SNP_P3_147033_496    | NW_004516433.1 | Scaffold1150 | 496                     | TT                              | CC                | 1946640524               |
| SNP_P3_147034_516    | NW_004516433.1 | Scaffold1150 | 516                     | GG                              | CC                | 1946640526               |
| SNP_P3_147035_849    | NW_004516433.1 | Scaffold1150 | 849                     | CC                              | AA                | 1946640528               |
| SNP_P3_147036_911    | NW_004516433.1 | Scaffold1150 | 911                     | CC                              | AA                | 1946640530               |
| SNP_P3_147037_1166   | NW_004516433.1 | Scaffold1150 | 1166                    | AA                              | CC                | 1946640532               |
| SNP_P3_147038_1169   | NW_004516433.1 | Scaffold1150 | 1169                    | AA                              | CC                | 1946640533               |
| SNP_P3_147039_1175   | NW_004516433.1 | Scaffold1150 | 1175                    | CC                              | GG                | 1946640535               |
| SNP_P3_147040_1195   | NW_004516433.1 | Scaffold1150 | 1195                    | AA                              | GG                | 1946640537               |
| SNP_P3_147041_1220   | NW_004516433.1 | Scaffold1150 | 1220                    | TT                              | CC                | 1946640540               |
| SNP_P3_147042_1236   | NW_004516433.1 | Scaffold1150 | 1236                    | TT                              | CC                | 1946640542               |
| SNP_P3_147043_18451  | NW_004516434.1 | Scaffold1151 | 18451                   | TT                              | CC                | 1946640544               |
| SNP_P3_147044_18772  | NW_004516434.1 | Scaffold1151 | 18772                   | TT                              | AA                | 1946640546               |
| SNP_P3_147046_19855  | NW_004516434.1 | Scaffold1151 | 19855                   | CC                              | TT                | 1946640548               |
| SNP_P3_147047_20004  | NW_004516434.1 | Scaffold1151 | 20004                   | CC                              | AA                | 1946640550               |
| SNP_P3_147048_20031  | NW_004516434.1 | Scaffold1151 | 20031                   | AA                              | TT                | 1946640552               |
| SNP_P3_147049_20269  | NW_004516434.1 | Scaffold1151 | 20269                   | TT                              | GG                | 1946640554               |
| SNP_P3_147050_29091  | NW_004516434.1 | Scaffold1151 | 29091                   | TT                              | CC                | 1946640556               |
| SNP_P3_147051_29561  | NW_004516434.1 | Scaffold1151 | 29561                   | GG                              | CC                | 1946640558               |
| SNP_P3_147053_117831 | NW_004516434.1 | Scaffold1151 | 117831                  | AA                              | TT                | 1946640560               |
| SNP_P3_147054_119357 | NW_004516434.1 | Scaffold1151 | 119357                  | CC                              | TT                | 1946640562               |
| SNP_P3_147055_119412 | NW_004516434.1 | Scaffold1151 | 119412                  | TT                              | CC                | 1946640564               |

| SNPs IDs             | Chromosome IDs | Chromosomes  | Physical positions (bp) | CDC Frontier (Reference genome) | (Pusa 256 & HPNB) | NCBI SNPdb Accession IDs |
|----------------------|----------------|--------------|-------------------------|---------------------------------|-------------------|--------------------------|
| SNP_P3_147056_119710 | NW_004516434.1 | Scaffold1151 | 119710                  | TT                              | CC                | 1946640565               |
| SNP_P3_147057_119758 | NW_004516434.1 | Scaffold1151 | 119758                  | AA                              | TT                | 1946640567               |
| SNP_P3_147059_142285 | NW_004516434.1 | Scaffold1151 | 142285                  | TT                              | CC                | 1946640569               |
| SNP_P3_147060_159993 | NW_004516434.1 | Scaffold1151 | 159993                  | GG                              | AA                | 1946640571               |
| SNP_P3_147061_161631 | NW_004516434.1 | Scaffold1151 | 161631                  | CC                              | TT                | 1946640573               |
| SNP_P3_147062_169089 | NW_004516434.1 | Scaffold1151 | 169089                  | TT                              | CC                | 1946640575               |
| SNP_P3_147063_169616 | NW_004516434.1 | Scaffold1151 | 169616                  | GG                              | AA                | 1946640577               |
| SNP_P3_147064_175655 | NW_004516434.1 | Scaffold1151 | 175655                  | GG                              | AA                | 1946640580               |
| SNP_P3_147065_180102 | NW_004516434.1 | Scaffold1151 | 180102                  | CC                              | AA                | 1946640582               |
| SNP_P3_147066_279777 | NW_004516434.1 | Scaffold1151 | 279777                  | AA                              | CC                | 1946640584               |
| SNP_P3_147067_279783 | NW_004516434.1 | Scaffold1151 | 279783                  | CC                              | GG                | 1946640586               |
| SNP_P3_147068_279802 | NW_004516434.1 | Scaffold1151 | 279802                  | AA                              | CC                | 1946640588               |
| SNP_P3_147069_279866 | NW_004516434.1 | Scaffold1151 | 279866                  | CC                              | AA                | 1946640590               |
| SNP_P3_147070_279877 | NW_004516434.1 | Scaffold1151 | 279877                  | AA                              | GG                | 1946640592               |
| SNP_P3_147071_279888 | NW_004516434.1 | Scaffold1151 | 279888                  | GG                              | AA                | 1946640594               |
| SNP_P3_147072_279896 | NW_004516434.1 | Scaffold1151 | 279896                  | AA                              | TT                | 1946640596               |
| SNP_P3_147073_279904 | NW_004516434.1 | Scaffold1151 | 279904                  | AA                              | GG                | 1946640598               |
| SNP_P3_147074_279919 | NW_004516434.1 | Scaffold1151 | 279919                  | CC                              | TT                | 1946640600               |
| SNP_P3_147075_279931 | NW_004516434.1 | Scaffold1151 | 279931                  | AA                              | CC                | 1946640602               |
| SNP_P3_147076_279948 | NW_004516434.1 | Scaffold1151 | 279948                  | TT                              | CC                | 1946640604               |
| SNP_P3_147077_279960 | NW_004516434.1 | Scaffold1151 | 279960                  | AA                              | CC                | 1946640606               |
| SNP_P3_147078_280116 | NW_004516434.1 | Scaffold1151 | 280116                  | AA                              | GG                | 1946640608               |
| SNP_P3_147079_280239 | NW_004516434.1 | Scaffold1151 | 280239                  | TT                              | CC                | 1946640610               |
| SNP_P3_147080_280976 | NW_004516434.1 | Scaffold1151 | 280976                  | AA                              | GG                | 1946640611               |
| SNP_P3_147081_281008 | NW_004516434.1 | Scaffold1151 | 281008                  | AA                              | CC                | 1946640613               |
| SNP_P3_147082_281023 | NW_004516434.1 | Scaffold1151 | 281023                  | AA                              | TT                | 1946640615               |
| SNP_P3_147083_281043 | NW_004516434.1 | Scaffold1151 | 281043                  | CC                              | AA                | 1946640617               |
| SNP_P3_147084_281054 | NW_004516434.1 | Scaffold1151 | 281054                  | TT                              | CC                | 1946640621               |
| SNP_P3_147085_281259 | NW_004516434.1 | Scaffold1151 | 281259                  | TT                              | CC                | 1946640623               |
| SNP_P3_147086_281289 | NW_004516434.1 | Scaffold1151 | 281289                  | AA                              | CC                | 1946640624               |
| SNP_P3_147088_13628  | NW_004516435.1 | Scaffold1152 | 13628                   | GG                              | TT                | 1946640626               |
| SNP_P3_147089_14212  | NW_004516435.1 | Scaffold1152 | 14212                   | GG                              | AA                | 1946640628               |
| SNP_P3_147090_14233  | NW_004516435.1 | Scaffold1152 | 14233                   | AA                              | TT                | 1946640630               |
| SNP_P3_147091_14238  | NW_004516435.1 | Scaffold1152 | 14238                   | GG                              | AA                | 1946640632               |
| SNP_P3_147092_14245  | NW_004516435.1 | Scaffold1152 | 14245                   | CC                              | TT                | 1946640634               |
| SNP_P3_147093_14248  | NW_004516435.1 | Scaffold1152 | 14248                   | TT                              | CC                | 1946640636               |
| SNP_P3_147094_14263  | NW_004516435.1 | Scaffold1152 | 14263                   | GG                              | AA                | 1946640638               |
| SNP_P3_147095_32311  | NW_004516435.1 | Scaffold1152 | 32311                   | TT                              | CC                | 1946640640               |
| SNP_P3_147096_32313  | NW_004516435.1 | Scaffold1152 | 32313                   | AA                              | GG                | 1946640642               |
| SNP_P3_147097_32458  | NW_004516435.1 | Scaffold1152 | 32458                   | CC                              | AA                | 1946640644               |
| SNP_P3_147098_32625  | NW_004516435.1 | Scaffold1152 | 32625                   | AA                              | CC                | 1946640646               |
| SNP_P3_147099_32629  | NW_004516435.1 | Scaffold1152 | 32629                   | AA                              | GG                | 1946640648               |

| SNPs IDs             | Chromosome IDs | Chromosomes  | Physical positions (bp) | CDC Frontier (Reference genome) | (Pusa 256 & HPNB) | NCBI SNPdb Accession IDs |
|----------------------|----------------|--------------|-------------------------|---------------------------------|-------------------|--------------------------|
| SNP_P3_147100_32751  | NW_004516435.1 | Scaffold1152 | 32751                   | CC                              | TT                | 1946640650               |
| SNP_P3_147101_32779  | NW_004516435.1 | Scaffold1152 | 32779                   | TT                              | CC                | 1946640652               |
| SNP_P3_147102_32798  | NW_004516435.1 | Scaffold1152 | 32798                   | GG                              | AA                | 1946640653               |
| SNP_P3_147103_32814  | NW_004516435.1 | Scaffold1152 | 32814                   | AA                              | TT                | 1946640655               |
| SNP_P3_147104_32835  | NW_004516435.1 | Scaffold1152 | 32835                   | AA                              | CC                | 1946640657               |
| SNP_P3_147105_33084  | NW_004516435.1 | Scaffold1152 | 33084                   | TT                              | GG                | 1946640659               |
| SNP_P3_147106_33129  | NW_004516435.1 | Scaffold1152 | 33129                   | AA                              | GG                | 1946640662               |
| SNP_P3_147107_33173  | NW_004516435.1 | Scaffold1152 | 33173                   | TT                              | CC                | 1946640664               |
| SNP_P3_147108_35428  | NW_004516435.1 | Scaffold1152 | 35428                   | CC                              | AA                | 1946640666               |
| SNP_P3_147109_36444  | NW_004516435.1 | Scaffold1152 | 36444                   | TT                              | AA                | 1946640668               |
| SNP_P3_147110_36461  | NW_004516435.1 | Scaffold1152 | 36461                   | GG                              | TT                | 1946640670               |
| SNP_P3_147111_36519  | NW_004516435.1 | Scaffold1152 | 36519                   | AA                              | GG                | 1946640672               |
| SNP_P3_147112_68805  | NW_004516435.1 | Scaffold1152 | 68805                   | GG                              | TT                | 1946640674               |
| SNP_P3_147113_77695  | NW_004516435.1 | Scaffold1152 | 77695                   | TT                              | CC                | 1946640676               |
| SNP_P3_147114_77811  | NW_004516435.1 | Scaffold1152 | 77811                   | TT                              | CC                | 1946640678               |
| SNP_P3_147115_77946  | NW_004516435.1 | Scaffold1152 | 77946                   | CC                              | TT                | 1946640680               |
| SNP_P3_147116_78616  | NW_004516435.1 | Scaffold1152 | 78616                   | AA                              | GG                | 1946640682               |
| SNP_P3_147117_78713  | NW_004516435.1 | Scaffold1152 | 78713                   | AA                              | TT                | 1946640684               |
| SNP_P3_147118_78824  | NW_004516435.1 | Scaffold1152 | 78824                   | TT                              | CC                | 1946640686               |
| SNP_P3_147119_78825  | NW_004516435.1 | Scaffold1152 | 78825                   | TT                              | CC                | 1946640688               |
| SNP_P3_147120_92735  | NW_004516435.1 | Scaffold1152 | 92735                   | AA                              | TT                | 1946640690               |
| SNP_P3_147121_92807  | NW_004516435.1 | Scaffold1152 | 92807                   | TT                              | CC                | 1946640691               |
| SNP_P3_147122_92897  | NW_004516435.1 | Scaffold1152 | 92897                   | TT                              | GG                | 1946640693               |
| SNP_P3_147123_92947  | NW_004516435.1 | Scaffold1152 | 92947                   | AA                              | CC                | 1946640695               |
| SNP_P3_147124_92996  | NW_004516435.1 | Scaffold1152 | 92996                   | TT                              | AA                | 1946640697               |
| SNP_P3_147125_93196  | NW_004516435.1 | Scaffold1152 | 93196                   | GG                              | CC                | 1946640699               |
| SNP_P3_147126_95463  | NW_004516435.1 | Scaffold1152 | 95463                   | CC                              | GG                | 1946640702               |
| SNP_P3_147127_95836  | NW_004516435.1 | Scaffold1152 | 95836                   | GG                              | TT                | 1946640704               |
| SNP_P3_147128_95854  | NW_004516435.1 | Scaffold1152 | 95854                   | AA                              | CC                | 1946640706               |
| SNP_P3_147129_95860  | NW_004516435.1 | Scaffold1152 | 95860                   | GG                              | AA                | 1946640708               |
| SNP_P3_147130_95878  | NW_004516435.1 | Scaffold1152 | 95878                   | CC                              | TT                | 1946640710               |
| SNP_P3_147131_115141 | NW_004516435.1 | Scaffold1152 | 115141                  | CC                              | TT                | 1946640712               |
| SNP_P3_147132_115146 | NW_004516435.1 | Scaffold1152 | 115146                  | AA                              | TT                | 1946640714               |
| SNP_P3_147133_115150 | NW_004516435.1 | Scaffold1152 | 115150                  | AA                              | GG                | 1946640716               |
| SNP_P3_147134_115173 | NW_004516435.1 | Scaffold1152 | 115173                  | TT                              | GG                | 1946640718               |
| SNP_P3_147135_115183 | NW_004516435.1 | Scaffold1152 | 115183                  | AA                              | TT                | 1946640720               |
| SNP_P3_147136_115197 | NW_004516435.1 | Scaffold1152 | 115197                  | CC                              | AA                | 1946640722               |
| SNP_P3_147137_115200 | NW_004516435.1 | Scaffold1152 | 115200                  | TT                              | GG                | 1946640724               |
| SNP_P3_147139_115432 | NW_004516435.1 | Scaffold1152 | 115432                  | GG                              | AA                | 1946640726               |
| SNP_P3_147140_115440 | NW_004516435.1 | Scaffold1152 | 115440                  | GG                              | CC                | 1946640727               |
| SNP_P3_147141_115472 | NW_004516435.1 | Scaffold1152 | 115472                  | CC                              | AA                | 1946640729               |
| SNP_P3_147142_115510 | NW_004516435.1 | Scaffold1152 | 115510                  | GG                              | AA                | 1946640731               |

| SNPs IDs             | Chromosome IDs | Chromosomes  | Physical positions (bp) | CDC Frontier (Reference genome) | (Pusa 256 & HPNB) | NCBI SNPdb Accession IDs |
|----------------------|----------------|--------------|-------------------------|---------------------------------|-------------------|--------------------------|
| SNP_P3_147143_115521 | NW_004516435.1 | Scaffold1152 | 115521                  | AA                              | GG                | 1946640733               |
| SNP_P3_147145_142699 | NW_004516435.1 | Scaffold1152 | 142699                  | CC                              | TT                | 1946640735               |
| SNP_P3_147146_143804 | NW_004516435.1 | Scaffold1152 | 143804                  | TT                              | CC                | 1946640737               |
| SNP_P3_147147_751    | NW_004516436.1 | Scaffold1153 | 751                     | AA                              | CC                | 1946640739               |
| SNP_P3_147148_13078  | NW_004516436.1 | Scaffold1153 | 13078                   | AA                              | GG                | 1946640742               |
| SNP_P3_147149_13087  | NW_004516436.1 | Scaffold1153 | 13087                   | AA                              | GG                | 1946640744               |
| SNP_P3_147150_13091  | NW_004516436.1 | Scaffold1153 | 13091                   | AA                              | TT                | 1946640746               |
| SNP_P3_147151_13098  | NW_004516436.1 | Scaffold1153 | 13098                   | GG                              | AA                | 1946640748               |
| SNP_P3_147153_42174  | NW_004516436.1 | Scaffold1153 | 42174                   | TT                              | CC                | 1946640749               |
| SNP_P3_147154_42188  | NW_004516436.1 | Scaffold1153 | 42188                   | GG                              | AA                | 1946640751               |
| SNP_P3_147155_42194  | NW_004516436.1 | Scaffold1153 | 42194                   | TT                              | AA                | 1946640753               |
| SNP_P3_147156_42198  | NW_004516436.1 | Scaffold1153 | 42198                   | TT                              | CC                | 1946640755               |
| SNP_P3_147157_42215  | NW_004516436.1 | Scaffold1153 | 42215                   | CC                              | GG                | 1946640757               |
| SNP_P3_147158_42217  | NW_004516436.1 | Scaffold1153 | 42217                   | TT                              | GG                | 1946640759               |
| SNP_P3_147159_43770  | NW_004516436.1 | Scaffold1153 | 43770                   | GG                              | TT                | 1946640761               |
| SNP_P3_147160_69662  | NW_004516436.1 | Scaffold1153 | 69662                   | CC                              | GG                | 1946640763               |
| SNP_P3_147161_76759  | NW_004516436.1 | Scaffold1153 | 76759                   | TT                              | CC                | 1946640765               |
| SNP_P3_147162_89053  | NW_004516436.1 | Scaffold1153 | 89053                   | CC                              | AA                | 1946640767               |
| SNP_P3_147163_89066  | NW_004516436.1 | Scaffold1153 | 89066                   | AA                              | GG                | 1946640769               |
| SNP_P3_147164_92503  | NW_004516436.1 | Scaffold1153 | 92503                   | AA                              | TT                | 1946640771               |
| SNP_P3_147165_108940 | NW_004516436.1 | Scaffold1153 | 108940                  | GG                              | AA                | 1946640773               |
| SNP_P3_147166_117972 | NW_004516436.1 | Scaffold1153 | 117972                  | TT                              | AA                | 1946640775               |
| SNP_P3_147167_128498 | NW_004516436.1 | Scaffold1153 | 128498                  | TT                              | AA                | 1946640777               |
| SNP_P3_147168_128607 | NW_004516436.1 | Scaffold1153 | 128607                  | TT                              | CC                | 1946640779               |
| SNP_P3_147169_158    | NW_004516439.1 | Scaffold1156 | 158                     | CC                              | AA                | 1946640780               |
| SNP_P3_147170_1482   | NW_004516439.1 | Scaffold1156 | 1482                    | AA                              | GG                | 1946640784               |
| SNP_P3_147171_1649   | NW_004516439.1 | Scaffold1156 | 1649                    | AA                              | GG                | 1946640786               |
| SNP_P3_147172_1691   | NW_004516439.1 | Scaffold1156 | 1691                    | GG                              | AA                | 1946640788               |
| SNP_P3_147173_1695   | NW_004516439.1 | Scaffold1156 | 1695                    | TT                              | CC                | 1946640790               |
| SNP_P3_147174_2679   | NW_004516439.1 | Scaffold1156 | 2679                    | AA                              | CC                | 1946640791               |
| SNP_P3_147175_2901   | NW_004516439.1 | Scaffold1156 | 2901                    | AA                              | CC                | 1946640793               |
| SNP_P3_147176_3022   | NW_004516439.1 | Scaffold1156 | 3022                    | GG                              | TT                | 1946640795               |
| SNP_P3_147177_3023   | NW_004516439.1 | Scaffold1156 | 3023                    | TT                              | AA                | 1946640797               |
| SNP_P3_147178_3051   | NW_004516439.1 | Scaffold1156 | 3051                    | AA                              | GG                | 1946640799               |
| SNP_P3_147179_3064   | NW_004516439.1 | Scaffold1156 | 3064                    | TT                              | CC                | 1946640801               |
| SNP_P3_147180_3081   | NW_004516439.1 | Scaffold1156 | 3081                    | TT                              | AA                | 1946640803               |
| SNP_P3_147181_3131   | NW_004516439.1 | Scaffold1156 | 3131                    | TT                              | CC                | 1946640805               |
| SNP_P3_147182_3250   | NW_004516439.1 | Scaffold1156 | 3250                    | TT                              | AA                | 1946640807               |
| SNP_P3_147183_3291   | NW_004516439.1 | Scaffold1156 | 3291                    | CC                              | TT                | 1946640809               |
| SNP_P3_147184_3353   | NW_004516439.1 | Scaffold1156 | 3353                    | CC                              | TT                | 1946640811               |
| SNP_P3_147186_3365   | NW_004516439.1 | Scaffold1156 | 3365                    | AA                              | TT                | 1946640813               |
| SNP_P3_147188_87     | NW_004516441.1 | Scaffold1158 | 87                      | CC                              | TT                | 1946640815               |

| SNPs IDs            | Chromosome IDs | Chromosomes  | Physical positions (bp) | CDC Frontier (Reference genome) | (Pusa 256 & HPNB) | NCBI SNPdb Accession IDs |
|---------------------|----------------|--------------|-------------------------|---------------------------------|-------------------|--------------------------|
| SNP_P3_147189_186   | NW_004516441.1 | Scaffold1158 | 186                     | TT                              | GG                | 1946640817               |
| SNP_P3_147190_347   | NW_004516441.1 | Scaffold1158 | 347                     | GG                              | AA                | 1946640819               |
| SNP_P3_147191_743   | NW_004516441.1 | Scaffold1158 | 743                     | CC                              | AA                | 1946640821               |
| SNP_P3_147192_5125  | NW_004516441.1 | Scaffold1158 | 5125                    | TT                              | CC                | 1946640824               |
| SNP_P3_147193_5134  | NW_004516441.1 | Scaffold1158 | 5134                    | GG                              | TT                | 1946640826               |
| SNP_P3_147194_5250  | NW_004516441.1 | Scaffold1158 | 5250                    | CC                              | TT                | 1946640828               |
| SNP_P3_147195_5274  | NW_004516441.1 | Scaffold1158 | 5274                    | CC                              | TT                | 1946640830               |
| SNP_P3_147197_2631  | NW_004516443.1 | Scaffold1161 | 2631                    | GG                              | TT                | 1946640831               |
| SNP_P3_147198_5106  | NW_004516443.1 | Scaffold1161 | 5106                    | CC                              | GG                | 1946640833               |
| SNP_P3_147199_7294  | NW_004516443.1 | Scaffold1161 | 7294                    | GG                              | TT                | 1946640835               |
| SNP_P3_147200_7316  | NW_004516443.1 | Scaffold1161 | 7316                    | AA                              | GG                | 1946640837               |
| SNP_P3_147201_7866  | NW_004516443.1 | Scaffold1161 | 7866                    | CC                              | AA                | 1946640839               |
| SNP_P3_147202_7870  | NW_004516443.1 | Scaffold1161 | 7870                    | GG                              | AA                | 1946640841               |
| SNP_P3_147204_12343 | NW_004516443.1 | Scaffold1161 | 12343                   | TT                              | CC                | 1946640843               |
| SNP_P3_147205_12435 | NW_004516443.1 | Scaffold1161 | 12435                   | AA                              | GG                | 1946640845               |
| SNP_P3_147206_12558 | NW_004516443.1 | Scaffold1161 | 12558                   | AA                              | TT                | 1946640847               |
| SNP_P3_147207_12561 | NW_004516443.1 | Scaffold1161 | 12561                   | GG                              | TT                | 1946640849               |
| SNP_P3_147208_12573 | NW_004516443.1 | Scaffold1161 | 12573                   | AA                              | TT                | 1946640851               |
| SNP_P3_147209_12604 | NW_004516443.1 | Scaffold1161 | 12604                   | GG                              | TT                | 1946640853               |
| SNP_P3_147210_12633 | NW_004516443.1 | Scaffold1161 | 12633                   | CC                              | AA                | 1946640854               |
| SNP_P3_147211_12735 | NW_004516443.1 | Scaffold1161 | 12735                   | TT                              | AA                | 1946640856               |
| SNP_P3_147212_12737 | NW_004516443.1 | Scaffold1161 | 12737                   | CC                              | GG                | 1946640858               |
| SNP_P3_147214_12960 | NW_004516443.1 | Scaffold1161 | 12960                   | AA                              | GG                | 1946640860               |
| SNP_P3_147215_13014 | NW_004516443.1 | Scaffold1161 | 13014                   | CC                              | AA                | 1946640862               |
| SNP_P3_147216_13016 | NW_004516443.1 | Scaffold1161 | 13016                   | TT                              | AA                | 1946640864               |
| SNP_P3_147218_980   | NW_004516446.1 | Scaffold1165 | 980                     | TT                              | GG                | 1946640866               |
| SNP_P3_147219_4067  | NW_004516446.1 | Scaffold1165 | 4067                    | CC                              | GG                | 1946640868               |
| SNP_P3_147220_6577  | NW_004516446.1 | Scaffold1165 | 6577                    | AA                              | TT                | 1946640870               |
| SNP_P3_147221_6608  | NW_004516446.1 | Scaffold1165 | 6608                    | TT                              | CC                | 1946640872               |
| SNP_P3_147222_45895 | NW_004516447.1 | Scaffold1166 | 45895                   | CC                              | TT                | 1946640874               |
| SNP_P3_147223_47658 | NW_004516447.1 | Scaffold1166 | 47658                   | AA                              | GG                | 1946640876               |
| SNP_P3_147224_47823 | NW_004516447.1 | Scaffold1166 | 47823                   | AA                              | GG                | 1946640878               |
| SNP_P3_147225_47892 | NW_004516447.1 | Scaffold1166 | 47892                   | CC                              | GG                | 1946640879               |
| SNP_P3_147226_47907 | NW_004516447.1 | Scaffold1166 | 47907                   | GG                              | AA                | 1946640882               |
| SNP_P3_147227_47924 | NW_004516447.1 | Scaffold1166 | 47924                   | CC                              | TT                | 1946640884               |
| SNP_P3_147228_47932 | NW_004516447.1 | Scaffold1166 | 47932                   | AA                              | GG                | 1946640886               |
| SNP_P3_147229_47933 | NW_004516447.1 | Scaffold1166 | 47933                   | TT                              | AA                | 1946640888               |
| SNP_P3_147230_48085 | NW_004516447.1 | Scaffold1166 | 48085                   | CC                              | AA                | 1946640890               |
| SNP_P3_147231_48116 | NW_004516447.1 | Scaffold1166 | 48116                   | AA                              | TT                | 1946640892               |
| SNP_P3_147232_48138 | NW_004516447.1 | Scaffold1166 | 48138                   | GG                              | AA                | 1946640894               |
| SNP_P3_147233_48153 | NW_004516447.1 | Scaffold1166 | 48153                   | GG                              | AA                | 1946640896               |
| SNP_P3_147234_48184 | NW_004516447.1 | Scaffold1166 | 48184                   | TT                              | CC                | 1946640899               |

| SNPs IDs            | Chromosome IDs | Chromosomes  | Physical positions (bp) | CDC Frontier (Reference genome) | (Pusa 256 & HPNB) | NCBI SNPdb Accession IDs |
|---------------------|----------------|--------------|-------------------------|---------------------------------|-------------------|--------------------------|
| SNP_P3_147235_48187 | NW_004516447.1 | Scaffold1166 | 48187                   | TT                              | AA                | 1946640901               |
| SNP_P3_147236_823   | NW_004516450.1 | Scaffold1172 | 823                     | GG                              | TT                | 1946640902               |
| SNP_P3_147237_825   | NW_004516450.1 | Scaffold1172 | 825                     | CC                              | TT                | 1946640904               |
| SNP_P3_147238_1064  | NW_004516450.1 | Scaffold1172 | 1064                    | GG                              | AA                | 1946640906               |
| SNP_P3_147239_1094  | NW_004516450.1 | Scaffold1172 | 1094                    | TT                              | AA                | 1946640908               |
| SNP_P3_147240_1305  | NW_004516450.1 | Scaffold1172 | 1305                    | AA                              | CC                | 1946640910               |
| SNP_P3_147241_11927 | NW_004516451.1 | Scaffold1173 | 11927                   | GG                              | TT                | 1946640912               |
| SNP_P3_147242_11951 | NW_004516451.1 | Scaffold1173 | 11951                   | CC                              | TT                | 1946640914               |
| SNP_P3_147243_12049 | NW_004516451.1 | Scaffold1173 | 12049                   | TT                              | CC                | 1946640916               |
| SNP_P3_147244_107   | NW_004516452.1 | Scaffold1174 | 107                     | GG                              | AA                | 1946640918               |
| SNP_P3_147245_108   | NW_004516452.1 | Scaffold1174 | 108                     | AA                              | TT                | 1946640920               |
| SNP_P3_147246_138   | NW_004516452.1 | Scaffold1174 | 138                     | AA                              | GG                | 1946640922               |
| SNP_P3_147247_154   | NW_004516452.1 | Scaffold1174 | 154                     | CC                              | AA                | 1946640924               |
| SNP_P3_147248_159   | NW_004516452.1 | Scaffold1174 | 159                     | AA                              | CC                | 1946640926               |
| SNP_P3_147249_265   | NW_004516452.1 | Scaffold1174 | 265                     | AA                              | GG                | 1946640928               |
| SNP_P3_147250_274   | NW_004516452.1 | Scaffold1174 | 274                     | CC                              | GG                | 1946640930               |
| SNP_P3_147252_433   | NW_004516452.1 | Scaffold1174 | 433                     | TT                              | GG                | 1946640932               |
| SNP_P3_147253_564   | NW_004516452.1 | Scaffold1174 | 564                     | CC                              | AA                | 1946640934               |
| SNP_P3_147254_741   | NW_004516452.1 | Scaffold1174 | 741                     | TT                              | GG                | 1946640936               |
| SNP_P3_147255_809   | NW_004516452.1 | Scaffold1174 | 809                     | TT                              | AA                | 1946640939               |
| SNP_P3_147256_1066  | NW_004516452.1 | Scaffold1174 | 1066                    | TT                              | CC                | 1946640941               |
| SNP_P3_147257_1134  | NW_004516452.1 | Scaffold1174 | 1134                    | GG                              | CC                | 1946640943               |
| SNP_P3_147258_1399  | NW_004516452.1 | Scaffold1174 | 1399                    | TT                              | AA                | 1946640945               |
| SNP_P3_147259_1483  | NW_004516452.1 | Scaffold1174 | 1483                    | GG                              | TT                | 1946640947               |
| SNP_P3_147260_1605  | NW_004516452.1 | Scaffold1174 | 1605                    | CC                              | TT                | 1946640949               |
| SNP_P3_147261_1706  | NW_004516452.1 | Scaffold1174 | 1706                    | CC                              | AA                | 1946640951               |
| SNP_P3_147262_1808  | NW_004516452.1 | Scaffold1174 | 1808                    | AA                              | TT                | 1946640953               |
| SNP_P3_147263_1873  | NW_004516452.1 | Scaffold1174 | 1873                    | CC                              | TT                | 1946640954               |
| SNP_P3_147264_11729 | NW_004516452.1 | Scaffold1174 | 11729                   | AA                              | GG                | 1946640956               |
| SNP_P3_147265_11953 | NW_004516452.1 | Scaffold1174 | 11953                   | TT                              | GG                | 1946640958               |
| SNP_P3_147266_15132 | NW_004516452.1 | Scaffold1174 | 15132                   | CC                              | TT                | 1946640960               |
| SNP_P3_147267_15211 | NW_004516452.1 | Scaffold1174 | 15211                   | AA                              | TT                | 1946640962               |
| SNP_P3_147268_15270 | NW_004516452.1 | Scaffold1174 | 15270                   | GG                              | TT                | 1946640964               |
| SNP_P3_147269_15297 | NW_004516452.1 | Scaffold1174 | 15297                   | AA                              | GG                | 1946640966               |
| SNP_P3_147270_15307 | NW_004516452.1 | Scaffold1174 | 15307                   | GG                              | TT                | 1946640968               |
| SNP_P3_147271_15381 | NW_004516452.1 | Scaffold1174 | 15381                   | GG                              | AA                | 1946640970               |
| SNP_P3_147272_15535 | NW_004516452.1 | Scaffold1174 | 15535                   | TT                              | CC                | 1946640972               |
| SNP_P3_147273_15569 | NW_004516452.1 | Scaffold1174 | 15569                   | TT                              | AA                | 1946640974               |
| SNP_P3_147274_15859 | NW_004516452.1 | Scaffold1174 | 15859                   | CC                              | TT                | 1946640976               |
| SNP_P3_147275_15943 | NW_004516452.1 | Scaffold1174 | 15943                   | AA                              | CC                | 1946640979               |
| SNP_P3_147276_15944 | NW_004516452.1 | Scaffold1174 | 15944                   | AA                              | CC                | 1946640981               |
| SNP_P3_147277_16085 | NW_004516452.1 | Scaffold1174 | 16085                   | AA                              | GG                | 1946640983               |

| SNPs IDs             | Chromosome IDs | Chromosomes    | Physical positions (bp) | CDC Frontier (Reference genome) | (Pusa 256 & HPNB) | NCBI SNPdb Accession IDs |
|----------------------|----------------|----------------|-------------------------|---------------------------------|-------------------|--------------------------|
| SNP_P3_147278_16188  | NW_004516452.1 | Scaffold1174   | 16188                   | AA                              | CC                | 1946640984               |
| SNP_P3_147279_21198  | NW_004516452.1 | Scaffold1174   | 21198                   | TT                              | CC                | 1946640986               |
| SNP_P3_147280_21378  | NW_004516452.1 | Scaffold1174   | 21378                   | GG                              | TT                | 1946640988               |
| SNP_P3_147281_22798  | NW_004516452.1 | Scaffold1174   | 22798                   | AA                              | TT                | 1946640990               |
| SNP_P3_147282_22834  | NW_004516452.1 | Scaffold1174   | 22834                   | CC                              | AA                | 1946640992               |
| SNP_P3_147283_22867  | NW_004516452.1 | Scaffold1174   | 22867                   | CC                              | AA                | 1946640994               |
| SNP_P3_147284_22877  | NW_004516452.1 | Scaffold1174   | 22877                   | GG                              | AA                | 1946640996               |
| SNP_P3_147285_22891  | NW_004516452.1 | Scaffold1174   | 22891                   | TT                              | GG                | 1946640998               |
| SNP_P3_147286_22913  | NW_004516452.1 | Scaffold1174   | 22913                   | GG                              | AA                | 1946641000               |
| SNP_P3_147287_22994  | NW_004516452.1 | Scaffold1174   | 22994                   | GG                              | AA                | 1946641002               |
| SNP_P3_147288_23002  | NW_004516452.1 | Scaffold1174   | 23002                   | TT                              | CC                | 1946641004               |
| SNP_P3_147290_23064  | NW_004516452.1 | Scaffold1174   | 23064                   | AA                              | GG                | 1946641006               |
| SNP_P3_147291_23094  | NW_004516452.1 | Scaffold1174   | 23094                   | GG                              | AA                | 1946641008               |
| SNP_P3_147292_23115  | NW_004516452.1 | Scaffold1174   | 23115                   | GG                              | AA                | 1946641010               |
| SNP_P3_147294_23761  | NW_004516452.1 | Scaffold1174   | 23761                   | CC                              | TT                | 1946641012               |
| SNP_P3_147295_23765  | NW_004516452.1 | Scaffold1174   | 23765                   | CC                              | GG                | 1946641014               |
| SNP_P3_147296_23766  | NW_004516452.1 | Scaffold1174   | 23766                   | CC                              | TT                | 1946641016               |
| SNP_P3_147297_23886  | NW_004516452.1 | Scaffold1174   | 23886                   | GG                              | CC                | 1946641018               |
| SNP_P3_147298_24818  | NW_004516452.1 | Scaffold1174   | 24818                   | AA                              | TT                | 1946641021               |
| SNP_P3_147299_25186  | NW_004516452.1 | Scaffold1174   | 25186                   | TT                              | AA                | 1946641023               |
| SNP_P3_147301_25401  | NW_004516452.1 | Scaffold1174   | 25401                   | CC                              | TT                | 1946641025               |
| SNP_P3_147302_25724  | NW_004516452.1 | Scaffold1174   | 25724                   | CC                              | TT                | 1946641027               |
| SNP_P3_147303_25734  | NW_004516452.1 | Scaffold1174   | 25734                   | TT                              | AA                | 1946641037               |
| SNP_P3_147304_25741  | NW_004516452.1 | Scaffold1174   | 25741                   | TT                              | CC                | 1946641039               |
| SNP_P3_147305_25744  | NW_004516452.1 | Scaffold1174   | 25744                   | GG                              | AA                | 1946641041               |
| SNP_P3_147306_493    | NW_004516453.1 | Scaffold1175   | 493                     | AA                              | GG                | 1946641043               |
| SNP_P3_147307_3294   | NW_004516453.1 | Scaffold1175   | 3294                    | CC                              | TT                | 1946641045               |
| SNP_P3_147308_3499   | NW_004516453.1 | Scaffold1175   | 3499                    | CC                              | GG                | 1946641047               |
| SNP_P3_147309_3503   | NW_004516453.1 | Scaffold1175   | 3503                    | AA                              | TT                | 1946641049               |
| SNP_P3_147310_3509   | NW_004516453.1 | Scaffold1175   | 3509                    | GG                              | AA                | 1946641051               |
| SNP_P3_147311_3530   | NW_004516453.1 | Scaffold1175   | 3530                    | AA                              | TT                | 1946641055               |
| SNP_P3_147312_3532   | NW_004516453.1 | Scaffold1175   | 3532                    | CC                              | TT                | 1946641057               |
| SNP_P3_147313_3571   | NW_004516453.1 | Scaffold1175   | 3571                    | GG                              | AA                | 1946641059               |
| SNP_P3_147315_37110  | NW_004516454.1 | Scaffold1176_2 | 37110                   | TT                              | GG                | 1946641061               |
| SNP_P3_147316_51635  | NW_004516454.1 | Scaffold1176_2 | 51635                   | TT                              | CC                | 1946641063               |
| SNP_P3_147317_51697  | NW_004516454.1 | Scaffold1176_2 | 51697                   | AA                              | CC                | 1946641065               |
| SNP_P3_147318_57713  | NW_004516454.1 | Scaffold1176_2 | 57713                   | AA                              | GG                | 1946641067               |
| SNP_P3_147319_57721  | NW_004516454.1 | Scaffold1176_2 | 57721                   | AA                              | CC                | 1946641069               |
| SNP_P3_147320_58073  | NW_004516454.1 | Scaffold1176_2 | 58073                   | TT                              | GG                | 1946641071               |
| SNP_P3_147322_93592  | NW_004516454.1 | Scaffold1176_2 | 93592                   | AA                              | TT                | 1946641073               |
| SNP_P3_147323_93594  | NW_004516454.1 | Scaffold1176_2 | 93594                   | AA                              | TT                | 1946641075               |
| SNP_P3_147325_158306 | NW_004516454.1 | Scaffold1176_2 | 158306                  | GG                              | TT                | 1946641077               |



| SNPs IDs             | Chromosome IDs | Chromosomes    | Physical positions (bp) | CDC Frontier (Reference genome) | (Pusa 256 & HPNB) | NCBI SNPdb Accession IDs |
|----------------------|----------------|----------------|-------------------------|---------------------------------|-------------------|--------------------------|
| SNP_P3_147326_187306 | NW_004516454.1 | Scaffold1176_2 | 187306                  | AA                              | GG                | 1946641079               |
| SNP_P3_147327_196063 | NW_004516454.1 | Scaffold1176_2 | 196063                  | CC                              | AA                | 1946641081               |
| SNP_P3_147328_196313 | NW_004516454.1 | Scaffold1176_2 | 196313                  | AA                              | CC                | 1946641082               |
| SNP_P3_147329_196314 | NW_004516454.1 | Scaffold1176_2 | 196314                  | AA                              | GG                | 1946641084               |
| SNP_P3_147330_196334 | NW_004516454.1 | Scaffold1176_2 | 196334                  | CC                              | AA                | 1946641086               |
| SNP_P3_147331_196383 | NW_004516454.1 | Scaffold1176_2 | 196383                  | AA                              | GG                | 1946641088               |
| SNP_P3_147333_196506 | NW_004516454.1 | Scaffold1176_2 | 196506                  | CC                              | AA                | 1946641090               |
| SNP_P3_147334_196623 | NW_004516454.1 | Scaffold1176_2 | 196623                  | TT                              | CC                | 1946641092               |
| SNP_P3_147335_196655 | NW_004516454.1 | Scaffold1176_2 | 196655                  | TT                              | CC                | 1946641094               |
| SNP_P3_147336_196676 | NW_004516454.1 | Scaffold1176_2 | 196676                  | CC                              | GG                | 1946641097               |
| SNP_P3_147337_196708 | NW_004516454.1 | Scaffold1176_2 | 196708                  | TT                              | AA                | 1946641099               |
| SNP_P3_147338_199252 | NW_004516454.1 | Scaffold1176_2 | 199252                  | GG                              | AA                | 1946641101               |
| SNP_P3_147339_226057 | NW_004516454.1 | Scaffold1176_2 | 226057                  | CC                              | TT                | 1946641103               |
| SNP_P3_147340_227395 | NW_004516454.1 | Scaffold1176_2 | 227395                  | AA                              | TT                | 1946641105               |
| SNP_P3_147341_237547 | NW_004516454.1 | Scaffold1176_2 | 237547                  | GG                              | AA                | 1946641107               |
| SNP_P3_147342_237788 | NW_004516454.1 | Scaffold1176_2 | 237788                  | TT                              | GG                | 1946641109               |
| SNP_P3_147343_238295 | NW_004516454.1 | Scaffold1176_2 | 238295                  | GG                              | TT                | 1946641111               |
| SNP_P3_147344_238525 | NW_004516454.1 | Scaffold1176_2 | 238525                  | GG                              | AA                | 1946641113               |
| SNP_P3_147345_238889 | NW_004516454.1 | Scaffold1176_2 | 238889                  | CC                              | GG                | 1946641115               |
| SNP_P3_147346_271480 | NW_004516454.1 | Scaffold1176_2 | 271480                  | CC                              | TT                | 1946641117               |
| SNP_P3_147347_271505 | NW_004516454.1 | Scaffold1176_2 | 271505                  | AA                              | GG                | 1946641119               |
| SNP_P3_147348_274880 | NW_004516454.1 | Scaffold1176_2 | 274880                  | GG                              | AA                | 1946641121               |
| SNP_P3_147349_290779 | NW_004516454.1 | Scaffold1176_2 | 290779                  | TT                              | GG                | 1946641123               |
| SNP_P3_147350_290780 | NW_004516454.1 | Scaffold1176_2 | 290780                  | AA                              | TT                | 1946641125               |
| SNP_P3_147351_316803 | NW_004516454.1 | Scaffold1176_2 | 316803                  | TT                              | CC                | 1946641127               |
| SNP_P3_147352_316807 | NW_004516454.1 | Scaffold1176_2 | 316807                  | AA                              | GG                | 1946641128               |
| SNP_P3_147353_320294 | NW_004516454.1 | Scaffold1176_2 | 320294                  | AA                              | GG                | 1946641130               |
| SNP_P3_147354_347107 | NW_004516454.1 | Scaffold1176_2 | 347107                  | GG                              | AA                | 1946641132               |
| SNP_P3_147355_347698 | NW_004516454.1 | Scaffold1176_2 | 347698                  | CC                              | TT                | 1946641135               |
| SNP_P3_147358_817    | NW_004516455.1 | Scaffold1177   | 817                     | AA                              | GG                | 1946641137               |
| SNP_P3_147359_1879   | NW_004516456.1 | Scaffold1178   | 1879                    | GG                              | TT                | 1946641139               |
| SNP_P3_147360_1898   | NW_004516456.1 | Scaffold1178   | 1898                    | CC                              | AA                | 1946641141               |
| SNP_P3_147361_1899   | NW_004516456.1 | Scaffold1178   | 1899                    | CC                              | TT                | 1946641143               |
| SNP_P3_147362_1935   | NW_004516456.1 | Scaffold1178   | 1935                    | TT                              | CC                | 1946641145               |
| SNP_P3_147363_1946   | NW_004516456.1 | Scaffold1178   | 1946                    | CC                              | TT                | 1946641147               |
| SNP_P3_147364_1956   | NW_004516456.1 | Scaffold1178   | 1956                    | GG                              | AA                | 1946641149               |
| SNP_P3_147365_2140   | NW_004516456.1 | Scaffold1178   | 2140                    | GG                              | AA                | 1946641151               |
| SNP_P3_147366_2249   | NW_004516456.1 | Scaffold1178   | 2249                    | CC                              | TT                | 1946641153               |
| SNP_P3_147367_2301   | NW_004516456.1 | Scaffold1178   | 2301                    | AA                              | GG                | 1946641155               |
| SNP_P3_147368_2388   | NW_004516456.1 | Scaffold1178   | 2388                    | AA                              | CC                | 1946641157               |
| SNP_P3_147369_2389   | NW_004516456.1 | Scaffold1178   | 2389                    | GG                              | AA                | 1946641159               |
| SNP_P3_147370_2851   | NW_004516456.1 | Scaffold1178   | 2851                    | CC                              | GG                | 1946641160               |

| SNPs IDs           | Chromosome IDs | Chromosomes  | Physical positions (bp) | CDC Frontier (Reference genome) | (Pusa 256 & HPNB) | NCBI SNPdb Accession IDs |
|--------------------|----------------|--------------|-------------------------|---------------------------------|-------------------|--------------------------|
| SNP_P3_147371_6725 | NW_004516456.1 | Scaffold1178 | 6725                    | TT                              | AA                | 1946641162               |
| SNP_P3_147372_6747 | NW_004516456.1 | Scaffold1178 | 6747                    | AA                              | GG                | 1946641164               |
| SNP_P3_147373_6765 | NW_004516456.1 | Scaffold1178 | 6765                    | AA                              | GG                | 1946641166               |
| SNP_P3_147374_9799 | NW_004516456.1 | Scaffold1178 | 9799                    | AA                              | GG                | 1946641168               |
| SNP_P3_147377_226  | NW_004516458.1 | Scaffold1180 | 226                     | TT                              | AA                | 1946641170               |
| SNP_P3_147378_266  | NW_004516458.1 | Scaffold1180 | 266                     | TT                              | CC                | 1946641172               |
| SNP_P3_147379_320  | NW_004516458.1 | Scaffold1180 | 320                     | GG                              | AA                | 1946641175               |
| SNP_P3_147380_439  | NW_004516458.1 | Scaffold1180 | 439                     | GG                              | AA                | 1946641177               |
| SNP_P3_147381_773  | NW_004516458.1 | Scaffold1180 | 773                     | GG                              | TT                | 1946641179               |
| SNP_P3_147382_2577 | NW_004516458.1 | Scaffold1180 | 2577                    | GG                              | AA                | 1946641181               |
| SNP_P3_147384_2632 | NW_004516458.1 | Scaffold1180 | 2632                    | CC                              | TT                | 1946641183               |
| SNP_P3_147385_2647 | NW_004516458.1 | Scaffold1180 | 2647                    | CC                              | TT                | 1946641185               |
| SNP_P3_147386_2673 | NW_004516458.1 | Scaffold1180 | 2673                    | TT                              | CC                | 1946641187               |
| SNP_P3_147387_2744 | NW_004516458.1 | Scaffold1180 | 2744                    | AA                              | GG                | 1946641189               |
| SNP_P3_147388_2749 | NW_004516458.1 | Scaffold1180 | 2749                    | CC                              | GG                | 1946641191               |
| SNP_P3_147389_2775 | NW_004516458.1 | Scaffold1180 | 2775                    | GG                              | CC                | 1946641193               |
| SNP_P3_147390_2786 | NW_004516458.1 | Scaffold1180 | 2786                    | GG                              | AA                | 1946641195               |
| SNP_P3_147391_2787 | NW_004516458.1 | Scaffold1180 | 2787                    | GG                              | CC                | 1946641197               |
| SNP_P3_147392_2833 | NW_004516458.1 | Scaffold1180 | 2833                    | CC                              | GG                | 1946641199               |
| SNP_P3_147393_2855 | NW_004516458.1 | Scaffold1180 | 2855                    | CC                              | AA                | 1946641201               |
| SNP_P3_147394_2856 | NW_004516458.1 | Scaffold1180 | 2856                    | GG                              | AA                | 1946641203               |
| SNP_P3_147396_2927 | NW_004516458.1 | Scaffold1180 | 2927                    | CC                              | AA                | 1946641204               |
| SNP_P3_147397_2954 | NW_004516458.1 | Scaffold1180 | 2954                    | TT                              | GG                | 1946641206               |
| SNP_P3_147398_2959 | NW_004516458.1 | Scaffold1180 | 2959                    | CC                              | TT                | 1946641208               |
| SNP_P3_147399_2964 | NW_004516458.1 | Scaffold1180 | 2964                    | AA                              | GG                | 1946641210               |
| SNP_P3_147400_2968 | NW_004516458.1 | Scaffold1180 | 2968                    | CC                              | AA                | 1946641212               |
| SNP_P3_147401_3087 | NW_004516458.1 | Scaffold1180 | 3087                    | GG                              | AA                | 1946641215               |
| SNP_P3_147402_3124 | NW_004516458.1 | Scaffold1180 | 3124                    | TT                              | CC                | 1946641217               |
| SNP_P3_147403_3132 | NW_004516458.1 | Scaffold1180 | 3132                    | CC                              | TT                | 1946641219               |
| SNP_P3_147404_3184 | NW_004516458.1 | Scaffold1180 | 3184                    | AA                              | CC                | 1946641221               |
| SNP_P3_147405_3216 | NW_004516458.1 | Scaffold1180 | 3216                    | CC                              | TT                | 1946641223               |
| SNP_P3_147406_3237 | NW_004516458.1 | Scaffold1180 | 3237                    | GG                              | TT                | 1946641225               |
| SNP_P3_147407_3240 | NW_004516458.1 | Scaffold1180 | 3240                    | GG                              | TT                | 1946641227               |
| SNP_P3_147408_3253 | NW_004516458.1 | Scaffold1180 | 3253                    | CC                              | TT                | 1946641229               |
| SNP_P3_147410_3293 | NW_004516458.1 | Scaffold1180 | 3293                    | AA                              | GG                | 1946641230               |
| SNP_P3_147411_3311 | NW_004516458.1 | Scaffold1180 | 3311                    | CC                              | TT                | 1946641232               |
| SNP_P3_147412_3329 | NW_004516458.1 | Scaffold1180 | 3329                    | TT                              | CC                | 1946641234               |
| SNP_P3_147413_3357 | NW_004516458.1 | Scaffold1180 | 3357                    | CC                              | TT                | 1946641236               |
| SNP_P3_147414_3395 | NW_004516458.1 | Scaffold1180 | 3395                    | AA                              | GG                | 1946641238               |
| SNP_P3_147415_3400 | NW_004516458.1 | Scaffold1180 | 3400                    | CC                              | GG                | 1946641240               |
| SNP_P3_147416_3435 | NW_004516458.1 | Scaffold1180 | 3435                    | GG                              | TT                | 1946641242               |
| SNP_P3_147417_3440 | NW_004516458.1 | Scaffold1180 | 3440                    | CC                              | TT                | 1946641244               |

| SNPs IDs            | Chromosome IDs | Chromosomes  | Physical positions (bp) | CDC Frontier (Reference genome) | (Pusa 256 & HPNB) | NCBI SNPdb Accession IDs |
|---------------------|----------------|--------------|-------------------------|---------------------------------|-------------------|--------------------------|
| SNP_P3_147418_3465  | NW_004516458.1 | Scaffold1180 | 3465                    | GG                              | AA                | 1946641246               |
| SNP_P3_147419_3472  | NW_004516458.1 | Scaffold1180 | 3472                    | GG                              | TT                | 1946641248               |
| SNP_P3_147420_3478  | NW_004516458.1 | Scaffold1180 | 3478                    | CC                              | TT                | 1946641250               |
| SNP_P3_147421_3509  | NW_004516458.1 | Scaffold1180 | 3509                    | GG                              | AA                | 1946641252               |
| SNP_P3_147422_3512  | NW_004516458.1 | Scaffold1180 | 3512                    | CC                              | TT                | 1946641254               |
| SNP_P3_147423_3576  | NW_004516458.1 | Scaffold1180 | 3576                    | AA                              | GG                | 1946641257               |
| SNP_P3_147424_3580  | NW_004516458.1 | Scaffold1180 | 3580                    | CC                              | TT                | 1946641259               |
| SNP_P3_147425_3665  | NW_004516458.1 | Scaffold1180 | 3665                    | TT                              | CC                | 1946641261               |
| SNP_P3_147427_3756  | NW_004516458.1 | Scaffold1180 | 3756                    | AA                              | TT                | 1946641263               |
| SNP_P3_147428_3820  | NW_004516458.1 | Scaffold1180 | 3820                    | TT                              | CC                | 1946641265               |
| SNP_P3_147429_3845  | NW_004516458.1 | Scaffold1180 | 3845                    | TT                              | CC                | 1946641267               |
| SNP_P3_147430_3873  | NW_004516458.1 | Scaffold1180 | 3873                    | AA                              | GG                | 1946641269               |
| SNP_P3_147431_3981  | NW_004516458.1 | Scaffold1180 | 3981                    | CC                              | TT                | 1946641270               |
| SNP_P3_147432_4048  | NW_004516458.1 | Scaffold1180 | 4048                    | AA                              | TT                | 1946641272               |
| SNP_P3_147433_13225 | NW_004516458.1 | Scaffold1180 | 13225                   | AA                              | GG                | 1946641274               |
| SNP_P3_147434_29366 | NW_004516458.1 | Scaffold1180 | 29366                   | TT                              | AA                | 1946641276               |
| SNP_P3_147435_29442 | NW_004516458.1 | Scaffold1180 | 29442                   | TT                              | GG                | 1946641278               |
| SNP_P3_147436_29630 | NW_004516458.1 | Scaffold1180 | 29630                   | AA                              | GG                | 1946641280               |
| SNP_P3_147437_29638 | NW_004516458.1 | Scaffold1180 | 29638                   | CC                              | TT                | 1946641282               |
| SNP_P3_147439_29661 | NW_004516458.1 | Scaffold1180 | 29661                   | AA                              | CC                | 1946641284               |
| SNP_P3_147440_31669 | NW_004516458.1 | Scaffold1180 | 31669                   | AA                              | TT                | 1946641286               |
| SNP_P3_147441_31712 | NW_004516458.1 | Scaffold1180 | 31712                   | AA                              | TT                | 1946641288               |
| SNP_P3_147443_59627 | NW_004516458.1 | Scaffold1180 | 59627                   | TT                              | CC                | 1946641290               |
| SNP_P3_147445_59731 | NW_004516458.1 | Scaffold1180 | 59731                   | AA                              | GG                | 1946641292               |
| SNP_P3_147446_59740 | NW_004516458.1 | Scaffold1180 | 59740                   | GG                              | AA                | 1946641294               |
| SNP_P3_147447_59750 | NW_004516458.1 | Scaffold1180 | 59750                   | AA                              | CC                | 1946641296               |
| SNP_P3_147448_59754 | NW_004516458.1 | Scaffold1180 | 59754                   | TT                              | AA                | 1946641298               |
| SNP_P3_147449_60611 | NW_004516458.1 | Scaffold1180 | 60611                   | GG                              | AA                | 1946641300               |
| SNP_P3_147450_69280 | NW_004516458.1 | Scaffold1180 | 69280                   | TT                              | GG                | 1946641302               |
| SNP_P3_147451_71361 | NW_004516458.1 | Scaffold1180 | 71361                   | AA                              | GG                | 1946641304               |
| SNP_P3_147452_81346 | NW_004516458.1 | Scaffold1180 | 81346                   | CC                              | TT                | 1946641306               |
| SNP_P3_147453_81614 | NW_004516458.1 | Scaffold1180 | 81614                   | TT                              | CC                | 1946641308               |
| SNP_P3_147455_90872 | NW_004516458.1 | Scaffold1180 | 90872                   | TT                              | CC                | 1946641310               |
| SNP_P3_147456_90927 | NW_004516458.1 | Scaffold1180 | 90927                   | GG                              | AA                | 1946641312               |
| SNP_P3_147458_93114 | NW_004516458.1 | Scaffold1180 | 93114                   | TT                              | CC                | 1946641314               |
| SNP_P3_147459_93135 | NW_004516458.1 | Scaffold1180 | 93135                   | AA                              | GG                | 1946641316               |
| SNP_P3_147460_93144 | NW_004516458.1 | Scaffold1180 | 93144                   | AA                              | GG                | 1946641318               |
| SNP_P3_147461_93171 | NW_004516458.1 | Scaffold1180 | 93171                   | CC                              | TT                | 1946641320               |
| SNP_P3_147462_93173 | NW_004516458.1 | Scaffold1180 | 93173                   | GG                              | AA                | 1946641322               |
| SNP_P3_147463_93180 | NW_004516458.1 | Scaffold1180 | 93180                   | AA                              | CC                | 1946641324               |
| SNP_P3_147464_93182 | NW_004516458.1 | Scaffold1180 | 93182                   | AA                              | CC                | 1946641326               |
| SNP_P3_147465_93222 | NW_004516458.1 | Scaffold1180 | 93222                   | AA                              | GG                | 1946641328               |

| SNPs IDs             | Chromosome IDs | Chromosomes  | Physical positions (bp) | CDC Frontier (Reference genome) | (Pusa 256 & HPNB) | NCBI SNPdb Accession IDs |
|----------------------|----------------|--------------|-------------------------|---------------------------------|-------------------|--------------------------|
| SNP_P3_147466_93255  | NW_004516458.1 | Scaffold1180 | 93255                   | GG                              | AA                | 1946641330               |
| SNP_P3_147467_93279  | NW_004516458.1 | Scaffold1180 | 93279                   | GG                              | AA                | 1946641332               |
| SNP_P3_147468_93280  | NW_004516458.1 | Scaffold1180 | 93280                   | AA                              | GG                | 1946641335               |
| SNP_P3_147469_93281  | NW_004516458.1 | Scaffold1180 | 93281                   | CC                              | TT                | 1946641337               |
| SNP_P3_147470_93524  | NW_004516458.1 | Scaffold1180 | 93524                   | GG                              | AA                | 1946641339               |
| SNP_P3_147471_110048 | NW_004516458.1 | Scaffold1180 | 110048                  | GG                              | AA                | 1946641341               |
| SNP_P3_147472_110084 | NW_004516458.1 | Scaffold1180 | 110084                  | AA                              | TT                | 1946641343               |
| SNP_P3_147473_121691 | NW_004516458.1 | Scaffold1180 | 121691                  | TT                              | AA                | 1946641345               |
| SNP_P3_147474_122136 | NW_004516458.1 | Scaffold1180 | 122136                  | CC                              | GG                | 1946641347               |
| SNP_P3_147475_128649 | NW_004516458.1 | Scaffold1180 | 128649                  | AA                              | GG                | 1946641349               |
| SNP_P3_147476_128716 | NW_004516458.1 | Scaffold1180 | 128716                  | TT                              | CC                | 1946641351               |
| SNP_P3_147478_129135 | NW_004516458.1 | Scaffold1180 | 129135                  | CC                              | AA                | 1946641353               |
| SNP_P3_147479_134534 | NW_004516458.1 | Scaffold1180 | 134534                  | GG                              | AA                | 1946641355               |
| SNP_P3_147480_134695 | NW_004516458.1 | Scaffold1180 | 134695                  | GG                              | TT                | 1946641356               |
| SNP_P3_147481_134696 | NW_004516458.1 | Scaffold1180 | 134696                  | GG                              | CC                | 1946641358               |
| SNP_P3_147482_134711 | NW_004516458.1 | Scaffold1180 | 134711                  | GG                              | AA                | 1946641360               |
| SNP_P3_147483_134734 | NW_004516458.1 | Scaffold1180 | 134734                  | GG                              | CC                | 1946641362               |
| SNP_P3_147485_136044 | NW_004516458.1 | Scaffold1180 | 136044                  | CC                              | AA                | 1946641364               |
| SNP_P3_147486_136048 | NW_004516458.1 | Scaffold1180 | 136048                  | AA                              | GG                | 1946641366               |
| SNP_P3_147487_136068 | NW_004516458.1 | Scaffold1180 | 136068                  | AA                              | GG                | 1946641368               |
| SNP_P3_147488_136090 | NW_004516458.1 | Scaffold1180 | 136090                  | TT                              | CC                | 1946641370               |
| SNP_P3_147489_137473 | NW_004516458.1 | Scaffold1180 | 137473                  | AA                              | GG                | 1946641372               |
| SNP_P3_147490_137850 | NW_004516458.1 | Scaffold1180 | 137850                  | AA                              | GG                | 1946641375               |
| SNP_P3_147491_137897 | NW_004516458.1 | Scaffold1180 | 137897                  | AA                              | TT                | 1946641377               |
| SNP_P3_147492_157624 | NW_004516458.1 | Scaffold1180 | 157624                  | GG                              | CC                | 1946641379               |
| SNP_P3_147493_157867 | NW_004516458.1 | Scaffold1180 | 157867                  | GG                              | AA                | 1946641381               |
| SNP_P3_147494_157882 | NW_004516458.1 | Scaffold1180 | 157882                  | CC                              | TT                | 1946641383               |
| SNP_P3_147495_159619 | NW_004516458.1 | Scaffold1180 | 159619                  | AA                              | GG                | 1946641385               |
| SNP_P3_147496_160531 | NW_004516458.1 | Scaffold1180 | 160531                  | GG                              | TT                | 1946641387               |
| SNP_P3_147497_163196 | NW_004516458.1 | Scaffold1180 | 163196                  | CC                              | TT                | 1946641389               |
| SNP_P3_147498_191424 | NW_004516458.1 | Scaffold1180 | 191424                  | TT                              | CC                | 1946641391               |
| SNP_P3_147499_194631 | NW_004516458.1 | Scaffold1180 | 194631                  | CC                              | TT                | 1946641393               |
| SNP_P3_147500_194689 | NW_004516458.1 | Scaffold1180 | 194689                  | CC                              | TT                | 1946641395               |
| SNP_P3_147502_207113 | NW_004516458.1 | Scaffold1180 | 207113                  | CC                              | AA                | 1946641396               |
| SNP_P3_147503_207624 | NW_004516458.1 | Scaffold1180 | 207624                  | GG                              | AA                | 1946641398               |
| SNP_P3_147504_207692 | NW_004516458.1 | Scaffold1180 | 207692                  | GG                              | AA                | 1946641400               |
| SNP_P3_147505_208395 | NW_004516458.1 | Scaffold1180 | 208395                  | GG                              | AA                | 1946641402               |
| SNP_P3_147507_208784 | NW_004516458.1 | Scaffold1180 | 208784                  | GG                              | AA                | 1946641404               |
| SNP_P3_147508_209185 | NW_004516458.1 | Scaffold1180 | 209185                  | GG                              | TT                | 1946641406               |
| SNP_P3_147510_209225 | NW_004516458.1 | Scaffold1180 | 209225                  | GG                              | AA                | 1946641408               |
| SNP_P3_147512_209484 | NW_004516458.1 | Scaffold1180 | 209484                  | AA                              | GG                | 1946641410               |
| SNP_P3_147513_209496 | NW_004516458.1 | Scaffold1180 | 209496                  | TT                              | CC                | 1946641412               |

| SNPs IDs             | Chromosome IDs | Chromosomes  | Physical positions (bp) | CDC Frontier (Reference genome) | (Pusa 256 & HPNB) | NCBI SNPdb Accession IDs |
|----------------------|----------------|--------------|-------------------------|---------------------------------|-------------------|--------------------------|
| SNP_P3_147514_209645 | NW_004516458.1 | Scaffold1180 | 209645                  | TT                              | CC                | 1946641414               |
| SNP_P3_147515_209690 | NW_004516458.1 | Scaffold1180 | 209690                  | AA                              | GG                | 1946641417               |
| SNP_P3_147516_209943 | NW_004516458.1 | Scaffold1180 | 209943                  | GG                              | TT                | 1946641419               |
| SNP_P3_147517_210828 | NW_004516458.1 | Scaffold1180 | 210828                  | AA                              | TT                | 1946641421               |
| SNP_P3_147518_210906 | NW_004516458.1 | Scaffold1180 | 210906                  | CC                              | GG                | 1946641423               |
| SNP_P3_147519_210987 | NW_004516458.1 | Scaffold1180 | 210987                  | CC                              | TT                | 1946641425               |
| SNP_P3_147520_211300 | NW_004516458.1 | Scaffold1180 | 211300                  | AA                              | CC                | 1946641427               |
| SNP_P3_147521_211315 | NW_004516458.1 | Scaffold1180 | 211315                  | CC                              | AA                | 1946641429               |
| SNP_P3_147522_211381 | NW_004516458.1 | Scaffold1180 | 211381                  | AA                              | GG                | 1946641431               |
| SNP_P3_147523_211397 | NW_004516458.1 | Scaffold1180 | 211397                  | AA                              | CC                | 1946641433               |
| SNP_P3_147524_211426 | NW_004516458.1 | Scaffold1180 | 211426                  | CC                              | GG                | 1946641435               |
| SNP_P3_147525_212352 | NW_004516458.1 | Scaffold1180 | 212352                  | TT                              | CC                | 1946641436               |
| SNP_P3_147526_212514 | NW_004516458.1 | Scaffold1180 | 212514                  | GG                              | AA                | 1946641438               |
| SNP_P3_147528_213243 | NW_004516458.1 | Scaffold1180 | 213243                  | GG                              | AA                | 1946641440               |
| SNP_P3_147529_213911 | NW_004516458.1 | Scaffold1180 | 213911                  | TT                              | CC                | 1946641442               |
| SNP_P3_147530_213925 | NW_004516458.1 | Scaffold1180 | 213925                  | TT                              | CC                | 1946641444               |
| SNP_P3_147531_214448 | NW_004516458.1 | Scaffold1180 | 214448                  | CC                              | TT                | 1946641446               |
| SNP_P3_147532_215388 | NW_004516458.1 | Scaffold1180 | 215388                  | AA                              | CC                | 1946641448               |
| SNP_P3_147533_215754 | NW_004516458.1 | Scaffold1180 | 215754                  | GG                              | AA                | 1946641450               |
| SNP_P3_147534_216211 | NW_004516458.1 | Scaffold1180 | 216211                  | GG                              | AA                | 1946641452               |
| SNP_P3_147536_217630 | NW_004516458.1 | Scaffold1180 | 217630                  | TT                              | CC                | 1946641454               |
| SNP_P3_147537_218585 | NW_004516458.1 | Scaffold1180 | 218585                  | TT                              | CC                | 1946641457               |
| SNP_P3_147538_218745 | NW_004516458.1 | Scaffold1180 | 218745                  | CC                              | TT                | 1946641459               |
| SNP_P3_147539_218887 | NW_004516458.1 | Scaffold1180 | 218887                  | GG                              | CC                | 1946641461               |
| SNP_P3_147540_218892 | NW_004516458.1 | Scaffold1180 | 218892                  | CC                              | TT                | 1946641463               |
| SNP_P3_147541_218911 | NW_004516458.1 | Scaffold1180 | 218911                  | TT                              | GG                | 1946641465               |
| SNP_P3_147542_218931 | NW_004516458.1 | Scaffold1180 | 218931                  | GG                              | TT                | 1946641467               |
| SNP_P3_147543_218945 | NW_004516458.1 | Scaffold1180 | 218945                  | TT                              | AA                | 1946641469               |
| SNP_P3_147544_218954 | NW_004516458.1 | Scaffold1180 | 218954                  | AA                              | TT                | 1946641471               |
| SNP_P3_147545_218958 | NW_004516458.1 | Scaffold1180 | 218958                  | GG                              | AA                | 1946641473               |
| SNP_P3_147546_219037 | NW_004516458.1 | Scaffold1180 | 219037                  | AA                              | CC                | 1946641474               |
| SNP_P3_147547_219039 | NW_004516458.1 | Scaffold1180 | 219039                  | GG                              | TT                | 1946641476               |
| SNP_P3_147549_226627 | NW_004516458.1 | Scaffold1180 | 226627                  | AA                              | TT                | 1946641478               |
| SNP_P3_147550_227312 | NW_004516458.1 | Scaffold1180 | 227312                  | TT                              | AA                | 1946641480               |
| SNP_P3_147551_227811 | NW_004516458.1 | Scaffold1180 | 227811                  | TT                              | GG                | 1946641482               |
| SNP_P3_147552_228110 | NW_004516458.1 | Scaffold1180 | 228110                  | GG                              | CC                | 1946641484               |
| SNP_P3_147553_240910 | NW_004516458.1 | Scaffold1180 | 240910                  | AA                              | GG                | 1946641486               |
| SNP_P3_147554_240923 | NW_004516458.1 | Scaffold1180 | 240923                  | AA                              | GG                | 1946641488               |
| SNP_P3_147555_241027 | NW_004516458.1 | Scaffold1180 | 241027                  | TT                              | AA                | 1946641490               |
| SNP_P3_147556_241239 | NW_004516458.1 | Scaffold1180 | 241239                  | TT                              | AA                | 1946641492               |
| SNP_P3_147557_241276 | NW_004516458.1 | Scaffold1180 | 241276                  | CC                              | GG                | 1946641494               |
| SNP_P3_147558_241313 | NW_004516458.1 | Scaffold1180 | 241313                  | AA                              | GG                | 1946641496               |

| SNPs IDs             | Chromosome IDs | Chromosomes  | Physical positions (bp) | CDC Frontier (Reference genome) | (Pusa 256 & HPNB) | NCBI SNPdb Accession IDs |
|----------------------|----------------|--------------|-------------------------|---------------------------------|-------------------|--------------------------|
| SNP_P3_147559_241399 | NW_004516458.1 | Scaffold1180 | 241399                  | GG                              | AA                | 1946641498               |
| SNP_P3_147560_241445 | NW_004516458.1 | Scaffold1180 | 241445                  | AA                              | GG                | 1946641500               |
| SNP_P3_147561_243917 | NW_004516458.1 | Scaffold1180 | 243917                  | TT                              | AA                | 1946641501               |
| SNP_P3_147562_244916 | NW_004516458.1 | Scaffold1180 | 244916                  | GG                              | AA                | 1946641503               |
| SNP_P3_147563_244941 | NW_004516458.1 | Scaffold1180 | 244941                  | TT                              | CC                | 1946641505               |
| SNP_P3_147564_245380 | NW_004516458.1 | Scaffold1180 | 245380                  | AA                              | TT                | 1946641507               |
| SNP_P3_147565_250448 | NW_004516458.1 | Scaffold1180 | 250448                  | CC                              | TT                | 1946641509               |
| SNP_P3_147566_252372 | NW_004516458.1 | Scaffold1180 | 252372                  | AA                              | GG                | 1946641511               |
| SNP_P3_147567_255446 | NW_004516458.1 | Scaffold1180 | 255446                  | TT                              | CC                | 1946641513               |
| SNP_P3_147568_255542 | NW_004516458.1 | Scaffold1180 | 255542                  | GG                              | CC                | 1946641515               |
| SNP_P3_147569_255574 | NW_004516458.1 | Scaffold1180 | 255574                  | CC                              | TT                | 1946641517               |
| SNP_P3_147570_255662 | NW_004516458.1 | Scaffold1180 | 255662                  | TT                              | CC                | 1946641519               |
| SNP_P3_147571_255713 | NW_004516458.1 | Scaffold1180 | 255713                  | AA                              | GG                | 1946641521               |
| SNP_P3_147572_255724 | NW_004516458.1 | Scaffold1180 | 255724                  | CC                              | GG                | 1946641523               |
| SNP_P3_147573_255738 | NW_004516458.1 | Scaffold1180 | 255738                  | AA                              | CC                | 1946641525               |
| SNP_P3_147574_255801 | NW_004516458.1 | Scaffold1180 | 255801                  | AA                              | TT                | 1946641527               |
| SNP_P3_147575_258522 | NW_004516458.1 | Scaffold1180 | 258522                  | CC                              | TT                | 1946641529               |
| SNP_P3_147576_268447 | NW_004516458.1 | Scaffold1180 | 268447                  | AA                              | CC                | 1946641531               |
| SNP_P3_147577_268452 | NW_004516458.1 | Scaffold1180 | 268452                  | AA                              | CC                | 1946641533               |
| SNP_P3_147578_254    | NW_004516459.1 | Scaffold1181 | 254                     | AA                              | GG                | 1946641535               |
| SNP_P3_147579_1494   | NW_004516459.1 | Scaffold1181 | 1494                    | GG                              | CC                | 1946641537               |
| SNP_P3_147580_1547   | NW_004516459.1 | Scaffold1181 | 1547                    | AA                              | TT                | 1946641539               |
| SNP_P3_147581_1559   | NW_004516459.1 | Scaffold1181 | 1559                    | CC                              | GG                | 1946641541               |
| SNP_P3_147582_1585   | NW_004516459.1 | Scaffold1181 | 1585                    | TT                              | AA                | 1946641543               |
| SNP_P3_147583_1606   | NW_004516459.1 | Scaffold1181 | 1606                    | AA                              | GG                | 1946641545               |
| SNP_P3_147584_1665   | NW_004516459.1 | Scaffold1181 | 1665                    | TT                              | AA                | 1946641547               |
| SNP_P3_147585_1685   | NW_004516459.1 | Scaffold1181 | 1685                    | GG                              | TT                | 1946641549               |
| SNP_P3_147586_1689   | NW_004516459.1 | Scaffold1181 | 1689                    | GG                              | CC                | 1946641551               |
| SNP_P3_147587_5388   | NW_004516459.1 | Scaffold1181 | 5388                    | AA                              | CC                | 1946641553               |
| SNP_P3_147588_5391   | NW_004516459.1 | Scaffold1181 | 5391                    | AA                              | TT                | 1946641555               |
| SNP_P3_147589_5445   | NW_004516459.1 | Scaffold1181 | 5445                    | CC                              | AA                | 1946641557               |
| SNP_P3_147590_5649   | NW_004516459.1 | Scaffold1181 | 5649                    | CC                              | TT                | 1946641559               |
| SNP_P3_147591_5657   | NW_004516459.1 | Scaffold1181 | 5657                    | CC                              | TT                | 1946641561               |
| SNP_P3_147592_5737   | NW_004516459.1 | Scaffold1181 | 5737                    | CC                              | AA                | 1946641563               |
| SNP_P3_147593_5889   | NW_004516459.1 | Scaffold1181 | 5889                    | AA                              | GG                | 1946641566               |
| SNP_P3_147595_6118   | NW_004516459.1 | Scaffold1181 | 6118                    | CC                              | AA                | 1946641568               |
| SNP_P3_147596_6141   | NW_004516459.1 | Scaffold1181 | 6141                    | TT                              | AA                | 1946641570               |
| SNP_P3_147597_6775   | NW_004516459.1 | Scaffold1181 | 6775                    | AA                              | TT                | 1946641571               |
| SNP_P3_147598_6863   | NW_004516459.1 | Scaffold1181 | 6863                    | CC                              | AA                | 1946641573               |
| SNP_P3_147599_6947   | NW_004516459.1 | Scaffold1181 | 6947                    | GG                              | AA                | 1946641575               |
| SNP_P3_147600_6949   | NW_004516459.1 | Scaffold1181 | 6949                    | CC                              | AA                | 1946641577               |
| SNP_P3_147601_7064   | NW_004516459.1 | Scaffold1181 | 7064                    | GG                              | CC                | 1946641579               |

| SNPs IDs            | Chromosome IDs | Chromosomes  | Physical positions (bp) | CDC Frontier (Reference genome) | (Pusa 256 & HPNB) | NCBI SNPdb Accession IDs |
|---------------------|----------------|--------------|-------------------------|---------------------------------|-------------------|--------------------------|
| SNP_P3_147602_7086  | NW_004516459.1 | Scaffold1181 | 7086                    | GG                              | CC                | 1946641581               |
| SNP_P3_147603_7093  | NW_004516459.1 | Scaffold1181 | 7093                    | CC                              | AA                | 1946641583               |
| SNP_P3_147604_7163  | NW_004516459.1 | Scaffold1181 | 7163                    | AA                              | CC                | 1946641585               |
| SNP_P3_147605_7164  | NW_004516459.1 | Scaffold1181 | 7164                    | GG                              | AA                | 1946641587               |
| SNP_P3_147606_7184  | NW_004516459.1 | Scaffold1181 | 7184                    | AA                              | CC                | 1946641589               |
| SNP_P3_147607_7214  | NW_004516459.1 | Scaffold1181 | 7214                    | TT                              | CC                | 1946641591               |
| SNP_P3_147608_7357  | NW_004516459.1 | Scaffold1181 | 7357                    | TT                              | CC                | 1946641592               |
| SNP_P3_147609_7435  | NW_004516459.1 | Scaffold1181 | 7435                    | AA                              | TT                | 1946641594               |
| SNP_P3_147610_7752  | NW_004516459.1 | Scaffold1181 | 7752                    | CC                              | TT                | 1946641596               |
| SNP_P3_147611_10764 | NW_004516459.1 | Scaffold1181 | 10764                   | TT                              | AA                | 1946641598               |
| SNP_P3_147612_10993 | NW_004516459.1 | Scaffold1181 | 10993                   | TT                              | CC                | 1946641600               |
| SNP_P3_147613_11066 | NW_004516459.1 | Scaffold1181 | 11066                   | TT                              | CC                | 1946641602               |
| SNP_P3_147614_11259 | NW_004516459.1 | Scaffold1181 | 11259                   | CC                              | AA                | 1946641605               |
| SNP_P3_147615_11260 | NW_004516459.1 | Scaffold1181 | 11260                   | CC                              | TT                | 1946641607               |
| SNP_P3_147616_11278 | NW_004516459.1 | Scaffold1181 | 11278                   | AA                              | TT                | 1946641610               |
| SNP_P3_147617_11285 | NW_004516459.1 | Scaffold1181 | 11285                   | AA                              | TT                | 1946641612               |
| SNP_P3_147618_11300 | NW_004516459.1 | Scaffold1181 | 11300                   | TT                              | CC                | 1946641614               |
| SNP_P3_147619_11499 | NW_004516459.1 | Scaffold1181 | 11499                   | AA                              | GG                | 1946641616               |
| SNP_P3_147620_11534 | NW_004516459.1 | Scaffold1181 | 11534                   | AA                              | GG                | 1946641617               |
| SNP_P3_147621_11546 | NW_004516459.1 | Scaffold1181 | 11546                   | GG                              | CC                | 1946641619               |
| SNP_P3_147622_101   | NW_004516461.1 | Scaffold1183 | 101                     | AA                              | TT                | 1946641621               |
| SNP_P3_147624_181   | NW_004516461.1 | Scaffold1183 | 181                     | TT                              | CC                | 1946641623               |
| SNP_P3_147625_2590  | NW_004516461.1 | Scaffold1183 | 2590                    | AA                              | CC                | 1946641625               |
| SNP_P3_147626_24880 | NW_004516461.1 | Scaffold1183 | 24880                   | GG                              | AA                | 1946641627               |
| SNP_P3_147627_29415 | NW_004516461.1 | Scaffold1183 | 29415                   | TT                              | CC                | 1946641629               |
| SNP_P3_147628_34544 | NW_004516461.1 | Scaffold1183 | 34544                   | AA                              | CC                | 1946641631               |
| SNP_P3_147629_34563 | NW_004516461.1 | Scaffold1183 | 34563                   | TT                              | CC                | 1946641633               |
| SNP_P3_147630_34573 | NW_004516461.1 | Scaffold1183 | 34573                   | CC                              | TT                | 1946641635               |
| SNP_P3_147631_34582 | NW_004516461.1 | Scaffold1183 | 34582                   | AA                              | GG                | 1946641636               |
| SNP_P3_147632_34583 | NW_004516461.1 | Scaffold1183 | 34583                   | GG                              | TT                | 1946641637               |
| SNP_P3_147633_42394 | NW_004516461.1 | Scaffold1183 | 42394                   | AA                              | GG                | 1946641638               |
| SNP_P3_147634_42415 | NW_004516461.1 | Scaffold1183 | 42415                   | TT                              | CC                | 1946641639               |
| SNP_P3_147635_42417 | NW_004516461.1 | Scaffold1183 | 42417                   | GG                              | AA                | 1946641640               |
| SNP_P3_147636_42665 | NW_004516461.1 | Scaffold1183 | 42665                   | CC                              | AA                | 1946641642               |
| SNP_P3_147637_42676 | NW_004516461.1 | Scaffold1183 | 42676                   | CC                              | AA                | 1946641643               |
| SNP_P3_147638_56433 | NW_004516461.1 | Scaffold1183 | 56433                   | CC                              | TT                | 1946641645               |
| SNP_P3_147639_59657 | NW_004516461.1 | Scaffold1183 | 59657                   | GG                              | AA                | 1946641647               |
| SNP_P3_147640_60396 | NW_004516461.1 | Scaffold1183 | 60396                   | TT                              | CC                | 1946641649               |
| SNP_P3_147641_60405 | NW_004516461.1 | Scaffold1183 | 60405                   | TT                              | GG                | 1946641651               |
| SNP_P3_147642_60455 | NW_004516461.1 | Scaffold1183 | 60455                   | AA                              | GG                | 1946641653               |
| SNP_P3_147643_60478 | NW_004516461.1 | Scaffold1183 | 60478                   | AA                              | GG                | 1946641655               |
| SNP_P3_147644_66286 | NW_004516461.1 | Scaffold1183 | 66286                   | TT                              | AA                | 1946641657               |

| SNPs IDs             | Chromosome IDs | Chromosomes  | Physical positions (bp) | CDC Frontier (Reference genome) | (Pusa 256 & HPNB) | NCBI SNPdb Accession IDs |
|----------------------|----------------|--------------|-------------------------|---------------------------------|-------------------|--------------------------|
| SNP_P3_147645_66779  | NW_004516461.1 | Scaffold1183 | 66779                   | AA                              | TT                | 1946641659               |
| SNP_P3_147646_75756  | NW_004516461.1 | Scaffold1183 | 75756                   | AA                              | GG                | 1946641661               |
| SNP_P3_147647_75848  | NW_004516461.1 | Scaffold1183 | 75848                   | AA                              | GG                | 1946641663               |
| SNP_P3_147648_75853  | NW_004516461.1 | Scaffold1183 | 75853                   | AA                              | GG                | 1946641665               |
| SNP_P3_147649_75885  | NW_004516461.1 | Scaffold1183 | 75885                   | AA                              | GG                | 1946641667               |
| SNP_P3_147650_75926  | NW_004516461.1 | Scaffold1183 | 75926                   | TT                              | CC                | 1946641669               |
| SNP_P3_147651_75931  | NW_004516461.1 | Scaffold1183 | 75931                   | TT                              | GG                | 1946641670               |
| SNP_P3_147652_75951  | NW_004516461.1 | Scaffold1183 | 75951                   | GG                              | TT                | 1946641672               |
| SNP_P3_147653_76003  | NW_004516461.1 | Scaffold1183 | 76003                   | AA                              | TT                | 1946641674               |
| SNP_P3_147654_76114  | NW_004516461.1 | Scaffold1183 | 76114                   | TT                              | CC                | 1946641676               |
| SNP_P3_147655_76141  | NW_004516461.1 | Scaffold1183 | 76141                   | AA                              | GG                | 1946641678               |
| SNP_P3_147656_76151  | NW_004516461.1 | Scaffold1183 | 76151                   | AA                              | GG                | 1946641681               |
| SNP_P3_147658_96654  | NW_004516461.1 | Scaffold1183 | 96654                   | GG                              | TT                | 1946641683               |
| SNP_P3_147659_96718  | NW_004516461.1 | Scaffold1183 | 96718                   | TT                              | CC                | 1946641685               |
| SNP_P3_147660_96855  | NW_004516461.1 | Scaffold1183 | 96855                   | CC                              | TT                | 1946641687               |
| SNP_P3_147661_96858  | NW_004516461.1 | Scaffold1183 | 96858                   | GG                              | AA                | 1946641689               |
| SNP_P3_147662_96927  | NW_004516461.1 | Scaffold1183 | 96927                   | GG                              | AA                | 1946641691               |
| SNP_P3_147663_96949  | NW_004516461.1 | Scaffold1183 | 96949                   | GG                              | CC                | 1946641693               |
| SNP_P3_147664_96996  | NW_004516461.1 | Scaffold1183 | 96996                   | TT                              | CC                | 1946641695               |
| SNP_P3_147665_97090  | NW_004516461.1 | Scaffold1183 | 97090                   | GG                              | AA                | 1946641697               |
| SNP_P3_147666_98874  | NW_004516461.1 | Scaffold1183 | 98874                   | AA                              | GG                | 1946641699               |
| SNP_P3_147667_107680 | NW_004516461.1 | Scaffold1183 | 107680                  | CC                              | TT                | 1946641701               |
| SNP_P3_147668_129027 | NW_004516461.1 | Scaffold1183 | 129027                  | AA                              | GG                | 1946641703               |
| SNP_P3_147669_129097 | NW_004516461.1 | Scaffold1183 | 129097                  | AA                              | CC                | 1946641705               |
| SNP_P3_147670_129488 | NW_004516461.1 | Scaffold1183 | 129488                  | CC                              | TT                | 1946641707               |
| SNP_P3_147671_130744 | NW_004516461.1 | Scaffold1183 | 130744                  | TT                              | CC                | 1946641709               |
| SNP_P3_147672_130746 | NW_004516461.1 | Scaffold1183 | 130746                  | TT                              | AA                | 1946641711               |
| SNP_P3_147674_147623 | NW_004516461.1 | Scaffold1183 | 147623                  | AA                              | CC                | 1946641713               |
| SNP_P3_147675_147627 | NW_004516461.1 | Scaffold1183 | 147627                  | CC                              | AA                | 1946641715               |
| SNP_P3_147676_147669 | NW_004516461.1 | Scaffold1183 | 147669                  | AA                              | GG                | 1946641717               |
| SNP_P3_147677_147831 | NW_004516461.1 | Scaffold1183 | 147831                  | CC                              | GG                | 1946641719               |
| SNP_P3_147678_147842 | NW_004516461.1 | Scaffold1183 | 147842                  | AA                              | GG                | 1946641722               |
| SNP_P3_147679_148775 | NW_004516461.1 | Scaffold1183 | 148775                  | CC                              | TT                | 1946641724               |
| SNP_P3_147680_148919 | NW_004516461.1 | Scaffold1183 | 148919                  | AA                              | GG                | 1946641726               |
| SNP_P3_147681_148960 | NW_004516461.1 | Scaffold1183 | 148960                  | AA                              | GG                | 1946641728               |
| SNP_P3_147682_151582 | NW_004516461.1 | Scaffold1183 | 151582                  | GG                              | TT                | 1946641729               |
| SNP_P3_147683_151589 | NW_004516461.1 | Scaffold1183 | 151589                  | GG                              | TT                | 1946641731               |
| SNP_P3_147684_151606 | NW_004516461.1 | Scaffold1183 | 151606                  | AA                              | TT                | 1946641733               |
| SNP_P3_147685_188106 | NW_004516461.1 | Scaffold1183 | 188106                  | TT                              | AA                | 1946641735               |
| SNP_P3_147686_193715 | NW_004516461.1 | Scaffold1183 | 193715                  | TT                              | CC                | 1946641737               |
| SNP_P3_147687_201933 | NW_004516461.1 | Scaffold1183 | 201933                  | TT                              | CC                | 1946641739               |
| SNP_P3_147688_224911 | NW_004516461.1 | Scaffold1183 | 224911                  | AA                              | GG                | 1946641741               |



| SNPs IDs             | Chromosome IDs | Chromosomes  | Physical positions (bp) | CDC Frontier (Reference genome) | (Pusa 256 & HPNB) | NCBI SNPdb Accession IDs |
|----------------------|----------------|--------------|-------------------------|---------------------------------|-------------------|--------------------------|
| SNP_P3_147689_232085 | NW_004516461.1 | Scaffold1183 | 232085                  | CC                              | TT                | 1946641743               |
| SNP_P3_147690_232092 | NW_004516461.1 | Scaffold1183 | 232092                  | TT                              | CC                | 1946641745               |
| SNP_P3_147691_232182 | NW_004516461.1 | Scaffold1183 | 232182                  | TT                              | CC                | 1946641747               |
| SNP_P3_147692_232434 | NW_004516461.1 | Scaffold1183 | 232434                  | AA                              | CC                | 1946641748               |
| SNP_P3_147693_234241 | NW_004516461.1 | Scaffold1183 | 234241                  | AA                              | GG                | 1946641750               |
| SNP_P3_147694_234544 | NW_004516461.1 | Scaffold1183 | 234544                  | CC                              | TT                | 1946641752               |
| SNP_P3_147695_2203   | NW_004516462.1 | Scaffold1185 | 2203                    | GG                              | AA                | 1946641754               |
| SNP_P3_147696_2437   | NW_004516462.1 | Scaffold1185 | 2437                    | TT                              | CC                | 1946641756               |
| SNP_P3_147697_2946   | NW_004516462.1 | Scaffold1185 | 2946                    | CC                              | AA                | 1946641758               |
| SNP_P3_147698_3698   | NW_004516462.1 | Scaffold1185 | 3698                    | CC                              | TT                | 1946641760               |
| SNP_P3_147699_3811   | NW_004516462.1 | Scaffold1185 | 3811                    | AA                              | TT                | 1946641762               |
| SNP_P3_147700_3828   | NW_004516462.1 | Scaffold1185 | 3828                    | TT                              | AA                | 1946641765               |
| SNP_P3_147701_4030   | NW_004516462.1 | Scaffold1185 | 4030                    | GG                              | AA                | 1946641771               |
| SNP_P3_147702_4308   | NW_004516462.1 | Scaffold1185 | 4308                    | TT                              | AA                | 1946641773               |
| SNP_P3_147703_4628   | NW_004516462.1 | Scaffold1185 | 4628                    | AA                              | GG                | 1946641775               |
| SNP_P3_147704_5496   | NW_004516462.1 | Scaffold1185 | 5496                    | GG                              | AA                | 1946641777               |
| SNP_P3_147705_5580   | NW_004516462.1 | Scaffold1185 | 5580                    | TT                              | CC                | 1946641779               |
| SNP_P3_147706_6187   | NW_004516462.1 | Scaffold1185 | 6187                    | GG                              | TT                | 1946641781               |
| SNP_P3_147708_6648   | NW_004516462.1 | Scaffold1185 | 6648                    | AA                              | GG                | 1946641783               |
| SNP_P3_147709_6650   | NW_004516462.1 | Scaffold1185 | 6650                    | AA                              | TT                | 1946641785               |
| SNP_P3_147710_7745   | NW_004516462.1 | Scaffold1185 | 7745                    | TT                              | CC                | 1946641787               |
| SNP_P3_147711_9100   | NW_004516462.1 | Scaffold1185 | 9100                    | GG                              | AA                | 1946641788               |
| SNP_P3_147712_9129   | NW_004516462.1 | Scaffold1185 | 9129                    | AA                              | GG                | 1946641790               |
| SNP_P3_147713_9192   | NW_004516462.1 | Scaffold1185 | 9192                    | GG                              | AA                | 1946641792               |
| SNP_P3_147714_9570   | NW_004516462.1 | Scaffold1185 | 9570                    | GG                              | AA                | 1946641794               |
| SNP_P3_147715_10573  | NW_004516462.1 | Scaffold1185 | 10573                   | CC                              | TT                | 1946641796               |
| SNP_P3_147716_10859  | NW_004516462.1 | Scaffold1185 | 10859                   | GG                              | AA                | 1946641798               |
| SNP_P3_147717_11079  | NW_004516462.1 | Scaffold1185 | 11079                   | AA                              | GG                | 1946641801               |
| SNP_P3_147718_11896  | NW_004516462.1 | Scaffold1185 | 11896                   | CC                              | GG                | 1946641803               |
| SNP_P3_147719_11936  | NW_004516462.1 | Scaffold1185 | 11936                   | AA                              | CC                | 1946641805               |
| SNP_P3_147720_11960  | NW_004516462.1 | Scaffold1185 | 11960                   | GG                              | TT                | 1946641807               |
| SNP_P3_147721_11976  | NW_004516462.1 | Scaffold1185 | 11976                   | TT                              | CC                | 1946641809               |
| SNP_P3_147722_12021  | NW_004516462.1 | Scaffold1185 | 12021                   | AA                              | TT                | 1946641811               |
| SNP_P3_147723_12024  | NW_004516462.1 | Scaffold1185 | 12024                   | TT                              | GG                | 1946641813               |
| SNP_P3_147724_12319  | NW_004516462.1 | Scaffold1185 | 12319                   | TT                              | AA                | 1946641815               |
| SNP_P3_147725_12650  | NW_004516462.1 | Scaffold1185 | 12650                   | CC                              | AA                | 1946641817               |
| SNP_P3_147726_12911  | NW_004516462.1 | Scaffold1185 | 12911                   | GG                              | AA                | 1946641819               |
| SNP_P3_147727_13994  | NW_004516462.1 | Scaffold1185 | 13994                   | GG                              | TT                | 1946641821               |
| SNP_P3_147728_14106  | NW_004516462.1 | Scaffold1185 | 14106                   | AA                              | GG                | 1946641823               |
| SNP_P3_147729_14127  | NW_004516462.1 | Scaffold1185 | 14127                   | GG                              | AA                | 1946641825               |
| SNP_P3_147730_14153  | NW_004516462.1 | Scaffold1185 | 14153                   | TT                              | CC                | 1946641827               |
| SNP_P3_147731_14447  | NW_004516462.1 | Scaffold1185 | 14447                   | GG                              | TT                | 1946641829               |

| SNPs IDs            | Chromosome IDs | Chromosomes  | Physical positions (bp) | CDC Frontier (Reference genome) | (Pusa 256 & HPNB) | NCBI SNPdb Accession IDs |
|---------------------|----------------|--------------|-------------------------|---------------------------------|-------------------|--------------------------|
| SNP_P3_147732_15776 | NW_004516462.1 | Scaffold1185 | 15776                   | CC                              | TT                | 1946641831               |
| SNP_P3_147733_15904 | NW_004516462.1 | Scaffold1185 | 15904                   | TT                              | CC                | 1946641833               |
| SNP_P3_147735_19984 | NW_004516462.1 | Scaffold1185 | 19984                   | GG                              | CC                | 1946641835               |
| SNP_P3_147736_20271 | NW_004516462.1 | Scaffold1185 | 20271                   | AA                              | CC                | 1946641837               |
| SNP_P3_147737_20443 | NW_004516462.1 | Scaffold1185 | 20443                   | GG                              | AA                | 1946641839               |
| SNP_P3_147739_21339 | NW_004516462.1 | Scaffold1185 | 21339                   | CC                              | TT                | 1946641841               |
| SNP_P3_147740_21525 | NW_004516462.1 | Scaffold1185 | 21525                   | CC                              | TT                | 1946641843               |
| SNP_P3_147741_21798 | NW_004516462.1 | Scaffold1185 | 21798                   | TT                              | AA                | 1946641845               |
| SNP_P3_147742_22115 | NW_004516462.1 | Scaffold1185 | 22115                   | CC                              | AA                | 1946641847               |
| SNP_P3_147743_22154 | NW_004516462.1 | Scaffold1185 | 22154                   | AA                              | GG                | 1946641849               |
| SNP_P3_147744_22287 | NW_004516462.1 | Scaffold1185 | 22287                   | TT                              | AA                | 1946641851               |
| SNP_P3_147745_22295 | NW_004516462.1 | Scaffold1185 | 22295                   | AA                              | CC                | 1946641852               |
| SNP_P3_147746_22539 | NW_004516462.1 | Scaffold1185 | 22539                   | CC                              | TT                | 1946641854               |
| SNP_P3_147747_22566 | NW_004516462.1 | Scaffold1185 | 22566                   | AA                              | GG                | 1946641856               |
| SNP_P3_147748_24596 | NW_004516462.1 | Scaffold1185 | 24596                   | AA                              | CC                | 1946641858               |
| SNP_P3_147749_25273 | NW_004516462.1 | Scaffold1185 | 25273                   | AA                              | GG                | 1946641860               |
| SNP_P3_147750_25776 | NW_004516462.1 | Scaffold1185 | 25776                   | GG                              | AA                | 1946641862               |
| SNP_P3_147751_26456 | NW_004516462.1 | Scaffold1185 | 26456                   | CC                              | AA                | 1946641865               |
| SNP_P3_147752_26643 | NW_004516462.1 | Scaffold1185 | 26643                   | GG                              | AA                | 1946641867               |
| SNP_P3_147753_27891 | NW_004516462.1 | Scaffold1185 | 27891                   | GG                              | AA                | 1946641869               |
| SNP_P3_147754_28071 | NW_004516462.1 | Scaffold1185 | 28071                   | TT                              | AA                | 1946641871               |
| SNP_P3_147755_30154 | NW_004516462.1 | Scaffold1185 | 30154                   | GG                              | CC                | 1946641875               |
| SNP_P3_147756_30199 | NW_004516462.1 | Scaffold1185 | 30199                   | CC                              | TT                | 1946641877               |
| SNP_P3_147757_30502 | NW_004516462.1 | Scaffold1185 | 30502                   | GG                              | AA                | 1946641879               |
| SNP_P3_147758_30507 | NW_004516462.1 | Scaffold1185 | 30507                   | GG                              | TT                | 1946641881               |
| SNP_P3_147759_30539 | NW_004516462.1 | Scaffold1185 | 30539                   | CC                              | TT                | 1946641882               |
| SNP_P3_147760_38662 | NW_004516462.1 | Scaffold1185 | 38662                   | TT                              | CC                | 1946641884               |
| SNP_P3_147761_38749 | NW_004516462.1 | Scaffold1185 | 38749                   | TT                              | AA                | 1946641886               |
| SNP_P3_147762_39198 | NW_004516462.1 | Scaffold1185 | 39198                   | GG                              | AA                | 1946641888               |
| SNP_P3_147763_42913 | NW_004516462.1 | Scaffold1185 | 42913                   | CC                              | TT                | 1946641890               |
| SNP_P3_147765_46909 | NW_004516462.1 | Scaffold1185 | 46909                   | AA                              | GG                | 1946641892               |
| SNP_P3_147766_47022 | NW_004516462.1 | Scaffold1185 | 47022                   | CC                              | TT                | 1946641894               |
| SNP_P3_147767_48684 | NW_004516462.1 | Scaffold1185 | 48684                   | AA                              | TT                | 1946641896               |
| SNP_P3_147768_49024 | NW_004516462.1 | Scaffold1185 | 49024                   | TT                              | CC                | 1946641898               |
| SNP_P3_147769_53179 | NW_004516462.1 | Scaffold1185 | 53179                   | CC                              | TT                | 1946641900               |
| SNP_P3_147770_67157 | NW_004516462.1 | Scaffold1185 | 67157                   | CC                              | AA                | 1946641902               |
| SNP_P3_147771_67222 | NW_004516462.1 | Scaffold1185 | 67222                   | AA                              | TT                | 1946641904               |
| SNP_P3_147772_67255 | NW_004516462.1 | Scaffold1185 | 67255                   | CC                              | TT                | 1946641906               |
| SNP_P3_147774_67421 | NW_004516462.1 | Scaffold1185 | 67421                   | GG                              | AA                | 1946641908               |
| SNP_P3_147776_67645 | NW_004516462.1 | Scaffold1185 | 67645                   | AA                              | CC                | 1946641910               |
| SNP_P3_147777_67697 | NW_004516462.1 | Scaffold1185 | 67697                   | TT                              | CC                | 1946641912               |
| SNP_P3_147778_92656 | NW_004516462.1 | Scaffold1185 | 92656                   | AA                              | TT                | 1946641915               |

| SNPs IDs             | Chromosome IDs | Chromosomes  | Physical positions (bp) | CDC Frontier (Reference genome) | (Pusa 256 & HPNB) | NCBI SNPdb Accession IDs |
|----------------------|----------------|--------------|-------------------------|---------------------------------|-------------------|--------------------------|
| SNP_P3_147779_92667  | NW_004516462.1 | Scaffold1185 | 92667                   | GG                              | CC                | 1946641917               |
| SNP_P3_147780_92671  | NW_004516462.1 | Scaffold1185 | 92671                   | GG                              | CC                | 1946641919               |
| SNP_P3_147781_93400  | NW_004516462.1 | Scaffold1185 | 93400                   | TT                              | GG                | 1946641921               |
| SNP_P3_147782_93537  | NW_004516462.1 | Scaffold1185 | 93537                   | GG                              | AA                | 1946641923               |
| SNP_P3_147783_93544  | NW_004516462.1 | Scaffold1185 | 93544                   | AA                              | CC                | 1946641925               |
| SNP_P3_147784_93561  | NW_004516462.1 | Scaffold1185 | 93561                   | AA                              | GG                | 1946641927               |
| SNP_P3_147785_93617  | NW_004516462.1 | Scaffold1185 | 93617                   | AA                              | GG                | 1946641929               |
| SNP_P3_147786_93642  | NW_004516462.1 | Scaffold1185 | 93642                   | AA                              | TT                | 1946641930               |
| SNP_P3_147787_93646  | NW_004516462.1 | Scaffold1185 | 93646                   | TT                              | CC                | 1946641932               |
| SNP_P3_147788_93807  | NW_004516462.1 | Scaffold1185 | 93807                   | CC                              | TT                | 1946641934               |
| SNP_P3_147789_93809  | NW_004516462.1 | Scaffold1185 | 93809                   | GG                              | TT                | 1946641936               |
| SNP_P3_147790_93810  | NW_004516462.1 | Scaffold1185 | 93810                   | AA                              | GG                | 1946641938               |
| SNP_P3_147791_93820  | NW_004516462.1 | Scaffold1185 | 93820                   | AA                              | TT                | 1946641940               |
| SNP_P3_147792_105403 | NW_004516462.1 | Scaffold1185 | 105403                  | AA                              | GG                | 1946641942               |
| SNP_P3_147793_105686 | NW_004516462.1 | Scaffold1185 | 105686                  | TT                              | GG                | 1946641944               |
| SNP_P3_147794_105758 | NW_004516462.1 | Scaffold1185 | 105758                  | TT                              | CC                | 1946641946               |
| SNP_P3_147795_105761 | NW_004516462.1 | Scaffold1185 | 105761                  | AA                              | CC                | 1946641948               |
| SNP_P3_147796_106416 | NW_004516462.1 | Scaffold1185 | 106416                  | AA                              | GG                | 1946641950               |
| SNP_P3_147797_115425 | NW_004516462.1 | Scaffold1185 | 115425                  | TT                              | CC                | 1946641952               |
| SNP_P3_147798_115429 | NW_004516462.1 | Scaffold1185 | 115429                  | AA                              | CC                | 1946641955               |
| SNP_P3_147799_115468 | NW_004516462.1 | Scaffold1185 | 115468                  | CC                              | GG                | 1946641957               |
| SNP_P3_147800_115480 | NW_004516462.1 | Scaffold1185 | 115480                  | CC                              | GG                | 1946641959               |
| SNP_P3_147801_115671 | NW_004516462.1 | Scaffold1185 | 115671                  | GG                              | AA                | 1946641961               |
| SNP_P3_147803_115720 | NW_004516462.1 | Scaffold1185 | 115720                  | TT                              | CC                | 1946641963               |
| SNP_P3_147804_129167 | NW_004516462.1 | Scaffold1185 | 129167                  | GG                              | TT                | 1946641965               |
| SNP_P3_147805_134345 | NW_004516462.1 | Scaffold1185 | 134345                  | TT                              | CC                | 1946641967               |
| SNP_P3_147806_134524 | NW_004516462.1 | Scaffold1185 | 134524                  | TT                              | CC                | 1946641969               |
| SNP_P3_147807_134525 | NW_004516462.1 | Scaffold1185 | 134525                  | CC                              | TT                | 1946641971               |
| SNP_P3_147808_134537 | NW_004516462.1 | Scaffold1185 | 134537                  | TT                              | CC                | 1946641972               |
| SNP_P3_147809_134539 | NW_004516462.1 | Scaffold1185 | 134539                  | TT                              | AA                | 1946641974               |
| SNP_P3_147810_134541 | NW_004516462.1 | Scaffold1185 | 134541                  | TT                              | AA                | 1946641976               |
| SNP_P3_147811_134551 | NW_004516462.1 | Scaffold1185 | 134551                  | TT                              | GG                | 1946641978               |
| SNP_P3_147812_134556 | NW_004516462.1 | Scaffold1185 | 134556                  | TT                              | CC                | 1946641980               |
| SNP_P3_147813_134558 | NW_004516462.1 | Scaffold1185 | 134558                  | TT                              | CC                | 1946641982               |
| SNP_P3_147814_134566 | NW_004516462.1 | Scaffold1185 | 134566                  | TT                              | GG                | 1946641984               |
| SNP_P3_147816_64     | NW_004516465.1 | Scaffold1191 | 64                      | TT                              | GG                | 1946641986               |
| SNP_P3_147817_281    | NW_004516465.1 | Scaffold1191 | 281                     | TT                              | AA                | 1946641988               |
| SNP_P3_147818_471    | NW_004516465.1 | Scaffold1191 | 471                     | CC                              | TT                | 1946641990               |
| SNP_P3_147819_481    | NW_004516465.1 | Scaffold1191 | 481                     | TT                              | CC                | 1946641992               |
| SNP_P3_147820_517    | NW_004516465.1 | Scaffold1191 | 517                     | CC                              | AA                | 1946641994               |
| SNP_P3_147821_588    | NW_004516465.1 | Scaffold1191 | 588                     | TT                              | GG                | 1946641997               |
| SNP_P3_147822_629    | NW_004516465.1 | Scaffold1191 | 629                     | AA                              | TT                | 1946641999               |

| SNPs IDs             | Chromosome IDs | Chromosomes  | Physical positions (bp) | CDC Frontier (Reference genome) | (Pusa 256 & HPNB) | NCBI SNPdb Accession IDs |
|----------------------|----------------|--------------|-------------------------|---------------------------------|-------------------|--------------------------|
| SNP_P3_147823_649    | NW_004516465.1 | Scaffold1191 | 649                     | AA                              | CC                | 1946642001               |
| SNP_P3_147824_824    | NW_004516465.1 | Scaffold1191 | 824                     | TT                              | CC                | 1946642003               |
| SNP_P3_147825_394    | NW_004516466.1 | Scaffold1192 | 394                     | GG                              | AA                | 1946642005               |
| SNP_P3_147826_400    | NW_004516466.1 | Scaffold1192 | 400                     | TT                              | AA                | 1946642007               |
| SNP_P3_147827_408    | NW_004516466.1 | Scaffold1192 | 408                     | GG                              | AA                | 1946642009               |
| SNP_P3_147828_470    | NW_004516466.1 | Scaffold1192 | 470                     | GG                              | CC                | 1946642011               |
| SNP_P3_147829_491    | NW_004516466.1 | Scaffold1192 | 491                     | CC                              | TT                | 1946642013               |
| SNP_P3_147830_517    | NW_004516466.1 | Scaffold1192 | 517                     | CC                              | AA                | 1946642015               |
| SNP_P3_147831_549    | NW_004516466.1 | Scaffold1192 | 549                     | GG                              | TT                | 1946642017               |
| SNP_P3_147832_660    | NW_004516466.1 | Scaffold1192 | 660                     | AA                              | GG                | 1946642019               |
| SNP_P3_147833_7232   | NW_004516467.1 | Scaffold1193 | 7232                    | GG                              | AA                | 1946642021               |
| SNP_P3_147835_7560   | NW_004516467.1 | Scaffold1193 | 7560                    | AA                              | GG                | 1946642024               |
| SNP_P3_147836_7605   | NW_004516467.1 | Scaffold1193 | 7605                    | TT                              | CC                | 1946642026               |
| SNP_P3_147837_9039   | NW_004516467.1 | Scaffold1193 | 9039                    | CC                              | TT                | 1946642028               |
| SNP_P3_147839_9068   | NW_004516467.1 | Scaffold1193 | 9068                    | AA                              | TT                | 1946642030               |
| SNP_P3_147840_9084   | NW_004516467.1 | Scaffold1193 | 9084                    | CC                              | TT                | 1946642032               |
| SNP_P3_147841_9464   | NW_004516467.1 | Scaffold1193 | 9464                    | AA                              | TT                | 1946642034               |
| SNP_P3_147842_9465   | NW_004516467.1 | Scaffold1193 | 9465                    | TT                              | CC                | 1946642036               |
| SNP_P3_147843_13463  | NW_004516467.1 | Scaffold1193 | 13463                   | AA                              | GG                | 1946642038               |
| SNP_P3_147844_62892  | NW_004516467.1 | Scaffold1193 | 62892                   | CC                              | TT                | 1946642040               |
| SNP_P3_147845_62991  | NW_004516467.1 | Scaffold1193 | 62991                   | AA                              | GG                | 1946642042               |
| SNP_P3_147846_63032  | NW_004516467.1 | Scaffold1193 | 63032                   | TT                              | CC                | 1946642044               |
| SNP_P3_147847_63068  | NW_004516467.1 | Scaffold1193 | 63068                   | TT                              | CC                | 1946642046               |
| SNP_P3_147848_63093  | NW_004516467.1 | Scaffold1193 | 63093                   | AA                              | TT                | 1946642048               |
| SNP_P3_147849_63101  | NW_004516467.1 | Scaffold1193 | 63101                   | AA                              | TT                | 1946642049               |
| SNP_P3_147851_63210  | NW_004516467.1 | Scaffold1193 | 63210                   | TT                              | GG                | 1946642051               |
| SNP_P3_147852_63255  | NW_004516467.1 | Scaffold1193 | 63255                   | TT                              | CC                | 1946642053               |
| SNP_P3_147853_63291  | NW_004516467.1 | Scaffold1193 | 63291                   | GG                              | AA                | 1946642055               |
| SNP_P3_147854_63324  | NW_004516467.1 | Scaffold1193 | 63324                   | TT                              | CC                | 1946642057               |
| SNP_P3_147855_108093 | NW_004516467.1 | Scaffold1193 | 108093                  | AA                              | GG                | 1946642059               |
| SNP_P3_147856_137529 | NW_004516467.1 | Scaffold1193 | 137529                  | AA                              | CC                | 1946642061               |
| SNP_P3_147857_192614 | NW_004516467.1 | Scaffold1193 | 192614                  | GG                              | AA                | 1946642064               |
| SNP_P3_147858_192904 | NW_004516467.1 | Scaffold1193 | 192904                  | CC                              | TT                | 1946642066               |
| SNP_P3_147859_192924 | NW_004516467.1 | Scaffold1193 | 192924                  | GG                              | AA                | 1946642068               |
| SNP_P3_147860_194055 | NW_004516467.1 | Scaffold1193 | 194055                  | AA                              | GG                | 1946642070               |
| SNP_P3_147861_194058 | NW_004516467.1 | Scaffold1193 | 194058                  | AA                              | TT                | 1946642072               |
| SNP_P3_147862_194079 | NW_004516467.1 | Scaffold1193 | 194079                  | CC                              | AA                | 1946642073               |
| SNP_P3_147863_194398 | NW_004516467.1 | Scaffold1193 | 194398                  | GG                              | TT                | 1946642075               |
| SNP_P3_147865_194401 | NW_004516467.1 | Scaffold1193 | 194401                  | TT                              | GG                | 1946642077               |
| SNP_P3_147866_222142 | NW_004516467.1 | Scaffold1193 | 222142                  | AA                              | TT                | 1946642079               |
| SNP_P3_147867_222158 | NW_004516467.1 | Scaffold1193 | 222158                  | AA                              | GG                | 1946642081               |
| SNP_P3_147869_222453 | NW_004516467.1 | Scaffold1193 | 222453                  | AA                              | GG                | 1946642083               |

| SNPs IDs             | Chromosome IDs | Chromosomes  | Physical positions (bp) | CDC Frontier (Reference genome) | (Pusa 256 & HPNB) | NCBI SNPdb Accession IDs |
|----------------------|----------------|--------------|-------------------------|---------------------------------|-------------------|--------------------------|
| SNP_P3_147870_226813 | NW_004516467.1 | Scaffold1193 | 226813                  | TT                              | AA                | 1946642085               |
| SNP_P3_147871_227269 | NW_004516467.1 | Scaffold1193 | 227269                  | TT                              | CC                | 1946642087               |
| SNP_P3_147873_241650 | NW_004516467.1 | Scaffold1193 | 241650                  | GG                              | AA                | 1946642089               |
| SNP_P3_147874_241704 | NW_004516467.1 | Scaffold1193 | 241704                  | TT                              | CC                | 1946642091               |
| SNP_P3_147875_241706 | NW_004516467.1 | Scaffold1193 | 241706                  | AA                              | GG                | 1946642093               |
| SNP_P3_147876_241720 | NW_004516467.1 | Scaffold1193 | 241720                  | TT                              | CC                | 1946642095               |
| SNP_P3_147877_241728 | NW_004516467.1 | Scaffold1193 | 241728                  | GG                              | TT                | 1946642097               |
| SNP_P3_147878_241763 | NW_004516467.1 | Scaffold1193 | 241763                  | TT                              | CC                | 1946642099               |
| SNP_P3_147879_241772 | NW_004516467.1 | Scaffold1193 | 241772                  | TT                              | CC                | 1946642101               |
| SNP_P3_147880_241877 | NW_004516467.1 | Scaffold1193 | 241877                  | AA                              | TT                | 1946642103               |
| SNP_P3_147881_241884 | NW_004516467.1 | Scaffold1193 | 241884                  | GG                              | TT                | 1946642105               |
| SNP_P3_147882_241933 | NW_004516467.1 | Scaffold1193 | 241933                  | CC                              | TT                | 1946642107               |
| SNP_P3_147883_241942 | NW_004516467.1 | Scaffold1193 | 241942                  | CC                              | TT                | 1946642109               |
| SNP_P3_147884_241969 | NW_004516467.1 | Scaffold1193 | 241969                  | AA                              | GG                | 1946642111               |
| SNP_P3_147885_241988 | NW_004516467.1 | Scaffold1193 | 241988                  | GG                              | TT                | 1946642113               |
| SNP_P3_147886_242203 | NW_004516467.1 | Scaffold1193 | 242203                  | TT                              | GG                | 1946642115               |
| SNP_P3_147887_247203 | NW_004516467.1 | Scaffold1193 | 247203                  | GG                              | AA                | 1946642117               |
| SNP_P3_147888_247246 | NW_004516467.1 | Scaffold1193 | 247246                  | AA                              | GG                | 1946642119               |
| SNP_P3_147889_247307 | NW_004516467.1 | Scaffold1193 | 247307                  | TT                              | CC                | 1946642121               |
| SNP_P3_147890_248203 | NW_004516467.1 | Scaffold1193 | 248203                  | GG                              | AA                | 1946642123               |
| SNP_P3_147891_248212 | NW_004516467.1 | Scaffold1193 | 248212                  | AA                              | GG                | 1946642124               |
| SNP_P3_147892_248235 | NW_004516467.1 | Scaffold1193 | 248235                  | TT                              | GG                | 1946642126               |
| SNP_P3_147893_272805 | NW_004516467.1 | Scaffold1193 | 272805                  | AA                              | GG                | 1946642128               |
| SNP_P3_147894_272831 | NW_004516467.1 | Scaffold1193 | 272831                  | CC                              | TT                | 1946642130               |
| SNP_P3_147895_272837 | NW_004516467.1 | Scaffold1193 | 272837                  | CC                              | GG                | 1946642132               |
| SNP_P3_147896_272843 | NW_004516467.1 | Scaffold1193 | 272843                  | CC                              | TT                | 1946642134               |
| SNP_P3_147897_272852 | NW_004516467.1 | Scaffold1193 | 272852                  | GG                              | AA                | 1946642136               |
| SNP_P3_147898_272858 | NW_004516467.1 | Scaffold1193 | 272858                  | TT                              | CC                | 1946642138               |
| SNP_P3_147899_272888 | NW_004516467.1 | Scaffold1193 | 272888                  | TT                              | CC                | 1946642140               |
| SNP_P3_147900_272900 | NW_004516467.1 | Scaffold1193 | 272900                  | CC                              | TT                | 1946642142               |
| SNP_P3_147901_272906 | NW_004516467.1 | Scaffold1193 | 272906                  | GG                              | AA                | 1946642144               |
| SNP_P3_147902_272921 | NW_004516467.1 | Scaffold1193 | 272921                  | GG                              | AA                | 1946642146               |
| SNP_P3_147903_272924 | NW_004516467.1 | Scaffold1193 | 272924                  | TT                              | CC                | 1946642149               |
| SNP_P3_147904_395    | NW_004516469.1 | Scaffold1195 | 395                     | GG                              | AA                | 1946642151               |
| SNP_P3_147905_404    | NW_004516469.1 | Scaffold1195 | 404                     | AA                              | GG                | 1946642153               |
| SNP_P3_147906_22800  | NW_004516469.1 | Scaffold1195 | 22800                   | AA                              | GG                | 1946642155               |
| SNP_P3_147908_34933  | NW_004516469.1 | Scaffold1195 | 34933                   | AA                              | GG                | 1946642156               |
| SNP_P3_147909_34974  | NW_004516469.1 | Scaffold1195 | 34974                   | AA                              | CC                | 1946642158               |
| SNP_P3_147910_35025  | NW_004516469.1 | Scaffold1195 | 35025                   | AA                              | GG                | 1946642160               |
| SNP_P3_147911_35084  | NW_004516469.1 | Scaffold1195 | 35084                   | TT                              | CC                | 1946642162               |
| SNP_P3_147912_35129  | NW_004516469.1 | Scaffold1195 | 35129                   | AA                              | CC                | 1946642164               |
| SNP_P3_147913_35142  | NW_004516469.1 | Scaffold1195 | 35142                   | TT                              | CC                | 1946642166               |

| SNPs IDs             | Chromosome IDs | Chromosomes  | Physical positions (bp) | CDC Frontier (Reference genome) | (Pusa 256 & HPNB) | NCBI SNPdb Accession IDs |
|----------------------|----------------|--------------|-------------------------|---------------------------------|-------------------|--------------------------|
| SNP_P3_147914_35180  | NW_004516469.1 | Scaffold1195 | 35180                   | AA                              | GG                | 1946642168               |
| SNP_P3_147915_35193  | NW_004516469.1 | Scaffold1195 | 35193                   | AA                              | CC                | 1946642170               |
| SNP_P3_147916_35227  | NW_004516469.1 | Scaffold1195 | 35227                   | AA                              | GG                | 1946642172               |
| SNP_P3_147917_35494  | NW_004516469.1 | Scaffold1195 | 35494                   | GG                              | AA                | 1946642174               |
| SNP_P3_147918_35495  | NW_004516469.1 | Scaffold1195 | 35495                   | TT                              | CC                | 1946642178               |
| SNP_P3_147919_35955  | NW_004516469.1 | Scaffold1195 | 35955                   | GG                              | TT                | 1946642180               |
| SNP_P3_147920_36795  | NW_004516469.1 | Scaffold1195 | 36795                   | CC                              | TT                | 1946642181               |
| SNP_P3_147921_36810  | NW_004516469.1 | Scaffold1195 | 36810                   | TT                              | AA                | 1946642183               |
| SNP_P3_147922_36811  | NW_004516469.1 | Scaffold1195 | 36811                   | AA                              | TT                | 1946642185               |
| SNP_P3_147923_63904  | NW_004516469.1 | Scaffold1195 | 63904                   | TT                              | AA                | 1946642187               |
| SNP_P3_147924_64007  | NW_004516469.1 | Scaffold1195 | 64007                   | AA                              | GG                | 1946642189               |
| SNP_P3_147926_64514  | NW_004516469.1 | Scaffold1195 | 64514                   | TT                              | CC                | 1946642191               |
| SNP_P3_147927_84572  | NW_004516469.1 | Scaffold1195 | 84572                   | GG                              | TT                | 1946642193               |
| SNP_P3_147928_91417  | NW_004516469.1 | Scaffold1195 | 91417                   | AA                              | TT                | 1946642195               |
| SNP_P3_147929_100938 | NW_004516469.1 | Scaffold1195 | 100938                  | TT                              | CC                | 1946642197               |
| SNP_P3_147930_101011 | NW_004516469.1 | Scaffold1195 | 101011                  | GG                              | AA                | 1946642199               |
| SNP_P3_147931_101083 | NW_004516469.1 | Scaffold1195 | 101083                  | TT                              | CC                | 1946642200               |
| SNP_P3_147932_101346 | NW_004516469.1 | Scaffold1195 | 101346                  | CC                              | TT                | 1946642202               |
| SNP_P3_147933_101418 | NW_004516469.1 | Scaffold1195 | 101418                  | TT                              | CC                | 1946642204               |
| SNP_P3_147934_111680 | NW_004516469.1 | Scaffold1195 | 111680                  | TT                              | AA                | 1946642206               |
| SNP_P3_147935_111926 | NW_004516469.1 | Scaffold1195 | 111926                  | TT                              | CC                | 1946642208               |
| SNP_P3_147936_111932 | NW_004516469.1 | Scaffold1195 | 111932                  | AA                              | TT                | 1946642210               |
| SNP_P3_147937_2583   | NW_004516470.1 | Scaffold1196 | 2583                    | AA                              | TT                | 1946642212               |
| SNP_P3_147938_2886   | NW_004516470.1 | Scaffold1196 | 2886                    | CC                              | TT                | 1946642214               |
| SNP_P3_147939_20074  | NW_004516470.1 | Scaffold1196 | 20074                   | CC                              | TT                | 1946642216               |
| SNP_P3_147941_34687  | NW_004516470.1 | Scaffold1196 | 34687                   | GG                              | TT                | 1946642218               |
| SNP_P3_147942_34697  | NW_004516470.1 | Scaffold1196 | 34697                   | CC                              | TT                | 1946642220               |
| SNP_P3_147943_34703  | NW_004516470.1 | Scaffold1196 | 34703                   | TT                              | CC                | 1946642222               |
| SNP_P3_147944_35041  | NW_004516470.1 | Scaffold1196 | 35041                   | AA                              | CC                | 1946642224               |
| SNP_P3_147945_37233  | NW_004516470.1 | Scaffold1196 | 37233                   | CC                              | GG                | 1946642226               |
| SNP_P3_147946_37235  | NW_004516470.1 | Scaffold1196 | 37235                   | TT                              | GG                | 1946642228               |
| SNP_P3_147947_37236  | NW_004516470.1 | Scaffold1196 | 37236                   | AA                              | GG                | 1946642230               |
| SNP_P3_147948_37590  | NW_004516470.1 | Scaffold1196 | 37590                   | TT                              | CC                | 1946642231               |
| SNP_P3_147949_38669  | NW_004516470.1 | Scaffold1196 | 38669                   | CC                              | AA                | 1946642233               |
| SNP_P3_147950_38688  | NW_004516470.1 | Scaffold1196 | 38688                   | AA                              | TT                | 1946642235               |
| SNP_P3_147951_39812  | NW_004516470.1 | Scaffold1196 | 39812                   | AA                              | GG                | 1946642237               |
| SNP_P3_147952_44348  | NW_004516470.1 | Scaffold1196 | 44348                   | GG                              | TT                | 1946642239               |
| SNP_P3_147953_55471  | NW_004516470.1 | Scaffold1196 | 55471                   | AA                              | CC                | 1946642241               |
| SNP_P3_147954_56352  | NW_004516470.1 | Scaffold1196 | 56352                   | TT                              | CC                | 1946642243               |
| SNP_P3_147955_56581  | NW_004516470.1 | Scaffold1196 | 56581                   | CC                              | TT                | 1946642245               |
| SNP_P3_147956_70562  | NW_004516470.1 | Scaffold1196 | 70562                   | TT                              | CC                | 1946642247               |
| SNP_P3_147957_78480  | NW_004516470.1 | Scaffold1196 | 78480                   | GG                              | CC                | 1946642248               |

| SNPs IDs             | Chromosome IDs | Chromosomes  | Physical positions (bp) | CDC Frontier (Reference genome) | (Pusa 256 & HPNB) | NCBI SNPdb Accession IDs |
|----------------------|----------------|--------------|-------------------------|---------------------------------|-------------------|--------------------------|
| SNP_P3_147959_78659  | NW_004516470.1 | Scaffold1196 | 78659                   | AA                              | GG                | 1946642250               |
| SNP_P3_147960_78811  | NW_004516470.1 | Scaffold1196 | 78811                   | GG                              | TT                | 1946642252               |
| SNP_P3_147962_105768 | NW_004516470.1 | Scaffold1196 | 105768                  | TT                              | CC                | 1946642254               |
| SNP_P3_147963_106805 | NW_004516470.1 | Scaffold1196 | 106805                  | TT                              | GG                | 1946642257               |
| SNP_P3_147964_110975 | NW_004516470.1 | Scaffold1196 | 110975                  | CC                              | GG                | 1946642259               |
| SNP_P3_147965_111033 | NW_004516470.1 | Scaffold1196 | 111033                  | GG                              | TT                | 1946642261               |
| SNP_P3_147966_111337 | NW_004516470.1 | Scaffold1196 | 111337                  | AA                              | GG                | 1946642262               |
| SNP_P3_147967_111362 | NW_004516470.1 | Scaffold1196 | 111362                  | TT                              | GG                | 1946642263               |
| SNP_P3_147968_111597 | NW_004516470.1 | Scaffold1196 | 111597                  | AA                              | TT                | 1946642264               |
| SNP_P3_147969_113827 | NW_004516470.1 | Scaffold1196 | 113827                  | GG                              | TT                | 1946642265               |
| SNP_P3_147971_118320 | NW_004516470.1 | Scaffold1196 | 118320                  | GG                              | AA                | 1946642266               |
| SNP_P3_147972_119622 | NW_004516470.1 | Scaffold1196 | 119622                  | AA                              | CC                | 1946642267               |
| SNP_P3_147973_119694 | NW_004516470.1 | Scaffold1196 | 119694                  | AA                              | GG                | 1946642268               |
| SNP_P3_147974_119739 | NW_004516470.1 | Scaffold1196 | 119739                  | CC                              | GG                | 1946642270               |
| SNP_P3_147975_120036 | NW_004516470.1 | Scaffold1196 | 120036                  | AA                              | GG                | 1946642272               |
| SNP_P3_147977_127631 | NW_004516470.1 | Scaffold1196 | 127631                  | CC                              | AA                | 1946642274               |
| SNP_P3_147978_134666 | NW_004516470.1 | Scaffold1196 | 134666                  | AA                              | TT                | 1946642276               |
| SNP_P3_147979_134668 | NW_004516470.1 | Scaffold1196 | 134668                  | TT                              | GG                | 1946642278               |
| SNP_P3_147980_134683 | NW_004516470.1 | Scaffold1196 | 134683                  | TT                              | AA                | 1946642279               |
| SNP_P3_147981_134694 | NW_004516470.1 | Scaffold1196 | 134694                  | AA                              | TT                | 1946642281               |
| SNP_P3_147982_139910 | NW_004516470.1 | Scaffold1196 | 139910                  | TT                              | GG                | 1946642283               |
| SNP_P3_147983_142162 | NW_004516470.1 | Scaffold1196 | 142162                  | CC                              | TT                | 1946642285               |
| SNP_P3_147984_144738 | NW_004516470.1 | Scaffold1196 | 144738                  | CC                              | TT                | 1946642287               |
| SNP_P3_147985_144755 | NW_004516470.1 | Scaffold1196 | 144755                  | TT                              | AA                | 1946642289               |
| SNP_P3_147986_166388 | NW_004516470.1 | Scaffold1196 | 166388                  | AA                              | CC                | 1946642292               |
| SNP_P3_147988_170920 | NW_004516470.1 | Scaffold1196 | 170920                  | CC                              | TT                | 1946642294               |
| SNP_P3_147989_170921 | NW_004516470.1 | Scaffold1196 | 170921                  | CC                              | TT                | 1946642296               |
| SNP_P3_147990_173002 | NW_004516470.1 | Scaffold1196 | 173002                  | TT                              | CC                | 1946642298               |
| SNP_P3_147991_175654 | NW_004516470.1 | Scaffold1196 | 175654                  | AA                              | GG                | 1946642300               |
| SNP_P3_147993_191378 | NW_004516470.1 | Scaffold1196 | 191378                  | TT                              | GG                | 1946642302               |
| SNP_P3_147994_192811 | NW_004516470.1 | Scaffold1196 | 192811                  | AA                              | GG                | 1946642304               |
| SNP_P3_147995_192878 | NW_004516470.1 | Scaffold1196 | 192878                  | TT                              | CC                | 1946642305               |
| SNP_P3_147996_192882 | NW_004516470.1 | Scaffold1196 | 192882                  | AA                              | GG                | 1946642307               |
| SNP_P3_147997_193226 | NW_004516470.1 | Scaffold1196 | 193226                  | TT                              | CC                | 1946642309               |
| SNP_P3_147998_193304 | NW_004516470.1 | Scaffold1196 | 193304                  | AA                              | GG                | 1946642311               |
| SNP_P3_147999_194712 | NW_004516470.1 | Scaffold1196 | 194712                  | CC                              | TT                | 1946642313               |
| SNP_P3_148001_205914 | NW_004516470.1 | Scaffold1196 | 205914                  | CC                              | AA                | 1946642315               |
| SNP_P3_148002_205962 | NW_004516470.1 | Scaffold1196 | 205962                  | CC                              | AA                | 1946642317               |
| SNP_P3_148003_206115 | NW_004516470.1 | Scaffold1196 | 206115                  | TT                              | AA                | 1946642319               |
| SNP_P3_148005_206789 | NW_004516470.1 | Scaffold1196 | 206789                  | GG                              | TT                | 1946642321               |
| SNP_P3_148006_207287 | NW_004516470.1 | Scaffold1196 | 207287                  | AA                              | GG                | 1946642323               |
| SNP_P3_148007_208315 | NW_004516470.1 | Scaffold1196 | 208315                  | CC                              | TT                | 1946642325               |

| SNPs IDs             | Chromosome IDs | Chromosomes  | Physical positions (bp) | CDC Frontier (Reference genome) | (Pusa 256 & HPNB) | NCBI SNPdb Accession IDs |
|----------------------|----------------|--------------|-------------------------|---------------------------------|-------------------|--------------------------|
| SNP_P3_148008_208321 | NW_004516470.1 | Scaffold1196 | 208321                  | AA                              | GG                | 1946642327               |
| SNP_P3_148009_1396   | NW_004516471.1 | Scaffold1197 | 1396                    | AA                              | TT                | 1946642329               |
| SNP_P3_148010_4963   | NW_004516471.1 | Scaffold1197 | 4963                    | CC                              | AA                | 1946642332               |
| SNP_P3_148011_4984   | NW_004516471.1 | Scaffold1197 | 4984                    | CC                              | TT                | 1946642334               |
| SNP_P3_148012_5059   | NW_004516471.1 | Scaffold1197 | 5059                    | TT                              | CC                | 1946642336               |
| SNP_P3_148014_5190   | NW_004516471.1 | Scaffold1197 | 5190                    | TT                              | CC                | 1946642338               |
| SNP_P3_148015_5244   | NW_004516471.1 | Scaffold1197 | 5244                    | AA                              | CC                | 1946642339               |
| SNP_P3_148016_5271   | NW_004516471.1 | Scaffold1197 | 5271                    | TT                              | AA                | 1946642341               |
| SNP_P3_148017_5272   | NW_004516471.1 | Scaffold1197 | 5272                    | CC                              | AA                | 1946642343               |
| SNP_P3_148018_5326   | NW_004516471.1 | Scaffold1197 | 5326                    | GG                              | AA                | 1946642345               |
| SNP_P3_148019_5332   | NW_004516471.1 | Scaffold1197 | 5332                    | AA                              | GG                | 1946642347               |
| SNP_P3_148020_5352   | NW_004516471.1 | Scaffold1197 | 5352                    | AA                              | GG                | 1946642349               |
| SNP_P3_148021_5407   | NW_004516471.1 | Scaffold1197 | 5407                    | AA                              | GG                | 1946642351               |
| SNP_P3_148022_5411   | NW_004516471.1 | Scaffold1197 | 5411                    | GG                              | AA                | 1946642353               |
| SNP_P3_148023_5508   | NW_004516471.1 | Scaffold1197 | 5508                    | GG                              | AA                | 1946642355               |
| SNP_P3_148024_5595   | NW_004516471.1 | Scaffold1197 | 5595                    | GG                              | AA                | 1946642357               |
| SNP_P3_148025_5615   | NW_004516471.1 | Scaffold1197 | 5615                    | AA                              | GG                | 1946642359               |
| SNP_P3_148026_5655   | NW_004516471.1 | Scaffold1197 | 5655                    | GG                              | TT                | 1946642361               |
| SNP_P3_148027_5681   | NW_004516471.1 | Scaffold1197 | 5681                    | TT                              | GG                | 1946642363               |
| SNP_P3_148028_5744   | NW_004516471.1 | Scaffold1197 | 5744                    | AA                              | TT                | 1946642365               |
| SNP_P3_148029_5879   | NW_004516471.1 | Scaffold1197 | 5879                    | TT                              | AA                | 1946642367               |
| SNP_P3_148030_5880   | NW_004516471.1 | Scaffold1197 | 5880                    | GG                              | TT                | 1946642369               |
| SNP_P3_148031_5894   | NW_004516471.1 | Scaffold1197 | 5894                    | CC                              | AA                | 1946642371               |
| SNP_P3_148032_6140   | NW_004516471.1 | Scaffold1197 | 6140                    | TT                              | CC                | 1946642374               |
| SNP_P3_148033_6232   | NW_004516471.1 | Scaffold1197 | 6232                    | CC                              | TT                | 1946642376               |
| SNP_P3_148034_6243   | NW_004516471.1 | Scaffold1197 | 6243                    | TT                              | CC                | 1946642378               |
| SNP_P3_148035_7100   | NW_004516471.1 | Scaffold1197 | 7100                    | CC                              | TT                | 1946642380               |
| SNP_P3_148036_7105   | NW_004516471.1 | Scaffold1197 | 7105                    | TT                              | GG                | 1946642382               |
| SNP_P3_148037_9804   | NW_004516471.1 | Scaffold1197 | 9804                    | AA                              | GG                | 1946642384               |
| SNP_P3_148038_9975   | NW_004516471.1 | Scaffold1197 | 9975                    | TT                              | CC                | 1946642386               |
| SNP_P3_148040_10299  | NW_004516471.1 | Scaffold1197 | 10299                   | GG                              | AA                | 1946642388               |
| SNP_P3_148041_19975  | NW_004516471.1 | Scaffold1197 | 19975                   | TT                              | CC                | 1946642390               |
| SNP_P3_148042_19980  | NW_004516471.1 | Scaffold1197 | 19980                   | TT                              | CC                | 1946642392               |
| SNP_P3_148043_23242  | NW_004516471.1 | Scaffold1197 | 23242                   | TT                              | AA                | 1946642394               |
| SNP_P3_148044_25630  | NW_004516471.1 | Scaffold1197 | 25630                   | TT                              | CC                | 1946642397               |
| SNP_P3_148045_25643  | NW_004516471.1 | Scaffold1197 | 25643                   | AA                              | TT                | 1946642399               |
| SNP_P3_148046_25685  | NW_004516471.1 | Scaffold1197 | 25685                   | TT                              | GG                | 1946642401               |
| SNP_P3_148047_25989  | NW_004516471.1 | Scaffold1197 | 25989                   | GG                              | AA                | 1946642403               |
| SNP_P3_148048_26009  | NW_004516471.1 | Scaffold1197 | 26009                   | CC                              | AA                | 1946642405               |
| SNP_P3_148049_26015  | NW_004516471.1 | Scaffold1197 | 26015                   | AA                              | CC                | 1946642407               |
| SNP_P3_148050_26021  | NW_004516471.1 | Scaffold1197 | 26021                   | CC                              | TT                | 1946642409               |
| SNP_P3_148051_26122  | NW_004516471.1 | Scaffold1197 | 26122                   | AA                              | GG                | 1946642411               |



| SNPs IDs             | Chromosome IDs | Chromosomes  | Physical positions (bp) | CDC Frontier (Reference genome) | (Pusa 256 & HPNB) | NCBI SNPdb Accession IDs |
|----------------------|----------------|--------------|-------------------------|---------------------------------|-------------------|--------------------------|
| SNP_P3_148052_40313  | NW_004516471.1 | Scaffold1197 | 40313                   | CC                              | GG                | 1946642413               |
| SNP_P3_148053_40336  | NW_004516471.1 | Scaffold1197 | 40336                   | GG                              | AA                | 1946642415               |
| SNP_P3_148054_40354  | NW_004516471.1 | Scaffold1197 | 40354                   | TT                              | AA                | 1946642418               |
| SNP_P3_148055_41860  | NW_004516471.1 | Scaffold1197 | 41860                   | AA                              | GG                | 1946642420               |
| SNP_P3_148056_41895  | NW_004516471.1 | Scaffold1197 | 41895                   | AA                              | TT                | 1946642422               |
| SNP_P3_148057_42383  | NW_004516471.1 | Scaffold1197 | 42383                   | GG                              | AA                | 1946642424               |
| SNP_P3_148058_48285  | NW_004516471.1 | Scaffold1197 | 48285                   | AA                              | GG                | 1946642426               |
| SNP_P3_148059_54833  | NW_004516471.1 | Scaffold1197 | 54833                   | GG                              | AA                | 1946642428               |
| SNP_P3_148060_58202  | NW_004516471.1 | Scaffold1197 | 58202                   | GG                              | AA                | 1946642430               |
| SNP_P3_148061_58266  | NW_004516471.1 | Scaffold1197 | 58266                   | TT                              | GG                | 1946642432               |
| SNP_P3_148062_58522  | NW_004516471.1 | Scaffold1197 | 58522                   | CC                              | TT                | 1946642434               |
| SNP_P3_148063_58544  | NW_004516471.1 | Scaffold1197 | 58544                   | AA                              | TT                | 1946642436               |
| SNP_P3_148064_58555  | NW_004516471.1 | Scaffold1197 | 58555                   | CC                              | TT                | 1946642438               |
| SNP_P3_148065_58587  | NW_004516471.1 | Scaffold1197 | 58587                   | TT                              | AA                | 1946642440               |
| SNP_P3_148066_58612  | NW_004516471.1 | Scaffold1197 | 58612                   | GG                              | AA                | 1946642442               |
| SNP_P3_148067_58619  | NW_004516471.1 | Scaffold1197 | 58619                   | GG                              | AA                | 1946642444               |
| SNP_P3_148068_58641  | NW_004516471.1 | Scaffold1197 | 58641                   | CC                              | AA                | 1946642446               |
| SNP_P3_148069_58656  | NW_004516471.1 | Scaffold1197 | 58656                   | AA                              | GG                | 1946642448               |
| SNP_P3_148070_68590  | NW_004516471.1 | Scaffold1197 | 68590                   | AA                              | GG                | 1946642450               |
| SNP_P3_148071_81885  | NW_004516471.1 | Scaffold1197 | 81885                   | TT                              | CC                | 1946642452               |
| SNP_P3_148072_82873  | NW_004516471.1 | Scaffold1197 | 82873                   | AA                              | TT                | 1946642454               |
| SNP_P3_148073_82874  | NW_004516471.1 | Scaffold1197 | 82874                   | CC                              | TT                | 1946642456               |
| SNP_P3_148074_87414  | NW_004516471.1 | Scaffold1197 | 87414                   | TT                              | CC                | 1946642458               |
| SNP_P3_148075_87425  | NW_004516471.1 | Scaffold1197 | 87425                   | TT                              | AA                | 1946642460               |
| SNP_P3_148077_138502 | NW_004516471.1 | Scaffold1197 | 138502                  | CC                              | TT                | 1946642462               |
| SNP_P3_148078_142099 | NW_004516471.1 | Scaffold1197 | 142099                  | TT                              | CC                | 1946642464               |
| SNP_P3_148079_142109 | NW_004516471.1 | Scaffold1197 | 142109                  | TT                              | AA                | 1946642467               |
| SNP_P3_148080_142202 | NW_004516471.1 | Scaffold1197 | 142202                  | CC                              | AA                | 1946642469               |
| SNP_P3_148081_142218 | NW_004516471.1 | Scaffold1197 | 142218                  | TT                              | AA                | 1946642471               |
| SNP_P3_148082_142582 | NW_004516471.1 | Scaffold1197 | 142582                  | GG                              | AA                | 1946642473               |
| SNP_P3_148083_142590 | NW_004516471.1 | Scaffold1197 | 142590                  | CC                              | AA                | 1946642475               |
| SNP_P3_148084_146312 | NW_004516471.1 | Scaffold1197 | 146312                  | CC                              | AA                | 1946642477               |
| SNP_P3_148085_146315 | NW_004516471.1 | Scaffold1197 | 146315                  | AA                              | GG                | 1946642479               |
| SNP_P3_148086_146321 | NW_004516471.1 | Scaffold1197 | 146321                  | AA                              | GG                | 1946642481               |
| SNP_P3_148087_146322 | NW_004516471.1 | Scaffold1197 | 146322                  | GG                              | AA                | 1946642483               |
| SNP_P3_148088_146328 | NW_004516471.1 | Scaffold1197 | 146328                  | AA                              | GG                | 1946642485               |
| SNP_P3_148089_148957 | NW_004516471.1 | Scaffold1197 | 148957                  | CC                              | TT                | 1946642487               |
| SNP_P3_148090_151652 | NW_004516471.1 | Scaffold1197 | 151652                  | GG                              | AA                | 1946642489               |
| SNP_P3_148091_151777 | NW_004516471.1 | Scaffold1197 | 151777                  | TT                              | CC                | 1946642491               |
| SNP_P3_148092_155845 | NW_004516471.1 | Scaffold1197 | 155845                  | AA                              | GG                | 1946642493               |
| SNP_P3_148093_155873 | NW_004516471.1 | Scaffold1197 | 155873                  | AA                              | CC                | 1946642495               |
| SNP_P3_148094_156030 | NW_004516471.1 | Scaffold1197 | 156030                  | GG                              | CC                | 1946642497               |

| SNPs IDs             | Chromosome IDs | Chromosomes  | Physical positions (bp) | CDC Frontier (Reference genome) | (Pusa 256 & HPNB) | NCBI SNPdb Accession IDs |
|----------------------|----------------|--------------|-------------------------|---------------------------------|-------------------|--------------------------|
| SNP_P3_148095_173164 | NW_004516471.1 | Scaffold1197 | 173164                  | AA                              | CC                | 1946642499               |
| SNP_P3_148096_186736 | NW_004516471.1 | Scaffold1197 | 186736                  | TT                              | CC                | 1946642501               |
| SNP_P3_148098_191500 | NW_004516471.1 | Scaffold1197 | 191500                  | CC                              | TT                | 1946642503               |
| SNP_P3_148099_191505 | NW_004516471.1 | Scaffold1197 | 191505                  | TT                              | CC                | 1946642505               |
| SNP_P3_148100_191723 | NW_004516471.1 | Scaffold1197 | 191723                  | CC                              | TT                | 1946642508               |
| SNP_P3_148101_194083 | NW_004516471.1 | Scaffold1197 | 194083                  | GG                              | AA                | 1946642510               |
| SNP_P3_148102_228239 | NW_004516471.1 | Scaffold1197 | 228239                  | TT                              | CC                | 1946642512               |
| SNP_P3_148103_231245 | NW_004516471.1 | Scaffold1197 | 231245                  | GG                              | CC                | 1946642514               |
| SNP_P3_148104_231267 | NW_004516471.1 | Scaffold1197 | 231267                  | AA                              | GG                | 1946642516               |
| SNP_P3_148105_231511 | NW_004516471.1 | Scaffold1197 | 231511                  | TT                              | GG                | 1946642518               |
| SNP_P3_148106_237149 | NW_004516471.1 | Scaffold1197 | 237149                  | CC                              | TT                | 1946642520               |
| SNP_P3_148107_237154 | NW_004516471.1 | Scaffold1197 | 237154                  | CC                              | TT                | 1946642522               |
| SNP_P3_148108_237169 | NW_004516471.1 | Scaffold1197 | 237169                  | CC                              | TT                | 1946642524               |
| SNP_P3_148109_242078 | NW_004516471.1 | Scaffold1197 | 242078                  | GG                              | AA                | 1946642526               |
| SNP_P3_148110_244283 | NW_004516471.1 | Scaffold1197 | 244283                  | TT                              | CC                | 1946642528               |
| SNP_P3_148112_248598 | NW_004516471.1 | Scaffold1197 | 248598                  | TT                              | CC                | 1946642530               |
| SNP_P3_148113_252699 | NW_004516471.1 | Scaffold1197 | 252699                  | CC                              | TT                | 1946642532               |
| SNP_P3_148114_252811 | NW_004516471.1 | Scaffold1197 | 252811                  | TT                              | GG                | 1946642534               |
| SNP_P3_148115_253208 | NW_004516471.1 | Scaffold1197 | 253208                  | AA                              | GG                | 1946642536               |
| SNP_P3_148117_268632 | NW_004516471.1 | Scaffold1197 | 268632                  | AA                              | CC                | 1946642538               |
| SNP_P3_148118_270344 | NW_004516471.1 | Scaffold1197 | 270344                  | AA                              | GG                | 1946642540               |
| SNP_P3_148119_270361 | NW_004516471.1 | Scaffold1197 | 270361                  | GG                              | CC                | 1946642542               |
| SNP_P3_148120_343916 | NW_004516471.1 | Scaffold1197 | 343916                  | AA                              | GG                | 1946642544               |
| SNP_P3_148121_359641 | NW_004516471.1 | Scaffold1197 | 359641                  | AA                              | TT                | 1946642546               |
| SNP_P3_148122_364093 | NW_004516471.1 | Scaffold1197 | 364093                  | GG                              | AA                | 1946642549               |
| SNP_P3_148123_369634 | NW_004516471.1 | Scaffold1197 | 369634                  | TT                              | GG                | 1946642552               |
| SNP_P3_148124_370009 | NW_004516471.1 | Scaffold1197 | 370009                  | GG                              | AA                | 1946642554               |
| SNP_P3_148125_370015 | NW_004516471.1 | Scaffold1197 | 370015                  | GG                              | AA                | 1946642556               |
| SNP_P3_148126_370032 | NW_004516471.1 | Scaffold1197 | 370032                  | TT                              | CC                | 1946642558               |
| SNP_P3_148127_370060 | NW_004516471.1 | Scaffold1197 | 370060                  | GG                              | AA                | 1946642560               |
| SNP_P3_148128_370069 | NW_004516471.1 | Scaffold1197 | 370069                  | CC                              | GG                | 1946642562               |
| SNP_P3_148129_370086 | NW_004516471.1 | Scaffold1197 | 370086                  | GG                              | AA                | 1946642564               |
| SNP_P3_148130_380421 | NW_004516471.1 | Scaffold1197 | 380421                  | TT                              | GG                | 1946642566               |
| SNP_P3_148131_380701 | NW_004516471.1 | Scaffold1197 | 380701                  | CC                              | TT                | 1946642568               |
| SNP_P3_148132_380702 | NW_004516471.1 | Scaffold1197 | 380702                  | CC                              | TT                | 1946642570               |
| SNP_P3_148133_380739 | NW_004516471.1 | Scaffold1197 | 380739                  | CC                              | AA                | 1946642572               |
| SNP_P3_148134_380770 | NW_004516471.1 | Scaffold1197 | 380770                  | TT                              | CC                | 1946642574               |
| SNP_P3_148135_385027 | NW_004516471.1 | Scaffold1197 | 385027                  | TT                              | CC                | 1946642576               |
| SNP_P3_148136_427634 | NW_004516471.1 | Scaffold1197 | 427634                  | GG                              | AA                | 1946642578               |
| SNP_P3_148137_433819 | NW_004516471.1 | Scaffold1197 | 433819                  | AA                              | CC                | 1946642580               |
| SNP_P3_148138_447909 | NW_004516471.1 | Scaffold1197 | 447909                  | GG                              | CC                | 1946642582               |
| SNP_P3_148139_447940 | NW_004516471.1 | Scaffold1197 | 447940                  | GG                              | TT                | 1946642584               |

| SNPs IDs             | Chromosome IDs | Chromosomes  | Physical positions (bp) | CDC Frontier (Reference genome) | (Pusa 256 & HPNB) | NCBI SNPdb Accession IDs |
|----------------------|----------------|--------------|-------------------------|---------------------------------|-------------------|--------------------------|
| SNP_P3_148140_447991 | NW_004516471.1 | Scaffold1197 | 447991                  | AA                              | GG                | 1946642586               |
| SNP_P3_148141_449440 | NW_004516471.1 | Scaffold1197 | 449440                  | AA                              | GG                | 1946642588               |
| SNP_P3_148142_460218 | NW_004516471.1 | Scaffold1197 | 460218                  | CC                              | TT                | 1946642590               |
| SNP_P3_148143_466314 | NW_004516471.1 | Scaffold1197 | 466314                  | TT                              | AA                | 1946642593               |
| SNP_P3_148145_501712 | NW_004516471.1 | Scaffold1197 | 501712                  | CC                              | TT                | 1946642595               |
| SNP_P3_148146_510615 | NW_004516471.1 | Scaffold1197 | 510615                  | AA                              | GG                | 1946642597               |
| SNP_P3_148147_510635 | NW_004516471.1 | Scaffold1197 | 510635                  | TT                              | CC                | 1946642599               |
| SNP_P3_148148_510674 | NW_004516471.1 | Scaffold1197 | 510674                  | TT                              | CC                | 1946642601               |
| SNP_P3_148149_510709 | NW_004516471.1 | Scaffold1197 | 510709                  | CC                              | TT                | 1946642603               |
| SNP_P3_148150_510760 | NW_004516471.1 | Scaffold1197 | 510760                  | TT                              | CC                | 1946642605               |
| SNP_P3_148151_510979 | NW_004516471.1 | Scaffold1197 | 510979                  | AA                              | TT                | 1946642607               |
| SNP_P3_148152_510982 | NW_004516471.1 | Scaffold1197 | 510982                  | CC                              | TT                | 1946642609               |
| SNP_P3_148153_510984 | NW_004516471.1 | Scaffold1197 | 510984                  | AA                              | CC                | 1946642611               |
| SNP_P3_148154_511006 | NW_004516471.1 | Scaffold1197 | 511006                  | GG                              | AA                | 1946642613               |
| SNP_P3_148155_511060 | NW_004516471.1 | Scaffold1197 | 511060                  | AA                              | TT                | 1946642615               |
| SNP_P3_148156_511145 | NW_004516471.1 | Scaffold1197 | 511145                  | TT                              | AA                | 1946642617               |
| SNP_P3_148157_511169 | NW_004516471.1 | Scaffold1197 | 511169                  | GG                              | AA                | 1946642619               |
| SNP_P3_148158_511189 | NW_004516471.1 | Scaffold1197 | 511189                  | GG                              | TT                | 1946642621               |
| SNP_P3_148159_511190 | NW_004516471.1 | Scaffold1197 | 511190                  | AA                              | GG                | 1946642623               |
| SNP_P3_148160_511999 | NW_004516471.1 | Scaffold1197 | 511999                  | TT                              | CC                | 1946642625               |
| SNP_P3_148161_515990 | NW_004516471.1 | Scaffold1197 | 515990                  | GG                              | CC                | 1946642627               |
| SNP_P3_148162_520563 | NW_004516471.1 | Scaffold1197 | 520563                  | CC                              | TT                | 1946642629               |
| SNP_P3_148163_520622 | NW_004516471.1 | Scaffold1197 | 520622                  | GG                              | TT                | 1946642631               |
| SNP_P3_148164_527105 | NW_004516471.1 | Scaffold1197 | 527105                  | TT                              | GG                | 1946642633               |
| SNP_P3_148165_550231 | NW_004516471.1 | Scaffold1197 | 550231                  | TT                              | AA                | 1946642636               |
| SNP_P3_148166_616    | NW_004516472.1 | Scaffold1198 | 616                     | CC                              | AA                | 1946642638               |
| SNP_P3_148167_667    | NW_004516472.1 | Scaffold1198 | 667                     | AA                              | GG                | 1946642640               |
| SNP_P3_148168_827    | NW_004516472.1 | Scaffold1198 | 827                     | CC                              | TT                | 1946642642               |
| SNP_P3_148169_829    | NW_004516472.1 | Scaffold1198 | 829                     | TT                              | CC                | 1946642644               |
| SNP_P3_148170_844    | NW_004516472.1 | Scaffold1198 | 844                     | GG                              | AA                | 1946642646               |
| SNP_P3_148171_982    | NW_004516472.1 | Scaffold1198 | 982                     | GG                              | AA                | 1946642648               |
| SNP_P3_148172_8608   | NW_004516473.1 | Scaffold1202 | 8608                    | AA                              | TT                | 1946642650               |
| SNP_P3_148175_68953  | NW_004516473.1 | Scaffold1202 | 68953                   | GG                              | CC                | 1946642652               |
| SNP_P3_148176_68954  | NW_004516473.1 | Scaffold1202 | 68954                   | AA                              | TT                | 1946642654               |
| SNP_P3_148177_71363  | NW_004516473.1 | Scaffold1202 | 71363                   | TT                              | AA                | 1946642656               |
| SNP_P3_148182_93158  | NW_004516473.1 | Scaffold1202 | 93158                   | GG                              | AA                | 1946642658               |
| SNP_P3_148183_122135 | NW_004516473.1 | Scaffold1202 | 122135                  | TT                              | GG                | 1946642660               |
| SNP_P3_148184_122139 | NW_004516473.1 | Scaffold1202 | 122139                  | AA                              | GG                | 1946642662               |
| SNP_P3_148185_122179 | NW_004516473.1 | Scaffold1202 | 122179                  | TT                              | CC                | 1946642664               |
| SNP_P3_148187_166446 | NW_004516473.1 | Scaffold1202 | 166446                  | CC                              | TT                | 1946642666               |
| SNP_P3_148188_176908 | NW_004516473.1 | Scaffold1202 | 176908                  | AA                              | TT                | 1946642668               |
| SNP_P3_148189_177025 | NW_004516473.1 | Scaffold1202 | 177025                  | TT                              | CC                | 1946642670               |

| SNPs IDs             | Chromosome IDs | Chromosomes  | Physical positions (bp) | CDC Frontier (Reference genome) | (Pusa 256 & HPNB) | NCBI SNPdb Accession IDs |
|----------------------|----------------|--------------|-------------------------|---------------------------------|-------------------|--------------------------|
| SNP_P3_148191_178470 | NW_004516473.1 | Scaffold1202 | 178470                  | TT                              | CC                | 1946642672               |
| SNP_P3_148192_178507 | NW_004516473.1 | Scaffold1202 | 178507                  | TT                              | GG                | 1946642673               |
| SNP_P3_148193_178509 | NW_004516473.1 | Scaffold1202 | 178509                  | GG                              | AA                | 1946642675               |
| SNP_P3_148194_178560 | NW_004516473.1 | Scaffold1202 | 178560                  | TT                              | CC                | 1946642679               |
| SNP_P3_148195_178562 | NW_004516473.1 | Scaffold1202 | 178562                  | TT                              | GG                | 1946642680               |
| SNP_P3_148196_178616 | NW_004516473.1 | Scaffold1202 | 178616                  | AA                              | GG                | 1946642682               |
| SNP_P3_148197_178639 | NW_004516473.1 | Scaffold1202 | 178639                  | GG                              | TT                | 1946642684               |
| SNP_P3_148198_178644 | NW_004516473.1 | Scaffold1202 | 178644                  | AA                              | GG                | 1946642686               |
| SNP_P3_148199_178715 | NW_004516473.1 | Scaffold1202 | 178715                  | TT                              | CC                | 1946642688               |
| SNP_P3_148200_178720 | NW_004516473.1 | Scaffold1202 | 178720                  | TT                              | CC                | 1946642690               |
| SNP_P3_148201_178721 | NW_004516473.1 | Scaffold1202 | 178721                  | TT                              | GG                | 1946642692               |
| SNP_P3_148202_178739 | NW_004516473.1 | Scaffold1202 | 178739                  | AA                              | CC                | 1946642694               |
| SNP_P3_148203_178741 | NW_004516473.1 | Scaffold1202 | 178741                  | TT                              | CC                | 1946642696               |
| SNP_P3_148204_178774 | NW_004516473.1 | Scaffold1202 | 178774                  | TT                              | GG                | 1946642698               |
| SNP_P3_148205_178845 | NW_004516473.1 | Scaffold1202 | 178845                  | TT                              | AA                | 1946642700               |
| SNP_P3_148206_178880 | NW_004516473.1 | Scaffold1202 | 178880                  | TT                              | CC                | 1946642702               |
| SNP_P3_148207_178898 | NW_004516473.1 | Scaffold1202 | 178898                  | TT                              | CC                | 1946642703               |
| SNP_P3_148208_178917 | NW_004516473.1 | Scaffold1202 | 178917                  | AA                              | GG                | 1946642705               |
| SNP_P3_148209_179056 | NW_004516473.1 | Scaffold1202 | 179056                  | AA                              | GG                | 1946642707               |
| SNP_P3_148210_179069 | NW_004516473.1 | Scaffold1202 | 179069                  | AA                              | GG                | 1946642709               |
| SNP_P3_148211_179089 | NW_004516473.1 | Scaffold1202 | 179089                  | TT                              | CC                | 1946642711               |
| SNP_P3_148212_179095 | NW_004516473.1 | Scaffold1202 | 179095                  | AA                              | GG                | 1946642713               |
| SNP_P3_148213_179096 | NW_004516473.1 | Scaffold1202 | 179096                  | AA                              | GG                | 1946642715               |
| SNP_P3_148214_179098 | NW_004516473.1 | Scaffold1202 | 179098                  | GG                              | TT                | 1946642717               |
| SNP_P3_148215_179127 | NW_004516473.1 | Scaffold1202 | 179127                  | AA                              | GG                | 1946642718               |
| SNP_P3_148216_179148 | NW_004516473.1 | Scaffold1202 | 179148                  | TT                              | CC                | 1946642720               |
| SNP_P3_148217_179152 | NW_004516473.1 | Scaffold1202 | 179152                  | AA                              | GG                | 1946642722               |
| SNP_P3_148218_179197 | NW_004516473.1 | Scaffold1202 | 179197                  | CC                              | GG                | 1946642724               |
| SNP_P3_148219_179220 | NW_004516473.1 | Scaffold1202 | 179220                  | TT                              | CC                | 1946642726               |
| SNP_P3_148220_179221 | NW_004516473.1 | Scaffold1202 | 179221                  | GG                              | CC                | 1946642729               |
| SNP_P3_148221_179272 | NW_004516473.1 | Scaffold1202 | 179272                  | AA                              | GG                | 1946642731               |
| SNP_P3_148222_179290 | NW_004516473.1 | Scaffold1202 | 179290                  | AA                              | GG                | 1946642733               |
| SNP_P3_148223_179328 | NW_004516473.1 | Scaffold1202 | 179328                  | CC                              | GG                | 1946642735               |
| SNP_P3_148224_179334 | NW_004516473.1 | Scaffold1202 | 179334                  | GG                              | AA                | 1946642737               |
| SNP_P3_148226_179498 | NW_004516473.1 | Scaffold1202 | 179498                  | AA                              | CC                | 1946642739               |
| SNP_P3_148227_179503 | NW_004516473.1 | Scaffold1202 | 179503                  | AA                              | GG                | 1946642741               |
| SNP_P3_148228_179517 | NW_004516473.1 | Scaffold1202 | 179517                  | AA                              | GG                | 1946642743               |
| SNP_P3_148229_179556 | NW_004516473.1 | Scaffold1202 | 179556                  | TT                              | GG                | 1946642744               |
| SNP_P3_148230_179574 | NW_004516473.1 | Scaffold1202 | 179574                  | CC                              | TT                | 1946642746               |
| SNP_P3_148232_179622 | NW_004516473.1 | Scaffold1202 | 179622                  | AA                              | GG                | 1946642748               |
| SNP_P3_148233_179657 | NW_004516473.1 | Scaffold1202 | 179657                  | AA                              | GG                | 1946642750               |
| SNP_P3_148234_179659 | NW_004516473.1 | Scaffold1202 | 179659                  | CC                              | GG                | 1946642752               |

| SNPs IDs             | Chromosome IDs | Chromosomes  | Physical positions (bp) | CDC Frontier (Reference genome) | (Pusa 256 & HPNB) | NCBI SNPdb Accession IDs |
|----------------------|----------------|--------------|-------------------------|---------------------------------|-------------------|--------------------------|
| SNP_P3_148235_179667 | NW_004516473.1 | Scaffold1202 | 179667                  | TT                              | GG                | 1946642754               |
| SNP_P3_148236_179686 | NW_004516473.1 | Scaffold1202 | 179686                  | AA                              | GG                | 1946642756               |
| SNP_P3_148237_179724 | NW_004516473.1 | Scaffold1202 | 179724                  | TT                              | CC                | 1946642758               |
| SNP_P3_148238_179743 | NW_004516473.1 | Scaffold1202 | 179743                  | AA                              | GG                | 1946642760               |
| SNP_P3_148239_179752 | NW_004516473.1 | Scaffold1202 | 179752                  | AA                              | GG                | 1946642762               |
| SNP_P3_148240_179754 | NW_004516473.1 | Scaffold1202 | 179754                  | CC                              | GG                | 1946642764               |
| SNP_P3_148241_179781 | NW_004516473.1 | Scaffold1202 | 179781                  | AA                              | GG                | 1946642766               |
| SNP_P3_148242_179808 | NW_004516473.1 | Scaffold1202 | 179808                  | AA                              | GG                | 1946642768               |
| SNP_P3_148243_183386 | NW_004516473.1 | Scaffold1202 | 183386                  | AA                              | CC                | 1946642770               |
| SNP_P3_148244_183458 | NW_004516473.1 | Scaffold1202 | 183458                  | TT                              | AA                | 1946642771               |
| SNP_P3_148245_183631 | NW_004516473.1 | Scaffold1202 | 183631                  | TT                              | AA                | 1946642775               |
| SNP_P3_148246_183660 | NW_004516473.1 | Scaffold1202 | 183660                  | AA                              | GG                | 1946642776               |
| SNP_P3_148247_183664 | NW_004516473.1 | Scaffold1202 | 183664                  | TT                              | CC                | 1946642778               |
| SNP_P3_148248_183675 | NW_004516473.1 | Scaffold1202 | 183675                  | TT                              | CC                | 1946642780               |
| SNP_P3_148249_183693 | NW_004516473.1 | Scaffold1202 | 183693                  | AA                              | TT                | 1946642782               |
| SNP_P3_148250_183751 | NW_004516473.1 | Scaffold1202 | 183751                  | AA                              | CC                | 1946642784               |
| SNP_P3_148251_183752 | NW_004516473.1 | Scaffold1202 | 183752                  | CC                              | TT                | 1946642786               |
| SNP_P3_148252_183755 | NW_004516473.1 | Scaffold1202 | 183755                  | AA                              | GG                | 1946642788               |
| SNP_P3_148253_183911 | NW_004516473.1 | Scaffold1202 | 183911                  | CC                              | TT                | 1946642790               |
| SNP_P3_148254_183912 | NW_004516473.1 | Scaffold1202 | 183912                  | GG                              | AA                | 1946642791               |
| SNP_P3_148255_185598 | NW_004516473.1 | Scaffold1202 | 185598                  | AA                              | TT                | 1946642793               |
| SNP_P3_148256_187909 | NW_004516473.1 | Scaffold1202 | 187909                  | AA                              | TT                | 1946642795               |
| SNP_P3_148257_190420 | NW_004516473.1 | Scaffold1202 | 190420                  | AA                              | CC                | 1946642797               |
| SNP_P3_148258_190431 | NW_004516473.1 | Scaffold1202 | 190431                  | GG                              | AA                | 1946642799               |
| SNP_P3_148259_190447 | NW_004516473.1 | Scaffold1202 | 190447                  | CC                              | TT                | 1946642801               |
| SNP_P3_148260_190651 | NW_004516473.1 | Scaffold1202 | 190651                  | AA                              | CC                | 1946642803               |
| SNP_P3_148261_190770 | NW_004516473.1 | Scaffold1202 | 190770                  | AA                              | CC                | 1946642805               |
| SNP_P3_148262_190791 | NW_004516473.1 | Scaffold1202 | 190791                  | AA                              | TT                | 1946642807               |
| SNP_P3_148263_190857 | NW_004516473.1 | Scaffold1202 | 190857                  | CC                              | AA                | 1946642809               |
| SNP_P3_148264_190899 | NW_004516473.1 | Scaffold1202 | 190899                  | GG                              | TT                | 1946642810               |
| SNP_P3_148265_190908 | NW_004516473.1 | Scaffold1202 | 190908                  | CC                              | AA                | 1946642812               |
| SNP_P3_148266_190913 | NW_004516473.1 | Scaffold1202 | 190913                  | AA                              | GG                | 1946642815               |
| SNP_P3_148267_196734 | NW_004516473.1 | Scaffold1202 | 196734                  | GG                              | AA                | 1946642817               |
| SNP_P3_148268_196751 | NW_004516473.1 | Scaffold1202 | 196751                  | GG                              | AA                | 1946642819               |
| SNP_P3_148269_196788 | NW_004516473.1 | Scaffold1202 | 196788                  | AA                              | CC                | 1946642821               |
| SNP_P3_148270_196792 | NW_004516473.1 | Scaffold1202 | 196792                  | GG                              | AA                | 1946642823               |
| SNP_P3_148271_196794 | NW_004516473.1 | Scaffold1202 | 196794                  | TT                              | AA                | 1946642825               |
| SNP_P3_148272_196826 | NW_004516473.1 | Scaffold1202 | 196826                  | CC                              | TT                | 1946642827               |
| SNP_P3_148273_197084 | NW_004516473.1 | Scaffold1202 | 197084                  | AA                              | TT                | 1946642829               |
| SNP_P3_148274_197136 | NW_004516473.1 | Scaffold1202 | 197136                  | GG                              | TT                | 1946642831               |
| SNP_P3_148275_210584 | NW_004516473.1 | Scaffold1202 | 210584                  | GG                              | AA                | 1946642833               |
| SNP_P3_148276_227605 | NW_004516473.1 | Scaffold1202 | 227605                  | GG                              | AA                | 1946642835               |

| SNPs IDs             | Chromosome IDs | Chromosomes  | Physical positions (bp) | CDC Frontier (Reference genome) | (Pusa 256 & HPNB) | NCBI SNPdb Accession IDs |
|----------------------|----------------|--------------|-------------------------|---------------------------------|-------------------|--------------------------|
| SNP_P3_148277_227640 | NW_004516473.1 | Scaffold1202 | 227640                  | AA                              | GG                | 1946642837               |
| SNP_P3_148278_227644 | NW_004516473.1 | Scaffold1202 | 227644                  | AA                              | TT                | 1946642839               |
| SNP_P3_148279_227734 | NW_004516473.1 | Scaffold1202 | 227734                  | TT                              | CC                | 1946642841               |
| SNP_P3_148280_227754 | NW_004516473.1 | Scaffold1202 | 227754                  | GG                              | AA                | 1946642843               |
| SNP_P3_148281_227852 | NW_004516473.1 | Scaffold1202 | 227852                  | GG                              | TT                | 1946642844               |
| SNP_P3_148282_227903 | NW_004516473.1 | Scaffold1202 | 227903                  | GG                              | AA                | 1946642846               |
| SNP_P3_148283_227957 | NW_004516473.1 | Scaffold1202 | 227957                  | CC                              | AA                | 1946642848               |
| SNP_P3_148284_227971 | NW_004516473.1 | Scaffold1202 | 227971                  | AA                              | GG                | 1946642850               |
| SNP_P3_148285_228080 | NW_004516473.1 | Scaffold1202 | 228080                  | CC                              | AA                | 1946642852               |
| SNP_P3_148286_228137 | NW_004516473.1 | Scaffold1202 | 228137                  | TT                              | CC                | 1946642854               |
| SNP_P3_148287_228168 | NW_004516473.1 | Scaffold1202 | 228168                  | CC                              | GG                | 1946642856               |
| SNP_P3_148288_228179 | NW_004516473.1 | Scaffold1202 | 228179                  | AA                              | GG                | 1946642859               |
| SNP_P3_148289_228256 | NW_004516473.1 | Scaffold1202 | 228256                  | TT                              | CC                | 1946642861               |
| SNP_P3_148290_228289 | NW_004516473.1 | Scaffold1202 | 228289                  | GG                              | CC                | 1946642863               |
| SNP_P3_148291_228290 | NW_004516473.1 | Scaffold1202 | 228290                  | CC                              | GG                | 1946642865               |
| SNP_P3_148292_228320 | NW_004516473.1 | Scaffold1202 | 228320                  | GG                              | CC                | 1946642867               |
| SNP_P3_148293_228654 | NW_004516473.1 | Scaffold1202 | 228654                  | CC                              | TT                | 1946642869               |
| SNP_P3_148294_249205 | NW_004516473.1 | Scaffold1202 | 249205                  | CC                              | TT                | 1946642870               |
| SNP_P3_148295_263761 | NW_004516473.1 | Scaffold1202 | 263761                  | TT                              | AA                | 1946642872               |
| SNP_P3_148296_263762 | NW_004516473.1 | Scaffold1202 | 263762                  | TT                              | CC                | 1946642874               |
| SNP_P3_148297_264386 | NW_004516473.1 | Scaffold1202 | 264386                  | CC                              | TT                | 1946642876               |
| SNP_P3_148298_272070 | NW_004516473.1 | Scaffold1202 | 272070                  | TT                              | AA                | 1946642878               |
| SNP_P3_148299_289014 | NW_004516473.1 | Scaffold1202 | 289014                  | GG                              | CC                | 1946642880               |
| SNP_P3_148300_289383 | NW_004516473.1 | Scaffold1202 | 289383                  | GG                              | AA                | 1946642882               |
| SNP_P3_148301_267    | NW_004516474.1 | Scaffold1206 | 267                     | GG                              | AA                | 1946642884               |
| SNP_P3_148302_463    | NW_004516474.1 | Scaffold1206 | 463                     | CC                              | TT                | 1946642885               |
| SNP_P3_148303_616    | NW_004516474.1 | Scaffold1206 | 616                     | GG                              | AA                | 1946642887               |
| SNP_P3_148304_653    | NW_004516474.1 | Scaffold1206 | 653                     | GG                              | CC                | 1946642889               |
| SNP_P3_148305_681    | NW_004516474.1 | Scaffold1206 | 681                     | AA                              | GG                | 1946642891               |
| SNP_P3_148306_709    | NW_004516474.1 | Scaffold1206 | 709                     | AA                              | GG                | 1946642893               |
| SNP_P3_148307_756    | NW_004516474.1 | Scaffold1206 | 756                     | GG                              | CC                | 1946642895               |
| SNP_P3_148309_993    | NW_004516474.1 | Scaffold1206 | 993                     | TT                              | CC                | 1946642897               |
| SNP_P3_148310_995    | NW_004516474.1 | Scaffold1206 | 995                     | GG                              | AA                | 1946642899               |
| SNP_P3_148311_47     | NW_004516475.1 | Scaffold1207 | 47                      | TT                              | CC                | 1946642901               |
| SNP_P3_148312_500    | NW_004516475.1 | Scaffold1207 | 500                     | AA                              | TT                | 1946642903               |
| SNP_P3_148313_806    | NW_004516475.1 | Scaffold1207 | 806                     | CC                              | AA                | 1946642905               |
| SNP_P3_148314_1236   | NW_004516475.1 | Scaffold1207 | 1236                    | GG                              | CC                | 1946642907               |
| SNP_P3_148315_1416   | NW_004516475.1 | Scaffold1207 | 1416                    | AA                              | GG                | 1946642909               |
| SNP_P3_148316_1525   | NW_004516475.1 | Scaffold1207 | 1525                    | GG                              | CC                | 1946642911               |
| SNP_P3_148317_4542   | NW_004516475.1 | Scaffold1207 | 4542                    | TT                              | AA                | 1946642913               |
| SNP_P3_148318_660    | NW_004516476.1 | Scaffold1210 | 660                     | GG                              | CC                | 1946642914               |
| SNP_P3_148319_12612  | NW_004516479.1 | Scaffold1215 | 12612                   | AA                              | GG                | 1946642916               |

| SNPs IDs            | Chromosome IDs | Chromosomes  | Physical positions (bp) | CDC Frontier (Reference genome) | (Pusa 256 & HPNB) | NCBI SNPdb Accession IDs |
|---------------------|----------------|--------------|-------------------------|---------------------------------|-------------------|--------------------------|
| SNP_P3_148320_12627 | NW_004516479.1 | Scaffold1215 | 12627                   | CC                              | AA                | 1946642918               |
| SNP_P3_148322_12752 | NW_004516479.1 | Scaffold1215 | 12752                   | TT                              | CC                | 1946642920               |
| SNP_P3_148323_12824 | NW_004516479.1 | Scaffold1215 | 12824                   | TT                              | CC                | 1946642922               |
| SNP_P3_148324_12891 | NW_004516479.1 | Scaffold1215 | 12891                   | GG                              | TT                | 1946642924               |
| SNP_P3_148326_13026 | NW_004516479.1 | Scaffold1215 | 13026                   | AA                              | GG                | 1946642926               |
| SNP_P3_148327_13045 | NW_004516479.1 | Scaffold1215 | 13045                   | GG                              | AA                | 1946642928               |
| SNP_P3_148328_13100 | NW_004516479.1 | Scaffold1215 | 13100                   | TT                              | CC                | 1946642930               |
| SNP_P3_148329_13129 | NW_004516479.1 | Scaffold1215 | 13129                   | CC                              | TT                | 1946642932               |
| SNP_P3_148330_13136 | NW_004516479.1 | Scaffold1215 | 13136                   | TT                              | GG                | 1946642934               |
| SNP_P3_148331_13151 | NW_004516479.1 | Scaffold1215 | 13151                   | AA                              | GG                | 1946642936               |
| SNP_P3_148332_13188 | NW_004516479.1 | Scaffold1215 | 13188                   | TT                              | AA                | 1946642938               |
| SNP_P3_148333_13249 | NW_004516479.1 | Scaffold1215 | 13249                   | GG                              | AA                | 1946642939               |
| SNP_P3_148334_13351 | NW_004516479.1 | Scaffold1215 | 13351                   | GG                              | AA                | 1946642943               |
| SNP_P3_148335_13353 | NW_004516479.1 | Scaffold1215 | 13353                   | TT                              | CC                | 1946642945               |
| SNP_P3_148336_13398 | NW_004516479.1 | Scaffold1215 | 13398                   | TT                              | CC                | 1946642947               |
| SNP_P3_148337_13482 | NW_004516479.1 | Scaffold1215 | 13482                   | GG                              | TT                | 1946642948               |
| SNP_P3_148338_13495 | NW_004516479.1 | Scaffold1215 | 13495                   | GG                              | TT                | 1946642950               |
| SNP_P3_148339_13539 | NW_004516479.1 | Scaffold1215 | 13539                   | AA                              | GG                | 1946642952               |
| SNP_P3_148340_13610 | NW_004516479.1 | Scaffold1215 | 13610                   | GG                              | AA                | 1946642954               |
| SNP_P3_148342_13674 | NW_004516479.1 | Scaffold1215 | 13674                   | CC                              | TT                | 1946642956               |
| SNP_P3_148343_13746 | NW_004516479.1 | Scaffold1215 | 13746                   | AA                              | TT                | 1946642958               |
| SNP_P3_148344_14031 | NW_004516479.1 | Scaffold1215 | 14031                   | CC                              | TT                | 1946642960               |
| SNP_P3_148345_14080 | NW_004516479.1 | Scaffold1215 | 14080                   | CC                              | TT                | 1946642962               |
| SNP_P3_148346_14098 | NW_004516479.1 | Scaffold1215 | 14098                   | AA                              | GG                | 1946642964               |
| SNP_P3_148347_14160 | NW_004516479.1 | Scaffold1215 | 14160                   | TT                              | CC                | 1946642966               |
| SNP_P3_148348_14161 | NW_004516479.1 | Scaffold1215 | 14161                   | GG                              | AA                | 1946642968               |
| SNP_P3_148349_14207 | NW_004516479.1 | Scaffold1215 | 14207                   | TT                              | GG                | 1946642970               |
| SNP_P3_148350_14216 | NW_004516479.1 | Scaffold1215 | 14216                   | AA                              | GG                | 1946642971               |
| SNP_P3_148351_14309 | NW_004516479.1 | Scaffold1215 | 14309                   | TT                              | CC                | 1946642973               |
| SNP_P3_148352_14340 | NW_004516479.1 | Scaffold1215 | 14340                   | TT                              | CC                | 1946642975               |
| SNP_P3_148353_14357 | NW_004516479.1 | Scaffold1215 | 14357                   | AA                              | TT                | 1946642977               |
| SNP_P3_148354_14405 | NW_004516479.1 | Scaffold1215 | 14405                   | GG                              | AA                | 1946642979               |
| SNP_P3_148355_14434 | NW_004516479.1 | Scaffold1215 | 14434                   | CC                              | GG                | 1946642981               |
| SNP_P3_148356_14441 | NW_004516479.1 | Scaffold1215 | 14441                   | GG                              | AA                | 1946642984               |
| SNP_P3_148357_14443 | NW_004516479.1 | Scaffold1215 | 14443                   | GG                              | AA                | 1946642986               |
| SNP_P3_148358_14465 | NW_004516479.1 | Scaffold1215 | 14465                   | CC                              | AA                | 1946642988               |
| SNP_P3_148359_16808 | NW_004516479.1 | Scaffold1215 | 16808                   | TT                              | CC                | 1946642990               |
| SNP_P3_148360_16811 | NW_004516479.1 | Scaffold1215 | 16811                   | GG                              | CC                | 1946642992               |
| SNP_P3_148361_16922 | NW_004516479.1 | Scaffold1215 | 16922                   | CC                              | AA                | 1946642994               |
| SNP_P3_148362_16925 | NW_004516479.1 | Scaffold1215 | 16925                   | AA                              | TT                | 1946642996               |
| SNP_P3_148363_16929 | NW_004516479.1 | Scaffold1215 | 16929                   | TT                              | AA                | 1946642998               |
| SNP_P3_148364_16943 | NW_004516479.1 | Scaffold1215 | 16943                   | TT                              | AA                | 1946643000               |

| SNPs IDs            | Chromosome IDs | Chromosomes  | Physical positions (bp) | CDC Frontier (Reference genome) | (Pusa 256 & HPNB) | NCBI SNPdb Accession IDs |
|---------------------|----------------|--------------|-------------------------|---------------------------------|-------------------|--------------------------|
| SNP_P3_148365_16944 | NW_004516479.1 | Scaffold1215 | 16944                   | AA                              | TT                | 1946643002               |
| SNP_P3_148366_16948 | NW_004516479.1 | Scaffold1215 | 16948                   | GG                              | TT                | 1946643004               |
| SNP_P3_148367_17824 | NW_004516479.1 | Scaffold1215 | 17824                   | TT                              | CC                | 1946643006               |
| SNP_P3_148368_17861 | NW_004516479.1 | Scaffold1215 | 17861                   | AA                              | TT                | 1946643008               |
| SNP_P3_148369_17917 | NW_004516479.1 | Scaffold1215 | 17917                   | CC                              | TT                | 1946643010               |
| SNP_P3_148370_17941 | NW_004516479.1 | Scaffold1215 | 17941                   | AA                              | CC                | 1946643012               |
| SNP_P3_148371_35731 | NW_004516479.1 | Scaffold1215 | 35731                   | GG                              | AA                | 1946643014               |
| SNP_P3_148372_35764 | NW_004516479.1 | Scaffold1215 | 35764                   | AA                              | GG                | 1946643016               |
| SNP_P3_148373_35902 | NW_004516479.1 | Scaffold1215 | 35902                   | AA                              | CC                | 1946643018               |
| SNP_P3_148374_35936 | NW_004516479.1 | Scaffold1215 | 35936                   | CC                              | AA                | 1946643019               |
| SNP_P3_148375_35942 | NW_004516479.1 | Scaffold1215 | 35942                   | AA                              | TT                | 1946643021               |
| SNP_P3_148376_35943 | NW_004516479.1 | Scaffold1215 | 35943                   | TT                              | AA                | 1946643023               |
| SNP_P3_148377_35986 | NW_004516479.1 | Scaffold1215 | 35986                   | TT                              | CC                | 1946643025               |
| SNP_P3_148378_41363 | NW_004516479.1 | Scaffold1215 | 41363                   | AA                              | GG                | 1946643027               |
| SNP_P3_148379_41470 | NW_004516479.1 | Scaffold1215 | 41470                   | CC                              | TT                | 1946643029               |
| SNP_P3_148380_41478 | NW_004516479.1 | Scaffold1215 | 41478                   | AA                              | CC                | 1946643032               |
| SNP_P3_148381_41503 | NW_004516479.1 | Scaffold1215 | 41503                   | CC                              | TT                | 1946643034               |
| SNP_P3_148383_41712 | NW_004516479.1 | Scaffold1215 | 41712                   | CC                              | TT                | 1946643036               |
| SNP_P3_148384_42150 | NW_004516479.1 | Scaffold1215 | 42150                   | GG                              | AA                | 1946643038               |
| SNP_P3_148385_42164 | NW_004516479.1 | Scaffold1215 | 42164                   | CC                              | GG                | 1946643040               |
| SNP_P3_148386_44264 | NW_004516479.1 | Scaffold1215 | 44264                   | AA                              | TT                | 1946643042               |
| SNP_P3_148387_44447 | NW_004516479.1 | Scaffold1215 | 44447                   | AA                              | TT                | 1946643044               |
| SNP_P3_148388_44610 | NW_004516479.1 | Scaffold1215 | 44610                   | TT                              | CC                | 1946643046               |
| SNP_P3_148390_44650 | NW_004516479.1 | Scaffold1215 | 44650                   | CC                              | TT                | 1946643048               |
| SNP_P3_148391_44672 | NW_004516479.1 | Scaffold1215 | 44672                   | AA                              | TT                | 1946643049               |
| SNP_P3_148393_45699 | NW_004516479.1 | Scaffold1215 | 45699                   | GG                              | AA                | 1946643051               |
| SNP_P3_148395_245   | NW_004516480.1 | Scaffold1216 | 245                     | GG                              | AA                | 1946643053               |
| SNP_P3_148396_269   | NW_004516480.1 | Scaffold1216 | 269                     | TT                              | AA                | 1946643055               |
| SNP_P3_148397_305   | NW_004516480.1 | Scaffold1216 | 305                     | AA                              | GG                | 1946643057               |
| SNP_P3_148398_364   | NW_004516480.1 | Scaffold1216 | 364                     | GG                              | AA                | 1946643059               |
| SNP_P3_148399_404   | NW_004516480.1 | Scaffold1216 | 404                     | CC                              | TT                | 1946643061               |
| SNP_P3_148400_486   | NW_004516480.1 | Scaffold1216 | 486                     | CC                              | TT                | 1946643063               |
| SNP_P3_148401_549   | NW_004516480.1 | Scaffold1216 | 549                     | TT                              | AA                | 1946643065               |
| SNP_P3_148402_638   | NW_004516480.1 | Scaffold1216 | 638                     | CC                              | TT                | 1946643067               |
| SNP_P3_148403_935   | NW_004516480.1 | Scaffold1216 | 935                     | AA                              | TT                | 1946643069               |
| SNP_P3_148404_3404  | NW_004516480.1 | Scaffold1216 | 3404                    | GG                              | CC                | 1946643071               |
| SNP_P3_148405_3579  | NW_004516480.1 | Scaffold1216 | 3579                    | AA                              | TT                | 1946643072               |
| SNP_P3_148406_3656  | NW_004516480.1 | Scaffold1216 | 3656                    | CC                              | TT                | 1946643074               |
| SNP_P3_148407_3890  | NW_004516480.1 | Scaffold1216 | 3890                    | AA                              | TT                | 1946643076               |
| SNP_P3_148408_4210  | NW_004516480.1 | Scaffold1216 | 4210                    | GG                              | TT                | 1946643078               |
| SNP_P3_148409_4269  | NW_004516480.1 | Scaffold1216 | 4269                    | GG                              | AA                | 1946643080               |
| SNP_P3_148410_4701  | NW_004516480.1 | Scaffold1216 | 4701                    | GG                              | AA                | 1946643082               |



| SNPs IDs            | Chromosome IDs | Chromosomes  | Physical positions (bp) | CDC Frontier (Reference genome) | (Pusa 256 & HPNB) | NCBI SNPdb Accession IDs |
|---------------------|----------------|--------------|-------------------------|---------------------------------|-------------------|--------------------------|
| SNP_P3_148411_4703  | NW_004516480.1 | Scaffold1216 | 4703                    | AA                              | CC                | 1946643085               |
| SNP_P3_148412_4832  | NW_004516480.1 | Scaffold1216 | 4832                    | TT                              | CC                | 1946643087               |
| SNP_P3_148413_4842  | NW_004516480.1 | Scaffold1216 | 4842                    | TT                              | CC                | 1946643089               |
| SNP_P3_148414_5074  | NW_004516480.1 | Scaffold1216 | 5074                    | CC                              | TT                | 1946643091               |
| SNP_P3_148415_5200  | NW_004516480.1 | Scaffold1216 | 5200                    | GG                              | TT                | 1946643093               |
| SNP_P3_148416_5209  | NW_004516480.1 | Scaffold1216 | 5209                    | CC                              | TT                | 1946643095               |
| SNP_P3_148417_13072 | NW_004516480.1 | Scaffold1216 | 13072                   | TT                              | AA                | 1946643097               |
| SNP_P3_148418_13266 | NW_004516480.1 | Scaffold1216 | 13266                   | CC                              | TT                | 1946643099               |
| SNP_P3_148419_13290 | NW_004516480.1 | Scaffold1216 | 13290                   | CC                              | TT                | 1946643101               |
| SNP_P3_148420_13308 | NW_004516480.1 | Scaffold1216 | 13308                   | TT                              | AA                | 1946643103               |
| SNP_P3_148421_13360 | NW_004516480.1 | Scaffold1216 | 13360                   | GG                              | CC                | 1946643105               |
| SNP_P3_148422_13444 | NW_004516480.1 | Scaffold1216 | 13444                   | GG                              | TT                | 1946643107               |
| SNP_P3_148423_13447 | NW_004516480.1 | Scaffold1216 | 13447                   | AA                              | TT                | 1946643109               |
| SNP_P3_148424_13637 | NW_004516480.1 | Scaffold1216 | 13637                   | TT                              | CC                | 1946643111               |
| SNP_P3_148425_13713 | NW_004516480.1 | Scaffold1216 | 13713                   | GG                              | AA                | 1946643113               |
| SNP_P3_148426_13758 | NW_004516480.1 | Scaffold1216 | 13758                   | AA                              | CC                | 1946643115               |
| SNP_P3_148427_14115 | NW_004516480.1 | Scaffold1216 | 14115                   | AA                              | TT                | 1946643117               |
| SNP_P3_148428_14207 | NW_004516480.1 | Scaffold1216 | 14207                   | AA                              | TT                | 1946643119               |
| SNP_P3_148429_14267 | NW_004516480.1 | Scaffold1216 | 14267                   | CC                              | TT                | 1946643121               |
| SNP_P3_148430_14422 | NW_004516480.1 | Scaffold1216 | 14422                   | CC                              | GG                | 1946643123               |
| SNP_P3_148431_14661 | NW_004516480.1 | Scaffold1216 | 14661                   | AA                              | TT                | 1946643125               |
| SNP_P3_148432_14844 | NW_004516480.1 | Scaffold1216 | 14844                   | TT                              | GG                | 1946643127               |
| SNP_P3_148433_14871 | NW_004516480.1 | Scaffold1216 | 14871                   | AA                              | GG                | 1946643129               |
| SNP_P3_148434_14885 | NW_004516480.1 | Scaffold1216 | 14885                   | TT                              | CC                | 1946643131               |
| SNP_P3_148435_15070 | NW_004516480.1 | Scaffold1216 | 15070                   | GG                              | TT                | 1946643133               |
| SNP_P3_148436_15722 | NW_004516480.1 | Scaffold1216 | 15722                   | AA                              | TT                | 1946643135               |
| SNP_P3_148437_15785 | NW_004516480.1 | Scaffold1216 | 15785                   | AA                              | GG                | 1946643136               |
| SNP_P3_148438_15786 | NW_004516480.1 | Scaffold1216 | 15786                   | AA                              | GG                | 1946643138               |
| SNP_P3_148439_16054 | NW_004516480.1 | Scaffold1216 | 16054                   | GG                              | CC                | 1946643142               |
| SNP_P3_148440_16109 | NW_004516480.1 | Scaffold1216 | 16109                   | GG                              | AA                | 1946643143               |
| SNP_P3_148441_16162 | NW_004516480.1 | Scaffold1216 | 16162                   | AA                              | TT                | 1946643145               |
| SNP_P3_148442_16283 | NW_004516480.1 | Scaffold1216 | 16283                   | TT                              | CC                | 1946643147               |
| SNP_P3_148443_16376 | NW_004516480.1 | Scaffold1216 | 16376                   | CC                              | AA                | 1946643149               |
| SNP_P3_148444_16418 | NW_004516480.1 | Scaffold1216 | 16418                   | GG                              | TT                | 1946643151               |
| SNP_P3_148445_16432 | NW_004516480.1 | Scaffold1216 | 16432                   | TT                              | GG                | 1946643153               |
| SNP_P3_148446_16433 | NW_004516480.1 | Scaffold1216 | 16433                   | GG                              | AA                | 1946643155               |
| SNP_P3_148447_16504 | NW_004516480.1 | Scaffold1216 | 16504                   | TT                              | CC                | 1946643157               |
| SNP_P3_148448_16552 | NW_004516480.1 | Scaffold1216 | 16552                   | GG                              | AA                | 1946643159               |
| SNP_P3_148449_16701 | NW_004516480.1 | Scaffold1216 | 16701                   | AA                              | TT                | 1946643161               |
| SNP_P3_148450_16745 | NW_004516480.1 | Scaffold1216 | 16745                   | CC                              | TT                | 1946643162               |
| SNP_P3_148451_16756 | NW_004516480.1 | Scaffold1216 | 16756                   | TT                              | AA                | 1946643164               |
| SNP_P3_148452_16814 | NW_004516480.1 | Scaffold1216 | 16814                   | CC                              | AA                | 1946643166               |

| SNPs IDs            | Chromosome IDs | Chromosomes  | Physical positions (bp) | CDC Frontier (Reference genome) | (Pusa 256 & HPNB) | NCBI SNPdb Accession IDs |
|---------------------|----------------|--------------|-------------------------|---------------------------------|-------------------|--------------------------|
| SNP_P3_148453_16816 | NW_004516480.1 | Scaffold1216 | 16816                   | GG                              | CC                | 1946643168               |
| SNP_P3_148454_16878 | NW_004516480.1 | Scaffold1216 | 16878                   | TT                              | AA                | 1946643170               |
| SNP_P3_148455_16918 | NW_004516480.1 | Scaffold1216 | 16918                   | AA                              | GG                | 1946643172               |
| SNP_P3_148456_16944 | NW_004516480.1 | Scaffold1216 | 16944                   | AA                              | GG                | 1946643174               |
| SNP_P3_148457_16955 | NW_004516480.1 | Scaffold1216 | 16955                   | CC                              | TT                | 1946643176               |
| SNP_P3_148458_17014 | NW_004516480.1 | Scaffold1216 | 17014                   | TT                              | CC                | 1946643178               |
| SNP_P3_148459_17025 | NW_004516480.1 | Scaffold1216 | 17025                   | GG                              | CC                | 1946643180               |
| SNP_P3_148460_17064 | NW_004516480.1 | Scaffold1216 | 17064                   | TT                              | CC                | 1946643182               |
| SNP_P3_148461_17068 | NW_004516480.1 | Scaffold1216 | 17068                   | TT                              | GG                | 1946643185               |
| SNP_P3_148462_17105 | NW_004516480.1 | Scaffold1216 | 17105                   | TT                              | AA                | 1946643187               |
| SNP_P3_148463_17113 | NW_004516480.1 | Scaffold1216 | 17113                   | AA                              | GG                | 1946643189               |
| SNP_P3_148464_17186 | NW_004516480.1 | Scaffold1216 | 17186                   | GG                              | TT                | 1946643191               |
| SNP_P3_148465_17409 | NW_004516480.1 | Scaffold1216 | 17409                   | AA                              | CC                | 1946643193               |
| SNP_P3_148466_17484 | NW_004516480.1 | Scaffold1216 | 17484                   | GG                              | AA                | 1946643194               |
| SNP_P3_148467_17552 | NW_004516480.1 | Scaffold1216 | 17552                   | TT                              | CC                | 1946643196               |
| SNP_P3_148468_17626 | NW_004516480.1 | Scaffold1216 | 17626                   | AA                              | GG                | 1946643198               |
| SNP_P3_148469_17687 | NW_004516480.1 | Scaffold1216 | 17687                   | AA                              | CC                | 1946643200               |
| SNP_P3_148470_20369 | NW_004516480.1 | Scaffold1216 | 20369                   | GG                              | AA                | 1946643202               |
| SNP_P3_148471_20501 | NW_004516480.1 | Scaffold1216 | 20501                   | CC                              | TT                | 1946643204               |
| SNP_P3_148472_20523 | NW_004516480.1 | Scaffold1216 | 20523                   | AA                              | TT                | 1946643206               |
| SNP_P3_148473_20525 | NW_004516480.1 | Scaffold1216 | 20525                   | CC                              | TT                | 1946643208               |
| SNP_P3_148474_20551 | NW_004516480.1 | Scaffold1216 | 20551                   | AA                              | GG                | 1946643210               |
| SNP_P3_148475_20581 | NW_004516480.1 | Scaffold1216 | 20581                   | TT                              | GG                | 1946643212               |
| SNP_P3_148476_20583 | NW_004516480.1 | Scaffold1216 | 20583                   | CC                              | TT                | 1946643214               |
| SNP_P3_148477_20631 | NW_004516480.1 | Scaffold1216 | 20631                   | AA                              | TT                | 1946643216               |
| SNP_P3_148478_20633 | NW_004516480.1 | Scaffold1216 | 20633                   | GG                              | TT                | 1946643218               |
| SNP_P3_148479_20653 | NW_004516480.1 | Scaffold1216 | 20653                   | GG                              | CC                | 1946643220               |
| SNP_P3_148481_20780 | NW_004516480.1 | Scaffold1216 | 20780                   | GG                              | CC                | 1946643222               |
| SNP_P3_148482_20791 | NW_004516480.1 | Scaffold1216 | 20791                   | AA                              | TT                | 1946643224               |
| SNP_P3_148483_20806 | NW_004516480.1 | Scaffold1216 | 20806                   | TT                              | AA                | 1946643227               |
| SNP_P3_148484_20816 | NW_004516480.1 | Scaffold1216 | 20816                   | TT                              | CC                | 1946643229               |
| SNP_P3_148485_20832 | NW_004516480.1 | Scaffold1216 | 20832                   | CC                              | GG                | 1946643231               |
| SNP_P3_148486_20837 | NW_004516480.1 | Scaffold1216 | 20837                   | CC                              | GG                | 1946643233               |
| SNP_P3_148487_20988 | NW_004516480.1 | Scaffold1216 | 20988                   | AA                              | GG                | 1946643235               |
| SNP_P3_148488_21006 | NW_004516480.1 | Scaffold1216 | 21006                   | GG                              | AA                | 1946643237               |
| SNP_P3_148489_21062 | NW_004516480.1 | Scaffold1216 | 21062                   | AA                              | GG                | 1946643239               |
| SNP_P3_148490_21393 | NW_004516480.1 | Scaffold1216 | 21393                   | GG                              | CC                | 1946643241               |
| SNP_P3_148491_21404 | NW_004516480.1 | Scaffold1216 | 21404                   | CC                              | GG                | 1946643243               |
| SNP_P3_148492_21851 | NW_004516480.1 | Scaffold1216 | 21851                   | AA                              | CC                | 1946643245               |
| SNP_P3_148493_21868 | NW_004516480.1 | Scaffold1216 | 21868                   | CC                              | AA                | 1946643247               |
| SNP_P3_148494_22111 | NW_004516480.1 | Scaffold1216 | 22111                   | TT                              | AA                | 1946643249               |
| SNP_P3_148495_22128 | NW_004516480.1 | Scaffold1216 | 22128                   | CC                              | AA                | 1946643251               |

| SNPs IDs            | Chromosome IDs | Chromosomes  | Physical positions (bp) | CDC Frontier (Reference genome) | (Pusa 256 & HPNB) | NCBI SNPdb Accession IDs |
|---------------------|----------------|--------------|-------------------------|---------------------------------|-------------------|--------------------------|
| SNP_P3_148496_22157 | NW_004516480.1 | Scaffold1216 | 22157                   | AA                              | TT                | 1946643253               |
| SNP_P3_148497_6381  | NW_004516482.1 | Scaffold1219 | 6381                    | AA                              | GG                | 1946643255               |
| SNP_P3_148498_6475  | NW_004516482.1 | Scaffold1219 | 6475                    | GG                              | AA                | 1946643257               |
| SNP_P3_148499_6656  | NW_004516482.1 | Scaffold1219 | 6656                    | GG                              | AA                | 1946643259               |
| SNP_P3_148500_6965  | NW_004516482.1 | Scaffold1219 | 6965                    | AA                              | TT                | 1946643261               |
| SNP_P3_148501_6985  | NW_004516482.1 | Scaffold1219 | 6985                    | TT                              | CC                | 1946643263               |
| SNP_P3_148502_6991  | NW_004516482.1 | Scaffold1219 | 6991                    | GG                              | AA                | 1946643265               |
| SNP_P3_148503_7034  | NW_004516482.1 | Scaffold1219 | 7034                    | CC                              | TT                | 1946643267               |
| SNP_P3_148504_7073  | NW_004516482.1 | Scaffold1219 | 7073                    | AA                              | TT                | 1946643269               |
| SNP_P3_148505_7087  | NW_004516482.1 | Scaffold1219 | 7087                    | TT                              | GG                | 1946643272               |
| SNP_P3_148506_7108  | NW_004516482.1 | Scaffold1219 | 7108                    | GG                              | AA                | 1946643274               |
| SNP_P3_148508_7214  | NW_004516482.1 | Scaffold1219 | 7214                    | TT                              | CC                | 1946643275               |
| SNP_P3_148509_7308  | NW_004516482.1 | Scaffold1219 | 7308                    | GG                              | TT                | 1946643277               |
| SNP_P3_148510_7341  | NW_004516482.1 | Scaffold1219 | 7341                    | CC                              | TT                | 1946643279               |
| SNP_P3_148512_7738  | NW_004516482.1 | Scaffold1219 | 7738                    | GG                              | CC                | 1946643281               |
| SNP_P3_148513_11383 | NW_004516482.1 | Scaffold1219 | 11383                   | AA                              | GG                | 1946643283               |
| SNP_P3_148514_11385 | NW_004516482.1 | Scaffold1219 | 11385                   | AA                              | TT                | 1946643285               |
| SNP_P3_148515_11504 | NW_004516482.1 | Scaffold1219 | 11504                   | CC                              | TT                | 1946643287               |
| SNP_P3_148516_11691 | NW_004516482.1 | Scaffold1219 | 11691                   | GG                              | AA                | 1946643289               |
| SNP_P3_148517_13367 | NW_004516482.1 | Scaffold1219 | 13367                   | CC                              | AA                | 1946643291               |
| SNP_P3_148518_14923 | NW_004516482.1 | Scaffold1219 | 14923                   | CC                              | TT                | 1946643292               |
| SNP_P3_148519_15245 | NW_004516482.1 | Scaffold1219 | 15245                   | TT                              | GG                | 1946643294               |
| SNP_P3_148520_16404 | NW_004516482.1 | Scaffold1219 | 16404                   | CC                              | TT                | 1946643296               |
| SNP_P3_148521_16442 | NW_004516482.1 | Scaffold1219 | 16442                   | CC                              | AA                | 1946643298               |
| SNP_P3_148522_16513 | NW_004516482.1 | Scaffold1219 | 16513                   | TT                              | GG                | 1946643300               |
| SNP_P3_148523_16547 | NW_004516482.1 | Scaffold1219 | 16547                   | AA                              | CC                | 1946643302               |
| SNP_P3_148524_16553 | NW_004516482.1 | Scaffold1219 | 16553                   | TT                              | CC                | 1946643304               |
| SNP_P3_148525_16562 | NW_004516482.1 | Scaffold1219 | 16562                   | CC                              | TT                | 1946643306               |
| SNP_P3_148526_16620 | NW_004516482.1 | Scaffold1219 | 16620                   | TT                              | CC                | 1946643308               |
| SNP_P3_148527_16658 | NW_004516482.1 | Scaffold1219 | 16658                   | TT                              | AA                | 1946643310               |
| SNP_P3_148528_16669 | NW_004516482.1 | Scaffold1219 | 16669                   | AA                              | TT                | 1946643312               |
| SNP_P3_148529_16706 | NW_004516482.1 | Scaffold1219 | 16706                   | GG                              | TT                | 1946643315               |
| SNP_P3_148530_28819 | NW_004516482.1 | Scaffold1219 | 28819                   | CC                              | GG                | 1946643317               |
| SNP_P3_148531_29147 | NW_004516482.1 | Scaffold1219 | 29147                   | CC                              | TT                | 1946643319               |
| SNP_P3_148532_29201 | NW_004516482.1 | Scaffold1219 | 29201                   | AA                              | CC                | 1946643320               |
| SNP_P3_148533_29345 | NW_004516482.1 | Scaffold1219 | 29345                   | GG                              | CC                | 1946643322               |
| SNP_P3_148534_29385 | NW_004516482.1 | Scaffold1219 | 29385                   | AA                              | TT                | 1946643324               |
| SNP_P3_148535_29397 | NW_004516482.1 | Scaffold1219 | 29397                   | AA                              | GG                | 1946643326               |
| SNP_P3_148536_29444 | NW_004516482.1 | Scaffold1219 | 29444                   | GG                              | TT                | 1946643328               |
| SNP_P3_148537_39627 | NW_004516482.1 | Scaffold1219 | 39627                   | AA                              | TT                | 1946643330               |
| SNP_P3_148538_39964 | NW_004516482.1 | Scaffold1219 | 39964                   | TT                              | CC                | 1946643332               |
| SNP_P3_148539_39981 | NW_004516482.1 | Scaffold1219 | 39981                   | AA                              | TT                | 1946643334               |

| SNPs IDs             | Chromosome IDs | Chromosomes  | Physical positions (bp) | CDC Frontier (Reference genome) | (Pusa 256 & HPNB) | NCBI SNPdb Accession IDs |
|----------------------|----------------|--------------|-------------------------|---------------------------------|-------------------|--------------------------|
| SNP_P3_148541_40236  | NW_004516482.1 | Scaffold1219 | 40236                   | CC                              | GG                | 1946643336               |
| SNP_P3_148544_53880  | NW_004516482.1 | Scaffold1219 | 53880                   | CC                              | AA                | 1946643338               |
| SNP_P3_148545_54163  | NW_004516482.1 | Scaffold1219 | 54163                   | GG                              | CC                | 1946643340               |
| SNP_P3_148546_54249  | NW_004516482.1 | Scaffold1219 | 54249                   | GG                              | AA                | 1946643341               |
| SNP_P3_148547_102475 | NW_004516482.1 | Scaffold1219 | 102475                  | TT                              | CC                | 1946643343               |
| SNP_P3_148548_103048 | NW_004516482.1 | Scaffold1219 | 103048                  | TT                              | CC                | 1946643345               |
| SNP_P3_148549_103068 | NW_004516482.1 | Scaffold1219 | 103068                  | TT                              | CC                | 1946643347               |
| SNP_P3_148550_103355 | NW_004516482.1 | Scaffold1219 | 103355                  | TT                              | CC                | 1946643349               |
| SNP_P3_148551_103368 | NW_004516482.1 | Scaffold1219 | 103368                  | AA                              | CC                | 1946643351               |
| SNP_P3_148552_8894   | NW_004516484.1 | Scaffold1221 | 8894                    | AA                              | GG                | 1946643353               |
| SNP_P3_148553_9079   | NW_004516484.1 | Scaffold1221 | 9079                    | AA                              | GG                | 1946643355               |
| SNP_P3_148554_9088   | NW_004516484.1 | Scaffold1221 | 9088                    | GG                              | CC                | 1946643356               |
| SNP_P3_148555_9141   | NW_004516484.1 | Scaffold1221 | 9141                    | AA                              | GG                | 1946643358               |
| SNP_P3_148557_32260  | NW_004516484.1 | Scaffold1221 | 32260                   | CC                              | TT                | 1946643360               |
| SNP_P3_148558_42806  | NW_004516484.1 | Scaffold1221 | 42806                   | GG                              | CC                | 1946643362               |
| SNP_P3_148559_42866  | NW_004516484.1 | Scaffold1221 | 42866                   | GG                              | CC                | 1946643365               |
| SNP_P3_148560_47239  | NW_004516484.1 | Scaffold1221 | 47239                   | TT                              | AA                | 1946643367               |
| SNP_P3_148561_48911  | NW_004516484.1 | Scaffold1221 | 48911                   | CC                              | TT                | 1946643369               |
| SNP_P3_148562_48934  | NW_004516484.1 | Scaffold1221 | 48934                   | AA                              | GG                | 1946643371               |
| SNP_P3_148563_49059  | NW_004516484.1 | Scaffold1221 | 49059                   | AA                              | TT                | 1946643373               |
| SNP_P3_148564_49068  | NW_004516484.1 | Scaffold1221 | 49068                   | AA                              | GG                | 1946643375               |
| SNP_P3_148565_49472  | NW_004516484.1 | Scaffold1221 | 49472                   | TT                              | CC                | 1946643377               |
| SNP_P3_148566_77238  | NW_004516484.1 | Scaffold1221 | 77238                   | AA                              | GG                | 1946643379               |
| SNP_P3_148567_77306  | NW_004516484.1 | Scaffold1221 | 77306                   | CC                              | TT                | 1946643381               |
| SNP_P3_148568_1077   | NW_004516485.1 | Scaffold1222 | 1077                    | AA                              | TT                | 1946643383               |
| SNP_P3_148569_13747  | NW_004516485.1 | Scaffold1222 | 13747                   | TT                              | AA                | 1946643385               |
| SNP_P3_148570_13750  | NW_004516485.1 | Scaffold1222 | 13750                   | TT                              | AA                | 1946643387               |
| SNP_P3_148571_13802  | NW_004516485.1 | Scaffold1222 | 13802                   | CC                              | TT                | 1946643389               |
| SNP_P3_148572_13837  | NW_004516485.1 | Scaffold1222 | 13837                   | CC                              | TT                | 1946643391               |
| SNP_P3_148573_13952  | NW_004516485.1 | Scaffold1222 | 13952                   | TT                              | AA                | 1946643393               |
| SNP_P3_148575_14510  | NW_004516485.1 | Scaffold1222 | 14510                   | CC                              | GG                | 1946643395               |
| SNP_P3_148576_14520  | NW_004516485.1 | Scaffold1222 | 14520                   | AA                              | GG                | 1946643397               |
| SNP_P3_148577_14529  | NW_004516485.1 | Scaffold1222 | 14529                   | TT                              | AA                | 1946643398               |
| SNP_P3_148578_14606  | NW_004516485.1 | Scaffold1222 | 14606                   | AA                              | CC                | 1946643400               |
| SNP_P3_148579_14615  | NW_004516485.1 | Scaffold1222 | 14615                   | CC                              | AA                | 1946643402               |
| SNP_P3_148580_14689  | NW_004516485.1 | Scaffold1222 | 14689                   | CC                              | TT                | 1946643404               |
| SNP_P3_148581_14713  | NW_004516485.1 | Scaffold1222 | 14713                   | AA                              | GG                | 1946643406               |
| SNP_P3_148582_14755  | NW_004516485.1 | Scaffold1222 | 14755                   | GG                              | CC                | 1946643408               |
| SNP_P3_148583_14806  | NW_004516485.1 | Scaffold1222 | 14806                   | TT                              | AA                | 1946643410               |
| SNP_P3_148584_14826  | NW_004516485.1 | Scaffold1222 | 14826                   | CC                              | TT                | 1946643411               |
| SNP_P3_148585_14856  | NW_004516485.1 | Scaffold1222 | 14856                   | TT                              | AA                | 1946643413               |
| SNP_P3_148586_14858  | NW_004516485.1 | Scaffold1222 | 14858                   | TT                              | AA                | 1946643415               |

| SNPs IDs            | Chromosome IDs | Chromosomes  | Physical positions (bp) | CDC Frontier (Reference genome) | (Pusa 256 & HPNB) | NCBI SNPdb Accession IDs |
|---------------------|----------------|--------------|-------------------------|---------------------------------|-------------------|--------------------------|
| SNP_P3_148587_14863 | NW_004516485.1 | Scaffold1222 | 14863                   | TT                              | GG                | 1946643417               |
| SNP_P3_148588_4016  | NW_004516486.1 | Scaffold1224 | 4016                    | TT                              | GG                | 1946643419               |
| SNP_P3_148589_4021  | NW_004516486.1 | Scaffold1224 | 4021                    | TT                              | AA                | 1946643421               |
| SNP_P3_148590_4107  | NW_004516486.1 | Scaffold1224 | 4107                    | TT                              | CC                | 1946643423               |
| SNP_P3_148591_4136  | NW_004516486.1 | Scaffold1224 | 4136                    | TT                              | CC                | 1946643425               |
| SNP_P3_148592_4138  | NW_004516486.1 | Scaffold1224 | 4138                    | GG                              | AA                | 1946643427               |
| SNP_P3_148593_4140  | NW_004516486.1 | Scaffold1224 | 4140                    | GG                              | CC                | 1946643429               |
| SNP_P3_148594_4175  | NW_004516486.1 | Scaffold1224 | 4175                    | CC                              | TT                | 1946643431               |
| SNP_P3_148595_4213  | NW_004516486.1 | Scaffold1224 | 4213                    | TT                              | CC                | 1946643433               |
| SNP_P3_148596_4250  | NW_004516486.1 | Scaffold1224 | 4250                    | TT                              | CC                | 1946643435               |
| SNP_P3_148597_4354  | NW_004516486.1 | Scaffold1224 | 4354                    | AA                              | CC                | 1946643437               |
| SNP_P3_148598_4366  | NW_004516486.1 | Scaffold1224 | 4366                    | AA                              | CC                | 1946643439               |
| SNP_P3_148599_4445  | NW_004516486.1 | Scaffold1224 | 4445                    | AA                              | GG                | 1946643441               |
| SNP_P3_148600_4910  | NW_004516486.1 | Scaffold1224 | 4910                    | GG                              | TT                | 1946643442               |
| SNP_P3_148601_5044  | NW_004516486.1 | Scaffold1224 | 5044                    | TT                              | AA                | 1946643444               |
| SNP_P3_148602_5066  | NW_004516486.1 | Scaffold1224 | 5066                    | TT                              | CC                | 1946643446               |
| SNP_P3_148603_5083  | NW_004516486.1 | Scaffold1224 | 5083                    | AA                              | GG                | 1946643448               |
| SNP_P3_148604_5253  | NW_004516486.1 | Scaffold1224 | 5253                    | GG                              | CC                | 1946643450               |
| SNP_P3_148605_5256  | NW_004516486.1 | Scaffold1224 | 5256                    | GG                              | CC                | 1946643452               |
| SNP_P3_148606_5280  | NW_004516486.1 | Scaffold1224 | 5280                    | TT                              | CC                | 1946643454               |
| SNP_P3_148607_7032  | NW_004516487.1 | Scaffold1226 | 7032                    | TT                              | CC                | 1946643456               |
| SNP_P3_148609_10567 | NW_004516487.1 | Scaffold1226 | 10567                   | TT                              | CC                | 1946643458               |
| SNP_P3_148610_10647 | NW_004516487.1 | Scaffold1226 | 10647                   | GG                              | AA                | 1946643460               |
| SNP_P3_148611_10874 | NW_004516487.1 | Scaffold1226 | 10874                   | GG                              | AA                | 1946643462               |
| SNP_P3_148612_10881 | NW_004516487.1 | Scaffold1226 | 10881                   | TT                              | CC                | 1946643464               |
| SNP_P3_148613_10908 | NW_004516487.1 | Scaffold1226 | 10908                   | AA                              | CC                | 1946643466               |
| SNP_P3_148614_32457 | NW_004516487.1 | Scaffold1226 | 32457                   | AA                              | TT                | 1946643467               |
| SNP_P3_148615_32823 | NW_004516487.1 | Scaffold1226 | 32823                   | AA                              | CC                | 1946643469               |
| SNP_P3_148616_32834 | NW_004516487.1 | Scaffold1226 | 32834                   | CC                              | TT                | 1946643471               |
| SNP_P3_148617_32837 | NW_004516487.1 | Scaffold1226 | 32837                   | AA                              | CC                | 1946643473               |
| SNP_P3_148618_33277 | NW_004516487.1 | Scaffold1226 | 33277                   | CC                              | TT                | 1946643475               |
| SNP_P3_148619_5119  | NW_004516489.1 | Scaffold1231 | 5119                    | TT                              | CC                | 1946643478               |
| SNP_P3_148620_5121  | NW_004516489.1 | Scaffold1231 | 5121                    | AA                              | GG                | 1946643480               |
| SNP_P3_148621_6816  | NW_004516489.1 | Scaffold1231 | 6816                    | CC                              | GG                | 1946643482               |
| SNP_P3_148622_6829  | NW_004516489.1 | Scaffold1231 | 6829                    | TT                              | CC                | 1946643484               |
| SNP_P3_148623_6853  | NW_004516489.1 | Scaffold1231 | 6853                    | CC                              | TT                | 1946643486               |
| SNP_P3_148624_6930  | NW_004516489.1 | Scaffold1231 | 6930                    | TT                              | CC                | 1946643488               |
| SNP_P3_148625_7231  | NW_004516489.1 | Scaffold1231 | 7231                    | GG                              | TT                | 1946643490               |
| SNP_P3_148626_7248  | NW_004516489.1 | Scaffold1231 | 7248                    | TT                              | CC                | 1946643492               |
| SNP_P3_148628_25734 | NW_004516489.1 | Scaffold1231 | 25734                   | CC                              | TT                | 1946643494               |
| SNP_P3_148629_43430 | NW_004516489.1 | Scaffold1231 | 43430                   | CC                              | AA                | 1946643496               |
| SNP_P3_148630_53176 | NW_004516489.1 | Scaffold1231 | 53176                   | GG                              | AA                | 1946643498               |

| SNPs IDs             | Chromosome IDs | Chromosomes  | Physical positions (bp) | CDC Frontier (Reference genome) | (Pusa 256 & HPNB) | NCBI SNPdb Accession IDs |
|----------------------|----------------|--------------|-------------------------|---------------------------------|-------------------|--------------------------|
| SNP_P3_148631_54952  | NW_004516489.1 | Scaffold1231 | 54952                   | TT                              | CC                | 1946643500               |
| SNP_P3_148632_74732  | NW_004516489.1 | Scaffold1231 | 74732                   | AA                              | CC                | 1946643502               |
| SNP_P3_148633_74909  | NW_004516489.1 | Scaffold1231 | 74909                   | GG                              | AA                | 1946643503               |
| SNP_P3_148634_80136  | NW_004516489.1 | Scaffold1231 | 80136                   | AA                              | CC                | 1946643505               |
| SNP_P3_148635_87509  | NW_004516489.1 | Scaffold1231 | 87509                   | GG                              | AA                | 1946643507               |
| SNP_P3_148636_87512  | NW_004516489.1 | Scaffold1231 | 87512                   | TT                              | CC                | 1946643509               |
| SNP_P3_148637_113338 | NW_004516489.1 | Scaffold1231 | 113338                  | GG                              | AA                | 1946643511               |
| SNP_P3_148638_121366 | NW_004516489.1 | Scaffold1231 | 121366                  | CC                              | TT                | 1946643513               |
| SNP_P3_148639_124261 | NW_004516489.1 | Scaffold1231 | 124261                  | CC                              | TT                | 1946643515               |
| SNP_P3_148640_127255 | NW_004516489.1 | Scaffold1231 | 127255                  | AA                              | TT                | 1946643517               |
| SNP_P3_148641_143103 | NW_004516489.1 | Scaffold1231 | 143103                  | CC                              | TT                | 1946643519               |
| SNP_P3_148642_185086 | NW_004516489.1 | Scaffold1231 | 185086                  | AA                              | GG                | 1946643522               |
| SNP_P3_148643_185127 | NW_004516489.1 | Scaffold1231 | 185127                  | AA                              | GG                | 1946643524               |
| SNP_P3_148644_185128 | NW_004516489.1 | Scaffold1231 | 185128                  | AA                              | GG                | 1946643526               |
| SNP_P3_148645_185155 | NW_004516489.1 | Scaffold1231 | 185155                  | AA                              | CC                | 1946643528               |
| SNP_P3_148646_185460 | NW_004516489.1 | Scaffold1231 | 185460                  | CC                              | TT                | 1946643530               |
| SNP_P3_148647_185496 | NW_004516489.1 | Scaffold1231 | 185496                  | GG                              | TT                | 1946643532               |
| SNP_P3_148648_185522 | NW_004516489.1 | Scaffold1231 | 185522                  | AA                              | CC                | 1946643534               |
| SNP_P3_148649_186606 | NW_004516489.1 | Scaffold1231 | 186606                  | GG                              | AA                | 1946643535               |
| SNP_P3_148650_186898 | NW_004516489.1 | Scaffold1231 | 186898                  | GG                              | AA                | 1946643537               |
| SNP_P3_148651_187397 | NW_004516489.1 | Scaffold1231 | 187397                  | GG                              | AA                | 1946643539               |
| SNP_P3_148652_187587 | NW_004516489.1 | Scaffold1231 | 187587                  | AA                              | TT                | 1946643541               |
| SNP_P3_148653_3158   | NW_004516491.1 | Scaffold1234 | 3158                    | GG                              | AA                | 1946643543               |
| SNP_P3_148654_113    | NW_004516492.1 | Scaffold1235 | 113                     | AA                              | CC                | 1946643545               |
| SNP_P3_148655_469    | NW_004516492.1 | Scaffold1235 | 469                     | TT                              | AA                | 1946643547               |
| SNP_P3_148656_545    | NW_004516492.1 | Scaffold1235 | 545                     | AA                              | TT                | 1946643549               |
| SNP_P3_148657_610    | NW_004516492.1 | Scaffold1235 | 610                     | CC                              | AA                | 1946643551               |
| SNP_P3_148658_848    | NW_004516492.1 | Scaffold1235 | 848                     | GG                              | AA                | 1946643553               |
| SNP_P3_148660_1078   | NW_004516492.1 | Scaffold1235 | 1078                    | TT                              | AA                | 1946643555               |
| SNP_P3_148661_1112   | NW_004516492.1 | Scaffold1235 | 1112                    | AA                              | GG                | 1946643557               |
| SNP_P3_148662_1138   | NW_004516492.1 | Scaffold1235 | 1138                    | CC                              | TT                | 1946643559               |
| SNP_P3_148663_9256   | NW_004516493.1 | Scaffold1236 | 9256                    | CC                              | AA                | 1946643562               |
| SNP_P3_148664_1154   | NW_004516495.1 | Scaffold1238 | 1154                    | TT                              | GG                | 1946643564               |
| SNP_P3_148665_1450   | NW_004516495.1 | Scaffold1238 | 1450                    | CC                              | TT                | 1946643566               |
| SNP_P3_148666_1928   | NW_004516495.1 | Scaffold1238 | 1928                    | TT                              | CC                | 1946643568               |
| SNP_P3_148667_30596  | NW_004516495.1 | Scaffold1238 | 30596                   | TT                              | CC                | 1946643570               |
| SNP_P3_148668_30720  | NW_004516495.1 | Scaffold1238 | 30720                   | AA                              | GG                | 1946643572               |
| SNP_P3_148669_30797  | NW_004516495.1 | Scaffold1238 | 30797                   | AA                              | CC                | 1946643574               |
| SNP_P3_148670_31178  | NW_004516495.1 | Scaffold1238 | 31178                   | AA                              | TT                | 1946643576               |
| SNP_P3_148672_64911  | NW_004516495.1 | Scaffold1238 | 64911                   | TT                              | CC                | 1946643578               |
| SNP_P3_148673_65487  | NW_004516495.1 | Scaffold1238 | 65487                   | TT                              | CC                | 1946643580               |
| SNP_P3_148674_65650  | NW_004516495.1 | Scaffold1238 | 65650                   | AA                              | GG                | 1946643582               |

| SNPs IDs             | Chromosome IDs | Chromosomes  | Physical positions (bp) | CDC Frontier (Reference genome) | (Pusa 256 & HPNB) | NCBI SNPdb Accession IDs |
|----------------------|----------------|--------------|-------------------------|---------------------------------|-------------------|--------------------------|
| SNP_P3_148675_65982  | NW_004516495.1 | Scaffold1238 | 65982                   | AA                              | GG                | 1946643584               |
| SNP_P3_148676_95598  | NW_004516495.1 | Scaffold1238 | 95598                   | CC                              | TT                | 1946643586               |
| SNP_P3_148677_95603  | NW_004516495.1 | Scaffold1238 | 95603                   | AA                              | TT                | 1946643588               |
| SNP_P3_148678_101775 | NW_004516495.1 | Scaffold1238 | 101775                  | TT                              | AA                | 1946643590               |
| SNP_P3_148679_103756 | NW_004516495.1 | Scaffold1238 | 103756                  | GG                              | TT                | 1946643592               |
| SNP_P3_148680_103783 | NW_004516495.1 | Scaffold1238 | 103783                  | AA                              | GG                | 1946643594               |
| SNP_P3_148681_103805 | NW_004516495.1 | Scaffold1238 | 103805                  | CC                              | TT                | 1946643596               |
| SNP_P3_148682_103821 | NW_004516495.1 | Scaffold1238 | 103821                  | CC                              | GG                | 1946643597               |
| SNP_P3_148683_103916 | NW_004516495.1 | Scaffold1238 | 103916                  | GG                              | AA                | 1946643599               |
| SNP_P3_148684_103927 | NW_004516495.1 | Scaffold1238 | 103927                  | CC                              | TT                | 1946643601               |
| SNP_P3_148685_103990 | NW_004516495.1 | Scaffold1238 | 103990                  | AA                              | TT                | 1946643603               |
| SNP_P3_148686_104024 | NW_004516495.1 | Scaffold1238 | 104024                  | AA                              | CC                | 1946643605               |
| SNP_P3_148687_104149 | NW_004516495.1 | Scaffold1238 | 104149                  | TT                              | GG                | 1946643607               |
| SNP_P3_148688_104167 | NW_004516495.1 | Scaffold1238 | 104167                  | AA                              | GG                | 1946643609               |
| SNP_P3_148689_104205 | NW_004516495.1 | Scaffold1238 | 104205                  | TT                              | CC                | 1946643611               |
| SNP_P3_148690_104222 | NW_004516495.1 | Scaffold1238 | 104222                  | AA                              | TT                | 1946643613               |
| SNP_P3_148691_104226 | NW_004516495.1 | Scaffold1238 | 104226                  | GG                              | AA                | 1946643615               |
| SNP_P3_148692_104299 | NW_004516495.1 | Scaffold1238 | 104299                  | GG                              | TT                | 1946643617               |
| SNP_P3_148693_104356 | NW_004516495.1 | Scaffold1238 | 104356                  | TT                              | AA                | 1946643619               |
| SNP_P3_148694_104364 | NW_004516495.1 | Scaffold1238 | 104364                  | TT                              | GG                | 1946643621               |
| SNP_P3_148695_104365 | NW_004516495.1 | Scaffold1238 | 104365                  | GG                              | TT                | 1946643622               |
| SNP_P3_148696_104391 | NW_004516495.1 | Scaffold1238 | 104391                  | GG                              | TT                | 1946643624               |
| SNP_P3_148697_104413 | NW_004516495.1 | Scaffold1238 | 104413                  | CC                              | TT                | 1946643626               |
| SNP_P3_148698_109458 | NW_004516495.1 | Scaffold1238 | 109458                  | TT                              | AA                | 1946643628               |
| SNP_P3_148699_109804 | NW_004516495.1 | Scaffold1238 | 109804                  | CC                              | TT                | 1946643630               |
| SNP_P3_148700_109869 | NW_004516495.1 | Scaffold1238 | 109869                  | CC                              | GG                | 1946643632               |
| SNP_P3_148701_110097 | NW_004516495.1 | Scaffold1238 | 110097                  | AA                              | GG                | 1946643635               |
| SNP_P3_148702_110247 | NW_004516495.1 | Scaffold1238 | 110247                  | AA                              | GG                | 1946643637               |
| SNP_P3_148703_110262 | NW_004516495.1 | Scaffold1238 | 110262                  | TT                              | CC                | 1946643639               |
| SNP_P3_148704_110271 | NW_004516495.1 | Scaffold1238 | 110271                  | GG                              | TT                | 1946643641               |
| SNP_P3_148706_110338 | NW_004516495.1 | Scaffold1238 | 110338                  | AA                              | CC                | 1946643643               |
| SNP_P3_148707_110526 | NW_004516495.1 | Scaffold1238 | 110526                  | CC                              | TT                | 1946643645               |
| SNP_P3_148708_110556 | NW_004516495.1 | Scaffold1238 | 110556                  | AA                              | CC                | 1946643647               |
| SNP_P3_148709_110560 | NW_004516495.1 | Scaffold1238 | 110560                  | TT                              | CC                | 1946643649               |
| SNP_P3_148710_110747 | NW_004516495.1 | Scaffold1238 | 110747                  | AA                              | CC                | 1946643651               |
| SNP_P3_148711_110759 | NW_004516495.1 | Scaffold1238 | 110759                  | TT                              | GG                | 1946643653               |
| SNP_P3_148712_110791 | NW_004516495.1 | Scaffold1238 | 110791                  | GG                              | AA                | 1946643655               |
| SNP_P3_148713_110818 | NW_004516495.1 | Scaffold1238 | 110818                  | TT                              | AA                | 1946643657               |
| SNP_P3_148714_110830 | NW_004516495.1 | Scaffold1238 | 110830                  | AA                              | TT                | 1946643659               |
| SNP_P3_148715_110839 | NW_004516495.1 | Scaffold1238 | 110839                  | TT                              | CC                | 1946643661               |
| SNP_P3_148716_110842 | NW_004516495.1 | Scaffold1238 | 110842                  | GG                              | AA                | 1946643663               |
| SNP_P3_148717_110843 | NW_004516495.1 | Scaffold1238 | 110843                  | GG                              | AA                | 1946643665               |

| SNPs IDs             | Chromosome IDs | Chromosomes  | Physical positions (bp) | CDC Frontier (Reference genome) | (Pusa 256 & HPNB) | NCBI SNPdb Accession IDs |
|----------------------|----------------|--------------|-------------------------|---------------------------------|-------------------|--------------------------|
| SNP_P3_148718_110845 | NW_004516495.1 | Scaffold1238 | 110845                  | TT                              | CC                | 1946643666               |
| SNP_P3_148719_110918 | NW_004516495.1 | Scaffold1238 | 110918                  | AA                              | TT                | 1946643668               |
| SNP_P3_148720_110941 | NW_004516495.1 | Scaffold1238 | 110941                  | TT                              | CC                | 1946643670               |
| SNP_P3_148721_110943 | NW_004516495.1 | Scaffold1238 | 110943                  | GG                              | CC                | 1946643672               |
| SNP_P3_148722_129496 | NW_004516495.1 | Scaffold1238 | 129496                  | GG                              | AA                | 1946643674               |
| SNP_P3_148723_130069 | NW_004516495.1 | Scaffold1238 | 130069                  | GG                              | AA                | 1946643676               |
| SNP_P3_148724_130078 | NW_004516495.1 | Scaffold1238 | 130078                  | GG                              | TT                | 1946643680               |
| SNP_P3_148726_130089 | NW_004516495.1 | Scaffold1238 | 130089                  | TT                              | CC                | 1946643682               |
| SNP_P3_148727_130359 | NW_004516495.1 | Scaffold1238 | 130359                  | AA                              | TT                | 1946643684               |
| SNP_P3_148728_132210 | NW_004516495.1 | Scaffold1238 | 132210                  | GG                              | AA                | 1946643686               |
| SNP_P3_148729_136281 | NW_004516495.1 | Scaffold1238 | 136281                  | TT                              | AA                | 1946643688               |
| SNP_P3_148730_136349 | NW_004516495.1 | Scaffold1238 | 136349                  | CC                              | TT                | 1946643690               |
| SNP_P3_148731_147017 | NW_004516495.1 | Scaffold1238 | 147017                  | AA                              | GG                | 1946643692               |
| SNP_P3_148732_172797 | NW_004516495.1 | Scaffold1238 | 172797                  | CC                              | TT                | 1946643694               |
| SNP_P3_148733_3931   | NW_004516496.1 | Scaffold1239 | 3931                    | AA                              | GG                | 1946643696               |
| SNP_P3_148734_4076   | NW_004516496.1 | Scaffold1239 | 4076                    | TT                              | CC                | 1946643698               |
| SNP_P3_148735_4196   | NW_004516496.1 | Scaffold1239 | 4196                    | CC                              | GG                | 1946643700               |
| SNP_P3_148737_4633   | NW_004516496.1 | Scaffold1239 | 4633                    | TT                              | CC                | 1946643702               |
| SNP_P3_148739_4925   | NW_004516496.1 | Scaffold1239 | 4925                    | CC                              | GG                | 1946643704               |
| SNP_P3_148740_5087   | NW_004516496.1 | Scaffold1239 | 5087                    | GG                              | CC                | 1946643707               |
| SNP_P3_148741_7024   | NW_004516497.1 | Scaffold1240 | 7024                    | CC                              | TT                | 1946643709               |
| SNP_P3_148742_62818  | NW_004516497.1 | Scaffold1240 | 62818                   | CC                              | TT                | 1946643711               |
| SNP_P3_148743_103850 | NW_004516497.1 | Scaffold1240 | 103850                  | GG                              | AA                | 1946643713               |
| SNP_P3_148744_105518 | NW_004516497.1 | Scaffold1240 | 105518                  | AA                              | GG                | 1946643715               |
| SNP_P3_148746_105771 | NW_004516497.1 | Scaffold1240 | 105771                  | AA                              | GG                | 1946643717               |
| SNP_P3_148747_106016 | NW_004516497.1 | Scaffold1240 | 106016                  | CC                              | TT                | 1946643719               |
| SNP_P3_148748_145473 | NW_004516497.1 | Scaffold1240 | 145473                  | CC                              | AA                | 1946643721               |
| SNP_P3_148749_145548 | NW_004516497.1 | Scaffold1240 | 145548                  | TT                              | CC                | 1946643723               |
| SNP_P3_148750_145554 | NW_004516497.1 | Scaffold1240 | 145554                  | TT                              | CC                | 1946643725               |
| SNP_P3_148751_145819 | NW_004516497.1 | Scaffold1240 | 145819                  | AA                              | GG                | 1946643726               |
| SNP_P3_148752_145900 | NW_004516497.1 | Scaffold1240 | 145900                  | GG                              | AA                | 1946643728               |
| SNP_P3_148753_145911 | NW_004516497.1 | Scaffold1240 | 145911                  | TT                              | AA                | 1946643730               |
| SNP_P3_148754_149476 | NW_004516497.1 | Scaffold1240 | 149476                  | AA                              | GG                | 1946643732               |
| SNP_P3_148755_2695   | NW_004516498.1 | Scaffold1242 | 2695                    | GG                              | AA                | 1946643734               |
| SNP_P3_148757_14562  | NW_004516498.1 | Scaffold1242 | 14562                   | AA                              | GG                | 1946643736               |
| SNP_P3_148758_14600  | NW_004516498.1 | Scaffold1242 | 14600                   | CC                              | TT                | 1946643738               |
| SNP_P3_148759_15004  | NW_004516498.1 | Scaffold1242 | 15004                   | TT                              | CC                | 1946643740               |
| SNP_P3_148760_15125  | NW_004516498.1 | Scaffold1242 | 15125                   | GG                              | AA                | 1946643742               |
| SNP_P3_148761_15160  | NW_004516498.1 | Scaffold1242 | 15160                   | TT                              | CC                | 1946643744               |
| SNP_P3_148762_15202  | NW_004516498.1 | Scaffold1242 | 15202                   | TT                              | GG                | 1946643746               |
| SNP_P3_148763_15204  | NW_004516498.1 | Scaffold1242 | 15204                   | CC                              | TT                | 1946643748               |
| SNP_P3_148764_15205  | NW_004516498.1 | Scaffold1242 | 15205                   | AA                              | GG                | 1946643750               |



| SNPs IDs            | Chromosome IDs | Chromosomes  | Physical positions (bp) | CDC Frontier (Reference genome) | (Pusa 256 & HPNB) | NCBI SNPdb Accession IDs |
|---------------------|----------------|--------------|-------------------------|---------------------------------|-------------------|--------------------------|
| SNP_P3_148765_17621 | NW_004516498.1 | Scaffold1242 | 17621                   | GG                              | AA                | 1946643752               |
| SNP_P3_148766_22590 | NW_004516498.1 | Scaffold1242 | 22590                   | CC                              | AA                | 1946643754               |
| SNP_P3_148767_26632 | NW_004516498.1 | Scaffold1242 | 26632                   | TT                              | AA                | 1946643756               |
| SNP_P3_148768_26635 | NW_004516498.1 | Scaffold1242 | 26635                   | TT                              | GG                | 1946643758               |
| SNP_P3_148769_27393 | NW_004516498.1 | Scaffold1242 | 27393                   | AA                              | TT                | 1946643760               |
| SNP_P3_148770_27586 | NW_004516498.1 | Scaffold1242 | 27586                   | GG                              | AA                | 1946643762               |
| SNP_P3_148771_40146 | NW_004516498.1 | Scaffold1242 | 40146                   | GG                              | TT                | 1946643764               |
| SNP_P3_148772_40393 | NW_004516498.1 | Scaffold1242 | 40393                   | AA                              | GG                | 1946643766               |
| SNP_P3_148773_40428 | NW_004516498.1 | Scaffold1242 | 40428                   | AA                              | CC                | 1946643768               |
| SNP_P3_148774_40487 | NW_004516498.1 | Scaffold1242 | 40487                   | GG                              | TT                | 1946643770               |
| SNP_P3_148775_40567 | NW_004516498.1 | Scaffold1242 | 40567                   | AA                              | CC                | 1946643772               |
| SNP_P3_148776_41234 | NW_004516498.1 | Scaffold1242 | 41234                   | GG                              | CC                | 1946643774               |
| SNP_P3_148777_47633 | NW_004516498.1 | Scaffold1242 | 47633                   | AA                              | GG                | 1946643776               |
| SNP_P3_148778_50869 | NW_004516498.1 | Scaffold1242 | 50869                   | AA                              | GG                | 1946643778               |
| SNP_P3_148779_51046 | NW_004516498.1 | Scaffold1242 | 51046                   | CC                              | TT                | 1946643780               |
| SNP_P3_148780_53712 | NW_004516498.1 | Scaffold1242 | 53712                   | GG                              | TT                | 1946643782               |
| SNP_P3_148781_53727 | NW_004516498.1 | Scaffold1242 | 53727                   | TT                              | CC                | 1946643784               |
| SNP_P3_148782_53728 | NW_004516498.1 | Scaffold1242 | 53728                   | CC                              | GG                | 1946643786               |
| SNP_P3_148783_55644 | NW_004516498.1 | Scaffold1242 | 55644                   | GG                              | TT                | 1946643789               |
| SNP_P3_148784_60733 | NW_004516498.1 | Scaffold1242 | 60733                   | TT                              | CC                | 1946643791               |
| SNP_P3_148785_775   | NW_004516499.1 | Scaffold1243 | 775                     | TT                              | GG                | 1946643793               |
| SNP_P3_148786_994   | NW_004516499.1 | Scaffold1243 | 994                     | GG                              | TT                | 1946643795               |
| SNP_P3_148787_1104  | NW_004516499.1 | Scaffold1243 | 1104                    | AA                              | GG                | 1946643797               |
| SNP_P3_148788_1272  | NW_004516499.1 | Scaffold1243 | 1272                    | AA                              | TT                | 1946643799               |
| SNP_P3_148789_1416  | NW_004516499.1 | Scaffold1243 | 1416                    | AA                              | GG                | 1946643801               |
| SNP_P3_148790_1426  | NW_004516499.1 | Scaffold1243 | 1426                    | TT                              | CC                | 1946643803               |
| SNP_P3_148791_1612  | NW_004516499.1 | Scaffold1243 | 1612                    | AA                              | CC                | 1946643805               |
| SNP_P3_148792_1675  | NW_004516499.1 | Scaffold1243 | 1675                    | CC                              | TT                | 1946643807               |
| SNP_P3_148793_1692  | NW_004516499.1 | Scaffold1243 | 1692                    | CC                              | TT                | 1946643808               |
| SNP_P3_148794_1818  | NW_004516499.1 | Scaffold1243 | 1818                    | AA                              | TT                | 1946643810               |
| SNP_P3_148795_2090  | NW_004516499.1 | Scaffold1243 | 2090                    | AA                              | CC                | 1946643812               |
| SNP_P3_148796_2211  | NW_004516499.1 | Scaffold1243 | 2211                    | AA                              | CC                | 1946643814               |
| SNP_P3_148797_2256  | NW_004516499.1 | Scaffold1243 | 2256                    | CC                              | GG                | 1946643816               |
| SNP_P3_148798_2105  | NW_004516500.1 | Scaffold1244 | 2105                    | TT                              | AA                | 1946643818               |
| SNP_P3_148799_2175  | NW_004516500.1 | Scaffold1244 | 2175                    | TT                              | AA                | 1946643820               |
| SNP_P3_148800_2183  | NW_004516500.1 | Scaffold1244 | 2183                    | AA                              | TT                | 1946643822               |
| SNP_P3_148801_2192  | NW_004516500.1 | Scaffold1244 | 2192                    | CC                              | AA                | 1946643824               |
| SNP_P3_148802_2305  | NW_004516500.1 | Scaffold1244 | 2305                    | TT                              | AA                | 1946643826               |
| SNP_P3_148803_2371  | NW_004516500.1 | Scaffold1244 | 2371                    | CC                              | AA                | 1946643829               |
| SNP_P3_148804_2634  | NW_004516500.1 | Scaffold1244 | 2634                    | TT                              | AA                | 1946643831               |
| SNP_P3_148805_2754  | NW_004516500.1 | Scaffold1244 | 2754                    | AA                              | GG                | 1946643833               |
| SNP_P3_148806_3208  | NW_004516500.1 | Scaffold1244 | 3208                    | GG                              | CC                | 1946643835               |

| SNPs IDs            | Chromosome IDs | Chromosomes  | Physical positions (bp) | CDC Frontier (Reference genome) | (Pusa 256 & HPNB) | NCBI SNPdb Accession IDs |
|---------------------|----------------|--------------|-------------------------|---------------------------------|-------------------|--------------------------|
| SNP_P3_148808_3850  | NW_004516500.1 | Scaffold1244 | 3850                    | AA                              | TT                | 1946643837               |
| SNP_P3_148809_4886  | NW_004516500.1 | Scaffold1244 | 4886                    | TT                              | AA                | 1946643839               |
| SNP_P3_148810_4980  | NW_004516500.1 | Scaffold1244 | 4980                    | TT                              | GG                | 1946643841               |
| SNP_P3_148811_5198  | NW_004516500.1 | Scaffold1244 | 5198                    | CC                              | TT                | 1946643843               |
| SNP_P3_148812_5216  | NW_004516500.1 | Scaffold1244 | 5216                    | CC                              | AA                | 1946643845               |
| SNP_P3_148813_5249  | NW_004516500.1 | Scaffold1244 | 5249                    | GG                              | TT                | 1946643846               |
| SNP_P3_148814_5274  | NW_004516500.1 | Scaffold1244 | 5274                    | AA                              | GG                | 1946643847               |
| SNP_P3_148815_5308  | NW_004516500.1 | Scaffold1244 | 5308                    | GG                              | TT                | 1946643848               |
| SNP_P3_148816_5318  | NW_004516500.1 | Scaffold1244 | 5318                    | AA                              | GG                | 1946643849               |
| SNP_P3_148817_5340  | NW_004516500.1 | Scaffold1244 | 5340                    | AA                              | TT                | 1946643850               |
| SNP_P3_148818_5362  | NW_004516500.1 | Scaffold1244 | 5362                    | GG                              | AA                | 1946643851               |
| SNP_P3_148819_5391  | NW_004516500.1 | Scaffold1244 | 5391                    | GG                              | TT                | 1946643852               |
| SNP_P3_148820_5395  | NW_004516500.1 | Scaffold1244 | 5395                    | AA                              | GG                | 1946643853               |
| SNP_P3_148821_5414  | NW_004516500.1 | Scaffold1244 | 5414                    | CC                              | TT                | 1946643854               |
| SNP_P3_148822_5416  | NW_004516500.1 | Scaffold1244 | 5416                    | TT                              | GG                | 1946643855               |
| SNP_P3_148823_5431  | NW_004516500.1 | Scaffold1244 | 5431                    | AA                              | GG                | 1946643856               |
| SNP_P3_148824_5441  | NW_004516500.1 | Scaffold1244 | 5441                    | CC                              | GG                | 1946643857               |
| SNP_P3_148825_5856  | NW_004516500.1 | Scaffold1244 | 5856                    | AA                              | GG                | 1946643858               |
| SNP_P3_148826_6018  | NW_004516500.1 | Scaffold1244 | 6018                    | TT                              | CC                | 1946643859               |
| SNP_P3_148827_6020  | NW_004516500.1 | Scaffold1244 | 6020                    | GG                              | AA                | 1946643860               |
| SNP_P3_148828_6059  | NW_004516500.1 | Scaffold1244 | 6059                    | TT                              | GG                | 1946643862               |
| SNP_P3_148829_7483  | NW_004516500.1 | Scaffold1244 | 7483                    | CC                              | AA                | 1946643864               |
| SNP_P3_148830_7840  | NW_004516500.1 | Scaffold1244 | 7840                    | AA                              | GG                | 1946643866               |
| SNP_P3_148831_7841  | NW_004516500.1 | Scaffold1244 | 7841                    | GG                              | AA                | 1946643868               |
| SNP_P3_148832_7843  | NW_004516500.1 | Scaffold1244 | 7843                    | AA                              | GG                | 1946643870               |
| SNP_P3_148833_7850  | NW_004516500.1 | Scaffold1244 | 7850                    | AA                              | TT                | 1946643872               |
| SNP_P3_148834_7856  | NW_004516500.1 | Scaffold1244 | 7856                    | CC                              | TT                | 1946643873               |
| SNP_P3_148835_7859  | NW_004516500.1 | Scaffold1244 | 7859                    | CC                              | TT                | 1946643875               |
| SNP_P3_148836_7866  | NW_004516500.1 | Scaffold1244 | 7866                    | GG                              | AA                | 1946643877               |
| SNP_P3_148837_7877  | NW_004516500.1 | Scaffold1244 | 7877                    | AA                              | GG                | 1946643879               |
| SNP_P3_148839_7967  | NW_004516500.1 | Scaffold1244 | 7967                    | AA                              | GG                | 1946643881               |
| SNP_P3_148840_7981  | NW_004516500.1 | Scaffold1244 | 7981                    | GG                              | AA                | 1946643883               |
| SNP_P3_148841_7982  | NW_004516500.1 | Scaffold1244 | 7982                    | TT                              | CC                | 1946643885               |
| SNP_P3_148842_7983  | NW_004516500.1 | Scaffold1244 | 7983                    | CC                              | TT                | 1946643887               |
| SNP_P3_148843_7984  | NW_004516500.1 | Scaffold1244 | 7984                    | CC                              | TT                | 1946643889               |
| SNP_P3_148844_7985  | NW_004516500.1 | Scaffold1244 | 7985                    | AA                              | GG                | 1946643891               |
| SNP_P3_148845_7993  | NW_004516500.1 | Scaffold1244 | 7993                    | AA                              | GG                | 1946643893               |
| SNP_P3_148846_7994  | NW_004516500.1 | Scaffold1244 | 7994                    | AA                              | GG                | 1946643895               |
| SNP_P3_148847_8168  | NW_004516500.1 | Scaffold1244 | 8168                    | GG                              | AA                | 1946643898               |
| SNP_P3_148848_8231  | NW_004516500.1 | Scaffold1244 | 8231                    | AA                              | TT                | 1946643900               |
| SNP_P3_148849_10111 | NW_004516500.1 | Scaffold1244 | 10111                   | GG                              | AA                | 1946643902               |
| SNP_P3_148851_13212 | NW_004516500.1 | Scaffold1244 | 13212                   | TT                              | CC                | 1946643904               |

| SNPs IDs            | Chromosome IDs | Chromosomes  | Physical positions (bp) | CDC Frontier (Reference genome) | (Pusa 256 & HPNB) | NCBI SNPdb Accession IDs |
|---------------------|----------------|--------------|-------------------------|---------------------------------|-------------------|--------------------------|
| SNP_P3_148852_13582 | NW_004516500.1 | Scaffold1244 | 13582                   | GG                              | AA                | 1946643906               |
| SNP_P3_148853_13681 | NW_004516500.1 | Scaffold1244 | 13681                   | AA                              | GG                | 1946643908               |
| SNP_P3_148854_13970 | NW_004516500.1 | Scaffold1244 | 13970                   | AA                              | TT                | 1946643910               |
| SNP_P3_148855_14040 | NW_004516500.1 | Scaffold1244 | 14040                   | CC                              | TT                | 1946643911               |
| SNP_P3_148856_16873 | NW_004516500.1 | Scaffold1244 | 16873                   | GG                              | CC                | 1946643913               |
| SNP_P3_148857_17129 | NW_004516500.1 | Scaffold1244 | 17129                   | CC                              | TT                | 1946643915               |
| SNP_P3_148858_17143 | NW_004516500.1 | Scaffold1244 | 17143                   | GG                              | AA                | 1946643917               |
| SNP_P3_148859_20186 | NW_004516500.1 | Scaffold1244 | 20186                   | TT                              | AA                | 1946643919               |
| SNP_P3_148860_20416 | NW_004516500.1 | Scaffold1244 | 20416                   | GG                              | AA                | 1946643921               |
| SNP_P3_148862_8724  | NW_004516502.1 | Scaffold1246 | 8724                    | TT                              | AA                | 1946643923               |
| SNP_P3_148863_64    | NW_004516503.1 | Scaffold1247 | 64                      | CC                              | GG                | 1946643925               |
| SNP_P3_148864_81    | NW_004516503.1 | Scaffold1247 | 81                      | AA                              | GG                | 1946643927               |
| SNP_P3_148865_694   | NW_004516503.1 | Scaffold1247 | 694                     | TT                              | CC                | 1946643929               |
| SNP_P3_148866_2104  | NW_004516503.1 | Scaffold1247 | 2104                    | AA                              | CC                | 1946643931               |
| SNP_P3_148867_2108  | NW_004516503.1 | Scaffold1247 | 2108                    | CC                              | AA                | 1946643933               |
| SNP_P3_148868_4951  | NW_004516503.1 | Scaffold1247 | 4951                    | AA                              | GG                | 1946643935               |
| SNP_P3_148869_5177  | NW_004516503.1 | Scaffold1247 | 5177                    | AA                              | CC                | 1946643938               |
| SNP_P3_148870_6614  | NW_004516503.1 | Scaffold1247 | 6614                    | TT                              | CC                | 1946643940               |
| SNP_P3_148871_6690  | NW_004516503.1 | Scaffold1247 | 6690                    | AA                              | GG                | 1946643942               |
| SNP_P3_148873_7736  | NW_004516503.1 | Scaffold1247 | 7736                    | TT                              | AA                | 1946643944               |
| SNP_P3_148874_7761  | NW_004516503.1 | Scaffold1247 | 7761                    | CC                              | AA                | 1946643945               |
| SNP_P3_148875_7833  | NW_004516503.1 | Scaffold1247 | 7833                    | GG                              | AA                | 1946643947               |
| SNP_P3_148876_7838  | NW_004516503.1 | Scaffold1247 | 7838                    | GG                              | AA                | 1946643949               |
| SNP_P3_148877_8169  | NW_004516503.1 | Scaffold1247 | 8169                    | GG                              | AA                | 1946643951               |
| SNP_P3_148878_8174  | NW_004516503.1 | Scaffold1247 | 8174                    | AA                              | TT                | 1946643953               |
| SNP_P3_148879_13306 | NW_004516503.1 | Scaffold1247 | 13306                   | GG                              | CC                | 1946643955               |
| SNP_P3_148880_13318 | NW_004516503.1 | Scaffold1247 | 13318                   | TT                              | CC                | 1946643957               |
| SNP_P3_148881_13440 | NW_004516503.1 | Scaffold1247 | 13440                   | CC                              | AA                | 1946643959               |
| SNP_P3_148882_13454 | NW_004516503.1 | Scaffold1247 | 13454                   | GG                              | CC                | 1946643961               |
| SNP_P3_148883_13477 | NW_004516503.1 | Scaffold1247 | 13477                   | CC                              | TT                | 1946643963               |
| SNP_P3_148884_13560 | NW_004516503.1 | Scaffold1247 | 13560                   | CC                              | AA                | 1946643965               |
| SNP_P3_148885_13598 | NW_004516503.1 | Scaffold1247 | 13598                   | CC                              | TT                | 1946643967               |
| SNP_P3_148886_13646 | NW_004516503.1 | Scaffold1247 | 13646                   | AA                              | TT                | 1946643969               |
| SNP_P3_148887_13647 | NW_004516503.1 | Scaffold1247 | 13647                   | CC                              | TT                | 1946643971               |
| SNP_P3_148888_13660 | NW_004516503.1 | Scaffold1247 | 13660                   | CC                              | TT                | 1946643972               |
| SNP_P3_148889_13668 | NW_004516503.1 | Scaffold1247 | 13668                   | AA                              | GG                | 1946643974               |
| SNP_P3_148890_13675 | NW_004516503.1 | Scaffold1247 | 13675                   | CC                              | AA                | 1946643976               |
| SNP_P3_148891_13852 | NW_004516503.1 | Scaffold1247 | 13852                   | AA                              | TT                | 1946643979               |
| SNP_P3_148892_13951 | NW_004516503.1 | Scaffold1247 | 13951                   | AA                              | TT                | 1946643981               |
| SNP_P3_148893_21297 | NW_004516503.1 | Scaffold1247 | 21297                   | AA                              | GG                | 1946643983               |
| SNP_P3_148894_30633 | NW_004516503.1 | Scaffold1247 | 30633                   | AA                              | GG                | 1946643985               |
| SNP_P3_148895_30634 | NW_004516503.1 | Scaffold1247 | 30634                   | AA                              | TT                | 1946643987               |

| SNPs IDs            | Chromosome IDs | Chromosomes  | Physical positions (bp) | CDC Frontier (Reference genome) | (Pusa 256 & HPNB) | NCBI SNPdb Accession IDs |
|---------------------|----------------|--------------|-------------------------|---------------------------------|-------------------|--------------------------|
| SNP_P3_148896_31076 | NW_004516503.1 | Scaffold1247 | 31076                   | TT                              | AA                | 1946643989               |
| SNP_P3_148897_32156 | NW_004516503.1 | Scaffold1247 | 32156                   | AA                              | GG                | 1946643991               |
| SNP_P3_148898_37410 | NW_004516503.1 | Scaffold1247 | 37410                   | TT                              | CC                | 1946643993               |
| SNP_P3_148899_37731 | NW_004516503.1 | Scaffold1247 | 37731                   | TT                              | CC                | 1946643994               |
| SNP_P3_148901_38188 | NW_004516503.1 | Scaffold1247 | 38188                   | TT                              | AA                | 1946643996               |
| SNP_P3_148902_38258 | NW_004516503.1 | Scaffold1247 | 38258                   | TT                              | CC                | 1946643998               |
| SNP_P3_148903_38335 | NW_004516503.1 | Scaffold1247 | 38335                   | AA                              | GG                | 1946644000               |
| SNP_P3_148904_38761 | NW_004516503.1 | Scaffold1247 | 38761                   | TT                              | AA                | 1946644002               |
| SNP_P3_148905_38764 | NW_004516503.1 | Scaffold1247 | 38764                   | AA                              | CC                | 1946644004               |
| SNP_P3_148906_498   | NW_004516504.1 | Scaffold1248 | 498                     | CC                              | AA                | 1946644006               |
| SNP_P3_148907_574   | NW_004516504.1 | Scaffold1248 | 574                     | GG                              | TT                | 1946644008               |
| SNP_P3_148908_589   | NW_004516504.1 | Scaffold1248 | 589                     | AA                              | CC                | 1946644010               |
| SNP_P3_148909_590   | NW_004516504.1 | Scaffold1248 | 590                     | TT                              | AA                | 1946644012               |
| SNP_P3_148910_686   | NW_004516505.1 | Scaffold1250 | 686                     | TT                              | GG                | 1946644013               |
| SNP_P3_148911_15073 | NW_004516507.1 | Scaffold1252 | 15073                   | TT                              | CC                | 1946644015               |
| SNP_P3_148912_22267 | NW_004516507.1 | Scaffold1252 | 22267                   | TT                              | AA                | 1946644017               |
| SNP_P3_148913_22443 | NW_004516507.1 | Scaffold1252 | 22443                   | GG                              | TT                | 1946644020               |
| SNP_P3_148914_26131 | NW_004516507.1 | Scaffold1252 | 26131                   | AA                              | CC                | 1946644022               |
| SNP_P3_148915_26617 | NW_004516507.1 | Scaffold1252 | 26617                   | GG                              | AA                | 1946644024               |
| SNP_P3_148916_28150 | NW_004516507.1 | Scaffold1252 | 28150                   | CC                              | GG                | 1946644026               |
| SNP_P3_148917_28316 | NW_004516507.1 | Scaffold1252 | 28316                   | GG                              | CC                | 1946644028               |
| SNP_P3_148918_43921 | NW_004516507.1 | Scaffold1252 | 43921                   | TT                              | GG                | 1946644030               |
| SNP_P3_148919_44238 | NW_004516507.1 | Scaffold1252 | 44238                   | TT                              | GG                | 1946644032               |
| SNP_P3_148920_55273 | NW_004516507.1 | Scaffold1252 | 55273                   | CC                              | TT                | 1946644033               |
| SNP_P3_148921_55461 | NW_004516507.1 | Scaffold1252 | 55461                   | GG                              | AA                | 1946644035               |
| SNP_P3_148922_55516 | NW_004516507.1 | Scaffold1252 | 55516                   | CC                              | TT                | 1946644038               |
| SNP_P3_148923_55572 | NW_004516507.1 | Scaffold1252 | 55572                   | TT                              | CC                | 1946644040               |
| SNP_P3_148924_55609 | NW_004516507.1 | Scaffold1252 | 55609                   | TT                              | CC                | 1946644042               |
| SNP_P3_148925_55658 | NW_004516507.1 | Scaffold1252 | 55658                   | GG                              | AA                | 1946644044               |
| SNP_P3_148926_55709 | NW_004516507.1 | Scaffold1252 | 55709                   | CC                              | TT                | 1946644046               |
| SNP_P3_148927_55717 | NW_004516507.1 | Scaffold1252 | 55717                   | CC                              | TT                | 1946644048               |
| SNP_P3_148928_55922 | NW_004516507.1 | Scaffold1252 | 55922                   | AA                              | GG                | 1946644049               |
| SNP_P3_148929_56095 | NW_004516507.1 | Scaffold1252 | 56095                   | GG                              | AA                | 1946644051               |
| SNP_P3_148930_56131 | NW_004516507.1 | Scaffold1252 | 56131                   | AA                              | GG                | 1946644053               |
| SNP_P3_148931_56354 | NW_004516507.1 | Scaffold1252 | 56354                   | TT                              | GG                | 1946644055               |
| SNP_P3_148932_60627 | NW_004516507.1 | Scaffold1252 | 60627                   | GG                              | AA                | 1946644057               |
| SNP_P3_148933_62956 | NW_004516507.1 | Scaffold1252 | 62956                   | CC                              | TT                | 1946644059               |
| SNP_P3_148934_62957 | NW_004516507.1 | Scaffold1252 | 62957                   | GG                              | AA                | 1946644062               |
| SNP_P3_148935_62973 | NW_004516507.1 | Scaffold1252 | 62973                   | AA                              | GG                | 1946644064               |
| SNP_P3_148936_62984 | NW_004516507.1 | Scaffold1252 | 62984                   | CC                              | TT                | 1946644066               |
| SNP_P3_148937_63536 | NW_004516507.1 | Scaffold1252 | 63536                   | GG                              | TT                | 1946644068               |
| SNP_P3_148938_63693 | NW_004516507.1 | Scaffold1252 | 63693                   | TT                              | CC                | 1946644070               |

| SNPs IDs             | Chromosome IDs | Chromosomes  | Physical positions (bp) | CDC Frontier (Reference genome) | (Pusa 256 & HPNB) | NCBI SNPdb Accession IDs |
|----------------------|----------------|--------------|-------------------------|---------------------------------|-------------------|--------------------------|
| SNP_P3_148939_64021  | NW_004516507.1 | Scaffold1252 | 64021                   | GG                              | TT                | 1946644072               |
| SNP_P3_148940_64234  | NW_004516507.1 | Scaffold1252 | 64234                   | TT                              | CC                | 1946644074               |
| SNP_P3_148941_65524  | NW_004516507.1 | Scaffold1252 | 65524                   | GG                              | AA                | 1946644076               |
| SNP_P3_148942_65531  | NW_004516507.1 | Scaffold1252 | 65531                   | TT                              | GG                | 1946644078               |
| SNP_P3_148943_71345  | NW_004516507.1 | Scaffold1252 | 71345                   | AA                              | TT                | 1946644080               |
| SNP_P3_148944_71710  | NW_004516507.1 | Scaffold1252 | 71710                   | AA                              | TT                | 1946644082               |
| SNP_P3_148945_71711  | NW_004516507.1 | Scaffold1252 | 71711                   | TT                              | GG                | 1946644084               |
| SNP_P3_148946_74496  | NW_004516507.1 | Scaffold1252 | 74496                   | AA                              | CC                | 1946644086               |
| SNP_P3_148947_75458  | NW_004516507.1 | Scaffold1252 | 75458                   | GG                              | TT                | 1946644088               |
| SNP_P3_148948_75475  | NW_004516507.1 | Scaffold1252 | 75475                   | TT                              | CC                | 1946644090               |
| SNP_P3_148949_76291  | NW_004516507.1 | Scaffold1252 | 76291                   | AA                              | GG                | 1946644091               |
| SNP_P3_148950_76316  | NW_004516507.1 | Scaffold1252 | 76316                   | AA                              | TT                | 1946644093               |
| SNP_P3_148952_95675  | NW_004516507.1 | Scaffold1252 | 95675                   | AA                              | TT                | 1946644095               |
| SNP_P3_148953_97955  | NW_004516507.1 | Scaffold1252 | 97955                   | GG                              | AA                | 1946644097               |
| SNP_P3_148954_97967  | NW_004516507.1 | Scaffold1252 | 97967                   | CC                              | TT                | 1946644099               |
| SNP_P3_148955_97969  | NW_004516507.1 | Scaffold1252 | 97969                   | GG                              | AA                | 1946644102               |
| SNP_P3_148956_97978  | NW_004516507.1 | Scaffold1252 | 97978                   | CC                              | GG                | 1946644104               |
| SNP_P3_148957_98004  | NW_004516507.1 | Scaffold1252 | 98004                   | TT                              | GG                | 1946644106               |
| SNP_P3_148959_98146  | NW_004516507.1 | Scaffold1252 | 98146                   | CC                              | AA                | 1946644108               |
| SNP_P3_148960_98150  | NW_004516507.1 | Scaffold1252 | 98150                   | TT                              | AA                | 1946644110               |
| SNP_P3_148961_98443  | NW_004516507.1 | Scaffold1252 | 98443                   | TT                              | CC                | 1946644112               |
| SNP_P3_148962_99930  | NW_004516507.1 | Scaffold1252 | 99930                   | AA                              | GG                | 1946644114               |
| SNP_P3_148963_102686 | NW_004516507.1 | Scaffold1252 | 102686                  | TT                              | CC                | 1946644116               |
| SNP_P3_148964_108219 | NW_004516507.1 | Scaffold1252 | 108219                  | GG                              | AA                | 1946644118               |
| SNP_P3_148965_108226 | NW_004516507.1 | Scaffold1252 | 108226                  | GG                              | AA                | 1946644120               |
| SNP_P3_148967_110715 | NW_004516507.1 | Scaffold1252 | 110715                  | TT                              | GG                | 1946644122               |
| SNP_P3_148968_294    | NW_004516509.1 | Scaffold1254 | 294                     | CC                              | AA                | 1946644123               |
| SNP_P3_148969_1281   | NW_004516510.1 | Scaffold1255 | 1281                    | AA                              | GG                | 1946644125               |
| SNP_P3_148971_1595   | NW_004516510.1 | Scaffold1255 | 1595                    | TT                              | GG                | 1946644127               |
| SNP_P3_148972_1712   | NW_004516510.1 | Scaffold1255 | 1712                    | TT                              | CC                | 1946644129               |
| SNP_P3_148973_1718   | NW_004516510.1 | Scaffold1255 | 1718                    | CC                              | TT                | 1946644131               |
| SNP_P3_148974_2004   | NW_004516510.1 | Scaffold1255 | 2004                    | AA                              | GG                | 1946644133               |
| SNP_P3_148975_2025   | NW_004516510.1 | Scaffold1255 | 2025                    | AA                              | CC                | 1946644135               |
| SNP_P3_148976_2108   | NW_004516510.1 | Scaffold1255 | 2108                    | CC                              | TT                | 1946644137               |
| SNP_P3_148977_2121   | NW_004516510.1 | Scaffold1255 | 2121                    | AA                              | GG                | 1946644139               |
| SNP_P3_148978_2155   | NW_004516510.1 | Scaffold1255 | 2155                    | CC                              | GG                | 1946644140               |
| SNP_P3_148979_2739   | NW_004516510.1 | Scaffold1255 | 2739                    | GG                              | AA                | 1946644144               |
| SNP_P3_148980_2748   | NW_004516510.1 | Scaffold1255 | 2748                    | CC                              | AA                | 1946644146               |
| SNP_P3_148981_3854   | NW_004516510.1 | Scaffold1255 | 3854                    | AA                              | GG                | 1946644148               |
| SNP_P3_148982_5523   | NW_004516510.1 | Scaffold1255 | 5523                    | AA                              | GG                | 1946644150               |
| SNP_P3_148983_5527   | NW_004516510.1 | Scaffold1255 | 5527                    | GG                              | AA                | 1946644152               |
| SNP_P3_148984_7273   | NW_004516510.1 | Scaffold1255 | 7273                    | TT                              | GG                | 1946644154               |

| SNPs IDs            | Chromosome IDs | Chromosomes  | Physical positions (bp) | CDC Frontier (Reference genome) | (Pusa 256 & HPNB) | NCBI SNPdb Accession IDs |
|---------------------|----------------|--------------|-------------------------|---------------------------------|-------------------|--------------------------|
| SNP_P3_148985_8581  | NW_004516510.1 | Scaffold1255 | 8581                    | TT                              | CC                | 1946644156               |
| SNP_P3_148986_9879  | NW_004516510.1 | Scaffold1255 | 9879                    | CC                              | TT                | 1946644158               |
| SNP_P3_148987_9891  | NW_004516510.1 | Scaffold1255 | 9891                    | TT                              | CC                | 1946644159               |
| SNP_P3_148988_9925  | NW_004516510.1 | Scaffold1255 | 9925                    | AA                              | GG                | 1946644161               |
| SNP_P3_148989_9944  | NW_004516510.1 | Scaffold1255 | 9944                    | TT                              | GG                | 1946644163               |
| SNP_P3_148990_14968 | NW_004516510.1 | Scaffold1255 | 14968                   | CC                              | GG                | 1946644165               |
| SNP_P3_148991_14982 | NW_004516510.1 | Scaffold1255 | 14982                   | GG                              | TT                | 1946644167               |
| SNP_P3_148992_17313 | NW_004516510.1 | Scaffold1255 | 17313                   | CC                              | TT                | 1946644169               |
| SNP_P3_148993_17317 | NW_004516510.1 | Scaffold1255 | 17317                   | AA                              | CC                | 1946644171               |
| SNP_P3_148994_17375 | NW_004516510.1 | Scaffold1255 | 17375                   | TT                              | CC                | 1946644173               |
| SNP_P3_148995_17422 | NW_004516510.1 | Scaffold1255 | 17422                   | TT                              | CC                | 1946644175               |
| SNP_P3_148996_17429 | NW_004516510.1 | Scaffold1255 | 17429                   | TT                              | GG                | 1946644177               |
| SNP_P3_148997_17461 | NW_004516510.1 | Scaffold1255 | 17461                   | CC                              | TT                | 1946644179               |
| SNP_P3_148998_17537 | NW_004516510.1 | Scaffold1255 | 17537                   | AA                              | TT                | 1946644181               |
| SNP_P3_148999_17583 | NW_004516510.1 | Scaffold1255 | 17583                   | TT                              | AA                | 1946644184               |
| SNP_P3_149000_17623 | NW_004516510.1 | Scaffold1255 | 17623                   | AA                              | GG                | 1946644186               |
| SNP_P3_149001_24778 | NW_004516510.1 | Scaffold1255 | 24778                   | AA                              | GG                | 1946644188               |
| SNP_P3_149002_24807 | NW_004516510.1 | Scaffold1255 | 24807                   | TT                              | CC                | 1946644190               |
| SNP_P3_149003_477   | NW_004516511.1 | Scaffold1256 | 477                     | GG                              | TT                | 1946644191               |
| SNP_P3_149004_535   | NW_004516511.1 | Scaffold1256 | 535                     | CC                              | AA                | 1946644193               |
| SNP_P3_149006_4126  | NW_004516511.1 | Scaffold1256 | 4126                    | TT                              | CC                | 1946644195               |
| SNP_P3_149007_8291  | NW_004516511.1 | Scaffold1256 | 8291                    | CC                              | TT                | 1946644197               |
| SNP_P3_149008_17398 | NW_004516511.1 | Scaffold1256 | 17398                   | TT                              | CC                | 1946644199               |
| SNP_P3_149009_20211 | NW_004516511.1 | Scaffold1256 | 20211                   | GG                              | AA                | 1946644201               |
| SNP_P3_149010_20338 | NW_004516511.1 | Scaffold1256 | 20338                   | CC                              | TT                | 1946644203               |
| SNP_P3_149011_21064 | NW_004516511.1 | Scaffold1256 | 21064                   | GG                              | AA                | 1946644205               |
| SNP_P3_149012_25160 | NW_004516511.1 | Scaffold1256 | 25160                   | CC                              | AA                | 1946644207               |
| SNP_P3_149013_25214 | NW_004516511.1 | Scaffold1256 | 25214                   | CC                              | TT                | 1946644209               |
| SNP_P3_149014_25321 | NW_004516511.1 | Scaffold1256 | 25321                   | TT                              | GG                | 1946644211               |
| SNP_P3_149015_25565 | NW_004516511.1 | Scaffold1256 | 25565                   | CC                              | TT                | 1946644213               |
| SNP_P3_149016_29870 | NW_004516511.1 | Scaffold1256 | 29870                   | GG                              | TT                | 1946644215               |
| SNP_P3_149017_31229 | NW_004516511.1 | Scaffold1256 | 31229                   | GG                              | AA                | 1946644217               |
| SNP_P3_149020_31453 | NW_004516511.1 | Scaffold1256 | 31453                   | GG                              | AA                | 1946644219               |
| SNP_P3_149021_31526 | NW_004516511.1 | Scaffold1256 | 31526                   | GG                              | CC                | 1946644221               |
| SNP_P3_149022_32397 | NW_004516511.1 | Scaffold1256 | 32397                   | CC                              | GG                | 1946644225               |
| SNP_P3_149023_32512 | NW_004516511.1 | Scaffold1256 | 32512                   | AA                              | CC                | 1946644227               |
| SNP_P3_149024_32549 | NW_004516511.1 | Scaffold1256 | 32549                   | GG                              | TT                | 1946644229               |
| SNP_P3_149025_32833 | NW_004516511.1 | Scaffold1256 | 32833                   | AA                              | TT                | 1946644231               |
| SNP_P3_149026_32959 | NW_004516511.1 | Scaffold1256 | 32959                   | TT                              | CC                | 1946644233               |
| SNP_P3_149027_33079 | NW_004516511.1 | Scaffold1256 | 33079                   | TT                              | GG                | 1946644235               |
| SNP_P3_149028_33114 | NW_004516511.1 | Scaffold1256 | 33114                   | AA                              | TT                | 1946644237               |
| SNP_P3_149029_33115 | NW_004516511.1 | Scaffold1256 | 33115                   | GG                              | AA                | 1946644239               |

| SNPs IDs            | Chromosome IDs | Chromosomes  | Physical positions (bp) | CDC Frontier (Reference genome) | (Pusa 256 & HPNB) | NCBI SNPdb Accession IDs |
|---------------------|----------------|--------------|-------------------------|---------------------------------|-------------------|--------------------------|
| SNP_P3_149030_33133 | NW_004516511.1 | Scaffold1256 | 33133                   | TT                              | GG                | 1946644241               |
| SNP_P3_149031_34726 | NW_004516511.1 | Scaffold1256 | 34726                   | GG                              | AA                | 1946644243               |
| SNP_P3_149032_35422 | NW_004516511.1 | Scaffold1256 | 35422                   | GG                              | AA                | 1946644245               |
| SNP_P3_149033_38090 | NW_004516511.1 | Scaffold1256 | 38090                   | AA                              | GG                | 1946644247               |
| SNP_P3_149034_38137 | NW_004516511.1 | Scaffold1256 | 38137                   | TT                              | GG                | 1946644249               |
| SNP_P3_149035_45059 | NW_004516511.1 | Scaffold1256 | 45059                   | AA                              | GG                | 1946644251               |
| SNP_P3_149036_45342 | NW_004516511.1 | Scaffold1256 | 45342                   | CC                              | TT                | 1946644253               |
| SNP_P3_149037_48911 | NW_004516511.1 | Scaffold1256 | 48911                   | CC                              | AA                | 1946644255               |
| SNP_P3_149038_49324 | NW_004516511.1 | Scaffold1256 | 49324                   | TT                              | CC                | 1946644257               |
| SNP_P3_149039_53223 | NW_004516511.1 | Scaffold1256 | 53223                   | AA                              | GG                | 1946644259               |
| SNP_P3_149040_55106 | NW_004516511.1 | Scaffold1256 | 55106                   | CC                              | GG                | 1946644261               |
| SNP_P3_149041_55432 | NW_004516511.1 | Scaffold1256 | 55432                   | CC                              | AA                | 1946644263               |
| SNP_P3_149042_59960 | NW_004516511.1 | Scaffold1256 | 59960                   | CC                              | AA                | 1946644266               |
| SNP_P3_149043_60075 | NW_004516511.1 | Scaffold1256 | 60075                   | AA                              | GG                | 1946644268               |
| SNP_P3_149044_60085 | NW_004516511.1 | Scaffold1256 | 60085                   | TT                              | CC                | 1946644270               |
| SNP_P3_149045_60243 | NW_004516511.1 | Scaffold1256 | 60243                   | TT                              | CC                | 1946644272               |
| SNP_P3_149046_60522 | NW_004516511.1 | Scaffold1256 | 60522                   | AA                              | TT                | 1946644274               |
| SNP_P3_149047_62562 | NW_004516511.1 | Scaffold1256 | 62562                   | CC                              | TT                | 1946644276               |
| SNP_P3_149048_62589 | NW_004516511.1 | Scaffold1256 | 62589                   | GG                              | AA                | 1946644278               |
| SNP_P3_149049_62595 | NW_004516511.1 | Scaffold1256 | 62595                   | TT                              | CC                | 1946644280               |
| SNP_P3_149050_62628 | NW_004516511.1 | Scaffold1256 | 62628                   | GG                              | AA                | 1946644282               |
| SNP_P3_149051_62633 | NW_004516511.1 | Scaffold1256 | 62633                   | CC                              | GG                | 1946644284               |
| SNP_P3_149052_62706 | NW_004516511.1 | Scaffold1256 | 62706                   | GG                              | AA                | 1946644285               |
| SNP_P3_149053_62716 | NW_004516511.1 | Scaffold1256 | 62716                   | TT                              | GG                | 1946644287               |
| SNP_P3_149054_63047 | NW_004516511.1 | Scaffold1256 | 63047                   | TT                              | CC                | 1946644289               |
| SNP_P3_149055_63103 | NW_004516511.1 | Scaffold1256 | 63103                   | AA                              | GG                | 1946644291               |
| SNP_P3_149056_64581 | NW_004516511.1 | Scaffold1256 | 64581                   | TT                              | CC                | 1946644293               |
| SNP_P3_149057_67315 | NW_004516511.1 | Scaffold1256 | 67315                   | AA                              | GG                | 1946644295               |
| SNP_P3_149058_69281 | NW_004516511.1 | Scaffold1256 | 69281                   | AA                              | TT                | 1946644297               |
| SNP_P3_149059_69282 | NW_004516511.1 | Scaffold1256 | 69282                   | CC                              | AA                | 1946644299               |
| SNP_P3_149060_69284 | NW_004516511.1 | Scaffold1256 | 69284                   | AA                              | GG                | 1946644301               |
| SNP_P3_149061_69293 | NW_004516511.1 | Scaffold1256 | 69293                   | CC                              | TT                | 1946644303               |
| SNP_P3_149062_69325 | NW_004516511.1 | Scaffold1256 | 69325                   | GG                              | TT                | 1946644306               |
| SNP_P3_149063_69586 | NW_004516511.1 | Scaffold1256 | 69586                   | AA                              | TT                | 1946644308               |
| SNP_P3_149064_69596 | NW_004516511.1 | Scaffold1256 | 69596                   | CC                              | GG                | 1946644310               |
| SNP_P3_149065_69635 | NW_004516511.1 | Scaffold1256 | 69635                   | TT                              | CC                | 1946644312               |
| SNP_P3_149066_76116 | NW_004516511.1 | Scaffold1256 | 76116                   | AA                              | TT                | 1946644314               |
| SNP_P3_149067_88243 | NW_004516511.1 | Scaffold1256 | 88243                   | GG                              | AA                | 1946644316               |
| SNP_P3_149068_3117  | NW_004516513.1 | Scaffold1259 | 3117                    | CC                              | AA                | 1946644318               |
| SNP_P3_149069_3601  | NW_004516513.1 | Scaffold1259 | 3601                    | GG                              | TT                | 1946644320               |
| SNP_P3_149070_16163 | NW_004516513.1 | Scaffold1259 | 16163                   | AA                              | GG                | 1946644322               |
| SNP_P3_149071_16234 | NW_004516513.1 | Scaffold1259 | 16234                   | TT                              | CC                | 1946644324               |

| SNPs IDs            | Chromosome IDs | Chromosomes  | Physical positions (bp) | CDC Frontier (Reference genome) | (Pusa 256 & HPNB) | NCBI SNPdb Accession IDs |
|---------------------|----------------|--------------|-------------------------|---------------------------------|-------------------|--------------------------|
| SNP_P3_149072_16516 | NW_004516513.1 | Scaffold1259 | 16516                   | CC                              | TT                | 1946644326               |
| SNP_P3_149073_16587 | NW_004516513.1 | Scaffold1259 | 16587                   | TT                              | AA                | 1946644328               |
| SNP_P3_149074_24519 | NW_004516513.1 | Scaffold1259 | 24519                   | GG                              | TT                | 1946644330               |
| SNP_P3_149075_64661 | NW_004516513.1 | Scaffold1259 | 64661                   | CC                              | TT                | 1946644332               |
| SNP_P3_149076_64690 | NW_004516513.1 | Scaffold1259 | 64690                   | CC                              | TT                | 1946644334               |
| SNP_P3_149077_64696 | NW_004516513.1 | Scaffold1259 | 64696                   | TT                              | AA                | 1946644336               |
| SNP_P3_149079_80047 | NW_004516513.1 | Scaffold1259 | 80047                   | AA                              | GG                | 1946644338               |
| SNP_P3_149080_3125  | NW_004516515.1 | Scaffold1261 | 3125                    | GG                              | AA                | 1946644339               |
| SNP_P3_149081_3126  | NW_004516515.1 | Scaffold1261 | 3126                    | AA                              | TT                | 1946644341               |
| SNP_P3_149083_3059  | NW_004516518.1 | Scaffold1269 | 3059                    | TT                              | AA                | 1946644343               |
| SNP_P3_149084_4868  | NW_004516518.1 | Scaffold1269 | 4868                    | CC                              | AA                | 1946644346               |
| SNP_P3_149085_5710  | NW_004516518.1 | Scaffold1269 | 5710                    | CC                              | AA                | 1946644348               |
| SNP_P3_149086_5711  | NW_004516518.1 | Scaffold1269 | 5711                    | AA                              | GG                | 1946644350               |
| SNP_P3_149087_81    | NW_004516520.1 | Scaffold1272 | 81                      | TT                              | GG                | 1946644352               |
| SNP_P3_149088_102   | NW_004516520.1 | Scaffold1272 | 102                     | AA                              | GG                | 1946644353               |
| SNP_P3_149089_106   | NW_004516520.1 | Scaffold1272 | 106                     | TT                              | CC                | 1946644355               |
| SNP_P3_149090_131   | NW_004516520.1 | Scaffold1272 | 131                     | CC                              | TT                | 1946644357               |
| SNP_P3_149091_196   | NW_004516520.1 | Scaffold1272 | 196                     | CC                              | AA                | 1946644359               |
| SNP_P3_149092_210   | NW_004516520.1 | Scaffold1272 | 210                     | TT                              | AA                | 1946644361               |
| SNP_P3_149093_211   | NW_004516520.1 | Scaffold1272 | 211                     | GG                              | TT                | 1946644363               |
| SNP_P3_149094_214   | NW_004516520.1 | Scaffold1272 | 214                     | GG                              | AA                | 1946644365               |
| SNP_P3_149095_221   | NW_004516520.1 | Scaffold1272 | 221                     | AA                              | GG                | 1946644367               |
| SNP_P3_149096_321   | NW_004516520.1 | Scaffold1272 | 321                     | TT                              | GG                | 1946644369               |
| SNP_P3_149097_441   | NW_004516520.1 | Scaffold1272 | 441                     | TT                              | AA                | 1946644371               |
| SNP_P3_149098_3068  | NW_004516520.1 | Scaffold1272 | 3068                    | CC                              | AA                | 1946644373               |
| SNP_P3_149099_7035  | NW_004516520.1 | Scaffold1272 | 7035                    | AA                              | GG                | 1946644375               |
| SNP_P3_149100_13124 | NW_004516520.1 | Scaffold1272 | 13124                   | GG                              | AA                | 1946644377               |
| SNP_P3_149101_13163 | NW_004516520.1 | Scaffold1272 | 13163                   | AA                              | GG                | 1946644379               |
| SNP_P3_149102_13166 | NW_004516520.1 | Scaffold1272 | 13166                   | GG                              | AA                | 1946644381               |
| SNP_P3_149103_13212 | NW_004516520.1 | Scaffold1272 | 13212                   | CC                              | AA                | 1946644383               |
| SNP_P3_149104_20067 | NW_004516520.1 | Scaffold1272 | 20067                   | TT                              | AA                | 1946644385               |
| SNP_P3_149105_21384 | NW_004516520.1 | Scaffold1272 | 21384                   | GG                              | AA                | 1946644387               |
| SNP_P3_149106_21445 | NW_004516520.1 | Scaffold1272 | 21445                   | AA                              | TT                | 1946644389               |
| SNP_P3_149107_21541 | NW_004516520.1 | Scaffold1272 | 21541                   | CC                              | TT                | 1946644391               |
| SNP_P3_149108_21777 | NW_004516520.1 | Scaffold1272 | 21777                   | CC                              | TT                | 1946644393               |
| SNP_P3_149109_21797 | NW_004516520.1 | Scaffold1272 | 21797                   | AA                              | GG                | 1946644395               |
| SNP_P3_149110_21798 | NW_004516520.1 | Scaffold1272 | 21798                   | CC                              | GG                | 1946644396               |
| SNP_P3_149111_21840 | NW_004516520.1 | Scaffold1272 | 21840                   | AA                              | GG                | 1946644398               |
| SNP_P3_149112_45685 | NW_004516520.1 | Scaffold1272 | 45685                   | AA                              | TT                | 1946644400               |
| SNP_P3_149113_49442 | NW_004516520.1 | Scaffold1272 | 49442                   | GG                              | AA                | 1946644403               |
| SNP_P3_149114_77906 | NW_004516520.1 | Scaffold1272 | 77906                   | CC                              | GG                | 1946644405               |
| SNP_P3_149115_86112 | NW_004516520.1 | Scaffold1272 | 86112                   | TT                              | CC                | 1946644407               |



| SNPs IDs             | Chromosome IDs | Chromosomes  | Physical positions (bp) | CDC Frontier (Reference genome) | (Pusa 256 & HPNB) | NCBI SNPdb Accession IDs |
|----------------------|----------------|--------------|-------------------------|---------------------------------|-------------------|--------------------------|
| SNP_P3_149116_87036  | NW_004516520.1 | Scaffold1272 | 87036                   | GG                              | AA                | 1946644409               |
| SNP_P3_149117_87079  | NW_004516520.1 | Scaffold1272 | 87079                   | AA                              | TT                | 1946644412               |
| SNP_P3_149118_87100  | NW_004516520.1 | Scaffold1272 | 87100                   | CC                              | TT                | 1946644414               |
| SNP_P3_149119_87120  | NW_004516520.1 | Scaffold1272 | 87120                   | GG                              | AA                | 1946644416               |
| SNP_P3_149120_87145  | NW_004516520.1 | Scaffold1272 | 87145                   | TT                              | CC                | 1946644418               |
| SNP_P3_149121_87195  | NW_004516520.1 | Scaffold1272 | 87195                   | TT                              | CC                | 1946644420               |
| SNP_P3_149122_87240  | NW_004516520.1 | Scaffold1272 | 87240                   | AA                              | GG                | 1946644422               |
| SNP_P3_149123_87249  | NW_004516520.1 | Scaffold1272 | 87249                   | TT                              | CC                | 1946644424               |
| SNP_P3_149124_87265  | NW_004516520.1 | Scaffold1272 | 87265                   | GG                              | AA                | 1946644426               |
| SNP_P3_149125_87276  | NW_004516520.1 | Scaffold1272 | 87276                   | AA                              | GG                | 1946644427               |
| SNP_P3_149126_87286  | NW_004516520.1 | Scaffold1272 | 87286                   | AA                              | GG                | 1946644429               |
| SNP_P3_149127_87394  | NW_004516520.1 | Scaffold1272 | 87394                   | CC                              | AA                | 1946644431               |
| SNP_P3_149128_87580  | NW_004516520.1 | Scaffold1272 | 87580                   | AA                              | GG                | 1946644433               |
| SNP_P3_149129_87588  | NW_004516520.1 | Scaffold1272 | 87588                   | GG                              | AA                | 1946644435               |
| SNP_P3_149130_87589  | NW_004516520.1 | Scaffold1272 | 87589                   | TT                              | AA                | 1946644437               |
| SNP_P3_149131_87610  | NW_004516520.1 | Scaffold1272 | 87610                   | AA                              | GG                | 1946644439               |
| SNP_P3_149132_87669  | NW_004516520.1 | Scaffold1272 | 87669                   | AA                              | GG                | 1946644441               |
| SNP_P3_149133_94551  | NW_004516520.1 | Scaffold1272 | 94551                   | TT                              | CC                | 1946644443               |
| SNP_P3_149134_94961  | NW_004516520.1 | Scaffold1272 | 94961                   | GG                              | TT                | 1946644445               |
| SNP_P3_149135_107543 | NW_004516520.1 | Scaffold1272 | 107543                  | TT                              | CC                | 1946644447               |
| SNP_P3_149136_109053 | NW_004516520.1 | Scaffold1272 | 109053                  | CC                              | AA                | 1946644449               |
| SNP_P3_149137_126250 | NW_004516520.1 | Scaffold1272 | 126250                  | TT                              | CC                | 1946644452               |
| SNP_P3_149138_132146 | NW_004516520.1 | Scaffold1272 | 132146                  | CC                              | TT                | 1946644454               |
| SNP_P3_149139_132540 | NW_004516520.1 | Scaffold1272 | 132540                  | TT                              | CC                | 1946644456               |
| SNP_P3_149140_132543 | NW_004516520.1 | Scaffold1272 | 132543                  | CC                              | TT                | 1946644458               |
| SNP_P3_149141_132559 | NW_004516520.1 | Scaffold1272 | 132559                  | GG                              | TT                | 1946644460               |
| SNP_P3_149142_132582 | NW_004516520.1 | Scaffold1272 | 132582                  | CC                              | TT                | 1946644462               |
| SNP_P3_149143_132630 | NW_004516520.1 | Scaffold1272 | 132630                  | CC                              | AA                | 1946644464               |
| SNP_P3_149144_132636 | NW_004516520.1 | Scaffold1272 | 132636                  | TT                              | CC                | 1946644466               |
| SNP_P3_149145_132660 | NW_004516520.1 | Scaffold1272 | 132660                  | AA                              | GG                | 1946644467               |
| SNP_P3_149146_132669 | NW_004516520.1 | Scaffold1272 | 132669                  | TT                              | CC                | 1946644469               |
| SNP_P3_149147_132675 | NW_004516520.1 | Scaffold1272 | 132675                  | AA                              | GG                | 1946644471               |
| SNP_P3_149148_132678 | NW_004516520.1 | Scaffold1272 | 132678                  | AA                              | GG                | 1946644473               |
| SNP_P3_149149_132686 | NW_004516520.1 | Scaffold1272 | 132686                  | GG                              | AA                | 1946644475               |
| SNP_P3_149150_132717 | NW_004516520.1 | Scaffold1272 | 132717                  | AA                              | GG                | 1946644477               |
| SNP_P3_149151_132816 | NW_004516520.1 | Scaffold1272 | 132816                  | TT                              | CC                | 1946644479               |
| SNP_P3_149152_133117 | NW_004516520.1 | Scaffold1272 | 133117                  | AA                              | GG                | 1946644481               |
| SNP_P3_149153_133765 | NW_004516520.1 | Scaffold1272 | 133765                  | GG                              | CC                | 1946644483               |
| SNP_P3_149154_133768 | NW_004516520.1 | Scaffold1272 | 133768                  | AA                              | GG                | 1946644485               |
| SNP_P3_149156_190558 | NW_004516520.1 | Scaffold1272 | 190558                  | TT                              | CC                | 1946644487               |
| SNP_P3_149157_190577 | NW_004516520.1 | Scaffold1272 | 190577                  | AA                              | GG                | 1946644489               |
| SNP_P3_149158_190699 | NW_004516520.1 | Scaffold1272 | 190699                  | AA                              | GG                | 1946644491               |

| SNPs IDs             | Chromosome IDs | Chromosomes  | Physical positions (bp) | CDC Frontier (Reference genome) | (Pusa 256 & HPNB) | NCBI SNPdb Accession IDs |
|----------------------|----------------|--------------|-------------------------|---------------------------------|-------------------|--------------------------|
| SNP_P3_149159_190816 | NW_004516520.1 | Scaffold1272 | 190816                  | CC                              | AA                | 1946644493               |
| SNP_P3_149160_190829 | NW_004516520.1 | Scaffold1272 | 190829                  | AA                              | GG                | 1946644495               |
| SNP_P3_149161_190960 | NW_004516520.1 | Scaffold1272 | 190960                  | GG                              | TT                | 1946644497               |
| SNP_P3_149162_191140 | NW_004516520.1 | Scaffold1272 | 191140                  | GG                              | AA                | 1946644499               |
| SNP_P3_149163_197054 | NW_004516520.1 | Scaffold1272 | 197054                  | CC                              | TT                | 1946644501               |
| SNP_P3_149164_197151 | NW_004516520.1 | Scaffold1272 | 197151                  | TT                              | GG                | 1946644503               |
| SNP_P3_149165_197609 | NW_004516520.1 | Scaffold1272 | 197609                  | TT                              | AA                | 1946644505               |
| SNP_P3_149166_197620 | NW_004516520.1 | Scaffold1272 | 197620                  | GG                              | AA                | 1946644507               |
| SNP_P3_149167_197663 | NW_004516520.1 | Scaffold1272 | 197663                  | CC                              | TT                | 1946644509               |
| SNP_P3_149168_197665 | NW_004516520.1 | Scaffold1272 | 197665                  | GG                              | AA                | 1946644511               |
| SNP_P3_149169_197688 | NW_004516520.1 | Scaffold1272 | 197688                  | CC                              | AA                | 1946644513               |
| SNP_P3_149170_197693 | NW_004516520.1 | Scaffold1272 | 197693                  | CC                              | TT                | 1946644515               |
| SNP_P3_149171_197749 | NW_004516520.1 | Scaffold1272 | 197749                  | TT                              | GG                | 1946644517               |
| SNP_P3_149172_197780 | NW_004516520.1 | Scaffold1272 | 197780                  | TT                              | CC                | 1946644518               |
| SNP_P3_149173_197788 | NW_004516520.1 | Scaffold1272 | 197788                  | AA                              | TT                | 1946644520               |
| SNP_P3_149174_197798 | NW_004516520.1 | Scaffold1272 | 197798                  | TT                              | GG                | 1946644522               |
| SNP_P3_149175_197804 | NW_004516520.1 | Scaffold1272 | 197804                  | AA                              | GG                | 1946644524               |
| SNP_P3_149176_214954 | NW_004516520.1 | Scaffold1272 | 214954                  | AA                              | GG                | 1946644526               |
| SNP_P3_149177_214986 | NW_004516520.1 | Scaffold1272 | 214986                  | CC                              | TT                | 1946644528               |
| SNP_P3_149178_219595 | NW_004516520.1 | Scaffold1272 | 219595                  | AA                              | TT                | 1946644530               |
| SNP_P3_149179_231195 | NW_004516520.1 | Scaffold1272 | 231195                  | CC                              | GG                | 1946644532               |
| SNP_P3_149180_231218 | NW_004516520.1 | Scaffold1272 | 231218                  | TT                              | CC                | 1946644535               |
| SNP_P3_149181_231240 | NW_004516520.1 | Scaffold1272 | 231240                  | AA                              | GG                | 1946644537               |
| SNP_P3_149182_231721 | NW_004516520.1 | Scaffold1272 | 231721                  | TT                              | CC                | 1946644539               |
| SNP_P3_149183_232131 | NW_004516520.1 | Scaffold1272 | 232131                  | TT                              | AA                | 1946644541               |
| SNP_P3_149184_1412   | NW_004516521.1 | Scaffold1273 | 1412                    | CC                              | TT                | 1946644542               |
| SNP_P3_149186_6918   | NW_004516522.1 | Scaffold1274 | 6918                    | CC                              | TT                | 1946644544               |
| SNP_P3_149187_6991   | NW_004516522.1 | Scaffold1274 | 6991                    | CC                              | GG                | 1946644546               |
| SNP_P3_149188_7060   | NW_004516522.1 | Scaffold1274 | 7060                    | TT                              | CC                | 1946644548               |
| SNP_P3_149189_7062   | NW_004516522.1 | Scaffold1274 | 7062                    | GG                              | TT                | 1946644550               |
| SNP_P3_149190_7071   | NW_004516522.1 | Scaffold1274 | 7071                    | GG                              | AA                | 1946644552               |
| SNP_P3_149191_7075   | NW_004516522.1 | Scaffold1274 | 7075                    | AA                              | GG                | 1946644554               |
| SNP_P3_149192_7085   | NW_004516522.1 | Scaffold1274 | 7085                    | GG                              | CC                | 1946644556               |
| SNP_P3_149193_7212   | NW_004516522.1 | Scaffold1274 | 7212                    | CC                              | AA                | 1946644558               |
| SNP_P3_149194_7268   | NW_004516522.1 | Scaffold1274 | 7268                    | AA                              | CC                | 1946644560               |
| SNP_P3_149195_7274   | NW_004516522.1 | Scaffold1274 | 7274                    | TT                              | CC                | 1946644562               |
| SNP_P3_149196_5547   | NW_004516523.1 | Scaffold1275 | 5547                    | GG                              | CC                | 1946644564               |
| SNP_P3_149197_5578   | NW_004516523.1 | Scaffold1275 | 5578                    | CC                              | TT                | 1946644566               |
| SNP_P3_149198_5691   | NW_004516523.1 | Scaffold1275 | 5691                    | TT                              | CC                | 1946644568               |
| SNP_P3_149199_5698   | NW_004516523.1 | Scaffold1275 | 5698                    | TT                              | CC                | 1946644570               |
| SNP_P3_149200_5791   | NW_004516523.1 | Scaffold1275 | 5791                    | AA                              | GG                | 1946644572               |
| SNP_P3_149201_5820   | NW_004516523.1 | Scaffold1275 | 5820                    | TT                              | CC                | 1946644574               |

| SNPs IDs            | Chromosome IDs | Chromosomes  | Physical positions (bp) | CDC Frontier (Reference genome) | (Pusa 256 & HPNB) | NCBI SNPdb Accession IDs |
|---------------------|----------------|--------------|-------------------------|---------------------------------|-------------------|--------------------------|
| SNP_P3_149202_5827  | NW_004516523.1 | Scaffold1275 | 5827                    | TT                              | CC                | 1946644576               |
| SNP_P3_149203_5844  | NW_004516523.1 | Scaffold1275 | 5844                    | GG                              | AA                | 1946644578               |
| SNP_P3_149204_5860  | NW_004516523.1 | Scaffold1275 | 5860                    | CC                              | TT                | 1946644580               |
| SNP_P3_149205_5861  | NW_004516523.1 | Scaffold1275 | 5861                    | AA                              | GG                | 1946644582               |
| SNP_P3_149206_5889  | NW_004516523.1 | Scaffold1275 | 5889                    | GG                              | AA                | 1946644584               |
| SNP_P3_149207_5916  | NW_004516523.1 | Scaffold1275 | 5916                    | CC                              | TT                | 1946644586               |
| SNP_P3_149208_5917  | NW_004516523.1 | Scaffold1275 | 5917                    | GG                              | AA                | 1946644588               |
| SNP_P3_149209_5933  | NW_004516523.1 | Scaffold1275 | 5933                    | TT                              | CC                | 1946644590               |
| SNP_P3_149210_5935  | NW_004516523.1 | Scaffold1275 | 5935                    | AA                              | GG                | 1946644592               |
| SNP_P3_149211_5972  | NW_004516523.1 | Scaffold1275 | 5972                    | GG                              | AA                | 1946644594               |
| SNP_P3_149212_5973  | NW_004516523.1 | Scaffold1275 | 5973                    | AA                              | GG                | 1946644596               |
| SNP_P3_149213_5997  | NW_004516523.1 | Scaffold1275 | 5997                    | GG                              | AA                | 1946644597               |
| SNP_P3_149214_6003  | NW_004516523.1 | Scaffold1275 | 6003                    | CC                              | TT                | 1946644599               |
| SNP_P3_149215_6035  | NW_004516523.1 | Scaffold1275 | 6035                    | TT                              | AA                | 1946644601               |
| SNP_P3_149216_6054  | NW_004516523.1 | Scaffold1275 | 6054                    | AA                              | GG                | 1946644603               |
| SNP_P3_149217_6055  | NW_004516523.1 | Scaffold1275 | 6055                    | AA                              | CC                | 1946644605               |
| SNP_P3_149218_6056  | NW_004516523.1 | Scaffold1275 | 6056                    | GG                              | CC                | 1946644607               |
| SNP_P3_149219_6058  | NW_004516523.1 | Scaffold1275 | 6058                    | AA                              | GG                | 1946644609               |
| SNP_P3_149220_6181  | NW_004516523.1 | Scaffold1275 | 6181                    | GG                              | AA                | 1946644612               |
| SNP_P3_149222_6212  | NW_004516523.1 | Scaffold1275 | 6212                    | TT                              | CC                | 1946644614               |
| SNP_P3_149223_6252  | NW_004516523.1 | Scaffold1275 | 6252                    | CC                              | TT                | 1946644616               |
| SNP_P3_149224_6255  | NW_004516523.1 | Scaffold1275 | 6255                    | TT                              | CC                | 1946644618               |
| SNP_P3_149225_6290  | NW_004516523.1 | Scaffold1275 | 6290                    | CC                              | TT                | 1946644620               |
| SNP_P3_149226_6363  | NW_004516523.1 | Scaffold1275 | 6363                    | AA                              | GG                | 1946644622               |
| SNP_P3_149227_6380  | NW_004516523.1 | Scaffold1275 | 6380                    | TT                              | CC                | 1946644624               |
| SNP_P3_149228_6452  | NW_004516523.1 | Scaffold1275 | 6452                    | AA                              | TT                | 1946644626               |
| SNP_P3_149229_8574  | NW_004516523.1 | Scaffold1275 | 8574                    | AA                              | TT                | 1946644628               |
| SNP_P3_149231_12123 | NW_004516523.1 | Scaffold1275 | 12123                   | CC                              | AA                | 1946644630               |
| SNP_P3_149232_12663 | NW_004516523.1 | Scaffold1275 | 12663                   | AA                              | GG                | 1946644632               |
| SNP_P3_149233_135   | NW_004516524.1 | Scaffold1276 | 135                     | AA                              | GG                | 1946644633               |
| SNP_P3_149234_314   | NW_004516524.1 | Scaffold1276 | 314                     | GG                              | TT                | 1946644635               |
| SNP_P3_149235_335   | NW_004516524.1 | Scaffold1276 | 335                     | CC                              | TT                | 1946644637               |
| SNP_P3_149236_615   | NW_004516524.1 | Scaffold1276 | 615                     | TT                              | AA                | 1946644639               |
| SNP_P3_149237_618   | NW_004516524.1 | Scaffold1276 | 618                     | AA                              | GG                | 1946644641               |
| SNP_P3_149238_623   | NW_004516524.1 | Scaffold1276 | 623                     | CC                              | TT                | 1946644643               |
| SNP_P3_149239_958   | NW_004516524.1 | Scaffold1276 | 958                     | AA                              | TT                | 1946644645               |
| SNP_P3_149240_1052  | NW_004516524.1 | Scaffold1276 | 1052                    | GG                              | CC                | 1946644647               |
| SNP_P3_149241_1087  | NW_004516524.1 | Scaffold1276 | 1087                    | CC                              | AA                | 1946644650               |
| SNP_P3_149242_1163  | NW_004516524.1 | Scaffold1276 | 1163                    | TT                              | CC                | 1946644652               |
| SNP_P3_149245_2279  | NW_004516524.1 | Scaffold1276 | 2279                    | GG                              | TT                | 1946644654               |
| SNP_P3_149246_22147 | NW_004516524.1 | Scaffold1276 | 22147                   | GG                              | TT                | 1946644656               |
| SNP_P3_149247_22179 | NW_004516524.1 | Scaffold1276 | 22179                   | TT                              | AA                | 1946644658               |

| SNPs IDs            | Chromosome IDs | Chromosomes  | Physical positions (bp) | CDC Frontier (Reference genome) | (Pusa 256 & HPNB) | NCBI SNPdb Accession IDs |
|---------------------|----------------|--------------|-------------------------|---------------------------------|-------------------|--------------------------|
| SNP_P3_149248_22218 | NW_004516524.1 | Scaffold1276 | 22218                   | TT                              | AA                | 1946644659               |
| SNP_P3_149249_22234 | NW_004516524.1 | Scaffold1276 | 22234                   | TT                              | CC                | 1946644661               |
| SNP_P3_149250_22514 | NW_004516524.1 | Scaffold1276 | 22514                   | CC                              | TT                | 1946644663               |
| SNP_P3_149251_45666 | NW_004516524.1 | Scaffold1276 | 45666                   | TT                              | GG                | 1946644665               |
| SNP_P3_149253_53613 | NW_004516524.1 | Scaffold1276 | 53613                   | GG                              | TT                | 1946644667               |
| SNP_P3_149254_57189 | NW_004516524.1 | Scaffold1276 | 57189                   | AA                              | GG                | 1946644669               |
| SNP_P3_149255_57210 | NW_004516524.1 | Scaffold1276 | 57210                   | TT                              | CC                | 1946644671               |
| SNP_P3_149256_57211 | NW_004516524.1 | Scaffold1276 | 57211                   | GG                              | AA                | 1946644673               |
| SNP_P3_149257_57215 | NW_004516524.1 | Scaffold1276 | 57215                   | CC                              | TT                | 1946644675               |
| SNP_P3_149258_57562 | NW_004516524.1 | Scaffold1276 | 57562                   | CC                              | GG                | 1946644677               |
| SNP_P3_149260_62656 | NW_004516524.1 | Scaffold1276 | 62656                   | AA                              | GG                | 1946644679               |
| SNP_P3_149261_495   | NW_004516525.1 | Scaffold1278 | 495                     | CC                              | AA                | 1946644681               |
| SNP_P3_149262_10794 | NW_004516525.1 | Scaffold1278 | 10794                   | AA                              | TT                | 1946644683               |
| SNP_P3_149263_10813 | NW_004516525.1 | Scaffold1278 | 10813                   | AA                              | GG                | 1946644685               |
| SNP_P3_149264_10855 | NW_004516525.1 | Scaffold1278 | 10855                   | GG                              | AA                | 1946644687               |
| SNP_P3_149266_34594 | NW_004516525.1 | Scaffold1278 | 34594                   | AA                              | GG                | 1946644689               |
| SNP_P3_149267_35154 | NW_004516525.1 | Scaffold1278 | 35154                   | GG                              | TT                | 1946644691               |
| SNP_P3_149268_35330 | NW_004516525.1 | Scaffold1278 | 35330                   | TT                              | CC                | 1946644693               |
| SNP_P3_149269_35348 | NW_004516525.1 | Scaffold1278 | 35348                   | TT                              | GG                | 1946644695               |
| SNP_P3_149270_35394 | NW_004516525.1 | Scaffold1278 | 35394                   | TT                              | CC                | 1946644697               |
| SNP_P3_149271_35914 | NW_004516525.1 | Scaffold1278 | 35914                   | CC                              | TT                | 1946644699               |
| SNP_P3_149272_35942 | NW_004516525.1 | Scaffold1278 | 35942                   | AA                              | GG                | 1946644701               |
| SNP_P3_149273_35972 | NW_004516525.1 | Scaffold1278 | 35972                   | CC                              | AA                | 1946644703               |
| SNP_P3_149274_35975 | NW_004516525.1 | Scaffold1278 | 35975                   | GG                              | AA                | 1946644705               |
| SNP_P3_149275_35990 | NW_004516525.1 | Scaffold1278 | 35990                   | TT                              | GG                | 1946644707               |
| SNP_P3_149276_61918 | NW_004516525.1 | Scaffold1278 | 61918                   | TT                              | CC                | 1946644709               |
| SNP_P3_149277_62213 | NW_004516525.1 | Scaffold1278 | 62213                   | GG                              | AA                | 1946644711               |
| SNP_P3_149278_62249 | NW_004516525.1 | Scaffold1278 | 62249                   | AA                              | GG                | 1946644713               |
| SNP_P3_149279_62271 | NW_004516525.1 | Scaffold1278 | 62271                   | TT                              | AA                | 1946644714               |
| SNP_P3_149280_62272 | NW_004516525.1 | Scaffold1278 | 62272                   | GG                              | AA                | 1946644716               |
| SNP_P3_149281_62273 | NW_004516525.1 | Scaffold1278 | 62273                   | GG                              | AA                | 1946644718               |
| SNP_P3_149282_62278 | NW_004516525.1 | Scaffold1278 | 62278                   | AA                              | GG                | 1946644720               |
| SNP_P3_149283_62283 | NW_004516525.1 | Scaffold1278 | 62283                   | CC                              | AA                | 1946644723               |
| SNP_P3_149284_62310 | NW_004516525.1 | Scaffold1278 | 62310                   | TT                              | CC                | 1946644725               |
| SNP_P3_149285_62326 | NW_004516525.1 | Scaffold1278 | 62326                   | GG                              | TT                | 1946644727               |
| SNP_P3_149286_62334 | NW_004516525.1 | Scaffold1278 | 62334                   | TT                              | CC                | 1946644729               |
| SNP_P3_149287_62335 | NW_004516525.1 | Scaffold1278 | 62335                   | TT                              | CC                | 1946644731               |
| SNP_P3_149288_62346 | NW_004516525.1 | Scaffold1278 | 62346                   | GG                              | AA                | 1946644733               |
| SNP_P3_149289_62369 | NW_004516525.1 | Scaffold1278 | 62369                   | CC                              | AA                | 1946644735               |
| SNP_P3_149290_62371 | NW_004516525.1 | Scaffold1278 | 62371                   | CC                              | TT                | 1946644737               |
| SNP_P3_149291_62511 | NW_004516525.1 | Scaffold1278 | 62511                   | GG                              | AA                | 1946644739               |
| SNP_P3_149292_62535 | NW_004516525.1 | Scaffold1278 | 62535                   | GG                              | AA                | 1946644740               |

| SNPs IDs            | Chromosome IDs | Chromosomes  | Physical positions (bp) | CDC Frontier (Reference genome) | (Pusa 256 & HPNB) | NCBI SNPdb Accession IDs |
|---------------------|----------------|--------------|-------------------------|---------------------------------|-------------------|--------------------------|
| SNP_P3_149293_62552 | NW_004516525.1 | Scaffold1278 | 62552                   | GG                              | AA                | 1946644742               |
| SNP_P3_149294_62733 | NW_004516525.1 | Scaffold1278 | 62733                   | TT                              | CC                | 1946644744               |
| SNP_P3_149295_62740 | NW_004516525.1 | Scaffold1278 | 62740                   | GG                              | AA                | 1946644746               |
| SNP_P3_149296_62768 | NW_004516525.1 | Scaffold1278 | 62768                   | GG                              | AA                | 1946644748               |
| SNP_P3_149297_62769 | NW_004516525.1 | Scaffold1278 | 62769                   | AA                              | TT                | 1946644750               |
| SNP_P3_149298_62795 | NW_004516525.1 | Scaffold1278 | 62795                   | CC                              | TT                | 1946644752               |
| SNP_P3_149299_62836 | NW_004516525.1 | Scaffold1278 | 62836                   | TT                              | CC                | 1946644754               |
| SNP_P3_149300_62857 | NW_004516525.1 | Scaffold1278 | 62857                   | GG                              | AA                | 1946644756               |
| SNP_P3_149301_62875 | NW_004516525.1 | Scaffold1278 | 62875                   | AA                              | CC                | 1946644758               |
| SNP_P3_149302_62879 | NW_004516525.1 | Scaffold1278 | 62879                   | CC                              | TT                | 1946644760               |
| SNP_P3_149303_62921 | NW_004516525.1 | Scaffold1278 | 62921                   | TT                              | GG                | 1946644761               |
| SNP_P3_149305_63131 | NW_004516525.1 | Scaffold1278 | 63131                   | TT                              | CC                | 1946644765               |
| SNP_P3_149306_63158 | NW_004516525.1 | Scaffold1278 | 63158                   | TT                              | CC                | 1946644767               |
| SNP_P3_149307_63160 | NW_004516525.1 | Scaffold1278 | 63160                   | AA                              | TT                | 1946644769               |
| SNP_P3_149308_63192 | NW_004516525.1 | Scaffold1278 | 63192                   | AA                              | GG                | 1946644771               |
| SNP_P3_149309_63215 | NW_004516525.1 | Scaffold1278 | 63215                   | GG                              | AA                | 1946644773               |
| SNP_P3_149310_63237 | NW_004516525.1 | Scaffold1278 | 63237                   | CC                              | TT                | 1946644776               |
| SNP_P3_149311_63241 | NW_004516525.1 | Scaffold1278 | 63241                   | CC                              | GG                | 1946644779               |
| SNP_P3_149314_63310 | NW_004516525.1 | Scaffold1278 | 63310                   | GG                              | AA                | 1946644781               |
| SNP_P3_149315_63317 | NW_004516525.1 | Scaffold1278 | 63317                   | TT                              | CC                | 1946644783               |
| SNP_P3_149316_63319 | NW_004516525.1 | Scaffold1278 | 63319                   | AA                              | GG                | 1946644785               |
| SNP_P3_149317_63354 | NW_004516525.1 | Scaffold1278 | 63354                   | AA                              | GG                | 1946644787               |
| SNP_P3_149318_63363 | NW_004516525.1 | Scaffold1278 | 63363                   | GG                              | AA                | 1946644789               |
| SNP_P3_149319_63387 | NW_004516525.1 | Scaffold1278 | 63387                   | AA                              | GG                | 1946644791               |
| SNP_P3_149320_63411 | NW_004516525.1 | Scaffold1278 | 63411                   | CC                              | TT                | 1946644793               |
| SNP_P3_149322_65140 | NW_004516525.1 | Scaffold1278 | 65140                   | AA                              | TT                | 1946644796               |
| SNP_P3_149323_83765 | NW_004516525.1 | Scaffold1278 | 83765                   | TT                              | CC                | 1946644798               |
| SNP_P3_149324_84020 | NW_004516525.1 | Scaffold1278 | 84020                   | GG                              | AA                | 1946644800               |
| SNP_P3_149325_95459 | NW_004516525.1 | Scaffold1278 | 95459                   | TT                              | CC                | 1946644802               |
| SNP_P3_149326_95500 | NW_004516525.1 | Scaffold1278 | 95500                   | AA                              | CC                | 1946644804               |
| SNP_P3_149327_95505 | NW_004516525.1 | Scaffold1278 | 95505                   | AA                              | TT                | 1946644806               |
| SNP_P3_149328_95516 | NW_004516525.1 | Scaffold1278 | 95516                   | TT                              | CC                | 1946644808               |
| SNP_P3_149329_95548 | NW_004516525.1 | Scaffold1278 | 95548                   | TT                              | GG                | 1946644810               |
| SNP_P3_149330_95878 | NW_004516525.1 | Scaffold1278 | 95878                   | AA                              | CC                | 1946644811               |
| SNP_P3_149331_95946 | NW_004516525.1 | Scaffold1278 | 95946                   | AA                              | CC                | 1946644813               |
| SNP_P3_149332_95990 | NW_004516525.1 | Scaffold1278 | 95990                   | AA                              | GG                | 1946644815               |
| SNP_P3_149333_96807 | NW_004516525.1 | Scaffold1278 | 96807                   | AA                              | CC                | 1946644817               |
| SNP_P3_149334_96825 | NW_004516525.1 | Scaffold1278 | 96825                   | GG                              | AA                | 1946644819               |
| SNP_P3_149335_97927 | NW_004516525.1 | Scaffold1278 | 97927                   | CC                              | TT                | 1946644822               |
| SNP_P3_149336_99984 | NW_004516525.1 | Scaffold1278 | 99984                   | AA                              | GG                | 1946644824               |
| SNP_P3_149338_417   | NW_004516526.1 | Scaffold1279 | 417                     | TT                              | CC                | 1946644826               |
| SNP_P3_149339_871   | NW_004516527.1 | Scaffold1281 | 871                     | GG                              | TT                | 1946644828               |

| SNPs IDs             | Chromosome IDs | Chromosomes  | Physical positions (bp) | CDC Frontier (Reference genome) | (Pusa 256 & HPNB) | NCBI SNPdb Accession IDs |
|----------------------|----------------|--------------|-------------------------|---------------------------------|-------------------|--------------------------|
| SNP_P3_149341_1886   | NW_004516527.1 | Scaffold1281 | 1886                    | TT                              | GG                | 1946644830               |
| SNP_P3_149343_46477  | NW_004516527.1 | Scaffold1281 | 46477                   | AA                              | TT                | 1946644832               |
| SNP_P3_149344_46549  | NW_004516527.1 | Scaffold1281 | 46549                   | GG                              | TT                | 1946644834               |
| SNP_P3_149346_46576  | NW_004516527.1 | Scaffold1281 | 46576                   | CC                              | AA                | 1946644836               |
| SNP_P3_149347_46768  | NW_004516527.1 | Scaffold1281 | 46768                   | AA                              | GG                | 1946644838               |
| SNP_P3_149348_46810  | NW_004516527.1 | Scaffold1281 | 46810                   | GG                              | AA                | 1946644840               |
| SNP_P3_149349_47382  | NW_004516527.1 | Scaffold1281 | 47382                   | TT                              | CC                | 1946644842               |
| SNP_P3_149350_47525  | NW_004516527.1 | Scaffold1281 | 47525                   | CC                              | TT                | 1946644844               |
| SNP_P3_149351_48268  | NW_004516527.1 | Scaffold1281 | 48268                   | GG                              | AA                | 1946644846               |
| SNP_P3_149352_48284  | NW_004516527.1 | Scaffold1281 | 48284                   | GG                              | AA                | 1946644848               |
| SNP_P3_149353_51401  | NW_004516527.1 | Scaffold1281 | 51401                   | GG                              | AA                | 1946644850               |
| SNP_P3_149354_51547  | NW_004516527.1 | Scaffold1281 | 51547                   | GG                              | AA                | 1946644852               |
| SNP_P3_149355_51650  | NW_004516527.1 | Scaffold1281 | 51650                   | GG                              | TT                | 1946644854               |
| SNP_P3_149356_51752  | NW_004516527.1 | Scaffold1281 | 51752                   | AA                              | GG                | 1946644856               |
| SNP_P3_149357_51809  | NW_004516527.1 | Scaffold1281 | 51809                   | CC                              | TT                | 1946644858               |
| SNP_P3_149359_52043  | NW_004516527.1 | Scaffold1281 | 52043                   | CC                              | AA                | 1946644860               |
| SNP_P3_149360_53074  | NW_004516527.1 | Scaffold1281 | 53074                   | AA                              | TT                | 1946644862               |
| SNP_P3_149361_53409  | NW_004516527.1 | Scaffold1281 | 53409                   | GG                              | AA                | 1946644864               |
| SNP_P3_149363_63347  | NW_004516527.1 | Scaffold1281 | 63347                   | CC                              | TT                | 1946644866               |
| SNP_P3_149364_66154  | NW_004516527.1 | Scaffold1281 | 66154                   | GG                              | TT                | 1946644868               |
| SNP_P3_149366_77128  | NW_004516527.1 | Scaffold1281 | 77128                   | TT                              | CC                | 1946644870               |
| SNP_P3_149368_118045 | NW_004516527.1 | Scaffold1281 | 118045                  | AA                              | TT                | 1946644871               |
| SNP_P3_149369_118046 | NW_004516527.1 | Scaffold1281 | 118046                  | AA                              | TT                | 1946644873               |
| SNP_P3_149370_118047 | NW_004516527.1 | Scaffold1281 | 118047                  | TT                              | AA                | 1946644875               |
| SNP_P3_149371_118053 | NW_004516527.1 | Scaffold1281 | 118053                  | GG                              | AA                | 1946644877               |
| SNP_P3_149374_154275 | NW_004516527.1 | Scaffold1281 | 154275                  | AA                              | GG                | 1946644879               |
| SNP_P3_149375_154295 | NW_004516527.1 | Scaffold1281 | 154295                  | TT                              | CC                | 1946644881               |
| SNP_P3_149376_154358 | NW_004516527.1 | Scaffold1281 | 154358                  | TT                              | CC                | 1946644884               |
| SNP_P3_149377_160415 | NW_004516527.1 | Scaffold1281 | 160415                  | AA                              | GG                | 1946644886               |
| SNP_P3_149379_161373 | NW_004516527.1 | Scaffold1281 | 161373                  | CC                              | TT                | 1946644888               |
| SNP_P3_149380_166134 | NW_004516527.1 | Scaffold1281 | 166134                  | AA                              | GG                | 1946644890               |
| SNP_P3_149381_168727 | NW_004516527.1 | Scaffold1281 | 168727                  | AA                              | TT                | 1946644891               |
| SNP_P3_149384_204007 | NW_004516527.1 | Scaffold1281 | 204007                  | GG                              | AA                | 1946644892               |
| SNP_P3_149385_283287 | NW_004516527.1 | Scaffold1281 | 283287                  | AA                              | CC                | 1946644893               |
| SNP_P3_149386_283298 | NW_004516527.1 | Scaffold1281 | 283298                  | GG                              | CC                | 1946644895               |
| SNP_P3_149387_295320 | NW_004516527.1 | Scaffold1281 | 295320                  | CC                              | TT                | 1946644896               |
| SNP_P3_149388_296926 | NW_004516527.1 | Scaffold1281 | 296926                  | GG                              | AA                | 1946644898               |
| SNP_P3_149389_296955 | NW_004516527.1 | Scaffold1281 | 296955                  | GG                              | TT                | 1946644900               |
| SNP_P3_149390_308631 | NW_004516527.1 | Scaffold1281 | 308631                  | GG                              | AA                | 1946644902               |
| SNP_P3_149391_353369 | NW_004516527.1 | Scaffold1281 | 353369                  | TT                              | GG                | 1946644904               |
| SNP_P3_149392_376175 | NW_004516527.1 | Scaffold1281 | 376175                  | CC                              | GG                | 1946644906               |
| SNP_P3_149393_376316 | NW_004516527.1 | Scaffold1281 | 376316                  | GG                              | AA                | 1946644908               |

| SNPs IDs             | Chromosome IDs | Chromosomes  | Physical positions (bp) | CDC Frontier (Reference genome) | (Pusa 256 & HPNB) | NCBI SNPdb Accession IDs |
|----------------------|----------------|--------------|-------------------------|---------------------------------|-------------------|--------------------------|
| SNP_P3_149396_376414 | NW_004516527.1 | Scaffold1281 | 376414                  | CC                              | TT                | 1946644910               |
| SNP_P3_149397_376489 | NW_004516527.1 | Scaffold1281 | 376489                  | AA                              | CC                | 1946644912               |
| SNP_P3_149398_376537 | NW_004516527.1 | Scaffold1281 | 376537                  | GG                              | TT                | 1946644915               |
| SNP_P3_149401_390591 | NW_004516527.1 | Scaffold1281 | 390591                  | TT                              | CC                | 1946644917               |
| SNP_P3_149402_414512 | NW_004516527.1 | Scaffold1281 | 414512                  | CC                              | TT                | 1946644919               |
| SNP_P3_149403_414579 | NW_004516527.1 | Scaffold1281 | 414579                  | AA                              | GG                | 1946644921               |
| SNP_P3_149404_414752 | NW_004516527.1 | Scaffold1281 | 414752                  | TT                              | GG                | 1946644923               |
| SNP_P3_149405_417660 | NW_004516527.1 | Scaffold1281 | 417660                  | CC                              | TT                | 1946644925               |
| SNP_P3_149406_426032 | NW_004516527.1 | Scaffold1281 | 426032                  | CC                              | TT                | 1946644927               |
| SNP_P3_149407_466800 | NW_004516527.1 | Scaffold1281 | 466800                  | AA                              | CC                | 1946644929               |
| SNP_P3_149408_467387 | NW_004516527.1 | Scaffold1281 | 467387                  | AA                              | GG                | 1946644931               |
| SNP_P3_149411_470972 | NW_004516527.1 | Scaffold1281 | 470972                  | AA                              | TT                | 1946644933               |
| SNP_P3_149412_471201 | NW_004516527.1 | Scaffold1281 | 471201                  | CC                              | TT                | 1946644935               |
| SNP_P3_149413_471371 | NW_004516527.1 | Scaffold1281 | 471371                  | CC                              | TT                | 1946644937               |
| SNP_P3_149414_471404 | NW_004516527.1 | Scaffold1281 | 471404                  | GG                              | AA                | 1946644939               |
| SNP_P3_149415_471422 | NW_004516527.1 | Scaffold1281 | 471422                  | AA                              | TT                | 1946644941               |
| SNP_P3_149416_471476 | NW_004516527.1 | Scaffold1281 | 471476                  | CC                              | AA                | 1946644943               |
| SNP_P3_149417_471502 | NW_004516527.1 | Scaffold1281 | 471502                  | TT                              | CC                | 1946644945               |
| SNP_P3_149418_471580 | NW_004516527.1 | Scaffold1281 | 471580                  | TT                              | GG                | 1946644947               |
| SNP_P3_149420_471940 | NW_004516527.1 | Scaffold1281 | 471940                  | AA                              | GG                | 1946644949               |
| SNP_P3_149421_472102 | NW_004516527.1 | Scaffold1281 | 472102                  | TT                              | CC                | 1946644951               |
| SNP_P3_149423_476897 | NW_004516527.1 | Scaffold1281 | 476897                  | CC                              | TT                | 1946644953               |
| SNP_P3_149424_485952 | NW_004516527.1 | Scaffold1281 | 485952                  | TT                              | CC                | 1946644955               |
| SNP_P3_149425_492005 | NW_004516527.1 | Scaffold1281 | 492005                  | CC                              | TT                | 1946644957               |
| SNP_P3_149426_492031 | NW_004516527.1 | Scaffold1281 | 492031                  | AA                              | GG                | 1946644959               |
| SNP_P3_149427_492039 | NW_004516527.1 | Scaffold1281 | 492039                  | AA                              | TT                | 1946644961               |
| SNP_P3_149428_492041 | NW_004516527.1 | Scaffold1281 | 492041                  | GG                              | TT                | 1946644963               |
| SNP_P3_149429_492108 | NW_004516527.1 | Scaffold1281 | 492108                  | GG                              | AA                | 1946644965               |
| SNP_P3_149430_492110 | NW_004516527.1 | Scaffold1281 | 492110                  | TT                              | CC                | 1946644966               |
| SNP_P3_149431_492115 | NW_004516527.1 | Scaffold1281 | 492115                  | CC                              | TT                | 1946644968               |
| SNP_P3_149432_492128 | NW_004516527.1 | Scaffold1281 | 492128                  | AA                              | GG                | 1946644970               |
| SNP_P3_149433_492145 | NW_004516527.1 | Scaffold1281 | 492145                  | CC                              | GG                | 1946644972               |
| SNP_P3_149434_492162 | NW_004516527.1 | Scaffold1281 | 492162                  | AA                              | GG                | 1946644974               |
| SNP_P3_149436_492369 | NW_004516527.1 | Scaffold1281 | 492369                  | CC                              | AA                | 1946644976               |
| SNP_P3_149437_492375 | NW_004516527.1 | Scaffold1281 | 492375                  | CC                              | AA                | 1946644978               |
| SNP_P3_149438_492386 | NW_004516527.1 | Scaffold1281 | 492386                  | CC                              | GG                | 1946644980               |
| SNP_P3_149439_492389 | NW_004516527.1 | Scaffold1281 | 492389                  | TT                              | CC                | 1946644982               |
| SNP_P3_149440_492402 | NW_004516527.1 | Scaffold1281 | 492402                  | CC                              | GG                | 1946644985               |
| SNP_P3_149442_503796 | NW_004516527.1 | Scaffold1281 | 503796                  | AA                              | CC                | 1946644987               |
| SNP_P3_149443_503894 | NW_004516527.1 | Scaffold1281 | 503894                  | TT                              | CC                | 1946644989               |
| SNP_P3_149444_503919 | NW_004516527.1 | Scaffold1281 | 503919                  | TT                              | CC                | 1946644991               |
| SNP_P3_149445_503921 | NW_004516527.1 | Scaffold1281 | 503921                  | GG                              | TT                | 1946644993               |

| SNPs IDs             | Chromosome IDs | Chromosomes  | Physical positions (bp) | CDC Frontier (Reference genome) | (Pusa 256 & HPNB) | NCBI SNPdb Accession IDs |
|----------------------|----------------|--------------|-------------------------|---------------------------------|-------------------|--------------------------|
| SNP_P3_149446_503957 | NW_004516527.1 | Scaffold1281 | 503957                  | TT                              | GG                | 1946644995               |
| SNP_P3_149447_504024 | NW_004516527.1 | Scaffold1281 | 504024                  | TT                              | GG                | 1946644997               |
| SNP_P3_149448_504098 | NW_004516527.1 | Scaffold1281 | 504098                  | GG                              | TT                | 1946644999               |
| SNP_P3_149449_504107 | NW_004516527.1 | Scaffold1281 | 504107                  | TT                              | CC                | 1946645001               |
| SNP_P3_149450_504115 | NW_004516527.1 | Scaffold1281 | 504115                  | TT                              | CC                | 1946645003               |
| SNP_P3_149451_504138 | NW_004516527.1 | Scaffold1281 | 504138                  | CC                              | TT                | 1946645005               |
| SNP_P3_149452_504281 | NW_004516527.1 | Scaffold1281 | 504281                  | AA                              | CC                | 1946645007               |
| SNP_P3_149453_504440 | NW_004516527.1 | Scaffold1281 | 504440                  | CC                              | TT                | 1946645009               |
| SNP_P3_149454_516530 | NW_004516527.1 | Scaffold1281 | 516530                  | CC                              | GG                | 1946645011               |
| SNP_P3_149455_518052 | NW_004516527.1 | Scaffold1281 | 518052                  | GG                              | AA                | 1946645013               |
| SNP_P3_149456_522619 | NW_004516527.1 | Scaffold1281 | 522619                  | GG                              | CC                | 1946645015               |
| SNP_P3_149457_4166   | NW_004516528.1 | Scaffold1283 | 4166                    | CC                              | AA                | 1946645018               |
| SNP_P3_149458_13443  | NW_004516528.1 | Scaffold1283 | 13443                   | AA                              | GG                | 1946645020               |
| SNP_P3_149459_34732  | NW_004516528.1 | Scaffold1283 | 34732                   | CC                              | TT                | 1946645021               |
| SNP_P3_149460_47169  | NW_004516528.1 | Scaffold1283 | 47169                   | TT                              | CC                | 1946645023               |
| SNP_P3_149461_53816  | NW_004516528.1 | Scaffold1283 | 53816                   | TT                              | AA                | 1946645025               |
| SNP_P3_149462_54000  | NW_004516528.1 | Scaffold1283 | 54000                   | CC                              | GG                | 1946645027               |
| SNP_P3_149463_54191  | NW_004516528.1 | Scaffold1283 | 54191                   | GG                              | TT                | 1946645029               |
| SNP_P3_149464_54204  | NW_004516528.1 | Scaffold1283 | 54204                   | AA                              | GG                | 1946645031               |
| SNP_P3_149465_54217  | NW_004516528.1 | Scaffold1283 | 54217                   | CC                              | TT                | 1946645033               |
| SNP_P3_149466_54256  | NW_004516528.1 | Scaffold1283 | 54256                   | TT                              | AA                | 1946645042               |
| SNP_P3_149467_74291  | NW_004516528.1 | Scaffold1283 | 74291                   | AA                              | GG                | 1946645045               |
| SNP_P3_149468_74300  | NW_004516528.1 | Scaffold1283 | 74300                   | CC                              | TT                | 1946645047               |
| SNP_P3_149469_74301  | NW_004516528.1 | Scaffold1283 | 74301                   | TT                              | GG                | 1946645049               |
| SNP_P3_149470_74306  | NW_004516528.1 | Scaffold1283 | 74306                   | AA                              | GG                | 1946645051               |
| SNP_P3_149471_74363  | NW_004516528.1 | Scaffold1283 | 74363                   | CC                              | TT                | 1946645053               |
| SNP_P3_149472_74380  | NW_004516528.1 | Scaffold1283 | 74380                   | TT                              | CC                | 1946645055               |
| SNP_P3_149473_74435  | NW_004516528.1 | Scaffold1283 | 74435                   | CC                              | TT                | 1946645057               |
| SNP_P3_149474_37820  | NW_004516529.1 | Scaffold1285 | 37820                   | AA                              | GG                | 1946645059               |
| SNP_P3_149475_65152  | NW_004516529.1 | Scaffold1285 | 65152                   | TT                              | GG                | 1946645061               |
| SNP_P3_149476_65171  | NW_004516529.1 | Scaffold1285 | 65171                   | AA                              | GG                | 1946645063               |
| SNP_P3_149477_65559  | NW_004516529.1 | Scaffold1285 | 65559                   | GG                              | AA                | 1946645065               |
| SNP_P3_149478_67137  | NW_004516529.1 | Scaffold1285 | 67137                   | AA                              | GG                | 1946645067               |
| SNP_P3_149479_67139  | NW_004516529.1 | Scaffold1285 | 67139                   | TT                              | AA                | 1946645069               |
| SNP_P3_149480_67274  | NW_004516529.1 | Scaffold1285 | 67274                   | TT                              | CC                | 1946645071               |
| SNP_P3_149481_67281  | NW_004516529.1 | Scaffold1285 | 67281                   | AA                              | GG                | 1946645073               |
| SNP_P3_149482_67301  | NW_004516529.1 | Scaffold1285 | 67301                   | AA                              | GG                | 1946645074               |
| SNP_P3_149483_67418  | NW_004516529.1 | Scaffold1285 | 67418                   | TT                              | GG                | 1946645076               |
| SNP_P3_149484_67454  | NW_004516529.1 | Scaffold1285 | 67454                   | TT                              | GG                | 1946645079               |
| SNP_P3_149485_67467  | NW_004516529.1 | Scaffold1285 | 67467                   | AA                              | TT                | 1946645081               |
| SNP_P3_149486_67548  | NW_004516529.1 | Scaffold1285 | 67548                   | TT                              | AA                | 1946645083               |
| SNP_P3_149487_67556  | NW_004516529.1 | Scaffold1285 | 67556                   | AA                              | GG                | 1946645085               |



| SNPs IDs             | Chromosome IDs | Chromosomes  | Physical positions (bp) | CDC Frontier (Reference genome) | (Pusa 256 & HPNB) | NCBI SNPdb Accession IDs |
|----------------------|----------------|--------------|-------------------------|---------------------------------|-------------------|--------------------------|
| SNP_P3_149488_67598  | NW_004516529.1 | Scaffold1285 | 67598                   | GG                              | AA                | 1946645087               |
| SNP_P3_149489_67602  | NW_004516529.1 | Scaffold1285 | 67602                   | AA                              | CC                | 1946645089               |
| SNP_P3_149490_67603  | NW_004516529.1 | Scaffold1285 | 67603                   | TT                              | CC                | 1946645091               |
| SNP_P3_149491_67606  | NW_004516529.1 | Scaffold1285 | 67606                   | AA                              | TT                | 1946645096               |
| SNP_P3_149492_67618  | NW_004516529.1 | Scaffold1285 | 67618                   | AA                              | CC                | 1946645098               |
| SNP_P3_149493_67645  | NW_004516529.1 | Scaffold1285 | 67645                   | CC                              | GG                | 1946645100               |
| SNP_P3_149494_67695  | NW_004516529.1 | Scaffold1285 | 67695                   | TT                              | CC                | 1946645102               |
| SNP_P3_149496_68311  | NW_004516529.1 | Scaffold1285 | 68311                   | AA                              | GG                | 1946645104               |
| SNP_P3_149497_68324  | NW_004516529.1 | Scaffold1285 | 68324                   | GG                              | CC                | 1946645106               |
| SNP_P3_149499_73066  | NW_004516529.1 | Scaffold1285 | 73066                   | TT                              | CC                | 1946645108               |
| SNP_P3_149500_88438  | NW_004516529.1 | Scaffold1285 | 88438                   | AA                              | CC                | 1946645111               |
| SNP_P3_149501_96428  | NW_004516529.1 | Scaffold1285 | 96428                   | GG                              | AA                | 1946645113               |
| SNP_P3_149503_97014  | NW_004516529.1 | Scaffold1285 | 97014                   | TT                              | CC                | 1946645115               |
| SNP_P3_149504_99026  | NW_004516529.1 | Scaffold1285 | 99026                   | AA                              | GG                | 1946645117               |
| SNP_P3_149505_132807 | NW_004516529.1 | Scaffold1285 | 132807                  | AA                              | GG                | 1946645119               |
| SNP_P3_149506_154780 | NW_004516529.1 | Scaffold1285 | 154780                  | TT                              | AA                | 1946645121               |
| SNP_P3_149507_160414 | NW_004516529.1 | Scaffold1285 | 160414                  | GG                              | TT                | 1946645123               |
| SNP_P3_149508_185149 | NW_004516529.1 | Scaffold1285 | 185149                  | AA                              | GG                | 1946645125               |
| SNP_P3_149509_199169 | NW_004516529.1 | Scaffold1285 | 199169                  | AA                              | GG                | 1946645127               |
| SNP_P3_149510_199197 | NW_004516529.1 | Scaffold1285 | 199197                  | AA                              | CC                | 1946645129               |
| SNP_P3_149511_202290 | NW_004516529.1 | Scaffold1285 | 202290                  | GG                              | AA                | 1946645131               |
| SNP_P3_149512_203884 | NW_004516529.1 | Scaffold1285 | 203884                  | GG                              | TT                | 1946645133               |
| SNP_P3_149513_204289 | NW_004516529.1 | Scaffold1285 | 204289                  | AA                              | TT                | 1946645135               |
| SNP_P3_149514_204605 | NW_004516529.1 | Scaffold1285 | 204605                  | CC                              | TT                | 1946645137               |
| SNP_P3_149515_210969 | NW_004516529.1 | Scaffold1285 | 210969                  | AA                              | CC                | 1946645139               |
| SNP_P3_149516_210981 | NW_004516529.1 | Scaffold1285 | 210981                  | AA                              | TT                | 1946645141               |
| SNP_P3_149517_210992 | NW_004516529.1 | Scaffold1285 | 210992                  | CC                              | TT                | 1946645143               |
| SNP_P3_149518_211052 | NW_004516529.1 | Scaffold1285 | 211052                  | TT                              | GG                | 1946645145               |
| SNP_P3_149519_211059 | NW_004516529.1 | Scaffold1285 | 211059                  | TT                              | CC                | 1946645147               |
| SNP_P3_149520_211083 | NW_004516529.1 | Scaffold1285 | 211083                  | TT                              | CC                | 1946645149               |
| SNP_P3_149521_211091 | NW_004516529.1 | Scaffold1285 | 211091                  | AA                              | CC                | 1946645151               |
| SNP_P3_149522_211094 | NW_004516529.1 | Scaffold1285 | 211094                  | TT                              | CC                | 1946645153               |
| SNP_P3_149523_214369 | NW_004516529.1 | Scaffold1285 | 214369                  | TT                              | AA                | 1946645155               |
| SNP_P3_149524_235918 | NW_004516529.1 | Scaffold1285 | 235918                  | TT                              | CC                | 1946645157               |
| SNP_P3_149525_239631 | NW_004516529.1 | Scaffold1285 | 239631                  | AA                              | GG                | 1946645159               |
| SNP_P3_149526_239666 | NW_004516529.1 | Scaffold1285 | 239666                  | AA                              | CC                | 1946645161               |
| SNP_P3_149527_239869 | NW_004516529.1 | Scaffold1285 | 239869                  | AA                              | CC                | 1946645163               |
| SNP_P3_149528_239884 | NW_004516529.1 | Scaffold1285 | 239884                  | AA                              | GG                | 1946645165               |
| SNP_P3_149529_240298 | NW_004516529.1 | Scaffold1285 | 240298                  | CC                              | TT                | 1946645167               |
| SNP_P3_149530_251577 | NW_004516529.1 | Scaffold1285 | 251577                  | AA                              | GG                | 1946645169               |
| SNP_P3_149532_252221 | NW_004516529.1 | Scaffold1285 | 252221                  | GG                              | TT                | 1946645171               |
| SNP_P3_149533_259914 | NW_004516529.1 | Scaffold1285 | 259914                  | TT                              | CC                | 1946645173               |

| SNPs IDs             | Chromosome IDs | Chromosomes  | Physical positions (bp) | CDC Frontier (Reference genome) | (Pusa 256 & HPNB) | NCBI SNPdb Accession IDs |
|----------------------|----------------|--------------|-------------------------|---------------------------------|-------------------|--------------------------|
| SNP_P3_149534_259921 | NW_004516529.1 | Scaffold1285 | 259921                  | CC                              | AA                | 1946645175               |
| SNP_P3_149535_278487 | NW_004516529.1 | Scaffold1285 | 278487                  | AA                              | GG                | 1946645176               |
| SNP_P3_149536_278501 | NW_004516529.1 | Scaffold1285 | 278501                  | TT                              | GG                | 1946645179               |
| SNP_P3_149537_278506 | NW_004516529.1 | Scaffold1285 | 278506                  | CC                              | TT                | 1946645181               |
| SNP_P3_149538_278535 | NW_004516529.1 | Scaffold1285 | 278535                  | TT                              | AA                | 1946645183               |
| SNP_P3_149539_278548 | NW_004516529.1 | Scaffold1285 | 278548                  | AA                              | TT                | 1946645185               |
| SNP_P3_149540_278582 | NW_004516529.1 | Scaffold1285 | 278582                  | GG                              | AA                | 1946645187               |
| SNP_P3_149541_278887 | NW_004516529.1 | Scaffold1285 | 278887                  | GG                              | TT                | 1946645189               |
| SNP_P3_149542_278914 | NW_004516529.1 | Scaffold1285 | 278914                  | TT                              | GG                | 1946645191               |
| SNP_P3_149543_279018 | NW_004516529.1 | Scaffold1285 | 279018                  | AA                              | GG                | 1946645193               |
| SNP_P3_149544_279037 | NW_004516529.1 | Scaffold1285 | 279037                  | AA                              | TT                | 1946645195               |
| SNP_P3_149545_279049 | NW_004516529.1 | Scaffold1285 | 279049                  | CC                              | TT                | 1946645197               |
| SNP_P3_149546_279057 | NW_004516529.1 | Scaffold1285 | 279057                  | CC                              | AA                | 1946645199               |
| SNP_P3_149547_279058 | NW_004516529.1 | Scaffold1285 | 279058                  | AA                              | GG                | 1946645201               |
| SNP_P3_149548_279085 | NW_004516529.1 | Scaffold1285 | 279085                  | TT                              | CC                | 1946645203               |
| SNP_P3_149549_279106 | NW_004516529.1 | Scaffold1285 | 279106                  | TT                              | GG                | 1946645205               |
| SNP_P3_149550_289287 | NW_004516529.1 | Scaffold1285 | 289287                  | AA                              | CC                | 1946645207               |
| SNP_P3_149551_325231 | NW_004516529.1 | Scaffold1285 | 325231                  | AA                              | GG                | 1946645209               |
| SNP_P3_149552_325249 | NW_004516529.1 | Scaffold1285 | 325249                  | CC                              | TT                | 1946645211               |
| SNP_P3_149553_326711 | NW_004516529.1 | Scaffold1285 | 326711                  | CC                              | TT                | 1946645213               |
| SNP_P3_149554_326725 | NW_004516529.1 | Scaffold1285 | 326725                  | GG                              | AA                | 1946645215               |
| SNP_P3_149555_328694 | NW_004516529.1 | Scaffold1285 | 328694                  | CC                              | TT                | 1946645217               |
| SNP_P3_149556_328699 | NW_004516529.1 | Scaffold1285 | 328699                  | TT                              | CC                | 1946645219               |
| SNP_P3_149557_330825 | NW_004516529.1 | Scaffold1285 | 330825                  | GG                              | AA                | 1946645221               |
| SNP_P3_149558_330897 | NW_004516529.1 | Scaffold1285 | 330897                  | TT                              | AA                | 1946645223               |
| SNP_P3_149559_331703 | NW_004516529.1 | Scaffold1285 | 331703                  | AA                              | GG                | 1946645225               |
| SNP_P3_149560_332169 | NW_004516529.1 | Scaffold1285 | 332169                  | TT                              | CC                | 1946645227               |
| SNP_P3_149561_2200   | NW_004516530.1 | Scaffold1286 | 2200                    | AA                              | GG                | 1946645229               |
| SNP_P3_149562_2249   | NW_004516530.1 | Scaffold1286 | 2249                    | TT                              | CC                | 1946645231               |
| SNP_P3_149563_2491   | NW_004516530.1 | Scaffold1286 | 2491                    | CC                              | TT                | 1946645233               |
| SNP_P3_149564_14548  | NW_004516530.1 | Scaffold1286 | 14548                   | TT                              | CC                | 1946645235               |
| SNP_P3_149565_14559  | NW_004516530.1 | Scaffold1286 | 14559                   | AA                              | GG                | 1946645237               |
| SNP_P3_149566_14591  | NW_004516530.1 | Scaffold1286 | 14591                   | GG                              | AA                | 1946645239               |
| SNP_P3_149567_14595  | NW_004516530.1 | Scaffold1286 | 14595                   | TT                              | AA                | 1946645241               |
| SNP_P3_149568_14597  | NW_004516530.1 | Scaffold1286 | 14597                   | CC                              | GG                | 1946645243               |
| SNP_P3_149569_15429  | NW_004516530.1 | Scaffold1286 | 15429                   | GG                              | TT                | 1946645245               |
| SNP_P3_149570_15455  | NW_004516530.1 | Scaffold1286 | 15455                   | GG                              | CC                | 1946645247               |
| SNP_P3_149571_15547  | NW_004516530.1 | Scaffold1286 | 15547                   | CC                              | TT                | 1946645249               |
| SNP_P3_149572_15559  | NW_004516530.1 | Scaffold1286 | 15559                   | CC                              | GG                | 1946645251               |
| SNP_P3_149573_15626  | NW_004516530.1 | Scaffold1286 | 15626                   | CC                              | GG                | 1946645253               |
| SNP_P3_149574_15741  | NW_004516530.1 | Scaffold1286 | 15741                   | AA                              | CC                | 1946645255               |
| SNP_P3_149575_15843  | NW_004516530.1 | Scaffold1286 | 15843                   | TT                              | CC                | 1946645257               |

| SNPs IDs            | Chromosome IDs | Chromosomes  | Physical positions (bp) | CDC Frontier (Reference genome) | (Pusa 256 & HPNB) | NCBI SNPdb Accession IDs |
|---------------------|----------------|--------------|-------------------------|---------------------------------|-------------------|--------------------------|
| SNP_P3_149576_15901 | NW_004516530.1 | Scaffold1286 | 15901                   | TT                              | AA                | 1946645259               |
| SNP_P3_149577_16075 | NW_004516530.1 | Scaffold1286 | 16075                   | AA                              | TT                | 1946645261               |
| SNP_P3_149578_16194 | NW_004516530.1 | Scaffold1286 | 16194                   | TT                              | GG                | 1946645263               |
| SNP_P3_149580_16472 | NW_004516530.1 | Scaffold1286 | 16472                   | GG                              | AA                | 1946645265               |
| SNP_P3_149581_64    | NW_004516533.1 | Scaffold1291 | 64                      | AA                              | GG                | 1946645267               |
| SNP_P3_149582_65    | NW_004516533.1 | Scaffold1291 | 65                      | AA                              | GG                | 1946645269               |
| SNP_P3_149584_3327  | NW_004516534.1 | Scaffold1292 | 3327                    | AA                              | CC                | 1946645271               |
| SNP_P3_149585_8032  | NW_004516534.1 | Scaffold1292 | 8032                    | TT                              | CC                | 1946645273               |
| SNP_P3_149586_8136  | NW_004516534.1 | Scaffold1292 | 8136                    | AA                              | GG                | 1946645275               |
| SNP_P3_149587_8147  | NW_004516534.1 | Scaffold1292 | 8147                    | TT                              | AA                | 1946645277               |
| SNP_P3_149588_8221  | NW_004516534.1 | Scaffold1292 | 8221                    | TT                              | CC                | 1946645279               |
| SNP_P3_149589_8270  | NW_004516534.1 | Scaffold1292 | 8270                    | TT                              | GG                | 1946645281               |
| SNP_P3_149590_8438  | NW_004516534.1 | Scaffold1292 | 8438                    | CC                              | TT                | 1946645283               |
| SNP_P3_149591_31800 | NW_004516535.1 | Scaffold1293 | 31800                   | CC                              | TT                | 1946645285               |
| SNP_P3_149592_31806 | NW_004516535.1 | Scaffold1293 | 31806                   | CC                              | TT                | 1946645287               |
| SNP_P3_149593_31807 | NW_004516535.1 | Scaffold1293 | 31807                   | TT                              | GG                | 1946645289               |
| SNP_P3_149594_31814 | NW_004516535.1 | Scaffold1293 | 31814                   | TT                              | CC                | 1946645291               |
| SNP_P3_149595_31824 | NW_004516535.1 | Scaffold1293 | 31824                   | TT                              | AA                | 1946645293               |
| SNP_P3_149596_31835 | NW_004516535.1 | Scaffold1293 | 31835                   | AA                              | GG                | 1946645295               |
| SNP_P3_149597_44413 | NW_004516535.1 | Scaffold1293 | 44413                   | AA                              | GG                | 1946645297               |
| SNP_P3_149598_44426 | NW_004516535.1 | Scaffold1293 | 44426                   | TT                              | CC                | 1946645299               |
| SNP_P3_149599_44441 | NW_004516535.1 | Scaffold1293 | 44441                   | TT                              | GG                | 1946645301               |
| SNP_P3_149600_44897 | NW_004516535.1 | Scaffold1293 | 44897                   | GG                              | AA                | 1946645303               |
| SNP_P3_149601_67174 | NW_004516535.1 | Scaffold1293 | 67174                   | CC                              | TT                | 1946645304               |
| SNP_P3_149602_67196 | NW_004516535.1 | Scaffold1293 | 67196                   | CC                              | TT                | 1946645306               |
| SNP_P3_149603_67558 | NW_004516535.1 | Scaffold1293 | 67558                   | TT                              | AA                | 1946645308               |
| SNP_P3_149604_68015 | NW_004516535.1 | Scaffold1293 | 68015                   | AA                              | TT                | 1946645310               |
| SNP_P3_149605_68226 | NW_004516535.1 | Scaffold1293 | 68226                   | GG                              | TT                | 1946645313               |
| SNP_P3_149606_68507 | NW_004516535.1 | Scaffold1293 | 68507                   | AA                              | GG                | 1946645315               |
| SNP_P3_149607_68556 | NW_004516535.1 | Scaffold1293 | 68556                   | AA                              | GG                | 1946645317               |
| SNP_P3_149608_68867 | NW_004516535.1 | Scaffold1293 | 68867                   | TT                              | CC                | 1946645319               |
| SNP_P3_149609_68892 | NW_004516535.1 | Scaffold1293 | 68892                   | AA                              | CC                | 1946645321               |
| SNP_P3_149610_71065 | NW_004516535.1 | Scaffold1293 | 71065                   | TT                              | CC                | 1946645323               |
| SNP_P3_149611_71522 | NW_004516535.1 | Scaffold1293 | 71522                   | TT                              | GG                | 1946645325               |
| SNP_P3_149612_72291 | NW_004516535.1 | Scaffold1293 | 72291                   | GG                              | AA                | 1946645327               |
| SNP_P3_149613_72515 | NW_004516535.1 | Scaffold1293 | 72515                   | AA                              | TT                | 1946645329               |
| SNP_P3_149614_72518 | NW_004516535.1 | Scaffold1293 | 72518                   | TT                              | CC                | 1946645331               |
| SNP_P3_149615_79058 | NW_004516535.1 | Scaffold1293 | 79058                   | AA                              | TT                | 1946645333               |
| SNP_P3_149616_79139 | NW_004516535.1 | Scaffold1293 | 79139                   | AA                              | TT                | 1946645335               |
| SNP_P3_149617_79161 | NW_004516535.1 | Scaffold1293 | 79161                   | CC                              | GG                | 1946645337               |
| SNP_P3_149618_79222 | NW_004516535.1 | Scaffold1293 | 79222                   | GG                              | TT                | 1946645339               |
| SNP_P3_149619_79234 | NW_004516535.1 | Scaffold1293 | 79234                   | GG                              | CC                | 1946645341               |

| SNPs IDs             | Chromosome IDs | Chromosomes    | Physical positions (bp) | CDC Frontier (Reference genome) | (Pusa 256 & HPNB) | NCBI SNPdb Accession IDs |
|----------------------|----------------|----------------|-------------------------|---------------------------------|-------------------|--------------------------|
| SNP_P3_149620_79330  | NW_004516535.1 | Scaffold1293   | 79330                   | TT                              | AA                | 1946645343               |
| SNP_P3_149621_79856  | NW_004516535.1 | Scaffold1293   | 79856                   | GG                              | CC                | 1946645346               |
| SNP_P3_149622_80296  | NW_004516535.1 | Scaffold1293   | 80296                   | TT                              | GG                | 1946645348               |
| SNP_P3_149623_88022  | NW_004516535.1 | Scaffold1293   | 88022                   | TT                              | AA                | 1946645350               |
| SNP_P3_149624_88345  | NW_004516535.1 | Scaffold1293   | 88345                   | TT                              | GG                | 1946645352               |
| SNP_P3_149625_88582  | NW_004516535.1 | Scaffold1293   | 88582                   | GG                              | AA                | 1946645354               |
| SNP_P3_149626_91051  | NW_004516535.1 | Scaffold1293   | 91051                   | AA                              | GG                | 1946645356               |
| SNP_P3_149627_91057  | NW_004516535.1 | Scaffold1293   | 91057                   | AA                              | GG                | 1946645358               |
| SNP_P3_149628_91084  | NW_004516535.1 | Scaffold1293   | 91084                   | CC                              | AA                | 1946645360               |
| SNP_P3_149629_91420  | NW_004516535.1 | Scaffold1293   | 91420                   | TT                              | GG                | 1946645361               |
| SNP_P3_149630_16436  | NW_004516536.1 | Scaffold1294   | 16436                   | TT                              | GG                | 1946645363               |
| SNP_P3_149631_16760  | NW_004516536.1 | Scaffold1294   | 16760                   | TT                              | CC                | 1946645365               |
| SNP_P3_149632_20741  | NW_004516536.1 | Scaffold1294   | 20741                   | AA                              | GG                | 1946645367               |
| SNP_P3_149633_29749  | NW_004516536.1 | Scaffold1294   | 29749                   | CC                              | GG                | 1946645369               |
| SNP_P3_149634_29815  | NW_004516536.1 | Scaffold1294   | 29815                   | GG                              | TT                | 1946645371               |
| SNP_P3_149635_29822  | NW_004516536.1 | Scaffold1294   | 29822                   | GG                              | AA                | 1946645373               |
| SNP_P3_149636_29910  | NW_004516536.1 | Scaffold1294   | 29910                   | AA                              | GG                | 1946645375               |
| SNP_P3_149638_30021  | NW_004516536.1 | Scaffold1294   | 30021                   | AA                              | TT                | 1946645377               |
| SNP_P3_149639_30087  | NW_004516536.1 | Scaffold1294   | 30087                   | AA                              | TT                | 1946645380               |
| SNP_P3_149640_30221  | NW_004516536.1 | Scaffold1294   | 30221                   | TT                              | GG                | 1946645388               |
| SNP_P3_149641_32899  | NW_004516536.1 | Scaffold1294   | 32899                   | GG                              | AA                | 1946645391               |
| SNP_P3_149642_33181  | NW_004516536.1 | Scaffold1294   | 33181                   | TT                              | GG                | 1946645392               |
| SNP_P3_149643_33349  | NW_004516536.1 | Scaffold1294   | 33349                   | TT                              | AA                | 1946645394               |
| SNP_P3_149644_33355  | NW_004516536.1 | Scaffold1294   | 33355                   | TT                              | CC                | 1946645397               |
| SNP_P3_149645_34328  | NW_004516536.1 | Scaffold1294   | 34328                   | GG                              | CC                | 1946645399               |
| SNP_P3_149646_34350  | NW_004516536.1 | Scaffold1294   | 34350                   | AA                              | TT                | 1946645401               |
| SNP_P3_149647_34458  | NW_004516536.1 | Scaffold1294   | 34458                   | TT                              | CC                | 1946645403               |
| SNP_P3_149648_34872  | NW_004516536.1 | Scaffold1294   | 34872                   | CC                              | GG                | 1946645405               |
| SNP_P3_149649_35084  | NW_004516536.1 | Scaffold1294   | 35084                   | TT                              | GG                | 1946645407               |
| SNP_P3_149650_39535  | NW_004516536.1 | Scaffold1294   | 39535                   | CC                              | TT                | 1946645409               |
| SNP_P3_149651_14466  | NW_004516537.1 | Scaffold1297   | 14466                   | TT                              | GG                | 1946645411               |
| SNP_P3_149652_6640   | NW_004516538.1 | Scaffold1301_1 | 6640                    | AA                              | GG                | 1946645413               |
| SNP_P3_149654_75392  | NW_004516538.1 | Scaffold1301_1 | 75392                   | CC                              | TT                | 1946645415               |
| SNP_P3_149655_168279 | NW_004516538.1 | Scaffold1301_1 | 168279                  | CC                              | TT                | 1946645417               |
| SNP_P3_149656_168297 | NW_004516538.1 | Scaffold1301_1 | 168297                  | TT                              | CC                | 1946645419               |
| SNP_P3_149657_168338 | NW_004516538.1 | Scaffold1301_1 | 168338                  | TT                              | CC                | 1946645421               |
| SNP_P3_149658_168345 | NW_004516538.1 | Scaffold1301_1 | 168345                  | AA                              | CC                | 1946645423               |
| SNP_P3_149659_168707 | NW_004516538.1 | Scaffold1301_1 | 168707                  | AA                              | GG                | 1946645425               |
| SNP_P3_149660_171713 | NW_004516538.1 | Scaffold1301_1 | 171713                  | GG                              | AA                | 1946645427               |
| SNP_P3_149661_175452 | NW_004516538.1 | Scaffold1301_1 | 175452                  | TT                              | AA                | 1946645430               |
| SNP_P3_149662_192775 | NW_004516538.1 | Scaffold1301_1 | 192775                  | TT                              | AA                | 1946645432               |
| SNP_P3_149663_286850 | NW_004516538.1 | Scaffold1301_1 | 286850                  | AA                              | GG                | 1946645433               |

| SNPs IDs             | Chromosome IDs | Chromosomes    | Physical positions (bp) | CDC Frontier (Reference genome) | (Pusa 256 & HPNB) | NCBI SNPdb Accession IDs |
|----------------------|----------------|----------------|-------------------------|---------------------------------|-------------------|--------------------------|
| SNP_P3_149664_290781 | NW_004516538.1 | Scaffold1301_1 | 290781                  | GG                              | AA                | 1946645435               |
| SNP_P3_149665_290783 | NW_004516538.1 | Scaffold1301_1 | 290783                  | GG                              | AA                | 1946645437               |
| SNP_P3_149666_298967 | NW_004516538.1 | Scaffold1301_1 | 298967                  | GG                              | AA                | 1946645439               |
| SNP_P3_149667_298968 | NW_004516538.1 | Scaffold1301_1 | 298968                  | GG                              | AA                | 1946645441               |
| SNP_P3_149668_298989 | NW_004516538.1 | Scaffold1301_1 | 298989                  | GG                              | AA                | 1946645443               |
| SNP_P3_149669_299022 | NW_004516538.1 | Scaffold1301_1 | 299022                  | CC                              | TT                | 1946645445               |
| SNP_P3_149670_299198 | NW_004516538.1 | Scaffold1301_1 | 299198                  | CC                              | AA                | 1946645447               |
| SNP_P3_149671_299200 | NW_004516538.1 | Scaffold1301_1 | 299200                  | AA                              | GG                | 1946645449               |
| SNP_P3_149673_299247 | NW_004516538.1 | Scaffold1301_1 | 299247                  | GG                              | TT                | 1946645451               |
| SNP_P3_149674_299271 | NW_004516538.1 | Scaffold1301_1 | 299271                  | TT                              | CC                | 1946645453               |
| SNP_P3_149675_299359 | NW_004516538.1 | Scaffold1301_1 | 299359                  | AA                              | GG                | 1946645455               |
| SNP_P3_149676_299371 | NW_004516538.1 | Scaffold1301_1 | 299371                  | TT                              | CC                | 1946645457               |
| SNP_P3_149677_299504 | NW_004516538.1 | Scaffold1301_1 | 299504                  | GG                              | AA                | 1946645458               |
| SNP_P3_149678_299540 | NW_004516538.1 | Scaffold1301_1 | 299540                  | GG                              | AA                | 1946645460               |
| SNP_P3_149679_299561 | NW_004516538.1 | Scaffold1301_1 | 299561                  | TT                              | CC                | 1946645462               |
| SNP_P3_149680_299572 | NW_004516538.1 | Scaffold1301_1 | 299572                  | AA                              | GG                | 1946645464               |
| SNP_P3_149681_307079 | NW_004516538.1 | Scaffold1301_1 | 307079                  | AA                              | TT                | 1946645466               |
| SNP_P3_149683_315099 | NW_004516538.1 | Scaffold1301_1 | 315099                  | GG                              | AA                | 1946645468               |
| SNP_P3_149684_1920   | NW_004516539.1 | Scaffold1302   | 1920                    | TT                              | GG                | 1946645470               |
| SNP_P3_149685_15392  | NW_004516539.1 | Scaffold1302   | 15392                   | CC                              | TT                | 1946645472               |
| SNP_P3_149686_19870  | NW_004516539.1 | Scaffold1302   | 19870                   | AA                              | GG                | 1946645474               |
| SNP_P3_149687_2352   | NW_004516540.1 | Scaffold1303   | 2352                    | TT                              | GG                | 1946645476               |
| SNP_P3_149688_2379   | NW_004516540.1 | Scaffold1303   | 2379                    | TT                              | GG                | 1946645478               |
| SNP_P3_149690_2392   | NW_004516540.1 | Scaffold1303   | 2392                    | TT                              | GG                | 1946645480               |
| SNP_P3_149691_5937   | NW_004516540.1 | Scaffold1303   | 5937                    | CC                              | TT                | 1946645482               |
| SNP_P3_149692_64     | NW_004516541.1 | Scaffold1304   | 64                      | TT                              | CC                | 1946645484               |
| SNP_P3_149693_97     | NW_004516541.1 | Scaffold1304   | 97                      | TT                              | GG                | 1946645486               |
| SNP_P3_149694_277    | NW_004516541.1 | Scaffold1304   | 277                     | TT                              | AA                | 1946645488               |
| SNP_P3_149695_360    | NW_004516541.1 | Scaffold1304   | 360                     | AA                              | CC                | 1946645490               |
| SNP_P3_149696_4841   | NW_004516543.1 | Scaffold1307   | 4841                    | TT                              | CC                | 1946645492               |
| SNP_P3_149697_4880   | NW_004516543.1 | Scaffold1307   | 4880                    | AA                              | TT                | 1946645494               |
| SNP_P3_149698_5443   | NW_004516543.1 | Scaffold1307   | 5443                    | AA                              | GG                | 1946645496               |
| SNP_P3_149699_5444   | NW_004516543.1 | Scaffold1307   | 5444                    | TT                              | AA                | 1946645498               |
| SNP_P3_149700_5851   | NW_004516543.1 | Scaffold1307   | 5851                    | CC                              | AA                | 1946645500               |
| SNP_P3_149702_10141  | NW_004516543.1 | Scaffold1307   | 10141                   | TT                              | AA                | 1946645502               |
| SNP_P3_149703_10142  | NW_004516543.1 | Scaffold1307   | 10142                   | AA                              | TT                | 1946645504               |
| SNP_P3_149704_10348  | NW_004516543.1 | Scaffold1307   | 10348                   | CC                              | TT                | 1946645506               |
| SNP_P3_149705_10533  | NW_004516543.1 | Scaffold1307   | 10533                   | AA                              | GG                | 1946645508               |
| SNP_P3_149706_10561  | NW_004516543.1 | Scaffold1307   | 10561                   | AA                              | TT                | 1946645510               |
| SNP_P3_149707_15987  | NW_004516543.1 | Scaffold1307   | 15987                   | TT                              | GG                | 1946645512               |
| SNP_P3_149708_17450  | NW_004516543.1 | Scaffold1307   | 17450                   | GG                              | CC                | 1946645514               |
| SNP_P3_149709_17452  | NW_004516543.1 | Scaffold1307   | 17452                   | TT                              | AA                | 1946645517               |

| SNPs IDs            | Chromosome IDs | Chromosomes  | Physical positions (bp) | CDC Frontier (Reference genome) | (Pusa 256 & HPNB) | NCBI SNPdb Accession IDs |
|---------------------|----------------|--------------|-------------------------|---------------------------------|-------------------|--------------------------|
| SNP_P3_149710_20487 | NW_004516543.1 | Scaffold1307 | 20487                   | TT                              | CC                | 1946645519               |
| SNP_P3_149711_23908 | NW_004516543.1 | Scaffold1307 | 23908                   | AA                              | CC                | 1946645521               |
| SNP_P3_149712_23910 | NW_004516543.1 | Scaffold1307 | 23910                   | CC                              | AA                | 1946645523               |
| SNP_P3_149713_23912 | NW_004516543.1 | Scaffold1307 | 23912                   | AA                              | GG                | 1946645525               |
| SNP_P3_149714_23913 | NW_004516543.1 | Scaffold1307 | 23913                   | AA                              | TT                | 1946645527               |
| SNP_P3_149715_23948 | NW_004516543.1 | Scaffold1307 | 23948                   | CC                              | TT                | 1946645529               |
| SNP_P3_149716_24236 | NW_004516543.1 | Scaffold1307 | 24236                   | AA                              | CC                | 1946645531               |
| SNP_P3_149717_24365 | NW_004516543.1 | Scaffold1307 | 24365                   | TT                              | AA                | 1946645533               |
| SNP_P3_149718_24372 | NW_004516543.1 | Scaffold1307 | 24372                   | AA                              | CC                | 1946645535               |
| SNP_P3_149719_24373 | NW_004516543.1 | Scaffold1307 | 24373                   | TT                              | AA                | 1946645537               |
| SNP_P3_149721_24887 | NW_004516543.1 | Scaffold1307 | 24887                   | GG                              | AA                | 1946645539               |
| SNP_P3_149722_25191 | NW_004516543.1 | Scaffold1307 | 25191                   | AA                              | GG                | 1946645541               |
| SNP_P3_149723_31631 | NW_004516543.1 | Scaffold1307 | 31631                   | AA                              | GG                | 1946645543               |
| SNP_P3_149724_34882 | NW_004516543.1 | Scaffold1307 | 34882                   | GG                              | CC                | 1946645545               |
| SNP_P3_149725_34885 | NW_004516543.1 | Scaffold1307 | 34885                   | AA                              | TT                | 1946645547               |
| SNP_P3_149726_34887 | NW_004516543.1 | Scaffold1307 | 34887                   | TT                              | CC                | 1946645549               |
| SNP_P3_149727_34892 | NW_004516543.1 | Scaffold1307 | 34892                   | GG                              | CC                | 1946645551               |
| SNP_P3_149728_34893 | NW_004516543.1 | Scaffold1307 | 34893                   | AA                              | TT                | 1946645553               |
| SNP_P3_149729_34895 | NW_004516543.1 | Scaffold1307 | 34895                   | AA                              | TT                | 1946645555               |
| SNP_P3_149730_36162 | NW_004516543.1 | Scaffold1307 | 36162                   | AA                              | TT                | 1946645557               |
| SNP_P3_149731_36188 | NW_004516543.1 | Scaffold1307 | 36188                   | AA                              | CC                | 1946645559               |
| SNP_P3_149732_38031 | NW_004516543.1 | Scaffold1307 | 38031                   | CC                              | TT                | 1946645561               |
| SNP_P3_149733_39502 | NW_004516543.1 | Scaffold1307 | 39502                   | AA                              | GG                | 1946645563               |
| SNP_P3_149734_39514 | NW_004516543.1 | Scaffold1307 | 39514                   | TT                              | CC                | 1946645565               |
| SNP_P3_149735_39540 | NW_004516543.1 | Scaffold1307 | 39540                   | TT                              | GG                | 1946645567               |
| SNP_P3_149736_39560 | NW_004516543.1 | Scaffold1307 | 39560                   | GG                              | TT                | 1946645569               |
| SNP_P3_149737_39634 | NW_004516543.1 | Scaffold1307 | 39634                   | CC                              | TT                | 1946645571               |
| SNP_P3_149738_39757 | NW_004516543.1 | Scaffold1307 | 39757                   | CC                              | AA                | 1946645573               |
| SNP_P3_149739_39861 | NW_004516543.1 | Scaffold1307 | 39861                   | AA                              | GG                | 1946645575               |
| SNP_P3_149741_41133 | NW_004516543.1 | Scaffold1307 | 41133                   | TT                              | AA                | 1946645577               |
| SNP_P3_149742_41591 | NW_004516543.1 | Scaffold1307 | 41591                   | AA                              | GG                | 1946645579               |
| SNP_P3_149743_2651  | NW_004516544.1 | Scaffold1308 | 2651                    | TT                              | AA                | 1946645581               |
| SNP_P3_149744_3398  | NW_004516544.1 | Scaffold1308 | 3398                    | AA                              | TT                | 1946645584               |
| SNP_P3_149745_3741  | NW_004516544.1 | Scaffold1308 | 3741                    | TT                              | AA                | 1946645586               |
| SNP_P3_149746_5626  | NW_004516544.1 | Scaffold1308 | 5626                    | GG                              | AA                | 1946645588               |
| SNP_P3_149747_5634  | NW_004516544.1 | Scaffold1308 | 5634                    | CC                              | TT                | 1946645590               |
| SNP_P3_149748_6265  | NW_004516544.1 | Scaffold1308 | 6265                    | CC                              | TT                | 1946645591               |
| SNP_P3_149749_8252  | NW_004516544.1 | Scaffold1308 | 8252                    | AA                              | CC                | 1946645593               |
| SNP_P3_149750_8256  | NW_004516544.1 | Scaffold1308 | 8256                    | AA                              | TT                | 1946645595               |
| SNP_P3_149751_8263  | NW_004516544.1 | Scaffold1308 | 8263                    | GG                              | AA                | 1946645597               |
| SNP_P3_149752_8278  | NW_004516544.1 | Scaffold1308 | 8278                    | CC                              | TT                | 1946645599               |
| SNP_P3_149753_8949  | NW_004516544.1 | Scaffold1308 | 8949                    | CC                              | TT                | 1946645601               |

| SNPs IDs            | Chromosome IDs | Chromosomes  | Physical positions (bp) | CDC Frontier (Reference genome) | (Pusa 256 & HPNB) | NCBI SNPdb Accession IDs |
|---------------------|----------------|--------------|-------------------------|---------------------------------|-------------------|--------------------------|
| SNP_P3_149754_8950  | NW_004516544.1 | Scaffold1308 | 8950                    | AA                              | TT                | 1946645603               |
| SNP_P3_149755_8973  | NW_004516544.1 | Scaffold1308 | 8973                    | TT                              | CC                | 1946645605               |
| SNP_P3_149756_9033  | NW_004516544.1 | Scaffold1308 | 9033                    | TT                              | AA                | 1946645607               |
| SNP_P3_149757_9357  | NW_004516544.1 | Scaffold1308 | 9357                    | GG                              | AA                | 1946645609               |
| SNP_P3_149758_9667  | NW_004516544.1 | Scaffold1308 | 9667                    | TT                              | CC                | 1946645611               |
| SNP_P3_149759_10320 | NW_004516544.1 | Scaffold1308 | 10320                   | TT                              | CC                | 1946645613               |
| SNP_P3_149760_11540 | NW_004516544.1 | Scaffold1308 | 11540                   | AA                              | TT                | 1946645615               |
| SNP_P3_149762_12023 | NW_004516544.1 | Scaffold1308 | 12023                   | CC                              | GG                | 1946645617               |
| SNP_P3_149763_12031 | NW_004516544.1 | Scaffold1308 | 12031                   | AA                              | TT                | 1946645619               |
| SNP_P3_149764_12655 | NW_004516544.1 | Scaffold1308 | 12655                   | GG                              | TT                | 1946645621               |
| SNP_P3_149765_12666 | NW_004516544.1 | Scaffold1308 | 12666                   | AA                              | TT                | 1946645623               |
| SNP_P3_149766_12669 | NW_004516544.1 | Scaffold1308 | 12669                   | CC                              | AA                | 1946645625               |
| SNP_P3_149767_12671 | NW_004516544.1 | Scaffold1308 | 12671                   | GG                              | AA                | 1946645627               |
| SNP_P3_149768_15268 | NW_004516544.1 | Scaffold1308 | 15268                   | GG                              | CC                | 1946645629               |
| SNP_P3_149769_15615 | NW_004516544.1 | Scaffold1308 | 15615                   | CC                              | TT                | 1946645631               |
| SNP_P3_149770_15669 | NW_004516544.1 | Scaffold1308 | 15669                   | AA                              | GG                | 1946645633               |
| SNP_P3_149771_15672 | NW_004516544.1 | Scaffold1308 | 15672                   | TT                              | AA                | 1946645634               |
| SNP_P3_149772_15676 | NW_004516544.1 | Scaffold1308 | 15676                   | TT                              | CC                | 1946645636               |
| SNP_P3_149773_15682 | NW_004516544.1 | Scaffold1308 | 15682                   | CC                              | TT                | 1946645638               |
| SNP_P3_149774_15686 | NW_004516544.1 | Scaffold1308 | 15686                   | GG                              | AA                | 1946645640               |
| SNP_P3_149776_21063 | NW_004516544.1 | Scaffold1308 | 21063                   | AA                              | TT                | 1946645642               |
| SNP_P3_149777_21120 | NW_004516544.1 | Scaffold1308 | 21120                   | AA                              | CC                | 1946645644               |
| SNP_P3_149778_21123 | NW_004516544.1 | Scaffold1308 | 21123                   | CC                              | AA                | 1946645646               |
| SNP_P3_149779_21126 | NW_004516544.1 | Scaffold1308 | 21126                   | TT                              | AA                | 1946645648               |
| SNP_P3_149780_21130 | NW_004516544.1 | Scaffold1308 | 21130                   | GG                              | AA                | 1946645650               |
| SNP_P3_149781_21694 | NW_004516544.1 | Scaffold1308 | 21694                   | CC                              | TT                | 1946645652               |
| SNP_P3_149782_21743 | NW_004516544.1 | Scaffold1308 | 21743                   | GG                              | AA                | 1946645654               |
| SNP_P3_149783_22171 | NW_004516544.1 | Scaffold1308 | 22171                   | AA                              | GG                | 1946645657               |
| SNP_P3_149784_24216 | NW_004516544.1 | Scaffold1308 | 24216                   | TT                              | CC                | 1946645659               |
| SNP_P3_149785_24302 | NW_004516544.1 | Scaffold1308 | 24302                   | CC                              | GG                | 1946645661               |
| SNP_P3_149786_24555 | NW_004516544.1 | Scaffold1308 | 24555                   | CC                              | AA                | 1946645663               |
| SNP_P3_149787_24559 | NW_004516544.1 | Scaffold1308 | 24559                   | GG                              | TT                | 1946645665               |
| SNP_P3_149788_24592 | NW_004516544.1 | Scaffold1308 | 24592                   | CC                              | TT                | 1946645667               |
| SNP_P3_149789_24622 | NW_004516544.1 | Scaffold1308 | 24622                   | AA                              | TT                | 1946645669               |
| SNP_P3_149790_28547 | NW_004516544.1 | Scaffold1308 | 28547                   | CC                              | TT                | 1946645671               |
| SNP_P3_149791_34570 | NW_004516544.1 | Scaffold1308 | 34570                   | CC                              | GG                | 1946645673               |
| SNP_P3_149792_35268 | NW_004516544.1 | Scaffold1308 | 35268                   | AA                              | GG                | 1946645674               |
| SNP_P3_149793_35419 | NW_004516544.1 | Scaffold1308 | 35419                   | CC                              | TT                | 1946645676               |
| SNP_P3_149794_40411 | NW_004516544.1 | Scaffold1308 | 40411                   | CC                              | GG                | 1946645678               |
| SNP_P3_149795_42160 | NW_004516544.1 | Scaffold1308 | 42160                   | AA                              | GG                | 1946645680               |
| SNP_P3_149796_43282 | NW_004516544.1 | Scaffold1308 | 43282                   | GG                              | CC                | 1946645682               |
| SNP_P3_149797_43931 | NW_004516544.1 | Scaffold1308 | 43931                   | AA                              | GG                | 1946645684               |

| SNPs IDs            | Chromosome IDs | Chromosomes  | Physical positions (bp) | CDC Frontier (Reference genome) | (Pusa 256 & HPNB) | NCBI SNPdb Accession IDs |
|---------------------|----------------|--------------|-------------------------|---------------------------------|-------------------|--------------------------|
| SNP_P3_149798_43936 | NW_004516544.1 | Scaffold1308 | 43936                   | TT                              | GG                | 1946645686               |
| SNP_P3_149799_45077 | NW_004516544.1 | Scaffold1308 | 45077                   | TT                              | CC                | 1946645688               |
| SNP_P3_149801_55932 | NW_004516544.1 | Scaffold1308 | 55932                   | GG                              | TT                | 1946645691               |
| SNP_P3_149802_55963 | NW_004516544.1 | Scaffold1308 | 55963                   | TT                              | GG                | 1946645693               |
| SNP_P3_149803_55966 | NW_004516544.1 | Scaffold1308 | 55966                   | CC                              | TT                | 1946645695               |
| SNP_P3_149804_55968 | NW_004516544.1 | Scaffold1308 | 55968                   | GG                              | AA                | 1946645697               |
| SNP_P3_149805_55977 | NW_004516544.1 | Scaffold1308 | 55977                   | CC                              | AA                | 1946645698               |
| SNP_P3_149806_55980 | NW_004516544.1 | Scaffold1308 | 55980                   | GG                              | AA                | 1946645700               |
| SNP_P3_149807_55984 | NW_004516544.1 | Scaffold1308 | 55984                   | GG                              | CC                | 1946645702               |
| SNP_P3_149808_55989 | NW_004516544.1 | Scaffold1308 | 55989                   | AA                              | GG                | 1946645704               |
| SNP_P3_149809_56463 | NW_004516544.1 | Scaffold1308 | 56463                   | GG                              | AA                | 1946645706               |
| SNP_P3_149810_57679 | NW_004516544.1 | Scaffold1308 | 57679                   | GG                              | AA                | 1946645708               |
| SNP_P3_149811_57899 | NW_004516544.1 | Scaffold1308 | 57899                   | TT                              | AA                | 1946645710               |
| SNP_P3_149812_58023 | NW_004516544.1 | Scaffold1308 | 58023                   | CC                              | TT                | 1946645712               |
| SNP_P3_149813_58643 | NW_004516544.1 | Scaffold1308 | 58643                   | CC                              | GG                | 1946645714               |
| SNP_P3_149814_58644 | NW_004516544.1 | Scaffold1308 | 58644                   | GG                              | AA                | 1946645716               |
| SNP_P3_149815_59184 | NW_004516544.1 | Scaffold1308 | 59184                   | GG                              | AA                | 1946645718               |
| SNP_P3_149816_62963 | NW_004516544.1 | Scaffold1308 | 62963                   | CC                              | TT                | 1946645720               |
| SNP_P3_149817_65759 | NW_004516544.1 | Scaffold1308 | 65759                   | AA                              | GG                | 1946645722               |
| SNP_P3_149818_65803 | NW_004516544.1 | Scaffold1308 | 65803                   | GG                              | AA                | 1946645724               |
| SNP_P3_149819_65820 | NW_004516544.1 | Scaffold1308 | 65820                   | CC                              | AA                | 1946645726               |
| SNP_P3_149820_65850 | NW_004516544.1 | Scaffold1308 | 65850                   | AA                              | GG                | 1946645728               |
| SNP_P3_149821_65903 | NW_004516544.1 | Scaffold1308 | 65903                   | AA                              | CC                | 1946645730               |
| SNP_P3_149822_66671 | NW_004516544.1 | Scaffold1308 | 66671                   | GG                              | AA                | 1946645732               |
| SNP_P3_149823_66872 | NW_004516544.1 | Scaffold1308 | 66872                   | AA                              | GG                | 1946645734               |
| SNP_P3_149824_68058 | NW_004516544.1 | Scaffold1308 | 68058                   | GG                              | TT                | 1946645736               |
| SNP_P3_149825_78366 | NW_004516544.1 | Scaffold1308 | 78366                   | AA                              | GG                | 1946645738               |
| SNP_P3_149826_78451 | NW_004516544.1 | Scaffold1308 | 78451                   | AA                              | GG                | 1946645740               |
| SNP_P3_149827_78523 | NW_004516544.1 | Scaffold1308 | 78523                   | GG                              | AA                | 1946645741               |
| SNP_P3_149828_78528 | NW_004516544.1 | Scaffold1308 | 78528                   | CC                              | GG                | 1946645743               |
| SNP_P3_149829_78635 | NW_004516544.1 | Scaffold1308 | 78635                   | CC                              | AA                | 1946645745               |
| SNP_P3_149830_78636 | NW_004516544.1 | Scaffold1308 | 78636                   | TT                              | CC                | 1946645747               |
| SNP_P3_149831_78643 | NW_004516544.1 | Scaffold1308 | 78643                   | TT                              | GG                | 1946645749               |
| SNP_P3_149833_83917 | NW_004516544.1 | Scaffold1308 | 83917                   | AA                              | TT                | 1946645751               |
| SNP_P3_149834_87209 | NW_004516544.1 | Scaffold1308 | 87209                   | TT                              | CC                | 1946645753               |
| SNP_P3_149835_87242 | NW_004516544.1 | Scaffold1308 | 87242                   | GG                              | AA                | 1946645755               |
| SNP_P3_149836_87248 | NW_004516544.1 | Scaffold1308 | 87248                   | GG                              | AA                | 1946645757               |
| SNP_P3_149837_87521 | NW_004516544.1 | Scaffold1308 | 87521                   | TT                              | GG                | 1946645759               |
| SNP_P3_149838_87539 | NW_004516544.1 | Scaffold1308 | 87539                   | AA                              | TT                | 1946645761               |
| SNP_P3_149839_87649 | NW_004516544.1 | Scaffold1308 | 87649                   | CC                              | GG                | 1946645763               |
| SNP_P3_149840_87740 | NW_004516544.1 | Scaffold1308 | 87740                   | GG                              | AA                | 1946645765               |
| SNP_P3_149841_87741 | NW_004516544.1 | Scaffold1308 | 87741                   | AA                              | GG                | 1946645767               |



| SNPs IDs            | Chromosome IDs | Chromosomes  | Physical positions (bp) | CDC Frontier (Reference genome) | (Pusa 256 & HPNB) | NCBI SNPdb Accession IDs |
|---------------------|----------------|--------------|-------------------------|---------------------------------|-------------------|--------------------------|
| SNP_P3_149842_87749 | NW_004516544.1 | Scaffold1308 | 87749                   | AA                              | GG                | 1946645769               |
| SNP_P3_149843_87763 | NW_004516544.1 | Scaffold1308 | 87763                   | TT                              | CC                | 1946645771               |
| SNP_P3_149844_87770 | NW_004516544.1 | Scaffold1308 | 87770                   | AA                              | CC                | 1946645773               |
| SNP_P3_149845_87795 | NW_004516544.1 | Scaffold1308 | 87795                   | AA                              | CC                | 1946645775               |
| SNP_P3_149846_87806 | NW_004516544.1 | Scaffold1308 | 87806                   | AA                              | CC                | 1946645776               |
| SNP_P3_149847_88541 | NW_004516544.1 | Scaffold1308 | 88541                   | TT                              | CC                | 1946645778               |
| SNP_P3_149848_89232 | NW_004516544.1 | Scaffold1308 | 89232                   | TT                              | CC                | 1946645780               |
| SNP_P3_149849_89234 | NW_004516544.1 | Scaffold1308 | 89234                   | TT                              | AA                | 1946645782               |
| SNP_P3_149850_89396 | NW_004516544.1 | Scaffold1308 | 89396                   | GG                              | TT                | 1946645784               |
| SNP_P3_149851_89400 | NW_004516544.1 | Scaffold1308 | 89400                   | CC                              | TT                | 1946645786               |
| SNP_P3_149852_90433 | NW_004516544.1 | Scaffold1308 | 90433                   | CC                              | TT                | 1946645788               |
| SNP_P3_149853_90479 | NW_004516544.1 | Scaffold1308 | 90479                   | GG                              | AA                | 1946645790               |
| SNP_P3_149854_90480 | NW_004516544.1 | Scaffold1308 | 90480                   | CC                              | AA                | 1946645792               |
| SNP_P3_149855_90511 | NW_004516544.1 | Scaffold1308 | 90511                   | TT                              | CC                | 1946645794               |
| SNP_P3_149856_90513 | NW_004516544.1 | Scaffold1308 | 90513                   | GG                              | TT                | 1946645796               |
| SNP_P3_149857_92801 | NW_004516544.1 | Scaffold1308 | 92801                   | CC                              | TT                | 1946645799               |
| SNP_P3_149858_94596 | NW_004516544.1 | Scaffold1308 | 94596                   | TT                              | GG                | 1946645801               |
| SNP_P3_149859_94807 | NW_004516544.1 | Scaffold1308 | 94807                   | GG                              | CC                | 1946645803               |
| SNP_P3_149860_95314 | NW_004516544.1 | Scaffold1308 | 95314                   | TT                              | GG                | 1946645805               |
| SNP_P3_149861_95864 | NW_004516544.1 | Scaffold1308 | 95864                   | GG                              | TT                | 1946645807               |
| SNP_P3_149862_97100 | NW_004516544.1 | Scaffold1308 | 97100                   | CC                              | AA                | 1946645809               |
| SNP_P3_149863_97107 | NW_004516544.1 | Scaffold1308 | 97107                   | TT                              | CC                | 1946645811               |
| SNP_P3_149864_97116 | NW_004516544.1 | Scaffold1308 | 97116                   | TT                              | CC                | 1946645813               |
| SNP_P3_149865_97117 | NW_004516544.1 | Scaffold1308 | 97117                   | GG                              | AA                | 1946645815               |
| SNP_P3_149866_97118 | NW_004516544.1 | Scaffold1308 | 97118                   | AA                              | CC                | 1946645817               |
| SNP_P3_149867_97120 | NW_004516544.1 | Scaffold1308 | 97120                   | GG                              | AA                | 1946645819               |
| SNP_P3_149868_97121 | NW_004516544.1 | Scaffold1308 | 97121                   | TT                              | CC                | 1946645821               |
| SNP_P3_149869_97151 | NW_004516544.1 | Scaffold1308 | 97151                   | TT                              | CC                | 1946645823               |
| SNP_P3_149870_97510 | NW_004516544.1 | Scaffold1308 | 97510                   | AA                              | GG                | 1946645825               |
| SNP_P3_149871_97675 | NW_004516544.1 | Scaffold1308 | 97675                   | TT                              | AA                | 1946645828               |
| SNP_P3_149872_97856 | NW_004516544.1 | Scaffold1308 | 97856                   | GG                              | CC                | 1946645830               |
| SNP_P3_149873_97897 | NW_004516544.1 | Scaffold1308 | 97897                   | TT                              | GG                | 1946645832               |
| SNP_P3_149874_97952 | NW_004516544.1 | Scaffold1308 | 97952                   | CC                              | GG                | 1946645834               |
| SNP_P3_149875_98002 | NW_004516544.1 | Scaffold1308 | 98002                   | CC                              | GG                | 1946645836               |
| SNP_P3_149876_98007 | NW_004516544.1 | Scaffold1308 | 98007                   | TT                              | AA                | 1946645838               |
| SNP_P3_149877_98051 | NW_004516544.1 | Scaffold1308 | 98051                   | GG                              | AA                | 1946645839               |
| SNP_P3_149878_98083 | NW_004516544.1 | Scaffold1308 | 98083                   | GG                              | TT                | 1946645840               |
| SNP_P3_149879_98086 | NW_004516544.1 | Scaffold1308 | 98086                   | CC                              | TT                | 1946645841               |
| SNP_P3_149880_98098 | NW_004516544.1 | Scaffold1308 | 98098                   | CC                              | AA                | 1946645843               |
| SNP_P3_149881_98104 | NW_004516544.1 | Scaffold1308 | 98104                   | CC                              | TT                | 1946645844               |
| SNP_P3_149882_98110 | NW_004516544.1 | Scaffold1308 | 98110                   | AA                              | CC                | 1946645845               |
| SNP_P3_149883_98134 | NW_004516544.1 | Scaffold1308 | 98134                   | TT                              | AA                | 1946645847               |

| SNPs IDs            | Chromosome IDs | Chromosomes  | Physical positions (bp) | CDC Frontier (Reference genome) | (Pusa 256 & HPNB) | NCBI SNPdb Accession IDs |
|---------------------|----------------|--------------|-------------------------|---------------------------------|-------------------|--------------------------|
| SNP_P3_149884_98804 | NW_004516544.1 | Scaffold1308 | 98804                   | GG                              | AA                | 1946645849               |
| SNP_P3_149886_3931  | NW_004516545.1 | Scaffold1309 | 3931                    | GG                              | AA                | 1946645852               |
| SNP_P3_149887_3932  | NW_004516545.1 | Scaffold1309 | 3932                    | TT                              | CC                | 1946645853               |
| SNP_P3_149888_3953  | NW_004516545.1 | Scaffold1309 | 3953                    | AA                              | GG                | 1946645855               |
| SNP_P3_149889_3957  | NW_004516545.1 | Scaffold1309 | 3957                    | AA                              | GG                | 1946645857               |
| SNP_P3_149890_5247  | NW_004516545.1 | Scaffold1309 | 5247                    | GG                              | CC                | 1946645859               |
| SNP_P3_149892_26542 | NW_004516545.1 | Scaffold1309 | 26542                   | CC                              | TT                | 1946645861               |
| SNP_P3_149893_26763 | NW_004516545.1 | Scaffold1309 | 26763                   | CC                              | TT                | 1946645863               |
| SNP_P3_149894_26766 | NW_004516545.1 | Scaffold1309 | 26766                   | CC                              | AA                | 1946645866               |
| SNP_P3_149895_29797 | NW_004516545.1 | Scaffold1309 | 29797                   | TT                              | CC                | 1946645868               |
| SNP_P3_149896_30164 | NW_004516545.1 | Scaffold1309 | 30164                   | CC                              | AA                | 1946645870               |
| SNP_P3_149898_36114 | NW_004516545.1 | Scaffold1309 | 36114                   | TT                              | CC                | 1946645872               |
| SNP_P3_149900_36177 | NW_004516545.1 | Scaffold1309 | 36177                   | AA                              | TT                | 1946645874               |
| SNP_P3_149901_36274 | NW_004516545.1 | Scaffold1309 | 36274                   | TT                              | AA                | 1946645875               |
| SNP_P3_149902_36298 | NW_004516545.1 | Scaffold1309 | 36298                   | AA                              | GG                | 1946645877               |
| SNP_P3_149903_36373 | NW_004516545.1 | Scaffold1309 | 36373                   | TT                              | AA                | 1946645879               |
| SNP_P3_149904_36390 | NW_004516545.1 | Scaffold1309 | 36390                   | AA                              | GG                | 1946645881               |
| SNP_P3_149905_36409 | NW_004516545.1 | Scaffold1309 | 36409                   | TT                              | CC                | 1946645883               |
| SNP_P3_149906_36470 | NW_004516545.1 | Scaffold1309 | 36470                   | CC                              | TT                | 1946645885               |
| SNP_P3_149907_39692 | NW_004516545.1 | Scaffold1309 | 39692                   | TT                              | GG                | 1946645887               |
| SNP_P3_149908_39801 | NW_004516545.1 | Scaffold1309 | 39801                   | TT                              | CC                | 1946645889               |
| SNP_P3_149909_40106 | NW_004516545.1 | Scaffold1309 | 40106                   | AA                              | GG                | 1946645891               |
| SNP_P3_149910_40127 | NW_004516545.1 | Scaffold1309 | 40127                   | AA                              | CC                | 1946645893               |
| SNP_P3_149911_40185 | NW_004516545.1 | Scaffold1309 | 40185                   | CC                              | AA                | 1946645895               |
| SNP_P3_149912_40459 | NW_004516545.1 | Scaffold1309 | 40459                   | TT                              | AA                | 1946645897               |
| SNP_P3_149913_46951 | NW_004516545.1 | Scaffold1309 | 46951                   | GG                              | AA                | 1946645898               |
| SNP_P3_149914_47513 | NW_004516545.1 | Scaffold1309 | 47513                   | GG                              | AA                | 1946645902               |
| SNP_P3_149915_48630 | NW_004516545.1 | Scaffold1309 | 48630                   | CC                              | AA                | 1946645904               |
| SNP_P3_149916_48917 | NW_004516545.1 | Scaffold1309 | 48917                   | CC                              | TT                | 1946645906               |
| SNP_P3_149917_49425 | NW_004516545.1 | Scaffold1309 | 49425                   | TT                              | CC                | 1946645908               |
| SNP_P3_149918_50267 | NW_004516545.1 | Scaffold1309 | 50267                   | TT                              | GG                | 1946645910               |
| SNP_P3_149920_50888 | NW_004516545.1 | Scaffold1309 | 50888                   | GG                              | TT                | 1946645912               |
| SNP_P3_149921_51035 | NW_004516545.1 | Scaffold1309 | 51035                   | CC                              | TT                | 1946645914               |
| SNP_P3_149922_51177 | NW_004516545.1 | Scaffold1309 | 51177                   | GG                              | AA                | 1946645916               |
| SNP_P3_149923_56218 | NW_004516545.1 | Scaffold1309 | 56218                   | GG                              | AA                | 1946645917               |
| SNP_P3_149924_56598 | NW_004516545.1 | Scaffold1309 | 56598                   | GG                              | TT                | 1946645919               |
| SNP_P3_149925_56616 | NW_004516545.1 | Scaffold1309 | 56616                   | CC                              | TT                | 1946645921               |
| SNP_P3_149926_57144 | NW_004516545.1 | Scaffold1309 | 57144                   | CC                              | AA                | 1946645923               |
| SNP_P3_149927_57218 | NW_004516545.1 | Scaffold1309 | 57218                   | CC                              | GG                | 1946645925               |
| SNP_P3_149928_57224 | NW_004516545.1 | Scaffold1309 | 57224                   | CC                              | AA                | 1946645927               |
| SNP_P3_149929_57248 | NW_004516545.1 | Scaffold1309 | 57248                   | AA                              | GG                | 1946645929               |
| SNP_P3_149930_57254 | NW_004516545.1 | Scaffold1309 | 57254                   | CC                              | TT                | 1946645931               |

| SNPs IDs            | Chromosome IDs | Chromosomes  | Physical positions (bp) | CDC Frontier (Reference genome) | (Pusa 256 & HPNB) | NCBI SNPdb Accession IDs |
|---------------------|----------------|--------------|-------------------------|---------------------------------|-------------------|--------------------------|
| SNP_P3_149931_57304 | NW_004516545.1 | Scaffold1309 | 57304                   | TT                              | GG                | 1946645932               |
| SNP_P3_149932_57521 | NW_004516545.1 | Scaffold1309 | 57521                   | CC                              | TT                | 1946645934               |
| SNP_P3_149933_57534 | NW_004516545.1 | Scaffold1309 | 57534                   | AA                              | GG                | 1946645936               |
| SNP_P3_149934_57535 | NW_004516545.1 | Scaffold1309 | 57535                   | TT                              | GG                | 1946645939               |
| SNP_P3_149935_57546 | NW_004516545.1 | Scaffold1309 | 57546                   | AA                              | CC                | 1946645940               |
| SNP_P3_149936_57635 | NW_004516545.1 | Scaffold1309 | 57635                   | AA                              | TT                | 1946645942               |
| SNP_P3_149937_57856 | NW_004516545.1 | Scaffold1309 | 57856                   | AA                              | CC                | 1946645944               |
| SNP_P3_149938_58063 | NW_004516545.1 | Scaffold1309 | 58063                   | CC                              | TT                | 1946645946               |
| SNP_P3_149940_70879 | NW_004516545.1 | Scaffold1309 | 70879                   | TT                              | GG                | 1946645948               |
| SNP_P3_149941_70881 | NW_004516545.1 | Scaffold1309 | 70881                   | CC                              | GG                | 1946645950               |
| SNP_P3_149942_71146 | NW_004516545.1 | Scaffold1309 | 71146                   | GG                              | TT                | 1946645952               |
| SNP_P3_149943_88534 | NW_004516545.1 | Scaffold1309 | 88534                   | TT                              | CC                | 1946645954               |
| SNP_P3_149945_88860 | NW_004516545.1 | Scaffold1309 | 88860                   | TT                              | AA                | 1946645956               |
| SNP_P3_149946_89142 | NW_004516545.1 | Scaffold1309 | 89142                   | TT                              | CC                | 1946645958               |
| SNP_P3_149947_89154 | NW_004516545.1 | Scaffold1309 | 89154                   | AA                              | GG                | 1946645959               |
| SNP_P3_149948_90176 | NW_004516545.1 | Scaffold1309 | 90176                   | TT                              | CC                | 1946645961               |
| SNP_P3_149949_90254 | NW_004516545.1 | Scaffold1309 | 90254                   | GG                              | AA                | 1946645963               |
| SNP_P3_149950_90637 | NW_004516545.1 | Scaffold1309 | 90637                   | GG                              | TT                | 1946645965               |
| SNP_P3_149951_94677 | NW_004516545.1 | Scaffold1309 | 94677                   | GG                              | AA                | 1946645967               |
| SNP_P3_149952_94698 | NW_004516545.1 | Scaffold1309 | 94698                   | TT                              | CC                | 1946645969               |
| SNP_P3_149953_36524 | NW_004516547.1 | Scaffold1312 | 36524                   | AA                              | GG                | 1946645971               |
| SNP_P3_149954_52026 | NW_004516547.1 | Scaffold1312 | 52026                   | AA                              | TT                | 1946645973               |
| SNP_P3_149956_58766 | NW_004516547.1 | Scaffold1312 | 58766                   | TT                              | AA                | 1946645975               |
| SNP_P3_149957_59447 | NW_004516547.1 | Scaffold1312 | 59447                   | GG                              | TT                | 1946645977               |
| SNP_P3_149958_62423 | NW_004516547.1 | Scaffold1312 | 62423                   | GG                              | AA                | 1946645979               |
| SNP_P3_149960_62454 | NW_004516547.1 | Scaffold1312 | 62454                   | GG                              | AA                | 1946645980               |
| SNP_P3_149961_62615 | NW_004516547.1 | Scaffold1312 | 62615                   | GG                              | TT                | 1946645982               |
| SNP_P3_149962_64919 | NW_004516547.1 | Scaffold1312 | 64919                   | TT                              | GG                | 1946645984               |
| SNP_P3_149963_64994 | NW_004516547.1 | Scaffold1312 | 64994                   | CC                              | GG                | 1946645986               |
| SNP_P3_149964_64995 | NW_004516547.1 | Scaffold1312 | 64995                   | GG                              | CC                | 1946645988               |
| SNP_P3_149965_65136 | NW_004516547.1 | Scaffold1312 | 65136                   | GG                              | AA                | 1946645989               |
| SNP_P3_149966_65658 | NW_004516547.1 | Scaffold1312 | 65658                   | TT                              | CC                | 1946645991               |
| SNP_P3_149968_66031 | NW_004516547.1 | Scaffold1312 | 66031                   | CC                              | TT                | 1946645993               |
| SNP_P3_149969_66606 | NW_004516547.1 | Scaffold1312 | 66606                   | AA                              | GG                | 1946645995               |
| SNP_P3_149970_67119 | NW_004516547.1 | Scaffold1312 | 67119                   | AA                              | CC                | 1946645997               |
| SNP_P3_149971_67938 | NW_004516547.1 | Scaffold1312 | 67938                   | TT                              | AA                | 1946645999               |
| SNP_P3_149972_68527 | NW_004516547.1 | Scaffold1312 | 68527                   | GG                              | AA                | 1946646000               |
| SNP_P3_149973_69466 | NW_004516547.1 | Scaffold1312 | 69466                   | GG                              | CC                | 1946646002               |
| SNP_P3_149974_69596 | NW_004516547.1 | Scaffold1312 | 69596                   | GG                              | TT                | 1946646003               |
| SNP_P3_149975_69913 | NW_004516547.1 | Scaffold1312 | 69913                   | TT                              | CC                | 1946646005               |
| SNP_P3_149978_71707 | NW_004516547.1 | Scaffold1312 | 71707                   | TT                              | CC                | 1946646007               |
| SNP_P3_149979_72077 | NW_004516547.1 | Scaffold1312 | 72077                   | CC                              | TT                | 1946646009               |

| SNPs IDs            | Chromosome IDs | Chromosomes  | Physical positions (bp) | CDC Frontier (Reference genome) | (Pusa 256 & HPNB) | NCBI SNPdb Accession IDs |
|---------------------|----------------|--------------|-------------------------|---------------------------------|-------------------|--------------------------|
| SNP_P3_149980_73979 | NW_004516547.1 | Scaffold1312 | 73979                   | AA                              | CC                | 1946646011               |
| SNP_P3_149981_74961 | NW_004516547.1 | Scaffold1312 | 74961                   | GG                              | AA                | 1946646013               |
| SNP_P3_149982_75105 | NW_004516547.1 | Scaffold1312 | 75105                   | AA                              | GG                | 1946646015               |
| SNP_P3_149983_75340 | NW_004516547.1 | Scaffold1312 | 75340                   | GG                              | AA                | 1946646017               |
| SNP_P3_149984_75346 | NW_004516547.1 | Scaffold1312 | 75346                   | AA                              | GG                | 1946646019               |
| SNP_P3_149985_75462 | NW_004516547.1 | Scaffold1312 | 75462                   | GG                              | TT                | 1946646020               |
| SNP_P3_149986_75568 | NW_004516547.1 | Scaffold1312 | 75568                   | CC                              | TT                | 1946646022               |
| SNP_P3_149987_75581 | NW_004516547.1 | Scaffold1312 | 75581                   | AA                              | TT                | 1946646023               |
| SNP_P3_149988_76168 | NW_004516547.1 | Scaffold1312 | 76168                   | AA                              | GG                | 1946646024               |
| SNP_P3_149989_76269 | NW_004516547.1 | Scaffold1312 | 76269                   | TT                              | CC                | 1946646025               |
| SNP_P3_149990_76652 | NW_004516547.1 | Scaffold1312 | 76652                   | CC                              | TT                | 1946646026               |
| SNP_P3_149991_78283 | NW_004516547.1 | Scaffold1312 | 78283                   | AA                              | TT                | 1946646027               |
| SNP_P3_149992_78435 | NW_004516547.1 | Scaffold1312 | 78435                   | GG                              | AA                | 1946646029               |
| SNP_P3_149993_78520 | NW_004516547.1 | Scaffold1312 | 78520                   | TT                              | AA                | 1946646030               |
| SNP_P3_149994_78625 | NW_004516547.1 | Scaffold1312 | 78625                   | AA                              | TT                | 1946646032               |
| SNP_P3_149995_78629 | NW_004516547.1 | Scaffold1312 | 78629                   | AA                              | GG                | 1946646035               |
| SNP_P3_149997_78775 | NW_004516547.1 | Scaffold1312 | 78775                   | GG                              | AA                | 1946646037               |
| SNP_P3_150001_78980 | NW_004516547.1 | Scaffold1312 | 78980                   | TT                              | CC                | 1946646039               |
| SNP_P3_150002_78991 | NW_004516547.1 | Scaffold1312 | 78991                   | AA                              | GG                | 1946646041               |
| SNP_P3_150003_79155 | NW_004516547.1 | Scaffold1312 | 79155                   | CC                              | TT                | 1946646043               |
| SNP_P3_150004_79226 | NW_004516547.1 | Scaffold1312 | 79226                   | AA                              | TT                | 1946646045               |
| SNP_P3_150005_79260 | NW_004516547.1 | Scaffold1312 | 79260                   | TT                              | CC                | 1946646047               |
| SNP_P3_150006_79280 | NW_004516547.1 | Scaffold1312 | 79280                   | GG                              | TT                | 1946646048               |
| SNP_P3_150007_79666 | NW_004516547.1 | Scaffold1312 | 79666                   | GG                              | AA                | 1946646049               |
| SNP_P3_150008_79682 | NW_004516547.1 | Scaffold1312 | 79682                   | GG                              | AA                | 1946646050               |
| SNP_P3_150009_79698 | NW_004516547.1 | Scaffold1312 | 79698                   | CC                              | AA                | 1946646051               |
| SNP_P3_150010_79733 | NW_004516547.1 | Scaffold1312 | 79733                   | CC                              | AA                | 1946646053               |
| SNP_P3_150011_79764 | NW_004516547.1 | Scaffold1312 | 79764                   | CC                              | TT                | 1946646054               |
| SNP_P3_150012_79824 | NW_004516547.1 | Scaffold1312 | 79824                   | AA                              | GG                | 1946646056               |
| SNP_P3_150013_79842 | NW_004516547.1 | Scaffold1312 | 79842                   | GG                              | AA                | 1946646058               |
| SNP_P3_150014_79901 | NW_004516547.1 | Scaffold1312 | 79901                   | CC                              | TT                | 1946646060               |
| SNP_P3_150015_79959 | NW_004516547.1 | Scaffold1312 | 79959                   | TT                              | CC                | 1946646062               |
| SNP_P3_150016_80007 | NW_004516547.1 | Scaffold1312 | 80007                   | CC                              | TT                | 1946646064               |
| SNP_P3_150017_80061 | NW_004516547.1 | Scaffold1312 | 80061                   | TT                              | GG                | 1946646066               |
| SNP_P3_150018_80259 | NW_004516547.1 | Scaffold1312 | 80259                   | CC                              | AA                | 1946646068               |
| SNP_P3_150019_80287 | NW_004516547.1 | Scaffold1312 | 80287                   | AA                              | CC                | 1946646070               |
| SNP_P3_150020_80350 | NW_004516547.1 | Scaffold1312 | 80350                   | CC                              | TT                | 1946646073               |
| SNP_P3_150021_80372 | NW_004516547.1 | Scaffold1312 | 80372                   | GG                              | AA                | 1946646074               |
| SNP_P3_150022_80394 | NW_004516547.1 | Scaffold1312 | 80394                   | GG                              | AA                | 1946646076               |
| SNP_P3_150023_80499 | NW_004516547.1 | Scaffold1312 | 80499                   | AA                              | TT                | 1946646078               |
| SNP_P3_150025_80593 | NW_004516547.1 | Scaffold1312 | 80593                   | GG                              | AA                | 1946646080               |
| SNP_P3_150026_80716 | NW_004516547.1 | Scaffold1312 | 80716                   | AA                              | GG                | 1946646082               |

| SNPs IDs            | Chromosome IDs | Chromosomes  | Physical positions (bp) | CDC Frontier (Reference genome) | (Pusa 256 & HPNB) | NCBI SNPdb Accession IDs |
|---------------------|----------------|--------------|-------------------------|---------------------------------|-------------------|--------------------------|
| SNP_P3_150027_80955 | NW_004516547.1 | Scaffold1312 | 80955                   | TT                              | CC                | 1946646084               |
| SNP_P3_150028_81003 | NW_004516547.1 | Scaffold1312 | 81003                   | CC                              | TT                | 1946646086               |
| SNP_P3_150029_81067 | NW_004516547.1 | Scaffold1312 | 81067                   | AA                              | CC                | 1946646088               |
| SNP_P3_150030_81081 | NW_004516547.1 | Scaffold1312 | 81081                   | TT                              | CC                | 1946646090               |
| SNP_P3_150031_81104 | NW_004516547.1 | Scaffold1312 | 81104                   | TT                              | GG                | 1946646092               |
| SNP_P3_150033_81389 | NW_004516547.1 | Scaffold1312 | 81389                   | TT                              | GG                | 1946646094               |
| SNP_P3_150034_81450 | NW_004516547.1 | Scaffold1312 | 81450                   | AA                              | GG                | 1946646096               |
| SNP_P3_150035_81469 | NW_004516547.1 | Scaffold1312 | 81469                   | TT                              | AA                | 1946646098               |
| SNP_P3_150036_81590 | NW_004516547.1 | Scaffold1312 | 81590                   | TT                              | CC                | 1946646100               |
| SNP_P3_150037_81727 | NW_004516547.1 | Scaffold1312 | 81727                   | AA                              | GG                | 1946646102               |
| SNP_P3_150038_81751 | NW_004516547.1 | Scaffold1312 | 81751                   | TT                              | CC                | 1946646103               |
| SNP_P3_150039_81898 | NW_004516547.1 | Scaffold1312 | 81898                   | AA                              | GG                | 1946646105               |
| SNP_P3_150040_82002 | NW_004516547.1 | Scaffold1312 | 82002                   | GG                              | AA                | 1946646106               |
| SNP_P3_150041_82003 | NW_004516547.1 | Scaffold1312 | 82003                   | AA                              | GG                | 1946646107               |
| SNP_P3_150042_82188 | NW_004516547.1 | Scaffold1312 | 82188                   | GG                              | AA                | 1946646108               |
| SNP_P3_150043_82276 | NW_004516547.1 | Scaffold1312 | 82276                   | TT                              | CC                | 1946646110               |
| SNP_P3_150044_82277 | NW_004516547.1 | Scaffold1312 | 82277                   | GG                              | AA                | 1946646112               |
| SNP_P3_150045_82296 | NW_004516547.1 | Scaffold1312 | 82296                   | CC                              | TT                | 1946646114               |
| SNP_P3_150046_82323 | NW_004516547.1 | Scaffold1312 | 82323                   | CC                              | TT                | 1946646115               |
| SNP_P3_150048_82356 | NW_004516547.1 | Scaffold1312 | 82356                   | TT                              | CC                | 1946646117               |
| SNP_P3_150049_82369 | NW_004516547.1 | Scaffold1312 | 82369                   | GG                              | AA                | 1946646119               |
| SNP_P3_150050_82524 | NW_004516547.1 | Scaffold1312 | 82524                   | AA                              | GG                | 1946646121               |
| SNP_P3_150051_82525 | NW_004516547.1 | Scaffold1312 | 82525                   | AA                              | CC                | 1946646123               |
| SNP_P3_150052_82588 | NW_004516547.1 | Scaffold1312 | 82588                   | CC                              | GG                | 1946646125               |
| SNP_P3_150053_82616 | NW_004516547.1 | Scaffold1312 | 82616                   | TT                              | CC                | 1946646127               |
| SNP_P3_150054_82627 | NW_004516547.1 | Scaffold1312 | 82627                   | CC                              | TT                | 1946646128               |
| SNP_P3_150055_82637 | NW_004516547.1 | Scaffold1312 | 82637                   | AA                              | TT                | 1946646129               |
| SNP_P3_150056_82673 | NW_004516547.1 | Scaffold1312 | 82673                   | AA                              | GG                | 1946646130               |
| SNP_P3_150057_82769 | NW_004516547.1 | Scaffold1312 | 82769                   | AA                              | TT                | 1946646131               |
| SNP_P3_150058_82845 | NW_004516547.1 | Scaffold1312 | 82845                   | GG                              | AA                | 1946646132               |
| SNP_P3_150059_82959 | NW_004516547.1 | Scaffold1312 | 82959                   | CC                              | AA                | 1946646133               |
| SNP_P3_150060_83001 | NW_004516547.1 | Scaffold1312 | 83001                   | AA                              | GG                | 1946646135               |
| SNP_P3_150061_83177 | NW_004516547.1 | Scaffold1312 | 83177                   | GG                              | AA                | 1946646137               |
| SNP_P3_150062_83302 | NW_004516547.1 | Scaffold1312 | 83302                   | TT                              | CC                | 1946646139               |
| SNP_P3_150063_83443 | NW_004516547.1 | Scaffold1312 | 83443                   | CC                              | TT                | 1946646141               |
| SNP_P3_150064_83462 | NW_004516547.1 | Scaffold1312 | 83462                   | TT                              | CC                | 1946646143               |
| SNP_P3_150065_86106 | NW_004516547.1 | Scaffold1312 | 86106                   | AA                              | GG                | 1946646145               |
| SNP_P3_150066_86120 | NW_004516547.1 | Scaffold1312 | 86120                   | CC                              | TT                | 1946646147               |
| SNP_P3_150067_86278 | NW_004516547.1 | Scaffold1312 | 86278                   | GG                              | AA                | 1946646149               |
| SNP_P3_150068_86291 | NW_004516547.1 | Scaffold1312 | 86291                   | GG                              | TT                | 1946646151               |
| SNP_P3_150069_86353 | NW_004516547.1 | Scaffold1312 | 86353                   | AA                              | TT                | 1946646152               |
| SNP_P3_150070_86363 | NW_004516547.1 | Scaffold1312 | 86363                   | AA                              | GG                | 1946646153               |

| SNPs IDs            | Chromosome IDs | Chromosomes  | Physical positions (bp) | CDC Frontier (Reference genome) | (Pusa 256 & HPNB) | NCBI SNPdb Accession IDs |
|---------------------|----------------|--------------|-------------------------|---------------------------------|-------------------|--------------------------|
| SNP_P3_150071_86383 | NW_004516547.1 | Scaffold1312 | 86383                   | GG                              | AA                | 1946646154               |
| SNP_P3_150072_86432 | NW_004516547.1 | Scaffold1312 | 86432                   | AA                              | GG                | 1946646155               |
| SNP_P3_150073_86525 | NW_004516547.1 | Scaffold1312 | 86525                   | AA                              | GG                | 1946646156               |
| SNP_P3_150074_86738 | NW_004516547.1 | Scaffold1312 | 86738                   | AA                              | TT                | 1946646160               |
| SNP_P3_150075_86772 | NW_004516547.1 | Scaffold1312 | 86772                   | GG                              | CC                | 1946646162               |
| SNP_P3_150077_86834 | NW_004516547.1 | Scaffold1312 | 86834                   | CC                              | TT                | 1946646164               |
| SNP_P3_150078_86843 | NW_004516547.1 | Scaffold1312 | 86843                   | GG                              | AA                | 1946646166               |
| SNP_P3_150079_86974 | NW_004516547.1 | Scaffold1312 | 86974                   | GG                              | TT                | 1946646168               |
| SNP_P3_150080_87071 | NW_004516547.1 | Scaffold1312 | 87071                   | TT                              | GG                | 1946646170               |
| SNP_P3_150081_87148 | NW_004516547.1 | Scaffold1312 | 87148                   | GG                              | TT                | 1946646172               |
| SNP_P3_150082_87208 | NW_004516547.1 | Scaffold1312 | 87208                   | AA                              | CC                | 1946646174               |
| SNP_P3_150083_87216 | NW_004516547.1 | Scaffold1312 | 87216                   | TT                              | CC                | 1946646175               |
| SNP_P3_150084_87401 | NW_004516547.1 | Scaffold1312 | 87401                   | TT                              | AA                | 1946646177               |
| SNP_P3_150085_87420 | NW_004516547.1 | Scaffold1312 | 87420                   | TT                              | CC                | 1946646178               |
| SNP_P3_150086_87451 | NW_004516547.1 | Scaffold1312 | 87451                   | AA                              | GG                | 1946646179               |
| SNP_P3_150087_87477 | NW_004516547.1 | Scaffold1312 | 87477                   | CC                              | TT                | 1946646181               |
| SNP_P3_150088_87550 | NW_004516547.1 | Scaffold1312 | 87550                   | TT                              | AA                | 1946646183               |
| SNP_P3_150089_87645 | NW_004516547.1 | Scaffold1312 | 87645                   | GG                              | AA                | 1946646185               |
| SNP_P3_150090_87750 | NW_004516547.1 | Scaffold1312 | 87750                   | AA                              | GG                | 1946646187               |
| SNP_P3_150091_87752 | NW_004516547.1 | Scaffold1312 | 87752                   | GG                              | CC                | 1946646189               |
| SNP_P3_150092_87797 | NW_004516547.1 | Scaffold1312 | 87797                   | GG                              | TT                | 1946646191               |
| SNP_P3_150093_87807 | NW_004516547.1 | Scaffold1312 | 87807                   | AA                              | GG                | 1946646193               |
| SNP_P3_150094_87845 | NW_004516547.1 | Scaffold1312 | 87845                   | GG                              | TT                | 1946646195               |
| SNP_P3_150095_88101 | NW_004516547.1 | Scaffold1312 | 88101                   | CC                              | GG                | 1946646197               |
| SNP_P3_150096_88539 | NW_004516547.1 | Scaffold1312 | 88539                   | GG                              | AA                | 1946646199               |
| SNP_P3_150097_88551 | NW_004516547.1 | Scaffold1312 | 88551                   | TT                              | AA                | 1946646201               |
| SNP_P3_150098_88763 | NW_004516547.1 | Scaffold1312 | 88763                   | CC                              | TT                | 1946646203               |
| SNP_P3_150099_88778 | NW_004516547.1 | Scaffold1312 | 88778                   | GG                              | TT                | 1946646205               |
| SNP_P3_150100_88809 | NW_004516547.1 | Scaffold1312 | 88809                   | GG                              | TT                | 1946646207               |
| SNP_P3_150101_88931 | NW_004516547.1 | Scaffold1312 | 88931                   | TT                              | AA                | 1946646209               |
| SNP_P3_150102_88944 | NW_004516547.1 | Scaffold1312 | 88944                   | CC                              | TT                | 1946646211               |
| SNP_P3_150104_89201 | NW_004516547.1 | Scaffold1312 | 89201                   | AA                              | CC                | 1946646213               |
| SNP_P3_150105_89251 | NW_004516547.1 | Scaffold1312 | 89251                   | AA                              | TT                | 1946646216               |
| SNP_P3_150106_89333 | NW_004516547.1 | Scaffold1312 | 89333                   | AA                              | GG                | 1946646218               |
| SNP_P3_150108_89728 | NW_004516547.1 | Scaffold1312 | 89728                   | GG                              | TT                | 1946646220               |
| SNP_P3_150110_89847 | NW_004516547.1 | Scaffold1312 | 89847                   | CC                              | AA                | 1946646222               |
| SNP_P3_150111_89910 | NW_004516547.1 | Scaffold1312 | 89910                   | AA                              | GG                | 1946646224               |
| SNP_P3_150112_89911 | NW_004516547.1 | Scaffold1312 | 89911                   | AA                              | GG                | 1946646226               |
| SNP_P3_150113_94123 | NW_004516547.1 | Scaffold1312 | 94123                   | CC                              | TT                | 1946646228               |
| SNP_P3_150114_94521 | NW_004516547.1 | Scaffold1312 | 94521                   | CC                              | AA                | 1946646230               |
| SNP_P3_150115_94528 | NW_004516547.1 | Scaffold1312 | 94528                   | GG                              | TT                | 1946646232               |
| SNP_P3_150116_95678 | NW_004516547.1 | Scaffold1312 | 95678                   | CC                              | TT                | 1946646234               |

| SNPs IDs             | Chromosome IDs | Chromosomes  | Physical positions (bp) | CDC Frontier (Reference genome) | (Pusa 256 & HPNB) | NCBI SNPdb Accession IDs |
|----------------------|----------------|--------------|-------------------------|---------------------------------|-------------------|--------------------------|
| SNP_P3_150117_95843  | NW_004516547.1 | Scaffold1312 | 95843                   | CC                              | TT                | 1946646236               |
| SNP_P3_150118_96428  | NW_004516547.1 | Scaffold1312 | 96428                   | GG                              | CC                | 1946646238               |
| SNP_P3_150119_96434  | NW_004516547.1 | Scaffold1312 | 96434                   | GG                              | TT                | 1946646239               |
| SNP_P3_150120_104590 | NW_004516547.1 | Scaffold1312 | 104590                  | CC                              | TT                | 1946646241               |
| SNP_P3_150121_1341   | NW_004516548.1 | Scaffold1313 | 1341                    | TT                              | CC                | 1946646243               |
| SNP_P3_150122_1344   | NW_004516548.1 | Scaffold1313 | 1344                    | AA                              | GG                | 1946646245               |
| SNP_P3_150123_1402   | NW_004516548.1 | Scaffold1313 | 1402                    | TT                              | CC                | 1946646248               |
| SNP_P3_150124_1774   | NW_004516548.1 | Scaffold1313 | 1774                    | AA                              | GG                | 1946646250               |
| SNP_P3_150125_1792   | NW_004516548.1 | Scaffold1313 | 1792                    | AA                              | TT                | 1946646252               |
| SNP_P3_150126_43795  | NW_004516548.1 | Scaffold1313 | 43795                   | CC                              | TT                | 1946646254               |
| SNP_P3_150128_47165  | NW_004516548.1 | Scaffold1313 | 47165                   | TT                              | CC                | 1946646256               |
| SNP_P3_150129_72084  | NW_004516548.1 | Scaffold1313 | 72084                   | GG                              | TT                | 1946646257               |
| SNP_P3_150130_72135  | NW_004516548.1 | Scaffold1313 | 72135                   | TT                              | CC                | 1946646259               |
| SNP_P3_150131_102466 | NW_004516548.1 | Scaffold1313 | 102466                  | CC                              | AA                | 1946646261               |
| SNP_P3_150132_102564 | NW_004516548.1 | Scaffold1313 | 102564                  | AA                              | GG                | 1946646263               |
| SNP_P3_150133_102672 | NW_004516548.1 | Scaffold1313 | 102672                  | CC                              | TT                | 1946646265               |
| SNP_P3_150134_102685 | NW_004516548.1 | Scaffold1313 | 102685                  | AA                              | GG                | 1946646267               |
| SNP_P3_150136_103240 | NW_004516548.1 | Scaffold1313 | 103240                  | TT                              | CC                | 1946646269               |
| SNP_P3_150137_103447 | NW_004516548.1 | Scaffold1313 | 103447                  | CC                              | AA                | 1946646271               |
| SNP_P3_150138_103457 | NW_004516548.1 | Scaffold1313 | 103457                  | CC                              | TT                | 1946646273               |
| SNP_P3_150139_103650 | NW_004516548.1 | Scaffold1313 | 103650                  | TT                              | AA                | 1946646275               |
| SNP_P3_150140_103720 | NW_004516548.1 | Scaffold1313 | 103720                  | AA                              | GG                | 1946646277               |
| SNP_P3_150141_103895 | NW_004516548.1 | Scaffold1313 | 103895                  | GG                              | CC                | 1946646278               |
| SNP_P3_150142_108427 | NW_004516548.1 | Scaffold1313 | 108427                  | AA                              | GG                | 1946646281               |
| SNP_P3_150143_108434 | NW_004516548.1 | Scaffold1313 | 108434                  | AA                              | TT                | 1946646283               |
| SNP_P3_150144_108474 | NW_004516548.1 | Scaffold1313 | 108474                  | CC                              | AA                | 1946646285               |
| SNP_P3_150145_108496 | NW_004516548.1 | Scaffold1313 | 108496                  | TT                              | GG                | 1946646287               |
| SNP_P3_150147_117761 | NW_004516548.1 | Scaffold1313 | 117761                  | GG                              | AA                | 1946646289               |
| SNP_P3_150148_117786 | NW_004516548.1 | Scaffold1313 | 117786                  | CC                              | GG                | 1946646291               |
| SNP_P3_150149_117787 | NW_004516548.1 | Scaffold1313 | 117787                  | CC                              | AA                | 1946646293               |
| SNP_P3_150150_117798 | NW_004516548.1 | Scaffold1313 | 117798                  | AA                              | GG                | 1946646295               |
| SNP_P3_150151_117825 | NW_004516548.1 | Scaffold1313 | 117825                  | AA                              | GG                | 1946646297               |
| SNP_P3_150152_117826 | NW_004516548.1 | Scaffold1313 | 117826                  | TT                              | CC                | 1946646299               |
| SNP_P3_150153_117860 | NW_004516548.1 | Scaffold1313 | 117860                  | CC                              | TT                | 1946646301               |
| SNP_P3_150154_117870 | NW_004516548.1 | Scaffold1313 | 117870                  | AA                              | GG                | 1946646302               |
| SNP_P3_150155_117881 | NW_004516548.1 | Scaffold1313 | 117881                  | CC                              | TT                | 1946646304               |
| SNP_P3_150156_117884 | NW_004516548.1 | Scaffold1313 | 117884                  | AA                              | GG                | 1946646306               |
| SNP_P3_150157_117900 | NW_004516548.1 | Scaffold1313 | 117900                  | TT                              | AA                | 1946646308               |
| SNP_P3_150158_117934 | NW_004516548.1 | Scaffold1313 | 117934                  | TT                              | CC                | 1946646310               |
| SNP_P3_150159_117941 | NW_004516548.1 | Scaffold1313 | 117941                  | AA                              | GG                | 1946646312               |
| SNP_P3_150160_117968 | NW_004516548.1 | Scaffold1313 | 117968                  | CC                              | TT                | 1946646315               |
| SNP_P3_150161_117977 | NW_004516548.1 | Scaffold1313 | 117977                  | CC                              | AA                | 1946646317               |

| SNPs IDs             | Chromosome IDs | Chromosomes  | Physical positions (bp) | CDC Frontier (Reference genome) | (Pusa 256 & HPNB) | NCBI SNPdb Accession IDs |
|----------------------|----------------|--------------|-------------------------|---------------------------------|-------------------|--------------------------|
| SNP_P3_150163_120068 | NW_004516548.1 | Scaffold1313 | 120068                  | CC                              | TT                | 1946646319               |
| SNP_P3_150164_120069 | NW_004516548.1 | Scaffold1313 | 120069                  | AA                              | CC                | 1946646321               |
| SNP_P3_150165_120243 | NW_004516548.1 | Scaffold1313 | 120243                  | TT                              | CC                | 1946646323               |
| SNP_P3_150166_120408 | NW_004516548.1 | Scaffold1313 | 120408                  | AA                              | GG                | 1946646325               |
| SNP_P3_150167_120438 | NW_004516548.1 | Scaffold1313 | 120438                  | TT                              | GG                | 1946646326               |
| SNP_P3_150168_120453 | NW_004516548.1 | Scaffold1313 | 120453                  | TT                              | CC                | 1946646328               |
| SNP_P3_150169_132240 | NW_004516548.1 | Scaffold1313 | 132240                  | CC                              | TT                | 1946646331               |
| SNP_P3_150170_132461 | NW_004516548.1 | Scaffold1313 | 132461                  | TT                              | AA                | 1946646336               |
| SNP_P3_150171_132556 | NW_004516548.1 | Scaffold1313 | 132556                  | AA                              | CC                | 1946646338               |
| SNP_P3_150172_133023 | NW_004516548.1 | Scaffold1313 | 133023                  | TT                              | CC                | 1946646340               |
| SNP_P3_150173_133172 | NW_004516548.1 | Scaffold1313 | 133172                  | TT                              | CC                | 1946646343               |
| SNP_P3_150174_133549 | NW_004516548.1 | Scaffold1313 | 133549                  | TT                              | GG                | 1946646345               |
| SNP_P3_150175_133556 | NW_004516548.1 | Scaffold1313 | 133556                  | TT                              | CC                | 1946646348               |
| SNP_P3_150176_133561 | NW_004516548.1 | Scaffold1313 | 133561                  | GG                              | CC                | 1946646350               |
| SNP_P3_150177_133562 | NW_004516548.1 | Scaffold1313 | 133562                  | AA                              | CC                | 1946646352               |
| SNP_P3_150178_133599 | NW_004516548.1 | Scaffold1313 | 133599                  | AA                              | TT                | 1946646354               |
| SNP_P3_150179_133746 | NW_004516548.1 | Scaffold1313 | 133746                  | TT                              | CC                | 1946646356               |
| SNP_P3_150181_133935 | NW_004516548.1 | Scaffold1313 | 133935                  | TT                              | CC                | 1946646358               |
| SNP_P3_150182_134159 | NW_004516548.1 | Scaffold1313 | 134159                  | CC                              | TT                | 1946646360               |
| SNP_P3_150183_134549 | NW_004516548.1 | Scaffold1313 | 134549                  | AA                              | GG                | 1946646362               |
| SNP_P3_150184_135935 | NW_004516548.1 | Scaffold1313 | 135935                  | GG                              | CC                | 1946646364               |
| SNP_P3_150185_138256 | NW_004516548.1 | Scaffold1313 | 138256                  | CC                              | TT                | 1946646366               |
| SNP_P3_150186_138408 | NW_004516548.1 | Scaffold1313 | 138408                  | AA                              | GG                | 1946646368               |
| SNP_P3_150188_157563 | NW_004516548.1 | Scaffold1313 | 157563                  | TT                              | CC                | 1946646370               |
| SNP_P3_150189_157565 | NW_004516548.1 | Scaffold1313 | 157565                  | TT                              | AA                | 1946646371               |
| SNP_P3_150190_158923 | NW_004516548.1 | Scaffold1313 | 158923                  | GG                              | AA                | 1946646374               |
| SNP_P3_150192_165254 | NW_004516548.1 | Scaffold1313 | 165254                  | GG                              | CC                | 1946646376               |
| SNP_P3_150193_165273 | NW_004516548.1 | Scaffold1313 | 165273                  | TT                              | CC                | 1946646378               |
| SNP_P3_150194_165289 | NW_004516548.1 | Scaffold1313 | 165289                  | TT                              | CC                | 1946646380               |
| SNP_P3_150195_167243 | NW_004516548.1 | Scaffold1313 | 167243                  | GG                              | TT                | 1946646382               |
| SNP_P3_150196_167246 | NW_004516548.1 | Scaffold1313 | 167246                  | TT                              | GG                | 1946646384               |
| SNP_P3_150197_168031 | NW_004516548.1 | Scaffold1313 | 168031                  | TT                              | CC                | 1946646386               |
| SNP_P3_150198_168275 | NW_004516548.1 | Scaffold1313 | 168275                  | AA                              | CC                | 1946646387               |
| SNP_P3_150199_168664 | NW_004516548.1 | Scaffold1313 | 168664                  | TT                              | CC                | 1946646390               |
| SNP_P3_150200_168665 | NW_004516548.1 | Scaffold1313 | 168665                  | AA                              | TT                | 1946646392               |
| SNP_P3_150201_168670 | NW_004516548.1 | Scaffold1313 | 168670                  | AA                              | GG                | 1946646393               |
| SNP_P3_150202_168677 | NW_004516548.1 | Scaffold1313 | 168677                  | AA                              | CC                | 1946646395               |
| SNP_P3_150203_168790 | NW_004516548.1 | Scaffold1313 | 168790                  | AA                              | CC                | 1946646397               |
| SNP_P3_150204_168844 | NW_004516548.1 | Scaffold1313 | 168844                  | AA                              | CC                | 1946646399               |
| SNP_P3_150205_168869 | NW_004516548.1 | Scaffold1313 | 168869                  | TT                              | AA                | 1946646401               |
| SNP_P3_150206_168883 | NW_004516548.1 | Scaffold1313 | 168883                  | AA                              | GG                | 1946646403               |
| SNP_P3_150207_168890 | NW_004516548.1 | Scaffold1313 | 168890                  | TT                              | CC                | 1946646405               |



| SNPs IDs             | Chromosome IDs | Chromosomes  | Physical positions (bp) | CDC Frontier (Reference genome) | (Pusa 256 & HPNB) | NCBI SNPdb Accession IDs |
|----------------------|----------------|--------------|-------------------------|---------------------------------|-------------------|--------------------------|
| SNP_P3_150208_168899 | NW_004516548.1 | Scaffold1313 | 168899                  | AA                              | CC                | 1946646407               |
| SNP_P3_150209_168928 | NW_004516548.1 | Scaffold1313 | 168928                  | AA                              | CC                | 1946646411               |
| SNP_P3_150210_168938 | NW_004516548.1 | Scaffold1313 | 168938                  | GG                              | TT                | 1946646413               |
| SNP_P3_150211_168950 | NW_004516548.1 | Scaffold1313 | 168950                  | TT                              | CC                | 1946646415               |
| SNP_P3_150212_171510 | NW_004516548.1 | Scaffold1313 | 171510                  | TT                              | CC                | 1946646417               |
| SNP_P3_150214_187056 | NW_004516548.1 | Scaffold1313 | 187056                  | CC                              | TT                | 1946646419               |
| SNP_P3_150215_195474 | NW_004516548.1 | Scaffold1313 | 195474                  | GG                              | AA                | 1946646421               |
| SNP_P3_150216_195487 | NW_004516548.1 | Scaffold1313 | 195487                  | TT                              | CC                | 1946646423               |
| SNP_P3_150217_201734 | NW_004516548.1 | Scaffold1313 | 201734                  | TT                              | CC                | 1946646425               |
| SNP_P3_150218_206208 | NW_004516548.1 | Scaffold1313 | 206208                  | TT                              | CC                | 1946646427               |
| SNP_P3_150219_216435 | NW_004516548.1 | Scaffold1313 | 216435                  | GG                              | TT                | 1946646429               |
| SNP_P3_150220_216483 | NW_004516548.1 | Scaffold1313 | 216483                  | AA                              | GG                | 1946646430               |
| SNP_P3_150221_216493 | NW_004516548.1 | Scaffold1313 | 216493                  | TT                              | CC                | 1946646432               |
| SNP_P3_150222_216636 | NW_004516548.1 | Scaffold1313 | 216636                  | TT                              | GG                | 1946646434               |
| SNP_P3_150223_216950 | NW_004516548.1 | Scaffold1313 | 216950                  | GG                              | AA                | 1946646436               |
| SNP_P3_150224_216965 | NW_004516548.1 | Scaffold1313 | 216965                  | TT                              | GG                | 1946646438               |
| SNP_P3_150225_229492 | NW_004516548.1 | Scaffold1313 | 229492                  | AA                              | GG                | 1946646440               |
| SNP_P3_150226_229501 | NW_004516548.1 | Scaffold1313 | 229501                  | TT                              | AA                | 1946646442               |
| SNP_P3_150227_229523 | NW_004516548.1 | Scaffold1313 | 229523                  | GG                              | TT                | 1946646444               |
| SNP_P3_150228_64     | NW_004516549.1 | Scaffold1314 | 64                      | TT                              | GG                | 1946646447               |
| SNP_P3_150229_65     | NW_004516549.1 | Scaffold1314 | 65                      | TT                              | AA                | 1946646449               |
| SNP_P3_150230_220    | NW_004516549.1 | Scaffold1314 | 220                     | GG                              | CC                | 1946646450               |
| SNP_P3_150231_346    | NW_004516549.1 | Scaffold1314 | 346                     | CC                              | GG                | 1946646452               |
| SNP_P3_150232_371    | NW_004516549.1 | Scaffold1314 | 371                     | GG                              | AA                | 1946646454               |
| SNP_P3_150233_524    | NW_004516549.1 | Scaffold1314 | 524                     | TT                              | GG                | 1946646456               |
| SNP_P3_150234_12984  | NW_004516550.1 | Scaffold1315 | 12984                   | CC                              | AA                | 1946646458               |
| SNP_P3_150235_14487  | NW_004516550.1 | Scaffold1315 | 14487                   | AA                              | GG                | 1946646460               |
| SNP_P3_150236_14544  | NW_004516550.1 | Scaffold1315 | 14544                   | GG                              | AA                | 1946646462               |
| SNP_P3_150237_14554  | NW_004516550.1 | Scaffold1315 | 14554                   | AA                              | GG                | 1946646464               |
| SNP_P3_150238_14779  | NW_004516550.1 | Scaffold1315 | 14779                   | GG                              | AA                | 1946646466               |
| SNP_P3_150239_14820  | NW_004516550.1 | Scaffold1315 | 14820                   | CC                              | TT                | 1946646468               |
| SNP_P3_150240_14827  | NW_004516550.1 | Scaffold1315 | 14827                   | TT                              | GG                | 1946646470               |
| SNP_P3_150241_14933  | NW_004516550.1 | Scaffold1315 | 14933                   | GG                              | TT                | 1946646472               |
| SNP_P3_150242_14936  | NW_004516550.1 | Scaffold1315 | 14936                   | AA                              | CC                | 1946646475               |
| SNP_P3_150243_14951  | NW_004516550.1 | Scaffold1315 | 14951                   | CC                              | TT                | 1946646477               |
| SNP_P3_150244_15389  | NW_004516550.1 | Scaffold1315 | 15389                   | TT                              | CC                | 1946646479               |
| SNP_P3_150245_15407  | NW_004516550.1 | Scaffold1315 | 15407                   | TT                              | AA                | 1946646481               |
| SNP_P3_150246_37551  | NW_004516550.1 | Scaffold1315 | 37551                   | CC                              | TT                | 1946646483               |
| SNP_P3_150247_37558  | NW_004516550.1 | Scaffold1315 | 37558                   | GG                              | AA                | 1946646486               |
| SNP_P3_150248_37920  | NW_004516550.1 | Scaffold1315 | 37920                   | CC                              | TT                | 1946646487               |
| SNP_P3_150249_37923  | NW_004516550.1 | Scaffold1315 | 37923                   | CC                              | TT                | 1946646490               |
| SNP_P3_150250_37942  | NW_004516550.1 | Scaffold1315 | 37942                   | TT                              | AA                | 1946646492               |

| SNPs IDs             | Chromosome IDs | Chromosomes  | Physical positions (bp) | CDC Frontier (Reference genome) | (Pusa 256 & HPNB) | NCBI SNPdb Accession IDs |
|----------------------|----------------|--------------|-------------------------|---------------------------------|-------------------|--------------------------|
| SNP_P3_150251_64194  | NW_004516550.1 | Scaffold1315 | 64194                   | GG                              | AA                | 1946646493               |
| SNP_P3_150252_93460  | NW_004516550.1 | Scaffold1315 | 93460                   | GG                              | CC                | 1946646496               |
| SNP_P3_150253_93465  | NW_004516550.1 | Scaffold1315 | 93465                   | CC                              | TT                | 1946646498               |
| SNP_P3_150254_93466  | NW_004516550.1 | Scaffold1315 | 93466                   | AA                              | GG                | 1946646500               |
| SNP_P3_150255_98263  | NW_004516550.1 | Scaffold1315 | 98263                   | CC                              | TT                | 1946646502               |
| SNP_P3_150256_108277 | NW_004516550.1 | Scaffold1315 | 108277                  | TT                              | CC                | 1946646504               |
| SNP_P3_150257_108974 | NW_004516550.1 | Scaffold1315 | 108974                  | TT                              | CC                | 1946646505               |
| SNP_P3_150258_109036 | NW_004516550.1 | Scaffold1315 | 109036                  | TT                              | CC                | 1946646507               |
| SNP_P3_150260_114801 | NW_004516550.1 | Scaffold1315 | 114801                  | CC                              | TT                | 1946646509               |
| SNP_P3_150261_114802 | NW_004516550.1 | Scaffold1315 | 114802                  | TT                              | GG                | 1946646512               |
| SNP_P3_150262_114813 | NW_004516550.1 | Scaffold1315 | 114813                  | TT                              | CC                | 1946646514               |
| SNP_P3_150263_114979 | NW_004516550.1 | Scaffold1315 | 114979                  | TT                              | CC                | 1946646516               |
| SNP_P3_150264_114983 | NW_004516550.1 | Scaffold1315 | 114983                  | CC                              | TT                | 1946646518               |
| SNP_P3_150265_115008 | NW_004516550.1 | Scaffold1315 | 115008                  | GG                              | AA                | 1946646520               |
| SNP_P3_150266_115048 | NW_004516550.1 | Scaffold1315 | 115048                  | CC                              | TT                | 1946646522               |
| SNP_P3_150267_115057 | NW_004516550.1 | Scaffold1315 | 115057                  | TT                              | CC                | 1946646524               |
| SNP_P3_150268_115092 | NW_004516550.1 | Scaffold1315 | 115092                  | AA                              | GG                | 1946646526               |
| SNP_P3_150270_115206 | NW_004516550.1 | Scaffold1315 | 115206                  | TT                              | AA                | 1946646528               |
| SNP_P3_150271_115235 | NW_004516550.1 | Scaffold1315 | 115235                  | TT                              | GG                | 1946646530               |
| SNP_P3_150272_115284 | NW_004516550.1 | Scaffold1315 | 115284                  | CC                              | TT                | 1946646532               |
| SNP_P3_150273_115305 | NW_004516550.1 | Scaffold1315 | 115305                  | AA                              | TT                | 1946646534               |
| SNP_P3_150274_120490 | NW_004516550.1 | Scaffold1315 | 120490                  | GG                              | AA                | 1946646536               |
| SNP_P3_150275_127678 | NW_004516550.1 | Scaffold1315 | 127678                  | TT                              | GG                | 1946646538               |
| SNP_P3_150276_128306 | NW_004516550.1 | Scaffold1315 | 128306                  | CC                              | TT                | 1946646540               |
| SNP_P3_150277_151180 | NW_004516550.1 | Scaffold1315 | 151180                  | AA                              | GG                | 1946646542               |
| SNP_P3_150278_151243 | NW_004516550.1 | Scaffold1315 | 151243                  | TT                              | GG                | 1946646544               |
| SNP_P3_150279_151271 | NW_004516550.1 | Scaffold1315 | 151271                  | CC                              | GG                | 1946646547               |
| SNP_P3_150280_151351 | NW_004516550.1 | Scaffold1315 | 151351                  | AA                              | CC                | 1946646549               |
| SNP_P3_150281_151407 | NW_004516550.1 | Scaffold1315 | 151407                  | TT                              | CC                | 1946646551               |
| SNP_P3_150282_151455 | NW_004516550.1 | Scaffold1315 | 151455                  | TT                              | AA                | 1946646553               |
| SNP_P3_150283_151516 | NW_004516550.1 | Scaffold1315 | 151516                  | TT                              | CC                | 1946646555               |
| SNP_P3_150284_151531 | NW_004516550.1 | Scaffold1315 | 151531                  | AA                              | TT                | 1946646557               |
| SNP_P3_150286_151634 | NW_004516550.1 | Scaffold1315 | 151634                  | GG                              | AA                | 1946646559               |
| SNP_P3_150287_160071 | NW_004516550.1 | Scaffold1315 | 160071                  | TT                              | AA                | 1946646561               |
| SNP_P3_150288_160078 | NW_004516550.1 | Scaffold1315 | 160078                  | TT                              | CC                | 1946646563               |
| SNP_P3_150289_160144 | NW_004516550.1 | Scaffold1315 | 160144                  | CC                              | TT                | 1946646565               |
| SNP_P3_150290_160176 | NW_004516550.1 | Scaffold1315 | 160176                  | TT                              | GG                | 1946646567               |
| SNP_P3_150291_161205 | NW_004516550.1 | Scaffold1315 | 161205                  | CC                              | TT                | 1946646569               |
| SNP_P3_150292_163391 | NW_004516550.1 | Scaffold1315 | 163391                  | TT                              | CC                | 1946646571               |
| SNP_P3_150293_163466 | NW_004516550.1 | Scaffold1315 | 163466                  | GG                              | AA                | 1946646573               |
| SNP_P3_150294_163542 | NW_004516550.1 | Scaffold1315 | 163542                  | CC                              | TT                | 1946646575               |
| SNP_P3_150295_163574 | NW_004516550.1 | Scaffold1315 | 163574                  | GG                              | TT                | 1946646577               |

| SNPs IDs             | Chromosome IDs | Chromosomes  | Physical positions (bp) | CDC Frontier (Reference genome) | (Pusa 256 & HPNB) | NCBI SNPdb Accession IDs |
|----------------------|----------------|--------------|-------------------------|---------------------------------|-------------------|--------------------------|
| SNP_P3_150296_163601 | NW_004516550.1 | Scaffold1315 | 163601                  | CC                              | TT                | 1946646580               |
| SNP_P3_150297_163630 | NW_004516550.1 | Scaffold1315 | 163630                  | TT                              | CC                | 1946646582               |
| SNP_P3_150298_163659 | NW_004516550.1 | Scaffold1315 | 163659                  | GG                              | AA                | 1946646584               |
| SNP_P3_150299_169130 | NW_004516550.1 | Scaffold1315 | 169130                  | AA                              | GG                | 1946646586               |
| SNP_P3_150300_169140 | NW_004516550.1 | Scaffold1315 | 169140                  | AA                              | CC                | 1946646588               |
| SNP_P3_150301_169144 | NW_004516550.1 | Scaffold1315 | 169144                  | AA                              | TT                | 1946646590               |
| SNP_P3_150302_169354 | NW_004516550.1 | Scaffold1315 | 169354                  | CC                              | TT                | 1946646592               |
| SNP_P3_150303_169467 | NW_004516550.1 | Scaffold1315 | 169467                  | CC                              | AA                | 1946646594               |
| SNP_P3_150304_169468 | NW_004516550.1 | Scaffold1315 | 169468                  | AA                              | TT                | 1946646596               |
| SNP_P3_150305_169832 | NW_004516550.1 | Scaffold1315 | 169832                  | GG                              | AA                | 1946646598               |
| SNP_P3_150306_169861 | NW_004516550.1 | Scaffold1315 | 169861                  | GG                              | AA                | 1946646600               |
| SNP_P3_150307_178564 | NW_004516550.1 | Scaffold1315 | 178564                  | CC                              | TT                | 1946646602               |
| SNP_P3_150308_178566 | NW_004516550.1 | Scaffold1315 | 178566                  | AA                              | GG                | 1946646604               |
| SNP_P3_150309_178573 | NW_004516550.1 | Scaffold1315 | 178573                  | CC                              | AA                | 1946646606               |
| SNP_P3_150310_178579 | NW_004516550.1 | Scaffold1315 | 178579                  | CC                              | AA                | 1946646608               |
| SNP_P3_150311_181326 | NW_004516550.1 | Scaffold1315 | 181326                  | AA                              | GG                | 1946646610               |
| SNP_P3_150314_181360 | NW_004516550.1 | Scaffold1315 | 181360                  | CC                              | TT                | 1946646613               |
| SNP_P3_150316_1057   | NW_004516551.1 | Scaffold1316 | 1057                    | CC                              | TT                | 1946646615               |
| SNP_P3_150317_3852   | NW_004516551.1 | Scaffold1316 | 3852                    | TT                              | CC                | 1946646617               |
| SNP_P3_150319_7515   | NW_004516551.1 | Scaffold1316 | 7515                    | GG                              | AA                | 1946646619               |
| SNP_P3_150320_8009   | NW_004516551.1 | Scaffold1316 | 8009                    | CC                              | TT                | 1946646621               |
| SNP_P3_150321_8402   | NW_004516551.1 | Scaffold1316 | 8402                    | AA                              | TT                | 1946646623               |
| SNP_P3_150322_8475   | NW_004516551.1 | Scaffold1316 | 8475                    | TT                              | GG                | 1946646625               |
| SNP_P3_150323_8666   | NW_004516551.1 | Scaffold1316 | 8666                    | GG                              | AA                | 1946646627               |
| SNP_P3_150324_8676   | NW_004516551.1 | Scaffold1316 | 8676                    | GG                              | AA                | 1946646629               |
| SNP_P3_150325_8686   | NW_004516551.1 | Scaffold1316 | 8686                    | TT                              | CC                | 1946646631               |
| SNP_P3_150326_8781   | NW_004516551.1 | Scaffold1316 | 8781                    | CC                              | TT                | 1946646633               |
| SNP_P3_150327_8972   | NW_004516551.1 | Scaffold1316 | 8972                    | CC                              | TT                | 1946646635               |
| SNP_P3_150328_9806   | NW_004516551.1 | Scaffold1316 | 9806                    | GG                              | AA                | 1946646637               |
| SNP_P3_150329_9928   | NW_004516551.1 | Scaffold1316 | 9928                    | AA                              | GG                | 1946646639               |
| SNP_P3_150330_9992   | NW_004516551.1 | Scaffold1316 | 9992                    | TT                              | CC                | 1946646641               |
| SNP_P3_150331_9995   | NW_004516551.1 | Scaffold1316 | 9995                    | AA                              | GG                | 1946646643               |
| SNP_P3_150332_10484  | NW_004516551.1 | Scaffold1316 | 10484                   | GG                              | AA                | 1946646646               |
| SNP_P3_150333_10826  | NW_004516551.1 | Scaffold1316 | 10826                   | AA                              | TT                | 1946646648               |
| SNP_P3_150334_10847  | NW_004516551.1 | Scaffold1316 | 10847                   | AA                              | GG                | 1946646651               |
| SNP_P3_150335_10997  | NW_004516551.1 | Scaffold1316 | 10997                   | AA                              | GG                | 1946646653               |
| SNP_P3_150336_11140  | NW_004516551.1 | Scaffold1316 | 11140                   | AA                              | TT                | 1946646655               |
| SNP_P3_150337_12837  | NW_004516551.1 | Scaffold1316 | 12837                   | CC                              | GG                | 1946646657               |
| SNP_P3_150339_13614  | NW_004516551.1 | Scaffold1316 | 13614                   | AA                              | GG                | 1946646659               |
| SNP_P3_150340_14046  | NW_004516551.1 | Scaffold1316 | 14046                   | GG                              | TT                | 1946646661               |
| SNP_P3_150341_1830   | NW_004516552.1 | Scaffold1317 | 1830                    | TT                              | GG                | 1946646663               |
| SNP_P3_150344_11928  | NW_004516552.1 | Scaffold1317 | 11928                   | GG                              | AA                | 1946646666               |

| SNPs IDs            | Chromosome IDs | Chromosomes  | Physical positions (bp) | CDC Frontier (Reference genome) | (Pusa 256 & HPNB) | NCBI SNPdb Accession IDs |
|---------------------|----------------|--------------|-------------------------|---------------------------------|-------------------|--------------------------|
| SNP_P3_150345_11951 | NW_004516552.1 | Scaffold1317 | 11951                   | AA                              | GG                | 1946646668               |
| SNP_P3_150346_14807 | NW_004516552.1 | Scaffold1317 | 14807                   | TT                              | CC                | 1946646670               |
| SNP_P3_150347_15694 | NW_004516552.1 | Scaffold1317 | 15694                   | TT                              | CC                | 1946646672               |
| SNP_P3_150348_15854 | NW_004516552.1 | Scaffold1317 | 15854                   | AA                              | GG                | 1946646674               |
| SNP_P3_150349_16504 | NW_004516552.1 | Scaffold1317 | 16504                   | GG                              | AA                | 1946646676               |
| SNP_P3_150350_19446 | NW_004516552.1 | Scaffold1317 | 19446                   | CC                              | TT                | 1946646678               |
| SNP_P3_150352_37489 | NW_004516552.1 | Scaffold1317 | 37489                   | AA                              | GG                | 1946646680               |
| SNP_P3_150353_41591 | NW_004516552.1 | Scaffold1317 | 41591                   | CC                              | AA                | 1946646682               |
| SNP_P3_150354_41941 | NW_004516552.1 | Scaffold1317 | 41941                   | GG                              | AA                | 1946646684               |
| SNP_P3_150355_41989 | NW_004516552.1 | Scaffold1317 | 41989                   | CC                              | TT                | 1946646686               |
| SNP_P3_150356_42917 | NW_004516552.1 | Scaffold1317 | 42917                   | GG                              | TT                | 1946646688               |
| SNP_P3_150357_44373 | NW_004516552.1 | Scaffold1317 | 44373                   | AA                              | GG                | 1946646690               |
| SNP_P3_150358_44390 | NW_004516552.1 | Scaffold1317 | 44390                   | GG                              | TT                | 1946646692               |
| SNP_P3_150359_44523 | NW_004516552.1 | Scaffold1317 | 44523                   | CC                              | TT                | 1946646694               |
| SNP_P3_150360_44527 | NW_004516552.1 | Scaffold1317 | 44527                   | GG                              | AA                | 1946646696               |
| SNP_P3_150361_44575 | NW_004516552.1 | Scaffold1317 | 44575                   | GG                              | AA                | 1946646698               |
| SNP_P3_150362_44668 | NW_004516552.1 | Scaffold1317 | 44668                   | TT                              | CC                | 1946646700               |
| SNP_P3_150363_44678 | NW_004516552.1 | Scaffold1317 | 44678                   | AA                              | GG                | 1946646702               |
| SNP_P3_150365_44748 | NW_004516552.1 | Scaffold1317 | 44748                   | AA                              | GG                | 1946646705               |
| SNP_P3_150366_44787 | NW_004516552.1 | Scaffold1317 | 44787                   | AA                              | GG                | 1946646707               |
| SNP_P3_150367_44802 | NW_004516552.1 | Scaffold1317 | 44802                   | AA                              | GG                | 1946646708               |
| SNP_P3_150368_44832 | NW_004516552.1 | Scaffold1317 | 44832                   | TT                              | GG                | 1946646711               |
| SNP_P3_150369_44880 | NW_004516552.1 | Scaffold1317 | 44880                   | CC                              | AA                | 1946646713               |
| SNP_P3_150371_44950 | NW_004516552.1 | Scaffold1317 | 44950                   | AA                              | GG                | 1946646715               |
| SNP_P3_150372_44951 | NW_004516552.1 | Scaffold1317 | 44951                   | AA                              | GG                | 1946646717               |
| SNP_P3_150373_44952 | NW_004516552.1 | Scaffold1317 | 44952                   | CC                              | AA                | 1946646719               |
| SNP_P3_150374_45012 | NW_004516552.1 | Scaffold1317 | 45012                   | CC                              | TT                | 1946646721               |
| SNP_P3_150375_45067 | NW_004516552.1 | Scaffold1317 | 45067                   | GG                              | CC                | 1946646723               |
| SNP_P3_150376_45142 | NW_004516552.1 | Scaffold1317 | 45142                   | GG                              | AA                | 1946646725               |
| SNP_P3_150378_45170 | NW_004516552.1 | Scaffold1317 | 45170                   | AA                              | GG                | 1946646728               |
| SNP_P3_150379_45223 | NW_004516552.1 | Scaffold1317 | 45223                   | AA                              | GG                | 1946646730               |
| SNP_P3_150380_45227 | NW_004516552.1 | Scaffold1317 | 45227                   | CC                              | TT                | 1946646732               |
| SNP_P3_150381_45245 | NW_004516552.1 | Scaffold1317 | 45245                   | GG                              | TT                | 1946646734               |
| SNP_P3_150382_45261 | NW_004516552.1 | Scaffold1317 | 45261                   | GG                              | CC                | 1946646736               |
| SNP_P3_150383_45266 | NW_004516552.1 | Scaffold1317 | 45266                   | GG                              | AA                | 1946646738               |
| SNP_P3_150384_45283 | NW_004516552.1 | Scaffold1317 | 45283                   | AA                              | CC                | 1946646740               |
| SNP_P3_150385_45298 | NW_004516552.1 | Scaffold1317 | 45298                   | GG                              | TT                | 1946646742               |
| SNP_P3_150386_45304 | NW_004516552.1 | Scaffold1317 | 45304                   | AA                              | GG                | 1946646744               |
| SNP_P3_150387_45332 | NW_004516552.1 | Scaffold1317 | 45332                   | TT                              | GG                | 1946646747               |
| SNP_P3_150388_45416 | NW_004516552.1 | Scaffold1317 | 45416                   | AA                              | GG                | 1946646749               |
| SNP_P3_150389_45457 | NW_004516552.1 | Scaffold1317 | 45457                   | TT                              | CC                | 1946646751               |
| SNP_P3_150390_45528 | NW_004516552.1 | Scaffold1317 | 45528                   | AA                              | GG                | 1946646753               |

| SNPs IDs            | Chromosome IDs | Chromosomes  | Physical positions (bp) | CDC Frontier (Reference genome) | (Pusa 256 & HPNB) | NCBI SNPdb Accession IDs |
|---------------------|----------------|--------------|-------------------------|---------------------------------|-------------------|--------------------------|
| SNP_P3_150391_45561 | NW_004516552.1 | Scaffold1317 | 45561                   | CC                              | TT                | 1946646755               |
| SNP_P3_150392_45852 | NW_004516552.1 | Scaffold1317 | 45852                   | CC                              | AA                | 1946646757               |
| SNP_P3_150393_46041 | NW_004516552.1 | Scaffold1317 | 46041                   | TT                              | GG                | 1946646759               |
| SNP_P3_150394_46176 | NW_004516552.1 | Scaffold1317 | 46176                   | AA                              | GG                | 1946646761               |
| SNP_P3_150395_46237 | NW_004516552.1 | Scaffold1317 | 46237                   | CC                              | TT                | 1946646763               |
| SNP_P3_150398_46417 | NW_004516552.1 | Scaffold1317 | 46417                   | TT                              | GG                | 1946646765               |
| SNP_P3_150399_46440 | NW_004516552.1 | Scaffold1317 | 46440                   | CC                              | TT                | 1946646767               |
| SNP_P3_150400_46455 | NW_004516552.1 | Scaffold1317 | 46455                   | CC                              | TT                | 1946646769               |
| SNP_P3_150401_46483 | NW_004516552.1 | Scaffold1317 | 46483                   | AA                              | CC                | 1946646771               |
| SNP_P3_150402_46489 | NW_004516552.1 | Scaffold1317 | 46489                   | GG                              | AA                | 1946646773               |
| SNP_P3_150403_46550 | NW_004516552.1 | Scaffold1317 | 46550                   | GG                              | TT                | 1946646775               |
| SNP_P3_150404_46551 | NW_004516552.1 | Scaffold1317 | 46551                   | AA                              | GG                | 1946646777               |
| SNP_P3_150405_46553 | NW_004516552.1 | Scaffold1317 | 46553                   | TT                              | AA                | 1946646779               |
| SNP_P3_150406_46567 | NW_004516552.1 | Scaffold1317 | 46567                   | GG                              | AA                | 1946646782               |
| SNP_P3_150408_46621 | NW_004516552.1 | Scaffold1317 | 46621                   | TT                              | AA                | 1946646784               |
| SNP_P3_150411_50602 | NW_004516552.1 | Scaffold1317 | 50602                   | GG                              | AA                | 1946646786               |
| SNP_P3_150412_50968 | NW_004516552.1 | Scaffold1317 | 50968                   | TT                              | AA                | 1946646788               |
| SNP_P3_150413_52013 | NW_004516552.1 | Scaffold1317 | 52013                   | CC                              | TT                | 1946646790               |
| SNP_P3_150414_52732 | NW_004516552.1 | Scaffold1317 | 52732                   | AA                              | GG                | 1946646792               |
| SNP_P3_150415_53260 | NW_004516552.1 | Scaffold1317 | 53260                   | TT                              | CC                | 1946646794               |
| SNP_P3_150417_56291 | NW_004516552.1 | Scaffold1317 | 56291                   | AA                              | GG                | 1946646796               |
| SNP_P3_150418_56842 | NW_004516552.1 | Scaffold1317 | 56842                   | AA                              | CC                | 1946646798               |
| SNP_P3_150419_59321 | NW_004516552.1 | Scaffold1317 | 59321                   | AA                              | GG                | 1946646800               |
| SNP_P3_150420_59382 | NW_004516552.1 | Scaffold1317 | 59382                   | TT                              | CC                | 1946646802               |
| SNP_P3_150421_59670 | NW_004516552.1 | Scaffold1317 | 59670                   | CC                              | TT                | 1946646804               |
| SNP_P3_150422_59708 | NW_004516552.1 | Scaffold1317 | 59708                   | AA                              | GG                | 1946646806               |
| SNP_P3_150423_59830 | NW_004516552.1 | Scaffold1317 | 59830                   | TT                              | GG                | 1946646808               |
| SNP_P3_150425_59899 | NW_004516552.1 | Scaffold1317 | 59899                   | AA                              | GG                | 1946646810               |
| SNP_P3_150426_60476 | NW_004516552.1 | Scaffold1317 | 60476                   | AA                              | GG                | 1946646812               |
| SNP_P3_150427_62935 | NW_004516552.1 | Scaffold1317 | 62935                   | GG                              | AA                | 1946646815               |
| SNP_P3_150428_63218 | NW_004516552.1 | Scaffold1317 | 63218                   | CC                              | AA                | 1946646817               |
| SNP_P3_150429_63232 | NW_004516552.1 | Scaffold1317 | 63232                   | TT                              | CC                | 1946646819               |
| SNP_P3_150430_63268 | NW_004516552.1 | Scaffold1317 | 63268                   | GG                              | AA                | 1946646821               |
| SNP_P3_150431_63283 | NW_004516552.1 | Scaffold1317 | 63283                   | GG                              | AA                | 1946646823               |
| SNP_P3_150432_63290 | NW_004516552.1 | Scaffold1317 | 63290                   | CC                              | TT                | 1946646825               |
| SNP_P3_150433_63297 | NW_004516552.1 | Scaffold1317 | 63297                   | AA                              | CC                | 1946646827               |
| SNP_P3_150434_63335 | NW_004516552.1 | Scaffold1317 | 63335                   | TT                              | CC                | 1946646828               |
| SNP_P3_150435_63369 | NW_004516552.1 | Scaffold1317 | 63369                   | TT                              | CC                | 1946646830               |
| SNP_P3_150436_63406 | NW_004516552.1 | Scaffold1317 | 63406                   | CC                              | TT                | 1946646832               |
| SNP_P3_150437_63420 | NW_004516552.1 | Scaffold1317 | 63420                   | CC                              | GG                | 1946646834               |
| SNP_P3_150438_63454 | NW_004516552.1 | Scaffold1317 | 63454                   | GG                              | CC                | 1946646836               |
| SNP_P3_150439_63508 | NW_004516552.1 | Scaffold1317 | 63508                   | CC                              | TT                | 1946646838               |

| SNPs IDs            | Chromosome IDs | Chromosomes  | Physical positions (bp) | CDC Frontier (Reference genome) | (Pusa 256 & HPNB) | NCBI SNPdb Accession IDs |
|---------------------|----------------|--------------|-------------------------|---------------------------------|-------------------|--------------------------|
| SNP_P3_150440_63509 | NW_004516552.1 | Scaffold1317 | 63509                   | CC                              | TT                | 1946646840               |
| SNP_P3_150441_63590 | NW_004516552.1 | Scaffold1317 | 63590                   | CC                              | TT                | 1946646842               |
| SNP_P3_150442_63593 | NW_004516552.1 | Scaffold1317 | 63593                   | CC                              | TT                | 1946646844               |
| SNP_P3_150443_63595 | NW_004516552.1 | Scaffold1317 | 63595                   | CC                              | TT                | 1946646847               |
| SNP_P3_150444_63603 | NW_004516552.1 | Scaffold1317 | 63603                   | GG                              | AA                | 1946646849               |
| SNP_P3_150445_63658 | NW_004516552.1 | Scaffold1317 | 63658                   | TT                              | AA                | 1946646851               |
| SNP_P3_150447_63720 | NW_004516552.1 | Scaffold1317 | 63720                   | TT                              | CC                | 1946646853               |
| SNP_P3_150448_63814 | NW_004516552.1 | Scaffold1317 | 63814                   | AA                              | CC                | 1946646855               |
| SNP_P3_150449_63901 | NW_004516552.1 | Scaffold1317 | 63901                   | TT                              | CC                | 1946646857               |
| SNP_P3_150450_64742 | NW_004516552.1 | Scaffold1317 | 64742                   | TT                              | GG                | 1946646859               |
| SNP_P3_150451_64998 | NW_004516552.1 | Scaffold1317 | 64998                   | TT                              | GG                | 1946646861               |
| SNP_P3_150452_65043 | NW_004516552.1 | Scaffold1317 | 65043                   | CC                              | AA                | 1946646863               |
| SNP_P3_150453_66074 | NW_004516552.1 | Scaffold1317 | 66074                   | CC                              | AA                | 1946646865               |
| SNP_P3_150454_66092 | NW_004516552.1 | Scaffold1317 | 66092                   | GG                              | TT                | 1946646867               |
| SNP_P3_150455_66147 | NW_004516552.1 | Scaffold1317 | 66147                   | GG                              | AA                | 1946646869               |
| SNP_P3_150456_66327 | NW_004516552.1 | Scaffold1317 | 66327                   | CC                              | TT                | 1946646871               |
| SNP_P3_150457_66328 | NW_004516552.1 | Scaffold1317 | 66328                   | AA                              | TT                | 1946646873               |
| SNP_P3_150458_66408 | NW_004516552.1 | Scaffold1317 | 66408                   | CC                              | TT                | 1946646875               |
| SNP_P3_150459_66599 | NW_004516552.1 | Scaffold1317 | 66599                   | AA                              | GG                | 1946646877               |
| SNP_P3_150460_66704 | NW_004516552.1 | Scaffold1317 | 66704                   | CC                              | AA                | 1946646879               |
| SNP_P3_150461_66713 | NW_004516552.1 | Scaffold1317 | 66713                   | GG                              | AA                | 1946646881               |
| SNP_P3_150462_68065 | NW_004516552.1 | Scaffold1317 | 68065                   | CC                              | TT                | 1946646883               |
| SNP_P3_150463_68072 | NW_004516552.1 | Scaffold1317 | 68072                   | GG                              | CC                | 1946646885               |
| SNP_P3_150464_68438 | NW_004516552.1 | Scaffold1317 | 68438                   | TT                              | AA                | 1946646887               |
| SNP_P3_150465_69278 | NW_004516552.1 | Scaffold1317 | 69278                   | AA                              | GG                | 1946646889               |
| SNP_P3_150466_69423 | NW_004516552.1 | Scaffold1317 | 69423                   | CC                              | TT                | 1946646891               |
| SNP_P3_150467_69475 | NW_004516552.1 | Scaffold1317 | 69475                   | CC                              | TT                | 1946646893               |
| SNP_P3_150468_69491 | NW_004516552.1 | Scaffold1317 | 69491                   | GG                              | AA                | 1946646895               |
| SNP_P3_150469_69631 | NW_004516552.1 | Scaffold1317 | 69631                   | AA                              | CC                | 1946646897               |
| SNP_P3_150470_72720 | NW_004516552.1 | Scaffold1317 | 72720                   | GG                              | AA                | 1946646899               |
| SNP_P3_150471_73039 | NW_004516552.1 | Scaffold1317 | 73039                   | GG                              | AA                | 1946646901               |
| SNP_P3_150472_73091 | NW_004516552.1 | Scaffold1317 | 73091                   | GG                              | AA                | 1946646903               |
| SNP_P3_150473_73292 | NW_004516552.1 | Scaffold1317 | 73292                   | CC                              | TT                | 1946646905               |
| SNP_P3_150474_73558 | NW_004516552.1 | Scaffold1317 | 73558                   | CC                              | GG                | 1946646907               |
| SNP_P3_150475_73559 | NW_004516552.1 | Scaffold1317 | 73559                   | TT                              | AA                | 1946646909               |
| SNP_P3_150476_73586 | NW_004516552.1 | Scaffold1317 | 73586                   | CC                              | TT                | 1946646911               |
| SNP_P3_150477_73698 | NW_004516552.1 | Scaffold1317 | 73698                   | GG                              | AA                | 1946646914               |
| SNP_P3_150478_9533  | NW_004516553.1 | Scaffold1319 | 9533                    | GG                              | AA                | 1946646916               |
| SNP_P3_150479_9544  | NW_004516553.1 | Scaffold1319 | 9544                    | TT                              | CC                | 1946646918               |
| SNP_P3_150480_19834 | NW_004516553.1 | Scaffold1319 | 19834                   | CC                              | GG                | 1946646920               |
| SNP_P3_150481_20000 | NW_004516553.1 | Scaffold1319 | 20000                   | GG                              | AA                | 1946646922               |
| SNP_P3_150482_20345 | NW_004516553.1 | Scaffold1319 | 20345                   | AA                              | GG                | 1946646924               |

| SNPs IDs            | Chromosome IDs | Chromosomes  | Physical positions (bp) | CDC Frontier (Reference genome) | (Pusa 256 & HPNB) | NCBI SNPdb Accession IDs |
|---------------------|----------------|--------------|-------------------------|---------------------------------|-------------------|--------------------------|
| SNP_P3_150483_20349 | NW_004516553.1 | Scaffold1319 | 20349                   | GG                              | AA                | 1946646926               |
| SNP_P3_150484_20397 | NW_004516553.1 | Scaffold1319 | 20397                   | CC                              | TT                | 1946646927               |
| SNP_P3_150485_20401 | NW_004516553.1 | Scaffold1319 | 20401                   | CC                              | TT                | 1946646929               |
| SNP_P3_150486_20403 | NW_004516553.1 | Scaffold1319 | 20403                   | CC                              | AA                | 1946646931               |
| SNP_P3_150487_92    | NW_004516554.1 | Scaffold1320 | 92                      | CC                              | TT                | 1946646933               |
| SNP_P3_150488_129   | NW_004516554.1 | Scaffold1320 | 129                     | TT                              | CC                | 1946646935               |
| SNP_P3_150489_343   | NW_004516554.1 | Scaffold1320 | 343                     | AA                              | TT                | 1946646937               |
| SNP_P3_150490_454   | NW_004516554.1 | Scaffold1320 | 454                     | TT                              | GG                | 1946646939               |
| SNP_P3_150491_632   | NW_004516554.1 | Scaffold1320 | 632                     | AA                              | GG                | 1946646941               |
| SNP_P3_150492_660   | NW_004516554.1 | Scaffold1320 | 660                     | AA                              | CC                | 1946646943               |
| SNP_P3_150493_919   | NW_004516554.1 | Scaffold1320 | 919                     | CC                              | AA                | 1946646945               |
| SNP_P3_150494_921   | NW_004516554.1 | Scaffold1320 | 921                     | AA                              | GG                | 1946646948               |
| SNP_P3_150495_1029  | NW_004516554.1 | Scaffold1320 | 1029                    | AA                              | TT                | 1946646950               |
| SNP_P3_150497_3294  | NW_004516554.1 | Scaffold1320 | 3294                    | TT                              | CC                | 1946646952               |
| SNP_P3_150498_17016 | NW_004516554.1 | Scaffold1320 | 17016                   | TT                              | AA                | 1946646954               |
| SNP_P3_150499_17017 | NW_004516554.1 | Scaffold1320 | 17017                   | TT                              | CC                | 1946646956               |
| SNP_P3_150500_17259 | NW_004516554.1 | Scaffold1320 | 17259                   | GG                              | AA                | 1946646957               |
| SNP_P3_150501_17304 | NW_004516554.1 | Scaffold1320 | 17304                   | AA                              | TT                | 1946646959               |
| SNP_P3_150502_17305 | NW_004516554.1 | Scaffold1320 | 17305                   | AA                              | TT                | 1946646961               |
| SNP_P3_150503_25699 | NW_004516554.1 | Scaffold1320 | 25699                   | TT                              | GG                | 1946646963               |
| SNP_P3_150504_27336 | NW_004516554.1 | Scaffold1320 | 27336                   | TT                              | AA                | 1946646965               |
| SNP_P3_150505_27349 | NW_004516554.1 | Scaffold1320 | 27349                   | GG                              | TT                | 1946646967               |
| SNP_P3_150506_27369 | NW_004516554.1 | Scaffold1320 | 27369                   | TT                              | CC                | 1946646969               |
| SNP_P3_150507_27370 | NW_004516554.1 | Scaffold1320 | 27370                   | TT                              | CC                | 1946646971               |
| SNP_P3_150508_913   | NW_004516556.1 | Scaffold1322 | 913                     | TT                              | AA                | 1946646973               |
| SNP_P3_150509_1159  | NW_004516556.1 | Scaffold1322 | 1159                    | AA                              | GG                | 1946646975               |
| SNP_P3_150510_1162  | NW_004516556.1 | Scaffold1322 | 1162                    | CC                              | GG                | 1946646977               |
| SNP_P3_150511_1185  | NW_004516556.1 | Scaffold1322 | 1185                    | GG                              | CC                | 1946646979               |
| SNP_P3_150512_1206  | NW_004516556.1 | Scaffold1322 | 1206                    | TT                              | GG                | 1946646981               |
| SNP_P3_150513_9058  | NW_004516556.1 | Scaffold1322 | 9058                    | GG                              | AA                | 1946646983               |
| SNP_P3_150514_9063  | NW_004516556.1 | Scaffold1322 | 9063                    | CC                              | AA                | 1946646985               |
| SNP_P3_150515_9113  | NW_004516556.1 | Scaffold1322 | 9113                    | AA                              | CC                | 1946646987               |
| SNP_P3_150516_9116  | NW_004516556.1 | Scaffold1322 | 9116                    | GG                              | AA                | 1946646989               |
| SNP_P3_150517_9201  | NW_004516556.1 | Scaffold1322 | 9201                    | GG                              | TT                | 1946646991               |
| SNP_P3_150518_9435  | NW_004516556.1 | Scaffold1322 | 9435                    | TT                              | AA                | 1946646993               |
| SNP_P3_150519_9608  | NW_004516556.1 | Scaffold1322 | 9608                    | TT                              | GG                | 1946646995               |
| SNP_P3_150520_9633  | NW_004516556.1 | Scaffold1322 | 9633                    | GG                              | CC                | 1946646997               |
| SNP_P3_150521_9711  | NW_004516556.1 | Scaffold1322 | 9711                    | TT                              | CC                | 1946646999               |
| SNP_P3_150523_9820  | NW_004516556.1 | Scaffold1322 | 9820                    | TT                              | AA                | 1946647001               |
| SNP_P3_150524_9936  | NW_004516556.1 | Scaffold1322 | 9936                    | TT                              | AA                | 1946647003               |
| SNP_P3_150525_9990  | NW_004516556.1 | Scaffold1322 | 9990                    | TT                              | AA                | 1946647005               |
| SNP_P3_150526_4585  | NW_004516557.1 | Scaffold1323 | 4585                    | GG                              | TT                | 1946647007               |

| SNPs IDs            | Chromosome IDs | Chromosomes  | Physical positions (bp) | CDC Frontier (Reference genome) | (Pusa 256 & HPNB) | NCBI SNPdb Accession IDs |
|---------------------|----------------|--------------|-------------------------|---------------------------------|-------------------|--------------------------|
| SNP_P3_150527_4610  | NW_004516557.1 | Scaffold1323 | 4610                    | GG                              | TT                | 1946647009               |
| SNP_P3_150528_5838  | NW_004516557.1 | Scaffold1323 | 5838                    | GG                              | TT                | 1946647011               |
| SNP_P3_150529_5987  | NW_004516557.1 | Scaffold1323 | 5987                    | GG                              | AA                | 1946647014               |
| SNP_P3_150530_5992  | NW_004516557.1 | Scaffold1323 | 5992                    | AA                              | TT                | 1946647016               |
| SNP_P3_150531_6001  | NW_004516557.1 | Scaffold1323 | 6001                    | AA                              | CC                | 1946647018               |
| SNP_P3_150532_6002  | NW_004516557.1 | Scaffold1323 | 6002                    | TT                              | AA                | 1946647020               |
| SNP_P3_150533_6007  | NW_004516557.1 | Scaffold1323 | 6007                    | CC                              | TT                | 1946647022               |
| SNP_P3_150534_6052  | NW_004516557.1 | Scaffold1323 | 6052                    | AA                              | TT                | 1946647024               |
| SNP_P3_150535_6055  | NW_004516557.1 | Scaffold1323 | 6055                    | AA                              | GG                | 1946647026               |
| SNP_P3_150536_6165  | NW_004516557.1 | Scaffold1323 | 6165                    | AA                              | TT                | 1946647028               |
| SNP_P3_150537_6168  | NW_004516557.1 | Scaffold1323 | 6168                    | GG                              | AA                | 1946647030               |
| SNP_P3_150539_6194  | NW_004516557.1 | Scaffold1323 | 6194                    | GG                              | TT                | 1946647032               |
| SNP_P3_150540_6195  | NW_004516557.1 | Scaffold1323 | 6195                    | GG                              | AA                | 1946647034               |
| SNP_P3_150541_6558  | NW_004516557.1 | Scaffold1323 | 6558                    | AA                              | GG                | 1946647036               |
| SNP_P3_150543_11165 | NW_004516557.1 | Scaffold1323 | 11165                   | GG                              | AA                | 1946647038               |
| SNP_P3_150544_11173 | NW_004516557.1 | Scaffold1323 | 11173                   | CC                              | AA                | 1946647040               |
| SNP_P3_150545_7437  | NW_004516558.1 | Scaffold1324 | 7437                    | AA                              | GG                | 1946647042               |
| SNP_P3_150546_7466  | NW_004516558.1 | Scaffold1324 | 7466                    | AA                              | TT                | 1946647044               |
| SNP_P3_150547_7623  | NW_004516558.1 | Scaffold1324 | 7623                    | AA                              | CC                | 1946647046               |
| SNP_P3_150548_7692  | NW_004516558.1 | Scaffold1324 | 7692                    | AA                              | CC                | 1946647049               |
| SNP_P3_150549_7694  | NW_004516558.1 | Scaffold1324 | 7694                    | AA                              | CC                | 1946647051               |
| SNP_P3_150550_7766  | NW_004516558.1 | Scaffold1324 | 7766                    | TT                              | CC                | 1946647053               |
| SNP_P3_150551_7924  | NW_004516558.1 | Scaffold1324 | 7924                    | CC                              | TT                | 1946647055               |
| SNP_P3_150553_7966  | NW_004516558.1 | Scaffold1324 | 7966                    | GG                              | TT                | 1946647057               |
| SNP_P3_150554_7982  | NW_004516558.1 | Scaffold1324 | 7982                    | GG                              | AA                | 1946647059               |
| SNP_P3_150555_7995  | NW_004516558.1 | Scaffold1324 | 7995                    | CC                              | AA                | 1946647061               |
| SNP_P3_150556_8021  | NW_004516558.1 | Scaffold1324 | 8021                    | TT                              | CC                | 1946647063               |
| SNP_P3_150557_8025  | NW_004516558.1 | Scaffold1324 | 8025                    | GG                              | AA                | 1946647065               |
| SNP_P3_150558_8043  | NW_004516558.1 | Scaffold1324 | 8043                    | TT                              | AA                | 1946647067               |
| SNP_P3_150559_8044  | NW_004516558.1 | Scaffold1324 | 8044                    | AA                              | GG                | 1946647069               |
| SNP_P3_150560_8085  | NW_004516558.1 | Scaffold1324 | 8085                    | AA                              | CC                | 1946647071               |
| SNP_P3_150561_8088  | NW_004516558.1 | Scaffold1324 | 8088                    | GG                              | TT                | 1946647073               |
| SNP_P3_150562_8141  | NW_004516558.1 | Scaffold1324 | 8141                    | CC                              | TT                | 1946647074               |
| SNP_P3_150563_8147  | NW_004516558.1 | Scaffold1324 | 8147                    | CC                              | TT                | 1946647075               |
| SNP_P3_150564_8163  | NW_004516558.1 | Scaffold1324 | 8163                    | TT                              | CC                | 1946647076               |
| SNP_P3_150565_8178  | NW_004516558.1 | Scaffold1324 | 8178                    | GG                              | TT                | 1946647078               |
| SNP_P3_150566_8192  | NW_004516558.1 | Scaffold1324 | 8192                    | AA                              | TT                | 1946647080               |
| SNP_P3_150567_8195  | NW_004516558.1 | Scaffold1324 | 8195                    | AA                              | TT                | 1946647083               |
| SNP_P3_150568_8221  | NW_004516558.1 | Scaffold1324 | 8221                    | CC                              | TT                | 1946647085               |
| SNP_P3_150569_8231  | NW_004516558.1 | Scaffold1324 | 8231                    | CC                              | AA                | 1946647087               |
| SNP_P3_150570_8232  | NW_004516558.1 | Scaffold1324 | 8232                    | GG                              | AA                | 1946647089               |
| SNP_P3_150571_8236  | NW_004516558.1 | Scaffold1324 | 8236                    | TT                              | AA                | 1946647091               |



| SNPs IDs             | Chromosome IDs | Chromosomes  | Physical positions (bp) | CDC Frontier (Reference genome) | (Pusa 256 & HPNB) | NCBI SNPdb Accession IDs |
|----------------------|----------------|--------------|-------------------------|---------------------------------|-------------------|--------------------------|
| SNP_P3_150572_8262   | NW_004516558.1 | Scaffold1324 | 8262                    | AA                              | GG                | 1946647093               |
| SNP_P3_150573_8459   | NW_004516558.1 | Scaffold1324 | 8459                    | CC                              | TT                | 1946647095               |
| SNP_P3_150575_8527   | NW_004516558.1 | Scaffold1324 | 8527                    | CC                              | TT                | 1946647097               |
| SNP_P3_150576_8598   | NW_004516558.1 | Scaffold1324 | 8598                    | CC                              | TT                | 1946647099               |
| SNP_P3_150577_40116  | NW_004516558.1 | Scaffold1324 | 40116                   | TT                              | AA                | 1946647101               |
| SNP_P3_150578_49635  | NW_004516558.1 | Scaffold1324 | 49635                   | AA                              | TT                | 1946647105               |
| SNP_P3_150580_49941  | NW_004516558.1 | Scaffold1324 | 49941                   | AA                              | TT                | 1946647107               |
| SNP_P3_150581_50011  | NW_004516558.1 | Scaffold1324 | 50011                   | AA                              | TT                | 1946647109               |
| SNP_P3_150582_50097  | NW_004516558.1 | Scaffold1324 | 50097                   | AA                              | TT                | 1946647111               |
| SNP_P3_150583_50100  | NW_004516558.1 | Scaffold1324 | 50100                   | AA                              | TT                | 1946647113               |
| SNP_P3_150584_50101  | NW_004516558.1 | Scaffold1324 | 50101                   | AA                              | TT                | 1946647116               |
| SNP_P3_150585_53628  | NW_004516558.1 | Scaffold1324 | 53628                   | AA                              | GG                | 1946647118               |
| SNP_P3_150586_53648  | NW_004516558.1 | Scaffold1324 | 53648                   | CC                              | TT                | 1946647120               |
| SNP_P3_150587_53653  | NW_004516558.1 | Scaffold1324 | 53653                   | CC                              | TT                | 1946647122               |
| SNP_P3_150589_55885  | NW_004516558.1 | Scaffold1324 | 55885                   | CC                              | TT                | 1946647124               |
| SNP_P3_150590_67540  | NW_004516558.1 | Scaffold1324 | 67540                   | AA                              | GG                | 1946647126               |
| SNP_P3_150591_90980  | NW_004516558.1 | Scaffold1324 | 90980                   | TT                              | GG                | 1946647128               |
| SNP_P3_150592_109964 | NW_004516558.1 | Scaffold1324 | 109964                  | TT                              | CC                | 1946647130               |
| SNP_P3_150594_110053 | NW_004516558.1 | Scaffold1324 | 110053                  | AA                              | GG                | 1946647132               |
| SNP_P3_150595_110283 | NW_004516558.1 | Scaffold1324 | 110283                  | GG                              | AA                | 1946647134               |
| SNP_P3_150596_110340 | NW_004516558.1 | Scaffold1324 | 110340                  | AA                              | GG                | 1946647136               |
| SNP_P3_150597_110350 | NW_004516558.1 | Scaffold1324 | 110350                  | CC                              | AA                | 1946647138               |
| SNP_P3_150598_110438 | NW_004516558.1 | Scaffold1324 | 110438                  | GG                              | TT                | 1946647140               |
| SNP_P3_150599_110502 | NW_004516558.1 | Scaffold1324 | 110502                  | AA                              | TT                | 1946647142               |
| SNP_P3_150600_110853 | NW_004516558.1 | Scaffold1324 | 110853                  | GG                              | AA                | 1946647144               |
| SNP_P3_150601_118959 | NW_004516558.1 | Scaffold1324 | 118959                  | TT                              | GG                | 1946647146               |
| SNP_P3_150602_171122 | NW_004516558.1 | Scaffold1324 | 171122                  | CC                              | AA                | 1946647148               |
| SNP_P3_150603_190494 | NW_004516558.1 | Scaffold1324 | 190494                  | GG                              | AA                | 1946647150               |
| SNP_P3_150604_190522 | NW_004516558.1 | Scaffold1324 | 190522                  | AA                              | GG                | 1946647153               |
| SNP_P3_150605_190590 | NW_004516558.1 | Scaffold1324 | 190590                  | AA                              | CC                | 1946647155               |
| SNP_P3_150606_209829 | NW_004516558.1 | Scaffold1324 | 209829                  | CC                              | TT                | 1946647157               |
| SNP_P3_150607_219371 | NW_004516558.1 | Scaffold1324 | 219371                  | CC                              | AA                | 1946647159               |
| SNP_P3_150608_219384 | NW_004516558.1 | Scaffold1324 | 219384                  | CC                              | TT                | 1946647161               |
| SNP_P3_150609_219401 | NW_004516558.1 | Scaffold1324 | 219401                  | AA                              | GG                | 1946647163               |
| SNP_P3_150610_219548 | NW_004516558.1 | Scaffold1324 | 219548                  | TT                              | CC                | 1946647165               |
| SNP_P3_150611_219569 | NW_004516558.1 | Scaffold1324 | 219569                  | TT                              | AA                | 1946647167               |
| SNP_P3_150612_219706 | NW_004516558.1 | Scaffold1324 | 219706                  | GG                              | TT                | 1946647169               |
| SNP_P3_150613_219881 | NW_004516558.1 | Scaffold1324 | 219881                  | AA                              | GG                | 1946647171               |
| SNP_P3_150614_219913 | NW_004516558.1 | Scaffold1324 | 219913                  | AA                              | CC                | 1946647173               |
| SNP_P3_150615_219934 | NW_004516558.1 | Scaffold1324 | 219934                  | CC                              | AA                | 1946647175               |
| SNP_P3_150616_225724 | NW_004516558.1 | Scaffold1324 | 225724                  | TT                              | AA                | 1946647177               |
| SNP_P3_150617_225726 | NW_004516558.1 | Scaffold1324 | 225726                  | GG                              | TT                | 1946647179               |

| SNPs IDs             | Chromosome IDs | Chromosomes  | Physical positions (bp) | CDC Frontier (Reference genome) | (Pusa 256 & HPNB) | NCBI SNPdb Accession IDs |
|----------------------|----------------|--------------|-------------------------|---------------------------------|-------------------|--------------------------|
| SNP_P3_150618_225761 | NW_004516558.1 | Scaffold1324 | 225761                  | CC                              | TT                | 1946647181               |
| SNP_P3_150619_225774 | NW_004516558.1 | Scaffold1324 | 225774                  | TT                              | CC                | 1946647183               |
| SNP_P3_150620_225896 | NW_004516558.1 | Scaffold1324 | 225896                  | GG                              | AA                | 1946647186               |
| SNP_P3_150621_225991 | NW_004516558.1 | Scaffold1324 | 225991                  | TT                              | GG                | 1946647188               |
| SNP_P3_150622_226001 | NW_004516558.1 | Scaffold1324 | 226001                  | TT                              | GG                | 1946647190               |
| SNP_P3_150623_226076 | NW_004516558.1 | Scaffold1324 | 226076                  | CC                              | TT                | 1946647192               |
| SNP_P3_150624_226086 | NW_004516558.1 | Scaffold1324 | 226086                  | AA                              | TT                | 1946647194               |
| SNP_P3_150625_226358 | NW_004516558.1 | Scaffold1324 | 226358                  | AA                              | GG                | 1946647196               |
| SNP_P3_150626_226409 | NW_004516558.1 | Scaffold1324 | 226409                  | AA                              | CC                | 1946647198               |
| SNP_P3_150627_226444 | NW_004516558.1 | Scaffold1324 | 226444                  | GG                              | AA                | 1946647200               |
| SNP_P3_150628_226975 | NW_004516558.1 | Scaffold1324 | 226975                  | AA                              | GG                | 1946647202               |
| SNP_P3_150629_226980 | NW_004516558.1 | Scaffold1324 | 226980                  | AA                              | GG                | 1946647204               |
| SNP_P3_150630_227036 | NW_004516558.1 | Scaffold1324 | 227036                  | GG                              | AA                | 1946647206               |
| SNP_P3_150631_227049 | NW_004516558.1 | Scaffold1324 | 227049                  | TT                              | CC                | 1946647208               |
| SNP_P3_150632_227067 | NW_004516558.1 | Scaffold1324 | 227067                  | GG                              | AA                | 1946647210               |
| SNP_P3_150633_227312 | NW_004516558.1 | Scaffold1324 | 227312                  | AA                              | GG                | 1946647212               |
| SNP_P3_150635_227409 | NW_004516558.1 | Scaffold1324 | 227409                  | TT                              | GG                | 1946647214               |
| SNP_P3_150636_227425 | NW_004516558.1 | Scaffold1324 | 227425                  | AA                              | CC                | 1946647216               |
| SNP_P3_150637_227535 | NW_004516558.1 | Scaffold1324 | 227535                  | TT                              | AA                | 1946647217               |
| SNP_P3_150638_227536 | NW_004516558.1 | Scaffold1324 | 227536                  | GG                              | TT                | 1946647219               |
| SNP_P3_150639_227664 | NW_004516558.1 | Scaffold1324 | 227664                  | GG                              | AA                | 1946647221               |
| SNP_P3_150640_227843 | NW_004516558.1 | Scaffold1324 | 227843                  | TT                              | CC                | 1946647223               |
| SNP_P3_150641_227893 | NW_004516558.1 | Scaffold1324 | 227893                  | CC                              | TT                | 1946647225               |
| SNP_P3_150642_227964 | NW_004516558.1 | Scaffold1324 | 227964                  | GG                              | AA                | 1946647227               |
| SNP_P3_150643_227978 | NW_004516558.1 | Scaffold1324 | 227978                  | TT                              | AA                | 1946647229               |
| SNP_P3_150644_228328 | NW_004516558.1 | Scaffold1324 | 228328                  | TT                              | GG                | 1946647231               |
| SNP_P3_150645_228459 | NW_004516558.1 | Scaffold1324 | 228459                  | AA                              | TT                | 1946647233               |
| SNP_P3_150646_228536 | NW_004516558.1 | Scaffold1324 | 228536                  | CC                              | AA                | 1946647235               |
| SNP_P3_150647_228548 | NW_004516558.1 | Scaffold1324 | 228548                  | AA                              | TT                | 1946647237               |
| SNP_P3_150648_228679 | NW_004516558.1 | Scaffold1324 | 228679                  | AA                              | GG                | 1946647239               |
| SNP_P3_150649_228793 | NW_004516558.1 | Scaffold1324 | 228793                  | GG                              | AA                | 1946647241               |
| SNP_P3_150650_228868 | NW_004516558.1 | Scaffold1324 | 228868                  | AA                              | GG                | 1946647243               |
| SNP_P3_150651_229790 | NW_004516558.1 | Scaffold1324 | 229790                  | GG                              | CC                | 1946647245               |
| SNP_P3_150652_234716 | NW_004516558.1 | Scaffold1324 | 234716                  | TT                              | AA                | 1946647247               |
| SNP_P3_150653_234817 | NW_004516558.1 | Scaffold1324 | 234817                  | CC                              | TT                | 1946647248               |
| SNP_P3_150654_234825 | NW_004516558.1 | Scaffold1324 | 234825                  | AA                              | GG                | 1946647250               |
| SNP_P3_150655_234840 | NW_004516558.1 | Scaffold1324 | 234840                  | GG                              | AA                | 1946647252               |
| SNP_P3_150656_234985 | NW_004516558.1 | Scaffold1324 | 234985                  | GG                              | CC                | 1946647254               |
| SNP_P3_150657_235040 | NW_004516558.1 | Scaffold1324 | 235040                  | TT                              | CC                | 1946647256               |
| SNP_P3_150659_235263 | NW_004516558.1 | Scaffold1324 | 235263                  | CC                              | TT                | 1946647258               |
| SNP_P3_150660_235264 | NW_004516558.1 | Scaffold1324 | 235264                  | AA                              | TT                | 1946647260               |
| SNP_P3_150661_235302 | NW_004516558.1 | Scaffold1324 | 235302                  | CC                              | TT                | 1946647262               |

| SNPs IDs             | Chromosome IDs | Chromosomes  | Physical positions (bp) | CDC Frontier (Reference genome) | (Pusa 256 & HPNB) | NCBI SNPdb Accession IDs |
|----------------------|----------------|--------------|-------------------------|---------------------------------|-------------------|--------------------------|
| SNP_P3_150662_235374 | NW_004516558.1 | Scaffold1324 | 235374                  | TT                              | AA                | 1946647264               |
| SNP_P3_150663_235454 | NW_004516558.1 | Scaffold1324 | 235454                  | TT                              | GG                | 1946647266               |
| SNP_P3_150665_235619 | NW_004516558.1 | Scaffold1324 | 235619                  | AA                              | GG                | 1946647268               |
| SNP_P3_150666_236004 | NW_004516558.1 | Scaffold1324 | 236004                  | GG                              | AA                | 1946647270               |
| SNP_P3_150667_236072 | NW_004516558.1 | Scaffold1324 | 236072                  | AA                              | CC                | 1946647272               |
| SNP_P3_150668_236153 | NW_004516558.1 | Scaffold1324 | 236153                  | AA                              | CC                | 1946647274               |
| SNP_P3_150669_236212 | NW_004516558.1 | Scaffold1324 | 236212                  | GG                              | AA                | 1946647276               |
| SNP_P3_150670_236250 | NW_004516558.1 | Scaffold1324 | 236250                  | AA                              | GG                | 1946647278               |
| SNP_P3_150671_236261 | NW_004516558.1 | Scaffold1324 | 236261                  | GG                              | AA                | 1946647280               |
| SNP_P3_150672_236280 | NW_004516558.1 | Scaffold1324 | 236280                  | TT                              | GG                | 1946647282               |
| SNP_P3_150673_236414 | NW_004516558.1 | Scaffold1324 | 236414                  | GG                              | AA                | 1946647284               |
| SNP_P3_150674_236473 | NW_004516558.1 | Scaffold1324 | 236473                  | GG                              | AA                | 1946647286               |
| SNP_P3_150675_236495 | NW_004516558.1 | Scaffold1324 | 236495                  | AA                              | CC                | 1946647289               |
| SNP_P3_150676_236516 | NW_004516558.1 | Scaffold1324 | 236516                  | CC                              | TT                | 1946647291               |
| SNP_P3_150677_236540 | NW_004516558.1 | Scaffold1324 | 236540                  | AA                              | GG                | 1946647293               |
| SNP_P3_150679_236759 | NW_004516558.1 | Scaffold1324 | 236759                  | AA                              | GG                | 1946647295               |
| SNP_P3_150680_236853 | NW_004516558.1 | Scaffold1324 | 236853                  | GG                              | CC                | 1946647297               |
| SNP_P3_150681_236916 | NW_004516558.1 | Scaffold1324 | 236916                  | TT                              | CC                | 1946647299               |
| SNP_P3_150682_237069 | NW_004516558.1 | Scaffold1324 | 237069                  | AA                              | CC                | 1946647300               |
| SNP_P3_150683_237071 | NW_004516558.1 | Scaffold1324 | 237071                  | CC                              | TT                | 1946647302               |
| SNP_P3_150684_237097 | NW_004516558.1 | Scaffold1324 | 237097                  | AA                              | GG                | 1946647304               |
| SNP_P3_150685_237098 | NW_004516558.1 | Scaffold1324 | 237098                  | TT                              | CC                | 1946647306               |
| SNP_P3_150686_237112 | NW_004516558.1 | Scaffold1324 | 237112                  | TT                              | CC                | 1946647308               |
| SNP_P3_150687_237114 | NW_004516558.1 | Scaffold1324 | 237114                  | GG                              | TT                | 1946647310               |
| SNP_P3_150688_237202 | NW_004516558.1 | Scaffold1324 | 237202                  | GG                              | AA                | 1946647312               |
| SNP_P3_150689_237300 | NW_004516558.1 | Scaffold1324 | 237300                  | AA                              | GG                | 1946647314               |
| SNP_P3_150690_237379 | NW_004516558.1 | Scaffold1324 | 237379                  | TT                              | CC                | 1946647316               |
| SNP_P3_150691_237502 | NW_004516558.1 | Scaffold1324 | 237502                  | CC                              | TT                | 1946647318               |
| SNP_P3_150692_237522 | NW_004516558.1 | Scaffold1324 | 237522                  | GG                              | CC                | 1946647321               |
| SNP_P3_150693_237539 | NW_004516558.1 | Scaffold1324 | 237539                  | TT                              | CC                | 1946647323               |
| SNP_P3_150694_237709 | NW_004516558.1 | Scaffold1324 | 237709                  | CC                              | TT                | 1946647325               |
| SNP_P3_150695_237904 | NW_004516558.1 | Scaffold1324 | 237904                  | AA                              | GG                | 1946647327               |
| SNP_P3_150697_238320 | NW_004516558.1 | Scaffold1324 | 238320                  | AA                              | TT                | 1946647329               |
| SNP_P3_150698_238322 | NW_004516558.1 | Scaffold1324 | 238322                  | AA                              | CC                | 1946647331               |
| SNP_P3_150700_238745 | NW_004516558.1 | Scaffold1324 | 238745                  | CC                              | TT                | 1946647333               |
| SNP_P3_150701_238805 | NW_004516558.1 | Scaffold1324 | 238805                  | CC                              | TT                | 1946647335               |
| SNP_P3_150702_238872 | NW_004516558.1 | Scaffold1324 | 238872                  | GG                              | CC                | 1946647337               |
| SNP_P3_150703_238936 | NW_004516558.1 | Scaffold1324 | 238936                  | AA                              | GG                | 1946647339               |
| SNP_P3_150704_238966 | NW_004516558.1 | Scaffold1324 | 238966                  | TT                              | CC                | 1946647341               |
| SNP_P3_150705_238992 | NW_004516558.1 | Scaffold1324 | 238992                  | TT                              | CC                | 1946647343               |
| SNP_P3_150706_239125 | NW_004516558.1 | Scaffold1324 | 239125                  | GG                              | AA                | 1946647345               |
| SNP_P3_150707_239133 | NW_004516558.1 | Scaffold1324 | 239133                  | TT                              | CC                | 1946647347               |

| SNPs IDs             | Chromosome IDs | Chromosomes  | Physical positions (bp) | CDC Frontier (Reference genome) | (Pusa 256 & HPNB) | NCBI SNPdb Accession IDs |
|----------------------|----------------|--------------|-------------------------|---------------------------------|-------------------|--------------------------|
| SNP_P3_150708_239134 | NW_004516558.1 | Scaffold1324 | 239134                  | GG                              | AA                | 1946647349               |
| SNP_P3_150709_239184 | NW_004516558.1 | Scaffold1324 | 239184                  | GG                              | AA                | 1946647351               |
| SNP_P3_150710_239336 | NW_004516558.1 | Scaffold1324 | 239336                  | GG                              | TT                | 1946647353               |
| SNP_P3_150711_239604 | NW_004516558.1 | Scaffold1324 | 239604                  | AA                              | GG                | 1946647355               |
| SNP_P3_150712_239790 | NW_004516558.1 | Scaffold1324 | 239790                  | GG                              | AA                | 1946647357               |
| SNP_P3_150713_239791 | NW_004516558.1 | Scaffold1324 | 239791                  | TT                              | CC                | 1946647359               |
| SNP_P3_150714_239837 | NW_004516558.1 | Scaffold1324 | 239837                  | TT                              | CC                | 1946647361               |
| SNP_P3_150715_240295 | NW_004516558.1 | Scaffold1324 | 240295                  | CC                              | TT                | 1946647363               |
| SNP_P3_150716_240347 | NW_004516558.1 | Scaffold1324 | 240347                  | GG                              | AA                | 1946647365               |
| SNP_P3_150717_240508 | NW_004516558.1 | Scaffold1324 | 240508                  | AA                              | GG                | 1946647367               |
| SNP_P3_150718_240530 | NW_004516558.1 | Scaffold1324 | 240530                  | CC                              | TT                | 1946647369               |
| SNP_P3_150719_240569 | NW_004516558.1 | Scaffold1324 | 240569                  | TT                              | CC                | 1946647371               |
| SNP_P3_150720_240723 | NW_004516558.1 | Scaffold1324 | 240723                  | CC                              | AA                | 1946647373               |
| SNP_P3_150721_240761 | NW_004516558.1 | Scaffold1324 | 240761                  | TT                              | CC                | 1946647375               |
| SNP_P3_150722_240773 | NW_004516558.1 | Scaffold1324 | 240773                  | TT                              | AA                | 1946647378               |
| SNP_P3_150723_240930 | NW_004516558.1 | Scaffold1324 | 240930                  | GG                              | AA                | 1946647380               |
| SNP_P3_150724_241003 | NW_004516558.1 | Scaffold1324 | 241003                  | TT                              | CC                | 1946647382               |
| SNP_P3_150725_241021 | NW_004516558.1 | Scaffold1324 | 241021                  | AA                              | GG                | 1946647384               |
| SNP_P3_150726_241041 | NW_004516558.1 | Scaffold1324 | 241041                  | TT                              | CC                | 1946647386               |
| SNP_P3_150727_241203 | NW_004516558.1 | Scaffold1324 | 241203                  | TT                              | CC                | 1946647388               |
| SNP_P3_150728_241206 | NW_004516558.1 | Scaffold1324 | 241206                  | TT                              | GG                | 1946647390               |
| SNP_P3_150729_241328 | NW_004516558.1 | Scaffold1324 | 241328                  | TT                              | CC                | 1946647392               |
| SNP_P3_150730_241353 | NW_004516558.1 | Scaffold1324 | 241353                  | AA                              | TT                | 1946647394               |
| SNP_P3_150731_241523 | NW_004516558.1 | Scaffold1324 | 241523                  | TT                              | CC                | 1946647396               |
| SNP_P3_150732_241558 | NW_004516558.1 | Scaffold1324 | 241558                  | CC                              | TT                | 1946647398               |
| SNP_P3_150733_241569 | NW_004516558.1 | Scaffold1324 | 241569                  | TT                              | CC                | 1946647400               |
| SNP_P3_150734_241582 | NW_004516558.1 | Scaffold1324 | 241582                  | GG                              | AA                | 1946647402               |
| SNP_P3_150735_241729 | NW_004516558.1 | Scaffold1324 | 241729                  | CC                              | TT                | 1946647404               |
| SNP_P3_150736_241847 | NW_004516558.1 | Scaffold1324 | 241847                  | CC                              | TT                | 1946647406               |
| SNP_P3_150737_241850 | NW_004516558.1 | Scaffold1324 | 241850                  | TT                              | CC                | 1946647408               |
| SNP_P3_150738_241884 | NW_004516558.1 | Scaffold1324 | 241884                  | GG                              | CC                | 1946647410               |
| SNP_P3_150742_245780 | NW_004516558.1 | Scaffold1324 | 245780                  | GG                              | TT                | 1946647412               |
| SNP_P3_150743_245781 | NW_004516558.1 | Scaffold1324 | 245781                  | CC                              | TT                | 1946647414               |
| SNP_P3_150744_245853 | NW_004516558.1 | Scaffold1324 | 245853                  | TT                              | CC                | 1946647416               |
| SNP_P3_150745_247901 | NW_004516558.1 | Scaffold1324 | 247901                  | CC                              | TT                | 1946647418               |
| SNP_P3_150746_247965 | NW_004516558.1 | Scaffold1324 | 247965                  | AA                              | TT                | 1946647420               |
| SNP_P3_150747_248095 | NW_004516558.1 | Scaffold1324 | 248095                  | TT                              | AA                | 1946647422               |
| SNP_P3_150748_248235 | NW_004516558.1 | Scaffold1324 | 248235                  | TT                              | CC                | 1946647424               |
| SNP_P3_150749_248314 | NW_004516558.1 | Scaffold1324 | 248314                  | AA                              | CC                | 1946647426               |
| SNP_P3_150750_249543 | NW_004516558.1 | Scaffold1324 | 249543                  | GG                              | AA                | 1946647428               |
| SNP_P3_150751_252594 | NW_004516558.1 | Scaffold1324 | 252594                  | AA                              | TT                | 1946647431               |
| SNP_P3_150752_252622 | NW_004516558.1 | Scaffold1324 | 252622                  | AA                              | CC                | 1946647433               |

| SNPs IDs             | Chromosome IDs | Chromosomes  | Physical positions (bp) | CDC Frontier (Reference genome) | (Pusa 256 & HPNB) | NCBI SNPdb Accession IDs |
|----------------------|----------------|--------------|-------------------------|---------------------------------|-------------------|--------------------------|
| SNP_P3_150754_252751 | NW_004516558.1 | Scaffold1324 | 252751                  | CC                              | TT                | 1946647434               |
| SNP_P3_150755_252775 | NW_004516558.1 | Scaffold1324 | 252775                  | AA                              | GG                | 1946647437               |
| SNP_P3_150757_252843 | NW_004516558.1 | Scaffold1324 | 252843                  | AA                              | CC                | 1946647439               |
| SNP_P3_150758_253082 | NW_004516558.1 | Scaffold1324 | 253082                  | TT                              | CC                | 1946647440               |
| SNP_P3_150759_253362 | NW_004516558.1 | Scaffold1324 | 253362                  | TT                              | GG                | 1946647442               |
| SNP_P3_150760_253375 | NW_004516558.1 | Scaffold1324 | 253375                  | CC                              | TT                | 1946647445               |
| SNP_P3_150761_253379 | NW_004516558.1 | Scaffold1324 | 253379                  | GG                              | TT                | 1946647447               |
| SNP_P3_150762_253520 | NW_004516558.1 | Scaffold1324 | 253520                  | CC                              | AA                | 1946647449               |
| SNP_P3_150763_253608 | NW_004516558.1 | Scaffold1324 | 253608                  | AA                              | GG                | 1946647451               |
| SNP_P3_150764_253611 | NW_004516558.1 | Scaffold1324 | 253611                  | CC                              | AA                | 1946647453               |
| SNP_P3_150766_253796 | NW_004516558.1 | Scaffold1324 | 253796                  | AA                              | TT                | 1946647454               |
| SNP_P3_150767_253985 | NW_004516558.1 | Scaffold1324 | 253985                  | TT                              | GG                | 1946647456               |
| SNP_P3_150768_254034 | NW_004516558.1 | Scaffold1324 | 254034                  | TT                              | CC                | 1946647459               |
| SNP_P3_150769_254050 | NW_004516558.1 | Scaffold1324 | 254050                  | CC                              | AA                | 1946647460               |
| SNP_P3_150770_254052 | NW_004516558.1 | Scaffold1324 | 254052                  | AA                              | TT                | 1946647462               |
| SNP_P3_150771_254078 | NW_004516558.1 | Scaffold1324 | 254078                  | AA                              | TT                | 1946647464               |
| SNP_P3_150772_254079 | NW_004516558.1 | Scaffold1324 | 254079                  | CC                              | TT                | 1946647466               |
| SNP_P3_150773_254104 | NW_004516558.1 | Scaffold1324 | 254104                  | GG                              | CC                | 1946647468               |
| SNP_P3_150774_254383 | NW_004516558.1 | Scaffold1324 | 254383                  | GG                              | TT                | 1946647470               |
| SNP_P3_150775_254945 | NW_004516558.1 | Scaffold1324 | 254945                  | AA                              | GG                | 1946647472               |
| SNP_P3_150776_255028 | NW_004516558.1 | Scaffold1324 | 255028                  | CC                              | AA                | 1946647474               |
| SNP_P3_150777_255090 | NW_004516558.1 | Scaffold1324 | 255090                  | AA                              | TT                | 1946647476               |
| SNP_P3_150778_255279 | NW_004516558.1 | Scaffold1324 | 255279                  | GG                              | TT                | 1946647477               |
| SNP_P3_150779_255543 | NW_004516558.1 | Scaffold1324 | 255543                  | AA                              | GG                | 1946647479               |
| SNP_P3_150780_255579 | NW_004516558.1 | Scaffold1324 | 255579                  | GG                              | AA                | 1946647481               |
| SNP_P3_150781_255580 | NW_004516558.1 | Scaffold1324 | 255580                  | GG                              | TT                | 1946647483               |
| SNP_P3_150782_255591 | NW_004516558.1 | Scaffold1324 | 255591                  | CC                              | GG                | 1946647485               |
| SNP_P3_150784_255687 | NW_004516558.1 | Scaffold1324 | 255687                  | AA                              | GG                | 1946647487               |
| SNP_P3_150785_255734 | NW_004516558.1 | Scaffold1324 | 255734                  | AA                              | GG                | 1946647489               |
| SNP_P3_150786_255774 | NW_004516558.1 | Scaffold1324 | 255774                  | CC                              | TT                | 1946647491               |
| SNP_P3_150787_255787 | NW_004516558.1 | Scaffold1324 | 255787                  | GG                              | TT                | 1946647493               |
| SNP_P3_150788_255835 | NW_004516558.1 | Scaffold1324 | 255835                  | GG                              | TT                | 1946647495               |
| SNP_P3_150789_255839 | NW_004516558.1 | Scaffold1324 | 255839                  | TT                              | GG                | 1946647497               |
| SNP_P3_150791_255878 | NW_004516558.1 | Scaffold1324 | 255878                  | GG                              | TT                | 1946647499               |
| SNP_P3_150793_256014 | NW_004516558.1 | Scaffold1324 | 256014                  | AA                              | GG                | 1946647501               |
| SNP_P3_150794_256050 | NW_004516558.1 | Scaffold1324 | 256050                  | TT                              | CC                | 1946647503               |
| SNP_P3_150795_256158 | NW_004516558.1 | Scaffold1324 | 256158                  | AA                              | GG                | 1946647505               |
| SNP_P3_150796_256209 | NW_004516558.1 | Scaffold1324 | 256209                  | GG                              | CC                | 1946647507               |
| SNP_P3_150797_256211 | NW_004516558.1 | Scaffold1324 | 256211                  | AA                              | TT                | 1946647509               |
| SNP_P3_150798_256277 | NW_004516558.1 | Scaffold1324 | 256277                  | TT                              | GG                | 1946647511               |
| SNP_P3_150800_256352 | NW_004516558.1 | Scaffold1324 | 256352                  | AA                              | GG                | 1946647513               |
| SNP_P3_150801_256403 | NW_004516558.1 | Scaffold1324 | 256403                  | AA                              | TT                | 1946647515               |

| SNPs IDs             | Chromosome IDs | Chromosomes  | Physical positions (bp) | CDC Frontier (Reference genome) | (Pusa 256 & HPNB) | NCBI SNPdb Accession IDs |
|----------------------|----------------|--------------|-------------------------|---------------------------------|-------------------|--------------------------|
| SNP_P3_150802_256425 | NW_004516558.1 | Scaffold1324 | 256425                  | GG                              | AA                | 1946647517               |
| SNP_P3_150803_256503 | NW_004516558.1 | Scaffold1324 | 256503                  | AA                              | GG                | 1946647519               |
| SNP_P3_150804_256610 | NW_004516558.1 | Scaffold1324 | 256610                  | TT                              | CC                | 1946647521               |
| SNP_P3_150805_265912 | NW_004516558.1 | Scaffold1324 | 265912                  | TT                              | CC                | 1946647523               |
| SNP_P3_150807_266031 | NW_004516558.1 | Scaffold1324 | 266031                  | CC                              | TT                | 1946647525               |
| SNP_P3_150808_266088 | NW_004516558.1 | Scaffold1324 | 266088                  | CC                              | TT                | 1946647527               |
| SNP_P3_150810_266150 | NW_004516558.1 | Scaffold1324 | 266150                  | AA                              | CC                | 1946647529               |
| SNP_P3_150811_266152 | NW_004516558.1 | Scaffold1324 | 266152                  | CC                              | TT                | 1946647531               |
| SNP_P3_150812_266169 | NW_004516558.1 | Scaffold1324 | 266169                  | AA                              | GG                | 1946647533               |
| SNP_P3_150813_266309 | NW_004516558.1 | Scaffold1324 | 266309                  | TT                              | AA                | 1946647535               |
| SNP_P3_150814_266386 | NW_004516558.1 | Scaffold1324 | 266386                  | GG                              | TT                | 1946647538               |
| SNP_P3_150815_266658 | NW_004516558.1 | Scaffold1324 | 266658                  | CC                              | TT                | 1946647540               |
| SNP_P3_150817_266786 | NW_004516558.1 | Scaffold1324 | 266786                  | TT                              | CC                | 1946647542               |
| SNP_P3_150818_266787 | NW_004516558.1 | Scaffold1324 | 266787                  | GG                              | AA                | 1946647544               |
| SNP_P3_150820_266850 | NW_004516558.1 | Scaffold1324 | 266850                  | TT                              | GG                | 1946647546               |
| SNP_P3_150821_266875 | NW_004516558.1 | Scaffold1324 | 266875                  | AA                              | GG                | 1946647548               |
| SNP_P3_150822_266930 | NW_004516558.1 | Scaffold1324 | 266930                  | TT                              | CC                | 1946647549               |
| SNP_P3_150823_267002 | NW_004516558.1 | Scaffold1324 | 267002                  | GG                              | CC                | 1946647551               |
| SNP_P3_150824_267023 | NW_004516558.1 | Scaffold1324 | 267023                  | CC                              | TT                | 1946647553               |
| SNP_P3_150825_267072 | NW_004516558.1 | Scaffold1324 | 267072                  | TT                              | CC                | 1946647555               |
| SNP_P3_150826_267182 | NW_004516558.1 | Scaffold1324 | 267182                  | AA                              | TT                | 1946647557               |
| SNP_P3_150827_267270 | NW_004516558.1 | Scaffold1324 | 267270                  | CC                              | TT                | 1946647559               |
| SNP_P3_150828_267692 | NW_004516558.1 | Scaffold1324 | 267692                  | AA                              | CC                | 1946647561               |
| SNP_P3_150829_267814 | NW_004516558.1 | Scaffold1324 | 267814                  | AA                              | GG                | 1946647563               |
| SNP_P3_150830_267864 | NW_004516558.1 | Scaffold1324 | 267864                  | TT                              | CC                | 1946647565               |
| SNP_P3_150831_267874 | NW_004516558.1 | Scaffold1324 | 267874                  | GG                              | AA                | 1946647567               |
| SNP_P3_150832_267967 | NW_004516558.1 | Scaffold1324 | 267967                  | GG                              | AA                | 1946647569               |
| SNP_P3_150834_268245 | NW_004516558.1 | Scaffold1324 | 268245                  | TT                              | AA                | 1946647571               |
| SNP_P3_150835_268324 | NW_004516558.1 | Scaffold1324 | 268324                  | GG                              | TT                | 1946647574               |
| SNP_P3_150836_268674 | NW_004516558.1 | Scaffold1324 | 268674                  | CC                              | TT                | 1946647576               |
| SNP_P3_150837_268786 | NW_004516558.1 | Scaffold1324 | 268786                  | GG                              | AA                | 1946647577               |
| SNP_P3_150838_268868 | NW_004516558.1 | Scaffold1324 | 268868                  | AA                              | GG                | 1946647579               |
| SNP_P3_150839_268904 | NW_004516558.1 | Scaffold1324 | 268904                  | TT                              | CC                | 1946647581               |
| SNP_P3_150840_268926 | NW_004516558.1 | Scaffold1324 | 268926                  | TT                              | CC                | 1946647583               |
| SNP_P3_150841_268984 | NW_004516558.1 | Scaffold1324 | 268984                  | GG                              | TT                | 1946647585               |
| SNP_P3_150842_269083 | NW_004516558.1 | Scaffold1324 | 269083                  | AA                              | GG                | 1946647588               |
| SNP_P3_150843_269150 | NW_004516558.1 | Scaffold1324 | 269150                  | CC                              | TT                | 1946647590               |
| SNP_P3_150844_269227 | NW_004516558.1 | Scaffold1324 | 269227                  | CC                              | TT                | 1946647592               |
| SNP_P3_150845_269298 | NW_004516558.1 | Scaffold1324 | 269298                  | TT                              | GG                | 1946647594               |
| SNP_P3_150846_269325 | NW_004516558.1 | Scaffold1324 | 269325                  | GG                              | AA                | 1946647596               |
| SNP_P3_150847_269469 | NW_004516558.1 | Scaffold1324 | 269469                  | CC                              | GG                | 1946647598               |
| SNP_P3_150848_269661 | NW_004516558.1 | Scaffold1324 | 269661                  | TT                              | GG                | 1946647600               |

| SNPs IDs             | Chromosome IDs | Chromosomes  | Physical positions (bp) | CDC Frontier (Reference genome) | (Pusa 256 & HPNB) | NCBI SNPdb Accession IDs |
|----------------------|----------------|--------------|-------------------------|---------------------------------|-------------------|--------------------------|
| SNP_P3_150849_269999 | NW_004516558.1 | Scaffold1324 | 269999                  | CC                              | TT                | 1946647602               |
| SNP_P3_150850_270055 | NW_004516558.1 | Scaffold1324 | 270055                  | TT                              | AA                | 1946647604               |
| SNP_P3_150851_270059 | NW_004516558.1 | Scaffold1324 | 270059                  | TT                              | GG                | 1946647606               |
| SNP_P3_150852_270140 | NW_004516558.1 | Scaffold1324 | 270140                  | CC                              | GG                | 1946647608               |
| SNP_P3_150853_270172 | NW_004516558.1 | Scaffold1324 | 270172                  | AA                              | GG                | 1946647610               |
| SNP_P3_150854_270197 | NW_004516558.1 | Scaffold1324 | 270197                  | AA                              | TT                | 1946647612               |
| SNP_P3_150855_270316 | NW_004516558.1 | Scaffold1324 | 270316                  | GG                              | AA                | 1946647614               |
| SNP_P3_150856_270334 | NW_004516558.1 | Scaffold1324 | 270334                  | CC                              | TT                | 1946647616               |
| SNP_P3_150857_270393 | NW_004516558.1 | Scaffold1324 | 270393                  | GG                              | AA                | 1946647618               |
| SNP_P3_150858_270398 | NW_004516558.1 | Scaffold1324 | 270398                  | CC                              | AA                | 1946647620               |
| SNP_P3_150859_270429 | NW_004516558.1 | Scaffold1324 | 270429                  | CC                              | TT                | 1946647622               |
| SNP_P3_150860_270448 | NW_004516558.1 | Scaffold1324 | 270448                  | TT                              | GG                | 1946647624               |
| SNP_P3_150861_270488 | NW_004516558.1 | Scaffold1324 | 270488                  | TT                              | CC                | 1946647626               |
| SNP_P3_150862_270560 | NW_004516558.1 | Scaffold1324 | 270560                  | TT                              | AA                | 1946647629               |
| SNP_P3_150863_270565 | NW_004516558.1 | Scaffold1324 | 270565                  | AA                              | GG                | 1946647631               |
| SNP_P3_150864_270627 | NW_004516558.1 | Scaffold1324 | 270627                  | CC                              | TT                | 1946647633               |
| SNP_P3_150865_270641 | NW_004516558.1 | Scaffold1324 | 270641                  | CC                              | AA                | 1946647635               |
| SNP_P3_150866_270657 | NW_004516558.1 | Scaffold1324 | 270657                  | TT                              | CC                | 1946647636               |
| SNP_P3_150867_270664 | NW_004516558.1 | Scaffold1324 | 270664                  | GG                              | AA                | 1946647638               |
| SNP_P3_150868_270771 | NW_004516558.1 | Scaffold1324 | 270771                  | TT                              | AA                | 1946647640               |
| SNP_P3_150869_270772 | NW_004516558.1 | Scaffold1324 | 270772                  | GG                              | CC                | 1946647642               |
| SNP_P3_150870_270778 | NW_004516558.1 | Scaffold1324 | 270778                  | TT                              | CC                | 1946647644               |
| SNP_P3_150872_270896 | NW_004516558.1 | Scaffold1324 | 270896                  | TT                              | CC                | 1946647646               |
| SNP_P3_150873_270977 | NW_004516558.1 | Scaffold1324 | 270977                  | GG                              | AA                | 1946647648               |
| SNP_P3_150874_271002 | NW_004516558.1 | Scaffold1324 | 271002                  | CC                              | TT                | 1946647650               |
| SNP_P3_150875_271004 | NW_004516558.1 | Scaffold1324 | 271004                  | TT                              | CC                | 1946647652               |
| SNP_P3_150876_271281 | NW_004516558.1 | Scaffold1324 | 271281                  | AA                              | GG                | 1946647654               |
| SNP_P3_150877_271299 | NW_004516558.1 | Scaffold1324 | 271299                  | TT                              | GG                | 1946647656               |
| SNP_P3_150878_271448 | NW_004516558.1 | Scaffold1324 | 271448                  | AA                              | TT                | 1946647658               |
| SNP_P3_150879_271450 | NW_004516558.1 | Scaffold1324 | 271450                  | CC                              | TT                | 1946647660               |
| SNP_P3_150880_271496 | NW_004516558.1 | Scaffold1324 | 271496                  | CC                              | GG                | 1946647662               |
| SNP_P3_150881_271521 | NW_004516558.1 | Scaffold1324 | 271521                  | GG                              | TT                | 1946647665               |
| SNP_P3_150882_271584 | NW_004516558.1 | Scaffold1324 | 271584                  | AA                              | GG                | 1946647667               |
| SNP_P3_150883_271730 | NW_004516558.1 | Scaffold1324 | 271730                  | TT                              | CC                | 1946647669               |
| SNP_P3_150884_271787 | NW_004516558.1 | Scaffold1324 | 271787                  | GG                              | AA                | 1946647671               |
| SNP_P3_150885_271820 | NW_004516558.1 | Scaffold1324 | 271820                  | CC                              | TT                | 1946647673               |
| SNP_P3_150888_272168 | NW_004516558.1 | Scaffold1324 | 272168                  | CC                              | TT                | 1946647675               |
| SNP_P3_150890_272246 | NW_004516558.1 | Scaffold1324 | 272246                  | GG                              | AA                | 1946647677               |
| SNP_P3_150891_272252 | NW_004516558.1 | Scaffold1324 | 272252                  | TT                              | CC                | 1946647678               |
| SNP_P3_150892_272292 | NW_004516558.1 | Scaffold1324 | 272292                  | TT                              | CC                | 1946647680               |
| SNP_P3_150893_272326 | NW_004516558.1 | Scaffold1324 | 272326                  | AA                              | CC                | 1946647682               |
| SNP_P3_150894_272332 | NW_004516558.1 | Scaffold1324 | 272332                  | TT                              | CC                | 1946647684               |

| SNPs IDs             | Chromosome IDs | Chromosomes  | Physical positions (bp) | CDC Frontier (Reference genome) | (Pusa 256 & HPNB) | NCBI SNPdb Accession IDs |
|----------------------|----------------|--------------|-------------------------|---------------------------------|-------------------|--------------------------|
| SNP_P3_150895_272392 | NW_004516558.1 | Scaffold1324 | 272392                  | CC                              | TT                | 1946647686               |
| SNP_P3_150896_272447 | NW_004516558.1 | Scaffold1324 | 272447                  | CC                              | AA                | 1946647688               |
| SNP_P3_150897_272463 | NW_004516558.1 | Scaffold1324 | 272463                  | GG                              | AA                | 1946647690               |
| SNP_P3_150900_272856 | NW_004516558.1 | Scaffold1324 | 272856                  | TT                              | CC                | 1946647692               |
| SNP_P3_150901_272878 | NW_004516558.1 | Scaffold1324 | 272878                  | AA                              | CC                | 1946647694               |
| SNP_P3_150902_272879 | NW_004516558.1 | Scaffold1324 | 272879                  | AA                              | CC                | 1946647696               |
| SNP_P3_150903_272943 | NW_004516558.1 | Scaffold1324 | 272943                  | CC                              | TT                | 1946647698               |
| SNP_P3_150904_272988 | NW_004516558.1 | Scaffold1324 | 272988                  | GG                              | AA                | 1946647700               |
| SNP_P3_150905_272993 | NW_004516558.1 | Scaffold1324 | 272993                  | CC                              | AA                | 1946647702               |
| SNP_P3_150906_273017 | NW_004516558.1 | Scaffold1324 | 273017                  | CC                              | AA                | 1946647704               |
| SNP_P3_150907_273045 | NW_004516558.1 | Scaffold1324 | 273045                  | AA                              | CC                | 1946647706               |
| SNP_P3_150908_273544 | NW_004516558.1 | Scaffold1324 | 273544                  | CC                              | TT                | 1946647708               |
| SNP_P3_150909_273567 | NW_004516558.1 | Scaffold1324 | 273567                  | AA                              | GG                | 1946647710               |
| SNP_P3_150910_273584 | NW_004516558.1 | Scaffold1324 | 273584                  | AA                              | TT                | 1946647712               |
| SNP_P3_150911_273586 | NW_004516558.1 | Scaffold1324 | 273586                  | AA                              | TT                | 1946647714               |
| SNP_P3_150912_273600 | NW_004516558.1 | Scaffold1324 | 273600                  | AA                              | CC                | 1946647716               |
| SNP_P3_150913_273608 | NW_004516558.1 | Scaffold1324 | 273608                  | AA                              | GG                | 1946647718               |
| SNP_P3_150914_276751 | NW_004516558.1 | Scaffold1324 | 276751                  | TT                              | AA                | 1946647720               |
| SNP_P3_150915_279179 | NW_004516558.1 | Scaffold1324 | 279179                  | AA                              | TT                | 1946647722               |
| SNP_P3_150917_279326 | NW_004516558.1 | Scaffold1324 | 279326                  | CC                              | TT                | 1946647724               |
| SNP_P3_150919_279367 | NW_004516558.1 | Scaffold1324 | 279367                  | TT                              | GG                | 1946647726               |
| SNP_P3_150920_292724 | NW_004516558.1 | Scaffold1324 | 292724                  | CC                              | TT                | 1946647728               |
| SNP_P3_150921_332595 | NW_004516558.1 | Scaffold1324 | 332595                  | AA                              | GG                | 1946647731               |
| SNP_P3_150923_362478 | NW_004516558.1 | Scaffold1324 | 362478                  | AA                              | GG                | 1946647733               |
| SNP_P3_150924_362838 | NW_004516558.1 | Scaffold1324 | 362838                  | GG                              | TT                | 1946647735               |
| SNP_P3_150925_390916 | NW_004516558.1 | Scaffold1324 | 390916                  | AA                              | TT                | 1946647737               |
| SNP_P3_150926_394293 | NW_004516558.1 | Scaffold1324 | 394293                  | TT                              | AA                | 1946647739               |
| SNP_P3_150927_394298 | NW_004516558.1 | Scaffold1324 | 394298                  | TT                              | AA                | 1946647741               |
| SNP_P3_150928_395149 | NW_004516558.1 | Scaffold1324 | 395149                  | TT                              | CC                | 1946647743               |
| SNP_P3_150929_397534 | NW_004516558.1 | Scaffold1324 | 397534                  | CC                              | TT                | 1946647745               |
| SNP_P3_150930_397545 | NW_004516558.1 | Scaffold1324 | 397545                  | GG                              | AA                | 1946647747               |
| SNP_P3_150931_405022 | NW_004516558.1 | Scaffold1324 | 405022                  | CC                              | TT                | 1946647749               |
| SNP_P3_150932_405031 | NW_004516558.1 | Scaffold1324 | 405031                  | CC                              | TT                | 1946647751               |
| SNP_P3_150935_476813 | NW_004516558.1 | Scaffold1324 | 476813                  | CC                              | TT                | 1946647753               |
| SNP_P3_150936_477940 | NW_004516558.1 | Scaffold1324 | 477940                  | AA                              | TT                | 1946647755               |
| SNP_P3_150937_483538 | NW_004516558.1 | Scaffold1324 | 483538                  | CC                              | AA                | 1946647757               |
| SNP_P3_150938_483735 | NW_004516558.1 | Scaffold1324 | 483735                  | AA                              | GG                | 1946647759               |
| SNP_P3_150939_485832 | NW_004516558.1 | Scaffold1324 | 485832                  | CC                              | GG                | 1946647761               |
| SNP_P3_150941_505060 | NW_004516558.1 | Scaffold1324 | 505060                  | TT                              | GG                | 1946647763               |
| SNP_P3_150942_505106 | NW_004516558.1 | Scaffold1324 | 505106                  | CC                              | AA                | 1946647765               |
| SNP_P3_150943_506539 | NW_004516558.1 | Scaffold1324 | 506539                  | AA                              | GG                | 1946647767               |
| SNP_P3_150944_507541 | NW_004516558.1 | Scaffold1324 | 507541                  | GG                              | TT                | 1946647769               |



| SNPs IDs             | Chromosome IDs | Chromosomes  | Physical positions (bp) | CDC Frontier (Reference genome) | (Pusa 256 & HPNB) | NCBI SNPdb Accession IDs |
|----------------------|----------------|--------------|-------------------------|---------------------------------|-------------------|--------------------------|
| SNP_P3_150945_514259 | NW_004516558.1 | Scaffold1324 | 514259                  | TT                              | CC                | 1946647771               |
| SNP_P3_150946_514268 | NW_004516558.1 | Scaffold1324 | 514268                  | GG                              | AA                | 1946647773               |
| SNP_P3_150947_514269 | NW_004516558.1 | Scaffold1324 | 514269                  | AA                              | GG                | 1946647775               |
| SNP_P3_150948_514344 | NW_004516558.1 | Scaffold1324 | 514344                  | TT                              | CC                | 1946647778               |
| SNP_P3_150949_514361 | NW_004516558.1 | Scaffold1324 | 514361                  | TT                              | CC                | 1946647780               |
| SNP_P3_150950_514407 | NW_004516558.1 | Scaffold1324 | 514407                  | CC                              | TT                | 1946647782               |
| SNP_P3_150951_514709 | NW_004516558.1 | Scaffold1324 | 514709                  | TT                              | AA                | 1946647784               |
| SNP_P3_150954_539215 | NW_004516558.1 | Scaffold1324 | 539215                  | CC                              | TT                | 1946647786               |
| SNP_P3_150955_543545 | NW_004516558.1 | Scaffold1324 | 543545                  | GG                              | AA                | 1946647788               |
| SNP_P3_150956_571035 | NW_004516558.1 | Scaffold1324 | 571035                  | GG                              | AA                | 1946647790               |
| SNP_P3_150957_576946 | NW_004516558.1 | Scaffold1324 | 576946                  | TT                              | GG                | 1946647791               |
| SNP_P3_150958_630416 | NW_004516558.1 | Scaffold1324 | 630416                  | AA                              | GG                | 1946647792               |
| SNP_P3_150959_630435 | NW_004516558.1 | Scaffold1324 | 630435                  | TT                              | GG                | 1946647793               |
| SNP_P3_150960_632467 | NW_004516558.1 | Scaffold1324 | 632467                  | TT                              | GG                | 1946647794               |
| SNP_P3_150961_632828 | NW_004516558.1 | Scaffold1324 | 632828                  | TT                              | CC                | 1946647795               |
| SNP_P3_150962_642296 | NW_004516558.1 | Scaffold1324 | 642296                  | CC                              | GG                | 1946647797               |
| SNP_P3_150963_642345 | NW_004516558.1 | Scaffold1324 | 642345                  | CC                              | TT                | 1946647799               |
| SNP_P3_150965_642632 | NW_004516558.1 | Scaffold1324 | 642632                  | TT                              | CC                | 1946647801               |
| SNP_P3_150966_642644 | NW_004516558.1 | Scaffold1324 | 642644                  | AA                              | GG                | 1946647803               |
| SNP_P3_150967_642656 | NW_004516558.1 | Scaffold1324 | 642656                  | TT                              | CC                | 1946647805               |
| SNP_P3_150968_642695 | NW_004516558.1 | Scaffold1324 | 642695                  | CC                              | TT                | 1946647807               |
| SNP_P3_150969_642698 | NW_004516558.1 | Scaffold1324 | 642698                  | GG                              | TT                | 1946647809               |
| SNP_P3_150970_642755 | NW_004516558.1 | Scaffold1324 | 642755                  | AA                              | GG                | 1946647811               |
| SNP_P3_150971_642762 | NW_004516558.1 | Scaffold1324 | 642762                  | TT                              | GG                | 1946647813               |
| SNP_P3_150972_652104 | NW_004516558.1 | Scaffold1324 | 652104                  | TT                              | AA                | 1946647815               |
| SNP_P3_150973_652115 | NW_004516558.1 | Scaffold1324 | 652115                  | TT                              | GG                | 1946647816               |
| SNP_P3_150975_684985 | NW_004516558.1 | Scaffold1324 | 684985                  | TT                              | CC                | 1946647818               |
| SNP_P3_150976_684999 | NW_004516558.1 | Scaffold1324 | 684999                  | AA                              | TT                | 1946647820               |
| SNP_P3_150977_685353 | NW_004516558.1 | Scaffold1324 | 685353                  | TT                              | CC                | 1946647822               |
| SNP_P3_150978_688374 | NW_004516558.1 | Scaffold1324 | 688374                  | AA                              | GG                | 1946647824               |
| SNP_P3_150981_744268 | NW_004516558.1 | Scaffold1324 | 744268                  | GG                              | CC                | 1946647826               |
| SNP_P3_150982_3081   | NW_004516559.1 | Scaffold1325 | 3081                    | CC                              | TT                | 1946647828               |
| SNP_P3_150983_20314  | NW_004516560.1 | Scaffold1327 | 20314                   | CC                              | AA                | 1946647830               |
| SNP_P3_150984_29419  | NW_004516560.1 | Scaffold1327 | 29419                   | TT                              | AA                | 1946647831               |
| SNP_P3_150985_29828  | NW_004516560.1 | Scaffold1327 | 29828                   | GG                              | TT                | 1946647834               |
| SNP_P3_150986_29839  | NW_004516560.1 | Scaffold1327 | 29839                   | GG                              | CC                | 1946647836               |
| SNP_P3_150987_29849  | NW_004516560.1 | Scaffold1327 | 29849                   | CC                              | TT                | 1946647838               |
| SNP_P3_150988_30929  | NW_004516560.1 | Scaffold1327 | 30929                   | CC                              | GG                | 1946647840               |
| SNP_P3_150989_31689  | NW_004516560.1 | Scaffold1327 | 31689                   | AA                              | CC                | 1946647842               |
| SNP_P3_150990_31690  | NW_004516560.1 | Scaffold1327 | 31690                   | AA                              | CC                | 1946647844               |
| SNP_P3_150991_32034  | NW_004516560.1 | Scaffold1327 | 32034                   | GG                              | TT                | 1946647846               |
| SNP_P3_150992_32039  | NW_004516560.1 | Scaffold1327 | 32039                   | AA                              | GG                | 1946647848               |

| SNPs IDs            | Chromosome IDs | Chromosomes  | Physical positions (bp) | CDC Frontier (Reference genome) | (Pusa 256 & HPNB) | NCBI SNPdb Accession IDs |
|---------------------|----------------|--------------|-------------------------|---------------------------------|-------------------|--------------------------|
| SNP_P3_150993_32214 | NW_004516560.1 | Scaffold1327 | 32214                   | TT                              | AA                | 1946647850               |
| SNP_P3_150994_32828 | NW_004516560.1 | Scaffold1327 | 32828                   | CC                              | GG                | 1946647852               |
| SNP_P3_150995_32862 | NW_004516560.1 | Scaffold1327 | 32862                   | TT                              | CC                | 1946647854               |
| SNP_P3_150996_33415 | NW_004516560.1 | Scaffold1327 | 33415                   | CC                              | AA                | 1946647856               |
| SNP_P3_150997_33422 | NW_004516560.1 | Scaffold1327 | 33422                   | GG                              | TT                | 1946647858               |
| SNP_P3_150998_33438 | NW_004516560.1 | Scaffold1327 | 33438                   | TT                              | CC                | 1946647860               |
| SNP_P3_150999_33443 | NW_004516560.1 | Scaffold1327 | 33443                   | CC                              | AA                | 1946647862               |
| SNP_P3_151000_33455 | NW_004516560.1 | Scaffold1327 | 33455                   | TT                              | CC                | 1946647864               |
| SNP_P3_151001_33560 | NW_004516560.1 | Scaffold1327 | 33560                   | GG                              | TT                | 1946647866               |
| SNP_P3_151002_33859 | NW_004516560.1 | Scaffold1327 | 33859                   | CC                              | TT                | 1946647869               |
| SNP_P3_151003_35693 | NW_004516560.1 | Scaffold1327 | 35693                   | TT                              | GG                | 1946647871               |
| SNP_P3_151004_39762 | NW_004516560.1 | Scaffold1327 | 39762                   | GG                              | TT                | 1946647873               |
| SNP_P3_151005_39766 | NW_004516560.1 | Scaffold1327 | 39766                   | TT                              | CC                | 1946647875               |
| SNP_P3_151006_39775 | NW_004516560.1 | Scaffold1327 | 39775                   | TT                              | AA                | 1946647877               |
| SNP_P3_151007_39905 | NW_004516560.1 | Scaffold1327 | 39905                   | GG                              | AA                | 1946647879               |
| SNP_P3_151008_39939 | NW_004516560.1 | Scaffold1327 | 39939                   | GG                              | TT                | 1946647881               |
| SNP_P3_151009_40100 | NW_004516560.1 | Scaffold1327 | 40100                   | TT                              | GG                | 1946647883               |
| SNP_P3_151010_40130 | NW_004516560.1 | Scaffold1327 | 40130                   | TT                              | GG                | 1946647885               |
| SNP_P3_151011_40141 | NW_004516560.1 | Scaffold1327 | 40141                   | CC                              | TT                | 1946647887               |
| SNP_P3_151012_40257 | NW_004516560.1 | Scaffold1327 | 40257                   | TT                              | AA                | 1946647889               |
| SNP_P3_151013_42341 | NW_004516560.1 | Scaffold1327 | 42341                   | GG                              | AA                | 1946647891               |
| SNP_P3_151014_42348 | NW_004516560.1 | Scaffold1327 | 42348                   | AA                              | TT                | 1946647893               |
| SNP_P3_151015_42369 | NW_004516560.1 | Scaffold1327 | 42369                   | CC                              | AA                | 1946647895               |
| SNP_P3_151016_42370 | NW_004516560.1 | Scaffold1327 | 42370                   | CC                              | AA                | 1946647897               |
| SNP_P3_151017_42375 | NW_004516560.1 | Scaffold1327 | 42375                   | TT                              | AA                | 1946647899               |
| SNP_P3_151018_43093 | NW_004516560.1 | Scaffold1327 | 43093                   | GG                              | AA                | 1946647901               |
| SNP_P3_151019_43094 | NW_004516560.1 | Scaffold1327 | 43094                   | CC                              | TT                | 1946647904               |
| SNP_P3_151020_43124 | NW_004516560.1 | Scaffold1327 | 43124                   | CC                              | GG                | 1946647905               |
| SNP_P3_151021_43222 | NW_004516560.1 | Scaffold1327 | 43222                   | AA                              | CC                | 1946647907               |
| SNP_P3_151022_49980 | NW_004516560.1 | Scaffold1327 | 49980                   | GG                              | TT                | 1946647909               |
| SNP_P3_151023_50235 | NW_004516560.1 | Scaffold1327 | 50235                   | CC                              | TT                | 1946647911               |
| SNP_P3_151024_50241 | NW_004516560.1 | Scaffold1327 | 50241                   | TT                              | CC                | 1946647913               |
| SNP_P3_151025_51093 | NW_004516560.1 | Scaffold1327 | 51093                   | GG                              | AA                | 1946647915               |
| SNP_P3_151026_51248 | NW_004516560.1 | Scaffold1327 | 51248                   | TT                              | CC                | 1946647917               |
| SNP_P3_151027_51282 | NW_004516560.1 | Scaffold1327 | 51282                   | GG                              | TT                | 1946647919               |
| SNP_P3_151028_54030 | NW_004516560.1 | Scaffold1327 | 54030                   | AA                              | CC                | 1946647921               |
| SNP_P3_151029_54034 | NW_004516560.1 | Scaffold1327 | 54034                   | GG                              | CC                | 1946647923               |
| SNP_P3_151030_54062 | NW_004516560.1 | Scaffold1327 | 54062                   | AA                              | TT                | 1946647926               |
| SNP_P3_151031_54149 | NW_004516560.1 | Scaffold1327 | 54149                   | AA                              | GG                | 1946647928               |
| SNP_P3_151032_54279 | NW_004516560.1 | Scaffold1327 | 54279                   | AA                              | CC                | 1946647931               |
| SNP_P3_151033_54376 | NW_004516560.1 | Scaffold1327 | 54376                   | AA                              | GG                | 1946647933               |
| SNP_P3_151034_54431 | NW_004516560.1 | Scaffold1327 | 54431                   | CC                              | GG                | 1946647935               |

| SNPs IDs             | Chromosome IDs | Chromosomes  | Physical positions (bp) | CDC Frontier (Reference genome) | (Pusa 256 & HPNB) | NCBI SNPdb Accession IDs |
|----------------------|----------------|--------------|-------------------------|---------------------------------|-------------------|--------------------------|
| SNP_P3_151035_54438  | NW_004516560.1 | Scaffold1327 | 54438                   | GG                              | TT                | 1946647937               |
| SNP_P3_151036_54538  | NW_004516560.1 | Scaffold1327 | 54538                   | AA                              | GG                | 1946647939               |
| SNP_P3_151037_58229  | NW_004516560.1 | Scaffold1327 | 58229                   | TT                              | CC                | 1946647941               |
| SNP_P3_151038_72177  | NW_004516560.1 | Scaffold1327 | 72177                   | TT                              | CC                | 1946647943               |
| SNP_P3_151039_72178  | NW_004516560.1 | Scaffold1327 | 72178                   | TT                              | CC                | 1946647945               |
| SNP_P3_151040_72181  | NW_004516560.1 | Scaffold1327 | 72181                   | TT                              | GG                | 1946647947               |
| SNP_P3_151041_74148  | NW_004516560.1 | Scaffold1327 | 74148                   | AA                              | TT                | 1946647949               |
| SNP_P3_151042_74540  | NW_004516560.1 | Scaffold1327 | 74540                   | CC                              | AA                | 1946647951               |
| SNP_P3_151043_81629  | NW_004516560.1 | Scaffold1327 | 81629                   | GG                              | CC                | 1946647953               |
| SNP_P3_151044_85648  | NW_004516560.1 | Scaffold1327 | 85648                   | TT                              | CC                | 1946647955               |
| SNP_P3_151045_85793  | NW_004516560.1 | Scaffold1327 | 85793                   | TT                              | GG                | 1946647958               |
| SNP_P3_151046_89327  | NW_004516560.1 | Scaffold1327 | 89327                   | AA                              | TT                | 1946647960               |
| SNP_P3_151047_89333  | NW_004516560.1 | Scaffold1327 | 89333                   | AA                              | GG                | 1946647962               |
| SNP_P3_151048_92103  | NW_004516560.1 | Scaffold1327 | 92103                   | AA                              | GG                | 1946647964               |
| SNP_P3_151049_92327  | NW_004516560.1 | Scaffold1327 | 92327                   | TT                              | GG                | 1946647966               |
| SNP_P3_151050_92345  | NW_004516560.1 | Scaffold1327 | 92345                   | TT                              | CC                | 1946647968               |
| SNP_P3_151051_92398  | NW_004516560.1 | Scaffold1327 | 92398                   | AA                              | TT                | 1946647970               |
| SNP_P3_151052_92402  | NW_004516560.1 | Scaffold1327 | 92402                   | CC                              | TT                | 1946647972               |
| SNP_P3_151053_92498  | NW_004516560.1 | Scaffold1327 | 92498                   | AA                              | TT                | 1946647974               |
| SNP_P3_151054_92540  | NW_004516560.1 | Scaffold1327 | 92540                   | AA                              | TT                | 1946647976               |
| SNP_P3_151055_92551  | NW_004516560.1 | Scaffold1327 | 92551                   | CC                              | TT                | 1946647978               |
| SNP_P3_151056_92584  | NW_004516560.1 | Scaffold1327 | 92584                   | TT                              | CC                | 1946647980               |
| SNP_P3_151057_95744  | NW_004516560.1 | Scaffold1327 | 95744                   | TT                              | CC                | 1946647982               |
| SNP_P3_151058_95836  | NW_004516560.1 | Scaffold1327 | 95836                   | AA                              | GG                | 1946647984               |
| SNP_P3_151059_107724 | NW_004516560.1 | Scaffold1327 | 107724                  | GG                              | AA                | 1946647986               |
| SNP_P3_151060_107759 | NW_004516560.1 | Scaffold1327 | 107759                  | AA                              | GG                | 1946647988               |
| SNP_P3_151061_112682 | NW_004516560.1 | Scaffold1327 | 112682                  | CC                              | GG                | 1946647990               |
| SNP_P3_151062_114458 | NW_004516560.1 | Scaffold1327 | 114458                  | AA                              | GG                | 1946647992               |
| SNP_P3_151063_114461 | NW_004516560.1 | Scaffold1327 | 114461                  | AA                              | GG                | 1946647995               |
| SNP_P3_151064_114508 | NW_004516560.1 | Scaffold1327 | 114508                  | GG                              | TT                | 1946647997               |
| SNP_P3_151065_114518 | NW_004516560.1 | Scaffold1327 | 114518                  | AA                              | CC                | 1946647999               |
| SNP_P3_151066_114521 | NW_004516560.1 | Scaffold1327 | 114521                  | AA                              | CC                | 1946648001               |
| SNP_P3_151067_114524 | NW_004516560.1 | Scaffold1327 | 114524                  | GG                              | TT                | 1946648003               |
| SNP_P3_151068_114525 | NW_004516560.1 | Scaffold1327 | 114525                  | GG                              | AA                | 1946648005               |
| SNP_P3_151069_114532 | NW_004516560.1 | Scaffold1327 | 114532                  | GG                              | AA                | 1946648007               |
| SNP_P3_151070_114537 | NW_004516560.1 | Scaffold1327 | 114537                  | CC                              | TT                | 1946648009               |
| SNP_P3_151071_114553 | NW_004516560.1 | Scaffold1327 | 114553                  | TT                              | CC                | 1946648011               |
| SNP_P3_151072_114569 | NW_004516560.1 | Scaffold1327 | 114569                  | GG                              | AA                | 1946648013               |
| SNP_P3_151073_114652 | NW_004516560.1 | Scaffold1327 | 114652                  | AA                              | GG                | 1946648015               |
| SNP_P3_151074_114738 | NW_004516560.1 | Scaffold1327 | 114738                  | CC                              | TT                | 1946648017               |
| SNP_P3_151075_114794 | NW_004516560.1 | Scaffold1327 | 114794                  | GG                              | AA                | 1946648019               |
| SNP_P3_151076_114804 | NW_004516560.1 | Scaffold1327 | 114804                  | TT                              | CC                | 1946648021               |

| SNPs IDs             | Chromosome IDs | Chromosomes  | Physical positions (bp) | CDC Frontier (Reference genome) | (Pusa 256 & HPNB) | NCBI SNPdb Accession IDs |
|----------------------|----------------|--------------|-------------------------|---------------------------------|-------------------|--------------------------|
| SNP_P3_151077_114834 | NW_004516560.1 | Scaffold1327 | 114834                  | TT                              | CC                | 1946648023               |
| SNP_P3_151078_114863 | NW_004516560.1 | Scaffold1327 | 114863                  | TT                              | CC                | 1946648025               |
| SNP_P3_151079_118802 | NW_004516560.1 | Scaffold1327 | 118802                  | GG                              | TT                | 1946648027               |
| SNP_P3_151080_120201 | NW_004516560.1 | Scaffold1327 | 120201                  | GG                              | AA                | 1946648029               |
| SNP_P3_151081_122913 | NW_004516560.1 | Scaffold1327 | 122913                  | GG                              | CC                | 1946648031               |
| SNP_P3_151082_123115 | NW_004516560.1 | Scaffold1327 | 123115                  | AA                              | TT                | 1946648033               |
| SNP_P3_151083_123159 | NW_004516560.1 | Scaffold1327 | 123159                  | AA                              | TT                | 1946648035               |
| SNP_P3_151084_2933   | NW_004516561.1 | Scaffold1328 | 2933                    | TT                              | GG                | 1946648037               |
| SNP_P3_151085_2989   | NW_004516561.1 | Scaffold1328 | 2989                    | CC                              | TT                | 1946648039               |
| SNP_P3_151086_7080   | NW_004516561.1 | Scaffold1328 | 7080                    | TT                              | CC                | 1946648041               |
| SNP_P3_151087_8807   | NW_004516561.1 | Scaffold1328 | 8807                    | AA                              | CC                | 1946648043               |
| SNP_P3_151088_9304   | NW_004516561.1 | Scaffold1328 | 9304                    | TT                              | GG                | 1946648045               |
| SNP_P3_151089_10798  | NW_004516561.1 | Scaffold1328 | 10798                   | GG                              | CC                | 1946648047               |
| SNP_P3_151090_10877  | NW_004516561.1 | Scaffold1328 | 10877                   | CC                              | AA                | 1946648049               |
| SNP_P3_151091_24264  | NW_004516561.1 | Scaffold1328 | 24264                   | AA                              | TT                | 1946648051               |
| SNP_P3_151092_26375  | NW_004516561.1 | Scaffold1328 | 26375                   | AA                              | TT                | 1946648053               |
| SNP_P3_151093_26474  | NW_004516561.1 | Scaffold1328 | 26474                   | AA                              | CC                | 1946648055               |
| SNP_P3_151094_26504  | NW_004516561.1 | Scaffold1328 | 26504                   | TT                              | CC                | 1946648056               |
| SNP_P3_151095_26661  | NW_004516561.1 | Scaffold1328 | 26661                   | GG                              | TT                | 1946648058               |
| SNP_P3_151096_26716  | NW_004516561.1 | Scaffold1328 | 26716                   | GG                              | AA                | 1946648061               |
| SNP_P3_151097_26726  | NW_004516561.1 | Scaffold1328 | 26726                   | CC                              | AA                | 1946648063               |
| SNP_P3_151098_30612  | NW_004516561.1 | Scaffold1328 | 30612                   | GG                              | AA                | 1946648065               |
| SNP_P3_151099_30640  | NW_004516561.1 | Scaffold1328 | 30640                   | CC                              | AA                | 1946648067               |
| SNP_P3_151100_30806  | NW_004516561.1 | Scaffold1328 | 30806                   | AA                              | GG                | 1946648069               |
| SNP_P3_151101_32077  | NW_004516561.1 | Scaffold1328 | 32077                   | GG                              | AA                | 1946648071               |
| SNP_P3_151102_38586  | NW_004516561.1 | Scaffold1328 | 38586                   | TT                              | CC                | 1946648073               |
| SNP_P3_151103_38871  | NW_004516561.1 | Scaffold1328 | 38871                   | TT                              | CC                | 1946648075               |
| SNP_P3_151104_53379  | NW_004516561.1 | Scaffold1328 | 53379                   | AA                              | CC                | 1946648077               |
| SNP_P3_151105_53405  | NW_004516561.1 | Scaffold1328 | 53405                   | AA                              | TT                | 1946648079               |
| SNP_P3_151106_56771  | NW_004516561.1 | Scaffold1328 | 56771                   | AA                              | TT                | 1946648081               |
| SNP_P3_151107_59504  | NW_004516561.1 | Scaffold1328 | 59504                   | CC                              | GG                | 1946648083               |
| SNP_P3_151108_63543  | NW_004516561.1 | Scaffold1328 | 63543                   | TT                              | CC                | 1946648084               |
| SNP_P3_151109_63919  | NW_004516561.1 | Scaffold1328 | 63919                   | TT                              | CC                | 1946648086               |
| SNP_P3_151110_64017  | NW_004516561.1 | Scaffold1328 | 64017                   | TT                              | CC                | 1946648088               |
| SNP_P3_151112_70730  | NW_004516561.1 | Scaffold1328 | 70730                   | AA                              | GG                | 1946648090               |
| SNP_P3_151113_71402  | NW_004516561.1 | Scaffold1328 | 71402                   | AA                              | CC                | 1946648092               |
| SNP_P3_151114_71571  | NW_004516561.1 | Scaffold1328 | 71571                   | CC                              | TT                | 1946648095               |
| SNP_P3_151116_72170  | NW_004516561.1 | Scaffold1328 | 72170                   | GG                              | AA                | 1946648097               |
| SNP_P3_151117_72565  | NW_004516561.1 | Scaffold1328 | 72565                   | AA                              | GG                | 1946648099               |
| SNP_P3_151118_72573  | NW_004516561.1 | Scaffold1328 | 72573                   | GG                              | TT                | 1946648101               |
| SNP_P3_151119_72592  | NW_004516561.1 | Scaffold1328 | 72592                   | TT                              | CC                | 1946648103               |
| SNP_P3_151120_72594  | NW_004516561.1 | Scaffold1328 | 72594                   | TT                              | GG                | 1946648105               |

| SNPs IDs            | Chromosome IDs | Chromosomes  | Physical positions (bp) | CDC Frontier (Reference genome) | (Pusa 256 & HPNB) | NCBI SNPdb Accession IDs |
|---------------------|----------------|--------------|-------------------------|---------------------------------|-------------------|--------------------------|
| SNP_P3_151121_73276 | NW_004516561.1 | Scaffold1328 | 73276                   | TT                              | GG                | 1946648107               |
| SNP_P3_151122_73307 | NW_004516561.1 | Scaffold1328 | 73307                   | TT                              | CC                | 1946648109               |
| SNP_P3_151123_77129 | NW_004516561.1 | Scaffold1328 | 77129                   | GG                              | TT                | 1946648110               |
| SNP_P3_151124_77271 | NW_004516561.1 | Scaffold1328 | 77271                   | CC                              | TT                | 1946648112               |
| SNP_P3_151125_77303 | NW_004516561.1 | Scaffold1328 | 77303                   | TT                              | CC                | 1946648114               |
| SNP_P3_151126_79923 | NW_004516561.1 | Scaffold1328 | 79923                   | AA                              | GG                | 1946648116               |
| SNP_P3_151127_52    | NW_004516562.1 | Scaffold1329 | 52                      | TT                              | AA                | 1946648118               |
| SNP_P3_151128_86    | NW_004516562.1 | Scaffold1329 | 86                      | GG                              | AA                | 1946648120               |
| SNP_P3_151129_351   | NW_004516562.1 | Scaffold1329 | 351                     | GG                              | TT                | 1946648122               |
| SNP_P3_151130_7766  | NW_004516562.1 | Scaffold1329 | 7766                    | AA                              | GG                | 1946648124               |
| SNP_P3_151131_18134 | NW_004516562.1 | Scaffold1329 | 18134                   | CC                              | TT                | 1946648126               |
| SNP_P3_151132_18803 | NW_004516562.1 | Scaffold1329 | 18803                   | AA                              | TT                | 1946648128               |
| SNP_P3_151133_28855 | NW_004516562.1 | Scaffold1329 | 28855                   | TT                              | GG                | 1946648130               |
| SNP_P3_151134_29135 | NW_004516562.1 | Scaffold1329 | 29135                   | AA                              | CC                | 1946648132               |
| SNP_P3_151135_1185  | NW_004516563.1 | Scaffold1330 | 1185                    | AA                              | TT                | 1946648134               |
| SNP_P3_151136_15381 | NW_004516563.1 | Scaffold1330 | 15381                   | TT                              | GG                | 1946648136               |
| SNP_P3_151137_16853 | NW_004516563.1 | Scaffold1330 | 16853                   | TT                              | CC                | 1946648138               |
| SNP_P3_151138_27789 | NW_004516563.1 | Scaffold1330 | 27789                   | TT                              | CC                | 1946648140               |
| SNP_P3_151139_27799 | NW_004516563.1 | Scaffold1330 | 27799                   | GG                              | TT                | 1946648142               |
| SNP_P3_151140_41163 | NW_004516563.1 | Scaffold1330 | 41163                   | AA                              | TT                | 1946648144               |
| SNP_P3_151141_41193 | NW_004516563.1 | Scaffold1330 | 41193                   | GG                              | TT                | 1946648146               |
| SNP_P3_151142_636   | NW_004516564.1 | Scaffold1331 | 636                     | TT                              | GG                | 1946648148               |
| SNP_P3_151143_23588 | NW_004516564.1 | Scaffold1331 | 23588                   | AA                              | TT                | 1946648150               |
| SNP_P3_151144_23855 | NW_004516564.1 | Scaffold1331 | 23855                   | CC                              | TT                | 1946648152               |
| SNP_P3_151145_23869 | NW_004516564.1 | Scaffold1331 | 23869                   | GG                              | AA                | 1946648153               |
| SNP_P3_151146_23870 | NW_004516564.1 | Scaffold1331 | 23870                   | TT                              | CC                | 1946648155               |
| SNP_P3_151147_23918 | NW_004516564.1 | Scaffold1331 | 23918                   | CC                              | GG                | 1946648157               |
| SNP_P3_151148_23935 | NW_004516564.1 | Scaffold1331 | 23935                   | CC                              | TT                | 1946648159               |
| SNP_P3_151149_23944 | NW_004516564.1 | Scaffold1331 | 23944                   | CC                              | TT                | 1946648161               |
| SNP_P3_151150_23949 | NW_004516564.1 | Scaffold1331 | 23949                   | GG                              | TT                | 1946648163               |
| SNP_P3_151151_24502 | NW_004516564.1 | Scaffold1331 | 24502                   | AA                              | GG                | 1946648165               |
| SNP_P3_151152_24511 | NW_004516564.1 | Scaffold1331 | 24511                   | AA                              | TT                | 1946648167               |
| SNP_P3_151153_24512 | NW_004516564.1 | Scaffold1331 | 24512                   | GG                              | AA                | 1946648169               |
| SNP_P3_151154_27397 | NW_004516564.1 | Scaffold1331 | 27397                   | AA                              | TT                | 1946648171               |
| SNP_P3_151155_27404 | NW_004516564.1 | Scaffold1331 | 27404                   | AA                              | GG                | 1946648173               |
| SNP_P3_151156_32675 | NW_004516564.1 | Scaffold1331 | 32675                   | TT                              | CC                | 1946648175               |
| SNP_P3_151157_33625 | NW_004516564.1 | Scaffold1331 | 33625                   | TT                              | CC                | 1946648177               |
| SNP_P3_151158_33926 | NW_004516564.1 | Scaffold1331 | 33926                   | TT                              | AA                | 1946648179               |
| SNP_P3_151159_39660 | NW_004516564.1 | Scaffold1331 | 39660                   | TT                              | CC                | 1946648181               |
| SNP_P3_151160_39871 | NW_004516564.1 | Scaffold1331 | 39871                   | GG                              | AA                | 1946648183               |
| SNP_P3_151161_41279 | NW_004516564.1 | Scaffold1331 | 41279                   | AA                              | CC                | 1946648185               |
| SNP_P3_151162_41460 | NW_004516564.1 | Scaffold1331 | 41460                   | CC                              | AA                | 1946648187               |

| SNPs IDs            | Chromosome IDs | Chromosomes  | Physical positions (bp) | CDC Frontier (Reference genome) | (Pusa 256 & HPNB) | NCBI SNPdb Accession IDs |
|---------------------|----------------|--------------|-------------------------|---------------------------------|-------------------|--------------------------|
| SNP_P3_151163_41462 | NW_004516564.1 | Scaffold1331 | 41462                   | AA                              | CC                | 1946648189               |
| SNP_P3_151164_41482 | NW_004516564.1 | Scaffold1331 | 41482                   | CC                              | AA                | 1946648191               |
| SNP_P3_151165_41498 | NW_004516564.1 | Scaffold1331 | 41498                   | CC                              | TT                | 1946648193               |
| SNP_P3_151166_50287 | NW_004516564.1 | Scaffold1331 | 50287                   | GG                              | AA                | 1946648195               |
| SNP_P3_151167_50309 | NW_004516564.1 | Scaffold1331 | 50309                   | CC                              | AA                | 1946648197               |
| SNP_P3_151168_50313 | NW_004516564.1 | Scaffold1331 | 50313                   | CC                              | TT                | 1946648199               |
| SNP_P3_151169_50358 | NW_004516564.1 | Scaffold1331 | 50358                   | CC                              | TT                | 1946648201               |
| SNP_P3_151170_50359 | NW_004516564.1 | Scaffold1331 | 50359                   | GG                              | TT                | 1946648203               |
| SNP_P3_151171_50373 | NW_004516564.1 | Scaffold1331 | 50373                   | CC                              | TT                | 1946648205               |
| SNP_P3_151173_50668 | NW_004516564.1 | Scaffold1331 | 50668                   | AA                              | GG                | 1946648207               |
| SNP_P3_151174_50721 | NW_004516564.1 | Scaffold1331 | 50721                   | TT                              | AA                | 1946648209               |
| SNP_P3_151175_53217 | NW_004516564.1 | Scaffold1331 | 53217                   | AA                              | TT                | 1946648211               |
| SNP_P3_151176_53218 | NW_004516564.1 | Scaffold1331 | 53218                   | AA                              | TT                | 1946648213               |
| SNP_P3_151177_54739 | NW_004516564.1 | Scaffold1331 | 54739                   | GG                              | AA                | 1946648215               |
| SNP_P3_151178_56053 | NW_004516564.1 | Scaffold1331 | 56053                   | GG                              | AA                | 1946648217               |
| SNP_P3_151180_57039 | NW_004516564.1 | Scaffold1331 | 57039                   | AA                              | CC                | 1946648219               |
| SNP_P3_151181_57637 | NW_004516564.1 | Scaffold1331 | 57637                   | TT                              | AA                | 1946648221               |
| SNP_P3_151182_58058 | NW_004516564.1 | Scaffold1331 | 58058                   | CC                              | TT                | 1946648224               |
| SNP_P3_151184_58262 | NW_004516564.1 | Scaffold1331 | 58262                   | GG                              | AA                | 1946648226               |
| SNP_P3_151185_58536 | NW_004516564.1 | Scaffold1331 | 58536                   | TT                              | CC                | 1946648229               |
| SNP_P3_151186_59968 | NW_004516564.1 | Scaffold1331 | 59968                   | AA                              | CC                | 1946648231               |
| SNP_P3_151187_61565 | NW_004516564.1 | Scaffold1331 | 61565                   | CC                              | AA                | 1946648233               |
| SNP_P3_151188_61674 | NW_004516564.1 | Scaffold1331 | 61674                   | CC                              | GG                | 1946648235               |
| SNP_P3_151189_62316 | NW_004516564.1 | Scaffold1331 | 62316                   | TT                              | CC                | 1946648238               |
| SNP_P3_151190_62626 | NW_004516564.1 | Scaffold1331 | 62626                   | GG                              | AA                | 1946648240               |
| SNP_P3_151191_63228 | NW_004516564.1 | Scaffold1331 | 63228                   | AA                              | TT                | 1946648242               |
| SNP_P3_151192_63837 | NW_004516564.1 | Scaffold1331 | 63837                   | AA                              | GG                | 1946648244               |
| SNP_P3_151193_64693 | NW_004516564.1 | Scaffold1331 | 64693                   | TT                              | CC                | 1946648246               |
| SNP_P3_151194_64817 | NW_004516564.1 | Scaffold1331 | 64817                   | AA                              | GG                | 1946648248               |
| SNP_P3_151195_75330 | NW_004516564.1 | Scaffold1331 | 75330                   | TT                              | AA                | 1946648250               |
| SNP_P3_151196_75654 | NW_004516564.1 | Scaffold1331 | 75654                   | AA                              | TT                | 1946648252               |
| SNP_P3_151197_75694 | NW_004516564.1 | Scaffold1331 | 75694                   | AA                              | CC                | 1946648254               |
| SNP_P3_151198_75707 | NW_004516564.1 | Scaffold1331 | 75707                   | TT                              | CC                | 1946648256               |
| SNP_P3_151199_78198 | NW_004516564.1 | Scaffold1331 | 78198                   | AA                              | GG                | 1946648258               |
| SNP_P3_151200_79144 | NW_004516564.1 | Scaffold1331 | 79144                   | GG                              | AA                | 1946648261               |
| SNP_P3_151202_82663 | NW_004516564.1 | Scaffold1331 | 82663                   | AA                              | TT                | 1946648263               |
| SNP_P3_151203_84087 | NW_004516564.1 | Scaffold1331 | 84087                   | GG                              | CC                | 1946648265               |
| SNP_P3_151204_85730 | NW_004516564.1 | Scaffold1331 | 85730                   | CC                              | TT                | 1946648267               |
| SNP_P3_151205_86188 | NW_004516564.1 | Scaffold1331 | 86188                   | GG                              | AA                | 1946648269               |
| SNP_P3_151206_86309 | NW_004516564.1 | Scaffold1331 | 86309                   | CC                              | TT                | 1946648271               |
| SNP_P3_151207_86786 | NW_004516564.1 | Scaffold1331 | 86786                   | CC                              | TT                | 1946648273               |
| SNP_P3_151208_188   | NW_004516565.1 | Scaffold1332 | 188                     | TT                              | GG                | 1946648275               |

| SNPs IDs           | Chromosome IDs | Chromosomes  | Physical positions (bp) | CDC Frontier (Reference genome) | (Pusa 256 & HPNB) | NCBI SNPdb Accession IDs |
|--------------------|----------------|--------------|-------------------------|---------------------------------|-------------------|--------------------------|
| SNP_P3_151209_361  | NW_004516565.1 | Scaffold1332 | 361                     | TT                              | AA                | 1946648277               |
| SNP_P3_151210_362  | NW_004516565.1 | Scaffold1332 | 362                     | TT                              | AA                | 1946648279               |
| SNP_P3_151211_363  | NW_004516565.1 | Scaffold1332 | 363                     | TT                              | AA                | 1946648281               |
| SNP_P3_151212_364  | NW_004516565.1 | Scaffold1332 | 364                     | TT                              | AA                | 1946648283               |
| SNP_P3_151213_365  | NW_004516565.1 | Scaffold1332 | 365                     | TT                              | AA                | 1946648285               |
| SNP_P3_151214_366  | NW_004516565.1 | Scaffold1332 | 366                     | TT                              | AA                | 1946648287               |
| SNP_P3_151215_386  | NW_004516565.1 | Scaffold1332 | 386                     | AA                              | GG                | 1946648289               |
| SNP_P3_151216_390  | NW_004516565.1 | Scaffold1332 | 390                     | TT                              | AA                | 1946648291               |
| SNP_P3_151217_391  | NW_004516565.1 | Scaffold1332 | 391                     | AA                              | GG                | 1946648293               |
| SNP_P3_151218_402  | NW_004516565.1 | Scaffold1332 | 402                     | CC                              | TT                | 1946648295               |
| SNP_P3_151219_423  | NW_004516565.1 | Scaffold1332 | 423                     | CC                              | TT                | 1946648298               |
| SNP_P3_151220_536  | NW_004516565.1 | Scaffold1332 | 536                     | GG                              | TT                | 1946648300               |
| SNP_P3_151221_610  | NW_004516565.1 | Scaffold1332 | 610                     | GG                              | AA                | 1946648302               |
| SNP_P3_151222_613  | NW_004516565.1 | Scaffold1332 | 613                     | TT                              | CC                | 1946648304               |
| SNP_P3_151223_673  | NW_004516565.1 | Scaffold1332 | 673                     | GG                              | TT                | 1946648306               |
| SNP_P3_151225_4554 | NW_004516565.1 | Scaffold1332 | 4554                    | TT                              | GG                | 1946648308               |
| SNP_P3_151226_4555 | NW_004516565.1 | Scaffold1332 | 4555                    | AA                              | CC                | 1946648310               |
| SNP_P3_151227_4894 | NW_004516565.1 | Scaffold1332 | 4894                    | GG                              | CC                | 1946648312               |
| SNP_P3_151228_5571 | NW_004516565.1 | Scaffold1332 | 5571                    | TT                              | AA                | 1946648314               |
| SNP_P3_151229_5596 | NW_004516565.1 | Scaffold1332 | 5596                    | CC                              | TT                | 1946648316               |
| SNP_P3_151231_5661 | NW_004516565.1 | Scaffold1332 | 5661                    | GG                              | TT                | 1946648318               |
| SNP_P3_151232_5665 | NW_004516565.1 | Scaffold1332 | 5665                    | GG                              | TT                | 1946648320               |
| SNP_P3_151234_5926 | NW_004516565.1 | Scaffold1332 | 5926                    | TT                              | AA                | 1946648322               |
| SNP_P3_151235_5952 | NW_004516565.1 | Scaffold1332 | 5952                    | CC                              | TT                | 1946648324               |
| SNP_P3_151236_6009 | NW_004516565.1 | Scaffold1332 | 6009                    | CC                              | AA                | 1946648326               |
| SNP_P3_151237_6029 | NW_004516565.1 | Scaffold1332 | 6029                    | GG                              | AA                | 1946648328               |
| SNP_P3_151238_6058 | NW_004516565.1 | Scaffold1332 | 6058                    | GG                              | TT                | 1946648330               |
| SNP_P3_151239_6072 | NW_004516565.1 | Scaffold1332 | 6072                    | CC                              | AA                | 1946648331               |
| SNP_P3_151240_6244 | NW_004516565.1 | Scaffold1332 | 6244                    | AA                              | GG                | 1946648332               |
| SNP_P3_151241_6251 | NW_004516565.1 | Scaffold1332 | 6251                    | AA                              | TT                | 1946648333               |
| SNP_P3_151242_6390 | NW_004516565.1 | Scaffold1332 | 6390                    | TT                              | CC                | 1946648334               |
| SNP_P3_151243_6571 | NW_004516565.1 | Scaffold1332 | 6571                    | CC                              | TT                | 1946648335               |
| SNP_P3_151244_7224 | NW_004516565.1 | Scaffold1332 | 7224                    | CC                              | TT                | 1946648337               |
| SNP_P3_151245_7282 | NW_004516565.1 | Scaffold1332 | 7282                    | CC                              | AA                | 1946648339               |
| SNP_P3_151246_7771 | NW_004516565.1 | Scaffold1332 | 7771                    | CC                              | TT                | 1946648341               |
| SNP_P3_151247_7940 | NW_004516565.1 | Scaffold1332 | 7940                    | AA                              | GG                | 1946648343               |
| SNP_P3_151248_7975 | NW_004516565.1 | Scaffold1332 | 7975                    | CC                              | TT                | 1946648345               |
| SNP_P3_151249_8008 | NW_004516565.1 | Scaffold1332 | 8008                    | AA                              | TT                | 1946648347               |
| SNP_P3_151251_8282 | NW_004516565.1 | Scaffold1332 | 8282                    | TT                              | CC                | 1946648348               |
| SNP_P3_151252_8403 | NW_004516565.1 | Scaffold1332 | 8403                    | CC                              | TT                | 1946648350               |
| SNP_P3_151253_8423 | NW_004516565.1 | Scaffold1332 | 8423                    | CC                              | AA                | 1946648352               |
| SNP_P3_151254_8453 | NW_004516565.1 | Scaffold1332 | 8453                    | AA                              | TT                | 1946648354               |

| SNPs IDs            | Chromosome IDs | Chromosomes  | Physical positions (bp) | CDC Frontier (Reference genome) | (Pusa 256 & HPNB) | NCBI SNPdb Accession IDs |
|---------------------|----------------|--------------|-------------------------|---------------------------------|-------------------|--------------------------|
| SNP_P3_151255_8454  | NW_004516565.1 | Scaffold1332 | 8454                    | AA                              | TT                | 1946648356               |
| SNP_P3_151257_8501  | NW_004516565.1 | Scaffold1332 | 8501                    | CC                              | AA                | 1946648358               |
| SNP_P3_151258_8681  | NW_004516565.1 | Scaffold1332 | 8681                    | AA                              | GG                | 1946648360               |
| SNP_P3_151259_8769  | NW_004516565.1 | Scaffold1332 | 8769                    | TT                              | CC                | 1946648362               |
| SNP_P3_151260_8818  | NW_004516565.1 | Scaffold1332 | 8818                    | AA                              | TT                | 1946648364               |
| SNP_P3_151261_8844  | NW_004516565.1 | Scaffold1332 | 8844                    | AA                              | GG                | 1946648368               |
| SNP_P3_151262_8883  | NW_004516565.1 | Scaffold1332 | 8883                    | TT                              | CC                | 1946648370               |
| SNP_P3_151263_8899  | NW_004516565.1 | Scaffold1332 | 8899                    | GG                              | AA                | 1946648372               |
| SNP_P3_151264_9066  | NW_004516565.1 | Scaffold1332 | 9066                    | CC                              | TT                | 1946648374               |
| SNP_P3_151265_9091  | NW_004516565.1 | Scaffold1332 | 9091                    | CC                              | GG                | 1946648376               |
| SNP_P3_151266_9110  | NW_004516565.1 | Scaffold1332 | 9110                    | CC                              | TT                | 1946648378               |
| SNP_P3_151267_9190  | NW_004516565.1 | Scaffold1332 | 9190                    | GG                              | TT                | 1946648380               |
| SNP_P3_151268_9355  | NW_004516565.1 | Scaffold1332 | 9355                    | TT                              | GG                | 1946648381               |
| SNP_P3_151269_9384  | NW_004516565.1 | Scaffold1332 | 9384                    | GG                              | TT                | 1946648383               |
| SNP_P3_151270_9416  | NW_004516565.1 | Scaffold1332 | 9416                    | GG                              | TT                | 1946648385               |
| SNP_P3_151271_9516  | NW_004516565.1 | Scaffold1332 | 9516                    | TT                              | CC                | 1946648387               |
| SNP_P3_151272_9624  | NW_004516565.1 | Scaffold1332 | 9624                    | TT                              | AA                | 1946648389               |
| SNP_P3_151273_9651  | NW_004516565.1 | Scaffold1332 | 9651                    | GG                              | AA                | 1946648391               |
| SNP_P3_151274_9684  | NW_004516565.1 | Scaffold1332 | 9684                    | GG                              | CC                | 1946648393               |
| SNP_P3_151275_9875  | NW_004516565.1 | Scaffold1332 | 9875                    | GG                              | CC                | 1946648395               |
| SNP_P3_151276_9953  | NW_004516565.1 | Scaffold1332 | 9953                    | AA                              | GG                | 1946648397               |
| SNP_P3_151278_11260 | NW_004516565.1 | Scaffold1332 | 11260                   | GG                              | TT                | 1946648399               |
| SNP_P3_151279_11285 | NW_004516565.1 | Scaffold1332 | 11285                   | GG                              | CC                | 1946648401               |
| SNP_P3_151280_22234 | NW_004516566.1 | Scaffold1335 | 22234                   | AA                              | GG                | 1946648403               |
| SNP_P3_151281_22259 | NW_004516566.1 | Scaffold1335 | 22259                   | TT                              | AA                | 1946648405               |
| SNP_P3_151282_22267 | NW_004516566.1 | Scaffold1335 | 22267                   | AA                              | GG                | 1946648408               |
| SNP_P3_151283_22268 | NW_004516566.1 | Scaffold1335 | 22268                   | AA                              | TT                | 1946648410               |
| SNP_P3_151284_22271 | NW_004516566.1 | Scaffold1335 | 22271                   | TT                              | CC                | 1946648412               |
| SNP_P3_151285_22279 | NW_004516566.1 | Scaffold1335 | 22279                   | TT                              | CC                | 1946648414               |
| SNP_P3_151286_22745 | NW_004516566.1 | Scaffold1335 | 22745                   | TT                              | CC                | 1946648416               |
| SNP_P3_151287_22746 | NW_004516566.1 | Scaffold1335 | 22746                   | TT                              | AA                | 1946648418               |
| SNP_P3_151288_22772 | NW_004516566.1 | Scaffold1335 | 22772                   | TT                              | AA                | 1946648420               |
| SNP_P3_151289_26790 | NW_004516566.1 | Scaffold1335 | 26790                   | TT                              | AA                | 1946648422               |
| SNP_P3_151290_26799 | NW_004516566.1 | Scaffold1335 | 26799                   | AA                              | GG                | 1946648424               |
| SNP_P3_151291_26824 | NW_004516566.1 | Scaffold1335 | 26824                   | GG                              | AA                | 1946648426               |
| SNP_P3_151292_27163 | NW_004516566.1 | Scaffold1335 | 27163                   | TT                              | CC                | 1946648428               |
| SNP_P3_151293_27337 | NW_004516566.1 | Scaffold1335 | 27337                   | AA                              | GG                | 1946648430               |
| SNP_P3_151294_27367 | NW_004516566.1 | Scaffold1335 | 27367                   | AA                              | GG                | 1946648432               |
| SNP_P3_151295_28359 | NW_004516566.1 | Scaffold1335 | 28359                   | AA                              | GG                | 1946648434               |
| SNP_P3_151296_31929 | NW_004516566.1 | Scaffold1335 | 31929                   | AA                              | CC                | 1946648436               |
| SNP_P3_151297_31930 | NW_004516566.1 | Scaffold1335 | 31930                   | CC                              | TT                | 1946648438               |
| SNP_P3_151298_31944 | NW_004516566.1 | Scaffold1335 | 31944                   | GG                              | CC                | 1946648440               |



| SNPs IDs            | Chromosome IDs | Chromosomes  | Physical positions (bp) | CDC Frontier (Reference genome) | (Pusa 256 & HPNB) | NCBI SNPdb Accession IDs |
|---------------------|----------------|--------------|-------------------------|---------------------------------|-------------------|--------------------------|
| SNP_P3_151299_31995 | NW_004516566.1 | Scaffold1335 | 31995                   | AA                              | GG                | 1946648442               |
| SNP_P3_151300_32150 | NW_004516566.1 | Scaffold1335 | 32150                   | AA                              | GG                | 1946648444               |
| SNP_P3_151301_32161 | NW_004516566.1 | Scaffold1335 | 32161                   | CC                              | TT                | 1946648445               |
| SNP_P3_151302_32539 | NW_004516566.1 | Scaffold1335 | 32539                   | GG                              | AA                | 1946648447               |
| SNP_P3_151303_33352 | NW_004516566.1 | Scaffold1335 | 33352                   | TT                              | GG                | 1946648451               |
| SNP_P3_151304_33392 | NW_004516566.1 | Scaffold1335 | 33392                   | GG                              | AA                | 1946648453               |
| SNP_P3_151305_33630 | NW_004516566.1 | Scaffold1335 | 33630                   | GG                              | AA                | 1946648455               |
| SNP_P3_151306_33682 | NW_004516566.1 | Scaffold1335 | 33682                   | TT                              | AA                | 1946648457               |
| SNP_P3_151307_33716 | NW_004516566.1 | Scaffold1335 | 33716                   | GG                              | AA                | 1946648459               |
| SNP_P3_151308_33727 | NW_004516566.1 | Scaffold1335 | 33727                   | GG                              | TT                | 1946648461               |
| SNP_P3_151309_33732 | NW_004516566.1 | Scaffold1335 | 33732                   | AA                              | GG                | 1946648463               |
| SNP_P3_151310_33733 | NW_004516566.1 | Scaffold1335 | 33733                   | GG                              | AA                | 1946648465               |
| SNP_P3_151311_33857 | NW_004516566.1 | Scaffold1335 | 33857                   | AA                              | GG                | 1946648467               |
| SNP_P3_151312_33888 | NW_004516566.1 | Scaffold1335 | 33888                   | CC                              | AA                | 1946648469               |
| SNP_P3_151313_33928 | NW_004516566.1 | Scaffold1335 | 33928                   | AA                              | GG                | 1946648471               |
| SNP_P3_151314_33929 | NW_004516566.1 | Scaffold1335 | 33929                   | TT                              | CC                | 1946648473               |
| SNP_P3_151315_33930 | NW_004516566.1 | Scaffold1335 | 33930                   | CC                              | TT                | 1946648475               |
| SNP_P3_151316_43665 | NW_004516566.1 | Scaffold1335 | 43665                   | TT                              | CC                | 1946648477               |
| SNP_P3_151317_43677 | NW_004516566.1 | Scaffold1335 | 43677                   | CC                              | GG                | 1946648479               |
| SNP_P3_151318_45125 | NW_004516566.1 | Scaffold1335 | 45125                   | AA                              | CC                | 1946648480               |
| SNP_P3_151320_45410 | NW_004516566.1 | Scaffold1335 | 45410                   | AA                              | TT                | 1946648482               |
| SNP_P3_151321_45667 | NW_004516566.1 | Scaffold1335 | 45667                   | GG                              | AA                | 1946648484               |
| SNP_P3_151322_45713 | NW_004516566.1 | Scaffold1335 | 45713                   | TT                              | CC                | 1946648486               |
| SNP_P3_151323_45791 | NW_004516566.1 | Scaffold1335 | 45791                   | CC                              | TT                | 1946648488               |
| SNP_P3_151324_45793 | NW_004516566.1 | Scaffold1335 | 45793                   | GG                              | CC                | 1946648490               |
| SNP_P3_151325_45803 | NW_004516566.1 | Scaffold1335 | 45803                   | TT                              | AA                | 1946648492               |
| SNP_P3_151326_45806 | NW_004516566.1 | Scaffold1335 | 45806                   | TT                              | AA                | 1946648495               |
| SNP_P3_151327_45840 | NW_004516566.1 | Scaffold1335 | 45840                   | TT                              | CC                | 1946648497               |
| SNP_P3_151328_45863 | NW_004516566.1 | Scaffold1335 | 45863                   | GG                              | AA                | 1946648499               |
| SNP_P3_151329_45924 | NW_004516566.1 | Scaffold1335 | 45924                   | GG                              | AA                | 1946648501               |
| SNP_P3_151330_45933 | NW_004516566.1 | Scaffold1335 | 45933                   | TT                              | GG                | 1946648503               |
| SNP_P3_151331_45941 | NW_004516566.1 | Scaffold1335 | 45941                   | GG                              | AA                | 1946648505               |
| SNP_P3_151332_45985 | NW_004516566.1 | Scaffold1335 | 45985                   | GG                              | CC                | 1946648507               |
| SNP_P3_151333_46032 | NW_004516566.1 | Scaffold1335 | 46032                   | AA                              | GG                | 1946648509               |
| SNP_P3_151334_46050 | NW_004516566.1 | Scaffold1335 | 46050                   | CC                              | TT                | 1946648510               |
| SNP_P3_151335_46073 | NW_004516566.1 | Scaffold1335 | 46073                   | TT                              | AA                | 1946648512               |
| SNP_P3_151336_46127 | NW_004516566.1 | Scaffold1335 | 46127                   | GG                              | AA                | 1946648514               |
| SNP_P3_151337_46137 | NW_004516566.1 | Scaffold1335 | 46137                   | CC                              | TT                | 1946648516               |
| SNP_P3_151338_46255 | NW_004516566.1 | Scaffold1335 | 46255                   | GG                              | AA                | 1946648518               |
| SNP_P3_151340_46291 | NW_004516566.1 | Scaffold1335 | 46291                   | GG                              | AA                | 1946648520               |
| SNP_P3_151341_46361 | NW_004516566.1 | Scaffold1335 | 46361                   | GG                              | TT                | 1946648522               |
| SNP_P3_151342_46375 | NW_004516566.1 | Scaffold1335 | 46375                   | CC                              | TT                | 1946648524               |

| SNPs IDs            | Chromosome IDs | Chromosomes  | Physical positions (bp) | CDC Frontier (Reference genome) | (Pusa 256 & HPNB) | NCBI SNPdb Accession IDs |
|---------------------|----------------|--------------|-------------------------|---------------------------------|-------------------|--------------------------|
| SNP_P3_151343_46433 | NW_004516566.1 | Scaffold1335 | 46433                   | TT                              | CC                | 1946648526               |
| SNP_P3_151344_46439 | NW_004516566.1 | Scaffold1335 | 46439                   | GG                              | TT                | 1946648528               |
| SNP_P3_151345_46471 | NW_004516566.1 | Scaffold1335 | 46471                   | TT                              | CC                | 1946648530               |
| SNP_P3_151346_3268  | NW_004516567.1 | Scaffold1337 | 3268                    | AA                              | TT                | 1946648532               |
| SNP_P3_151347_17851 | NW_004516567.1 | Scaffold1337 | 17851                   | CC                              | TT                | 1946648534               |
| SNP_P3_151348_21833 | NW_004516567.1 | Scaffold1337 | 21833                   | TT                              | CC                | 1946648537               |
| SNP_P3_151349_25455 | NW_004516567.1 | Scaffold1337 | 25455                   | CC                              | TT                | 1946648539               |
| SNP_P3_151350_30998 | NW_004516567.1 | Scaffold1337 | 30998                   | TT                              | CC                | 1946648541               |
| SNP_P3_151351_34569 | NW_004516567.1 | Scaffold1337 | 34569                   | AA                              | GG                | 1946648543               |
| SNP_P3_151352_35439 | NW_004516567.1 | Scaffold1337 | 35439                   | GG                              | AA                | 1946648545               |
| SNP_P3_151353_37145 | NW_004516567.1 | Scaffold1337 | 37145                   | GG                              | AA                | 1946648547               |
| SNP_P3_151354_37305 | NW_004516567.1 | Scaffold1337 | 37305                   | GG                              | AA                | 1946648549               |
| SNP_P3_151355_40818 | NW_004516567.1 | Scaffold1337 | 40818                   | AA                              | GG                | 1946648551               |
| SNP_P3_151356_40887 | NW_004516567.1 | Scaffold1337 | 40887                   | CC                              | AA                | 1946648559               |
| SNP_P3_151358_40897 | NW_004516567.1 | Scaffold1337 | 40897                   | AA                              | CC                | 1946648561               |
| SNP_P3_151360_41210 | NW_004516567.1 | Scaffold1337 | 41210                   | CC                              | AA                | 1946648563               |
| SNP_P3_151361_41234 | NW_004516567.1 | Scaffold1337 | 41234                   | TT                              | AA                | 1946648565               |
| SNP_P3_151362_41438 | NW_004516567.1 | Scaffold1337 | 41438                   | CC                              | TT                | 1946648567               |
| SNP_P3_151363_43081 | NW_004516567.1 | Scaffold1337 | 43081                   | CC                              | AA                | 1946648570               |
| SNP_P3_151364_45518 | NW_004516567.1 | Scaffold1337 | 45518                   | AA                              | GG                | 1946648572               |
| SNP_P3_151366_19706 | NW_004516568.1 | Scaffold1338 | 19706                   | GG                              | AA                | 1946648574               |
| SNP_P3_151367_19727 | NW_004516568.1 | Scaffold1338 | 19727                   | CC                              | TT                | 1946648576               |
| SNP_P3_151368_19728 | NW_004516568.1 | Scaffold1338 | 19728                   | TT                              | CC                | 1946648578               |
| SNP_P3_151369_1266  | NW_004516569.1 | Scaffold1339 | 1266                    | TT                              | AA                | 1946648580               |
| SNP_P3_151370_1296  | NW_004516569.1 | Scaffold1339 | 1296                    | TT                              | GG                | 1946648582               |
| SNP_P3_151371_1301  | NW_004516569.1 | Scaffold1339 | 1301                    | GG                              | CC                | 1946648584               |
| SNP_P3_151372_1555  | NW_004516569.1 | Scaffold1339 | 1555                    | AA                              | CC                | 1946648586               |
| SNP_P3_151373_1883  | NW_004516569.1 | Scaffold1339 | 1883                    | TT                              | GG                | 1946648588               |
| SNP_P3_151374_262   | NW_004516570.1 | Scaffold1342 | 262                     | TT                              | CC                | 1946648590               |
| SNP_P3_151375_269   | NW_004516570.1 | Scaffold1342 | 269                     | GG                              | AA                | 1946648592               |
| SNP_P3_151376_526   | NW_004516570.1 | Scaffold1342 | 526                     | CC                              | AA                | 1946648594               |
| SNP_P3_151377_549   | NW_004516570.1 | Scaffold1342 | 549                     | CC                              | AA                | 1946648596               |
| SNP_P3_151378_573   | NW_004516570.1 | Scaffold1342 | 573                     | AA                              | TT                | 1946648598               |
| SNP_P3_151379_5560  | NW_004516571.1 | Scaffold1343 | 5560                    | GG                              | AA                | 1946648600               |
| SNP_P3_151380_10491 | NW_004516572.1 | Scaffold1344 | 10491                   | AA                              | CC                | 1946648602               |
| SNP_P3_151381_11277 | NW_004516572.1 | Scaffold1344 | 11277                   | CC                              | AA                | 1946648604               |
| SNP_P3_151382_11435 | NW_004516572.1 | Scaffold1344 | 11435                   | GG                              | AA                | 1946648606               |
| SNP_P3_151383_11739 | NW_004516572.1 | Scaffold1344 | 11739                   | GG                              | AA                | 1946648608               |
| SNP_P3_151384_11963 | NW_004516572.1 | Scaffold1344 | 11963                   | GG                              | AA                | 1946648611               |
| SNP_P3_151385_11982 | NW_004516572.1 | Scaffold1344 | 11982                   | GG                              | AA                | 1946648613               |
| SNP_P3_151386_14655 | NW_004516572.1 | Scaffold1344 | 14655                   | GG                              | CC                | 1946648615               |
| SNP_P3_151387_20708 | NW_004516572.1 | Scaffold1344 | 20708                   | GG                              | AA                | 1946648617               |

| SNPs IDs             | Chromosome IDs | Chromosomes    | Physical positions (bp) | CDC Frontier (Reference genome) | (Pusa 256 & HPNB) | NCBI SNPdb Accession IDs |
|----------------------|----------------|----------------|-------------------------|---------------------------------|-------------------|--------------------------|
| SNP_P3_151388_20796  | NW_004516572.1 | Scaffold1344   | 20796                   | AA                              | CC                | 1946648619               |
| SNP_P3_151389_20802  | NW_004516572.1 | Scaffold1344   | 20802                   | AA                              | GG                | 1946648621               |
| SNP_P3_151390_20809  | NW_004516572.1 | Scaffold1344   | 20809                   | GG                              | AA                | 1946648624               |
| SNP_P3_151391_20948  | NW_004516572.1 | Scaffold1344   | 20948                   | GG                              | CC                | 1946648626               |
| SNP_P3_151392_20954  | NW_004516572.1 | Scaffold1344   | 20954                   | GG                              | AA                | 1946648628               |
| SNP_P3_151393_20972  | NW_004516572.1 | Scaffold1344   | 20972                   | TT                              | CC                | 1946648630               |
| SNP_P3_151394_20998  | NW_004516572.1 | Scaffold1344   | 20998                   | AA                              | GG                | 1946648632               |
| SNP_P3_151395_21040  | NW_004516572.1 | Scaffold1344   | 21040                   | AA                              | GG                | 1946648634               |
| SNP_P3_151396_661    | NW_004516574.1 | Scaffold1348_1 | 661                     | AA                              | GG                | 1946648636               |
| SNP_P3_151397_12866  | NW_004516574.1 | Scaffold1348_1 | 12866                   | AA                              | GG                | 1946648638               |
| SNP_P3_151399_35494  | NW_004516574.1 | Scaffold1348_1 | 35494                   | CC                              | TT                | 1946648640               |
| SNP_P3_151400_57067  | NW_004516574.1 | Scaffold1348_1 | 57067                   | AA                              | TT                | 1946648642               |
| SNP_P3_151401_74062  | NW_004516574.1 | Scaffold1348_1 | 74062                   | GG                              | AA                | 1946648645               |
| SNP_P3_151402_101070 | NW_004516574.1 | Scaffold1348_1 | 101070                  | AA                              | GG                | 1946648648               |
| SNP_P3_151403_106705 | NW_004516574.1 | Scaffold1348_1 | 106705                  | AA                              | TT                | 1946648650               |
| SNP_P3_151405_143196 | NW_004516574.1 | Scaffold1348_1 | 143196                  | GG                              | TT                | 1946648652               |
| SNP_P3_151406_152776 | NW_004516574.1 | Scaffold1348_1 | 152776                  | TT                              | AA                | 1946648654               |
| SNP_P3_151407_157443 | NW_004516574.1 | Scaffold1348_1 | 157443                  | TT                              | AA                | 1946648656               |
| SNP_P3_151408_169369 | NW_004516574.1 | Scaffold1348_1 | 169369                  | CC                              | TT                | 1946648658               |
| SNP_P3_151409_171740 | NW_004516574.1 | Scaffold1348_1 | 171740                  | AA                              | GG                | 1946648660               |
| SNP_P3_151410_171778 | NW_004516574.1 | Scaffold1348_1 | 171778                  | AA                              | TT                | 1946648662               |
| SNP_P3_151411_171791 | NW_004516574.1 | Scaffold1348_1 | 171791                  | AA                              | GG                | 1946648664               |
| SNP_P3_151412_171810 | NW_004516574.1 | Scaffold1348_1 | 171810                  | GG                              | AA                | 1946648666               |
| SNP_P3_151413_171861 | NW_004516574.1 | Scaffold1348_1 | 171861                  | CC                              | TT                | 1946648668               |
| SNP_P3_151414_171881 | NW_004516574.1 | Scaffold1348_1 | 171881                  | CC                              | TT                | 1946648670               |
| SNP_P3_151415_171900 | NW_004516574.1 | Scaffold1348_1 | 171900                  | GG                              | AA                | 1946648672               |
| SNP_P3_151416_171942 | NW_004516574.1 | Scaffold1348_1 | 171942                  | AA                              | GG                | 1946648674               |
| SNP_P3_151417_172097 | NW_004516574.1 | Scaffold1348_1 | 172097                  | AA                              | TT                | 1946648676               |
| SNP_P3_151418_172098 | NW_004516574.1 | Scaffold1348_1 | 172098                  | AA                              | TT                | 1946648678               |
| SNP_P3_151419_172099 | NW_004516574.1 | Scaffold1348_1 | 172099                  | TT                              | AA                | 1946648680               |
| SNP_P3_151420_172151 | NW_004516574.1 | Scaffold1348_1 | 172151                  | TT                              | AA                | 1946648682               |
| SNP_P3_151421_172191 | NW_004516574.1 | Scaffold1348_1 | 172191                  | TT                              | CC                | 1946648684               |
| SNP_P3_151423_172233 | NW_004516574.1 | Scaffold1348_1 | 172233                  | TT                              | CC                | 1946648686               |
| SNP_P3_151424_172249 | NW_004516574.1 | Scaffold1348_1 | 172249                  | CC                              | AA                | 1946648688               |
| SNP_P3_151425_172265 | NW_004516574.1 | Scaffold1348_1 | 172265                  | TT                              | GG                | 1946648690               |
| SNP_P3_151426_172274 | NW_004516574.1 | Scaffold1348_1 | 172274                  | CC                              | TT                | 1946648692               |
| SNP_P3_151428_172290 | NW_004516574.1 | Scaffold1348_1 | 172290                  | TT                              | CC                | 1946648694               |
| SNP_P3_151429_172318 | NW_004516574.1 | Scaffold1348_1 | 172318                  | TT                              | AA                | 1946648696               |
| SNP_P3_151430_174762 | NW_004516574.1 | Scaffold1348_1 | 174762                  | AA                              | TT                | 1946648698               |
| SNP_P3_151431_187288 | NW_004516574.1 | Scaffold1348_1 | 187288                  | CC                              | TT                | 1946648700               |
| SNP_P3_151432_190473 | NW_004516574.1 | Scaffold1348_1 | 190473                  | AA                              | GG                | 1946648702               |
| SNP_P3_151433_194511 | NW_004516574.1 | Scaffold1348_1 | 194511                  | TT                              | AA                | 1946648704               |

| SNPs IDs             | Chromosome IDs | Chromosomes    | Physical positions (bp) | CDC Frontier (Reference genome) | (Pusa 256 & HPNB) | NCBI SNPdb Accession IDs |
|----------------------|----------------|----------------|-------------------------|---------------------------------|-------------------|--------------------------|
| SNP_P3_151434_194535 | NW_004516574.1 | Scaffold1348_1 | 194535                  | CC                              | TT                | 1946648706               |
| SNP_P3_151435_194559 | NW_004516574.1 | Scaffold1348_1 | 194559                  | TT                              | GG                | 1946648708               |
| SNP_P3_151436_195121 | NW_004516574.1 | Scaffold1348_1 | 195121                  | TT                              | CC                | 1946648710               |
| SNP_P3_151437_231771 | NW_004516574.1 | Scaffold1348_1 | 231771                  | TT                              | CC                | 1946648711               |
| SNP_P3_151438_244360 | NW_004516574.1 | Scaffold1348_1 | 244360                  | TT                              | CC                | 1946648713               |
| SNP_P3_151439_244364 | NW_004516574.1 | Scaffold1348_1 | 244364                  | CC                              | TT                | 1946648715               |
| SNP_P3_151440_244396 | NW_004516574.1 | Scaffold1348_1 | 244396                  | AA                              | GG                | 1946648717               |
| SNP_P3_151441_250470 | NW_004516574.1 | Scaffold1348_1 | 250470                  | TT                              | CC                | 1946648719               |
| SNP_P3_151442_250472 | NW_004516574.1 | Scaffold1348_1 | 250472                  | TT                              | AA                | 1946648721               |
| SNP_P3_151444_271153 | NW_004516574.1 | Scaffold1348_1 | 271153                  | CC                              | TT                | 1946648723               |
| SNP_P3_151445_275374 | NW_004516574.1 | Scaffold1348_1 | 275374                  | TT                              | CC                | 1946648726               |
| SNP_P3_151446_281119 | NW_004516574.1 | Scaffold1348_1 | 281119                  | AA                              | CC                | 1946648728               |
| SNP_P3_151447_308881 | NW_004516574.1 | Scaffold1348_1 | 308881                  | TT                              | GG                | 1946648730               |
| SNP_P3_151448_315787 | NW_004516574.1 | Scaffold1348_1 | 315787                  | GG                              | CC                | 1946648732               |
| SNP_P3_151450_339381 | NW_004516574.1 | Scaffold1348_1 | 339381                  | AA                              | TT                | 1946648734               |
| SNP_P3_151451_342673 | NW_004516574.1 | Scaffold1348_1 | 342673                  | CC                              | TT                | 1946648736               |
| SNP_P3_151452_363792 | NW_004516574.1 | Scaffold1348_1 | 363792                  | TT                              | CC                | 1946648738               |
| SNP_P3_151453_364514 | NW_004516574.1 | Scaffold1348_1 | 364514                  | AA                              | GG                | 1946648740               |
| SNP_P3_151456_383819 | NW_004516574.1 | Scaffold1348_1 | 383819                  | GG                              | AA                | 1946648741               |
| SNP_P3_151457_383843 | NW_004516574.1 | Scaffold1348_1 | 383843                  | CC                              | TT                | 1946648743               |
| SNP_P3_151459_383872 | NW_004516574.1 | Scaffold1348_1 | 383872                  | AA                              | GG                | 1946648745               |
| SNP_P3_151461_383952 | NW_004516574.1 | Scaffold1348_1 | 383952                  | GG                              | TT                | 1946648747               |
| SNP_P3_151462_384210 | NW_004516574.1 | Scaffold1348_1 | 384210                  | AA                              | GG                | 1946648749               |
| SNP_P3_151463_384221 | NW_004516574.1 | Scaffold1348_1 | 384221                  | CC                              | TT                | 1946648751               |
| SNP_P3_151464_386420 | NW_004516574.1 | Scaffold1348_1 | 386420                  | AA                              | CC                | 1946648753               |
| SNP_P3_151465_386478 | NW_004516574.1 | Scaffold1348_1 | 386478                  | AA                              | GG                | 1946648755               |
| SNP_P3_151466_386577 | NW_004516574.1 | Scaffold1348_1 | 386577                  | AA                              | CC                | 1946648757               |
| SNP_P3_151467_386615 | NW_004516574.1 | Scaffold1348_1 | 386615                  | AA                              | GG                | 1946648759               |
| SNP_P3_151468_386616 | NW_004516574.1 | Scaffold1348_1 | 386616                  | TT                              | GG                | 1946648761               |
| SNP_P3_151470_388414 | NW_004516574.1 | Scaffold1348_1 | 388414                  | TT                              | AA                | 1946648762               |
| SNP_P3_151471_404433 | NW_004516574.1 | Scaffold1348_1 | 404433                  | AA                              | TT                | 1946648765               |
| SNP_P3_151472_414556 | NW_004516574.1 | Scaffold1348_1 | 414556                  | GG                              | AA                | 1946648767               |
| SNP_P3_151473_423644 | NW_004516574.1 | Scaffold1348_1 | 423644                  | GG                              | CC                | 1946648769               |
| SNP_P3_151475_456748 | NW_004516574.1 | Scaffold1348_1 | 456748                  | AA                              | GG                | 1946648771               |
| SNP_P3_151478_508029 | NW_004516574.1 | Scaffold1348_1 | 508029                  | TT                              | CC                | 1946648773               |
| SNP_P3_151479_509752 | NW_004516574.1 | Scaffold1348_1 | 509752                  | GG                              | AA                | 1946648775               |
| SNP_P3_151480_515007 | NW_004516574.1 | Scaffold1348_1 | 515007                  | AA                              | GG                | 1946648777               |
| SNP_P3_151481_521825 | NW_004516574.1 | Scaffold1348_1 | 521825                  | CC                              | TT                | 1946648779               |
| SNP_P3_151482_544339 | NW_004516574.1 | Scaffold1348_1 | 544339                  | TT                              | CC                | 1946648781               |
| SNP_P3_151483_545499 | NW_004516574.1 | Scaffold1348_1 | 545499                  | TT                              | CC                | 1946648782               |
| SNP_P3_151485_564526 | NW_004516574.1 | Scaffold1348_1 | 564526                  | AA                              | GG                | 1946648784               |
| SNP_P3_151486_565597 | NW_004516574.1 | Scaffold1348_1 | 565597                  | CC                              | TT                | 1946648786               |

| SNPs IDs              | Chromosome IDs | Chromosomes    | Physical positions (bp) | CDC Frontier (Reference genome) | (Pusa 256 & HPNB) | NCBI SNPdb Accession IDs |
|-----------------------|----------------|----------------|-------------------------|---------------------------------|-------------------|--------------------------|
| SNP_P3_151487_571771  | NW_004516574.1 | Scaffold1348_1 | 571771                  | AA                              | GG                | 1946648788               |
| SNP_P3_151489_584443  | NW_004516574.1 | Scaffold1348_1 | 584443                  | AA                              | CC                | 1946648790               |
| SNP_P3_151491_698071  | NW_004516574.1 | Scaffold1348_1 | 698071                  | GG                              | AA                | 1946648792               |
| SNP_P3_151493_712663  | NW_004516574.1 | Scaffold1348_1 | 712663                  | TT                              | CC                | 1946648794               |
| SNP_P3_151494_742184  | NW_004516574.1 | Scaffold1348_1 | 742184                  | AA                              | GG                | 1946648796               |
| SNP_P3_151495_752681  | NW_004516574.1 | Scaffold1348_1 | 752681                  | CC                              | TT                | 1946648798               |
| SNP_P3_151496_754168  | NW_004516574.1 | Scaffold1348_1 | 754168                  | AA                              | TT                | 1946648800               |
| SNP_P3_151497_779400  | NW_004516574.1 | Scaffold1348_1 | 779400                  | TT                              | CC                | 1946648802               |
| SNP_P3_151498_786179  | NW_004516574.1 | Scaffold1348_1 | 786179                  | AA                              | GG                | 1946648803               |
| SNP_P3_151499_789112  | NW_004516574.1 | Scaffold1348_1 | 789112                  | TT                              | CC                | 1946648806               |
| SNP_P3_151500_792765  | NW_004516574.1 | Scaffold1348_1 | 792765                  | CC                              | TT                | 1946648808               |
| SNP_P3_151501_816613  | NW_004516574.1 | Scaffold1348_1 | 816613                  | CC                              | TT                | 1946648810               |
| SNP_P3_151504_875062  | NW_004516574.1 | Scaffold1348_1 | 875062                  | CC                              | TT                | 1946648812               |
| SNP_P3_151507_887781  | NW_004516574.1 | Scaffold1348_1 | 887781                  | CC                              | TT                | 1946648814               |
| SNP_P3_151508_888013  | NW_004516574.1 | Scaffold1348_1 | 888013                  | CC                              | AA                | 1946648816               |
| SNP_P3_151509_888024  | NW_004516574.1 | Scaffold1348_1 | 888024                  | TT                              | CC                | 1946648818               |
| SNP_P3_151510_888083  | NW_004516574.1 | Scaffold1348_1 | 888083                  | CC                              | TT                | 1946648820               |
| SNP_P3_151513_888263  | NW_004516574.1 | Scaffold1348_1 | 888263                  | TT                              | CC                | 1946648822               |
| SNP_P3_151514_888264  | NW_004516574.1 | Scaffold1348_1 | 888264                  | CC                              | TT                | 1946648823               |
| SNP_P3_151515_894345  | NW_004516574.1 | Scaffold1348_1 | 894345                  | CC                              | TT                | 1946648825               |
| SNP_P3_151516_894367  | NW_004516574.1 | Scaffold1348_1 | 894367                  | GG                              | AA                | 1946648827               |
| SNP_P3_151517_894369  | NW_004516574.1 | Scaffold1348_1 | 894369                  | TT                              | CC                | 1946648829               |
| SNP_P3_151518_894377  | NW_004516574.1 | Scaffold1348_1 | 894377                  | AA                              | GG                | 1946648831               |
| SNP_P3_151519_894383  | NW_004516574.1 | Scaffold1348_1 | 894383                  | TT                              | GG                | 1946648833               |
| SNP_P3_151520_894419  | NW_004516574.1 | Scaffold1348_1 | 894419                  | AA                              | GG                | 1946648835               |
| SNP_P3_151521_894421  | NW_004516574.1 | Scaffold1348_1 | 894421                  | GG                              | AA                | 1946648837               |
| SNP_P3_151522_894460  | NW_004516574.1 | Scaffold1348_1 | 894460                  | AA                              | GG                | 1946648839               |
| SNP_P3_151523_894691  | NW_004516574.1 | Scaffold1348_1 | 894691                  | AA                              | GG                | 1946648841               |
| SNP_P3_151524_894706  | NW_004516574.1 | Scaffold1348_1 | 894706                  | TT                              | AA                | 1946648843               |
| SNP_P3_151525_894933  | NW_004516574.1 | Scaffold1348_1 | 894933                  | CC                              | TT                | 1946648846               |
| SNP_P3_151526_900659  | NW_004516574.1 | Scaffold1348_1 | 900659                  | GG                              | TT                | 1946648848               |
| SNP_P3_151527_956240  | NW_004516574.1 | Scaffold1348_1 | 956240                  | AA                              | TT                | 1946648850               |
| SNP_P3_151528_983405  | NW_004516574.1 | Scaffold1348_1 | 983405                  | GG                              | AA                | 1946648852               |
| SNP_P3_151529_987463  | NW_004516574.1 | Scaffold1348_1 | 987463                  | TT                              | AA                | 1946648854               |
| SNP_P3_151530_1028579 | NW_004516574.1 | Scaffold1348_1 | 1028579                 | CC                              | AA                | 1946648856               |
| SNP_P3_151531_1028599 | NW_004516574.1 | Scaffold1348_1 | 1028599                 | GG                              | AA                | 1946648858               |
| SNP_P3_151532_1028601 | NW_004516574.1 | Scaffold1348_1 | 1028601                 | AA                              | CC                | 1946648859               |
| SNP_P3_151533_1028796 | NW_004516574.1 | Scaffold1348_1 | 1028796                 | CC                              | TT                | 1946648861               |
| SNP_P3_151534_1031967 | NW_004516574.1 | Scaffold1348_1 | 1031967                 | AA                              | GG                | 1946648863               |
| SNP_P3_151535_1044222 | NW_004516574.1 | Scaffold1348_1 | 1044222                 | GG                              | CC                | 1946648865               |
| SNP_P3_151536_1133662 | NW_004516574.1 | Scaffold1348_1 | 1133662                 | TT                              | GG                | 1946648867               |
| SNP_P3_151537_1133664 | NW_004516574.1 | Scaffold1348_1 | 1133664                 | AA                              | CC                | 1946648869               |

| SNPs IDs              | Chromosome IDs | Chromosomes    | Physical positions (bp) | CDC Frontier (Reference genome) | (Pusa 256 & HPNB) | NCBI SNPdb Accession IDs |
|-----------------------|----------------|----------------|-------------------------|---------------------------------|-------------------|--------------------------|
| SNP_P3_151538_1138055 | NW_004516574.1 | Scaffold1348_1 | 1138055                 | AA                              | TT                | 1946648871               |
| SNP_P3_151539_1138066 | NW_004516574.1 | Scaffold1348_1 | 1138066                 | AA                              | GG                | 1946648874               |
| SNP_P3_151540_1138072 | NW_004516574.1 | Scaffold1348_1 | 1138072                 | TT                              | AA                | 1946648876               |
| SNP_P3_151541_1138131 | NW_004516574.1 | Scaffold1348_1 | 1138131                 | AA                              | TT                | 1946648878               |
| SNP_P3_151542_1138165 | NW_004516574.1 | Scaffold1348_1 | 1138165                 | TT                              | AA                | 1946648880               |
| SNP_P3_151543_1138169 | NW_004516574.1 | Scaffold1348_1 | 1138169                 | AA                              | GG                | 1946648882               |
| SNP_P3_151544_1138171 | NW_004516574.1 | Scaffold1348_1 | 1138171                 | AA                              | TT                | 1946648884               |
| SNP_P3_151545_1138212 | NW_004516574.1 | Scaffold1348_1 | 1138212                 | AA                              | GG                | 1946648886               |
| SNP_P3_151546_1138283 | NW_004516574.1 | Scaffold1348_1 | 1138283                 | GG                              | TT                | 1946648888               |
| SNP_P3_151547_1138327 | NW_004516574.1 | Scaffold1348_1 | 1138327                 | TT                              | CC                | 1946648890               |
| SNP_P3_151548_1138346 | NW_004516574.1 | Scaffold1348_1 | 1138346                 | GG                              | TT                | 1946648892               |
| SNP_P3_151549_1138402 | NW_004516574.1 | Scaffold1348_1 | 1138402                 | AA                              | GG                | 1946648894               |
| SNP_P3_151550_1138410 | NW_004516574.1 | Scaffold1348_1 | 1138410                 | AA                              | CC                | 1946648896               |
| SNP_P3_151551_1138431 | NW_004516574.1 | Scaffold1348_1 | 1138431                 | AA                              | GG                | 1946648898               |
| SNP_P3_151552_1138440 | NW_004516574.1 | Scaffold1348_1 | 1138440                 | CC                              | GG                | 1946648900               |
| SNP_P3_151553_1138462 | NW_004516574.1 | Scaffold1348_1 | 1138462                 | AA                              | TT                | 1946648902               |
| SNP_P3_151556_1138556 | NW_004516574.1 | Scaffold1348_1 | 1138556                 | CC                              | GG                | 1946648904               |
| SNP_P3_151557_1138587 | NW_004516574.1 | Scaffold1348_1 | 1138587                 | TT                              | CC                | 1946648906               |
| SNP_P3_151558_1138589 | NW_004516574.1 | Scaffold1348_1 | 1138589                 | AA                              | TT                | 1946648908               |
| SNP_P3_151559_1138595 | NW_004516574.1 | Scaffold1348_1 | 1138595                 | AA                              | CC                | 1946648911               |
| SNP_P3_151560_1138618 | NW_004516574.1 | Scaffold1348_1 | 1138618                 | CC                              | TT                | 1946648913               |
| SNP_P3_151561_1138634 | NW_004516574.1 | Scaffold1348_1 | 1138634                 | AA                              | TT                | 1946648915               |
| SNP_P3_151562_1138663 | NW_004516574.1 | Scaffold1348_1 | 1138663                 | GG                              | TT                | 1946648917               |
| SNP_P3_151563_1138694 | NW_004516574.1 | Scaffold1348_1 | 1138694                 | TT                              | CC                | 1946648919               |
| SNP_P3_151564_1138696 | NW_004516574.1 | Scaffold1348_1 | 1138696                 | TT                              | CC                | 1946648921               |
| SNP_P3_151565_1138722 | NW_004516574.1 | Scaffold1348_1 | 1138722                 | AA                              | GG                | 1946648923               |
| SNP_P3_151566_1138725 | NW_004516574.1 | Scaffold1348_1 | 1138725                 | CC                              | AA                | 1946648925               |
| SNP_P3_151567_1138753 | NW_004516574.1 | Scaffold1348_1 | 1138753                 | TT                              | CC                | 1946648927               |
| SNP_P3_151568_1138772 | NW_004516574.1 | Scaffold1348_1 | 1138772                 | CC                              | AA                | 1946648929               |
| SNP_P3_151569_1138778 | NW_004516574.1 | Scaffold1348_1 | 1138778                 | GG                              | AA                | 1946648931               |
| SNP_P3_151570_1138782 | NW_004516574.1 | Scaffold1348_1 | 1138782                 | TT                              | CC                | 1946648933               |
| SNP_P3_151571_1138790 | NW_004516574.1 | Scaffold1348_1 | 1138790                 | CC                              | TT                | 1946648935               |
| SNP_P3_151572_1138794 | NW_004516574.1 | Scaffold1348_1 | 1138794                 | TT                              | AA                | 1946648937               |
| SNP_P3_151573_1138819 | NW_004516574.1 | Scaffold1348_1 | 1138819                 | AA                              | GG                | 1946648939               |
| SNP_P3_151574_1138836 | NW_004516574.1 | Scaffold1348_1 | 1138836                 | GG                              | AA                | 1946648941               |
| SNP_P3_151575_1138841 | NW_004516574.1 | Scaffold1348_1 | 1138841                 | TT                              | CC                | 1946648943               |
| SNP_P3_151576_1138873 | NW_004516574.1 | Scaffold1348_1 | 1138873                 | TT                              | CC                | 1946648945               |
| SNP_P3_151577_1139296 | NW_004516574.1 | Scaffold1348_1 | 1139296                 | TT                              | GG                | 1946648947               |
| SNP_P3_151578_1139312 | NW_004516574.1 | Scaffold1348_1 | 1139312                 | AA                              | GG                | 1946648950               |
| SNP_P3_151579_1139335 | NW_004516574.1 | Scaffold1348_1 | 1139335                 | TT                              | CC                | 1946648952               |
| SNP_P3_151580_1139400 | NW_004516574.1 | Scaffold1348_1 | 1139400                 | AA                              | CC                | 1946648954               |
| SNP_P3_151581_1139403 | NW_004516574.1 | Scaffold1348_1 | 1139403                 | CC                              | TT                | 1946648956               |

| SNPs IDs              | Chromosome IDs | Chromosomes    | Physical positions (bp) | CDC Frontier (Reference genome) | (Pusa 256 & HPNB) | NCBI SNPdb Accession IDs |
|-----------------------|----------------|----------------|-------------------------|---------------------------------|-------------------|--------------------------|
| SNP_P3_151582_1139418 | NW_004516574.1 | Scaffold1348_1 | 1139418                 | AA                              | TT                | 1946648958               |
| SNP_P3_151583_1139420 | NW_004516574.1 | Scaffold1348_1 | 1139420                 | GG                              | AA                | 1946648960               |
| SNP_P3_151584_1139477 | NW_004516574.1 | Scaffold1348_1 | 1139477                 | CC                              | TT                | 1946648962               |
| SNP_P3_151585_1139478 | NW_004516574.1 | Scaffold1348_1 | 1139478                 | AA                              | CC                | 1946648964               |
| SNP_P3_151586_1139610 | NW_004516574.1 | Scaffold1348_1 | 1139610                 | GG                              | CC                | 1946648966               |
| SNP_P3_151587_1139697 | NW_004516574.1 | Scaffold1348_1 | 1139697                 | GG                              | TT                | 1946648968               |
| SNP_P3_151588_1139769 | NW_004516574.1 | Scaffold1348_1 | 1139769                 | GG                              | TT                | 1946648970               |
| SNP_P3_151589_1139780 | NW_004516574.1 | Scaffold1348_1 | 1139780                 | AA                              | GG                | 1946648972               |
| SNP_P3_151590_1146204 | NW_004516574.1 | Scaffold1348_1 | 1146204                 | CC                              | TT                | 1946648974               |
| SNP_P3_151591_1156312 | NW_004516574.1 | Scaffold1348_1 | 1156312                 | TT                              | GG                | 1946648976               |
| SNP_P3_151593_1163116 | NW_004516574.1 | Scaffold1348_1 | 1163116                 | TT                              | AA                | 1946648978               |
| SNP_P3_151594_1165745 | NW_004516574.1 | Scaffold1348_1 | 1165745                 | AA                              | GG                | 1946648980               |
| SNP_P3_151595_1167576 | NW_004516574.1 | Scaffold1348_1 | 1167576                 | TT                              | CC                | 1946648982               |
| SNP_P3_151596_1167890 | NW_004516574.1 | Scaffold1348_1 | 1167890                 | AA                              | GG                | 1946648984               |
| SNP_P3_151597_1183065 | NW_004516574.1 | Scaffold1348_1 | 1183065                 | TT                              | CC                | 1946648986               |
| SNP_P3_151598_1194980 | NW_004516574.1 | Scaffold1348_1 | 1194980                 | TT                              | AA                | 1946648988               |
| SNP_P3_151599_1209532 | NW_004516574.1 | Scaffold1348_1 | 1209532                 | CC                              | TT                | 1946648990               |
| SNP_P3_151600_1210715 | NW_004516574.1 | Scaffold1348_1 | 1210715                 | TT                              | CC                | 1946648992               |
| SNP_P3_151601_1219194 | NW_004516574.1 | Scaffold1348_1 | 1219194                 | GG                              | CC                | 1946648994               |
| SNP_P3_151603_1269256 | NW_004516574.1 | Scaffold1348_1 | 1269256                 | TT                              | AA                | 1946648996               |
| SNP_P3_151604_1279024 | NW_004516574.1 | Scaffold1348_1 | 1279024                 | CC                              | TT                | 1946648998               |
| SNP_P3_151606_1320854 | NW_004516574.1 | Scaffold1348_1 | 1320854                 | TT                              | CC                | 1946649000               |
| SNP_P3_151607_1322980 | NW_004516574.1 | Scaffold1348_1 | 1322980                 | GG                              | TT                | 1946649002               |
| SNP_P3_151608_1323074 | NW_004516574.1 | Scaffold1348_1 | 1323074                 | GG                              | TT                | 1946649004               |
| SNP_P3_151609_1323076 | NW_004516574.1 | Scaffold1348_1 | 1323076                 | AA                              | TT                | 1946649006               |
| SNP_P3_151610_1323087 | NW_004516574.1 | Scaffold1348_1 | 1323087                 | AA                              | GG                | 1946649008               |
| SNP_P3_151611_1323182 | NW_004516574.1 | Scaffold1348_1 | 1323182                 | TT                              | CC                | 1946649010               |
| SNP_P3_151612_1323248 | NW_004516574.1 | Scaffold1348_1 | 1323248                 | AA                              | GG                | 1946649012               |
| SNP_P3_151613_1323270 | NW_004516574.1 | Scaffold1348_1 | 1323270                 | TT                              | CC                | 1946649014               |
| SNP_P3_151614_1323277 | NW_004516574.1 | Scaffold1348_1 | 1323277                 | CC                              | TT                | 1946649016               |
| SNP_P3_151615_1323308 | NW_004516574.1 | Scaffold1348_1 | 1323308                 | AA                              | GG                | 1946649018               |
| SNP_P3_151616_1361279 | NW_004516574.1 | Scaffold1348_1 | 1361279                 | GG                              | AA                | 1946649020               |
| SNP_P3_151617_1370272 | NW_004516574.1 | Scaffold1348_1 | 1370272                 | AA                              | TT                | 1946649023               |
| SNP_P3_151619_1398411 | NW_004516574.1 | Scaffold1348_1 | 1398411                 | GG                              | AA                | 1946649025               |
| SNP_P3_151621_1408512 | NW_004516574.1 | Scaffold1348_1 | 1408512                 | AA                              | CC                | 1946649027               |
| SNP_P3_151622_1408784 | NW_004516574.1 | Scaffold1348_1 | 1408784                 | CC                              | TT                | 1946649029               |
| SNP_P3_151623_1410092 | NW_004516574.1 | Scaffold1348_1 | 1410092                 | TT                              | GG                | 1946649031               |
| SNP_P3_151624_1410187 | NW_004516574.1 | Scaffold1348_1 | 1410187                 | TT                              | CC                | 1946649033               |
| SNP_P3_151625_1410194 | NW_004516574.1 | Scaffold1348_1 | 1410194                 | AA                              | GG                | 1946649035               |
| SNP_P3_151626_1410201 | NW_004516574.1 | Scaffold1348_1 | 1410201                 | TT                              | CC                | 1946649037               |
| SNP_P3_151627_1410344 | NW_004516574.1 | Scaffold1348_1 | 1410344                 | AA                              | GG                | 1946649039               |
| SNP_P3_151628_1410371 | NW_004516574.1 | Scaffold1348_1 | 1410371                 | TT                              | CC                | 1946649041               |

| SNPs IDs              | Chromosome IDs | Chromosomes    | Physical positions (bp) | CDC Frontier (Reference genome) | (Pusa 256 & HPNB) | NCBI SNPdb Accession IDs |
|-----------------------|----------------|----------------|-------------------------|---------------------------------|-------------------|--------------------------|
| SNP_P3_151629_1410522 | NW_004516574.1 | Scaffold1348_1 | 1410522                 | AA                              | GG                | 1946649043               |
| SNP_P3_151630_1410556 | NW_004516574.1 | Scaffold1348_1 | 1410556                 | TT                              | CC                | 1946649045               |
| SNP_P3_151631_143     | NW_004516576.1 | Scaffold1351   | 143                     | AA                              | CC                | 1946649047               |
| SNP_P3_151632_21716   | NW_004516576.1 | Scaffold1351   | 21716                   | TT                              | CC                | 1946649049               |
| SNP_P3_151634_21764   | NW_004516576.1 | Scaffold1351   | 21764                   | TT                              | CC                | 1946649051               |
| SNP_P3_151635_55164   | NW_004516576.1 | Scaffold1351   | 55164                   | GG                              | AA                | 1946649053               |
| SNP_P3_151636_62544   | NW_004516576.1 | Scaffold1351   | 62544                   | CC                              | TT                | 1946649055               |
| SNP_P3_151637_62568   | NW_004516576.1 | Scaffold1351   | 62568                   | GG                              | AA                | 1946649057               |
| SNP_P3_151638_62577   | NW_004516576.1 | Scaffold1351   | 62577                   | CC                              | GG                | 1946649059               |
| SNP_P3_151639_62597   | NW_004516576.1 | Scaffold1351   | 62597                   | GG                              | AA                | 1946649062               |
| SNP_P3_151640_62675   | NW_004516576.1 | Scaffold1351   | 62675                   | TT                              | GG                | 1946649064               |
| SNP_P3_151641_66645   | NW_004516576.1 | Scaffold1351   | 66645                   | AA                              | GG                | 1946649066               |
| SNP_P3_151643_109859  | NW_004516576.1 | Scaffold1351   | 109859                  | AA                              | CC                | 1946649068               |
| SNP_P3_151644_109864  | NW_004516576.1 | Scaffold1351   | 109864                  | AA                              | GG                | 1946649070               |
| SNP_P3_151645_156104  | NW_004516576.1 | Scaffold1351   | 156104                  | CC                              | AA                | 1946649072               |
| SNP_P3_151646_156378  | NW_004516576.1 | Scaffold1351   | 156378                  | GG                              | AA                | 1946649074               |
| SNP_P3_151648_164217  | NW_004516576.1 | Scaffold1351   | 164217                  | AA                              | TT                | 1946649076               |
| SNP_P3_151649_164222  | NW_004516576.1 | Scaffold1351   | 164222                  | AA                              | CC                | 1946649078               |
| SNP_P3_151650_164224  | NW_004516576.1 | Scaffold1351   | 164224                  | AA                              | TT                | 1946649080               |
| SNP_P3_151652_194779  | NW_004516576.1 | Scaffold1351   | 194779                  | GG                              | TT                | 1946649082               |
| SNP_P3_151653_198685  | NW_004516576.1 | Scaffold1351   | 198685                  | GG                              | AA                | 1946649084               |
| SNP_P3_151654_198998  | NW_004516576.1 | Scaffold1351   | 198998                  | CC                              | TT                | 1946649086               |
| SNP_P3_151656_217634  | NW_004516576.1 | Scaffold1351   | 217634                  | TT                              | AA                | 1946649088               |
| SNP_P3_151657_224364  | NW_004516576.1 | Scaffold1351   | 224364                  | GG                              | TT                | 1946649090               |
| SNP_P3_151659_257981  | NW_004516576.1 | Scaffold1351   | 257981                  | GG                              | AA                | 1946649092               |
| SNP_P3_151660_274685  | NW_004516576.1 | Scaffold1351   | 274685                  | CC                              | TT                | 1946649094               |
| SNP_P3_151661_274726  | NW_004516576.1 | Scaffold1351   | 274726                  | GG                              | AA                | 1946649096               |
| SNP_P3_151662_274812  | NW_004516576.1 | Scaffold1351   | 274812                  | CC                              | TT                | 1946649098               |
| SNP_P3_151663_274912  | NW_004516576.1 | Scaffold1351   | 274912                  | AA                              | CC                | 1946649102               |
| SNP_P3_151665_275410  | NW_004516576.1 | Scaffold1351   | 275410                  | TT                              | CC                | 1946649104               |
| SNP_P3_151666_286240  | NW_004516576.1 | Scaffold1351   | 286240                  | AA                              | GG                | 1946649106               |
| SNP_P3_151667_295969  | NW_004516576.1 | Scaffold1351   | 295969                  | CC                              | TT                | 1946649108               |
| SNP_P3_151668_302275  | NW_004516576.1 | Scaffold1351   | 302275                  | AA                              | GG                | 1946649110               |
| SNP_P3_151669_302381  | NW_004516576.1 | Scaffold1351   | 302381                  | GG                              | AA                | 1946649112               |
| SNP_P3_151670_302623  | NW_004516576.1 | Scaffold1351   | 302623                  | AA                              | GG                | 1946649114               |
| SNP_P3_151672_302713  | NW_004516576.1 | Scaffold1351   | 302713                  | AA                              | GG                | 1946649116               |
| SNP_P3_151673_302734  | NW_004516576.1 | Scaffold1351   | 302734                  | GG                              | CC                | 1946649118               |
| SNP_P3_151674_302771  | NW_004516576.1 | Scaffold1351   | 302771                  | TT                              | CC                | 1946649120               |
| SNP_P3_151675_327137  | NW_004516576.1 | Scaffold1351   | 327137                  | GG                              | AA                | 1946649122               |
| SNP_P3_151676_340991  | NW_004516576.1 | Scaffold1351   | 340991                  | AA                              | GG                | 1946649124               |
| SNP_P3_151677_342422  | NW_004516576.1 | Scaffold1351   | 342422                  | GG                              | AA                | 1946649126               |
| SNP_P3_151678_342783  | NW_004516576.1 | Scaffold1351   | 342783                  | GG                              | TT                | 1946649128               |



| SNPs IDs             | Chromosome IDs | Chromosomes  | Physical positions (bp) | CDC Frontier (Reference genome) | (Pusa 256 & HPNB) | NCBI SNPdb Accession IDs |
|----------------------|----------------|--------------|-------------------------|---------------------------------|-------------------|--------------------------|
| SNP_P3_151679_342856 | NW_004516576.1 | Scaffold1351 | 342856                  | CC                              | TT                | 1946649130               |
| SNP_P3_151680_350739 | NW_004516576.1 | Scaffold1351 | 350739                  | GG                              | AA                | 1946649131               |
| SNP_P3_151681_366068 | NW_004516576.1 | Scaffold1351 | 366068                  | GG                              | TT                | 1946649135               |
| SNP_P3_151682_366108 | NW_004516576.1 | Scaffold1351 | 366108                  | AA                              | GG                | 1946649137               |
| SNP_P3_151683_366201 | NW_004516576.1 | Scaffold1351 | 366201                  | TT                              | AA                | 1946649138               |
| SNP_P3_151684_366273 | NW_004516576.1 | Scaffold1351 | 366273                  | TT                              | GG                | 1946649140               |
| SNP_P3_151685_366305 | NW_004516576.1 | Scaffold1351 | 366305                  | GG                              | TT                | 1946649142               |
| SNP_P3_151686_368113 | NW_004516576.1 | Scaffold1351 | 368113                  | TT                              | CC                | 1946649144               |
| SNP_P3_151687_2230   | NW_004516579.1 | Scaffold1354 | 2230                    | CC                              | TT                | 1946649146               |
| SNP_P3_151688_405    | NW_004516582.1 | Scaffold1358 | 405                     | AA                              | TT                | 1946649148               |
| SNP_P3_151689_476    | NW_004516582.1 | Scaffold1358 | 476                     | CC                              | TT                | 1946649150               |
| SNP_P3_151691_522    | NW_004516582.1 | Scaffold1358 | 522                     | TT                              | CC                | 1946649152               |
| SNP_P3_151692_578    | NW_004516582.1 | Scaffold1358 | 578                     | AA                              | GG                | 1946649154               |
| SNP_P3_151693_682    | NW_004516582.1 | Scaffold1358 | 682                     | TT                              | CC                | 1946649156               |
| SNP_P3_151694_705    | NW_004516582.1 | Scaffold1358 | 705                     | CC                              | AA                | 1946649157               |
| SNP_P3_151695_732    | NW_004516582.1 | Scaffold1358 | 732                     | AA                              | CC                | 1946649159               |
| SNP_P3_151696_752    | NW_004516582.1 | Scaffold1358 | 752                     | GG                              | AA                | 1946649161               |
| SNP_P3_151697_765    | NW_004516582.1 | Scaffold1358 | 765                     | CC                              | TT                | 1946649163               |
| SNP_P3_151699_814    | NW_004516582.1 | Scaffold1358 | 814                     | AA                              | TT                | 1946649165               |
| SNP_P3_151700_995    | NW_004516582.1 | Scaffold1358 | 995                     | AA                              | CC                | 1946649167               |
| SNP_P3_151701_1002   | NW_004516582.1 | Scaffold1358 | 1002                    | AA                              | TT                | 1946649169               |
| SNP_P3_151702_1229   | NW_004516582.1 | Scaffold1358 | 1229                    | AA                              | CC                | 1946649171               |
| SNP_P3_151703_4482   | NW_004516582.1 | Scaffold1358 | 4482                    | TT                              | CC                | 1946649174               |
| SNP_P3_151704_4501   | NW_004516582.1 | Scaffold1358 | 4501                    | AA                              | CC                | 1946649175               |
| SNP_P3_151705_4629   | NW_004516582.1 | Scaffold1358 | 4629                    | AA                              | GG                | 1946649177               |
| SNP_P3_151706_4650   | NW_004516582.1 | Scaffold1358 | 4650                    | TT                              | AA                | 1946649179               |
| SNP_P3_151707_4684   | NW_004516582.1 | Scaffold1358 | 4684                    | AA                              | GG                | 1946649181               |
| SNP_P3_151708_4697   | NW_004516582.1 | Scaffold1358 | 4697                    | AA                              | GG                | 1946649183               |
| SNP_P3_151709_4700   | NW_004516582.1 | Scaffold1358 | 4700                    | AA                              | GG                | 1946649185               |
| SNP_P3_151710_9797   | NW_004516582.1 | Scaffold1358 | 9797                    | TT                              | AA                | 1946649187               |
| SNP_P3_151711_10073  | NW_004516582.1 | Scaffold1358 | 10073                   | GG                              | AA                | 1946649189               |
| SNP_P3_151712_10138  | NW_004516582.1 | Scaffold1358 | 10138                   | CC                              | AA                | 1946649191               |
| SNP_P3_151713_10227  | NW_004516582.1 | Scaffold1358 | 10227                   | AA                              | CC                | 1946649192               |
| SNP_P3_151714_10289  | NW_004516582.1 | Scaffold1358 | 10289                   | AA                              | TT                | 1946649194               |
| SNP_P3_151715_10450  | NW_004516582.1 | Scaffold1358 | 10450                   | TT                              | AA                | 1946649196               |
| SNP_P3_151716_10451  | NW_004516582.1 | Scaffold1358 | 10451                   | AA                              | TT                | 1946649198               |
| SNP_P3_151717_10592  | NW_004516582.1 | Scaffold1358 | 10592                   | GG                              | AA                | 1946649200               |
| SNP_P3_151718_10657  | NW_004516582.1 | Scaffold1358 | 10657                   | CC                              | TT                | 1946649202               |
| SNP_P3_151719_11392  | NW_004516582.1 | Scaffold1358 | 11392                   | AA                              | GG                | 1946649204               |
| SNP_P3_151720_11757  | NW_004516582.1 | Scaffold1358 | 11757                   | AA                              | GG                | 1946649206               |
| SNP_P3_151721_11825  | NW_004516582.1 | Scaffold1358 | 11825                   | AA                              | GG                | 1946649208               |
| SNP_P3_151722_11896  | NW_004516582.1 | Scaffold1358 | 11896                   | AA                              | TT                | 1946649210               |

| SNPs IDs             | Chromosome IDs | Chromosomes  | Physical positions (bp) | CDC Frontier (Reference genome) | (Pusa 256 & HPNB) | NCBI SNPdb Accession IDs |
|----------------------|----------------|--------------|-------------------------|---------------------------------|-------------------|--------------------------|
| SNP_P3_151723_12088  | NW_004516582.1 | Scaffold1358 | 12088                   | CC                              | GG                | 1946649212               |
| SNP_P3_151724_12128  | NW_004516582.1 | Scaffold1358 | 12128                   | AA                              | GG                | 1946649214               |
| SNP_P3_151725_12154  | NW_004516582.1 | Scaffold1358 | 12154                   | TT                              | AA                | 1946649216               |
| SNP_P3_151726_12155  | NW_004516582.1 | Scaffold1358 | 12155                   | AA                              | TT                | 1946649218               |
| SNP_P3_151727_35262  | NW_004516583.1 | Scaffold1359 | 35262                   | CC                              | AA                | 1946649220               |
| SNP_P3_151728_35273  | NW_004516583.1 | Scaffold1359 | 35273                   | AA                              | GG                | 1946649222               |
| SNP_P3_151729_42651  | NW_004516583.1 | Scaffold1359 | 42651                   | TT                              | CC                | 1946649224               |
| SNP_P3_151730_42715  | NW_004516583.1 | Scaffold1359 | 42715                   | TT                              | CC                | 1946649226               |
| SNP_P3_151731_42770  | NW_004516583.1 | Scaffold1359 | 42770                   | AA                              | GG                | 1946649228               |
| SNP_P3_151732_43334  | NW_004516583.1 | Scaffold1359 | 43334                   | AA                              | GG                | 1946649230               |
| SNP_P3_151733_57478  | NW_004516583.1 | Scaffold1359 | 57478                   | AA                              | GG                | 1946649232               |
| SNP_P3_151734_57500  | NW_004516583.1 | Scaffold1359 | 57500                   | CC                              | TT                | 1946649234               |
| SNP_P3_151735_57505  | NW_004516583.1 | Scaffold1359 | 57505                   | TT                              | CC                | 1946649236               |
| SNP_P3_151736_57514  | NW_004516583.1 | Scaffold1359 | 57514                   | CC                              | TT                | 1946649238               |
| SNP_P3_151737_57535  | NW_004516583.1 | Scaffold1359 | 57535                   | AA                              | GG                | 1946649240               |
| SNP_P3_151738_58569  | NW_004516583.1 | Scaffold1359 | 58569                   | TT                              | GG                | 1946649242               |
| SNP_P3_151739_58595  | NW_004516583.1 | Scaffold1359 | 58595                   | AA                              | GG                | 1946649244               |
| SNP_P3_151740_58609  | NW_004516583.1 | Scaffold1359 | 58609                   | CC                              | TT                | 1946649246               |
| SNP_P3_151742_74383  | NW_004516583.1 | Scaffold1359 | 74383                   | TT                              | AA                | 1946649248               |
| SNP_P3_151744_74645  | NW_004516583.1 | Scaffold1359 | 74645                   | AA                              | GG                | 1946649249               |
| SNP_P3_151745_74688  | NW_004516583.1 | Scaffold1359 | 74688                   | AA                              | TT                | 1946649251               |
| SNP_P3_151746_74690  | NW_004516583.1 | Scaffold1359 | 74690                   | CC                              | TT                | 1946649255               |
| SNP_P3_151747_91974  | NW_004516583.1 | Scaffold1359 | 91974                   | CC                              | AA                | 1946649257               |
| SNP_P3_151748_91992  | NW_004516583.1 | Scaffold1359 | 91992                   | GG                              | AA                | 1946649259               |
| SNP_P3_151749_98577  | NW_004516583.1 | Scaffold1359 | 98577                   | TT                              | GG                | 1946649260               |
| SNP_P3_151750_99511  | NW_004516583.1 | Scaffold1359 | 99511                   | TT                              | GG                | 1946649262               |
| SNP_P3_151751_99531  | NW_004516583.1 | Scaffold1359 | 99531                   | GG                              | TT                | 1946649264               |
| SNP_P3_151752_99544  | NW_004516583.1 | Scaffold1359 | 99544                   | TT                              | CC                | 1946649266               |
| SNP_P3_151753_101209 | NW_004516583.1 | Scaffold1359 | 101209                  | TT                              | CC                | 1946649268               |
| SNP_P3_151754_101918 | NW_004516583.1 | Scaffold1359 | 101918                  | AA                              | GG                | 1946649270               |
| SNP_P3_151755_108437 | NW_004516583.1 | Scaffold1359 | 108437                  | AA                              | GG                | 1946649272               |
| SNP_P3_151756_115102 | NW_004516583.1 | Scaffold1359 | 115102                  | GG                              | TT                | 1946649274               |
| SNP_P3_151757_115186 | NW_004516583.1 | Scaffold1359 | 115186                  | TT                              | CC                | 1946649276               |
| SNP_P3_151759_14198  | NW_004516584.1 | Scaffold1360 | 14198                   | GG                              | TT                | 1946649278               |
| SNP_P3_151760_14311  | NW_004516584.1 | Scaffold1360 | 14311                   | CC                              | GG                | 1946649280               |
| SNP_P3_151761_14354  | NW_004516584.1 | Scaffold1360 | 14354                   | AA                              | GG                | 1946649282               |
| SNP_P3_151762_14459  | NW_004516584.1 | Scaffold1360 | 14459                   | AA                              | TT                | 1946649284               |
| SNP_P3_151763_14896  | NW_004516584.1 | Scaffold1360 | 14896                   | AA                              | TT                | 1946649286               |
| SNP_P3_151764_14930  | NW_004516584.1 | Scaffold1360 | 14930                   | AA                              | GG                | 1946649288               |
| SNP_P3_151765_15085  | NW_004516584.1 | Scaffold1360 | 15085                   | TT                              | CC                | 1946649290               |
| SNP_P3_151766_15087  | NW_004516584.1 | Scaffold1360 | 15087                   | TT                              | CC                | 1946649291               |
| SNP_P3_151767_15129  | NW_004516584.1 | Scaffold1360 | 15129                   | GG                              | TT                | 1946649295               |

| SNPs IDs             | Chromosome IDs | Chromosomes  | Physical positions (bp) | CDC Frontier (Reference genome) | (Pusa 256 & HPNB) | NCBI SNPdb Accession IDs |
|----------------------|----------------|--------------|-------------------------|---------------------------------|-------------------|--------------------------|
| SNP_P3_151768_15133  | NW_004516584.1 | Scaffold1360 | 15133                   | GG                              | AA                | 1946649297               |
| SNP_P3_151769_15483  | NW_004516584.1 | Scaffold1360 | 15483                   | TT                              | AA                | 1946649299               |
| SNP_P3_151770_16977  | NW_004516584.1 | Scaffold1360 | 16977                   | CC                              | TT                | 1946649301               |
| SNP_P3_151771_17013  | NW_004516584.1 | Scaffold1360 | 17013                   | AA                              | TT                | 1946649303               |
| SNP_P3_151772_17318  | NW_004516584.1 | Scaffold1360 | 17318                   | AA                              | CC                | 1946649305               |
| SNP_P3_151774_17417  | NW_004516584.1 | Scaffold1360 | 17417                   | TT                              | GG                | 1946649307               |
| SNP_P3_151776_9817   | NW_004516585.1 | Scaffold1361 | 9817                    | TT                              | GG                | 1946649309               |
| SNP_P3_151777_9897   | NW_004516585.1 | Scaffold1361 | 9897                    | CC                              | TT                | 1946649311               |
| SNP_P3_151778_10995  | NW_004516585.1 | Scaffold1361 | 10995                   | CC                              | TT                | 1946649313               |
| SNP_P3_151779_11012  | NW_004516585.1 | Scaffold1361 | 11012                   | CC                              | TT                | 1946649315               |
| SNP_P3_151780_31198  | NW_004516587.1 | Scaffold1364 | 31198                   | GG                              | CC                | 1946649316               |
| SNP_P3_151781_61799  | NW_004516587.1 | Scaffold1364 | 61799                   | AA                              | TT                | 1946649318               |
| SNP_P3_151782_76674  | NW_004516587.1 | Scaffold1364 | 76674                   | CC                              | GG                | 1946649320               |
| SNP_P3_151783_76710  | NW_004516587.1 | Scaffold1364 | 76710                   | CC                              | TT                | 1946649322               |
| SNP_P3_151784_76734  | NW_004516587.1 | Scaffold1364 | 76734                   | GG                              | AA                | 1946649324               |
| SNP_P3_151785_76885  | NW_004516587.1 | Scaffold1364 | 76885                   | TT                              | AA                | 1946649326               |
| SNP_P3_151786_87939  | NW_004516587.1 | Scaffold1364 | 87939                   | AA                              | GG                | 1946649328               |
| SNP_P3_151787_89138  | NW_004516587.1 | Scaffold1364 | 89138                   | GG                              | AA                | 1946649330               |
| SNP_P3_151788_110485 | NW_004516587.1 | Scaffold1364 | 110485                  | AA                              | GG                | 1946649332               |
| SNP_P3_151789_110691 | NW_004516587.1 | Scaffold1364 | 110691                  | CC                              | TT                | 1946649335               |
| SNP_P3_151790_113972 | NW_004516587.1 | Scaffold1364 | 113972                  | CC                              | TT                | 1946649337               |
| SNP_P3_151791_114925 | NW_004516587.1 | Scaffold1364 | 114925                  | GG                              | AA                | 1946649339               |
| SNP_P3_151792_133497 | NW_004516587.1 | Scaffold1364 | 133497                  | CC                              | AA                | 1946649341               |
| SNP_P3_151793_133505 | NW_004516587.1 | Scaffold1364 | 133505                  | AA                              | TT                | 1946649343               |
| SNP_P3_151794_133506 | NW_004516587.1 | Scaffold1364 | 133506                  | AA                              | TT                | 1946649345               |
| SNP_P3_151795_137283 | NW_004516587.1 | Scaffold1364 | 137283                  | GG                              | AA                | 1946649347               |
| SNP_P3_151796_152495 | NW_004516587.1 | Scaffold1364 | 152495                  | GG                              | AA                | 1946649348               |
| SNP_P3_151797_158923 | NW_004516587.1 | Scaffold1364 | 158923                  | GG                              | AA                | 1946649349               |
| SNP_P3_151798_687    | NW_004516588.1 | Scaffold1365 | 687                     | TT                              | CC                | 1946649350               |
| SNP_P3_151799_747    | NW_004516588.1 | Scaffold1365 | 747                     | TT                              | CC                | 1946649351               |
| SNP_P3_151800_783    | NW_004516588.1 | Scaffold1365 | 783                     | TT                              | CC                | 1946649352               |
| SNP_P3_151801_7094   | NW_004516588.1 | Scaffold1365 | 7094                    | AA                              | TT                | 1946649353               |
| SNP_P3_151802_7112   | NW_004516588.1 | Scaffold1365 | 7112                    | TT                              | AA                | 1946649355               |
| SNP_P3_151803_7404   | NW_004516588.1 | Scaffold1365 | 7404                    | GG                              | AA                | 1946649357               |
| SNP_P3_151804_7426   | NW_004516588.1 | Scaffold1365 | 7426                    | TT                              | GG                | 1946649359               |
| SNP_P3_151805_7472   | NW_004516588.1 | Scaffold1365 | 7472                    | AA                              | TT                | 1946649361               |
| SNP_P3_151806_7613   | NW_004516588.1 | Scaffold1365 | 7613                    | CC                              | GG                | 1946649363               |
| SNP_P3_151807_7662   | NW_004516588.1 | Scaffold1365 | 7662                    | GG                              | AA                | 1946649365               |
| SNP_P3_151808_7682   | NW_004516588.1 | Scaffold1365 | 7682                    | AA                              | TT                | 1946649368               |
| SNP_P3_151809_7760   | NW_004516588.1 | Scaffold1365 | 7760                    | GG                              | TT                | 1946649370               |
| SNP_P3_151810_8126   | NW_004516588.1 | Scaffold1365 | 8126                    | CC                              | TT                | 1946649372               |
| SNP_P3_151811_8129   | NW_004516588.1 | Scaffold1365 | 8129                    | AA                              | TT                | 1946649374               |

| SNPs IDs            | Chromosome IDs | Chromosomes  | Physical positions (bp) | CDC Frontier (Reference genome) | (Pusa 256 & HPNB) | NCBI SNPdb Accession IDs |
|---------------------|----------------|--------------|-------------------------|---------------------------------|-------------------|--------------------------|
| SNP_P3_151812_8200  | NW_004516588.1 | Scaffold1365 | 8200                    | TT                              | AA                | 1946649376               |
| SNP_P3_151813_8212  | NW_004516588.1 | Scaffold1365 | 8212                    | AA                              | GG                | 1946649378               |
| SNP_P3_151814_8227  | NW_004516588.1 | Scaffold1365 | 8227                    | TT                              | AA                | 1946649380               |
| SNP_P3_151815_8260  | NW_004516588.1 | Scaffold1365 | 8260                    | TT                              | CC                | 1946649381               |
| SNP_P3_151816_8277  | NW_004516588.1 | Scaffold1365 | 8277                    | GG                              | AA                | 1946649383               |
| SNP_P3_151817_8354  | NW_004516588.1 | Scaffold1365 | 8354                    | CC                              | TT                | 1946649385               |
| SNP_P3_151818_8423  | NW_004516588.1 | Scaffold1365 | 8423                    | TT                              | AA                | 1946649387               |
| SNP_P3_151819_8468  | NW_004516588.1 | Scaffold1365 | 8468                    | CC                              | GG                | 1946649389               |
| SNP_P3_151820_8563  | NW_004516588.1 | Scaffold1365 | 8563                    | GG                              | CC                | 1946649391               |
| SNP_P3_151821_8658  | NW_004516588.1 | Scaffold1365 | 8658                    | TT                              | AA                | 1946649393               |
| SNP_P3_151822_8696  | NW_004516588.1 | Scaffold1365 | 8696                    | CC                              | AA                | 1946649395               |
| SNP_P3_151823_8723  | NW_004516588.1 | Scaffold1365 | 8723                    | TT                              | GG                | 1946649397               |
| SNP_P3_151824_8871  | NW_004516588.1 | Scaffold1365 | 8871                    | AA                              | GG                | 1946649398               |
| SNP_P3_151825_19348 | NW_004516588.1 | Scaffold1365 | 19348                   | GG                              | AA                | 1946649400               |
| SNP_P3_151826_19355 | NW_004516588.1 | Scaffold1365 | 19355                   | AA                              | GG                | 1946649402               |
| SNP_P3_151827_19356 | NW_004516588.1 | Scaffold1365 | 19356                   | GG                              | CC                | 1946649404               |
| SNP_P3_151828_19358 | NW_004516588.1 | Scaffold1365 | 19358                   | AA                              | TT                | 1946649406               |
| SNP_P3_151829_25192 | NW_004516588.1 | Scaffold1365 | 25192                   | CC                              | TT                | 1946649408               |
| SNP_P3_151830_25193 | NW_004516588.1 | Scaffold1365 | 25193                   | TT                              | CC                | 1946649410               |
| SNP_P3_151832_86598 | NW_004516588.1 | Scaffold1365 | 86598                   | TT                              | AA                | 1946649412               |
| SNP_P3_151833_86662 | NW_004516588.1 | Scaffold1365 | 86662                   | CC                              | TT                | 1946649414               |
| SNP_P3_151834_86831 | NW_004516588.1 | Scaffold1365 | 86831                   | CC                              | AA                | 1946649416               |
| SNP_P3_151835_86862 | NW_004516588.1 | Scaffold1365 | 86862                   | TT                              | CC                | 1946649418               |
| SNP_P3_151836_87050 | NW_004516588.1 | Scaffold1365 | 87050                   | CC                              | GG                | 1946649420               |
| SNP_P3_151837_87151 | NW_004516588.1 | Scaffold1365 | 87151                   | CC                              | TT                | 1946649422               |
| SNP_P3_151838_87551 | NW_004516588.1 | Scaffold1365 | 87551                   | CC                              | AA                | 1946649424               |
| SNP_P3_151839_89127 | NW_004516588.1 | Scaffold1365 | 89127                   | GG                              | AA                | 1946649426               |
| SNP_P3_151840_95245 | NW_004516588.1 | Scaffold1365 | 95245                   | GG                              | TT                | 1946649428               |
| SNP_P3_151841_95261 | NW_004516588.1 | Scaffold1365 | 95261                   | AA                              | GG                | 1946649429               |
| SNP_P3_151842_96159 | NW_004516588.1 | Scaffold1365 | 96159                   | GG                              | TT                | 1946649431               |
| SNP_P3_151843_96253 | NW_004516588.1 | Scaffold1365 | 96253                   | AA                              | CC                | 1946649433               |
| SNP_P3_151844_96382 | NW_004516588.1 | Scaffold1365 | 96382                   | AA                              | TT                | 1946649435               |
| SNP_P3_151845_96410 | NW_004516588.1 | Scaffold1365 | 96410                   | TT                              | CC                | 1946649437               |
| SNP_P3_151846_96631 | NW_004516588.1 | Scaffold1365 | 96631                   | AA                              | TT                | 1946649439               |
| SNP_P3_151847_96864 | NW_004516588.1 | Scaffold1365 | 96864                   | GG                              | AA                | 1946649441               |
| SNP_P3_151848_97347 | NW_004516588.1 | Scaffold1365 | 97347                   | CC                              | TT                | 1946649443               |
| SNP_P3_151849_97469 | NW_004516588.1 | Scaffold1365 | 97469                   | TT                              | CC                | 1946649445               |
| SNP_P3_151850_98885 | NW_004516588.1 | Scaffold1365 | 98885                   | CC                              | AA                | 1946649447               |
| SNP_P3_151851_98901 | NW_004516588.1 | Scaffold1365 | 98901                   | TT                              | GG                | 1946649523               |
| SNP_P3_151852_99083 | NW_004516588.1 | Scaffold1365 | 99083                   | AA                              | TT                | 1946649526               |
| SNP_P3_151853_99146 | NW_004516588.1 | Scaffold1365 | 99146                   | AA                              | GG                | 1946649528               |
| SNP_P3_151854_99150 | NW_004516588.1 | Scaffold1365 | 99150                   | GG                              | TT                | 1946649530               |

| SNPs IDs             | Chromosome IDs | Chromosomes  | Physical positions (bp) | CDC Frontier (Reference genome) | (Pusa 256 & HPNB) | NCBI SNPdb Accession IDs |
|----------------------|----------------|--------------|-------------------------|---------------------------------|-------------------|--------------------------|
| SNP_P3_151855_99268  | NW_004516588.1 | Scaffold1365 | 99268                   | CC                              | TT                | 1946649533               |
| SNP_P3_151856_99351  | NW_004516588.1 | Scaffold1365 | 99351                   | CC                              | AA                | 1946649535               |
| SNP_P3_151857_101531 | NW_004516588.1 | Scaffold1365 | 101531                  | GG                              | TT                | 1946649537               |
| SNP_P3_151858_102505 | NW_004516588.1 | Scaffold1365 | 102505                  | AA                              | GG                | 1946649539               |
| SNP_P3_151860_104475 | NW_004516588.1 | Scaffold1365 | 104475                  | AA                              | TT                | 1946649541               |
| SNP_P3_151861_104476 | NW_004516588.1 | Scaffold1365 | 104476                  | TT                              | CC                | 1946649544               |
| SNP_P3_151862_104504 | NW_004516588.1 | Scaffold1365 | 104504                  | AA                              | TT                | 1946649546               |
| SNP_P3_151863_104524 | NW_004516588.1 | Scaffold1365 | 104524                  | CC                              | GG                | 1946649548               |
| SNP_P3_151864_104823 | NW_004516588.1 | Scaffold1365 | 104823                  | GG                              | AA                | 1946649550               |
| SNP_P3_151865_106169 | NW_004516588.1 | Scaffold1365 | 106169                  | GG                              | AA                | 1946649552               |
| SNP_P3_151866_253    | NW_004516589.1 | Scaffold1366 | 253                     | CC                              | AA                | 1946649554               |
| SNP_P3_151867_280    | NW_004516589.1 | Scaffold1366 | 280                     | TT                              | CC                | 1946649556               |
| SNP_P3_151868_285    | NW_004516589.1 | Scaffold1366 | 285                     | GG                              | AA                | 1946649558               |
| SNP_P3_151869_300    | NW_004516589.1 | Scaffold1366 | 300                     | GG                              | AA                | 1946649560               |
| SNP_P3_151870_321    | NW_004516589.1 | Scaffold1366 | 321                     | AA                              | GG                | 1946649562               |
| SNP_P3_151872_558    | NW_004516589.1 | Scaffold1366 | 558                     | GG                              | CC                | 1946649564               |
| SNP_P3_151873_561    | NW_004516589.1 | Scaffold1366 | 561                     | GG                              | AA                | 1946649566               |
| SNP_P3_151874_689    | NW_004516589.1 | Scaffold1366 | 689                     | AA                              | TT                | 1946649568               |
| SNP_P3_151875_1046   | NW_004516589.1 | Scaffold1366 | 1046                    | AA                              | GG                | 1946649570               |
| SNP_P3_151877_13423  | NW_004516590.1 | Scaffold1367 | 13423                   | TT                              | CC                | 1946649572               |
| SNP_P3_151878_13438  | NW_004516590.1 | Scaffold1367 | 13438                   | GG                              | TT                | 1946649574               |
| SNP_P3_151879_13445  | NW_004516590.1 | Scaffold1367 | 13445                   | CC                              | TT                | 1946649576               |
| SNP_P3_151880_13672  | NW_004516590.1 | Scaffold1367 | 13672                   | CC                              | TT                | 1946649578               |
| SNP_P3_151881_22302  | NW_004516590.1 | Scaffold1367 | 22302                   | CC                              | TT                | 1946649580               |
| SNP_P3_151882_22363  | NW_004516590.1 | Scaffold1367 | 22363                   | TT                              | GG                | 1946649583               |
| SNP_P3_151883_22398  | NW_004516590.1 | Scaffold1367 | 22398                   | AA                              | GG                | 1946649585               |
| SNP_P3_151884_22418  | NW_004516590.1 | Scaffold1367 | 22418                   | AA                              | TT                | 1946649587               |
| SNP_P3_151885_22710  | NW_004516590.1 | Scaffold1367 | 22710                   | GG                              | CC                | 1946649589               |
| SNP_P3_151886_27677  | NW_004516590.1 | Scaffold1367 | 27677                   | GG                              | TT                | 1946649590               |
| SNP_P3_151887_29606  | NW_004516590.1 | Scaffold1367 | 29606                   | TT                              | GG                | 1946649591               |
| SNP_P3_151888_29892  | NW_004516590.1 | Scaffold1367 | 29892                   | AA                              | CC                | 1946649592               |
| SNP_P3_151889_29949  | NW_004516590.1 | Scaffold1367 | 29949                   | AA                              | CC                | 1946649593               |
| SNP_P3_151890_31184  | NW_004516590.1 | Scaffold1367 | 31184                   | CC                              | TT                | 1946649594               |
| SNP_P3_151891_866    | NW_004516591.1 | Scaffold1368 | 866                     | TT                              | CC                | 1946649595               |
| SNP_P3_151892_5212   | NW_004516592.1 | Scaffold1369 | 5212                    | AA                              | GG                | 1946649596               |
| SNP_P3_151893_5227   | NW_004516592.1 | Scaffold1369 | 5227                    | AA                              | TT                | 1946649597               |
| SNP_P3_151894_5229   | NW_004516592.1 | Scaffold1369 | 5229                    | AA                              | GG                | 1946649598               |
| SNP_P3_151895_5240   | NW_004516592.1 | Scaffold1369 | 5240                    | AA                              | GG                | 1946649599               |
| SNP_P3_151899_41992  | NW_004516592.1 | Scaffold1369 | 41992                   | CC                              | TT                | 1946649600               |
| SNP_P3_151900_48257  | NW_004516592.1 | Scaffold1369 | 48257                   | AA                              | GG                | 1946649602               |
| SNP_P3_151901_68064  | NW_004516592.1 | Scaffold1369 | 68064                   | AA                              | TT                | 1946649604               |
| SNP_P3_151902_68082  | NW_004516592.1 | Scaffold1369 | 68082                   | TT                              | AA                | 1946649606               |

| SNPs IDs             | Chromosome IDs | Chromosomes  | Physical positions (bp) | CDC Frontier (Reference genome) | (Pusa 256 & HPNB) | NCBI SNPdb Accession IDs |
|----------------------|----------------|--------------|-------------------------|---------------------------------|-------------------|--------------------------|
| SNP_P3_151903_68091  | NW_004516592.1 | Scaffold1369 | 68091                   | AA                              | CC                | 1946649608               |
| SNP_P3_151904_68092  | NW_004516592.1 | Scaffold1369 | 68092                   | GG                              | AA                | 1946649610               |
| SNP_P3_151905_68422  | NW_004516592.1 | Scaffold1369 | 68422                   | CC                              | AA                | 1946649613               |
| SNP_P3_151906_68484  | NW_004516592.1 | Scaffold1369 | 68484                   | CC                              | TT                | 1946649615               |
| SNP_P3_151907_68487  | NW_004516592.1 | Scaffold1369 | 68487                   | CC                              | TT                | 1946649617               |
| SNP_P3_151908_68505  | NW_004516592.1 | Scaffold1369 | 68505                   | TT                              | CC                | 1946649619               |
| SNP_P3_151909_68517  | NW_004516592.1 | Scaffold1369 | 68517                   | TT                              | CC                | 1946649621               |
| SNP_P3_151910_68525  | NW_004516592.1 | Scaffold1369 | 68525                   | AA                              | GG                | 1946649623               |
| SNP_P3_151911_68531  | NW_004516592.1 | Scaffold1369 | 68531                   | CC                              | TT                | 1946649625               |
| SNP_P3_151914_75583  | NW_004516592.1 | Scaffold1369 | 75583                   | AA                              | GG                | 1946649627               |
| SNP_P3_151915_76676  | NW_004516592.1 | Scaffold1369 | 76676                   | TT                              | CC                | 1946649629               |
| SNP_P3_151916_76677  | NW_004516592.1 | Scaffold1369 | 76677                   | CC                              | TT                | 1946649631               |
| SNP_P3_151917_76679  | NW_004516592.1 | Scaffold1369 | 76679                   | AA                              | GG                | 1946649633               |
| SNP_P3_151918_76700  | NW_004516592.1 | Scaffold1369 | 76700                   | TT                              | CC                | 1946649635               |
| SNP_P3_151919_76702  | NW_004516592.1 | Scaffold1369 | 76702                   | TT                              | CC                | 1946649637               |
| SNP_P3_151920_76742  | NW_004516592.1 | Scaffold1369 | 76742                   | AA                              | GG                | 1946649639               |
| SNP_P3_151921_77014  | NW_004516592.1 | Scaffold1369 | 77014                   | AA                              | GG                | 1946649641               |
| SNP_P3_151922_77113  | NW_004516592.1 | Scaffold1369 | 77113                   | TT                              | GG                | 1946649643               |
| SNP_P3_151923_77140  | NW_004516592.1 | Scaffold1369 | 77140                   | AA                              | GG                | 1946649645               |
| SNP_P3_151924_77199  | NW_004516592.1 | Scaffold1369 | 77199                   | GG                              | TT                | 1946649647               |
| SNP_P3_151925_77212  | NW_004516592.1 | Scaffold1369 | 77212                   | AA                              | GG                | 1946649650               |
| SNP_P3_151927_81027  | NW_004516592.1 | Scaffold1369 | 81027                   | AA                              | GG                | 1946649652               |
| SNP_P3_151929_123101 | NW_004516592.1 | Scaffold1369 | 123101                  | GG                              | AA                | 1946649654               |
| SNP_P3_151930_123122 | NW_004516592.1 | Scaffold1369 | 123122                  | TT                              | CC                | 1946649656               |
| SNP_P3_151935_190065 | NW_004516592.1 | Scaffold1369 | 190065                  | GG                              | TT                | 1946649658               |
| SNP_P3_151936_196910 | NW_004516592.1 | Scaffold1369 | 196910                  | GG                              | AA                | 1946649660               |
| SNP_P3_151937_196937 | NW_004516592.1 | Scaffold1369 | 196937                  | CC                              | TT                | 1946649662               |
| SNP_P3_151938_197203 | NW_004516592.1 | Scaffold1369 | 197203                  | GG                              | TT                | 1946649664               |
| SNP_P3_151939_197264 | NW_004516592.1 | Scaffold1369 | 197264                  | GG                              | AA                | 1946649666               |
| SNP_P3_151940_204422 | NW_004516592.1 | Scaffold1369 | 204422                  | CC                              | TT                | 1946649668               |
| SNP_P3_151941_204443 | NW_004516592.1 | Scaffold1369 | 204443                  | CC                              | AA                | 1946649669               |
| SNP_P3_151943_204492 | NW_004516592.1 | Scaffold1369 | 204492                  | GG                              | TT                | 1946649671               |
| SNP_P3_151944_205531 | NW_004516592.1 | Scaffold1369 | 205531                  | CC                              | TT                | 1946649673               |
| SNP_P3_151945_205541 | NW_004516592.1 | Scaffold1369 | 205541                  | CC                              | TT                | 1946649675               |
| SNP_P3_151946_205598 | NW_004516592.1 | Scaffold1369 | 205598                  | CC                              | TT                | 1946649677               |
| SNP_P3_151947_210259 | NW_004516592.1 | Scaffold1369 | 210259                  | AA                              | GG                | 1946649679               |
| SNP_P3_151948_211148 | NW_004516592.1 | Scaffold1369 | 211148                  | TT                              | AA                | 1946649681               |
| SNP_P3_151949_215462 | NW_004516592.1 | Scaffold1369 | 215462                  | TT                              | GG                | 1946649683               |
| SNP_P3_151950_215463 | NW_004516592.1 | Scaffold1369 | 215463                  | CC                              | TT                | 1946649685               |
| SNP_P3_151951_215532 | NW_004516592.1 | Scaffold1369 | 215532                  | TT                              | CC                | 1946649687               |
| SNP_P3_151952_215837 | NW_004516592.1 | Scaffold1369 | 215837                  | TT                              | GG                | 1946649690               |
| SNP_P3_151953_15734  | NW_004516593.1 | Scaffold1370 | 15734                   | GG                              | AA                | 1946649692               |

| SNPs IDs            | Chromosome IDs | Chromosomes  | Physical positions (bp) | CDC Frontier (Reference genome) | (Pusa 256 & HPNB) | NCBI SNPdb Accession IDs |
|---------------------|----------------|--------------|-------------------------|---------------------------------|-------------------|--------------------------|
| SNP_P3_151954_22870 | NW_004516593.1 | Scaffold1370 | 22870                   | AA                              | GG                | 1946649694               |
| SNP_P3_151955_27588 | NW_004516593.1 | Scaffold1370 | 27588                   | GG                              | AA                | 1946649696               |
| SNP_P3_151956_27669 | NW_004516593.1 | Scaffold1370 | 27669                   | AA                              | GG                | 1946649698               |
| SNP_P3_151957_27721 | NW_004516593.1 | Scaffold1370 | 27721                   | AA                              | GG                | 1946649700               |
| SNP_P3_151958_27753 | NW_004516593.1 | Scaffold1370 | 27753                   | AA                              | GG                | 1946649702               |
| SNP_P3_151959_27764 | NW_004516593.1 | Scaffold1370 | 27764                   | TT                              | CC                | 1946649703               |
| SNP_P3_151960_27871 | NW_004516593.1 | Scaffold1370 | 27871                   | TT                              | CC                | 1946649705               |
| SNP_P3_151961_27890 | NW_004516593.1 | Scaffold1370 | 27890                   | TT                              | GG                | 1946649707               |
| SNP_P3_151962_27894 | NW_004516593.1 | Scaffold1370 | 27894                   | AA                              | GG                | 1946649709               |
| SNP_P3_151963_27901 | NW_004516593.1 | Scaffold1370 | 27901                   | AA                              | GG                | 1946649711               |
| SNP_P3_151964_27935 | NW_004516593.1 | Scaffold1370 | 27935                   | GG                              | TT                | 1946649713               |
| SNP_P3_151965_27936 | NW_004516593.1 | Scaffold1370 | 27936                   | CC                              | TT                | 1946649715               |
| SNP_P3_151966_27946 | NW_004516593.1 | Scaffold1370 | 27946                   | AA                              | GG                | 1946649717               |
| SNP_P3_151967_27961 | NW_004516593.1 | Scaffold1370 | 27961                   | CC                              | TT                | 1946649719               |
| SNP_P3_151968_27997 | NW_004516593.1 | Scaffold1370 | 27997                   | GG                              | AA                | 1946649721               |
| SNP_P3_151969_28040 | NW_004516593.1 | Scaffold1370 | 28040                   | TT                              | CC                | 1946649723               |
| SNP_P3_151970_39244 | NW_004516593.1 | Scaffold1370 | 39244                   | AA                              | GG                | 1946649724               |
| SNP_P3_151972_83699 | NW_004516593.1 | Scaffold1370 | 83699                   | AA                              | CC                | 1946649726               |
| SNP_P3_151973_83780 | NW_004516593.1 | Scaffold1370 | 83780                   | CC                              | TT                | 1946649729               |
| SNP_P3_151974_83984 | NW_004516593.1 | Scaffold1370 | 83984                   | TT                              | CC                | 1946649731               |
| SNP_P3_151975_84000 | NW_004516593.1 | Scaffold1370 | 84000                   | CC                              | TT                | 1946649733               |
| SNP_P3_151976_84057 | NW_004516593.1 | Scaffold1370 | 84057                   | AA                              | CC                | 1946649735               |
| SNP_P3_151977_86070 | NW_004516593.1 | Scaffold1370 | 86070                   | AA                              | CC                | 1946649737               |
| SNP_P3_151978_86394 | NW_004516593.1 | Scaffold1370 | 86394                   | CC                              | GG                | 1946649739               |
| SNP_P3_151979_86437 | NW_004516593.1 | Scaffold1370 | 86437                   | GG                              | AA                | 1946649741               |
| SNP_P3_151980_7540  | NW_004516594.1 | Scaffold1371 | 7540                    | TT                              | CC                | 1946649743               |
| SNP_P3_151981_24787 | NW_004516594.1 | Scaffold1371 | 24787                   | TT                              | GG                | 1946649745               |
| SNP_P3_151982_26768 | NW_004516594.1 | Scaffold1371 | 26768                   | AA                              | CC                | 1946649747               |
| SNP_P3_151983_27121 | NW_004516594.1 | Scaffold1371 | 27121                   | TT                              | GG                | 1946649749               |
| SNP_P3_151984_27162 | NW_004516594.1 | Scaffold1371 | 27162                   | AA                              | GG                | 1946649751               |
| SNP_P3_151985_27163 | NW_004516594.1 | Scaffold1371 | 27163                   | AA                              | CC                | 1946649753               |
| SNP_P3_151986_27294 | NW_004516594.1 | Scaffold1371 | 27294                   | AA                              | TT                | 1946649755               |
| SNP_P3_151987_27363 | NW_004516594.1 | Scaffold1371 | 27363                   | GG                              | AA                | 1946649757               |
| SNP_P3_151988_27414 | NW_004516594.1 | Scaffold1371 | 27414                   | TT                              | CC                | 1946649759               |
| SNP_P3_151989_27418 | NW_004516594.1 | Scaffold1371 | 27418                   | AA                              | GG                | 1946649761               |
| SNP_P3_151990_27423 | NW_004516594.1 | Scaffold1371 | 27423                   | CC                              | TT                | 1946649763               |
| SNP_P3_151991_27526 | NW_004516594.1 | Scaffold1371 | 27526                   | TT                              | CC                | 1946649765               |
| SNP_P3_151992_27548 | NW_004516594.1 | Scaffold1371 | 27548                   | GG                              | AA                | 1946649767               |
| SNP_P3_151993_27667 | NW_004516594.1 | Scaffold1371 | 27667                   | TT                              | CC                | 1946649770               |
| SNP_P3_151994_27677 | NW_004516594.1 | Scaffold1371 | 27677                   | GG                              | AA                | 1946649772               |
| SNP_P3_151995_44584 | NW_004516594.1 | Scaffold1371 | 44584                   | CC                              | TT                | 1946649774               |
| SNP_P3_151996_44593 | NW_004516594.1 | Scaffold1371 | 44593                   | TT                              | CC                | 1946649776               |

| SNPs IDs             | Chromosome IDs | Chromosomes  | Physical positions (bp) | CDC Frontier (Reference genome) | (Pusa 256 & HPNB) | NCBI SNPdb Accession IDs |
|----------------------|----------------|--------------|-------------------------|---------------------------------|-------------------|--------------------------|
| SNP_P3_151997_44629  | NW_004516594.1 | Scaffold1371 | 44629                   | GG                              | AA                | 1946649778               |
| SNP_P3_151998_44796  | NW_004516594.1 | Scaffold1371 | 44796                   | AA                              | GG                | 1946649780               |
| SNP_P3_151999_45739  | NW_004516594.1 | Scaffold1371 | 45739                   | AA                              | TT                | 1946649781               |
| SNP_P3_152000_45742  | NW_004516594.1 | Scaffold1371 | 45742                   | AA                              | TT                | 1946649783               |
| SNP_P3_152001_45744  | NW_004516594.1 | Scaffold1371 | 45744                   | AA                              | GG                | 1946649785               |
| SNP_P3_152003_65046  | NW_004516594.1 | Scaffold1371 | 65046                   | TT                              | CC                | 1946649787               |
| SNP_P3_152004_65047  | NW_004516594.1 | Scaffold1371 | 65047                   | TT                              | CC                | 1946649789               |
| SNP_P3_152005_65095  | NW_004516594.1 | Scaffold1371 | 65095                   | AA                              | GG                | 1946649791               |
| SNP_P3_152006_65139  | NW_004516594.1 | Scaffold1371 | 65139                   | AA                              | TT                | 1946649793               |
| SNP_P3_152007_65148  | NW_004516594.1 | Scaffold1371 | 65148                   | AA                              | GG                | 1946649795               |
| SNP_P3_152008_65152  | NW_004516594.1 | Scaffold1371 | 65152                   | AA                              | GG                | 1946649797               |
| SNP_P3_152009_65174  | NW_004516594.1 | Scaffold1371 | 65174                   | GG                              | TT                | 1946649799               |
| SNP_P3_152010_65181  | NW_004516594.1 | Scaffold1371 | 65181                   | TT                              | CC                | 1946649801               |
| SNP_P3_152011_65187  | NW_004516594.1 | Scaffold1371 | 65187                   | TT                              | CC                | 1946649804               |
| SNP_P3_152012_65206  | NW_004516594.1 | Scaffold1371 | 65206                   | CC                              | GG                | 1946649807               |
| SNP_P3_152013_65212  | NW_004516594.1 | Scaffold1371 | 65212                   | AA                              | GG                | 1946649809               |
| SNP_P3_152014_65257  | NW_004516594.1 | Scaffold1371 | 65257                   | AA                              | GG                | 1946649811               |
| SNP_P3_152015_66479  | NW_004516594.1 | Scaffold1371 | 66479                   | AA                              | GG                | 1946649813               |
| SNP_P3_152016_66609  | NW_004516594.1 | Scaffold1371 | 66609                   | AA                              | GG                | 1946649815               |
| SNP_P3_152017_66637  | NW_004516594.1 | Scaffold1371 | 66637                   | AA                              | GG                | 1946649817               |
| SNP_P3_152018_66817  | NW_004516594.1 | Scaffold1371 | 66817                   | AA                              | GG                | 1946649819               |
| SNP_P3_152019_69749  | NW_004516594.1 | Scaffold1371 | 69749                   | CC                              | AA                | 1946649821               |
| SNP_P3_152020_72565  | NW_004516594.1 | Scaffold1371 | 72565                   | TT                              | GG                | 1946649823               |
| SNP_P3_152022_112542 | NW_004516594.1 | Scaffold1371 | 112542                  | AA                              | GG                | 1946649825               |
| SNP_P3_152023_4930   | NW_004516595.1 | Scaffold1372 | 4930                    | GG                              | AA                | 1946649827               |
| SNP_P3_152024_4615   | NW_004516596.1 | Scaffold1373 | 4615                    | TT                              | GG                | 1946649829               |
| SNP_P3_152025_4626   | NW_004516596.1 | Scaffold1373 | 4626                    | AA                              | CC                | 1946649830               |
| SNP_P3_152026_4778   | NW_004516596.1 | Scaffold1373 | 4778                    | GG                              | TT                | 1946649832               |
| SNP_P3_152027_5164   | NW_004516596.1 | Scaffold1373 | 5164                    | CC                              | TT                | 1946649834               |
| SNP_P3_152028_989    | NW_004516597.1 | Scaffold1376 | 989                     | AA                              | GG                | 1946649836               |
| SNP_P3_152029_1395   | NW_004516597.1 | Scaffold1376 | 1395                    | CC                              | TT                | 1946649838               |
| SNP_P3_152030_1516   | NW_004516597.1 | Scaffold1376 | 1516                    | TT                              | CC                | 1946649840               |
| SNP_P3_152031_21815  | NW_004516597.1 | Scaffold1376 | 21815                   | AA                              | GG                | 1946649842               |
| SNP_P3_152032_21816  | NW_004516597.1 | Scaffold1376 | 21816                   | AA                              | CC                | 1946649844               |
| SNP_P3_152033_21839  | NW_004516597.1 | Scaffold1376 | 21839                   | AA                              | GG                | 1946649846               |
| SNP_P3_152034_21854  | NW_004516597.1 | Scaffold1376 | 21854                   | GG                              | AA                | 1946649848               |
| SNP_P3_152035_21859  | NW_004516597.1 | Scaffold1376 | 21859                   | TT                              | CC                | 1946649850               |
| SNP_P3_152036_21877  | NW_004516597.1 | Scaffold1376 | 21877                   | TT                              | CC                | 1946649852               |
| SNP_P3_152037_21943  | NW_004516597.1 | Scaffold1376 | 21943                   | TT                              | CC                | 1946649854               |
| SNP_P3_152038_22232  | NW_004516597.1 | Scaffold1376 | 22232                   | GG                              | AA                | 1946649856               |
| SNP_P3_152039_22235  | NW_004516597.1 | Scaffold1376 | 22235                   | AA                              | GG                | 1946649858               |
| SNP_P3_152040_22250  | NW_004516597.1 | Scaffold1376 | 22250                   | AA                              | GG                | 1946649860               |



| SNPs IDs            | Chromosome IDs | Chromosomes  | Physical positions (bp) | CDC Frontier (Reference genome) | (Pusa 256 & HPNB) | NCBI SNPdb Accession IDs |
|---------------------|----------------|--------------|-------------------------|---------------------------------|-------------------|--------------------------|
| SNP_P3_152041_22262 | NW_004516597.1 | Scaffold1376 | 22262                   | TT                              | CC                | 1946649863               |
| SNP_P3_152042_22268 | NW_004516597.1 | Scaffold1376 | 22268                   | GG                              | AA                | 1946649865               |
| SNP_P3_152043_22269 | NW_004516597.1 | Scaffold1376 | 22269                   | TT                              | AA                | 1946649867               |
| SNP_P3_152044_22273 | NW_004516597.1 | Scaffold1376 | 22273                   | AA                              | GG                | 1946649868               |
| SNP_P3_152045_22901 | NW_004516597.1 | Scaffold1376 | 22901                   | CC                              | TT                | 1946649870               |
| SNP_P3_152046_39251 | NW_004516597.1 | Scaffold1376 | 39251                   | CC                              | AA                | 1946649872               |
| SNP_P3_152047_54150 | NW_004516597.1 | Scaffold1376 | 54150                   | CC                              | AA                | 1946649889               |
| SNP_P3_152048_54155 | NW_004516597.1 | Scaffold1376 | 54155                   | GG                              | TT                | 1946649891               |
| SNP_P3_152049_54222 | NW_004516597.1 | Scaffold1376 | 54222                   | AA                              | GG                | 1946649893               |
| SNP_P3_152050_54252 | NW_004516597.1 | Scaffold1376 | 54252                   | TT                              | CC                | 1946649895               |
| SNP_P3_152051_57757 | NW_004516597.1 | Scaffold1376 | 57757                   | CC                              | TT                | 1946649897               |
| SNP_P3_152052_57761 | NW_004516597.1 | Scaffold1376 | 57761                   | AA                              | TT                | 1946649899               |
| SNP_P3_152053_57762 | NW_004516597.1 | Scaffold1376 | 57762                   | AA                              | GG                | 1946649901               |
| SNP_P3_152054_57796 | NW_004516597.1 | Scaffold1376 | 57796                   | TT                              | CC                | 1946649903               |
| SNP_P3_152055_57803 | NW_004516597.1 | Scaffold1376 | 57803                   | TT                              | CC                | 1946649905               |
| SNP_P3_152056_57806 | NW_004516597.1 | Scaffold1376 | 57806                   | GG                              | AA                | 1946649907               |
| SNP_P3_152057_57809 | NW_004516597.1 | Scaffold1376 | 57809                   | AA                              | CC                | 1946649909               |
| SNP_P3_152058_57819 | NW_004516597.1 | Scaffold1376 | 57819                   | AA                              | GG                | 1946649911               |
| SNP_P3_152059_57835 | NW_004516597.1 | Scaffold1376 | 57835                   | AA                              | GG                | 1946649914               |
| SNP_P3_152060_57839 | NW_004516597.1 | Scaffold1376 | 57839                   | AA                              | GG                | 1946649916               |
| SNP_P3_152061_57845 | NW_004516597.1 | Scaffold1376 | 57845                   | TT                              | AA                | 1946649918               |
| SNP_P3_152062_57853 | NW_004516597.1 | Scaffold1376 | 57853                   | AA                              | GG                | 1946649920               |
| SNP_P3_152063_57870 | NW_004516597.1 | Scaffold1376 | 57870                   | TT                              | CC                | 1946649922               |
| SNP_P3_152064_57872 | NW_004516597.1 | Scaffold1376 | 57872                   | GG                              | AA                | 1946649924               |
| SNP_P3_152065_57884 | NW_004516597.1 | Scaffold1376 | 57884                   | TT                              | GG                | 1946649926               |
| SNP_P3_152066_57889 | NW_004516597.1 | Scaffold1376 | 57889                   | CC                              | AA                | 1946649928               |
| SNP_P3_152067_57905 | NW_004516597.1 | Scaffold1376 | 57905                   | TT                              | CC                | 1946649930               |
| SNP_P3_152068_57929 | NW_004516597.1 | Scaffold1376 | 57929                   | CC                              | TT                | 1946649932               |
| SNP_P3_152069_57971 | NW_004516597.1 | Scaffold1376 | 57971                   | TT                              | CC                | 1946649934               |
| SNP_P3_152070_57996 | NW_004516597.1 | Scaffold1376 | 57996                   | CC                              | TT                | 1946649936               |
| SNP_P3_152071_58001 | NW_004516597.1 | Scaffold1376 | 58001                   | CC                              | TT                | 1946649938               |
| SNP_P3_152072_58004 | NW_004516597.1 | Scaffold1376 | 58004                   | CC                              | TT                | 1946649940               |
| SNP_P3_152073_58009 | NW_004516597.1 | Scaffold1376 | 58009                   | GG                              | AA                | 1946649942               |
| SNP_P3_152074_58034 | NW_004516597.1 | Scaffold1376 | 58034                   | AA                              | GG                | 1946649944               |
| SNP_P3_152075_58161 | NW_004516597.1 | Scaffold1376 | 58161                   | GG                              | AA                | 1946649945               |
| SNP_P3_152076_58266 | NW_004516597.1 | Scaffold1376 | 58266                   | TT                              | AA                | 1946649947               |
| SNP_P3_152077_58345 | NW_004516597.1 | Scaffold1376 | 58345                   | GG                              | AA                | 1946649949               |
| SNP_P3_152078_58371 | NW_004516597.1 | Scaffold1376 | 58371                   | CC                              | AA                | 1946649951               |
| SNP_P3_152079_58383 | NW_004516597.1 | Scaffold1376 | 58383                   | AA                              | GG                | 1946649954               |
| SNP_P3_152080_58403 | NW_004516597.1 | Scaffold1376 | 58403                   | TT                              | CC                | 1946649956               |
| SNP_P3_152081_66106 | NW_004516597.1 | Scaffold1376 | 66106                   | CC                              | AA                | 1946649958               |
| SNP_P3_152082_66112 | NW_004516597.1 | Scaffold1376 | 66112                   | AA                              | GG                | 1946649960               |

| SNPs IDs            | Chromosome IDs | Chromosomes  | Physical positions (bp) | CDC Frontier (Reference genome) | (Pusa 256 & HPNB) | NCBI SNPdb Accession IDs |
|---------------------|----------------|--------------|-------------------------|---------------------------------|-------------------|--------------------------|
| SNP_P3_152083_66144 | NW_004516597.1 | Scaffold1376 | 66144                   | GG                              | AA                | 1946649962               |
| SNP_P3_152084_66175 | NW_004516597.1 | Scaffold1376 | 66175                   | CC                              | TT                | 1946649963               |
| SNP_P3_152085_66227 | NW_004516597.1 | Scaffold1376 | 66227                   | AA                              | GG                | 1946649965               |
| SNP_P3_152086_66273 | NW_004516597.1 | Scaffold1376 | 66273                   | GG                              | AA                | 1946649967               |
| SNP_P3_152087_66274 | NW_004516597.1 | Scaffold1376 | 66274                   | AA                              | GG                | 1946649969               |
| SNP_P3_152088_66292 | NW_004516597.1 | Scaffold1376 | 66292                   | TT                              | CC                | 1946649971               |
| SNP_P3_152089_66316 | NW_004516597.1 | Scaffold1376 | 66316                   | AA                              | GG                | 1946649973               |
| SNP_P3_152090_66466 | NW_004516597.1 | Scaffold1376 | 66466                   | CC                              | TT                | 1946649975               |
| SNP_P3_152091_66493 | NW_004516597.1 | Scaffold1376 | 66493                   | AA                              | GG                | 1946649977               |
| SNP_P3_152092_66628 | NW_004516597.1 | Scaffold1376 | 66628                   | CC                              | TT                | 1946649979               |
| SNP_P3_152093_66655 | NW_004516597.1 | Scaffold1376 | 66655                   | TT                              | CC                | 1946649981               |
| SNP_P3_152095_69098 | NW_004516597.1 | Scaffold1376 | 69098                   | AA                              | TT                | 1946649983               |
| SNP_P3_152096_69130 | NW_004516597.1 | Scaffold1376 | 69130                   | CC                              | AA                | 1946649985               |
| SNP_P3_152097_69387 | NW_004516597.1 | Scaffold1376 | 69387                   | TT                              | CC                | 1946649987               |
| SNP_P3_152098_69409 | NW_004516597.1 | Scaffold1376 | 69409                   | GG                              | AA                | 1946649989               |
| SNP_P3_152099_69624 | NW_004516597.1 | Scaffold1376 | 69624                   | GG                              | AA                | 1946649991               |
| SNP_P3_152100_69648 | NW_004516597.1 | Scaffold1376 | 69648                   | CC                              | AA                | 1946649993               |
| SNP_P3_152101_1726  | NW_004516600.1 | Scaffold1380 | 1726                    | AA                              | GG                | 1946649995               |
| SNP_P3_152102_1828  | NW_004516600.1 | Scaffold1380 | 1828                    | GG                              | CC                | 1946649997               |
| SNP_P3_152103_2062  | NW_004516600.1 | Scaffold1380 | 2062                    | GG                              | TT                | 1946649999               |
| SNP_P3_152104_4527  | NW_004516600.1 | Scaffold1380 | 4527                    | GG                              | AA                | 1946650001               |
| SNP_P3_152105_4547  | NW_004516600.1 | Scaffold1380 | 4547                    | TT                              | CC                | 1946650003               |
| SNP_P3_152106_4555  | NW_004516600.1 | Scaffold1380 | 4555                    | GG                              | AA                | 1946650005               |
| SNP_P3_152107_4708  | NW_004516600.1 | Scaffold1380 | 4708                    | TT                              | AA                | 1946650007               |
| SNP_P3_152108_4786  | NW_004516600.1 | Scaffold1380 | 4786                    | TT                              | GG                | 1946650009               |
| SNP_P3_152110_5103  | NW_004516600.1 | Scaffold1380 | 5103                    | GG                              | AA                | 1946650011               |
| SNP_P3_152111_5425  | NW_004516600.1 | Scaffold1380 | 5425                    | TT                              | AA                | 1946650013               |
| SNP_P3_152113_6440  | NW_004516600.1 | Scaffold1380 | 6440                    | AA                              | CC                | 1946650015               |
| SNP_P3_152114_6505  | NW_004516600.1 | Scaffold1380 | 6505                    | TT                              | CC                | 1946650017               |
| SNP_P3_152115_7938  | NW_004516600.1 | Scaffold1380 | 7938                    | GG                              | AA                | 1946650019               |
| SNP_P3_152116_7950  | NW_004516600.1 | Scaffold1380 | 7950                    | AA                              | TT                | 1946650021               |
| SNP_P3_152117_7973  | NW_004516600.1 | Scaffold1380 | 7973                    | AA                              | TT                | 1946650023               |
| SNP_P3_152118_7977  | NW_004516600.1 | Scaffold1380 | 7977                    | AA                              | GG                | 1946650025               |
| SNP_P3_152119_8127  | NW_004516600.1 | Scaffold1380 | 8127                    | AA                              | CC                | 1946650027               |
| SNP_P3_152120_8337  | NW_004516600.1 | Scaffold1380 | 8337                    | AA                              | GG                | 1946650029               |
| SNP_P3_152121_8355  | NW_004516600.1 | Scaffold1380 | 8355                    | GG                              | AA                | 1946650031               |
| SNP_P3_152123_10083 | NW_004516600.1 | Scaffold1380 | 10083                   | TT                              | CC                | 1946650034               |
| SNP_P3_152124_10287 | NW_004516600.1 | Scaffold1380 | 10287                   | AA                              | GG                | 1946650036               |
| SNP_P3_152125_10353 | NW_004516600.1 | Scaffold1380 | 10353                   | GG                              | AA                | 1946650038               |
| SNP_P3_152126_10622 | NW_004516600.1 | Scaffold1380 | 10622                   | GG                              | CC                | 1946650040               |
| SNP_P3_152127_10723 | NW_004516600.1 | Scaffold1380 | 10723                   | GG                              | AA                | 1946650042               |
| SNP_P3_152128_10759 | NW_004516600.1 | Scaffold1380 | 10759                   | TT                              | GG                | 1946650044               |

| SNPs IDs             | Chromosome IDs | Chromosomes  | Physical positions (bp) | CDC Frontier (Reference genome) | (Pusa 256 & HPNB) | NCBI SNPdb Accession IDs |
|----------------------|----------------|--------------|-------------------------|---------------------------------|-------------------|--------------------------|
| SNP_P3_152129_11786  | NW_004516600.1 | Scaffold1380 | 11786                   | AA                              | GG                | 1946650046               |
| SNP_P3_152130_11866  | NW_004516600.1 | Scaffold1380 | 11866                   | AA                              | TT                | 1946650048               |
| SNP_P3_152131_12202  | NW_004516600.1 | Scaffold1380 | 12202                   | CC                              | TT                | 1946650050               |
| SNP_P3_152132_2850   | NW_004516601.1 | Scaffold1382 | 2850                    | TT                              | AA                | 1946650052               |
| SNP_P3_152133_4622   | NW_004516601.1 | Scaffold1382 | 4622                    | GG                              | AA                | 1946650054               |
| SNP_P3_152134_89034  | NW_004516601.1 | Scaffold1382 | 89034                   | CC                              | AA                | 1946650056               |
| SNP_P3_152135_94964  | NW_004516601.1 | Scaffold1382 | 94964                   | TT                              | CC                | 1946650058               |
| SNP_P3_152136_111392 | NW_004516601.1 | Scaffold1382 | 111392                  | TT                              | GG                | 1946650060               |
| SNP_P3_152137_122110 | NW_004516601.1 | Scaffold1382 | 122110                  | TT                              | CC                | 1946650062               |
| SNP_P3_152138_127287 | NW_004516601.1 | Scaffold1382 | 127287                  | GG                              | CC                | 1946650064               |
| SNP_P3_152139_127672 | NW_004516601.1 | Scaffold1382 | 127672                  | GG                              | TT                | 1946650066               |
| SNP_P3_152140_127673 | NW_004516601.1 | Scaffold1382 | 127673                  | CC                              | TT                | 1946650068               |
| SNP_P3_152141_127745 | NW_004516601.1 | Scaffold1382 | 127745                  | GG                              | TT                | 1946650070               |
| SNP_P3_152144_150627 | NW_004516601.1 | Scaffold1382 | 150627                  | TT                              | GG                | 1946650072               |
| SNP_P3_152145_161463 | NW_004516601.1 | Scaffold1382 | 161463                  | AA                              | CC                | 1946650073               |
| SNP_P3_152146_162502 | NW_004516601.1 | Scaffold1382 | 162502                  | CC                              | AA                | 1946650074               |
| SNP_P3_152147_162518 | NW_004516601.1 | Scaffold1382 | 162518                  | CC                              | TT                | 1946650075               |
| SNP_P3_152148_162893 | NW_004516601.1 | Scaffold1382 | 162893                  | AA                              | GG                | 1946650077               |
| SNP_P3_152149_162953 | NW_004516601.1 | Scaffold1382 | 162953                  | GG                              | AA                | 1946650080               |
| SNP_P3_152150_162958 | NW_004516601.1 | Scaffold1382 | 162958                  | CC                              | AA                | 1946650082               |
| SNP_P3_152151_163291 | NW_004516601.1 | Scaffold1382 | 163291                  | AA                              | GG                | 1946650085               |
| SNP_P3_152152_223197 | NW_004516601.1 | Scaffold1382 | 223197                  | TT                              | AA                | 1946650087               |
| SNP_P3_152153_223210 | NW_004516601.1 | Scaffold1382 | 223210                  | GG                              | CC                | 1946650089               |
| SNP_P3_152154_223413 | NW_004516601.1 | Scaffold1382 | 223413                  | TT                              | CC                | 1946650091               |
| SNP_P3_152155_223497 | NW_004516601.1 | Scaffold1382 | 223497                  | GG                              | AA                | 1946650093               |
| SNP_P3_152156_225493 | NW_004516601.1 | Scaffold1382 | 225493                  | TT                              | AA                | 1946650095               |
| SNP_P3_152157_225507 | NW_004516601.1 | Scaffold1382 | 225507                  | AA                              | CC                | 1946650097               |
| SNP_P3_152158_225516 | NW_004516601.1 | Scaffold1382 | 225516                  | GG                              | AA                | 1946650099               |
| SNP_P3_152159_225591 | NW_004516601.1 | Scaffold1382 | 225591                  | AA                              | GG                | 1946650101               |
| SNP_P3_152160_225629 | NW_004516601.1 | Scaffold1382 | 225629                  | AA                              | TT                | 1946650103               |
| SNP_P3_152161_225633 | NW_004516601.1 | Scaffold1382 | 225633                  | AA                              | GG                | 1946650106               |
| SNP_P3_152162_225691 | NW_004516601.1 | Scaffold1382 | 225691                  | TT                              | AA                | 1946650108               |
| SNP_P3_152163_225886 | NW_004516601.1 | Scaffold1382 | 225886                  | AA                              | GG                | 1946650110               |
| SNP_P3_152164_225949 | NW_004516601.1 | Scaffold1382 | 225949                  | GG                              | TT                | 1946650112               |
| SNP_P3_152165_225960 | NW_004516601.1 | Scaffold1382 | 225960                  | CC                              | GG                | 1946650114               |
| SNP_P3_152166_225971 | NW_004516601.1 | Scaffold1382 | 225971                  | CC                              | AA                | 1946650116               |
| SNP_P3_152167_226247 | NW_004516601.1 | Scaffold1382 | 226247                  | AA                              | GG                | 1946650118               |
| SNP_P3_152168_234112 | NW_004516601.1 | Scaffold1382 | 234112                  | TT                              | GG                | 1946650120               |
| SNP_P3_152169_234117 | NW_004516601.1 | Scaffold1382 | 234117                  | CC                              | TT                | 1946650122               |
| SNP_P3_152170_234151 | NW_004516601.1 | Scaffold1382 | 234151                  | TT                              | CC                | 1946650124               |
| SNP_P3_152171_234157 | NW_004516601.1 | Scaffold1382 | 234157                  | TT                              | AA                | 1946650126               |
| SNP_P3_152172_234168 | NW_004516601.1 | Scaffold1382 | 234168                  | CC                              | TT                | 1946650128               |

| SNPs IDs             | Chromosome IDs | Chromosomes  | Physical positions (bp) | CDC Frontier (Reference genome) | (Pusa 256 & HPNB) | NCBI SNPdb Accession IDs |
|----------------------|----------------|--------------|-------------------------|---------------------------------|-------------------|--------------------------|
| SNP_P3_152173_234176 | NW_004516601.1 | Scaffold1382 | 234176                  | AA                              | GG                | 1946650130               |
| SNP_P3_152174_234196 | NW_004516601.1 | Scaffold1382 | 234196                  | GG                              | AA                | 1946650132               |
| SNP_P3_152175_234207 | NW_004516601.1 | Scaffold1382 | 234207                  | GG                              | AA                | 1946650134               |
| SNP_P3_152176_238234 | NW_004516601.1 | Scaffold1382 | 238234                  | TT                              | AA                | 1946650136               |
| SNP_P3_152177_238629 | NW_004516601.1 | Scaffold1382 | 238629                  | AA                              | GG                | 1946650138               |
| SNP_P3_152178_254788 | NW_004516601.1 | Scaffold1382 | 254788                  | AA                              | GG                | 1946650140               |
| SNP_P3_152179_254799 | NW_004516601.1 | Scaffold1382 | 254799                  | TT                              | CC                | 1946650142               |
| SNP_P3_152180_254800 | NW_004516601.1 | Scaffold1382 | 254800                  | TT                              | CC                | 1946650145               |
| SNP_P3_152181_260562 | NW_004516601.1 | Scaffold1382 | 260562                  | AA                              | TT                | 1946650147               |
| SNP_P3_152182_260584 | NW_004516601.1 | Scaffold1382 | 260584                  | TT                              | AA                | 1946650149               |
| SNP_P3_152183_260972 | NW_004516601.1 | Scaffold1382 | 260972                  | GG                              | AA                | 1946650150               |
| SNP_P3_152185_267817 | NW_004516601.1 | Scaffold1382 | 267817                  | GG                              | TT                | 1946650152               |
| SNP_P3_152186_281777 | NW_004516601.1 | Scaffold1382 | 281777                  | TT                              | CC                | 1946650154               |
| SNP_P3_152187_281778 | NW_004516601.1 | Scaffold1382 | 281778                  | TT                              | CC                | 1946650156               |
| SNP_P3_152188_281791 | NW_004516601.1 | Scaffold1382 | 281791                  | TT                              | CC                | 1946650158               |
| SNP_P3_152189_281829 | NW_004516601.1 | Scaffold1382 | 281829                  | TT                              | CC                | 1946650160               |
| SNP_P3_152190_281851 | NW_004516601.1 | Scaffold1382 | 281851                  | CC                              | TT                | 1946650162               |
| SNP_P3_152191_281869 | NW_004516601.1 | Scaffold1382 | 281869                  | AA                              | CC                | 1946650164               |
| SNP_P3_152192_281913 | NW_004516601.1 | Scaffold1382 | 281913                  | CC                              | GG                | 1946650166               |
| SNP_P3_152193_281988 | NW_004516601.1 | Scaffold1382 | 281988                  | AA                              | GG                | 1946650168               |
| SNP_P3_152194_282090 | NW_004516601.1 | Scaffold1382 | 282090                  | TT                              | CC                | 1946650170               |
| SNP_P3_152195_282141 | NW_004516601.1 | Scaffold1382 | 282141                  | CC                              | TT                | 1946650172               |
| SNP_P3_152196_282164 | NW_004516601.1 | Scaffold1382 | 282164                  | CC                              | TT                | 1946650173               |
| SNP_P3_152197_284035 | NW_004516601.1 | Scaffold1382 | 284035                  | AA                              | GG                | 1946650175               |
| SNP_P3_152198_284058 | NW_004516601.1 | Scaffold1382 | 284058                  | TT                              | GG                | 1946650177               |
| SNP_P3_152199_290323 | NW_004516601.1 | Scaffold1382 | 290323                  | GG                              | CC                | 1946650179               |
| SNP_P3_152200_290325 | NW_004516601.1 | Scaffold1382 | 290325                  | AA                              | TT                | 1946650181               |
| SNP_P3_152201_290331 | NW_004516601.1 | Scaffold1382 | 290331                  | CC                              | TT                | 1946650183               |
| SNP_P3_152202_290332 | NW_004516601.1 | Scaffold1382 | 290332                  | TT                              | AA                | 1946650185               |
| SNP_P3_152203_290333 | NW_004516601.1 | Scaffold1382 | 290333                  | AA                              | TT                | 1946650187               |
| SNP_P3_152204_290336 | NW_004516601.1 | Scaffold1382 | 290336                  | GG                              | TT                | 1946650189               |
| SNP_P3_152205_290337 | NW_004516601.1 | Scaffold1382 | 290337                  | TT                              | CC                | 1946650191               |
| SNP_P3_152206_290342 | NW_004516601.1 | Scaffold1382 | 290342                  | TT                              | AA                | 1946650193               |
| SNP_P3_152207_290346 | NW_004516601.1 | Scaffold1382 | 290346                  | CC                              | AA                | 1946650195               |
| SNP_P3_152208_290365 | NW_004516601.1 | Scaffold1382 | 290365                  | CC                              | GG                | 1946650197               |
| SNP_P3_152209_290367 | NW_004516601.1 | Scaffold1382 | 290367                  | CC                              | TT                | 1946650199               |
| SNP_P3_152210_290368 | NW_004516601.1 | Scaffold1382 | 290368                  | CC                              | GG                | 1946650201               |
| SNP_P3_152211_292107 | NW_004516601.1 | Scaffold1382 | 292107                  | AA                              | CC                | 1946650203               |
| SNP_P3_152212_292264 | NW_004516601.1 | Scaffold1382 | 292264                  | TT                              | CC                | 1946650205               |
| SNP_P3_152213_292483 | NW_004516601.1 | Scaffold1382 | 292483                  | AA                              | CC                | 1946650207               |
| SNP_P3_152214_292601 | NW_004516601.1 | Scaffold1382 | 292601                  | TT                              | AA                | 1946650209               |
| SNP_P3_152215_292654 | NW_004516601.1 | Scaffold1382 | 292654                  | CC                              | AA                | 1946650211               |

| SNPs IDs             | Chromosome IDs | Chromosomes  | Physical positions (bp) | CDC Frontier (Reference genome) | (Pusa 256 & HPNB) | NCBI SNPdb Accession IDs |
|----------------------|----------------|--------------|-------------------------|---------------------------------|-------------------|--------------------------|
| SNP_P3_152216_292711 | NW_004516601.1 | Scaffold1382 | 292711                  | GG                              | AA                | 1946650213               |
| SNP_P3_152217_292734 | NW_004516601.1 | Scaffold1382 | 292734                  | GG                              | TT                | 1946650215               |
| SNP_P3_152218_292807 | NW_004516601.1 | Scaffold1382 | 292807                  | CC                              | AA                | 1946650217               |
| SNP_P3_152219_292890 | NW_004516601.1 | Scaffold1382 | 292890                  | GG                              | AA                | 1946650220               |
| SNP_P3_152220_292945 | NW_004516601.1 | Scaffold1382 | 292945                  | CC                              | TT                | 1946650222               |
| SNP_P3_152221_293589 | NW_004516601.1 | Scaffold1382 | 293589                  | AA                              | CC                | 1946650224               |
| SNP_P3_152222_293591 | NW_004516601.1 | Scaffold1382 | 293591                  | CC                              | GG                | 1946650226               |
| SNP_P3_152223_293592 | NW_004516601.1 | Scaffold1382 | 293592                  | CC                              | AA                | 1946650228               |
| SNP_P3_152224_293801 | NW_004516601.1 | Scaffold1382 | 293801                  | GG                              | AA                | 1946650230               |
| SNP_P3_152225_293945 | NW_004516601.1 | Scaffold1382 | 293945                  | TT                              | AA                | 1946650232               |
| SNP_P3_152226_293960 | NW_004516601.1 | Scaffold1382 | 293960                  | TT                              | AA                | 1946650234               |
| SNP_P3_152227_294026 | NW_004516601.1 | Scaffold1382 | 294026                  | TT                              | AA                | 1946650236               |
| SNP_P3_152228_294041 | NW_004516601.1 | Scaffold1382 | 294041                  | CC                              | TT                | 1946650238               |
| SNP_P3_152229_294043 | NW_004516601.1 | Scaffold1382 | 294043                  | CC                              | GG                | 1946650240               |
| SNP_P3_152230_294046 | NW_004516601.1 | Scaffold1382 | 294046                  | AA                              | TT                | 1946650242               |
| SNP_P3_152231_294052 | NW_004516601.1 | Scaffold1382 | 294052                  | CC                              | TT                | 1946650244               |
| SNP_P3_152232_294074 | NW_004516601.1 | Scaffold1382 | 294074                  | TT                              | CC                | 1946650246               |
| SNP_P3_152233_294103 | NW_004516601.1 | Scaffold1382 | 294103                  | CC                              | TT                | 1946650248               |
| SNP_P3_152234_294110 | NW_004516601.1 | Scaffold1382 | 294110                  | CC                              | AA                | 1946650250               |
| SNP_P3_152235_294170 | NW_004516601.1 | Scaffold1382 | 294170                  | CC                              | TT                | 1946650252               |
| SNP_P3_152236_294189 | NW_004516601.1 | Scaffold1382 | 294189                  | TT                              | AA                | 1946650254               |
| SNP_P3_152237_294228 | NW_004516601.1 | Scaffold1382 | 294228                  | AA                              | GG                | 1946650257               |
| SNP_P3_152238_294264 | NW_004516601.1 | Scaffold1382 | 294264                  | TT                              | GG                | 1946650259               |
| SNP_P3_152239_294309 | NW_004516601.1 | Scaffold1382 | 294309                  | GG                              | TT                | 1946650261               |
| SNP_P3_152241_295256 | NW_004516601.1 | Scaffold1382 | 295256                  | TT                              | AA                | 1946650263               |
| SNP_P3_152242_295348 | NW_004516601.1 | Scaffold1382 | 295348                  | AA                              | CC                | 1946650265               |
| SNP_P3_152243_295406 | NW_004516601.1 | Scaffold1382 | 295406                  | CC                              | GG                | 1946650267               |
| SNP_P3_152244_295415 | NW_004516601.1 | Scaffold1382 | 295415                  | CC                              | GG                | 1946650269               |
| SNP_P3_152245_295424 | NW_004516601.1 | Scaffold1382 | 295424                  | GG                              | AA                | 1946650271               |
| SNP_P3_152246_295455 | NW_004516601.1 | Scaffold1382 | 295455                  | GG                              | TT                | 1946650273               |
| SNP_P3_152247_295504 | NW_004516601.1 | Scaffold1382 | 295504                  | GG                              | CC                | 1946650275               |
| SNP_P3_152248_295505 | NW_004516601.1 | Scaffold1382 | 295505                  | AA                              | GG                | 1946650277               |
| SNP_P3_152249_295562 | NW_004516601.1 | Scaffold1382 | 295562                  | TT                              | GG                | 1946650279               |
| SNP_P3_152250_295693 | NW_004516601.1 | Scaffold1382 | 295693                  | AA                              | GG                | 1946650281               |
| SNP_P3_152251_295849 | NW_004516601.1 | Scaffold1382 | 295849                  | TT                              | CC                | 1946650283               |
| SNP_P3_152253_295887 | NW_004516601.1 | Scaffold1382 | 295887                  | CC                              | GG                | 1946650285               |
| SNP_P3_152254_296051 | NW_004516601.1 | Scaffold1382 | 296051                  | GG                              | CC                | 1946650287               |
| SNP_P3_152255_296079 | NW_004516601.1 | Scaffold1382 | 296079                  | AA                              | TT                | 1946650289               |
| SNP_P3_152256_296156 | NW_004516601.1 | Scaffold1382 | 296156                  | CC                              | TT                | 1946650291               |
| SNP_P3_152257_296177 | NW_004516601.1 | Scaffold1382 | 296177                  | AA                              | TT                | 1946650293               |
| SNP_P3_152258_296248 | NW_004516601.1 | Scaffold1382 | 296248                  | AA                              | TT                | 1946650296               |
| SNP_P3_152259_296252 | NW_004516601.1 | Scaffold1382 | 296252                  | AA                              | TT                | 1946650298               |

| SNPs IDs             | Chromosome IDs | Chromosomes  | Physical positions (bp) | CDC Frontier (Reference genome) | (Pusa 256 & HPNB) | NCBI SNPdb Accession IDs |
|----------------------|----------------|--------------|-------------------------|---------------------------------|-------------------|--------------------------|
| SNP_P3_152260_296377 | NW_004516601.1 | Scaffold1382 | 296377                  | CC                              | GG                | 1946650300               |
| SNP_P3_152261_296436 | NW_004516601.1 | Scaffold1382 | 296436                  | CC                              | TT                | 1946650302               |
| SNP_P3_152262_296439 | NW_004516601.1 | Scaffold1382 | 296439                  | CC                              | GG                | 1946650304               |
| SNP_P3_152263_296496 | NW_004516601.1 | Scaffold1382 | 296496                  | TT                              | CC                | 1946650306               |
| SNP_P3_152264_296497 | NW_004516601.1 | Scaffold1382 | 296497                  | GG                              | TT                | 1946650308               |
| SNP_P3_152265_296503 | NW_004516601.1 | Scaffold1382 | 296503                  | GG                              | AA                | 1946650310               |
| SNP_P3_152267_296544 | NW_004516601.1 | Scaffold1382 | 296544                  | TT                              | CC                | 1946650312               |
| SNP_P3_152268_296583 | NW_004516601.1 | Scaffold1382 | 296583                  | TT                              | CC                | 1946650314               |
| SNP_P3_152269_296722 | NW_004516601.1 | Scaffold1382 | 296722                  | CC                              | GG                | 1946650316               |
| SNP_P3_152270_296728 | NW_004516601.1 | Scaffold1382 | 296728                  | TT                              | AA                | 1946650318               |
| SNP_P3_152271_296735 | NW_004516601.1 | Scaffold1382 | 296735                  | TT                              | CC                | 1946650320               |
| SNP_P3_152272_296763 | NW_004516601.1 | Scaffold1382 | 296763                  | AA                              | GG                | 1946650322               |
| SNP_P3_152273_296900 | NW_004516601.1 | Scaffold1382 | 296900                  | TT                              | CC                | 1946650324               |
| SNP_P3_152274_296910 | NW_004516601.1 | Scaffold1382 | 296910                  | GG                              | TT                | 1946650326               |
| SNP_P3_152275_299674 | NW_004516601.1 | Scaffold1382 | 299674                  | AA                              | TT                | 1946650328               |
| SNP_P3_152276_305752 | NW_004516601.1 | Scaffold1382 | 305752                  | CC                              | AA                | 1946650330               |
| SNP_P3_152277_317598 | NW_004516601.1 | Scaffold1382 | 317598                  | TT                              | CC                | 1946650332               |
| SNP_P3_152278_317602 | NW_004516601.1 | Scaffold1382 | 317602                  | TT                              | GG                | 1946650335               |
| SNP_P3_152279_332544 | NW_004516601.1 | Scaffold1382 | 332544                  | GG                              | TT                | 1946650337               |
| SNP_P3_152280_332960 | NW_004516601.1 | Scaffold1382 | 332960                  | CC                              | TT                | 1946650339               |
| SNP_P3_152281_339063 | NW_004516601.1 | Scaffold1382 | 339063                  | TT                              | AA                | 1946650341               |
| SNP_P3_152282_339067 | NW_004516601.1 | Scaffold1382 | 339067                  | GG                              | TT                | 1946650343               |
| SNP_P3_152283_339369 | NW_004516601.1 | Scaffold1382 | 339369                  | TT                              | GG                | 1946650345               |
| SNP_P3_152284_339472 | NW_004516601.1 | Scaffold1382 | 339472                  | AA                              | CC                | 1946650347               |
| SNP_P3_152285_343655 | NW_004516601.1 | Scaffold1382 | 343655                  | AA                              | GG                | 1946650349               |
| SNP_P3_152286_344402 | NW_004516601.1 | Scaffold1382 | 344402                  | GG                              | TT                | 1946650351               |
| SNP_P3_152287_344405 | NW_004516601.1 | Scaffold1382 | 344405                  | TT                              | CC                | 1946650353               |
| SNP_P3_152288_344408 | NW_004516601.1 | Scaffold1382 | 344408                  | TT                              | AA                | 1946650355               |
| SNP_P3_152289_354520 | NW_004516601.1 | Scaffold1382 | 354520                  | TT                              | AA                | 1946650357               |
| SNP_P3_152290_354529 | NW_004516601.1 | Scaffold1382 | 354529                  | AA                              | CC                | 1946650359               |
| SNP_P3_152291_354531 | NW_004516601.1 | Scaffold1382 | 354531                  | AA                              | TT                | 1946650361               |
| SNP_P3_152292_360513 | NW_004516601.1 | Scaffold1382 | 360513                  | CC                              | TT                | 1946650363               |
| SNP_P3_152293_365622 | NW_004516601.1 | Scaffold1382 | 365622                  | TT                              | CC                | 1946650365               |
| SNP_P3_152294_365631 | NW_004516601.1 | Scaffold1382 | 365631                  | GG                              | AA                | 1946650367               |
| SNP_P3_152295_365638 | NW_004516601.1 | Scaffold1382 | 365638                  | AA                              | TT                | 1946650369               |
| SNP_P3_152296_365649 | NW_004516601.1 | Scaffold1382 | 365649                  | TT                              | CC                | 1946650371               |
| SNP_P3_152297_366878 | NW_004516601.1 | Scaffold1382 | 366878                  | TT                              | GG                | 1946650373               |
| SNP_P3_152298_369193 | NW_004516601.1 | Scaffold1382 | 369193                  | CC                              | TT                | 1946650376               |
| SNP_P3_152299_370226 | NW_004516601.1 | Scaffold1382 | 370226                  | CC                              | AA                | 1946650378               |
| SNP_P3_152300_370303 | NW_004516601.1 | Scaffold1382 | 370303                  | TT                              | AA                | 1946650380               |
| SNP_P3_152301_373691 | NW_004516601.1 | Scaffold1382 | 373691                  | GG                              | AA                | 1946650383               |
| SNP_P3_152302_373742 | NW_004516601.1 | Scaffold1382 | 373742                  | AA                              | CC                | 1946650385               |

| SNPs IDs             | Chromosome IDs | Chromosomes  | Physical positions (bp) | CDC Frontier (Reference genome) | (Pusa 256 & HPNB) | NCBI SNPdb Accession IDs |
|----------------------|----------------|--------------|-------------------------|---------------------------------|-------------------|--------------------------|
| SNP_P3_152303_373792 | NW_004516601.1 | Scaffold1382 | 373792                  | TT                              | AA                | 1946650387               |
| SNP_P3_152304_373990 | NW_004516601.1 | Scaffold1382 | 373990                  | GG                              | TT                | 1946650389               |
| SNP_P3_152305_374143 | NW_004516601.1 | Scaffold1382 | 374143                  | TT                              | CC                | 1946650391               |
| SNP_P3_152306_374167 | NW_004516601.1 | Scaffold1382 | 374167                  | GG                              | AA                | 1946650393               |
| SNP_P3_152307_375596 | NW_004516601.1 | Scaffold1382 | 375596                  | AA                              | CC                | 1946650395               |
| SNP_P3_152308_377235 | NW_004516601.1 | Scaffold1382 | 377235                  | GG                              | TT                | 1946650397               |
| SNP_P3_152309_390654 | NW_004516601.1 | Scaffold1382 | 390654                  | AA                              | TT                | 1946650399               |
| SNP_P3_152310_390658 | NW_004516601.1 | Scaffold1382 | 390658                  | CC                              | TT                | 1946650401               |
| SNP_P3_152311_390666 | NW_004516601.1 | Scaffold1382 | 390666                  | TT                              | AA                | 1946650403               |
| SNP_P3_152312_397357 | NW_004516601.1 | Scaffold1382 | 397357                  | AA                              | GG                | 1946650405               |
| SNP_P3_152313_397376 | NW_004516601.1 | Scaffold1382 | 397376                  | TT                              | AA                | 1946650407               |
| SNP_P3_152314_397390 | NW_004516601.1 | Scaffold1382 | 397390                  | TT                              | CC                | 1946650409               |
| SNP_P3_152315_397395 | NW_004516601.1 | Scaffold1382 | 397395                  | TT                              | GG                | 1946650411               |
| SNP_P3_152316_397419 | NW_004516601.1 | Scaffold1382 | 397419                  | GG                              | AA                | 1946650413               |
| SNP_P3_152317_405135 | NW_004516601.1 | Scaffold1382 | 405135                  | GG                              | TT                | 1946650415               |
| SNP_P3_152318_414485 | NW_004516601.1 | Scaffold1382 | 414485                  | AA                              | GG                | 1946650416               |
| SNP_P3_152319_417318 | NW_004516601.1 | Scaffold1382 | 417318                  | GG                              | AA                | 1946650418               |
| SNP_P3_152320_417376 | NW_004516601.1 | Scaffold1382 | 417376                  | CC                              | GG                | 1946650422               |
| SNP_P3_152321_417684 | NW_004516601.1 | Scaffold1382 | 417684                  | AA                              | CC                | 1946650424               |
| SNP_P3_152322_417769 | NW_004516601.1 | Scaffold1382 | 417769                  | GG                              | AA                | 1946650425               |
| SNP_P3_152323_418028 | NW_004516601.1 | Scaffold1382 | 418028                  | CC                              | AA                | 1946650427               |
| SNP_P3_152324_418030 | NW_004516601.1 | Scaffold1382 | 418030                  | TT                              | GG                | 1946650429               |
| SNP_P3_152326_424339 | NW_004516601.1 | Scaffold1382 | 424339                  | CC                              | TT                | 1946650431               |
| SNP_P3_152327_424348 | NW_004516601.1 | Scaffold1382 | 424348                  | AA                              | GG                | 1946650433               |
| SNP_P3_152328_424477 | NW_004516601.1 | Scaffold1382 | 424477                  | AA                              | GG                | 1946650435               |
| SNP_P3_152329_449426 | NW_004516601.1 | Scaffold1382 | 449426                  | AA                              | TT                | 1946650437               |
| SNP_P3_152330_456774 | NW_004516601.1 | Scaffold1382 | 456774                  | CC                              | AA                | 1946650439               |
| SNP_P3_152331_457020 | NW_004516601.1 | Scaffold1382 | 457020                  | TT                              | CC                | 1946650441               |
| SNP_P3_152332_457133 | NW_004516601.1 | Scaffold1382 | 457133                  | GG                              | AA                | 1946650443               |
| SNP_P3_152333_458045 | NW_004516601.1 | Scaffold1382 | 458045                  | TT                              | CC                | 1946650445               |
| SNP_P3_152334_470508 | NW_004516601.1 | Scaffold1382 | 470508                  | AA                              | TT                | 1946650447               |
| SNP_P3_152335_470706 | NW_004516601.1 | Scaffold1382 | 470706                  | AA                              | CC                | 1946650449               |
| SNP_P3_152336_477817 | NW_004516601.1 | Scaffold1382 | 477817                  | CC                              | TT                | 1946650451               |
| SNP_P3_152337_480843 | NW_004516601.1 | Scaffold1382 | 480843                  | AA                              | GG                | 1946650453               |
| SNP_P3_152338_489933 | NW_004516601.1 | Scaffold1382 | 489933                  | TT                              | GG                | 1946650455               |
| SNP_P3_152339_500964 | NW_004516601.1 | Scaffold1382 | 500964                  | GG                              | AA                | 1946650457               |
| SNP_P3_152340_500973 | NW_004516601.1 | Scaffold1382 | 500973                  | AA                              | CC                | 1946650461               |
| SNP_P3_152341_526517 | NW_004516601.1 | Scaffold1382 | 526517                  | CC                              | TT                | 1946650463               |
| SNP_P3_152342_526519 | NW_004516601.1 | Scaffold1382 | 526519                  | CC                              | TT                | 1946650465               |
| SNP_P3_152343_526539 | NW_004516601.1 | Scaffold1382 | 526539                  | CC                              | TT                | 1946650467               |
| SNP_P3_152344_526553 | NW_004516601.1 | Scaffold1382 | 526553                  | TT                              | GG                | 1946650469               |
| SNP_P3_152345_526577 | NW_004516601.1 | Scaffold1382 | 526577                  | CC                              | GG                | 1946650471               |

| SNPs IDs             | Chromosome IDs | Chromosomes  | Physical positions (bp) | CDC Frontier (Reference genome) | (Pusa 256 & HPNB) | NCBI SNPdb Accession IDs |
|----------------------|----------------|--------------|-------------------------|---------------------------------|-------------------|--------------------------|
| SNP_P3_152346_526842 | NW_004516601.1 | Scaffold1382 | 526842                  | GG                              | TT                | 1946650473               |
| SNP_P3_152347_526845 | NW_004516601.1 | Scaffold1382 | 526845                  | CC                              | TT                | 1946650475               |
| SNP_P3_152348_526885 | NW_004516601.1 | Scaffold1382 | 526885                  | AA                              | TT                | 1946650477               |
| SNP_P3_152349_527005 | NW_004516601.1 | Scaffold1382 | 527005                  | CC                              | TT                | 1946650478               |
| SNP_P3_152350_527027 | NW_004516601.1 | Scaffold1382 | 527027                  | CC                              | TT                | 1946650480               |
| SNP_P3_152351_536488 | NW_004516601.1 | Scaffold1382 | 536488                  | AA                              | GG                | 1946650482               |
| SNP_P3_152352_536517 | NW_004516601.1 | Scaffold1382 | 536517                  | AA                              | GG                | 1946650484               |
| SNP_P3_152353_536525 | NW_004516601.1 | Scaffold1382 | 536525                  | GG                              | TT                | 1946650486               |
| SNP_P3_152354_536528 | NW_004516601.1 | Scaffold1382 | 536528                  | AA                              | GG                | 1946650488               |
| SNP_P3_152355_536531 | NW_004516601.1 | Scaffold1382 | 536531                  | AA                              | CC                | 1946650490               |
| SNP_P3_152356_536640 | NW_004516601.1 | Scaffold1382 | 536640                  | CC                              | TT                | 1946650492               |
| SNP_P3_152357_536701 | NW_004516601.1 | Scaffold1382 | 536701                  | CC                              | AA                | 1946650494               |
| SNP_P3_152358_536742 | NW_004516601.1 | Scaffold1382 | 536742                  | AA                              | TT                | 1946650496               |
| SNP_P3_152359_536769 | NW_004516601.1 | Scaffold1382 | 536769                  | GG                              | CC                | 1946650500               |
| SNP_P3_152360_536839 | NW_004516601.1 | Scaffold1382 | 536839                  | AA                              | GG                | 1946650502               |
| SNP_P3_152361_536952 | NW_004516601.1 | Scaffold1382 | 536952                  | CC                              | GG                | 1946650504               |
| SNP_P3_152362_536961 | NW_004516601.1 | Scaffold1382 | 536961                  | TT                              | GG                | 1946650506               |
| SNP_P3_152363_537008 | NW_004516601.1 | Scaffold1382 | 537008                  | CC                              | GG                | 1946650508               |
| SNP_P3_152364_537011 | NW_004516601.1 | Scaffold1382 | 537011                  | AA                              | TT                | 1946650510               |
| SNP_P3_152365_537025 | NW_004516601.1 | Scaffold1382 | 537025                  | CC                              | AA                | 1946650512               |
| SNP_P3_152366_537046 | NW_004516601.1 | Scaffold1382 | 537046                  | AA                              | TT                | 1946650514               |
| SNP_P3_152367_537062 | NW_004516601.1 | Scaffold1382 | 537062                  | TT                              | GG                | 1946650516               |
| SNP_P3_152368_537071 | NW_004516601.1 | Scaffold1382 | 537071                  | CC                              | TT                | 1946650518               |
| SNP_P3_152369_537141 | NW_004516601.1 | Scaffold1382 | 537141                  | GG                              | TT                | 1946650520               |
| SNP_P3_152370_537159 | NW_004516601.1 | Scaffold1382 | 537159                  | AA                              | TT                | 1946650522               |
| SNP_P3_152371_538584 | NW_004516601.1 | Scaffold1382 | 538584                  | AA                              | GG                | 1946650524               |
| SNP_P3_152372_541251 | NW_004516601.1 | Scaffold1382 | 541251                  | CC                              | TT                | 1946650526               |
| SNP_P3_152373_541271 | NW_004516601.1 | Scaffold1382 | 541271                  | TT                              | GG                | 1946650528               |
| SNP_P3_152374_541306 | NW_004516601.1 | Scaffold1382 | 541306                  | TT                              | GG                | 1946650530               |
| SNP_P3_152375_544383 | NW_004516601.1 | Scaffold1382 | 544383                  | AA                              | TT                | 1946650532               |
| SNP_P3_152376_545281 | NW_004516601.1 | Scaffold1382 | 545281                  | TT                              | CC                | 1946650534               |
| SNP_P3_152377_545284 | NW_004516601.1 | Scaffold1382 | 545284                  | CC                              | GG                | 1946650538               |
| SNP_P3_152378_545285 | NW_004516601.1 | Scaffold1382 | 545285                  | GG                              | AA                | 1946650540               |
| SNP_P3_152379_545314 | NW_004516601.1 | Scaffold1382 | 545314                  | GG                              | CC                | 1946650542               |
| SNP_P3_152380_545358 | NW_004516601.1 | Scaffold1382 | 545358                  | CC                              | TT                | 1946650544               |
| SNP_P3_152381_545360 | NW_004516601.1 | Scaffold1382 | 545360                  | CC                              | GG                | 1946650546               |
| SNP_P3_152382_545562 | NW_004516601.1 | Scaffold1382 | 545562                  | TT                              | CC                | 1946650548               |
| SNP_P3_152383_545867 | NW_004516601.1 | Scaffold1382 | 545867                  | TT                              | AA                | 1946650550               |
| SNP_P3_152385_545870 | NW_004516601.1 | Scaffold1382 | 545870                  | GG                              | AA                | 1946650552               |
| SNP_P3_152386_545923 | NW_004516601.1 | Scaffold1382 | 545923                  | CC                              | TT                | 1946650554               |
| SNP_P3_152387_561006 | NW_004516601.1 | Scaffold1382 | 561006                  | TT                              | AA                | 1946650556               |
| SNP_P3_152388_366    | NW_004516603.1 | Scaffold1386 | 366                     | GG                              | AA                | 1946650558               |



| SNPs IDs            | Chromosome IDs | Chromosomes  | Physical positions (bp) | CDC Frontier (Reference genome) | (Pusa 256 & HPNB) | NCBI SNPdb Accession IDs |
|---------------------|----------------|--------------|-------------------------|---------------------------------|-------------------|--------------------------|
| SNP_P3_152390_4394  | NW_004516603.1 | Scaffold1386 | 4394                    | CC                              | TT                | 1946650560               |
| SNP_P3_152391_6544  | NW_004516603.1 | Scaffold1386 | 6544                    | AA                              | CC                | 1946650562               |
| SNP_P3_152392_7093  | NW_004516603.1 | Scaffold1386 | 7093                    | AA                              | GG                | 1946650564               |
| SNP_P3_152393_7098  | NW_004516603.1 | Scaffold1386 | 7098                    | TT                              | AA                | 1946650566               |
| SNP_P3_152394_7107  | NW_004516603.1 | Scaffold1386 | 7107                    | AA                              | TT                | 1946650568               |
| SNP_P3_152395_7440  | NW_004516603.1 | Scaffold1386 | 7440                    | CC                              | TT                | 1946650570               |
| SNP_P3_152396_7500  | NW_004516603.1 | Scaffold1386 | 7500                    | CC                              | AA                | 1946650572               |
| SNP_P3_152397_7585  | NW_004516603.1 | Scaffold1386 | 7585                    | AA                              | CC                | 1946650574               |
| SNP_P3_152398_7797  | NW_004516603.1 | Scaffold1386 | 7797                    | TT                              | CC                | 1946650577               |
| SNP_P3_152399_7806  | NW_004516603.1 | Scaffold1386 | 7806                    | AA                              | TT                | 1946650579               |
| SNP_P3_152400_7822  | NW_004516603.1 | Scaffold1386 | 7822                    | AA                              | TT                | 1946650581               |
| SNP_P3_152401_7829  | NW_004516603.1 | Scaffold1386 | 7829                    | TT                              | AA                | 1946650583               |
| SNP_P3_152403_10780 | NW_004516603.1 | Scaffold1386 | 10780                   | TT                              | AA                | 1946650585               |
| SNP_P3_152404_10796 | NW_004516603.1 | Scaffold1386 | 10796                   | AA                              | GG                | 1946650587               |
| SNP_P3_152405_10802 | NW_004516603.1 | Scaffold1386 | 10802                   | CC                              | TT                | 1946650589               |
| SNP_P3_152406_10809 | NW_004516603.1 | Scaffold1386 | 10809                   | TT                              | AA                | 1946650591               |
| SNP_P3_152407_13516 | NW_004516603.1 | Scaffold1386 | 13516                   | GG                              | TT                | 1946650593               |
| SNP_P3_152408_13590 | NW_004516603.1 | Scaffold1386 | 13590                   | GG                              | AA                | 1946650595               |
| SNP_P3_152409_13604 | NW_004516603.1 | Scaffold1386 | 13604                   | CC                              | TT                | 1946650597               |
| SNP_P3_152411_13659 | NW_004516603.1 | Scaffold1386 | 13659                   | TT                              | CC                | 1946650599               |
| SNP_P3_152412_13671 | NW_004516603.1 | Scaffold1386 | 13671                   | GG                              | AA                | 1946650601               |
| SNP_P3_152413_13699 | NW_004516603.1 | Scaffold1386 | 13699                   | GG                              | AA                | 1946650603               |
| SNP_P3_152414_13707 | NW_004516603.1 | Scaffold1386 | 13707                   | AA                              | TT                | 1946650605               |
| SNP_P3_152415_13710 | NW_004516603.1 | Scaffold1386 | 13710                   | TT                              | AA                | 1946650607               |
| SNP_P3_152416_13862 | NW_004516603.1 | Scaffold1386 | 13862                   | GG                              | AA                | 1946650609               |
| SNP_P3_152417_13895 | NW_004516603.1 | Scaffold1386 | 13895                   | AA                              | GG                | 1946650611               |
| SNP_P3_152418_13907 | NW_004516603.1 | Scaffold1386 | 13907                   | AA                              | GG                | 1946650613               |
| SNP_P3_152419_16535 | NW_004516603.1 | Scaffold1386 | 16535                   | TT                              | CC                | 1946650615               |
| SNP_P3_152420_27901 | NW_004516603.1 | Scaffold1386 | 27901                   | CC                              | TT                | 1946650617               |
| SNP_P3_152421_36546 | NW_004516603.1 | Scaffold1386 | 36546                   | CC                              | GG                | 1946650619               |
| SNP_P3_152422_38199 | NW_004516603.1 | Scaffold1386 | 38199                   | AA                              | GG                | 1946650621               |
| SNP_P3_152423_38475 | NW_004516603.1 | Scaffold1386 | 38475                   | GG                              | AA                | 1946650623               |
| SNP_P3_152424_38507 | NW_004516603.1 | Scaffold1386 | 38507                   | AA                              | GG                | 1946650625               |
| SNP_P3_152425_38540 | NW_004516603.1 | Scaffold1386 | 38540                   | AA                              | GG                | 1946650627               |
| SNP_P3_152426_38770 | NW_004516603.1 | Scaffold1386 | 38770                   | AA                              | GG                | 1946650629               |
| SNP_P3_152427_38776 | NW_004516603.1 | Scaffold1386 | 38776                   | GG                              | AA                | 1946650631               |
| SNP_P3_152428_39006 | NW_004516603.1 | Scaffold1386 | 39006                   | TT                              | CC                | 1946650634               |
| SNP_P3_152429_41464 | NW_004516603.1 | Scaffold1386 | 41464                   | CC                              | TT                | 1946650636               |
| SNP_P3_152430_53672 | NW_004516603.1 | Scaffold1386 | 53672                   | TT                              | CC                | 1946650638               |
| SNP_P3_152431_8559  | NW_004516606.1 | Scaffold1390 | 8559                    | TT                              | AA                | 1946650640               |
| SNP_P3_152432_8562  | NW_004516606.1 | Scaffold1390 | 8562                    | CC                              | TT                | 1946650642               |
| SNP_P3_152433_8573  | NW_004516606.1 | Scaffold1390 | 8573                    | TT                              | CC                | 1946650644               |

| SNPs IDs             | Chromosome IDs | Chromosomes  | Physical positions (bp) | CDC Frontier (Reference genome) | (Pusa 256 & HPNB) | NCBI SNPdb Accession IDs |
|----------------------|----------------|--------------|-------------------------|---------------------------------|-------------------|--------------------------|
| SNP_P3_152434_10301  | NW_004516606.1 | Scaffold1390 | 10301                   | GG                              | AA                | 1946650646               |
| SNP_P3_152435_30811  | NW_004516606.1 | Scaffold1390 | 30811                   | AA                              | TT                | 1946650648               |
| SNP_P3_152436_30813  | NW_004516606.1 | Scaffold1390 | 30813                   | TT                              | CC                | 1946650650               |
| SNP_P3_152437_32810  | NW_004516606.1 | Scaffold1390 | 32810                   | AA                              | TT                | 1946650653               |
| SNP_P3_152439_38493  | NW_004516606.1 | Scaffold1390 | 38493                   | AA                              | GG                | 1946650655               |
| SNP_P3_152440_38495  | NW_004516606.1 | Scaffold1390 | 38495                   | GG                              | TT                | 1946650657               |
| SNP_P3_152441_49625  | NW_004516606.1 | Scaffold1390 | 49625                   | AA                              | TT                | 1946650659               |
| SNP_P3_152442_49658  | NW_004516606.1 | Scaffold1390 | 49658                   | TT                              | CC                | 1946650661               |
| SNP_P3_152443_49956  | NW_004516606.1 | Scaffold1390 | 49956                   | AA                              | GG                | 1946650663               |
| SNP_P3_152444_49957  | NW_004516606.1 | Scaffold1390 | 49957                   | AA                              | GG                | 1946650665               |
| SNP_P3_152445_52182  | NW_004516606.1 | Scaffold1390 | 52182                   | TT                              | CC                | 1946650667               |
| SNP_P3_152446_58659  | NW_004516606.1 | Scaffold1390 | 58659                   | AA                              | TT                | 1946650669               |
| SNP_P3_152447_58667  | NW_004516606.1 | Scaffold1390 | 58667                   | AA                              | TT                | 1946650671               |
| SNP_P3_152448_67035  | NW_004516606.1 | Scaffold1390 | 67035                   | AA                              | GG                | 1946650673               |
| SNP_P3_152449_69017  | NW_004516606.1 | Scaffold1390 | 69017                   | GG                              | TT                | 1946650675               |
| SNP_P3_152450_72683  | NW_004516606.1 | Scaffold1390 | 72683                   | AA                              | TT                | 1946650677               |
| SNP_P3_152451_72690  | NW_004516606.1 | Scaffold1390 | 72690                   | CC                              | TT                | 1946650679               |
| SNP_P3_152452_86029  | NW_004516606.1 | Scaffold1390 | 86029                   | TT                              | AA                | 1946650681               |
| SNP_P3_152453_86126  | NW_004516606.1 | Scaffold1390 | 86126                   | TT                              | GG                | 1946650683               |
| SNP_P3_152454_86138  | NW_004516606.1 | Scaffold1390 | 86138                   | AA                              | TT                | 1946650685               |
| SNP_P3_152455_86143  | NW_004516606.1 | Scaffold1390 | 86143                   | GG                              | AA                | 1946650686               |
| SNP_P3_152456_86159  | NW_004516606.1 | Scaffold1390 | 86159                   | GG                              | AA                | 1946650688               |
| SNP_P3_152457_86178  | NW_004516606.1 | Scaffold1390 | 86178                   | TT                              | CC                | 1946650690               |
| SNP_P3_152458_86338  | NW_004516606.1 | Scaffold1390 | 86338                   | TT                              | AA                | 1946650692               |
| SNP_P3_152459_86342  | NW_004516606.1 | Scaffold1390 | 86342                   | AA                              | TT                | 1946650695               |
| SNP_P3_152460_86358  | NW_004516606.1 | Scaffold1390 | 86358                   | CC                              | GG                | 1946650697               |
| SNP_P3_152461_86362  | NW_004516606.1 | Scaffold1390 | 86362                   | TT                              | CC                | 1946650699               |
| SNP_P3_152462_86426  | NW_004516606.1 | Scaffold1390 | 86426                   | GG                              | AA                | 1946650701               |
| SNP_P3_152463_100619 | NW_004516606.1 | Scaffold1390 | 100619                  | TT                              | CC                | 1946650703               |
| SNP_P3_152464_100697 | NW_004516606.1 | Scaffold1390 | 100697                  | GG                              | AA                | 1946650704               |
| SNP_P3_152465_101140 | NW_004516606.1 | Scaffold1390 | 101140                  | TT                              | CC                | 1946650706               |
| SNP_P3_152466_101256 | NW_004516606.1 | Scaffold1390 | 101256                  | AA                              | CC                | 1946650708               |
| SNP_P3_152467_102060 | NW_004516606.1 | Scaffold1390 | 102060                  | AA                              | CC                | 1946650710               |
| SNP_P3_152468_102399 | NW_004516606.1 | Scaffold1390 | 102399                  | TT                              | GG                | 1946650712               |
| SNP_P3_152469_102432 | NW_004516606.1 | Scaffold1390 | 102432                  | CC                              | TT                | 1946650714               |
| SNP_P3_152470_102613 | NW_004516606.1 | Scaffold1390 | 102613                  | TT                              | CC                | 1946650716               |
| SNP_P3_152471_108522 | NW_004516606.1 | Scaffold1390 | 108522                  | AA                              | GG                | 1946650718               |
| SNP_P3_152472_108547 | NW_004516606.1 | Scaffold1390 | 108547                  | CC                              | TT                | 1946650720               |
| SNP_P3_152473_111085 | NW_004516606.1 | Scaffold1390 | 111085                  | AA                              | TT                | 1946650722               |
| SNP_P3_152475_2764   | NW_004516608.1 | Scaffold1393 | 2764                    | GG                              | AA                | 1946650724               |
| SNP_P3_152476_3242   | NW_004516609.1 | Scaffold1394 | 3242                    | TT                              | CC                | 1946650726               |
| SNP_P3_152477_5358   | NW_004516609.1 | Scaffold1394 | 5358                    | CC                              | TT                | 1946650728               |

| SNPs IDs            | Chromosome IDs | Chromosomes  | Physical positions (bp) | CDC Frontier (Reference genome) | (Pusa 256 & HPNB) | NCBI SNPdb Accession IDs |
|---------------------|----------------|--------------|-------------------------|---------------------------------|-------------------|--------------------------|
| SNP_P3_152478_5364  | NW_004516609.1 | Scaffold1394 | 5364                    | GG                              | AA                | 1946650730               |
| SNP_P3_152479_5367  | NW_004516609.1 | Scaffold1394 | 5367                    | TT                              | GG                | 1946650732               |
| SNP_P3_152480_5370  | NW_004516609.1 | Scaffold1394 | 5370                    | TT                              | AA                | 1946650735               |
| SNP_P3_152481_5448  | NW_004516609.1 | Scaffold1394 | 5448                    | GG                              | AA                | 1946650737               |
| SNP_P3_152482_5475  | NW_004516609.1 | Scaffold1394 | 5475                    | AA                              | GG                | 1946650739               |
| SNP_P3_152483_5519  | NW_004516609.1 | Scaffold1394 | 5519                    | TT                              | CC                | 1946650741               |
| SNP_P3_152484_6936  | NW_004516609.1 | Scaffold1394 | 6936                    | GG                              | CC                | 1946650743               |
| SNP_P3_152485_7868  | NW_004516609.1 | Scaffold1394 | 7868                    | GG                              | AA                | 1946650745               |
| SNP_P3_152486_12007 | NW_004516609.1 | Scaffold1394 | 12007                   | TT                              | CC                | 1946650747               |
| SNP_P3_152487_12130 | NW_004516609.1 | Scaffold1394 | 12130                   | CC                              | TT                | 1946650749               |
| SNP_P3_152488_12165 | NW_004516609.1 | Scaffold1394 | 12165                   | GG                              | AA                | 1946650750               |
| SNP_P3_152489_12172 | NW_004516609.1 | Scaffold1394 | 12172                   | AA                              | GG                | 1946650752               |
| SNP_P3_152490_12219 | NW_004516609.1 | Scaffold1394 | 12219                   | GG                              | AA                | 1946650754               |
| SNP_P3_152491_12223 | NW_004516609.1 | Scaffold1394 | 12223                   | CC                              | AA                | 1946650756               |
| SNP_P3_152493_12262 | NW_004516609.1 | Scaffold1394 | 12262                   | AA                              | GG                | 1946650758               |
| SNP_P3_152494_12374 | NW_004516609.1 | Scaffold1394 | 12374                   | AA                              | GG                | 1946650760               |
| SNP_P3_152495_12415 | NW_004516609.1 | Scaffold1394 | 12415                   | AA                              | TT                | 1946650762               |
| SNP_P3_152496_12440 | NW_004516609.1 | Scaffold1394 | 12440                   | TT                              | CC                | 1946650764               |
| SNP_P3_152497_12497 | NW_004516609.1 | Scaffold1394 | 12497                   | GG                              | TT                | 1946650766               |
| SNP_P3_152498_12510 | NW_004516609.1 | Scaffold1394 | 12510                   | GG                              | AA                | 1946650768               |
| SNP_P3_152499_12578 | NW_004516609.1 | Scaffold1394 | 12578                   | TT                              | CC                | 1946650770               |
| SNP_P3_152500_25557 | NW_004516609.1 | Scaffold1394 | 25557                   | GG                              | AA                | 1946650772               |
| SNP_P3_152501_25567 | NW_004516609.1 | Scaffold1394 | 25567                   | GG                              | AA                | 1946650775               |
| SNP_P3_152502_27221 | NW_004516609.1 | Scaffold1394 | 27221                   | AA                              | GG                | 1946650777               |
| SNP_P3_152503_27227 | NW_004516609.1 | Scaffold1394 | 27227                   | TT                              | GG                | 1946650779               |
| SNP_P3_152504_27833 | NW_004516609.1 | Scaffold1394 | 27833                   | TT                              | CC                | 1946650781               |
| SNP_P3_152505_30435 | NW_004516609.1 | Scaffold1394 | 30435                   | AA                              | TT                | 1946650783               |
| SNP_P3_152506_30673 | NW_004516609.1 | Scaffold1394 | 30673                   | GG                              | AA                | 1946650785               |
| SNP_P3_152507_30679 | NW_004516609.1 | Scaffold1394 | 30679                   | AA                              | GG                | 1946650787               |
| SNP_P3_152508_30682 | NW_004516609.1 | Scaffold1394 | 30682                   | AA                              | GG                | 1946650789               |
| SNP_P3_152509_30686 | NW_004516609.1 | Scaffold1394 | 30686                   | TT                              | AA                | 1946650791               |
| SNP_P3_152510_1455  | NW_004516612.1 | Scaffold1399 | 1455                    | TT                              | GG                | 1946650793               |
| SNP_P3_152511_1489  | NW_004516612.1 | Scaffold1399 | 1489                    | AA                              | CC                | 1946650795               |
| SNP_P3_152512_1504  | NW_004516612.1 | Scaffold1399 | 1504                    | CC                              | TT                | 1946650797               |
| SNP_P3_152513_5781  | NW_004516612.1 | Scaffold1399 | 5781                    | TT                              | CC                | 1946650799               |
| SNP_P3_152514_5835  | NW_004516612.1 | Scaffold1399 | 5835                    | CC                              | GG                | 1946650801               |
| SNP_P3_152515_5844  | NW_004516612.1 | Scaffold1399 | 5844                    | TT                              | GG                | 1946650802               |
| SNP_P3_152516_5853  | NW_004516612.1 | Scaffold1399 | 5853                    | GG                              | CC                | 1946650804               |
| SNP_P3_152517_5979  | NW_004516612.1 | Scaffold1399 | 5979                    | CC                              | TT                | 1946650806               |
| SNP_P3_152518_6010  | NW_004516612.1 | Scaffold1399 | 6010                    | CC                              | AA                | 1946650808               |
| SNP_P3_152519_6047  | NW_004516612.1 | Scaffold1399 | 6047                    | TT                              | GG                | 1946650810               |
| SNP_P3_152520_18964 | NW_004516612.1 | Scaffold1399 | 18964                   | AA                              | GG                | 1946650812               |

| SNPs IDs            | Chromosome IDs | Chromosomes  | Physical positions (bp) | CDC Frontier (Reference genome) | (Pusa 256 & HPNB) | NCBI SNPdb Accession IDs |
|---------------------|----------------|--------------|-------------------------|---------------------------------|-------------------|--------------------------|
| SNP_P3_152521_19032 | NW_004516612.1 | Scaffold1399 | 19032                   | CC                              | TT                | 1946650815               |
| SNP_P3_152522_19207 | NW_004516612.1 | Scaffold1399 | 19207                   | AA                              | TT                | 1946650817               |
| SNP_P3_152523_19377 | NW_004516612.1 | Scaffold1399 | 19377                   | CC                              | AA                | 1946650819               |
| SNP_P3_152524_21202 | NW_004516612.1 | Scaffold1399 | 21202                   | AA                              | CC                | 1946650821               |
| SNP_P3_152525_23644 | NW_004516612.1 | Scaffold1399 | 23644                   | AA                              | CC                | 1946650823               |
| SNP_P3_152526_25034 | NW_004516612.1 | Scaffold1399 | 25034                   | CC                              | TT                | 1946650825               |
| SNP_P3_152527_2598  | NW_004516614.1 | Scaffold1401 | 2598                    | TT                              | GG                | 1946650827               |
| SNP_P3_152528_2629  | NW_004516614.1 | Scaffold1401 | 2629                    | GG                              | AA                | 1946650829               |
| SNP_P3_152529_2674  | NW_004516614.1 | Scaffold1401 | 2674                    | TT                              | GG                | 1946650831               |
| SNP_P3_152530_2992  | NW_004516614.1 | Scaffold1401 | 2992                    | CC                              | TT                | 1946650834               |
| SNP_P3_152531_3005  | NW_004516614.1 | Scaffold1401 | 3005                    | GG                              | AA                | 1946650836               |
| SNP_P3_152532_3034  | NW_004516614.1 | Scaffold1401 | 3034                    | GG                              | AA                | 1946650838               |
| SNP_P3_152533_25673 | NW_004516614.1 | Scaffold1401 | 25673                   | TT                              | CC                | 1946650840               |
| SNP_P3_152534_25924 | NW_004516614.1 | Scaffold1401 | 25924                   | TT                              | CC                | 1946650842               |
| SNP_P3_152535_28229 | NW_004516614.1 | Scaffold1401 | 28229                   | CC                              | TT                | 1946650844               |
| SNP_P3_152536_53732 | NW_004516614.1 | Scaffold1401 | 53732                   | CC                              | TT                | 1946650846               |
| SNP_P3_152537_63125 | NW_004516614.1 | Scaffold1401 | 63125                   | GG                              | TT                | 1946650848               |
| SNP_P3_152538_65607 | NW_004516614.1 | Scaffold1401 | 65607                   | TT                              | CC                | 1946650850               |
| SNP_P3_152539_67483 | NW_004516614.1 | Scaffold1401 | 67483                   | CC                              | GG                | 1946650852               |
| SNP_P3_152540_67563 | NW_004516614.1 | Scaffold1401 | 67563                   | TT                              | AA                | 1946650854               |
| SNP_P3_152541_67713 | NW_004516614.1 | Scaffold1401 | 67713                   | TT                              | CC                | 1946650856               |
| SNP_P3_152542_70853 | NW_004516614.1 | Scaffold1401 | 70853                   | TT                              | CC                | 1946650857               |
| SNP_P3_152543_71030 | NW_004516614.1 | Scaffold1401 | 71030                   | TT                              | GG                | 1946650859               |
| SNP_P3_152544_71054 | NW_004516614.1 | Scaffold1401 | 71054                   | TT                              | CC                | 1946650861               |
| SNP_P3_152545_71193 | NW_004516614.1 | Scaffold1401 | 71193                   | TT                              | CC                | 1946650863               |
| SNP_P3_152546_71441 | NW_004516614.1 | Scaffold1401 | 71441                   | CC                              | AA                | 1946650865               |
| SNP_P3_152547_71485 | NW_004516614.1 | Scaffold1401 | 71485                   | CC                              | TT                | 1946650867               |
| SNP_P3_152548_87793 | NW_004516614.1 | Scaffold1401 | 87793                   | GG                              | CC                | 1946650869               |
| SNP_P3_152549_889   | NW_004516615.1 | Scaffold1403 | 889                     | TT                              | AA                | 1946650871               |
| SNP_P3_152550_961   | NW_004516615.1 | Scaffold1403 | 961                     | AA                              | GG                | 1946650873               |
| SNP_P3_152551_1235  | NW_004516615.1 | Scaffold1403 | 1235                    | GG                              | AA                | 1946650875               |
| SNP_P3_152552_1970  | NW_004516616.1 | Scaffold1404 | 1970                    | AA                              | CC                | 1946650877               |
| SNP_P3_152553_2711  | NW_004516617.1 | Scaffold1405 | 2711                    | CC                              | GG                | 1946650879               |
| SNP_P3_152554_2965  | NW_004516617.1 | Scaffold1405 | 2965                    | CC                              | AA                | 1946650881               |
| SNP_P3_152555_49    | NW_004516619.1 | Scaffold1408 | 49                      | CC                              | TT                | 1946650883               |
| SNP_P3_152556_557   | NW_004516619.1 | Scaffold1408 | 557                     | TT                              | GG                | 1946650885               |
| SNP_P3_152557_624   | NW_004516619.1 | Scaffold1408 | 624                     | AA                              | GG                | 1946650887               |
| SNP_P3_152558_658   | NW_004516619.1 | Scaffold1408 | 658                     | TT                              | AA                | 1946650889               |
| SNP_P3_152559_2211  | NW_004516619.1 | Scaffold1408 | 2211                    | TT                              | CC                | 1946650891               |
| SNP_P3_152560_2528  | NW_004516619.1 | Scaffold1408 | 2528                    | CC                              | AA                | 1946650893               |
| SNP_P3_152561_2649  | NW_004516619.1 | Scaffold1408 | 2649                    | AA                              | CC                | 1946650895               |
| SNP_P3_152562_2699  | NW_004516619.1 | Scaffold1408 | 2699                    | AA                              | GG                | 1946650897               |

| SNPs IDs            | Chromosome IDs | Chromosomes  | Physical positions (bp) | CDC Frontier (Reference genome) | (Pusa 256 & HPNB) | NCBI SNPdb Accession IDs |
|---------------------|----------------|--------------|-------------------------|---------------------------------|-------------------|--------------------------|
| SNP_P3_152563_2874  | NW_004516619.1 | Scaffold1408 | 2874                    | GG                              | TT                | 1946650899               |
| SNP_P3_152564_2903  | NW_004516619.1 | Scaffold1408 | 2903                    | GG                              | CC                | 1946650901               |
| SNP_P3_152565_4933  | NW_004516619.1 | Scaffold1408 | 4933                    | AA                              | GG                | 1946650902               |
| SNP_P3_152566_5273  | NW_004516619.1 | Scaffold1408 | 5273                    | AA                              | GG                | 1946650904               |
| SNP_P3_152567_5330  | NW_004516619.1 | Scaffold1408 | 5330                    | AA                              | TT                | 1946650906               |
| SNP_P3_152568_5484  | NW_004516619.1 | Scaffold1408 | 5484                    | AA                              | TT                | 1946650908               |
| SNP_P3_152569_5505  | NW_004516619.1 | Scaffold1408 | 5505                    | TT                              | CC                | 1946650910               |
| SNP_P3_152570_5698  | NW_004516619.1 | Scaffold1408 | 5698                    | GG                              | TT                | 1946650912               |
| SNP_P3_152571_5840  | NW_004516619.1 | Scaffold1408 | 5840                    | TT                              | AA                | 1946650913               |
| SNP_P3_152572_5949  | NW_004516619.1 | Scaffold1408 | 5949                    | GG                              | TT                | 1946650914               |
| SNP_P3_152573_6239  | NW_004516619.1 | Scaffold1408 | 6239                    | GG                              | TT                | 1946650915               |
| SNP_P3_152574_6591  | NW_004516619.1 | Scaffold1408 | 6591                    | GG                              | AA                | 1946650916               |
| SNP_P3_152575_6705  | NW_004516619.1 | Scaffold1408 | 6705                    | CC                              | AA                | 1946650917               |
| SNP_P3_152576_6991  | NW_004516619.1 | Scaffold1408 | 6991                    | TT                              | AA                | 1946650918               |
| SNP_P3_152577_7048  | NW_004516619.1 | Scaffold1408 | 7048                    | CC                              | TT                | 1946650919               |
| SNP_P3_152578_7086  | NW_004516619.1 | Scaffold1408 | 7086                    | CC                              | TT                | 1946650920               |
| SNP_P3_152579_7213  | NW_004516619.1 | Scaffold1408 | 7213                    | GG                              | TT                | 1946650921               |
| SNP_P3_152580_7648  | NW_004516619.1 | Scaffold1408 | 7648                    | GG                              | TT                | 1946650922               |
| SNP_P3_152581_7665  | NW_004516619.1 | Scaffold1408 | 7665                    | AA                              | GG                | 1946650923               |
| SNP_P3_152582_7670  | NW_004516619.1 | Scaffold1408 | 7670                    | AA                              | TT                | 1946650924               |
| SNP_P3_152583_7671  | NW_004516619.1 | Scaffold1408 | 7671                    | TT                              | GG                | 1946650925               |
| SNP_P3_152584_7919  | NW_004516619.1 | Scaffold1408 | 7919                    | TT                              | AA                | 1946650926               |
| SNP_P3_152585_8981  | NW_004516619.1 | Scaffold1408 | 8981                    | TT                              | CC                | 1946650927               |
| SNP_P3_152586_8984  | NW_004516619.1 | Scaffold1408 | 8984                    | CC                              | GG                | 1946650928               |
| SNP_P3_152587_9235  | NW_004516619.1 | Scaffold1408 | 9235                    | TT                              | CC                | 1946650929               |
| SNP_P3_152588_9407  | NW_004516619.1 | Scaffold1408 | 9407                    | AA                              | CC                | 1946650930               |
| SNP_P3_152589_9633  | NW_004516619.1 | Scaffold1408 | 9633                    | CC                              | TT                | 1946650931               |
| SNP_P3_152590_9829  | NW_004516619.1 | Scaffold1408 | 9829                    | TT                              | AA                | 1946650932               |
| SNP_P3_152591_9833  | NW_004516619.1 | Scaffold1408 | 9833                    | GG                              | CC                | 1946650933               |
| SNP_P3_152592_9926  | NW_004516619.1 | Scaffold1408 | 9926                    | CC                              | TT                | 1946650934               |
| SNP_P3_152593_10022 | NW_004516619.1 | Scaffold1408 | 10022                   | AA                              | TT                | 1946650935               |
| SNP_P3_152594_10031 | NW_004516619.1 | Scaffold1408 | 10031                   | GG                              | CC                | 1946650936               |
| SNP_P3_152595_10044 | NW_004516619.1 | Scaffold1408 | 10044                   | TT                              | CC                | 1946650937               |
| SNP_P3_152596_10131 | NW_004516619.1 | Scaffold1408 | 10131                   | AA                              | GG                | 1946650938               |
| SNP_P3_152597_10221 | NW_004516619.1 | Scaffold1408 | 10221                   | CC                              | GG                | 1946650939               |
| SNP_P3_152598_10449 | NW_004516619.1 | Scaffold1408 | 10449                   | TT                              | AA                | 1946650940               |
| SNP_P3_152599_10482 | NW_004516619.1 | Scaffold1408 | 10482                   | TT                              | GG                | 1946650941               |
| SNP_P3_152600_10511 | NW_004516619.1 | Scaffold1408 | 10511                   | GG                              | AA                | 1946650942               |
| SNP_P3_152601_10610 | NW_004516619.1 | Scaffold1408 | 10610                   | GG                              | AA                | 1946650943               |
| SNP_P3_152602_10668 | NW_004516619.1 | Scaffold1408 | 10668                   | TT                              | GG                | 1946650944               |
| SNP_P3_152603_10937 | NW_004516619.1 | Scaffold1408 | 10937                   | GG                              | TT                | 1946650945               |
| SNP_P3_152604_11039 | NW_004516619.1 | Scaffold1408 | 11039                   | CC                              | TT                | 1946650946               |

| SNPs IDs            | Chromosome IDs | Chromosomes  | Physical positions (bp) | CDC Frontier (Reference genome) | (Pusa 256 & HPNB) | NCBI SNPdb Accession IDs |
|---------------------|----------------|--------------|-------------------------|---------------------------------|-------------------|--------------------------|
| SNP_P3_152605_11041 | NW_004516619.1 | Scaffold1408 | 11041                   | TT                              | GG                | 1946650947               |
| SNP_P3_152606_11318 | NW_004516619.1 | Scaffold1408 | 11318                   | CC                              | TT                | 1946650948               |
| SNP_P3_152607_11804 | NW_004516619.1 | Scaffold1408 | 11804                   | CC                              | AA                | 1946650949               |
| SNP_P3_152609_11847 | NW_004516619.1 | Scaffold1408 | 11847                   | AA                              | TT                | 1946650950               |
| SNP_P3_152610_11852 | NW_004516619.1 | Scaffold1408 | 11852                   | AA                              | GG                | 1946650951               |
| SNP_P3_152611_12084 | NW_004516619.1 | Scaffold1408 | 12084                   | CC                              | TT                | 1946650952               |
| SNP_P3_152612_16413 | NW_004516619.1 | Scaffold1408 | 16413                   | AA                              | TT                | 1946650953               |
| SNP_P3_152614_16486 | NW_004516619.1 | Scaffold1408 | 16486                   | AA                              | GG                | 1946650954               |
| SNP_P3_152615_16766 | NW_004516619.1 | Scaffold1408 | 16766                   | AA                              | GG                | 1946650955               |
| SNP_P3_152616_16855 | NW_004516619.1 | Scaffold1408 | 16855                   | AA                              | GG                | 1946650956               |
| SNP_P3_152617_18760 | NW_004516619.1 | Scaffold1408 | 18760                   | TT                              | AA                | 1946650957               |
| SNP_P3_152618_18836 | NW_004516619.1 | Scaffold1408 | 18836                   | TT                              | AA                | 1946650958               |
| SNP_P3_152619_19111 | NW_004516619.1 | Scaffold1408 | 19111                   | TT                              | AA                | 1946650959               |
| SNP_P3_152620_19137 | NW_004516619.1 | Scaffold1408 | 19137                   | GG                              | TT                | 1946650960               |
| SNP_P3_152621_19138 | NW_004516619.1 | Scaffold1408 | 19138                   | TT                              | AA                | 1946650961               |
| SNP_P3_152622_19283 | NW_004516619.1 | Scaffold1408 | 19283                   | AA                              | TT                | 1946650962               |
| SNP_P3_152623_20316 | NW_004516619.1 | Scaffold1408 | 20316                   | CC                              | AA                | 1946650963               |
| SNP_P3_152624_20385 | NW_004516619.1 | Scaffold1408 | 20385                   | AA                              | TT                | 1946650964               |
| SNP_P3_152625_20442 | NW_004516619.1 | Scaffold1408 | 20442                   | TT                              | AA                | 1946650965               |
| SNP_P3_152627_21332 | NW_004516619.1 | Scaffold1408 | 21332                   | AA                              | GG                | 1946650966               |
| SNP_P3_152628_21551 | NW_004516619.1 | Scaffold1408 | 21551                   | GG                              | AA                | 1946650967               |
| SNP_P3_152629_21786 | NW_004516619.1 | Scaffold1408 | 21786                   | TT                              | CC                | 1946650968               |
| SNP_P3_152630_21923 | NW_004516619.1 | Scaffold1408 | 21923                   | AA                              | TT                | 1946650969               |
| SNP_P3_152631_23814 | NW_004516619.1 | Scaffold1408 | 23814                   | GG                              | AA                | 1946650970               |
| SNP_P3_152632_23870 | NW_004516619.1 | Scaffold1408 | 23870                   | GG                              | TT                | 1946650971               |
| SNP_P3_152633_23986 | NW_004516619.1 | Scaffold1408 | 23986                   | GG                              | TT                | 1946650972               |
| SNP_P3_152634_24607 | NW_004516619.1 | Scaffold1408 | 24607                   | CC                              | TT                | 1946650973               |
| SNP_P3_152636_24817 | NW_004516619.1 | Scaffold1408 | 24817                   | CC                              | TT                | 1946650974               |
| SNP_P3_152638_25071 | NW_004516619.1 | Scaffold1408 | 25071                   | GG                              | TT                | 1946650975               |
| SNP_P3_152639_25112 | NW_004516619.1 | Scaffold1408 | 25112                   | AA                              | GG                | 1946650976               |
| SNP_P3_152640_25228 | NW_004516619.1 | Scaffold1408 | 25228                   | CC                              | GG                | 1946650977               |
| SNP_P3_152641_25233 | NW_004516619.1 | Scaffold1408 | 25233                   | AA                              | CC                | 1946650979               |
| SNP_P3_152642_25269 | NW_004516619.1 | Scaffold1408 | 25269                   | GG                              | AA                | 1946650983               |
| SNP_P3_152643_26068 | NW_004516619.1 | Scaffold1408 | 26068                   | AA                              | GG                | 1946650985               |
| SNP_P3_152644_26180 | NW_004516619.1 | Scaffold1408 | 26180                   | TT                              | GG                | 1946650987               |
| SNP_P3_152645_26338 | NW_004516619.1 | Scaffold1408 | 26338                   | CC                              | GG                | 1946650989               |
| SNP_P3_152646_26395 | NW_004516619.1 | Scaffold1408 | 26395                   | TT                              | AA                | 1946650990               |
| SNP_P3_152647_26413 | NW_004516619.1 | Scaffold1408 | 26413                   | AA                              | TT                | 1946650992               |
| SNP_P3_152648_26414 | NW_004516619.1 | Scaffold1408 | 26414                   | TT                              | AA                | 1946650994               |
| SNP_P3_152649_26485 | NW_004516619.1 | Scaffold1408 | 26485                   | AA                              | TT                | 1946650996               |
| SNP_P3_152650_26534 | NW_004516619.1 | Scaffold1408 | 26534                   | TT                              | CC                | 1946650998               |
| SNP_P3_152651_26651 | NW_004516619.1 | Scaffold1408 | 26651                   | TT                              | AA                | 1946651000               |

| SNPs IDs            | Chromosome IDs | Chromosomes  | Physical positions (bp) | CDC Frontier (Reference genome) | (Pusa 256 & HPNB) | NCBI SNPdb Accession IDs |
|---------------------|----------------|--------------|-------------------------|---------------------------------|-------------------|--------------------------|
| SNP_P3_152652_26678 | NW_004516619.1 | Scaffold1408 | 26678                   | GG                              | CC                | 1946651002               |
| SNP_P3_152653_26688 | NW_004516619.1 | Scaffold1408 | 26688                   | GG                              | TT                | 1946651004               |
| SNP_P3_152654_26751 | NW_004516619.1 | Scaffold1408 | 26751                   | AA                              | CC                | 1946651006               |
| SNP_P3_152655_26756 | NW_004516619.1 | Scaffold1408 | 26756                   | CC                              | TT                | 1946651008               |
| SNP_P3_152656_26762 | NW_004516619.1 | Scaffold1408 | 26762                   | CC                              | TT                | 1946651010               |
| SNP_P3_152657_26768 | NW_004516619.1 | Scaffold1408 | 26768                   | GG                              | TT                | 1946651012               |
| SNP_P3_152658_26778 | NW_004516619.1 | Scaffold1408 | 26778                   | GG                              | TT                | 1946651014               |
| SNP_P3_152659_26971 | NW_004516619.1 | Scaffold1408 | 26971                   | TT                              | AA                | 1946651016               |
| SNP_P3_152660_26991 | NW_004516619.1 | Scaffold1408 | 26991                   | TT                              | AA                | 1946651018               |
| SNP_P3_152661_27035 | NW_004516619.1 | Scaffold1408 | 27035                   | GG                              | AA                | 1946651021               |
| SNP_P3_152662_27147 | NW_004516619.1 | Scaffold1408 | 27147                   | GG                              | CC                | 1946651023               |
| SNP_P3_152663_27277 | NW_004516619.1 | Scaffold1408 | 27277                   | CC                              | TT                | 1946651025               |
| SNP_P3_152664_27349 | NW_004516619.1 | Scaffold1408 | 27349                   | GG                              | TT                | 1946651027               |
| SNP_P3_152665_27360 | NW_004516619.1 | Scaffold1408 | 27360                   | CC                              | TT                | 1946651029               |
| SNP_P3_152666_27372 | NW_004516619.1 | Scaffold1408 | 27372                   | AA                              | TT                | 1946651031               |
| SNP_P3_152667_27451 | NW_004516619.1 | Scaffold1408 | 27451                   | GG                              | CC                | 1946651033               |
| SNP_P3_152668_27479 | NW_004516619.1 | Scaffold1408 | 27479                   | GG                              | TT                | 1946651035               |
| SNP_P3_152669_27498 | NW_004516619.1 | Scaffold1408 | 27498                   | CC                              | GG                | 1946651037               |
| SNP_P3_152670_27523 | NW_004516619.1 | Scaffold1408 | 27523                   | AA                              | GG                | 1946651039               |
| SNP_P3_152671_27587 | NW_004516619.1 | Scaffold1408 | 27587                   | AA                              | TT                | 1946651041               |
| SNP_P3_152672_27779 | NW_004516619.1 | Scaffold1408 | 27779                   | GG                              | TT                | 1946651043               |
| SNP_P3_152673_27892 | NW_004516619.1 | Scaffold1408 | 27892                   | TT                              | AA                | 1946651045               |
| SNP_P3_152674_27894 | NW_004516619.1 | Scaffold1408 | 27894                   | TT                              | GG                | 1946651047               |
| SNP_P3_152675_27901 | NW_004516619.1 | Scaffold1408 | 27901                   | AA                              | TT                | 1946651049               |
| SNP_P3_152676_28025 | NW_004516619.1 | Scaffold1408 | 28025                   | TT                              | CC                | 1946651051               |
| SNP_P3_152677_28129 | NW_004516619.1 | Scaffold1408 | 28129                   | TT                              | AA                | 1946651053               |
| SNP_P3_152678_28182 | NW_004516619.1 | Scaffold1408 | 28182                   | TT                              | GG                | 1946651055               |
| SNP_P3_152679_28244 | NW_004516619.1 | Scaffold1408 | 28244                   | GG                              | AA                | 1946651057               |
| SNP_P3_152680_29146 | NW_004516619.1 | Scaffold1408 | 29146                   | AA                              | TT                | 1946651059               |
| SNP_P3_152681_29186 | NW_004516619.1 | Scaffold1408 | 29186                   | CC                              | TT                | 1946651062               |
| SNP_P3_152682_29202 | NW_004516619.1 | Scaffold1408 | 29202                   | AA                              | GG                | 1946651064               |
| SNP_P3_152683_29283 | NW_004516619.1 | Scaffold1408 | 29283                   | AA                              | TT                | 1946651066               |
| SNP_P3_152684_29302 | NW_004516619.1 | Scaffold1408 | 29302                   | TT                              | GG                | 1946651068               |
| SNP_P3_152685_29303 | NW_004516619.1 | Scaffold1408 | 29303                   | AA                              | TT                | 1946651070               |
| SNP_P3_152686_29328 | NW_004516619.1 | Scaffold1408 | 29328                   | CC                              | TT                | 1946651072               |
| SNP_P3_152687_29389 | NW_004516619.1 | Scaffold1408 | 29389                   | AA                              | GG                | 1946651074               |
| SNP_P3_152688_29441 | NW_004516619.1 | Scaffold1408 | 29441                   | AA                              | GG                | 1946651076               |
| SNP_P3_152690_29952 | NW_004516619.1 | Scaffold1408 | 29952                   | GG                              | AA                | 1946651078               |
| SNP_P3_152691_34640 | NW_004516619.1 | Scaffold1408 | 34640                   | AA                              | CC                | 1946651080               |
| SNP_P3_152692_34804 | NW_004516619.1 | Scaffold1408 | 34804                   | AA                              | GG                | 1946651082               |
| SNP_P3_152693_34829 | NW_004516619.1 | Scaffold1408 | 34829                   | CC                              | TT                | 1946651084               |
| SNP_P3_152694_34910 | NW_004516619.1 | Scaffold1408 | 34910                   | GG                              | AA                | 1946651086               |

| SNPs IDs            | Chromosome IDs | Chromosomes  | Physical positions (bp) | CDC Frontier (Reference genome) | (Pusa 256 & HPNB) | NCBI SNPdb Accession IDs |
|---------------------|----------------|--------------|-------------------------|---------------------------------|-------------------|--------------------------|
| SNP_P3_152695_34962 | NW_004516619.1 | Scaffold1408 | 34962                   | TT                              | CC                | 1946651088               |
| SNP_P3_152696_34963 | NW_004516619.1 | Scaffold1408 | 34963                   | GG                              | AA                | 1946651090               |
| SNP_P3_152697_34994 | NW_004516619.1 | Scaffold1408 | 34994                   | TT                              | CC                | 1946651092               |
| SNP_P3_152698_35039 | NW_004516619.1 | Scaffold1408 | 35039                   | CC                              | AA                | 1946651094               |
| SNP_P3_152699_35214 | NW_004516619.1 | Scaffold1408 | 35214                   | GG                              | AA                | 1946651096               |
| SNP_P3_152700_35929 | NW_004516619.1 | Scaffold1408 | 35929                   | CC                              | AA                | 1946651098               |
| SNP_P3_152701_37011 | NW_004516619.1 | Scaffold1408 | 37011                   | TT                              | GG                | 1946651100               |
| SNP_P3_152702_37063 | NW_004516619.1 | Scaffold1408 | 37063                   | GG                              | AA                | 1946651102               |
| SNP_P3_152703_37111 | NW_004516619.1 | Scaffold1408 | 37111                   | AA                              | GG                | 1946651104               |
| SNP_P3_152704_37147 | NW_004516619.1 | Scaffold1408 | 37147                   | TT                              | AA                | 1946651106               |
| SNP_P3_152705_37165 | NW_004516619.1 | Scaffold1408 | 37165                   | AA                              | CC                | 1946651108               |
| SNP_P3_152706_37299 | NW_004516619.1 | Scaffold1408 | 37299                   | GG                              | AA                | 1946651110               |
| SNP_P3_152707_37326 | NW_004516619.1 | Scaffold1408 | 37326                   | TT                              | CC                | 1946651112               |
| SNP_P3_152708_37329 | NW_004516619.1 | Scaffold1408 | 37329                   | AA                              | TT                | 1946651114               |
| SNP_P3_152709_37374 | NW_004516619.1 | Scaffold1408 | 37374                   | TT                              | CC                | 1946651116               |
| SNP_P3_152710_40671 | NW_004516619.1 | Scaffold1408 | 40671                   | TT                              | AA                | 1946651118               |
| SNP_P3_152711_40931 | NW_004516619.1 | Scaffold1408 | 40931                   | TT                              | CC                | 1946651120               |
| SNP_P3_152712_52712 | NW_004516619.1 | Scaffold1408 | 52712                   | TT                              | AA                | 1946651122               |
| SNP_P3_152713_52862 | NW_004516619.1 | Scaffold1408 | 52862                   | AA                              | TT                | 1946651124               |
| SNP_P3_152714_53106 | NW_004516619.1 | Scaffold1408 | 53106                   | TT                              | AA                | 1946651126               |
| SNP_P3_152715_53145 | NW_004516619.1 | Scaffold1408 | 53145                   | GG                              | AA                | 1946651128               |
| SNP_P3_152716_53150 | NW_004516619.1 | Scaffold1408 | 53150                   | TT                              | CC                | 1946651130               |
| SNP_P3_152717_53201 | NW_004516619.1 | Scaffold1408 | 53201                   | AA                              | TT                | 1946651132               |
| SNP_P3_152718_53242 | NW_004516619.1 | Scaffold1408 | 53242                   | GG                              | CC                | 1946651134               |
| SNP_P3_152719_53269 | NW_004516619.1 | Scaffold1408 | 53269                   | GG                              | TT                | 1946651137               |
| SNP_P3_152720_53278 | NW_004516619.1 | Scaffold1408 | 53278                   | TT                              | GG                | 1946651139               |
| SNP_P3_152721_53298 | NW_004516619.1 | Scaffold1408 | 53298                   | CC                              | TT                | 1946651141               |
| SNP_P3_152722_54413 | NW_004516619.1 | Scaffold1408 | 54413                   | TT                              | AA                | 1946651143               |
| SNP_P3_152723_54499 | NW_004516619.1 | Scaffold1408 | 54499                   | CC                              | AA                | 1946651145               |
| SNP_P3_152724_54611 | NW_004516619.1 | Scaffold1408 | 54611                   | AA                              | CC                | 1946651147               |
| SNP_P3_152725_54797 | NW_004516619.1 | Scaffold1408 | 54797                   | AA                              | GG                | 1946651149               |
| SNP_P3_152726_54907 | NW_004516619.1 | Scaffold1408 | 54907                   | AA                              | GG                | 1946651151               |
| SNP_P3_152727_55103 | NW_004516619.1 | Scaffold1408 | 55103                   | CC                              | AA                | 1946651153               |
| SNP_P3_152728_55167 | NW_004516619.1 | Scaffold1408 | 55167                   | AA                              | TT                | 1946651155               |
| SNP_P3_152729_55219 | NW_004516619.1 | Scaffold1408 | 55219                   | CC                              | TT                | 1946651157               |
| SNP_P3_152730_55670 | NW_004516619.1 | Scaffold1408 | 55670                   | AA                              | GG                | 1946651159               |
| SNP_P3_152731_56025 | NW_004516619.1 | Scaffold1408 | 56025                   | TT                              | CC                | 1946651161               |
| SNP_P3_152732_56026 | NW_004516619.1 | Scaffold1408 | 56026                   | TT                              | CC                | 1946651163               |
| SNP_P3_152733_56180 | NW_004516619.1 | Scaffold1408 | 56180                   | AA                              | CC                | 1946651165               |
| SNP_P3_152734_56294 | NW_004516619.1 | Scaffold1408 | 56294                   | CC                              | TT                | 1946651167               |
| SNP_P3_152735_56892 | NW_004516619.1 | Scaffold1408 | 56892                   | AA                              | CC                | 1946651169               |
| SNP_P3_152737_61311 | NW_004516619.1 | Scaffold1408 | 61311                   | AA                              | TT                | 1946651171               |



| SNPs IDs            | Chromosome IDs | Chromosomes  | Physical positions (bp) | CDC Frontier (Reference genome) | (Pusa 256 & HPNB) | NCBI SNPdb Accession IDs |
|---------------------|----------------|--------------|-------------------------|---------------------------------|-------------------|--------------------------|
| SNP_P3_152738_61312 | NW_004516619.1 | Scaffold1408 | 61312                   | TT                              | GG                | 1946651173               |
| SNP_P3_152739_61316 | NW_004516619.1 | Scaffold1408 | 61316                   | GG                              | AA                | 1946651176               |
| SNP_P3_152740_61322 | NW_004516619.1 | Scaffold1408 | 61322                   | GG                              | AA                | 1946651178               |
| SNP_P3_152741_61332 | NW_004516619.1 | Scaffold1408 | 61332                   | CC                              | AA                | 1946651180               |
| SNP_P3_152742_61878 | NW_004516619.1 | Scaffold1408 | 61878                   | TT                              | GG                | 1946651182               |
| SNP_P3_152743_61882 | NW_004516619.1 | Scaffold1408 | 61882                   | GG                              | AA                | 1946651184               |
| SNP_P3_152744_62197 | NW_004516619.1 | Scaffold1408 | 62197                   | TT                              | CC                | 1946651186               |
| SNP_P3_152745_62285 | NW_004516619.1 | Scaffold1408 | 62285                   | AA                              | TT                | 1946651188               |
| SNP_P3_152746_62860 | NW_004516619.1 | Scaffold1408 | 62860                   | TT                              | CC                | 1946651190               |
| SNP_P3_152747_63118 | NW_004516619.1 | Scaffold1408 | 63118                   | TT                              | CC                | 1946651192               |
| SNP_P3_152748_63185 | NW_004516619.1 | Scaffold1408 | 63185                   | TT                              | AA                | 1946651194               |
| SNP_P3_152749_63231 | NW_004516619.1 | Scaffold1408 | 63231                   | AA                              | GG                | 1946651196               |
| SNP_P3_152750_66530 | NW_004516619.1 | Scaffold1408 | 66530                   | TT                              | GG                | 1946651198               |
| SNP_P3_152751_66596 | NW_004516619.1 | Scaffold1408 | 66596                   | TT                              | CC                | 1946651200               |
| SNP_P3_152752_66672 | NW_004516619.1 | Scaffold1408 | 66672                   | CC                              | TT                | 1946651201               |
| SNP_P3_152753_66725 | NW_004516619.1 | Scaffold1408 | 66725                   | TT                              | AA                | 1946651202               |
| SNP_P3_152754_66774 | NW_004516619.1 | Scaffold1408 | 66774                   | CC                              | TT                | 1946651203               |
| SNP_P3_152755_66992 | NW_004516619.1 | Scaffold1408 | 66992                   | GG                              | AA                | 1946651204               |
| SNP_P3_152756_67025 | NW_004516619.1 | Scaffold1408 | 67025                   | CC                              | TT                | 1946651206               |
| SNP_P3_152757_67068 | NW_004516619.1 | Scaffold1408 | 67068                   | AA                              | TT                | 1946651208               |
| SNP_P3_152758_68250 | NW_004516619.1 | Scaffold1408 | 68250                   | CC                              | GG                | 1946651210               |
| SNP_P3_152759_68267 | NW_004516619.1 | Scaffold1408 | 68267                   | TT                              | AA                | 1946651213               |
| SNP_P3_152760_68306 | NW_004516619.1 | Scaffold1408 | 68306                   | TT                              | GG                | 1946651215               |
| SNP_P3_152761_68320 | NW_004516619.1 | Scaffold1408 | 68320                   | AA                              | TT                | 1946651217               |
| SNP_P3_152762_68335 | NW_004516619.1 | Scaffold1408 | 68335                   | AA                              | GG                | 1946651219               |
| SNP_P3_152763_68490 | NW_004516619.1 | Scaffold1408 | 68490                   | AA                              | GG                | 1946651221               |
| SNP_P3_152764_68508 | NW_004516619.1 | Scaffold1408 | 68508                   | CC                              | TT                | 1946651223               |
| SNP_P3_152765_68714 | NW_004516619.1 | Scaffold1408 | 68714                   | AA                              | CC                | 1946651225               |
| SNP_P3_152766_68715 | NW_004516619.1 | Scaffold1408 | 68715                   | AA                              | TT                | 1946651227               |
| SNP_P3_152767_69184 | NW_004516619.1 | Scaffold1408 | 69184                   | AA                              | GG                | 1946651229               |
| SNP_P3_152768_69220 | NW_004516619.1 | Scaffold1408 | 69220                   | TT                              | GG                | 1946651232               |
| SNP_P3_152769_69225 | NW_004516619.1 | Scaffold1408 | 69225                   | GG                              | CC                | 1946651234               |
| SNP_P3_152770_69266 | NW_004516619.1 | Scaffold1408 | 69266                   | AA                              | TT                | 1946651236               |
| SNP_P3_152771_69412 | NW_004516619.1 | Scaffold1408 | 69412                   | CC                              | TT                | 1946651238               |
| SNP_P3_152772_69652 | NW_004516619.1 | Scaffold1408 | 69652                   | CC                              | TT                | 1946651240               |
| SNP_P3_152774_69863 | NW_004516619.1 | Scaffold1408 | 69863                   | CC                              | TT                | 1946651242               |
| SNP_P3_152775_69942 | NW_004516619.1 | Scaffold1408 | 69942                   | GG                              | AA                | 1946651244               |
| SNP_P3_152776_70022 | NW_004516619.1 | Scaffold1408 | 70022                   | TT                              | AA                | 1946651246               |
| SNP_P3_152777_70141 | NW_004516619.1 | Scaffold1408 | 70141                   | GG                              | AA                | 1946651248               |
| SNP_P3_152778_70248 | NW_004516619.1 | Scaffold1408 | 70248                   | TT                              | CC                | 1946651251               |
| SNP_P3_152779_70484 | NW_004516619.1 | Scaffold1408 | 70484                   | CC                              | TT                | 1946651254               |
| SNP_P3_152780_70487 | NW_004516619.1 | Scaffold1408 | 70487                   | TT                              | AA                | 1946651256               |

| SNPs IDs            | Chromosome IDs | Chromosomes  | Physical positions (bp) | CDC Frontier (Reference genome) | (Pusa 256 & HPNB) | NCBI SNPdb Accession IDs |
|---------------------|----------------|--------------|-------------------------|---------------------------------|-------------------|--------------------------|
| SNP_P3_152781_70655 | NW_004516619.1 | Scaffold1408 | 70655                   | TT                              | AA                | 1946651258               |
| SNP_P3_152783_71633 | NW_004516619.1 | Scaffold1408 | 71633                   | CC                              | TT                | 1946651260               |
| SNP_P3_152784_71683 | NW_004516619.1 | Scaffold1408 | 71683                   | TT                              | AA                | 1946651262               |
| SNP_P3_152785_71691 | NW_004516619.1 | Scaffold1408 | 71691                   | GG                              | TT                | 1946651264               |
| SNP_P3_152787_71985 | NW_004516619.1 | Scaffold1408 | 71985                   | GG                              | AA                | 1946651266               |
| SNP_P3_152788_72045 | NW_004516619.1 | Scaffold1408 | 72045                   | GG                              | TT                | 1946651269               |
| SNP_P3_152789_72071 | NW_004516619.1 | Scaffold1408 | 72071                   | GG                              | TT                | 1946651271               |
| SNP_P3_152790_72109 | NW_004516619.1 | Scaffold1408 | 72109                   | TT                              | AA                | 1946651273               |
| SNP_P3_152791_72312 | NW_004516619.1 | Scaffold1408 | 72312                   | TT                              | CC                | 1946651275               |
| SNP_P3_152792_72362 | NW_004516619.1 | Scaffold1408 | 72362                   | AA                              | TT                | 1946651277               |
| SNP_P3_152793_72602 | NW_004516619.1 | Scaffold1408 | 72602                   | AA                              | GG                | 1946651280               |
| SNP_P3_152794_72621 | NW_004516619.1 | Scaffold1408 | 72621                   | GG                              | TT                | 1946651282               |
| SNP_P3_152795_72654 | NW_004516619.1 | Scaffold1408 | 72654                   | TT                              | AA                | 1946651284               |
| SNP_P3_152796_72660 | NW_004516619.1 | Scaffold1408 | 72660                   | GG                              | TT                | 1946651286               |
| SNP_P3_152797_73151 | NW_004516619.1 | Scaffold1408 | 73151                   | CC                              | AA                | 1946651288               |
| SNP_P3_152798_73240 | NW_004516619.1 | Scaffold1408 | 73240                   | AA                              | TT                | 1946651291               |
| SNP_P3_152799_74971 | NW_004516619.1 | Scaffold1408 | 74971                   | AA                              | GG                | 1946651293               |
| SNP_P3_152800_75364 | NW_004516619.1 | Scaffold1408 | 75364                   | CC                              | GG                | 1946651295               |
| SNP_P3_152801_75402 | NW_004516619.1 | Scaffold1408 | 75402                   | AA                              | TT                | 1946651297               |
| SNP_P3_152802_76302 | NW_004516619.1 | Scaffold1408 | 76302                   | CC                              | GG                | 1946651299               |
| SNP_P3_152803_76364 | NW_004516619.1 | Scaffold1408 | 76364                   | CC                              | TT                | 1946651301               |
| SNP_P3_152804_77010 | NW_004516619.1 | Scaffold1408 | 77010                   | AA                              | CC                | 1946651303               |
| SNP_P3_152805_77520 | NW_004516619.1 | Scaffold1408 | 77520                   | TT                              | CC                | 1946651305               |
| SNP_P3_152807_77605 | NW_004516619.1 | Scaffold1408 | 77605                   | AA                              | TT                | 1946651307               |
| SNP_P3_152808_77610 | NW_004516619.1 | Scaffold1408 | 77610                   | GG                              | AA                | 1946651309               |
| SNP_P3_152809_77819 | NW_004516619.1 | Scaffold1408 | 77819                   | AA                              | CC                | 1946651311               |
| SNP_P3_152810_77840 | NW_004516619.1 | Scaffold1408 | 77840                   | GG                              | AA                | 1946651313               |
| SNP_P3_152811_77899 | NW_004516619.1 | Scaffold1408 | 77899                   | TT                              | CC                | 1946651315               |
| SNP_P3_152812_77935 | NW_004516619.1 | Scaffold1408 | 77935                   | GG                              | CC                | 1946651317               |
| SNP_P3_152813_78109 | NW_004516619.1 | Scaffold1408 | 78109                   | GG                              | AA                | 1946651319               |
| SNP_P3_152814_78161 | NW_004516619.1 | Scaffold1408 | 78161                   | CC                              | AA                | 1946651321               |
| SNP_P3_152815_78269 | NW_004516619.1 | Scaffold1408 | 78269                   | GG                              | CC                | 1946651323               |
| SNP_P3_152816_80139 | NW_004516619.1 | Scaffold1408 | 80139                   | CC                              | AA                | 1946651325               |
| SNP_P3_152817_80181 | NW_004516619.1 | Scaffold1408 | 80181                   | TT                              | CC                | 1946651327               |
| SNP_P3_152818_80470 | NW_004516619.1 | Scaffold1408 | 80470                   | AA                              | TT                | 1946651329               |
| SNP_P3_152820_80707 | NW_004516619.1 | Scaffold1408 | 80707                   | GG                              | AA                | 1946651332               |
| SNP_P3_152821_80772 | NW_004516619.1 | Scaffold1408 | 80772                   | CC                              | GG                | 1946651333               |
| SNP_P3_152822_80847 | NW_004516619.1 | Scaffold1408 | 80847                   | GG                              | AA                | 1946651335               |
| SNP_P3_152823_80854 | NW_004516619.1 | Scaffold1408 | 80854                   | TT                              | GG                | 1946651342               |
| SNP_P3_152824_80953 | NW_004516619.1 | Scaffold1408 | 80953                   | CC                              | GG                | 1946651344               |
| SNP_P3_152825_81113 | NW_004516619.1 | Scaffold1408 | 81113                   | GG                              | TT                | 1946651346               |
| SNP_P3_152826_81211 | NW_004516619.1 | Scaffold1408 | 81211                   | GG                              | TT                | 1946651348               |

| SNPs IDs            | Chromosome IDs | Chromosomes  | Physical positions (bp) | CDC Frontier (Reference genome) | (Pusa 256 & HPNB) | NCBI SNPdb Accession IDs |
|---------------------|----------------|--------------|-------------------------|---------------------------------|-------------------|--------------------------|
| SNP_P3_152827_81246 | NW_004516619.1 | Scaffold1408 | 81246                   | GG                              | AA                | 1946651350               |
| SNP_P3_152828_81702 | NW_004516619.1 | Scaffold1408 | 81702                   | TT                              | AA                | 1946651352               |
| SNP_P3_152829_81789 | NW_004516619.1 | Scaffold1408 | 81789                   | TT                              | CC                | 1946651391               |
| SNP_P3_152830_81819 | NW_004516619.1 | Scaffold1408 | 81819                   | CC                              | TT                | 1946651393               |
| SNP_P3_152831_82001 | NW_004516619.1 | Scaffold1408 | 82001                   | TT                              | AA                | 1946651395               |
| SNP_P3_152832_82064 | NW_004516619.1 | Scaffold1408 | 82064                   | GG                              | TT                | 1946651398               |
| SNP_P3_152833_82112 | NW_004516619.1 | Scaffold1408 | 82112                   | GG                              | AA                | 1946651400               |
| SNP_P3_152834_82135 | NW_004516619.1 | Scaffold1408 | 82135                   | TT                              | AA                | 1946651402               |
| SNP_P3_152835_82136 | NW_004516619.1 | Scaffold1408 | 82136                   | CC                              | TT                | 1946651403               |
| SNP_P3_152836_82714 | NW_004516619.1 | Scaffold1408 | 82714                   | GG                              | CC                | 1946651404               |
| SNP_P3_152837_82828 | NW_004516619.1 | Scaffold1408 | 82828                   | GG                              | AA                | 1946651405               |
| SNP_P3_152838_82868 | NW_004516619.1 | Scaffold1408 | 82868                   | CC                              | AA                | 1946651406               |
| SNP_P3_152839_82922 | NW_004516619.1 | Scaffold1408 | 82922                   | AA                              | TT                | 1946651407               |
| SNP_P3_152840_82974 | NW_004516619.1 | Scaffold1408 | 82974                   | CC                              | GG                | 1946651408               |
| SNP_P3_152841_83047 | NW_004516619.1 | Scaffold1408 | 83047                   | GG                              | TT                | 1946651409               |
| SNP_P3_152842_83104 | NW_004516619.1 | Scaffold1408 | 83104                   | TT                              | AA                | 1946651410               |
| SNP_P3_152843_83108 | NW_004516619.1 | Scaffold1408 | 83108                   | TT                              | CC                | 1946651411               |
| SNP_P3_152844_83610 | NW_004516619.1 | Scaffold1408 | 83610                   | CC                              | TT                | 1946651412               |
| SNP_P3_152845_83784 | NW_004516619.1 | Scaffold1408 | 83784                   | GG                              | TT                | 1946651413               |
| SNP_P3_152846_84068 | NW_004516619.1 | Scaffold1408 | 84068                   | TT                              | GG                | 1946651414               |
| SNP_P3_152847_84900 | NW_004516619.1 | Scaffold1408 | 84900                   | TT                              | CC                | 1946651415               |
| SNP_P3_152848_84941 | NW_004516619.1 | Scaffold1408 | 84941                   | CC                              | TT                | 1946651416               |
| SNP_P3_152849_85025 | NW_004516619.1 | Scaffold1408 | 85025                   | TT                              | GG                | 1946651417               |
| SNP_P3_152850_85081 | NW_004516619.1 | Scaffold1408 | 85081                   | AA                              | GG                | 1946651418               |
| SNP_P3_152851_85082 | NW_004516619.1 | Scaffold1408 | 85082                   | AA                              | GG                | 1946651419               |
| SNP_P3_152852_85104 | NW_004516619.1 | Scaffold1408 | 85104                   | TT                              | GG                | 1946651420               |
| SNP_P3_152853_85133 | NW_004516619.1 | Scaffold1408 | 85133                   | TT                              | GG                | 1946651421               |
| SNP_P3_152854_85216 | NW_004516619.1 | Scaffold1408 | 85216                   | AA                              | TT                | 1946651422               |
| SNP_P3_152855_85227 | NW_004516619.1 | Scaffold1408 | 85227                   | TT                              | AA                | 1946651423               |
| SNP_P3_152856_85470 | NW_004516619.1 | Scaffold1408 | 85470                   | AA                              | TT                | 1946651424               |
| SNP_P3_152857_85772 | NW_004516619.1 | Scaffold1408 | 85772                   | AA                              | CC                | 1946651425               |
| SNP_P3_152858_85918 | NW_004516619.1 | Scaffold1408 | 85918                   | GG                              | TT                | 1946651426               |
| SNP_P3_152859_86294 | NW_004516619.1 | Scaffold1408 | 86294                   | GG                              | TT                | 1946651427               |
| SNP_P3_152860_86421 | NW_004516619.1 | Scaffold1408 | 86421                   | GG                              | AA                | 1946651428               |
| SNP_P3_152861_86801 | NW_004516619.1 | Scaffold1408 | 86801                   | AA                              | GG                | 1946651429               |
| SNP_P3_152862_89083 | NW_004516619.1 | Scaffold1408 | 89083                   | TT                              | GG                | 1946651430               |
| SNP_P3_152863_89221 | NW_004516619.1 | Scaffold1408 | 89221                   | AA                              | TT                | 1946651431               |
| SNP_P3_152864_89302 | NW_004516619.1 | Scaffold1408 | 89302                   | GG                              | TT                | 1946651432               |
| SNP_P3_152865_89578 | NW_004516619.1 | Scaffold1408 | 89578                   | AA                              | GG                | 1946651433               |
| SNP_P3_152866_89984 | NW_004516619.1 | Scaffold1408 | 89984                   | GG                              | CC                | 1946651434               |
| SNP_P3_152868_90803 | NW_004516619.1 | Scaffold1408 | 90803                   | TT                              | AA                | 1946651435               |
| SNP_P3_152869_90811 | NW_004516619.1 | Scaffold1408 | 90811                   | TT                              | GG                | 1946651436               |

| SNPs IDs             | Chromosome IDs | Chromosomes  | Physical positions (bp) | CDC Frontier (Reference genome) | (Pusa 256 & HPNB) | NCBI SNPdb Accession IDs |
|----------------------|----------------|--------------|-------------------------|---------------------------------|-------------------|--------------------------|
| SNP_P3_152870_90838  | NW_004516619.1 | Scaffold1408 | 90838                   | TT                              | GG                | 1946651437               |
| SNP_P3_152871_91245  | NW_004516619.1 | Scaffold1408 | 91245                   | TT                              | CC                | 1946651438               |
| SNP_P3_152873_91908  | NW_004516619.1 | Scaffold1408 | 91908                   | GG                              | TT                | 1946651439               |
| SNP_P3_152874_92145  | NW_004516619.1 | Scaffold1408 | 92145                   | CC                              | TT                | 1946651440               |
| SNP_P3_152875_92249  | NW_004516619.1 | Scaffold1408 | 92249                   | AA                              | TT                | 1946651441               |
| SNP_P3_152877_92365  | NW_004516619.1 | Scaffold1408 | 92365                   | TT                              | CC                | 1946651442               |
| SNP_P3_152878_92446  | NW_004516619.1 | Scaffold1408 | 92446                   | GG                              | AA                | 1946651443               |
| SNP_P3_152879_92451  | NW_004516619.1 | Scaffold1408 | 92451                   | CC                              | GG                | 1946651444               |
| SNP_P3_152880_92486  | NW_004516619.1 | Scaffold1408 | 92486                   | AA                              | GG                | 1946651445               |
| SNP_P3_152881_92545  | NW_004516619.1 | Scaffold1408 | 92545                   | AA                              | TT                | 1946651446               |
| SNP_P3_152882_92582  | NW_004516619.1 | Scaffold1408 | 92582                   | CC                              | TT                | 1946651447               |
| SNP_P3_152883_92592  | NW_004516619.1 | Scaffold1408 | 92592                   | TT                              | GG                | 1946651448               |
| SNP_P3_152884_92620  | NW_004516619.1 | Scaffold1408 | 92620                   | TT                              | GG                | 1946651449               |
| SNP_P3_152885_92659  | NW_004516619.1 | Scaffold1408 | 92659                   | CC                              | TT                | 1946651450               |
| SNP_P3_152886_92667  | NW_004516619.1 | Scaffold1408 | 92667                   | GG                              | AA                | 1946651451               |
| SNP_P3_152887_92736  | NW_004516619.1 | Scaffold1408 | 92736                   | TT                              | AA                | 1946651452               |
| SNP_P3_152888_92870  | NW_004516619.1 | Scaffold1408 | 92870                   | TT                              | GG                | 1946651453               |
| SNP_P3_152889_92918  | NW_004516619.1 | Scaffold1408 | 92918                   | AA                              | TT                | 1946651454               |
| SNP_P3_152891_96104  | NW_004516619.1 | Scaffold1408 | 96104                   | GG                              | AA                | 1946651455               |
| SNP_P3_152892_96105  | NW_004516619.1 | Scaffold1408 | 96105                   | AA                              | GG                | 1946651456               |
| SNP_P3_152893_96107  | NW_004516619.1 | Scaffold1408 | 96107                   | GG                              | TT                | 1946651457               |
| SNP_P3_152894_96108  | NW_004516619.1 | Scaffold1408 | 96108                   | TT                              | CC                | 1946651458               |
| SNP_P3_152895_96109  | NW_004516619.1 | Scaffold1408 | 96109                   | GG                              | AA                | 1946651459               |
| SNP_P3_152896_96151  | NW_004516619.1 | Scaffold1408 | 96151                   | CC                              | AA                | 1946651460               |
| SNP_P3_152897_96197  | NW_004516619.1 | Scaffold1408 | 96197                   | CC                              | TT                | 1946651461               |
| SNP_P3_152898_96209  | NW_004516619.1 | Scaffold1408 | 96209                   | GG                              | AA                | 1946651462               |
| SNP_P3_152899_96269  | NW_004516619.1 | Scaffold1408 | 96269                   | TT                              | AA                | 1946651463               |
| SNP_P3_152900_96558  | NW_004516619.1 | Scaffold1408 | 96558                   | TT                              | AA                | 1946651464               |
| SNP_P3_152901_101536 | NW_004516619.1 | Scaffold1408 | 101536                  | AA                              | GG                | 1946651465               |
| SNP_P3_152902_101954 | NW_004516619.1 | Scaffold1408 | 101954                  | TT                              | AA                | 1946651466               |
| SNP_P3_152903_102157 | NW_004516619.1 | Scaffold1408 | 102157                  | CC                              | AA                | 1946651467               |
| SNP_P3_152904_102347 | NW_004516619.1 | Scaffold1408 | 102347                  | TT                              | CC                | 1946651468               |
| SNP_P3_152905_103316 | NW_004516619.1 | Scaffold1408 | 103316                  | AA                              | CC                | 1946651469               |
| SNP_P3_152906_103333 | NW_004516619.1 | Scaffold1408 | 103333                  | TT                              | GG                | 1946651470               |
| SNP_P3_152907_103646 | NW_004516619.1 | Scaffold1408 | 103646                  | TT                              | CC                | 1946651471               |
| SNP_P3_152909_104667 | NW_004516619.1 | Scaffold1408 | 104667                  | AA                              | TT                | 1946651472               |
| SNP_P3_152910_104815 | NW_004516619.1 | Scaffold1408 | 104815                  | AA                              | GG                | 1946651473               |
| SNP_P3_152911_104915 | NW_004516619.1 | Scaffold1408 | 104915                  | AA                              | GG                | 1946651474               |
| SNP_P3_152912_105536 | NW_004516619.1 | Scaffold1408 | 105536                  | AA                              | GG                | 1946651475               |
| SNP_P3_152916_108639 | NW_004516619.1 | Scaffold1408 | 108639                  | GG                              | TT                | 1946651476               |
| SNP_P3_152917_108640 | NW_004516619.1 | Scaffold1408 | 108640                  | TT                              | GG                | 1946651477               |
| SNP_P3_152918_5681   | NW_004516620.1 | Scaffold1409 | 5681                    | CC                              | TT                | 1946651478               |

| SNPs IDs            | Chromosome IDs | Chromosomes  | Physical positions (bp) | CDC Frontier (Reference genome) | (Pusa 256 & HPNB) | NCBI SNPdb Accession IDs |
|---------------------|----------------|--------------|-------------------------|---------------------------------|-------------------|--------------------------|
| SNP_P3_152919_5728  | NW_004516620.1 | Scaffold1409 | 5728                    | CC                              | TT                | 1946651479               |
| SNP_P3_152920_5761  | NW_004516620.1 | Scaffold1409 | 5761                    | AA                              | CC                | 1946651480               |
| SNP_P3_152922_6094  | NW_004516620.1 | Scaffold1409 | 6094                    | TT                              | AA                | 1946651481               |
| SNP_P3_152923_6850  | NW_004516620.1 | Scaffold1409 | 6850                    | AA                              | GG                | 1946651482               |
| SNP_P3_152924_6895  | NW_004516620.1 | Scaffold1409 | 6895                    | AA                              | TT                | 1946651483               |
| SNP_P3_152925_6921  | NW_004516620.1 | Scaffold1409 | 6921                    | TT                              | CC                | 1946651484               |
| SNP_P3_152926_6922  | NW_004516620.1 | Scaffold1409 | 6922                    | AA                              | GG                | 1946651485               |
| SNP_P3_152927_6928  | NW_004516620.1 | Scaffold1409 | 6928                    | GG                              | TT                | 1946651486               |
| SNP_P3_152928_7412  | NW_004516620.1 | Scaffold1409 | 7412                    | GG                              | AA                | 1946651487               |
| SNP_P3_152929_8743  | NW_004516620.1 | Scaffold1409 | 8743                    | TT                              | GG                | 1946651488               |
| SNP_P3_152930_8884  | NW_004516620.1 | Scaffold1409 | 8884                    | TT                              | CC                | 1946651489               |
| SNP_P3_152931_8919  | NW_004516620.1 | Scaffold1409 | 8919                    | AA                              | GG                | 1946651490               |
| SNP_P3_152932_8950  | NW_004516620.1 | Scaffold1409 | 8950                    | AA                              | GG                | 1946651491               |
| SNP_P3_152933_8982  | NW_004516620.1 | Scaffold1409 | 8982                    | TT                              | CC                | 1946651492               |
| SNP_P3_152934_8996  | NW_004516620.1 | Scaffold1409 | 8996                    | CC                              | TT                | 1946651493               |
| SNP_P3_152935_9001  | NW_004516620.1 | Scaffold1409 | 9001                    | CC                              | TT                | 1946651494               |
| SNP_P3_152936_9006  | NW_004516620.1 | Scaffold1409 | 9006                    | CC                              | TT                | 1946651495               |
| SNP_P3_152937_9018  | NW_004516620.1 | Scaffold1409 | 9018                    | GG                              | AA                | 1946651496               |
| SNP_P3_152938_9044  | NW_004516620.1 | Scaffold1409 | 9044                    | CC                              | TT                | 1946651497               |
| SNP_P3_152940_9107  | NW_004516620.1 | Scaffold1409 | 9107                    | CC                              | AA                | 1946651498               |
| SNP_P3_152941_9120  | NW_004516620.1 | Scaffold1409 | 9120                    | CC                              | AA                | 1946651499               |
| SNP_P3_152942_9152  | NW_004516620.1 | Scaffold1409 | 9152                    | CC                              | TT                | 1946651500               |
| SNP_P3_152943_9213  | NW_004516620.1 | Scaffold1409 | 9213                    | CC                              | TT                | 1946651501               |
| SNP_P3_152944_9243  | NW_004516620.1 | Scaffold1409 | 9243                    | TT                              | CC                | 1946651502               |
| SNP_P3_152945_9257  | NW_004516620.1 | Scaffold1409 | 9257                    | TT                              | AA                | 1946651503               |
| SNP_P3_152946_9336  | NW_004516620.1 | Scaffold1409 | 9336                    | TT                              | AA                | 1946651504               |
| SNP_P3_152947_9452  | NW_004516620.1 | Scaffold1409 | 9452                    | CC                              | TT                | 1946651505               |
| SNP_P3_152948_9510  | NW_004516620.1 | Scaffold1409 | 9510                    | TT                              | CC                | 1946651506               |
| SNP_P3_152949_9568  | NW_004516620.1 | Scaffold1409 | 9568                    | CC                              | TT                | 1946651507               |
| SNP_P3_152950_9591  | NW_004516620.1 | Scaffold1409 | 9591                    | AA                              | TT                | 1946651508               |
| SNP_P3_152951_9910  | NW_004516620.1 | Scaffold1409 | 9910                    | AA                              | CC                | 1946651509               |
| SNP_P3_152952_9978  | NW_004516620.1 | Scaffold1409 | 9978                    | TT                              | CC                | 1946651510               |
| SNP_P3_152953_9982  | NW_004516620.1 | Scaffold1409 | 9982                    | TT                              | CC                | 1946651511               |
| SNP_P3_152954_10078 | NW_004516620.1 | Scaffold1409 | 10078                   | TT                              | AA                | 1946651512               |
| SNP_P3_152955_12375 | NW_004516620.1 | Scaffold1409 | 12375                   | AA                              | CC                | 1946651513               |
| SNP_P3_152956_12482 | NW_004516620.1 | Scaffold1409 | 12482                   | TT                              | CC                | 1946651514               |
| SNP_P3_152957_12552 | NW_004516620.1 | Scaffold1409 | 12552                   | AA                              | GG                | 1946651515               |
| SNP_P3_152958_12575 | NW_004516620.1 | Scaffold1409 | 12575                   | AA                              | GG                | 1946651516               |
| SNP_P3_152959_12585 | NW_004516620.1 | Scaffold1409 | 12585                   | GG                              | AA                | 1946651517               |
| SNP_P3_152960_12691 | NW_004516620.1 | Scaffold1409 | 12691                   | AA                              | TT                | 1946651518               |
| SNP_P3_152961_12744 | NW_004516620.1 | Scaffold1409 | 12744                   | CC                              | GG                | 1946651519               |
| SNP_P3_152962_12800 | NW_004516620.1 | Scaffold1409 | 12800                   | GG                              | AA                | 1946651520               |

| SNPs IDs             | Chromosome IDs | Chromosomes  | Physical positions (bp) | CDC Frontier (Reference genome) | (Pusa 256 & HPNB) | NCBI SNPdb Accession IDs |
|----------------------|----------------|--------------|-------------------------|---------------------------------|-------------------|--------------------------|
| SNP_P3_152963_14734  | NW_004516620.1 | Scaffold1409 | 14734                   | GG                              | CC                | 1946651521               |
| SNP_P3_152964_14999  | NW_004516620.1 | Scaffold1409 | 14999                   | AA                              | CC                | 1946651522               |
| SNP_P3_152966_35590  | NW_004516622.1 | Scaffold1411 | 35590                   | GG                              | CC                | 1946651523               |
| SNP_P3_152967_35965  | NW_004516622.1 | Scaffold1411 | 35965                   | CC                              | AA                | 1946651524               |
| SNP_P3_152968_36051  | NW_004516622.1 | Scaffold1411 | 36051                   | TT                              | CC                | 1946651525               |
| SNP_P3_152969_39021  | NW_004516622.1 | Scaffold1411 | 39021                   | GG                              | TT                | 1946651526               |
| SNP_P3_152970_39207  | NW_004516622.1 | Scaffold1411 | 39207                   | TT                              | CC                | 1946651527               |
| SNP_P3_152971_55374  | NW_004516622.1 | Scaffold1411 | 55374                   | CC                              | AA                | 1946651528               |
| SNP_P3_152972_55380  | NW_004516622.1 | Scaffold1411 | 55380                   | CC                              | TT                | 1946651529               |
| SNP_P3_152973_55432  | NW_004516622.1 | Scaffold1411 | 55432                   | GG                              | TT                | 1946651530               |
| SNP_P3_152975_63007  | NW_004516622.1 | Scaffold1411 | 63007                   | CC                              | TT                | 1946651531               |
| SNP_P3_152976_72231  | NW_004516622.1 | Scaffold1411 | 72231                   | CC                              | AA                | 1946651532               |
| SNP_P3_152977_72246  | NW_004516622.1 | Scaffold1411 | 72246                   | AA                              | GG                | 1946651533               |
| SNP_P3_152978_72272  | NW_004516622.1 | Scaffold1411 | 72272                   | AA                              | CC                | 1946651534               |
| SNP_P3_152979_72282  | NW_004516622.1 | Scaffold1411 | 72282                   | AA                              | GG                | 1946651535               |
| SNP_P3_152980_72306  | NW_004516622.1 | Scaffold1411 | 72306                   | AA                              | CC                | 1946651536               |
| SNP_P3_152981_72310  | NW_004516622.1 | Scaffold1411 | 72310                   | GG                              | AA                | 1946651537               |
| SNP_P3_152982_72324  | NW_004516622.1 | Scaffold1411 | 72324                   | TT                              | AA                | 1946651538               |
| SNP_P3_152983_73066  | NW_004516622.1 | Scaffold1411 | 73066                   | CC                              | GG                | 1946651539               |
| SNP_P3_152984_73086  | NW_004516622.1 | Scaffold1411 | 73086                   | AA                              | GG                | 1946651540               |
| SNP_P3_152985_76856  | NW_004516622.1 | Scaffold1411 | 76856                   | TT                              | AA                | 1946651541               |
| SNP_P3_152986_87332  | NW_004516622.1 | Scaffold1411 | 87332                   | CC                              | GG                | 1946651542               |
| SNP_P3_152987_114654 | NW_004516622.1 | Scaffold1411 | 114654                  | CC                              | TT                | 1946651543               |
| SNP_P3_152988_123747 | NW_004516622.1 | Scaffold1411 | 123747                  | TT                              | CC                | 1946651544               |
| SNP_P3_152989_124946 | NW_004516622.1 | Scaffold1411 | 124946                  | CC                              | GG                | 1946651545               |
| SNP_P3_152990_135337 | NW_004516622.1 | Scaffold1411 | 135337                  | CC                              | AA                | 1946651546               |
| SNP_P3_152991_3409   | NW_004516623.1 | Scaffold1412 | 3409                    | GG                              | TT                | 1946651547               |
| SNP_P3_152992_3426   | NW_004516623.1 | Scaffold1412 | 3426                    | TT                              | GG                | 1946651548               |
| SNP_P3_152993_3469   | NW_004516623.1 | Scaffold1412 | 3469                    | GG                              | AA                | 1946651549               |
| SNP_P3_152994_3482   | NW_004516623.1 | Scaffold1412 | 3482                    | GG                              | AA                | 1946651550               |
| SNP_P3_152995_3514   | NW_004516623.1 | Scaffold1412 | 3514                    | CC                              | TT                | 1946651552               |
| SNP_P3_152996_3515   | NW_004516623.1 | Scaffold1412 | 3515                    | AA                              | GG                | 1946651554               |
| SNP_P3_152997_3543   | NW_004516623.1 | Scaffold1412 | 3543                    | TT                              | AA                | 1946651556               |
| SNP_P3_152998_3734   | NW_004516623.1 | Scaffold1412 | 3734                    | TT                              | CC                | 1946651558               |
| SNP_P3_152999_3748   | NW_004516623.1 | Scaffold1412 | 3748                    | TT                              | GG                | 1946651560               |
| SNP_P3_153000_3786   | NW_004516623.1 | Scaffold1412 | 3786                    | TT                              | GG                | 1946651562               |
| SNP_P3_153001_3853   | NW_004516623.1 | Scaffold1412 | 3853                    | AA                              | GG                | 1946651564               |
| SNP_P3_153002_3863   | NW_004516623.1 | Scaffold1412 | 3863                    | AA                              | GG                | 1946651566               |
| SNP_P3_153003_17077  | NW_004516623.1 | Scaffold1412 | 17077                   | GG                              | AA                | 1946651568               |
| SNP_P3_153004_17458  | NW_004516623.1 | Scaffold1412 | 17458                   | TT                              | AA                | 1946651569               |
| SNP_P3_153005_17595  | NW_004516623.1 | Scaffold1412 | 17595                   | CC                              | TT                | 1946651571               |
| SNP_P3_153007_18151  | NW_004516623.1 | Scaffold1412 | 18151                   | AA                              | GG                | 1946651573               |

| SNPs IDs            | Chromosome IDs | Chromosomes  | Physical positions (bp) | CDC Frontier (Reference genome) | (Pusa 256 & HPNB) | NCBI SNPdb Accession IDs |
|---------------------|----------------|--------------|-------------------------|---------------------------------|-------------------|--------------------------|
| SNP_P3_153008_18209 | NW_004516623.1 | Scaffold1412 | 18209                   | GG                              | TT                | 1946651575               |
| SNP_P3_153009_2127  | NW_004516625.1 | Scaffold1414 | 2127                    | GG                              | AA                | 1946651577               |
| SNP_P3_153010_2437  | NW_004516625.1 | Scaffold1414 | 2437                    | AA                              | TT                | 1946651579               |
| SNP_P3_153011_2521  | NW_004516625.1 | Scaffold1414 | 2521                    | AA                              | TT                | 1946651581               |
| SNP_P3_153013_20673 | NW_004516625.1 | Scaffold1414 | 20673                   | AA                              | GG                | 1946651583               |
| SNP_P3_153014_20681 | NW_004516625.1 | Scaffold1414 | 20681                   | TT                              | AA                | 1946651585               |
| SNP_P3_153015_29680 | NW_004516625.1 | Scaffold1414 | 29680                   | AA                              | CC                | 1946651587               |
| SNP_P3_153016_32255 | NW_004516625.1 | Scaffold1414 | 32255                   | TT                              | CC                | 1946651589               |
| SNP_P3_153017_32934 | NW_004516625.1 | Scaffold1414 | 32934                   | CC                              | TT                | 1946651592               |
| SNP_P3_153018_33045 | NW_004516625.1 | Scaffold1414 | 33045                   | TT                              | CC                | 1946651594               |
| SNP_P3_153019_33120 | NW_004516625.1 | Scaffold1414 | 33120                   | CC                              | AA                | 1946651596               |
| SNP_P3_153020_35999 | NW_004516625.1 | Scaffold1414 | 35999                   | TT                              | GG                | 1946651598               |
| SNP_P3_153021_36025 | NW_004516625.1 | Scaffold1414 | 36025                   | GG                              | CC                | 1946651600               |
| SNP_P3_153022_36485 | NW_004516625.1 | Scaffold1414 | 36485                   | CC                              | AA                | 1946651602               |
| SNP_P3_153023_36500 | NW_004516625.1 | Scaffold1414 | 36500                   | TT                              | AA                | 1946651603               |
| SNP_P3_153024_36517 | NW_004516625.1 | Scaffold1414 | 36517                   | AA                              | GG                | 1946651605               |
| SNP_P3_153025_36519 | NW_004516625.1 | Scaffold1414 | 36519                   | AA                              | TT                | 1946651607               |
| SNP_P3_153026_36520 | NW_004516625.1 | Scaffold1414 | 36520                   | AA                              | GG                | 1946651609               |
| SNP_P3_153027_37984 | NW_004516625.1 | Scaffold1414 | 37984                   | AA                              | GG                | 1946651611               |
| SNP_P3_153028_38087 | NW_004516625.1 | Scaffold1414 | 38087                   | GG                              | AA                | 1946651613               |
| SNP_P3_153029_38155 | NW_004516625.1 | Scaffold1414 | 38155                   | TT                              | CC                | 1946651615               |
| SNP_P3_153030_38194 | NW_004516625.1 | Scaffold1414 | 38194                   | GG                              | AA                | 1946651617               |
| SNP_P3_153033_48682 | NW_004516625.1 | Scaffold1414 | 48682                   | GG                              | TT                | 1946651619               |
| SNP_P3_153034_48687 | NW_004516625.1 | Scaffold1414 | 48687                   | CC                              | TT                | 1946651621               |
| SNP_P3_153035_48838 | NW_004516625.1 | Scaffold1414 | 48838                   | GG                              | CC                | 1946651623               |
| SNP_P3_153036_48864 | NW_004516625.1 | Scaffold1414 | 48864                   | TT                              | CC                | 1946651625               |
| SNP_P3_153037_48895 | NW_004516625.1 | Scaffold1414 | 48895                   | GG                              | AA                | 1946651627               |
| SNP_P3_153038_55014 | NW_004516625.1 | Scaffold1414 | 55014                   | AA                              | TT                | 1946651629               |
| SNP_P3_153039_55023 | NW_004516625.1 | Scaffold1414 | 55023                   | AA                              | GG                | 1946651631               |
| SNP_P3_153040_55033 | NW_004516625.1 | Scaffold1414 | 55033                   | TT                              | CC                | 1946651633               |
| SNP_P3_153041_55291 | NW_004516625.1 | Scaffold1414 | 55291                   | CC                              | AA                | 1946651634               |
| SNP_P3_153043_55402 | NW_004516625.1 | Scaffold1414 | 55402                   | AA                              | CC                | 1946651636               |
| SNP_P3_153044_55409 | NW_004516625.1 | Scaffold1414 | 55409                   | TT                              | CC                | 1946651640               |
| SNP_P3_153045_56195 | NW_004516625.1 | Scaffold1414 | 56195                   | TT                              | AA                | 1946651642               |
| SNP_P3_153046_59456 | NW_004516625.1 | Scaffold1414 | 59456                   | AA                              | CC                | 1946651644               |
| SNP_P3_153047_59486 | NW_004516625.1 | Scaffold1414 | 59486                   | TT                              | CC                | 1946651646               |
| SNP_P3_153048_59516 | NW_004516625.1 | Scaffold1414 | 59516                   | AA                              | GG                | 1946651648               |
| SNP_P3_153049_59759 | NW_004516625.1 | Scaffold1414 | 59759                   | GG                              | AA                | 1946651650               |
| SNP_P3_153050_59813 | NW_004516625.1 | Scaffold1414 | 59813                   | CC                              | TT                | 1946651652               |
| SNP_P3_153051_59835 | NW_004516625.1 | Scaffold1414 | 59835                   | AA                              | GG                | 1946651654               |
| SNP_P3_153052_59887 | NW_004516625.1 | Scaffold1414 | 59887                   | CC                              | TT                | 1946651656               |
| SNP_P3_153053_63749 | NW_004516625.1 | Scaffold1414 | 63749                   | GG                              | AA                | 1946651658               |

| SNPs IDs             | Chromosome IDs | Chromosomes  | Physical positions (bp) | CDC Frontier (Reference genome) | (Pusa 256 & HPNB) | NCBI SNPdb Accession IDs |
|----------------------|----------------|--------------|-------------------------|---------------------------------|-------------------|--------------------------|
| SNP_P3_153054_64718  | NW_004516625.1 | Scaffold1414 | 64718                   | AA                              | CC                | 1946651660               |
| SNP_P3_153055_67066  | NW_004516625.1 | Scaffold1414 | 67066                   | CC                              | GG                | 1946651662               |
| SNP_P3_153056_67081  | NW_004516625.1 | Scaffold1414 | 67081                   | GG                              | AA                | 1946651664               |
| SNP_P3_153057_67127  | NW_004516625.1 | Scaffold1414 | 67127                   | CC                              | AA                | 1946651666               |
| SNP_P3_153058_67141  | NW_004516625.1 | Scaffold1414 | 67141                   | AA                              | TT                | 1946651668               |
| SNP_P3_153059_67319  | NW_004516625.1 | Scaffold1414 | 67319                   | TT                              | AA                | 1946651670               |
| SNP_P3_153060_68104  | NW_004516625.1 | Scaffold1414 | 68104                   | GG                              | AA                | 1946651672               |
| SNP_P3_153061_71247  | NW_004516625.1 | Scaffold1414 | 71247                   | TT                              | CC                | 1946651674               |
| SNP_P3_153062_71248  | NW_004516625.1 | Scaffold1414 | 71248                   | CC                              | TT                | 1946651676               |
| SNP_P3_153063_71249  | NW_004516625.1 | Scaffold1414 | 71249                   | TT                              | GG                | 1946651678               |
| SNP_P3_153064_85060  | NW_004516625.1 | Scaffold1414 | 85060                   | TT                              | GG                | 1946651680               |
| SNP_P3_153065_115145 | NW_004516625.1 | Scaffold1414 | 115145                  | TT                              | CC                | 1946651682               |
| SNP_P3_153066_124044 | NW_004516625.1 | Scaffold1414 | 124044                  | CC                              | TT                | 1946651684               |
| SNP_P3_153067_124664 | NW_004516625.1 | Scaffold1414 | 124664                  | TT                              | CC                | 1946651686               |
| SNP_P3_153068_124832 | NW_004516625.1 | Scaffold1414 | 124832                  | AA                              | TT                | 1946651689               |
| SNP_P3_153069_124951 | NW_004516625.1 | Scaffold1414 | 124951                  | CC                              | TT                | 1946651691               |
| SNP_P3_153070_125022 | NW_004516625.1 | Scaffold1414 | 125022                  | AA                              | TT                | 1946651693               |
| SNP_P3_153071_125045 | NW_004516625.1 | Scaffold1414 | 125045                  | AA                              | GG                | 1946651695               |
| SNP_P3_153072_125064 | NW_004516625.1 | Scaffold1414 | 125064                  | GG                              | AA                | 1946651697               |
| SNP_P3_153073_125123 | NW_004516625.1 | Scaffold1414 | 125123                  | AA                              | CC                | 1946651699               |
| SNP_P3_153074_125124 | NW_004516625.1 | Scaffold1414 | 125124                  | TT                              | CC                | 1946651700               |
| SNP_P3_153075_125131 | NW_004516625.1 | Scaffold1414 | 125131                  | AA                              | GG                | 1946651702               |
| SNP_P3_153076_125174 | NW_004516625.1 | Scaffold1414 | 125174                  | GG                              | AA                | 1946651704               |
| SNP_P3_153077_125196 | NW_004516625.1 | Scaffold1414 | 125196                  | AA                              | CC                | 1946651706               |
| SNP_P3_153078_125522 | NW_004516625.1 | Scaffold1414 | 125522                  | AA                              | GG                | 1946651708               |
| SNP_P3_153079_125600 | NW_004516625.1 | Scaffold1414 | 125600                  | GG                              | TT                | 1946651710               |
| SNP_P3_153081_139602 | NW_004516625.1 | Scaffold1414 | 139602                  | TT                              | CC                | 1946651712               |
| SNP_P3_153082_139625 | NW_004516625.1 | Scaffold1414 | 139625                  | AA                              | GG                | 1946651714               |
| SNP_P3_153083_139629 | NW_004516625.1 | Scaffold1414 | 139629                  | GG                              | CC                | 1946651716               |
| SNP_P3_153084_139959 | NW_004516625.1 | Scaffold1414 | 139959                  | TT                              | CC                | 1946651718               |
| SNP_P3_153085_139984 | NW_004516625.1 | Scaffold1414 | 139984                  | AA                              | GG                | 1946651720               |
| SNP_P3_153086_140010 | NW_004516625.1 | Scaffold1414 | 140010                  | AA                              | GG                | 1946651722               |
| SNP_P3_153087_140048 | NW_004516625.1 | Scaffold1414 | 140048                  | AA                              | GG                | 1946651724               |
| SNP_P3_153088_140086 | NW_004516625.1 | Scaffold1414 | 140086                  | AA                              | GG                | 1946651726               |
| SNP_P3_153089_140097 | NW_004516625.1 | Scaffold1414 | 140097                  | TT                              | CC                | 1946651728               |
| SNP_P3_153090_143714 | NW_004516625.1 | Scaffold1414 | 143714                  | TT                              | GG                | 1946651732               |
| SNP_P3_153091_145180 | NW_004516625.1 | Scaffold1414 | 145180                  | GG                              | TT                | 1946651734               |
| SNP_P3_153092_145188 | NW_004516625.1 | Scaffold1414 | 145188                  | AA                              | TT                | 1946651736               |
| SNP_P3_153093_145241 | NW_004516625.1 | Scaffold1414 | 145241                  | GG                              | AA                | 1946651738               |
| SNP_P3_153094_145242 | NW_004516625.1 | Scaffold1414 | 145242                  | CC                              | AA                | 1946651740               |
| SNP_P3_153095_145246 | NW_004516625.1 | Scaffold1414 | 145246                  | AA                              | TT                | 1946651742               |
| SNP_P3_153096_145252 | NW_004516625.1 | Scaffold1414 | 145252                  | AA                              | TT                | 1946651744               |



| SNPs IDs             | Chromosome IDs | Chromosomes  | Physical positions (bp) | CDC Frontier (Reference genome) | (Pusa 256 & HPNB) | NCBI SNPdb Accession IDs |
|----------------------|----------------|--------------|-------------------------|---------------------------------|-------------------|--------------------------|
| SNP_P3_153097_145584 | NW_004516625.1 | Scaffold1414 | 145584                  | GG                              | AA                | 1946651746               |
| SNP_P3_153098_145601 | NW_004516625.1 | Scaffold1414 | 145601                  | GG                              | AA                | 1946651748               |
| SNP_P3_153099_145631 | NW_004516625.1 | Scaffold1414 | 145631                  | CC                              | GG                | 1946651750               |
| SNP_P3_153100_145666 | NW_004516625.1 | Scaffold1414 | 145666                  | AA                              | CC                | 1946651752               |
| SNP_P3_153101_145674 | NW_004516625.1 | Scaffold1414 | 145674                  | AA                              | GG                | 1946651754               |
| SNP_P3_153102_146686 | NW_004516625.1 | Scaffold1414 | 146686                  | TT                              | CC                | 1946651756               |
| SNP_P3_153103_147233 | NW_004516625.1 | Scaffold1414 | 147233                  | TT                              | CC                | 1946651758               |
| SNP_P3_153104_147380 | NW_004516625.1 | Scaffold1414 | 147380                  | CC                              | AA                | 1946651760               |
| SNP_P3_153105_148787 | NW_004516625.1 | Scaffold1414 | 148787                  | GG                              | TT                | 1946651762               |
| SNP_P3_153106_149520 | NW_004516625.1 | Scaffold1414 | 149520                  | CC                              | GG                | 1946651764               |
| SNP_P3_153107_149522 | NW_004516625.1 | Scaffold1414 | 149522                  | TT                              | GG                | 1946651766               |
| SNP_P3_153108_149536 | NW_004516625.1 | Scaffold1414 | 149536                  | TT                              | CC                | 1946651768               |
| SNP_P3_153109_151029 | NW_004516625.1 | Scaffold1414 | 151029                  | TT                              | CC                | 1946651770               |
| SNP_P3_153110_151368 | NW_004516625.1 | Scaffold1414 | 151368                  | AA                              | GG                | 1946651773               |
| SNP_P3_153111_151393 | NW_004516625.1 | Scaffold1414 | 151393                  | TT                              | GG                | 1946651775               |
| SNP_P3_153112_172700 | NW_004516625.1 | Scaffold1414 | 172700                  | TT                              | CC                | 1946651777               |
| SNP_P3_153113_177162 | NW_004516625.1 | Scaffold1414 | 177162                  | GG                              | CC                | 1946651779               |
| SNP_P3_153114_190257 | NW_004516625.1 | Scaffold1414 | 190257                  | CC                              | AA                | 1946651781               |
| SNP_P3_153115_190283 | NW_004516625.1 | Scaffold1414 | 190283                  | AA                              | CC                | 1946651783               |
| SNP_P3_153116_190286 | NW_004516625.1 | Scaffold1414 | 190286                  | TT                              | GG                | 1946651785               |
| SNP_P3_153117_190314 | NW_004516625.1 | Scaffold1414 | 190314                  | CC                              | TT                | 1946651787               |
| SNP_P3_153118_190327 | NW_004516625.1 | Scaffold1414 | 190327                  | TT                              | CC                | 1946651789               |
| SNP_P3_153119_190353 | NW_004516625.1 | Scaffold1414 | 190353                  | AA                              | GG                | 1946651791               |
| SNP_P3_153120_190363 | NW_004516625.1 | Scaffold1414 | 190363                  | AA                              | TT                | 1946651793               |
| SNP_P3_153121_190375 | NW_004516625.1 | Scaffold1414 | 190375                  | TT                              | CC                | 1946651795               |
| SNP_P3_153122_190390 | NW_004516625.1 | Scaffold1414 | 190390                  | CC                              | TT                | 1946651797               |
| SNP_P3_153123_190394 | NW_004516625.1 | Scaffold1414 | 190394                  | GG                              | AA                | 1946651799               |
| SNP_P3_153124_190449 | NW_004516625.1 | Scaffold1414 | 190449                  | CC                              | TT                | 1946651801               |
| SNP_P3_153125_190469 | NW_004516625.1 | Scaffold1414 | 190469                  | AA                              | TT                | 1946651803               |
| SNP_P3_153127_190557 | NW_004516625.1 | Scaffold1414 | 190557                  | AA                              | GG                | 1946651805               |
| SNP_P3_153128_190580 | NW_004516625.1 | Scaffold1414 | 190580                  | TT                              | CC                | 1946651807               |
| SNP_P3_153130_190638 | NW_004516625.1 | Scaffold1414 | 190638                  | TT                              | CC                | 1946651809               |
| SNP_P3_153131_190644 | NW_004516625.1 | Scaffold1414 | 190644                  | GG                              | AA                | 1946651812               |
| SNP_P3_153132_190664 | NW_004516625.1 | Scaffold1414 | 190664                  | TT                              | CC                | 1946651815               |
| SNP_P3_153133_190675 | NW_004516625.1 | Scaffold1414 | 190675                  | AA                              | CC                | 1946651818               |
| SNP_P3_153134_190698 | NW_004516625.1 | Scaffold1414 | 190698                  | TT                              | GG                | 1946651820               |
| SNP_P3_153135_190900 | NW_004516625.1 | Scaffold1414 | 190900                  | TT                              | CC                | 1946651822               |
| SNP_P3_153136_190917 | NW_004516625.1 | Scaffold1414 | 190917                  | AA                              | GG                | 1946651824               |
| SNP_P3_153137_190920 | NW_004516625.1 | Scaffold1414 | 190920                  | AA                              | GG                | 1946651826               |
| SNP_P3_153138_190930 | NW_004516625.1 | Scaffold1414 | 190930                  | CC                              | AA                | 1946651828               |
| SNP_P3_153139_195589 | NW_004516625.1 | Scaffold1414 | 195589                  | AA                              | CC                | 1946651830               |
| SNP_P3_153140_209026 | NW_004516625.1 | Scaffold1414 | 209026                  | CC                              | TT                | 1946651831               |

| SNPs IDs             | Chromosome IDs | Chromosomes  | Physical positions (bp) | CDC Frontier (Reference genome) | (Pusa 256 & HPNB) | NCBI SNPdb Accession IDs |
|----------------------|----------------|--------------|-------------------------|---------------------------------|-------------------|--------------------------|
| SNP_P3_153141_209066 | NW_004516625.1 | Scaffold1414 | 209066                  | TT                              | CC                | 1946651833               |
| SNP_P3_153142_209371 | NW_004516625.1 | Scaffold1414 | 209371                  | GG                              | AA                | 1946651835               |
| SNP_P3_153143_209401 | NW_004516625.1 | Scaffold1414 | 209401                  | TT                              | AA                | 1946651838               |
| SNP_P3_153144_215436 | NW_004516625.1 | Scaffold1414 | 215436                  | CC                              | TT                | 1946651840               |
| SNP_P3_153145_215523 | NW_004516625.1 | Scaffold1414 | 215523                  | TT                              | CC                | 1946651842               |
| SNP_P3_153146_217191 | NW_004516625.1 | Scaffold1414 | 217191                  | CC                              | TT                | 1946651844               |
| SNP_P3_153147_226834 | NW_004516625.1 | Scaffold1414 | 226834                  | AA                              | CC                | 1946651846               |
| SNP_P3_153148_226836 | NW_004516625.1 | Scaffold1414 | 226836                  | GG                              | TT                | 1946651848               |
| SNP_P3_153149_226853 | NW_004516625.1 | Scaffold1414 | 226853                  | AA                              | CC                | 1946651850               |
| SNP_P3_153150_226875 | NW_004516625.1 | Scaffold1414 | 226875                  | CC                              | TT                | 1946651852               |
| SNP_P3_153151_226876 | NW_004516625.1 | Scaffold1414 | 226876                  | AA                              | GG                | 1946651854               |
| SNP_P3_153152_234586 | NW_004516625.1 | Scaffold1414 | 234586                  | TT                              | AA                | 1946651856               |
| SNP_P3_153153_235099 | NW_004516625.1 | Scaffold1414 | 235099                  | AA                              | TT                | 1946651858               |
| SNP_P3_153154_240925 | NW_004516625.1 | Scaffold1414 | 240925                  | AA                              | CC                | 1946651860               |
| SNP_P3_153155_241015 | NW_004516625.1 | Scaffold1414 | 241015                  | GG                              | AA                | 1946651861               |
| SNP_P3_153156_241209 | NW_004516625.1 | Scaffold1414 | 241209                  | TT                              | CC                | 1946651863               |
| SNP_P3_153157_241248 | NW_004516625.1 | Scaffold1414 | 241248                  | AA                              | CC                | 1946651865               |
| SNP_P3_153158_241304 | NW_004516625.1 | Scaffold1414 | 241304                  | AA                              | GG                | 1946651867               |
| SNP_P3_153159_245996 | NW_004516625.1 | Scaffold1414 | 245996                  | TT                              | CC                | 1946651869               |
| SNP_P3_153160_246004 | NW_004516625.1 | Scaffold1414 | 246004                  | CC                              | TT                | 1946651871               |
| SNP_P3_153161_246034 | NW_004516625.1 | Scaffold1414 | 246034                  | GG                              | AA                | 1946651873               |
| SNP_P3_153162_246054 | NW_004516625.1 | Scaffold1414 | 246054                  | TT                              | AA                | 1946651875               |
| SNP_P3_153163_246066 | NW_004516625.1 | Scaffold1414 | 246066                  | GG                              | AA                | 1946651878               |
| SNP_P3_153164_246134 | NW_004516625.1 | Scaffold1414 | 246134                  | CC                              | GG                | 1946651880               |
| SNP_P3_153165_246148 | NW_004516625.1 | Scaffold1414 | 246148                  | CC                              | AA                | 1946651882               |
| SNP_P3_153166_246149 | NW_004516625.1 | Scaffold1414 | 246149                  | TT                              | CC                | 1946651884               |
| SNP_P3_153167_246539 | NW_004516625.1 | Scaffold1414 | 246539                  | TT                              | AA                | 1946651886               |
| SNP_P3_153168_8687   | NW_004516627.1 | Scaffold1417 | 8687                    | CC                              | TT                | 1946651888               |
| SNP_P3_153169_8691   | NW_004516627.1 | Scaffold1417 | 8691                    | GG                              | AA                | 1946651890               |
| SNP_P3_153170_8941   | NW_004516627.1 | Scaffold1417 | 8941                    | AA                              | GG                | 1946651892               |
| SNP_P3_153171_9099   | NW_004516627.1 | Scaffold1417 | 9099                    | GG                              | AA                | 1946651894               |
| SNP_P3_153173_35160  | NW_004516627.1 | Scaffold1417 | 35160                   | CC                              | TT                | 1946651896               |
| SNP_P3_153176_44572  | NW_004516627.1 | Scaffold1417 | 44572                   | TT                              | CC                | 1946651898               |
| SNP_P3_153177_46884  | NW_004516627.1 | Scaffold1417 | 46884                   | CC                              | AA                | 1946651900               |
| SNP_P3_153178_46905  | NW_004516627.1 | Scaffold1417 | 46905                   | CC                              | GG                | 1946651902               |
| SNP_P3_153179_47226  | NW_004516627.1 | Scaffold1417 | 47226                   | CC                              | TT                | 1946651904               |
| SNP_P3_153180_58599  | NW_004516627.1 | Scaffold1417 | 58599                   | AA                              | GG                | 1946651906               |
| SNP_P3_153181_58658  | NW_004516627.1 | Scaffold1417 | 58658                   | GG                              | AA                | 1946651908               |
| SNP_P3_153182_58661  | NW_004516627.1 | Scaffold1417 | 58661                   | TT                              | AA                | 1946651910               |
| SNP_P3_153183_58674  | NW_004516627.1 | Scaffold1417 | 58674                   | AA                              | TT                | 1946651912               |
| SNP_P3_153184_58684  | NW_004516627.1 | Scaffold1417 | 58684                   | TT                              | CC                | 1946651914               |
| SNP_P3_153185_58701  | NW_004516627.1 | Scaffold1417 | 58701                   | AA                              | GG                | 1946651916               |

| SNPs IDs             | Chromosome IDs | Chromosomes  | Physical positions (bp) | CDC Frontier (Reference genome) | (Pusa 256 & HPNB) | NCBI SNPdb Accession IDs |
|----------------------|----------------|--------------|-------------------------|---------------------------------|-------------------|--------------------------|
| SNP_P3_153186_87604  | NW_004516627.1 | Scaffold1417 | 87604                   | CC                              | TT                | 1946651919               |
| SNP_P3_153187_87661  | NW_004516627.1 | Scaffold1417 | 87661                   | GG                              | AA                | 1946651920               |
| SNP_P3_153188_87678  | NW_004516627.1 | Scaffold1417 | 87678                   | AA                              | TT                | 1946651922               |
| SNP_P3_153189_87682  | NW_004516627.1 | Scaffold1417 | 87682                   | AA                              | TT                | 1946651924               |
| SNP_P3_153190_87942  | NW_004516627.1 | Scaffold1417 | 87942                   | GG                              | AA                | 1946651926               |
| SNP_P3_153191_87945  | NW_004516627.1 | Scaffold1417 | 87945                   | AA                              | TT                | 1946651928               |
| SNP_P3_153192_88084  | NW_004516627.1 | Scaffold1417 | 88084                   | TT                              | CC                | 1946651930               |
| SNP_P3_153193_94622  | NW_004516627.1 | Scaffold1417 | 94622                   | CC                              | TT                | 1946651932               |
| SNP_P3_153194_98185  | NW_004516627.1 | Scaffold1417 | 98185                   | AA                              | GG                | 1946651934               |
| SNP_P3_153195_119975 | NW_004516627.1 | Scaffold1417 | 119975                  | TT                              | AA                | 1946651936               |
| SNP_P3_153196_119992 | NW_004516627.1 | Scaffold1417 | 119992                  | AA                              | CC                | 1946651938               |
| SNP_P3_153197_120013 | NW_004516627.1 | Scaffold1417 | 120013                  | CC                              | TT                | 1946651940               |
| SNP_P3_153198_120026 | NW_004516627.1 | Scaffold1417 | 120026                  | CC                              | TT                | 1946651942               |
| SNP_P3_153199_123643 | NW_004516627.1 | Scaffold1417 | 123643                  | TT                              | GG                | 1946651944               |
| SNP_P3_153200_123793 | NW_004516627.1 | Scaffold1417 | 123793                  | TT                              | CC                | 1946651946               |
| SNP_P3_153202_123834 | NW_004516627.1 | Scaffold1417 | 123834                  | GG                              | CC                | 1946651948               |
| SNP_P3_153203_123859 | NW_004516627.1 | Scaffold1417 | 123859                  | TT                              | CC                | 1946651950               |
| SNP_P3_153204_123927 | NW_004516627.1 | Scaffold1417 | 123927                  | GG                              | AA                | 1946651952               |
| SNP_P3_153205_123950 | NW_004516627.1 | Scaffold1417 | 123950                  | TT                              | AA                | 1946651954               |
| SNP_P3_153206_127854 | NW_004516627.1 | Scaffold1417 | 127854                  | CC                              | TT                | 1946651956               |
| SNP_P3_153207_178522 | NW_004516627.1 | Scaffold1417 | 178522                  | GG                              | TT                | 1946651959               |
| SNP_P3_153208_178886 | NW_004516627.1 | Scaffold1417 | 178886                  | CC                              | GG                | 1946651961               |
| SNP_P3_153209_178895 | NW_004516627.1 | Scaffold1417 | 178895                  | CC                              | TT                | 1946651962               |
| SNP_P3_153210_184458 | NW_004516627.1 | Scaffold1417 | 184458                  | TT                              | CC                | 1946651964               |
| SNP_P3_153211_189626 | NW_004516627.1 | Scaffold1417 | 189626                  | GG                              | AA                | 1946651966               |
| SNP_P3_153212_189666 | NW_004516627.1 | Scaffold1417 | 189666                  | GG                              | AA                | 1946651968               |
| SNP_P3_153213_191830 | NW_004516627.1 | Scaffold1417 | 191830                  | GG                              | AA                | 1946651970               |
| SNP_P3_153215_191849 | NW_004516627.1 | Scaffold1417 | 191849                  | AA                              | GG                | 1946651972               |
| SNP_P3_153216_192709 | NW_004516627.1 | Scaffold1417 | 192709                  | GG                              | CC                | 1946651974               |
| SNP_P3_153217_234445 | NW_004516627.1 | Scaffold1417 | 234445                  | AA                              | GG                | 1946651976               |
| SNP_P3_153218_234621 | NW_004516627.1 | Scaffold1417 | 234621                  | TT                              | CC                | 1946651978               |
| SNP_P3_153219_234654 | NW_004516627.1 | Scaffold1417 | 234654                  | CC                              | GG                | 1946651980               |
| SNP_P3_153220_242594 | NW_004516627.1 | Scaffold1417 | 242594                  | AA                              | TT                | 1946651982               |
| SNP_P3_153222_245426 | NW_004516627.1 | Scaffold1417 | 245426                  | TT                              | CC                | 1946651984               |
| SNP_P3_153223_249671 | NW_004516627.1 | Scaffold1417 | 249671                  | AA                              | GG                | 1946651986               |
| SNP_P3_153224_249942 | NW_004516627.1 | Scaffold1417 | 249942                  | GG                              | TT                | 1946651988               |
| SNP_P3_153225_249955 | NW_004516627.1 | Scaffold1417 | 249955                  | TT                              | CC                | 1946651990               |
| SNP_P3_153226_250063 | NW_004516627.1 | Scaffold1417 | 250063                  | AA                              | GG                | 1946651992               |
| SNP_P3_153227_260257 | NW_004516627.1 | Scaffold1417 | 260257                  | GG                              | TT                | 1946651994               |
| SNP_P3_153228_260275 | NW_004516627.1 | Scaffold1417 | 260275                  | CC                              | TT                | 1946651996               |
| SNP_P3_153229_260347 | NW_004516627.1 | Scaffold1417 | 260347                  | GG                              | AA                | 1946651999               |
| SNP_P3_153230_282879 | NW_004516627.1 | Scaffold1417 | 282879                  | AA                              | GG                | 1946652001               |

| SNPs IDs             | Chromosome IDs | Chromosomes  | Physical positions (bp) | CDC Frontier (Reference genome) | (Pusa 256 & HPNB) | NCBI SNPdb Accession IDs |
|----------------------|----------------|--------------|-------------------------|---------------------------------|-------------------|--------------------------|
| SNP_P3_153231_282942 | NW_004516627.1 | Scaffold1417 | 282942                  | AA                              | TT                | 1946652003               |
| SNP_P3_153232_282955 | NW_004516627.1 | Scaffold1417 | 282955                  | GG                              | AA                | 1946652005               |
| SNP_P3_153234_314675 | NW_004516627.1 | Scaffold1417 | 314675                  | CC                              | TT                | 1946652007               |
| SNP_P3_153235_314765 | NW_004516627.1 | Scaffold1417 | 314765                  | GG                              | AA                | 1946652009               |
| SNP_P3_153236_314805 | NW_004516627.1 | Scaffold1417 | 314805                  | AA                              | TT                | 1946652011               |
| SNP_P3_153237_314850 | NW_004516627.1 | Scaffold1417 | 314850                  | TT                              | AA                | 1946652013               |
| SNP_P3_153238_352081 | NW_004516627.1 | Scaffold1417 | 352081                  | CC                              | GG                | 1946652015               |
| SNP_P3_153239_352091 | NW_004516627.1 | Scaffold1417 | 352091                  | AA                              | GG                | 1946652017               |
| SNP_P3_153240_352211 | NW_004516627.1 | Scaffold1417 | 352211                  | CC                              | TT                | 1946652019               |
| SNP_P3_153241_352223 | NW_004516627.1 | Scaffold1417 | 352223                  | TT                              | CC                | 1946652021               |
| SNP_P3_153242_352260 | NW_004516627.1 | Scaffold1417 | 352260                  | GG                              | AA                | 1946652023               |
| SNP_P3_153243_352302 | NW_004516627.1 | Scaffold1417 | 352302                  | AA                              | GG                | 1946652025               |
| SNP_P3_153244_352311 | NW_004516627.1 | Scaffold1417 | 352311                  | GG                              | TT                | 1946652027               |
| SNP_P3_153245_5071   | NW_004516628.1 | Scaffold1418 | 5071                    | AA                              | TT                | 1946652029               |
| SNP_P3_153247_8542   | NW_004516628.1 | Scaffold1418 | 8542                    | GG                              | AA                | 1946652031               |
| SNP_P3_153248_8780   | NW_004516628.1 | Scaffold1418 | 8780                    | TT                              | CC                | 1946652033               |
| SNP_P3_153249_9534   | NW_004516628.1 | Scaffold1418 | 9534                    | GG                              | AA                | 1946652036               |
| SNP_P3_153250_12095  | NW_004516628.1 | Scaffold1418 | 12095                   | CC                              | TT                | 1946652038               |
| SNP_P3_153251_13957  | NW_004516628.1 | Scaffold1418 | 13957                   | TT                              | CC                | 1946652040               |
| SNP_P3_153252_14452  | NW_004516628.1 | Scaffold1418 | 14452                   | TT                              | CC                | 1946652042               |
| SNP_P3_153254_16368  | NW_004516628.1 | Scaffold1418 | 16368                   | CC                              | TT                | 1946652044               |
| SNP_P3_153255_17363  | NW_004516628.1 | Scaffold1418 | 17363                   | TT                              | CC                | 1946652046               |
| SNP_P3_153256_17777  | NW_004516628.1 | Scaffold1418 | 17777                   | CC                              | TT                | 1946652048               |
| SNP_P3_153259_18338  | NW_004516628.1 | Scaffold1418 | 18338                   | TT                              | CC                | 1946652050               |
| SNP_P3_153260_18480  | NW_004516628.1 | Scaffold1418 | 18480                   | CC                              | TT                | 1946652052               |
| SNP_P3_153261_18543  | NW_004516628.1 | Scaffold1418 | 18543                   | AA                              | GG                | 1946652054               |
| SNP_P3_153262_18812  | NW_004516628.1 | Scaffold1418 | 18812                   | CC                              | AA                | 1946652056               |
| SNP_P3_153265_23307  | NW_004516628.1 | Scaffold1418 | 23307                   | AA                              | GG                | 1946652058               |
| SNP_P3_153266_24706  | NW_004516628.1 | Scaffold1418 | 24706                   | CC                              | GG                | 1946652060               |
| SNP_P3_153267_25170  | NW_004516628.1 | Scaffold1418 | 25170                   | TT                              | GG                | 1946652062               |
| SNP_P3_153268_25213  | NW_004516628.1 | Scaffold1418 | 25213                   | CC                              | GG                | 1946652064               |
| SNP_P3_153270_32025  | NW_004516628.1 | Scaffold1418 | 32025                   | AA                              | TT                | 1946652066               |
| SNP_P3_153271_32984  | NW_004516628.1 | Scaffold1418 | 32984                   | GG                              | AA                | 1946652068               |
| SNP_P3_153272_33084  | NW_004516628.1 | Scaffold1418 | 33084                   | AA                              | TT                | 1946652070               |
| SNP_P3_153274_38722  | NW_004516628.1 | Scaffold1418 | 38722                   | CC                              | TT                | 1946652072               |
| SNP_P3_153275_39466  | NW_004516628.1 | Scaffold1418 | 39466                   | CC                              | TT                | 1946652074               |
| SNP_P3_153276_61556  | NW_004516628.1 | Scaffold1418 | 61556                   | TT                              | CC                | 1946652076               |
| SNP_P3_153277_61932  | NW_004516628.1 | Scaffold1418 | 61932                   | CC                              | TT                | 1946652078               |
| SNP_P3_153278_71750  | NW_004516628.1 | Scaffold1418 | 71750                   | TT                              | GG                | 1946652082               |
| SNP_P3_153279_91671  | NW_004516628.1 | Scaffold1418 | 91671                   | CC                              | TT                | 1946652084               |
| SNP_P3_153280_196    | NW_004516629.1 | Scaffold1419 | 196                     | TT                              | CC                | 1946652086               |
| SNP_P3_153281_510    | NW_004516629.1 | Scaffold1419 | 510                     | AA                              | TT                | 1946652088               |

| SNPs IDs            | Chromosome IDs | Chromosomes  | Physical positions (bp) | CDC Frontier (Reference genome) | (Pusa 256 & HPNB) | NCBI SNPdb Accession IDs |
|---------------------|----------------|--------------|-------------------------|---------------------------------|-------------------|--------------------------|
| SNP_P3_153282_545   | NW_004516629.1 | Scaffold1419 | 545                     | CC                              | AA                | 1946652090               |
| SNP_P3_153283_964   | NW_004516629.1 | Scaffold1419 | 964                     | GG                              | AA                | 1946652092               |
| SNP_P3_153284_1641  | NW_004516629.1 | Scaffold1419 | 1641                    | CC                              | TT                | 1946652094               |
| SNP_P3_153285_1682  | NW_004516629.1 | Scaffold1419 | 1682                    | GG                              | CC                | 1946652096               |
| SNP_P3_153286_9789  | NW_004516629.1 | Scaffold1419 | 9789                    | CC                              | AA                | 1946652098               |
| SNP_P3_153287_9791  | NW_004516629.1 | Scaffold1419 | 9791                    | GG                              | AA                | 1946652100               |
| SNP_P3_153288_10358 | NW_004516629.1 | Scaffold1419 | 10358                   | TT                              | AA                | 1946652102               |
| SNP_P3_153289_10422 | NW_004516629.1 | Scaffold1419 | 10422                   | GG                              | CC                | 1946652104               |
| SNP_P3_153290_10553 | NW_004516629.1 | Scaffold1419 | 10553                   | GG                              | CC                | 1946652106               |
| SNP_P3_153291_10564 | NW_004516629.1 | Scaffold1419 | 10564                   | GG                              | AA                | 1946652108               |
| SNP_P3_153292_10567 | NW_004516629.1 | Scaffold1419 | 10567                   | TT                              | CC                | 1946652110               |
| SNP_P3_153294_10762 | NW_004516629.1 | Scaffold1419 | 10762                   | GG                              | AA                | 1946652112               |
| SNP_P3_153295_10791 | NW_004516629.1 | Scaffold1419 | 10791                   | GG                              | AA                | 1946652114               |
| SNP_P3_153296_10796 | NW_004516629.1 | Scaffold1419 | 10796                   | CC                              | TT                | 1946652116               |
| SNP_P3_153297_10797 | NW_004516629.1 | Scaffold1419 | 10797                   | CC                              | AA                | 1946652118               |
| SNP_P3_153298_18552 | NW_004516629.1 | Scaffold1419 | 18552                   | AA                              | TT                | 1946652120               |
| SNP_P3_153299_19512 | NW_004516629.1 | Scaffold1419 | 19512                   | TT                              | GG                | 1946652122               |
| SNP_P3_153300_19521 | NW_004516629.1 | Scaffold1419 | 19521                   | TT                              | GG                | 1946652124               |
| SNP_P3_153301_19690 | NW_004516629.1 | Scaffold1419 | 19690                   | CC                              | TT                | 1946652127               |
| SNP_P3_153302_19692 | NW_004516629.1 | Scaffold1419 | 19692                   | TT                              | GG                | 1946652129               |
| SNP_P3_153303_19767 | NW_004516629.1 | Scaffold1419 | 19767                   | TT                              | CC                | 1946652131               |
| SNP_P3_153304_20019 | NW_004516629.1 | Scaffold1419 | 20019                   | CC                              | TT                | 1946652133               |
| SNP_P3_153305_20140 | NW_004516629.1 | Scaffold1419 | 20140                   | AA                              | CC                | 1946652135               |
| SNP_P3_153306_20146 | NW_004516629.1 | Scaffold1419 | 20146                   | GG                              | CC                | 1946652137               |
| SNP_P3_153307_20148 | NW_004516629.1 | Scaffold1419 | 20148                   | GG                              | AA                | 1946652138               |
| SNP_P3_153308_20164 | NW_004516629.1 | Scaffold1419 | 20164                   | CC                              | TT                | 1946652140               |
| SNP_P3_153309_20193 | NW_004516629.1 | Scaffold1419 | 20193                   | AA                              | CC                | 1946652142               |
| SNP_P3_153310_20298 | NW_004516629.1 | Scaffold1419 | 20298                   | AA                              | CC                | 1946652144               |
| SNP_P3_153311_20761 | NW_004516629.1 | Scaffold1419 | 20761                   | GG                              | AA                | 1946652146               |
| SNP_P3_153312_20763 | NW_004516629.1 | Scaffold1419 | 20763                   | GG                              | CC                | 1946652148               |
| SNP_P3_153313_20780 | NW_004516629.1 | Scaffold1419 | 20780                   | CC                              | TT                | 1946652150               |
| SNP_P3_153314_21058 | NW_004516629.1 | Scaffold1419 | 21058                   | AA                              | CC                | 1946652152               |
| SNP_P3_153316_21556 | NW_004516629.1 | Scaffold1419 | 21556                   | GG                              | CC                | 1946652154               |
| SNP_P3_153317_21620 | NW_004516629.1 | Scaffold1419 | 21620                   | TT                              | CC                | 1946652156               |
| SNP_P3_153318_21645 | NW_004516629.1 | Scaffold1419 | 21645                   | TT                              | AA                | 1946652158               |
| SNP_P3_153319_21646 | NW_004516629.1 | Scaffold1419 | 21646                   | CC                              | AA                | 1946652160               |
| SNP_P3_153320_21651 | NW_004516629.1 | Scaffold1419 | 21651                   | AA                              | TT                | 1946652162               |
| SNP_P3_153321_21664 | NW_004516629.1 | Scaffold1419 | 21664                   | TT                              | AA                | 1946652164               |
| SNP_P3_153322_21682 | NW_004516629.1 | Scaffold1419 | 21682                   | AA                              | GG                | 1946652166               |
| SNP_P3_153323_21748 | NW_004516629.1 | Scaffold1419 | 21748                   | GG                              | AA                | 1946652168               |
| SNP_P3_153324_21758 | NW_004516629.1 | Scaffold1419 | 21758                   | AA                              | TT                | 1946652170               |
| SNP_P3_153325_22058 | NW_004516629.1 | Scaffold1419 | 22058                   | CC                              | TT                | 1946652172               |

| SNPs IDs            | Chromosome IDs | Chromosomes  | Physical positions (bp) | CDC Frontier (Reference genome) | (Pusa 256 & HPNB) | NCBI SNPdb Accession IDs |
|---------------------|----------------|--------------|-------------------------|---------------------------------|-------------------|--------------------------|
| SNP_P3_153326_22070 | NW_004516629.1 | Scaffold1419 | 22070                   | AA                              | TT                | 1946652174               |
| SNP_P3_153327_22122 | NW_004516629.1 | Scaffold1419 | 22122                   | AA                              | TT                | 1946652176               |
| SNP_P3_153328_22323 | NW_004516629.1 | Scaffold1419 | 22323                   | AA                              | GG                | 1946652179               |
| SNP_P3_153329_22395 | NW_004516629.1 | Scaffold1419 | 22395                   | GG                              | TT                | 1946652181               |
| SNP_P3_153331_22472 | NW_004516629.1 | Scaffold1419 | 22472                   | GG                              | AA                | 1946652183               |
| SNP_P3_153332_22697 | NW_004516629.1 | Scaffold1419 | 22697                   | TT                              | CC                | 1946652185               |
| SNP_P3_153333_22732 | NW_004516629.1 | Scaffold1419 | 22732                   | GG                              | TT                | 1946652187               |
| SNP_P3_153334_22918 | NW_004516629.1 | Scaffold1419 | 22918                   | CC                              | AA                | 1946652189               |
| SNP_P3_153335_22927 | NW_004516629.1 | Scaffold1419 | 22927                   | GG                              | AA                | 1946652192               |
| SNP_P3_153336_24583 | NW_004516629.1 | Scaffold1419 | 24583                   | CC                              | TT                | 1946652194               |
| SNP_P3_153337_24605 | NW_004516629.1 | Scaffold1419 | 24605                   | GG                              | AA                | 1946652196               |
| SNP_P3_153338_24708 | NW_004516629.1 | Scaffold1419 | 24708                   | TT                              | GG                | 1946652198               |
| SNP_P3_153340_24845 | NW_004516629.1 | Scaffold1419 | 24845                   | CC                              | TT                | 1946652199               |
| SNP_P3_153341_24990 | NW_004516629.1 | Scaffold1419 | 24990                   | AA                              | TT                | 1946652201               |
| SNP_P3_153342_26033 | NW_004516629.1 | Scaffold1419 | 26033                   | TT                              | GG                | 1946652203               |
| SNP_P3_153343_26316 | NW_004516629.1 | Scaffold1419 | 26316                   | CC                              | TT                | 1946652205               |
| SNP_P3_153344_26324 | NW_004516629.1 | Scaffold1419 | 26324                   | TT                              | CC                | 1946652207               |
| SNP_P3_153345_26470 | NW_004516629.1 | Scaffold1419 | 26470                   | CC                              | AA                | 1946652209               |
| SNP_P3_153346_26475 | NW_004516629.1 | Scaffold1419 | 26475                   | TT                              | CC                | 1946652211               |
| SNP_P3_153347_26522 | NW_004516629.1 | Scaffold1419 | 26522                   | CC                              | AA                | 1946652213               |
| SNP_P3_153348_26580 | NW_004516629.1 | Scaffold1419 | 26580                   | GG                              | AA                | 1946652215               |
| SNP_P3_153349_26632 | NW_004516629.1 | Scaffold1419 | 26632                   | TT                              | GG                | 1946652217               |
| SNP_P3_153350_26753 | NW_004516629.1 | Scaffold1419 | 26753                   | TT                              | AA                | 1946652219               |
| SNP_P3_153351_26783 | NW_004516629.1 | Scaffold1419 | 26783                   | GG                              | AA                | 1946652221               |
| SNP_P3_153352_26847 | NW_004516629.1 | Scaffold1419 | 26847                   | CC                              | TT                | 1946652223               |
| SNP_P3_153353_26879 | NW_004516629.1 | Scaffold1419 | 26879                   | TT                              | CC                | 1946652225               |
| SNP_P3_153354_26895 | NW_004516629.1 | Scaffold1419 | 26895                   | AA                              | CC                | 1946652227               |
| SNP_P3_153355_26897 | NW_004516629.1 | Scaffold1419 | 26897                   | AA                              | GG                | 1946652229               |
| SNP_P3_153356_27067 | NW_004516629.1 | Scaffold1419 | 27067                   | TT                              | CC                | 1946652232               |
| SNP_P3_153357_27252 | NW_004516629.1 | Scaffold1419 | 27252                   | CC                              | TT                | 1946652234               |
| SNP_P3_153358_30345 | NW_004516629.1 | Scaffold1419 | 30345                   | AA                              | CC                | 1946652236               |
| SNP_P3_153359_30675 | NW_004516629.1 | Scaffold1419 | 30675                   | AA                              | GG                | 1946652238               |
| SNP_P3_153362_30887 | NW_004516629.1 | Scaffold1419 | 30887                   | CC                              | TT                | 1946652240               |
| SNP_P3_153363_30889 | NW_004516629.1 | Scaffold1419 | 30889                   | TT                              | GG                | 1946652242               |
| SNP_P3_153364_30980 | NW_004516629.1 | Scaffold1419 | 30980                   | AA                              | TT                | 1946652244               |
| SNP_P3_153365_31948 | NW_004516629.1 | Scaffold1419 | 31948                   | GG                              | AA                | 1946652246               |
| SNP_P3_153366_45414 | NW_004516629.1 | Scaffold1419 | 45414                   | TT                              | GG                | 1946652248               |
| SNP_P3_153367_45417 | NW_004516629.1 | Scaffold1419 | 45417                   | CC                              | TT                | 1946652250               |
| SNP_P3_153368_48603 | NW_004516629.1 | Scaffold1419 | 48603                   | CC                              | TT                | 1946652251               |
| SNP_P3_153369_49571 | NW_004516629.1 | Scaffold1419 | 49571                   | AA                              | TT                | 1946652253               |
| SNP_P3_153370_49576 | NW_004516629.1 | Scaffold1419 | 49576                   | AA                              | TT                | 1946652255               |
| SNP_P3_153371_49692 | NW_004516629.1 | Scaffold1419 | 49692                   | AA                              | TT                | 1946652257               |

| SNPs IDs            | Chromosome IDs | Chromosomes  | Physical positions (bp) | CDC Frontier (Reference genome) | (Pusa 256 & HPNB) | NCBI SNPdb Accession IDs |
|---------------------|----------------|--------------|-------------------------|---------------------------------|-------------------|--------------------------|
| SNP_P3_153373_50847 | NW_004516629.1 | Scaffold1419 | 50847                   | AA                              | CC                | 1946652259               |
| SNP_P3_153374_50879 | NW_004516629.1 | Scaffold1419 | 50879                   | AA                              | TT                | 1946652261               |
| SNP_P3_153375_50898 | NW_004516629.1 | Scaffold1419 | 50898                   | TT                              | AA                | 1946652263               |
| SNP_P3_153376_51069 | NW_004516629.1 | Scaffold1419 | 51069                   | CC                              | TT                | 1946652265               |
| SNP_P3_153377_51237 | NW_004516629.1 | Scaffold1419 | 51237                   | AA                              | CC                | 1946652267               |
| SNP_P3_153378_51238 | NW_004516629.1 | Scaffold1419 | 51238                   | AA                              | CC                | 1946652269               |
| SNP_P3_153379_57438 | NW_004516629.1 | Scaffold1419 | 57438                   | AA                              | GG                | 1946652272               |
| SNP_P3_153380_57444 | NW_004516629.1 | Scaffold1419 | 57444                   | AA                              | GG                | 1946652274               |
| SNP_P3_153381_57483 | NW_004516629.1 | Scaffold1419 | 57483                   | AA                              | GG                | 1946652277               |
| SNP_P3_153382_57499 | NW_004516629.1 | Scaffold1419 | 57499                   | TT                              | CC                | 1946652280               |
| SNP_P3_153383_57593 | NW_004516629.1 | Scaffold1419 | 57593                   | TT                              | GG                | 1946652282               |
| SNP_P3_153384_57601 | NW_004516629.1 | Scaffold1419 | 57601                   | TT                              | GG                | 1946652284               |
| SNP_P3_153385_58009 | NW_004516629.1 | Scaffold1419 | 58009                   | AA                              | GG                | 1946652286               |
| SNP_P3_153386_64490 | NW_004516629.1 | Scaffold1419 | 64490                   | TT                              | CC                | 1946652288               |
| SNP_P3_153387_64541 | NW_004516629.1 | Scaffold1419 | 64541                   | AA                              | CC                | 1946652290               |
| SNP_P3_153388_64881 | NW_004516629.1 | Scaffold1419 | 64881                   | AA                              | CC                | 1946652292               |
| SNP_P3_153389_1638  | NW_004516630.1 | Scaffold1420 | 1638                    | GG                              | AA                | 1946652294               |
| SNP_P3_153390_1750  | NW_004516630.1 | Scaffold1420 | 1750                    | AA                              | CC                | 1946652296               |
| SNP_P3_153391_1753  | NW_004516630.1 | Scaffold1420 | 1753                    | AA                              | CC                | 1946652298               |
| SNP_P3_153392_1782  | NW_004516630.1 | Scaffold1420 | 1782                    | CC                              | TT                | 1946652300               |
| SNP_P3_153393_1817  | NW_004516630.1 | Scaffold1420 | 1817                    | TT                              | CC                | 1946652302               |
| SNP_P3_153394_1835  | NW_004516630.1 | Scaffold1420 | 1835                    | TT                              | CC                | 1946652304               |
| SNP_P3_153395_1867  | NW_004516630.1 | Scaffold1420 | 1867                    | AA                              | CC                | 1946652307               |
| SNP_P3_153396_1881  | NW_004516630.1 | Scaffold1420 | 1881                    | CC                              | AA                | 1946652309               |
| SNP_P3_153397_1924  | NW_004516630.1 | Scaffold1420 | 1924                    | CC                              | GG                | 1946652311               |
| SNP_P3_153398_1928  | NW_004516630.1 | Scaffold1420 | 1928                    | TT                              | AA                | 1946652313               |
| SNP_P3_153399_1986  | NW_004516630.1 | Scaffold1420 | 1986                    | GG                              | AA                | 1946652315               |
| SNP_P3_153400_2092  | NW_004516630.1 | Scaffold1420 | 2092                    | AA                              | GG                | 1946652317               |
| SNP_P3_153401_2105  | NW_004516630.1 | Scaffold1420 | 2105                    | TT                              | CC                | 1946652319               |
| SNP_P3_153402_2195  | NW_004516630.1 | Scaffold1420 | 2195                    | AA                              | GG                | 1946652321               |
| SNP_P3_153403_2229  | NW_004516630.1 | Scaffold1420 | 2229                    | TT                              | GG                | 1946652323               |
| SNP_P3_153404_2274  | NW_004516630.1 | Scaffold1420 | 2274                    | GG                              | AA                | 1946652325               |
| SNP_P3_153405_4520  | NW_004516630.1 | Scaffold1420 | 4520                    | TT                              | AA                | 1946652327               |
| SNP_P3_153406_4930  | NW_004516630.1 | Scaffold1420 | 4930                    | TT                              | CC                | 1946652329               |
| SNP_P3_153407_5121  | NW_004516630.1 | Scaffold1420 | 5121                    | CC                              | TT                | 1946652331               |
| SNP_P3_153408_5131  | NW_004516630.1 | Scaffold1420 | 5131                    | CC                              | TT                | 1946652333               |
| SNP_P3_153409_5146  | NW_004516630.1 | Scaffold1420 | 5146                    | AA                              | TT                | 1946652335               |
| SNP_P3_153410_5328  | NW_004516630.1 | Scaffold1420 | 5328                    | CC                              | AA                | 1946652337               |
| SNP_P3_153411_5355  | NW_004516630.1 | Scaffold1420 | 5355                    | CC                              | AA                | 1946652339               |
| SNP_P3_153412_5381  | NW_004516630.1 | Scaffold1420 | 5381                    | AA                              | GG                | 1946652341               |
| SNP_P3_153413_5384  | NW_004516630.1 | Scaffold1420 | 5384                    | CC                              | AA                | 1946652343               |
| SNP_P3_153414_5408  | NW_004516630.1 | Scaffold1420 | 5408                    | CC                              | TT                | 1946652345               |

| SNPs IDs            | Chromosome IDs | Chromosomes  | Physical positions (bp) | CDC Frontier (Reference genome) | (Pusa 256 & HPNB) | NCBI SNPdb Accession IDs |
|---------------------|----------------|--------------|-------------------------|---------------------------------|-------------------|--------------------------|
| SNP_P3_153415_5409  | NW_004516630.1 | Scaffold1420 | 5409                    | AA                              | CC                | 1946652348               |
| SNP_P3_153416_11591 | NW_004516630.1 | Scaffold1420 | 11591                   | GG                              | AA                | 1946652350               |
| SNP_P3_153417_11592 | NW_004516630.1 | Scaffold1420 | 11592                   | AA                              | CC                | 1946652352               |
| SNP_P3_153418_12154 | NW_004516630.1 | Scaffold1420 | 12154                   | AA                              | CC                | 1946652354               |
| SNP_P3_153419_14907 | NW_004516630.1 | Scaffold1420 | 14907                   | TT                              | AA                | 1946652356               |
| SNP_P3_153420_15131 | NW_004516630.1 | Scaffold1420 | 15131                   | CC                              | TT                | 1946652358               |
| SNP_P3_153421_15166 | NW_004516630.1 | Scaffold1420 | 15166                   | TT                              | AA                | 1946652360               |
| SNP_P3_153422_15167 | NW_004516630.1 | Scaffold1420 | 15167                   | TT                              | CC                | 1946652362               |
| SNP_P3_153423_15222 | NW_004516630.1 | Scaffold1420 | 15222                   | TT                              | CC                | 1946652364               |
| SNP_P3_153424_20522 | NW_004516630.1 | Scaffold1420 | 20522                   | CC                              | GG                | 1946652366               |
| SNP_P3_153426_20876 | NW_004516630.1 | Scaffold1420 | 20876                   | AA                              | GG                | 1946652368               |
| SNP_P3_153428_20890 | NW_004516630.1 | Scaffold1420 | 20890                   | CC                              | AA                | 1946652370               |
| SNP_P3_153429_21199 | NW_004516630.1 | Scaffold1420 | 21199                   | CC                              | GG                | 1946652372               |
| SNP_P3_153430_21259 | NW_004516630.1 | Scaffold1420 | 21259                   | GG                              | TT                | 1946652374               |
| SNP_P3_153432_21397 | NW_004516630.1 | Scaffold1420 | 21397                   | AA                              | CC                | 1946652376               |
| SNP_P3_153433_21449 | NW_004516630.1 | Scaffold1420 | 21449                   | CC                              | TT                | 1946652378               |
| SNP_P3_153434_21462 | NW_004516630.1 | Scaffold1420 | 21462                   | AA                              | GG                | 1946652380               |
| SNP_P3_153436_64    | NW_004516633.1 | Scaffold1424 | 64                      | CC                              | GG                | 1946652382               |
| SNP_P3_153437_91    | NW_004516633.1 | Scaffold1424 | 91                      | AA                              | TT                | 1946652386               |
| SNP_P3_153438_461   | NW_004516633.1 | Scaffold1424 | 461                     | CC                              | TT                | 1946652388               |
| SNP_P3_153439_496   | NW_004516633.1 | Scaffold1424 | 496                     | GG                              | TT                | 1946652390               |
| SNP_P3_153440_748   | NW_004516633.1 | Scaffold1424 | 748                     | GG                              | TT                | 1946652392               |
| SNP_P3_153442_5399  | NW_004516633.1 | Scaffold1424 | 5399                    | AA                              | GG                | 1946652394               |
| SNP_P3_153443_5408  | NW_004516633.1 | Scaffold1424 | 5408                    | AA                              | TT                | 1946652396               |
| SNP_P3_153444_5411  | NW_004516633.1 | Scaffold1424 | 5411                    | TT                              | CC                | 1946652398               |
| SNP_P3_153445_5419  | NW_004516633.1 | Scaffold1424 | 5419                    | AA                              | TT                | 1946652400               |
| SNP_P3_153447_43721 | NW_004516633.1 | Scaffold1424 | 43721                   | GG                              | TT                | 1946652402               |
| SNP_P3_153448_43729 | NW_004516633.1 | Scaffold1424 | 43729                   | TT                              | GG                | 1946652404               |
| SNP_P3_153449_43741 | NW_004516633.1 | Scaffold1424 | 43741                   | TT                              | AA                | 1946652407               |
| SNP_P3_153450_43742 | NW_004516633.1 | Scaffold1424 | 43742                   | GG                              | TT                | 1946652409               |
| SNP_P3_153451_43748 | NW_004516633.1 | Scaffold1424 | 43748                   | AA                              | GG                | 1946652411               |
| SNP_P3_153452_43778 | NW_004516633.1 | Scaffold1424 | 43778                   | TT                              | AA                | 1946652413               |
| SNP_P3_153453_43780 | NW_004516633.1 | Scaffold1424 | 43780                   | CC                              | TT                | 1946652415               |
| SNP_P3_153454_43807 | NW_004516633.1 | Scaffold1424 | 43807                   | TT                              | CC                | 1946652417               |
| SNP_P3_153455_43828 | NW_004516633.1 | Scaffold1424 | 43828                   | TT                              | AA                | 1946652419               |
| SNP_P3_153456_43842 | NW_004516633.1 | Scaffold1424 | 43842                   | TT                              | CC                | 1946652421               |
| SNP_P3_153457_43858 | NW_004516633.1 | Scaffold1424 | 43858                   | AA                              | GG                | 1946652424               |
| SNP_P3_153458_43881 | NW_004516633.1 | Scaffold1424 | 43881                   | CC                              | GG                | 1946652426               |
| SNP_P3_153459_43913 | NW_004516633.1 | Scaffold1424 | 43913                   | GG                              | CC                | 1946652428               |
| SNP_P3_153460_43941 | NW_004516633.1 | Scaffold1424 | 43941                   | TT                              | AA                | 1946652430               |
| SNP_P3_153461_44027 | NW_004516633.1 | Scaffold1424 | 44027                   | GG                              | CC                | 1946652432               |
| SNP_P3_153462_44093 | NW_004516633.1 | Scaffold1424 | 44093                   | GG                              | TT                | 1946652434               |



| SNPs IDs            | Chromosome IDs | Chromosomes  | Physical positions (bp) | CDC Frontier (Reference genome) | (Pusa 256 & HPNB) | NCBI SNPdb Accession IDs |
|---------------------|----------------|--------------|-------------------------|---------------------------------|-------------------|--------------------------|
| SNP_P3_153463_44104 | NW_004516633.1 | Scaffold1424 | 44104                   | CC                              | AA                | 1946652436               |
| SNP_P3_153464_44143 | NW_004516633.1 | Scaffold1424 | 44143                   | GG                              | CC                | 1946652438               |
| SNP_P3_153465_44144 | NW_004516633.1 | Scaffold1424 | 44144                   | GG                              | AA                | 1946652440               |
| SNP_P3_153466_44149 | NW_004516633.1 | Scaffold1424 | 44149                   | AA                              | TT                | 1946652442               |
| SNP_P3_153467_44169 | NW_004516633.1 | Scaffold1424 | 44169                   | GG                              | TT                | 1946652444               |
| SNP_P3_153468_44177 | NW_004516633.1 | Scaffold1424 | 44177                   | TT                              | CC                | 1946652446               |
| SNP_P3_153469_44184 | NW_004516633.1 | Scaffold1424 | 44184                   | AA                              | CC                | 1946652448               |
| SNP_P3_153470_44196 | NW_004516633.1 | Scaffold1424 | 44196                   | TT                              | GG                | 1946652450               |
| SNP_P3_153471_44214 | NW_004516633.1 | Scaffold1424 | 44214                   | GG                              | CC                | 1946652452               |
| SNP_P3_153472_44237 | NW_004516633.1 | Scaffold1424 | 44237                   | AA                              | GG                | 1946652454               |
| SNP_P3_153473_48228 | NW_004516633.1 | Scaffold1424 | 48228                   | GG                              | CC                | 1946652456               |
| SNP_P3_153474_48247 | NW_004516633.1 | Scaffold1424 | 48247                   | CC                              | AA                | 1946652458               |
| SNP_P3_153475_48252 | NW_004516633.1 | Scaffold1424 | 48252                   | GG                              | AA                | 1946652460               |
| SNP_P3_153476_48274 | NW_004516633.1 | Scaffold1424 | 48274                   | GG                              | TT                | 1946652462               |
| SNP_P3_153477_48278 | NW_004516633.1 | Scaffold1424 | 48278                   | TT                              | AA                | 1946652464               |
| SNP_P3_153478_48400 | NW_004516633.1 | Scaffold1424 | 48400                   | AA                              | CC                | 1946652467               |
| SNP_P3_153479_48407 | NW_004516633.1 | Scaffold1424 | 48407                   | AA                              | GG                | 1946652469               |
| SNP_P3_153480_48468 | NW_004516633.1 | Scaffold1424 | 48468                   | GG                              | AA                | 1946652471               |
| SNP_P3_153481_48493 | NW_004516633.1 | Scaffold1424 | 48493                   | GG                              | TT                | 1946652473               |
| SNP_P3_153482_48511 | NW_004516633.1 | Scaffold1424 | 48511                   | AA                              | GG                | 1946652475               |
| SNP_P3_153483_48576 | NW_004516633.1 | Scaffold1424 | 48576                   | AA                              | TT                | 1946652477               |
| SNP_P3_153484_48580 | NW_004516633.1 | Scaffold1424 | 48580                   | TT                              | CC                | 1946652479               |
| SNP_P3_153486_48711 | NW_004516633.1 | Scaffold1424 | 48711                   | TT                              | GG                | 1946652481               |
| SNP_P3_153487_48741 | NW_004516633.1 | Scaffold1424 | 48741                   | GG                              | AA                | 1946652482               |
| SNP_P3_153488_3750  | NW_004516634.1 | Scaffold1425 | 3750                    | AA                              | TT                | 1946652484               |
| SNP_P3_153489_3757  | NW_004516634.1 | Scaffold1425 | 3757                    | CC                              | AA                | 1946652486               |
| SNP_P3_153490_4216  | NW_004516634.1 | Scaffold1425 | 4216                    | GG                              | CC                | 1946652488               |
| SNP_P3_153491_4237  | NW_004516634.1 | Scaffold1425 | 4237                    | TT                              | CC                | 1946652491               |
| SNP_P3_153492_4412  | NW_004516634.1 | Scaffold1425 | 4412                    | AA                              | CC                | 1946652493               |
| SNP_P3_153493_4447  | NW_004516634.1 | Scaffold1425 | 4447                    | TT                              | CC                | 1946652495               |
| SNP_P3_153494_4525  | NW_004516634.1 | Scaffold1425 | 4525                    | GG                              | AA                | 1946652497               |
| SNP_P3_153495_4776  | NW_004516634.1 | Scaffold1425 | 4776                    | AA                              | CC                | 1946652499               |
| SNP_P3_153496_4804  | NW_004516634.1 | Scaffold1425 | 4804                    | AA                              | GG                | 1946652501               |
| SNP_P3_153497_4814  | NW_004516634.1 | Scaffold1425 | 4814                    | TT                              | GG                | 1946652504               |
| SNP_P3_153498_4852  | NW_004516634.1 | Scaffold1425 | 4852                    | TT                              | AA                | 1946652506               |
| SNP_P3_153499_4853  | NW_004516634.1 | Scaffold1425 | 4853                    | AA                              | CC                | 1946652508               |
| SNP_P3_153500_4856  | NW_004516634.1 | Scaffold1425 | 4856                    | AA                              | GG                | 1946652510               |
| SNP_P3_153501_4874  | NW_004516634.1 | Scaffold1425 | 4874                    | AA                              | TT                | 1946652512               |
| SNP_P3_153502_4888  | NW_004516634.1 | Scaffold1425 | 4888                    | TT                              | AA                | 1946652514               |
| SNP_P3_153503_4889  | NW_004516634.1 | Scaffold1425 | 4889                    | GG                              | AA                | 1946652516               |
| SNP_P3_153504_4911  | NW_004516634.1 | Scaffold1425 | 4911                    | CC                              | AA                | 1946652518               |
| SNP_P3_153505_5189  | NW_004516635.1 | Scaffold1426 | 5189                    | GG                              | AA                | 1946652520               |

| SNPs IDs            | Chromosome IDs | Chromosomes  | Physical positions (bp) | CDC Frontier (Reference genome) | (Pusa 256 & HPNB) | NCBI SNPdb Accession IDs |
|---------------------|----------------|--------------|-------------------------|---------------------------------|-------------------|--------------------------|
| SNP_P3_153506_5570  | NW_004516635.1 | Scaffold1426 | 5570                    | AA                              | GG                | 1946652522               |
| SNP_P3_153507_5631  | NW_004516635.1 | Scaffold1426 | 5631                    | TT                              | AA                | 1946652524               |
| SNP_P3_153508_5786  | NW_004516635.1 | Scaffold1426 | 5786                    | CC                              | TT                | 1946652526               |
| SNP_P3_153510_5971  | NW_004516635.1 | Scaffold1426 | 5971                    | TT                              | GG                | 1946652528               |
| SNP_P3_153511_6191  | NW_004516635.1 | Scaffold1426 | 6191                    | TT                              | GG                | 1946652530               |
| SNP_P3_153512_6209  | NW_004516635.1 | Scaffold1426 | 6209                    | TT                              | CC                | 1946652532               |
| SNP_P3_153513_6220  | NW_004516635.1 | Scaffold1426 | 6220                    | AA                              | GG                | 1946652534               |
| SNP_P3_153514_6332  | NW_004516635.1 | Scaffold1426 | 6332                    | AA                              | TT                | 1946652536               |
| SNP_P3_153516_6855  | NW_004516635.1 | Scaffold1426 | 6855                    | CC                              | TT                | 1946652538               |
| SNP_P3_153517_7007  | NW_004516635.1 | Scaffold1426 | 7007                    | CC                              | AA                | 1946652540               |
| SNP_P3_153518_7023  | NW_004516635.1 | Scaffold1426 | 7023                    | TT                              | CC                | 1946652542               |
| SNP_P3_153519_7044  | NW_004516635.1 | Scaffold1426 | 7044                    | AA                              | GG                | 1946652544               |
| SNP_P3_153520_7073  | NW_004516635.1 | Scaffold1426 | 7073                    | AA                              | TT                | 1946652546               |
| SNP_P3_153522_7241  | NW_004516635.1 | Scaffold1426 | 7241                    | AA                              | GG                | 1946652547               |
| SNP_P3_153523_7380  | NW_004516635.1 | Scaffold1426 | 7380                    | TT                              | CC                | 1946652549               |
| SNP_P3_153524_7439  | NW_004516635.1 | Scaffold1426 | 7439                    | CC                              | TT                | 1946652551               |
| SNP_P3_153525_7529  | NW_004516635.1 | Scaffold1426 | 7529                    | CC                              | TT                | 1946652553               |
| SNP_P3_153526_11640 | NW_004516635.1 | Scaffold1426 | 11640                   | AA                              | TT                | 1946652555               |
| SNP_P3_153528_820   | NW_004516636.1 | Scaffold1429 | 820                     | AA                              | GG                | 1946652557               |
| SNP_P3_153529_858   | NW_004516636.1 | Scaffold1429 | 858                     | TT                              | GG                | 1946652559               |
| SNP_P3_153530_862   | NW_004516636.1 | Scaffold1429 | 862                     | CC                              | GG                | 1946652561               |
| SNP_P3_153531_879   | NW_004516636.1 | Scaffold1429 | 879                     | GG                              | AA                | 1946652563               |
| SNP_P3_153533_1203  | NW_004516637.1 | Scaffold1430 | 1203                    | CC                              | TT                | 1946652565               |
| SNP_P3_153534_1234  | NW_004516637.1 | Scaffold1430 | 1234                    | CC                              | GG                | 1946652567               |
| SNP_P3_153535_1240  | NW_004516637.1 | Scaffold1430 | 1240                    | TT                              | AA                | 1946652569               |
| SNP_P3_153536_1250  | NW_004516637.1 | Scaffold1430 | 1250                    | TT                              | CC                | 1946652571               |
| SNP_P3_153537_1251  | NW_004516637.1 | Scaffold1430 | 1251                    | GG                              | AA                | 1946652573               |
| SNP_P3_153539_1447  | NW_004516637.1 | Scaffold1430 | 1447                    | GG                              | TT                | 1946652575               |
| SNP_P3_153540_1459  | NW_004516637.1 | Scaffold1430 | 1459                    | TT                              | AA                | 1946652577               |
| SNP_P3_153541_1509  | NW_004516637.1 | Scaffold1430 | 1509                    | TT                              | CC                | 1946652579               |
| SNP_P3_153542_2296  | NW_004516637.1 | Scaffold1430 | 2296                    | GG                              | CC                | 1946652581               |
| SNP_P3_153543_4425  | NW_004516637.1 | Scaffold1430 | 4425                    | AA                              | CC                | 1946652583               |
| SNP_P3_153544_4491  | NW_004516637.1 | Scaffold1430 | 4491                    | GG                              | AA                | 1946652585               |
| SNP_P3_153545_4841  | NW_004516637.1 | Scaffold1430 | 4841                    | TT                              | AA                | 1946652587               |
| SNP_P3_153546_4868  | NW_004516637.1 | Scaffold1430 | 4868                    | TT                              | GG                | 1946652606               |
| SNP_P3_153547_4893  | NW_004516637.1 | Scaffold1430 | 4893                    | GG                              | AA                | 1946652608               |
| SNP_P3_153548_8509  | NW_004516637.1 | Scaffold1430 | 8509                    | CC                              | TT                | 1946652610               |
| SNP_P3_153549_443   | NW_004516638.1 | Scaffold1432 | 443                     | TT                              | CC                | 1946652612               |
| SNP_P3_153550_1569  | NW_004516638.1 | Scaffold1432 | 1569                    | TT                              | CC                | 1946652614               |
| SNP_P3_153551_8233  | NW_004516638.1 | Scaffold1432 | 8233                    | GG                              | TT                | 1946652615               |
| SNP_P3_153552_8719  | NW_004516638.1 | Scaffold1432 | 8719                    | GG                              | CC                | 1946652617               |
| SNP_P3_153553_9123  | NW_004516638.1 | Scaffold1432 | 9123                    | GG                              | AA                | 1946652619               |

| SNPs IDs            | Chromosome IDs | Chromosomes  | Physical positions (bp) | CDC Frontier (Reference genome) | (Pusa 256 & HPNB) | NCBI SNPdb Accession IDs |
|---------------------|----------------|--------------|-------------------------|---------------------------------|-------------------|--------------------------|
| SNP_P3_153554_9136  | NW_004516638.1 | Scaffold1432 | 9136                    | AA                              | GG                | 1946652621               |
| SNP_P3_153555_15735 | NW_004516638.1 | Scaffold1432 | 15735                   | AA                              | GG                | 1946652623               |
| SNP_P3_153556_30050 | NW_004516638.1 | Scaffold1432 | 30050                   | TT                              | CC                | 1946652626               |
| SNP_P3_153558_30309 | NW_004516638.1 | Scaffold1432 | 30309                   | GG                              | TT                | 1946652628               |
| SNP_P3_153559_33871 | NW_004516638.1 | Scaffold1432 | 33871                   | TT                              | CC                | 1946652630               |
| SNP_P3_153560_40027 | NW_004516638.1 | Scaffold1432 | 40027                   | CC                              | AA                | 1946652632               |
| SNP_P3_153561_58321 | NW_004516638.1 | Scaffold1432 | 58321                   | CC                              | GG                | 1946652634               |
| SNP_P3_153562_59852 | NW_004516638.1 | Scaffold1432 | 59852                   | CC                              | AA                | 1946652636               |
| SNP_P3_153563_64292 | NW_004516638.1 | Scaffold1432 | 64292                   | GG                              | CC                | 1946652637               |
| SNP_P3_153564_66476 | NW_004516638.1 | Scaffold1432 | 66476                   | AA                              | GG                | 1946652638               |
| SNP_P3_153565_66483 | NW_004516638.1 | Scaffold1432 | 66483                   | TT                              | CC                | 1946652639               |
| SNP_P3_153566_66762 | NW_004516638.1 | Scaffold1432 | 66762                   | AA                              | GG                | 1946652640               |
| SNP_P3_153568_67736 | NW_004516638.1 | Scaffold1432 | 67736                   | AA                              | TT                | 1946652641               |
| SNP_P3_153569_70486 | NW_004516638.1 | Scaffold1432 | 70486                   | TT                              | AA                | 1946652642               |
| SNP_P3_153570_76164 | NW_004516638.1 | Scaffold1432 | 76164                   | TT                              | CC                | 1946652644               |
| SNP_P3_153571_79988 | NW_004516638.1 | Scaffold1432 | 79988                   | TT                              | CC                | 1946652646               |
| SNP_P3_153572_80022 | NW_004516638.1 | Scaffold1432 | 80022                   | CC                              | GG                | 1946652647               |
| SNP_P3_153573_80033 | NW_004516638.1 | Scaffold1432 | 80033                   | TT                              | CC                | 1946652649               |
| SNP_P3_153574_80134 | NW_004516638.1 | Scaffold1432 | 80134                   | TT                              | CC                | 1946652651               |
| SNP_P3_153576_80178 | NW_004516638.1 | Scaffold1432 | 80178                   | CC                              | TT                | 1946652653               |
| SNP_P3_153577_80235 | NW_004516638.1 | Scaffold1432 | 80235                   | TT                              | AA                | 1946652655               |
| SNP_P3_153578_80283 | NW_004516638.1 | Scaffold1432 | 80283                   | TT                              | AA                | 1946652657               |
| SNP_P3_153579_80327 | NW_004516638.1 | Scaffold1432 | 80327                   | CC                              | TT                | 1946652659               |
| SNP_P3_153580_80344 | NW_004516638.1 | Scaffold1432 | 80344                   | GG                              | AA                | 1946652661               |
| SNP_P3_153581_80402 | NW_004516638.1 | Scaffold1432 | 80402                   | CC                              | AA                | 1946652663               |
| SNP_P3_153584_80595 | NW_004516638.1 | Scaffold1432 | 80595                   | AA                              | CC                | 1946652666               |
| SNP_P3_153585_80627 | NW_004516638.1 | Scaffold1432 | 80627                   | AA                              | GG                | 1946652668               |
| SNP_P3_153586_80633 | NW_004516638.1 | Scaffold1432 | 80633                   | CC                              | TT                | 1946652670               |
| SNP_P3_153587_80688 | NW_004516638.1 | Scaffold1432 | 80688                   | TT                              | AA                | 1946652672               |
| SNP_P3_153588_80792 | NW_004516638.1 | Scaffold1432 | 80792                   | CC                              | GG                | 1946652674               |
| SNP_P3_153589_80884 | NW_004516638.1 | Scaffold1432 | 80884                   | TT                              | CC                | 1946652676               |
| SNP_P3_153590_64    | NW_004516639.1 | Scaffold1433 | 64                      | CC                              | AA                | 1946652678               |
| SNP_P3_153591_479   | NW_004516639.1 | Scaffold1433 | 479                     | CC                              | TT                | 1946652680               |
| SNP_P3_153592_773   | NW_004516639.1 | Scaffold1433 | 773                     | AA                              | GG                | 1946652682               |
| SNP_P3_153593_898   | NW_004516639.1 | Scaffold1433 | 898                     | CC                              | TT                | 1946652684               |
| SNP_P3_153594_4719  | NW_004516639.1 | Scaffold1433 | 4719                    | GG                              | AA                | 1946652686               |
| SNP_P3_153595_4936  | NW_004516639.1 | Scaffold1433 | 4936                    | AA                              | GG                | 1946652688               |
| SNP_P3_153596_4943  | NW_004516639.1 | Scaffold1433 | 4943                    | TT                              | GG                | 1946652689               |
| SNP_P3_153597_5184  | NW_004516639.1 | Scaffold1433 | 5184                    | AA                              | GG                | 1946652691               |
| SNP_P3_153598_6060  | NW_004516639.1 | Scaffold1433 | 6060                    | CC                              | TT                | 1946652693               |
| SNP_P3_153599_6285  | NW_004516639.1 | Scaffold1433 | 6285                    | TT                              | GG                | 1946652695               |
| SNP_P3_153600_6365  | NW_004516639.1 | Scaffold1433 | 6365                    | AA                              | TT                | 1946652697               |

| SNPs IDs            | Chromosome IDs | Chromosomes  | Physical positions (bp) | CDC Frontier (Reference genome) | (Pusa 256 & HPNB) | NCBI SNPdb Accession IDs |
|---------------------|----------------|--------------|-------------------------|---------------------------------|-------------------|--------------------------|
| SNP_P3_153601_8284  | NW_004516639.1 | Scaffold1433 | 8284                    | CC                              | TT                | 1946652699               |
| SNP_P3_153602_8286  | NW_004516639.1 | Scaffold1433 | 8286                    | AA                              | GG                | 1946652701               |
| SNP_P3_153603_8312  | NW_004516639.1 | Scaffold1433 | 8312                    | TT                              | GG                | 1946652703               |
| SNP_P3_153604_8331  | NW_004516639.1 | Scaffold1433 | 8331                    | AA                              | TT                | 1946652706               |
| SNP_P3_153605_8358  | NW_004516639.1 | Scaffold1433 | 8358                    | AA                              | GG                | 1946652708               |
| SNP_P3_153606_8606  | NW_004516639.1 | Scaffold1433 | 8606                    | GG                              | AA                | 1946652710               |
| SNP_P3_153607_8617  | NW_004516639.1 | Scaffold1433 | 8617                    | TT                              | CC                | 1946652712               |
| SNP_P3_153608_8663  | NW_004516639.1 | Scaffold1433 | 8663                    | TT                              | CC                | 1946652714               |
| SNP_P3_153609_9052  | NW_004516639.1 | Scaffold1433 | 9052                    | CC                              | AA                | 1946652717               |
| SNP_P3_153610_9094  | NW_004516639.1 | Scaffold1433 | 9094                    | AA                              | CC                | 1946652719               |
| SNP_P3_153611_9327  | NW_004516639.1 | Scaffold1433 | 9327                    | AA                              | GG                | 1946652721               |
| SNP_P3_153612_9416  | NW_004516639.1 | Scaffold1433 | 9416                    | CC                              | AA                | 1946652723               |
| SNP_P3_153613_10398 | NW_004516639.1 | Scaffold1433 | 10398                   | TT                              | AA                | 1946652725               |
| SNP_P3_153614_10414 | NW_004516639.1 | Scaffold1433 | 10414                   | TT                              | CC                | 1946652727               |
| SNP_P3_153615_10597 | NW_004516639.1 | Scaffold1433 | 10597                   | CC                              | TT                | 1946652729               |
| SNP_P3_153616_11493 | NW_004516639.1 | Scaffold1433 | 11493                   | CC                              | TT                | 1946652731               |
| SNP_P3_153617_12799 | NW_004516639.1 | Scaffold1433 | 12799                   | GG                              | TT                | 1946652733               |
| SNP_P3_153618_15441 | NW_004516639.1 | Scaffold1433 | 15441                   | TT                              | GG                | 1946652735               |
| SNP_P3_153619_15450 | NW_004516639.1 | Scaffold1433 | 15450                   | GG                              | TT                | 1946652737               |
| SNP_P3_153620_15452 | NW_004516639.1 | Scaffold1433 | 15452                   | CC                              | AA                | 1946652739               |
| SNP_P3_153622_15456 | NW_004516639.1 | Scaffold1433 | 15456                   | TT                              | CC                | 1946652741               |
| SNP_P3_153623_15750 | NW_004516639.1 | Scaffold1433 | 15750                   | AA                              | GG                | 1946652743               |
| SNP_P3_153624_15787 | NW_004516639.1 | Scaffold1433 | 15787                   | CC                              | AA                | 1946652745               |
| SNP_P3_153625_15798 | NW_004516639.1 | Scaffold1433 | 15798                   | GG                              | AA                | 1946652747               |
| SNP_P3_153626_15861 | NW_004516639.1 | Scaffold1433 | 15861                   | CC                              | AA                | 1946652749               |
| SNP_P3_153627_18733 | NW_004516639.1 | Scaffold1433 | 18733                   | AA                              | GG                | 1946652751               |
| SNP_P3_153628_18927 | NW_004516639.1 | Scaffold1433 | 18927                   | AA                              | CC                | 1946652753               |
| SNP_P3_153629_19088 | NW_004516639.1 | Scaffold1433 | 19088                   | TT                              | GG                | 1946652756               |
| SNP_P3_153630_19090 | NW_004516639.1 | Scaffold1433 | 19090                   | TT                              | CC                | 1946652758               |
| SNP_P3_153631_19554 | NW_004516639.1 | Scaffold1433 | 19554                   | CC                              | TT                | 1946652760               |
| SNP_P3_153632_21121 | NW_004516639.1 | Scaffold1433 | 21121                   | AA                              | CC                | 1946652762               |
| SNP_P3_153633_21161 | NW_004516639.1 | Scaffold1433 | 21161                   | CC                              | TT                | 1946652764               |
| SNP_P3_153634_21166 | NW_004516639.1 | Scaffold1433 | 21166                   | TT                              | AA                | 1946652766               |
| SNP_P3_153635_21186 | NW_004516639.1 | Scaffold1433 | 21186                   | CC                              | TT                | 1946652768               |
| SNP_P3_153636_21230 | NW_004516639.1 | Scaffold1433 | 21230                   | CC                              | AA                | 1946652770               |
| SNP_P3_153637_21239 | NW_004516639.1 | Scaffold1433 | 21239                   | CC                              | TT                | 1946652772               |
| SNP_P3_153639_21298 | NW_004516639.1 | Scaffold1433 | 21298                   | GG                              | AA                | 1946652774               |
| SNP_P3_153640_21435 | NW_004516639.1 | Scaffold1433 | 21435                   | TT                              | AA                | 1946652776               |
| SNP_P3_153641_21475 | NW_004516639.1 | Scaffold1433 | 21475                   | CC                              | TT                | 1946652780               |
| SNP_P3_153642_21534 | NW_004516639.1 | Scaffold1433 | 21534                   | TT                              | GG                | 1946652782               |
| SNP_P3_153643_21627 | NW_004516639.1 | Scaffold1433 | 21627                   | TT                              | GG                | 1946652784               |
| SNP_P3_153644_21634 | NW_004516639.1 | Scaffold1433 | 21634                   | GG                              | TT                | 1946652786               |

| SNPs IDs            | Chromosome IDs | Chromosomes  | Physical positions (bp) | CDC Frontier (Reference genome) | (Pusa 256 & HPNB) | NCBI SNPdb Accession IDs |
|---------------------|----------------|--------------|-------------------------|---------------------------------|-------------------|--------------------------|
| SNP_P3_153645_21662 | NW_004516639.1 | Scaffold1433 | 21662                   | AA                              | TT                | 1946652788               |
| SNP_P3_153646_21696 | NW_004516639.1 | Scaffold1433 | 21696                   | GG                              | AA                | 1946652790               |
| SNP_P3_153647_21735 | NW_004516639.1 | Scaffold1433 | 21735                   | TT                              | GG                | 1946652792               |
| SNP_P3_153649_21803 | NW_004516639.1 | Scaffold1433 | 21803                   | GG                              | TT                | 1946652794               |
| SNP_P3_153650_21828 | NW_004516639.1 | Scaffold1433 | 21828                   | GG                              | AA                | 1946652796               |
| SNP_P3_153651_21886 | NW_004516639.1 | Scaffold1433 | 21886                   | CC                              | TT                | 1946652798               |
| SNP_P3_153653_22036 | NW_004516639.1 | Scaffold1433 | 22036                   | CC                              | GG                | 1946652800               |
| SNP_P3_153654_22055 | NW_004516639.1 | Scaffold1433 | 22055                   | TT                              | CC                | 1946652802               |
| SNP_P3_153655_22214 | NW_004516639.1 | Scaffold1433 | 22214                   | TT                              | CC                | 1946652804               |
| SNP_P3_153656_22239 | NW_004516639.1 | Scaffold1433 | 22239                   | GG                              | AA                | 1946652806               |
| SNP_P3_153657_22328 | NW_004516639.1 | Scaffold1433 | 22328                   | TT                              | GG                | 1946652808               |
| SNP_P3_153658_22331 | NW_004516639.1 | Scaffold1433 | 22331                   | GG                              | TT                | 1946652810               |
| SNP_P3_153659_22393 | NW_004516639.1 | Scaffold1433 | 22393                   | GG                              | CC                | 1946652812               |
| SNP_P3_153660_22413 | NW_004516639.1 | Scaffold1433 | 22413                   | TT                              | GG                | 1946652814               |
| SNP_P3_153661_22457 | NW_004516639.1 | Scaffold1433 | 22457                   | AA                              | GG                | 1946652817               |
| SNP_P3_153662_22489 | NW_004516639.1 | Scaffold1433 | 22489                   | CC                              | TT                | 1946652819               |
| SNP_P3_153663_22493 | NW_004516639.1 | Scaffold1433 | 22493                   | CC                              | TT                | 1946652821               |
| SNP_P3_153664_22527 | NW_004516639.1 | Scaffold1433 | 22527                   | CC                              | TT                | 1946652823               |
| SNP_P3_153665_22543 | NW_004516639.1 | Scaffold1433 | 22543                   | AA                              | TT                | 1946652825               |
| SNP_P3_153666_22584 | NW_004516639.1 | Scaffold1433 | 22584                   | TT                              | AA                | 1946652827               |
| SNP_P3_153667_22669 | NW_004516639.1 | Scaffold1433 | 22669                   | TT                              | CC                | 1946652829               |
| SNP_P3_153668_22692 | NW_004516639.1 | Scaffold1433 | 22692                   | AA                              | GG                | 1946652831               |
| SNP_P3_153669_22818 | NW_004516639.1 | Scaffold1433 | 22818                   | CC                              | AA                | 1946652833               |
| SNP_P3_153670_22870 | NW_004516639.1 | Scaffold1433 | 22870                   | TT                              | GG                | 1946652835               |
| SNP_P3_153671_22935 | NW_004516639.1 | Scaffold1433 | 22935                   | CC                              | AA                | 1946652837               |
| SNP_P3_153672_22954 | NW_004516639.1 | Scaffold1433 | 22954                   | TT                              | GG                | 1946652839               |
| SNP_P3_153673_23040 | NW_004516639.1 | Scaffold1433 | 23040                   | AA                              | TT                | 1946652841               |
| SNP_P3_153674_24339 | NW_004516639.1 | Scaffold1433 | 24339                   | GG                              | CC                | 1946652843               |
| SNP_P3_153676_24689 | NW_004516639.1 | Scaffold1433 | 24689                   | CC                              | TT                | 1946652845               |
| SNP_P3_153677_24737 | NW_004516639.1 | Scaffold1433 | 24737                   | AA                              | GG                | 1946652847               |
| SNP_P3_153678_24801 | NW_004516639.1 | Scaffold1433 | 24801                   | GG                              | CC                | 1946652849               |
| SNP_P3_153679_24964 | NW_004516639.1 | Scaffold1433 | 24964                   | AA                              | GG                | 1946652851               |
| SNP_P3_153680_24979 | NW_004516639.1 | Scaffold1433 | 24979                   | AA                              | GG                | 1946652853               |
| SNP_P3_153681_25009 | NW_004516639.1 | Scaffold1433 | 25009                   | GG                              | AA                | 1946652855               |
| SNP_P3_153682_25049 | NW_004516639.1 | Scaffold1433 | 25049                   | CC                              | AA                | 1946652858               |
| SNP_P3_153683_25051 | NW_004516639.1 | Scaffold1433 | 25051                   | AA                              | GG                | 1946652860               |
| SNP_P3_153684_25075 | NW_004516639.1 | Scaffold1433 | 25075                   | AA                              | CC                | 1946652862               |
| SNP_P3_153685_25104 | NW_004516639.1 | Scaffold1433 | 25104                   | TT                              | CC                | 1946652864               |
| SNP_P3_153686_25106 | NW_004516639.1 | Scaffold1433 | 25106                   | GG                              | TT                | 1946652866               |
| SNP_P3_153687_25108 | NW_004516639.1 | Scaffold1433 | 25108                   | CC                              | TT                | 1946652868               |
| SNP_P3_153688_25134 | NW_004516639.1 | Scaffold1433 | 25134                   | CC                              | TT                | 1946652870               |
| SNP_P3_153689_25170 | NW_004516639.1 | Scaffold1433 | 25170                   | GG                              | AA                | 1946652872               |

| SNPs IDs             | Chromosome IDs | Chromosomes  | Physical positions (bp) | CDC Frontier (Reference genome) | (Pusa 256 & HPNB) | NCBI SNPdb Accession IDs |
|----------------------|----------------|--------------|-------------------------|---------------------------------|-------------------|--------------------------|
| SNP_P3_153690_25175  | NW_004516639.1 | Scaffold1433 | 25175                   | GG                              | CC                | 1946652874               |
| SNP_P3_153691_25594  | NW_004516639.1 | Scaffold1433 | 25594                   | TT                              | CC                | 1946652876               |
| SNP_P3_153692_25595  | NW_004516639.1 | Scaffold1433 | 25595                   | AA                              | GG                | 1946652878               |
| SNP_P3_153693_25655  | NW_004516639.1 | Scaffold1433 | 25655                   | GG                              | AA                | 1946652880               |
| SNP_P3_153694_25834  | NW_004516639.1 | Scaffold1433 | 25834                   | AA                              | TT                | 1946652882               |
| SNP_P3_153695_25835  | NW_004516639.1 | Scaffold1433 | 25835                   | CC                              | TT                | 1946652884               |
| SNP_P3_153696_25889  | NW_004516639.1 | Scaffold1433 | 25889                   | GG                              | CC                | 1946652886               |
| SNP_P3_153697_26323  | NW_004516639.1 | Scaffold1433 | 26323                   | CC                              | AA                | 1946652888               |
| SNP_P3_153698_31816  | NW_004516639.1 | Scaffold1433 | 31816                   | GG                              | AA                | 1946652890               |
| SNP_P3_153699_32045  | NW_004516639.1 | Scaffold1433 | 32045                   | AA                              | CC                | 1946652891               |
| SNP_P3_153701_33328  | NW_004516639.1 | Scaffold1433 | 33328                   | CC                              | TT                | 1946652892               |
| SNP_P3_153703_33779  | NW_004516639.1 | Scaffold1433 | 33779                   | CC                              | TT                | 1946652893               |
| SNP_P3_153707_38887  | NW_004516639.1 | Scaffold1433 | 38887                   | TT                              | CC                | 1946652894               |
| SNP_P3_153708_39107  | NW_004516639.1 | Scaffold1433 | 39107                   | TT                              | AA                | 1946652895               |
| SNP_P3_153709_39179  | NW_004516639.1 | Scaffold1433 | 39179                   | GG                              | AA                | 1946652896               |
| SNP_P3_153710_40477  | NW_004516639.1 | Scaffold1433 | 40477                   | AA                              | TT                | 1946652897               |
| SNP_P3_153711_894    | NW_004516640.1 | Scaffold1436 | 894                     | GG                              | AA                | 1946652898               |
| SNP_P3_153712_1062   | NW_004516640.1 | Scaffold1436 | 1062                    | GG                              | TT                | 1946652899               |
| SNP_P3_153713_1095   | NW_004516640.1 | Scaffold1436 | 1095                    | CC                              | TT                | 1946652900               |
| SNP_P3_153714_1305   | NW_004516640.1 | Scaffold1436 | 1305                    | GG                              | AA                | 1946652901               |
| SNP_P3_153715_1593   | NW_004516640.1 | Scaffold1436 | 1593                    | GG                              | AA                | 1946652902               |
| SNP_P3_153717_64     | NW_004516641.1 | Scaffold1437 | 64                      | CC                              | TT                | 1946652904               |
| SNP_P3_153718_73     | NW_004516641.1 | Scaffold1437 | 73                      | GG                              | AA                | 1946652906               |
| SNP_P3_153719_85     | NW_004516641.1 | Scaffold1437 | 85                      | AA                              | GG                | 1946652908               |
| SNP_P3_153720_91     | NW_004516641.1 | Scaffold1437 | 91                      | GG                              | AA                | 1946652910               |
| SNP_P3_153721_97     | NW_004516641.1 | Scaffold1437 | 97                      | AA                              | GG                | 1946652912               |
| SNP_P3_153722_98     | NW_004516641.1 | Scaffold1437 | 98                      | TT                              | CC                | 1946652914               |
| SNP_P3_153723_109    | NW_004516641.1 | Scaffold1437 | 109                     | TT                              | CC                | 1946652916               |
| SNP_P3_153724_11628  | NW_004516641.1 | Scaffold1437 | 11628                   | GG                              | AA                | 1946652918               |
| SNP_P3_153725_11651  | NW_004516641.1 | Scaffold1437 | 11651                   | CC                              | GG                | 1946652920               |
| SNP_P3_153726_6646   | NW_004516642.1 | Scaffold1439 | 6646                    | CC                              | AA                | 1946652923               |
| SNP_P3_153728_43801  | NW_004516642.1 | Scaffold1439 | 43801                   | CC                              | AA                | 1946652925               |
| SNP_P3_153729_50602  | NW_004516642.1 | Scaffold1439 | 50602                   | TT                              | AA                | 1946652927               |
| SNP_P3_153730_54963  | NW_004516642.1 | Scaffold1439 | 54963                   | AA                              | TT                | 1946652929               |
| SNP_P3_153734_153005 | NW_004516642.1 | Scaffold1439 | 153005                  | TT                              | CC                | 1946652931               |
| SNP_P3_153735_153006 | NW_004516642.1 | Scaffold1439 | 153006                  | CC                              | AA                | 1946652933               |
| SNP_P3_153736_153455 | NW_004516642.1 | Scaffold1439 | 153455                  | AA                              | GG                | 1946652935               |
| SNP_P3_153737_153730 | NW_004516642.1 | Scaffold1439 | 153730                  | TT                              | CC                | 1946652937               |
| SNP_P3_153738_199541 | NW_004516642.1 | Scaffold1439 | 199541                  | TT                              | AA                | 1946652939               |
| SNP_P3_153740_206085 | NW_004516642.1 | Scaffold1439 | 206085                  | GG                              | AA                | 1946652977               |
| SNP_P3_153741_206183 | NW_004516642.1 | Scaffold1439 | 206183                  | TT                              | AA                | 1946652979               |
| SNP_P3_153742_206203 | NW_004516642.1 | Scaffold1439 | 206203                  | GG                              | AA                | 1946652981               |

| SNPs IDs             | Chromosome IDs | Chromosomes  | Physical positions (bp) | CDC Frontier (Reference genome) | (Pusa 256 & HPNB) | NCBI SNPdb Accession IDs |
|----------------------|----------------|--------------|-------------------------|---------------------------------|-------------------|--------------------------|
| SNP_P3_153743_206204 | NW_004516642.1 | Scaffold1439 | 206204                  | TT                              | CC                | 1946652983               |
| SNP_P3_153744_210316 | NW_004516642.1 | Scaffold1439 | 210316                  | CC                              | TT                | 1946652985               |
| SNP_P3_153745_224924 | NW_004516642.1 | Scaffold1439 | 224924                  | GG                              | AA                | 1946652987               |
| SNP_P3_153746_244266 | NW_004516642.1 | Scaffold1439 | 244266                  | CC                              | AA                | 1946652989               |
| SNP_P3_153747_244299 | NW_004516642.1 | Scaffold1439 | 244299                  | TT                              | AA                | 1946652991               |
| SNP_P3_153748_248568 | NW_004516642.1 | Scaffold1439 | 248568                  | GG                              | TT                | 1946652993               |
| SNP_P3_153749_248847 | NW_004516642.1 | Scaffold1439 | 248847                  | CC                              | AA                | 1946652995               |
| SNP_P3_153750_268296 | NW_004516642.1 | Scaffold1439 | 268296                  | TT                              | CC                | 1946652997               |
| SNP_P3_153751_272774 | NW_004516642.1 | Scaffold1439 | 272774                  | GG                              | AA                | 1946652999               |
| SNP_P3_153752_274440 | NW_004516642.1 | Scaffold1439 | 274440                  | CC                              | TT                | 1946653001               |
| SNP_P3_153753_274521 | NW_004516642.1 | Scaffold1439 | 274521                  | TT                              | CC                | 1946653003               |
| SNP_P3_153754_1470   | NW_004516643.1 | Scaffold1440 | 1470                    | CC                              | TT                | 1946653005               |
| SNP_P3_153755_2728   | NW_004516643.1 | Scaffold1440 | 2728                    | GG                              | TT                | 1946653009               |
| SNP_P3_153756_2782   | NW_004516643.1 | Scaffold1440 | 2782                    | CC                              | TT                | 1946653011               |
| SNP_P3_153757_2790   | NW_004516643.1 | Scaffold1440 | 2790                    | TT                              | CC                | 1946653013               |
| SNP_P3_153758_2861   | NW_004516643.1 | Scaffold1440 | 2861                    | CC                              | TT                | 1946653015               |
| SNP_P3_153759_2871   | NW_004516643.1 | Scaffold1440 | 2871                    | CC                              | GG                | 1946653017               |
| SNP_P3_153760_3029   | NW_004516643.1 | Scaffold1440 | 3029                    | AA                              | GG                | 1946653019               |
| SNP_P3_153761_3034   | NW_004516643.1 | Scaffold1440 | 3034                    | GG                              | TT                | 1946653021               |
| SNP_P3_153762_3088   | NW_004516643.1 | Scaffold1440 | 3088                    | TT                              | CC                | 1946653023               |
| SNP_P3_153763_3091   | NW_004516643.1 | Scaffold1440 | 3091                    | AA                              | TT                | 1946653025               |
| SNP_P3_153764_3099   | NW_004516643.1 | Scaffold1440 | 3099                    | TT                              | GG                | 1946653027               |
| SNP_P3_153765_3121   | NW_004516643.1 | Scaffold1440 | 3121                    | TT                              | CC                | 1946653029               |
| SNP_P3_153766_3155   | NW_004516643.1 | Scaffold1440 | 3155                    | AA                              | GG                | 1946653031               |
| SNP_P3_153767_3197   | NW_004516643.1 | Scaffold1440 | 3197                    | AA                              | CC                | 1946653033               |
| SNP_P3_153768_25960  | NW_004516643.1 | Scaffold1440 | 25960                   | TT                              | CC                | 1946653035               |
| SNP_P3_153769_33914  | NW_004516643.1 | Scaffold1440 | 33914                   | CC                              | TT                | 1946653037               |
| SNP_P3_153770_37159  | NW_004516643.1 | Scaffold1440 | 37159                   | AA                              | CC                | 1946653039               |
| SNP_P3_153774_1356   | NW_004516646.1 | Scaffold1445 | 1356                    | AA                              | TT                | 1946653041               |
| SNP_P3_153775_1407   | NW_004516646.1 | Scaffold1445 | 1407                    | TT                              | AA                | 1946653044               |
| SNP_P3_153776_1421   | NW_004516646.1 | Scaffold1445 | 1421                    | TT                              | AA                | 1946653047               |
| SNP_P3_153777_1682   | NW_004516646.1 | Scaffold1445 | 1682                    | GG                              | AA                | 1946653049               |
| SNP_P3_153778_3822   | NW_004516646.1 | Scaffold1445 | 3822                    | GG                              | AA                | 1946653051               |
| SNP_P3_153779_4123   | NW_004516646.1 | Scaffold1445 | 4123                    | AA                              | GG                | 1946653053               |
| SNP_P3_153780_4312   | NW_004516646.1 | Scaffold1445 | 4312                    | CC                              | TT                | 1946653056               |
| SNP_P3_153781_4348   | NW_004516646.1 | Scaffold1445 | 4348                    | TT                              | AA                | 1946653058               |
| SNP_P3_153782_4353   | NW_004516646.1 | Scaffold1445 | 4353                    | TT                              | CC                | 1946653060               |
| SNP_P3_153783_4388   | NW_004516646.1 | Scaffold1445 | 4388                    | CC                              | TT                | 1946653062               |
| SNP_P3_153784_4556   | NW_004516646.1 | Scaffold1445 | 4556                    | AA                              | CC                | 1946653064               |
| SNP_P3_153785_9854   | NW_004516647.1 | Scaffold1446 | 9854                    | GG                              | CC                | 1946653066               |
| SNP_P3_153786_10086  | NW_004516647.1 | Scaffold1446 | 10086                   | AA                              | GG                | 1946653068               |
| SNP_P3_153787_10101  | NW_004516647.1 | Scaffold1446 | 10101                   | TT                              | GG                | 1946653070               |

| SNPs IDs            | Chromosome IDs | Chromosomes  | Physical positions (bp) | CDC Frontier (Reference genome) | (Pusa 256 & HPNB) | NCBI SNPdb Accession IDs |
|---------------------|----------------|--------------|-------------------------|---------------------------------|-------------------|--------------------------|
| SNP_P3_153788_11301 | NW_004516647.1 | Scaffold1446 | 11301                   | GG                              | AA                | 1946653072               |
| SNP_P3_153789_11711 | NW_004516647.1 | Scaffold1446 | 11711                   | TT                              | CC                | 1946653074               |
| SNP_P3_153790_13683 | NW_004516647.1 | Scaffold1446 | 13683                   | AA                              | GG                | 1946653076               |
| SNP_P3_153791_11576 | NW_004516648.1 | Scaffold1447 | 11576                   | GG                              | CC                | 1946653078               |
| SNP_P3_153792_13904 | NW_004516648.1 | Scaffold1447 | 13904                   | CC                              | AA                | 1946653080               |
| SNP_P3_153793_13958 | NW_004516648.1 | Scaffold1447 | 13958                   | AA                              | GG                | 1946653083               |
| SNP_P3_153794_18932 | NW_004516648.1 | Scaffold1447 | 18932                   | TT                              | GG                | 1946653085               |
| SNP_P3_153795_18945 | NW_004516648.1 | Scaffold1447 | 18945                   | TT                              | CC                | 1946653087               |
| SNP_P3_153796_20108 | NW_004516648.1 | Scaffold1447 | 20108                   | TT                              | CC                | 1946653089               |
| SNP_P3_153797_20123 | NW_004516648.1 | Scaffold1447 | 20123                   | AA                              | GG                | 1946653091               |
| SNP_P3_153798_20159 | NW_004516648.1 | Scaffold1447 | 20159                   | CC                              | TT                | 1946653093               |
| SNP_P3_153799_20161 | NW_004516648.1 | Scaffold1447 | 20161                   | AA                              | GG                | 1946653094               |
| SNP_P3_153800_20163 | NW_004516648.1 | Scaffold1447 | 20163                   | TT                              | GG                | 1946653096               |
| SNP_P3_153801_20164 | NW_004516648.1 | Scaffold1447 | 20164                   | TT                              | AA                | 1946653098               |
| SNP_P3_153802_20366 | NW_004516648.1 | Scaffold1447 | 20366                   | TT                              | CC                | 1946653100               |
| SNP_P3_153803_20381 | NW_004516648.1 | Scaffold1447 | 20381                   | AA                              | TT                | 1946653102               |
| SNP_P3_153805_20390 | NW_004516648.1 | Scaffold1447 | 20390                   | CC                              | TT                | 1946653104               |
| SNP_P3_153806_20418 | NW_004516648.1 | Scaffold1447 | 20418                   | AA                              | GG                | 1946653106               |
| SNP_P3_153807_20423 | NW_004516648.1 | Scaffold1447 | 20423                   | CC                              | TT                | 1946653108               |
| SNP_P3_153808_20438 | NW_004516648.1 | Scaffold1447 | 20438                   | TT                              | CC                | 1946653110               |
| SNP_P3_153809_20439 | NW_004516648.1 | Scaffold1447 | 20439                   | CC                              | TT                | 1946653112               |
| SNP_P3_153810_20450 | NW_004516648.1 | Scaffold1447 | 20450                   | GG                              | TT                | 1946653114               |
| SNP_P3_153811_21271 | NW_004516648.1 | Scaffold1447 | 21271                   | TT                              | CC                | 1946653116               |
| SNP_P3_153812_21615 | NW_004516648.1 | Scaffold1447 | 21615                   | GG                              | TT                | 1946653118               |
| SNP_P3_153813_21660 | NW_004516648.1 | Scaffold1447 | 21660                   | TT                              | AA                | 1946653120               |
| SNP_P3_153814_21675 | NW_004516648.1 | Scaffold1447 | 21675                   | TT                              | GG                | 1946653123               |
| SNP_P3_153817_23833 | NW_004516648.1 | Scaffold1447 | 23833                   | AA                              | CC                | 1946653125               |
| SNP_P3_153818_24167 | NW_004516648.1 | Scaffold1447 | 24167                   | TT                              | AA                | 1946653127               |
| SNP_P3_153819_24586 | NW_004516648.1 | Scaffold1447 | 24586                   | CC                              | GG                | 1946653129               |
| SNP_P3_153820_24600 | NW_004516648.1 | Scaffold1447 | 24600                   | TT                              | AA                | 1946653131               |
| SNP_P3_153821_24635 | NW_004516648.1 | Scaffold1447 | 24635                   | TT                              | CC                | 1946653133               |
| SNP_P3_153822_24663 | NW_004516648.1 | Scaffold1447 | 24663                   | AA                              | CC                | 1946653135               |
| SNP_P3_153823_24672 | NW_004516648.1 | Scaffold1447 | 24672                   | TT                              | CC                | 1946653137               |
| SNP_P3_153824_24684 | NW_004516648.1 | Scaffold1447 | 24684                   | GG                              | AA                | 1946653139               |
| SNP_P3_153825_25703 | NW_004516648.1 | Scaffold1447 | 25703                   | AA                              | CC                | 1946653141               |
| SNP_P3_153826_26280 | NW_004516648.1 | Scaffold1447 | 26280                   | AA                              | TT                | 1946653143               |
| SNP_P3_153827_26295 | NW_004516648.1 | Scaffold1447 | 26295                   | GG                              | AA                | 1946653145               |
| SNP_P3_153828_26324 | NW_004516648.1 | Scaffold1447 | 26324                   | AA                              | GG                | 1946653147               |
| SNP_P3_153829_26336 | NW_004516648.1 | Scaffold1447 | 26336                   | CC                              | TT                | 1946653149               |
| SNP_P3_153830_26338 | NW_004516648.1 | Scaffold1447 | 26338                   | CC                              | TT                | 1946653151               |
| SNP_P3_153831_26340 | NW_004516648.1 | Scaffold1447 | 26340                   | AA                              | GG                | 1946653153               |
| SNP_P3_153832_26353 | NW_004516648.1 | Scaffold1447 | 26353                   | TT                              | CC                | 1946653155               |



| SNPs IDs            | Chromosome IDs | Chromosomes  | Physical positions (bp) | CDC Frontier (Reference genome) | (Pusa 256 & HPNB) | NCBI SNPdb Accession IDs |
|---------------------|----------------|--------------|-------------------------|---------------------------------|-------------------|--------------------------|
| SNP_P3_153833_26509 | NW_004516648.1 | Scaffold1447 | 26509                   | TT                              | AA                | 1946653156               |
| SNP_P3_153834_26518 | NW_004516648.1 | Scaffold1447 | 26518                   | GG                              | TT                | 1946653158               |
| SNP_P3_153835_26687 | NW_004516648.1 | Scaffold1447 | 26687                   | CC                              | GG                | 1946653160               |
| SNP_P3_153836_26692 | NW_004516648.1 | Scaffold1447 | 26692                   | CC                              | GG                | 1946653162               |
| SNP_P3_153837_28834 | NW_004516648.1 | Scaffold1447 | 28834                   | GG                              | AA                | 1946653165               |
| SNP_P3_153838_30861 | NW_004516648.1 | Scaffold1447 | 30861                   | GG                              | CC                | 1946653167               |
| SNP_P3_153839_30872 | NW_004516648.1 | Scaffold1447 | 30872                   | TT                              | AA                | 1946653169               |
| SNP_P3_153840_30879 | NW_004516648.1 | Scaffold1447 | 30879                   | CC                              | TT                | 1946653171               |
| SNP_P3_153841_30937 | NW_004516648.1 | Scaffold1447 | 30937                   | GG                              | TT                | 1946653173               |
| SNP_P3_153842_30964 | NW_004516648.1 | Scaffold1447 | 30964                   | CC                              | TT                | 1946653175               |
| SNP_P3_153843_33824 | NW_004516648.1 | Scaffold1447 | 33824                   | AA                              | CC                | 1946653177               |
| SNP_P3_153844_34065 | NW_004516648.1 | Scaffold1447 | 34065                   | AA                              | TT                | 1946653179               |
| SNP_P3_153845_34108 | NW_004516648.1 | Scaffold1447 | 34108                   | AA                              | TT                | 1946653181               |
| SNP_P3_153846_34111 | NW_004516648.1 | Scaffold1447 | 34111                   | AA                              | GG                | 1946653183               |
| SNP_P3_153847_43323 | NW_004516648.1 | Scaffold1447 | 43323                   | GG                              | TT                | 1946653185               |
| SNP_P3_153848_861   | NW_004516649.1 | Scaffold1448 | 861                     | GG                              | AA                | 1946653187               |
| SNP_P3_153849_930   | NW_004516649.1 | Scaffold1448 | 930                     | TT                              | GG                | 1946653189               |
| SNP_P3_153850_1206  | NW_004516649.1 | Scaffold1448 | 1206                    | TT                              | AA                | 1946653191               |
| SNP_P3_153851_6364  | NW_004516649.1 | Scaffold1448 | 6364                    | GG                              | AA                | 1946653193               |
| SNP_P3_153854_12043 | NW_004516649.1 | Scaffold1448 | 12043                   | TT                              | GG                | 1946653195               |
| SNP_P3_153855_12873 | NW_004516649.1 | Scaffold1448 | 12873                   | GG                              | AA                | 1946653197               |
| SNP_P3_153856_12874 | NW_004516649.1 | Scaffold1448 | 12874                   | TT                              | CC                | 1946653199               |
| SNP_P3_153858_13616 | NW_004516649.1 | Scaffold1448 | 13616                   | AA                              | TT                | 1946653201               |
| SNP_P3_153859_20476 | NW_004516649.1 | Scaffold1448 | 20476                   | GG                              | AA                | 1946653203               |
| SNP_P3_153860_20839 | NW_004516649.1 | Scaffold1448 | 20839                   | GG                              | AA                | 1946653205               |
| SNP_P3_153861_20848 | NW_004516649.1 | Scaffold1448 | 20848                   | GG                              | CC                | 1946653207               |
| SNP_P3_153862_20990 | NW_004516649.1 | Scaffold1448 | 20990                   | AA                              | GG                | 1946653209               |
| SNP_P3_153863_21025 | NW_004516649.1 | Scaffold1448 | 21025                   | AA                              | CC                | 1946653211               |
| SNP_P3_153864_21034 | NW_004516649.1 | Scaffold1448 | 21034                   | GG                              | TT                | 1946653213               |
| SNP_P3_153865_21039 | NW_004516649.1 | Scaffold1448 | 21039                   | AA                              | GG                | 1946653215               |
| SNP_P3_153866_21095 | NW_004516649.1 | Scaffold1448 | 21095                   | CC                              | AA                | 1946653217               |
| SNP_P3_153867_21098 | NW_004516649.1 | Scaffold1448 | 21098                   | TT                              | CC                | 1946653219               |
| SNP_P3_153868_21159 | NW_004516649.1 | Scaffold1448 | 21159                   | AA                              | CC                | 1946653220               |
| SNP_P3_153869_21186 | NW_004516649.1 | Scaffold1448 | 21186                   | CC                              | TT                | 1946653222               |
| SNP_P3_153870_30166 | NW_004516649.1 | Scaffold1448 | 30166                   | GG                              | CC                | 1946653224               |
| SNP_P3_153871_36203 | NW_004516649.1 | Scaffold1448 | 36203                   | GG                              | AA                | 1946653226               |
| SNP_P3_153872_39731 | NW_004516649.1 | Scaffold1448 | 39731                   | CC                              | TT                | 1946653228               |
| SNP_P3_153873_40358 | NW_004516649.1 | Scaffold1448 | 40358                   | TT                              | CC                | 1946653230               |
| SNP_P3_153874_40798 | NW_004516649.1 | Scaffold1448 | 40798                   | CC                              | AA                | 1946653232               |
| SNP_P3_153875_40859 | NW_004516649.1 | Scaffold1448 | 40859                   | AA                              | GG                | 1946653234               |
| SNP_P3_153876_40860 | NW_004516649.1 | Scaffold1448 | 40860                   | TT                              | CC                | 1946653236               |
| SNP_P3_153877_40863 | NW_004516649.1 | Scaffold1448 | 40863                   | TT                              | AA                | 1946653239               |

| SNPs IDs             | Chromosome IDs | Chromosomes  | Physical positions (bp) | CDC Frontier (Reference genome) | (Pusa 256 & HPNB) | NCBI SNPdb Accession IDs |
|----------------------|----------------|--------------|-------------------------|---------------------------------|-------------------|--------------------------|
| SNP_P3_153878_40885  | NW_004516649.1 | Scaffold1448 | 40885                   | AA                              | GG                | 1946653241               |
| SNP_P3_153879_41006  | NW_004516649.1 | Scaffold1448 | 41006                   | TT                              | CC                | 1946653243               |
| SNP_P3_153880_43098  | NW_004516649.1 | Scaffold1448 | 43098                   | GG                              | TT                | 1946653245               |
| SNP_P3_153881_45802  | NW_004516649.1 | Scaffold1448 | 45802                   | TT                              | GG                | 1946653247               |
| SNP_P3_153882_52265  | NW_004516649.1 | Scaffold1448 | 52265                   | CC                              | GG                | 1946653249               |
| SNP_P3_153883_52267  | NW_004516649.1 | Scaffold1448 | 52267                   | AA                              | GG                | 1946653251               |
| SNP_P3_153884_78836  | NW_004516649.1 | Scaffold1448 | 78836                   | AA                              | GG                | 1946653253               |
| SNP_P3_153885_90063  | NW_004516649.1 | Scaffold1448 | 90063                   | TT                              | AA                | 1946653255               |
| SNP_P3_153886_90092  | NW_004516649.1 | Scaffold1448 | 90092                   | GG                              | CC                | 1946653257               |
| SNP_P3_153887_90100  | NW_004516649.1 | Scaffold1448 | 90100                   | AA                              | GG                | 1946653259               |
| SNP_P3_153888_90120  | NW_004516649.1 | Scaffold1448 | 90120                   | TT                              | CC                | 1946653261               |
| SNP_P3_153889_90180  | NW_004516649.1 | Scaffold1448 | 90180                   | TT                              | AA                | 1946653263               |
| SNP_P3_153890_90322  | NW_004516649.1 | Scaffold1448 | 90322                   | GG                              | AA                | 1946653265               |
| SNP_P3_153891_90376  | NW_004516649.1 | Scaffold1448 | 90376                   | GG                              | CC                | 1946653267               |
| SNP_P3_153892_90420  | NW_004516649.1 | Scaffold1448 | 90420                   | GG                              | AA                | 1946653268               |
| SNP_P3_153893_90432  | NW_004516649.1 | Scaffold1448 | 90432                   | AA                              | TT                | 1946653270               |
| SNP_P3_153894_90467  | NW_004516649.1 | Scaffold1448 | 90467                   | GG                              | CC                | 1946653272               |
| SNP_P3_153895_90509  | NW_004516649.1 | Scaffold1448 | 90509                   | AA                              | GG                | 1946653274               |
| SNP_P3_153896_90682  | NW_004516649.1 | Scaffold1448 | 90682                   | TT                              | GG                | 1946653276               |
| SNP_P3_153897_91514  | NW_004516649.1 | Scaffold1448 | 91514                   | TT                              | AA                | 1946653279               |
| SNP_P3_153898_92365  | NW_004516649.1 | Scaffold1448 | 92365                   | TT                              | AA                | 1946653281               |
| SNP_P3_153899_92400  | NW_004516649.1 | Scaffold1448 | 92400                   | TT                              | AA                | 1946653283               |
| SNP_P3_153900_98811  | NW_004516649.1 | Scaffold1448 | 98811                   | CC                              | GG                | 1946653285               |
| SNP_P3_153901_99412  | NW_004516649.1 | Scaffold1448 | 99412                   | TT                              | GG                | 1946653287               |
| SNP_P3_153903_102110 | NW_004516649.1 | Scaffold1448 | 102110                  | TT                              | AA                | 1946653289               |
| SNP_P3_153904_102183 | NW_004516649.1 | Scaffold1448 | 102183                  | CC                              | TT                | 1946653291               |
| SNP_P3_153905_104019 | NW_004516649.1 | Scaffold1448 | 104019                  | CC                              | TT                | 1946653293               |
| SNP_P3_153906_106034 | NW_004516649.1 | Scaffold1448 | 106034                  | CC                              | AA                | 1946653295               |
| SNP_P3_153907_106129 | NW_004516649.1 | Scaffold1448 | 106129                  | CC                              | AA                | 1946653297               |
| SNP_P3_153908_109285 | NW_004516649.1 | Scaffold1448 | 109285                  | GG                              | AA                | 1946653299               |
| SNP_P3_153909_109419 | NW_004516649.1 | Scaffold1448 | 109419                  | AA                              | GG                | 1946653301               |
| SNP_P3_153910_110565 | NW_004516649.1 | Scaffold1448 | 110565                  | TT                              | GG                | 1946653302               |
| SNP_P3_153911_115220 | NW_004516649.1 | Scaffold1448 | 115220                  | GG                              | AA                | 1946653304               |
| SNP_P3_153912_116749 | NW_004516649.1 | Scaffold1448 | 116749                  | TT                              | CC                | 1946653306               |
| SNP_P3_153913_118106 | NW_004516649.1 | Scaffold1448 | 118106                  | AA                              | TT                | 1946653308               |
| SNP_P3_153914_144037 | NW_004516649.1 | Scaffold1448 | 144037                  | TT                              | CC                | 1946653310               |
| SNP_P3_153915_144038 | NW_004516649.1 | Scaffold1448 | 144038                  | CC                              | TT                | 1946653312               |
| SNP_P3_153916_144081 | NW_004516649.1 | Scaffold1448 | 144081                  | AA                              | GG                | 1946653314               |
| SNP_P3_153917_146985 | NW_004516649.1 | Scaffold1448 | 146985                  | TT                              | CC                | 1946653316               |
| SNP_P3_153918_148481 | NW_004516649.1 | Scaffold1448 | 148481                  | CC                              | TT                | 1946653320               |
| SNP_P3_153919_148744 | NW_004516649.1 | Scaffold1448 | 148744                  | GG                              | AA                | 1946653322               |
| SNP_P3_153920_3537   | NW_004516650.1 | Scaffold1449 | 3537                    | CC                              | GG                | 1946653324               |

| SNPs IDs            | Chromosome IDs | Chromosomes  | Physical positions (bp) | CDC Frontier (Reference genome) | (Pusa 256 & HPNB) | NCBI SNPdb Accession IDs |
|---------------------|----------------|--------------|-------------------------|---------------------------------|-------------------|--------------------------|
| SNP_P3_153921_3724  | NW_004516650.1 | Scaffold1449 | 3724                    | TT                              | AA                | 1946653326               |
| SNP_P3_153922_3730  | NW_004516650.1 | Scaffold1449 | 3730                    | TT                              | AA                | 1946653328               |
| SNP_P3_153923_3954  | NW_004516650.1 | Scaffold1449 | 3954                    | AA                              | TT                | 1946653330               |
| SNP_P3_153925_6752  | NW_004516650.1 | Scaffold1449 | 6752                    | TT                              | CC                | 1946653332               |
| SNP_P3_153926_6765  | NW_004516650.1 | Scaffold1449 | 6765                    | CC                              | GG                | 1946653334               |
| SNP_P3_153927_6844  | NW_004516650.1 | Scaffold1449 | 6844                    | AA                              | GG                | 1946653336               |
| SNP_P3_153928_7149  | NW_004516650.1 | Scaffold1449 | 7149                    | AA                              | GG                | 1946653338               |
| SNP_P3_153929_7581  | NW_004516650.1 | Scaffold1449 | 7581                    | AA                              | CC                | 1946653340               |
| SNP_P3_153930_7638  | NW_004516650.1 | Scaffold1449 | 7638                    | GG                              | AA                | 1946653342               |
| SNP_P3_153931_7668  | NW_004516650.1 | Scaffold1449 | 7668                    | GG                              | TT                | 1946653344               |
| SNP_P3_153932_7783  | NW_004516650.1 | Scaffold1449 | 7783                    | GG                              | CC                | 1946653346               |
| SNP_P3_153933_10974 | NW_004516650.1 | Scaffold1449 | 10974                   | TT                              | CC                | 1946653348               |
| SNP_P3_153934_10988 | NW_004516650.1 | Scaffold1449 | 10988                   | TT                              | GG                | 1946653350               |
| SNP_P3_153935_11307 | NW_004516650.1 | Scaffold1449 | 11307                   | TT                              | CC                | 1946653352               |
| SNP_P3_153936_16049 | NW_004516650.1 | Scaffold1449 | 16049                   | CC                              | TT                | 1946653354               |
| SNP_P3_153937_19476 | NW_004516650.1 | Scaffold1449 | 19476                   | GG                              | TT                | 1946653356               |
| SNP_P3_153938_19528 | NW_004516650.1 | Scaffold1449 | 19528                   | GG                              | TT                | 1946653358               |
| SNP_P3_153939_19574 | NW_004516650.1 | Scaffold1449 | 19574                   | AA                              | GG                | 1946653361               |
| SNP_P3_153940_19590 | NW_004516650.1 | Scaffold1449 | 19590                   | AA                              | GG                | 1946653363               |
| SNP_P3_153941_19597 | NW_004516650.1 | Scaffold1449 | 19597                   | AA                              | GG                | 1946653365               |
| SNP_P3_153942_28302 | NW_004516650.1 | Scaffold1449 | 28302                   | GG                              | AA                | 1946653367               |
| SNP_P3_153943_47982 | NW_004516650.1 | Scaffold1449 | 47982                   | TT                              | CC                | 1946653369               |
| SNP_P3_153944_54379 | NW_004516650.1 | Scaffold1449 | 54379                   | GG                              | AA                | 1946653371               |
| SNP_P3_153945_54440 | NW_004516650.1 | Scaffold1449 | 54440                   | TT                              | CC                | 1946653373               |
| SNP_P3_153946_54830 | NW_004516650.1 | Scaffold1449 | 54830                   | TT                              | AA                | 1946653375               |
| SNP_P3_153947_59017 | NW_004516650.1 | Scaffold1449 | 59017                   | CC                              | TT                | 1946653377               |
| SNP_P3_153948_3839  | NW_004516651.1 | Scaffold1450 | 3839                    | CC                              | TT                | 1946653379               |
| SNP_P3_153950_44412 | NW_004516651.1 | Scaffold1450 | 44412                   | CC                              | TT                | 1946653381               |
| SNP_P3_153951_44436 | NW_004516651.1 | Scaffold1450 | 44436                   | AA                              | TT                | 1946653383               |
| SNP_P3_153952_50412 | NW_004516651.1 | Scaffold1450 | 50412                   | AA                              | TT                | 1946653385               |
| SNP_P3_153953_50413 | NW_004516651.1 | Scaffold1450 | 50413                   | AA                              | TT                | 1946653387               |
| SNP_P3_153954_54169 | NW_004516651.1 | Scaffold1450 | 54169                   | CC                              | AA                | 1946653390               |
| SNP_P3_153955_62698 | NW_004516651.1 | Scaffold1450 | 62698                   | GG                              | AA                | 1946653392               |
| SNP_P3_153956_71529 | NW_004516651.1 | Scaffold1450 | 71529                   | GG                              | AA                | 1946653394               |
| SNP_P3_153957_71799 | NW_004516651.1 | Scaffold1450 | 71799                   | AA                              | GG                | 1946653396               |
| SNP_P3_153958_71846 | NW_004516651.1 | Scaffold1450 | 71846                   | AA                              | GG                | 1946653399               |
| SNP_P3_153959_71870 | NW_004516651.1 | Scaffold1450 | 71870                   | GG                              | AA                | 1946653401               |
| SNP_P3_153960_71932 | NW_004516651.1 | Scaffold1450 | 71932                   | TT                              | CC                | 1946653404               |
| SNP_P3_153961_880   | NW_004516653.1 | Scaffold1452 | 880                     | AA                              | TT                | 1946653406               |
| SNP_P3_153963_4016  | NW_004516653.1 | Scaffold1452 | 4016                    | GG                              | TT                | 1946653408               |
| SNP_P3_153965_4090  | NW_004516653.1 | Scaffold1452 | 4090                    | AA                              | TT                | 1946653410               |
| SNP_P3_153966_4107  | NW_004516653.1 | Scaffold1452 | 4107                    | TT                              | CC                | 1946653412               |

| SNPs IDs            | Chromosome IDs | Chromosomes  | Physical positions (bp) | CDC Frontier (Reference genome) | (Pusa 256 & HPNB) | NCBI SNPdb Accession IDs |
|---------------------|----------------|--------------|-------------------------|---------------------------------|-------------------|--------------------------|
| SNP_P3_153967_4123  | NW_004516653.1 | Scaffold1452 | 4123                    | GG                              | AA                | 1946653414               |
| SNP_P3_153968_6389  | NW_004516653.1 | Scaffold1452 | 6389                    | GG                              | AA                | 1946653416               |
| SNP_P3_153970_29775 | NW_004516653.1 | Scaffold1452 | 29775                   | CC                              | TT                | 1946653418               |
| SNP_P3_153971_29820 | NW_004516653.1 | Scaffold1452 | 29820                   | TT                              | AA                | 1946653420               |
| SNP_P3_153972_29854 | NW_004516653.1 | Scaffold1452 | 29854                   | TT                              | AA                | 1946653422               |
| SNP_P3_153973_29871 | NW_004516653.1 | Scaffold1452 | 29871                   | AA                              | TT                | 1946653424               |
| SNP_P3_153974_30013 | NW_004516653.1 | Scaffold1452 | 30013                   | CC                              | AA                | 1946653427               |
| SNP_P3_153975_30110 | NW_004516653.1 | Scaffold1452 | 30110                   | TT                              | AA                | 1946653429               |
| SNP_P3_153976_30167 | NW_004516653.1 | Scaffold1452 | 30167                   | TT                              | AA                | 1946653431               |
| SNP_P3_153977_30196 | NW_004516653.1 | Scaffold1452 | 30196                   | AA                              | CC                | 1946653433               |
| SNP_P3_153978_30205 | NW_004516653.1 | Scaffold1452 | 30205                   | CC                              | TT                | 1946653437               |
| SNP_P3_153980_30221 | NW_004516653.1 | Scaffold1452 | 30221                   | CC                              | AA                | 1946653439               |
| SNP_P3_153981_30289 | NW_004516653.1 | Scaffold1452 | 30289                   | GG                              | TT                | 1946653441               |
| SNP_P3_153982_30293 | NW_004516653.1 | Scaffold1452 | 30293                   | GG                              | TT                | 1946653443               |
| SNP_P3_153983_30349 | NW_004516653.1 | Scaffold1452 | 30349                   | CC                              | GG                | 1946653445               |
| SNP_P3_153984_30354 | NW_004516653.1 | Scaffold1452 | 30354                   | AA                              | TT                | 1946653447               |
| SNP_P3_153985_30386 | NW_004516653.1 | Scaffold1452 | 30386                   | TT                              | GG                | 1946653449               |
| SNP_P3_153986_30390 | NW_004516653.1 | Scaffold1452 | 30390                   | AA                              | TT                | 1946653451               |
| SNP_P3_153987_30481 | NW_004516653.1 | Scaffold1452 | 30481                   | GG                              | AA                | 1946653453               |
| SNP_P3_153988_30487 | NW_004516653.1 | Scaffold1452 | 30487                   | GG                              | TT                | 1946653455               |
| SNP_P3_153989_30490 | NW_004516653.1 | Scaffold1452 | 30490                   | AA                              | CC                | 1946653457               |
| SNP_P3_153990_30537 | NW_004516653.1 | Scaffold1452 | 30537                   | AA                              | CC                | 1946653459               |
| SNP_P3_153991_44933 | NW_004516653.1 | Scaffold1452 | 44933                   | GG                              | TT                | 1946653461               |
| SNP_P3_153993_44947 | NW_004516653.1 | Scaffold1452 | 44947                   | TT                              | CC                | 1946653463               |
| SNP_P3_153994_414   | NW_004516654.1 | Scaffold1453 | 414                     | GG                              | CC                | 1946653465               |
| SNP_P3_153995_8045  | NW_004516654.1 | Scaffold1453 | 8045                    | CC                              | GG                | 1946653467               |
| SNP_P3_153996_25676 | NW_004516654.1 | Scaffold1453 | 25676                   | GG                              | TT                | 1946653469               |
| SNP_P3_153997_25742 | NW_004516654.1 | Scaffold1453 | 25742                   | TT                              | CC                | 1946653471               |
| SNP_P3_153998_28095 | NW_004516654.1 | Scaffold1453 | 28095                   | TT                              | AA                | 1946653475               |
| SNP_P3_153999_34796 | NW_004516654.1 | Scaffold1453 | 34796                   | GG                              | AA                | 1946653477               |
| SNP_P3_154000_34879 | NW_004516654.1 | Scaffold1453 | 34879                   | CC                              | AA                | 1946653479               |
| SNP_P3_154001_35383 | NW_004516654.1 | Scaffold1453 | 35383                   | CC                              | TT                | 1946653481               |
| SNP_P3_154002_42035 | NW_004516654.1 | Scaffold1453 | 42035                   | AA                              | GG                | 1946653483               |
| SNP_P3_154003_42337 | NW_004516654.1 | Scaffold1453 | 42337                   | GG                              | AA                | 1946653485               |
| SNP_P3_154004_42341 | NW_004516654.1 | Scaffold1453 | 42341                   | AA                              | CC                | 1946653487               |
| SNP_P3_154005_42365 | NW_004516654.1 | Scaffold1453 | 42365                   | GG                              | CC                | 1946653489               |
| SNP_P3_154006_51908 | NW_004516654.1 | Scaffold1453 | 51908                   | CC                              | GG                | 1946653491               |
| SNP_P3_154007_52284 | NW_004516654.1 | Scaffold1453 | 52284                   | CC                              | TT                | 1946653493               |
| SNP_P3_154008_56879 | NW_004516654.1 | Scaffold1453 | 56879                   | CC                              | TT                | 1946653495               |
| SNP_P3_154009_61157 | NW_004516654.1 | Scaffold1453 | 61157                   | CC                              | TT                | 1946653497               |
| SNP_P3_154010_82294 | NW_004516654.1 | Scaffold1453 | 82294                   | GG                              | CC                | 1946653499               |
| SNP_P3_154011_86583 | NW_004516654.1 | Scaffold1453 | 86583                   | GG                              | AA                | 1946653501               |

| SNPs IDs             | Chromosome IDs | Chromosomes  | Physical positions (bp) | CDC Frontier (Reference genome) | (Pusa 256 & HPNB) | NCBI SNPdb Accession IDs |
|----------------------|----------------|--------------|-------------------------|---------------------------------|-------------------|--------------------------|
| SNP_P3_154012_86588  | NW_004516654.1 | Scaffold1453 | 86588                   | AA                              | TT                | 1946653503               |
| SNP_P3_154013_86593  | NW_004516654.1 | Scaffold1453 | 86593                   | GG                              | TT                | 1946653505               |
| SNP_P3_154014_86601  | NW_004516654.1 | Scaffold1453 | 86601                   | AA                              | TT                | 1946653507               |
| SNP_P3_154015_97820  | NW_004516654.1 | Scaffold1453 | 97820                   | TT                              | CC                | 1946653509               |
| SNP_P3_154016_97841  | NW_004516654.1 | Scaffold1453 | 97841                   | TT                              | AA                | 1946653512               |
| SNP_P3_154017_99040  | NW_004516654.1 | Scaffold1453 | 99040                   | CC                              | TT                | 1946653514               |
| SNP_P3_154018_99041  | NW_004516654.1 | Scaffold1453 | 99041                   | CC                              | AA                | 1946653516               |
| SNP_P3_154019_106691 | NW_004516654.1 | Scaffold1453 | 106691                  | CC                              | AA                | 1946653518               |
| SNP_P3_154020_106710 | NW_004516654.1 | Scaffold1453 | 106710                  | TT                              | GG                | 1946653520               |
| SNP_P3_154021_106738 | NW_004516654.1 | Scaffold1453 | 106738                  | CC                              | GG                | 1946653522               |
| SNP_P3_154022_106745 | NW_004516654.1 | Scaffold1453 | 106745                  | GG                              | CC                | 1946653525               |
| SNP_P3_154023_106761 | NW_004516654.1 | Scaffold1453 | 106761                  | TT                              | CC                | 1946653527               |
| SNP_P3_154024_107739 | NW_004516654.1 | Scaffold1453 | 107739                  | AA                              | GG                | 1946653529               |
| SNP_P3_154025_108325 | NW_004516654.1 | Scaffold1453 | 108325                  | TT                              | GG                | 1946653531               |
| SNP_P3_154026_108361 | NW_004516654.1 | Scaffold1453 | 108361                  | AA                              | CC                | 1946653533               |
| SNP_P3_154027_108396 | NW_004516654.1 | Scaffold1453 | 108396                  | AA                              | TT                | 1946653535               |
| SNP_P3_154028_108413 | NW_004516654.1 | Scaffold1453 | 108413                  | GG                              | TT                | 1946653537               |
| SNP_P3_154029_108784 | NW_004516654.1 | Scaffold1453 | 108784                  | CC                              | TT                | 1946653539               |
| SNP_P3_154030_108788 | NW_004516654.1 | Scaffold1453 | 108788                  | AA                              | GG                | 1946653541               |
| SNP_P3_154031_108807 | NW_004516654.1 | Scaffold1453 | 108807                  | CC                              | GG                | 1946653543               |
| SNP_P3_154032_108834 | NW_004516654.1 | Scaffold1453 | 108834                  | AA                              | GG                | 1946653545               |
| SNP_P3_154033_108865 | NW_004516654.1 | Scaffold1453 | 108865                  | AA                              | GG                | 1946653547               |
| SNP_P3_154034_108904 | NW_004516654.1 | Scaffold1453 | 108904                  | AA                              | GG                | 1946653549               |
| SNP_P3_154035_108926 | NW_004516654.1 | Scaffold1453 | 108926                  | CC                              | TT                | 1946653552               |
| SNP_P3_154036_108943 | NW_004516654.1 | Scaffold1453 | 108943                  | GG                              | AA                | 1946653554               |
| SNP_P3_154037_108967 | NW_004516654.1 | Scaffold1453 | 108967                  | AA                              | GG                | 1946653556               |
| SNP_P3_154038_109049 | NW_004516654.1 | Scaffold1453 | 109049                  | CC                              | GG                | 1946653558               |
| SNP_P3_154039_109079 | NW_004516654.1 | Scaffold1453 | 109079                  | CC                              | TT                | 1946653560               |
| SNP_P3_154040_109085 | NW_004516654.1 | Scaffold1453 | 109085                  | TT                              | AA                | 1946653562               |
| SNP_P3_154041_109106 | NW_004516654.1 | Scaffold1453 | 109106                  | TT                              | CC                | 1946653564               |
| SNP_P3_154042_109134 | NW_004516654.1 | Scaffold1453 | 109134                  | GG                              | TT                | 1946653565               |
| SNP_P3_154043_109135 | NW_004516654.1 | Scaffold1453 | 109135                  | GG                              | CC                | 1946653566               |
| SNP_P3_154044_109214 | NW_004516654.1 | Scaffold1453 | 109214                  | CC                              | GG                | 1946653567               |
| SNP_P3_154045_109222 | NW_004516654.1 | Scaffold1453 | 109222                  | TT                              | CC                | 1946653568               |
| SNP_P3_154046_109297 | NW_004516654.1 | Scaffold1453 | 109297                  | CC                              | AA                | 1946653569               |
| SNP_P3_154047_109307 | NW_004516654.1 | Scaffold1453 | 109307                  | AA                              | CC                | 1946653570               |
| SNP_P3_154048_110577 | NW_004516654.1 | Scaffold1453 | 110577                  | AA                              | TT                | 1946653571               |
| SNP_P3_154049_110636 | NW_004516654.1 | Scaffold1453 | 110636                  | TT                              | CC                | 1946653572               |
| SNP_P3_154050_110637 | NW_004516654.1 | Scaffold1453 | 110637                  | TT                              | GG                | 1946653574               |
| SNP_P3_154051_110656 | NW_004516654.1 | Scaffold1453 | 110656                  | CC                              | TT                | 1946653576               |
| SNP_P3_154052_110908 | NW_004516654.1 | Scaffold1453 | 110908                  | CC                              | TT                | 1946653578               |
| SNP_P3_154053_596    | NW_004516655.1 | Scaffold1455 | 596                     | CC                              | TT                | 1946653581               |

| SNPs IDs            | Chromosome IDs | Chromosomes  | Physical positions (bp) | CDC Frontier (Reference genome) | (Pusa 256 & HPNB) | NCBI SNPdb Accession IDs |
|---------------------|----------------|--------------|-------------------------|---------------------------------|-------------------|--------------------------|
| SNP_P3_154054_604   | NW_004516655.1 | Scaffold1455 | 604                     | GG                              | CC                | 1946653583               |
| SNP_P3_154055_770   | NW_004516655.1 | Scaffold1455 | 770                     | CC                              | AA                | 1946653585               |
| SNP_P3_154056_6891  | NW_004516655.1 | Scaffold1455 | 6891                    | GG                              | AA                | 1946653587               |
| SNP_P3_154057_7116  | NW_004516655.1 | Scaffold1455 | 7116                    | TT                              | AA                | 1946653589               |
| SNP_P3_154058_7133  | NW_004516655.1 | Scaffold1455 | 7133                    | GG                              | AA                | 1946653591               |
| SNP_P3_154059_7134  | NW_004516655.1 | Scaffold1455 | 7134                    | AA                              | CC                | 1946653593               |
| SNP_P3_154060_7162  | NW_004516655.1 | Scaffold1455 | 7162                    | TT                              | CC                | 1946653594               |
| SNP_P3_154061_11106 | NW_004516655.1 | Scaffold1455 | 11106                   | AA                              | GG                | 1946653595               |
| SNP_P3_154062_11129 | NW_004516655.1 | Scaffold1455 | 11129                   | TT                              | CC                | 1946653596               |
| SNP_P3_154063_11414 | NW_004516655.1 | Scaffold1455 | 11414                   | GG                              | AA                | 1946653597               |
| SNP_P3_154064_11459 | NW_004516655.1 | Scaffold1455 | 11459                   | TT                              | GG                | 1946653598               |
| SNP_P3_154065_11556 | NW_004516655.1 | Scaffold1455 | 11556                   | CC                              | TT                | 1946653599               |
| SNP_P3_154066_11568 | NW_004516655.1 | Scaffold1455 | 11568                   | CC                              | GG                | 1946653600               |
| SNP_P3_154067_11734 | NW_004516655.1 | Scaffold1455 | 11734                   | CC                              | TT                | 1946653601               |
| SNP_P3_154068_11790 | NW_004516655.1 | Scaffold1455 | 11790                   | CC                              | TT                | 1946653602               |
| SNP_P3_154069_12175 | NW_004516655.1 | Scaffold1455 | 12175                   | GG                              | AA                | 1946653604               |
| SNP_P3_154070_12403 | NW_004516655.1 | Scaffold1455 | 12403                   | AA                              | GG                | 1946653606               |
| SNP_P3_154072_12662 | NW_004516655.1 | Scaffold1455 | 12662                   | TT                              | GG                | 1946653607               |
| SNP_P3_154073_12908 | NW_004516655.1 | Scaffold1455 | 12908                   | AA                              | CC                | 1946653609               |
| SNP_P3_154075_13183 | NW_004516655.1 | Scaffold1455 | 13183                   | TT                              | GG                | 1946653611               |
| SNP_P3_154076_13196 | NW_004516655.1 | Scaffold1455 | 13196                   | AA                              | CC                | 1946653613               |
| SNP_P3_154077_13238 | NW_004516655.1 | Scaffold1455 | 13238                   | CC                              | TT                | 1946653615               |
| SNP_P3_154078_13502 | NW_004516655.1 | Scaffold1455 | 13502                   | AA                              | GG                | 1946653617               |
| SNP_P3_154079_13503 | NW_004516655.1 | Scaffold1455 | 13503                   | GG                              | AA                | 1946653619               |
| SNP_P3_154080_13813 | NW_004516655.1 | Scaffold1455 | 13813                   | CC                              | GG                | 1946653622               |
| SNP_P3_154081_14581 | NW_004516655.1 | Scaffold1455 | 14581                   | AA                              | CC                | 1946653624               |
| SNP_P3_154082_14945 | NW_004516655.1 | Scaffold1455 | 14945                   | AA                              | TT                | 1946653626               |
| SNP_P3_154083_14968 | NW_004516655.1 | Scaffold1455 | 14968                   | AA                              | GG                | 1946653628               |
| SNP_P3_154084_14971 | NW_004516655.1 | Scaffold1455 | 14971                   | AA                              | GG                | 1946653630               |
| SNP_P3_154085_15017 | NW_004516655.1 | Scaffold1455 | 15017                   | TT                              | CC                | 1946653632               |
| SNP_P3_154086_15023 | NW_004516655.1 | Scaffold1455 | 15023                   | GG                              | AA                | 1946653634               |
| SNP_P3_154087_15025 | NW_004516655.1 | Scaffold1455 | 15025                   | TT                              | AA                | 1946653636               |
| SNP_P3_154088_15062 | NW_004516655.1 | Scaffold1455 | 15062                   | GG                              | CC                | 1946653638               |
| SNP_P3_154089_16236 | NW_004516655.1 | Scaffold1455 | 16236                   | GG                              | TT                | 1946653640               |
| SNP_P3_154090_16503 | NW_004516655.1 | Scaffold1455 | 16503                   | TT                              | CC                | 1946653642               |
| SNP_P3_154091_17969 | NW_004516655.1 | Scaffold1455 | 17969                   | TT                              | AA                | 1946653644               |
| SNP_P3_154092_17976 | NW_004516655.1 | Scaffold1455 | 17976                   | AA                              | TT                | 1946653646               |
| SNP_P3_154093_18515 | NW_004516655.1 | Scaffold1455 | 18515                   | TT                              | AA                | 1946653648               |
| SNP_P3_154094_18652 | NW_004516655.1 | Scaffold1455 | 18652                   | TT                              | GG                | 1946653649               |
| SNP_P3_154095_18655 | NW_004516655.1 | Scaffold1455 | 18655                   | GG                              | AA                | 1946653651               |
| SNP_P3_154096_18789 | NW_004516655.1 | Scaffold1455 | 18789                   | TT                              | CC                | 1946653653               |
| SNP_P3_154097_18836 | NW_004516655.1 | Scaffold1455 | 18836                   | AA                              | GG                | 1946653655               |

| SNPs IDs            | Chromosome IDs | Chromosomes  | Physical positions (bp) | CDC Frontier (Reference genome) | (Pusa 256 & HPNB) | NCBI SNPdb Accession IDs |
|---------------------|----------------|--------------|-------------------------|---------------------------------|-------------------|--------------------------|
| SNP_P3_154098_18896 | NW_004516655.1 | Scaffold1455 | 18896                   | CC                              | TT                | 1946653657               |
| SNP_P3_154099_18920 | NW_004516655.1 | Scaffold1455 | 18920                   | TT                              | CC                | 1946653659               |
| SNP_P3_154100_19070 | NW_004516655.1 | Scaffold1455 | 19070                   | GG                              | AA                | 1946653661               |
| SNP_P3_154101_20868 | NW_004516655.1 | Scaffold1455 | 20868                   | AA                              | GG                | 1946653663               |
| SNP_P3_154102_21151 | NW_004516655.1 | Scaffold1455 | 21151                   | TT                              | AA                | 1946653665               |
| SNP_P3_154103_21455 | NW_004516655.1 | Scaffold1455 | 21455                   | TT                              | GG                | 1946653667               |
| SNP_P3_154104_21595 | NW_004516655.1 | Scaffold1455 | 21595                   | CC                              | GG                | 1946653669               |
| SNP_P3_154105_21604 | NW_004516655.1 | Scaffold1455 | 21604                   | CC                              | AA                | 1946653671               |
| SNP_P3_154106_21607 | NW_004516655.1 | Scaffold1455 | 21607                   | AA                              | GG                | 1946653673               |
| SNP_P3_154107_21636 | NW_004516655.1 | Scaffold1455 | 21636                   | CC                              | TT                | 1946653675               |
| SNP_P3_154108_42223 | NW_004516655.1 | Scaffold1455 | 42223                   | GG                              | AA                | 1946653677               |
| SNP_P3_154109_42388 | NW_004516655.1 | Scaffold1455 | 42388                   | TT                              | GG                | 1946653679               |
| SNP_P3_154110_42438 | NW_004516655.1 | Scaffold1455 | 42438                   | GG                              | CC                | 1946653681               |
| SNP_P3_154111_1312  | NW_004516656.1 | Scaffold1456 | 1312                    | TT                              | CC                | 1946653683               |
| SNP_P3_154112_19492 | NW_004516657.1 | Scaffold1457 | 19492                   | CC                              | GG                | 1946653685               |
| SNP_P3_154113_19500 | NW_004516657.1 | Scaffold1457 | 19500                   | GG                              | TT                | 1946653687               |
| SNP_P3_154114_19649 | NW_004516657.1 | Scaffold1457 | 19649                   | GG                              | AA                | 1946653689               |
| SNP_P3_154115_19834 | NW_004516657.1 | Scaffold1457 | 19834                   | AA                              | GG                | 1946653691               |
| SNP_P3_154116_19944 | NW_004516657.1 | Scaffold1457 | 19944                   | AA                              | TT                | 1946653693               |
| SNP_P3_154119_25671 | NW_004516657.1 | Scaffold1457 | 25671                   | GG                              | CC                | 1946653694               |
| SNP_P3_154120_32645 | NW_004516657.1 | Scaffold1457 | 32645                   | GG                              | AA                | 1946653695               |
| SNP_P3_154121_33569 | NW_004516657.1 | Scaffold1457 | 33569                   | GG                              | AA                | 1946653696               |
| SNP_P3_154122_34301 | NW_004516657.1 | Scaffold1457 | 34301                   | TT                              | CC                | 1946653697               |
| SNP_P3_154123_39137 | NW_004516657.1 | Scaffold1457 | 39137                   | AA                              | GG                | 1946653698               |
| SNP_P3_154124_39410 | NW_004516657.1 | Scaffold1457 | 39410                   | GG                              | AA                | 1946653699               |
| SNP_P3_154125_56132 | NW_004516657.1 | Scaffold1457 | 56132                   | CC                              | AA                | 1946653700               |
| SNP_P3_154126_68208 | NW_004516657.1 | Scaffold1457 | 68208                   | GG                              | TT                | 1946653702               |
| SNP_P3_154127_68576 | NW_004516657.1 | Scaffold1457 | 68576                   | AA                              | CC                | 1946653703               |
| SNP_P3_154128_935   | NW_004516659.1 | Scaffold1459 | 935                     | TT                              | CC                | 1946653705               |
| SNP_P3_154129_3741  | NW_004516659.1 | Scaffold1459 | 3741                    | TT                              | GG                | 1946653707               |
| SNP_P3_154130_4250  | NW_004516659.1 | Scaffold1459 | 4250                    | AA                              | CC                | 1946653709               |
| SNP_P3_154131_4696  | NW_004516659.1 | Scaffold1459 | 4696                    | TT                              | CC                | 1946653711               |
| SNP_P3_154132_5511  | NW_004516659.1 | Scaffold1459 | 5511                    | GG                              | AA                | 1946653714               |
| SNP_P3_154133_6197  | NW_004516659.1 | Scaffold1459 | 6197                    | TT                              | CC                | 1946653716               |
| SNP_P3_154134_6202  | NW_004516659.1 | Scaffold1459 | 6202                    | CC                              | TT                | 1946653718               |
| SNP_P3_154135_8699  | NW_004516659.1 | Scaffold1459 | 8699                    | TT                              | AA                | 1946653720               |
| SNP_P3_154136_8731  | NW_004516659.1 | Scaffold1459 | 8731                    | GG                              | AA                | 1946653721               |
| SNP_P3_154137_8772  | NW_004516659.1 | Scaffold1459 | 8772                    | TT                              | GG                | 1946653723               |
| SNP_P3_154138_969   | NW_004516660.1 | Scaffold1460 | 969                     | TT                              | CC                | 1946653725               |
| SNP_P3_154139_12390 | NW_004516661.1 | Scaffold1461 | 12390                   | GG                              | CC                | 1946653727               |
| SNP_P3_154140_12567 | NW_004516661.1 | Scaffold1461 | 12567                   | CC                              | TT                | 1946653729               |
| SNP_P3_154141_13019 | NW_004516661.1 | Scaffold1461 | 13019                   | GG                              | AA                | 1946653732               |

| SNPs IDs            | Chromosome IDs | Chromosomes  | Physical positions (bp) | CDC Frontier (Reference genome) | (Pusa 256 & HPNB) | NCBI SNPdb Accession IDs |
|---------------------|----------------|--------------|-------------------------|---------------------------------|-------------------|--------------------------|
| SNP_P3_154142_13164 | NW_004516661.1 | Scaffold1461 | 13164                   | CC                              | GG                | 1946653734               |
| SNP_P3_154143_7366  | NW_004516662.1 | Scaffold1462 | 7366                    | CC                              | TT                | 1946653736               |
| SNP_P3_154144_7374  | NW_004516662.1 | Scaffold1462 | 7374                    | TT                              | CC                | 1946653738               |
| SNP_P3_154145_7667  | NW_004516662.1 | Scaffold1462 | 7667                    | GG                              | TT                | 1946653740               |
| SNP_P3_154147_12174 | NW_004516662.1 | Scaffold1462 | 12174                   | GG                              | CC                | 1946653742               |
| SNP_P3_154149_12477 | NW_004516662.1 | Scaffold1462 | 12477                   | AA                              | TT                | 1946653745               |
| SNP_P3_154150_12719 | NW_004516662.1 | Scaffold1462 | 12719                   | CC                              | TT                | 1946653747               |
| SNP_P3_154151_12891 | NW_004516662.1 | Scaffold1462 | 12891                   | CC                              | TT                | 1946653749               |
| SNP_P3_154152_12893 | NW_004516662.1 | Scaffold1462 | 12893                   | AA                              | TT                | 1946653751               |
| SNP_P3_154153_15068 | NW_004516662.1 | Scaffold1462 | 15068                   | GG                              | TT                | 1946653753               |
| SNP_P3_154154_15081 | NW_004516662.1 | Scaffold1462 | 15081                   | TT                              | GG                | 1946653755               |
| SNP_P3_154155_15143 | NW_004516662.1 | Scaffold1462 | 15143                   | CC                              | GG                | 1946653757               |
| SNP_P3_154156_15228 | NW_004516662.1 | Scaffold1462 | 15228                   | GG                              | AA                | 1946653759               |
| SNP_P3_154157_15896 | NW_004516662.1 | Scaffold1462 | 15896                   | TT                              | AA                | 1946653761               |
| SNP_P3_154158_15924 | NW_004516662.1 | Scaffold1462 | 15924                   | GG                              | AA                | 1946653763               |
| SNP_P3_154159_15118 | NW_004516663.1 | Scaffold1464 | 15118                   | GG                              | TT                | 1946653765               |
| SNP_P3_154160_15147 | NW_004516663.1 | Scaffold1464 | 15147                   | TT                              | CC                | 1946653767               |
| SNP_P3_154162_69835 | NW_004516663.1 | Scaffold1464 | 69835                   | GG                              | AA                | 1946653770               |
| SNP_P3_154163_69857 | NW_004516663.1 | Scaffold1464 | 69857                   | TT                              | CC                | 1946653772               |
| SNP_P3_154164_69894 | NW_004516663.1 | Scaffold1464 | 69894                   | CC                              | GG                | 1946653774               |
| SNP_P3_154165_70111 | NW_004516663.1 | Scaffold1464 | 70111                   | TT                              | CC                | 1946653776               |
| SNP_P3_154166_70240 | NW_004516663.1 | Scaffold1464 | 70240                   | TT                              | AA                | 1946653778               |
| SNP_P3_154167_70310 | NW_004516663.1 | Scaffold1464 | 70310                   | GG                              | TT                | 1946653780               |
| SNP_P3_154168_78567 | NW_004516663.1 | Scaffold1464 | 78567                   | AA                              | GG                | 1946653782               |
| SNP_P3_154169_79091 | NW_004516663.1 | Scaffold1464 | 79091                   | GG                              | TT                | 1946653784               |
| SNP_P3_154170_79112 | NW_004516663.1 | Scaffold1464 | 79112                   | CC                              | TT                | 1946653786               |
| SNP_P3_154171_79133 | NW_004516663.1 | Scaffold1464 | 79133                   | CC                              | TT                | 1946653788               |
| SNP_P3_154172_79134 | NW_004516663.1 | Scaffold1464 | 79134                   | AA                              | TT                | 1946653790               |
| SNP_P3_154173_79161 | NW_004516663.1 | Scaffold1464 | 79161                   | CC                              | GG                | 1946653792               |
| SNP_P3_154174_79174 | NW_004516663.1 | Scaffold1464 | 79174                   | AA                              | TT                | 1946653794               |
| SNP_P3_154175_79182 | NW_004516663.1 | Scaffold1464 | 79182                   | TT                              | AA                | 1946653796               |
| SNP_P3_154176_79188 | NW_004516663.1 | Scaffold1464 | 79188                   | TT                              | GG                | 1946653798               |
| SNP_P3_154177_79212 | NW_004516663.1 | Scaffold1464 | 79212                   | TT                              | CC                | 1946653800               |
| SNP_P3_154178_79226 | NW_004516663.1 | Scaffold1464 | 79226                   | CC                              | TT                | 1946653802               |
| SNP_P3_154179_85431 | NW_004516663.1 | Scaffold1464 | 85431                   | GG                              | CC                | 1946653804               |
| SNP_P3_154180_89961 | NW_004516663.1 | Scaffold1464 | 89961                   | TT                              | CC                | 1946653806               |
| SNP_P3_154181_90005 | NW_004516663.1 | Scaffold1464 | 90005                   | AA                              | GG                | 1946653809               |
| SNP_P3_154182_90136 | NW_004516663.1 | Scaffold1464 | 90136                   | CC                              | TT                | 1946653811               |
| SNP_P3_154183_90140 | NW_004516663.1 | Scaffold1464 | 90140                   | GG                              | TT                | 1946653813               |
| SNP_P3_154184_90147 | NW_004516663.1 | Scaffold1464 | 90147                   | TT                              | CC                | 1946653815               |
| SNP_P3_154185_2313  | NW_004516664.1 | Scaffold1465 | 2313                    | GG                              | CC                | 1946653817               |
| SNP_P3_154186_2616  | NW_004516664.1 | Scaffold1465 | 2616                    | CC                              | GG                | 1946653819               |



| SNPs IDs             | Chromosome IDs | Chromosomes  | Physical positions (bp) | CDC Frontier (Reference genome) | (Pusa 256 & HPNB) | NCBI SNPdb Accession IDs |
|----------------------|----------------|--------------|-------------------------|---------------------------------|-------------------|--------------------------|
| SNP_P3_154188_4693   | NW_004516664.1 | Scaffold1465 | 4693                    | AA                              | TT                | 1946653821               |
| SNP_P3_154190_8491   | NW_004516664.1 | Scaffold1465 | 8491                    | TT                              | CC                | 1946653823               |
| SNP_P3_154191_8492   | NW_004516664.1 | Scaffold1465 | 8492                    | TT                              | GG                | 1946653825               |
| SNP_P3_154192_8504   | NW_004516664.1 | Scaffold1465 | 8504                    | CC                              | TT                | 1946653827               |
| SNP_P3_154193_12118  | NW_004516664.1 | Scaffold1465 | 12118                   | GG                              | TT                | 1946653829               |
| SNP_P3_154194_12140  | NW_004516664.1 | Scaffold1465 | 12140                   | AA                              | TT                | 1946653831               |
| SNP_P3_154195_12212  | NW_004516664.1 | Scaffold1465 | 12212                   | AA                              | CC                | 1946653833               |
| SNP_P3_154196_12429  | NW_004516664.1 | Scaffold1465 | 12429                   | GG                              | AA                | 1946653835               |
| SNP_P3_154197_12558  | NW_004516664.1 | Scaffold1465 | 12558                   | TT                              | AA                | 1946653837               |
| SNP_P3_154198_12668  | NW_004516664.1 | Scaffold1465 | 12668                   | GG                              | AA                | 1946653839               |
| SNP_P3_154200_22550  | NW_004516664.1 | Scaffold1465 | 22550                   | CC                              | TT                | 1946653841               |
| SNP_P3_154201_22571  | NW_004516664.1 | Scaffold1465 | 22571                   | CC                              | GG                | 1946653843               |
| SNP_P3_154202_22577  | NW_004516664.1 | Scaffold1465 | 22577                   | AA                              | TT                | 1946653845               |
| SNP_P3_154203_22780  | NW_004516664.1 | Scaffold1465 | 22780                   | AA                              | CC                | 1946653847               |
| SNP_P3_154204_22909  | NW_004516664.1 | Scaffold1465 | 22909                   | CC                              | AA                | 1946653850               |
| SNP_P3_154206_36619  | NW_004516664.1 | Scaffold1465 | 36619                   | CC                              | TT                | 1946653852               |
| SNP_P3_154208_59225  | NW_004516665.1 | Scaffold1466 | 59225                   | AA                              | TT                | 1946653854               |
| SNP_P3_154209_59226  | NW_004516665.1 | Scaffold1466 | 59226                   | AA                              | TT                | 1946653856               |
| SNP_P3_154210_62861  | NW_004516665.1 | Scaffold1466 | 62861                   | AA                              | GG                | 1946653858               |
| SNP_P3_154211_73290  | NW_004516665.1 | Scaffold1466 | 73290                   | CC                              | TT                | 1946653859               |
| SNP_P3_154213_73448  | NW_004516665.1 | Scaffold1466 | 73448                   | CC                              | AA                | 1946653860               |
| SNP_P3_154214_82344  | NW_004516665.1 | Scaffold1466 | 82344                   | AA                              | TT                | 1946653862               |
| SNP_P3_154215_84986  | NW_004516665.1 | Scaffold1466 | 84986                   | GG                              | CC                | 1946653863               |
| SNP_P3_154216_86018  | NW_004516665.1 | Scaffold1466 | 86018                   | CC                              | TT                | 1946653865               |
| SNP_P3_154217_130984 | NW_004516665.1 | Scaffold1466 | 130984                  | AA                              | GG                | 1946653867               |
| SNP_P3_154218_131408 | NW_004516665.1 | Scaffold1466 | 131408                  | GG                              | AA                | 1946653869               |
| SNP_P3_154219_144437 | NW_004516665.1 | Scaffold1466 | 144437                  | AA                              | GG                | 1946653871               |
| SNP_P3_154220_154036 | NW_004516665.1 | Scaffold1466 | 154036                  | GG                              | AA                | 1946653873               |
| SNP_P3_154221_154103 | NW_004516665.1 | Scaffold1466 | 154103                  | AA                              | GG                | 1946653875               |
| SNP_P3_154222_154399 | NW_004516665.1 | Scaffold1466 | 154399                  | CC                              | GG                | 1946653877               |
| SNP_P3_154223_156242 | NW_004516665.1 | Scaffold1466 | 156242                  | CC                              | TT                | 1946653879               |
| SNP_P3_154224_173557 | NW_004516665.1 | Scaffold1466 | 173557                  | TT                              | CC                | 1946653881               |
| SNP_P3_154225_178769 | NW_004516665.1 | Scaffold1466 | 178769                  | GG                              | TT                | 1946653883               |
| SNP_P3_154226_179799 | NW_004516665.1 | Scaffold1466 | 179799                  | CC                              | TT                | 1946653886               |
| SNP_P3_154227_180847 | NW_004516665.1 | Scaffold1466 | 180847                  | TT                              | CC                | 1946653888               |
| SNP_P3_154228_181151 | NW_004516665.1 | Scaffold1466 | 181151                  | AA                              | CC                | 1946653890               |
| SNP_P3_154229_187969 | NW_004516665.1 | Scaffold1466 | 187969                  | TT                              | CC                | 1946653892               |
| SNP_P3_154230_217101 | NW_004516665.1 | Scaffold1466 | 217101                  | TT                              | AA                | 1946653894               |
| SNP_P3_154232_223785 | NW_004516665.1 | Scaffold1466 | 223785                  | GG                              | TT                | 1946653896               |
| SNP_P3_154233_232374 | NW_004516665.1 | Scaffold1466 | 232374                  | AA                              | GG                | 1946653898               |
| SNP_P3_154235_241184 | NW_004516665.1 | Scaffold1466 | 241184                  | GG                              | AA                | 1946653900               |
| SNP_P3_154236_241206 | NW_004516665.1 | Scaffold1466 | 241206                  | CC                              | TT                | 1946653902               |

| SNPs IDs             | Chromosome IDs | Chromosomes  | Physical positions (bp) | CDC Frontier (Reference genome) | (Pusa 256 & HPNB) | NCBI SNPdb Accession IDs |
|----------------------|----------------|--------------|-------------------------|---------------------------------|-------------------|--------------------------|
| SNP_P3_154237_241253 | NW_004516665.1 | Scaffold1466 | 241253                  | TT                              | CC                | 1946653904               |
| SNP_P3_154238_241255 | NW_004516665.1 | Scaffold1466 | 241255                  | TT                              | CC                | 1946653906               |
| SNP_P3_154239_241446 | NW_004516665.1 | Scaffold1466 | 241446                  | TT                              | CC                | 1946653908               |
| SNP_P3_154240_241501 | NW_004516665.1 | Scaffold1466 | 241501                  | TT                              | CC                | 1946653910               |
| SNP_P3_154241_241640 | NW_004516665.1 | Scaffold1466 | 241640                  | TT                              | AA                | 1946653912               |
| SNP_P3_154242_241656 | NW_004516665.1 | Scaffold1466 | 241656                  | CC                              | TT                | 1946653914               |
| SNP_P3_154243_241686 | NW_004516665.1 | Scaffold1466 | 241686                  | GG                              | AA                | 1946653916               |
| SNP_P3_154244_245348 | NW_004516665.1 | Scaffold1466 | 245348                  | CC                              | TT                | 1946653917               |
| SNP_P3_154245_264620 | NW_004516665.1 | Scaffold1466 | 264620                  | AA                              | GG                | 1946653919               |
| SNP_P3_154246_265290 | NW_004516665.1 | Scaffold1466 | 265290                  | CC                              | TT                | 1946653921               |
| SNP_P3_154247_268156 | NW_004516665.1 | Scaffold1466 | 268156                  | GG                              | AA                | 1946653923               |
| SNP_P3_154248_274881 | NW_004516665.1 | Scaffold1466 | 274881                  | TT                              | AA                | 1946653926               |
| SNP_P3_154249_281192 | NW_004516665.1 | Scaffold1466 | 281192                  | AA                              | CC                | 1946653928               |
| SNP_P3_154251_311542 | NW_004516665.1 | Scaffold1466 | 311542                  | CC                              | AA                | 1946653930               |
| SNP_P3_154252_311987 | NW_004516665.1 | Scaffold1466 | 311987                  | AA                              | GG                | 1946653932               |
| SNP_P3_154253_323421 | NW_004516665.1 | Scaffold1466 | 323421                  | TT                              | GG                | 1946653933               |
| SNP_P3_154254_328634 | NW_004516665.1 | Scaffold1466 | 328634                  | AA                              | GG                | 1946653935               |
| SNP_P3_154255_329012 | NW_004516665.1 | Scaffold1466 | 329012                  | CC                              | TT                | 1946653937               |
| SNP_P3_154256_332498 | NW_004516665.1 | Scaffold1466 | 332498                  | GG                              | TT                | 1946653939               |
| SNP_P3_154257_337853 | NW_004516665.1 | Scaffold1466 | 337853                  | TT                              | GG                | 1946653941               |
| SNP_P3_154258_345145 | NW_004516665.1 | Scaffold1466 | 345145                  | CC                              | TT                | 1946653943               |
| SNP_P3_154259_345149 | NW_004516665.1 | Scaffold1466 | 345149                  | GG                              | TT                | 1946653945               |
| SNP_P3_154260_347238 | NW_004516665.1 | Scaffold1466 | 347238                  | CC                              | TT                | 1946653947               |
| SNP_P3_154261_350525 | NW_004516665.1 | Scaffold1466 | 350525                  | CC                              | TT                | 1946653949               |
| SNP_P3_154262_358112 | NW_004516665.1 | Scaffold1466 | 358112                  | GG                              | AA                | 1946653951               |
| SNP_P3_154263_358150 | NW_004516665.1 | Scaffold1466 | 358150                  | CC                              | TT                | 1946653953               |
| SNP_P3_154264_358151 | NW_004516665.1 | Scaffold1466 | 358151                  | AA                              | GG                | 1946653955               |
| SNP_P3_154265_358458 | NW_004516665.1 | Scaffold1466 | 358458                  | TT                              | CC                | 1946653957               |
| SNP_P3_154266_358484 | NW_004516665.1 | Scaffold1466 | 358484                  | AA                              | GG                | 1946653959               |
| SNP_P3_154267_1110   | NW_004516666.1 | Scaffold1467 | 1110                    | TT                              | CC                | 1946653961               |
| SNP_P3_154269_11974  | NW_004516666.1 | Scaffold1467 | 11974                   | AA                              | GG                | 1946653963               |
| SNP_P3_154271_22476  | NW_004516666.1 | Scaffold1467 | 22476                   | TT                              | CC                | 1946653965               |
| SNP_P3_154272_22480  | NW_004516666.1 | Scaffold1467 | 22480                   | TT                              | GG                | 1946653967               |
| SNP_P3_154273_22481  | NW_004516666.1 | Scaffold1467 | 22481                   | GG                              | TT                | 1946653969               |
| SNP_P3_154274_24101  | NW_004516666.1 | Scaffold1467 | 24101                   | AA                              | TT                | 1946653971               |
| SNP_P3_154275_24107  | NW_004516666.1 | Scaffold1467 | 24107                   | AA                              | GG                | 1946653973               |
| SNP_P3_154277_86176  | NW_004516666.1 | Scaffold1467 | 86176                   | AA                              | GG                | 1946653975               |
| SNP_P3_154278_86770  | NW_004516666.1 | Scaffold1467 | 86770                   | GG                              | AA                | 1946653976               |
| SNP_P3_154279_87070  | NW_004516666.1 | Scaffold1467 | 87070                   | GG                              | AA                | 1946653978               |
| SNP_P3_154280_91832  | NW_004516666.1 | Scaffold1467 | 91832                   | CC                              | TT                | 1946653980               |
| SNP_P3_154281_91838  | NW_004516666.1 | Scaffold1467 | 91838                   | GG                              | TT                | 1946653982               |
| SNP_P3_154282_91880  | NW_004516666.1 | Scaffold1467 | 91880                   | CC                              | TT                | 1946653985               |

| SNPs IDs             | Chromosome IDs | Chromosomes  | Physical positions (bp) | CDC Frontier (Reference genome) | (Pusa 256 & HPNB) | NCBI SNPdb Accession IDs |
|----------------------|----------------|--------------|-------------------------|---------------------------------|-------------------|--------------------------|
| SNP_P3_154283_92227  | NW_004516666.1 | Scaffold1467 | 92227                   | GG                              | CC                | 1946653987               |
| SNP_P3_154284_92228  | NW_004516666.1 | Scaffold1467 | 92228                   | CC                              | AA                | 1946653989               |
| SNP_P3_154285_92235  | NW_004516666.1 | Scaffold1467 | 92235                   | TT                              | GG                | 1946653991               |
| SNP_P3_154286_94350  | NW_004516666.1 | Scaffold1467 | 94350                   | GG                              | TT                | 1946653993               |
| SNP_P3_154287_94401  | NW_004516666.1 | Scaffold1467 | 94401                   | CC                              | TT                | 1946653995               |
| SNP_P3_154288_143339 | NW_004516666.1 | Scaffold1467 | 143339                  | TT                              | CC                | 1946653997               |
| SNP_P3_154289_175996 | NW_004516666.1 | Scaffold1467 | 175996                  | GG                              | TT                | 1946653999               |
| SNP_P3_154291_202704 | NW_004516666.1 | Scaffold1467 | 202704                  | GG                              | TT                | 1946654001               |
| SNP_P3_154292_206457 | NW_004516666.1 | Scaffold1467 | 206457                  | AA                              | GG                | 1946654003               |
| SNP_P3_154293_206464 | NW_004516666.1 | Scaffold1467 | 206464                  | AA                              | TT                | 1946654004               |
| SNP_P3_154294_3549   | NW_004516667.1 | Scaffold1468 | 3549                    | GG                              | AA                | 1946654005               |
| SNP_P3_154295_3550   | NW_004516667.1 | Scaffold1468 | 3550                    | TT                              | AA                | 1946654006               |
| SNP_P3_154296_3624   | NW_004516667.1 | Scaffold1468 | 3624                    | GG                              | TT                | 1946654008               |
| SNP_P3_154297_3734   | NW_004516667.1 | Scaffold1468 | 3734                    | GG                              | CC                | 1946654009               |
| SNP_P3_154298_4037   | NW_004516667.1 | Scaffold1468 | 4037                    | GG                              | TT                | 1946654011               |
| SNP_P3_154299_14325  | NW_004516667.1 | Scaffold1468 | 14325                   | GG                              | AA                | 1946654012               |
| SNP_P3_154300_802    | NW_004516669.1 | Scaffold1472 | 802                     | AA                              | TT                | 1946654015               |
| SNP_P3_154301_820    | NW_004516669.1 | Scaffold1472 | 820                     | GG                              | AA                | 1946654017               |
| SNP_P3_154302_858    | NW_004516669.1 | Scaffold1472 | 858                     | CC                              | TT                | 1946654019               |
| SNP_P3_154303_1149   | NW_004516669.1 | Scaffold1472 | 1149                    | TT                              | CC                | 1946654021               |
| SNP_P3_154304_2253   | NW_004516669.1 | Scaffold1472 | 2253                    | TT                              | CC                | 1946654023               |
| SNP_P3_154305_3109   | NW_004516669.1 | Scaffold1472 | 3109                    | TT                              | CC                | 1946654025               |
| SNP_P3_154306_2048   | NW_004516670.1 | Scaffold1473 | 2048                    | AA                              | GG                | 1946654027               |
| SNP_P3_154307_2063   | NW_004516670.1 | Scaffold1473 | 2063                    | AA                              | GG                | 1946654029               |
| SNP_P3_154308_2230   | NW_004516670.1 | Scaffold1473 | 2230                    | CC                              | TT                | 1946654030               |
| SNP_P3_154309_2255   | NW_004516670.1 | Scaffold1473 | 2255                    | GG                              | AA                | 1946654031               |
| SNP_P3_154310_2347   | NW_004516670.1 | Scaffold1473 | 2347                    | TT                              | GG                | 1946654032               |
| SNP_P3_154311_2590   | NW_004516670.1 | Scaffold1473 | 2590                    | TT                              | AA                | 1946654034               |
| SNP_P3_154312_2737   | NW_004516670.1 | Scaffold1473 | 2737                    | AA                              | GG                | 1946654036               |
| SNP_P3_154313_2924   | NW_004516670.1 | Scaffold1473 | 2924                    | AA                              | GG                | 1946654038               |
| SNP_P3_154314_3047   | NW_004516670.1 | Scaffold1473 | 3047                    | TT                              | CC                | 1946654040               |
| SNP_P3_154315_3060   | NW_004516670.1 | Scaffold1473 | 3060                    | GG                              | AA                | 1946654042               |
| SNP_P3_154316_3404   | NW_004516670.1 | Scaffold1473 | 3404                    | TT                              | CC                | 1946654044               |
| SNP_P3_154317_22838  | NW_004516671.1 | Scaffold1475 | 22838                   | AA                              | GG                | 1946654046               |
| SNP_P3_154318_25592  | NW_004516671.1 | Scaffold1475 | 25592                   | AA                              | GG                | 1946654048               |
| SNP_P3_154319_25957  | NW_004516671.1 | Scaffold1475 | 25957                   | GG                              | TT                | 1946654050               |
| SNP_P3_154320_42497  | NW_004516671.1 | Scaffold1475 | 42497                   | TT                              | CC                | 1946654052               |
| SNP_P3_154321_42498  | NW_004516671.1 | Scaffold1475 | 42498                   | CC                              | AA                | 1946654053               |
| SNP_P3_154322_42520  | NW_004516671.1 | Scaffold1475 | 42520                   | AA                              | GG                | 1946654054               |
| SNP_P3_154323_42933  | NW_004516671.1 | Scaffold1475 | 42933                   | GG                              | AA                | 1946654055               |
| SNP_P3_154324_55811  | NW_004516671.1 | Scaffold1475 | 55811                   | AA                              | GG                | 1946654056               |
| SNP_P3_154325_55824  | NW_004516671.1 | Scaffold1475 | 55824                   | TT                              | AA                | 1946654057               |

| SNPs IDs             | Chromosome IDs | Chromosomes  | Physical positions (bp) | CDC Frontier (Reference genome) | (Pusa 256 & HPNB) | NCBI SNPdb Accession IDs |
|----------------------|----------------|--------------|-------------------------|---------------------------------|-------------------|--------------------------|
| SNP_P3_154326_55870  | NW_004516671.1 | Scaffold1475 | 55870                   | TT                              | CC                | 1946654058               |
| SNP_P3_154327_60256  | NW_004516671.1 | Scaffold1475 | 60256                   | TT                              | CC                | 1946654060               |
| SNP_P3_154328_62032  | NW_004516671.1 | Scaffold1475 | 62032                   | CC                              | TT                | 1946654062               |
| SNP_P3_154330_67438  | NW_004516671.1 | Scaffold1475 | 67438                   | CC                              | AA                | 1946654064               |
| SNP_P3_154331_68228  | NW_004516671.1 | Scaffold1475 | 68228                   | TT                              | AA                | 1946654066               |
| SNP_P3_154332_69084  | NW_004516671.1 | Scaffold1475 | 69084                   | AA                              | GG                | 1946654067               |
| SNP_P3_154333_69193  | NW_004516671.1 | Scaffold1475 | 69193                   | GG                              | AA                | 1946654069               |
| SNP_P3_154334_69330  | NW_004516671.1 | Scaffold1475 | 69330                   | AA                              | GG                | 1946654070               |
| SNP_P3_154335_73246  | NW_004516671.1 | Scaffold1475 | 73246                   | AA                              | CC                | 1946654071               |
| SNP_P3_154336_73572  | NW_004516671.1 | Scaffold1475 | 73572                   | GG                              | TT                | 1946654072               |
| SNP_P3_154337_73582  | NW_004516671.1 | Scaffold1475 | 73582                   | TT                              | AA                | 1946654073               |
| SNP_P3_154338_81549  | NW_004516671.1 | Scaffold1475 | 81549                   | TT                              | GG                | 1946654074               |
| SNP_P3_154339_96781  | NW_004516671.1 | Scaffold1475 | 96781                   | TT                              | GG                | 1946654076               |
| SNP_P3_154340_99384  | NW_004516671.1 | Scaffold1475 | 99384                   | CC                              | TT                | 1946654078               |
| SNP_P3_154341_99630  | NW_004516671.1 | Scaffold1475 | 99630                   | AA                              | GG                | 1946654080               |
| SNP_P3_154342_99632  | NW_004516671.1 | Scaffold1475 | 99632                   | TT                              | CC                | 1946654082               |
| SNP_P3_154343_99658  | NW_004516671.1 | Scaffold1475 | 99658                   | TT                              | GG                | 1946654084               |
| SNP_P3_154344_99825  | NW_004516671.1 | Scaffold1475 | 99825                   | TT                              | CC                | 1946654086               |
| SNP_P3_154346_106167 | NW_004516671.1 | Scaffold1475 | 106167                  | CC                              | GG                | 1946654088               |
| SNP_P3_154347_495    | NW_004516673.1 | Scaffold1477 | 495                     | GG                              | CC                | 1946654090               |
| SNP_P3_154348_899    | NW_004516673.1 | Scaffold1477 | 899                     | TT                              | CC                | 1946654092               |
| SNP_P3_154350_1011   | NW_004516674.1 | Scaffold1478 | 1011                    | AA                              | GG                | 1946654094               |
| SNP_P3_154351_1038   | NW_004516674.1 | Scaffold1478 | 1038                    | CC                              | AA                | 1946654095               |
| SNP_P3_154352_1053   | NW_004516674.1 | Scaffold1478 | 1053                    | GG                              | AA                | 1946654097               |
| SNP_P3_154353_1069   | NW_004516674.1 | Scaffold1478 | 1069                    | GG                              | AA                | 1946654099               |
| SNP_P3_154354_8912   | NW_004516674.1 | Scaffold1478 | 8912                    | TT                              | CC                | 1946654102               |
| SNP_P3_154355_8983   | NW_004516674.1 | Scaffold1478 | 8983                    | TT                              | GG                | 1946654104               |
| SNP_P3_154356_9033   | NW_004516674.1 | Scaffold1478 | 9033                    | TT                              | CC                | 1946654106               |
| SNP_P3_154358_10925  | NW_004516674.1 | Scaffold1478 | 10925                   | TT                              | CC                | 1946654108               |
| SNP_P3_154359_10980  | NW_004516674.1 | Scaffold1478 | 10980                   | AA                              | TT                | 1946654110               |
| SNP_P3_154360_10983  | NW_004516674.1 | Scaffold1478 | 10983                   | AA                              | TT                | 1946654112               |
| SNP_P3_154361_10999  | NW_004516674.1 | Scaffold1478 | 10999                   | AA                              | TT                | 1946654114               |
| SNP_P3_154362_11224  | NW_004516674.1 | Scaffold1478 | 11224                   | TT                              | GG                | 1946654116               |
| SNP_P3_154363_21378  | NW_004516674.1 | Scaffold1478 | 21378                   | AA                              | TT                | 1946654117               |
| SNP_P3_154364_23330  | NW_004516674.1 | Scaffold1478 | 23330                   | TT                              | CC                | 1946654120               |
| SNP_P3_154365_23331  | NW_004516674.1 | Scaffold1478 | 23331                   | GG                              | AA                | 1946654122               |
| SNP_P3_154367_23623  | NW_004516674.1 | Scaffold1478 | 23623                   | AA                              | GG                | 1946654124               |
| SNP_P3_154368_32053  | NW_004516674.1 | Scaffold1478 | 32053                   | AA                              | TT                | 1946654126               |
| SNP_P3_154369_38399  | NW_004516674.1 | Scaffold1478 | 38399                   | TT                              | GG                | 1946654128               |
| SNP_P3_154370_40218  | NW_004516674.1 | Scaffold1478 | 40218                   | CC                              | TT                | 1946654130               |
| SNP_P3_154371_43036  | NW_004516674.1 | Scaffold1478 | 43036                   | TT                              | GG                | 1946654132               |
| SNP_P3_154372_45183  | NW_004516674.1 | Scaffold1478 | 45183                   | TT                              | CC                | 1946654134               |

| SNPs IDs            | Chromosome IDs | Chromosomes  | Physical positions (bp) | CDC Frontier (Reference genome) | (Pusa 256 & HPNB) | NCBI SNPdb Accession IDs |
|---------------------|----------------|--------------|-------------------------|---------------------------------|-------------------|--------------------------|
| SNP_P3_154373_64265 | NW_004516674.1 | Scaffold1478 | 64265                   | AA                              | CC                | 1946654136               |
| SNP_P3_154374_72050 | NW_004516674.1 | Scaffold1478 | 72050                   | TT                              | CC                | 1946654138               |
| SNP_P3_154375_72051 | NW_004516674.1 | Scaffold1478 | 72051                   | AA                              | CC                | 1946654140               |
| SNP_P3_154376_73537 | NW_004516674.1 | Scaffold1478 | 73537                   | TT                              | AA                | 1946654142               |
| SNP_P3_154377_73539 | NW_004516674.1 | Scaffold1478 | 73539                   | AA                              | CC                | 1946654144               |
| SNP_P3_154378_73581 | NW_004516674.1 | Scaffold1478 | 73581                   | GG                              | AA                | 1946654146               |
| SNP_P3_154382_73797 | NW_004516674.1 | Scaffold1478 | 73797                   | GG                              | AA                | 1946654148               |
| SNP_P3_154383_73806 | NW_004516674.1 | Scaffold1478 | 73806                   | GG                              | TT                | 1946654150               |
| SNP_P3_154384_73835 | NW_004516674.1 | Scaffold1478 | 73835                   | AA                              | TT                | 1946654152               |
| SNP_P3_154385_73866 | NW_004516674.1 | Scaffold1478 | 73866                   | CC                              | TT                | 1946654154               |
| SNP_P3_154387_88431 | NW_004516674.1 | Scaffold1478 | 88431                   | GG                              | CC                | 1946654157               |
| SNP_P3_154388_92172 | NW_004516674.1 | Scaffold1478 | 92172                   | AA                              | GG                | 1946654159               |
| SNP_P3_154389_3330  | NW_004516675.1 | Scaffold1479 | 3330                    | CC                              | AA                | 1946654161               |
| SNP_P3_154390_5716  | NW_004516678.1 | Scaffold1483 | 5716                    | AA                              | GG                | 1946654163               |
| SNP_P3_154391_5748  | NW_004516678.1 | Scaffold1483 | 5748                    | TT                              | CC                | 1946654165               |
| SNP_P3_154392_5984  | NW_004516678.1 | Scaffold1483 | 5984                    | GG                              | AA                | 1946654167               |
| SNP_P3_154393_6000  | NW_004516678.1 | Scaffold1483 | 6000                    | CC                              | TT                | 1946654169               |
| SNP_P3_154394_6016  | NW_004516678.1 | Scaffold1483 | 6016                    | GG                              | TT                | 1946654171               |
| SNP_P3_154395_6017  | NW_004516678.1 | Scaffold1483 | 6017                    | GG                              | AA                | 1946654173               |
| SNP_P3_154396_6030  | NW_004516678.1 | Scaffold1483 | 6030                    | CC                              | TT                | 1946654175               |
| SNP_P3_154397_6085  | NW_004516678.1 | Scaffold1483 | 6085                    | TT                              | GG                | 1946654177               |
| SNP_P3_154398_6105  | NW_004516678.1 | Scaffold1483 | 6105                    | CC                              | TT                | 1946654180               |
| SNP_P3_154399_6309  | NW_004516678.1 | Scaffold1483 | 6309                    | GG                              | CC                | 1946654182               |
| SNP_P3_154400_6377  | NW_004516678.1 | Scaffold1483 | 6377                    | AA                              | GG                | 1946654184               |
| SNP_P3_154401_6393  | NW_004516678.1 | Scaffold1483 | 6393                    | AA                              | GG                | 1946654186               |
| SNP_P3_154402_6399  | NW_004516678.1 | Scaffold1483 | 6399                    | GG                              | CC                | 1946654188               |
| SNP_P3_154403_6411  | NW_004516678.1 | Scaffold1483 | 6411                    | CC                              | AA                | 1946654190               |
| SNP_P3_154405_6508  | NW_004516678.1 | Scaffold1483 | 6508                    | TT                              | CC                | 1946654192               |
| SNP_P3_154406_6533  | NW_004516678.1 | Scaffold1483 | 6533                    | CC                              | TT                | 1946654194               |
| SNP_P3_154407_6536  | NW_004516678.1 | Scaffold1483 | 6536                    | GG                              | AA                | 1946654196               |
| SNP_P3_154408_6564  | NW_004516678.1 | Scaffold1483 | 6564                    | GG                              | CC                | 1946654198               |
| SNP_P3_154409_6606  | NW_004516678.1 | Scaffold1483 | 6606                    | GG                              | AA                | 1946654200               |
| SNP_P3_154410_6618  | NW_004516678.1 | Scaffold1483 | 6618                    | TT                              | GG                | 1946654202               |
| SNP_P3_154411_6665  | NW_004516678.1 | Scaffold1483 | 6665                    | AA                              | CC                | 1946654204               |
| SNP_P3_154412_6713  | NW_004516678.1 | Scaffold1483 | 6713                    | CC                              | TT                | 1946654206               |
| SNP_P3_154413_6764  | NW_004516678.1 | Scaffold1483 | 6764                    | TT                              | CC                | 1946654208               |
| SNP_P3_154414_6772  | NW_004516678.1 | Scaffold1483 | 6772                    | CC                              | TT                | 1946654210               |
| SNP_P3_154415_6809  | NW_004516678.1 | Scaffold1483 | 6809                    | TT                              | CC                | 1946654213               |
| SNP_P3_154416_6814  | NW_004516678.1 | Scaffold1483 | 6814                    | TT                              | CC                | 1946654215               |
| SNP_P3_154417_6817  | NW_004516678.1 | Scaffold1483 | 6817                    | AA                              | TT                | 1946654217               |
| SNP_P3_154419_6891  | NW_004516678.1 | Scaffold1483 | 6891                    | TT                              | GG                | 1946654219               |
| SNP_P3_154420_6901  | NW_004516678.1 | Scaffold1483 | 6901                    | AA                              | GG                | 1946654221               |

| SNPs IDs            | Chromosome IDs | Chromosomes  | Physical positions (bp) | CDC Frontier (Reference genome) | (Pusa 256 & HPNB) | NCBI SNPdb Accession IDs |
|---------------------|----------------|--------------|-------------------------|---------------------------------|-------------------|--------------------------|
| SNP_P3_154421_6917  | NW_004516678.1 | Scaffold1483 | 6917                    | AA                              | CC                | 1946654223               |
| SNP_P3_154422_6930  | NW_004516678.1 | Scaffold1483 | 6930                    | GG                              | CC                | 1946654225               |
| SNP_P3_154423_17852 | NW_004516678.1 | Scaffold1483 | 17852                   | TT                              | CC                | 1946654227               |
| SNP_P3_154424_27571 | NW_004516678.1 | Scaffold1483 | 27571                   | CC                              | AA                | 1946654229               |
| SNP_P3_154425_27629 | NW_004516678.1 | Scaffold1483 | 27629                   | CC                              | TT                | 1946654231               |
| SNP_P3_154426_27981 | NW_004516678.1 | Scaffold1483 | 27981                   | GG                              | AA                | 1946654233               |
| SNP_P3_154427_28011 | NW_004516678.1 | Scaffold1483 | 28011                   | CC                              | TT                | 1946654235               |
| SNP_P3_154428_34496 | NW_004516678.1 | Scaffold1483 | 34496                   | TT                              | CC                | 1946654237               |
| SNP_P3_154430_52168 | NW_004516678.1 | Scaffold1483 | 52168                   | AA                              | CC                | 1946654239               |
| SNP_P3_154432_54800 | NW_004516678.1 | Scaffold1483 | 54800                   | AA                              | TT                | 1946654241               |
| SNP_P3_154433_54848 | NW_004516678.1 | Scaffold1483 | 54848                   | CC                              | TT                | 1946654243               |
| SNP_P3_154434_55108 | NW_004516678.1 | Scaffold1483 | 55108                   | AA                              | GG                | 1946654245               |
| SNP_P3_154435_55114 | NW_004516678.1 | Scaffold1483 | 55114                   | GG                              | TT                | 1946654247               |
| SNP_P3_154436_55117 | NW_004516678.1 | Scaffold1483 | 55117                   | TT                              | GG                | 1946654249               |
| SNP_P3_154437_55122 | NW_004516678.1 | Scaffold1483 | 55122                   | TT                              | CC                | 1946654251               |
| SNP_P3_154438_55177 | NW_004516678.1 | Scaffold1483 | 55177                   | CC                              | GG                | 1946654253               |
| SNP_P3_154439_55185 | NW_004516678.1 | Scaffold1483 | 55185                   | CC                              | TT                | 1946654255               |
| SNP_P3_154440_55403 | NW_004516678.1 | Scaffold1483 | 55403                   | CC                              | TT                | 1946654257               |
| SNP_P3_154441_55520 | NW_004516678.1 | Scaffold1483 | 55520                   | GG                              | AA                | 1946654259               |
| SNP_P3_154442_56860 | NW_004516678.1 | Scaffold1483 | 56860                   | AA                              | CC                | 1946654261               |
| SNP_P3_154443_57081 | NW_004516678.1 | Scaffold1483 | 57081                   | AA                              | CC                | 1946654263               |
| SNP_P3_154445_57268 | NW_004516678.1 | Scaffold1483 | 57268                   | AA                              | GG                | 1946654265               |
| SNP_P3_154446_57311 | NW_004516678.1 | Scaffold1483 | 57311                   | AA                              | GG                | 1946654267               |
| SNP_P3_154447_69213 | NW_004516678.1 | Scaffold1483 | 69213                   | AA                              | GG                | 1946654269               |
| SNP_P3_154448_69313 | NW_004516678.1 | Scaffold1483 | 69313                   | TT                              | AA                | 1946654271               |
| SNP_P3_154450_69768 | NW_004516678.1 | Scaffold1483 | 69768                   | AA                              | CC                | 1946654273               |
| SNP_P3_154451_69873 | NW_004516678.1 | Scaffold1483 | 69873                   | GG                              | CC                | 1946654275               |
| SNP_P3_154452_69893 | NW_004516678.1 | Scaffold1483 | 69893                   | AA                              | GG                | 1946654278               |
| SNP_P3_154453_69969 | NW_004516678.1 | Scaffold1483 | 69969                   | GG                              | AA                | 1946654280               |
| SNP_P3_154454_70289 | NW_004516678.1 | Scaffold1483 | 70289                   | TT                              | CC                | 1946654282               |
| SNP_P3_154455_262   | NW_004516680.1 | Scaffold1486 | 262                     | GG                              | AA                | 1946654284               |
| SNP_P3_154456_474   | NW_004516680.1 | Scaffold1486 | 474                     | TT                              | AA                | 1946654286               |
| SNP_P3_154457_64    | NW_004516681.1 | Scaffold1488 | 64                      | GG                              | CC                | 1946654288               |
| SNP_P3_154458_85    | NW_004516681.1 | Scaffold1488 | 85                      | AA                              | CC                | 1946654290               |
| SNP_P3_154459_89    | NW_004516681.1 | Scaffold1488 | 89                      | GG                              | AA                | 1946654293               |
| SNP_P3_154460_125   | NW_004516681.1 | Scaffold1488 | 125                     | CC                              | TT                | 1946654295               |
| SNP_P3_154461_325   | NW_004516681.1 | Scaffold1488 | 325                     | GG                              | TT                | 1946654297               |
| SNP_P3_154462_341   | NW_004516681.1 | Scaffold1488 | 341                     | AA                              | CC                | 1946654299               |
| SNP_P3_154463_512   | NW_004516681.1 | Scaffold1488 | 512                     | AA                              | TT                | 1946654301               |
| SNP_P3_154465_6574  | NW_004516681.1 | Scaffold1488 | 6574                    | AA                              | GG                | 1946654303               |
| SNP_P3_154466_9367  | NW_004516681.1 | Scaffold1488 | 9367                    | AA                              | TT                | 1946654305               |
| SNP_P3_154467_650   | NW_004516683.1 | Scaffold1490 | 650                     | GG                              | CC                | 1946654307               |

| SNPs IDs            | Chromosome IDs | Chromosomes  | Physical positions (bp) | CDC Frontier (Reference genome) | (Pusa 256 & HPNB) | NCBI SNPdb Accession IDs |
|---------------------|----------------|--------------|-------------------------|---------------------------------|-------------------|--------------------------|
| SNP_P3_154468_668   | NW_004516683.1 | Scaffold1490 | 668                     | GG                              | CC                | 1946654309               |
| SNP_P3_154469_687   | NW_004516683.1 | Scaffold1490 | 687                     | TT                              | AA                | 1946654311               |
| SNP_P3_154470_702   | NW_004516683.1 | Scaffold1490 | 702                     | CC                              | AA                | 1946654313               |
| SNP_P3_154471_730   | NW_004516683.1 | Scaffold1490 | 730                     | CC                              | TT                | 1946654316               |
| SNP_P3_154472_766   | NW_004516683.1 | Scaffold1490 | 766                     | GG                              | TT                | 1946654318               |
| SNP_P3_154473_784   | NW_004516683.1 | Scaffold1490 | 784                     | AA                              | TT                | 1946654320               |
| SNP_P3_154474_938   | NW_004516683.1 | Scaffold1490 | 938                     | CC                              | AA                | 1946654322               |
| SNP_P3_154475_968   | NW_004516683.1 | Scaffold1490 | 968                     | GG                              | AA                | 1946654324               |
| SNP_P3_154476_973   | NW_004516683.1 | Scaffold1490 | 973                     | CC                              | AA                | 1946654326               |
| SNP_P3_154477_974   | NW_004516683.1 | Scaffold1490 | 974                     | GG                              | AA                | 1946654328               |
| SNP_P3_154478_1009  | NW_004516683.1 | Scaffold1490 | 1009                    | GG                              | AA                | 1946654330               |
| SNP_P3_154479_1048  | NW_004516683.1 | Scaffold1490 | 1048                    | TT                              | CC                | 1946654333               |
| SNP_P3_154480_1141  | NW_004516683.1 | Scaffold1490 | 1141                    | AA                              | CC                | 1946654336               |
| SNP_P3_154481_1151  | NW_004516683.1 | Scaffold1490 | 1151                    | AA                              | GG                | 1946654338               |
| SNP_P3_154482_1158  | NW_004516683.1 | Scaffold1490 | 1158                    | GG                              | AA                | 1946654340               |
| SNP_P3_154483_1229  | NW_004516683.1 | Scaffold1490 | 1229                    | GG                              | CC                | 1946654342               |
| SNP_P3_154485_1296  | NW_004516683.1 | Scaffold1490 | 1296                    | TT                              | CC                | 1946654344               |
| SNP_P3_154486_1431  | NW_004516683.1 | Scaffold1490 | 1431                    | AA                              | TT                | 1946654346               |
| SNP_P3_154487_9803  | NW_004516683.1 | Scaffold1490 | 9803                    | GG                              | TT                | 1946654348               |
| SNP_P3_154488_12154 | NW_004516683.1 | Scaffold1490 | 12154                   | AA                              | TT                | 1946654350               |
| SNP_P3_154489_12176 | NW_004516683.1 | Scaffold1490 | 12176                   | TT                              | GG                | 1946654352               |
| SNP_P3_154490_12177 | NW_004516683.1 | Scaffold1490 | 12177                   | TT                              | AA                | 1946654354               |
| SNP_P3_154491_12198 | NW_004516683.1 | Scaffold1490 | 12198                   | AA                              | CC                | 1946654356               |
| SNP_P3_154492_12220 | NW_004516683.1 | Scaffold1490 | 12220                   | CC                              | AA                | 1946654358               |
| SNP_P3_154493_13948 | NW_004516683.1 | Scaffold1490 | 13948                   | AA                              | TT                | 1946654360               |
| SNP_P3_154494_13960 | NW_004516683.1 | Scaffold1490 | 13960                   | CC                              | TT                | 1946654362               |
| SNP_P3_154495_13978 | NW_004516683.1 | Scaffold1490 | 13978                   | CC                              | TT                | 1946654364               |
| SNP_P3_154496_14227 | NW_004516683.1 | Scaffold1490 | 14227                   | TT                              | CC                | 1946654366               |
| SNP_P3_154497_14254 | NW_004516683.1 | Scaffold1490 | 14254                   | AA                              | GG                | 1946654368               |
| SNP_P3_154498_14257 | NW_004516683.1 | Scaffold1490 | 14257                   | AA                              | CC                | 1946654371               |
| SNP_P3_154499_14266 | NW_004516683.1 | Scaffold1490 | 14266                   | GG                              | AA                | 1946654373               |
| SNP_P3_154501_14410 | NW_004516683.1 | Scaffold1490 | 14410                   | TT                              | AA                | 1946654375               |
| SNP_P3_154502_14455 | NW_004516683.1 | Scaffold1490 | 14455                   | AA                              | TT                | 1946654377               |
| SNP_P3_154503_14457 | NW_004516683.1 | Scaffold1490 | 14457                   | AA                              | CC                | 1946654379               |
| SNP_P3_154504_16398 | NW_004516683.1 | Scaffold1490 | 16398                   | AA                              | CC                | 1946654381               |
| SNP_P3_154505_47734 | NW_004516683.1 | Scaffold1490 | 47734                   | AA                              | CC                | 1946654383               |
| SNP_P3_154507_66615 | NW_004516683.1 | Scaffold1490 | 66615                   | AA                              | GG                | 1946654385               |
| SNP_P3_154508_73801 | NW_004516683.1 | Scaffold1490 | 73801                   | TT                              | CC                | 1946654387               |
| SNP_P3_154510_74312 | NW_004516683.1 | Scaffold1490 | 74312                   | TT                              | AA                | 1946654389               |
| SNP_P3_154511_74318 | NW_004516683.1 | Scaffold1490 | 74318                   | TT                              | CC                | 1946654391               |
| SNP_P3_154512_74360 | NW_004516683.1 | Scaffold1490 | 74360                   | TT                              | CC                | 1946654393               |
| SNP_P3_154513_74649 | NW_004516683.1 | Scaffold1490 | 74649                   | AA                              | GG                | 1946654395               |

| SNPs IDs             | Chromosome IDs | Chromosomes  | Physical positions (bp) | CDC Frontier (Reference genome) | (Pusa 256 & HPNB) | NCBI SNPdb Accession IDs |
|----------------------|----------------|--------------|-------------------------|---------------------------------|-------------------|--------------------------|
| SNP_P3_154514_78057  | NW_004516683.1 | Scaffold1490 | 78057                   | GG                              | AA                | 1946654397               |
| SNP_P3_154515_134192 | NW_004516683.1 | Scaffold1490 | 134192                  | TT                              | CC                | 1946654399               |
| SNP_P3_154516_157720 | NW_004516683.1 | Scaffold1490 | 157720                  | TT                              | AA                | 1946654401               |
| SNP_P3_154518_360    | NW_004516684.1 | Scaffold1491 | 360                     | GG                              | TT                | 1946654403               |
| SNP_P3_154519_535    | NW_004516684.1 | Scaffold1491 | 535                     | GG                              | CC                | 1946654405               |
| SNP_P3_154520_571    | NW_004516684.1 | Scaffold1491 | 571                     | TT                              | GG                | 1946654407               |
| SNP_P3_154521_602    | NW_004516684.1 | Scaffold1491 | 602                     | CC                              | TT                | 1946654409               |
| SNP_P3_154522_625    | NW_004516684.1 | Scaffold1491 | 625                     | GG                              | CC                | 1946654411               |
| SNP_P3_154523_653    | NW_004516684.1 | Scaffold1491 | 653                     | CC                              | GG                | 1946654413               |
| SNP_P3_154524_671    | NW_004516684.1 | Scaffold1491 | 671                     | GG                              | TT                | 1946654415               |
| SNP_P3_154525_519    | NW_004516685.1 | Scaffold1492 | 519                     | AA                              | GG                | 1946654418               |
| SNP_P3_154526_382    | NW_004516686.1 | Scaffold1493 | 382                     | CC                              | TT                | 1946654420               |
| SNP_P3_154527_1571   | NW_004516686.1 | Scaffold1493 | 1571                    | AA                              | TT                | 1946654422               |
| SNP_P3_154528_1643   | NW_004516686.1 | Scaffold1493 | 1643                    | AA                              | CC                | 1946654424               |
| SNP_P3_154529_1644   | NW_004516686.1 | Scaffold1493 | 1644                    | TT                              | AA                | 1946654426               |
| SNP_P3_154530_1669   | NW_004516686.1 | Scaffold1493 | 1669                    | TT                              | GG                | 1946654429               |
| SNP_P3_154531_1824   | NW_004516686.1 | Scaffold1493 | 1824                    | AA                              | TT                | 1946654431               |
| SNP_P3_154532_1832   | NW_004516686.1 | Scaffold1493 | 1832                    | TT                              | AA                | 1946654433               |
| SNP_P3_154533_2064   | NW_004516686.1 | Scaffold1493 | 2064                    | AA                              | TT                | 1946654435               |
| SNP_P3_154534_2174   | NW_004516686.1 | Scaffold1493 | 2174                    | GG                              | AA                | 1946654437               |
| SNP_P3_154535_2217   | NW_004516686.1 | Scaffold1493 | 2217                    | CC                              | TT                | 1946654439               |
| SNP_P3_154536_2229   | NW_004516686.1 | Scaffold1493 | 2229                    | TT                              | CC                | 1946654441               |
| SNP_P3_154537_2349   | NW_004516686.1 | Scaffold1493 | 2349                    | GG                              | AA                | 1946654443               |
| SNP_P3_154538_2355   | NW_004516686.1 | Scaffold1493 | 2355                    | AA                              | GG                | 1946654445               |
| SNP_P3_154539_2484   | NW_004516686.1 | Scaffold1493 | 2484                    | CC                              | AA                | 1946654447               |
| SNP_P3_154540_2827   | NW_004516686.1 | Scaffold1493 | 2827                    | GG                              | CC                | 1946654449               |
| SNP_P3_154541_2843   | NW_004516686.1 | Scaffold1493 | 2843                    | AA                              | GG                | 1946654451               |
| SNP_P3_154542_2935   | NW_004516686.1 | Scaffold1493 | 2935                    | AA                              | CC                | 1946654453               |
| SNP_P3_154543_3363   | NW_004516686.1 | Scaffold1493 | 3363                    | AA                              | GG                | 1946654455               |
| SNP_P3_154544_3434   | NW_004516686.1 | Scaffold1493 | 3434                    | AA                              | GG                | 1946654458               |
| SNP_P3_154545_3508   | NW_004516686.1 | Scaffold1493 | 3508                    | TT                              | CC                | 1946654460               |
| SNP_P3_154546_3609   | NW_004516686.1 | Scaffold1493 | 3609                    | TT                              | AA                | 1946654462               |
| SNP_P3_154547_12823  | NW_004516686.1 | Scaffold1493 | 12823                   | AA                              | GG                | 1946654464               |
| SNP_P3_154548_12827  | NW_004516686.1 | Scaffold1493 | 12827                   | CC                              | TT                | 1946654466               |
| SNP_P3_154549_34739  | NW_004516686.1 | Scaffold1493 | 34739                   | GG                              | AA                | 1946654468               |
| SNP_P3_154550_34874  | NW_004516686.1 | Scaffold1493 | 34874                   | CC                              | TT                | 1946654470               |
| SNP_P3_154551_34907  | NW_004516686.1 | Scaffold1493 | 34907                   | GG                              | AA                | 1946654472               |
| SNP_P3_154552_34913  | NW_004516686.1 | Scaffold1493 | 34913                   | TT                              | CC                | 1946654474               |
| SNP_P3_154553_35089  | NW_004516686.1 | Scaffold1493 | 35089                   | CC                              | TT                | 1946654476               |
| SNP_P3_154554_38511  | NW_004516686.1 | Scaffold1493 | 38511                   | CC                              | GG                | 1946654477               |
| SNP_P3_154555_56018  | NW_004516686.1 | Scaffold1493 | 56018                   | CC                              | GG                | 1946654479               |
| SNP_P3_154556_56118  | NW_004516686.1 | Scaffold1493 | 56118                   | AA                              | GG                | 1946654481               |



| SNPs IDs            | Chromosome IDs | Chromosomes  | Physical positions (bp) | CDC Frontier (Reference genome) | (Pusa 256 & HPNB) | NCBI SNPdb Accession IDs |
|---------------------|----------------|--------------|-------------------------|---------------------------------|-------------------|--------------------------|
| SNP_P3_154557_56149 | NW_004516686.1 | Scaffold1493 | 56149                   | AA                              | GG                | 1946654483               |
| SNP_P3_154558_56157 | NW_004516686.1 | Scaffold1493 | 56157                   | TT                              | CC                | 1946654485               |
| SNP_P3_154559_56162 | NW_004516686.1 | Scaffold1493 | 56162                   | TT                              | CC                | 1946654487               |
| SNP_P3_154560_56172 | NW_004516686.1 | Scaffold1493 | 56172                   | GG                              | TT                | 1946654489               |
| SNP_P3_154561_56181 | NW_004516686.1 | Scaffold1493 | 56181                   | GG                              | AA                | 1946654491               |
| SNP_P3_154562_56419 | NW_004516686.1 | Scaffold1493 | 56419                   | TT                              | CC                | 1946654493               |
| SNP_P3_154563_56420 | NW_004516686.1 | Scaffold1493 | 56420                   | GG                              | AA                | 1946654496               |
| SNP_P3_154564_64522 | NW_004516686.1 | Scaffold1493 | 64522                   | CC                              | TT                | 1946654498               |
| SNP_P3_154566_65521 | NW_004516686.1 | Scaffold1493 | 65521                   | CC                              | AA                | 1946654500               |
| SNP_P3_154567_65594 | NW_004516686.1 | Scaffold1493 | 65594                   | TT                              | CC                | 1946654502               |
| SNP_P3_154568_65676 | NW_004516686.1 | Scaffold1493 | 65676                   | TT                              | AA                | 1946654504               |
| SNP_P3_154569_65684 | NW_004516686.1 | Scaffold1493 | 65684                   | TT                              | GG                | 1946654506               |
| SNP_P3_154570_65697 | NW_004516686.1 | Scaffold1493 | 65697                   | CC                              | TT                | 1946654508               |
| SNP_P3_154571_65699 | NW_004516686.1 | Scaffold1493 | 65699                   | AA                              | CC                | 1946654510               |
| SNP_P3_154572_65786 | NW_004516686.1 | Scaffold1493 | 65786                   | CC                              | TT                | 1946654512               |
| SNP_P3_154573_65882 | NW_004516686.1 | Scaffold1493 | 65882                   | GG                              | CC                | 1946654514               |
| SNP_P3_154574_65917 | NW_004516686.1 | Scaffold1493 | 65917                   | TT                              | CC                | 1946654516               |
| SNP_P3_154576_67189 | NW_004516686.1 | Scaffold1493 | 67189                   | CC                              | TT                | 1946654518               |
| SNP_P3_154577_67212 | NW_004516686.1 | Scaffold1493 | 67212                   | AA                              | GG                | 1946654520               |
| SNP_P3_154578_67213 | NW_004516686.1 | Scaffold1493 | 67213                   | GG                              | AA                | 1946654522               |
| SNP_P3_154579_67245 | NW_004516686.1 | Scaffold1493 | 67245                   | AA                              | GG                | 1946654524               |
| SNP_P3_154580_71330 | NW_004516686.1 | Scaffold1493 | 71330                   | TT                              | CC                | 1946654526               |
| SNP_P3_154581_85009 | NW_004516686.1 | Scaffold1493 | 85009                   | GG                              | AA                | 1946654528               |
| SNP_P3_154582_85010 | NW_004516686.1 | Scaffold1493 | 85010                   | TT                              | CC                | 1946654530               |
| SNP_P3_154583_85017 | NW_004516686.1 | Scaffold1493 | 85017                   | TT                              | CC                | 1946654532               |
| SNP_P3_154584_85049 | NW_004516686.1 | Scaffold1493 | 85049                   | TT                              | CC                | 1946654534               |
| SNP_P3_154585_85072 | NW_004516686.1 | Scaffold1493 | 85072                   | CC                              | AA                | 1946654537               |
| SNP_P3_154586_85114 | NW_004516686.1 | Scaffold1493 | 85114                   | GG                              | AA                | 1946654539               |
| SNP_P3_154587_85126 | NW_004516686.1 | Scaffold1493 | 85126                   | TT                              | CC                | 1946654541               |
| SNP_P3_154588_85141 | NW_004516686.1 | Scaffold1493 | 85141                   | CC                              | TT                | 1946654543               |
| SNP_P3_154589_85145 | NW_004516686.1 | Scaffold1493 | 85145                   | AA                              | GG                | 1946654545               |
| SNP_P3_154590_85282 | NW_004516686.1 | Scaffold1493 | 85282                   | AA                              | GG                | 1946654547               |
| SNP_P3_154591_85373 | NW_004516686.1 | Scaffold1493 | 85373                   | TT                              | CC                | 1946654548               |
| SNP_P3_154592_85401 | NW_004516686.1 | Scaffold1493 | 85401                   | GG                              | AA                | 1946654550               |
| SNP_P3_154593_85437 | NW_004516686.1 | Scaffold1493 | 85437                   | TT                              | CC                | 1946654552               |
| SNP_P3_154594_85451 | NW_004516686.1 | Scaffold1493 | 85451                   | CC                              | TT                | 1946654554               |
| SNP_P3_154595_89579 | NW_004516686.1 | Scaffold1493 | 89579                   | AA                              | CC                | 1946654556               |
| SNP_P3_154596_89719 | NW_004516686.1 | Scaffold1493 | 89719                   | GG                              | AA                | 1946654558               |
| SNP_P3_154597_89747 | NW_004516686.1 | Scaffold1493 | 89747                   | GG                              | AA                | 1946654560               |
| SNP_P3_154598_89788 | NW_004516686.1 | Scaffold1493 | 89788                   | CC                              | AA                | 1946654562               |
| SNP_P3_154599_89792 | NW_004516686.1 | Scaffold1493 | 89792                   | TT                              | CC                | 1946654565               |
| SNP_P3_154601_21186 | NW_004516689.1 | Scaffold1496 | 21186                   | TT                              | CC                | 1946654567               |

| SNPs IDs             | Chromosome IDs | Chromosomes  | Physical positions (bp) | CDC Frontier (Reference genome) | (Pusa 256 & HPNB) | NCBI SNPdb Accession IDs |
|----------------------|----------------|--------------|-------------------------|---------------------------------|-------------------|--------------------------|
| SNP_P3_154602_21214  | NW_004516689.1 | Scaffold1496 | 21214                   | CC                              | AA                | 1946654569               |
| SNP_P3_154603_21364  | NW_004516689.1 | Scaffold1496 | 21364                   | AA                              | TT                | 1946654571               |
| SNP_P3_154604_21372  | NW_004516689.1 | Scaffold1496 | 21372                   | CC                              | AA                | 1946654573               |
| SNP_P3_154605_21377  | NW_004516689.1 | Scaffold1496 | 21377                   | AA                              | TT                | 1946654576               |
| SNP_P3_154606_21380  | NW_004516689.1 | Scaffold1496 | 21380                   | AA                              | GG                | 1946654578               |
| SNP_P3_154607_21382  | NW_004516689.1 | Scaffold1496 | 21382                   | CC                              | TT                | 1946654580               |
| SNP_P3_154608_21393  | NW_004516689.1 | Scaffold1496 | 21393                   | AA                              | GG                | 1946654582               |
| SNP_P3_154609_21426  | NW_004516689.1 | Scaffold1496 | 21426                   | TT                              | AA                | 1946654584               |
| SNP_P3_154610_21432  | NW_004516689.1 | Scaffold1496 | 21432                   | TT                              | AA                | 1946654586               |
| SNP_P3_154611_21470  | NW_004516689.1 | Scaffold1496 | 21470                   | GG                              | AA                | 1946654588               |
| SNP_P3_154612_21476  | NW_004516689.1 | Scaffold1496 | 21476                   | TT                              | AA                | 1946654590               |
| SNP_P3_154614_29295  | NW_004516689.1 | Scaffold1496 | 29295                   | TT                              | CC                | 1946654592               |
| SNP_P3_154615_29342  | NW_004516689.1 | Scaffold1496 | 29342                   | GG                              | TT                | 1946654594               |
| SNP_P3_154616_31008  | NW_004516689.1 | Scaffold1496 | 31008                   | CC                              | TT                | 1946654596               |
| SNP_P3_154617_45118  | NW_004516689.1 | Scaffold1496 | 45118                   | CC                              | TT                | 1946654598               |
| SNP_P3_154618_53996  | NW_004516689.1 | Scaffold1496 | 53996                   | GG                              | CC                | 1946654600               |
| SNP_P3_154620_57855  | NW_004516689.1 | Scaffold1496 | 57855                   | GG                              | AA                | 1946654602               |
| SNP_P3_154621_81345  | NW_004516689.1 | Scaffold1496 | 81345                   | CC                              | TT                | 1946654604               |
| SNP_P3_154622_81351  | NW_004516689.1 | Scaffold1496 | 81351                   | TT                              | CC                | 1946654606               |
| SNP_P3_154623_81357  | NW_004516689.1 | Scaffold1496 | 81357                   | TT                              | GG                | 1946654608               |
| SNP_P3_154624_82714  | NW_004516689.1 | Scaffold1496 | 82714                   | GG                              | AA                | 1946654610               |
| SNP_P3_154626_88686  | NW_004516689.1 | Scaffold1496 | 88686                   | TT                              | CC                | 1946654612               |
| SNP_P3_154628_123085 | NW_004516689.1 | Scaffold1496 | 123085                  | AA                              | CC                | 1946654614               |
| SNP_P3_154629_123117 | NW_004516689.1 | Scaffold1496 | 123117                  | CC                              | TT                | 1946654617               |
| SNP_P3_154630_123309 | NW_004516689.1 | Scaffold1496 | 123309                  | CC                              | TT                | 1946654619               |
| SNP_P3_154631_123325 | NW_004516689.1 | Scaffold1496 | 123325                  | CC                              | TT                | 1946654621               |
| SNP_P3_154632_123336 | NW_004516689.1 | Scaffold1496 | 123336                  | CC                              | TT                | 1946654623               |
| SNP_P3_154633_123396 | NW_004516689.1 | Scaffold1496 | 123396                  | CC                              | TT                | 1946654627               |
| SNP_P3_154634_123399 | NW_004516689.1 | Scaffold1496 | 123399                  | GG                              | AA                | 1946654629               |
| SNP_P3_154635_123427 | NW_004516689.1 | Scaffold1496 | 123427                  | GG                              | AA                | 1946654631               |
| SNP_P3_154637_123446 | NW_004516689.1 | Scaffold1496 | 123446                  | AA                              | GG                | 1946654633               |
| SNP_P3_154638_123914 | NW_004516689.1 | Scaffold1496 | 123914                  | AA                              | TT                | 1946654635               |
| SNP_P3_154639_138434 | NW_004516689.1 | Scaffold1496 | 138434                  | GG                              | AA                | 1946654637               |
| SNP_P3_154640_138982 | NW_004516689.1 | Scaffold1496 | 138982                  | TT                              | GG                | 1946654639               |
| SNP_P3_154641_139202 | NW_004516689.1 | Scaffold1496 | 139202                  | TT                              | CC                | 1946654641               |
| SNP_P3_154642_147530 | NW_004516689.1 | Scaffold1496 | 147530                  | GG                              | AA                | 1946654643               |
| SNP_P3_154643_147592 | NW_004516689.1 | Scaffold1496 | 147592                  | TT                              | CC                | 1946654645               |
| SNP_P3_154645_181841 | NW_004516689.1 | Scaffold1496 | 181841                  | GG                              | AA                | 1946654647               |
| SNP_P3_154646_182595 | NW_004516689.1 | Scaffold1496 | 182595                  | TT                              | CC                | 1946654649               |
| SNP_P3_154647_184571 | NW_004516689.1 | Scaffold1496 | 184571                  | AA                              | GG                | 1946654651               |
| SNP_P3_154648_184578 | NW_004516689.1 | Scaffold1496 | 184578                  | CC                              | TT                | 1946654654               |
| SNP_P3_154649_189300 | NW_004516689.1 | Scaffold1496 | 189300                  | TT                              | CC                | 1946654656               |

| SNPs IDs             | Chromosome IDs | Chromosomes  | Physical positions (bp) | CDC Frontier (Reference genome) | (Pusa 256 & HPNB) | NCBI SNPdb Accession IDs |
|----------------------|----------------|--------------|-------------------------|---------------------------------|-------------------|--------------------------|
| SNP_P3_154650_189531 | NW_004516689.1 | Scaffold1496 | 189531                  | AA                              | GG                | 1946654658               |
| SNP_P3_154651_193834 | NW_004516689.1 | Scaffold1496 | 193834                  | CC                              | TT                | 1946654660               |
| SNP_P3_154652_193841 | NW_004516689.1 | Scaffold1496 | 193841                  | TT                              | GG                | 1946654662               |
| SNP_P3_154653_193849 | NW_004516689.1 | Scaffold1496 | 193849                  | GG                              | AA                | 1946654664               |
| SNP_P3_154654_200952 | NW_004516689.1 | Scaffold1496 | 200952                  | CC                              | TT                | 1946654667               |
| SNP_P3_154655_202769 | NW_004516689.1 | Scaffold1496 | 202769                  | AA                              | GG                | 1946654669               |
| SNP_P3_154657_205718 | NW_004516689.1 | Scaffold1496 | 205718                  | CC                              | TT                | 1946654671               |
| SNP_P3_154658_206445 | NW_004516689.1 | Scaffold1496 | 206445                  | GG                              | AA                | 1946654673               |
| SNP_P3_154659_206453 | NW_004516689.1 | Scaffold1496 | 206453                  | AA                              | GG                | 1946654675               |
| SNP_P3_154661_206499 | NW_004516689.1 | Scaffold1496 | 206499                  | GG                              | TT                | 1946654677               |
| SNP_P3_154662_209095 | NW_004516689.1 | Scaffold1496 | 209095                  | CC                              | GG                | 1946654679               |
| SNP_P3_154663_213400 | NW_004516689.1 | Scaffold1496 | 213400                  | CC                              | AA                | 1946654681               |
| SNP_P3_154664_215617 | NW_004516689.1 | Scaffold1496 | 215617                  | GG                              | AA                | 1946654683               |
| SNP_P3_154665_216039 | NW_004516689.1 | Scaffold1496 | 216039                  | AA                              | TT                | 1946654685               |
| SNP_P3_154666_216058 | NW_004516689.1 | Scaffold1496 | 216058                  | AA                              | GG                | 1946654687               |
| SNP_P3_154667_217281 | NW_004516689.1 | Scaffold1496 | 217281                  | AA                              | CC                | 1946654689               |
| SNP_P3_154668_217310 | NW_004516689.1 | Scaffold1496 | 217310                  | GG                              | AA                | 1946654691               |
| SNP_P3_154669_229593 | NW_004516689.1 | Scaffold1496 | 229593                  | CC                              | AA                | 1946654694               |
| SNP_P3_154670_231886 | NW_004516689.1 | Scaffold1496 | 231886                  | CC                              | AA                | 1946654696               |
| SNP_P3_154675_237716 | NW_004516689.1 | Scaffold1496 | 237716                  | GG                              | AA                | 1946654698               |
| SNP_P3_154676_238797 | NW_004516689.1 | Scaffold1496 | 238797                  | CC                              | TT                | 1946654700               |
| SNP_P3_154677_238913 | NW_004516689.1 | Scaffold1496 | 238913                  | CC                              | TT                | 1946654702               |
| SNP_P3_154678_246576 | NW_004516689.1 | Scaffold1496 | 246576                  | GG                              | AA                | 1946654704               |
| SNP_P3_154679_246898 | NW_004516689.1 | Scaffold1496 | 246898                  | CC                              | AA                | 1946654706               |
| SNP_P3_154680_247630 | NW_004516689.1 | Scaffold1496 | 247630                  | GG                              | AA                | 1946654708               |
| SNP_P3_154681_252720 | NW_004516689.1 | Scaffold1496 | 252720                  | CC                              | AA                | 1946654710               |
| SNP_P3_154682_269540 | NW_004516689.1 | Scaffold1496 | 269540                  | CC                              | GG                | 1946654712               |
| SNP_P3_154683_269957 | NW_004516689.1 | Scaffold1496 | 269957                  | GG                              | AA                | 1946654714               |
| SNP_P3_154684_275732 | NW_004516689.1 | Scaffold1496 | 275732                  | TT                              | CC                | 1946654716               |
| SNP_P3_154685_275820 | NW_004516689.1 | Scaffold1496 | 275820                  | TT                              | CC                | 1946654718               |
| SNP_P3_154686_278252 | NW_004516689.1 | Scaffold1496 | 278252                  | TT                              | CC                | 1946654720               |
| SNP_P3_154687_280558 | NW_004516689.1 | Scaffold1496 | 280558                  | CC                              | TT                | 1946654722               |
| SNP_P3_154688_285343 | NW_004516689.1 | Scaffold1496 | 285343                  | GG                              | AA                | 1946654724               |
| SNP_P3_154689_285645 | NW_004516689.1 | Scaffold1496 | 285645                  | GG                              | AA                | 1946654726               |
| SNP_P3_154690_286202 | NW_004516689.1 | Scaffold1496 | 286202                  | GG                              | AA                | 1946654728               |
| SNP_P3_154691_288407 | NW_004516689.1 | Scaffold1496 | 288407                  | CC                              | TT                | 1946654730               |
| SNP_P3_154692_290711 | NW_004516689.1 | Scaffold1496 | 290711                  | TT                              | AA                | 1946654733               |
| SNP_P3_154693_295934 | NW_004516689.1 | Scaffold1496 | 295934                  | TT                              | CC                | 1946654735               |
| SNP_P3_154694_295964 | NW_004516689.1 | Scaffold1496 | 295964                  | CC                              | TT                | 1946654737               |
| SNP_P3_154695_306831 | NW_004516689.1 | Scaffold1496 | 306831                  | GG                              | AA                | 1946654739               |
| SNP_P3_154697_309014 | NW_004516689.1 | Scaffold1496 | 309014                  | TT                              | AA                | 1946654741               |
| SNP_P3_154698_309068 | NW_004516689.1 | Scaffold1496 | 309068                  | AA                              | GG                | 1946654743               |

| SNPs IDs             | Chromosome IDs | Chromosomes  | Physical positions (bp) | CDC Frontier (Reference genome) | (Pusa 256 & HPNB) | NCBI SNPdb Accession IDs |
|----------------------|----------------|--------------|-------------------------|---------------------------------|-------------------|--------------------------|
| SNP_P3_154699_309679 | NW_004516689.1 | Scaffold1496 | 309679                  | CC                              | TT                | 1946654745               |
| SNP_P3_154700_1751   | NW_004516690.1 | Scaffold1497 | 1751                    | GG                              | AA                | 1946654747               |
| SNP_P3_154701_3526   | NW_004516690.1 | Scaffold1497 | 3526                    | AA                              | TT                | 1946654749               |
| SNP_P3_154702_3632   | NW_004516690.1 | Scaffold1497 | 3632                    | GG                              | CC                | 1946654751               |
| SNP_P3_154703_3780   | NW_004516690.1 | Scaffold1497 | 3780                    | GG                              | CC                | 1946654753               |
| SNP_P3_154704_3910   | NW_004516690.1 | Scaffold1497 | 3910                    | TT                              | GG                | 1946654755               |
| SNP_P3_154705_3911   | NW_004516690.1 | Scaffold1497 | 3911                    | AA                              | TT                | 1946654757               |
| SNP_P3_154706_3970   | NW_004516690.1 | Scaffold1497 | 3970                    | AA                              | GG                | 1946654759               |
| SNP_P3_154707_4114   | NW_004516690.1 | Scaffold1497 | 4114                    | AA                              | TT                | 1946654761               |
| SNP_P3_154708_4127   | NW_004516690.1 | Scaffold1497 | 4127                    | CC                              | TT                | 1946654763               |
| SNP_P3_154709_4152   | NW_004516690.1 | Scaffold1497 | 4152                    | AA                              | TT                | 1946654765               |
| SNP_P3_154710_4231   | NW_004516690.1 | Scaffold1497 | 4231                    | TT                              | CC                | 1946654767               |
| SNP_P3_154711_4247   | NW_004516690.1 | Scaffold1497 | 4247                    | TT                              | AA                | 1946654769               |
| SNP_P3_154712_4534   | NW_004516690.1 | Scaffold1497 | 4534                    | CC                              | TT                | 1946654772               |
| SNP_P3_154713_1642   | NW_004516691.1 | Scaffold1498 | 1642                    | AA                              | GG                | 1946654774               |
| SNP_P3_154714_1648   | NW_004516691.1 | Scaffold1498 | 1648                    | CC                              | TT                | 1946654776               |
| SNP_P3_154715_1673   | NW_004516691.1 | Scaffold1498 | 1673                    | AA                              | GG                | 1946654778               |
| SNP_P3_154716_1675   | NW_004516691.1 | Scaffold1498 | 1675                    | AA                              | GG                | 1946654780               |
| SNP_P3_154717_2316   | NW_004516691.1 | Scaffold1498 | 2316                    | GG                              | AA                | 1946654782               |
| SNP_P3_154718_4014   | NW_004516691.1 | Scaffold1498 | 4014                    | GG                              | AA                | 1946654784               |
| SNP_P3_154719_440    | NW_004516692.1 | Scaffold1499 | 440                     | TT                              | CC                | 1946654786               |
| SNP_P3_154720_592    | NW_004516692.1 | Scaffold1499 | 592                     | CC                              | AA                | 1946654788               |
| SNP_P3_154722_998    | NW_004516692.1 | Scaffold1499 | 998                     | TT                              | AA                | 1946654790               |
| SNP_P3_154723_1244   | NW_004516692.1 | Scaffold1499 | 1244                    | TT                              | CC                | 1946654792               |
| SNP_P3_154724_4488   | NW_004516692.1 | Scaffold1499 | 4488                    | AA                              | GG                | 1946654794               |
| SNP_P3_154725_7232   | NW_004516692.1 | Scaffold1499 | 7232                    | CC                              | GG                | 1946654796               |
| SNP_P3_154726_10507  | NW_004516692.1 | Scaffold1499 | 10507                   | AA                              | GG                | 1946654798               |
| SNP_P3_154727_11357  | NW_004516692.1 | Scaffold1499 | 11357                   | TT                              | AA                | 1946654800               |
| SNP_P3_154728_11544  | NW_004516692.1 | Scaffold1499 | 11544                   | CC                              | TT                | 1946654802               |
| SNP_P3_154729_11639  | NW_004516692.1 | Scaffold1499 | 11639                   | TT                              | CC                | 1946654804               |
| SNP_P3_154730_11641  | NW_004516692.1 | Scaffold1499 | 11641                   | TT                              | AA                | 1946654806               |
| SNP_P3_154731_11647  | NW_004516692.1 | Scaffold1499 | 11647                   | TT                              | CC                | 1946654808               |
| SNP_P3_154732_11852  | NW_004516692.1 | Scaffold1499 | 11852                   | GG                              | AA                | 1946654810               |
| SNP_P3_154733_12147  | NW_004516692.1 | Scaffold1499 | 12147                   | GG                              | TT                | 1946654813               |
| SNP_P3_154734_12172  | NW_004516692.1 | Scaffold1499 | 12172                   | CC                              | TT                | 1946654815               |
| SNP_P3_154735_12255  | NW_004516692.1 | Scaffold1499 | 12255                   | TT                              | AA                | 1946654817               |
| SNP_P3_154736_13384  | NW_004516692.1 | Scaffold1499 | 13384                   | CC                              | TT                | 1946654819               |
| SNP_P3_154737_14472  | NW_004516692.1 | Scaffold1499 | 14472                   | GG                              | AA                | 1946654821               |
| SNP_P3_154738_17191  | NW_004516692.1 | Scaffold1499 | 17191                   | CC                              | AA                | 1946654823               |
| SNP_P3_154739_19340  | NW_004516692.1 | Scaffold1499 | 19340                   | AA                              | GG                | 1946654825               |
| SNP_P3_154740_19438  | NW_004516692.1 | Scaffold1499 | 19438                   | TT                              | GG                | 1946654827               |
| SNP_P3_154741_19585  | NW_004516692.1 | Scaffold1499 | 19585                   | TT                              | CC                | 1946654829               |

| SNPs IDs            | Chromosome IDs | Chromosomes  | Physical positions (bp) | CDC Frontier (Reference genome) | (Pusa 256 & HPNB) | NCBI SNPdb Accession IDs |
|---------------------|----------------|--------------|-------------------------|---------------------------------|-------------------|--------------------------|
| SNP_P3_154743_24878 | NW_004516692.1 | Scaffold1499 | 24878                   | GG                              | AA                | 1946654831               |
| SNP_P3_154744_25081 | NW_004516692.1 | Scaffold1499 | 25081                   | CC                              | TT                | 1946654833               |
| SNP_P3_154745_28725 | NW_004516692.1 | Scaffold1499 | 28725                   | CC                              | TT                | 1946654835               |
| SNP_P3_154746_29708 | NW_004516692.1 | Scaffold1499 | 29708                   | TT                              | AA                | 1946654837               |
| SNP_P3_154747_29713 | NW_004516692.1 | Scaffold1499 | 29713                   | GG                              | AA                | 1946654839               |
| SNP_P3_154748_29718 | NW_004516692.1 | Scaffold1499 | 29718                   | CC                              | TT                | 1946654841               |
| SNP_P3_154749_30406 | NW_004516692.1 | Scaffold1499 | 30406                   | GG                              | TT                | 1946654843               |
| SNP_P3_154750_30428 | NW_004516692.1 | Scaffold1499 | 30428                   | TT                              | CC                | 1946654845               |
| SNP_P3_154751_34115 | NW_004516692.1 | Scaffold1499 | 34115                   | GG                              | AA                | 1946654847               |
| SNP_P3_154752_34163 | NW_004516692.1 | Scaffold1499 | 34163                   | AA                              | TT                | 1946654849               |
| SNP_P3_154753_34169 | NW_004516692.1 | Scaffold1499 | 34169                   | CC                              | TT                | 1946654851               |
| SNP_P3_154754_34181 | NW_004516692.1 | Scaffold1499 | 34181                   | AA                              | TT                | 1946654854               |
| SNP_P3_154755_34196 | NW_004516692.1 | Scaffold1499 | 34196                   | TT                              | AA                | 1946654856               |
| SNP_P3_154756_34245 | NW_004516692.1 | Scaffold1499 | 34245                   | CC                              | AA                | 1946654858               |
| SNP_P3_154757_34326 | NW_004516692.1 | Scaffold1499 | 34326                   | AA                              | CC                | 1946654860               |
| SNP_P3_154758_34350 | NW_004516692.1 | Scaffold1499 | 34350                   | AA                              | TT                | 1946654862               |
| SNP_P3_154759_34357 | NW_004516692.1 | Scaffold1499 | 34357                   | GG                              | TT                | 1946654864               |
| SNP_P3_154760_34419 | NW_004516692.1 | Scaffold1499 | 34419                   | GG                              | AA                | 1946654866               |
| SNP_P3_154761_34433 | NW_004516692.1 | Scaffold1499 | 34433                   | TT                              | AA                | 1946654868               |
| SNP_P3_154762_34447 | NW_004516692.1 | Scaffold1499 | 34447                   | AA                              | GG                | 1946654870               |
| SNP_P3_154763_34486 | NW_004516692.1 | Scaffold1499 | 34486                   | GG                              | TT                | 1946654872               |
| SNP_P3_154764_34492 | NW_004516692.1 | Scaffold1499 | 34492                   | CC                              | TT                | 1946654874               |
| SNP_P3_154765_34568 | NW_004516692.1 | Scaffold1499 | 34568                   | AA                              | TT                | 1946654876               |
| SNP_P3_154766_34629 | NW_004516692.1 | Scaffold1499 | 34629                   | GG                              | CC                | 1946654878               |
| SNP_P3_154767_34648 | NW_004516692.1 | Scaffold1499 | 34648                   | CC                              | AA                | 1946654880               |
| SNP_P3_154768_34664 | NW_004516692.1 | Scaffold1499 | 34664                   | TT                              | GG                | 1946654882               |
| SNP_P3_154770_40426 | NW_004516692.1 | Scaffold1499 | 40426                   | CC                              | TT                | 1946654885               |
| SNP_P3_154771_46042 | NW_004516692.1 | Scaffold1499 | 46042                   | AA                              | CC                | 1946654887               |
| SNP_P3_154772_46071 | NW_004516692.1 | Scaffold1499 | 46071                   | AA                              | GG                | 1946654889               |
| SNP_P3_154773_46207 | NW_004516692.1 | Scaffold1499 | 46207                   | TT                              | GG                | 1946654891               |
| SNP_P3_154774_46233 | NW_004516692.1 | Scaffold1499 | 46233                   | GG                              | AA                | 1946654893               |
| SNP_P3_154775_46241 | NW_004516692.1 | Scaffold1499 | 46241                   | CC                              | AA                | 1946654895               |
| SNP_P3_154776_46315 | NW_004516692.1 | Scaffold1499 | 46315                   | GG                              | TT                | 1946654897               |
| SNP_P3_154777_46320 | NW_004516692.1 | Scaffold1499 | 46320                   | AA                              | CC                | 1946654899               |
| SNP_P3_154778_47204 | NW_004516692.1 | Scaffold1499 | 47204                   | AA                              | GG                | 1946654901               |
| SNP_P3_154779_50395 | NW_004516692.1 | Scaffold1499 | 50395                   | TT                              | CC                | 1946654903               |
| SNP_P3_154780_54367 | NW_004516692.1 | Scaffold1499 | 54367                   | AA                              | CC                | 1946654905               |
| SNP_P3_154781_54382 | NW_004516692.1 | Scaffold1499 | 54382                   | AA                              | TT                | 1946654907               |
| SNP_P3_154782_54392 | NW_004516692.1 | Scaffold1499 | 54392                   | CC                              | TT                | 1946654910               |
| SNP_P3_154783_56354 | NW_004516692.1 | Scaffold1499 | 56354                   | AA                              | CC                | 1946654913               |
| SNP_P3_154784_56523 | NW_004516692.1 | Scaffold1499 | 56523                   | CC                              | AA                | 1946654915               |
| SNP_P3_154785_56817 | NW_004516692.1 | Scaffold1499 | 56817                   | CC                              | TT                | 1946654917               |

| SNPs IDs             | Chromosome IDs | Chromosomes  | Physical positions (bp) | CDC Frontier (Reference genome) | (Pusa 256 & HPNB) | NCBI SNPdb Accession IDs |
|----------------------|----------------|--------------|-------------------------|---------------------------------|-------------------|--------------------------|
| SNP_P3_154786_60034  | NW_004516692.1 | Scaffold1499 | 60034                   | AA                              | GG                | 1946654919               |
| SNP_P3_154788_64536  | NW_004516692.1 | Scaffold1499 | 64536                   | GG                              | TT                | 1946654921               |
| SNP_P3_154790_71114  | NW_004516692.1 | Scaffold1499 | 71114                   | GG                              | AA                | 1946654923               |
| SNP_P3_154791_73770  | NW_004516692.1 | Scaffold1499 | 73770                   | TT                              | CC                | 1946654925               |
| SNP_P3_154793_74444  | NW_004516692.1 | Scaffold1499 | 74444                   | CC                              | TT                | 1946654927               |
| SNP_P3_154794_107766 | NW_004516692.1 | Scaffold1499 | 107766                  | AA                              | GG                | 1946654929               |
| SNP_P3_154797_113314 | NW_004516692.1 | Scaffold1499 | 113314                  | TT                              | GG                | 1946654931               |
| SNP_P3_154798_115435 | NW_004516692.1 | Scaffold1499 | 115435                  | TT                              | CC                | 1946654933               |
| SNP_P3_154799_116182 | NW_004516692.1 | Scaffold1499 | 116182                  | GG                              | AA                | 1946654935               |
| SNP_P3_154800_116532 | NW_004516692.1 | Scaffold1499 | 116532                  | TT                              | CC                | 1946654937               |
| SNP_P3_154802_137153 | NW_004516692.1 | Scaffold1499 | 137153                  | GG                              | AA                | 1946654939               |
| SNP_P3_154803_139155 | NW_004516692.1 | Scaffold1499 | 139155                  | TT                              | CC                | 1946654941               |
| SNP_P3_154804_139261 | NW_004516692.1 | Scaffold1499 | 139261                  | GG                              | AA                | 1946654943               |
| SNP_P3_154805_145503 | NW_004516692.1 | Scaffold1499 | 145503                  | AA                              | GG                | 1946654946               |
| SNP_P3_154806_147721 | NW_004516692.1 | Scaffold1499 | 147721                  | TT                              | CC                | 1946654948               |
| SNP_P3_154807_147916 | NW_004516692.1 | Scaffold1499 | 147916                  | GG                              | CC                | 1946654951               |
| SNP_P3_154808_148181 | NW_004516692.1 | Scaffold1499 | 148181                  | GG                              | TT                | 1946654953               |
| SNP_P3_154809_156135 | NW_004516692.1 | Scaffold1499 | 156135                  | CC                              | TT                | 1946654955               |
| SNP_P3_154810_156205 | NW_004516692.1 | Scaffold1499 | 156205                  | TT                              | CC                | 1946654957               |
| SNP_P3_154811_169    | NW_004516693.1 | Scaffold1502 | 169                     | GG                              | AA                | 1946654959               |
| SNP_P3_154812_214    | NW_004516693.1 | Scaffold1502 | 214                     | TT                              | CC                | 1946654961               |
| SNP_P3_154813_524    | NW_004516693.1 | Scaffold1502 | 524                     | AA                              | CC                | 1946654963               |
| SNP_P3_154815_1180   | NW_004516693.1 | Scaffold1502 | 1180                    | CC                              | GG                | 1946654965               |
| SNP_P3_154816_1193   | NW_004516693.1 | Scaffold1502 | 1193                    | GG                              | TT                | 1946654967               |
| SNP_P3_154817_1205   | NW_004516693.1 | Scaffold1502 | 1205                    | GG                              | AA                | 1946654969               |
| SNP_P3_154818_1339   | NW_004516693.1 | Scaffold1502 | 1339                    | CC                              | TT                | 1946654971               |
| SNP_P3_154819_1411   | NW_004516693.1 | Scaffold1502 | 1411                    | CC                              | TT                | 1946654973               |
| SNP_P3_154820_1432   | NW_004516693.1 | Scaffold1502 | 1432                    | CC                              | AA                | 1946654975               |
| SNP_P3_154821_1497   | NW_004516693.1 | Scaffold1502 | 1497                    | TT                              | GG                | 1946654977               |
| SNP_P3_154822_1538   | NW_004516693.1 | Scaffold1502 | 1538                    | AA                              | CC                | 1946654979               |
| SNP_P3_154823_1566   | NW_004516693.1 | Scaffold1502 | 1566                    | AA                              | CC                | 1946654980               |
| SNP_P3_154824_1708   | NW_004516693.1 | Scaffold1502 | 1708                    | CC                              | AA                | 1946654981               |
| SNP_P3_154825_1847   | NW_004516693.1 | Scaffold1502 | 1847                    | GG                              | CC                | 1946654982               |
| SNP_P3_154826_1864   | NW_004516693.1 | Scaffold1502 | 1864                    | GG                              | CC                | 1946654984               |
| SNP_P3_154827_2317   | NW_004516693.1 | Scaffold1502 | 2317                    | CC                              | TT                | 1946654986               |
| SNP_P3_154829_10089  | NW_004516694.1 | Scaffold1504 | 10089                   | TT                              | CC                | 1946654988               |
| SNP_P3_154830_10191  | NW_004516694.1 | Scaffold1504 | 10191                   | AA                              | GG                | 1946654990               |
| SNP_P3_154831_10260  | NW_004516694.1 | Scaffold1504 | 10260                   | TT                              | GG                | 1946654992               |
| SNP_P3_154832_10262  | NW_004516694.1 | Scaffold1504 | 10262                   | TT                              | CC                | 1946654994               |
| SNP_P3_154833_10413  | NW_004516694.1 | Scaffold1504 | 10413                   | TT                              | CC                | 1946654995               |
| SNP_P3_154834_10444  | NW_004516694.1 | Scaffold1504 | 10444                   | AA                              | CC                | 1946654997               |
| SNP_P3_154835_10463  | NW_004516694.1 | Scaffold1504 | 10463                   | AA                              | GG                | 1946654999               |

| SNPs IDs             | Chromosome IDs | Chromosomes  | Physical positions (bp) | CDC Frontier (Reference genome) | (Pusa 256 & HPNB) | NCBI SNPdb Accession IDs |
|----------------------|----------------|--------------|-------------------------|---------------------------------|-------------------|--------------------------|
| SNP_P3_154836_10479  | NW_004516694.1 | Scaffold1504 | 10479                   | TT                              | CC                | 1946655001               |
| SNP_P3_154837_10501  | NW_004516694.1 | Scaffold1504 | 10501                   | GG                              | AA                | 1946655003               |
| SNP_P3_154838_10506  | NW_004516694.1 | Scaffold1504 | 10506                   | CC                              | TT                | 1946655005               |
| SNP_P3_154839_10573  | NW_004516694.1 | Scaffold1504 | 10573                   | AA                              | CC                | 1946655007               |
| SNP_P3_154840_10575  | NW_004516694.1 | Scaffold1504 | 10575                   | GG                              | CC                | 1946655009               |
| SNP_P3_154841_10726  | NW_004516694.1 | Scaffold1504 | 10726                   | TT                              | CC                | 1946655011               |
| SNP_P3_154842_114272 | NW_004516694.1 | Scaffold1504 | 114272                  | CC                              | TT                | 1946655014               |
| SNP_P3_154843_114327 | NW_004516694.1 | Scaffold1504 | 114327                  | GG                              | AA                | 1946655016               |
| SNP_P3_154844_114329 | NW_004516694.1 | Scaffold1504 | 114329                  | AA                              | GG                | 1946655018               |
| SNP_P3_154845_135021 | NW_004516694.1 | Scaffold1504 | 135021                  | AA                              | GG                | 1946655020               |
| SNP_P3_154846_135066 | NW_004516694.1 | Scaffold1504 | 135066                  | AA                              | TT                | 1946655022               |
| SNP_P3_154847_135209 | NW_004516694.1 | Scaffold1504 | 135209                  | CC                              | TT                | 1946655024               |
| SNP_P3_154848_140560 | NW_004516694.1 | Scaffold1504 | 140560                  | TT                              | GG                | 1946655026               |
| SNP_P3_154849_140614 | NW_004516694.1 | Scaffold1504 | 140614                  | AA                              | TT                | 1946655028               |
| SNP_P3_154851_140928 | NW_004516694.1 | Scaffold1504 | 140928                  | CC                              | GG                | 1946655030               |
| SNP_P3_154852_141069 | NW_004516694.1 | Scaffold1504 | 141069                  | AA                              | GG                | 1946655032               |
| SNP_P3_154853_141110 | NW_004516694.1 | Scaffold1504 | 141110                  | TT                              | CC                | 1946655034               |
| SNP_P3_154854_141118 | NW_004516694.1 | Scaffold1504 | 141118                  | TT                              | CC                | 1946655036               |
| SNP_P3_154855_141137 | NW_004516694.1 | Scaffold1504 | 141137                  | TT                              | GG                | 1946655038               |
| SNP_P3_154856_141158 | NW_004516694.1 | Scaffold1504 | 141158                  | GG                              | AA                | 1946655040               |
| SNP_P3_154857_141159 | NW_004516694.1 | Scaffold1504 | 141159                  | GG                              | AA                | 1946655043               |
| SNP_P3_154858_161224 | NW_004516694.1 | Scaffold1504 | 161224                  | AA                              | GG                | 1946655045               |
| SNP_P3_154859_161263 | NW_004516694.1 | Scaffold1504 | 161263                  | AA                              | TT                | 1946655047               |
| SNP_P3_154860_161347 | NW_004516694.1 | Scaffold1504 | 161347                  | AA                              | GG                | 1946655049               |
| SNP_P3_154861_161609 | NW_004516694.1 | Scaffold1504 | 161609                  | CC                              | AA                | 1946655051               |
| SNP_P3_154862_161643 | NW_004516694.1 | Scaffold1504 | 161643                  | TT                              | CC                | 1946655053               |
| SNP_P3_154863_161685 | NW_004516694.1 | Scaffold1504 | 161685                  | TT                              | AA                | 1946655057               |
| SNP_P3_154864_173983 | NW_004516694.1 | Scaffold1504 | 173983                  | AA                              | GG                | 1946655059               |
| SNP_P3_154865_174106 | NW_004516694.1 | Scaffold1504 | 174106                  | GG                              | AA                | 1946655061               |
| SNP_P3_154866_174356 | NW_004516694.1 | Scaffold1504 | 174356                  | AA                              | GG                | 1946655063               |
| SNP_P3_154867_174467 | NW_004516694.1 | Scaffold1504 | 174467                  | AA                              | GG                | 1946655065               |
| SNP_P3_154868_174493 | NW_004516694.1 | Scaffold1504 | 174493                  | GG                              | TT                | 1946655067               |
| SNP_P3_154869_174557 | NW_004516694.1 | Scaffold1504 | 174557                  | AA                              | GG                | 1946655068               |
| SNP_P3_154870_182247 | NW_004516694.1 | Scaffold1504 | 182247                  | GG                              | AA                | 1946655070               |
| SNP_P3_154871_182267 | NW_004516694.1 | Scaffold1504 | 182267                  | AA                              | CC                | 1946655072               |
| SNP_P3_154872_182283 | NW_004516694.1 | Scaffold1504 | 182283                  | CC                              | TT                | 1946655074               |
| SNP_P3_154873_182375 | NW_004516694.1 | Scaffold1504 | 182375                  | CC                              | AA                | 1946655076               |
| SNP_P3_154874_182420 | NW_004516694.1 | Scaffold1504 | 182420                  | CC                              | GG                | 1946655078               |
| SNP_P3_154875_182557 | NW_004516694.1 | Scaffold1504 | 182557                  | AA                              | TT                | 1946655080               |
| SNP_P3_154876_182558 | NW_004516694.1 | Scaffold1504 | 182558                  | AA                              | TT                | 1946655082               |
| SNP_P3_154877_182567 | NW_004516694.1 | Scaffold1504 | 182567                  | AA                              | GG                | 1946655084               |
| SNP_P3_154878_182622 | NW_004516694.1 | Scaffold1504 | 182622                  | CC                              | AA                | 1946655086               |

| SNPs IDs             | Chromosome IDs | Chromosomes  | Physical positions (bp) | CDC Frontier (Reference genome) | (Pusa 256 & HPNB) | NCBI SNPdb Accession IDs |
|----------------------|----------------|--------------|-------------------------|---------------------------------|-------------------|--------------------------|
| SNP_P3_154879_182672 | NW_004516694.1 | Scaffold1504 | 182672                  | TT                              | AA                | 1946655088               |
| SNP_P3_154880_182680 | NW_004516694.1 | Scaffold1504 | 182680                  | GG                              | TT                | 1946655090               |
| SNP_P3_154881_182685 | NW_004516694.1 | Scaffold1504 | 182685                  | AA                              | TT                | 1946655092               |
| SNP_P3_154882_182732 | NW_004516694.1 | Scaffold1504 | 182732                  | TT                              | CC                | 1946655094               |
| SNP_P3_154883_182754 | NW_004516694.1 | Scaffold1504 | 182754                  | TT                              | AA                | 1946655096               |
| SNP_P3_154884_191945 | NW_004516694.1 | Scaffold1504 | 191945                  | TT                              | GG                | 1946655100               |
| SNP_P3_154885_194941 | NW_004516694.1 | Scaffold1504 | 194941                  | AA                              | GG                | 1946655102               |
| SNP_P3_154886_194993 | NW_004516694.1 | Scaffold1504 | 194993                  | AA                              | GG                | 1946655104               |
| SNP_P3_154887_195005 | NW_004516694.1 | Scaffold1504 | 195005                  | TT                              | CC                | 1946655106               |
| SNP_P3_154888_195014 | NW_004516694.1 | Scaffold1504 | 195014                  | AA                              | GG                | 1946655108               |
| SNP_P3_154889_195029 | NW_004516694.1 | Scaffold1504 | 195029                  | CC                              | TT                | 1946655110               |
| SNP_P3_154890_195044 | NW_004516694.1 | Scaffold1504 | 195044                  | AA                              | GG                | 1946655112               |
| SNP_P3_154892_237157 | NW_004516694.1 | Scaffold1504 | 237157                  | AA                              | GG                | 1946655114               |
| SNP_P3_154893_240740 | NW_004516694.1 | Scaffold1504 | 240740                  | TT                              | GG                | 1946655116               |
| SNP_P3_154894_240757 | NW_004516694.1 | Scaffold1504 | 240757                  | GG                              | AA                | 1946655118               |
| SNP_P3_154895_241175 | NW_004516694.1 | Scaffold1504 | 241175                  | CC                              | TT                | 1946655120               |
| SNP_P3_154896_241177 | NW_004516694.1 | Scaffold1504 | 241177                  | AA                              | GG                | 1946655122               |
| SNP_P3_154897_241195 | NW_004516694.1 | Scaffold1504 | 241195                  | CC                              | TT                | 1946655124               |
| SNP_P3_154898_241198 | NW_004516694.1 | Scaffold1504 | 241198                  | TT                              | CC                | 1946655126               |
| SNP_P3_154899_241204 | NW_004516694.1 | Scaffold1504 | 241204                  | GG                              | AA                | 1946655128               |
| SNP_P3_154900_241230 | NW_004516694.1 | Scaffold1504 | 241230                  | TT                              | CC                | 1946655130               |
| SNP_P3_154901_242878 | NW_004516694.1 | Scaffold1504 | 242878                  | AA                              | GG                | 1946655132               |
| SNP_P3_154902_242890 | NW_004516694.1 | Scaffold1504 | 242890                  | AA                              | GG                | 1946655134               |
| SNP_P3_154903_242893 | NW_004516694.1 | Scaffold1504 | 242893                  | GG                              | AA                | 1946655136               |
| SNP_P3_154904_242922 | NW_004516694.1 | Scaffold1504 | 242922                  | GG                              | CC                | 1946655138               |
| SNP_P3_154905_242944 | NW_004516694.1 | Scaffold1504 | 242944                  | TT                              | CC                | 1946655141               |
| SNP_P3_154906_242947 | NW_004516694.1 | Scaffold1504 | 242947                  | TT                              | GG                | 1946655143               |
| SNP_P3_154907_242993 | NW_004516694.1 | Scaffold1504 | 242993                  | CC                              | AA                | 1946655145               |
| SNP_P3_154908_273784 | NW_004516694.1 | Scaffold1504 | 273784                  | CC                              | TT                | 1946655147               |
| SNP_P3_154909_282301 | NW_004516694.1 | Scaffold1504 | 282301                  | AA                              | GG                | 1946655149               |
| SNP_P3_154911_318576 | NW_004516694.1 | Scaffold1504 | 318576                  | CC                              | AA                | 1946655151               |
| SNP_P3_154912_318595 | NW_004516694.1 | Scaffold1504 | 318595                  | TT                              | CC                | 1946655153               |
| SNP_P3_154913_318775 | NW_004516694.1 | Scaffold1504 | 318775                  | AA                              | GG                | 1946655155               |
| SNP_P3_154914_318833 | NW_004516694.1 | Scaffold1504 | 318833                  | AA                              | TT                | 1946655157               |
| SNP_P3_154915_318844 | NW_004516694.1 | Scaffold1504 | 318844                  | TT                              | AA                | 1946655159               |
| SNP_P3_154916_318875 | NW_004516694.1 | Scaffold1504 | 318875                  | AA                              | GG                | 1946655161               |
| SNP_P3_154917_323170 | NW_004516694.1 | Scaffold1504 | 323170                  | TT                              | GG                | 1946655163               |
| SNP_P3_154918_323171 | NW_004516694.1 | Scaffold1504 | 323171                  | AA                              | CC                | 1946655165               |
| SNP_P3_154919_327468 | NW_004516694.1 | Scaffold1504 | 327468                  | TT                              | CC                | 1946655168               |
| SNP_P3_154920_328708 | NW_004516694.1 | Scaffold1504 | 328708                  | TT                              | CC                | 1946655170               |
| SNP_P3_154921_328714 | NW_004516694.1 | Scaffold1504 | 328714                  | GG                              | AA                | 1946655172               |
| SNP_P3_154922_328717 | NW_004516694.1 | Scaffold1504 | 328717                  | GG                              | AA                | 1946655174               |



| SNPs IDs             | Chromosome IDs | Chromosomes  | Physical positions (bp) | CDC Frontier (Reference genome) | (Pusa 256 & HPNB) | NCBI SNPdb Accession IDs |
|----------------------|----------------|--------------|-------------------------|---------------------------------|-------------------|--------------------------|
| SNP_P3_154923_342876 | NW_004516694.1 | Scaffold1504 | 342876                  | CC                              | GG                | 1946655176               |
| SNP_P3_154924_368308 | NW_004516694.1 | Scaffold1504 | 368308                  | TT                              | AA                | 1946655178               |
| SNP_P3_154925_383820 | NW_004516694.1 | Scaffold1504 | 383820                  | AA                              | GG                | 1946655182               |
| SNP_P3_154926_384102 | NW_004516694.1 | Scaffold1504 | 384102                  | GG                              | AA                | 1946655184               |
| SNP_P3_154927_389009 | NW_004516694.1 | Scaffold1504 | 389009                  | CC                              | TT                | 1946655186               |
| SNP_P3_154928_396057 | NW_004516694.1 | Scaffold1504 | 396057                  | TT                              | CC                | 1946655188               |
| SNP_P3_154929_398300 | NW_004516694.1 | Scaffold1504 | 398300                  | AA                              | GG                | 1946655190               |
| SNP_P3_154930_398474 | NW_004516694.1 | Scaffold1504 | 398474                  | CC                              | TT                | 1946655193               |
| SNP_P3_154931_398802 | NW_004516694.1 | Scaffold1504 | 398802                  | AA                              | GG                | 1946655195               |
| SNP_P3_154934_14013  | NW_004516696.1 | Scaffold1506 | 14013                   | AA                              | TT                | 1946655197               |
| SNP_P3_154935_14021  | NW_004516696.1 | Scaffold1506 | 14021                   | TT                              | CC                | 1946655199               |
| SNP_P3_154936_14282  | NW_004516696.1 | Scaffold1506 | 14282                   | AA                              | GG                | 1946655201               |
| SNP_P3_154937_14288  | NW_004516696.1 | Scaffold1506 | 14288                   | TT                              | CC                | 1946655203               |
| SNP_P3_154938_14330  | NW_004516696.1 | Scaffold1506 | 14330                   | AA                              | TT                | 1946655205               |
| SNP_P3_154939_19036  | NW_004516696.1 | Scaffold1506 | 19036                   | TT                              | CC                | 1946655207               |
| SNP_P3_154940_19048  | NW_004516696.1 | Scaffold1506 | 19048                   | AA                              | GG                | 1946655209               |
| SNP_P3_154941_19056  | NW_004516696.1 | Scaffold1506 | 19056                   | AA                              | GG                | 1946655211               |
| SNP_P3_154942_49917  | NW_004516696.1 | Scaffold1506 | 49917                   | CC                              | TT                | 1946655213               |
| SNP_P3_154945_69270  | NW_004516696.1 | Scaffold1506 | 69270                   | TT                              | AA                | 1946655215               |
| SNP_P3_154946_70874  | NW_004516696.1 | Scaffold1506 | 70874                   | AA                              | TT                | 1946655217               |
| SNP_P3_154947_71072  | NW_004516696.1 | Scaffold1506 | 71072                   | TT                              | AA                | 1946655220               |
| SNP_P3_154948_71076  | NW_004516696.1 | Scaffold1506 | 71076                   | TT                              | CC                | 1946655222               |
| SNP_P3_154949_103250 | NW_004516696.1 | Scaffold1506 | 103250                  | AA                              | CC                | 1946655224               |
| SNP_P3_154950_103299 | NW_004516696.1 | Scaffold1506 | 103299                  | AA                              | GG                | 1946655226               |
| SNP_P3_154951_103625 | NW_004516696.1 | Scaffold1506 | 103625                  | TT                              | GG                | 1946655228               |
| SNP_P3_154952_103725 | NW_004516696.1 | Scaffold1506 | 103725                  | AA                              | CC                | 1946655230               |
| SNP_P3_154953_103726 | NW_004516696.1 | Scaffold1506 | 103726                  | TT                              | AA                | 1946655232               |
| SNP_P3_154954_103730 | NW_004516696.1 | Scaffold1506 | 103730                  | AA                              | CC                | 1946655234               |
| SNP_P3_154955_103742 | NW_004516696.1 | Scaffold1506 | 103742                  | TT                              | CC                | 1946655236               |
| SNP_P3_154957_113510 | NW_004516696.1 | Scaffold1506 | 113510                  | CC                              | TT                | 1946655238               |
| SNP_P3_154958_118253 | NW_004516696.1 | Scaffold1506 | 118253                  | AA                              | TT                | 1946655240               |
| SNP_P3_154959_119005 | NW_004516696.1 | Scaffold1506 | 119005                  | TT                              | AA                | 1946655242               |
| SNP_P3_154960_119009 | NW_004516696.1 | Scaffold1506 | 119009                  | GG                              | AA                | 1946655244               |
| SNP_P3_154961_119101 | NW_004516696.1 | Scaffold1506 | 119101                  | GG                              | AA                | 1946655246               |
| SNP_P3_154962_30266  | NW_004516697.1 | Scaffold1507 | 30266                   | TT                              | GG                | 1946655248               |
| SNP_P3_154963_30534  | NW_004516697.1 | Scaffold1507 | 30534                   | GG                              | AA                | 1946655250               |
| SNP_P3_154964_30559  | NW_004516697.1 | Scaffold1507 | 30559                   | TT                              | GG                | 1946655252               |
| SNP_P3_154965_30697  | NW_004516697.1 | Scaffold1507 | 30697                   | TT                              | CC                | 1946655254               |
| SNP_P3_154966_5886   | NW_004516698.1 | Scaffold1508 | 5886                    | CC                              | TT                | 1946655256               |
| SNP_P3_154967_6184   | NW_004516698.1 | Scaffold1508 | 6184                    | CC                              | GG                | 1946655258               |
| SNP_P3_154968_6194   | NW_004516698.1 | Scaffold1508 | 6194                    | AA                              | GG                | 1946655260               |
| SNP_P3_154969_6226   | NW_004516698.1 | Scaffold1508 | 6226                    | CC                              | TT                | 1946655262               |

| SNPs IDs             | Chromosome IDs | Chromosomes  | Physical positions (bp) | CDC Frontier (Reference genome) | (Pusa 256 & HPNB) | NCBI SNPdb Accession IDs |
|----------------------|----------------|--------------|-------------------------|---------------------------------|-------------------|--------------------------|
| SNP_P3_154970_18755  | NW_004516698.1 | Scaffold1508 | 18755                   | AA                              | TT                | 1946655264               |
| SNP_P3_154971_18763  | NW_004516698.1 | Scaffold1508 | 18763                   | TT                              | CC                | 1946655266               |
| SNP_P3_154973_19565  | NW_004516698.1 | Scaffold1508 | 19565                   | CC                              | TT                | 1946655268               |
| SNP_P3_154974_25563  | NW_004516698.1 | Scaffold1508 | 25563                   | TT                              | AA                | 1946655270               |
| SNP_P3_154975_25581  | NW_004516698.1 | Scaffold1508 | 25581                   | GG                              | TT                | 1946655272               |
| SNP_P3_154976_26837  | NW_004516698.1 | Scaffold1508 | 26837                   | TT                              | CC                | 1946655274               |
| SNP_P3_154977_27157  | NW_004516698.1 | Scaffold1508 | 27157                   | GG                              | AA                | 1946655276               |
| SNP_P3_154978_43875  | NW_004516698.1 | Scaffold1508 | 43875                   | AA                              | CC                | 1946655278               |
| SNP_P3_154979_43884  | NW_004516698.1 | Scaffold1508 | 43884                   | CC                              | TT                | 1946655280               |
| SNP_P3_154980_47199  | NW_004516698.1 | Scaffold1508 | 47199                   | AA                              | CC                | 1946655282               |
| SNP_P3_154982_70786  | NW_004516698.1 | Scaffold1508 | 70786                   | GG                              | AA                | 1946655285               |
| SNP_P3_154983_79237  | NW_004516698.1 | Scaffold1508 | 79237                   | CC                              | AA                | 1946655287               |
| SNP_P3_154984_79617  | NW_004516698.1 | Scaffold1508 | 79617                   | TT                              | CC                | 1946655289               |
| SNP_P3_154985_84358  | NW_004516698.1 | Scaffold1508 | 84358                   | CC                              | GG                | 1946655291               |
| SNP_P3_154986_84625  | NW_004516698.1 | Scaffold1508 | 84625                   | TT                              | CC                | 1946655293               |
| SNP_P3_154987_84998  | NW_004516698.1 | Scaffold1508 | 84998                   | TT                              | GG                | 1946655295               |
| SNP_P3_154988_89501  | NW_004516698.1 | Scaffold1508 | 89501                   | TT                              | CC                | 1946655297               |
| SNP_P3_154989_105739 | NW_004516698.1 | Scaffold1508 | 105739                  | TT                              | CC                | 1946655299               |
| SNP_P3_154990_115931 | NW_004516698.1 | Scaffold1508 | 115931                  | GG                              | AA                | 1946655301               |
| SNP_P3_154991_1095   | NW_004516700.1 | Scaffold1511 | 1095                    | GG                              | TT                | 1946655302               |
| SNP_P3_154992_1367   | NW_004516700.1 | Scaffold1511 | 1367                    | AA                              | GG                | 1946655303               |
| SNP_P3_154993_2660   | NW_004516700.1 | Scaffold1511 | 2660                    | AA                              | TT                | 1946655304               |
| SNP_P3_154994_2923   | NW_004516700.1 | Scaffold1511 | 2923                    | GG                              | AA                | 1946655305               |
| SNP_P3_154995_12541  | NW_004516700.1 | Scaffold1511 | 12541                   | TT                              | CC                | 1946655306               |
| SNP_P3_154996_13376  | NW_004516700.1 | Scaffold1511 | 13376                   | GG                              | AA                | 1946655307               |
| SNP_P3_154997_14886  | NW_004516700.1 | Scaffold1511 | 14886                   | CC                              | TT                | 1946655308               |
| SNP_P3_154998_24851  | NW_004516700.1 | Scaffold1511 | 24851                   | TT                              | CC                | 1946655309               |
| SNP_P3_154999_24943  | NW_004516700.1 | Scaffold1511 | 24943                   | TT                              | AA                | 1946655310               |
| SNP_P3_155000_24955  | NW_004516700.1 | Scaffold1511 | 24955                   | TT                              | GG                | 1946655311               |
| SNP_P3_155001_24976  | NW_004516700.1 | Scaffold1511 | 24976                   | CC                              | TT                | 1946655312               |
| SNP_P3_155002_24980  | NW_004516700.1 | Scaffold1511 | 24980                   | AA                              | GG                | 1946655313               |
| SNP_P3_155003_25076  | NW_004516700.1 | Scaffold1511 | 25076                   | AA                              | GG                | 1946655314               |
| SNP_P3_155004_27130  | NW_004516700.1 | Scaffold1511 | 27130                   | AA                              | CC                | 1946655315               |
| SNP_P3_155005_27234  | NW_004516700.1 | Scaffold1511 | 27234                   | TT                              | GG                | 1946655316               |
| SNP_P3_155006_30730  | NW_004516700.1 | Scaffold1511 | 30730                   | TT                              | AA                | 1946655317               |
| SNP_P3_155008_31991  | NW_004516700.1 | Scaffold1511 | 31991                   | GG                              | AA                | 1946655318               |
| SNP_P3_155009_32130  | NW_004516700.1 | Scaffold1511 | 32130                   | TT                              | CC                | 1946655319               |
| SNP_P3_155010_34272  | NW_004516700.1 | Scaffold1511 | 34272                   | TT                              | GG                | 1946655320               |
| SNP_P3_155011_34289  | NW_004516700.1 | Scaffold1511 | 34289                   | CC                              | GG                | 1946655321               |
| SNP_P3_155012_34538  | NW_004516700.1 | Scaffold1511 | 34538                   | TT                              | CC                | 1946655322               |
| SNP_P3_155013_35556  | NW_004516700.1 | Scaffold1511 | 35556                   | TT                              | CC                | 1946655323               |
| SNP_P3_155014_35591  | NW_004516700.1 | Scaffold1511 | 35591                   | AA                              | TT                | 1946655324               |

| SNPs IDs             | Chromosome IDs | Chromosomes  | Physical positions (bp) | CDC Frontier (Reference genome) | (Pusa 256 & HPNB) | NCBI SNPdb Accession IDs |
|----------------------|----------------|--------------|-------------------------|---------------------------------|-------------------|--------------------------|
| SNP_P3_155015_36607  | NW_004516700.1 | Scaffold1511 | 36607                   | GG                              | AA                | 1946655325               |
| SNP_P3_155016_40778  | NW_004516700.1 | Scaffold1511 | 40778                   | GG                              | AA                | 1946655326               |
| SNP_P3_155017_44132  | NW_004516700.1 | Scaffold1511 | 44132                   | TT                              | CC                | 1946655327               |
| SNP_P3_155018_44432  | NW_004516700.1 | Scaffold1511 | 44432                   | GG                              | AA                | 1946655328               |
| SNP_P3_155019_46537  | NW_004516700.1 | Scaffold1511 | 46537                   | TT                              | CC                | 1946655329               |
| SNP_P3_155020_47846  | NW_004516700.1 | Scaffold1511 | 47846                   | AA                              | CC                | 1946655330               |
| SNP_P3_155021_47932  | NW_004516700.1 | Scaffold1511 | 47932                   | CC                              | GG                | 1946655331               |
| SNP_P3_155022_48855  | NW_004516700.1 | Scaffold1511 | 48855                   | CC                              | TT                | 1946655332               |
| SNP_P3_155023_52518  | NW_004516700.1 | Scaffold1511 | 52518                   | TT                              | CC                | 1946655333               |
| SNP_P3_155025_59122  | NW_004516700.1 | Scaffold1511 | 59122                   | AA                              | GG                | 1946655334               |
| SNP_P3_155026_60829  | NW_004516700.1 | Scaffold1511 | 60829                   | TT                              | CC                | 1946655335               |
| SNP_P3_155028_62603  | NW_004516700.1 | Scaffold1511 | 62603                   | TT                              | CC                | 1946655336               |
| SNP_P3_155029_71804  | NW_004516700.1 | Scaffold1511 | 71804                   | AA                              | CC                | 1946655337               |
| SNP_P3_155030_74105  | NW_004516700.1 | Scaffold1511 | 74105                   | GG                              | AA                | 1946655338               |
| SNP_P3_155031_81412  | NW_004516700.1 | Scaffold1511 | 81412                   | TT                              | CC                | 1946655339               |
| SNP_P3_155032_82333  | NW_004516700.1 | Scaffold1511 | 82333                   | GG                              | AA                | 1946655340               |
| SNP_P3_155033_82558  | NW_004516700.1 | Scaffold1511 | 82558                   | TT                              | CC                | 1946655341               |
| SNP_P3_155034_82711  | NW_004516700.1 | Scaffold1511 | 82711                   | TT                              | CC                | 1946655342               |
| SNP_P3_155035_82717  | NW_004516700.1 | Scaffold1511 | 82717                   | AA                              | TT                | 1946655343               |
| SNP_P3_155036_82719  | NW_004516700.1 | Scaffold1511 | 82719                   | TT                              | AA                | 1946655344               |
| SNP_P3_155037_82734  | NW_004516700.1 | Scaffold1511 | 82734                   | TT                              | CC                | 1946655345               |
| SNP_P3_155038_82742  | NW_004516700.1 | Scaffold1511 | 82742                   | TT                              | CC                | 1946655346               |
| SNP_P3_155039_82775  | NW_004516700.1 | Scaffold1511 | 82775                   | AA                              | GG                | 1946655347               |
| SNP_P3_155040_82803  | NW_004516700.1 | Scaffold1511 | 82803                   | AA                              | CC                | 1946655348               |
| SNP_P3_155041_82902  | NW_004516700.1 | Scaffold1511 | 82902                   | GG                              | AA                | 1946655349               |
| SNP_P3_155042_82987  | NW_004516700.1 | Scaffold1511 | 82987                   | GG                              | TT                | 1946655350               |
| SNP_P3_155043_83141  | NW_004516700.1 | Scaffold1511 | 83141                   | AA                              | GG                | 1946655351               |
| SNP_P3_155044_83615  | NW_004516700.1 | Scaffold1511 | 83615                   | TT                              | AA                | 1946655352               |
| SNP_P3_155045_84726  | NW_004516700.1 | Scaffold1511 | 84726                   | AA                              | CC                | 1946655353               |
| SNP_P3_155046_85743  | NW_004516700.1 | Scaffold1511 | 85743                   | TT                              | GG                | 1946655354               |
| SNP_P3_155047_88946  | NW_004516700.1 | Scaffold1511 | 88946                   | CC                              | TT                | 1946655355               |
| SNP_P3_155048_89093  | NW_004516700.1 | Scaffold1511 | 89093                   | GG                              | TT                | 1946655356               |
| SNP_P3_155049_91018  | NW_004516700.1 | Scaffold1511 | 91018                   | GG                              | AA                | 1946655357               |
| SNP_P3_155050_91235  | NW_004516700.1 | Scaffold1511 | 91235                   | AA                              | CC                | 1946655358               |
| SNP_P3_155051_91799  | NW_004516700.1 | Scaffold1511 | 91799                   | TT                              | CC                | 1946655359               |
| SNP_P3_155052_92556  | NW_004516700.1 | Scaffold1511 | 92556                   | GG                              | AA                | 1946655360               |
| SNP_P3_155053_92800  | NW_004516700.1 | Scaffold1511 | 92800                   | AA                              | GG                | 1946655361               |
| SNP_P3_155054_93029  | NW_004516700.1 | Scaffold1511 | 93029                   | AA                              | GG                | 1946655362               |
| SNP_P3_155055_93436  | NW_004516700.1 | Scaffold1511 | 93436                   | GG                              | AA                | 1946655363               |
| SNP_P3_155057_98053  | NW_004516700.1 | Scaffold1511 | 98053                   | AA                              | GG                | 1946655364               |
| SNP_P3_155059_99159  | NW_004516700.1 | Scaffold1511 | 99159                   | GG                              | AA                | 1946655365               |
| SNP_P3_155060_102347 | NW_004516700.1 | Scaffold1511 | 102347                  | CC                              | TT                | 1946655366               |

| SNPs IDs             | Chromosome IDs | Chromosomes  | Physical positions (bp) | CDC Frontier (Reference genome) | (Pusa 256 & HPNB) | NCBI SNPdb Accession IDs |
|----------------------|----------------|--------------|-------------------------|---------------------------------|-------------------|--------------------------|
| SNP_P3_155061_105296 | NW_004516700.1 | Scaffold1511 | 105296                  | GG                              | AA                | 1946655367               |
| SNP_P3_155062_105536 | NW_004516700.1 | Scaffold1511 | 105536                  | TT                              | CC                | 1946655368               |
| SNP_P3_155063_105654 | NW_004516700.1 | Scaffold1511 | 105654                  | TT                              | GG                | 1946655369               |
| SNP_P3_155064_105848 | NW_004516700.1 | Scaffold1511 | 105848                  | GG                              | CC                | 1946655370               |
| SNP_P3_155065_106881 | NW_004516700.1 | Scaffold1511 | 106881                  | TT                              | CC                | 1946655371               |
| SNP_P3_155066_107259 | NW_004516700.1 | Scaffold1511 | 107259                  | CC                              | TT                | 1946655372               |
| SNP_P3_155067_107628 | NW_004516700.1 | Scaffold1511 | 107628                  | CC                              | TT                | 1946655373               |
| SNP_P3_155069_110876 | NW_004516700.1 | Scaffold1511 | 110876                  | AA                              | GG                | 1946655374               |
| SNP_P3_155070_110882 | NW_004516700.1 | Scaffold1511 | 110882                  | GG                              | CC                | 1946655375               |
| SNP_P3_155071_111767 | NW_004516700.1 | Scaffold1511 | 111767                  | AA                              | CC                | 1946655376               |
| SNP_P3_155072_111806 | NW_004516700.1 | Scaffold1511 | 111806                  | TT                              | CC                | 1946655377               |
| SNP_P3_155073_111818 | NW_004516700.1 | Scaffold1511 | 111818                  | AA                              | TT                | 1946655378               |
| SNP_P3_155074_111846 | NW_004516700.1 | Scaffold1511 | 111846                  | TT                              | CC                | 1946655379               |
| SNP_P3_155075_112018 | NW_004516700.1 | Scaffold1511 | 112018                  | CC                              | AA                | 1946655380               |
| SNP_P3_155076_116252 | NW_004516700.1 | Scaffold1511 | 116252                  | TT                              | CC                | 1946655381               |
| SNP_P3_155077_116280 | NW_004516700.1 | Scaffold1511 | 116280                  | TT                              | GG                | 1946655382               |
| SNP_P3_155078_116381 | NW_004516700.1 | Scaffold1511 | 116381                  | TT                              | GG                | 1946655383               |
| SNP_P3_155079_117596 | NW_004516700.1 | Scaffold1511 | 117596                  | GG                              | CC                | 1946655384               |
| SNP_P3_155080_117633 | NW_004516700.1 | Scaffold1511 | 117633                  | AA                              | CC                | 1946655385               |
| SNP_P3_155081_121886 | NW_004516700.1 | Scaffold1511 | 121886                  | CC                              | TT                | 1946655386               |
| SNP_P3_155082_122175 | NW_004516700.1 | Scaffold1511 | 122175                  | TT                              | CC                | 1946655387               |
| SNP_P3_155083_122575 | NW_004516700.1 | Scaffold1511 | 122575                  | TT                              | CC                | 1946655388               |
| SNP_P3_155084_122729 | NW_004516700.1 | Scaffold1511 | 122729                  | AA                              | CC                | 1946655389               |
| SNP_P3_155085_122843 | NW_004516700.1 | Scaffold1511 | 122843                  | CC                              | TT                | 1946655390               |
| SNP_P3_155086_123685 | NW_004516700.1 | Scaffold1511 | 123685                  | AA                              | GG                | 1946655391               |
| SNP_P3_155087_124385 | NW_004516700.1 | Scaffold1511 | 124385                  | GG                              | TT                | 1946655392               |
| SNP_P3_155088_125208 | NW_004516700.1 | Scaffold1511 | 125208                  | AA                              | GG                | 1946655393               |
| SNP_P3_155090_125254 | NW_004516700.1 | Scaffold1511 | 125254                  | TT                              | AA                | 1946655394               |
| SNP_P3_155091_126123 | NW_004516700.1 | Scaffold1511 | 126123                  | TT                              | CC                | 1946655395               |
| SNP_P3_155092_126141 | NW_004516700.1 | Scaffold1511 | 126141                  | GG                              | AA                | 1946655396               |
| SNP_P3_155094_129057 | NW_004516700.1 | Scaffold1511 | 129057                  | TT                              | CC                | 1946655397               |
| SNP_P3_155095_129068 | NW_004516700.1 | Scaffold1511 | 129068                  | GG                              | AA                | 1946655398               |
| SNP_P3_155096_129175 | NW_004516700.1 | Scaffold1511 | 129175                  | AA                              | GG                | 1946655399               |
| SNP_P3_155097_129197 | NW_004516700.1 | Scaffold1511 | 129197                  | GG                              | AA                | 1946655400               |
| SNP_P3_155098_131025 | NW_004516700.1 | Scaffold1511 | 131025                  | TT                              | GG                | 1946655401               |
| SNP_P3_155099_133165 | NW_004516700.1 | Scaffold1511 | 133165                  | AA                              | GG                | 1946655402               |
| SNP_P3_155100_133618 | NW_004516700.1 | Scaffold1511 | 133618                  | AA                              | GG                | 1946655403               |
| SNP_P3_155102_133937 | NW_004516700.1 | Scaffold1511 | 133937                  | TT                              | CC                | 1946655404               |
| SNP_P3_155103_135749 | NW_004516700.1 | Scaffold1511 | 135749                  | AA                              | TT                | 1946655406               |
| SNP_P3_155105_137060 | NW_004516700.1 | Scaffold1511 | 137060                  | CC                              | TT                | 1946655408               |
| SNP_P3_155106_137175 | NW_004516700.1 | Scaffold1511 | 137175                  | GG                              | AA                | 1946655410               |
| SNP_P3_155107_143373 | NW_004516700.1 | Scaffold1511 | 143373                  | AA                              | CC                | 1946655412               |

| SNPs IDs             | Chromosome IDs | Chromosomes  | Physical positions (bp) | CDC Frontier (Reference genome) | (Pusa 256 & HPNB) | NCBI SNPdb Accession IDs |
|----------------------|----------------|--------------|-------------------------|---------------------------------|-------------------|--------------------------|
| SNP_P3_155108_143686 | NW_004516700.1 | Scaffold1511 | 143686                  | TT                              | CC                | 1946655414               |
| SNP_P3_155109_143691 | NW_004516700.1 | Scaffold1511 | 143691                  | TT                              | AA                | 1946655416               |
| SNP_P3_155112_145618 | NW_004516700.1 | Scaffold1511 | 145618                  | TT                              | CC                | 1946655418               |
| SNP_P3_155113_147218 | NW_004516700.1 | Scaffold1511 | 147218                  | CC                              | TT                | 1946655420               |
| SNP_P3_155115_152522 | NW_004516700.1 | Scaffold1511 | 152522                  | GG                              | AA                | 1946655422               |
| SNP_P3_155116_154867 | NW_004516700.1 | Scaffold1511 | 154867                  | AA                              | GG                | 1946655424               |
| SNP_P3_155117_155545 | NW_004516700.1 | Scaffold1511 | 155545                  | TT                              | CC                | 1946655426               |
| SNP_P3_155118_155547 | NW_004516700.1 | Scaffold1511 | 155547                  | AA                              | CC                | 1946655428               |
| SNP_P3_155119_156361 | NW_004516700.1 | Scaffold1511 | 156361                  | TT                              | CC                | 1946655430               |
| SNP_P3_155120_157147 | NW_004516700.1 | Scaffold1511 | 157147                  | CC                              | TT                | 1946655432               |
| SNP_P3_155121_162462 | NW_004516700.1 | Scaffold1511 | 162462                  | GG                              | AA                | 1946655434               |
| SNP_P3_155122_163232 | NW_004516700.1 | Scaffold1511 | 163232                  | TT                              | GG                | 1946655436               |
| SNP_P3_155123_163410 | NW_004516700.1 | Scaffold1511 | 163410                  | AA                              | TT                | 1946655438               |
| SNP_P3_155124_164515 | NW_004516700.1 | Scaffold1511 | 164515                  | TT                              | AA                | 1946655441               |
| SNP_P3_155125_164795 | NW_004516700.1 | Scaffold1511 | 164795                  | AA                              | CC                | 1946655443               |
| SNP_P3_155126_165196 | NW_004516700.1 | Scaffold1511 | 165196                  | CC                              | TT                | 1946655446               |
| SNP_P3_155127_165796 | NW_004516700.1 | Scaffold1511 | 165796                  | AA                              | TT                | 1946655448               |
| SNP_P3_155128_166981 | NW_004516700.1 | Scaffold1511 | 166981                  | AA                              | GG                | 1946655450               |
| SNP_P3_155129_168786 | NW_004516700.1 | Scaffold1511 | 168786                  | GG                              | CC                | 1946655452               |
| SNP_P3_155130_168997 | NW_004516700.1 | Scaffold1511 | 168997                  | AA                              | TT                | 1946655454               |
| SNP_P3_155131_169125 | NW_004516700.1 | Scaffold1511 | 169125                  | GG                              | AA                | 1946655456               |
| SNP_P3_155132_170366 | NW_004516700.1 | Scaffold1511 | 170366                  | TT                              | AA                | 1946655458               |
| SNP_P3_155133_170914 | NW_004516700.1 | Scaffold1511 | 170914                  | TT                              | CC                | 1946655460               |
| SNP_P3_155134_170930 | NW_004516700.1 | Scaffold1511 | 170930                  | TT                              | CC                | 1946655462               |
| SNP_P3_155135_172948 | NW_004516700.1 | Scaffold1511 | 172948                  | AA                              | GG                | 1946655464               |
| SNP_P3_155136_173014 | NW_004516700.1 | Scaffold1511 | 173014                  | GG                              | AA                | 1946655466               |
| SNP_P3_155137_173986 | NW_004516700.1 | Scaffold1511 | 173986                  | CC                              | TT                | 1946655468               |
| SNP_P3_155138_174183 | NW_004516700.1 | Scaffold1511 | 174183                  | TT                              | CC                | 1946655470               |
| SNP_P3_155139_174276 | NW_004516700.1 | Scaffold1511 | 174276                  | AA                              | GG                | 1946655472               |
| SNP_P3_155140_174417 | NW_004516700.1 | Scaffold1511 | 174417                  | GG                              | CC                | 1946655474               |
| SNP_P3_155141_174581 | NW_004516700.1 | Scaffold1511 | 174581                  | TT                              | CC                | 1946655476               |
| SNP_P3_155142_174597 | NW_004516700.1 | Scaffold1511 | 174597                  | AA                              | CC                | 1946655478               |
| SNP_P3_155143_174606 | NW_004516700.1 | Scaffold1511 | 174606                  | CC                              | TT                | 1946655481               |
| SNP_P3_155144_174625 | NW_004516700.1 | Scaffold1511 | 174625                  | TT                              | CC                | 1946655483               |
| SNP_P3_155145_174631 | NW_004516700.1 | Scaffold1511 | 174631                  | AA                              | GG                | 1946655485               |
| SNP_P3_155146_174643 | NW_004516700.1 | Scaffold1511 | 174643                  | CC                              | GG                | 1946655487               |
| SNP_P3_155147_174676 | NW_004516700.1 | Scaffold1511 | 174676                  | GG                              | TT                | 1946655490               |
| SNP_P3_155148_174693 | NW_004516700.1 | Scaffold1511 | 174693                  | TT                              | CC                | 1946655492               |
| SNP_P3_155149_174811 | NW_004516700.1 | Scaffold1511 | 174811                  | TT                              | CC                | 1946655494               |
| SNP_P3_155150_175085 | NW_004516700.1 | Scaffold1511 | 175085                  | CC                              | AA                | 1946655496               |
| SNP_P3_155151_176520 | NW_004516700.1 | Scaffold1511 | 176520                  | GG                              | AA                | 1946655498               |
| SNP_P3_155152_180243 | NW_004516700.1 | Scaffold1511 | 180243                  | TT                              | CC                | 1946655500               |

| SNPs IDs             | Chromosome IDs | Chromosomes  | Physical positions (bp) | CDC Frontier (Reference genome) | (Pusa 256 & HPNB) | NCBI SNPdb Accession IDs |
|----------------------|----------------|--------------|-------------------------|---------------------------------|-------------------|--------------------------|
| SNP_P3_155153_180354 | NW_004516700.1 | Scaffold1511 | 180354                  | AA                              | CC                | 1946655502               |
| SNP_P3_155154_181038 | NW_004516700.1 | Scaffold1511 | 181038                  | AA                              | GG                | 1946655504               |
| SNP_P3_155155_181755 | NW_004516700.1 | Scaffold1511 | 181755                  | GG                              | AA                | 1946655506               |
| SNP_P3_155156_182522 | NW_004516700.1 | Scaffold1511 | 182522                  | CC                              | TT                | 1946655508               |
| SNP_P3_155157_185073 | NW_004516700.1 | Scaffold1511 | 185073                  | AA                              | GG                | 1946655510               |
| SNP_P3_155158_185778 | NW_004516700.1 | Scaffold1511 | 185778                  | AA                              | GG                | 1946655512               |
| SNP_P3_155159_187062 | NW_004516700.1 | Scaffold1511 | 187062                  | AA                              | CC                | 1946655514               |
| SNP_P3_155160_189242 | NW_004516700.1 | Scaffold1511 | 189242                  | CC                              | GG                | 1946655517               |
| SNP_P3_155161_189261 | NW_004516700.1 | Scaffold1511 | 189261                  | AA                              | CC                | 1946655519               |
| SNP_P3_155162_189263 | NW_004516700.1 | Scaffold1511 | 189263                  | CC                              | TT                | 1946655521               |
| SNP_P3_155163_191339 | NW_004516700.1 | Scaffold1511 | 191339                  | TT                              | CC                | 1946655523               |
| SNP_P3_155164_1692   | NW_004516701.1 | Scaffold1512 | 1692                    | TT                              | GG                | 1946655525               |
| SNP_P3_155165_8544   | NW_004516701.1 | Scaffold1512 | 8544                    | CC                              | AA                | 1946655527               |
| SNP_P3_155166_9174   | NW_004516701.1 | Scaffold1512 | 9174                    | AA                              | GG                | 1946655529               |
| SNP_P3_155167_1400   | NW_004516704.1 | Scaffold1515 | 1400                    | GG                              | TT                | 1946655531               |
| SNP_P3_155168_7955   | NW_004516704.1 | Scaffold1515 | 7955                    | GG                              | AA                | 1946655533               |
| SNP_P3_155170_9115   | NW_004516704.1 | Scaffold1515 | 9115                    | TT                              | CC                | 1946655535               |
| SNP_P3_155171_9254   | NW_004516704.1 | Scaffold1515 | 9254                    | TT                              | AA                | 1946655537               |
| SNP_P3_155172_9263   | NW_004516704.1 | Scaffold1515 | 9263                    | TT                              | AA                | 1946655539               |
| SNP_P3_155173_9358   | NW_004516704.1 | Scaffold1515 | 9358                    | GG                              | AA                | 1946655541               |
| SNP_P3_155174_9385   | NW_004516704.1 | Scaffold1515 | 9385                    | AA                              | CC                | 1946655545               |
| SNP_P3_155175_9387   | NW_004516704.1 | Scaffold1515 | 9387                    | GG                              | TT                | 1946655547               |
| SNP_P3_155176_9455   | NW_004516704.1 | Scaffold1515 | 9455                    | AA                              | CC                | 1946655549               |
| SNP_P3_155177_9503   | NW_004516704.1 | Scaffold1515 | 9503                    | AA                              | TT                | 1946655551               |
| SNP_P3_155178_9548   | NW_004516704.1 | Scaffold1515 | 9548                    | TT                              | CC                | 1946655553               |
| SNP_P3_155179_9675   | NW_004516704.1 | Scaffold1515 | 9675                    | AA                              | TT                | 1946655555               |
| SNP_P3_155180_9791   | NW_004516704.1 | Scaffold1515 | 9791                    | CC                              | TT                | 1946655557               |
| SNP_P3_155181_9885   | NW_004516704.1 | Scaffold1515 | 9885                    | AA                              | GG                | 1946655559               |
| SNP_P3_155182_9909   | NW_004516704.1 | Scaffold1515 | 9909                    | AA                              | GG                | 1946655561               |
| SNP_P3_155183_10090  | NW_004516704.1 | Scaffold1515 | 10090                   | CC                              | TT                | 1946655563               |
| SNP_P3_155184_13327  | NW_004516704.1 | Scaffold1515 | 13327                   | GG                              | CC                | 1946655566               |
| SNP_P3_155185_14919  | NW_004516704.1 | Scaffold1515 | 14919                   | CC                              | TT                | 1946655568               |
| SNP_P3_155186_15072  | NW_004516704.1 | Scaffold1515 | 15072                   | TT                              | AA                | 1946655570               |
| SNP_P3_155187_15199  | NW_004516704.1 | Scaffold1515 | 15199                   | GG                              | AA                | 1946655572               |
| SNP_P3_155188_15278  | NW_004516704.1 | Scaffold1515 | 15278                   | CC                              | AA                | 1946655574               |
| SNP_P3_155189_15280  | NW_004516704.1 | Scaffold1515 | 15280                   | GG                              | AA                | 1946655576               |
| SNP_P3_155190_15383  | NW_004516704.1 | Scaffold1515 | 15383                   | CC                              | TT                | 1946655578               |
| SNP_P3_155191_15413  | NW_004516704.1 | Scaffold1515 | 15413                   | CC                              | TT                | 1946655580               |
| SNP_P3_155192_15424  | NW_004516704.1 | Scaffold1515 | 15424                   | TT                              | CC                | 1946655583               |
| SNP_P3_155193_15460  | NW_004516704.1 | Scaffold1515 | 15460                   | CC                              | GG                | 1946655585               |
| SNP_P3_155194_15506  | NW_004516704.1 | Scaffold1515 | 15506                   | TT                              | AA                | 1946655587               |
| SNP_P3_155196_15699  | NW_004516704.1 | Scaffold1515 | 15699                   | AA                              | CC                | 1946655589               |

| SNPs IDs            | Chromosome IDs | Chromosomes  | Physical positions (bp) | CDC Frontier (Reference genome) | (Pusa 256 & HPNB) | NCBI SNPdb Accession IDs |
|---------------------|----------------|--------------|-------------------------|---------------------------------|-------------------|--------------------------|
| SNP_P3_155197_15775 | NW_004516704.1 | Scaffold1515 | 15775                   | TT                              | CC                | 1946655591               |
| SNP_P3_155198_16034 | NW_004516704.1 | Scaffold1515 | 16034                   | AA                              | GG                | 1946655593               |
| SNP_P3_155199_17493 | NW_004516704.1 | Scaffold1515 | 17493                   | TT                              | CC                | 1946655595               |
| SNP_P3_155200_17517 | NW_004516704.1 | Scaffold1515 | 17517                   | TT                              | CC                | 1946655597               |
| SNP_P3_155201_17548 | NW_004516704.1 | Scaffold1515 | 17548                   | TT                              | CC                | 1946655599               |
| SNP_P3_155202_17629 | NW_004516704.1 | Scaffold1515 | 17629                   | AA                              | TT                | 1946655601               |
| SNP_P3_155203_17835 | NW_004516704.1 | Scaffold1515 | 17835                   | GG                              | AA                | 1946655603               |
| SNP_P3_155204_18052 | NW_004516704.1 | Scaffold1515 | 18052                   | TT                              | CC                | 1946655605               |
| SNP_P3_155205_18225 | NW_004516704.1 | Scaffold1515 | 18225                   | TT                              | CC                | 1946655607               |
| SNP_P3_155206_18232 | NW_004516704.1 | Scaffold1515 | 18232                   | CC                              | TT                | 1946655609               |
| SNP_P3_155207_18247 | NW_004516704.1 | Scaffold1515 | 18247                   | TT                              | AA                | 1946655611               |
| SNP_P3_155209_30530 | NW_004516704.1 | Scaffold1515 | 30530                   | TT                              | CC                | 1946655613               |
| SNP_P3_155210_30919 | NW_004516704.1 | Scaffold1515 | 30919                   | AA                              | GG                | 1946655615               |
| SNP_P3_155211_377   | NW_004516705.1 | Scaffold1516 | 377                     | GG                              | AA                | 1946655617               |
| SNP_P3_155212_531   | NW_004516705.1 | Scaffold1516 | 531                     | GG                              | TT                | 1946655621               |
| SNP_P3_155213_554   | NW_004516705.1 | Scaffold1516 | 554                     | TT                              | GG                | 1946655623               |
| SNP_P3_155214_574   | NW_004516705.1 | Scaffold1516 | 574                     | GG                              | CC                | 1946655625               |
| SNP_P3_155215_825   | NW_004516705.1 | Scaffold1516 | 825                     | GG                              | TT                | 1946655627               |
| SNP_P3_155216_2311  | NW_004516705.1 | Scaffold1516 | 2311                    | AA                              | CC                | 1946655629               |
| SNP_P3_155217_2354  | NW_004516705.1 | Scaffold1516 | 2354                    | TT                              | CC                | 1946655631               |
| SNP_P3_155218_2355  | NW_004516705.1 | Scaffold1516 | 2355                    | AA                              | TT                | 1946655633               |
| SNP_P3_155219_2623  | NW_004516705.1 | Scaffold1516 | 2623                    | CC                              | GG                | 1946655635               |
| SNP_P3_155220_2725  | NW_004516705.1 | Scaffold1516 | 2725                    | GG                              | TT                | 1946655637               |
| SNP_P3_155221_3038  | NW_004516705.1 | Scaffold1516 | 3038                    | GG                              | TT                | 1946655639               |
| SNP_P3_155222_3058  | NW_004516705.1 | Scaffold1516 | 3058                    | AA                              | CC                | 1946655641               |
| SNP_P3_155223_3059  | NW_004516705.1 | Scaffold1516 | 3059                    | TT                              | AA                | 1946655643               |
| SNP_P3_155224_3067  | NW_004516705.1 | Scaffold1516 | 3067                    | AA                              | TT                | 1946655645               |
| SNP_P3_155225_3191  | NW_004516705.1 | Scaffold1516 | 3191                    | CC                              | TT                | 1946655647               |
| SNP_P3_155226_8044  | NW_004516705.1 | Scaffold1516 | 8044                    | CC                              | TT                | 1946655649               |
| SNP_P3_155227_8052  | NW_004516705.1 | Scaffold1516 | 8052                    | AA                              | CC                | 1946655651               |
| SNP_P3_155228_8098  | NW_004516705.1 | Scaffold1516 | 8098                    | CC                              | TT                | 1946655653               |
| SNP_P3_155229_8143  | NW_004516705.1 | Scaffold1516 | 8143                    | TT                              | CC                | 1946655655               |
| SNP_P3_155230_8307  | NW_004516705.1 | Scaffold1516 | 8307                    | GG                              | CC                | 1946655657               |
| SNP_P3_155231_8320  | NW_004516705.1 | Scaffold1516 | 8320                    | AA                              | CC                | 1946655660               |
| SNP_P3_155232_8430  | NW_004516705.1 | Scaffold1516 | 8430                    | GG                              | AA                | 1946655662               |
| SNP_P3_155233_8441  | NW_004516705.1 | Scaffold1516 | 8441                    | CC                              | GG                | 1946655664               |
| SNP_P3_155234_8469  | NW_004516705.1 | Scaffold1516 | 8469                    | TT                              | GG                | 1946655666               |
| SNP_P3_155235_8997  | NW_004516705.1 | Scaffold1516 | 8997                    | GG                              | TT                | 1946655668               |
| SNP_P3_155236_9101  | NW_004516705.1 | Scaffold1516 | 9101                    | TT                              | CC                | 1946655670               |
| SNP_P3_155237_9111  | NW_004516705.1 | Scaffold1516 | 9111                    | TT                              | CC                | 1946655672               |
| SNP_P3_155238_4034  | NW_004516706.1 | Scaffold1519 | 4034                    | GG                              | TT                | 1946655674               |
| SNP_P3_155239_16750 | NW_004516706.1 | Scaffold1519 | 16750                   | TT                              | GG                | 1946655676               |

| SNPs IDs            | Chromosome IDs | Chromosomes  | Physical positions (bp) | CDC Frontier (Reference genome) | (Pusa 256 & HPNB) | NCBI SNPdb Accession IDs |
|---------------------|----------------|--------------|-------------------------|---------------------------------|-------------------|--------------------------|
| SNP_P3_155240_16800 | NW_004516706.1 | Scaffold1519 | 16800                   | GG                              | AA                | 1946655678               |
| SNP_P3_155241_16809 | NW_004516706.1 | Scaffold1519 | 16809                   | TT                              | AA                | 1946655680               |
| SNP_P3_155242_16864 | NW_004516706.1 | Scaffold1519 | 16864                   | AA                              | CC                | 1946655682               |
| SNP_P3_155243_16875 | NW_004516706.1 | Scaffold1519 | 16875                   | CC                              | TT                | 1946655684               |
| SNP_P3_155244_17063 | NW_004516706.1 | Scaffold1519 | 17063                   | GG                              | TT                | 1946655686               |
| SNP_P3_155245_621   | NW_004516707.1 | Scaffold1520 | 621                     | TT                              | AA                | 1946655688               |
| SNP_P3_155246_2758  | NW_004516707.1 | Scaffold1520 | 2758                    | CC                              | AA                | 1946655690               |
| SNP_P3_155247_4773  | NW_004516707.1 | Scaffold1520 | 4773                    | CC                              | TT                | 1946655692               |
| SNP_P3_155248_64    | NW_004516708.1 | Scaffold1521 | 64                      | AA                              | GG                | 1946655694               |
| SNP_P3_155249_425   | NW_004516708.1 | Scaffold1521 | 425                     | TT                              | GG                | 1946655696               |
| SNP_P3_155250_463   | NW_004516708.1 | Scaffold1521 | 463                     | TT                              | AA                | 1946655699               |
| SNP_P3_155251_559   | NW_004516708.1 | Scaffold1521 | 559                     | GG                              | AA                | 1946655701               |
| SNP_P3_155252_593   | NW_004516708.1 | Scaffold1521 | 593                     | AA                              | GG                | 1946655703               |
| SNP_P3_155253_599   | NW_004516708.1 | Scaffold1521 | 599                     | AA                              | GG                | 1946655705               |
| SNP_P3_155254_632   | NW_004516708.1 | Scaffold1521 | 632                     | AA                              | CC                | 1946655707               |
| SNP_P3_155255_657   | NW_004516708.1 | Scaffold1521 | 657                     | AA                              | TT                | 1946655709               |
| SNP_P3_155256_705   | NW_004516708.1 | Scaffold1521 | 705                     | CC                              | TT                | 1946655711               |
| SNP_P3_155257_725   | NW_004516708.1 | Scaffold1521 | 725                     | CC                              | TT                | 1946655713               |
| SNP_P3_155259_983   | NW_004516708.1 | Scaffold1521 | 983                     | AA                              | GG                | 1946655715               |
| SNP_P3_155260_1065  | NW_004516708.1 | Scaffold1521 | 1065                    | AA                              | TT                | 1946655717               |
| SNP_P3_155261_1133  | NW_004516708.1 | Scaffold1521 | 1133                    | CC                              | AA                | 1946655719               |
| SNP_P3_155262_5730  | NW_004516708.1 | Scaffold1521 | 5730                    | AA                              | TT                | 1946655721               |
| SNP_P3_155263_5913  | NW_004516708.1 | Scaffold1521 | 5913                    | CC                              | TT                | 1946655723               |
| SNP_P3_155264_7659  | NW_004516708.1 | Scaffold1521 | 7659                    | TT                              | GG                | 1946655725               |
| SNP_P3_155265_7678  | NW_004516708.1 | Scaffold1521 | 7678                    | GG                              | TT                | 1946655727               |
| SNP_P3_155266_8220  | NW_004516708.1 | Scaffold1521 | 8220                    | AA                              | CC                | 1946655728               |
| SNP_P3_155267_8339  | NW_004516708.1 | Scaffold1521 | 8339                    | AA                              | CC                | 1946655730               |
| SNP_P3_155268_8365  | NW_004516708.1 | Scaffold1521 | 8365                    | AA                              | TT                | 1946655732               |
| SNP_P3_155269_8377  | NW_004516708.1 | Scaffold1521 | 8377                    | AA                              | TT                | 1946655734               |
| SNP_P3_155270_8383  | NW_004516708.1 | Scaffold1521 | 8383                    | TT                              | GG                | 1946655736               |
| SNP_P3_155271_8652  | NW_004516708.1 | Scaffold1521 | 8652                    | GG                              | CC                | 1946655739               |
| SNP_P3_155272_8724  | NW_004516708.1 | Scaffold1521 | 8724                    | GG                              | CC                | 1946655741               |
| SNP_P3_155273_8742  | NW_004516708.1 | Scaffold1521 | 8742                    | AA                              | GG                | 1946655743               |
| SNP_P3_155274_8772  | NW_004516708.1 | Scaffold1521 | 8772                    | AA                              | GG                | 1946655745               |
| SNP_P3_155275_10307 | NW_004516708.1 | Scaffold1521 | 10307                   | AA                              | GG                | 1946655747               |
| SNP_P3_155276_10345 | NW_004516708.1 | Scaffold1521 | 10345                   | TT                              | AA                | 1946655749               |
| SNP_P3_155277_10386 | NW_004516708.1 | Scaffold1521 | 10386                   | GG                              | AA                | 1946655751               |
| SNP_P3_155278_10400 | NW_004516708.1 | Scaffold1521 | 10400                   | CC                              | TT                | 1946655753               |
| SNP_P3_155279_10747 | NW_004516708.1 | Scaffold1521 | 10747                   | GG                              | TT                | 1946655755               |
| SNP_P3_155280_10757 | NW_004516708.1 | Scaffold1521 | 10757                   | TT                              | CC                | 1946655757               |
| SNP_P3_155282_11946 | NW_004516708.1 | Scaffold1521 | 11946                   | CC                              | GG                | 1946655759               |
| SNP_P3_155283_11999 | NW_004516708.1 | Scaffold1521 | 11999                   | CC                              | TT                | 1946655761               |



| SNPs IDs            | Chromosome IDs | Chromosomes  | Physical positions (bp) | CDC Frontier (Reference genome) | (Pusa 256 & HPNB) | NCBI SNPdb Accession IDs |
|---------------------|----------------|--------------|-------------------------|---------------------------------|-------------------|--------------------------|
| SNP_P3_155284_13539 | NW_004516708.1 | Scaffold1521 | 13539                   | TT                              | AA                | 1946655763               |
| SNP_P3_155286_15273 | NW_004516708.1 | Scaffold1521 | 15273                   | TT                              | CC                | 1946655765               |
| SNP_P3_155287_15300 | NW_004516708.1 | Scaffold1521 | 15300                   | TT                              | AA                | 1946655767               |
| SNP_P3_155288_15309 | NW_004516708.1 | Scaffold1521 | 15309                   | TT                              | GG                | 1946655769               |
| SNP_P3_155289_15346 | NW_004516708.1 | Scaffold1521 | 15346                   | TT                              | AA                | 1946655771               |
| SNP_P3_155290_15440 | NW_004516708.1 | Scaffold1521 | 15440                   | AA                              | TT                | 1946655773               |
| SNP_P3_155291_15463 | NW_004516708.1 | Scaffold1521 | 15463                   | AA                              | TT                | 1946655775               |
| SNP_P3_155292_15470 | NW_004516708.1 | Scaffold1521 | 15470                   | AA                              | CC                | 1946655777               |
| SNP_P3_155293_15481 | NW_004516708.1 | Scaffold1521 | 15481                   | TT                              | AA                | 1946655780               |
| SNP_P3_155294_15531 | NW_004516708.1 | Scaffold1521 | 15531                   | CC                              | AA                | 1946655782               |
| SNP_P3_155295_15538 | NW_004516708.1 | Scaffold1521 | 15538                   | CC                              | TT                | 1946655784               |
| SNP_P3_155296_15560 | NW_004516708.1 | Scaffold1521 | 15560                   | TT                              | CC                | 1946655786               |
| SNP_P3_155299_18009 | NW_004516708.1 | Scaffold1521 | 18009                   | TT                              | AA                | 1946655788               |
| SNP_P3_155300_18012 | NW_004516708.1 | Scaffold1521 | 18012                   | AA                              | GG                | 1946655790               |
| SNP_P3_155301_18684 | NW_004516708.1 | Scaffold1521 | 18684                   | CC                              | TT                | 1946655792               |
| SNP_P3_155302_18706 | NW_004516708.1 | Scaffold1521 | 18706                   | CC                              | TT                | 1946655794               |
| SNP_P3_155303_18728 | NW_004516708.1 | Scaffold1521 | 18728                   | AA                              | GG                | 1946655796               |
| SNP_P3_155304_19013 | NW_004516708.1 | Scaffold1521 | 19013                   | TT                              | CC                | 1946655798               |
| SNP_P3_155305_19138 | NW_004516708.1 | Scaffold1521 | 19138                   | AA                              | CC                | 1946655799               |
| SNP_P3_155306_19302 | NW_004516708.1 | Scaffold1521 | 19302                   | TT                              | GG                | 1946655801               |
| SNP_P3_155307_19363 | NW_004516708.1 | Scaffold1521 | 19363                   | CC                              | TT                | 1946655803               |
| SNP_P3_155308_19398 | NW_004516708.1 | Scaffold1521 | 19398                   | TT                              | GG                | 1946655805               |
| SNP_P3_155310_19506 | NW_004516708.1 | Scaffold1521 | 19506                   | GG                              | AA                | 1946655807               |
| SNP_P3_155311_19605 | NW_004516708.1 | Scaffold1521 | 19605                   | CC                              | AA                | 1946655809               |
| SNP_P3_155312_19653 | NW_004516708.1 | Scaffold1521 | 19653                   | CC                              | AA                | 1946655811               |
| SNP_P3_155313_19670 | NW_004516708.1 | Scaffold1521 | 19670                   | TT                              | AA                | 1946655813               |
| SNP_P3_155314_19764 | NW_004516708.1 | Scaffold1521 | 19764                   | CC                              | TT                | 1946655815               |
| SNP_P3_155315_19964 | NW_004516708.1 | Scaffold1521 | 19964                   | TT                              | CC                | 1946655817               |
| SNP_P3_155317_21318 | NW_004516708.1 | Scaffold1521 | 21318                   | AA                              | CC                | 1946655820               |
| SNP_P3_155318_21505 | NW_004516708.1 | Scaffold1521 | 21505                   | CC                              | TT                | 1946655822               |
| SNP_P3_155319_21510 | NW_004516708.1 | Scaffold1521 | 21510                   | CC                              | TT                | 1946655824               |
| SNP_P3_155320_21578 | NW_004516708.1 | Scaffold1521 | 21578                   | TT                              | AA                | 1946655826               |
| SNP_P3_155321_21606 | NW_004516708.1 | Scaffold1521 | 21606                   | AA                              | GG                | 1946655828               |
| SNP_P3_155322_23422 | NW_004516708.1 | Scaffold1521 | 23422                   | GG                              | TT                | 1946655830               |
| SNP_P3_155323_23817 | NW_004516708.1 | Scaffold1521 | 23817                   | TT                              | GG                | 1946655832               |
| SNP_P3_155324_25362 | NW_004516708.1 | Scaffold1521 | 25362                   | TT                              | AA                | 1946655834               |
| SNP_P3_155326_25700 | NW_004516708.1 | Scaffold1521 | 25700                   | GG                              | CC                | 1946655836               |
| SNP_P3_155327_25845 | NW_004516708.1 | Scaffold1521 | 25845                   | CC                              | TT                | 1946655838               |
| SNP_P3_155328_25915 | NW_004516708.1 | Scaffold1521 | 25915                   | AA                              | GG                | 1946655840               |
| SNP_P3_155329_26566 | NW_004516708.1 | Scaffold1521 | 26566                   | AA                              | GG                | 1946655842               |
| SNP_P3_155330_26848 | NW_004516708.1 | Scaffold1521 | 26848                   | TT                              | AA                | 1946655844               |
| SNP_P3_155331_27375 | NW_004516708.1 | Scaffold1521 | 27375                   | GG                              | AA                | 1946655846               |

| SNPs IDs            | Chromosome IDs | Chromosomes  | Physical positions (bp) | CDC Frontier (Reference genome) | (Pusa 256 & HPNB) | NCBI SNPdb Accession IDs |
|---------------------|----------------|--------------|-------------------------|---------------------------------|-------------------|--------------------------|
| SNP_P3_155332_1299  | NW_004516709.1 | Scaffold1523 | 1299                    | TT                              | AA                | 1946655848               |
| SNP_P3_155333_2740  | NW_004516709.1 | Scaffold1523 | 2740                    | TT                              | CC                | 1946655850               |
| SNP_P3_155334_9777  | NW_004516709.1 | Scaffold1523 | 9777                    | GG                              | TT                | 1946655852               |
| SNP_P3_155335_9867  | NW_004516709.1 | Scaffold1523 | 9867                    | GG                              | CC                | 1946655854               |
| SNP_P3_155336_9904  | NW_004516709.1 | Scaffold1523 | 9904                    | AA                              | GG                | 1946655856               |
| SNP_P3_155337_9933  | NW_004516709.1 | Scaffold1523 | 9933                    | CC                              | GG                | 1946655858               |
| SNP_P3_155338_2508  | NW_004516710.1 | Scaffold1524 | 2508                    | CC                              | TT                | 1946655860               |
| SNP_P3_155339_2509  | NW_004516710.1 | Scaffold1524 | 2509                    | AA                              | GG                | 1946655862               |
| SNP_P3_155340_2510  | NW_004516710.1 | Scaffold1524 | 2510                    | CC                              | AA                | 1946655864               |
| SNP_P3_155341_2513  | NW_004516710.1 | Scaffold1524 | 2513                    | CC                              | TT                | 1946655866               |
| SNP_P3_155342_6911  | NW_004516710.1 | Scaffold1524 | 6911                    | AA                              | TT                | 1946655868               |
| SNP_P3_155343_3208  | NW_004516712.1 | Scaffold1526 | 3208                    | AA                              | TT                | 1946655870               |
| SNP_P3_155344_3221  | NW_004516712.1 | Scaffold1526 | 3221                    | AA                              | TT                | 1946655872               |
| SNP_P3_155345_3241  | NW_004516712.1 | Scaffold1526 | 3241                    | TT                              | AA                | 1946655874               |
| SNP_P3_155346_4489  | NW_004516712.1 | Scaffold1526 | 4489                    | TT                              | GG                | 1946655876               |
| SNP_P3_155347_419   | NW_004516713.1 | Scaffold1529 | 419                     | CC                              | TT                | 1946655878               |
| SNP_P3_155348_4759  | NW_004516714.1 | Scaffold1530 | 4759                    | GG                              | AA                | 1946655880               |
| SNP_P3_155349_7420  | NW_004516714.1 | Scaffold1530 | 7420                    | TT                              | AA                | 1946655882               |
| SNP_P3_155351_10096 | NW_004516714.1 | Scaffold1530 | 10096                   | CC                              | TT                | 1946655884               |
| SNP_P3_155352_10194 | NW_004516714.1 | Scaffold1530 | 10194                   | TT                              | CC                | 1946655886               |
| SNP_P3_155353_10225 | NW_004516714.1 | Scaffold1530 | 10225                   | CC                              | TT                | 1946655888               |
| SNP_P3_155354_10299 | NW_004516714.1 | Scaffold1530 | 10299                   | GG                              | AA                | 1946655890               |
| SNP_P3_155355_10309 | NW_004516714.1 | Scaffold1530 | 10309                   | CC                              | TT                | 1946655892               |
| SNP_P3_155356_10320 | NW_004516714.1 | Scaffold1530 | 10320                   | GG                              | AA                | 1946655894               |
| SNP_P3_155357_10432 | NW_004516714.1 | Scaffold1530 | 10432                   | TT                              | CC                | 1946655896               |
| SNP_P3_155358_10462 | NW_004516714.1 | Scaffold1530 | 10462                   | TT                              | CC                | 1946655898               |
| SNP_P3_155359_10507 | NW_004516714.1 | Scaffold1530 | 10507                   | TT                              | AA                | 1946655901               |
| SNP_P3_155360_13129 | NW_004516714.1 | Scaffold1530 | 13129                   | GG                              | AA                | 1946655903               |
| SNP_P3_155361_13176 | NW_004516714.1 | Scaffold1530 | 13176                   | GG                              | TT                | 1946655905               |
| SNP_P3_155362_13385 | NW_004516714.1 | Scaffold1530 | 13385                   | AA                              | TT                | 1946655907               |
| SNP_P3_155363_13386 | NW_004516714.1 | Scaffold1530 | 13386                   | GG                              | AA                | 1946655909               |
| SNP_P3_155364_13402 | NW_004516714.1 | Scaffold1530 | 13402                   | GG                              | AA                | 1946655911               |
| SNP_P3_155365_13457 | NW_004516714.1 | Scaffold1530 | 13457                   | GG                              | TT                | 1946655913               |
| SNP_P3_155366_13460 | NW_004516714.1 | Scaffold1530 | 13460                   | TT                              | CC                | 1946655915               |
| SNP_P3_155367_13465 | NW_004516714.1 | Scaffold1530 | 13465                   | CC                              | AA                | 1946655917               |
| SNP_P3_155368_13510 | NW_004516714.1 | Scaffold1530 | 13510                   | TT                              | CC                | 1946655919               |
| SNP_P3_155369_13548 | NW_004516714.1 | Scaffold1530 | 13548                   | GG                              | AA                | 1946655921               |
| SNP_P3_155370_13602 | NW_004516714.1 | Scaffold1530 | 13602                   | CC                              | TT                | 1946655923               |
| SNP_P3_155371_13609 | NW_004516714.1 | Scaffold1530 | 13609                   | TT                              | AA                | 1946655925               |
| SNP_P3_155372_13628 | NW_004516714.1 | Scaffold1530 | 13628                   | TT                              | CC                | 1946655927               |
| SNP_P3_155373_13752 | NW_004516714.1 | Scaffold1530 | 13752                   | TT                              | CC                | 1946655929               |
| SNP_P3_155374_13811 | NW_004516714.1 | Scaffold1530 | 13811                   | GG                              | CC                | 1946655931               |

| SNPs IDs            | Chromosome IDs | Chromosomes  | Physical positions (bp) | CDC Frontier (Reference genome) | (Pusa 256 & HPNB) | NCBI SNPdb Accession IDs |
|---------------------|----------------|--------------|-------------------------|---------------------------------|-------------------|--------------------------|
| SNP_P3_155375_13983 | NW_004516714.1 | Scaffold1530 | 13983                   | GG                              | AA                | 1946655933               |
| SNP_P3_155376_14007 | NW_004516714.1 | Scaffold1530 | 14007                   | AA                              | GG                | 1946655936               |
| SNP_P3_155377_14010 | NW_004516714.1 | Scaffold1530 | 14010                   | TT                              | GG                | 1946655939               |
| SNP_P3_155379_14446 | NW_004516714.1 | Scaffold1530 | 14446                   | AA                              | TT                | 1946655941               |
| SNP_P3_155380_14488 | NW_004516714.1 | Scaffold1530 | 14488                   | GG                              | TT                | 1946655943               |
| SNP_P3_155381_14527 | NW_004516714.1 | Scaffold1530 | 14527                   | AA                              | GG                | 1946655945               |
| SNP_P3_155382_14633 | NW_004516714.1 | Scaffold1530 | 14633                   | CC                              | AA                | 1946655947               |
| SNP_P3_155383_14647 | NW_004516714.1 | Scaffold1530 | 14647                   | TT                              | CC                | 1946655949               |
| SNP_P3_155384_14720 | NW_004516714.1 | Scaffold1530 | 14720                   | TT                              | GG                | 1946655951               |
| SNP_P3_155385_14755 | NW_004516714.1 | Scaffold1530 | 14755                   | TT                              | CC                | 1946655953               |
| SNP_P3_155386_14924 | NW_004516714.1 | Scaffold1530 | 14924                   | AA                              | GG                | 1946655955               |
| SNP_P3_155387_14976 | NW_004516714.1 | Scaffold1530 | 14976                   | AA                              | CC                | 1946655957               |
| SNP_P3_155388_15043 | NW_004516714.1 | Scaffold1530 | 15043                   | TT                              | AA                | 1946655959               |
| SNP_P3_155389_15046 | NW_004516714.1 | Scaffold1530 | 15046                   | GG                              | AA                | 1946655961               |
| SNP_P3_155390_15082 | NW_004516714.1 | Scaffold1530 | 15082                   | TT                              | GG                | 1946655963               |
| SNP_P3_155391_15089 | NW_004516714.1 | Scaffold1530 | 15089                   | CC                              | TT                | 1946655965               |
| SNP_P3_155392_15466 | NW_004516714.1 | Scaffold1530 | 15466                   | CC                              | AA                | 1946655967               |
| SNP_P3_155393_15846 | NW_004516714.1 | Scaffold1530 | 15846                   | AA                              | GG                | 1946655969               |
| SNP_P3_155395_16172 | NW_004516714.1 | Scaffold1530 | 16172                   | GG                              | AA                | 1946655971               |
| SNP_P3_155396_16175 | NW_004516714.1 | Scaffold1530 | 16175                   | AA                              | TT                | 1946655973               |
| SNP_P3_155397_16440 | NW_004516714.1 | Scaffold1530 | 16440                   | GG                              | AA                | 1946655977               |
| SNP_P3_155398_16460 | NW_004516714.1 | Scaffold1530 | 16460                   | CC                              | TT                | 1946655979               |
| SNP_P3_155399_16525 | NW_004516714.1 | Scaffold1530 | 16525                   | GG                              | AA                | 1946655981               |
| SNP_P3_155400_16658 | NW_004516714.1 | Scaffold1530 | 16658                   | GG                              | CC                | 1946655983               |
| SNP_P3_155401_16847 | NW_004516714.1 | Scaffold1530 | 16847                   | GG                              | AA                | 1946655985               |
| SNP_P3_155403_16998 | NW_004516714.1 | Scaffold1530 | 16998                   | CC                              | TT                | 1946655987               |
| SNP_P3_155404_17101 | NW_004516714.1 | Scaffold1530 | 17101                   | CC                              | GG                | 1946655989               |
| SNP_P3_155405_17184 | NW_004516714.1 | Scaffold1530 | 17184                   | AA                              | GG                | 1946655991               |
| SNP_P3_155406_17477 | NW_004516714.1 | Scaffold1530 | 17477                   | GG                              | AA                | 1946655993               |
| SNP_P3_155407_17510 | NW_004516714.1 | Scaffold1530 | 17510                   | CC                              | AA                | 1946655995               |
| SNP_P3_155408_17710 | NW_004516714.1 | Scaffold1530 | 17710                   | TT                              | GG                | 1946655997               |
| SNP_P3_155409_17769 | NW_004516714.1 | Scaffold1530 | 17769                   | GG                              | CC                | 1946655999               |
| SNP_P3_155410_17792 | NW_004516714.1 | Scaffold1530 | 17792                   | GG                              | TT                | 1946656001               |
| SNP_P3_155411_17814 | NW_004516714.1 | Scaffold1530 | 17814                   | GG                              | TT                | 1946656003               |
| SNP_P3_155413_17883 | NW_004516714.1 | Scaffold1530 | 17883                   | CC                              | TT                | 1946656005               |
| SNP_P3_155414_17919 | NW_004516714.1 | Scaffold1530 | 17919                   | TT                              | AA                | 1946656007               |
| SNP_P3_155415_17997 | NW_004516714.1 | Scaffold1530 | 17997                   | CC                              | TT                | 1946656009               |
| SNP_P3_155416_18077 | NW_004516714.1 | Scaffold1530 | 18077                   | GG                              | AA                | 1946656011               |
| SNP_P3_155417_18091 | NW_004516714.1 | Scaffold1530 | 18091                   | GG                              | TT                | 1946656013               |
| SNP_P3_155418_18671 | NW_004516714.1 | Scaffold1530 | 18671                   | CC                              | GG                | 1946656016               |
| SNP_P3_155420_18838 | NW_004516714.1 | Scaffold1530 | 18838                   | GG                              | AA                | 1946656018               |
| SNP_P3_155421_18839 | NW_004516714.1 | Scaffold1530 | 18839                   | AA                              | GG                | 1946656020               |

| SNPs IDs            | Chromosome IDs | Chromosomes  | Physical positions (bp) | CDC Frontier (Reference genome) | (Pusa 256 & HPNB) | NCBI SNPdb Accession IDs |
|---------------------|----------------|--------------|-------------------------|---------------------------------|-------------------|--------------------------|
| SNP_P3_155422_18918 | NW_004516714.1 | Scaffold1530 | 18918                   | CC                              | AA                | 1946656022               |
| SNP_P3_155423_18929 | NW_004516714.1 | Scaffold1530 | 18929                   | GG                              | TT                | 1946656024               |
| SNP_P3_155424_18932 | NW_004516714.1 | Scaffold1530 | 18932                   | AA                              | GG                | 1946656026               |
| SNP_P3_155427_19158 | NW_004516714.1 | Scaffold1530 | 19158                   | GG                              | TT                | 1946656029               |
| SNP_P3_155428_19165 | NW_004516714.1 | Scaffold1530 | 19165                   | GG                              | AA                | 1946656031               |
| SNP_P3_155429_19186 | NW_004516714.1 | Scaffold1530 | 19186                   | AA                              | TT                | 1946656033               |
| SNP_P3_155430_19420 | NW_004516714.1 | Scaffold1530 | 19420                   | AA                              | TT                | 1946656035               |
| SNP_P3_155431_19443 | NW_004516714.1 | Scaffold1530 | 19443                   | CC                              | GG                | 1946656037               |
| SNP_P3_155433_19735 | NW_004516714.1 | Scaffold1530 | 19735                   | TT                              | AA                | 1946656039               |
| SNP_P3_155434_19742 | NW_004516714.1 | Scaffold1530 | 19742                   | CC                              | TT                | 1946656041               |
| SNP_P3_155436_19908 | NW_004516714.1 | Scaffold1530 | 19908                   | CC                              | TT                | 1946656043               |
| SNP_P3_155437_19957 | NW_004516714.1 | Scaffold1530 | 19957                   | TT                              | CC                | 1946656046               |
| SNP_P3_155438_19958 | NW_004516714.1 | Scaffold1530 | 19958                   | GG                              | AA                | 1946656048               |
| SNP_P3_155439_20007 | NW_004516714.1 | Scaffold1530 | 20007                   | CC                              | GG                | 1946656050               |
| SNP_P3_155441_20457 | NW_004516714.1 | Scaffold1530 | 20457                   | CC                              | TT                | 1946656052               |
| SNP_P3_155442_20653 | NW_004516714.1 | Scaffold1530 | 20653                   | AA                              | GG                | 1946656055               |
| SNP_P3_155443_20799 | NW_004516714.1 | Scaffold1530 | 20799                   | TT                              | AA                | 1946656057               |
| SNP_P3_155444_20817 | NW_004516714.1 | Scaffold1530 | 20817                   | TT                              | CC                | 1946656059               |
| SNP_P3_155445_20825 | NW_004516714.1 | Scaffold1530 | 20825                   | GG                              | AA                | 1946656061               |
| SNP_P3_155446_20830 | NW_004516714.1 | Scaffold1530 | 20830                   | AA                              | GG                | 1946656063               |
| SNP_P3_155447_21032 | NW_004516714.1 | Scaffold1530 | 21032                   | AA                              | TT                | 1946656065               |
| SNP_P3_155449_21189 | NW_004516714.1 | Scaffold1530 | 21189                   | AA                              | GG                | 1946656067               |
| SNP_P3_155450_21234 | NW_004516714.1 | Scaffold1530 | 21234                   | CC                              | TT                | 1946656069               |
| SNP_P3_155451_21256 | NW_004516714.1 | Scaffold1530 | 21256                   | GG                              | AA                | 1946656071               |
| SNP_P3_155452_21344 | NW_004516714.1 | Scaffold1530 | 21344                   | AA                              | GG                | 1946656073               |
| SNP_P3_155453_21399 | NW_004516714.1 | Scaffold1530 | 21399                   | GG                              | AA                | 1946656075               |
| SNP_P3_155454_21410 | NW_004516714.1 | Scaffold1530 | 21410                   | AA                              | GG                | 1946656076               |
| SNP_P3_155455_21416 | NW_004516714.1 | Scaffold1530 | 21416                   | AA                              | CC                | 1946656078               |
| SNP_P3_155456_21420 | NW_004516714.1 | Scaffold1530 | 21420                   | CC                              | AA                | 1946656080               |
| SNP_P3_155457_21430 | NW_004516714.1 | Scaffold1530 | 21430                   | AA                              | CC                | 1946656082               |
| SNP_P3_155458_21451 | NW_004516714.1 | Scaffold1530 | 21451                   | GG                              | AA                | 1946656084               |
| SNP_P3_155459_21510 | NW_004516714.1 | Scaffold1530 | 21510                   | TT                              | CC                | 1946656086               |
| SNP_P3_155460_21520 | NW_004516714.1 | Scaffold1530 | 21520                   | AA                              | GG                | 1946656088               |
| SNP_P3_155461_21582 | NW_004516714.1 | Scaffold1530 | 21582                   | CC                              | TT                | 1946656090               |
| SNP_P3_155462_21725 | NW_004516714.1 | Scaffold1530 | 21725                   | CC                              | TT                | 1946656092               |
| SNP_P3_155463_21821 | NW_004516714.1 | Scaffold1530 | 21821                   | TT                              | CC                | 1946656096               |
| SNP_P3_155464_21852 | NW_004516714.1 | Scaffold1530 | 21852                   | GG                              | AA                | 1946656098               |
| SNP_P3_155465_22141 | NW_004516714.1 | Scaffold1530 | 22141                   | AA                              | GG                | 1946656100               |
| SNP_P3_155466_22158 | NW_004516714.1 | Scaffold1530 | 22158                   | GG                              | TT                | 1946656102               |
| SNP_P3_155467_22214 | NW_004516714.1 | Scaffold1530 | 22214                   | GG                              | TT                | 1946656104               |
| SNP_P3_155468_22280 | NW_004516714.1 | Scaffold1530 | 22280                   | TT                              | CC                | 1946656106               |
| SNP_P3_155469_22298 | NW_004516714.1 | Scaffold1530 | 22298                   | CC                              | TT                | 1946656108               |

| SNPs IDs            | Chromosome IDs | Chromosomes  | Physical positions (bp) | CDC Frontier (Reference genome) | (Pusa 256 & HPNB) | NCBI SNPdb Accession IDs |
|---------------------|----------------|--------------|-------------------------|---------------------------------|-------------------|--------------------------|
| SNP_P3_155470_22300 | NW_004516714.1 | Scaffold1530 | 22300                   | CC                              | TT                | 1946656110               |
| SNP_P3_155471_22322 | NW_004516714.1 | Scaffold1530 | 22322                   | TT                              | CC                | 1946656112               |
| SNP_P3_155472_22403 | NW_004516714.1 | Scaffold1530 | 22403                   | AA                              | GG                | 1946656114               |
| SNP_P3_155473_22465 | NW_004516714.1 | Scaffold1530 | 22465                   | GG                              | AA                | 1946656116               |
| SNP_P3_155474_22491 | NW_004516714.1 | Scaffold1530 | 22491                   | AA                              | GG                | 1946656118               |
| SNP_P3_155475_22520 | NW_004516714.1 | Scaffold1530 | 22520                   | GG                              | CC                | 1946656120               |
| SNP_P3_155476_22595 | NW_004516714.1 | Scaffold1530 | 22595                   | AA                              | GG                | 1946656122               |
| SNP_P3_155477_23014 | NW_004516714.1 | Scaffold1530 | 23014                   | AA                              | GG                | 1946656124               |
| SNP_P3_155479_23524 | NW_004516714.1 | Scaffold1530 | 23524                   | GG                              | CC                | 1946656126               |
| SNP_P3_155480_23534 | NW_004516714.1 | Scaffold1530 | 23534                   | CC                              | AA                | 1946656128               |
| SNP_P3_155481_23612 | NW_004516714.1 | Scaffold1530 | 23612                   | AA                              | TT                | 1946656130               |
| SNP_P3_155482_23858 | NW_004516714.1 | Scaffold1530 | 23858                   | CC                              | AA                | 1946656134               |
| SNP_P3_155483_23866 | NW_004516714.1 | Scaffold1530 | 23866                   | TT                              | AA                | 1946656136               |
| SNP_P3_155484_23895 | NW_004516714.1 | Scaffold1530 | 23895                   | CC                              | TT                | 1946656138               |
| SNP_P3_155485_23906 | NW_004516714.1 | Scaffold1530 | 23906                   | AA                              | CC                | 1946656140               |
| SNP_P3_155486_23918 | NW_004516714.1 | Scaffold1530 | 23918                   | CC                              | AA                | 1946656142               |
| SNP_P3_155487_24066 | NW_004516714.1 | Scaffold1530 | 24066                   | TT                              | CC                | 1946656144               |
| SNP_P3_155488_24256 | NW_004516714.1 | Scaffold1530 | 24256                   | TT                              | GG                | 1946656146               |
| SNP_P3_155489_24313 | NW_004516714.1 | Scaffold1530 | 24313                   | CC                              | GG                | 1946656148               |
| SNP_P3_155490_24427 | NW_004516714.1 | Scaffold1530 | 24427                   | TT                              | CC                | 1946656150               |
| SNP_P3_155491_24460 | NW_004516714.1 | Scaffold1530 | 24460                   | GG                              | AA                | 1946656152               |
| SNP_P3_155492_24470 | NW_004516714.1 | Scaffold1530 | 24470                   | CC                              | TT                | 1946656154               |
| SNP_P3_155493_24528 | NW_004516714.1 | Scaffold1530 | 24528                   | AA                              | GG                | 1946656156               |
| SNP_P3_155494_24604 | NW_004516714.1 | Scaffold1530 | 24604                   | AA                              | GG                | 1946656159               |
| SNP_P3_155495_24621 | NW_004516714.1 | Scaffold1530 | 24621                   | AA                              | GG                | 1946656161               |
| SNP_P3_155496_24638 | NW_004516714.1 | Scaffold1530 | 24638                   | TT                              | CC                | 1946656163               |
| SNP_P3_155497_24686 | NW_004516714.1 | Scaffold1530 | 24686                   | AA                              | GG                | 1946656165               |
| SNP_P3_155499_24718 | NW_004516714.1 | Scaffold1530 | 24718                   | AA                              | TT                | 1946656167               |
| SNP_P3_155500_24741 | NW_004516714.1 | Scaffold1530 | 24741                   | TT                              | AA                | 1946656169               |
| SNP_P3_155501_24781 | NW_004516714.1 | Scaffold1530 | 24781                   | CC                              | TT                | 1946656172               |
| SNP_P3_155502_25059 | NW_004516714.1 | Scaffold1530 | 25059                   | TT                              | CC                | 1946656174               |
| SNP_P3_155503_25097 | NW_004516714.1 | Scaffold1530 | 25097                   | CC                              | AA                | 1946656176               |
| SNP_P3_155504_25098 | NW_004516714.1 | Scaffold1530 | 25098                   | GG                              | AA                | 1946656178               |
| SNP_P3_155505_25101 | NW_004516714.1 | Scaffold1530 | 25101                   | TT                              | GG                | 1946656180               |
| SNP_P3_155506_25111 | NW_004516714.1 | Scaffold1530 | 25111                   | GG                              | CC                | 1946656182               |
| SNP_P3_155507_25143 | NW_004516714.1 | Scaffold1530 | 25143                   | CC                              | TT                | 1946656184               |
| SNP_P3_155508_25144 | NW_004516714.1 | Scaffold1530 | 25144                   | TT                              | CC                | 1946656186               |
| SNP_P3_155509_25223 | NW_004516714.1 | Scaffold1530 | 25223                   | TT                              | AA                | 1946656188               |
| SNP_P3_155510_25224 | NW_004516714.1 | Scaffold1530 | 25224                   | TT                              | AA                | 1946656190               |
| SNP_P3_155511_25399 | NW_004516714.1 | Scaffold1530 | 25399                   | TT                              | CC                | 1946656192               |
| SNP_P3_155512_25441 | NW_004516714.1 | Scaffold1530 | 25441                   | TT                              | AA                | 1946656194               |
| SNP_P3_155513_25485 | NW_004516714.1 | Scaffold1530 | 25485                   | AA                              | GG                | 1946656196               |

| SNPs IDs            | Chromosome IDs | Chromosomes  | Physical positions (bp) | CDC Frontier (Reference genome) | (Pusa 256 & HPNB) | NCBI SNPdb Accession IDs |
|---------------------|----------------|--------------|-------------------------|---------------------------------|-------------------|--------------------------|
| SNP_P3_155515_25535 | NW_004516714.1 | Scaffold1530 | 25535                   | GG                              | TT                | 1946656198               |
| SNP_P3_155516_25706 | NW_004516714.1 | Scaffold1530 | 25706                   | CC                              | GG                | 1946656200               |
| SNP_P3_155517_25823 | NW_004516714.1 | Scaffold1530 | 25823                   | GG                              | AA                | 1946656202               |
| SNP_P3_155519_25908 | NW_004516714.1 | Scaffold1530 | 25908                   | AA                              | GG                | 1946656204               |
| SNP_P3_155520_25987 | NW_004516714.1 | Scaffold1530 | 25987                   | AA                              | GG                | 1946656206               |
| SNP_P3_155521_26013 | NW_004516714.1 | Scaffold1530 | 26013                   | TT                              | CC                | 1946656209               |
| SNP_P3_155522_26023 | NW_004516714.1 | Scaffold1530 | 26023                   | CC                              | TT                | 1946656211               |
| SNP_P3_155523_26147 | NW_004516714.1 | Scaffold1530 | 26147                   | GG                              | TT                | 1946656213               |
| SNP_P3_155524_26244 | NW_004516714.1 | Scaffold1530 | 26244                   | AA                              | TT                | 1946656215               |
| SNP_P3_155525_26262 | NW_004516714.1 | Scaffold1530 | 26262                   | AA                              | TT                | 1946656217               |
| SNP_P3_155526_26270 | NW_004516714.1 | Scaffold1530 | 26270                   | GG                              | AA                | 1946656219               |
| SNP_P3_155527_26363 | NW_004516714.1 | Scaffold1530 | 26363                   | CC                              | TT                | 1946656221               |
| SNP_P3_155529_26417 | NW_004516714.1 | Scaffold1530 | 26417                   | CC                              | AA                | 1946656223               |
| SNP_P3_155530_26432 | NW_004516714.1 | Scaffold1530 | 26432                   | TT                              | AA                | 1946656225               |
| SNP_P3_155531_26462 | NW_004516714.1 | Scaffold1530 | 26462                   | TT                              | CC                | 1946656227               |
| SNP_P3_155532_26542 | NW_004516714.1 | Scaffold1530 | 26542                   | TT                              | AA                | 1946656229               |
| SNP_P3_155533_26557 | NW_004516714.1 | Scaffold1530 | 26557                   | AA                              | GG                | 1946656231               |
| SNP_P3_155534_26603 | NW_004516714.1 | Scaffold1530 | 26603                   | AA                              | TT                | 1946656233               |
| SNP_P3_155536_26782 | NW_004516714.1 | Scaffold1530 | 26782                   | AA                              | GG                | 1946656235               |
| SNP_P3_155538_27016 | NW_004516714.1 | Scaffold1530 | 27016                   | AA                              | GG                | 1946656237               |
| SNP_P3_155539_27025 | NW_004516714.1 | Scaffold1530 | 27025                   | TT                              | CC                | 1946656239               |
| SNP_P3_155540_27031 | NW_004516714.1 | Scaffold1530 | 27031                   | GG                              | AA                | 1946656241               |
| SNP_P3_155542_27115 | NW_004516714.1 | Scaffold1530 | 27115                   | TT                              | CC                | 1946656243               |
| SNP_P3_155545_27386 | NW_004516714.1 | Scaffold1530 | 27386                   | GG                              | AA                | 1946656245               |
| SNP_P3_155546_27476 | NW_004516714.1 | Scaffold1530 | 27476                   | TT                              | AA                | 1946656247               |
| SNP_P3_155547_27480 | NW_004516714.1 | Scaffold1530 | 27480                   | AA                              | TT                | 1946656250               |
| SNP_P3_155548_27582 | NW_004516714.1 | Scaffold1530 | 27582                   | AA                              | GG                | 1946656252               |
| SNP_P3_155549_27592 | NW_004516714.1 | Scaffold1530 | 27592                   | AA                              | GG                | 1946656254               |
| SNP_P3_155550_27737 | NW_004516714.1 | Scaffold1530 | 27737                   | TT                              | CC                | 1946656256               |
| SNP_P3_155552_27835 | NW_004516714.1 | Scaffold1530 | 27835                   | AA                              | GG                | 1946656258               |
| SNP_P3_155553_27873 | NW_004516714.1 | Scaffold1530 | 27873                   | GG                              | TT                | 1946656260               |
| SNP_P3_155554_27909 | NW_004516714.1 | Scaffold1530 | 27909                   | AA                              | TT                | 1946656262               |
| SNP_P3_155556_28052 | NW_004516714.1 | Scaffold1530 | 28052                   | GG                              | AA                | 1946656264               |
| SNP_P3_155557_28165 | NW_004516714.1 | Scaffold1530 | 28165                   | GG                              | AA                | 1946656266               |
| SNP_P3_155558_28179 | NW_004516714.1 | Scaffold1530 | 28179                   | AA                              | TT                | 1946656268               |
| SNP_P3_155559_28275 | NW_004516714.1 | Scaffold1530 | 28275                   | TT                              | CC                | 1946656271               |
| SNP_P3_155561_28454 | NW_004516714.1 | Scaffold1530 | 28454                   | AA                              | TT                | 1946656273               |
| SNP_P3_155562_28599 | NW_004516714.1 | Scaffold1530 | 28599                   | CC                              | AA                | 1946656275               |
| SNP_P3_155563_28621 | NW_004516714.1 | Scaffold1530 | 28621                   | GG                              | AA                | 1946656277               |
| SNP_P3_155564_28626 | NW_004516714.1 | Scaffold1530 | 28626                   | CC                              | TT                | 1946656279               |
| SNP_P3_155565_28635 | NW_004516714.1 | Scaffold1530 | 28635                   | CC                              | GG                | 1946656281               |
| SNP_P3_155566_28652 | NW_004516714.1 | Scaffold1530 | 28652                   | TT                              | GG                | 1946656283               |

| SNPs IDs            | Chromosome IDs | Chromosomes  | Physical positions (bp) | CDC Frontier (Reference genome) | (Pusa 256 & HPNB) | NCBI SNPdb Accession IDs |
|---------------------|----------------|--------------|-------------------------|---------------------------------|-------------------|--------------------------|
| SNP_P3_155567_28710 | NW_004516714.1 | Scaffold1530 | 28710                   | TT                              | CC                | 1946656285               |
| SNP_P3_155569_28888 | NW_004516714.1 | Scaffold1530 | 28888                   | CC                              | TT                | 1946656287               |
| SNP_P3_155570_477   | NW_004516715.1 | Scaffold1531 | 477                     | CC                              | AA                | 1946656291               |
| SNP_P3_155571_517   | NW_004516715.1 | Scaffold1531 | 517                     | CC                              | TT                | 1946656293               |
| SNP_P3_155572_656   | NW_004516715.1 | Scaffold1531 | 656                     | CC                              | TT                | 1946656295               |
| SNP_P3_155573_695   | NW_004516715.1 | Scaffold1531 | 695                     | AA                              | GG                | 1946656297               |
| SNP_P3_155574_702   | NW_004516715.1 | Scaffold1531 | 702                     | TT                              | AA                | 1946656298               |
| SNP_P3_155575_778   | NW_004516715.1 | Scaffold1531 | 778                     | AA                              | TT                | 1946656300               |
| SNP_P3_155576_3898  | NW_004516715.1 | Scaffold1531 | 3898                    | CC                              | TT                | 1946656302               |
| SNP_P3_155577_4236  | NW_004516715.1 | Scaffold1531 | 4236                    | GG                              | TT                | 1946656304               |
| SNP_P3_155578_4358  | NW_004516715.1 | Scaffold1531 | 4358                    | AA                              | GG                | 1946656306               |
| SNP_P3_155579_4432  | NW_004516715.1 | Scaffold1531 | 4432                    | CC                              | AA                | 1946656308               |
| SNP_P3_155580_11772 | NW_004516715.1 | Scaffold1531 | 11772                   | TT                              | CC                | 1946656310               |
| SNP_P3_155581_12435 | NW_004516715.1 | Scaffold1531 | 12435                   | AA                              | CC                | 1946656312               |
| SNP_P3_155582_19825 | NW_004516715.1 | Scaffold1531 | 19825                   | AA                              | GG                | 1946656314               |
| SNP_P3_155583_22199 | NW_004516715.1 | Scaffold1531 | 22199                   | AA                              | GG                | 1946656316               |
| SNP_P3_155584_22282 | NW_004516715.1 | Scaffold1531 | 22282                   | CC                              | TT                | 1946656318               |
| SNP_P3_155585_22349 | NW_004516715.1 | Scaffold1531 | 22349                   | CC                              | TT                | 1946656320               |
| SNP_P3_155586_22518 | NW_004516715.1 | Scaffold1531 | 22518                   | AA                              | GG                | 1946656323               |
| SNP_P3_155587_23946 | NW_004516715.1 | Scaffold1531 | 23946                   | CC                              | TT                | 1946656325               |
| SNP_P3_155588_23950 | NW_004516715.1 | Scaffold1531 | 23950                   | AA                              | CC                | 1946656326               |
| SNP_P3_155589_23951 | NW_004516715.1 | Scaffold1531 | 23951                   | TT                              | CC                | 1946656328               |
| SNP_P3_155590_24062 | NW_004516715.1 | Scaffold1531 | 24062                   | TT                              | GG                | 1946656330               |
| SNP_P3_155591_24063 | NW_004516715.1 | Scaffold1531 | 24063                   | TT                              | GG                | 1946656333               |
| SNP_P3_155592_24093 | NW_004516715.1 | Scaffold1531 | 24093                   | TT                              | CC                | 1946656335               |
| SNP_P3_155593_24116 | NW_004516715.1 | Scaffold1531 | 24116                   | CC                              | TT                | 1946656337               |
| SNP_P3_155594_24251 | NW_004516715.1 | Scaffold1531 | 24251                   | AA                              | GG                | 1946656339               |
| SNP_P3_155595_24341 | NW_004516715.1 | Scaffold1531 | 24341                   | TT                              | CC                | 1946656341               |
| SNP_P3_155596_24349 | NW_004516715.1 | Scaffold1531 | 24349                   | AA                              | TT                | 1946656343               |
| SNP_P3_155597_24529 | NW_004516715.1 | Scaffold1531 | 24529                   | CC                              | TT                | 1946656345               |
| SNP_P3_155598_24546 | NW_004516715.1 | Scaffold1531 | 24546                   | CC                              | AA                | 1946656347               |
| SNP_P3_155599_24547 | NW_004516715.1 | Scaffold1531 | 24547                   | AA                              | GG                | 1946656349               |
| SNP_P3_155600_24595 | NW_004516715.1 | Scaffold1531 | 24595                   | AA                              | TT                | 1946656351               |
| SNP_P3_155601_24699 | NW_004516715.1 | Scaffold1531 | 24699                   | TT                              | CC                | 1946656353               |
| SNP_P3_155602_24702 | NW_004516715.1 | Scaffold1531 | 24702                   | CC                              | TT                | 1946656355               |
| SNP_P3_155603_24858 | NW_004516715.1 | Scaffold1531 | 24858                   | CC                              | AA                | 1946656357               |
| SNP_P3_155604_24868 | NW_004516715.1 | Scaffold1531 | 24868                   | AA                              | CC                | 1946656359               |
| SNP_P3_155605_24875 | NW_004516715.1 | Scaffold1531 | 24875                   | GG                              | TT                | 1946656361               |
| SNP_P3_155608_25698 | NW_004516715.1 | Scaffold1531 | 25698                   | TT                              | AA                | 1946656363               |
| SNP_P3_155609_25945 | NW_004516715.1 | Scaffold1531 | 25945                   | CC                              | GG                | 1946656365               |
| SNP_P3_155610_26082 | NW_004516715.1 | Scaffold1531 | 26082                   | CC                              | TT                | 1946656368               |
| SNP_P3_155611_26084 | NW_004516715.1 | Scaffold1531 | 26084                   | TT                              | AA                | 1946656370               |

| SNPs IDs            | Chromosome IDs | Chromosomes  | Physical positions (bp) | CDC Frontier (Reference genome) | (Pusa 256 & HPNB) | NCBI SNPdb Accession IDs |
|---------------------|----------------|--------------|-------------------------|---------------------------------|-------------------|--------------------------|
| SNP_P3_155612_26807 | NW_004516715.1 | Scaffold1531 | 26807                   | CC                              | AA                | 1946656372               |
| SNP_P3_155614_26948 | NW_004516715.1 | Scaffold1531 | 26948                   | TT                              | AA                | 1946656374               |
| SNP_P3_155615_27154 | NW_004516715.1 | Scaffold1531 | 27154                   | TT                              | CC                | 1946656376               |
| SNP_P3_155616_27767 | NW_004516715.1 | Scaffold1531 | 27767                   | AA                              | GG                | 1946656378               |
| SNP_P3_155617_27820 | NW_004516715.1 | Scaffold1531 | 27820                   | AA                              | GG                | 1946656380               |
| SNP_P3_155618_27856 | NW_004516715.1 | Scaffold1531 | 27856                   | TT                              | GG                | 1946656382               |
| SNP_P3_155619_27884 | NW_004516715.1 | Scaffold1531 | 27884                   | AA                              | TT                | 1946656384               |
| SNP_P3_155620_27941 | NW_004516715.1 | Scaffold1531 | 27941                   | TT                              | CC                | 1946656392               |
| SNP_P3_155621_27959 | NW_004516715.1 | Scaffold1531 | 27959                   | CC                              | GG                | 1946656395               |
| SNP_P3_155622_28001 | NW_004516715.1 | Scaffold1531 | 28001                   | TT                              | AA                | 1946656397               |
| SNP_P3_155623_28008 | NW_004516715.1 | Scaffold1531 | 28008                   | GG                              | AA                | 1946656399               |
| SNP_P3_155624_28034 | NW_004516715.1 | Scaffold1531 | 28034                   | TT                              | CC                | 1946656401               |
| SNP_P3_155625_28138 | NW_004516715.1 | Scaffold1531 | 28138                   | TT                              | AA                | 1946656403               |
| SNP_P3_155626_28145 | NW_004516715.1 | Scaffold1531 | 28145                   | GG                              | AA                | 1946656405               |
| SNP_P3_155627_28175 | NW_004516715.1 | Scaffold1531 | 28175                   | TT                              | GG                | 1946656407               |
| SNP_P3_155628_28180 | NW_004516715.1 | Scaffold1531 | 28180                   | GG                              | AA                | 1946656409               |
| SNP_P3_155629_28187 | NW_004516715.1 | Scaffold1531 | 28187                   | CC                              | AA                | 1946656411               |
| SNP_P3_155630_28345 | NW_004516715.1 | Scaffold1531 | 28345                   | AA                              | GG                | 1946656413               |
| SNP_P3_155631_28346 | NW_004516715.1 | Scaffold1531 | 28346                   | GG                              | AA                | 1946656415               |
| SNP_P3_155632_28363 | NW_004516715.1 | Scaffold1531 | 28363                   | TT                              | GG                | 1946656418               |
| SNP_P3_155633_28435 | NW_004516715.1 | Scaffold1531 | 28435                   | CC                              | AA                | 1946656420               |
| SNP_P3_155634_28443 | NW_004516715.1 | Scaffold1531 | 28443                   | CC                              | AA                | 1946656422               |
| SNP_P3_155635_28494 | NW_004516715.1 | Scaffold1531 | 28494                   | AA                              | GG                | 1946656424               |
| SNP_P3_155636_28528 | NW_004516715.1 | Scaffold1531 | 28528                   | TT                              | CC                | 1946656426               |
| SNP_P3_155637_28531 | NW_004516715.1 | Scaffold1531 | 28531                   | GG                              | AA                | 1946656428               |
| SNP_P3_155638_28564 | NW_004516715.1 | Scaffold1531 | 28564                   | TT                              | AA                | 1946656430               |
| SNP_P3_155639_28579 | NW_004516715.1 | Scaffold1531 | 28579                   | AA                              | CC                | 1946656432               |
| SNP_P3_155640_28623 | NW_004516715.1 | Scaffold1531 | 28623                   | AA                              | TT                | 1946656434               |
| SNP_P3_155641_28644 | NW_004516715.1 | Scaffold1531 | 28644                   | TT                              | GG                | 1946656436               |
| SNP_P3_155642_28790 | NW_004516715.1 | Scaffold1531 | 28790                   | AA                              | TT                | 1946656437               |
| SNP_P3_155643_28795 | NW_004516715.1 | Scaffold1531 | 28795                   | TT                              | CC                | 1946656439               |
| SNP_P3_155644_28908 | NW_004516715.1 | Scaffold1531 | 28908                   | AA                              | GG                | 1946656441               |
| SNP_P3_155645_28925 | NW_004516715.1 | Scaffold1531 | 28925                   | GG                              | CC                | 1946656443               |
| SNP_P3_155646_28972 | NW_004516715.1 | Scaffold1531 | 28972                   | GG                              | AA                | 1946656445               |
| SNP_P3_155647_29064 | NW_004516715.1 | Scaffold1531 | 29064                   | TT                              | CC                | 1946656447               |
| SNP_P3_155648_29106 | NW_004516715.1 | Scaffold1531 | 29106                   | GG                              | AA                | 1946656449               |
| SNP_P3_155649_29133 | NW_004516715.1 | Scaffold1531 | 29133                   | CC                              | TT                | 1946656451               |
| SNP_P3_155650_29158 | NW_004516715.1 | Scaffold1531 | 29158                   | TT                              | AA                | 1946656453               |
| SNP_P3_155651_29214 | NW_004516715.1 | Scaffold1531 | 29214                   | GG                              | TT                | 1946656455               |
| SNP_P3_155652_29221 | NW_004516715.1 | Scaffold1531 | 29221                   | TT                              | AA                | 1946656458               |
| SNP_P3_155653_29265 | NW_004516715.1 | Scaffold1531 | 29265                   | TT                              | AA                | 1946656460               |
| SNP_P3_155654_29276 | NW_004516715.1 | Scaffold1531 | 29276                   | GG                              | AA                | 1946656462               |



| SNPs IDs            | Chromosome IDs | Chromosomes  | Physical positions (bp) | CDC Frontier (Reference genome) | (Pusa 256 & HPNB) | NCBI SNPdb Accession IDs |
|---------------------|----------------|--------------|-------------------------|---------------------------------|-------------------|--------------------------|
| SNP_P3_155655_29327 | NW_004516715.1 | Scaffold1531 | 29327                   | TT                              | GG                | 1946656464               |
| SNP_P3_155656_29344 | NW_004516715.1 | Scaffold1531 | 29344                   | GG                              | CC                | 1946656466               |
| SNP_P3_155657_29360 | NW_004516715.1 | Scaffold1531 | 29360                   | TT                              | AA                | 1946656468               |
| SNP_P3_155658_29362 | NW_004516715.1 | Scaffold1531 | 29362                   | CC                              | GG                | 1946656470               |
| SNP_P3_155659_29403 | NW_004516715.1 | Scaffold1531 | 29403                   | GG                              | CC                | 1946656472               |
| SNP_P3_155660_29421 | NW_004516715.1 | Scaffold1531 | 29421                   | GG                              | CC                | 1946656474               |
| SNP_P3_155662_29460 | NW_004516715.1 | Scaffold1531 | 29460                   | GG                              | TT                | 1946656476               |
| SNP_P3_155663_29509 | NW_004516715.1 | Scaffold1531 | 29509                   | AA                              | TT                | 1946656478               |
| SNP_P3_155664_30081 | NW_004516715.1 | Scaffold1531 | 30081                   | AA                              | CC                | 1946656480               |
| SNP_P3_155665_30551 | NW_004516715.1 | Scaffold1531 | 30551                   | AA                              | GG                | 1946656482               |
| SNP_P3_155666_34615 | NW_004516715.1 | Scaffold1531 | 34615                   | AA                              | TT                | 1946656484               |
| SNP_P3_155667_34674 | NW_004516715.1 | Scaffold1531 | 34674                   | CC                              | AA                | 1946656486               |
| SNP_P3_155668_34841 | NW_004516715.1 | Scaffold1531 | 34841                   | CC                              | TT                | 1946656488               |
| SNP_P3_155669_34849 | NW_004516715.1 | Scaffold1531 | 34849                   | TT                              | AA                | 1946656490               |
| SNP_P3_155670_34873 | NW_004516715.1 | Scaffold1531 | 34873                   | GG                              | AA                | 1946656492               |
| SNP_P3_155671_34931 | NW_004516715.1 | Scaffold1531 | 34931                   | AA                              | TT                | 1946656494               |
| SNP_P3_155672_34957 | NW_004516715.1 | Scaffold1531 | 34957                   | AA                              | TT                | 1946656496               |
| SNP_P3_155673_34989 | NW_004516715.1 | Scaffold1531 | 34989                   | TT                              | CC                | 1946656499               |
| SNP_P3_155674_35117 | NW_004516715.1 | Scaffold1531 | 35117                   | TT                              | CC                | 1946656501               |
| SNP_P3_155675_35143 | NW_004516715.1 | Scaffold1531 | 35143                   | TT                              | GG                | 1946656503               |
| SNP_P3_155676_35192 | NW_004516715.1 | Scaffold1531 | 35192                   | CC                              | TT                | 1946656505               |
| SNP_P3_155677_35245 | NW_004516715.1 | Scaffold1531 | 35245                   | CC                              | AA                | 1946656507               |
| SNP_P3_155678_35397 | NW_004516715.1 | Scaffold1531 | 35397                   | AA                              | CC                | 1946656509               |
| SNP_P3_155679_35398 | NW_004516715.1 | Scaffold1531 | 35398                   | AA                              | GG                | 1946656511               |
| SNP_P3_155681_35584 | NW_004516715.1 | Scaffold1531 | 35584                   | CC                              | TT                | 1946656513               |
| SNP_P3_155682_35602 | NW_004516715.1 | Scaffold1531 | 35602                   | AA                              | CC                | 1946656515               |
| SNP_P3_155683_35650 | NW_004516715.1 | Scaffold1531 | 35650                   | GG                              | TT                | 1946656517               |
| SNP_P3_155684_35654 | NW_004516715.1 | Scaffold1531 | 35654                   | CC                              | TT                | 1946656518               |
| SNP_P3_155685_35684 | NW_004516715.1 | Scaffold1531 | 35684                   | GG                              | AA                | 1946656520               |
| SNP_P3_155686_35704 | NW_004516715.1 | Scaffold1531 | 35704                   | GG                              | AA                | 1946656522               |
| SNP_P3_155687_35733 | NW_004516715.1 | Scaffold1531 | 35733                   | AA                              | GG                | 1946656524               |
| SNP_P3_155688_35766 | NW_004516715.1 | Scaffold1531 | 35766                   | TT                              | CC                | 1946656526               |
| SNP_P3_155689_35817 | NW_004516715.1 | Scaffold1531 | 35817                   | TT                              | CC                | 1946656528               |
| SNP_P3_155690_35831 | NW_004516715.1 | Scaffold1531 | 35831                   | TT                              | AA                | 1946656530               |
| SNP_P3_155691_35838 | NW_004516715.1 | Scaffold1531 | 35838                   | CC                              | GG                | 1946656532               |
| SNP_P3_155692_35879 | NW_004516715.1 | Scaffold1531 | 35879                   | TT                              | CC                | 1946656534               |
| SNP_P3_155693_36119 | NW_004516715.1 | Scaffold1531 | 36119                   | CC                              | GG                | 1946656536               |
| SNP_P3_155694_36129 | NW_004516715.1 | Scaffold1531 | 36129                   | CC                              | AA                | 1946656538               |
| SNP_P3_155695_36252 | NW_004516715.1 | Scaffold1531 | 36252                   | GG                              | AA                | 1946656541               |
| SNP_P3_155696_36269 | NW_004516715.1 | Scaffold1531 | 36269                   | AA                              | TT                | 1946656543               |
| SNP_P3_155697_36502 | NW_004516715.1 | Scaffold1531 | 36502                   | AA                              | GG                | 1946656545               |
| SNP_P3_155698_36572 | NW_004516715.1 | Scaffold1531 | 36572                   | TT                              | CC                | 1946656547               |

| SNPs IDs            | Chromosome IDs | Chromosomes  | Physical positions (bp) | CDC Frontier (Reference genome) | (Pusa 256 & HPNB) | NCBI SNPdb Accession IDs |
|---------------------|----------------|--------------|-------------------------|---------------------------------|-------------------|--------------------------|
| SNP_P3_155699_36738 | NW_004516715.1 | Scaffold1531 | 36738                   | CC                              | GG                | 1946656549               |
| SNP_P3_155700_36824 | NW_004516715.1 | Scaffold1531 | 36824                   | GG                              | TT                | 1946656550               |
| SNP_P3_155701_36873 | NW_004516715.1 | Scaffold1531 | 36873                   | AA                              | TT                | 1946656552               |
| SNP_P3_155702_36897 | NW_004516715.1 | Scaffold1531 | 36897                   | CC                              | AA                | 1946656554               |
| SNP_P3_155703_37226 | NW_004516715.1 | Scaffold1531 | 37226                   | GG                              | AA                | 1946656556               |
| SNP_P3_155704_37778 | NW_004516715.1 | Scaffold1531 | 37778                   | CC                              | TT                | 1946656558               |
| SNP_P3_155705_37814 | NW_004516715.1 | Scaffold1531 | 37814                   | TT                              | CC                | 1946656560               |
| SNP_P3_155706_37870 | NW_004516715.1 | Scaffold1531 | 37870                   | GG                              | AA                | 1946656562               |
| SNP_P3_155707_37909 | NW_004516715.1 | Scaffold1531 | 37909                   | TT                              | GG                | 1946656564               |
| SNP_P3_155708_37964 | NW_004516715.1 | Scaffold1531 | 37964                   | CC                              | TT                | 1946656566               |
| SNP_P3_155709_37978 | NW_004516715.1 | Scaffold1531 | 37978                   | CC                              | TT                | 1946656568               |
| SNP_P3_155710_38017 | NW_004516715.1 | Scaffold1531 | 38017                   | TT                              | CC                | 1946656570               |
| SNP_P3_155711_38044 | NW_004516715.1 | Scaffold1531 | 38044                   | TT                              | CC                | 1946656572               |
| SNP_P3_155712_38156 | NW_004516715.1 | Scaffold1531 | 38156                   | AA                              | TT                | 1946656574               |
| SNP_P3_155713_38239 | NW_004516715.1 | Scaffold1531 | 38239                   | TT                              | CC                | 1946656576               |
| SNP_P3_155714_38258 | NW_004516715.1 | Scaffold1531 | 38258                   | AA                              | TT                | 1946656578               |
| SNP_P3_155715_39043 | NW_004516715.1 | Scaffold1531 | 39043                   | TT                              | CC                | 1946656581               |
| SNP_P3_155716_39409 | NW_004516715.1 | Scaffold1531 | 39409                   | AA                              | GG                | 1946656583               |
| SNP_P3_155717_39423 | NW_004516715.1 | Scaffold1531 | 39423                   | CC                              | GG                | 1946656585               |
| SNP_P3_155718_39424 | NW_004516715.1 | Scaffold1531 | 39424                   | GG                              | AA                | 1946656587               |
| SNP_P3_155719_40573 | NW_004516715.1 | Scaffold1531 | 40573                   | AA                              | GG                | 1946656589               |
| SNP_P3_155720_7992  | NW_004516716.1 | Scaffold1532 | 7992                    | TT                              | AA                | 1946656591               |
| SNP_P3_155721_8006  | NW_004516716.1 | Scaffold1532 | 8006                    | AA                              | GG                | 1946656593               |
| SNP_P3_155722_8283  | NW_004516716.1 | Scaffold1532 | 8283                    | AA                              | CC                | 1946656595               |
| SNP_P3_155723_8308  | NW_004516716.1 | Scaffold1532 | 8308                    | AA                              | GG                | 1946656597               |
| SNP_P3_155724_8817  | NW_004516716.1 | Scaffold1532 | 8817                    | TT                              | GG                | 1946656599               |
| SNP_P3_155725_10243 | NW_004516716.1 | Scaffold1532 | 10243                   | AA                              | GG                | 1946656601               |
| SNP_P3_155726_10280 | NW_004516716.1 | Scaffold1532 | 10280                   | CC                              | TT                | 1946656603               |
| SNP_P3_155727_10288 | NW_004516716.1 | Scaffold1532 | 10288                   | GG                              | AA                | 1946656605               |
| SNP_P3_155728_10348 | NW_004516716.1 | Scaffold1532 | 10348                   | AA                              | GG                | 1946656607               |
| SNP_P3_155729_10399 | NW_004516716.1 | Scaffold1532 | 10399                   | TT                              | AA                | 1946656609               |
| SNP_P3_155730_10527 | NW_004516716.1 | Scaffold1532 | 10527                   | TT                              | CC                | 1946656611               |
| SNP_P3_155731_10646 | NW_004516716.1 | Scaffold1532 | 10646                   | AA                              | TT                | 1946656613               |
| SNP_P3_155732_10685 | NW_004516716.1 | Scaffold1532 | 10685                   | GG                              | CC                | 1946656615               |
| SNP_P3_155733_10689 | NW_004516716.1 | Scaffold1532 | 10689                   | CC                              | TT                | 1946656617               |
| SNP_P3_155734_10703 | NW_004516716.1 | Scaffold1532 | 10703                   | TT                              | AA                | 1946656619               |
| SNP_P3_155736_10823 | NW_004516716.1 | Scaffold1532 | 10823                   | AA                              | GG                | 1946656621               |
| SNP_P3_155737_10849 | NW_004516716.1 | Scaffold1532 | 10849                   | CC                              | TT                | 1946656623               |
| SNP_P3_155738_10855 | NW_004516716.1 | Scaffold1532 | 10855                   | TT                              | AA                | 1946656625               |
| SNP_P3_155739_15772 | NW_004516716.1 | Scaffold1532 | 15772                   | AA                              | GG                | 1946656627               |
| SNP_P3_155740_18526 | NW_004516716.1 | Scaffold1532 | 18526                   | GG                              | AA                | 1946656629               |
| SNP_P3_155741_22090 | NW_004516716.1 | Scaffold1532 | 22090                   | AA                              | GG                | 1946656631               |

| SNPs IDs            | Chromosome IDs | Chromosomes  | Physical positions (bp) | CDC Frontier (Reference genome) | (Pusa 256 & HPNB) | NCBI SNPdb Accession IDs |
|---------------------|----------------|--------------|-------------------------|---------------------------------|-------------------|--------------------------|
| SNP_P3_155742_22119 | NW_004516716.1 | Scaffold1532 | 22119                   | GG                              | AA                | 1946656634               |
| SNP_P3_155743_22154 | NW_004516716.1 | Scaffold1532 | 22154                   | AA                              | GG                | 1946656636               |
| SNP_P3_155744_22161 | NW_004516716.1 | Scaffold1532 | 22161                   | TT                              | CC                | 1946656638               |
| SNP_P3_155745_22176 | NW_004516716.1 | Scaffold1532 | 22176                   | TT                              | CC                | 1946656640               |
| SNP_P3_155746_22182 | NW_004516716.1 | Scaffold1532 | 22182                   | GG                              | AA                | 1946656642               |
| SNP_P3_155747_22188 | NW_004516716.1 | Scaffold1532 | 22188                   | AA                              | GG                | 1946656644               |
| SNP_P3_155748_22190 | NW_004516716.1 | Scaffold1532 | 22190                   | TT                              | CC                | 1946656646               |
| SNP_P3_155749_22606 | NW_004516716.1 | Scaffold1532 | 22606                   | AA                              | GG                | 1946656648               |
| SNP_P3_155750_24826 | NW_004516716.1 | Scaffold1532 | 24826                   | AA                              | CC                | 1946656650               |
| SNP_P3_155752_25123 | NW_004516716.1 | Scaffold1532 | 25123                   | TT                              | CC                | 1946656652               |
| SNP_P3_155753_25161 | NW_004516716.1 | Scaffold1532 | 25161                   | CC                              | TT                | 1946656655               |
| SNP_P3_155754_25182 | NW_004516716.1 | Scaffold1532 | 25182                   | GG                              | TT                | 1946656657               |
| SNP_P3_155755_25211 | NW_004516716.1 | Scaffold1532 | 25211                   | GG                              | AA                | 1946656659               |
| SNP_P3_155756_25236 | NW_004516716.1 | Scaffold1532 | 25236                   | TT                              | CC                | 1946656661               |
| SNP_P3_155757_25248 | NW_004516716.1 | Scaffold1532 | 25248                   | GG                              | TT                | 1946656663               |
| SNP_P3_155758_25270 | NW_004516716.1 | Scaffold1532 | 25270                   | GG                              | AA                | 1946656665               |
| SNP_P3_155759_25298 | NW_004516716.1 | Scaffold1532 | 25298                   | TT                              | CC                | 1946656667               |
| SNP_P3_155760_25299 | NW_004516716.1 | Scaffold1532 | 25299                   | TT                              | CC                | 1946656669               |
| SNP_P3_155761_25776 | NW_004516716.1 | Scaffold1532 | 25776                   | CC                              | TT                | 1946656671               |
| SNP_P3_155762_25814 | NW_004516716.1 | Scaffold1532 | 25814                   | AA                              | TT                | 1946656673               |
| SNP_P3_155763_25815 | NW_004516716.1 | Scaffold1532 | 25815                   | TT                              | AA                | 1946656675               |
| SNP_P3_155764_25830 | NW_004516716.1 | Scaffold1532 | 25830                   | CC                              | TT                | 1946656677               |
| SNP_P3_155765_25861 | NW_004516716.1 | Scaffold1532 | 25861                   | CC                              | TT                | 1946656679               |
| SNP_P3_155766_25899 | NW_004516716.1 | Scaffold1532 | 25899                   | GG                              | TT                | 1946656681               |
| SNP_P3_155767_26119 | NW_004516716.1 | Scaffold1532 | 26119                   | AA                              | TT                | 1946656683               |
| SNP_P3_155768_26127 | NW_004516716.1 | Scaffold1532 | 26127                   | TT                              | AA                | 1946656685               |
| SNP_P3_155769_26362 | NW_004516716.1 | Scaffold1532 | 26362                   | AA                              | TT                | 1946656687               |
| SNP_P3_155770_32814 | NW_004516716.1 | Scaffold1532 | 32814                   | GG                              | TT                | 1946656689               |
| SNP_P3_155771_33354 | NW_004516716.1 | Scaffold1532 | 33354                   | AA                              | GG                | 1946656691               |
| SNP_P3_155772_57881 | NW_004516716.1 | Scaffold1532 | 57881                   | GG                              | TT                | 1946656693               |
| SNP_P3_155773_58929 | NW_004516716.1 | Scaffold1532 | 58929                   | TT                              | CC                | 1946656695               |
| SNP_P3_155774_60967 | NW_004516716.1 | Scaffold1532 | 60967                   | CC                              | TT                | 1946656697               |
| SNP_P3_155775_65493 | NW_004516716.1 | Scaffold1532 | 65493                   | CC                              | TT                | 1946656699               |
| SNP_P3_155777_82048 | NW_004516716.1 | Scaffold1532 | 82048                   | CC                              | TT                | 1946656701               |
| SNP_P3_155778_621   | NW_004516717.1 | Scaffold1533 | 621                     | AA                              | CC                | 1946656703               |
| SNP_P3_155779_6734  | NW_004516717.1 | Scaffold1533 | 6734                    | AA                              | GG                | 1946656705               |
| SNP_P3_155780_7079  | NW_004516717.1 | Scaffold1533 | 7079                    | CC                              | TT                | 1946656707               |
| SNP_P3_155781_7096  | NW_004516717.1 | Scaffold1533 | 7096                    | TT                              | CC                | 1946656709               |
| SNP_P3_155782_7302  | NW_004516717.1 | Scaffold1533 | 7302                    | CC                              | TT                | 1946656711               |
| SNP_P3_155783_10866 | NW_004516717.1 | Scaffold1533 | 10866                   | AA                              | GG                | 1946656713               |
| SNP_P3_155784_11378 | NW_004516717.1 | Scaffold1533 | 11378                   | CC                              | TT                | 1946656715               |
| SNP_P3_155785_11385 | NW_004516717.1 | Scaffold1533 | 11385                   | AA                              | CC                | 1946656717               |

| SNPs IDs             | Chromosome IDs | Chromosomes  | Physical positions (bp) | CDC Frontier (Reference genome) | (Pusa 256 & HPNB) | NCBI SNPdb Accession IDs |
|----------------------|----------------|--------------|-------------------------|---------------------------------|-------------------|--------------------------|
| SNP_P3_155787_14315  | NW_004516717.1 | Scaffold1533 | 14315                   | TT                              | CC                | 1946656720               |
| SNP_P3_155788_14330  | NW_004516717.1 | Scaffold1533 | 14330                   | AA                              | GG                | 1946656723               |
| SNP_P3_155789_14369  | NW_004516717.1 | Scaffold1533 | 14369                   | TT                              | GG                | 1946656725               |
| SNP_P3_155790_14392  | NW_004516717.1 | Scaffold1533 | 14392                   | TT                              | GG                | 1946656727               |
| SNP_P3_155791_14401  | NW_004516717.1 | Scaffold1533 | 14401                   | CC                              | TT                | 1946656729               |
| SNP_P3_155792_14406  | NW_004516717.1 | Scaffold1533 | 14406                   | AA                              | GG                | 1946656731               |
| SNP_P3_155793_14484  | NW_004516717.1 | Scaffold1533 | 14484                   | CC                              | TT                | 1946656733               |
| SNP_P3_155794_14754  | NW_004516717.1 | Scaffold1533 | 14754                   | TT                              | CC                | 1946656735               |
| SNP_P3_155795_36771  | NW_004516717.1 | Scaffold1533 | 36771                   | AA                              | CC                | 1946656737               |
| SNP_P3_155796_36791  | NW_004516717.1 | Scaffold1533 | 36791                   | CC                              | AA                | 1946656739               |
| SNP_P3_155798_63741  | NW_004516717.1 | Scaffold1533 | 63741                   | TT                              | GG                | 1946656741               |
| SNP_P3_155799_63804  | NW_004516717.1 | Scaffold1533 | 63804                   | AA                              | CC                | 1946656777               |
| SNP_P3_155800_63818  | NW_004516717.1 | Scaffold1533 | 63818                   | GG                              | AA                | 1946656779               |
| SNP_P3_155801_65430  | NW_004516717.1 | Scaffold1533 | 65430                   | AA                              | GG                | 1946656781               |
| SNP_P3_155802_72467  | NW_004516717.1 | Scaffold1533 | 72467                   | TT                              | CC                | 1946656784               |
| SNP_P3_155803_73857  | NW_004516717.1 | Scaffold1533 | 73857                   | AA                              | GG                | 1946656786               |
| SNP_P3_155805_84748  | NW_004516717.1 | Scaffold1533 | 84748                   | TT                              | CC                | 1946656788               |
| SNP_P3_155806_84752  | NW_004516717.1 | Scaffold1533 | 84752                   | CC                              | TT                | 1946656790               |
| SNP_P3_155807_84762  | NW_004516717.1 | Scaffold1533 | 84762                   | AA                              | GG                | 1946656792               |
| SNP_P3_155808_88779  | NW_004516717.1 | Scaffold1533 | 88779                   | GG                              | AA                | 1946656794               |
| SNP_P3_155809_88954  | NW_004516717.1 | Scaffold1533 | 88954                   | AA                              | GG                | 1946656796               |
| SNP_P3_155810_89280  | NW_004516717.1 | Scaffold1533 | 89280                   | AA                              | GG                | 1946656798               |
| SNP_P3_155811_89287  | NW_004516717.1 | Scaffold1533 | 89287                   | GG                              | AA                | 1946656800               |
| SNP_P3_155812_91861  | NW_004516717.1 | Scaffold1533 | 91861                   | TT                              | GG                | 1946656802               |
| SNP_P3_155813_105963 | NW_004516717.1 | Scaffold1533 | 105963                  | TT                              | CC                | 1946656804               |
| SNP_P3_155814_105973 | NW_004516717.1 | Scaffold1533 | 105973                  | TT                              | CC                | 1946656806               |
| SNP_P3_155815_105978 | NW_004516717.1 | Scaffold1533 | 105978                  | GG                              | AA                | 1946656808               |
| SNP_P3_155817_120374 | NW_004516717.1 | Scaffold1533 | 120374                  | GG                              | AA                | 1946656810               |
| SNP_P3_155818_121416 | NW_004516717.1 | Scaffold1533 | 121416                  | AA                              | GG                | 1946656812               |
| SNP_P3_155819_121420 | NW_004516717.1 | Scaffold1533 | 121420                  | GG                              | AA                | 1946656814               |
| SNP_P3_155820_121446 | NW_004516717.1 | Scaffold1533 | 121446                  | AA                              | TT                | 1946656816               |
| SNP_P3_155821_121511 | NW_004516717.1 | Scaffold1533 | 121511                  | TT                              | CC                | 1946656818               |
| SNP_P3_155822_128768 | NW_004516717.1 | Scaffold1533 | 128768                  | TT                              | GG                | 1946656820               |
| SNP_P3_155823_135092 | NW_004516717.1 | Scaffold1533 | 135092                  | AA                              | GG                | 1946656822               |
| SNP_P3_155824_135197 | NW_004516717.1 | Scaffold1533 | 135197                  | TT                              | CC                | 1946656824               |
| SNP_P3_155826_2578   | NW_004516718.1 | Scaffold1535 | 2578                    | TT                              | AA                | 1946656826               |
| SNP_P3_155828_2992   | NW_004516718.1 | Scaffold1535 | 2992                    | AA                              | GG                | 1946656828               |
| SNP_P3_155829_3078   | NW_004516718.1 | Scaffold1535 | 3078                    | TT                              | AA                | 1946656830               |
| SNP_P3_155830_3089   | NW_004516718.1 | Scaffold1535 | 3089                    | CC                              | TT                | 1946656832               |
| SNP_P3_155831_3111   | NW_004516718.1 | Scaffold1535 | 3111                    | AA                              | TT                | 1946656834               |
| SNP_P3_155832_3153   | NW_004516718.1 | Scaffold1535 | 3153                    | CC                              | TT                | 1946656836               |
| SNP_P3_155833_442    | NW_004516720.1 | Scaffold1542 | 442                     | AA                              | GG                | 1946656838               |

| SNPs IDs            | Chromosome IDs | Chromosomes  | Physical positions (bp) | CDC Frontier (Reference genome) | (Pusa 256 & HPNB) | NCBI SNPdb Accession IDs |
|---------------------|----------------|--------------|-------------------------|---------------------------------|-------------------|--------------------------|
| SNP_P3_155834_574   | NW_004516720.1 | Scaffold1542 | 574                     | AA                              | GG                | 1946656840               |
| SNP_P3_155835_39366 | NW_004516720.1 | Scaffold1542 | 39366                   | AA                              | CC                | 1946656842               |
| SNP_P3_155836_64    | NW_004516721.1 | Scaffold1543 | 64                      | GG                              | CC                | 1946656844               |
| SNP_P3_155837_328   | NW_004516721.1 | Scaffold1543 | 328                     | GG                              | TT                | 1946656846               |
| SNP_P3_155838_644   | NW_004516722.1 | Scaffold1544 | 644                     | TT                              | AA                | 1946656848               |
| SNP_P3_155839_782   | NW_004516722.1 | Scaffold1544 | 782                     | TT                              | GG                | 1946656850               |
| SNP_P3_155840_830   | NW_004516722.1 | Scaffold1544 | 830                     | CC                              | AA                | 1946656852               |
| SNP_P3_155841_1190  | NW_004516722.1 | Scaffold1544 | 1190                    | TT                              | AA                | 1946656854               |
| SNP_P3_155842_1191  | NW_004516722.1 | Scaffold1544 | 1191                    | GG                              | TT                | 1946656856               |
| SNP_P3_155843_1589  | NW_004516722.1 | Scaffold1544 | 1589                    | AA                              | GG                | 1946656858               |
| SNP_P3_155844_1656  | NW_004516722.1 | Scaffold1544 | 1656                    | AA                              | TT                | 1946656860               |
| SNP_P3_155845_1679  | NW_004516722.1 | Scaffold1544 | 1679                    | CC                              | TT                | 1946656862               |
| SNP_P3_155846_1705  | NW_004516722.1 | Scaffold1544 | 1705                    | TT                              | CC                | 1946656865               |
| SNP_P3_155847_1767  | NW_004516722.1 | Scaffold1544 | 1767                    | AA                              | CC                | 1946656867               |
| SNP_P3_155848_2411  | NW_004516722.1 | Scaffold1544 | 2411                    | GG                              | AA                | 1946656869               |
| SNP_P3_155849_2527  | NW_004516722.1 | Scaffold1544 | 2527                    | TT                              | CC                | 1946656871               |
| SNP_P3_155850_2804  | NW_004516722.1 | Scaffold1544 | 2804                    | AA                              | GG                | 1946656873               |
| SNP_P3_155851_2874  | NW_004516722.1 | Scaffold1544 | 2874                    | GG                              | AA                | 1946656875               |
| SNP_P3_155852_9076  | NW_004516722.1 | Scaffold1544 | 9076                    | TT                              | GG                | 1946656877               |
| SNP_P3_155853_9127  | NW_004516722.1 | Scaffold1544 | 9127                    | CC                              | GG                | 1946656879               |
| SNP_P3_155854_9308  | NW_004516722.1 | Scaffold1544 | 9308                    | AA                              | TT                | 1946656881               |
| SNP_P3_155855_9649  | NW_004516722.1 | Scaffold1544 | 9649                    | CC                              | TT                | 1946656883               |
| SNP_P3_155856_14141 | NW_004516722.1 | Scaffold1544 | 14141                   | GG                              | CC                | 1946656885               |
| SNP_P3_155857_14187 | NW_004516722.1 | Scaffold1544 | 14187                   | AA                              | GG                | 1946656887               |
| SNP_P3_155858_14401 | NW_004516722.1 | Scaffold1544 | 14401                   | AA                              | TT                | 1946656889               |
| SNP_P3_155859_14576 | NW_004516722.1 | Scaffold1544 | 14576                   | GG                              | CC                | 1946656891               |
| SNP_P3_155861_14944 | NW_004516722.1 | Scaffold1544 | 14944                   | TT                              | CC                | 1946656893               |
| SNP_P3_155862_15019 | NW_004516722.1 | Scaffold1544 | 15019                   | AA                              | GG                | 1946656895               |
| SNP_P3_155863_3981  | NW_004516723.1 | Scaffold1545 | 3981                    | TT                              | GG                | 1946656898               |
| SNP_P3_155864_13302 | NW_004516723.1 | Scaffold1545 | 13302                   | GG                              | AA                | 1946656900               |
| SNP_P3_155865_23609 | NW_004516723.1 | Scaffold1545 | 23609                   | CC                              | TT                | 1946656902               |
| SNP_P3_155866_39183 | NW_004516723.1 | Scaffold1545 | 39183                   | TT                              | CC                | 1946656904               |
| SNP_P3_155867_41325 | NW_004516723.1 | Scaffold1545 | 41325                   | TT                              | CC                | 1946656906               |
| SNP_P3_155868_51492 | NW_004516723.1 | Scaffold1545 | 51492                   | TT                              | GG                | 1946656908               |
| SNP_P3_155869_60902 | NW_004516723.1 | Scaffold1545 | 60902                   | TT                              | CC                | 1946656910               |
| SNP_P3_155870_60907 | NW_004516723.1 | Scaffold1545 | 60907                   | TT                              | CC                | 1946656912               |
| SNP_P3_155871_61382 | NW_004516723.1 | Scaffold1545 | 61382                   | TT                              | AA                | 1946656914               |
| SNP_P3_155872_74951 | NW_004516723.1 | Scaffold1545 | 74951                   | AA                              | GG                | 1946656916               |
| SNP_P3_155873_81342 | NW_004516723.1 | Scaffold1545 | 81342                   | AA                              | TT                | 1946656918               |
| SNP_P3_155874_81343 | NW_004516723.1 | Scaffold1545 | 81343                   | GG                              | AA                | 1946656920               |
| SNP_P3_155875_81400 | NW_004516723.1 | Scaffold1545 | 81400                   | GG                              | CC                | 1946656922               |
| SNP_P3_155876_81406 | NW_004516723.1 | Scaffold1545 | 81406                   | TT                              | CC                | 1946656924               |

| SNPs IDs             | Chromosome IDs | Chromosomes  | Physical positions (bp) | CDC Frontier (Reference genome) | (Pusa 256 & HPNB) | NCBI SNPdb Accession IDs |
|----------------------|----------------|--------------|-------------------------|---------------------------------|-------------------|--------------------------|
| SNP_P3_155878_81521  | NW_004516723.1 | Scaffold1545 | 81521                   | AA                              | GG                | 1946656926               |
| SNP_P3_155879_81616  | NW_004516723.1 | Scaffold1545 | 81616                   | TT                              | AA                | 1946656928               |
| SNP_P3_155880_81627  | NW_004516723.1 | Scaffold1545 | 81627                   | GG                              | AA                | 1946656930               |
| SNP_P3_155881_81633  | NW_004516723.1 | Scaffold1545 | 81633                   | CC                              | AA                | 1946656932               |
| SNP_P3_155882_81648  | NW_004516723.1 | Scaffold1545 | 81648                   | AA                              | GG                | 1946656934               |
| SNP_P3_155883_81661  | NW_004516723.1 | Scaffold1545 | 81661                   | CC                              | GG                | 1946656937               |
| SNP_P3_155884_81665  | NW_004516723.1 | Scaffold1545 | 81665                   | TT                              | GG                | 1946656939               |
| SNP_P3_155885_81699  | NW_004516723.1 | Scaffold1545 | 81699                   | AA                              | GG                | 1946656941               |
| SNP_P3_155886_81763  | NW_004516723.1 | Scaffold1545 | 81763                   | TT                              | GG                | 1946656943               |
| SNP_P3_155887_81779  | NW_004516723.1 | Scaffold1545 | 81779                   | TT                              | CC                | 1946656945               |
| SNP_P3_155888_81786  | NW_004516723.1 | Scaffold1545 | 81786                   | TT                              | CC                | 1946656947               |
| SNP_P3_155889_81787  | NW_004516723.1 | Scaffold1545 | 81787                   | TT                              | GG                | 1946656949               |
| SNP_P3_155890_81790  | NW_004516723.1 | Scaffold1545 | 81790                   | GG                              | AA                | 1946656951               |
| SNP_P3_155891_81791  | NW_004516723.1 | Scaffold1545 | 81791                   | AA                              | GG                | 1946656953               |
| SNP_P3_155892_81797  | NW_004516723.1 | Scaffold1545 | 81797                   | TT                              | AA                | 1946656955               |
| SNP_P3_155893_81813  | NW_004516723.1 | Scaffold1545 | 81813                   | AA                              | TT                | 1946656957               |
| SNP_P3_155894_81874  | NW_004516723.1 | Scaffold1545 | 81874                   | AA                              | TT                | 1946656960               |
| SNP_P3_155895_81894  | NW_004516723.1 | Scaffold1545 | 81894                   | AA                              | GG                | 1946656962               |
| SNP_P3_155896_81895  | NW_004516723.1 | Scaffold1545 | 81895                   | CC                              | TT                | 1946656964               |
| SNP_P3_155898_114303 | NW_004516723.1 | Scaffold1545 | 114303                  | TT                              | CC                | 1946656966               |
| SNP_P3_155900_192180 | NW_004516723.1 | Scaffold1545 | 192180                  | GG                              | AA                | 1946656968               |
| SNP_P3_155902_212603 | NW_004516723.1 | Scaffold1545 | 212603                  | TT                              | CC                | 1946656970               |
| SNP_P3_155903_237498 | NW_004516723.1 | Scaffold1545 | 237498                  | TT                              | CC                | 1946656972               |
| SNP_P3_155904_237523 | NW_004516723.1 | Scaffold1545 | 237523                  | AA                              | CC                | 1946656974               |
| SNP_P3_155905_237666 | NW_004516723.1 | Scaffold1545 | 237666                  | TT                              | CC                | 1946656977               |
| SNP_P3_155906_239389 | NW_004516723.1 | Scaffold1545 | 239389                  | CC                              | GG                | 1946656979               |
| SNP_P3_155909_268651 | NW_004516723.1 | Scaffold1545 | 268651                  | CC                              | GG                | 1946656981               |
| SNP_P3_155910_269162 | NW_004516723.1 | Scaffold1545 | 269162                  | CC                              | AA                | 1946656983               |
| SNP_P3_155911_272728 | NW_004516723.1 | Scaffold1545 | 272728                  | TT                              | GG                | 1946656985               |
| SNP_P3_155912_274671 | NW_004516723.1 | Scaffold1545 | 274671                  | AA                              | GG                | 1946656987               |
| SNP_P3_155913_279810 | NW_004516723.1 | Scaffold1545 | 279810                  | AA                              | CC                | 1946656990               |
| SNP_P3_155914_279885 | NW_004516723.1 | Scaffold1545 | 279885                  | AA                              | TT                | 1946656992               |
| SNP_P3_155915_285828 | NW_004516723.1 | Scaffold1545 | 285828                  | AA                              | TT                | 1946656994               |
| SNP_P3_155916_286942 | NW_004516723.1 | Scaffold1545 | 286942                  | CC                              | AA                | 1946656996               |
| SNP_P3_155917_288405 | NW_004516723.1 | Scaffold1545 | 288405                  | AA                              | GG                | 1946656998               |
| SNP_P3_155918_288438 | NW_004516723.1 | Scaffold1545 | 288438                  | AA                              | GG                | 1946657000               |
| SNP_P3_155919_288461 | NW_004516723.1 | Scaffold1545 | 288461                  | GG                              | CC                | 1946657002               |
| SNP_P3_155920_288547 | NW_004516723.1 | Scaffold1545 | 288547                  | GG                              | AA                | 1946657004               |
| SNP_P3_155922_296616 | NW_004516723.1 | Scaffold1545 | 296616                  | CC                              | TT                | 1946657006               |
| SNP_P3_155923_299527 | NW_004516723.1 | Scaffold1545 | 299527                  | AA                              | CC                | 1946657008               |
| SNP_P3_155924_331059 | NW_004516723.1 | Scaffold1545 | 331059                  | AA                              | GG                | 1946657010               |
| SNP_P3_155925_332897 | NW_004516723.1 | Scaffold1545 | 332897                  | AA                              | TT                | 1946657012               |

| SNPs IDs             | Chromosome IDs | Chromosomes  | Physical positions (bp) | CDC Frontier (Reference genome) | (Pusa 256 & HPNB) | NCBI SNPdb Accession IDs |
|----------------------|----------------|--------------|-------------------------|---------------------------------|-------------------|--------------------------|
| SNP_P3_155926_332907 | NW_004516723.1 | Scaffold1545 | 332907                  | GG                              | TT                | 1946657014               |
| SNP_P3_155927_332913 | NW_004516723.1 | Scaffold1545 | 332913                  | TT                              | AA                | 1946657017               |
| SNP_P3_155928_333867 | NW_004516723.1 | Scaffold1545 | 333867                  | CC                              | TT                | 1946657019               |
| SNP_P3_155930_59060  | NW_004516724.1 | Scaffold1546 | 59060                   | TT                              | AA                | 1946657021               |
| SNP_P3_155931_59061  | NW_004516724.1 | Scaffold1546 | 59061                   | GG                              | AA                | 1946657023               |
| SNP_P3_155932_59069  | NW_004516724.1 | Scaffold1546 | 59069                   | TT                              | CC                | 1946657025               |
| SNP_P3_155933_59078  | NW_004516724.1 | Scaffold1546 | 59078                   | AA                              | CC                | 1946657027               |
| SNP_P3_155934_59102  | NW_004516724.1 | Scaffold1546 | 59102                   | GG                              | AA                | 1946657029               |
| SNP_P3_155935_59116  | NW_004516724.1 | Scaffold1546 | 59116                   | CC                              | TT                | 1946657031               |
| SNP_P3_155936_65974  | NW_004516724.1 | Scaffold1546 | 65974                   | AA                              | CC                | 1946657033               |
| SNP_P3_155937_65976  | NW_004516724.1 | Scaffold1546 | 65976                   | AA                              | CC                | 1946657035               |
| SNP_P3_155938_99055  | NW_004516724.1 | Scaffold1546 | 99055                   | CC                              | GG                | 1946657037               |
| SNP_P3_155940_125114 | NW_004516724.1 | Scaffold1546 | 125114                  | TT                              | AA                | 1946657039               |
| SNP_P3_155941_127817 | NW_004516724.1 | Scaffold1546 | 127817                  | GG                              | TT                | 1946657041               |
| SNP_P3_155942_134708 | NW_004516724.1 | Scaffold1546 | 134708                  | CC                              | TT                | 1946657043               |
| SNP_P3_155943_141005 | NW_004516724.1 | Scaffold1546 | 141005                  | TT                              | CC                | 1946657045               |
| SNP_P3_155944_141049 | NW_004516724.1 | Scaffold1546 | 141049                  | TT                              | GG                | 1946657047               |
| SNP_P3_155945_141056 | NW_004516724.1 | Scaffold1546 | 141056                  | GG                              | CC                | 1946657049               |
| SNP_P3_155946_141062 | NW_004516724.1 | Scaffold1546 | 141062                  | GG                              | AA                | 1946657051               |
| SNP_P3_155947_141064 | NW_004516724.1 | Scaffold1546 | 141064                  | AA                              | TT                | 1946657054               |
| SNP_P3_155948_141072 | NW_004516724.1 | Scaffold1546 | 141072                  | GG                              | AA                | 1946657056               |
| SNP_P3_155949_141086 | NW_004516724.1 | Scaffold1546 | 141086                  | CC                              | AA                | 1946657058               |
| SNP_P3_155950_141115 | NW_004516724.1 | Scaffold1546 | 141115                  | GG                              | TT                | 1946657060               |
| SNP_P3_155951_141381 | NW_004516724.1 | Scaffold1546 | 141381                  | TT                              | GG                | 1946657062               |
| SNP_P3_155952_141430 | NW_004516724.1 | Scaffold1546 | 141430                  | CC                              | TT                | 1946657065               |
| SNP_P3_155953_141466 | NW_004516724.1 | Scaffold1546 | 141466                  | TT                              | AA                | 1946657067               |
| SNP_P3_155954_141503 | NW_004516724.1 | Scaffold1546 | 141503                  | AA                              | GG                | 1946657069               |
| SNP_P3_155955_141511 | NW_004516724.1 | Scaffold1546 | 141511                  | TT                              | CC                | 1946657071               |
| SNP_P3_155956_141516 | NW_004516724.1 | Scaffold1546 | 141516                  | GG                              | AA                | 1946657073               |
| SNP_P3_155957_141772 | NW_004516724.1 | Scaffold1546 | 141772                  | GG                              | AA                | 1946657075               |
| SNP_P3_155958_141776 | NW_004516724.1 | Scaffold1546 | 141776                  | AA                              | TT                | 1946657077               |
| SNP_P3_155959_141851 | NW_004516724.1 | Scaffold1546 | 141851                  | AA                              | GG                | 1946657079               |
| SNP_P3_155960_141863 | NW_004516724.1 | Scaffold1546 | 141863                  | GG                              | AA                | 1946657081               |
| SNP_P3_155961_855    | NW_004516726.1 | Scaffold1548 | 855                     | TT                              | GG                | 1946657084               |
| SNP_P3_155962_872    | NW_004516726.1 | Scaffold1548 | 872                     | AA                              | GG                | 1946657086               |
| SNP_P3_155965_1173   | NW_004516726.1 | Scaffold1548 | 1173                    | AA                              | GG                | 1946657088               |
| SNP_P3_155966_1469   | NW_004516726.1 | Scaffold1548 | 1469                    | GG                              | TT                | 1946657090               |
| SNP_P3_155967_1557   | NW_004516726.1 | Scaffold1548 | 1557                    | AA                              | TT                | 1946657092               |
| SNP_P3_155968_1732   | NW_004516726.1 | Scaffold1548 | 1732                    | TT                              | CC                | 1946657094               |
| SNP_P3_155969_11023  | NW_004516726.1 | Scaffold1548 | 11023                   | AA                              | TT                | 1946657096               |
| SNP_P3_155971_11161  | NW_004516726.1 | Scaffold1548 | 11161                   | CC                              | GG                | 1946657098               |
| SNP_P3_155972_11187  | NW_004516726.1 | Scaffold1548 | 11187                   | CC                              | TT                | 1946657100               |

| SNPs IDs            | Chromosome IDs | Chromosomes  | Physical positions (bp) | CDC Frontier (Reference genome) | (Pusa 256 & HPNB) | NCBI SNPdb Accession IDs |
|---------------------|----------------|--------------|-------------------------|---------------------------------|-------------------|--------------------------|
| SNP_P3_155973_11283 | NW_004516726.1 | Scaffold1548 | 11283                   | CC                              | TT                | 1946657102               |
| SNP_P3_155974_11388 | NW_004516726.1 | Scaffold1548 | 11388                   | CC                              | GG                | 1946657104               |
| SNP_P3_155975_11560 | NW_004516726.1 | Scaffold1548 | 11560                   | CC                              | TT                | 1946657106               |
| SNP_P3_155976_12606 | NW_004516726.1 | Scaffold1548 | 12606                   | TT                              | CC                | 1946657108               |
| SNP_P3_155977_15061 | NW_004516726.1 | Scaffold1548 | 15061                   | CC                              | TT                | 1946657110               |
| SNP_P3_155978_15067 | NW_004516726.1 | Scaffold1548 | 15067                   | AA                              | TT                | 1946657112               |
| SNP_P3_155979_15089 | NW_004516726.1 | Scaffold1548 | 15089                   | GG                              | AA                | 1946657114               |
| SNP_P3_155980_15102 | NW_004516726.1 | Scaffold1548 | 15102                   | GG                              | AA                | 1946657116               |
| SNP_P3_155981_18355 | NW_004516726.1 | Scaffold1548 | 18355                   | GG                              | AA                | 1946657118               |
| SNP_P3_155982_18625 | NW_004516726.1 | Scaffold1548 | 18625                   | TT                              | AA                | 1946657120               |
| SNP_P3_155983_18691 | NW_004516726.1 | Scaffold1548 | 18691                   | AA                              | TT                | 1946657123               |
| SNP_P3_155984_18719 | NW_004516726.1 | Scaffold1548 | 18719                   | AA                              | GG                | 1946657125               |
| SNP_P3_155985_19141 | NW_004516726.1 | Scaffold1548 | 19141                   | TT                              | GG                | 1946657127               |
| SNP_P3_155986_20048 | NW_004516726.1 | Scaffold1548 | 20048                   | CC                              | TT                | 1946657129               |
| SNP_P3_155987_20187 | NW_004516726.1 | Scaffold1548 | 20187                   | CC                              | TT                | 1946657131               |
| SNP_P3_155988_20320 | NW_004516726.1 | Scaffold1548 | 20320                   | CC                              | AA                | 1946657133               |
| SNP_P3_155989_21152 | NW_004516726.1 | Scaffold1548 | 21152                   | CC                              | TT                | 1946657135               |
| SNP_P3_155990_21163 | NW_004516726.1 | Scaffold1548 | 21163                   | TT                              | GG                | 1946657137               |
| SNP_P3_155991_24779 | NW_004516726.1 | Scaffold1548 | 24779                   | AA                              | GG                | 1946657139               |
| SNP_P3_155992_25048 | NW_004516726.1 | Scaffold1548 | 25048                   | CC                              | AA                | 1946657141               |
| SNP_P3_155993_25129 | NW_004516726.1 | Scaffold1548 | 25129                   | CC                              | AA                | 1946657143               |
| SNP_P3_155994_25138 | NW_004516726.1 | Scaffold1548 | 25138                   | TT                              | CC                | 1946657145               |
| SNP_P3_155995_27407 | NW_004516726.1 | Scaffold1548 | 27407                   | TT                              | CC                | 1946657147               |
| SNP_P3_155996_27497 | NW_004516726.1 | Scaffold1548 | 27497                   | GG                              | AA                | 1946657149               |
| SNP_P3_155997_27590 | NW_004516726.1 | Scaffold1548 | 27590                   | CC                              | TT                | 1946657150               |
| SNP_P3_155998_27669 | NW_004516726.1 | Scaffold1548 | 27669                   | GG                              | AA                | 1946657152               |
| SNP_P3_155999_27879 | NW_004516726.1 | Scaffold1548 | 27879                   | GG                              | TT                | 1946657154               |
| SNP_P3_156000_5485  | NW_004516728.1 | Scaffold1550 | 5485                    | GG                              | TT                | 1946657156               |
| SNP_P3_156001_5488  | NW_004516728.1 | Scaffold1550 | 5488                    | AA                              | TT                | 1946657158               |
| SNP_P3_156002_5792  | NW_004516728.1 | Scaffold1550 | 5792                    | AA                              | GG                | 1946657160               |
| SNP_P3_156003_5795  | NW_004516728.1 | Scaffold1550 | 5795                    | GG                              | TT                | 1946657163               |
| SNP_P3_156004_5840  | NW_004516728.1 | Scaffold1550 | 5840                    | AA                              | TT                | 1946657165               |
| SNP_P3_156005_5854  | NW_004516728.1 | Scaffold1550 | 5854                    | GG                              | AA                | 1946657167               |
| SNP_P3_156006_10252 | NW_004516728.1 | Scaffold1550 | 10252                   | TT                              | GG                | 1946657169               |
| SNP_P3_156007_10257 | NW_004516728.1 | Scaffold1550 | 10257                   | TT                              | GG                | 1946657171               |
| SNP_P3_156008_12518 | NW_004516728.1 | Scaffold1550 | 12518                   | AA                              | GG                | 1946657173               |
| SNP_P3_156009_12729 | NW_004516728.1 | Scaffold1550 | 12729                   | TT                              | AA                | 1946657175               |
| SNP_P3_156010_16296 | NW_004516728.1 | Scaffold1550 | 16296                   | CC                              | TT                | 1946657177               |
| SNP_P3_156011_16376 | NW_004516728.1 | Scaffold1550 | 16376                   | CC                              | TT                | 1946657179               |
| SNP_P3_156013_16444 | NW_004516728.1 | Scaffold1550 | 16444                   | TT                              | CC                | 1946657181               |
| SNP_P3_156014_16785 | NW_004516728.1 | Scaffold1550 | 16785                   | TT                              | GG                | 1946657183               |
| SNP_P3_156015_16891 | NW_004516728.1 | Scaffold1550 | 16891                   | AA                              | GG                | 1946657185               |



| SNPs IDs            | Chromosome IDs | Chromosomes  | Physical positions (bp) | CDC Frontier (Reference genome) | (Pusa 256 & HPNB) | NCBI SNPdb Accession IDs |
|---------------------|----------------|--------------|-------------------------|---------------------------------|-------------------|--------------------------|
| SNP_P3_156017_18141 | NW_004516728.1 | Scaffold1550 | 18141                   | TT                              | CC                | 1946657187               |
| SNP_P3_156018_18336 | NW_004516728.1 | Scaffold1550 | 18336                   | AA                              | TT                | 1946657189               |
| SNP_P3_156019_18351 | NW_004516728.1 | Scaffold1550 | 18351                   | GG                              | TT                | 1946657191               |
| SNP_P3_156020_33635 | NW_004516728.1 | Scaffold1550 | 33635                   | TT                              | GG                | 1946657193               |
| SNP_P3_156021_33760 | NW_004516728.1 | Scaffold1550 | 33760                   | CC                              | AA                | 1946657195               |
| SNP_P3_156022_33766 | NW_004516728.1 | Scaffold1550 | 33766                   | TT                              | CC                | 1946657197               |
| SNP_P3_156023_40467 | NW_004516728.1 | Scaffold1550 | 40467                   | TT                              | CC                | 1946657199               |
| SNP_P3_156024_40470 | NW_004516728.1 | Scaffold1550 | 40470                   | TT                              | CC                | 1946657201               |
| SNP_P3_156025_40546 | NW_004516728.1 | Scaffold1550 | 40546                   | AA                              | TT                | 1946657204               |
| SNP_P3_156026_40829 | NW_004516728.1 | Scaffold1550 | 40829                   | AA                              | CC                | 1946657206               |
| SNP_P3_156027_40840 | NW_004516728.1 | Scaffold1550 | 40840                   | CC                              | TT                | 1946657208               |
| SNP_P3_156028_40960 | NW_004516728.1 | Scaffold1550 | 40960                   | AA                              | TT                | 1946657210               |
| SNP_P3_156029_40990 | NW_004516728.1 | Scaffold1550 | 40990                   | AA                              | GG                | 1946657212               |
| SNP_P3_156030_41102 | NW_004516728.1 | Scaffold1550 | 41102                   | CC                              | GG                | 1946657214               |
| SNP_P3_156031_41138 | NW_004516728.1 | Scaffold1550 | 41138                   | TT                              | AA                | 1946657216               |
| SNP_P3_156032_43159 | NW_004516728.1 | Scaffold1550 | 43159                   | TT                              | CC                | 1946657218               |
| SNP_P3_156033_43470 | NW_004516728.1 | Scaffold1550 | 43470                   | CC                              | TT                | 1946657220               |
| SNP_P3_156034_43588 | NW_004516728.1 | Scaffold1550 | 43588                   | AA                              | GG                | 1946657222               |
| SNP_P3_156035_43907 | NW_004516728.1 | Scaffold1550 | 43907                   | AA                              | GG                | 1946657224               |
| SNP_P3_156036_44127 | NW_004516728.1 | Scaffold1550 | 44127                   | AA                              | GG                | 1946657226               |
| SNP_P3_156037_44137 | NW_004516728.1 | Scaffold1550 | 44137                   | AA                              | TT                | 1946657228               |
| SNP_P3_156038_44240 | NW_004516728.1 | Scaffold1550 | 44240                   | AA                              | GG                | 1946657230               |
| SNP_P3_156039_44277 | NW_004516728.1 | Scaffold1550 | 44277                   | TT                              | AA                | 1946657232               |
| SNP_P3_156041_44394 | NW_004516728.1 | Scaffold1550 | 44394                   | TT                              | CC                | 1946657234               |
| SNP_P3_156042_44511 | NW_004516728.1 | Scaffold1550 | 44511                   | AA                              | CC                | 1946657236               |
| SNP_P3_156043_44512 | NW_004516728.1 | Scaffold1550 | 44512                   | CC                              | AA                | 1946657238               |
| SNP_P3_156044_49213 | NW_004516728.1 | Scaffold1550 | 49213                   | AA                              | CC                | 1946657240               |
| SNP_P3_156045_49221 | NW_004516728.1 | Scaffold1550 | 49221                   | TT                              | GG                | 1946657242               |
| SNP_P3_156046_49266 | NW_004516728.1 | Scaffold1550 | 49266                   | TT                              | CC                | 1946657244               |
| SNP_P3_156047_49267 | NW_004516728.1 | Scaffold1550 | 49267                   | AA                              | TT                | 1946657246               |
| SNP_P3_156048_49398 | NW_004516728.1 | Scaffold1550 | 49398                   | CC                              | TT                | 1946657248               |
| SNP_P3_156049_49559 | NW_004516728.1 | Scaffold1550 | 49559                   | GG                              | TT                | 1946657250               |
| SNP_P3_156050_49619 | NW_004516728.1 | Scaffold1550 | 49619                   | CC                              | TT                | 1946657252               |
| SNP_P3_156051_52767 | NW_004516728.1 | Scaffold1550 | 52767                   | TT                              | AA                | 1946657254               |
| SNP_P3_156052_53172 | NW_004516728.1 | Scaffold1550 | 53172                   | AA                              | CC                | 1946657256               |
| SNP_P3_156053_53343 | NW_004516728.1 | Scaffold1550 | 53343                   | TT                              | AA                | 1946657258               |
| SNP_P3_156054_53361 | NW_004516728.1 | Scaffold1550 | 53361                   | TT                              | CC                | 1946657260               |
| SNP_P3_156056_61339 | NW_004516728.1 | Scaffold1550 | 61339                   | TT                              | CC                | 1946657262               |
| SNP_P3_156057_61378 | NW_004516728.1 | Scaffold1550 | 61378                   | AA                              | GG                | 1946657264               |
| SNP_P3_156058_63288 | NW_004516728.1 | Scaffold1550 | 63288                   | AA                              | GG                | 1946657266               |
| SNP_P3_156059_63541 | NW_004516728.1 | Scaffold1550 | 63541                   | AA                              | GG                | 1946657268               |
| SNP_P3_156060_63543 | NW_004516728.1 | Scaffold1550 | 63543                   | AA                              | GG                | 1946657270               |

| SNPs IDs             | Chromosome IDs | Chromosomes  | Physical positions (bp) | CDC Frontier (Reference genome) | (Pusa 256 & HPNB) | NCBI SNPdb Accession IDs |
|----------------------|----------------|--------------|-------------------------|---------------------------------|-------------------|--------------------------|
| SNP_P3_156061_63634  | NW_004516728.1 | Scaffold1550 | 63634                   | AA                              | GG                | 1946657272               |
| SNP_P3_156062_63667  | NW_004516728.1 | Scaffold1550 | 63667                   | AA                              | GG                | 1946657275               |
| SNP_P3_156063_63832  | NW_004516728.1 | Scaffold1550 | 63832                   | AA                              | GG                | 1946657277               |
| SNP_P3_156064_70671  | NW_004516728.1 | Scaffold1550 | 70671                   | TT                              | CC                | 1946657279               |
| SNP_P3_156065_70705  | NW_004516728.1 | Scaffold1550 | 70705                   | AA                              | CC                | 1946657281               |
| SNP_P3_156066_77609  | NW_004516728.1 | Scaffold1550 | 77609                   | AA                              | CC                | 1946657283               |
| SNP_P3_156067_81532  | NW_004516728.1 | Scaffold1550 | 81532                   | GG                              | AA                | 1946657285               |
| SNP_P3_156068_98994  | NW_004516728.1 | Scaffold1550 | 98994                   | TT                              | AA                | 1946657287               |
| SNP_P3_156069_99066  | NW_004516728.1 | Scaffold1550 | 99066                   | CC                              | AA                | 1946657289               |
| SNP_P3_156070_99067  | NW_004516728.1 | Scaffold1550 | 99067                   | AA                              | GG                | 1946657291               |
| SNP_P3_156071_99132  | NW_004516728.1 | Scaffold1550 | 99132                   | CC                              | TT                | 1946657293               |
| SNP_P3_156072_99275  | NW_004516728.1 | Scaffold1550 | 99275                   | CC                              | GG                | 1946657295               |
| SNP_P3_156073_99346  | NW_004516728.1 | Scaffold1550 | 99346                   | CC                              | TT                | 1946657297               |
| SNP_P3_156074_100238 | NW_004516728.1 | Scaffold1550 | 100238                  | TT                              | CC                | 1946657299               |
| SNP_P3_156075_100250 | NW_004516728.1 | Scaffold1550 | 100250                  | AA                              | GG                | 1946657301               |
| SNP_P3_156076_100264 | NW_004516728.1 | Scaffold1550 | 100264                  | TT                              | AA                | 1946657303               |
| SNP_P3_156077_100306 | NW_004516728.1 | Scaffold1550 | 100306                  | AA                              | TT                | 1946657305               |
| SNP_P3_156078_100508 | NW_004516728.1 | Scaffold1550 | 100508                  | AA                              | TT                | 1946657307               |
| SNP_P3_156079_100520 | NW_004516728.1 | Scaffold1550 | 100520                  | AA                              | CC                | 1946657309               |
| SNP_P3_156080_100982 | NW_004516728.1 | Scaffold1550 | 100982                  | AA                              | TT                | 1946657311               |
| SNP_P3_156081_105085 | NW_004516728.1 | Scaffold1550 | 105085                  | GG                              | AA                | 1946657314               |
| SNP_P3_156082_1928   | NW_004516730.1 | Scaffold1552 | 1928                    | TT                              | AA                | 1946657316               |
| SNP_P3_156083_1954   | NW_004516730.1 | Scaffold1552 | 1954                    | CC                              | TT                | 1946657318               |
| SNP_P3_156084_2004   | NW_004516730.1 | Scaffold1552 | 2004                    | CC                              | TT                | 1946657321               |
| SNP_P3_156085_2125   | NW_004516730.1 | Scaffold1552 | 2125                    | GG                              | AA                | 1946657323               |
| SNP_P3_156087_2280   | NW_004516730.1 | Scaffold1552 | 2280                    | TT                              | CC                | 1946657325               |
| SNP_P3_156088_4664   | NW_004516730.1 | Scaffold1552 | 4664                    | TT                              | CC                | 1946657327               |
| SNP_P3_156089_4792   | NW_004516730.1 | Scaffold1552 | 4792                    | CC                              | TT                | 1946657329               |
| SNP_P3_156090_4819   | NW_004516730.1 | Scaffold1552 | 4819                    | CC                              | AA                | 1946657331               |
| SNP_P3_156091_4837   | NW_004516730.1 | Scaffold1552 | 4837                    | AA                              | GG                | 1946657333               |
| SNP_P3_156092_4872   | NW_004516730.1 | Scaffold1552 | 4872                    | TT                              | CC                | 1946657335               |
| SNP_P3_156093_4911   | NW_004516730.1 | Scaffold1552 | 4911                    | CC                              | AA                | 1946657337               |
| SNP_P3_156094_5040   | NW_004516730.1 | Scaffold1552 | 5040                    | AA                              | GG                | 1946657339               |
| SNP_P3_156095_5093   | NW_004516730.1 | Scaffold1552 | 5093                    | AA                              | GG                | 1946657341               |
| SNP_P3_156096_5127   | NW_004516730.1 | Scaffold1552 | 5127                    | CC                              | TT                | 1946657343               |
| SNP_P3_156097_5403   | NW_004516730.1 | Scaffold1552 | 5403                    | CC                              | TT                | 1946657345               |
| SNP_P3_156098_5410   | NW_004516730.1 | Scaffold1552 | 5410                    | GG                              | AA                | 1946657347               |
| SNP_P3_156099_6352   | NW_004516730.1 | Scaffold1552 | 6352                    | TT                              | CC                | 1946657349               |
| SNP_P3_156100_6361   | NW_004516730.1 | Scaffold1552 | 6361                    | CC                              | TT                | 1946657351               |
| SNP_P3_156101_6380   | NW_004516730.1 | Scaffold1552 | 6380                    | AA                              | GG                | 1946657355               |
| SNP_P3_156102_6430   | NW_004516730.1 | Scaffold1552 | 6430                    | AA                              | GG                | 1946657357               |
| SNP_P3_156103_6484   | NW_004516730.1 | Scaffold1552 | 6484                    | TT                              | GG                | 1946657359               |

| SNPs IDs            | Chromosome IDs | Chromosomes  | Physical positions (bp) | CDC Frontier (Reference genome) | (Pusa 256 & HPNB) | NCBI SNPdb Accession IDs |
|---------------------|----------------|--------------|-------------------------|---------------------------------|-------------------|--------------------------|
| SNP_P3_156104_6541  | NW_004516730.1 | Scaffold1552 | 6541                    | TT                              | AA                | 1946657361               |
| SNP_P3_156105_6585  | NW_004516730.1 | Scaffold1552 | 6585                    | GG                              | AA                | 1946657363               |
| SNP_P3_156106_6591  | NW_004516730.1 | Scaffold1552 | 6591                    | CC                              | AA                | 1946657365               |
| SNP_P3_156107_6596  | NW_004516730.1 | Scaffold1552 | 6596                    | GG                              | TT                | 1946657367               |
| SNP_P3_156108_6598  | NW_004516730.1 | Scaffold1552 | 6598                    | CC                              | TT                | 1946657369               |
| SNP_P3_156109_6615  | NW_004516730.1 | Scaffold1552 | 6615                    | CC                              | TT                | 1946657371               |
| SNP_P3_156110_7414  | NW_004516730.1 | Scaffold1552 | 7414                    | AA                              | GG                | 1946657373               |
| SNP_P3_156111_7792  | NW_004516730.1 | Scaffold1552 | 7792                    | TT                              | AA                | 1946657375               |
| SNP_P3_156112_7811  | NW_004516730.1 | Scaffold1552 | 7811                    | TT                              | CC                | 1946657377               |
| SNP_P3_156113_7818  | NW_004516730.1 | Scaffold1552 | 7818                    | AA                              | GG                | 1946657380               |
| SNP_P3_156114_7987  | NW_004516730.1 | Scaffold1552 | 7987                    | TT                              | CC                | 1946657382               |
| SNP_P3_156115_7998  | NW_004516730.1 | Scaffold1552 | 7998                    | CC                              | TT                | 1946657384               |
| SNP_P3_156116_8031  | NW_004516730.1 | Scaffold1552 | 8031                    | GG                              | AA                | 1946657386               |
| SNP_P3_156117_8070  | NW_004516730.1 | Scaffold1552 | 8070                    | CC                              | TT                | 1946657388               |
| SNP_P3_156118_8125  | NW_004516730.1 | Scaffold1552 | 8125                    | CC                              | TT                | 1946657390               |
| SNP_P3_156119_8171  | NW_004516730.1 | Scaffold1552 | 8171                    | CC                              | TT                | 1946657393               |
| SNP_P3_156120_8197  | NW_004516730.1 | Scaffold1552 | 8197                    | GG                              | TT                | 1946657395               |
| SNP_P3_156121_8275  | NW_004516730.1 | Scaffold1552 | 8275                    | CC                              | TT                | 1946657397               |
| SNP_P3_156122_8915  | NW_004516730.1 | Scaffold1552 | 8915                    | AA                              | GG                | 1946657400               |
| SNP_P3_156123_10780 | NW_004516730.1 | Scaffold1552 | 10780                   | TT                              | AA                | 1946657402               |
| SNP_P3_156124_10808 | NW_004516730.1 | Scaffold1552 | 10808                   | CC                              | GG                | 1946657404               |
| SNP_P3_156125_10856 | NW_004516730.1 | Scaffold1552 | 10856                   | AA                              | CC                | 1946657406               |
| SNP_P3_156126_11332 | NW_004516730.1 | Scaffold1552 | 11332                   | AA                              | TT                | 1946657409               |
| SNP_P3_156127_11370 | NW_004516730.1 | Scaffold1552 | 11370                   | CC                              | GG                | 1946657411               |
| SNP_P3_156128_11478 | NW_004516730.1 | Scaffold1552 | 11478                   | GG                              | AA                | 1946657413               |
| SNP_P3_156129_13272 | NW_004516730.1 | Scaffold1552 | 13272                   | AA                              | GG                | 1946657415               |
| SNP_P3_156130_13296 | NW_004516730.1 | Scaffold1552 | 13296                   | CC                              | AA                | 1946657417               |
| SNP_P3_156131_13312 | NW_004516730.1 | Scaffold1552 | 13312                   | AA                              | TT                | 1946657419               |
| SNP_P3_156132_13327 | NW_004516730.1 | Scaffold1552 | 13327                   | TT                              | GG                | 1946657421               |
| SNP_P3_156133_13359 | NW_004516730.1 | Scaffold1552 | 13359                   | AA                              | GG                | 1946657423               |
| SNP_P3_156134_17406 | NW_004516730.1 | Scaffold1552 | 17406                   | GG                              | AA                | 1946657425               |
| SNP_P3_156135_19741 | NW_004516730.1 | Scaffold1552 | 19741                   | GG                              | TT                | 1946657427               |
| SNP_P3_156136_19809 | NW_004516730.1 | Scaffold1552 | 19809                   | CC                              | AA                | 1946657431               |
| SNP_P3_156137_19836 | NW_004516730.1 | Scaffold1552 | 19836                   | CC                              | GG                | 1946657433               |
| SNP_P3_156138_19890 | NW_004516730.1 | Scaffold1552 | 19890                   | TT                              | CC                | 1946657435               |
| SNP_P3_156139_19952 | NW_004516730.1 | Scaffold1552 | 19952                   | AA                              | GG                | 1946657437               |
| SNP_P3_156140_19992 | NW_004516730.1 | Scaffold1552 | 19992                   | GG                              | AA                | 1946657439               |
| SNP_P3_156141_20170 | NW_004516730.1 | Scaffold1552 | 20170                   | CC                              | TT                | 1946657441               |
| SNP_P3_156142_20290 | NW_004516730.1 | Scaffold1552 | 20290                   | TT                              | CC                | 1946657443               |
| SNP_P3_156143_20295 | NW_004516730.1 | Scaffold1552 | 20295                   | GG                              | AA                | 1946657445               |
| SNP_P3_156144_20448 | NW_004516730.1 | Scaffold1552 | 20448                   | AA                              | TT                | 1946657446               |
| SNP_P3_156145_20558 | NW_004516730.1 | Scaffold1552 | 20558                   | TT                              | AA                | 1946657447               |

| SNPs IDs            | Chromosome IDs | Chromosomes  | Physical positions (bp) | CDC Frontier (Reference genome) | (Pusa 256 & HPNB) | NCBI SNPdb Accession IDs |
|---------------------|----------------|--------------|-------------------------|---------------------------------|-------------------|--------------------------|
| SNP_P3_156146_2685  | NW_004516731.1 | Scaffold1553 | 2685                    | AA                              | CC                | 1946657448               |
| SNP_P3_156147_3780  | NW_004516731.1 | Scaffold1553 | 3780                    | AA                              | GG                | 1946657449               |
| SNP_P3_156148_4270  | NW_004516731.1 | Scaffold1553 | 4270                    | CC                              | AA                | 1946657450               |
| SNP_P3_156149_4382  | NW_004516731.1 | Scaffold1553 | 4382                    | AA                              | GG                | 1946657451               |
| SNP_P3_156150_4868  | NW_004516731.1 | Scaffold1553 | 4868                    | GG                              | TT                | 1946657452               |
| SNP_P3_156151_4887  | NW_004516731.1 | Scaffold1553 | 4887                    | TT                              | CC                | 1946657453               |
| SNP_P3_156152_1045  | NW_004516734.1 | Scaffold1557 | 1045                    | CC                              | TT                | 1946657454               |
| SNP_P3_156153_1477  | NW_004516734.1 | Scaffold1557 | 1477                    | AA                              | GG                | 1946657455               |
| SNP_P3_156154_1491  | NW_004516734.1 | Scaffold1557 | 1491                    | CC                              | TT                | 1946657456               |
| SNP_P3_156155_1540  | NW_004516734.1 | Scaffold1557 | 1540                    | TT                              | GG                | 1946657457               |
| SNP_P3_156156_3229  | NW_004516734.1 | Scaffold1557 | 3229                    | TT                              | CC                | 1946657458               |
| SNP_P3_156157_3703  | NW_004516734.1 | Scaffold1557 | 3703                    | TT                              | AA                | 1946657459               |
| SNP_P3_156158_3722  | NW_004516734.1 | Scaffold1557 | 3722                    | TT                              | CC                | 1946657460               |
| SNP_P3_156159_320   | NW_004516736.1 | Scaffold1559 | 320                     | AA                              | TT                | 1946657461               |
| SNP_P3_156160_321   | NW_004516736.1 | Scaffold1559 | 321                     | TT                              | CC                | 1946657462               |
| SNP_P3_156161_758   | NW_004516736.1 | Scaffold1559 | 758                     | CC                              | TT                | 1946657463               |
| SNP_P3_156162_820   | NW_004516736.1 | Scaffold1559 | 820                     | AA                              | TT                | 1946657464               |
| SNP_P3_156163_2258  | NW_004516736.1 | Scaffold1559 | 2258                    | TT                              | AA                | 1946657465               |
| SNP_P3_156164_784   | NW_004516738.1 | Scaffold1561 | 784                     | AA                              | GG                | 1946657466               |
| SNP_P3_156165_1874  | NW_004516738.1 | Scaffold1561 | 1874                    | CC                              | AA                | 1946657467               |
| SNP_P3_156167_6954  | NW_004516738.1 | Scaffold1561 | 6954                    | GG                              | TT                | 1946657468               |
| SNP_P3_156168_6955  | NW_004516738.1 | Scaffold1561 | 6955                    | TT                              | CC                | 1946657469               |
| SNP_P3_156169_6956  | NW_004516738.1 | Scaffold1561 | 6956                    | GG                              | AA                | 1946657470               |
| SNP_P3_156170_6959  | NW_004516738.1 | Scaffold1561 | 6959                    | TT                              | GG                | 1946657471               |
| SNP_P3_156171_6967  | NW_004516738.1 | Scaffold1561 | 6967                    | TT                              | GG                | 1946657472               |
| SNP_P3_156172_7664  | NW_004516738.1 | Scaffold1561 | 7664                    | CC                              | GG                | 1946657473               |
| SNP_P3_156173_7666  | NW_004516738.1 | Scaffold1561 | 7666                    | TT                              | CC                | 1946657474               |
| SNP_P3_156174_7731  | NW_004516738.1 | Scaffold1561 | 7731                    | GG                              | TT                | 1946657475               |
| SNP_P3_156175_14803 | NW_004516738.1 | Scaffold1561 | 14803                   | CC                              | TT                | 1946657476               |
| SNP_P3_156176_17639 | NW_004516738.1 | Scaffold1561 | 17639                   | CC                              | TT                | 1946657477               |
| SNP_P3_156177_17654 | NW_004516738.1 | Scaffold1561 | 17654                   | AA                              | GG                | 1946657478               |
| SNP_P3_156178_17658 | NW_004516738.1 | Scaffold1561 | 17658                   | GG                              | TT                | 1946657479               |
| SNP_P3_156179_18059 | NW_004516738.1 | Scaffold1561 | 18059                   | CC                              | AA                | 1946657480               |
| SNP_P3_156180_21166 | NW_004516738.1 | Scaffold1561 | 21166                   | GG                              | TT                | 1946657481               |
| SNP_P3_156181_21665 | NW_004516738.1 | Scaffold1561 | 21665                   | GG                              | TT                | 1946657482               |
| SNP_P3_156182_21873 | NW_004516738.1 | Scaffold1561 | 21873                   | CC                              | TT                | 1946657483               |
| SNP_P3_156184_21883 | NW_004516738.1 | Scaffold1561 | 21883                   | GG                              | CC                | 1946657484               |
| SNP_P3_156185_25802 | NW_004516738.1 | Scaffold1561 | 25802                   | GG                              | AA                | 1946657485               |
| SNP_P3_156187_31450 | NW_004516738.1 | Scaffold1561 | 31450                   | GG                              | CC                | 1946657486               |
| SNP_P3_156188_34204 | NW_004516738.1 | Scaffold1561 | 34204                   | TT                              | AA                | 1946657488               |
| SNP_P3_156189_36927 | NW_004516738.1 | Scaffold1561 | 36927                   | AA                              | GG                | 1946657490               |
| SNP_P3_156190_37149 | NW_004516738.1 | Scaffold1561 | 37149                   | GG                              | AA                | 1946657492               |

| SNPs IDs            | Chromosome IDs | Chromosomes  | Physical positions (bp) | CDC Frontier (Reference genome) | (Pusa 256 & HPNB) | NCBI SNPdb Accession IDs |
|---------------------|----------------|--------------|-------------------------|---------------------------------|-------------------|--------------------------|
| SNP_P3_156191_37222 | NW_004516738.1 | Scaffold1561 | 37222                   | TT                              | CC                | 1946657494               |
| SNP_P3_156192_44889 | NW_004516738.1 | Scaffold1561 | 44889                   | GG                              | AA                | 1946657495               |
| SNP_P3_156193_49502 | NW_004516738.1 | Scaffold1561 | 49502                   | AA                              | CC                | 1946657497               |
| SNP_P3_156194_52370 | NW_004516738.1 | Scaffold1561 | 52370                   | GG                              | AA                | 1946657499               |
| SNP_P3_156195_52704 | NW_004516738.1 | Scaffold1561 | 52704                   | TT                              | AA                | 1946657501               |
| SNP_P3_156196_52735 | NW_004516738.1 | Scaffold1561 | 52735                   | TT                              | CC                | 1946657503               |
| SNP_P3_156197_52742 | NW_004516738.1 | Scaffold1561 | 52742                   | CC                              | TT                | 1946657505               |
| SNP_P3_156199_53058 | NW_004516738.1 | Scaffold1561 | 53058                   | CC                              | TT                | 1946657507               |
| SNP_P3_156200_54837 | NW_004516738.1 | Scaffold1561 | 54837                   | CC                              | GG                | 1946657509               |
| SNP_P3_156201_55106 | NW_004516738.1 | Scaffold1561 | 55106                   | AA                              | TT                | 1946657511               |
| SNP_P3_156202_55110 | NW_004516738.1 | Scaffold1561 | 55110                   | AA                              | GG                | 1946657513               |
| SNP_P3_156203_55124 | NW_004516738.1 | Scaffold1561 | 55124                   | TT                              | CC                | 1946657515               |
| SNP_P3_156204_55146 | NW_004516738.1 | Scaffold1561 | 55146                   | AA                              | GG                | 1946657517               |
| SNP_P3_156205_55159 | NW_004516738.1 | Scaffold1561 | 55159                   | CC                              | TT                | 1946657519               |
| SNP_P3_156206_55160 | NW_004516738.1 | Scaffold1561 | 55160                   | GG                              | CC                | 1946657521               |
| SNP_P3_156207_55164 | NW_004516738.1 | Scaffold1561 | 55164                   | TT                              | CC                | 1946657523               |
| SNP_P3_156208_55182 | NW_004516738.1 | Scaffold1561 | 55182                   | TT                              | AA                | 1946657525               |
| SNP_P3_156209_55229 | NW_004516738.1 | Scaffold1561 | 55229                   | CC                              | AA                | 1946657527               |
| SNP_P3_156210_55271 | NW_004516738.1 | Scaffold1561 | 55271                   | CC                              | TT                | 1946657529               |
| SNP_P3_156211_55285 | NW_004516738.1 | Scaffold1561 | 55285                   | AA                              | TT                | 1946657531               |
| SNP_P3_156212_55298 | NW_004516738.1 | Scaffold1561 | 55298                   | GG                              | AA                | 1946657533               |
| SNP_P3_156213_55356 | NW_004516738.1 | Scaffold1561 | 55356                   | CC                              | TT                | 1946657536               |
| SNP_P3_156214_55385 | NW_004516738.1 | Scaffold1561 | 55385                   | AA                              | CC                | 1946657538               |
| SNP_P3_156215_55396 | NW_004516738.1 | Scaffold1561 | 55396                   | AA                              | GG                | 1946657540               |
| SNP_P3_156216_55407 | NW_004516738.1 | Scaffold1561 | 55407                   | CC                              | AA                | 1946657542               |
| SNP_P3_156217_55408 | NW_004516738.1 | Scaffold1561 | 55408                   | TT                              | AA                | 1946657544               |
| SNP_P3_156218_55547 | NW_004516738.1 | Scaffold1561 | 55547                   | GG                              | AA                | 1946657546               |
| SNP_P3_156219_55594 | NW_004516738.1 | Scaffold1561 | 55594                   | AA                              | GG                | 1946657548               |
| SNP_P3_156220_55610 | NW_004516738.1 | Scaffold1561 | 55610                   | AA                              | GG                | 1946657550               |
| SNP_P3_156221_55642 | NW_004516738.1 | Scaffold1561 | 55642                   | AA                              | GG                | 1946657552               |
| SNP_P3_156222_55701 | NW_004516738.1 | Scaffold1561 | 55701                   | TT                              | CC                | 1946657554               |
| SNP_P3_156223_69675 | NW_004516738.1 | Scaffold1561 | 69675                   | AA                              | GG                | 1946657556               |
| SNP_P3_156224_69780 | NW_004516738.1 | Scaffold1561 | 69780                   | GG                              | AA                | 1946657558               |
| SNP_P3_156225_69864 | NW_004516738.1 | Scaffold1561 | 69864                   | GG                              | TT                | 1946657560               |
| SNP_P3_156226_69882 | NW_004516738.1 | Scaffold1561 | 69882                   | GG                              | TT                | 1946657562               |
| SNP_P3_156227_69885 | NW_004516738.1 | Scaffold1561 | 69885                   | GG                              | TT                | 1946657564               |
| SNP_P3_156228_69974 | NW_004516738.1 | Scaffold1561 | 69974                   | TT                              | GG                | 1946657566               |
| SNP_P3_156229_69980 | NW_004516738.1 | Scaffold1561 | 69980                   | AA                              | CC                | 1946657568               |
| SNP_P3_156230_70497 | NW_004516738.1 | Scaffold1561 | 70497                   | AA                              | GG                | 1946657570               |
| SNP_P3_156231_70521 | NW_004516738.1 | Scaffold1561 | 70521                   | TT                              | CC                | 1946657572               |
| SNP_P3_156232_70536 | NW_004516738.1 | Scaffold1561 | 70536                   | AA                              | TT                | 1946657574               |
| SNP_P3_156233_70544 | NW_004516738.1 | Scaffold1561 | 70544                   | AA                              | CC                | 1946657576               |

| SNPs IDs             | Chromosome IDs | Chromosomes  | Physical positions (bp) | CDC Frontier (Reference genome) | (Pusa 256 & HPNB) | NCBI SNPdb Accession IDs |
|----------------------|----------------|--------------|-------------------------|---------------------------------|-------------------|--------------------------|
| SNP_P3_156234_70662  | NW_004516738.1 | Scaffold1561 | 70662                   | GG                              | AA                | 1946657578               |
| SNP_P3_156235_70667  | NW_004516738.1 | Scaffold1561 | 70667                   | TT                              | CC                | 1946657580               |
| SNP_P3_156236_70926  | NW_004516738.1 | Scaffold1561 | 70926                   | GG                              | AA                | 1946657582               |
| SNP_P3_156237_80007  | NW_004516738.1 | Scaffold1561 | 80007                   | AA                              | GG                | 1946657584               |
| SNP_P3_156238_80008  | NW_004516738.1 | Scaffold1561 | 80008                   | TT                              | CC                | 1946657586               |
| SNP_P3_156239_80075  | NW_004516738.1 | Scaffold1561 | 80075                   | AA                              | TT                | 1946657588               |
| SNP_P3_156240_80091  | NW_004516738.1 | Scaffold1561 | 80091                   | GG                              | AA                | 1946657590               |
| SNP_P3_156241_80132  | NW_004516738.1 | Scaffold1561 | 80132                   | AA                              | GG                | 1946657594               |
| SNP_P3_156242_80157  | NW_004516738.1 | Scaffold1561 | 80157                   | TT                              | GG                | 1946657595               |
| SNP_P3_156243_80419  | NW_004516738.1 | Scaffold1561 | 80419                   | AA                              | GG                | 1946657597               |
| SNP_P3_156244_84548  | NW_004516738.1 | Scaffold1561 | 84548                   | CC                              | TT                | 1946657599               |
| SNP_P3_156245_85436  | NW_004516738.1 | Scaffold1561 | 85436                   | CC                              | GG                | 1946657601               |
| SNP_P3_156246_994    | NW_004516739.1 | Scaffold1562 | 994                     | GG                              | AA                | 1946657603               |
| SNP_P3_156247_1028   | NW_004516739.1 | Scaffold1562 | 1028                    | TT                              | AA                | 1946657605               |
| SNP_P3_156248_1049   | NW_004516739.1 | Scaffold1562 | 1049                    | GG                              | AA                | 1946657607               |
| SNP_P3_156249_1053   | NW_004516739.1 | Scaffold1562 | 1053                    | AA                              | GG                | 1946657609               |
| SNP_P3_156250_1069   | NW_004516739.1 | Scaffold1562 | 1069                    | CC                              | AA                | 1946657611               |
| SNP_P3_156252_1082   | NW_004516739.1 | Scaffold1562 | 1082                    | GG                              | AA                | 1946657613               |
| SNP_P3_156253_1342   | NW_004516739.1 | Scaffold1562 | 1342                    | CC                              | AA                | 1946657615               |
| SNP_P3_156254_1346   | NW_004516739.1 | Scaffold1562 | 1346                    | AA                              | TT                | 1946657617               |
| SNP_P3_156255_1352   | NW_004516739.1 | Scaffold1562 | 1352                    | CC                              | AA                | 1946657619               |
| SNP_P3_156256_1353   | NW_004516739.1 | Scaffold1562 | 1353                    | CC                              | AA                | 1946657621               |
| SNP_P3_156257_1546   | NW_004516739.1 | Scaffold1562 | 1546                    | TT                              | CC                | 1946657623               |
| SNP_P3_156258_25275  | NW_004516739.1 | Scaffold1562 | 25275                   | GG                              | AA                | 1946657625               |
| SNP_P3_156260_42653  | NW_004516739.1 | Scaffold1562 | 42653                   | AA                              | TT                | 1946657627               |
| SNP_P3_156263_51380  | NW_004516739.1 | Scaffold1562 | 51380                   | AA                              | GG                | 1946657629               |
| SNP_P3_156264_51417  | NW_004516739.1 | Scaffold1562 | 51417                   | TT                              | CC                | 1946657632               |
| SNP_P3_156265_64444  | NW_004516739.1 | Scaffold1562 | 64444                   | GG                              | AA                | 1946657634               |
| SNP_P3_156268_77222  | NW_004516739.1 | Scaffold1562 | 77222                   | AA                              | GG                | 1946657636               |
| SNP_P3_156269_82072  | NW_004516739.1 | Scaffold1562 | 82072                   | GG                              | AA                | 1946657638               |
| SNP_P3_156270_96986  | NW_004516739.1 | Scaffold1562 | 96986                   | GG                              | AA                | 1946657640               |
| SNP_P3_156271_101427 | NW_004516739.1 | Scaffold1562 | 101427                  | TT                              | CC                | 1946657642               |
| SNP_P3_156272_101785 | NW_004516739.1 | Scaffold1562 | 101785                  | GG                              | CC                | 1946657644               |
| SNP_P3_156273_101812 | NW_004516739.1 | Scaffold1562 | 101812                  | AA                              | GG                | 1946657646               |
| SNP_P3_156274_101818 | NW_004516739.1 | Scaffold1562 | 101818                  | AA                              | GG                | 1946657648               |
| SNP_P3_156275_101879 | NW_004516739.1 | Scaffold1562 | 101879                  | AA                              | GG                | 1946657650               |
| SNP_P3_156276_101893 | NW_004516739.1 | Scaffold1562 | 101893                  | AA                              | TT                | 1946657652               |
| SNP_P3_156277_102232 | NW_004516739.1 | Scaffold1562 | 102232                  | TT                              | AA                | 1946657654               |
| SNP_P3_156278_102254 | NW_004516739.1 | Scaffold1562 | 102254                  | TT                              | GG                | 1946657656               |
| SNP_P3_156279_102314 | NW_004516739.1 | Scaffold1562 | 102314                  | TT                              | AA                | 1946657658               |
| SNP_P3_156280_104130 | NW_004516739.1 | Scaffold1562 | 104130                  | TT                              | CC                | 1946657660               |
| SNP_P3_156282_20563  | NW_004516740.1 | Scaffold1565 | 20563                   | TT                              | GG                | 1946657662               |

| SNPs IDs            | Chromosome IDs | Chromosomes  | Physical positions (bp) | CDC Frontier (Reference genome) | (Pusa 256 & HPNB) | NCBI SNPdb Accession IDs |
|---------------------|----------------|--------------|-------------------------|---------------------------------|-------------------|--------------------------|
| SNP_P3_156283_1618  | NW_004516741.1 | Scaffold1566 | 1618                    | AA                              | CC                | 1946657664               |
| SNP_P3_156284_1637  | NW_004516741.1 | Scaffold1566 | 1637                    | AA                              | GG                | 1946657666               |
| SNP_P3_156285_1641  | NW_004516741.1 | Scaffold1566 | 1641                    | AA                              | GG                | 1946657668               |
| SNP_P3_156287_741   | NW_004516742.1 | Scaffold1568 | 741                     | AA                              | GG                | 1946657672               |
| SNP_P3_156288_888   | NW_004516742.1 | Scaffold1568 | 888                     | CC                              | AA                | 1946657674               |
| SNP_P3_156289_1861  | NW_004516742.1 | Scaffold1568 | 1861                    | TT                              | GG                | 1946657676               |
| SNP_P3_156290_2130  | NW_004516742.1 | Scaffold1568 | 2130                    | TT                              | AA                | 1946657678               |
| SNP_P3_156291_2271  | NW_004516742.1 | Scaffold1568 | 2271                    | TT                              | AA                | 1946657680               |
| SNP_P3_156292_3253  | NW_004516742.1 | Scaffold1568 | 3253                    | GG                              | TT                | 1946657682               |
| SNP_P3_156293_3273  | NW_004516742.1 | Scaffold1568 | 3273                    | AA                              | GG                | 1946657684               |
| SNP_P3_156294_9542  | NW_004516742.1 | Scaffold1568 | 9542                    | GG                              | CC                | 1946657687               |
| SNP_P3_156295_9993  | NW_004516742.1 | Scaffold1568 | 9993                    | TT                              | CC                | 1946657689               |
| SNP_P3_156296_11606 | NW_004516742.1 | Scaffold1568 | 11606                   | AA                              | GG                | 1946657691               |
| SNP_P3_156297_11652 | NW_004516742.1 | Scaffold1568 | 11652                   | GG                              | TT                | 1946657693               |
| SNP_P3_156298_11764 | NW_004516742.1 | Scaffold1568 | 11764                   | TT                              | CC                | 1946657695               |
| SNP_P3_156299_11933 | NW_004516742.1 | Scaffold1568 | 11933                   | TT                              | CC                | 1946657697               |
| SNP_P3_156300_12772 | NW_004516742.1 | Scaffold1568 | 12772                   | TT                              | CC                | 1946657699               |
| SNP_P3_156301_12811 | NW_004516742.1 | Scaffold1568 | 12811                   | AA                              | CC                | 1946657701               |
| SNP_P3_156302_13660 | NW_004516742.1 | Scaffold1568 | 13660                   | GG                              | AA                | 1946657703               |
| SNP_P3_156303_13679 | NW_004516742.1 | Scaffold1568 | 13679                   | TT                              | GG                | 1946657705               |
| SNP_P3_156304_14759 | NW_004516742.1 | Scaffold1568 | 14759                   | AA                              | CC                | 1946657707               |
| SNP_P3_156305_15212 | NW_004516742.1 | Scaffold1568 | 15212                   | TT                              | CC                | 1946657709               |
| SNP_P3_156306_17265 | NW_004516742.1 | Scaffold1568 | 17265                   | AA                              | GG                | 1946657711               |
| SNP_P3_156307_17267 | NW_004516742.1 | Scaffold1568 | 17267                   | GG                              | AA                | 1946657713               |
| SNP_P3_156308_17271 | NW_004516742.1 | Scaffold1568 | 17271                   | AA                              | TT                | 1946657715               |
| SNP_P3_156309_17905 | NW_004516742.1 | Scaffold1568 | 17905                   | CC                              | GG                | 1946657717               |
| SNP_P3_156310_18012 | NW_004516742.1 | Scaffold1568 | 18012                   | AA                              | TT                | 1946657719               |
| SNP_P3_156311_21003 | NW_004516742.1 | Scaffold1568 | 21003                   | GG                              | TT                | 1946657721               |
| SNP_P3_156312_22311 | NW_004516742.1 | Scaffold1568 | 22311                   | AA                              | GG                | 1946657723               |
| SNP_P3_156314_22463 | NW_004516742.1 | Scaffold1568 | 22463                   | CC                              | AA                | 1946657725               |
| SNP_P3_156315_22600 | NW_004516742.1 | Scaffold1568 | 22600                   | TT                              | GG                | 1946657727               |
| SNP_P3_156316_22602 | NW_004516742.1 | Scaffold1568 | 22602                   | TT                              | CC                | 1946657729               |
| SNP_P3_156317_22818 | NW_004516742.1 | Scaffold1568 | 22818                   | CC                              | TT                | 1946657732               |
| SNP_P3_156318_22832 | NW_004516742.1 | Scaffold1568 | 22832                   | GG                              | AA                | 1946657735               |
| SNP_P3_156319_22846 | NW_004516742.1 | Scaffold1568 | 22846                   | GG                              | TT                | 1946657737               |
| SNP_P3_156320_23008 | NW_004516742.1 | Scaffold1568 | 23008                   | TT                              | AA                | 1946657739               |
| SNP_P3_156321_23068 | NW_004516742.1 | Scaffold1568 | 23068                   | TT                              | AA                | 1946657741               |
| SNP_P3_156322_23072 | NW_004516742.1 | Scaffold1568 | 23072                   | TT                              | CC                | 1946657744               |
| SNP_P3_156323_23196 | NW_004516742.1 | Scaffold1568 | 23196                   | TT                              | GG                | 1946657746               |
| SNP_P3_156324_23453 | NW_004516742.1 | Scaffold1568 | 23453                   | CC                              | TT                | 1946657748               |
| SNP_P3_156325_23596 | NW_004516742.1 | Scaffold1568 | 23596                   | CC                              | GG                | 1946657750               |
| SNP_P3_156326_23601 | NW_004516742.1 | Scaffold1568 | 23601                   | TT                              | CC                | 1946657752               |

| SNPs IDs            | Chromosome IDs | Chromosomes  | Physical positions (bp) | CDC Frontier (Reference genome) | (Pusa 256 & HPNB) | NCBI SNPdb Accession IDs |
|---------------------|----------------|--------------|-------------------------|---------------------------------|-------------------|--------------------------|
| SNP_P3_156327_23610 | NW_004516742.1 | Scaffold1568 | 23610                   | AA                              | GG                | 1946657754               |
| SNP_P3_156328_23659 | NW_004516742.1 | Scaffold1568 | 23659                   | GG                              | CC                | 1946657756               |
| SNP_P3_156329_23667 | NW_004516742.1 | Scaffold1568 | 23667                   | AA                              | TT                | 1946657758               |
| SNP_P3_156330_23731 | NW_004516742.1 | Scaffold1568 | 23731                   | AA                              | TT                | 1946657759               |
| SNP_P3_156331_24396 | NW_004516742.1 | Scaffold1568 | 24396                   | GG                              | TT                | 1946657760               |
| SNP_P3_156332_24472 | NW_004516742.1 | Scaffold1568 | 24472                   | GG                              | AA                | 1946657761               |
| SNP_P3_156333_24742 | NW_004516742.1 | Scaffold1568 | 24742                   | TT                              | GG                | 1946657762               |
| SNP_P3_156334_24754 | NW_004516742.1 | Scaffold1568 | 24754                   | TT                              | CC                | 1946657763               |
| SNP_P3_156335_25098 | NW_004516742.1 | Scaffold1568 | 25098                   | TT                              | GG                | 1946657764               |
| SNP_P3_156336_25510 | NW_004516742.1 | Scaffold1568 | 25510                   | GG                              | CC                | 1946657765               |
| SNP_P3_156337_25835 | NW_004516742.1 | Scaffold1568 | 25835                   | AA                              | GG                | 1946657767               |
| SNP_P3_156338_25836 | NW_004516742.1 | Scaffold1568 | 25836                   | GG                              | TT                | 1946657770               |
| SNP_P3_156339_27199 | NW_004516742.1 | Scaffold1568 | 27199                   | TT                              | CC                | 1946657772               |
| SNP_P3_156340_27385 | NW_004516742.1 | Scaffold1568 | 27385                   | AA                              | GG                | 1946657774               |
| SNP_P3_156341_28611 | NW_004516742.1 | Scaffold1568 | 28611                   | TT                              | CC                | 1946657776               |
| SNP_P3_156342_28651 | NW_004516742.1 | Scaffold1568 | 28651                   | GG                              | CC                | 1946657778               |
| SNP_P3_156343_33292 | NW_004516742.1 | Scaffold1568 | 33292                   | TT                              | CC                | 1946657780               |
| SNP_P3_156344_33300 | NW_004516742.1 | Scaffold1568 | 33300                   | TT                              | CC                | 1946657782               |
| SNP_P3_156345_33313 | NW_004516742.1 | Scaffold1568 | 33313                   | AA                              | TT                | 1946657784               |
| SNP_P3_156348_33390 | NW_004516742.1 | Scaffold1568 | 33390                   | CC                              | TT                | 1946657786               |
| SNP_P3_156349_33621 | NW_004516742.1 | Scaffold1568 | 33621                   | TT                              | CC                | 1946657788               |
| SNP_P3_156351_33911 | NW_004516742.1 | Scaffold1568 | 33911                   | CC                              | GG                | 1946657790               |
| SNP_P3_156353_44390 | NW_004516742.1 | Scaffold1568 | 44390                   | CC                              | TT                | 1946657792               |
| SNP_P3_156354_44391 | NW_004516742.1 | Scaffold1568 | 44391                   | AA                              | TT                | 1946657794               |
| SNP_P3_156355_44419 | NW_004516742.1 | Scaffold1568 | 44419                   | TT                              | CC                | 1946657796               |
| SNP_P3_156359_44478 | NW_004516742.1 | Scaffold1568 | 44478                   | AA                              | GG                | 1946657798               |
| SNP_P3_156360_44487 | NW_004516742.1 | Scaffold1568 | 44487                   | TT                              | AA                | 1946657800               |
| SNP_P3_156361_44506 | NW_004516742.1 | Scaffold1568 | 44506                   | AA                              | TT                | 1946657803               |
| SNP_P3_156362_44511 | NW_004516742.1 | Scaffold1568 | 44511                   | GG                              | TT                | 1946657805               |
| SNP_P3_156364_44551 | NW_004516742.1 | Scaffold1568 | 44551                   | CC                              | AA                | 1946657807               |
| SNP_P3_156365_44559 | NW_004516742.1 | Scaffold1568 | 44559                   | TT                              | GG                | 1946657809               |
| SNP_P3_156366_44568 | NW_004516742.1 | Scaffold1568 | 44568                   | AA                              | GG                | 1946657812               |
| SNP_P3_156367_44576 | NW_004516742.1 | Scaffold1568 | 44576                   | AA                              | TT                | 1946657814               |
| SNP_P3_156368_46136 | NW_004516742.1 | Scaffold1568 | 46136                   | TT                              | AA                | 1946657816               |
| SNP_P3_156369_46493 | NW_004516742.1 | Scaffold1568 | 46493                   | TT                              | CC                | 1946657818               |
| SNP_P3_156370_46720 | NW_004516742.1 | Scaffold1568 | 46720                   | GG                              | AA                | 1946657820               |
| SNP_P3_156371_46881 | NW_004516742.1 | Scaffold1568 | 46881                   | AA                              | TT                | 1946657822               |
| SNP_P3_156372_47641 | NW_004516742.1 | Scaffold1568 | 47641                   | TT                              | AA                | 1946657824               |
| SNP_P3_156373_47683 | NW_004516742.1 | Scaffold1568 | 47683                   | TT                              | AA                | 1946657826               |
| SNP_P3_156374_47734 | NW_004516742.1 | Scaffold1568 | 47734                   | CC                              | TT                | 1946657828               |
| SNP_P3_156375_47751 | NW_004516742.1 | Scaffold1568 | 47751                   | CC                              | AA                | 1946657830               |
| SNP_P3_156377_48736 | NW_004516742.1 | Scaffold1568 | 48736                   | GG                              | AA                | 1946657832               |



| SNPs IDs            | Chromosome IDs | Chromosomes  | Physical positions (bp) | CDC Frontier (Reference genome) | (Pusa 256 & HPNB) | NCBI SNPdb Accession IDs |
|---------------------|----------------|--------------|-------------------------|---------------------------------|-------------------|--------------------------|
| SNP_P3_156379_49083 | NW_004516742.1 | Scaffold1568 | 49083                   | AA                              | TT                | 1946657834               |
| SNP_P3_156380_49142 | NW_004516742.1 | Scaffold1568 | 49142                   | TT                              | AA                | 1946657836               |
| SNP_P3_156381_49157 | NW_004516742.1 | Scaffold1568 | 49157                   | GG                              | CC                | 1946657838               |
| SNP_P3_156382_49164 | NW_004516742.1 | Scaffold1568 | 49164                   | TT                              | CC                | 1946657840               |
| SNP_P3_156383_49466 | NW_004516742.1 | Scaffold1568 | 49466                   | AA                              | TT                | 1946657843               |
| SNP_P3_156384_49835 | NW_004516742.1 | Scaffold1568 | 49835                   | AA                              | TT                | 1946657845               |
| SNP_P3_156385_51678 | NW_004516742.1 | Scaffold1568 | 51678                   | TT                              | CC                | 1946657847               |
| SNP_P3_156386_51693 | NW_004516742.1 | Scaffold1568 | 51693                   | AA                              | GG                | 1946657849               |
| SNP_P3_156387_51726 | NW_004516742.1 | Scaffold1568 | 51726                   | CC                              | GG                | 1946657851               |
| SNP_P3_156388_51914 | NW_004516742.1 | Scaffold1568 | 51914                   | GG                              | AA                | 1946657853               |
| SNP_P3_156390_53491 | NW_004516742.1 | Scaffold1568 | 53491                   | CC                              | GG                | 1946657855               |
| SNP_P3_156391_53747 | NW_004516742.1 | Scaffold1568 | 53747                   | TT                              | CC                | 1946657857               |
| SNP_P3_156393_53836 | NW_004516742.1 | Scaffold1568 | 53836                   | TT                              | CC                | 1946657859               |
| SNP_P3_156394_53884 | NW_004516742.1 | Scaffold1568 | 53884                   | AA                              | GG                | 1946657861               |
| SNP_P3_156395_54350 | NW_004516742.1 | Scaffold1568 | 54350                   | TT                              | AA                | 1946657863               |
| SNP_P3_156396_57656 | NW_004516742.1 | Scaffold1568 | 57656                   | AA                              | CC                | 1946657865               |
| SNP_P3_156397_66587 | NW_004516742.1 | Scaffold1568 | 66587                   | TT                              | AA                | 1946657867               |
| SNP_P3_156398_66600 | NW_004516742.1 | Scaffold1568 | 66600                   | TT                              | AA                | 1946657869               |
| SNP_P3_156399_66716 | NW_004516742.1 | Scaffold1568 | 66716                   | TT                              | AA                | 1946657871               |
| SNP_P3_156400_66893 | NW_004516742.1 | Scaffold1568 | 66893                   | CC                              | AA                | 1946657873               |
| SNP_P3_156401_70768 | NW_004516742.1 | Scaffold1568 | 70768                   | AA                              | TT                | 1946657875               |
| SNP_P3_156402_72894 | NW_004516742.1 | Scaffold1568 | 72894                   | CC                              | TT                | 1946657877               |
| SNP_P3_156403_73421 | NW_004516742.1 | Scaffold1568 | 73421                   | GG                              | AA                | 1946657879               |
| SNP_P3_156404_73494 | NW_004516742.1 | Scaffold1568 | 73494                   | GG                              | TT                | 1946657881               |
| SNP_P3_156405_74402 | NW_004516742.1 | Scaffold1568 | 74402                   | TT                              | CC                | 1946657884               |
| SNP_P3_156406_74790 | NW_004516742.1 | Scaffold1568 | 74790                   | CC                              | TT                | 1946657886               |
| SNP_P3_156407_74854 | NW_004516742.1 | Scaffold1568 | 74854                   | TT                              | AA                | 1946657888               |
| SNP_P3_156408_77825 | NW_004516742.1 | Scaffold1568 | 77825                   | CC                              | AA                | 1946657890               |
| SNP_P3_156409_77830 | NW_004516742.1 | Scaffold1568 | 77830                   | CC                              | TT                | 1946657900               |
| SNP_P3_156410_78785 | NW_004516742.1 | Scaffold1568 | 78785                   | AA                              | GG                | 1946657902               |
| SNP_P3_156411_78796 | NW_004516742.1 | Scaffold1568 | 78796                   | AA                              | TT                | 1946657904               |
| SNP_P3_156412_78848 | NW_004516742.1 | Scaffold1568 | 78848                   | AA                              | GG                | 1946657906               |
| SNP_P3_156413_78863 | NW_004516742.1 | Scaffold1568 | 78863                   | CC                              | TT                | 1946657908               |
| SNP_P3_156414_79069 | NW_004516742.1 | Scaffold1568 | 79069                   | GG                              | AA                | 1946657910               |
| SNP_P3_156415_79077 | NW_004516742.1 | Scaffold1568 | 79077                   | TT                              | AA                | 1946657913               |
| SNP_P3_156416_79150 | NW_004516742.1 | Scaffold1568 | 79150                   | GG                              | TT                | 1946657915               |
| SNP_P3_156417_80053 | NW_004516742.1 | Scaffold1568 | 80053                   | GG                              | CC                | 1946657917               |
| SNP_P3_156418_80149 | NW_004516742.1 | Scaffold1568 | 80149                   | TT                              | CC                | 1946657919               |
| SNP_P3_156419_80150 | NW_004516742.1 | Scaffold1568 | 80150                   | GG                              | AA                | 1946657921               |
| SNP_P3_156420_80257 | NW_004516742.1 | Scaffold1568 | 80257                   | CC                              | GG                | 1946657923               |
| SNP_P3_156421_80367 | NW_004516742.1 | Scaffold1568 | 80367                   | AA                              | TT                | 1946657925               |
| SNP_P3_156422_80368 | NW_004516742.1 | Scaffold1568 | 80368                   | TT                              | CC                | 1946657927               |

| SNPs IDs            | Chromosome IDs | Chromosomes  | Physical positions (bp) | CDC Frontier (Reference genome) | (Pusa 256 & HPNB) | NCBI SNPdb Accession IDs |
|---------------------|----------------|--------------|-------------------------|---------------------------------|-------------------|--------------------------|
| SNP_P3_156423_80428 | NW_004516742.1 | Scaffold1568 | 80428                   | TT                              | GG                | 1946657929               |
| SNP_P3_156424_80485 | NW_004516742.1 | Scaffold1568 | 80485                   | AA                              | TT                | 1946657931               |
| SNP_P3_156425_80501 | NW_004516742.1 | Scaffold1568 | 80501                   | AA                              | CC                | 1946657933               |
| SNP_P3_156426_80671 | NW_004516742.1 | Scaffold1568 | 80671                   | CC                              | GG                | 1946657935               |
| SNP_P3_156427_81815 | NW_004516742.1 | Scaffold1568 | 81815                   | GG                              | AA                | 1946657937               |
| SNP_P3_156428_81923 | NW_004516742.1 | Scaffold1568 | 81923                   | TT                              | GG                | 1946657939               |
| SNP_P3_156429_81946 | NW_004516742.1 | Scaffold1568 | 81946                   | AA                              | TT                | 1946657941               |
| SNP_P3_156430_82223 | NW_004516742.1 | Scaffold1568 | 82223                   | TT                              | GG                | 1946657943               |
| SNP_P3_156431_82246 | NW_004516742.1 | Scaffold1568 | 82246                   | AA                              | TT                | 1946657945               |
| SNP_P3_156432_82488 | NW_004516742.1 | Scaffold1568 | 82488                   | GG                              | CC                | 1946657947               |
| SNP_P3_156433_82524 | NW_004516742.1 | Scaffold1568 | 82524                   | CC                              | GG                | 1946657949               |
| SNP_P3_156434_82550 | NW_004516742.1 | Scaffold1568 | 82550                   | AA                              | TT                | 1946657951               |
| SNP_P3_156435_82717 | NW_004516742.1 | Scaffold1568 | 82717                   | TT                              | CC                | 1946657953               |
| SNP_P3_156437_82833 | NW_004516742.1 | Scaffold1568 | 82833                   | AA                              | GG                | 1946657955               |
| SNP_P3_156438_83266 | NW_004516742.1 | Scaffold1568 | 83266                   | GG                              | TT                | 1946657957               |
| SNP_P3_156439_83281 | NW_004516742.1 | Scaffold1568 | 83281                   | GG                              | TT                | 1946657959               |
| SNP_P3_156440_9538  | NW_004516743.1 | Scaffold1569 | 9538                    | TT                              | AA                | 1946657961               |
| SNP_P3_156441_16094 | NW_004516743.1 | Scaffold1569 | 16094                   | CC                              | AA                | 1946657963               |
| SNP_P3_156442_19628 | NW_004516743.1 | Scaffold1569 | 19628                   | CC                              | TT                | 1946657965               |
| SNP_P3_156443_19634 | NW_004516743.1 | Scaffold1569 | 19634                   | CC                              | AA                | 1946657967               |
| SNP_P3_156444_25545 | NW_004516743.1 | Scaffold1569 | 25545                   | GG                              | AA                | 1946657969               |
| SNP_P3_156445_25655 | NW_004516743.1 | Scaffold1569 | 25655                   | TT                              | AA                | 1946657971               |
| SNP_P3_156446_25899 | NW_004516743.1 | Scaffold1569 | 25899                   | AA                              | CC                | 1946657973               |
| SNP_P3_156447_32348 | NW_004516743.1 | Scaffold1569 | 32348                   | GG                              | TT                | 1946657975               |
| SNP_P3_156448_32401 | NW_004516743.1 | Scaffold1569 | 32401                   | AA                              | CC                | 1946657977               |
| SNP_P3_156449_32457 | NW_004516743.1 | Scaffold1569 | 32457                   | CC                              | GG                | 1946657978               |
| SNP_P3_156452_32774 | NW_004516743.1 | Scaffold1569 | 32774                   | AA                              | CC                | 1946657979               |
| SNP_P3_156453_32866 | NW_004516743.1 | Scaffold1569 | 32866                   | AA                              | CC                | 1946657980               |
| SNP_P3_156454_32883 | NW_004516743.1 | Scaffold1569 | 32883                   | CC                              | GG                | 1946657981               |
| SNP_P3_156455_32885 | NW_004516743.1 | Scaffold1569 | 32885                   | AA                              | TT                | 1946657982               |
| SNP_P3_156456_32895 | NW_004516743.1 | Scaffold1569 | 32895                   | AA                              | GG                | 1946657983               |
| SNP_P3_156457_32929 | NW_004516743.1 | Scaffold1569 | 32929                   | AA                              | TT                | 1946657984               |
| SNP_P3_156458_32956 | NW_004516743.1 | Scaffold1569 | 32956                   | AA                              | CC                | 1946657986               |
| SNP_P3_156460_33009 | NW_004516743.1 | Scaffold1569 | 33009                   | CC                              | TT                | 1946657988               |
| SNP_P3_156461_33019 | NW_004516743.1 | Scaffold1569 | 33019                   | TT                              | CC                | 1946657990               |
| SNP_P3_156462_33042 | NW_004516743.1 | Scaffold1569 | 33042                   | GG                              | TT                | 1946657992               |
| SNP_P3_156463_33047 | NW_004516743.1 | Scaffold1569 | 33047                   | TT                              | CC                | 1946657994               |
| SNP_P3_156464_33220 | NW_004516743.1 | Scaffold1569 | 33220                   | GG                              | CC                | 1946657996               |
| SNP_P3_156465_33880 | NW_004516743.1 | Scaffold1569 | 33880                   | GG                              | CC                | 1946657998               |
| SNP_P3_156466_35604 | NW_004516743.1 | Scaffold1569 | 35604                   | AA                              | GG                | 1946658000               |
| SNP_P3_156467_35613 | NW_004516743.1 | Scaffold1569 | 35613                   | CC                              | AA                | 1946658002               |
| SNP_P3_156468_3384  | NW_004516745.1 | Scaffold1572 | 3384                    | AA                              | CC                | 1946658004               |

| SNPs IDs             | Chromosome IDs | Chromosomes  | Physical positions (bp) | CDC Frontier (Reference genome) | (Pusa 256 & HPNB) | NCBI SNPdb Accession IDs |
|----------------------|----------------|--------------|-------------------------|---------------------------------|-------------------|--------------------------|
| SNP_P3_156469_3387   | NW_004516745.1 | Scaffold1572 | 3387                    | CC                              | AA                | 1946658006               |
| SNP_P3_156470_4515   | NW_004516745.1 | Scaffold1572 | 4515                    | AA                              | CC                | 1946658008               |
| SNP_P3_156471_6285   | NW_004516745.1 | Scaffold1572 | 6285                    | AA                              | CC                | 1946658010               |
| SNP_P3_156472_6289   | NW_004516745.1 | Scaffold1572 | 6289                    | GG                              | AA                | 1946658012               |
| SNP_P3_156473_6388   | NW_004516745.1 | Scaffold1572 | 6388                    | GG                              | AA                | 1946658014               |
| SNP_P3_156474_6564   | NW_004516745.1 | Scaffold1572 | 6564                    | CC                              | AA                | 1946658016               |
| SNP_P3_156475_6579   | NW_004516745.1 | Scaffold1572 | 6579                    | AA                              | GG                | 1946658018               |
| SNP_P3_156476_6588   | NW_004516745.1 | Scaffold1572 | 6588                    | GG                              | AA                | 1946658020               |
| SNP_P3_156477_6622   | NW_004516745.1 | Scaffold1572 | 6622                    | CC                              | GG                | 1946658022               |
| SNP_P3_156478_1851   | NW_004516746.1 | Scaffold1573 | 1851                    | TT                              | CC                | 1946658024               |
| SNP_P3_156479_2043   | NW_004516746.1 | Scaffold1573 | 2043                    | AA                              | GG                | 1946658026               |
| SNP_P3_156480_2578   | NW_004516746.1 | Scaffold1573 | 2578                    | AA                              | TT                | 1946658029               |
| SNP_P3_156482_21100  | NW_004516747.1 | Scaffold1574 | 21100                   | TT                              | CC                | 1946658031               |
| SNP_P3_156483_68795  | NW_004516747.1 | Scaffold1574 | 68795                   | CC                              | TT                | 1946658033               |
| SNP_P3_156484_68815  | NW_004516747.1 | Scaffold1574 | 68815                   | GG                              | AA                | 1946658035               |
| SNP_P3_156485_69279  | NW_004516747.1 | Scaffold1574 | 69279                   | AA                              | TT                | 1946658037               |
| SNP_P3_156486_75559  | NW_004516747.1 | Scaffold1574 | 75559                   | AA                              | GG                | 1946658039               |
| SNP_P3_156487_84308  | NW_004516747.1 | Scaffold1574 | 84308                   | TT                              | GG                | 1946658041               |
| SNP_P3_156488_98891  | NW_004516747.1 | Scaffold1574 | 98891                   | TT                              | CC                | 1946658043               |
| SNP_P3_156489_106285 | NW_004516747.1 | Scaffold1574 | 106285                  | CC                              | GG                | 1946658045               |
| SNP_P3_156490_106293 | NW_004516747.1 | Scaffold1574 | 106293                  | GG                              | CC                | 1946658047               |
| SNP_P3_156491_106367 | NW_004516747.1 | Scaffold1574 | 106367                  | TT                              | GG                | 1946658049               |
| SNP_P3_156492_109330 | NW_004516747.1 | Scaffold1574 | 109330                  | GG                              | AA                | 1946658051               |
| SNP_P3_156493_109336 | NW_004516747.1 | Scaffold1574 | 109336                  | AA                              | GG                | 1946658053               |
| SNP_P3_156494_109340 | NW_004516747.1 | Scaffold1574 | 109340                  | GG                              | TT                | 1946658055               |
| SNP_P3_156495_109754 | NW_004516747.1 | Scaffold1574 | 109754                  | GG                              | CC                | 1946658057               |
| SNP_P3_156496_110172 | NW_004516747.1 | Scaffold1574 | 110172                  | TT                              | CC                | 1946658059               |
| SNP_P3_156497_110180 | NW_004516747.1 | Scaffold1574 | 110180                  | AA                              | GG                | 1946658062               |
| SNP_P3_156498_110294 | NW_004516747.1 | Scaffold1574 | 110294                  | GG                              | AA                | 1946658064               |
| SNP_P3_156499_110396 | NW_004516747.1 | Scaffold1574 | 110396                  | CC                              | TT                | 1946658066               |
| SNP_P3_156500_110429 | NW_004516747.1 | Scaffold1574 | 110429                  | CC                              | TT                | 1946658068               |
| SNP_P3_156501_50990  | NW_004516748.1 | Scaffold1575 | 50990                   | TT                              | CC                | 1946658071               |
| SNP_P3_156502_56441  | NW_004516748.1 | Scaffold1575 | 56441                   | TT                              | GG                | 1946658073               |
| SNP_P3_156503_83692  | NW_004516748.1 | Scaffold1575 | 83692                   | AA                              | GG                | 1946658075               |
| SNP_P3_156504_83700  | NW_004516748.1 | Scaffold1575 | 83700                   | AA                              | TT                | 1946658077               |
| SNP_P3_156505_90081  | NW_004516748.1 | Scaffold1575 | 90081                   | CC                              | TT                | 1946658079               |
| SNP_P3_156506_90091  | NW_004516748.1 | Scaffold1575 | 90091                   | CC                              | TT                | 1946658081               |
| SNP_P3_156507_123902 | NW_004516748.1 | Scaffold1575 | 123902                  | GG                              | AA                | 1946658083               |
| SNP_P3_156508_123942 | NW_004516748.1 | Scaffold1575 | 123942                  | TT                              | CC                | 1946658085               |
| SNP_P3_156509_124777 | NW_004516748.1 | Scaffold1575 | 124777                  | TT                              | CC                | 1946658087               |
| SNP_P3_156510_143151 | NW_004516748.1 | Scaffold1575 | 143151                  | AA                              | GG                | 1946658089               |
| SNP_P3_156511_143190 | NW_004516748.1 | Scaffold1575 | 143190                  | CC                              | GG                | 1946658091               |

| SNPs IDs             | Chromosome IDs | Chromosomes  | Physical positions (bp) | CDC Frontier (Reference genome) | (Pusa 256 & HPNB) | NCBI SNPdb Accession IDs |
|----------------------|----------------|--------------|-------------------------|---------------------------------|-------------------|--------------------------|
| SNP_P3_156512_156568 | NW_004516748.1 | Scaffold1575 | 156568                  | GG                              | AA                | 1946658093               |
| SNP_P3_156513_158652 | NW_004516748.1 | Scaffold1575 | 158652                  | TT                              | CC                | 1946658095               |
| SNP_P3_156514_158670 | NW_004516748.1 | Scaffold1575 | 158670                  | AA                              | GG                | 1946658097               |
| SNP_P3_156515_188911 | NW_004516748.1 | Scaffold1575 | 188911                  | TT                              | CC                | 1946658100               |
| SNP_P3_156517_195267 | NW_004516748.1 | Scaffold1575 | 195267                  | GG                              | AA                | 1946658102               |
| SNP_P3_156518_2940   | NW_004516751.1 | Scaffold1578 | 2940                    | TT                              | CC                | 1946658104               |
| SNP_P3_156519_4313   | NW_004516751.1 | Scaffold1578 | 4313                    | AA                              | TT                | 1946658107               |
| SNP_P3_156520_17010  | NW_004516751.1 | Scaffold1578 | 17010                   | AA                              | GG                | 1946658109               |
| SNP_P3_156521_17190  | NW_004516751.1 | Scaffold1578 | 17190                   | CC                              | TT                | 1946658111               |
| SNP_P3_156522_19662  | NW_004516751.1 | Scaffold1578 | 19662                   | TT                              | GG                | 1946658113               |
| SNP_P3_156523_24054  | NW_004516751.1 | Scaffold1578 | 24054                   | GG                              | CC                | 1946658115               |
| SNP_P3_156524_29452  | NW_004516751.1 | Scaffold1578 | 29452                   | TT                              | CC                | 1946658117               |
| SNP_P3_156525_29485  | NW_004516751.1 | Scaffold1578 | 29485                   | CC                              | TT                | 1946658119               |
| SNP_P3_156526_29512  | NW_004516751.1 | Scaffold1578 | 29512                   | CC                              | TT                | 1946658121               |
| SNP_P3_156527_29610  | NW_004516751.1 | Scaffold1578 | 29610                   | AA                              | CC                | 1946658123               |
| SNP_P3_156528_29840  | NW_004516751.1 | Scaffold1578 | 29840                   | AA                              | TT                | 1946658125               |
| SNP_P3_156529_29940  | NW_004516751.1 | Scaffold1578 | 29940                   | TT                              | AA                | 1946658128               |
| SNP_P3_156530_29942  | NW_004516751.1 | Scaffold1578 | 29942                   | GG                              | AA                | 1946658130               |
| SNP_P3_156531_30054  | NW_004516751.1 | Scaffold1578 | 30054                   | AA                              | TT                | 1946658132               |
| SNP_P3_156532_30062  | NW_004516751.1 | Scaffold1578 | 30062                   | CC                              | TT                | 1946658134               |
| SNP_P3_156533_33852  | NW_004516751.1 | Scaffold1578 | 33852                   | TT                              | CC                | 1946658136               |
| SNP_P3_156534_33854  | NW_004516751.1 | Scaffold1578 | 33854                   | GG                              | TT                | 1946658138               |
| SNP_P3_156535_33873  | NW_004516751.1 | Scaffold1578 | 33873                   | AA                              | GG                | 1946658141               |
| SNP_P3_156536_41958  | NW_004516751.1 | Scaffold1578 | 41958                   | TT                              | GG                | 1946658144               |
| SNP_P3_156537_45428  | NW_004516751.1 | Scaffold1578 | 45428                   | AA                              | CC                | 1946658146               |
| SNP_P3_156538_46541  | NW_004516751.1 | Scaffold1578 | 46541                   | TT                              | GG                | 1946658148               |
| SNP_P3_156539_46562  | NW_004516751.1 | Scaffold1578 | 46562                   | CC                              | AA                | 1946658150               |
| SNP_P3_156540_58501  | NW_004516751.1 | Scaffold1578 | 58501                   | GG                              | CC                | 1946658152               |
| SNP_P3_156541_58503  | NW_004516751.1 | Scaffold1578 | 58503                   | TT                              | AA                | 1946658154               |
| SNP_P3_156542_58886  | NW_004516751.1 | Scaffold1578 | 58886                   | TT                              | AA                | 1946658156               |
| SNP_P3_156543_59797  | NW_004516751.1 | Scaffold1578 | 59797                   | TT                              | CC                | 1946658158               |
| SNP_P3_156544_60963  | NW_004516751.1 | Scaffold1578 | 60963                   | TT                              | AA                | 1946658160               |
| SNP_P3_156545_63339  | NW_004516751.1 | Scaffold1578 | 63339                   | TT                              | AA                | 1946658162               |
| SNP_P3_156546_65965  | NW_004516751.1 | Scaffold1578 | 65965                   | TT                              | AA                | 1946658165               |
| SNP_P3_156548_77067  | NW_004516751.1 | Scaffold1578 | 77067                   | AA                              | GG                | 1946658167               |
| SNP_P3_156549_77122  | NW_004516751.1 | Scaffold1578 | 77122                   | TT                              | AA                | 1946658169               |
| SNP_P3_156550_77150  | NW_004516751.1 | Scaffold1578 | 77150                   | GG                              | TT                | 1946658171               |
| SNP_P3_156551_77234  | NW_004516751.1 | Scaffold1578 | 77234                   | TT                              | AA                | 1946658173               |
| SNP_P3_156552_77603  | NW_004516751.1 | Scaffold1578 | 77603                   | TT                              | AA                | 1946658175               |
| SNP_P3_156554_77876  | NW_004516751.1 | Scaffold1578 | 77876                   | AA                              | GG                | 1946658177               |
| SNP_P3_156555_78463  | NW_004516751.1 | Scaffold1578 | 78463                   | CC                              | TT                | 1946658179               |
| SNP_P3_156556_78478  | NW_004516751.1 | Scaffold1578 | 78478                   | TT                              | CC                | 1946658183               |

| SNPs IDs            | Chromosome IDs | Chromosomes  | Physical positions (bp) | CDC Frontier (Reference genome) | (Pusa 256 & HPNB) | NCBI SNPdb Accession IDs |
|---------------------|----------------|--------------|-------------------------|---------------------------------|-------------------|--------------------------|
| SNP_P3_156557_78496 | NW_004516751.1 | Scaffold1578 | 78496                   | TT                              | AA                | 1946658185               |
| SNP_P3_156558_78861 | NW_004516751.1 | Scaffold1578 | 78861                   | CC                              | TT                | 1946658187               |
| SNP_P3_156559_78862 | NW_004516751.1 | Scaffold1578 | 78862                   | GG                              | AA                | 1946658189               |
| SNP_P3_156560_78914 | NW_004516751.1 | Scaffold1578 | 78914                   | TT                              | AA                | 1946658191               |
| SNP_P3_156561_79007 | NW_004516751.1 | Scaffold1578 | 79007                   | GG                              | TT                | 1946658193               |
| SNP_P3_156563_80868 | NW_004516751.1 | Scaffold1578 | 80868                   | AA                              | CC                | 1946658195               |
| SNP_P3_156564_85623 | NW_004516751.1 | Scaffold1578 | 85623                   | CC                              | AA                | 1946658197               |
| SNP_P3_156565_86455 | NW_004516751.1 | Scaffold1578 | 86455                   | AA                              | GG                | 1946658199               |
| SNP_P3_156566_86831 | NW_004516751.1 | Scaffold1578 | 86831                   | AA                              | GG                | 1946658202               |
| SNP_P3_156567_88345 | NW_004516751.1 | Scaffold1578 | 88345                   | CC                              | AA                | 1946658204               |
| SNP_P3_156568_88346 | NW_004516751.1 | Scaffold1578 | 88346                   | AA                              | CC                | 1946658206               |
| SNP_P3_156571_8838  | NW_004516752.1 | Scaffold1579 | 8838                    | CC                              | TT                | 1946658208               |
| SNP_P3_156572_9028  | NW_004516752.1 | Scaffold1579 | 9028                    | TT                              | CC                | 1946658210               |
| SNP_P3_156573_9179  | NW_004516752.1 | Scaffold1579 | 9179                    | TT                              | CC                | 1946658212               |
| SNP_P3_156574_9191  | NW_004516752.1 | Scaffold1579 | 9191                    | TT                              | CC                | 1946658214               |
| SNP_P3_156575_9297  | NW_004516752.1 | Scaffold1579 | 9297                    | TT                              | AA                | 1946658216               |
| SNP_P3_156576_9299  | NW_004516752.1 | Scaffold1579 | 9299                    | CC                              | AA                | 1946658219               |
| SNP_P3_156577_9339  | NW_004516752.1 | Scaffold1579 | 9339                    | TT                              | CC                | 1946658222               |
| SNP_P3_156578_9343  | NW_004516752.1 | Scaffold1579 | 9343                    | AA                              | GG                | 1946658224               |
| SNP_P3_156579_9348  | NW_004516752.1 | Scaffold1579 | 9348                    | TT                              | GG                | 1946658226               |
| SNP_P3_156580_9442  | NW_004516752.1 | Scaffold1579 | 9442                    | CC                              | TT                | 1946658228               |
| SNP_P3_156581_9508  | NW_004516752.1 | Scaffold1579 | 9508                    | CC                              | TT                | 1946658230               |
| SNP_P3_156582_9510  | NW_004516752.1 | Scaffold1579 | 9510                    | GG                              | AA                | 1946658232               |
| SNP_P3_156583_9526  | NW_004516752.1 | Scaffold1579 | 9526                    | AA                              | TT                | 1946658234               |
| SNP_P3_156584_9726  | NW_004516752.1 | Scaffold1579 | 9726                    | AA                              | GG                | 1946658236               |
| SNP_P3_156585_9727  | NW_004516752.1 | Scaffold1579 | 9727                    | AA                              | CC                | 1946658238               |
| SNP_P3_156586_9764  | NW_004516752.1 | Scaffold1579 | 9764                    | AA                              | TT                | 1946658240               |
| SNP_P3_156587_9793  | NW_004516752.1 | Scaffold1579 | 9793                    | TT                              | CC                | 1946658242               |
| SNP_P3_156588_17623 | NW_004516752.1 | Scaffold1579 | 17623                   | AA                              | GG                | 1946658244               |
| SNP_P3_156589_17625 | NW_004516752.1 | Scaffold1579 | 17625                   | AA                              | TT                | 1946658246               |
| SNP_P3_156590_35111 | NW_004516752.1 | Scaffold1579 | 35111                   | AA                              | TT                | 1946658248               |
| SNP_P3_156591_35130 | NW_004516752.1 | Scaffold1579 | 35130                   | TT                              | CC                | 1946658250               |
| SNP_P3_156592_35153 | NW_004516752.1 | Scaffold1579 | 35153                   | TT                              | CC                | 1946658252               |
| SNP_P3_156593_35173 | NW_004516752.1 | Scaffold1579 | 35173                   | AA                              | GG                | 1946658255               |
| SNP_P3_156595_35254 | NW_004516752.1 | Scaffold1579 | 35254                   | AA                              | GG                | 1946658257               |
| SNP_P3_156596_35279 | NW_004516752.1 | Scaffold1579 | 35279                   | AA                              | GG                | 1946658260               |
| SNP_P3_156597_35295 | NW_004516752.1 | Scaffold1579 | 35295                   | CC                              | TT                | 1946658262               |
| SNP_P3_156598_35487 | NW_004516752.1 | Scaffold1579 | 35487                   | TT                              | AA                | 1946658264               |
| SNP_P3_156599_35524 | NW_004516752.1 | Scaffold1579 | 35524                   | AA                              | TT                | 1946658266               |
| SNP_P3_156600_35592 | NW_004516752.1 | Scaffold1579 | 35592                   | TT                              | CC                | 1946658268               |
| SNP_P3_156601_57419 | NW_004516752.1 | Scaffold1579 | 57419                   | GG                              | AA                | 1946658270               |
| SNP_P3_156602_57420 | NW_004516752.1 | Scaffold1579 | 57420                   | AA                              | GG                | 1946658272               |

| SNPs IDs             | Chromosome IDs | Chromosomes  | Physical positions (bp) | CDC Frontier (Reference genome) | (Pusa 256 & HPNB) | NCBI SNPdb Accession IDs |
|----------------------|----------------|--------------|-------------------------|---------------------------------|-------------------|--------------------------|
| SNP_P3_156603_60719  | NW_004516752.1 | Scaffold1579 | 60719                   | GG                              | AA                | 1946658273               |
| SNP_P3_156604_60721  | NW_004516752.1 | Scaffold1579 | 60721                   | AA                              | GG                | 1946658275               |
| SNP_P3_156606_65094  | NW_004516752.1 | Scaffold1579 | 65094                   | TT                              | CC                | 1946658277               |
| SNP_P3_156607_65117  | NW_004516752.1 | Scaffold1579 | 65117                   | TT                              | CC                | 1946658279               |
| SNP_P3_156608_65194  | NW_004516752.1 | Scaffold1579 | 65194                   | CC                              | TT                | 1946658281               |
| SNP_P3_156609_65196  | NW_004516752.1 | Scaffold1579 | 65196                   | GG                              | AA                | 1946658283               |
| SNP_P3_156610_65477  | NW_004516752.1 | Scaffold1579 | 65477                   | TT                              | AA                | 1946658285               |
| SNP_P3_156611_69353  | NW_004516752.1 | Scaffold1579 | 69353                   | GG                              | AA                | 1946658287               |
| SNP_P3_156612_82762  | NW_004516752.1 | Scaffold1579 | 82762                   | GG                              | AA                | 1946658290               |
| SNP_P3_156613_83080  | NW_004516752.1 | Scaffold1579 | 83080                   | GG                              | CC                | 1946658292               |
| SNP_P3_156614_83106  | NW_004516752.1 | Scaffold1579 | 83106                   | AA                              | TT                | 1946658294               |
| SNP_P3_156615_87998  | NW_004516752.1 | Scaffold1579 | 87998                   | GG                              | CC                | 1946658296               |
| SNP_P3_156616_88191  | NW_004516752.1 | Scaffold1579 | 88191                   | TT                              | CC                | 1946658299               |
| SNP_P3_156617_88343  | NW_004516752.1 | Scaffold1579 | 88343                   | CC                              | TT                | 1946658301               |
| SNP_P3_156619_135418 | NW_004516752.1 | Scaffold1579 | 135418                  | CC                              | AA                | 1946658303               |
| SNP_P3_156620_146419 | NW_004516752.1 | Scaffold1579 | 146419                  | GG                              | CC                | 1946658305               |
| SNP_P3_156621_150696 | NW_004516752.1 | Scaffold1579 | 150696                  | CC                              | TT                | 1946658307               |
| SNP_P3_156622_150854 | NW_004516752.1 | Scaffold1579 | 150854                  | CC                              | TT                | 1946658309               |
| SNP_P3_156623_150871 | NW_004516752.1 | Scaffold1579 | 150871                  | TT                              | AA                | 1946658311               |
| SNP_P3_156624_163141 | NW_004516752.1 | Scaffold1579 | 163141                  | GG                              | AA                | 1946658313               |
| SNP_P3_156625_163987 | NW_004516752.1 | Scaffold1579 | 163987                  | AA                              | TT                | 1946658315               |
| SNP_P3_156626_164435 | NW_004516752.1 | Scaffold1579 | 164435                  | GG                              | CC                | 1946658317               |
| SNP_P3_156627_164810 | NW_004516752.1 | Scaffold1579 | 164810                  | AA                              | GG                | 1946658319               |
| SNP_P3_156628_166898 | NW_004516752.1 | Scaffold1579 | 166898                  | TT                              | GG                | 1946658321               |
| SNP_P3_156629_172379 | NW_004516752.1 | Scaffold1579 | 172379                  | GG                              | AA                | 1946658323               |
| SNP_P3_156630_172381 | NW_004516752.1 | Scaffold1579 | 172381                  | TT                              | CC                | 1946658325               |
| SNP_P3_156631_172407 | NW_004516752.1 | Scaffold1579 | 172407                  | TT                              | CC                | 1946658327               |
| SNP_P3_156632_172420 | NW_004516752.1 | Scaffold1579 | 172420                  | CC                              | AA                | 1946658329               |
| SNP_P3_156633_172428 | NW_004516752.1 | Scaffold1579 | 172428                  | TT                              | AA                | 1946658331               |
| SNP_P3_156634_187208 | NW_004516752.1 | Scaffold1579 | 187208                  | TT                              | CC                | 1946658333               |
| SNP_P3_156635_190279 | NW_004516752.1 | Scaffold1579 | 190279                  | AA                              | TT                | 1946658335               |
| SNP_P3_156636_190281 | NW_004516752.1 | Scaffold1579 | 190281                  | TT                              | CC                | 1946658338               |
| SNP_P3_156637_191660 | NW_004516752.1 | Scaffold1579 | 191660                  | CC                              | AA                | 1946658340               |
| SNP_P3_156638_192018 | NW_004516752.1 | Scaffold1579 | 192018                  | CC                              | TT                | 1946658342               |
| SNP_P3_156639_194242 | NW_004516752.1 | Scaffold1579 | 194242                  | AA                              | CC                | 1946658344               |
| SNP_P3_156640_194455 | NW_004516752.1 | Scaffold1579 | 194455                  | CC                              | TT                | 1946658346               |
| SNP_P3_156641_194457 | NW_004516752.1 | Scaffold1579 | 194457                  | AA                              | CC                | 1946658348               |
| SNP_P3_156642_194537 | NW_004516752.1 | Scaffold1579 | 194537                  | CC                              | GG                | 1946658350               |
| SNP_P3_156643_194550 | NW_004516752.1 | Scaffold1579 | 194550                  | AA                              | CC                | 1946658352               |
| SNP_P3_156644_195303 | NW_004516752.1 | Scaffold1579 | 195303                  | CC                              | TT                | 1946658354               |
| SNP_P3_156645_203330 | NW_004516752.1 | Scaffold1579 | 203330                  | TT                              | AA                | 1946658356               |
| SNP_P3_156646_203342 | NW_004516752.1 | Scaffold1579 | 203342                  | TT                              | CC                | 1946658358               |

| SNPs IDs             | Chromosome IDs | Chromosomes  | Physical positions (bp) | CDC Frontier (Reference genome) | (Pusa 256 & HPNB) | NCBI SNPdb Accession IDs |
|----------------------|----------------|--------------|-------------------------|---------------------------------|-------------------|--------------------------|
| SNP_P3_156647_203345 | NW_004516752.1 | Scaffold1579 | 203345                  | AA                              | CC                | 1946658360               |
| SNP_P3_156648_203490 | NW_004516752.1 | Scaffold1579 | 203490                  | AA                              | TT                | 1946658362               |
| SNP_P3_156649_203536 | NW_004516752.1 | Scaffold1579 | 203536                  | TT                              | AA                | 1946658364               |
| SNP_P3_156650_204020 | NW_004516752.1 | Scaffold1579 | 204020                  | CC                              | TT                | 1946658366               |
| SNP_P3_156651_217473 | NW_004516752.1 | Scaffold1579 | 217473                  | TT                              | AA                | 1946658368               |
| SNP_P3_156652_217482 | NW_004516752.1 | Scaffold1579 | 217482                  | TT                              | CC                | 1946658369               |
| SNP_P3_156653_226211 | NW_004516752.1 | Scaffold1579 | 226211                  | TT                              | CC                | 1946658371               |
| SNP_P3_156654_226214 | NW_004516752.1 | Scaffold1579 | 226214                  | TT                              | CC                | 1946658373               |
| SNP_P3_156655_226230 | NW_004516752.1 | Scaffold1579 | 226230                  | GG                              | AA                | 1946658375               |
| SNP_P3_156656_226235 | NW_004516752.1 | Scaffold1579 | 226235                  | TT                              | CC                | 1946658378               |
| SNP_P3_156657_226259 | NW_004516752.1 | Scaffold1579 | 226259                  | TT                              | CC                | 1946658380               |
| SNP_P3_156658_226290 | NW_004516752.1 | Scaffold1579 | 226290                  | AA                              | GG                | 1946658382               |
| SNP_P3_156659_226505 | NW_004516752.1 | Scaffold1579 | 226505                  | TT                              | CC                | 1946658384               |
| SNP_P3_156660_226512 | NW_004516752.1 | Scaffold1579 | 226512                  | TT                              | AA                | 1946658386               |
| SNP_P3_156661_231524 | NW_004516752.1 | Scaffold1579 | 231524                  | GG                              | AA                | 1946658388               |
| SNP_P3_156662_232671 | NW_004516752.1 | Scaffold1579 | 232671                  | TT                              | CC                | 1946658390               |
| SNP_P3_156663_232808 | NW_004516752.1 | Scaffold1579 | 232808                  | AA                              | GG                | 1946658392               |
| SNP_P3_156664_232819 | NW_004516752.1 | Scaffold1579 | 232819                  | AA                              | CC                | 1946658394               |
| SNP_P3_156665_232820 | NW_004516752.1 | Scaffold1579 | 232820                  | AA                              | TT                | 1946658396               |
| SNP_P3_156666_233009 | NW_004516752.1 | Scaffold1579 | 233009                  | AA                              | GG                | 1946658398               |
| SNP_P3_156667_233075 | NW_004516752.1 | Scaffold1579 | 233075                  | CC                              | GG                | 1946658400               |
| SNP_P3_156668_233094 | NW_004516752.1 | Scaffold1579 | 233094                  | CC                              | AA                | 1946658402               |
| SNP_P3_156669_233206 | NW_004516752.1 | Scaffold1579 | 233206                  | AA                              | GG                | 1946658404               |
| SNP_P3_156670_233211 | NW_004516752.1 | Scaffold1579 | 233211                  | AA                              | CC                | 1946658406               |
| SNP_P3_156671_233946 | NW_004516752.1 | Scaffold1579 | 233946                  | TT                              | CC                | 1946658408               |
| SNP_P3_156672_233960 | NW_004516752.1 | Scaffold1579 | 233960                  | TT                              | AA                | 1946658410               |
| SNP_P3_156673_234030 | NW_004516752.1 | Scaffold1579 | 234030                  | TT                              | AA                | 1946658412               |
| SNP_P3_156674_234063 | NW_004516752.1 | Scaffold1579 | 234063                  | TT                              | GG                | 1946658414               |
| SNP_P3_156675_234077 | NW_004516752.1 | Scaffold1579 | 234077                  | AA                              | GG                | 1946658416               |
| SNP_P3_156676_234103 | NW_004516752.1 | Scaffold1579 | 234103                  | TT                              | GG                | 1946658419               |
| SNP_P3_156677_234343 | NW_004516752.1 | Scaffold1579 | 234343                  | AA                              | TT                | 1946658421               |
| SNP_P3_156678_238504 | NW_004516752.1 | Scaffold1579 | 238504                  | TT                              | AA                | 1946658423               |
| SNP_P3_156679_240973 | NW_004516752.1 | Scaffold1579 | 240973                  | AA                              | GG                | 1946658425               |
| SNP_P3_156680_241246 | NW_004516752.1 | Scaffold1579 | 241246                  | AA                              | CC                | 1946658427               |
| SNP_P3_156681_241773 | NW_004516752.1 | Scaffold1579 | 241773                  | GG                              | TT                | 1946658429               |
| SNP_P3_156682_243275 | NW_004516752.1 | Scaffold1579 | 243275                  | AA                              | GG                | 1946658431               |
| SNP_P3_156683_243292 | NW_004516752.1 | Scaffold1579 | 243292                  | AA                              | CC                | 1946658433               |
| SNP_P3_156684_243297 | NW_004516752.1 | Scaffold1579 | 243297                  | CC                              | TT                | 1946658435               |
| SNP_P3_156685_243396 | NW_004516752.1 | Scaffold1579 | 243396                  | TT                              | GG                | 1946658437               |
| SNP_P3_156686_243710 | NW_004516752.1 | Scaffold1579 | 243710                  | TT                              | CC                | 1946658439               |
| SNP_P3_156687_243755 | NW_004516752.1 | Scaffold1579 | 243755                  | TT                              | CC                | 1946658441               |
| SNP_P3_156688_243800 | NW_004516752.1 | Scaffold1579 | 243800                  | AA                              | GG                | 1946658443               |

| SNPs IDs             | Chromosome IDs | Chromosomes  | Physical positions (bp) | CDC Frontier (Reference genome) | (Pusa 256 & HPNB) | NCBI SNPdb Accession IDs |
|----------------------|----------------|--------------|-------------------------|---------------------------------|-------------------|--------------------------|
| SNP_P3_156689_243804 | NW_004516752.1 | Scaffold1579 | 243804                  | TT                              | CC                | 1946658445               |
| SNP_P3_156690_243805 | NW_004516752.1 | Scaffold1579 | 243805                  | AA                              | GG                | 1946658446               |
| SNP_P3_156691_243839 | NW_004516752.1 | Scaffold1579 | 243839                  | TT                              | GG                | 1946658448               |
| SNP_P3_156692_244430 | NW_004516752.1 | Scaffold1579 | 244430                  | GG                              | AA                | 1946658450               |
| SNP_P3_156693_244431 | NW_004516752.1 | Scaffold1579 | 244431                  | AA                              | GG                | 1946658452               |
| SNP_P3_156694_244445 | NW_004516752.1 | Scaffold1579 | 244445                  | TT                              | CC                | 1946658454               |
| SNP_P3_156695_5188   | NW_004516753.1 | Scaffold1580 | 5188                    | GG                              | AA                | 1946658456               |
| SNP_P3_156696_5223   | NW_004516753.1 | Scaffold1580 | 5223                    | TT                              | CC                | 1946658459               |
| SNP_P3_156697_7153   | NW_004516753.1 | Scaffold1580 | 7153                    | GG                              | AA                | 1946658461               |
| SNP_P3_156698_7207   | NW_004516753.1 | Scaffold1580 | 7207                    | AA                              | CC                | 1946658463               |
| SNP_P3_156699_7217   | NW_004516753.1 | Scaffold1580 | 7217                    | TT                              | GG                | 1946658465               |
| SNP_P3_156700_7241   | NW_004516753.1 | Scaffold1580 | 7241                    | AA                              | CC                | 1946658467               |
| SNP_P3_156701_7280   | NW_004516753.1 | Scaffold1580 | 7280                    | AA                              | GG                | 1946658469               |
| SNP_P3_156703_7551   | NW_004516753.1 | Scaffold1580 | 7551                    | GG                              | AA                | 1946658471               |
| SNP_P3_156704_7596   | NW_004516753.1 | Scaffold1580 | 7596                    | TT                              | AA                | 1946658472               |
| SNP_P3_156705_7730   | NW_004516753.1 | Scaffold1580 | 7730                    | TT                              | GG                | 1946658474               |
| SNP_P3_156706_61949  | NW_004516753.1 | Scaffold1580 | 61949                   | AA                              | GG                | 1946658476               |
| SNP_P3_156708_64542  | NW_004516753.1 | Scaffold1580 | 64542                   | AA                              | TT                | 1946658478               |
| SNP_P3_156709_69772  | NW_004516753.1 | Scaffold1580 | 69772                   | GG                              | AA                | 1946658480               |
| SNP_P3_156710_69803  | NW_004516753.1 | Scaffold1580 | 69803                   | TT                              | GG                | 1946658482               |
| SNP_P3_156711_69840  | NW_004516753.1 | Scaffold1580 | 69840                   | AA                              | TT                | 1946658484               |
| SNP_P3_156712_69874  | NW_004516753.1 | Scaffold1580 | 69874                   | TT                              | CC                | 1946658486               |
| SNP_P3_156714_70138  | NW_004516753.1 | Scaffold1580 | 70138                   | GG                              | AA                | 1946658489               |
| SNP_P3_156715_70481  | NW_004516753.1 | Scaffold1580 | 70481                   | TT                              | CC                | 1946658491               |
| SNP_P3_156716_98195  | NW_004516753.1 | Scaffold1580 | 98195                   | AA                              | GG                | 1946658493               |
| SNP_P3_156717_98196  | NW_004516753.1 | Scaffold1580 | 98196                   | TT                              | AA                | 1946658495               |
| SNP_P3_156718_168772 | NW_004516753.1 | Scaffold1580 | 168772                  | GG                              | AA                | 1946658498               |
| SNP_P3_156719_169206 | NW_004516753.1 | Scaffold1580 | 169206                  | TT                              | GG                | 1946658500               |
| SNP_P3_156720_169207 | NW_004516753.1 | Scaffold1580 | 169207                  | TT                              | CC                | 1946658502               |
| SNP_P3_156721_170529 | NW_004516753.1 | Scaffold1580 | 170529                  | CC                              | TT                | 1946658504               |
| SNP_P3_156723_176128 | NW_004516753.1 | Scaffold1580 | 176128                  | CC                              | TT                | 1946658506               |
| SNP_P3_156724_184211 | NW_004516753.1 | Scaffold1580 | 184211                  | CC                              | TT                | 1946658508               |
| SNP_P3_156725_184236 | NW_004516753.1 | Scaffold1580 | 184236                  | CC                              | TT                | 1946658510               |
| SNP_P3_156726_184262 | NW_004516753.1 | Scaffold1580 | 184262                  | GG                              | AA                | 1946658512               |
| SNP_P3_156727_184304 | NW_004516753.1 | Scaffold1580 | 184304                  | TT                              | AA                | 1946658514               |
| SNP_P3_156728_184392 | NW_004516753.1 | Scaffold1580 | 184392                  | TT                              | AA                | 1946658516               |
| SNP_P3_156729_185221 | NW_004516753.1 | Scaffold1580 | 185221                  | AA                              | GG                | 1946658518               |
| SNP_P3_156730_185231 | NW_004516753.1 | Scaffold1580 | 185231                  | CC                              | TT                | 1946658520               |
| SNP_P3_156731_185383 | NW_004516753.1 | Scaffold1580 | 185383                  | AA                              | TT                | 1946658522               |
| SNP_P3_156732_194413 | NW_004516753.1 | Scaffold1580 | 194413                  | CC                              | GG                | 1946658524               |
| SNP_P3_156733_196163 | NW_004516753.1 | Scaffold1580 | 196163                  | TT                              | GG                | 1946658526               |
| SNP_P3_156734_220299 | NW_004516753.1 | Scaffold1580 | 220299                  | AA                              | GG                | 1946658528               |



| SNPs IDs             | Chromosome IDs | Chromosomes  | Physical positions (bp) | CDC Frontier (Reference genome) | (Pusa 256 & HPNB) | NCBI SNPdb Accession IDs |
|----------------------|----------------|--------------|-------------------------|---------------------------------|-------------------|--------------------------|
| SNP_P3_156735_232566 | NW_004516753.1 | Scaffold1580 | 232566                  | CC                              | AA                | 1946658530               |
| SNP_P3_156737_254441 | NW_004516753.1 | Scaffold1580 | 254441                  | AA                              | TT                | 1946658532               |
| SNP_P3_156739_266507 | NW_004516753.1 | Scaffold1580 | 266507                  | AA                              | TT                | 1946658534               |
| SNP_P3_156740_280493 | NW_004516753.1 | Scaffold1580 | 280493                  | GG                              | AA                | 1946658536               |
| SNP_P3_156741_293866 | NW_004516753.1 | Scaffold1580 | 293866                  | GG                              | CC                | 1946658539               |
| SNP_P3_156742_361067 | NW_004516753.1 | Scaffold1580 | 361067                  | TT                              | CC                | 1946658541               |
| SNP_P3_156743_361103 | NW_004516753.1 | Scaffold1580 | 361103                  | AA                              | TT                | 1946658543               |
| SNP_P3_156744_395285 | NW_004516753.1 | Scaffold1580 | 395285                  | TT                              | AA                | 1946658544               |
| SNP_P3_156745_395578 | NW_004516753.1 | Scaffold1580 | 395578                  | AA                              | GG                | 1946658546               |
| SNP_P3_156746_399323 | NW_004516753.1 | Scaffold1580 | 399323                  | GG                              | AA                | 1946658548               |
| SNP_P3_156748_399571 | NW_004516753.1 | Scaffold1580 | 399571                  | GG                              | AA                | 1946658550               |
| SNP_P3_156749_471838 | NW_004516753.1 | Scaffold1580 | 471838                  | GG                              | AA                | 1946658552               |
| SNP_P3_156750_472094 | NW_004516753.1 | Scaffold1580 | 472094                  | GG                              | AA                | 1946658554               |
| SNP_P3_156754_472715 | NW_004516753.1 | Scaffold1580 | 472715                  | TT                              | GG                | 1946658556               |
| SNP_P3_156755_472834 | NW_004516753.1 | Scaffold1580 | 472834                  | AA                              | TT                | 1946658558               |
| SNP_P3_156756_472849 | NW_004516753.1 | Scaffold1580 | 472849                  | CC                              | AA                | 1946658560               |
| SNP_P3_156757_472905 | NW_004516753.1 | Scaffold1580 | 472905                  | AA                              | GG                | 1946658562               |
| SNP_P3_156758_472915 | NW_004516753.1 | Scaffold1580 | 472915                  | CC                              | AA                | 1946658564               |
| SNP_P3_156759_472917 | NW_004516753.1 | Scaffold1580 | 472917                  | AA                              | GG                | 1946658566               |
| SNP_P3_156760_472945 | NW_004516753.1 | Scaffold1580 | 472945                  | AA                              | GG                | 1946658567               |
| SNP_P3_156761_472951 | NW_004516753.1 | Scaffold1580 | 472951                  | CC                              | AA                | 1946658569               |
| SNP_P3_156762_472952 | NW_004516753.1 | Scaffold1580 | 472952                  | AA                              | GG                | 1946658571               |
| SNP_P3_156763_472987 | NW_004516753.1 | Scaffold1580 | 472987                  | GG                              | AA                | 1946658573               |
| SNP_P3_156764_473032 | NW_004516753.1 | Scaffold1580 | 473032                  | CC                              | TT                | 1946658575               |
| SNP_P3_156765_473072 | NW_004516753.1 | Scaffold1580 | 473072                  | TT                              | CC                | 1946658578               |
| SNP_P3_156766_473112 | NW_004516753.1 | Scaffold1580 | 473112                  | AA                              | GG                | 1946658580               |
| SNP_P3_156767_473120 | NW_004516753.1 | Scaffold1580 | 473120                  | GG                              | AA                | 1946658582               |
| SNP_P3_156768_473123 | NW_004516753.1 | Scaffold1580 | 473123                  | AA                              | TT                | 1946658584               |
| SNP_P3_156769_473150 | NW_004516753.1 | Scaffold1580 | 473150                  | TT                              | GG                | 1946658586               |
| SNP_P3_156770_473221 | NW_004516753.1 | Scaffold1580 | 473221                  | CC                              | TT                | 1946658588               |
| SNP_P3_156771_473223 | NW_004516753.1 | Scaffold1580 | 473223                  | CC                              | TT                | 1946658590               |
| SNP_P3_156772_504841 | NW_004516753.1 | Scaffold1580 | 504841                  | AA                              | GG                | 1946658592               |
| SNP_P3_156773_504949 | NW_004516753.1 | Scaffold1580 | 504949                  | CC                              | TT                | 1946658594               |
| SNP_P3_156774_504952 | NW_004516753.1 | Scaffold1580 | 504952                  | AA                              | CC                | 1946658596               |
| SNP_P3_156775_505307 | NW_004516753.1 | Scaffold1580 | 505307                  | AA                              | CC                | 1946658598               |
| SNP_P3_156776_505356 | NW_004516753.1 | Scaffold1580 | 505356                  | TT                              | GG                | 1946658600               |
| SNP_P3_156777_505415 | NW_004516753.1 | Scaffold1580 | 505415                  | TT                              | CC                | 1946658602               |
| SNP_P3_156778_505416 | NW_004516753.1 | Scaffold1580 | 505416                  | AA                              | GG                | 1946658604               |
| SNP_P3_156779_7663   | NW_004516754.1 | Scaffold1581 | 7663                    | TT                              | CC                | 1946658606               |
| SNP_P3_156780_7667   | NW_004516754.1 | Scaffold1581 | 7667                    | CC                              | AA                | 1946658608               |
| SNP_P3_156781_7731   | NW_004516754.1 | Scaffold1581 | 7731                    | GG                              | CC                | 1946658610               |
| SNP_P3_156782_13890  | NW_004516754.1 | Scaffold1581 | 13890                   | TT                              | AA                | 1946658611               |

| SNPs IDs             | Chromosome IDs | Chromosomes  | Physical positions (bp) | CDC Frontier (Reference genome) | (Pusa 256 & HPNB) | NCBI SNPdb Accession IDs |
|----------------------|----------------|--------------|-------------------------|---------------------------------|-------------------|--------------------------|
| SNP_P3_156783_174    | NW_004516755.1 | Scaffold1585 | 174                     | CC                              | TT                | 1946658614               |
| SNP_P3_156784_26140  | NW_004516755.1 | Scaffold1585 | 26140                   | GG                              | AA                | 1946658616               |
| SNP_P3_156785_57990  | NW_004516755.1 | Scaffold1585 | 57990                   | GG                              | TT                | 1946658618               |
| SNP_P3_156786_58032  | NW_004516755.1 | Scaffold1585 | 58032                   | CC                              | GG                | 1946658621               |
| SNP_P3_156787_58074  | NW_004516755.1 | Scaffold1585 | 58074                   | AA                              | GG                | 1946658623               |
| SNP_P3_156788_58139  | NW_004516755.1 | Scaffold1585 | 58139                   | TT                              | CC                | 1946658625               |
| SNP_P3_156789_58342  | NW_004516755.1 | Scaffold1585 | 58342                   | CC                              | TT                | 1946658627               |
| SNP_P3_156790_58357  | NW_004516755.1 | Scaffold1585 | 58357                   | TT                              | GG                | 1946658629               |
| SNP_P3_156791_58358  | NW_004516755.1 | Scaffold1585 | 58358                   | GG                              | AA                | 1946658631               |
| SNP_P3_156792_58362  | NW_004516755.1 | Scaffold1585 | 58362                   | GG                              | AA                | 1946658633               |
| SNP_P3_156793_58368  | NW_004516755.1 | Scaffold1585 | 58368                   | TT                              | CC                | 1946658635               |
| SNP_P3_156794_58393  | NW_004516755.1 | Scaffold1585 | 58393                   | AA                              | GG                | 1946658637               |
| SNP_P3_156795_58466  | NW_004516755.1 | Scaffold1585 | 58466                   | GG                              | TT                | 1946658639               |
| SNP_P3_156796_58484  | NW_004516755.1 | Scaffold1585 | 58484                   | CC                              | AA                | 1946658641               |
| SNP_P3_156797_58485  | NW_004516755.1 | Scaffold1585 | 58485                   | CC                              | TT                | 1946658643               |
| SNP_P3_156798_58531  | NW_004516755.1 | Scaffold1585 | 58531                   | TT                              | CC                | 1946658645               |
| SNP_P3_156799_58562  | NW_004516755.1 | Scaffold1585 | 58562                   | GG                              | AA                | 1946658647               |
| SNP_P3_156800_58577  | NW_004516755.1 | Scaffold1585 | 58577                   | TT                              | CC                | 1946658649               |
| SNP_P3_156801_58785  | NW_004516755.1 | Scaffold1585 | 58785                   | AA                              | CC                | 1946658651               |
| SNP_P3_156802_58801  | NW_004516755.1 | Scaffold1585 | 58801                   | AA                              | GG                | 1946658653               |
| SNP_P3_156803_58805  | NW_004516755.1 | Scaffold1585 | 58805                   | TT                              | CC                | 1946658655               |
| SNP_P3_156804_58822  | NW_004516755.1 | Scaffold1585 | 58822                   | TT                              | GG                | 1946658657               |
| SNP_P3_156805_59001  | NW_004516755.1 | Scaffold1585 | 59001                   | CC                              | TT                | 1946658659               |
| SNP_P3_156806_61903  | NW_004516755.1 | Scaffold1585 | 61903                   | CC                              | TT                | 1946658662               |
| SNP_P3_156807_62170  | NW_004516755.1 | Scaffold1585 | 62170                   | TT                              | CC                | 1946658664               |
| SNP_P3_156808_62176  | NW_004516755.1 | Scaffold1585 | 62176                   | TT                              | CC                | 1946658667               |
| SNP_P3_156810_83478  | NW_004516755.1 | Scaffold1585 | 83478                   | CC                              | TT                | 1946658669               |
| SNP_P3_156811_145197 | NW_004516755.1 | Scaffold1585 | 145197                  | AA                              | GG                | 1946658671               |
| SNP_P3_156812_179450 | NW_004516755.1 | Scaffold1585 | 179450                  | TT                              | CC                | 1946658673               |
| SNP_P3_156813_179463 | NW_004516755.1 | Scaffold1585 | 179463                  | GG                              | AA                | 1946658675               |
| SNP_P3_156814_183381 | NW_004516755.1 | Scaffold1585 | 183381                  | CC                              | TT                | 1946658677               |
| SNP_P3_156815_183403 | NW_004516755.1 | Scaffold1585 | 183403                  | GG                              | AA                | 1946658679               |
| SNP_P3_156816_183574 | NW_004516755.1 | Scaffold1585 | 183574                  | CC                              | AA                | 1946658681               |
| SNP_P3_156817_94     | NW_004516756.1 | Scaffold1586 | 94                      | TT                              | CC                | 1946658683               |
| SNP_P3_156818_127    | NW_004516756.1 | Scaffold1586 | 127                     | AA                              | GG                | 1946658685               |
| SNP_P3_156819_150    | NW_004516756.1 | Scaffold1586 | 150                     | AA                              | TT                | 1946658687               |
| SNP_P3_156820_427    | NW_004516756.1 | Scaffold1586 | 427                     | GG                              | AA                | 1946658689               |
| SNP_P3_156821_799    | NW_004516756.1 | Scaffold1586 | 799                     | TT                              | CC                | 1946658691               |
| SNP_P3_156822_1821   | NW_004516756.1 | Scaffold1586 | 1821                    | AA                              | TT                | 1946658693               |
| SNP_P3_156824_2154   | NW_004516756.1 | Scaffold1586 | 2154                    | GG                              | AA                | 1946658695               |
| SNP_P3_156825_2196   | NW_004516756.1 | Scaffold1586 | 2196                    | AA                              | CC                | 1946658698               |
| SNP_P3_156826_2205   | NW_004516756.1 | Scaffold1586 | 2205                    | CC                              | GG                | 1946658701               |

| SNPs IDs            | Chromosome IDs | Chromosomes  | Physical positions (bp) | CDC Frontier (Reference genome) | (Pusa 256 & HPNB) | NCBI SNPdb Accession IDs |
|---------------------|----------------|--------------|-------------------------|---------------------------------|-------------------|--------------------------|
| SNP_P3_156827_13151 | NW_004516756.1 | Scaffold1586 | 13151                   | GG                              | AA                | 1946658703               |
| SNP_P3_156828_6506  | NW_004516758.1 | Scaffold1588 | 6506                    | AA                              | GG                | 1946658705               |
| SNP_P3_156829_6528  | NW_004516758.1 | Scaffold1588 | 6528                    | AA                              | GG                | 1946658707               |
| SNP_P3_156830_8316  | NW_004516759.1 | Scaffold1590 | 8316                    | AA                              | TT                | 1946658709               |
| SNP_P3_156831_8323  | NW_004516759.1 | Scaffold1590 | 8323                    | TT                              | CC                | 1946658711               |
| SNP_P3_156832_8364  | NW_004516759.1 | Scaffold1590 | 8364                    | CC                              | TT                | 1946658713               |
| SNP_P3_156833_8373  | NW_004516759.1 | Scaffold1590 | 8373                    | AA                              | CC                | 1946658715               |
| SNP_P3_156834_8470  | NW_004516759.1 | Scaffold1590 | 8470                    | CC                              | TT                | 1946658718               |
| SNP_P3_156835_8487  | NW_004516759.1 | Scaffold1590 | 8487                    | CC                              | TT                | 1946658720               |
| SNP_P3_156836_8517  | NW_004516759.1 | Scaffold1590 | 8517                    | CC                              | AA                | 1946658722               |
| SNP_P3_156837_8553  | NW_004516759.1 | Scaffold1590 | 8553                    | TT                              | CC                | 1946658724               |
| SNP_P3_156839_8609  | NW_004516759.1 | Scaffold1590 | 8609                    | TT                              | CC                | 1946658726               |
| SNP_P3_156840_8633  | NW_004516759.1 | Scaffold1590 | 8633                    | CC                              | AA                | 1946658728               |
| SNP_P3_156841_8726  | NW_004516759.1 | Scaffold1590 | 8726                    | TT                              | CC                | 1946658730               |
| SNP_P3_156842_8735  | NW_004516759.1 | Scaffold1590 | 8735                    | GG                              | AA                | 1946658732               |
| SNP_P3_156843_8809  | NW_004516759.1 | Scaffold1590 | 8809                    | GG                              | AA                | 1946658734               |
| SNP_P3_156844_8835  | NW_004516759.1 | Scaffold1590 | 8835                    | TT                              | CC                | 1946658736               |
| SNP_P3_156845_9647  | NW_004516759.1 | Scaffold1590 | 9647                    | TT                              | GG                | 1946658738               |
| SNP_P3_156846_12414 | NW_004516759.1 | Scaffold1590 | 12414                   | TT                              | CC                | 1946658740               |
| SNP_P3_156847_12434 | NW_004516759.1 | Scaffold1590 | 12434                   | CC                              | TT                | 1946658742               |
| SNP_P3_156848_12456 | NW_004516759.1 | Scaffold1590 | 12456                   | CC                              | GG                | 1946658744               |
| SNP_P3_156849_12622 | NW_004516759.1 | Scaffold1590 | 12622                   | AA                              | GG                | 1946658746               |
| SNP_P3_156850_12718 | NW_004516759.1 | Scaffold1590 | 12718                   | AA                              | TT                | 1946658748               |
| SNP_P3_156851_12724 | NW_004516759.1 | Scaffold1590 | 12724                   | AA                              | GG                | 1946658751               |
| SNP_P3_156852_12886 | NW_004516759.1 | Scaffold1590 | 12886                   | TT                              | GG                | 1946658753               |
| SNP_P3_156853_12915 | NW_004516759.1 | Scaffold1590 | 12915                   | TT                              | CC                | 1946658755               |
| SNP_P3_156854_12988 | NW_004516759.1 | Scaffold1590 | 12988                   | GG                              | AA                | 1946658757               |
| SNP_P3_156855_4502  | NW_004516762.1 | Scaffold1599 | 4502                    | GG                              | AA                | 1946658759               |
| SNP_P3_156856_157   | NW_004516763.1 | Scaffold1600 | 157                     | CC                              | AA                | 1946658761               |
| SNP_P3_156857_426   | NW_004516763.1 | Scaffold1600 | 426                     | AA                              | TT                | 1946658763               |
| SNP_P3_156858_839   | NW_004516763.1 | Scaffold1600 | 839                     | CC                              | AA                | 1946658765               |
| SNP_P3_156859_7307  | NW_004516764.1 | Scaffold1603 | 7307                    | GG                              | TT                | 1946658767               |
| SNP_P3_156860_7678  | NW_004516764.1 | Scaffold1603 | 7678                    | CC                              | TT                | 1946658769               |
| SNP_P3_156861_7686  | NW_004516764.1 | Scaffold1603 | 7686                    | AA                              | GG                | 1946658771               |
| SNP_P3_156862_7688  | NW_004516764.1 | Scaffold1603 | 7688                    | GG                              | TT                | 1946658773               |
| SNP_P3_156863_7726  | NW_004516764.1 | Scaffold1603 | 7726                    | TT                              | CC                | 1946658775               |
| SNP_P3_156864_7729  | NW_004516764.1 | Scaffold1603 | 7729                    | TT                              | GG                | 1946658777               |
| SNP_P3_156865_7744  | NW_004516764.1 | Scaffold1603 | 7744                    | TT                              | CC                | 1946658779               |
| SNP_P3_156866_22435 | NW_004516764.1 | Scaffold1603 | 22435                   | AA                              | GG                | 1946658781               |
| SNP_P3_156867_22611 | NW_004516764.1 | Scaffold1603 | 22611                   | AA                              | TT                | 1946658783               |
| SNP_P3_156868_46646 | NW_004516764.1 | Scaffold1603 | 46646                   | TT                              | CC                | 1946658785               |
| SNP_P3_156869_46703 | NW_004516764.1 | Scaffold1603 | 46703                   | TT                              | CC                | 1946658787               |

| SNPs IDs             | Chromosome IDs | Chromosomes  | Physical positions (bp) | CDC Frontier (Reference genome) | (Pusa 256 & HPNB) | NCBI SNPdb Accession IDs |
|----------------------|----------------|--------------|-------------------------|---------------------------------|-------------------|--------------------------|
| SNP_P3_156870_46849  | NW_004516764.1 | Scaffold1603 | 46849                   | AA                              | CC                | 1946658789               |
| SNP_P3_156871_1954   | NW_004516765.1 | Scaffold1606 | 1954                    | TT                              | CC                | 1946658791               |
| SNP_P3_156872_315    | NW_004516766.1 | Scaffold1607 | 315                     | GG                              | AA                | 1946658793               |
| SNP_P3_156873_391    | NW_004516766.1 | Scaffold1607 | 391                     | TT                              | CC                | 1946658795               |
| SNP_P3_156874_9874   | NW_004516766.1 | Scaffold1607 | 9874                    | GG                              | AA                | 1946658797               |
| SNP_P3_156875_13918  | NW_004516766.1 | Scaffold1607 | 13918                   | TT                              | CC                | 1946658800               |
| SNP_P3_156876_14084  | NW_004516766.1 | Scaffold1607 | 14084                   | AA                              | GG                | 1946658802               |
| SNP_P3_156877_14171  | NW_004516766.1 | Scaffold1607 | 14171                   | AA                              | TT                | 1946658803               |
| SNP_P3_156878_14323  | NW_004516766.1 | Scaffold1607 | 14323                   | GG                              | TT                | 1946658804               |
| SNP_P3_156879_14540  | NW_004516766.1 | Scaffold1607 | 14540                   | GG                              | AA                | 1946658805               |
| SNP_P3_156880_22916  | NW_004516766.1 | Scaffold1607 | 22916                   | TT                              | GG                | 1946658807               |
| SNP_P3_156881_29535  | NW_004516766.1 | Scaffold1607 | 29535                   | GG                              | TT                | 1946658809               |
| SNP_P3_156882_33252  | NW_004516766.1 | Scaffold1607 | 33252                   | TT                              | CC                | 1946658811               |
| SNP_P3_156883_33291  | NW_004516766.1 | Scaffold1607 | 33291                   | TT                              | CC                | 1946658813               |
| SNP_P3_156884_33297  | NW_004516766.1 | Scaffold1607 | 33297                   | AA                              | GG                | 1946658815               |
| SNP_P3_156885_33343  | NW_004516766.1 | Scaffold1607 | 33343                   | GG                              | AA                | 1946658817               |
| SNP_P3_156886_42086  | NW_004516766.1 | Scaffold1607 | 42086                   | CC                              | TT                | 1946658819               |
| SNP_P3_156887_47122  | NW_004516766.1 | Scaffold1607 | 47122                   | CC                              | AA                | 1946658821               |
| SNP_P3_156888_47185  | NW_004516766.1 | Scaffold1607 | 47185                   | CC                              | AA                | 1946658823               |
| SNP_P3_156889_47212  | NW_004516766.1 | Scaffold1607 | 47212                   | TT                              | GG                | 1946658825               |
| SNP_P3_156890_47255  | NW_004516766.1 | Scaffold1607 | 47255                   | AA                              | CC                | 1946658827               |
| SNP_P3_156891_47267  | NW_004516766.1 | Scaffold1607 | 47267                   | AA                              | CC                | 1946658829               |
| SNP_P3_156892_47430  | NW_004516766.1 | Scaffold1607 | 47430                   | TT                              | AA                | 1946658831               |
| SNP_P3_156893_47516  | NW_004516766.1 | Scaffold1607 | 47516                   | TT                              | CC                | 1946658833               |
| SNP_P3_156894_47517  | NW_004516766.1 | Scaffold1607 | 47517                   | TT                              | CC                | 1946658836               |
| SNP_P3_156895_47560  | NW_004516766.1 | Scaffold1607 | 47560                   | TT                              | CC                | 1946658839               |
| SNP_P3_156896_60100  | NW_004516766.1 | Scaffold1607 | 60100                   | TT                              | GG                | 1946658841               |
| SNP_P3_156897_69296  | NW_004516766.1 | Scaffold1607 | 69296                   | AA                              | GG                | 1946658843               |
| SNP_P3_156898_75678  | NW_004516766.1 | Scaffold1607 | 75678                   | AA                              | TT                | 1946658845               |
| SNP_P3_156899_94435  | NW_004516766.1 | Scaffold1607 | 94435                   | AA                              | GG                | 1946658847               |
| SNP_P3_156900_99023  | NW_004516766.1 | Scaffold1607 | 99023                   | TT                              | AA                | 1946658849               |
| SNP_P3_156901_99067  | NW_004516766.1 | Scaffold1607 | 99067                   | AA                              | TT                | 1946658852               |
| SNP_P3_156902_99188  | NW_004516766.1 | Scaffold1607 | 99188                   | TT                              | CC                | 1946658854               |
| SNP_P3_156903_99229  | NW_004516766.1 | Scaffold1607 | 99229                   | GG                              | AA                | 1946658856               |
| SNP_P3_156904_99407  | NW_004516766.1 | Scaffold1607 | 99407                   | TT                              | CC                | 1946658858               |
| SNP_P3_156905_116848 | NW_004516766.1 | Scaffold1607 | 116848                  | TT                              | AA                | 1946658860               |
| SNP_P3_156906_117126 | NW_004516766.1 | Scaffold1607 | 117126                  | GG                              | CC                | 1946658862               |
| SNP_P3_156907_117128 | NW_004516766.1 | Scaffold1607 | 117128                  | GG                              | TT                | 1946658864               |
| SNP_P3_156908_117170 | NW_004516766.1 | Scaffold1607 | 117170                  | TT                              | AA                | 1946658866               |
| SNP_P3_156909_117920 | NW_004516766.1 | Scaffold1607 | 117920                  | TT                              | AA                | 1946658868               |
| SNP_P3_156910_117924 | NW_004516766.1 | Scaffold1607 | 117924                  | TT                              | GG                | 1946658870               |
| SNP_P3_156912_119639 | NW_004516766.1 | Scaffold1607 | 119639                  | AA                              | GG                | 1946658872               |

| SNPs IDs             | Chromosome IDs | Chromosomes  | Physical positions (bp) | CDC Frontier (Reference genome) | (Pusa 256 & HPNB) | NCBI SNPdb Accession IDs |
|----------------------|----------------|--------------|-------------------------|---------------------------------|-------------------|--------------------------|
| SNP_P3_156913_119717 | NW_004516766.1 | Scaffold1607 | 119717                  | AA                              | TT                | 1946658875               |
| SNP_P3_156914_119768 | NW_004516766.1 | Scaffold1607 | 119768                  | AA                              | GG                | 1946658878               |
| SNP_P3_156915_119775 | NW_004516766.1 | Scaffold1607 | 119775                  | GG                              | AA                | 1946658880               |
| SNP_P3_156916_119882 | NW_004516766.1 | Scaffold1607 | 119882                  | TT                              | GG                | 1946658882               |
| SNP_P3_156917_119888 | NW_004516766.1 | Scaffold1607 | 119888                  | CC                              | TT                | 1946658884               |
| SNP_P3_156918_119895 | NW_004516766.1 | Scaffold1607 | 119895                  | GG                              | AA                | 1946658886               |
| SNP_P3_156919_119896 | NW_004516766.1 | Scaffold1607 | 119896                  | CC                              | AA                | 1946658888               |
| SNP_P3_156920_119928 | NW_004516766.1 | Scaffold1607 | 119928                  | TT                              | CC                | 1946658890               |
| SNP_P3_156921_119938 | NW_004516766.1 | Scaffold1607 | 119938                  | AA                              | CC                | 1946658892               |
| SNP_P3_156922_120019 | NW_004516766.1 | Scaffold1607 | 120019                  | CC                              | TT                | 1946658894               |
| SNP_P3_156923_120025 | NW_004516766.1 | Scaffold1607 | 120025                  | GG                              | AA                | 1946658896               |
| SNP_P3_156924_120181 | NW_004516766.1 | Scaffold1607 | 120181                  | CC                              | TT                | 1946658898               |
| SNP_P3_156925_120193 | NW_004516766.1 | Scaffold1607 | 120193                  | AA                              | GG                | 1946658900               |
| SNP_P3_156926_120231 | NW_004516766.1 | Scaffold1607 | 120231                  | AA                              | CC                | 1946658901               |
| SNP_P3_156927_120315 | NW_004516766.1 | Scaffold1607 | 120315                  | CC                              | AA                | 1946658902               |
| SNP_P3_156928_120322 | NW_004516766.1 | Scaffold1607 | 120322                  | AA                              | TT                | 1946658904               |
| SNP_P3_156929_120325 | NW_004516766.1 | Scaffold1607 | 120325                  | GG                              | AA                | 1946658906               |
| SNP_P3_156930_122550 | NW_004516766.1 | Scaffold1607 | 122550                  | AA                              | GG                | 1946658908               |
| SNP_P3_156931_122742 | NW_004516766.1 | Scaffold1607 | 122742                  | TT                              | AA                | 1946658911               |
| SNP_P3_156934_4985   | NW_004516768.1 | Scaffold1609 | 4985                    | GG                              | AA                | 1946658913               |
| SNP_P3_156935_2839   | NW_004516770.1 | Scaffold1612 | 2839                    | AA                              | GG                | 1946658916               |
| SNP_P3_156936_2390   | NW_004516771.1 | Scaffold1613 | 2390                    | CC                              | AA                | 1946658918               |
| SNP_P3_156937_10351  | NW_004516771.1 | Scaffold1613 | 10351                   | GG                              | AA                | 1946658920               |
| SNP_P3_156938_10359  | NW_004516771.1 | Scaffold1613 | 10359                   | TT                              | CC                | 1946658922               |
| SNP_P3_156939_10570  | NW_004516771.1 | Scaffold1613 | 10570                   | CC                              | TT                | 1946658924               |
| SNP_P3_156940_10630  | NW_004516771.1 | Scaffold1613 | 10630                   | GG                              | AA                | 1946658926               |
| SNP_P3_156941_10633  | NW_004516771.1 | Scaffold1613 | 10633                   | AA                              | TT                | 1946658928               |
| SNP_P3_156943_10726  | NW_004516771.1 | Scaffold1613 | 10726                   | TT                              | CC                | 1946658930               |
| SNP_P3_156944_11396  | NW_004516771.1 | Scaffold1613 | 11396                   | TT                              | GG                | 1946658932               |
| SNP_P3_156945_28687  | NW_004516771.1 | Scaffold1613 | 28687                   | GG                              | AA                | 1946658934               |
| SNP_P3_156947_54699  | NW_004516771.1 | Scaffold1613 | 54699                   | AA                              | CC                | 1946658936               |
| SNP_P3_156948_57302  | NW_004516771.1 | Scaffold1613 | 57302                   | GG                              | AA                | 1946658938               |
| SNP_P3_156949_65321  | NW_004516771.1 | Scaffold1613 | 65321                   | AA                              | GG                | 1946658941               |
| SNP_P3_156950_65333  | NW_004516771.1 | Scaffold1613 | 65333                   | TT                              | CC                | 1946658943               |
| SNP_P3_156951_65339  | NW_004516771.1 | Scaffold1613 | 65339                   | AA                              | CC                | 1946658945               |
| SNP_P3_156952_65341  | NW_004516771.1 | Scaffold1613 | 65341                   | GG                              | AA                | 1946658947               |
| SNP_P3_156953_65426  | NW_004516771.1 | Scaffold1613 | 65426                   | AA                              | GG                | 1946658949               |
| SNP_P3_156954_65455  | NW_004516771.1 | Scaffold1613 | 65455                   | TT                              | CC                | 1946658952               |
| SNP_P3_156955_65476  | NW_004516771.1 | Scaffold1613 | 65476                   | AA                              | GG                | 1946658954               |
| SNP_P3_156956_88689  | NW_004516771.1 | Scaffold1613 | 88689                   | TT                              | AA                | 1946658956               |
| SNP_P3_156957_90986  | NW_004516771.1 | Scaffold1613 | 90986                   | TT                              | CC                | 1946658958               |
| SNP_P3_156958_95610  | NW_004516771.1 | Scaffold1613 | 95610                   | AA                              | CC                | 1946658960               |

| SNPs IDs             | Chromosome IDs | Chromosomes  | Physical positions (bp) | CDC Frontier (Reference genome) | (Pusa 256 & HPNB) | NCBI SNPdb Accession IDs |
|----------------------|----------------|--------------|-------------------------|---------------------------------|-------------------|--------------------------|
| SNP_P3_156959_98421  | NW_004516771.1 | Scaffold1613 | 98421                   | AA                              | TT                | 1946658962               |
| SNP_P3_156961_98456  | NW_004516771.1 | Scaffold1613 | 98456                   | TT                              | CC                | 1946658963               |
| SNP_P3_156962_100209 | NW_004516771.1 | Scaffold1613 | 100209                  | CC                              | TT                | 1946658964               |
| SNP_P3_156964_107869 | NW_004516771.1 | Scaffold1613 | 107869                  | AA                              | GG                | 1946658965               |
| SNP_P3_156965_113636 | NW_004516771.1 | Scaffold1613 | 113636                  | TT                              | CC                | 1946658966               |
| SNP_P3_156966_113897 | NW_004516771.1 | Scaffold1613 | 113897                  | GG                              | AA                | 1946658968               |
| SNP_P3_156967_115434 | NW_004516771.1 | Scaffold1613 | 115434                  | CC                              | TT                | 1946658970               |
| SNP_P3_156968_115948 | NW_004516771.1 | Scaffold1613 | 115948                  | TT                              | AA                | 1946658972               |
| SNP_P3_156969_116032 | NW_004516771.1 | Scaffold1613 | 116032                  | CC                              | TT                | 1946658974               |
| SNP_P3_156970_116043 | NW_004516771.1 | Scaffold1613 | 116043                  | GG                              | TT                | 1946658976               |
| SNP_P3_156971_116064 | NW_004516771.1 | Scaffold1613 | 116064                  | CC                              | AA                | 1946658978               |
| SNP_P3_156972_116913 | NW_004516771.1 | Scaffold1613 | 116913                  | AA                              | GG                | 1946658980               |
| SNP_P3_156973_117098 | NW_004516771.1 | Scaffold1613 | 117098                  | GG                              | CC                | 1946658982               |
| SNP_P3_156974_117299 | NW_004516771.1 | Scaffold1613 | 117299                  | CC                              | TT                | 1946658985               |
| SNP_P3_156975_117313 | NW_004516771.1 | Scaffold1613 | 117313                  | AA                              | GG                | 1946658986               |
| SNP_P3_156976_117373 | NW_004516771.1 | Scaffold1613 | 117373                  | AA                              | GG                | 1946658988               |
| SNP_P3_156977_117379 | NW_004516771.1 | Scaffold1613 | 117379                  | AA                              | GG                | 1946658990               |
| SNP_P3_156978_5436   | NW_004516772.1 | Scaffold1614 | 5436                    | AA                              | GG                | 1946658992               |
| SNP_P3_156979_5466   | NW_004516772.1 | Scaffold1614 | 5466                    | GG                              | AA                | 1946658994               |
| SNP_P3_156980_5510   | NW_004516772.1 | Scaffold1614 | 5510                    | TT                              | CC                | 1946658996               |
| SNP_P3_156981_6566   | NW_004516772.1 | Scaffold1614 | 6566                    | TT                              | GG                | 1946658998               |
| SNP_P3_156982_6807   | NW_004516772.1 | Scaffold1614 | 6807                    | TT                              | GG                | 1946659000               |
| SNP_P3_156983_7613   | NW_004516772.1 | Scaffold1614 | 7613                    | TT                              | AA                | 1946659009               |
| SNP_P3_156984_7663   | NW_004516772.1 | Scaffold1614 | 7663                    | CC                              | AA                | 1946659011               |
| SNP_P3_156985_7714   | NW_004516772.1 | Scaffold1614 | 7714                    | TT                              | AA                | 1946659014               |
| SNP_P3_156986_8043   | NW_004516772.1 | Scaffold1614 | 8043                    | GG                              | AA                | 1946659016               |
| SNP_P3_156987_8066   | NW_004516772.1 | Scaffold1614 | 8066                    | AA                              | CC                | 1946659018               |
| SNP_P3_156988_8113   | NW_004516772.1 | Scaffold1614 | 8113                    | AA                              | CC                | 1946659020               |
| SNP_P3_156989_8344   | NW_004516772.1 | Scaffold1614 | 8344                    | GG                              | TT                | 1946659022               |
| SNP_P3_156990_8697   | NW_004516772.1 | Scaffold1614 | 8697                    | TT                              | CC                | 1946659024               |
| SNP_P3_156991_9318   | NW_004516772.1 | Scaffold1614 | 9318                    | TT                              | CC                | 1946659026               |
| SNP_P3_156992_9319   | NW_004516772.1 | Scaffold1614 | 9319                    | GG                              | AA                | 1946659028               |
| SNP_P3_156993_9389   | NW_004516772.1 | Scaffold1614 | 9389                    | AA                              | GG                | 1946659030               |
| SNP_P3_156994_9888   | NW_004516772.1 | Scaffold1614 | 9888                    | AA                              | GG                | 1946659033               |
| SNP_P3_156995_13490  | NW_004516772.1 | Scaffold1614 | 13490                   | TT                              | AA                | 1946659035               |
| SNP_P3_156996_13669  | NW_004516772.1 | Scaffold1614 | 13669                   | CC                              | TT                | 1946659037               |
| SNP_P3_156997_13695  | NW_004516772.1 | Scaffold1614 | 13695                   | AA                              | TT                | 1946659039               |
| SNP_P3_156998_13706  | NW_004516772.1 | Scaffold1614 | 13706                   | TT                              | GG                | 1946659041               |
| SNP_P3_156999_13724  | NW_004516772.1 | Scaffold1614 | 13724                   | TT                              | GG                | 1946659071               |
| SNP_P3_157000_13732  | NW_004516772.1 | Scaffold1614 | 13732                   | CC                              | TT                | 1946659073               |
| SNP_P3_157001_13791  | NW_004516772.1 | Scaffold1614 | 13791                   | AA                              | TT                | 1946659075               |
| SNP_P3_157002_13828  | NW_004516772.1 | Scaffold1614 | 13828                   | CC                              | GG                | 1946659077               |

| SNPs IDs             | Chromosome IDs | Chromosomes  | Physical positions (bp) | CDC Frontier (Reference genome) | (Pusa 256 & HPNB) | NCBI SNPdb Accession IDs |
|----------------------|----------------|--------------|-------------------------|---------------------------------|-------------------|--------------------------|
| SNP_P3_157003_13878  | NW_004516772.1 | Scaffold1614 | 13878                   | GG                              | CC                | 1946659080               |
| SNP_P3_157004_14031  | NW_004516772.1 | Scaffold1614 | 14031                   | TT                              | CC                | 1946659082               |
| SNP_P3_157005_14056  | NW_004516772.1 | Scaffold1614 | 14056                   | GG                              | CC                | 1946659084               |
| SNP_P3_157007_14103  | NW_004516772.1 | Scaffold1614 | 14103                   | TT                              | AA                | 1946659086               |
| SNP_P3_157008_14189  | NW_004516772.1 | Scaffold1614 | 14189                   | AA                              | CC                | 1946659088               |
| SNP_P3_157009_14195  | NW_004516772.1 | Scaffold1614 | 14195                   | GG                              | CC                | 1946659090               |
| SNP_P3_157010_14198  | NW_004516772.1 | Scaffold1614 | 14198                   | TT                              | CC                | 1946659091               |
| SNP_P3_157011_14410  | NW_004516772.1 | Scaffold1614 | 14410                   | AA                              | TT                | 1946659093               |
| SNP_P3_157012_14422  | NW_004516772.1 | Scaffold1614 | 14422                   | GG                              | CC                | 1946659095               |
| SNP_P3_157013_14445  | NW_004516772.1 | Scaffold1614 | 14445                   | AA                              | TT                | 1946659097               |
| SNP_P3_157015_66115  | NW_004516772.1 | Scaffold1614 | 66115                   | TT                              | CC                | 1946659100               |
| SNP_P3_157016_66132  | NW_004516772.1 | Scaffold1614 | 66132                   | TT                              | CC                | 1946659102               |
| SNP_P3_157017_66358  | NW_004516772.1 | Scaffold1614 | 66358                   | TT                              | CC                | 1946659104               |
| SNP_P3_157018_66393  | NW_004516772.1 | Scaffold1614 | 66393                   | GG                              | CC                | 1946659106               |
| SNP_P3_157019_66485  | NW_004516772.1 | Scaffold1614 | 66485                   | GG                              | CC                | 1946659108               |
| SNP_P3_157020_66508  | NW_004516772.1 | Scaffold1614 | 66508                   | AA                              | GG                | 1946659110               |
| SNP_P3_157021_66848  | NW_004516772.1 | Scaffold1614 | 66848                   | CC                              | TT                | 1946659111               |
| SNP_P3_157022_70035  | NW_004516772.1 | Scaffold1614 | 70035                   | TT                              | AA                | 1946659112               |
| SNP_P3_157023_70093  | NW_004516772.1 | Scaffold1614 | 70093                   | AA                              | GG                | 1946659114               |
| SNP_P3_157024_70500  | NW_004516772.1 | Scaffold1614 | 70500                   | AA                              | CC                | 1946659115               |
| SNP_P3_157025_80635  | NW_004516772.1 | Scaffold1614 | 80635                   | CC                              | TT                | 1946659116               |
| SNP_P3_157026_86993  | NW_004516772.1 | Scaffold1614 | 86993                   | AA                              | GG                | 1946659117               |
| SNP_P3_157027_95855  | NW_004516772.1 | Scaffold1614 | 95855                   | CC                              | TT                | 1946659119               |
| SNP_P3_157028_96569  | NW_004516772.1 | Scaffold1614 | 96569                   | CC                              | TT                | 1946659121               |
| SNP_P3_157029_97219  | NW_004516772.1 | Scaffold1614 | 97219                   | GG                              | CC                | 1946659123               |
| SNP_P3_157030_99702  | NW_004516772.1 | Scaffold1614 | 99702                   | CC                              | TT                | 1946659126               |
| SNP_P3_157031_100165 | NW_004516772.1 | Scaffold1614 | 100165                  | AA                              | GG                | 1946659128               |
| SNP_P3_157032_100446 | NW_004516772.1 | Scaffold1614 | 100446                  | CC                              | AA                | 1946659130               |
| SNP_P3_157033_102331 | NW_004516772.1 | Scaffold1614 | 102331                  | TT                              | GG                | 1946659132               |
| SNP_P3_157034_102663 | NW_004516772.1 | Scaffold1614 | 102663                  | TT                              | GG                | 1946659134               |
| SNP_P3_157035_104578 | NW_004516772.1 | Scaffold1614 | 104578                  | CC                              | TT                | 1946659136               |
| SNP_P3_157036_108769 | NW_004516772.1 | Scaffold1614 | 108769                  | GG                              | AA                | 1946659138               |
| SNP_P3_157037_108782 | NW_004516772.1 | Scaffold1614 | 108782                  | CC                              | TT                | 1946659139               |
| SNP_P3_157038_111164 | NW_004516772.1 | Scaffold1614 | 111164                  | GG                              | AA                | 1946659140               |
| SNP_P3_157039_111547 | NW_004516772.1 | Scaffold1614 | 111547                  | AA                              | CC                | 1946659142               |
| SNP_P3_157040_112879 | NW_004516772.1 | Scaffold1614 | 112879                  | TT                              | AA                | 1946659178               |
| SNP_P3_157041_113023 | NW_004516772.1 | Scaffold1614 | 113023                  | AA                              | TT                | 1946659179               |
| SNP_P3_157042_113646 | NW_004516772.1 | Scaffold1614 | 113646                  | CC                              | TT                | 1946659180               |
| SNP_P3_157043_113654 | NW_004516772.1 | Scaffold1614 | 113654                  | GG                              | AA                | 1946659181               |
| SNP_P3_157044_113859 | NW_004516772.1 | Scaffold1614 | 113859                  | TT                              | CC                | 1946659182               |
| SNP_P3_157045_114003 | NW_004516772.1 | Scaffold1614 | 114003                  | TT                              | CC                | 1946659183               |
| SNP_P3_157046_114019 | NW_004516772.1 | Scaffold1614 | 114019                  | CC                              | TT                | 1946659184               |

| SNPs IDs             | Chromosome IDs | Chromosomes  | Physical positions (bp) | CDC Frontier (Reference genome) | (Pusa 256 & HPNB) | NCBI SNPdb Accession IDs |
|----------------------|----------------|--------------|-------------------------|---------------------------------|-------------------|--------------------------|
| SNP_P3_157047_114044 | NW_004516772.1 | Scaffold1614 | 114044                  | TT                              | CC                | 1946659185               |
| SNP_P3_157048_114638 | NW_004516772.1 | Scaffold1614 | 114638                  | TT                              | CC                | 1946659186               |
| SNP_P3_157049_114654 | NW_004516772.1 | Scaffold1614 | 114654                  | CC                              | GG                | 1946659187               |
| SNP_P3_157050_114658 | NW_004516772.1 | Scaffold1614 | 114658                  | TT                              | CC                | 1946659189               |
| SNP_P3_157051_114681 | NW_004516772.1 | Scaffold1614 | 114681                  | TT                              | CC                | 1946659190               |
| SNP_P3_157052_114700 | NW_004516772.1 | Scaffold1614 | 114700                  | CC                              | TT                | 1946659191               |
| SNP_P3_157053_114723 | NW_004516772.1 | Scaffold1614 | 114723                  | AA                              | TT                | 1946659192               |
| SNP_P3_157054_114756 | NW_004516772.1 | Scaffold1614 | 114756                  | AA                              | TT                | 1946659194               |
| SNP_P3_157055_114805 | NW_004516772.1 | Scaffold1614 | 114805                  | GG                              | AA                | 1946659196               |
| SNP_P3_157056_114810 | NW_004516772.1 | Scaffold1614 | 114810                  | GG                              | AA                | 1946659198               |
| SNP_P3_157057_114818 | NW_004516772.1 | Scaffold1614 | 114818                  | AA                              | TT                | 1946659200               |
| SNP_P3_157058_114841 | NW_004516772.1 | Scaffold1614 | 114841                  | TT                              | CC                | 1946659202               |
| SNP_P3_157059_114900 | NW_004516772.1 | Scaffold1614 | 114900                  | TT                              | CC                | 1946659204               |
| SNP_P3_157060_114913 | NW_004516772.1 | Scaffold1614 | 114913                  | GG                              | AA                | 1946659206               |
| SNP_P3_157061_114920 | NW_004516772.1 | Scaffold1614 | 114920                  | TT                              | AA                | 1946659208               |
| SNP_P3_157062_114921 | NW_004516772.1 | Scaffold1614 | 114921                  | AA                              | TT                | 1946659210               |
| SNP_P3_157063_114926 | NW_004516772.1 | Scaffold1614 | 114926                  | TT                              | GG                | 1946659212               |
| SNP_P3_157064_114977 | NW_004516772.1 | Scaffold1614 | 114977                  | AA                              | CC                | 1946659215               |
| SNP_P3_157065_115028 | NW_004516772.1 | Scaffold1614 | 115028                  | CC                              | TT                | 1946659217               |
| SNP_P3_157066_115113 | NW_004516772.1 | Scaffold1614 | 115113                  | AA                              | GG                | 1946659219               |
| SNP_P3_157067_115114 | NW_004516772.1 | Scaffold1614 | 115114                  | TT                              | GG                | 1946659221               |
| SNP_P3_157068_115120 | NW_004516772.1 | Scaffold1614 | 115120                  | CC                              | GG                | 1946659223               |
| SNP_P3_157069_115131 | NW_004516772.1 | Scaffold1614 | 115131                  | CC                              | TT                | 1946659225               |
| SNP_P3_157070_115627 | NW_004516772.1 | Scaffold1614 | 115627                  | GG                              | AA                | 1946659227               |
| SNP_P3_157071_115749 | NW_004516772.1 | Scaffold1614 | 115749                  | TT                              | CC                | 1946659229               |
| SNP_P3_157072_115750 | NW_004516772.1 | Scaffold1614 | 115750                  | GG                              | AA                | 1946659231               |
| SNP_P3_157073_115760 | NW_004516772.1 | Scaffold1614 | 115760                  | GG                              | AA                | 1946659233               |
| SNP_P3_157074_115773 | NW_004516772.1 | Scaffold1614 | 115773                  | GG                              | CC                | 1946659234               |
| SNP_P3_157075_115791 | NW_004516772.1 | Scaffold1614 | 115791                  | CC                              | TT                | 1946659235               |
| SNP_P3_157076_115857 | NW_004516772.1 | Scaffold1614 | 115857                  | CC                              | TT                | 1946659236               |
| SNP_P3_157077_116153 | NW_004516772.1 | Scaffold1614 | 116153                  | AA                              | GG                | 1946659237               |
| SNP_P3_157078_116264 | NW_004516772.1 | Scaffold1614 | 116264                  | TT                              | AA                | 1946659239               |
| SNP_P3_157079_116740 | NW_004516772.1 | Scaffold1614 | 116740                  | AA                              | TT                | 1946659241               |
| SNP_P3_157080_116917 | NW_004516772.1 | Scaffold1614 | 116917                  | CC                              | GG                | 1946659243               |
| SNP_P3_157081_117039 | NW_004516772.1 | Scaffold1614 | 117039                  | TT                              | CC                | 1946659245               |
| SNP_P3_157082_118302 | NW_004516772.1 | Scaffold1614 | 118302                  | AA                              | GG                | 1946659247               |
| SNP_P3_157083_118353 | NW_004516772.1 | Scaffold1614 | 118353                  | GG                              | TT                | 1946659249               |
| SNP_P3_157084_118616 | NW_004516772.1 | Scaffold1614 | 118616                  | AA                              | TT                | 1946659251               |
| SNP_P3_157085_118980 | NW_004516772.1 | Scaffold1614 | 118980                  | TT                              | CC                | 1946659253               |
| SNP_P3_157086_119989 | NW_004516772.1 | Scaffold1614 | 119989                  | TT                              | GG                | 1946659255               |
| SNP_P3_157087_120875 | NW_004516772.1 | Scaffold1614 | 120875                  | GG                              | CC                | 1946659257               |
| SNP_P3_157088_120964 | NW_004516772.1 | Scaffold1614 | 120964                  | TT                              | AA                | 1946659258               |



| SNPs IDs             | Chromosome IDs | Chromosomes  | Physical positions (bp) | CDC Frontier (Reference genome) | (Pusa 256 & HPNB) | NCBI SNPdb Accession IDs |
|----------------------|----------------|--------------|-------------------------|---------------------------------|-------------------|--------------------------|
| SNP_P3_157089_121033 | NW_004516772.1 | Scaffold1614 | 121033                  | CC                              | GG                | 1946659260               |
| SNP_P3_157090_121043 | NW_004516772.1 | Scaffold1614 | 121043                  | CC                              | TT                | 1946659262               |
| SNP_P3_157091_124167 | NW_004516772.1 | Scaffold1614 | 124167                  | AA                              | CC                | 1946659264               |
| SNP_P3_157092_124290 | NW_004516772.1 | Scaffold1614 | 124290                  | GG                              | AA                | 1946659268               |
| SNP_P3_157093_124660 | NW_004516772.1 | Scaffold1614 | 124660                  | GG                              | TT                | 1946659270               |
| SNP_P3_157095_132630 | NW_004516772.1 | Scaffold1614 | 132630                  | AA                              | CC                | 1946659272               |
| SNP_P3_157096_132680 | NW_004516772.1 | Scaffold1614 | 132680                  | AA                              | GG                | 1946659274               |
| SNP_P3_157097_132916 | NW_004516772.1 | Scaffold1614 | 132916                  | CC                              | AA                | 1946659276               |
| SNP_P3_157098_133098 | NW_004516772.1 | Scaffold1614 | 133098                  | TT                              | AA                | 1946659278               |
| SNP_P3_157099_133251 | NW_004516772.1 | Scaffold1614 | 133251                  | TT                              | GG                | 1946659280               |
| SNP_P3_157100_134404 | NW_004516772.1 | Scaffold1614 | 134404                  | AA                              | TT                | 1946659282               |
| SNP_P3_157101_135517 | NW_004516772.1 | Scaffold1614 | 135517                  | GG                              | AA                | 1946659284               |
| SNP_P3_157102_135560 | NW_004516772.1 | Scaffold1614 | 135560                  | CC                              | TT                | 1946659286               |
| SNP_P3_157103_136578 | NW_004516772.1 | Scaffold1614 | 136578                  | GG                              | TT                | 1946659288               |
| SNP_P3_157104_137114 | NW_004516772.1 | Scaffold1614 | 137114                  | CC                              | GG                | 1946659290               |
| SNP_P3_157105_138943 | NW_004516772.1 | Scaffold1614 | 138943                  | GG                              | TT                | 1946659292               |
| SNP_P3_157106_140867 | NW_004516772.1 | Scaffold1614 | 140867                  | CC                              | TT                | 1946659294               |
| SNP_P3_157107_142008 | NW_004516772.1 | Scaffold1614 | 142008                  | TT                              | GG                | 1946659296               |
| SNP_P3_157108_146683 | NW_004516772.1 | Scaffold1614 | 146683                  | TT                              | CC                | 1946659298               |
| SNP_P3_157109_148170 | NW_004516772.1 | Scaffold1614 | 148170                  | AA                              | TT                | 1946659300               |
| SNP_P3_157110_148233 | NW_004516772.1 | Scaffold1614 | 148233                  | AA                              | GG                | 1946659302               |
| SNP_P3_157111_148237 | NW_004516772.1 | Scaffold1614 | 148237                  | AA                              | GG                | 1946659304               |
| SNP_P3_157112_148238 | NW_004516772.1 | Scaffold1614 | 148238                  | CC                              | GG                | 1946659307               |
| SNP_P3_157113_148248 | NW_004516772.1 | Scaffold1614 | 148248                  | GG                              | AA                | 1946659309               |
| SNP_P3_157114_151826 | NW_004516772.1 | Scaffold1614 | 151826                  | GG                              | AA                | 1946659311               |
| SNP_P3_157115_151877 | NW_004516772.1 | Scaffold1614 | 151877                  | TT                              | AA                | 1946659313               |
| SNP_P3_157116_151892 | NW_004516772.1 | Scaffold1614 | 151892                  | AA                              | TT                | 1946659315               |
| SNP_P3_157117_152159 | NW_004516772.1 | Scaffold1614 | 152159                  | AA                              | TT                | 1946659317               |
| SNP_P3_157118_152936 | NW_004516772.1 | Scaffold1614 | 152936                  | CC                              | TT                | 1946659319               |
| SNP_P3_157119_153481 | NW_004516772.1 | Scaffold1614 | 153481                  | CC                              | TT                | 1946659321               |
| SNP_P3_157120_154090 | NW_004516772.1 | Scaffold1614 | 154090                  | TT                              | CC                | 1946659322               |
| SNP_P3_157121_154092 | NW_004516772.1 | Scaffold1614 | 154092                  | AA                              | CC                | 1946659324               |
| SNP_P3_157122_154173 | NW_004516772.1 | Scaffold1614 | 154173                  | GG                              | CC                | 1946659326               |
| SNP_P3_157123_154349 | NW_004516772.1 | Scaffold1614 | 154349                  | CC                              | AA                | 1946659328               |
| SNP_P3_157124_154402 | NW_004516772.1 | Scaffold1614 | 154402                  | CC                              | TT                | 1946659330               |
| SNP_P3_157125_155028 | NW_004516772.1 | Scaffold1614 | 155028                  | GG                              | TT                | 1946659332               |
| SNP_P3_157126_155686 | NW_004516772.1 | Scaffold1614 | 155686                  | TT                              | CC                | 1946659334               |
| SNP_P3_157127_157135 | NW_004516772.1 | Scaffold1614 | 157135                  | GG                              | CC                | 1946659336               |
| SNP_P3_157128_158187 | NW_004516772.1 | Scaffold1614 | 158187                  | CC                              | GG                | 1946659338               |
| SNP_P3_157129_158255 | NW_004516772.1 | Scaffold1614 | 158255                  | AA                              | GG                | 1946659340               |
| SNP_P3_157130_159655 | NW_004516772.1 | Scaffold1614 | 159655                  | AA                              | CC                | 1946659342               |
| SNP_P3_157131_160277 | NW_004516772.1 | Scaffold1614 | 160277                  | TT                              | CC                | 1946659344               |

| SNPs IDs             | Chromosome IDs | Chromosomes  | Physical positions (bp) | CDC Frontier (Reference genome) | (Pusa 256 & HPNB) | NCBI SNPdb Accession IDs |
|----------------------|----------------|--------------|-------------------------|---------------------------------|-------------------|--------------------------|
| SNP_P3_157132_161706 | NW_004516772.1 | Scaffold1614 | 161706                  | AA                              | CC                | 1946659346               |
| SNP_P3_157133_162051 | NW_004516772.1 | Scaffold1614 | 162051                  | CC                              | GG                | 1946659348               |
| SNP_P3_157134_162298 | NW_004516772.1 | Scaffold1614 | 162298                  | CC                              | GG                | 1946659350               |
| SNP_P3_157135_162315 | NW_004516772.1 | Scaffold1614 | 162315                  | AA                              | CC                | 1946659352               |
| SNP_P3_157136_163795 | NW_004516772.1 | Scaffold1614 | 163795                  | GG                              | TT                | 1946659354               |
| SNP_P3_157137_163848 | NW_004516772.1 | Scaffold1614 | 163848                  | AA                              | GG                | 1946659356               |
| SNP_P3_157138_163859 | NW_004516772.1 | Scaffold1614 | 163859                  | GG                              | AA                | 1946659358               |
| SNP_P3_157139_163872 | NW_004516772.1 | Scaffold1614 | 163872                  | GG                              | AA                | 1946659360               |
| SNP_P3_157140_163894 | NW_004516772.1 | Scaffold1614 | 163894                  | GG                              | AA                | 1946659362               |
| SNP_P3_157141_163906 | NW_004516772.1 | Scaffold1614 | 163906                  | AA                              | GG                | 1946659364               |
| SNP_P3_157142_163924 | NW_004516772.1 | Scaffold1614 | 163924                  | TT                              | CC                | 1946659366               |
| SNP_P3_157143_163926 | NW_004516772.1 | Scaffold1614 | 163926                  | GG                              | AA                | 1946659368               |
| SNP_P3_157144_164141 | NW_004516772.1 | Scaffold1614 | 164141                  | CC                              | TT                | 1946659370               |
| SNP_P3_157145_164145 | NW_004516772.1 | Scaffold1614 | 164145                  | AA                              | GG                | 1946659373               |
| SNP_P3_157146_164153 | NW_004516772.1 | Scaffold1614 | 164153                  | CC                              | GG                | 1946659375               |
| SNP_P3_157147_164156 | NW_004516772.1 | Scaffold1614 | 164156                  | AA                              | TT                | 1946659377               |
| SNP_P3_157148_164157 | NW_004516772.1 | Scaffold1614 | 164157                  | CC                              | AA                | 1946659379               |
| SNP_P3_157149_164277 | NW_004516772.1 | Scaffold1614 | 164277                  | AA                              | GG                | 1946659381               |
| SNP_P3_157150_164282 | NW_004516772.1 | Scaffold1614 | 164282                  | TT                              | GG                | 1946659383               |
| SNP_P3_157151_164427 | NW_004516772.1 | Scaffold1614 | 164427                  | TT                              | GG                | 1946659385               |
| SNP_P3_157153_164494 | NW_004516772.1 | Scaffold1614 | 164494                  | GG                              | AA                | 1946659387               |
| SNP_P3_157154_164504 | NW_004516772.1 | Scaffold1614 | 164504                  | CC                              | TT                | 1946659389               |
| SNP_P3_157155_164533 | NW_004516772.1 | Scaffold1614 | 164533                  | CC                              | TT                | 1946659391               |
| SNP_P3_157156_164555 | NW_004516772.1 | Scaffold1614 | 164555                  | GG                              | AA                | 1946659393               |
| SNP_P3_157157_167342 | NW_004516772.1 | Scaffold1614 | 167342                  | GG                              | TT                | 1946659395               |
| SNP_P3_157158_167749 | NW_004516772.1 | Scaffold1614 | 167749                  | CC                              | AA                | 1946659397               |
| SNP_P3_157159_167755 | NW_004516772.1 | Scaffold1614 | 167755                  | TT                              | AA                | 1946659399               |
| SNP_P3_157160_168729 | NW_004516772.1 | Scaffold1614 | 168729                  | TT                              | CC                | 1946659401               |
| SNP_P3_157161_168858 | NW_004516772.1 | Scaffold1614 | 168858                  | GG                              | CC                | 1946659403               |
| SNP_P3_157162_169135 | NW_004516772.1 | Scaffold1614 | 169135                  | AA                              | CC                | 1946659405               |
| SNP_P3_157163_184308 | NW_004516772.1 | Scaffold1614 | 184308                  | AA                              | CC                | 1946659407               |
| SNP_P3_157164_186399 | NW_004516772.1 | Scaffold1614 | 186399                  | AA                              | GG                | 1946659409               |
| SNP_P3_157165_186771 | NW_004516772.1 | Scaffold1614 | 186771                  | AA                              | GG                | 1946659411               |
| SNP_P3_157166_186772 | NW_004516772.1 | Scaffold1614 | 186772                  | AA                              | GG                | 1946659413               |
| SNP_P3_157167_186870 | NW_004516772.1 | Scaffold1614 | 186870                  | CC                              | GG                | 1946659417               |
| SNP_P3_157168_187728 | NW_004516772.1 | Scaffold1614 | 187728                  | AA                              | GG                | 1946659419               |
| SNP_P3_157169_188421 | NW_004516772.1 | Scaffold1614 | 188421                  | AA                              | CC                | 1946659421               |
| SNP_P3_157171_190866 | NW_004516772.1 | Scaffold1614 | 190866                  | TT                              | AA                | 1946659423               |
| SNP_P3_157172_192882 | NW_004516772.1 | Scaffold1614 | 192882                  | GG                              | AA                | 1946659425               |
| SNP_P3_157173_193075 | NW_004516772.1 | Scaffold1614 | 193075                  | GG                              | AA                | 1946659427               |
| SNP_P3_157174_193112 | NW_004516772.1 | Scaffold1614 | 193112                  | GG                              | AA                | 1946659429               |
| SNP_P3_157175_194351 | NW_004516772.1 | Scaffold1614 | 194351                  | AA                              | TT                | 1946659431               |

| SNPs IDs             | Chromosome IDs | Chromosomes  | Physical positions (bp) | CDC Frontier (Reference genome) | (Pusa 256 & HPNB) | NCBI SNPdb Accession IDs |
|----------------------|----------------|--------------|-------------------------|---------------------------------|-------------------|--------------------------|
| SNP_P3_157176_40     | NW_004516773.1 | Scaffold1615 | 40                      | TT                              | AA                | 1946659434               |
| SNP_P3_157177_103    | NW_004516773.1 | Scaffold1615 | 103                     | GG                              | TT                | 1946659436               |
| SNP_P3_157178_546    | NW_004516773.1 | Scaffold1615 | 546                     | CC                              | TT                | 1946659438               |
| SNP_P3_157179_549    | NW_004516773.1 | Scaffold1615 | 549                     | GG                              | AA                | 1946659440               |
| SNP_P3_157181_1392   | NW_004516774.1 | Scaffold1616 | 1392                    | TT                              | AA                | 1946659442               |
| SNP_P3_157182_1710   | NW_004516774.1 | Scaffold1616 | 1710                    | CC                              | TT                | 1946659444               |
| SNP_P3_157183_430    | NW_004516775.1 | Scaffold1620 | 430                     | TT                              | GG                | 1946659446               |
| SNP_P3_157184_516    | NW_004516775.1 | Scaffold1620 | 516                     | TT                              | CC                | 1946659448               |
| SNP_P3_157185_810    | NW_004516775.1 | Scaffold1620 | 810                     | TT                              | GG                | 1946659450               |
| SNP_P3_157186_1074   | NW_004516775.1 | Scaffold1620 | 1074                    | GG                              | AA                | 1946659452               |
| SNP_P3_157188_14045  | NW_004516777.1 | Scaffold1623 | 14045                   | GG                              | TT                | 1946659454               |
| SNP_P3_157189_14302  | NW_004516777.1 | Scaffold1623 | 14302                   | AA                              | GG                | 1946659457               |
| SNP_P3_157190_14374  | NW_004516777.1 | Scaffold1623 | 14374                   | AA                              | TT                | 1946659459               |
| SNP_P3_157191_2360   | NW_004516779.1 | Scaffold1626 | 2360                    | CC                              | GG                | 1946659461               |
| SNP_P3_157192_14500  | NW_004516779.1 | Scaffold1626 | 14500                   | AA                              | TT                | 1946659463               |
| SNP_P3_157193_31246  | NW_004516779.1 | Scaffold1626 | 31246                   | AA                              | GG                | 1946659465               |
| SNP_P3_157194_31465  | NW_004516779.1 | Scaffold1626 | 31465                   | GG                              | AA                | 1946659467               |
| SNP_P3_157195_31484  | NW_004516779.1 | Scaffold1626 | 31484                   | TT                              | GG                | 1946659469               |
| SNP_P3_157196_31539  | NW_004516779.1 | Scaffold1626 | 31539                   | AA                              | CC                | 1946659471               |
| SNP_P3_157197_32160  | NW_004516779.1 | Scaffold1626 | 32160                   | AA                              | GG                | 1946659473               |
| SNP_P3_157198_32455  | NW_004516779.1 | Scaffold1626 | 32455                   | CC                              | TT                | 1946659475               |
| SNP_P3_157199_37760  | NW_004516779.1 | Scaffold1626 | 37760                   | CC                              | GG                | 1946659477               |
| SNP_P3_157200_38977  | NW_004516779.1 | Scaffold1626 | 38977                   | CC                              | AA                | 1946659479               |
| SNP_P3_157201_40369  | NW_004516779.1 | Scaffold1626 | 40369                   | GG                              | AA                | 1946659481               |
| SNP_P3_157202_76926  | NW_004516779.1 | Scaffold1626 | 76926                   | TT                              | CC                | 1946659483               |
| SNP_P3_157203_108306 | NW_004516779.1 | Scaffold1626 | 108306                  | CC                              | GG                | 1946659485               |
| SNP_P3_157204_108384 | NW_004516779.1 | Scaffold1626 | 108384                  | CC                              | TT                | 1946659487               |
| SNP_P3_157205_108408 | NW_004516779.1 | Scaffold1626 | 108408                  | TT                              | AA                | 1946659489               |
| SNP_P3_157206_108438 | NW_004516779.1 | Scaffold1626 | 108438                  | AA                              | CC                | 1946659491               |
| SNP_P3_157207_108691 | NW_004516779.1 | Scaffold1626 | 108691                  | TT                              | GG                | 1946659493               |
| SNP_P3_157208_108895 | NW_004516779.1 | Scaffold1626 | 108895                  | GG                              | AA                | 1946659495               |
| SNP_P3_157209_118851 | NW_004516779.1 | Scaffold1626 | 118851                  | AA                              | TT                | 1946659497               |
| SNP_P3_157210_118867 | NW_004516779.1 | Scaffold1626 | 118867                  | CC                              | AA                | 1946659499               |
| SNP_P3_157212_127026 | NW_004516779.1 | Scaffold1626 | 127026                  | TT                              | CC                | 1946659501               |
| SNP_P3_157213_127379 | NW_004516779.1 | Scaffold1626 | 127379                  | GG                              | AA                | 1946659503               |
| SNP_P3_157214_127424 | NW_004516779.1 | Scaffold1626 | 127424                  | AA                              | GG                | 1946659505               |
| SNP_P3_157215_128015 | NW_004516779.1 | Scaffold1626 | 128015                  | AA                              | TT                | 1946659507               |
| SNP_P3_157216_144732 | NW_004516779.1 | Scaffold1626 | 144732                  | TT                              | CC                | 1946659509               |
| SNP_P3_157217_6051   | NW_004516781.1 | Scaffold1630 | 6051                    | AA                              | GG                | 1946659511               |
| SNP_P3_157218_6088   | NW_004516781.1 | Scaffold1630 | 6088                    | AA                              | GG                | 1946659513               |
| SNP_P3_157220_13028  | NW_004516781.1 | Scaffold1630 | 13028                   | TT                              | AA                | 1946659515               |
| SNP_P3_157221_13029  | NW_004516781.1 | Scaffold1630 | 13029                   | AA                              | TT                | 1946659517               |

| SNPs IDs            | Chromosome IDs | Chromosomes  | Physical positions (bp) | CDC Frontier (Reference genome) | (Pusa 256 & HPNB) | NCBI SNPdb Accession IDs |
|---------------------|----------------|--------------|-------------------------|---------------------------------|-------------------|--------------------------|
| SNP_P3_157222_13196 | NW_004516781.1 | Scaffold1630 | 13196                   | GG                              | AA                | 1946659519               |
| SNP_P3_157223_13197 | NW_004516781.1 | Scaffold1630 | 13197                   | TT                              | GG                | 1946659521               |
| SNP_P3_157224_13206 | NW_004516781.1 | Scaffold1630 | 13206                   | CC                              | TT                | 1946659523               |
| SNP_P3_157225_13256 | NW_004516781.1 | Scaffold1630 | 13256                   | CC                              | TT                | 1946659525               |
| SNP_P3_157226_13359 | NW_004516781.1 | Scaffold1630 | 13359                   | AA                              | GG                | 1946659527               |
| SNP_P3_157227_13380 | NW_004516781.1 | Scaffold1630 | 13380                   | TT                              | CC                | 1946659529               |
| SNP_P3_157228_13411 | NW_004516781.1 | Scaffold1630 | 13411                   | AA                              | TT                | 1946659531               |
| SNP_P3_157229_13433 | NW_004516781.1 | Scaffold1630 | 13433                   | AA                              | GG                | 1946659533               |
| SNP_P3_157230_13474 | NW_004516781.1 | Scaffold1630 | 13474                   | TT                              | AA                | 1946659535               |
| SNP_P3_157231_20341 | NW_004516781.1 | Scaffold1630 | 20341                   | CC                              | AA                | 1946659537               |
| SNP_P3_157232_20425 | NW_004516781.1 | Scaffold1630 | 20425                   | GG                              | TT                | 1946659539               |
| SNP_P3_157233_20430 | NW_004516781.1 | Scaffold1630 | 20430                   | CC                              | TT                | 1946659541               |
| SNP_P3_157234_28743 | NW_004516781.1 | Scaffold1630 | 28743                   | GG                              | AA                | 1946659544               |
| SNP_P3_157235_28969 | NW_004516781.1 | Scaffold1630 | 28969                   | GG                              | CC                | 1946659546               |
| SNP_P3_157236_30193 | NW_004516781.1 | Scaffold1630 | 30193                   | CC                              | TT                | 1946659547               |
| SNP_P3_157237_30235 | NW_004516781.1 | Scaffold1630 | 30235                   | AA                              | CC                | 1946659549               |
| SNP_P3_157238_30252 | NW_004516781.1 | Scaffold1630 | 30252                   | AA                              | TT                | 1946659551               |
| SNP_P3_157239_30264 | NW_004516781.1 | Scaffold1630 | 30264                   | CC                              | TT                | 1946659553               |
| SNP_P3_157240_30269 | NW_004516781.1 | Scaffold1630 | 30269                   | TT                              | CC                | 1946659556               |
| SNP_P3_157241_30284 | NW_004516781.1 | Scaffold1630 | 30284                   | GG                              | CC                | 1946659558               |
| SNP_P3_157242_30352 | NW_004516781.1 | Scaffold1630 | 30352                   | AA                              | GG                | 1946659561               |
| SNP_P3_157243_30432 | NW_004516781.1 | Scaffold1630 | 30432                   | AA                              | GG                | 1946659563               |
| SNP_P3_157244_30439 | NW_004516781.1 | Scaffold1630 | 30439                   | CC                              | AA                | 1946659565               |
| SNP_P3_157245_30471 | NW_004516781.1 | Scaffold1630 | 30471                   | TT                              | CC                | 1946659567               |
| SNP_P3_157246_30487 | NW_004516781.1 | Scaffold1630 | 30487                   | TT                              | CC                | 1946659569               |
| SNP_P3_157247_30532 | NW_004516781.1 | Scaffold1630 | 30532                   | GG                              | AA                | 1946659571               |
| SNP_P3_157248_30546 | NW_004516781.1 | Scaffold1630 | 30546                   | TT                              | CC                | 1946659573               |
| SNP_P3_157249_30550 | NW_004516781.1 | Scaffold1630 | 30550                   | AA                              | TT                | 1946659575               |
| SNP_P3_157250_30556 | NW_004516781.1 | Scaffold1630 | 30556                   | AA                              | CC                | 1946659577               |
| SNP_P3_157251_35798 | NW_004516781.1 | Scaffold1630 | 35798                   | TT                              | CC                | 1946659579               |
| SNP_P3_157252_37113 | NW_004516781.1 | Scaffold1630 | 37113                   | CC                              | TT                | 1946659581               |
| SNP_P3_157253_37251 | NW_004516781.1 | Scaffold1630 | 37251                   | TT                              | AA                | 1946659583               |
| SNP_P3_157254_37317 | NW_004516781.1 | Scaffold1630 | 37317                   | TT                              | AA                | 1946659585               |
| SNP_P3_157255_37323 | NW_004516781.1 | Scaffold1630 | 37323                   | GG                              | CC                | 1946659587               |
| SNP_P3_157256_37619 | NW_004516781.1 | Scaffold1630 | 37619                   | GG                              | AA                | 1946659589               |
| SNP_P3_157257_37971 | NW_004516781.1 | Scaffold1630 | 37971                   | TT                              | GG                | 1946659591               |
| SNP_P3_157258_40291 | NW_004516781.1 | Scaffold1630 | 40291                   | CC                              | AA                | 1946659593               |
| SNP_P3_157259_40292 | NW_004516781.1 | Scaffold1630 | 40292                   | GG                              | AA                | 1946659595               |
| SNP_P3_157260_40353 | NW_004516781.1 | Scaffold1630 | 40353                   | GG                              | TT                | 1946659597               |
| SNP_P3_157261_41270 | NW_004516781.1 | Scaffold1630 | 41270                   | AA                              | GG                | 1946659600               |
| SNP_P3_157262_44038 | NW_004516781.1 | Scaffold1630 | 44038                   | AA                              | GG                | 1946659602               |
| SNP_P3_157263_44047 | NW_004516781.1 | Scaffold1630 | 44047                   | GG                              | CC                | 1946659604               |

| SNPs IDs             | Chromosome IDs | Chromosomes  | Physical positions (bp) | CDC Frontier (Reference genome) | (Pusa 256 & HPNB) | NCBI SNPdb Accession IDs |
|----------------------|----------------|--------------|-------------------------|---------------------------------|-------------------|--------------------------|
| SNP_P3_157264_44048  | NW_004516781.1 | Scaffold1630 | 44048                   | TT                              | CC                | 1946659606               |
| SNP_P3_157265_44068  | NW_004516781.1 | Scaffold1630 | 44068                   | AA                              | GG                | 1946659608               |
| SNP_P3_157266_44317  | NW_004516781.1 | Scaffold1630 | 44317                   | CC                              | TT                | 1946659610               |
| SNP_P3_157267_48900  | NW_004516781.1 | Scaffold1630 | 48900                   | AA                              | CC                | 1946659613               |
| SNP_P3_157268_49246  | NW_004516781.1 | Scaffold1630 | 49246                   | CC                              | GG                | 1946659615               |
| SNP_P3_157269_55486  | NW_004516781.1 | Scaffold1630 | 55486                   | AA                              | TT                | 1946659617               |
| SNP_P3_157270_55496  | NW_004516781.1 | Scaffold1630 | 55496                   | TT                              | CC                | 1946659619               |
| SNP_P3_157271_55554  | NW_004516781.1 | Scaffold1630 | 55554                   | AA                              | TT                | 1946659621               |
| SNP_P3_157272_55560  | NW_004516781.1 | Scaffold1630 | 55560                   | CC                              | AA                | 1946659623               |
| SNP_P3_157273_57116  | NW_004516781.1 | Scaffold1630 | 57116                   | GG                              | CC                | 1946659625               |
| SNP_P3_157274_57188  | NW_004516781.1 | Scaffold1630 | 57188                   | GG                              | AA                | 1946659627               |
| SNP_P3_157275_57190  | NW_004516781.1 | Scaffold1630 | 57190                   | GG                              | AA                | 1946659630               |
| SNP_P3_157276_57261  | NW_004516781.1 | Scaffold1630 | 57261                   | CC                              | AA                | 1946659632               |
| SNP_P3_157277_57274  | NW_004516781.1 | Scaffold1630 | 57274                   | GG                              | TT                | 1946659635               |
| SNP_P3_157278_57318  | NW_004516781.1 | Scaffold1630 | 57318                   | CC                              | TT                | 1946659639               |
| SNP_P3_157279_57327  | NW_004516781.1 | Scaffold1630 | 57327                   | AA                              | GG                | 1946659641               |
| SNP_P3_157280_57711  | NW_004516781.1 | Scaffold1630 | 57711                   | GG                              | AA                | 1946659643               |
| SNP_P3_157281_71889  | NW_004516781.1 | Scaffold1630 | 71889                   | CC                              | TT                | 1946659645               |
| SNP_P3_157282_80362  | NW_004516781.1 | Scaffold1630 | 80362                   | TT                              | CC                | 1946659647               |
| SNP_P3_157283_81561  | NW_004516781.1 | Scaffold1630 | 81561                   | AA                              | TT                | 1946659649               |
| SNP_P3_157284_93302  | NW_004516781.1 | Scaffold1630 | 93302                   | AA                              | TT                | 1946659651               |
| SNP_P3_157285_93305  | NW_004516781.1 | Scaffold1630 | 93305                   | TT                              | CC                | 1946659653               |
| SNP_P3_157286_93311  | NW_004516781.1 | Scaffold1630 | 93311                   | AA                              | GG                | 1946659655               |
| SNP_P3_157287_93312  | NW_004516781.1 | Scaffold1630 | 93312                   | CC                              | TT                | 1946659657               |
| SNP_P3_157288_93323  | NW_004516781.1 | Scaffold1630 | 93323                   | AA                              | TT                | 1946659659               |
| SNP_P3_157289_93335  | NW_004516781.1 | Scaffold1630 | 93335                   | GG                              | AA                | 1946659661               |
| SNP_P3_157290_93374  | NW_004516781.1 | Scaffold1630 | 93374                   | GG                              | AA                | 1946659663               |
| SNP_P3_157291_93377  | NW_004516781.1 | Scaffold1630 | 93377                   | AA                              | TT                | 1946659665               |
| SNP_P3_157292_95396  | NW_004516781.1 | Scaffold1630 | 95396                   | AA                              | GG                | 1946659667               |
| SNP_P3_157293_95486  | NW_004516781.1 | Scaffold1630 | 95486                   | AA                              | GG                | 1946659669               |
| SNP_P3_157294_95626  | NW_004516781.1 | Scaffold1630 | 95626                   | GG                              | CC                | 1946659671               |
| SNP_P3_157296_105562 | NW_004516781.1 | Scaffold1630 | 105562                  | TT                              | CC                | 1946659673               |
| SNP_P3_157297_105681 | NW_004516781.1 | Scaffold1630 | 105681                  | TT                              | CC                | 1946659675               |
| SNP_P3_157298_106803 | NW_004516781.1 | Scaffold1630 | 106803                  | TT                              | GG                | 1946659679               |
| SNP_P3_157299_106811 | NW_004516781.1 | Scaffold1630 | 106811                  | GG                              | AA                | 1946659681               |
| SNP_P3_157300_106812 | NW_004516781.1 | Scaffold1630 | 106812                  | GG                              | AA                | 1946659683               |
| SNP_P3_157301_106827 | NW_004516781.1 | Scaffold1630 | 106827                  | CC                              | TT                | 1946659685               |
| SNP_P3_157302_106833 | NW_004516781.1 | Scaffold1630 | 106833                  | AA                              | GG                | 1946659687               |
| SNP_P3_157303_106838 | NW_004516781.1 | Scaffold1630 | 106838                  | TT                              | GG                | 1946659689               |
| SNP_P3_157304_106906 | NW_004516781.1 | Scaffold1630 | 106906                  | AA                              | CC                | 1946659691               |
| SNP_P3_157306_107736 | NW_004516781.1 | Scaffold1630 | 107736                  | TT                              | CC                | 1946659693               |
| SNP_P3_157307_107740 | NW_004516781.1 | Scaffold1630 | 107740                  | AA                              | TT                | 1946659695               |

| SNPs IDs             | Chromosome IDs | Chromosomes  | Physical positions (bp) | CDC Frontier (Reference genome) | (Pusa 256 & HPNB) | NCBI SNPdb Accession IDs |
|----------------------|----------------|--------------|-------------------------|---------------------------------|-------------------|--------------------------|
| SNP_P3_157308_107764 | NW_004516781.1 | Scaffold1630 | 107764                  | CC                              | TT                | 1946659697               |
| SNP_P3_157309_107794 | NW_004516781.1 | Scaffold1630 | 107794                  | AA                              | GG                | 1946659699               |
| SNP_P3_157310_107815 | NW_004516781.1 | Scaffold1630 | 107815                  | AA                              | TT                | 1946659701               |
| SNP_P3_157311_109564 | NW_004516781.1 | Scaffold1630 | 109564                  | GG                              | CC                | 1946659703               |
| SNP_P3_157312_110248 | NW_004516781.1 | Scaffold1630 | 110248                  | GG                              | AA                | 1946659705               |
| SNP_P3_157313_110346 | NW_004516781.1 | Scaffold1630 | 110346                  | TT                              | AA                | 1946659707               |
| SNP_P3_157314_111650 | NW_004516781.1 | Scaffold1630 | 111650                  | AA                              | TT                | 1946659709               |
| SNP_P3_157315_111664 | NW_004516781.1 | Scaffold1630 | 111664                  | TT                              | GG                | 1946659711               |
| SNP_P3_157316_112867 | NW_004516781.1 | Scaffold1630 | 112867                  | GG                              | AA                | 1946659713               |
| SNP_P3_157317_112875 | NW_004516781.1 | Scaffold1630 | 112875                  | CC                              | TT                | 1946659715               |
| SNP_P3_157318_113259 | NW_004516781.1 | Scaffold1630 | 113259                  | AA                              | GG                | 1946659717               |
| SNP_P3_157319_113272 | NW_004516781.1 | Scaffold1630 | 113272                  | TT                              | AA                | 1946659719               |
| SNP_P3_157320_113592 | NW_004516781.1 | Scaffold1630 | 113592                  | TT                              | AA                | 1946659721               |
| SNP_P3_157321_113637 | NW_004516781.1 | Scaffold1630 | 113637                  | AA                              | TT                | 1946659723               |
| SNP_P3_157322_120895 | NW_004516781.1 | Scaffold1630 | 120895                  | GG                              | AA                | 1946659724               |
| SNP_P3_157323_121099 | NW_004516781.1 | Scaffold1630 | 121099                  | TT                              | CC                | 1946659726               |
| SNP_P3_157324_125894 | NW_004516781.1 | Scaffold1630 | 125894                  | CC                              | AA                | 1946659728               |
| SNP_P3_157325_128310 | NW_004516781.1 | Scaffold1630 | 128310                  | TT                              | AA                | 1946659730               |
| SNP_P3_157326_128311 | NW_004516781.1 | Scaffold1630 | 128311                  | TT                              | AA                | 1946659732               |
| SNP_P3_157327_136355 | NW_004516781.1 | Scaffold1630 | 136355                  | GG                              | TT                | 1946659734               |
| SNP_P3_157328_136763 | NW_004516781.1 | Scaffold1630 | 136763                  | GG                              | CC                | 1946659736               |
| SNP_P3_157329_136771 | NW_004516781.1 | Scaffold1630 | 136771                  | TT                              | CC                | 1946659738               |
| SNP_P3_157330_153523 | NW_004516781.1 | Scaffold1630 | 153523                  | CC                              | AA                | 1946659740               |
| SNP_P3_157331_157857 | NW_004516781.1 | Scaffold1630 | 157857                  | AA                              | GG                | 1946659742               |
| SNP_P3_157332_158724 | NW_004516781.1 | Scaffold1630 | 158724                  | CC                              | TT                | 1946659744               |
| SNP_P3_157333_158968 | NW_004516781.1 | Scaffold1630 | 158968                  | GG                              | AA                | 1946659746               |
| SNP_P3_157334_159246 | NW_004516781.1 | Scaffold1630 | 159246                  | AA                              | GG                | 1946659748               |
| SNP_P3_157335_177196 | NW_004516781.1 | Scaffold1630 | 177196                  | AA                              | GG                | 1946659750               |
| SNP_P3_157336_177199 | NW_004516781.1 | Scaffold1630 | 177199                  | TT                              | GG                | 1946659752               |
| SNP_P3_157337_185020 | NW_004516781.1 | Scaffold1630 | 185020                  | CC                              | AA                | 1946659754               |
| SNP_P3_157338_10295  | NW_004516782.1 | Scaffold1631 | 10295                   | TT                              | AA                | 1946659756               |
| SNP_P3_157340_49613  | NW_004516782.1 | Scaffold1631 | 49613                   | AA                              | CC                | 1946659759               |
| SNP_P3_157342_56326  | NW_004516782.1 | Scaffold1631 | 56326                   | TT                              | AA                | 1946659761               |
| SNP_P3_157343_58366  | NW_004516782.1 | Scaffold1631 | 58366                   | TT                              | AA                | 1946659763               |
| SNP_P3_157344_58383  | NW_004516782.1 | Scaffold1631 | 58383                   | CC                              | GG                | 1946659765               |
| SNP_P3_157345_108700 | NW_004516782.1 | Scaffold1631 | 108700                  | AA                              | GG                | 1946659767               |
| SNP_P3_157346_121042 | NW_004516782.1 | Scaffold1631 | 121042                  | AA                              | GG                | 1946659769               |
| SNP_P3_157347_121043 | NW_004516782.1 | Scaffold1631 | 121043                  | AA                              | TT                | 1946659771               |
| SNP_P3_157348_121051 | NW_004516782.1 | Scaffold1631 | 121051                  | AA                              | TT                | 1946659773               |
| SNP_P3_157349_121105 | NW_004516782.1 | Scaffold1631 | 121105                  | GG                              | AA                | 1946659775               |
| SNP_P3_157350_121469 | NW_004516782.1 | Scaffold1631 | 121469                  | GG                              | TT                | 1946659777               |
| SNP_P3_157351_170074 | NW_004516782.1 | Scaffold1631 | 170074                  | GG                              | AA                | 1946659779               |

| SNPs IDs             | Chromosome IDs | Chromosomes  | Physical positions (bp) | CDC Frontier (Reference genome) | (Pusa 256 & HPNB) | NCBI SNPdb Accession IDs |
|----------------------|----------------|--------------|-------------------------|---------------------------------|-------------------|--------------------------|
| SNP_P3_157352_174098 | NW_004516782.1 | Scaffold1631 | 174098                  | GG                              | CC                | 1946659781               |
| SNP_P3_157353_174109 | NW_004516782.1 | Scaffold1631 | 174109                  | AA                              | CC                | 1946659783               |
| SNP_P3_157354_174145 | NW_004516782.1 | Scaffold1631 | 174145                  | GG                              | AA                | 1946659785               |
| SNP_P3_157355_176857 | NW_004516782.1 | Scaffold1631 | 176857                  | GG                              | TT                | 1946659787               |
| SNP_P3_157356_201413 | NW_004516782.1 | Scaffold1631 | 201413                  | GG                              | TT                | 1946659789               |
| SNP_P3_157357_212473 | NW_004516782.1 | Scaffold1631 | 212473                  | TT                              | CC                | 1946659791               |
| SNP_P3_157358_222535 | NW_004516782.1 | Scaffold1631 | 222535                  | TT                              | CC                | 1946659793               |
| SNP_P3_157359_230900 | NW_004516782.1 | Scaffold1631 | 230900                  | TT                              | CC                | 1946659796               |
| SNP_P3_157360_233342 | NW_004516782.1 | Scaffold1631 | 233342                  | AA                              | TT                | 1946659799               |
| SNP_P3_157362_248410 | NW_004516782.1 | Scaffold1631 | 248410                  | GG                              | AA                | 1946659801               |
| SNP_P3_157363_249045 | NW_004516782.1 | Scaffold1631 | 249045                  | CC                              | TT                | 1946659803               |
| SNP_P3_157364_250209 | NW_004516782.1 | Scaffold1631 | 250209                  | TT                              | AA                | 1946659805               |
| SNP_P3_157365_16853  | NW_004516783.1 | Scaffold1632 | 16853                   | AA                              | CC                | 1946659807               |
| SNP_P3_157367_26028  | NW_004516783.1 | Scaffold1632 | 26028                   | GG                              | CC                | 1946659809               |
| SNP_P3_157368_26487  | NW_004516783.1 | Scaffold1632 | 26487                   | TT                              | CC                | 1946659811               |
| SNP_P3_157370_52295  | NW_004516783.1 | Scaffold1632 | 52295                   | TT                              | CC                | 1946659813               |
| SNP_P3_157371_58992  | NW_004516783.1 | Scaffold1632 | 58992                   | GG                              | AA                | 1946659815               |
| SNP_P3_157372_80480  | NW_004516783.1 | Scaffold1632 | 80480                   | TT                              | CC                | 1946659817               |
| SNP_P3_157375_15935  | NW_004516784.1 | Scaffold1633 | 15935                   | CC                              | GG                | 1946659819               |
| SNP_P3_157377_61866  | NW_004516784.1 | Scaffold1633 | 61866                   | GG                              | AA                | 1946659821               |
| SNP_P3_157378_61962  | NW_004516784.1 | Scaffold1633 | 61962                   | AA                              | GG                | 1946659823               |
| SNP_P3_157379_62124  | NW_004516784.1 | Scaffold1633 | 62124                   | AA                              | GG                | 1946659825               |
| SNP_P3_157380_62189  | NW_004516784.1 | Scaffold1633 | 62189                   | TT                              | CC                | 1946659827               |
| SNP_P3_157381_64145  | NW_004516784.1 | Scaffold1633 | 64145                   | AA                              | GG                | 1946659829               |
| SNP_P3_157382_68363  | NW_004516784.1 | Scaffold1633 | 68363                   | TT                              | CC                | 1946659831               |
| SNP_P3_157383_73192  | NW_004516784.1 | Scaffold1633 | 73192                   | GG                              | AA                | 1946659833               |
| SNP_P3_157384_96778  | NW_004516784.1 | Scaffold1633 | 96778                   | TT                              | GG                | 1946659835               |
| SNP_P3_157385_96779  | NW_004516784.1 | Scaffold1633 | 96779                   | TT                              | GG                | 1946659837               |
| SNP_P3_157386_121876 | NW_004516784.1 | Scaffold1633 | 121876                  | TT                              | CC                | 1946659839               |
| SNP_P3_157387_167679 | NW_004516784.1 | Scaffold1633 | 167679                  | TT                              | AA                | 1946659841               |
| SNP_P3_157388_175302 | NW_004516784.1 | Scaffold1633 | 175302                  | CC                              | GG                | 1946659843               |
| SNP_P3_157389_182174 | NW_004516784.1 | Scaffold1633 | 182174                  | CC                              | GG                | 1946659845               |
| SNP_P3_157390_1259   | NW_004516785.1 | Scaffold1634 | 1259                    | CC                              | TT                | 1946659847               |
| SNP_P3_157391_8585   | NW_004516785.1 | Scaffold1634 | 8585                    | CC                              | AA                | 1946659849               |
| SNP_P3_157392_9495   | NW_004516785.1 | Scaffold1634 | 9495                    | AA                              | TT                | 1946659851               |
| SNP_P3_157393_10302  | NW_004516785.1 | Scaffold1634 | 10302                   | AA                              | CC                | 1946659853               |
| SNP_P3_157394_15447  | NW_004516785.1 | Scaffold1634 | 15447                   | TT                              | CC                | 1946659855               |
| SNP_P3_157395_18473  | NW_004516785.1 | Scaffold1634 | 18473                   | AA                              | CC                | 1946659857               |
| SNP_P3_157396_18780  | NW_004516785.1 | Scaffold1634 | 18780                   | TT                              | CC                | 1946659859               |
| SNP_P3_157397_20763  | NW_004516785.1 | Scaffold1634 | 20763                   | AA                              | TT                | 1946659861               |
| SNP_P3_157398_22002  | NW_004516785.1 | Scaffold1634 | 22002                   | GG                              | CC                | 1946659864               |
| SNP_P3_157399_23536  | NW_004516785.1 | Scaffold1634 | 23536                   | CC                              | TT                | 1946659866               |

| SNPs IDs             | Chromosome IDs | Chromosomes  | Physical positions (bp) | CDC Frontier (Reference genome) | (Pusa 256 & HPNB) | NCBI SNPdb Accession IDs |
|----------------------|----------------|--------------|-------------------------|---------------------------------|-------------------|--------------------------|
| SNP_P3_157400_23551  | NW_004516785.1 | Scaffold1634 | 23551                   | AA                              | CC                | 1946659868               |
| SNP_P3_157401_23557  | NW_004516785.1 | Scaffold1634 | 23557                   | CC                              | TT                | 1946659870               |
| SNP_P3_157402_24657  | NW_004516785.1 | Scaffold1634 | 24657                   | TT                              | AA                | 1946659872               |
| SNP_P3_157403_24732  | NW_004516785.1 | Scaffold1634 | 24732                   | CC                              | TT                | 1946659874               |
| SNP_P3_157404_25119  | NW_004516785.1 | Scaffold1634 | 25119                   | TT                              | GG                | 1946659876               |
| SNP_P3_157405_20312  | NW_004516786.1 | Scaffold1635 | 20312                   | TT                              | CC                | 1946659878               |
| SNP_P3_157406_26514  | NW_004516786.1 | Scaffold1635 | 26514                   | TT                              | CC                | 1946659880               |
| SNP_P3_157408_34634  | NW_004516786.1 | Scaffold1635 | 34634                   | CC                              | TT                | 1946659882               |
| SNP_P3_157409_35178  | NW_004516786.1 | Scaffold1635 | 35178                   | CC                              | TT                | 1946659884               |
| SNP_P3_157411_59074  | NW_004516786.1 | Scaffold1635 | 59074                   | TT                              | CC                | 1946659886               |
| SNP_P3_157412_59110  | NW_004516786.1 | Scaffold1635 | 59110                   | CC                              | GG                | 1946659888               |
| SNP_P3_157413_59412  | NW_004516786.1 | Scaffold1635 | 59412                   | TT                              | GG                | 1946659890               |
| SNP_P3_157414_67687  | NW_004516786.1 | Scaffold1635 | 67687                   | CC                              | TT                | 1946659893               |
| SNP_P3_157415_71676  | NW_004516786.1 | Scaffold1635 | 71676                   | GG                              | AA                | 1946659895               |
| SNP_P3_157418_71853  | NW_004516786.1 | Scaffold1635 | 71853                   | GG                              | TT                | 1946659897               |
| SNP_P3_157419_71889  | NW_004516786.1 | Scaffold1635 | 71889                   | AA                              | GG                | 1946659899               |
| SNP_P3_157421_72076  | NW_004516786.1 | Scaffold1635 | 72076                   | AA                              | GG                | 1946659901               |
| SNP_P3_157422_72086  | NW_004516786.1 | Scaffold1635 | 72086                   | AA                              | TT                | 1946659903               |
| SNP_P3_157423_72305  | NW_004516786.1 | Scaffold1635 | 72305                   | AA                              | GG                | 1946659905               |
| SNP_P3_157425_75133  | NW_004516786.1 | Scaffold1635 | 75133                   | TT                              | CC                | 1946659907               |
| SNP_P3_157426_75222  | NW_004516786.1 | Scaffold1635 | 75222                   | CC                              | TT                | 1946659909               |
| SNP_P3_157427_94051  | NW_004516786.1 | Scaffold1635 | 94051                   | CC                              | AA                | 1946659911               |
| SNP_P3_157428_94354  | NW_004516786.1 | Scaffold1635 | 94354                   | TT                              | AA                | 1946659913               |
| SNP_P3_157429_105109 | NW_004516786.1 | Scaffold1635 | 105109                  | AA                              | GG                | 1946659915               |
| SNP_P3_157430_105130 | NW_004516786.1 | Scaffold1635 | 105130                  | CC                              | GG                | 1946659917               |
| SNP_P3_157431_105142 | NW_004516786.1 | Scaffold1635 | 105142                  | AA                              | GG                | 1946659919               |
| SNP_P3_157432_110793 | NW_004516786.1 | Scaffold1635 | 110793                  | GG                              | TT                | 1946659921               |
| SNP_P3_157433_115676 | NW_004516786.1 | Scaffold1635 | 115676                  | AA                              | CC                | 1946659923               |
| SNP_P3_157434_115681 | NW_004516786.1 | Scaffold1635 | 115681                  | GG                              | AA                | 1946659925               |
| SNP_P3_157435_116013 | NW_004516786.1 | Scaffold1635 | 116013                  | TT                              | CC                | 1946659927               |
| SNP_P3_157436_131096 | NW_004516786.1 | Scaffold1635 | 131096                  | AA                              | CC                | 1946659929               |
| SNP_P3_157437_131255 | NW_004516786.1 | Scaffold1635 | 131255                  | TT                              | CC                | 1946659931               |
| SNP_P3_157438_131484 | NW_004516786.1 | Scaffold1635 | 131484                  | GG                              | AA                | 1946659933               |
| SNP_P3_157439_131494 | NW_004516786.1 | Scaffold1635 | 131494                  | AA                              | TT                | 1946659935               |
| SNP_P3_157440_131496 | NW_004516786.1 | Scaffold1635 | 131496                  | GG                              | TT                | 1946659937               |
| SNP_P3_157441_131503 | NW_004516786.1 | Scaffold1635 | 131503                  | TT                              | AA                | 1946659939               |
| SNP_P3_157442_131509 | NW_004516786.1 | Scaffold1635 | 131509                  | CC                              | TT                | 1946659941               |
| SNP_P3_157443_131514 | NW_004516786.1 | Scaffold1635 | 131514                  | GG                              | TT                | 1946659943               |
| SNP_P3_157444_131543 | NW_004516786.1 | Scaffold1635 | 131543                  | AA                              | TT                | 1946659945               |
| SNP_P3_157445_131560 | NW_004516786.1 | Scaffold1635 | 131560                  | CC                              | GG                | 1946659947               |
| SNP_P3_157446_131571 | NW_004516786.1 | Scaffold1635 | 131571                  | TT                              | CC                | 1946659949               |
| SNP_P3_157447_131590 | NW_004516786.1 | Scaffold1635 | 131590                  | AA                              | CC                | 1946659951               |



| SNPs IDs             | Chromosome IDs | Chromosomes  | Physical positions (bp) | CDC Frontier (Reference genome) | (Pusa 256 & HPNB) | NCBI SNPdb Accession IDs |
|----------------------|----------------|--------------|-------------------------|---------------------------------|-------------------|--------------------------|
| SNP_P3_157448_131627 | NW_004516786.1 | Scaffold1635 | 131627                  | TT                              | CC                | 1946659953               |
| SNP_P3_157449_131629 | NW_004516786.1 | Scaffold1635 | 131629                  | GG                              | TT                | 1946659955               |
| SNP_P3_157450_131688 | NW_004516786.1 | Scaffold1635 | 131688                  | CC                              | TT                | 1946659957               |
| SNP_P3_157451_131691 | NW_004516786.1 | Scaffold1635 | 131691                  | TT                              | AA                | 1946659959               |
| SNP_P3_157452_131703 | NW_004516786.1 | Scaffold1635 | 131703                  | TT                              | CC                | 1946659961               |
| SNP_P3_157453_131705 | NW_004516786.1 | Scaffold1635 | 131705                  | CC                              | TT                | 1946659963               |
| SNP_P3_157454_131710 | NW_004516786.1 | Scaffold1635 | 131710                  | AA                              | CC                | 1946659965               |
| SNP_P3_157455_131714 | NW_004516786.1 | Scaffold1635 | 131714                  | AA                              | TT                | 1946659968               |
| SNP_P3_157456_131760 | NW_004516786.1 | Scaffold1635 | 131760                  | AA                              | CC                | 1946659970               |
| SNP_P3_157457_131782 | NW_004516786.1 | Scaffold1635 | 131782                  | GG                              | CC                | 1946659972               |
| SNP_P3_157458_131811 | NW_004516786.1 | Scaffold1635 | 131811                  | CC                              | GG                | 1946659974               |
| SNP_P3_157459_131840 | NW_004516786.1 | Scaffold1635 | 131840                  | TT                              | AA                | 1946659976               |
| SNP_P3_157460_131866 | NW_004516786.1 | Scaffold1635 | 131866                  | AA                              | TT                | 1946659978               |
| SNP_P3_157461_131867 | NW_004516786.1 | Scaffold1635 | 131867                  | AA                              | GG                | 1946659980               |
| SNP_P3_157462_131887 | NW_004516786.1 | Scaffold1635 | 131887                  | AA                              | CC                | 1946659982               |
| SNP_P3_157463_131922 | NW_004516786.1 | Scaffold1635 | 131922                  | CC                              | TT                | 1946659984               |
| SNP_P3_157464_131925 | NW_004516786.1 | Scaffold1635 | 131925                  | AA                              | GG                | 1946659986               |
| SNP_P3_157465_131942 | NW_004516786.1 | Scaffold1635 | 131942                  | GG                              | AA                | 1946659988               |
| SNP_P3_157466_131978 | NW_004516786.1 | Scaffold1635 | 131978                  | AA                              | TT                | 1946659990               |
| SNP_P3_157467_132210 | NW_004516786.1 | Scaffold1635 | 132210                  | GG                              | AA                | 1946659992               |
| SNP_P3_157468_132227 | NW_004516786.1 | Scaffold1635 | 132227                  | GG                              | TT                | 1946659994               |
| SNP_P3_157469_132230 | NW_004516786.1 | Scaffold1635 | 132230                  | AA                              | GG                | 1946659996               |
| SNP_P3_157470_132232 | NW_004516786.1 | Scaffold1635 | 132232                  | TT                              | AA                | 1946659998               |
| SNP_P3_157471_132246 | NW_004516786.1 | Scaffold1635 | 132246                  | GG                              | AA                | 1946660000               |
| SNP_P3_157472_132261 | NW_004516786.1 | Scaffold1635 | 132261                  | AA                              | TT                | 1946660002               |
| SNP_P3_157473_132265 | NW_004516786.1 | Scaffold1635 | 132265                  | TT                              | AA                | 1946660004               |
| SNP_P3_157474_132266 | NW_004516786.1 | Scaffold1635 | 132266                  | GG                              | AA                | 1946660007               |
| SNP_P3_157475_132297 | NW_004516786.1 | Scaffold1635 | 132297                  | GG                              | AA                | 1946660009               |
| SNP_P3_157476_132299 | NW_004516786.1 | Scaffold1635 | 132299                  | GG                              | AA                | 1946660011               |
| SNP_P3_157477_132324 | NW_004516786.1 | Scaffold1635 | 132324                  | TT                              | CC                | 1946660013               |
| SNP_P3_157478_133239 | NW_004516786.1 | Scaffold1635 | 133239                  | CC                              | AA                | 1946660015               |
| SNP_P3_157479_135463 | NW_004516786.1 | Scaffold1635 | 135463                  | AA                              | GG                | 1946660017               |
| SNP_P3_157480_135473 | NW_004516786.1 | Scaffold1635 | 135473                  | TT                              | AA                | 1946660019               |
| SNP_P3_157481_137398 | NW_004516786.1 | Scaffold1635 | 137398                  | TT                              | CC                | 1946660021               |
| SNP_P3_157482_140023 | NW_004516786.1 | Scaffold1635 | 140023                  | TT                              | AA                | 1946660023               |
| SNP_P3_157483_355    | NW_004516787.1 | Scaffold1637 | 355                     | AA                              | TT                | 1946660025               |
| SNP_P3_157484_1133   | NW_004516787.1 | Scaffold1637 | 1133                    | CC                              | GG                | 1946660027               |
| SNP_P3_157485_1146   | NW_004516787.1 | Scaffold1637 | 1146                    | AA                              | CC                | 1946660030               |
| SNP_P3_157486_1243   | NW_004516787.1 | Scaffold1637 | 1243                    | AA                              | GG                | 1946660032               |
| SNP_P3_157488_9785   | NW_004516788.1 | Scaffold1638 | 9785                    | CC                              | GG                | 1946660034               |
| SNP_P3_157489_17284  | NW_004516788.1 | Scaffold1638 | 17284                   | TT                              | CC                | 1946660036               |
| SNP_P3_157490_17332  | NW_004516788.1 | Scaffold1638 | 17332                   | GG                              | TT                | 1946660038               |

| SNPs IDs            | Chromosome IDs | Chromosomes  | Physical positions (bp) | CDC Frontier (Reference genome) | (Pusa 256 & HPNB) | NCBI SNPdb Accession IDs |
|---------------------|----------------|--------------|-------------------------|---------------------------------|-------------------|--------------------------|
| SNP_P3_157491_25944 | NW_004516788.1 | Scaffold1638 | 25944                   | TT                              | AA                | 1946660040               |
| SNP_P3_157492_46227 | NW_004516788.1 | Scaffold1638 | 46227                   | GG                              | TT                | 1946660042               |
| SNP_P3_157493_53034 | NW_004516788.1 | Scaffold1638 | 53034                   | TT                              | GG                | 1946660044               |
| SNP_P3_157494_54599 | NW_004516788.1 | Scaffold1638 | 54599                   | AA                              | GG                | 1946660047               |
| SNP_P3_157495_54648 | NW_004516788.1 | Scaffold1638 | 54648                   | AA                              | GG                | 1946660049               |
| SNP_P3_157496_54747 | NW_004516788.1 | Scaffold1638 | 54747                   | AA                              | GG                | 1946660051               |
| SNP_P3_157497_54757 | NW_004516788.1 | Scaffold1638 | 54757                   | TT                              | CC                | 1946660053               |
| SNP_P3_157498_54802 | NW_004516788.1 | Scaffold1638 | 54802                   | AA                              | GG                | 1946660055               |
| SNP_P3_157499_54852 | NW_004516788.1 | Scaffold1638 | 54852                   | TT                              | AA                | 1946660057               |
| SNP_P3_157501_54937 | NW_004516788.1 | Scaffold1638 | 54937                   | TT                              | CC                | 1946660059               |
| SNP_P3_157502_54979 | NW_004516788.1 | Scaffold1638 | 54979                   | TT                              | AA                | 1946660061               |
| SNP_P3_157503_58430 | NW_004516788.1 | Scaffold1638 | 58430                   | AA                              | GG                | 1946660063               |
| SNP_P3_157504_58834 | NW_004516788.1 | Scaffold1638 | 58834                   | CC                              | TT                | 1946660065               |
| SNP_P3_157505_65402 | NW_004516788.1 | Scaffold1638 | 65402                   | TT                              | CC                | 1946660067               |
| SNP_P3_157506_65640 | NW_004516788.1 | Scaffold1638 | 65640                   | AA                              | GG                | 1946660069               |
| SNP_P3_157507_68653 | NW_004516788.1 | Scaffold1638 | 68653                   | CC                              | GG                | 1946660071               |
| SNP_P3_157508_72075 | NW_004516788.1 | Scaffold1638 | 72075                   | GG                              | TT                | 1946660073               |
| SNP_P3_157509_1483  | NW_004516792.1 | Scaffold1643 | 1483                    | TT                              | CC                | 1946660075               |
| SNP_P3_157510_1509  | NW_004516792.1 | Scaffold1643 | 1509                    | CC                              | TT                | 1946660077               |
| SNP_P3_157511_4477  | NW_004516792.1 | Scaffold1643 | 4477                    | AA                              | TT                | 1946660079               |
| SNP_P3_157512_4719  | NW_004516792.1 | Scaffold1643 | 4719                    | AA                              | GG                | 1946660081               |
| SNP_P3_157514_5330  | NW_004516792.1 | Scaffold1643 | 5330                    | CC                              | GG                | 1946660083               |
| SNP_P3_157515_5412  | NW_004516792.1 | Scaffold1643 | 5412                    | CC                              | TT                | 1946660086               |
| SNP_P3_157516_5442  | NW_004516792.1 | Scaffold1643 | 5442                    | AA                              | GG                | 1946660089               |
| SNP_P3_157517_7499  | NW_004516792.1 | Scaffold1643 | 7499                    | TT                              | CC                | 1946660091               |
| SNP_P3_157518_15313 | NW_004516792.1 | Scaffold1643 | 15313                   | AA                              | TT                | 1946660093               |
| SNP_P3_157519_15323 | NW_004516792.1 | Scaffold1643 | 15323                   | AA                              | CC                | 1946660095               |
| SNP_P3_157520_15461 | NW_004516792.1 | Scaffold1643 | 15461                   | TT                              | CC                | 1946660097               |
| SNP_P3_157521_15634 | NW_004516792.1 | Scaffold1643 | 15634                   | AA                              | GG                | 1946660099               |
| SNP_P3_157522_15642 | NW_004516792.1 | Scaffold1643 | 15642                   | TT                              | AA                | 1946660101               |
| SNP_P3_157523_15648 | NW_004516792.1 | Scaffold1643 | 15648                   | AA                              | CC                | 1946660103               |
| SNP_P3_157524_15675 | NW_004516792.1 | Scaffold1643 | 15675                   | AA                              | TT                | 1946660105               |
| SNP_P3_157525_15680 | NW_004516792.1 | Scaffold1643 | 15680                   | GG                              | AA                | 1946660107               |
| SNP_P3_157526_15750 | NW_004516792.1 | Scaffold1643 | 15750                   | AA                              | GG                | 1946660109               |
| SNP_P3_157527_15756 | NW_004516792.1 | Scaffold1643 | 15756                   | AA                              | GG                | 1946660111               |
| SNP_P3_157528_15771 | NW_004516792.1 | Scaffold1643 | 15771                   | CC                              | AA                | 1946660113               |
| SNP_P3_157529_15792 | NW_004516792.1 | Scaffold1643 | 15792                   | CC                              | TT                | 1946660115               |
| SNP_P3_157530_15827 | NW_004516792.1 | Scaffold1643 | 15827                   | GG                              | CC                | 1946660117               |
| SNP_P3_157531_16356 | NW_004516792.1 | Scaffold1643 | 16356                   | TT                              | AA                | 1946660119               |
| SNP_P3_157532_16450 | NW_004516792.1 | Scaffold1643 | 16450                   | TT                              | CC                | 1946660121               |
| SNP_P3_157533_16479 | NW_004516792.1 | Scaffold1643 | 16479                   | AA                              | TT                | 1946660125               |
| SNP_P3_157534_16552 | NW_004516792.1 | Scaffold1643 | 16552                   | TT                              | AA                | 1946660127               |

| SNPs IDs             | Chromosome IDs | Chromosomes  | Physical positions (bp) | CDC Frontier (Reference genome) | (Pusa 256 & HPNB) | NCBI SNPdb Accession IDs |
|----------------------|----------------|--------------|-------------------------|---------------------------------|-------------------|--------------------------|
| SNP_P3_157535_16558  | NW_004516792.1 | Scaffold1643 | 16558                   | AA                              | TT                | 1946660129               |
| SNP_P3_157536_16560  | NW_004516792.1 | Scaffold1643 | 16560                   | AA                              | TT                | 1946660130               |
| SNP_P3_157537_17397  | NW_004516792.1 | Scaffold1643 | 17397                   | CC                              | GG                | 1946660132               |
| SNP_P3_157538_22266  | NW_004516792.1 | Scaffold1643 | 22266                   | TT                              | GG                | 1946660134               |
| SNP_P3_157539_22274  | NW_004516792.1 | Scaffold1643 | 22274                   | TT                              | GG                | 1946660136               |
| SNP_P3_157540_22286  | NW_004516792.1 | Scaffold1643 | 22286                   | CC                              | TT                | 1946660138               |
| SNP_P3_157541_22313  | NW_004516792.1 | Scaffold1643 | 22313                   | AA                              | GG                | 1946660140               |
| SNP_P3_157542_22333  | NW_004516792.1 | Scaffold1643 | 22333                   | GG                              | CC                | 1946660142               |
| SNP_P3_157543_22347  | NW_004516792.1 | Scaffold1643 | 22347                   | AA                              | GG                | 1946660144               |
| SNP_P3_157544_22353  | NW_004516792.1 | Scaffold1643 | 22353                   | AA                              | GG                | 1946660146               |
| SNP_P3_157545_31014  | NW_004516792.1 | Scaffold1643 | 31014                   | CC                              | TT                | 1946660147               |
| SNP_P3_157547_67727  | NW_004516792.1 | Scaffold1643 | 67727                   | GG                              | AA                | 1946660148               |
| SNP_P3_157548_67760  | NW_004516792.1 | Scaffold1643 | 67760                   | CC                              | TT                | 1946660149               |
| SNP_P3_157549_68111  | NW_004516792.1 | Scaffold1643 | 68111                   | TT                              | CC                | 1946660150               |
| SNP_P3_157550_79580  | NW_004516792.1 | Scaffold1643 | 79580                   | AA                              | GG                | 1946660151               |
| SNP_P3_157551_79612  | NW_004516792.1 | Scaffold1643 | 79612                   | CC                              | TT                | 1946660152               |
| SNP_P3_157552_126696 | NW_004516792.1 | Scaffold1643 | 126696                  | AA                              | GG                | 1946660153               |
| SNP_P3_157554_155898 | NW_004516792.1 | Scaffold1643 | 155898                  | TT                              | AA                | 1946660154               |
| SNP_P3_157555_155909 | NW_004516792.1 | Scaffold1643 | 155909                  | TT                              | AA                | 1946660155               |
| SNP_P3_157556_155919 | NW_004516792.1 | Scaffold1643 | 155919                  | GG                              | AA                | 1946660156               |
| SNP_P3_157557_155927 | NW_004516792.1 | Scaffold1643 | 155927                  | AA                              | GG                | 1946660158               |
| SNP_P3_157558_155938 | NW_004516792.1 | Scaffold1643 | 155938                  | AA                              | GG                | 1946660160               |
| SNP_P3_157559_155958 | NW_004516792.1 | Scaffold1643 | 155958                  | AA                              | GG                | 1946660162               |
| SNP_P3_157560_156117 | NW_004516792.1 | Scaffold1643 | 156117                  | TT                              | CC                | 1946660164               |
| SNP_P3_157562_156824 | NW_004516792.1 | Scaffold1643 | 156824                  | CC                              | TT                | 1946660166               |
| SNP_P3_157563_156899 | NW_004516792.1 | Scaffold1643 | 156899                  | AA                              | GG                | 1946660168               |
| SNP_P3_157564_156946 | NW_004516792.1 | Scaffold1643 | 156946                  | CC                              | TT                | 1946660170               |
| SNP_P3_157565_159712 | NW_004516792.1 | Scaffold1643 | 159712                  | AA                              | CC                | 1946660172               |
| SNP_P3_157566_161327 | NW_004516792.1 | Scaffold1643 | 161327                  | GG                              | AA                | 1946660175               |
| SNP_P3_157568_163893 | NW_004516792.1 | Scaffold1643 | 163893                  | GG                              | AA                | 1946660177               |
| SNP_P3_157569_163990 | NW_004516792.1 | Scaffold1643 | 163990                  | GG                              | TT                | 1946660179               |
| SNP_P3_157570_164017 | NW_004516792.1 | Scaffold1643 | 164017                  | TT                              | CC                | 1946660181               |
| SNP_P3_157571_164019 | NW_004516792.1 | Scaffold1643 | 164019                  | AA                              | GG                | 1946660183               |
| SNP_P3_157572_164609 | NW_004516792.1 | Scaffold1643 | 164609                  | TT                              | CC                | 1946660185               |
| SNP_P3_157573_164736 | NW_004516792.1 | Scaffold1643 | 164736                  | TT                              | CC                | 1946660187               |
| SNP_P3_157574_164812 | NW_004516792.1 | Scaffold1643 | 164812                  | CC                              | TT                | 1946660189               |
| SNP_P3_157575_165289 | NW_004516792.1 | Scaffold1643 | 165289                  | CC                              | TT                | 1946660191               |
| SNP_P3_157576_165562 | NW_004516792.1 | Scaffold1643 | 165562                  | GG                              | AA                | 1946660193               |
| SNP_P3_157577_166370 | NW_004516792.1 | Scaffold1643 | 166370                  | GG                              | AA                | 1946660195               |
| SNP_P3_157579_166960 | NW_004516792.1 | Scaffold1643 | 166960                  | AA                              | TT                | 1946660197               |
| SNP_P3_157580_166961 | NW_004516792.1 | Scaffold1643 | 166961                  | TT                              | AA                | 1946660199               |
| SNP_P3_157581_166984 | NW_004516792.1 | Scaffold1643 | 166984                  | AA                              | TT                | 1946660201               |

| SNPs IDs             | Chromosome IDs | Chromosomes  | Physical positions (bp) | CDC Frontier (Reference genome) | (Pusa 256 & HPNB) | NCBI SNPdb Accession IDs |
|----------------------|----------------|--------------|-------------------------|---------------------------------|-------------------|--------------------------|
| SNP_P3_157582_167002 | NW_004516792.1 | Scaffold1643 | 167002                  | AA                              | CC                | 1946660203               |
| SNP_P3_157583_167116 | NW_004516792.1 | Scaffold1643 | 167116                  | GG                              | AA                | 1946660205               |
| SNP_P3_157584_167336 | NW_004516792.1 | Scaffold1643 | 167336                  | TT                              | CC                | 1946660207               |
| SNP_P3_157585_167347 | NW_004516792.1 | Scaffold1643 | 167347                  | GG                              | AA                | 1946660209               |
| SNP_P3_157586_167375 | NW_004516792.1 | Scaffold1643 | 167375                  | AA                              | GG                | 1946660211               |
| SNP_P3_157587_167395 | NW_004516792.1 | Scaffold1643 | 167395                  | AA                              | GG                | 1946660215               |
| SNP_P3_157588_167398 | NW_004516792.1 | Scaffold1643 | 167398                  | CC                              | TT                | 1946660217               |
| SNP_P3_157589_167419 | NW_004516792.1 | Scaffold1643 | 167419                  | TT                              | CC                | 1946660219               |
| SNP_P3_157590_167454 | NW_004516792.1 | Scaffold1643 | 167454                  | CC                              | AA                | 1946660221               |
| SNP_P3_157591_167478 | NW_004516792.1 | Scaffold1643 | 167478                  | GG                              | AA                | 1946660223               |
| SNP_P3_157592_167511 | NW_004516792.1 | Scaffold1643 | 167511                  | CC                              | TT                | 1946660225               |
| SNP_P3_157593_167548 | NW_004516792.1 | Scaffold1643 | 167548                  | AA                              | GG                | 1946660227               |
| SNP_P3_157594_167549 | NW_004516792.1 | Scaffold1643 | 167549                  | CC                              | TT                | 1946660229               |
| SNP_P3_157595_167550 | NW_004516792.1 | Scaffold1643 | 167550                  | GG                              | AA                | 1946660231               |
| SNP_P3_157596_167584 | NW_004516792.1 | Scaffold1643 | 167584                  | CC                              | AA                | 1946660233               |
| SNP_P3_157597_167638 | NW_004516792.1 | Scaffold1643 | 167638                  | TT                              | AA                | 1946660235               |
| SNP_P3_157598_167656 | NW_004516792.1 | Scaffold1643 | 167656                  | GG                              | AA                | 1946660237               |
| SNP_P3_157599_167659 | NW_004516792.1 | Scaffold1643 | 167659                  | GG                              | AA                | 1946660239               |
| SNP_P3_157600_167681 | NW_004516792.1 | Scaffold1643 | 167681                  | GG                              | AA                | 1946660242               |
| SNP_P3_157601_167766 | NW_004516792.1 | Scaffold1643 | 167766                  | TT                              | AA                | 1946660244               |
| SNP_P3_157602_167829 | NW_004516792.1 | Scaffold1643 | 167829                  | AA                              | GG                | 1946660246               |
| SNP_P3_157604_169482 | NW_004516792.1 | Scaffold1643 | 169482                  | GG                              | AA                | 1946660248               |
| SNP_P3_157605_169501 | NW_004516792.1 | Scaffold1643 | 169501                  | GG                              | TT                | 1946660250               |
| SNP_P3_157606_169558 | NW_004516792.1 | Scaffold1643 | 169558                  | CC                              | TT                | 1946660253               |
| SNP_P3_157607_170473 | NW_004516792.1 | Scaffold1643 | 170473                  | TT                              | AA                | 1946660255               |
| SNP_P3_157608_170474 | NW_004516792.1 | Scaffold1643 | 170474                  | TT                              | AA                | 1946660257               |
| SNP_P3_157609_170986 | NW_004516792.1 | Scaffold1643 | 170986                  | CC                              | TT                | 1946660259               |
| SNP_P3_157611_171701 | NW_004516792.1 | Scaffold1643 | 171701                  | TT                              | CC                | 1946660261               |
| SNP_P3_157612_171703 | NW_004516792.1 | Scaffold1643 | 171703                  | CC                              | TT                | 1946660263               |
| SNP_P3_157613_171864 | NW_004516792.1 | Scaffold1643 | 171864                  | CC                              | TT                | 1946660265               |
| SNP_P3_157614_171915 | NW_004516792.1 | Scaffold1643 | 171915                  | CC                              | TT                | 1946660267               |
| SNP_P3_157615_171936 | NW_004516792.1 | Scaffold1643 | 171936                  | CC                              | GG                | 1946660269               |
| SNP_P3_157616_172001 | NW_004516792.1 | Scaffold1643 | 172001                  | TT                              | AA                | 1946660271               |
| SNP_P3_157617_172037 | NW_004516792.1 | Scaffold1643 | 172037                  | CC                              | TT                | 1946660273               |
| SNP_P3_157618_172294 | NW_004516792.1 | Scaffold1643 | 172294                  | CC                              | AA                | 1946660275               |
| SNP_P3_157619_180898 | NW_004516792.1 | Scaffold1643 | 180898                  | CC                              | TT                | 1946660277               |
| SNP_P3_157620_180904 | NW_004516792.1 | Scaffold1643 | 180904                  | CC                              | TT                | 1946660279               |
| SNP_P3_157621_180916 | NW_004516792.1 | Scaffold1643 | 180916                  | TT                              | CC                | 1946660281               |
| SNP_P3_157622_180924 | NW_004516792.1 | Scaffold1643 | 180924                  | TT                              | CC                | 1946660283               |
| SNP_P3_157623_180962 | NW_004516792.1 | Scaffold1643 | 180962                  | AA                              | CC                | 1946660285               |
| SNP_P3_157625_181071 | NW_004516792.1 | Scaffold1643 | 181071                  | GG                              | CC                | 1946660287               |
| SNP_P3_157626_181151 | NW_004516792.1 | Scaffold1643 | 181151                  | AA                              | CC                | 1946660288               |

| SNPs IDs             | Chromosome IDs | Chromosomes  | Physical positions (bp) | CDC Frontier (Reference genome) | (Pusa 256 & HPNB) | NCBI SNPdb Accession IDs |
|----------------------|----------------|--------------|-------------------------|---------------------------------|-------------------|--------------------------|
| SNP_P3_157627_181164 | NW_004516792.1 | Scaffold1643 | 181164                  | GG                              | AA                | 1946660289               |
| SNP_P3_157628_181333 | NW_004516792.1 | Scaffold1643 | 181333                  | TT                              | GG                | 1946660290               |
| SNP_P3_157629_181385 | NW_004516792.1 | Scaffold1643 | 181385                  | GG                              | AA                | 1946660291               |
| SNP_P3_157630_181447 | NW_004516792.1 | Scaffold1643 | 181447                  | CC                              | TT                | 1946660292               |
| SNP_P3_157631_183362 | NW_004516792.1 | Scaffold1643 | 183362                  | TT                              | CC                | 1946660293               |
| SNP_P3_157632_183382 | NW_004516792.1 | Scaffold1643 | 183382                  | TT                              | CC                | 1946660294               |
| SNP_P3_157633_187337 | NW_004516792.1 | Scaffold1643 | 187337                  | AA                              | TT                | 1946660295               |
| SNP_P3_157634_187365 | NW_004516792.1 | Scaffold1643 | 187365                  | GG                              | AA                | 1946660297               |
| SNP_P3_157635_187405 | NW_004516792.1 | Scaffold1643 | 187405                  | CC                              | TT                | 1946660299               |
| SNP_P3_157636_187437 | NW_004516792.1 | Scaffold1643 | 187437                  | CC                              | TT                | 1946660301               |
| SNP_P3_157637_188549 | NW_004516792.1 | Scaffold1643 | 188549                  | TT                              | CC                | 1946660303               |
| SNP_P3_157638_189062 | NW_004516792.1 | Scaffold1643 | 189062                  | CC                              | TT                | 1946660305               |
| SNP_P3_157639_189698 | NW_004516792.1 | Scaffold1643 | 189698                  | TT                              | AA                | 1946660306               |
| SNP_P3_157640_189959 | NW_004516792.1 | Scaffold1643 | 189959                  | GG                              | AA                | 1946660308               |
| SNP_P3_157641_189978 | NW_004516792.1 | Scaffold1643 | 189978                  | CC                              | AA                | 1946660310               |
| SNP_P3_157642_190007 | NW_004516792.1 | Scaffold1643 | 190007                  | AA                              | GG                | 1946660312               |
| SNP_P3_157643_190030 | NW_004516792.1 | Scaffold1643 | 190030                  | CC                              | GG                | 1946660314               |
| SNP_P3_157644_190075 | NW_004516792.1 | Scaffold1643 | 190075                  | GG                              | AA                | 1946660316               |
| SNP_P3_157645_190295 | NW_004516792.1 | Scaffold1643 | 190295                  | AA                              | TT                | 1946660318               |
| SNP_P3_157646_190330 | NW_004516792.1 | Scaffold1643 | 190330                  | GG                              | AA                | 1946660321               |
| SNP_P3_157647_190413 | NW_004516792.1 | Scaffold1643 | 190413                  | AA                              | CC                | 1946660323               |
| SNP_P3_157648_190520 | NW_004516792.1 | Scaffold1643 | 190520                  | AA                              | TT                | 1946660325               |
| SNP_P3_157649_190537 | NW_004516792.1 | Scaffold1643 | 190537                  | AA                              | CC                | 1946660327               |
| SNP_P3_157650_190596 | NW_004516792.1 | Scaffold1643 | 190596                  | AA                              | CC                | 1946660329               |
| SNP_P3_157651_190655 | NW_004516792.1 | Scaffold1643 | 190655                  | AA                              | GG                | 1946660331               |
| SNP_P3_157652_190743 | NW_004516792.1 | Scaffold1643 | 190743                  | TT                              | AA                | 1946660333               |
| SNP_P3_157653_190763 | NW_004516792.1 | Scaffold1643 | 190763                  | TT                              | AA                | 1946660335               |
| SNP_P3_157654_190767 | NW_004516792.1 | Scaffold1643 | 190767                  | TT                              | CC                | 1946660337               |
| SNP_P3_157657_192975 | NW_004516792.1 | Scaffold1643 | 192975                  | CC                              | TT                | 1946660339               |
| SNP_P3_157658_192978 | NW_004516792.1 | Scaffold1643 | 192978                  | TT                              | CC                | 1946660340               |
| SNP_P3_157659_193037 | NW_004516792.1 | Scaffold1643 | 193037                  | AA                              | GG                | 1946660342               |
| SNP_P3_157660_193066 | NW_004516792.1 | Scaffold1643 | 193066                  | GG                              | AA                | 1946660344               |
| SNP_P3_157661_193108 | NW_004516792.1 | Scaffold1643 | 193108                  | GG                              | AA                | 1946660346               |
| SNP_P3_157662_193132 | NW_004516792.1 | Scaffold1643 | 193132                  | GG                              | AA                | 1946660348               |
| SNP_P3_157663_193189 | NW_004516792.1 | Scaffold1643 | 193189                  | CC                              | AA                | 1946660350               |
| SNP_P3_157664_193193 | NW_004516792.1 | Scaffold1643 | 193193                  | CC                              | AA                | 1946660352               |
| SNP_P3_157665_193211 | NW_004516792.1 | Scaffold1643 | 193211                  | CC                              | TT                | 1946660354               |
| SNP_P3_157666_193219 | NW_004516792.1 | Scaffold1643 | 193219                  | GG                              | CC                | 1946660356               |
| SNP_P3_157667_193220 | NW_004516792.1 | Scaffold1643 | 193220                  | AA                              | CC                | 1946660358               |
| SNP_P3_157668_193256 | NW_004516792.1 | Scaffold1643 | 193256                  | AA                              | GG                | 1946660361               |
| SNP_P3_157669_193308 | NW_004516792.1 | Scaffold1643 | 193308                  | CC                              | TT                | 1946660363               |
| SNP_P3_157670_201063 | NW_004516792.1 | Scaffold1643 | 201063                  | GG                              | AA                | 1946660365               |

| SNPs IDs             | Chromosome IDs | Chromosomes  | Physical positions (bp) | CDC Frontier (Reference genome) | (Pusa 256 & HPNB) | NCBI SNPdb Accession IDs |
|----------------------|----------------|--------------|-------------------------|---------------------------------|-------------------|--------------------------|
| SNP_P3_157671_201132 | NW_004516792.1 | Scaffold1643 | 201132                  | TT                              | AA                | 1946660367               |
| SNP_P3_157672_201177 | NW_004516792.1 | Scaffold1643 | 201177                  | AA                              | GG                | 1946660368               |
| SNP_P3_157673_201267 | NW_004516792.1 | Scaffold1643 | 201267                  | TT                              | CC                | 1946660371               |
| SNP_P3_157674_201277 | NW_004516792.1 | Scaffold1643 | 201277                  | TT                              | CC                | 1946660373               |
| SNP_P3_157675_201308 | NW_004516792.1 | Scaffold1643 | 201308                  | AA                              | GG                | 1946660375               |
| SNP_P3_157676_201337 | NW_004516792.1 | Scaffold1643 | 201337                  | CC                              | GG                | 1946660377               |
| SNP_P3_157677_201340 | NW_004516792.1 | Scaffold1643 | 201340                  | CC                              | TT                | 1946660379               |
| SNP_P3_157678_201365 | NW_004516792.1 | Scaffold1643 | 201365                  | CC                              | TT                | 1946660381               |
| SNP_P3_157679_201373 | NW_004516792.1 | Scaffold1643 | 201373                  | TT                              | CC                | 1946660383               |
| SNP_P3_157680_201378 | NW_004516792.1 | Scaffold1643 | 201378                  | TT                              | CC                | 1946660385               |
| SNP_P3_157681_201387 | NW_004516792.1 | Scaffold1643 | 201387                  | CC                              | TT                | 1946660387               |
| SNP_P3_157682_201412 | NW_004516792.1 | Scaffold1643 | 201412                  | CC                              | GG                | 1946660389               |
| SNP_P3_157683_201467 | NW_004516792.1 | Scaffold1643 | 201467                  | AA                              | GG                | 1946660391               |
| SNP_P3_157684_201482 | NW_004516792.1 | Scaffold1643 | 201482                  | GG                              | CC                | 1946660393               |
| SNP_P3_157685_201485 | NW_004516792.1 | Scaffold1643 | 201485                  | TT                              | CC                | 1946660395               |
| SNP_P3_157686_201548 | NW_004516792.1 | Scaffold1643 | 201548                  | GG                              | AA                | 1946660397               |
| SNP_P3_157687_201565 | NW_004516792.1 | Scaffold1643 | 201565                  | AA                              | GG                | 1946660398               |
| SNP_P3_157688_202523 | NW_004516792.1 | Scaffold1643 | 202523                  | TT                              | GG                | 1946660401               |
| SNP_P3_157689_202525 | NW_004516792.1 | Scaffold1643 | 202525                  | TT                              | CC                | 1946660403               |
| SNP_P3_157690_202526 | NW_004516792.1 | Scaffold1643 | 202526                  | AA                              | TT                | 1946660405               |
| SNP_P3_157691_202551 | NW_004516792.1 | Scaffold1643 | 202551                  | AA                              | GG                | 1946660407               |
| SNP_P3_157692_204592 | NW_004516792.1 | Scaffold1643 | 204592                  | TT                              | CC                | 1946660409               |
| SNP_P3_157693_206836 | NW_004516792.1 | Scaffold1643 | 206836                  | AA                              | TT                | 1946660411               |
| SNP_P3_157694_206996 | NW_004516792.1 | Scaffold1643 | 206996                  | CC                              | TT                | 1946660413               |
| SNP_P3_157695_207305 | NW_004516792.1 | Scaffold1643 | 207305                  | TT                              | CC                | 1946660415               |
| SNP_P3_157696_207397 | NW_004516792.1 | Scaffold1643 | 207397                  | TT                              | AA                | 1946660417               |
| SNP_P3_157697_207469 | NW_004516792.1 | Scaffold1643 | 207469                  | TT                              | CC                | 1946660419               |
| SNP_P3_157698_207828 | NW_004516792.1 | Scaffold1643 | 207828                  | GG                              | AA                | 1946660421               |
| SNP_P3_157699_207859 | NW_004516792.1 | Scaffold1643 | 207859                  | GG                              | AA                | 1946660423               |
| SNP_P3_157700_207991 | NW_004516792.1 | Scaffold1643 | 207991                  | CC                              | GG                | 1946660425               |
| SNP_P3_157701_208010 | NW_004516792.1 | Scaffold1643 | 208010                  | GG                              | AA                | 1946660427               |
| SNP_P3_157702_208036 | NW_004516792.1 | Scaffold1643 | 208036                  | GG                              | AA                | 1946660429               |
| SNP_P3_157703_208403 | NW_004516792.1 | Scaffold1643 | 208403                  | AA                              | TT                | 1946660431               |
| SNP_P3_157704_208422 | NW_004516792.1 | Scaffold1643 | 208422                  | GG                              | AA                | 1946660432               |
| SNP_P3_157705_208431 | NW_004516792.1 | Scaffold1643 | 208431                  | CC                              | AA                | 1946660434               |
| SNP_P3_157706_208435 | NW_004516792.1 | Scaffold1643 | 208435                  | AA                              | CC                | 1946660436               |
| SNP_P3_157707_208436 | NW_004516792.1 | Scaffold1643 | 208436                  | AA                              | TT                | 1946660438               |
| SNP_P3_157708_208457 | NW_004516792.1 | Scaffold1643 | 208457                  | AA                              | GG                | 1946660442               |
| SNP_P3_157709_208470 | NW_004516792.1 | Scaffold1643 | 208470                  | AA                              | TT                | 1946660444               |
| SNP_P3_157710_208650 | NW_004516792.1 | Scaffold1643 | 208650                  | TT                              | CC                | 1946660446               |
| SNP_P3_157711_209385 | NW_004516792.1 | Scaffold1643 | 209385                  | CC                              | GG                | 1946660447               |
| SNP_P3_157712_209452 | NW_004516792.1 | Scaffold1643 | 209452                  | TT                              | AA                | 1946660450               |

| SNPs IDs             | Chromosome IDs | Chromosomes  | Physical positions (bp) | CDC Frontier (Reference genome) | (Pusa 256 & HPNB) | NCBI SNPdb Accession IDs |
|----------------------|----------------|--------------|-------------------------|---------------------------------|-------------------|--------------------------|
| SNP_P3_157713_209878 | NW_004516792.1 | Scaffold1643 | 209878                  | CC                              | TT                | 1946660452               |
| SNP_P3_157714_210161 | NW_004516792.1 | Scaffold1643 | 210161                  | TT                              | AA                | 1946660454               |
| SNP_P3_157715_210213 | NW_004516792.1 | Scaffold1643 | 210213                  | AA                              | GG                | 1946660456               |
| SNP_P3_157716_210234 | NW_004516792.1 | Scaffold1643 | 210234                  | TT                              | CC                | 1946660457               |
| SNP_P3_157717_210242 | NW_004516792.1 | Scaffold1643 | 210242                  | TT                              | AA                | 1946660459               |
| SNP_P3_157718_210260 | NW_004516792.1 | Scaffold1643 | 210260                  | AA                              | TT                | 1946660461               |
| SNP_P3_157719_210279 | NW_004516792.1 | Scaffold1643 | 210279                  | GG                              | AA                | 1946660463               |
| SNP_P3_157720_210301 | NW_004516792.1 | Scaffold1643 | 210301                  | TT                              | AA                | 1946660465               |
| SNP_P3_157721_210309 | NW_004516792.1 | Scaffold1643 | 210309                  | TT                              | AA                | 1946660467               |
| SNP_P3_157723_210515 | NW_004516792.1 | Scaffold1643 | 210515                  | TT                              | CC                | 1946660469               |
| SNP_P3_157724_210516 | NW_004516792.1 | Scaffold1643 | 210516                  | GG                              | TT                | 1946660471               |
| SNP_P3_157727_210727 | NW_004516792.1 | Scaffold1643 | 210727                  | GG                              | AA                | 1946660473               |
| SNP_P3_157728_210784 | NW_004516792.1 | Scaffold1643 | 210784                  | TT                              | CC                | 1946660475               |
| SNP_P3_157729_210872 | NW_004516792.1 | Scaffold1643 | 210872                  | TT                              | CC                | 1946660477               |
| SNP_P3_157730_210914 | NW_004516792.1 | Scaffold1643 | 210914                  | TT                              | AA                | 1946660480               |
| SNP_P3_157731_210932 | NW_004516792.1 | Scaffold1643 | 210932                  | AA                              | CC                | 1946660482               |
| SNP_P3_157732_210976 | NW_004516792.1 | Scaffold1643 | 210976                  | TT                              | AA                | 1946660484               |
| SNP_P3_157734_211057 | NW_004516792.1 | Scaffold1643 | 211057                  | TT                              | AA                | 1946660486               |
| SNP_P3_157736_211113 | NW_004516792.1 | Scaffold1643 | 211113                  | CC                              | AA                | 1946660488               |
| SNP_P3_157737_211176 | NW_004516792.1 | Scaffold1643 | 211176                  | TT                              | CC                | 1946660490               |
| SNP_P3_157738_211191 | NW_004516792.1 | Scaffold1643 | 211191                  | GG                              | AA                | 1946660492               |
| SNP_P3_157740_211346 | NW_004516792.1 | Scaffold1643 | 211346                  | TT                              | AA                | 1946660494               |
| SNP_P3_157741_211354 | NW_004516792.1 | Scaffold1643 | 211354                  | CC                              | AA                | 1946660495               |
| SNP_P3_157742_211367 | NW_004516792.1 | Scaffold1643 | 211367                  | GG                              | TT                | 1946660497               |
| SNP_P3_157743_213227 | NW_004516792.1 | Scaffold1643 | 213227                  | AA                              | TT                | 1946660499               |
| SNP_P3_157744_213915 | NW_004516792.1 | Scaffold1643 | 213915                  | GG                              | CC                | 1946660501               |
| SNP_P3_157746_214852 | NW_004516792.1 | Scaffold1643 | 214852                  | CC                              | TT                | 1946660503               |
| SNP_P3_157747_215033 | NW_004516792.1 | Scaffold1643 | 215033                  | GG                              | AA                | 1946660505               |
| SNP_P3_157748_215158 | NW_004516792.1 | Scaffold1643 | 215158                  | GG                              | AA                | 1946660507               |
| SNP_P3_157749_215240 | NW_004516792.1 | Scaffold1643 | 215240                  | CC                              | TT                | 1946660509               |
| SNP_P3_157750_4585   | NW_004516793.1 | Scaffold1644 | 4585                    | TT                              | AA                | 1946660511               |
| SNP_P3_157751_4732   | NW_004516793.1 | Scaffold1644 | 4732                    | CC                              | TT                | 1946660513               |
| SNP_P3_157752_10075  | NW_004516793.1 | Scaffold1644 | 10075                   | GG                              | AA                | 1946660516               |
| SNP_P3_157753_10079  | NW_004516793.1 | Scaffold1644 | 10079                   | GG                              | AA                | 1946660518               |
| SNP_P3_157754_10082  | NW_004516793.1 | Scaffold1644 | 10082                   | TT                              | CC                | 1946660520               |
| SNP_P3_157755_10092  | NW_004516793.1 | Scaffold1644 | 10092                   | TT                              | CC                | 1946660522               |
| SNP_P3_157756_10147  | NW_004516793.1 | Scaffold1644 | 10147                   | AA                              | GG                | 1946660524               |
| SNP_P3_157757_10498  | NW_004516793.1 | Scaffold1644 | 10498                   | AA                              | GG                | 1946660526               |
| SNP_P3_157758_10551  | NW_004516793.1 | Scaffold1644 | 10551                   | AA                              | TT                | 1946660528               |
| SNP_P3_157759_5532   | NW_004516795.1 | Scaffold1649 | 5532                    | AA                              | CC                | 1946660530               |
| SNP_P3_157760_17672  | NW_004516795.1 | Scaffold1649 | 17672                   | TT                              | AA                | 1946660532               |
| SNP_P3_157761_18019  | NW_004516795.1 | Scaffold1649 | 18019                   | CC                              | TT                | 1946660534               |

| SNPs IDs           | Chromosome IDs | Chromosomes  | Physical positions (bp) | CDC Frontier (Reference genome) | (Pusa 256 & HPNB) | NCBI SNPdb Accession IDs |
|--------------------|----------------|--------------|-------------------------|---------------------------------|-------------------|--------------------------|
| SNP_P3_157762_182  | NW_004516797.1 | Scaffold1651 | 182                     | AA                              | CC                | 1946660536               |
| SNP_P3_157763_4184 | NW_004516797.1 | Scaffold1651 | 4184                    | AA                              | GG                | 1946660538               |
| SNP_P3_157764_4289 | NW_004516797.1 | Scaffold1651 | 4289                    | GG                              | AA                | 1946660540               |
| SNP_P3_157765_4305 | NW_004516797.1 | Scaffold1651 | 4305                    | GG                              | AA                | 1946660542               |
| SNP_P3_157766_4367 | NW_004516797.1 | Scaffold1651 | 4367                    | GG                              | AA                | 1946660544               |
| SNP_P3_157767_4485 | NW_004516797.1 | Scaffold1651 | 4485                    | TT                              | CC                | 1946660546               |
| SNP_P3_157768_4525 | NW_004516797.1 | Scaffold1651 | 4525                    | AA                              | TT                | 1946660548               |
| SNP_P3_157769_4665 | NW_004516797.1 | Scaffold1651 | 4665                    | TT                              | CC                | 1946660550               |
| SNP_P3_157770_4675 | NW_004516797.1 | Scaffold1651 | 4675                    | GG                              | AA                | 1946660552               |
| SNP_P3_157771_4809 | NW_004516797.1 | Scaffold1651 | 4809                    | TT                              | CC                | 1946660554               |
| SNP_P3_157772_5085 | NW_004516797.1 | Scaffold1651 | 5085                    | TT                              | GG                | 1946660556               |
| SNP_P3_157774_5171 | NW_004516797.1 | Scaffold1651 | 5171                    | CC                              | TT                | 1946660560               |
| SNP_P3_157775_5265 | NW_004516797.1 | Scaffold1651 | 5265                    | GG                              | AA                | 1946660562               |
| SNP_P3_157776_5441 | NW_004516797.1 | Scaffold1651 | 5441                    | TT                              | CC                | 1946660564               |
| SNP_P3_157777_5473 | NW_004516797.1 | Scaffold1651 | 5473                    | TT                              | CC                | 1946660566               |
| SNP_P3_157778_5474 | NW_004516797.1 | Scaffold1651 | 5474                    | TT                              | CC                | 1946660568               |
| SNP_P3_157779_5662 | NW_004516797.1 | Scaffold1651 | 5662                    | TT                              | CC                | 1946660570               |
| SNP_P3_157780_5669 | NW_004516797.1 | Scaffold1651 | 5669                    | AA                              | GG                | 1946660572               |
| SNP_P3_157781_5711 | NW_004516797.1 | Scaffold1651 | 5711                    | GG                              | CC                | 1946660574               |
| SNP_P3_157782_6032 | NW_004516797.1 | Scaffold1651 | 6032                    | TT                              | CC                | 1946660576               |
| SNP_P3_157783_6068 | NW_004516797.1 | Scaffold1651 | 6068                    | AA                              | GG                | 1946660578               |
| SNP_P3_157784_6152 | NW_004516797.1 | Scaffold1651 | 6152                    | TT                              | CC                | 1946660580               |
| SNP_P3_157785_6223 | NW_004516797.1 | Scaffold1651 | 6223                    | TT                              | CC                | 1946660582               |
| SNP_P3_157786_6549 | NW_004516797.1 | Scaffold1651 | 6549                    | GG                              | AA                | 1946660584               |
| SNP_P3_157787_6999 | NW_004516797.1 | Scaffold1651 | 6999                    | TT                              | CC                | 1946660586               |
| SNP_P3_157789_7087 | NW_004516797.1 | Scaffold1651 | 7087                    | AA                              | TT                | 1946660588               |
| SNP_P3_157790_7151 | NW_004516797.1 | Scaffold1651 | 7151                    | CC                              | AA                | 1946660591               |
| SNP_P3_157791_7212 | NW_004516797.1 | Scaffold1651 | 7212                    | AA                              | GG                | 1946660593               |
| SNP_P3_157792_7309 | NW_004516797.1 | Scaffold1651 | 7309                    | AA                              | TT                | 1946660595               |
| SNP_P3_157793_7370 | NW_004516797.1 | Scaffold1651 | 7370                    | CC                              | TT                | 1946660598               |
| SNP_P3_157794_7376 | NW_004516797.1 | Scaffold1651 | 7376                    | TT                              | CC                | 1946660600               |
| SNP_P3_157795_7440 | NW_004516797.1 | Scaffold1651 | 7440                    | GG                              | TT                | 1946660602               |
| SNP_P3_157796_7558 | NW_004516797.1 | Scaffold1651 | 7558                    | AA                              | GG                | 1946660604               |
| SNP_P3_157797_7638 | NW_004516797.1 | Scaffold1651 | 7638                    | GG                              | AA                | 1946660606               |
| SNP_P3_157798_7685 | NW_004516797.1 | Scaffold1651 | 7685                    | CC                              | TT                | 1946660608               |
| SNP_P3_157799_7707 | NW_004516797.1 | Scaffold1651 | 7707                    | AA                              | CC                | 1946660610               |
| SNP_P3_157800_8796 | NW_004516797.1 | Scaffold1651 | 8796                    | AA                              | GG                | 1946660612               |
| SNP_P3_157801_9019 | NW_004516797.1 | Scaffold1651 | 9019                    | CC                              | AA                | 1946660614               |
| SNP_P3_157802_9081 | NW_004516797.1 | Scaffold1651 | 9081                    | GG                              | AA                | 1946660616               |
| SNP_P3_157803_9085 | NW_004516797.1 | Scaffold1651 | 9085                    | GG                              | TT                | 1946660618               |
| SNP_P3_157804_9305 | NW_004516797.1 | Scaffold1651 | 9305                    | TT                              | CC                | 1946660620               |
| SNP_P3_157805_9323 | NW_004516797.1 | Scaffold1651 | 9323                    | TT                              | GG                | 1946660622               |



| SNPs IDs            | Chromosome IDs | Chromosomes  | Physical positions (bp) | CDC Frontier (Reference genome) | (Pusa 256 & HPNB) | NCBI SNPdb Accession IDs |
|---------------------|----------------|--------------|-------------------------|---------------------------------|-------------------|--------------------------|
| SNP_P3_157806_9331  | NW_004516797.1 | Scaffold1651 | 9331                    | GG                              | TT                | 1946660624               |
| SNP_P3_157807_9343  | NW_004516797.1 | Scaffold1651 | 9343                    | AA                              | CC                | 1946660626               |
| SNP_P3_157808_9353  | NW_004516797.1 | Scaffold1651 | 9353                    | TT                              | GG                | 1946660628               |
| SNP_P3_157809_9452  | NW_004516797.1 | Scaffold1651 | 9452                    | GG                              | TT                | 1946660630               |
| SNP_P3_157810_9771  | NW_004516797.1 | Scaffold1651 | 9771                    | GG                              | AA                | 1946660632               |
| SNP_P3_157811_9813  | NW_004516797.1 | Scaffold1651 | 9813                    | GG                              | AA                | 1946660635               |
| SNP_P3_157813_10057 | NW_004516797.1 | Scaffold1651 | 10057                   | GG                              | AA                | 1946660637               |
| SNP_P3_157814_10086 | NW_004516797.1 | Scaffold1651 | 10086                   | CC                              | AA                | 1946660639               |
| SNP_P3_157815_10258 | NW_004516797.1 | Scaffold1651 | 10258                   | TT                              | CC                | 1946660641               |
| SNP_P3_157816_10314 | NW_004516797.1 | Scaffold1651 | 10314                   | AA                              | GG                | 1946660643               |
| SNP_P3_157817_10362 | NW_004516797.1 | Scaffold1651 | 10362                   | GG                              | AA                | 1946660646               |
| SNP_P3_157818_10400 | NW_004516797.1 | Scaffold1651 | 10400                   | AA                              | GG                | 1946660648               |
| SNP_P3_157819_10429 | NW_004516797.1 | Scaffold1651 | 10429                   | CC                              | TT                | 1946660650               |
| SNP_P3_157820_10503 | NW_004516797.1 | Scaffold1651 | 10503                   | GG                              | AA                | 1946660652               |
| SNP_P3_157821_10603 | NW_004516797.1 | Scaffold1651 | 10603                   | GG                              | TT                | 1946660654               |
| SNP_P3_157822_10722 | NW_004516797.1 | Scaffold1651 | 10722                   | GG                              | AA                | 1946660656               |
| SNP_P3_157823_10836 | NW_004516797.1 | Scaffold1651 | 10836                   | GG                              | AA                | 1946660658               |
| SNP_P3_157824_10841 | NW_004516797.1 | Scaffold1651 | 10841                   | CC                              | TT                | 1946660660               |
| SNP_P3_157825_10882 | NW_004516797.1 | Scaffold1651 | 10882                   | CC                              | TT                | 1946660662               |
| SNP_P3_157826_11014 | NW_004516797.1 | Scaffold1651 | 11014                   | AA                              | TT                | 1946660664               |
| SNP_P3_157827_11033 | NW_004516797.1 | Scaffold1651 | 11033                   | AA                              | GG                | 1946660666               |
| SNP_P3_157828_11042 | NW_004516797.1 | Scaffold1651 | 11042                   | GG                              | AA                | 1946660668               |
| SNP_P3_157829_11047 | NW_004516797.1 | Scaffold1651 | 11047                   | GG                              | AA                | 1946660670               |
| SNP_P3_157830_11081 | NW_004516797.1 | Scaffold1651 | 11081                   | TT                              | GG                | 1946660672               |
| SNP_P3_157831_11082 | NW_004516797.1 | Scaffold1651 | 11082                   | CC                              | TT                | 1946660674               |
| SNP_P3_157832_11155 | NW_004516797.1 | Scaffold1651 | 11155                   | CC                              | TT                | 1946660676               |
| SNP_P3_157833_11219 | NW_004516797.1 | Scaffold1651 | 11219                   | CC                              | TT                | 1946660678               |
| SNP_P3_157834_11242 | NW_004516797.1 | Scaffold1651 | 11242                   | TT                              | CC                | 1946660680               |
| SNP_P3_157835_11463 | NW_004516797.1 | Scaffold1651 | 11463                   | GG                              | AA                | 1946660682               |
| SNP_P3_157836_11486 | NW_004516797.1 | Scaffold1651 | 11486                   | TT                              | CC                | 1946660684               |
| SNP_P3_157837_11490 | NW_004516797.1 | Scaffold1651 | 11490                   | GG                              | TT                | 1946660686               |
| SNP_P3_157838_11572 | NW_004516797.1 | Scaffold1651 | 11572                   | AA                              | GG                | 1946660688               |
| SNP_P3_157839_11638 | NW_004516797.1 | Scaffold1651 | 11638                   | AA                              | GG                | 1946660690               |
| SNP_P3_157840_11648 | NW_004516797.1 | Scaffold1651 | 11648                   | GG                              | TT                | 1946660692               |
| SNP_P3_157841_11829 | NW_004516797.1 | Scaffold1651 | 11829                   | AA                              | GG                | 1946660694               |
| SNP_P3_157842_12084 | NW_004516797.1 | Scaffold1651 | 12084                   | CC                              | TT                | 1946660696               |
| SNP_P3_157843_12256 | NW_004516797.1 | Scaffold1651 | 12256                   | CC                              | TT                | 1946660698               |
| SNP_P3_157844_12261 | NW_004516797.1 | Scaffold1651 | 12261                   | TT                              | CC                | 1946660700               |
| SNP_P3_157845_12323 | NW_004516797.1 | Scaffold1651 | 12323                   | CC                              | TT                | 1946660702               |
| SNP_P3_157846_12330 | NW_004516797.1 | Scaffold1651 | 12330                   | CC                              | TT                | 1946660704               |
| SNP_P3_157847_12337 | NW_004516797.1 | Scaffold1651 | 12337                   | AA                              | GG                | 1946660706               |
| SNP_P3_157849_13043 | NW_004516797.1 | Scaffold1651 | 13043                   | TT                              | CC                | 1946660708               |

| SNPs IDs            | Chromosome IDs | Chromosomes  | Physical positions (bp) | CDC Frontier (Reference genome) | (Pusa 256 & HPNB) | NCBI SNPdb Accession IDs |
|---------------------|----------------|--------------|-------------------------|---------------------------------|-------------------|--------------------------|
| SNP_P3_157850_13097 | NW_004516797.1 | Scaffold1651 | 13097                   | AA                              | TT                | 1946660710               |
| SNP_P3_157851_13161 | NW_004516797.1 | Scaffold1651 | 13161                   | CC                              | TT                | 1946660712               |
| SNP_P3_157852_13209 | NW_004516797.1 | Scaffold1651 | 13209                   | GG                              | AA                | 1946660714               |
| SNP_P3_157854_13454 | NW_004516797.1 | Scaffold1651 | 13454                   | AA                              | CC                | 1946660716               |
| SNP_P3_157855_13462 | NW_004516797.1 | Scaffold1651 | 13462                   | CC                              | TT                | 1946660718               |
| SNP_P3_157856_13487 | NW_004516797.1 | Scaffold1651 | 13487                   | CC                              | TT                | 1946660720               |
| SNP_P3_157858_13627 | NW_004516797.1 | Scaffold1651 | 13627                   | AA                              | GG                | 1946660722               |
| SNP_P3_157859_13644 | NW_004516797.1 | Scaffold1651 | 13644                   | CC                              | AA                | 1946660724               |
| SNP_P3_157860_13668 | NW_004516797.1 | Scaffold1651 | 13668                   | AA                              | TT                | 1946660727               |
| SNP_P3_157861_13679 | NW_004516797.1 | Scaffold1651 | 13679                   | GG                              | AA                | 1946660729               |
| SNP_P3_157862_13694 | NW_004516797.1 | Scaffold1651 | 13694                   | AA                              | GG                | 1946660731               |
| SNP_P3_157863_13843 | NW_004516797.1 | Scaffold1651 | 13843                   | GG                              | CC                | 1946660733               |
| SNP_P3_157864_13891 | NW_004516797.1 | Scaffold1651 | 13891                   | TT                              | AA                | 1946660735               |
| SNP_P3_157865_14049 | NW_004516797.1 | Scaffold1651 | 14049                   | AA                              | CC                | 1946660737               |
| SNP_P3_157866_14177 | NW_004516797.1 | Scaffold1651 | 14177                   | GG                              | TT                | 1946660739               |
| SNP_P3_157868_14358 | NW_004516797.1 | Scaffold1651 | 14358                   | GG                              | AA                | 1946660741               |
| SNP_P3_157869_14585 | NW_004516797.1 | Scaffold1651 | 14585                   | AA                              | CC                | 1946660743               |
| SNP_P3_157870_14639 | NW_004516797.1 | Scaffold1651 | 14639                   | CC                              | AA                | 1946660745               |
| SNP_P3_157871_14813 | NW_004516797.1 | Scaffold1651 | 14813                   | AA                              | CC                | 1946660747               |
| SNP_P3_157872_14919 | NW_004516797.1 | Scaffold1651 | 14919                   | GG                              | AA                | 1946660749               |
| SNP_P3_157873_14967 | NW_004516797.1 | Scaffold1651 | 14967                   | TT                              | CC                | 1946660752               |
| SNP_P3_157874_16101 | NW_004516797.1 | Scaffold1651 | 16101                   | CC                              | TT                | 1946660754               |
| SNP_P3_157875_16191 | NW_004516797.1 | Scaffold1651 | 16191                   | AA                              | GG                | 1946660756               |
| SNP_P3_157879_16690 | NW_004516797.1 | Scaffold1651 | 16690                   | TT                              | GG                | 1946660758               |
| SNP_P3_157880_16784 | NW_004516797.1 | Scaffold1651 | 16784                   | AA                              | GG                | 1946660760               |
| SNP_P3_157882_16872 | NW_004516797.1 | Scaffold1651 | 16872                   | GG                              | AA                | 1946660762               |
| SNP_P3_157884_17291 | NW_004516797.1 | Scaffold1651 | 17291                   | GG                              | AA                | 1946660764               |
| SNP_P3_157885_17314 | NW_004516797.1 | Scaffold1651 | 17314                   | CC                              | GG                | 1946660765               |
| SNP_P3_157886_17352 | NW_004516797.1 | Scaffold1651 | 17352                   | CC                              | TT                | 1946660766               |
| SNP_P3_157887_17497 | NW_004516797.1 | Scaffold1651 | 17497                   | CC                              | TT                | 1946660767               |
| SNP_P3_157889_17739 | NW_004516797.1 | Scaffold1651 | 17739                   | GG                              | AA                | 1946660768               |
| SNP_P3_157891_18310 | NW_004516797.1 | Scaffold1651 | 18310                   | GG                              | AA                | 1946660770               |
| SNP_P3_157892_18415 | NW_004516797.1 | Scaffold1651 | 18415                   | TT                              | CC                | 1946660772               |
| SNP_P3_157893_18477 | NW_004516797.1 | Scaffold1651 | 18477                   | CC                              | TT                | 1946660774               |
| SNP_P3_157895_18579 | NW_004516797.1 | Scaffold1651 | 18579                   | GG                              | CC                | 1946660776               |
| SNP_P3_157896_18614 | NW_004516797.1 | Scaffold1651 | 18614                   | GG                              | AA                | 1946660778               |
| SNP_P3_157897_18754 | NW_004516797.1 | Scaffold1651 | 18754                   | TT                              | CC                | 1946660780               |
| SNP_P3_157898_18759 | NW_004516797.1 | Scaffold1651 | 18759                   | GG                              | AA                | 1946660782               |
| SNP_P3_157899_18795 | NW_004516797.1 | Scaffold1651 | 18795                   | TT                              | AA                | 1946660785               |
| SNP_P3_157900_18796 | NW_004516797.1 | Scaffold1651 | 18796                   | GG                              | AA                | 1946660787               |
| SNP_P3_157901_18813 | NW_004516797.1 | Scaffold1651 | 18813                   | GG                              | TT                | 1946660789               |
| SNP_P3_157903_19021 | NW_004516797.1 | Scaffold1651 | 19021                   | TT                              | CC                | 1946660791               |

| SNPs IDs            | Chromosome IDs | Chromosomes  | Physical positions (bp) | CDC Frontier (Reference genome) | (Pusa 256 & HPNB) | NCBI SNPdb Accession IDs |
|---------------------|----------------|--------------|-------------------------|---------------------------------|-------------------|--------------------------|
| SNP_P3_157904_19062 | NW_004516797.1 | Scaffold1651 | 19062                   | GG                              | AA                | 1946660793               |
| SNP_P3_157905_19817 | NW_004516797.1 | Scaffold1651 | 19817                   | AA                              | TT                | 1946660795               |
| SNP_P3_157906_19854 | NW_004516797.1 | Scaffold1651 | 19854                   | AA                              | GG                | 1946660798               |
| SNP_P3_157907_20099 | NW_004516797.1 | Scaffold1651 | 20099                   | CC                              | TT                | 1946660800               |
| SNP_P3_157908_20104 | NW_004516797.1 | Scaffold1651 | 20104                   | AA                              | TT                | 1946660802               |
| SNP_P3_157909_20253 | NW_004516797.1 | Scaffold1651 | 20253                   | GG                              | TT                | 1946660804               |
| SNP_P3_157910_20382 | NW_004516797.1 | Scaffold1651 | 20382                   | CC                              | TT                | 1946660806               |
| SNP_P3_157911_20709 | NW_004516797.1 | Scaffold1651 | 20709                   | AA                              | GG                | 1946660808               |
| SNP_P3_157912_20953 | NW_004516797.1 | Scaffold1651 | 20953                   | AA                              | CC                | 1946660810               |
| SNP_P3_157913_22607 | NW_004516797.1 | Scaffold1651 | 22607                   | TT                              | CC                | 1946660812               |
| SNP_P3_157914_22608 | NW_004516797.1 | Scaffold1651 | 22608                   | TT                              | CC                | 1946660814               |
| SNP_P3_157916_23019 | NW_004516797.1 | Scaffold1651 | 23019                   | TT                              | CC                | 1946660816               |
| SNP_P3_157917_23064 | NW_004516797.1 | Scaffold1651 | 23064                   | GG                              | AA                | 1946660818               |
| SNP_P3_157918_30268 | NW_004516797.1 | Scaffold1651 | 30268                   | CC                              | TT                | 1946660820               |
| SNP_P3_157919_30471 | NW_004516797.1 | Scaffold1651 | 30471                   | GG                              | AA                | 1946660822               |
| SNP_P3_157920_30693 | NW_004516797.1 | Scaffold1651 | 30693                   | TT                              | GG                | 1946660824               |
| SNP_P3_157921_30934 | NW_004516797.1 | Scaffold1651 | 30934                   | CC                              | TT                | 1946660826               |
| SNP_P3_157922_31077 | NW_004516797.1 | Scaffold1651 | 31077                   | GG                              | AA                | 1946660828               |
| SNP_P3_157923_31081 | NW_004516797.1 | Scaffold1651 | 31081                   | TT                              | CC                | 1946660830               |
| SNP_P3_157924_31137 | NW_004516797.1 | Scaffold1651 | 31137                   | AA                              | GG                | 1946660832               |
| SNP_P3_157925_31271 | NW_004516797.1 | Scaffold1651 | 31271                   | GG                              | CC                | 1946660834               |
| SNP_P3_157926_31348 | NW_004516797.1 | Scaffold1651 | 31348                   | CC                              | TT                | 1946660836               |
| SNP_P3_157927_31440 | NW_004516797.1 | Scaffold1651 | 31440                   | TT                              | GG                | 1946660838               |
| SNP_P3_157928_31441 | NW_004516797.1 | Scaffold1651 | 31441                   | CC                              | TT                | 1946660840               |
| SNP_P3_157929_31470 | NW_004516797.1 | Scaffold1651 | 31470                   | AA                              | GG                | 1946660842               |
| SNP_P3_157930_31530 | NW_004516797.1 | Scaffold1651 | 31530                   | CC                              | TT                | 1946660844               |
| SNP_P3_157931_31546 | NW_004516797.1 | Scaffold1651 | 31546                   | GG                              | AA                | 1946660846               |
| SNP_P3_157933_44332 | NW_004516799.1 | Scaffold1654 | 44332                   | GG                              | AA                | 1946660848               |
| SNP_P3_157934_44436 | NW_004516799.1 | Scaffold1654 | 44436                   | AA                              | TT                | 1946660850               |
| SNP_P3_157935_44673 | NW_004516799.1 | Scaffold1654 | 44673                   | GG                              | AA                | 1946660852               |
| SNP_P3_157936_44873 | NW_004516799.1 | Scaffold1654 | 44873                   | GG                              | AA                | 1946660854               |
| SNP_P3_157937_69522 | NW_004516799.1 | Scaffold1654 | 69522                   | GG                              | TT                | 1946660856               |
| SNP_P3_157938_74254 | NW_004516799.1 | Scaffold1654 | 74254                   | GG                              | TT                | 1946660858               |
| SNP_P3_157939_77673 | NW_004516799.1 | Scaffold1654 | 77673                   | CC                              | TT                | 1946660860               |
| SNP_P3_157940_77686 | NW_004516799.1 | Scaffold1654 | 77686                   | TT                              | CC                | 1946660862               |
| SNP_P3_157941_77688 | NW_004516799.1 | Scaffold1654 | 77688                   | TT                              | CC                | 1946660864               |
| SNP_P3_157942_78516 | NW_004516799.1 | Scaffold1654 | 78516                   | TT                              | CC                | 1946660866               |
| SNP_P3_157943_87    | NW_004516801.1 | Scaffold1657 | 87                      | GG                              | AA                | 1946660868               |
| SNP_P3_157944_154   | NW_004516801.1 | Scaffold1657 | 154                     | CC                              | TT                | 1946660870               |
| SNP_P3_157945_169   | NW_004516801.1 | Scaffold1657 | 169                     | CC                              | TT                | 1946660872               |
| SNP_P3_157946_205   | NW_004516801.1 | Scaffold1657 | 205                     | TT                              | CC                | 1946660874               |
| SNP_P3_157947_279   | NW_004516801.1 | Scaffold1657 | 279                     | TT                              | CC                | 1946660876               |

| SNPs IDs            | Chromosome IDs | Chromosomes  | Physical positions (bp) | CDC Frontier (Reference genome) | (Pusa 256 & HPNB) | NCBI SNPdb Accession IDs |
|---------------------|----------------|--------------|-------------------------|---------------------------------|-------------------|--------------------------|
| SNP_P3_157948_320   | NW_004516801.1 | Scaffold1657 | 320                     | AA                              | GG                | 1946660878               |
| SNP_P3_157949_324   | NW_004516801.1 | Scaffold1657 | 324                     | GG                              | AA                | 1946660880               |
| SNP_P3_157950_337   | NW_004516801.1 | Scaffold1657 | 337                     | TT                              | AA                | 1946660882               |
| SNP_P3_157951_359   | NW_004516801.1 | Scaffold1657 | 359                     | TT                              | GG                | 1946660884               |
| SNP_P3_157952_411   | NW_004516801.1 | Scaffold1657 | 411                     | GG                              | CC                | 1946660886               |
| SNP_P3_157953_460   | NW_004516801.1 | Scaffold1657 | 460                     | CC                              | AA                | 1946660889               |
| SNP_P3_157954_568   | NW_004516801.1 | Scaffold1657 | 568                     | AA                              | GG                | 1946660891               |
| SNP_P3_157955_578   | NW_004516801.1 | Scaffold1657 | 578                     | GG                              | TT                | 1946660893               |
| SNP_P3_157956_660   | NW_004516801.1 | Scaffold1657 | 660                     | TT                              | AA                | 1946660895               |
| SNP_P3_157957_661   | NW_004516801.1 | Scaffold1657 | 661                     | GG                              | TT                | 1946660897               |
| SNP_P3_157958_913   | NW_004516801.1 | Scaffold1657 | 913                     | TT                              | CC                | 1946660899               |
| SNP_P3_157959_1030  | NW_004516801.1 | Scaffold1657 | 1030                    | AA                              | GG                | 1946660901               |
| SNP_P3_157960_1467  | NW_004516801.1 | Scaffold1657 | 1467                    | TT                              | CC                | 1946660903               |
| SNP_P3_157961_64    | NW_004516803.1 | Scaffold1659 | 64                      | AA                              | TT                | 1946660905               |
| SNP_P3_157962_99    | NW_004516803.1 | Scaffold1659 | 99                      | GG                              | TT                | 1946660907               |
| SNP_P3_157964_157   | NW_004516803.1 | Scaffold1659 | 157                     | GG                              | AA                | 1946660909               |
| SNP_P3_157965_453   | NW_004516803.1 | Scaffold1659 | 453                     | TT                              | AA                | 1946660911               |
| SNP_P3_157966_565   | NW_004516803.1 | Scaffold1659 | 565                     | TT                              | AA                | 1946660913               |
| SNP_P3_157967_702   | NW_004516803.1 | Scaffold1659 | 702                     | TT                              | CC                | 1946660915               |
| SNP_P3_157968_1583  | NW_004516803.1 | Scaffold1659 | 1583                    | TT                              | AA                | 1946660917               |
| SNP_P3_157969_2088  | NW_004516803.1 | Scaffold1659 | 2088                    | GG                              | AA                | 1946660919               |
| SNP_P3_157970_2162  | NW_004516803.1 | Scaffold1659 | 2162                    | TT                              | CC                | 1946660921               |
| SNP_P3_157971_2216  | NW_004516803.1 | Scaffold1659 | 2216                    | GG                              | AA                | 1946660923               |
| SNP_P3_157972_2279  | NW_004516803.1 | Scaffold1659 | 2279                    | CC                              | TT                | 1946660926               |
| SNP_P3_157973_2869  | NW_004516803.1 | Scaffold1659 | 2869                    | GG                              | AA                | 1946660928               |
| SNP_P3_157974_2925  | NW_004516803.1 | Scaffold1659 | 2925                    | GG                              | AA                | 1946660930               |
| SNP_P3_157975_3019  | NW_004516803.1 | Scaffold1659 | 3019                    | AA                              | TT                | 1946660932               |
| SNP_P3_157976_3371  | NW_004516803.1 | Scaffold1659 | 3371                    | CC                              | GG                | 1946660934               |
| SNP_P3_157977_3810  | NW_004516803.1 | Scaffold1659 | 3810                    | CC                              | AA                | 1946660936               |
| SNP_P3_157978_3978  | NW_004516803.1 | Scaffold1659 | 3978                    | CC                              | TT                | 1946660938               |
| SNP_P3_157979_4527  | NW_004516803.1 | Scaffold1659 | 4527                    | CC                              | AA                | 1946660940               |
| SNP_P3_157980_4832  | NW_004516803.1 | Scaffold1659 | 4832                    | GG                              | AA                | 1946660942               |
| SNP_P3_157981_4902  | NW_004516803.1 | Scaffold1659 | 4902                    | TT                              | CC                | 1946660944               |
| SNP_P3_157982_4997  | NW_004516803.1 | Scaffold1659 | 4997                    | TT                              | CC                | 1946660946               |
| SNP_P3_157983_5109  | NW_004516803.1 | Scaffold1659 | 5109                    | CC                              | TT                | 1946660948               |
| SNP_P3_157984_19744 | NW_004516803.1 | Scaffold1659 | 19744                   | GG                              | TT                | 1946660950               |
| SNP_P3_157985_19768 | NW_004516803.1 | Scaffold1659 | 19768                   | TT                              | CC                | 1946660952               |
| SNP_P3_157986_19786 | NW_004516803.1 | Scaffold1659 | 19786                   | TT                              | CC                | 1946660954               |
| SNP_P3_157987_19830 | NW_004516803.1 | Scaffold1659 | 19830                   | GG                              | AA                | 1946660956               |
| SNP_P3_157988_19874 | NW_004516803.1 | Scaffold1659 | 19874                   | TT                              | AA                | 1946660958               |
| SNP_P3_157989_19940 | NW_004516803.1 | Scaffold1659 | 19940                   | AA                              | GG                | 1946660960               |
| SNP_P3_157991_20029 | NW_004516803.1 | Scaffold1659 | 20029                   | TT                              | GG                | 1946660962               |

| SNPs IDs             | Chromosome IDs | Chromosomes  | Physical positions (bp) | CDC Frontier (Reference genome) | (Pusa 256 & HPNB) | NCBI SNPdb Accession IDs |
|----------------------|----------------|--------------|-------------------------|---------------------------------|-------------------|--------------------------|
| SNP_P3_157992_20075  | NW_004516803.1 | Scaffold1659 | 20075                   | CC                              | TT                | 1946660964               |
| SNP_P3_157993_20186  | NW_004516803.1 | Scaffold1659 | 20186                   | TT                              | CC                | 1946660966               |
| SNP_P3_157994_20229  | NW_004516803.1 | Scaffold1659 | 20229                   | AA                              | GG                | 1946660968               |
| SNP_P3_157995_20349  | NW_004516803.1 | Scaffold1659 | 20349                   | GG                              | AA                | 1946660970               |
| SNP_P3_157996_20366  | NW_004516803.1 | Scaffold1659 | 20366                   | AA                              | TT                | 1946660972               |
| SNP_P3_157998_20499  | NW_004516803.1 | Scaffold1659 | 20499                   | TT                              | AA                | 1946660974               |
| SNP_P3_157999_21061  | NW_004516803.1 | Scaffold1659 | 21061                   | AA                              | GG                | 1946660975               |
| SNP_P3_158000_21117  | NW_004516803.1 | Scaffold1659 | 21117                   | GG                              | AA                | 1946660977               |
| SNP_P3_158002_21486  | NW_004516803.1 | Scaffold1659 | 21486                   | GG                              | TT                | 1946660979               |
| SNP_P3_158003_21629  | NW_004516803.1 | Scaffold1659 | 21629                   | CC                              | TT                | 1946660981               |
| SNP_P3_158004_21977  | NW_004516803.1 | Scaffold1659 | 21977                   | GG                              | AA                | 1946660983               |
| SNP_P3_158005_35121  | NW_004516803.1 | Scaffold1659 | 35121                   | AA                              | GG                | 1946660985               |
| SNP_P3_158006_42833  | NW_004516803.1 | Scaffold1659 | 42833                   | GG                              | AA                | 1946660987               |
| SNP_P3_158007_81360  | NW_004516803.1 | Scaffold1659 | 81360                   | CC                              | TT                | 1946660989               |
| SNP_P3_158008_81409  | NW_004516803.1 | Scaffold1659 | 81409                   | GG                              | AA                | 1946660991               |
| SNP_P3_158010_95977  | NW_004516803.1 | Scaffold1659 | 95977                   | AA                              | GG                | 1946660993               |
| SNP_P3_158011_96017  | NW_004516803.1 | Scaffold1659 | 96017                   | AA                              | GG                | 1946660995               |
| SNP_P3_158012_96235  | NW_004516803.1 | Scaffold1659 | 96235                   | TT                              | CC                | 1946660997               |
| SNP_P3_158014_96411  | NW_004516803.1 | Scaffold1659 | 96411                   | GG                              | CC                | 1946660999               |
| SNP_P3_158015_105882 | NW_004516803.1 | Scaffold1659 | 105882                  | AA                              | GG                | 1946661001               |
| SNP_P3_158016_123300 | NW_004516803.1 | Scaffold1659 | 123300                  | TT                              | GG                | 1946661003               |
| SNP_P3_158017_123355 | NW_004516803.1 | Scaffold1659 | 123355                  | GG                              | AA                | 1946661005               |
| SNP_P3_158018_123381 | NW_004516803.1 | Scaffold1659 | 123381                  | CC                              | TT                | 1946661007               |
| SNP_P3_158020_131636 | NW_004516803.1 | Scaffold1659 | 131636                  | CC                              | TT                | 1946661009               |
| SNP_P3_158021_135811 | NW_004516803.1 | Scaffold1659 | 135811                  | GG                              | AA                | 1946661012               |
| SNP_P3_158022_135817 | NW_004516803.1 | Scaffold1659 | 135817                  | CC                              | TT                | 1946661014               |
| SNP_P3_158023_172348 | NW_004516803.1 | Scaffold1659 | 172348                  | AA                              | GG                | 1946661016               |
| SNP_P3_158024_172355 | NW_004516803.1 | Scaffold1659 | 172355                  | GG                              | AA                | 1946661018               |
| SNP_P3_158026_217066 | NW_004516803.1 | Scaffold1659 | 217066                  | TT                              | AA                | 1946661020               |
| SNP_P3_158027_217087 | NW_004516803.1 | Scaffold1659 | 217087                  | TT                              | CC                | 1946661022               |
| SNP_P3_158028_217096 | NW_004516803.1 | Scaffold1659 | 217096                  | AA                              | GG                | 1946661024               |
| SNP_P3_158029_217206 | NW_004516803.1 | Scaffold1659 | 217206                  | AA                              | GG                | 1946661026               |
| SNP_P3_158030_217299 | NW_004516803.1 | Scaffold1659 | 217299                  | AA                              | GG                | 1946661028               |
| SNP_P3_158031_226376 | NW_004516803.1 | Scaffold1659 | 226376                  | TT                              | CC                | 1946661030               |
| SNP_P3_158032_226391 | NW_004516803.1 | Scaffold1659 | 226391                  | TT                              | CC                | 1946661032               |
| SNP_P3_158033_227833 | NW_004516803.1 | Scaffold1659 | 227833                  | GG                              | AA                | 1946661034               |
| SNP_P3_158034_235049 | NW_004516803.1 | Scaffold1659 | 235049                  | AA                              | GG                | 1946661036               |
| SNP_P3_158035_240748 | NW_004516803.1 | Scaffold1659 | 240748                  | TT                              | CC                | 1946661038               |
| SNP_P3_158036_244052 | NW_004516803.1 | Scaffold1659 | 244052                  | TT                              | GG                | 1946661040               |
| SNP_P3_158037_244057 | NW_004516803.1 | Scaffold1659 | 244057                  | CC                              | AA                | 1946661042               |
| SNP_P3_158038_244115 | NW_004516803.1 | Scaffold1659 | 244115                  | CC                              | TT                | 1946661044               |
| SNP_P3_158039_244252 | NW_004516803.1 | Scaffold1659 | 244252                  | GG                              | AA                | 1946661046               |

| SNPs IDs             | Chromosome IDs | Chromosomes  | Physical positions (bp) | CDC Frontier (Reference genome) | (Pusa 256 & HPNB) | NCBI SNPdb Accession IDs |
|----------------------|----------------|--------------|-------------------------|---------------------------------|-------------------|--------------------------|
| SNP_P3_158040_244274 | NW_004516803.1 | Scaffold1659 | 244274                  | TT                              | GG                | 1946661048               |
| SNP_P3_158041_244294 | NW_004516803.1 | Scaffold1659 | 244294                  | CC                              | TT                | 1946661050               |
| SNP_P3_158042_249417 | NW_004516803.1 | Scaffold1659 | 249417                  | AA                              | GG                | 1946661052               |
| SNP_P3_158043_249478 | NW_004516803.1 | Scaffold1659 | 249478                  | CC                              | TT                | 1946661054               |
| SNP_P3_158044_264283 | NW_004516803.1 | Scaffold1659 | 264283                  | CC                              | TT                | 1946661056               |
| SNP_P3_158045_264836 | NW_004516803.1 | Scaffold1659 | 264836                  | TT                              | CC                | 1946661058               |
| SNP_P3_158046_268691 | NW_004516803.1 | Scaffold1659 | 268691                  | AA                              | GG                | 1946661060               |
| SNP_P3_158047_269032 | NW_004516803.1 | Scaffold1659 | 269032                  | CC                              | TT                | 1946661062               |
| SNP_P3_158048_269042 | NW_004516803.1 | Scaffold1659 | 269042                  | TT                              | CC                | 1946661064               |
| SNP_P3_158049_269067 | NW_004516803.1 | Scaffold1659 | 269067                  | TT                              | CC                | 1946661066               |
| SNP_P3_158050_269080 | NW_004516803.1 | Scaffold1659 | 269080                  | CC                              | GG                | 1946661069               |
| SNP_P3_158051_269101 | NW_004516803.1 | Scaffold1659 | 269101                  | CC                              | GG                | 1946661071               |
| SNP_P3_158053_282444 | NW_004516803.1 | Scaffold1659 | 282444                  | AA                              | GG                | 1946661073               |
| SNP_P3_158055_282920 | NW_004516803.1 | Scaffold1659 | 282920                  | CC                              | GG                | 1946661075               |
| SNP_P3_158056_283386 | NW_004516803.1 | Scaffold1659 | 283386                  | TT                              | AA                | 1946661077               |
| SNP_P3_158057_284100 | NW_004516803.1 | Scaffold1659 | 284100                  | CC                              | TT                | 1946661079               |
| SNP_P3_158058_287457 | NW_004516803.1 | Scaffold1659 | 287457                  | AA                              | CC                | 1946661081               |
| SNP_P3_158059_287460 | NW_004516803.1 | Scaffold1659 | 287460                  | CC                              | TT                | 1946661083               |
| SNP_P3_158060_287461 | NW_004516803.1 | Scaffold1659 | 287461                  | AA                              | CC                | 1946661085               |
| SNP_P3_158061_287463 | NW_004516803.1 | Scaffold1659 | 287463                  | GG                              | AA                | 1946661087               |
| SNP_P3_158062_287466 | NW_004516803.1 | Scaffold1659 | 287466                  | CC                              | TT                | 1946661088               |
| SNP_P3_158063_287467 | NW_004516803.1 | Scaffold1659 | 287467                  | AA                              | GG                | 1946661091               |
| SNP_P3_158064_287501 | NW_004516803.1 | Scaffold1659 | 287501                  | GG                              | AA                | 1946661093               |
| SNP_P3_158065_287503 | NW_004516803.1 | Scaffold1659 | 287503                  | AA                              | GG                | 1946661095               |
| SNP_P3_158066_287505 | NW_004516803.1 | Scaffold1659 | 287505                  | AA                              | GG                | 1946661097               |
| SNP_P3_158067_294678 | NW_004516803.1 | Scaffold1659 | 294678                  | TT                              | CC                | 1946661099               |
| SNP_P3_158068_294721 | NW_004516803.1 | Scaffold1659 | 294721                  | CC                              | GG                | 1946661101               |
| SNP_P3_158069_294748 | NW_004516803.1 | Scaffold1659 | 294748                  | TT                              | CC                | 1946661103               |
| SNP_P3_158070_294760 | NW_004516803.1 | Scaffold1659 | 294760                  | AA                              | GG                | 1946661105               |
| SNP_P3_158071_339332 | NW_004516803.1 | Scaffold1659 | 339332                  | CC                              | TT                | 1946661107               |
| SNP_P3_158072_355392 | NW_004516803.1 | Scaffold1659 | 355392                  | TT                              | CC                | 1946661109               |
| SNP_P3_158073_355975 | NW_004516803.1 | Scaffold1659 | 355975                  | AA                              | TT                | 1946661110               |
| SNP_P3_158074_358736 | NW_004516803.1 | Scaffold1659 | 358736                  | TT                              | CC                | 1946661112               |
| SNP_P3_158075_359077 | NW_004516803.1 | Scaffold1659 | 359077                  | TT                              | CC                | 1946661114               |
| SNP_P3_158076_359178 | NW_004516803.1 | Scaffold1659 | 359178                  | AA                              | GG                | 1946661116               |
| SNP_P3_158077_359371 | NW_004516803.1 | Scaffold1659 | 359371                  | TT                              | CC                | 1946661118               |
| SNP_P3_158078_364329 | NW_004516803.1 | Scaffold1659 | 364329                  | TT                              | CC                | 1946661120               |
| SNP_P3_158079_389462 | NW_004516803.1 | Scaffold1659 | 389462                  | AA                              | GG                | 1946661122               |
| SNP_P3_158080_389492 | NW_004516803.1 | Scaffold1659 | 389492                  | AA                              | GG                | 1946661124               |
| SNP_P3_158081_404174 | NW_004516803.1 | Scaffold1659 | 404174                  | CC                              | TT                | 1946661126               |
| SNP_P3_158082_404423 | NW_004516803.1 | Scaffold1659 | 404423                  | CC                              | AA                | 1946661128               |
| SNP_P3_158083_404430 | NW_004516803.1 | Scaffold1659 | 404430                  | CC                              | AA                | 1946661131               |

| SNPs IDs             | Chromosome IDs | Chromosomes  | Physical positions (bp) | CDC Frontier (Reference genome) | (Pusa 256 & HPNB) | NCBI SNPdb Accession IDs |
|----------------------|----------------|--------------|-------------------------|---------------------------------|-------------------|--------------------------|
| SNP_P3_158084_413945 | NW_004516803.1 | Scaffold1659 | 413945                  | GG                              | AA                | 1946661133               |
| SNP_P3_158086_421511 | NW_004516803.1 | Scaffold1659 | 421511                  | TT                              | CC                | 1946661135               |
| SNP_P3_158087_424148 | NW_004516803.1 | Scaffold1659 | 424148                  | AA                              | GG                | 1946661137               |
| SNP_P3_158088_424204 | NW_004516803.1 | Scaffold1659 | 424204                  | CC                              | TT                | 1946661139               |
| SNP_P3_158089_424250 | NW_004516803.1 | Scaffold1659 | 424250                  | CC                              | TT                | 1946661141               |
| SNP_P3_158090_436162 | NW_004516803.1 | Scaffold1659 | 436162                  | CC                              | TT                | 1946661143               |
| SNP_P3_158091_436176 | NW_004516803.1 | Scaffold1659 | 436176                  | GG                              | CC                | 1946661145               |
| SNP_P3_158092_436180 | NW_004516803.1 | Scaffold1659 | 436180                  | AA                              | CC                | 1946661147               |
| SNP_P3_158093_437059 | NW_004516803.1 | Scaffold1659 | 437059                  | TT                              | CC                | 1946661149               |
| SNP_P3_158094_437405 | NW_004516803.1 | Scaffold1659 | 437405                  | GG                              | CC                | 1946661151               |
| SNP_P3_158095_442470 | NW_004516803.1 | Scaffold1659 | 442470                  | AA                              | GG                | 1946661153               |
| SNP_P3_158096_442634 | NW_004516803.1 | Scaffold1659 | 442634                  | TT                              | CC                | 1946661155               |
| SNP_P3_158097_466160 | NW_004516803.1 | Scaffold1659 | 466160                  | GG                              | AA                | 1946661157               |
| SNP_P3_158098_466174 | NW_004516803.1 | Scaffold1659 | 466174                  | GG                              | AA                | 1946661159               |
| SNP_P3_158099_466910 | NW_004516803.1 | Scaffold1659 | 466910                  | TT                              | CC                | 1946661161               |
| SNP_P3_158100_468098 | NW_004516803.1 | Scaffold1659 | 468098                  | TT                              | GG                | 1946661163               |
| SNP_P3_158101_468122 | NW_004516803.1 | Scaffold1659 | 468122                  | CC                              | AA                | 1946661165               |
| SNP_P3_158102_468162 | NW_004516803.1 | Scaffold1659 | 468162                  | AA                              | GG                | 1946661167               |
| SNP_P3_158103_468515 | NW_004516803.1 | Scaffold1659 | 468515                  | AA                              | TT                | 1946661169               |
| SNP_P3_158104_468562 | NW_004516803.1 | Scaffold1659 | 468562                  | TT                              | CC                | 1946661172               |
| SNP_P3_158105_468601 | NW_004516803.1 | Scaffold1659 | 468601                  | CC                              | TT                | 1946661174               |
| SNP_P3_158106_468608 | NW_004516803.1 | Scaffold1659 | 468608                  | TT                              | GG                | 1946661176               |
| SNP_P3_158107_468618 | NW_004516803.1 | Scaffold1659 | 468618                  | TT                              | CC                | 1946661178               |
| SNP_P3_158108_11663  | NW_004516805.1 | Scaffold1661 | 11663                   | AA                              | TT                | 1946661180               |
| SNP_P3_158109_11702  | NW_004516805.1 | Scaffold1661 | 11702                   | CC                              | AA                | 1946661182               |
| SNP_P3_158110_11721  | NW_004516805.1 | Scaffold1661 | 11721                   | CC                              | TT                | 1946661184               |
| SNP_P3_158111_11729  | NW_004516805.1 | Scaffold1661 | 11729                   | CC                              | TT                | 1946661186               |
| SNP_P3_158112_11735  | NW_004516805.1 | Scaffold1661 | 11735                   | AA                              | CC                | 1946661188               |
| SNP_P3_158113_12242  | NW_004516805.1 | Scaffold1661 | 12242                   | CC                              | AA                | 1946661190               |
| SNP_P3_158114_19781  | NW_004516805.1 | Scaffold1661 | 19781                   | CC                              | AA                | 1946661192               |
| SNP_P3_158115_20754  | NW_004516805.1 | Scaffold1661 | 20754                   | AA                              | GG                | 1946661194               |
| SNP_P3_158116_20783  | NW_004516805.1 | Scaffold1661 | 20783                   | TT                              | AA                | 1946661196               |
| SNP_P3_158117_23513  | NW_004516805.1 | Scaffold1661 | 23513                   | GG                              | AA                | 1946661198               |
| SNP_P3_158118_23514  | NW_004516805.1 | Scaffold1661 | 23514                   | AA                              | TT                | 1946661200               |
| SNP_P3_158120_38036  | NW_004516805.1 | Scaffold1661 | 38036                   | AA                              | TT                | 1946661202               |
| SNP_P3_158121_38047  | NW_004516805.1 | Scaffold1661 | 38047                   | CC                              | TT                | 1946661204               |
| SNP_P3_158122_50246  | NW_004516805.1 | Scaffold1661 | 50246                   | TT                              | CC                | 1946661206               |
| SNP_P3_158123_53917  | NW_004516805.1 | Scaffold1661 | 53917                   | AA                              | GG                | 1946661208               |
| SNP_P3_158125_89919  | NW_004516805.1 | Scaffold1661 | 89919                   | AA                              | GG                | 1946661210               |
| SNP_P3_158127_106633 | NW_004516805.1 | Scaffold1661 | 106633                  | TT                              | CC                | 1946661212               |
| SNP_P3_158128_106640 | NW_004516805.1 | Scaffold1661 | 106640                  | CC                              | TT                | 1946661214               |
| SNP_P3_158129_106931 | NW_004516805.1 | Scaffold1661 | 106931                  | CC                              | AA                | 1946661216               |

| SNPs IDs             | Chromosome IDs | Chromosomes  | Physical positions (bp) | CDC Frontier (Reference genome) | (Pusa 256 & HPNB) | NCBI SNPdb Accession IDs |
|----------------------|----------------|--------------|-------------------------|---------------------------------|-------------------|--------------------------|
| SNP_P3_158130_106946 | NW_004516805.1 | Scaffold1661 | 106946                  | AA                              | GG                | 1946661218               |
| SNP_P3_158131_106953 | NW_004516805.1 | Scaffold1661 | 106953                  | TT                              | GG                | 1946661220               |
| SNP_P3_158132_107185 | NW_004516805.1 | Scaffold1661 | 107185                  | GG                              | AA                | 1946661222               |
| SNP_P3_158133_108832 | NW_004516805.1 | Scaffold1661 | 108832                  | AA                              | GG                | 1946661224               |
| SNP_P3_158134_112859 | NW_004516805.1 | Scaffold1661 | 112859                  | AA                              | CC                | 1946661226               |
| SNP_P3_158135_113848 | NW_004516805.1 | Scaffold1661 | 113848                  | AA                              | GG                | 1946661228               |
| SNP_P3_158136_113855 | NW_004516805.1 | Scaffold1661 | 113855                  | CC                              | TT                | 1946661230               |
| SNP_P3_158137_117756 | NW_004516805.1 | Scaffold1661 | 117756                  | TT                              | AA                | 1946661232               |
| SNP_P3_158138_117813 | NW_004516805.1 | Scaffold1661 | 117813                  | TT                              | GG                | 1946661234               |
| SNP_P3_158139_112    | NW_004516806.1 | Scaffold1663 | 112                     | TT                              | GG                | 1946661236               |
| SNP_P3_158140_297    | NW_004516806.1 | Scaffold1663 | 297                     | GG                              | AA                | 1946661238               |
| SNP_P3_158141_415    | NW_004516806.1 | Scaffold1663 | 415                     | GG                              | AA                | 1946661240               |
| SNP_P3_158142_554    | NW_004516806.1 | Scaffold1663 | 554                     | TT                              | AA                | 1946661242               |
| SNP_P3_158143_604    | NW_004516806.1 | Scaffold1663 | 604                     | TT                              | AA                | 1946661244               |
| SNP_P3_158144_656    | NW_004516806.1 | Scaffold1663 | 656                     | AA                              | GG                | 1946661246               |
| SNP_P3_158145_2707   | NW_004516807.1 | Scaffold1664 | 2707                    | AA                              | TT                | 1946661248               |
| SNP_P3_158146_3029   | NW_004516807.1 | Scaffold1664 | 3029                    | AA                              | CC                | 1946661250               |
| SNP_P3_158147_23869  | NW_004516807.1 | Scaffold1664 | 23869                   | AA                              | GG                | 1946661252               |
| SNP_P3_158148_54808  | NW_004516807.1 | Scaffold1664 | 54808                   | CC                              | TT                | 1946661254               |
| SNP_P3_158149_66558  | NW_004516807.1 | Scaffold1664 | 66558                   | TT                              | GG                | 1946661256               |
| SNP_P3_158150_86205  | NW_004516807.1 | Scaffold1664 | 86205                   | AA                              | TT                | 1946661258               |
| SNP_P3_158151_94979  | NW_004516807.1 | Scaffold1664 | 94979                   | AA                              | GG                | 1946661260               |
| SNP_P3_158152_118660 | NW_004516807.1 | Scaffold1664 | 118660                  | CC                              | TT                | 1946661262               |
| SNP_P3_158153_125342 | NW_004516807.1 | Scaffold1664 | 125342                  | AA                              | CC                | 1946661264               |
| SNP_P3_158154_125353 | NW_004516807.1 | Scaffold1664 | 125353                  | AA                              | GG                | 1946661266               |
| SNP_P3_158155_127607 | NW_004516807.1 | Scaffold1664 | 127607                  | GG                              | TT                | 1946661268               |
| SNP_P3_158157_163711 | NW_004516807.1 | Scaffold1664 | 163711                  | GG                              | CC                | 1946661270               |
| SNP_P3_158158_188682 | NW_004516807.1 | Scaffold1664 | 188682                  | AA                              | CC                | 1946661272               |
| SNP_P3_158159_2617   | NW_004516810.1 | Scaffold1673 | 2617                    | AA                              | GG                | 1946661274               |
| SNP_P3_158160_2737   | NW_004516810.1 | Scaffold1673 | 2737                    | AA                              | TT                | 1946661276               |
| SNP_P3_158161_10052  | NW_004516810.1 | Scaffold1673 | 10052                   | TT                              | CC                | 1946661278               |
| SNP_P3_158162_64     | NW_004516811.1 | Scaffold1674 | 64                      | TT                              | CC                | 1946661280               |
| SNP_P3_158163_65     | NW_004516811.1 | Scaffold1674 | 65                      | AA                              | GG                | 1946661282               |
| SNP_P3_158164_405    | NW_004516811.1 | Scaffold1674 | 405                     | CC                              | TT                | 1946661284               |
| SNP_P3_158165_511    | NW_004516811.1 | Scaffold1674 | 511                     | GG                              | TT                | 1946661286               |
| SNP_P3_158168_504    | NW_004516812.1 | Scaffold1675 | 504                     | AA                              | GG                | 1946661288               |
| SNP_P3_158170_723    | NW_004516812.1 | Scaffold1675 | 723                     | TT                              | AA                | 1946661290               |
| SNP_P3_158171_994    | NW_004516812.1 | Scaffold1675 | 994                     | GG                              | AA                | 1946661292               |
| SNP_P3_158172_1012   | NW_004516812.1 | Scaffold1675 | 1012                    | TT                              | GG                | 1946661294               |
| SNP_P3_158173_1365   | NW_004516812.1 | Scaffold1675 | 1365                    | TT                              | CC                | 1946661297               |
| SNP_P3_158174_3872   | NW_004516812.1 | Scaffold1675 | 3872                    | TT                              | AA                | 1946661299               |
| SNP_P3_158175_424    | NW_004516814.1 | Scaffold1679 | 424                     | CC                              | TT                | 1946661301               |



| SNPs IDs            | Chromosome IDs | Chromosomes  | Physical positions (bp) | CDC Frontier (Reference genome) | (Pusa 256 & HPNB) | NCBI SNPdb Accession IDs |
|---------------------|----------------|--------------|-------------------------|---------------------------------|-------------------|--------------------------|
| SNP_P3_158176_665   | NW_004516814.1 | Scaffold1679 | 665                     | CC                              | TT                | 1946661303               |
| SNP_P3_158178_1911  | NW_004516815.1 | Scaffold1680 | 1911                    | AA                              | TT                | 1946661305               |
| SNP_P3_158179_15886 | NW_004516815.1 | Scaffold1680 | 15886                   | AA                              | TT                | 1946661307               |
| SNP_P3_158180_16312 | NW_004516815.1 | Scaffold1680 | 16312                   | CC                              | GG                | 1946661309               |
| SNP_P3_158181_16325 | NW_004516815.1 | Scaffold1680 | 16325                   | TT                              | AA                | 1946661311               |
| SNP_P3_158182_18077 | NW_004516815.1 | Scaffold1680 | 18077                   | TT                              | AA                | 1946661313               |
| SNP_P3_158183_21212 | NW_004516815.1 | Scaffold1680 | 21212                   | TT                              | GG                | 1946661315               |
| SNP_P3_158184_21619 | NW_004516815.1 | Scaffold1680 | 21619                   | AA                              | GG                | 1946661317               |
| SNP_P3_158185_23351 | NW_004516815.1 | Scaffold1680 | 23351                   | CC                              | TT                | 1946661319               |
| SNP_P3_158186_24290 | NW_004516815.1 | Scaffold1680 | 24290                   | TT                              | GG                | 1946661321               |
| SNP_P3_158187_24323 | NW_004516815.1 | Scaffold1680 | 24323                   | TT                              | AA                | 1946661323               |
| SNP_P3_158188_24336 | NW_004516815.1 | Scaffold1680 | 24336                   | AA                              | GG                | 1946661325               |
| SNP_P3_158189_402   | NW_004516816.1 | Scaffold1681 | 402                     | AA                              | TT                | 1946661327               |
| SNP_P3_158190_411   | NW_004516816.1 | Scaffold1681 | 411                     | CC                              | GG                | 1946661329               |
| SNP_P3_158191_414   | NW_004516816.1 | Scaffold1681 | 414                     | AA                              | GG                | 1946661331               |
| SNP_P3_158192_450   | NW_004516816.1 | Scaffold1681 | 450                     | GG                              | TT                | 1946661333               |
| SNP_P3_158193_635   | NW_004516816.1 | Scaffold1681 | 635                     | CC                              | AA                | 1946661336               |
| SNP_P3_158194_685   | NW_004516816.1 | Scaffold1681 | 685                     | CC                              | GG                | 1946661338               |
| SNP_P3_158195_743   | NW_004516816.1 | Scaffold1681 | 743                     | AA                              | CC                | 1946661340               |
| SNP_P3_158196_756   | NW_004516816.1 | Scaffold1681 | 756                     | AA                              | GG                | 1946661342               |
| SNP_P3_158197_828   | NW_004516816.1 | Scaffold1681 | 828                     | TT                              | GG                | 1946661344               |
| SNP_P3_158198_849   | NW_004516816.1 | Scaffold1681 | 849                     | CC                              | TT                | 1946661345               |
| SNP_P3_158200_998   | NW_004516816.1 | Scaffold1681 | 998                     | AA                              | GG                | 1946661347               |
| SNP_P3_158201_1160  | NW_004516816.1 | Scaffold1681 | 1160                    | GG                              | TT                | 1946661349               |
| SNP_P3_158202_1247  | NW_004516816.1 | Scaffold1681 | 1247                    | TT                              | CC                | 1946661351               |
| SNP_P3_158203_1335  | NW_004516816.1 | Scaffold1681 | 1335                    | AA                              | GG                | 1946661353               |
| SNP_P3_158204_1421  | NW_004516816.1 | Scaffold1681 | 1421                    | AA                              | CC                | 1946661355               |
| SNP_P3_158205_1749  | NW_004516816.1 | Scaffold1681 | 1749                    | CC                              | TT                | 1946661357               |
| SNP_P3_158206_1792  | NW_004516816.1 | Scaffold1681 | 1792                    | CC                              | TT                | 1946661359               |
| SNP_P3_158207_1935  | NW_004516816.1 | Scaffold1681 | 1935                    | GG                              | TT                | 1946661361               |
| SNP_P3_158208_2513  | NW_004516816.1 | Scaffold1681 | 2513                    | GG                              | AA                | 1946661363               |
| SNP_P3_158209_3861  | NW_004516816.1 | Scaffold1681 | 3861                    | GG                              | AA                | 1946661365               |
| SNP_P3_158210_5308  | NW_004516816.1 | Scaffold1681 | 5308                    | GG                              | CC                | 1946661367               |
| SNP_P3_158211_5735  | NW_004516816.1 | Scaffold1681 | 5735                    | AA                              | GG                | 1946661369               |
| SNP_P3_158212_6044  | NW_004516816.1 | Scaffold1681 | 6044                    | AA                              | GG                | 1946661371               |
| SNP_P3_158213_6544  | NW_004516816.1 | Scaffold1681 | 6544                    | CC                              | TT                | 1946661373               |
| SNP_P3_158214_6574  | NW_004516816.1 | Scaffold1681 | 6574                    | TT                              | CC                | 1946661375               |
| SNP_P3_158215_6576  | NW_004516816.1 | Scaffold1681 | 6576                    | GG                              | AA                | 1946661378               |
| SNP_P3_158216_6583  | NW_004516816.1 | Scaffold1681 | 6583                    | CC                              | TT                | 1946661380               |
| SNP_P3_158217_6614  | NW_004516816.1 | Scaffold1681 | 6614                    | TT                              | GG                | 1946661382               |
| SNP_P3_158218_6634  | NW_004516816.1 | Scaffold1681 | 6634                    | AA                              | TT                | 1946661384               |
| SNP_P3_158219_6714  | NW_004516816.1 | Scaffold1681 | 6714                    | AA                              | GG                | 1946661386               |

| SNPs IDs            | Chromosome IDs | Chromosomes  | Physical positions (bp) | CDC Frontier (Reference genome) | (Pusa 256 & HPNB) | NCBI SNPdb Accession IDs |
|---------------------|----------------|--------------|-------------------------|---------------------------------|-------------------|--------------------------|
| SNP_P3_158220_6722  | NW_004516816.1 | Scaffold1681 | 6722                    | AA                              | GG                | 1946661388               |
| SNP_P3_158221_6838  | NW_004516816.1 | Scaffold1681 | 6838                    | GG                              | AA                | 1946661390               |
| SNP_P3_158222_6864  | NW_004516816.1 | Scaffold1681 | 6864                    | CC                              | GG                | 1946661392               |
| SNP_P3_158223_6904  | NW_004516816.1 | Scaffold1681 | 6904                    | CC                              | AA                | 1946661394               |
| SNP_P3_158224_6913  | NW_004516816.1 | Scaffold1681 | 6913                    | CC                              | AA                | 1946661396               |
| SNP_P3_158225_7082  | NW_004516816.1 | Scaffold1681 | 7082                    | AA                              | TT                | 1946661398               |
| SNP_P3_158226_7258  | NW_004516816.1 | Scaffold1681 | 7258                    | TT                              | CC                | 1946661400               |
| SNP_P3_158227_7289  | NW_004516816.1 | Scaffold1681 | 7289                    | TT                              | CC                | 1946661402               |
| SNP_P3_158228_3086  | NW_004516817.1 | Scaffold1682 | 3086                    | AA                              | TT                | 1946661404               |
| SNP_P3_158229_3088  | NW_004516817.1 | Scaffold1682 | 3088                    | GG                              | CC                | 1946661406               |
| SNP_P3_158231_8677  | NW_004516817.1 | Scaffold1682 | 8677                    | CC                              | TT                | 1946661408               |
| SNP_P3_158232_14131 | NW_004516817.1 | Scaffold1682 | 14131                   | GG                              | TT                | 1946661410               |
| SNP_P3_158233_14177 | NW_004516817.1 | Scaffold1682 | 14177                   | GG                              | CC                | 1946661412               |
| SNP_P3_158234_1416  | NW_004516818.1 | Scaffold1683 | 1416                    | AA                              | CC                | 1946661413               |
| SNP_P3_158235_1461  | NW_004516818.1 | Scaffold1683 | 1461                    | AA                              | GG                | 1946661415               |
| SNP_P3_158236_1485  | NW_004516818.1 | Scaffold1683 | 1485                    | CC                              | TT                | 1946661418               |
| SNP_P3_158237_1612  | NW_004516819.1 | Scaffold1684 | 1612                    | AA                              | GG                | 1946661420               |
| SNP_P3_158238_6135  | NW_004516819.1 | Scaffold1684 | 6135                    | AA                              | GG                | 1946661422               |
| SNP_P3_158239_6391  | NW_004516819.1 | Scaffold1684 | 6391                    | GG                              | AA                | 1946661424               |
| SNP_P3_158241_16846 | NW_004516819.1 | Scaffold1684 | 16846                   | CC                              | TT                | 1946661426               |
| SNP_P3_158242_17127 | NW_004516819.1 | Scaffold1684 | 17127                   | AA                              | CC                | 1946661428               |
| SNP_P3_158243_17169 | NW_004516819.1 | Scaffold1684 | 17169                   | AA                              | TT                | 1946661430               |
| SNP_P3_158244_17212 | NW_004516819.1 | Scaffold1684 | 17212                   | CC                              | TT                | 1946661432               |
| SNP_P3_158245_17215 | NW_004516819.1 | Scaffold1684 | 17215                   | CC                              | GG                | 1946661434               |
| SNP_P3_158246_17326 | NW_004516819.1 | Scaffold1684 | 17326                   | TT                              | CC                | 1946661436               |
| SNP_P3_158247_19671 | NW_004516819.1 | Scaffold1684 | 19671                   | GG                              | CC                | 1946661438               |
| SNP_P3_158248_22755 | NW_004516819.1 | Scaffold1684 | 22755                   | TT                              | CC                | 1946661440               |
| SNP_P3_158249_23002 | NW_004516819.1 | Scaffold1684 | 23002                   | TT                              | GG                | 1946661442               |
| SNP_P3_158250_23035 | NW_004516819.1 | Scaffold1684 | 23035                   | GG                              | AA                | 1946661444               |
| SNP_P3_158251_23057 | NW_004516819.1 | Scaffold1684 | 23057                   | AA                              | GG                | 1946661446               |
| SNP_P3_158252_24226 | NW_004516819.1 | Scaffold1684 | 24226                   | CC                              | GG                | 1946661448               |
| SNP_P3_158253_24230 | NW_004516819.1 | Scaffold1684 | 24230                   | GG                              | AA                | 1946661450               |
| SNP_P3_158254_24409 | NW_004516819.1 | Scaffold1684 | 24409                   | CC                              | TT                | 1946661452               |
| SNP_P3_158255_24420 | NW_004516819.1 | Scaffold1684 | 24420                   | CC                              | AA                | 1946661454               |
| SNP_P3_158256_24449 | NW_004516819.1 | Scaffold1684 | 24449                   | GG                              | AA                | 1946661456               |
| SNP_P3_158257_24642 | NW_004516819.1 | Scaffold1684 | 24642                   | TT                              | AA                | 1946661459               |
| SNP_P3_158258_26614 | NW_004516819.1 | Scaffold1684 | 26614                   | CC                              | TT                | 1946661461               |
| SNP_P3_158259_26673 | NW_004516819.1 | Scaffold1684 | 26673                   | AA                              | CC                | 1946661463               |
| SNP_P3_158260_26738 | NW_004516819.1 | Scaffold1684 | 26738                   | AA                              | GG                | 1946661465               |
| SNP_P3_158261_27650 | NW_004516819.1 | Scaffold1684 | 27650                   | CC                              | AA                | 1946661467               |
| SNP_P3_158262_28184 | NW_004516819.1 | Scaffold1684 | 28184                   | AA                              | CC                | 1946661469               |
| SNP_P3_158263_28199 | NW_004516819.1 | Scaffold1684 | 28199                   | CC                              | GG                | 1946661471               |

| SNPs IDs            | Chromosome IDs | Chromosomes  | Physical positions (bp) | CDC Frontier (Reference genome) | (Pusa 256 & HPNB) | NCBI SNPdb Accession IDs |
|---------------------|----------------|--------------|-------------------------|---------------------------------|-------------------|--------------------------|
| SNP_P3_158264_28223 | NW_004516819.1 | Scaffold1684 | 28223                   | AA                              | GG                | 1946661473               |
| SNP_P3_158265_28224 | NW_004516819.1 | Scaffold1684 | 28224                   | CC                              | TT                | 1946661475               |
| SNP_P3_158266_28471 | NW_004516819.1 | Scaffold1684 | 28471                   | CC                              | TT                | 1946661477               |
| SNP_P3_158267_28511 | NW_004516819.1 | Scaffold1684 | 28511                   | TT                              | CC                | 1946661479               |
| SNP_P3_158268_28577 | NW_004516819.1 | Scaffold1684 | 28577                   | GG                              | AA                | 1946661481               |
| SNP_P3_158269_28632 | NW_004516819.1 | Scaffold1684 | 28632                   | TT                              | CC                | 1946661483               |
| SNP_P3_158270_28808 | NW_004516819.1 | Scaffold1684 | 28808                   | TT                              | CC                | 1946661485               |
| SNP_P3_158271_29014 | NW_004516819.1 | Scaffold1684 | 29014                   | CC                              | TT                | 1946661487               |
| SNP_P3_158272_29037 | NW_004516819.1 | Scaffold1684 | 29037                   | AA                              | TT                | 1946661489               |
| SNP_P3_158273_29071 | NW_004516819.1 | Scaffold1684 | 29071                   | AA                              | TT                | 1946661491               |
| SNP_P3_158274_29089 | NW_004516819.1 | Scaffold1684 | 29089                   | GG                              | CC                | 1946661493               |
| SNP_P3_158275_29091 | NW_004516819.1 | Scaffold1684 | 29091                   | GG                              | TT                | 1946661495               |
| SNP_P3_158276_29122 | NW_004516819.1 | Scaffold1684 | 29122                   | CC                              | TT                | 1946661497               |
| SNP_P3_158277_29200 | NW_004516819.1 | Scaffold1684 | 29200                   | TT                              | AA                | 1946661499               |
| SNP_P3_158278_29228 | NW_004516819.1 | Scaffold1684 | 29228                   | GG                              | AA                | 1946661501               |
| SNP_P3_158279_29244 | NW_004516819.1 | Scaffold1684 | 29244                   | GG                              | AA                | 1946661503               |
| SNP_P3_158280_29390 | NW_004516819.1 | Scaffold1684 | 29390                   | GG                              | AA                | 1946661505               |
| SNP_P3_158281_29392 | NW_004516819.1 | Scaffold1684 | 29392                   | TT                              | AA                | 1946661508               |
| SNP_P3_158282_29440 | NW_004516819.1 | Scaffold1684 | 29440                   | AA                              | TT                | 1946661510               |
| SNP_P3_158283_29480 | NW_004516819.1 | Scaffold1684 | 29480                   | TT                              | CC                | 1946661512               |
| SNP_P3_158284_29494 | NW_004516819.1 | Scaffold1684 | 29494                   | AA                              | TT                | 1946661514               |
| SNP_P3_158285_29533 | NW_004516819.1 | Scaffold1684 | 29533                   | TT                              | CC                | 1946661516               |
| SNP_P3_158286_29637 | NW_004516819.1 | Scaffold1684 | 29637                   | AA                              | CC                | 1946661518               |
| SNP_P3_158287_29673 | NW_004516819.1 | Scaffold1684 | 29673                   | GG                              | AA                | 1946661519               |
| SNP_P3_158288_29692 | NW_004516819.1 | Scaffold1684 | 29692                   | TT                              | AA                | 1946661520               |
| SNP_P3_158289_29778 | NW_004516819.1 | Scaffold1684 | 29778                   | TT                              | CC                | 1946661521               |
| SNP_P3_158290_29861 | NW_004516819.1 | Scaffold1684 | 29861                   | CC                              | AA                | 1946661522               |
| SNP_P3_158291_30550 | NW_004516819.1 | Scaffold1684 | 30550                   | AA                              | TT                | 1946661524               |
| SNP_P3_158292_30551 | NW_004516819.1 | Scaffold1684 | 30551                   | AA                              | GG                | 1946661526               |
| SNP_P3_158293_33493 | NW_004516819.1 | Scaffold1684 | 33493                   | AA                              | TT                | 1946661528               |
| SNP_P3_158294_33542 | NW_004516819.1 | Scaffold1684 | 33542                   | CC                              | TT                | 1946661530               |
| SNP_P3_158295_40314 | NW_004516819.1 | Scaffold1684 | 40314                   | TT                              | AA                | 1946661532               |
| SNP_P3_158296_40322 | NW_004516819.1 | Scaffold1684 | 40322                   | TT                              | GG                | 1946661534               |
| SNP_P3_158297_40334 | NW_004516819.1 | Scaffold1684 | 40334                   | AA                              | GG                | 1946661536               |
| SNP_P3_158298_40339 | NW_004516819.1 | Scaffold1684 | 40339                   | TT                              | CC                | 1946661538               |
| SNP_P3_158299_40344 | NW_004516819.1 | Scaffold1684 | 40344                   | AA                              | TT                | 1946661540               |
| SNP_P3_158300_40602 | NW_004516819.1 | Scaffold1684 | 40602                   | CC                              | TT                | 1946661542               |
| SNP_P3_158301_40850 | NW_004516819.1 | Scaffold1684 | 40850                   | GG                              | TT                | 1946661544               |
| SNP_P3_158302_40899 | NW_004516819.1 | Scaffold1684 | 40899                   | TT                              | GG                | 1946661546               |
| SNP_P3_158303_41170 | NW_004516819.1 | Scaffold1684 | 41170                   | TT                              | CC                | 1946661548               |
| SNP_P3_158304_42095 | NW_004516819.1 | Scaffold1684 | 42095                   | TT                              | CC                | 1946661550               |
| SNP_P3_158305_42288 | NW_004516819.1 | Scaffold1684 | 42288                   | AA                              | GG                | 1946661552               |

| SNPs IDs            | Chromosome IDs | Chromosomes  | Physical positions (bp) | CDC Frontier (Reference genome) | (Pusa 256 & HPNB) | NCBI SNPdb Accession IDs |
|---------------------|----------------|--------------|-------------------------|---------------------------------|-------------------|--------------------------|
| SNP_P3_158306_42711 | NW_004516819.1 | Scaffold1684 | 42711                   | CC                              | TT                | 1946661554               |
| SNP_P3_158307_44439 | NW_004516819.1 | Scaffold1684 | 44439                   | CC                              | TT                | 1946661556               |
| SNP_P3_158308_44572 | NW_004516819.1 | Scaffold1684 | 44572                   | CC                              | TT                | 1946661558               |
| SNP_P3_158309_55256 | NW_004516819.1 | Scaffold1684 | 55256                   | TT                              | GG                | 1946661560               |
| SNP_P3_158310_55257 | NW_004516819.1 | Scaffold1684 | 55257                   | GG                              | TT                | 1946661562               |
| SNP_P3_158311_59872 | NW_004516819.1 | Scaffold1684 | 59872                   | CC                              | TT                | 1946661564               |
| SNP_P3_158312_59876 | NW_004516819.1 | Scaffold1684 | 59876                   | TT                              | CC                | 1946661566               |
| SNP_P3_158313_60162 | NW_004516819.1 | Scaffold1684 | 60162                   | TT                              | GG                | 1946661568               |
| SNP_P3_158314_62885 | NW_004516819.1 | Scaffold1684 | 62885                   | AA                              | GG                | 1946661570               |
| SNP_P3_158315_62991 | NW_004516819.1 | Scaffold1684 | 62991                   | AA                              | GG                | 1946661572               |
| SNP_P3_158316_63107 | NW_004516819.1 | Scaffold1684 | 63107                   | CC                              | TT                | 1946661574               |
| SNP_P3_158318_71054 | NW_004516819.1 | Scaffold1684 | 71054                   | CC                              | TT                | 1946661576               |
| SNP_P3_158319_71070 | NW_004516819.1 | Scaffold1684 | 71070                   | TT                              | GG                | 1946661578               |
| SNP_P3_158320_71276 | NW_004516819.1 | Scaffold1684 | 71276                   | AA                              | GG                | 1946661580               |
| SNP_P3_158321_71306 | NW_004516819.1 | Scaffold1684 | 71306                   | CC                              | TT                | 1946661582               |
| SNP_P3_158322_71329 | NW_004516819.1 | Scaffold1684 | 71329                   | GG                              | AA                | 1946661584               |
| SNP_P3_158323_71460 | NW_004516819.1 | Scaffold1684 | 71460                   | AA                              | TT                | 1946661586               |
| SNP_P3_158324_71712 | NW_004516819.1 | Scaffold1684 | 71712                   | CC                              | TT                | 1946661588               |
| SNP_P3_158325_75374 | NW_004516819.1 | Scaffold1684 | 75374                   | TT                              | CC                | 1946661590               |
| SNP_P3_158326_80331 | NW_004516819.1 | Scaffold1684 | 80331                   | CC                              | TT                | 1946661592               |
| SNP_P3_158327_80665 | NW_004516819.1 | Scaffold1684 | 80665                   | AA                              | TT                | 1946661593               |
| SNP_P3_158329_4869  | NW_004516820.1 | Scaffold1685 | 4869                    | GG                              | AA                | 1946661596               |
| SNP_P3_158330_15717 | NW_004516820.1 | Scaffold1685 | 15717                   | TT                              | AA                | 1946661598               |
| SNP_P3_158331_21063 | NW_004516820.1 | Scaffold1685 | 21063                   | GG                              | AA                | 1946661600               |
| SNP_P3_158332_24073 | NW_004516820.1 | Scaffold1685 | 24073                   | TT                              | GG                | 1946661602               |
| SNP_P3_158333_32911 | NW_004516820.1 | Scaffold1685 | 32911                   | TT                              | CC                | 1946661604               |
| SNP_P3_158334_32990 | NW_004516820.1 | Scaffold1685 | 32990                   | GG                              | AA                | 1946661606               |
| SNP_P3_158335_33007 | NW_004516820.1 | Scaffold1685 | 33007                   | CC                              | TT                | 1946661608               |
| SNP_P3_158336_33247 | NW_004516820.1 | Scaffold1685 | 33247                   | AA                              | CC                | 1946661609               |
| SNP_P3_158338_33300 | NW_004516820.1 | Scaffold1685 | 33300                   | GG                              | AA                | 1946661611               |
| SNP_P3_158339_53511 | NW_004516820.1 | Scaffold1685 | 53511                   | TT                              | GG                | 1946661613               |
| SNP_P3_158340_59050 | NW_004516820.1 | Scaffold1685 | 59050                   | TT                              | CC                | 1946661615               |
| SNP_P3_158341_64716 | NW_004516820.1 | Scaffold1685 | 64716                   | AA                              | CC                | 1946661617               |
| SNP_P3_158342_64750 | NW_004516820.1 | Scaffold1685 | 64750                   | CC                              | TT                | 1946661619               |
| SNP_P3_158344_66889 | NW_004516820.1 | Scaffold1685 | 66889                   | AA                              | TT                | 1946661621               |
| SNP_P3_158345_66973 | NW_004516820.1 | Scaffold1685 | 66973                   | AA                              | CC                | 1946661623               |
| SNP_P3_158346_66974 | NW_004516820.1 | Scaffold1685 | 66974                   | CC                              | TT                | 1946661625               |
| SNP_P3_158347_76997 | NW_004516820.1 | Scaffold1685 | 76997                   | AA                              | TT                | 1946661628               |
| SNP_P3_158348_77006 | NW_004516820.1 | Scaffold1685 | 77006                   | AA                              | TT                | 1946661630               |
| SNP_P3_158349_77011 | NW_004516820.1 | Scaffold1685 | 77011                   | CC                              | TT                | 1946661632               |
| SNP_P3_158350_77019 | NW_004516820.1 | Scaffold1685 | 77019                   | TT                              | AA                | 1946661634               |
| SNP_P3_158351_77026 | NW_004516820.1 | Scaffold1685 | 77026                   | AA                              | GG                | 1946661636               |

| SNPs IDs             | Chromosome IDs | Chromosomes  | Physical positions (bp) | CDC Frontier (Reference genome) | (Pusa 256 & HPNB) | NCBI SNPdb Accession IDs |
|----------------------|----------------|--------------|-------------------------|---------------------------------|-------------------|--------------------------|
| SNP_P3_158353_78957  | NW_004516820.1 | Scaffold1685 | 78957                   | TT                              | GG                | 1946661638               |
| SNP_P3_158354_81104  | NW_004516820.1 | Scaffold1685 | 81104                   | AA                              | GG                | 1946661640               |
| SNP_P3_158355_81125  | NW_004516820.1 | Scaffold1685 | 81125                   | GG                              | AA                | 1946661642               |
| SNP_P3_158356_83235  | NW_004516820.1 | Scaffold1685 | 83235                   | AA                              | CC                | 1946661644               |
| SNP_P3_158357_83301  | NW_004516820.1 | Scaffold1685 | 83301                   | CC                              | TT                | 1946661646               |
| SNP_P3_158358_83438  | NW_004516820.1 | Scaffold1685 | 83438                   | TT                              | CC                | 1946661648               |
| SNP_P3_158359_88573  | NW_004516820.1 | Scaffold1685 | 88573                   | TT                              | CC                | 1946661650               |
| SNP_P3_158360_88825  | NW_004516820.1 | Scaffold1685 | 88825                   | AA                              | TT                | 1946661652               |
| SNP_P3_158361_88828  | NW_004516820.1 | Scaffold1685 | 88828                   | TT                              | CC                | 1946661654               |
| SNP_P3_158362_88885  | NW_004516820.1 | Scaffold1685 | 88885                   | AA                              | CC                | 1946661656               |
| SNP_P3_158363_89145  | NW_004516820.1 | Scaffold1685 | 89145                   | CC                              | TT                | 1946661658               |
| SNP_P3_158364_95774  | NW_004516820.1 | Scaffold1685 | 95774                   | CC                              | GG                | 1946661660               |
| SNP_P3_158365_95777  | NW_004516820.1 | Scaffold1685 | 95777                   | AA                              | GG                | 1946661662               |
| SNP_P3_158366_95784  | NW_004516820.1 | Scaffold1685 | 95784                   | GG                              | AA                | 1946661664               |
| SNP_P3_158367_96260  | NW_004516820.1 | Scaffold1685 | 96260                   | TT                              | AA                | 1946661666               |
| SNP_P3_158368_103376 | NW_004516820.1 | Scaffold1685 | 103376                  | CC                              | TT                | 1946661668               |
| SNP_P3_158370_117152 | NW_004516820.1 | Scaffold1685 | 117152                  | CC                              | TT                | 1946661670               |
| SNP_P3_158371_120119 | NW_004516820.1 | Scaffold1685 | 120119                  | TT                              | CC                | 1946661672               |
| SNP_P3_158372_120495 | NW_004516820.1 | Scaffold1685 | 120495                  | GG                              | CC                | 1946661674               |
| SNP_P3_158373_125083 | NW_004516820.1 | Scaffold1685 | 125083                  | AA                              | GG                | 1946661676               |
| SNP_P3_158374_125098 | NW_004516820.1 | Scaffold1685 | 125098                  | AA                              | TT                | 1946661678               |
| SNP_P3_158375_125144 | NW_004516820.1 | Scaffold1685 | 125144                  | TT                              | AA                | 1946661680               |
| SNP_P3_158376_125184 | NW_004516820.1 | Scaffold1685 | 125184                  | TT                              | AA                | 1946661688               |
| SNP_P3_158377_126363 | NW_004516820.1 | Scaffold1685 | 126363                  | TT                              | CC                | 1946661690               |
| SNP_P3_158378_127907 | NW_004516820.1 | Scaffold1685 | 127907                  | AA                              | CC                | 1946661692               |
| SNP_P3_158379_128047 | NW_004516820.1 | Scaffold1685 | 128047                  | TT                              | AA                | 1946661694               |
| SNP_P3_158380_128118 | NW_004516820.1 | Scaffold1685 | 128118                  | AA                              | GG                | 1946661696               |
| SNP_P3_158381_128284 | NW_004516820.1 | Scaffold1685 | 128284                  | TT                              | AA                | 1946661698               |
| SNP_P3_158382_128288 | NW_004516820.1 | Scaffold1685 | 128288                  | CC                              | AA                | 1946661701               |
| SNP_P3_158383_128312 | NW_004516820.1 | Scaffold1685 | 128312                  | GG                              | TT                | 1946661703               |
| SNP_P3_158384_128408 | NW_004516820.1 | Scaffold1685 | 128408                  | TT                              | AA                | 1946661705               |
| SNP_P3_158385_129448 | NW_004516820.1 | Scaffold1685 | 129448                  | GG                              | AA                | 1946661707               |
| SNP_P3_158386_135919 | NW_004516820.1 | Scaffold1685 | 135919                  | TT                              | AA                | 1946661709               |
| SNP_P3_158387_136266 | NW_004516820.1 | Scaffold1685 | 136266                  | GG                              | AA                | 1946661711               |
| SNP_P3_158388_28164  | NW_004516822.1 | Scaffold1687 | 28164                   | TT                              | AA                | 1946661713               |
| SNP_P3_158389_35087  | NW_004516822.1 | Scaffold1687 | 35087                   | AA                              | TT                | 1946661715               |
| SNP_P3_158390_54361  | NW_004516822.1 | Scaffold1687 | 54361                   | TT                              | CC                | 1946661717               |
| SNP_P3_158391_54796  | NW_004516822.1 | Scaffold1687 | 54796                   | TT                              | GG                | 1946661719               |
| SNP_P3_158392_54821  | NW_004516822.1 | Scaffold1687 | 54821                   | TT                              | CC                | 1946661721               |
| SNP_P3_158394_82101  | NW_004516822.1 | Scaffold1687 | 82101                   | AA                              | GG                | 1946661723               |
| SNP_P3_158395_85085  | NW_004516822.1 | Scaffold1687 | 85085                   | AA                              | GG                | 1946661725               |
| SNP_P3_158396_112340 | NW_004516822.1 | Scaffold1687 | 112340                  | CC                              | TT                | 1946661727               |

| SNPs IDs             | Chromosome IDs | Chromosomes  | Physical positions (bp) | CDC Frontier (Reference genome) | (Pusa 256 & HPNB) | NCBI SNPdb Accession IDs |
|----------------------|----------------|--------------|-------------------------|---------------------------------|-------------------|--------------------------|
| SNP_P3_158397_142757 | NW_004516822.1 | Scaffold1687 | 142757                  | TT                              | AA                | 1946661729               |
| SNP_P3_158398_144609 | NW_004516822.1 | Scaffold1687 | 144609                  | GG                              | AA                | 1946661731               |
| SNP_P3_158399_144623 | NW_004516822.1 | Scaffold1687 | 144623                  | TT                              | GG                | 1946661733               |
| SNP_P3_158400_144636 | NW_004516822.1 | Scaffold1687 | 144636                  | AA                              | GG                | 1946661735               |
| SNP_P3_158401_144637 | NW_004516822.1 | Scaffold1687 | 144637                  | GG                              | AA                | 1946661737               |
| SNP_P3_158402_144662 | NW_004516822.1 | Scaffold1687 | 144662                  | CC                              | AA                | 1946661739               |
| SNP_P3_158403_144667 | NW_004516822.1 | Scaffold1687 | 144667                  | CC                              | GG                | 1946661741               |
| SNP_P3_158404_144859 | NW_004516822.1 | Scaffold1687 | 144859                  | TT                              | CC                | 1946661743               |
| SNP_P3_158405_144889 | NW_004516822.1 | Scaffold1687 | 144889                  | AA                              | GG                | 1946661745               |
| SNP_P3_158407_170381 | NW_004516822.1 | Scaffold1687 | 170381                  | GG                              | AA                | 1946661747               |
| SNP_P3_158408_170435 | NW_004516822.1 | Scaffold1687 | 170435                  | TT                              | GG                | 1946661749               |
| SNP_P3_158409_180732 | NW_004516822.1 | Scaffold1687 | 180732                  | TT                              | CC                | 1946661751               |
| SNP_P3_158410_189466 | NW_004516822.1 | Scaffold1687 | 189466                  | TT                              | CC                | 1946661753               |
| SNP_P3_158411_190264 | NW_004516822.1 | Scaffold1687 | 190264                  | TT                              | AA                | 1946661755               |
| SNP_P3_158412_190265 | NW_004516822.1 | Scaffold1687 | 190265                  | TT                              | AA                | 1946661757               |
| SNP_P3_158413_196971 | NW_004516822.1 | Scaffold1687 | 196971                  | AA                              | CC                | 1946661759               |
| SNP_P3_158414_223901 | NW_004516822.1 | Scaffold1687 | 223901                  | GG                              | CC                | 1946661761               |
| SNP_P3_158415_224163 | NW_004516822.1 | Scaffold1687 | 224163                  | TT                              | CC                | 1946661763               |
| SNP_P3_158417_2221   | NW_004516823.1 | Scaffold1688 | 2221                    | GG                              | AA                | 1946661765               |
| SNP_P3_158418_2365   | NW_004516823.1 | Scaffold1688 | 2365                    | TT                              | CC                | 1946661767               |
| SNP_P3_158419_2378   | NW_004516823.1 | Scaffold1688 | 2378                    | TT                              | CC                | 1946661769               |
| SNP_P3_158420_2423   | NW_004516823.1 | Scaffold1688 | 2423                    | AA                              | GG                | 1946661771               |
| SNP_P3_158421_2431   | NW_004516823.1 | Scaffold1688 | 2431                    | TT                              | CC                | 1946661773               |
| SNP_P3_158422_2432   | NW_004516823.1 | Scaffold1688 | 2432                    | CC                              | GG                | 1946661775               |
| SNP_P3_158423_1821   | NW_004516824.1 | Scaffold1689 | 1821                    | AA                              | CC                | 1946661777               |
| SNP_P3_158424_16434  | NW_004516825.1 | Scaffold1690 | 16434                   | TT                              | CC                | 1946661779               |
| SNP_P3_158425_16491  | NW_004516825.1 | Scaffold1690 | 16491                   | GG                              | CC                | 1946661781               |
| SNP_P3_158426_16521  | NW_004516825.1 | Scaffold1690 | 16521                   | TT                              | AA                | 1946661783               |
| SNP_P3_158427_16551  | NW_004516825.1 | Scaffold1690 | 16551                   | TT                              | CC                | 1946661785               |
| SNP_P3_158428_16610  | NW_004516825.1 | Scaffold1690 | 16610                   | AA                              | CC                | 1946661787               |
| SNP_P3_158429_528    | NW_004516828.1 | Scaffold1694 | 528                     | TT                              | GG                | 1946661789               |
| SNP_P3_158430_2363   | NW_004516829.1 | Scaffold1695 | 2363                    | TT                              | CC                | 1946661791               |
| SNP_P3_158431_2727   | NW_004516829.1 | Scaffold1695 | 2727                    | GG                              | TT                | 1946661793               |
| SNP_P3_158432_2744   | NW_004516829.1 | Scaffold1695 | 2744                    | CC                              | TT                | 1946661795               |
| SNP_P3_158433_6193   | NW_004516829.1 | Scaffold1695 | 6193                    | GG                              | AA                | 1946661798               |
| SNP_P3_158434_6218   | NW_004516829.1 | Scaffold1695 | 6218                    | CC                              | TT                | 1946661800               |
| SNP_P3_158435_3688   | NW_004516830.1 | Scaffold1696 | 3688                    | GG                              | AA                | 1946661802               |
| SNP_P3_158436_3690   | NW_004516830.1 | Scaffold1696 | 3690                    | CC                              | AA                | 1946661804               |
| SNP_P3_158437_3693   | NW_004516830.1 | Scaffold1696 | 3693                    | GG                              | AA                | 1946661806               |
| SNP_P3_158438_3698   | NW_004516830.1 | Scaffold1696 | 3698                    | AA                              | TT                | 1946661808               |
| SNP_P3_158439_3699   | NW_004516830.1 | Scaffold1696 | 3699                    | CC                              | GG                | 1946661810               |
| SNP_P3_158440_3700   | NW_004516830.1 | Scaffold1696 | 3700                    | AA                              | TT                | 1946661812               |

| SNPs IDs            | Chromosome IDs | Chromosomes  | Physical positions (bp) | CDC Frontier (Reference genome) | (Pusa 256 & HPNB) | NCBI SNPdb Accession IDs |
|---------------------|----------------|--------------|-------------------------|---------------------------------|-------------------|--------------------------|
| SNP_P3_158441_3705  | NW_004516830.1 | Scaffold1696 | 3705                    | TT                              | CC                | 1946661814               |
| SNP_P3_158442_3708  | NW_004516830.1 | Scaffold1696 | 3708                    | TT                              | GG                | 1946661816               |
| SNP_P3_158443_3710  | NW_004516830.1 | Scaffold1696 | 3710                    | TT                              | CC                | 1946661818               |
| SNP_P3_158444_3725  | NW_004516830.1 | Scaffold1696 | 3725                    | CC                              | TT                | 1946661820               |
| SNP_P3_158445_3815  | NW_004516830.1 | Scaffold1696 | 3815                    | TT                              | AA                | 1946661822               |
| SNP_P3_158446_3817  | NW_004516830.1 | Scaffold1696 | 3817                    | AA                              | GG                | 1946661824               |
| SNP_P3_158447_3819  | NW_004516830.1 | Scaffold1696 | 3819                    | TT                              | AA                | 1946661826               |
| SNP_P3_158448_3822  | NW_004516830.1 | Scaffold1696 | 3822                    | TT                              | AA                | 1946661828               |
| SNP_P3_158449_3823  | NW_004516830.1 | Scaffold1696 | 3823                    | TT                              | AA                | 1946661830               |
| SNP_P3_158450_3824  | NW_004516830.1 | Scaffold1696 | 3824                    | TT                              | AA                | 1946661832               |
| SNP_P3_158451_4137  | NW_004516830.1 | Scaffold1696 | 4137                    | CC                              | TT                | 1946661834               |
| SNP_P3_158453_4571  | NW_004516830.1 | Scaffold1696 | 4571                    | TT                              | CC                | 1946661837               |
| SNP_P3_158454_4637  | NW_004516830.1 | Scaffold1696 | 4637                    | AA                              | GG                | 1946661839               |
| SNP_P3_158455_4875  | NW_004516830.1 | Scaffold1696 | 4875                    | TT                              | CC                | 1946661841               |
| SNP_P3_158456_4930  | NW_004516830.1 | Scaffold1696 | 4930                    | CC                              | GG                | 1946661843               |
| SNP_P3_158457_4948  | NW_004516830.1 | Scaffold1696 | 4948                    | CC                              | TT                | 1946661845               |
| SNP_P3_158458_5007  | NW_004516830.1 | Scaffold1696 | 5007                    | CC                              | TT                | 1946661847               |
| SNP_P3_158459_5008  | NW_004516830.1 | Scaffold1696 | 5008                    | GG                              | CC                | 1946661849               |
| SNP_P3_158460_5088  | NW_004516830.1 | Scaffold1696 | 5088                    | CC                              | TT                | 1946661851               |
| SNP_P3_158461_5104  | NW_004516830.1 | Scaffold1696 | 5104                    | GG                              | AA                | 1946661853               |
| SNP_P3_158462_5134  | NW_004516830.1 | Scaffold1696 | 5134                    | TT                              | AA                | 1946661855               |
| SNP_P3_158463_5160  | NW_004516830.1 | Scaffold1696 | 5160                    | GG                              | AA                | 1946661857               |
| SNP_P3_158464_5198  | NW_004516830.1 | Scaffold1696 | 5198                    | GG                              | AA                | 1946661859               |
| SNP_P3_158465_5222  | NW_004516830.1 | Scaffold1696 | 5222                    | GG                              | AA                | 1946661861               |
| SNP_P3_158466_5308  | NW_004516830.1 | Scaffold1696 | 5308                    | TT                              | GG                | 1946661863               |
| SNP_P3_158467_5348  | NW_004516830.1 | Scaffold1696 | 5348                    | CC                              | AA                | 1946661865               |
| SNP_P3_158469_5448  | NW_004516830.1 | Scaffold1696 | 5448                    | AA                              | GG                | 1946661867               |
| SNP_P3_158470_5532  | NW_004516830.1 | Scaffold1696 | 5532                    | CC                              | AA                | 1946661875               |
| SNP_P3_158471_5703  | NW_004516830.1 | Scaffold1696 | 5703                    | AA                              | TT                | 1946661877               |
| SNP_P3_158472_5771  | NW_004516830.1 | Scaffold1696 | 5771                    | TT                              | AA                | 1946661879               |
| SNP_P3_158473_7117  | NW_004516830.1 | Scaffold1696 | 7117                    | GG                              | TT                | 1946661881               |
| SNP_P3_158474_7720  | NW_004516830.1 | Scaffold1696 | 7720                    | CC                              | AA                | 1946661883               |
| SNP_P3_158475_7754  | NW_004516830.1 | Scaffold1696 | 7754                    | TT                              | CC                | 1946661885               |
| SNP_P3_158476_7919  | NW_004516830.1 | Scaffold1696 | 7919                    | AA                              | GG                | 1946661887               |
| SNP_P3_158477_7997  | NW_004516830.1 | Scaffold1696 | 7997                    | CC                              | TT                | 1946661889               |
| SNP_P3_158478_8230  | NW_004516830.1 | Scaffold1696 | 8230                    | AA                              | CC                | 1946661891               |
| SNP_P3_158479_8249  | NW_004516830.1 | Scaffold1696 | 8249                    | GG                              | AA                | 1946661893               |
| SNP_P3_158480_8369  | NW_004516830.1 | Scaffold1696 | 8369                    | CC                              | AA                | 1946661895               |
| SNP_P3_158481_8383  | NW_004516830.1 | Scaffold1696 | 8383                    | CC                              | TT                | 1946661897               |
| SNP_P3_158482_10442 | NW_004516830.1 | Scaffold1696 | 10442                   | AA                              | CC                | 1946661899               |
| SNP_P3_158483_10551 | NW_004516830.1 | Scaffold1696 | 10551                   | AA                              | GG                | 1946661902               |
| SNP_P3_158484_10603 | NW_004516830.1 | Scaffold1696 | 10603                   | AA                              | CC                | 1946661904               |

| SNPs IDs            | Chromosome IDs | Chromosomes  | Physical positions (bp) | CDC Frontier (Reference genome) | (Pusa 256 & HPNB) | NCBI SNPdb Accession IDs |
|---------------------|----------------|--------------|-------------------------|---------------------------------|-------------------|--------------------------|
| SNP_P3_158485_10695 | NW_004516830.1 | Scaffold1696 | 10695                   | TT                              | AA                | 1946661906               |
| SNP_P3_158486_12369 | NW_004516830.1 | Scaffold1696 | 12369                   | TT                              | CC                | 1946661908               |
| SNP_P3_158487_12372 | NW_004516830.1 | Scaffold1696 | 12372                   | GG                              | AA                | 1946661910               |
| SNP_P3_158488_12510 | NW_004516830.1 | Scaffold1696 | 12510                   | TT                              | CC                | 1946661912               |
| SNP_P3_158489_12572 | NW_004516830.1 | Scaffold1696 | 12572                   | CC                              | TT                | 1946661914               |
| SNP_P3_158490_12584 | NW_004516830.1 | Scaffold1696 | 12584                   | CC                              | TT                | 1946661916               |
| SNP_P3_158491_12704 | NW_004516830.1 | Scaffold1696 | 12704                   | AA                              | GG                | 1946661918               |
| SNP_P3_158492_12754 | NW_004516830.1 | Scaffold1696 | 12754                   | TT                              | CC                | 1946661920               |
| SNP_P3_158493_12853 | NW_004516830.1 | Scaffold1696 | 12853                   | AA                              | GG                | 1946661922               |
| SNP_P3_158494_12901 | NW_004516830.1 | Scaffold1696 | 12901                   | CC                              | AA                | 1946661924               |
| SNP_P3_158495_12946 | NW_004516830.1 | Scaffold1696 | 12946                   | GG                              | TT                | 1946661926               |
| SNP_P3_158496_12951 | NW_004516830.1 | Scaffold1696 | 12951                   | CC                              | AA                | 1946661928               |
| SNP_P3_158497_12956 | NW_004516830.1 | Scaffold1696 | 12956                   | TT                              | CC                | 1946661930               |
| SNP_P3_158498_12957 | NW_004516830.1 | Scaffold1696 | 12957                   | GG                              | AA                | 1946661932               |
| SNP_P3_158499_13432 | NW_004516830.1 | Scaffold1696 | 13432                   | TT                              | CC                | 1946661934               |
| SNP_P3_158500_15224 | NW_004516830.1 | Scaffold1696 | 15224                   | AA                              | CC                | 1946661936               |
| SNP_P3_158501_15979 | NW_004516830.1 | Scaffold1696 | 15979                   | TT                              | CC                | 1946661938               |
| SNP_P3_158502_16104 | NW_004516830.1 | Scaffold1696 | 16104                   | AA                              | CC                | 1946661941               |
| SNP_P3_158503_16268 | NW_004516830.1 | Scaffold1696 | 16268                   | GG                              | CC                | 1946661943               |
| SNP_P3_158504_16431 | NW_004516830.1 | Scaffold1696 | 16431                   | GG                              | AA                | 1946661945               |
| SNP_P3_158505_20096 | NW_004516830.1 | Scaffold1696 | 20096                   | AA                              | CC                | 1946661947               |
| SNP_P3_158506_20172 | NW_004516830.1 | Scaffold1696 | 20172                   | CC                              | TT                | 1946661949               |
| SNP_P3_158507_20255 | NW_004516830.1 | Scaffold1696 | 20255                   | TT                              | CC                | 1946661951               |
| SNP_P3_158508_20420 | NW_004516830.1 | Scaffold1696 | 20420                   | AA                              | TT                | 1946661953               |
| SNP_P3_158509_20465 | NW_004516830.1 | Scaffold1696 | 20465                   | CC                              | TT                | 1946661955               |
| SNP_P3_158510_20483 | NW_004516830.1 | Scaffold1696 | 20483                   | AA                              | GG                | 1946661957               |
| SNP_P3_158511_20494 | NW_004516830.1 | Scaffold1696 | 20494                   | CC                              | AA                | 1946661960               |
| SNP_P3_158512_20499 | NW_004516830.1 | Scaffold1696 | 20499                   | AA                              | CC                | 1946661962               |
| SNP_P3_158513_20758 | NW_004516830.1 | Scaffold1696 | 20758                   | CC                              | AA                | 1946661963               |
| SNP_P3_158514_20775 | NW_004516830.1 | Scaffold1696 | 20775                   | TT                              | CC                | 1946661964               |
| SNP_P3_158515_20848 | NW_004516830.1 | Scaffold1696 | 20848                   | AA                              | TT                | 1946661965               |
| SNP_P3_158516_20899 | NW_004516830.1 | Scaffold1696 | 20899                   | CC                              | TT                | 1946661966               |
| SNP_P3_158517_21252 | NW_004516830.1 | Scaffold1696 | 21252                   | GG                              | TT                | 1946661967               |
| SNP_P3_158518_21270 | NW_004516830.1 | Scaffold1696 | 21270                   | AA                              | GG                | 1946661968               |
| SNP_P3_158519_21318 | NW_004516830.1 | Scaffold1696 | 21318                   | TT                              | CC                | 1946661969               |
| SNP_P3_158520_21357 | NW_004516830.1 | Scaffold1696 | 21357                   | AA                              | TT                | 1946661971               |
| SNP_P3_158521_21365 | NW_004516830.1 | Scaffold1696 | 21365                   | AA                              | GG                | 1946661973               |
| SNP_P3_158522_21449 | NW_004516830.1 | Scaffold1696 | 21449                   | TT                              | AA                | 1946661975               |
| SNP_P3_158523_21459 | NW_004516830.1 | Scaffold1696 | 21459                   | GG                              | CC                | 1946661977               |
| SNP_P3_158524_21486 | NW_004516830.1 | Scaffold1696 | 21486                   | GG                              | AA                | 1946661979               |
| SNP_P3_158525_21535 | NW_004516830.1 | Scaffold1696 | 21535                   | CC                              | TT                | 1946661981               |
| SNP_P3_158526_21582 | NW_004516830.1 | Scaffold1696 | 21582                   | GG                              | AA                | 1946661983               |



| SNPs IDs            | Chromosome IDs | Chromosomes  | Physical positions (bp) | CDC Frontier (Reference genome) | (Pusa 256 & HPNB) | NCBI SNPdb Accession IDs |
|---------------------|----------------|--------------|-------------------------|---------------------------------|-------------------|--------------------------|
| SNP_P3_158527_21614 | NW_004516830.1 | Scaffold1696 | 21614                   | TT                              | CC                | 1946661985               |
| SNP_P3_158528_21648 | NW_004516830.1 | Scaffold1696 | 21648                   | AA                              | TT                | 1946661987               |
| SNP_P3_158529_21665 | NW_004516830.1 | Scaffold1696 | 21665                   | AA                              | CC                | 1946661989               |
| SNP_P3_158530_21677 | NW_004516830.1 | Scaffold1696 | 21677                   | CC                              | TT                | 1946661991               |
| SNP_P3_158531_22855 | NW_004516830.1 | Scaffold1696 | 22855                   | AA                              | GG                | 1946661993               |
| SNP_P3_158532_22924 | NW_004516830.1 | Scaffold1696 | 22924                   | AA                              | GG                | 1946661995               |
| SNP_P3_158533_23077 | NW_004516830.1 | Scaffold1696 | 23077                   | CC                              | TT                | 1946661997               |
| SNP_P3_158534_23124 | NW_004516830.1 | Scaffold1696 | 23124                   | GG                              | TT                | 1946661999               |
| SNP_P3_158535_23140 | NW_004516830.1 | Scaffold1696 | 23140                   | CC                              | GG                | 1946662001               |
| SNP_P3_158536_23179 | NW_004516830.1 | Scaffold1696 | 23179                   | CC                              | TT                | 1946662003               |
| SNP_P3_158537_450   | NW_004516832.1 | Scaffold1699 | 450                     | AA                              | TT                | 1946662005               |
| SNP_P3_158538_456   | NW_004516832.1 | Scaffold1699 | 456                     | GG                              | AA                | 1946662007               |
| SNP_P3_158539_622   | NW_004516832.1 | Scaffold1699 | 622                     | TT                              | GG                | 1946662009               |
| SNP_P3_158540_648   | NW_004516832.1 | Scaffold1699 | 648                     | AA                              | GG                | 1946662011               |
| SNP_P3_158541_650   | NW_004516832.1 | Scaffold1699 | 650                     | AA                              | GG                | 1946662013               |
| SNP_P3_158542_657   | NW_004516832.1 | Scaffold1699 | 657                     | GG                              | CC                | 1946662016               |
| SNP_P3_158543_665   | NW_004516832.1 | Scaffold1699 | 665                     | AA                              | CC                | 1946662018               |
| SNP_P3_158544_668   | NW_004516832.1 | Scaffold1699 | 668                     | AA                              | GG                | 1946662020               |
| SNP_P3_158545_669   | NW_004516832.1 | Scaffold1699 | 669                     | AA                              | GG                | 1946662022               |
| SNP_P3_158546_927   | NW_004516832.1 | Scaffold1699 | 927                     | TT                              | GG                | 1946662024               |
| SNP_P3_158547_1014  | NW_004516832.1 | Scaffold1699 | 1014                    | AA                              | CC                | 1946662026               |
| SNP_P3_158548_1167  | NW_004516832.1 | Scaffold1699 | 1167                    | AA                              | TT                | 1946662028               |
| SNP_P3_158549_1601  | NW_004516832.1 | Scaffold1699 | 1601                    | CC                              | AA                | 1946662030               |
| SNP_P3_158550_1607  | NW_004516832.1 | Scaffold1699 | 1607                    | CC                              | TT                | 1946662032               |
| SNP_P3_158551_1686  | NW_004516832.1 | Scaffold1699 | 1686                    | AA                              | CC                | 1946662034               |
| SNP_P3_158552_1893  | NW_004516832.1 | Scaffold1699 | 1893                    | TT                              | CC                | 1946662036               |
| SNP_P3_158553_2324  | NW_004516832.1 | Scaffold1699 | 2324                    | GG                              | TT                | 1946662038               |
| SNP_P3_158554_2606  | NW_004516832.1 | Scaffold1699 | 2606                    | AA                              | GG                | 1946662040               |
| SNP_P3_158555_7380  | NW_004516832.1 | Scaffold1699 | 7380                    | GG                              | AA                | 1946662042               |
| SNP_P3_158556_7387  | NW_004516832.1 | Scaffold1699 | 7387                    | TT                              | CC                | 1946662044               |
| SNP_P3_158557_16039 | NW_004516832.1 | Scaffold1699 | 16039                   | TT                              | CC                | 1946662046               |
| SNP_P3_158558_17230 | NW_004516832.1 | Scaffold1699 | 17230                   | GG                              | AA                | 1946662048               |
| SNP_P3_158559_18649 | NW_004516832.1 | Scaffold1699 | 18649                   | CC                              | AA                | 1946662050               |
| SNP_P3_158560_6973  | NW_004516833.1 | Scaffold1701 | 6973                    | GG                              | CC                | 1946662052               |
| SNP_P3_158561_7068  | NW_004516833.1 | Scaffold1701 | 7068                    | AA                              | CC                | 1946662055               |
| SNP_P3_158562_7119  | NW_004516833.1 | Scaffold1701 | 7119                    | TT                              | GG                | 1946662057               |
| SNP_P3_158563_26246 | NW_004516833.1 | Scaffold1701 | 26246                   | AA                              | GG                | 1946662059               |
| SNP_P3_158564_26261 | NW_004516833.1 | Scaffold1701 | 26261                   | TT                              | AA                | 1946662061               |
| SNP_P3_158565_26720 | NW_004516833.1 | Scaffold1701 | 26720                   | AA                              | GG                | 1946662063               |
| SNP_P3_158566_26915 | NW_004516833.1 | Scaffold1701 | 26915                   | AA                              | GG                | 1946662065               |
| SNP_P3_158567_26924 | NW_004516833.1 | Scaffold1701 | 26924                   | CC                              | TT                | 1946662067               |
| SNP_P3_158568_26938 | NW_004516833.1 | Scaffold1701 | 26938                   | GG                              | AA                | 1946662068               |

| SNPs IDs            | Chromosome IDs | Chromosomes  | Physical positions (bp) | CDC Frontier (Reference genome) | (Pusa 256 & HPNB) | NCBI SNPdb Accession IDs |
|---------------------|----------------|--------------|-------------------------|---------------------------------|-------------------|--------------------------|
| SNP_P3_158569_26942 | NW_004516833.1 | Scaffold1701 | 26942                   | AA                              | GG                | 1946662070               |
| SNP_P3_158570_26960 | NW_004516833.1 | Scaffold1701 | 26960                   | CC                              | AA                | 1946662072               |
| SNP_P3_158571_26973 | NW_004516833.1 | Scaffold1701 | 26973                   | TT                              | CC                | 1946662074               |
| SNP_P3_158572_26978 | NW_004516833.1 | Scaffold1701 | 26978                   | CC                              | TT                | 1946662076               |
| SNP_P3_158573_26984 | NW_004516833.1 | Scaffold1701 | 26984                   | AA                              | GG                | 1946662078               |
| SNP_P3_158574_27011 | NW_004516833.1 | Scaffold1701 | 27011                   | TT                              | AA                | 1946662080               |
| SNP_P3_158575_27023 | NW_004516833.1 | Scaffold1701 | 27023                   | CC                              | AA                | 1946662082               |
| SNP_P3_158576_27027 | NW_004516833.1 | Scaffold1701 | 27027                   | CC                              | GG                | 1946662084               |
| SNP_P3_158577_27039 | NW_004516833.1 | Scaffold1701 | 27039                   | GG                              | AA                | 1946662086               |
| SNP_P3_158578_27536 | NW_004516833.1 | Scaffold1701 | 27536                   | AA                              | TT                | 1946662088               |
| SNP_P3_158579_27552 | NW_004516833.1 | Scaffold1701 | 27552                   | GG                              | TT                | 1946662090               |
| SNP_P3_158580_37626 | NW_004516833.1 | Scaffold1701 | 37626                   | AA                              | GG                | 1946662092               |
| SNP_P3_158581_37779 | NW_004516833.1 | Scaffold1701 | 37779                   | GG                              | TT                | 1946662094               |
| SNP_P3_158582_37957 | NW_004516833.1 | Scaffold1701 | 37957                   | CC                              | GG                | 1946662097               |
| SNP_P3_158583_37985 | NW_004516833.1 | Scaffold1701 | 37985                   | GG                              | CC                | 1946662099               |
| SNP_P3_158584_38037 | NW_004516833.1 | Scaffold1701 | 38037                   | AA                              | GG                | 1946662101               |
| SNP_P3_158585_39374 | NW_004516833.1 | Scaffold1701 | 39374                   | TT                              | GG                | 1946662102               |
| SNP_P3_158586_42148 | NW_004516833.1 | Scaffold1701 | 42148                   | AA                              | TT                | 1946662104               |
| SNP_P3_158587_54117 | NW_004516833.1 | Scaffold1701 | 54117                   | GG                              | AA                | 1946662106               |
| SNP_P3_158588_54170 | NW_004516833.1 | Scaffold1701 | 54170                   | AA                              | GG                | 1946662108               |
| SNP_P3_158589_54190 | NW_004516833.1 | Scaffold1701 | 54190                   | GG                              | CC                | 1946662110               |
| SNP_P3_158590_54410 | NW_004516833.1 | Scaffold1701 | 54410                   | TT                              | CC                | 1946662113               |
| SNP_P3_158591_57407 | NW_004516833.1 | Scaffold1701 | 57407                   | GG                              | AA                | 1946662115               |
| SNP_P3_158592_57677 | NW_004516833.1 | Scaffold1701 | 57677                   | AA                              | CC                | 1946662117               |
| SNP_P3_158593_57678 | NW_004516833.1 | Scaffold1701 | 57678                   | AA                              | TT                | 1946662119               |
| SNP_P3_158594_57724 | NW_004516833.1 | Scaffold1701 | 57724                   | CC                              | TT                | 1946662121               |
| SNP_P3_158595_57734 | NW_004516833.1 | Scaffold1701 | 57734                   | TT                              | CC                | 1946662123               |
| SNP_P3_158596_57739 | NW_004516833.1 | Scaffold1701 | 57739                   | AA                              | GG                | 1946662125               |
| SNP_P3_158597_57760 | NW_004516833.1 | Scaffold1701 | 57760                   | GG                              | AA                | 1946662127               |
| SNP_P3_158598_57873 | NW_004516833.1 | Scaffold1701 | 57873                   | AA                              | TT                | 1946662129               |
| SNP_P3_158599_57902 | NW_004516833.1 | Scaffold1701 | 57902                   | TT                              | CC                | 1946662131               |
| SNP_P3_158600_57912 | NW_004516833.1 | Scaffold1701 | 57912                   | TT                              | AA                | 1946662133               |
| SNP_P3_158601_57945 | NW_004516833.1 | Scaffold1701 | 57945                   | TT                              | CC                | 1946662136               |
| SNP_P3_158602_68059 | NW_004516833.1 | Scaffold1701 | 68059                   | AA                              | GG                | 1946662138               |
| SNP_P3_158603_86567 | NW_004516833.1 | Scaffold1701 | 86567                   | GG                              | AA                | 1946662140               |
| SNP_P3_158604_86592 | NW_004516833.1 | Scaffold1701 | 86592                   | GG                              | AA                | 1946662142               |
| SNP_P3_158605_86607 | NW_004516833.1 | Scaffold1701 | 86607                   | CC                              | TT                | 1946662144               |
| SNP_P3_158606_86612 | NW_004516833.1 | Scaffold1701 | 86612                   | GG                              | AA                | 1946662146               |
| SNP_P3_158607_86613 | NW_004516833.1 | Scaffold1701 | 86613                   | GG                              | TT                | 1946662148               |
| SNP_P3_158608_86623 | NW_004516833.1 | Scaffold1701 | 86623                   | CC                              | AA                | 1946662150               |
| SNP_P3_158609_86656 | NW_004516833.1 | Scaffold1701 | 86656                   | CC                              | TT                | 1946662152               |
| SNP_P3_158610_86885 | NW_004516833.1 | Scaffold1701 | 86885                   | AA                              | GG                | 1946662154               |

| SNPs IDs             | Chromosome IDs | Chromosomes  | Physical positions (bp) | CDC Frontier (Reference genome) | (Pusa 256 & HPNB) | NCBI SNPdb Accession IDs |
|----------------------|----------------|--------------|-------------------------|---------------------------------|-------------------|--------------------------|
| SNP_P3_158611_86907  | NW_004516833.1 | Scaffold1701 | 86907                   | CC                              | TT                | 1946662155               |
| SNP_P3_158612_92564  | NW_004516833.1 | Scaffold1701 | 92564                   | CC                              | TT                | 1946662157               |
| SNP_P3_158614_101192 | NW_004516833.1 | Scaffold1701 | 101192                  | TT                              | CC                | 1946662159               |
| SNP_P3_158615_101230 | NW_004516833.1 | Scaffold1701 | 101230                  | TT                              | CC                | 1946662161               |
| SNP_P3_158616_101256 | NW_004516833.1 | Scaffold1701 | 101256                  | GG                              | AA                | 1946662163               |
| SNP_P3_158617_106728 | NW_004516833.1 | Scaffold1701 | 106728                  | TT                              | GG                | 1946662165               |
| SNP_P3_158618_126270 | NW_004516833.1 | Scaffold1701 | 126270                  | AA                              | CC                | 1946662167               |
| SNP_P3_158619_126569 | NW_004516833.1 | Scaffold1701 | 126569                  | AA                              | GG                | 1946662169               |
| SNP_P3_158620_126571 | NW_004516833.1 | Scaffold1701 | 126571                  | AA                              | CC                | 1946662171               |
| SNP_P3_158621_126581 | NW_004516833.1 | Scaffold1701 | 126581                  | AA                              | CC                | 1946662173               |
| SNP_P3_158622_141629 | NW_004516833.1 | Scaffold1701 | 141629                  | CC                              | TT                | 1946662176               |
| SNP_P3_158623_142670 | NW_004516833.1 | Scaffold1701 | 142670                  | AA                              | GG                | 1946662178               |
| SNP_P3_158624_145682 | NW_004516833.1 | Scaffold1701 | 145682                  | GG                              | AA                | 1946662180               |
| SNP_P3_158625_145787 | NW_004516833.1 | Scaffold1701 | 145787                  | CC                              | TT                | 1946662182               |
| SNP_P3_158626_145801 | NW_004516833.1 | Scaffold1701 | 145801                  | GG                              | AA                | 1946662184               |
| SNP_P3_158627_151013 | NW_004516833.1 | Scaffold1701 | 151013                  | TT                              | GG                | 1946662186               |
| SNP_P3_158628_151014 | NW_004516833.1 | Scaffold1701 | 151014                  | CC                              | TT                | 1946662188               |
| SNP_P3_158629_151925 | NW_004516833.1 | Scaffold1701 | 151925                  | AA                              | TT                | 1946662190               |
| SNP_P3_158630_151927 | NW_004516833.1 | Scaffold1701 | 151927                  | AA                              | GG                | 1946662192               |
| SNP_P3_158631_151941 | NW_004516833.1 | Scaffold1701 | 151941                  | GG                              | AA                | 1946662194               |
| SNP_P3_158632_151955 | NW_004516833.1 | Scaffold1701 | 151955                  | AA                              | GG                | 1946662196               |
| SNP_P3_158633_151979 | NW_004516833.1 | Scaffold1701 | 151979                  | CC                              | TT                | 1946662198               |
| SNP_P3_158634_151982 | NW_004516833.1 | Scaffold1701 | 151982                  | AA                              | GG                | 1946662200               |
| SNP_P3_158635_151997 | NW_004516833.1 | Scaffold1701 | 151997                  | CC                              | TT                | 1946662203               |
| SNP_P3_158636_152024 | NW_004516833.1 | Scaffold1701 | 152024                  | TT                              | CC                | 1946662204               |
| SNP_P3_158637_154121 | NW_004516833.1 | Scaffold1701 | 154121                  | CC                              | TT                | 1946662206               |
| SNP_P3_158638_14327  | NW_004516835.1 | Scaffold1703 | 14327                   | CC                              | TT                | 1946662208               |
| SNP_P3_158639_22881  | NW_004516835.1 | Scaffold1703 | 22881                   | GG                              | AA                | 1946662210               |
| SNP_P3_158640_48256  | NW_004516835.1 | Scaffold1703 | 48256                   | TT                              | CC                | 1946662212               |
| SNP_P3_158641_48543  | NW_004516835.1 | Scaffold1703 | 48543                   | TT                              | CC                | 1946662214               |
| SNP_P3_158643_86499  | NW_004516835.1 | Scaffold1703 | 86499                   | CC                              | AA                | 1946662216               |
| SNP_P3_158644_110257 | NW_004516835.1 | Scaffold1703 | 110257                  | TT                              | CC                | 1946662218               |
| SNP_P3_158645_125952 | NW_004516835.1 | Scaffold1703 | 125952                  | CC                              | TT                | 1946662220               |
| SNP_P3_158646_130642 | NW_004516835.1 | Scaffold1703 | 130642                  | GG                              | AA                | 1946662222               |
| SNP_P3_158647_130670 | NW_004516835.1 | Scaffold1703 | 130670                  | TT                              | CC                | 1946662224               |
| SNP_P3_158648_130696 | NW_004516835.1 | Scaffold1703 | 130696                  | CC                              | TT                | 1946662226               |
| SNP_P3_158649_130722 | NW_004516835.1 | Scaffold1703 | 130722                  | TT                              | CC                | 1946662228               |
| SNP_P3_158650_130725 | NW_004516835.1 | Scaffold1703 | 130725                  | CC                              | TT                | 1946662230               |
| SNP_P3_158651_130744 | NW_004516835.1 | Scaffold1703 | 130744                  | CC                              | TT                | 1946662232               |
| SNP_P3_158652_130911 | NW_004516835.1 | Scaffold1703 | 130911                  | AA                              | GG                | 1946662234               |
| SNP_P3_158653_130935 | NW_004516835.1 | Scaffold1703 | 130935                  | CC                              | AA                | 1946662236               |
| SNP_P3_158654_130943 | NW_004516835.1 | Scaffold1703 | 130943                  | GG                              | AA                | 1946662238               |

| SNPs IDs             | Chromosome IDs | Chromosomes  | Physical positions (bp) | CDC Frontier (Reference genome) | (Pusa 256 & HPNB) | NCBI SNPdb Accession IDs |
|----------------------|----------------|--------------|-------------------------|---------------------------------|-------------------|--------------------------|
| SNP_P3_158656_131182 | NW_004516835.1 | Scaffold1703 | 131182                  | AA                              | CC                | 1946662240               |
| SNP_P3_158657_131213 | NW_004516835.1 | Scaffold1703 | 131213                  | TT                              | GG                | 1946662242               |
| SNP_P3_158658_153846 | NW_004516835.1 | Scaffold1703 | 153846                  | CC                              | GG                | 1946662244               |
| SNP_P3_158659_154750 | NW_004516835.1 | Scaffold1703 | 154750                  | GG                              | TT                | 1946662246               |
| SNP_P3_158660_165010 | NW_004516835.1 | Scaffold1703 | 165010                  | AA                              | GG                | 1946662248               |
| SNP_P3_158661_165023 | NW_004516835.1 | Scaffold1703 | 165023                  | TT                              | AA                | 1946662250               |
| SNP_P3_158662_165046 | NW_004516835.1 | Scaffold1703 | 165046                  | AA                              | CC                | 1946662252               |
| SNP_P3_158663_165049 | NW_004516835.1 | Scaffold1703 | 165049                  | GG                              | AA                | 1946662254               |
| SNP_P3_158664_165060 | NW_004516835.1 | Scaffold1703 | 165060                  | TT                              | GG                | 1946662256               |
| SNP_P3_158665_165319 | NW_004516835.1 | Scaffold1703 | 165319                  | TT                              | GG                | 1946662258               |
| SNP_P3_158666_165327 | NW_004516835.1 | Scaffold1703 | 165327                  | TT                              | GG                | 1946662261               |
| SNP_P3_158667_170280 | NW_004516835.1 | Scaffold1703 | 170280                  | TT                              | CC                | 1946662263               |
| SNP_P3_158668_191229 | NW_004516835.1 | Scaffold1703 | 191229                  | AA                              | GG                | 1946662265               |
| SNP_P3_158669_197864 | NW_004516835.1 | Scaffold1703 | 197864                  | AA                              | CC                | 1946662267               |
| SNP_P3_158670_198182 | NW_004516835.1 | Scaffold1703 | 198182                  | CC                              | AA                | 1946662269               |
| SNP_P3_158671_199063 | NW_004516835.1 | Scaffold1703 | 199063                  | GG                              | TT                | 1946662271               |
| SNP_P3_158672_200062 | NW_004516835.1 | Scaffold1703 | 200062                  | CC                              | TT                | 1946662273               |
| SNP_P3_158673_200147 | NW_004516835.1 | Scaffold1703 | 200147                  | TT                              | AA                | 1946662276               |
| SNP_P3_158674_200679 | NW_004516835.1 | Scaffold1703 | 200679                  | TT                              | CC                | 1946662278               |
| SNP_P3_158676_219609 | NW_004516835.1 | Scaffold1703 | 219609                  | TT                              | CC                | 1946662280               |
| SNP_P3_158677_219630 | NW_004516835.1 | Scaffold1703 | 219630                  | TT                              | CC                | 1946662282               |
| SNP_P3_158678_221275 | NW_004516835.1 | Scaffold1703 | 221275                  | TT                              | CC                | 1946662284               |
| SNP_P3_158679_221287 | NW_004516835.1 | Scaffold1703 | 221287                  | AA                              | TT                | 1946662286               |
| SNP_P3_158680_221292 | NW_004516835.1 | Scaffold1703 | 221292                  | CC                              | AA                | 1946662288               |
| SNP_P3_158681_221293 | NW_004516835.1 | Scaffold1703 | 221293                  | TT                              | CC                | 1946662290               |
| SNP_P3_158682_221778 | NW_004516835.1 | Scaffold1703 | 221778                  | CC                              | TT                | 1946662292               |
| SNP_P3_158683_222965 | NW_004516835.1 | Scaffold1703 | 222965                  | AA                              | GG                | 1946662294               |
| SNP_P3_158684_223002 | NW_004516835.1 | Scaffold1703 | 223002                  | GG                              | AA                | 1946662296               |
| SNP_P3_158685_223074 | NW_004516835.1 | Scaffold1703 | 223074                  | GG                              | AA                | 1946662298               |
| SNP_P3_158686_223111 | NW_004516835.1 | Scaffold1703 | 223111                  | TT                              | CC                | 1946662300               |
| SNP_P3_158687_223126 | NW_004516835.1 | Scaffold1703 | 223126                  | GG                              | AA                | 1946662302               |
| SNP_P3_158688_232321 | NW_004516835.1 | Scaffold1703 | 232321                  | CC                              | TT                | 1946662304               |
| SNP_P3_158689_232358 | NW_004516835.1 | Scaffold1703 | 232358                  | CC                              | TT                | 1946662306               |
| SNP_P3_158690_232590 | NW_004516835.1 | Scaffold1703 | 232590                  | AA                              | GG                | 1946662308               |
| SNP_P3_158691_243440 | NW_004516835.1 | Scaffold1703 | 243440                  | AA                              | GG                | 1946662310               |
| SNP_P3_158692_262400 | NW_004516835.1 | Scaffold1703 | 262400                  | AA                              | TT                | 1946662313               |
| SNP_P3_158693_268031 | NW_004516835.1 | Scaffold1703 | 268031                  | GG                              | AA                | 1946662315               |
| SNP_P3_158694_268034 | NW_004516835.1 | Scaffold1703 | 268034                  | GG                              | TT                | 1946662317               |
| SNP_P3_158695_277824 | NW_004516835.1 | Scaffold1703 | 277824                  | CC                              | TT                | 1946662319               |
| SNP_P3_158696_297240 | NW_004516835.1 | Scaffold1703 | 297240                  | AA                              | TT                | 1946662321               |
| SNP_P3_158697_8699   | NW_004516836.1 | Scaffold1704 | 8699                    | AA                              | GG                | 1946662323               |
| SNP_P3_158698_8790   | NW_004516836.1 | Scaffold1704 | 8790                    | AA                              | GG                | 1946662325               |

| SNPs IDs            | Chromosome IDs | Chromosomes  | Physical positions (bp) | CDC Frontier (Reference genome) | (Pusa 256 & HPNB) | NCBI SNPdb Accession IDs |
|---------------------|----------------|--------------|-------------------------|---------------------------------|-------------------|--------------------------|
| SNP_P3_158699_8834  | NW_004516836.1 | Scaffold1704 | 8834                    | TT                              | CC                | 1946662327               |
| SNP_P3_158701_9137  | NW_004516836.1 | Scaffold1704 | 9137                    | AA                              | GG                | 1946662329               |
| SNP_P3_158702_9221  | NW_004516836.1 | Scaffold1704 | 9221                    | AA                              | TT                | 1946662331               |
| SNP_P3_158703_9271  | NW_004516836.1 | Scaffold1704 | 9271                    | AA                              | GG                | 1946662333               |
| SNP_P3_158704_9301  | NW_004516836.1 | Scaffold1704 | 9301                    | AA                              | CC                | 1946662335               |
| SNP_P3_158706_11047 | NW_004516836.1 | Scaffold1704 | 11047                   | AA                              | CC                | 1946662337               |
| SNP_P3_158707_11073 | NW_004516836.1 | Scaffold1704 | 11073                   | CC                              | GG                | 1946662339               |
| SNP_P3_158709_11854 | NW_004516836.1 | Scaffold1704 | 11854                   | TT                              | CC                | 1946662341               |
| SNP_P3_158710_11857 | NW_004516836.1 | Scaffold1704 | 11857                   | CC                              | TT                | 1946662343               |
| SNP_P3_158711_12597 | NW_004516836.1 | Scaffold1704 | 12597                   | GG                              | AA                | 1946662345               |
| SNP_P3_158712_12793 | NW_004516836.1 | Scaffold1704 | 12793                   | CC                              | TT                | 1946662347               |
| SNP_P3_158714_26009 | NW_004516836.1 | Scaffold1704 | 26009                   | CC                              | GG                | 1946662349               |
| SNP_P3_158715_26125 | NW_004516836.1 | Scaffold1704 | 26125                   | CC                              | AA                | 1946662352               |
| SNP_P3_158716_26128 | NW_004516836.1 | Scaffold1704 | 26128                   | TT                              | CC                | 1946662354               |
| SNP_P3_158717_26146 | NW_004516836.1 | Scaffold1704 | 26146                   | AA                              | CC                | 1946662356               |
| SNP_P3_158718_32873 | NW_004516836.1 | Scaffold1704 | 32873                   | TT                              | CC                | 1946662358               |
| SNP_P3_158719_32938 | NW_004516836.1 | Scaffold1704 | 32938                   | AA                              | GG                | 1946662361               |
| SNP_P3_158720_39297 | NW_004516836.1 | Scaffold1704 | 39297                   | GG                              | TT                | 1946662364               |
| SNP_P3_158721_51418 | NW_004516836.1 | Scaffold1704 | 51418                   | CC                              | TT                | 1946662366               |
| SNP_P3_158722_77907 | NW_004516836.1 | Scaffold1704 | 77907                   | TT                              | AA                | 1946662368               |
| SNP_P3_158723_81883 | NW_004516836.1 | Scaffold1704 | 81883                   | GG                              | AA                | 1946662370               |
| SNP_P3_158724_81930 | NW_004516836.1 | Scaffold1704 | 81930                   | CC                              | TT                | 1946662372               |
| SNP_P3_158725_82704 | NW_004516836.1 | Scaffold1704 | 82704                   | AA                              | TT                | 1946662374               |
| SNP_P3_158726_82705 | NW_004516836.1 | Scaffold1704 | 82705                   | TT                              | AA                | 1946662376               |
| SNP_P3_158727_92236 | NW_004516836.1 | Scaffold1704 | 92236                   | CC                              | GG                | 1946662378               |
| SNP_P3_158728_1061  | NW_004516837.1 | Scaffold1706 | 1061                    | CC                              | TT                | 1946662380               |
| SNP_P3_158729_1128  | NW_004516837.1 | Scaffold1706 | 1128                    | CC                              | TT                | 1946662382               |
| SNP_P3_158730_1237  | NW_004516837.1 | Scaffold1706 | 1237                    | AA                              | GG                | 1946662384               |
| SNP_P3_158731_1542  | NW_004516837.1 | Scaffold1706 | 1542                    | AA                              | CC                | 1946662386               |
| SNP_P3_158732_22951 | NW_004516837.1 | Scaffold1706 | 22951                   | AA                              | GG                | 1946662389               |
| SNP_P3_158733_61837 | NW_004516837.1 | Scaffold1706 | 61837                   | CC                              | AA                | 1946662391               |
| SNP_P3_158734_76903 | NW_004516837.1 | Scaffold1706 | 76903                   | TT                              | CC                | 1946662393               |
| SNP_P3_158735_76926 | NW_004516837.1 | Scaffold1706 | 76926                   | TT                              | CC                | 1946662395               |
| SNP_P3_158736_76959 | NW_004516837.1 | Scaffold1706 | 76959                   | TT                              | CC                | 1946662397               |
| SNP_P3_158737_76985 | NW_004516837.1 | Scaffold1706 | 76985                   | CC                              | TT                | 1946662399               |
| SNP_P3_158738_76987 | NW_004516837.1 | Scaffold1706 | 76987                   | AA                              | GG                | 1946662401               |
| SNP_P3_158739_77022 | NW_004516837.1 | Scaffold1706 | 77022                   | GG                              | AA                | 1946662403               |
| SNP_P3_158740_77072 | NW_004516837.1 | Scaffold1706 | 77072                   | CC                              | GG                | 1946662405               |
| SNP_P3_158741_77551 | NW_004516837.1 | Scaffold1706 | 77551                   | AA                              | GG                | 1946662407               |
| SNP_P3_158742_77609 | NW_004516837.1 | Scaffold1706 | 77609                   | GG                              | TT                | 1946662409               |
| SNP_P3_158743_79654 | NW_004516837.1 | Scaffold1706 | 79654                   | AA                              | GG                | 1946662411               |
| SNP_P3_158744_79670 | NW_004516837.1 | Scaffold1706 | 79670                   | AA                              | TT                | 1946662413               |

| SNPs IDs             | Chromosome IDs | Chromosomes  | Physical positions (bp) | CDC Frontier (Reference genome) | (Pusa 256 & HPNB) | NCBI SNPdb Accession IDs |
|----------------------|----------------|--------------|-------------------------|---------------------------------|-------------------|--------------------------|
| SNP_P3_158745_79680  | NW_004516837.1 | Scaffold1706 | 79680                   | AA                              | CC                | 1946662414               |
| SNP_P3_158746_79691  | NW_004516837.1 | Scaffold1706 | 79691                   | AA                              | GG                | 1946662417               |
| SNP_P3_158747_79707  | NW_004516837.1 | Scaffold1706 | 79707                   | TT                              | CC                | 1946662419               |
| SNP_P3_158748_79712  | NW_004516837.1 | Scaffold1706 | 79712                   | GG                              | AA                | 1946662421               |
| SNP_P3_158749_79722  | NW_004516837.1 | Scaffold1706 | 79722                   | TT                              | CC                | 1946662423               |
| SNP_P3_158750_83530  | NW_004516837.1 | Scaffold1706 | 83530                   | TT                              | GG                | 1946662425               |
| SNP_P3_158751_83591  | NW_004516837.1 | Scaffold1706 | 83591                   | TT                              | AA                | 1946662427               |
| SNP_P3_158752_83651  | NW_004516837.1 | Scaffold1706 | 83651                   | AA                              | GG                | 1946662430               |
| SNP_P3_158753_83652  | NW_004516837.1 | Scaffold1706 | 83652                   | GG                              | AA                | 1946662432               |
| SNP_P3_158754_83659  | NW_004516837.1 | Scaffold1706 | 83659                   | AA                              | GG                | 1946662434               |
| SNP_P3_158755_83829  | NW_004516837.1 | Scaffold1706 | 83829                   | TT                              | CC                | 1946662436               |
| SNP_P3_158756_83961  | NW_004516837.1 | Scaffold1706 | 83961                   | TT                              | GG                | 1946662438               |
| SNP_P3_158757_83999  | NW_004516837.1 | Scaffold1706 | 83999                   | TT                              | CC                | 1946662440               |
| SNP_P3_158758_84027  | NW_004516837.1 | Scaffold1706 | 84027                   | GG                              | AA                | 1946662441               |
| SNP_P3_158759_84366  | NW_004516837.1 | Scaffold1706 | 84366                   | GG                              | AA                | 1946662443               |
| SNP_P3_158760_89079  | NW_004516837.1 | Scaffold1706 | 89079                   | CC                              | TT                | 1946662445               |
| SNP_P3_158761_91142  | NW_004516837.1 | Scaffold1706 | 91142                   | AA                              | TT                | 1946662447               |
| SNP_P3_158762_93799  | NW_004516837.1 | Scaffold1706 | 93799                   | CC                              | TT                | 1946662450               |
| SNP_P3_158765_116350 | NW_004516837.1 | Scaffold1706 | 116350                  | CC                              | GG                | 1946662451               |
| SNP_P3_158766_117517 | NW_004516837.1 | Scaffold1706 | 117517                  | GG                              | CC                | 1946662453               |
| SNP_P3_158767_491    | NW_004516839.1 | Scaffold1708 | 491                     | CC                              | TT                | 1946662455               |
| SNP_P3_158768_533    | NW_004516839.1 | Scaffold1708 | 533                     | AA                              | GG                | 1946662457               |
| SNP_P3_158769_2380   | NW_004516839.1 | Scaffold1708 | 2380                    | CC                              | TT                | 1946662459               |
| SNP_P3_158771_5833   | NW_004516839.1 | Scaffold1708 | 5833                    | CC                              | TT                | 1946662461               |
| SNP_P3_158772_7683   | NW_004516839.1 | Scaffold1708 | 7683                    | AA                              | GG                | 1946662463               |
| SNP_P3_158773_7717   | NW_004516839.1 | Scaffold1708 | 7717                    | GG                              | AA                | 1946662465               |
| SNP_P3_158774_8143   | NW_004516839.1 | Scaffold1708 | 8143                    | GG                              | CC                | 1946662468               |
| SNP_P3_158775_12402  | NW_004516839.1 | Scaffold1708 | 12402                   | AA                              | GG                | 1946662470               |
| SNP_P3_158776_12615  | NW_004516839.1 | Scaffold1708 | 12615                   | TT                              | GG                | 1946662472               |
| SNP_P3_158777_13759  | NW_004516839.1 | Scaffold1708 | 13759                   | AA                              | TT                | 1946662474               |
| SNP_P3_158778_14170  | NW_004516839.1 | Scaffold1708 | 14170                   | CC                              | GG                | 1946662476               |
| SNP_P3_158780_21787  | NW_004516839.1 | Scaffold1708 | 21787                   | AA                              | GG                | 1946662478               |
| SNP_P3_158781_24494  | NW_004516839.1 | Scaffold1708 | 24494                   | GG                              | AA                | 1946662480               |
| SNP_P3_158782_26113  | NW_004516839.1 | Scaffold1708 | 26113                   | GG                              | CC                | 1946662482               |
| SNP_P3_158783_26592  | NW_004516839.1 | Scaffold1708 | 26592                   | AA                              | GG                | 1946662484               |
| SNP_P3_158784_26636  | NW_004516839.1 | Scaffold1708 | 26636                   | TT                              | CC                | 1946662486               |
| SNP_P3_158785_26721  | NW_004516839.1 | Scaffold1708 | 26721                   | AA                              | GG                | 1946662488               |
| SNP_P3_158786_29042  | NW_004516839.1 | Scaffold1708 | 29042                   | GG                              | AA                | 1946662490               |
| SNP_P3_158788_29880  | NW_004516839.1 | Scaffold1708 | 29880                   | GG                              | CC                | 1946662492               |
| SNP_P3_158789_29914  | NW_004516839.1 | Scaffold1708 | 29914                   | CC                              | TT                | 1946662494               |
| SNP_P3_158790_29961  | NW_004516839.1 | Scaffold1708 | 29961                   | CC                              | TT                | 1946662496               |
| SNP_P3_158791_35314  | NW_004516839.1 | Scaffold1708 | 35314                   | GG                              | AA                | 1946662498               |

| SNPs IDs            | Chromosome IDs | Chromosomes  | Physical positions (bp) | CDC Frontier (Reference genome) | (Pusa 256 & HPNB) | NCBI SNPdb Accession IDs |
|---------------------|----------------|--------------|-------------------------|---------------------------------|-------------------|--------------------------|
| SNP_P3_158792_40740 | NW_004516839.1 | Scaffold1708 | 40740                   | TT                              | GG                | 1946662500               |
| SNP_P3_158793_40877 | NW_004516839.1 | Scaffold1708 | 40877                   | AA                              | TT                | 1946662502               |
| SNP_P3_158794_41320 | NW_004516839.1 | Scaffold1708 | 41320                   | CC                              | GG                | 1946662504               |
| SNP_P3_158795_41323 | NW_004516839.1 | Scaffold1708 | 41323                   | GG                              | TT                | 1946662506               |
| SNP_P3_158796_41337 | NW_004516839.1 | Scaffold1708 | 41337                   | AA                              | GG                | 1946662508               |
| SNP_P3_158797_41370 | NW_004516839.1 | Scaffold1708 | 41370                   | CC                              | AA                | 1946662510               |
| SNP_P3_158798_42566 | NW_004516839.1 | Scaffold1708 | 42566                   | TT                              | AA                | 1946662512               |
| SNP_P3_158801_44787 | NW_004516839.1 | Scaffold1708 | 44787                   | AA                              | TT                | 1946662514               |
| SNP_P3_158802_59966 | NW_004516839.1 | Scaffold1708 | 59966                   | GG                              | AA                | 1946662516               |
| SNP_P3_158803_64427 | NW_004516839.1 | Scaffold1708 | 64427                   | CC                              | TT                | 1946662518               |
| SNP_P3_158804_67154 | NW_004516839.1 | Scaffold1708 | 67154                   | TT                              | CC                | 1946662520               |
| SNP_P3_158805_67165 | NW_004516839.1 | Scaffold1708 | 67165                   | CC                              | AA                | 1946662522               |
| SNP_P3_158806_67291 | NW_004516839.1 | Scaffold1708 | 67291                   | GG                              | CC                | 1946662524               |
| SNP_P3_158807_67545 | NW_004516839.1 | Scaffold1708 | 67545                   | AA                              | GG                | 1946662526               |
| SNP_P3_158808_67560 | NW_004516839.1 | Scaffold1708 | 67560                   | AA                              | GG                | 1946662528               |
| SNP_P3_158811_84817 | NW_004516839.1 | Scaffold1708 | 84817                   | CC                              | TT                | 1946662530               |
| SNP_P3_158812_85782 | NW_004516839.1 | Scaffold1708 | 85782                   | AA                              | GG                | 1946662532               |
| SNP_P3_158813_87228 | NW_004516839.1 | Scaffold1708 | 87228                   | GG                              | CC                | 1946662534               |
| SNP_P3_158815_87954 | NW_004516839.1 | Scaffold1708 | 87954                   | GG                              | AA                | 1946662536               |
| SNP_P3_158817_88377 | NW_004516839.1 | Scaffold1708 | 88377                   | TT                              | CC                | 1946662538               |
| SNP_P3_158819_89630 | NW_004516839.1 | Scaffold1708 | 89630                   | CC                              | AA                | 1946662540               |
| SNP_P3_158820_64    | NW_004516840.1 | Scaffold1709 | 64                      | CC                              | AA                | 1946662542               |
| SNP_P3_158821_65    | NW_004516840.1 | Scaffold1709 | 65                      | AA                              | TT                | 1946662544               |
| SNP_P3_158822_81    | NW_004516840.1 | Scaffold1709 | 81                      | TT                              | CC                | 1946662546               |
| SNP_P3_158823_196   | NW_004516840.1 | Scaffold1709 | 196                     | GG                              | AA                | 1946662548               |
| SNP_P3_158824_197   | NW_004516840.1 | Scaffold1709 | 197                     | CC                              | GG                | 1946662550               |
| SNP_P3_158825_202   | NW_004516840.1 | Scaffold1709 | 202                     | GG                              | AA                | 1946662552               |
| SNP_P3_158826_203   | NW_004516840.1 | Scaffold1709 | 203                     | GG                              | TT                | 1946662554               |
| SNP_P3_158827_264   | NW_004516840.1 | Scaffold1709 | 264                     | AA                              | GG                | 1946662556               |
| SNP_P3_158828_403   | NW_004516840.1 | Scaffold1709 | 403                     | AA                              | GG                | 1946662558               |
| SNP_P3_158829_422   | NW_004516840.1 | Scaffold1709 | 422                     | CC                              | AA                | 1946662559               |
| SNP_P3_158830_3889  | NW_004516840.1 | Scaffold1709 | 3889                    | CC                              | TT                | 1946662561               |
| SNP_P3_158831_3895  | NW_004516840.1 | Scaffold1709 | 3895                    | CC                              | AA                | 1946662563               |
| SNP_P3_158832_6411  | NW_004516840.1 | Scaffold1709 | 6411                    | AA                              | GG                | 1946662565               |
| SNP_P3_158833_416   | NW_004516841.1 | Scaffold1710 | 416                     | AA                              | TT                | 1946662567               |
| SNP_P3_158834_616   | NW_004516841.1 | Scaffold1710 | 616                     | TT                              | GG                | 1946662569               |
| SNP_P3_158835_8312  | NW_004516841.1 | Scaffold1710 | 8312                    | AA                              | GG                | 1946662571               |
| SNP_P3_158836_8315  | NW_004516841.1 | Scaffold1710 | 8315                    | TT                              | CC                | 1946662573               |
| SNP_P3_158837_8317  | NW_004516841.1 | Scaffold1710 | 8317                    | TT                              | CC                | 1946662575               |
| SNP_P3_158838_8323  | NW_004516841.1 | Scaffold1710 | 8323                    | AA                              | TT                | 1946662577               |
| SNP_P3_158839_8325  | NW_004516841.1 | Scaffold1710 | 8325                    | GG                              | AA                | 1946662578               |
| SNP_P3_158840_8329  | NW_004516841.1 | Scaffold1710 | 8329                    | AA                              | GG                | 1946662580               |

| SNPs IDs             | Chromosome IDs | Chromosomes  | Physical positions (bp) | CDC Frontier (Reference genome) | (Pusa 256 & HPNB) | NCBI SNPdb Accession IDs |
|----------------------|----------------|--------------|-------------------------|---------------------------------|-------------------|--------------------------|
| SNP_P3_158841_8357   | NW_004516841.1 | Scaffold1710 | 8357                    | GG                              | AA                | 1946662582               |
| SNP_P3_158842_8585   | NW_004516841.1 | Scaffold1710 | 8585                    | AA                              | CC                | 1946662584               |
| SNP_P3_158843_8589   | NW_004516841.1 | Scaffold1710 | 8589                    | TT                              | AA                | 1946662586               |
| SNP_P3_158844_8654   | NW_004516841.1 | Scaffold1710 | 8654                    | CC                              | TT                | 1946662588               |
| SNP_P3_158845_8698   | NW_004516841.1 | Scaffold1710 | 8698                    | GG                              | CC                | 1946662590               |
| SNP_P3_158847_22869  | NW_004516841.1 | Scaffold1710 | 22869                   | TT                              | AA                | 1946662592               |
| SNP_P3_158850_64108  | NW_004516841.1 | Scaffold1710 | 64108                   | TT                              | CC                | 1946662594               |
| SNP_P3_158851_93168  | NW_004516841.1 | Scaffold1710 | 93168                   | TT                              | AA                | 1946662596               |
| SNP_P3_158852_93514  | NW_004516841.1 | Scaffold1710 | 93514                   | AA                              | CC                | 1946662598               |
| SNP_P3_158853_93532  | NW_004516841.1 | Scaffold1710 | 93532                   | AA                              | GG                | 1946662600               |
| SNP_P3_158854_125650 | NW_004516841.1 | Scaffold1710 | 125650                  | TT                              | CC                | 1946662602               |
| SNP_P3_158855_143978 | NW_004516841.1 | Scaffold1710 | 143978                  | CC                              | TT                | 1946662604               |
| SNP_P3_158856_144247 | NW_004516841.1 | Scaffold1710 | 144247                  | TT                              | GG                | 1946662606               |
| SNP_P3_158860_167976 | NW_004516841.1 | Scaffold1710 | 167976                  | AA                              | TT                | 1946662608               |
| SNP_P3_158861_1608   | NW_004516842.1 | Scaffold1711 | 1608                    | TT                              | CC                | 1946662610               |
| SNP_P3_158863_2894   | NW_004516842.1 | Scaffold1711 | 2894                    | GG                              | AA                | 1946662612               |
| SNP_P3_158864_5276   | NW_004516842.1 | Scaffold1711 | 5276                    | TT                              | GG                | 1946662614               |
| SNP_P3_158865_8823   | NW_004516842.1 | Scaffold1711 | 8823                    | CC                              | TT                | 1946662616               |
| SNP_P3_158866_8834   | NW_004516842.1 | Scaffold1711 | 8834                    | TT                              | AA                | 1946662618               |
| SNP_P3_158868_9159   | NW_004516842.1 | Scaffold1711 | 9159                    | CC                              | TT                | 1946662620               |
| SNP_P3_158869_9180   | NW_004516842.1 | Scaffold1711 | 9180                    | GG                              | TT                | 1946662622               |
| SNP_P3_158870_9198   | NW_004516842.1 | Scaffold1711 | 9198                    | TT                              | CC                | 1946662624               |
| SNP_P3_158871_2791   | NW_004516843.1 | Scaffold1715 | 2791                    | AA                              | TT                | 1946662626               |
| SNP_P3_158872_20989  | NW_004516843.1 | Scaffold1715 | 20989                   | GG                              | TT                | 1946662628               |
| SNP_P3_158873_21019  | NW_004516843.1 | Scaffold1715 | 21019                   | TT                              | AA                | 1946662629               |
| SNP_P3_158874_21022  | NW_004516843.1 | Scaffold1715 | 21022                   | GG                              | AA                | 1946662631               |
| SNP_P3_158875_21024  | NW_004516843.1 | Scaffold1715 | 21024                   | AA                              | GG                | 1946662633               |
| SNP_P3_158876_21033  | NW_004516843.1 | Scaffold1715 | 21033                   | CC                              | TT                | 1946662636               |
| SNP_P3_158877_21040  | NW_004516843.1 | Scaffold1715 | 21040                   | GG                              | CC                | 1946662637               |
| SNP_P3_158878_21048  | NW_004516843.1 | Scaffold1715 | 21048                   | TT                              | CC                | 1946662639               |
| SNP_P3_158879_21065  | NW_004516843.1 | Scaffold1715 | 21065                   | CC                              | GG                | 1946662641               |
| SNP_P3_158880_21071  | NW_004516843.1 | Scaffold1715 | 21071                   | AA                              | GG                | 1946662643               |
| SNP_P3_158881_748    | NW_004516845.1 | Scaffold1717 | 748                     | TT                              | AA                | 1946662645               |
| SNP_P3_158882_1117   | NW_004516845.1 | Scaffold1717 | 1117                    | GG                              | AA                | 1946662647               |
| SNP_P3_158883_1188   | NW_004516845.1 | Scaffold1717 | 1188                    | GG                              | CC                | 1946662649               |
| SNP_P3_158884_8719   | NW_004516845.1 | Scaffold1717 | 8719                    | TT                              | AA                | 1946662651               |
| SNP_P3_158885_14235  | NW_004516846.1 | Scaffold1718 | 14235                   | AA                              | GG                | 1946662653               |
| SNP_P3_158886_60473  | NW_004516846.1 | Scaffold1718 | 60473                   | TT                              | CC                | 1946662656               |
| SNP_P3_158887_68016  | NW_004516846.1 | Scaffold1718 | 68016                   | AA                              | GG                | 1946662658               |
| SNP_P3_158888_70772  | NW_004516846.1 | Scaffold1718 | 70772                   | GG                              | AA                | 1946662660               |
| SNP_P3_158889_71058  | NW_004516846.1 | Scaffold1718 | 71058                   | AA                              | TT                | 1946662662               |
| SNP_P3_158890_71077  | NW_004516846.1 | Scaffold1718 | 71077                   | AA                              | TT                | 1946662664               |



| SNPs IDs             | Chromosome IDs | Chromosomes  | Physical positions (bp) | CDC Frontier (Reference genome) | (Pusa 256 & HPNB) | NCBI SNPdb Accession IDs |
|----------------------|----------------|--------------|-------------------------|---------------------------------|-------------------|--------------------------|
| SNP_P3_158891_71089  | NW_004516846.1 | Scaffold1718 | 71089                   | CC                              | TT                | 1946662666               |
| SNP_P3_158892_83087  | NW_004516846.1 | Scaffold1718 | 83087                   | CC                              | TT                | 1946662668               |
| SNP_P3_158893_83098  | NW_004516846.1 | Scaffold1718 | 83098                   | CC                              | TT                | 1946662670               |
| SNP_P3_158894_13655  | NW_004516849.1 | Scaffold1722 | 13655                   | CC                              | AA                | 1946662672               |
| SNP_P3_158896_31728  | NW_004516849.1 | Scaffold1722 | 31728                   | CC                              | TT                | 1946662674               |
| SNP_P3_158897_37801  | NW_004516849.1 | Scaffold1722 | 37801                   | AA                              | GG                | 1946662675               |
| SNP_P3_158898_37811  | NW_004516849.1 | Scaffold1722 | 37811                   | GG                              | AA                | 1946662677               |
| SNP_P3_158899_38133  | NW_004516849.1 | Scaffold1722 | 38133                   | TT                              | CC                | 1946662679               |
| SNP_P3_158900_42599  | NW_004516849.1 | Scaffold1722 | 42599                   | CC                              | TT                | 1946662681               |
| SNP_P3_158901_42602  | NW_004516849.1 | Scaffold1722 | 42602                   | AA                              | GG                | 1946662683               |
| SNP_P3_158902_56104  | NW_004516849.1 | Scaffold1722 | 56104                   | GG                              | AA                | 1946662685               |
| SNP_P3_158903_65999  | NW_004516849.1 | Scaffold1722 | 65999                   | AA                              | CC                | 1946662687               |
| SNP_P3_158904_66019  | NW_004516849.1 | Scaffold1722 | 66019                   | TT                              | GG                | 1946662689               |
| SNP_P3_158905_66075  | NW_004516849.1 | Scaffold1722 | 66075                   | TT                              | GG                | 1946662691               |
| SNP_P3_158906_66182  | NW_004516849.1 | Scaffold1722 | 66182                   | GG                              | CC                | 1946662693               |
| SNP_P3_158908_66341  | NW_004516849.1 | Scaffold1722 | 66341                   | AA                              | GG                | 1946662695               |
| SNP_P3_158909_116938 | NW_004516849.1 | Scaffold1722 | 116938                  | GG                              | AA                | 1946662697               |
| SNP_P3_158912_135590 | NW_004516849.1 | Scaffold1722 | 135590                  | GG                              | AA                | 1946662699               |
| SNP_P3_158913_135675 | NW_004516849.1 | Scaffold1722 | 135675                  | GG                              | AA                | 1946662701               |
| SNP_P3_158914_135682 | NW_004516849.1 | Scaffold1722 | 135682                  | TT                              | CC                | 1946662703               |
| SNP_P3_158915_135727 | NW_004516849.1 | Scaffold1722 | 135727                  | TT                              | CC                | 1946662705               |
| SNP_P3_158916_139054 | NW_004516849.1 | Scaffold1722 | 139054                  | TT                              | CC                | 1946662707               |
| SNP_P3_158917_173953 | NW_004516849.1 | Scaffold1722 | 173953                  | GG                              | TT                | 1946662709               |
| SNP_P3_158918_173999 | NW_004516849.1 | Scaffold1722 | 173999                  | AA                              | GG                | 1946662711               |
| SNP_P3_158919_176623 | NW_004516849.1 | Scaffold1722 | 176623                  | CC                              | TT                | 1946662713               |
| SNP_P3_158920_184366 | NW_004516849.1 | Scaffold1722 | 184366                  | CC                              | TT                | 1946662715               |
| SNP_P3_158921_184376 | NW_004516849.1 | Scaffold1722 | 184376                  | AA                              | TT                | 1946662717               |
| SNP_P3_158922_184587 | NW_004516849.1 | Scaffold1722 | 184587                  | AA                              | GG                | 1946662719               |
| SNP_P3_158923_184611 | NW_004516849.1 | Scaffold1722 | 184611                  | CC                              | AA                | 1946662721               |
| SNP_P3_158924_184626 | NW_004516849.1 | Scaffold1722 | 184626                  | AA                              | GG                | 1946662723               |
| SNP_P3_158925_184654 | NW_004516849.1 | Scaffold1722 | 184654                  | AA                              | GG                | 1946662725               |
| SNP_P3_158926_184665 | NW_004516849.1 | Scaffold1722 | 184665                  | GG                              | AA                | 1946662727               |
| SNP_P3_158927_184755 | NW_004516849.1 | Scaffold1722 | 184755                  | CC                              | TT                | 1946662729               |
| SNP_P3_158928_184770 | NW_004516849.1 | Scaffold1722 | 184770                  | TT                              | CC                | 1946662731               |
| SNP_P3_158929_184773 | NW_004516849.1 | Scaffold1722 | 184773                  | CC                              | TT                | 1946662733               |
| SNP_P3_158930_187229 | NW_004516849.1 | Scaffold1722 | 187229                  | AA                              | GG                | 1946662735               |
| SNP_P3_158931_657    | NW_004516850.1 | Scaffold1723 | 657                     | CC                              | TT                | 1946662737               |
| SNP_P3_158932_796    | NW_004516850.1 | Scaffold1723 | 796                     | GG                              | CC                | 1946662739               |
| SNP_P3_158933_801    | NW_004516850.1 | Scaffold1723 | 801                     | CC                              | TT                | 1946662741               |
| SNP_P3_158935_817    | NW_004516850.1 | Scaffold1723 | 817                     | TT                              | CC                | 1946662745               |
| SNP_P3_158936_869    | NW_004516850.1 | Scaffold1723 | 869                     | CC                              | TT                | 1946662748               |
| SNP_P3_158938_1086   | NW_004516850.1 | Scaffold1723 | 1086                    | TT                              | CC                | 1946662752               |

| SNPs IDs            | Chromosome IDs | Chromosomes  | Physical positions (bp) | CDC Frontier (Reference genome) | (Pusa 256 & HPNB) | NCBI SNPdb Accession IDs |
|---------------------|----------------|--------------|-------------------------|---------------------------------|-------------------|--------------------------|
| SNP_P3_158939_1133  | NW_004516850.1 | Scaffold1723 | 1133                    | AA                              | GG                | 1946662757               |
| SNP_P3_158940_1151  | NW_004516850.1 | Scaffold1723 | 1151                    | AA                              | GG                | 1946662759               |
| SNP_P3_158941_1176  | NW_004516850.1 | Scaffold1723 | 1176                    | TT                              | CC                | 1946662761               |
| SNP_P3_158942_1188  | NW_004516850.1 | Scaffold1723 | 1188                    | AA                              | CC                | 1946662763               |
| SNP_P3_158943_1193  | NW_004516850.1 | Scaffold1723 | 1193                    | GG                              | TT                | 1946662765               |
| SNP_P3_158944_1241  | NW_004516850.1 | Scaffold1723 | 1241                    | CC                              | TT                | 1946662767               |
| SNP_P3_158945_1271  | NW_004516850.1 | Scaffold1723 | 1271                    | GG                              | TT                | 1946662769               |
| SNP_P3_158947_1314  | NW_004516850.1 | Scaffold1723 | 1314                    | GG                              | AA                | 1946662771               |
| SNP_P3_158948_1351  | NW_004516850.1 | Scaffold1723 | 1351                    | TT                              | AA                | 1946662773               |
| SNP_P3_158949_1418  | NW_004516850.1 | Scaffold1723 | 1418                    | TT                              | CC                | 1946662775               |
| SNP_P3_158950_1424  | NW_004516850.1 | Scaffold1723 | 1424                    | CC                              | TT                | 1946662777               |
| SNP_P3_158951_1437  | NW_004516850.1 | Scaffold1723 | 1437                    | CC                              | TT                | 1946662779               |
| SNP_P3_158952_1487  | NW_004516850.1 | Scaffold1723 | 1487                    | AA                              | TT                | 1946662781               |
| SNP_P3_158953_1488  | NW_004516850.1 | Scaffold1723 | 1488                    | CC                              | AA                | 1946662783               |
| SNP_P3_158954_1493  | NW_004516850.1 | Scaffold1723 | 1493                    | AA                              | CC                | 1946662785               |
| SNP_P3_158955_1510  | NW_004516850.1 | Scaffold1723 | 1510                    | AA                              | TT                | 1946662787               |
| SNP_P3_158956_1516  | NW_004516850.1 | Scaffold1723 | 1516                    | GG                              | AA                | 1946662789               |
| SNP_P3_158957_1523  | NW_004516850.1 | Scaffold1723 | 1523                    | AA                              | GG                | 1946662793               |
| SNP_P3_158958_90    | NW_004516851.1 | Scaffold1725 | 90                      | TT                              | GG                | 1946662795               |
| SNP_P3_158959_179   | NW_004516851.1 | Scaffold1725 | 179                     | CC                              | GG                | 1946662797               |
| SNP_P3_158960_488   | NW_004516851.1 | Scaffold1725 | 488                     | AA                              | GG                | 1946662799               |
| SNP_P3_158961_22028 | NW_004516851.1 | Scaffold1725 | 22028                   | AA                              | GG                | 1946662801               |
| SNP_P3_158963_22112 | NW_004516851.1 | Scaffold1725 | 22112                   | TT                              | CC                | 1946662803               |
| SNP_P3_158964_22140 | NW_004516851.1 | Scaffold1725 | 22140                   | TT                              | GG                | 1946662805               |
| SNP_P3_158965_23028 | NW_004516851.1 | Scaffold1725 | 23028                   | TT                              | AA                | 1946662807               |
| SNP_P3_158966_28648 | NW_004516851.1 | Scaffold1725 | 28648                   | AA                              | CC                | 1946662809               |
| SNP_P3_158967_28662 | NW_004516851.1 | Scaffold1725 | 28662                   | AA                              | TT                | 1946662811               |
| SNP_P3_158969_33511 | NW_004516851.1 | Scaffold1725 | 33511                   | AA                              | GG                | 1946662813               |
| SNP_P3_158970_33594 | NW_004516851.1 | Scaffold1725 | 33594                   | GG                              | AA                | 1946662815               |
| SNP_P3_158971_33600 | NW_004516851.1 | Scaffold1725 | 33600                   | GG                              | AA                | 1946662817               |
| SNP_P3_158972_33622 | NW_004516851.1 | Scaffold1725 | 33622                   | AA                              | GG                | 1946662819               |
| SNP_P3_158973_33631 | NW_004516851.1 | Scaffold1725 | 33631                   | AA                              | GG                | 1946662821               |
| SNP_P3_158974_33665 | NW_004516851.1 | Scaffold1725 | 33665                   | AA                              | GG                | 1946662823               |
| SNP_P3_158975_33667 | NW_004516851.1 | Scaffold1725 | 33667                   | AA                              | TT                | 1946662825               |
| SNP_P3_158976_33670 | NW_004516851.1 | Scaffold1725 | 33670                   | AA                              | GG                | 1946662827               |
| SNP_P3_158977_33973 | NW_004516851.1 | Scaffold1725 | 33973                   | TT                              | CC                | 1946662830               |
| SNP_P3_158978_33988 | NW_004516851.1 | Scaffold1725 | 33988                   | TT                              | GG                | 1946662832               |
| SNP_P3_158979_34060 | NW_004516851.1 | Scaffold1725 | 34060                   | TT                              | CC                | 1946662834               |
| SNP_P3_158980_34068 | NW_004516851.1 | Scaffold1725 | 34068                   | AA                              | CC                | 1946662836               |
| SNP_P3_158981_34465 | NW_004516851.1 | Scaffold1725 | 34465                   | TT                              | CC                | 1946662838               |
| SNP_P3_158982_40002 | NW_004516851.1 | Scaffold1725 | 40002                   | AA                              | GG                | 1946662840               |
| SNP_P3_158983_40012 | NW_004516851.1 | Scaffold1725 | 40012                   | TT                              | CC                | 1946662842               |

| SNPs IDs            | Chromosome IDs | Chromosomes  | Physical positions (bp) | CDC Frontier (Reference genome) | (Pusa 256 & HPNB) | NCBI SNPdb Accession IDs |
|---------------------|----------------|--------------|-------------------------|---------------------------------|-------------------|--------------------------|
| SNP_P3_158984_40077 | NW_004516851.1 | Scaffold1725 | 40077                   | TT                              | CC                | 1946662844               |
| SNP_P3_158985_40132 | NW_004516851.1 | Scaffold1725 | 40132                   | TT                              | CC                | 1946662846               |
| SNP_P3_158986_40357 | NW_004516851.1 | Scaffold1725 | 40357                   | GG                              | AA                | 1946662848               |
| SNP_P3_158987_40424 | NW_004516851.1 | Scaffold1725 | 40424                   | TT                              | CC                | 1946662851               |
| SNP_P3_158988_40432 | NW_004516851.1 | Scaffold1725 | 40432                   | AA                              | GG                | 1946662853               |
| SNP_P3_158989_40443 | NW_004516851.1 | Scaffold1725 | 40443                   | AA                              | CC                | 1946662855               |
| SNP_P3_158990_40491 | NW_004516851.1 | Scaffold1725 | 40491                   | TT                              | CC                | 1946662857               |
| SNP_P3_158991_40502 | NW_004516851.1 | Scaffold1725 | 40502                   | AA                              | GG                | 1946662859               |
| SNP_P3_158993_16009 | NW_004516852.1 | Scaffold1726 | 16009                   | TT                              | GG                | 1946662861               |
| SNP_P3_158994_16011 | NW_004516852.1 | Scaffold1726 | 16011                   | AA                              | GG                | 1946662863               |
| SNP_P3_158995_24463 | NW_004516852.1 | Scaffold1726 | 24463                   | GG                              | AA                | 1946662865               |
| SNP_P3_158996_24475 | NW_004516852.1 | Scaffold1726 | 24475                   | AA                              | GG                | 1946662868               |
| SNP_P3_158997_24529 | NW_004516852.1 | Scaffold1726 | 24529                   | TT                              | GG                | 1946662870               |
| SNP_P3_158998_30749 | NW_004516852.1 | Scaffold1726 | 30749                   | GG                              | AA                | 1946662873               |
| SNP_P3_158999_30903 | NW_004516852.1 | Scaffold1726 | 30903                   | CC                              | TT                | 1946662875               |
| SNP_P3_159000_35338 | NW_004516852.1 | Scaffold1726 | 35338                   | AA                              | GG                | 1946662877               |
| SNP_P3_159001_44699 | NW_004516852.1 | Scaffold1726 | 44699                   | GG                              | AA                | 1946662879               |
| SNP_P3_159002_47041 | NW_004516852.1 | Scaffold1726 | 47041                   | TT                              | GG                | 1946662881               |
| SNP_P3_159003_47291 | NW_004516852.1 | Scaffold1726 | 47291                   | CC                              | TT                | 1946662883               |
| SNP_P3_159004_49179 | NW_004516852.1 | Scaffold1726 | 49179                   | AA                              | TT                | 1946662885               |
| SNP_P3_159005_49200 | NW_004516852.1 | Scaffold1726 | 49200                   | AA                              | GG                | 1946662887               |
| SNP_P3_159006_49273 | NW_004516852.1 | Scaffold1726 | 49273                   | CC                              | TT                | 1946662889               |
| SNP_P3_159007_16395 | NW_004516854.1 | Scaffold1728 | 16395                   | GG                              | AA                | 1946662891               |
| SNP_P3_159009_28093 | NW_004516854.1 | Scaffold1728 | 28093                   | GG                              | CC                | 1946662893               |
| SNP_P3_159010_470   | NW_004516855.1 | Scaffold1729 | 470                     | CC                              | GG                | 1946662895               |
| SNP_P3_159011_522   | NW_004516855.1 | Scaffold1729 | 522                     | AA                              | TT                | 1946662897               |
| SNP_P3_159012_779   | NW_004516855.1 | Scaffold1729 | 779                     | TT                              | AA                | 1946662899               |
| SNP_P3_159013_818   | NW_004516855.1 | Scaffold1729 | 818                     | CC                              | TT                | 1946662901               |
| SNP_P3_159014_8518  | NW_004516855.1 | Scaffold1729 | 8518                    | CC                              | AA                | 1946662903               |
| SNP_P3_159015_8557  | NW_004516855.1 | Scaffold1729 | 8557                    | CC                              | TT                | 1946662905               |
| SNP_P3_159016_8574  | NW_004516855.1 | Scaffold1729 | 8574                    | TT                              | GG                | 1946662907               |
| SNP_P3_159017_8586  | NW_004516855.1 | Scaffold1729 | 8586                    | CC                              | TT                | 1946662909               |
| SNP_P3_159018_8968  | NW_004516855.1 | Scaffold1729 | 8968                    | TT                              | CC                | 1946662911               |
| SNP_P3_159019_9055  | NW_004516855.1 | Scaffold1729 | 9055                    | TT                              | CC                | 1946662913               |
| SNP_P3_159020_16161 | NW_004516855.1 | Scaffold1729 | 16161                   | CC                              | TT                | 1946662915               |
| SNP_P3_159021_27503 | NW_004516855.1 | Scaffold1729 | 27503                   | TT                              | GG                | 1946662917               |
| SNP_P3_159022_27505 | NW_004516855.1 | Scaffold1729 | 27505                   | TT                              | GG                | 1946662919               |
| SNP_P3_159023_27517 | NW_004516855.1 | Scaffold1729 | 27517                   | TT                              | CC                | 1946662921               |
| SNP_P3_159024_44316 | NW_004516855.1 | Scaffold1729 | 44316                   | TT                              | CC                | 1946662923               |
| SNP_P3_159025_49953 | NW_004516855.1 | Scaffold1729 | 49953                   | TT                              | GG                | 1946662925               |
| SNP_P3_159026_50030 | NW_004516855.1 | Scaffold1729 | 50030                   | TT                              | CC                | 1946662927               |
| SNP_P3_159027_50032 | NW_004516855.1 | Scaffold1729 | 50032                   | GG                              | TT                | 1946662929               |

| SNPs IDs             | Chromosome IDs | Chromosomes  | Physical positions (bp) | CDC Frontier (Reference genome) | (Pusa 256 & HPNB) | NCBI SNPdb Accession IDs |
|----------------------|----------------|--------------|-------------------------|---------------------------------|-------------------|--------------------------|
| SNP_P3_159028_61497  | NW_004516855.1 | Scaffold1729 | 61497                   | TT                              | CC                | 1946662931               |
| SNP_P3_159029_69487  | NW_004516855.1 | Scaffold1729 | 69487                   | GG                              | AA                | 1946662933               |
| SNP_P3_159030_79849  | NW_004516855.1 | Scaffold1729 | 79849                   | AA                              | GG                | 1946662935               |
| SNP_P3_159031_79972  | NW_004516855.1 | Scaffold1729 | 79972                   | AA                              | CC                | 1946662937               |
| SNP_P3_159032_80019  | NW_004516855.1 | Scaffold1729 | 80019                   | AA                              | CC                | 1946662939               |
| SNP_P3_159033_80056  | NW_004516855.1 | Scaffold1729 | 80056                   | TT                              | GG                | 1946662941               |
| SNP_P3_159034_80209  | NW_004516855.1 | Scaffold1729 | 80209                   | CC                              | TT                | 1946662943               |
| SNP_P3_159035_80278  | NW_004516855.1 | Scaffold1729 | 80278                   | TT                              | CC                | 1946662945               |
| SNP_P3_159036_80324  | NW_004516855.1 | Scaffold1729 | 80324                   | GG                              | CC                | 1946662947               |
| SNP_P3_159037_80332  | NW_004516855.1 | Scaffold1729 | 80332                   | AA                              | GG                | 1946662949               |
| SNP_P3_159038_80374  | NW_004516855.1 | Scaffold1729 | 80374                   | AA                              | GG                | 1946662951               |
| SNP_P3_159039_80390  | NW_004516855.1 | Scaffold1729 | 80390                   | TT                              | CC                | 1946662953               |
| SNP_P3_159040_86090  | NW_004516855.1 | Scaffold1729 | 86090                   | TT                              | CC                | 1946662955               |
| SNP_P3_159041_86481  | NW_004516855.1 | Scaffold1729 | 86481                   | AA                              | GG                | 1946662957               |
| SNP_P3_159043_98574  | NW_004516855.1 | Scaffold1729 | 98574                   | TT                              | CC                | 1946662959               |
| SNP_P3_159044_98616  | NW_004516855.1 | Scaffold1729 | 98616                   | GG                              | CC                | 1946662961               |
| SNP_P3_159045_104745 | NW_004516855.1 | Scaffold1729 | 104745                  | CC                              | TT                | 1946662963               |
| SNP_P3_159046_140244 | NW_004516855.1 | Scaffold1729 | 140244                  | CC                              | GG                | 1946662965               |
| SNP_P3_159047_147197 | NW_004516855.1 | Scaffold1729 | 147197                  | AA                              | GG                | 1946662967               |
| SNP_P3_159048_147408 | NW_004516855.1 | Scaffold1729 | 147408                  | GG                              | AA                | 1946662970               |
| SNP_P3_159049_147518 | NW_004516855.1 | Scaffold1729 | 147518                  | TT                              | GG                | 1946662972               |
| SNP_P3_159050_11463  | NW_004516856.1 | Scaffold1730 | 11463                   | CC                              | TT                | 1946662974               |
| SNP_P3_159051_11482  | NW_004516856.1 | Scaffold1730 | 11482                   | AA                              | GG                | 1946662976               |
| SNP_P3_159052_11626  | NW_004516856.1 | Scaffold1730 | 11626                   | GG                              | CC                | 1946662978               |
| SNP_P3_159054_12188  | NW_004516856.1 | Scaffold1730 | 12188                   | CC                              | TT                | 1946662980               |
| SNP_P3_159055_12319  | NW_004516856.1 | Scaffold1730 | 12319                   | AA                              | TT                | 1946662982               |
| SNP_P3_159057_15169  | NW_004516856.1 | Scaffold1730 | 15169                   | GG                              | AA                | 1946662985               |
| SNP_P3_159058_15487  | NW_004516856.1 | Scaffold1730 | 15487                   | CC                              | TT                | 1946662987               |
| SNP_P3_159059_15496  | NW_004516856.1 | Scaffold1730 | 15496                   | GG                              | TT                | 1946662989               |
| SNP_P3_159060_18183  | NW_004516856.1 | Scaffold1730 | 18183                   | CC                              | TT                | 1946662991               |
| SNP_P3_159061_18937  | NW_004516856.1 | Scaffold1730 | 18937                   | GG                              | AA                | 1946662993               |
| SNP_P3_159063_22261  | NW_004516856.1 | Scaffold1730 | 22261                   | GG                              | AA                | 1946662995               |
| SNP_P3_159064_22369  | NW_004516856.1 | Scaffold1730 | 22369                   | GG                              | TT                | 1946662997               |
| SNP_P3_159065_24540  | NW_004516856.1 | Scaffold1730 | 24540                   | AA                              | CC                | 1946662999               |
| SNP_P3_159066_24768  | NW_004516856.1 | Scaffold1730 | 24768                   | AA                              | TT                | 1946663001               |
| SNP_P3_159067_24947  | NW_004516856.1 | Scaffold1730 | 24947                   | GG                              | AA                | 1946663003               |
| SNP_P3_159068_25173  | NW_004516856.1 | Scaffold1730 | 25173                   | TT                              | AA                | 1946663005               |
| SNP_P3_159070_25708  | NW_004516856.1 | Scaffold1730 | 25708                   | CC                              | TT                | 1946663007               |
| SNP_P3_159071_26122  | NW_004516856.1 | Scaffold1730 | 26122                   | AA                              | GG                | 1946663009               |
| SNP_P3_159072_28567  | NW_004516856.1 | Scaffold1730 | 28567                   | TT                              | CC                | 1946663011               |
| SNP_P3_159073_28590  | NW_004516856.1 | Scaffold1730 | 28590                   | AA                              | TT                | 1946663013               |
| SNP_P3_159074_28648  | NW_004516856.1 | Scaffold1730 | 28648                   | TT                              | CC                | 1946663015               |

| SNPs IDs            | Chromosome IDs | Chromosomes  | Physical positions (bp) | CDC Frontier (Reference genome) | (Pusa 256 & HPNB) | NCBI SNPdb Accession IDs |
|---------------------|----------------|--------------|-------------------------|---------------------------------|-------------------|--------------------------|
| SNP_P3_159075_28768 | NW_004516856.1 | Scaffold1730 | 28768                   | GG                              | AA                | 1946663017               |
| SNP_P3_159076_28806 | NW_004516856.1 | Scaffold1730 | 28806                   | TT                              | GG                | 1946663019               |
| SNP_P3_159077_28828 | NW_004516856.1 | Scaffold1730 | 28828                   | TT                              | AA                | 1946663021               |
| SNP_P3_159078_28830 | NW_004516856.1 | Scaffold1730 | 28830                   | AA                              | CC                | 1946663023               |
| SNP_P3_159079_28838 | NW_004516856.1 | Scaffold1730 | 28838                   | GG                              | AA                | 1946663026               |
| SNP_P3_159080_28842 | NW_004516856.1 | Scaffold1730 | 28842                   | GG                              | AA                | 1946663028               |
| SNP_P3_159081_28890 | NW_004516856.1 | Scaffold1730 | 28890                   | GG                              | TT                | 1946663030               |
| SNP_P3_159082_32114 | NW_004516856.1 | Scaffold1730 | 32114                   | AA                              | GG                | 1946663032               |
| SNP_P3_159083_32256 | NW_004516856.1 | Scaffold1730 | 32256                   | GG                              | AA                | 1946663034               |
| SNP_P3_159084_32368 | NW_004516856.1 | Scaffold1730 | 32368                   | AA                              | TT                | 1946663036               |
| SNP_P3_159085_32450 | NW_004516856.1 | Scaffold1730 | 32450                   | CC                              | TT                | 1946663038               |
| SNP_P3_159086_32451 | NW_004516856.1 | Scaffold1730 | 32451                   | TT                              | AA                | 1946663040               |
| SNP_P3_159087_33213 | NW_004516856.1 | Scaffold1730 | 33213                   | AA                              | GG                | 1946663042               |
| SNP_P3_159088_33343 | NW_004516856.1 | Scaffold1730 | 33343                   | AA                              | TT                | 1946663044               |
| SNP_P3_159089_33367 | NW_004516856.1 | Scaffold1730 | 33367                   | AA                              | TT                | 1946663046               |
| SNP_P3_159090_33533 | NW_004516856.1 | Scaffold1730 | 33533                   | TT                              | CC                | 1946663048               |
| SNP_P3_159091_33548 | NW_004516856.1 | Scaffold1730 | 33548                   | TT                              | CC                | 1946663050               |
| SNP_P3_159092_33690 | NW_004516856.1 | Scaffold1730 | 33690                   | AA                              | GG                | 1946663052               |
| SNP_P3_159093_33737 | NW_004516856.1 | Scaffold1730 | 33737                   | TT                              | CC                | 1946663054               |
| SNP_P3_159094_34022 | NW_004516856.1 | Scaffold1730 | 34022                   | TT                              | CC                | 1946663056               |
| SNP_P3_159095_34037 | NW_004516856.1 | Scaffold1730 | 34037                   | AA                              | GG                | 1946663058               |
| SNP_P3_159096_34148 | NW_004516856.1 | Scaffold1730 | 34148                   | GG                              | TT                | 1946663060               |
| SNP_P3_159097_34787 | NW_004516856.1 | Scaffold1730 | 34787                   | TT                              | CC                | 1946663062               |
| SNP_P3_159098_34794 | NW_004516856.1 | Scaffold1730 | 34794                   | GG                              | AA                | 1946663064               |
| SNP_P3_159099_43356 | NW_004516856.1 | Scaffold1730 | 43356                   | TT                              | GG                | 1946663066               |
| SNP_P3_159100_43496 | NW_004516856.1 | Scaffold1730 | 43496                   | TT                              | AA                | 1946663068               |
| SNP_P3_159101_46200 | NW_004516856.1 | Scaffold1730 | 46200                   | CC                              | GG                | 1946663069               |
| SNP_P3_159102_46652 | NW_004516856.1 | Scaffold1730 | 46652                   | AA                              | GG                | 1946663071               |
| SNP_P3_159103_46690 | NW_004516856.1 | Scaffold1730 | 46690                   | TT                              | AA                | 1946663073               |
| SNP_P3_159104_46731 | NW_004516856.1 | Scaffold1730 | 46731                   | AA                              | CC                | 1946663075               |
| SNP_P3_159105_47030 | NW_004516856.1 | Scaffold1730 | 47030                   | TT                              | CC                | 1946663077               |
| SNP_P3_159106_49583 | NW_004516856.1 | Scaffold1730 | 49583                   | GG                              | TT                | 1946663079               |
| SNP_P3_159107_49584 | NW_004516856.1 | Scaffold1730 | 49584                   | GG                              | AA                | 1946663081               |
| SNP_P3_159108_52537 | NW_004516856.1 | Scaffold1730 | 52537                   | TT                              | GG                | 1946663083               |
| SNP_P3_159109_52576 | NW_004516856.1 | Scaffold1730 | 52576                   | CC                              | TT                | 1946663085               |
| SNP_P3_159110_52667 | NW_004516856.1 | Scaffold1730 | 52667                   | TT                              | AA                | 1946663087               |
| SNP_P3_159111_52717 | NW_004516856.1 | Scaffold1730 | 52717                   | GG                              | TT                | 1946663089               |
| SNP_P3_159112_52786 | NW_004516856.1 | Scaffold1730 | 52786                   | TT                              | AA                | 1946663091               |
| SNP_P3_159113_52807 | NW_004516856.1 | Scaffold1730 | 52807                   | CC                              | TT                | 1946663093               |
| SNP_P3_159114_52851 | NW_004516856.1 | Scaffold1730 | 52851                   | TT                              | GG                | 1946663095               |
| SNP_P3_159115_52872 | NW_004516856.1 | Scaffold1730 | 52872                   | AA                              | GG                | 1946663097               |
| SNP_P3_159116_54069 | NW_004516856.1 | Scaffold1730 | 54069                   | GG                              | AA                | 1946663099               |

| SNPs IDs            | Chromosome IDs | Chromosomes  | Physical positions (bp) | CDC Frontier (Reference genome) | (Pusa 256 & HPNB) | NCBI SNPdb Accession IDs |
|---------------------|----------------|--------------|-------------------------|---------------------------------|-------------------|--------------------------|
| SNP_P3_159117_54242 | NW_004516856.1 | Scaffold1730 | 54242                   | TT                              | CC                | 1946663101               |
| SNP_P3_159118_54445 | NW_004516856.1 | Scaffold1730 | 54445                   | CC                              | TT                | 1946663103               |
| SNP_P3_159119_58792 | NW_004516856.1 | Scaffold1730 | 58792                   | AA                              | CC                | 1946663105               |
| SNP_P3_159120_58794 | NW_004516856.1 | Scaffold1730 | 58794                   | TT                              | GG                | 1946663107               |
| SNP_P3_159121_58819 | NW_004516856.1 | Scaffold1730 | 58819                   | CC                              | TT                | 1946663109               |
| SNP_P3_159122_58868 | NW_004516856.1 | Scaffold1730 | 58868                   | CC                              | TT                | 1946663111               |
| SNP_P3_159123_58882 | NW_004516856.1 | Scaffold1730 | 58882                   | GG                              | CC                | 1946663113               |
| SNP_P3_159124_58896 | NW_004516856.1 | Scaffold1730 | 58896                   | GG                              | TT                | 1946663115               |
| SNP_P3_159125_58914 | NW_004516856.1 | Scaffold1730 | 58914                   | TT                              | CC                | 1946663117               |
| SNP_P3_159126_64920 | NW_004516856.1 | Scaffold1730 | 64920                   | CC                              | AA                | 1946663119               |
| SNP_P3_159127_66877 | NW_004516856.1 | Scaffold1730 | 66877                   | TT                              | CC                | 1946663121               |
| SNP_P3_159128_67953 | NW_004516856.1 | Scaffold1730 | 67953                   | CC                              | AA                | 1946663123               |
| SNP_P3_159129_68688 | NW_004516856.1 | Scaffold1730 | 68688                   | AA                              | GG                | 1946663125               |
| SNP_P3_159130_69094 | NW_004516856.1 | Scaffold1730 | 69094                   | TT                              | CC                | 1946663126               |
| SNP_P3_159131_69275 | NW_004516856.1 | Scaffold1730 | 69275                   | TT                              | CC                | 1946663127               |
| SNP_P3_159132_69564 | NW_004516856.1 | Scaffold1730 | 69564                   | TT                              | CC                | 1946663128               |
| SNP_P3_159133_70395 | NW_004516856.1 | Scaffold1730 | 70395                   | CC                              | TT                | 1946663129               |
| SNP_P3_159134_72035 | NW_004516856.1 | Scaffold1730 | 72035                   | GG                              | CC                | 1946663130               |
| SNP_P3_159135_72236 | NW_004516856.1 | Scaffold1730 | 72236                   | GG                              | AA                | 1946663131               |
| SNP_P3_159136_72238 | NW_004516856.1 | Scaffold1730 | 72238                   | AA                              | GG                | 1946663133               |
| SNP_P3_159137_72242 | NW_004516856.1 | Scaffold1730 | 72242                   | TT                              | CC                | 1946663135               |
| SNP_P3_159138_72268 | NW_004516856.1 | Scaffold1730 | 72268                   | AA                              | GG                | 1946663137               |
| SNP_P3_159139_72683 | NW_004516856.1 | Scaffold1730 | 72683                   | TT                              | CC                | 1946663139               |
| SNP_P3_159140_73457 | NW_004516856.1 | Scaffold1730 | 73457                   | TT                              | CC                | 1946663140               |
| SNP_P3_159141_74525 | NW_004516856.1 | Scaffold1730 | 74525                   | GG                              | TT                | 1946663142               |
| SNP_P3_159142_74564 | NW_004516856.1 | Scaffold1730 | 74564                   | GG                              | AA                | 1946663144               |
| SNP_P3_159143_76498 | NW_004516856.1 | Scaffold1730 | 76498                   | AA                              | CC                | 1946663146               |
| SNP_P3_159144_76710 | NW_004516856.1 | Scaffold1730 | 76710                   | CC                              | GG                | 1946663149               |
| SNP_P3_159145_76788 | NW_004516856.1 | Scaffold1730 | 76788                   | AA                              | CC                | 1946663150               |
| SNP_P3_159147_81884 | NW_004516856.1 | Scaffold1730 | 81884                   | TT                              | GG                | 1946663152               |
| SNP_P3_159148_81934 | NW_004516856.1 | Scaffold1730 | 81934                   | AA                              | CC                | 1946663154               |
| SNP_P3_159149_82221 | NW_004516856.1 | Scaffold1730 | 82221                   | CC                              | AA                | 1946663156               |
| SNP_P3_159150_83015 | NW_004516856.1 | Scaffold1730 | 83015                   | AA                              | GG                | 1946663158               |
| SNP_P3_159152_88241 | NW_004516856.1 | Scaffold1730 | 88241                   | AA                              | GG                | 1946663160               |
| SNP_P3_159153_88578 | NW_004516856.1 | Scaffold1730 | 88578                   | TT                              | CC                | 1946663162               |
| SNP_P3_159154_90474 | NW_004516856.1 | Scaffold1730 | 90474                   | AA                              | TT                | 1946663164               |
| SNP_P3_159155_90669 | NW_004516856.1 | Scaffold1730 | 90669                   | CC                              | TT                | 1946663166               |
| SNP_P3_159156_90800 | NW_004516856.1 | Scaffold1730 | 90800                   | TT                              | CC                | 1946663168               |
| SNP_P3_159157_90949 | NW_004516856.1 | Scaffold1730 | 90949                   | CC                              | AA                | 1946663170               |
| SNP_P3_159158_92008 | NW_004516856.1 | Scaffold1730 | 92008                   | TT                              | CC                | 1946663172               |
| SNP_P3_159159_95545 | NW_004516856.1 | Scaffold1730 | 95545                   | TT                              | GG                | 1946663174               |
| SNP_P3_159160_98680 | NW_004516856.1 | Scaffold1730 | 98680                   | TT                              | CC                | 1946663176               |

| SNPs IDs             | Chromosome IDs | Chromosomes  | Physical positions (bp) | CDC Frontier (Reference genome) | (Pusa 256 & HPNB) | NCBI SNPdb Accession IDs |
|----------------------|----------------|--------------|-------------------------|---------------------------------|-------------------|--------------------------|
| SNP_P3_159161_104171 | NW_004516856.1 | Scaffold1730 | 104171                  | GG                              | AA                | 1946663178               |
| SNP_P3_159162_105931 | NW_004516856.1 | Scaffold1730 | 105931                  | AA                              | GG                | 1946663180               |
| SNP_P3_159163_106010 | NW_004516856.1 | Scaffold1730 | 106010                  | CC                              | TT                | 1946663182               |
| SNP_P3_159164_106169 | NW_004516856.1 | Scaffold1730 | 106169                  | TT                              | CC                | 1946663184               |
| SNP_P3_159165_106172 | NW_004516856.1 | Scaffold1730 | 106172                  | CC                              | TT                | 1946663187               |
| SNP_P3_159166_106272 | NW_004516856.1 | Scaffold1730 | 106272                  | TT                              | CC                | 1946663189               |
| SNP_P3_159167_109372 | NW_004516856.1 | Scaffold1730 | 109372                  | AA                              | GG                | 1946663191               |
| SNP_P3_159168_110485 | NW_004516856.1 | Scaffold1730 | 110485                  | TT                              | CC                | 1946663193               |
| SNP_P3_159169_110804 | NW_004516856.1 | Scaffold1730 | 110804                  | AA                              | CC                | 1946663195               |
| SNP_P3_159170_111139 | NW_004516856.1 | Scaffold1730 | 111139                  | CC                              | TT                | 1946663197               |
| SNP_P3_159171_111319 | NW_004516856.1 | Scaffold1730 | 111319                  | CC                              | TT                | 1946663199               |
| SNP_P3_159172_111850 | NW_004516856.1 | Scaffold1730 | 111850                  | GG                              | TT                | 1946663201               |
| SNP_P3_159173_111859 | NW_004516856.1 | Scaffold1730 | 111859                  | TT                              | CC                | 1946663203               |
| SNP_P3_159174_111890 | NW_004516856.1 | Scaffold1730 | 111890                  | CC                              | TT                | 1946663205               |
| SNP_P3_159175_111918 | NW_004516856.1 | Scaffold1730 | 111918                  | TT                              | CC                | 1946663207               |
| SNP_P3_159176_112418 | NW_004516856.1 | Scaffold1730 | 112418                  | CC                              | TT                | 1946663209               |
| SNP_P3_159177_113538 | NW_004516856.1 | Scaffold1730 | 113538                  | CC                              | AA                | 1946663211               |
| SNP_P3_159178_113612 | NW_004516856.1 | Scaffold1730 | 113612                  | GG                              | CC                | 1946663213               |
| SNP_P3_159179_114603 | NW_004516856.1 | Scaffold1730 | 114603                  | CC                              | TT                | 1946663216               |
| SNP_P3_159180_114621 | NW_004516856.1 | Scaffold1730 | 114621                  | AA                              | GG                | 1946663218               |
| SNP_P3_159181_114645 | NW_004516856.1 | Scaffold1730 | 114645                  | TT                              | CC                | 1946663220               |
| SNP_P3_159182_114659 | NW_004516856.1 | Scaffold1730 | 114659                  | CC                              | AA                | 1946663222               |
| SNP_P3_159183_114666 | NW_004516856.1 | Scaffold1730 | 114666                  | AA                              | GG                | 1946663224               |
| SNP_P3_159184_114723 | NW_004516856.1 | Scaffold1730 | 114723                  | CC                              | AA                | 1946663227               |
| SNP_P3_159185_114730 | NW_004516856.1 | Scaffold1730 | 114730                  | GG                              | AA                | 1946663229               |
| SNP_P3_159186_114941 | NW_004516856.1 | Scaffold1730 | 114941                  | TT                              | CC                | 1946663231               |
| SNP_P3_159187_115639 | NW_004516856.1 | Scaffold1730 | 115639                  | TT                              | CC                | 1946663233               |
| SNP_P3_159188_118319 | NW_004516856.1 | Scaffold1730 | 118319                  | AA                              | CC                | 1946663235               |
| SNP_P3_159189_118362 | NW_004516856.1 | Scaffold1730 | 118362                  | AA                              | GG                | 1946663237               |
| SNP_P3_159190_118419 | NW_004516856.1 | Scaffold1730 | 118419                  | GG                              | TT                | 1946663239               |
| SNP_P3_159192_121929 | NW_004516856.1 | Scaffold1730 | 121929                  | CC                              | AA                | 1946663241               |
| SNP_P3_159193_121965 | NW_004516856.1 | Scaffold1730 | 121965                  | TT                              | AA                | 1946663243               |
| SNP_P3_159194_121969 | NW_004516856.1 | Scaffold1730 | 121969                  | GG                              | CC                | 1946663245               |
| SNP_P3_159195_121982 | NW_004516856.1 | Scaffold1730 | 121982                  | AA                              | GG                | 1946663247               |
| SNP_P3_159196_121985 | NW_004516856.1 | Scaffold1730 | 121985                  | AA                              | GG                | 1946663249               |
| SNP_P3_159197_122106 | NW_004516856.1 | Scaffold1730 | 122106                  | CC                              | TT                | 1946663251               |
| SNP_P3_159198_122352 | NW_004516856.1 | Scaffold1730 | 122352                  | GG                              | AA                | 1946663253               |
| SNP_P3_159199_122373 | NW_004516856.1 | Scaffold1730 | 122373                  | GG                              | TT                | 1946663255               |
| SNP_P3_159200_122528 | NW_004516856.1 | Scaffold1730 | 122528                  | CC                              | GG                | 1946663256               |
| SNP_P3_159201_122548 | NW_004516856.1 | Scaffold1730 | 122548                  | CC                              | GG                | 1946663258               |
| SNP_P3_159202_123671 | NW_004516856.1 | Scaffold1730 | 123671                  | CC                              | GG                | 1946663260               |
| SNP_P3_159203_125705 | NW_004516856.1 | Scaffold1730 | 125705                  | GG                              | TT                | 1946663262               |

| SNPs IDs             | Chromosome IDs | Chromosomes  | Physical positions (bp) | CDC Frontier (Reference genome) | (Pusa 256 & HPNB) | NCBI SNPdb Accession IDs |
|----------------------|----------------|--------------|-------------------------|---------------------------------|-------------------|--------------------------|
| SNP_P3_159204_125949 | NW_004516856.1 | Scaffold1730 | 125949                  | AA                              | TT                | 1946663264               |
| SNP_P3_159205_125953 | NW_004516856.1 | Scaffold1730 | 125953                  | TT                              | GG                | 1946663267               |
| SNP_P3_159206_125960 | NW_004516856.1 | Scaffold1730 | 125960                  | AA                              | GG                | 1946663269               |
| SNP_P3_159207_125962 | NW_004516856.1 | Scaffold1730 | 125962                  | GG                              | TT                | 1946663271               |
| SNP_P3_159208_9829   | NW_004516857.1 | Scaffold1731 | 9829                    | CC                              | TT                | 1946663273               |
| SNP_P3_159209_9909   | NW_004516857.1 | Scaffold1731 | 9909                    | AA                              | GG                | 1946663275               |
| SNP_P3_159210_29066  | NW_004516857.1 | Scaffold1731 | 29066                   | TT                              | AA                | 1946663277               |
| SNP_P3_159211_29090  | NW_004516857.1 | Scaffold1731 | 29090                   | CC                              | TT                | 1946663279               |
| SNP_P3_159213_35682  | NW_004516857.1 | Scaffold1731 | 35682                   | TT                              | CC                | 1946663281               |
| SNP_P3_159214_38795  | NW_004516857.1 | Scaffold1731 | 38795                   | CC                              | TT                | 1946663283               |
| SNP_P3_159215_38803  | NW_004516857.1 | Scaffold1731 | 38803                   | CC                              | TT                | 1946663285               |
| SNP_P3_159216_38811  | NW_004516857.1 | Scaffold1731 | 38811                   | CC                              | TT                | 1946663287               |
| SNP_P3_159217_38819  | NW_004516857.1 | Scaffold1731 | 38819                   | CC                              | TT                | 1946663289               |
| SNP_P3_159218_38827  | NW_004516857.1 | Scaffold1731 | 38827                   | CC                              | TT                | 1946663291               |
| SNP_P3_159219_38835  | NW_004516857.1 | Scaffold1731 | 38835                   | CC                              | TT                | 1946663293               |
| SNP_P3_159221_38910  | NW_004516857.1 | Scaffold1731 | 38910                   | AA                              | CC                | 1946663295               |
| SNP_P3_159222_38974  | NW_004516857.1 | Scaffold1731 | 38974                   | TT                              | AA                | 1946663297               |
| SNP_P3_159223_39828  | NW_004516857.1 | Scaffold1731 | 39828                   | CC                              | TT                | 1946663300               |
| SNP_P3_159225_39917  | NW_004516857.1 | Scaffold1731 | 39917                   | AA                              | GG                | 1946663302               |
| SNP_P3_159226_41767  | NW_004516857.1 | Scaffold1731 | 41767                   | GG                              | TT                | 1946663305               |
| SNP_P3_159227_44362  | NW_004516857.1 | Scaffold1731 | 44362                   | TT                              | AA                | 1946663307               |
| SNP_P3_159228_47385  | NW_004516857.1 | Scaffold1731 | 47385                   | AA                              | GG                | 1946663309               |
| SNP_P3_159229_48501  | NW_004516857.1 | Scaffold1731 | 48501                   | CC                              | TT                | 1946663311               |
| SNP_P3_159231_50013  | NW_004516857.1 | Scaffold1731 | 50013                   | CC                              | TT                | 1946663313               |
| SNP_P3_159232_51758  | NW_004516857.1 | Scaffold1731 | 51758                   | TT                              | CC                | 1946663315               |
| SNP_P3_159233_52597  | NW_004516857.1 | Scaffold1731 | 52597                   | CC                              | AA                | 1946663317               |
| SNP_P3_159235_54079  | NW_004516857.1 | Scaffold1731 | 54079                   | AA                              | GG                | 1946663319               |
| SNP_P3_159236_54357  | NW_004516857.1 | Scaffold1731 | 54357                   | AA                              | GG                | 1946663321               |
| SNP_P3_159237_54370  | NW_004516857.1 | Scaffold1731 | 54370                   | CC                              | TT                | 1946663323               |
| SNP_P3_159238_62720  | NW_004516857.1 | Scaffold1731 | 62720                   | AA                              | GG                | 1946663324               |
| SNP_P3_159239_62723  | NW_004516857.1 | Scaffold1731 | 62723                   | CC                              | TT                | 1946663326               |
| SNP_P3_159240_63731  | NW_004516857.1 | Scaffold1731 | 63731                   | TT                              | CC                | 1946663328               |
| SNP_P3_159241_64455  | NW_004516857.1 | Scaffold1731 | 64455                   | CC                              | AA                | 1946663330               |
| SNP_P3_159242_65266  | NW_004516857.1 | Scaffold1731 | 65266                   | GG                              | AA                | 1946663332               |
| SNP_P3_159243_65269  | NW_004516857.1 | Scaffold1731 | 65269                   | TT                              | AA                | 1946663334               |
| SNP_P3_159244_65367  | NW_004516857.1 | Scaffold1731 | 65367                   | CC                              | TT                | 1946663336               |
| SNP_P3_159245_65438  | NW_004516857.1 | Scaffold1731 | 65438                   | GG                              | TT                | 1946663338               |
| SNP_P3_159247_66198  | NW_004516857.1 | Scaffold1731 | 66198                   | GG                              | AA                | 1946663340               |
| SNP_P3_159248_83855  | NW_004516857.1 | Scaffold1731 | 83855                   | CC                              | TT                | 1946663342               |
| SNP_P3_159250_85402  | NW_004516857.1 | Scaffold1731 | 85402                   | AA                              | GG                | 1946663345               |
| SNP_P3_159251_85936  | NW_004516857.1 | Scaffold1731 | 85936                   | TT                              | CC                | 1946663347               |
| SNP_P3_159253_86713  | NW_004516857.1 | Scaffold1731 | 86713                   | TT                              | AA                | 1946663349               |



| SNPs IDs            | Chromosome IDs | Chromosomes  | Physical positions (bp) | CDC Frontier (Reference genome) | (Pusa 256 & HPNB) | NCBI SNPdb Accession IDs |
|---------------------|----------------|--------------|-------------------------|---------------------------------|-------------------|--------------------------|
| SNP_P3_159254_356   | NW_004516858.1 | Scaffold1734 | 356                     | AA                              | GG                | 1946663351               |
| SNP_P3_159255_377   | NW_004516858.1 | Scaffold1734 | 377                     | GG                              | AA                | 1946663353               |
| SNP_P3_159256_415   | NW_004516858.1 | Scaffold1734 | 415                     | GG                              | AA                | 1946663355               |
| SNP_P3_159257_417   | NW_004516858.1 | Scaffold1734 | 417                     | GG                              | AA                | 1946663357               |
| SNP_P3_159258_437   | NW_004516858.1 | Scaffold1734 | 437                     | TT                              | CC                | 1946663359               |
| SNP_P3_159259_462   | NW_004516858.1 | Scaffold1734 | 462                     | AA                              | TT                | 1946663361               |
| SNP_P3_159260_464   | NW_004516858.1 | Scaffold1734 | 464                     | CC                              | TT                | 1946663363               |
| SNP_P3_159261_827   | NW_004516858.1 | Scaffold1734 | 827                     | GG                              | AA                | 1946663365               |
| SNP_P3_159262_6472  | NW_004516858.1 | Scaffold1734 | 6472                    | TT                              | GG                | 1946663367               |
| SNP_P3_159263_6582  | NW_004516858.1 | Scaffold1734 | 6582                    | TT                              | CC                | 1946663369               |
| SNP_P3_159264_6599  | NW_004516858.1 | Scaffold1734 | 6599                    | TT                              | CC                | 1946663371               |
| SNP_P3_159265_6788  | NW_004516858.1 | Scaffold1734 | 6788                    | AA                              | TT                | 1946663373               |
| SNP_P3_159266_6789  | NW_004516858.1 | Scaffold1734 | 6789                    | CC                              | TT                | 1946663375               |
| SNP_P3_159267_7138  | NW_004516858.1 | Scaffold1734 | 7138                    | CC                              | TT                | 1946663377               |
| SNP_P3_159268_7393  | NW_004516858.1 | Scaffold1734 | 7393                    | GG                              | TT                | 1946663379               |
| SNP_P3_159269_7595  | NW_004516858.1 | Scaffold1734 | 7595                    | AA                              | GG                | 1946663381               |
| SNP_P3_159270_7596  | NW_004516858.1 | Scaffold1734 | 7596                    | TT                              | AA                | 1946663384               |
| SNP_P3_159271_7819  | NW_004516858.1 | Scaffold1734 | 7819                    | CC                              | TT                | 1946663386               |
| SNP_P3_159272_7891  | NW_004516858.1 | Scaffold1734 | 7891                    | CC                              | AA                | 1946663388               |
| SNP_P3_159273_8073  | NW_004516858.1 | Scaffold1734 | 8073                    | AA                              | TT                | 1946663390               |
| SNP_P3_159274_8164  | NW_004516858.1 | Scaffold1734 | 8164                    | AA                              | GG                | 1946663392               |
| SNP_P3_159275_8202  | NW_004516858.1 | Scaffold1734 | 8202                    | GG                              | TT                | 1946663394               |
| SNP_P3_159276_9961  | NW_004516858.1 | Scaffold1734 | 9961                    | AA                              | TT                | 1946663397               |
| SNP_P3_159277_10087 | NW_004516858.1 | Scaffold1734 | 10087                   | TT                              | CC                | 1946663399               |
| SNP_P3_159278_10190 | NW_004516858.1 | Scaffold1734 | 10190                   | GG                              | AA                | 1946663401               |
| SNP_P3_159279_10323 | NW_004516858.1 | Scaffold1734 | 10323                   | GG                              | AA                | 1946663403               |
| SNP_P3_159280_10335 | NW_004516858.1 | Scaffold1734 | 10335                   | AA                              | TT                | 1946663405               |
| SNP_P3_159281_10362 | NW_004516858.1 | Scaffold1734 | 10362                   | TT                              | CC                | 1946663407               |
| SNP_P3_159282_10377 | NW_004516858.1 | Scaffold1734 | 10377                   | GG                              | TT                | 1946663409               |
| SNP_P3_159283_10471 | NW_004516858.1 | Scaffold1734 | 10471                   | TT                              | CC                | 1946663411               |
| SNP_P3_159284_10583 | NW_004516858.1 | Scaffold1734 | 10583                   | GG                              | AA                | 1946663413               |
| SNP_P3_159285_10765 | NW_004516858.1 | Scaffold1734 | 10765                   | AA                              | TT                | 1946663415               |
| SNP_P3_159286_2951  | NW_004516859.1 | Scaffold1736 | 2951                    | TT                              | GG                | 1946663417               |
| SNP_P3_159287_7728  | NW_004516859.1 | Scaffold1736 | 7728                    | TT                              | CC                | 1946663419               |
| SNP_P3_159288_7796  | NW_004516859.1 | Scaffold1736 | 7796                    | TT                              | GG                | 1946663421               |
| SNP_P3_159289_8242  | NW_004516859.1 | Scaffold1736 | 8242                    | GG                              | AA                | 1946663425               |
| SNP_P3_159290_8334  | NW_004516859.1 | Scaffold1736 | 8334                    | AA                              | GG                | 1946663427               |
| SNP_P3_159292_8742  | NW_004516859.1 | Scaffold1736 | 8742                    | TT                              | CC                | 1946663429               |
| SNP_P3_159293_8792  | NW_004516859.1 | Scaffold1736 | 8792                    | GG                              | AA                | 1946663431               |
| SNP_P3_159294_8826  | NW_004516859.1 | Scaffold1736 | 8826                    | GG                              | AA                | 1946663433               |
| SNP_P3_159295_17304 | NW_004516859.1 | Scaffold1736 | 17304                   | TT                              | CC                | 1946663435               |
| SNP_P3_159296_25876 | NW_004516859.1 | Scaffold1736 | 25876                   | TT                              | AA                | 1946663437               |

| SNPs IDs            | Chromosome IDs | Chromosomes  | Physical positions (bp) | CDC Frontier (Reference genome) | (Pusa 256 & HPNB) | NCBI SNPdb Accession IDs |
|---------------------|----------------|--------------|-------------------------|---------------------------------|-------------------|--------------------------|
| SNP_P3_159297_32332 | NW_004516859.1 | Scaffold1736 | 32332                   | GG                              | AA                | 1946663439               |
| SNP_P3_159298_1338  | NW_004516861.1 | Scaffold1739 | 1338                    | AA                              | GG                | 1946663441               |
| SNP_P3_159300_446   | NW_004516862.1 | Scaffold1740 | 446                     | CC                              | TT                | 1946663443               |
| SNP_P3_159301_918   | NW_004516862.1 | Scaffold1740 | 918                     | GG                              | TT                | 1946663445               |
| SNP_P3_159302_929   | NW_004516862.1 | Scaffold1740 | 929                     | TT                              | GG                | 1946663447               |
| SNP_P3_159303_1026  | NW_004516862.1 | Scaffold1740 | 1026                    | GG                              | AA                | 1946663449               |
| SNP_P3_159304_1495  | NW_004516862.1 | Scaffold1740 | 1495                    | GG                              | TT                | 1946663451               |
| SNP_P3_159305_1859  | NW_004516862.1 | Scaffold1740 | 1859                    | TT                              | CC                | 1946663453               |
| SNP_P3_159306_2104  | NW_004516862.1 | Scaffold1740 | 2104                    | CC                              | GG                | 1946663455               |
| SNP_P3_159308_2186  | NW_004516862.1 | Scaffold1740 | 2186                    | GG                              | TT                | 1946663457               |
| SNP_P3_159309_2422  | NW_004516862.1 | Scaffold1740 | 2422                    | GG                              | AA                | 1946663459               |
| SNP_P3_159310_2428  | NW_004516862.1 | Scaffold1740 | 2428                    | TT                              | CC                | 1946663462               |
| SNP_P3_159311_2462  | NW_004516862.1 | Scaffold1740 | 2462                    | GG                              | AA                | 1946663464               |
| SNP_P3_159312_2496  | NW_004516862.1 | Scaffold1740 | 2496                    | CC                              | AA                | 1946663466               |
| SNP_P3_159313_2506  | NW_004516862.1 | Scaffold1740 | 2506                    | GG                              | AA                | 1946663468               |
| SNP_P3_159315_2734  | NW_004516862.1 | Scaffold1740 | 2734                    | GG                              | AA                | 1946663470               |
| SNP_P3_159316_4589  | NW_004516862.1 | Scaffold1740 | 4589                    | TT                              | CC                | 1946663472               |
| SNP_P3_159317_4595  | NW_004516862.1 | Scaffold1740 | 4595                    | AA                              | GG                | 1946663474               |
| SNP_P3_159318_4740  | NW_004516862.1 | Scaffold1740 | 4740                    | GG                              | AA                | 1946663476               |
| SNP_P3_159319_4907  | NW_004516862.1 | Scaffold1740 | 4907                    | CC                              | AA                | 1946663478               |
| SNP_P3_159320_5017  | NW_004516862.1 | Scaffold1740 | 5017                    | GG                              | CC                | 1946663480               |
| SNP_P3_159321_5058  | NW_004516862.1 | Scaffold1740 | 5058                    | CC                              | TT                | 1946663482               |
| SNP_P3_159322_5084  | NW_004516862.1 | Scaffold1740 | 5084                    | GG                              | TT                | 1946663484               |
| SNP_P3_159323_5247  | NW_004516862.1 | Scaffold1740 | 5247                    | CC                              | TT                | 1946663486               |
| SNP_P3_159324_5248  | NW_004516862.1 | Scaffold1740 | 5248                    | GG                              | AA                | 1946663488               |
| SNP_P3_159325_5277  | NW_004516862.1 | Scaffold1740 | 5277                    | GG                              | AA                | 1946663490               |
| SNP_P3_159326_14452 | NW_004516862.1 | Scaffold1740 | 14452                   | AA                              | GG                | 1946663492               |
| SNP_P3_159327_16506 | NW_004516862.1 | Scaffold1740 | 16506                   | TT                              | GG                | 1946663494               |
| SNP_P3_159328_16526 | NW_004516862.1 | Scaffold1740 | 16526                   | TT                              | CC                | 1946663496               |
| SNP_P3_159329_16843 | NW_004516862.1 | Scaffold1740 | 16843                   | AA                              | GG                | 1946663498               |
| SNP_P3_159330_4820  | NW_004516863.1 | Scaffold1742 | 4820                    | GG                              | AA                | 1946663501               |
| SNP_P3_159332_254   | NW_004516866.1 | Scaffold1745 | 254                     | GG                              | CC                | 1946663503               |
| SNP_P3_159333_3635  | NW_004516866.1 | Scaffold1745 | 3635                    | CC                              | TT                | 1946663505               |
| SNP_P3_159334_4908  | NW_004516866.1 | Scaffold1745 | 4908                    | AA                              | GG                | 1946663507               |
| SNP_P3_159335_5023  | NW_004516866.1 | Scaffold1745 | 5023                    | AA                              | CC                | 1946663509               |
| SNP_P3_159336_5063  | NW_004516866.1 | Scaffold1745 | 5063                    | GG                              | AA                | 1946663511               |
| SNP_P3_159337_5069  | NW_004516866.1 | Scaffold1745 | 5069                    | AA                              | GG                | 1946663513               |
| SNP_P3_159338_5228  | NW_004516866.1 | Scaffold1745 | 5228                    | AA                              | GG                | 1946663515               |
| SNP_P3_159339_1800  | NW_004516870.1 | Scaffold1750 | 1800                    | TT                              | CC                | 1946663517               |
| SNP_P3_159341_30345 | NW_004516870.1 | Scaffold1750 | 30345                   | TT                              | CC                | 1946663519               |
| SNP_P3_159342_59718 | NW_004516870.1 | Scaffold1750 | 59718                   | GG                              | AA                | 1946663521               |
| SNP_P3_159343_71046 | NW_004516870.1 | Scaffold1750 | 71046                   | TT                              | AA                | 1946663523               |

| SNPs IDs             | Chromosome IDs | Chromosomes  | Physical positions (bp) | CDC Frontier (Reference genome) | (Pusa 256 & HPNB) | NCBI SNPdb Accession IDs |
|----------------------|----------------|--------------|-------------------------|---------------------------------|-------------------|--------------------------|
| SNP_P3_159344_71736  | NW_004516870.1 | Scaffold1750 | 71736                   | TT                              | CC                | 1946663525               |
| SNP_P3_159345_87482  | NW_004516870.1 | Scaffold1750 | 87482                   | TT                              | AA                | 1946663527               |
| SNP_P3_159346_87485  | NW_004516870.1 | Scaffold1750 | 87485                   | AA                              | GG                | 1946663529               |
| SNP_P3_159347_97601  | NW_004516870.1 | Scaffold1750 | 97601                   | GG                              | AA                | 1946663531               |
| SNP_P3_159348_112940 | NW_004516870.1 | Scaffold1750 | 112940                  | AA                              | GG                | 1946663533               |
| SNP_P3_159349_113141 | NW_004516870.1 | Scaffold1750 | 113141                  | CC                              | TT                | 1946663535               |
| SNP_P3_159350_113258 | NW_004516870.1 | Scaffold1750 | 113258                  | AA                              | GG                | 1946663537               |
| SNP_P3_159352_143011 | NW_004516870.1 | Scaffold1750 | 143011                  | CC                              | AA                | 1946663540               |
| SNP_P3_159353_151670 | NW_004516870.1 | Scaffold1750 | 151670                  | CC                              | TT                | 1946663542               |
| SNP_P3_159354_151751 | NW_004516870.1 | Scaffold1750 | 151751                  | TT                              | CC                | 1946663544               |
| SNP_P3_159355_151810 | NW_004516870.1 | Scaffold1750 | 151810                  | AA                              | GG                | 1946663546               |
| SNP_P3_159356_152168 | NW_004516870.1 | Scaffold1750 | 152168                  | CC                              | AA                | 1946663548               |
| SNP_P3_159357_152202 | NW_004516870.1 | Scaffold1750 | 152202                  | GG                              | TT                | 1946663550               |
| SNP_P3_159358_165191 | NW_004516870.1 | Scaffold1750 | 165191                  | GG                              | AA                | 1946663552               |
| SNP_P3_159359_167133 | NW_004516870.1 | Scaffold1750 | 167133                  | GG                              | AA                | 1946663554               |
| SNP_P3_159360_202281 | NW_004516870.1 | Scaffold1750 | 202281                  | AA                              | TT                | 1946663556               |
| SNP_P3_159361_236063 | NW_004516870.1 | Scaffold1750 | 236063                  | AA                              | CC                | 1946663557               |
| SNP_P3_159362_236652 | NW_004516870.1 | Scaffold1750 | 236652                  | GG                              | AA                | 1946663559               |
| SNP_P3_159363_237017 | NW_004516870.1 | Scaffold1750 | 237017                  | GG                              | AA                | 1946663561               |
| SNP_P3_159364_258882 | NW_004516870.1 | Scaffold1750 | 258882                  | CC                              | TT                | 1946663563               |
| SNP_P3_159365_262474 | NW_004516870.1 | Scaffold1750 | 262474                  | CC                              | GG                | 1946663565               |
| SNP_P3_159366_262507 | NW_004516870.1 | Scaffold1750 | 262507                  | AA                              | CC                | 1946663567               |
| SNP_P3_159367_2900   | NW_004516871.1 | Scaffold1751 | 2900                    | TT                              | AA                | 1946663569               |
| SNP_P3_159368_6165   | NW_004516871.1 | Scaffold1751 | 6165                    | TT                              | AA                | 1946663571               |
| SNP_P3_159369_6177   | NW_004516871.1 | Scaffold1751 | 6177                    | TT                              | AA                | 1946663573               |
| SNP_P3_159370_6226   | NW_004516871.1 | Scaffold1751 | 6226                    | TT                              | AA                | 1946663575               |
| SNP_P3_159371_8733   | NW_004516871.1 | Scaffold1751 | 8733                    | GG                              | CC                | 1946663577               |
| SNP_P3_159372_9041   | NW_004516871.1 | Scaffold1751 | 9041                    | AA                              | GG                | 1946663579               |
| SNP_P3_159373_9105   | NW_004516871.1 | Scaffold1751 | 9105                    | TT                              | AA                | 1946663581               |
| SNP_P3_159374_11431  | NW_004516871.1 | Scaffold1751 | 11431                   | CC                              | TT                | 1946663583               |
| SNP_P3_159375_11432  | NW_004516871.1 | Scaffold1751 | 11432                   | AA                              | GG                | 1946663585               |
| SNP_P3_159376_11471  | NW_004516871.1 | Scaffold1751 | 11471                   | AA                              | CC                | 1946663587               |
| SNP_P3_159377_11670  | NW_004516871.1 | Scaffold1751 | 11670                   | AA                              | CC                | 1946663589               |
| SNP_P3_159378_11764  | NW_004516871.1 | Scaffold1751 | 11764                   | AA                              | GG                | 1946663591               |
| SNP_P3_159379_14860  | NW_004516871.1 | Scaffold1751 | 14860                   | CC                              | AA                | 1946663593               |
| SNP_P3_159381_15458  | NW_004516871.1 | Scaffold1751 | 15458                   | TT                              | CC                | 1946663595               |
| SNP_P3_159382_15633  | NW_004516871.1 | Scaffold1751 | 15633                   | AA                              | CC                | 1946663597               |
| SNP_P3_159383_15689  | NW_004516871.1 | Scaffold1751 | 15689                   | CC                              | AA                | 1946663599               |
| SNP_P3_159384_17332  | NW_004516871.1 | Scaffold1751 | 17332                   | GG                              | AA                | 1946663601               |
| SNP_P3_159385_19407  | NW_004516871.1 | Scaffold1751 | 19407                   | GG                              | TT                | 1946663603               |
| SNP_P3_159386_19411  | NW_004516871.1 | Scaffold1751 | 19411                   | CC                              | TT                | 1946663605               |
| SNP_P3_159388_19431  | NW_004516871.1 | Scaffold1751 | 19431                   | AA                              | GG                | 1946663606               |

| SNPs IDs            | Chromosome IDs | Chromosomes  | Physical positions (bp) | CDC Frontier (Reference genome) | (Pusa 256 & HPNB) | NCBI SNPdb Accession IDs |
|---------------------|----------------|--------------|-------------------------|---------------------------------|-------------------|--------------------------|
| SNP_P3_159389_19455 | NW_004516871.1 | Scaffold1751 | 19455                   | GG                              | AA                | 1946663608               |
| SNP_P3_159390_19460 | NW_004516871.1 | Scaffold1751 | 19460                   | AA                              | GG                | 1946663610               |
| SNP_P3_159391_34131 | NW_004516871.1 | Scaffold1751 | 34131                   | AA                              | GG                | 1946663612               |
| SNP_P3_159392_34132 | NW_004516871.1 | Scaffold1751 | 34132                   | TT                              | GG                | 1946663614               |
| SNP_P3_159393_34139 | NW_004516871.1 | Scaffold1751 | 34139                   | CC                              | AA                | 1946663616               |
| SNP_P3_159394_34143 | NW_004516871.1 | Scaffold1751 | 34143                   | GG                              | AA                | 1946663618               |
| SNP_P3_159395_34144 | NW_004516871.1 | Scaffold1751 | 34144                   | GG                              | TT                | 1946663620               |
| SNP_P3_159396_34149 | NW_004516871.1 | Scaffold1751 | 34149                   | AA                              | GG                | 1946663622               |
| SNP_P3_159397_34156 | NW_004516871.1 | Scaffold1751 | 34156                   | GG                              | AA                | 1946663624               |
| SNP_P3_159398_38362 | NW_004516871.1 | Scaffold1751 | 38362                   | AA                              | TT                | 1946663626               |
| SNP_P3_159399_40854 | NW_004516871.1 | Scaffold1751 | 40854                   | CC                              | TT                | 1946663628               |
| SNP_P3_159400_41281 | NW_004516871.1 | Scaffold1751 | 41281                   | AA                              | TT                | 1946663630               |
| SNP_P3_159401_43600 | NW_004516871.1 | Scaffold1751 | 43600                   | AA                              | TT                | 1946663632               |
| SNP_P3_159402_44788 | NW_004516871.1 | Scaffold1751 | 44788                   | CC                              | GG                | 1946663634               |
| SNP_P3_159403_54189 | NW_004516871.1 | Scaffold1751 | 54189                   | GG                              | AA                | 1946663636               |
| SNP_P3_159404_63359 | NW_004516871.1 | Scaffold1751 | 63359                   | AA                              | TT                | 1946663637               |
| SNP_P3_159405_63373 | NW_004516871.1 | Scaffold1751 | 63373                   | GG                              | AA                | 1946663639               |
| SNP_P3_159406_63376 | NW_004516871.1 | Scaffold1751 | 63376                   | TT                              | GG                | 1946663641               |
| SNP_P3_159407_63441 | NW_004516871.1 | Scaffold1751 | 63441                   | TT                              | CC                | 1946663643               |
| SNP_P3_159408_63476 | NW_004516871.1 | Scaffold1751 | 63476                   | GG                              | AA                | 1946663645               |
| SNP_P3_159409_63487 | NW_004516871.1 | Scaffold1751 | 63487                   | CC                              | TT                | 1946663647               |
| SNP_P3_159410_63491 | NW_004516871.1 | Scaffold1751 | 63491                   | AA                              | GG                | 1946663649               |
| SNP_P3_159411_63532 | NW_004516871.1 | Scaffold1751 | 63532                   | AA                              | TT                | 1946663651               |
| SNP_P3_159412_63737 | NW_004516871.1 | Scaffold1751 | 63737                   | GG                              | AA                | 1946663653               |
| SNP_P3_159413_63748 | NW_004516871.1 | Scaffold1751 | 63748                   | CC                              | TT                | 1946663655               |
| SNP_P3_159414_65096 | NW_004516871.1 | Scaffold1751 | 65096                   | TT                              | CC                | 1946663657               |
| SNP_P3_159415_65302 | NW_004516871.1 | Scaffold1751 | 65302                   | GG                              | AA                | 1946663659               |
| SNP_P3_159416_65314 | NW_004516871.1 | Scaffold1751 | 65314                   | AA                              | TT                | 1946663661               |
| SNP_P3_159417_65323 | NW_004516871.1 | Scaffold1751 | 65323                   | CC                              | TT                | 1946663663               |
| SNP_P3_159418_65332 | NW_004516871.1 | Scaffold1751 | 65332                   | TT                              | CC                | 1946663665               |
| SNP_P3_159419_65334 | NW_004516871.1 | Scaffold1751 | 65334                   | AA                              | GG                | 1946663668               |
| SNP_P3_159420_65338 | NW_004516871.1 | Scaffold1751 | 65338                   | TT                              | CC                | 1946663670               |
| SNP_P3_159421_65356 | NW_004516871.1 | Scaffold1751 | 65356                   | GG                              | AA                | 1946663672               |
| SNP_P3_159422_68955 | NW_004516871.1 | Scaffold1751 | 68955                   | TT                              | CC                | 1946663674               |
| SNP_P3_159424_68958 | NW_004516871.1 | Scaffold1751 | 68958                   | CC                              | TT                | 1946663676               |
| SNP_P3_159425_68962 | NW_004516871.1 | Scaffold1751 | 68962                   | CC                              | TT                | 1946663678               |
| SNP_P3_159426_68991 | NW_004516871.1 | Scaffold1751 | 68991                   | GG                              | AA                | 1946663680               |
| SNP_P3_159427_69036 | NW_004516871.1 | Scaffold1751 | 69036                   | AA                              | GG                | 1946663682               |
| SNP_P3_159428_69103 | NW_004516871.1 | Scaffold1751 | 69103                   | AA                              | GG                | 1946663684               |
| SNP_P3_159429_69123 | NW_004516871.1 | Scaffold1751 | 69123                   | TT                              | CC                | 1946663686               |
| SNP_P3_159430_69127 | NW_004516871.1 | Scaffold1751 | 69127                   | CC                              | AA                | 1946663688               |
| SNP_P3_159431_69160 | NW_004516871.1 | Scaffold1751 | 69160                   | CC                              | TT                | 1946663690               |

| SNPs IDs             | Chromosome IDs | Chromosomes  | Physical positions (bp) | CDC Frontier (Reference genome) | (Pusa 256 & HPNB) | NCBI SNPdb Accession IDs |
|----------------------|----------------|--------------|-------------------------|---------------------------------|-------------------|--------------------------|
| SNP_P3_159432_69514  | NW_004516871.1 | Scaffold1751 | 69514                   | TT                              | GG                | 1946663692               |
| SNP_P3_159433_69537  | NW_004516871.1 | Scaffold1751 | 69537                   | GG                              | TT                | 1946663694               |
| SNP_P3_159434_73398  | NW_004516871.1 | Scaffold1751 | 73398                   | AA                              | TT                | 1946663696               |
| SNP_P3_159435_75493  | NW_004516871.1 | Scaffold1751 | 75493                   | GG                              | TT                | 1946663698               |
| SNP_P3_159436_75503  | NW_004516871.1 | Scaffold1751 | 75503                   | AA                              | TT                | 1946663700               |
| SNP_P3_159437_75882  | NW_004516871.1 | Scaffold1751 | 75882                   | GG                              | AA                | 1946663703               |
| SNP_P3_159438_75898  | NW_004516871.1 | Scaffold1751 | 75898                   | AA                              | CC                | 1946663705               |
| SNP_P3_159439_76222  | NW_004516871.1 | Scaffold1751 | 76222                   | GG                              | CC                | 1946663707               |
| SNP_P3_159440_76234  | NW_004516871.1 | Scaffold1751 | 76234                   | AA                              | GG                | 1946663709               |
| SNP_P3_159441_80052  | NW_004516871.1 | Scaffold1751 | 80052                   | CC                              | TT                | 1946663711               |
| SNP_P3_159442_80063  | NW_004516871.1 | Scaffold1751 | 80063                   | TT                              | CC                | 1946663713               |
| SNP_P3_159443_80403  | NW_004516871.1 | Scaffold1751 | 80403                   | AA                              | GG                | 1946663715               |
| SNP_P3_159444_80423  | NW_004516871.1 | Scaffold1751 | 80423                   | GG                              | TT                | 1946663717               |
| SNP_P3_159445_80427  | NW_004516871.1 | Scaffold1751 | 80427                   | CC                              | AA                | 1946663719               |
| SNP_P3_159446_80445  | NW_004516871.1 | Scaffold1751 | 80445                   | AA                              | GG                | 1946663721               |
| SNP_P3_159447_80575  | NW_004516871.1 | Scaffold1751 | 80575                   | AA                              | GG                | 1946663723               |
| SNP_P3_159448_88312  | NW_004516871.1 | Scaffold1751 | 88312                   | GG                              | TT                | 1946663725               |
| SNP_P3_159449_91126  | NW_004516871.1 | Scaffold1751 | 91126                   | AA                              | GG                | 1946663727               |
| SNP_P3_159450_96016  | NW_004516871.1 | Scaffold1751 | 96016                   | CC                              | TT                | 1946663729               |
| SNP_P3_159451_96025  | NW_004516871.1 | Scaffold1751 | 96025                   | TT                              | GG                | 1946663730               |
| SNP_P3_159452_96028  | NW_004516871.1 | Scaffold1751 | 96028                   | AA                              | GG                | 1946663732               |
| SNP_P3_159454_110975 | NW_004516871.1 | Scaffold1751 | 110975                  | CC                              | AA                | 1946663734               |
| SNP_P3_159456_113352 | NW_004516871.1 | Scaffold1751 | 113352                  | GG                              | AA                | 1946663736               |
| SNP_P3_159457_115046 | NW_004516871.1 | Scaffold1751 | 115046                  | CC                              | GG                | 1946663739               |
| SNP_P3_159458_115049 | NW_004516871.1 | Scaffold1751 | 115049                  | AA                              | CC                | 1946663741               |
| SNP_P3_159459_117599 | NW_004516871.1 | Scaffold1751 | 117599                  | CC                              | AA                | 1946663744               |
| SNP_P3_159460_127615 | NW_004516871.1 | Scaffold1751 | 127615                  | AA                              | CC                | 1946663746               |
| SNP_P3_159461_132960 | NW_004516871.1 | Scaffold1751 | 132960                  | TT                              | AA                | 1946663748               |
| SNP_P3_159462_133975 | NW_004516871.1 | Scaffold1751 | 133975                  | CC                              | TT                | 1946663750               |
| SNP_P3_159463_135246 | NW_004516871.1 | Scaffold1751 | 135246                  | CC                              | AA                | 1946663752               |
| SNP_P3_159465_135940 | NW_004516871.1 | Scaffold1751 | 135940                  | TT                              | CC                | 1946663754               |
| SNP_P3_159466_136334 | NW_004516871.1 | Scaffold1751 | 136334                  | GG                              | CC                | 1946663756               |
| SNP_P3_159467_141394 | NW_004516871.1 | Scaffold1751 | 141394                  | CC                              | TT                | 1946663758               |
| SNP_P3_159468_141395 | NW_004516871.1 | Scaffold1751 | 141395                  | AA                              | GG                | 1946663759               |
| SNP_P3_159469_141404 | NW_004516871.1 | Scaffold1751 | 141404                  | AA                              | TT                | 1946663761               |
| SNP_P3_159470_141415 | NW_004516871.1 | Scaffold1751 | 141415                  | AA                              | TT                | 1946663763               |
| SNP_P3_159471_144109 | NW_004516871.1 | Scaffold1751 | 144109                  | CC                              | GG                | 1946663765               |
| SNP_P3_159472_144140 | NW_004516871.1 | Scaffold1751 | 144140                  | GG                              | CC                | 1946663767               |
| SNP_P3_159473_144150 | NW_004516871.1 | Scaffold1751 | 144150                  | CC                              | AA                | 1946663769               |
| SNP_P3_159474_144151 | NW_004516871.1 | Scaffold1751 | 144151                  | AA                              | CC                | 1946663771               |
| SNP_P3_159475_144181 | NW_004516871.1 | Scaffold1751 | 144181                  | AA                              | GG                | 1946663773               |
| SNP_P3_159476_144186 | NW_004516871.1 | Scaffold1751 | 144186                  | GG                              | TT                | 1946663775               |

| SNPs IDs             | Chromosome IDs | Chromosomes  | Physical positions (bp) | CDC Frontier (Reference genome) | (Pusa 256 & HPNB) | NCBI SNPdb Accession IDs |
|----------------------|----------------|--------------|-------------------------|---------------------------------|-------------------|--------------------------|
| SNP_P3_159477_144228 | NW_004516871.1 | Scaffold1751 | 144228                  | GG                              | CC                | 1946663777               |
| SNP_P3_159478_144320 | NW_004516871.1 | Scaffold1751 | 144320                  | TT                              | GG                | 1946663779               |
| SNP_P3_159479_144322 | NW_004516871.1 | Scaffold1751 | 144322                  | CC                              | GG                | 1946663782               |
| SNP_P3_159480_144328 | NW_004516871.1 | Scaffold1751 | 144328                  | AA                              | CC                | 1946663784               |
| SNP_P3_159481_144337 | NW_004516871.1 | Scaffold1751 | 144337                  | CC                              | TT                | 1946663786               |
| SNP_P3_159482_144481 | NW_004516871.1 | Scaffold1751 | 144481                  | GG                              | AA                | 1946663788               |
| SNP_P3_159483_147212 | NW_004516871.1 | Scaffold1751 | 147212                  | AA                              | CC                | 1946663790               |
| SNP_P3_159484_150965 | NW_004516871.1 | Scaffold1751 | 150965                  | AA                              | GG                | 1946663792               |
| SNP_P3_159485_159199 | NW_004516871.1 | Scaffold1751 | 159199                  | GG                              | TT                | 1946663794               |
| SNP_P3_159486_159208 | NW_004516871.1 | Scaffold1751 | 159208                  | GG                              | TT                | 1946663796               |
| SNP_P3_159487_159217 | NW_004516871.1 | Scaffold1751 | 159217                  | AA                              | TT                | 1946663798               |
| SNP_P3_159488_159227 | NW_004516871.1 | Scaffold1751 | 159227                  | GG                              | AA                | 1946663800               |
| SNP_P3_159489_159608 | NW_004516871.1 | Scaffold1751 | 159608                  | AA                              | GG                | 1946663802               |
| SNP_P3_159490_159617 | NW_004516871.1 | Scaffold1751 | 159617                  | CC                              | TT                | 1946663804               |
| SNP_P3_159491_163417 | NW_004516871.1 | Scaffold1751 | 163417                  | TT                              | AA                | 1946663806               |
| SNP_P3_159492_175890 | NW_004516871.1 | Scaffold1751 | 175890                  | AA                              | CC                | 1946663808               |
| SNP_P3_159493_175940 | NW_004516871.1 | Scaffold1751 | 175940                  | AA                              | GG                | 1946663810               |
| SNP_P3_159494_175960 | NW_004516871.1 | Scaffold1751 | 175960                  | AA                              | GG                | 1946663812               |
| SNP_P3_159495_175961 | NW_004516871.1 | Scaffold1751 | 175961                  | GG                              | AA                | 1946663814               |
| SNP_P3_159496_176350 | NW_004516871.1 | Scaffold1751 | 176350                  | AA                              | TT                | 1946663816               |
| SNP_P3_159498_180699 | NW_004516871.1 | Scaffold1751 | 180699                  | CC                              | TT                | 1946663818               |
| SNP_P3_159499_181033 | NW_004516871.1 | Scaffold1751 | 181033                  | AA                              | TT                | 1946663820               |
| SNP_P3_159500_193928 | NW_004516871.1 | Scaffold1751 | 193928                  | GG                              | AA                | 1946663824               |
| SNP_P3_159501_194210 | NW_004516871.1 | Scaffold1751 | 194210                  | AA                              | GG                | 1946663826               |
| SNP_P3_159502_194284 | NW_004516871.1 | Scaffold1751 | 194284                  | CC                              | TT                | 1946663828               |
| SNP_P3_159503_194778 | NW_004516871.1 | Scaffold1751 | 194778                  | TT                              | AA                | 1946663830               |
| SNP_P3_159504_195383 | NW_004516871.1 | Scaffold1751 | 195383                  | GG                              | AA                | 1946663832               |
| SNP_P3_159505_195701 | NW_004516871.1 | Scaffold1751 | 195701                  | TT                              | AA                | 1946663834               |
| SNP_P3_159506_201478 | NW_004516871.1 | Scaffold1751 | 201478                  | CC                              | TT                | 1946663836               |
| SNP_P3_159507_214135 | NW_004516871.1 | Scaffold1751 | 214135                  | TT                              | GG                | 1946663838               |
| SNP_P3_159508_252577 | NW_004516871.1 | Scaffold1751 | 252577                  | AA                              | GG                | 1946663840               |
| SNP_P3_159509_257678 | NW_004516871.1 | Scaffold1751 | 257678                  | AA                              | GG                | 1946663842               |
| SNP_P3_159510_258381 | NW_004516871.1 | Scaffold1751 | 258381                  | AA                              | TT                | 1946663844               |
| SNP_P3_159511_308939 | NW_004516871.1 | Scaffold1751 | 308939                  | AA                              | GG                | 1946663846               |
| SNP_P3_159512_316880 | NW_004516871.1 | Scaffold1751 | 316880                  | GG                              | AA                | 1946663848               |
| SNP_P3_159513_346699 | NW_004516871.1 | Scaffold1751 | 346699                  | TT                              | CC                | 1946663850               |
| SNP_P3_159514_349443 | NW_004516871.1 | Scaffold1751 | 349443                  | GG                              | AA                | 1946663852               |
| SNP_P3_159515_361979 | NW_004516871.1 | Scaffold1751 | 361979                  | TT                              | GG                | 1946663854               |
| SNP_P3_159516_361992 | NW_004516871.1 | Scaffold1751 | 361992                  | AA                              | CC                | 1946663856               |
| SNP_P3_159517_362158 | NW_004516871.1 | Scaffold1751 | 362158                  | AA                              | GG                | 1946663858               |
| SNP_P3_159518_362167 | NW_004516871.1 | Scaffold1751 | 362167                  | AA                              | TT                | 1946663861               |
| SNP_P3_159519_380772 | NW_004516871.1 | Scaffold1751 | 380772                  | TT                              | CC                | 1946663863               |

| SNPs IDs             | Chromosome IDs | Chromosomes  | Physical positions (bp) | CDC Frontier (Reference genome) | (Pusa 256 & HPNB) | NCBI SNPdb Accession IDs |
|----------------------|----------------|--------------|-------------------------|---------------------------------|-------------------|--------------------------|
| SNP_P3_159520_381808 | NW_004516871.1 | Scaffold1751 | 381808                  | CC                              | GG                | 1946663865               |
| SNP_P3_159521_390500 | NW_004516871.1 | Scaffold1751 | 390500                  | AA                              | GG                | 1946663867               |
| SNP_P3_159522_390504 | NW_004516871.1 | Scaffold1751 | 390504                  | GG                              | AA                | 1946663869               |
| SNP_P3_159523_390510 | NW_004516871.1 | Scaffold1751 | 390510                  | AA                              | GG                | 1946663871               |
| SNP_P3_159524_390831 | NW_004516871.1 | Scaffold1751 | 390831                  | CC                              | AA                | 1946663873               |
| SNP_P3_159526_405411 | NW_004516871.1 | Scaffold1751 | 405411                  | AA                              | TT                | 1946663875               |
| SNP_P3_159527_423682 | NW_004516871.1 | Scaffold1751 | 423682                  | CC                              | TT                | 1946663877               |
| SNP_P3_159528_423736 | NW_004516871.1 | Scaffold1751 | 423736                  | TT                              | CC                | 1946663879               |
| SNP_P3_159529_425160 | NW_004516871.1 | Scaffold1751 | 425160                  | TT                              | CC                | 1946663881               |
| SNP_P3_159530_426264 | NW_004516871.1 | Scaffold1751 | 426264                  | AA                              | GG                | 1946663883               |
| SNP_P3_159531_426293 | NW_004516871.1 | Scaffold1751 | 426293                  | GG                              | TT                | 1946663885               |
| SNP_P3_159532_448683 | NW_004516871.1 | Scaffold1751 | 448683                  | GG                              | AA                | 1946663887               |
| SNP_P3_159533_448976 | NW_004516871.1 | Scaffold1751 | 448976                  | AA                              | GG                | 1946663889               |
| SNP_P3_159534_448991 | NW_004516871.1 | Scaffold1751 | 448991                  | GG                              | AA                | 1946663891               |
| SNP_P3_159535_449013 | NW_004516871.1 | Scaffold1751 | 449013                  | AA                              | TT                | 1946663893               |
| SNP_P3_159536_449089 | NW_004516871.1 | Scaffold1751 | 449089                  | CC                              | TT                | 1946663895               |
| SNP_P3_159541_495845 | NW_004516871.1 | Scaffold1751 | 495845                  | GG                              | AA                | 1946663897               |
| SNP_P3_159542_495848 | NW_004516871.1 | Scaffold1751 | 495848                  | GG                              | AA                | 1946663900               |
| SNP_P3_159543_497134 | NW_004516871.1 | Scaffold1751 | 497134                  | CC                              | TT                | 1946663902               |
| SNP_P3_159544_497318 | NW_004516871.1 | Scaffold1751 | 497318                  | TT                              | CC                | 1946663904               |
| SNP_P3_159545_497392 | NW_004516871.1 | Scaffold1751 | 497392                  | TT                              | GG                | 1946663906               |
| SNP_P3_159546_530680 | NW_004516871.1 | Scaffold1751 | 530680                  | TT                              | CC                | 1946663908               |
| SNP_P3_159547_547001 | NW_004516871.1 | Scaffold1751 | 547001                  | GG                              | CC                | 1946663910               |
| SNP_P3_159549_572884 | NW_004516871.1 | Scaffold1751 | 572884                  | CC                              | TT                | 1946663912               |
| SNP_P3_159550_583992 | NW_004516871.1 | Scaffold1751 | 583992                  | GG                              | TT                | 1946663914               |
| SNP_P3_159551_596900 | NW_004516871.1 | Scaffold1751 | 596900                  | TT                              | CC                | 1946663916               |
| SNP_P3_159552_608337 | NW_004516871.1 | Scaffold1751 | 608337                  | AA                              | GG                | 1946663918               |
| SNP_P3_159553_608365 | NW_004516871.1 | Scaffold1751 | 608365                  | AA                              | GG                | 1946663920               |
| SNP_P3_159554_624296 | NW_004516871.1 | Scaffold1751 | 624296                  | GG                              | CC                | 1946663922               |
| SNP_P3_159555_624670 | NW_004516871.1 | Scaffold1751 | 624670                  | CC                              | TT                | 1946663923               |
| SNP_P3_159556_624820 | NW_004516871.1 | Scaffold1751 | 624820                  | TT                              | CC                | 1946663926               |
| SNP_P3_159557_631374 | NW_004516871.1 | Scaffold1751 | 631374                  | TT                              | CC                | 1946663928               |
| SNP_P3_159558_631505 | NW_004516871.1 | Scaffold1751 | 631505                  | AA                              | GG                | 1946663930               |
| SNP_P3_159559_631894 | NW_004516871.1 | Scaffold1751 | 631894                  | TT                              | AA                | 1946663931               |
| SNP_P3_159560_631982 | NW_004516871.1 | Scaffold1751 | 631982                  | TT                              | AA                | 1946663933               |
| SNP_P3_159561_632104 | NW_004516871.1 | Scaffold1751 | 632104                  | GG                              | AA                | 1946663935               |
| SNP_P3_159562_632356 | NW_004516871.1 | Scaffold1751 | 632356                  | TT                              | CC                | 1946663937               |
| SNP_P3_159563_632367 | NW_004516871.1 | Scaffold1751 | 632367                  | AA                              | TT                | 1946663939               |
| SNP_P3_159564_632720 | NW_004516871.1 | Scaffold1751 | 632720                  | GG                              | AA                | 1946663942               |
| SNP_P3_159565_362    | NW_004516872.1 | Scaffold1752 | 362                     | AA                              | TT                | 1946663944               |
| SNP_P3_159566_396    | NW_004516872.1 | Scaffold1752 | 396                     | GG                              | CC                | 1946663946               |
| SNP_P3_159567_696    | NW_004516872.1 | Scaffold1752 | 696                     | TT                              | AA                | 1946663948               |

| SNPs IDs             | Chromosome IDs | Chromosomes  | Physical positions (bp) | CDC Frontier (Reference genome) | (Pusa 256 & HPNB) | NCBI SNPdb Accession IDs |
|----------------------|----------------|--------------|-------------------------|---------------------------------|-------------------|--------------------------|
| SNP_P3_159568_825    | NW_004516872.1 | Scaffold1752 | 825                     | TT                              | CC                | 1946663950               |
| SNP_P3_159569_4845   | NW_004516873.1 | Scaffold1754 | 4845                    | TT                              | CC                | 1946663952               |
| SNP_P3_159570_4861   | NW_004516873.1 | Scaffold1754 | 4861                    | TT                              | CC                | 1946663954               |
| SNP_P3_159571_4919   | NW_004516873.1 | Scaffold1754 | 4919                    | TT                              | GG                | 1946663956               |
| SNP_P3_159572_5068   | NW_004516873.1 | Scaffold1754 | 5068                    | GG                              | AA                | 1946663958               |
| SNP_P3_159573_6397   | NW_004516873.1 | Scaffold1754 | 6397                    | TT                              | GG                | 1946663959               |
| SNP_P3_159574_6491   | NW_004516873.1 | Scaffold1754 | 6491                    | TT                              | AA                | 1946663961               |
| SNP_P3_159575_6513   | NW_004516873.1 | Scaffold1754 | 6513                    | TT                              | CC                | 1946663963               |
| SNP_P3_159576_6638   | NW_004516873.1 | Scaffold1754 | 6638                    | GG                              | AA                | 1946663965               |
| SNP_P3_159577_6716   | NW_004516873.1 | Scaffold1754 | 6716                    | TT                              | GG                | 1946663967               |
| SNP_P3_159578_6939   | NW_004516873.1 | Scaffold1754 | 6939                    | GG                              | TT                | 1946663969               |
| SNP_P3_159579_6963   | NW_004516873.1 | Scaffold1754 | 6963                    | AA                              | CC                | 1946663971               |
| SNP_P3_159580_6972   | NW_004516873.1 | Scaffold1754 | 6972                    | GG                              | AA                | 1946663973               |
| SNP_P3_159581_7170   | NW_004516873.1 | Scaffold1754 | 7170                    | TT                              | CC                | 1946663975               |
| SNP_P3_159582_10460  | NW_004516874.1 | Scaffold1755 | 10460                   | GG                              | AA                | 1946663977               |
| SNP_P3_159583_10487  | NW_004516874.1 | Scaffold1755 | 10487                   | AA                              | TT                | 1946663979               |
| SNP_P3_159584_10901  | NW_004516874.1 | Scaffold1755 | 10901                   | AA                              | GG                | 1946663982               |
| SNP_P3_159585_10922  | NW_004516874.1 | Scaffold1755 | 10922                   | TT                              | AA                | 1946663984               |
| SNP_P3_159586_14259  | NW_004516874.1 | Scaffold1755 | 14259                   | GG                              | AA                | 1946663987               |
| SNP_P3_159587_17971  | NW_004516874.1 | Scaffold1755 | 17971                   | GG                              | AA                | 1946663989               |
| SNP_P3_159588_17979  | NW_004516874.1 | Scaffold1755 | 17979                   | AA                              | GG                | 1946663991               |
| SNP_P3_159589_24017  | NW_004516874.1 | Scaffold1755 | 24017                   | TT                              | GG                | 1946663993               |
| SNP_P3_159590_24227  | NW_004516874.1 | Scaffold1755 | 24227                   | AA                              | TT                | 1946663995               |
| SNP_P3_159591_27895  | NW_004516874.1 | Scaffold1755 | 27895                   | GG                              | AA                | 1946663997               |
| SNP_P3_159592_32240  | NW_004516874.1 | Scaffold1755 | 32240                   | TT                              | CC                | 1946663998               |
| SNP_P3_159593_32309  | NW_004516874.1 | Scaffold1755 | 32309                   | GG                              | AA                | 1946664000               |
| SNP_P3_159594_32347  | NW_004516874.1 | Scaffold1755 | 32347                   | CC                              | TT                | 1946664002               |
| SNP_P3_159595_32358  | NW_004516874.1 | Scaffold1755 | 32358                   | TT                              | CC                | 1946664004               |
| SNP_P3_159596_32610  | NW_004516874.1 | Scaffold1755 | 32610                   | TT                              | GG                | 1946664006               |
| SNP_P3_159597_32632  | NW_004516874.1 | Scaffold1755 | 32632                   | AA                              | CC                | 1946664008               |
| SNP_P3_159598_32654  | NW_004516874.1 | Scaffold1755 | 32654                   | AA                              | TT                | 1946664010               |
| SNP_P3_159599_32711  | NW_004516874.1 | Scaffold1755 | 32711                   | GG                              | CC                | 1946664012               |
| SNP_P3_159600_33192  | NW_004516874.1 | Scaffold1755 | 33192                   | CC                              | AA                | 1946664014               |
| SNP_P3_159601_34370  | NW_004516874.1 | Scaffold1755 | 34370                   | TT                              | GG                | 1946664016               |
| SNP_P3_159602_59358  | NW_004516874.1 | Scaffold1755 | 59358                   | TT                              | AA                | 1946664018               |
| SNP_P3_159603_68142  | NW_004516874.1 | Scaffold1755 | 68142                   | GG                              | AA                | 1946664020               |
| SNP_P3_159604_119037 | NW_004516874.1 | Scaffold1755 | 119037                  | TT                              | CC                | 1946664022               |
| SNP_P3_159605_124860 | NW_004516874.1 | Scaffold1755 | 124860                  | AA                              | CC                | 1946664024               |
| SNP_P3_159606_126132 | NW_004516874.1 | Scaffold1755 | 126132                  | CC                              | GG                | 1946664026               |
| SNP_P3_159607_126246 | NW_004516874.1 | Scaffold1755 | 126246                  | AA                              | GG                | 1946664028               |
| SNP_P3_159608_126272 | NW_004516874.1 | Scaffold1755 | 126272                  | AA                              | GG                | 1946664031               |
| SNP_P3_159609_126634 | NW_004516874.1 | Scaffold1755 | 126634                  | CC                              | TT                | 1946664033               |



| SNPs IDs             | Chromosome IDs | Chromosomes  | Physical positions (bp) | CDC Frontier (Reference genome) | (Pusa 256 & HPNB) | NCBI SNPdb Accession IDs |
|----------------------|----------------|--------------|-------------------------|---------------------------------|-------------------|--------------------------|
| SNP_P3_159610_126640 | NW_004516874.1 | Scaffold1755 | 126640                  | CC                              | TT                | 1946664035               |
| SNP_P3_159612_126750 | NW_004516874.1 | Scaffold1755 | 126750                  | TT                              | CC                | 1946664037               |
| SNP_P3_159613_126751 | NW_004516874.1 | Scaffold1755 | 126751                  | AA                              | TT                | 1946664039               |
| SNP_P3_159614_126796 | NW_004516874.1 | Scaffold1755 | 126796                  | CC                              | TT                | 1946664041               |
| SNP_P3_159615_126805 | NW_004516874.1 | Scaffold1755 | 126805                  | AA                              | CC                | 1946664043               |
| SNP_P3_159616_126867 | NW_004516874.1 | Scaffold1755 | 126867                  | CC                              | TT                | 1946664045               |
| SNP_P3_159617_127556 | NW_004516874.1 | Scaffold1755 | 127556                  | AA                              | GG                | 1946664048               |
| SNP_P3_159618_127790 | NW_004516874.1 | Scaffold1755 | 127790                  | TT                              | GG                | 1946664050               |
| SNP_P3_159619_127838 | NW_004516874.1 | Scaffold1755 | 127838                  | CC                              | AA                | 1946664052               |
| SNP_P3_159620_127979 | NW_004516874.1 | Scaffold1755 | 127979                  | TT                              | CC                | 1946664054               |
| SNP_P3_159621_128707 | NW_004516874.1 | Scaffold1755 | 128707                  | CC                              | TT                | 1946664056               |
| SNP_P3_159623_128875 | NW_004516874.1 | Scaffold1755 | 128875                  | CC                              | AA                | 1946664058               |
| SNP_P3_159624_128902 | NW_004516874.1 | Scaffold1755 | 128902                  | GG                              | AA                | 1946664060               |
| SNP_P3_159625_129030 | NW_004516874.1 | Scaffold1755 | 129030                  | AA                              | GG                | 1946664062               |
| SNP_P3_159626_129036 | NW_004516874.1 | Scaffold1755 | 129036                  | TT                              | AA                | 1946664064               |
| SNP_P3_159627_129054 | NW_004516874.1 | Scaffold1755 | 129054                  | TT                              | CC                | 1946664066               |
| SNP_P3_159628_129077 | NW_004516874.1 | Scaffold1755 | 129077                  | AA                              | CC                | 1946664068               |
| SNP_P3_159629_129084 | NW_004516874.1 | Scaffold1755 | 129084                  | TT                              | GG                | 1946664070               |
| SNP_P3_159630_129091 | NW_004516874.1 | Scaffold1755 | 129091                  | TT                              | GG                | 1946664072               |
| SNP_P3_159631_129093 | NW_004516874.1 | Scaffold1755 | 129093                  | CC                              | GG                | 1946664074               |
| SNP_P3_159632_129130 | NW_004516874.1 | Scaffold1755 | 129130                  | AA                              | GG                | 1946664076               |
| SNP_P3_159634_129151 | NW_004516874.1 | Scaffold1755 | 129151                  | TT                              | CC                | 1946664078               |
| SNP_P3_159635_129176 | NW_004516874.1 | Scaffold1755 | 129176                  | TT                              | CC                | 1946664080               |
| SNP_P3_159636_165    | NW_004516875.1 | Scaffold1756 | 165                     | GG                              | AA                | 1946664082               |
| SNP_P3_159637_172    | NW_004516875.1 | Scaffold1756 | 172                     | TT                              | GG                | 1946664084               |
| SNP_P3_159638_372    | NW_004516875.1 | Scaffold1756 | 372                     | GG                              | AA                | 1946664087               |
| SNP_P3_159639_922    | NW_004516875.1 | Scaffold1756 | 922                     | TT                              | AA                | 1946664089               |
| SNP_P3_159640_937    | NW_004516875.1 | Scaffold1756 | 937                     | GG                              | TT                | 1946664091               |
| SNP_P3_159641_974    | NW_004516875.1 | Scaffold1756 | 974                     | CC                              | TT                | 1946664093               |
| SNP_P3_159642_1351   | NW_004516875.1 | Scaffold1756 | 1351                    | GG                              | AA                | 1946664095               |
| SNP_P3_159643_3215   | NW_004516875.1 | Scaffold1756 | 3215                    | GG                              | AA                | 1946664097               |
| SNP_P3_159644_4095   | NW_004516875.1 | Scaffold1756 | 4095                    | CC                              | GG                | 1946664099               |
| SNP_P3_159645_4677   | NW_004516875.1 | Scaffold1756 | 4677                    | GG                              | AA                | 1946664101               |
| SNP_P3_159646_4787   | NW_004516875.1 | Scaffold1756 | 4787                    | GG                              | AA                | 1946664103               |
| SNP_P3_159647_5156   | NW_004516875.1 | Scaffold1756 | 5156                    | CC                              | TT                | 1946664105               |
| SNP_P3_159649_6600   | NW_004516875.1 | Scaffold1756 | 6600                    | CC                              | TT                | 1946664106               |
| SNP_P3_159651_71599  | NW_004516875.1 | Scaffold1756 | 71599                   | GG                              | TT                | 1946664107               |
| SNP_P3_159652_86108  | NW_004516875.1 | Scaffold1756 | 86108                   | CC                              | AA                | 1946664108               |
| SNP_P3_159653_86525  | NW_004516875.1 | Scaffold1756 | 86525                   | GG                              | CC                | 1946664109               |
| SNP_P3_159654_86544  | NW_004516875.1 | Scaffold1756 | 86544                   | AA                              | GG                | 1946664110               |
| SNP_P3_159656_454    | NW_004516876.1 | Scaffold1757 | 454                     | AA                              | CC                | 1946664111               |
| SNP_P3_159657_520    | NW_004516876.1 | Scaffold1757 | 520                     | TT                              | CC                | 1946664113               |

| SNPs IDs            | Chromosome IDs | Chromosomes  | Physical positions (bp) | CDC Frontier (Reference genome) | (Pusa 256 & HPNB) | NCBI SNPdb Accession IDs |
|---------------------|----------------|--------------|-------------------------|---------------------------------|-------------------|--------------------------|
| SNP_P3_159659_1271  | NW_004516876.1 | Scaffold1757 | 1271                    | GG                              | AA                | 1946664115               |
| SNP_P3_159660_1272  | NW_004516876.1 | Scaffold1757 | 1272                    | CC                              | TT                | 1946664118               |
| SNP_P3_159661_1274  | NW_004516876.1 | Scaffold1757 | 1274                    | TT                              | AA                | 1946664128               |
| SNP_P3_159662_1275  | NW_004516876.1 | Scaffold1757 | 1275                    | GG                              | TT                | 1946664130               |
| SNP_P3_159663_1306  | NW_004516876.1 | Scaffold1757 | 1306                    | AA                              | TT                | 1946664132               |
| SNP_P3_159664_1307  | NW_004516876.1 | Scaffold1757 | 1307                    | TT                              | AA                | 1946664133               |
| SNP_P3_159665_1805  | NW_004516876.1 | Scaffold1757 | 1805                    | GG                              | AA                | 1946664136               |
| SNP_P3_159666_1863  | NW_004516876.1 | Scaffold1757 | 1863                    | TT                              | AA                | 1946664138               |
| SNP_P3_159667_1938  | NW_004516876.1 | Scaffold1757 | 1938                    | TT                              | GG                | 1946664141               |
| SNP_P3_159668_1946  | NW_004516876.1 | Scaffold1757 | 1946                    | CC                              | TT                | 1946664143               |
| SNP_P3_159669_2071  | NW_004516876.1 | Scaffold1757 | 2071                    | TT                              | GG                | 1946664146               |
| SNP_P3_159670_2123  | NW_004516876.1 | Scaffold1757 | 2123                    | GG                              | AA                | 1946664148               |
| SNP_P3_159671_2178  | NW_004516876.1 | Scaffold1757 | 2178                    | AA                              | TT                | 1946664150               |
| SNP_P3_159672_2179  | NW_004516876.1 | Scaffold1757 | 2179                    | AA                              | TT                | 1946664153               |
| SNP_P3_159673_2406  | NW_004516876.1 | Scaffold1757 | 2406                    | TT                              | AA                | 1946664155               |
| SNP_P3_159674_16147 | NW_004516876.1 | Scaffold1757 | 16147                   | CC                              | TT                | 1946664157               |
| SNP_P3_159675_16415 | NW_004516876.1 | Scaffold1757 | 16415                   | TT                              | CC                | 1946664159               |
| SNP_P3_159676_16418 | NW_004516876.1 | Scaffold1757 | 16418                   | TT                              | AA                | 1946664161               |
| SNP_P3_159677_16423 | NW_004516876.1 | Scaffold1757 | 16423                   | CC                              | TT                | 1946664162               |
| SNP_P3_159678_16538 | NW_004516876.1 | Scaffold1757 | 16538                   | TT                              | CC                | 1946664164               |
| SNP_P3_159679_16576 | NW_004516876.1 | Scaffold1757 | 16576                   | AA                              | GG                | 1946664166               |
| SNP_P3_159680_16840 | NW_004516876.1 | Scaffold1757 | 16840                   | TT                              | AA                | 1946664168               |
| SNP_P3_159681_20250 | NW_004516876.1 | Scaffold1757 | 20250                   | CC                              | TT                | 1946664170               |
| SNP_P3_159682_24302 | NW_004516876.1 | Scaffold1757 | 24302                   | GG                              | TT                | 1946664172               |
| SNP_P3_159683_24356 | NW_004516876.1 | Scaffold1757 | 24356                   | CC                              | TT                | 1946664174               |
| SNP_P3_159684_24523 | NW_004516876.1 | Scaffold1757 | 24523                   | AA                              | CC                | 1946664176               |
| SNP_P3_159685_24533 | NW_004516876.1 | Scaffold1757 | 24533                   | CC                              | TT                | 1946664178               |
| SNP_P3_159686_24673 | NW_004516876.1 | Scaffold1757 | 24673                   | CC                              | AA                | 1946664180               |
| SNP_P3_159687_24703 | NW_004516876.1 | Scaffold1757 | 24703                   | AA                              | GG                | 1946664182               |
| SNP_P3_159688_24953 | NW_004516876.1 | Scaffold1757 | 24953                   | GG                              | TT                | 1946664184               |
| SNP_P3_159689_25259 | NW_004516876.1 | Scaffold1757 | 25259                   | TT                              | CC                | 1946664186               |
| SNP_P3_159690_25271 | NW_004516876.1 | Scaffold1757 | 25271                   | TT                              | CC                | 1946664188               |
| SNP_P3_159691_25272 | NW_004516876.1 | Scaffold1757 | 25272                   | TT                              | CC                | 1946664190               |
| SNP_P3_159692_25296 | NW_004516876.1 | Scaffold1757 | 25296                   | AA                              | TT                | 1946664192               |
| SNP_P3_159693_25364 | NW_004516876.1 | Scaffold1757 | 25364                   | CC                              | AA                | 1946664194               |
| SNP_P3_159694_25584 | NW_004516876.1 | Scaffold1757 | 25584                   | AA                              | TT                | 1946664196               |
| SNP_P3_159695_25592 | NW_004516876.1 | Scaffold1757 | 25592                   | TT                              | CC                | 1946664198               |
| SNP_P3_159696_25646 | NW_004516876.1 | Scaffold1757 | 25646                   | GG                              | AA                | 1946664200               |
| SNP_P3_159697_26318 | NW_004516876.1 | Scaffold1757 | 26318                   | CC                              | AA                | 1946664202               |
| SNP_P3_159698_27829 | NW_004516876.1 | Scaffold1757 | 27829                   | CC                              | AA                | 1946664204               |
| SNP_P3_159699_27859 | NW_004516876.1 | Scaffold1757 | 27859                   | CC                              | TT                | 1946664207               |
| SNP_P3_159700_28062 | NW_004516876.1 | Scaffold1757 | 28062                   | TT                              | CC                | 1946664209               |

| SNPs IDs             | Chromosome IDs | Chromosomes  | Physical positions (bp) | CDC Frontier (Reference genome) | (Pusa 256 & HPNB) | NCBI SNPdb Accession IDs |
|----------------------|----------------|--------------|-------------------------|---------------------------------|-------------------|--------------------------|
| SNP_P3_159701_31536  | NW_004516876.1 | Scaffold1757 | 31536                   | TT                              | CC                | 1946664211               |
| SNP_P3_159702_31539  | NW_004516876.1 | Scaffold1757 | 31539                   | TT                              | CC                | 1946664213               |
| SNP_P3_159703_31732  | NW_004516876.1 | Scaffold1757 | 31732                   | AA                              | CC                | 1946664215               |
| SNP_P3_159704_31742  | NW_004516876.1 | Scaffold1757 | 31742                   | TT                              | AA                | 1946664217               |
| SNP_P3_159705_31774  | NW_004516876.1 | Scaffold1757 | 31774                   | GG                              | AA                | 1946664219               |
| SNP_P3_159706_40801  | NW_004516876.1 | Scaffold1757 | 40801                   | AA                              | CC                | 1946664221               |
| SNP_P3_159707_48119  | NW_004516876.1 | Scaffold1757 | 48119                   | AA                              | TT                | 1946664223               |
| SNP_P3_159708_49947  | NW_004516876.1 | Scaffold1757 | 49947                   | AA                              | TT                | 1946664225               |
| SNP_P3_159709_145622 | NW_004516876.1 | Scaffold1757 | 145622                  | AA                              | TT                | 1946664227               |
| SNP_P3_159710_150951 | NW_004516876.1 | Scaffold1757 | 150951                  | CC                              | TT                | 1946664229               |
| SNP_P3_159711_151638 | NW_004516876.1 | Scaffold1757 | 151638                  | CC                              | TT                | 1946664231               |
| SNP_P3_159712_151841 | NW_004516876.1 | Scaffold1757 | 151841                  | CC                              | AA                | 1946664233               |
| SNP_P3_159713_343    | NW_004516877.1 | Scaffold1761 | 343                     | AA                              | GG                | 1946664235               |
| SNP_P3_159714_372    | NW_004516877.1 | Scaffold1761 | 372                     | TT                              | CC                | 1946664237               |
| SNP_P3_159715_1063   | NW_004516877.1 | Scaffold1761 | 1063                    | AA                              | TT                | 1946664239               |
| SNP_P3_159716_3883   | NW_004516877.1 | Scaffold1761 | 3883                    | TT                              | CC                | 1946664241               |
| SNP_P3_159717_3909   | NW_004516877.1 | Scaffold1761 | 3909                    | CC                              | TT                | 1946664243               |
| SNP_P3_159718_3915   | NW_004516877.1 | Scaffold1761 | 3915                    | AA                              | CC                | 1946664246               |
| SNP_P3_159719_3923   | NW_004516877.1 | Scaffold1761 | 3923                    | GG                              | TT                | 1946664248               |
| SNP_P3_159720_4005   | NW_004516877.1 | Scaffold1761 | 4005                    | AA                              | CC                | 1946664250               |
| SNP_P3_159721_4014   | NW_004516877.1 | Scaffold1761 | 4014                    | TT                              | CC                | 1946664252               |
| SNP_P3_159722_4140   | NW_004516877.1 | Scaffold1761 | 4140                    | AA                              | GG                | 1946664254               |
| SNP_P3_159723_4216   | NW_004516877.1 | Scaffold1761 | 4216                    | TT                              | CC                | 1946664256               |
| SNP_P3_159724_4262   | NW_004516877.1 | Scaffold1761 | 4262                    | CC                              | AA                | 1946664258               |
| SNP_P3_159725_4266   | NW_004516877.1 | Scaffold1761 | 4266                    | AA                              | CC                | 1946664260               |
| SNP_P3_159726_4284   | NW_004516877.1 | Scaffold1761 | 4284                    | GG                              | TT                | 1946664262               |
| SNP_P3_159727_4294   | NW_004516877.1 | Scaffold1761 | 4294                    | TT                              | CC                | 1946664265               |
| SNP_P3_159728_4352   | NW_004516877.1 | Scaffold1761 | 4352                    | TT                              | AA                | 1946664266               |
| SNP_P3_159729_4651   | NW_004516877.1 | Scaffold1761 | 4651                    | CC                              | TT                | 1946664267               |
| SNP_P3_159730_10869  | NW_004516877.1 | Scaffold1761 | 10869                   | AA                              | GG                | 1946664268               |
| SNP_P3_159731_10919  | NW_004516877.1 | Scaffold1761 | 10919                   | CC                              | TT                | 1946664269               |
| SNP_P3_159732_11075  | NW_004516877.1 | Scaffold1761 | 11075                   | AA                              | CC                | 1946664270               |
| SNP_P3_159733_11170  | NW_004516877.1 | Scaffold1761 | 11170                   | AA                              | TT                | 1946664271               |
| SNP_P3_159734_11320  | NW_004516877.1 | Scaffold1761 | 11320                   | TT                              | CC                | 1946664272               |
| SNP_P3_159735_11372  | NW_004516877.1 | Scaffold1761 | 11372                   | TT                              | CC                | 1946664273               |
| SNP_P3_159736_11415  | NW_004516877.1 | Scaffold1761 | 11415                   | TT                              | AA                | 1946664274               |
| SNP_P3_159737_11459  | NW_004516877.1 | Scaffold1761 | 11459                   | AA                              | TT                | 1946664275               |
| SNP_P3_159738_16216  | NW_004516877.1 | Scaffold1761 | 16216                   | TT                              | AA                | 1946664277               |
| SNP_P3_159739_41785  | NW_004516877.1 | Scaffold1761 | 41785                   | CC                              | TT                | 1946664279               |
| SNP_P3_159741_88805  | NW_004516877.1 | Scaffold1761 | 88805                   | AA                              | GG                | 1946664281               |
| SNP_P3_159742_2220   | NW_004516879.1 | Scaffold1763 | 2220                    | CC                              | TT                | 1946664283               |
| SNP_P3_159743_3064   | NW_004516879.1 | Scaffold1763 | 3064                    | TT                              | GG                | 1946664285               |

| SNPs IDs            | Chromosome IDs | Chromosomes  | Physical positions (bp) | CDC Frontier (Reference genome) | (Pusa 256 & HPNB) | NCBI SNPdb Accession IDs |
|---------------------|----------------|--------------|-------------------------|---------------------------------|-------------------|--------------------------|
| SNP_P3_159744_3067  | NW_004516879.1 | Scaffold1763 | 3067                    | TT                              | AA                | 1946664287               |
| SNP_P3_159745_3073  | NW_004516879.1 | Scaffold1763 | 3073                    | GG                              | TT                | 1946664289               |
| SNP_P3_159746_4355  | NW_004516879.1 | Scaffold1763 | 4355                    | CC                              | TT                | 1946664291               |
| SNP_P3_159747_8481  | NW_004516879.1 | Scaffold1763 | 8481                    | TT                              | CC                | 1946664293               |
| SNP_P3_159748_10551 | NW_004516879.1 | Scaffold1763 | 10551                   | AA                              | GG                | 1946664295               |
| SNP_P3_159749_10578 | NW_004516879.1 | Scaffold1763 | 10578                   | AA                              | CC                | 1946664297               |
| SNP_P3_159750_10595 | NW_004516879.1 | Scaffold1763 | 10595                   | AA                              | CC                | 1946664299               |
| SNP_P3_159751_10632 | NW_004516879.1 | Scaffold1763 | 10632                   | AA                              | GG                | 1946664301               |
| SNP_P3_159752_10641 | NW_004516879.1 | Scaffold1763 | 10641                   | CC                              | TT                | 1946664303               |
| SNP_P3_159753_10985 | NW_004516879.1 | Scaffold1763 | 10985                   | GG                              | CC                | 1946664305               |
| SNP_P3_159754_17355 | NW_004516879.1 | Scaffold1763 | 17355                   | AA                              | GG                | 1946664307               |
| SNP_P3_159755_19142 | NW_004516879.1 | Scaffold1763 | 19142                   | GG                              | AA                | 1946664309               |
| SNP_P3_159756_19162 | NW_004516879.1 | Scaffold1763 | 19162                   | TT                              | AA                | 1946664311               |
| SNP_P3_159757_19166 | NW_004516879.1 | Scaffold1763 | 19166                   | AA                              | TT                | 1946664313               |
| SNP_P3_159758_19167 | NW_004516879.1 | Scaffold1763 | 19167                   | AA                              | TT                | 1946664315               |
| SNP_P3_159759_19169 | NW_004516879.1 | Scaffold1763 | 19169                   | AA                              | TT                | 1946664317               |
| SNP_P3_159760_19183 | NW_004516879.1 | Scaffold1763 | 19183                   | AA                              | GG                | 1946664319               |
| SNP_P3_159761_19194 | NW_004516879.1 | Scaffold1763 | 19194                   | TT                              | CC                | 1946664321               |
| SNP_P3_159762_19222 | NW_004516879.1 | Scaffold1763 | 19222                   | CC                              | GG                | 1946664323               |
| SNP_P3_159763_19234 | NW_004516879.1 | Scaffold1763 | 19234                   | TT                              | GG                | 1946664325               |
| SNP_P3_159764_19261 | NW_004516879.1 | Scaffold1763 | 19261                   | AA                              | TT                | 1946664327               |
| SNP_P3_159765_19425 | NW_004516879.1 | Scaffold1763 | 19425                   | AA                              | CC                | 1946664329               |
| SNP_P3_159766_21683 | NW_004516879.1 | Scaffold1763 | 21683                   | GG                              | TT                | 1946664331               |
| SNP_P3_159767_690   | NW_004516880.1 | Scaffold1767 | 690                     | TT                              | CC                | 1946664333               |
| SNP_P3_159768_814   | NW_004516880.1 | Scaffold1767 | 814                     | GG                              | TT                | 1946664335               |
| SNP_P3_159769_6091  | NW_004516880.1 | Scaffold1767 | 6091                    | GG                              | AA                | 1946664337               |
| SNP_P3_159770_6361  | NW_004516880.1 | Scaffold1767 | 6361                    | AA                              | TT                | 1946664340               |
| SNP_P3_159771_6920  | NW_004516880.1 | Scaffold1767 | 6920                    | AA                              | GG                | 1946664343               |
| SNP_P3_159772_7051  | NW_004516880.1 | Scaffold1767 | 7051                    | AA                              | GG                | 1946664345               |
| SNP_P3_159773_7161  | NW_004516880.1 | Scaffold1767 | 7161                    | GG                              | AA                | 1946664347               |
| SNP_P3_159774_8910  | NW_004516880.1 | Scaffold1767 | 8910                    | TT                              | CC                | 1946664349               |
| SNP_P3_159775_8923  | NW_004516880.1 | Scaffold1767 | 8923                    | GG                              | AA                | 1946664352               |
| SNP_P3_159776_11868 | NW_004516880.1 | Scaffold1767 | 11868                   | AA                              | TT                | 1946664355               |
| SNP_P3_159777_15112 | NW_004516880.1 | Scaffold1767 | 15112                   | GG                              | AA                | 1946664357               |
| SNP_P3_159778_16371 | NW_004516880.1 | Scaffold1767 | 16371                   | TT                              | AA                | 1946664359               |
| SNP_P3_159779_16716 | NW_004516880.1 | Scaffold1767 | 16716                   | GG                              | AA                | 1946664361               |
| SNP_P3_159780_18059 | NW_004516880.1 | Scaffold1767 | 18059                   | AA                              | GG                | 1946664363               |
| SNP_P3_159781_18071 | NW_004516880.1 | Scaffold1767 | 18071                   | TT                              | GG                | 1946664365               |
| SNP_P3_159782_24783 | NW_004516880.1 | Scaffold1767 | 24783                   | AA                              | GG                | 1946664367               |
| SNP_P3_159783_25190 | NW_004516880.1 | Scaffold1767 | 25190                   | GG                              | TT                | 1946664368               |
| SNP_P3_159784_25226 | NW_004516880.1 | Scaffold1767 | 25226                   | TT                              | GG                | 1946664370               |
| SNP_P3_159785_25227 | NW_004516880.1 | Scaffold1767 | 25227                   | GG                              | AA                | 1946664372               |

| SNPs IDs            | Chromosome IDs | Chromosomes  | Physical positions (bp) | CDC Frontier (Reference genome) | (Pusa 256 & HPNB) | NCBI SNPdb Accession IDs |
|---------------------|----------------|--------------|-------------------------|---------------------------------|-------------------|--------------------------|
| SNP_P3_159786_25238 | NW_004516880.1 | Scaffold1767 | 25238                   | TT                              | GG                | 1946664374               |
| SNP_P3_159787_25375 | NW_004516880.1 | Scaffold1767 | 25375                   | GG                              | TT                | 1946664376               |
| SNP_P3_159788_25660 | NW_004516880.1 | Scaffold1767 | 25660                   | TT                              | CC                | 1946664378               |
| SNP_P3_159790_28433 | NW_004516880.1 | Scaffold1767 | 28433                   | AA                              | CC                | 1946664380               |
| SNP_P3_159791_31661 | NW_004516880.1 | Scaffold1767 | 31661                   | GG                              | AA                | 1946664382               |
| SNP_P3_159792_41419 | NW_004516880.1 | Scaffold1767 | 41419                   | CC                              | TT                | 1946664384               |
| SNP_P3_159793_41843 | NW_004516880.1 | Scaffold1767 | 41843                   | CC                              | TT                | 1946664386               |
| SNP_P3_159794_619   | NW_004516881.1 | Scaffold1768 | 619                     | CC                              | TT                | 1946664388               |
| SNP_P3_159795_929   | NW_004516881.1 | Scaffold1768 | 929                     | TT                              | CC                | 1946664390               |
| SNP_P3_159796_983   | NW_004516881.1 | Scaffold1768 | 983                     | AA                              | TT                | 1946664392               |
| SNP_P3_159797_1393  | NW_004516881.1 | Scaffold1768 | 1393                    | GG                              | AA                | 1946664394               |
| SNP_P3_159798_1466  | NW_004516881.1 | Scaffold1768 | 1466                    | AA                              | TT                | 1946664396               |
| SNP_P3_159799_1467  | NW_004516881.1 | Scaffold1768 | 1467                    | CC                              | TT                | 1946664398               |
| SNP_P3_159800_1752  | NW_004516881.1 | Scaffold1768 | 1752                    | TT                              | CC                | 1946664400               |
| SNP_P3_159801_12690 | NW_004516881.1 | Scaffold1768 | 12690                   | AA                              | CC                | 1946664402               |
| SNP_P3_159803_23019 | NW_004516881.1 | Scaffold1768 | 23019                   | TT                              | GG                | 1946664405               |
| SNP_P3_159804_23020 | NW_004516881.1 | Scaffold1768 | 23020                   | CC                              | GG                | 1946664407               |
| SNP_P3_159805_29427 | NW_004516881.1 | Scaffold1768 | 29427                   | TT                              | CC                | 1946664409               |
| SNP_P3_159806_29712 | NW_004516881.1 | Scaffold1768 | 29712                   | TT                              | GG                | 1946664411               |
| SNP_P3_159807_29747 | NW_004516881.1 | Scaffold1768 | 29747                   | AA                              | CC                | 1946664413               |
| SNP_P3_159808_29893 | NW_004516881.1 | Scaffold1768 | 29893                   | GG                              | AA                | 1946664415               |
| SNP_P3_159809_29901 | NW_004516881.1 | Scaffold1768 | 29901                   | TT                              | CC                | 1946664417               |
| SNP_P3_159810_29969 | NW_004516881.1 | Scaffold1768 | 29969                   | CC                              | GG                | 1946664419               |
| SNP_P3_159811_38315 | NW_004516881.1 | Scaffold1768 | 38315                   | CC                              | TT                | 1946664421               |
| SNP_P3_159812_3210  | NW_004516882.1 | Scaffold1769 | 3210                    | TT                              | CC                | 1946664423               |
| SNP_P3_159813_3235  | NW_004516882.1 | Scaffold1769 | 3235                    | TT                              | AA                | 1946664425               |
| SNP_P3_159814_3253  | NW_004516882.1 | Scaffold1769 | 3253                    | AA                              | TT                | 1946664427               |
| SNP_P3_159815_3377  | NW_004516882.1 | Scaffold1769 | 3377                    | GG                              | AA                | 1946664433               |
| SNP_P3_159816_3407  | NW_004516882.1 | Scaffold1769 | 3407                    | AA                              | GG                | 1946664435               |
| SNP_P3_159817_3548  | NW_004516882.1 | Scaffold1769 | 3548                    | TT                              | GG                | 1946664437               |
| SNP_P3_159818_3705  | NW_004516882.1 | Scaffold1769 | 3705                    | TT                              | AA                | 1946664439               |
| SNP_P3_159819_3724  | NW_004516882.1 | Scaffold1769 | 3724                    | AA                              | TT                | 1946664442               |
| SNP_P3_159820_3725  | NW_004516882.1 | Scaffold1769 | 3725                    | TT                              | GG                | 1946664444               |
| SNP_P3_159821_4198  | NW_004516882.1 | Scaffold1769 | 4198                    | CC                              | GG                | 1946664446               |
| SNP_P3_159822_5703  | NW_004516884.1 | Scaffold1771 | 5703                    | GG                              | AA                | 1946664448               |
| SNP_P3_159823_5878  | NW_004516884.1 | Scaffold1771 | 5878                    | GG                              | AA                | 1946664450               |
| SNP_P3_159824_5886  | NW_004516884.1 | Scaffold1771 | 5886                    | TT                              | CC                | 1946664452               |
| SNP_P3_159825_5896  | NW_004516884.1 | Scaffold1771 | 5896                    | TT                              | CC                | 1946664454               |
| SNP_P3_159826_5905  | NW_004516884.1 | Scaffold1771 | 5905                    | GG                              | AA                | 1946664456               |
| SNP_P3_159827_5914  | NW_004516884.1 | Scaffold1771 | 5914                    | GG                              | CC                | 1946664458               |
| SNP_P3_159828_5916  | NW_004516884.1 | Scaffold1771 | 5916                    | GG                              | AA                | 1946664460               |
| SNP_P3_159829_5923  | NW_004516884.1 | Scaffold1771 | 5923                    | CC                              | TT                | 1946664462               |

| SNPs IDs             | Chromosome IDs | Chromosomes  | Physical positions (bp) | CDC Frontier (Reference genome) | (Pusa 256 & HPNB) | NCBI SNPdb Accession IDs |
|----------------------|----------------|--------------|-------------------------|---------------------------------|-------------------|--------------------------|
| SNP_P3_159830_5932   | NW_004516884.1 | Scaffold1771 | 5932                    | CC                              | TT                | 1946664465               |
| SNP_P3_159831_5941   | NW_004516884.1 | Scaffold1771 | 5941                    | TT                              | CC                | 1946664467               |
| SNP_P3_159832_5953   | NW_004516884.1 | Scaffold1771 | 5953                    | TT                              | CC                | 1946664469               |
| SNP_P3_159833_5965   | NW_004516884.1 | Scaffold1771 | 5965                    | TT                              | CC                | 1946664471               |
| SNP_P3_159834_5966   | NW_004516884.1 | Scaffold1771 | 5966                    | CC                              | TT                | 1946664473               |
| SNP_P3_159835_5980   | NW_004516884.1 | Scaffold1771 | 5980                    | GG                              | TT                | 1946664475               |
| SNP_P3_159836_6894   | NW_004516884.1 | Scaffold1771 | 6894                    | CC                              | TT                | 1946664477               |
| SNP_P3_159837_6952   | NW_004516884.1 | Scaffold1771 | 6952                    | GG                              | AA                | 1946664479               |
| SNP_P3_159838_6957   | NW_004516884.1 | Scaffold1771 | 6957                    | TT                              | CC                | 1946664481               |
| SNP_P3_159839_6969   | NW_004516884.1 | Scaffold1771 | 6969                    | AA                              | GG                | 1946664483               |
| SNP_P3_159840_6970   | NW_004516884.1 | Scaffold1771 | 6970                    | TT                              | GG                | 1946664485               |
| SNP_P3_159841_6973   | NW_004516884.1 | Scaffold1771 | 6973                    | TT                              | GG                | 1946664487               |
| SNP_P3_159842_6991   | NW_004516884.1 | Scaffold1771 | 6991                    | TT                              | CC                | 1946664489               |
| SNP_P3_159843_7083   | NW_004516884.1 | Scaffold1771 | 7083                    | TT                              | CC                | 1946664490               |
| SNP_P3_159844_7084   | NW_004516884.1 | Scaffold1771 | 7084                    | AA                              | GG                | 1946664492               |
| SNP_P3_159845_7104   | NW_004516884.1 | Scaffold1771 | 7104                    | GG                              | TT                | 1946664494               |
| SNP_P3_159846_7287   | NW_004516884.1 | Scaffold1771 | 7287                    | AA                              | CC                | 1946664496               |
| SNP_P3_159847_7354   | NW_004516884.1 | Scaffold1771 | 7354                    | TT                              | CC                | 1946664498               |
| SNP_P3_159848_7455   | NW_004516884.1 | Scaffold1771 | 7455                    | CC                              | TT                | 1946664500               |
| SNP_P3_159849_7501   | NW_004516884.1 | Scaffold1771 | 7501                    | GG                              | AA                | 1946664502               |
| SNP_P3_159850_7537   | NW_004516884.1 | Scaffold1771 | 7537                    | GG                              | AA                | 1946664505               |
| SNP_P3_159851_11187  | NW_004516884.1 | Scaffold1771 | 11187                   | CC                              | GG                | 1946664507               |
| SNP_P3_159852_14710  | NW_004516884.1 | Scaffold1771 | 14710                   | TT                              | CC                | 1946664509               |
| SNP_P3_159853_15464  | NW_004516884.1 | Scaffold1771 | 15464                   | AA                              | GG                | 1946664511               |
| SNP_P3_159854_15808  | NW_004516884.1 | Scaffold1771 | 15808                   | AA                              | TT                | 1946664513               |
| SNP_P3_159855_16378  | NW_004516884.1 | Scaffold1771 | 16378                   | GG                              | AA                | 1946664515               |
| SNP_P3_159856_48750  | NW_004516884.1 | Scaffold1771 | 48750                   | TT                              | CC                | 1946664517               |
| SNP_P3_159858_83811  | NW_004516884.1 | Scaffold1771 | 83811                   | TT                              | CC                | 1946664519               |
| SNP_P3_159859_119350 | NW_004516884.1 | Scaffold1771 | 119350                  | GG                              | AA                | 1946664521               |
| SNP_P3_159860_129649 | NW_004516884.1 | Scaffold1771 | 129649                  | AA                              | GG                | 1946664523               |
| SNP_P3_159861_131513 | NW_004516884.1 | Scaffold1771 | 131513                  | CC                              | GG                | 1946664525               |
| SNP_P3_159862_815    | NW_004516886.1 | Scaffold1773 | 815                     | CC                              | TT                | 1946664527               |
| SNP_P3_159863_847    | NW_004516886.1 | Scaffold1773 | 847                     | TT                              | AA                | 1946664529               |
| SNP_P3_159864_2403   | NW_004516886.1 | Scaffold1773 | 2403                    | CC                              | AA                | 1946664531               |
| SNP_P3_159865_2942   | NW_004516886.1 | Scaffold1773 | 2942                    | CC                              | TT                | 1946664533               |
| SNP_P3_159866_3311   | NW_004516886.1 | Scaffold1773 | 3311                    | TT                              | GG                | 1946664535               |
| SNP_P3_159867_4498   | NW_004516886.1 | Scaffold1773 | 4498                    | TT                              | CC                | 1946664537               |
| SNP_P3_159868_4827   | NW_004516886.1 | Scaffold1773 | 4827                    | TT                              | CC                | 1946664539               |
| SNP_P3_159869_5390   | NW_004516886.1 | Scaffold1773 | 5390                    | GG                              | TT                | 1946664541               |
| SNP_P3_159870_8102   | NW_004516886.1 | Scaffold1773 | 8102                    | AA                              | TT                | 1946664543               |
| SNP_P3_159871_8558   | NW_004516886.1 | Scaffold1773 | 8558                    | TT                              | AA                | 1946664546               |
| SNP_P3_159872_8644   | NW_004516886.1 | Scaffold1773 | 8644                    | AA                              | GG                | 1946664548               |

| SNPs IDs            | Chromosome IDs | Chromosomes  | Physical positions (bp) | CDC Frontier (Reference genome) | (Pusa 256 & HPNB) | NCBI SNPdb Accession IDs |
|---------------------|----------------|--------------|-------------------------|---------------------------------|-------------------|--------------------------|
| SNP_P3_159873_8739  | NW_004516886.1 | Scaffold1773 | 8739                    | AA                              | GG                | 1946664550               |
| SNP_P3_159874_8746  | NW_004516886.1 | Scaffold1773 | 8746                    | AA                              | TT                | 1946664552               |
| SNP_P3_159875_8762  | NW_004516886.1 | Scaffold1773 | 8762                    | AA                              | TT                | 1946664554               |
| SNP_P3_159876_8778  | NW_004516886.1 | Scaffold1773 | 8778                    | AA                              | GG                | 1946664556               |
| SNP_P3_159877_8779  | NW_004516886.1 | Scaffold1773 | 8779                    | AA                              | GG                | 1946664558               |
| SNP_P3_159878_8782  | NW_004516886.1 | Scaffold1773 | 8782                    | GG                              | AA                | 1946664560               |
| SNP_P3_159879_9108  | NW_004516886.1 | Scaffold1773 | 9108                    | AA                              | TT                | 1946664562               |
| SNP_P3_159880_9876  | NW_004516886.1 | Scaffold1773 | 9876                    | TT                              | AA                | 1946664564               |
| SNP_P3_159881_9932  | NW_004516886.1 | Scaffold1773 | 9932                    | GG                              | AA                | 1946664566               |
| SNP_P3_159882_9934  | NW_004516886.1 | Scaffold1773 | 9934                    | CC                              | AA                | 1946664568               |
| SNP_P3_159883_10257 | NW_004516886.1 | Scaffold1773 | 10257                   | AA                              | TT                | 1946664570               |
| SNP_P3_159885_10821 | NW_004516886.1 | Scaffold1773 | 10821                   | CC                              | TT                | 1946664572               |
| SNP_P3_159886_10831 | NW_004516886.1 | Scaffold1773 | 10831                   | CC                              | AA                | 1946664574               |
| SNP_P3_159887_11740 | NW_004516886.1 | Scaffold1773 | 11740                   | CC                              | TT                | 1946664576               |
| SNP_P3_159888_12226 | NW_004516886.1 | Scaffold1773 | 12226                   | AA                              | GG                | 1946664578               |
| SNP_P3_159889_13257 | NW_004516886.1 | Scaffold1773 | 13257                   | TT                              | AA                | 1946664580               |
| SNP_P3_159890_13315 | NW_004516886.1 | Scaffold1773 | 13315                   | GG                              | TT                | 1946664582               |
| SNP_P3_159891_13397 | NW_004516886.1 | Scaffold1773 | 13397                   | TT                              | AA                | 1946664584               |
| SNP_P3_159892_13403 | NW_004516886.1 | Scaffold1773 | 13403                   | AA                              | GG                | 1946664586               |
| SNP_P3_159893_13406 | NW_004516886.1 | Scaffold1773 | 13406                   | CC                              | GG                | 1946664588               |
| SNP_P3_159894_13414 | NW_004516886.1 | Scaffold1773 | 13414                   | GG                              | AA                | 1946664590               |
| SNP_P3_159895_13418 | NW_004516886.1 | Scaffold1773 | 13418                   | GG                              | AA                | 1946664592               |
| SNP_P3_159896_13422 | NW_004516886.1 | Scaffold1773 | 13422                   | CC                              | AA                | 1946664594               |
| SNP_P3_159897_13424 | NW_004516886.1 | Scaffold1773 | 13424                   | GG                              | AA                | 1946664596               |
| SNP_P3_159899_14182 | NW_004516886.1 | Scaffold1773 | 14182                   | GG                              | AA                | 1946664598               |
| SNP_P3_159900_14229 | NW_004516886.1 | Scaffold1773 | 14229                   | AA                              | TT                | 1946664600               |
| SNP_P3_159901_15718 | NW_004516886.1 | Scaffold1773 | 15718                   | TT                              | AA                | 1946664602               |
| SNP_P3_159902_15872 | NW_004516886.1 | Scaffold1773 | 15872                   | TT                              | GG                | 1946664605               |
| SNP_P3_159903_15954 | NW_004516886.1 | Scaffold1773 | 15954                   | TT                              | CC                | 1946664607               |
| SNP_P3_159904_16001 | NW_004516886.1 | Scaffold1773 | 16001                   | AA                              | TT                | 1946664609               |
| SNP_P3_159905_16224 | NW_004516886.1 | Scaffold1773 | 16224                   | GG                              | TT                | 1946664611               |
| SNP_P3_159906_16309 | NW_004516886.1 | Scaffold1773 | 16309                   | GG                              | AA                | 1946664613               |
| SNP_P3_159907_16316 | NW_004516886.1 | Scaffold1773 | 16316                   | AA                              | TT                | 1946664615               |
| SNP_P3_159908_16390 | NW_004516886.1 | Scaffold1773 | 16390                   | AA                              | GG                | 1946664617               |
| SNP_P3_159910_16492 | NW_004516886.1 | Scaffold1773 | 16492                   | CC                              | GG                | 1946664619               |
| SNP_P3_159911_16537 | NW_004516886.1 | Scaffold1773 | 16537                   | TT                              | CC                | 1946664621               |
| SNP_P3_159912_16760 | NW_004516886.1 | Scaffold1773 | 16760                   | TT                              | AA                | 1946664623               |
| SNP_P3_159913_16801 | NW_004516886.1 | Scaffold1773 | 16801                   | CC                              | TT                | 1946664626               |
| SNP_P3_159914_16835 | NW_004516886.1 | Scaffold1773 | 16835                   | CC                              | AA                | 1946664628               |
| SNP_P3_159915_16857 | NW_004516886.1 | Scaffold1773 | 16857                   | TT                              | GG                | 1946664630               |
| SNP_P3_159916_16860 | NW_004516886.1 | Scaffold1773 | 16860                   | AA                              | GG                | 1946664632               |
| SNP_P3_159917_16874 | NW_004516886.1 | Scaffold1773 | 16874                   | CC                              | TT                | 1946664634               |

| SNPs IDs            | Chromosome IDs | Chromosomes  | Physical positions (bp) | CDC Frontier (Reference genome) | (Pusa 256 & HPNB) | NCBI SNPdb Accession IDs |
|---------------------|----------------|--------------|-------------------------|---------------------------------|-------------------|--------------------------|
| SNP_P3_159918_17822 | NW_004516886.1 | Scaffold1773 | 17822                   | GG                              | AA                | 1946664636               |
| SNP_P3_159919_18124 | NW_004516886.1 | Scaffold1773 | 18124                   | AA                              | TT                | 1946664638               |
| SNP_P3_159920_18144 | NW_004516886.1 | Scaffold1773 | 18144                   | GG                              | AA                | 1946664640               |
| SNP_P3_159921_18150 | NW_004516886.1 | Scaffold1773 | 18150                   | TT                              | GG                | 1946664642               |
| SNP_P3_159922_18171 | NW_004516886.1 | Scaffold1773 | 18171                   | CC                              | AA                | 1946664644               |
| SNP_P3_159923_18172 | NW_004516886.1 | Scaffold1773 | 18172                   | CC                              | TT                | 1946664646               |
| SNP_P3_159924_18549 | NW_004516886.1 | Scaffold1773 | 18549                   | GG                              | CC                | 1946664648               |
| SNP_P3_159925_19827 | NW_004516886.1 | Scaffold1773 | 19827                   | CC                              | TT                | 1946664650               |
| SNP_P3_159926_20100 | NW_004516886.1 | Scaffold1773 | 20100                   | AA                              | CC                | 1946664652               |
| SNP_P3_159927_20576 | NW_004516886.1 | Scaffold1773 | 20576                   | TT                              | CC                | 1946664654               |
| SNP_P3_159928_26089 | NW_004516886.1 | Scaffold1773 | 26089                   | AA                              | GG                | 1946664656               |
| SNP_P3_159929_26091 | NW_004516886.1 | Scaffold1773 | 26091                   | AA                              | GG                | 1946664658               |
| SNP_P3_159930_26094 | NW_004516886.1 | Scaffold1773 | 26094                   | AA                              | GG                | 1946664660               |
| SNP_P3_159931_26107 | NW_004516886.1 | Scaffold1773 | 26107                   | CC                              | AA                | 1946664662               |
| SNP_P3_159932_28354 | NW_004516886.1 | Scaffold1773 | 28354                   | CC                              | GG                | 1946664664               |
| SNP_P3_159933_28769 | NW_004516886.1 | Scaffold1773 | 28769                   | CC                              | AA                | 1946664666               |
| SNP_P3_159934_29444 | NW_004516886.1 | Scaffold1773 | 29444                   | CC                              | AA                | 1946664668               |
| SNP_P3_159935_30071 | NW_004516886.1 | Scaffold1773 | 30071                   | GG                              | CC                | 1946664670               |
| SNP_P3_159936_30310 | NW_004516886.1 | Scaffold1773 | 30310                   | TT                              | AA                | 1946664672               |
| SNP_P3_159937_30421 | NW_004516886.1 | Scaffold1773 | 30421                   | CC                              | TT                | 1946664674               |
| SNP_P3_159938_30734 | NW_004516886.1 | Scaffold1773 | 30734                   | TT                              | AA                | 1946664676               |
| SNP_P3_159939_30766 | NW_004516886.1 | Scaffold1773 | 30766                   | AA                              | TT                | 1946664678               |
| SNP_P3_159940_31139 | NW_004516886.1 | Scaffold1773 | 31139                   | AA                              | GG                | 1946664680               |
| SNP_P3_159941_32256 | NW_004516886.1 | Scaffold1773 | 32256                   | CC                              | TT                | 1946664682               |
| SNP_P3_159942_32977 | NW_004516886.1 | Scaffold1773 | 32977                   | CC                              | TT                | 1946664684               |
| SNP_P3_159943_33041 | NW_004516886.1 | Scaffold1773 | 33041                   | CC                              | AA                | 1946664686               |
| SNP_P3_159944_34487 | NW_004516886.1 | Scaffold1773 | 34487                   | GG                              | AA                | 1946664688               |
| SNP_P3_159945_35303 | NW_004516886.1 | Scaffold1773 | 35303                   | CC                              | TT                | 1946664690               |
| SNP_P3_159946_35438 | NW_004516886.1 | Scaffold1773 | 35438                   | TT                              | CC                | 1946664692               |
| SNP_P3_159947_35543 | NW_004516886.1 | Scaffold1773 | 35543                   | GG                              | AA                | 1946664694               |
| SNP_P3_159948_35639 | NW_004516886.1 | Scaffold1773 | 35639                   | CC                              | TT                | 1946664696               |
| SNP_P3_159949_35674 | NW_004516886.1 | Scaffold1773 | 35674                   | TT                              | CC                | 1946664698               |
| SNP_P3_159950_37010 | NW_004516886.1 | Scaffold1773 | 37010                   | GG                              | CC                | 1946664700               |
| SNP_P3_159951_41480 | NW_004516886.1 | Scaffold1773 | 41480                   | CC                              | AA                | 1946664702               |
| SNP_P3_159952_49140 | NW_004516886.1 | Scaffold1773 | 49140                   | CC                              | AA                | 1946664704               |
| SNP_P3_159953_49483 | NW_004516886.1 | Scaffold1773 | 49483                   | CC                              | GG                | 1946664706               |
| SNP_P3_159954_49744 | NW_004516886.1 | Scaffold1773 | 49744                   | GG                              | AA                | 1946664708               |
| SNP_P3_159955_2777  | NW_004516888.1 | Scaffold1776 | 2777                    | AA                              | TT                | 1946664710               |
| SNP_P3_159956_9184  | NW_004516888.1 | Scaffold1776 | 9184                    | CC                              | AA                | 1946664712               |
| SNP_P3_159957_14351 | NW_004516888.1 | Scaffold1776 | 14351                   | AA                              | GG                | 1946664714               |
| SNP_P3_159958_14403 | NW_004516888.1 | Scaffold1776 | 14403                   | AA                              | GG                | 1946664716               |
| SNP_P3_159959_14474 | NW_004516888.1 | Scaffold1776 | 14474                   | AA                              | CC                | 1946664718               |



| SNPs IDs             | Chromosome IDs | Chromosomes  | Physical positions (bp) | CDC Frontier (Reference genome) | (Pusa 256 & HPNB) | NCBI SNPdb Accession IDs |
|----------------------|----------------|--------------|-------------------------|---------------------------------|-------------------|--------------------------|
| SNP_P3_159960_16317  | NW_004516888.1 | Scaffold1776 | 16317                   | TT                              | CC                | 1946664720               |
| SNP_P3_159961_16544  | NW_004516888.1 | Scaffold1776 | 16544                   | TT                              | CC                | 1946664722               |
| SNP_P3_159962_16622  | NW_004516888.1 | Scaffold1776 | 16622                   | TT                              | AA                | 1946664724               |
| SNP_P3_159963_16637  | NW_004516888.1 | Scaffold1776 | 16637                   | GG                              | AA                | 1946664726               |
| SNP_P3_159964_16672  | NW_004516888.1 | Scaffold1776 | 16672                   | CC                              | GG                | 1946664728               |
| SNP_P3_159965_16679  | NW_004516888.1 | Scaffold1776 | 16679                   | GG                              | AA                | 1946664730               |
| SNP_P3_159966_16725  | NW_004516888.1 | Scaffold1776 | 16725                   | CC                              | TT                | 1946664732               |
| SNP_P3_159967_23437  | NW_004516888.1 | Scaffold1776 | 23437                   | TT                              | AA                | 1946664734               |
| SNP_P3_159968_23458  | NW_004516888.1 | Scaffold1776 | 23458                   | GG                              | AA                | 1946664736               |
| SNP_P3_159969_23550  | NW_004516888.1 | Scaffold1776 | 23550                   | TT                              | AA                | 1946664738               |
| SNP_P3_159971_23569  | NW_004516888.1 | Scaffold1776 | 23569                   | AA                              | GG                | 1946664740               |
| SNP_P3_159972_23955  | NW_004516888.1 | Scaffold1776 | 23955                   | GG                              | AA                | 1946664742               |
| SNP_P3_159973_26660  | NW_004516888.1 | Scaffold1776 | 26660                   | AA                              | TT                | 1946664744               |
| SNP_P3_159974_27788  | NW_004516888.1 | Scaffold1776 | 27788                   | CC                              | TT                | 1946664747               |
| SNP_P3_159975_29291  | NW_004516888.1 | Scaffold1776 | 29291                   | AA                              | GG                | 1946664749               |
| SNP_P3_159976_22254  | NW_004516889.1 | Scaffold1777 | 22254                   | CC                              | GG                | 1946664751               |
| SNP_P3_159977_22306  | NW_004516889.1 | Scaffold1777 | 22306                   | AA                              | GG                | 1946664754               |
| SNP_P3_159978_22335  | NW_004516889.1 | Scaffold1777 | 22335                   | GG                              | AA                | 1946664756               |
| SNP_P3_159979_22385  | NW_004516889.1 | Scaffold1777 | 22385                   | TT                              | AA                | 1946664759               |
| SNP_P3_159980_22444  | NW_004516889.1 | Scaffold1777 | 22444                   | AA                              | TT                | 1946664761               |
| SNP_P3_159981_22451  | NW_004516889.1 | Scaffold1777 | 22451                   | GG                              | AA                | 1946664763               |
| SNP_P3_159982_22536  | NW_004516889.1 | Scaffold1777 | 22536                   | CC                              | TT                | 1946664765               |
| SNP_P3_159983_22626  | NW_004516889.1 | Scaffold1777 | 22626                   | AA                              | GG                | 1946664767               |
| SNP_P3_159984_22809  | NW_004516889.1 | Scaffold1777 | 22809                   | AA                              | GG                | 1946664769               |
| SNP_P3_159985_22844  | NW_004516889.1 | Scaffold1777 | 22844                   | TT                              | CC                | 1946664771               |
| SNP_P3_159986_22857  | NW_004516889.1 | Scaffold1777 | 22857                   | TT                              | CC                | 1946664773               |
| SNP_P3_159987_22873  | NW_004516889.1 | Scaffold1777 | 22873                   | GG                              | CC                | 1946664775               |
| SNP_P3_159988_22909  | NW_004516889.1 | Scaffold1777 | 22909                   | TT                              | GG                | 1946664777               |
| SNP_P3_159989_28106  | NW_004516889.1 | Scaffold1777 | 28106                   | CC                              | TT                | 1946664779               |
| SNP_P3_159991_70396  | NW_004516889.1 | Scaffold1777 | 70396                   | CC                              | TT                | 1946664781               |
| SNP_P3_159992_103874 | NW_004516889.1 | Scaffold1777 | 103874                  | TT                              | CC                | 1946664785               |
| SNP_P3_159993_104197 | NW_004516889.1 | Scaffold1777 | 104197                  | GG                              | AA                | 1946664787               |
| SNP_P3_159994_104242 | NW_004516889.1 | Scaffold1777 | 104242                  | CC                              | TT                | 1946664789               |
| SNP_P3_159995_104295 | NW_004516889.1 | Scaffold1777 | 104295                  | CC                              | TT                | 1946664791               |
| SNP_P3_159996_114358 | NW_004516889.1 | Scaffold1777 | 114358                  | CC                              | TT                | 1946664793               |
| SNP_P3_159997_126985 | NW_004516889.1 | Scaffold1777 | 126985                  | AA                              | GG                | 1946664795               |
| SNP_P3_159998_147376 | NW_004516889.1 | Scaffold1777 | 147376                  | CC                              | GG                | 1946664797               |
| SNP_P3_159999_162355 | NW_004516889.1 | Scaffold1777 | 162355                  | CC                              | AA                | 1946664799               |
| SNP_P3_160000_164689 | NW_004516889.1 | Scaffold1777 | 164689                  | AA                              | GG                | 1946664801               |
| SNP_P3_160001_182099 | NW_004516889.1 | Scaffold1777 | 182099                  | GG                              | TT                | 1946664803               |
| SNP_P3_160002_182698 | NW_004516889.1 | Scaffold1777 | 182698                  | TT                              | CC                | 1946664805               |
| SNP_P3_160003_182705 | NW_004516889.1 | Scaffold1777 | 182705                  | TT                              | GG                | 1946664807               |

| SNPs IDs             | Chromosome IDs | Chromosomes  | Physical positions (bp) | CDC Frontier (Reference genome) | (Pusa 256 & HPNB) | NCBI SNPdb Accession IDs |
|----------------------|----------------|--------------|-------------------------|---------------------------------|-------------------|--------------------------|
| SNP_P3_160004_271911 | NW_004516889.1 | Scaffold1777 | 271911                  | TT                              | CC                | 1946664809               |
| SNP_P3_160005_273166 | NW_004516889.1 | Scaffold1777 | 273166                  | GG                              | AA                | 1946664811               |
| SNP_P3_160006_273175 | NW_004516889.1 | Scaffold1777 | 273175                  | AA                              | GG                | 1946664813               |
| SNP_P3_160007_273184 | NW_004516889.1 | Scaffold1777 | 273184                  | TT                              | CC                | 1946664815               |
| SNP_P3_160008_273224 | NW_004516889.1 | Scaffold1777 | 273224                  | AA                              | GG                | 1946664817               |
| SNP_P3_160009_273554 | NW_004516889.1 | Scaffold1777 | 273554                  | AA                              | GG                | 1946664819               |
| SNP_P3_160010_273621 | NW_004516889.1 | Scaffold1777 | 273621                  | GG                              | AA                | 1946664822               |
| SNP_P3_160011_282895 | NW_004516889.1 | Scaffold1777 | 282895                  | GG                              | AA                | 1946664824               |
| SNP_P3_160012_340110 | NW_004516889.1 | Scaffold1777 | 340110                  | AA                              | GG                | 1946664826               |
| SNP_P3_160013_342440 | NW_004516889.1 | Scaffold1777 | 342440                  | GG                              | AA                | 1946664828               |
| SNP_P3_160014_343007 | NW_004516889.1 | Scaffold1777 | 343007                  | AA                              | GG                | 1946664830               |
| SNP_P3_160015_343116 | NW_004516889.1 | Scaffold1777 | 343116                  | CC                              | TT                | 1946664833               |
| SNP_P3_160016_343140 | NW_004516889.1 | Scaffold1777 | 343140                  | TT                              | CC                | 1946664835               |
| SNP_P3_160017_343164 | NW_004516889.1 | Scaffold1777 | 343164                  | CC                              | TT                | 1946664837               |
| SNP_P3_160018_343173 | NW_004516889.1 | Scaffold1777 | 343173                  | CC                              | TT                | 1946664839               |
| SNP_P3_160019_343185 | NW_004516889.1 | Scaffold1777 | 343185                  | GG                              | AA                | 1946664841               |
| SNP_P3_160020_343228 | NW_004516889.1 | Scaffold1777 | 343228                  | TT                              | CC                | 1946664843               |
| SNP_P3_160021_343253 | NW_004516889.1 | Scaffold1777 | 343253                  | AA                              | GG                | 1946664846               |
| SNP_P3_160022_343257 | NW_004516889.1 | Scaffold1777 | 343257                  | AA                              | GG                | 1946664848               |
| SNP_P3_160023_343260 | NW_004516889.1 | Scaffold1777 | 343260                  | AA                              | GG                | 1946664850               |
| SNP_P3_160024_343269 | NW_004516889.1 | Scaffold1777 | 343269                  | AA                              | CC                | 1946664852               |
| SNP_P3_160026_343342 | NW_004516889.1 | Scaffold1777 | 343342                  | CC                              | GG                | 1946664854               |
| SNP_P3_160027_343375 | NW_004516889.1 | Scaffold1777 | 343375                  | GG                              | AA                | 1946664856               |
| SNP_P3_160028_343381 | NW_004516889.1 | Scaffold1777 | 343381                  | CC                              | TT                | 1946664858               |
| SNP_P3_160029_343417 | NW_004516889.1 | Scaffold1777 | 343417                  | TT                              | CC                | 1946664861               |
| SNP_P3_160030_343462 | NW_004516889.1 | Scaffold1777 | 343462                  | AA                              | GG                | 1946664863               |
| SNP_P3_160031_343466 | NW_004516889.1 | Scaffold1777 | 343466                  | TT                              | CC                | 1946664865               |
| SNP_P3_160032_343484 | NW_004516889.1 | Scaffold1777 | 343484                  | TT                              | AA                | 1946664867               |
| SNP_P3_160033_343489 | NW_004516889.1 | Scaffold1777 | 343489                  | TT                              | CC                | 1946664869               |
| SNP_P3_160034_343506 | NW_004516889.1 | Scaffold1777 | 343506                  | CC                              | TT                | 1946664871               |
| SNP_P3_160035_343522 | NW_004516889.1 | Scaffold1777 | 343522                  | AA                              | GG                | 1946664873               |
| SNP_P3_160036_343537 | NW_004516889.1 | Scaffold1777 | 343537                  | GG                              | AA                | 1946664875               |
| SNP_P3_160037_343621 | NW_004516889.1 | Scaffold1777 | 343621                  | GG                              | AA                | 1946664877               |
| SNP_P3_160038_343622 | NW_004516889.1 | Scaffold1777 | 343622                  | GG                              | AA                | 1946664879               |
| SNP_P3_160039_343681 | NW_004516889.1 | Scaffold1777 | 343681                  | CC                              | TT                | 1946664881               |
| SNP_P3_160040_344981 | NW_004516889.1 | Scaffold1777 | 344981                  | AA                              | GG                | 1946664883               |
| SNP_P3_160041_344990 | NW_004516889.1 | Scaffold1777 | 344990                  | GG                              | AA                | 1946664885               |
| SNP_P3_160042_345392 | NW_004516889.1 | Scaffold1777 | 345392                  | TT                              | CC                | 1946664887               |
| SNP_P3_160043_345439 | NW_004516889.1 | Scaffold1777 | 345439                  | AA                              | GG                | 1946664889               |
| SNP_P3_160044_347701 | NW_004516889.1 | Scaffold1777 | 347701                  | GG                              | AA                | 1946664891               |
| SNP_P3_160045_347873 | NW_004516889.1 | Scaffold1777 | 347873                  | GG                              | AA                | 1946664893               |
| SNP_P3_160046_348110 | NW_004516889.1 | Scaffold1777 | 348110                  | AA                              | TT                | 1946664895               |

| SNPs IDs             | Chromosome IDs | Chromosomes  | Physical positions (bp) | CDC Frontier (Reference genome) | (Pusa 256 & HPNB) | NCBI SNPdb Accession IDs |
|----------------------|----------------|--------------|-------------------------|---------------------------------|-------------------|--------------------------|
| SNP_P3_160047_350865 | NW_004516889.1 | Scaffold1777 | 350865                  | TT                              | CC                | 1946664898               |
| SNP_P3_160048_350887 | NW_004516889.1 | Scaffold1777 | 350887                  | GG                              | AA                | 1946664900               |
| SNP_P3_160049_356814 | NW_004516889.1 | Scaffold1777 | 356814                  | TT                              | CC                | 1946664902               |
| SNP_P3_160050_358122 | NW_004516889.1 | Scaffold1777 | 358122                  | AA                              | CC                | 1946664904               |
| SNP_P3_160052_368268 | NW_004516889.1 | Scaffold1777 | 368268                  | GG                              | TT                | 1946664906               |
| SNP_P3_160053_393196 | NW_004516889.1 | Scaffold1777 | 393196                  | GG                              | AA                | 1946664908               |
| SNP_P3_160056_447175 | NW_004516889.1 | Scaffold1777 | 447175                  | CC                              | GG                | 1946664910               |
| SNP_P3_160057_447199 | NW_004516889.1 | Scaffold1777 | 447199                  | TT                              | AA                | 1946664912               |
| SNP_P3_160058_447384 | NW_004516889.1 | Scaffold1777 | 447384                  | TT                              | CC                | 1946664914               |
| SNP_P3_160059_492339 | NW_004516889.1 | Scaffold1777 | 492339                  | TT                              | CC                | 1946664916               |
| SNP_P3_160061_518894 | NW_004516889.1 | Scaffold1777 | 518894                  | AA                              | GG                | 1946664918               |
| SNP_P3_160062_518940 | NW_004516889.1 | Scaffold1777 | 518940                  | TT                              | CC                | 1946664921               |
| SNP_P3_160063_518955 | NW_004516889.1 | Scaffold1777 | 518955                  | TT                              | CC                | 1946664923               |
| SNP_P3_160064_519169 | NW_004516889.1 | Scaffold1777 | 519169                  | TT                              | GG                | 1946664925               |
| SNP_P3_160065_519476 | NW_004516889.1 | Scaffold1777 | 519476                  | TT                              | CC                | 1946664927               |
| SNP_P3_160066_519484 | NW_004516889.1 | Scaffold1777 | 519484                  | TT                              | GG                | 1946664929               |
| SNP_P3_160067_519529 | NW_004516889.1 | Scaffold1777 | 519529                  | GG                              | AA                | 1946664931               |
| SNP_P3_160069_539766 | NW_004516889.1 | Scaffold1777 | 539766                  | CC                              | TT                | 1946664933               |
| SNP_P3_160070_540923 | NW_004516889.1 | Scaffold1777 | 540923                  | AA                              | TT                | 1946664935               |
| SNP_P3_160071_551373 | NW_004516889.1 | Scaffold1777 | 551373                  | TT                              | CC                | 1946664938               |
| SNP_P3_160073_567365 | NW_004516889.1 | Scaffold1777 | 567365                  | GG                              | AA                | 1946664940               |
| SNP_P3_160074_567413 | NW_004516889.1 | Scaffold1777 | 567413                  | CC                              | TT                | 1946664942               |
| SNP_P3_160075_567453 | NW_004516889.1 | Scaffold1777 | 567453                  | GG                              | TT                | 1946664944               |
| SNP_P3_160076_567465 | NW_004516889.1 | Scaffold1777 | 567465                  | CC                              | TT                | 1946664946               |
| SNP_P3_160077_567468 | NW_004516889.1 | Scaffold1777 | 567468                  | AA                              | GG                | 1946664948               |
| SNP_P3_160078_569614 | NW_004516889.1 | Scaffold1777 | 569614                  | AA                              | GG                | 1946664950               |
| SNP_P3_160079_569622 | NW_004516889.1 | Scaffold1777 | 569622                  | AA                              | CC                | 1946664952               |
| SNP_P3_160080_569638 | NW_004516889.1 | Scaffold1777 | 569638                  | CC                              | AA                | 1946664954               |
| SNP_P3_160081_569979 | NW_004516889.1 | Scaffold1777 | 569979                  | CC                              | TT                | 1946664956               |
| SNP_P3_160082_570153 | NW_004516889.1 | Scaffold1777 | 570153                  | TT                              | AA                | 1946664958               |
| SNP_P3_160083_570158 | NW_004516889.1 | Scaffold1777 | 570158                  | CC                              | AA                | 1946664960               |
| SNP_P3_160084_579901 | NW_004516889.1 | Scaffold1777 | 579901                  | AA                              | GG                | 1946664962               |
| SNP_P3_160086_613663 | NW_004516889.1 | Scaffold1777 | 613663                  | GG                              | AA                | 1946664964               |
| SNP_P3_160087_613665 | NW_004516889.1 | Scaffold1777 | 613665                  | AA                              | GG                | 1946664966               |
| SNP_P3_160088_613731 | NW_004516889.1 | Scaffold1777 | 613731                  | AA                              | GG                | 1946664968               |
| SNP_P3_160089_613787 | NW_004516889.1 | Scaffold1777 | 613787                  | GG                              | AA                | 1946664970               |
| SNP_P3_160090_613810 | NW_004516889.1 | Scaffold1777 | 613810                  | TT                              | CC                | 1946664972               |
| SNP_P3_160091_613859 | NW_004516889.1 | Scaffold1777 | 613859                  | CC                              | GG                | 1946664974               |
| SNP_P3_160092_613879 | NW_004516889.1 | Scaffold1777 | 613879                  | GG                              | AA                | 1946664977               |
| SNP_P3_160093_614044 | NW_004516889.1 | Scaffold1777 | 614044                  | TT                              | CC                | 1946664979               |
| SNP_P3_160094_614064 | NW_004516889.1 | Scaffold1777 | 614064                  | AA                              | GG                | 1946664981               |
| SNP_P3_160095_614402 | NW_004516889.1 | Scaffold1777 | 614402                  | AA                              | GG                | 1946664983               |

| SNPs IDs             | Chromosome IDs | Chromosomes  | Physical positions (bp) | CDC Frontier (Reference genome) | (Pusa 256 & HPNB) | NCBI SNPdb Accession IDs |
|----------------------|----------------|--------------|-------------------------|---------------------------------|-------------------|--------------------------|
| SNP_P3_160097_614649 | NW_004516889.1 | Scaffold1777 | 614649                  | CC                              | AA                | 1946664985               |
| SNP_P3_160098_614684 | NW_004516889.1 | Scaffold1777 | 614684                  | CC                              | TT                | 1946664987               |
| SNP_P3_160100_614717 | NW_004516889.1 | Scaffold1777 | 614717                  | CC                              | TT                | 1946664989               |
| SNP_P3_160101_617427 | NW_004516889.1 | Scaffold1777 | 617427                  | CC                              | TT                | 1946664991               |
| SNP_P3_160102_623744 | NW_004516889.1 | Scaffold1777 | 623744                  | CC                              | AA                | 1946664993               |
| SNP_P3_160103_623808 | NW_004516889.1 | Scaffold1777 | 623808                  | TT                              | CC                | 1946664995               |
| SNP_P3_160104_623811 | NW_004516889.1 | Scaffold1777 | 623811                  | GG                              | AA                | 1946664997               |
| SNP_P3_160105_623814 | NW_004516889.1 | Scaffold1777 | 623814                  | CC                              | TT                | 1946664999               |
| SNP_P3_160106_623848 | NW_004516889.1 | Scaffold1777 | 623848                  | GG                              | AA                | 1946665000               |
| SNP_P3_160107_624109 | NW_004516889.1 | Scaffold1777 | 624109                  | AA                              | TT                | 1946665002               |
| SNP_P3_160108_624116 | NW_004516889.1 | Scaffold1777 | 624116                  | TT                              | AA                | 1946665004               |
| SNP_P3_160109_624140 | NW_004516889.1 | Scaffold1777 | 624140                  | TT                              | CC                | 1946665006               |
| SNP_P3_160110_624353 | NW_004516889.1 | Scaffold1777 | 624353                  | AA                              | GG                | 1946665008               |
| SNP_P3_160111_624370 | NW_004516889.1 | Scaffold1777 | 624370                  | TT                              | GG                | 1946665010               |
| SNP_P3_160112_624379 | NW_004516889.1 | Scaffold1777 | 624379                  | GG                              | TT                | 1946665012               |
| SNP_P3_160113_625564 | NW_004516889.1 | Scaffold1777 | 625564                  | GG                              | TT                | 1946665015               |
| SNP_P3_160114_625648 | NW_004516889.1 | Scaffold1777 | 625648                  | AA                              | GG                | 1946665018               |
| SNP_P3_160115_625735 | NW_004516889.1 | Scaffold1777 | 625735                  | AA                              | GG                | 1946665020               |
| SNP_P3_160116_625749 | NW_004516889.1 | Scaffold1777 | 625749                  | GG                              | CC                | 1946665022               |
| SNP_P3_160117_626419 | NW_004516889.1 | Scaffold1777 | 626419                  | CC                              | TT                | 1946665024               |
| SNP_P3_160118_626478 | NW_004516889.1 | Scaffold1777 | 626478                  | AA                              | TT                | 1946665026               |
| SNP_P3_160119_626517 | NW_004516889.1 | Scaffold1777 | 626517                  | CC                              | AA                | 1946665028               |
| SNP_P3_160120_626782 | NW_004516889.1 | Scaffold1777 | 626782                  | TT                              | CC                | 1946665030               |
| SNP_P3_160121_628203 | NW_004516889.1 | Scaffold1777 | 628203                  | CC                              | TT                | 1946665032               |
| SNP_P3_160122_628264 | NW_004516889.1 | Scaffold1777 | 628264                  | TT                              | CC                | 1946665034               |
| SNP_P3_160123_628295 | NW_004516889.1 | Scaffold1777 | 628295                  | TT                              | CC                | 1946665036               |
| SNP_P3_160124_628406 | NW_004516889.1 | Scaffold1777 | 628406                  | GG                              | AA                | 1946665038               |
| SNP_P3_160125_628448 | NW_004516889.1 | Scaffold1777 | 628448                  | AA                              | GG                | 1946665040               |
| SNP_P3_160126_628509 | NW_004516889.1 | Scaffold1777 | 628509                  | AA                              | GG                | 1946665042               |
| SNP_P3_160127_628540 | NW_004516889.1 | Scaffold1777 | 628540                  | CC                              | AA                | 1946665044               |
| SNP_P3_160128_628629 | NW_004516889.1 | Scaffold1777 | 628629                  | AA                              | GG                | 1946665046               |
| SNP_P3_160129_628679 | NW_004516889.1 | Scaffold1777 | 628679                  | TT                              | CC                | 1946665048               |
| SNP_P3_160130_628701 | NW_004516889.1 | Scaffold1777 | 628701                  | AA                              | CC                | 1946665050               |
| SNP_P3_160131_629083 | NW_004516889.1 | Scaffold1777 | 629083                  | TT                              | CC                | 1946665052               |
| SNP_P3_160132_629227 | NW_004516889.1 | Scaffold1777 | 629227                  | GG                              | CC                | 1946665055               |
| SNP_P3_160133_629451 | NW_004516889.1 | Scaffold1777 | 629451                  | TT                              | CC                | 1946665057               |
| SNP_P3_160134_629487 | NW_004516889.1 | Scaffold1777 | 629487                  | CC                              | TT                | 1946665059               |
| SNP_P3_160135_629612 | NW_004516889.1 | Scaffold1777 | 629612                  | AA                              | GG                | 1946665061               |
| SNP_P3_160136_632545 | NW_004516889.1 | Scaffold1777 | 632545                  | GG                              | AA                | 1946665063               |
| SNP_P3_160137_636259 | NW_004516889.1 | Scaffold1777 | 636259                  | AA                              | GG                | 1946665065               |
| SNP_P3_160139_636513 | NW_004516889.1 | Scaffold1777 | 636513                  | CC                              | TT                | 1946665067               |
| SNP_P3_160140_636544 | NW_004516889.1 | Scaffold1777 | 636544                  | AA                              | TT                | 1946665069               |

| SNPs IDs             | Chromosome IDs | Chromosomes  | Physical positions (bp) | CDC Frontier (Reference genome) | (Pusa 256 & HPNB) | NCBI SNPdb Accession IDs |
|----------------------|----------------|--------------|-------------------------|---------------------------------|-------------------|--------------------------|
| SNP_P3_160141_636598 | NW_004516889.1 | Scaffold1777 | 636598                  | TT                              | AA                | 1946665071               |
| SNP_P3_160142_637579 | NW_004516889.1 | Scaffold1777 | 637579                  | TT                              | CC                | 1946665073               |
| SNP_P3_160143_152    | NW_004516890.1 | Scaffold1778 | 152                     | CC                              | GG                | 1946665075               |
| SNP_P3_160144_192    | NW_004516890.1 | Scaffold1778 | 192                     | CC                              | TT                | 1946665077               |
| SNP_P3_160145_205    | NW_004516890.1 | Scaffold1778 | 205                     | AA                              | CC                | 1946665079               |
| SNP_P3_160146_414    | NW_004516890.1 | Scaffold1778 | 414                     | GG                              | CC                | 1946665081               |
| SNP_P3_160147_723    | NW_004516890.1 | Scaffold1778 | 723                     | TT                              | AA                | 1946665083               |
| SNP_P3_160148_852    | NW_004516890.1 | Scaffold1778 | 852                     | TT                              | AA                | 1946665085               |
| SNP_P3_160149_908    | NW_004516890.1 | Scaffold1778 | 908                     | AA                              | CC                | 1946665087               |
| SNP_P3_160150_915    | NW_004516890.1 | Scaffold1778 | 915                     | AA                              | GG                | 1946665089               |
| SNP_P3_160151_925    | NW_004516890.1 | Scaffold1778 | 925                     | TT                              | CC                | 1946665091               |
| SNP_P3_160152_982    | NW_004516890.1 | Scaffold1778 | 982                     | GG                              | AA                | 1946665093               |
| SNP_P3_160153_1212   | NW_004516890.1 | Scaffold1778 | 1212                    | CC                              | TT                | 1946665095               |
| SNP_P3_160154_1214   | NW_004516890.1 | Scaffold1778 | 1214                    | CC                              | GG                | 1946665097               |
| SNP_P3_160155_1218   | NW_004516890.1 | Scaffold1778 | 1218                    | AA                              | CC                | 1946665100               |
| SNP_P3_160156_1223   | NW_004516890.1 | Scaffold1778 | 1223                    | TT                              | GG                | 1946665103               |
| SNP_P3_160157_1229   | NW_004516890.1 | Scaffold1778 | 1229                    | CC                              | TT                | 1946665105               |
| SNP_P3_160159_1278   | NW_004516890.1 | Scaffold1778 | 1278                    | CC                              | AA                | 1946665107               |
| SNP_P3_160160_1651   | NW_004516890.1 | Scaffold1778 | 1651                    | CC                              | TT                | 1946665108               |
| SNP_P3_160161_1918   | NW_004516890.1 | Scaffold1778 | 1918                    | AA                              | GG                | 1946665110               |
| SNP_P3_160162_1973   | NW_004516890.1 | Scaffold1778 | 1973                    | TT                              | GG                | 1946665112               |
| SNP_P3_160163_1980   | NW_004516890.1 | Scaffold1778 | 1980                    | CC                              | TT                | 1946665114               |
| SNP_P3_160164_2044   | NW_004516890.1 | Scaffold1778 | 2044                    | TT                              | AA                | 1946665116               |
| SNP_P3_160165_3043   | NW_004516890.1 | Scaffold1778 | 3043                    | AA                              | GG                | 1946665118               |
| SNP_P3_160166_3121   | NW_004516890.1 | Scaffold1778 | 3121                    | CC                              | TT                | 1946665120               |
| SNP_P3_160167_4067   | NW_004516890.1 | Scaffold1778 | 4067                    | GG                              | AA                | 1946665122               |
| SNP_P3_160168_4156   | NW_004516890.1 | Scaffold1778 | 4156                    | GG                              | AA                | 1946665124               |
| SNP_P3_160169_4177   | NW_004516890.1 | Scaffold1778 | 4177                    | TT                              | GG                | 1946665126               |
| SNP_P3_160170_4184   | NW_004516890.1 | Scaffold1778 | 4184                    | GG                              | AA                | 1946665128               |
| SNP_P3_160171_4197   | NW_004516890.1 | Scaffold1778 | 4197                    | CC                              | TT                | 1946665130               |
| SNP_P3_160172_4236   | NW_004516890.1 | Scaffold1778 | 4236                    | TT                              | CC                | 1946665131               |
| SNP_P3_160173_4505   | NW_004516890.1 | Scaffold1778 | 4505                    | GG                              | AA                | 1946665133               |
| SNP_P3_160174_4559   | NW_004516890.1 | Scaffold1778 | 4559                    | GG                              | AA                | 1946665135               |
| SNP_P3_160175_4571   | NW_004516890.1 | Scaffold1778 | 4571                    | TT                              | AA                | 1946665137               |
| SNP_P3_160176_4573   | NW_004516890.1 | Scaffold1778 | 4573                    | CC                              | TT                | 1946665139               |
| SNP_P3_160177_4586   | NW_004516890.1 | Scaffold1778 | 4586                    | TT                              | CC                | 1946665141               |
| SNP_P3_160178_4889   | NW_004516890.1 | Scaffold1778 | 4889                    | TT                              | CC                | 1946665143               |
| SNP_P3_160179_4904   | NW_004516890.1 | Scaffold1778 | 4904                    | CC                              | TT                | 1946665145               |
| SNP_P3_160180_4925   | NW_004516890.1 | Scaffold1778 | 4925                    | TT                              | CC                | 1946665147               |
| SNP_P3_160181_4960   | NW_004516890.1 | Scaffold1778 | 4960                    | GG                              | AA                | 1946665149               |
| SNP_P3_160182_4973   | NW_004516890.1 | Scaffold1778 | 4973                    | AA                              | GG                | 1946665152               |
| SNP_P3_160183_5011   | NW_004516890.1 | Scaffold1778 | 5011                    | AA                              | GG                | 1946665154               |

| SNPs IDs            | Chromosome IDs | Chromosomes  | Physical positions (bp) | CDC Frontier (Reference genome) | (Pusa 256 & HPNB) | NCBI SNPdb Accession IDs |
|---------------------|----------------|--------------|-------------------------|---------------------------------|-------------------|--------------------------|
| SNP_P3_160184_10419 | NW_004516890.1 | Scaffold1778 | 10419                   | TT                              | AA                | 1946665156               |
| SNP_P3_160185_10507 | NW_004516890.1 | Scaffold1778 | 10507                   | TT                              | GG                | 1946665158               |
| SNP_P3_160186_12024 | NW_004516890.1 | Scaffold1778 | 12024                   | AA                              | GG                | 1946665160               |
| SNP_P3_160187_15263 | NW_004516890.1 | Scaffold1778 | 15263                   | AA                              | TT                | 1946665162               |
| SNP_P3_160188_15750 | NW_004516890.1 | Scaffold1778 | 15750                   | AA                              | TT                | 1946665164               |
| SNP_P3_160189_15832 | NW_004516890.1 | Scaffold1778 | 15832                   | AA                              | GG                | 1946665166               |
| SNP_P3_160190_15882 | NW_004516890.1 | Scaffold1778 | 15882                   | AA                              | TT                | 1946665168               |
| SNP_P3_160191_15959 | NW_004516890.1 | Scaffold1778 | 15959                   | GG                              | AA                | 1946665170               |
| SNP_P3_160192_15998 | NW_004516890.1 | Scaffold1778 | 15998                   | AA                              | TT                | 1946665172               |
| SNP_P3_160193_16103 | NW_004516890.1 | Scaffold1778 | 16103                   | CC                              | TT                | 1946665174               |
| SNP_P3_160194_16113 | NW_004516890.1 | Scaffold1778 | 16113                   | TT                              | CC                | 1946665177               |
| SNP_P3_160195_16129 | NW_004516890.1 | Scaffold1778 | 16129                   | CC                              | GG                | 1946665179               |
| SNP_P3_160196_16171 | NW_004516890.1 | Scaffold1778 | 16171                   | AA                              | GG                | 1946665181               |
| SNP_P3_160197_16240 | NW_004516890.1 | Scaffold1778 | 16240                   | TT                              | CC                | 1946665183               |
| SNP_P3_160198_16241 | NW_004516890.1 | Scaffold1778 | 16241                   | TT                              | GG                | 1946665185               |
| SNP_P3_160199_16282 | NW_004516890.1 | Scaffold1778 | 16282                   | CC                              | AA                | 1946665187               |
| SNP_P3_160200_16286 | NW_004516890.1 | Scaffold1778 | 16286                   | AA                              | GG                | 1946665189               |
| SNP_P3_160201_16312 | NW_004516890.1 | Scaffold1778 | 16312                   | TT                              | CC                | 1946665191               |
| SNP_P3_160202_16340 | NW_004516890.1 | Scaffold1778 | 16340                   | CC                              | TT                | 1946665193               |
| SNP_P3_160203_16420 | NW_004516890.1 | Scaffold1778 | 16420                   | AA                              | CC                | 1946665195               |
| SNP_P3_160204_16423 | NW_004516890.1 | Scaffold1778 | 16423                   | GG                              | AA                | 1946665197               |
| SNP_P3_160205_16476 | NW_004516890.1 | Scaffold1778 | 16476                   | GG                              | AA                | 1946665199               |
| SNP_P3_160206_16489 | NW_004516890.1 | Scaffold1778 | 16489                   | CC                              | TT                | 1946665202               |
| SNP_P3_160207_16601 | NW_004516890.1 | Scaffold1778 | 16601                   | AA                              | GG                | 1946665205               |
| SNP_P3_160208_16645 | NW_004516890.1 | Scaffold1778 | 16645                   | TT                              | AA                | 1946665207               |
| SNP_P3_160209_16648 | NW_004516890.1 | Scaffold1778 | 16648                   | TT                              | GG                | 1946665209               |
| SNP_P3_160210_16716 | NW_004516890.1 | Scaffold1778 | 16716                   | CC                              | TT                | 1946665211               |
| SNP_P3_160211_16754 | NW_004516890.1 | Scaffold1778 | 16754                   | CC                              | TT                | 1946665213               |
| SNP_P3_160212_16858 | NW_004516890.1 | Scaffold1778 | 16858                   | CC                              | GG                | 1946665215               |
| SNP_P3_160213_16869 | NW_004516890.1 | Scaffold1778 | 16869                   | GG                              | AA                | 1946665217               |
| SNP_P3_160214_16915 | NW_004516890.1 | Scaffold1778 | 16915                   | TT                              | CC                | 1946665219               |
| SNP_P3_160215_16931 | NW_004516890.1 | Scaffold1778 | 16931                   | AA                              | GG                | 1946665221               |
| SNP_P3_160216_16974 | NW_004516890.1 | Scaffold1778 | 16974                   | GG                              | TT                | 1946665223               |
| SNP_P3_160217_16988 | NW_004516890.1 | Scaffold1778 | 16988                   | AA                              | GG                | 1946665226               |
| SNP_P3_160218_17022 | NW_004516890.1 | Scaffold1778 | 17022                   | TT                              | GG                | 1946665228               |
| SNP_P3_160219_18767 | NW_004516890.1 | Scaffold1778 | 18767                   | CC                              | TT                | 1946665230               |
| SNP_P3_160220_18805 | NW_004516890.1 | Scaffold1778 | 18805                   | TT                              | CC                | 1946665232               |
| SNP_P3_160221_8319  | NW_004516891.1 | Scaffold1779 | 8319                    | GG                              | AA                | 1946665234               |
| SNP_P3_160222_8743  | NW_004516891.1 | Scaffold1779 | 8743                    | AA                              | GG                | 1946665236               |
| SNP_P3_160223_9608  | NW_004516891.1 | Scaffold1779 | 9608                    | AA                              | TT                | 1946665238               |
| SNP_P3_160224_9609  | NW_004516891.1 | Scaffold1779 | 9609                    | TT                              | CC                | 1946665241               |
| SNP_P3_160225_11152 | NW_004516891.1 | Scaffold1779 | 11152                   | TT                              | CC                | 1946665243               |

| SNPs IDs             | Chromosome IDs | Chromosomes  | Physical positions (bp) | CDC Frontier (Reference genome) | (Pusa 256 & HPNB) | NCBI SNPdb Accession IDs |
|----------------------|----------------|--------------|-------------------------|---------------------------------|-------------------|--------------------------|
| SNP_P3_160226_11176  | NW_004516891.1 | Scaffold1779 | 11176                   | AA                              | GG                | 1946665245               |
| SNP_P3_160227_11533  | NW_004516891.1 | Scaffold1779 | 11533                   | AA                              | CC                | 1946665247               |
| SNP_P3_160228_11553  | NW_004516891.1 | Scaffold1779 | 11553                   | AA                              | GG                | 1946665249               |
| SNP_P3_160229_11585  | NW_004516891.1 | Scaffold1779 | 11585                   | GG                              | TT                | 1946665252               |
| SNP_P3_160230_11653  | NW_004516891.1 | Scaffold1779 | 11653                   | GG                              | AA                | 1946665254               |
| SNP_P3_160231_11659  | NW_004516891.1 | Scaffold1779 | 11659                   | TT                              | GG                | 1946665256               |
| SNP_P3_160232_12357  | NW_004516891.1 | Scaffold1779 | 12357                   | AA                              | GG                | 1946665258               |
| SNP_P3_160233_12647  | NW_004516891.1 | Scaffold1779 | 12647                   | CC                              | AA                | 1946665261               |
| SNP_P3_160234_12681  | NW_004516891.1 | Scaffold1779 | 12681                   | GG                              | AA                | 1946665263               |
| SNP_P3_160235_12688  | NW_004516891.1 | Scaffold1779 | 12688                   | TT                              | CC                | 1946665265               |
| SNP_P3_160236_12702  | NW_004516891.1 | Scaffold1779 | 12702                   | GG                              | AA                | 1946665267               |
| SNP_P3_160237_55749  | NW_004516891.1 | Scaffold1779 | 55749                   | TT                              | AA                | 1946665269               |
| SNP_P3_160238_118991 | NW_004516891.1 | Scaffold1779 | 118991                  | TT                              | CC                | 1946665271               |
| SNP_P3_160239_119031 | NW_004516891.1 | Scaffold1779 | 119031                  | CC                              | TT                | 1946665273               |
| SNP_P3_160240_119111 | NW_004516891.1 | Scaffold1779 | 119111                  | CC                              | TT                | 1946665275               |
| SNP_P3_160241_119160 | NW_004516891.1 | Scaffold1779 | 119160                  | CC                              | AA                | 1946665277               |
| SNP_P3_160242_119244 | NW_004516891.1 | Scaffold1779 | 119244                  | TT                              | CC                | 1946665280               |
| SNP_P3_160243_119275 | NW_004516891.1 | Scaffold1779 | 119275                  | TT                              | AA                | 1946665282               |
| SNP_P3_160244_119450 | NW_004516891.1 | Scaffold1779 | 119450                  | GG                              | TT                | 1946665284               |
| SNP_P3_160245_119565 | NW_004516891.1 | Scaffold1779 | 119565                  | CC                              | TT                | 1946665286               |
| SNP_P3_160246_121926 | NW_004516891.1 | Scaffold1779 | 121926                  | CC                              | TT                | 1946665288               |
| SNP_P3_160247_122089 | NW_004516891.1 | Scaffold1779 | 122089                  | AA                              | GG                | 1946665290               |
| SNP_P3_160248_122238 | NW_004516891.1 | Scaffold1779 | 122238                  | AA                              | GG                | 1946665292               |
| SNP_P3_160249_129700 | NW_004516891.1 | Scaffold1779 | 129700                  | GG                              | AA                | 1946665294               |
| SNP_P3_160252_132015 | NW_004516891.1 | Scaffold1779 | 132015                  | TT                              | CC                | 1946665296               |
| SNP_P3_160253_132441 | NW_004516891.1 | Scaffold1779 | 132441                  | AA                              | GG                | 1946665298               |
| SNP_P3_160254_132965 | NW_004516891.1 | Scaffold1779 | 132965                  | GG                              | AA                | 1946665300               |
| SNP_P3_160255_132999 | NW_004516891.1 | Scaffold1779 | 132999                  | GG                              | AA                | 1946665302               |
| SNP_P3_160256_5693   | NW_004516893.1 | Scaffold1782 | 5693                    | AA                              | GG                | 1946665305               |
| SNP_P3_160258_5946   | NW_004516893.1 | Scaffold1782 | 5946                    | AA                              | GG                | 1946665307               |
| SNP_P3_160259_5976   | NW_004516893.1 | Scaffold1782 | 5976                    | CC                              | TT                | 1946665309               |
| SNP_P3_160260_6072   | NW_004516893.1 | Scaffold1782 | 6072                    | AA                              | TT                | 1946665311               |
| SNP_P3_160261_6100   | NW_004516893.1 | Scaffold1782 | 6100                    | CC                              | TT                | 1946665313               |
| SNP_P3_160262_6121   | NW_004516893.1 | Scaffold1782 | 6121                    | GG                              | AA                | 1946665315               |
| SNP_P3_160263_6158   | NW_004516893.1 | Scaffold1782 | 6158                    | TT                              | CC                | 1946665317               |
| SNP_P3_160264_6171   | NW_004516893.1 | Scaffold1782 | 6171                    | TT                              | GG                | 1946665319               |
| SNP_P3_160265_6208   | NW_004516893.1 | Scaffold1782 | 6208                    | AA                              | GG                | 1946665321               |
| SNP_P3_160266_3178   | NW_004516894.1 | Scaffold1783 | 3178                    | CC                              | TT                | 1946665323               |
| SNP_P3_160267_5042   | NW_004516894.1 | Scaffold1783 | 5042                    | AA                              | GG                | 1946665325               |
| SNP_P3_160268_37357  | NW_004516894.1 | Scaffold1783 | 37357                   | AA                              | TT                | 1946665328               |
| SNP_P3_160269_37671  | NW_004516894.1 | Scaffold1783 | 37671                   | GG                              | AA                | 1946665330               |
| SNP_P3_160270_38185  | NW_004516894.1 | Scaffold1783 | 38185                   | AA                              | GG                | 1946665332               |

| SNPs IDs            | Chromosome IDs | Chromosomes  | Physical positions (bp) | CDC Frontier (Reference genome) | (Pusa 256 & HPNB) | NCBI SNPdb Accession IDs |
|---------------------|----------------|--------------|-------------------------|---------------------------------|-------------------|--------------------------|
| SNP_P3_160271_39952 | NW_004516894.1 | Scaffold1783 | 39952                   | AA                              | TT                | 1946665334               |
| SNP_P3_160272_40127 | NW_004516894.1 | Scaffold1783 | 40127                   | CC                              | TT                | 1946665336               |
| SNP_P3_160273_40203 | NW_004516894.1 | Scaffold1783 | 40203                   | AA                              | TT                | 1946665338               |
| SNP_P3_160274_40251 | NW_004516894.1 | Scaffold1783 | 40251                   | AA                              | CC                | 1946665340               |
| SNP_P3_160275_40269 | NW_004516894.1 | Scaffold1783 | 40269                   | TT                              | GG                | 1946665342               |
| SNP_P3_160276_40291 | NW_004516894.1 | Scaffold1783 | 40291                   | GG                              | AA                | 1946665344               |
| SNP_P3_160277_46055 | NW_004516894.1 | Scaffold1783 | 46055                   | TT                              | CC                | 1946665346               |
| SNP_P3_160278_46057 | NW_004516894.1 | Scaffold1783 | 46057                   | TT                              | CC                | 1946665348               |
| SNP_P3_160279_46060 | NW_004516894.1 | Scaffold1783 | 46060                   | AA                              | GG                | 1946665350               |
| SNP_P3_160280_46087 | NW_004516894.1 | Scaffold1783 | 46087                   | CC                              | AA                | 1946665352               |
| SNP_P3_160281_417   | NW_004516897.1 | Scaffold1789 | 417                     | AA                              | GG                | 1946665354               |
| SNP_P3_160282_21349 | NW_004516897.1 | Scaffold1789 | 21349                   | AA                              | TT                | 1946665356               |
| SNP_P3_160283_10135 | NW_004516898.1 | Scaffold1791 | 10135                   | AA                              | TT                | 1946665358               |
| SNP_P3_160284_316   | NW_004516900.1 | Scaffold1793 | 316                     | GG                              | AA                | 1946665360               |
| SNP_P3_160285_408   | NW_004516900.1 | Scaffold1793 | 408                     | TT                              | AA                | 1946665362               |
| SNP_P3_160286_2724  | NW_004516901.1 | Scaffold1795 | 2724                    | TT                              | AA                | 1946665364               |
| SNP_P3_160287_5402  | NW_004516901.1 | Scaffold1795 | 5402                    | AA                              | GG                | 1946665367               |
| SNP_P3_160289_5642  | NW_004516901.1 | Scaffold1795 | 5642                    | AA                              | GG                | 1946665369               |
| SNP_P3_160290_5762  | NW_004516901.1 | Scaffold1795 | 5762                    | GG                              | AA                | 1946665371               |
| SNP_P3_160291_6568  | NW_004516901.1 | Scaffold1795 | 6568                    | AA                              | CC                | 1946665373               |
| SNP_P3_160292_5245  | NW_004516903.1 | Scaffold1797 | 5245                    | CC                              | TT                | 1946665375               |
| SNP_P3_160293_16773 | NW_004516903.1 | Scaffold1797 | 16773                   | AA                              | CC                | 1946665376               |
| SNP_P3_160294_16777 | NW_004516903.1 | Scaffold1797 | 16777                   | AA                              | TT                | 1946665378               |
| SNP_P3_160295_23519 | NW_004516903.1 | Scaffold1797 | 23519                   | AA                              | TT                | 1946665380               |
| SNP_P3_160296_23905 | NW_004516903.1 | Scaffold1797 | 23905                   | CC                              | AA                | 1946665382               |
| SNP_P3_160297_26370 | NW_004516903.1 | Scaffold1797 | 26370                   | TT                              | CC                | 1946665384               |
| SNP_P3_160298_26470 | NW_004516903.1 | Scaffold1797 | 26470                   | GG                              | CC                | 1946665386               |
| SNP_P3_160299_26483 | NW_004516903.1 | Scaffold1797 | 26483                   | TT                              | GG                | 1946665388               |
| SNP_P3_160300_26519 | NW_004516903.1 | Scaffold1797 | 26519                   | TT                              | AA                | 1946665390               |
| SNP_P3_160301_26523 | NW_004516903.1 | Scaffold1797 | 26523                   | TT                              | CC                | 1946665393               |
| SNP_P3_160302_37300 | NW_004516903.1 | Scaffold1797 | 37300                   | TT                              | AA                | 1946665395               |
| SNP_P3_160303_37844 | NW_004516903.1 | Scaffold1797 | 37844                   | CC                              | AA                | 1946665397               |
| SNP_P3_160304_37895 | NW_004516903.1 | Scaffold1797 | 37895                   | CC                              | GG                | 1946665398               |
| SNP_P3_160305_1579  | NW_004516904.1 | Scaffold1798 | 1579                    | CC                              | TT                | 1946665400               |
| SNP_P3_160306_1588  | NW_004516904.1 | Scaffold1798 | 1588                    | TT                              | AA                | 1946665402               |
| SNP_P3_160307_1686  | NW_004516904.1 | Scaffold1798 | 1686                    | TT                              | CC                | 1946665404               |
| SNP_P3_160308_1695  | NW_004516904.1 | Scaffold1798 | 1695                    | TT                              | CC                | 1946665406               |
| SNP_P3_160309_1731  | NW_004516904.1 | Scaffold1798 | 1731                    | CC                              | AA                | 1946665408               |
| SNP_P3_160310_1757  | NW_004516904.1 | Scaffold1798 | 1757                    | AA                              | GG                | 1946665410               |
| SNP_P3_160311_1785  | NW_004516904.1 | Scaffold1798 | 1785                    | TT                              | CC                | 1946665412               |
| SNP_P3_160312_1802  | NW_004516904.1 | Scaffold1798 | 1802                    | TT                              | CC                | 1946665414               |
| SNP_P3_160313_8016  | NW_004516905.1 | Scaffold1799 | 8016                    | GG                              | AA                | 1946665416               |



| SNPs IDs             | Chromosome IDs | Chromosomes  | Physical positions (bp) | CDC Frontier (Reference genome) | (Pusa 256 & HPNB) | NCBI SNPdb Accession IDs |
|----------------------|----------------|--------------|-------------------------|---------------------------------|-------------------|--------------------------|
| SNP_P3_160314_9806   | NW_004516905.1 | Scaffold1799 | 9806                    | GG                              | TT                | 1946665418               |
| SNP_P3_160315_9963   | NW_004516905.1 | Scaffold1799 | 9963                    | GG                              | AA                | 1946665420               |
| SNP_P3_160316_3437   | NW_004516907.1 | Scaffold1802 | 3437                    | CC                              | AA                | 1946665422               |
| SNP_P3_160317_3722   | NW_004516907.1 | Scaffold1802 | 3722                    | GG                              | AA                | 1946665424               |
| SNP_P3_160318_15612  | NW_004516907.1 | Scaffold1802 | 15612                   | CC                              | TT                | 1946665426               |
| SNP_P3_160319_15636  | NW_004516907.1 | Scaffold1802 | 15636                   | TT                              | CC                | 1946665428               |
| SNP_P3_160320_15653  | NW_004516907.1 | Scaffold1802 | 15653                   | TT                              | CC                | 1946665430               |
| SNP_P3_160321_15785  | NW_004516907.1 | Scaffold1802 | 15785                   | GG                              | AA                | 1946665432               |
| SNP_P3_160322_20150  | NW_004516907.1 | Scaffold1802 | 20150                   | GG                              | AA                | 1946665434               |
| SNP_P3_160324_20482  | NW_004516907.1 | Scaffold1802 | 20482                   | TT                              | CC                | 1946665436               |
| SNP_P3_160327_82017  | NW_004516909.1 | Scaffold1804 | 82017                   | TT                              | CC                | 1946665438               |
| SNP_P3_160328_101016 | NW_004516909.1 | Scaffold1804 | 101016                  | TT                              | AA                | 1946665440               |
| SNP_P3_160329_101205 | NW_004516909.1 | Scaffold1804 | 101205                  | AA                              | TT                | 1946665442               |
| SNP_P3_160330_113090 | NW_004516909.1 | Scaffold1804 | 113090                  | GG                              | AA                | 1946665444               |
| SNP_P3_160331_113125 | NW_004516909.1 | Scaffold1804 | 113125                  | CC                              | AA                | 1946665446               |
| SNP_P3_160332_116307 | NW_004516909.1 | Scaffold1804 | 116307                  | CC                              | TT                | 1946665448               |
| SNP_P3_160333_116347 | NW_004516909.1 | Scaffold1804 | 116347                  | TT                              | GG                | 1946665450               |
| SNP_P3_160334_116392 | NW_004516909.1 | Scaffold1804 | 116392                  | CC                              | TT                | 1946665452               |
| SNP_P3_160335_116409 | NW_004516909.1 | Scaffold1804 | 116409                  | GG                              | TT                | 1946665454               |
| SNP_P3_160336_116423 | NW_004516909.1 | Scaffold1804 | 116423                  | CC                              | AA                | 1946665456               |
| SNP_P3_160338_135682 | NW_004516909.1 | Scaffold1804 | 135682                  | CC                              | AA                | 1946665458               |
| SNP_P3_160339_135700 | NW_004516909.1 | Scaffold1804 | 135700                  | TT                              | CC                | 1946665460               |
| SNP_P3_160340_135706 | NW_004516909.1 | Scaffold1804 | 135706                  | CC                              | GG                | 1946665462               |
| SNP_P3_160341_135761 | NW_004516909.1 | Scaffold1804 | 135761                  | TT                              | AA                | 1946665465               |
| SNP_P3_160342_135794 | NW_004516909.1 | Scaffold1804 | 135794                  | GG                              | TT                | 1946665467               |
| SNP_P3_160343_136107 | NW_004516909.1 | Scaffold1804 | 136107                  | CC                              | TT                | 1946665469               |
| SNP_P3_160344_148889 | NW_004516909.1 | Scaffold1804 | 148889                  | GG                              | AA                | 1946665471               |
| SNP_P3_160345_149172 | NW_004516909.1 | Scaffold1804 | 149172                  | CC                              | TT                | 1946665473               |
| SNP_P3_160346_149175 | NW_004516909.1 | Scaffold1804 | 149175                  | CC                              | GG                | 1946665475               |
| SNP_P3_160347_150692 | NW_004516909.1 | Scaffold1804 | 150692                  | GG                              | AA                | 1946665476               |
| SNP_P3_160348_150723 | NW_004516909.1 | Scaffold1804 | 150723                  | CC                              | TT                | 1946665477               |
| SNP_P3_160349_151496 | NW_004516909.1 | Scaffold1804 | 151496                  | AA                              | TT                | 1946665478               |
| SNP_P3_160350_151501 | NW_004516909.1 | Scaffold1804 | 151501                  | GG                              | AA                | 1946665479               |
| SNP_P3_160351_154623 | NW_004516909.1 | Scaffold1804 | 154623                  | AA                              | TT                | 1946665480               |
| SNP_P3_160352_154630 | NW_004516909.1 | Scaffold1804 | 154630                  | TT                              | AA                | 1946665482               |
| SNP_P3_160353_154631 | NW_004516909.1 | Scaffold1804 | 154631                  | TT                              | AA                | 1946665484               |
| SNP_P3_160354_154632 | NW_004516909.1 | Scaffold1804 | 154632                  | TT                              | AA                | 1946665486               |
| SNP_P3_160355_154633 | NW_004516909.1 | Scaffold1804 | 154633                  | TT                              | AA                | 1946665488               |
| SNP_P3_160356_154783 | NW_004516909.1 | Scaffold1804 | 154783                  | TT                              | CC                | 1946665490               |
| SNP_P3_160358_154876 | NW_004516909.1 | Scaffold1804 | 154876                  | CC                              | GG                | 1946665492               |
| SNP_P3_160359_154877 | NW_004516909.1 | Scaffold1804 | 154877                  | TT                              | CC                | 1946665494               |
| SNP_P3_160360_154914 | NW_004516909.1 | Scaffold1804 | 154914                  | TT                              | GG                | 1946665496               |

| SNPs IDs             | Chromosome IDs | Chromosomes  | Physical positions (bp) | CDC Frontier (Reference genome) | (Pusa 256 & HPNB) | NCBI SNPdb Accession IDs |
|----------------------|----------------|--------------|-------------------------|---------------------------------|-------------------|--------------------------|
| SNP_P3_160361_162544 | NW_004516909.1 | Scaffold1804 | 162544                  | TT                              | CC                | 1946665499               |
| SNP_P3_160362_175838 | NW_004516909.1 | Scaffold1804 | 175838                  | AA                              | TT                | 1946665501               |
| SNP_P3_160364_180252 | NW_004516909.1 | Scaffold1804 | 180252                  | TT                              | GG                | 1946665503               |
| SNP_P3_160365_183783 | NW_004516909.1 | Scaffold1804 | 183783                  | AA                              | TT                | 1946665505               |
| SNP_P3_160366_184121 | NW_004516909.1 | Scaffold1804 | 184121                  | CC                              | TT                | 1946665507               |
| SNP_P3_160367_184140 | NW_004516909.1 | Scaffold1804 | 184140                  | GG                              | TT                | 1946665509               |
| SNP_P3_160368_184148 | NW_004516909.1 | Scaffold1804 | 184148                  | CC                              | TT                | 1946665511               |
| SNP_P3_160369_184160 | NW_004516909.1 | Scaffold1804 | 184160                  | CC                              | TT                | 1946665513               |
| SNP_P3_160370_184229 | NW_004516909.1 | Scaffold1804 | 184229                  | GG                              | TT                | 1946665515               |
| SNP_P3_160371_184335 | NW_004516909.1 | Scaffold1804 | 184335                  | TT                              | GG                | 1946665517               |
| SNP_P3_160372_184392 | NW_004516909.1 | Scaffold1804 | 184392                  | TT                              | GG                | 1946665519               |
| SNP_P3_160373_184427 | NW_004516909.1 | Scaffold1804 | 184427                  | TT                              | GG                | 1946665521               |
| SNP_P3_160374_184706 | NW_004516909.1 | Scaffold1804 | 184706                  | AA                              | GG                | 1946665523               |
| SNP_P3_160375_184725 | NW_004516909.1 | Scaffold1804 | 184725                  | CC                              | GG                | 1946665525               |
| SNP_P3_160376_184776 | NW_004516909.1 | Scaffold1804 | 184776                  | TT                              | CC                | 1946665527               |
| SNP_P3_160377_188854 | NW_004516909.1 | Scaffold1804 | 188854                  | TT                              | CC                | 1946665529               |
| SNP_P3_160378_191696 | NW_004516909.1 | Scaffold1804 | 191696                  | CC                              | TT                | 1946665531               |
| SNP_P3_160379_191709 | NW_004516909.1 | Scaffold1804 | 191709                  | AA                              | GG                | 1946665533               |
| SNP_P3_160380_191720 | NW_004516909.1 | Scaffold1804 | 191720                  | AA                              | GG                | 1946665535               |
| SNP_P3_160381_191771 | NW_004516909.1 | Scaffold1804 | 191771                  | AA                              | CC                | 1946665537               |
| SNP_P3_160382_191811 | NW_004516909.1 | Scaffold1804 | 191811                  | GG                              | AA                | 1946665540               |
| SNP_P3_160383_191895 | NW_004516909.1 | Scaffold1804 | 191895                  | GG                              | AA                | 1946665542               |
| SNP_P3_160384_192093 | NW_004516909.1 | Scaffold1804 | 192093                  | AA                              | GG                | 1946665544               |
| SNP_P3_160385_192140 | NW_004516909.1 | Scaffold1804 | 192140                  | TT                              | AA                | 1946665546               |
| SNP_P3_160386_192173 | NW_004516909.1 | Scaffold1804 | 192173                  | AA                              | GG                | 1946665548               |
| SNP_P3_160387_192246 | NW_004516909.1 | Scaffold1804 | 192246                  | GG                              | AA                | 1946665550               |
| SNP_P3_160388_192247 | NW_004516909.1 | Scaffold1804 | 192247                  | TT                              | AA                | 1946665552               |
| SNP_P3_160389_192248 | NW_004516909.1 | Scaffold1804 | 192248                  | AA                              | GG                | 1946665555               |
| SNP_P3_160390_192249 | NW_004516909.1 | Scaffold1804 | 192249                  | TT                              | AA                | 1946665557               |
| SNP_P3_160391_212997 | NW_004516909.1 | Scaffold1804 | 212997                  | CC                              | GG                | 1946665559               |
| SNP_P3_160392_219387 | NW_004516909.1 | Scaffold1804 | 219387                  | AA                              | TT                | 1946665561               |
| SNP_P3_160393_219874 | NW_004516909.1 | Scaffold1804 | 219874                  | AA                              | GG                | 1946665563               |
| SNP_P3_160394_221547 | NW_004516909.1 | Scaffold1804 | 221547                  | GG                              | CC                | 1946665565               |
| SNP_P3_160395_229558 | NW_004516909.1 | Scaffold1804 | 229558                  | TT                              | GG                | 1946665567               |
| SNP_P3_160396_234328 | NW_004516909.1 | Scaffold1804 | 234328                  | TT                              | CC                | 1946665569               |
| SNP_P3_160397_234640 | NW_004516909.1 | Scaffold1804 | 234640                  | CC                              | TT                | 1946665571               |
| SNP_P3_160398_235382 | NW_004516909.1 | Scaffold1804 | 235382                  | AA                              | TT                | 1946665573               |
| SNP_P3_160399_236960 | NW_004516909.1 | Scaffold1804 | 236960                  | GG                              | AA                | 1946665575               |
| SNP_P3_160400_244682 | NW_004516909.1 | Scaffold1804 | 244682                  | CC                              | AA                | 1946665577               |
| SNP_P3_160401_246790 | NW_004516909.1 | Scaffold1804 | 246790                  | AA                              | GG                | 1946665579               |
| SNP_P3_160402_246799 | NW_004516909.1 | Scaffold1804 | 246799                  | GG                              | AA                | 1946665581               |
| SNP_P3_160403_246834 | NW_004516909.1 | Scaffold1804 | 246834                  | GG                              | TT                | 1946665583               |

| SNPs IDs             | Chromosome IDs | Chromosomes  | Physical positions (bp) | CDC Frontier (Reference genome) | (Pusa 256 & HPNB) | NCBI SNPdb Accession IDs |
|----------------------|----------------|--------------|-------------------------|---------------------------------|-------------------|--------------------------|
| SNP_P3_160404_246865 | NW_004516909.1 | Scaffold1804 | 246865                  | AA                              | GG                | 1946665585               |
| SNP_P3_160405_246901 | NW_004516909.1 | Scaffold1804 | 246901                  | GG                              | TT                | 1946665587               |
| SNP_P3_160406_247171 | NW_004516909.1 | Scaffold1804 | 247171                  | CC                              | GG                | 1946665589               |
| SNP_P3_160407_247176 | NW_004516909.1 | Scaffold1804 | 247176                  | AA                              | GG                | 1946665591               |
| SNP_P3_160408_247307 | NW_004516909.1 | Scaffold1804 | 247307                  | AA                              | CC                | 1946665594               |
| SNP_P3_160409_247315 | NW_004516909.1 | Scaffold1804 | 247315                  | AA                              | GG                | 1946665596               |
| SNP_P3_160410_253308 | NW_004516909.1 | Scaffold1804 | 253308                  | AA                              | TT                | 1946665598               |
| SNP_P3_160411_253314 | NW_004516909.1 | Scaffold1804 | 253314                  | TT                              | AA                | 1946665600               |
| SNP_P3_160412_253541 | NW_004516909.1 | Scaffold1804 | 253541                  | AA                              | TT                | 1946665602               |
| SNP_P3_160413_253574 | NW_004516909.1 | Scaffold1804 | 253574                  | TT                              | CC                | 1946665604               |
| SNP_P3_160414_253716 | NW_004516909.1 | Scaffold1804 | 253716                  | TT                              | CC                | 1946665606               |
| SNP_P3_160415_253840 | NW_004516909.1 | Scaffold1804 | 253840                  | CC                              | TT                | 1946665608               |
| SNP_P3_160416_253897 | NW_004516909.1 | Scaffold1804 | 253897                  | CC                              | TT                | 1946665610               |
| SNP_P3_160417_254487 | NW_004516909.1 | Scaffold1804 | 254487                  | AA                              | CC                | 1946665612               |
| SNP_P3_160418_257485 | NW_004516909.1 | Scaffold1804 | 257485                  | AA                              | GG                | 1946665614               |
| SNP_P3_160419_259120 | NW_004516909.1 | Scaffold1804 | 259120                  | GG                              | AA                | 1946665616               |
| SNP_P3_160420_271321 | NW_004516909.1 | Scaffold1804 | 271321                  | TT                              | CC                | 1946665618               |
| SNP_P3_160421_271391 | NW_004516909.1 | Scaffold1804 | 271391                  | TT                              | CC                | 1946665620               |
| SNP_P3_160422_271856 | NW_004516909.1 | Scaffold1804 | 271856                  | TT                              | CC                | 1946665622               |
| SNP_P3_160423_271863 | NW_004516909.1 | Scaffold1804 | 271863                  | CC                              | TT                | 1946665624               |
| SNP_P3_160424_281354 | NW_004516909.1 | Scaffold1804 | 281354                  | CC                              | TT                | 1946665626               |
| SNP_P3_160425_289176 | NW_004516909.1 | Scaffold1804 | 289176                  | GG                              | AA                | 1946665628               |
| SNP_P3_160426_298415 | NW_004516909.1 | Scaffold1804 | 298415                  | GG                              | AA                | 1946665632               |
| SNP_P3_160427_303353 | NW_004516909.1 | Scaffold1804 | 303353                  | TT                              | CC                | 1946665634               |
| SNP_P3_160428_303423 | NW_004516909.1 | Scaffold1804 | 303423                  | GG                              | AA                | 1946665636               |
| SNP_P3_160429_317851 | NW_004516909.1 | Scaffold1804 | 317851                  | CC                              | GG                | 1946665638               |
| SNP_P3_160430_317904 | NW_004516909.1 | Scaffold1804 | 317904                  | CC                              | AA                | 1946665640               |
| SNP_P3_160431_317906 | NW_004516909.1 | Scaffold1804 | 317906                  | TT                              | AA                | 1946665642               |
| SNP_P3_160433_318745 | NW_004516909.1 | Scaffold1804 | 318745                  | CC                              | TT                | 1946665644               |
| SNP_P3_160434_64     | NW_004516910.1 | Scaffold1806 | 64                      | CC                              | AA                | 1946665646               |
| SNP_P3_160435_107    | NW_004516910.1 | Scaffold1806 | 107                     | AA                              | TT                | 1946665648               |
| SNP_P3_160437_225    | NW_004516910.1 | Scaffold1806 | 225                     | CC                              | TT                | 1946665650               |
| SNP_P3_160438_347    | NW_004516910.1 | Scaffold1806 | 347                     | AA                              | CC                | 1946665652               |
| SNP_P3_160439_457    | NW_004516910.1 | Scaffold1806 | 457                     | TT                              | AA                | 1946665654               |
| SNP_P3_160440_469    | NW_004516910.1 | Scaffold1806 | 469                     | CC                              | TT                | 1946665656               |
| SNP_P3_160441_555    | NW_004516910.1 | Scaffold1806 | 555                     | AA                              | GG                | 1946665658               |
| SNP_P3_160442_645    | NW_004516910.1 | Scaffold1806 | 645                     | CC                              | TT                | 1946665660               |
| SNP_P3_160443_650    | NW_004516910.1 | Scaffold1806 | 650                     | GG                              | CC                | 1946665662               |
| SNP_P3_160444_672    | NW_004516910.1 | Scaffold1806 | 672                     | GG                              | AA                | 1946665664               |
| SNP_P3_160445_701    | NW_004516910.1 | Scaffold1806 | 701                     | AA                              | GG                | 1946665666               |
| SNP_P3_160446_730    | NW_004516910.1 | Scaffold1806 | 730                     | AA                              | GG                | 1946665669               |
| SNP_P3_160447_2391   | NW_004516910.1 | Scaffold1806 | 2391                    | GG                              | TT                | 1946665671               |

| SNPs IDs            | Chromosome IDs | Chromosomes  | Physical positions (bp) | CDC Frontier (Reference genome) | (Pusa 256 & HPNB) | NCBI SNPdb Accession IDs |
|---------------------|----------------|--------------|-------------------------|---------------------------------|-------------------|--------------------------|
| SNP_P3_160448_2422  | NW_004516910.1 | Scaffold1806 | 2422                    | TT                              | CC                | 1946665674               |
| SNP_P3_160449_2435  | NW_004516910.1 | Scaffold1806 | 2435                    | AA                              | GG                | 1946665676               |
| SNP_P3_160450_2563  | NW_004516910.1 | Scaffold1806 | 2563                    | TT                              | AA                | 1946665678               |
| SNP_P3_160451_2566  | NW_004516910.1 | Scaffold1806 | 2566                    | TT                              | CC                | 1946665680               |
| SNP_P3_160452_2624  | NW_004516910.1 | Scaffold1806 | 2624                    | AA                              | GG                | 1946665683               |
| SNP_P3_160453_2647  | NW_004516910.1 | Scaffold1806 | 2647                    | AA                              | CC                | 1946665685               |
| SNP_P3_160454_2754  | NW_004516910.1 | Scaffold1806 | 2754                    | CC                              | TT                | 1946665687               |
| SNP_P3_160455_2942  | NW_004516910.1 | Scaffold1806 | 2942                    | CC                              | TT                | 1946665689               |
| SNP_P3_160457_3857  | NW_004516910.1 | Scaffold1806 | 3857                    | AA                              | TT                | 1946665691               |
| SNP_P3_160458_4586  | NW_004516910.1 | Scaffold1806 | 4586                    | AA                              | GG                | 1946665693               |
| SNP_P3_160459_4702  | NW_004516910.1 | Scaffold1806 | 4702                    | TT                              | CC                | 1946665695               |
| SNP_P3_160460_4816  | NW_004516910.1 | Scaffold1806 | 4816                    | TT                              | GG                | 1946665697               |
| SNP_P3_160461_4881  | NW_004516910.1 | Scaffold1806 | 4881                    | TT                              | AA                | 1946665699               |
| SNP_P3_160462_4919  | NW_004516910.1 | Scaffold1806 | 4919                    | AA                              | GG                | 1946665701               |
| SNP_P3_160463_4956  | NW_004516910.1 | Scaffold1806 | 4956                    | CC                              | GG                | 1946665703               |
| SNP_P3_160464_4966  | NW_004516910.1 | Scaffold1806 | 4966                    | GG                              | AA                | 1946665706               |
| SNP_P3_160465_5041  | NW_004516910.1 | Scaffold1806 | 5041                    | AA                              | TT                | 1946665709               |
| SNP_P3_160466_5290  | NW_004516910.1 | Scaffold1806 | 5290                    | CC                              | TT                | 1946665711               |
| SNP_P3_160467_6569  | NW_004516910.1 | Scaffold1806 | 6569                    | CC                              | TT                | 1946665713               |
| SNP_P3_160468_6581  | NW_004516910.1 | Scaffold1806 | 6581                    | CC                              | AA                | 1946665715               |
| SNP_P3_160470_6906  | NW_004516910.1 | Scaffold1806 | 6906                    | AA                              | GG                | 1946665717               |
| SNP_P3_160471_6978  | NW_004516910.1 | Scaffold1806 | 6978                    | CC                              | TT                | 1946665719               |
| SNP_P3_160472_6987  | NW_004516910.1 | Scaffold1806 | 6987                    | GG                              | AA                | 1946665721               |
| SNP_P3_160473_7016  | NW_004516910.1 | Scaffold1806 | 7016                    | AA                              | GG                | 1946665723               |
| SNP_P3_160474_7518  | NW_004516910.1 | Scaffold1806 | 7518                    | TT                              | AA                | 1946665725               |
| SNP_P3_160475_7535  | NW_004516910.1 | Scaffold1806 | 7535                    | AA                              | GG                | 1946665727               |
| SNP_P3_160476_7906  | NW_004516910.1 | Scaffold1806 | 7906                    | GG                              | TT                | 1946665729               |
| SNP_P3_160477_7950  | NW_004516910.1 | Scaffold1806 | 7950                    | TT                              | AA                | 1946665731               |
| SNP_P3_160478_8213  | NW_004516910.1 | Scaffold1806 | 8213                    | CC                              | AA                | 1946665733               |
| SNP_P3_160479_8265  | NW_004516910.1 | Scaffold1806 | 8265                    | AA                              | GG                | 1946665735               |
| SNP_P3_160480_8478  | NW_004516910.1 | Scaffold1806 | 8478                    | AA                              | GG                | 1946665737               |
| SNP_P3_160481_8493  | NW_004516910.1 | Scaffold1806 | 8493                    | AA                              | CC                | 1946665739               |
| SNP_P3_160482_8536  | NW_004516910.1 | Scaffold1806 | 8536                    | AA                              | GG                | 1946665741               |
| SNP_P3_160483_8599  | NW_004516910.1 | Scaffold1806 | 8599                    | AA                              | GG                | 1946665744               |
| SNP_P3_160484_8760  | NW_004516910.1 | Scaffold1806 | 8760                    | CC                              | GG                | 1946665746               |
| SNP_P3_160485_8776  | NW_004516910.1 | Scaffold1806 | 8776                    | AA                              | GG                | 1946665748               |
| SNP_P3_160486_9048  | NW_004516910.1 | Scaffold1806 | 9048                    | CC                              | TT                | 1946665750               |
| SNP_P3_160487_23856 | NW_004516910.1 | Scaffold1806 | 23856                   | CC                              | TT                | 1946665753               |
| SNP_P3_160488_23943 | NW_004516910.1 | Scaffold1806 | 23943                   | TT                              | AA                | 1946665755               |
| SNP_P3_160489_23962 | NW_004516910.1 | Scaffold1806 | 23962                   | GG                              | AA                | 1946665757               |
| SNP_P3_160490_24090 | NW_004516910.1 | Scaffold1806 | 24090                   | CC                              | TT                | 1946665759               |
| SNP_P3_160491_24170 | NW_004516910.1 | Scaffold1806 | 24170                   | TT                              | AA                | 1946665761               |

| SNPs IDs             | Chromosome IDs | Chromosomes  | Physical positions (bp) | CDC Frontier (Reference genome) | (Pusa 256 & HPNB) | NCBI SNPdb Accession IDs |
|----------------------|----------------|--------------|-------------------------|---------------------------------|-------------------|--------------------------|
| SNP_P3_160492_24224  | NW_004516910.1 | Scaffold1806 | 24224                   | CC                              | AA                | 1946665763               |
| SNP_P3_160493_24312  | NW_004516910.1 | Scaffold1806 | 24312                   | GG                              | AA                | 1946665765               |
| SNP_P3_160494_24427  | NW_004516910.1 | Scaffold1806 | 24427                   | CC                              | AA                | 1946665767               |
| SNP_P3_160495_24656  | NW_004516910.1 | Scaffold1806 | 24656                   | CC                              | TT                | 1946665769               |
| SNP_P3_160496_24660  | NW_004516910.1 | Scaffold1806 | 24660                   | CC                              | TT                | 1946665771               |
| SNP_P3_160497_24768  | NW_004516910.1 | Scaffold1806 | 24768                   | CC                              | AA                | 1946665773               |
| SNP_P3_160498_25347  | NW_004516910.1 | Scaffold1806 | 25347                   | AA                              | CC                | 1946665775               |
| SNP_P3_160499_25986  | NW_004516910.1 | Scaffold1806 | 25986                   | CC                              | TT                | 1946665777               |
| SNP_P3_160500_26040  | NW_004516910.1 | Scaffold1806 | 26040                   | GG                              | AA                | 1946665779               |
| SNP_P3_160501_26757  | NW_004516910.1 | Scaffold1806 | 26757                   | GG                              | AA                | 1946665781               |
| SNP_P3_160502_27969  | NW_004516910.1 | Scaffold1806 | 27969                   | AA                              | TT                | 1946665784               |
| SNP_P3_160503_417    | NW_004516913.1 | Scaffold1810 | 417                     | TT                              | CC                | 1946665786               |
| SNP_P3_160504_473    | NW_004516913.1 | Scaffold1810 | 473                     | CC                              | GG                | 1946665788               |
| SNP_P3_160505_498    | NW_004516913.1 | Scaffold1810 | 498                     | GG                              | AA                | 1946665790               |
| SNP_P3_160506_519    | NW_004516913.1 | Scaffold1810 | 519                     | GG                              | AA                | 1946665792               |
| SNP_P3_160507_969    | NW_004516913.1 | Scaffold1810 | 969                     | AA                              | TT                | 1946665794               |
| SNP_P3_160508_1028   | NW_004516913.1 | Scaffold1810 | 1028                    | TT                              | AA                | 1946665796               |
| SNP_P3_160509_1431   | NW_004516913.1 | Scaffold1810 | 1431                    | GG                              | AA                | 1946665798               |
| SNP_P3_160510_1511   | NW_004516913.1 | Scaffold1810 | 1511                    | GG                              | AA                | 1946665800               |
| SNP_P3_160511_1533   | NW_004516913.1 | Scaffold1810 | 1533                    | GG                              | TT                | 1946665802               |
| SNP_P3_160512_1649   | NW_004516913.1 | Scaffold1810 | 1649                    | AA                              | CC                | 1946665804               |
| SNP_P3_160513_1694   | NW_004516913.1 | Scaffold1810 | 1694                    | CC                              | TT                | 1946665806               |
| SNP_P3_160514_1735   | NW_004516913.1 | Scaffold1810 | 1735                    | TT                              | AA                | 1946665808               |
| SNP_P3_160515_1946   | NW_004516913.1 | Scaffold1810 | 1946                    | TT                              | AA                | 1946665810               |
| SNP_P3_160516_2053   | NW_004516913.1 | Scaffold1810 | 2053                    | CC                              | TT                | 1946665812               |
| SNP_P3_160517_2066   | NW_004516913.1 | Scaffold1810 | 2066                    | GG                              | AA                | 1946665814               |
| SNP_P3_160518_2243   | NW_004516913.1 | Scaffold1810 | 2243                    | TT                              | CC                | 1946665816               |
| SNP_P3_160519_20457  | NW_004516913.1 | Scaffold1810 | 20457                   | CC                              | TT                | 1946665818               |
| SNP_P3_160520_22596  | NW_004516913.1 | Scaffold1810 | 22596                   | GG                              | TT                | 1946665820               |
| SNP_P3_160522_33191  | NW_004516913.1 | Scaffold1810 | 33191                   | AA                              | TT                | 1946665823               |
| SNP_P3_160523_48301  | NW_004516913.1 | Scaffold1810 | 48301                   | AA                              | GG                | 1946665825               |
| SNP_P3_160524_71614  | NW_004516913.1 | Scaffold1810 | 71614                   | TT                              | CC                | 1946665827               |
| SNP_P3_160526_95353  | NW_004516913.1 | Scaffold1810 | 95353                   | TT                              | CC                | 1946665829               |
| SNP_P3_160527_98390  | NW_004516913.1 | Scaffold1810 | 98390                   | TT                              | CC                | 1946665831               |
| SNP_P3_160528_98522  | NW_004516913.1 | Scaffold1810 | 98522                   | AA                              | TT                | 1946665833               |
| SNP_P3_160530_98595  | NW_004516913.1 | Scaffold1810 | 98595                   | TT                              | AA                | 1946665835               |
| SNP_P3_160531_98663  | NW_004516913.1 | Scaffold1810 | 98663                   | AA                              | GG                | 1946665837               |
| SNP_P3_160532_98676  | NW_004516913.1 | Scaffold1810 | 98676                   | CC                              | TT                | 1946665839               |
| SNP_P3_160533_98679  | NW_004516913.1 | Scaffold1810 | 98679                   | CC                              | AA                | 1946665841               |
| SNP_P3_160534_101967 | NW_004516913.1 | Scaffold1810 | 101967                  | AA                              | TT                | 1946665843               |
| SNP_P3_160535_102211 | NW_004516913.1 | Scaffold1810 | 102211                  | GG                              | AA                | 1946665845               |
| SNP_P3_160536_103203 | NW_004516913.1 | Scaffold1810 | 103203                  | TT                              | CC                | 1946665847               |

| SNPs IDs             | Chromosome IDs | Chromosomes  | Physical positions (bp) | CDC Frontier (Reference genome) | (Pusa 256 & HPNB) | NCBI SNPdb Accession IDs |
|----------------------|----------------|--------------|-------------------------|---------------------------------|-------------------|--------------------------|
| SNP_P3_160537_103209 | NW_004516913.1 | Scaffold1810 | 103209                  | TT                              | GG                | 1946665849               |
| SNP_P3_160539_103347 | NW_004516913.1 | Scaffold1810 | 103347                  | GG                              | AA                | 1946665851               |
| SNP_P3_160540_103363 | NW_004516913.1 | Scaffold1810 | 103363                  | TT                              | AA                | 1946665853               |
| SNP_P3_160541_103413 | NW_004516913.1 | Scaffold1810 | 103413                  | AA                              | GG                | 1946665855               |
| SNP_P3_160542_103633 | NW_004516913.1 | Scaffold1810 | 103633                  | GG                              | AA                | 1946665857               |
| SNP_P3_160543_103667 | NW_004516913.1 | Scaffold1810 | 103667                  | GG                              | TT                | 1946665860               |
| SNP_P3_160546_103934 | NW_004516913.1 | Scaffold1810 | 103934                  | TT                              | CC                | 1946665862               |
| SNP_P3_160547_103940 | NW_004516913.1 | Scaffold1810 | 103940                  | AA                              | GG                | 1946665864               |
| SNP_P3_160548_104801 | NW_004516913.1 | Scaffold1810 | 104801                  | AA                              | TT                | 1946665866               |
| SNP_P3_160549_104802 | NW_004516913.1 | Scaffold1810 | 104802                  | CC                              | AA                | 1946665868               |
| SNP_P3_160550_105030 | NW_004516913.1 | Scaffold1810 | 105030                  | CC                              | AA                | 1946665870               |
| SNP_P3_160551_105071 | NW_004516913.1 | Scaffold1810 | 105071                  | AA                              | TT                | 1946665872               |
| SNP_P3_160552_105320 | NW_004516913.1 | Scaffold1810 | 105320                  | TT                              | AA                | 1946665875               |
| SNP_P3_160553_105352 | NW_004516913.1 | Scaffold1810 | 105352                  | CC                              | TT                | 1946665877               |
| SNP_P3_160554_105355 | NW_004516913.1 | Scaffold1810 | 105355                  | CC                              | AA                | 1946665879               |
| SNP_P3_160555_46     | NW_004516914.1 | Scaffold1811 | 46                      | CC                              | TT                | 1946665881               |
| SNP_P3_160556_105    | NW_004516914.1 | Scaffold1811 | 105                     | TT                              | CC                | 1946665883               |
| SNP_P3_160557_492    | NW_004516914.1 | Scaffold1811 | 492                     | CC                              | GG                | 1946665885               |
| SNP_P3_160558_8899   | NW_004516918.1 | Scaffold1815 | 8899                    | GG                              | TT                | 1946665887               |
| SNP_P3_160559_8930   | NW_004516918.1 | Scaffold1815 | 8930                    | TT                              | CC                | 1946665889               |
| SNP_P3_160560_8947   | NW_004516918.1 | Scaffold1815 | 8947                    | GG                              | AA                | 1946665891               |
| SNP_P3_160561_9240   | NW_004516918.1 | Scaffold1815 | 9240                    | AA                              | GG                | 1946665893               |
| SNP_P3_160562_9320   | NW_004516918.1 | Scaffold1815 | 9320                    | TT                              | CC                | 1946665895               |
| SNP_P3_160563_12795  | NW_004516918.1 | Scaffold1815 | 12795                   | AA                              | GG                | 1946665897               |
| SNP_P3_160564_13019  | NW_004516918.1 | Scaffold1815 | 13019                   | AA                              | GG                | 1946665900               |
| SNP_P3_160565_13105  | NW_004516918.1 | Scaffold1815 | 13105                   | GG                              | TT                | 1946665902               |
| SNP_P3_160566_16703  | NW_004516918.1 | Scaffold1815 | 16703                   | CC                              | AA                | 1946665904               |
| SNP_P3_160567_17025  | NW_004516918.1 | Scaffold1815 | 17025                   | TT                              | CC                | 1946665906               |
| SNP_P3_160568_17032  | NW_004516918.1 | Scaffold1815 | 17032                   | CC                              | TT                | 1946665908               |
| SNP_P3_160570_24010  | NW_004516918.1 | Scaffold1815 | 24010                   | AA                              | TT                | 1946665910               |
| SNP_P3_160571_24135  | NW_004516918.1 | Scaffold1815 | 24135                   | TT                              | CC                | 1946665912               |
| SNP_P3_160572_25471  | NW_004516918.1 | Scaffold1815 | 25471                   | GG                              | TT                | 1946665914               |
| SNP_P3_160573_34555  | NW_004516918.1 | Scaffold1815 | 34555                   | CC                              | TT                | 1946665916               |
| SNP_P3_160574_2880   | NW_004516919.1 | Scaffold1816 | 2880                    | AA                              | GG                | 1946665918               |
| SNP_P3_160575_15682  | NW_004516919.1 | Scaffold1816 | 15682                   | AA                              | GG                | 1946665920               |
| SNP_P3_160576_19267  | NW_004516919.1 | Scaffold1816 | 19267                   | TT                              | GG                | 1946665922               |
| SNP_P3_160577_26240  | NW_004516919.1 | Scaffold1816 | 26240                   | TT                              | CC                | 1946665924               |
| SNP_P3_160578_26302  | NW_004516919.1 | Scaffold1816 | 26302                   | CC                              | AA                | 1946665926               |
| SNP_P3_160579_26759  | NW_004516919.1 | Scaffold1816 | 26759                   | CC                              | GG                | 1946665928               |
| SNP_P3_160580_27803  | NW_004516919.1 | Scaffold1816 | 27803                   | AA                              | CC                | 1946665930               |
| SNP_P3_160581_27897  | NW_004516919.1 | Scaffold1816 | 27897                   | CC                              | AA                | 1946665932               |
| SNP_P3_160582_27997  | NW_004516919.1 | Scaffold1816 | 27997                   | AA                              | CC                | 1946665934               |

| SNPs IDs            | Chromosome IDs | Chromosomes  | Physical positions (bp) | CDC Frontier (Reference genome) | (Pusa 256 & HPNB) | NCBI SNPdb Accession IDs |
|---------------------|----------------|--------------|-------------------------|---------------------------------|-------------------|--------------------------|
| SNP_P3_160583_28316 | NW_004516919.1 | Scaffold1816 | 28316                   | TT                              | GG                | 1946665936               |
| SNP_P3_160584_28707 | NW_004516919.1 | Scaffold1816 | 28707                   | GG                              | AA                | 1946665938               |
| SNP_P3_160585_28719 | NW_004516919.1 | Scaffold1816 | 28719                   | GG                              | CC                | 1946665941               |
| SNP_P3_160586_52952 | NW_004516919.1 | Scaffold1816 | 52952                   | TT                              | CC                | 1946665943               |
| SNP_P3_160587_53083 | NW_004516919.1 | Scaffold1816 | 53083                   | CC                              | GG                | 1946665945               |
| SNP_P3_160588_53110 | NW_004516919.1 | Scaffold1816 | 53110                   | AA                              | GG                | 1946665947               |
| SNP_P3_160589_53115 | NW_004516919.1 | Scaffold1816 | 53115                   | GG                              | AA                | 1946665949               |
| SNP_P3_160590_53141 | NW_004516919.1 | Scaffold1816 | 53141                   | AA                              | GG                | 1946665951               |
| SNP_P3_160591_53347 | NW_004516919.1 | Scaffold1816 | 53347                   | CC                              | GG                | 1946665953               |
| SNP_P3_160592_53349 | NW_004516919.1 | Scaffold1816 | 53349                   | AA                              | GG                | 1946665955               |
| SNP_P3_160593_53367 | NW_004516919.1 | Scaffold1816 | 53367                   | AA                              | GG                | 1946665957               |
| SNP_P3_160594_53386 | NW_004516919.1 | Scaffold1816 | 53386                   | TT                              | AA                | 1946665959               |
| SNP_P3_160595_53496 | NW_004516919.1 | Scaffold1816 | 53496                   | GG                              | CC                | 1946665960               |
| SNP_P3_160596_53552 | NW_004516919.1 | Scaffold1816 | 53552                   | TT                              | CC                | 1946665962               |
| SNP_P3_160597_53582 | NW_004516919.1 | Scaffold1816 | 53582                   | CC                              | TT                | 1946665965               |
| SNP_P3_160599_53666 | NW_004516919.1 | Scaffold1816 | 53666                   | CC                              | TT                | 1946665967               |
| SNP_P3_160600_53686 | NW_004516919.1 | Scaffold1816 | 53686                   | TT                              | CC                | 1946665969               |
| SNP_P3_160602_1744  | NW_004516920.1 | Scaffold1817 | 1744                    | AA                              | TT                | 1946665971               |
| SNP_P3_160603_1809  | NW_004516920.1 | Scaffold1817 | 1809                    | TT                              | CC                | 1946665973               |
| SNP_P3_160604_2024  | NW_004516920.1 | Scaffold1817 | 2024                    | TT                              | CC                | 1946665975               |
| SNP_P3_160605_3079  | NW_004516920.1 | Scaffold1817 | 3079                    | AA                              | GG                | 1946665977               |
| SNP_P3_160606_3298  | NW_004516920.1 | Scaffold1817 | 3298                    | AA                              | GG                | 1946665979               |
| SNP_P3_160607_3336  | NW_004516920.1 | Scaffold1817 | 3336                    | TT                              | CC                | 1946665982               |
| SNP_P3_160608_3403  | NW_004516920.1 | Scaffold1817 | 3403                    | TT                              | CC                | 1946665984               |
| SNP_P3_160609_3432  | NW_004516920.1 | Scaffold1817 | 3432                    | TT                              | CC                | 1946665986               |
| SNP_P3_160610_3679  | NW_004516920.1 | Scaffold1817 | 3679                    | CC                              | GG                | 1946665988               |
| SNP_P3_160611_10762 | NW_004516921.1 | Scaffold1818 | 10762                   | TT                              | AA                | 1946665989               |
| SNP_P3_160612_18995 | NW_004516921.1 | Scaffold1818 | 18995                   | GG                              | TT                | 1946665991               |
| SNP_P3_160613_19595 | NW_004516921.1 | Scaffold1818 | 19595                   | CC                              | GG                | 1946665993               |
| SNP_P3_160614_22425 | NW_004516921.1 | Scaffold1818 | 22425                   | TT                              | CC                | 1946665995               |
| SNP_P3_160615_22554 | NW_004516921.1 | Scaffold1818 | 22554                   | AA                              | CC                | 1946665997               |
| SNP_P3_160616_22561 | NW_004516921.1 | Scaffold1818 | 22561                   | GG                              | TT                | 1946665999               |
| SNP_P3_160617_22566 | NW_004516921.1 | Scaffold1818 | 22566                   | TT                              | GG                | 1946666001               |
| SNP_P3_160618_22590 | NW_004516921.1 | Scaffold1818 | 22590                   | TT                              | CC                | 1946666003               |
| SNP_P3_160619_22832 | NW_004516921.1 | Scaffold1818 | 22832                   | AA                              | TT                | 1946666005               |
| SNP_P3_160620_24585 | NW_004516921.1 | Scaffold1818 | 24585                   | AA                              | TT                | 1946666007               |
| SNP_P3_160621_24965 | NW_004516921.1 | Scaffold1818 | 24965                   | TT                              | CC                | 1946666009               |
| SNP_P3_160622_24971 | NW_004516921.1 | Scaffold1818 | 24971                   | AA                              | GG                | 1946666011               |
| SNP_P3_160623_25832 | NW_004516921.1 | Scaffold1818 | 25832                   | AA                              | TT                | 1946666013               |
| SNP_P3_160624_25837 | NW_004516921.1 | Scaffold1818 | 25837                   | CC                              | AA                | 1946666015               |
| SNP_P3_160625_25839 | NW_004516921.1 | Scaffold1818 | 25839                   | GG                              | CC                | 1946666017               |
| SNP_P3_160626_25843 | NW_004516921.1 | Scaffold1818 | 25843                   | TT                              | CC                | 1946666019               |

| SNPs IDs            | Chromosome IDs | Chromosomes  | Physical positions (bp) | CDC Frontier (Reference genome) | (Pusa 256 & HPNB) | NCBI SNPdb Accession IDs |
|---------------------|----------------|--------------|-------------------------|---------------------------------|-------------------|--------------------------|
| SNP_P3_160627_28499 | NW_004516921.1 | Scaffold1818 | 28499                   | GG                              | CC                | 1946666021               |
| SNP_P3_160628_28531 | NW_004516921.1 | Scaffold1818 | 28531                   | TT                              | CC                | 1946666024               |
| SNP_P3_160629_28576 | NW_004516921.1 | Scaffold1818 | 28576                   | AA                              | GG                | 1946666026               |
| SNP_P3_160630_28593 | NW_004516921.1 | Scaffold1818 | 28593                   | AA                              | GG                | 1946666028               |
| SNP_P3_160631_28603 | NW_004516921.1 | Scaffold1818 | 28603                   | AA                              | TT                | 1946666030               |
| SNP_P3_160632_28630 | NW_004516921.1 | Scaffold1818 | 28630                   | GG                              | AA                | 1946666032               |
| SNP_P3_160633_136   | NW_004516923.1 | Scaffold1820 | 136                     | AA                              | TT                | 1946666034               |
| SNP_P3_160634_200   | NW_004516923.1 | Scaffold1820 | 200                     | CC                              | TT                | 1946666036               |
| SNP_P3_160635_206   | NW_004516923.1 | Scaffold1820 | 206                     | GG                              | AA                | 1946666038               |
| SNP_P3_160636_8597  | NW_004516924.1 | Scaffold1822 | 8597                    | TT                              | CC                | 1946666040               |
| SNP_P3_160638_9193  | NW_004516924.1 | Scaffold1822 | 9193                    | CC                              | TT                | 1946666042               |
| SNP_P3_160639_9196  | NW_004516924.1 | Scaffold1822 | 9196                    | CC                              | TT                | 1946666044               |
| SNP_P3_160642_17423 | NW_004516924.1 | Scaffold1822 | 17423                   | TT                              | AA                | 1946666046               |
| SNP_P3_160643_17507 | NW_004516924.1 | Scaffold1822 | 17507                   | TT                              | AA                | 1946666048               |
| SNP_P3_160644_17846 | NW_004516924.1 | Scaffold1822 | 17846                   | CC                              | TT                | 1946666050               |
| SNP_P3_160645_18282 | NW_004516924.1 | Scaffold1822 | 18282                   | AA                              | GG                | 1946666052               |
| SNP_P3_160646_18329 | NW_004516924.1 | Scaffold1822 | 18329                   | CC                              | AA                | 1946666054               |
| SNP_P3_160647_18332 | NW_004516924.1 | Scaffold1822 | 18332                   | GG                              | AA                | 1946666056               |
| SNP_P3_160648_18526 | NW_004516924.1 | Scaffold1822 | 18526                   | CC                              | TT                | 1946666058               |
| SNP_P3_160649_21797 | NW_004516924.1 | Scaffold1822 | 21797                   | GG                              | AA                | 1946666061               |
| SNP_P3_160650_21833 | NW_004516924.1 | Scaffold1822 | 21833                   | GG                              | CC                | 1946666063               |
| SNP_P3_160651_21870 | NW_004516924.1 | Scaffold1822 | 21870                   | AA                              | GG                | 1946666066               |
| SNP_P3_160652_24618 | NW_004516924.1 | Scaffold1822 | 24618                   | TT                              | CC                | 1946666068               |
| SNP_P3_160653_24639 | NW_004516924.1 | Scaffold1822 | 24639                   | AA                              | TT                | 1946666070               |
| SNP_P3_160654_26971 | NW_004516924.1 | Scaffold1822 | 26971                   | CC                              | TT                | 1946666072               |
| SNP_P3_160655_27090 | NW_004516924.1 | Scaffold1822 | 27090                   | CC                              | TT                | 1946666074               |
| SNP_P3_160656_27110 | NW_004516924.1 | Scaffold1822 | 27110                   | TT                              | AA                | 1946666076               |
| SNP_P3_160657_38842 | NW_004516924.1 | Scaffold1822 | 38842                   | CC                              | GG                | 1946666078               |
| SNP_P3_160658_39647 | NW_004516924.1 | Scaffold1822 | 39647                   | AA                              | TT                | 1946666080               |
| SNP_P3_160660_39676 | NW_004516924.1 | Scaffold1822 | 39676                   | CC                              | TT                | 1946666082               |
| SNP_P3_160661_39698 | NW_004516924.1 | Scaffold1822 | 39698                   | AA                              | GG                | 1946666084               |
| SNP_P3_160662_40031 | NW_004516924.1 | Scaffold1822 | 40031                   | TT                              | AA                | 1946666086               |
| SNP_P3_160663_46900 | NW_004516924.1 | Scaffold1822 | 46900                   | GG                              | AA                | 1946666088               |
| SNP_P3_160664_47554 | NW_004516924.1 | Scaffold1822 | 47554                   | TT                              | CC                | 1946666090               |
| SNP_P3_160665_47566 | NW_004516924.1 | Scaffold1822 | 47566                   | TT                              | CC                | 1946666092               |
| SNP_P3_160666_53753 | NW_004516924.1 | Scaffold1822 | 53753                   | GG                              | TT                | 1946666094               |
| SNP_P3_160667_59815 | NW_004516924.1 | Scaffold1822 | 59815                   | AA                              | GG                | 1946666096               |
| SNP_P3_160669_17537 | NW_004516926.1 | Scaffold1825 | 17537                   | CC                              | AA                | 1946666098               |
| SNP_P3_160670_25433 | NW_004516926.1 | Scaffold1825 | 25433                   | GG                              | AA                | 1946666099               |
| SNP_P3_160671_25436 | NW_004516926.1 | Scaffold1825 | 25436                   | TT                              | CC                | 1946666101               |
| SNP_P3_160672_25471 | NW_004516926.1 | Scaffold1825 | 25471                   | GG                              | AA                | 1946666104               |
| SNP_P3_160673_25474 | NW_004516926.1 | Scaffold1825 | 25474                   | TT                              | CC                | 1946666106               |



| SNPs IDs             | Chromosome IDs | Chromosomes  | Physical positions (bp) | CDC Frontier (Reference genome) | (Pusa 256 & HPNB) | NCBI SNPdb Accession IDs |
|----------------------|----------------|--------------|-------------------------|---------------------------------|-------------------|--------------------------|
| SNP_P3_160674_25516  | NW_004516926.1 | Scaffold1825 | 25516                   | TT                              | CC                | 1946666108               |
| SNP_P3_160675_25518  | NW_004516926.1 | Scaffold1825 | 25518                   | TT                              | CC                | 1946666110               |
| SNP_P3_160676_26276  | NW_004516926.1 | Scaffold1825 | 26276                   | CC                              | TT                | 1946666112               |
| SNP_P3_160678_26422  | NW_004516926.1 | Scaffold1825 | 26422                   | TT                              | CC                | 1946666114               |
| SNP_P3_160679_38974  | NW_004516926.1 | Scaffold1825 | 38974                   | CC                              | AA                | 1946666116               |
| SNP_P3_160680_40444  | NW_004516926.1 | Scaffold1825 | 40444                   | CC                              | TT                | 1946666119               |
| SNP_P3_160681_40458  | NW_004516926.1 | Scaffold1825 | 40458                   | AA                              | TT                | 1946666121               |
| SNP_P3_160682_40708  | NW_004516926.1 | Scaffold1825 | 40708                   | CC                              | TT                | 1946666123               |
| SNP_P3_160683_48808  | NW_004516926.1 | Scaffold1825 | 48808                   | CC                              | TT                | 1946666125               |
| SNP_P3_160684_48828  | NW_004516926.1 | Scaffold1825 | 48828                   | CC                              | TT                | 1946666127               |
| SNP_P3_160685_48840  | NW_004516926.1 | Scaffold1825 | 48840                   | GG                              | AA                | 1946666129               |
| SNP_P3_160686_48858  | NW_004516926.1 | Scaffold1825 | 48858                   | TT                              | CC                | 1946666131               |
| SNP_P3_160687_63766  | NW_004516926.1 | Scaffold1825 | 63766                   | TT                              | CC                | 1946666133               |
| SNP_P3_160688_63787  | NW_004516926.1 | Scaffold1825 | 63787                   | GG                              | CC                | 1946666135               |
| SNP_P3_160689_64269  | NW_004516926.1 | Scaffold1825 | 64269                   | GG                              | AA                | 1946666137               |
| SNP_P3_160690_71278  | NW_004516926.1 | Scaffold1825 | 71278                   | CC                              | GG                | 1946666140               |
| SNP_P3_160691_71297  | NW_004516926.1 | Scaffold1825 | 71297                   | AA                              | CC                | 1946666142               |
| SNP_P3_160692_71341  | NW_004516926.1 | Scaffold1825 | 71341                   | CC                              | TT                | 1946666144               |
| SNP_P3_160693_71566  | NW_004516926.1 | Scaffold1825 | 71566                   | GG                              | AA                | 1946666146               |
| SNP_P3_160694_71567  | NW_004516926.1 | Scaffold1825 | 71567                   | AA                              | GG                | 1946666148               |
| SNP_P3_160695_112049 | NW_004516926.1 | Scaffold1825 | 112049                  | AA                              | TT                | 1946666150               |
| SNP_P3_160696_112050 | NW_004516926.1 | Scaffold1825 | 112050                  | TT                              | AA                | 1946666152               |
| SNP_P3_160697_126833 | NW_004516926.1 | Scaffold1825 | 126833                  | TT                              | CC                | 1946666154               |
| SNP_P3_160698_126843 | NW_004516926.1 | Scaffold1825 | 126843                  | AA                              | GG                | 1946666157               |
| SNP_P3_160699_131572 | NW_004516926.1 | Scaffold1825 | 131572                  | GG                              | AA                | 1946666159               |
| SNP_P3_160700_132222 | NW_004516926.1 | Scaffold1825 | 132222                  | CC                              | TT                | 1946666161               |
| SNP_P3_160701_133693 | NW_004516926.1 | Scaffold1825 | 133693                  | CC                              | TT                | 1946666163               |
| SNP_P3_160702_134910 | NW_004516926.1 | Scaffold1825 | 134910                  | TT                              | CC                | 1946666165               |
| SNP_P3_160703_134964 | NW_004516926.1 | Scaffold1825 | 134964                  | AA                              | GG                | 1946666167               |
| SNP_P3_160704_135657 | NW_004516926.1 | Scaffold1825 | 135657                  | AA                              | TT                | 1946666169               |
| SNP_P3_160705_135658 | NW_004516926.1 | Scaffold1825 | 135658                  | TT                              | CC                | 1946666171               |
| SNP_P3_160706_135705 | NW_004516926.1 | Scaffold1825 | 135705                  | GG                              | CC                | 1946666173               |
| SNP_P3_160707_142323 | NW_004516926.1 | Scaffold1825 | 142323                  | CC                              | AA                | 1946666176               |
| SNP_P3_160708_143175 | NW_004516926.1 | Scaffold1825 | 143175                  | TT                              | GG                | 1946666179               |
| SNP_P3_160709_143217 | NW_004516926.1 | Scaffold1825 | 143217                  | CC                              | TT                | 1946666186               |
| SNP_P3_160710_143226 | NW_004516926.1 | Scaffold1825 | 143226                  | GG                              | AA                | 1946666188               |
| SNP_P3_160711_143246 | NW_004516926.1 | Scaffold1825 | 143246                  | TT                              | CC                | 1946666190               |
| SNP_P3_160712_143262 | NW_004516926.1 | Scaffold1825 | 143262                  | GG                              | TT                | 1946666192               |
| SNP_P3_160713_144112 | NW_004516926.1 | Scaffold1825 | 144112                  | CC                              | TT                | 1946666194               |
| SNP_P3_160714_146708 | NW_004516926.1 | Scaffold1825 | 146708                  | AA                              | GG                | 1946666196               |
| SNP_P3_160715_146711 | NW_004516926.1 | Scaffold1825 | 146711                  | CC                              | GG                | 1946666198               |
| SNP_P3_160716_146908 | NW_004516926.1 | Scaffold1825 | 146908                  | AA                              | TT                | 1946666200               |

| SNPs IDs             | Chromosome IDs | Chromosomes  | Physical positions (bp) | CDC Frontier (Reference genome) | (Pusa 256 & HPNB) | NCBI SNPdb Accession IDs |
|----------------------|----------------|--------------|-------------------------|---------------------------------|-------------------|--------------------------|
| SNP_P3_160717_147746 | NW_004516926.1 | Scaffold1825 | 147746                  | TT                              | CC                | 1946666203               |
| SNP_P3_160718_147754 | NW_004516926.1 | Scaffold1825 | 147754                  | GG                              | CC                | 1946666205               |
| SNP_P3_160719_147783 | NW_004516926.1 | Scaffold1825 | 147783                  | GG                              | CC                | 1946666207               |
| SNP_P3_160720_149764 | NW_004516926.1 | Scaffold1825 | 149764                  | CC                              | TT                | 1946666209               |
| SNP_P3_160721_149857 | NW_004516926.1 | Scaffold1825 | 149857                  | CC                              | TT                | 1946666211               |
| SNP_P3_160722_150217 | NW_004516926.1 | Scaffold1825 | 150217                  | CC                              | TT                | 1946666213               |
| SNP_P3_160723_156503 | NW_004516926.1 | Scaffold1825 | 156503                  | AA                              | GG                | 1946666215               |
| SNP_P3_160724_2121   | NW_004516927.1 | Scaffold1826 | 2121                    | CC                              | TT                | 1946666217               |
| SNP_P3_160725_2135   | NW_004516927.1 | Scaffold1826 | 2135                    | GG                              | AA                | 1946666219               |
| SNP_P3_160726_2136   | NW_004516927.1 | Scaffold1826 | 2136                    | CC                              | AA                | 1946666221               |
| SNP_P3_160727_21518  | NW_004516928.1 | Scaffold1829 | 21518                   | TT                              | CC                | 1946666223               |
| SNP_P3_160729_24506  | NW_004516929.1 | Scaffold1830 | 24506                   | CC                              | TT                | 1946666225               |
| SNP_P3_160730_24709  | NW_004516929.1 | Scaffold1830 | 24709                   | GG                              | TT                | 1946666227               |
| SNP_P3_160731_24753  | NW_004516929.1 | Scaffold1830 | 24753                   | CC                              | AA                | 1946666229               |
| SNP_P3_160732_29442  | NW_004516929.1 | Scaffold1830 | 29442                   | AA                              | TT                | 1946666231               |
| SNP_P3_160733_29453  | NW_004516929.1 | Scaffold1830 | 29453                   | CC                              | TT                | 1946666233               |
| SNP_P3_160734_29454  | NW_004516929.1 | Scaffold1830 | 29454                   | AA                              | GG                | 1946666235               |
| SNP_P3_160735_29455  | NW_004516929.1 | Scaffold1830 | 29455                   | CC                              | AA                | 1946666238               |
| SNP_P3_160736_29458  | NW_004516929.1 | Scaffold1830 | 29458                   | CC                              | TT                | 1946666240               |
| SNP_P3_160737_29777  | NW_004516929.1 | Scaffold1830 | 29777                   | GG                              | TT                | 1946666242               |
| SNP_P3_160738_29785  | NW_004516929.1 | Scaffold1830 | 29785                   | AA                              | GG                | 1946666244               |
| SNP_P3_160739_29802  | NW_004516929.1 | Scaffold1830 | 29802                   | AA                              | TT                | 1946666246               |
| SNP_P3_160740_33494  | NW_004516929.1 | Scaffold1830 | 33494                   | CC                              | AA                | 1946666248               |
| SNP_P3_160741_33918  | NW_004516929.1 | Scaffold1830 | 33918                   | AA                              | GG                | 1946666250               |
| SNP_P3_160742_37555  | NW_004516929.1 | Scaffold1830 | 37555                   | TT                              | GG                | 1946666252               |
| SNP_P3_160743_1506   | NW_004516930.1 | Scaffold1832 | 1506                    | CC                              | TT                | 1946666254               |
| SNP_P3_160744_1532   | NW_004516930.1 | Scaffold1832 | 1532                    | AA                              | GG                | 1946666256               |
| SNP_P3_160745_64     | NW_004516931.1 | Scaffold1835 | 64                      | CC                              | GG                | 1946666258               |
| SNP_P3_160746_104    | NW_004516931.1 | Scaffold1835 | 104                     | AA                              | TT                | 1946666260               |
| SNP_P3_160747_558    | NW_004516931.1 | Scaffold1835 | 558                     | GG                              | AA                | 1946666262               |
| SNP_P3_160748_666    | NW_004516931.1 | Scaffold1835 | 666                     | TT                              | GG                | 1946666264               |
| SNP_P3_160749_712    | NW_004516931.1 | Scaffold1835 | 712                     | AA                              | GG                | 1946666266               |
| SNP_P3_160750_1171   | NW_004516931.1 | Scaffold1835 | 1171                    | TT                              | GG                | 1946666268               |
| SNP_P3_160751_1448   | NW_004516931.1 | Scaffold1835 | 1448                    | TT                              | CC                | 1946666270               |
| SNP_P3_160752_1683   | NW_004516931.1 | Scaffold1835 | 1683                    | AA                              | GG                | 1946666272               |
| SNP_P3_160753_1716   | NW_004516931.1 | Scaffold1835 | 1716                    | AA                              | GG                | 1946666275               |
| SNP_P3_160754_1774   | NW_004516931.1 | Scaffold1835 | 1774                    | TT                              | CC                | 1946666277               |
| SNP_P3_160755_1785   | NW_004516931.1 | Scaffold1835 | 1785                    | GG                              | AA                | 1946666279               |
| SNP_P3_160756_1791   | NW_004516931.1 | Scaffold1835 | 1791                    | CC                              | TT                | 1946666281               |
| SNP_P3_160757_2068   | NW_004516931.1 | Scaffold1835 | 2068                    | CC                              | TT                | 1946666283               |
| SNP_P3_160758_2116   | NW_004516931.1 | Scaffold1835 | 2116                    | AA                              | GG                | 1946666285               |
| SNP_P3_160759_2161   | NW_004516931.1 | Scaffold1835 | 2161                    | CC                              | TT                | 1946666286               |

| SNPs IDs            | Chromosome IDs | Chromosomes  | Physical positions (bp) | CDC Frontier (Reference genome) | (Pusa 256 & HPNB) | NCBI SNPdb Accession IDs |
|---------------------|----------------|--------------|-------------------------|---------------------------------|-------------------|--------------------------|
| SNP_P3_160760_5325  | NW_004516931.1 | Scaffold1835 | 5325                    | TT                              | CC                | 1946666287               |
| SNP_P3_160761_5364  | NW_004516931.1 | Scaffold1835 | 5364                    | CC                              | AA                | 1946666288               |
| SNP_P3_160762_5430  | NW_004516931.1 | Scaffold1835 | 5430                    | TT                              | CC                | 1946666289               |
| SNP_P3_160763_5916  | NW_004516931.1 | Scaffold1835 | 5916                    | TT                              | AA                | 1946666290               |
| SNP_P3_160764_6732  | NW_004516931.1 | Scaffold1835 | 6732                    | TT                              | GG                | 1946666291               |
| SNP_P3_160765_6783  | NW_004516931.1 | Scaffold1835 | 6783                    | GG                              | CC                | 1946666292               |
| SNP_P3_160766_6785  | NW_004516931.1 | Scaffold1835 | 6785                    | GG                              | CC                | 1946666293               |
| SNP_P3_160767_6805  | NW_004516931.1 | Scaffold1835 | 6805                    | CC                              | GG                | 1946666294               |
| SNP_P3_160768_6812  | NW_004516931.1 | Scaffold1835 | 6812                    | TT                              | CC                | 1946666295               |
| SNP_P3_160769_6814  | NW_004516931.1 | Scaffold1835 | 6814                    | GG                              | AA                | 1946666296               |
| SNP_P3_160770_6823  | NW_004516931.1 | Scaffold1835 | 6823                    | GG                              | CC                | 1946666297               |
| SNP_P3_160771_6834  | NW_004516931.1 | Scaffold1835 | 6834                    | AA                              | GG                | 1946666298               |
| SNP_P3_160772_6839  | NW_004516931.1 | Scaffold1835 | 6839                    | AA                              | GG                | 1946666299               |
| SNP_P3_160773_6855  | NW_004516931.1 | Scaffold1835 | 6855                    | GG                              | TT                | 1946666300               |
| SNP_P3_160774_6860  | NW_004516931.1 | Scaffold1835 | 6860                    | CC                              | GG                | 1946666301               |
| SNP_P3_160775_6863  | NW_004516931.1 | Scaffold1835 | 6863                    | GG                              | CC                | 1946666302               |
| SNP_P3_160776_6914  | NW_004516931.1 | Scaffold1835 | 6914                    | GG                              | TT                | 1946666303               |
| SNP_P3_160777_7333  | NW_004516931.1 | Scaffold1835 | 7333                    | TT                              | GG                | 1946666304               |
| SNP_P3_160778_7345  | NW_004516931.1 | Scaffold1835 | 7345                    | AA                              | GG                | 1946666305               |
| SNP_P3_160779_7559  | NW_004516931.1 | Scaffold1835 | 7559                    | CC                              | TT                | 1946666306               |
| SNP_P3_160780_7710  | NW_004516931.1 | Scaffold1835 | 7710                    | GG                              | CC                | 1946666307               |
| SNP_P3_160781_7766  | NW_004516931.1 | Scaffold1835 | 7766                    | CC                              | TT                | 1946666308               |
| SNP_P3_160782_7829  | NW_004516931.1 | Scaffold1835 | 7829                    | AA                              | GG                | 1946666309               |
| SNP_P3_160783_7977  | NW_004516931.1 | Scaffold1835 | 7977                    | AA                              | TT                | 1946666310               |
| SNP_P3_160784_8026  | NW_004516931.1 | Scaffold1835 | 8026                    | AA                              | GG                | 1946666311               |
| SNP_P3_160787_8207  | NW_004516931.1 | Scaffold1835 | 8207                    | GG                              | AA                | 1946666312               |
| SNP_P3_160788_8208  | NW_004516931.1 | Scaffold1835 | 8208                    | CC                              | TT                | 1946666313               |
| SNP_P3_160789_8324  | NW_004516931.1 | Scaffold1835 | 8324                    | CC                              | TT                | 1946666314               |
| SNP_P3_160790_8339  | NW_004516931.1 | Scaffold1835 | 8339                    | CC                              | GG                | 1946666315               |
| SNP_P3_160791_8341  | NW_004516931.1 | Scaffold1835 | 8341                    | GG                              | TT                | 1946666316               |
| SNP_P3_160792_8404  | NW_004516931.1 | Scaffold1835 | 8404                    | TT                              | GG                | 1946666317               |
| SNP_P3_160793_8438  | NW_004516931.1 | Scaffold1835 | 8438                    | TT                              | GG                | 1946666318               |
| SNP_P3_160794_8456  | NW_004516931.1 | Scaffold1835 | 8456                    | AA                              | GG                | 1946666319               |
| SNP_P3_160796_8515  | NW_004516931.1 | Scaffold1835 | 8515                    | GG                              | AA                | 1946666320               |
| SNP_P3_160797_8762  | NW_004516931.1 | Scaffold1835 | 8762                    | GG                              | TT                | 1946666321               |
| SNP_P3_160798_8831  | NW_004516931.1 | Scaffold1835 | 8831                    | CC                              | AA                | 1946666322               |
| SNP_P3_160799_8927  | NW_004516931.1 | Scaffold1835 | 8927                    | AA                              | GG                | 1946666323               |
| SNP_P3_160801_10187 | NW_004516931.1 | Scaffold1835 | 10187                   | AA                              | TT                | 1946666324               |
| SNP_P3_160802_10541 | NW_004516931.1 | Scaffold1835 | 10541                   | CC                              | GG                | 1946666325               |
| SNP_P3_160803_10563 | NW_004516931.1 | Scaffold1835 | 10563                   | TT                              | CC                | 1946666326               |
| SNP_P3_160804_11152 | NW_004516931.1 | Scaffold1835 | 11152                   | CC                              | AA                | 1946666327               |
| SNP_P3_160806_11356 | NW_004516931.1 | Scaffold1835 | 11356                   | CC                              | TT                | 1946666328               |

| SNPs IDs            | Chromosome IDs | Chromosomes  | Physical positions (bp) | CDC Frontier (Reference genome) | (Pusa 256 & HPNB) | NCBI SNPdb Accession IDs |
|---------------------|----------------|--------------|-------------------------|---------------------------------|-------------------|--------------------------|
| SNP_P3_160807_11545 | NW_004516931.1 | Scaffold1835 | 11545                   | GG                              | CC                | 1946666329               |
| SNP_P3_160808_25690 | NW_004516931.1 | Scaffold1835 | 25690                   | CC                              | TT                | 1946666330               |
| SNP_P3_160809_25790 | NW_004516931.1 | Scaffold1835 | 25790                   | GG                              | AA                | 1946666331               |
| SNP_P3_160810_25836 | NW_004516931.1 | Scaffold1835 | 25836                   | CC                              | TT                | 1946666332               |
| SNP_P3_160811_26198 | NW_004516931.1 | Scaffold1835 | 26198                   | AA                              | GG                | 1946666334               |
| SNP_P3_160812_26901 | NW_004516931.1 | Scaffold1835 | 26901                   | AA                              | GG                | 1946666336               |
| SNP_P3_160814_524   | NW_004516932.1 | Scaffold1838 | 524                     | GG                              | AA                | 1946666338               |
| SNP_P3_160815_2227  | NW_004516932.1 | Scaffold1838 | 2227                    | AA                              | GG                | 1946666340               |
| SNP_P3_160816_410   | NW_004516933.1 | Scaffold1839 | 410                     | AA                              | TT                | 1946666342               |
| SNP_P3_160817_668   | NW_004516933.1 | Scaffold1839 | 668                     | GG                              | TT                | 1946666344               |
| SNP_P3_160818_9782  | NW_004516933.1 | Scaffold1839 | 9782                    | AA                              | TT                | 1946666346               |
| SNP_P3_160819_9823  | NW_004516933.1 | Scaffold1839 | 9823                    | CC                              | TT                | 1946666348               |
| SNP_P3_160820_19331 | NW_004516933.1 | Scaffold1839 | 19331                   | AA                              | GG                | 1946666350               |
| SNP_P3_160821_5873  | NW_004516934.1 | Scaffold1840 | 5873                    | GG                              | AA                | 1946666352               |
| SNP_P3_160822_7615  | NW_004516934.1 | Scaffold1840 | 7615                    | CC                              | GG                | 1946666354               |
| SNP_P3_160823_188   | NW_004516936.1 | Scaffold1843 | 188                     | TT                              | CC                | 1946666356               |
| SNP_P3_160824_496   | NW_004516936.1 | Scaffold1843 | 496                     | AA                              | GG                | 1946666365               |
| SNP_P3_160825_905   | NW_004516936.1 | Scaffold1843 | 905                     | AA                              | CC                | 1946666367               |
| SNP_P3_160826_913   | NW_004516936.1 | Scaffold1843 | 913                     | CC                              | GG                | 1946666369               |
| SNP_P3_160827_951   | NW_004516936.1 | Scaffold1843 | 951                     | AA                              | TT                | 1946666371               |
| SNP_P3_160828_615   | NW_004516937.1 | Scaffold1844 | 615                     | AA                              | TT                | 1946666373               |
| SNP_P3_160829_665   | NW_004516937.1 | Scaffold1844 | 665                     | AA                              | GG                | 1946666375               |
| SNP_P3_160830_679   | NW_004516937.1 | Scaffold1844 | 679                     | GG                              | AA                | 1946666377               |
| SNP_P3_160831_710   | NW_004516937.1 | Scaffold1844 | 710                     | TT                              | GG                | 1946666379               |
| SNP_P3_160832_734   | NW_004516937.1 | Scaffold1844 | 734                     | AA                              | GG                | 1946666382               |
| SNP_P3_160833_837   | NW_004516937.1 | Scaffold1844 | 837                     | AA                              | GG                | 1946666384               |
| SNP_P3_160834_847   | NW_004516937.1 | Scaffold1844 | 847                     | CC                              | AA                | 1946666386               |
| SNP_P3_160835_886   | NW_004516937.1 | Scaffold1844 | 886                     | CC                              | TT                | 1946666388               |
| SNP_P3_160836_917   | NW_004516937.1 | Scaffold1844 | 917                     | CC                              | TT                | 1946666390               |
| SNP_P3_160837_957   | NW_004516937.1 | Scaffold1844 | 957                     | TT                              | CC                | 1946666392               |
| SNP_P3_160838_967   | NW_004516937.1 | Scaffold1844 | 967                     | TT                              | CC                | 1946666394               |
| SNP_P3_160839_990   | NW_004516937.1 | Scaffold1844 | 990                     | TT                              | CC                | 1946666396               |
| SNP_P3_160840_1035  | NW_004516937.1 | Scaffold1844 | 1035                    | AA                              | CC                | 1946666398               |
| SNP_P3_160841_1228  | NW_004516937.1 | Scaffold1844 | 1228                    | AA                              | TT                | 1946666400               |
| SNP_P3_160842_1686  | NW_004516937.1 | Scaffold1844 | 1686                    | GG                              | TT                | 1946666402               |
| SNP_P3_160843_1701  | NW_004516937.1 | Scaffold1844 | 1701                    | CC                              | TT                | 1946666404               |
| SNP_P3_160844_1777  | NW_004516937.1 | Scaffold1844 | 1777                    | GG                              | AA                | 1946666406               |
| SNP_P3_160845_1863  | NW_004516937.1 | Scaffold1844 | 1863                    | GG                              | CC                | 1946666408               |
| SNP_P3_160846_1881  | NW_004516937.1 | Scaffold1844 | 1881                    | TT                              | CC                | 1946666410               |
| SNP_P3_160847_1932  | NW_004516937.1 | Scaffold1844 | 1932                    | AA                              | TT                | 1946666412               |
| SNP_P3_160850_2126  | NW_004516937.1 | Scaffold1844 | 2126                    | AA                              | CC                | 1946666414               |
| SNP_P3_160851_2154  | NW_004516937.1 | Scaffold1844 | 2154                    | TT                              | GG                | 1946666416               |

| SNPs IDs             | Chromosome IDs | Chromosomes  | Physical positions (bp) | CDC Frontier (Reference genome) | (Pusa 256 & HPNB) | NCBI SNPdb Accession IDs |
|----------------------|----------------|--------------|-------------------------|---------------------------------|-------------------|--------------------------|
| SNP_P3_160853_2240   | NW_004516937.1 | Scaffold1844 | 2240                    | TT                              | AA                | 1946666418               |
| SNP_P3_160854_2309   | NW_004516937.1 | Scaffold1844 | 2309                    | CC                              | AA                | 1946666421               |
| SNP_P3_160855_2327   | NW_004516937.1 | Scaffold1844 | 2327                    | CC                              | AA                | 1946666423               |
| SNP_P3_160856_2403   | NW_004516937.1 | Scaffold1844 | 2403                    | TT                              | GG                | 1946666425               |
| SNP_P3_160857_2464   | NW_004516937.1 | Scaffold1844 | 2464                    | GG                              | TT                | 1946666427               |
| SNP_P3_160858_2487   | NW_004516937.1 | Scaffold1844 | 2487                    | GG                              | TT                | 1946666429               |
| SNP_P3_160860_2631   | NW_004516937.1 | Scaffold1844 | 2631                    | CC                              | AA                | 1946666431               |
| SNP_P3_160861_2673   | NW_004516937.1 | Scaffold1844 | 2673                    | AA                              | TT                | 1946666433               |
| SNP_P3_160862_2797   | NW_004516937.1 | Scaffold1844 | 2797                    | CC                              | TT                | 1946666435               |
| SNP_P3_160863_2809   | NW_004516937.1 | Scaffold1844 | 2809                    | AA                              | CC                | 1946666437               |
| SNP_P3_160864_6270   | NW_004516937.1 | Scaffold1844 | 6270                    | CC                              | TT                | 1946666439               |
| SNP_P3_160865_6271   | NW_004516937.1 | Scaffold1844 | 6271                    | AA                              | GG                | 1946666441               |
| SNP_P3_160867_10611  | NW_004516937.1 | Scaffold1844 | 10611                   | TT                              | AA                | 1946666444               |
| SNP_P3_160868_10710  | NW_004516937.1 | Scaffold1844 | 10710                   | GG                              | CC                | 1946666446               |
| SNP_P3_160869_10977  | NW_004516937.1 | Scaffold1844 | 10977                   | AA                              | CC                | 1946666448               |
| SNP_P3_160870_12434  | NW_004516937.1 | Scaffold1844 | 12434                   | AA                              | TT                | 1946666450               |
| SNP_P3_160871_12452  | NW_004516937.1 | Scaffold1844 | 12452                   | CC                              | GG                | 1946666452               |
| SNP_P3_160872_12728  | NW_004516937.1 | Scaffold1844 | 12728                   | CC                              | TT                | 1946666454               |
| SNP_P3_160873_12745  | NW_004516937.1 | Scaffold1844 | 12745                   | AA                              | GG                | 1946666456               |
| SNP_P3_160874_12816  | NW_004516937.1 | Scaffold1844 | 12816                   | AA                              | TT                | 1946666458               |
| SNP_P3_160875_12819  | NW_004516937.1 | Scaffold1844 | 12819                   | AA                              | GG                | 1946666461               |
| SNP_P3_160876_14409  | NW_004516937.1 | Scaffold1844 | 14409                   | AA                              | GG                | 1946666463               |
| SNP_P3_160877_15930  | NW_004516937.1 | Scaffold1844 | 15930                   | CC                              | TT                | 1946666465               |
| SNP_P3_160878_44631  | NW_004516937.1 | Scaffold1844 | 44631                   | TT                              | CC                | 1946666467               |
| SNP_P3_160879_46627  | NW_004516937.1 | Scaffold1844 | 46627                   | TT                              | CC                | 1946666469               |
| SNP_P3_160880_57768  | NW_004516937.1 | Scaffold1844 | 57768                   | AA                              | GG                | 1946666471               |
| SNP_P3_160881_88539  | NW_004516937.1 | Scaffold1844 | 88539                   | GG                              | AA                | 1946666473               |
| SNP_P3_160882_89502  | NW_004516937.1 | Scaffold1844 | 89502                   | AA                              | GG                | 1946666475               |
| SNP_P3_160883_89530  | NW_004516937.1 | Scaffold1844 | 89530                   | AA                              | GG                | 1946666477               |
| SNP_P3_160884_89538  | NW_004516937.1 | Scaffold1844 | 89538                   | TT                              | CC                | 1946666479               |
| SNP_P3_160885_89549  | NW_004516937.1 | Scaffold1844 | 89549                   | TT                              | CC                | 1946666481               |
| SNP_P3_160886_89577  | NW_004516937.1 | Scaffold1844 | 89577                   | CC                              | GG                | 1946666482               |
| SNP_P3_160887_89838  | NW_004516937.1 | Scaffold1844 | 89838                   | TT                              | CC                | 1946666483               |
| SNP_P3_160888_117832 | NW_004516937.1 | Scaffold1844 | 117832                  | AA                              | GG                | 1946666484               |
| SNP_P3_160889_117835 | NW_004516937.1 | Scaffold1844 | 117835                  | AA                              | GG                | 1946666485               |
| SNP_P3_160890_120998 | NW_004516937.1 | Scaffold1844 | 120998                  | AA                              | GG                | 1946666486               |
| SNP_P3_160891_121126 | NW_004516937.1 | Scaffold1844 | 121126                  | GG                              | TT                | 1946666488               |
| SNP_P3_160892_121128 | NW_004516937.1 | Scaffold1844 | 121128                  | TT                              | GG                | 1946666490               |
| SNP_P3_160894_121176 | NW_004516937.1 | Scaffold1844 | 121176                  | CC                              | AA                | 1946666492               |
| SNP_P3_160895_121191 | NW_004516937.1 | Scaffold1844 | 121191                  | CC                              | GG                | 1946666495               |
| SNP_P3_160896_121561 | NW_004516937.1 | Scaffold1844 | 121561                  | GG                              | TT                | 1946666497               |
| SNP_P3_160897_123145 | NW_004516937.1 | Scaffold1844 | 123145                  | AA                              | GG                | 1946666499               |

| SNPs IDs             | Chromosome IDs | Chromosomes  | Physical positions (bp) | CDC Frontier (Reference genome) | (Pusa 256 & HPNB) | NCBI SNPdb Accession IDs |
|----------------------|----------------|--------------|-------------------------|---------------------------------|-------------------|--------------------------|
| SNP_P3_160898_123321 | NW_004516937.1 | Scaffold1844 | 123321                  | GG                              | AA                | 1946666501               |
| SNP_P3_160899_134053 | NW_004516937.1 | Scaffold1844 | 134053                  | GG                              | TT                | 1946666503               |
| SNP_P3_160900_134285 | NW_004516937.1 | Scaffold1844 | 134285                  | AA                              | GG                | 1946666504               |
| SNP_P3_160901_134351 | NW_004516937.1 | Scaffold1844 | 134351                  | TT                              | AA                | 1946666507               |
| SNP_P3_160902_134376 | NW_004516937.1 | Scaffold1844 | 134376                  | AA                              | TT                | 1946666509               |
| SNP_P3_160903_134896 | NW_004516937.1 | Scaffold1844 | 134896                  | GG                              | AA                | 1946666511               |
| SNP_P3_160905_157438 | NW_004516937.1 | Scaffold1844 | 157438                  | TT                              | CC                | 1946666513               |
| SNP_P3_160906_157447 | NW_004516937.1 | Scaffold1844 | 157447                  | CC                              | TT                | 1946666515               |
| SNP_P3_160907_157464 | NW_004516937.1 | Scaffold1844 | 157464                  | TT                              | GG                | 1946666517               |
| SNP_P3_160908_157534 | NW_004516937.1 | Scaffold1844 | 157534                  | TT                              | CC                | 1946666519               |
| SNP_P3_160909_157540 | NW_004516937.1 | Scaffold1844 | 157540                  | CC                              | AA                | 1946666521               |
| SNP_P3_160910_157750 | NW_004516937.1 | Scaffold1844 | 157750                  | TT                              | AA                | 1946666523               |
| SNP_P3_160911_157821 | NW_004516937.1 | Scaffold1844 | 157821                  | TT                              | AA                | 1946666525               |
| SNP_P3_160914_166799 | NW_004516937.1 | Scaffold1844 | 166799                  | CC                              | TT                | 1946666527               |
| SNP_P3_160915_166812 | NW_004516937.1 | Scaffold1844 | 166812                  | CC                              | TT                | 1946666529               |
| SNP_P3_160916_166906 | NW_004516937.1 | Scaffold1844 | 166906                  | TT                              | CC                | 1946666531               |
| SNP_P3_160917_167034 | NW_004516937.1 | Scaffold1844 | 167034                  | TT                              | GG                | 1946666533               |
| SNP_P3_160918_167045 | NW_004516937.1 | Scaffold1844 | 167045                  | TT                              | CC                | 1946666536               |
| SNP_P3_160919_167090 | NW_004516937.1 | Scaffold1844 | 167090                  | AA                              | GG                | 1946666538               |
| SNP_P3_160920_167103 | NW_004516937.1 | Scaffold1844 | 167103                  | AA                              | GG                | 1946666540               |
| SNP_P3_160921_167132 | NW_004516937.1 | Scaffold1844 | 167132                  | CC                              | TT                | 1946666542               |
| SNP_P3_160922_167141 | NW_004516937.1 | Scaffold1844 | 167141                  | CC                              | TT                | 1946666544               |
| SNP_P3_160923_167163 | NW_004516937.1 | Scaffold1844 | 167163                  | AA                              | TT                | 1946666545               |
| SNP_P3_160924_167164 | NW_004516937.1 | Scaffold1844 | 167164                  | AA                              | TT                | 1946666547               |
| SNP_P3_160926_167266 | NW_004516937.1 | Scaffold1844 | 167266                  | TT                              | AA                | 1946666549               |
| SNP_P3_160927_167317 | NW_004516937.1 | Scaffold1844 | 167317                  | GG                              | TT                | 1946666551               |
| SNP_P3_160928_167318 | NW_004516937.1 | Scaffold1844 | 167318                  | TT                              | GG                | 1946666553               |
| SNP_P3_160929_167358 | NW_004516937.1 | Scaffold1844 | 167358                  | CC                              | GG                | 1946666555               |
| SNP_P3_160930_167367 | NW_004516937.1 | Scaffold1844 | 167367                  | GG                              | AA                | 1946666557               |
| SNP_P3_160931_167377 | NW_004516937.1 | Scaffold1844 | 167377                  | AA                              | TT                | 1946666559               |
| SNP_P3_160932_167385 | NW_004516937.1 | Scaffold1844 | 167385                  | CC                              | TT                | 1946666561               |
| SNP_P3_160933_167389 | NW_004516937.1 | Scaffold1844 | 167389                  | CC                              | TT                | 1946666563               |
| SNP_P3_160935_167462 | NW_004516937.1 | Scaffold1844 | 167462                  | AA                              | CC                | 1946666565               |
| SNP_P3_160936_167466 | NW_004516937.1 | Scaffold1844 | 167466                  | TT                              | GG                | 1946666567               |
| SNP_P3_160937_167549 | NW_004516937.1 | Scaffold1844 | 167549                  | GG                              | TT                | 1946666569               |
| SNP_P3_160938_167552 | NW_004516937.1 | Scaffold1844 | 167552                  | AA                              | TT                | 1946666572               |
| SNP_P3_160939_167554 | NW_004516937.1 | Scaffold1844 | 167554                  | AA                              | GG                | 1946666574               |
| SNP_P3_160940_167602 | NW_004516937.1 | Scaffold1844 | 167602                  | CC                              | TT                | 1946666576               |
| SNP_P3_160941_167639 | NW_004516937.1 | Scaffold1844 | 167639                  | GG                              | TT                | 1946666578               |
| SNP_P3_160942_220    | NW_004516938.1 | Scaffold1845 | 220                     | AA                              | GG                | 1946666580               |
| SNP_P3_160943_523    | NW_004516938.1 | Scaffold1845 | 523                     | CC                              | TT                | 1946666582               |
| SNP_P3_160944_922    | NW_004516938.1 | Scaffold1845 | 922                     | GG                              | AA                | 1946666584               |

| SNPs IDs            | Chromosome IDs | Chromosomes  | Physical positions (bp) | CDC Frontier (Reference genome) | (Pusa 256 & HPNB) | NCBI SNPdb Accession IDs |
|---------------------|----------------|--------------|-------------------------|---------------------------------|-------------------|--------------------------|
| SNP_P3_160945_939   | NW_004516938.1 | Scaffold1845 | 939                     | GG                              | AA                | 1946666586               |
| SNP_P3_160946_8898  | NW_004516938.1 | Scaffold1845 | 8898                    | GG                              | TT                | 1946666588               |
| SNP_P3_160947_10793 | NW_004516938.1 | Scaffold1845 | 10793                   | TT                              | CC                | 1946666590               |
| SNP_P3_160948_15405 | NW_004516938.1 | Scaffold1845 | 15405                   | TT                              | CC                | 1946666592               |
| SNP_P3_160949_15470 | NW_004516938.1 | Scaffold1845 | 15470                   | TT                              | CC                | 1946666594               |
| SNP_P3_160950_15483 | NW_004516938.1 | Scaffold1845 | 15483                   | AA                              | GG                | 1946666596               |
| SNP_P3_160951_15525 | NW_004516938.1 | Scaffold1845 | 15525                   | AA                              | CC                | 1946666598               |
| SNP_P3_160952_15584 | NW_004516938.1 | Scaffold1845 | 15584                   | TT                              | CC                | 1946666600               |
| SNP_P3_160953_17964 | NW_004516938.1 | Scaffold1845 | 17964                   | AA                              | TT                | 1946666602               |
| SNP_P3_160954_19983 | NW_004516938.1 | Scaffold1845 | 19983                   | TT                              | GG                | 1946666604               |
| SNP_P3_160955_20262 | NW_004516938.1 | Scaffold1845 | 20262                   | CC                              | TT                | 1946666606               |
| SNP_P3_160956_26373 | NW_004516938.1 | Scaffold1845 | 26373                   | TT                              | CC                | 1946666608               |
| SNP_P3_160957_28566 | NW_004516938.1 | Scaffold1845 | 28566                   | AA                              | GG                | 1946666611               |
| SNP_P3_160958_28580 | NW_004516938.1 | Scaffold1845 | 28580                   | TT                              | CC                | 1946666613               |
| SNP_P3_160959_28770 | NW_004516938.1 | Scaffold1845 | 28770                   | GG                              | AA                | 1946666615               |
| SNP_P3_160960_28773 | NW_004516938.1 | Scaffold1845 | 28773                   | CC                              | TT                | 1946666617               |
| SNP_P3_160961_28787 | NW_004516938.1 | Scaffold1845 | 28787                   | CC                              | AA                | 1946666619               |
| SNP_P3_160962_28790 | NW_004516938.1 | Scaffold1845 | 28790                   | AA                              | GG                | 1946666621               |
| SNP_P3_160963_28816 | NW_004516938.1 | Scaffold1845 | 28816                   | GG                              | AA                | 1946666623               |
| SNP_P3_160964_28820 | NW_004516938.1 | Scaffold1845 | 28820                   | AA                              | CC                | 1946666625               |
| SNP_P3_160965_28842 | NW_004516938.1 | Scaffold1845 | 28842                   | CC                              | GG                | 1946666627               |
| SNP_P3_160966_28850 | NW_004516938.1 | Scaffold1845 | 28850                   | TT                              | CC                | 1946666629               |
| SNP_P3_160967_28860 | NW_004516938.1 | Scaffold1845 | 28860                   | GG                              | AA                | 1946666631               |
| SNP_P3_160968_33267 | NW_004516938.1 | Scaffold1845 | 33267                   | AA                              | TT                | 1946666633               |
| SNP_P3_160969_33276 | NW_004516938.1 | Scaffold1845 | 33276                   | GG                              | TT                | 1946666635               |
| SNP_P3_160970_34864 | NW_004516938.1 | Scaffold1845 | 34864                   | TT                              | CC                | 1946666637               |
| SNP_P3_160971_34904 | NW_004516938.1 | Scaffold1845 | 34904                   | GG                              | CC                | 1946666639               |
| SNP_P3_160972_34905 | NW_004516938.1 | Scaffold1845 | 34905                   | CC                              | GG                | 1946666641               |
| SNP_P3_160973_35447 | NW_004516938.1 | Scaffold1845 | 35447                   | GG                              | AA                | 1946666643               |
| SNP_P3_160974_40182 | NW_004516938.1 | Scaffold1845 | 40182                   | GG                              | CC                | 1946666645               |
| SNP_P3_160975_40614 | NW_004516938.1 | Scaffold1845 | 40614                   | TT                              | CC                | 1946666647               |
| SNP_P3_160976_44891 | NW_004516938.1 | Scaffold1845 | 44891                   | GG                              | CC                | 1946666650               |
| SNP_P3_160978_50185 | NW_004516938.1 | Scaffold1845 | 50185                   | AA                              | GG                | 1946666652               |
| SNP_P3_160979_51854 | NW_004516938.1 | Scaffold1845 | 51854                   | AA                              | GG                | 1946666654               |
| SNP_P3_160980_52808 | NW_004516938.1 | Scaffold1845 | 52808                   | TT                              | GG                | 1946666656               |
| SNP_P3_160981_58573 | NW_004516938.1 | Scaffold1845 | 58573                   | GG                              | AA                | 1946666658               |
| SNP_P3_160982_58987 | NW_004516938.1 | Scaffold1845 | 58987                   | CC                              | TT                | 1946666660               |
| SNP_P3_160983_63028 | NW_004516938.1 | Scaffold1845 | 63028                   | GG                              | AA                | 1946666662               |
| SNP_P3_160984_67369 | NW_004516938.1 | Scaffold1845 | 67369                   | CC                              | TT                | 1946666664               |
| SNP_P3_160985_70616 | NW_004516938.1 | Scaffold1845 | 70616                   | AA                              | GG                | 1946666666               |
| SNP_P3_160986_79181 | NW_004516938.1 | Scaffold1845 | 79181                   | TT                              | AA                | 1946666668               |
| SNP_P3_160988_79738 | NW_004516938.1 | Scaffold1845 | 79738                   | TT                              | AA                | 1946666670               |

| SNPs IDs             | Chromosome IDs | Chromosomes  | Physical positions (bp) | CDC Frontier (Reference genome) | (Pusa 256 & HPNB) | NCBI SNPdb Accession IDs |
|----------------------|----------------|--------------|-------------------------|---------------------------------|-------------------|--------------------------|
| SNP_P3_160989_81179  | NW_004516938.1 | Scaffold1845 | 81179                   | TT                              | CC                | 1946666672               |
| SNP_P3_160990_82017  | NW_004516938.1 | Scaffold1845 | 82017                   | GG                              | AA                | 1946666674               |
| SNP_P3_160991_84980  | NW_004516938.1 | Scaffold1845 | 84980                   | AA                              | TT                | 1946666676               |
| SNP_P3_160992_86197  | NW_004516938.1 | Scaffold1845 | 86197                   | CC                              | TT                | 1946666678               |
| SNP_P3_160993_86371  | NW_004516938.1 | Scaffold1845 | 86371                   | GG                              | AA                | 1946666680               |
| SNP_P3_160994_92813  | NW_004516938.1 | Scaffold1845 | 92813                   | TT                              | CC                | 1946666683               |
| SNP_P3_160995_94480  | NW_004516938.1 | Scaffold1845 | 94480                   | AA                              | GG                | 1946666685               |
| SNP_P3_160996_94787  | NW_004516938.1 | Scaffold1845 | 94787                   | TT                              | CC                | 1946666687               |
| SNP_P3_160997_100784 | NW_004516938.1 | Scaffold1845 | 100784                  | TT                              | AA                | 1946666690               |
| SNP_P3_160998_104135 | NW_004516938.1 | Scaffold1845 | 104135                  | TT                              | CC                | 1946666692               |
| SNP_P3_160999_107344 | NW_004516938.1 | Scaffold1845 | 107344                  | AA                              | GG                | 1946666694               |
| SNP_P3_161000_114773 | NW_004516938.1 | Scaffold1845 | 114773                  | AA                              | GG                | 1946666697               |
| SNP_P3_161001_116906 | NW_004516938.1 | Scaffold1845 | 116906                  | GG                              | AA                | 1946666699               |
| SNP_P3_161003_124315 | NW_004516938.1 | Scaffold1845 | 124315                  | CC                              | TT                | 1946666701               |
| SNP_P3_161004_126546 | NW_004516938.1 | Scaffold1845 | 126546                  | AA                              | GG                | 1946666703               |
| SNP_P3_161005_127049 | NW_004516938.1 | Scaffold1845 | 127049                  | GG                              | AA                | 1946666705               |
| SNP_P3_161006_127166 | NW_004516938.1 | Scaffold1845 | 127166                  | AA                              | TT                | 1946666707               |
| SNP_P3_161007_127213 | NW_004516938.1 | Scaffold1845 | 127213                  | CC                              | GG                | 1946666709               |
| SNP_P3_161008_127476 | NW_004516938.1 | Scaffold1845 | 127476                  | TT                              | GG                | 1946666711               |
| SNP_P3_161009_127525 | NW_004516938.1 | Scaffold1845 | 127525                  | TT                              | CC                | 1946666713               |
| SNP_P3_161010_127560 | NW_004516938.1 | Scaffold1845 | 127560                  | CC                              | TT                | 1946666716               |
| SNP_P3_161011_127576 | NW_004516938.1 | Scaffold1845 | 127576                  | CC                              | TT                | 1946666718               |
| SNP_P3_161012_127584 | NW_004516938.1 | Scaffold1845 | 127584                  | AA                              | GG                | 1946666720               |
| SNP_P3_161013_127660 | NW_004516938.1 | Scaffold1845 | 127660                  | AA                              | GG                | 1946666722               |
| SNP_P3_161015_1023   | NW_004516940.1 | Scaffold1847 | 1023                    | AA                              | CC                | 1946666724               |
| SNP_P3_161016_932    | NW_004516941.1 | Scaffold1848 | 932                     | CC                              | TT                | 1946666726               |
| SNP_P3_161017_3470   | NW_004516941.1 | Scaffold1848 | 3470                    | AA                              | TT                | 1946666729               |
| SNP_P3_161018_3503   | NW_004516941.1 | Scaffold1848 | 3503                    | CC                              | AA                | 1946666731               |
| SNP_P3_161019_3507   | NW_004516941.1 | Scaffold1848 | 3507                    | AA                              | GG                | 1946666733               |
| SNP_P3_161020_3767   | NW_004516941.1 | Scaffold1848 | 3767                    | GG                              | TT                | 1946666735               |
| SNP_P3_161021_3788   | NW_004516941.1 | Scaffold1848 | 3788                    | CC                              | TT                | 1946666738               |
| SNP_P3_161022_4359   | NW_004516941.1 | Scaffold1848 | 4359                    | GG                              | TT                | 1946666740               |
| SNP_P3_161023_10934  | NW_004516941.1 | Scaffold1848 | 10934                   | GG                              | CC                | 1946666742               |
| SNP_P3_161024_10940  | NW_004516941.1 | Scaffold1848 | 10940                   | CC                              | TT                | 1946666744               |
| SNP_P3_161025_10951  | NW_004516941.1 | Scaffold1848 | 10951                   | GG                              | TT                | 1946666746               |
| SNP_P3_161027_11165  | NW_004516941.1 | Scaffold1848 | 11165                   | GG                              | TT                | 1946666748               |
| SNP_P3_161028_11184  | NW_004516941.1 | Scaffold1848 | 11184                   | AA                              | CC                | 1946666750               |
| SNP_P3_161029_11354  | NW_004516941.1 | Scaffold1848 | 11354                   | TT                              | CC                | 1946666752               |
| SNP_P3_161030_11407  | NW_004516941.1 | Scaffold1848 | 11407                   | GG                              | TT                | 1946666754               |
| SNP_P3_161031_12037  | NW_004516941.1 | Scaffold1848 | 12037                   | TT                              | CC                | 1946666756               |
| SNP_P3_161032_12050  | NW_004516941.1 | Scaffold1848 | 12050                   | AA                              | GG                | 1946666758               |
| SNP_P3_161033_12161  | NW_004516941.1 | Scaffold1848 | 12161                   | AA                              | GG                | 1946666760               |



| SNPs IDs            | Chromosome IDs | Chromosomes  | Physical positions (bp) | CDC Frontier (Reference genome) | (Pusa 256 & HPNB) | NCBI SNPdb Accession IDs |
|---------------------|----------------|--------------|-------------------------|---------------------------------|-------------------|--------------------------|
| SNP_P3_161034_12166 | NW_004516941.1 | Scaffold1848 | 12166                   | TT                              | CC                | 1946666762               |
| SNP_P3_161035_12207 | NW_004516941.1 | Scaffold1848 | 12207                   | AA                              | GG                | 1946666765               |
| SNP_P3_161036_12213 | NW_004516941.1 | Scaffold1848 | 12213                   | CC                              | TT                | 1946666768               |
| SNP_P3_161037_12434 | NW_004516941.1 | Scaffold1848 | 12434                   | GG                              | AA                | 1946666770               |
| SNP_P3_161038_12436 | NW_004516941.1 | Scaffold1848 | 12436                   | CC                              | GG                | 1946666790               |
| SNP_P3_161039_64    | NW_004516943.1 | Scaffold1851 | 64                      | AA                              | CC                | 1946666792               |
| SNP_P3_161040_385   | NW_004516943.1 | Scaffold1851 | 385                     | TT                              | CC                | 1946666794               |
| SNP_P3_161041_539   | NW_004516943.1 | Scaffold1851 | 539                     | GG                              | CC                | 1946666796               |
| SNP_P3_161042_11737 | NW_004516944.1 | Scaffold1852 | 11737                   | CC                              | TT                | 1946666799               |
| SNP_P3_161043_11793 | NW_004516944.1 | Scaffold1852 | 11793                   | AA                              | GG                | 1946666801               |
| SNP_P3_161044_19025 | NW_004516944.1 | Scaffold1852 | 19025                   | TT                              | GG                | 1946666803               |
| SNP_P3_161045_19028 | NW_004516944.1 | Scaffold1852 | 19028                   | AA                              | TT                | 1946666805               |
| SNP_P3_161046_22142 | NW_004516944.1 | Scaffold1852 | 22142                   | TT                              | AA                | 1946666807               |
| SNP_P3_161047_42750 | NW_004516944.1 | Scaffold1852 | 42750                   | AA                              | CC                | 1946666809               |
| SNP_P3_161048_42764 | NW_004516944.1 | Scaffold1852 | 42764                   | TT                              | GG                | 1946666811               |
| SNP_P3_161049_43156 | NW_004516944.1 | Scaffold1852 | 43156                   | CC                              | TT                | 1946666813               |
| SNP_P3_161050_43157 | NW_004516944.1 | Scaffold1852 | 43157                   | GG                              | TT                | 1946666815               |
| SNP_P3_161051_43161 | NW_004516944.1 | Scaffold1852 | 43161                   | GG                              | CC                | 1946666817               |
| SNP_P3_161052_43162 | NW_004516944.1 | Scaffold1852 | 43162                   | GG                              | AA                | 1946666819               |
| SNP_P3_161053_43192 | NW_004516944.1 | Scaffold1852 | 43192                   | TT                              | GG                | 1946666821               |
| SNP_P3_161054_43209 | NW_004516944.1 | Scaffold1852 | 43209                   | TT                              | CC                | 1946666823               |
| SNP_P3_161055_43307 | NW_004516944.1 | Scaffold1852 | 43307                   | AA                              | GG                | 1946666826               |
| SNP_P3_161056_43396 | NW_004516944.1 | Scaffold1852 | 43396                   | CC                              | AA                | 1946666829               |
| SNP_P3_161057_43401 | NW_004516944.1 | Scaffold1852 | 43401                   | AA                              | CC                | 1946666831               |
| SNP_P3_161058_43413 | NW_004516944.1 | Scaffold1852 | 43413                   | AA                              | TT                | 1946666833               |
| SNP_P3_161059_57735 | NW_004516944.1 | Scaffold1852 | 57735                   | GG                              | AA                | 1946666835               |
| SNP_P3_161060_81871 | NW_004516944.1 | Scaffold1852 | 81871                   | GG                              | TT                | 1946666837               |
| SNP_P3_161061_93824 | NW_004516944.1 | Scaffold1852 | 93824                   | GG                              | TT                | 1946666839               |
| SNP_P3_161062_93832 | NW_004516944.1 | Scaffold1852 | 93832                   | AA                              | GG                | 1946666841               |
| SNP_P3_161063_93835 | NW_004516944.1 | Scaffold1852 | 93835                   | AA                              | GG                | 1946666843               |
| SNP_P3_161064_93900 | NW_004516944.1 | Scaffold1852 | 93900                   | CC                              | GG                | 1946666845               |
| SNP_P3_161065_93988 | NW_004516944.1 | Scaffold1852 | 93988                   | TT                              | GG                | 1946666848               |
| SNP_P3_161066_94027 | NW_004516944.1 | Scaffold1852 | 94027                   | AA                              | CC                | 1946666850               |
| SNP_P3_161067_94239 | NW_004516944.1 | Scaffold1852 | 94239                   | TT                              | CC                | 1946666852               |
| SNP_P3_161069_94271 | NW_004516944.1 | Scaffold1852 | 94271                   | AA                              | TT                | 1946666854               |
| SNP_P3_161070_94277 | NW_004516944.1 | Scaffold1852 | 94277                   | AA                              | GG                | 1946666856               |
| SNP_P3_161071_94281 | NW_004516944.1 | Scaffold1852 | 94281                   | TT                              | CC                | 1946666858               |
| SNP_P3_161072_94296 | NW_004516944.1 | Scaffold1852 | 94296                   | CC                              | TT                | 1946666860               |
| SNP_P3_161073_94298 | NW_004516944.1 | Scaffold1852 | 94298                   | GG                              | CC                | 1946666862               |
| SNP_P3_161074_94303 | NW_004516944.1 | Scaffold1852 | 94303                   | CC                              | TT                | 1946666865               |
| SNP_P3_161075_94307 | NW_004516944.1 | Scaffold1852 | 94307                   | TT                              | CC                | 1946666867               |
| SNP_P3_161076_94340 | NW_004516944.1 | Scaffold1852 | 94340                   | TT                              | CC                | 1946666869               |

| SNPs IDs             | Chromosome IDs | Chromosomes  | Physical positions (bp) | CDC Frontier (Reference genome) | (Pusa 256 & HPNB) | NCBI SNPdb Accession IDs |
|----------------------|----------------|--------------|-------------------------|---------------------------------|-------------------|--------------------------|
| SNP_P3_161077_94420  | NW_004516944.1 | Scaffold1852 | 94420                   | CC                              | TT                | 1946666871               |
| SNP_P3_161078_94454  | NW_004516944.1 | Scaffold1852 | 94454                   | AA                              | GG                | 1946666874               |
| SNP_P3_161081_94670  | NW_004516944.1 | Scaffold1852 | 94670                   | AA                              | GG                | 1946666876               |
| SNP_P3_161082_94685  | NW_004516944.1 | Scaffold1852 | 94685                   | AA                              | GG                | 1946666878               |
| SNP_P3_161083_94707  | NW_004516944.1 | Scaffold1852 | 94707                   | GG                              | AA                | 1946666880               |
| SNP_P3_161084_94739  | NW_004516944.1 | Scaffold1852 | 94739                   | CC                              | TT                | 1946666882               |
| SNP_P3_161086_94799  | NW_004516944.1 | Scaffold1852 | 94799                   | GG                              | AA                | 1946666884               |
| SNP_P3_161089_94946  | NW_004516944.1 | Scaffold1852 | 94946                   | TT                              | CC                | 1946666887               |
| SNP_P3_161090_95104  | NW_004516944.1 | Scaffold1852 | 95104                   | AA                              | TT                | 1946666889               |
| SNP_P3_161091_95109  | NW_004516944.1 | Scaffold1852 | 95109                   | GG                              | AA                | 1946666891               |
| SNP_P3_161092_95122  | NW_004516944.1 | Scaffold1852 | 95122                   | CC                              | TT                | 1946666893               |
| SNP_P3_161093_95147  | NW_004516944.1 | Scaffold1852 | 95147                   | AA                              | TT                | 1946666895               |
| SNP_P3_161094_95167  | NW_004516944.1 | Scaffold1852 | 95167                   | TT                              | GG                | 1946666897               |
| SNP_P3_161095_95191  | NW_004516944.1 | Scaffold1852 | 95191                   | TT                              | CC                | 1946666899               |
| SNP_P3_161096_95249  | NW_004516944.1 | Scaffold1852 | 95249                   | GG                              | TT                | 1946666902               |
| SNP_P3_161097_95335  | NW_004516944.1 | Scaffold1852 | 95335                   | TT                              | GG                | 1946666904               |
| SNP_P3_161098_95380  | NW_004516944.1 | Scaffold1852 | 95380                   | TT                              | GG                | 1946666906               |
| SNP_P3_161100_98035  | NW_004516944.1 | Scaffold1852 | 98035                   | AA                              | TT                | 1946666909               |
| SNP_P3_161101_101421 | NW_004516944.1 | Scaffold1852 | 101421                  | TT                              | CC                | 1946666911               |
| SNP_P3_161102_101606 | NW_004516944.1 | Scaffold1852 | 101606                  | CC                              | AA                | 1946666913               |
| SNP_P3_161103_101615 | NW_004516944.1 | Scaffold1852 | 101615                  | GG                              | AA                | 1946666915               |
| SNP_P3_161105_101855 | NW_004516944.1 | Scaffold1852 | 101855                  | AA                              | GG                | 1946666917               |
| SNP_P3_161106_101858 | NW_004516944.1 | Scaffold1852 | 101858                  | GG                              | AA                | 1946666919               |
| SNP_P3_161107_101859 | NW_004516944.1 | Scaffold1852 | 101859                  | TT                              | CC                | 1946666921               |
| SNP_P3_161108_101955 | NW_004516944.1 | Scaffold1852 | 101955                  | TT                              | AA                | 1946666923               |
| SNP_P3_161109_101979 | NW_004516944.1 | Scaffold1852 | 101979                  | GG                              | AA                | 1946666925               |
| SNP_P3_161110_102172 | NW_004516944.1 | Scaffold1852 | 102172                  | TT                              | CC                | 1946666927               |
| SNP_P3_161111_102199 | NW_004516944.1 | Scaffold1852 | 102199                  | GG                              | AA                | 1946666929               |
| SNP_P3_161113_102907 | NW_004516944.1 | Scaffold1852 | 102907                  | TT                              | CC                | 1946666931               |
| SNP_P3_161114_102936 | NW_004516944.1 | Scaffold1852 | 102936                  | GG                              | AA                | 1946666933               |
| SNP_P3_161116_103011 | NW_004516944.1 | Scaffold1852 | 103011                  | TT                              | AA                | 1946666936               |
| SNP_P3_161117_103023 | NW_004516944.1 | Scaffold1852 | 103023                  | CC                              | TT                | 1946666938               |
| SNP_P3_161118_103101 | NW_004516944.1 | Scaffold1852 | 103101                  | CC                              | AA                | 1946666941               |
| SNP_P3_161119_103133 | NW_004516944.1 | Scaffold1852 | 103133                  | AA                              | TT                | 1946666943               |
| SNP_P3_161120_103134 | NW_004516944.1 | Scaffold1852 | 103134                  | TT                              | AA                | 1946666945               |
| SNP_P3_161121_103192 | NW_004516944.1 | Scaffold1852 | 103192                  | TT                              | AA                | 1946666947               |
| SNP_P3_161123_103457 | NW_004516944.1 | Scaffold1852 | 103457                  | GG                              | AA                | 1946666949               |
| SNP_P3_161124_103483 | NW_004516944.1 | Scaffold1852 | 103483                  | AA                              | TT                | 1946666951               |
| SNP_P3_161125_103499 | NW_004516944.1 | Scaffold1852 | 103499                  | TT                              | CC                | 1946666953               |
| SNP_P3_161127_103552 | NW_004516944.1 | Scaffold1852 | 103552                  | CC                              | TT                | 1946666955               |
| SNP_P3_161128_103561 | NW_004516944.1 | Scaffold1852 | 103561                  | TT                              | CC                | 1946666957               |
| SNP_P3_161129_103577 | NW_004516944.1 | Scaffold1852 | 103577                  | GG                              | AA                | 1946666959               |

| SNPs IDs             | Chromosome IDs | Chromosomes  | Physical positions (bp) | CDC Frontier (Reference genome) | (Pusa 256 & HPNB) | NCBI SNPdb Accession IDs |
|----------------------|----------------|--------------|-------------------------|---------------------------------|-------------------|--------------------------|
| SNP_P3_161130_103630 | NW_004516944.1 | Scaffold1852 | 103630                  | AA                              | GG                | 1946666961               |
| SNP_P3_161131_104028 | NW_004516944.1 | Scaffold1852 | 104028                  | GG                              | TT                | 1946666963               |
| SNP_P3_161132_104029 | NW_004516944.1 | Scaffold1852 | 104029                  | GG                              | TT                | 1946666965               |
| SNP_P3_161134_10528  | NW_004516945.1 | Scaffold1854 | 10528                   | TT                              | AA                | 1946666967               |
| SNP_P3_161135_35464  | NW_004516945.1 | Scaffold1854 | 35464                   | AA                              | GG                | 1946666969               |
| SNP_P3_161136_39160  | NW_004516945.1 | Scaffold1854 | 39160                   | CC                              | TT                | 1946666971               |
| SNP_P3_161137_39813  | NW_004516945.1 | Scaffold1854 | 39813                   | AA                              | TT                | 1946666973               |
| SNP_P3_161138_39831  | NW_004516945.1 | Scaffold1854 | 39831                   | GG                              | AA                | 1946666975               |
| SNP_P3_161139_41008  | NW_004516945.1 | Scaffold1854 | 41008                   | TT                              | CC                | 1946666977               |
| SNP_P3_161140_49964  | NW_004516945.1 | Scaffold1854 | 49964                   | AA                              | GG                | 1946666979               |
| SNP_P3_161141_50024  | NW_004516945.1 | Scaffold1854 | 50024                   | AA                              | TT                | 1946666983               |
| SNP_P3_161142_50045  | NW_004516945.1 | Scaffold1854 | 50045                   | GG                              | AA                | 1946666985               |
| SNP_P3_161143_52399  | NW_004516945.1 | Scaffold1854 | 52399                   | AA                              | TT                | 1946666987               |
| SNP_P3_161144_590    | NW_004516947.1 | Scaffold1856 | 590                     | GG                              | AA                | 1946666989               |
| SNP_P3_161145_6543   | NW_004516947.1 | Scaffold1856 | 6543                    | CC                              | TT                | 1946666991               |
| SNP_P3_161146_6544   | NW_004516947.1 | Scaffold1856 | 6544                    | TT                              | GG                | 1946666994               |
| SNP_P3_161147_6790   | NW_004516947.1 | Scaffold1856 | 6790                    | GG                              | AA                | 1946666996               |
| SNP_P3_161148_12160  | NW_004516951.1 | Scaffold1861 | 12160                   | AA                              | GG                | 1946666998               |
| SNP_P3_161150_12318  | NW_004516951.1 | Scaffold1861 | 12318                   | AA                              | CC                | 1946667000               |
| SNP_P3_161151_12407  | NW_004516951.1 | Scaffold1861 | 12407                   | CC                              | AA                | 1946667002               |
| SNP_P3_161152_12439  | NW_004516951.1 | Scaffold1861 | 12439                   | AA                              | GG                | 1946667004               |
| SNP_P3_161153_12478  | NW_004516951.1 | Scaffold1861 | 12478                   | TT                              | CC                | 1946667006               |
| SNP_P3_161154_12688  | NW_004516951.1 | Scaffold1861 | 12688                   | TT                              | CC                | 1946667008               |
| SNP_P3_161155_12707  | NW_004516951.1 | Scaffold1861 | 12707                   | TT                              | CC                | 1946667010               |
| SNP_P3_161156_12778  | NW_004516951.1 | Scaffold1861 | 12778                   | TT                              | CC                | 1946667013               |
| SNP_P3_161157_12788  | NW_004516951.1 | Scaffold1861 | 12788                   | AA                              | GG                | 1946667015               |
| SNP_P3_161158_12793  | NW_004516951.1 | Scaffold1861 | 12793                   | AA                              | GG                | 1946667017               |
| SNP_P3_161159_12821  | NW_004516951.1 | Scaffold1861 | 12821                   | TT                              | CC                | 1946667019               |
| SNP_P3_161160_1010   | NW_004516952.1 | Scaffold1862 | 1010                    | AA                              | TT                | 1946667021               |
| SNP_P3_161161_1011   | NW_004516952.1 | Scaffold1862 | 1011                    | TT                              | AA                | 1946667024               |
| SNP_P3_161163_3013   | NW_004516953.1 | Scaffold1864 | 3013                    | GG                              | TT                | 1946667026               |
| SNP_P3_161164_3585   | NW_004516953.1 | Scaffold1864 | 3585                    | GG                              | AA                | 1946667028               |
| SNP_P3_161167_3785   | NW_004516953.1 | Scaffold1864 | 3785                    | CC                              | TT                | 1946667030               |
| SNP_P3_161168_3789   | NW_004516953.1 | Scaffold1864 | 3789                    | TT                              | CC                | 1946667032               |
| SNP_P3_161169_3790   | NW_004516953.1 | Scaffold1864 | 3790                    | GG                              | AA                | 1946667034               |
| SNP_P3_161170_3808   | NW_004516953.1 | Scaffold1864 | 3808                    | AA                              | GG                | 1946667036               |
| SNP_P3_161172_3900   | NW_004516953.1 | Scaffold1864 | 3900                    | GG                              | CC                | 1946667038               |
| SNP_P3_161173_3919   | NW_004516953.1 | Scaffold1864 | 3919                    | CC                              | TT                | 1946667040               |
| SNP_P3_161174_3970   | NW_004516953.1 | Scaffold1864 | 3970                    | TT                              | CC                | 1946667042               |
| SNP_P3_161175_4124   | NW_004516953.1 | Scaffold1864 | 4124                    | GG                              | AA                | 1946667044               |
| SNP_P3_161176_4138   | NW_004516953.1 | Scaffold1864 | 4138                    | GG                              | TT                | 1946667047               |
| SNP_P3_161177_4243   | NW_004516953.1 | Scaffold1864 | 4243                    | AA                              | GG                | 1946667049               |

| SNPs IDs            | Chromosome IDs | Chromosomes  | Physical positions (bp) | CDC Frontier (Reference genome) | (Pusa 256 & HPNB) | NCBI SNPdb Accession IDs |
|---------------------|----------------|--------------|-------------------------|---------------------------------|-------------------|--------------------------|
| SNP_P3_161179_4337  | NW_004516953.1 | Scaffold1864 | 4337                    | TT                              | AA                | 1946667051               |
| SNP_P3_161180_4362  | NW_004516953.1 | Scaffold1864 | 4362                    | AA                              | GG                | 1946667053               |
| SNP_P3_161182_4619  | NW_004516953.1 | Scaffold1864 | 4619                    | CC                              | TT                | 1946667056               |
| SNP_P3_161184_4764  | NW_004516953.1 | Scaffold1864 | 4764                    | TT                              | CC                | 1946667058               |
| SNP_P3_161185_4791  | NW_004516953.1 | Scaffold1864 | 4791                    | CC                              | GG                | 1946667061               |
| SNP_P3_161186_4893  | NW_004516953.1 | Scaffold1864 | 4893                    | CC                              | TT                | 1946667064               |
| SNP_P3_161187_4901  | NW_004516953.1 | Scaffold1864 | 4901                    | CC                              | TT                | 1946667066               |
| SNP_P3_161188_4973  | NW_004516953.1 | Scaffold1864 | 4973                    | GG                              | AA                | 1946667069               |
| SNP_P3_161189_4984  | NW_004516953.1 | Scaffold1864 | 4984                    | GG                              | AA                | 1946667071               |
| SNP_P3_161190_5028  | NW_004516953.1 | Scaffold1864 | 5028                    | GG                              | TT                | 1946667073               |
| SNP_P3_161192_5292  | NW_004516953.1 | Scaffold1864 | 5292                    | GG                              | AA                | 1946667075               |
| SNP_P3_161193_5300  | NW_004516953.1 | Scaffold1864 | 5300                    | TT                              | AA                | 1946667077               |
| SNP_P3_161194_5382  | NW_004516953.1 | Scaffold1864 | 5382                    | TT                              | CC                | 1946667080               |
| SNP_P3_161195_5523  | NW_004516953.1 | Scaffold1864 | 5523                    | TT                              | AA                | 1946667082               |
| SNP_P3_161197_5603  | NW_004516953.1 | Scaffold1864 | 5603                    | CC                              | TT                | 1946667084               |
| SNP_P3_161198_5613  | NW_004516953.1 | Scaffold1864 | 5613                    | CC                              | TT                | 1946667086               |
| SNP_P3_161199_5673  | NW_004516953.1 | Scaffold1864 | 5673                    | CC                              | AA                | 1946667088               |
| SNP_P3_161200_5700  | NW_004516953.1 | Scaffold1864 | 5700                    | CC                              | TT                | 1946667090               |
| SNP_P3_161201_5715  | NW_004516953.1 | Scaffold1864 | 5715                    | TT                              | CC                | 1946667092               |
| SNP_P3_161202_5716  | NW_004516953.1 | Scaffold1864 | 5716                    | TT                              | CC                | 1946667094               |
| SNP_P3_161203_5753  | NW_004516953.1 | Scaffold1864 | 5753                    | AA                              | GG                | 1946667096               |
| SNP_P3_161204_5754  | NW_004516953.1 | Scaffold1864 | 5754                    | CC                              | TT                | 1946667098               |
| SNP_P3_161205_5758  | NW_004516953.1 | Scaffold1864 | 5758                    | TT                              | CC                | 1946667100               |
| SNP_P3_161206_5762  | NW_004516953.1 | Scaffold1864 | 5762                    | AA                              | GG                | 1946667102               |
| SNP_P3_161207_5789  | NW_004516953.1 | Scaffold1864 | 5789                    | TT                              | CC                | 1946667104               |
| SNP_P3_161208_5848  | NW_004516953.1 | Scaffold1864 | 5848                    | CC                              | TT                | 1946667106               |
| SNP_P3_161209_5875  | NW_004516953.1 | Scaffold1864 | 5875                    | TT                              | GG                | 1946667108               |
| SNP_P3_161213_6035  | NW_004516953.1 | Scaffold1864 | 6035                    | CC                              | AA                | 1946667110               |
| SNP_P3_161214_6058  | NW_004516953.1 | Scaffold1864 | 6058                    | CC                              | AA                | 1946667112               |
| SNP_P3_161215_6163  | NW_004516953.1 | Scaffold1864 | 6163                    | AA                              | GG                | 1946667114               |
| SNP_P3_161216_6194  | NW_004516953.1 | Scaffold1864 | 6194                    | AA                              | CC                | 1946667116               |
| SNP_P3_161217_6220  | NW_004516953.1 | Scaffold1864 | 6220                    | GG                              | AA                | 1946667118               |
| SNP_P3_161219_6306  | NW_004516953.1 | Scaffold1864 | 6306                    | GG                              | TT                | 1946667120               |
| SNP_P3_161220_6401  | NW_004516953.1 | Scaffold1864 | 6401                    | TT                              | GG                | 1946667122               |
| SNP_P3_161221_6452  | NW_004516953.1 | Scaffold1864 | 6452                    | GG                              | AA                | 1946667124               |
| SNP_P3_161222_9904  | NW_004516953.1 | Scaffold1864 | 9904                    | AA                              | GG                | 1946667126               |
| SNP_P3_161223_10114 | NW_004516953.1 | Scaffold1864 | 10114                   | AA                              | CC                | 1946667128               |
| SNP_P3_161224_10143 | NW_004516953.1 | Scaffold1864 | 10143                   | CC                              | TT                | 1946667130               |
| SNP_P3_161225_10268 | NW_004516953.1 | Scaffold1864 | 10268                   | CC                              | TT                | 1946667132               |
| SNP_P3_161226_10269 | NW_004516953.1 | Scaffold1864 | 10269                   | TT                              | AA                | 1946667134               |
| SNP_P3_161227_10359 | NW_004516953.1 | Scaffold1864 | 10359                   | CC                              | TT                | 1946667136               |
| SNP_P3_161228_10477 | NW_004516953.1 | Scaffold1864 | 10477                   | CC                              | AA                | 1946667138               |

| SNPs IDs            | Chromosome IDs | Chromosomes  | Physical positions (bp) | CDC Frontier (Reference genome) | (Pusa 256 & HPNB) | NCBI SNPdb Accession IDs |
|---------------------|----------------|--------------|-------------------------|---------------------------------|-------------------|--------------------------|
| SNP_P3_161229_10555 | NW_004516953.1 | Scaffold1864 | 10555                   | AA                              | GG                | 1946667140               |
| SNP_P3_161230_10571 | NW_004516953.1 | Scaffold1864 | 10571                   | TT                              | GG                | 1946667142               |
| SNP_P3_161231_10600 | NW_004516953.1 | Scaffold1864 | 10600                   | TT                              | GG                | 1946667144               |
| SNP_P3_161232_10736 | NW_004516953.1 | Scaffold1864 | 10736                   | CC                              | TT                | 1946667146               |
| SNP_P3_161233_10746 | NW_004516953.1 | Scaffold1864 | 10746                   | CC                              | TT                | 1946667148               |
| SNP_P3_161234_10776 | NW_004516953.1 | Scaffold1864 | 10776                   | CC                              | TT                | 1946667150               |
| SNP_P3_161235_10841 | NW_004516953.1 | Scaffold1864 | 10841                   | TT                              | CC                | 1946667152               |
| SNP_P3_161236_10856 | NW_004516953.1 | Scaffold1864 | 10856                   | AA                              | TT                | 1946667154               |
| SNP_P3_161237_10858 | NW_004516953.1 | Scaffold1864 | 10858                   | TT                              | CC                | 1946667156               |
| SNP_P3_161238_10917 | NW_004516953.1 | Scaffold1864 | 10917                   | CC                              | TT                | 1946667158               |
| SNP_P3_161239_11038 | NW_004516953.1 | Scaffold1864 | 11038                   | CC                              | TT                | 1946667160               |
| SNP_P3_161240_11080 | NW_004516953.1 | Scaffold1864 | 11080                   | AA                              | CC                | 1946667162               |
| SNP_P3_161241_11104 | NW_004516953.1 | Scaffold1864 | 11104                   | TT                              | AA                | 1946667164               |
| SNP_P3_161242_11176 | NW_004516953.1 | Scaffold1864 | 11176                   | TT                              | AA                | 1946667166               |
| SNP_P3_161243_11180 | NW_004516953.1 | Scaffold1864 | 11180                   | AA                              | CC                | 1946667169               |
| SNP_P3_161244_11218 | NW_004516953.1 | Scaffold1864 | 11218                   | TT                              | AA                | 1946667171               |
| SNP_P3_161245_11260 | NW_004516953.1 | Scaffold1864 | 11260                   | TT                              | AA                | 1946667173               |
| SNP_P3_161246_11473 | NW_004516953.1 | Scaffold1864 | 11473                   | CC                              | TT                | 1946667175               |
| SNP_P3_161247_11585 | NW_004516953.1 | Scaffold1864 | 11585                   | AA                              | GG                | 1946667177               |
| SNP_P3_161248_11622 | NW_004516953.1 | Scaffold1864 | 11622                   | TT                              | CC                | 1946667179               |
| SNP_P3_161249_11657 | NW_004516953.1 | Scaffold1864 | 11657                   | TT                              | CC                | 1946667181               |
| SNP_P3_161250_11696 | NW_004516953.1 | Scaffold1864 | 11696                   | CC                              | TT                | 1946667183               |
| SNP_P3_161251_11825 | NW_004516953.1 | Scaffold1864 | 11825                   | CC                              | TT                | 1946667186               |
| SNP_P3_161252_11873 | NW_004516953.1 | Scaffold1864 | 11873                   | GG                              | AA                | 1946667188               |
| SNP_P3_161253_11904 | NW_004516953.1 | Scaffold1864 | 11904                   | AA                              | GG                | 1946667190               |
| SNP_P3_161254_11947 | NW_004516953.1 | Scaffold1864 | 11947                   | TT                              | CC                | 1946667192               |
| SNP_P3_161255_12327 | NW_004516953.1 | Scaffold1864 | 12327                   | TT                              | CC                | 1946667194               |
| SNP_P3_161256_14499 | NW_004516953.1 | Scaffold1864 | 14499                   | GG                              | AA                | 1946667196               |
| SNP_P3_161257_14634 | NW_004516953.1 | Scaffold1864 | 14634                   | GG                              | AA                | 1946667198               |
| SNP_P3_161258_14637 | NW_004516953.1 | Scaffold1864 | 14637                   | GG                              | CC                | 1946667200               |
| SNP_P3_161259_14640 | NW_004516953.1 | Scaffold1864 | 14640                   | CC                              | TT                | 1946667202               |
| SNP_P3_161260_14713 | NW_004516953.1 | Scaffold1864 | 14713                   | CC                              | TT                | 1946667204               |
| SNP_P3_161262_14875 | NW_004516953.1 | Scaffold1864 | 14875                   | AA                              | GG                | 1946667207               |
| SNP_P3_161263_14907 | NW_004516953.1 | Scaffold1864 | 14907                   | CC                              | TT                | 1946667209               |
| SNP_P3_161265_15100 | NW_004516953.1 | Scaffold1864 | 15100                   | TT                              | GG                | 1946667211               |
| SNP_P3_161266_15112 | NW_004516953.1 | Scaffold1864 | 15112                   | GG                              | AA                | 1946667213               |
| SNP_P3_161267_15257 | NW_004516953.1 | Scaffold1864 | 15257                   | TT                              | GG                | 1946667215               |
| SNP_P3_161268_15269 | NW_004516953.1 | Scaffold1864 | 15269                   | GG                              | AA                | 1946667217               |
| SNP_P3_161269_17257 | NW_004516953.1 | Scaffold1864 | 17257                   | TT                              | CC                | 1946667219               |
| SNP_P3_161271_17648 | NW_004516953.1 | Scaffold1864 | 17648                   | TT                              | AA                | 1946667221               |
| SNP_P3_161273_19613 | NW_004516953.1 | Scaffold1864 | 19613                   | CC                              | TT                | 1946667223               |
| SNP_P3_161274_19788 | NW_004516953.1 | Scaffold1864 | 19788                   | TT                              | AA                | 1946667225               |

| SNPs IDs             | Chromosome IDs | Chromosomes  | Physical positions (bp) | CDC Frontier (Reference genome) | (Pusa 256 & HPNB) | NCBI SNPdb Accession IDs |
|----------------------|----------------|--------------|-------------------------|---------------------------------|-------------------|--------------------------|
| SNP_P3_161275_19823  | NW_004516953.1 | Scaffold1864 | 19823                   | GG                              | AA                | 1946667227               |
| SNP_P3_161276_19862  | NW_004516953.1 | Scaffold1864 | 19862                   | AA                              | CC                | 1946667229               |
| SNP_P3_161277_20019  | NW_004516953.1 | Scaffold1864 | 20019                   | AA                              | TT                | 1946667231               |
| SNP_P3_161278_20342  | NW_004516953.1 | Scaffold1864 | 20342                   | CC                              | TT                | 1946667233               |
| SNP_P3_161279_20371  | NW_004516953.1 | Scaffold1864 | 20371                   | GG                              | AA                | 1946667235               |
| SNP_P3_161280_20458  | NW_004516953.1 | Scaffold1864 | 20458                   | AA                              | CC                | 1946667237               |
| SNP_P3_161281_4320   | NW_004516955.1 | Scaffold1866 | 4320                    | CC                              | TT                | 1946667239               |
| SNP_P3_161282_4324   | NW_004516955.1 | Scaffold1866 | 4324                    | TT                              | GG                | 1946667241               |
| SNP_P3_161283_4341   | NW_004516955.1 | Scaffold1866 | 4341                    | CC                              | TT                | 1946667243               |
| SNP_P3_161284_4435   | NW_004516955.1 | Scaffold1866 | 4435                    | AA                              | GG                | 1946667245               |
| SNP_P3_161285_4437   | NW_004516955.1 | Scaffold1866 | 4437                    | CC                              | TT                | 1946667248               |
| SNP_P3_161286_4475   | NW_004516955.1 | Scaffold1866 | 4475                    | GG                              | AA                | 1946667250               |
| SNP_P3_161287_4480   | NW_004516955.1 | Scaffold1866 | 4480                    | AA                              | GG                | 1946667252               |
| SNP_P3_161288_4510   | NW_004516955.1 | Scaffold1866 | 4510                    | AA                              | GG                | 1946667254               |
| SNP_P3_161289_4520   | NW_004516955.1 | Scaffold1866 | 4520                    | AA                              | GG                | 1946667256               |
| SNP_P3_161290_4523   | NW_004516955.1 | Scaffold1866 | 4523                    | AA                              | GG                | 1946667258               |
| SNP_P3_161291_4660   | NW_004516955.1 | Scaffold1866 | 4660                    | GG                              | TT                | 1946667261               |
| SNP_P3_161292_35242  | NW_004516955.1 | Scaffold1866 | 35242                   | TT                              | CC                | 1946667263               |
| SNP_P3_161295_44369  | NW_004516955.1 | Scaffold1866 | 44369                   | TT                              | CC                | 1946667265               |
| SNP_P3_161297_50333  | NW_004516955.1 | Scaffold1866 | 50333                   | AA                              | GG                | 1946667267               |
| SNP_P3_161298_62290  | NW_004516955.1 | Scaffold1866 | 62290                   | AA                              | TT                | 1946667270               |
| SNP_P3_161299_62679  | NW_004516955.1 | Scaffold1866 | 62679                   | TT                              | CC                | 1946667272               |
| SNP_P3_161300_62718  | NW_004516955.1 | Scaffold1866 | 62718                   | GG                              | AA                | 1946667274               |
| SNP_P3_161301_62759  | NW_004516955.1 | Scaffold1866 | 62759                   | TT                              | GG                | 1946667277               |
| SNP_P3_161303_62850  | NW_004516955.1 | Scaffold1866 | 62850                   | TT                              | CC                | 1946667279               |
| SNP_P3_161304_62883  | NW_004516955.1 | Scaffold1866 | 62883                   | CC                              | TT                | 1946667281               |
| SNP_P3_161305_62916  | NW_004516955.1 | Scaffold1866 | 62916                   | CC                              | AA                | 1946667283               |
| SNP_P3_161306_62962  | NW_004516955.1 | Scaffold1866 | 62962                   | AA                              | CC                | 1946667285               |
| SNP_P3_161307_63070  | NW_004516955.1 | Scaffold1866 | 63070                   | TT                              | AA                | 1946667287               |
| SNP_P3_161308_63117  | NW_004516955.1 | Scaffold1866 | 63117                   | AA                              | TT                | 1946667289               |
| SNP_P3_161309_63121  | NW_004516955.1 | Scaffold1866 | 63121                   | AA                              | GG                | 1946667291               |
| SNP_P3_161310_84450  | NW_004516955.1 | Scaffold1866 | 84450                   | GG                              | AA                | 1946667293               |
| SNP_P3_161311_85336  | NW_004516955.1 | Scaffold1866 | 85336                   | CC                              | TT                | 1946667295               |
| SNP_P3_161312_85354  | NW_004516955.1 | Scaffold1866 | 85354                   | AA                              | CC                | 1946667297               |
| SNP_P3_161313_85362  | NW_004516955.1 | Scaffold1866 | 85362                   | TT                              | CC                | 1946667300               |
| SNP_P3_161315_92348  | NW_004516955.1 | Scaffold1866 | 92348                   | AA                              | GG                | 1946667302               |
| SNP_P3_161316_92625  | NW_004516955.1 | Scaffold1866 | 92625                   | TT                              | AA                | 1946667304               |
| SNP_P3_161317_100384 | NW_004516955.1 | Scaffold1866 | 100384                  | AA                              | GG                | 1946667307               |
| SNP_P3_161318_100400 | NW_004516955.1 | Scaffold1866 | 100400                  | TT                              | CC                | 1946667309               |
| SNP_P3_161319_100408 | NW_004516955.1 | Scaffold1866 | 100408                  | AA                              | GG                | 1946667311               |
| SNP_P3_161320_100443 | NW_004516955.1 | Scaffold1866 | 100443                  | TT                              | CC                | 1946667313               |
| SNP_P3_161321_100488 | NW_004516955.1 | Scaffold1866 | 100488                  | TT                              | GG                | 1946667315               |

| SNPs IDs             | Chromosome IDs | Chromosomes  | Physical positions (bp) | CDC Frontier (Reference genome) | (Pusa 256 & HPNB) | NCBI SNPdb Accession IDs |
|----------------------|----------------|--------------|-------------------------|---------------------------------|-------------------|--------------------------|
| SNP_P3_161322_100508 | NW_004516955.1 | Scaffold1866 | 100508                  | CC                              | TT                | 1946667317               |
| SNP_P3_161323_100730 | NW_004516955.1 | Scaffold1866 | 100730                  | TT                              | CC                | 1946667319               |
| SNP_P3_161324_100764 | NW_004516955.1 | Scaffold1866 | 100764                  | TT                              | CC                | 1946667322               |
| SNP_P3_161325_100847 | NW_004516955.1 | Scaffold1866 | 100847                  | AA                              | GG                | 1946667324               |
| SNP_P3_161326_100867 | NW_004516955.1 | Scaffold1866 | 100867                  | TT                              | CC                | 1946667326               |
| SNP_P3_161327_100927 | NW_004516955.1 | Scaffold1866 | 100927                  | TT                              | GG                | 1946667328               |
| SNP_P3_161328_115673 | NW_004516955.1 | Scaffold1866 | 115673                  | TT                              | AA                | 1946667330               |
| SNP_P3_161329_115706 | NW_004516955.1 | Scaffold1866 | 115706                  | TT                              | AA                | 1946667332               |
| SNP_P3_161330_123967 | NW_004516955.1 | Scaffold1866 | 123967                  | AA                              | TT                | 1946667334               |
| SNP_P3_161331_133442 | NW_004516955.1 | Scaffold1866 | 133442                  | GG                              | AA                | 1946667336               |
| SNP_P3_161332_135121 | NW_004516955.1 | Scaffold1866 | 135121                  | GG                              | AA                | 1946667337               |
| SNP_P3_161333_135305 | NW_004516955.1 | Scaffold1866 | 135305                  | CC                              | TT                | 1946667339               |
| SNP_P3_161335_141542 | NW_004516955.1 | Scaffold1866 | 141542                  | TT                              | AA                | 1946667341               |
| SNP_P3_161336_141549 | NW_004516955.1 | Scaffold1866 | 141549                  | CC                              | TT                | 1946667344               |
| SNP_P3_161337_141588 | NW_004516955.1 | Scaffold1866 | 141588                  | TT                              | AA                | 1946667346               |
| SNP_P3_161338_141591 | NW_004516955.1 | Scaffold1866 | 141591                  | CC                              | TT                | 1946667348               |
| SNP_P3_161339_141592 | NW_004516955.1 | Scaffold1866 | 141592                  | CC                              | TT                | 1946667350               |
| SNP_P3_161340_141606 | NW_004516955.1 | Scaffold1866 | 141606                  | CC                              | TT                | 1946667352               |
| SNP_P3_161341_143311 | NW_004516955.1 | Scaffold1866 | 143311                  | TT                              | CC                | 1946667354               |
| SNP_P3_161342_143331 | NW_004516955.1 | Scaffold1866 | 143331                  | GG                              | AA                | 1946667356               |
| SNP_P3_161343_143333 | NW_004516955.1 | Scaffold1866 | 143333                  | CC                              | TT                | 1946667358               |
| SNP_P3_161344_6230   | NW_004516956.1 | Scaffold1867 | 6230                    | GG                              | AA                | 1946667360               |
| SNP_P3_161345_25502  | NW_004516956.1 | Scaffold1867 | 25502                   | AA                              | GG                | 1946667362               |
| SNP_P3_161346_29984  | NW_004516956.1 | Scaffold1867 | 29984                   | AA                              | GG                | 1946667364               |
| SNP_P3_161347_57664  | NW_004516956.1 | Scaffold1867 | 57664                   | TT                              | CC                | 1946667365               |
| SNP_P3_161348_60654  | NW_004516956.1 | Scaffold1867 | 60654                   | CC                              | AA                | 1946667367               |
| SNP_P3_161349_63942  | NW_004516956.1 | Scaffold1867 | 63942                   | CC                              | TT                | 1946667369               |
| SNP_P3_161350_63943  | NW_004516956.1 | Scaffold1867 | 63943                   | CC                              | TT                | 1946667371               |
| SNP_P3_161351_63960  | NW_004516956.1 | Scaffold1867 | 63960                   | TT                              | CC                | 1946667373               |
| SNP_P3_161352_70977  | NW_004516956.1 | Scaffold1867 | 70977                   | TT                              | CC                | 1946667375               |
| SNP_P3_161353_70991  | NW_004516956.1 | Scaffold1867 | 70991                   | CC                              | TT                | 1946667377               |
| SNP_P3_161354_71006  | NW_004516956.1 | Scaffold1867 | 71006                   | GG                              | AA                | 1946667379               |
| SNP_P3_161355_71012  | NW_004516956.1 | Scaffold1867 | 71012                   | AA                              | CC                | 1946667381               |
| SNP_P3_161356_71018  | NW_004516956.1 | Scaffold1867 | 71018                   | TT                              | CC                | 1946667383               |
| SNP_P3_161357_71027  | NW_004516956.1 | Scaffold1867 | 71027                   | TT                              | CC                | 1946667386               |
| SNP_P3_161358_71037  | NW_004516956.1 | Scaffold1867 | 71037                   | AA                              | CC                | 1946667388               |
| SNP_P3_161359_71038  | NW_004516956.1 | Scaffold1867 | 71038                   | CC                              | AA                | 1946667390               |
| SNP_P3_161360_76816  | NW_004516956.1 | Scaffold1867 | 76816                   | TT                              | GG                | 1946667392               |
| SNP_P3_161361_90422  | NW_004516956.1 | Scaffold1867 | 90422                   | AA                              | TT                | 1946667394               |
| SNP_P3_161362_90483  | NW_004516956.1 | Scaffold1867 | 90483                   | AA                              | GG                | 1946667396               |
| SNP_P3_161363_90500  | NW_004516956.1 | Scaffold1867 | 90500                   | AA                              | TT                | 1946667398               |
| SNP_P3_161364_90503  | NW_004516956.1 | Scaffold1867 | 90503                   | CC                              | GG                | 1946667400               |

| SNPs IDs             | Chromosome IDs | Chromosomes  | Physical positions (bp) | CDC Frontier (Reference genome) | (Pusa 256 & HPNB) | NCBI SNPdb Accession IDs |
|----------------------|----------------|--------------|-------------------------|---------------------------------|-------------------|--------------------------|
| SNP_P3_161365_95410  | NW_004516956.1 | Scaffold1867 | 95410                   | TT                              | AA                | 1946667402               |
| SNP_P3_161367_95443  | NW_004516956.1 | Scaffold1867 | 95443                   | CC                              | TT                | 1946667404               |
| SNP_P3_161368_96083  | NW_004516956.1 | Scaffold1867 | 96083                   | TT                              | AA                | 1946667406               |
| SNP_P3_161369_96101  | NW_004516956.1 | Scaffold1867 | 96101                   | TT                              | AA                | 1946667408               |
| SNP_P3_161370_96395  | NW_004516956.1 | Scaffold1867 | 96395                   | AA                              | GG                | 1946667409               |
| SNP_P3_161371_96424  | NW_004516956.1 | Scaffold1867 | 96424                   | AA                              | GG                | 1946667410               |
| SNP_P3_161372_96595  | NW_004516956.1 | Scaffold1867 | 96595                   | AA                              | CC                | 1946667411               |
| SNP_P3_161373_96679  | NW_004516956.1 | Scaffold1867 | 96679                   | GG                              | CC                | 1946667412               |
| SNP_P3_161374_96746  | NW_004516956.1 | Scaffold1867 | 96746                   | CC                              | TT                | 1946667413               |
| SNP_P3_161375_96774  | NW_004516956.1 | Scaffold1867 | 96774                   | GG                              | AA                | 1946667414               |
| SNP_P3_161376_96814  | NW_004516956.1 | Scaffold1867 | 96814                   | AA                              | GG                | 1946667415               |
| SNP_P3_161377_97076  | NW_004516956.1 | Scaffold1867 | 97076                   | AA                              | GG                | 1946667416               |
| SNP_P3_161378_97088  | NW_004516956.1 | Scaffold1867 | 97088                   | AA                              | CC                | 1946667417               |
| SNP_P3_161379_106040 | NW_004516956.1 | Scaffold1867 | 106040                  | CC                              | AA                | 1946667418               |
| SNP_P3_161380_106691 | NW_004516956.1 | Scaffold1867 | 106691                  | AA                              | CC                | 1946667419               |
| SNP_P3_161381_111320 | NW_004516956.1 | Scaffold1867 | 111320                  | TT                              | AA                | 1946667420               |
| SNP_P3_161382_111322 | NW_004516956.1 | Scaffold1867 | 111322                  | AA                              | TT                | 1946667421               |
| SNP_P3_161383_111323 | NW_004516956.1 | Scaffold1867 | 111323                  | GG                              | TT                | 1946667422               |
| SNP_P3_161384_163285 | NW_004516956.1 | Scaffold1867 | 163285                  | AA                              | CC                | 1946667423               |
| SNP_P3_161385_163370 | NW_004516956.1 | Scaffold1867 | 163370                  | TT                              | CC                | 1946667424               |
| SNP_P3_161386_163455 | NW_004516956.1 | Scaffold1867 | 163455                  | TT                              | CC                | 1946667426               |
| SNP_P3_161387_163467 | NW_004516956.1 | Scaffold1867 | 163467                  | AA                              | GG                | 1946667428               |
| SNP_P3_161388_163529 | NW_004516956.1 | Scaffold1867 | 163529                  | CC                              | TT                | 1946667430               |
| SNP_P3_161389_164369 | NW_004516956.1 | Scaffold1867 | 164369                  | CC                              | TT                | 1946667431               |
| SNP_P3_161390_164390 | NW_004516956.1 | Scaffold1867 | 164390                  | CC                              | AA                | 1946667434               |
| SNP_P3_161391_172188 | NW_004516956.1 | Scaffold1867 | 172188                  | AA                              | CC                | 1946667435               |
| SNP_P3_161393_179761 | NW_004516956.1 | Scaffold1867 | 179761                  | TT                              | GG                | 1946667437               |
| SNP_P3_161394_179858 | NW_004516956.1 | Scaffold1867 | 179858                  | TT                              | CC                | 1946667439               |
| SNP_P3_161396_206933 | NW_004516956.1 | Scaffold1867 | 206933                  | CC                              | TT                | 1946667441               |
| SNP_P3_161397_214970 | NW_004516956.1 | Scaffold1867 | 214970                  | AA                              | CC                | 1946667443               |
| SNP_P3_161398_224352 | NW_004516956.1 | Scaffold1867 | 224352                  | GG                              | AA                | 1946667445               |
| SNP_P3_161399_226666 | NW_004516956.1 | Scaffold1867 | 226666                  | AA                              | GG                | 1946667447               |
| SNP_P3_161401_229447 | NW_004516956.1 | Scaffold1867 | 229447                  | CC                              | TT                | 1946667450               |
| SNP_P3_161402_237261 | NW_004516956.1 | Scaffold1867 | 237261                  | GG                              | TT                | 1946667452               |
| SNP_P3_161403_237431 | NW_004516956.1 | Scaffold1867 | 237431                  | CC                              | TT                | 1946667454               |
| SNP_P3_161404_237465 | NW_004516956.1 | Scaffold1867 | 237465                  | GG                              | AA                | 1946667456               |
| SNP_P3_161405_237467 | NW_004516956.1 | Scaffold1867 | 237467                  | CC                              | TT                | 1946667458               |
| SNP_P3_161406_237476 | NW_004516956.1 | Scaffold1867 | 237476                  | AA                              | GG                | 1946667460               |
| SNP_P3_161407_237506 | NW_004516956.1 | Scaffold1867 | 237506                  | AA                              | CC                | 1946667462               |
| SNP_P3_161408_237512 | NW_004516956.1 | Scaffold1867 | 237512                  | TT                              | CC                | 1946667464               |
| SNP_P3_161409_237521 | NW_004516956.1 | Scaffold1867 | 237521                  | CC                              | TT                | 1946667466               |
| SNP_P3_161410_237539 | NW_004516956.1 | Scaffold1867 | 237539                  | TT                              | CC                | 1946667468               |



| SNPs IDs             | Chromosome IDs | Chromosomes  | Physical positions (bp) | CDC Frontier (Reference genome) | (Pusa 256 & HPNB) | NCBI SNPdb Accession IDs |
|----------------------|----------------|--------------|-------------------------|---------------------------------|-------------------|--------------------------|
| SNP_P3_161411_237566 | NW_004516956.1 | Scaffold1867 | 237566                  | CC                              | TT                | 1946667470               |
| SNP_P3_161412_237578 | NW_004516956.1 | Scaffold1867 | 237578                  | AA                              | CC                | 1946667472               |
| SNP_P3_161413_237592 | NW_004516956.1 | Scaffold1867 | 237592                  | TT                              | CC                | 1946667474               |
| SNP_P3_161414_237611 | NW_004516956.1 | Scaffold1867 | 237611                  | GG                              | AA                | 1946667476               |
| SNP_P3_161415_237636 | NW_004516956.1 | Scaffold1867 | 237636                  | CC                              | TT                | 1946667478               |
| SNP_P3_161416_237644 | NW_004516956.1 | Scaffold1867 | 237644                  | AA                              | GG                | 1946667480               |
| SNP_P3_161417_237650 | NW_004516956.1 | Scaffold1867 | 237650                  | TT                              | CC                | 1946667483               |
| SNP_P3_161418_237661 | NW_004516956.1 | Scaffold1867 | 237661                  | AA                              | GG                | 1946667485               |
| SNP_P3_161419_237688 | NW_004516956.1 | Scaffold1867 | 237688                  | GG                              | AA                | 1946667488               |
| SNP_P3_161420_237713 | NW_004516956.1 | Scaffold1867 | 237713                  | TT                              | CC                | 1946667490               |
| SNP_P3_161421_237715 | NW_004516956.1 | Scaffold1867 | 237715                  | AA                              | CC                | 1946667492               |
| SNP_P3_161422_237752 | NW_004516956.1 | Scaffold1867 | 237752                  | TT                              | CC                | 1946667494               |
| SNP_P3_161423_267037 | NW_004516956.1 | Scaffold1867 | 267037                  | CC                              | TT                | 1946667496               |
| SNP_P3_161424_314805 | NW_004516956.1 | Scaffold1867 | 314805                  | AA                              | GG                | 1946667498               |
| SNP_P3_161425_314824 | NW_004516956.1 | Scaffold1867 | 314824                  | TT                              | CC                | 1946667500               |
| SNP_P3_161426_314826 | NW_004516956.1 | Scaffold1867 | 314826                  | GG                              | TT                | 1946667503               |
| SNP_P3_161427_323699 | NW_004516956.1 | Scaffold1867 | 323699                  | GG                              | TT                | 1946667505               |
| SNP_P3_161428_331364 | NW_004516956.1 | Scaffold1867 | 331364                  | GG                              | CC                | 1946667507               |
| SNP_P3_161429_468    | NW_004516957.1 | Scaffold1868 | 468                     | GG                              | TT                | 1946667509               |
| SNP_P3_161430_64     | NW_004516958.1 | Scaffold1869 | 64                      | AA                              | GG                | 1946667511               |
| SNP_P3_161431_307    | NW_004516958.1 | Scaffold1869 | 307                     | AA                              | GG                | 1946667513               |
| SNP_P3_161432_419    | NW_004516958.1 | Scaffold1869 | 419                     | TT                              | GG                | 1946667515               |
| SNP_P3_161433_569    | NW_004516958.1 | Scaffold1869 | 569                     | TT                              | AA                | 1946667517               |
| SNP_P3_161434_808    | NW_004516958.1 | Scaffold1869 | 808                     | AA                              | TT                | 1946667519               |
| SNP_P3_161435_840    | NW_004516958.1 | Scaffold1869 | 840                     | AA                              | GG                | 1946667521               |
| SNP_P3_161436_1497   | NW_004516958.1 | Scaffold1869 | 1497                    | TT                              | CC                | 1946667523               |
| SNP_P3_161437_1498   | NW_004516958.1 | Scaffold1869 | 1498                    | GG                              | AA                | 1946667525               |
| SNP_P3_161438_2083   | NW_004516958.1 | Scaffold1869 | 2083                    | AA                              | GG                | 1946667528               |
| SNP_P3_161439_8198   | NW_004516958.1 | Scaffold1869 | 8198                    | CC                              | TT                | 1946667530               |
| SNP_P3_161440_8213   | NW_004516958.1 | Scaffold1869 | 8213                    | TT                              | CC                | 1946667532               |
| SNP_P3_161441_11472  | NW_004516958.1 | Scaffold1869 | 11472                   | TT                              | AA                | 1946667534               |
| SNP_P3_161442_12121  | NW_004516958.1 | Scaffold1869 | 12121                   | AA                              | GG                | 1946667536               |
| SNP_P3_161443_12686  | NW_004516958.1 | Scaffold1869 | 12686                   | CC                              | AA                | 1946667538               |
| SNP_P3_161444_12851  | NW_004516958.1 | Scaffold1869 | 12851                   | TT                              | CC                | 1946667540               |
| SNP_P3_161445_13099  | NW_004516958.1 | Scaffold1869 | 13099                   | AA                              | GG                | 1946667542               |
| SNP_P3_161446_14045  | NW_004516958.1 | Scaffold1869 | 14045                   | GG                              | AA                | 1946667544               |
| SNP_P3_161447_14055  | NW_004516958.1 | Scaffold1869 | 14055                   | GG                              | TT                | 1946667546               |
| SNP_P3_161448_14066  | NW_004516958.1 | Scaffold1869 | 14066                   | CC                              | GG                | 1946667548               |
| SNP_P3_161449_14200  | NW_004516958.1 | Scaffold1869 | 14200                   | GG                              | AA                | 1946667550               |
| SNP_P3_161450_14222  | NW_004516958.1 | Scaffold1869 | 14222                   | TT                              | CC                | 1946667551               |
| SNP_P3_161451_14315  | NW_004516958.1 | Scaffold1869 | 14315                   | CC                              | AA                | 1946667553               |
| SNP_P3_161452_14372  | NW_004516958.1 | Scaffold1869 | 14372                   | GG                              | TT                | 1946667555               |

| SNPs IDs            | Chromosome IDs | Chromosomes  | Physical positions (bp) | CDC Frontier (Reference genome) | (Pusa 256 & HPNB) | NCBI SNPdb Accession IDs |
|---------------------|----------------|--------------|-------------------------|---------------------------------|-------------------|--------------------------|
| SNP_P3_161453_14416 | NW_004516958.1 | Scaffold1869 | 14416                   | GG                              | AA                | 1946667557               |
| SNP_P3_161454_15938 | NW_004516958.1 | Scaffold1869 | 15938                   | CC                              | GG                | 1946667559               |
| SNP_P3_161455_15953 | NW_004516958.1 | Scaffold1869 | 15953                   | TT                              | CC                | 1946667561               |
| SNP_P3_161457_16088 | NW_004516958.1 | Scaffold1869 | 16088                   | TT                              | AA                | 1946667563               |
| SNP_P3_161458_16097 | NW_004516958.1 | Scaffold1869 | 16097                   | TT                              | CC                | 1946667566               |
| SNP_P3_161459_16230 | NW_004516958.1 | Scaffold1869 | 16230                   | AA                              | TT                | 1946667568               |
| SNP_P3_161460_16245 | NW_004516958.1 | Scaffold1869 | 16245                   | TT                              | CC                | 1946667570               |
| SNP_P3_161461_16263 | NW_004516958.1 | Scaffold1869 | 16263                   | CC                              | TT                | 1946667572               |
| SNP_P3_161462_16288 | NW_004516958.1 | Scaffold1869 | 16288                   | AA                              | TT                | 1946667574               |
| SNP_P3_161463_16642 | NW_004516958.1 | Scaffold1869 | 16642                   | AA                              | GG                | 1946667576               |
| SNP_P3_161464_16690 | NW_004516958.1 | Scaffold1869 | 16690                   | AA                              | GG                | 1946667578               |
| SNP_P3_161465_16744 | NW_004516958.1 | Scaffold1869 | 16744                   | GG                              | AA                | 1946667580               |
| SNP_P3_161466_16756 | NW_004516958.1 | Scaffold1869 | 16756                   | AA                              | GG                | 1946667582               |
| SNP_P3_161467_16786 | NW_004516958.1 | Scaffold1869 | 16786                   | CC                              | TT                | 1946667584               |
| SNP_P3_161468_16803 | NW_004516958.1 | Scaffold1869 | 16803                   | CC                              | TT                | 1946667586               |
| SNP_P3_161469_16851 | NW_004516958.1 | Scaffold1869 | 16851                   | GG                              | AA                | 1946667588               |
| SNP_P3_161470_17012 | NW_004516958.1 | Scaffold1869 | 17012                   | CC                              | TT                | 1946667590               |
| SNP_P3_161471_18810 | NW_004516958.1 | Scaffold1869 | 18810                   | CC                              | GG                | 1946667592               |
| SNP_P3_161472_18929 | NW_004516958.1 | Scaffold1869 | 18929                   | AA                              | CC                | 1946667594               |
| SNP_P3_161473_18973 | NW_004516958.1 | Scaffold1869 | 18973                   | CC                              | TT                | 1946667596               |
| SNP_P3_161474_19057 | NW_004516958.1 | Scaffold1869 | 19057                   | CC                              | AA                | 1946667598               |
| SNP_P3_161475_19154 | NW_004516958.1 | Scaffold1869 | 19154                   | GG                              | AA                | 1946667600               |
| SNP_P3_161476_19167 | NW_004516958.1 | Scaffold1869 | 19167                   | TT                              | CC                | 1946667603               |
| SNP_P3_161477_19278 | NW_004516958.1 | Scaffold1869 | 19278                   | GG                              | AA                | 1946667605               |
| SNP_P3_161478_19302 | NW_004516958.1 | Scaffold1869 | 19302                   | AA                              | GG                | 1946667607               |
| SNP_P3_161479_19380 | NW_004516958.1 | Scaffold1869 | 19380                   | CC                              | TT                | 1946667609               |
| SNP_P3_161480_19515 | NW_004516958.1 | Scaffold1869 | 19515                   | TT                              | GG                | 1946667611               |
| SNP_P3_161482_19603 | NW_004516958.1 | Scaffold1869 | 19603                   | CC                              | TT                | 1946667613               |
| SNP_P3_161483_19609 | NW_004516958.1 | Scaffold1869 | 19609                   | TT                              | CC                | 1946667615               |
| SNP_P3_161484_19757 | NW_004516958.1 | Scaffold1869 | 19757                   | CC                              | AA                | 1946667617               |
| SNP_P3_161485_19847 | NW_004516958.1 | Scaffold1869 | 19847                   | CC                              | AA                | 1946667619               |
| SNP_P3_161486_19950 | NW_004516958.1 | Scaffold1869 | 19950                   | CC                              | AA                | 1946667621               |
| SNP_P3_161487_19962 | NW_004516958.1 | Scaffold1869 | 19962                   | AA                              | TT                | 1946667623               |
| SNP_P3_161488_19996 | NW_004516958.1 | Scaffold1869 | 19996                   | CC                              | TT                | 1946667625               |
| SNP_P3_161490_20064 | NW_004516958.1 | Scaffold1869 | 20064                   | TT                              | GG                | 1946667627               |
| SNP_P3_161491_20108 | NW_004516958.1 | Scaffold1869 | 20108                   | TT                              | AA                | 1946667629               |
| SNP_P3_161492_20228 | NW_004516958.1 | Scaffold1869 | 20228                   | AA                              | CC                | 1946667631               |
| SNP_P3_161493_20356 | NW_004516958.1 | Scaffold1869 | 20356                   | AA                              | GG                | 1946667635               |
| SNP_P3_161494_20396 | NW_004516958.1 | Scaffold1869 | 20396                   | TT                              | CC                | 1946667637               |
| SNP_P3_161495_20419 | NW_004516958.1 | Scaffold1869 | 20419                   | TT                              | CC                | 1946667639               |
| SNP_P3_161496_21058 | NW_004516958.1 | Scaffold1869 | 21058                   | AA                              | GG                | 1946667641               |
| SNP_P3_161497_21103 | NW_004516958.1 | Scaffold1869 | 21103                   | TT                              | GG                | 1946667643               |

| SNPs IDs            | Chromosome IDs | Chromosomes  | Physical positions (bp) | CDC Frontier (Reference genome) | (Pusa 256 & HPNB) | NCBI SNPdb Accession IDs |
|---------------------|----------------|--------------|-------------------------|---------------------------------|-------------------|--------------------------|
| SNP_P3_161498_21143 | NW_004516958.1 | Scaffold1869 | 21143                   | CC                              | TT                | 1946667645               |
| SNP_P3_161499_24480 | NW_004516958.1 | Scaffold1869 | 24480                   | AA                              | GG                | 1946667647               |
| SNP_P3_161500_24564 | NW_004516958.1 | Scaffold1869 | 24564                   | TT                              | CC                | 1946667649               |
| SNP_P3_161501_418   | NW_004516959.1 | Scaffold1870 | 418                     | TT                              | CC                | 1946667652               |
| SNP_P3_161502_421   | NW_004516959.1 | Scaffold1870 | 421                     | TT                              | AA                | 1946667654               |
| SNP_P3_161503_634   | NW_004516959.1 | Scaffold1870 | 634                     | TT                              | AA                | 1946667656               |
| SNP_P3_161504_756   | NW_004516959.1 | Scaffold1870 | 756                     | TT                              | GG                | 1946667658               |
| SNP_P3_161505_11605 | NW_004516959.1 | Scaffold1870 | 11605                   | CC                              | TT                | 1946667661               |
| SNP_P3_161506_18837 | NW_004516959.1 | Scaffold1870 | 18837                   | AA                              | GG                | 1946667663               |
| SNP_P3_161507_18862 | NW_004516959.1 | Scaffold1870 | 18862                   | CC                              | AA                | 1946667665               |
| SNP_P3_161508_18871 | NW_004516959.1 | Scaffold1870 | 18871                   | AA                              | GG                | 1946667667               |
| SNP_P3_161509_18904 | NW_004516959.1 | Scaffold1870 | 18904                   | TT                              | CC                | 1946667669               |
| SNP_P3_161510_20636 | NW_004516959.1 | Scaffold1870 | 20636                   | GG                              | CC                | 1946667672               |
| SNP_P3_161511_20986 | NW_004516959.1 | Scaffold1870 | 20986                   | TT                              | CC                | 1946667674               |
| SNP_P3_161512_21180 | NW_004516959.1 | Scaffold1870 | 21180                   | TT                              | GG                | 1946667676               |
| SNP_P3_161513_24438 | NW_004516959.1 | Scaffold1870 | 24438                   | TT                              | CC                | 1946667678               |
| SNP_P3_161514_24440 | NW_004516959.1 | Scaffold1870 | 24440                   | GG                              | AA                | 1946667680               |
| SNP_P3_161515_24811 | NW_004516959.1 | Scaffold1870 | 24811                   | GG                              | TT                | 1946667682               |
| SNP_P3_161516_21982 | NW_004516960.1 | Scaffold1872 | 21982                   | GG                              | TT                | 1946667684               |
| SNP_P3_161517_22004 | NW_004516960.1 | Scaffold1872 | 22004                   | CC                              | TT                | 1946667686               |
| SNP_P3_161518_665   | NW_004516961.1 | Scaffold1874 | 665                     | AA                              | GG                | 1946667689               |
| SNP_P3_161519_2518  | NW_004516961.1 | Scaffold1874 | 2518                    | GG                              | TT                | 1946667691               |
| SNP_P3_161520_3161  | NW_004516961.1 | Scaffold1874 | 3161                    | AA                              | GG                | 1946667693               |
| SNP_P3_161521_7848  | NW_004516961.1 | Scaffold1874 | 7848                    | GG                              | AA                | 1946667695               |
| SNP_P3_161522_7864  | NW_004516961.1 | Scaffold1874 | 7864                    | TT                              | CC                | 1946667697               |
| SNP_P3_161523_281   | NW_004516962.1 | Scaffold1878 | 281                     | TT                              | CC                | 1946667699               |
| SNP_P3_161524_4921  | NW_004516962.1 | Scaffold1878 | 4921                    | CC                              | TT                | 1946667701               |
| SNP_P3_161525_4940  | NW_004516962.1 | Scaffold1878 | 4940                    | GG                              | AA                | 1946667703               |
| SNP_P3_161526_4943  | NW_004516962.1 | Scaffold1878 | 4943                    | AA                              | GG                | 1946667706               |
| SNP_P3_161527_4949  | NW_004516962.1 | Scaffold1878 | 4949                    | TT                              | GG                | 1946667708               |
| SNP_P3_161528_4972  | NW_004516962.1 | Scaffold1878 | 4972                    | AA                              | GG                | 1946667711               |
| SNP_P3_161529_4973  | NW_004516962.1 | Scaffold1878 | 4973                    | CC                              | TT                | 1946667713               |
| SNP_P3_161530_6242  | NW_004516962.1 | Scaffold1878 | 6242                    | TT                              | AA                | 1946667715               |
| SNP_P3_161531_7926  | NW_004516962.1 | Scaffold1878 | 7926                    | AA                              | TT                | 1946667717               |
| SNP_P3_161533_8924  | NW_004516962.1 | Scaffold1878 | 8924                    | TT                              | CC                | 1946667719               |
| SNP_P3_161534_9691  | NW_004516962.1 | Scaffold1878 | 9691                    | AA                              | TT                | 1946667721               |
| SNP_P3_161535_9726  | NW_004516962.1 | Scaffold1878 | 9726                    | GG                              | TT                | 1946667723               |
| SNP_P3_161536_10424 | NW_004516962.1 | Scaffold1878 | 10424                   | CC                              | TT                | 1946667725               |
| SNP_P3_161537_10437 | NW_004516962.1 | Scaffold1878 | 10437                   | AA                              | TT                | 1946667727               |
| SNP_P3_161538_14782 | NW_004516962.1 | Scaffold1878 | 14782                   | TT                              | CC                | 1946667729               |
| SNP_P3_161539_16336 | NW_004516962.1 | Scaffold1878 | 16336                   | TT                              | AA                | 1946667731               |
| SNP_P3_161540_18711 | NW_004516962.1 | Scaffold1878 | 18711                   | TT                              | GG                | 1946667733               |

| SNPs IDs            | Chromosome IDs | Chromosomes  | Physical positions (bp) | CDC Frontier (Reference genome) | (Pusa 256 & HPNB) | NCBI SNPdb Accession IDs |
|---------------------|----------------|--------------|-------------------------|---------------------------------|-------------------|--------------------------|
| SNP_P3_161541_19382 | NW_004516962.1 | Scaffold1878 | 19382                   | TT                              | CC                | 1946667735               |
| SNP_P3_161542_21386 | NW_004516962.1 | Scaffold1878 | 21386                   | AA                              | CC                | 1946667738               |
| SNP_P3_161543_21572 | NW_004516962.1 | Scaffold1878 | 21572                   | CC                              | TT                | 1946667740               |
| SNP_P3_161544_21733 | NW_004516962.1 | Scaffold1878 | 21733                   | TT                              | CC                | 1946667742               |
| SNP_P3_161545_22016 | NW_004516962.1 | Scaffold1878 | 22016                   | TT                              | GG                | 1946667744               |
| SNP_P3_161547_26232 | NW_004516962.1 | Scaffold1878 | 26232                   | CC                              | TT                | 1946667746               |
| SNP_P3_161548_26582 | NW_004516962.1 | Scaffold1878 | 26582                   | AA                              | GG                | 1946667748               |
| SNP_P3_161549_28725 | NW_004516962.1 | Scaffold1878 | 28725                   | AA                              | CC                | 1946667750               |
| SNP_P3_161550_28978 | NW_004516962.1 | Scaffold1878 | 28978                   | GG                              | AA                | 1946667752               |
| SNP_P3_161551_29112 | NW_004516962.1 | Scaffold1878 | 29112                   | AA                              | TT                | 1946667754               |
| SNP_P3_161552_30995 | NW_004516962.1 | Scaffold1878 | 30995                   | AA                              | CC                | 1946667756               |
| SNP_P3_161553_31755 | NW_004516962.1 | Scaffold1878 | 31755                   | AA                              | TT                | 1946667758               |
| SNP_P3_161555_32839 | NW_004516962.1 | Scaffold1878 | 32839                   | CC                              | TT                | 1946667760               |
| SNP_P3_161556_34857 | NW_004516962.1 | Scaffold1878 | 34857                   | CC                              | TT                | 1946667762               |
| SNP_P3_161557_40201 | NW_004516962.1 | Scaffold1878 | 40201                   | TT                              | CC                | 1946667764               |
| SNP_P3_161559_40520 | NW_004516962.1 | Scaffold1878 | 40520                   | TT                              | CC                | 1946667766               |
| SNP_P3_161560_40549 | NW_004516962.1 | Scaffold1878 | 40549                   | CC                              | GG                | 1946667768               |
| SNP_P3_161561_40558 | NW_004516962.1 | Scaffold1878 | 40558                   | AA                              | CC                | 1946667770               |
| SNP_P3_161562_40603 | NW_004516962.1 | Scaffold1878 | 40603                   | CC                              | TT                | 1946667773               |
| SNP_P3_161563_40607 | NW_004516962.1 | Scaffold1878 | 40607                   | GG                              | AA                | 1946667775               |
| SNP_P3_161564_40614 | NW_004516962.1 | Scaffold1878 | 40614                   | TT                              | CC                | 1946667777               |
| SNP_P3_161565_40624 | NW_004516962.1 | Scaffold1878 | 40624                   | AA                              | GG                | 1946667779               |
| SNP_P3_161566_40645 | NW_004516962.1 | Scaffold1878 | 40645                   | AA                              | GG                | 1946667781               |
| SNP_P3_161568_40677 | NW_004516962.1 | Scaffold1878 | 40677                   | GG                              | AA                | 1946667783               |
| SNP_P3_161569_40686 | NW_004516962.1 | Scaffold1878 | 40686                   | AA                              | GG                | 1946667785               |
| SNP_P3_161570_40695 | NW_004516962.1 | Scaffold1878 | 40695                   | AA                              | GG                | 1946667787               |
| SNP_P3_161571_40713 | NW_004516962.1 | Scaffold1878 | 40713                   | AA                              | GG                | 1946667789               |
| SNP_P3_161572_40729 | NW_004516962.1 | Scaffold1878 | 40729                   | AA                              | TT                | 1946667791               |
| SNP_P3_161573_40734 | NW_004516962.1 | Scaffold1878 | 40734                   | AA                              | GG                | 1946667793               |
| SNP_P3_161574_40768 | NW_004516962.1 | Scaffold1878 | 40768                   | AA                              | GG                | 1946667795               |
| SNP_P3_161575_43771 | NW_004516962.1 | Scaffold1878 | 43771                   | AA                              | TT                | 1946667797               |
| SNP_P3_161576_44851 | NW_004516962.1 | Scaffold1878 | 44851                   | CC                              | TT                | 1946667798               |
| SNP_P3_161577_44949 | NW_004516962.1 | Scaffold1878 | 44949                   | GG                              | TT                | 1946667800               |
| SNP_P3_161578_46500 | NW_004516962.1 | Scaffold1878 | 46500                   | AA                              | GG                | 1946667802               |
| SNP_P3_161579_47474 | NW_004516962.1 | Scaffold1878 | 47474                   | TT                              | CC                | 1946667804               |
| SNP_P3_161580_48880 | NW_004516962.1 | Scaffold1878 | 48880                   | AA                              | TT                | 1946667806               |
| SNP_P3_161581_49242 | NW_004516962.1 | Scaffold1878 | 49242                   | GG                              | AA                | 1946667808               |
| SNP_P3_161583_52588 | NW_004516962.1 | Scaffold1878 | 52588                   | CC                              | AA                | 1946667811               |
| SNP_P3_161585_52754 | NW_004516962.1 | Scaffold1878 | 52754                   | AA                              | GG                | 1946667813               |
| SNP_P3_161587_69347 | NW_004516962.1 | Scaffold1878 | 69347                   | GG                              | TT                | 1946667815               |
| SNP_P3_161588_70595 | NW_004516962.1 | Scaffold1878 | 70595                   | TT                              | AA                | 1946667817               |
| SNP_P3_161589_71668 | NW_004516962.1 | Scaffold1878 | 71668                   | GG                              | CC                | 1946667819               |

| SNPs IDs            | Chromosome IDs | Chromosomes  | Physical positions (bp) | CDC Frontier (Reference genome) | (Pusa 256 & HPNB) | NCBI SNPdb Accession IDs |
|---------------------|----------------|--------------|-------------------------|---------------------------------|-------------------|--------------------------|
| SNP_P3_161591_75016 | NW_004516962.1 | Scaffold1878 | 75016                   | TT                              | AA                | 1946667821               |
| SNP_P3_161592_75389 | NW_004516962.1 | Scaffold1878 | 75389                   | AA                              | CC                | 1946667823               |
| SNP_P3_161593_75390 | NW_004516962.1 | Scaffold1878 | 75390                   | AA                              | GG                | 1946667825               |
| SNP_P3_161594_77122 | NW_004516962.1 | Scaffold1878 | 77122                   | CC                              | AA                | 1946667827               |
| SNP_P3_161595_77518 | NW_004516962.1 | Scaffold1878 | 77518                   | CC                              | TT                | 1946667828               |
| SNP_P3_161596_1398  | NW_004516965.1 | Scaffold1883 | 1398                    | AA                              | GG                | 1946667830               |
| SNP_P3_161597_570   | NW_004516966.1 | Scaffold1884 | 570                     | AA                              | GG                | 1946667832               |
| SNP_P3_161598_19651 | NW_004516966.1 | Scaffold1884 | 19651                   | GG                              | AA                | 1946667834               |
| SNP_P3_161600_500   | NW_004516967.1 | Scaffold1885 | 500                     | AA                              | TT                | 1946667836               |
| SNP_P3_161601_501   | NW_004516967.1 | Scaffold1885 | 501                     | TT                              | AA                | 1946667838               |
| SNP_P3_161602_521   | NW_004516967.1 | Scaffold1885 | 521                     | TT                              | CC                | 1946667840               |
| SNP_P3_161603_525   | NW_004516967.1 | Scaffold1885 | 525                     | CC                              | AA                | 1946667842               |
| SNP_P3_161604_538   | NW_004516967.1 | Scaffold1885 | 538                     | GG                              | TT                | 1946667844               |
| SNP_P3_161605_559   | NW_004516967.1 | Scaffold1885 | 559                     | AA                              | CC                | 1946667846               |
| SNP_P3_161606_618   | NW_004516967.1 | Scaffold1885 | 618                     | TT                              | GG                | 1946667848               |
| SNP_P3_161607_653   | NW_004516967.1 | Scaffold1885 | 653                     | CC                              | AA                | 1946667851               |
| SNP_P3_161608_673   | NW_004516967.1 | Scaffold1885 | 673                     | GG                              | AA                | 1946667853               |
| SNP_P3_161609_819   | NW_004516967.1 | Scaffold1885 | 819                     | CC                              | GG                | 1946667855               |
| SNP_P3_161610_917   | NW_004516967.1 | Scaffold1885 | 917                     | AA                              | TT                | 1946667857               |
| SNP_P3_161611_965   | NW_004516967.1 | Scaffold1885 | 965                     | TT                              | CC                | 1946667859               |
| SNP_P3_161612_1844  | NW_004516967.1 | Scaffold1885 | 1844                    | TT                              | CC                | 1946667861               |
| SNP_P3_161613_1845  | NW_004516967.1 | Scaffold1885 | 1845                    | AA                              | TT                | 1946667863               |
| SNP_P3_161614_1927  | NW_004516967.1 | Scaffold1885 | 1927                    | TT                              | CC                | 1946667865               |
| SNP_P3_161615_2006  | NW_004516967.1 | Scaffold1885 | 2006                    | TT                              | GG                | 1946667867               |
| SNP_P3_161616_2043  | NW_004516967.1 | Scaffold1885 | 2043                    | GG                              | CC                | 1946667869               |
| SNP_P3_161617_2065  | NW_004516967.1 | Scaffold1885 | 2065                    | TT                              | AA                | 1946667871               |
| SNP_P3_161618_2067  | NW_004516967.1 | Scaffold1885 | 2067                    | GG                              | AA                | 1946667873               |
| SNP_P3_161619_2093  | NW_004516967.1 | Scaffold1885 | 2093                    | CC                              | AA                | 1946667875               |
| SNP_P3_161620_2107  | NW_004516967.1 | Scaffold1885 | 2107                    | AA                              | TT                | 1946667877               |
| SNP_P3_161621_2267  | NW_004516967.1 | Scaffold1885 | 2267                    | CC                              | GG                | 1946667879               |
| SNP_P3_161622_2319  | NW_004516967.1 | Scaffold1885 | 2319                    | AA                              | CC                | 1946667881               |
| SNP_P3_161623_2325  | NW_004516967.1 | Scaffold1885 | 2325                    | TT                              | GG                | 1946667883               |
| SNP_P3_161624_2683  | NW_004516967.1 | Scaffold1885 | 2683                    | AA                              | GG                | 1946667885               |
| SNP_P3_161625_2695  | NW_004516967.1 | Scaffold1885 | 2695                    | TT                              | AA                | 1946667887               |
| SNP_P3_161626_2763  | NW_004516967.1 | Scaffold1885 | 2763                    | GG                              | TT                | 1946667891               |
| SNP_P3_161627_3086  | NW_004516967.1 | Scaffold1885 | 3086                    | CC                              | TT                | 1946667893               |
| SNP_P3_161628_4000  | NW_004516967.1 | Scaffold1885 | 4000                    | TT                              | CC                | 1946667895               |
| SNP_P3_161629_5279  | NW_004516967.1 | Scaffold1885 | 5279                    | TT                              | AA                | 1946667897               |
| SNP_P3_161630_12229 | NW_004516967.1 | Scaffold1885 | 12229                   | GG                              | TT                | 1946667899               |
| SNP_P3_161631_12764 | NW_004516967.1 | Scaffold1885 | 12764                   | TT                              | CC                | 1946667901               |
| SNP_P3_161632_13114 | NW_004516967.1 | Scaffold1885 | 13114                   | AA                              | CC                | 1946667903               |
| SNP_P3_161633_13120 | NW_004516967.1 | Scaffold1885 | 13120                   | TT                              | CC                | 1946667905               |

| SNPs IDs            | Chromosome IDs | Chromosomes  | Physical positions (bp) | CDC Frontier (Reference genome) | (Pusa 256 & HPNB) | NCBI SNPdb Accession IDs |
|---------------------|----------------|--------------|-------------------------|---------------------------------|-------------------|--------------------------|
| SNP_P3_161634_13142 | NW_004516967.1 | Scaffold1885 | 13142                   | AA                              | GG                | 1946667908               |
| SNP_P3_161635_13473 | NW_004516967.1 | Scaffold1885 | 13473                   | GG                              | AA                | 1946667910               |
| SNP_P3_161636_13518 | NW_004516967.1 | Scaffold1885 | 13518                   | AA                              | GG                | 1946667912               |
| SNP_P3_161637_13555 | NW_004516967.1 | Scaffold1885 | 13555                   | CC                              | TT                | 1946667914               |
| SNP_P3_161638_32308 | NW_004516967.1 | Scaffold1885 | 32308                   | AA                              | GG                | 1946667916               |
| SNP_P3_161639_35885 | NW_004516967.1 | Scaffold1885 | 35885                   | GG                              | AA                | 1946667918               |
| SNP_P3_161640_39311 | NW_004516967.1 | Scaffold1885 | 39311                   | TT                              | CC                | 1946667920               |
| SNP_P3_161641_39606 | NW_004516967.1 | Scaffold1885 | 39606                   | AA                              | CC                | 1946667922               |
| SNP_P3_161642_39783 | NW_004516967.1 | Scaffold1885 | 39783                   | AA                              | CC                | 1946667924               |
| SNP_P3_161643_40085 | NW_004516967.1 | Scaffold1885 | 40085                   | CC                              | GG                | 1946667926               |
| SNP_P3_161644_40089 | NW_004516967.1 | Scaffold1885 | 40089                   | CC                              | TT                | 1946667928               |
| SNP_P3_161646_40614 | NW_004516967.1 | Scaffold1885 | 40614                   | CC                              | AA                | 1946667930               |
| SNP_P3_161648_42540 | NW_004516967.1 | Scaffold1885 | 42540                   | TT                              | CC                | 1946667932               |
| SNP_P3_161649_42661 | NW_004516967.1 | Scaffold1885 | 42661                   | CC                              | AA                | 1946667934               |
| SNP_P3_161650_42833 | NW_004516967.1 | Scaffold1885 | 42833                   | TT                              | CC                | 1946667936               |
| SNP_P3_161651_42986 | NW_004516967.1 | Scaffold1885 | 42986                   | GG                              | AA                | 1946667938               |
| SNP_P3_161652_43818 | NW_004516967.1 | Scaffold1885 | 43818                   | AA                              | GG                | 1946667940               |
| SNP_P3_161653_43822 | NW_004516967.1 | Scaffold1885 | 43822                   | TT                              | AA                | 1946667942               |
| SNP_P3_161654_45434 | NW_004516967.1 | Scaffold1885 | 45434                   | TT                              | GG                | 1946667944               |
| SNP_P3_161655_46767 | NW_004516967.1 | Scaffold1885 | 46767                   | GG                              | AA                | 1946667946               |
| SNP_P3_161656_46787 | NW_004516967.1 | Scaffold1885 | 46787                   | AA                              | TT                | 1946667948               |
| SNP_P3_161657_46818 | NW_004516967.1 | Scaffold1885 | 46818                   | TT                              | GG                | 1946667950               |
| SNP_P3_161658_47090 | NW_004516967.1 | Scaffold1885 | 47090                   | TT                              | CC                | 1946667952               |
| SNP_P3_161659_47458 | NW_004516967.1 | Scaffold1885 | 47458                   | CC                              | GG                | 1946667954               |
| SNP_P3_161661_47740 | NW_004516967.1 | Scaffold1885 | 47740                   | TT                              | GG                | 1946667956               |
| SNP_P3_161662_17790 | NW_004516968.1 | Scaffold1886 | 17790                   | AA                              | TT                | 1946667958               |
| SNP_P3_161664_18289 | NW_004516968.1 | Scaffold1886 | 18289                   | CC                              | TT                | 1946667960               |
| SNP_P3_161665_19108 | NW_004516968.1 | Scaffold1886 | 19108                   | TT                              | GG                | 1946667962               |
| SNP_P3_161666_21789 | NW_004516968.1 | Scaffold1886 | 21789                   | AA                              | CC                | 1946667964               |
| SNP_P3_161667_22449 | NW_004516968.1 | Scaffold1886 | 22449                   | AA                              | CC                | 1946667966               |
| SNP_P3_161668_23751 | NW_004516968.1 | Scaffold1886 | 23751                   | CC                              | TT                | 1946667968               |
| SNP_P3_161670_32863 | NW_004516968.1 | Scaffold1886 | 32863                   | AA                              | TT                | 1946667971               |
| SNP_P3_161671_32871 | NW_004516968.1 | Scaffold1886 | 32871                   | GG                              | CC                | 1946667973               |
| SNP_P3_161672_32872 | NW_004516968.1 | Scaffold1886 | 32872                   | GG                              | AA                | 1946667975               |
| SNP_P3_161674_33808 | NW_004516968.1 | Scaffold1886 | 33808                   | AA                              | GG                | 1946667977               |
| SNP_P3_161675_33809 | NW_004516968.1 | Scaffold1886 | 33809                   | GG                              | AA                | 1946667979               |
| SNP_P3_161676_94    | NW_004516969.1 | Scaffold1888 | 94                      | CC                              | AA                | 1946667981               |
| SNP_P3_161677_364   | NW_004516969.1 | Scaffold1888 | 364                     | CC                              | GG                | 1946667983               |
| SNP_P3_161679_533   | NW_004516969.1 | Scaffold1888 | 533                     | AA                              | CC                | 1946667985               |
| SNP_P3_161680_547   | NW_004516969.1 | Scaffold1888 | 547                     | AA                              | GG                | 1946667987               |
| SNP_P3_161681_588   | NW_004516969.1 | Scaffold1888 | 588                     | AA                              | GG                | 1946667989               |
| SNP_P3_161683_130   | NW_004516972.1 | Scaffold1893 | 130                     | CC                              | GG                | 1946667991               |

| SNPs IDs            | Chromosome IDs | Chromosomes  | Physical positions (bp) | CDC Frontier (Reference genome) | (Pusa 256 & HPNB) | NCBI SNPdb Accession IDs |
|---------------------|----------------|--------------|-------------------------|---------------------------------|-------------------|--------------------------|
| SNP_P3_161684_151   | NW_004516972.1 | Scaffold1893 | 151                     | CC                              | GG                | 1946667993               |
| SNP_P3_161685_183   | NW_004516972.1 | Scaffold1893 | 183                     | CC                              | TT                | 1946667995               |
| SNP_P3_161686_506   | NW_004516972.1 | Scaffold1893 | 506                     | CC                              | TT                | 1946667997               |
| SNP_P3_161687_2233  | NW_004516972.1 | Scaffold1893 | 2233                    | CC                              | TT                | 1946667999               |
| SNP_P3_161688_2375  | NW_004516972.1 | Scaffold1893 | 2375                    | GG                              | AA                | 1946668001               |
| SNP_P3_161689_2377  | NW_004516972.1 | Scaffold1893 | 2377                    | CC                              | TT                | 1946668004               |
| SNP_P3_161690_14923 | NW_004516972.1 | Scaffold1893 | 14923                   | CC                              | AA                | 1946668006               |
| SNP_P3_161691_14944 | NW_004516972.1 | Scaffold1893 | 14944                   | AA                              | GG                | 1946668008               |
| SNP_P3_161692_14946 | NW_004516972.1 | Scaffold1893 | 14946                   | GG                              | TT                | 1946668011               |
| SNP_P3_161693_14951 | NW_004516972.1 | Scaffold1893 | 14951                   | GG                              | TT                | 1946668013               |
| SNP_P3_161694_14962 | NW_004516972.1 | Scaffold1893 | 14962                   | CC                              | AA                | 1946668015               |
| SNP_P3_161695_15271 | NW_004516972.1 | Scaffold1893 | 15271                   | GG                              | AA                | 1946668017               |
| SNP_P3_161696_15747 | NW_004516972.1 | Scaffold1893 | 15747                   | AA                              | GG                | 1946668019               |
| SNP_P3_161697_15793 | NW_004516972.1 | Scaffold1893 | 15793                   | TT                              | GG                | 1946668021               |
| SNP_P3_161698_15796 | NW_004516972.1 | Scaffold1893 | 15796                   | TT                              | AA                | 1946668023               |
| SNP_P3_161699_15812 | NW_004516972.1 | Scaffold1893 | 15812                   | GG                              | AA                | 1946668025               |
| SNP_P3_161700_15847 | NW_004516972.1 | Scaffold1893 | 15847                   | TT                              | GG                | 1946668027               |
| SNP_P3_161701_16055 | NW_004516972.1 | Scaffold1893 | 16055                   | AA                              | GG                | 1946668029               |
| SNP_P3_161702_17354 | NW_004516972.1 | Scaffold1893 | 17354                   | AA                              | CC                | 1946668032               |
| SNP_P3_161703_17454 | NW_004516972.1 | Scaffold1893 | 17454                   | TT                              | AA                | 1946668034               |
| SNP_P3_161704_44556 | NW_004516972.1 | Scaffold1893 | 44556                   | CC                              | TT                | 1946668036               |
| SNP_P3_161705_46877 | NW_004516972.1 | Scaffold1893 | 46877                   | AA                              | GG                | 1946668038               |
| SNP_P3_161706_1430  | NW_004516973.1 | Scaffold1894 | 1430                    | CC                              | TT                | 1946668040               |
| SNP_P3_161707_1439  | NW_004516973.1 | Scaffold1894 | 1439                    | GG                              | CC                | 1946668042               |
| SNP_P3_161708_1530  | NW_004516973.1 | Scaffold1894 | 1530                    | AA                              | CC                | 1946668044               |
| SNP_P3_161709_1719  | NW_004516973.1 | Scaffold1894 | 1719                    | CC                              | TT                | 1946668046               |
| SNP_P3_161710_2251  | NW_004516974.1 | Scaffold1896 | 2251                    | GG                              | TT                | 1946668048               |
| SNP_P3_161711_2261  | NW_004516974.1 | Scaffold1896 | 2261                    | GG                              | CC                | 1946668050               |
| SNP_P3_161712_6761  | NW_004516974.1 | Scaffold1896 | 6761                    | AA                              | CC                | 1946668052               |
| SNP_P3_161713_13456 | NW_004516974.1 | Scaffold1896 | 13456                   | GG                              | AA                | 1946668054               |
| SNP_P3_161714_13484 | NW_004516974.1 | Scaffold1896 | 13484                   | CC                              | TT                | 1946668056               |
| SNP_P3_161715_14329 | NW_004516974.1 | Scaffold1896 | 14329                   | CC                              | GG                | 1946668059               |
| SNP_P3_161716_17145 | NW_004516974.1 | Scaffold1896 | 17145                   | CC                              | GG                | 1946668061               |
| SNP_P3_161717_18633 | NW_004516974.1 | Scaffold1896 | 18633                   | GG                              | CC                | 1946668063               |
| SNP_P3_161718_2964  | NW_004516975.1 | Scaffold1897 | 2964                    | AA                              | CC                | 1946668065               |
| SNP_P3_161719_2987  | NW_004516975.1 | Scaffold1897 | 2987                    | TT                              | CC                | 1946668067               |
| SNP_P3_161720_3004  | NW_004516975.1 | Scaffold1897 | 3004                    | TT                              | AA                | 1946668069               |
| SNP_P3_161721_3027  | NW_004516975.1 | Scaffold1897 | 3027                    | GG                              | AA                | 1946668071               |
| SNP_P3_161722_3045  | NW_004516975.1 | Scaffold1897 | 3045                    | TT                              | CC                | 1946668073               |
| SNP_P3_161723_11738 | NW_004516975.1 | Scaffold1897 | 11738                   | TT                              | GG                | 1946668075               |
| SNP_P3_161724_11899 | NW_004516975.1 | Scaffold1897 | 11899                   | CC                              | TT                | 1946668077               |
| SNP_P3_161726_14419 | NW_004516977.1 | Scaffold1899 | 14419                   | CC                              | TT                | 1946668079               |

| SNPs IDs            | Chromosome IDs | Chromosomes  | Physical positions (bp) | CDC Frontier (Reference genome) | (Pusa 256 & HPNB) | NCBI SNPdb Accession IDs |
|---------------------|----------------|--------------|-------------------------|---------------------------------|-------------------|--------------------------|
| SNP_P3_161727_33408 | NW_004516977.1 | Scaffold1899 | 33408                   | AA                              | CC                | 1946668081               |
| SNP_P3_161728_33568 | NW_004516977.1 | Scaffold1899 | 33568                   | AA                              | GG                | 1946668083               |
| SNP_P3_161729_33735 | NW_004516977.1 | Scaffold1899 | 33735                   | TT                              | CC                | 1946668085               |
| SNP_P3_161730_33816 | NW_004516977.1 | Scaffold1899 | 33816                   | TT                              | CC                | 1946668087               |
| SNP_P3_161731_70869 | NW_004516977.1 | Scaffold1899 | 70869                   | AA                              | GG                | 1946668089               |
| SNP_P3_161732_73432 | NW_004516977.1 | Scaffold1899 | 73432                   | TT                              | AA                | 1946668091               |
| SNP_P3_161733_1158  | NW_004516978.1 | Scaffold1900 | 1158                    | TT                              | CC                | 1946668093               |
| SNP_P3_161734_1163  | NW_004516978.1 | Scaffold1900 | 1163                    | CC                              | TT                | 1946668095               |
| SNP_P3_161735_1198  | NW_004516978.1 | Scaffold1900 | 1198                    | GG                              | TT                | 1946668097               |
| SNP_P3_161736_64    | NW_004516981.1 | Scaffold1903 | 64                      | AA                              | GG                | 1946668099               |
| SNP_P3_161737_128   | NW_004516981.1 | Scaffold1903 | 128                     | GG                              | CC                | 1946668102               |
| SNP_P3_161738_201   | NW_004516981.1 | Scaffold1903 | 201                     | GG                              | CC                | 1946668104               |
| SNP_P3_161739_686   | NW_004516981.1 | Scaffold1903 | 686                     | AA                              | CC                | 1946668106               |
| SNP_P3_161740_1739  | NW_004516981.1 | Scaffold1903 | 1739                    | GG                              | AA                | 1946668108               |
| SNP_P3_161741_1814  | NW_004516981.1 | Scaffold1903 | 1814                    | GG                              | AA                | 1946668110               |
| SNP_P3_161742_2071  | NW_004516981.1 | Scaffold1903 | 2071                    | GG                              | CC                | 1946668112               |
| SNP_P3_161743_2188  | NW_004516981.1 | Scaffold1903 | 2188                    | AA                              | GG                | 1946668114               |
| SNP_P3_161744_2206  | NW_004516981.1 | Scaffold1903 | 2206                    | AA                              | TT                | 1946668116               |
| SNP_P3_161745_2221  | NW_004516981.1 | Scaffold1903 | 2221                    | GG                              | AA                | 1946668118               |
| SNP_P3_161746_2222  | NW_004516981.1 | Scaffold1903 | 2222                    | GG                              | AA                | 1946668120               |
| SNP_P3_161747_2233  | NW_004516981.1 | Scaffold1903 | 2233                    | GG                              | AA                | 1946668123               |
| SNP_P3_161748_2252  | NW_004516981.1 | Scaffold1903 | 2252                    | TT                              | AA                | 1946668125               |
| SNP_P3_161749_1107  | NW_004516982.1 | Scaffold1904 | 1107                    | TT                              | CC                | 1946668128               |
| SNP_P3_161750_1109  | NW_004516982.1 | Scaffold1904 | 1109                    | TT                              | GG                | 1946668130               |
| SNP_P3_161751_1116  | NW_004516982.1 | Scaffold1904 | 1116                    | AA                              | GG                | 1946668132               |
| SNP_P3_161752_1134  | NW_004516982.1 | Scaffold1904 | 1134                    | CC                              | TT                | 1946668134               |
| SNP_P3_161753_1149  | NW_004516982.1 | Scaffold1904 | 1149                    | AA                              | TT                | 1946668136               |
| SNP_P3_161754_1157  | NW_004516982.1 | Scaffold1904 | 1157                    | AA                              | GG                | 1946668138               |
| SNP_P3_161755_1173  | NW_004516982.1 | Scaffold1904 | 1173                    | AA                              | GG                | 1946668140               |
| SNP_P3_161756_1191  | NW_004516982.1 | Scaffold1904 | 1191                    | GG                              | AA                | 1946668142               |
| SNP_P3_161757_1215  | NW_004516982.1 | Scaffold1904 | 1215                    | AA                              | TT                | 1946668144               |
| SNP_P3_161758_1273  | NW_004516982.1 | Scaffold1904 | 1273                    | TT                              | AA                | 1946668146               |
| SNP_P3_161759_1335  | NW_004516982.1 | Scaffold1904 | 1335                    | AA                              | GG                | 1946668148               |
| SNP_P3_161760_1487  | NW_004516982.1 | Scaffold1904 | 1487                    | CC                              | GG                | 1946668150               |
| SNP_P3_161761_1527  | NW_004516982.1 | Scaffold1904 | 1527                    | GG                              | AA                | 1946668152               |
| SNP_P3_161762_1569  | NW_004516982.1 | Scaffold1904 | 1569                    | GG                              | AA                | 1946668154               |
| SNP_P3_161763_1575  | NW_004516982.1 | Scaffold1904 | 1575                    | TT                              | CC                | 1946668156               |
| SNP_P3_161764_1581  | NW_004516982.1 | Scaffold1904 | 1581                    | TT                              | GG                | 1946668159               |
| SNP_P3_161765_338   | NW_004516983.1 | Scaffold1905 | 338                     | AA                              | GG                | 1946668161               |
| SNP_P3_161767_1763  | NW_004516983.1 | Scaffold1905 | 1763                    | CC                              | GG                | 1946668163               |
| SNP_P3_161768_1803  | NW_004516983.1 | Scaffold1905 | 1803                    | CC                              | TT                | 1946668165               |
| SNP_P3_161769_1823  | NW_004516983.1 | Scaffold1905 | 1823                    | TT                              | GG                | 1946668167               |



| SNPs IDs            | Chromosome IDs | Chromosomes  | Physical positions (bp) | CDC Frontier (Reference genome) | (Pusa 256 & HPNB) | NCBI SNPdb Accession IDs |
|---------------------|----------------|--------------|-------------------------|---------------------------------|-------------------|--------------------------|
| SNP_P3_161770_1844  | NW_004516983.1 | Scaffold1905 | 1844                    | AA                              | CC                | 1946668169               |
| SNP_P3_161771_1872  | NW_004516983.1 | Scaffold1905 | 1872                    | GG                              | CC                | 1946668172               |
| SNP_P3_161772_1889  | NW_004516983.1 | Scaffold1905 | 1889                    | GG                              | AA                | 1946668174               |
| SNP_P3_161773_1988  | NW_004516983.1 | Scaffold1905 | 1988                    | TT                              | GG                | 1946668176               |
| SNP_P3_161774_2002  | NW_004516983.1 | Scaffold1905 | 2002                    | AA                              | CC                | 1946668178               |
| SNP_P3_161776_2103  | NW_004516983.1 | Scaffold1905 | 2103                    | GG                              | AA                | 1946668180               |
| SNP_P3_161777_2125  | NW_004516983.1 | Scaffold1905 | 2125                    | AA                              | TT                | 1946668182               |
| SNP_P3_161778_2134  | NW_004516983.1 | Scaffold1905 | 2134                    | TT                              | CC                | 1946668184               |
| SNP_P3_161779_2136  | NW_004516983.1 | Scaffold1905 | 2136                    | GG                              | AA                | 1946668186               |
| SNP_P3_161780_2217  | NW_004516983.1 | Scaffold1905 | 2217                    | TT                              | AA                | 1946668188               |
| SNP_P3_161781_5213  | NW_004516983.1 | Scaffold1905 | 5213                    | TT                              | CC                | 1946668190               |
| SNP_P3_161782_7555  | NW_004516983.1 | Scaffold1905 | 7555                    | TT                              | AA                | 1946668192               |
| SNP_P3_161783_7928  | NW_004516983.1 | Scaffold1905 | 7928                    | GG                              | TT                | 1946668194               |
| SNP_P3_161784_16504 | NW_004516983.1 | Scaffold1905 | 16504                   | TT                              | GG                | 1946668197               |
| SNP_P3_161785_16560 | NW_004516983.1 | Scaffold1905 | 16560                   | TT                              | CC                | 1946668199               |
| SNP_P3_161786_16756 | NW_004516983.1 | Scaffold1905 | 16756                   | AA                              | CC                | 1946668201               |
| SNP_P3_161787_16816 | NW_004516983.1 | Scaffold1905 | 16816                   | TT                              | AA                | 1946668203               |
| SNP_P3_161788_16880 | NW_004516983.1 | Scaffold1905 | 16880                   | AA                              | GG                | 1946668205               |
| SNP_P3_161789_16886 | NW_004516983.1 | Scaffold1905 | 16886                   | TT                              | CC                | 1946668207               |
| SNP_P3_161790_16917 | NW_004516983.1 | Scaffold1905 | 16917                   | AA                              | GG                | 1946668209               |
| SNP_P3_161791_16927 | NW_004516983.1 | Scaffold1905 | 16927                   | TT                              | CC                | 1946668211               |
| SNP_P3_161792_16946 | NW_004516983.1 | Scaffold1905 | 16946                   | TT                              | CC                | 1946668213               |
| SNP_P3_161793_16966 | NW_004516983.1 | Scaffold1905 | 16966                   | CC                              | AA                | 1946668215               |
| SNP_P3_161794_22096 | NW_004516983.1 | Scaffold1905 | 22096                   | AA                              | GG                | 1946668217               |
| SNP_P3_161795_22104 | NW_004516983.1 | Scaffold1905 | 22104                   | TT                              | CC                | 1946668219               |
| SNP_P3_161796_22168 | NW_004516983.1 | Scaffold1905 | 22168                   | GG                              | AA                | 1946668221               |
| SNP_P3_161797_22797 | NW_004516983.1 | Scaffold1905 | 22797                   | TT                              | GG                | 1946668223               |
| SNP_P3_161798_31672 | NW_004516983.1 | Scaffold1905 | 31672                   | GG                              | AA                | 1946668225               |
| SNP_P3_161799_31971 | NW_004516983.1 | Scaffold1905 | 31971                   | TT                              | GG                | 1946668227               |
| SNP_P3_161800_32011 | NW_004516983.1 | Scaffold1905 | 32011                   | TT                              | AA                | 1946668229               |
| SNP_P3_161801_32057 | NW_004516983.1 | Scaffold1905 | 32057                   | CC                              | GG                | 1946668231               |
| SNP_P3_161802_32295 | NW_004516983.1 | Scaffold1905 | 32295                   | GG                              | CC                | 1946668234               |
| SNP_P3_161803_1760  | NW_004516984.1 | Scaffold1907 | 1760                    | CC                              | TT                | 1946668236               |
| SNP_P3_161804_18610 | NW_004516984.1 | Scaffold1907 | 18610                   | TT                              | GG                | 1946668238               |
| SNP_P3_161805_18664 | NW_004516984.1 | Scaffold1907 | 18664                   | CC                              | TT                | 1946668240               |
| SNP_P3_161806_18778 | NW_004516984.1 | Scaffold1907 | 18778                   | GG                              | CC                | 1946668242               |
| SNP_P3_161807_18904 | NW_004516984.1 | Scaffold1907 | 18904                   | GG                              | AA                | 1946668244               |
| SNP_P3_161808_23137 | NW_004516984.1 | Scaffold1907 | 23137                   | CC                              | GG                | 1946668247               |
| SNP_P3_161809_23702 | NW_004516984.1 | Scaffold1907 | 23702                   | CC                              | TT                | 1946668249               |
| SNP_P3_161810_23722 | NW_004516984.1 | Scaffold1907 | 23722                   | TT                              | GG                | 1946668251               |
| SNP_P3_161811_23733 | NW_004516984.1 | Scaffold1907 | 23733                   | TT                              | GG                | 1946668253               |
| SNP_P3_161812_23741 | NW_004516984.1 | Scaffold1907 | 23741                   | AA                              | GG                | 1946668255               |

| SNPs IDs            | Chromosome IDs | Chromosomes  | Physical positions (bp) | CDC Frontier (Reference genome) | (Pusa 256 & HPNB) | NCBI SNPdb Accession IDs |
|---------------------|----------------|--------------|-------------------------|---------------------------------|-------------------|--------------------------|
| SNP_P3_161813_23839 | NW_004516984.1 | Scaffold1907 | 23839                   | CC                              | TT                | 1946668257               |
| SNP_P3_161814_23840 | NW_004516984.1 | Scaffold1907 | 23840                   | AA                              | GG                | 1946668259               |
| SNP_P3_161815_24075 | NW_004516984.1 | Scaffold1907 | 24075                   | TT                              | GG                | 1946668261               |
| SNP_P3_161816_24096 | NW_004516984.1 | Scaffold1907 | 24096                   | GG                              | TT                | 1946668263               |
| SNP_P3_161817_37524 | NW_004516984.1 | Scaffold1907 | 37524                   | AA                              | TT                | 1946668265               |
| SNP_P3_161818_37558 | NW_004516984.1 | Scaffold1907 | 37558                   | GG                              | TT                | 1946668267               |
| SNP_P3_161819_50153 | NW_004516984.1 | Scaffold1907 | 50153                   | AA                              | GG                | 1946668269               |
| SNP_P3_161820_50156 | NW_004516984.1 | Scaffold1907 | 50156                   | GG                              | AA                | 1946668271               |
| SNP_P3_161821_55873 | NW_004516984.1 | Scaffold1907 | 55873                   | GG                              | TT                | 1946668273               |
| SNP_P3_161822_62877 | NW_004516984.1 | Scaffold1907 | 62877                   | AA                              | GG                | 1946668275               |
| SNP_P3_161823_62925 | NW_004516984.1 | Scaffold1907 | 62925                   | GG                              | TT                | 1946668277               |
| SNP_P3_161824_63214 | NW_004516984.1 | Scaffold1907 | 63214                   | CC                              | AA                | 1946668280               |
| SNP_P3_161825_72042 | NW_004516984.1 | Scaffold1907 | 72042                   | TT                              | CC                | 1946668282               |
| SNP_P3_161826_72043 | NW_004516984.1 | Scaffold1907 | 72043                   | AA                              | GG                | 1946668284               |
| SNP_P3_161827_90810 | NW_004516984.1 | Scaffold1907 | 90810                   | GG                              | CC                | 1946668286               |
| SNP_P3_161828_90861 | NW_004516984.1 | Scaffold1907 | 90861                   | GG                              | CC                | 1946668288               |
| SNP_P3_161829_90903 | NW_004516984.1 | Scaffold1907 | 90903                   | GG                              | CC                | 1946668290               |
| SNP_P3_161830_264   | NW_004516987.1 | Scaffold1910 | 264                     | GG                              | AA                | 1946668292               |
| SNP_P3_161831_303   | NW_004516987.1 | Scaffold1910 | 303                     | AA                              | GG                | 1946668294               |
| SNP_P3_161832_306   | NW_004516987.1 | Scaffold1910 | 306                     | CC                              | TT                | 1946668296               |
| SNP_P3_161833_307   | NW_004516987.1 | Scaffold1910 | 307                     | TT                              | CC                | 1946668299               |
| SNP_P3_161834_309   | NW_004516987.1 | Scaffold1910 | 309                     | TT                              | CC                | 1946668301               |
| SNP_P3_161835_587   | NW_004516987.1 | Scaffold1910 | 587                     | AA                              | CC                | 1946668303               |
| SNP_P3_161836_590   | NW_004516987.1 | Scaffold1910 | 590                     | AA                              | CC                | 1946668305               |
| SNP_P3_161837_615   | NW_004516987.1 | Scaffold1910 | 615                     | GG                              | AA                | 1946668307               |
| SNP_P3_161838_836   | NW_004516987.1 | Scaffold1910 | 836                     | GG                              | AA                | 1946668309               |
| SNP_P3_161839_6501  | NW_004516987.1 | Scaffold1910 | 6501                    | AA                              | TT                | 1946668311               |
| SNP_P3_161840_6509  | NW_004516987.1 | Scaffold1910 | 6509                    | AA                              | TT                | 1946668313               |
| SNP_P3_161841_6619  | NW_004516987.1 | Scaffold1910 | 6619                    | CC                              | TT                | 1946668315               |
| SNP_P3_161842_6620  | NW_004516987.1 | Scaffold1910 | 6620                    | CC                              | TT                | 1946668317               |
| SNP_P3_161843_6621  | NW_004516987.1 | Scaffold1910 | 6621                    | AA                              | TT                | 1946668319               |
| SNP_P3_161844_6622  | NW_004516987.1 | Scaffold1910 | 6622                    | TT                              | GG                | 1946668321               |
| SNP_P3_161845_6680  | NW_004516987.1 | Scaffold1910 | 6680                    | GG                              | CC                | 1946668323               |
| SNP_P3_161846_6681  | NW_004516987.1 | Scaffold1910 | 6681                    | AA                              | TT                | 1946668325               |
| SNP_P3_161847_6686  | NW_004516987.1 | Scaffold1910 | 6686                    | CC                              | TT                | 1946668327               |
| SNP_P3_161848_6688  | NW_004516987.1 | Scaffold1910 | 6688                    | TT                              | AA                | 1946668329               |
| SNP_P3_161849_6712  | NW_004516987.1 | Scaffold1910 | 6712                    | GG                              | AA                | 1946668331               |
| SNP_P3_161850_6781  | NW_004516987.1 | Scaffold1910 | 6781                    | GG                              | TT                | 1946668333               |
| SNP_P3_161851_6935  | NW_004516987.1 | Scaffold1910 | 6935                    | GG                              | CC                | 1946668335               |
| SNP_P3_161852_6998  | NW_004516987.1 | Scaffold1910 | 6998                    | AA                              | TT                | 1946668337               |
| SNP_P3_161853_7009  | NW_004516987.1 | Scaffold1910 | 7009                    | TT                              | GG                | 1946668341               |
| SNP_P3_161854_7010  | NW_004516987.1 | Scaffold1910 | 7010                    | GG                              | CC                | 1946668343               |

| SNPs IDs            | Chromosome IDs | Chromosomes  | Physical positions (bp) | CDC Frontier (Reference genome) | (Pusa 256 & HPNB) | NCBI SNPdb Accession IDs |
|---------------------|----------------|--------------|-------------------------|---------------------------------|-------------------|--------------------------|
| SNP_P3_161855_7081  | NW_004516987.1 | Scaffold1910 | 7081                    | AA                              | GG                | 1946668345               |
| SNP_P3_161856_7105  | NW_004516987.1 | Scaffold1910 | 7105                    | TT                              | CC                | 1946668347               |
| SNP_P3_161857_7142  | NW_004516987.1 | Scaffold1910 | 7142                    | CC                              | GG                | 1946668349               |
| SNP_P3_161858_7157  | NW_004516987.1 | Scaffold1910 | 7157                    | TT                              | CC                | 1946668351               |
| SNP_P3_161859_7597  | NW_004516987.1 | Scaffold1910 | 7597                    | CC                              | TT                | 1946668353               |
| SNP_P3_161860_8937  | NW_004516987.1 | Scaffold1910 | 8937                    | GG                              | TT                | 1946668355               |
| SNP_P3_161861_13474 | NW_004516987.1 | Scaffold1910 | 13474                   | CC                              | TT                | 1946668357               |
| SNP_P3_161862_13475 | NW_004516987.1 | Scaffold1910 | 13475                   | TT                              | CC                | 1946668359               |
| SNP_P3_161863_13477 | NW_004516987.1 | Scaffold1910 | 13477                   | GG                              | AA                | 1946668361               |
| SNP_P3_161864_13549 | NW_004516987.1 | Scaffold1910 | 13549                   | AA                              | TT                | 1946668363               |
| SNP_P3_161865_13647 | NW_004516987.1 | Scaffold1910 | 13647                   | GG                              | TT                | 1946668365               |
| SNP_P3_161866_13695 | NW_004516987.1 | Scaffold1910 | 13695                   | GG                              | AA                | 1946668367               |
| SNP_P3_161867_13957 | NW_004516987.1 | Scaffold1910 | 13957                   | AA                              | CC                | 1946668369               |
| SNP_P3_161868_14057 | NW_004516987.1 | Scaffold1910 | 14057                   | TT                              | CC                | 1946668371               |
| SNP_P3_161869_17795 | NW_004516987.1 | Scaffold1910 | 17795                   | TT                              | CC                | 1946668373               |
| SNP_P3_161870_18151 | NW_004516987.1 | Scaffold1910 | 18151                   | GG                              | CC                | 1946668375               |
| SNP_P3_161871_18229 | NW_004516987.1 | Scaffold1910 | 18229                   | TT                              | GG                | 1946668378               |
| SNP_P3_161872_18981 | NW_004516987.1 | Scaffold1910 | 18981                   | AA                              | GG                | 1946668380               |
| SNP_P3_161873_21920 | NW_004516987.1 | Scaffold1910 | 21920                   | GG                              | CC                | 1946668383               |
| SNP_P3_161874_21921 | NW_004516987.1 | Scaffold1910 | 21921                   | AA                              | TT                | 1946668385               |
| SNP_P3_161875_23400 | NW_004516987.1 | Scaffold1910 | 23400                   | GG                              | AA                | 1946668387               |
| SNP_P3_161876_23464 | NW_004516987.1 | Scaffold1910 | 23464                   | CC                              | AA                | 1946668389               |
| SNP_P3_161878_30228 | NW_004516987.1 | Scaffold1910 | 30228                   | CC                              | GG                | 1946668391               |
| SNP_P3_161879_36679 | NW_004516987.1 | Scaffold1910 | 36679                   | GG                              | TT                | 1946668393               |
| SNP_P3_161880_36680 | NW_004516987.1 | Scaffold1910 | 36680                   | TT                              | CC                | 1946668395               |
| SNP_P3_161881_36710 | NW_004516987.1 | Scaffold1910 | 36710                   | CC                              | TT                | 1946668397               |
| SNP_P3_161882_36746 | NW_004516987.1 | Scaffold1910 | 36746                   | GG                              | AA                | 1946668399               |
| SNP_P3_161883_36788 | NW_004516987.1 | Scaffold1910 | 36788                   | TT                              | CC                | 1946668401               |
| SNP_P3_161884_36797 | NW_004516987.1 | Scaffold1910 | 36797                   | GG                              | AA                | 1946668403               |
| SNP_P3_161886_37056 | NW_004516987.1 | Scaffold1910 | 37056                   | TT                              | CC                | 1946668405               |
| SNP_P3_161887_37079 | NW_004516987.1 | Scaffold1910 | 37079                   | TT                              | CC                | 1946668407               |
| SNP_P3_161888_37089 | NW_004516987.1 | Scaffold1910 | 37089                   | AA                              | GG                | 1946668409               |
| SNP_P3_161889_37111 | NW_004516987.1 | Scaffold1910 | 37111                   | AA                              | CC                | 1946668411               |
| SNP_P3_161890_37137 | NW_004516987.1 | Scaffold1910 | 37137                   | TT                              | CC                | 1946668413               |
| SNP_P3_161891_42579 | NW_004516987.1 | Scaffold1910 | 42579                   | TT                              | CC                | 1946668416               |
| SNP_P3_161892_42585 | NW_004516987.1 | Scaffold1910 | 42585                   | CC                              | GG                | 1946668418               |
| SNP_P3_161893_46547 | NW_004516987.1 | Scaffold1910 | 46547                   | CC                              | GG                | 1946668420               |
| SNP_P3_161894_46549 | NW_004516987.1 | Scaffold1910 | 46549                   | TT                              | AA                | 1946668422               |
| SNP_P3_161895_46621 | NW_004516987.1 | Scaffold1910 | 46621                   | TT                              | GG                | 1946668424               |
| SNP_P3_161896_46652 | NW_004516987.1 | Scaffold1910 | 46652                   | CC                              | AA                | 1946668426               |
| SNP_P3_161897_47094 | NW_004516987.1 | Scaffold1910 | 47094                   | CC                              | AA                | 1946668428               |
| SNP_P3_161898_2708  | NW_004516988.1 | Scaffold1911 | 2708                    | CC                              | AA                | 1946668430               |

| SNPs IDs            | Chromosome IDs | Chromosomes  | Physical positions (bp) | CDC Frontier (Reference genome) | (Pusa 256 & HPNB) | NCBI SNPdb Accession IDs |
|---------------------|----------------|--------------|-------------------------|---------------------------------|-------------------|--------------------------|
| SNP_P3_161899_2723  | NW_004516988.1 | Scaffold1911 | 2723                    | TT                              | AA                | 1946668432               |
| SNP_P3_161900_2724  | NW_004516988.1 | Scaffold1911 | 2724                    | CC                              | GG                | 1946668434               |
| SNP_P3_161901_2726  | NW_004516988.1 | Scaffold1911 | 2726                    | AA                              | TT                | 1946668436               |
| SNP_P3_161902_2743  | NW_004516988.1 | Scaffold1911 | 2743                    | AA                              | TT                | 1946668438               |
| SNP_P3_161903_2815  | NW_004516988.1 | Scaffold1911 | 2815                    | TT                              | AA                | 1946668440               |
| SNP_P3_161904_2843  | NW_004516988.1 | Scaffold1911 | 2843                    | GG                              | TT                | 1946668442               |
| SNP_P3_161905_2905  | NW_004516988.1 | Scaffold1911 | 2905                    | TT                              | GG                | 1946668444               |
| SNP_P3_161906_2943  | NW_004516988.1 | Scaffold1911 | 2943                    | CC                              | AA                | 1946668446               |
| SNP_P3_161907_3010  | NW_004516988.1 | Scaffold1911 | 3010                    | TT                              | CC                | 1946668448               |
| SNP_P3_161908_3017  | NW_004516988.1 | Scaffold1911 | 3017                    | CC                              | TT                | 1946668450               |
| SNP_P3_161909_3146  | NW_004516988.1 | Scaffold1911 | 3146                    | TT                              | CC                | 1946668453               |
| SNP_P3_161910_3210  | NW_004516988.1 | Scaffold1911 | 3210                    | GG                              | CC                | 1946668455               |
| SNP_P3_161911_3275  | NW_004516988.1 | Scaffold1911 | 3275                    | CC                              | TT                | 1946668457               |
| SNP_P3_161913_12254 | NW_004516988.1 | Scaffold1911 | 12254                   | GG                              | AA                | 1946668459               |
| SNP_P3_161914_12266 | NW_004516988.1 | Scaffold1911 | 12266                   | CC                              | TT                | 1946668461               |
| SNP_P3_161915_12329 | NW_004516988.1 | Scaffold1911 | 12329                   | GG                              | AA                | 1946668464               |
| SNP_P3_161916_12368 | NW_004516988.1 | Scaffold1911 | 12368                   | TT                              | AA                | 1946668466               |
| SNP_P3_161917_12611 | NW_004516988.1 | Scaffold1911 | 12611                   | TT                              | GG                | 1946668468               |
| SNP_P3_161918_12650 | NW_004516988.1 | Scaffold1911 | 12650                   | AA                              | TT                | 1946668470               |
| SNP_P3_161919_12733 | NW_004516988.1 | Scaffold1911 | 12733                   | TT                              | GG                | 1946668472               |
| SNP_P3_161920_12755 | NW_004516988.1 | Scaffold1911 | 12755                   | TT                              | CC                | 1946668474               |
| SNP_P3_161921_12922 | NW_004516988.1 | Scaffold1911 | 12922                   | GG                              | AA                | 1946668476               |
| SNP_P3_161923_13119 | NW_004516988.1 | Scaffold1911 | 13119                   | AA                              | GG                | 1946668478               |
| SNP_P3_161924_13121 | NW_004516988.1 | Scaffold1911 | 13121                   | AA                              | GG                | 1946668480               |
| SNP_P3_161925_13134 | NW_004516988.1 | Scaffold1911 | 13134                   | GG                              | TT                | 1946668482               |
| SNP_P3_161926_13178 | NW_004516988.1 | Scaffold1911 | 13178                   | AA                              | GG                | 1946668484               |
| SNP_P3_161927_13202 | NW_004516988.1 | Scaffold1911 | 13202                   | GG                              | AA                | 1946668486               |
| SNP_P3_161928_13210 | NW_004516988.1 | Scaffold1911 | 13210                   | CC                              | TT                | 1946668488               |
| SNP_P3_161929_13218 | NW_004516988.1 | Scaffold1911 | 13218                   | AA                              | GG                | 1946668492               |
| SNP_P3_161930_13224 | NW_004516988.1 | Scaffold1911 | 13224                   | AA                              | GG                | 1946668494               |
| SNP_P3_161931_13256 | NW_004516988.1 | Scaffold1911 | 13256                   | AA                              | GG                | 1946668496               |
| SNP_P3_161932_13322 | NW_004516988.1 | Scaffold1911 | 13322                   | TT                              | CC                | 1946668498               |
| SNP_P3_161933_14878 | NW_004516988.1 | Scaffold1911 | 14878                   | AA                              | CC                | 1946668500               |
| SNP_P3_161934_14941 | NW_004516988.1 | Scaffold1911 | 14941                   | AA                              | CC                | 1946668502               |
| SNP_P3_161935_15252 | NW_004516988.1 | Scaffold1911 | 15252                   | AA                              | GG                | 1946668504               |
| SNP_P3_161936_16689 | NW_004516988.1 | Scaffold1911 | 16689                   | TT                              | CC                | 1946668506               |
| SNP_P3_161937_16781 | NW_004516988.1 | Scaffold1911 | 16781                   | TT                              | CC                | 1946668509               |
| SNP_P3_161938_16842 | NW_004516988.1 | Scaffold1911 | 16842                   | GG                              | TT                | 1946668511               |
| SNP_P3_161939_16872 | NW_004516988.1 | Scaffold1911 | 16872                   | TT                              | AA                | 1946668513               |
| SNP_P3_161940_16900 | NW_004516988.1 | Scaffold1911 | 16900                   | TT                              | AA                | 1946668515               |
| SNP_P3_161941_16954 | NW_004516988.1 | Scaffold1911 | 16954                   | AA                              | TT                | 1946668517               |
| SNP_P3_161942_16955 | NW_004516988.1 | Scaffold1911 | 16955                   | GG                              | AA                | 1946668519               |

| SNPs IDs             | Chromosome IDs | Chromosomes  | Physical positions (bp) | CDC Frontier (Reference genome) | (Pusa 256 & HPNB) | NCBI SNPdb Accession IDs |
|----------------------|----------------|--------------|-------------------------|---------------------------------|-------------------|--------------------------|
| SNP_P3_161943_16958  | NW_004516988.1 | Scaffold1911 | 16958                   | AA                              | TT                | 1946668521               |
| SNP_P3_161944_16959  | NW_004516988.1 | Scaffold1911 | 16959                   | TT                              | CC                | 1946668523               |
| SNP_P3_161945_17046  | NW_004516988.1 | Scaffold1911 | 17046                   | AA                              | GG                | 1946668526               |
| SNP_P3_161946_17143  | NW_004516988.1 | Scaffold1911 | 17143                   | AA                              | CC                | 1946668528               |
| SNP_P3_161947_17215  | NW_004516988.1 | Scaffold1911 | 17215                   | TT                              | CC                | 1946668530               |
| SNP_P3_161948_17218  | NW_004516988.1 | Scaffold1911 | 17218                   | AA                              | TT                | 1946668533               |
| SNP_P3_161949_17224  | NW_004516988.1 | Scaffold1911 | 17224                   | AA                              | GG                | 1946668535               |
| SNP_P3_161950_17305  | NW_004516988.1 | Scaffold1911 | 17305                   | GG                              | AA                | 1946668537               |
| SNP_P3_161951_17370  | NW_004516988.1 | Scaffold1911 | 17370                   | TT                              | AA                | 1946668539               |
| SNP_P3_161952_17379  | NW_004516988.1 | Scaffold1911 | 17379                   | TT                              | GG                | 1946668541               |
| SNP_P3_161954_17382  | NW_004516988.1 | Scaffold1911 | 17382                   | AA                              | GG                | 1946668543               |
| SNP_P3_161955_17402  | NW_004516988.1 | Scaffold1911 | 17402                   | AA                              | GG                | 1946668545               |
| SNP_P3_161956_17403  | NW_004516988.1 | Scaffold1911 | 17403                   | GG                              | CC                | 1946668547               |
| SNP_P3_161957_2489   | NW_004516989.1 | Scaffold1912 | 2489                    | GG                              | AA                | 1946668549               |
| SNP_P3_161958_2835   | NW_004516989.1 | Scaffold1912 | 2835                    | CC                              | TT                | 1946668551               |
| SNP_P3_161959_3003   | NW_004516989.1 | Scaffold1912 | 3003                    | TT                              | CC                | 1946668553               |
| SNP_P3_161960_3067   | NW_004516989.1 | Scaffold1912 | 3067                    | AA                              | TT                | 1946668555               |
| SNP_P3_161961_3108   | NW_004516989.1 | Scaffold1912 | 3108                    | AA                              | GG                | 1946668557               |
| SNP_P3_161962_5908   | NW_004516989.1 | Scaffold1912 | 5908                    | CC                              | GG                | 1946668559               |
| SNP_P3_161963_8014   | NW_004516989.1 | Scaffold1912 | 8014                    | AA                              | TT                | 1946668562               |
| SNP_P3_161964_8024   | NW_004516989.1 | Scaffold1912 | 8024                    | AA                              | GG                | 1946668564               |
| SNP_P3_161965_8196   | NW_004516989.1 | Scaffold1912 | 8196                    | GG                              | AA                | 1946668566               |
| SNP_P3_161966_8200   | NW_004516989.1 | Scaffold1912 | 8200                    | AA                              | CC                | 1946668568               |
| SNP_P3_161967_8338   | NW_004516989.1 | Scaffold1912 | 8338                    | GG                              | AA                | 1946668570               |
| SNP_P3_161968_16266  | NW_004516989.1 | Scaffold1912 | 16266                   | GG                              | AA                | 1946668572               |
| SNP_P3_161969_16482  | NW_004516989.1 | Scaffold1912 | 16482                   | TT                              | AA                | 1946668574               |
| SNP_P3_161970_5677   | NW_004516990.1 | Scaffold1913 | 5677                    | GG                              | CC                | 1946668576               |
| SNP_P3_161971_59752  | NW_004516994.1 | Scaffold1918 | 59752                   | CC                              | TT                | 1946668578               |
| SNP_P3_161972_59885  | NW_004516994.1 | Scaffold1918 | 59885                   | GG                              | AA                | 1946668580               |
| SNP_P3_161974_69189  | NW_004516994.1 | Scaffold1918 | 69189                   | AA                              | GG                | 1946668582               |
| SNP_P3_161975_93818  | NW_004516994.1 | Scaffold1918 | 93818                   | TT                              | GG                | 1946668585               |
| SNP_P3_161976_94157  | NW_004516994.1 | Scaffold1918 | 94157                   | AA                              | GG                | 1946668587               |
| SNP_P3_161977_94203  | NW_004516994.1 | Scaffold1918 | 94203                   | AA                              | GG                | 1946668590               |
| SNP_P3_161978_96800  | NW_004516994.1 | Scaffold1918 | 96800                   | TT                              | CC                | 1946668592               |
| SNP_P3_161979_101543 | NW_004516994.1 | Scaffold1918 | 101543                  | CC                              | TT                | 1946668594               |
| SNP_P3_161980_101676 | NW_004516994.1 | Scaffold1918 | 101676                  | GG                              | TT                | 1946668596               |
| SNP_P3_161981_101688 | NW_004516994.1 | Scaffold1918 | 101688                  | AA                              | GG                | 1946668598               |
| SNP_P3_161982_102817 | NW_004516994.1 | Scaffold1918 | 102817                  | AA                              | GG                | 1946668600               |
| SNP_P3_161983_116102 | NW_004516994.1 | Scaffold1918 | 116102                  | AA                              | GG                | 1946668602               |
| SNP_P3_161984_123277 | NW_004516994.1 | Scaffold1918 | 123277                  | GG                              | AA                | 1946668604               |
| SNP_P3_161985_123384 | NW_004516994.1 | Scaffold1918 | 123384                  | GG                              | AA                | 1946668606               |
| SNP_P3_161986_123499 | NW_004516994.1 | Scaffold1918 | 123499                  | CC                              | TT                | 1946668608               |

| SNPs IDs             | Chromosome IDs | Chromosomes  | Physical positions (bp) | CDC Frontier (Reference genome) | (Pusa 256 & HPNB) | NCBI SNPdb Accession IDs |
|----------------------|----------------|--------------|-------------------------|---------------------------------|-------------------|--------------------------|
| SNP_P3_161987_123520 | NW_004516994.1 | Scaffold1918 | 123520                  | AA                              | GG                | 1946668610               |
| SNP_P3_161988_126159 | NW_004516994.1 | Scaffold1918 | 126159                  | TT                              | CC                | 1946668612               |
| SNP_P3_161989_171992 | NW_004516994.1 | Scaffold1918 | 171992                  | TT                              | AA                | 1946668614               |
| SNP_P3_161990_172317 | NW_004516994.1 | Scaffold1918 | 172317                  | CC                              | TT                | 1946668616               |
| SNP_P3_161991_172646 | NW_004516994.1 | Scaffold1918 | 172646                  | GG                              | TT                | 1946668618               |
| SNP_P3_161992_173058 | NW_004516994.1 | Scaffold1918 | 173058                  | CC                              | GG                | 1946668620               |
| SNP_P3_161993_173186 | NW_004516994.1 | Scaffold1918 | 173186                  | CC                              | GG                | 1946668622               |
| SNP_P3_161994_173204 | NW_004516994.1 | Scaffold1918 | 173204                  | GG                              | AA                | 1946668624               |
| SNP_P3_161995_185947 | NW_004516994.1 | Scaffold1918 | 185947                  | TT                              | AA                | 1946668626               |
| SNP_P3_161998_205639 | NW_004516994.1 | Scaffold1918 | 205639                  | AA                              | GG                | 1946668628               |
| SNP_P3_161999_205642 | NW_004516994.1 | Scaffold1918 | 205642                  | TT                              | CC                | 1946668630               |
| SNP_P3_162000_205645 | NW_004516994.1 | Scaffold1918 | 205645                  | TT                              | CC                | 1946668632               |
| SNP_P3_162001_205657 | NW_004516994.1 | Scaffold1918 | 205657                  | TT                              | CC                | 1946668634               |
| SNP_P3_162002_205658 | NW_004516994.1 | Scaffold1918 | 205658                  | TT                              | GG                | 1946668637               |
| SNP_P3_162003_205722 | NW_004516994.1 | Scaffold1918 | 205722                  | CC                              | TT                | 1946668639               |
| SNP_P3_162004_205729 | NW_004516994.1 | Scaffold1918 | 205729                  | GG                              | AA                | 1946668641               |
| SNP_P3_162005_205730 | NW_004516994.1 | Scaffold1918 | 205730                  | TT                              | CC                | 1946668643               |
| SNP_P3_162007_213693 | NW_004516994.1 | Scaffold1918 | 213693                  | TT                              | CC                | 1946668645               |
| SNP_P3_162008_229558 | NW_004516994.1 | Scaffold1918 | 229558                  | AA                              | GG                | 1946668647               |
| SNP_P3_162009_235288 | NW_004516994.1 | Scaffold1918 | 235288                  | CC                              | GG                | 1946668649               |
| SNP_P3_162010_235975 | NW_004516994.1 | Scaffold1918 | 235975                  | TT                              | CC                | 1946668652               |
| SNP_P3_162011_235978 | NW_004516994.1 | Scaffold1918 | 235978                  | GG                              | AA                | 1946668654               |
| SNP_P3_162012_236028 | NW_004516994.1 | Scaffold1918 | 236028                  | TT                              | CC                | 1946668656               |
| SNP_P3_162013_236338 | NW_004516994.1 | Scaffold1918 | 236338                  | AA                              | TT                | 1946668658               |
| SNP_P3_162014_236351 | NW_004516994.1 | Scaffold1918 | 236351                  | TT                              | CC                | 1946668660               |
| SNP_P3_162015_236376 | NW_004516994.1 | Scaffold1918 | 236376                  | GG                              | AA                | 1946668662               |
| SNP_P3_162016_236429 | NW_004516994.1 | Scaffold1918 | 236429                  | GG                              | AA                | 1946668664               |
| SNP_P3_162017_239534 | NW_004516994.1 | Scaffold1918 | 239534                  | TT                              | CC                | 1946668666               |
| SNP_P3_162018_239537 | NW_004516994.1 | Scaffold1918 | 239537                  | TT                              | AA                | 1946668668               |
| SNP_P3_162019_256129 | NW_004516994.1 | Scaffold1918 | 256129                  | AA                              | GG                | 1946668670               |
| SNP_P3_162020_967    | NW_004516995.1 | Scaffold1919 | 967                     | GG                              | AA                | 1946668672               |
| SNP_P3_162021_1387   | NW_004516995.1 | Scaffold1919 | 1387                    | AA                              | TT                | 1946668674               |
| SNP_P3_162022_1848   | NW_004516995.1 | Scaffold1919 | 1848                    | CC                              | GG                | 1946668676               |
| SNP_P3_162023_1925   | NW_004516995.1 | Scaffold1919 | 1925                    | GG                              | TT                | 1946668679               |
| SNP_P3_162024_1944   | NW_004516995.1 | Scaffold1919 | 1944                    | CC                              | AA                | 1946668681               |
| SNP_P3_162025_2447   | NW_004516995.1 | Scaffold1919 | 2447                    | CC                              | GG                | 1946668683               |
| SNP_P3_162026_2451   | NW_004516995.1 | Scaffold1919 | 2451                    | TT                              | CC                | 1946668685               |
| SNP_P3_162027_2463   | NW_004516995.1 | Scaffold1919 | 2463                    | AA                              | CC                | 1946668687               |
| SNP_P3_162028_2689   | NW_004516995.1 | Scaffold1919 | 2689                    | TT                              | AA                | 1946668689               |
| SNP_P3_162029_4470   | NW_004516995.1 | Scaffold1919 | 4470                    | CC                              | TT                | 1946668691               |
| SNP_P3_162030_4588   | NW_004516995.1 | Scaffold1919 | 4588                    | TT                              | GG                | 1946668694               |
| SNP_P3_162031_4644   | NW_004516995.1 | Scaffold1919 | 4644                    | AA                              | GG                | 1946668696               |

| SNPs IDs            | Chromosome IDs | Chromosomes  | Physical positions (bp) | CDC Frontier (Reference genome) | (Pusa 256 & HPNB) | NCBI SNPdb Accession IDs |
|---------------------|----------------|--------------|-------------------------|---------------------------------|-------------------|--------------------------|
| SNP_P3_162032_4650  | NW_004516995.1 | Scaffold1919 | 4650                    | AA                              | GG                | 1946668698               |
| SNP_P3_162033_4918  | NW_004516995.1 | Scaffold1919 | 4918                    | AA                              | GG                | 1946668700               |
| SNP_P3_162034_5236  | NW_004516995.1 | Scaffold1919 | 5236                    | CC                              | GG                | 1946668702               |
| SNP_P3_162035_1280  | NW_004516996.1 | Scaffold1920 | 1280                    | GG                              | AA                | 1946668706               |
| SNP_P3_162036_1284  | NW_004516996.1 | Scaffold1920 | 1284                    | GG                              | TT                | 1946668708               |
| SNP_P3_162037_1287  | NW_004516996.1 | Scaffold1920 | 1287                    | CC                              | TT                | 1946668710               |
| SNP_P3_162038_1289  | NW_004516996.1 | Scaffold1920 | 1289                    | CC                              | AA                | 1946668712               |
| SNP_P3_162039_1290  | NW_004516996.1 | Scaffold1920 | 1290                    | GG                              | AA                | 1946668714               |
| SNP_P3_162040_5259  | NW_004516996.1 | Scaffold1920 | 5259                    | CC                              | TT                | 1946668716               |
| SNP_P3_162041_5329  | NW_004516996.1 | Scaffold1920 | 5329                    | CC                              | TT                | 1946668718               |
| SNP_P3_162042_6035  | NW_004516996.1 | Scaffold1920 | 6035                    | AA                              | GG                | 1946668720               |
| SNP_P3_162043_8492  | NW_004516996.1 | Scaffold1920 | 8492                    | AA                              | CC                | 1946668722               |
| SNP_P3_162044_8497  | NW_004516996.1 | Scaffold1920 | 8497                    | AA                              | TT                | 1946668724               |
| SNP_P3_162045_8573  | NW_004516996.1 | Scaffold1920 | 8573                    | CC                              | AA                | 1946668726               |
| SNP_P3_162046_8574  | NW_004516996.1 | Scaffold1920 | 8574                    | CC                              | AA                | 1946668728               |
| SNP_P3_162047_8713  | NW_004516996.1 | Scaffold1920 | 8713                    | AA                              | TT                | 1946668730               |
| SNP_P3_162048_8718  | NW_004516996.1 | Scaffold1920 | 8718                    | TT                              | AA                | 1946668732               |
| SNP_P3_162049_8719  | NW_004516996.1 | Scaffold1920 | 8719                    | GG                              | CC                | 1946668734               |
| SNP_P3_162050_8720  | NW_004516996.1 | Scaffold1920 | 8720                    | TT                              | AA                | 1946668736               |
| SNP_P3_162051_8730  | NW_004516996.1 | Scaffold1920 | 8730                    | CC                              | AA                | 1946668738               |
| SNP_P3_162052_8733  | NW_004516996.1 | Scaffold1920 | 8733                    | GG                              | CC                | 1946668740               |
| SNP_P3_162053_8741  | NW_004516996.1 | Scaffold1920 | 8741                    | GG                              | AA                | 1946668742               |
| SNP_P3_162054_8749  | NW_004516996.1 | Scaffold1920 | 8749                    | CC                              | AA                | 1946668745               |
| SNP_P3_162055_8751  | NW_004516996.1 | Scaffold1920 | 8751                    | AA                              | TT                | 1946668747               |
| SNP_P3_162056_8859  | NW_004516996.1 | Scaffold1920 | 8859                    | AA                              | TT                | 1946668749               |
| SNP_P3_162057_8872  | NW_004516996.1 | Scaffold1920 | 8872                    | TT                              | AA                | 1946668751               |
| SNP_P3_162058_8885  | NW_004516996.1 | Scaffold1920 | 8885                    | GG                              | AA                | 1946668753               |
| SNP_P3_162059_8889  | NW_004516996.1 | Scaffold1920 | 8889                    | GG                              | TT                | 1946668755               |
| SNP_P3_162060_8892  | NW_004516996.1 | Scaffold1920 | 8892                    | CC                              | TT                | 1946668757               |
| SNP_P3_162061_8895  | NW_004516996.1 | Scaffold1920 | 8895                    | GG                              | AA                | 1946668759               |
| SNP_P3_162062_8900  | NW_004516996.1 | Scaffold1920 | 8900                    | GG                              | TT                | 1946668761               |
| SNP_P3_162063_9010  | NW_004516996.1 | Scaffold1920 | 9010                    | GG                              | CC                | 1946668763               |
| SNP_P3_162064_9936  | NW_004516996.1 | Scaffold1920 | 9936                    | AA                              | GG                | 1946668765               |
| SNP_P3_162065_10063 | NW_004516996.1 | Scaffold1920 | 10063                   | CC                              | AA                | 1946668767               |
| SNP_P3_162066_10102 | NW_004516996.1 | Scaffold1920 | 10102                   | TT                              | CC                | 1946668770               |
| SNP_P3_162067_10232 | NW_004516996.1 | Scaffold1920 | 10232                   | TT                              | AA                | 1946668772               |
| SNP_P3_162068_10264 | NW_004516996.1 | Scaffold1920 | 10264                   | AA                              | CC                | 1946668774               |
| SNP_P3_162069_10333 | NW_004516996.1 | Scaffold1920 | 10333                   | TT                              | AA                | 1946668776               |
| SNP_P3_162071_10407 | NW_004516996.1 | Scaffold1920 | 10407                   | CC                              | TT                | 1946668778               |
| SNP_P3_162072_10477 | NW_004516996.1 | Scaffold1920 | 10477                   | CC                              | TT                | 1946668780               |
| SNP_P3_162073_10478 | NW_004516996.1 | Scaffold1920 | 10478                   | TT                              | CC                | 1946668782               |
| SNP_P3_162074_10542 | NW_004516996.1 | Scaffold1920 | 10542                   | AA                              | TT                | 1946668784               |

| SNPs IDs             | Chromosome IDs | Chromosomes  | Physical positions (bp) | CDC Frontier (Reference genome) | (Pusa 256 & HPNB) | NCBI SNPdb Accession IDs |
|----------------------|----------------|--------------|-------------------------|---------------------------------|-------------------|--------------------------|
| SNP_P3_162075_10545  | NW_004516996.1 | Scaffold1920 | 10545                   | GG                              | AA                | 1946668786               |
| SNP_P3_162076_14638  | NW_004516996.1 | Scaffold1920 | 14638                   | GG                              | AA                | 1946668788               |
| SNP_P3_162077_14881  | NW_004516996.1 | Scaffold1920 | 14881                   | CC                              | AA                | 1946668790               |
| SNP_P3_162078_14907  | NW_004516996.1 | Scaffold1920 | 14907                   | GG                              | TT                | 1946668792               |
| SNP_P3_162079_16181  | NW_004516996.1 | Scaffold1920 | 16181                   | CC                              | TT                | 1946668794               |
| SNP_P3_162080_16196  | NW_004516996.1 | Scaffold1920 | 16196                   | TT                              | GG                | 1946668796               |
| SNP_P3_162081_20842  | NW_004516996.1 | Scaffold1920 | 20842                   | GG                              | CC                | 1946668798               |
| SNP_P3_162082_25458  | NW_004516996.1 | Scaffold1920 | 25458                   | CC                              | TT                | 1946668802               |
| SNP_P3_162084_212    | NW_004516997.1 | Scaffold1922 | 212                     | AA                              | CC                | 1946668804               |
| SNP_P3_162085_33080  | NW_004516997.1 | Scaffold1922 | 33080                   | TT                              | CC                | 1946668806               |
| SNP_P3_162086_44670  | NW_004516997.1 | Scaffold1922 | 44670                   | AA                              | TT                | 1946668808               |
| SNP_P3_162087_1815   | NW_004516998.1 | Scaffold1923 | 1815                    | CC                              | TT                | 1946668809               |
| SNP_P3_162088_2780   | NW_004516998.1 | Scaffold1923 | 2780                    | CC                              | AA                | 1946668810               |
| SNP_P3_162089_3297   | NW_004516998.1 | Scaffold1923 | 3297                    | CC                              | TT                | 1946668811               |
| SNP_P3_162090_3298   | NW_004516998.1 | Scaffold1923 | 3298                    | AA                              | TT                | 1946668812               |
| SNP_P3_162091_3772   | NW_004516998.1 | Scaffold1923 | 3772                    | GG                              | AA                | 1946668813               |
| SNP_P3_162092_5632   | NW_004516998.1 | Scaffold1923 | 5632                    | GG                              | AA                | 1946668815               |
| SNP_P3_162093_10394  | NW_004516998.1 | Scaffold1923 | 10394                   | AA                              | TT                | 1946668817               |
| SNP_P3_162094_10433  | NW_004516998.1 | Scaffold1923 | 10433                   | CC                              | TT                | 1946668819               |
| SNP_P3_162095_10669  | NW_004516998.1 | Scaffold1923 | 10669                   | GG                              | AA                | 1946668821               |
| SNP_P3_162097_2421   | NW_004517001.1 | Scaffold1928 | 2421                    | GG                              | CC                | 1946668824               |
| SNP_P3_162098_3661   | NW_004517001.1 | Scaffold1928 | 3661                    | CC                              | GG                | 1946668826               |
| SNP_P3_162100_3916   | NW_004517001.1 | Scaffold1928 | 3916                    | CC                              | TT                | 1946668828               |
| SNP_P3_162101_3932   | NW_004517001.1 | Scaffold1928 | 3932                    | CC                              | TT                | 1946668830               |
| SNP_P3_162102_3995   | NW_004517001.1 | Scaffold1928 | 3995                    | AA                              | CC                | 1946668832               |
| SNP_P3_162103_15924  | NW_004517001.1 | Scaffold1928 | 15924                   | GG                              | TT                | 1946668834               |
| SNP_P3_162105_15975  | NW_004517001.1 | Scaffold1928 | 15975                   | AA                              | GG                | 1946668836               |
| SNP_P3_162106_16313  | NW_004517001.1 | Scaffold1928 | 16313                   | GG                              | AA                | 1946668838               |
| SNP_P3_162107_67493  | NW_004517001.1 | Scaffold1928 | 67493                   | GG                              | AA                | 1946668840               |
| SNP_P3_162108_68102  | NW_004517001.1 | Scaffold1928 | 68102                   | AA                              | GG                | 1946668842               |
| SNP_P3_162109_68445  | NW_004517001.1 | Scaffold1928 | 68445                   | TT                              | CC                | 1946668844               |
| SNP_P3_162110_68522  | NW_004517001.1 | Scaffold1928 | 68522                   | CC                              | TT                | 1946668846               |
| SNP_P3_162111_77980  | NW_004517001.1 | Scaffold1928 | 77980                   | GG                              | TT                | 1946668849               |
| SNP_P3_162112_78296  | NW_004517001.1 | Scaffold1928 | 78296                   | GG                              | AA                | 1946668851               |
| SNP_P3_162113_78429  | NW_004517001.1 | Scaffold1928 | 78429                   | TT                              | AA                | 1946668853               |
| SNP_P3_162114_78673  | NW_004517001.1 | Scaffold1928 | 78673                   | TT                              | CC                | 1946668855               |
| SNP_P3_162115_79425  | NW_004517001.1 | Scaffold1928 | 79425                   | CC                              | TT                | 1946668858               |
| SNP_P3_162116_118239 | NW_004517001.1 | Scaffold1928 | 118239                  | TT                              | CC                | 1946668860               |
| SNP_P3_162117_118256 | NW_004517001.1 | Scaffold1928 | 118256                  | AA                              | TT                | 1946668862               |
| SNP_P3_162118_118361 | NW_004517001.1 | Scaffold1928 | 118361                  | AA                              | GG                | 1946668864               |
| SNP_P3_162119_118869 | NW_004517001.1 | Scaffold1928 | 118869                  | TT                              | GG                | 1946668866               |
| SNP_P3_162120_1440   | NW_004517003.1 | Scaffold1930 | 1440                    | TT                              | CC                | 1946668868               |



| SNPs IDs            | Chromosome IDs | Chromosomes  | Physical positions (bp) | CDC Frontier (Reference genome) | (Pusa 256 & HPNB) | NCBI SNPdb Accession IDs |
|---------------------|----------------|--------------|-------------------------|---------------------------------|-------------------|--------------------------|
| SNP_P3_162121_1447  | NW_004517003.1 | Scaffold1930 | 1447                    | TT                              | CC                | 1946668870               |
| SNP_P3_162122_1644  | NW_004517003.1 | Scaffold1930 | 1644                    | AA                              | CC                | 1946668873               |
| SNP_P3_162123_1664  | NW_004517003.1 | Scaffold1930 | 1664                    | CC                              | GG                | 1946668875               |
| SNP_P3_162124_1693  | NW_004517003.1 | Scaffold1930 | 1693                    | CC                              | TT                | 1946668878               |
| SNP_P3_162125_1705  | NW_004517003.1 | Scaffold1930 | 1705                    | GG                              | AA                | 1946668880               |
| SNP_P3_162126_1713  | NW_004517003.1 | Scaffold1930 | 1713                    | CC                              | TT                | 1946668882               |
| SNP_P3_162128_16051 | NW_004517003.1 | Scaffold1930 | 16051                   | CC                              | TT                | 1946668884               |
| SNP_P3_162129_22825 | NW_004517003.1 | Scaffold1930 | 22825                   | CC                              | AA                | 1946668886               |
| SNP_P3_162130_23982 | NW_004517003.1 | Scaffold1930 | 23982                   | AA                              | GG                | 1946668888               |
| SNP_P3_162131_24239 | NW_004517003.1 | Scaffold1930 | 24239                   | CC                              | AA                | 1946668890               |
| SNP_P3_162133_30273 | NW_004517003.1 | Scaffold1930 | 30273                   | AA                              | CC                | 1946668892               |
| SNP_P3_162134_30293 | NW_004517003.1 | Scaffold1930 | 30293                   | AA                              | GG                | 1946668895               |
| SNP_P3_162135_31695 | NW_004517003.1 | Scaffold1930 | 31695                   | AA                              | GG                | 1946668897               |
| SNP_P3_162136_32450 | NW_004517003.1 | Scaffold1930 | 32450                   | AA                              | TT                | 1946668900               |
| SNP_P3_162137_32583 | NW_004517003.1 | Scaffold1930 | 32583                   | GG                              | AA                | 1946668902               |
| SNP_P3_162138_32623 | NW_004517003.1 | Scaffold1930 | 32623                   | TT                              | AA                | 1946668904               |
| SNP_P3_162139_32670 | NW_004517003.1 | Scaffold1930 | 32670                   | GG                              | TT                | 1946668906               |
| SNP_P3_162140_32685 | NW_004517003.1 | Scaffold1930 | 32685                   | AA                              | GG                | 1946668908               |
| SNP_P3_162141_32690 | NW_004517003.1 | Scaffold1930 | 32690                   | GG                              | AA                | 1946668911               |
| SNP_P3_162142_32696 | NW_004517003.1 | Scaffold1930 | 32696                   | GG                              | TT                | 1946668913               |
| SNP_P3_162143_32778 | NW_004517003.1 | Scaffold1930 | 32778                   | TT                              | CC                | 1946668915               |
| SNP_P3_162146_33842 | NW_004517003.1 | Scaffold1930 | 33842                   | GG                              | AA                | 1946668917               |
| SNP_P3_162147_33844 | NW_004517003.1 | Scaffold1930 | 33844                   | CC                              | TT                | 1946668919               |
| SNP_P3_162148_33854 | NW_004517003.1 | Scaffold1930 | 33854                   | TT                              | CC                | 1946668921               |
| SNP_P3_162149_33888 | NW_004517003.1 | Scaffold1930 | 33888                   | AA                              | TT                | 1946668923               |
| SNP_P3_162150_37276 | NW_004517003.1 | Scaffold1930 | 37276                   | TT                              | CC                | 1946668926               |
| SNP_P3_162151_37319 | NW_004517003.1 | Scaffold1930 | 37319                   | CC                              | AA                | 1946668928               |
| SNP_P3_162152_37332 | NW_004517003.1 | Scaffold1930 | 37332                   | GG                              | TT                | 1946668930               |
| SNP_P3_162153_37374 | NW_004517003.1 | Scaffold1930 | 37374                   | CC                              | TT                | 1946668932               |
| SNP_P3_162154_37421 | NW_004517003.1 | Scaffold1930 | 37421                   | TT                              | CC                | 1946668934               |
| SNP_P3_162155_37508 | NW_004517003.1 | Scaffold1930 | 37508                   | TT                              | AA                | 1946668936               |
| SNP_P3_162156_37509 | NW_004517003.1 | Scaffold1930 | 37509                   | AA                              | GG                | 1946668938               |
| SNP_P3_162157_37596 | NW_004517003.1 | Scaffold1930 | 37596                   | TT                              | CC                | 1946668940               |
| SNP_P3_162158_37623 | NW_004517003.1 | Scaffold1930 | 37623                   | TT                              | AA                | 1946668942               |
| SNP_P3_162159_37738 | NW_004517003.1 | Scaffold1930 | 37738                   | AA                              | TT                | 1946668944               |
| SNP_P3_162160_37811 | NW_004517003.1 | Scaffold1930 | 37811                   | TT                              | GG                | 1946668946               |
| SNP_P3_162161_37822 | NW_004517003.1 | Scaffold1930 | 37822                   | TT                              | CC                | 1946668948               |
| SNP_P3_162162_37824 | NW_004517003.1 | Scaffold1930 | 37824                   | AA                              | GG                | 1946668950               |
| SNP_P3_162163_37861 | NW_004517003.1 | Scaffold1930 | 37861                   | AA                              | CC                | 1946668952               |
| SNP_P3_162164_37862 | NW_004517003.1 | Scaffold1930 | 37862                   | TT                              | GG                | 1946668954               |
| SNP_P3_162165_37898 | NW_004517003.1 | Scaffold1930 | 37898                   | GG                              | AA                | 1946668956               |
| SNP_P3_162166_38481 | NW_004517003.1 | Scaffold1930 | 38481                   | GG                              | TT                | 1946668958               |

| SNPs IDs            | Chromosome IDs | Chromosomes  | Physical positions (bp) | CDC Frontier (Reference genome) | (Pusa 256 & HPNB) | NCBI SNPdb Accession IDs |
|---------------------|----------------|--------------|-------------------------|---------------------------------|-------------------|--------------------------|
| SNP_P3_162167_38552 | NW_004517003.1 | Scaffold1930 | 38552                   | GG                              | CC                | 1946668960               |
| SNP_P3_162168_39010 | NW_004517003.1 | Scaffold1930 | 39010                   | TT                              | GG                | 1946668963               |
| SNP_P3_162169_39015 | NW_004517003.1 | Scaffold1930 | 39015                   | GG                              | AA                | 1946668965               |
| SNP_P3_162170_39269 | NW_004517003.1 | Scaffold1930 | 39269                   | CC                              | TT                | 1946668967               |
| SNP_P3_162171_39297 | NW_004517003.1 | Scaffold1930 | 39297                   | GG                              | AA                | 1946668969               |
| SNP_P3_162172_40169 | NW_004517003.1 | Scaffold1930 | 40169                   | CC                              | TT                | 1946668971               |
| SNP_P3_162173_40244 | NW_004517003.1 | Scaffold1930 | 40244                   | AA                              | GG                | 1946668973               |
| SNP_P3_162174_40246 | NW_004517003.1 | Scaffold1930 | 40246                   | CC                              | TT                | 1946668975               |
| SNP_P3_162175_40381 | NW_004517003.1 | Scaffold1930 | 40381                   | TT                              | GG                | 1946668977               |
| SNP_P3_162176_40407 | NW_004517003.1 | Scaffold1930 | 40407                   | GG                              | TT                | 1946668979               |
| SNP_P3_162177_40485 | NW_004517003.1 | Scaffold1930 | 40485                   | CC                              | GG                | 1946668981               |
| SNP_P3_162178_40493 | NW_004517003.1 | Scaffold1930 | 40493                   | GG                              | TT                | 1946668983               |
| SNP_P3_162179_40583 | NW_004517003.1 | Scaffold1930 | 40583                   | CC                              | TT                | 1946668985               |
| SNP_P3_162180_40671 | NW_004517003.1 | Scaffold1930 | 40671                   | TT                              | GG                | 1946668987               |
| SNP_P3_162181_41515 | NW_004517003.1 | Scaffold1930 | 41515                   | TT                              | AA                | 1946668989               |
| SNP_P3_162182_41531 | NW_004517003.1 | Scaffold1930 | 41531                   | TT                              | CC                | 1946668992               |
| SNP_P3_162183_41833 | NW_004517003.1 | Scaffold1930 | 41833                   | GG                              | CC                | 1946668994               |
| SNP_P3_162184_41846 | NW_004517003.1 | Scaffold1930 | 41846                   | TT                              | CC                | 1946668996               |
| SNP_P3_162185_42087 | NW_004517003.1 | Scaffold1930 | 42087                   | TT                              | GG                | 1946668998               |
| SNP_P3_162186_42165 | NW_004517003.1 | Scaffold1930 | 42165                   | CC                              | TT                | 1946669000               |
| SNP_P3_162187_42360 | NW_004517003.1 | Scaffold1930 | 42360                   | AA                              | TT                | 1946669002               |
| SNP_P3_162188_45012 | NW_004517003.1 | Scaffold1930 | 45012                   | AA                              | GG                | 1946669004               |
| SNP_P3_162189_45140 | NW_004517003.1 | Scaffold1930 | 45140                   | TT                              | GG                | 1946669006               |
| SNP_P3_162190_45147 | NW_004517003.1 | Scaffold1930 | 45147                   | CC                              | TT                | 1946669008               |
| SNP_P3_162191_45365 | NW_004517003.1 | Scaffold1930 | 45365                   | AA                              | CC                | 1946669010               |
| SNP_P3_162192_45479 | NW_004517003.1 | Scaffold1930 | 45479                   | AA                              | GG                | 1946669012               |
| SNP_P3_162193_59808 | NW_004517003.1 | Scaffold1930 | 59808                   | GG                              | AA                | 1946669014               |
| SNP_P3_162194_59920 | NW_004517003.1 | Scaffold1930 | 59920                   | AA                              | TT                | 1946669016               |
| SNP_P3_162196_36711 | NW_004517005.1 | Scaffold1932 | 36711                   | TT                              | CC                | 1946669018               |
| SNP_P3_162197_66055 | NW_004517005.1 | Scaffold1932 | 66055                   | TT                              | CC                | 1946669020               |
| SNP_P3_162198_77550 | NW_004517005.1 | Scaffold1932 | 77550                   | TT                              | CC                | 1946669022               |
| SNP_P3_162199_77556 | NW_004517005.1 | Scaffold1932 | 77556                   | AA                              | TT                | 1946669024               |
| SNP_P3_162200_77587 | NW_004517005.1 | Scaffold1932 | 77587                   | TT                              | CC                | 1946669026               |
| SNP_P3_162201_77595 | NW_004517005.1 | Scaffold1932 | 77595                   | AA                              | CC                | 1946669028               |
| SNP_P3_162202_77655 | NW_004517005.1 | Scaffold1932 | 77655                   | AA                              | GG                | 1946669031               |
| SNP_P3_162203_77656 | NW_004517005.1 | Scaffold1932 | 77656                   | TT                              | AA                | 1946669033               |
| SNP_P3_162204_77658 | NW_004517005.1 | Scaffold1932 | 77658                   | TT                              | CC                | 1946669035               |
| SNP_P3_162205_77659 | NW_004517005.1 | Scaffold1932 | 77659                   | TT                              | GG                | 1946669037               |
| SNP_P3_162206_77711 | NW_004517005.1 | Scaffold1932 | 77711                   | GG                              | AA                | 1946669039               |
| SNP_P3_162207_82728 | NW_004517005.1 | Scaffold1932 | 82728                   | GG                              | AA                | 1946669041               |
| SNP_P3_162208_82750 | NW_004517005.1 | Scaffold1932 | 82750                   | GG                              | AA                | 1946669043               |
| SNP_P3_162209_82769 | NW_004517005.1 | Scaffold1932 | 82769                   | AA                              | GG                | 1946669045               |

| SNPs IDs            | Chromosome IDs | Chromosomes  | Physical positions (bp) | CDC Frontier (Reference genome) | (Pusa 256 & HPNB) | NCBI SNPdb Accession IDs |
|---------------------|----------------|--------------|-------------------------|---------------------------------|-------------------|--------------------------|
| SNP_P3_162210_82774 | NW_004517005.1 | Scaffold1932 | 82774                   | CC                              | TT                | 1946669047               |
| SNP_P3_162211_83183 | NW_004517005.1 | Scaffold1932 | 83183                   | AA                              | GG                | 1946669049               |
| SNP_P3_162212_83209 | NW_004517005.1 | Scaffold1932 | 83209                   | CC                              | AA                | 1946669051               |
| SNP_P3_162213_83220 | NW_004517005.1 | Scaffold1932 | 83220                   | CC                              | AA                | 1946669053               |
| SNP_P3_162214_347   | NW_004517006.1 | Scaffold1933 | 347                     | GG                              | AA                | 1946669056               |
| SNP_P3_162215_1029  | NW_004517007.1 | Scaffold1934 | 1029                    | CC                              | AA                | 1946669058               |
| SNP_P3_162216_6406  | NW_004517009.1 | Scaffold1936 | 6406                    | TT                              | CC                | 1946669060               |
| SNP_P3_162217_7510  | NW_004517009.1 | Scaffold1936 | 7510                    | AA                              | GG                | 1946669062               |
| SNP_P3_162218_1067  | NW_004517010.1 | Scaffold1937 | 1067                    | GG                              | AA                | 1946669064               |
| SNP_P3_162219_1068  | NW_004517010.1 | Scaffold1937 | 1068                    | TT                              | CC                | 1946669066               |
| SNP_P3_162220_1070  | NW_004517010.1 | Scaffold1937 | 1070                    | TT                              | AA                | 1946669068               |
| SNP_P3_162221_1072  | NW_004517010.1 | Scaffold1937 | 1072                    | AA                              | CC                | 1946669071               |
| SNP_P3_162222_4467  | NW_004517010.1 | Scaffold1937 | 4467                    | TT                              | CC                | 1946669073               |
| SNP_P3_162223_7206  | NW_004517010.1 | Scaffold1937 | 7206                    | CC                              | AA                | 1946669075               |
| SNP_P3_162224_233   | NW_004517013.1 | Scaffold1940 | 233                     | GG                              | CC                | 1946669077               |
| SNP_P3_162225_546   | NW_004517013.1 | Scaffold1940 | 546                     | AA                              | GG                | 1946669079               |
| SNP_P3_162227_121   | NW_004517016.1 | Scaffold1943 | 121                     | CC                              | TT                | 1946669081               |
| SNP_P3_162228_126   | NW_004517016.1 | Scaffold1943 | 126                     | CC                              | TT                | 1946669083               |
| SNP_P3_162229_218   | NW_004517016.1 | Scaffold1943 | 218                     | GG                              | CC                | 1946669085               |
| SNP_P3_162230_278   | NW_004517016.1 | Scaffold1943 | 278                     | AA                              | GG                | 1946669087               |
| SNP_P3_162231_532   | NW_004517016.1 | Scaffold1943 | 532                     | TT                              | AA                | 1946669090               |
| SNP_P3_162232_534   | NW_004517016.1 | Scaffold1943 | 534                     | GG                              | TT                | 1946669093               |
| SNP_P3_162233_2329  | NW_004517016.1 | Scaffold1943 | 2329                    | GG                              | AA                | 1946669095               |
| SNP_P3_162234_2350  | NW_004517016.1 | Scaffold1943 | 2350                    | AA                              | CC                | 1946669097               |
| SNP_P3_162235_2417  | NW_004517016.1 | Scaffold1943 | 2417                    | TT                              | GG                | 1946669099               |
| SNP_P3_162236_2421  | NW_004517016.1 | Scaffold1943 | 2421                    | TT                              | CC                | 1946669102               |
| SNP_P3_162237_2450  | NW_004517016.1 | Scaffold1943 | 2450                    | TT                              | CC                | 1946669104               |
| SNP_P3_162238_2451  | NW_004517016.1 | Scaffold1943 | 2451                    | CC                              | TT                | 1946669106               |
| SNP_P3_162239_2457  | NW_004517016.1 | Scaffold1943 | 2457                    | TT                              | AA                | 1946669108               |
| SNP_P3_162240_2497  | NW_004517016.1 | Scaffold1943 | 2497                    | CC                              | TT                | 1946669111               |
| SNP_P3_162242_2555  | NW_004517016.1 | Scaffold1943 | 2555                    | TT                              | GG                | 1946669114               |
| SNP_P3_162243_2556  | NW_004517016.1 | Scaffold1943 | 2556                    | TT                              | CC                | 1946669116               |
| SNP_P3_162244_2564  | NW_004517016.1 | Scaffold1943 | 2564                    | AA                              | TT                | 1946669118               |
| SNP_P3_162245_2942  | NW_004517016.1 | Scaffold1943 | 2942                    | CC                              | TT                | 1946669120               |
| SNP_P3_162247_3008  | NW_004517016.1 | Scaffold1943 | 3008                    | CC                              | AA                | 1946669122               |
| SNP_P3_162248_8394  | NW_004517016.1 | Scaffold1943 | 8394                    | CC                              | AA                | 1946669125               |
| SNP_P3_162249_18023 | NW_004517016.1 | Scaffold1943 | 18023                   | CC                              | TT                | 1946669127               |
| SNP_P3_162250_31410 | NW_004517016.1 | Scaffold1943 | 31410                   | AA                              | TT                | 1946669129               |
| SNP_P3_162251_51097 | NW_004517016.1 | Scaffold1943 | 51097                   | AA                              | TT                | 1946669131               |
| SNP_P3_162252_51098 | NW_004517016.1 | Scaffold1943 | 51098                   | AA                              | CC                | 1946669133               |
| SNP_P3_162253_75916 | NW_004517016.1 | Scaffold1943 | 75916                   | TT                              | AA                | 1946669135               |
| SNP_P3_162254_79329 | NW_004517016.1 | Scaffold1943 | 79329                   | GG                              | AA                | 1946669137               |

| SNPs IDs             | Chromosome IDs | Chromosomes  | Physical positions (bp) | CDC Frontier (Reference genome) | (Pusa 256 & HPNB) | NCBI SNPdb Accession IDs |
|----------------------|----------------|--------------|-------------------------|---------------------------------|-------------------|--------------------------|
| SNP_P3_162255_83560  | NW_004517016.1 | Scaffold1943 | 83560                   | GG                              | AA                | 1946669139               |
| SNP_P3_162256_85337  | NW_004517016.1 | Scaffold1943 | 85337                   | GG                              | TT                | 1946669141               |
| SNP_P3_162257_94603  | NW_004517016.1 | Scaffold1943 | 94603                   | TT                              | CC                | 1946669143               |
| SNP_P3_162258_110617 | NW_004517016.1 | Scaffold1943 | 110617                  | AA                              | TT                | 1946669145               |
| SNP_P3_162259_116136 | NW_004517016.1 | Scaffold1943 | 116136                  | GG                              | AA                | 1946669147               |
| SNP_P3_162260_118912 | NW_004517016.1 | Scaffold1943 | 118912                  | AA                              | GG                | 1946669149               |
| SNP_P3_162262_121178 | NW_004517016.1 | Scaffold1943 | 121178                  | GG                              | AA                | 1946669151               |
| SNP_P3_162263_121193 | NW_004517016.1 | Scaffold1943 | 121193                  | CC                              | TT                | 1946669153               |
| SNP_P3_162264_121195 | NW_004517016.1 | Scaffold1943 | 121195                  | GG                              | TT                | 1946669155               |
| SNP_P3_162265_121198 | NW_004517016.1 | Scaffold1943 | 121198                  | TT                              | GG                | 1946669157               |
| SNP_P3_162266_121228 | NW_004517016.1 | Scaffold1943 | 121228                  | CC                              | AA                | 1946669159               |
| SNP_P3_162267_121231 | NW_004517016.1 | Scaffold1943 | 121231                  | TT                              | CC                | 1946669161               |
| SNP_P3_162269_121458 | NW_004517016.1 | Scaffold1943 | 121458                  | AA                              | GG                | 1946669163               |
| SNP_P3_162270_121482 | NW_004517016.1 | Scaffold1943 | 121482                  | TT                              | CC                | 1946669165               |
| SNP_P3_162271_121531 | NW_004517016.1 | Scaffold1943 | 121531                  | TT                              | CC                | 1946669167               |
| SNP_P3_162272_121587 | NW_004517016.1 | Scaffold1943 | 121587                  | AA                              | GG                | 1946669169               |
| SNP_P3_162273_121633 | NW_004517016.1 | Scaffold1943 | 121633                  | TT                              | CC                | 1946669171               |
| SNP_P3_162274_121642 | NW_004517016.1 | Scaffold1943 | 121642                  | GG                              | AA                | 1946669173               |
| SNP_P3_162275_121787 | NW_004517016.1 | Scaffold1943 | 121787                  | GG                              | TT                | 1946669175               |
| SNP_P3_162276_121792 | NW_004517016.1 | Scaffold1943 | 121792                  | AA                              | TT                | 1946669177               |
| SNP_P3_162277_123259 | NW_004517016.1 | Scaffold1943 | 123259                  | TT                              | GG                | 1946669179               |
| SNP_P3_162278_123361 | NW_004517016.1 | Scaffold1943 | 123361                  | AA                              | GG                | 1946669181               |
| SNP_P3_162279_123364 | NW_004517016.1 | Scaffold1943 | 123364                  | CC                              | AA                | 1946669183               |
| SNP_P3_162280_123439 | NW_004517016.1 | Scaffold1943 | 123439                  | CC                              | TT                | 1946669185               |
| SNP_P3_162281_123495 | NW_004517016.1 | Scaffold1943 | 123495                  | AA                              | GG                | 1946669187               |
| SNP_P3_162282_123496 | NW_004517016.1 | Scaffold1943 | 123496                  | GG                              | AA                | 1946669189               |
| SNP_P3_162283_123511 | NW_004517016.1 | Scaffold1943 | 123511                  | AA                              | GG                | 1946669191               |
| SNP_P3_162284_123524 | NW_004517016.1 | Scaffold1943 | 123524                  | TT                              | CC                | 1946669193               |
| SNP_P3_162285_123532 | NW_004517016.1 | Scaffold1943 | 123532                  | TT                              | AA                | 1946669196               |
| SNP_P3_162286_123535 | NW_004517016.1 | Scaffold1943 | 123535                  | AA                              | GG                | 1946669198               |
| SNP_P3_162287_123538 | NW_004517016.1 | Scaffold1943 | 123538                  | GG                              | AA                | 1946669200               |
| SNP_P3_162288_123577 | NW_004517016.1 | Scaffold1943 | 123577                  | AA                              | CC                | 1946669202               |
| SNP_P3_162289_123583 | NW_004517016.1 | Scaffold1943 | 123583                  | TT                              | GG                | 1946669204               |
| SNP_P3_162290_123752 | NW_004517016.1 | Scaffold1943 | 123752                  | AA                              | GG                | 1946669206               |
| SNP_P3_162291_123778 | NW_004517016.1 | Scaffold1943 | 123778                  | CC                              | TT                | 1946669208               |
| SNP_P3_162292_127048 | NW_004517016.1 | Scaffold1943 | 127048                  | GG                              | AA                | 1946669210               |
| SNP_P3_162293_127056 | NW_004517016.1 | Scaffold1943 | 127056                  | CC                              | TT                | 1946669212               |
| SNP_P3_162294_127385 | NW_004517016.1 | Scaffold1943 | 127385                  | CC                              | TT                | 1946669214               |
| SNP_P3_162295_127404 | NW_004517016.1 | Scaffold1943 | 127404                  | TT                              | CC                | 1946669216               |
| SNP_P3_162296_127508 | NW_004517016.1 | Scaffold1943 | 127508                  | CC                              | TT                | 1946669219               |
| SNP_P3_162297_127523 | NW_004517016.1 | Scaffold1943 | 127523                  | TT                              | CC                | 1946669221               |
| SNP_P3_162298_127541 | NW_004517016.1 | Scaffold1943 | 127541                  | CC                              | AA                | 1946669223               |

| SNPs IDs             | Chromosome IDs | Chromosomes  | Physical positions (bp) | CDC Frontier (Reference genome) | (Pusa 256 & HPNB) | NCBI SNPdb Accession IDs |
|----------------------|----------------|--------------|-------------------------|---------------------------------|-------------------|--------------------------|
| SNP_P3_162299_127556 | NW_004517016.1 | Scaffold1943 | 127556                  | TT                              | CC                | 1946669225               |
| SNP_P3_162300_127568 | NW_004517016.1 | Scaffold1943 | 127568                  | GG                              | AA                | 1946669227               |
| SNP_P3_162301_128136 | NW_004517016.1 | Scaffold1943 | 128136                  | TT                              | CC                | 1946669229               |
| SNP_P3_162302_132062 | NW_004517016.1 | Scaffold1943 | 132062                  | AA                              | GG                | 1946669231               |
| SNP_P3_162303_132236 | NW_004517016.1 | Scaffold1943 | 132236                  | GG                              | AA                | 1946669233               |
| SNP_P3_162304_134374 | NW_004517016.1 | Scaffold1943 | 134374                  | CC                              | TT                | 1946669235               |
| SNP_P3_162305_134579 | NW_004517016.1 | Scaffold1943 | 134579                  | TT                              | CC                | 1946669237               |
| SNP_P3_162306_151027 | NW_004517016.1 | Scaffold1943 | 151027                  | AA                              | TT                | 1946669239               |
| SNP_P3_162307_151402 | NW_004517016.1 | Scaffold1943 | 151402                  | AA                              | TT                | 1946669241               |
| SNP_P3_162308_153189 | NW_004517016.1 | Scaffold1943 | 153189                  | GG                              | CC                | 1946669243               |
| SNP_P3_162309_158652 | NW_004517016.1 | Scaffold1943 | 158652                  | GG                              | AA                | 1946669245               |
| SNP_P3_162310_163701 | NW_004517016.1 | Scaffold1943 | 163701                  | AA                              | GG                | 1946669248               |
| SNP_P3_162311_163876 | NW_004517016.1 | Scaffold1943 | 163876                  | TT                              | AA                | 1946669250               |
| SNP_P3_162312_171612 | NW_004517016.1 | Scaffold1943 | 171612                  | TT                              | CC                | 1946669252               |
| SNP_P3_162313_171758 | NW_004517016.1 | Scaffold1943 | 171758                  | GG                              | TT                | 1946669254               |
| SNP_P3_162315_171892 | NW_004517016.1 | Scaffold1943 | 171892                  | AA                              | GG                | 1946669256               |
| SNP_P3_162316_171930 | NW_004517016.1 | Scaffold1943 | 171930                  | GG                              | AA                | 1946669258               |
| SNP_P3_162317_171934 | NW_004517016.1 | Scaffold1943 | 171934                  | AA                              | GG                | 1946669260               |
| SNP_P3_162318_171946 | NW_004517016.1 | Scaffold1943 | 171946                  | AA                              | GG                | 1946669262               |
| SNP_P3_162319_171965 | NW_004517016.1 | Scaffold1943 | 171965                  | GG                              | AA                | 1946669264               |
| SNP_P3_162320_178027 | NW_004517016.1 | Scaffold1943 | 178027                  | AA                              | CC                | 1946669266               |
| SNP_P3_162321_179455 | NW_004517016.1 | Scaffold1943 | 179455                  | CC                              | TT                | 1946669268               |
| SNP_P3_162322_179569 | NW_004517016.1 | Scaffold1943 | 179569                  | CC                              | AA                | 1946669270               |
| SNP_P3_162323_179580 | NW_004517016.1 | Scaffold1943 | 179580                  | CC                              | AA                | 1946669272               |
| SNP_P3_162324_204611 | NW_004517016.1 | Scaffold1943 | 204611                  | GG                              | AA                | 1946669274               |
| SNP_P3_162325_223181 | NW_004517016.1 | Scaffold1943 | 223181                  | TT                              | AA                | 1946669276               |
| SNP_P3_162327_224079 | NW_004517016.1 | Scaffold1943 | 224079                  | TT                              | GG                | 1946669278               |
| SNP_P3_162328_233282 | NW_004517016.1 | Scaffold1943 | 233282                  | AA                              | GG                | 1946669281               |
| SNP_P3_162329_234895 | NW_004517016.1 | Scaffold1943 | 234895                  | GG                              | AA                | 1946669283               |
| SNP_P3_162330_236108 | NW_004517016.1 | Scaffold1943 | 236108                  | AA                              | GG                | 1946669285               |
| SNP_P3_162331_242525 | NW_004517016.1 | Scaffold1943 | 242525                  | CC                              | TT                | 1946669288               |
| SNP_P3_162333_254153 | NW_004517016.1 | Scaffold1943 | 254153                  | GG                              | AA                | 1946669290               |
| SNP_P3_162336_281222 | NW_004517016.1 | Scaffold1943 | 281222                  | CC                              | TT                | 1946669292               |
| SNP_P3_162337_281483 | NW_004517016.1 | Scaffold1943 | 281483                  | GG                              | AA                | 1946669294               |
| SNP_P3_162338_281550 | NW_004517016.1 | Scaffold1943 | 281550                  | AA                              | GG                | 1946669296               |
| SNP_P3_162339_281594 | NW_004517016.1 | Scaffold1943 | 281594                  | AA                              | GG                | 1946669299               |
| SNP_P3_162340_281629 | NW_004517016.1 | Scaffold1943 | 281629                  | GG                              | TT                | 1946669301               |
| SNP_P3_162341_281684 | NW_004517016.1 | Scaffold1943 | 281684                  | GG                              | AA                | 1946669303               |
| SNP_P3_162342_281687 | NW_004517016.1 | Scaffold1943 | 281687                  | TT                              | GG                | 1946669305               |
| SNP_P3_162343_281925 | NW_004517016.1 | Scaffold1943 | 281925                  | GG                              | AA                | 1946669308               |
| SNP_P3_162345_282676 | NW_004517016.1 | Scaffold1943 | 282676                  | AA                              | GG                | 1946669310               |
| SNP_P3_162346_299675 | NW_004517016.1 | Scaffold1943 | 299675                  | TT                              | GG                | 1946669312               |

| SNPs IDs             | Chromosome IDs | Chromosomes  | Physical positions (bp) | CDC Frontier (Reference genome) | (Pusa 256 & HPNB) | NCBI SNPdb Accession IDs |
|----------------------|----------------|--------------|-------------------------|---------------------------------|-------------------|--------------------------|
| SNP_P3_162347_300486 | NW_004517016.1 | Scaffold1943 | 300486                  | AA                              | GG                | 1946669314               |
| SNP_P3_162348_307368 | NW_004517016.1 | Scaffold1943 | 307368                  | GG                              | AA                | 1946669316               |
| SNP_P3_162349_318967 | NW_004517016.1 | Scaffold1943 | 318967                  | GG                              | AA                | 1946669318               |
| SNP_P3_162352_359575 | NW_004517016.1 | Scaffold1943 | 359575                  | CC                              | AA                | 1946669320               |
| SNP_P3_162353_368065 | NW_004517016.1 | Scaffold1943 | 368065                  | TT                              | CC                | 1946669322               |
| SNP_P3_162354_372342 | NW_004517016.1 | Scaffold1943 | 372342                  | CC                              | TT                | 1946669325               |
| SNP_P3_162355_376590 | NW_004517016.1 | Scaffold1943 | 376590                  | AA                              | TT                | 1946669327               |
| SNP_P3_162356_377184 | NW_004517016.1 | Scaffold1943 | 377184                  | TT                              | CC                | 1946669329               |
| SNP_P3_162357_381766 | NW_004517016.1 | Scaffold1943 | 381766                  | TT                              | CC                | 1946669331               |
| SNP_P3_162359_383504 | NW_004517016.1 | Scaffold1943 | 383504                  | GG                              | CC                | 1946669333               |
| SNP_P3_162360_390344 | NW_004517016.1 | Scaffold1943 | 390344                  | GG                              | AA                | 1946669337               |
| SNP_P3_162361_390657 | NW_004517016.1 | Scaffold1943 | 390657                  | GG                              | AA                | 1946669339               |
| SNP_P3_162362_392407 | NW_004517016.1 | Scaffold1943 | 392407                  | GG                              | AA                | 1946669341               |
| SNP_P3_162363_392555 | NW_004517016.1 | Scaffold1943 | 392555                  | AA                              | GG                | 1946669344               |
| SNP_P3_162364_392578 | NW_004517016.1 | Scaffold1943 | 392578                  | TT                              | CC                | 1946669346               |
| SNP_P3_162365_392606 | NW_004517016.1 | Scaffold1943 | 392606                  | AA                              | GG                | 1946669348               |
| SNP_P3_162366_392609 | NW_004517016.1 | Scaffold1943 | 392609                  | TT                              | AA                | 1946669350               |
| SNP_P3_162367_392932 | NW_004517016.1 | Scaffold1943 | 392932                  | TT                              | GG                | 1946669352               |
| SNP_P3_162368_393161 | NW_004517016.1 | Scaffold1943 | 393161                  | TT                              | GG                | 1946669355               |
| SNP_P3_162369_393163 | NW_004517016.1 | Scaffold1943 | 393163                  | TT                              | AA                | 1946669356               |
| SNP_P3_162370_393343 | NW_004517016.1 | Scaffold1943 | 393343                  | GG                              | AA                | 1946669357               |
| SNP_P3_162371_393359 | NW_004517016.1 | Scaffold1943 | 393359                  | CC                              | TT                | 1946669358               |
| SNP_P3_162373_394099 | NW_004517016.1 | Scaffold1943 | 394099                  | AA                              | CC                | 1946669359               |
| SNP_P3_162374_394196 | NW_004517016.1 | Scaffold1943 | 394196                  | TT                              | CC                | 1946669360               |
| SNP_P3_162375_394299 | NW_004517016.1 | Scaffold1943 | 394299                  | CC                              | TT                | 1946669361               |
| SNP_P3_162376_394392 | NW_004517016.1 | Scaffold1943 | 394392                  | CC                              | TT                | 1946669362               |
| SNP_P3_162377_394450 | NW_004517016.1 | Scaffold1943 | 394450                  | TT                              | AA                | 1946669363               |
| SNP_P3_162378_394748 | NW_004517016.1 | Scaffold1943 | 394748                  | CC                              | AA                | 1946669364               |
| SNP_P3_162379_394887 | NW_004517016.1 | Scaffold1943 | 394887                  | AA                              | TT                | 1946669365               |
| SNP_P3_162380_395066 | NW_004517016.1 | Scaffold1943 | 395066                  | AA                              | GG                | 1946669366               |
| SNP_P3_162381_395254 | NW_004517016.1 | Scaffold1943 | 395254                  | TT                              | CC                | 1946669367               |
| SNP_P3_162382_395385 | NW_004517016.1 | Scaffold1943 | 395385                  | AA                              | TT                | 1946669368               |
| SNP_P3_162383_395401 | NW_004517016.1 | Scaffold1943 | 395401                  | AA                              | GG                | 1946669369               |
| SNP_P3_162384_395493 | NW_004517016.1 | Scaffold1943 | 395493                  | TT                              | CC                | 1946669370               |
| SNP_P3_162385_395531 | NW_004517016.1 | Scaffold1943 | 395531                  | AA                              | TT                | 1946669371               |
| SNP_P3_162386_395540 | NW_004517016.1 | Scaffold1943 | 395540                  | GG                              | AA                | 1946669372               |
| SNP_P3_162387_395627 | NW_004517016.1 | Scaffold1943 | 395627                  | GG                              | AA                | 1946669373               |
| SNP_P3_162388_395654 | NW_004517016.1 | Scaffold1943 | 395654                  | CC                              | TT                | 1946669374               |
| SNP_P3_162389_396042 | NW_004517016.1 | Scaffold1943 | 396042                  | AA                              | CC                | 1946669375               |
| SNP_P3_162390_396043 | NW_004517016.1 | Scaffold1943 | 396043                  | CC                              | AA                | 1946669376               |
| SNP_P3_162391_1901   | NW_004517017.1 | Scaffold1944 | 1901                    | TT                              | CC                | 1946669377               |
| SNP_P3_162393_841    | NW_004517018.1 | Scaffold1945 | 841                     | AA                              | GG                | 1946669378               |

| SNPs IDs             | Chromosome IDs | Chromosomes  | Physical positions (bp) | CDC Frontier (Reference genome) | (Pusa 256 & HPNB) | NCBI SNPdb Accession IDs |
|----------------------|----------------|--------------|-------------------------|---------------------------------|-------------------|--------------------------|
| SNP_P3_162395_4384   | NW_004517018.1 | Scaffold1945 | 4384                    | CC                              | AA                | 1946669379               |
| SNP_P3_162397_6095   | NW_004517018.1 | Scaffold1945 | 6095                    | AA                              | GG                | 1946669380               |
| SNP_P3_162398_11645  | NW_004517018.1 | Scaffold1945 | 11645                   | CC                              | TT                | 1946669381               |
| SNP_P3_162399_11719  | NW_004517018.1 | Scaffold1945 | 11719                   | CC                              | TT                | 1946669383               |
| SNP_P3_162400_11725  | NW_004517018.1 | Scaffold1945 | 11725                   | AA                              | GG                | 1946669385               |
| SNP_P3_162401_11900  | NW_004517018.1 | Scaffold1945 | 11900                   | GG                              | AA                | 1946669387               |
| SNP_P3_162402_11915  | NW_004517018.1 | Scaffold1945 | 11915                   | AA                              | GG                | 1946669389               |
| SNP_P3_162403_11928  | NW_004517018.1 | Scaffold1945 | 11928                   | TT                              | CC                | 1946669391               |
| SNP_P3_162404_12029  | NW_004517018.1 | Scaffold1945 | 12029                   | AA                              | GG                | 1946669393               |
| SNP_P3_162406_80980  | NW_004517018.1 | Scaffold1945 | 80980                   | CC                              | AA                | 1946669395               |
| SNP_P3_162407_85314  | NW_004517018.1 | Scaffold1945 | 85314                   | TT                              | CC                | 1946669397               |
| SNP_P3_162408_95737  | NW_004517018.1 | Scaffold1945 | 95737                   | CC                              | TT                | 1946669399               |
| SNP_P3_162409_96529  | NW_004517018.1 | Scaffold1945 | 96529                   | TT                              | CC                | 1946669401               |
| SNP_P3_162410_96532  | NW_004517018.1 | Scaffold1945 | 96532                   | GG                              | AA                | 1946669403               |
| SNP_P3_162411_97858  | NW_004517018.1 | Scaffold1945 | 97858                   | GG                              | AA                | 1946669405               |
| SNP_P3_162412_105122 | NW_004517018.1 | Scaffold1945 | 105122                  | AA                              | TT                | 1946669407               |
| SNP_P3_162413_128439 | NW_004517018.1 | Scaffold1945 | 128439                  | AA                              | TT                | 1946669408               |
| SNP_P3_162414_128458 | NW_004517018.1 | Scaffold1945 | 128458                  | AA                              | GG                | 1946669410               |
| SNP_P3_162415_128801 | NW_004517018.1 | Scaffold1945 | 128801                  | CC                              | TT                | 1946669412               |
| SNP_P3_162416_128959 | NW_004517018.1 | Scaffold1945 | 128959                  | CC                              | TT                | 1946669414               |
| SNP_P3_162417_129588 | NW_004517018.1 | Scaffold1945 | 129588                  | GG                              | AA                | 1946669416               |
| SNP_P3_162418_129650 | NW_004517018.1 | Scaffold1945 | 129650                  | CC                              | AA                | 1946669418               |
| SNP_P3_162419_129657 | NW_004517018.1 | Scaffold1945 | 129657                  | CC                              | TT                | 1946669420               |
| SNP_P3_162420_135861 | NW_004517018.1 | Scaffold1945 | 135861                  | AA                              | GG                | 1946669422               |
| SNP_P3_162421_138213 | NW_004517018.1 | Scaffold1945 | 138213                  | GG                              | AA                | 1946669424               |
| SNP_P3_162422_144312 | NW_004517018.1 | Scaffold1945 | 144312                  | CC                              | AA                | 1946669426               |
| SNP_P3_162423_159286 | NW_004517018.1 | Scaffold1945 | 159286                  | TT                              | CC                | 1946669428               |
| SNP_P3_162424_163735 | NW_004517018.1 | Scaffold1945 | 163735                  | AA                              | GG                | 1946669430               |
| SNP_P3_162425_164109 | NW_004517018.1 | Scaffold1945 | 164109                  | AA                              | CC                | 1946669432               |
| SNP_P3_162426_166917 | NW_004517018.1 | Scaffold1945 | 166917                  | AA                              | TT                | 1946669434               |
| SNP_P3_162427_166953 | NW_004517018.1 | Scaffold1945 | 166953                  | CC                              | TT                | 1946669436               |
| SNP_P3_162429_1314   | NW_004517019.1 | Scaffold1946 | 1314                    | TT                              | AA                | 1946669438               |
| SNP_P3_162430_1400   | NW_004517019.1 | Scaffold1946 | 1400                    | TT                              | CC                | 1946669440               |
| SNP_P3_162431_1649   | NW_004517019.1 | Scaffold1946 | 1649                    | TT                              | CC                | 1946669442               |
| SNP_P3_162432_5513   | NW_004517019.1 | Scaffold1946 | 5513                    | CC                              | TT                | 1946669444               |
| SNP_P3_162433_6511   | NW_004517019.1 | Scaffold1946 | 6511                    | AA                              | TT                | 1946669446               |
| SNP_P3_162434_6550   | NW_004517019.1 | Scaffold1946 | 6550                    | GG                              | TT                | 1946669449               |
| SNP_P3_162435_9783   | NW_004517019.1 | Scaffold1946 | 9783                    | AA                              | TT                | 1946669451               |
| SNP_P3_162436_15447  | NW_004517019.1 | Scaffold1946 | 15447                   | CC                              | GG                | 1946669453               |
| SNP_P3_162437_15454  | NW_004517019.1 | Scaffold1946 | 15454                   | AA                              | GG                | 1946669455               |
| SNP_P3_162438_15464  | NW_004517019.1 | Scaffold1946 | 15464                   | AA                              | GG                | 1946669457               |
| SNP_P3_162439_15479  | NW_004517019.1 | Scaffold1946 | 15479                   | AA                              | CC                | 1946669459               |

| SNPs IDs            | Chromosome IDs | Chromosomes  | Physical positions (bp) | CDC Frontier (Reference genome) | (Pusa 256 & HPNB) | NCBI SNPdb Accession IDs |
|---------------------|----------------|--------------|-------------------------|---------------------------------|-------------------|--------------------------|
| SNP_P3_162440_20239 | NW_004517019.1 | Scaffold1946 | 20239                   | TT                              | CC                | 1946669461               |
| SNP_P3_162442_28561 | NW_004517019.1 | Scaffold1946 | 28561                   | AA                              | CC                | 1946669463               |
| SNP_P3_162443_28877 | NW_004517019.1 | Scaffold1946 | 28877                   | AA                              | GG                | 1946669466               |
| SNP_P3_162444_28928 | NW_004517019.1 | Scaffold1946 | 28928                   | CC                              | GG                | 1946669468               |
| SNP_P3_162445_33798 | NW_004517019.1 | Scaffold1946 | 33798                   | GG                              | AA                | 1946669470               |
| SNP_P3_162447_43802 | NW_004517019.1 | Scaffold1946 | 43802                   | AA                              | GG                | 1946669472               |
| SNP_P3_162448_74131 | NW_004517019.1 | Scaffold1946 | 74131                   | TT                              | CC                | 1946669474               |
| SNP_P3_162449_75019 | NW_004517019.1 | Scaffold1946 | 75019                   | AA                              | GG                | 1946669476               |
| SNP_P3_162450_75028 | NW_004517019.1 | Scaffold1946 | 75028                   | AA                              | CC                | 1946669478               |
| SNP_P3_162451_1465  | NW_004517021.1 | Scaffold1949 | 1465                    | TT                              | AA                | 1946669480               |
| SNP_P3_162452_1466  | NW_004517021.1 | Scaffold1949 | 1466                    | AA                              | TT                | 1946669482               |
| SNP_P3_162453_2027  | NW_004517021.1 | Scaffold1949 | 2027                    | TT                              | AA                | 1946669484               |
| SNP_P3_162454_5999  | NW_004517021.1 | Scaffold1949 | 5999                    | TT                              | CC                | 1946669487               |
| SNP_P3_162455_6002  | NW_004517021.1 | Scaffold1949 | 6002                    | AA                              | GG                | 1946669489               |
| SNP_P3_162457_3162  | NW_004517022.1 | Scaffold1950 | 3162                    | TT                              | CC                | 1946669491               |
| SNP_P3_162458_3191  | NW_004517022.1 | Scaffold1950 | 3191                    | TT                              | GG                | 1946669493               |
| SNP_P3_162459_3210  | NW_004517022.1 | Scaffold1950 | 3210                    | CC                              | TT                | 1946669495               |
| SNP_P3_162460_21367 | NW_004517022.1 | Scaffold1950 | 21367                   | GG                              | TT                | 1946669497               |
| SNP_P3_162461_22388 | NW_004517022.1 | Scaffold1950 | 22388                   | TT                              | AA                | 1946669499               |
| SNP_P3_162462_22393 | NW_004517022.1 | Scaffold1950 | 22393                   | AA                              | TT                | 1946669501               |
| SNP_P3_162463_22436 | NW_004517022.1 | Scaffold1950 | 22436                   | GG                              | TT                | 1946669503               |
| SNP_P3_162464_22437 | NW_004517022.1 | Scaffold1950 | 22437                   | AA                              | CC                | 1946669505               |
| SNP_P3_162465_22438 | NW_004517022.1 | Scaffold1950 | 22438                   | GG                              | AA                | 1946669507               |
| SNP_P3_162466_22498 | NW_004517022.1 | Scaffold1950 | 22498                   | CC                              | AA                | 1946669509               |
| SNP_P3_162467_22502 | NW_004517022.1 | Scaffold1950 | 22502                   | CC                              | AA                | 1946669511               |
| SNP_P3_162468_4685  | NW_004517024.1 | Scaffold1952 | 4685                    | CC                              | GG                | 1946669513               |
| SNP_P3_162469_4721  | NW_004517024.1 | Scaffold1952 | 4721                    | CC                              | AA                | 1946669515               |
| SNP_P3_162470_5752  | NW_004517024.1 | Scaffold1952 | 5752                    | CC                              | TT                | 1946669517               |
| SNP_P3_162471_672   | NW_004517026.1 | Scaffold1954 | 672                     | TT                              | AA                | 1946669519               |
| SNP_P3_162472_784   | NW_004517026.1 | Scaffold1954 | 784                     | CC                              | GG                | 1946669521               |
| SNP_P3_162473_799   | NW_004517026.1 | Scaffold1954 | 799                     | CC                              | TT                | 1946669523               |
| SNP_P3_162474_863   | NW_004517026.1 | Scaffold1954 | 863                     | CC                              | TT                | 1946669526               |
| SNP_P3_162475_908   | NW_004517026.1 | Scaffold1954 | 908                     | GG                              | AA                | 1946669528               |
| SNP_P3_162476_931   | NW_004517026.1 | Scaffold1954 | 931                     | AA                              | CC                | 1946669530               |
| SNP_P3_162478_1062  | NW_004517026.1 | Scaffold1954 | 1062                    | TT                              | CC                | 1946669532               |
| SNP_P3_162479_1155  | NW_004517026.1 | Scaffold1954 | 1155                    | TT                              | CC                | 1946669534               |
| SNP_P3_162480_1164  | NW_004517026.1 | Scaffold1954 | 1164                    | AA                              | TT                | 1946669536               |
| SNP_P3_162481_1202  | NW_004517026.1 | Scaffold1954 | 1202                    | TT                              | CC                | 1946669539               |
| SNP_P3_162482_1293  | NW_004517026.1 | Scaffold1954 | 1293                    | AA                              | TT                | 1946669541               |
| SNP_P3_162483_1351  | NW_004517026.1 | Scaffold1954 | 1351                    | TT                              | GG                | 1946669543               |
| SNP_P3_162484_1442  | NW_004517026.1 | Scaffold1954 | 1442                    | TT                              | AA                | 1946669545               |
| SNP_P3_162485_1448  | NW_004517026.1 | Scaffold1954 | 1448                    | TT                              | AA                | 1946669547               |



| SNPs IDs            | Chromosome IDs | Chromosomes  | Physical positions (bp) | CDC Frontier (Reference genome) | (Pusa 256 & HPNB) | NCBI SNPdb Accession IDs |
|---------------------|----------------|--------------|-------------------------|---------------------------------|-------------------|--------------------------|
| SNP_P3_162486_1461  | NW_004517026.1 | Scaffold1954 | 1461                    | TT                              | CC                | 1946669550               |
| SNP_P3_162487_1503  | NW_004517026.1 | Scaffold1954 | 1503                    | AA                              | TT                | 1946669552               |
| SNP_P3_162488_1524  | NW_004517026.1 | Scaffold1954 | 1524                    | AA                              | GG                | 1946669554               |
| SNP_P3_162489_1525  | NW_004517026.1 | Scaffold1954 | 1525                    | CC                              | TT                | 1946669556               |
| SNP_P3_162490_1581  | NW_004517026.1 | Scaffold1954 | 1581                    | CC                              | TT                | 1946669558               |
| SNP_P3_162491_1760  | NW_004517026.1 | Scaffold1954 | 1760                    | AA                              | GG                | 1946669560               |
| SNP_P3_162492_2307  | NW_004517026.1 | Scaffold1954 | 2307                    | AA                              | GG                | 1946669563               |
| SNP_P3_162493_2332  | NW_004517026.1 | Scaffold1954 | 2332                    | GG                              | AA                | 1946669565               |
| SNP_P3_162495_2544  | NW_004517026.1 | Scaffold1954 | 2544                    | AA                              | GG                | 1946669567               |
| SNP_P3_162496_2569  | NW_004517026.1 | Scaffold1954 | 2569                    | TT                              | AA                | 1946669569               |
| SNP_P3_162497_2581  | NW_004517026.1 | Scaffold1954 | 2581                    | AA                              | CC                | 1946669571               |
| SNP_P3_162498_4692  | NW_004517026.1 | Scaffold1954 | 4692                    | GG                              | AA                | 1946669573               |
| SNP_P3_162499_4837  | NW_004517026.1 | Scaffold1954 | 4837                    | TT                              | AA                | 1946669575               |
| SNP_P3_162500_4852  | NW_004517026.1 | Scaffold1954 | 4852                    | TT                              | CC                | 1946669577               |
| SNP_P3_162501_4860  | NW_004517026.1 | Scaffold1954 | 4860                    | GG                              | TT                | 1946669579               |
| SNP_P3_162502_4879  | NW_004517026.1 | Scaffold1954 | 4879                    | AA                              | GG                | 1946669581               |
| SNP_P3_162503_4933  | NW_004517026.1 | Scaffold1954 | 4933                    | CC                              | TT                | 1946669583               |
| SNP_P3_162504_4974  | NW_004517026.1 | Scaffold1954 | 4974                    | CC                              | TT                | 1946669585               |
| SNP_P3_162505_5093  | NW_004517026.1 | Scaffold1954 | 5093                    | GG                              | AA                | 1946669587               |
| SNP_P3_162506_5150  | NW_004517026.1 | Scaffold1954 | 5150                    | GG                              | TT                | 1946669589               |
| SNP_P3_162507_9910  | NW_004517028.1 | Scaffold1956 | 9910                    | GG                              | AA                | 1946669591               |
| SNP_P3_162508_9935  | NW_004517028.1 | Scaffold1956 | 9935                    | AA                              | GG                | 1946669593               |
| SNP_P3_162509_9976  | NW_004517028.1 | Scaffold1956 | 9976                    | TT                              | GG                | 1946669595               |
| SNP_P3_162510_10021 | NW_004517028.1 | Scaffold1956 | 10021                   | GG                              | TT                | 1946669597               |
| SNP_P3_162511_10129 | NW_004517028.1 | Scaffold1956 | 10129                   | AA                              | GG                | 1946669599               |
| SNP_P3_162512_10911 | NW_004517028.1 | Scaffold1956 | 10911                   | CC                              | TT                | 1946669601               |
| SNP_P3_162513_11025 | NW_004517028.1 | Scaffold1956 | 11025                   | TT                              | GG                | 1946669603               |
| SNP_P3_162514_14129 | NW_004517028.1 | Scaffold1956 | 14129                   | TT                              | GG                | 1946669606               |
| SNP_P3_162515_14186 | NW_004517028.1 | Scaffold1956 | 14186                   | TT                              | AA                | 1946669613               |
| SNP_P3_162516_14271 | NW_004517028.1 | Scaffold1956 | 14271                   | TT                              | GG                | 1946669615               |
| SNP_P3_162517_14276 | NW_004517028.1 | Scaffold1956 | 14276                   | AA                              | GG                | 1946669617               |
| SNP_P3_162518_14296 | NW_004517028.1 | Scaffold1956 | 14296                   | GG                              | AA                | 1946669619               |
| SNP_P3_162519_14305 | NW_004517028.1 | Scaffold1956 | 14305                   | AA                              | GG                | 1946669621               |
| SNP_P3_162520_15845 | NW_004517028.1 | Scaffold1956 | 15845                   | AA                              | GG                | 1946669623               |
| SNP_P3_162521_15974 | NW_004517028.1 | Scaffold1956 | 15974                   | AA                              | GG                | 1946669625               |
| SNP_P3_162522_15982 | NW_004517028.1 | Scaffold1956 | 15982                   | GG                              | CC                | 1946669627               |
| SNP_P3_162523_16500 | NW_004517028.1 | Scaffold1956 | 16500                   | CC                              | TT                | 1946669629               |
| SNP_P3_162524_16866 | NW_004517028.1 | Scaffold1956 | 16866                   | GG                              | CC                | 1946669637               |
| SNP_P3_162525_17018 | NW_004517028.1 | Scaffold1956 | 17018                   | TT                              | CC                | 1946669639               |
| SNP_P3_162526_17064 | NW_004517028.1 | Scaffold1956 | 17064                   | CC                              | TT                | 1946669641               |
| SNP_P3_162527_17112 | NW_004517028.1 | Scaffold1956 | 17112                   | AA                              | TT                | 1946669643               |
| SNP_P3_162528_17605 | NW_004517028.1 | Scaffold1956 | 17605                   | TT                              | GG                | 1946669645               |

| SNPs IDs            | Chromosome IDs | Chromosomes  | Physical positions (bp) | CDC Frontier (Reference genome) | (Pusa 256 & HPNB) | NCBI SNPdb Accession IDs |
|---------------------|----------------|--------------|-------------------------|---------------------------------|-------------------|--------------------------|
| SNP_P3_162529_17995 | NW_004517028.1 | Scaffold1956 | 17995                   | AA                              | TT                | 1946669647               |
| SNP_P3_162530_18784 | NW_004517028.1 | Scaffold1956 | 18784                   | AA                              | CC                | 1946669649               |
| SNP_P3_162531_18958 | NW_004517028.1 | Scaffold1956 | 18958                   | GG                              | AA                | 1946669651               |
| SNP_P3_162532_18990 | NW_004517028.1 | Scaffold1956 | 18990                   | CC                              | TT                | 1946669653               |
| SNP_P3_162533_22730 | NW_004517028.1 | Scaffold1956 | 22730                   | GG                              | AA                | 1946669655               |
| SNP_P3_162534_27556 | NW_004517028.1 | Scaffold1956 | 27556                   | TT                              | GG                | 1946669657               |
| SNP_P3_162535_27557 | NW_004517028.1 | Scaffold1956 | 27557                   | GG                              | TT                | 1946669659               |
| SNP_P3_162536_27681 | NW_004517028.1 | Scaffold1956 | 27681                   | TT                              | AA                | 1946669661               |
| SNP_P3_162537_27791 | NW_004517028.1 | Scaffold1956 | 27791                   | AA                              | GG                | 1946669663               |
| SNP_P3_162538_27974 | NW_004517028.1 | Scaffold1956 | 27974                   | GG                              | AA                | 1946669665               |
| SNP_P3_162539_28043 | NW_004517028.1 | Scaffold1956 | 28043                   | TT                              | GG                | 1946669667               |
| SNP_P3_162541_30833 | NW_004517028.1 | Scaffold1956 | 30833                   | AA                              | CC                | 1946669669               |
| SNP_P3_162542_30858 | NW_004517028.1 | Scaffold1956 | 30858                   | TT                              | GG                | 1946669671               |
| SNP_P3_162544_31492 | NW_004517028.1 | Scaffold1956 | 31492                   | TT                              | AA                | 1946669673               |
| SNP_P3_162545_34728 | NW_004517028.1 | Scaffold1956 | 34728                   | AA                              | GG                | 1946669675               |
| SNP_P3_162546_40746 | NW_004517028.1 | Scaffold1956 | 40746                   | GG                              | AA                | 1946669677               |
| SNP_P3_162547_46654 | NW_004517028.1 | Scaffold1956 | 46654                   | TT                              | CC                | 1946669679               |
| SNP_P3_162548_52596 | NW_004517028.1 | Scaffold1956 | 52596                   | TT                              | AA                | 1946669682               |
| SNP_P3_162549_52702 | NW_004517028.1 | Scaffold1956 | 52702                   | AA                              | TT                | 1946669685               |
| SNP_P3_162550_53818 | NW_004517028.1 | Scaffold1956 | 53818                   | TT                              | GG                | 1946669687               |
| SNP_P3_162551_54171 | NW_004517028.1 | Scaffold1956 | 54171                   | AA                              | TT                | 1946669689               |
| SNP_P3_162552_63443 | NW_004517028.1 | Scaffold1956 | 63443                   | TT                              | CC                | 1946669691               |
| SNP_P3_162553_63538 | NW_004517028.1 | Scaffold1956 | 63538                   | GG                              | AA                | 1946669693               |
| SNP_P3_162554_63554 | NW_004517028.1 | Scaffold1956 | 63554                   | CC                              | TT                | 1946669695               |
| SNP_P3_162556_72186 | NW_004517028.1 | Scaffold1956 | 72186                   | AA                              | TT                | 1946669697               |
| SNP_P3_162557_72190 | NW_004517028.1 | Scaffold1956 | 72190                   | TT                              | CC                | 1946669699               |
| SNP_P3_162558_72222 | NW_004517028.1 | Scaffold1956 | 72222                   | AA                              | GG                | 1946669701               |
| SNP_P3_162559_72491 | NW_004517028.1 | Scaffold1956 | 72491                   | TT                              | GG                | 1946669703               |
| SNP_P3_162560_72497 | NW_004517028.1 | Scaffold1956 | 72497                   | AA                              | GG                | 1946669706               |
| SNP_P3_162561_72498 | NW_004517028.1 | Scaffold1956 | 72498                   | GG                              | AA                | 1946669708               |
| SNP_P3_162562_72517 | NW_004517028.1 | Scaffold1956 | 72517                   | TT                              | AA                | 1946669710               |
| SNP_P3_162563_72526 | NW_004517028.1 | Scaffold1956 | 72526                   | GG                              | TT                | 1946669712               |
| SNP_P3_162564_72593 | NW_004517028.1 | Scaffold1956 | 72593                   | AA                              | CC                | 1946669714               |
| SNP_P3_162565_72617 | NW_004517028.1 | Scaffold1956 | 72617                   | AA                              | GG                | 1946669716               |
| SNP_P3_162566_85717 | NW_004517028.1 | Scaffold1956 | 85717                   | CC                              | TT                | 1946669718               |
| SNP_P3_162567_85880 | NW_004517028.1 | Scaffold1956 | 85880                   | AA                              | TT                | 1946669721               |
| SNP_P3_162569_86053 | NW_004517028.1 | Scaffold1956 | 86053                   | AA                              | CC                | 1946669723               |
| SNP_P3_162570_86154 | NW_004517028.1 | Scaffold1956 | 86154                   | TT                              | CC                | 1946669725               |
| SNP_P3_162571_86193 | NW_004517028.1 | Scaffold1956 | 86193                   | TT                              | GG                | 1946669727               |
| SNP_P3_162572_86200 | NW_004517028.1 | Scaffold1956 | 86200                   | CC                              | AA                | 1946669729               |
| SNP_P3_162573_86227 | NW_004517028.1 | Scaffold1956 | 86227                   | GG                              | AA                | 1946669731               |
| SNP_P3_162574_86241 | NW_004517028.1 | Scaffold1956 | 86241                   | AA                              | GG                | 1946669734               |

| SNPs IDs             | Chromosome IDs | Chromosomes  | Physical positions (bp) | CDC Frontier (Reference genome) | (Pusa 256 & HPNB) | NCBI SNPdb Accession IDs |
|----------------------|----------------|--------------|-------------------------|---------------------------------|-------------------|--------------------------|
| SNP_P3_162575_88025  | NW_004517028.1 | Scaffold1956 | 88025                   | GG                              | AA                | 1946669736               |
| SNP_P3_162576_88040  | NW_004517028.1 | Scaffold1956 | 88040                   | AA                              | CC                | 1946669738               |
| SNP_P3_162577_88263  | NW_004517028.1 | Scaffold1956 | 88263                   | GG                              | TT                | 1946669740               |
| SNP_P3_162578_88432  | NW_004517028.1 | Scaffold1956 | 88432                   | AA                              | GG                | 1946669742               |
| SNP_P3_162579_88531  | NW_004517028.1 | Scaffold1956 | 88531                   | CC                              | AA                | 1946669744               |
| SNP_P3_162580_93193  | NW_004517028.1 | Scaffold1956 | 93193                   | AA                              | GG                | 1946669746               |
| SNP_P3_162581_93295  | NW_004517028.1 | Scaffold1956 | 93295                   | AA                              | GG                | 1946669748               |
| SNP_P3_162582_93403  | NW_004517028.1 | Scaffold1956 | 93403                   | TT                              | CC                | 1946669750               |
| SNP_P3_162583_93497  | NW_004517028.1 | Scaffold1956 | 93497                   | GG                              | AA                | 1946669752               |
| SNP_P3_162584_93498  | NW_004517028.1 | Scaffold1956 | 93498                   | GG                              | CC                | 1946669754               |
| SNP_P3_162585_93539  | NW_004517028.1 | Scaffold1956 | 93539                   | AA                              | GG                | 1946669758               |
| SNP_P3_162586_93685  | NW_004517028.1 | Scaffold1956 | 93685                   | GG                              | TT                | 1946669760               |
| SNP_P3_162587_96638  | NW_004517028.1 | Scaffold1956 | 96638                   | TT                              | AA                | 1946669762               |
| SNP_P3_162588_96881  | NW_004517028.1 | Scaffold1956 | 96881                   | AA                              | GG                | 1946669764               |
| SNP_P3_162589_96918  | NW_004517028.1 | Scaffold1956 | 96918                   | GG                              | AA                | 1946669766               |
| SNP_P3_162590_97227  | NW_004517028.1 | Scaffold1956 | 97227                   | TT                              | GG                | 1946669769               |
| SNP_P3_162591_119806 | NW_004517028.1 | Scaffold1956 | 119806                  | CC                              | TT                | 1946669771               |
| SNP_P3_162592_119854 | NW_004517028.1 | Scaffold1956 | 119854                  | GG                              | CC                | 1946669773               |
| SNP_P3_162593_120035 | NW_004517028.1 | Scaffold1956 | 120035                  | CC                              | GG                | 1946669775               |
| SNP_P3_162594_120038 | NW_004517028.1 | Scaffold1956 | 120038                  | CC                              | TT                | 1946669777               |
| SNP_P3_162595_134890 | NW_004517028.1 | Scaffold1956 | 134890                  | CC                              | TT                | 1946669779               |
| SNP_P3_162596_135136 | NW_004517028.1 | Scaffold1956 | 135136                  | GG                              | AA                | 1946669781               |
| SNP_P3_162597_135212 | NW_004517028.1 | Scaffold1956 | 135212                  | CC                              | GG                | 1946669783               |
| SNP_P3_162598_18964  | NW_004517029.1 | Scaffold1959 | 18964                   | CC                              | TT                | 1946669785               |
| SNP_P3_162599_19319  | NW_004517029.1 | Scaffold1959 | 19319                   | TT                              | CC                | 1946669787               |
| SNP_P3_162600_32537  | NW_004517029.1 | Scaffold1959 | 32537                   | TT                              | GG                | 1946669789               |
| SNP_P3_162601_32620  | NW_004517029.1 | Scaffold1959 | 32620                   | GG                              | CC                | 1946669791               |
| SNP_P3_162602_32628  | NW_004517029.1 | Scaffold1959 | 32628                   | GG                              | TT                | 1946669793               |
| SNP_P3_162603_33312  | NW_004517029.1 | Scaffold1959 | 33312                   | GG                              | AA                | 1946669796               |
| SNP_P3_162604_33453  | NW_004517029.1 | Scaffold1959 | 33453                   | GG                              | AA                | 1946669798               |
| SNP_P3_162605_33467  | NW_004517029.1 | Scaffold1959 | 33467                   | AA                              | GG                | 1946669800               |
| SNP_P3_162606_44984  | NW_004517029.1 | Scaffold1959 | 44984                   | GG                              | AA                | 1946669802               |
| SNP_P3_162607_45265  | NW_004517029.1 | Scaffold1959 | 45265                   | AA                              | TT                | 1946669804               |
| SNP_P3_162608_45333  | NW_004517029.1 | Scaffold1959 | 45333                   | CC                              | TT                | 1946669806               |
| SNP_P3_162609_45433  | NW_004517029.1 | Scaffold1959 | 45433                   | CC                              | TT                | 1946669808               |
| SNP_P3_162610_45482  | NW_004517029.1 | Scaffold1959 | 45482                   | CC                              | TT                | 1946669810               |
| SNP_P3_162611_45538  | NW_004517029.1 | Scaffold1959 | 45538                   | CC                              | TT                | 1946669812               |
| SNP_P3_162612_45572  | NW_004517029.1 | Scaffold1959 | 45572                   | AA                              | GG                | 1946669814               |
| SNP_P3_162613_46569  | NW_004517029.1 | Scaffold1959 | 46569                   | AA                              | GG                | 1946669816               |
| SNP_P3_162614_46647  | NW_004517029.1 | Scaffold1959 | 46647                   | GG                              | TT                | 1946669818               |
| SNP_P3_162615_46691  | NW_004517029.1 | Scaffold1959 | 46691                   | AA                              | GG                | 1946669821               |
| SNP_P3_162616_46694  | NW_004517029.1 | Scaffold1959 | 46694                   | AA                              | CC                | 1946669823               |

| SNPs IDs             | Chromosome IDs | Chromosomes  | Physical positions (bp) | CDC Frontier (Reference genome) | (Pusa 256 & HPNB) | NCBI SNPdb Accession IDs |
|----------------------|----------------|--------------|-------------------------|---------------------------------|-------------------|--------------------------|
| SNP_P3_162617_46936  | NW_004517029.1 | Scaffold1959 | 46936                   | CC                              | AA                | 1946669825               |
| SNP_P3_162618_47215  | NW_004517029.1 | Scaffold1959 | 47215                   | TT                              | CC                | 1946669827               |
| SNP_P3_162620_47298  | NW_004517029.1 | Scaffold1959 | 47298                   | CC                              | TT                | 1946669829               |
| SNP_P3_162621_47522  | NW_004517029.1 | Scaffold1959 | 47522                   | TT                              | GG                | 1946669831               |
| SNP_P3_162622_47525  | NW_004517029.1 | Scaffold1959 | 47525                   | GG                              | CC                | 1946669833               |
| SNP_P3_162623_47589  | NW_004517029.1 | Scaffold1959 | 47589                   | AA                              | GG                | 1946669835               |
| SNP_P3_162624_47654  | NW_004517029.1 | Scaffold1959 | 47654                   | TT                              | CC                | 1946669837               |
| SNP_P3_162625_50362  | NW_004517029.1 | Scaffold1959 | 50362                   | TT                              | AA                | 1946669839               |
| SNP_P3_162626_50374  | NW_004517029.1 | Scaffold1959 | 50374                   | CC                              | TT                | 1946669842               |
| SNP_P3_162627_56695  | NW_004517029.1 | Scaffold1959 | 56695                   | CC                              | TT                | 1946669844               |
| SNP_P3_162628_59076  | NW_004517029.1 | Scaffold1959 | 59076                   | AA                              | GG                | 1946669846               |
| SNP_P3_162629_59120  | NW_004517029.1 | Scaffold1959 | 59120                   | TT                              | CC                | 1946669848               |
| SNP_P3_162630_59169  | NW_004517029.1 | Scaffold1959 | 59169                   | AA                              | GG                | 1946669850               |
| SNP_P3_162631_59376  | NW_004517029.1 | Scaffold1959 | 59376                   | AA                              | CC                | 1946669852               |
| SNP_P3_162632_59387  | NW_004517029.1 | Scaffold1959 | 59387                   | TT                              | AA                | 1946669854               |
| SNP_P3_162633_64335  | NW_004517029.1 | Scaffold1959 | 64335                   | AA                              | GG                | 1946669856               |
| SNP_P3_162634_64342  | NW_004517029.1 | Scaffold1959 | 64342                   | CC                              | TT                | 1946669858               |
| SNP_P3_162635_67709  | NW_004517029.1 | Scaffold1959 | 67709                   | CC                              | AA                | 1946669860               |
| SNP_P3_162636_67732  | NW_004517029.1 | Scaffold1959 | 67732                   | GG                              | AA                | 1946669862               |
| SNP_P3_162637_79205  | NW_004517029.1 | Scaffold1959 | 79205                   | TT                              | CC                | 1946669864               |
| SNP_P3_162639_84677  | NW_004517029.1 | Scaffold1959 | 84677                   | GG                              | CC                | 1946669866               |
| SNP_P3_162640_120749 | NW_004517029.1 | Scaffold1959 | 120749                  | CC                              | AA                | 1946669868               |
| SNP_P3_162641_120780 | NW_004517029.1 | Scaffold1959 | 120780                  | CC                              | TT                | 1946669870               |
| SNP_P3_162643_131312 | NW_004517029.1 | Scaffold1959 | 131312                  | GG                              | AA                | 1946669872               |
| SNP_P3_162645_360    | NW_004517030.1 | Scaffold1960 | 360                     | GG                              | AA                | 1946669874               |
| SNP_P3_162646_8789   | NW_004517032.1 | Scaffold1962 | 8789                    | TT                              | CC                | 1946669876               |
| SNP_P3_162647_8805   | NW_004517032.1 | Scaffold1962 | 8805                    | AA                              | CC                | 1946669878               |
| SNP_P3_162648_9179   | NW_004517032.1 | Scaffold1962 | 9179                    | AA                              | CC                | 1946669881               |
| SNP_P3_162650_19739  | NW_004517032.1 | Scaffold1962 | 19739                   | TT                              | GG                | 1946669883               |
| SNP_P3_162651_22898  | NW_004517032.1 | Scaffold1962 | 22898                   | GG                              | AA                | 1946669885               |
| SNP_P3_162652_33128  | NW_004517032.1 | Scaffold1962 | 33128                   | GG                              | CC                | 1946669887               |
| SNP_P3_162653_33141  | NW_004517032.1 | Scaffold1962 | 33141                   | CC                              | AA                | 1946669889               |
| SNP_P3_162654_34991  | NW_004517032.1 | Scaffold1962 | 34991                   | CC                              | AA                | 1946669891               |
| SNP_P3_162655_35365  | NW_004517032.1 | Scaffold1962 | 35365                   | TT                              | CC                | 1946669893               |
| SNP_P3_162656_44482  | NW_004517032.1 | Scaffold1962 | 44482                   | TT                              | GG                | 1946669895               |
| SNP_P3_162657_44490  | NW_004517032.1 | Scaffold1962 | 44490                   | GG                              | AA                | 1946669897               |
| SNP_P3_162658_49094  | NW_004517032.1 | Scaffold1962 | 49094                   | GG                              | AA                | 1946669899               |
| SNP_P3_162659_72393  | NW_004517032.1 | Scaffold1962 | 72393                   | GG                              | AA                | 1946669901               |
| SNP_P3_162660_92289  | NW_004517032.1 | Scaffold1962 | 92289                   | TT                              | CC                | 1946669903               |
| SNP_P3_162661_114441 | NW_004517032.1 | Scaffold1962 | 114441                  | AA                              | TT                | 1946669905               |
| SNP_P3_162662_119045 | NW_004517032.1 | Scaffold1962 | 119045                  | TT                              | CC                | 1946669907               |
| SNP_P3_162664_170086 | NW_004517032.1 | Scaffold1962 | 170086                  | GG                              | AA                | 1946669909               |

| SNPs IDs             | Chromosome IDs | Chromosomes  | Physical positions (bp) | CDC Frontier (Reference genome) | (Pusa 256 & HPNB) | NCBI SNPdb Accession IDs |
|----------------------|----------------|--------------|-------------------------|---------------------------------|-------------------|--------------------------|
| SNP_P3_162665_170135 | NW_004517032.1 | Scaffold1962 | 170135                  | CC                              | TT                | 1946669911               |
| SNP_P3_162666_170303 | NW_004517032.1 | Scaffold1962 | 170303                  | TT                              | GG                | 1946669913               |
| SNP_P3_162667_170314 | NW_004517032.1 | Scaffold1962 | 170314                  | CC                              | TT                | 1946669915               |
| SNP_P3_162668_170396 | NW_004517032.1 | Scaffold1962 | 170396                  | CC                              | TT                | 1946669917               |
| SNP_P3_162669_170553 | NW_004517032.1 | Scaffold1962 | 170553                  | CC                              | TT                | 1946669921               |
| SNP_P3_162670_170687 | NW_004517032.1 | Scaffold1962 | 170687                  | CC                              | TT                | 1946669923               |
| SNP_P3_162672_170743 | NW_004517032.1 | Scaffold1962 | 170743                  | TT                              | CC                | 1946669925               |
| SNP_P3_162673_170953 | NW_004517032.1 | Scaffold1962 | 170953                  | GG                              | AA                | 1946669927               |
| SNP_P3_162674_171050 | NW_004517032.1 | Scaffold1962 | 171050                  | TT                              | CC                | 1946669929               |
| SNP_P3_162675_171057 | NW_004517032.1 | Scaffold1962 | 171057                  | AA                              | TT                | 1946669931               |
| SNP_P3_162676_517    | NW_004517033.1 | Scaffold1963 | 517                     | TT                              | CC                | 1946669933               |
| SNP_P3_162677_576    | NW_004517033.1 | Scaffold1963 | 576                     | AA                              | GG                | 1946669935               |
| SNP_P3_162678_585    | NW_004517033.1 | Scaffold1963 | 585                     | GG                              | AA                | 1946669937               |
| SNP_P3_162679_620    | NW_004517033.1 | Scaffold1963 | 620                     | TT                              | AA                | 1946669939               |
| SNP_P3_162680_626    | NW_004517033.1 | Scaffold1963 | 626                     | AA                              | TT                | 1946669941               |
| SNP_P3_162682_2374   | NW_004517033.1 | Scaffold1963 | 2374                    | AA                              | TT                | 1946669943               |
| SNP_P3_162683_3106   | NW_004517033.1 | Scaffold1963 | 3106                    | AA                              | GG                | 1946669945               |
| SNP_P3_162684_9173   | NW_004517033.1 | Scaffold1963 | 9173                    | TT                              | GG                | 1946669947               |
| SNP_P3_162685_6197   | NW_004517034.1 | Scaffold1964 | 6197                    | TT                              | CC                | 1946669949               |
| SNP_P3_162687_7258   | NW_004517034.1 | Scaffold1964 | 7258                    | AA                              | GG                | 1946669950               |
| SNP_P3_162688_7550   | NW_004517034.1 | Scaffold1964 | 7550                    | TT                              | CC                | 1946669952               |
| SNP_P3_162689_7736   | NW_004517034.1 | Scaffold1964 | 7736                    | CC                              | TT                | 1946669955               |
| SNP_P3_162690_7839   | NW_004517034.1 | Scaffold1964 | 7839                    | GG                              | AA                | 1946669957               |
| SNP_P3_162691_8291   | NW_004517034.1 | Scaffold1964 | 8291                    | CC                              | TT                | 1946669959               |
| SNP_P3_162692_8405   | NW_004517034.1 | Scaffold1964 | 8405                    | CC                              | TT                | 1946669961               |
| SNP_P3_162693_8463   | NW_004517034.1 | Scaffold1964 | 8463                    | GG                              | AA                | 1946669963               |
| SNP_P3_162694_8908   | NW_004517034.1 | Scaffold1964 | 8908                    | AA                              | GG                | 1946669965               |
| SNP_P3_162696_9086   | NW_004517034.1 | Scaffold1964 | 9086                    | CC                              | GG                | 1946669967               |
| SNP_P3_162697_9087   | NW_004517034.1 | Scaffold1964 | 9087                    | TT                              | GG                | 1946669969               |
| SNP_P3_162698_9088   | NW_004517034.1 | Scaffold1964 | 9088                    | CC                              | AA                | 1946669971               |
| SNP_P3_162699_9089   | NW_004517034.1 | Scaffold1964 | 9089                    | CC                              | GG                | 1946669973               |
| SNP_P3_162700_9348   | NW_004517034.1 | Scaffold1964 | 9348                    | TT                              | AA                | 1946669975               |
| SNP_P3_162701_9550   | NW_004517034.1 | Scaffold1964 | 9550                    | CC                              | GG                | 1946669977               |
| SNP_P3_162702_10009  | NW_004517034.1 | Scaffold1964 | 10009                   | GG                              | AA                | 1946669979               |
| SNP_P3_162703_10272  | NW_004517034.1 | Scaffold1964 | 10272                   | TT                              | CC                | 1946669981               |
| SNP_P3_162704_10279  | NW_004517034.1 | Scaffold1964 | 10279                   | GG                              | AA                | 1946669982               |
| SNP_P3_162705_10442  | NW_004517034.1 | Scaffold1964 | 10442                   | GG                              | AA                | 1946669985               |
| SNP_P3_162706_10529  | NW_004517034.1 | Scaffold1964 | 10529                   | AA                              | GG                | 1946669987               |
| SNP_P3_162707_10764  | NW_004517034.1 | Scaffold1964 | 10764                   | TT                              | CC                | 1946669989               |
| SNP_P3_162708_10821  | NW_004517034.1 | Scaffold1964 | 10821                   | AA                              | GG                | 1946669992               |
| SNP_P3_162709_10842  | NW_004517034.1 | Scaffold1964 | 10842                   | TT                              | GG                | 1946669994               |
| SNP_P3_162711_11016  | NW_004517034.1 | Scaffold1964 | 11016                   | GG                              | AA                | 1946669996               |

| SNPs IDs             | Chromosome IDs | Chromosomes  | Physical positions (bp) | CDC Frontier (Reference genome) | (Pusa 256 & HPNB) | NCBI SNPdb Accession IDs |
|----------------------|----------------|--------------|-------------------------|---------------------------------|-------------------|--------------------------|
| SNP_P3_162714_20054  | NW_004517034.1 | Scaffold1964 | 20054                   | TT                              | AA                | 1946669998               |
| SNP_P3_162715_20246  | NW_004517034.1 | Scaffold1964 | 20246                   | CC                              | TT                | 1946670000               |
| SNP_P3_162716_20248  | NW_004517034.1 | Scaffold1964 | 20248                   | CC                              | TT                | 1946670002               |
| SNP_P3_162717_20257  | NW_004517034.1 | Scaffold1964 | 20257                   | CC                              | AA                | 1946670005               |
| SNP_P3_162718_20368  | NW_004517034.1 | Scaffold1964 | 20368                   | TT                              | CC                | 1946670008               |
| SNP_P3_162719_20394  | NW_004517034.1 | Scaffold1964 | 20394                   | TT                              | AA                | 1946670010               |
| SNP_P3_162720_20422  | NW_004517034.1 | Scaffold1964 | 20422                   | GG                              | AA                | 1946670012               |
| SNP_P3_162721_20442  | NW_004517034.1 | Scaffold1964 | 20442                   | CC                              | TT                | 1946670014               |
| SNP_P3_162722_20601  | NW_004517034.1 | Scaffold1964 | 20601                   | AA                              | CC                | 1946670016               |
| SNP_P3_162723_20811  | NW_004517034.1 | Scaffold1964 | 20811                   | TT                              | CC                | 1946670018               |
| SNP_P3_162724_20884  | NW_004517034.1 | Scaffold1964 | 20884                   | GG                              | AA                | 1946670020               |
| SNP_P3_162725_20885  | NW_004517034.1 | Scaffold1964 | 20885                   | CC                              | TT                | 1946670022               |
| SNP_P3_162726_20940  | NW_004517034.1 | Scaffold1964 | 20940                   | CC                              | AA                | 1946670025               |
| SNP_P3_162727_21130  | NW_004517034.1 | Scaffold1964 | 21130                   | TT                              | CC                | 1946670027               |
| SNP_P3_162728_21191  | NW_004517034.1 | Scaffold1964 | 21191                   | AA                              | GG                | 1946670029               |
| SNP_P3_162730_21717  | NW_004517034.1 | Scaffold1964 | 21717                   | TT                              | CC                | 1946670031               |
| SNP_P3_162731_21847  | NW_004517034.1 | Scaffold1964 | 21847                   | AA                              | CC                | 1946670033               |
| SNP_P3_162732_22615  | NW_004517034.1 | Scaffold1964 | 22615                   | GG                              | CC                | 1946670035               |
| SNP_P3_162733_36116  | NW_004517034.1 | Scaffold1964 | 36116                   | TT                              | GG                | 1946670037               |
| SNP_P3_162734_87606  | NW_004517034.1 | Scaffold1964 | 87606                   | CC                              | TT                | 1946670039               |
| SNP_P3_162735_87670  | NW_004517034.1 | Scaffold1964 | 87670                   | AA                              | GG                | 1946670041               |
| SNP_P3_162736_113158 | NW_004517034.1 | Scaffold1964 | 113158                  | GG                              | AA                | 1946670043               |
| SNP_P3_162738_122708 | NW_004517034.1 | Scaffold1964 | 122708                  | TT                              | CC                | 1946670046               |
| SNP_P3_162742_171915 | NW_004517034.1 | Scaffold1964 | 171915                  | TT                              | CC                | 1946670048               |
| SNP_P3_162743_172096 | NW_004517034.1 | Scaffold1964 | 172096                  | TT                              | CC                | 1946670050               |
| SNP_P3_162745_172293 | NW_004517034.1 | Scaffold1964 | 172293                  | AA                              | GG                | 1946670052               |
| SNP_P3_162746_172369 | NW_004517034.1 | Scaffold1964 | 172369                  | CC                              | TT                | 1946670054               |
| SNP_P3_162747_4056   | NW_004517040.1 | Scaffold1971 | 4056                    | TT                              | CC                | 1946670056               |
| SNP_P3_162748_4292   | NW_004517040.1 | Scaffold1971 | 4292                    | TT                              | CC                | 1946670058               |
| SNP_P3_162749_4317   | NW_004517040.1 | Scaffold1971 | 4317                    | CC                              | AA                | 1946670060               |
| SNP_P3_162750_4445   | NW_004517040.1 | Scaffold1971 | 4445                    | TT                              | CC                | 1946670062               |
| SNP_P3_162751_4579   | NW_004517040.1 | Scaffold1971 | 4579                    | AA                              | CC                | 1946670064               |
| SNP_P3_162752_4827   | NW_004517040.1 | Scaffold1971 | 4827                    | AA                              | GG                | 1946670066               |
| SNP_P3_162753_1055   | NW_004517042.1 | Scaffold1974 | 1055                    | AA                              | GG                | 1946670068               |
| SNP_P3_162754_1180   | NW_004517042.1 | Scaffold1974 | 1180                    | AA                              | TT                | 1946670070               |
| SNP_P3_162755_1206   | NW_004517042.1 | Scaffold1974 | 1206                    | GG                              | AA                | 1946670072               |
| SNP_P3_162756_1231   | NW_004517042.1 | Scaffold1974 | 1231                    | AA                              | CC                | 1946670074               |
| SNP_P3_162757_4398   | NW_004517042.1 | Scaffold1974 | 4398                    | CC                              | TT                | 1946670076               |
| SNP_P3_162758_423    | NW_004517044.1 | Scaffold1976 | 423                     | CC                              | AA                | 1946670078               |
| SNP_P3_162759_589    | NW_004517044.1 | Scaffold1976 | 589                     | CC                              | TT                | 1946670080               |
| SNP_P3_162760_4762   | NW_004517044.1 | Scaffold1976 | 4762                    | TT                              | GG                | 1946670082               |
| SNP_P3_162761_4766   | NW_004517044.1 | Scaffold1976 | 4766                    | GG                              | AA                | 1946670084               |

| SNPs IDs            | Chromosome IDs | Chromosomes  | Physical positions (bp) | CDC Frontier (Reference genome) | (Pusa 256 & HPNB) | NCBI SNPdb Accession IDs |
|---------------------|----------------|--------------|-------------------------|---------------------------------|-------------------|--------------------------|
| SNP_P3_162762_5395  | NW_004517044.1 | Scaffold1976 | 5395                    | CC                              | TT                | 1946670086               |
| SNP_P3_162763_5444  | NW_004517044.1 | Scaffold1976 | 5444                    | GG                              | AA                | 1946670088               |
| SNP_P3_162764_5452  | NW_004517044.1 | Scaffold1976 | 5452                    | AA                              | CC                | 1946670090               |
| SNP_P3_162765_5460  | NW_004517044.1 | Scaffold1976 | 5460                    | AA                              | GG                | 1946670093               |
| SNP_P3_162766_5471  | NW_004517044.1 | Scaffold1976 | 5471                    | CC                              | AA                | 1946670097               |
| SNP_P3_162767_5472  | NW_004517044.1 | Scaffold1976 | 5472                    | AA                              | GG                | 1946670101               |
| SNP_P3_162768_5613  | NW_004517044.1 | Scaffold1976 | 5613                    | TT                              | AA                | 1946670103               |
| SNP_P3_162769_5677  | NW_004517044.1 | Scaffold1976 | 5677                    | AA                              | CC                | 1946670105               |
| SNP_P3_162770_5737  | NW_004517044.1 | Scaffold1976 | 5737                    | AA                              | CC                | 1946670107               |
| SNP_P3_162771_9298  | NW_004517044.1 | Scaffold1976 | 9298                    | AA                              | GG                | 1946670109               |
| SNP_P3_162772_9381  | NW_004517044.1 | Scaffold1976 | 9381                    | AA                              | GG                | 1946670111               |
| SNP_P3_162773_9479  | NW_004517044.1 | Scaffold1976 | 9479                    | TT                              | CC                | 1946670113               |
| SNP_P3_162774_9511  | NW_004517044.1 | Scaffold1976 | 9511                    | AA                              | GG                | 1946670115               |
| SNP_P3_162775_9663  | NW_004517044.1 | Scaffold1976 | 9663                    | AA                              | TT                | 1946670117               |
| SNP_P3_162776_10608 | NW_004517044.1 | Scaffold1976 | 10608                   | TT                              | AA                | 1946670119               |
| SNP_P3_162777_10738 | NW_004517044.1 | Scaffold1976 | 10738                   | CC                              | TT                | 1946670121               |
| SNP_P3_162778_10858 | NW_004517044.1 | Scaffold1976 | 10858                   | CC                              | AA                | 1946670123               |
| SNP_P3_162779_10866 | NW_004517044.1 | Scaffold1976 | 10866                   | GG                              | AA                | 1946670125               |
| SNP_P3_162780_10886 | NW_004517044.1 | Scaffold1976 | 10886                   | TT                              | CC                | 1946670127               |
| SNP_P3_162781_17113 | NW_004517044.1 | Scaffold1976 | 17113                   | CC                              | TT                | 1946670130               |
| SNP_P3_162782_17145 | NW_004517044.1 | Scaffold1976 | 17145                   | AA                              | TT                | 1946670132               |
| SNP_P3_162783_17168 | NW_004517044.1 | Scaffold1976 | 17168                   | TT                              | AA                | 1946670135               |
| SNP_P3_162784_17358 | NW_004517044.1 | Scaffold1976 | 17358                   | TT                              | GG                | 1946670137               |
| SNP_P3_162785_17607 | NW_004517044.1 | Scaffold1976 | 17607                   | GG                              | AA                | 1946670139               |
| SNP_P3_162786_17636 | NW_004517044.1 | Scaffold1976 | 17636                   | TT                              | CC                | 1946670141               |
| SNP_P3_162787_26197 | NW_004517044.1 | Scaffold1976 | 26197                   | CC                              | AA                | 1946670143               |
| SNP_P3_162788_26216 | NW_004517044.1 | Scaffold1976 | 26216                   | TT                              | CC                | 1946670145               |
| SNP_P3_162789_26420 | NW_004517044.1 | Scaffold1976 | 26420                   | CC                              | TT                | 1946670147               |
| SNP_P3_162790_26880 | NW_004517044.1 | Scaffold1976 | 26880                   | TT                              | AA                | 1946670149               |
| SNP_P3_162791_26882 | NW_004517044.1 | Scaffold1976 | 26882                   | TT                              | AA                | 1946670151               |
| SNP_P3_162792_26889 | NW_004517044.1 | Scaffold1976 | 26889                   | TT                              | GG                | 1946670154               |
| SNP_P3_162793_27004 | NW_004517044.1 | Scaffold1976 | 27004                   | AA                              | CC                | 1946670156               |
| SNP_P3_162794_27005 | NW_004517044.1 | Scaffold1976 | 27005                   | TT                              | CC                | 1946670158               |
| SNP_P3_162795_27043 | NW_004517044.1 | Scaffold1976 | 27043                   | AA                              | GG                | 1946670160               |
| SNP_P3_162796_27055 | NW_004517044.1 | Scaffold1976 | 27055                   | AA                              | GG                | 1946670162               |
| SNP_P3_162797_27056 | NW_004517044.1 | Scaffold1976 | 27056                   | AA                              | TT                | 1946670164               |
| SNP_P3_162798_27061 | NW_004517044.1 | Scaffold1976 | 27061                   | GG                              | AA                | 1946670166               |
| SNP_P3_162799_27083 | NW_004517044.1 | Scaffold1976 | 27083                   | GG                              | CC                | 1946670168               |
| SNP_P3_162800_27089 | NW_004517044.1 | Scaffold1976 | 27089                   | CC                              | TT                | 1946670170               |
| SNP_P3_162801_27109 | NW_004517044.1 | Scaffold1976 | 27109                   | AA                              | GG                | 1946670172               |
| SNP_P3_162802_27139 | NW_004517044.1 | Scaffold1976 | 27139                   | GG                              | AA                | 1946670175               |
| SNP_P3_162803_27168 | NW_004517044.1 | Scaffold1976 | 27168                   | GG                              | CC                | 1946670177               |

| SNPs IDs             | Chromosome IDs | Chromosomes  | Physical positions (bp) | CDC Frontier (Reference genome) | (Pusa 256 & HPNB) | NCBI SNPdb Accession IDs |
|----------------------|----------------|--------------|-------------------------|---------------------------------|-------------------|--------------------------|
| SNP_P3_162804_27175  | NW_004517044.1 | Scaffold1976 | 27175                   | TT                              | CC                | 1946670179               |
| SNP_P3_162805_27433  | NW_004517044.1 | Scaffold1976 | 27433                   | AA                              | TT                | 1946670181               |
| SNP_P3_162806_27451  | NW_004517044.1 | Scaffold1976 | 27451                   | AA                              | GG                | 1946670183               |
| SNP_P3_162807_28172  | NW_004517044.1 | Scaffold1976 | 28172                   | TT                              | AA                | 1946670185               |
| SNP_P3_162808_28179  | NW_004517044.1 | Scaffold1976 | 28179                   | CC                              | GG                | 1946670187               |
| SNP_P3_162809_28209  | NW_004517044.1 | Scaffold1976 | 28209                   | GG                              | AA                | 1946670189               |
| SNP_P3_162810_28227  | NW_004517044.1 | Scaffold1976 | 28227                   | AA                              | TT                | 1946670191               |
| SNP_P3_162811_28273  | NW_004517044.1 | Scaffold1976 | 28273                   | TT                              | AA                | 1946670193               |
| SNP_P3_162812_28441  | NW_004517044.1 | Scaffold1976 | 28441                   | TT                              | AA                | 1946670195               |
| SNP_P3_162813_28618  | NW_004517044.1 | Scaffold1976 | 28618                   | AA                              | GG                | 1946670197               |
| SNP_P3_162814_31155  | NW_004517044.1 | Scaffold1976 | 31155                   | AA                              | CC                | 1946670199               |
| SNP_P3_162815_31168  | NW_004517044.1 | Scaffold1976 | 31168                   | AA                              | GG                | 1946670201               |
| SNP_P3_162816_31210  | NW_004517044.1 | Scaffold1976 | 31210                   | AA                              | GG                | 1946670203               |
| SNP_P3_162817_31214  | NW_004517044.1 | Scaffold1976 | 31214                   | AA                              | GG                | 1946670205               |
| SNP_P3_162818_31270  | NW_004517044.1 | Scaffold1976 | 31270                   | TT                              | GG                | 1946670207               |
| SNP_P3_162819_31612  | NW_004517044.1 | Scaffold1976 | 31612                   | GG                              | AA                | 1946670209               |
| SNP_P3_162820_500    | NW_004517046.1 | Scaffold1981 | 500                     | GG                              | AA                | 1946670211               |
| SNP_P3_162822_16604  | NW_004517046.1 | Scaffold1981 | 16604                   | GG                              | TT                | 1946670213               |
| SNP_P3_162823_29900  | NW_004517046.1 | Scaffold1981 | 29900                   | TT                              | AA                | 1946670215               |
| SNP_P3_162824_30730  | NW_004517046.1 | Scaffold1981 | 30730                   | TT                              | GG                | 1946670217               |
| SNP_P3_162825_30737  | NW_004517046.1 | Scaffold1981 | 30737                   | TT                              | GG                | 1946670219               |
| SNP_P3_162826_50238  | NW_004517046.1 | Scaffold1981 | 50238                   | TT                              | AA                | 1946670221               |
| SNP_P3_162827_50648  | NW_004517046.1 | Scaffold1981 | 50648                   | CC                              | TT                | 1946670223               |
| SNP_P3_162828_50679  | NW_004517046.1 | Scaffold1981 | 50679                   | AA                              | GG                | 1946670225               |
| SNP_P3_162829_55066  | NW_004517046.1 | Scaffold1981 | 55066                   | TT                              | AA                | 1946670227               |
| SNP_P3_162830_82396  | NW_004517046.1 | Scaffold1981 | 82396                   | CC                              | GG                | 1946670229               |
| SNP_P3_162831_82412  | NW_004517046.1 | Scaffold1981 | 82412                   | CC                              | GG                | 1946670231               |
| SNP_P3_162832_82481  | NW_004517046.1 | Scaffold1981 | 82481                   | AA                              | GG                | 1946670233               |
| SNP_P3_162833_82519  | NW_004517046.1 | Scaffold1981 | 82519                   | GG                              | AA                | 1946670235               |
| SNP_P3_162834_82774  | NW_004517046.1 | Scaffold1981 | 82774                   | AA                              | TT                | 1946670237               |
| SNP_P3_162835_82906  | NW_004517046.1 | Scaffold1981 | 82906                   | CC                              | GG                | 1946670238               |
| SNP_P3_162836_91284  | NW_004517046.1 | Scaffold1981 | 91284                   | AA                              | GG                | 1946670240               |
| SNP_P3_162838_100200 | NW_004517046.1 | Scaffold1981 | 100200                  | GG                              | AA                | 1946670242               |
| SNP_P3_162839_100201 | NW_004517046.1 | Scaffold1981 | 100201                  | TT                              | CC                | 1946670244               |
| SNP_P3_162840_100210 | NW_004517046.1 | Scaffold1981 | 100210                  | CC                              | TT                | 1946670246               |
| SNP_P3_162841_100491 | NW_004517046.1 | Scaffold1981 | 100491                  | GG                              | AA                | 1946670248               |
| SNP_P3_162842_100492 | NW_004517046.1 | Scaffold1981 | 100492                  | CC                              | TT                | 1946670250               |
| SNP_P3_162843_100501 | NW_004517046.1 | Scaffold1981 | 100501                  | TT                              | CC                | 1946670252               |
| SNP_P3_162844_100560 | NW_004517046.1 | Scaffold1981 | 100560                  | CC                              | TT                | 1946670254               |
| SNP_P3_162846_100621 | NW_004517046.1 | Scaffold1981 | 100621                  | GG                              | AA                | 1946670256               |
| SNP_P3_162847_112452 | NW_004517046.1 | Scaffold1981 | 112452                  | GG                              | TT                | 1946670258               |
| SNP_P3_162848_113452 | NW_004517046.1 | Scaffold1981 | 113452                  | GG                              | AA                | 1946670260               |



| SNPs IDs             | Chromosome IDs | Chromosomes  | Physical positions (bp) | CDC Frontier (Reference genome) | (Pusa 256 & HPNB) | NCBI SNPdb Accession IDs |
|----------------------|----------------|--------------|-------------------------|---------------------------------|-------------------|--------------------------|
| SNP_P3_162852_131491 | NW_004517046.1 | Scaffold1981 | 131491                  | AA                              | TT                | 1946670262               |
| SNP_P3_162853_148952 | NW_004517046.1 | Scaffold1981 | 148952                  | GG                              | AA                | 1946670264               |
| SNP_P3_162854_149229 | NW_004517046.1 | Scaffold1981 | 149229                  | GG                              | TT                | 1946670266               |
| SNP_P3_162857_159064 | NW_004517046.1 | Scaffold1981 | 159064                  | AA                              | TT                | 1946670268               |
| SNP_P3_162858_159103 | NW_004517046.1 | Scaffold1981 | 159103                  | TT                              | CC                | 1946670270               |
| SNP_P3_162860_159315 | NW_004517046.1 | Scaffold1981 | 159315                  | AA                              | CC                | 1946670272               |
| SNP_P3_162861_159377 | NW_004517046.1 | Scaffold1981 | 159377                  | GG                              | CC                | 1946670274               |
| SNP_P3_162862_163608 | NW_004517046.1 | Scaffold1981 | 163608                  | AA                              | GG                | 1946670276               |
| SNP_P3_162863_164922 | NW_004517046.1 | Scaffold1981 | 164922                  | CC                              | AA                | 1946670278               |
| SNP_P3_162864_164958 | NW_004517046.1 | Scaffold1981 | 164958                  | CC                              | AA                | 1946670280               |
| SNP_P3_162866_181878 | NW_004517046.1 | Scaffold1981 | 181878                  | TT                              | CC                | 1946670282               |
| SNP_P3_162867_183313 | NW_004517046.1 | Scaffold1981 | 183313                  | CC                              | TT                | 1946670284               |
| SNP_P3_162868_191556 | NW_004517046.1 | Scaffold1981 | 191556                  | GG                              | TT                | 1946670286               |
| SNP_P3_162871_240669 | NW_004517046.1 | Scaffold1981 | 240669                  | AA                              | TT                | 1946670289               |
| SNP_P3_162872_240890 | NW_004517046.1 | Scaffold1981 | 240890                  | TT                              | AA                | 1946670291               |
| SNP_P3_162873_242067 | NW_004517046.1 | Scaffold1981 | 242067                  | TT                              | CC                | 1946670293               |
| SNP_P3_162874_243116 | NW_004517046.1 | Scaffold1981 | 243116                  | TT                              | AA                | 1946670295               |
| SNP_P3_162875_243491 | NW_004517046.1 | Scaffold1981 | 243491                  | GG                              | AA                | 1946670297               |
| SNP_P3_162876_243578 | NW_004517046.1 | Scaffold1981 | 243578                  | CC                              | TT                | 1946670299               |
| SNP_P3_162877_243789 | NW_004517046.1 | Scaffold1981 | 243789                  | CC                              | GG                | 1946670301               |
| SNP_P3_162878_255286 | NW_004517046.1 | Scaffold1981 | 255286                  | CC                              | TT                | 1946670303               |
| SNP_P3_162879_264343 | NW_004517046.1 | Scaffold1981 | 264343                  | AA                              | GG                | 1946670305               |
| SNP_P3_162880_276691 | NW_004517046.1 | Scaffold1981 | 276691                  | AA                              | GG                | 1946670307               |
| SNP_P3_162881_276788 | NW_004517046.1 | Scaffold1981 | 276788                  | AA                              | CC                | 1946670309               |
| SNP_P3_162882_277055 | NW_004517046.1 | Scaffold1981 | 277055                  | GG                              | AA                | 1946670311               |
| SNP_P3_162883_277065 | NW_004517046.1 | Scaffold1981 | 277065                  | TT                              | CC                | 1946670313               |
| SNP_P3_162884_277095 | NW_004517046.1 | Scaffold1981 | 277095                  | TT                              | CC                | 1946670315               |
| SNP_P3_162885_277133 | NW_004517046.1 | Scaffold1981 | 277133                  | TT                              | CC                | 1946670317               |
| SNP_P3_162886_278198 | NW_004517046.1 | Scaffold1981 | 278198                  | AA                              | GG                | 1946670319               |
| SNP_P3_162887_278323 | NW_004517046.1 | Scaffold1981 | 278323                  | GG                              | AA                | 1946670321               |
| SNP_P3_162888_278347 | NW_004517046.1 | Scaffold1981 | 278347                  | GG                              | AA                | 1946670323               |
| SNP_P3_162889_278361 | NW_004517046.1 | Scaffold1981 | 278361                  | AA                              | GG                | 1946670327               |
| SNP_P3_162891_292434 | NW_004517046.1 | Scaffold1981 | 292434                  | AA                              | GG                | 1946670329               |
| SNP_P3_162892_304137 | NW_004517046.1 | Scaffold1981 | 304137                  | GG                              | AA                | 1946670331               |
| SNP_P3_162893_310315 | NW_004517046.1 | Scaffold1981 | 310315                  | GG                              | AA                | 1946670333               |
| SNP_P3_162894_313094 | NW_004517046.1 | Scaffold1981 | 313094                  | CC                              | TT                | 1946670335               |
| SNP_P3_162895_316579 | NW_004517046.1 | Scaffold1981 | 316579                  | GG                              | AA                | 1946670337               |
| SNP_P3_162897_320612 | NW_004517046.1 | Scaffold1981 | 320612                  | GG                              | AA                | 1946670339               |
| SNP_P3_162898_320635 | NW_004517046.1 | Scaffold1981 | 320635                  | CC                              | TT                | 1946670341               |
| SNP_P3_162899_320667 | NW_004517046.1 | Scaffold1981 | 320667                  | TT                              | CC                | 1946670343               |
| SNP_P3_162900_320672 | NW_004517046.1 | Scaffold1981 | 320672                  | TT                              | CC                | 1946670345               |
| SNP_P3_162901_320686 | NW_004517046.1 | Scaffold1981 | 320686                  | AA                              | GG                | 1946670347               |

| SNPs IDs             | Chromosome IDs | Chromosomes  | Physical positions (bp) | CDC Frontier (Reference genome) | (Pusa 256 & HPNB) | NCBI SNPdb Accession IDs |
|----------------------|----------------|--------------|-------------------------|---------------------------------|-------------------|--------------------------|
| SNP_P3_162902_320688 | NW_004517046.1 | Scaffold1981 | 320688                  | AA                              | GG                | 1946670349               |
| SNP_P3_162903_320705 | NW_004517046.1 | Scaffold1981 | 320705                  | AA                              | GG                | 1946670351               |
| SNP_P3_162904_320734 | NW_004517046.1 | Scaffold1981 | 320734                  | TT                              | GG                | 1946670354               |
| SNP_P3_162905_320741 | NW_004517046.1 | Scaffold1981 | 320741                  | GG                              | AA                | 1946670356               |
| SNP_P3_162906_320780 | NW_004517046.1 | Scaffold1981 | 320780                  | GG                              | AA                | 1946670358               |
| SNP_P3_162907_320831 | NW_004517046.1 | Scaffold1981 | 320831                  | AA                              | GG                | 1946670360               |
| SNP_P3_162908_320942 | NW_004517046.1 | Scaffold1981 | 320942                  | AA                              | GG                | 1946670362               |
| SNP_P3_162909_320958 | NW_004517046.1 | Scaffold1981 | 320958                  | CC                              | TT                | 1946670365               |
| SNP_P3_162910_320985 | NW_004517046.1 | Scaffold1981 | 320985                  | GG                              | TT                | 1946670367               |
| SNP_P3_162911_321128 | NW_004517046.1 | Scaffold1981 | 321128                  | AA                              | GG                | 1946670369               |
| SNP_P3_162912_321180 | NW_004517046.1 | Scaffold1981 | 321180                  | TT                              | GG                | 1946670371               |
| SNP_P3_162913_321191 | NW_004517046.1 | Scaffold1981 | 321191                  | TT                              | CC                | 1946670373               |
| SNP_P3_162915_324561 | NW_004517046.1 | Scaffold1981 | 324561                  | GG                              | AA                | 1946670375               |
| SNP_P3_162916_325436 | NW_004517046.1 | Scaffold1981 | 325436                  | GG                              | TT                | 1946670378               |
| SNP_P3_162918_329504 | NW_004517046.1 | Scaffold1981 | 329504                  | TT                              | AA                | 1946670380               |
| SNP_P3_162919_335682 | NW_004517046.1 | Scaffold1981 | 335682                  | GG                              | AA                | 1946670382               |
| SNP_P3_162920_335948 | NW_004517046.1 | Scaffold1981 | 335948                  | GG                              | AA                | 1946670384               |
| SNP_P3_162921_336033 | NW_004517046.1 | Scaffold1981 | 336033                  | AA                              | TT                | 1946670387               |
| SNP_P3_162922_336040 | NW_004517046.1 | Scaffold1981 | 336040                  | TT                              | CC                | 1946670389               |
| SNP_P3_162923_336048 | NW_004517046.1 | Scaffold1981 | 336048                  | AA                              | GG                | 1946670392               |
| SNP_P3_162924_336187 | NW_004517046.1 | Scaffold1981 | 336187                  | AA                              | GG                | 1946670394               |
| SNP_P3_162926_336219 | NW_004517046.1 | Scaffold1981 | 336219                  | CC                              | TT                | 1946670396               |
| SNP_P3_162927_336220 | NW_004517046.1 | Scaffold1981 | 336220                  | TT                              | CC                | 1946670398               |
| SNP_P3_162928_336259 | NW_004517046.1 | Scaffold1981 | 336259                  | GG                              | CC                | 1946670400               |
| SNP_P3_162929_336490 | NW_004517046.1 | Scaffold1981 | 336490                  | AA                              | GG                | 1946670402               |
| SNP_P3_162930_336500 | NW_004517046.1 | Scaffold1981 | 336500                  | AA                              | GG                | 1946670404               |
| SNP_P3_162931_336546 | NW_004517046.1 | Scaffold1981 | 336546                  | GG                              | AA                | 1946670406               |
| SNP_P3_162932_336547 | NW_004517046.1 | Scaffold1981 | 336547                  | TT                              | CC                | 1946670409               |
| SNP_P3_162933_336565 | NW_004517046.1 | Scaffold1981 | 336565                  | TT                              | CC                | 1946670411               |
| SNP_P3_162934_336623 | NW_004517046.1 | Scaffold1981 | 336623                  | AA                              | GG                | 1946670413               |
| SNP_P3_162935_336685 | NW_004517046.1 | Scaffold1981 | 336685                  | AA                              | GG                | 1946670415               |
| SNP_P3_162936_336849 | NW_004517046.1 | Scaffold1981 | 336849                  | GG                              | AA                | 1946670417               |
| SNP_P3_162937_336862 | NW_004517046.1 | Scaffold1981 | 336862                  | GG                              | AA                | 1946670419               |
| SNP_P3_162938_336873 | NW_004517046.1 | Scaffold1981 | 336873                  | CC                              | GG                | 1946670422               |
| SNP_P3_162939_336875 | NW_004517046.1 | Scaffold1981 | 336875                  | AA                              | GG                | 1946670424               |
| SNP_P3_162941_336954 | NW_004517046.1 | Scaffold1981 | 336954                  | TT                              | CC                | 1946670426               |
| SNP_P3_162942_336987 | NW_004517046.1 | Scaffold1981 | 336987                  | AA                              | GG                | 1946670429               |
| SNP_P3_162943_337302 | NW_004517046.1 | Scaffold1981 | 337302                  | CC                              | GG                | 1946670431               |
| SNP_P3_162944_339477 | NW_004517046.1 | Scaffold1981 | 339477                  | CC                              | GG                | 1946670433               |
| SNP_P3_162945_339537 | NW_004517046.1 | Scaffold1981 | 339537                  | GG                              | AA                | 1946670435               |
| SNP_P3_162946_340616 | NW_004517046.1 | Scaffold1981 | 340616                  | AA                              | GG                | 1946670437               |
| SNP_P3_162947_340835 | NW_004517046.1 | Scaffold1981 | 340835                  | TT                              | AA                | 1946670439               |

| SNPs IDs             | Chromosome IDs | Chromosomes  | Physical positions (bp) | CDC Frontier (Reference genome) | (Pusa 256 & HPNB) | NCBI SNPdb Accession IDs |
|----------------------|----------------|--------------|-------------------------|---------------------------------|-------------------|--------------------------|
| SNP_P3_162948_341032 | NW_004517046.1 | Scaffold1981 | 341032                  | CC                              | TT                | 1946670441               |
| SNP_P3_162949_341662 | NW_004517046.1 | Scaffold1981 | 341662                  | CC                              | GG                | 1946670443               |
| SNP_P3_162950_341678 | NW_004517046.1 | Scaffold1981 | 341678                  | GG                              | AA                | 1946670445               |
| SNP_P3_162951_341692 | NW_004517046.1 | Scaffold1981 | 341692                  | CC                              | AA                | 1946670447               |
| SNP_P3_162952_341703 | NW_004517046.1 | Scaffold1981 | 341703                  | AA                              | GG                | 1946670449               |
| SNP_P3_162953_341947 | NW_004517046.1 | Scaffold1981 | 341947                  | TT                              | CC                | 1946670451               |
| SNP_P3_162954_343597 | NW_004517046.1 | Scaffold1981 | 343597                  | TT                              | CC                | 1946670453               |
| SNP_P3_162955_343612 | NW_004517046.1 | Scaffold1981 | 343612                  | TT                              | CC                | 1946670455               |
| SNP_P3_162956_343762 | NW_004517046.1 | Scaffold1981 | 343762                  | TT                              | AA                | 1946670457               |
| SNP_P3_162957_344246 | NW_004517046.1 | Scaffold1981 | 344246                  | AA                              | GG                | 1946670459               |
| SNP_P3_162959_347008 | NW_004517046.1 | Scaffold1981 | 347008                  | GG                              | TT                | 1946670462               |
| SNP_P3_162960_347009 | NW_004517046.1 | Scaffold1981 | 347009                  | GG                              | CC                | 1946670464               |
| SNP_P3_162961_347989 | NW_004517046.1 | Scaffold1981 | 347989                  | TT                              | AA                | 1946670466               |
| SNP_P3_162962_347996 | NW_004517046.1 | Scaffold1981 | 347996                  | AA                              | TT                | 1946670468               |
| SNP_P3_162963_348024 | NW_004517046.1 | Scaffold1981 | 348024                  | CC                              | TT                | 1946670470               |
| SNP_P3_162964_348203 | NW_004517046.1 | Scaffold1981 | 348203                  | AA                              | CC                | 1946670472               |
| SNP_P3_162965_348269 | NW_004517046.1 | Scaffold1981 | 348269                  | CC                              | AA                | 1946670474               |
| SNP_P3_162966_348474 | NW_004517046.1 | Scaffold1981 | 348474                  | AA                              | TT                | 1946670476               |
| SNP_P3_162967_348476 | NW_004517046.1 | Scaffold1981 | 348476                  | AA                              | TT                | 1946670478               |
| SNP_P3_162968_348951 | NW_004517046.1 | Scaffold1981 | 348951                  | GG                              | CC                | 1946670480               |
| SNP_P3_162969_349213 | NW_004517046.1 | Scaffold1981 | 349213                  | TT                              | CC                | 1946670482               |
| SNP_P3_162970_349229 | NW_004517046.1 | Scaffold1981 | 349229                  | TT                              | AA                | 1946670484               |
| SNP_P3_162971_349253 | NW_004517046.1 | Scaffold1981 | 349253                  | CC                              | GG                | 1946670486               |
| SNP_P3_162972_349263 | NW_004517046.1 | Scaffold1981 | 349263                  | AA                              | GG                | 1946670488               |
| SNP_P3_162973_349626 | NW_004517046.1 | Scaffold1981 | 349626                  | GG                              | TT                | 1946670490               |
| SNP_P3_162974_351596 | NW_004517046.1 | Scaffold1981 | 351596                  | TT                              | GG                | 1946670492               |
| SNP_P3_162975_351622 | NW_004517046.1 | Scaffold1981 | 351622                  | TT                              | CC                | 1946670494               |
| SNP_P3_162976_351750 | NW_004517046.1 | Scaffold1981 | 351750                  | GG                              | AA                | 1946670496               |
| SNP_P3_162978_351809 | NW_004517046.1 | Scaffold1981 | 351809                  | AA                              | TT                | 1946670499               |
| SNP_P3_162979_351822 | NW_004517046.1 | Scaffold1981 | 351822                  | AA                              | GG                | 1946670501               |
| SNP_P3_162980_351824 | NW_004517046.1 | Scaffold1981 | 351824                  | AA                              | TT                | 1946670503               |
| SNP_P3_162981_351827 | NW_004517046.1 | Scaffold1981 | 351827                  | AA                              | CC                | 1946670505               |
| SNP_P3_162982_351935 | NW_004517046.1 | Scaffold1981 | 351935                  | AA                              | GG                | 1946670507               |
| SNP_P3_162983_351952 | NW_004517046.1 | Scaffold1981 | 351952                  | CC                              | GG                | 1946670509               |
| SNP_P3_162984_351983 | NW_004517046.1 | Scaffold1981 | 351983                  | GG                              | AA                | 1946670511               |
| SNP_P3_162985_351986 | NW_004517046.1 | Scaffold1981 | 351986                  | GG                              | AA                | 1946670513               |
| SNP_P3_162986_352203 | NW_004517046.1 | Scaffold1981 | 352203                  | TT                              | AA                | 1946670515               |
| SNP_P3_162987_352221 | NW_004517046.1 | Scaffold1981 | 352221                  | AA                              | GG                | 1946670517               |
| SNP_P3_162988_352382 | NW_004517046.1 | Scaffold1981 | 352382                  | AA                              | TT                | 1946670519               |
| SNP_P3_162989_355139 | NW_004517046.1 | Scaffold1981 | 355139                  | TT                              | GG                | 1946670521               |
| SNP_P3_162990_355286 | NW_004517046.1 | Scaffold1981 | 355286                  | TT                              | CC                | 1946670523               |
| SNP_P3_162991_355336 | NW_004517046.1 | Scaffold1981 | 355336                  | GG                              | AA                | 1946670525               |

| SNPs IDs             | Chromosome IDs | Chromosomes  | Physical positions (bp) | CDC Frontier (Reference genome) | (Pusa 256 & HPNB) | NCBI SNPdb Accession IDs |
|----------------------|----------------|--------------|-------------------------|---------------------------------|-------------------|--------------------------|
| SNP_P3_162993_355419 | NW_004517046.1 | Scaffold1981 | 355419                  | TT                              | CC                | 1946670527               |
| SNP_P3_162994_355435 | NW_004517046.1 | Scaffold1981 | 355435                  | TT                              | AA                | 1946670529               |
| SNP_P3_162995_355440 | NW_004517046.1 | Scaffold1981 | 355440                  | GG                              | AA                | 1946670531               |
| SNP_P3_162996_355612 | NW_004517046.1 | Scaffold1981 | 355612                  | GG                              | AA                | 1946670533               |
| SNP_P3_162997_355663 | NW_004517046.1 | Scaffold1981 | 355663                  | GG                              | TT                | 1946670535               |
| SNP_P3_162999_355807 | NW_004517046.1 | Scaffold1981 | 355807                  | AA                              | GG                | 1946670537               |
| SNP_P3_163000_356557 | NW_004517046.1 | Scaffold1981 | 356557                  | TT                              | CC                | 1946670539               |
| SNP_P3_163001_356565 | NW_004517046.1 | Scaffold1981 | 356565                  | GG                              | AA                | 1946670541               |
| SNP_P3_163002_356710 | NW_004517046.1 | Scaffold1981 | 356710                  | CC                              | TT                | 1946670544               |
| SNP_P3_163003_357128 | NW_004517046.1 | Scaffold1981 | 357128                  | AA                              | TT                | 1946670546               |
| SNP_P3_163006_361514 | NW_004517046.1 | Scaffold1981 | 361514                  | TT                              | AA                | 1946670549               |
| SNP_P3_163007_362739 | NW_004517046.1 | Scaffold1981 | 362739                  | TT                              | CC                | 1946670551               |
| SNP_P3_163008_363784 | NW_004517046.1 | Scaffold1981 | 363784                  | TT                              | CC                | 1946670553               |
| SNP_P3_163009_363916 | NW_004517046.1 | Scaffold1981 | 363916                  | CC                              | TT                | 1946670555               |
| SNP_P3_163010_364589 | NW_004517046.1 | Scaffold1981 | 364589                  | TT                              | CC                | 1946670557               |
| SNP_P3_163011_364601 | NW_004517046.1 | Scaffold1981 | 364601                  | TT                              | AA                | 1946670559               |
| SNP_P3_163013_364638 | NW_004517046.1 | Scaffold1981 | 364638                  | AA                              | GG                | 1946670561               |
| SNP_P3_163014_365484 | NW_004517046.1 | Scaffold1981 | 365484                  | GG                              | CC                | 1946670563               |
| SNP_P3_163015_365812 | NW_004517046.1 | Scaffold1981 | 365812                  | AA                              | GG                | 1946670565               |
| SNP_P3_163016_365842 | NW_004517046.1 | Scaffold1981 | 365842                  | TT                              | AA                | 1946670567               |
| SNP_P3_163017_365845 | NW_004517046.1 | Scaffold1981 | 365845                  | GG                              | CC                | 1946670569               |
| SNP_P3_163018_366324 | NW_004517046.1 | Scaffold1981 | 366324                  | CC                              | TT                | 1946670571               |
| SNP_P3_163019_366508 | NW_004517046.1 | Scaffold1981 | 366508                  | CC                              | GG                | 1946670573               |
| SNP_P3_163020_366526 | NW_004517046.1 | Scaffold1981 | 366526                  | AA                              | CC                | 1946670575               |
| SNP_P3_163021_367136 | NW_004517046.1 | Scaffold1981 | 367136                  | GG                              | AA                | 1946670577               |
| SNP_P3_163022_368863 | NW_004517046.1 | Scaffold1981 | 368863                  | AA                              | GG                | 1946670579               |
| SNP_P3_163023_369099 | NW_004517046.1 | Scaffold1981 | 369099                  | GG                              | AA                | 1946670582               |
| SNP_P3_163024_370688 | NW_004517046.1 | Scaffold1981 | 370688                  | AA                              | TT                | 1946670584               |
| SNP_P3_163026_370748 | NW_004517046.1 | Scaffold1981 | 370748                  | GG                              | AA                | 1946670586               |
| SNP_P3_163027_370752 | NW_004517046.1 | Scaffold1981 | 370752                  | TT                              | CC                | 1946670588               |
| SNP_P3_163028_370756 | NW_004517046.1 | Scaffold1981 | 370756                  | AA                              | TT                | 1946670589               |
| SNP_P3_163029_370793 | NW_004517046.1 | Scaffold1981 | 370793                  | AA                              | GG                | 1946670591               |
| SNP_P3_163030_370796 | NW_004517046.1 | Scaffold1981 | 370796                  | TT                              | AA                | 1946670593               |
| SNP_P3_163031_370797 | NW_004517046.1 | Scaffold1981 | 370797                  | CC                              | AA                | 1946670595               |
| SNP_P3_163033_370983 | NW_004517046.1 | Scaffold1981 | 370983                  | TT                              | AA                | 1946670597               |
| SNP_P3_163034_370991 | NW_004517046.1 | Scaffold1981 | 370991                  | CC                              | TT                | 1946670599               |
| SNP_P3_163036_371685 | NW_004517046.1 | Scaffold1981 | 371685                  | CC                              | TT                | 1946670601               |
| SNP_P3_163037_371958 | NW_004517046.1 | Scaffold1981 | 371958                  | TT                              | AA                | 1946670602               |
| SNP_P3_163038_371989 | NW_004517046.1 | Scaffold1981 | 371989                  | CC                              | AA                | 1946670603               |
| SNP_P3_163039_371992 | NW_004517046.1 | Scaffold1981 | 371992                  | TT                              | GG                | 1946670604               |
| SNP_P3_163040_371998 | NW_004517046.1 | Scaffold1981 | 371998                  | GG                              | AA                | 1946670605               |
| SNP_P3_163041_372143 | NW_004517046.1 | Scaffold1981 | 372143                  | CC                              | GG                | 1946670606               |

| SNPs IDs             | Chromosome IDs | Chromosomes  | Physical positions (bp) | CDC Frontier (Reference genome) | (Pusa 256 & HPNB) | NCBI SNPdb Accession IDs |
|----------------------|----------------|--------------|-------------------------|---------------------------------|-------------------|--------------------------|
| SNP_P3_163042_372235 | NW_004517046.1 | Scaffold1981 | 372235                  | GG                              | TT                | 1946670607               |
| SNP_P3_163043_372446 | NW_004517046.1 | Scaffold1981 | 372446                  | TT                              | CC                | 1946670608               |
| SNP_P3_163044_373918 | NW_004517046.1 | Scaffold1981 | 373918                  | AA                              | GG                | 1946670609               |
| SNP_P3_163045_373920 | NW_004517046.1 | Scaffold1981 | 373920                  | TT                              | GG                | 1946670610               |
| SNP_P3_163046_373967 | NW_004517046.1 | Scaffold1981 | 373967                  | AA                              | TT                | 1946670611               |
| SNP_P3_163047_373972 | NW_004517046.1 | Scaffold1981 | 373972                  | CC                              | TT                | 1946670612               |
| SNP_P3_163049_375074 | NW_004517046.1 | Scaffold1981 | 375074                  | TT                              | CC                | 1946670613               |
| SNP_P3_163050_375093 | NW_004517046.1 | Scaffold1981 | 375093                  | TT                              | CC                | 1946670614               |
| SNP_P3_163051_375112 | NW_004517046.1 | Scaffold1981 | 375112                  | TT                              | CC                | 1946670615               |
| SNP_P3_163052_375118 | NW_004517046.1 | Scaffold1981 | 375118                  | TT                              | CC                | 1946670616               |
| SNP_P3_163053_375126 | NW_004517046.1 | Scaffold1981 | 375126                  | CC                              | GG                | 1946670617               |
| SNP_P3_163054_375404 | NW_004517046.1 | Scaffold1981 | 375404                  | AA                              | GG                | 1946670618               |
| SNP_P3_163055_375414 | NW_004517046.1 | Scaffold1981 | 375414                  | TT                              | GG                | 1946670619               |
| SNP_P3_163056_375472 | NW_004517046.1 | Scaffold1981 | 375472                  | AA                              | TT                | 1946670620               |
| SNP_P3_163057_376382 | NW_004517046.1 | Scaffold1981 | 376382                  | AA                              | GG                | 1946670621               |
| SNP_P3_163058_376398 | NW_004517046.1 | Scaffold1981 | 376398                  | TT                              | CC                | 1946670622               |
| SNP_P3_163060_377673 | NW_004517046.1 | Scaffold1981 | 377673                  | TT                              | CC                | 1946670623               |
| SNP_P3_163061_378140 | NW_004517046.1 | Scaffold1981 | 378140                  | AA                              | GG                | 1946670624               |
| SNP_P3_163062_378296 | NW_004517046.1 | Scaffold1981 | 378296                  | TT                              | GG                | 1946670625               |
| SNP_P3_163063_378462 | NW_004517046.1 | Scaffold1981 | 378462                  | TT                              | CC                | 1946670626               |
| SNP_P3_163064_378579 | NW_004517046.1 | Scaffold1981 | 378579                  | GG                              | TT                | 1946670627               |
| SNP_P3_163065_378595 | NW_004517046.1 | Scaffold1981 | 378595                  | GG                              | AA                | 1946670628               |
| SNP_P3_163066_378603 | NW_004517046.1 | Scaffold1981 | 378603                  | CC                              | TT                | 1946670629               |
| SNP_P3_163067_378654 | NW_004517046.1 | Scaffold1981 | 378654                  | GG                              | AA                | 1946670630               |
| SNP_P3_163069_383915 | NW_004517046.1 | Scaffold1981 | 383915                  | AA                              | CC                | 1946670631               |
| SNP_P3_163070_385947 | NW_004517046.1 | Scaffold1981 | 385947                  | CC                              | TT                | 1946670632               |
| SNP_P3_163071_387273 | NW_004517046.1 | Scaffold1981 | 387273                  | CC                              | TT                | 1946670633               |
| SNP_P3_163072_389286 | NW_004517046.1 | Scaffold1981 | 389286                  | GG                              | TT                | 1946670634               |
| SNP_P3_163073_390316 | NW_004517046.1 | Scaffold1981 | 390316                  | GG                              | TT                | 1946670635               |
| SNP_P3_163075_392842 | NW_004517046.1 | Scaffold1981 | 392842                  | CC                              | AA                | 1946670636               |
| SNP_P3_163076_394439 | NW_004517046.1 | Scaffold1981 | 394439                  | TT                              | AA                | 1946670637               |
| SNP_P3_163077_394565 | NW_004517046.1 | Scaffold1981 | 394565                  | CC                              | TT                | 1946670638               |
| SNP_P3_163078_395241 | NW_004517046.1 | Scaffold1981 | 395241                  | AA                              | GG                | 1946670639               |
| SNP_P3_163080_395410 | NW_004517046.1 | Scaffold1981 | 395410                  | AA                              | TT                | 1946670640               |
| SNP_P3_163081_401385 | NW_004517046.1 | Scaffold1981 | 401385                  | TT                              | AA                | 1946670641               |
| SNP_P3_163082_403222 | NW_004517046.1 | Scaffold1981 | 403222                  | AA                              | GG                | 1946670642               |
| SNP_P3_163083_403243 | NW_004517046.1 | Scaffold1981 | 403243                  | AA                              | GG                | 1946670643               |
| SNP_P3_163085_403289 | NW_004517046.1 | Scaffold1981 | 403289                  | CC                              | TT                | 1946670644               |
| SNP_P3_163086_405398 | NW_004517046.1 | Scaffold1981 | 405398                  | GG                              | TT                | 1946670646               |
| SNP_P3_163087_407992 | NW_004517046.1 | Scaffold1981 | 407992                  | AA                              | GG                | 1946670648               |
| SNP_P3_163089_408997 | NW_004517046.1 | Scaffold1981 | 408997                  | TT                              | AA                | 1946670650               |
| SNP_P3_163090_410431 | NW_004517046.1 | Scaffold1981 | 410431                  | GG                              | AA                | 1946670652               |

| SNPs IDs             | Chromosome IDs | Chromosomes  | Physical positions (bp) | CDC Frontier (Reference genome) | (Pusa 256 & HPNB) | NCBI SNPdb Accession IDs |
|----------------------|----------------|--------------|-------------------------|---------------------------------|-------------------|--------------------------|
| SNP_P3_163092_416795 | NW_004517046.1 | Scaffold1981 | 416795                  | AA                              | GG                | 1946670654               |
| SNP_P3_163093_416831 | NW_004517046.1 | Scaffold1981 | 416831                  | AA                              | GG                | 1946670655               |
| SNP_P3_163094_416833 | NW_004517046.1 | Scaffold1981 | 416833                  | AA                              | TT                | 1946670657               |
| SNP_P3_163095_416844 | NW_004517046.1 | Scaffold1981 | 416844                  | AA                              | TT                | 1946670659               |
| SNP_P3_163096_417015 | NW_004517046.1 | Scaffold1981 | 417015                  | CC                              | TT                | 1946670661               |
| SNP_P3_163097_417618 | NW_004517046.1 | Scaffold1981 | 417618                  | GG                              | CC                | 1946670663               |
| SNP_P3_163098_420019 | NW_004517046.1 | Scaffold1981 | 420019                  | AA                              | GG                | 1946670665               |
| SNP_P3_163099_420029 | NW_004517046.1 | Scaffold1981 | 420029                  | AA                              | TT                | 1946670667               |
| SNP_P3_163101_421920 | NW_004517046.1 | Scaffold1981 | 421920                  | TT                              | CC                | 1946670669               |
| SNP_P3_163102_421967 | NW_004517046.1 | Scaffold1981 | 421967                  | TT                              | CC                | 1946670672               |
| SNP_P3_163103_422015 | NW_004517046.1 | Scaffold1981 | 422015                  | TT                              | CC                | 1946670674               |
| SNP_P3_163104_423202 | NW_004517046.1 | Scaffold1981 | 423202                  | GG                              | AA                | 1946670676               |
| SNP_P3_163105_423208 | NW_004517046.1 | Scaffold1981 | 423208                  | AA                              | GG                | 1946670678               |
| SNP_P3_163106_430770 | NW_004517046.1 | Scaffold1981 | 430770                  | GG                              | TT                | 1946670680               |
| SNP_P3_163107_431361 | NW_004517046.1 | Scaffold1981 | 431361                  | AA                              | GG                | 1946670682               |
| SNP_P3_163108_1285   | NW_004517048.1 | Scaffold1983 | 1285                    | GG                              | CC                | 1946670684               |
| SNP_P3_163112_29059  | NW_004517048.1 | Scaffold1983 | 29059                   | TT                              | GG                | 1946670686               |
| SNP_P3_163113_30046  | NW_004517048.1 | Scaffold1983 | 30046                   | AA                              | CC                | 1946670688               |
| SNP_P3_163114_30048  | NW_004517048.1 | Scaffold1983 | 30048                   | TT                              | CC                | 1946670690               |
| SNP_P3_163115_30066  | NW_004517048.1 | Scaffold1983 | 30066                   | AA                              | GG                | 1946670692               |
| SNP_P3_163116_30319  | NW_004517048.1 | Scaffold1983 | 30319                   | GG                              | AA                | 1946670694               |
| SNP_P3_163117_30767  | NW_004517048.1 | Scaffold1983 | 30767                   | AA                              | TT                | 1946670696               |
| SNP_P3_163118_30768  | NW_004517048.1 | Scaffold1983 | 30768                   | AA                              | TT                | 1946670698               |
| SNP_P3_163119_34126  | NW_004517048.1 | Scaffold1983 | 34126                   | AA                              | GG                | 1946670701               |
| SNP_P3_163120_34215  | NW_004517048.1 | Scaffold1983 | 34215                   | GG                              | AA                | 1946670703               |
| SNP_P3_163122_34337  | NW_004517048.1 | Scaffold1983 | 34337                   | AA                              | TT                | 1946670705               |
| SNP_P3_163123_34553  | NW_004517048.1 | Scaffold1983 | 34553                   | TT                              | CC                | 1946670707               |
| SNP_P3_163124_34712  | NW_004517048.1 | Scaffold1983 | 34712                   | TT                              | CC                | 1946670709               |
| SNP_P3_163125_34732  | NW_004517048.1 | Scaffold1983 | 34732                   | GG                              | AA                | 1946670711               |
| SNP_P3_163126_34737  | NW_004517048.1 | Scaffold1983 | 34737                   | AA                              | CC                | 1946670713               |
| SNP_P3_163127_37635  | NW_004517048.1 | Scaffold1983 | 37635                   | GG                              | AA                | 1946670715               |
| SNP_P3_163128_37637  | NW_004517048.1 | Scaffold1983 | 37637                   | TT                              | AA                | 1946670717               |
| SNP_P3_163129_37652  | NW_004517048.1 | Scaffold1983 | 37652                   | TT                              | GG                | 1946670719               |
| SNP_P3_163130_39741  | NW_004517048.1 | Scaffold1983 | 39741                   | CC                              | AA                | 1946670721               |
| SNP_P3_163131_40054  | NW_004517048.1 | Scaffold1983 | 40054                   | TT                              | GG                | 1946670723               |
| SNP_P3_163132_47980  | NW_004517048.1 | Scaffold1983 | 47980                   | AA                              | CC                | 1946670725               |
| SNP_P3_163133_47987  | NW_004517048.1 | Scaffold1983 | 47987                   | AA                              | GG                | 1946670727               |
| SNP_P3_163134_48027  | NW_004517048.1 | Scaffold1983 | 48027                   | AA                              | GG                | 1946670729               |
| SNP_P3_163135_48281  | NW_004517048.1 | Scaffold1983 | 48281                   | CC                              | TT                | 1946670731               |
| SNP_P3_163136_48293  | NW_004517048.1 | Scaffold1983 | 48293                   | AA                              | GG                | 1946670733               |
| SNP_P3_163137_48326  | NW_004517048.1 | Scaffold1983 | 48326                   | AA                              | CC                | 1946670735               |
| SNP_P3_163138_60431  | NW_004517048.1 | Scaffold1983 | 60431                   | CC                              | AA                | 1946670737               |

| SNPs IDs             | Chromosome IDs | Chromosomes  | Physical positions (bp) | CDC Frontier (Reference genome) | (Pusa 256 & HPNB) | NCBI SNPdb Accession IDs |
|----------------------|----------------|--------------|-------------------------|---------------------------------|-------------------|--------------------------|
| SNP_P3_163139_62796  | NW_004517048.1 | Scaffold1983 | 62796                   | AA                              | CC                | 1946670739               |
| SNP_P3_163140_62806  | NW_004517048.1 | Scaffold1983 | 62806                   | AA                              | GG                | 1946670741               |
| SNP_P3_163141_62815  | NW_004517048.1 | Scaffold1983 | 62815                   | TT                              | AA                | 1946670743               |
| SNP_P3_163142_62898  | NW_004517048.1 | Scaffold1983 | 62898                   | TT                              | AA                | 1946670745               |
| SNP_P3_163143_63218  | NW_004517048.1 | Scaffold1983 | 63218                   | CC                              | AA                | 1946670747               |
| SNP_P3_163144_63409  | NW_004517048.1 | Scaffold1983 | 63409                   | TT                              | AA                | 1946670749               |
| SNP_P3_163145_63591  | NW_004517048.1 | Scaffold1983 | 63591                   | AA                              | GG                | 1946670751               |
| SNP_P3_163146_63708  | NW_004517048.1 | Scaffold1983 | 63708                   | GG                              | TT                | 1946670753               |
| SNP_P3_163148_23061  | NW_004517049.1 | Scaffold1984 | 23061                   | CC                              | TT                | 1946670755               |
| SNP_P3_163149_31291  | NW_004517049.1 | Scaffold1984 | 31291                   | TT                              | CC                | 1946670757               |
| SNP_P3_163150_55003  | NW_004517049.1 | Scaffold1984 | 55003                   | TT                              | AA                | 1946670760               |
| SNP_P3_163151_62467  | NW_004517049.1 | Scaffold1984 | 62467                   | TT                              | CC                | 1946670762               |
| SNP_P3_163152_62914  | NW_004517049.1 | Scaffold1984 | 62914                   | CC                              | TT                | 1946670764               |
| SNP_P3_163153_63840  | NW_004517049.1 | Scaffold1984 | 63840                   | CC                              | TT                | 1946670766               |
| SNP_P3_163154_65600  | NW_004517049.1 | Scaffold1984 | 65600                   | AA                              | GG                | 1946670768               |
| SNP_P3_163155_65627  | NW_004517049.1 | Scaffold1984 | 65627                   | AA                              | GG                | 1946670770               |
| SNP_P3_163156_68422  | NW_004517049.1 | Scaffold1984 | 68422                   | AA                              | GG                | 1946670772               |
| SNP_P3_163157_95163  | NW_004517049.1 | Scaffold1984 | 95163                   | AA                              | GG                | 1946670774               |
| SNP_P3_163158_96555  | NW_004517049.1 | Scaffold1984 | 96555                   | TT                              | GG                | 1946670777               |
| SNP_P3_163159_96575  | NW_004517049.1 | Scaffold1984 | 96575                   | CC                              | TT                | 1946670779               |
| SNP_P3_163160_100297 | NW_004517049.1 | Scaffold1984 | 100297                  | CC                              | AA                | 1946670781               |
| SNP_P3_163161_133630 | NW_004517049.1 | Scaffold1984 | 133630                  | CC                              | TT                | 1946670783               |
| SNP_P3_163163_133632 | NW_004517049.1 | Scaffold1984 | 133632                  | TT                              | CC                | 1946670785               |
| SNP_P3_163164_134176 | NW_004517049.1 | Scaffold1984 | 134176                  | GG                              | AA                | 1946670787               |
| SNP_P3_163165_136048 | NW_004517049.1 | Scaffold1984 | 136048                  | GG                              | AA                | 1946670789               |
| SNP_P3_163166_138110 | NW_004517049.1 | Scaffold1984 | 138110                  | TT                              | CC                | 1946670791               |
| SNP_P3_163167_140374 | NW_004517049.1 | Scaffold1984 | 140374                  | TT                              | CC                | 1946670793               |
| SNP_P3_163168_171935 | NW_004517049.1 | Scaffold1984 | 171935                  | GG                              | AA                | 1946670795               |
| SNP_P3_163169_172470 | NW_004517049.1 | Scaffold1984 | 172470                  | TT                              | GG                | 1946670797               |
| SNP_P3_163170_172505 | NW_004517049.1 | Scaffold1984 | 172505                  | TT                              | CC                | 1946670798               |
| SNP_P3_163171_172530 | NW_004517049.1 | Scaffold1984 | 172530                  | CC                              | TT                | 1946670800               |
| SNP_P3_163172_172533 | NW_004517049.1 | Scaffold1984 | 172533                  | TT                              | GG                | 1946670802               |
| SNP_P3_163173_172543 | NW_004517049.1 | Scaffold1984 | 172543                  | GG                              | AA                | 1946670804               |
| SNP_P3_163174_194124 | NW_004517049.1 | Scaffold1984 | 194124                  | CC                              | AA                | 1946670806               |
| SNP_P3_163175_243891 | NW_004517049.1 | Scaffold1984 | 243891                  | AA                              | TT                | 1946670809               |
| SNP_P3_163176_243949 | NW_004517049.1 | Scaffold1984 | 243949                  | TT                              | GG                | 1946670811               |
| SNP_P3_163177_243972 | NW_004517049.1 | Scaffold1984 | 243972                  | GG                              | TT                | 1946670814               |
| SNP_P3_163178_243994 | NW_004517049.1 | Scaffold1984 | 243994                  | AA                              | GG                | 1946670816               |
| SNP_P3_163179_243997 | NW_004517049.1 | Scaffold1984 | 243997                  | AA                              | GG                | 1946670818               |
| SNP_P3_163180_244006 | NW_004517049.1 | Scaffold1984 | 244006                  | TT                              | GG                | 1946670820               |
| SNP_P3_163181_244009 | NW_004517049.1 | Scaffold1984 | 244009                  | AA                              | GG                | 1946670822               |
| SNP_P3_163182_244125 | NW_004517049.1 | Scaffold1984 | 244125                  | TT                              | AA                | 1946670824               |

| SNPs IDs             | Chromosome IDs | Chromosomes  | Physical positions (bp) | CDC Frontier (Reference genome) | (Pusa 256 & HPNB) | NCBI SNPdb Accession IDs |
|----------------------|----------------|--------------|-------------------------|---------------------------------|-------------------|--------------------------|
| SNP_P3_163183_244290 | NW_004517049.1 | Scaffold1984 | 244290                  | AA                              | CC                | 1946670826               |
| SNP_P3_163184_244382 | NW_004517049.1 | Scaffold1984 | 244382                  | AA                              | GG                | 1946670829               |
| SNP_P3_163185_244383 | NW_004517049.1 | Scaffold1984 | 244383                  | GG                              | AA                | 1946670831               |
| SNP_P3_163186_244461 | NW_004517049.1 | Scaffold1984 | 244461                  | AA                              | GG                | 1946670833               |
| SNP_P3_163187_244511 | NW_004517049.1 | Scaffold1984 | 244511                  | AA                              | GG                | 1946670835               |
| SNP_P3_163188_244513 | NW_004517049.1 | Scaffold1984 | 244513                  | AA                              | GG                | 1946670837               |
| SNP_P3_163189_251492 | NW_004517049.1 | Scaffold1984 | 251492                  | CC                              | AA                | 1946670839               |
| SNP_P3_163190_251498 | NW_004517049.1 | Scaffold1984 | 251498                  | TT                              | CC                | 1946670841               |
| SNP_P3_163191_251607 | NW_004517049.1 | Scaffold1984 | 251607                  | TT                              | CC                | 1946670843               |
| SNP_P3_163192_251614 | NW_004517049.1 | Scaffold1984 | 251614                  | GG                              | AA                | 1946670846               |
| SNP_P3_163193_251618 | NW_004517049.1 | Scaffold1984 | 251618                  | CC                              | GG                | 1946670848               |
| SNP_P3_163194_251622 | NW_004517049.1 | Scaffold1984 | 251622                  | TT                              | CC                | 1946670849               |
| SNP_P3_163195_251651 | NW_004517049.1 | Scaffold1984 | 251651                  | TT                              | CC                | 1946670850               |
| SNP_P3_163196_251801 | NW_004517049.1 | Scaffold1984 | 251801                  | CC                              | TT                | 1946670852               |
| SNP_P3_163197_253206 | NW_004517049.1 | Scaffold1984 | 253206                  | TT                              | GG                | 1946670854               |
| SNP_P3_163198_253263 | NW_004517049.1 | Scaffold1984 | 253263                  | GG                              | AA                | 1946670856               |
| SNP_P3_163199_253265 | NW_004517049.1 | Scaffold1984 | 253265                  | CC                              | TT                | 1946670858               |
| SNP_P3_163200_253317 | NW_004517049.1 | Scaffold1984 | 253317                  | AA                              | GG                | 1946670860               |
| SNP_P3_163201_253463 | NW_004517049.1 | Scaffold1984 | 253463                  | AA                              | TT                | 1946670862               |
| SNP_P3_163202_253667 | NW_004517049.1 | Scaffold1984 | 253667                  | CC                              | TT                | 1946670864               |
| SNP_P3_163203_253748 | NW_004517049.1 | Scaffold1984 | 253748                  | TT                              | AA                | 1946670866               |
| SNP_P3_163204_253764 | NW_004517049.1 | Scaffold1984 | 253764                  | GG                              | AA                | 1946670868               |
| SNP_P3_163205_253837 | NW_004517049.1 | Scaffold1984 | 253837                  | GG                              | CC                | 1946670870               |
| SNP_P3_163206_253846 | NW_004517049.1 | Scaffold1984 | 253846                  | CC                              | GG                | 1946670871               |
| SNP_P3_163207_255517 | NW_004517049.1 | Scaffold1984 | 255517                  | CC                              | TT                | 1946670872               |
| SNP_P3_163208_255532 | NW_004517049.1 | Scaffold1984 | 255532                  | TT                              | CC                | 1946670873               |
| SNP_P3_163209_255868 | NW_004517049.1 | Scaffold1984 | 255868                  | AA                              | CC                | 1946670874               |
| SNP_P3_163210_284010 | NW_004517049.1 | Scaffold1984 | 284010                  | GG                              | AA                | 1946670875               |
| SNP_P3_163211_307380 | NW_004517049.1 | Scaffold1984 | 307380                  | TT                              | AA                | 1946670876               |
| SNP_P3_163212_323144 | NW_004517049.1 | Scaffold1984 | 323144                  | TT                              | AA                | 1946670878               |
| SNP_P3_163214_323575 | NW_004517049.1 | Scaffold1984 | 323575                  | CC                              | TT                | 1946670879               |
| SNP_P3_163215_323593 | NW_004517049.1 | Scaffold1984 | 323593                  | TT                              | CC                | 1946670880               |
| SNP_P3_163216_323614 | NW_004517049.1 | Scaffold1984 | 323614                  | CC                              | TT                | 1946670881               |
| SNP_P3_163218_323682 | NW_004517049.1 | Scaffold1984 | 323682                  | TT                              | CC                | 1946670882               |
| SNP_P3_163219_323685 | NW_004517049.1 | Scaffold1984 | 323685                  | TT                              | CC                | 1946670883               |
| SNP_P3_163220_323688 | NW_004517049.1 | Scaffold1984 | 323688                  | AA                              | GG                | 1946670884               |
| SNP_P3_163221_323706 | NW_004517049.1 | Scaffold1984 | 323706                  | GG                              | AA                | 1946670885               |
| SNP_P3_163222_323718 | NW_004517049.1 | Scaffold1984 | 323718                  | TT                              | CC                | 1946670886               |
| SNP_P3_163223_323802 | NW_004517049.1 | Scaffold1984 | 323802                  | TT                              | CC                | 1946670887               |
| SNP_P3_163224_323847 | NW_004517049.1 | Scaffold1984 | 323847                  | AA                              | GG                | 1946670888               |
| SNP_P3_163225_323868 | NW_004517049.1 | Scaffold1984 | 323868                  | CC                              | TT                | 1946670890               |
| SNP_P3_163226_325158 | NW_004517049.1 | Scaffold1984 | 325158                  | GG                              | AA                | 1946670891               |



| SNPs IDs             | Chromosome IDs | Chromosomes  | Physical positions (bp) | CDC Frontier (Reference genome) | (Pusa 256 & HPNB) | NCBI SNPdb Accession IDs |
|----------------------|----------------|--------------|-------------------------|---------------------------------|-------------------|--------------------------|
| SNP_P3_163227_325206 | NW_004517049.1 | Scaffold1984 | 325206                  | GG                              | AA                | 1946670892               |
| SNP_P3_163228_325320 | NW_004517049.1 | Scaffold1984 | 325320                  | AA                              | GG                | 1946670893               |
| SNP_P3_163229_325346 | NW_004517049.1 | Scaffold1984 | 325346                  | AA                              | GG                | 1946670894               |
| SNP_P3_163230_325392 | NW_004517049.1 | Scaffold1984 | 325392                  | TT                              | CC                | 1946670895               |
| SNP_P3_163231_325395 | NW_004517049.1 | Scaffold1984 | 325395                  | CC                              | TT                | 1946670896               |
| SNP_P3_163232_325407 | NW_004517049.1 | Scaffold1984 | 325407                  | CC                              | TT                | 1946670897               |
| SNP_P3_163234_325550 | NW_004517049.1 | Scaffold1984 | 325550                  | TT                              | CC                | 1946670898               |
| SNP_P3_163235_325559 | NW_004517049.1 | Scaffold1984 | 325559                  | TT                              | CC                | 1946670899               |
| SNP_P3_163236_325586 | NW_004517049.1 | Scaffold1984 | 325586                  | GG                              | AA                | 1946670900               |
| SNP_P3_163237_325685 | NW_004517049.1 | Scaffold1984 | 325685                  | GG                              | AA                | 1946670901               |
| SNP_P3_163238_325713 | NW_004517049.1 | Scaffold1984 | 325713                  | GG                              | AA                | 1946670903               |
| SNP_P3_163239_325742 | NW_004517049.1 | Scaffold1984 | 325742                  | TT                              | CC                | 1946670905               |
| SNP_P3_163241_325754 | NW_004517049.1 | Scaffold1984 | 325754                  | AA                              | GG                | 1946670907               |
| SNP_P3_163242_325761 | NW_004517049.1 | Scaffold1984 | 325761                  | AA                              | CC                | 1946670909               |
| SNP_P3_163243_325779 | NW_004517049.1 | Scaffold1984 | 325779                  | TT                              | CC                | 1946670911               |
| SNP_P3_163244_325784 | NW_004517049.1 | Scaffold1984 | 325784                  | GG                              | AA                | 1946670913               |
| SNP_P3_163245_325790 | NW_004517049.1 | Scaffold1984 | 325790                  | GG                              | AA                | 1946670915               |
| SNP_P3_163246_328463 | NW_004517049.1 | Scaffold1984 | 328463                  | GG                              | AA                | 1946670917               |
| SNP_P3_163247_328859 | NW_004517049.1 | Scaffold1984 | 328859                  | TT                              | CC                | 1946670918               |
| SNP_P3_163248_333533 | NW_004517049.1 | Scaffold1984 | 333533                  | AA                              | TT                | 1946670920               |
| SNP_P3_163249_342780 | NW_004517049.1 | Scaffold1984 | 342780                  | TT                              | CC                | 1946670922               |
| SNP_P3_163250_342913 | NW_004517049.1 | Scaffold1984 | 342913                  | AA                              | GG                | 1946670924               |
| SNP_P3_163251_342944 | NW_004517049.1 | Scaffold1984 | 342944                  | AA                              | GG                | 1946670926               |
| SNP_P3_163252_342970 | NW_004517049.1 | Scaffold1984 | 342970                  | TT                              | GG                | 1946670928               |
| SNP_P3_163253_342999 | NW_004517049.1 | Scaffold1984 | 342999                  | AA                              | GG                | 1946670930               |
| SNP_P3_163254_343354 | NW_004517049.1 | Scaffold1984 | 343354                  | TT                              | CC                | 1946670932               |
| SNP_P3_163255_343358 | NW_004517049.1 | Scaffold1984 | 343358                  | CC                              | TT                | 1946670934               |
| SNP_P3_163256_343367 | NW_004517049.1 | Scaffold1984 | 343367                  | TT                              | GG                | 1946670936               |
| SNP_P3_163257_343380 | NW_004517049.1 | Scaffold1984 | 343380                  | TT                              | GG                | 1946670938               |
| SNP_P3_163258_343382 | NW_004517049.1 | Scaffold1984 | 343382                  | GG                              | AA                | 1946670940               |
| SNP_P3_163259_343385 | NW_004517049.1 | Scaffold1984 | 343385                  | TT                              | AA                | 1946670942               |
| SNP_P3_163260_343399 | NW_004517049.1 | Scaffold1984 | 343399                  | TT                              | CC                | 1946670944               |
| SNP_P3_163261_343416 | NW_004517049.1 | Scaffold1984 | 343416                  | TT                              | CC                | 1946670946               |
| SNP_P3_163262_343449 | NW_004517049.1 | Scaffold1984 | 343449                  | AA                              | GG                | 1946670948               |
| SNP_P3_163263_345913 | NW_004517049.1 | Scaffold1984 | 345913                  | TT                              | CC                | 1946670950               |
| SNP_P3_163264_359226 | NW_004517049.1 | Scaffold1984 | 359226                  | TT                              | CC                | 1946670952               |
| SNP_P3_163265_359978 | NW_004517049.1 | Scaffold1984 | 359978                  | AA                              | GG                | 1946670954               |
| SNP_P3_163266_360007 | NW_004517049.1 | Scaffold1984 | 360007                  | AA                              | GG                | 1946670956               |
| SNP_P3_163267_360122 | NW_004517049.1 | Scaffold1984 | 360122                  | CC                              | AA                | 1946670957               |
| SNP_P3_163268_360316 | NW_004517049.1 | Scaffold1984 | 360316                  | AA                              | GG                | 1946670959               |
| SNP_P3_163269_362646 | NW_004517049.1 | Scaffold1984 | 362646                  | AA                              | CC                | 1946670962               |
| SNP_P3_163270_363077 | NW_004517049.1 | Scaffold1984 | 363077                  | CC                              | TT                | 1946670963               |

| SNPs IDs             | Chromosome IDs | Chromosomes  | Physical positions (bp) | CDC Frontier (Reference genome) | (Pusa 256 & HPNB) | NCBI SNPdb Accession IDs |
|----------------------|----------------|--------------|-------------------------|---------------------------------|-------------------|--------------------------|
| SNP_P3_163271_384349 | NW_004517049.1 | Scaffold1984 | 384349                  | TT                              | AA                | 1946670965               |
| SNP_P3_163272_384350 | NW_004517049.1 | Scaffold1984 | 384350                  | CC                              | AA                | 1946670967               |
| SNP_P3_163273_384351 | NW_004517049.1 | Scaffold1984 | 384351                  | AA                              | TT                | 1946670969               |
| SNP_P3_163274_384352 | NW_004517049.1 | Scaffold1984 | 384352                  | AA                              | TT                | 1946670970               |
| SNP_P3_163275_384353 | NW_004517049.1 | Scaffold1984 | 384353                  | AA                              | TT                | 1946670971               |
| SNP_P3_163276_384356 | NW_004517049.1 | Scaffold1984 | 384356                  | CC                              | AA                | 1946670972               |
| SNP_P3_163277_384358 | NW_004517049.1 | Scaffold1984 | 384358                  | CC                              | AA                | 1946670973               |
| SNP_P3_163278_384374 | NW_004517049.1 | Scaffold1984 | 384374                  | CC                              | AA                | 1946670976               |
| SNP_P3_163279_384375 | NW_004517049.1 | Scaffold1984 | 384375                  | AA                              | TT                | 1946670978               |
| SNP_P3_163280_384462 | NW_004517049.1 | Scaffold1984 | 384462                  | GG                              | AA                | 1946670980               |
| SNP_P3_163281_384722 | NW_004517049.1 | Scaffold1984 | 384722                  | AA                              | GG                | 1946670982               |
| SNP_P3_163282_384744 | NW_004517049.1 | Scaffold1984 | 384744                  | TT                              | GG                | 1946670984               |
| SNP_P3_163283_386604 | NW_004517049.1 | Scaffold1984 | 386604                  | AA                              | TT                | 1946670986               |
| SNP_P3_163284_386618 | NW_004517049.1 | Scaffold1984 | 386618                  | TT                              | AA                | 1946670988               |
| SNP_P3_163285_386835 | NW_004517049.1 | Scaffold1984 | 386835                  | AA                              | GG                | 1946670991               |
| SNP_P3_163286_386943 | NW_004517049.1 | Scaffold1984 | 386943                  | TT                              | CC                | 1946670993               |
| SNP_P3_163287_386961 | NW_004517049.1 | Scaffold1984 | 386961                  | CC                              | AA                | 1946670995               |
| SNP_P3_163288_386963 | NW_004517049.1 | Scaffold1984 | 386963                  | CC                              | TT                | 1946670997               |
| SNP_P3_163289_387057 | NW_004517049.1 | Scaffold1984 | 387057                  | GG                              | AA                | 1946670999               |
| SNP_P3_163290_387105 | NW_004517049.1 | Scaffold1984 | 387105                  | CC                              | TT                | 1946671001               |
| SNP_P3_163291_387139 | NW_004517049.1 | Scaffold1984 | 387139                  | TT                              | CC                | 1946671003               |
| SNP_P3_163292_387239 | NW_004517049.1 | Scaffold1984 | 387239                  | TT                              | AA                | 1946671005               |
| SNP_P3_163293_387326 | NW_004517049.1 | Scaffold1984 | 387326                  | TT                              | AA                | 1946671007               |
| SNP_P3_163294_4436   | NW_004517050.1 | Scaffold1985 | 4436                    | GG                              | AA                | 1946671009               |
| SNP_P3_163295_4457   | NW_004517050.1 | Scaffold1985 | 4457                    | TT                              | CC                | 1946671011               |
| SNP_P3_163296_5017   | NW_004517050.1 | Scaffold1985 | 5017                    | GG                              | TT                | 1946671013               |
| SNP_P3_163297_5148   | NW_004517050.1 | Scaffold1985 | 5148                    | TT                              | CC                | 1946671015               |
| SNP_P3_163298_9259   | NW_004517050.1 | Scaffold1985 | 9259                    | AA                              | GG                | 1946671017               |
| SNP_P3_163300_61636  | NW_004517050.1 | Scaffold1985 | 61636                   | GG                              | AA                | 1946671019               |
| SNP_P3_163301_87218  | NW_004517050.1 | Scaffold1985 | 87218                   | GG                              | AA                | 1946671021               |
| SNP_P3_163302_87243  | NW_004517050.1 | Scaffold1985 | 87243                   | AA                              | GG                | 1946671023               |
| SNP_P3_163303_87244  | NW_004517050.1 | Scaffold1985 | 87244                   | CC                              | TT                | 1946671025               |
| SNP_P3_163304_109641 | NW_004517050.1 | Scaffold1985 | 109641                  | GG                              | AA                | 1946671027               |
| SNP_P3_163305_109696 | NW_004517050.1 | Scaffold1985 | 109696                  | GG                              | CC                | 1946671029               |
| SNP_P3_163306_109698 | NW_004517050.1 | Scaffold1985 | 109698                  | TT                              | CC                | 1946671031               |
| SNP_P3_163308_109751 | NW_004517050.1 | Scaffold1985 | 109751                  | AA                              | GG                | 1946671033               |
| SNP_P3_163309_109805 | NW_004517050.1 | Scaffold1985 | 109805                  | AA                              | GG                | 1946671035               |
| SNP_P3_163310_109834 | NW_004517050.1 | Scaffold1985 | 109834                  | AA                              | GG                | 1946671037               |
| SNP_P3_163311_110115 | NW_004517050.1 | Scaffold1985 | 110115                  | AA                              | TT                | 1946671039               |
| SNP_P3_163312_135426 | NW_004517050.1 | Scaffold1985 | 135426                  | TT                              | CC                | 1946671041               |
| SNP_P3_163313_135753 | NW_004517050.1 | Scaffold1985 | 135753                  | AA                              | TT                | 1946671043               |
| SNP_P3_163314_141811 | NW_004517050.1 | Scaffold1985 | 141811                  | TT                              | CC                | 1946671044               |

| SNPs IDs             | Chromosome IDs | Chromosomes  | Physical positions (bp) | CDC Frontier (Reference genome) | (Pusa 256 & HPNB) | NCBI SNPdb Accession IDs |
|----------------------|----------------|--------------|-------------------------|---------------------------------|-------------------|--------------------------|
| SNP_P3_163315_966    | NW_004517052.1 | Scaffold1987 | 966                     | CC                              | TT                | 1946671046               |
| SNP_P3_163316_973    | NW_004517052.1 | Scaffold1987 | 973                     | TT                              | AA                | 1946671048               |
| SNP_P3_163317_3744   | NW_004517052.1 | Scaffold1987 | 3744                    | TT                              | CC                | 1946671050               |
| SNP_P3_163318_3745   | NW_004517052.1 | Scaffold1987 | 3745                    | TT                              | AA                | 1946671052               |
| SNP_P3_163319_257    | NW_004517053.1 | Scaffold1988 | 257                     | TT                              | CC                | 1946671054               |
| SNP_P3_163321_4406   | NW_004517053.1 | Scaffold1988 | 4406                    | TT                              | CC                | 1946671056               |
| SNP_P3_163323_4590   | NW_004517053.1 | Scaffold1988 | 4590                    | CC                              | TT                | 1946671058               |
| SNP_P3_163324_4737   | NW_004517053.1 | Scaffold1988 | 4737                    | TT                              | CC                | 1946671060               |
| SNP_P3_163325_4794   | NW_004517053.1 | Scaffold1988 | 4794                    | AA                              | GG                | 1946671062               |
| SNP_P3_163326_4798   | NW_004517053.1 | Scaffold1988 | 4798                    | GG                              | CC                | 1946671064               |
| SNP_P3_163327_4965   | NW_004517053.1 | Scaffold1988 | 4965                    | CC                              | GG                | 1946671066               |
| SNP_P3_163328_4988   | NW_004517053.1 | Scaffold1988 | 4988                    | GG                              | AA                | 1946671068               |
| SNP_P3_163329_5207   | NW_004517053.1 | Scaffold1988 | 5207                    | CC                              | TT                | 1946671070               |
| SNP_P3_163330_7354   | NW_004517053.1 | Scaffold1988 | 7354                    | GG                              | TT                | 1946671072               |
| SNP_P3_163331_7447   | NW_004517053.1 | Scaffold1988 | 7447                    | GG                              | TT                | 1946671074               |
| SNP_P3_163332_7515   | NW_004517053.1 | Scaffold1988 | 7515                    | TT                              | AA                | 1946671076               |
| SNP_P3_163333_7756   | NW_004517053.1 | Scaffold1988 | 7756                    | TT                              | GG                | 1946671078               |
| SNP_P3_163335_8442   | NW_004517053.1 | Scaffold1988 | 8442                    | CC                              | TT                | 1946671079               |
| SNP_P3_163336_14100  | NW_004517053.1 | Scaffold1988 | 14100                   | CC                              | TT                | 1946671081               |
| SNP_P3_163337_4319   | NW_004517055.1 | Scaffold1990 | 4319                    | GG                              | TT                | 1946671083               |
| SNP_P3_163338_4399   | NW_004517055.1 | Scaffold1990 | 4399                    | AA                              | GG                | 1946671085               |
| SNP_P3_163339_4406   | NW_004517055.1 | Scaffold1990 | 4406                    | TT                              | CC                | 1946671087               |
| SNP_P3_163340_4473   | NW_004517055.1 | Scaffold1990 | 4473                    | AA                              | GG                | 1946671089               |
| SNP_P3_163341_8863   | NW_004517055.1 | Scaffold1990 | 8863                    | GG                              | AA                | 1946671091               |
| SNP_P3_163342_22352  | NW_004517055.1 | Scaffold1990 | 22352                   | AA                              | GG                | 1946671093               |
| SNP_P3_163343_100123 | NW_004517056.1 | Scaffold1991 | 100123                  | TT                              | CC                | 1946671095               |
| SNP_P3_163344_100164 | NW_004517056.1 | Scaffold1991 | 100164                  | TT                              | AA                | 1946671097               |
| SNP_P3_163345_100176 | NW_004517056.1 | Scaffold1991 | 100176                  | TT                              | CC                | 1946671099               |
| SNP_P3_163347_105189 | NW_004517056.1 | Scaffold1991 | 105189                  | TT                              | GG                | 1946671101               |
| SNP_P3_163348_113487 | NW_004517056.1 | Scaffold1991 | 113487                  | CC                              | AA                | 1946671103               |
| SNP_P3_163349_113518 | NW_004517056.1 | Scaffold1991 | 113518                  | AA                              | GG                | 1946671105               |
| SNP_P3_163350_113583 | NW_004517056.1 | Scaffold1991 | 113583                  | GG                              | AA                | 1946671107               |
| SNP_P3_163351_113612 | NW_004517056.1 | Scaffold1991 | 113612                  | GG                              | CC                | 1946671109               |
| SNP_P3_163352_113915 | NW_004517056.1 | Scaffold1991 | 113915                  | TT                              | CC                | 1946671111               |
| SNP_P3_163353_113975 | NW_004517056.1 | Scaffold1991 | 113975                  | GG                              | AA                | 1946671113               |
| SNP_P3_163354_113988 | NW_004517056.1 | Scaffold1991 | 113988                  | AA                              | GG                | 1946671115               |
| SNP_P3_163355_113996 | NW_004517056.1 | Scaffold1991 | 113996                  | TT                              | CC                | 1946671116               |
| SNP_P3_163356_113998 | NW_004517056.1 | Scaffold1991 | 113998                  | GG                              | AA                | 1946671118               |
| SNP_P3_163357_114003 | NW_004517056.1 | Scaffold1991 | 114003                  | CC                              | TT                | 1946671120               |
| SNP_P3_163358_114007 | NW_004517056.1 | Scaffold1991 | 114007                  | TT                              | CC                | 1946671122               |
| SNP_P3_163359_114008 | NW_004517056.1 | Scaffold1991 | 114008                  | CC                              | TT                | 1946671124               |
| SNP_P3_163360_114325 | NW_004517056.1 | Scaffold1991 | 114325                  | AA                              | CC                | 1946671126               |

| SNPs IDs            | Chromosome IDs | Chromosomes  | Physical positions (bp) | CDC Frontier (Reference genome) | (Pusa 256 & HPNB) | NCBI SNPdb Accession IDs |
|---------------------|----------------|--------------|-------------------------|---------------------------------|-------------------|--------------------------|
| SNP_P3_163362_4127  | NW_004517060.1 | Scaffold1995 | 4127                    | GG                              | TT                | 1946671128               |
| SNP_P3_163363_744   | NW_004517061.1 | Scaffold1996 | 744                     | GG                              | AA                | 1946671130               |
| SNP_P3_163364_895   | NW_004517061.1 | Scaffold1996 | 895                     | CC                              | TT                | 1946671132               |
| SNP_P3_163365_1036  | NW_004517061.1 | Scaffold1996 | 1036                    | CC                              | TT                | 1946671135               |
| SNP_P3_163366_1039  | NW_004517061.1 | Scaffold1996 | 1039                    | CC                              | TT                | 1946671138               |
| SNP_P3_163367_1041  | NW_004517061.1 | Scaffold1996 | 1041                    | GG                              | AA                | 1946671140               |
| SNP_P3_163368_1057  | NW_004517061.1 | Scaffold1996 | 1057                    | GG                              | AA                | 1946671143               |
| SNP_P3_163369_1084  | NW_004517061.1 | Scaffold1996 | 1084                    | CC                              | TT                | 1946671145               |
| SNP_P3_163370_1099  | NW_004517061.1 | Scaffold1996 | 1099                    | CC                              | AA                | 1946671147               |
| SNP_P3_163373_5001  | NW_004517061.1 | Scaffold1996 | 5001                    | GG                              | AA                | 1946671149               |
| SNP_P3_163374_5022  | NW_004517061.1 | Scaffold1996 | 5022                    | CC                              | TT                | 1946671151               |
| SNP_P3_163375_5024  | NW_004517061.1 | Scaffold1996 | 5024                    | CC                              | TT                | 1946671153               |
| SNP_P3_163376_5025  | NW_004517061.1 | Scaffold1996 | 5025                    | GG                              | AA                | 1946671155               |
| SNP_P3_163377_5027  | NW_004517061.1 | Scaffold1996 | 5027                    | GG                              | TT                | 1946671157               |
| SNP_P3_163378_5206  | NW_004517061.1 | Scaffold1996 | 5206                    | AA                              | CC                | 1946671160               |
| SNP_P3_163379_5376  | NW_004517061.1 | Scaffold1996 | 5376                    | AA                              | GG                | 1946671162               |
| SNP_P3_163380_5502  | NW_004517061.1 | Scaffold1996 | 5502                    | GG                              | AA                | 1946671164               |
| SNP_P3_163381_5518  | NW_004517061.1 | Scaffold1996 | 5518                    | GG                              | TT                | 1946671166               |
| SNP_P3_163382_5563  | NW_004517061.1 | Scaffold1996 | 5563                    | AA                              | GG                | 1946671168               |
| SNP_P3_163383_5631  | NW_004517061.1 | Scaffold1996 | 5631                    | CC                              | TT                | 1946671170               |
| SNP_P3_163385_5745  | NW_004517061.1 | Scaffold1996 | 5745                    | CC                              | AA                | 1946671172               |
| SNP_P3_163386_5863  | NW_004517061.1 | Scaffold1996 | 5863                    | GG                              | AA                | 1946671175               |
| SNP_P3_163387_5866  | NW_004517061.1 | Scaffold1996 | 5866                    | TT                              | CC                | 1946671177               |
| SNP_P3_163388_5902  | NW_004517061.1 | Scaffold1996 | 5902                    | TT                              | AA                | 1946671179               |
| SNP_P3_163389_5947  | NW_004517061.1 | Scaffold1996 | 5947                    | CC                              | TT                | 1946671181               |
| SNP_P3_163391_6048  | NW_004517061.1 | Scaffold1996 | 6048                    | GG                              | AA                | 1946671183               |
| SNP_P3_163392_6074  | NW_004517061.1 | Scaffold1996 | 6074                    | AA                              | GG                | 1946671185               |
| SNP_P3_163393_6160  | NW_004517061.1 | Scaffold1996 | 6160                    | AA                              | GG                | 1946671187               |
| SNP_P3_163394_6221  | NW_004517061.1 | Scaffold1996 | 6221                    | TT                              | CC                | 1946671189               |
| SNP_P3_163395_420   | NW_004517062.1 | Scaffold1997 | 420                     | AA                              | CC                | 1946671191               |
| SNP_P3_163396_22303 | NW_004517062.1 | Scaffold1997 | 22303                   | TT                              | AA                | 1946671193               |
| SNP_P3_163397_39257 | NW_004517062.1 | Scaffold1997 | 39257                   | GG                              | AA                | 1946671195               |
| SNP_P3_163398_433   | NW_004517063.1 | Scaffold1999 | 433                     | AA                              | TT                | 1946671197               |
| SNP_P3_163399_2958  | NW_004517063.1 | Scaffold1999 | 2958                    | AA                              | GG                | 1946671199               |
| SNP_P3_163400_3035  | NW_004517063.1 | Scaffold1999 | 3035                    | GG                              | AA                | 1946671201               |
| SNP_P3_163401_3092  | NW_004517063.1 | Scaffold1999 | 3092                    | TT                              | CC                | 1946671203               |
| SNP_P3_163402_4196  | NW_004517063.1 | Scaffold1999 | 4196                    | TT                              | GG                | 1946671205               |
| SNP_P3_163403_4458  | NW_004517063.1 | Scaffold1999 | 4458                    | GG                              | AA                | 1946671206               |
| SNP_P3_163404_6213  | NW_004517063.1 | Scaffold1999 | 6213                    | CC                              | TT                | 1946671207               |
| SNP_P3_163405_7310  | NW_004517063.1 | Scaffold1999 | 7310                    | CC                              | AA                | 1946671208               |
| SNP_P3_163406_7557  | NW_004517063.1 | Scaffold1999 | 7557                    | AA                              | CC                | 1946671210               |
| SNP_P3_163407_7576  | NW_004517063.1 | Scaffold1999 | 7576                    | TT                              | GG                | 1946671212               |

| SNPs IDs            | Chromosome IDs | Chromosomes  | Physical positions (bp) | CDC Frontier (Reference genome) | (Pusa 256 & HPNB) | NCBI SNPdb Accession IDs |
|---------------------|----------------|--------------|-------------------------|---------------------------------|-------------------|--------------------------|
| SNP_P3_163408_7913  | NW_004517063.1 | Scaffold1999 | 7913                    | AA                              | TT                | 1946671214               |
| SNP_P3_163409_8810  | NW_004517063.1 | Scaffold1999 | 8810                    | GG                              | CC                | 1946671216               |
| SNP_P3_163410_10633 | NW_004517063.1 | Scaffold1999 | 10633                   | TT                              | CC                | 1946671218               |
| SNP_P3_163412_24572 | NW_004517063.1 | Scaffold1999 | 24572                   | CC                              | AA                | 1946671220               |
| SNP_P3_163413_24873 | NW_004517063.1 | Scaffold1999 | 24873                   | CC                              | AA                | 1946671222               |
| SNP_P3_163414_25627 | NW_004517063.1 | Scaffold1999 | 25627                   | TT                              | CC                | 1946671224               |
| SNP_P3_163415_25728 | NW_004517063.1 | Scaffold1999 | 25728                   | AA                              | TT                | 1946671226               |
| SNP_P3_163416_25931 | NW_004517063.1 | Scaffold1999 | 25931                   | GG                              | TT                | 1946671228               |
| SNP_P3_163417_26052 | NW_004517063.1 | Scaffold1999 | 26052                   | TT                              | AA                | 1946671230               |
| SNP_P3_163418_27769 | NW_004517063.1 | Scaffold1999 | 27769                   | GG                              | AA                | 1946671232               |
| SNP_P3_163419_28005 | NW_004517063.1 | Scaffold1999 | 28005                   | TT                              | CC                | 1946671234               |
| SNP_P3_163420_28859 | NW_004517063.1 | Scaffold1999 | 28859                   | CC                              | GG                | 1946671236               |
| SNP_P3_163422_29821 | NW_004517063.1 | Scaffold1999 | 29821                   | GG                              | AA                | 1946671238               |
| SNP_P3_163424_29969 | NW_004517063.1 | Scaffold1999 | 29969                   | AA                              | GG                | 1946671240               |
| SNP_P3_163425_30248 | NW_004517063.1 | Scaffold1999 | 30248                   | GG                              | CC                | 1946671242               |
| SNP_P3_163426_30249 | NW_004517063.1 | Scaffold1999 | 30249                   | GG                              | AA                | 1946671244               |
| SNP_P3_163427_30301 | NW_004517063.1 | Scaffold1999 | 30301                   | CC                              | TT                | 1946671246               |
| SNP_P3_163428_30319 | NW_004517063.1 | Scaffold1999 | 30319                   | TT                              | AA                | 1946671248               |
| SNP_P3_163429_30490 | NW_004517063.1 | Scaffold1999 | 30490                   | CC                              | TT                | 1946671250               |
| SNP_P3_163430_30530 | NW_004517063.1 | Scaffold1999 | 30530                   | TT                              | CC                | 1946671252               |
| SNP_P3_163431_30604 | NW_004517063.1 | Scaffold1999 | 30604                   | AA                              | GG                | 1946671254               |
| SNP_P3_163432_30698 | NW_004517063.1 | Scaffold1999 | 30698                   | TT                              | AA                | 1946671256               |
| SNP_P3_163433_30719 | NW_004517063.1 | Scaffold1999 | 30719                   | AA                              | GG                | 1946671258               |
| SNP_P3_163434_30741 | NW_004517063.1 | Scaffold1999 | 30741                   | CC                              | TT                | 1946671261               |
| SNP_P3_163435_30799 | NW_004517063.1 | Scaffold1999 | 30799                   | CC                              | TT                | 1946671263               |
| SNP_P3_163436_31052 | NW_004517063.1 | Scaffold1999 | 31052                   | CC                              | AA                | 1946671265               |
| SNP_P3_163437_31258 | NW_004517063.1 | Scaffold1999 | 31258                   | GG                              | AA                | 1946671267               |
| SNP_P3_163438_31963 | NW_004517063.1 | Scaffold1999 | 31963                   | CC                              | TT                | 1946671269               |
| SNP_P3_163439_31975 | NW_004517063.1 | Scaffold1999 | 31975                   | CC                              | AA                | 1946671271               |
| SNP_P3_163440_32111 | NW_004517063.1 | Scaffold1999 | 32111                   | TT                              | AA                | 1946671273               |
| SNP_P3_163441_32312 | NW_004517063.1 | Scaffold1999 | 32312                   | TT                              | CC                | 1946671275               |
| SNP_P3_163442_32326 | NW_004517063.1 | Scaffold1999 | 32326                   | CC                              | GG                | 1946671277               |
| SNP_P3_163443_32374 | NW_004517063.1 | Scaffold1999 | 32374                   | GG                              | AA                | 1946671279               |
| SNP_P3_163444_32470 | NW_004517063.1 | Scaffold1999 | 32470                   | AA                              | GG                | 1946671281               |
| SNP_P3_163445_32503 | NW_004517063.1 | Scaffold1999 | 32503                   | TT                              | GG                | 1946671283               |
| SNP_P3_163446_32524 | NW_004517063.1 | Scaffold1999 | 32524                   | TT                              | AA                | 1946671285               |
| SNP_P3_163447_32602 | NW_004517063.1 | Scaffold1999 | 32602                   | GG                              | TT                | 1946671287               |
| SNP_P3_163448_32709 | NW_004517063.1 | Scaffold1999 | 32709                   | CC                              | AA                | 1946671289               |
| SNP_P3_163449_1088  | NW_004517064.1 | Scaffold2000 | 1088                    | TT                              | AA                | 1946671291               |
| SNP_P3_163450_1100  | NW_004517064.1 | Scaffold2000 | 1100                    | AA                              | CC                | 1946671293               |
| SNP_P3_163451_1115  | NW_004517064.1 | Scaffold2000 | 1115                    | AA                              | TT                | 1946671295               |
| SNP_P3_163452_1127  | NW_004517064.1 | Scaffold2000 | 1127                    | CC                              | TT                | 1946671297               |

| SNPs IDs           | Chromosome IDs | Chromosomes  | Physical positions (bp) | CDC Frontier (Reference genome) | (Pusa 256 & HPNB) | NCBI SNPdb Accession IDs |
|--------------------|----------------|--------------|-------------------------|---------------------------------|-------------------|--------------------------|
| SNP_P3_163453_1140 | NW_004517064.1 | Scaffold2000 | 1140                    | TT                              | CC                | 1946671299               |
| SNP_P3_163454_1164 | NW_004517064.1 | Scaffold2000 | 1164                    | GG                              | AA                | 1946671301               |
| SNP_P3_163455_1245 | NW_004517064.1 | Scaffold2000 | 1245                    | AA                              | GG                | 1946671303               |
| SNP_P3_163456_1258 | NW_004517064.1 | Scaffold2000 | 1258                    | AA                              | CC                | 1946671305               |
| SNP_P3_163457_1376 | NW_004517064.1 | Scaffold2000 | 1376                    | CC                              | TT                | 1946671307               |
| SNP_P3_163458_1444 | NW_004517064.1 | Scaffold2000 | 1444                    | GG                              | AA                | 1946671309               |
| SNP_P3_163459_1523 | NW_004517064.1 | Scaffold2000 | 1523                    | CC                              | GG                | 1946671311               |
| SNP_P3_163461_1565 | NW_004517064.1 | Scaffold2000 | 1565                    | AA                              | GG                | 1946671314               |
| SNP_P3_163462_1606 | NW_004517064.1 | Scaffold2000 | 1606                    | AA                              | CC                | 1946671316               |
| SNP_P3_163463_1613 | NW_004517064.1 | Scaffold2000 | 1613                    | TT                              | GG                | 1946671318               |
| SNP_P3_163464_1625 | NW_004517064.1 | Scaffold2000 | 1625                    | CC                              | AA                | 1946671320               |
| SNP_P3_163465_1627 | NW_004517064.1 | Scaffold2000 | 1627                    | AA                              | TT                | 1946671322               |
| SNP_P3_163466_1671 | NW_004517064.1 | Scaffold2000 | 1671                    | TT                              | GG                | 1946671324               |
| SNP_P3_163467_1686 | NW_004517064.1 | Scaffold2000 | 1686                    | GG                              | CC                | 1946671326               |
| SNP_P3_163468_1709 | NW_004517064.1 | Scaffold2000 | 1709                    | GG                              | AA                | 1946671328               |
| SNP_P3_163469_1746 | NW_004517064.1 | Scaffold2000 | 1746                    | TT                              | CC                | 1946671330               |
| SNP_P3_163470_1750 | NW_004517064.1 | Scaffold2000 | 1750                    | TT                              | AA                | 1946671332               |
| SNP_P3_163471_1754 | NW_004517064.1 | Scaffold2000 | 1754                    | TT                              | AA                | 1946671334               |
| SNP_P3_163472_1765 | NW_004517064.1 | Scaffold2000 | 1765                    | TT                              | CC                | 1946671336               |
| SNP_P3_163473_1784 | NW_004517064.1 | Scaffold2000 | 1784                    | TT                              | CC                | 1946671338               |
| SNP_P3_163474_1791 | NW_004517064.1 | Scaffold2000 | 1791                    | TT                              | AA                | 1946671340               |
| SNP_P3_163475_2063 | NW_004517064.1 | Scaffold2000 | 2063                    | AA                              | GG                | 1946671343               |
| SNP_P3_163476_2085 | NW_004517064.1 | Scaffold2000 | 2085                    | CC                              | GG                | 1946671345               |
| SNP_P3_163477_2114 | NW_004517064.1 | Scaffold2000 | 2114                    | AA                              | CC                | 1946671347               |
| SNP_P3_163478_2117 | NW_004517064.1 | Scaffold2000 | 2117                    | AA                              | TT                | 1946671350               |
| SNP_P3_163479_2118 | NW_004517064.1 | Scaffold2000 | 2118                    | TT                              | AA                | 1946671352               |
| SNP_P3_163480_2120 | NW_004517064.1 | Scaffold2000 | 2120                    | GG                              | TT                | 1946671354               |
| SNP_P3_163481_2158 | NW_004517064.1 | Scaffold2000 | 2158                    | GG                              | TT                | 1946671356               |
| SNP_P3_163482_2163 | NW_004517064.1 | Scaffold2000 | 2163                    | CC                              | AA                | 1946671359               |
| SNP_P3_163483_2251 | NW_004517064.1 | Scaffold2000 | 2251                    | TT                              | AA                | 1946671361               |
| SNP_P3_163484_2261 | NW_004517064.1 | Scaffold2000 | 2261                    | TT                              | GG                | 1946671363               |
| SNP_P3_163485_2351 | NW_004517064.1 | Scaffold2000 | 2351                    | TT                              | AA                | 1946671365               |
| SNP_P3_163486_2382 | NW_004517064.1 | Scaffold2000 | 2382                    | CC                              | AA                | 1946671367               |
| SNP_P3_163487_2396 | NW_004517064.1 | Scaffold2000 | 2396                    | AA                              | GG                | 1946671369               |
| SNP_P3_163488_2418 | NW_004517064.1 | Scaffold2000 | 2418                    | GG                              | TT                | 1946671372               |
| SNP_P3_163489_2530 | NW_004517064.1 | Scaffold2000 | 2530                    | AA                              | CC                | 1946671374               |
| SNP_P3_163490_2557 | NW_004517064.1 | Scaffold2000 | 2557                    | AA                              | GG                | 1946671376               |
| SNP_P3_163491_2560 | NW_004517064.1 | Scaffold2000 | 2560                    | CC                              | AA                | 1946671378               |
| SNP_P3_163492_2577 | NW_004517064.1 | Scaffold2000 | 2577                    | GG                              | TT                | 1946671380               |
| SNP_P3_163493_2580 | NW_004517064.1 | Scaffold2000 | 2580                    | AA                              | TT                | 1946671382               |
| SNP_P3_163494_2641 | NW_004517064.1 | Scaffold2000 | 2641                    | GG                              | CC                | 1946671384               |
| SNP_P3_163495_2678 | NW_004517064.1 | Scaffold2000 | 2678                    | CC                              | AA                | 1946671387               |

| SNPs IDs            | Chromosome IDs | Chromosomes  | Physical positions (bp) | CDC Frontier (Reference genome) | (Pusa 256 & HPNB) | NCBI SNPdb Accession IDs |
|---------------------|----------------|--------------|-------------------------|---------------------------------|-------------------|--------------------------|
| SNP_P3_163496_2730  | NW_004517064.1 | Scaffold2000 | 2730                    | AA                              | TT                | 1946671389               |
| SNP_P3_163497_2811  | NW_004517064.1 | Scaffold2000 | 2811                    | AA                              | CC                | 1946671391               |
| SNP_P3_163498_2817  | NW_004517064.1 | Scaffold2000 | 2817                    | TT                              | GG                | 1946671393               |
| SNP_P3_163499_2818  | NW_004517064.1 | Scaffold2000 | 2818                    | GG                              | TT                | 1946671395               |
| SNP_P3_163500_2852  | NW_004517064.1 | Scaffold2000 | 2852                    | GG                              | AA                | 1946671397               |
| SNP_P3_163501_2878  | NW_004517064.1 | Scaffold2000 | 2878                    | CC                              | AA                | 1946671399               |
| SNP_P3_163502_2917  | NW_004517064.1 | Scaffold2000 | 2917                    | AA                              | GG                | 1946671401               |
| SNP_P3_163503_2944  | NW_004517064.1 | Scaffold2000 | 2944                    | TT                              | AA                | 1946671403               |
| SNP_P3_163504_2965  | NW_004517064.1 | Scaffold2000 | 2965                    | CC                              | AA                | 1946671405               |
| SNP_P3_163505_2971  | NW_004517064.1 | Scaffold2000 | 2971                    | CC                              | AA                | 1946671407               |
| SNP_P3_163506_3027  | NW_004517064.1 | Scaffold2000 | 3027                    | GG                              | CC                | 1946671409               |
| SNP_P3_163507_3039  | NW_004517064.1 | Scaffold2000 | 3039                    | AA                              | GG                | 1946671411               |
| SNP_P3_163508_4142  | NW_004517064.1 | Scaffold2000 | 4142                    | TT                              | CC                | 1946671413               |
| SNP_P3_163509_4144  | NW_004517064.1 | Scaffold2000 | 4144                    | GG                              | CC                | 1946671415               |
| SNP_P3_163510_9516  | NW_004517064.1 | Scaffold2000 | 9516                    | TT                              | AA                | 1946671417               |
| SNP_P3_163511_10741 | NW_004517064.1 | Scaffold2000 | 10741                   | AA                              | GG                | 1946671419               |
| SNP_P3_163512_10811 | NW_004517064.1 | Scaffold2000 | 10811                   | GG                              | AA                | 1946671421               |
| SNP_P3_163514_10890 | NW_004517064.1 | Scaffold2000 | 10890                   | TT                              | CC                | 1946671424               |
| SNP_P3_163515_11238 | NW_004517064.1 | Scaffold2000 | 11238                   | GG                              | CC                | 1946671426               |
| SNP_P3_163516_11259 | NW_004517064.1 | Scaffold2000 | 11259                   | CC                              | GG                | 1946671428               |
| SNP_P3_163517_11276 | NW_004517064.1 | Scaffold2000 | 11276                   | GG                              | AA                | 1946671430               |
| SNP_P3_163518_11302 | NW_004517064.1 | Scaffold2000 | 11302                   | CC                              | TT                | 1946671432               |
| SNP_P3_163519_11339 | NW_004517064.1 | Scaffold2000 | 11339                   | CC                              | TT                | 1946671434               |
| SNP_P3_163520_11341 | NW_004517064.1 | Scaffold2000 | 11341                   | AA                              | GG                | 1946671436               |
| SNP_P3_163521_11365 | NW_004517064.1 | Scaffold2000 | 11365                   | CC                              | TT                | 1946671438               |
| SNP_P3_163522_11411 | NW_004517064.1 | Scaffold2000 | 11411                   | CC                              | GG                | 1946671440               |
| SNP_P3_163523_11420 | NW_004517064.1 | Scaffold2000 | 11420                   | GG                              | TT                | 1946671442               |
| SNP_P3_163524_11425 | NW_004517064.1 | Scaffold2000 | 11425                   | TT                              | GG                | 1946671444               |
| SNP_P3_163525_11536 | NW_004517064.1 | Scaffold2000 | 11536                   | CC                              | TT                | 1946671446               |
| SNP_P3_163526_11544 | NW_004517064.1 | Scaffold2000 | 11544                   | AA                              | GG                | 1946671448               |
| SNP_P3_163527_11569 | NW_004517064.1 | Scaffold2000 | 11569                   | CC                              | GG                | 1946671450               |
| SNP_P3_163528_11735 | NW_004517064.1 | Scaffold2000 | 11735                   | CC                              | GG                | 1946671452               |
| SNP_P3_163529_11754 | NW_004517064.1 | Scaffold2000 | 11754                   | GG                              | AA                | 1946671454               |
| SNP_P3_163530_13743 | NW_004517064.1 | Scaffold2000 | 13743                   | AA                              | GG                | 1946671456               |
| SNP_P3_163531_13866 | NW_004517064.1 | Scaffold2000 | 13866                   | AA                              | GG                | 1946671458               |
| SNP_P3_163532_13887 | NW_004517064.1 | Scaffold2000 | 13887                   | TT                              | AA                | 1946671460               |
| SNP_P3_163533_13894 | NW_004517064.1 | Scaffold2000 | 13894                   | TT                              | GG                | 1946671462               |
| SNP_P3_163534_13948 | NW_004517064.1 | Scaffold2000 | 13948                   | CC                              | AA                | 1946671465               |
| SNP_P3_163535_13950 | NW_004517064.1 | Scaffold2000 | 13950                   | CC                              | TT                | 1946671467               |
| SNP_P3_163536_14086 | NW_004517064.1 | Scaffold2000 | 14086                   | CC                              | AA                | 1946671469               |
| SNP_P3_163537_14156 | NW_004517064.1 | Scaffold2000 | 14156                   | AA                              | CC                | 1946671471               |
| SNP_P3_163539_14240 | NW_004517064.1 | Scaffold2000 | 14240                   | AA                              | GG                | 1946671473               |

| SNPs IDs            | Chromosome IDs | Chromosomes  | Physical positions (bp) | CDC Frontier (Reference genome) | (Pusa 256 & HPNB) | NCBI SNPdb Accession IDs |
|---------------------|----------------|--------------|-------------------------|---------------------------------|-------------------|--------------------------|
| SNP_P3_163540_14241 | NW_004517064.1 | Scaffold2000 | 14241                   | CC                              | TT                | 1946671475               |
| SNP_P3_163541_14266 | NW_004517064.1 | Scaffold2000 | 14266                   | TT                              | CC                | 1946671477               |
| SNP_P3_163542_18454 | NW_004517064.1 | Scaffold2000 | 18454                   | AA                              | CC                | 1946671479               |
| SNP_P3_163543_18504 | NW_004517064.1 | Scaffold2000 | 18504                   | TT                              | CC                | 1946671481               |
| SNP_P3_163544_18526 | NW_004517064.1 | Scaffold2000 | 18526                   | AA                              | CC                | 1946671483               |
| SNP_P3_163545_18672 | NW_004517064.1 | Scaffold2000 | 18672                   | CC                              | TT                | 1946671485               |
| SNP_P3_163546_18818 | NW_004517064.1 | Scaffold2000 | 18818                   | TT                              | GG                | 1946671487               |
| SNP_P3_163547_20109 | NW_004517064.1 | Scaffold2000 | 20109                   | GG                              | AA                | 1946671489               |
| SNP_P3_163548_20285 | NW_004517064.1 | Scaffold2000 | 20285                   | CC                              | AA                | 1946671492               |
| SNP_P3_163549_20469 | NW_004517064.1 | Scaffold2000 | 20469                   | TT                              | AA                | 1946671494               |
| SNP_P3_163550_20635 | NW_004517064.1 | Scaffold2000 | 20635                   | AA                              | GG                | 1946671496               |
| SNP_P3_163551_20663 | NW_004517064.1 | Scaffold2000 | 20663                   | TT                              | GG                | 1946671498               |
| SNP_P3_163552_20800 | NW_004517064.1 | Scaffold2000 | 20800                   | TT                              | AA                | 1946671500               |
| SNP_P3_163553_21397 | NW_004517064.1 | Scaffold2000 | 21397                   | CC                              | TT                | 1946671502               |
| SNP_P3_163554_21414 | NW_004517064.1 | Scaffold2000 | 21414                   | AA                              | CC                | 1946671505               |
| SNP_P3_163555_21423 | NW_004517064.1 | Scaffold2000 | 21423                   | TT                              | CC                | 1946671507               |
| SNP_P3_163556_21424 | NW_004517064.1 | Scaffold2000 | 21424                   | AA                              | CC                | 1946671509               |
| SNP_P3_163557_21425 | NW_004517064.1 | Scaffold2000 | 21425                   | TT                              | AA                | 1946671511               |
| SNP_P3_163558_21435 | NW_004517064.1 | Scaffold2000 | 21435                   | GG                              | AA                | 1946671513               |
| SNP_P3_163559_21443 | NW_004517064.1 | Scaffold2000 | 21443                   | CC                              | TT                | 1946671515               |
| SNP_P3_163560_21517 | NW_004517064.1 | Scaffold2000 | 21517                   | AA                              | CC                | 1946671517               |
| SNP_P3_163561_21594 | NW_004517064.1 | Scaffold2000 | 21594                   | TT                              | GG                | 1946671519               |
| SNP_P3_163563_22479 | NW_004517064.1 | Scaffold2000 | 22479                   | CC                              | AA                | 1946671521               |
| SNP_P3_163564_22495 | NW_004517064.1 | Scaffold2000 | 22495                   | GG                              | CC                | 1946671523               |
| SNP_P3_163565_22517 | NW_004517064.1 | Scaffold2000 | 22517                   | AA                              | GG                | 1946671525               |
| SNP_P3_163566_22532 | NW_004517064.1 | Scaffold2000 | 22532                   | AA                              | GG                | 1946671527               |
| SNP_P3_163567_22552 | NW_004517064.1 | Scaffold2000 | 22552                   | AA                              | GG                | 1946671529               |
| SNP_P3_163568_22553 | NW_004517064.1 | Scaffold2000 | 22553                   | CC                              | AA                | 1946671531               |
| SNP_P3_163569_22556 | NW_004517064.1 | Scaffold2000 | 22556                   | CC                              | TT                | 1946671533               |
| SNP_P3_163570_22583 | NW_004517064.1 | Scaffold2000 | 22583                   | GG                              | AA                | 1946671535               |
| SNP_P3_163571_22598 | NW_004517064.1 | Scaffold2000 | 22598                   | AA                              | GG                | 1946671537               |
| SNP_P3_163572_26646 | NW_004517064.1 | Scaffold2000 | 26646                   | TT                              | AA                | 1946671539               |
| SNP_P3_163573_26888 | NW_004517064.1 | Scaffold2000 | 26888                   | AA                              | CC                | 1946671543               |
| SNP_P3_163574_1347  | NW_004517066.1 | Scaffold2003 | 1347                    | AA                              | GG                | 1946671545               |
| SNP_P3_163575_3615  | NW_004517066.1 | Scaffold2003 | 3615                    | AA                              | TT                | 1946671547               |
| SNP_P3_163576_3651  | NW_004517066.1 | Scaffold2003 | 3651                    | TT                              | CC                | 1946671549               |
| SNP_P3_163577_3688  | NW_004517066.1 | Scaffold2003 | 3688                    | CC                              | GG                | 1946671551               |
| SNP_P3_163578_3727  | NW_004517066.1 | Scaffold2003 | 3727                    | CC                              | TT                | 1946671553               |
| SNP_P3_163579_3740  | NW_004517066.1 | Scaffold2003 | 3740                    | CC                              | AA                | 1946671555               |
| SNP_P3_163580_3778  | NW_004517066.1 | Scaffold2003 | 3778                    | CC                              | TT                | 1946671557               |
| SNP_P3_163581_3789  | NW_004517066.1 | Scaffold2003 | 3789                    | AA                              | GG                | 1946671559               |
| SNP_P3_163582_5293  | NW_004517066.1 | Scaffold2003 | 5293                    | TT                              | CC                | 1946671561               |



| SNPs IDs            | Chromosome IDs | Chromosomes  | Physical positions (bp) | CDC Frontier (Reference genome) | (Pusa 256 & HPNB) | NCBI SNPdb Accession IDs |
|---------------------|----------------|--------------|-------------------------|---------------------------------|-------------------|--------------------------|
| SNP_P3_163583_7505  | NW_004517066.1 | Scaffold2003 | 7505                    | GG                              | TT                | 1946671563               |
| SNP_P3_163584_7612  | NW_004517066.1 | Scaffold2003 | 7612                    | TT                              | CC                | 1946671565               |
| SNP_P3_163585_7903  | NW_004517066.1 | Scaffold2003 | 7903                    | TT                              | CC                | 1946671567               |
| SNP_P3_163586_8219  | NW_004517066.1 | Scaffold2003 | 8219                    | AA                              | GG                | 1946671569               |
| SNP_P3_163587_11493 | NW_004517066.1 | Scaffold2003 | 11493                   | TT                              | GG                | 1946671571               |
| SNP_P3_163588_12521 | NW_004517066.1 | Scaffold2003 | 12521                   | GG                              | AA                | 1946671573               |
| SNP_P3_163589_13459 | NW_004517066.1 | Scaffold2003 | 13459                   | CC                              | AA                | 1946671576               |
| SNP_P3_163590_13480 | NW_004517066.1 | Scaffold2003 | 13480                   | AA                              | TT                | 1946671578               |
| SNP_P3_163591_14644 | NW_004517066.1 | Scaffold2003 | 14644                   | AA                              | TT                | 1946671581               |
| SNP_P3_163592_19133 | NW_004517066.1 | Scaffold2003 | 19133                   | AA                              | GG                | 1946671583               |
| SNP_P3_163593_19382 | NW_004517066.1 | Scaffold2003 | 19382                   | AA                              | GG                | 1946671585               |
| SNP_P3_163594_19522 | NW_004517066.1 | Scaffold2003 | 19522                   | GG                              | AA                | 1946671587               |
| SNP_P3_163595_19524 | NW_004517066.1 | Scaffold2003 | 19524                   | GG                              | AA                | 1946671589               |
| SNP_P3_163596_19539 | NW_004517066.1 | Scaffold2003 | 19539                   | AA                              | TT                | 1946671591               |
| SNP_P3_163597_19544 | NW_004517066.1 | Scaffold2003 | 19544                   | GG                              | TT                | 1946671593               |
| SNP_P3_163598_19795 | NW_004517066.1 | Scaffold2003 | 19795                   | AA                              | GG                | 1946671595               |
| SNP_P3_163599_19894 | NW_004517066.1 | Scaffold2003 | 19894                   | TT                              | CC                | 1946671597               |
| SNP_P3_163600_19909 | NW_004517066.1 | Scaffold2003 | 19909                   | CC                              | AA                | 1946671599               |
| SNP_P3_163601_22637 | NW_004517066.1 | Scaffold2003 | 22637                   | CC                              | AA                | 1946671601               |
| SNP_P3_163602_22924 | NW_004517066.1 | Scaffold2003 | 22924                   | CC                              | AA                | 1946671603               |
| SNP_P3_163603_23205 | NW_004517066.1 | Scaffold2003 | 23205                   | CC                              | AA                | 1946671605               |
| SNP_P3_163604_23263 | NW_004517066.1 | Scaffold2003 | 23263                   | CC                              | TT                | 1946671608               |
| SNP_P3_163605_23376 | NW_004517066.1 | Scaffold2003 | 23376                   | AA                              | TT                | 1946671610               |
| SNP_P3_163606_23554 | NW_004517066.1 | Scaffold2003 | 23554                   | CC                              | AA                | 1946671612               |
| SNP_P3_163607_23555 | NW_004517066.1 | Scaffold2003 | 23555                   | CC                              | TT                | 1946671615               |
| SNP_P3_163608_23621 | NW_004517066.1 | Scaffold2003 | 23621                   | CC                              | TT                | 1946671617               |
| SNP_P3_163609_32868 | NW_004517066.1 | Scaffold2003 | 32868                   | AA                              | TT                | 1946671619               |
| SNP_P3_163610_5145  | NW_004517067.1 | Scaffold2004 | 5145                    | AA                              | TT                | 1946671621               |
| SNP_P3_163611_5246  | NW_004517067.1 | Scaffold2004 | 5246                    | AA                              | GG                | 1946671623               |
| SNP_P3_163612_454   | NW_004517068.1 | Scaffold2005 | 454                     | CC                              | TT                | 1946671625               |
| SNP_P3_163613_2251  | NW_004517068.1 | Scaffold2005 | 2251                    | GG                              | AA                | 1946671627               |
| SNP_P3_163614_5431  | NW_004517068.1 | Scaffold2005 | 5431                    | CC                              | AA                | 1946671629               |
| SNP_P3_163615_7022  | NW_004517068.1 | Scaffold2005 | 7022                    | CC                              | AA                | 1946671631               |
| SNP_P3_163616_7032  | NW_004517068.1 | Scaffold2005 | 7032                    | GG                              | TT                | 1946671633               |
| SNP_P3_163617_8190  | NW_004517068.1 | Scaffold2005 | 8190                    | AA                              | GG                | 1946671635               |
| SNP_P3_163618_8394  | NW_004517068.1 | Scaffold2005 | 8394                    | CC                              | TT                | 1946671637               |
| SNP_P3_163619_8826  | NW_004517068.1 | Scaffold2005 | 8826                    | TT                              | CC                | 1946671639               |
| SNP_P3_163620_8855  | NW_004517068.1 | Scaffold2005 | 8855                    | TT                              | GG                | 1946671641               |
| SNP_P3_163621_9010  | NW_004517068.1 | Scaffold2005 | 9010                    | AA                              | TT                | 1946671644               |
| SNP_P3_163622_9013  | NW_004517068.1 | Scaffold2005 | 9013                    | CC                              | TT                | 1946671646               |
| SNP_P3_163623_9136  | NW_004517068.1 | Scaffold2005 | 9136                    | TT                              | AA                | 1946671648               |
| SNP_P3_163624_9146  | NW_004517068.1 | Scaffold2005 | 9146                    | CC                              | TT                | 1946671650               |

| SNPs IDs            | Chromosome IDs | Chromosomes  | Physical positions (bp) | CDC Frontier (Reference genome) | (Pusa 256 & HPNB) | NCBI SNPdb Accession IDs |
|---------------------|----------------|--------------|-------------------------|---------------------------------|-------------------|--------------------------|
| SNP_P3_163625_9185  | NW_004517068.1 | Scaffold2005 | 9185                    | TT                              | CC                | 1946671652               |
| SNP_P3_163626_9228  | NW_004517068.1 | Scaffold2005 | 9228                    | GG                              | AA                | 1946671654               |
| SNP_P3_163627_10125 | NW_004517068.1 | Scaffold2005 | 10125                   | GG                              | AA                | 1946671656               |
| SNP_P3_163628_12336 | NW_004517068.1 | Scaffold2005 | 12336                   | TT                              | CC                | 1946671659               |
| SNP_P3_163629_12947 | NW_004517068.1 | Scaffold2005 | 12947                   | TT                              | CC                | 1946671661               |
| SNP_P3_163631_15191 | NW_004517068.1 | Scaffold2005 | 15191                   | AA                              | TT                | 1946671663               |
| SNP_P3_163632_21832 | NW_004517068.1 | Scaffold2005 | 21832                   | CC                              | AA                | 1946671665               |
| SNP_P3_163633_21906 | NW_004517068.1 | Scaffold2005 | 21906                   | GG                              | AA                | 1946671667               |
| SNP_P3_163634_21943 | NW_004517068.1 | Scaffold2005 | 21943                   | GG                              | AA                | 1946671669               |
| SNP_P3_163635_24923 | NW_004517068.1 | Scaffold2005 | 24923                   | GG                              | AA                | 1946671672               |
| SNP_P3_163636_25260 | NW_004517068.1 | Scaffold2005 | 25260                   | TT                              | GG                | 1946671674               |
| SNP_P3_163639_32384 | NW_004517068.1 | Scaffold2005 | 32384                   | TT                              | CC                | 1946671676               |
| SNP_P3_163640_1194  | NW_004517069.1 | Scaffold2006 | 1194                    | AA                              | TT                | 1946671678               |
| SNP_P3_163641_1201  | NW_004517069.1 | Scaffold2006 | 1201                    | CC                              | TT                | 1946671680               |
| SNP_P3_163642_1219  | NW_004517069.1 | Scaffold2006 | 1219                    | TT                              | CC                | 1946671682               |
| SNP_P3_163643_1295  | NW_004517069.1 | Scaffold2006 | 1295                    | CC                              | TT                | 1946671684               |
| SNP_P3_163644_449   | NW_004517070.1 | Scaffold2008 | 449                     | AA                              | GG                | 1946671686               |
| SNP_P3_163645_3454  | NW_004517072.1 | Scaffold2010 | 3454                    | CC                              | TT                | 1946671687               |
| SNP_P3_163646_3505  | NW_004517072.1 | Scaffold2010 | 3505                    | AA                              | GG                | 1946671689               |
| SNP_P3_163647_3513  | NW_004517072.1 | Scaffold2010 | 3513                    | GG                              | AA                | 1946671691               |
| SNP_P3_163648_3525  | NW_004517072.1 | Scaffold2010 | 3525                    | CC                              | TT                | 1946671693               |
| SNP_P3_163649_3620  | NW_004517072.1 | Scaffold2010 | 3620                    | TT                              | CC                | 1946671695               |
| SNP_P3_163651_3696  | NW_004517072.1 | Scaffold2010 | 3696                    | TT                              | GG                | 1946671697               |
| SNP_P3_163652_3711  | NW_004517072.1 | Scaffold2010 | 3711                    | AA                              | TT                | 1946671700               |
| SNP_P3_163653_3744  | NW_004517072.1 | Scaffold2010 | 3744                    | AA                              | TT                | 1946671702               |
| SNP_P3_163654_3748  | NW_004517072.1 | Scaffold2010 | 3748                    | TT                              | AA                | 1946671704               |
| SNP_P3_163655_3755  | NW_004517072.1 | Scaffold2010 | 3755                    | GG                              | AA                | 1946671706               |
| SNP_P3_163656_3757  | NW_004517072.1 | Scaffold2010 | 3757                    | CC                              | TT                | 1946671708               |
| SNP_P3_163657_3765  | NW_004517072.1 | Scaffold2010 | 3765                    | CC                              | TT                | 1946671710               |
| SNP_P3_163658_3766  | NW_004517072.1 | Scaffold2010 | 3766                    | TT                              | AA                | 1946671712               |
| SNP_P3_163659_3768  | NW_004517072.1 | Scaffold2010 | 3768                    | TT                              | CC                | 1946671714               |
| SNP_P3_163660_3769  | NW_004517072.1 | Scaffold2010 | 3769                    | TT                              | AA                | 1946671717               |
| SNP_P3_163661_3771  | NW_004517072.1 | Scaffold2010 | 3771                    | AA                              | CC                | 1946671719               |
| SNP_P3_163662_3772  | NW_004517072.1 | Scaffold2010 | 3772                    | CC                              | TT                | 1946671721               |
| SNP_P3_163663_3776  | NW_004517072.1 | Scaffold2010 | 3776                    | AA                              | GG                | 1946671723               |
| SNP_P3_163664_3798  | NW_004517072.1 | Scaffold2010 | 3798                    | TT                              | AA                | 1946671725               |
| SNP_P3_163665_3803  | NW_004517072.1 | Scaffold2010 | 3803                    | GG                              | AA                | 1946671727               |
| SNP_P3_163666_4168  | NW_004517072.1 | Scaffold2010 | 4168                    | TT                              | CC                | 1946671729               |
| SNP_P3_163667_4282  | NW_004517072.1 | Scaffold2010 | 4282                    | AA                              | GG                | 1946671731               |
| SNP_P3_163668_5403  | NW_004517072.1 | Scaffold2010 | 5403                    | TT                              | CC                | 1946671733               |
| SNP_P3_163669_5493  | NW_004517072.1 | Scaffold2010 | 5493                    | GG                              | TT                | 1946671735               |
| SNP_P3_163670_6079  | NW_004517072.1 | Scaffold2010 | 6079                    | AA                              | GG                | 1946671738               |

| SNPs IDs            | Chromosome IDs | Chromosomes  | Physical positions (bp) | CDC Frontier (Reference genome) | (Pusa 256 & HPNB) | NCBI SNPdb Accession IDs |
|---------------------|----------------|--------------|-------------------------|---------------------------------|-------------------|--------------------------|
| SNP_P3_163671_6403  | NW_004517072.1 | Scaffold2010 | 6403                    | GG                              | AA                | 1946671740               |
| SNP_P3_163672_6507  | NW_004517072.1 | Scaffold2010 | 6507                    | AA                              | CC                | 1946671742               |
| SNP_P3_163673_6544  | NW_004517072.1 | Scaffold2010 | 6544                    | GG                              | AA                | 1946671744               |
| SNP_P3_163675_6879  | NW_004517072.1 | Scaffold2010 | 6879                    | CC                              | AA                | 1946671746               |
| SNP_P3_163676_6917  | NW_004517072.1 | Scaffold2010 | 6917                    | CC                              | TT                | 1946671748               |
| SNP_P3_163677_7016  | NW_004517072.1 | Scaffold2010 | 7016                    | TT                              | GG                | 1946671750               |
| SNP_P3_163678_7254  | NW_004517072.1 | Scaffold2010 | 7254                    | TT                              | CC                | 1946671752               |
| SNP_P3_163679_7484  | NW_004517072.1 | Scaffold2010 | 7484                    | GG                              | AA                | 1946671754               |
| SNP_P3_163680_7532  | NW_004517072.1 | Scaffold2010 | 7532                    | CC                              | AA                | 1946671756               |
| SNP_P3_163682_8235  | NW_004517072.1 | Scaffold2010 | 8235                    | TT                              | CC                | 1946671758               |
| SNP_P3_163683_11669 | NW_004517072.1 | Scaffold2010 | 11669                   | AA                              | GG                | 1946671760               |
| SNP_P3_163684_2914  | NW_004517075.1 | Scaffold2014 | 2914                    | TT                              | CC                | 1946671762               |
| SNP_P3_163685_1589  | NW_004517078.1 | Scaffold2017 | 1589                    | AA                              | GG                | 1946671764               |
| SNP_P3_163686_1708  | NW_004517078.1 | Scaffold2017 | 1708                    | GG                              | TT                | 1946671766               |
| SNP_P3_163687_1719  | NW_004517078.1 | Scaffold2017 | 1719                    | TT                              | GG                | 1946671769               |
| SNP_P3_163688_1848  | NW_004517078.1 | Scaffold2017 | 1848                    | AA                              | CC                | 1946671771               |
| SNP_P3_163689_1895  | NW_004517078.1 | Scaffold2017 | 1895                    | CC                              | TT                | 1946671773               |
| SNP_P3_163690_1156  | NW_004517079.1 | Scaffold2018 | 1156                    | CC                              | AA                | 1946671776               |
| SNP_P3_163691_1980  | NW_004517079.1 | Scaffold2018 | 1980                    | AA                              | CC                | 1946671778               |
| SNP_P3_163692_2520  | NW_004517079.1 | Scaffold2018 | 2520                    | AA                              | GG                | 1946671780               |
| SNP_P3_163693_4172  | NW_004517079.1 | Scaffold2018 | 4172                    | AA                              | GG                | 1946671782               |
| SNP_P3_163695_5396  | NW_004517079.1 | Scaffold2018 | 5396                    | CC                              | TT                | 1946671784               |
| SNP_P3_163696_5538  | NW_004517079.1 | Scaffold2018 | 5538                    | TT                              | AA                | 1946671786               |
| SNP_P3_163697_13979 | NW_004517079.1 | Scaffold2018 | 13979                   | TT                              | AA                | 1946671789               |
| SNP_P3_163699_18262 | NW_004517079.1 | Scaffold2018 | 18262                   | TT                              | CC                | 1946671791               |
| SNP_P3_163700_18723 | NW_004517079.1 | Scaffold2018 | 18723                   | AA                              | TT                | 1946671793               |
| SNP_P3_163701_19823 | NW_004517079.1 | Scaffold2018 | 19823                   | AA                              | GG                | 1946671795               |
| SNP_P3_163702_20501 | NW_004517079.1 | Scaffold2018 | 20501                   | CC                              | TT                | 1946671797               |
| SNP_P3_163703_20572 | NW_004517079.1 | Scaffold2018 | 20572                   | CC                              | TT                | 1946671799               |
| SNP_P3_163704_21454 | NW_004517079.1 | Scaffold2018 | 21454                   | CC                              | AA                | 1946671801               |
| SNP_P3_163705_21455 | NW_004517079.1 | Scaffold2018 | 21455                   | TT                              | CC                | 1946671803               |
| SNP_P3_163706_21831 | NW_004517079.1 | Scaffold2018 | 21831                   | AA                              | TT                | 1946671805               |
| SNP_P3_163707_21997 | NW_004517079.1 | Scaffold2018 | 21997                   | AA                              | TT                | 1946671807               |
| SNP_P3_163708_22004 | NW_004517079.1 | Scaffold2018 | 22004                   | GG                              | AA                | 1946671809               |
| SNP_P3_163709_22020 | NW_004517079.1 | Scaffold2018 | 22020                   | TT                              | GG                | 1946671811               |
| SNP_P3_163710_23357 | NW_004517079.1 | Scaffold2018 | 23357                   | CC                              | AA                | 1946671814               |
| SNP_P3_163711_25652 | NW_004517079.1 | Scaffold2018 | 25652                   | CC                              | TT                | 1946671816               |
| SNP_P3_163712_27539 | NW_004517079.1 | Scaffold2018 | 27539                   | CC                              | TT                | 1946671818               |
| SNP_P3_163713_27551 | NW_004517079.1 | Scaffold2018 | 27551                   | GG                              | AA                | 1946671820               |
| SNP_P3_163714_27584 | NW_004517079.1 | Scaffold2018 | 27584                   | CC                              | GG                | 1946671822               |
| SNP_P3_163715_27587 | NW_004517079.1 | Scaffold2018 | 27587                   | AA                              | GG                | 1946671824               |
| SNP_P3_163716_27749 | NW_004517079.1 | Scaffold2018 | 27749                   | TT                              | CC                | 1946671826               |

| SNPs IDs            | Chromosome IDs | Chromosomes  | Physical positions (bp) | CDC Frontier (Reference genome) | (Pusa 256 & HPNB) | NCBI SNPdb Accession IDs |
|---------------------|----------------|--------------|-------------------------|---------------------------------|-------------------|--------------------------|
| SNP_P3_163717_27752 | NW_004517079.1 | Scaffold2018 | 27752                   | GG                              | CC                | 1946671828               |
| SNP_P3_163718_27816 | NW_004517079.1 | Scaffold2018 | 27816                   | TT                              | CC                | 1946671830               |
| SNP_P3_163720_28385 | NW_004517079.1 | Scaffold2018 | 28385                   | CC                              | TT                | 1946671832               |
| SNP_P3_163721_28388 | NW_004517079.1 | Scaffold2018 | 28388                   | GG                              | TT                | 1946671834               |
| SNP_P3_163722_28488 | NW_004517079.1 | Scaffold2018 | 28488                   | AA                              | TT                | 1946671836               |
| SNP_P3_163723_28571 | NW_004517079.1 | Scaffold2018 | 28571                   | GG                              | TT                | 1946671838               |
| SNP_P3_163724_6383  | NW_004517080.1 | Scaffold2020 | 6383                    | AA                              | TT                | 1946671840               |
| SNP_P3_163725_6913  | NW_004517080.1 | Scaffold2020 | 6913                    | AA                              | GG                | 1946671842               |
| SNP_P3_163726_7073  | NW_004517080.1 | Scaffold2020 | 7073                    | TT                              | CC                | 1946671844               |
| SNP_P3_163727_7347  | NW_004517080.1 | Scaffold2020 | 7347                    | CC                              | TT                | 1946671846               |
| SNP_P3_163728_7375  | NW_004517080.1 | Scaffold2020 | 7375                    | GG                              | AA                | 1946671848               |
| SNP_P3_163729_7383  | NW_004517080.1 | Scaffold2020 | 7383                    | TT                              | AA                | 1946671850               |
| SNP_P3_163730_7409  | NW_004517080.1 | Scaffold2020 | 7409                    | TT                              | CC                | 1946671853               |
| SNP_P3_163731_7459  | NW_004517080.1 | Scaffold2020 | 7459                    | CC                              | AA                | 1946671855               |
| SNP_P3_163732_7495  | NW_004517080.1 | Scaffold2020 | 7495                    | GG                              | TT                | 1946671857               |
| SNP_P3_163733_7507  | NW_004517080.1 | Scaffold2020 | 7507                    | CC                              | GG                | 1946671859               |
| SNP_P3_163734_7565  | NW_004517080.1 | Scaffold2020 | 7565                    | AA                              | CC                | 1946671862               |
| SNP_P3_163735_7579  | NW_004517080.1 | Scaffold2020 | 7579                    | CC                              | TT                | 1946671864               |
| SNP_P3_163736_7582  | NW_004517080.1 | Scaffold2020 | 7582                    | TT                              | GG                | 1946671866               |
| SNP_P3_163737_7616  | NW_004517080.1 | Scaffold2020 | 7616                    | TT                              | GG                | 1946671868               |
| SNP_P3_163738_7668  | NW_004517080.1 | Scaffold2020 | 7668                    | TT                              | CC                | 1946671870               |
| SNP_P3_163739_7687  | NW_004517080.1 | Scaffold2020 | 7687                    | AA                              | GG                | 1946671872               |
| SNP_P3_163740_7839  | NW_004517080.1 | Scaffold2020 | 7839                    | AA                              | CC                | 1946671874               |
| SNP_P3_163741_13265 | NW_004517080.1 | Scaffold2020 | 13265                   | AA                              | CC                | 1946671876               |
| SNP_P3_163742_13266 | NW_004517080.1 | Scaffold2020 | 13266                   | AA                              | GG                | 1946671878               |
| SNP_P3_163743_13584 | NW_004517080.1 | Scaffold2020 | 13584                   | TT                              | AA                | 1946671880               |
| SNP_P3_163744_13716 | NW_004517080.1 | Scaffold2020 | 13716                   | CC                              | TT                | 1946671882               |
| SNP_P3_163745_1399  | NW_004517082.1 | Scaffold2022 | 1399                    | CC                              | GG                | 1946671884               |
| SNP_P3_163746_1719  | NW_004517082.1 | Scaffold2022 | 1719                    | CC                              | TT                | 1946671886               |
| SNP_P3_163747_8447  | NW_004517082.1 | Scaffold2022 | 8447                    | TT                              | CC                | 1946671888               |
| SNP_P3_163748_8505  | NW_004517082.1 | Scaffold2022 | 8505                    | CC                              | TT                | 1946671892               |
| SNP_P3_163749_8863  | NW_004517082.1 | Scaffold2022 | 8863                    | TT                              | CC                | 1946671894               |
| SNP_P3_163750_19469 | NW_004517082.1 | Scaffold2022 | 19469                   | GG                              | TT                | 1946671896               |
| SNP_P3_163751_47623 | NW_004517082.1 | Scaffold2022 | 47623                   | AA                              | GG                | 1946671898               |
| SNP_P3_163752_58619 | NW_004517082.1 | Scaffold2022 | 58619                   | AA                              | TT                | 1946671900               |
| SNP_P3_163753_58913 | NW_004517082.1 | Scaffold2022 | 58913                   | AA                              | TT                | 1946671902               |
| SNP_P3_163754_61333 | NW_004517082.1 | Scaffold2022 | 61333                   | TT                              | GG                | 1946671904               |
| SNP_P3_163755_69826 | NW_004517082.1 | Scaffold2022 | 69826                   | GG                              | AA                | 1946671906               |
| SNP_P3_163756_82785 | NW_004517082.1 | Scaffold2022 | 82785                   | CC                              | GG                | 1946671908               |
| SNP_P3_163757_83040 | NW_004517082.1 | Scaffold2022 | 83040                   | AA                              | GG                | 1946671910               |
| SNP_P3_163758_83111 | NW_004517082.1 | Scaffold2022 | 83111                   | TT                              | CC                | 1946671912               |
| SNP_P3_163759_85415 | NW_004517082.1 | Scaffold2022 | 85415                   | TT                              | AA                | 1946671914               |

| SNPs IDs             | Chromosome IDs | Chromosomes  | Physical positions (bp) | CDC Frontier (Reference genome) | (Pusa 256 & HPNB) | NCBI SNPdb Accession IDs |
|----------------------|----------------|--------------|-------------------------|---------------------------------|-------------------|--------------------------|
| SNP_P3_163760_110135 | NW_004517082.1 | Scaffold2022 | 110135                  | TT                              | CC                | 1946671916               |
| SNP_P3_163761_110161 | NW_004517082.1 | Scaffold2022 | 110161                  | TT                              | CC                | 1946671918               |
| SNP_P3_163762_110529 | NW_004517082.1 | Scaffold2022 | 110529                  | TT                              | CC                | 1946671920               |
| SNP_P3_163763_110669 | NW_004517082.1 | Scaffold2022 | 110669                  | CC                              | TT                | 1946671922               |
| SNP_P3_163764_110790 | NW_004517082.1 | Scaffold2022 | 110790                  | AA                              | GG                | 1946671924               |
| SNP_P3_163765_110823 | NW_004517082.1 | Scaffold2022 | 110823                  | TT                              | CC                | 1946671926               |
| SNP_P3_163766_113166 | NW_004517082.1 | Scaffold2022 | 113166                  | CC                              | TT                | 1946671928               |
| SNP_P3_163767_115189 | NW_004517082.1 | Scaffold2022 | 115189                  | TT                              | CC                | 1946671931               |
| SNP_P3_163768_115206 | NW_004517082.1 | Scaffold2022 | 115206                  | AA                              | GG                | 1946671933               |
| SNP_P3_163769_115840 | NW_004517082.1 | Scaffold2022 | 115840                  | TT                              | AA                | 1946671935               |
| SNP_P3_163770_116269 | NW_004517082.1 | Scaffold2022 | 116269                  | AA                              | CC                | 1946671937               |
| SNP_P3_163771_116492 | NW_004517082.1 | Scaffold2022 | 116492                  | AA                              | TT                | 1946671939               |
| SNP_P3_163773_132676 | NW_004517082.1 | Scaffold2022 | 132676                  | CC                              | TT                | 1946671941               |
| SNP_P3_163774_132693 | NW_004517082.1 | Scaffold2022 | 132693                  | CC                              | TT                | 1946671943               |
| SNP_P3_163775_133012 | NW_004517082.1 | Scaffold2022 | 133012                  | AA                              | GG                | 1946671945               |
| SNP_P3_163776_133052 | NW_004517082.1 | Scaffold2022 | 133052                  | TT                              | CC                | 1946671947               |
| SNP_P3_163777_136212 | NW_004517082.1 | Scaffold2022 | 136212                  | GG                              | AA                | 1946671949               |
| SNP_P3_163778_136215 | NW_004517082.1 | Scaffold2022 | 136215                  | CC                              | TT                | 1946671951               |
| SNP_P3_163779_136221 | NW_004517082.1 | Scaffold2022 | 136221                  | CC                              | AA                | 1946671953               |
| SNP_P3_163780_136275 | NW_004517082.1 | Scaffold2022 | 136275                  | TT                              | AA                | 1946671955               |
| SNP_P3_163781_136299 | NW_004517082.1 | Scaffold2022 | 136299                  | GG                              | AA                | 1946671957               |
| SNP_P3_163782_136488 | NW_004517082.1 | Scaffold2022 | 136488                  | GG                              | TT                | 1946671958               |
| SNP_P3_163783_136522 | NW_004517082.1 | Scaffold2022 | 136522                  | TT                              | CC                | 1946671960               |
| SNP_P3_163784_136540 | NW_004517082.1 | Scaffold2022 | 136540                  | AA                              | GG                | 1946671962               |
| SNP_P3_163785_136640 | NW_004517082.1 | Scaffold2022 | 136640                  | AA                              | GG                | 1946671964               |
| SNP_P3_163786_136756 | NW_004517082.1 | Scaffold2022 | 136756                  | CC                              | TT                | 1946671966               |
| SNP_P3_163787_136765 | NW_004517082.1 | Scaffold2022 | 136765                  | TT                              | GG                | 1946671969               |
| SNP_P3_163788_136772 | NW_004517082.1 | Scaffold2022 | 136772                  | TT                              | CC                | 1946671972               |
| SNP_P3_163789_136798 | NW_004517082.1 | Scaffold2022 | 136798                  | CC                              | TT                | 1946671974               |
| SNP_P3_163790_136873 | NW_004517082.1 | Scaffold2022 | 136873                  | CC                              | TT                | 1946671976               |
| SNP_P3_163791_136888 | NW_004517082.1 | Scaffold2022 | 136888                  | TT                              | CC                | 1946671978               |
| SNP_P3_163792_136909 | NW_004517082.1 | Scaffold2022 | 136909                  | GG                              | AA                | 1946671980               |
| SNP_P3_163793_139308 | NW_004517082.1 | Scaffold2022 | 139308                  | CC                              | AA                | 1946671982               |
| SNP_P3_163794_139335 | NW_004517082.1 | Scaffold2022 | 139335                  | TT                              | CC                | 1946671984               |
| SNP_P3_163795_139357 | NW_004517082.1 | Scaffold2022 | 139357                  | TT                              | CC                | 1946671986               |
| SNP_P3_163796_139446 | NW_004517082.1 | Scaffold2022 | 139446                  | CC                              | TT                | 1946671988               |
| SNP_P3_163797_140763 | NW_004517082.1 | Scaffold2022 | 140763                  | AA                              | TT                | 1946671990               |
| SNP_P3_163798_155561 | NW_004517082.1 | Scaffold2022 | 155561                  | CC                              | TT                | 1946671992               |
| SNP_P3_163799_155636 | NW_004517082.1 | Scaffold2022 | 155636                  | TT                              | AA                | 1946671994               |
| SNP_P3_163800_155873 | NW_004517082.1 | Scaffold2022 | 155873                  | TT                              | CC                | 1946671996               |
| SNP_P3_163801_156053 | NW_004517082.1 | Scaffold2022 | 156053                  | GG                              | AA                | 1946671998               |
| SNP_P3_163802_156061 | NW_004517082.1 | Scaffold2022 | 156061                  | CC                              | TT                | 1946672000               |

| SNPs IDs             | Chromosome IDs | Chromosomes  | Physical positions (bp) | CDC Frontier (Reference genome) | (Pusa 256 & HPNB) | NCBI SNPdb Accession IDs |
|----------------------|----------------|--------------|-------------------------|---------------------------------|-------------------|--------------------------|
| SNP_P3_163803_156090 | NW_004517082.1 | Scaffold2022 | 156090                  | TT                              | CC                | 1946672002               |
| SNP_P3_163804_156105 | NW_004517082.1 | Scaffold2022 | 156105                  | TT                              | GG                | 1946672004               |
| SNP_P3_163805_156917 | NW_004517082.1 | Scaffold2022 | 156917                  | AA                              | GG                | 1946672006               |
| SNP_P3_163806_158898 | NW_004517082.1 | Scaffold2022 | 158898                  | AA                              | GG                | 1946672009               |
| SNP_P3_163807_158904 | NW_004517082.1 | Scaffold2022 | 158904                  | TT                              | CC                | 1946672011               |
| SNP_P3_163808_158916 | NW_004517082.1 | Scaffold2022 | 158916                  | CC                              | TT                | 1946672013               |
| SNP_P3_163809_158923 | NW_004517082.1 | Scaffold2022 | 158923                  | AA                              | TT                | 1946672015               |
| SNP_P3_163810_158928 | NW_004517082.1 | Scaffold2022 | 158928                  | TT                              | GG                | 1946672017               |
| SNP_P3_163811_158940 | NW_004517082.1 | Scaffold2022 | 158940                  | AA                              | TT                | 1946672019               |
| SNP_P3_163812_158978 | NW_004517082.1 | Scaffold2022 | 158978                  | GG                              | TT                | 1946672021               |
| SNP_P3_163813_158982 | NW_004517082.1 | Scaffold2022 | 158982                  | CC                              | TT                | 1946672023               |
| SNP_P3_163814_162376 | NW_004517082.1 | Scaffold2022 | 162376                  | TT                              | CC                | 1946672025               |
| SNP_P3_163816_9968   | NW_004517083.1 | Scaffold2023 | 9968                    | CC                              | TT                | 1946672027               |
| SNP_P3_163817_9978   | NW_004517083.1 | Scaffold2023 | 9978                    | TT                              | AA                | 1946672029               |
| SNP_P3_163818_9988   | NW_004517083.1 | Scaffold2023 | 9988                    | CC                              | TT                | 1946672030               |
| SNP_P3_163819_769    | NW_004517084.1 | Scaffold2024 | 769                     | TT                              | CC                | 1946672032               |
| SNP_P3_163820_816    | NW_004517084.1 | Scaffold2024 | 816                     | GG                              | AA                | 1946672034               |
| SNP_P3_163821_1623   | NW_004517084.1 | Scaffold2024 | 1623                    | GG                              | AA                | 1946672036               |
| SNP_P3_163822_1669   | NW_004517084.1 | Scaffold2024 | 1669                    | AA                              | GG                | 1946672038               |
| SNP_P3_163823_1822   | NW_004517084.1 | Scaffold2024 | 1822                    | GG                              | CC                | 1946672040               |
| SNP_P3_163824_1831   | NW_004517084.1 | Scaffold2024 | 1831                    | CC                              | TT                | 1946672042               |
| SNP_P3_163825_1839   | NW_004517084.1 | Scaffold2024 | 1839                    | TT                              | CC                | 1946672044               |
| SNP_P3_163826_1908   | NW_004517084.1 | Scaffold2024 | 1908                    | TT                              | CC                | 1946672046               |
| SNP_P3_163828_1987   | NW_004517084.1 | Scaffold2024 | 1987                    | TT                              | CC                | 1946672048               |
| SNP_P3_163829_2028   | NW_004517084.1 | Scaffold2024 | 2028                    | CC                              | TT                | 1946672050               |
| SNP_P3_163830_2050   | NW_004517084.1 | Scaffold2024 | 2050                    | GG                              | TT                | 1946672052               |
| SNP_P3_163831_2070   | NW_004517084.1 | Scaffold2024 | 2070                    | AA                              | CC                | 1946672054               |
| SNP_P3_163832_2246   | NW_004517084.1 | Scaffold2024 | 2246                    | TT                              | GG                | 1946672056               |
| SNP_P3_163833_2285   | NW_004517084.1 | Scaffold2024 | 2285                    | AA                              | TT                | 1946672058               |
| SNP_P3_163834_2301   | NW_004517084.1 | Scaffold2024 | 2301                    | TT                              | CC                | 1946672060               |
| SNP_P3_163835_4000   | NW_004517084.1 | Scaffold2024 | 4000                    | CC                              | TT                | 1946672062               |
| SNP_P3_163836_4213   | NW_004517084.1 | Scaffold2024 | 4213                    | TT                              | GG                | 1946672064               |
| SNP_P3_163837_4757   | NW_004517084.1 | Scaffold2024 | 4757                    | CC                              | AA                | 1946672066               |
| SNP_P3_163838_1779   | NW_004517086.1 | Scaffold2026 | 1779                    | TT                              | GG                | 1946672068               |
| SNP_P3_163839_4431   | NW_004517086.1 | Scaffold2026 | 4431                    | TT                              | CC                | 1946672070               |
| SNP_P3_163840_4432   | NW_004517086.1 | Scaffold2026 | 4432                    | TT                              | AA                | 1946672072               |
| SNP_P3_163841_4463   | NW_004517086.1 | Scaffold2026 | 4463                    | GG                              | AA                | 1946672074               |
| SNP_P3_163842_4466   | NW_004517086.1 | Scaffold2026 | 4466                    | TT                              | CC                | 1946672076               |
| SNP_P3_163843_4485   | NW_004517086.1 | Scaffold2026 | 4485                    | AA                              | GG                | 1946672078               |
| SNP_P3_163844_5188   | NW_004517086.1 | Scaffold2026 | 5188                    | AA                              | CC                | 1946672081               |
| SNP_P3_163845_5220   | NW_004517086.1 | Scaffold2026 | 5220                    | CC                              | TT                | 1946672083               |
| SNP_P3_163846_5239   | NW_004517086.1 | Scaffold2026 | 5239                    | AA                              | GG                | 1946672085               |

| SNPs IDs             | Chromosome IDs | Chromosomes  | Physical positions (bp) | CDC Frontier (Reference genome) | (Pusa 256 & HPNB) | NCBI SNPdb Accession IDs |
|----------------------|----------------|--------------|-------------------------|---------------------------------|-------------------|--------------------------|
| SNP_P3_163847_5264   | NW_004517086.1 | Scaffold2026 | 5264                    | TT                              | CC                | 1946672087               |
| SNP_P3_163848_6627   | NW_004517086.1 | Scaffold2026 | 6627                    | AA                              | CC                | 1946672089               |
| SNP_P3_163849_452    | NW_004517087.1 | Scaffold2027 | 452                     | GG                              | TT                | 1946672092               |
| SNP_P3_163850_711    | NW_004517087.1 | Scaffold2027 | 711                     | TT                              | AA                | 1946672094               |
| SNP_P3_163852_1195   | NW_004517087.1 | Scaffold2027 | 1195                    | CC                              | AA                | 1946672096               |
| SNP_P3_163853_1492   | NW_004517087.1 | Scaffold2027 | 1492                    | CC                              | TT                | 1946672098               |
| SNP_P3_163854_2854   | NW_004517087.1 | Scaffold2027 | 2854                    | AA                              | TT                | 1946672100               |
| SNP_P3_163855_3025   | NW_004517087.1 | Scaffold2027 | 3025                    | GG                              | AA                | 1946672102               |
| SNP_P3_163856_13745  | NW_004517087.1 | Scaffold2027 | 13745                   | TT                              | AA                | 1946672104               |
| SNP_P3_163857_13748  | NW_004517087.1 | Scaffold2027 | 13748                   | AA                              | TT                | 1946672106               |
| SNP_P3_163858_30753  | NW_004517087.1 | Scaffold2027 | 30753                   | AA                              | GG                | 1946672108               |
| SNP_P3_163859_48631  | NW_004517087.1 | Scaffold2027 | 48631                   | CC                              | TT                | 1946672110               |
| SNP_P3_163860_49478  | NW_004517087.1 | Scaffold2027 | 49478                   | CC                              | GG                | 1946672112               |
| SNP_P3_163861_49496  | NW_004517087.1 | Scaffold2027 | 49496                   | TT                              | CC                | 1946672114               |
| SNP_P3_163862_49703  | NW_004517087.1 | Scaffold2027 | 49703                   | AA                              | GG                | 1946672116               |
| SNP_P3_163863_49733  | NW_004517087.1 | Scaffold2027 | 49733                   | AA                              | GG                | 1946672119               |
| SNP_P3_163864_49783  | NW_004517087.1 | Scaffold2027 | 49783                   | CC                              | TT                | 1946672121               |
| SNP_P3_163865_52647  | NW_004517087.1 | Scaffold2027 | 52647                   | CC                              | AA                | 1946672123               |
| SNP_P3_163866_54117  | NW_004517087.1 | Scaffold2027 | 54117                   | GG                              | TT                | 1946672125               |
| SNP_P3_163867_54597  | NW_004517087.1 | Scaffold2027 | 54597                   | CC                              | GG                | 1946672127               |
| SNP_P3_163868_55552  | NW_004517087.1 | Scaffold2027 | 55552                   | AA                              | GG                | 1946672129               |
| SNP_P3_163869_55625  | NW_004517087.1 | Scaffold2027 | 55625                   | AA                              | GG                | 1946672131               |
| SNP_P3_163870_56169  | NW_004517087.1 | Scaffold2027 | 56169                   | TT                              | GG                | 1946672133               |
| SNP_P3_163871_56181  | NW_004517087.1 | Scaffold2027 | 56181                   | AA                              | GG                | 1946672135               |
| SNP_P3_163872_56186  | NW_004517087.1 | Scaffold2027 | 56186                   | AA                              | GG                | 1946672138               |
| SNP_P3_163873_56213  | NW_004517087.1 | Scaffold2027 | 56213                   | AA                              | TT                | 1946672140               |
| SNP_P3_163874_108589 | NW_004517087.1 | Scaffold2027 | 108589                  | CC                              | TT                | 1946672142               |
| SNP_P3_163875_108916 | NW_004517087.1 | Scaffold2027 | 108916                  | TT                              | CC                | 1946672144               |
| SNP_P3_163876_119539 | NW_004517087.1 | Scaffold2027 | 119539                  | AA                              | GG                | 1946672146               |
| SNP_P3_163877_119541 | NW_004517087.1 | Scaffold2027 | 119541                  | GG                              | TT                | 1946672148               |
| SNP_P3_163878_119641 | NW_004517087.1 | Scaffold2027 | 119641                  | AA                              | TT                | 1946672150               |
| SNP_P3_163879_140358 | NW_004517087.1 | Scaffold2027 | 140358                  | AA                              | GG                | 1946672152               |
| SNP_P3_163880_140461 | NW_004517087.1 | Scaffold2027 | 140461                  | TT                              | AA                | 1946672154               |
| SNP_P3_163881_140477 | NW_004517087.1 | Scaffold2027 | 140477                  | GG                              | AA                | 1946672156               |
| SNP_P3_163882_140753 | NW_004517087.1 | Scaffold2027 | 140753                  | AA                              | TT                | 1946672159               |
| SNP_P3_163883_140754 | NW_004517087.1 | Scaffold2027 | 140754                  | CC                              | TT                | 1946672161               |
| SNP_P3_163884_160045 | NW_004517087.1 | Scaffold2027 | 160045                  | TT                              | CC                | 1946672163               |
| SNP_P3_163885_160211 | NW_004517087.1 | Scaffold2027 | 160211                  | TT                              | CC                | 1946672165               |
| SNP_P3_163886_161245 | NW_004517087.1 | Scaffold2027 | 161245                  | TT                              | CC                | 1946672168               |
| SNP_P3_163887_85     | NW_004517090.1 | Scaffold2030 | 85                      | TT                              | GG                | 1946672170               |
| SNP_P3_163888_468    | NW_004517090.1 | Scaffold2030 | 468                     | AA                              | GG                | 1946672172               |
| SNP_P3_163889_470    | NW_004517090.1 | Scaffold2030 | 470                     | GG                              | TT                | 1946672174               |

| SNPs IDs             | Chromosome IDs | Chromosomes  | Physical positions (bp) | CDC Frontier (Reference genome) | (Pusa 256 & HPNB) | NCBI SNPdb Accession IDs |
|----------------------|----------------|--------------|-------------------------|---------------------------------|-------------------|--------------------------|
| SNP_P3_163890_3425   | NW_004517090.1 | Scaffold2030 | 3425                    | TT                              | CC                | 1946672176               |
| SNP_P3_163891_3572   | NW_004517090.1 | Scaffold2030 | 3572                    | AA                              | TT                | 1946672178               |
| SNP_P3_163892_3643   | NW_004517090.1 | Scaffold2030 | 3643                    | CC                              | AA                | 1946672180               |
| SNP_P3_163894_4233   | NW_004517090.1 | Scaffold2030 | 4233                    | TT                              | GG                | 1946672182               |
| SNP_P3_163895_4574   | NW_004517090.1 | Scaffold2030 | 4574                    | GG                              | CC                | 1946672184               |
| SNP_P3_163897_4609   | NW_004517090.1 | Scaffold2030 | 4609                    | AA                              | GG                | 1946672186               |
| SNP_P3_163898_4785   | NW_004517090.1 | Scaffold2030 | 4785                    | CC                              | TT                | 1946672188               |
| SNP_P3_163899_4793   | NW_004517090.1 | Scaffold2030 | 4793                    | TT                              | CC                | 1946672190               |
| SNP_P3_163901_5006   | NW_004517090.1 | Scaffold2030 | 5006                    | AA                              | TT                | 1946672192               |
| SNP_P3_163902_7480   | NW_004517090.1 | Scaffold2030 | 7480                    | CC                              | AA                | 1946672194               |
| SNP_P3_163903_8884   | NW_004517090.1 | Scaffold2030 | 8884                    | GG                              | AA                | 1946672196               |
| SNP_P3_163904_9157   | NW_004517090.1 | Scaffold2030 | 9157                    | TT                              | CC                | 1946672198               |
| SNP_P3_163905_653    | NW_004517092.1 | Scaffold2033 | 653                     | TT                              | CC                | 1946672200               |
| SNP_P3_163906_698    | NW_004517092.1 | Scaffold2033 | 698                     | CC                              | TT                | 1946672202               |
| SNP_P3_163907_7009   | NW_004517092.1 | Scaffold2033 | 7009                    | AA                              | TT                | 1946672204               |
| SNP_P3_163908_7092   | NW_004517092.1 | Scaffold2033 | 7092                    | AA                              | TT                | 1946672207               |
| SNP_P3_163909_15922  | NW_004517092.1 | Scaffold2033 | 15922                   | AA                              | GG                | 1946672209               |
| SNP_P3_163910_21063  | NW_004517092.1 | Scaffold2033 | 21063                   | TT                              | CC                | 1946672211               |
| SNP_P3_163911_44456  | NW_004517092.1 | Scaffold2033 | 44456                   | GG                              | AA                | 1946672213               |
| SNP_P3_163913_58102  | NW_004517092.1 | Scaffold2033 | 58102                   | AA                              | CC                | 1946672215               |
| SNP_P3_163914_61743  | NW_004517092.1 | Scaffold2033 | 61743                   | TT                              | AA                | 1946672217               |
| SNP_P3_163915_66311  | NW_004517092.1 | Scaffold2033 | 66311                   | GG                              | AA                | 1946672219               |
| SNP_P3_163916_66315  | NW_004517092.1 | Scaffold2033 | 66315                   | AA                              | GG                | 1946672221               |
| SNP_P3_163917_66321  | NW_004517092.1 | Scaffold2033 | 66321                   | GG                              | AA                | 1946672223               |
| SNP_P3_163918_66352  | NW_004517092.1 | Scaffold2033 | 66352                   | AA                              | GG                | 1946672225               |
| SNP_P3_163919_66380  | NW_004517092.1 | Scaffold2033 | 66380                   | CC                              | TT                | 1946672227               |
| SNP_P3_163920_66629  | NW_004517092.1 | Scaffold2033 | 66629                   | AA                              | CC                | 1946672229               |
| SNP_P3_163921_79989  | NW_004517092.1 | Scaffold2033 | 79989                   | GG                              | AA                | 1946672231               |
| SNP_P3_163922_89482  | NW_004517092.1 | Scaffold2033 | 89482                   | AA                              | CC                | 1946672233               |
| SNP_P3_163923_106474 | NW_004517092.1 | Scaffold2033 | 106474                  | GG                              | AA                | 1946672235               |
| SNP_P3_163924_106682 | NW_004517092.1 | Scaffold2033 | 106682                  | GG                              | AA                | 1946672237               |
| SNP_P3_163926_108715 | NW_004517092.1 | Scaffold2033 | 108715                  | CC                              | AA                | 1946672238               |
| SNP_P3_163928_165333 | NW_004517092.1 | Scaffold2033 | 165333                  | AA                              | TT                | 1946672239               |
| SNP_P3_163929_165382 | NW_004517092.1 | Scaffold2033 | 165382                  | CC                              | GG                | 1946672240               |
| SNP_P3_163930_165495 | NW_004517092.1 | Scaffold2033 | 165495                  | GG                              | TT                | 1946672241               |
| SNP_P3_163931_165500 | NW_004517092.1 | Scaffold2033 | 165500                  | AA                              | TT                | 1946672242               |
| SNP_P3_163932_170625 | NW_004517092.1 | Scaffold2033 | 170625                  | GG                              | TT                | 1946672243               |
| SNP_P3_163933_180988 | NW_004517092.1 | Scaffold2033 | 180988                  | TT                              | CC                | 1946672244               |
| SNP_P3_163934_180994 | NW_004517092.1 | Scaffold2033 | 180994                  | CC                              | TT                | 1946672246               |
| SNP_P3_163935_181003 | NW_004517092.1 | Scaffold2033 | 181003                  | GG                              | TT                | 1946672248               |
| SNP_P3_163936_182501 | NW_004517092.1 | Scaffold2033 | 182501                  | TT                              | CC                | 1946672250               |
| SNP_P3_163937_182807 | NW_004517092.1 | Scaffold2033 | 182807                  | AA                              | TT                | 1946672252               |



| SNPs IDs             | Chromosome IDs | Chromosomes  | Physical positions (bp) | CDC Frontier (Reference genome) | (Pusa 256 & HPNB) | NCBI SNPdb Accession IDs |
|----------------------|----------------|--------------|-------------------------|---------------------------------|-------------------|--------------------------|
| SNP_P3_163938_183839 | NW_004517092.1 | Scaffold2033 | 183839                  | GG                              | AA                | 1946672254               |
| SNP_P3_163939_183841 | NW_004517092.1 | Scaffold2033 | 183841                  | GG                              | AA                | 1946672256               |
| SNP_P3_163941_183921 | NW_004517092.1 | Scaffold2033 | 183921                  | GG                              | AA                | 1946672258               |
| SNP_P3_163942_183963 | NW_004517092.1 | Scaffold2033 | 183963                  | GG                              | TT                | 1946672260               |
| SNP_P3_163943_184007 | NW_004517092.1 | Scaffold2033 | 184007                  | GG                              | AA                | 1946672262               |
| SNP_P3_163944_184160 | NW_004517092.1 | Scaffold2033 | 184160                  | AA                              | TT                | 1946672264               |
| SNP_P3_163945_184231 | NW_004517092.1 | Scaffold2033 | 184231                  | AA                              | GG                | 1946672266               |
| SNP_P3_163946_184279 | NW_004517092.1 | Scaffold2033 | 184279                  | AA                              | GG                | 1946672268               |
| SNP_P3_163947_184280 | NW_004517092.1 | Scaffold2033 | 184280                  | AA                              | GG                | 1946672270               |
| SNP_P3_163948_184338 | NW_004517092.1 | Scaffold2033 | 184338                  | TT                              | GG                | 1946672272               |
| SNP_P3_163949_184360 | NW_004517092.1 | Scaffold2033 | 184360                  | AA                              | TT                | 1946672274               |
| SNP_P3_163950_184373 | NW_004517092.1 | Scaffold2033 | 184373                  | AA                              | CC                | 1946672276               |
| SNP_P3_163951_184376 | NW_004517092.1 | Scaffold2033 | 184376                  | AA                              | TT                | 1946672280               |
| SNP_P3_163952_191939 | NW_004517092.1 | Scaffold2033 | 191939                  | TT                              | AA                | 1946672282               |
| SNP_P3_163953_191962 | NW_004517092.1 | Scaffold2033 | 191962                  | AA                              | TT                | 1946672284               |
| SNP_P3_163954_192268 | NW_004517092.1 | Scaffold2033 | 192268                  | AA                              | CC                | 1946672286               |
| SNP_P3_163955_513    | NW_004517094.1 | Scaffold2035 | 513                     | CC                              | TT                | 1946672288               |
| SNP_P3_163956_520    | NW_004517094.1 | Scaffold2035 | 520                     | AA                              | CC                | 1946672290               |
| SNP_P3_163957_16984  | NW_004517094.1 | Scaffold2035 | 16984                   | CC                              | TT                | 1946672292               |
| SNP_P3_163958_8947   | NW_004517095.1 | Scaffold2036 | 8947                    | GG                              | AA                | 1946672294               |
| SNP_P3_163959_8993   | NW_004517095.1 | Scaffold2036 | 8993                    | AA                              | TT                | 1946672296               |
| SNP_P3_163960_9041   | NW_004517095.1 | Scaffold2036 | 9041                    | GG                              | AA                | 1946672298               |
| SNP_P3_163961_9066   | NW_004517095.1 | Scaffold2036 | 9066                    | TT                              | CC                | 1946672300               |
| SNP_P3_163962_9089   | NW_004517095.1 | Scaffold2036 | 9089                    | CC                              | TT                | 1946672302               |
| SNP_P3_163963_9101   | NW_004517095.1 | Scaffold2036 | 9101                    | TT                              | CC                | 1946672304               |
| SNP_P3_163964_9168   | NW_004517095.1 | Scaffold2036 | 9168                    | CC                              | AA                | 1946672306               |
| SNP_P3_163965_14749  | NW_004517095.1 | Scaffold2036 | 14749                   | CC                              | TT                | 1946672308               |
| SNP_P3_163966_14826  | NW_004517095.1 | Scaffold2036 | 14826                   | GG                              | AA                | 1946672310               |
| SNP_P3_163967_15076  | NW_004517095.1 | Scaffold2036 | 15076                   | AA                              | GG                | 1946672312               |
| SNP_P3_163968_15087  | NW_004517095.1 | Scaffold2036 | 15087                   | CC                              | GG                | 1946672314               |
| SNP_P3_163969_15095  | NW_004517095.1 | Scaffold2036 | 15095                   | CC                              | TT                | 1946672316               |
| SNP_P3_163970_35514  | NW_004517095.1 | Scaffold2036 | 35514                   | CC                              | TT                | 1946672319               |
| SNP_P3_163971_39595  | NW_004517095.1 | Scaffold2036 | 39595                   | TT                              | AA                | 1946672321               |
| SNP_P3_163972_43538  | NW_004517095.1 | Scaffold2036 | 43538                   | GG                              | AA                | 1946672323               |
| SNP_P3_163973_43929  | NW_004517095.1 | Scaffold2036 | 43929                   | CC                              | TT                | 1946672325               |
| SNP_P3_163974_47866  | NW_004517095.1 | Scaffold2036 | 47866                   | AA                              | GG                | 1946672327               |
| SNP_P3_163975_48006  | NW_004517095.1 | Scaffold2036 | 48006                   | AA                              | GG                | 1946672329               |
| SNP_P3_163976_48018  | NW_004517095.1 | Scaffold2036 | 48018                   | AA                              | GG                | 1946672331               |
| SNP_P3_163977_48047  | NW_004517095.1 | Scaffold2036 | 48047                   | TT                              | CC                | 1946672333               |
| SNP_P3_163978_48057  | NW_004517095.1 | Scaffold2036 | 48057                   | AA                              | GG                | 1946672335               |
| SNP_P3_163979_48069  | NW_004517095.1 | Scaffold2036 | 48069                   | GG                              | AA                | 1946672337               |
| SNP_P3_163980_48090  | NW_004517095.1 | Scaffold2036 | 48090                   | GG                              | AA                | 1946672339               |

| SNPs IDs             | Chromosome IDs | Chromosomes  | Physical positions (bp) | CDC Frontier (Reference genome) | (Pusa 256 & HPNB) | NCBI SNPdb Accession IDs |
|----------------------|----------------|--------------|-------------------------|---------------------------------|-------------------|--------------------------|
| SNP_P3_163981_48096  | NW_004517095.1 | Scaffold2036 | 48096                   | TT                              | CC                | 1946672341               |
| SNP_P3_163982_48108  | NW_004517095.1 | Scaffold2036 | 48108                   | GG                              | AA                | 1946672343               |
| SNP_P3_163983_48113  | NW_004517095.1 | Scaffold2036 | 48113                   | GG                              | AA                | 1946672345               |
| SNP_P3_163984_51555  | NW_004517095.1 | Scaffold2036 | 51555                   | TT                              | CC                | 1946672346               |
| SNP_P3_163985_51583  | NW_004517095.1 | Scaffold2036 | 51583                   | TT                              | CC                | 1946672347               |
| SNP_P3_163986_54727  | NW_004517095.1 | Scaffold2036 | 54727                   | CC                              | GG                | 1946672348               |
| SNP_P3_163987_57639  | NW_004517095.1 | Scaffold2036 | 57639                   | AA                              | GG                | 1946672349               |
| SNP_P3_163988_57734  | NW_004517095.1 | Scaffold2036 | 57734                   | AA                              | GG                | 1946672350               |
| SNP_P3_163989_58420  | NW_004517095.1 | Scaffold2036 | 58420                   | CC                              | AA                | 1946672351               |
| SNP_P3_163990_73024  | NW_004517095.1 | Scaffold2036 | 73024                   | CC                              | GG                | 1946672352               |
| SNP_P3_163991_73197  | NW_004517095.1 | Scaffold2036 | 73197                   | AA                              | GG                | 1946672353               |
| SNP_P3_163992_73353  | NW_004517095.1 | Scaffold2036 | 73353                   | TT                              | CC                | 1946672354               |
| SNP_P3_163993_73380  | NW_004517095.1 | Scaffold2036 | 73380                   | TT                              | AA                | 1946672355               |
| SNP_P3_163995_73453  | NW_004517095.1 | Scaffold2036 | 73453                   | TT                              | GG                | 1946672357               |
| SNP_P3_163996_73476  | NW_004517095.1 | Scaffold2036 | 73476                   | TT                              | CC                | 1946672359               |
| SNP_P3_163997_73486  | NW_004517095.1 | Scaffold2036 | 73486                   | GG                              | AA                | 1946672361               |
| SNP_P3_163998_118007 | NW_004517095.1 | Scaffold2036 | 118007                  | CC                              | AA                | 1946672363               |
| SNP_P3_164000_157689 | NW_004517095.1 | Scaffold2036 | 157689                  | CC                              | TT                | 1946672365               |
| SNP_P3_164001_157971 | NW_004517095.1 | Scaffold2036 | 157971                  | CC                              | TT                | 1946672367               |
| SNP_P3_164002_158079 | NW_004517095.1 | Scaffold2036 | 158079                  | AA                              | CC                | 1946672369               |
| SNP_P3_164003_158112 | NW_004517095.1 | Scaffold2036 | 158112                  | TT                              | CC                | 1946672371               |
| SNP_P3_164004_158147 | NW_004517095.1 | Scaffold2036 | 158147                  | AA                              | TT                | 1946672373               |
| SNP_P3_164005_167448 | NW_004517095.1 | Scaffold2036 | 167448                  | TT                              | AA                | 1946672375               |
| SNP_P3_164006_182687 | NW_004517095.1 | Scaffold2036 | 182687                  | AA                              | GG                | 1946672377               |
| SNP_P3_164007_241090 | NW_004517095.1 | Scaffold2036 | 241090                  | CC                              | TT                | 1946672379               |
| SNP_P3_164008_670    | NW_004517096.1 | Scaffold2037 | 670                     | CC                              | TT                | 1946672381               |
| SNP_P3_164009_731    | NW_004517096.1 | Scaffold2037 | 731                     | TT                              | CC                | 1946672385               |
| SNP_P3_164010_1649   | NW_004517096.1 | Scaffold2037 | 1649                    | CC                              | AA                | 1946672387               |
| SNP_P3_164011_8288   | NW_004517096.1 | Scaffold2037 | 8288                    | TT                              | CC                | 1946672389               |
| SNP_P3_164012_8319   | NW_004517096.1 | Scaffold2037 | 8319                    | TT                              | GG                | 1946672391               |
| SNP_P3_164013_31002  | NW_004517096.1 | Scaffold2037 | 31002                   | AA                              | GG                | 1946672393               |
| SNP_P3_164014_36849  | NW_004517096.1 | Scaffold2037 | 36849                   | AA                              | GG                | 1946672395               |
| SNP_P3_164015_36855  | NW_004517096.1 | Scaffold2037 | 36855                   | CC                              | TT                | 1946672397               |
| SNP_P3_164016_38852  | NW_004517096.1 | Scaffold2037 | 38852                   | AA                              | GG                | 1946672399               |
| SNP_P3_164017_41518  | NW_004517096.1 | Scaffold2037 | 41518                   | AA                              | TT                | 1946672401               |
| SNP_P3_164018_43744  | NW_004517096.1 | Scaffold2037 | 43744                   | CC                              | TT                | 1946672403               |
| SNP_P3_164019_43745  | NW_004517096.1 | Scaffold2037 | 43745                   | CC                              | TT                | 1946672405               |
| SNP_P3_164020_15727  | NW_004517097.1 | Scaffold2039 | 15727                   | AA                              | TT                | 1946672407               |
| SNP_P3_164021_15728  | NW_004517097.1 | Scaffold2039 | 15728                   | CC                              | TT                | 1946672409               |
| SNP_P3_164022_16542  | NW_004517097.1 | Scaffold2039 | 16542                   | CC                              | TT                | 1946672411               |
| SNP_P3_164023_16593  | NW_004517097.1 | Scaffold2039 | 16593                   | AA                              | GG                | 1946672413               |
| SNP_P3_164024_16594  | NW_004517097.1 | Scaffold2039 | 16594                   | TT                              | CC                | 1946672415               |

| SNPs IDs             | Chromosome IDs | Chromosomes  | Physical positions (bp) | CDC Frontier (Reference genome) | (Pusa 256 & HPNB) | NCBI SNPdb Accession IDs |
|----------------------|----------------|--------------|-------------------------|---------------------------------|-------------------|--------------------------|
| SNP_P3_164025_16601  | NW_004517097.1 | Scaffold2039 | 16601                   | GG                              | CC                | 1946672417               |
| SNP_P3_164026_20621  | NW_004517097.1 | Scaffold2039 | 20621                   | GG                              | AA                | 1946672420               |
| SNP_P3_164027_20652  | NW_004517097.1 | Scaffold2039 | 20652                   | GG                              | AA                | 1946672422               |
| SNP_P3_164028_20670  | NW_004517097.1 | Scaffold2039 | 20670                   | AA                              | GG                | 1946672425               |
| SNP_P3_164029_20692  | NW_004517097.1 | Scaffold2039 | 20692                   | AA                              | GG                | 1946672427               |
| SNP_P3_164030_20950  | NW_004517097.1 | Scaffold2039 | 20950                   | CC                              | AA                | 1946672429               |
| SNP_P3_164031_36729  | NW_004517097.1 | Scaffold2039 | 36729                   | CC                              | TT                | 1946672431               |
| SNP_P3_164032_36752  | NW_004517097.1 | Scaffold2039 | 36752                   | TT                              | CC                | 1946672433               |
| SNP_P3_164033_55750  | NW_004517097.1 | Scaffold2039 | 55750                   | GG                              | AA                | 1946672435               |
| SNP_P3_164035_68934  | NW_004517097.1 | Scaffold2039 | 68934                   | GG                              | AA                | 1946672437               |
| SNP_P3_164036_70528  | NW_004517097.1 | Scaffold2039 | 70528                   | AA                              | GG                | 1946672439               |
| SNP_P3_164037_84466  | NW_004517097.1 | Scaffold2039 | 84466                   | GG                              | AA                | 1946672441               |
| SNP_P3_164038_167357 | NW_004517097.1 | Scaffold2039 | 167357                  | AA                              | TT                | 1946672443               |
| SNP_P3_164039_182537 | NW_004517097.1 | Scaffold2039 | 182537                  | CC                              | TT                | 1946672446               |
| SNP_P3_164040_14467  | NW_004517098.1 | Scaffold2040 | 14467                   | GG                              | AA                | 1946672448               |
| SNP_P3_164041_14468  | NW_004517098.1 | Scaffold2040 | 14468                   | AA                              | GG                | 1946672450               |
| SNP_P3_164042_14504  | NW_004517098.1 | Scaffold2040 | 14504                   | GG                              | AA                | 1946672452               |
| SNP_P3_164043_14515  | NW_004517098.1 | Scaffold2040 | 14515                   | AA                              | GG                | 1946672455               |
| SNP_P3_164044_14516  | NW_004517098.1 | Scaffold2040 | 14516                   | GG                              | AA                | 1946672457               |
| SNP_P3_164045_14538  | NW_004517098.1 | Scaffold2040 | 14538                   | AA                              | GG                | 1946672459               |
| SNP_P3_164046_14906  | NW_004517098.1 | Scaffold2040 | 14906                   | AA                              | GG                | 1946672461               |
| SNP_P3_164047_20717  | NW_004517098.1 | Scaffold2040 | 20717                   | AA                              | GG                | 1946672464               |
| SNP_P3_164048_20819  | NW_004517098.1 | Scaffold2040 | 20819                   | CC                              | TT                | 1946672466               |
| SNP_P3_164049_23876  | NW_004517098.1 | Scaffold2040 | 23876                   | TT                              | CC                | 1946672468               |
| SNP_P3_164050_23880  | NW_004517098.1 | Scaffold2040 | 23880                   | TT                              | CC                | 1946672470               |
| SNP_P3_164051_23893  | NW_004517098.1 | Scaffold2040 | 23893                   | AA                              | GG                | 1946672472               |
| SNP_P3_164052_23898  | NW_004517098.1 | Scaffold2040 | 23898                   | AA                              | GG                | 1946672474               |
| SNP_P3_164053_23899  | NW_004517098.1 | Scaffold2040 | 23899                   | GG                              | AA                | 1946672476               |
| SNP_P3_164054_35255  | NW_004517098.1 | Scaffold2040 | 35255                   | GG                              | TT                | 1946672478               |
| SNP_P3_164055_35681  | NW_004517098.1 | Scaffold2040 | 35681                   | AA                              | GG                | 1946672480               |
| SNP_P3_164056_35723  | NW_004517098.1 | Scaffold2040 | 35723                   | AA                              | GG                | 1946672482               |
| SNP_P3_164057_38237  | NW_004517098.1 | Scaffold2040 | 38237                   | CC                              | TT                | 1946672484               |
| SNP_P3_164058_39938  | NW_004517098.1 | Scaffold2040 | 39938                   | CC                              | AA                | 1946672486               |
| SNP_P3_164059_52422  | NW_004517098.1 | Scaffold2040 | 52422                   | AA                              | GG                | 1946672488               |
| SNP_P3_164060_58973  | NW_004517098.1 | Scaffold2040 | 58973                   | TT                              | CC                | 1946672490               |
| SNP_P3_164061_58974  | NW_004517098.1 | Scaffold2040 | 58974                   | TT                              | GG                | 1946672492               |
| SNP_P3_164062_69586  | NW_004517098.1 | Scaffold2040 | 69586                   | AA                              | GG                | 1946672494               |
| SNP_P3_164063_69635  | NW_004517098.1 | Scaffold2040 | 69635                   | AA                              | GG                | 1946672497               |
| SNP_P3_164064_69734  | NW_004517098.1 | Scaffold2040 | 69734                   | GG                              | TT                | 1946672499               |
| SNP_P3_164065_71437  | NW_004517098.1 | Scaffold2040 | 71437                   | AA                              | GG                | 1946672501               |
| SNP_P3_164066_71481  | NW_004517098.1 | Scaffold2040 | 71481                   | AA                              | GG                | 1946672503               |
| SNP_P3_164067_72632  | NW_004517098.1 | Scaffold2040 | 72632                   | CC                              | TT                | 1946672505               |

| SNPs IDs             | Chromosome IDs | Chromosomes  | Physical positions (bp) | CDC Frontier (Reference genome) | (Pusa 256 & HPNB) | NCBI SNPdb Accession IDs |
|----------------------|----------------|--------------|-------------------------|---------------------------------|-------------------|--------------------------|
| SNP_P3_164068_75581  | NW_004517098.1 | Scaffold2040 | 75581                   | CC                              | AA                | 1946672507               |
| SNP_P3_164069_75590  | NW_004517098.1 | Scaffold2040 | 75590                   | CC                              | TT                | 1946672509               |
| SNP_P3_164070_79737  | NW_004517098.1 | Scaffold2040 | 79737                   | AA                              | TT                | 1946672511               |
| SNP_P3_164071_80205  | NW_004517098.1 | Scaffold2040 | 80205                   | AA                              | GG                | 1946672513               |
| SNP_P3_164073_115916 | NW_004517098.1 | Scaffold2040 | 115916                  | TT                              | CC                | 1946672515               |
| SNP_P3_164074_115945 | NW_004517098.1 | Scaffold2040 | 115945                  | TT                              | CC                | 1946672517               |
| SNP_P3_164075_115950 | NW_004517098.1 | Scaffold2040 | 115950                  | CC                              | TT                | 1946672519               |
| SNP_P3_164076_127225 | NW_004517098.1 | Scaffold2040 | 127225                  | AA                              | GG                | 1946672521               |
| SNP_P3_164077_134685 | NW_004517098.1 | Scaffold2040 | 134685                  | CC                              | TT                | 1946672523               |
| SNP_P3_164078_138283 | NW_004517098.1 | Scaffold2040 | 138283                  | GG                              | AA                | 1946672525               |
| SNP_P3_164079_138524 | NW_004517098.1 | Scaffold2040 | 138524                  | CC                              | TT                | 1946672527               |
| SNP_P3_164080_139776 | NW_004517098.1 | Scaffold2040 | 139776                  | AA                              | GG                | 1946672529               |
| SNP_P3_164081_139897 | NW_004517098.1 | Scaffold2040 | 139897                  | GG                              | AA                | 1946672532               |
| SNP_P3_164082_139902 | NW_004517098.1 | Scaffold2040 | 139902                  | AA                              | GG                | 1946672534               |
| SNP_P3_164083_139927 | NW_004517098.1 | Scaffold2040 | 139927                  | CC                              | TT                | 1946672536               |
| SNP_P3_164084_139945 | NW_004517098.1 | Scaffold2040 | 139945                  | TT                              | GG                | 1946672538               |
| SNP_P3_164085_140004 | NW_004517098.1 | Scaffold2040 | 140004                  | AA                              | GG                | 1946672540               |
| SNP_P3_164086_140027 | NW_004517098.1 | Scaffold2040 | 140027                  | TT                              | CC                | 1946672542               |
| SNP_P3_164087_157681 | NW_004517098.1 | Scaffold2040 | 157681                  | CC                              | GG                | 1946672544               |
| SNP_P3_164088_158157 | NW_004517098.1 | Scaffold2040 | 158157                  | TT                              | CC                | 1946672546               |
| SNP_P3_164089_158180 | NW_004517098.1 | Scaffold2040 | 158180                  | GG                              | CC                | 1946672548               |
| SNP_P3_164091_159630 | NW_004517098.1 | Scaffold2040 | 159630                  | AA                              | GG                | 1946672550               |
| SNP_P3_164092_159668 | NW_004517098.1 | Scaffold2040 | 159668                  | CC                              | TT                | 1946672552               |
| SNP_P3_164093_160013 | NW_004517098.1 | Scaffold2040 | 160013                  | TT                              | CC                | 1946672554               |
| SNP_P3_164094_163448 | NW_004517098.1 | Scaffold2040 | 163448                  | GG                              | AA                | 1946672556               |
| SNP_P3_164095_163496 | NW_004517098.1 | Scaffold2040 | 163496                  | CC                              | TT                | 1946672558               |
| SNP_P3_164096_163824 | NW_004517098.1 | Scaffold2040 | 163824                  | TT                              | AA                | 1946672560               |
| SNP_P3_164097_163837 | NW_004517098.1 | Scaffold2040 | 163837                  | CC                              | TT                | 1946672562               |
| SNP_P3_164098_163896 | NW_004517098.1 | Scaffold2040 | 163896                  | AA                              | GG                | 1946672564               |
| SNP_P3_164099_172767 | NW_004517098.1 | Scaffold2040 | 172767                  | TT                              | GG                | 1946672566               |
| SNP_P3_164100_172768 | NW_004517098.1 | Scaffold2040 | 172768                  | GG                              | CC                | 1946672568               |
| SNP_P3_164101_172779 | NW_004517098.1 | Scaffold2040 | 172779                  | TT                              | CC                | 1946672571               |
| SNP_P3_164102_172802 | NW_004517098.1 | Scaffold2040 | 172802                  | AA                              | TT                | 1946672573               |
| SNP_P3_164103_173158 | NW_004517098.1 | Scaffold2040 | 173158                  | TT                              | AA                | 1946672575               |
| SNP_P3_164104_173181 | NW_004517098.1 | Scaffold2040 | 173181                  | CC                              | TT                | 1946672577               |
| SNP_P3_164105_173309 | NW_004517098.1 | Scaffold2040 | 173309                  | TT                              | CC                | 1946672579               |
| SNP_P3_164106_174134 | NW_004517098.1 | Scaffold2040 | 174134                  | CC                              | TT                | 1946672581               |
| SNP_P3_164108_181012 | NW_004517098.1 | Scaffold2040 | 181012                  | GG                              | TT                | 1946672583               |
| SNP_P3_164109_181076 | NW_004517098.1 | Scaffold2040 | 181076                  | CC                              | AA                | 1946672585               |
| SNP_P3_164110_181087 | NW_004517098.1 | Scaffold2040 | 181087                  | AA                              | TT                | 1946672587               |
| SNP_P3_164112_200649 | NW_004517098.1 | Scaffold2040 | 200649                  | AA                              | GG                | 1946672589               |
| SNP_P3_164113_200895 | NW_004517098.1 | Scaffold2040 | 200895                  | CC                              | TT                | 1946672591               |

| SNPs IDs             | Chromosome IDs | Chromosomes  | Physical positions (bp) | CDC Frontier (Reference genome) | (Pusa 256 & HPNB) | NCBI SNPdb Accession IDs |
|----------------------|----------------|--------------|-------------------------|---------------------------------|-------------------|--------------------------|
| SNP_P3_164114_200898 | NW_004517098.1 | Scaffold2040 | 200898                  | GG                              | AA                | 1946672593               |
| SNP_P3_164115_200951 | NW_004517098.1 | Scaffold2040 | 200951                  | TT                              | CC                | 1946672595               |
| SNP_P3_164116_200977 | NW_004517098.1 | Scaffold2040 | 200977                  | TT                              | AA                | 1946672597               |
| SNP_P3_164117_207967 | NW_004517098.1 | Scaffold2040 | 207967                  | TT                              | CC                | 1946672601               |
| SNP_P3_164118_212452 | NW_004517098.1 | Scaffold2040 | 212452                  | GG                              | AA                | 1946672603               |
| SNP_P3_164119_212548 | NW_004517098.1 | Scaffold2040 | 212548                  | GG                              | CC                | 1946672605               |
| SNP_P3_164120_212581 | NW_004517098.1 | Scaffold2040 | 212581                  | AA                              | CC                | 1946672607               |
| SNP_P3_164122_212883 | NW_004517098.1 | Scaffold2040 | 212883                  | TT                              | CC                | 1946672609               |
| SNP_P3_164123_212905 | NW_004517098.1 | Scaffold2040 | 212905                  | TT                              | GG                | 1946672611               |
| SNP_P3_164124_212953 | NW_004517098.1 | Scaffold2040 | 212953                  | TT                              | AA                | 1946672613               |
| SNP_P3_164125_219365 | NW_004517098.1 | Scaffold2040 | 219365                  | GG                              | AA                | 1946672615               |
| SNP_P3_164127_243953 | NW_004517098.1 | Scaffold2040 | 243953                  | AA                              | TT                | 1946672617               |
| SNP_P3_164128_244168 | NW_004517098.1 | Scaffold2040 | 244168                  | AA                              | GG                | 1946672619               |
| SNP_P3_164129_244228 | NW_004517098.1 | Scaffold2040 | 244228                  | GG                              | AA                | 1946672621               |
| SNP_P3_164130_413    | NW_004517104.1 | Scaffold2050 | 413                     | GG                              | CC                | 1946672623               |
| SNP_P3_164131_481    | NW_004517104.1 | Scaffold2050 | 481                     | TT                              | CC                | 1946672625               |
| SNP_P3_164132_3579   | NW_004517104.1 | Scaffold2050 | 3579                    | CC                              | TT                | 1946672627               |
| SNP_P3_164133_10754  | NW_004517104.1 | Scaffold2050 | 10754                   | AA                              | GG                | 1946672629               |
| SNP_P3_164134_6308   | NW_004517105.1 | Scaffold2051 | 6308                    | TT                              | CC                | 1946672631               |
| SNP_P3_164135_6382   | NW_004517105.1 | Scaffold2051 | 6382                    | TT                              | CC                | 1946672633               |
| SNP_P3_164136_6465   | NW_004517105.1 | Scaffold2051 | 6465                    | TT                              | CC                | 1946672635               |
| SNP_P3_164138_6586   | NW_004517105.1 | Scaffold2051 | 6586                    | CC                              | TT                | 1946672637               |
| SNP_P3_164139_9906   | NW_004517105.1 | Scaffold2051 | 9906                    | GG                              | TT                | 1946672639               |
| SNP_P3_164140_11558  | NW_004517105.1 | Scaffold2051 | 11558                   | GG                              | AA                | 1946672641               |
| SNP_P3_164141_11564  | NW_004517105.1 | Scaffold2051 | 11564                   | GG                              | TT                | 1946672644               |
| SNP_P3_164142_11946  | NW_004517105.1 | Scaffold2051 | 11946                   | TT                              | GG                | 1946672646               |
| SNP_P3_164143_12017  | NW_004517105.1 | Scaffold2051 | 12017                   | AA                              | CC                | 1946672648               |
| SNP_P3_164144_12032  | NW_004517105.1 | Scaffold2051 | 12032                   | AA                              | TT                | 1946672650               |
| SNP_P3_164145_12041  | NW_004517105.1 | Scaffold2051 | 12041                   | TT                              | CC                | 1946672652               |
| SNP_P3_164146_12244  | NW_004517105.1 | Scaffold2051 | 12244                   | GG                              | AA                | 1946672654               |
| SNP_P3_164147_12420  | NW_004517105.1 | Scaffold2051 | 12420                   | TT                              | CC                | 1946672656               |
| SNP_P3_164148_14969  | NW_004517105.1 | Scaffold2051 | 14969                   | AA                              | TT                | 1946672658               |
| SNP_P3_164149_24811  | NW_004517105.1 | Scaffold2051 | 24811                   | AA                              | GG                | 1946672660               |
| SNP_P3_164150_24828  | NW_004517105.1 | Scaffold2051 | 24828                   | TT                              | CC                | 1946672662               |
| SNP_P3_164151_24843  | NW_004517105.1 | Scaffold2051 | 24843                   | GG                              | TT                | 1946672664               |
| SNP_P3_164152_25121  | NW_004517105.1 | Scaffold2051 | 25121                   | TT                              | CC                | 1946672666               |
| SNP_P3_164153_25122  | NW_004517105.1 | Scaffold2051 | 25122                   | AA                              | GG                | 1946672668               |
| SNP_P3_164154_31507  | NW_004517105.1 | Scaffold2051 | 31507                   | AA                              | CC                | 1946672670               |
| SNP_P3_164155_32165  | NW_004517105.1 | Scaffold2051 | 32165                   | TT                              | CC                | 1946672672               |
| SNP_P3_164156_32531  | NW_004517105.1 | Scaffold2051 | 32531                   | AA                              | TT                | 1946672674               |
| SNP_P3_164157_40110  | NW_004517105.1 | Scaffold2051 | 40110                   | CC                              | TT                | 1946672676               |
| SNP_P3_164158_40575  | NW_004517105.1 | Scaffold2051 | 40575                   | CC                              | TT                | 1946672678               |

| SNPs IDs             | Chromosome IDs | Chromosomes  | Physical positions (bp) | CDC Frontier (Reference genome) | (Pusa 256 & HPNB) | NCBI SNPdb Accession IDs |
|----------------------|----------------|--------------|-------------------------|---------------------------------|-------------------|--------------------------|
| SNP_P3_164159_40590  | NW_004517105.1 | Scaffold2051 | 40590                   | TT                              | CC                | 1946672680               |
| SNP_P3_164161_40629  | NW_004517105.1 | Scaffold2051 | 40629                   | CC                              | GG                | 1946672682               |
| SNP_P3_164162_40645  | NW_004517105.1 | Scaffold2051 | 40645                   | TT                              | CC                | 1946672684               |
| SNP_P3_164163_40679  | NW_004517105.1 | Scaffold2051 | 40679                   | GG                              | AA                | 1946672686               |
| SNP_P3_164164_40759  | NW_004517105.1 | Scaffold2051 | 40759                   | TT                              | CC                | 1946672688               |
| SNP_P3_164165_40787  | NW_004517105.1 | Scaffold2051 | 40787                   | AA                              | GG                | 1946672690               |
| SNP_P3_164166_40789  | NW_004517105.1 | Scaffold2051 | 40789                   | TT                              | CC                | 1946672692               |
| SNP_P3_164167_40800  | NW_004517105.1 | Scaffold2051 | 40800                   | AA                              | GG                | 1946672694               |
| SNP_P3_164168_41062  | NW_004517105.1 | Scaffold2051 | 41062                   | TT                              | CC                | 1946672696               |
| SNP_P3_164169_41103  | NW_004517105.1 | Scaffold2051 | 41103                   | AA                              | GG                | 1946672698               |
| SNP_P3_164170_41769  | NW_004517105.1 | Scaffold2051 | 41769                   | GG                              | CC                | 1946672700               |
| SNP_P3_164171_41793  | NW_004517105.1 | Scaffold2051 | 41793                   | CC                              | TT                | 1946672702               |
| SNP_P3_164172_93408  | NW_004517105.1 | Scaffold2051 | 93408                   | TT                              | AA                | 1946672704               |
| SNP_P3_164173_93485  | NW_004517105.1 | Scaffold2051 | 93485                   | TT                              | CC                | 1946672706               |
| SNP_P3_164174_139792 | NW_004517105.1 | Scaffold2051 | 139792                  | TT                              | CC                | 1946672708               |
| SNP_P3_164175_140166 | NW_004517105.1 | Scaffold2051 | 140166                  | AA                              | GG                | 1946672710               |
| SNP_P3_164176_141650 | NW_004517105.1 | Scaffold2051 | 141650                  | AA                              | GG                | 1946672712               |
| SNP_P3_164177_141652 | NW_004517105.1 | Scaffold2051 | 141652                  | TT                              | AA                | 1946672714               |
| SNP_P3_164178_141663 | NW_004517105.1 | Scaffold2051 | 141663                  | CC                              | GG                | 1946672716               |
| SNP_P3_164179_141711 | NW_004517105.1 | Scaffold2051 | 141711                  | TT                              | CC                | 1946672718               |
| SNP_P3_164180_141730 | NW_004517105.1 | Scaffold2051 | 141730                  | CC                              | GG                | 1946672720               |
| SNP_P3_164181_141820 | NW_004517105.1 | Scaffold2051 | 141820                  | CC                              | GG                | 1946672722               |
| SNP_P3_164182_141984 | NW_004517105.1 | Scaffold2051 | 141984                  | AA                              | GG                | 1946672724               |
| SNP_P3_164183_142018 | NW_004517105.1 | Scaffold2051 | 142018                  | GG                              | AA                | 1946672726               |
| SNP_P3_164184_142064 | NW_004517105.1 | Scaffold2051 | 142064                  | TT                              | CC                | 1946672728               |
| SNP_P3_164185_142076 | NW_004517105.1 | Scaffold2051 | 142076                  | AA                              | GG                | 1946672730               |
| SNP_P3_164186_142077 | NW_004517105.1 | Scaffold2051 | 142077                  | TT                              | GG                | 1946672732               |
| SNP_P3_164187_170096 | NW_004517105.1 | Scaffold2051 | 170096                  | AA                              | GG                | 1946672734               |
| SNP_P3_164188_184229 | NW_004517105.1 | Scaffold2051 | 184229                  | TT                              | AA                | 1946672736               |
| SNP_P3_164189_189050 | NW_004517105.1 | Scaffold2051 | 189050                  | GG                              | AA                | 1946672738               |
| SNP_P3_164190_189069 | NW_004517105.1 | Scaffold2051 | 189069                  | CC                              | AA                | 1946672740               |
| SNP_P3_164191_189073 | NW_004517105.1 | Scaffold2051 | 189073                  | AA                              | GG                | 1946672742               |
| SNP_P3_164192_189079 | NW_004517105.1 | Scaffold2051 | 189079                  | AA                              | GG                | 1946672744               |
| SNP_P3_164193_189080 | NW_004517105.1 | Scaffold2051 | 189080                  | GG                              | AA                | 1946672746               |
| SNP_P3_164194_201886 | NW_004517105.1 | Scaffold2051 | 201886                  | TT                              | GG                | 1946672748               |
| SNP_P3_164195_206932 | NW_004517105.1 | Scaffold2051 | 206932                  | AA                              | TT                | 1946672750               |
| SNP_P3_164196_230587 | NW_004517105.1 | Scaffold2051 | 230587                  | AA                              | GG                | 1946672752               |
| SNP_P3_164197_230590 | NW_004517105.1 | Scaffold2051 | 230590                  | TT                              | CC                | 1946672754               |
| SNP_P3_164198_230652 | NW_004517105.1 | Scaffold2051 | 230652                  | AA                              | TT                | 1946672756               |
| SNP_P3_164199_258    | NW_004517107.1 | Scaffold2054 | 258                     | AA                              | TT                | 1946672758               |
| SNP_P3_164200_465    | NW_004517107.1 | Scaffold2054 | 465                     | AA                              | GG                | 1946672760               |
| SNP_P3_164201_545    | NW_004517108.1 | Scaffold2055 | 545                     | GG                              | AA                | 1946672762               |

| SNPs IDs           | Chromosome IDs | Chromosomes  | Physical positions (bp) | CDC Frontier (Reference genome) | (Pusa 256 & HPNB) | NCBI SNPdb Accession IDs |
|--------------------|----------------|--------------|-------------------------|---------------------------------|-------------------|--------------------------|
| SNP_P3_164202_1860 | NW_004517108.1 | Scaffold2055 | 1860                    | AA                              | CC                | 1946672764               |
| SNP_P3_164203_1939 | NW_004517109.1 | Scaffold2056 | 1939                    | AA                              | TT                | 1946672766               |
| SNP_P3_164204_1963 | NW_004517109.1 | Scaffold2056 | 1963                    | TT                              | AA                | 1946672768               |
| SNP_P3_164205_2758 | NW_004517109.1 | Scaffold2056 | 2758                    | GG                              | AA                | 1946672771               |
| SNP_P3_164206_3131 | NW_004517109.1 | Scaffold2056 | 3131                    | GG                              | TT                | 1946672773               |
| SNP_P3_164207_3143 | NW_004517109.1 | Scaffold2056 | 3143                    | AA                              | CC                | 1946672775               |
| SNP_P3_164208_3457 | NW_004517109.1 | Scaffold2056 | 3457                    | GG                              | AA                | 1946672777               |
| SNP_P3_164209_3472 | NW_004517109.1 | Scaffold2056 | 3472                    | CC                              | TT                | 1946672779               |
| SNP_P3_164210_3479 | NW_004517109.1 | Scaffold2056 | 3479                    | TT                              | GG                | 1946672781               |
| SNP_P3_164211_3492 | NW_004517109.1 | Scaffold2056 | 3492                    | TT                              | GG                | 1946672782               |
| SNP_P3_164212_3729 | NW_004517109.1 | Scaffold2056 | 3729                    | AA                              | TT                | 1946672783               |
| SNP_P3_164213_3730 | NW_004517109.1 | Scaffold2056 | 3730                    | CC                              | TT                | 1946672784               |
| SNP_P3_164214_3757 | NW_004517109.1 | Scaffold2056 | 3757                    | TT                              | GG                | 1946672786               |
| SNP_P3_164215_3779 | NW_004517109.1 | Scaffold2056 | 3779                    | AA                              | CC                | 1946672788               |
| SNP_P3_164216_4154 | NW_004517109.1 | Scaffold2056 | 4154                    | TT                              | GG                | 1946672790               |
| SNP_P3_164217_5776 | NW_004517109.1 | Scaffold2056 | 5776                    | TT                              | CC                | 1946672792               |
| SNP_P3_164218_7731 | NW_004517109.1 | Scaffold2056 | 7731                    | AA                              | CC                | 1946672794               |
| SNP_P3_164219_7740 | NW_004517109.1 | Scaffold2056 | 7740                    | TT                              | AA                | 1946672797               |
| SNP_P3_164220_7975 | NW_004517109.1 | Scaffold2056 | 7975                    | TT                              | CC                | 1946672799               |
| SNP_P3_164221_5050 | NW_004517111.1 | Scaffold2062 | 5050                    | GG                              | TT                | 1946672801               |
| SNP_P3_164222_782  | NW_004517112.1 | Scaffold2063 | 782                     | CC                              | TT                | 1946672803               |
| SNP_P3_164223_1321 | NW_004517113.1 | Scaffold2064 | 1321                    | TT                              | CC                | 1946672805               |
| SNP_P3_164224_1344 | NW_004517113.1 | Scaffold2064 | 1344                    | TT                              | CC                | 1946672807               |
| SNP_P3_164225_1488 | NW_004517113.1 | Scaffold2064 | 1488                    | GG                              | AA                | 1946672809               |
| SNP_P3_164226_1698 | NW_004517113.1 | Scaffold2064 | 1698                    | AA                              | TT                | 1946672811               |
| SNP_P3_164228_1860 | NW_004517113.1 | Scaffold2064 | 1860                    | AA                              | TT                | 1946672814               |
| SNP_P3_164229_1868 | NW_004517113.1 | Scaffold2064 | 1868                    | AA                              | GG                | 1946672816               |
| SNP_P3_164230_1869 | NW_004517113.1 | Scaffold2064 | 1869                    | GG                              | AA                | 1946672818               |
| SNP_P3_164231_1870 | NW_004517113.1 | Scaffold2064 | 1870                    | GG                              | TT                | 1946672820               |
| SNP_P3_164232_1983 | NW_004517113.1 | Scaffold2064 | 1983                    | AA                              | GG                | 1946672822               |
| SNP_P3_164233_2013 | NW_004517113.1 | Scaffold2064 | 2013                    | GG                              | AA                | 1946672824               |
| SNP_P3_164234_2169 | NW_004517113.1 | Scaffold2064 | 2169                    | TT                              | CC                | 1946672826               |
| SNP_P3_164235_7273 | NW_004517113.1 | Scaffold2064 | 7273                    | GG                              | AA                | 1946672828               |
| SNP_P3_164236_7287 | NW_004517113.1 | Scaffold2064 | 7287                    | AA                              | GG                | 1946672830               |
| SNP_P3_164237_7298 | NW_004517113.1 | Scaffold2064 | 7298                    | GG                              | AA                | 1946672832               |
| SNP_P3_164238_7302 | NW_004517113.1 | Scaffold2064 | 7302                    | AA                              | CC                | 1946672834               |
| SNP_P3_164239_7303 | NW_004517113.1 | Scaffold2064 | 7303                    | GG                              | AA                | 1946672836               |
| SNP_P3_164240_7321 | NW_004517113.1 | Scaffold2064 | 7321                    | TT                              | CC                | 1946672838               |
| SNP_P3_164241_9114 | NW_004517113.1 | Scaffold2064 | 9114                    | CC                              | TT                | 1946672840               |
| SNP_P3_164242_9146 | NW_004517113.1 | Scaffold2064 | 9146                    | AA                              | GG                | 1946672842               |
| SNP_P3_164244_1617 | NW_004517115.1 | Scaffold2066 | 1617                    | CC                              | AA                | 1946672844               |
| SNP_P3_164245_2703 | NW_004517115.1 | Scaffold2066 | 2703                    | TT                              | CC                | 1946672846               |

| SNPs IDs            | Chromosome IDs | Chromosomes  | Physical positions (bp) | CDC Frontier (Reference genome) | (Pusa 256 & HPNB) | NCBI SNPdb Accession IDs |
|---------------------|----------------|--------------|-------------------------|---------------------------------|-------------------|--------------------------|
| SNP_P3_164246_4013  | NW_004517115.1 | Scaffold2066 | 4013                    | GG                              | AA                | 1946672848               |
| SNP_P3_164247_1597  | NW_004517118.1 | Scaffold2072 | 1597                    | GG                              | TT                | 1946672850               |
| SNP_P3_164248_3236  | NW_004517118.1 | Scaffold2072 | 3236                    | GG                              | AA                | 1946672852               |
| SNP_P3_164249_3239  | NW_004517118.1 | Scaffold2072 | 3239                    | AA                              | GG                | 1946672854               |
| SNP_P3_164250_4777  | NW_004517118.1 | Scaffold2072 | 4777                    | TT                              | AA                | 1946672856               |
| SNP_P3_164251_5006  | NW_004517118.1 | Scaffold2072 | 5006                    | TT                              | AA                | 1946672858               |
| SNP_P3_164252_5071  | NW_004517118.1 | Scaffold2072 | 5071                    | AA                              | GG                | 1946672860               |
| SNP_P3_164253_5303  | NW_004517118.1 | Scaffold2072 | 5303                    | GG                              | AA                | 1946672862               |
| SNP_P3_164254_6810  | NW_004517118.1 | Scaffold2072 | 6810                    | GG                              | AA                | 1946672864               |
| SNP_P3_164255_7138  | NW_004517118.1 | Scaffold2072 | 7138                    | GG                              | AA                | 1946672866               |
| SNP_P3_164256_7145  | NW_004517118.1 | Scaffold2072 | 7145                    | GG                              | TT                | 1946672868               |
| SNP_P3_164257_10638 | NW_004517118.1 | Scaffold2072 | 10638                   | TT                              | CC                | 1946672870               |
| SNP_P3_164258_11531 | NW_004517118.1 | Scaffold2072 | 11531                   | TT                              | CC                | 1946672872               |
| SNP_P3_164259_11840 | NW_004517118.1 | Scaffold2072 | 11840                   | CC                              | TT                | 1946672874               |
| SNP_P3_164260_11848 | NW_004517118.1 | Scaffold2072 | 11848                   | GG                              | AA                | 1946672876               |
| SNP_P3_164261_33534 | NW_004517118.1 | Scaffold2072 | 33534                   | TT                              | GG                | 1946672879               |
| SNP_P3_164262_38151 | NW_004517118.1 | Scaffold2072 | 38151                   | AA                              | TT                | 1946672881               |
| SNP_P3_164263_38202 | NW_004517118.1 | Scaffold2072 | 38202                   | CC                              | TT                | 1946672883               |
| SNP_P3_164264_38241 | NW_004517118.1 | Scaffold2072 | 38241                   | CC                              | GG                | 1946672885               |
| SNP_P3_164265_39139 | NW_004517118.1 | Scaffold2072 | 39139                   | AA                              | GG                | 1946672887               |
| SNP_P3_164268_16990 | NW_004517119.1 | Scaffold2074 | 16990                   | GG                              | TT                | 1946672889               |
| SNP_P3_164269_16997 | NW_004517119.1 | Scaffold2074 | 16997                   | AA                              | TT                | 1946672891               |
| SNP_P3_164270_17276 | NW_004517119.1 | Scaffold2074 | 17276                   | GG                              | AA                | 1946672893               |
| SNP_P3_164271_17282 | NW_004517119.1 | Scaffold2074 | 17282                   | AA                              | GG                | 1946672895               |
| SNP_P3_164273_22002 | NW_004517119.1 | Scaffold2074 | 22002                   | GG                              | TT                | 1946672897               |
| SNP_P3_164274_3858  | NW_004517120.1 | Scaffold2075 | 3858                    | AA                              | TT                | 1946672899               |
| SNP_P3_164275_3914  | NW_004517120.1 | Scaffold2075 | 3914                    | CC                              | AA                | 1946672901               |
| SNP_P3_164276_4183  | NW_004517120.1 | Scaffold2075 | 4183                    | GG                              | TT                | 1946672903               |
| SNP_P3_164277_7410  | NW_004517120.1 | Scaffold2075 | 7410                    | AA                              | CC                | 1946672905               |
| SNP_P3_164278_7411  | NW_004517120.1 | Scaffold2075 | 7411                    | CC                              | TT                | 1946672907               |
| SNP_P3_164279_913   | NW_004517121.1 | Scaffold2076 | 913                     | CC                              | TT                | 1946672909               |
| SNP_P3_164280_928   | NW_004517121.1 | Scaffold2076 | 928                     | CC                              | TT                | 1946672911               |
| SNP_P3_164281_1012  | NW_004517121.1 | Scaffold2076 | 1012                    | AA                              | GG                | 1946672913               |
| SNP_P3_164282_1382  | NW_004517121.1 | Scaffold2076 | 1382                    | TT                              | CC                | 1946672915               |
| SNP_P3_164283_1482  | NW_004517121.1 | Scaffold2076 | 1482                    | AA                              | GG                | 1946672918               |
| SNP_P3_164284_2970  | NW_004517121.1 | Scaffold2076 | 2970                    | AA                              | TT                | 1946672920               |
| SNP_P3_164285_3325  | NW_004517121.1 | Scaffold2076 | 3325                    | TT                              | GG                | 1946672922               |
| SNP_P3_164286_3363  | NW_004517121.1 | Scaffold2076 | 3363                    | CC                              | TT                | 1946672924               |
| SNP_P3_164287_9964  | NW_004517121.1 | Scaffold2076 | 9964                    | GG                              | AA                | 1946672926               |
| SNP_P3_164288_11211 | NW_004517121.1 | Scaffold2076 | 11211                   | TT                              | CC                | 1946672928               |
| SNP_P3_164289_11266 | NW_004517121.1 | Scaffold2076 | 11266                   | AA                              | CC                | 1946672930               |
| SNP_P3_164290_11626 | NW_004517121.1 | Scaffold2076 | 11626                   | TT                              | GG                | 1946672932               |



| SNPs IDs            | Chromosome IDs | Chromosomes  | Physical positions (bp) | CDC Frontier (Reference genome) | (Pusa 256 & HPNB) | NCBI SNPdb Accession IDs |
|---------------------|----------------|--------------|-------------------------|---------------------------------|-------------------|--------------------------|
| SNP_P3_164291_11662 | NW_004517121.1 | Scaffold2076 | 11662                   | TT                              | GG                | 1946672934               |
| SNP_P3_164292_12219 | NW_004517121.1 | Scaffold2076 | 12219                   | TT                              | AA                | 1946672936               |
| SNP_P3_164293_12284 | NW_004517121.1 | Scaffold2076 | 12284                   | CC                              | TT                | 1946672938               |
| SNP_P3_164294_12928 | NW_004517121.1 | Scaffold2076 | 12928                   | AA                              | GG                | 1946672940               |
| SNP_P3_164295_20912 | NW_004517121.1 | Scaffold2076 | 20912                   | AA                              | CC                | 1946672941               |
| SNP_P3_164296_20973 | NW_004517121.1 | Scaffold2076 | 20973                   | AA                              | GG                | 1946672943               |
| SNP_P3_164297_20987 | NW_004517121.1 | Scaffold2076 | 20987                   | AA                              | GG                | 1946672945               |
| SNP_P3_164298_21113 | NW_004517121.1 | Scaffold2076 | 21113                   | TT                              | CC                | 1946672947               |
| SNP_P3_164299_21251 | NW_004517121.1 | Scaffold2076 | 21251                   | TT                              | CC                | 1946672949               |
| SNP_P3_164300_21465 | NW_004517121.1 | Scaffold2076 | 21465                   | GG                              | TT                | 1946672951               |
| SNP_P3_164301_21467 | NW_004517121.1 | Scaffold2076 | 21467                   | GG                              | TT                | 1946672954               |
| SNP_P3_164302_21744 | NW_004517121.1 | Scaffold2076 | 21744                   | AA                              | GG                | 1946672956               |
| SNP_P3_164303_21766 | NW_004517121.1 | Scaffold2076 | 21766                   | AA                              | TT                | 1946672958               |
| SNP_P3_164304_21782 | NW_004517121.1 | Scaffold2076 | 21782                   | CC                              | TT                | 1946672974               |
| SNP_P3_164305_21909 | NW_004517121.1 | Scaffold2076 | 21909                   | AA                              | GG                | 1946672976               |
| SNP_P3_164306_1816  | NW_004517124.1 | Scaffold2081 | 1816                    | TT                              | CC                | 1946672979               |
| SNP_P3_164307_1836  | NW_004517124.1 | Scaffold2081 | 1836                    | TT                              | CC                | 1946672981               |
| SNP_P3_164308_2813  | NW_004517124.1 | Scaffold2081 | 2813                    | GG                              | AA                | 1946672983               |
| SNP_P3_164309_2903  | NW_004517124.1 | Scaffold2081 | 2903                    | AA                              | TT                | 1946672986               |
| SNP_P3_164310_2923  | NW_004517124.1 | Scaffold2081 | 2923                    | TT                              | AA                | 1946672989               |
| SNP_P3_164311_3260  | NW_004517124.1 | Scaffold2081 | 3260                    | TT                              | GG                | 1946672991               |
| SNP_P3_164312_1710  | NW_004517125.1 | Scaffold2082 | 1710                    | CC                              | AA                | 1946672993               |
| SNP_P3_164313_12950 | NW_004517125.1 | Scaffold2082 | 12950                   | AA                              | GG                | 1946672995               |
| SNP_P3_164314_12970 | NW_004517125.1 | Scaffold2082 | 12970                   | AA                              | GG                | 1946672997               |
| SNP_P3_164315_12977 | NW_004517125.1 | Scaffold2082 | 12977                   | GG                              | TT                | 1946673000               |
| SNP_P3_164316_12992 | NW_004517125.1 | Scaffold2082 | 12992                   | TT                              | CC                | 1946673002               |
| SNP_P3_164317_13001 | NW_004517125.1 | Scaffold2082 | 13001                   | AA                              | GG                | 1946673004               |
| SNP_P3_164318_13003 | NW_004517125.1 | Scaffold2082 | 13003                   | AA                              | GG                | 1946673006               |
| SNP_P3_164319_27475 | NW_004517125.1 | Scaffold2082 | 27475                   | TT                              | CC                | 1946673008               |
| SNP_P3_164320_29292 | NW_004517125.1 | Scaffold2082 | 29292                   | AA                              | GG                | 1946673011               |
| SNP_P3_164321_29573 | NW_004517125.1 | Scaffold2082 | 29573                   | AA                              | TT                | 1946673013               |
| SNP_P3_164322_29606 | NW_004517125.1 | Scaffold2082 | 29606                   | GG                              | AA                | 1946673015               |
| SNP_P3_164323_29622 | NW_004517125.1 | Scaffold2082 | 29622                   | AA                              | TT                | 1946673017               |
| SNP_P3_164324_29684 | NW_004517125.1 | Scaffold2082 | 29684                   | GG                              | AA                | 1946673019               |
| SNP_P3_164325_44649 | NW_004517125.1 | Scaffold2082 | 44649                   | AA                              | GG                | 1946673021               |
| SNP_P3_164326_44659 | NW_004517125.1 | Scaffold2082 | 44659                   | AA                              | TT                | 1946673023               |
| SNP_P3_164327_44765 | NW_004517125.1 | Scaffold2082 | 44765                   | AA                              | CC                | 1946673025               |
| SNP_P3_164328_44766 | NW_004517125.1 | Scaffold2082 | 44766                   | AA                              | GG                | 1946673027               |
| SNP_P3_164329_44767 | NW_004517125.1 | Scaffold2082 | 44767                   | AA                              | CC                | 1946673029               |
| SNP_P3_164330_44932 | NW_004517125.1 | Scaffold2082 | 44932                   | GG                              | AA                | 1946673031               |
| SNP_P3_164331_44947 | NW_004517125.1 | Scaffold2082 | 44947                   | TT                              | CC                | 1946673033               |
| SNP_P3_164332_58367 | NW_004517125.1 | Scaffold2082 | 58367                   | TT                              | CC                | 1946673035               |

| SNPs IDs            | Chromosome IDs | Chromosomes  | Physical positions (bp) | CDC Frontier (Reference genome) | (Pusa 256 & HPNB) | NCBI SNPdb Accession IDs |
|---------------------|----------------|--------------|-------------------------|---------------------------------|-------------------|--------------------------|
| SNP_P3_164333_58373 | NW_004517125.1 | Scaffold2082 | 58373                   | TT                              | CC                | 1946673038               |
| SNP_P3_164334_58388 | NW_004517125.1 | Scaffold2082 | 58388                   | TT                              | CC                | 1946673040               |
| SNP_P3_164335_58402 | NW_004517125.1 | Scaffold2082 | 58402                   | TT                              | CC                | 1946673042               |
| SNP_P3_164336_58410 | NW_004517125.1 | Scaffold2082 | 58410                   | CC                              | TT                | 1946673044               |
| SNP_P3_164338_4731  | NW_004517126.1 | Scaffold2083 | 4731                    | AA                              | TT                | 1946673046               |
| SNP_P3_164339_5021  | NW_004517126.1 | Scaffold2083 | 5021                    | AA                              | TT                | 1946673048               |
| SNP_P3_164340_5238  | NW_004517126.1 | Scaffold2083 | 5238                    | TT                              | CC                | 1946673050               |
| SNP_P3_164341_22150 | NW_004517126.1 | Scaffold2083 | 22150                   | AA                              | CC                | 1946673052               |
| SNP_P3_164342_22224 | NW_004517126.1 | Scaffold2083 | 22224                   | GG                              | AA                | 1946673054               |
| SNP_P3_164343_22239 | NW_004517126.1 | Scaffold2083 | 22239                   | AA                              | TT                | 1946673056               |
| SNP_P3_164344_1504  | NW_004517129.1 | Scaffold2087 | 1504                    | GG                              | AA                | 1946673058               |
| SNP_P3_164345_1514  | NW_004517129.1 | Scaffold2087 | 1514                    | AA                              | GG                | 1946673060               |
| SNP_P3_164346_1739  | NW_004517129.1 | Scaffold2087 | 1739                    | AA                              | GG                | 1946673062               |
| SNP_P3_164347_2091  | NW_004517129.1 | Scaffold2087 | 2091                    | GG                              | TT                | 1946673064               |
| SNP_P3_164348_2187  | NW_004517129.1 | Scaffold2087 | 2187                    | TT                              | CC                | 1946673066               |
| SNP_P3_164349_2539  | NW_004517129.1 | Scaffold2087 | 2539                    | GG                              | AA                | 1946673068               |
| SNP_P3_164350_3234  | NW_004517129.1 | Scaffold2087 | 3234                    | GG                              | AA                | 1946673070               |
| SNP_P3_164351_3276  | NW_004517129.1 | Scaffold2087 | 3276                    | CC                              | TT                | 1946673072               |
| SNP_P3_164352_3317  | NW_004517129.1 | Scaffold2087 | 3317                    | TT                              | CC                | 1946673074               |
| SNP_P3_164353_3337  | NW_004517129.1 | Scaffold2087 | 3337                    | GG                              | CC                | 1946673076               |
| SNP_P3_164354_3344  | NW_004517129.1 | Scaffold2087 | 3344                    | GG                              | AA                | 1946673078               |
| SNP_P3_164355_3346  | NW_004517129.1 | Scaffold2087 | 3346                    | GG                              | AA                | 1946673080               |
| SNP_P3_164356_3448  | NW_004517129.1 | Scaffold2087 | 3448                    | GG                              | AA                | 1946673082               |
| SNP_P3_164357_3560  | NW_004517129.1 | Scaffold2087 | 3560                    | AA                              | GG                | 1946673084               |
| SNP_P3_164358_3565  | NW_004517129.1 | Scaffold2087 | 3565                    | AA                              | TT                | 1946673087               |
| SNP_P3_164359_3585  | NW_004517129.1 | Scaffold2087 | 3585                    | AA                              | GG                | 1946673089               |
| SNP_P3_164360_3652  | NW_004517129.1 | Scaffold2087 | 3652                    | AA                              | GG                | 1946673091               |
| SNP_P3_164361_3768  | NW_004517129.1 | Scaffold2087 | 3768                    | TT                              | CC                | 1946673093               |
| SNP_P3_164362_4180  | NW_004517129.1 | Scaffold2087 | 4180                    | GG                              | AA                | 1946673095               |
| SNP_P3_164363_5635  | NW_004517129.1 | Scaffold2087 | 5635                    | TT                              | AA                | 1946673097               |
| SNP_P3_164364_9613  | NW_004517129.1 | Scaffold2087 | 9613                    | AA                              | CC                | 1946673099               |
| SNP_P3_164365_444   | NW_004517131.1 | Scaffold2089 | 444                     | AA                              | CC                | 1946673101               |
| SNP_P3_164366_526   | NW_004517131.1 | Scaffold2089 | 526                     | TT                              | GG                | 1946673103               |
| SNP_P3_164367_691   | NW_004517131.1 | Scaffold2089 | 691                     | AA                              | GG                | 1946673105               |
| SNP_P3_164368_736   | NW_004517131.1 | Scaffold2089 | 736                     | AA                              | GG                | 1946673108               |
| SNP_P3_164369_806   | NW_004517131.1 | Scaffold2089 | 806                     | TT                              | GG                | 1946673110               |
| SNP_P3_164370_899   | NW_004517131.1 | Scaffold2089 | 899                     | AA                              | GG                | 1946673112               |
| SNP_P3_164371_920   | NW_004517131.1 | Scaffold2089 | 920                     | AA                              | TT                | 1946673114               |
| SNP_P3_164372_947   | NW_004517131.1 | Scaffold2089 | 947                     | GG                              | TT                | 1946673116               |
| SNP_P3_164373_953   | NW_004517131.1 | Scaffold2089 | 953                     | CC                              | GG                | 1946673118               |
| SNP_P3_164374_958   | NW_004517131.1 | Scaffold2089 | 958                     | GG                              | AA                | 1946673120               |
| SNP_P3_164376_1077  | NW_004517131.1 | Scaffold2089 | 1077                    | TT                              | GG                | 1946673122               |

| SNPs IDs            | Chromosome IDs | Chromosomes  | Physical positions (bp) | CDC Frontier (Reference genome) | (Pusa 256 & HPNB) | NCBI SNPdb Accession IDs |
|---------------------|----------------|--------------|-------------------------|---------------------------------|-------------------|--------------------------|
| SNP_P3_164377_1090  | NW_004517131.1 | Scaffold2089 | 1090                    | GG                              | CC                | 1946673125               |
| SNP_P3_164379_1162  | NW_004517131.1 | Scaffold2089 | 1162                    | AA                              | GG                | 1946673127               |
| SNP_P3_164380_1163  | NW_004517131.1 | Scaffold2089 | 1163                    | CC                              | AA                | 1946673129               |
| SNP_P3_164381_1167  | NW_004517131.1 | Scaffold2089 | 1167                    | CC                              | AA                | 1946673131               |
| SNP_P3_164382_5545  | NW_004517131.1 | Scaffold2089 | 5545                    | TT                              | CC                | 1946673133               |
| SNP_P3_164383_5547  | NW_004517131.1 | Scaffold2089 | 5547                    | AA                              | TT                | 1946673135               |
| SNP_P3_164384_6458  | NW_004517131.1 | Scaffold2089 | 6458                    | CC                              | TT                | 1946673137               |
| SNP_P3_164385_6467  | NW_004517131.1 | Scaffold2089 | 6467                    | AA                              | TT                | 1946673139               |
| SNP_P3_164386_6474  | NW_004517131.1 | Scaffold2089 | 6474                    | AA                              | CC                | 1946673141               |
| SNP_P3_164387_6535  | NW_004517131.1 | Scaffold2089 | 6535                    | GG                              | TT                | 1946673143               |
| SNP_P3_164388_5913  | NW_004517134.1 | Scaffold2095 | 5913                    | AA                              | GG                | 1946673145               |
| SNP_P3_164390_7219  | NW_004517134.1 | Scaffold2095 | 7219                    | AA                              | TT                | 1946673147               |
| SNP_P3_164391_7272  | NW_004517134.1 | Scaffold2095 | 7272                    | TT                              | CC                | 1946673149               |
| SNP_P3_164392_7439  | NW_004517134.1 | Scaffold2095 | 7439                    | TT                              | CC                | 1946673151               |
| SNP_P3_164393_7596  | NW_004517134.1 | Scaffold2095 | 7596                    | AA                              | TT                | 1946673153               |
| SNP_P3_164394_7917  | NW_004517134.1 | Scaffold2095 | 7917                    | TT                              | GG                | 1946673155               |
| SNP_P3_164395_7976  | NW_004517134.1 | Scaffold2095 | 7976                    | CC                              | TT                | 1946673157               |
| SNP_P3_164396_7991  | NW_004517134.1 | Scaffold2095 | 7991                    | GG                              | AA                | 1946673159               |
| SNP_P3_164397_22866 | NW_004517134.1 | Scaffold2095 | 22866                   | CC                              | AA                | 1946673161               |
| SNP_P3_164398_2011  | NW_004517135.1 | Scaffold2096 | 2011                    | CC                              | TT                | 1946673163               |
| SNP_P3_164399_2077  | NW_004517135.1 | Scaffold2096 | 2077                    | TT                              | CC                | 1946673166               |
| SNP_P3_164400_4554  | NW_004517136.1 | Scaffold2097 | 4554                    | CC                              | AA                | 1946673168               |
| SNP_P3_164401_4662  | NW_004517136.1 | Scaffold2097 | 4662                    | AA                              | GG                | 1946673170               |
| SNP_P3_164402_4663  | NW_004517136.1 | Scaffold2097 | 4663                    | GG                              | TT                | 1946673172               |
| SNP_P3_164404_5025  | NW_004517136.1 | Scaffold2097 | 5025                    | TT                              | CC                | 1946673175               |
| SNP_P3_164405_6563  | NW_004517136.1 | Scaffold2097 | 6563                    | TT                              | CC                | 1946673177               |
| SNP_P3_164406_6878  | NW_004517136.1 | Scaffold2097 | 6878                    | AA                              | GG                | 1946673179               |
| SNP_P3_164407_20767 | NW_004517136.1 | Scaffold2097 | 20767                   | AA                              | CC                | 1946673181               |
| SNP_P3_164409_29520 | NW_004517136.1 | Scaffold2097 | 29520                   | GG                              | AA                | 1946673183               |
| SNP_P3_164410_31601 | NW_004517136.1 | Scaffold2097 | 31601                   | TT                              | CC                | 1946673185               |
| SNP_P3_164411_31731 | NW_004517136.1 | Scaffold2097 | 31731                   | CC                              | TT                | 1946673188               |
| SNP_P3_164412_31751 | NW_004517136.1 | Scaffold2097 | 31751                   | AA                              | GG                | 1946673190               |
| SNP_P3_164413_31784 | NW_004517136.1 | Scaffold2097 | 31784                   | TT                              | GG                | 1946673192               |
| SNP_P3_164414_36475 | NW_004517136.1 | Scaffold2097 | 36475                   | CC                              | GG                | 1946673194               |
| SNP_P3_164415_50188 | NW_004517136.1 | Scaffold2097 | 50188                   | GG                              | CC                | 1946673196               |
| SNP_P3_164416_50190 | NW_004517136.1 | Scaffold2097 | 50190                   | AA                              | TT                | 1946673198               |
| SNP_P3_164417_2936  | NW_004517140.1 | Scaffold2103 | 2936                    | GG                              | CC                | 1946673200               |
| SNP_P3_164418_4769  | NW_004517140.1 | Scaffold2103 | 4769                    | GG                              | CC                | 1946673202               |
| SNP_P3_164419_28928 | NW_004517140.1 | Scaffold2103 | 28928                   | CC                              | TT                | 1946673204               |
| SNP_P3_164420_42506 | NW_004517140.1 | Scaffold2103 | 42506                   | GG                              | CC                | 1946673206               |
| SNP_P3_164421_42697 | NW_004517140.1 | Scaffold2103 | 42697                   | TT                              | CC                | 1946673209               |
| SNP_P3_164422_42734 | NW_004517140.1 | Scaffold2103 | 42734                   | AA                              | TT                | 1946673211               |

| SNPs IDs             | Chromosome IDs | Chromosomes  | Physical positions (bp) | CDC Frontier (Reference genome) | (Pusa 256 & HPNB) | NCBI SNPdb Accession IDs |
|----------------------|----------------|--------------|-------------------------|---------------------------------|-------------------|--------------------------|
| SNP_P3_164423_52448  | NW_004517140.1 | Scaffold2103 | 52448                   | CC                              | GG                | 1946673214               |
| SNP_P3_164424_95825  | NW_004517140.1 | Scaffold2103 | 95825                   | TT                              | CC                | 1946673216               |
| SNP_P3_164425_102845 | NW_004517140.1 | Scaffold2103 | 102845                  | GG                              | AA                | 1946673218               |
| SNP_P3_164426_112430 | NW_004517140.1 | Scaffold2103 | 112430                  | AA                              | GG                | 1946673220               |
| SNP_P3_164427_117689 | NW_004517140.1 | Scaffold2103 | 117689                  | TT                              | GG                | 1946673223               |
| SNP_P3_164428_118766 | NW_004517140.1 | Scaffold2103 | 118766                  | TT                              | CC                | 1946673225               |
| SNP_P3_164429_118774 | NW_004517140.1 | Scaffold2103 | 118774                  | TT                              | CC                | 1946673227               |
| SNP_P3_164430_118810 | NW_004517140.1 | Scaffold2103 | 118810                  | TT                              | GG                | 1946673229               |
| SNP_P3_164431_118836 | NW_004517140.1 | Scaffold2103 | 118836                  | TT                              | AA                | 1946673231               |
| SNP_P3_164432_119201 | NW_004517140.1 | Scaffold2103 | 119201                  | AA                              | GG                | 1946673233               |
| SNP_P3_164433_119216 | NW_004517140.1 | Scaffold2103 | 119216                  | AA                              | GG                | 1946673235               |
| SNP_P3_164434_119219 | NW_004517140.1 | Scaffold2103 | 119219                  | AA                              | CC                | 1946673237               |
| SNP_P3_164435_119363 | NW_004517140.1 | Scaffold2103 | 119363                  | GG                              | AA                | 1946673239               |
| SNP_P3_164436_119364 | NW_004517140.1 | Scaffold2103 | 119364                  | CC                              | AA                | 1946673241               |
| SNP_P3_164437_119366 | NW_004517140.1 | Scaffold2103 | 119366                  | CC                              | TT                | 1946673243               |
| SNP_P3_164438_119375 | NW_004517140.1 | Scaffold2103 | 119375                  | TT                              | GG                | 1946673245               |
| SNP_P3_164439_119388 | NW_004517140.1 | Scaffold2103 | 119388                  | GG                              | AA                | 1946673247               |
| SNP_P3_164440_119390 | NW_004517140.1 | Scaffold2103 | 119390                  | TT                              | CC                | 1946673249               |
| SNP_P3_164441_119399 | NW_004517140.1 | Scaffold2103 | 119399                  | TT                              | AA                | 1946673252               |
| SNP_P3_164442_119417 | NW_004517140.1 | Scaffold2103 | 119417                  | AA                              | GG                | 1946673254               |
| SNP_P3_164443_119424 | NW_004517140.1 | Scaffold2103 | 119424                  | AA                              | GG                | 1946673256               |
| SNP_P3_164444_123849 | NW_004517140.1 | Scaffold2103 | 123849                  | AA                              | TT                | 1946673258               |
| SNP_P3_164445_123875 | NW_004517140.1 | Scaffold2103 | 123875                  | CC                              | GG                | 1946673260               |
| SNP_P3_164446_123948 | NW_004517140.1 | Scaffold2103 | 123948                  | GG                              | AA                | 1946673262               |
| SNP_P3_164447_124005 | NW_004517140.1 | Scaffold2103 | 124005                  | AA                              | GG                | 1946673264               |
| SNP_P3_164448_124013 | NW_004517140.1 | Scaffold2103 | 124013                  | GG                              | AA                | 1946673266               |
| SNP_P3_164449_124049 | NW_004517140.1 | Scaffold2103 | 124049                  | GG                              | TT                | 1946673268               |
| SNP_P3_164451_124064 | NW_004517140.1 | Scaffold2103 | 124064                  | AA                              | GG                | 1946673270               |
| SNP_P3_164452_124074 | NW_004517140.1 | Scaffold2103 | 124074                  | GG                              | AA                | 1946673272               |
| SNP_P3_164454_124165 | NW_004517140.1 | Scaffold2103 | 124165                  | TT                              | CC                | 1946673274               |
| SNP_P3_164456_133853 | NW_004517140.1 | Scaffold2103 | 133853                  | CC                              | TT                | 1946673276               |
| SNP_P3_164458_134236 | NW_004517140.1 | Scaffold2103 | 134236                  | AA                              | GG                | 1946673278               |
| SNP_P3_164459_134269 | NW_004517140.1 | Scaffold2103 | 134269                  | CC                              | TT                | 1946673280               |
| SNP_P3_164460_135627 | NW_004517140.1 | Scaffold2103 | 135627                  | GG                              | TT                | 1946673282               |
| SNP_P3_164461_135804 | NW_004517140.1 | Scaffold2103 | 135804                  | GG                              | AA                | 1946673284               |
| SNP_P3_164462_135816 | NW_004517140.1 | Scaffold2103 | 135816                  | GG                              | TT                | 1946673286               |
| SNP_P3_164463_135826 | NW_004517140.1 | Scaffold2103 | 135826                  | TT                              | CC                | 1946673288               |
| SNP_P3_164464_135837 | NW_004517140.1 | Scaffold2103 | 135837                  | AA                              | GG                | 1946673291               |
| SNP_P3_164466_162333 | NW_004517140.1 | Scaffold2103 | 162333                  | GG                              | TT                | 1946673293               |
| SNP_P3_164467_162338 | NW_004517140.1 | Scaffold2103 | 162338                  | CC                              | TT                | 1946673295               |
| SNP_P3_164468_4568   | NW_004517141.1 | Scaffold2104 | 4568                    | GG                              | AA                | 1946673297               |
| SNP_P3_164469_5013   | NW_004517141.1 | Scaffold2104 | 5013                    | TT                              | AA                | 1946673299               |

| SNPs IDs            | Chromosome IDs | Chromosomes  | Physical positions (bp) | CDC Frontier (Reference genome) | (Pusa 256 & HPNB) | NCBI SNPdb Accession IDs |
|---------------------|----------------|--------------|-------------------------|---------------------------------|-------------------|--------------------------|
| SNP_P3_164470_5479  | NW_004517141.1 | Scaffold2104 | 5479                    | TT                              | GG                | 1946673301               |
| SNP_P3_164471_5637  | NW_004517141.1 | Scaffold2104 | 5637                    | CC                              | GG                | 1946673303               |
| SNP_P3_164472_5719  | NW_004517141.1 | Scaffold2104 | 5719                    | CC                              | GG                | 1946673305               |
| SNP_P3_164473_6003  | NW_004517141.1 | Scaffold2104 | 6003                    | CC                              | TT                | 1946673307               |
| SNP_P3_164474_6404  | NW_004517141.1 | Scaffold2104 | 6404                    | GG                              | TT                | 1946673309               |
| SNP_P3_164475_9443  | NW_004517141.1 | Scaffold2104 | 9443                    | CC                              | TT                | 1946673311               |
| SNP_P3_164476_9444  | NW_004517141.1 | Scaffold2104 | 9444                    | CC                              | AA                | 1946673313               |
| SNP_P3_164477_17230 | NW_004517141.1 | Scaffold2104 | 17230                   | TT                              | CC                | 1946673315               |
| SNP_P3_164478_18009 | NW_004517141.1 | Scaffold2104 | 18009                   | AA                              | GG                | 1946673317               |
| SNP_P3_164479_18236 | NW_004517141.1 | Scaffold2104 | 18236                   | GG                              | AA                | 1946673319               |
| SNP_P3_164480_18267 | NW_004517141.1 | Scaffold2104 | 18267                   | AA                              | GG                | 1946673321               |
| SNP_P3_164481_18407 | NW_004517141.1 | Scaffold2104 | 18407                   | CC                              | TT                | 1946673323               |
| SNP_P3_164482_25301 | NW_004517141.1 | Scaffold2104 | 25301                   | TT                              | AA                | 1946673325               |
| SNP_P3_164483_25388 | NW_004517141.1 | Scaffold2104 | 25388                   | CC                              | TT                | 1946673327               |
| SNP_P3_164484_27022 | NW_004517141.1 | Scaffold2104 | 27022                   | GG                              | CC                | 1946673330               |
| SNP_P3_164485_35688 | NW_004517141.1 | Scaffold2104 | 35688                   | TT                              | AA                | 1946673332               |
| SNP_P3_164486_35716 | NW_004517141.1 | Scaffold2104 | 35716                   | TT                              | GG                | 1946673334               |
| SNP_P3_164487_60568 | NW_004517141.1 | Scaffold2104 | 60568                   | AA                              | GG                | 1946673336               |
| SNP_P3_164488_60899 | NW_004517141.1 | Scaffold2104 | 60899                   | GG                              | CC                | 1946673337               |
| SNP_P3_164489_61003 | NW_004517141.1 | Scaffold2104 | 61003                   | AA                              | GG                | 1946673339               |
| SNP_P3_164490_275   | NW_004517143.1 | Scaffold2106 | 275                     | TT                              | CC                | 1946673341               |
| SNP_P3_164491_278   | NW_004517143.1 | Scaffold2106 | 278                     | TT                              | CC                | 1946673343               |
| SNP_P3_164492_284   | NW_004517143.1 | Scaffold2106 | 284                     | CC                              | TT                | 1946673345               |
| SNP_P3_164493_286   | NW_004517143.1 | Scaffold2106 | 286                     | AA                              | GG                | 1946673347               |
| SNP_P3_164494_313   | NW_004517143.1 | Scaffold2106 | 313                     | CC                              | TT                | 1946673349               |
| SNP_P3_164495_586   | NW_004517143.1 | Scaffold2106 | 586                     | TT                              | AA                | 1946673351               |
| SNP_P3_164496_689   | NW_004517143.1 | Scaffold2106 | 689                     | AA                              | GG                | 1946673354               |
| SNP_P3_164497_1229  | NW_004517144.1 | Scaffold2108 | 1229                    | TT                              | AA                | 1946673356               |
| SNP_P3_164498_1465  | NW_004517144.1 | Scaffold2108 | 1465                    | CC                              | TT                | 1946673358               |
| SNP_P3_164499_1513  | NW_004517144.1 | Scaffold2108 | 1513                    | TT                              | CC                | 1946673360               |
| SNP_P3_164500_1514  | NW_004517144.1 | Scaffold2108 | 1514                    | GG                              | AA                | 1946673362               |
| SNP_P3_164501_1830  | NW_004517144.1 | Scaffold2108 | 1830                    | TT                              | AA                | 1946673368               |
| SNP_P3_164502_1880  | NW_004517144.1 | Scaffold2108 | 1880                    | CC                              | TT                | 1946673370               |
| SNP_P3_164503_1902  | NW_004517144.1 | Scaffold2108 | 1902                    | CC                              | AA                | 1946673372               |
| SNP_P3_164504_2346  | NW_004517144.1 | Scaffold2108 | 2346                    | GG                              | AA                | 1946673374               |
| SNP_P3_164505_3001  | NW_004517144.1 | Scaffold2108 | 3001                    | AA                              | CC                | 1946673376               |
| SNP_P3_164506_1111  | NW_004517145.1 | Scaffold2110 | 1111                    | TT                              | GG                | 1946673378               |
| SNP_P3_164508_4024  | NW_004517146.1 | Scaffold2113 | 4024                    | AA                              | CC                | 1946673380               |
| SNP_P3_164509_4270  | NW_004517146.1 | Scaffold2113 | 4270                    | TT                              | AA                | 1946673382               |
| SNP_P3_164510_5167  | NW_004517153.1 | Scaffold2124 | 5167                    | TT                              | CC                | 1946673384               |
| SNP_P3_164511_5296  | NW_004517153.1 | Scaffold2124 | 5296                    | TT                              | AA                | 1946673386               |
| SNP_P3_164512_9962  | NW_004517153.1 | Scaffold2124 | 9962                    | AA                              | TT                | 1946673388               |

| SNPs IDs            | Chromosome IDs | Chromosomes  | Physical positions (bp) | CDC Frontier (Reference genome) | (Pusa 256 & HPNB) | NCBI SNPdb Accession IDs |
|---------------------|----------------|--------------|-------------------------|---------------------------------|-------------------|--------------------------|
| SNP_P3_164513_10855 | NW_004517153.1 | Scaffold2124 | 10855                   | CC                              | GG                | 1946673390               |
| SNP_P3_164514_11246 | NW_004517153.1 | Scaffold2124 | 11246                   | AA                              | TT                | 1946673392               |
| SNP_P3_164515_35217 | NW_004517153.1 | Scaffold2124 | 35217                   | CC                              | AA                | 1946673394               |
| SNP_P3_164516_35226 | NW_004517153.1 | Scaffold2124 | 35226                   | AA                              | GG                | 1946673396               |
| SNP_P3_164517_35317 | NW_004517153.1 | Scaffold2124 | 35317                   | CC                              | AA                | 1946673398               |
| SNP_P3_164518_35390 | NW_004517153.1 | Scaffold2124 | 35390                   | AA                              | GG                | 1946673400               |
| SNP_P3_164519_35428 | NW_004517153.1 | Scaffold2124 | 35428                   | CC                              | TT                | 1946673402               |
| SNP_P3_164520_14739 | NW_004517154.1 | Scaffold2125 | 14739                   | AA                              | GG                | 1946673404               |
| SNP_P3_164521_14809 | NW_004517154.1 | Scaffold2125 | 14809                   | TT                              | AA                | 1946673406               |
| SNP_P3_164522_17891 | NW_004517154.1 | Scaffold2125 | 17891                   | TT                              | CC                | 1946673409               |
| SNP_P3_164523_37476 | NW_004517154.1 | Scaffold2125 | 37476                   | TT                              | GG                | 1946673411               |
| SNP_P3_164524_40322 | NW_004517154.1 | Scaffold2125 | 40322                   | CC                              | TT                | 1946673413               |
| SNP_P3_164526_5407  | NW_004517155.1 | Scaffold2126 | 5407                    | CC                              | TT                | 1946673415               |
| SNP_P3_164527_5425  | NW_004517155.1 | Scaffold2126 | 5425                    | AA                              | GG                | 1946673417               |
| SNP_P3_164528_5429  | NW_004517155.1 | Scaffold2126 | 5429                    | GG                              | AA                | 1946673419               |
| SNP_P3_164529_5433  | NW_004517155.1 | Scaffold2126 | 5433                    | AA                              | TT                | 1946673421               |
| SNP_P3_164530_5474  | NW_004517155.1 | Scaffold2126 | 5474                    | TT                              | AA                | 1946673423               |
| SNP_P3_164531_5531  | NW_004517155.1 | Scaffold2126 | 5531                    | TT                              | GG                | 1946673425               |
| SNP_P3_164532_5724  | NW_004517155.1 | Scaffold2126 | 5724                    | AA                              | GG                | 1946673427               |
| SNP_P3_164533_5725  | NW_004517155.1 | Scaffold2126 | 5725                    | GG                              | TT                | 1946673429               |
| SNP_P3_164534_6069  | NW_004517155.1 | Scaffold2126 | 6069                    | AA                              | GG                | 1946673431               |
| SNP_P3_164535_8903  | NW_004517155.1 | Scaffold2126 | 8903                    | TT                              | CC                | 1946673433               |
| SNP_P3_164536_9498  | NW_004517155.1 | Scaffold2126 | 9498                    | GG                              | AA                | 1946673435               |
| SNP_P3_164537_11000 | NW_004517155.1 | Scaffold2126 | 11000                   | AA                              | CC                | 1946673437               |
| SNP_P3_164538_11051 | NW_004517155.1 | Scaffold2126 | 11051                   | AA                              | TT                | 1946673439               |
| SNP_P3_164539_13808 | NW_004517155.1 | Scaffold2126 | 13808                   | AA                              | GG                | 1946673441               |
| SNP_P3_164540_14056 | NW_004517155.1 | Scaffold2126 | 14056                   | GG                              | CC                | 1946673443               |
| SNP_P3_164541_14102 | NW_004517155.1 | Scaffold2126 | 14102                   | GG                              | CC                | 1946673445               |
| SNP_P3_164542_14168 | NW_004517155.1 | Scaffold2126 | 14168                   | TT                              | AA                | 1946673447               |
| SNP_P3_164543_14180 | NW_004517155.1 | Scaffold2126 | 14180                   | GG                              | CC                | 1946673449               |
| SNP_P3_164544_14185 | NW_004517155.1 | Scaffold2126 | 14185                   | AA                              | TT                | 1946673451               |
| SNP_P3_164545_14218 | NW_004517155.1 | Scaffold2126 | 14218                   | GG                              | TT                | 1946673453               |
| SNP_P3_164546_18654 | NW_004517155.1 | Scaffold2126 | 18654                   | TT                              | CC                | 1946673455               |
| SNP_P3_164549_1222  | NW_004517156.1 | Scaffold2127 | 1222                    | CC                              | GG                | 1946673457               |
| SNP_P3_164550_1251  | NW_004517156.1 | Scaffold2127 | 1251                    | CC                              | GG                | 1946673460               |
| SNP_P3_164552_9925  | NW_004517156.1 | Scaffold2127 | 9925                    | AA                              | GG                | 1946673462               |
| SNP_P3_164554_19816 | NW_004517156.1 | Scaffold2127 | 19816                   | TT                              | AA                | 1946673464               |
| SNP_P3_164555_31171 | NW_004517156.1 | Scaffold2127 | 31171                   | AA                              | CC                | 1946673466               |
| SNP_P3_164556_31293 | NW_004517156.1 | Scaffold2127 | 31293                   | TT                              | CC                | 1946673468               |
| SNP_P3_164557_32109 | NW_004517156.1 | Scaffold2127 | 32109                   | AA                              | TT                | 1946673470               |
| SNP_P3_164558_32122 | NW_004517156.1 | Scaffold2127 | 32122                   | GG                              | AA                | 1946673472               |
| SNP_P3_164560_39844 | NW_004517156.1 | Scaffold2127 | 39844                   | GG                              | AA                | 1946673474               |

| SNPs IDs            | Chromosome IDs | Chromosomes  | Physical positions (bp) | CDC Frontier (Reference genome) | (Pusa 256 & HPNB) | NCBI SNPdb Accession IDs |
|---------------------|----------------|--------------|-------------------------|---------------------------------|-------------------|--------------------------|
| SNP_P3_164561_39863 | NW_004517156.1 | Scaffold2127 | 39863                   | CC                              | TT                | 1946673476               |
| SNP_P3_164562_39865 | NW_004517156.1 | Scaffold2127 | 39865                   | AA                              | GG                | 1946673478               |
| SNP_P3_164563_39878 | NW_004517156.1 | Scaffold2127 | 39878                   | TT                              | AA                | 1946673480               |
| SNP_P3_164564_39879 | NW_004517156.1 | Scaffold2127 | 39879                   | CC                              | TT                | 1946673482               |
| SNP_P3_164565_39889 | NW_004517156.1 | Scaffold2127 | 39889                   | TT                              | CC                | 1946673484               |
| SNP_P3_164566_39891 | NW_004517156.1 | Scaffold2127 | 39891                   | GG                              | AA                | 1946673486               |
| SNP_P3_164567_40136 | NW_004517156.1 | Scaffold2127 | 40136                   | CC                              | TT                | 1946673488               |
| SNP_P3_164568_40140 | NW_004517156.1 | Scaffold2127 | 40140                   | AA                              | TT                | 1946673490               |
| SNP_P3_164569_40846 | NW_004517156.1 | Scaffold2127 | 40846                   | TT                              | CC                | 1946673492               |
| SNP_P3_164570_40879 | NW_004517156.1 | Scaffold2127 | 40879                   | TT                              | GG                | 1946673494               |
| SNP_P3_164571_47605 | NW_004517156.1 | Scaffold2127 | 47605                   | CC                              | TT                | 1946673496               |
| SNP_P3_164572_14289 | NW_004517157.1 | Scaffold2128 | 14289                   | CC                              | TT                | 1946673498               |
| SNP_P3_164573_14311 | NW_004517157.1 | Scaffold2128 | 14311                   | TT                              | CC                | 1946673501               |
| SNP_P3_164574_14579 | NW_004517157.1 | Scaffold2128 | 14579                   | AA                              | GG                | 1946673503               |
| SNP_P3_164575_14622 | NW_004517157.1 | Scaffold2128 | 14622                   | TT                              | AA                | 1946673505               |
| SNP_P3_164576_14823 | NW_004517157.1 | Scaffold2128 | 14823                   | TT                              | CC                | 1946673507               |
| SNP_P3_164577_14838 | NW_004517157.1 | Scaffold2128 | 14838                   | CC                              | TT                | 1946673509               |
| SNP_P3_164578_14879 | NW_004517157.1 | Scaffold2128 | 14879                   | CC                              | TT                | 1946673511               |
| SNP_P3_164579_15025 | NW_004517157.1 | Scaffold2128 | 15025                   | GG                              | AA                | 1946673513               |
| SNP_P3_164580_779   | NW_004517159.1 | Scaffold2131 | 779                     | GG                              | AA                | 1946673515               |
| SNP_P3_164582_1037  | NW_004517160.1 | Scaffold2132 | 1037                    | TT                              | GG                | 1946673517               |
| SNP_P3_164583_1042  | NW_004517160.1 | Scaffold2132 | 1042                    | TT                              | AA                | 1946673519               |
| SNP_P3_164584_1071  | NW_004517160.1 | Scaffold2132 | 1071                    | CC                              | AA                | 1946673521               |
| SNP_P3_164585_1313  | NW_004517160.1 | Scaffold2132 | 1313                    | TT                              | CC                | 1946673523               |
| SNP_P3_164586_1342  | NW_004517160.1 | Scaffold2132 | 1342                    | TT                              | AA                | 1946673525               |
| SNP_P3_164587_3812  | NW_004517162.1 | Scaffold2134 | 3812                    | AA                              | CC                | 1946673527               |
| SNP_P3_164588_3877  | NW_004517162.1 | Scaffold2134 | 3877                    | AA                              | CC                | 1946673529               |
| SNP_P3_164589_3880  | NW_004517162.1 | Scaffold2134 | 3880                    | TT                              | AA                | 1946673531               |
| SNP_P3_164590_3881  | NW_004517162.1 | Scaffold2134 | 3881                    | AA                              | TT                | 1946673533               |
| SNP_P3_164591_4134  | NW_004517162.1 | Scaffold2134 | 4134                    | TT                              | CC                | 1946673535               |
| SNP_P3_164592_4195  | NW_004517162.1 | Scaffold2134 | 4195                    | AA                              | CC                | 1946673537               |
| SNP_P3_164593_5066  | NW_004517162.1 | Scaffold2134 | 5066                    | TT                              | GG                | 1946673539               |
| SNP_P3_164594_5069  | NW_004517162.1 | Scaffold2134 | 5069                    | CC                              | TT                | 1946673541               |
| SNP_P3_164595_5251  | NW_004517162.1 | Scaffold2134 | 5251                    | GG                              | AA                | 1946673543               |
| SNP_P3_164596_5252  | NW_004517162.1 | Scaffold2134 | 5252                    | AA                              | GG                | 1946673545               |
| SNP_P3_164597_5294  | NW_004517162.1 | Scaffold2134 | 5294                    | CC                              | GG                | 1946673547               |
| SNP_P3_164598_5364  | NW_004517162.1 | Scaffold2134 | 5364                    | TT                              | CC                | 1946673549               |
| SNP_P3_164600_5541  | NW_004517162.1 | Scaffold2134 | 5541                    | GG                              | AA                | 1946673551               |
| SNP_P3_164601_5686  | NW_004517162.1 | Scaffold2134 | 5686                    | CC                              | TT                | 1946673553               |
| SNP_P3_164602_5764  | NW_004517162.1 | Scaffold2134 | 5764                    | TT                              | CC                | 1946673555               |
| SNP_P3_164603_5783  | NW_004517162.1 | Scaffold2134 | 5783                    | TT                              | CC                | 1946673556               |
| SNP_P3_164604_5802  | NW_004517162.1 | Scaffold2134 | 5802                    | CC                              | TT                | 1946673557               |

| SNPs IDs            | Chromosome IDs | Chromosomes  | Physical positions (bp) | CDC Frontier (Reference genome) | (Pusa 256 & HPNB) | NCBI SNPdb Accession IDs |
|---------------------|----------------|--------------|-------------------------|---------------------------------|-------------------|--------------------------|
| SNP_P3_164605_5821  | NW_004517162.1 | Scaffold2134 | 5821                    | CC                              | TT                | 1946673558               |
| SNP_P3_164606_5830  | NW_004517162.1 | Scaffold2134 | 5830                    | TT                              | CC                | 1946673559               |
| SNP_P3_164607_7156  | NW_004517163.1 | Scaffold2135 | 7156                    | GG                              | AA                | 1946673560               |
| SNP_P3_164608_7275  | NW_004517163.1 | Scaffold2135 | 7275                    | TT                              | CC                | 1946673561               |
| SNP_P3_164609_7279  | NW_004517163.1 | Scaffold2135 | 7279                    | TT                              | CC                | 1946673562               |
| SNP_P3_164610_7305  | NW_004517163.1 | Scaffold2135 | 7305                    | CC                              | AA                | 1946673563               |
| SNP_P3_164611_7337  | NW_004517163.1 | Scaffold2135 | 7337                    | TT                              | CC                | 1946673564               |
| SNP_P3_164612_7378  | NW_004517163.1 | Scaffold2135 | 7378                    | CC                              | TT                | 1946673565               |
| SNP_P3_164613_7443  | NW_004517163.1 | Scaffold2135 | 7443                    | GG                              | AA                | 1946673566               |
| SNP_P3_164614_148   | NW_004517164.1 | Scaffold2138 | 148                     | AA                              | GG                | 1946673567               |
| SNP_P3_164615_375   | NW_004517164.1 | Scaffold2138 | 375                     | AA                              | CC                | 1946673568               |
| SNP_P3_164616_1455  | NW_004517165.1 | Scaffold2139 | 1455                    | GG                              | TT                | 1946673569               |
| SNP_P3_164617_1491  | NW_004517165.1 | Scaffold2139 | 1491                    | CC                              | AA                | 1946673570               |
| SNP_P3_164618_1498  | NW_004517165.1 | Scaffold2139 | 1498                    | TT                              | AA                | 1946673571               |
| SNP_P3_164619_359   | NW_004517166.1 | Scaffold2140 | 359                     | AA                              | GG                | 1946673572               |
| SNP_P3_164620_550   | NW_004517166.1 | Scaffold2140 | 550                     | TT                              | CC                | 1946673573               |
| SNP_P3_164621_563   | NW_004517166.1 | Scaffold2140 | 563                     | AA                              | TT                | 1946673574               |
| SNP_P3_164622_605   | NW_004517166.1 | Scaffold2140 | 605                     | AA                              | GG                | 1946673575               |
| SNP_P3_164623_724   | NW_004517166.1 | Scaffold2140 | 724                     | TT                              | GG                | 1946673576               |
| SNP_P3_164624_880   | NW_004517166.1 | Scaffold2140 | 880                     | CC                              | GG                | 1946673578               |
| SNP_P3_164625_910   | NW_004517166.1 | Scaffold2140 | 910                     | AA                              | GG                | 1946673580               |
| SNP_P3_164626_1082  | NW_004517166.1 | Scaffold2140 | 1082                    | CC                              | AA                | 1946673582               |
| SNP_P3_164627_1115  | NW_004517166.1 | Scaffold2140 | 1115                    | GG                              | CC                | 1946673584               |
| SNP_P3_164629_14586 | NW_004517167.1 | Scaffold2141 | 14586                   | CC                              | TT                | 1946673586               |
| SNP_P3_164630_14963 | NW_004517167.1 | Scaffold2141 | 14963                   | CC                              | GG                | 1946673588               |
| SNP_P3_164631_15238 | NW_004517167.1 | Scaffold2141 | 15238                   | TT                              | CC                | 1946673590               |
| SNP_P3_164632_15368 | NW_004517167.1 | Scaffold2141 | 15368                   | CC                              | TT                | 1946673592               |
| SNP_P3_164633_15369 | NW_004517167.1 | Scaffold2141 | 15369                   | AA                              | CC                | 1946673595               |
| SNP_P3_164634_15397 | NW_004517167.1 | Scaffold2141 | 15397                   | CC                              | AA                | 1946673597               |
| SNP_P3_164635_15416 | NW_004517167.1 | Scaffold2141 | 15416                   | GG                              | AA                | 1946673599               |
| SNP_P3_164636_15538 | NW_004517167.1 | Scaffold2141 | 15538                   | GG                              | TT                | 1946673601               |
| SNP_P3_164637_15848 | NW_004517167.1 | Scaffold2141 | 15848                   | TT                              | GG                | 1946673603               |
| SNP_P3_164638_16639 | NW_004517167.1 | Scaffold2141 | 16639                   | AA                              | GG                | 1946673605               |
| SNP_P3_164639_16705 | NW_004517167.1 | Scaffold2141 | 16705                   | GG                              | TT                | 1946673607               |
| SNP_P3_164641_17538 | NW_004517167.1 | Scaffold2141 | 17538                   | GG                              | AA                | 1946673609               |
| SNP_P3_164642_17541 | NW_004517167.1 | Scaffold2141 | 17541                   | CC                              | TT                | 1946673611               |
| SNP_P3_164643_17926 | NW_004517167.1 | Scaffold2141 | 17926                   | GG                              | AA                | 1946673613               |
| SNP_P3_164645_19662 | NW_004517167.1 | Scaffold2141 | 19662                   | GG                              | AA                | 1946673615               |
| SNP_P3_164646_20550 | NW_004517167.1 | Scaffold2141 | 20550                   | AA                              | GG                | 1946673617               |
| SNP_P3_164647_558   | NW_004517168.1 | Scaffold2142 | 558                     | TT                              | CC                | 1946673619               |
| SNP_P3_164648_588   | NW_004517168.1 | Scaffold2142 | 588                     | GG                              | AA                | 1946673621               |
| SNP_P3_164649_699   | NW_004517168.1 | Scaffold2142 | 699                     | CC                              | GG                | 1946673623               |



| SNPs IDs            | Chromosome IDs | Chromosomes  | Physical positions (bp) | CDC Frontier (Reference genome) | (Pusa 256 & HPNB) | NCBI SNPdb Accession IDs |
|---------------------|----------------|--------------|-------------------------|---------------------------------|-------------------|--------------------------|
| SNP_P3_164650_2299  | NW_004517169.1 | Scaffold2145 | 2299                    | TT                              | CC                | 1946673625               |
| SNP_P3_164651_504   | NW_004517170.1 | Scaffold2146 | 504                     | TT                              | AA                | 1946673627               |
| SNP_P3_164652_1167  | NW_004517170.1 | Scaffold2146 | 1167                    | CC                              | TT                | 1946673629               |
| SNP_P3_164653_908   | NW_004517171.1 | Scaffold2147 | 908                     | TT                              | AA                | 1946673631               |
| SNP_P3_164654_911   | NW_004517171.1 | Scaffold2147 | 911                     | TT                              | CC                | 1946673633               |
| SNP_P3_164655_960   | NW_004517171.1 | Scaffold2147 | 960                     | TT                              | CC                | 1946673635               |
| SNP_P3_164656_961   | NW_004517171.1 | Scaffold2147 | 961                     | GG                              | TT                | 1946673637               |
| SNP_P3_164657_965   | NW_004517171.1 | Scaffold2147 | 965                     | AA                              | GG                | 1946673639               |
| SNP_P3_164658_982   | NW_004517171.1 | Scaffold2147 | 982                     | AA                              | GG                | 1946673641               |
| SNP_P3_164659_1062  | NW_004517171.1 | Scaffold2147 | 1062                    | GG                              | TT                | 1946673642               |
| SNP_P3_164660_1168  | NW_004517171.1 | Scaffold2147 | 1168                    | AA                              | GG                | 1946673643               |
| SNP_P3_164661_1435  | NW_004517171.1 | Scaffold2147 | 1435                    | AA                              | GG                | 1946673644               |
| SNP_P3_164662_5252  | NW_004517171.1 | Scaffold2147 | 5252                    | TT                              | CC                | 1946673646               |
| SNP_P3_164663_5261  | NW_004517171.1 | Scaffold2147 | 5261                    | TT                              | CC                | 1946673648               |
| SNP_P3_164664_5265  | NW_004517171.1 | Scaffold2147 | 5265                    | TT                              | CC                | 1946673651               |
| SNP_P3_164665_5270  | NW_004517171.1 | Scaffold2147 | 5270                    | TT                              | GG                | 1946673653               |
| SNP_P3_164666_5299  | NW_004517171.1 | Scaffold2147 | 5299                    | CC                              | AA                | 1946673655               |
| SNP_P3_164667_5353  | NW_004517171.1 | Scaffold2147 | 5353                    | TT                              | GG                | 1946673657               |
| SNP_P3_164668_5670  | NW_004517171.1 | Scaffold2147 | 5670                    | GG                              | AA                | 1946673659               |
| SNP_P3_164669_6058  | NW_004517171.1 | Scaffold2147 | 6058                    | TT                              | GG                | 1946673662               |
| SNP_P3_164670_6113  | NW_004517171.1 | Scaffold2147 | 6113                    | AA                              | CC                | 1946673664               |
| SNP_P3_164671_6130  | NW_004517171.1 | Scaffold2147 | 6130                    | TT                              | AA                | 1946673667               |
| SNP_P3_164672_6410  | NW_004517171.1 | Scaffold2147 | 6410                    | GG                              | AA                | 1946673669               |
| SNP_P3_164673_6414  | NW_004517171.1 | Scaffold2147 | 6414                    | CC                              | TT                | 1946673671               |
| SNP_P3_164674_6453  | NW_004517171.1 | Scaffold2147 | 6453                    | AA                              | GG                | 1946673673               |
| SNP_P3_164675_20520 | NW_004517171.1 | Scaffold2147 | 20520                   | AA                              | TT                | 1946673675               |
| SNP_P3_164676_21438 | NW_004517171.1 | Scaffold2147 | 21438                   | GG                              | AA                | 1946673677               |
| SNP_P3_164677_21489 | NW_004517171.1 | Scaffold2147 | 21489                   | GG                              | AA                | 1946673679               |
| SNP_P3_164678_21568 | NW_004517171.1 | Scaffold2147 | 21568                   | TT                              | CC                | 1946673681               |
| SNP_P3_164680_22383 | NW_004517171.1 | Scaffold2147 | 22383                   | TT                              | AA                | 1946673683               |
| SNP_P3_164681_22514 | NW_004517171.1 | Scaffold2147 | 22514                   | CC                              | AA                | 1946673685               |
| SNP_P3_164682_22689 | NW_004517171.1 | Scaffold2147 | 22689                   | GG                              | TT                | 1946673687               |
| SNP_P3_164683_22692 | NW_004517171.1 | Scaffold2147 | 22692                   | GG                              | AA                | 1946673689               |
| SNP_P3_164684_22914 | NW_004517171.1 | Scaffold2147 | 22914                   | AA                              | CC                | 1946673691               |
| SNP_P3_164685_22931 | NW_004517171.1 | Scaffold2147 | 22931                   | CC                              | GG                | 1946673693               |
| SNP_P3_164686_23471 | NW_004517171.1 | Scaffold2147 | 23471                   | AA                              | TT                | 1946673695               |
| SNP_P3_164687_23499 | NW_004517171.1 | Scaffold2147 | 23499                   | CC                              | TT                | 1946673697               |
| SNP_P3_164688_23625 | NW_004517171.1 | Scaffold2147 | 23625                   | AA                              | TT                | 1946673699               |
| SNP_P3_164689_24159 | NW_004517171.1 | Scaffold2147 | 24159                   | CC                              | GG                | 1946673701               |
| SNP_P3_164691_24520 | NW_004517171.1 | Scaffold2147 | 24520                   | TT                              | GG                | 1946673704               |
| SNP_P3_164692_24783 | NW_004517171.1 | Scaffold2147 | 24783                   | TT                              | CC                | 1946673706               |
| SNP_P3_164693_24907 | NW_004517171.1 | Scaffold2147 | 24907                   | AA                              | TT                | 1946673708               |

| SNPs IDs            | Chromosome IDs | Chromosomes  | Physical positions (bp) | CDC Frontier (Reference genome) | (Pusa 256 & HPNB) | NCBI SNPdb Accession IDs |
|---------------------|----------------|--------------|-------------------------|---------------------------------|-------------------|--------------------------|
| SNP_P3_164694_25005 | NW_004517171.1 | Scaffold2147 | 25005                   | AA                              | CC                | 1946673710               |
| SNP_P3_164695_418   | NW_004517174.1 | Scaffold2151 | 418                     | CC                              | GG                | 1946673712               |
| SNP_P3_164696_646   | NW_004517174.1 | Scaffold2151 | 646                     | AA                              | CC                | 1946673714               |
| SNP_P3_164697_856   | NW_004517174.1 | Scaffold2151 | 856                     | TT                              | CC                | 1946673716               |
| SNP_P3_164698_868   | NW_004517174.1 | Scaffold2151 | 868                     | GG                              | AA                | 1946673718               |
| SNP_P3_164699_1219  | NW_004517174.1 | Scaffold2151 | 1219                    | AA                              | GG                | 1946673720               |
| SNP_P3_164700_20987 | NW_004517175.1 | Scaffold2152 | 20987                   | GG                              | CC                | 1946673722               |
| SNP_P3_164701_21213 | NW_004517175.1 | Scaffold2152 | 21213                   | CC                              | TT                | 1946673724               |
| SNP_P3_164702_21274 | NW_004517175.1 | Scaffold2152 | 21274                   | GG                              | CC                | 1946673726               |
| SNP_P3_164703_21408 | NW_004517175.1 | Scaffold2152 | 21408                   | TT                              | GG                | 1946673728               |
| SNP_P3_164704_21432 | NW_004517175.1 | Scaffold2152 | 21432                   | GG                              | AA                | 1946673730               |
| SNP_P3_164705_21460 | NW_004517175.1 | Scaffold2152 | 21460                   | AA                              | CC                | 1946673733               |
| SNP_P3_164706_21623 | NW_004517175.1 | Scaffold2152 | 21623                   | CC                              | TT                | 1946673735               |
| SNP_P3_164707_21624 | NW_004517175.1 | Scaffold2152 | 21624                   | TT                              | CC                | 1946673737               |
| SNP_P3_164708_22146 | NW_004517175.1 | Scaffold2152 | 22146                   | GG                              | TT                | 1946673739               |
| SNP_P3_164709_22586 | NW_004517175.1 | Scaffold2152 | 22586                   | TT                              | CC                | 1946673742               |
| SNP_P3_164710_22590 | NW_004517175.1 | Scaffold2152 | 22590                   | CC                              | AA                | 1946673744               |
| SNP_P3_164711_34070 | NW_004517175.1 | Scaffold2152 | 34070                   | CC                              | TT                | 1946673746               |
| SNP_P3_164712_34119 | NW_004517175.1 | Scaffold2152 | 34119                   | AA                              | CC                | 1946673748               |
| SNP_P3_164713_34302 | NW_004517175.1 | Scaffold2152 | 34302                   | CC                              | AA                | 1946673750               |
| SNP_P3_164714_34324 | NW_004517175.1 | Scaffold2152 | 34324                   | TT                              | CC                | 1946673752               |
| SNP_P3_164715_34331 | NW_004517175.1 | Scaffold2152 | 34331                   | GG                              | AA                | 1946673754               |
| SNP_P3_164716_41828 | NW_004517175.1 | Scaffold2152 | 41828                   | GG                              | AA                | 1946673756               |
| SNP_P3_164718_41854 | NW_004517175.1 | Scaffold2152 | 41854                   | AA                              | TT                | 1946673758               |
| SNP_P3_164719_41855 | NW_004517175.1 | Scaffold2152 | 41855                   | CC                              | TT                | 1946673760               |
| SNP_P3_164720_41863 | NW_004517175.1 | Scaffold2152 | 41863                   | AA                              | GG                | 1946673762               |
| SNP_P3_164721_41875 | NW_004517175.1 | Scaffold2152 | 41875                   | TT                              | AA                | 1946673764               |
| SNP_P3_164722_41876 | NW_004517175.1 | Scaffold2152 | 41876                   | AA                              | TT                | 1946673766               |
| SNP_P3_164723_41880 | NW_004517175.1 | Scaffold2152 | 41880                   | AA                              | CC                | 1946673768               |
| SNP_P3_164724_41883 | NW_004517175.1 | Scaffold2152 | 41883                   | TT                              | AA                | 1946673770               |
| SNP_P3_164725_41919 | NW_004517175.1 | Scaffold2152 | 41919                   | AA                              | TT                | 1946673773               |
| SNP_P3_164726_41941 | NW_004517175.1 | Scaffold2152 | 41941                   | GG                              | AA                | 1946673775               |
| SNP_P3_164727_42202 | NW_004517175.1 | Scaffold2152 | 42202                   | GG                              | AA                | 1946673777               |
| SNP_P3_164728_42219 | NW_004517175.1 | Scaffold2152 | 42219                   | CC                              | AA                | 1946673779               |
| SNP_P3_164729_42702 | NW_004517175.1 | Scaffold2152 | 42702                   | CC                              | TT                | 1946673782               |
| SNP_P3_164730_43065 | NW_004517175.1 | Scaffold2152 | 43065                   | TT                              | CC                | 1946673784               |
| SNP_P3_164731_43090 | NW_004517175.1 | Scaffold2152 | 43090                   | AA                              | GG                | 1946673786               |
| SNP_P3_164732_51122 | NW_004517175.1 | Scaffold2152 | 51122                   | TT                              | AA                | 1946673788               |
| SNP_P3_164733_51126 | NW_004517175.1 | Scaffold2152 | 51126                   | TT                              | GG                | 1946673790               |
| SNP_P3_164734_67604 | NW_004517175.1 | Scaffold2152 | 67604                   | TT                              | CC                | 1946673792               |
| SNP_P3_164735_67746 | NW_004517175.1 | Scaffold2152 | 67746                   | TT                              | GG                | 1946673794               |
| SNP_P3_164736_67775 | NW_004517175.1 | Scaffold2152 | 67775                   | TT                              | CC                | 1946673796               |

| SNPs IDs             | Chromosome IDs | Chromosomes  | Physical positions (bp) | CDC Frontier (Reference genome) | (Pusa 256 & HPNB) | NCBI SNPdb Accession IDs |
|----------------------|----------------|--------------|-------------------------|---------------------------------|-------------------|--------------------------|
| SNP_P3_164737_67781  | NW_004517175.1 | Scaffold2152 | 67781                   | CC                              | TT                | 1946673798               |
| SNP_P3_164738_67786  | NW_004517175.1 | Scaffold2152 | 67786                   | AA                              | GG                | 1946673800               |
| SNP_P3_164739_67955  | NW_004517175.1 | Scaffold2152 | 67955                   | AA                              | GG                | 1946673802               |
| SNP_P3_164740_76175  | NW_004517175.1 | Scaffold2152 | 76175                   | CC                              | GG                | 1946673804               |
| SNP_P3_164741_76194  | NW_004517175.1 | Scaffold2152 | 76194                   | CC                              | AA                | 1946673806               |
| SNP_P3_164743_76463  | NW_004517175.1 | Scaffold2152 | 76463                   | GG                              | AA                | 1946673809               |
| SNP_P3_164745_79336  | NW_004517175.1 | Scaffold2152 | 79336                   | CC                              | TT                | 1946673811               |
| SNP_P3_164747_88110  | NW_004517175.1 | Scaffold2152 | 88110                   | TT                              | CC                | 1946673813               |
| SNP_P3_164748_88697  | NW_004517175.1 | Scaffold2152 | 88697                   | TT                              | CC                | 1946673815               |
| SNP_P3_164749_88722  | NW_004517175.1 | Scaffold2152 | 88722                   | CC                              | AA                | 1946673817               |
| SNP_P3_164750_88832  | NW_004517175.1 | Scaffold2152 | 88832                   | GG                              | CC                | 1946673819               |
| SNP_P3_164751_88890  | NW_004517175.1 | Scaffold2152 | 88890                   | CC                              | AA                | 1946673821               |
| SNP_P3_164752_88956  | NW_004517175.1 | Scaffold2152 | 88956                   | AA                              | CC                | 1946673823               |
| SNP_P3_164753_91306  | NW_004517175.1 | Scaffold2152 | 91306                   | AA                              | CC                | 1946673825               |
| SNP_P3_164754_95660  | NW_004517175.1 | Scaffold2152 | 95660                   | AA                              | GG                | 1946673827               |
| SNP_P3_164755_95889  | NW_004517175.1 | Scaffold2152 | 95889                   | CC                              | TT                | 1946673830               |
| SNP_P3_164756_108317 | NW_004517175.1 | Scaffold2152 | 108317                  | GG                              | AA                | 1946673832               |
| SNP_P3_164758_108713 | NW_004517175.1 | Scaffold2152 | 108713                  | GG                              | AA                | 1946673834               |
| SNP_P3_164759_108807 | NW_004517175.1 | Scaffold2152 | 108807                  | CC                              | TT                | 1946673836               |
| SNP_P3_164760_108824 | NW_004517175.1 | Scaffold2152 | 108824                  | AA                              | GG                | 1946673838               |
| SNP_P3_164761_109002 | NW_004517175.1 | Scaffold2152 | 109002                  | GG                              | TT                | 1946673840               |
| SNP_P3_164762_129790 | NW_004517175.1 | Scaffold2152 | 129790                  | CC                              | AA                | 1946673842               |
| SNP_P3_164763_162688 | NW_004517175.1 | Scaffold2152 | 162688                  | CC                              | GG                | 1946673844               |
| SNP_P3_164764_162872 | NW_004517175.1 | Scaffold2152 | 162872                  | CC                              | TT                | 1946673846               |
| SNP_P3_164765_162877 | NW_004517175.1 | Scaffold2152 | 162877                  | TT                              | CC                | 1946673849               |
| SNP_P3_164766_163170 | NW_004517175.1 | Scaffold2152 | 163170                  | CC                              | TT                | 1946673851               |
| SNP_P3_164767_163172 | NW_004517175.1 | Scaffold2152 | 163172                  | GG                              | AA                | 1946673853               |
| SNP_P3_164768_163271 | NW_004517175.1 | Scaffold2152 | 163271                  | GG                              | AA                | 1946673855               |
| SNP_P3_164769_178063 | NW_004517175.1 | Scaffold2152 | 178063                  | GG                              | AA                | 1946673857               |
| SNP_P3_164770_210397 | NW_004517175.1 | Scaffold2152 | 210397                  | AA                              | CC                | 1946673859               |
| SNP_P3_164771_210422 | NW_004517175.1 | Scaffold2152 | 210422                  | AA                              | GG                | 1946673861               |
| SNP_P3_164772_213190 | NW_004517175.1 | Scaffold2152 | 213190                  | CC                              | TT                | 1946673863               |
| SNP_P3_164773_215278 | NW_004517175.1 | Scaffold2152 | 215278                  | TT                              | CC                | 1946673865               |
| SNP_P3_164774_215308 | NW_004517175.1 | Scaffold2152 | 215308                  | GG                              | AA                | 1946673867               |
| SNP_P3_164775_215673 | NW_004517175.1 | Scaffold2152 | 215673                  | AA                              | GG                | 1946673869               |
| SNP_P3_164776_281158 | NW_004517175.1 | Scaffold2152 | 281158                  | GG                              | AA                | 1946673871               |
| SNP_P3_164778_283134 | NW_004517175.1 | Scaffold2152 | 283134                  | AA                              | TT                | 1946673873               |
| SNP_P3_164779_283136 | NW_004517175.1 | Scaffold2152 | 283136                  | AA                              | CC                | 1946673875               |
| SNP_P3_164780_283302 | NW_004517175.1 | Scaffold2152 | 283302                  | AA                              | GG                | 1946673876               |
| SNP_P3_164782_283310 | NW_004517175.1 | Scaffold2152 | 283310                  | GG                              | TT                | 1946673878               |
| SNP_P3_164783_283314 | NW_004517175.1 | Scaffold2152 | 283314                  | TT                              | CC                | 1946673880               |
| SNP_P3_164784_283381 | NW_004517175.1 | Scaffold2152 | 283381                  | CC                              | TT                | 1946673882               |

| SNPs IDs             | Chromosome IDs | Chromosomes  | Physical positions (bp) | CDC Frontier (Reference genome) | (Pusa 256 & HPNB) | NCBI SNPdb Accession IDs |
|----------------------|----------------|--------------|-------------------------|---------------------------------|-------------------|--------------------------|
| SNP_P3_164785_285360 | NW_004517175.1 | Scaffold2152 | 285360                  | AA                              | GG                | 1946673884               |
| SNP_P3_164788_324352 | NW_004517175.1 | Scaffold2152 | 324352                  | AA                              | GG                | 1946673886               |
| SNP_P3_164789_324654 | NW_004517175.1 | Scaffold2152 | 324654                  | AA                              | TT                | 1946673888               |
| SNP_P3_164790_324667 | NW_004517175.1 | Scaffold2152 | 324667                  | AA                              | GG                | 1946673890               |
| SNP_P3_164791_324904 | NW_004517175.1 | Scaffold2152 | 324904                  | AA                              | TT                | 1946673892               |
| SNP_P3_164792_333266 | NW_004517175.1 | Scaffold2152 | 333266                  | GG                              | AA                | 1946673894               |
| SNP_P3_164793_336134 | NW_004517175.1 | Scaffold2152 | 336134                  | TT                              | CC                | 1946673896               |
| SNP_P3_164794_336462 | NW_004517175.1 | Scaffold2152 | 336462                  | CC                              | AA                | 1946673898               |
| SNP_P3_164795_336657 | NW_004517175.1 | Scaffold2152 | 336657                  | TT                              | CC                | 1946673900               |
| SNP_P3_164796_336735 | NW_004517175.1 | Scaffold2152 | 336735                  | AA                              | GG                | 1946673902               |
| SNP_P3_164798_368576 | NW_004517175.1 | Scaffold2152 | 368576                  | AA                              | GG                | 1946673904               |
| SNP_P3_164799_372292 | NW_004517175.1 | Scaffold2152 | 372292                  | GG                              | AA                | 1946673906               |
| SNP_P3_164800_379485 | NW_004517175.1 | Scaffold2152 | 379485                  | AA                              | GG                | 1946673907               |
| SNP_P3_164801_379695 | NW_004517175.1 | Scaffold2152 | 379695                  | TT                              | CC                | 1946673909               |
| SNP_P3_164802_379906 | NW_004517175.1 | Scaffold2152 | 379906                  | GG                              | AA                | 1946673911               |
| SNP_P3_164803_379932 | NW_004517175.1 | Scaffold2152 | 379932                  | TT                              | GG                | 1946673913               |
| SNP_P3_164804_380096 | NW_004517175.1 | Scaffold2152 | 380096                  | AA                              | GG                | 1946673915               |
| SNP_P3_164805_380109 | NW_004517175.1 | Scaffold2152 | 380109                  | TT                              | AA                | 1946673917               |
| SNP_P3_164807_8210   | NW_004517176.1 | Scaffold2153 | 8210                    | AA                              | GG                | 1946673919               |
| SNP_P3_164808_8250   | NW_004517176.1 | Scaffold2153 | 8250                    | CC                              | TT                | 1946673921               |
| SNP_P3_164809_8254   | NW_004517176.1 | Scaffold2153 | 8254                    | CC                              | TT                | 1946673923               |
| SNP_P3_164810_8538   | NW_004517176.1 | Scaffold2153 | 8538                    | GG                              | AA                | 1946673925               |
| SNP_P3_164811_8570   | NW_004517176.1 | Scaffold2153 | 8570                    | CC                              | TT                | 1946673927               |
| SNP_P3_164812_8592   | NW_004517176.1 | Scaffold2153 | 8592                    | GG                              | AA                | 1946673929               |
| SNP_P3_164813_19856  | NW_004517176.1 | Scaffold2153 | 19856                   | AA                              | GG                | 1946673931               |
| SNP_P3_164814_32554  | NW_004517176.1 | Scaffold2153 | 32554                   | AA                              | GG                | 1946673933               |
| SNP_P3_164815_32879  | NW_004517176.1 | Scaffold2153 | 32879                   | GG                              | AA                | 1946673935               |
| SNP_P3_164816_32901  | NW_004517176.1 | Scaffold2153 | 32901                   | TT                              | CC                | 1946673937               |
| SNP_P3_164817_40785  | NW_004517176.1 | Scaffold2153 | 40785                   | TT                              | AA                | 1946673939               |
| SNP_P3_164818_49828  | NW_004517176.1 | Scaffold2153 | 49828                   | GG                              | TT                | 1946673941               |
| SNP_P3_164819_64     | NW_004517177.1 | Scaffold2155 | 64                      | AA                              | CC                | 1946673943               |
| SNP_P3_164820_70     | NW_004517177.1 | Scaffold2155 | 70                      | AA                              | CC                | 1946673944               |
| SNP_P3_164821_120    | NW_004517177.1 | Scaffold2155 | 120                     | CC                              | TT                | 1946673946               |
| SNP_P3_164822_127    | NW_004517177.1 | Scaffold2155 | 127                     | AA                              | TT                | 1946673948               |
| SNP_P3_164823_195    | NW_004517177.1 | Scaffold2155 | 195                     | CC                              | TT                | 1946673950               |
| SNP_P3_164824_595    | NW_004517177.1 | Scaffold2155 | 595                     | AA                              | TT                | 1946673952               |
| SNP_P3_164825_25464  | NW_004517177.1 | Scaffold2155 | 25464                   | CC                              | TT                | 1946673954               |
| SNP_P3_164826_25712  | NW_004517177.1 | Scaffold2155 | 25712                   | CC                              | TT                | 1946673956               |
| SNP_P3_164827_25725  | NW_004517177.1 | Scaffold2155 | 25725                   | AA                              | TT                | 1946673958               |
| SNP_P3_164828_25904  | NW_004517177.1 | Scaffold2155 | 25904                   | TT                              | CC                | 1946673960               |
| SNP_P3_164829_38905  | NW_004517177.1 | Scaffold2155 | 38905                   | TT                              | CC                | 1946673962               |
| SNP_P3_164830_39384  | NW_004517177.1 | Scaffold2155 | 39384                   | AA                              | TT                | 1946673964               |

| SNPs IDs             | Chromosome IDs | Chromosomes  | Physical positions (bp) | CDC Frontier (Reference genome) | (Pusa 256 & HPNB) | NCBI SNPdb Accession IDs |
|----------------------|----------------|--------------|-------------------------|---------------------------------|-------------------|--------------------------|
| SNP_P3_164831_39508  | NW_004517177.1 | Scaffold2155 | 39508                   | CC                              | AA                | 1946673967               |
| SNP_P3_164832_40388  | NW_004517177.1 | Scaffold2155 | 40388                   | CC                              | AA                | 1946673969               |
| SNP_P3_164833_40408  | NW_004517177.1 | Scaffold2155 | 40408                   | GG                              | AA                | 1946673971               |
| SNP_P3_164834_598    | NW_004517178.1 | Scaffold2157 | 598                     | TT                              | CC                | 1946673973               |
| SNP_P3_164835_873    | NW_004517178.1 | Scaffold2157 | 873                     | CC                              | GG                | 1946673975               |
| SNP_P3_164836_917    | NW_004517178.1 | Scaffold2157 | 917                     | AA                              | GG                | 1946673977               |
| SNP_P3_164837_119    | NW_004517179.1 | Scaffold2158 | 119                     | AA                              | GG                | 1946673979               |
| SNP_P3_164838_252    | NW_004517179.1 | Scaffold2158 | 252                     | AA                              | GG                | 1946673981               |
| SNP_P3_164839_312    | NW_004517179.1 | Scaffold2158 | 312                     | TT                              | CC                | 1946673983               |
| SNP_P3_164840_316    | NW_004517179.1 | Scaffold2158 | 316                     | AA                              | TT                | 1946673985               |
| SNP_P3_164841_335    | NW_004517179.1 | Scaffold2158 | 335                     | TT                              | CC                | 1946673987               |
| SNP_P3_164842_577    | NW_004517179.1 | Scaffold2158 | 577                     | CC                              | TT                | 1946673989               |
| SNP_P3_164843_619    | NW_004517179.1 | Scaffold2158 | 619                     | GG                              | TT                | 1946673991               |
| SNP_P3_164844_9209   | NW_004517179.1 | Scaffold2158 | 9209                    | AA                              | GG                | 1946673993               |
| SNP_P3_164845_9231   | NW_004517179.1 | Scaffold2158 | 9231                    | TT                              | AA                | 1946673995               |
| SNP_P3_164846_24876  | NW_004517179.1 | Scaffold2158 | 24876                   | AA                              | GG                | 1946673997               |
| SNP_P3_164847_24904  | NW_004517179.1 | Scaffold2158 | 24904                   | AA                              | GG                | 1946673999               |
| SNP_P3_164848_24931  | NW_004517179.1 | Scaffold2158 | 24931                   | GG                              | AA                | 1946674001               |
| SNP_P3_164849_64441  | NW_004517179.1 | Scaffold2158 | 64441                   | AA                              | GG                | 1946674003               |
| SNP_P3_164850_64514  | NW_004517179.1 | Scaffold2158 | 64514                   | AA                              | GG                | 1946674006               |
| SNP_P3_164851_64623  | NW_004517179.1 | Scaffold2158 | 64623                   | GG                              | TT                | 1946674008               |
| SNP_P3_164852_64624  | NW_004517179.1 | Scaffold2158 | 64624                   | TT                              | GG                | 1946674010               |
| SNP_P3_164853_64691  | NW_004517179.1 | Scaffold2158 | 64691                   | GG                              | TT                | 1946674012               |
| SNP_P3_164854_64776  | NW_004517179.1 | Scaffold2158 | 64776                   | GG                              | AA                | 1946674014               |
| SNP_P3_164855_64810  | NW_004517179.1 | Scaffold2158 | 64810                   | TT                              | CC                | 1946674016               |
| SNP_P3_164856_64848  | NW_004517179.1 | Scaffold2158 | 64848                   | AA                              | CC                | 1946674018               |
| SNP_P3_164858_64946  | NW_004517179.1 | Scaffold2158 | 64946                   | CC                              | TT                | 1946674020               |
| SNP_P3_164861_83120  | NW_004517179.1 | Scaffold2158 | 83120                   | AA                              | GG                | 1946674023               |
| SNP_P3_164862_83709  | NW_004517179.1 | Scaffold2158 | 83709                   | TT                              | AA                | 1946674025               |
| SNP_P3_164863_96951  | NW_004517179.1 | Scaffold2158 | 96951                   | AA                              | GG                | 1946674027               |
| SNP_P3_164864_102692 | NW_004517179.1 | Scaffold2158 | 102692                  | CC                              | GG                | 1946674029               |
| SNP_P3_164865_102695 | NW_004517179.1 | Scaffold2158 | 102695                  | AA                              | GG                | 1946674031               |
| SNP_P3_164866_103757 | NW_004517179.1 | Scaffold2158 | 103757                  | AA                              | GG                | 1946674033               |
| SNP_P3_164867_103849 | NW_004517179.1 | Scaffold2158 | 103849                  | CC                              | TT                | 1946674035               |
| SNP_P3_164868_104291 | NW_004517179.1 | Scaffold2158 | 104291                  | TT                              | CC                | 1946674037               |
| SNP_P3_164869_104559 | NW_004517179.1 | Scaffold2158 | 104559                  | TT                              | CC                | 1946674039               |
| SNP_P3_164870_106105 | NW_004517179.1 | Scaffold2158 | 106105                  | TT                              | GG                | 1946674041               |
| SNP_P3_164871_113505 | NW_004517179.1 | Scaffold2158 | 113505                  | AA                              | CC                | 1946674043               |
| SNP_P3_164872_113513 | NW_004517179.1 | Scaffold2158 | 113513                  | GG                              | TT                | 1946674045               |
| SNP_P3_164873_117028 | NW_004517179.1 | Scaffold2158 | 117028                  | TT                              | AA                | 1946674047               |
| SNP_P3_164874_117031 | NW_004517179.1 | Scaffold2158 | 117031                  | AA                              | TT                | 1946674049               |
| SNP_P3_164875_117066 | NW_004517179.1 | Scaffold2158 | 117066                  | AA                              | GG                | 1946674051               |

| SNPs IDs             | Chromosome IDs | Chromosomes  | Physical positions (bp) | CDC Frontier (Reference genome) | (Pusa 256 & HPNB) | NCBI SNPdb Accession IDs |
|----------------------|----------------|--------------|-------------------------|---------------------------------|-------------------|--------------------------|
| SNP_P3_164876_117324 | NW_004517179.1 | Scaffold2158 | 117324                  | CC                              | AA                | 1946674053               |
| SNP_P3_164877_117349 | NW_004517179.1 | Scaffold2158 | 117349                  | GG                              | AA                | 1946674055               |
| SNP_P3_164878_124323 | NW_004517179.1 | Scaffold2158 | 124323                  | TT                              | CC                | 1946674057               |
| SNP_P3_164879_125131 | NW_004517179.1 | Scaffold2158 | 125131                  | AA                              | GG                | 1946674059               |
| SNP_P3_164880_125403 | NW_004517179.1 | Scaffold2158 | 125403                  | TT                              | AA                | 1946674061               |
| SNP_P3_164881_125726 | NW_004517179.1 | Scaffold2158 | 125726                  | AA                              | GG                | 1946674063               |
| SNP_P3_164882_127238 | NW_004517179.1 | Scaffold2158 | 127238                  | TT                              | GG                | 1946674065               |
| SNP_P3_164883_127266 | NW_004517179.1 | Scaffold2158 | 127266                  | AA                              | CC                | 1946674067               |
| SNP_P3_164884_127639 | NW_004517179.1 | Scaffold2158 | 127639                  | TT                              | GG                | 1946674068               |
| SNP_P3_164885_127647 | NW_004517179.1 | Scaffold2158 | 127647                  | TT                              | CC                | 1946674070               |
| SNP_P3_164886_151694 | NW_004517179.1 | Scaffold2158 | 151694                  | CC                              | AA                | 1946674072               |
| SNP_P3_164887_151701 | NW_004517179.1 | Scaffold2158 | 151701                  | AA                              | TT                | 1946674074               |
| SNP_P3_164888_151732 | NW_004517179.1 | Scaffold2158 | 151732                  | AA                              | GG                | 1946674076               |
| SNP_P3_164890_201597 | NW_004517179.1 | Scaffold2158 | 201597                  | TT                              | CC                | 1946674078               |
| SNP_P3_164891_218955 | NW_004517179.1 | Scaffold2158 | 218955                  | TT                              | CC                | 1946674080               |
| SNP_P3_164892_219118 | NW_004517179.1 | Scaffold2158 | 219118                  | AA                              | CC                | 1946674082               |
| SNP_P3_164893_219178 | NW_004517179.1 | Scaffold2158 | 219178                  | TT                              | CC                | 1946674084               |
| SNP_P3_164894_219229 | NW_004517179.1 | Scaffold2158 | 219229                  | TT                              | CC                | 1946674086               |
| SNP_P3_164895_219282 | NW_004517179.1 | Scaffold2158 | 219282                  | AA                              | GG                | 1946674088               |
| SNP_P3_164896_219312 | NW_004517179.1 | Scaffold2158 | 219312                  | CC                              | AA                | 1946674090               |
| SNP_P3_164897_219358 | NW_004517179.1 | Scaffold2158 | 219358                  | TT                              | CC                | 1946674092               |
| SNP_P3_164898_219373 | NW_004517179.1 | Scaffold2158 | 219373                  | CC                              | TT                | 1946674094               |
| SNP_P3_164899_219397 | NW_004517179.1 | Scaffold2158 | 219397                  | GG                              | AA                | 1946674096               |
| SNP_P3_164900_4499   | NW_004517180.1 | Scaffold2160 | 4499                    | AA                              | GG                | 1946674098               |
| SNP_P3_164901_4538   | NW_004517180.1 | Scaffold2160 | 4538                    | AA                              | CC                | 1946674100               |
| SNP_P3_164902_4542   | NW_004517180.1 | Scaffold2160 | 4542                    | AA                              | CC                | 1946674102               |
| SNP_P3_164903_4550   | NW_004517180.1 | Scaffold2160 | 4550                    | TT                              | AA                | 1946674104               |
| SNP_P3_164904_4651   | NW_004517180.1 | Scaffold2160 | 4651                    | CC                              | TT                | 1946674106               |
| SNP_P3_164905_4813   | NW_004517180.1 | Scaffold2160 | 4813                    | TT                              | CC                | 1946674108               |
| SNP_P3_164906_4859   | NW_004517180.1 | Scaffold2160 | 4859                    | AA                              | GG                | 1946674110               |
| SNP_P3_164907_6314   | NW_004517180.1 | Scaffold2160 | 6314                    | TT                              | CC                | 1946674112               |
| SNP_P3_164908_12971  | NW_004517180.1 | Scaffold2160 | 12971                   | GG                              | CC                | 1946674114               |
| SNP_P3_164909_20697  | NW_004517180.1 | Scaffold2160 | 20697                   | GG                              | TT                | 1946674116               |
| SNP_P3_164910_20946  | NW_004517180.1 | Scaffold2160 | 20946                   | AA                              | GG                | 1946674118               |
| SNP_P3_164911_20979  | NW_004517180.1 | Scaffold2160 | 20979                   | AA                              | TT                | 1946674121               |
| SNP_P3_164912_20994  | NW_004517180.1 | Scaffold2160 | 20994                   | CC                              | AA                | 1946674123               |
| SNP_P3_164913_23082  | NW_004517180.1 | Scaffold2160 | 23082                   | TT                              | AA                | 1946674125               |
| SNP_P3_164914_30599  | NW_004517180.1 | Scaffold2160 | 30599                   | CC                              | TT                | 1946674127               |
| SNP_P3_164915_31408  | NW_004517180.1 | Scaffold2160 | 31408                   | TT                              | CC                | 1946674129               |
| SNP_P3_164916_31527  | NW_004517180.1 | Scaffold2160 | 31527                   | GG                              | AA                | 1946674131               |
| SNP_P3_164917_33713  | NW_004517180.1 | Scaffold2160 | 33713                   | CC                              | AA                | 1946674133               |
| SNP_P3_164918_33827  | NW_004517180.1 | Scaffold2160 | 33827                   | GG                              | CC                | 1946674135               |

| SNPs IDs             | Chromosome IDs | Chromosomes  | Physical positions (bp) | CDC Frontier (Reference genome) | (Pusa 256 & HPNB) | NCBI SNPdb Accession IDs |
|----------------------|----------------|--------------|-------------------------|---------------------------------|-------------------|--------------------------|
| SNP_P3_164919_33861  | NW_004517180.1 | Scaffold2160 | 33861                   | AA                              | GG                | 1946674137               |
| SNP_P3_164920_34203  | NW_004517180.1 | Scaffold2160 | 34203                   | GG                              | AA                | 1946674139               |
| SNP_P3_164921_34567  | NW_004517180.1 | Scaffold2160 | 34567                   | AA                              | TT                | 1946674141               |
| SNP_P3_164922_34826  | NW_004517180.1 | Scaffold2160 | 34826                   | TT                              | CC                | 1946674143               |
| SNP_P3_164923_59     | NW_004517181.1 | Scaffold2161 | 59                      | AA                              | GG                | 1946674145               |
| SNP_P3_164924_63     | NW_004517181.1 | Scaffold2161 | 63                      | TT                              | CC                | 1946674147               |
| SNP_P3_164925_64     | NW_004517181.1 | Scaffold2161 | 64                      | AA                              | GG                | 1946674149               |
| SNP_P3_164927_133    | NW_004517181.1 | Scaffold2161 | 133                     | TT                              | CC                | 1946674151               |
| SNP_P3_164929_7491   | NW_004517181.1 | Scaffold2161 | 7491                    | GG                              | TT                | 1946674154               |
| SNP_P3_164930_8455   | NW_004517181.1 | Scaffold2161 | 8455                    | GG                              | AA                | 1946674156               |
| SNP_P3_164931_8504   | NW_004517181.1 | Scaffold2161 | 8504                    | AA                              | GG                | 1946674158               |
| SNP_P3_164932_8706   | NW_004517181.1 | Scaffold2161 | 8706                    | GG                              | AA                | 1946674160               |
| SNP_P3_164933_8946   | NW_004517181.1 | Scaffold2161 | 8946                    | GG                              | AA                | 1946674162               |
| SNP_P3_164934_11644  | NW_004517181.1 | Scaffold2161 | 11644                   | AA                              | TT                | 1946674164               |
| SNP_P3_164935_14452  | NW_004517181.1 | Scaffold2161 | 14452                   | TT                              | CC                | 1946674166               |
| SNP_P3_164936_14641  | NW_004517181.1 | Scaffold2161 | 14641                   | TT                              | CC                | 1946674168               |
| SNP_P3_164937_27233  | NW_004517181.1 | Scaffold2161 | 27233                   | GG                              | TT                | 1946674170               |
| SNP_P3_164938_58411  | NW_004517181.1 | Scaffold2161 | 58411                   | GG                              | TT                | 1946674172               |
| SNP_P3_164939_58420  | NW_004517181.1 | Scaffold2161 | 58420                   | AA                              | TT                | 1946674174               |
| SNP_P3_164940_58424  | NW_004517181.1 | Scaffold2161 | 58424                   | GG                              | AA                | 1946674176               |
| SNP_P3_164941_58425  | NW_004517181.1 | Scaffold2161 | 58425                   | TT                              | AA                | 1946674178               |
| SNP_P3_164942_58427  | NW_004517181.1 | Scaffold2161 | 58427                   | TT                              | GG                | 1946674181               |
| SNP_P3_164943_61483  | NW_004517181.1 | Scaffold2161 | 61483                   | GG                              | AA                | 1946674183               |
| SNP_P3_164944_73786  | NW_004517181.1 | Scaffold2161 | 73786                   | AA                              | GG                | 1946674185               |
| SNP_P3_164945_94482  | NW_004517181.1 | Scaffold2161 | 94482                   | CC                              | AA                | 1946674187               |
| SNP_P3_164946_94483  | NW_004517181.1 | Scaffold2161 | 94483                   | AA                              | TT                | 1946674189               |
| SNP_P3_164948_104914 | NW_004517181.1 | Scaffold2161 | 104914                  | TT                              | CC                | 1946674191               |
| SNP_P3_164949_106421 | NW_004517181.1 | Scaffold2161 | 106421                  | CC                              | AA                | 1946674193               |
| SNP_P3_164950_106432 | NW_004517181.1 | Scaffold2161 | 106432                  | TT                              | CC                | 1946674195               |
| SNP_P3_164951_106508 | NW_004517181.1 | Scaffold2161 | 106508                  | TT                              | CC                | 1946674196               |
| SNP_P3_164952_106515 | NW_004517181.1 | Scaffold2161 | 106515                  | AA                              | TT                | 1946674198               |
| SNP_P3_164953_106549 | NW_004517181.1 | Scaffold2161 | 106549                  | TT                              | AA                | 1946674200               |
| SNP_P3_164954_106774 | NW_004517181.1 | Scaffold2161 | 106774                  | CC                              | TT                | 1946674202               |
| SNP_P3_164955_106775 | NW_004517181.1 | Scaffold2161 | 106775                  | AA                              | GG                | 1946674204               |
| SNP_P3_164956_106841 | NW_004517181.1 | Scaffold2161 | 106841                  | TT                              | AA                | 1946674206               |
| SNP_P3_164957_106865 | NW_004517181.1 | Scaffold2161 | 106865                  | GG                              | AA                | 1946674208               |
| SNP_P3_164958_106882 | NW_004517181.1 | Scaffold2161 | 106882                  | TT                              | CC                | 1946674210               |
| SNP_P3_164959_107097 | NW_004517181.1 | Scaffold2161 | 107097                  | AA                              | TT                | 1946674213               |
| SNP_P3_164960_107102 | NW_004517181.1 | Scaffold2161 | 107102                  | AA                              | GG                | 1946674215               |
| SNP_P3_164962_111326 | NW_004517181.1 | Scaffold2161 | 111326                  | GG                              | AA                | 1946674218               |
| SNP_P3_164963_111372 | NW_004517181.1 | Scaffold2161 | 111372                  | AA                              | GG                | 1946674220               |
| SNP_P3_164964_111673 | NW_004517181.1 | Scaffold2161 | 111673                  | TT                              | CC                | 1946674222               |

| SNPs IDs             | Chromosome IDs | Chromosomes  | Physical positions (bp) | CDC Frontier (Reference genome) | (Pusa 256 & HPNB) | NCBI SNPdb Accession IDs |
|----------------------|----------------|--------------|-------------------------|---------------------------------|-------------------|--------------------------|
| SNP_P3_164965_128537 | NW_004517181.1 | Scaffold2161 | 128537                  | TT                              | AA                | 1946674225               |
| SNP_P3_164966_128965 | NW_004517181.1 | Scaffold2161 | 128965                  | TT                              | CC                | 1946674227               |
| SNP_P3_164967_128975 | NW_004517181.1 | Scaffold2161 | 128975                  | AA                              | GG                | 1946674229               |
| SNP_P3_164968_138018 | NW_004517181.1 | Scaffold2161 | 138018                  | AA                              | GG                | 1946674231               |
| SNP_P3_164969_184501 | NW_004517181.1 | Scaffold2161 | 184501                  | CC                              | TT                | 1946674233               |
| SNP_P3_164971_196631 | NW_004517181.1 | Scaffold2161 | 196631                  | AA                              | GG                | 1946674236               |
| SNP_P3_164972_196773 | NW_004517181.1 | Scaffold2161 | 196773                  | GG                              | AA                | 1946674238               |
| SNP_P3_164973_197728 | NW_004517181.1 | Scaffold2161 | 197728                  | AA                              | CC                | 1946674240               |
| SNP_P3_164974_203511 | NW_004517181.1 | Scaffold2161 | 203511                  | GG                              | CC                | 1946674242               |
| SNP_P3_164975_216237 | NW_004517181.1 | Scaffold2161 | 216237                  | TT                              | CC                | 1946674244               |
| SNP_P3_164976_224990 | NW_004517181.1 | Scaffold2161 | 224990                  | TT                              | CC                | 1946674245               |
| SNP_P3_164977_235453 | NW_004517181.1 | Scaffold2161 | 235453                  | AA                              | GG                | 1946674247               |
| SNP_P3_164978_249647 | NW_004517181.1 | Scaffold2161 | 249647                  | AA                              | TT                | 1946674249               |
| SNP_P3_164979_271949 | NW_004517181.1 | Scaffold2161 | 271949                  | CC                              | TT                | 1946674252               |
| SNP_P3_164981_281145 | NW_004517181.1 | Scaffold2161 | 281145                  | CC                              | TT                | 1946674254               |
| SNP_P3_164982_579    | NW_004517182.1 | Scaffold2163 | 579                     | TT                              | GG                | 1946674256               |
| SNP_P3_164983_8126   | NW_004517182.1 | Scaffold2163 | 8126                    | TT                              | AA                | 1946674258               |
| SNP_P3_164984_8395   | NW_004517182.1 | Scaffold2163 | 8395                    | AA                              | CC                | 1946674260               |
| SNP_P3_164985_31917  | NW_004517182.1 | Scaffold2163 | 31917                   | CC                              | TT                | 1946674261               |
| SNP_P3_164986_44399  | NW_004517182.1 | Scaffold2163 | 44399                   | CC                              | GG                | 1946674263               |
| SNP_P3_164987_44451  | NW_004517182.1 | Scaffold2163 | 44451                   | CC                              | GG                | 1946674265               |
| SNP_P3_164988_49429  | NW_004517182.1 | Scaffold2163 | 49429                   | AA                              | CC                | 1946674267               |
| SNP_P3_164989_51029  | NW_004517182.1 | Scaffold2163 | 51029                   | TT                              | AA                | 1946674269               |
| SNP_P3_164990_52369  | NW_004517182.1 | Scaffold2163 | 52369                   | GG                              | AA                | 1946674271               |
| SNP_P3_164991_57118  | NW_004517182.1 | Scaffold2163 | 57118                   | TT                              | AA                | 1946674273               |
| SNP_P3_164992_58596  | NW_004517182.1 | Scaffold2163 | 58596                   | GG                              | TT                | 1946674275               |
| SNP_P3_164993_60102  | NW_004517182.1 | Scaffold2163 | 60102                   | AA                              | TT                | 1946674277               |
| SNP_P3_164994_61664  | NW_004517182.1 | Scaffold2163 | 61664                   | CC                              | AA                | 1946674279               |
| SNP_P3_164995_69690  | NW_004517182.1 | Scaffold2163 | 69690                   | AA                              | TT                | 1946674281               |
| SNP_P3_164996_69706  | NW_004517182.1 | Scaffold2163 | 69706                   | TT                              | GG                | 1946674283               |
| SNP_P3_164997_69747  | NW_004517182.1 | Scaffold2163 | 69747                   | GG                              | AA                | 1946674285               |
| SNP_P3_164998_71222  | NW_004517182.1 | Scaffold2163 | 71222                   | AA                              | GG                | 1946674287               |
| SNP_P3_164999_71289  | NW_004517182.1 | Scaffold2163 | 71289                   | TT                              | AA                | 1946674289               |
| SNP_P3_165000_71317  | NW_004517182.1 | Scaffold2163 | 71317                   | CC                              | AA                | 1946674291               |
| SNP_P3_165001_71323  | NW_004517182.1 | Scaffold2163 | 71323                   | AA                              | GG                | 1946674293               |
| SNP_P3_165002_71434  | NW_004517182.1 | Scaffold2163 | 71434                   | CC                              | AA                | 1946674295               |
| SNP_P3_165003_71469  | NW_004517182.1 | Scaffold2163 | 71469                   | TT                              | AA                | 1946674297               |
| SNP_P3_165005_71491  | NW_004517182.1 | Scaffold2163 | 71491                   | TT                              | GG                | 1946674299               |
| SNP_P3_165006_71550  | NW_004517182.1 | Scaffold2163 | 71550                   | CC                              | AA                | 1946674301               |
| SNP_P3_165007_71570  | NW_004517182.1 | Scaffold2163 | 71570                   | AA                              | TT                | 1946674303               |
| SNP_P3_165008_71576  | NW_004517182.1 | Scaffold2163 | 71576                   | AA                              | TT                | 1946674305               |
| SNP_P3_165009_71864  | NW_004517182.1 | Scaffold2163 | 71864                   | AA                              | TT                | 1946674307               |



| SNPs IDs            | Chromosome IDs | Chromosomes  | Physical positions (bp) | CDC Frontier (Reference genome) | (Pusa 256 & HPNB) | NCBI SNPdb Accession IDs |
|---------------------|----------------|--------------|-------------------------|---------------------------------|-------------------|--------------------------|
| SNP_P3_165010_74072 | NW_004517182.1 | Scaffold2163 | 74072                   | TT                              | CC                | 1946674309               |
| SNP_P3_165011_78165 | NW_004517182.1 | Scaffold2163 | 78165                   | GG                              | AA                | 1946674311               |
| SNP_P3_165012_78336 | NW_004517182.1 | Scaffold2163 | 78336                   | TT                              | AA                | 1946674314               |
| SNP_P3_165013_78359 | NW_004517182.1 | Scaffold2163 | 78359                   | GG                              | AA                | 1946674316               |
| SNP_P3_165014_78497 | NW_004517182.1 | Scaffold2163 | 78497                   | TT                              | CC                | 1946674317               |
| SNP_P3_165015_78498 | NW_004517182.1 | Scaffold2163 | 78498                   | AA                              | GG                | 1946674318               |
| SNP_P3_165016_78546 | NW_004517182.1 | Scaffold2163 | 78546                   | TT                              | GG                | 1946674319               |
| SNP_P3_165017_78589 | NW_004517182.1 | Scaffold2163 | 78589                   | AA                              | TT                | 1946674320               |
| SNP_P3_165018_78691 | NW_004517182.1 | Scaffold2163 | 78691                   | AA                              | TT                | 1946674321               |
| SNP_P3_165019_78744 | NW_004517182.1 | Scaffold2163 | 78744                   | GG                              | AA                | 1946674323               |
| SNP_P3_165020_4847  | NW_004517183.1 | Scaffold2164 | 4847                    | TT                              | CC                | 1946674325               |
| SNP_P3_165021_6464  | NW_004517183.1 | Scaffold2164 | 6464                    | CC                              | AA                | 1946674327               |
| SNP_P3_165022_6945  | NW_004517183.1 | Scaffold2164 | 6945                    | GG                              | AA                | 1946674329               |
| SNP_P3_165023_22213 | NW_004517183.1 | Scaffold2164 | 22213                   | CC                              | TT                | 1946674331               |
| SNP_P3_165024_22423 | NW_004517183.1 | Scaffold2164 | 22423                   | TT                              | CC                | 1946674333               |
| SNP_P3_165025_22430 | NW_004517183.1 | Scaffold2164 | 22430                   | GG                              | AA                | 1946674335               |
| SNP_P3_165026_23043 | NW_004517183.1 | Scaffold2164 | 23043                   | TT                              | AA                | 1946674337               |
| SNP_P3_165027_23106 | NW_004517183.1 | Scaffold2164 | 23106                   | AA                              | GG                | 1946674339               |
| SNP_P3_165028_23427 | NW_004517183.1 | Scaffold2164 | 23427                   | TT                              | AA                | 1946674341               |
| SNP_P3_165029_29150 | NW_004517183.1 | Scaffold2164 | 29150                   | AA                              | GG                | 1946674343               |
| SNP_P3_165030_29503 | NW_004517183.1 | Scaffold2164 | 29503                   | AA                              | GG                | 1946674345               |
| SNP_P3_165031_38915 | NW_004517183.1 | Scaffold2164 | 38915                   | TT                              | CC                | 1946674347               |
| SNP_P3_165032_38962 | NW_004517183.1 | Scaffold2164 | 38962                   | TT                              | GG                | 1946674349               |
| SNP_P3_165033_39001 | NW_004517183.1 | Scaffold2164 | 39001                   | CC                              | TT                | 1946674351               |
| SNP_P3_165034_39220 | NW_004517183.1 | Scaffold2164 | 39220                   | GG                              | AA                | 1946674353               |
| SNP_P3_165035_39430 | NW_004517183.1 | Scaffold2164 | 39430                   | TT                              | CC                | 1946674355               |
| SNP_P3_165036_48912 | NW_004517183.1 | Scaffold2164 | 48912                   | AA                              | CC                | 1946674357               |
| SNP_P3_165037_48946 | NW_004517183.1 | Scaffold2164 | 48946                   | AA                              | GG                | 1946674359               |
| SNP_P3_165038_49275 | NW_004517183.1 | Scaffold2164 | 49275                   | GG                              | AA                | 1946674361               |
| SNP_P3_165039_49285 | NW_004517183.1 | Scaffold2164 | 49285                   | GG                              | AA                | 1946674363               |
| SNP_P3_165040_59047 | NW_004517183.1 | Scaffold2164 | 59047                   | GG                              | AA                | 1946674365               |
| SNP_P3_165041_59060 | NW_004517183.1 | Scaffold2164 | 59060                   | AA                              | GG                | 1946674367               |
| SNP_P3_165042_59096 | NW_004517183.1 | Scaffold2164 | 59096                   | GG                              | CC                | 1946674369               |
| SNP_P3_165043_59114 | NW_004517183.1 | Scaffold2164 | 59114                   | CC                              | TT                | 1946674371               |
| SNP_P3_165044_62887 | NW_004517183.1 | Scaffold2164 | 62887                   | AA                              | CC                | 1946674373               |
| SNP_P3_165045_63018 | NW_004517183.1 | Scaffold2164 | 63018                   | AA                              | GG                | 1946674375               |
| SNP_P3_165046_63290 | NW_004517183.1 | Scaffold2164 | 63290                   | GG                              | AA                | 1946674377               |
| SNP_P3_165047_63353 | NW_004517183.1 | Scaffold2164 | 63353                   | GG                              | TT                | 1946674379               |
| SNP_P3_165048_65796 | NW_004517183.1 | Scaffold2164 | 65796                   | CC                              | TT                | 1946674381               |
| SNP_P3_165049_67635 | NW_004517183.1 | Scaffold2164 | 67635                   | TT                              | CC                | 1946674383               |
| SNP_P3_165050_70312 | NW_004517183.1 | Scaffold2164 | 70312                   | CC                              | TT                | 1946674385               |
| SNP_P3_165051_71388 | NW_004517183.1 | Scaffold2164 | 71388                   | TT                              | CC                | 1946674387               |

| SNPs IDs             | Chromosome IDs | Chromosomes  | Physical positions (bp) | CDC Frontier (Reference genome) | (Pusa 256 & HPNB) | NCBI SNPdb Accession IDs |
|----------------------|----------------|--------------|-------------------------|---------------------------------|-------------------|--------------------------|
| SNP_P3_165052_71390  | NW_004517183.1 | Scaffold2164 | 71390                   | AA                              | GG                | 1946674389               |
| SNP_P3_165054_71575  | NW_004517183.1 | Scaffold2164 | 71575                   | TT                              | AA                | 1946674391               |
| SNP_P3_165055_71609  | NW_004517183.1 | Scaffold2164 | 71609                   | TT                              | AA                | 1946674393               |
| SNP_P3_165056_71658  | NW_004517183.1 | Scaffold2164 | 71658                   | TT                              | CC                | 1946674395               |
| SNP_P3_165057_71684  | NW_004517183.1 | Scaffold2164 | 71684                   | GG                              | AA                | 1946674398               |
| SNP_P3_165058_71752  | NW_004517183.1 | Scaffold2164 | 71752                   | GG                              | AA                | 1946674400               |
| SNP_P3_165060_90497  | NW_004517183.1 | Scaffold2164 | 90497                   | AA                              | CC                | 1946674402               |
| SNP_P3_165061_91237  | NW_004517183.1 | Scaffold2164 | 91237                   | CC                              | TT                | 1946674404               |
| SNP_P3_165062_91315  | NW_004517183.1 | Scaffold2164 | 91315                   | CC                              | TT                | 1946674406               |
| SNP_P3_165063_467    | NW_004517184.1 | Scaffold2166 | 467                     | AA                              | GG                | 1946674408               |
| SNP_P3_165064_719    | NW_004517184.1 | Scaffold2166 | 719                     | TT                              | CC                | 1946674411               |
| SNP_P3_165065_770    | NW_004517184.1 | Scaffold2166 | 770                     | TT                              | CC                | 1946674412               |
| SNP_P3_165066_792    | NW_004517184.1 | Scaffold2166 | 792                     | AA                              | GG                | 1946674414               |
| SNP_P3_165067_831    | NW_004517184.1 | Scaffold2166 | 831                     | TT                              | AA                | 1946674416               |
| SNP_P3_165068_20017  | NW_004517184.1 | Scaffold2166 | 20017                   | CC                              | AA                | 1946674418               |
| SNP_P3_165069_39729  | NW_004517184.1 | Scaffold2166 | 39729                   | GG                              | AA                | 1946674420               |
| SNP_P3_165070_39743  | NW_004517184.1 | Scaffold2166 | 39743                   | TT                              | CC                | 1946674422               |
| SNP_P3_165071_39833  | NW_004517184.1 | Scaffold2166 | 39833                   | GG                              | AA                | 1946674424               |
| SNP_P3_165075_54121  | NW_004517184.1 | Scaffold2166 | 54121                   | AA                              | GG                | 1946674426               |
| SNP_P3_165076_140438 | NW_004517184.1 | Scaffold2166 | 140438                  | CC                              | TT                | 1946674428               |
| SNP_P3_165077_140581 | NW_004517184.1 | Scaffold2166 | 140581                  | AA                              | TT                | 1946674430               |
| SNP_P3_165078_148701 | NW_004517184.1 | Scaffold2166 | 148701                  | AA                              | GG                | 1946674432               |
| SNP_P3_165079_153282 | NW_004517184.1 | Scaffold2166 | 153282                  | CC                              | TT                | 1946674434               |
| SNP_P3_165080_156911 | NW_004517184.1 | Scaffold2166 | 156911                  | GG                              | TT                | 1946674436               |
| SNP_P3_165083_192122 | NW_004517184.1 | Scaffold2166 | 192122                  | AA                              | TT                | 1946674438               |
| SNP_P3_165085_204092 | NW_004517184.1 | Scaffold2166 | 204092                  | AA                              | GG                | 1946674440               |
| SNP_P3_165086_204093 | NW_004517184.1 | Scaffold2166 | 204093                  | AA                              | GG                | 1946674442               |
| SNP_P3_165087_204104 | NW_004517184.1 | Scaffold2166 | 204104                  | TT                              | CC                | 1946674444               |
| SNP_P3_165089_10887  | NW_004517185.1 | Scaffold2168 | 10887                   | AA                              | CC                | 1946674446               |
| SNP_P3_165090_12761  | NW_004517185.1 | Scaffold2168 | 12761                   | AA                              | TT                | 1946674448               |
| SNP_P3_165091_12772  | NW_004517185.1 | Scaffold2168 | 12772                   | GG                              | TT                | 1946674450               |
| SNP_P3_165092_12841  | NW_004517185.1 | Scaffold2168 | 12841                   | CC                              | AA                | 1946674452               |
| SNP_P3_165093_12872  | NW_004517185.1 | Scaffold2168 | 12872                   | GG                              | AA                | 1946674454               |
| SNP_P3_165094_12876  | NW_004517185.1 | Scaffold2168 | 12876                   | AA                              | TT                | 1946674456               |
| SNP_P3_165095_12878  | NW_004517185.1 | Scaffold2168 | 12878                   | GG                              | CC                | 1946674458               |
| SNP_P3_165096_12879  | NW_004517185.1 | Scaffold2168 | 12879                   | CC                              | AA                | 1946674459               |
| SNP_P3_165097_13087  | NW_004517185.1 | Scaffold2168 | 13087                   | AA                              | CC                | 1946674461               |
| SNP_P3_165098_13089  | NW_004517185.1 | Scaffold2168 | 13089                   | CC                              | AA                | 1946674463               |
| SNP_P3_165099_13132  | NW_004517185.1 | Scaffold2168 | 13132                   | AA                              | CC                | 1946674465               |
| SNP_P3_165100_13143  | NW_004517185.1 | Scaffold2168 | 13143                   | AA                              | TT                | 1946674467               |
| SNP_P3_165101_13188  | NW_004517185.1 | Scaffold2168 | 13188                   | GG                              | AA                | 1946674469               |
| SNP_P3_165102_13206  | NW_004517185.1 | Scaffold2168 | 13206                   | AA                              | GG                | 1946674471               |

| SNPs IDs            | Chromosome IDs | Chromosomes  | Physical positions (bp) | CDC Frontier (Reference genome) | (Pusa 256 & HPNB) | NCBI SNPdb Accession IDs |
|---------------------|----------------|--------------|-------------------------|---------------------------------|-------------------|--------------------------|
| SNP_P3_165103_13235 | NW_004517185.1 | Scaffold2168 | 13235                   | TT                              | CC                | 1946674473               |
| SNP_P3_165104_13488 | NW_004517185.1 | Scaffold2168 | 13488                   | CC                              | AA                | 1946674475               |
| SNP_P3_165105_13513 | NW_004517185.1 | Scaffold2168 | 13513                   | CC                              | AA                | 1946674477               |
| SNP_P3_165106_13726 | NW_004517185.1 | Scaffold2168 | 13726                   | AA                              | CC                | 1946674479               |
| SNP_P3_165107_13728 | NW_004517185.1 | Scaffold2168 | 13728                   | CC                              | TT                | 1946674481               |
| SNP_P3_165108_15839 | NW_004517185.1 | Scaffold2168 | 15839                   | GG                              | AA                | 1946674483               |
| SNP_P3_165109_15864 | NW_004517185.1 | Scaffold2168 | 15864                   | CC                              | TT                | 1946674485               |
| SNP_P3_165110_64    | NW_004517186.1 | Scaffold2169 | 64                      | AA                              | TT                | 1946674487               |
| SNP_P3_165111_68    | NW_004517186.1 | Scaffold2169 | 68                      | TT                              | CC                | 1946674489               |
| SNP_P3_165112_1092  | NW_004517186.1 | Scaffold2169 | 1092                    | AA                              | TT                | 1946674491               |
| SNP_P3_165113_1107  | NW_004517186.1 | Scaffold2169 | 1107                    | AA                              | GG                | 1946674494               |
| SNP_P3_165114_1117  | NW_004517186.1 | Scaffold2169 | 1117                    | CC                              | TT                | 1946674496               |
| SNP_P3_165115_2348  | NW_004517187.1 | Scaffold2170 | 2348                    | AA                              | GG                | 1946674498               |
| SNP_P3_165116_2404  | NW_004517187.1 | Scaffold2170 | 2404                    | TT                              | CC                | 1946674500               |
| SNP_P3_165117_2469  | NW_004517187.1 | Scaffold2170 | 2469                    | TT                              | CC                | 1946674502               |
| SNP_P3_165118_2727  | NW_004517187.1 | Scaffold2170 | 2727                    | TT                              | CC                | 1946674504               |
| SNP_P3_165119_2919  | NW_004517187.1 | Scaffold2170 | 2919                    | CC                              | GG                | 1946675003               |
| SNP_P3_165120_3185  | NW_004517187.1 | Scaffold2170 | 3185                    | CC                              | TT                | 1946675005               |
| SNP_P3_165121_3187  | NW_004517187.1 | Scaffold2170 | 3187                    | CC                              | TT                | 1946675007               |
| SNP_P3_165122_3249  | NW_004517187.1 | Scaffold2170 | 3249                    | GG                              | AA                | 1946675010               |
| SNP_P3_165123_3307  | NW_004517187.1 | Scaffold2170 | 3307                    | GG                              | AA                | 1946675012               |
| SNP_P3_165124_3349  | NW_004517187.1 | Scaffold2170 | 3349                    | AA                              | GG                | 1946675014               |
| SNP_P3_165125_3512  | NW_004517187.1 | Scaffold2170 | 3512                    | AA                              | GG                | 1946675017               |
| SNP_P3_165126_3579  | NW_004517187.1 | Scaffold2170 | 3579                    | GG                              | AA                | 1946675020               |
| SNP_P3_165127_3817  | NW_004517187.1 | Scaffold2170 | 3817                    | GG                              | AA                | 1946675022               |
| SNP_P3_165128_3999  | NW_004517187.1 | Scaffold2170 | 3999                    | TT                              | CC                | 1946675024               |
| SNP_P3_165130_4279  | NW_004517187.1 | Scaffold2170 | 4279                    | CC                              | GG                | 1946675026               |
| SNP_P3_165131_4498  | NW_004517187.1 | Scaffold2170 | 4498                    | GG                              | AA                | 1946675028               |
| SNP_P3_165132_4672  | NW_004517187.1 | Scaffold2170 | 4672                    | GG                              | CC                | 1946675030               |
| SNP_P3_165133_4761  | NW_004517187.1 | Scaffold2170 | 4761                    | GG                              | AA                | 1946675032               |
| SNP_P3_165136_5536  | NW_004517187.1 | Scaffold2170 | 5536                    | GG                              | TT                | 1946675034               |
| SNP_P3_165137_5788  | NW_004517187.1 | Scaffold2170 | 5788                    | CC                              | TT                | 1946675036               |
| SNP_P3_165138_6265  | NW_004517187.1 | Scaffold2170 | 6265                    | TT                              | CC                | 1946675039               |
| SNP_P3_165139_6409  | NW_004517187.1 | Scaffold2170 | 6409                    | TT                              | GG                | 1946675041               |
| SNP_P3_165140_6558  | NW_004517187.1 | Scaffold2170 | 6558                    | GG                              | AA                | 1946675044               |
| SNP_P3_165141_6576  | NW_004517187.1 | Scaffold2170 | 6576                    | TT                              | CC                | 1946675046               |
| SNP_P3_165142_6593  | NW_004517187.1 | Scaffold2170 | 6593                    | AA                              | GG                | 1946675049               |
| SNP_P3_165143_6597  | NW_004517187.1 | Scaffold2170 | 6597                    | GG                              | CC                | 1946675052               |
| SNP_P3_165144_6599  | NW_004517187.1 | Scaffold2170 | 6599                    | AA                              | GG                | 1946675055               |
| SNP_P3_165145_6653  | NW_004517187.1 | Scaffold2170 | 6653                    | AA                              | GG                | 1946675057               |
| SNP_P3_165147_6913  | NW_004517187.1 | Scaffold2170 | 6913                    | AA                              | GG                | 1946675059               |
| SNP_P3_165148_6929  | NW_004517187.1 | Scaffold2170 | 6929                    | AA                              | GG                | 1946675062               |

| SNPs IDs            | Chromosome IDs | Chromosomes  | Physical positions (bp) | CDC Frontier (Reference genome) | (Pusa 256 & HPNB) | NCBI SNPdb Accession IDs |
|---------------------|----------------|--------------|-------------------------|---------------------------------|-------------------|--------------------------|
| SNP_P3_165149_7055  | NW_004517187.1 | Scaffold2170 | 7055                    | GG                              | TT                | 1946675064               |
| SNP_P3_165150_7161  | NW_004517187.1 | Scaffold2170 | 7161                    | AA                              | GG                | 1946675066               |
| SNP_P3_165151_7287  | NW_004517187.1 | Scaffold2170 | 7287                    | AA                              | GG                | 1946675068               |
| SNP_P3_165152_7475  | NW_004517187.1 | Scaffold2170 | 7475                    | CC                              | AA                | 1946675070               |
| SNP_P3_165153_7529  | NW_004517187.1 | Scaffold2170 | 7529                    | CC                              | TT                | 1946675072               |
| SNP_P3_165154_7691  | NW_004517187.1 | Scaffold2170 | 7691                    | CC                              | TT                | 1946675074               |
| SNP_P3_165155_9667  | NW_004517187.1 | Scaffold2170 | 9667                    | TT                              | AA                | 1946675076               |
| SNP_P3_165156_10006 | NW_004517187.1 | Scaffold2170 | 10006                   | AA                              | GG                | 1946675078               |
| SNP_P3_165157_11824 | NW_004517187.1 | Scaffold2170 | 11824                   | CC                              | TT                | 1946675080               |
| SNP_P3_165159_12356 | NW_004517187.1 | Scaffold2170 | 12356                   | AA                              | GG                | 1946675082               |
| SNP_P3_165160_12433 | NW_004517187.1 | Scaffold2170 | 12433                   | CC                              | TT                | 1946675084               |
| SNP_P3_165161_12658 | NW_004517187.1 | Scaffold2170 | 12658                   | TT                              | AA                | 1946675086               |
| SNP_P3_165163_13232 | NW_004517187.1 | Scaffold2170 | 13232                   | AA                              | GG                | 1946675088               |
| SNP_P3_165164_14090 | NW_004517187.1 | Scaffold2170 | 14090                   | CC                              | TT                | 1946675090               |
| SNP_P3_165166_14545 | NW_004517187.1 | Scaffold2170 | 14545                   | GG                              | AA                | 1946675092               |
| SNP_P3_165167_37914 | NW_004517187.1 | Scaffold2170 | 37914                   | CC                              | TT                | 1946675094               |
| SNP_P3_165168_37978 | NW_004517187.1 | Scaffold2170 | 37978                   | AA                              | CC                | 1946675097               |
| SNP_P3_165169_629   | NW_004517189.1 | Scaffold2173 | 629                     | CC                              | TT                | 1946675099               |
| SNP_P3_165170_1847  | NW_004517189.1 | Scaffold2173 | 1847                    | GG                              | TT                | 1946675102               |
| SNP_P3_165171_2257  | NW_004517189.1 | Scaffold2173 | 2257                    | AA                              | GG                | 1946675104               |
| SNP_P3_165172_2298  | NW_004517189.1 | Scaffold2173 | 2298                    | CC                              | AA                | 1946675106               |
| SNP_P3_165173_2301  | NW_004517189.1 | Scaffold2173 | 2301                    | GG                              | AA                | 1946675109               |
| SNP_P3_165174_3717  | NW_004517189.1 | Scaffold2173 | 3717                    | AA                              | TT                | 1946675111               |
| SNP_P3_165175_6634  | NW_004517189.1 | Scaffold2173 | 6634                    | GG                              | TT                | 1946675113               |
| SNP_P3_165176_6787  | NW_004517189.1 | Scaffold2173 | 6787                    | CC                              | TT                | 1946675115               |
| SNP_P3_165177_6924  | NW_004517189.1 | Scaffold2173 | 6924                    | CC                              | GG                | 1946675117               |
| SNP_P3_165178_7008  | NW_004517189.1 | Scaffold2173 | 7008                    | AA                              | TT                | 1946675119               |
| SNP_P3_165179_7024  | NW_004517189.1 | Scaffold2173 | 7024                    | CC                              | TT                | 1946675122               |
| SNP_P3_165180_7077  | NW_004517189.1 | Scaffold2173 | 7077                    | AA                              | TT                | 1946675124               |
| SNP_P3_165181_7116  | NW_004517189.1 | Scaffold2173 | 7116                    | CC                              | GG                | 1946675126               |
| SNP_P3_165182_7157  | NW_004517189.1 | Scaffold2173 | 7157                    | AA                              | CC                | 1946675128               |
| SNP_P3_165183_7290  | NW_004517189.1 | Scaffold2173 | 7290                    | AA                              | TT                | 1946675130               |
| SNP_P3_165184_7441  | NW_004517189.1 | Scaffold2173 | 7441                    | AA                              | GG                | 1946675133               |
| SNP_P3_165185_7482  | NW_004517189.1 | Scaffold2173 | 7482                    | CC                              | TT                | 1946675135               |
| SNP_P3_165186_10420 | NW_004517189.1 | Scaffold2173 | 10420                   | GG                              | AA                | 1946675137               |
| SNP_P3_165187_10442 | NW_004517189.1 | Scaffold2173 | 10442                   | AA                              | TT                | 1946675139               |
| SNP_P3_165188_10450 | NW_004517189.1 | Scaffold2173 | 10450                   | CC                              | GG                | 1946675142               |
| SNP_P3_165189_10475 | NW_004517189.1 | Scaffold2173 | 10475                   | GG                              | CC                | 1946675144               |
| SNP_P3_165190_10476 | NW_004517189.1 | Scaffold2173 | 10476                   | AA                              | CC                | 1946675147               |
| SNP_P3_165191_10479 | NW_004517189.1 | Scaffold2173 | 10479                   | AA                              | GG                | 1946675149               |
| SNP_P3_165192_10651 | NW_004517189.1 | Scaffold2173 | 10651                   | TT                              | GG                | 1946675151               |
| SNP_P3_165193_10663 | NW_004517189.1 | Scaffold2173 | 10663                   | GG                              | CC                | 1946675153               |

| SNPs IDs            | Chromosome IDs | Chromosomes  | Physical positions (bp) | CDC Frontier (Reference genome) | (Pusa 256 & HPNB) | NCBI SNPdb Accession IDs |
|---------------------|----------------|--------------|-------------------------|---------------------------------|-------------------|--------------------------|
| SNP_P3_165194_10670 | NW_004517189.1 | Scaffold2173 | 10670                   | AA                              | GG                | 1946675155               |
| SNP_P3_165195_10716 | NW_004517189.1 | Scaffold2173 | 10716                   | GG                              | CC                | 1946675157               |
| SNP_P3_165196_10765 | NW_004517189.1 | Scaffold2173 | 10765                   | AA                              | TT                | 1946675160               |
| SNP_P3_165197_12818 | NW_004517189.1 | Scaffold2173 | 12818                   | AA                              | TT                | 1946675162               |
| SNP_P3_165198_15833 | NW_004517189.1 | Scaffold2173 | 15833                   | GG                              | AA                | 1946675164               |
| SNP_P3_165199_15836 | NW_004517189.1 | Scaffold2173 | 15836                   | CC                              | GG                | 1946675166               |
| SNP_P3_165200_15841 | NW_004517189.1 | Scaffold2173 | 15841                   | AA                              | CC                | 1946675168               |
| SNP_P3_165201_15846 | NW_004517189.1 | Scaffold2173 | 15846                   | TT                              | GG                | 1946675170               |
| SNP_P3_165202_15863 | NW_004517189.1 | Scaffold2173 | 15863                   | GG                              | TT                | 1946675172               |
| SNP_P3_165203_18247 | NW_004517189.1 | Scaffold2173 | 18247                   | TT                              | AA                | 1946675175               |
| SNP_P3_165204_18368 | NW_004517189.1 | Scaffold2173 | 18368                   | AA                              | GG                | 1946675177               |
| SNP_P3_165205_18377 | NW_004517189.1 | Scaffold2173 | 18377                   | AA                              | GG                | 1946675179               |
| SNP_P3_165206_18383 | NW_004517189.1 | Scaffold2173 | 18383                   | GG                              | AA                | 1946675182               |
| SNP_P3_165207_18397 | NW_004517189.1 | Scaffold2173 | 18397                   | GG                              | TT                | 1946675184               |
| SNP_P3_165208_18406 | NW_004517189.1 | Scaffold2173 | 18406                   | GG                              | AA                | 1946675186               |
| SNP_P3_165209_18460 | NW_004517189.1 | Scaffold2173 | 18460                   | CC                              | AA                | 1946675188               |
| SNP_P3_165210_18490 | NW_004517189.1 | Scaffold2173 | 18490                   | CC                              | TT                | 1946675190               |
| SNP_P3_165211_18529 | NW_004517189.1 | Scaffold2173 | 18529                   | GG                              | CC                | 1946675192               |
| SNP_P3_165212_18585 | NW_004517189.1 | Scaffold2173 | 18585                   | GG                              | CC                | 1946675194               |
| SNP_P3_165213_18603 | NW_004517189.1 | Scaffold2173 | 18603                   | CC                              | AA                | 1946675196               |
| SNP_P3_165214_18875 | NW_004517189.1 | Scaffold2173 | 18875                   | TT                              | CC                | 1946675198               |
| SNP_P3_165215_18941 | NW_004517189.1 | Scaffold2173 | 18941                   | CC                              | GG                | 1946675200               |
| SNP_P3_165216_19112 | NW_004517189.1 | Scaffold2173 | 19112                   | CC                              | GG                | 1946675202               |
| SNP_P3_165217_19130 | NW_004517189.1 | Scaffold2173 | 19130                   | AA                              | GG                | 1946675204               |
| SNP_P3_165218_19254 | NW_004517189.1 | Scaffold2173 | 19254                   | AA                              | GG                | 1946675206               |
| SNP_P3_165219_19273 | NW_004517189.1 | Scaffold2173 | 19273                   | GG                              | CC                | 1946675209               |
| SNP_P3_165220_19284 | NW_004517189.1 | Scaffold2173 | 19284                   | TT                              | CC                | 1946675211               |
| SNP_P3_165221_19597 | NW_004517189.1 | Scaffold2173 | 19597                   | GG                              | CC                | 1946675213               |
| SNP_P3_165223_19633 | NW_004517189.1 | Scaffold2173 | 19633                   | TT                              | AA                | 1946675215               |
| SNP_P3_165224_19731 | NW_004517189.1 | Scaffold2173 | 19731                   | AA                              | GG                | 1946675217               |
| SNP_P3_165225_19749 | NW_004517189.1 | Scaffold2173 | 19749                   | AA                              | TT                | 1946675219               |
| SNP_P3_165226_19754 | NW_004517189.1 | Scaffold2173 | 19754                   | AA                              | TT                | 1946675222               |
| SNP_P3_165227_19763 | NW_004517189.1 | Scaffold2173 | 19763                   | AA                              | GG                | 1946675224               |
| SNP_P3_165228_19816 | NW_004517189.1 | Scaffold2173 | 19816                   | TT                              | AA                | 1946675226               |
| SNP_P3_165229_19817 | NW_004517189.1 | Scaffold2173 | 19817                   | TT                              | GG                | 1946675228               |
| SNP_P3_165231_19918 | NW_004517189.1 | Scaffold2173 | 19918                   | AA                              | GG                | 1946675230               |
| SNP_P3_165232_19947 | NW_004517189.1 | Scaffold2173 | 19947                   | CC                              | TT                | 1946675232               |
| SNP_P3_165233_19953 | NW_004517189.1 | Scaffold2173 | 19953                   | AA                              | CC                | 1946675234               |
| SNP_P3_165234_19990 | NW_004517189.1 | Scaffold2173 | 19990                   | AA                              | GG                | 1946675236               |
| SNP_P3_165235_20246 | NW_004517189.1 | Scaffold2173 | 20246                   | CC                              | AA                | 1946675238               |
| SNP_P3_165236_20272 | NW_004517189.1 | Scaffold2173 | 20272                   | AA                              | GG                | 1946675240               |
| SNP_P3_165237_20293 | NW_004517189.1 | Scaffold2173 | 20293                   | CC                              | AA                | 1946675242               |

| SNPs IDs            | Chromosome IDs | Chromosomes  | Physical positions (bp) | CDC Frontier (Reference genome) | (Pusa 256 & HPNB) | NCBI SNPdb Accession IDs |
|---------------------|----------------|--------------|-------------------------|---------------------------------|-------------------|--------------------------|
| SNP_P3_165238_20317 | NW_004517189.1 | Scaffold2173 | 20317                   | TT                              | AA                | 1946675245               |
| SNP_P3_165239_20416 | NW_004517189.1 | Scaffold2173 | 20416                   | TT                              | GG                | 1946675247               |
| SNP_P3_165240_20454 | NW_004517189.1 | Scaffold2173 | 20454                   | TT                              | GG                | 1946675249               |
| SNP_P3_165241_20455 | NW_004517189.1 | Scaffold2173 | 20455                   | TT                              | AA                | 1946675251               |
| SNP_P3_165242_20456 | NW_004517189.1 | Scaffold2173 | 20456                   | AA                              | CC                | 1946675253               |
| SNP_P3_165243_20461 | NW_004517189.1 | Scaffold2173 | 20461                   | AA                              | TT                | 1946675255               |
| SNP_P3_165244_20468 | NW_004517189.1 | Scaffold2173 | 20468                   | TT                              | AA                | 1946675257               |
| SNP_P3_165245_20496 | NW_004517189.1 | Scaffold2173 | 20496                   | CC                              | GG                | 1946675260               |
| SNP_P3_165246_20562 | NW_004517189.1 | Scaffold2173 | 20562                   | GG                              | AA                | 1946675262               |
| SNP_P3_165247_20575 | NW_004517189.1 | Scaffold2173 | 20575                   | TT                              | AA                | 1946675263               |
| SNP_P3_165248_20584 | NW_004517189.1 | Scaffold2173 | 20584                   | TT                              | CC                | 1946675265               |
| SNP_P3_165249_20586 | NW_004517189.1 | Scaffold2173 | 20586                   | CC                              | GG                | 1946675267               |
| SNP_P3_165250_20597 | NW_004517189.1 | Scaffold2173 | 20597                   | TT                              | AA                | 1946675269               |
| SNP_P3_165251_20600 | NW_004517189.1 | Scaffold2173 | 20600                   | TT                              | AA                | 1946675271               |
| SNP_P3_165252_20675 | NW_004517189.1 | Scaffold2173 | 20675                   | AA                              | GG                | 1946675273               |
| SNP_P3_165253_20760 | NW_004517189.1 | Scaffold2173 | 20760                   | GG                              | TT                | 1946675275               |
| SNP_P3_165254_20823 | NW_004517189.1 | Scaffold2173 | 20823                   | CC                              | GG                | 1946675277               |
| SNP_P3_165255_20841 | NW_004517189.1 | Scaffold2173 | 20841                   | CC                              | GG                | 1946675279               |
| SNP_P3_165256_20846 | NW_004517189.1 | Scaffold2173 | 20846                   | AA                              | GG                | 1946675282               |
| SNP_P3_165257_21006 | NW_004517189.1 | Scaffold2173 | 21006                   | AA                              | GG                | 1946675284               |
| SNP_P3_165258_21213 | NW_004517189.1 | Scaffold2173 | 21213                   | TT                              | CC                | 1946675286               |
| SNP_P3_165259_21219 | NW_004517189.1 | Scaffold2173 | 21219                   | GG                              | CC                | 1946675288               |
| SNP_P3_165260_21233 | NW_004517189.1 | Scaffold2173 | 21233                   | CC                              | AA                | 1946675290               |
| SNP_P3_165261_21236 | NW_004517189.1 | Scaffold2173 | 21236                   | GG                              | CC                | 1946675292               |
| SNP_P3_165262_21238 | NW_004517189.1 | Scaffold2173 | 21238                   | AA                              | GG                | 1946675295               |
| SNP_P3_165263_21239 | NW_004517189.1 | Scaffold2173 | 21239                   | TT                              | AA                | 1946675297               |
| SNP_P3_165264_27333 | NW_004517189.1 | Scaffold2173 | 27333                   | TT                              | AA                | 1946675299               |
| SNP_P3_165265_52221 | NW_004517189.1 | Scaffold2173 | 52221                   | AA                              | CC                | 1946675301               |
| SNP_P3_165266_52561 | NW_004517189.1 | Scaffold2173 | 52561                   | TT                              | CC                | 1946675303               |
| SNP_P3_165267_54778 | NW_004517189.1 | Scaffold2173 | 54778                   | GG                              | CC                | 1946675305               |
| SNP_P3_165268_54816 | NW_004517189.1 | Scaffold2173 | 54816                   | GG                              | TT                | 1946675307               |
| SNP_P3_165269_56428 | NW_004517189.1 | Scaffold2173 | 56428                   | GG                              | TT                | 1946675309               |
| SNP_P3_165270_56504 | NW_004517189.1 | Scaffold2173 | 56504                   | GG                              | TT                | 1946675311               |
| SNP_P3_165271_56594 | NW_004517189.1 | Scaffold2173 | 56594                   | GG                              | CC                | 1946675313               |
| SNP_P3_165272_56621 | NW_004517189.1 | Scaffold2173 | 56621                   | TT                              | AA                | 1946675315               |
| SNP_P3_165273_60599 | NW_004517189.1 | Scaffold2173 | 60599                   | AA                              | GG                | 1946675317               |
| SNP_P3_165274_80906 | NW_004517189.1 | Scaffold2173 | 80906                   | TT                              | CC                | 1946675321               |
| SNP_P3_165275_80922 | NW_004517189.1 | Scaffold2173 | 80922                   | TT                              | GG                | 1946675323               |
| SNP_P3_165276_84396 | NW_004517189.1 | Scaffold2173 | 84396                   | AA                              | GG                | 1946675325               |
| SNP_P3_165277_87986 | NW_004517189.1 | Scaffold2173 | 87986                   | AA                              | TT                | 1946675327               |
| SNP_P3_165278_89435 | NW_004517189.1 | Scaffold2173 | 89435                   | GG                              | TT                | 1946675329               |
| SNP_P3_165279_6243  | NW_004517192.1 | Scaffold2176 | 6243                    | AA                              | TT                | 1946675331               |

| SNPs IDs            | Chromosome IDs | Chromosomes  | Physical positions (bp) | CDC Frontier (Reference genome) | (Pusa 256 & HPNB) | NCBI SNPdb Accession IDs |
|---------------------|----------------|--------------|-------------------------|---------------------------------|-------------------|--------------------------|
| SNP_P3_165280_6352  | NW_004517192.1 | Scaffold2176 | 6352                    | AA                              | TT                | 1946675333               |
| SNP_P3_165281_6690  | NW_004517192.1 | Scaffold2176 | 6690                    | CC                              | GG                | 1946675335               |
| SNP_P3_165282_6715  | NW_004517192.1 | Scaffold2176 | 6715                    | CC                              | GG                | 1946675337               |
| SNP_P3_165283_6760  | NW_004517192.1 | Scaffold2176 | 6760                    | GG                              | TT                | 1946675339               |
| SNP_P3_165284_8954  | NW_004517192.1 | Scaffold2176 | 8954                    | GG                              | TT                | 1946675341               |
| SNP_P3_165285_10688 | NW_004517192.1 | Scaffold2176 | 10688                   | GG                              | TT                | 1946675343               |
| SNP_P3_165286_10700 | NW_004517192.1 | Scaffold2176 | 10700                   | AA                              | GG                | 1946675345               |
| SNP_P3_165287_14596 | NW_004517192.1 | Scaffold2176 | 14596                   | GG                              | TT                | 1946675347               |
| SNP_P3_165288_14597 | NW_004517192.1 | Scaffold2176 | 14597                   | AA                              | CC                | 1946675349               |
| SNP_P3_165289_18301 | NW_004517192.1 | Scaffold2176 | 18301                   | GG                              | AA                | 1946675351               |
| SNP_P3_165290_18485 | NW_004517192.1 | Scaffold2176 | 18485                   | GG                              | AA                | 1946675353               |
| SNP_P3_165291_19163 | NW_004517192.1 | Scaffold2176 | 19163                   | CC                              | TT                | 1946675354               |
| SNP_P3_165292_23796 | NW_004517192.1 | Scaffold2176 | 23796                   | CC                              | AA                | 1946675355               |
| SNP_P3_165293_23835 | NW_004517192.1 | Scaffold2176 | 23835                   | CC                              | TT                | 1946675356               |
| SNP_P3_165294_23855 | NW_004517192.1 | Scaffold2176 | 23855                   | CC                              | AA                | 1946675357               |
| SNP_P3_165295_24403 | NW_004517192.1 | Scaffold2176 | 24403                   | TT                              | GG                | 1946675358               |
| SNP_P3_165296_24413 | NW_004517192.1 | Scaffold2176 | 24413                   | TT                              | CC                | 1946675359               |
| SNP_P3_165297_26600 | NW_004517192.1 | Scaffold2176 | 26600                   | AA                              | GG                | 1946675360               |
| SNP_P3_165298_27141 | NW_004517192.1 | Scaffold2176 | 27141                   | CC                              | GG                | 1946675361               |
| SNP_P3_165299_27196 | NW_004517192.1 | Scaffold2176 | 27196                   | GG                              | AA                | 1946675363               |
| SNP_P3_165300_27408 | NW_004517192.1 | Scaffold2176 | 27408                   | CC                              | AA                | 1946675365               |
| SNP_P3_165301_28909 | NW_004517192.1 | Scaffold2176 | 28909                   | TT                              | AA                | 1946675368               |
| SNP_P3_165302_29609 | NW_004517192.1 | Scaffold2176 | 29609                   | AA                              | TT                | 1946675370               |
| SNP_P3_165303_33584 | NW_004517192.1 | Scaffold2176 | 33584                   | AA                              | GG                | 1946675372               |
| SNP_P3_165304_33591 | NW_004517192.1 | Scaffold2176 | 33591                   | TT                              | CC                | 1946675374               |
| SNP_P3_165305_33621 | NW_004517192.1 | Scaffold2176 | 33621                   | CC                              | TT                | 1946675376               |
| SNP_P3_165306_2476  | NW_004517193.1 | Scaffold2177 | 2476                    | TT                              | CC                | 1946675378               |
| SNP_P3_165307_2789  | NW_004517193.1 | Scaffold2177 | 2789                    | CC                              | TT                | 1946675380               |
| SNP_P3_165308_2874  | NW_004517193.1 | Scaffold2177 | 2874                    | TT                              | AA                | 1946675382               |
| SNP_P3_165309_2880  | NW_004517193.1 | Scaffold2177 | 2880                    | AA                              | GG                | 1946675384               |
| SNP_P3_165310_10148 | NW_004517193.1 | Scaffold2177 | 10148                   | TT                              | CC                | 1946675386               |
| SNP_P3_165311_10169 | NW_004517193.1 | Scaffold2177 | 10169                   | CC                              | AA                | 1946675388               |
| SNP_P3_165312_10254 | NW_004517193.1 | Scaffold2177 | 10254                   | TT                              | CC                | 1946675390               |
| SNP_P3_165313_10302 | NW_004517193.1 | Scaffold2177 | 10302                   | TT                              | GG                | 1946675392               |
| SNP_P3_165314_10965 | NW_004517193.1 | Scaffold2177 | 10965                   | CC                              | TT                | 1946675394               |
| SNP_P3_165315_79    | NW_004517195.1 | Scaffold2179 | 79                      | TT                              | CC                | 1946675396               |
| SNP_P3_165316_113   | NW_004517195.1 | Scaffold2179 | 113                     | AA                              | TT                | 1946675398               |
| SNP_P3_165317_121   | NW_004517195.1 | Scaffold2179 | 121                     | GG                              | AA                | 1946675401               |
| SNP_P3_165318_463   | NW_004517195.1 | Scaffold2179 | 463                     | AA                              | GG                | 1946675403               |
| SNP_P3_165319_512   | NW_004517195.1 | Scaffold2179 | 512                     | CC                              | TT                | 1946675405               |
| SNP_P3_165320_513   | NW_004517195.1 | Scaffold2179 | 513                     | CC                              | TT                | 1946675407               |
| SNP_P3_165321_5944  | NW_004517195.1 | Scaffold2179 | 5944                    | CC                              | TT                | 1946675409               |

| SNPs IDs            | Chromosome IDs | Chromosomes  | Physical positions (bp) | CDC Frontier (Reference genome) | (Pusa 256 & HPNB) | NCBI SNPdb Accession IDs |
|---------------------|----------------|--------------|-------------------------|---------------------------------|-------------------|--------------------------|
| SNP_P3_165325_23282 | NW_004517195.1 | Scaffold2179 | 23282                   | TT                              | CC                | 1946675411               |
| SNP_P3_165326_24584 | NW_004517195.1 | Scaffold2179 | 24584                   | TT                              | CC                | 1946675413               |
| SNP_P3_165327_24605 | NW_004517195.1 | Scaffold2179 | 24605                   | TT                              | CC                | 1946675415               |
| SNP_P3_165328_24613 | NW_004517195.1 | Scaffold2179 | 24613                   | AA                              | GG                | 1946675417               |
| SNP_P3_165329_26270 | NW_004517195.1 | Scaffold2179 | 26270                   | AA                              | GG                | 1946675419               |
| SNP_P3_165330_26285 | NW_004517195.1 | Scaffold2179 | 26285                   | AA                              | GG                | 1946675422               |
| SNP_P3_165331_26324 | NW_004517195.1 | Scaffold2179 | 26324                   | GG                              | TT                | 1946675424               |
| SNP_P3_165332_34862 | NW_004517195.1 | Scaffold2179 | 34862                   | TT                              | CC                | 1946675426               |
| SNP_P3_165333_34900 | NW_004517195.1 | Scaffold2179 | 34900                   | CC                              | TT                | 1946675428               |
| SNP_P3_165334_34990 | NW_004517195.1 | Scaffold2179 | 34990                   | CC                              | GG                | 1946675430               |
| SNP_P3_165335_35003 | NW_004517195.1 | Scaffold2179 | 35003                   | AA                              | GG                | 1946675432               |
| SNP_P3_165336_35517 | NW_004517195.1 | Scaffold2179 | 35517                   | TT                              | CC                | 1946675434               |
| SNP_P3_165337_35703 | NW_004517195.1 | Scaffold2179 | 35703                   | AA                              | TT                | 1946675436               |
| SNP_P3_165338_35730 | NW_004517195.1 | Scaffold2179 | 35730                   | AA                              | GG                | 1946675438               |
| SNP_P3_165339_35893 | NW_004517195.1 | Scaffold2179 | 35893                   | AA                              | GG                | 1946675441               |
| SNP_P3_165342_36022 | NW_004517195.1 | Scaffold2179 | 36022                   | GG                              | AA                | 1946675443               |
| SNP_P3_165343_36034 | NW_004517195.1 | Scaffold2179 | 36034                   | TT                              | CC                | 1946675445               |
| SNP_P3_165344_36044 | NW_004517195.1 | Scaffold2179 | 36044                   | AA                              | GG                | 1946675447               |
| SNP_P3_165346_36100 | NW_004517195.1 | Scaffold2179 | 36100                   | GG                              | AA                | 1946675449               |
| SNP_P3_165347_36166 | NW_004517195.1 | Scaffold2179 | 36166                   | AA                              | GG                | 1946675451               |
| SNP_P3_165348_36177 | NW_004517195.1 | Scaffold2179 | 36177                   | AA                              | GG                | 1946675453               |
| SNP_P3_165349_36182 | NW_004517195.1 | Scaffold2179 | 36182                   | CC                              | GG                | 1946675455               |
| SNP_P3_165350_36362 | NW_004517195.1 | Scaffold2179 | 36362                   | AA                              | GG                | 1946675457               |
| SNP_P3_165351_36371 | NW_004517195.1 | Scaffold2179 | 36371                   | AA                              | GG                | 1946675459               |
| SNP_P3_165352_36392 | NW_004517195.1 | Scaffold2179 | 36392                   | CC                              | TT                | 1946675461               |
| SNP_P3_165353_36466 | NW_004517195.1 | Scaffold2179 | 36466                   | CC                              | TT                | 1946675463               |
| SNP_P3_165354_36475 | NW_004517195.1 | Scaffold2179 | 36475                   | TT                              | CC                | 1946675465               |
| SNP_P3_165355_36517 | NW_004517195.1 | Scaffold2179 | 36517                   | TT                              | CC                | 1946675467               |
| SNP_P3_165356_36555 | NW_004517195.1 | Scaffold2179 | 36555                   | TT                              | GG                | 1946675469               |
| SNP_P3_165357_44280 | NW_004517195.1 | Scaffold2179 | 44280                   | AA                              | TT                | 1946675471               |
| SNP_P3_165358_52058 | NW_004517195.1 | Scaffold2179 | 52058                   | AA                              | TT                | 1946675473               |
| SNP_P3_165360_57189 | NW_004517195.1 | Scaffold2179 | 57189                   | TT                              | CC                | 1946675475               |
| SNP_P3_165361_57265 | NW_004517195.1 | Scaffold2179 | 57265                   | TT                              | CC                | 1946675478               |
| SNP_P3_165362_57297 | NW_004517195.1 | Scaffold2179 | 57297                   | AA                              | GG                | 1946675480               |
| SNP_P3_165363_58672 | NW_004517195.1 | Scaffold2179 | 58672                   | GG                              | TT                | 1946675482               |
| SNP_P3_165364_81790 | NW_004517195.1 | Scaffold2179 | 81790                   | AA                              | GG                | 1946675484               |
| SNP_P3_165365_82068 | NW_004517195.1 | Scaffold2179 | 82068                   | AA                              | GG                | 1946675486               |
| SNP_P3_165366_82137 | NW_004517195.1 | Scaffold2179 | 82137                   | AA                              | GG                | 1946675488               |
| SNP_P3_165367_82174 | NW_004517195.1 | Scaffold2179 | 82174                   | CC                              | TT                | 1946675490               |
| SNP_P3_165368_82184 | NW_004517195.1 | Scaffold2179 | 82184                   | AA                              | GG                | 1946675492               |
| SNP_P3_165369_82363 | NW_004517195.1 | Scaffold2179 | 82363                   | CC                              | TT                | 1946675494               |
| SNP_P3_165370_82387 | NW_004517195.1 | Scaffold2179 | 82387                   | AA                              | CC                | 1946675496               |



| SNPs IDs            | Chromosome IDs | Chromosomes  | Physical positions (bp) | CDC Frontier (Reference genome) | (Pusa 256 & HPNB) | NCBI SNPdb Accession IDs |
|---------------------|----------------|--------------|-------------------------|---------------------------------|-------------------|--------------------------|
| SNP_P3_165371_82435 | NW_004517195.1 | Scaffold2179 | 82435                   | AA                              | GG                | 1946675498               |
| SNP_P3_165372_82447 | NW_004517195.1 | Scaffold2179 | 82447                   | AA                              | CC                | 1946675500               |
| SNP_P3_165373_94903 | NW_004517195.1 | Scaffold2179 | 94903                   | CC                              | TT                | 1946675501               |
| SNP_P3_165374_4713  | NW_004517198.1 | Scaffold2182 | 4713                    | AA                              | TT                | 1946675502               |
| SNP_P3_165375_164   | NW_004517199.1 | Scaffold2183 | 164                     | GG                              | AA                | 1946675503               |
| SNP_P3_165376_173   | NW_004517199.1 | Scaffold2183 | 173                     | CC                              | TT                | 1946675504               |
| SNP_P3_165377_378   | NW_004517199.1 | Scaffold2183 | 378                     | TT                              | GG                | 1946675505               |
| SNP_P3_165378_559   | NW_004517199.1 | Scaffold2183 | 559                     | TT                              | CC                | 1946675506               |
| SNP_P3_165379_623   | NW_004517199.1 | Scaffold2183 | 623                     | AA                              | CC                | 1946675507               |
| SNP_P3_165380_650   | NW_004517199.1 | Scaffold2183 | 650                     | AA                              | GG                | 1946675508               |
| SNP_P3_165381_672   | NW_004517199.1 | Scaffold2183 | 672                     | TT                              | CC                | 1946675509               |
| SNP_P3_165382_830   | NW_004517199.1 | Scaffold2183 | 830                     | TT                              | AA                | 1946675510               |
| SNP_P3_165383_832   | NW_004517199.1 | Scaffold2183 | 832                     | TT                              | AA                | 1946675511               |
| SNP_P3_165384_4067  | NW_004517199.1 | Scaffold2183 | 4067                    | TT                              | GG                | 1946675512               |
| SNP_P3_165385_4151  | NW_004517199.1 | Scaffold2183 | 4151                    | GG                              | AA                | 1946675513               |
| SNP_P3_165386_4171  | NW_004517199.1 | Scaffold2183 | 4171                    | AA                              | CC                | 1946675514               |
| SNP_P3_165388_4213  | NW_004517199.1 | Scaffold2183 | 4213                    | AA                              | CC                | 1946675516               |
| SNP_P3_165389_4463  | NW_004517199.1 | Scaffold2183 | 4463                    | TT                              | CC                | 1946675518               |
| SNP_P3_165390_4499  | NW_004517199.1 | Scaffold2183 | 4499                    | TT                              | CC                | 1946675520               |
| SNP_P3_165391_4511  | NW_004517199.1 | Scaffold2183 | 4511                    | AA                              | GG                | 1946675522               |
| SNP_P3_165392_4590  | NW_004517199.1 | Scaffold2183 | 4590                    | TT                              | CC                | 1946675524               |
| SNP_P3_165393_5934  | NW_004517199.1 | Scaffold2183 | 5934                    | AA                              | GG                | 1946675526               |
| SNP_P3_165394_6099  | NW_004517199.1 | Scaffold2183 | 6099                    | AA                              | CC                | 1946675528               |
| SNP_P3_165395_6268  | NW_004517199.1 | Scaffold2183 | 6268                    | TT                              | CC                | 1946675530               |
| SNP_P3_165396_6297  | NW_004517199.1 | Scaffold2183 | 6297                    | TT                              | CC                | 1946675532               |
| SNP_P3_165397_6345  | NW_004517199.1 | Scaffold2183 | 6345                    | AA                              | GG                | 1946675534               |
| SNP_P3_165398_6392  | NW_004517199.1 | Scaffold2183 | 6392                    | AA                              | GG                | 1946675536               |
| SNP_P3_165399_6478  | NW_004517199.1 | Scaffold2183 | 6478                    | CC                              | AA                | 1946675540               |
| SNP_P3_165400_6727  | NW_004517199.1 | Scaffold2183 | 6727                    | GG                              | CC                | 1946675542               |
| SNP_P3_165401_6991  | NW_004517199.1 | Scaffold2183 | 6991                    | CC                              | AA                | 1946675544               |
| SNP_P3_165402_7213  | NW_004517199.1 | Scaffold2183 | 7213                    | TT                              | CC                | 1946675546               |
| SNP_P3_165403_7405  | NW_004517199.1 | Scaffold2183 | 7405                    | TT                              | GG                | 1946675548               |
| SNP_P3_165404_7429  | NW_004517199.1 | Scaffold2183 | 7429                    | TT                              | CC                | 1946675550               |
| SNP_P3_165405_7441  | NW_004517199.1 | Scaffold2183 | 7441                    | CC                              | GG                | 1946675552               |
| SNP_P3_165406_12812 | NW_004517199.1 | Scaffold2183 | 12812                   | TT                              | AA                | 1946675554               |
| SNP_P3_165407_14540 | NW_004517199.1 | Scaffold2183 | 14540                   | TT                              | CC                | 1946675556               |
| SNP_P3_165408_15907 | NW_004517199.1 | Scaffold2183 | 15907                   | GG                              | TT                | 1946675558               |
| SNP_P3_165409_16420 | NW_004517199.1 | Scaffold2183 | 16420                   | AA                              | CC                | 1946675560               |
| SNP_P3_165410_16738 | NW_004517199.1 | Scaffold2183 | 16738                   | AA                              | GG                | 1946675562               |
| SNP_P3_165411_16740 | NW_004517199.1 | Scaffold2183 | 16740                   | GG                              | AA                | 1946675564               |
| SNP_P3_165412_16796 | NW_004517199.1 | Scaffold2183 | 16796                   | GG                              | AA                | 1946675566               |
| SNP_P3_165413_18039 | NW_004517199.1 | Scaffold2183 | 18039                   | AA                              | GG                | 1946675568               |

| SNPs IDs            | Chromosome IDs | Chromosomes  | Physical positions (bp) | CDC Frontier (Reference genome) | (Pusa 256 & HPNB) | NCBI SNPdb Accession IDs |
|---------------------|----------------|--------------|-------------------------|---------------------------------|-------------------|--------------------------|
| SNP_P3_165414_18611 | NW_004517199.1 | Scaffold2183 | 18611                   | GG                              | AA                | 1946675570               |
| SNP_P3_165415_18989 | NW_004517199.1 | Scaffold2183 | 18989                   | GG                              | AA                | 1946675572               |
| SNP_P3_165416_19156 | NW_004517199.1 | Scaffold2183 | 19156                   | GG                              | CC                | 1946675574               |
| SNP_P3_165417_19440 | NW_004517199.1 | Scaffold2183 | 19440                   | GG                              | AA                | 1946675576               |
| SNP_P3_165418_19473 | NW_004517199.1 | Scaffold2183 | 19473                   | TT                              | CC                | 1946675578               |
| SNP_P3_165419_19500 | NW_004517199.1 | Scaffold2183 | 19500                   | TT                              | AA                | 1946675580               |
| SNP_P3_165420_19526 | NW_004517199.1 | Scaffold2183 | 19526                   | AA                              | TT                | 1946675583               |
| SNP_P3_165421_19625 | NW_004517199.1 | Scaffold2183 | 19625                   | GG                              | TT                | 1946675586               |
| SNP_P3_165422_19740 | NW_004517199.1 | Scaffold2183 | 19740                   | AA                              | CC                | 1946675588               |
| SNP_P3_165423_19741 | NW_004517199.1 | Scaffold2183 | 19741                   | TT                              | AA                | 1946675590               |
| SNP_P3_165424_19871 | NW_004517199.1 | Scaffold2183 | 19871                   | TT                              | AA                | 1946675592               |
| SNP_P3_165426_19977 | NW_004517199.1 | Scaffold2183 | 19977                   | CC                              | TT                | 1946675594               |
| SNP_P3_165427_20103 | NW_004517199.1 | Scaffold2183 | 20103                   | CC                              | TT                | 1946675596               |
| SNP_P3_165428_20359 | NW_004517199.1 | Scaffold2183 | 20359                   | GG                              | AA                | 1946675598               |
| SNP_P3_165429_23730 | NW_004517199.1 | Scaffold2183 | 23730                   | AA                              | CC                | 1946675600               |
| SNP_P3_165430_23757 | NW_004517199.1 | Scaffold2183 | 23757                   | TT                              | CC                | 1946675602               |
| SNP_P3_165431_23760 | NW_004517199.1 | Scaffold2183 | 23760                   | TT                              | AA                | 1946675604               |
| SNP_P3_165432_23762 | NW_004517199.1 | Scaffold2183 | 23762                   | AA                              | TT                | 1946675606               |
| SNP_P3_165433_23907 | NW_004517199.1 | Scaffold2183 | 23907                   | GG                              | TT                | 1946675608               |
| SNP_P3_165434_24190 | NW_004517199.1 | Scaffold2183 | 24190                   | TT                              | CC                | 1946675610               |
| SNP_P3_165435_24238 | NW_004517199.1 | Scaffold2183 | 24238                   | CC                              | GG                | 1946675612               |
| SNP_P3_165436_24253 | NW_004517199.1 | Scaffold2183 | 24253                   | AA                              | GG                | 1946675614               |
| SNP_P3_165437_28098 | NW_004517199.1 | Scaffold2183 | 28098                   | TT                              | AA                | 1946675616               |
| SNP_P3_165438_28476 | NW_004517199.1 | Scaffold2183 | 28476                   | TT                              | CC                | 1946675618               |
| SNP_P3_165439_28514 | NW_004517199.1 | Scaffold2183 | 28514                   | TT                              | AA                | 1946675620               |
| SNP_P3_165440_30243 | NW_004517199.1 | Scaffold2183 | 30243                   | AA                              | TT                | 1946675622               |
| SNP_P3_165441_32853 | NW_004517199.1 | Scaffold2183 | 32853                   | TT                              | CC                | 1946675625               |
| SNP_P3_165442_32935 | NW_004517199.1 | Scaffold2183 | 32935                   | TT                              | CC                | 1946675628               |
| SNP_P3_165443_33266 | NW_004517199.1 | Scaffold2183 | 33266                   | CC                              | AA                | 1946675630               |
| SNP_P3_165444_33336 | NW_004517199.1 | Scaffold2183 | 33336                   | CC                              | AA                | 1946675632               |
| SNP_P3_165445_33873 | NW_004517199.1 | Scaffold2183 | 33873                   | GG                              | TT                | 1946675634               |
| SNP_P3_165446_33888 | NW_004517199.1 | Scaffold2183 | 33888                   | CC                              | GG                | 1946675636               |
| SNP_P3_165447_33963 | NW_004517199.1 | Scaffold2183 | 33963                   | GG                              | TT                | 1946675638               |
| SNP_P3_165448_34021 | NW_004517199.1 | Scaffold2183 | 34021                   | AA                              | TT                | 1946675640               |
| SNP_P3_165449_38226 | NW_004517199.1 | Scaffold2183 | 38226                   | GG                              | AA                | 1946675642               |
| SNP_P3_165450_39057 | NW_004517199.1 | Scaffold2183 | 39057                   | GG                              | AA                | 1946675644               |
| SNP_P3_165451_39170 | NW_004517199.1 | Scaffold2183 | 39170                   | CC                              | TT                | 1946675646               |
| SNP_P3_165452_39186 | NW_004517199.1 | Scaffold2183 | 39186                   | GG                              | AA                | 1946675648               |
| SNP_P3_165453_39407 | NW_004517199.1 | Scaffold2183 | 39407                   | AA                              | CC                | 1946675650               |
| SNP_P3_165454_40099 | NW_004517199.1 | Scaffold2183 | 40099                   | GG                              | TT                | 1946675652               |
| SNP_P3_165455_40680 | NW_004517199.1 | Scaffold2183 | 40680                   | TT                              | CC                | 1946675654               |
| SNP_P3_165456_40993 | NW_004517199.1 | Scaffold2183 | 40993                   | GG                              | AA                | 1946675656               |

| SNPs IDs            | Chromosome IDs | Chromosomes  | Physical positions (bp) | CDC Frontier (Reference genome) | (Pusa 256 & HPNB) | NCBI SNPdb Accession IDs |
|---------------------|----------------|--------------|-------------------------|---------------------------------|-------------------|--------------------------|
| SNP_P3_165457_41021 | NW_004517199.1 | Scaffold2183 | 41021                   | GG                              | TT                | 1946675658               |
| SNP_P3_165458_41057 | NW_004517199.1 | Scaffold2183 | 41057                   | TT                              | AA                | 1946675660               |
| SNP_P3_165459_41263 | NW_004517199.1 | Scaffold2183 | 41263                   | AA                              | GG                | 1946675663               |
| SNP_P3_165460_41294 | NW_004517199.1 | Scaffold2183 | 41294                   | AA                              | GG                | 1946675665               |
| SNP_P3_165461_44114 | NW_004517199.1 | Scaffold2183 | 44114                   | TT                              | CC                | 1946675667               |
| SNP_P3_165462_44178 | NW_004517199.1 | Scaffold2183 | 44178                   | CC                              | TT                | 1946675669               |
| SNP_P3_165463_44515 | NW_004517199.1 | Scaffold2183 | 44515                   | CC                              | TT                | 1946675671               |
| SNP_P3_165464_46265 | NW_004517199.1 | Scaffold2183 | 46265                   | AA                              | TT                | 1946675673               |
| SNP_P3_165465_46480 | NW_004517199.1 | Scaffold2183 | 46480                   | AA                              | GG                | 1946675675               |
| SNP_P3_165466_46570 | NW_004517199.1 | Scaffold2183 | 46570                   | TT                              | CC                | 1946675677               |
| SNP_P3_165467_46656 | NW_004517199.1 | Scaffold2183 | 46656                   | CC                              | TT                | 1946675679               |
| SNP_P3_165468_46671 | NW_004517199.1 | Scaffold2183 | 46671                   | AA                              | GG                | 1946675681               |
| SNP_P3_165469_47622 | NW_004517199.1 | Scaffold2183 | 47622                   | CC                              | TT                | 1946675683               |
| SNP_P3_165470_47671 | NW_004517199.1 | Scaffold2183 | 47671                   | AA                              | GG                | 1946675685               |
| SNP_P3_165471_47906 | NW_004517199.1 | Scaffold2183 | 47906                   | CC                              | TT                | 1946675687               |
| SNP_P3_165472_48092 | NW_004517199.1 | Scaffold2183 | 48092                   | AA                              | GG                | 1946675689               |
| SNP_P3_165473_48126 | NW_004517199.1 | Scaffold2183 | 48126                   | TT                              | CC                | 1946675691               |
| SNP_P3_165474_48399 | NW_004517199.1 | Scaffold2183 | 48399                   | TT                              | CC                | 1946675693               |
| SNP_P3_165475_48423 | NW_004517199.1 | Scaffold2183 | 48423                   | AA                              | GG                | 1946675695               |
| SNP_P3_165476_48424 | NW_004517199.1 | Scaffold2183 | 48424                   | AA                              | GG                | 1946675697               |
| SNP_P3_165477_48432 | NW_004517199.1 | Scaffold2183 | 48432                   | CC                              | TT                | 1946675700               |
| SNP_P3_165478_48490 | NW_004517199.1 | Scaffold2183 | 48490                   | CC                              | TT                | 1946675703               |
| SNP_P3_165479_49360 | NW_004517199.1 | Scaffold2183 | 49360                   | TT                              | AA                | 1946675705               |
| SNP_P3_165480_49684 | NW_004517199.1 | Scaffold2183 | 49684                   | TT                              | AA                | 1946675707               |
| SNP_P3_165481_49792 | NW_004517199.1 | Scaffold2183 | 49792                   | CC                              | AA                | 1946675709               |
| SNP_P3_165482_52997 | NW_004517199.1 | Scaffold2183 | 52997                   | TT                              | CC                | 1946675711               |
| SNP_P3_165483_54755 | NW_004517199.1 | Scaffold2183 | 54755                   | GG                              | TT                | 1946675713               |
| SNP_P3_165484_59334 | NW_004517199.1 | Scaffold2183 | 59334                   | CC                              | TT                | 1946675715               |
| SNP_P3_165485_59364 | NW_004517199.1 | Scaffold2183 | 59364                   | CC                              | TT                | 1946675717               |
| SNP_P3_165486_59384 | NW_004517199.1 | Scaffold2183 | 59384                   | TT                              | CC                | 1946675720               |
| SNP_P3_165487_59424 | NW_004517199.1 | Scaffold2183 | 59424                   | TT                              | AA                | 1946675722               |
| SNP_P3_165488_61479 | NW_004517199.1 | Scaffold2183 | 61479                   | GG                              | AA                | 1946675724               |
| SNP_P3_165489_63848 | NW_004517199.1 | Scaffold2183 | 63848                   | AA                              | CC                | 1946675726               |
| SNP_P3_165490_63852 | NW_004517199.1 | Scaffold2183 | 63852                   | TT                              | GG                | 1946675728               |
| SNP_P3_165491_65132 | NW_004517199.1 | Scaffold2183 | 65132                   | CC                              | AA                | 1946675730               |
| SNP_P3_165493_65769 | NW_004517199.1 | Scaffold2183 | 65769                   | AA                              | GG                | 1946675732               |
| SNP_P3_165494_65771 | NW_004517199.1 | Scaffold2183 | 65771                   | TT                              | AA                | 1946675734               |
| SNP_P3_165495_65792 | NW_004517199.1 | Scaffold2183 | 65792                   | TT                              | CC                | 1946675736               |
| SNP_P3_165496_65794 | NW_004517199.1 | Scaffold2183 | 65794                   | AA                              | GG                | 1946675739               |
| SNP_P3_165497_65862 | NW_004517199.1 | Scaffold2183 | 65862                   | GG                              | AA                | 1946675742               |
| SNP_P3_165498_65866 | NW_004517199.1 | Scaffold2183 | 65866                   | CC                              | GG                | 1946675744               |
| SNP_P3_165499_65874 | NW_004517199.1 | Scaffold2183 | 65874                   | GG                              | CC                | 1946675746               |

| SNPs IDs            | Chromosome IDs | Chromosomes  | Physical positions (bp) | CDC Frontier (Reference genome) | (Pusa 256 & HPNB) | NCBI SNPdb Accession IDs |
|---------------------|----------------|--------------|-------------------------|---------------------------------|-------------------|--------------------------|
| SNP_P3_165500_65885 | NW_004517199.1 | Scaffold2183 | 65885                   | AA                              | GG                | 1946675748               |
| SNP_P3_165501_65962 | NW_004517199.1 | Scaffold2183 | 65962                   | AA                              | CC                | 1946675750               |
| SNP_P3_165502_65977 | NW_004517199.1 | Scaffold2183 | 65977                   | TT                              | AA                | 1946675752               |
| SNP_P3_165503_66047 | NW_004517199.1 | Scaffold2183 | 66047                   | AA                              | TT                | 1946675754               |
| SNP_P3_165504_66733 | NW_004517199.1 | Scaffold2183 | 66733                   | AA                              | CC                | 1946675756               |
| SNP_P3_165505_66800 | NW_004517199.1 | Scaffold2183 | 66800                   | TT                              | AA                | 1946675758               |
| SNP_P3_165506_67007 | NW_004517199.1 | Scaffold2183 | 67007                   | GG                              | TT                | 1946675760               |
| SNP_P3_165507_67052 | NW_004517199.1 | Scaffold2183 | 67052                   | AA                              | GG                | 1946675762               |
| SNP_P3_165508_67107 | NW_004517199.1 | Scaffold2183 | 67107                   | GG                              | AA                | 1946675764               |
| SNP_P3_165509_67126 | NW_004517199.1 | Scaffold2183 | 67126                   | AA                              | GG                | 1946675766               |
| SNP_P3_165510_67268 | NW_004517199.1 | Scaffold2183 | 67268                   | GG                              | AA                | 1946675768               |
| SNP_P3_165511_67320 | NW_004517199.1 | Scaffold2183 | 67320                   | CC                              | TT                | 1946675770               |
| SNP_P3_165512_67385 | NW_004517199.1 | Scaffold2183 | 67385                   | CC                              | TT                | 1946675772               |
| SNP_P3_165513_67437 | NW_004517199.1 | Scaffold2183 | 67437                   | CC                              | TT                | 1946675774               |
| SNP_P3_165515_67662 | NW_004517199.1 | Scaffold2183 | 67662                   | TT                              | AA                | 1946675776               |
| SNP_P3_165516_67677 | NW_004517199.1 | Scaffold2183 | 67677                   | CC                              | AA                | 1946675778               |
| SNP_P3_165517_67684 | NW_004517199.1 | Scaffold2183 | 67684                   | AA                              | TT                | 1946675780               |
| SNP_P3_165518_67699 | NW_004517199.1 | Scaffold2183 | 67699                   | AA                              | GG                | 1946675782               |
| SNP_P3_165519_67769 | NW_004517199.1 | Scaffold2183 | 67769                   | CC                              | GG                | 1946675784               |
| SNP_P3_165521_67902 | NW_004517199.1 | Scaffold2183 | 67902                   | AA                              | GG                | 1946675786               |
| SNP_P3_165522_67938 | NW_004517199.1 | Scaffold2183 | 67938                   | TT                              | AA                | 1946675788               |
| SNP_P3_165523_67962 | NW_004517199.1 | Scaffold2183 | 67962                   | AA                              | TT                | 1946675790               |
| SNP_P3_165524_68000 | NW_004517199.1 | Scaffold2183 | 68000                   | AA                              | TT                | 1946675792               |
| SNP_P3_165525_68001 | NW_004517199.1 | Scaffold2183 | 68001                   | GG                              | CC                | 1946675794               |
| SNP_P3_165526_68053 | NW_004517199.1 | Scaffold2183 | 68053                   | TT                              | CC                | 1946675796               |
| SNP_P3_165527_68095 | NW_004517199.1 | Scaffold2183 | 68095                   | AA                              | GG                | 1946675798               |
| SNP_P3_165528_68164 | NW_004517199.1 | Scaffold2183 | 68164                   | GG                              | CC                | 1946675800               |
| SNP_P3_165529_68238 | NW_004517199.1 | Scaffold2183 | 68238                   | AA                              | GG                | 1946675802               |
| SNP_P3_165530_68261 | NW_004517199.1 | Scaffold2183 | 68261                   | CC                              | TT                | 1946675804               |
| SNP_P3_165531_68271 | NW_004517199.1 | Scaffold2183 | 68271                   | GG                              | AA                | 1946675806               |
| SNP_P3_165532_68276 | NW_004517199.1 | Scaffold2183 | 68276                   | CC                              | TT                | 1946675808               |
| SNP_P3_165533_68288 | NW_004517199.1 | Scaffold2183 | 68288                   | CC                              | TT                | 1946675810               |
| SNP_P3_165534_68350 | NW_004517199.1 | Scaffold2183 | 68350                   | CC                              | GG                | 1946675812               |
| SNP_P3_165535_68357 | NW_004517199.1 | Scaffold2183 | 68357                   | AA                              | GG                | 1946675814               |
| SNP_P3_165536_68384 | NW_004517199.1 | Scaffold2183 | 68384                   | AA                              | TT                | 1946675816               |
| SNP_P3_165537_68450 | NW_004517199.1 | Scaffold2183 | 68450                   | GG                              | TT                | 1946675818               |
| SNP_P3_165538_68458 | NW_004517199.1 | Scaffold2183 | 68458                   | GG                              | AA                | 1946675820               |
| SNP_P3_165539_68510 | NW_004517199.1 | Scaffold2183 | 68510                   | TT                              | AA                | 1946675822               |
| SNP_P3_165540_68512 | NW_004517199.1 | Scaffold2183 | 68512                   | CC                              | TT                | 1946675824               |
| SNP_P3_165541_68521 | NW_004517199.1 | Scaffold2183 | 68521                   | AA                              | GG                | 1946675826               |
| SNP_P3_165542_68535 | NW_004517199.1 | Scaffold2183 | 68535                   | GG                              | AA                | 1946675828               |
| SNP_P3_165543_68599 | NW_004517199.1 | Scaffold2183 | 68599                   | AA                              | GG                | 1946675830               |

| SNPs IDs            | Chromosome IDs | Chromosomes  | Physical positions (bp) | CDC Frontier (Reference genome) | (Pusa 256 & HPNB) | NCBI SNPdb Accession IDs |
|---------------------|----------------|--------------|-------------------------|---------------------------------|-------------------|--------------------------|
| SNP_P3_165544_68618 | NW_004517199.1 | Scaffold2183 | 68618                   | CC                              | TT                | 1946675832               |
| SNP_P3_165545_68654 | NW_004517199.1 | Scaffold2183 | 68654                   | AA                              | TT                | 1946675834               |
| SNP_P3_165546_68725 | NW_004517199.1 | Scaffold2183 | 68725                   | CC                              | AA                | 1946675836               |
| SNP_P3_165547_68739 | NW_004517199.1 | Scaffold2183 | 68739                   | AA                              | CC                | 1946675838               |
| SNP_P3_165548_68808 | NW_004517199.1 | Scaffold2183 | 68808                   | CC                              | AA                | 1946675840               |
| SNP_P3_165549_68819 | NW_004517199.1 | Scaffold2183 | 68819                   | AA                              | GG                | 1946675842               |
| SNP_P3_165550_68828 | NW_004517199.1 | Scaffold2183 | 68828                   | TT                              | AA                | 1946675844               |
| SNP_P3_165551_68856 | NW_004517199.1 | Scaffold2183 | 68856                   | CC                              | TT                | 1946675846               |
| SNP_P3_165552_68881 | NW_004517199.1 | Scaffold2183 | 68881                   | CC                              | TT                | 1946675848               |
| SNP_P3_165553_68889 | NW_004517199.1 | Scaffold2183 | 68889                   | AA                              | GG                | 1946675850               |
| SNP_P3_165554_68890 | NW_004517199.1 | Scaffold2183 | 68890                   | AA                              | GG                | 1946675852               |
| SNP_P3_165555_68911 | NW_004517199.1 | Scaffold2183 | 68911                   | TT                              | CC                | 1946675854               |
| SNP_P3_165556_69127 | NW_004517199.1 | Scaffold2183 | 69127                   | TT                              | CC                | 1946675856               |
| SNP_P3_165557_69142 | NW_004517199.1 | Scaffold2183 | 69142                   | CC                              | TT                | 1946675859               |
| SNP_P3_165558_69165 | NW_004517199.1 | Scaffold2183 | 69165                   | GG                              | AA                | 1946675861               |
| SNP_P3_165559_69166 | NW_004517199.1 | Scaffold2183 | 69166                   | CC                              | GG                | 1946675863               |
| SNP_P3_165560_69179 | NW_004517199.1 | Scaffold2183 | 69179                   | AA                              | TT                | 1946675865               |
| SNP_P3_165561_69225 | NW_004517199.1 | Scaffold2183 | 69225                   | TT                              | GG                | 1946675867               |
| SNP_P3_165562_69248 | NW_004517199.1 | Scaffold2183 | 69248                   | TT                              | CC                | 1946675869               |
| SNP_P3_165563_69331 | NW_004517199.1 | Scaffold2183 | 69331                   | GG                              | CC                | 1946675871               |
| SNP_P3_165564_69334 | NW_004517199.1 | Scaffold2183 | 69334                   | AA                              | GG                | 1946675873               |
| SNP_P3_165565_69430 | NW_004517199.1 | Scaffold2183 | 69430                   | CC                              | TT                | 1946675875               |
| SNP_P3_165566_69481 | NW_004517199.1 | Scaffold2183 | 69481                   | TT                              | CC                | 1946675877               |
| SNP_P3_165567_69495 | NW_004517199.1 | Scaffold2183 | 69495                   | CC                              | TT                | 1946675879               |
| SNP_P3_165568_69509 | NW_004517199.1 | Scaffold2183 | 69509                   | TT                              | AA                | 1946675881               |
| SNP_P3_165569_69539 | NW_004517199.1 | Scaffold2183 | 69539                   | TT                              | CC                | 1946675883               |
| SNP_P3_165570_69651 | NW_004517199.1 | Scaffold2183 | 69651                   | CC                              | TT                | 1946675887               |
| SNP_P3_165571_69657 | NW_004517199.1 | Scaffold2183 | 69657                   | CC                              | TT                | 1946675889               |
| SNP_P3_165572_69677 | NW_004517199.1 | Scaffold2183 | 69677                   | AA                              | TT                | 1946675891               |
| SNP_P3_165573_69688 | NW_004517199.1 | Scaffold2183 | 69688                   | GG                              | AA                | 1946675893               |
| SNP_P3_165574_69724 | NW_004517199.1 | Scaffold2183 | 69724                   | GG                              | AA                | 1946675895               |
| SNP_P3_165575_69761 | NW_004517199.1 | Scaffold2183 | 69761                   | CC                              | TT                | 1946675897               |
| SNP_P3_165576_69777 | NW_004517199.1 | Scaffold2183 | 69777                   | GG                              | AA                | 1946675899               |
| SNP_P3_165577_69814 | NW_004517199.1 | Scaffold2183 | 69814                   | TT                              | CC                | 1946675901               |
| SNP_P3_165578_69857 | NW_004517199.1 | Scaffold2183 | 69857                   | TT                              | AA                | 1946675903               |
| SNP_P3_165579_69926 | NW_004517199.1 | Scaffold2183 | 69926                   | AA                              | GG                | 1946675905               |
| SNP_P3_165580_69963 | NW_004517199.1 | Scaffold2183 | 69963                   | CC                              | AA                | 1946675907               |
| SNP_P3_165581_69978 | NW_004517199.1 | Scaffold2183 | 69978                   | TT                              | CC                | 1946675908               |
| SNP_P3_165582_70082 | NW_004517199.1 | Scaffold2183 | 70082                   | AA                              | GG                | 1946675909               |
| SNP_P3_165583_70101 | NW_004517199.1 | Scaffold2183 | 70101                   | TT                              | AA                | 1946675910               |
| SNP_P3_165584_70140 | NW_004517199.1 | Scaffold2183 | 70140                   | CC                              | TT                | 1946675911               |
| SNP_P3_165585_70191 | NW_004517199.1 | Scaffold2183 | 70191                   | CC                              | TT                | 1946675912               |

| SNPs IDs             | Chromosome IDs | Chromosomes  | Physical positions (bp) | CDC Frontier (Reference genome) | (Pusa 256 & HPNB) | NCBI SNPdb Accession IDs |
|----------------------|----------------|--------------|-------------------------|---------------------------------|-------------------|--------------------------|
| SNP_P3_165586_70192  | NW_004517199.1 | Scaffold2183 | 70192                   | GG                              | AA                | 1946675913               |
| SNP_P3_165587_70370  | NW_004517199.1 | Scaffold2183 | 70370                   | CC                              | AA                | 1946675914               |
| SNP_P3_165588_70413  | NW_004517199.1 | Scaffold2183 | 70413                   | GG                              | CC                | 1946675915               |
| SNP_P3_165589_70455  | NW_004517199.1 | Scaffold2183 | 70455                   | CC                              | TT                | 1946675916               |
| SNP_P3_165590_70523  | NW_004517199.1 | Scaffold2183 | 70523                   | CC                              | TT                | 1946675917               |
| SNP_P3_165591_70527  | NW_004517199.1 | Scaffold2183 | 70527                   | CC                              | TT                | 1946675918               |
| SNP_P3_165592_70541  | NW_004517199.1 | Scaffold2183 | 70541                   | AA                              | GG                | 1946675919               |
| SNP_P3_165593_70555  | NW_004517199.1 | Scaffold2183 | 70555                   | AA                              | GG                | 1946675920               |
| SNP_P3_165594_71103  | NW_004517199.1 | Scaffold2183 | 71103                   | TT                              | CC                | 1946675921               |
| SNP_P3_165595_71151  | NW_004517199.1 | Scaffold2183 | 71151                   | GG                              | AA                | 1946675922               |
| SNP_P3_165596_71228  | NW_004517199.1 | Scaffold2183 | 71228                   | AA                              | GG                | 1946675923               |
| SNP_P3_165597_71491  | NW_004517199.1 | Scaffold2183 | 71491                   | AA                              | GG                | 1946675925               |
| SNP_P3_165598_71674  | NW_004517199.1 | Scaffold2183 | 71674                   | CC                              | AA                | 1946675927               |
| SNP_P3_165599_71898  | NW_004517199.1 | Scaffold2183 | 71898                   | TT                              | CC                | 1946675929               |
| SNP_P3_165600_71937  | NW_004517199.1 | Scaffold2183 | 71937                   | GG                              | CC                | 1946675931               |
| SNP_P3_165601_71952  | NW_004517199.1 | Scaffold2183 | 71952                   | TT                              | GG                | 1946675933               |
| SNP_P3_165602_74329  | NW_004517199.1 | Scaffold2183 | 74329                   | GG                              | AA                | 1946675935               |
| SNP_P3_165603_74343  | NW_004517199.1 | Scaffold2183 | 74343                   | TT                              | CC                | 1946675937               |
| SNP_P3_165604_74392  | NW_004517199.1 | Scaffold2183 | 74392                   | TT                              | CC                | 1946675939               |
| SNP_P3_165605_74424  | NW_004517199.1 | Scaffold2183 | 74424                   | GG                              | AA                | 1946675941               |
| SNP_P3_165606_74425  | NW_004517199.1 | Scaffold2183 | 74425                   | TT                              | GG                | 1946675943               |
| SNP_P3_165607_74444  | NW_004517199.1 | Scaffold2183 | 74444                   | AA                              | CC                | 1946675946               |
| SNP_P3_165608_74532  | NW_004517199.1 | Scaffold2183 | 74532                   | TT                              | CC                | 1946675948               |
| SNP_P3_165609_74546  | NW_004517199.1 | Scaffold2183 | 74546                   | GG                              | AA                | 1946675950               |
| SNP_P3_165610_75061  | NW_004517199.1 | Scaffold2183 | 75061                   | AA                              | GG                | 1946675952               |
| SNP_P3_165611_75077  | NW_004517199.1 | Scaffold2183 | 75077                   | AA                              | TT                | 1946675954               |
| SNP_P3_165612_75079  | NW_004517199.1 | Scaffold2183 | 75079                   | AA                              | TT                | 1946675956               |
| SNP_P3_165613_64     | NW_004517201.1 | Scaffold2185 | 64                      | CC                              | AA                | 1946675958               |
| SNP_P3_165615_39589  | NW_004517205.1 | Scaffold2192 | 39589                   | AA                              | TT                | 1946675959               |
| SNP_P3_165616_47681  | NW_004517205.1 | Scaffold2192 | 47681                   | TT                              | CC                | 1946675961               |
| SNP_P3_165617_55891  | NW_004517205.1 | Scaffold2192 | 55891                   | CC                              | TT                | 1946675963               |
| SNP_P3_165618_55953  | NW_004517205.1 | Scaffold2192 | 55953                   | AA                              | TT                | 1946675965               |
| SNP_P3_165619_56039  | NW_004517205.1 | Scaffold2192 | 56039                   | TT                              | GG                | 1946675968               |
| SNP_P3_165620_70281  | NW_004517205.1 | Scaffold2192 | 70281                   | GG                              | TT                | 1946675970               |
| SNP_P3_165621_74133  | NW_004517205.1 | Scaffold2192 | 74133                   | GG                              | TT                | 1946675972               |
| SNP_P3_165624_107964 | NW_004517205.1 | Scaffold2192 | 107964                  | TT                              | CC                | 1946675974               |
| SNP_P3_165626_108014 | NW_004517205.1 | Scaffold2192 | 108014                  | GG                              | AA                | 1946675976               |
| SNP_P3_165627_108373 | NW_004517205.1 | Scaffold2192 | 108373                  | GG                              | TT                | 1946675979               |
| SNP_P3_165628_108406 | NW_004517205.1 | Scaffold2192 | 108406                  | GG                              | AA                | 1946675981               |
| SNP_P3_165629_108424 | NW_004517205.1 | Scaffold2192 | 108424                  | TT                              | CC                | 1946675983               |
| SNP_P3_165630_108506 | NW_004517205.1 | Scaffold2192 | 108506                  | TT                              | CC                | 1946675985               |
| SNP_P3_165631_108649 | NW_004517205.1 | Scaffold2192 | 108649                  | CC                              | TT                | 1946675987               |

| SNPs IDs             | Chromosome IDs | Chromosomes  | Physical positions (bp) | CDC Frontier (Reference genome) | (Pusa 256 & HPNB) | NCBI SNPdb Accession IDs |
|----------------------|----------------|--------------|-------------------------|---------------------------------|-------------------|--------------------------|
| SNP_P3_165632_108666 | NW_004517205.1 | Scaffold2192 | 108666                  | TT                              | GG                | 1946675989               |
| SNP_P3_165633_108705 | NW_004517205.1 | Scaffold2192 | 108705                  | TT                              | CC                | 1946675991               |
| SNP_P3_165634_108894 | NW_004517205.1 | Scaffold2192 | 108894                  | CC                              | AA                | 1946675994               |
| SNP_P3_165635_108912 | NW_004517205.1 | Scaffold2192 | 108912                  | AA                              | TT                | 1946675996               |
| SNP_P3_165636_108940 | NW_004517205.1 | Scaffold2192 | 108940                  | TT                              | GG                | 1946675997               |
| SNP_P3_165637_108947 | NW_004517205.1 | Scaffold2192 | 108947                  | TT                              | CC                | 1946675998               |
| SNP_P3_165638_108951 | NW_004517205.1 | Scaffold2192 | 108951                  | AA                              | GG                | 1946675999               |
| SNP_P3_165639_108956 | NW_004517205.1 | Scaffold2192 | 108956                  | AA                              | CC                | 1946676000               |
| SNP_P3_165640_108996 | NW_004517205.1 | Scaffold2192 | 108996                  | TT                              | CC                | 1946676001               |
| SNP_P3_165641_109272 | NW_004517205.1 | Scaffold2192 | 109272                  | CC                              | TT                | 1946676002               |
| SNP_P3_165642_119352 | NW_004517205.1 | Scaffold2192 | 119352                  | GG                              | AA                | 1946676003               |
| SNP_P3_165643_132082 | NW_004517205.1 | Scaffold2192 | 132082                  | AA                              | GG                | 1946676004               |
| SNP_P3_165644_132091 | NW_004517205.1 | Scaffold2192 | 132091                  | GG                              | AA                | 1946676005               |
| SNP_P3_165645_135073 | NW_004517205.1 | Scaffold2192 | 135073                  | AA                              | GG                | 1946676006               |
| SNP_P3_165646_160414 | NW_004517205.1 | Scaffold2192 | 160414                  | AA                              | GG                | 1946676007               |
| SNP_P3_165647_160811 | NW_004517205.1 | Scaffold2192 | 160811                  | CC                              | TT                | 1946676008               |
| SNP_P3_165648_160825 | NW_004517205.1 | Scaffold2192 | 160825                  | TT                              | CC                | 1946676009               |
| SNP_P3_165649_163987 | NW_004517205.1 | Scaffold2192 | 163987                  | TT                              | CC                | 1946676010               |
| SNP_P3_165650_170718 | NW_004517205.1 | Scaffold2192 | 170718                  | GG                              | AA                | 1946676011               |
| SNP_P3_165651_170726 | NW_004517205.1 | Scaffold2192 | 170726                  | AA                              | GG                | 1946676012               |
| SNP_P3_165652_170748 | NW_004517205.1 | Scaffold2192 | 170748                  | CC                              | TT                | 1946676013               |
| SNP_P3_165654_182729 | NW_004517205.1 | Scaffold2192 | 182729                  | TT                              | AA                | 1946676014               |
| SNP_P3_165655_182740 | NW_004517205.1 | Scaffold2192 | 182740                  | TT                              | AA                | 1946676015               |
| SNP_P3_165656_182757 | NW_004517205.1 | Scaffold2192 | 182757                  | GG                              | AA                | 1946676016               |
| SNP_P3_165657_182765 | NW_004517205.1 | Scaffold2192 | 182765                  | TT                              | CC                | 1946676017               |
| SNP_P3_165658_182777 | NW_004517205.1 | Scaffold2192 | 182777                  | TT                              | CC                | 1946676018               |
| SNP_P3_165659_182823 | NW_004517205.1 | Scaffold2192 | 182823                  | TT                              | CC                | 1946676019               |
| SNP_P3_165660_182891 | NW_004517205.1 | Scaffold2192 | 182891                  | AA                              | CC                | 1946676020               |
| SNP_P3_165661_182997 | NW_004517205.1 | Scaffold2192 | 182997                  | AA                              | TT                | 1946676021               |
| SNP_P3_165662_199400 | NW_004517205.1 | Scaffold2192 | 199400                  | CC                              | TT                | 1946676022               |
| SNP_P3_165663_209237 | NW_004517205.1 | Scaffold2192 | 209237                  | CC                              | TT                | 1946676023               |
| SNP_P3_165664_217422 | NW_004517205.1 | Scaffold2192 | 217422                  | CC                              | TT                | 1946676024               |
| SNP_P3_165665_217447 | NW_004517205.1 | Scaffold2192 | 217447                  | AA                              | GG                | 1946676025               |
| SNP_P3_165666_3094   | NW_004517206.1 | Scaffold2193 | 3094                    | GG                              | AA                | 1946676026               |
| SNP_P3_165667_3121   | NW_004517206.1 | Scaffold2193 | 3121                    | GG                              | AA                | 1946676027               |
| SNP_P3_165669_12391  | NW_004517206.1 | Scaffold2193 | 12391                   | CC                              | TT                | 1946676028               |
| SNP_P3_165670_12550  | NW_004517206.1 | Scaffold2193 | 12550                   | AA                              | CC                | 1946676029               |
| SNP_P3_165671_12559  | NW_004517206.1 | Scaffold2193 | 12559                   | GG                              | TT                | 1946676030               |
| SNP_P3_165672_12826  | NW_004517206.1 | Scaffold2193 | 12826                   | GG                              | AA                | 1946676031               |
| SNP_P3_165673_12845  | NW_004517206.1 | Scaffold2193 | 12845                   | CC                              | TT                | 1946676032               |
| SNP_P3_165674_13003  | NW_004517206.1 | Scaffold2193 | 13003                   | CC                              | GG                | 1946676033               |
| SNP_P3_165675_13085  | NW_004517206.1 | Scaffold2193 | 13085                   | TT                              | CC                | 1946676034               |

| SNPs IDs             | Chromosome IDs | Chromosomes  | Physical positions (bp) | CDC Frontier (Reference genome) | (Pusa 256 & HPNB) | NCBI SNPdb Accession IDs |
|----------------------|----------------|--------------|-------------------------|---------------------------------|-------------------|--------------------------|
| SNP_P3_165676_13118  | NW_004517206.1 | Scaffold2193 | 13118                   | AA                              | CC                | 1946676035               |
| SNP_P3_165677_13232  | NW_004517206.1 | Scaffold2193 | 13232                   | TT                              | CC                | 1946676036               |
| SNP_P3_165678_13257  | NW_004517206.1 | Scaffold2193 | 13257                   | TT                              | GG                | 1946676037               |
| SNP_P3_165679_18023  | NW_004517206.1 | Scaffold2193 | 18023                   | CC                              | AA                | 1946676038               |
| SNP_P3_165680_20927  | NW_004517206.1 | Scaffold2193 | 20927                   | GG                              | AA                | 1946676039               |
| SNP_P3_165681_31259  | NW_004517206.1 | Scaffold2193 | 31259                   | GG                              | AA                | 1946676040               |
| SNP_P3_165682_31356  | NW_004517206.1 | Scaffold2193 | 31356                   | GG                              | TT                | 1946676041               |
| SNP_P3_165683_31358  | NW_004517206.1 | Scaffold2193 | 31358                   | AA                              | GG                | 1946676042               |
| SNP_P3_165684_31407  | NW_004517206.1 | Scaffold2193 | 31407                   | TT                              | GG                | 1946676043               |
| SNP_P3_165687_31492  | NW_004517206.1 | Scaffold2193 | 31492                   | CC                              | TT                | 1946676044               |
| SNP_P3_165688_31525  | NW_004517206.1 | Scaffold2193 | 31525                   | CC                              | TT                | 1946676045               |
| SNP_P3_165689_31532  | NW_004517206.1 | Scaffold2193 | 31532                   | AA                              | GG                | 1946676046               |
| SNP_P3_165690_31562  | NW_004517206.1 | Scaffold2193 | 31562                   | TT                              | CC                | 1946676047               |
| SNP_P3_165691_31702  | NW_004517206.1 | Scaffold2193 | 31702                   | TT                              | CC                | 1946676048               |
| SNP_P3_165692_31771  | NW_004517206.1 | Scaffold2193 | 31771                   | CC                              | TT                | 1946676049               |
| SNP_P3_165693_31793  | NW_004517206.1 | Scaffold2193 | 31793                   | GG                              | TT                | 1946676050               |
| SNP_P3_165694_31804  | NW_004517206.1 | Scaffold2193 | 31804                   | AA                              | GG                | 1946676051               |
| SNP_P3_165695_51109  | NW_004517206.1 | Scaffold2193 | 51109                   | GG                              | AA                | 1946676052               |
| SNP_P3_165696_51138  | NW_004517206.1 | Scaffold2193 | 51138                   | CC                              | GG                | 1946676053               |
| SNP_P3_165697_51181  | NW_004517206.1 | Scaffold2193 | 51181                   | TT                              | CC                | 1946676054               |
| SNP_P3_165698_51395  | NW_004517206.1 | Scaffold2193 | 51395                   | AA                              | GG                | 1946676055               |
| SNP_P3_165699_52494  | NW_004517206.1 | Scaffold2193 | 52494                   | TT                              | CC                | 1946676056               |
| SNP_P3_165700_55520  | NW_004517206.1 | Scaffold2193 | 55520                   | TT                              | CC                | 1946676057               |
| SNP_P3_165701_58867  | NW_004517206.1 | Scaffold2193 | 58867                   | TT                              | AA                | 1946676058               |
| SNP_P3_165702_59046  | NW_004517206.1 | Scaffold2193 | 59046                   | AA                              | GG                | 1946676059               |
| SNP_P3_165703_59154  | NW_004517206.1 | Scaffold2193 | 59154                   | GG                              | TT                | 1946676060               |
| SNP_P3_165704_59432  | NW_004517206.1 | Scaffold2193 | 59432                   | AA                              | GG                | 1946676061               |
| SNP_P3_165705_60647  | NW_004517206.1 | Scaffold2193 | 60647                   | CC                              | AA                | 1946676062               |
| SNP_P3_165706_60713  | NW_004517206.1 | Scaffold2193 | 60713                   | TT                              | CC                | 1946676063               |
| SNP_P3_165707_89793  | NW_004517206.1 | Scaffold2193 | 89793                   | AA                              | GG                | 1946676064               |
| SNP_P3_165708_89808  | NW_004517206.1 | Scaffold2193 | 89808                   | CC                              | TT                | 1946676065               |
| SNP_P3_165709_89824  | NW_004517206.1 | Scaffold2193 | 89824                   | TT                              | CC                | 1946676066               |
| SNP_P3_165710_89835  | NW_004517206.1 | Scaffold2193 | 89835                   | AA                              | GG                | 1946676067               |
| SNP_P3_165711_89843  | NW_004517206.1 | Scaffold2193 | 89843                   | TT                              | CC                | 1946676068               |
| SNP_P3_165713_105317 | NW_004517206.1 | Scaffold2193 | 105317                  | GG                              | AA                | 1946676069               |
| SNP_P3_165714_111349 | NW_004517206.1 | Scaffold2193 | 111349                  | CC                              | GG                | 1946676070               |
| SNP_P3_165715_123057 | NW_004517206.1 | Scaffold2193 | 123057                  | TT                              | GG                | 1946676071               |
| SNP_P3_165716_123345 | NW_004517206.1 | Scaffold2193 | 123345                  | GG                              | AA                | 1946676072               |
| SNP_P3_165717_123346 | NW_004517206.1 | Scaffold2193 | 123346                  | AA                              | TT                | 1946676073               |
| SNP_P3_165718_123347 | NW_004517206.1 | Scaffold2193 | 123347                  | AA                              | TT                | 1946676074               |
| SNP_P3_165719_123523 | NW_004517206.1 | Scaffold2193 | 123523                  | GG                              | AA                | 1946676075               |
| SNP_P3_165720_123605 | NW_004517206.1 | Scaffold2193 | 123605                  | AA                              | GG                | 1946676076               |



| SNPs IDs             | Chromosome IDs | Chromosomes  | Physical positions (bp) | CDC Frontier (Reference genome) | (Pusa 256 & HPNB) | NCBI SNPdb Accession IDs |
|----------------------|----------------|--------------|-------------------------|---------------------------------|-------------------|--------------------------|
| SNP_P3_165721_123632 | NW_004517206.1 | Scaffold2193 | 123632                  | AA                              | GG                | 1946676077               |
| SNP_P3_165722_123670 | NW_004517206.1 | Scaffold2193 | 123670                  | GG                              | TT                | 1946676078               |
| SNP_P3_165723_123682 | NW_004517206.1 | Scaffold2193 | 123682                  | TT                              | CC                | 1946676079               |
| SNP_P3_165724_123685 | NW_004517206.1 | Scaffold2193 | 123685                  | TT                              | CC                | 1946676080               |
| SNP_P3_165725_127975 | NW_004517206.1 | Scaffold2193 | 127975                  | AA                              | GG                | 1946676081               |
| SNP_P3_165726_127978 | NW_004517206.1 | Scaffold2193 | 127978                  | TT                              | GG                | 1946676082               |
| SNP_P3_165727_128010 | NW_004517206.1 | Scaffold2193 | 128010                  | GG                              | AA                | 1946676083               |
| SNP_P3_165729_4299   | NW_004517207.1 | Scaffold2194 | 4299                    | TT                              | AA                | 1946676084               |
| SNP_P3_165730_9023   | NW_004517207.1 | Scaffold2194 | 9023                    | CC                              | TT                | 1946676085               |
| SNP_P3_165731_9080   | NW_004517207.1 | Scaffold2194 | 9080                    | CC                              | AA                | 1946676086               |
| SNP_P3_165732_9179   | NW_004517207.1 | Scaffold2194 | 9179                    | AA                              | CC                | 1946676087               |
| SNP_P3_165733_9202   | NW_004517207.1 | Scaffold2194 | 9202                    | AA                              | GG                | 1946676088               |
| SNP_P3_165734_9287   | NW_004517207.1 | Scaffold2194 | 9287                    | TT                              | GG                | 1946676089               |
| SNP_P3_165735_17966  | NW_004517207.1 | Scaffold2194 | 17966                   | AA                              | CC                | 1946676090               |
| SNP_P3_165736_18166  | NW_004517207.1 | Scaffold2194 | 18166                   | GG                              | CC                | 1946676091               |
| SNP_P3_165737_18553  | NW_004517207.1 | Scaffold2194 | 18553                   | GG                              | TT                | 1946676092               |
| SNP_P3_165738_18871  | NW_004517207.1 | Scaffold2194 | 18871                   | TT                              | AA                | 1946676093               |
| SNP_P3_165739_19161  | NW_004517207.1 | Scaffold2194 | 19161                   | AA                              | GG                | 1946676094               |
| SNP_P3_165740_19402  | NW_004517207.1 | Scaffold2194 | 19402                   | TT                              | CC                | 1946676095               |
| SNP_P3_165741_19416  | NW_004517207.1 | Scaffold2194 | 19416                   | TT                              | CC                | 1946676096               |
| SNP_P3_165742_23395  | NW_004517207.1 | Scaffold2194 | 23395                   | CC                              | GG                | 1946676097               |
| SNP_P3_165743_23671  | NW_004517207.1 | Scaffold2194 | 23671                   | CC                              | TT                | 1946676098               |
| SNP_P3_165744_23700  | NW_004517207.1 | Scaffold2194 | 23700                   | AA                              | TT                | 1946676099               |
| SNP_P3_165745_23812  | NW_004517207.1 | Scaffold2194 | 23812                   | TT                              | GG                | 1946676100               |
| SNP_P3_165746_23818  | NW_004517207.1 | Scaffold2194 | 23818                   | AA                              | GG                | 1946676101               |
| SNP_P3_165747_23838  | NW_004517207.1 | Scaffold2194 | 23838                   | TT                              | GG                | 1946676102               |
| SNP_P3_165748_23989  | NW_004517207.1 | Scaffold2194 | 23989                   | TT                              | GG                | 1946676103               |
| SNP_P3_165749_24056  | NW_004517207.1 | Scaffold2194 | 24056                   | GG                              | TT                | 1946676104               |
| SNP_P3_165750_24078  | NW_004517207.1 | Scaffold2194 | 24078                   | TT                              | GG                | 1946676105               |
| SNP_P3_165751_24080  | NW_004517207.1 | Scaffold2194 | 24080                   | AA                              | GG                | 1946676106               |
| SNP_P3_165752_24099  | NW_004517207.1 | Scaffold2194 | 24099                   | GG                              | TT                | 1946676107               |
| SNP_P3_165753_24636  | NW_004517207.1 | Scaffold2194 | 24636                   | CC                              | TT                | 1946676108               |
| SNP_P3_165754_24734  | NW_004517207.1 | Scaffold2194 | 24734                   | TT                              | GG                | 1946676109               |
| SNP_P3_165755_24782  | NW_004517207.1 | Scaffold2194 | 24782                   | CC                              | TT                | 1946676110               |
| SNP_P3_165756_24963  | NW_004517207.1 | Scaffold2194 | 24963                   | AA                              | GG                | 1946676111               |
| SNP_P3_165757_25080  | NW_004517207.1 | Scaffold2194 | 25080                   | TT                              | AA                | 1946676112               |
| SNP_P3_165758_26573  | NW_004517207.1 | Scaffold2194 | 26573                   | AA                              | GG                | 1946676113               |
| SNP_P3_165760_598    | NW_004517208.1 | Scaffold2195 | 598                     | TT                              | GG                | 1946676114               |
| SNP_P3_165761_736    | NW_004517208.1 | Scaffold2195 | 736                     | TT                              | AA                | 1946676115               |
| SNP_P3_165762_1825   | NW_004517208.1 | Scaffold2195 | 1825                    | AA                              | GG                | 1946676116               |
| SNP_P3_165763_1954   | NW_004517208.1 | Scaffold2195 | 1954                    | TT                              | CC                | 1946676117               |
| SNP_P3_165764_2062   | NW_004517208.1 | Scaffold2195 | 2062                    | GG                              | AA                | 1946676118               |

| SNPs IDs            | Chromosome IDs | Chromosomes  | Physical positions (bp) | CDC Frontier (Reference genome) | (Pusa 256 & HPNB) | NCBI SNPdb Accession IDs |
|---------------------|----------------|--------------|-------------------------|---------------------------------|-------------------|--------------------------|
| SNP_P3_165765_2066  | NW_004517208.1 | Scaffold2195 | 2066                    | AA                              | CC                | 1946676119               |
| SNP_P3_165767_909   | NW_004517210.1 | Scaffold2199 | 909                     | AA                              | GG                | 1946676120               |
| SNP_P3_165768_918   | NW_004517210.1 | Scaffold2199 | 918                     | AA                              | GG                | 1946676121               |
| SNP_P3_165769_1388  | NW_004517215.1 | Scaffold2205 | 1388                    | GG                              | AA                | 1946676122               |
| SNP_P3_165770_1408  | NW_004517215.1 | Scaffold2205 | 1408                    | CC                              | TT                | 1946676123               |
| SNP_P3_165771_1456  | NW_004517215.1 | Scaffold2205 | 1456                    | CC                              | TT                | 1946676124               |
| SNP_P3_165772_1734  | NW_004517215.1 | Scaffold2205 | 1734                    | TT                              | GG                | 1946676125               |
| SNP_P3_165773_2761  | NW_004517215.1 | Scaffold2205 | 2761                    | GG                              | AA                | 1946676126               |
| SNP_P3_165774_3009  | NW_004517215.1 | Scaffold2205 | 3009                    | CC                              | GG                | 1946676127               |
| SNP_P3_165775_3023  | NW_004517215.1 | Scaffold2205 | 3023                    | TT                              | AA                | 1946676128               |
| SNP_P3_165776_3227  | NW_004517215.1 | Scaffold2205 | 3227                    | CC                              | TT                | 1946676129               |
| SNP_P3_165777_3374  | NW_004517215.1 | Scaffold2205 | 3374                    | GG                              | CC                | 1946676130               |
| SNP_P3_165778_3467  | NW_004517215.1 | Scaffold2205 | 3467                    | CC                              | TT                | 1946676131               |
| SNP_P3_165779_3550  | NW_004517215.1 | Scaffold2205 | 3550                    | AA                              | CC                | 1946676132               |
| SNP_P3_165780_3551  | NW_004517215.1 | Scaffold2205 | 3551                    | GG                              | AA                | 1946676133               |
| SNP_P3_165781_5140  | NW_004517215.1 | Scaffold2205 | 5140                    | TT                              | AA                | 1946676134               |
| SNP_P3_165782_10046 | NW_004517215.1 | Scaffold2205 | 10046                   | AA                              | GG                | 1946676135               |
| SNP_P3_165783_10076 | NW_004517215.1 | Scaffold2205 | 10076                   | AA                              | GG                | 1946676136               |
| SNP_P3_165784_10233 | NW_004517215.1 | Scaffold2205 | 10233                   | TT                              | GG                | 1946676137               |
| SNP_P3_165785_10366 | NW_004517215.1 | Scaffold2205 | 10366                   | GG                              | CC                | 1946676138               |
| SNP_P3_165786_10518 | NW_004517215.1 | Scaffold2205 | 10518                   | AA                              | GG                | 1946676139               |
| SNP_P3_165787_10618 | NW_004517215.1 | Scaffold2205 | 10618                   | TT                              | AA                | 1946676140               |
| SNP_P3_165788_14795 | NW_004517215.1 | Scaffold2205 | 14795                   | CC                              | AA                | 1946676141               |
| SNP_P3_165789_15323 | NW_004517215.1 | Scaffold2205 | 15323                   | GG                              | AA                | 1946676142               |
| SNP_P3_165790_15943 | NW_004517215.1 | Scaffold2205 | 15943                   | TT                              | CC                | 1946676143               |
| SNP_P3_165791_16282 | NW_004517215.1 | Scaffold2205 | 16282                   | GG                              | AA                | 1946676144               |
| SNP_P3_165792_16289 | NW_004517215.1 | Scaffold2205 | 16289                   | TT                              | CC                | 1946676145               |
| SNP_P3_165793_16508 | NW_004517215.1 | Scaffold2205 | 16508                   | CC                              | AA                | 1946676146               |
| SNP_P3_165794_20251 | NW_004517215.1 | Scaffold2205 | 20251                   | CC                              | AA                | 1946676147               |
| SNP_P3_165795_20291 | NW_004517215.1 | Scaffold2205 | 20291                   | AA                              | GG                | 1946676148               |
| SNP_P3_165796_21408 | NW_004517215.1 | Scaffold2205 | 21408                   | TT                              | GG                | 1946676149               |
| SNP_P3_165797_21459 | NW_004517215.1 | Scaffold2205 | 21459                   | TT                              | GG                | 1946676150               |
| SNP_P3_165798_22240 | NW_004517215.1 | Scaffold2205 | 22240                   | AA                              | GG                | 1946676151               |
| SNP_P3_165799_23162 | NW_004517215.1 | Scaffold2205 | 23162                   | CC                              | AA                | 1946676152               |
| SNP_P3_165800_23801 | NW_004517215.1 | Scaffold2205 | 23801                   | CC                              | TT                | 1946676153               |
| SNP_P3_165801_24159 | NW_004517215.1 | Scaffold2205 | 24159                   | GG                              | AA                | 1946676154               |
| SNP_P3_165802_24194 | NW_004517215.1 | Scaffold2205 | 24194                   | CC                              | TT                | 1946676155               |
| SNP_P3_165803_24784 | NW_004517215.1 | Scaffold2205 | 24784                   | GG                              | TT                | 1946676156               |
| SNP_P3_165804_27701 | NW_004517215.1 | Scaffold2205 | 27701                   | GG                              | AA                | 1946676157               |
| SNP_P3_165805_27702 | NW_004517215.1 | Scaffold2205 | 27702                   | AA                              | GG                | 1946676158               |
| SNP_P3_165806_29389 | NW_004517215.1 | Scaffold2205 | 29389                   | AA                              | GG                | 1946676159               |
| SNP_P3_165807_29405 | NW_004517215.1 | Scaffold2205 | 29405                   | GG                              | TT                | 1946676160               |

| SNPs IDs            | Chromosome IDs | Chromosomes  | Physical positions (bp) | CDC Frontier (Reference genome) | (Pusa 256 & HPNB) | NCBI SNPdb Accession IDs |
|---------------------|----------------|--------------|-------------------------|---------------------------------|-------------------|--------------------------|
| SNP_P3_165808_29407 | NW_004517215.1 | Scaffold2205 | 29407                   | TT                              | GG                | 1946676161               |
| SNP_P3_165809_29408 | NW_004517215.1 | Scaffold2205 | 29408                   | TT                              | CC                | 1946676162               |
| SNP_P3_165811_37805 | NW_004517215.1 | Scaffold2205 | 37805                   | AA                              | TT                | 1946676163               |
| SNP_P3_165812_37930 | NW_004517215.1 | Scaffold2205 | 37930                   | CC                              | TT                | 1946676164               |
| SNP_P3_165813_38136 | NW_004517215.1 | Scaffold2205 | 38136                   | AA                              | TT                | 1946676165               |
| SNP_P3_165814_38229 | NW_004517215.1 | Scaffold2205 | 38229                   | TT                              | CC                | 1946676166               |
| SNP_P3_165815_38409 | NW_004517215.1 | Scaffold2205 | 38409                   | CC                              | GG                | 1946676167               |
| SNP_P3_165816_38509 | NW_004517215.1 | Scaffold2205 | 38509                   | AA                              | GG                | 1946676168               |
| SNP_P3_165817_38710 | NW_004517215.1 | Scaffold2205 | 38710                   | TT                              | CC                | 1946676169               |
| SNP_P3_165818_43525 | NW_004517215.1 | Scaffold2205 | 43525                   | TT                              | CC                | 1946676170               |
| SNP_P3_165819_43534 | NW_004517215.1 | Scaffold2205 | 43534                   | AA                              | CC                | 1946676171               |
| SNP_P3_165820_43594 | NW_004517215.1 | Scaffold2205 | 43594                   | TT                              | GG                | 1946676172               |
| SNP_P3_165821_47991 | NW_004517215.1 | Scaffold2205 | 47991                   | GG                              | TT                | 1946676173               |
| SNP_P3_165822_48027 | NW_004517215.1 | Scaffold2205 | 48027                   | GG                              | AA                | 1946676174               |
| SNP_P3_165823_48332 | NW_004517215.1 | Scaffold2205 | 48332                   | CC                              | TT                | 1946676175               |
| SNP_P3_165824_48458 | NW_004517215.1 | Scaffold2205 | 48458                   | AA                              | TT                | 1946676176               |
| SNP_P3_165825_48485 | NW_004517215.1 | Scaffold2205 | 48485                   | AA                              | GG                | 1946676177               |
| SNP_P3_165826_48646 | NW_004517215.1 | Scaffold2205 | 48646                   | GG                              | CC                | 1946676178               |
| SNP_P3_165827_48679 | NW_004517215.1 | Scaffold2205 | 48679                   | CC                              | TT                | 1946676179               |
| SNP_P3_165828_48756 | NW_004517215.1 | Scaffold2205 | 48756                   | AA                              | GG                | 1946676180               |
| SNP_P3_165829_48860 | NW_004517215.1 | Scaffold2205 | 48860                   | GG                              | AA                | 1946676181               |
| SNP_P3_165830_49044 | NW_004517215.1 | Scaffold2205 | 49044                   | CC                              | GG                | 1946676182               |
| SNP_P3_165831_49070 | NW_004517215.1 | Scaffold2205 | 49070                   | TT                              | CC                | 1946676183               |
| SNP_P3_165832_49093 | NW_004517215.1 | Scaffold2205 | 49093                   | TT                              | CC                | 1946676184               |
| SNP_P3_165833_49096 | NW_004517215.1 | Scaffold2205 | 49096                   | TT                              | CC                | 1946676185               |
| SNP_P3_165835_49167 | NW_004517215.1 | Scaffold2205 | 49167                   | TT                              | CC                | 1946676186               |
| SNP_P3_165836_49205 | NW_004517215.1 | Scaffold2205 | 49205                   | CC                              | AA                | 1946676187               |
| SNP_P3_165837_669   | NW_004517217.1 | Scaffold2207 | 669                     | CC                              | GG                | 1946676188               |
| SNP_P3_165838_704   | NW_004517217.1 | Scaffold2207 | 704                     | CC                              | TT                | 1946676189               |
| SNP_P3_165839_711   | NW_004517217.1 | Scaffold2207 | 711                     | TT                              | AA                | 1946676190               |
| SNP_P3_165840_715   | NW_004517217.1 | Scaffold2207 | 715                     | TT                              | AA                | 1946676191               |
| SNP_P3_165841_786   | NW_004517217.1 | Scaffold2207 | 786                     | GG                              | CC                | 1946676192               |
| SNP_P3_165842_824   | NW_004517217.1 | Scaffold2207 | 824                     | AA                              | GG                | 1946676193               |
| SNP_P3_165843_829   | NW_004517217.1 | Scaffold2207 | 829                     | CC                              | AA                | 1946676194               |
| SNP_P3_165844_830   | NW_004517217.1 | Scaffold2207 | 830                     | GG                              | TT                | 1946676195               |
| SNP_P3_165845_834   | NW_004517217.1 | Scaffold2207 | 834                     | CC                              | TT                | 1946676196               |
| SNP_P3_165846_835   | NW_004517217.1 | Scaffold2207 | 835                     | AA                              | GG                | 1946676197               |
| SNP_P3_165847_1018  | NW_004517217.1 | Scaffold2207 | 1018                    | AA                              | GG                | 1946676198               |
| SNP_P3_165848_1023  | NW_004517217.1 | Scaffold2207 | 1023                    | CC                              | AA                | 1946676199               |
| SNP_P3_165849_1043  | NW_004517217.1 | Scaffold2207 | 1043                    | TT                              | CC                | 1946676200               |
| SNP_P3_165850_1050  | NW_004517217.1 | Scaffold2207 | 1050                    | GG                              | TT                | 1946676201               |
| SNP_P3_165851_1056  | NW_004517217.1 | Scaffold2207 | 1056                    | TT                              | CC                | 1946676202               |

| SNPs IDs            | Chromosome IDs | Chromosomes  | Physical positions (bp) | CDC Frontier (Reference genome) | (Pusa 256 & HPNB) | NCBI SNPdb Accession IDs |
|---------------------|----------------|--------------|-------------------------|---------------------------------|-------------------|--------------------------|
| SNP_P3_165852_1094  | NW_004517217.1 | Scaffold2207 | 1094                    | CC                              | TT                | 1946676203               |
| SNP_P3_165853_1124  | NW_004517217.1 | Scaffold2207 | 1124                    | TT                              | AA                | 1946676204               |
| SNP_P3_165854_1233  | NW_004517217.1 | Scaffold2207 | 1233                    | GG                              | TT                | 1946676205               |
| SNP_P3_165855_1589  | NW_004517217.1 | Scaffold2207 | 1589                    | GG                              | CC                | 1946676206               |
| SNP_P3_165856_4518  | NW_004517218.1 | Scaffold2208 | 4518                    | GG                              | CC                | 1946676207               |
| SNP_P3_165857_4745  | NW_004517218.1 | Scaffold2208 | 4745                    | TT                              | CC                | 1946676208               |
| SNP_P3_165858_5008  | NW_004517218.1 | Scaffold2208 | 5008                    | TT                              | CC                | 1946676209               |
| SNP_P3_165861_5278  | NW_004517218.1 | Scaffold2208 | 5278                    | CC                              | TT                | 1946676210               |
| SNP_P3_165862_5433  | NW_004517218.1 | Scaffold2208 | 5433                    | AA                              | TT                | 1946676211               |
| SNP_P3_165863_5943  | NW_004517218.1 | Scaffold2208 | 5943                    | GG                              | CC                | 1946676212               |
| SNP_P3_165864_6281  | NW_004517218.1 | Scaffold2208 | 6281                    | AA                              | GG                | 1946676213               |
| SNP_P3_165865_6712  | NW_004517218.1 | Scaffold2208 | 6712                    | TT                              | CC                | 1946676214               |
| SNP_P3_165866_6907  | NW_004517218.1 | Scaffold2208 | 6907                    | AA                              | GG                | 1946676215               |
| SNP_P3_165867_7108  | NW_004517218.1 | Scaffold2208 | 7108                    | AA                              | CC                | 1946676216               |
| SNP_P3_165868_7192  | NW_004517218.1 | Scaffold2208 | 7192                    | GG                              | CC                | 1946676217               |
| SNP_P3_165869_7200  | NW_004517218.1 | Scaffold2208 | 7200                    | TT                              | GG                | 1946676218               |
| SNP_P3_165870_8114  | NW_004517218.1 | Scaffold2208 | 8114                    | AA                              | CC                | 1946676219               |
| SNP_P3_165871_8289  | NW_004517218.1 | Scaffold2208 | 8289                    | AA                              | TT                | 1946676220               |
| SNP_P3_165872_8352  | NW_004517218.1 | Scaffold2208 | 8352                    | CC                              | TT                | 1946676221               |
| SNP_P3_165873_8432  | NW_004517218.1 | Scaffold2208 | 8432                    | AA                              | CC                | 1946676222               |
| SNP_P3_165874_9424  | NW_004517218.1 | Scaffold2208 | 9424                    | TT                              | AA                | 1946676223               |
| SNP_P3_165875_9693  | NW_004517218.1 | Scaffold2208 | 9693                    | AA                              | CC                | 1946676224               |
| SNP_P3_165876_9893  | NW_004517218.1 | Scaffold2208 | 9893                    | GG                              | TT                | 1946676225               |
| SNP_P3_165877_9986  | NW_004517218.1 | Scaffold2208 | 9986                    | GG                              | AA                | 1946676226               |
| SNP_P3_165878_10099 | NW_004517218.1 | Scaffold2208 | 10099                   | CC                              | TT                | 1946676227               |
| SNP_P3_165880_10416 | NW_004517218.1 | Scaffold2208 | 10416                   | CC                              | AA                | 1946676228               |
| SNP_P3_165881_10470 | NW_004517218.1 | Scaffold2208 | 10470                   | CC                              | AA                | 1946676229               |
| SNP_P3_165882_10560 | NW_004517218.1 | Scaffold2208 | 10560                   | CC                              | GG                | 1946676230               |
| SNP_P3_165883_10678 | NW_004517218.1 | Scaffold2208 | 10678                   | GG                              | TT                | 1946676231               |
| SNP_P3_165884_10689 | NW_004517218.1 | Scaffold2208 | 10689                   | GG                              | AA                | 1946676232               |
| SNP_P3_165885_15598 | NW_004517218.1 | Scaffold2208 | 15598                   | GG                              | CC                | 1946676233               |
| SNP_P3_165886_16019 | NW_004517218.1 | Scaffold2208 | 16019                   | GG                              | CC                | 1946676234               |
| SNP_P3_165887_16248 | NW_004517218.1 | Scaffold2208 | 16248                   | CC                              | TT                | 1946676235               |
| SNP_P3_165888_18835 | NW_004517218.1 | Scaffold2208 | 18835                   | AA                              | GG                | 1946676236               |
| SNP_P3_165890_18880 | NW_004517218.1 | Scaffold2208 | 18880                   | AA                              | GG                | 1946676237               |
| SNP_P3_165891_18910 | NW_004517218.1 | Scaffold2208 | 18910                   | TT                              | AA                | 1946676238               |
| SNP_P3_165892_19178 | NW_004517218.1 | Scaffold2208 | 19178                   | AA                              | TT                | 1946676239               |
| SNP_P3_165893_19894 | NW_004517218.1 | Scaffold2208 | 19894                   | AA                              | GG                | 1946676240               |
| SNP_P3_165894_19895 | NW_004517218.1 | Scaffold2208 | 19895                   | GG                              | CC                | 1946676241               |
| SNP_P3_165896_20387 | NW_004517218.1 | Scaffold2208 | 20387                   | AA                              | TT                | 1946676242               |
| SNP_P3_165897_20929 | NW_004517218.1 | Scaffold2208 | 20929                   | AA                              | GG                | 1946676243               |
| SNP_P3_165898_20963 | NW_004517218.1 | Scaffold2208 | 20963                   | TT                              | AA                | 1946676244               |

| SNPs IDs            | Chromosome IDs | Chromosomes  | Physical positions (bp) | CDC Frontier (Reference genome) | (Pusa 256 & HPNB) | NCBI SNPdb Accession IDs |
|---------------------|----------------|--------------|-------------------------|---------------------------------|-------------------|--------------------------|
| SNP_P3_165899_21019 | NW_004517218.1 | Scaffold2208 | 21019                   | TT                              | CC                | 1946676245               |
| SNP_P3_165900_21411 | NW_004517218.1 | Scaffold2208 | 21411                   | GG                              | AA                | 1946676246               |
| SNP_P3_165901_21484 | NW_004517218.1 | Scaffold2208 | 21484                   | TT                              | CC                | 1946676247               |
| SNP_P3_165902_23542 | NW_004517218.1 | Scaffold2208 | 23542                   | GG                              | AA                | 1946676248               |
| SNP_P3_165903_1818  | NW_004517219.1 | Scaffold2209 | 1818                    | CC                              | TT                | 1946676249               |
| SNP_P3_165904_1850  | NW_004517219.1 | Scaffold2209 | 1850                    | CC                              | TT                | 1946676250               |
| SNP_P3_165905_1869  | NW_004517219.1 | Scaffold2209 | 1869                    | TT                              | AA                | 1946676251               |
| SNP_P3_165906_2310  | NW_004517219.1 | Scaffold2209 | 2310                    | AA                              | CC                | 1946676252               |
| SNP_P3_165907_2311  | NW_004517219.1 | Scaffold2209 | 2311                    | TT                              | CC                | 1946676253               |
| SNP_P3_165908_2314  | NW_004517219.1 | Scaffold2209 | 2314                    | TT                              | CC                | 1946676254               |
| SNP_P3_165909_64    | NW_004517220.1 | Scaffold2210 | 64                      | AA                              | TT                | 1946676255               |
| SNP_P3_165910_371   | NW_004517220.1 | Scaffold2210 | 371                     | AA                              | TT                | 1946676256               |
| SNP_P3_165911_397   | NW_004517220.1 | Scaffold2210 | 397                     | AA                              | GG                | 1946676257               |
| SNP_P3_165912_434   | NW_004517220.1 | Scaffold2210 | 434                     | CC                              | TT                | 1946676258               |
| SNP_P3_165913_912   | NW_004517220.1 | Scaffold2210 | 912                     | TT                              | GG                | 1946676259               |
| SNP_P3_165914_1174  | NW_004517220.1 | Scaffold2210 | 1174                    | AA                              | TT                | 1946676260               |
| SNP_P3_165915_1236  | NW_004517220.1 | Scaffold2210 | 1236                    | AA                              | GG                | 1946676261               |
| SNP_P3_165916_5860  | NW_004517220.1 | Scaffold2210 | 5860                    | GG                              | AA                | 1946676262               |
| SNP_P3_165917_7168  | NW_004517220.1 | Scaffold2210 | 7168                    | CC                              | TT                | 1946676263               |
| SNP_P3_165918_7205  | NW_004517220.1 | Scaffold2210 | 7205                    | GG                              | AA                | 1946676264               |
| SNP_P3_165919_7447  | NW_004517220.1 | Scaffold2210 | 7447                    | TT                              | CC                | 1946676265               |
| SNP_P3_165920_7458  | NW_004517220.1 | Scaffold2210 | 7458                    | GG                              | AA                | 1946676266               |
| SNP_P3_165921_7551  | NW_004517220.1 | Scaffold2210 | 7551                    | GG                              | AA                | 1946676267               |
| SNP_P3_165922_7654  | NW_004517220.1 | Scaffold2210 | 7654                    | AA                              | GG                | 1946676268               |
| SNP_P3_165923_7742  | NW_004517220.1 | Scaffold2210 | 7742                    | GG                              | CC                | 1946676269               |
| SNP_P3_165924_7823  | NW_004517220.1 | Scaffold2210 | 7823                    | CC                              | AA                | 1946676270               |
| SNP_P3_165925_7842  | NW_004517220.1 | Scaffold2210 | 7842                    | GG                              | CC                | 1946676271               |
| SNP_P3_165926_7844  | NW_004517220.1 | Scaffold2210 | 7844                    | GG                              | AA                | 1946676272               |
| SNP_P3_165927_7847  | NW_004517220.1 | Scaffold2210 | 7847                    | CC                              | TT                | 1946676273               |
| SNP_P3_165928_8048  | NW_004517220.1 | Scaffold2210 | 8048                    | TT                              | GG                | 1946676274               |
| SNP_P3_165929_8079  | NW_004517220.1 | Scaffold2210 | 8079                    | TT                              | AA                | 1946676275               |
| SNP_P3_165930_8122  | NW_004517220.1 | Scaffold2210 | 8122                    | TT                              | CC                | 1946676276               |
| SNP_P3_165931_14602 | NW_004517220.1 | Scaffold2210 | 14602                   | GG                              | AA                | 1946676277               |
| SNP_P3_165932_14789 | NW_004517220.1 | Scaffold2210 | 14789                   | TT                              | CC                | 1946676278               |
| SNP_P3_165933_14858 | NW_004517220.1 | Scaffold2210 | 14858                   | TT                              | CC                | 1946676279               |
| SNP_P3_165934_14969 | NW_004517220.1 | Scaffold2210 | 14969                   | TT                              | GG                | 1946676280               |
| SNP_P3_165935_15142 | NW_004517220.1 | Scaffold2210 | 15142                   | AA                              | GG                | 1946676281               |
| SNP_P3_165936_15168 | NW_004517220.1 | Scaffold2210 | 15168                   | GG                              | TT                | 1946676282               |
| SNP_P3_165938_15240 | NW_004517220.1 | Scaffold2210 | 15240                   | AA                              | CC                | 1946676283               |
| SNP_P3_165939_15281 | NW_004517220.1 | Scaffold2210 | 15281                   | AA                              | GG                | 1946676284               |
| SNP_P3_165940_15581 | NW_004517220.1 | Scaffold2210 | 15581                   | CC                              | TT                | 1946676285               |
| SNP_P3_165941_18310 | NW_004517220.1 | Scaffold2210 | 18310                   | TT                              | GG                | 1946676286               |

| SNPs IDs            | Chromosome IDs | Chromosomes  | Physical positions (bp) | CDC Frontier (Reference genome) | (Pusa 256 & HPNB) | NCBI SNPdb Accession IDs |
|---------------------|----------------|--------------|-------------------------|---------------------------------|-------------------|--------------------------|
| SNP_P3_165942_20915 | NW_004517220.1 | Scaffold2210 | 20915                   | GG                              | AA                | 1946676287               |
| SNP_P3_165943_21693 | NW_004517220.1 | Scaffold2210 | 21693                   | TT                              | CC                | 1946676288               |
| SNP_P3_165944_21910 | NW_004517220.1 | Scaffold2210 | 21910                   | TT                              | AA                | 1946676289               |
| SNP_P3_165945_21915 | NW_004517220.1 | Scaffold2210 | 21915                   | TT                              | GG                | 1946676290               |
| SNP_P3_165946_22578 | NW_004517220.1 | Scaffold2210 | 22578                   | AA                              | CC                | 1946676291               |
| SNP_P3_165947_22593 | NW_004517220.1 | Scaffold2210 | 22593                   | CC                              | TT                | 1946676292               |
| SNP_P3_165948_22713 | NW_004517220.1 | Scaffold2210 | 22713                   | CC                              | TT                | 1946676293               |
| SNP_P3_165949_22716 | NW_004517220.1 | Scaffold2210 | 22716                   | TT                              | GG                | 1946676294               |
| SNP_P3_165950_22804 | NW_004517220.1 | Scaffold2210 | 22804                   | CC                              | TT                | 1946676295               |
| SNP_P3_165951_22805 | NW_004517220.1 | Scaffold2210 | 22805                   | GG                              | AA                | 1946676296               |
| SNP_P3_165952_22811 | NW_004517220.1 | Scaffold2210 | 22811                   | CC                              | AA                | 1946676297               |
| SNP_P3_165953_22850 | NW_004517220.1 | Scaffold2210 | 22850                   | CC                              | GG                | 1946676298               |
| SNP_P3_165954_22909 | NW_004517220.1 | Scaffold2210 | 22909                   | CC                              | TT                | 1946676299               |
| SNP_P3_165955_27831 | NW_004517220.1 | Scaffold2210 | 27831                   | TT                              | CC                | 1946676300               |
| SNP_P3_165956_27940 | NW_004517220.1 | Scaffold2210 | 27940                   | CC                              | GG                | 1946676301               |
| SNP_P3_165957_27963 | NW_004517220.1 | Scaffold2210 | 27963                   | TT                              | GG                | 1946676302               |
| SNP_P3_165958_28711 | NW_004517220.1 | Scaffold2210 | 28711                   | AA                              | TT                | 1946676303               |
| SNP_P3_165959_28870 | NW_004517220.1 | Scaffold2210 | 28870                   | CC                              | TT                | 1946676304               |
| SNP_P3_165960_28960 | NW_004517220.1 | Scaffold2210 | 28960                   | TT                              | GG                | 1946676305               |
| SNP_P3_165961_29005 | NW_004517220.1 | Scaffold2210 | 29005                   | TT                              | AA                | 1946676306               |
| SNP_P3_165962_31192 | NW_004517220.1 | Scaffold2210 | 31192                   | AA                              | CC                | 1946676307               |
| SNP_P3_165963_31289 | NW_004517220.1 | Scaffold2210 | 31289                   | AA                              | GG                | 1946676308               |
| SNP_P3_165964_31348 | NW_004517220.1 | Scaffold2210 | 31348                   | AA                              | CC                | 1946676309               |
| SNP_P3_165965_31451 | NW_004517220.1 | Scaffold2210 | 31451                   | TT                              | GG                | 1946676310               |
| SNP_P3_165966_31456 | NW_004517220.1 | Scaffold2210 | 31456                   | CC                              | GG                | 1946676311               |
| SNP_P3_165967_31533 | NW_004517220.1 | Scaffold2210 | 31533                   | TT                              | CC                | 1946676312               |
| SNP_P3_165968_31555 | NW_004517220.1 | Scaffold2210 | 31555                   | TT                              | AA                | 1946676313               |
| SNP_P3_165969_31930 | NW_004517220.1 | Scaffold2210 | 31930                   | GG                              | AA                | 1946676314               |
| SNP_P3_165970_31936 | NW_004517220.1 | Scaffold2210 | 31936                   | TT                              | AA                | 1946676315               |
| SNP_P3_165971_34034 | NW_004517220.1 | Scaffold2210 | 34034                   | CC                              | TT                | 1946676316               |
| SNP_P3_165972_34041 | NW_004517220.1 | Scaffold2210 | 34041                   | GG                              | AA                | 1946676317               |
| SNP_P3_165973_34142 | NW_004517220.1 | Scaffold2210 | 34142                   | GG                              | AA                | 1946676318               |
| SNP_P3_165974_34147 | NW_004517220.1 | Scaffold2210 | 34147                   | AA                              | CC                | 1946676319               |
| SNP_P3_165975_34385 | NW_004517220.1 | Scaffold2210 | 34385                   | AA                              | CC                | 1946676320               |
| SNP_P3_165976_34398 | NW_004517220.1 | Scaffold2210 | 34398                   | TT                              | AA                | 1946676321               |
| SNP_P3_165977_34687 | NW_004517220.1 | Scaffold2210 | 34687                   | AA                              | CC                | 1946676322               |
| SNP_P3_165978_34704 | NW_004517220.1 | Scaffold2210 | 34704                   | GG                              | TT                | 1946676323               |
| SNP_P3_165979_34753 | NW_004517220.1 | Scaffold2210 | 34753                   | AA                              | TT                | 1946676324               |
| SNP_P3_165980_34761 | NW_004517220.1 | Scaffold2210 | 34761                   | AA                              | GG                | 1946676325               |
| SNP_P3_165981_35034 | NW_004517220.1 | Scaffold2210 | 35034                   | AA                              | GG                | 1946676326               |
| SNP_P3_165982_36016 | NW_004517220.1 | Scaffold2210 | 36016                   | GG                              | AA                | 1946676327               |
| SNP_P3_165983_36082 | NW_004517220.1 | Scaffold2210 | 36082                   | AA                              | CC                | 1946676328               |

| SNPs IDs            | Chromosome IDs | Chromosomes  | Physical positions (bp) | CDC Frontier (Reference genome) | (Pusa 256 & HPNB) | NCBI SNPdb Accession IDs |
|---------------------|----------------|--------------|-------------------------|---------------------------------|-------------------|--------------------------|
| SNP_P3_165984_36167 | NW_004517220.1 | Scaffold2210 | 36167                   | AA                              | TT                | 1946676329               |
| SNP_P3_165986_36207 | NW_004517220.1 | Scaffold2210 | 36207                   | TT                              | AA                | 1946676330               |
| SNP_P3_165987_36346 | NW_004517220.1 | Scaffold2210 | 36346                   | GG                              | TT                | 1946676331               |
| SNP_P3_165988_36355 | NW_004517220.1 | Scaffold2210 | 36355                   | AA                              | GG                | 1946676332               |
| SNP_P3_165989_36360 | NW_004517220.1 | Scaffold2210 | 36360                   | TT                              | GG                | 1946676333               |
| SNP_P3_165990_36361 | NW_004517220.1 | Scaffold2210 | 36361                   | GG                              | TT                | 1946676334               |
| SNP_P3_165991_55167 | NW_004517220.1 | Scaffold2210 | 55167                   | GG                              | AA                | 1946676335               |
| SNP_P3_165992_55176 | NW_004517220.1 | Scaffold2210 | 55176                   | TT                              | AA                | 1946676336               |
| SNP_P3_165993_55226 | NW_004517220.1 | Scaffold2210 | 55226                   | CC                              | AA                | 1946676337               |
| SNP_P3_165994_55230 | NW_004517220.1 | Scaffold2210 | 55230                   | AA                              | TT                | 1946676338               |
| SNP_P3_165995_55817 | NW_004517220.1 | Scaffold2210 | 55817                   | AA                              | GG                | 1946676339               |
| SNP_P3_165996_55922 | NW_004517220.1 | Scaffold2210 | 55922                   | AA                              | CC                | 1946676340               |
| SNP_P3_165997_55984 | NW_004517220.1 | Scaffold2210 | 55984                   | TT                              | AA                | 1946676341               |
| SNP_P3_165998_56046 | NW_004517220.1 | Scaffold2210 | 56046                   | AA                              | GG                | 1946676342               |
| SNP_P3_165999_57331 | NW_004517220.1 | Scaffold2210 | 57331                   | TT                              | CC                | 1946676343               |
| SNP_P3_166000_57352 | NW_004517220.1 | Scaffold2210 | 57352                   | CC                              | TT                | 1946676344               |
| SNP_P3_166001_57543 | NW_004517220.1 | Scaffold2210 | 57543                   | GG                              | AA                | 1946676345               |
| SNP_P3_166002_57579 | NW_004517220.1 | Scaffold2210 | 57579                   | CC                              | TT                | 1946676346               |
| SNP_P3_166003_57645 | NW_004517220.1 | Scaffold2210 | 57645                   | AA                              | GG                | 1946676347               |
| SNP_P3_166004_57682 | NW_004517220.1 | Scaffold2210 | 57682                   | TT                              | GG                | 1946676348               |
| SNP_P3_166005_58470 | NW_004517220.1 | Scaffold2210 | 58470                   | AA                              | GG                | 1946676349               |
| SNP_P3_166006_58481 | NW_004517220.1 | Scaffold2210 | 58481                   | CC                              | GG                | 1946676350               |
| SNP_P3_166007_60143 | NW_004517220.1 | Scaffold2210 | 60143                   | TT                              | GG                | 1946676351               |
| SNP_P3_166008_60257 | NW_004517220.1 | Scaffold2210 | 60257                   | CC                              | GG                | 1946676352               |
| SNP_P3_166009_60280 | NW_004517220.1 | Scaffold2210 | 60280                   | TT                              | GG                | 1946676353               |
| SNP_P3_166010_60545 | NW_004517220.1 | Scaffold2210 | 60545                   | AA                              | TT                | 1946676354               |
| SNP_P3_166011_60558 | NW_004517220.1 | Scaffold2210 | 60558                   | AA                              | CC                | 1946676355               |
| SNP_P3_166012_60894 | NW_004517220.1 | Scaffold2210 | 60894                   | GG                              | AA                | 1946676356               |
| SNP_P3_166013_60897 | NW_004517220.1 | Scaffold2210 | 60897                   | AA                              | GG                | 1946676357               |
| SNP_P3_166015_62567 | NW_004517220.1 | Scaffold2210 | 62567                   | TT                              | AA                | 1946676358               |
| SNP_P3_166016_62744 | NW_004517220.1 | Scaffold2210 | 62744                   | TT                              | CC                | 1946676359               |
| SNP_P3_166017_62879 | NW_004517220.1 | Scaffold2210 | 62879                   | AA                              | CC                | 1946676360               |
| SNP_P3_166018_63046 | NW_004517220.1 | Scaffold2210 | 63046                   | CC                              | TT                | 1946676361               |
| SNP_P3_166019_63138 | NW_004517220.1 | Scaffold2210 | 63138                   | CC                              | TT                | 1946676362               |
| SNP_P3_166020_63154 | NW_004517220.1 | Scaffold2210 | 63154                   | GG                              | CC                | 1946676363               |
| SNP_P3_166021_63171 | NW_004517220.1 | Scaffold2210 | 63171                   | TT                              | CC                | 1946676364               |
| SNP_P3_166022_63262 | NW_004517220.1 | Scaffold2210 | 63262                   | GG                              | AA                | 1946676365               |
| SNP_P3_166023_63789 | NW_004517220.1 | Scaffold2210 | 63789                   | CC                              | TT                | 1946676366               |
| SNP_P3_166024_63802 | NW_004517220.1 | Scaffold2210 | 63802                   | TT                              | CC                | 1946676367               |
| SNP_P3_166025_63863 | NW_004517220.1 | Scaffold2210 | 63863                   | CC                              | TT                | 1946676368               |
| SNP_P3_166026_65748 | NW_004517220.1 | Scaffold2210 | 65748                   | TT                              | GG                | 1946676369               |
| SNP_P3_166027_65998 | NW_004517220.1 | Scaffold2210 | 65998                   | TT                              | CC                | 1946676370               |

| SNPs IDs            | Chromosome IDs | Chromosomes  | Physical positions (bp) | CDC Frontier (Reference genome) | (Pusa 256 & HPNB) | NCBI SNPdb Accession IDs |
|---------------------|----------------|--------------|-------------------------|---------------------------------|-------------------|--------------------------|
| SNP_P3_166028_66083 | NW_004517220.1 | Scaffold2210 | 66083                   | GG                              | CC                | 1946676371               |
| SNP_P3_166029_66094 | NW_004517220.1 | Scaffold2210 | 66094                   | GG                              | TT                | 1946676372               |
| SNP_P3_166030_66247 | NW_004517220.1 | Scaffold2210 | 66247                   | TT                              | AA                | 1946676373               |
| SNP_P3_166031_66398 | NW_004517220.1 | Scaffold2210 | 66398                   | GG                              | AA                | 1946676374               |
| SNP_P3_166032_66450 | NW_004517220.1 | Scaffold2210 | 66450                   | AA                              | TT                | 1946676375               |
| SNP_P3_166033_70162 | NW_004517220.1 | Scaffold2210 | 70162                   | CC                              | TT                | 1946676376               |
| SNP_P3_166034_71295 | NW_004517220.1 | Scaffold2210 | 71295                   | CC                              | TT                | 1946676377               |
| SNP_P3_166035_71594 | NW_004517220.1 | Scaffold2210 | 71594                   | GG                              | AA                | 1946676378               |
| SNP_P3_166036_71630 | NW_004517220.1 | Scaffold2210 | 71630                   | TT                              | GG                | 1946676379               |
| SNP_P3_166037_72009 | NW_004517220.1 | Scaffold2210 | 72009                   | GG                              | AA                | 1946676380               |
| SNP_P3_166038_72110 | NW_004517220.1 | Scaffold2210 | 72110                   | TT                              | CC                | 1946676381               |
| SNP_P3_166039_72543 | NW_004517220.1 | Scaffold2210 | 72543                   | TT                              | AA                | 1946676382               |
| SNP_P3_166040_72610 | NW_004517220.1 | Scaffold2210 | 72610                   | AA                              | GG                | 1946676383               |
| SNP_P3_166041_72684 | NW_004517220.1 | Scaffold2210 | 72684                   | AA                              | GG                | 1946676384               |
| SNP_P3_166042_72698 | NW_004517220.1 | Scaffold2210 | 72698                   | TT                              | CC                | 1946676385               |
| SNP_P3_166043_72913 | NW_004517220.1 | Scaffold2210 | 72913                   | CC                              | GG                | 1946676386               |
| SNP_P3_166044_3556  | NW_004517223.1 | Scaffold2214 | 3556                    | AA                              | TT                | 1946676387               |
| SNP_P3_166045_10814 | NW_004517223.1 | Scaffold2214 | 10814                   | AA                              | CC                | 1946676388               |
| SNP_P3_166046_18878 | NW_004517223.1 | Scaffold2214 | 18878                   | TT                              | GG                | 1946676389               |
| SNP_P3_166047_18881 | NW_004517223.1 | Scaffold2214 | 18881                   | GG                              | AA                | 1946676390               |
| SNP_P3_166048_19087 | NW_004517223.1 | Scaffold2214 | 19087                   | TT                              | AA                | 1946676391               |
| SNP_P3_166049_21054 | NW_004517223.1 | Scaffold2214 | 21054                   | AA                              | CC                | 1946676392               |
| SNP_P3_166050_21061 | NW_004517223.1 | Scaffold2214 | 21061                   | TT                              | GG                | 1946676393               |
| SNP_P3_166051_21406 | NW_004517223.1 | Scaffold2214 | 21406                   | GG                              | CC                | 1946676394               |
| SNP_P3_166052_1051  | NW_004517224.1 | Scaffold2216 | 1051                    | CC                              | TT                | 1946676395               |
| SNP_P3_166053_1072  | NW_004517224.1 | Scaffold2216 | 1072                    | GG                              | CC                | 1946676396               |
| SNP_P3_166054_9487  | NW_004517224.1 | Scaffold2216 | 9487                    | GG                              | AA                | 1946676397               |
| SNP_P3_166055_9491  | NW_004517224.1 | Scaffold2216 | 9491                    | TT                              | CC                | 1946676398               |
| SNP_P3_166056_9527  | NW_004517224.1 | Scaffold2216 | 9527                    | CC                              | GG                | 1946676399               |
| SNP_P3_166057_9921  | NW_004517224.1 | Scaffold2216 | 9921                    | AA                              | GG                | 1946676400               |
| SNP_P3_166058_9925  | NW_004517224.1 | Scaffold2216 | 9925                    | TT                              | CC                | 1946676401               |
| SNP_P3_166059_9964  | NW_004517224.1 | Scaffold2216 | 9964                    | GG                              | AA                | 1946676402               |
| SNP_P3_166060_21207 | NW_004517224.1 | Scaffold2216 | 21207                   | GG                              | TT                | 1946676403               |
| SNP_P3_166061_21265 | NW_004517224.1 | Scaffold2216 | 21265                   | TT                              | CC                | 1946676404               |
| SNP_P3_166062_21275 | NW_004517224.1 | Scaffold2216 | 21275                   | CC                              | TT                | 1946676405               |
| SNP_P3_166063_32103 | NW_004517224.1 | Scaffold2216 | 32103                   | GG                              | TT                | 1946676406               |
| SNP_P3_166064_32109 | NW_004517224.1 | Scaffold2216 | 32109                   | AA                              | TT                | 1946676407               |
| SNP_P3_166065_42650 | NW_004517224.1 | Scaffold2216 | 42650                   | TT                              | CC                | 1946676408               |
| SNP_P3_166066_1354  | NW_004517226.1 | Scaffold2218 | 1354                    | TT                              | AA                | 1946676409               |
| SNP_P3_166067_1608  | NW_004517226.1 | Scaffold2218 | 1608                    | CC                              | TT                | 1946676410               |
| SNP_P3_166068_1610  | NW_004517226.1 | Scaffold2218 | 1610                    | GG                              | AA                | 1946676411               |
| SNP_P3_166069_1685  | NW_004517226.1 | Scaffold2218 | 1685                    | AA                              | CC                | 1946676412               |



| SNPs IDs            | Chromosome IDs | Chromosomes  | Physical positions (bp) | CDC Frontier (Reference genome) | (Pusa 256 & HPNB) | NCBI SNPdb Accession IDs |
|---------------------|----------------|--------------|-------------------------|---------------------------------|-------------------|--------------------------|
| SNP_P3_166070_1740  | NW_004517226.1 | Scaffold2218 | 1740                    | TT                              | CC                | 1946676413               |
| SNP_P3_166071_1741  | NW_004517226.1 | Scaffold2218 | 1741                    | TT                              | AA                | 1946676414               |
| SNP_P3_166072_2873  | NW_004517226.1 | Scaffold2218 | 2873                    | TT                              | GG                | 1946676415               |
| SNP_P3_166073_2874  | NW_004517226.1 | Scaffold2218 | 2874                    | GG                              | TT                | 1946676416               |
| SNP_P3_166074_2885  | NW_004517226.1 | Scaffold2218 | 2885                    | CC                              | AA                | 1946676417               |
| SNP_P3_166075_2892  | NW_004517226.1 | Scaffold2218 | 2892                    | GG                              | AA                | 1946676418               |
| SNP_P3_166076_5392  | NW_004517226.1 | Scaffold2218 | 5392                    | TT                              | CC                | 1946676419               |
| SNP_P3_166077_10536 | NW_004517226.1 | Scaffold2218 | 10536                   | CC                              | AA                | 1946676420               |
| SNP_P3_166078_10571 | NW_004517226.1 | Scaffold2218 | 10571                   | TT                              | CC                | 1946676421               |
| SNP_P3_166079_10606 | NW_004517226.1 | Scaffold2218 | 10606                   | GG                              | AA                | 1946676423               |
| SNP_P3_166080_10705 | NW_004517226.1 | Scaffold2218 | 10705                   | AA                              | GG                | 1946676425               |
| SNP_P3_166081_10834 | NW_004517226.1 | Scaffold2218 | 10834                   | AA                              | TT                | 1946676427               |
| SNP_P3_166082_10934 | NW_004517226.1 | Scaffold2218 | 10934                   | GG                              | AA                | 1946676429               |
| SNP_P3_166083_11163 | NW_004517226.1 | Scaffold2218 | 11163                   | TT                              | CC                | 1946676431               |
| SNP_P3_166084_11369 | NW_004517226.1 | Scaffold2218 | 11369                   | AA                              | TT                | 1946676433               |
| SNP_P3_166085_11925 | NW_004517226.1 | Scaffold2218 | 11925                   | GG                              | AA                | 1946676435               |
| SNP_P3_166086_12575 | NW_004517226.1 | Scaffold2218 | 12575                   | GG                              | AA                | 1946676438               |
| SNP_P3_166087_12706 | NW_004517226.1 | Scaffold2218 | 12706                   | TT                              | AA                | 1946676440               |
| SNP_P3_166088_10398 | NW_004517227.1 | Scaffold2219 | 10398                   | CC                              | AA                | 1946676442               |
| SNP_P3_166089_10451 | NW_004517227.1 | Scaffold2219 | 10451                   | TT                              | GG                | 1946676443               |
| SNP_P3_166090_10456 | NW_004517227.1 | Scaffold2219 | 10456                   | AA                              | GG                | 1946676445               |
| SNP_P3_166091_64    | NW_004517228.1 | Scaffold2222 | 64                      | GG                              | TT                | 1946676448               |
| SNP_P3_166092_76    | NW_004517228.1 | Scaffold2222 | 76                      | GG                              | AA                | 1946676450               |
| SNP_P3_166093_91    | NW_004517228.1 | Scaffold2222 | 91                      | AA                              | TT                | 1946676452               |
| SNP_P3_166094_238   | NW_004517228.1 | Scaffold2222 | 238                     | AA                              | TT                | 1946676455               |
| SNP_P3_166095_1030  | NW_004517228.1 | Scaffold2222 | 1030                    | GG                              | AA                | 1946676457               |
| SNP_P3_166096_377   | NW_004517230.1 | Scaffold2225 | 377                     | TT                              | AA                | 1946676459               |
| SNP_P3_166097_701   | NW_004517230.1 | Scaffold2225 | 701                     | AA                              | GG                | 1946676461               |
| SNP_P3_166098_702   | NW_004517230.1 | Scaffold2225 | 702                     | GG                              | AA                | 1946676463               |
| SNP_P3_166099_708   | NW_004517230.1 | Scaffold2225 | 708                     | TT                              | CC                | 1946676465               |
| SNP_P3_166100_752   | NW_004517230.1 | Scaffold2225 | 752                     | TT                              | CC                | 1946676467               |
| SNP_P3_166102_1830  | NW_004517232.1 | Scaffold2227 | 1830                    | AA                              | CC                | 1946676469               |
| SNP_P3_166103_4004  | NW_004517232.1 | Scaffold2227 | 4004                    | CC                              | GG                | 1946676471               |
| SNP_P3_166104_4020  | NW_004517232.1 | Scaffold2227 | 4020                    | CC                              | TT                | 1946676473               |
| SNP_P3_166105_16204 | NW_004517232.1 | Scaffold2227 | 16204                   | AA                              | GG                | 1946676475               |
| SNP_P3_166106_16917 | NW_004517232.1 | Scaffold2227 | 16917                   | CC                              | TT                | 1946676477               |
| SNP_P3_166107_27899 | NW_004517232.1 | Scaffold2227 | 27899                   | GG                              | AA                | 1946676479               |
| SNP_P3_166109_28335 | NW_004517232.1 | Scaffold2227 | 28335                   | CC                              | AA                | 1946676481               |
| SNP_P3_166110_28638 | NW_004517232.1 | Scaffold2227 | 28638                   | TT                              | AA                | 1946676483               |
| SNP_P3_166111_29215 | NW_004517232.1 | Scaffold2227 | 29215                   | GG                              | AA                | 1946676486               |
| SNP_P3_166112_29227 | NW_004517232.1 | Scaffold2227 | 29227                   | AA                              | GG                | 1946676488               |
| SNP_P3_166113_29242 | NW_004517232.1 | Scaffold2227 | 29242                   | AA                              | GG                | 1946676490               |

| SNPs IDs            | Chromosome IDs | Chromosomes  | Physical positions (bp) | CDC Frontier (Reference genome) | (Pusa 256 & HPNB) | NCBI SNPdb Accession IDs |
|---------------------|----------------|--------------|-------------------------|---------------------------------|-------------------|--------------------------|
| SNP_P3_166114_29258 | NW_004517232.1 | Scaffold2227 | 29258                   | CC                              | AA                | 1946676492               |
| SNP_P3_166115_29271 | NW_004517232.1 | Scaffold2227 | 29271                   | TT                              | CC                | 1946676494               |
| SNP_P3_166116_29276 | NW_004517232.1 | Scaffold2227 | 29276                   | CC                              | GG                | 1946676496               |
| SNP_P3_166117_29299 | NW_004517232.1 | Scaffold2227 | 29299                   | CC                              | TT                | 1946676498               |
| SNP_P3_166118_29312 | NW_004517232.1 | Scaffold2227 | 29312                   | TT                              | CC                | 1946676500               |
| SNP_P3_166119_29338 | NW_004517232.1 | Scaffold2227 | 29338                   | AA                              | GG                | 1946676502               |
| SNP_P3_166120_29347 | NW_004517232.1 | Scaffold2227 | 29347                   | AA                              | GG                | 1946676504               |
| SNP_P3_166121_29405 | NW_004517232.1 | Scaffold2227 | 29405                   | TT                              | CC                | 1946676506               |
| SNP_P3_166122_29458 | NW_004517232.1 | Scaffold2227 | 29458                   | GG                              | AA                | 1946676508               |
| SNP_P3_166123_29464 | NW_004517232.1 | Scaffold2227 | 29464                   | TT                              | CC                | 1946676510               |
| SNP_P3_166124_29467 | NW_004517232.1 | Scaffold2227 | 29467                   | TT                              | CC                | 1946676512               |
| SNP_P3_166125_29500 | NW_004517232.1 | Scaffold2227 | 29500                   | AA                              | TT                | 1946676515               |
| SNP_P3_166126_29503 | NW_004517232.1 | Scaffold2227 | 29503                   | GG                              | AA                | 1946676517               |
| SNP_P3_166127_29524 | NW_004517232.1 | Scaffold2227 | 29524                   | TT                              | AA                | 1946676519               |
| SNP_P3_166128_29530 | NW_004517232.1 | Scaffold2227 | 29530                   | AA                              | CC                | 1946676522               |
| SNP_P3_166129_29548 | NW_004517232.1 | Scaffold2227 | 29548                   | AA                              | GG                | 1946676524               |
| SNP_P3_166130_29563 | NW_004517232.1 | Scaffold2227 | 29563                   | TT                              | CC                | 1946676526               |
| SNP_P3_166131_29596 | NW_004517232.1 | Scaffold2227 | 29596                   | CC                              | TT                | 1946676528               |
| SNP_P3_166132_29764 | NW_004517232.1 | Scaffold2227 | 29764                   | GG                              | AA                | 1946676530               |
| SNP_P3_166133_29793 | NW_004517232.1 | Scaffold2227 | 29793                   | GG                              | AA                | 1946676532               |
| SNP_P3_166135_43048 | NW_004517232.1 | Scaffold2227 | 43048                   | CC                              | TT                | 1946676534               |
| SNP_P3_166136_43657 | NW_004517232.1 | Scaffold2227 | 43657                   | GG                              | AA                | 1946676536               |
| SNP_P3_166137_43659 | NW_004517232.1 | Scaffold2227 | 43659                   | AA                              | GG                | 1946676538               |
| SNP_P3_166138_43661 | NW_004517232.1 | Scaffold2227 | 43661                   | GG                              | TT                | 1946676540               |
| SNP_P3_166139_53549 | NW_004517232.1 | Scaffold2227 | 53549                   | GG                              | CC                | 1946676542               |
| SNP_P3_166140_403   | NW_004517236.1 | Scaffold2233 | 403                     | TT                              | CC                | 1946676545               |
| SNP_P3_166141_581   | NW_004517236.1 | Scaffold2233 | 581                     | TT                              | AA                | 1946676547               |
| SNP_P3_166142_688   | NW_004517236.1 | Scaffold2233 | 688                     | GG                              | AA                | 1946676549               |
| SNP_P3_166143_689   | NW_004517236.1 | Scaffold2233 | 689                     | AA                              | GG                | 1946676551               |
| SNP_P3_166144_870   | NW_004517236.1 | Scaffold2233 | 870                     | TT                              | AA                | 1946676553               |
| SNP_P3_166145_408   | NW_004517238.1 | Scaffold2235 | 408                     | TT                              | GG                | 1946676555               |
| SNP_P3_166146_874   | NW_004517238.1 | Scaffold2235 | 874                     | AA                              | TT                | 1946676557               |
| SNP_P3_166148_1811  | NW_004517238.1 | Scaffold2235 | 1811                    | GG                              | AA                | 1946676559               |
| SNP_P3_166149_1542  | NW_004517240.1 | Scaffold2238 | 1542                    | AA                              | CC                | 1946676562               |
| SNP_P3_166150_3496  | NW_004517240.1 | Scaffold2238 | 3496                    | GG                              | AA                | 1946676564               |
| SNP_P3_166151_5933  | NW_004517240.1 | Scaffold2238 | 5933                    | CC                              | AA                | 1946676566               |
| SNP_P3_166152_6565  | NW_004517240.1 | Scaffold2238 | 6565                    | CC                              | TT                | 1946676569               |
| SNP_P3_166153_8430  | NW_004517240.1 | Scaffold2238 | 8430                    | TT                              | AA                | 1946676571               |
| SNP_P3_166154_8756  | NW_004517240.1 | Scaffold2238 | 8756                    | AA                              | CC                | 1946676573               |
| SNP_P3_166155_184   | NW_004517241.1 | Scaffold2239 | 184                     | CC                              | TT                | 1946676575               |
| SNP_P3_166156_604   | NW_004517241.1 | Scaffold2239 | 604                     | AA                              | GG                | 1946676577               |
| SNP_P3_166157_720   | NW_004517241.1 | Scaffold2239 | 720                     | AA                              | CC                | 1946676579               |

| SNPs IDs            | Chromosome IDs | Chromosomes  | Physical positions (bp) | CDC Frontier (Reference genome) | (Pusa 256 & HPNB) | NCBI SNPdb Accession IDs |
|---------------------|----------------|--------------|-------------------------|---------------------------------|-------------------|--------------------------|
| SNP_P3_166158_815   | NW_004517241.1 | Scaffold2239 | 815                     | GG                              | AA                | 1946676581               |
| SNP_P3_166159_972   | NW_004517241.1 | Scaffold2239 | 972                     | AA                              | TT                | 1946676583               |
| SNP_P3_166160_1083  | NW_004517241.1 | Scaffold2239 | 1083                    | AA                              | GG                | 1946676585               |
| SNP_P3_166161_979   | NW_004517242.1 | Scaffold2240 | 979                     | GG                              | CC                | 1946676587               |
| SNP_P3_166162_5828  | NW_004517243.1 | Scaffold2241 | 5828                    | GG                              | AA                | 1946676589               |
| SNP_P3_166163_5857  | NW_004517243.1 | Scaffold2241 | 5857                    | GG                              | AA                | 1946676592               |
| SNP_P3_166164_5892  | NW_004517243.1 | Scaffold2241 | 5892                    | GG                              | AA                | 1946676594               |
| SNP_P3_166165_5916  | NW_004517243.1 | Scaffold2241 | 5916                    | CC                              | GG                | 1946676596               |
| SNP_P3_166167_6260  | NW_004517243.1 | Scaffold2241 | 6260                    | GG                              | CC                | 1946676598               |
| SNP_P3_166168_6285  | NW_004517243.1 | Scaffold2241 | 6285                    | TT                              | CC                | 1946676600               |
| SNP_P3_166169_6524  | NW_004517243.1 | Scaffold2241 | 6524                    | GG                              | CC                | 1946676602               |
| SNP_P3_166170_6574  | NW_004517243.1 | Scaffold2241 | 6574                    | AA                              | CC                | 1946676604               |
| SNP_P3_166171_8228  | NW_004517243.1 | Scaffold2241 | 8228                    | TT                              | GG                | 1946676607               |
| SNP_P3_166172_8235  | NW_004517243.1 | Scaffold2241 | 8235                    | AA                              | TT                | 1946676609               |
| SNP_P3_166173_8516  | NW_004517243.1 | Scaffold2241 | 8516                    | TT                              | AA                | 1946676611               |
| SNP_P3_166174_8539  | NW_004517243.1 | Scaffold2241 | 8539                    | AA                              | TT                | 1946676613               |
| SNP_P3_166175_8541  | NW_004517243.1 | Scaffold2241 | 8541                    | CC                              | GG                | 1946676615               |
| SNP_P3_166176_8549  | NW_004517243.1 | Scaffold2241 | 8549                    | AA                              | TT                | 1946676617               |
| SNP_P3_166177_13226 | NW_004517243.1 | Scaffold2241 | 13226                   | AA                              | GG                | 1946676619               |
| SNP_P3_166178_13235 | NW_004517243.1 | Scaffold2241 | 13235                   | GG                              | CC                | 1946676621               |
| SNP_P3_166179_24528 | NW_004517243.1 | Scaffold2241 | 24528                   | TT                              | AA                | 1946676623               |
| SNP_P3_166180_24860 | NW_004517243.1 | Scaffold2241 | 24860                   | AA                              | GG                | 1946676625               |
| SNP_P3_166181_378   | NW_004517244.1 | Scaffold2243 | 378                     | GG                              | CC                | 1946676627               |
| SNP_P3_166182_647   | NW_004517244.1 | Scaffold2243 | 647                     | AA                              | CC                | 1946676630               |
| SNP_P3_166183_648   | NW_004517244.1 | Scaffold2243 | 648                     | TT                              | CC                | 1946676632               |
| SNP_P3_166184_678   | NW_004517244.1 | Scaffold2243 | 678                     | CC                              | AA                | 1946676634               |
| SNP_P3_166185_797   | NW_004517244.1 | Scaffold2243 | 797                     | CC                              | GG                | 1946676636               |
| SNP_P3_166186_823   | NW_004517244.1 | Scaffold2243 | 823                     | AA                              | GG                | 1946676638               |
| SNP_P3_166187_6035  | NW_004517245.1 | Scaffold2244 | 6035                    | TT                              | CC                | 1946676640               |
| SNP_P3_166188_6071  | NW_004517245.1 | Scaffold2244 | 6071                    | CC                              | AA                | 1946676642               |
| SNP_P3_166189_6162  | NW_004517245.1 | Scaffold2244 | 6162                    | CC                              | TT                | 1946676644               |
| SNP_P3_166190_6173  | NW_004517245.1 | Scaffold2244 | 6173                    | TT                              | CC                | 1946676646               |
| SNP_P3_166191_6404  | NW_004517245.1 | Scaffold2244 | 6404                    | GG                              | AA                | 1946676648               |
| SNP_P3_166192_279   | NW_004517247.1 | Scaffold2247 | 279                     | GG                              | AA                | 1946676650               |
| SNP_P3_166193_316   | NW_004517247.1 | Scaffold2247 | 316                     | GG                              | AA                | 1946676652               |
| SNP_P3_166194_658   | NW_004517248.1 | Scaffold2248 | 658                     | GG                              | AA                | 1946676654               |
| SNP_P3_166195_5836  | NW_004517248.1 | Scaffold2248 | 5836                    | TT                              | GG                | 1946676656               |
| SNP_P3_166196_5863  | NW_004517248.1 | Scaffold2248 | 5863                    | TT                              | CC                | 1946676658               |
| SNP_P3_166197_219   | NW_004517249.1 | Scaffold2249 | 219                     | TT                              | CC                | 1946676660               |
| SNP_P3_166198_334   | NW_004517249.1 | Scaffold2249 | 334                     | AA                              | GG                | 1946676662               |
| SNP_P3_166199_413   | NW_004517249.1 | Scaffold2249 | 413                     | GG                              | TT                | 1946676664               |
| SNP_P3_166200_436   | NW_004517249.1 | Scaffold2249 | 436                     | GG                              | TT                | 1946676665               |

| SNPs IDs            | Chromosome IDs | Chromosomes  | Physical positions (bp) | CDC Frontier (Reference genome) | (Pusa 256 & HPNB) | NCBI SNPdb Accession IDs |
|---------------------|----------------|--------------|-------------------------|---------------------------------|-------------------|--------------------------|
| SNP_P3_166201_450   | NW_004517249.1 | Scaffold2249 | 450                     | CC                              | TT                | 1946676667               |
| SNP_P3_166202_567   | NW_004517249.1 | Scaffold2249 | 567                     | CC                              | TT                | 1946676670               |
| SNP_P3_166203_587   | NW_004517249.1 | Scaffold2249 | 587                     | TT                              | CC                | 1946676672               |
| SNP_P3_166204_609   | NW_004517249.1 | Scaffold2249 | 609                     | CC                              | TT                | 1946676674               |
| SNP_P3_166205_627   | NW_004517249.1 | Scaffold2249 | 627                     | CC                              | TT                | 1946676676               |
| SNP_P3_166206_776   | NW_004517249.1 | Scaffold2249 | 776                     | TT                              | AA                | 1946676678               |
| SNP_P3_166207_793   | NW_004517249.1 | Scaffold2249 | 793                     | CC                              | TT                | 1946676680               |
| SNP_P3_166208_930   | NW_004517249.1 | Scaffold2249 | 930                     | CC                              | TT                | 1946676682               |
| SNP_P3_166209_945   | NW_004517249.1 | Scaffold2249 | 945                     | AA                              | GG                | 1946676684               |
| SNP_P3_166211_1168  | NW_004517249.1 | Scaffold2249 | 1168                    | AA                              | GG                | 1946676686               |
| SNP_P3_166212_1200  | NW_004517249.1 | Scaffold2249 | 1200                    | AA                              | TT                | 1946676688               |
| SNP_P3_166213_1210  | NW_004517249.1 | Scaffold2249 | 1210                    | AA                              | GG                | 1946676690               |
| SNP_P3_166214_23622 | NW_004517249.1 | Scaffold2249 | 23622                   | AA                              | GG                | 1946676692               |
| SNP_P3_166215_23657 | NW_004517249.1 | Scaffold2249 | 23657                   | CC                              | AA                | 1946676694               |
| SNP_P3_166216_23874 | NW_004517249.1 | Scaffold2249 | 23874                   | TT                              | CC                | 1946676696               |
| SNP_P3_166217_23911 | NW_004517249.1 | Scaffold2249 | 23911                   | AA                              | GG                | 1946676698               |
| SNP_P3_166218_29020 | NW_004517249.1 | Scaffold2249 | 29020                   | AA                              | GG                | 1946676700               |
| SNP_P3_166219_29361 | NW_004517249.1 | Scaffold2249 | 29361                   | TT                              | GG                | 1946676702               |
| SNP_P3_166220_29424 | NW_004517249.1 | Scaffold2249 | 29424                   | TT                              | CC                | 1946676704               |
| SNP_P3_166221_34004 | NW_004517249.1 | Scaffold2249 | 34004                   | GG                              | CC                | 1946676706               |
| SNP_P3_166222_34020 | NW_004517249.1 | Scaffold2249 | 34020                   | TT                              | CC                | 1946676709               |
| SNP_P3_166223_36210 | NW_004517249.1 | Scaffold2249 | 36210                   | TT                              | CC                | 1946676715               |
| SNP_P3_166224_36217 | NW_004517249.1 | Scaffold2249 | 36217                   | CC                              | TT                | 1946676717               |
| SNP_P3_166225_36226 | NW_004517249.1 | Scaffold2249 | 36226                   | CC                              | AA                | 1946676720               |
| SNP_P3_166226_36256 | NW_004517249.1 | Scaffold2249 | 36256                   | CC                              | TT                | 1946676722               |
| SNP_P3_166227_36262 | NW_004517249.1 | Scaffold2249 | 36262                   | CC                              | GG                | 1946676724               |
| SNP_P3_166228_48269 | NW_004517249.1 | Scaffold2249 | 48269                   | CC                              | GG                | 1946676726               |
| SNP_P3_166229_48315 | NW_004517249.1 | Scaffold2249 | 48315                   | GG                              | CC                | 1946676729               |
| SNP_P3_166230_48974 | NW_004517249.1 | Scaffold2249 | 48974                   | CC                              | AA                | 1946676731               |
| SNP_P3_166231_49072 | NW_004517249.1 | Scaffold2249 | 49072                   | GG                              | TT                | 1946676733               |
| SNP_P3_166232_49091 | NW_004517249.1 | Scaffold2249 | 49091                   | TT                              | GG                | 1946676735               |
| SNP_P3_166233_49214 | NW_004517249.1 | Scaffold2249 | 49214                   | AA                              | TT                | 1946676737               |
| SNP_P3_166234_49280 | NW_004517249.1 | Scaffold2249 | 49280                   | TT                              | GG                | 1946676739               |
| SNP_P3_166235_49358 | NW_004517249.1 | Scaffold2249 | 49358                   | AA                              | TT                | 1946676741               |
| SNP_P3_166236_49395 | NW_004517249.1 | Scaffold2249 | 49395                   | AA                              | TT                | 1946676743               |
| SNP_P3_166237_49401 | NW_004517249.1 | Scaffold2249 | 49401                   | TT                              | AA                | 1946676745               |
| SNP_P3_166238_49406 | NW_004517249.1 | Scaffold2249 | 49406                   | GG                              | AA                | 1946676747               |
| SNP_P3_166239_49502 | NW_004517249.1 | Scaffold2249 | 49502                   | AA                              | TT                | 1946676749               |
| SNP_P3_166240_50581 | NW_004517249.1 | Scaffold2249 | 50581                   | AA                              | CC                | 1946676751               |
| SNP_P3_166241_54266 | NW_004517249.1 | Scaffold2249 | 54266                   | TT                              | GG                | 1946676753               |
| SNP_P3_166242_54298 | NW_004517249.1 | Scaffold2249 | 54298                   | AA                              | TT                | 1946676755               |
| SNP_P3_166243_54494 | NW_004517249.1 | Scaffold2249 | 54494                   | CC                              | TT                | 1946676757               |

| SNPs IDs            | Chromosome IDs | Chromosomes  | Physical positions (bp) | CDC Frontier (Reference genome) | (Pusa 256 & HPNB) | NCBI SNPdb Accession IDs |
|---------------------|----------------|--------------|-------------------------|---------------------------------|-------------------|--------------------------|
| SNP_P3_166244_56871 | NW_004517249.1 | Scaffold2249 | 56871                   | TT                              | GG                | 1946676760               |
| SNP_P3_166245_56882 | NW_004517249.1 | Scaffold2249 | 56882                   | CC                              | AA                | 1946676762               |
| SNP_P3_166246_56899 | NW_004517249.1 | Scaffold2249 | 56899                   | AA                              | CC                | 1946676764               |
| SNP_P3_166247_56900 | NW_004517249.1 | Scaffold2249 | 56900                   | GG                              | CC                | 1946676767               |
| SNP_P3_166248_56937 | NW_004517249.1 | Scaffold2249 | 56937                   | TT                              | GG                | 1946676769               |
| SNP_P3_166249_61465 | NW_004517249.1 | Scaffold2249 | 61465                   | AA                              | CC                | 1946676771               |
| SNP_P3_166250_73871 | NW_004517249.1 | Scaffold2249 | 73871                   | AA                              | GG                | 1946676773               |
| SNP_P3_166251_73872 | NW_004517249.1 | Scaffold2249 | 73872                   | GG                              | TT                | 1946676775               |
| SNP_P3_166252_73889 | NW_004517249.1 | Scaffold2249 | 73889                   | GG                              | AA                | 1946676777               |
| SNP_P3_166253_77349 | NW_004517249.1 | Scaffold2249 | 77349                   | GG                              | AA                | 1946676779               |
| SNP_P3_166254_80858 | NW_004517249.1 | Scaffold2249 | 80858                   | TT                              | GG                | 1946676781               |
| SNP_P3_166255_80879 | NW_004517249.1 | Scaffold2249 | 80879                   | TT                              | GG                | 1946676783               |
| SNP_P3_166256_83478 | NW_004517249.1 | Scaffold2249 | 83478                   | AA                              | GG                | 1946676785               |
| SNP_P3_166257_83501 | NW_004517249.1 | Scaffold2249 | 83501                   | TT                              | CC                | 1946676787               |
| SNP_P3_166258_83539 | NW_004517249.1 | Scaffold2249 | 83539                   | TT                              | GG                | 1946676789               |
| SNP_P3_166259_784   | NW_004517251.1 | Scaffold2252 | 784                     | GG                              | TT                | 1946676791               |
| SNP_P3_166260_62    | NW_004517253.1 | Scaffold2254 | 62                      | TT                              | CC                | 1946676793               |
| SNP_P3_166261_117   | NW_004517253.1 | Scaffold2254 | 117                     | TT                              | GG                | 1946676795               |
| SNP_P3_166262_383   | NW_004517253.1 | Scaffold2254 | 383                     | AA                              | CC                | 1946676797               |
| SNP_P3_166263_437   | NW_004517253.1 | Scaffold2254 | 437                     | AA                              | TT                | 1946676800               |
| SNP_P3_166264_462   | NW_004517253.1 | Scaffold2254 | 462                     | AA                              | TT                | 1946676802               |
| SNP_P3_166265_167   | NW_004517254.1 | Scaffold2256 | 167                     | GG                              | AA                | 1946676804               |
| SNP_P3_166266_707   | NW_004517254.1 | Scaffold2256 | 707                     | CC                              | TT                | 1946676806               |
| SNP_P3_166267_1033  | NW_004517254.1 | Scaffold2256 | 1033                    | CC                              | TT                | 1946676809               |
| SNP_P3_166268_1468  | NW_004517254.1 | Scaffold2256 | 1468                    | GG                              | AA                | 1946676811               |
| SNP_P3_166269_1621  | NW_004517254.1 | Scaffold2256 | 1621                    | AA                              | TT                | 1946676813               |
| SNP_P3_166270_1947  | NW_004517254.1 | Scaffold2256 | 1947                    | TT                              | CC                | 1946676815               |
| SNP_P3_166271_2350  | NW_004517254.1 | Scaffold2256 | 2350                    | GG                              | AA                | 1946676817               |
| SNP_P3_166272_3282  | NW_004517254.1 | Scaffold2256 | 3282                    | CC                              | GG                | 1946676819               |
| SNP_P3_166273_5347  | NW_004517254.1 | Scaffold2256 | 5347                    | CC                              | AA                | 1946676821               |
| SNP_P3_166274_5361  | NW_004517254.1 | Scaffold2256 | 5361                    | GG                              | AA                | 1946676823               |
| SNP_P3_166275_5698  | NW_004517254.1 | Scaffold2256 | 5698                    | AA                              | TT                | 1946676825               |
| SNP_P3_166276_607   | NW_004517255.1 | Scaffold2257 | 607                     | AA                              | CC                | 1946676827               |
| SNP_P3_166277_829   | NW_004517256.1 | Scaffold2258 | 829                     | TT                              | CC                | 1946676829               |
| SNP_P3_166278_2221  | NW_004517256.1 | Scaffold2258 | 2221                    | AA                              | TT                | 1946676831               |
| SNP_P3_166279_2311  | NW_004517256.1 | Scaffold2258 | 2311                    | AA                              | GG                | 1946676833               |
| SNP_P3_166280_2393  | NW_004517256.1 | Scaffold2258 | 2393                    | CC                              | TT                | 1946676835               |
| SNP_P3_166282_341   | NW_004517258.1 | Scaffold2261 | 341                     | AA                              | GG                | 1946676838               |
| SNP_P3_166283_342   | NW_004517258.1 | Scaffold2261 | 342                     | TT                              | AA                | 1946676840               |
| SNP_P3_166285_1444  | NW_004517259.1 | Scaffold2263 | 1444                    | GG                              | TT                | 1946676842               |
| SNP_P3_166286_1459  | NW_004517259.1 | Scaffold2263 | 1459                    | TT                              | CC                | 1946676844               |
| SNP_P3_166287_1465  | NW_004517259.1 | Scaffold2263 | 1465                    | AA                              | CC                | 1946676846               |

| SNPs IDs             | Chromosome IDs | Chromosomes  | Physical positions (bp) | CDC Frontier (Reference genome) | (Pusa 256 & HPNB) | NCBI SNPdb Accession IDs |
|----------------------|----------------|--------------|-------------------------|---------------------------------|-------------------|--------------------------|
| SNP_P3_166288_1485   | NW_004517259.1 | Scaffold2263 | 1485                    | CC                              | GG                | 1946676848               |
| SNP_P3_166289_1517   | NW_004517259.1 | Scaffold2263 | 1517                    | TT                              | AA                | 1946676850               |
| SNP_P3_166290_1769   | NW_004517259.1 | Scaffold2263 | 1769                    | AA                              | TT                | 1946676852               |
| SNP_P3_166291_1821   | NW_004517259.1 | Scaffold2263 | 1821                    | TT                              | CC                | 1946676854               |
| SNP_P3_166292_1990   | NW_004517259.1 | Scaffold2263 | 1990                    | AA                              | CC                | 1946676856               |
| SNP_P3_166293_2195   | NW_004517259.1 | Scaffold2263 | 2195                    | CC                              | TT                | 1946676858               |
| SNP_P3_166294_4592   | NW_004517260.1 | Scaffold2264 | 4592                    | TT                              | AA                | 1946676860               |
| SNP_P3_166295_45     | NW_004517261.1 | Scaffold2267 | 45                      | GG                              | AA                | 1946676862               |
| SNP_P3_166296_484    | NW_004517262.1 | Scaffold2268 | 484                     | CC                              | TT                | 1946676864               |
| SNP_P3_166297_1077   | NW_004517262.1 | Scaffold2268 | 1077                    | TT                              | CC                | 1946676866               |
| SNP_P3_166298_7122   | NW_004517262.1 | Scaffold2268 | 7122                    | AA                              | GG                | 1946676868               |
| SNP_P3_166299_9181   | NW_004517262.1 | Scaffold2268 | 9181                    | AA                              | CC                | 1946676870               |
| SNP_P3_166301_9184   | NW_004517262.1 | Scaffold2268 | 9184                    | AA                              | GG                | 1946676872               |
| SNP_P3_166302_10542  | NW_004517263.1 | Scaffold2269 | 10542                   | AA                              | TT                | 1946676875               |
| SNP_P3_166303_14093  | NW_004517263.1 | Scaffold2269 | 14093                   | CC                              | TT                | 1946676877               |
| SNP_P3_166304_18469  | NW_004517263.1 | Scaffold2269 | 18469                   | AA                              | GG                | 1946676879               |
| SNP_P3_166305_18644  | NW_004517263.1 | Scaffold2269 | 18644                   | CC                              | TT                | 1946676881               |
| SNP_P3_166306_20135  | NW_004517263.1 | Scaffold2269 | 20135                   | AA                              | CC                | 1946676883               |
| SNP_P3_166307_20143  | NW_004517263.1 | Scaffold2269 | 20143                   | TT                              | AA                | 1946676885               |
| SNP_P3_166309_20587  | NW_004517263.1 | Scaffold2269 | 20587                   | AA                              | GG                | 1946676887               |
| SNP_P3_166310_43093  | NW_004517263.1 | Scaffold2269 | 43093                   | TT                              | GG                | 1946676889               |
| SNP_P3_166311_43131  | NW_004517263.1 | Scaffold2269 | 43131                   | AA                              | GG                | 1946676891               |
| SNP_P3_166312_43136  | NW_004517263.1 | Scaffold2269 | 43136                   | AA                              | GG                | 1946676893               |
| SNP_P3_166313_43194  | NW_004517263.1 | Scaffold2269 | 43194                   | AA                              | CC                | 1946676895               |
| SNP_P3_166314_43242  | NW_004517263.1 | Scaffold2269 | 43242                   | TT                              | GG                | 1946676898               |
| SNP_P3_166315_43296  | NW_004517263.1 | Scaffold2269 | 43296                   | GG                              | AA                | 1946676900               |
| SNP_P3_166316_43312  | NW_004517263.1 | Scaffold2269 | 43312                   | TT                              | GG                | 1946676902               |
| SNP_P3_166317_43406  | NW_004517263.1 | Scaffold2269 | 43406                   | AA                              | GG                | 1946676904               |
| SNP_P3_166318_43447  | NW_004517263.1 | Scaffold2269 | 43447                   | TT                              | CC                | 1946676906               |
| SNP_P3_166319_43451  | NW_004517263.1 | Scaffold2269 | 43451                   | CC                              | TT                | 1946676908               |
| SNP_P3_166321_62509  | NW_004517263.1 | Scaffold2269 | 62509                   | CC                              | TT                | 1946676910               |
| SNP_P3_166323_108900 | NW_004517263.1 | Scaffold2269 | 108900                  | CC                              | TT                | 1946676913               |
| SNP_P3_166324_108952 | NW_004517263.1 | Scaffold2269 | 108952                  | AA                              | GG                | 1946676915               |
| SNP_P3_166325_138906 | NW_004517263.1 | Scaffold2269 | 138906                  | GG                              | TT                | 1946676917               |
| SNP_P3_166326_138940 | NW_004517263.1 | Scaffold2269 | 138940                  | GG                              | AA                | 1946676919               |
| SNP_P3_166327_139607 | NW_004517263.1 | Scaffold2269 | 139607                  | AA                              | GG                | 1946676921               |
| SNP_P3_166328_139660 | NW_004517263.1 | Scaffold2269 | 139660                  | AA                              | GG                | 1946676923               |
| SNP_P3_166329_139820 | NW_004517263.1 | Scaffold2269 | 139820                  | GG                              | AA                | 1946676925               |
| SNP_P3_166330_139956 | NW_004517263.1 | Scaffold2269 | 139956                  | AA                              | GG                | 1946676927               |
| SNP_P3_166331_139965 | NW_004517263.1 | Scaffold2269 | 139965                  | GG                              | AA                | 1946676929               |
| SNP_P3_166332_139976 | NW_004517263.1 | Scaffold2269 | 139976                  | AA                              | GG                | 1946676931               |
| SNP_P3_166333_140027 | NW_004517263.1 | Scaffold2269 | 140027                  | TT                              | GG                | 1946676933               |

| SNPs IDs             | Chromosome IDs | Chromosomes  | Physical positions (bp) | CDC Frontier (Reference genome) | (Pusa 256 & HPNB) | NCBI SNPdb Accession IDs |
|----------------------|----------------|--------------|-------------------------|---------------------------------|-------------------|--------------------------|
| SNP_P3_166334_167161 | NW_004517263.1 | Scaffold2269 | 167161                  | CC                              | TT                | 1946676935               |
| SNP_P3_166335_172122 | NW_004517263.1 | Scaffold2269 | 172122                  | AA                              | GG                | 1946676937               |
| SNP_P3_166336_173448 | NW_004517263.1 | Scaffold2269 | 173448                  | GG                              | CC                | 1946676940               |
| SNP_P3_166337_173462 | NW_004517263.1 | Scaffold2269 | 173462                  | TT                              | CC                | 1946676942               |
| SNP_P3_166338_173755 | NW_004517263.1 | Scaffold2269 | 173755                  | TT                              | CC                | 1946676944               |
| SNP_P3_166339_173770 | NW_004517263.1 | Scaffold2269 | 173770                  | AA                              | GG                | 1946676947               |
| SNP_P3_166340_1499   | NW_004517265.1 | Scaffold2273 | 1499                    | AA                              | GG                | 1946676949               |
| SNP_P3_166341_1589   | NW_004517265.1 | Scaffold2273 | 1589                    | GG                              | AA                | 1946676951               |
| SNP_P3_166342_1592   | NW_004517265.1 | Scaffold2273 | 1592                    | CC                              | GG                | 1946676953               |
| SNP_P3_166343_1616   | NW_004517265.1 | Scaffold2273 | 1616                    | CC                              | GG                | 1946676955               |
| SNP_P3_166344_2665   | NW_004517265.1 | Scaffold2273 | 2665                    | GG                              | TT                | 1946676958               |
| SNP_P3_166345_2714   | NW_004517265.1 | Scaffold2273 | 2714                    | GG                              | AA                | 1946676960               |
| SNP_P3_166346_2947   | NW_004517265.1 | Scaffold2273 | 2947                    | CC                              | AA                | 1946676962               |
| SNP_P3_166347_2951   | NW_004517265.1 | Scaffold2273 | 2951                    | TT                              | CC                | 1946676964               |
| SNP_P3_166348_3143   | NW_004517265.1 | Scaffold2273 | 3143                    | CC                              | TT                | 1946676966               |
| SNP_P3_166349_3203   | NW_004517265.1 | Scaffold2273 | 3203                    | GG                              | AA                | 1946676968               |
| SNP_P3_166350_3216   | NW_004517265.1 | Scaffold2273 | 3216                    | GG                              | AA                | 1946676971               |
| SNP_P3_166351_3234   | NW_004517265.1 | Scaffold2273 | 3234                    | CC                              | TT                | 1946676973               |
| SNP_P3_166352_3261   | NW_004517265.1 | Scaffold2273 | 3261                    | TT                              | GG                | 1946676975               |
| SNP_P3_166353_4296   | NW_004517265.1 | Scaffold2273 | 4296                    | TT                              | CC                | 1946676977               |
| SNP_P3_166354_7444   | NW_004517265.1 | Scaffold2273 | 7444                    | GG                              | CC                | 1946676979               |
| SNP_P3_166355_7450   | NW_004517265.1 | Scaffold2273 | 7450                    | TT                              | GG                | 1946676981               |
| SNP_P3_166356_7457   | NW_004517265.1 | Scaffold2273 | 7457                    | TT                              | AA                | 1946676985               |
| SNP_P3_166357_7464   | NW_004517265.1 | Scaffold2273 | 7464                    | TT                              | CC                | 1946676987               |
| SNP_P3_166358_7470   | NW_004517265.1 | Scaffold2273 | 7470                    | GG                              | TT                | 1946676989               |
| SNP_P3_166359_7478   | NW_004517265.1 | Scaffold2273 | 7478                    | CC                              | AA                | 1946676991               |
| SNP_P3_166361_11965  | NW_004517265.1 | Scaffold2273 | 11965                   | TT                              | AA                | 1946676994               |
| SNP_P3_166362_12285  | NW_004517265.1 | Scaffold2273 | 12285                   | AA                              | GG                | 1946676996               |
| SNP_P3_166363_18480  | NW_004517265.1 | Scaffold2273 | 18480                   | CC                              | AA                | 1946676998               |
| SNP_P3_166364_18495  | NW_004517265.1 | Scaffold2273 | 18495                   | TT                              | GG                | 1946677000               |
| SNP_P3_166365_18503  | NW_004517265.1 | Scaffold2273 | 18503                   | AA                              | TT                | 1946677002               |
| SNP_P3_166366_22663  | NW_004517265.1 | Scaffold2273 | 22663                   | GG                              | CC                | 1946677004               |
| SNP_P3_166367_22697  | NW_004517265.1 | Scaffold2273 | 22697                   | CC                              | AA                | 1946677006               |
| SNP_P3_166368_22702  | NW_004517265.1 | Scaffold2273 | 22702                   | TT                              | AA                | 1946677008               |
| SNP_P3_166369_22795  | NW_004517265.1 | Scaffold2273 | 22795                   | CC                              | GG                | 1946677010               |
| SNP_P3_166370_24428  | NW_004517265.1 | Scaffold2273 | 24428                   | GG                              | TT                | 1946677012               |
| SNP_P3_166371_24444  | NW_004517265.1 | Scaffold2273 | 24444                   | GG                              | AA                | 1946677014               |
| SNP_P3_166372_24795  | NW_004517265.1 | Scaffold2273 | 24795                   | TT                              | GG                | 1946677016               |
| SNP_P3_166373_24808  | NW_004517265.1 | Scaffold2273 | 24808                   | AA                              | GG                | 1946677018               |
| SNP_P3_166375_24962  | NW_004517265.1 | Scaffold2273 | 24962                   | AA                              | TT                | 1946677020               |
| SNP_P3_166377_26210  | NW_004517265.1 | Scaffold2273 | 26210                   | GG                              | TT                | 1946677023               |
| SNP_P3_166378_32935  | NW_004517265.1 | Scaffold2273 | 32935                   | GG                              | TT                | 1946677025               |

| SNPs IDs            | Chromosome IDs | Chromosomes  | Physical positions (bp) | CDC Frontier (Reference genome) | (Pusa 256 & HPNB) | NCBI SNPdb Accession IDs |
|---------------------|----------------|--------------|-------------------------|---------------------------------|-------------------|--------------------------|
| SNP_P3_166379_32995 | NW_004517265.1 | Scaffold2273 | 32995                   | GG                              | AA                | 1946677027               |
| SNP_P3_166381_33128 | NW_004517265.1 | Scaffold2273 | 33128                   | GG                              | TT                | 1946677029               |
| SNP_P3_166382_33158 | NW_004517265.1 | Scaffold2273 | 33158                   | AA                              | GG                | 1946677031               |
| SNP_P3_166383_33172 | NW_004517265.1 | Scaffold2273 | 33172                   | CC                              | GG                | 1946677033               |
| SNP_P3_166384_33186 | NW_004517265.1 | Scaffold2273 | 33186                   | TT                              | GG                | 1946677035               |
| SNP_P3_166385_33213 | NW_004517265.1 | Scaffold2273 | 33213                   | GG                              | CC                | 1946677037               |
| SNP_P3_166386_36690 | NW_004517265.1 | Scaffold2273 | 36690                   | TT                              | CC                | 1946677039               |
| SNP_P3_166387_38119 | NW_004517265.1 | Scaffold2273 | 38119                   | GG                              | AA                | 1946677041               |
| SNP_P3_166388_38362 | NW_004517265.1 | Scaffold2273 | 38362                   | TT                              | CC                | 1946677043               |
| SNP_P3_166389_2937  | NW_004517266.1 | Scaffold2275 | 2937                    | GG                              | AA                | 1946677045               |
| SNP_P3_166391_1264  | NW_004517269.1 | Scaffold2280 | 1264                    | AA                              | GG                | 1946677047               |
| SNP_P3_166392_1655  | NW_004517269.1 | Scaffold2280 | 1655                    | TT                              | AA                | 1946677049               |
| SNP_P3_166393_8047  | NW_004517271.1 | Scaffold2282 | 8047                    | TT                              | GG                | 1946677050               |
| SNP_P3_166394_8068  | NW_004517271.1 | Scaffold2282 | 8068                    | CC                              | TT                | 1946677052               |
| SNP_P3_166395_8075  | NW_004517271.1 | Scaffold2282 | 8075                    | GG                              | AA                | 1946677054               |
| SNP_P3_166396_8079  | NW_004517271.1 | Scaffold2282 | 8079                    | TT                              | AA                | 1946677056               |
| SNP_P3_166397_8080  | NW_004517271.1 | Scaffold2282 | 8080                    | GG                              | AA                | 1946677058               |
| SNP_P3_166398_8096  | NW_004517271.1 | Scaffold2282 | 8096                    | TT                              | GG                | 1946677060               |
| SNP_P3_166399_8113  | NW_004517271.1 | Scaffold2282 | 8113                    | TT                              | AA                | 1946677063               |
| SNP_P3_166400_8118  | NW_004517271.1 | Scaffold2282 | 8118                    | AA                              | CC                | 1946677065               |
| SNP_P3_166401_8189  | NW_004517271.1 | Scaffold2282 | 8189                    | TT                              | CC                | 1946677067               |
| SNP_P3_166402_2953  | NW_004517272.1 | Scaffold2285 | 2953                    | TT                              | CC                | 1946677069               |
| SNP_P3_166403_246   | NW_004517273.1 | Scaffold2286 | 246                     | GG                              | AA                | 1946677070               |
| SNP_P3_166404_93    | NW_004517274.1 | Scaffold2287 | 93                      | AA                              | CC                | 1946677072               |
| SNP_P3_166405_123   | NW_004517274.1 | Scaffold2287 | 123                     | GG                              | TT                | 1946677074               |
| SNP_P3_166406_231   | NW_004517274.1 | Scaffold2287 | 231                     | CC                              | GG                | 1946677076               |
| SNP_P3_166407_326   | NW_004517274.1 | Scaffold2287 | 326                     | AA                              | GG                | 1946677078               |
| SNP_P3_166409_399   | NW_004517274.1 | Scaffold2287 | 399                     | GG                              | CC                | 1946677080               |
| SNP_P3_166410_436   | NW_004517274.1 | Scaffold2287 | 436                     | GG                              | AA                | 1946677082               |
| SNP_P3_166411_439   | NW_004517274.1 | Scaffold2287 | 439                     | GG                              | AA                | 1946677084               |
| SNP_P3_166413_506   | NW_004517274.1 | Scaffold2287 | 506                     | GG                              | AA                | 1946677086               |
| SNP_P3_166414_528   | NW_004517274.1 | Scaffold2287 | 528                     | CC                              | TT                | 1946677088               |
| SNP_P3_166415_591   | NW_004517274.1 | Scaffold2287 | 591                     | TT                              | CC                | 1946677090               |
| SNP_P3_166416_630   | NW_004517274.1 | Scaffold2287 | 630                     | TT                              | GG                | 1946677091               |
| SNP_P3_166417_659   | NW_004517274.1 | Scaffold2287 | 659                     | GG                              | AA                | 1946677093               |
| SNP_P3_166418_675   | NW_004517274.1 | Scaffold2287 | 675                     | TT                              | GG                | 1946677095               |
| SNP_P3_166419_793   | NW_004517274.1 | Scaffold2287 | 793                     | CC                              | TT                | 1946677097               |
| SNP_P3_166420_885   | NW_004517274.1 | Scaffold2287 | 885                     | CC                              | TT                | 1946677099               |
| SNP_P3_166421_910   | NW_004517274.1 | Scaffold2287 | 910                     | GG                              | AA                | 1946677101               |
| SNP_P3_166422_979   | NW_004517274.1 | Scaffold2287 | 979                     | GG                              | TT                | 1946677104               |
| SNP_P3_166423_1006  | NW_004517274.1 | Scaffold2287 | 1006                    | TT                              | AA                | 1946677106               |
| SNP_P3_166424_1086  | NW_004517274.1 | Scaffold2287 | 1086                    | AA                              | TT                | 1946677108               |



| SNPs IDs            | Chromosome IDs | Chromosomes  | Physical positions (bp) | CDC Frontier (Reference genome) | (Pusa 256 & HPNB) | NCBI SNPdb Accession IDs |
|---------------------|----------------|--------------|-------------------------|---------------------------------|-------------------|--------------------------|
| SNP_P3_166425_1092  | NW_004517274.1 | Scaffold2287 | 1092                    | GG                              | AA                | 1946677110               |
| SNP_P3_166426_1101  | NW_004517274.1 | Scaffold2287 | 1101                    | CC                              | TT                | 1946677112               |
| SNP_P3_166427_1125  | NW_004517274.1 | Scaffold2287 | 1125                    | AA                              | GG                | 1946677114               |
| SNP_P3_166428_2912  | NW_004517275.1 | Scaffold2289 | 2912                    | AA                              | CC                | 1946677116               |
| SNP_P3_166429_3235  | NW_004517275.1 | Scaffold2289 | 3235                    | CC                              | TT                | 1946677118               |
| SNP_P3_166430_3278  | NW_004517275.1 | Scaffold2289 | 3278                    | TT                              | AA                | 1946677119               |
| SNP_P3_166431_3534  | NW_004517275.1 | Scaffold2289 | 3534                    | CC                              | TT                | 1946677121               |
| SNP_P3_166432_3557  | NW_004517275.1 | Scaffold2289 | 3557                    | CC                              | GG                | 1946677123               |
| SNP_P3_166433_3580  | NW_004517275.1 | Scaffold2289 | 3580                    | AA                              | GG                | 1946677125               |
| SNP_P3_166434_9577  | NW_004517275.1 | Scaffold2289 | 9577                    | GG                              | TT                | 1946677127               |
| SNP_P3_166435_11823 | NW_004517275.1 | Scaffold2289 | 11823                   | CC                              | AA                | 1946677129               |
| SNP_P3_166436_11824 | NW_004517275.1 | Scaffold2289 | 11824                   | TT                              | AA                | 1946677131               |
| SNP_P3_166437_11882 | NW_004517275.1 | Scaffold2289 | 11882                   | AA                              | GG                | 1946677133               |
| SNP_P3_166438_11997 | NW_004517275.1 | Scaffold2289 | 11997                   | CC                              | GG                | 1946677135               |
| SNP_P3_166439_12580 | NW_004517275.1 | Scaffold2289 | 12580                   | GG                              | CC                | 1946677137               |
| SNP_P3_166440_12685 | NW_004517275.1 | Scaffold2289 | 12685                   | TT                              | AA                | 1946677139               |
| SNP_P3_166441_12701 | NW_004517275.1 | Scaffold2289 | 12701                   | GG                              | CC                | 1946677141               |
| SNP_P3_166442_12817 | NW_004517275.1 | Scaffold2289 | 12817                   | GG                              | AA                | 1946677144               |
| SNP_P3_166444_12938 | NW_004517275.1 | Scaffold2289 | 12938                   | TT                              | GG                | 1946677146               |
| SNP_P3_166445_13071 | NW_004517275.1 | Scaffold2289 | 13071                   | TT                              | AA                | 1946677148               |
| SNP_P3_166446_13134 | NW_004517275.1 | Scaffold2289 | 13134                   | AA                              | GG                | 1946677150               |
| SNP_P3_166447_13154 | NW_004517275.1 | Scaffold2289 | 13154                   | AA                              | TT                | 1946677151               |
| SNP_P3_166448_14208 | NW_004517275.1 | Scaffold2289 | 14208                   | CC                              | AA                | 1946677153               |
| SNP_P3_166449_14212 | NW_004517275.1 | Scaffold2289 | 14212                   | TT                              | CC                | 1946677155               |
| SNP_P3_166451_14657 | NW_004517275.1 | Scaffold2289 | 14657                   | AA                              | GG                | 1946677157               |
| SNP_P3_166452_15273 | NW_004517275.1 | Scaffold2289 | 15273                   | CC                              | AA                | 1946677159               |
| SNP_P3_166453_15274 | NW_004517275.1 | Scaffold2289 | 15274                   | AA                              | CC                | 1946677161               |
| SNP_P3_166454_15275 | NW_004517275.1 | Scaffold2289 | 15275                   | CC                              | AA                | 1946677163               |
| SNP_P3_166455_15352 | NW_004517275.1 | Scaffold2289 | 15352                   | GG                              | TT                | 1946677165               |
| SNP_P3_166456_15381 | NW_004517275.1 | Scaffold2289 | 15381                   | AA                              | GG                | 1946677167               |
| SNP_P3_166457_15485 | NW_004517275.1 | Scaffold2289 | 15485                   | AA                              | TT                | 1946677169               |
| SNP_P3_166458_15501 | NW_004517275.1 | Scaffold2289 | 15501                   | TT                              | GG                | 1946677171               |
| SNP_P3_166459_15688 | NW_004517275.1 | Scaffold2289 | 15688                   | CC                              | TT                | 1946677173               |
| SNP_P3_166460_16987 | NW_004517275.1 | Scaffold2289 | 16987                   | AA                              | TT                | 1946677175               |
| SNP_P3_166461_17153 | NW_004517275.1 | Scaffold2289 | 17153                   | GG                              | AA                | 1946677177               |
| SNP_P3_166462_17436 | NW_004517275.1 | Scaffold2289 | 17436                   | CC                              | TT                | 1946677179               |
| SNP_P3_166463_17437 | NW_004517275.1 | Scaffold2289 | 17437                   | CC                              | GG                | 1946677181               |
| SNP_P3_166464_16819 | NW_004517276.1 | Scaffold2290 | 16819                   | CC                              | TT                | 1946677182               |
| SNP_P3_166465_58070 | NW_004517276.1 | Scaffold2290 | 58070                   | GG                              | TT                | 1946677184               |
| SNP_P3_166466_1979  | NW_004517277.1 | Scaffold2291 | 1979                    | AA                              | GG                | 1946677186               |
| SNP_P3_166467_2153  | NW_004517277.1 | Scaffold2291 | 2153                    | CC                              | AA                | 1946677188               |
| SNP_P3_166468_130   | NW_004517278.1 | Scaffold2292 | 130                     | CC                              | GG                | 1946677190               |

| SNPs IDs            | Chromosome IDs | Chromosomes  | Physical positions (bp) | CDC Frontier (Reference genome) | (Pusa 256 & HPNB) | NCBI SNPdb Accession IDs |
|---------------------|----------------|--------------|-------------------------|---------------------------------|-------------------|--------------------------|
| SNP_P3_166469_166   | NW_004517278.1 | Scaffold2292 | 166                     | GG                              | CC                | 1946677192               |
| SNP_P3_166470_327   | NW_004517278.1 | Scaffold2292 | 327                     | TT                              | GG                | 1946677194               |
| SNP_P3_166471_373   | NW_004517278.1 | Scaffold2292 | 373                     | TT                              | CC                | 1946677196               |
| SNP_P3_166472_9910  | NW_004517281.1 | Scaffold2297 | 9910                    | AA                              | GG                | 1946677198               |
| SNP_P3_166473_15091 | NW_004517281.1 | Scaffold2297 | 15091                   | GG                              | CC                | 1946677200               |
| SNP_P3_166474_15094 | NW_004517281.1 | Scaffold2297 | 15094                   | CC                              | TT                | 1946677202               |
| SNP_P3_166475_15103 | NW_004517281.1 | Scaffold2297 | 15103                   | AA                              | TT                | 1946677204               |
| SNP_P3_166476_23668 | NW_004517281.1 | Scaffold2297 | 23668                   | AA                              | CC                | 1946677207               |
| SNP_P3_166477_391   | NW_004517284.1 | Scaffold2300 | 391                     | TT                              | CC                | 1946677209               |
| SNP_P3_166478_1328  | NW_004517285.1 | Scaffold2301 | 1328                    | TT                              | CC                | 1946677211               |
| SNP_P3_166479_1329  | NW_004517285.1 | Scaffold2301 | 1329                    | CC                              | TT                | 1946677213               |
| SNP_P3_166480_1353  | NW_004517285.1 | Scaffold2301 | 1353                    | GG                              | CC                | 1946677215               |
| SNP_P3_166482_1628  | NW_004517285.1 | Scaffold2301 | 1628                    | AA                              | GG                | 1946677217               |
| SNP_P3_166483_1668  | NW_004517285.1 | Scaffold2301 | 1668                    | CC                              | AA                | 1946677219               |
| SNP_P3_166484_1754  | NW_004517285.1 | Scaffold2301 | 1754                    | TT                              | GG                | 1946677221               |
| SNP_P3_166485_1765  | NW_004517285.1 | Scaffold2301 | 1765                    | TT                              | CC                | 1946677224               |
| SNP_P3_166486_1788  | NW_004517285.1 | Scaffold2301 | 1788                    | CC                              | GG                | 1946677226               |
| SNP_P3_166487_1800  | NW_004517285.1 | Scaffold2301 | 1800                    | CC                              | TT                | 1946677228               |
| SNP_P3_166488_1879  | NW_004517285.1 | Scaffold2301 | 1879                    | AA                              | CC                | 1946677230               |
| SNP_P3_166489_1885  | NW_004517285.1 | Scaffold2301 | 1885                    | GG                              | AA                | 1946677232               |
| SNP_P3_166490_1886  | NW_004517285.1 | Scaffold2301 | 1886                    | GG                              | CC                | 1946677234               |
| SNP_P3_166491_1903  | NW_004517285.1 | Scaffold2301 | 1903                    | AA                              | GG                | 1946677236               |
| SNP_P3_166492_1984  | NW_004517285.1 | Scaffold2301 | 1984                    | CC                              | GG                | 1946677238               |
| SNP_P3_166493_1988  | NW_004517285.1 | Scaffold2301 | 1988                    | TT                              | CC                | 1946677240               |
| SNP_P3_166494_1997  | NW_004517285.1 | Scaffold2301 | 1997                    | TT                              | CC                | 1946677242               |
| SNP_P3_166495_2072  | NW_004517285.1 | Scaffold2301 | 2072                    | CC                              | TT                | 1946677245               |
| SNP_P3_166496_2083  | NW_004517285.1 | Scaffold2301 | 2083                    | CC                              | TT                | 1946677248               |
| SNP_P3_166497_2298  | NW_004517285.1 | Scaffold2301 | 2298                    | AA                              | GG                | 1946677250               |
| SNP_P3_166498_2316  | NW_004517285.1 | Scaffold2301 | 2316                    | AA                              | GG                | 1946677252               |
| SNP_P3_166499_2362  | NW_004517285.1 | Scaffold2301 | 2362                    | TT                              | AA                | 1946677254               |
| SNP_P3_166500_2400  | NW_004517285.1 | Scaffold2301 | 2400                    | GG                              | CC                | 1946677256               |
| SNP_P3_166501_2422  | NW_004517285.1 | Scaffold2301 | 2422                    | CC                              | GG                | 1946677258               |
| SNP_P3_166502_2450  | NW_004517285.1 | Scaffold2301 | 2450                    | CC                              | TT                | 1946677260               |
| SNP_P3_166503_2714  | NW_004517285.1 | Scaffold2301 | 2714                    | TT                              | GG                | 1946677262               |
| SNP_P3_166504_2730  | NW_004517285.1 | Scaffold2301 | 2730                    | TT                              | CC                | 1946677264               |
| SNP_P3_166505_2732  | NW_004517285.1 | Scaffold2301 | 2732                    | AA                              | GG                | 1946677266               |
| SNP_P3_166506_2806  | NW_004517285.1 | Scaffold2301 | 2806                    | AA                              | TT                | 1946677268               |
| SNP_P3_166507_5096  | NW_004517285.1 | Scaffold2301 | 5096                    | TT                              | CC                | 1946677270               |
| SNP_P3_166508_5104  | NW_004517285.1 | Scaffold2301 | 5104                    | CC                              | AA                | 1946677271               |
| SNP_P3_166509_5889  | NW_004517285.1 | Scaffold2301 | 5889                    | GG                              | AA                | 1946677273               |
| SNP_P3_166510_6124  | NW_004517285.1 | Scaffold2301 | 6124                    | TT                              | AA                | 1946677275               |
| SNP_P3_166511_6258  | NW_004517285.1 | Scaffold2301 | 6258                    | GG                              | TT                | 1946677277               |

| SNPs IDs            | Chromosome IDs | Chromosomes  | Physical positions (bp) | CDC Frontier (Reference genome) | (Pusa 256 & HPNB) | NCBI SNPdb Accession IDs |
|---------------------|----------------|--------------|-------------------------|---------------------------------|-------------------|--------------------------|
| SNP_P3_166512_6336  | NW_004517285.1 | Scaffold2301 | 6336                    | AA                              | TT                | 1946677279               |
| SNP_P3_166514_6560  | NW_004517285.1 | Scaffold2301 | 6560                    | TT                              | CC                | 1946677281               |
| SNP_P3_166515_7074  | NW_004517285.1 | Scaffold2301 | 7074                    | TT                              | CC                | 1946677284               |
| SNP_P3_166516_7927  | NW_004517285.1 | Scaffold2301 | 7927                    | TT                              | CC                | 1946677286               |
| SNP_P3_166517_8048  | NW_004517285.1 | Scaffold2301 | 8048                    | TT                              | CC                | 1946677288               |
| SNP_P3_166518_8087  | NW_004517285.1 | Scaffold2301 | 8087                    | AA                              | GG                | 1946677290               |
| SNP_P3_166519_8102  | NW_004517285.1 | Scaffold2301 | 8102                    | TT                              | CC                | 1946677292               |
| SNP_P3_166520_8120  | NW_004517285.1 | Scaffold2301 | 8120                    | CC                              | TT                | 1946677294               |
| SNP_P3_166521_8131  | NW_004517285.1 | Scaffold2301 | 8131                    | AA                              | GG                | 1946677296               |
| SNP_P3_166522_8189  | NW_004517285.1 | Scaffold2301 | 8189                    | CC                              | TT                | 1946677298               |
| SNP_P3_166523_8210  | NW_004517285.1 | Scaffold2301 | 8210                    | AA                              | GG                | 1946677300               |
| SNP_P3_166524_8252  | NW_004517285.1 | Scaffold2301 | 8252                    | TT                              | CC                | 1946677302               |
| SNP_P3_166525_8253  | NW_004517285.1 | Scaffold2301 | 8253                    | TT                              | CC                | 1946677304               |
| SNP_P3_166526_8287  | NW_004517285.1 | Scaffold2301 | 8287                    | TT                              | CC                | 1946677306               |
| SNP_P3_166527_8304  | NW_004517285.1 | Scaffold2301 | 8304                    | CC                              | GG                | 1946677308               |
| SNP_P3_166528_8330  | NW_004517285.1 | Scaffold2301 | 8330                    | GG                              | TT                | 1946677310               |
| SNP_P3_166529_8396  | NW_004517285.1 | Scaffold2301 | 8396                    | AA                              | GG                | 1946677312               |
| SNP_P3_166530_8416  | NW_004517285.1 | Scaffold2301 | 8416                    | CC                              | GG                | 1946677314               |
| SNP_P3_166531_8429  | NW_004517285.1 | Scaffold2301 | 8429                    | CC                              | AA                | 1946677316               |
| SNP_P3_166532_8453  | NW_004517285.1 | Scaffold2301 | 8453                    | AA                              | GG                | 1946677318               |
| SNP_P3_166533_8495  | NW_004517285.1 | Scaffold2301 | 8495                    | AA                              | GG                | 1946677320               |
| SNP_P3_166534_13605 | NW_004517285.1 | Scaffold2301 | 13605                   | AA                              | GG                | 1946677322               |
| SNP_P3_166535_15413 | NW_004517285.1 | Scaffold2301 | 15413                   | AA                              | TT                | 1946677324               |
| SNP_P3_166536_15433 | NW_004517285.1 | Scaffold2301 | 15433                   | GG                              | AA                | 1946677326               |
| SNP_P3_166537_18125 | NW_004517285.1 | Scaffold2301 | 18125                   | AA                              | CC                | 1946677329               |
| SNP_P3_166538_18154 | NW_004517285.1 | Scaffold2301 | 18154                   | CC                              | TT                | 1946677332               |
| SNP_P3_166539_18175 | NW_004517285.1 | Scaffold2301 | 18175                   | TT                              | CC                | 1946677334               |
| SNP_P3_166540_18192 | NW_004517285.1 | Scaffold2301 | 18192                   | TT                              | AA                | 1946677336               |
| SNP_P3_166541_18265 | NW_004517285.1 | Scaffold2301 | 18265                   | CC                              | TT                | 1946677338               |
| SNP_P3_166542_18330 | NW_004517285.1 | Scaffold2301 | 18330                   | AA                              | TT                | 1946677340               |
| SNP_P3_166543_18491 | NW_004517285.1 | Scaffold2301 | 18491                   | TT                              | GG                | 1946677342               |
| SNP_P3_166544_18515 | NW_004517285.1 | Scaffold2301 | 18515                   | TT                              | GG                | 1946677344               |
| SNP_P3_166545_18525 | NW_004517285.1 | Scaffold2301 | 18525                   | GG                              | AA                | 1946677346               |
| SNP_P3_166546_18552 | NW_004517285.1 | Scaffold2301 | 18552                   | TT                              | CC                | 1946677348               |
| SNP_P3_166547_18609 | NW_004517285.1 | Scaffold2301 | 18609                   | AA                              | GG                | 1946677350               |
| SNP_P3_166548_18663 | NW_004517285.1 | Scaffold2301 | 18663                   | GG                              | AA                | 1946677352               |
| SNP_P3_166549_18687 | NW_004517285.1 | Scaffold2301 | 18687                   | AA                              | GG                | 1946677354               |
| SNP_P3_166550_18693 | NW_004517285.1 | Scaffold2301 | 18693                   | CC                              | TT                | 1946677356               |
| SNP_P3_166551_18711 | NW_004517285.1 | Scaffold2301 | 18711                   | TT                              | AA                | 1946677358               |
| SNP_P3_166552_18732 | NW_004517285.1 | Scaffold2301 | 18732                   | TT                              | AA                | 1946677360               |
| SNP_P3_166553_22439 | NW_004517285.1 | Scaffold2301 | 22439                   | AA                              | TT                | 1946677362               |
| SNP_P3_166554_22500 | NW_004517285.1 | Scaffold2301 | 22500                   | GG                              | TT                | 1946677364               |

| SNPs IDs            | Chromosome IDs | Chromosomes  | Physical positions (bp) | CDC Frontier (Reference genome) | (Pusa 256 & HPNB) | NCBI SNPdb Accession IDs |
|---------------------|----------------|--------------|-------------------------|---------------------------------|-------------------|--------------------------|
| SNP_P3_166555_22522 | NW_004517285.1 | Scaffold2301 | 22522                   | CC                              | GG                | 1946677366               |
| SNP_P3_166556_22532 | NW_004517285.1 | Scaffold2301 | 22532                   | TT                              | AA                | 1946677368               |
| SNP_P3_166557_22613 | NW_004517285.1 | Scaffold2301 | 22613                   | AA                              | CC                | 1946677370               |
| SNP_P3_166558_22670 | NW_004517285.1 | Scaffold2301 | 22670                   | CC                              | TT                | 1946677372               |
| SNP_P3_166559_22715 | NW_004517285.1 | Scaffold2301 | 22715                   | TT                              | GG                | 1946677374               |
| SNP_P3_166561_22891 | NW_004517285.1 | Scaffold2301 | 22891                   | CC                              | TT                | 1946677376               |
| SNP_P3_166562_22998 | NW_004517285.1 | Scaffold2301 | 22998                   | AA                              | GG                | 1946677379               |
| SNP_P3_166563_23016 | NW_004517285.1 | Scaffold2301 | 23016                   | AA                              | GG                | 1946677381               |
| SNP_P3_166564_23021 | NW_004517285.1 | Scaffold2301 | 23021                   | CC                              | TT                | 1946677383               |
| SNP_P3_166565_23022 | NW_004517285.1 | Scaffold2301 | 23022                   | AA                              | GG                | 1946677385               |
| SNP_P3_166566_23056 | NW_004517285.1 | Scaffold2301 | 23056                   | TT                              | CC                | 1946677387               |
| SNP_P3_166567_23214 | NW_004517285.1 | Scaffold2301 | 23214                   | CC                              | GG                | 1946677389               |
| SNP_P3_166568_29324 | NW_004517285.1 | Scaffold2301 | 29324                   | CC                              | GG                | 1946677392               |
| SNP_P3_166569_29388 | NW_004517285.1 | Scaffold2301 | 29388                   | AA                              | GG                | 1946677394               |
| SNP_P3_166570_29410 | NW_004517285.1 | Scaffold2301 | 29410                   | TT                              | GG                | 1946677396               |
| SNP_P3_166571_29651 | NW_004517285.1 | Scaffold2301 | 29651                   | AA                              | GG                | 1946677398               |
| SNP_P3_166572_30310 | NW_004517285.1 | Scaffold2301 | 30310                   | GG                              | AA                | 1946677400               |
| SNP_P3_166573_30344 | NW_004517285.1 | Scaffold2301 | 30344                   | AA                              | GG                | 1946677403               |
| SNP_P3_166574_31693 | NW_004517285.1 | Scaffold2301 | 31693                   | AA                              | CC                | 1946677405               |
| SNP_P3_166575_32024 | NW_004517285.1 | Scaffold2301 | 32024                   | GG                              | AA                | 1946677407               |
| SNP_P3_166576_32044 | NW_004517285.1 | Scaffold2301 | 32044                   | GG                              | AA                | 1946677409               |
| SNP_P3_166577_32049 | NW_004517285.1 | Scaffold2301 | 32049                   | GG                              | AA                | 1946677411               |
| SNP_P3_166578_32162 | NW_004517285.1 | Scaffold2301 | 32162                   | CC                              | TT                | 1946677413               |
| SNP_P3_166579_32179 | NW_004517285.1 | Scaffold2301 | 32179                   | CC                              | TT                | 1946677415               |
| SNP_P3_166580_32192 | NW_004517285.1 | Scaffold2301 | 32192                   | AA                              | GG                | 1946677418               |
| SNP_P3_166581_32231 | NW_004517285.1 | Scaffold2301 | 32231                   | TT                              | CC                | 1946677420               |
| SNP_P3_166582_32237 | NW_004517285.1 | Scaffold2301 | 32237                   | TT                              | GG                | 1946677422               |
| SNP_P3_166583_32243 | NW_004517285.1 | Scaffold2301 | 32243                   | CC                              | TT                | 1946677424               |
| SNP_P3_166584_32309 | NW_004517285.1 | Scaffold2301 | 32309                   | TT                              | CC                | 1946677427               |
| SNP_P3_166585_32456 | NW_004517285.1 | Scaffold2301 | 32456                   | CC                              | TT                | 1946677429               |
| SNP_P3_166586_32682 | NW_004517285.1 | Scaffold2301 | 32682                   | GG                              | CC                | 1946677431               |
| SNP_P3_166587_32687 | NW_004517285.1 | Scaffold2301 | 32687                   | GG                              | TT                | 1946677433               |
| SNP_P3_166588_32710 | NW_004517285.1 | Scaffold2301 | 32710                   | AA                              | GG                | 1946677435               |
| SNP_P3_166589_32833 | NW_004517285.1 | Scaffold2301 | 32833                   | TT                              | CC                | 1946677437               |
| SNP_P3_166591_35155 | NW_004517285.1 | Scaffold2301 | 35155                   | GG                              | AA                | 1946677439               |
| SNP_P3_166592_35264 | NW_004517285.1 | Scaffold2301 | 35264                   | AA                              | GG                | 1946677441               |
| SNP_P3_166593_35488 | NW_004517285.1 | Scaffold2301 | 35488                   | CC                              | TT                | 1946677443               |
| SNP_P3_166594_35507 | NW_004517285.1 | Scaffold2301 | 35507                   | AA                              | GG                | 1946677445               |
| SNP_P3_166595_35542 | NW_004517285.1 | Scaffold2301 | 35542                   | TT                              | AA                | 1946677447               |
| SNP_P3_166596_35634 | NW_004517285.1 | Scaffold2301 | 35634                   | AA                              | TT                | 1946677449               |
| SNP_P3_166597_35650 | NW_004517285.1 | Scaffold2301 | 35650                   | CC                              | TT                | 1946677451               |
| SNP_P3_166598_35762 | NW_004517285.1 | Scaffold2301 | 35762                   | AA                              | CC                | 1946677453               |

| SNPs IDs            | Chromosome IDs | Chromosomes  | Physical positions (bp) | CDC Frontier (Reference genome) | (Pusa 256 & HPNB) | NCBI SNPdb Accession IDs |
|---------------------|----------------|--------------|-------------------------|---------------------------------|-------------------|--------------------------|
| SNP_P3_166599_35770 | NW_004517285.1 | Scaffold2301 | 35770                   | CC                              | TT                | 1946677455               |
| SNP_P3_166600_35775 | NW_004517285.1 | Scaffold2301 | 35775                   | CC                              | TT                | 1946677457               |
| SNP_P3_166601_35850 | NW_004517285.1 | Scaffold2301 | 35850                   | GG                              | TT                | 1946677459               |
| SNP_P3_166602_36028 | NW_004517285.1 | Scaffold2301 | 36028                   | TT                              | CC                | 1946677462               |
| SNP_P3_166603_36031 | NW_004517285.1 | Scaffold2301 | 36031                   | GG                              | AA                | 1946677465               |
| SNP_P3_166604_36032 | NW_004517285.1 | Scaffold2301 | 36032                   | AA                              | TT                | 1946677467               |
| SNP_P3_166605_36069 | NW_004517285.1 | Scaffold2301 | 36069                   | GG                              | CC                | 1946677469               |
| SNP_P3_166606_36073 | NW_004517285.1 | Scaffold2301 | 36073                   | TT                              | GG                | 1946677471               |
| SNP_P3_166607_36152 | NW_004517285.1 | Scaffold2301 | 36152                   | CC                              | GG                | 1946677473               |
| SNP_P3_166608_40590 | NW_004517285.1 | Scaffold2301 | 40590                   | TT                              | AA                | 1946677475               |
| SNP_P3_166609_40890 | NW_004517285.1 | Scaffold2301 | 40890                   | GG                              | TT                | 1946677477               |
| SNP_P3_166610_40918 | NW_004517285.1 | Scaffold2301 | 40918                   | AA                              | CC                | 1946677479               |
| SNP_P3_166611_41074 | NW_004517285.1 | Scaffold2301 | 41074                   | CC                              | TT                | 1946677481               |
| SNP_P3_166612_41075 | NW_004517285.1 | Scaffold2301 | 41075                   | AA                              | TT                | 1946677483               |
| SNP_P3_166613_41102 | NW_004517285.1 | Scaffold2301 | 41102                   | GG                              | AA                | 1946677485               |
| SNP_P3_166614_41126 | NW_004517285.1 | Scaffold2301 | 41126                   | AA                              | CC                | 1946677487               |
| SNP_P3_166615_41551 | NW_004517285.1 | Scaffold2301 | 41551                   | CC                              | TT                | 1946677489               |
| SNP_P3_166616_41555 | NW_004517285.1 | Scaffold2301 | 41555                   | GG                              | AA                | 1946677491               |
| SNP_P3_166617_41576 | NW_004517285.1 | Scaffold2301 | 41576                   | AA                              | TT                | 1946677493               |
| SNP_P3_166618_41611 | NW_004517285.1 | Scaffold2301 | 41611                   | TT                              | CC                | 1946677495               |
| SNP_P3_166619_43171 | NW_004517285.1 | Scaffold2301 | 43171                   | AA                              | TT                | 1946677497               |
| SNP_P3_166620_43216 | NW_004517285.1 | Scaffold2301 | 43216                   | AA                              | GG                | 1946677499               |
| SNP_P3_166621_43228 | NW_004517285.1 | Scaffold2301 | 43228                   | CC                              | GG                | 1946677501               |
| SNP_P3_166622_43509 | NW_004517285.1 | Scaffold2301 | 43509                   | TT                              | GG                | 1946677504               |
| SNP_P3_166623_43539 | NW_004517285.1 | Scaffold2301 | 43539                   | TT                              | CC                | 1946677506               |
| SNP_P3_166624_52696 | NW_004517285.1 | Scaffold2301 | 52696                   | CC                              | GG                | 1946677508               |
| SNP_P3_166625_53627 | NW_004517285.1 | Scaffold2301 | 53627                   | GG                              | AA                | 1946677510               |
| SNP_P3_166626_53654 | NW_004517285.1 | Scaffold2301 | 53654                   | TT                              | AA                | 1946677512               |
| SNP_P3_166627_53663 | NW_004517285.1 | Scaffold2301 | 53663                   | AA                              | GG                | 1946677514               |
| SNP_P3_166628_53950 | NW_004517285.1 | Scaffold2301 | 53950                   | AA                              | GG                | 1946677516               |
| SNP_P3_166629_53952 | NW_004517285.1 | Scaffold2301 | 53952                   | GG                              | CC                | 1946677518               |
| SNP_P3_166630_53964 | NW_004517285.1 | Scaffold2301 | 53964                   | GG                              | AA                | 1946677520               |
| SNP_P3_166631_53985 | NW_004517285.1 | Scaffold2301 | 53985                   | GG                              | TT                | 1946677522               |
| SNP_P3_166632_54032 | NW_004517285.1 | Scaffold2301 | 54032                   | AA                              | CC                | 1946677524               |
| SNP_P3_166633_54289 | NW_004517285.1 | Scaffold2301 | 54289                   | AA                              | CC                | 1946677526               |
| SNP_P3_166635_54397 | NW_004517285.1 | Scaffold2301 | 54397                   | AA                              | CC                | 1946677528               |
| SNP_P3_166636_54458 | NW_004517285.1 | Scaffold2301 | 54458                   | TT                              | GG                | 1946677530               |
| SNP_P3_166638_54573 | NW_004517285.1 | Scaffold2301 | 54573                   | GG                              | AA                | 1946677532               |
| SNP_P3_166639_54577 | NW_004517285.1 | Scaffold2301 | 54577                   | CC                              | TT                | 1946677534               |
| SNP_P3_166640_54698 | NW_004517285.1 | Scaffold2301 | 54698                   | TT                              | AA                | 1946677536               |
| SNP_P3_166641_54726 | NW_004517285.1 | Scaffold2301 | 54726                   | TT                              | AA                | 1946677538               |
| SNP_P3_166642_55701 | NW_004517285.1 | Scaffold2301 | 55701                   | GG                              | AA                | 1946677540               |

| SNPs IDs            | Chromosome IDs | Chromosomes  | Physical positions (bp) | CDC Frontier (Reference genome) | (Pusa 256 & HPNB) | NCBI SNPdb Accession IDs |
|---------------------|----------------|--------------|-------------------------|---------------------------------|-------------------|--------------------------|
| SNP_P3_166643_55716 | NW_004517285.1 | Scaffold2301 | 55716                   | TT                              | CC                | 1946677543               |
| SNP_P3_166644_55775 | NW_004517285.1 | Scaffold2301 | 55775                   | GG                              | CC                | 1946677545               |
| SNP_P3_166645_56625 | NW_004517285.1 | Scaffold2301 | 56625                   | AA                              | TT                | 1946677547               |
| SNP_P3_166646_57296 | NW_004517285.1 | Scaffold2301 | 57296                   | TT                              | CC                | 1946677549               |
| SNP_P3_166647_57427 | NW_004517285.1 | Scaffold2301 | 57427                   | AA                              | GG                | 1946677551               |
| SNP_P3_166648_57484 | NW_004517285.1 | Scaffold2301 | 57484                   | CC                              | TT                | 1946677553               |
| SNP_P3_166649_60700 | NW_004517285.1 | Scaffold2301 | 60700                   | GG                              | AA                | 1946677555               |
| SNP_P3_166650_61324 | NW_004517285.1 | Scaffold2301 | 61324                   | GG                              | TT                | 1946677557               |
| SNP_P3_166651_61365 | NW_004517285.1 | Scaffold2301 | 61365                   | TT                              | CC                | 1946677559               |
| SNP_P3_166652_61420 | NW_004517285.1 | Scaffold2301 | 61420                   | TT                              | CC                | 1946677561               |
| SNP_P3_166653_61465 | NW_004517285.1 | Scaffold2301 | 61465                   | TT                              | AA                | 1946677563               |
| SNP_P3_166654_61535 | NW_004517285.1 | Scaffold2301 | 61535                   | GG                              | AA                | 1946677565               |
| SNP_P3_166655_61556 | NW_004517285.1 | Scaffold2301 | 61556                   | AA                              | GG                | 1946677567               |
| SNP_P3_166656_61612 | NW_004517285.1 | Scaffold2301 | 61612                   | CC                              | GG                | 1946677569               |
| SNP_P3_166657_61660 | NW_004517285.1 | Scaffold2301 | 61660                   | TT                              | CC                | 1946677571               |
| SNP_P3_166658_64479 | NW_004517285.1 | Scaffold2301 | 64479                   | AA                              | GG                | 1946677573               |
| SNP_P3_166659_64587 | NW_004517285.1 | Scaffold2301 | 64587                   | CC                              | AA                | 1946677575               |
| SNP_P3_166660_64756 | NW_004517285.1 | Scaffold2301 | 64756                   | GG                              | CC                | 1946677577               |
| SNP_P3_166661_64800 | NW_004517285.1 | Scaffold2301 | 64800                   | GG                              | AA                | 1946677579               |
| SNP_P3_166662_64864 | NW_004517285.1 | Scaffold2301 | 64864                   | AA                              | CC                | 1946677582               |
| SNP_P3_166664_65036 | NW_004517285.1 | Scaffold2301 | 65036                   | TT                              | GG                | 1946677584               |
| SNP_P3_166665_65163 | NW_004517285.1 | Scaffold2301 | 65163                   | AA                              | TT                | 1946677586               |
| SNP_P3_166666_65266 | NW_004517285.1 | Scaffold2301 | 65266                   | AA                              | GG                | 1946677588               |
| SNP_P3_166668_65354 | NW_004517285.1 | Scaffold2301 | 65354                   | TT                              | AA                | 1946677590               |
| SNP_P3_166669_69173 | NW_004517285.1 | Scaffold2301 | 69173                   | AA                              | TT                | 1946677592               |
| SNP_P3_166670_73885 | NW_004517285.1 | Scaffold2301 | 73885                   | TT                              | CC                | 1946677594               |
| SNP_P3_166671_73911 | NW_004517285.1 | Scaffold2301 | 73911                   | AA                              | GG                | 1946677596               |
| SNP_P3_166672_73912 | NW_004517285.1 | Scaffold2301 | 73912                   | TT                              | AA                | 1946677598               |
| SNP_P3_166673_483   | NW_004517287.1 | Scaffold2303 | 483                     | AA                              | GG                | 1946677600               |
| SNP_P3_166674_491   | NW_004517287.1 | Scaffold2303 | 491                     | GG                              | CC                | 1946677602               |
| SNP_P3_166675_536   | NW_004517287.1 | Scaffold2303 | 536                     | GG                              | AA                | 1946677604               |
| SNP_P3_166676_843   | NW_004517287.1 | Scaffold2303 | 843                     | AA                              | TT                | 1946677606               |
| SNP_P3_166677_869   | NW_004517287.1 | Scaffold2303 | 869                     | AA                              | TT                | 1946677608               |
| SNP_P3_166678_794   | NW_004517288.1 | Scaffold2304 | 794                     | AA                              | GG                | 1946677610               |
| SNP_P3_166679_4825  | NW_004517290.1 | Scaffold2306 | 4825                    | GG                              | AA                | 1946677612               |
| SNP_P3_166680_4190  | NW_004517292.1 | Scaffold2309 | 4190                    | TT                              | CC                | 1946677614               |
| SNP_P3_166681_6256  | NW_004517292.1 | Scaffold2309 | 6256                    | GG                              | CC                | 1946677616               |
| SNP_P3_166682_6260  | NW_004517292.1 | Scaffold2309 | 6260                    | TT                              | GG                | 1946677618               |
| SNP_P3_166683_6284  | NW_004517292.1 | Scaffold2309 | 6284                    | CC                              | TT                | 1946677621               |
| SNP_P3_166684_6328  | NW_004517292.1 | Scaffold2309 | 6328                    | CC                              | TT                | 1946677623               |
| SNP_P3_166685_483   | NW_004517293.1 | Scaffold2311 | 483                     | AA                              | GG                | 1946677625               |
| SNP_P3_166686_514   | NW_004517293.1 | Scaffold2311 | 514                     | AA                              | GG                | 1946677627               |

| SNPs IDs            | Chromosome IDs | Chromosomes  | Physical positions (bp) | CDC Frontier (Reference genome) | (Pusa 256 & HPNB) | NCBI SNPdb Accession IDs |
|---------------------|----------------|--------------|-------------------------|---------------------------------|-------------------|--------------------------|
| SNP_P3_166687_26459 | NW_004517293.1 | Scaffold2311 | 26459                   | CC                              | AA                | 1946677629               |
| SNP_P3_166688_41380 | NW_004517293.1 | Scaffold2311 | 41380                   | GG                              | TT                | 1946677631               |
| SNP_P3_166689_41492 | NW_004517293.1 | Scaffold2311 | 41492                   | AA                              | GG                | 1946677634               |
| SNP_P3_166690_41499 | NW_004517293.1 | Scaffold2311 | 41499                   | CC                              | TT                | 1946677636               |
| SNP_P3_166691_41695 | NW_004517293.1 | Scaffold2311 | 41695                   | TT                              | AA                | 1946677638               |
| SNP_P3_166692_46577 | NW_004517293.1 | Scaffold2311 | 46577                   | AA                              | TT                | 1946677640               |
| SNP_P3_166693_46597 | NW_004517293.1 | Scaffold2311 | 46597                   | TT                              | CC                | 1946677642               |
| SNP_P3_166694_46664 | NW_004517293.1 | Scaffold2311 | 46664                   | CC                              | TT                | 1946677644               |
| SNP_P3_166695_46940 | NW_004517293.1 | Scaffold2311 | 46940                   | CC                              | TT                | 1946677646               |
| SNP_P3_166696_50622 | NW_004517293.1 | Scaffold2311 | 50622                   | AA                              | GG                | 1946677648               |
| SNP_P3_166697_50665 | NW_004517293.1 | Scaffold2311 | 50665                   | CC                              | AA                | 1946677650               |
| SNP_P3_166698_50702 | NW_004517293.1 | Scaffold2311 | 50702                   | AA                              | GG                | 1946677652               |
| SNP_P3_166699_78854 | NW_004517293.1 | Scaffold2311 | 78854                   | CC                              | TT                | 1946677654               |
| SNP_P3_166700_87781 | NW_004517293.1 | Scaffold2311 | 87781                   | CC                              | TT                | 1946677656               |
| SNP_P3_166701_88104 | NW_004517293.1 | Scaffold2311 | 88104                   | AA                              | TT                | 1946677658               |
| SNP_P3_166702_95296 | NW_004517293.1 | Scaffold2311 | 95296                   | TT                              | CC                | 1946677661               |
| SNP_P3_166703_95317 | NW_004517293.1 | Scaffold2311 | 95317                   | AA                              | CC                | 1946677663               |
| SNP_P3_166704_95332 | NW_004517293.1 | Scaffold2311 | 95332                   | CC                              | TT                | 1946677665               |
| SNP_P3_166705_95346 | NW_004517293.1 | Scaffold2311 | 95346                   | AA                              | CC                | 1946677667               |
| SNP_P3_166706_644   | NW_004517295.1 | Scaffold2314 | 644                     | GG                              | TT                | 1946677669               |
| SNP_P3_166707_678   | NW_004517295.1 | Scaffold2314 | 678                     | GG                              | CC                | 1946677671               |
| SNP_P3_166708_684   | NW_004517295.1 | Scaffold2314 | 684                     | CC                              | TT                | 1946677673               |
| SNP_P3_166710_427   | NW_004517297.1 | Scaffold2319 | 427                     | TT                              | AA                | 1946677675               |
| SNP_P3_166711_492   | NW_004517297.1 | Scaffold2319 | 492                     | AA                              | CC                | 1946677677               |
| SNP_P3_166712_518   | NW_004517297.1 | Scaffold2319 | 518                     | AA                              | TT                | 1946677679               |
| SNP_P3_166713_636   | NW_004517297.1 | Scaffold2319 | 636                     | AA                              | TT                | 1946677681               |
| SNP_P3_166714_677   | NW_004517297.1 | Scaffold2319 | 677                     | AA                              | TT                | 1946677683               |
| SNP_P3_166715_898   | NW_004517297.1 | Scaffold2319 | 898                     | GG                              | AA                | 1946677685               |
| SNP_P3_166716_953   | NW_004517297.1 | Scaffold2319 | 953                     | CC                              | TT                | 1946677687               |
| SNP_P3_166717_14723 | NW_004517298.1 | Scaffold2320 | 14723                   | CC                              | TT                | 1946677690               |
| SNP_P3_166718_14768 | NW_004517298.1 | Scaffold2320 | 14768                   | GG                              | AA                | 1946677692               |
| SNP_P3_166719_14784 | NW_004517298.1 | Scaffold2320 | 14784                   | AA                              | GG                | 1946677694               |
| SNP_P3_166720_14907 | NW_004517298.1 | Scaffold2320 | 14907                   | TT                              | CC                | 1946677696               |
| SNP_P3_166721_14913 | NW_004517298.1 | Scaffold2320 | 14913                   | TT                              | AA                | 1946677699               |
| SNP_P3_166722_14919 | NW_004517298.1 | Scaffold2320 | 14919                   | AA                              | GG                | 1946677701               |
| SNP_P3_166723_2757  | NW_004517300.1 | Scaffold2322 | 2757                    | AA                              | TT                | 1946677703               |
| SNP_P3_166724_6488  | NW_004517300.1 | Scaffold2322 | 6488                    | GG                              | AA                | 1946677705               |
| SNP_P3_166725_7166  | NW_004517300.1 | Scaffold2322 | 7166                    | GG                              | AA                | 1946677707               |
| SNP_P3_166728_941   | NW_004517302.1 | Scaffold2325 | 941                     | CC                              | TT                | 1946677709               |
| SNP_P3_166729_944   | NW_004517302.1 | Scaffold2325 | 944                     | AA                              | GG                | 1946677711               |
| SNP_P3_166730_967   | NW_004517302.1 | Scaffold2325 | 967                     | AA                              | GG                | 1946677713               |
| SNP_P3_166731_2741  | NW_004517302.1 | Scaffold2325 | 2741                    | CC                              | TT                | 1946677715               |

| SNPs IDs            | Chromosome IDs | Chromosomes  | Physical positions (bp) | CDC Frontier (Reference genome) | (Pusa 256 & HPNB) | NCBI SNPdb Accession IDs |
|---------------------|----------------|--------------|-------------------------|---------------------------------|-------------------|--------------------------|
| SNP_P3_166733_18021 | NW_004517302.1 | Scaffold2325 | 18021                   | TT                              | GG                | 1946677717               |
| SNP_P3_166734_22505 | NW_004517302.1 | Scaffold2325 | 22505                   | GG                              | CC                | 1946677719               |
| SNP_P3_166735_35208 | NW_004517302.1 | Scaffold2325 | 35208                   | AA                              | CC                | 1946677721               |
| SNP_P3_166736_35571 | NW_004517302.1 | Scaffold2325 | 35571                   | AA                              | GG                | 1946677723               |
| SNP_P3_166737_49083 | NW_004517302.1 | Scaffold2325 | 49083                   | AA                              | GG                | 1946677725               |
| SNP_P3_166739_51326 | NW_004517302.1 | Scaffold2325 | 51326                   | GG                              | AA                | 1946677727               |
| SNP_P3_166740_51337 | NW_004517302.1 | Scaffold2325 | 51337                   | GG                              | AA                | 1946677729               |
| SNP_P3_166741_51667 | NW_004517302.1 | Scaffold2325 | 51667                   | AA                              | GG                | 1946677731               |
| SNP_P3_166742_51723 | NW_004517302.1 | Scaffold2325 | 51723                   | AA                              | GG                | 1946677733               |
| SNP_P3_166743_51867 | NW_004517302.1 | Scaffold2325 | 51867                   | AA                              | GG                | 1946677735               |
| SNP_P3_166744_52091 | NW_004517302.1 | Scaffold2325 | 52091                   | TT                              | GG                | 1946677737               |
| SNP_P3_166745_52098 | NW_004517302.1 | Scaffold2325 | 52098                   | AA                              | GG                | 1946677739               |
| SNP_P3_166746_58431 | NW_004517302.1 | Scaffold2325 | 58431                   | TT                              | AA                | 1946677741               |
| SNP_P3_166748_58557 | NW_004517302.1 | Scaffold2325 | 58557                   | AA                              | TT                | 1946677743               |
| SNP_P3_166749_58650 | NW_004517302.1 | Scaffold2325 | 58650                   | CC                              | TT                | 1946677745               |
| SNP_P3_166750_58791 | NW_004517302.1 | Scaffold2325 | 58791                   | TT                              | CC                | 1946677747               |
| SNP_P3_166751_58793 | NW_004517302.1 | Scaffold2325 | 58793                   | GG                              | CC                | 1946677748               |
| SNP_P3_166752_58880 | NW_004517302.1 | Scaffold2325 | 58880                   | AA                              | TT                | 1946677750               |
| SNP_P3_166753_58908 | NW_004517302.1 | Scaffold2325 | 58908                   | AA                              | CC                | 1946677752               |
| SNP_P3_166755_59077 | NW_004517302.1 | Scaffold2325 | 59077                   | GG                              | AA                | 1946677754               |
| SNP_P3_166756_59268 | NW_004517302.1 | Scaffold2325 | 59268                   | AA                              | TT                | 1946677756               |
| SNP_P3_166757_59987 | NW_004517302.1 | Scaffold2325 | 59987                   | CC                              | GG                | 1946677758               |
| SNP_P3_166758_60057 | NW_004517302.1 | Scaffold2325 | 60057                   | CC                              | TT                | 1946677760               |
| SNP_P3_166759_60095 | NW_004517302.1 | Scaffold2325 | 60095                   | GG                              | CC                | 1946677762               |
| SNP_P3_166760_60508 | NW_004517302.1 | Scaffold2325 | 60508                   | AA                              | TT                | 1946677765               |
| SNP_P3_166761_60620 | NW_004517302.1 | Scaffold2325 | 60620                   | GG                              | AA                | 1946677767               |
| SNP_P3_166762_60788 | NW_004517302.1 | Scaffold2325 | 60788                   | CC                              | TT                | 1946677769               |
| SNP_P3_166763_61071 | NW_004517302.1 | Scaffold2325 | 61071                   | GG                              | AA                | 1946677771               |
| SNP_P3_166764_61081 | NW_004517302.1 | Scaffold2325 | 61081                   | AA                              | TT                | 1946677773               |
| SNP_P3_166765_69657 | NW_004517302.1 | Scaffold2325 | 69657                   | AA                              | TT                | 1946677775               |
| SNP_P3_166766_2925  | NW_004517303.1 | Scaffold2328 | 2925                    | TT                              | AA                | 1946677777               |
| SNP_P3_166767_10989 | NW_004517303.1 | Scaffold2328 | 10989                   | AA                              | CC                | 1946677779               |
| SNP_P3_166768_13432 | NW_004517303.1 | Scaffold2328 | 13432                   | GG                              | TT                | 1946677781               |
| SNP_P3_166769_13454 | NW_004517303.1 | Scaffold2328 | 13454                   | TT                              | CC                | 1946677783               |
| SNP_P3_166770_13458 | NW_004517303.1 | Scaffold2328 | 13458                   | AA                              | CC                | 1946677785               |
| SNP_P3_166771_13459 | NW_004517303.1 | Scaffold2328 | 13459                   | TT                              | CC                | 1946677787               |
| SNP_P3_166772_13573 | NW_004517303.1 | Scaffold2328 | 13573                   | CC                              | TT                | 1946677789               |
| SNP_P3_166773_13782 | NW_004517303.1 | Scaffold2328 | 13782                   | AA                              | GG                | 1946677791               |
| SNP_P3_166774_13939 | NW_004517303.1 | Scaffold2328 | 13939                   | TT                              | GG                | 1946677793               |
| SNP_P3_166775_13956 | NW_004517303.1 | Scaffold2328 | 13956                   | TT                              | CC                | 1946677795               |
| SNP_P3_166777_64297 | NW_004517305.1 | Scaffold2330 | 64297                   | GG                              | TT                | 1946677797               |
| SNP_P3_166779_68814 | NW_004517305.1 | Scaffold2330 | 68814                   | CC                              | GG                | 1946677799               |



| SNPs IDs             | Chromosome IDs | Chromosomes  | Physical positions (bp) | CDC Frontier (Reference genome) | (Pusa 256 & HPNB) | NCBI SNPdb Accession IDs |
|----------------------|----------------|--------------|-------------------------|---------------------------------|-------------------|--------------------------|
| SNP_P3_166781_91879  | NW_004517305.1 | Scaffold2330 | 91879                   | AA                              | GG                | 1946677801               |
| SNP_P3_166782_94521  | NW_004517305.1 | Scaffold2330 | 94521                   | GG                              | AA                | 1946677803               |
| SNP_P3_166783_94543  | NW_004517305.1 | Scaffold2330 | 94543                   | GG                              | AA                | 1946677805               |
| SNP_P3_166784_94549  | NW_004517305.1 | Scaffold2330 | 94549                   | TT                              | AA                | 1946677807               |
| SNP_P3_166785_94907  | NW_004517305.1 | Scaffold2330 | 94907                   | TT                              | CC                | 1946677809               |
| SNP_P3_166786_94922  | NW_004517305.1 | Scaffold2330 | 94922                   | AA                              | TT                | 1946677812               |
| SNP_P3_166787_94923  | NW_004517305.1 | Scaffold2330 | 94923                   | AA                              | TT                | 1946677814               |
| SNP_P3_166788_94925  | NW_004517305.1 | Scaffold2330 | 94925                   | AA                              | TT                | 1946677816               |
| SNP_P3_166789_94933  | NW_004517305.1 | Scaffold2330 | 94933                   | TT                              | AA                | 1946677818               |
| SNP_P3_166791_104367 | NW_004517305.1 | Scaffold2330 | 104367                  | AA                              | CC                | 1946677820               |
| SNP_P3_166792_105322 | NW_004517305.1 | Scaffold2330 | 105322                  | TT                              | CC                | 1946677822               |
| SNP_P3_166794_334    | NW_004517306.1 | Scaffold2331 | 334                     | GG                              | AA                | 1946677824               |
| SNP_P3_166795_426    | NW_004517306.1 | Scaffold2331 | 426                     | TT                              | AA                | 1946677826               |
| SNP_P3_166796_461    | NW_004517306.1 | Scaffold2331 | 461                     | AA                              | GG                | 1946677828               |
| SNP_P3_166797_496    | NW_004517306.1 | Scaffold2331 | 496                     | CC                              | TT                | 1946677831               |
| SNP_P3_166798_306    | NW_004517308.1 | Scaffold2334 | 306                     | GG                              | AA                | 1946677833               |
| SNP_P3_166799_666    | NW_004517308.1 | Scaffold2334 | 666                     | AA                              | CC                | 1946677835               |
| SNP_P3_166800_64     | NW_004517309.1 | Scaffold2337 | 64                      | GG                              | TT                | 1946677838               |
| SNP_P3_166801_2135   | NW_004517309.1 | Scaffold2337 | 2135                    | AA                              | TT                | 1946678008               |
| SNP_P3_166802_19040  | NW_004517309.1 | Scaffold2337 | 19040                   | TT                              | CC                | 1946678010               |
| SNP_P3_166803_745    | NW_004517313.1 | Scaffold2342 | 745                     | CC                              | TT                | 1946678012               |
| SNP_P3_166804_944    | NW_004517313.1 | Scaffold2342 | 944                     | CC                              | AA                | 1946678015               |
| SNP_P3_166805_981    | NW_004517313.1 | Scaffold2342 | 981                     | CC                              | TT                | 1946678017               |
| SNP_P3_166806_1020   | NW_004517313.1 | Scaffold2342 | 1020                    | TT                              | AA                | 1946678019               |
| SNP_P3_166807_3456   | NW_004517313.1 | Scaffold2342 | 3456                    | GG                              | CC                | 1946678021               |
| SNP_P3_166808_15153  | NW_004517313.1 | Scaffold2342 | 15153                   | AA                              | CC                | 1946678023               |
| SNP_P3_166809_20126  | NW_004517313.1 | Scaffold2342 | 20126                   | TT                              | CC                | 1946678025               |
| SNP_P3_166810_22878  | NW_004517313.1 | Scaffold2342 | 22878                   | GG                              | AA                | 1946678027               |
| SNP_P3_166811_22935  | NW_004517313.1 | Scaffold2342 | 22935                   | TT                              | GG                | 1946678030               |
| SNP_P3_166812_23175  | NW_004517313.1 | Scaffold2342 | 23175                   | CC                              | AA                | 1946678032               |
| SNP_P3_166813_23194  | NW_004517313.1 | Scaffold2342 | 23194                   | AA                              | TT                | 1946678034               |
| SNP_P3_166814_13566  | NW_004517314.1 | Scaffold2343 | 13566                   | TT                              | AA                | 1946678036               |
| SNP_P3_166816_19833  | NW_004517314.1 | Scaffold2343 | 19833                   | AA                              | GG                | 1946678038               |
| SNP_P3_166817_20313  | NW_004517314.1 | Scaffold2343 | 20313                   | TT                              | CC                | 1946678040               |
| SNP_P3_166818_20324  | NW_004517314.1 | Scaffold2343 | 20324                   | AA                              | CC                | 1946678042               |
| SNP_P3_166819_20382  | NW_004517314.1 | Scaffold2343 | 20382                   | AA                              | TT                | 1946678044               |
| SNP_P3_166820_23849  | NW_004517314.1 | Scaffold2343 | 23849                   | AA                              | TT                | 1946678046               |
| SNP_P3_166821_24252  | NW_004517314.1 | Scaffold2343 | 24252                   | TT                              | CC                | 1946678048               |
| SNP_P3_166822_40407  | NW_004517314.1 | Scaffold2343 | 40407                   | TT                              | GG                | 1946678049               |
| SNP_P3_166823_40959  | NW_004517314.1 | Scaffold2343 | 40959                   | GG                              | AA                | 1946678050               |
| SNP_P3_166824_45714  | NW_004517314.1 | Scaffold2343 | 45714                   | GG                              | AA                | 1946678051               |
| SNP_P3_166825_45823  | NW_004517314.1 | Scaffold2343 | 45823                   | AA                              | GG                | 1946678052               |

| SNPs IDs            | Chromosome IDs | Chromosomes  | Physical positions (bp) | CDC Frontier (Reference genome) | (Pusa 256 & HPNB) | NCBI SNPdb Accession IDs |
|---------------------|----------------|--------------|-------------------------|---------------------------------|-------------------|--------------------------|
| SNP_P3_166826_46826 | NW_004517314.1 | Scaffold2343 | 46826                   | TT                              | CC                | 1946678053               |
| SNP_P3_166827_47134 | NW_004517314.1 | Scaffold2343 | 47134                   | TT                              | GG                | 1946678055               |
| SNP_P3_166828_1507  | NW_004517315.1 | Scaffold2344 | 1507                    | TT                              | CC                | 1946678057               |
| SNP_P3_166829_1509  | NW_004517315.1 | Scaffold2344 | 1509                    | TT                              | AA                | 1946678059               |
| SNP_P3_166830_1521  | NW_004517315.1 | Scaffold2344 | 1521                    | TT                              | CC                | 1946678061               |
| SNP_P3_166831_1533  | NW_004517315.1 | Scaffold2344 | 1533                    | GG                              | AA                | 1946678063               |
| SNP_P3_166832_529   | NW_004517316.1 | Scaffold2345 | 529                     | CC                              | TT                | 1946678065               |
| SNP_P3_166833_732   | NW_004517316.1 | Scaffold2345 | 732                     | CC                              | GG                | 1946678067               |
| SNP_P3_166834_793   | NW_004517316.1 | Scaffold2345 | 793                     | CC                              | TT                | 1946678070               |
| SNP_P3_166835_796   | NW_004517316.1 | Scaffold2345 | 796                     | AA                              | CC                | 1946678072               |
| SNP_P3_166836_1023  | NW_004517316.1 | Scaffold2345 | 1023                    | GG                              | AA                | 1946678074               |
| SNP_P3_166837_2862  | NW_004517316.1 | Scaffold2345 | 2862                    | TT                              | AA                | 1946678076               |
| SNP_P3_166838_3066  | NW_004517316.1 | Scaffold2345 | 3066                    | CC                              | AA                | 1946678078               |
| SNP_P3_166839_11594 | NW_004517316.1 | Scaffold2345 | 11594                   | TT                              | AA                | 1946678080               |
| SNP_P3_166841_13044 | NW_004517316.1 | Scaffold2345 | 13044                   | CC                              | AA                | 1946678082               |
| SNP_P3_166842_13054 | NW_004517316.1 | Scaffold2345 | 13054                   | AA                              | GG                | 1946678084               |
| SNP_P3_166843_13100 | NW_004517316.1 | Scaffold2345 | 13100                   | GG                              | TT                | 1946678086               |
| SNP_P3_166844_13591 | NW_004517316.1 | Scaffold2345 | 13591                   | TT                              | AA                | 1946678088               |
| SNP_P3_166845_16436 | NW_004517316.1 | Scaffold2345 | 16436                   | GG                              | TT                | 1946678090               |
| SNP_P3_166846_16560 | NW_004517316.1 | Scaffold2345 | 16560                   | TT                              | AA                | 1946678092               |
| SNP_P3_166847_16924 | NW_004517316.1 | Scaffold2345 | 16924                   | AA                              | GG                | 1946678094               |
| SNP_P3_166848_17912 | NW_004517316.1 | Scaffold2345 | 17912                   | CC                              | AA                | 1946678096               |
| SNP_P3_166850_21288 | NW_004517316.1 | Scaffold2345 | 21288                   | TT                              | AA                | 1946678098               |
| SNP_P3_166851_21346 | NW_004517316.1 | Scaffold2345 | 21346                   | GG                              | AA                | 1946678099               |
| SNP_P3_166853_21422 | NW_004517316.1 | Scaffold2345 | 21422                   | AA                              | GG                | 1946678101               |
| SNP_P3_166854_314   | NW_004517317.1 | Scaffold2346 | 314                     | AA                              | GG                | 1946678103               |
| SNP_P3_166855_317   | NW_004517317.1 | Scaffold2346 | 317                     | AA                              | GG                | 1946678105               |
| SNP_P3_166856_433   | NW_004517317.1 | Scaffold2346 | 433                     | TT                              | GG                | 1946678107               |
| SNP_P3_166857_501   | NW_004517317.1 | Scaffold2346 | 501                     | CC                              | AA                | 1946678109               |
| SNP_P3_166858_569   | NW_004517317.1 | Scaffold2346 | 569                     | AA                              | TT                | 1946678111               |
| SNP_P3_166859_870   | NW_004517317.1 | Scaffold2346 | 870                     | CC                              | AA                | 1946678113               |
| SNP_P3_166860_898   | NW_004517317.1 | Scaffold2346 | 898                     | TT                              | AA                | 1946678115               |
| SNP_P3_166861_917   | NW_004517317.1 | Scaffold2346 | 917                     | AA                              | GG                | 1946678118               |
| SNP_P3_166862_933   | NW_004517317.1 | Scaffold2346 | 933                     | GG                              | AA                | 1946678120               |
| SNP_P3_166863_952   | NW_004517317.1 | Scaffold2346 | 952                     | AA                              | TT                | 1946678122               |
| SNP_P3_166864_972   | NW_004517317.1 | Scaffold2346 | 972                     | CC                              | TT                | 1946678124               |
| SNP_P3_166865_974   | NW_004517317.1 | Scaffold2346 | 974                     | AA                              | GG                | 1946678126               |
| SNP_P3_166866_989   | NW_004517317.1 | Scaffold2346 | 989                     | CC                              | AA                | 1946678128               |
| SNP_P3_166867_1008  | NW_004517317.1 | Scaffold2346 | 1008                    | CC                              | TT                | 1946678130               |
| SNP_P3_166868_1050  | NW_004517317.1 | Scaffold2346 | 1050                    | GG                              | AA                | 1946678132               |
| SNP_P3_166869_1137  | NW_004517317.1 | Scaffold2346 | 1137                    | CC                              | TT                | 1946678134               |
| SNP_P3_166870_1218  | NW_004517317.1 | Scaffold2346 | 1218                    | TT                              | AA                | 1946678136               |

| SNPs IDs            | Chromosome IDs | Chromosomes  | Physical positions (bp) | CDC Frontier (Reference genome) | (Pusa 256 & HPNB) | NCBI SNPdb Accession IDs |
|---------------------|----------------|--------------|-------------------------|---------------------------------|-------------------|--------------------------|
| SNP_P3_166871_1245  | NW_004517317.1 | Scaffold2346 | 1245                    | TT                              | CC                | 1946678138               |
| SNP_P3_166872_1254  | NW_004517317.1 | Scaffold2346 | 1254                    | CC                              | TT                | 1946678140               |
| SNP_P3_166873_1263  | NW_004517317.1 | Scaffold2346 | 1263                    | CC                              | GG                | 1946678142               |
| SNP_P3_166874_1378  | NW_004517317.1 | Scaffold2346 | 1378                    | TT                              | AA                | 1946678144               |
| SNP_P3_166875_1456  | NW_004517317.1 | Scaffold2346 | 1456                    | CC                              | TT                | 1946678146               |
| SNP_P3_166876_1517  | NW_004517317.1 | Scaffold2346 | 1517                    | TT                              | GG                | 1946678148               |
| SNP_P3_166877_1524  | NW_004517317.1 | Scaffold2346 | 1524                    | CC                              | TT                | 1946678150               |
| SNP_P3_166878_1682  | NW_004517317.1 | Scaffold2346 | 1682                    | TT                              | GG                | 1946678152               |
| SNP_P3_166879_1723  | NW_004517317.1 | Scaffold2346 | 1723                    | GG                              | CC                | 1946678154               |
| SNP_P3_166880_1745  | NW_004517317.1 | Scaffold2346 | 1745                    | GG                              | AA                | 1946678156               |
| SNP_P3_166881_7169  | NW_004517317.1 | Scaffold2346 | 7169                    | GG                              | TT                | 1946678158               |
| SNP_P3_166883_7417  | NW_004517317.1 | Scaffold2346 | 7417                    | CC                              | AA                | 1946678160               |
| SNP_P3_166884_7457  | NW_004517317.1 | Scaffold2346 | 7457                    | TT                              | CC                | 1946678163               |
| SNP_P3_166885_7672  | NW_004517317.1 | Scaffold2346 | 7672                    | GG                              | AA                | 1946678165               |
| SNP_P3_166886_7676  | NW_004517317.1 | Scaffold2346 | 7676                    | CC                              | AA                | 1946678167               |
| SNP_P3_166887_7729  | NW_004517317.1 | Scaffold2346 | 7729                    | TT                              | GG                | 1946678169               |
| SNP_P3_166888_26280 | NW_004517317.1 | Scaffold2346 | 26280                   | CC                              | AA                | 1946678171               |
| SNP_P3_166889_26329 | NW_004517317.1 | Scaffold2346 | 26329                   | TT                              | CC                | 1946678173               |
| SNP_P3_166890_26336 | NW_004517317.1 | Scaffold2346 | 26336                   | TT                              | GG                | 1946678175               |
| SNP_P3_166891_26555 | NW_004517317.1 | Scaffold2346 | 26555                   | GG                              | AA                | 1946678177               |
| SNP_P3_166892_26591 | NW_004517317.1 | Scaffold2346 | 26591                   | AA                              | CC                | 1946678179               |
| SNP_P3_166893_26803 | NW_004517317.1 | Scaffold2346 | 26803                   | AA                              | GG                | 1946678181               |
| SNP_P3_166894_27349 | NW_004517317.1 | Scaffold2346 | 27349                   | TT                              | AA                | 1946678183               |
| SNP_P3_166895_27798 | NW_004517317.1 | Scaffold2346 | 27798                   | GG                              | TT                | 1946678185               |
| SNP_P3_166896_27826 | NW_004517317.1 | Scaffold2346 | 27826                   | CC                              | TT                | 1946678187               |
| SNP_P3_166897_27899 | NW_004517317.1 | Scaffold2346 | 27899                   | GG                              | TT                | 1946678189               |
| SNP_P3_166898_27952 | NW_004517317.1 | Scaffold2346 | 27952                   | TT                              | GG                | 1946678191               |
| SNP_P3_166899_27996 | NW_004517317.1 | Scaffold2346 | 27996                   | AA                              | CC                | 1946678193               |
| SNP_P3_166900_28056 | NW_004517317.1 | Scaffold2346 | 28056                   | TT                              | AA                | 1946678195               |
| SNP_P3_166901_28067 | NW_004517317.1 | Scaffold2346 | 28067                   | CC                              | TT                | 1946678197               |
| SNP_P3_166902_28152 | NW_004517317.1 | Scaffold2346 | 28152                   | CC                              | TT                | 1946678199               |
| SNP_P3_166903_28160 | NW_004517317.1 | Scaffold2346 | 28160                   | CC                              | TT                | 1946678201               |
| SNP_P3_166904_28282 | NW_004517317.1 | Scaffold2346 | 28282                   | AA                              | TT                | 1946678203               |
| SNP_P3_166905_28354 | NW_004517317.1 | Scaffold2346 | 28354                   | TT                              | CC                | 1946678205               |
| SNP_P3_166906_28378 | NW_004517317.1 | Scaffold2346 | 28378                   | TT                              | GG                | 1946678207               |
| SNP_P3_166908_28426 | NW_004517317.1 | Scaffold2346 | 28426                   | CC                              | GG                | 1946678209               |
| SNP_P3_166909_28564 | NW_004517317.1 | Scaffold2346 | 28564                   | GG                              | AA                | 1946678211               |
| SNP_P3_166910_28574 | NW_004517317.1 | Scaffold2346 | 28574                   | AA                              | GG                | 1946678213               |
| SNP_P3_166911_28656 | NW_004517317.1 | Scaffold2346 | 28656                   | CC                              | GG                | 1946678215               |
| SNP_P3_166912_30637 | NW_004517317.1 | Scaffold2346 | 30637                   | TT                              | AA                | 1946678217               |
| SNP_P3_166913_30705 | NW_004517317.1 | Scaffold2346 | 30705                   | GG                              | AA                | 1946678219               |
| SNP_P3_166914_30749 | NW_004517317.1 | Scaffold2346 | 30749                   | CC                              | GG                | 1946678221               |

| SNPs IDs            | Chromosome IDs | Chromosomes  | Physical positions (bp) | CDC Frontier (Reference genome) | (Pusa 256 & HPNB) | NCBI SNPdb Accession IDs |
|---------------------|----------------|--------------|-------------------------|---------------------------------|-------------------|--------------------------|
| SNP_P3_166915_30788 | NW_004517317.1 | Scaffold2346 | 30788                   | TT                              | GG                | 1946678223               |
| SNP_P3_166916_30793 | NW_004517317.1 | Scaffold2346 | 30793                   | AA                              | GG                | 1946678225               |
| SNP_P3_166917_30811 | NW_004517317.1 | Scaffold2346 | 30811                   | GG                              | TT                | 1946678227               |
| SNP_P3_166918_30815 | NW_004517317.1 | Scaffold2346 | 30815                   | TT                              | CC                | 1946678229               |
| SNP_P3_166919_30816 | NW_004517317.1 | Scaffold2346 | 30816                   | CC                              | TT                | 1946678231               |
| SNP_P3_166920_30834 | NW_004517317.1 | Scaffold2346 | 30834                   | CC                              | TT                | 1946678233               |
| SNP_P3_166921_30880 | NW_004517317.1 | Scaffold2346 | 30880                   | TT                              | CC                | 1946678235               |
| SNP_P3_166922_30894 | NW_004517317.1 | Scaffold2346 | 30894                   | GG                              | AA                | 1946678237               |
| SNP_P3_166923_31166 | NW_004517317.1 | Scaffold2346 | 31166                   | TT                              | CC                | 1946678239               |
| SNP_P3_166924_31206 | NW_004517317.1 | Scaffold2346 | 31206                   | CC                              | TT                | 1946678241               |
| SNP_P3_166925_31236 | NW_004517317.1 | Scaffold2346 | 31236                   | TT                              | GG                | 1946678243               |
| SNP_P3_166926_31266 | NW_004517317.1 | Scaffold2346 | 31266                   | AA                              | TT                | 1946678245               |
| SNP_P3_166927_31281 | NW_004517317.1 | Scaffold2346 | 31281                   | AA                              | GG                | 1946678247               |
| SNP_P3_166928_31286 | NW_004517317.1 | Scaffold2346 | 31286                   | AA                              | GG                | 1946678249               |
| SNP_P3_166929_31346 | NW_004517317.1 | Scaffold2346 | 31346                   | CC                              | AA                | 1946678252               |
| SNP_P3_166930_31369 | NW_004517317.1 | Scaffold2346 | 31369                   | AA                              | GG                | 1946678254               |
| SNP_P3_166931_31411 | NW_004517317.1 | Scaffold2346 | 31411                   | GG                              | AA                | 1946678256               |
| SNP_P3_166932_31533 | NW_004517317.1 | Scaffold2346 | 31533                   | AA                              | CC                | 1946678258               |
| SNP_P3_166933_31610 | NW_004517317.1 | Scaffold2346 | 31610                   | GG                              | AA                | 1946678260               |
| SNP_P3_166934_31735 | NW_004517317.1 | Scaffold2346 | 31735                   | GG                              | AA                | 1946678262               |
| SNP_P3_166935_31745 | NW_004517317.1 | Scaffold2346 | 31745                   | CC                              | TT                | 1946678264               |
| SNP_P3_166936_31760 | NW_004517317.1 | Scaffold2346 | 31760                   | AA                              | GG                | 1946678266               |
| SNP_P3_166937_31767 | NW_004517317.1 | Scaffold2346 | 31767                   | TT                              | GG                | 1946678268               |
| SNP_P3_166938_31777 | NW_004517317.1 | Scaffold2346 | 31777                   | AA                              | GG                | 1946678270               |
| SNP_P3_166939_31792 | NW_004517317.1 | Scaffold2346 | 31792                   | CC                              | AA                | 1946678272               |
| SNP_P3_166940_31808 | NW_004517317.1 | Scaffold2346 | 31808                   | CC                              | TT                | 1946678274               |
| SNP_P3_166941_893   | NW_004517318.1 | Scaffold2347 | 893                     | TT                              | AA                | 1946678276               |
| SNP_P3_166942_2005  | NW_004517319.1 | Scaffold2348 | 2005                    | TT                              | AA                | 1946678278               |
| SNP_P3_166943_2464  | NW_004517319.1 | Scaffold2348 | 2464                    | GG                              | AA                | 1946678280               |
| SNP_P3_166944_2484  | NW_004517319.1 | Scaffold2348 | 2484                    | GG                              | AA                | 1946678282               |
| SNP_P3_166945_10033 | NW_004517319.1 | Scaffold2348 | 10033                   | TT                              | GG                | 1946678284               |
| SNP_P3_166946_10097 | NW_004517319.1 | Scaffold2348 | 10097                   | TT                              | CC                | 1946678286               |
| SNP_P3_166947_10212 | NW_004517319.1 | Scaffold2348 | 10212                   | TT                              | CC                | 1946678288               |
| SNP_P3_166948_10430 | NW_004517319.1 | Scaffold2348 | 10430                   | TT                              | GG                | 1946678291               |
| SNP_P3_166949_45413 | NW_004517319.1 | Scaffold2348 | 45413                   | GG                              | AA                | 1946678293               |
| SNP_P3_166950_45844 | NW_004517319.1 | Scaffold2348 | 45844                   | AA                              | GG                | 1946678295               |
| SNP_P3_166951_45861 | NW_004517319.1 | Scaffold2348 | 45861                   | CC                              | TT                | 1946678297               |
| SNP_P3_166952_45891 | NW_004517319.1 | Scaffold2348 | 45891                   | TT                              | GG                | 1946678300               |
| SNP_P3_166953_45898 | NW_004517319.1 | Scaffold2348 | 45898                   | AA                              | GG                | 1946678302               |
| SNP_P3_166954_45920 | NW_004517319.1 | Scaffold2348 | 45920                   | CC                              | TT                | 1946678304               |
| SNP_P3_166955_45957 | NW_004517319.1 | Scaffold2348 | 45957                   | TT                              | CC                | 1946678306               |
| SNP_P3_166956_51978 | NW_004517319.1 | Scaffold2348 | 51978                   | TT                              | AA                | 1946678309               |

| SNPs IDs             | Chromosome IDs | Chromosomes  | Physical positions (bp) | CDC Frontier (Reference genome) | (Pusa 256 & HPNB) | NCBI SNPdb Accession IDs |
|----------------------|----------------|--------------|-------------------------|---------------------------------|-------------------|--------------------------|
| SNP_P3_166957_52139  | NW_004517319.1 | Scaffold2348 | 52139                   | CC                              | TT                | 1946678311               |
| SNP_P3_166958_52294  | NW_004517319.1 | Scaffold2348 | 52294                   | TT                              | GG                | 1946678313               |
| SNP_P3_166959_52306  | NW_004517319.1 | Scaffold2348 | 52306                   | GG                              | AA                | 1946678315               |
| SNP_P3_166960_52329  | NW_004517319.1 | Scaffold2348 | 52329                   | GG                              | AA                | 1946678318               |
| SNP_P3_166961_52407  | NW_004517319.1 | Scaffold2348 | 52407                   | TT                              | CC                | 1946678320               |
| SNP_P3_166962_56011  | NW_004517319.1 | Scaffold2348 | 56011                   | TT                              | CC                | 1946678322               |
| SNP_P3_166963_56020  | NW_004517319.1 | Scaffold2348 | 56020                   | GG                              | AA                | 1946678324               |
| SNP_P3_166964_63988  | NW_004517319.1 | Scaffold2348 | 63988                   | AA                              | CC                | 1946678326               |
| SNP_P3_166965_64017  | NW_004517319.1 | Scaffold2348 | 64017                   | CC                              | AA                | 1946678328               |
| SNP_P3_166966_64181  | NW_004517319.1 | Scaffold2348 | 64181                   | TT                              | AA                | 1946678330               |
| SNP_P3_166967_64223  | NW_004517319.1 | Scaffold2348 | 64223                   | AA                              | GG                | 1946678332               |
| SNP_P3_166968_64237  | NW_004517319.1 | Scaffold2348 | 64237                   | GG                              | TT                | 1946678334               |
| SNP_P3_166969_64280  | NW_004517319.1 | Scaffold2348 | 64280                   | TT                              | CC                | 1946678336               |
| SNP_P3_166970_64345  | NW_004517319.1 | Scaffold2348 | 64345                   | GG                              | AA                | 1946678338               |
| SNP_P3_166971_64493  | NW_004517319.1 | Scaffold2348 | 64493                   | GG                              | CC                | 1946678340               |
| SNP_P3_166972_64561  | NW_004517319.1 | Scaffold2348 | 64561                   | GG                              | CC                | 1946678342               |
| SNP_P3_166973_64564  | NW_004517319.1 | Scaffold2348 | 64564                   | AA                              | GG                | 1946678343               |
| SNP_P3_166974_64596  | NW_004517319.1 | Scaffold2348 | 64596                   | GG                              | AA                | 1946678344               |
| SNP_P3_166975_64610  | NW_004517319.1 | Scaffold2348 | 64610                   | AA                              | CC                | 1946678345               |
| SNP_P3_166976_64924  | NW_004517319.1 | Scaffold2348 | 64924                   | GG                              | TT                | 1946678346               |
| SNP_P3_166977_85448  | NW_004517319.1 | Scaffold2348 | 85448                   | CC                              | TT                | 1946678347               |
| SNP_P3_166978_92776  | NW_004517319.1 | Scaffold2348 | 92776                   | CC                              | TT                | 1946678348               |
| SNP_P3_166979_103983 | NW_004517319.1 | Scaffold2348 | 103983                  | TT                              | AA                | 1946678349               |
| SNP_P3_166980_105306 | NW_004517319.1 | Scaffold2348 | 105306                  | AA                              | CC                | 1946678350               |
| SNP_P3_166981_105564 | NW_004517319.1 | Scaffold2348 | 105564                  | AA                              | TT                | 1946678351               |
| SNP_P3_166982_105736 | NW_004517319.1 | Scaffold2348 | 105736                  | TT                              | CC                | 1946678352               |
| SNP_P3_166983_105772 | NW_004517319.1 | Scaffold2348 | 105772                  | TT                              | GG                | 1946678353               |
| SNP_P3_166984_105783 | NW_004517319.1 | Scaffold2348 | 105783                  | TT                              | CC                | 1946678354               |
| SNP_P3_166985_105803 | NW_004517319.1 | Scaffold2348 | 105803                  | AA                              | CC                | 1946678355               |
| SNP_P3_166986_105804 | NW_004517319.1 | Scaffold2348 | 105804                  | TT                              | AA                | 1946678356               |
| SNP_P3_166987_108273 | NW_004517319.1 | Scaffold2348 | 108273                  | AA                              | CC                | 1946678357               |
| SNP_P3_166988_108293 | NW_004517319.1 | Scaffold2348 | 108293                  | CC                              | TT                | 1946678358               |
| SNP_P3_166989_108389 | NW_004517319.1 | Scaffold2348 | 108389                  | AA                              | CC                | 1946678359               |
| SNP_P3_166990_108391 | NW_004517319.1 | Scaffold2348 | 108391                  | GG                              | TT                | 1946678360               |
| SNP_P3_166991_108397 | NW_004517319.1 | Scaffold2348 | 108397                  | AA                              | CC                | 1946678361               |
| SNP_P3_166992_108404 | NW_004517319.1 | Scaffold2348 | 108404                  | CC                              | GG                | 1946678362               |
| SNP_P3_166993_111651 | NW_004517319.1 | Scaffold2348 | 111651                  | TT                              | AA                | 1946678363               |
| SNP_P3_166994_113325 | NW_004517319.1 | Scaffold2348 | 113325                  | GG                              | AA                | 1946678364               |
| SNP_P3_166995_116527 | NW_004517319.1 | Scaffold2348 | 116527                  | TT                              | GG                | 1946678365               |
| SNP_P3_166996_138890 | NW_004517319.1 | Scaffold2348 | 138890                  | TT                              | AA                | 1946678366               |
| SNP_P3_166997_139874 | NW_004517319.1 | Scaffold2348 | 139874                  | CC                              | TT                | 1946678367               |
| SNP_P3_166998_139914 | NW_004517319.1 | Scaffold2348 | 139914                  | AA                              | GG                | 1946678368               |

| SNPs IDs             | Chromosome IDs | Chromosomes  | Physical positions (bp) | CDC Frontier (Reference genome) | (Pusa 256 & HPNB) | NCBI SNPdb Accession IDs |
|----------------------|----------------|--------------|-------------------------|---------------------------------|-------------------|--------------------------|
| SNP_P3_166999_155111 | NW_004517319.1 | Scaffold2348 | 155111                  | CC                              | TT                | 1946678369               |
| SNP_P3_167000_165874 | NW_004517319.1 | Scaffold2348 | 165874                  | TT                              | CC                | 1946678370               |
| SNP_P3_167001_172472 | NW_004517319.1 | Scaffold2348 | 172472                  | GG                              | CC                | 1946678371               |
| SNP_P3_167003_517    | NW_004517320.1 | Scaffold2349 | 517                     | CC                              | GG                | 1946678372               |
| SNP_P3_167004_592    | NW_004517320.1 | Scaffold2349 | 592                     | AA                              | GG                | 1946678373               |
| SNP_P3_167005_641    | NW_004517320.1 | Scaffold2349 | 641                     | TT                              | AA                | 1946678374               |
| SNP_P3_167006_668    | NW_004517320.1 | Scaffold2349 | 668                     | TT                              | AA                | 1946678375               |
| SNP_P3_167007_945    | NW_004517320.1 | Scaffold2349 | 945                     | TT                              | CC                | 1946678376               |
| SNP_P3_167008_1012   | NW_004517320.1 | Scaffold2349 | 1012                    | TT                              | CC                | 1946678377               |
| SNP_P3_167009_980    | NW_004517322.1 | Scaffold2351 | 980                     | TT                              | AA                | 1946678378               |
| SNP_P3_167010_584    | NW_004517323.1 | Scaffold2352 | 584                     | AA                              | CC                | 1946678379               |
| SNP_P3_167011_753    | NW_004517323.1 | Scaffold2352 | 753                     | TT                              | CC                | 1946678380               |
| SNP_P3_167012_763    | NW_004517323.1 | Scaffold2352 | 763                     | GG                              | AA                | 1946678381               |
| SNP_P3_167013_783    | NW_004517323.1 | Scaffold2352 | 783                     | GG                              | CC                | 1946678382               |
| SNP_P3_167014_830    | NW_004517323.1 | Scaffold2352 | 830                     | TT                              | CC                | 1946678383               |
| SNP_P3_167015_891    | NW_004517323.1 | Scaffold2352 | 891                     | TT                              | CC                | 1946678384               |
| SNP_P3_167016_911    | NW_004517323.1 | Scaffold2352 | 911                     | AA                              | GG                | 1946678385               |
| SNP_P3_167017_955    | NW_004517323.1 | Scaffold2352 | 955                     | AA                              | CC                | 1946678386               |
| SNP_P3_167018_962    | NW_004517323.1 | Scaffold2352 | 962                     | GG                              | AA                | 1946678387               |
| SNP_P3_167019_977    | NW_004517323.1 | Scaffold2352 | 977                     | TT                              | GG                | 1946678388               |
| SNP_P3_167020_1028   | NW_004517323.1 | Scaffold2352 | 1028                    | CC                              | AA                | 1946678389               |
| SNP_P3_167021_1050   | NW_004517323.1 | Scaffold2352 | 1050                    | AA                              | GG                | 1946678390               |
| SNP_P3_167022_1076   | NW_004517323.1 | Scaffold2352 | 1076                    | AA                              | GG                | 1946678391               |
| SNP_P3_167023_1094   | NW_004517323.1 | Scaffold2352 | 1094                    | AA                              | GG                | 1946678392               |
| SNP_P3_167024_1095   | NW_004517323.1 | Scaffold2352 | 1095                    | AA                              | GG                | 1946678393               |
| SNP_P3_167025_1153   | NW_004517323.1 | Scaffold2352 | 1153                    | CC                              | GG                | 1946678394               |
| SNP_P3_167026_1175   | NW_004517323.1 | Scaffold2352 | 1175                    | GG                              | AA                | 1946678395               |
| SNP_P3_167027_1201   | NW_004517323.1 | Scaffold2352 | 1201                    | AA                              | GG                | 1946678396               |
| SNP_P3_167028_1246   | NW_004517323.1 | Scaffold2352 | 1246                    | GG                              | CC                | 1946678397               |
| SNP_P3_167029_4199   | NW_004517324.1 | Scaffold2354 | 4199                    | GG                              | AA                | 1946678398               |
| SNP_P3_167030_4202   | NW_004517324.1 | Scaffold2354 | 4202                    | TT                              | AA                | 1946678399               |
| SNP_P3_167031_4220   | NW_004517324.1 | Scaffold2354 | 4220                    | TT                              | AA                | 1946678400               |
| SNP_P3_167032_4285   | NW_004517324.1 | Scaffold2354 | 4285                    | CC                              | GG                | 1946678401               |
| SNP_P3_167034_4333   | NW_004517324.1 | Scaffold2354 | 4333                    | TT                              | GG                | 1946678402               |
| SNP_P3_167035_4349   | NW_004517324.1 | Scaffold2354 | 4349                    | TT                              | AA                | 1946678403               |
| SNP_P3_167036_4350   | NW_004517324.1 | Scaffold2354 | 4350                    | GG                              | AA                | 1946678404               |
| SNP_P3_167037_4361   | NW_004517324.1 | Scaffold2354 | 4361                    | CC                              | AA                | 1946678405               |
| SNP_P3_167038_4424   | NW_004517324.1 | Scaffold2354 | 4424                    | GG                              | CC                | 1946678406               |
| SNP_P3_167039_4427   | NW_004517324.1 | Scaffold2354 | 4427                    | CC                              | TT                | 1946678407               |
| SNP_P3_167040_4434   | NW_004517324.1 | Scaffold2354 | 4434                    | AA                              | TT                | 1946678408               |
| SNP_P3_167041_6351   | NW_004517324.1 | Scaffold2354 | 6351                    | CC                              | TT                | 1946678409               |
| SNP_P3_167042_6636   | NW_004517324.1 | Scaffold2354 | 6636                    | GG                              | AA                | 1946678410               |

| SNPs IDs            | Chromosome IDs | Chromosomes  | Physical positions (bp) | CDC Frontier (Reference genome) | (Pusa 256 & HPNB) | NCBI SNPdb Accession IDs |
|---------------------|----------------|--------------|-------------------------|---------------------------------|-------------------|--------------------------|
| SNP_P3_167043_6663  | NW_004517324.1 | Scaffold2354 | 6663                    | AA                              | TT                | 1946678411               |
| SNP_P3_167044_6692  | NW_004517324.1 | Scaffold2354 | 6692                    | CC                              | GG                | 1946678412               |
| SNP_P3_167045_6697  | NW_004517324.1 | Scaffold2354 | 6697                    | TT                              | AA                | 1946678413               |
| SNP_P3_167046_10653 | NW_004517324.1 | Scaffold2354 | 10653                   | GG                              | AA                | 1946678414               |
| SNP_P3_167047_10926 | NW_004517324.1 | Scaffold2354 | 10926                   | AA                              | TT                | 1946678415               |
| SNP_P3_167048_10958 | NW_004517324.1 | Scaffold2354 | 10958                   | AA                              | GG                | 1946678416               |
| SNP_P3_167049_11328 | NW_004517324.1 | Scaffold2354 | 11328                   | GG                              | CC                | 1946678417               |
| SNP_P3_167050_11540 | NW_004517324.1 | Scaffold2354 | 11540                   | CC                              | GG                | 1946678418               |
| SNP_P3_167051_11541 | NW_004517324.1 | Scaffold2354 | 11541                   | AA                              | TT                | 1946678419               |
| SNP_P3_167052_12155 | NW_004517324.1 | Scaffold2354 | 12155                   | CC                              | TT                | 1946678420               |
| SNP_P3_167053_12257 | NW_004517324.1 | Scaffold2354 | 12257                   | GG                              | TT                | 1946678421               |
| SNP_P3_167054_12296 | NW_004517324.1 | Scaffold2354 | 12296                   | AA                              | CC                | 1946678422               |
| SNP_P3_167055_12321 | NW_004517324.1 | Scaffold2354 | 12321                   | AA                              | CC                | 1946678423               |
| SNP_P3_167056_12486 | NW_004517324.1 | Scaffold2354 | 12486                   | CC                              | GG                | 1946678424               |
| SNP_P3_167057_12531 | NW_004517324.1 | Scaffold2354 | 12531                   | CC                              | AA                | 1946678425               |
| SNP_P3_167058_12567 | NW_004517324.1 | Scaffold2354 | 12567                   | AA                              | GG                | 1946678426               |
| SNP_P3_167059_13343 | NW_004517324.1 | Scaffold2354 | 13343                   | GG                              | AA                | 1946678427               |
| SNP_P3_167060_15347 | NW_004517324.1 | Scaffold2354 | 15347                   | AA                              | TT                | 1946678428               |
| SNP_P3_167061_15392 | NW_004517324.1 | Scaffold2354 | 15392                   | GG                              | CC                | 1946678429               |
| SNP_P3_167062_2959  | NW_004517326.1 | Scaffold2356 | 2959                    | CC                              | TT                | 1946678430               |
| SNP_P3_167063_2972  | NW_004517326.1 | Scaffold2356 | 2972                    | CC                              | TT                | 1946678431               |
| SNP_P3_167064_3070  | NW_004517326.1 | Scaffold2356 | 3070                    | GG                              | AA                | 1946678432               |
| SNP_P3_167065_5648  | NW_004517326.1 | Scaffold2356 | 5648                    | AA                              | GG                | 1946678433               |
| SNP_P3_167066_5654  | NW_004517326.1 | Scaffold2356 | 5654                    | TT                              | CC                | 1946678434               |
| SNP_P3_167067_5679  | NW_004517326.1 | Scaffold2356 | 5679                    | GG                              | AA                | 1946678435               |
| SNP_P3_167068_5734  | NW_004517326.1 | Scaffold2356 | 5734                    | GG                              | TT                | 1946678436               |
| SNP_P3_167069_5746  | NW_004517326.1 | Scaffold2356 | 5746                    | CC                              | TT                | 1946678437               |
| SNP_P3_167070_6127  | NW_004517326.1 | Scaffold2356 | 6127                    | TT                              | AA                | 1946678438               |
| SNP_P3_167071_6261  | NW_004517326.1 | Scaffold2356 | 6261                    | CC                              | TT                | 1946678439               |
| SNP_P3_167072_6313  | NW_004517326.1 | Scaffold2356 | 6313                    | AA                              | GG                | 1946678440               |
| SNP_P3_167073_34597 | NW_004517326.1 | Scaffold2356 | 34597                   | AA                              | GG                | 1946678441               |
| SNP_P3_167074_35160 | NW_004517326.1 | Scaffold2356 | 35160                   | CC                              | TT                | 1946678442               |
| SNP_P3_167075_44449 | NW_004517326.1 | Scaffold2356 | 44449                   | AA                              | GG                | 1946678443               |
| SNP_P3_167076_44944 | NW_004517326.1 | Scaffold2356 | 44944                   | GG                              | AA                | 1946678444               |
| SNP_P3_167078_45337 | NW_004517326.1 | Scaffold2356 | 45337                   | TT                              | CC                | 1946678445               |
| SNP_P3_167079_45367 | NW_004517326.1 | Scaffold2356 | 45367                   | TT                              | CC                | 1946678446               |
| SNP_P3_167080_45403 | NW_004517326.1 | Scaffold2356 | 45403                   | AA                              | GG                | 1946678447               |
| SNP_P3_167081_45425 | NW_004517326.1 | Scaffold2356 | 45425                   | CC                              | TT                | 1946678448               |
| SNP_P3_167082_45440 | NW_004517326.1 | Scaffold2356 | 45440                   | TT                              | CC                | 1946678449               |
| SNP_P3_167083_45445 | NW_004517326.1 | Scaffold2356 | 45445                   | CC                              | TT                | 1946678450               |
| SNP_P3_167084_45451 | NW_004517326.1 | Scaffold2356 | 45451                   | CC                              | TT                | 1946678451               |
| SNP_P3_167085_45454 | NW_004517326.1 | Scaffold2356 | 45454                   | AA                              | GG                | 1946678452               |

| SNPs IDs             | Chromosome IDs | Chromosomes  | Physical positions (bp) | CDC Frontier (Reference genome) | (Pusa 256 & HPNB) | NCBI SNPdb Accession IDs |
|----------------------|----------------|--------------|-------------------------|---------------------------------|-------------------|--------------------------|
| SNP_P3_167086_45457  | NW_004517326.1 | Scaffold2356 | 45457                   | TT                              | CC                | 1946678453               |
| SNP_P3_167087_45715  | NW_004517326.1 | Scaffold2356 | 45715                   | CC                              | TT                | 1946678454               |
| SNP_P3_167088_45781  | NW_004517326.1 | Scaffold2356 | 45781                   | CC                              | TT                | 1946678455               |
| SNP_P3_167089_66161  | NW_004517326.1 | Scaffold2356 | 66161                   | CC                              | AA                | 1946678456               |
| SNP_P3_167090_66162  | NW_004517326.1 | Scaffold2356 | 66162                   | TT                              | CC                | 1946678457               |
| SNP_P3_167091_71384  | NW_004517326.1 | Scaffold2356 | 71384                   | TT                              | CC                | 1946678458               |
| SNP_P3_167092_71388  | NW_004517326.1 | Scaffold2356 | 71388                   | GG                              | AA                | 1946678460               |
| SNP_P3_167093_74141  | NW_004517326.1 | Scaffold2356 | 74141                   | AA                              | TT                | 1946678462               |
| SNP_P3_167094_76194  | NW_004517326.1 | Scaffold2356 | 76194                   | AA                              | GG                | 1946678465               |
| SNP_P3_167095_76885  | NW_004517326.1 | Scaffold2356 | 76885                   | CC                              | GG                | 1946678467               |
| SNP_P3_167096_133297 | NW_004517326.1 | Scaffold2356 | 133297                  | AA                              | CC                | 1946678470               |
| SNP_P3_167097_133552 | NW_004517326.1 | Scaffold2356 | 133552                  | TT                              | AA                | 1946678472               |
| SNP_P3_167098_133567 | NW_004517326.1 | Scaffold2356 | 133567                  | AA                              | CC                | 1946678474               |
| SNP_P3_167099_135084 | NW_004517326.1 | Scaffold2356 | 135084                  | TT                              | CC                | 1946678476               |
| SNP_P3_167100_135094 | NW_004517326.1 | Scaffold2356 | 135094                  | CC                              | TT                | 1946678478               |
| SNP_P3_167101_135147 | NW_004517326.1 | Scaffold2356 | 135147                  | TT                              | CC                | 1946678480               |
| SNP_P3_167102_135162 | NW_004517326.1 | Scaffold2356 | 135162                  | CC                              | TT                | 1946678482               |
| SNP_P3_167103_135354 | NW_004517326.1 | Scaffold2356 | 135354                  | AA                              | GG                | 1946678484               |
| SNP_P3_167105_136169 | NW_004517326.1 | Scaffold2356 | 136169                  | CC                              | TT                | 1946678486               |
| SNP_P3_167106_136214 | NW_004517326.1 | Scaffold2356 | 136214                  | AA                              | GG                | 1946678488               |
| SNP_P3_167107_136363 | NW_004517326.1 | Scaffold2356 | 136363                  | TT                              | AA                | 1946678490               |
| SNP_P3_167108_136475 | NW_004517326.1 | Scaffold2356 | 136475                  | GG                              | TT                | 1946678492               |
| SNP_P3_167109_136822 | NW_004517326.1 | Scaffold2356 | 136822                  | TT                              | CC                | 1946678494               |
| SNP_P3_167110_136835 | NW_004517326.1 | Scaffold2356 | 136835                  | CC                              | TT                | 1946678496               |
| SNP_P3_167111_136847 | NW_004517326.1 | Scaffold2356 | 136847                  | GG                              | AA                | 1946678498               |
| SNP_P3_167112_137025 | NW_004517326.1 | Scaffold2356 | 137025                  | GG                              | AA                | 1946678501               |
| SNP_P3_167113_138154 | NW_004517326.1 | Scaffold2356 | 138154                  | TT                              | CC                | 1946678504               |
| SNP_P3_167115_138714 | NW_004517326.1 | Scaffold2356 | 138714                  | CC                              | TT                | 1946678506               |
| SNP_P3_167116_138729 | NW_004517326.1 | Scaffold2356 | 138729                  | GG                              | AA                | 1946678508               |
| SNP_P3_167117_146532 | NW_004517326.1 | Scaffold2356 | 146532                  | TT                              | CC                | 1946678510               |
| SNP_P3_167118_147383 | NW_004517326.1 | Scaffold2356 | 147383                  | TT                              | CC                | 1946678512               |
| SNP_P3_167119_147402 | NW_004517326.1 | Scaffold2356 | 147402                  | CC                              | GG                | 1946678514               |
| SNP_P3_167120_147622 | NW_004517326.1 | Scaffold2356 | 147622                  | GG                              | AA                | 1946678516               |
| SNP_P3_167121_155468 | NW_004517326.1 | Scaffold2356 | 155468                  | TT                              | GG                | 1946678518               |
| SNP_P3_167122_181800 | NW_004517326.1 | Scaffold2356 | 181800                  | GG                              | AA                | 1946678520               |
| SNP_P3_167123_189465 | NW_004517326.1 | Scaffold2356 | 189465                  | TT                              | AA                | 1946678522               |
| SNP_P3_167124_189894 | NW_004517326.1 | Scaffold2356 | 189894                  | CC                              | GG                | 1946678524               |
| SNP_P3_167125_189920 | NW_004517326.1 | Scaffold2356 | 189920                  | AA                              | CC                | 1946678526               |
| SNP_P3_167126_196769 | NW_004517326.1 | Scaffold2356 | 196769                  | GG                              | CC                | 1946678528               |
| SNP_P3_167127_196923 | NW_004517326.1 | Scaffold2356 | 196923                  | GG                              | TT                | 1946678530               |
| SNP_P3_167128_196987 | NW_004517326.1 | Scaffold2356 | 196987                  | AA                              | GG                | 1946678532               |
| SNP_P3_167129_196988 | NW_004517326.1 | Scaffold2356 | 196988                  | TT                              | CC                | 1946678534               |



| SNPs IDs             | Chromosome IDs | Chromosomes  | Physical positions (bp) | CDC Frontier (Reference genome) | (Pusa 256 & HPNB) | NCBI SNPdb Accession IDs |
|----------------------|----------------|--------------|-------------------------|---------------------------------|-------------------|--------------------------|
| SNP_P3_167130_205643 | NW_004517326.1 | Scaffold2356 | 205643                  | AA                              | CC                | 1946678536               |
| SNP_P3_167131_205878 | NW_004517326.1 | Scaffold2356 | 205878                  | AA                              | TT                | 1946678538               |
| SNP_P3_167132_205954 | NW_004517326.1 | Scaffold2356 | 205954                  | AA                              | CC                | 1946678540               |
| SNP_P3_167133_206017 | NW_004517326.1 | Scaffold2356 | 206017                  | AA                              | GG                | 1946678544               |
| SNP_P3_167135_248802 | NW_004517326.1 | Scaffold2356 | 248802                  | GG                              | AA                | 1946678546               |
| SNP_P3_167136_249195 | NW_004517326.1 | Scaffold2356 | 249195                  | AA                              | GG                | 1946678548               |
| SNP_P3_167137_257466 | NW_004517326.1 | Scaffold2356 | 257466                  | TT                              | CC                | 1946678550               |
| SNP_P3_167138_268644 | NW_004517326.1 | Scaffold2356 | 268644                  | AA                              | GG                | 1946678552               |
| SNP_P3_167139_268672 | NW_004517326.1 | Scaffold2356 | 268672                  | CC                              | TT                | 1946678554               |
| SNP_P3_167141_294255 | NW_004517326.1 | Scaffold2356 | 294255                  | AA                              | GG                | 1946678556               |
| SNP_P3_167142_294264 | NW_004517326.1 | Scaffold2356 | 294264                  | AA                              | GG                | 1946678558               |
| SNP_P3_167143_294295 | NW_004517326.1 | Scaffold2356 | 294295                  | CC                              | TT                | 1946678560               |
| SNP_P3_167144_294408 | NW_004517326.1 | Scaffold2356 | 294408                  | GG                              | TT                | 1946678562               |
| SNP_P3_167145_294700 | NW_004517326.1 | Scaffold2356 | 294700                  | TT                              | CC                | 1946678564               |
| SNP_P3_167146_294765 | NW_004517326.1 | Scaffold2356 | 294765                  | AA                              | GG                | 1946678566               |
| SNP_P3_167147_8334   | NW_004517327.1 | Scaffold2357 | 8334                    | AA                              | TT                | 1946678568               |
| SNP_P3_167149_13959  | NW_004517327.1 | Scaffold2357 | 13959                   | CC                              | TT                | 1946678571               |
| SNP_P3_167150_16590  | NW_004517327.1 | Scaffold2357 | 16590                   | TT                              | GG                | 1946678573               |
| SNP_P3_167151_23110  | NW_004517327.1 | Scaffold2357 | 23110                   | AA                              | GG                | 1946678575               |
| SNP_P3_167152_31021  | NW_004517327.1 | Scaffold2357 | 31021                   | CC                              | TT                | 1946678577               |
| SNP_P3_167153_215    | NW_004517328.1 | Scaffold2358 | 215                     | TT                              | CC                | 1946678580               |
| SNP_P3_167154_221    | NW_004517328.1 | Scaffold2358 | 221                     | GG                              | CC                | 1946678582               |
| SNP_P3_167155_445    | NW_004517328.1 | Scaffold2358 | 445                     | CC                              | TT                | 1946678584               |
| SNP_P3_167156_601    | NW_004517328.1 | Scaffold2358 | 601                     | CC                              | AA                | 1946678587               |
| SNP_P3_167157_662    | NW_004517328.1 | Scaffold2358 | 662                     | AA                              | GG                | 1946678589               |
| SNP_P3_167158_679    | NW_004517328.1 | Scaffold2358 | 679                     | AA                              | TT                | 1946678591               |
| SNP_P3_167159_799    | NW_004517328.1 | Scaffold2358 | 799                     | AA                              | GG                | 1946678593               |
| SNP_P3_167160_873    | NW_004517328.1 | Scaffold2358 | 873                     | AA                              | GG                | 1946678595               |
| SNP_P3_167161_921    | NW_004517328.1 | Scaffold2358 | 921                     | TT                              | CC                | 1946678597               |
| SNP_P3_167162_1010   | NW_004517328.1 | Scaffold2358 | 1010                    | TT                              | CC                | 1946678599               |
| SNP_P3_167163_1071   | NW_004517328.1 | Scaffold2358 | 1071                    | GG                              | CC                | 1946678601               |
| SNP_P3_167164_1443   | NW_004517328.1 | Scaffold2358 | 1443                    | AA                              | TT                | 1946678603               |
| SNP_P3_167165_1508   | NW_004517328.1 | Scaffold2358 | 1508                    | AA                              | GG                | 1946678605               |
| SNP_P3_167166_1792   | NW_004517328.1 | Scaffold2358 | 1792                    | CC                              | TT                | 1946678607               |
| SNP_P3_167167_2042   | NW_004517328.1 | Scaffold2358 | 2042                    | AA                              | GG                | 1946678609               |
| SNP_P3_167168_2175   | NW_004517328.1 | Scaffold2358 | 2175                    | TT                              | GG                | 1946678611               |
| SNP_P3_167169_2368   | NW_004517328.1 | Scaffold2358 | 2368                    | TT                              | CC                | 1946678613               |
| SNP_P3_167170_2384   | NW_004517328.1 | Scaffold2358 | 2384                    | CC                              | TT                | 1946678615               |
| SNP_P3_167171_2607   | NW_004517328.1 | Scaffold2358 | 2607                    | GG                              | AA                | 1946678617               |
| SNP_P3_167172_2740   | NW_004517328.1 | Scaffold2358 | 2740                    | CC                              | TT                | 1946678619               |
| SNP_P3_167173_2748   | NW_004517328.1 | Scaffold2358 | 2748                    | TT                              | CC                | 1946678622               |
| SNP_P3_167174_3122   | NW_004517328.1 | Scaffold2358 | 3122                    | GG                              | TT                | 1946678624               |

| SNPs IDs            | Chromosome IDs | Chromosomes  | Physical positions (bp) | CDC Frontier (Reference genome) | (Pusa 256 & HPNB) | NCBI SNPdb Accession IDs |
|---------------------|----------------|--------------|-------------------------|---------------------------------|-------------------|--------------------------|
| SNP_P3_167175_13877 | NW_004517328.1 | Scaffold2358 | 13877                   | CC                              | TT                | 1946678626               |
| SNP_P3_167176_13885 | NW_004517328.1 | Scaffold2358 | 13885                   | AA                              | GG                | 1946678629               |
| SNP_P3_167177_16164 | NW_004517328.1 | Scaffold2358 | 16164                   | TT                              | AA                | 1946678631               |
| SNP_P3_167178_16274 | NW_004517328.1 | Scaffold2358 | 16274                   | TT                              | CC                | 1946678633               |
| SNP_P3_167179_16446 | NW_004517328.1 | Scaffold2358 | 16446                   | GG                              | AA                | 1946678635               |
| SNP_P3_167180_16571 | NW_004517328.1 | Scaffold2358 | 16571                   | TT                              | CC                | 1946678637               |
| SNP_P3_167181_16613 | NW_004517328.1 | Scaffold2358 | 16613                   | TT                              | CC                | 1946678639               |
| SNP_P3_167182_16646 | NW_004517328.1 | Scaffold2358 | 16646                   | GG                              | CC                | 1946678641               |
| SNP_P3_167183_16659 | NW_004517328.1 | Scaffold2358 | 16659                   | TT                              | CC                | 1946678643               |
| SNP_P3_167184_16678 | NW_004517328.1 | Scaffold2358 | 16678                   | GG                              | AA                | 1946678645               |
| SNP_P3_167185_16688 | NW_004517328.1 | Scaffold2358 | 16688                   | TT                              | CC                | 1946678647               |
| SNP_P3_167186_16805 | NW_004517328.1 | Scaffold2358 | 16805                   | CC                              | AA                | 1946678649               |
| SNP_P3_167187_16828 | NW_004517328.1 | Scaffold2358 | 16828                   | CC                              | TT                | 1946678673               |
| SNP_P3_167188_19121 | NW_004517328.1 | Scaffold2358 | 19121                   | GG                              | TT                | 1946678675               |
| SNP_P3_167189_19422 | NW_004517328.1 | Scaffold2358 | 19422                   | GG                              | AA                | 1946678677               |
| SNP_P3_167190_19706 | NW_004517328.1 | Scaffold2358 | 19706                   | GG                              | AA                | 1946678679               |
| SNP_P3_167191_19717 | NW_004517328.1 | Scaffold2358 | 19717                   | TT                              | AA                | 1946678682               |
| SNP_P3_167192_19731 | NW_004517328.1 | Scaffold2358 | 19731                   | TT                              | CC                | 1946678684               |
| SNP_P3_167193_19778 | NW_004517328.1 | Scaffold2358 | 19778                   | GG                              | AA                | 1946678686               |
| SNP_P3_167194_19782 | NW_004517328.1 | Scaffold2358 | 19782                   | AA                              | CC                | 1946678688               |
| SNP_P3_167195_19877 | NW_004517328.1 | Scaffold2358 | 19877                   | AA                              | TT                | 1946678690               |
| SNP_P3_167196_19878 | NW_004517328.1 | Scaffold2358 | 19878                   | TT                              | GG                | 1946678692               |
| SNP_P3_167197_20003 | NW_004517328.1 | Scaffold2358 | 20003                   | TT                              | GG                | 1946678694               |
| SNP_P3_167198_20667 | NW_004517328.1 | Scaffold2358 | 20667                   | TT                              | AA                | 1946678696               |
| SNP_P3_167199_20744 | NW_004517328.1 | Scaffold2358 | 20744                   | AA                              | TT                | 1946678698               |
| SNP_P3_167200_20997 | NW_004517328.1 | Scaffold2358 | 20997                   | TT                              | AA                | 1946678700               |
| SNP_P3_167201_21085 | NW_004517328.1 | Scaffold2358 | 21085                   | TT                              | CC                | 1946678702               |
| SNP_P3_167202_34374 | NW_004517328.1 | Scaffold2358 | 34374                   | AA                              | CC                | 1946678704               |
| SNP_P3_167203_34570 | NW_004517328.1 | Scaffold2358 | 34570                   | GG                              | AA                | 1946678707               |
| SNP_P3_167204_34621 | NW_004517328.1 | Scaffold2358 | 34621                   | CC                              | TT                | 1946678709               |
| SNP_P3_167205_36173 | NW_004517328.1 | Scaffold2358 | 36173                   | AA                              | TT                | 1946678711               |
| SNP_P3_167206_36635 | NW_004517328.1 | Scaffold2358 | 36635                   | GG                              | AA                | 1946678713               |
| SNP_P3_167208_55089 | NW_004517328.1 | Scaffold2358 | 55089                   | TT                              | AA                | 1946678715               |
| SNP_P3_167209_55109 | NW_004517328.1 | Scaffold2358 | 55109                   | TT                              | AA                | 1946678717               |
| SNP_P3_167210_55224 | NW_004517328.1 | Scaffold2358 | 55224                   | TT                              | CC                | 1946678719               |
| SNP_P3_167211_2498  | NW_004517330.1 | Scaffold2361 | 2498                    | AA                              | TT                | 1946678722               |
| SNP_P3_167212_2993  | NW_004517330.1 | Scaffold2361 | 2993                    | AA                              | GG                | 1946678724               |
| SNP_P3_167213_3217  | NW_004517330.1 | Scaffold2361 | 3217                    | GG                              | AA                | 1946678726               |
| SNP_P3_167214_3310  | NW_004517330.1 | Scaffold2361 | 3310                    | AA                              | GG                | 1946678728               |
| SNP_P3_167215_6600  | NW_004517330.1 | Scaffold2361 | 6600                    | TT                              | CC                | 1946678730               |
| SNP_P3_167216_6604  | NW_004517330.1 | Scaffold2361 | 6604                    | CC                              | TT                | 1946678732               |
| SNP_P3_167217_6689  | NW_004517330.1 | Scaffold2361 | 6689                    | CC                              | TT                | 1946678734               |

| SNPs IDs            | Chromosome IDs | Chromosomes  | Physical positions (bp) | CDC Frontier (Reference genome) | (Pusa 256 & HPNB) | NCBI SNPdb Accession IDs |
|---------------------|----------------|--------------|-------------------------|---------------------------------|-------------------|--------------------------|
| SNP_P3_167218_6727  | NW_004517330.1 | Scaffold2361 | 6727                    | TT                              | AA                | 1946678736               |
| SNP_P3_167219_13363 | NW_004517330.1 | Scaffold2361 | 13363                   | AA                              | CC                | 1946678738               |
| SNP_P3_167220_13639 | NW_004517330.1 | Scaffold2361 | 13639                   | AA                              | CC                | 1946678740               |
| SNP_P3_167221_17669 | NW_004517330.1 | Scaffold2361 | 17669                   | CC                              | TT                | 1946678742               |
| SNP_P3_167222_19170 | NW_004517330.1 | Scaffold2361 | 19170                   | AA                              | GG                | 1946678744               |
| SNP_P3_167223_19181 | NW_004517330.1 | Scaffold2361 | 19181                   | TT                              | AA                | 1946678746               |
| SNP_P3_167224_19218 | NW_004517330.1 | Scaffold2361 | 19218                   | TT                              | AA                | 1946678748               |
| SNP_P3_167225_19230 | NW_004517330.1 | Scaffold2361 | 19230                   | AA                              | CC                | 1946678750               |
| SNP_P3_167226_19976 | NW_004517330.1 | Scaffold2361 | 19976                   | AA                              | GG                | 1946678752               |
| SNP_P3_167227_20029 | NW_004517330.1 | Scaffold2361 | 20029                   | GG                              | AA                | 1946678754               |
| SNP_P3_167228_20037 | NW_004517330.1 | Scaffold2361 | 20037                   | TT                              | CC                | 1946678756               |
| SNP_P3_167229_20399 | NW_004517330.1 | Scaffold2361 | 20399                   | TT                              | AA                | 1946678758               |
| SNP_P3_167230_25751 | NW_004517330.1 | Scaffold2361 | 25751                   | TT                              | CC                | 1946678760               |
| SNP_P3_167231_25770 | NW_004517330.1 | Scaffold2361 | 25770                   | AA                              | CC                | 1946678763               |
| SNP_P3_167232_25782 | NW_004517330.1 | Scaffold2361 | 25782                   | TT                              | AA                | 1946678765               |
| SNP_P3_167233_29227 | NW_004517330.1 | Scaffold2361 | 29227                   | AA                              | GG                | 1946678767               |
| SNP_P3_167234_40121 | NW_004517330.1 | Scaffold2361 | 40121                   | AA                              | TT                | 1946678769               |
| SNP_P3_167235_45321 | NW_004517330.1 | Scaffold2361 | 45321                   | AA                              | GG                | 1946678771               |
| SNP_P3_167236_45365 | NW_004517330.1 | Scaffold2361 | 45365                   | AA                              | GG                | 1946678773               |
| SNP_P3_167238_45398 | NW_004517330.1 | Scaffold2361 | 45398                   | AA                              | GG                | 1946678775               |
| SNP_P3_167239_45408 | NW_004517330.1 | Scaffold2361 | 45408                   | CC                              | TT                | 1946678777               |
| SNP_P3_167240_45414 | NW_004517330.1 | Scaffold2361 | 45414                   | AA                              | TT                | 1946678779               |
| SNP_P3_167241_45471 | NW_004517330.1 | Scaffold2361 | 45471                   | TT                              | CC                | 1946678781               |
| SNP_P3_167242_45481 | NW_004517330.1 | Scaffold2361 | 45481                   | CC                              | GG                | 1946678783               |
| SNP_P3_167243_19567 | NW_004517333.1 | Scaffold2366 | 19567                   | GG                              | CC                | 1946678785               |
| SNP_P3_167244_19626 | NW_004517333.1 | Scaffold2366 | 19626                   | GG                              | AA                | 1946678787               |
| SNP_P3_167245_19653 | NW_004517333.1 | Scaffold2366 | 19653                   | CC                              | AA                | 1946678789               |
| SNP_P3_167246_19664 | NW_004517333.1 | Scaffold2366 | 19664                   | AA                              | TT                | 1946678792               |
| SNP_P3_167247_19679 | NW_004517333.1 | Scaffold2366 | 19679                   | GG                              | CC                | 1946678794               |
| SNP_P3_167248_19783 | NW_004517333.1 | Scaffold2366 | 19783                   | GG                              | AA                | 1946678796               |
| SNP_P3_167249_19807 | NW_004517333.1 | Scaffold2366 | 19807                   | CC                              | TT                | 1946678798               |
| SNP_P3_167250_19816 | NW_004517333.1 | Scaffold2366 | 19816                   | GG                              | AA                | 1946678800               |
| SNP_P3_167251_19832 | NW_004517333.1 | Scaffold2366 | 19832                   | TT                              | CC                | 1946678802               |
| SNP_P3_167252_19848 | NW_004517333.1 | Scaffold2366 | 19848                   | GG                              | AA                | 1946678804               |
| SNP_P3_167253_19852 | NW_004517333.1 | Scaffold2366 | 19852                   | GG                              | AA                | 1946678806               |
| SNP_P3_167254_19870 | NW_004517333.1 | Scaffold2366 | 19870                   | AA                              | GG                | 1946678808               |
| SNP_P3_167255_19885 | NW_004517333.1 | Scaffold2366 | 19885                   | TT                              | CC                | 1946678810               |
| SNP_P3_167256_19893 | NW_004517333.1 | Scaffold2366 | 19893                   | AA                              | CC                | 1946678812               |
| SNP_P3_167257_19981 | NW_004517333.1 | Scaffold2366 | 19981                   | CC                              | AA                | 1946678814               |
| SNP_P3_167258_19983 | NW_004517333.1 | Scaffold2366 | 19983                   | AA                              | GG                | 1946678816               |
| SNP_P3_167259_20944 | NW_004517333.1 | Scaffold2366 | 20944                   | TT                              | CC                | 1946678818               |
| SNP_P3_167260_21243 | NW_004517333.1 | Scaffold2366 | 21243                   | CC                              | TT                | 1946678820               |

| SNPs IDs            | Chromosome IDs | Chromosomes  | Physical positions (bp) | CDC Frontier (Reference genome) | (Pusa 256 & HPNB) | NCBI SNPdb Accession IDs |
|---------------------|----------------|--------------|-------------------------|---------------------------------|-------------------|--------------------------|
| SNP_P3_167261_21251 | NW_004517333.1 | Scaffold2366 | 21251                   | GG                              | TT                | 1946678823               |
| SNP_P3_167262_21252 | NW_004517333.1 | Scaffold2366 | 21252                   | GG                              | AA                | 1946678825               |
| SNP_P3_167263_21258 | NW_004517333.1 | Scaffold2366 | 21258                   | TT                              | CC                | 1946678827               |
| SNP_P3_167264_21306 | NW_004517333.1 | Scaffold2366 | 21306                   | TT                              | CC                | 1946678830               |
| SNP_P3_167265_21310 | NW_004517333.1 | Scaffold2366 | 21310                   | TT                              | AA                | 1946678832               |
| SNP_P3_167266_21332 | NW_004517333.1 | Scaffold2366 | 21332                   | TT                              | GG                | 1946678834               |
| SNP_P3_167267_21370 | NW_004517333.1 | Scaffold2366 | 21370                   | AA                              | GG                | 1946678836               |
| SNP_P3_167268_21383 | NW_004517333.1 | Scaffold2366 | 21383                   | TT                              | CC                | 1946678839               |
| SNP_P3_167269_21431 | NW_004517333.1 | Scaffold2366 | 21431                   | TT                              | CC                | 1946678841               |
| SNP_P3_167270_21730 | NW_004517333.1 | Scaffold2366 | 21730                   | TT                              | GG                | 1946678843               |
| SNP_P3_167271_24368 | NW_004517333.1 | Scaffold2366 | 24368                   | GG                              | CC                | 1946678845               |
| SNP_P3_167272_26437 | NW_004517333.1 | Scaffold2366 | 26437                   | AA                              | GG                | 1946678847               |
| SNP_P3_167273_26440 | NW_004517333.1 | Scaffold2366 | 26440                   | TT                              | CC                | 1946678849               |
| SNP_P3_167274_693   | NW_004517334.1 | Scaffold2367 | 693                     | AA                              | GG                | 1946678851               |
| SNP_P3_167275_730   | NW_004517334.1 | Scaffold2367 | 730                     | TT                              | AA                | 1946678853               |
| SNP_P3_167276_745   | NW_004517334.1 | Scaffold2367 | 745                     | AA                              | CC                | 1946678855               |
| SNP_P3_167277_752   | NW_004517334.1 | Scaffold2367 | 752                     | AA                              | TT                | 1946678857               |
| SNP_P3_167278_777   | NW_004517334.1 | Scaffold2367 | 777                     | CC                              | GG                | 1946678859               |
| SNP_P3_167279_823   | NW_004517334.1 | Scaffold2367 | 823                     | AA                              | CC                | 1946678861               |
| SNP_P3_167280_824   | NW_004517334.1 | Scaffold2367 | 824                     | CC                              | TT                | 1946678863               |
| SNP_P3_167281_831   | NW_004517334.1 | Scaffold2367 | 831                     | GG                              | TT                | 1946678865               |
| SNP_P3_167282_1786  | NW_004517334.1 | Scaffold2367 | 1786                    | GG                              | AA                | 1946678867               |
| SNP_P3_167283_1795  | NW_004517334.1 | Scaffold2367 | 1795                    | TT                              | CC                | 1946678869               |
| SNP_P3_167284_1859  | NW_004517334.1 | Scaffold2367 | 1859                    | CC                              | GG                | 1946678871               |
| SNP_P3_167285_1862  | NW_004517334.1 | Scaffold2367 | 1862                    | AA                              | CC                | 1946678873               |
| SNP_P3_167287_1872  | NW_004517334.1 | Scaffold2367 | 1872                    | TT                              | AA                | 1946678876               |
| SNP_P3_167288_2683  | NW_004517334.1 | Scaffold2367 | 2683                    | GG                              | TT                | 1946678878               |
| SNP_P3_167289_6270  | NW_004517334.1 | Scaffold2367 | 6270                    | TT                              | CC                | 1946678880               |
| SNP_P3_167290_6521  | NW_004517334.1 | Scaffold2367 | 6521                    | TT                              | GG                | 1946678882               |
| SNP_P3_167291_7242  | NW_004517334.1 | Scaffold2367 | 7242                    | AA                              | GG                | 1946678884               |
| SNP_P3_167292_2804  | NW_004517335.1 | Scaffold2368 | 2804                    | CC                              | GG                | 1946678886               |
| SNP_P3_167294_25806 | NW_004517335.1 | Scaffold2368 | 25806                   | TT                              | AA                | 1946678888               |
| SNP_P3_167295_25842 | NW_004517335.1 | Scaffold2368 | 25842                   | AA                              | CC                | 1946678890               |
| SNP_P3_167296_25846 | NW_004517335.1 | Scaffold2368 | 25846                   | TT                              | CC                | 1946678892               |
| SNP_P3_167298_25961 | NW_004517335.1 | Scaffold2368 | 25961                   | TT                              | CC                | 1946678894               |
| SNP_P3_167299_26007 | NW_004517335.1 | Scaffold2368 | 26007                   | CC                              | TT                | 1946678896               |
| SNP_P3_167300_26069 | NW_004517335.1 | Scaffold2368 | 26069                   | GG                              | AA                | 1946678898               |
| SNP_P3_167302_26106 | NW_004517335.1 | Scaffold2368 | 26106                   | TT                              | CC                | 1946678901               |
| SNP_P3_167303_26193 | NW_004517335.1 | Scaffold2368 | 26193                   | AA                              | TT                | 1946678903               |
| SNP_P3_167306_26276 | NW_004517335.1 | Scaffold2368 | 26276                   | TT                              | GG                | 1946678905               |
| SNP_P3_167307_26287 | NW_004517335.1 | Scaffold2368 | 26287                   | CC                              | TT                | 1946678907               |
| SNP_P3_167308_26361 | NW_004517335.1 | Scaffold2368 | 26361                   | GG                              | AA                | 1946678909               |

| SNPs IDs            | Chromosome IDs | Chromosomes  | Physical positions (bp) | CDC Frontier (Reference genome) | (Pusa 256 & HPNB) | NCBI SNPdb Accession IDs |
|---------------------|----------------|--------------|-------------------------|---------------------------------|-------------------|--------------------------|
| SNP_P3_167309_26376 | NW_004517335.1 | Scaffold2368 | 26376                   | CC                              | GG                | 1946678911               |
| SNP_P3_167310_26401 | NW_004517335.1 | Scaffold2368 | 26401                   | TT                              | GG                | 1946678913               |
| SNP_P3_167311_26413 | NW_004517335.1 | Scaffold2368 | 26413                   | AA                              | GG                | 1946678915               |
| SNP_P3_167312_26458 | NW_004517335.1 | Scaffold2368 | 26458                   | AA                              | TT                | 1946678917               |
| SNP_P3_167313_26583 | NW_004517335.1 | Scaffold2368 | 26583                   | AA                              | GG                | 1946678919               |
| SNP_P3_167314_40509 | NW_004517335.1 | Scaffold2368 | 40509                   | CC                              | TT                | 1946678921               |
| SNP_P3_167315_40511 | NW_004517335.1 | Scaffold2368 | 40511                   | TT                              | AA                | 1946678923               |
| SNP_P3_167316_43507 | NW_004517335.1 | Scaffold2368 | 43507                   | GG                              | AA                | 1946678926               |
| SNP_P3_167318_53608 | NW_004517335.1 | Scaffold2368 | 53608                   | GG                              | AA                | 1946678928               |
| SNP_P3_167319_53734 | NW_004517335.1 | Scaffold2368 | 53734                   | GG                              | AA                | 1946678930               |
| SNP_P3_167320_53761 | NW_004517335.1 | Scaffold2368 | 53761                   | TT                              | AA                | 1946678933               |
| SNP_P3_167321_53778 | NW_004517335.1 | Scaffold2368 | 53778                   | GG                              | AA                | 1946678935               |
| SNP_P3_167322_53790 | NW_004517335.1 | Scaffold2368 | 53790                   | TT                              | CC                | 1946678937               |
| SNP_P3_167323_53874 | NW_004517335.1 | Scaffold2368 | 53874                   | AA                              | GG                | 1946678939               |
| SNP_P3_167324_53891 | NW_004517335.1 | Scaffold2368 | 53891                   | TT                              | CC                | 1946678941               |
| SNP_P3_167325_53910 | NW_004517335.1 | Scaffold2368 | 53910                   | AA                              | GG                | 1946678943               |
| SNP_P3_167326_53912 | NW_004517335.1 | Scaffold2368 | 53912                   | AA                              | TT                | 1946678945               |
| SNP_P3_167327_53931 | NW_004517335.1 | Scaffold2368 | 53931                   | CC                              | TT                | 1946678947               |
| SNP_P3_167328_53937 | NW_004517335.1 | Scaffold2368 | 53937                   | AA                              | CC                | 1946678949               |
| SNP_P3_167329_53945 | NW_004517335.1 | Scaffold2368 | 53945                   | GG                              | TT                | 1946678951               |
| SNP_P3_167330_53949 | NW_004517335.1 | Scaffold2368 | 53949                   | TT                              | AA                | 1946678953               |
| SNP_P3_167331_53983 | NW_004517335.1 | Scaffold2368 | 53983                   | AA                              | GG                | 1946678955               |
| SNP_P3_167332_53988 | NW_004517335.1 | Scaffold2368 | 53988                   | AA                              | CC                | 1946678957               |
| SNP_P3_167333_53989 | NW_004517335.1 | Scaffold2368 | 53989                   | CC                              | TT                | 1946678960               |
| SNP_P3_167334_53990 | NW_004517335.1 | Scaffold2368 | 53990                   | AA                              | TT                | 1946678962               |
| SNP_P3_167335_54043 | NW_004517335.1 | Scaffold2368 | 54043                   | GG                              | CC                | 1946678965               |
| SNP_P3_167336_54045 | NW_004517335.1 | Scaffold2368 | 54045                   | CC                              | GG                | 1946678967               |
| SNP_P3_167337_54058 | NW_004517335.1 | Scaffold2368 | 54058                   | CC                              | AA                | 1946678970               |
| SNP_P3_167340_54500 | NW_004517335.1 | Scaffold2368 | 54500                   | GG                              | AA                | 1946678972               |
| SNP_P3_167341_54563 | NW_004517335.1 | Scaffold2368 | 54563                   | TT                              | CC                | 1946678974               |
| SNP_P3_167342_54818 | NW_004517335.1 | Scaffold2368 | 54818                   | AA                              | GG                | 1946678976               |
| SNP_P3_167344_55139 | NW_004517335.1 | Scaffold2368 | 55139                   | CC                              | TT                | 1946678978               |
| SNP_P3_167346_60039 | NW_004517335.1 | Scaffold2368 | 60039                   | CC                              | AA                | 1946678980               |
| SNP_P3_167347_588   | NW_004517338.1 | Scaffold2371 | 588                     | AA                              | GG                | 1946678983               |
| SNP_P3_167348_21246 | NW_004517338.1 | Scaffold2371 | 21246                   | CC                              | TT                | 1946678985               |
| SNP_P3_167349_36416 | NW_004517338.1 | Scaffold2371 | 36416                   | AA                              | GG                | 1946678987               |
| SNP_P3_167350_43536 | NW_004517338.1 | Scaffold2371 | 43536                   | AA                              | GG                | 1946678989               |
| SNP_P3_167352_70775 | NW_004517338.1 | Scaffold2371 | 70775                   | TT                              | CC                | 1946678991               |
| SNP_P3_167353_70777 | NW_004517338.1 | Scaffold2371 | 70777                   | AA                              | CC                | 1946678993               |
| SNP_P3_167354_70794 | NW_004517338.1 | Scaffold2371 | 70794                   | GG                              | TT                | 1946678995               |
| SNP_P3_167355_71121 | NW_004517338.1 | Scaffold2371 | 71121                   | AA                              | CC                | 1946678998               |
| SNP_P3_167357_72480 | NW_004517338.1 | Scaffold2371 | 72480                   | CC                              | TT                | 1946679000               |

| SNPs IDs            | Chromosome IDs | Chromosomes  | Physical positions (bp) | CDC Frontier (Reference genome) | (Pusa 256 & HPNB) | NCBI SNPdb Accession IDs |
|---------------------|----------------|--------------|-------------------------|---------------------------------|-------------------|--------------------------|
| SNP_P3_167358_72481 | NW_004517338.1 | Scaffold2371 | 72481                   | GG                              | AA                | 1946679002               |
| SNP_P3_167359_72498 | NW_004517338.1 | Scaffold2371 | 72498                   | AA                              | CC                | 1946679004               |
| SNP_P3_167360_72607 | NW_004517338.1 | Scaffold2371 | 72607                   | TT                              | CC                | 1946679006               |
| SNP_P3_167361_72643 | NW_004517338.1 | Scaffold2371 | 72643                   | TT                              | CC                | 1946679008               |
| SNP_P3_167362_72757 | NW_004517338.1 | Scaffold2371 | 72757                   | GG                              | CC                | 1946679010               |
| SNP_P3_167363_73060 | NW_004517338.1 | Scaffold2371 | 73060                   | GG                              | AA                | 1946679012               |
| SNP_P3_167365_73172 | NW_004517338.1 | Scaffold2371 | 73172                   | TT                              | CC                | 1946679014               |
| SNP_P3_167366_73258 | NW_004517338.1 | Scaffold2371 | 73258                   | CC                              | TT                | 1946679016               |
| SNP_P3_167367_73264 | NW_004517338.1 | Scaffold2371 | 73264                   | AA                              | GG                | 1946679018               |
| SNP_P3_167368_73277 | NW_004517338.1 | Scaffold2371 | 73277                   | AA                              | GG                | 1946679020               |
| SNP_P3_167369_73289 | NW_004517338.1 | Scaffold2371 | 73289                   | TT                              | CC                | 1946679022               |
| SNP_P3_167370_73300 | NW_004517338.1 | Scaffold2371 | 73300                   | AA                              | GG                | 1946679024               |
| SNP_P3_167371_73320 | NW_004517338.1 | Scaffold2371 | 73320                   | CC                              | TT                | 1946679026               |
| SNP_P3_167373_73388 | NW_004517338.1 | Scaffold2371 | 73388                   | TT                              | GG                | 1946679028               |
| SNP_P3_167374_73517 | NW_004517338.1 | Scaffold2371 | 73517                   | AA                              | CC                | 1946679031               |
| SNP_P3_167375_73576 | NW_004517338.1 | Scaffold2371 | 73576                   | AA                              | TT                | 1946679033               |
| SNP_P3_167376_73646 | NW_004517338.1 | Scaffold2371 | 73646                   | GG                              | AA                | 1946679035               |
| SNP_P3_167377_73724 | NW_004517338.1 | Scaffold2371 | 73724                   | AA                              | GG                | 1946679037               |
| SNP_P3_167378_73750 | NW_004517338.1 | Scaffold2371 | 73750                   | GG                              | TT                | 1946679039               |
| SNP_P3_167379_73751 | NW_004517338.1 | Scaffold2371 | 73751                   | GG                              | CC                | 1946679041               |
| SNP_P3_167381_73874 | NW_004517338.1 | Scaffold2371 | 73874                   | TT                              | AA                | 1946679043               |
| SNP_P3_167382_73878 | NW_004517338.1 | Scaffold2371 | 73878                   | CC                              | AA                | 1946679045               |
| SNP_P3_167384_74041 | NW_004517338.1 | Scaffold2371 | 74041                   | TT                              | AA                | 1946679047               |
| SNP_P3_167385_74125 | NW_004517338.1 | Scaffold2371 | 74125                   | AA                              | GG                | 1946679049               |
| SNP_P3_167386_74252 | NW_004517338.1 | Scaffold2371 | 74252                   | AA                              | TT                | 1946679051               |
| SNP_P3_167387_74254 | NW_004517338.1 | Scaffold2371 | 74254                   | TT                              | AA                | 1946679053               |
| SNP_P3_167388_74269 | NW_004517338.1 | Scaffold2371 | 74269                   | CC                              | TT                | 1946679055               |
| SNP_P3_167389_74386 | NW_004517338.1 | Scaffold2371 | 74386                   | AA                              | GG                | 1946679057               |
| SNP_P3_167390_74447 | NW_004517338.1 | Scaffold2371 | 74447                   | GG                              | AA                | 1946679059               |
| SNP_P3_167391_74682 | NW_004517338.1 | Scaffold2371 | 74682                   | GG                              | AA                | 1946679061               |
| SNP_P3_167392_74697 | NW_004517338.1 | Scaffold2371 | 74697                   | AA                              | CC                | 1946679063               |
| SNP_P3_167393_74729 | NW_004517338.1 | Scaffold2371 | 74729                   | TT                              | GG                | 1946679065               |
| SNP_P3_167394_74772 | NW_004517338.1 | Scaffold2371 | 74772                   | GG                              | CC                | 1946679068               |
| SNP_P3_167395_76966 | NW_004517338.1 | Scaffold2371 | 76966                   | AA                              | CC                | 1946679070               |
| SNP_P3_167396_77320 | NW_004517338.1 | Scaffold2371 | 77320                   | AA                              | TT                | 1946679072               |
| SNP_P3_167397_92227 | NW_004517338.1 | Scaffold2371 | 92227                   | AA                              | GG                | 1946679074               |
| SNP_P3_167398_92252 | NW_004517338.1 | Scaffold2371 | 92252                   | GG                              | TT                | 1946679076               |
| SNP_P3_167399_92297 | NW_004517338.1 | Scaffold2371 | 92297                   | TT                              | GG                | 1946679078               |
| SNP_P3_167400_92441 | NW_004517338.1 | Scaffold2371 | 92441                   | CC                              | AA                | 1946679080               |
| SNP_P3_167401_92822 | NW_004517338.1 | Scaffold2371 | 92822                   | GG                              | CC                | 1946679082               |
| SNP_P3_167402_92898 | NW_004517338.1 | Scaffold2371 | 92898                   | AA                              | GG                | 1946679084               |
| SNP_P3_167403_92924 | NW_004517338.1 | Scaffold2371 | 92924                   | CC                              | GG                | 1946679086               |

| SNPs IDs             | Chromosome IDs | Chromosomes  | Physical positions (bp) | CDC Frontier (Reference genome) | (Pusa 256 & HPNB) | NCBI SNPdb Accession IDs |
|----------------------|----------------|--------------|-------------------------|---------------------------------|-------------------|--------------------------|
| SNP_P3_167404_92962  | NW_004517338.1 | Scaffold2371 | 92962                   | CC                              | GG                | 1946679088               |
| SNP_P3_167406_127457 | NW_004517338.1 | Scaffold2371 | 127457                  | CC                              | TT                | 1946679090               |
| SNP_P3_167407_127786 | NW_004517338.1 | Scaffold2371 | 127786                  | TT                              | CC                | 1946679092               |
| SNP_P3_167408_127816 | NW_004517338.1 | Scaffold2371 | 127816                  | TT                              | CC                | 1946679094               |
| SNP_P3_167409_127915 | NW_004517338.1 | Scaffold2371 | 127915                  | TT                              | GG                | 1946679096               |
| SNP_P3_167410_127939 | NW_004517338.1 | Scaffold2371 | 127939                  | CC                              | TT                | 1946679098               |
| SNP_P3_167411_128065 | NW_004517338.1 | Scaffold2371 | 128065                  | CC                              | AA                | 1946679100               |
| SNP_P3_167412_128066 | NW_004517338.1 | Scaffold2371 | 128066                  | AA                              | TT                | 1946679104               |
| SNP_P3_167413_128158 | NW_004517338.1 | Scaffold2371 | 128158                  | GG                              | TT                | 1946679106               |
| SNP_P3_167414_128426 | NW_004517338.1 | Scaffold2371 | 128426                  | GG                              | TT                | 1946679108               |
| SNP_P3_167415_128429 | NW_004517338.1 | Scaffold2371 | 128429                  | CC                              | TT                | 1946679110               |
| SNP_P3_167416_128609 | NW_004517338.1 | Scaffold2371 | 128609                  | CC                              | TT                | 1946679112               |
| SNP_P3_167417_128720 | NW_004517338.1 | Scaffold2371 | 128720                  | CC                              | TT                | 1946679114               |
| SNP_P3_167418_128753 | NW_004517338.1 | Scaffold2371 | 128753                  | AA                              | CC                | 1946679116               |
| SNP_P3_167419_128775 | NW_004517338.1 | Scaffold2371 | 128775                  | AA                              | GG                | 1946679118               |
| SNP_P3_167420_129024 | NW_004517338.1 | Scaffold2371 | 129024                  | TT                              | AA                | 1946679120               |
| SNP_P3_167421_129347 | NW_004517338.1 | Scaffold2371 | 129347                  | TT                              | CC                | 1946679122               |
| SNP_P3_167422_149904 | NW_004517338.1 | Scaffold2371 | 149904                  | AA                              | GG                | 1946679124               |
| SNP_P3_167423_150013 | NW_004517338.1 | Scaffold2371 | 150013                  | CC                              | AA                | 1946679126               |
| SNP_P3_167424_150023 | NW_004517338.1 | Scaffold2371 | 150023                  | GG                              | AA                | 1946679128               |
| SNP_P3_167426_150100 | NW_004517338.1 | Scaffold2371 | 150100                  | AA                              | TT                | 1946679130               |
| SNP_P3_167427_150233 | NW_004517338.1 | Scaffold2371 | 150233                  | TT                              | AA                | 1946679132               |
| SNP_P3_167428_150237 | NW_004517338.1 | Scaffold2371 | 150237                  | TT                              | AA                | 1946679135               |
| SNP_P3_167429_150240 | NW_004517338.1 | Scaffold2371 | 150240                  | TT                              | AA                | 1946679137               |
| SNP_P3_167430_150289 | NW_004517338.1 | Scaffold2371 | 150289                  | AA                              | GG                | 1946679139               |
| SNP_P3_167431_150308 | NW_004517338.1 | Scaffold2371 | 150308                  | TT                              | AA                | 1946679141               |
| SNP_P3_167432_150319 | NW_004517338.1 | Scaffold2371 | 150319                  | AA                              | GG                | 1946679143               |
| SNP_P3_167433_150410 | NW_004517338.1 | Scaffold2371 | 150410                  | CC                              | AA                | 1946679145               |
| SNP_P3_167434_150424 | NW_004517338.1 | Scaffold2371 | 150424                  | CC                              | AA                | 1946679147               |
| SNP_P3_167435_150493 | NW_004517338.1 | Scaffold2371 | 150493                  | AA                              | TT                | 1946679149               |
| SNP_P3_167436_168185 | NW_004517338.1 | Scaffold2371 | 168185                  | TT                              | CC                | 1946679151               |
| SNP_P3_167437_168235 | NW_004517338.1 | Scaffold2371 | 168235                  | AA                              | GG                | 1946679153               |
| SNP_P3_167438_172026 | NW_004517338.1 | Scaffold2371 | 172026                  | AA                              | GG                | 1946679155               |
| SNP_P3_167439_172075 | NW_004517338.1 | Scaffold2371 | 172075                  | CC                              | TT                | 1946679157               |
| SNP_P3_167440_172090 | NW_004517338.1 | Scaffold2371 | 172090                  | AA                              | GG                | 1946679159               |
| SNP_P3_167441_174298 | NW_004517338.1 | Scaffold2371 | 174298                  | AA                              | GG                | 1946679161               |
| SNP_P3_167442_202929 | NW_004517338.1 | Scaffold2371 | 202929                  | TT                              | CC                | 1946679163               |
| SNP_P3_167443_224151 | NW_004517338.1 | Scaffold2371 | 224151                  | AA                              | GG                | 1946679165               |
| SNP_P3_167444_246381 | NW_004517338.1 | Scaffold2371 | 246381                  | AA                              | TT                | 1946679168               |
| SNP_P3_167446_262100 | NW_004517338.1 | Scaffold2371 | 262100                  | GG                              | AA                | 1946679170               |
| SNP_P3_167447_262113 | NW_004517338.1 | Scaffold2371 | 262113                  | CC                              | AA                | 1946679172               |
| SNP_P3_167448_262114 | NW_004517338.1 | Scaffold2371 | 262114                  | CC                              | TT                | 1946679174               |

| SNPs IDs             | Chromosome IDs | Chromosomes  | Physical positions (bp) | CDC Frontier (Reference genome) | (Pusa 256 & HPNB) | NCBI SNPdb Accession IDs |
|----------------------|----------------|--------------|-------------------------|---------------------------------|-------------------|--------------------------|
| SNP_P3_167449_276900 | NW_004517338.1 | Scaffold2371 | 276900                  | CC                              | TT                | 1946679176               |
| SNP_P3_167450_287438 | NW_004517338.1 | Scaffold2371 | 287438                  | GG                              | AA                | 1946679178               |
| SNP_P3_167452_290225 | NW_004517338.1 | Scaffold2371 | 290225                  | TT                              | AA                | 1946679180               |
| SNP_P3_167453_291054 | NW_004517338.1 | Scaffold2371 | 291054                  | AA                              | CC                | 1946679182               |
| SNP_P3_167454_291505 | NW_004517338.1 | Scaffold2371 | 291505                  | AA                              | GG                | 1946679184               |
| SNP_P3_167455_292110 | NW_004517338.1 | Scaffold2371 | 292110                  | CC                              | TT                | 1946679186               |
| SNP_P3_167456_292341 | NW_004517338.1 | Scaffold2371 | 292341                  | CC                              | TT                | 1946679188               |
| SNP_P3_167457_292512 | NW_004517338.1 | Scaffold2371 | 292512                  | GG                              | AA                | 1946679190               |
| SNP_P3_167458_292854 | NW_004517338.1 | Scaffold2371 | 292854                  | GG                              | AA                | 1946679192               |
| SNP_P3_167459_294881 | NW_004517338.1 | Scaffold2371 | 294881                  | GG                              | AA                | 1946679194               |
| SNP_P3_167461_328605 | NW_004517338.1 | Scaffold2371 | 328605                  | CC                              | TT                | 1946679196               |
| SNP_P3_167462_340760 | NW_004517338.1 | Scaffold2371 | 340760                  | TT                              | AA                | 1946679198               |
| SNP_P3_167463_340979 | NW_004517338.1 | Scaffold2371 | 340979                  | TT                              | GG                | 1946679200               |
| SNP_P3_167464_363618 | NW_004517338.1 | Scaffold2371 | 363618                  | CC                              | TT                | 1946679202               |
| SNP_P3_167465_363808 | NW_004517338.1 | Scaffold2371 | 363808                  | CC                              | GG                | 1946679204               |
| SNP_P3_167466_363868 | NW_004517338.1 | Scaffold2371 | 363868                  | AA                              | GG                | 1946679206               |
| SNP_P3_167467_364328 | NW_004517338.1 | Scaffold2371 | 364328                  | GG                              | TT                | 1946679208               |
| SNP_P3_167468_1051   | NW_004517339.1 | Scaffold2372 | 1051                    | AA                              | GG                | 1946679210               |
| SNP_P3_167469_1710   | NW_004517339.1 | Scaffold2372 | 1710                    | GG                              | TT                | 1946679212               |
| SNP_P3_167470_1823   | NW_004517339.1 | Scaffold2372 | 1823                    | CC                              | TT                | 1946679214               |
| SNP_P3_167471_1847   | NW_004517339.1 | Scaffold2372 | 1847                    | TT                              | CC                | 1946679215               |
| SNP_P3_167472_1880   | NW_004517339.1 | Scaffold2372 | 1880                    | GG                              | CC                | 1946679217               |
| SNP_P3_167473_1991   | NW_004517339.1 | Scaffold2372 | 1991                    | AA                              | TT                | 1946679219               |
| SNP_P3_167474_1721   | NW_004517340.1 | Scaffold2373 | 1721                    | GG                              | AA                | 1946679221               |
| SNP_P3_167475_1777   | NW_004517340.1 | Scaffold2373 | 1777                    | AA                              | GG                | 1946679223               |
| SNP_P3_167476_1779   | NW_004517340.1 | Scaffold2373 | 1779                    | AA                              | GG                | 1946679225               |
| SNP_P3_167477_1809   | NW_004517340.1 | Scaffold2373 | 1809                    | AA                              | GG                | 1946679227               |
| SNP_P3_167478_1823   | NW_004517340.1 | Scaffold2373 | 1823                    | TT                              | GG                | 1946679230               |
| SNP_P3_167479_1901   | NW_004517340.1 | Scaffold2373 | 1901                    | AA                              | GG                | 1946679232               |
| SNP_P3_167480_2040   | NW_004517340.1 | Scaffold2373 | 2040                    | TT                              | CC                | 1946679234               |
| SNP_P3_167481_2109   | NW_004517340.1 | Scaffold2373 | 2109                    | TT                              | CC                | 1946679236               |
| SNP_P3_167482_2145   | NW_004517340.1 | Scaffold2373 | 2145                    | AA                              | GG                | 1946679238               |
| SNP_P3_167483_26730  | NW_004517340.1 | Scaffold2373 | 26730                   | CC                              | AA                | 1946679240               |
| SNP_P3_167484_26736  | NW_004517340.1 | Scaffold2373 | 26736                   | CC                              | TT                | 1946679242               |
| SNP_P3_167485_26791  | NW_004517340.1 | Scaffold2373 | 26791                   | GG                              | CC                | 1946679244               |
| SNP_P3_167486_28746  | NW_004517340.1 | Scaffold2373 | 28746                   | GG                              | AA                | 1946679246               |
| SNP_P3_167487_28810  | NW_004517340.1 | Scaffold2373 | 28810                   | CC                              | TT                | 1946679248               |
| SNP_P3_167488_29026  | NW_004517340.1 | Scaffold2373 | 29026                   | GG                              | AA                | 1946679250               |
| SNP_P3_167489_29037  | NW_004517340.1 | Scaffold2373 | 29037                   | GG                              | AA                | 1946679252               |
| SNP_P3_167490_29060  | NW_004517340.1 | Scaffold2373 | 29060                   | AA                              | GG                | 1946679255               |
| SNP_P3_167491_29063  | NW_004517340.1 | Scaffold2373 | 29063                   | AA                              | GG                | 1946679257               |
| SNP_P3_167492_29101  | NW_004517340.1 | Scaffold2373 | 29101                   | AA                              | GG                | 1946679259               |



| SNPs IDs             | Chromosome IDs | Chromosomes  | Physical positions (bp) | CDC Frontier (Reference genome) | (Pusa 256 & HPNB) | NCBI SNPdb Accession IDs |
|----------------------|----------------|--------------|-------------------------|---------------------------------|-------------------|--------------------------|
| SNP_P3_167493_32647  | NW_004517340.1 | Scaffold2373 | 32647                   | CC                              | TT                | 1946679262               |
| SNP_P3_167495_39148  | NW_004517340.1 | Scaffold2373 | 39148                   | AA                              | TT                | 1946679264               |
| SNP_P3_167496_39149  | NW_004517340.1 | Scaffold2373 | 39149                   | AA                              | TT                | 1946679266               |
| SNP_P3_167497_39153  | NW_004517340.1 | Scaffold2373 | 39153                   | GG                              | AA                | 1946679268               |
| SNP_P3_167498_39215  | NW_004517340.1 | Scaffold2373 | 39215                   | TT                              | CC                | 1946679270               |
| SNP_P3_167499_39436  | NW_004517340.1 | Scaffold2373 | 39436                   | GG                              | AA                | 1946679272               |
| SNP_P3_167501_39723  | NW_004517340.1 | Scaffold2373 | 39723                   | TT                              | CC                | 1946679274               |
| SNP_P3_167502_39835  | NW_004517340.1 | Scaffold2373 | 39835                   | TT                              | GG                | 1946679276               |
| SNP_P3_167503_39849  | NW_004517340.1 | Scaffold2373 | 39849                   | TT                              | GG                | 1946679278               |
| SNP_P3_167504_39904  | NW_004517340.1 | Scaffold2373 | 39904                   | GG                              | AA                | 1946679280               |
| SNP_P3_167506_64168  | NW_004517340.1 | Scaffold2373 | 64168                   | GG                              | AA                | 1946679282               |
| SNP_P3_167507_64194  | NW_004517340.1 | Scaffold2373 | 64194                   | GG                              | AA                | 1946679284               |
| SNP_P3_167508_64304  | NW_004517340.1 | Scaffold2373 | 64304                   | GG                              | TT                | 1946679286               |
| SNP_P3_167509_64320  | NW_004517340.1 | Scaffold2373 | 64320                   | AA                              | CC                | 1946679288               |
| SNP_P3_167510_64345  | NW_004517340.1 | Scaffold2373 | 64345                   | AA                              | GG                | 1946679290               |
| SNP_P3_167511_64346  | NW_004517340.1 | Scaffold2373 | 64346                   | TT                              | AA                | 1946679292               |
| SNP_P3_167512_64359  | NW_004517340.1 | Scaffold2373 | 64359                   | CC                              | GG                | 1946679294               |
| SNP_P3_167513_64400  | NW_004517340.1 | Scaffold2373 | 64400                   | AA                              | TT                | 1946679296               |
| SNP_P3_167514_64706  | NW_004517340.1 | Scaffold2373 | 64706                   | AA                              | GG                | 1946679298               |
| SNP_P3_167515_69100  | NW_004517340.1 | Scaffold2373 | 69100                   | CC                              | GG                | 1946679300               |
| SNP_P3_167517_69636  | NW_004517340.1 | Scaffold2373 | 69636                   | CC                              | TT                | 1946679302               |
| SNP_P3_167518_69681  | NW_004517340.1 | Scaffold2373 | 69681                   | AA                              | TT                | 1946679304               |
| SNP_P3_167519_69733  | NW_004517340.1 | Scaffold2373 | 69733                   | TT                              | CC                | 1946679306               |
| SNP_P3_167520_71183  | NW_004517340.1 | Scaffold2373 | 71183                   | TT                              | AA                | 1946679308               |
| SNP_P3_167521_81340  | NW_004517340.1 | Scaffold2373 | 81340                   | GG                              | AA                | 1946679310               |
| SNP_P3_167522_84371  | NW_004517340.1 | Scaffold2373 | 84371                   | TT                              | CC                | 1946679312               |
| SNP_P3_167523_84604  | NW_004517340.1 | Scaffold2373 | 84604                   | TT                              | AA                | 1946679314               |
| SNP_P3_167524_84610  | NW_004517340.1 | Scaffold2373 | 84610                   | GG                              | AA                | 1946679316               |
| SNP_P3_167525_84664  | NW_004517340.1 | Scaffold2373 | 84664                   | CC                              | TT                | 1946679318               |
| SNP_P3_167526_84787  | NW_004517340.1 | Scaffold2373 | 84787                   | GG                              | AA                | 1946679320               |
| SNP_P3_167527_106577 | NW_004517340.1 | Scaffold2373 | 106577                  | TT                              | GG                | 1946679322               |
| SNP_P3_167528_114663 | NW_004517340.1 | Scaffold2373 | 114663                  | TT                              | AA                | 1946679324               |
| SNP_P3_167529_115516 | NW_004517340.1 | Scaffold2373 | 115516                  | TT                              | AA                | 1946679326               |
| SNP_P3_167530_115573 | NW_004517340.1 | Scaffold2373 | 115573                  | TT                              | CC                | 1946679328               |
| SNP_P3_167531_122318 | NW_004517340.1 | Scaffold2373 | 122318                  | CC                              | TT                | 1946679331               |
| SNP_P3_167532_124551 | NW_004517340.1 | Scaffold2373 | 124551                  | AA                              | GG                | 1946679333               |
| SNP_P3_167533_124769 | NW_004517340.1 | Scaffold2373 | 124769                  | AA                              | GG                | 1946679335               |
| SNP_P3_167534_124780 | NW_004517340.1 | Scaffold2373 | 124780                  | CC                              | AA                | 1946679338               |
| SNP_P3_167535_124782 | NW_004517340.1 | Scaffold2373 | 124782                  | TT                              | AA                | 1946679340               |
| SNP_P3_167536_124788 | NW_004517340.1 | Scaffold2373 | 124788                  | CC                              | AA                | 1946679342               |
| SNP_P3_167537_124789 | NW_004517340.1 | Scaffold2373 | 124789                  | TT                              | AA                | 1946679344               |
| SNP_P3_167538_124798 | NW_004517340.1 | Scaffold2373 | 124798                  | GG                              | TT                | 1946679346               |

| SNPs IDs             | Chromosome IDs | Chromosomes  | Physical positions (bp) | CDC Frontier (Reference genome) | (Pusa 256 & HPNB) | NCBI SNPdb Accession IDs |
|----------------------|----------------|--------------|-------------------------|---------------------------------|-------------------|--------------------------|
| SNP_P3_167539_124802 | NW_004517340.1 | Scaffold2373 | 124802                  | TT                              | CC                | 1946679348               |
| SNP_P3_167540_124804 | NW_004517340.1 | Scaffold2373 | 124804                  | CC                              | TT                | 1946679350               |
| SNP_P3_167541_124819 | NW_004517340.1 | Scaffold2373 | 124819                  | AA                              | CC                | 1946679352               |
| SNP_P3_167542_124841 | NW_004517340.1 | Scaffold2373 | 124841                  | CC                              | TT                | 1946679354               |
| SNP_P3_167543_124853 | NW_004517340.1 | Scaffold2373 | 124853                  | GG                              | AA                | 1946679356               |
| SNP_P3_167544_124865 | NW_004517340.1 | Scaffold2373 | 124865                  | CC                              | TT                | 1946679358               |
| SNP_P3_167545_124930 | NW_004517340.1 | Scaffold2373 | 124930                  | TT                              | CC                | 1946679360               |
| SNP_P3_167546_127958 | NW_004517340.1 | Scaffold2373 | 127958                  | CC                              | TT                | 1946679362               |
| SNP_P3_167547_148729 | NW_004517340.1 | Scaffold2373 | 148729                  | CC                              | GG                | 1946679364               |
| SNP_P3_167548_148858 | NW_004517340.1 | Scaffold2373 | 148858                  | CC                              | TT                | 1946679366               |
| SNP_P3_167549_148955 | NW_004517340.1 | Scaffold2373 | 148955                  | GG                              | AA                | 1946679368               |
| SNP_P3_167550_149123 | NW_004517340.1 | Scaffold2373 | 149123                  | TT                              | GG                | 1946679370               |
| SNP_P3_167551_149329 | NW_004517340.1 | Scaffold2373 | 149329                  | CC                              | TT                | 1946679372               |
| SNP_P3_167552_149367 | NW_004517340.1 | Scaffold2373 | 149367                  | GG                              | TT                | 1946679374               |
| SNP_P3_167553_149408 | NW_004517340.1 | Scaffold2373 | 149408                  | GG                              | AA                | 1946679376               |
| SNP_P3_167554_149578 | NW_004517340.1 | Scaffold2373 | 149578                  | AA                              | GG                | 1946679378               |
| SNP_P3_167555_149652 | NW_004517340.1 | Scaffold2373 | 149652                  | AA                              | GG                | 1946679380               |
| SNP_P3_167556_149716 | NW_004517340.1 | Scaffold2373 | 149716                  | AA                              | CC                | 1946679382               |
| SNP_P3_167557_149971 | NW_004517340.1 | Scaffold2373 | 149971                  | TT                              | CC                | 1946679384               |
| SNP_P3_167558_150053 | NW_004517340.1 | Scaffold2373 | 150053                  | TT                              | CC                | 1946679386               |
| SNP_P3_167559_150089 | NW_004517340.1 | Scaffold2373 | 150089                  | GG                              | AA                | 1946679388               |
| SNP_P3_167560_150122 | NW_004517340.1 | Scaffold2373 | 150122                  | CC                              | TT                | 1946679390               |
| SNP_P3_167561_150146 | NW_004517340.1 | Scaffold2373 | 150146                  | TT                              | CC                | 1946679392               |
| SNP_P3_167562_150184 | NW_004517340.1 | Scaffold2373 | 150184                  | TT                              | CC                | 1946679394               |
| SNP_P3_167563_150387 | NW_004517340.1 | Scaffold2373 | 150387                  | CC                              | AA                | 1946679397               |
| SNP_P3_167564_151019 | NW_004517340.1 | Scaffold2373 | 151019                  | AA                              | GG                | 1946679399               |
| SNP_P3_167565_151064 | NW_004517340.1 | Scaffold2373 | 151064                  | TT                              | CC                | 1946679400               |
| SNP_P3_167566_151068 | NW_004517340.1 | Scaffold2373 | 151068                  | GG                              | TT                | 1946679402               |
| SNP_P3_167567_151070 | NW_004517340.1 | Scaffold2373 | 151070                  | CC                              | TT                | 1946679404               |
| SNP_P3_167568_151085 | NW_004517340.1 | Scaffold2373 | 151085                  | TT                              | CC                | 1946679441               |
| SNP_P3_167569_151327 | NW_004517340.1 | Scaffold2373 | 151327                  | TT                              | CC                | 1946679443               |
| SNP_P3_167570_151456 | NW_004517340.1 | Scaffold2373 | 151456                  | TT                              | CC                | 1946679445               |
| SNP_P3_167571_151833 | NW_004517340.1 | Scaffold2373 | 151833                  | GG                              | AA                | 1946679447               |
| SNP_P3_167572_152078 | NW_004517340.1 | Scaffold2373 | 152078                  | CC                              | TT                | 1946679449               |
| SNP_P3_167573_152333 | NW_004517340.1 | Scaffold2373 | 152333                  | TT                              | GG                | 1946679451               |
| SNP_P3_167574_152521 | NW_004517340.1 | Scaffold2373 | 152521                  | TT                              | CC                | 1946679453               |
| SNP_P3_167575_152620 | NW_004517340.1 | Scaffold2373 | 152620                  | GG                              | AA                | 1946679455               |
| SNP_P3_167576_152704 | NW_004517340.1 | Scaffold2373 | 152704                  | CC                              | GG                | 1946679457               |
| SNP_P3_167577_152772 | NW_004517340.1 | Scaffold2373 | 152772                  | AA                              | CC                | 1946679459               |
| SNP_P3_167578_152870 | NW_004517340.1 | Scaffold2373 | 152870                  | AA                              | CC                | 1946679461               |
| SNP_P3_167579_1183   | NW_004517341.1 | Scaffold2374 | 1183                    | CC                              | GG                | 1946679463               |
| SNP_P3_167580_2703   | NW_004517342.1 | Scaffold2375 | 2703                    | AA                              | GG                | 1946679466               |

| SNPs IDs            | Chromosome IDs | Chromosomes  | Physical positions (bp) | CDC Frontier (Reference genome) | (Pusa 256 & HPNB) | NCBI SNPdb Accession IDs |
|---------------------|----------------|--------------|-------------------------|---------------------------------|-------------------|--------------------------|
| SNP_P3_167582_3377  | NW_004517342.1 | Scaffold2375 | 3377                    | AA                              | GG                | 1946679468               |
| SNP_P3_167583_3690  | NW_004517342.1 | Scaffold2375 | 3690                    | TT                              | CC                | 1946679470               |
| SNP_P3_167584_3733  | NW_004517342.1 | Scaffold2375 | 3733                    | TT                              | CC                | 1946679472               |
| SNP_P3_167586_1315  | NW_004517343.1 | Scaffold2376 | 1315                    | CC                              | GG                | 1946679474               |
| SNP_P3_167587_1393  | NW_004517343.1 | Scaffold2376 | 1393                    | AA                              | TT                | 1946679476               |
| SNP_P3_167588_1395  | NW_004517343.1 | Scaffold2376 | 1395                    | TT                              | CC                | 1946679478               |
| SNP_P3_167589_1668  | NW_004517343.1 | Scaffold2376 | 1668                    | GG                              | CC                | 1946679480               |
| SNP_P3_167590_1968  | NW_004517343.1 | Scaffold2376 | 1968                    | AA                              | GG                | 1946679482               |
| SNP_P3_167592_4151  | NW_004517343.1 | Scaffold2376 | 4151                    | CC                              | AA                | 1946679484               |
| SNP_P3_167594_9343  | NW_004517343.1 | Scaffold2376 | 9343                    | GG                              | CC                | 1946679486               |
| SNP_P3_167595_9425  | NW_004517343.1 | Scaffold2376 | 9425                    | AA                              | TT                | 1946679488               |
| SNP_P3_167596_9426  | NW_004517343.1 | Scaffold2376 | 9426                    | AA                              | CC                | 1946679490               |
| SNP_P3_167597_9561  | NW_004517343.1 | Scaffold2376 | 9561                    | TT                              | CC                | 1946679492               |
| SNP_P3_167598_9676  | NW_004517343.1 | Scaffold2376 | 9676                    | GG                              | AA                | 1946679495               |
| SNP_P3_167599_10313 | NW_004517343.1 | Scaffold2376 | 10313                   | CC                              | GG                | 1946679497               |
| SNP_P3_167600_10322 | NW_004517343.1 | Scaffold2376 | 10322                   | AA                              | GG                | 1946679499               |
| SNP_P3_167601_10462 | NW_004517343.1 | Scaffold2376 | 10462                   | TT                              | AA                | 1946679501               |
| SNP_P3_167602_12557 | NW_004517343.1 | Scaffold2376 | 12557                   | GG                              | CC                | 1946679503               |
| SNP_P3_167603_12615 | NW_004517343.1 | Scaffold2376 | 12615                   | CC                              | TT                | 1946679505               |
| SNP_P3_167604_12616 | NW_004517343.1 | Scaffold2376 | 12616                   | TT                              | AA                | 1946679507               |
| SNP_P3_167605_13698 | NW_004517343.1 | Scaffold2376 | 13698                   | CC                              | GG                | 1946679509               |
| SNP_P3_167606_15614 | NW_004517343.1 | Scaffold2376 | 15614                   | AA                              | CC                | 1946679511               |
| SNP_P3_167607_15632 | NW_004517343.1 | Scaffold2376 | 15632                   | AA                              | TT                | 1946679512               |
| SNP_P3_167608_15701 | NW_004517343.1 | Scaffold2376 | 15701                   | TT                              | CC                | 1946679513               |
| SNP_P3_167609_15710 | NW_004517343.1 | Scaffold2376 | 15710                   | AA                              | TT                | 1946679514               |
| SNP_P3_167610_15719 | NW_004517343.1 | Scaffold2376 | 15719                   | TT                              | AA                | 1946679515               |
| SNP_P3_167611_15773 | NW_004517343.1 | Scaffold2376 | 15773                   | AA                              | TT                | 1946679516               |
| SNP_P3_167612_15889 | NW_004517343.1 | Scaffold2376 | 15889                   | CC                              | GG                | 1946679517               |
| SNP_P3_167613_16476 | NW_004517343.1 | Scaffold2376 | 16476                   | AA                              | TT                | 1946679518               |
| SNP_P3_167614_16556 | NW_004517343.1 | Scaffold2376 | 16556                   | TT                              | CC                | 1946679519               |
| SNP_P3_167615_915   | NW_004517345.1 | Scaffold2378 | 915                     | CC                              | AA                | 1946679520               |
| SNP_P3_167616_1057  | NW_004517345.1 | Scaffold2378 | 1057                    | CC                              | TT                | 1946679521               |
| SNP_P3_167618_6343  | NW_004517345.1 | Scaffold2378 | 6343                    | TT                              | CC                | 1946679522               |
| SNP_P3_167619_6828  | NW_004517345.1 | Scaffold2378 | 6828                    | AA                              | GG                | 1946679523               |
| SNP_P3_167620_17162 | NW_004517345.1 | Scaffold2378 | 17162                   | CC                              | TT                | 1946679524               |
| SNP_P3_167621_17197 | NW_004517345.1 | Scaffold2378 | 17197                   | TT                              | CC                | 1946679525               |
| SNP_P3_167622_17435 | NW_004517345.1 | Scaffold2378 | 17435                   | GG                              | CC                | 1946679526               |
| SNP_P3_167623_17440 | NW_004517345.1 | Scaffold2378 | 17440                   | GG                              | AA                | 1946679527               |
| SNP_P3_167624_17459 | NW_004517345.1 | Scaffold2378 | 17459                   | AA                              | TT                | 1946679528               |
| SNP_P3_167625_17477 | NW_004517345.1 | Scaffold2378 | 17477                   | GG                              | AA                | 1946679529               |
| SNP_P3_167626_17524 | NW_004517345.1 | Scaffold2378 | 17524                   | CC                              | TT                | 1946679530               |
| SNP_P3_167627_17550 | NW_004517345.1 | Scaffold2378 | 17550                   | TT                              | CC                | 1946679531               |

| SNPs IDs            | Chromosome IDs | Chromosomes  | Physical positions (bp) | CDC Frontier (Reference genome) | (Pusa 256 & HPNB) | NCBI SNPdb Accession IDs |
|---------------------|----------------|--------------|-------------------------|---------------------------------|-------------------|--------------------------|
| SNP_P3_167628_17689 | NW_004517345.1 | Scaffold2378 | 17689                   | TT                              | CC                | 1946679532               |
| SNP_P3_167629_17716 | NW_004517345.1 | Scaffold2378 | 17716                   | GG                              | AA                | 1946679533               |
| SNP_P3_167630_22911 | NW_004517345.1 | Scaffold2378 | 22911                   | CC                              | AA                | 1946679534               |
| SNP_P3_167632_23149 | NW_004517345.1 | Scaffold2378 | 23149                   | TT                              | CC                | 1946679535               |
| SNP_P3_167633_30241 | NW_004517345.1 | Scaffold2378 | 30241                   | AA                              | TT                | 1946679536               |
| SNP_P3_167634_30350 | NW_004517345.1 | Scaffold2378 | 30350                   | AA                              | CC                | 1946679537               |
| SNP_P3_167635_30396 | NW_004517345.1 | Scaffold2378 | 30396                   | AA                              | GG                | 1946679538               |
| SNP_P3_167636_37149 | NW_004517345.1 | Scaffold2378 | 37149                   | GG                              | CC                | 1946679539               |
| SNP_P3_167639_37354 | NW_004517345.1 | Scaffold2378 | 37354                   | CC                              | AA                | 1946679540               |
| SNP_P3_167640_42629 | NW_004517345.1 | Scaffold2378 | 42629                   | CC                              | GG                | 1946679541               |
| SNP_P3_167641_42656 | NW_004517345.1 | Scaffold2378 | 42656                   | CC                              | TT                | 1946679542               |
| SNP_P3_167642_43079 | NW_004517345.1 | Scaffold2378 | 43079                   | GG                              | TT                | 1946679543               |
| SNP_P3_167643_5516  | NW_004517348.1 | Scaffold2382 | 5516                    | AA                              | GG                | 1946679544               |
| SNP_P3_167645_11672 | NW_004517348.1 | Scaffold2382 | 11672                   | AA                              | GG                | 1946679545               |
| SNP_P3_167646_12975 | NW_004517348.1 | Scaffold2382 | 12975                   | CC                              | TT                | 1946679546               |
| SNP_P3_167647_24261 | NW_004517348.1 | Scaffold2382 | 24261                   | GG                              | TT                | 1946679547               |
| SNP_P3_167648_25600 | NW_004517348.1 | Scaffold2382 | 25600                   | AA                              | GG                | 1946679548               |
| SNP_P3_167649_26015 | NW_004517348.1 | Scaffold2382 | 26015                   | GG                              | AA                | 1946679549               |
| SNP_P3_167650_27024 | NW_004517348.1 | Scaffold2382 | 27024                   | TT                              | AA                | 1946679550               |
| SNP_P3_167651_27080 | NW_004517348.1 | Scaffold2382 | 27080                   | TT                              | AA                | 1946679551               |
| SNP_P3_167652_27844 | NW_004517348.1 | Scaffold2382 | 27844                   | TT                              | CC                | 1946679552               |
| SNP_P3_167653_27859 | NW_004517348.1 | Scaffold2382 | 27859                   | TT                              | CC                | 1946679553               |
| SNP_P3_167654_28167 | NW_004517348.1 | Scaffold2382 | 28167                   | TT                              | GG                | 1946679554               |
| SNP_P3_167655_28184 | NW_004517348.1 | Scaffold2382 | 28184                   | TT                              | CC                | 1946679555               |
| SNP_P3_167656_28198 | NW_004517348.1 | Scaffold2382 | 28198                   | TT                              | CC                | 1946679556               |
| SNP_P3_167657_28602 | NW_004517348.1 | Scaffold2382 | 28602                   | AA                              | TT                | 1946679557               |
| SNP_P3_167658_2219  | NW_004517350.1 | Scaffold2385 | 2219                    | CC                              | TT                | 1946679558               |
| SNP_P3_167659_2259  | NW_004517350.1 | Scaffold2385 | 2259                    | TT                              | GG                | 1946679559               |
| SNP_P3_167660_2274  | NW_004517350.1 | Scaffold2385 | 2274                    | TT                              | CC                | 1946679560               |
| SNP_P3_167661_2298  | NW_004517350.1 | Scaffold2385 | 2298                    | GG                              | AA                | 1946679561               |
| SNP_P3_167662_2312  | NW_004517350.1 | Scaffold2385 | 2312                    | CC                              | TT                | 1946679562               |
| SNP_P3_167663_2418  | NW_004517350.1 | Scaffold2385 | 2418                    | CC                              | TT                | 1946679563               |
| SNP_P3_167664_2724  | NW_004517350.1 | Scaffold2385 | 2724                    | GG                              | AA                | 1946679564               |
| SNP_P3_167665_2728  | NW_004517350.1 | Scaffold2385 | 2728                    | TT                              | GG                | 1946679565               |
| SNP_P3_167666_2987  | NW_004517350.1 | Scaffold2385 | 2987                    | CC                              | TT                | 1946679566               |
| SNP_P3_167667_2993  | NW_004517350.1 | Scaffold2385 | 2993                    | GG                              | AA                | 1946679567               |
| SNP_P3_167668_3156  | NW_004517350.1 | Scaffold2385 | 3156                    | TT                              | AA                | 1946679568               |
| SNP_P3_167669_3415  | NW_004517350.1 | Scaffold2385 | 3415                    | GG                              | AA                | 1946679569               |
| SNP_P3_167670_3419  | NW_004517350.1 | Scaffold2385 | 3419                    | TT                              | CC                | 1946679570               |
| SNP_P3_167671_3476  | NW_004517350.1 | Scaffold2385 | 3476                    | TT                              | AA                | 1946679571               |
| SNP_P3_167672_3588  | NW_004517350.1 | Scaffold2385 | 3588                    | AA                              | GG                | 1946679572               |
| SNP_P3_167673_3696  | NW_004517350.1 | Scaffold2385 | 3696                    | AA                              | CC                | 1946679573               |

| SNPs IDs             | Chromosome IDs | Chromosomes  | Physical positions (bp) | CDC Frontier (Reference genome) | (Pusa 256 & HPNB) | NCBI SNPdb Accession IDs |
|----------------------|----------------|--------------|-------------------------|---------------------------------|-------------------|--------------------------|
| SNP_P3_167676_5885   | NW_004517350.1 | Scaffold2385 | 5885                    | TT                              | CC                | 1946679574               |
| SNP_P3_167677_2375   | NW_004517351.1 | Scaffold2386 | 2375                    | AA                              | GG                | 1946679575               |
| SNP_P3_167678_44499  | NW_004517351.1 | Scaffold2386 | 44499                   | AA                              | GG                | 1946679576               |
| SNP_P3_167679_44663  | NW_004517351.1 | Scaffold2386 | 44663                   | GG                              | AA                | 1946679577               |
| SNP_P3_167680_52813  | NW_004517351.1 | Scaffold2386 | 52813                   | TT                              | CC                | 1946679578               |
| SNP_P3_167681_59654  | NW_004517351.1 | Scaffold2386 | 59654                   | CC                              | GG                | 1946679579               |
| SNP_P3_167682_59871  | NW_004517351.1 | Scaffold2386 | 59871                   | GG                              | TT                | 1946679580               |
| SNP_P3_167683_60038  | NW_004517351.1 | Scaffold2386 | 60038                   | TT                              | AA                | 1946679581               |
| SNP_P3_167684_60051  | NW_004517351.1 | Scaffold2386 | 60051                   | AA                              | GG                | 1946679582               |
| SNP_P3_167685_60085  | NW_004517351.1 | Scaffold2386 | 60085                   | CC                              | TT                | 1946679583               |
| SNP_P3_167686_77256  | NW_004517351.1 | Scaffold2386 | 77256                   | GG                              | AA                | 1946679584               |
| SNP_P3_167687_106166 | NW_004517351.1 | Scaffold2386 | 106166                  | TT                              | GG                | 1946679585               |
| SNP_P3_167688_106175 | NW_004517351.1 | Scaffold2386 | 106175                  | TT                              | CC                | 1946679586               |
| SNP_P3_167689_106189 | NW_004517351.1 | Scaffold2386 | 106189                  | AA                              | GG                | 1946679587               |
| SNP_P3_167690_106234 | NW_004517351.1 | Scaffold2386 | 106234                  | GG                              | AA                | 1946679588               |
| SNP_P3_167691_106485 | NW_004517351.1 | Scaffold2386 | 106485                  | CC                              | TT                | 1946679589               |
| SNP_P3_167692_128022 | NW_004517351.1 | Scaffold2386 | 128022                  | CC                              | AA                | 1946679590               |
| SNP_P3_167694_172405 | NW_004517351.1 | Scaffold2386 | 172405                  | TT                              | CC                | 1946679591               |
| SNP_P3_167695_178774 | NW_004517351.1 | Scaffold2386 | 178774                  | CC                              | GG                | 1946679592               |
| SNP_P3_167696_178796 | NW_004517351.1 | Scaffold2386 | 178796                  | AA                              | GG                | 1946679593               |
| SNP_P3_167697_178805 | NW_004517351.1 | Scaffold2386 | 178805                  | AA                              | GG                | 1946679594               |
| SNP_P3_167698_178809 | NW_004517351.1 | Scaffold2386 | 178809                  | TT                              | CC                | 1946679595               |
| SNP_P3_167699_178811 | NW_004517351.1 | Scaffold2386 | 178811                  | AA                              | TT                | 1946679596               |
| SNP_P3_167700_178818 | NW_004517351.1 | Scaffold2386 | 178818                  | TT                              | CC                | 1946679597               |
| SNP_P3_167701_178873 | NW_004517351.1 | Scaffold2386 | 178873                  | TT                              | GG                | 1946679598               |
| SNP_P3_167702_196670 | NW_004517351.1 | Scaffold2386 | 196670                  | AA                              | CC                | 1946679599               |
| SNP_P3_167703_196676 | NW_004517351.1 | Scaffold2386 | 196676                  | AA                              | TT                | 1946679600               |
| SNP_P3_167704_196702 | NW_004517351.1 | Scaffold2386 | 196702                  | GG                              | TT                | 1946679602               |
| SNP_P3_167705_196704 | NW_004517351.1 | Scaffold2386 | 196704                  | AA                              | GG                | 1946679604               |
| SNP_P3_167707_196740 | NW_004517351.1 | Scaffold2386 | 196740                  | CC                              | TT                | 1946679606               |
| SNP_P3_167708_196742 | NW_004517351.1 | Scaffold2386 | 196742                  | CC                              | TT                | 1946679608               |
| SNP_P3_167710_196852 | NW_004517351.1 | Scaffold2386 | 196852                  | AA                              | GG                | 1946679610               |
| SNP_P3_167711_196876 | NW_004517351.1 | Scaffold2386 | 196876                  | TT                              | CC                | 1946679614               |
| SNP_P3_167712_196887 | NW_004517351.1 | Scaffold2386 | 196887                  | GG                              | AA                | 1946679616               |
| SNP_P3_167713_196889 | NW_004517351.1 | Scaffold2386 | 196889                  | CC                              | AA                | 1946679618               |
| SNP_P3_167714_197004 | NW_004517351.1 | Scaffold2386 | 197004                  | TT                              | CC                | 1946679620               |
| SNP_P3_167715_197012 | NW_004517351.1 | Scaffold2386 | 197012                  | TT                              | GG                | 1946679622               |
| SNP_P3_167716_197036 | NW_004517351.1 | Scaffold2386 | 197036                  | TT                              | CC                | 1946679624               |
| SNP_P3_167717_197229 | NW_004517351.1 | Scaffold2386 | 197229                  | TT                              | CC                | 1946679626               |
| SNP_P3_167718_207884 | NW_004517351.1 | Scaffold2386 | 207884                  | GG                              | AA                | 1946679628               |
| SNP_P3_167719_213743 | NW_004517351.1 | Scaffold2386 | 213743                  | AA                              | GG                | 1946679630               |
| SNP_P3_167720_213781 | NW_004517351.1 | Scaffold2386 | 213781                  | CC                              | TT                | 1946679632               |

| SNPs IDs             | Chromosome IDs | Chromosomes  | Physical positions (bp) | CDC Frontier (Reference genome) | (Pusa 256 & HPNB) | NCBI SNPdb Accession IDs |
|----------------------|----------------|--------------|-------------------------|---------------------------------|-------------------|--------------------------|
| SNP_P3_167721_213827 | NW_004517351.1 | Scaffold2386 | 213827                  | CC                              | TT                | 1946679634               |
| SNP_P3_167722_214129 | NW_004517351.1 | Scaffold2386 | 214129                  | TT                              | AA                | 1946679636               |
| SNP_P3_167723_214134 | NW_004517351.1 | Scaffold2386 | 214134                  | CC                              | AA                | 1946679637               |
| SNP_P3_167724_214138 | NW_004517351.1 | Scaffold2386 | 214138                  | CC                              | TT                | 1946679639               |
| SNP_P3_167725_214322 | NW_004517351.1 | Scaffold2386 | 214322                  | TT                              | CC                | 1946679641               |
| SNP_P3_167726_5574   | NW_004517352.1 | Scaffold2388 | 5574                    | AA                              | GG                | 1946679643               |
| SNP_P3_167727_5629   | NW_004517352.1 | Scaffold2388 | 5629                    | AA                              | TT                | 1946679646               |
| SNP_P3_167728_6945   | NW_004517352.1 | Scaffold2388 | 6945                    | AA                              | GG                | 1946679648               |
| SNP_P3_167729_7481   | NW_004517352.1 | Scaffold2388 | 7481                    | TT                              | AA                | 1946679651               |
| SNP_P3_167730_7522   | NW_004517352.1 | Scaffold2388 | 7522                    | AA                              | GG                | 1946679653               |
| SNP_P3_167731_7548   | NW_004517352.1 | Scaffold2388 | 7548                    | AA                              | GG                | 1946679655               |
| SNP_P3_167732_7717   | NW_004517352.1 | Scaffold2388 | 7717                    | CC                              | TT                | 1946679657               |
| SNP_P3_167733_7887   | NW_004517352.1 | Scaffold2388 | 7887                    | AA                              | CC                | 1946679659               |
| SNP_P3_167734_8361   | NW_004517352.1 | Scaffold2388 | 8361                    | GG                              | AA                | 1946679661               |
| SNP_P3_167735_14530  | NW_004517352.1 | Scaffold2388 | 14530                   | TT                              | GG                | 1946679663               |
| SNP_P3_167736_15606  | NW_004517352.1 | Scaffold2388 | 15606                   | AA                              | CC                | 1946679665               |
| SNP_P3_167737_27123  | NW_004517352.1 | Scaffold2388 | 27123                   | CC                              | GG                | 1946679667               |
| SNP_P3_167738_27504  | NW_004517352.1 | Scaffold2388 | 27504                   | GG                              | AA                | 1946679669               |
| SNP_P3_167739_27517  | NW_004517352.1 | Scaffold2388 | 27517                   | GG                              | TT                | 1946679671               |
| SNP_P3_167740_32713  | NW_004517352.1 | Scaffold2388 | 32713                   | TT                              | AA                | 1946679673               |
| SNP_P3_167741_46215  | NW_004517352.1 | Scaffold2388 | 46215                   | TT                              | AA                | 1946679675               |
| SNP_P3_167742_49745  | NW_004517352.1 | Scaffold2388 | 49745                   | TT                              | GG                | 1946679677               |
| SNP_P3_167743_50108  | NW_004517352.1 | Scaffold2388 | 50108                   | CC                              | AA                | 1946679679               |
| SNP_P3_167744_12499  | NW_004517353.1 | Scaffold2389 | 12499                   | AA                              | TT                | 1946679681               |
| SNP_P3_167745_13104  | NW_004517353.1 | Scaffold2389 | 13104                   | TT                              | CC                | 1946679683               |
| SNP_P3_167746_1515   | NW_004517355.1 | Scaffold2392 | 1515                    | AA                              | CC                | 1946679685               |
| SNP_P3_167747_1519   | NW_004517355.1 | Scaffold2392 | 1519                    | AA                              | GG                | 1946679688               |
| SNP_P3_167748_1549   | NW_004517355.1 | Scaffold2392 | 1549                    | GG                              | AA                | 1946679690               |
| SNP_P3_167749_1588   | NW_004517355.1 | Scaffold2392 | 1588                    | TT                              | AA                | 1946679692               |
| SNP_P3_167750_1760   | NW_004517355.1 | Scaffold2392 | 1760                    | AA                              | CC                | 1946679694               |
| SNP_P3_167753_10908  | NW_004517355.1 | Scaffold2392 | 10908                   | GG                              | AA                | 1946679696               |
| SNP_P3_167754_11214  | NW_004517355.1 | Scaffold2392 | 11214                   | CC                              | GG                | 1946679697               |
| SNP_P3_167755_11327  | NW_004517355.1 | Scaffold2392 | 11327                   | TT                              | GG                | 1946679699               |
| SNP_P3_167756_17806  | NW_004517355.1 | Scaffold2392 | 17806                   | CC                              | TT                | 1946679701               |
| SNP_P3_167757_17812  | NW_004517355.1 | Scaffold2392 | 17812                   | TT                              | CC                | 1946679703               |
| SNP_P3_167758_17860  | NW_004517355.1 | Scaffold2392 | 17860                   | GG                              | CC                | 1946679705               |
| SNP_P3_167759_17913  | NW_004517355.1 | Scaffold2392 | 17913                   | AA                              | GG                | 1946679707               |
| SNP_P3_167760_17944  | NW_004517355.1 | Scaffold2392 | 17944                   | GG                              | AA                | 1946679709               |
| SNP_P3_167761_18007  | NW_004517355.1 | Scaffold2392 | 18007                   | GG                              | CC                | 1946679711               |
| SNP_P3_167763_18795  | NW_004517355.1 | Scaffold2392 | 18795                   | CC                              | TT                | 1946679713               |
| SNP_P3_167764_18797  | NW_004517355.1 | Scaffold2392 | 18797                   | TT                              | GG                | 1946679715               |
| SNP_P3_167765_18811  | NW_004517355.1 | Scaffold2392 | 18811                   | TT                              | AA                | 1946679717               |

| SNPs IDs             | Chromosome IDs | Chromosomes  | Physical positions (bp) | CDC Frontier (Reference genome) | (Pusa 256 & HPNB) | NCBI SNPdb Accession IDs |
|----------------------|----------------|--------------|-------------------------|---------------------------------|-------------------|--------------------------|
| SNP_P3_167766_18866  | NW_004517355.1 | Scaffold2392 | 18866                   | AA                              | GG                | 1946679719               |
| SNP_P3_167767_18873  | NW_004517355.1 | Scaffold2392 | 18873                   | TT                              | CC                | 1946679721               |
| SNP_P3_167768_18900  | NW_004517355.1 | Scaffold2392 | 18900                   | TT                              | CC                | 1946679723               |
| SNP_P3_167769_18950  | NW_004517355.1 | Scaffold2392 | 18950                   | AA                              | GG                | 1946679725               |
| SNP_P3_167770_19080  | NW_004517355.1 | Scaffold2392 | 19080                   | TT                              | AA                | 1946679727               |
| SNP_P3_167771_19455  | NW_004517355.1 | Scaffold2392 | 19455                   | TT                              | AA                | 1946679729               |
| SNP_P3_167772_19543  | NW_004517355.1 | Scaffold2392 | 19543                   | GG                              | TT                | 1946679731               |
| SNP_P3_167773_19592  | NW_004517355.1 | Scaffold2392 | 19592                   | GG                              | AA                | 1946679733               |
| SNP_P3_167774_19629  | NW_004517355.1 | Scaffold2392 | 19629                   | AA                              | TT                | 1946679735               |
| SNP_P3_167775_19702  | NW_004517355.1 | Scaffold2392 | 19702                   | AA                              | TT                | 1946679737               |
| SNP_P3_167776_19733  | NW_004517355.1 | Scaffold2392 | 19733                   | GG                              | CC                | 1946679739               |
| SNP_P3_167778_20363  | NW_004517355.1 | Scaffold2392 | 20363                   | AA                              | GG                | 1946679741               |
| SNP_P3_167779_40703  | NW_004517355.1 | Scaffold2392 | 40703                   | GG                              | AA                | 1946679743               |
| SNP_P3_167780_102577 | NW_004517355.1 | Scaffold2392 | 102577                  | CC                              | AA                | 1946679745               |
| SNP_P3_167781_104874 | NW_004517355.1 | Scaffold2392 | 104874                  | GG                              | AA                | 1946679747               |
| SNP_P3_167782_110686 | NW_004517355.1 | Scaffold2392 | 110686                  | GG                              | AA                | 1946679749               |
| SNP_P3_167783_165876 | NW_004517355.1 | Scaffold2392 | 165876                  | TT                              | CC                | 1946679751               |
| SNP_P3_167784_190515 | NW_004517355.1 | Scaffold2392 | 190515                  | CC                              | TT                | 1946679753               |
| SNP_P3_167785_190520 | NW_004517355.1 | Scaffold2392 | 190520                  | AA                              | GG                | 1946679755               |
| SNP_P3_167786_193345 | NW_004517355.1 | Scaffold2392 | 193345                  | CC                              | TT                | 1946679757               |
| SNP_P3_167787_193348 | NW_004517355.1 | Scaffold2392 | 193348                  | AA                              | GG                | 1946679759               |
| SNP_P3_167789_253251 | NW_004517355.1 | Scaffold2392 | 253251                  | AA                              | TT                | 1946679761               |
| SNP_P3_167791_266828 | NW_004517355.1 | Scaffold2392 | 266828                  | AA                              | TT                | 1946679763               |
| SNP_P3_167792_280516 | NW_004517355.1 | Scaffold2392 | 280516                  | AA                              | TT                | 1946679766               |
| SNP_P3_167793_283472 | NW_004517355.1 | Scaffold2392 | 283472                  | AA                              | GG                | 1946679768               |
| SNP_P3_167794_283495 | NW_004517355.1 | Scaffold2392 | 283495                  | CC                              | TT                | 1946679770               |
| SNP_P3_167795_283586 | NW_004517355.1 | Scaffold2392 | 283586                  | AA                              | GG                | 1946679772               |
| SNP_P3_167796_283600 | NW_004517355.1 | Scaffold2392 | 283600                  | GG                              | AA                | 1946679774               |
| SNP_P3_167797_283651 | NW_004517355.1 | Scaffold2392 | 283651                  | TT                              | CC                | 1946679776               |
| SNP_P3_167800_322850 | NW_004517355.1 | Scaffold2392 | 322850                  | AA                              | GG                | 1946679778               |
| SNP_P3_167801_322865 | NW_004517355.1 | Scaffold2392 | 322865                  | GG                              | AA                | 1946679780               |
| SNP_P3_167802_323193 | NW_004517355.1 | Scaffold2392 | 323193                  | GG                              | CC                | 1946679782               |
| SNP_P3_167803_325998 | NW_004517355.1 | Scaffold2392 | 325998                  | CC                              | AA                | 1946679784               |
| SNP_P3_167804_326017 | NW_004517355.1 | Scaffold2392 | 326017                  | TT                              | GG                | 1946679786               |
| SNP_P3_167805_326141 | NW_004517355.1 | Scaffold2392 | 326141                  | TT                              | GG                | 1946679788               |
| SNP_P3_167806_326160 | NW_004517355.1 | Scaffold2392 | 326160                  | TT                              | CC                | 1946679790               |
| SNP_P3_167807_326165 | NW_004517355.1 | Scaffold2392 | 326165                  | CC                              | AA                | 1946679793               |
| SNP_P3_167809_326235 | NW_004517355.1 | Scaffold2392 | 326235                  | CC                              | GG                | 1946679795               |
| SNP_P3_167810_326260 | NW_004517355.1 | Scaffold2392 | 326260                  | AA                              | CC                | 1946679797               |
| SNP_P3_167811_354133 | NW_004517355.1 | Scaffold2392 | 354133                  | AA                              | GG                | 1946679799               |
| SNP_P3_167812_3755   | NW_004517356.1 | Scaffold2394 | 3755                    | GG                              | TT                | 1946679801               |
| SNP_P3_167813_3807   | NW_004517356.1 | Scaffold2394 | 3807                    | GG                              | AA                | 1946679803               |

| SNPs IDs            | Chromosome IDs | Chromosomes  | Physical positions (bp) | CDC Frontier (Reference genome) | (Pusa 256 & HPNB) | NCBI SNPdb Accession IDs |
|---------------------|----------------|--------------|-------------------------|---------------------------------|-------------------|--------------------------|
| SNP_P3_167814_4607  | NW_004517356.1 | Scaffold2394 | 4607                    | CC                              | TT                | 1946679805               |
| SNP_P3_167815_1452  | NW_004517358.1 | Scaffold2396 | 1452                    | AA                              | GG                | 1946679807               |
| SNP_P3_167816_1791  | NW_004517358.1 | Scaffold2396 | 1791                    | AA                              | GG                | 1946679810               |
| SNP_P3_167817_1796  | NW_004517358.1 | Scaffold2396 | 1796                    | AA                              | GG                | 1946679812               |
| SNP_P3_167818_1813  | NW_004517358.1 | Scaffold2396 | 1813                    | AA                              | CC                | 1946679814               |
| SNP_P3_167819_1843  | NW_004517358.1 | Scaffold2396 | 1843                    | GG                              | AA                | 1946679816               |
| SNP_P3_167820_768   | NW_004517359.1 | Scaffold2397 | 768                     | GG                              | CC                | 1946679818               |
| SNP_P3_167821_790   | NW_004517359.1 | Scaffold2397 | 790                     | TT                              | AA                | 1946679820               |
| SNP_P3_167822_1074  | NW_004517362.1 | Scaffold2402 | 1074                    | GG                              | AA                | 1946679822               |
| SNP_P3_167823_1409  | NW_004517362.1 | Scaffold2402 | 1409                    | AA                              | GG                | 1946679824               |
| SNP_P3_167824_1433  | NW_004517362.1 | Scaffold2402 | 1433                    | TT                              | AA                | 1946679826               |
| SNP_P3_167825_1160  | NW_004517363.1 | Scaffold2405 | 1160                    | GG                              | CC                | 1946679828               |
| SNP_P3_167827_2604  | NW_004517365.1 | Scaffold2408 | 2604                    | TT                              | GG                | 1946679830               |
| SNP_P3_167828_678   | NW_004517366.1 | Scaffold2409 | 678                     | CC                              | GG                | 1946679832               |
| SNP_P3_167829_7280  | NW_004517367.1 | Scaffold2410 | 7280                    | CC                              | GG                | 1946679834               |
| SNP_P3_167830_7597  | NW_004517367.1 | Scaffold2410 | 7597                    | CC                              | AA                | 1946679836               |
| SNP_P3_167831_7617  | NW_004517367.1 | Scaffold2410 | 7617                    | AA                              | GG                | 1946679838               |
| SNP_P3_167832_7622  | NW_004517367.1 | Scaffold2410 | 7622                    | AA                              | GG                | 1946679840               |
| SNP_P3_167833_7647  | NW_004517367.1 | Scaffold2410 | 7647                    | TT                              | AA                | 1946679842               |
| SNP_P3_167834_9664  | NW_004517367.1 | Scaffold2410 | 9664                    | TT                              | AA                | 1946679845               |
| SNP_P3_167835_9868  | NW_004517367.1 | Scaffold2410 | 9868                    | AA                              | TT                | 1946679847               |
| SNP_P3_167836_10061 | NW_004517367.1 | Scaffold2410 | 10061                   | CC                              | TT                | 1946679849               |
| SNP_P3_167837_10085 | NW_004517367.1 | Scaffold2410 | 10085                   | AA                              | TT                | 1946679851               |
| SNP_P3_167838_10086 | NW_004517367.1 | Scaffold2410 | 10086                   | GG                              | AA                | 1946679853               |
| SNP_P3_167839_12242 | NW_004517367.1 | Scaffold2410 | 12242                   | AA                              | GG                | 1946679855               |
| SNP_P3_167841_15354 | NW_004517367.1 | Scaffold2410 | 15354                   | TT                              | AA                | 1946679857               |
| SNP_P3_167842_16058 | NW_004517367.1 | Scaffold2410 | 16058                   | AA                              | TT                | 1946679859               |
| SNP_P3_167843_16089 | NW_004517367.1 | Scaffold2410 | 16089                   | AA                              | CC                | 1946679861               |
| SNP_P3_167844_16156 | NW_004517367.1 | Scaffold2410 | 16156                   | CC                              | TT                | 1946679863               |
| SNP_P3_167845_16181 | NW_004517367.1 | Scaffold2410 | 16181                   | GG                              | TT                | 1946679865               |
| SNP_P3_167846_16202 | NW_004517367.1 | Scaffold2410 | 16202                   | AA                              | GG                | 1946679867               |
| SNP_P3_167847_18019 | NW_004517367.1 | Scaffold2410 | 18019                   | TT                              | GG                | 1946679869               |
| SNP_P3_167848_19369 | NW_004517367.1 | Scaffold2410 | 19369                   | GG                              | AA                | 1946679871               |
| SNP_P3_167849_31852 | NW_004517367.1 | Scaffold2410 | 31852                   | CC                              | GG                | 1946679873               |
| SNP_P3_167850_34371 | NW_004517367.1 | Scaffold2410 | 34371                   | AA                              | GG                | 1946679875               |
| SNP_P3_167851_34524 | NW_004517367.1 | Scaffold2410 | 34524                   | CC                              | TT                | 1946679878               |
| SNP_P3_167852_9232  | NW_004517369.1 | Scaffold2412 | 9232                    | CC                              | TT                | 1946679880               |
| SNP_P3_167853_9241  | NW_004517369.1 | Scaffold2412 | 9241                    | TT                              | CC                | 1946679882               |
| SNP_P3_167855_9275  | NW_004517369.1 | Scaffold2412 | 9275                    | TT                              | CC                | 1946679884               |
| SNP_P3_167856_9292  | NW_004517369.1 | Scaffold2412 | 9292                    | CC                              | AA                | 1946679886               |
| SNP_P3_167857_12154 | NW_004517369.1 | Scaffold2412 | 12154                   | TT                              | AA                | 1946679888               |
| SNP_P3_167858_12836 | NW_004517369.1 | Scaffold2412 | 12836                   | TT                              | CC                | 1946679890               |



| SNPs IDs            | Chromosome IDs | Chromosomes  | Physical positions (bp) | CDC Frontier (Reference genome) | (Pusa 256 & HPNB) | NCBI SNPdb Accession IDs |
|---------------------|----------------|--------------|-------------------------|---------------------------------|-------------------|--------------------------|
| SNP_P3_167859_12848 | NW_004517369.1 | Scaffold2412 | 12848                   | CC                              | TT                | 1946679892               |
| SNP_P3_167860_12864 | NW_004517369.1 | Scaffold2412 | 12864                   | TT                              | CC                | 1946679894               |
| SNP_P3_167861_12865 | NW_004517369.1 | Scaffold2412 | 12865                   | AA                              | GG                | 1946679896               |
| SNP_P3_167862_12866 | NW_004517369.1 | Scaffold2412 | 12866                   | GG                              | AA                | 1946679898               |
| SNP_P3_167863_13035 | NW_004517369.1 | Scaffold2412 | 13035                   | CC                              | AA                | 1946679900               |
| SNP_P3_167864_13041 | NW_004517369.1 | Scaffold2412 | 13041                   | GG                              | AA                | 1946679902               |
| SNP_P3_167865_13184 | NW_004517369.1 | Scaffold2412 | 13184                   | TT                              | CC                | 1946679904               |
| SNP_P3_167866_29399 | NW_004517369.1 | Scaffold2412 | 29399                   | GG                              | CC                | 1946679906               |
| SNP_P3_167867_46553 | NW_004517369.1 | Scaffold2412 | 46553                   | TT                              | AA                | 1946679908               |
| SNP_P3_167868_48500 | NW_004517369.1 | Scaffold2412 | 48500                   | TT                              | AA                | 1946679911               |
| SNP_P3_167869_55226 | NW_004517369.1 | Scaffold2412 | 55226                   | GG                              | CC                | 1946679913               |
| SNP_P3_167870_61290 | NW_004517369.1 | Scaffold2412 | 61290                   | TT                              | GG                | 1946679915               |
| SNP_P3_167871_62669 | NW_004517369.1 | Scaffold2412 | 62669                   | AA                              | GG                | 1946679917               |
| SNP_P3_167872_62686 | NW_004517369.1 | Scaffold2412 | 62686                   | CC                              | GG                | 1946679919               |
| SNP_P3_167873_62687 | NW_004517369.1 | Scaffold2412 | 62687                   | AA                              | GG                | 1946679921               |
| SNP_P3_167874_62702 | NW_004517369.1 | Scaffold2412 | 62702                   | AA                              | CC                | 1946679923               |
| SNP_P3_167875_62715 | NW_004517369.1 | Scaffold2412 | 62715                   | TT                              | CC                | 1946679925               |
| SNP_P3_167876_63505 | NW_004517369.1 | Scaffold2412 | 63505                   | CC                              | TT                | 1946679927               |
| SNP_P3_167877_64091 | NW_004517369.1 | Scaffold2412 | 64091                   | TT                              | GG                | 1946679929               |
| SNP_P3_167878_64258 | NW_004517369.1 | Scaffold2412 | 64258                   | AA                              | GG                | 1946679931               |
| SNP_P3_167879_64280 | NW_004517369.1 | Scaffold2412 | 64280                   | CC                              | TT                | 1946679933               |
| SNP_P3_167880_64281 | NW_004517369.1 | Scaffold2412 | 64281                   | TT                              | AA                | 1946679935               |
| SNP_P3_167881_66112 | NW_004517369.1 | Scaffold2412 | 66112                   | TT                              | CC                | 1946679937               |
| SNP_P3_167882_66186 | NW_004517369.1 | Scaffold2412 | 66186                   | CC                              | GG                | 1946679939               |
| SNP_P3_167883_66236 | NW_004517369.1 | Scaffold2412 | 66236                   | GG                              | TT                | 1946679941               |
| SNP_P3_167884_12575 | NW_004517370.1 | Scaffold2413 | 12575                   | TT                              | GG                | 1946679944               |
| SNP_P3_167885_12584 | NW_004517370.1 | Scaffold2413 | 12584                   | AA                              | TT                | 1946679946               |
| SNP_P3_167886_12778 | NW_004517370.1 | Scaffold2413 | 12778                   | GG                              | TT                | 1946679948               |
| SNP_P3_167887_12791 | NW_004517370.1 | Scaffold2413 | 12791                   | AA                              | TT                | 1946679950               |
| SNP_P3_167888_12912 | NW_004517370.1 | Scaffold2413 | 12912                   | GG                              | TT                | 1946679952               |
| SNP_P3_167889_12934 | NW_004517370.1 | Scaffold2413 | 12934                   | AA                              | GG                | 1946679954               |
| SNP_P3_167890_15420 | NW_004517370.1 | Scaffold2413 | 15420                   | GG                              | AA                | 1946679956               |
| SNP_P3_167891_187   | NW_004517371.1 | Scaffold2415 | 187                     | TT                              | CC                | 1946679959               |
| SNP_P3_167892_221   | NW_004517371.1 | Scaffold2415 | 221                     | TT                              | CC                | 1946679961               |
| SNP_P3_167893_579   | NW_004517371.1 | Scaffold2415 | 579                     | TT                              | CC                | 1946679963               |
| SNP_P3_167894_627   | NW_004517371.1 | Scaffold2415 | 627                     | TT                              | CC                | 1946679965               |
| SNP_P3_167895_711   | NW_004517371.1 | Scaffold2415 | 711                     | GG                              | AA                | 1946679967               |
| SNP_P3_167897_38794 | NW_004517371.1 | Scaffold2415 | 38794                   | CC                              | AA                | 1946679969               |
| SNP_P3_167900_44784 | NW_004517371.1 | Scaffold2415 | 44784                   | AA                              | TT                | 1946679972               |
| SNP_P3_167901_44785 | NW_004517371.1 | Scaffold2415 | 44785                   | CC                              | AA                | 1946679975               |
| SNP_P3_167902_88970 | NW_004517371.1 | Scaffold2415 | 88970                   | TT                              | CC                | 1946679977               |
| SNP_P3_167903_88979 | NW_004517371.1 | Scaffold2415 | 88979                   | CC                              | GG                | 1946679979               |

| SNPs IDs             | Chromosome IDs | Chromosomes  | Physical positions (bp) | CDC Frontier (Reference genome) | (Pusa 256 & HPNB) | NCBI SNPdb Accession IDs |
|----------------------|----------------|--------------|-------------------------|---------------------------------|-------------------|--------------------------|
| SNP_P3_167904_92168  | NW_004517371.1 | Scaffold2415 | 92168                   | CC                              | TT                | 1946679981               |
| SNP_P3_167905_102476 | NW_004517371.1 | Scaffold2415 | 102476                  | TT                              | CC                | 1946679983               |
| SNP_P3_167906_104140 | NW_004517371.1 | Scaffold2415 | 104140                  | AA                              | GG                | 1946679986               |
| SNP_P3_167908_755    | NW_004517374.1 | Scaffold2420 | 755                     | CC                              | TT                | 1946679988               |
| SNP_P3_167909_1166   | NW_004517375.1 | Scaffold2421 | 1166                    | TT                              | CC                | 1946679990               |
| SNP_P3_167910_7885   | NW_004517375.1 | Scaffold2421 | 7885                    | TT                              | AA                | 1946679992               |
| SNP_P3_167911_8079   | NW_004517375.1 | Scaffold2421 | 8079                    | AA                              | GG                | 1946679994               |
| SNP_P3_167912_8228   | NW_004517375.1 | Scaffold2421 | 8228                    | TT                              | AA                | 1946679996               |
| SNP_P3_167913_8277   | NW_004517375.1 | Scaffold2421 | 8277                    | CC                              | AA                | 1946679998               |
| SNP_P3_167914_8337   | NW_004517375.1 | Scaffold2421 | 8337                    | CC                              | AA                | 1946680000               |
| SNP_P3_167915_8411   | NW_004517375.1 | Scaffold2421 | 8411                    | AA                              | TT                | 1946680002               |
| SNP_P3_167916_8416   | NW_004517375.1 | Scaffold2421 | 8416                    | GG                              | AA                | 1946680004               |
| SNP_P3_167917_8519   | NW_004517375.1 | Scaffold2421 | 8519                    | TT                              | CC                | 1946680006               |
| SNP_P3_167918_8589   | NW_004517375.1 | Scaffold2421 | 8589                    | CC                              | TT                | 1946680008               |
| SNP_P3_167919_8596   | NW_004517375.1 | Scaffold2421 | 8596                    | CC                              | GG                | 1946680012               |
| SNP_P3_167920_8618   | NW_004517375.1 | Scaffold2421 | 8618                    | AA                              | TT                | 1946680014               |
| SNP_P3_167921_11991  | NW_004517375.1 | Scaffold2421 | 11991                   | TT                              | CC                | 1946680016               |
| SNP_P3_167922_12154  | NW_004517375.1 | Scaffold2421 | 12154                   | CC                              | TT                | 1946680018               |
| SNP_P3_167923_12358  | NW_004517375.1 | Scaffold2421 | 12358                   | AA                              | GG                | 1946680020               |
| SNP_P3_167924_12636  | NW_004517375.1 | Scaffold2421 | 12636                   | AA                              | TT                | 1946680022               |
| SNP_P3_167925_16779  | NW_004517375.1 | Scaffold2421 | 16779                   | CC                              | AA                | 1946680024               |
| SNP_P3_167926_16780  | NW_004517375.1 | Scaffold2421 | 16780                   | AA                              | CC                | 1946680026               |
| SNP_P3_167927_16787  | NW_004517375.1 | Scaffold2421 | 16787                   | TT                              | AA                | 1946680028               |
| SNP_P3_167928_17169  | NW_004517375.1 | Scaffold2421 | 17169                   | CC                              | TT                | 1946680030               |
| SNP_P3_167929_24732  | NW_004517375.1 | Scaffold2421 | 24732                   | GG                              | AA                | 1946680032               |
| SNP_P3_167930_24823  | NW_004517375.1 | Scaffold2421 | 24823                   | AA                              | GG                | 1946680034               |
| SNP_P3_167931_24843  | NW_004517375.1 | Scaffold2421 | 24843                   | TT                              | CC                | 1946680036               |
| SNP_P3_167932_25154  | NW_004517375.1 | Scaffold2421 | 25154                   | TT                              | CC                | 1946680038               |
| SNP_P3_167933_25239  | NW_004517375.1 | Scaffold2421 | 25239                   | TT                              | AA                | 1946680040               |
| SNP_P3_167934_25251  | NW_004517375.1 | Scaffold2421 | 25251                   | TT                              | GG                | 1946680043               |
| SNP_P3_167935_25396  | NW_004517375.1 | Scaffold2421 | 25396                   | CC                              | AA                | 1946680045               |
| SNP_P3_167937_33742  | NW_004517375.1 | Scaffold2421 | 33742                   | AA                              | GG                | 1946680047               |
| SNP_P3_167938_33789  | NW_004517375.1 | Scaffold2421 | 33789                   | GG                              | AA                | 1946680049               |
| SNP_P3_167939_33826  | NW_004517375.1 | Scaffold2421 | 33826                   | AA                              | GG                | 1946680051               |
| SNP_P3_167940_34315  | NW_004517375.1 | Scaffold2421 | 34315                   | TT                              | CC                | 1946680053               |
| SNP_P3_167941_34345  | NW_004517375.1 | Scaffold2421 | 34345                   | GG                              | AA                | 1946680055               |
| SNP_P3_167942_34347  | NW_004517375.1 | Scaffold2421 | 34347                   | AA                              | CC                | 1946680057               |
| SNP_P3_167943_34375  | NW_004517375.1 | Scaffold2421 | 34375                   | TT                              | GG                | 1946680059               |
| SNP_P3_167944_34411  | NW_004517375.1 | Scaffold2421 | 34411                   | CC                              | GG                | 1946680061               |
| SNP_P3_167945_34517  | NW_004517375.1 | Scaffold2421 | 34517                   | TT                              | AA                | 1946680063               |
| SNP_P3_167946_34563  | NW_004517375.1 | Scaffold2421 | 34563                   | CC                              | GG                | 1946680066               |
| SNP_P3_167947_34600  | NW_004517375.1 | Scaffold2421 | 34600                   | GG                              | AA                | 1946680068               |

| SNPs IDs            | Chromosome IDs | Chromosomes  | Physical positions (bp) | CDC Frontier (Reference genome) | (Pusa 256 & HPNB) | NCBI SNPdb Accession IDs |
|---------------------|----------------|--------------|-------------------------|---------------------------------|-------------------|--------------------------|
| SNP_P3_167948_34638 | NW_004517375.1 | Scaffold2421 | 34638                   | TT                              | AA                | 1946680070               |
| SNP_P3_167949_39827 | NW_004517375.1 | Scaffold2421 | 39827                   | AA                              | GG                | 1946680072               |
| SNP_P3_167950_39829 | NW_004517375.1 | Scaffold2421 | 39829                   | AA                              | CC                | 1946680075               |
| SNP_P3_167951_39836 | NW_004517375.1 | Scaffold2421 | 39836                   | CC                              | AA                | 1946680077               |
| SNP_P3_167952_39855 | NW_004517375.1 | Scaffold2421 | 39855                   | GG                              | TT                | 1946680079               |
| SNP_P3_167953_39897 | NW_004517375.1 | Scaffold2421 | 39897                   | TT                              | GG                | 1946680081               |
| SNP_P3_167954_40198 | NW_004517375.1 | Scaffold2421 | 40198                   | TT                              | CC                | 1946680083               |
| SNP_P3_167955_40199 | NW_004517375.1 | Scaffold2421 | 40199                   | CC                              | AA                | 1946680085               |
| SNP_P3_167956_40288 | NW_004517375.1 | Scaffold2421 | 40288                   | CC                              | TT                | 1946680087               |
| SNP_P3_167957_40305 | NW_004517375.1 | Scaffold2421 | 40305                   | GG                              | AA                | 1946680089               |
| SNP_P3_167958_40407 | NW_004517375.1 | Scaffold2421 | 40407                   | TT                              | CC                | 1946680091               |
| SNP_P3_167959_40451 | NW_004517375.1 | Scaffold2421 | 40451                   | GG                              | AA                | 1946680092               |
| SNP_P3_167960_40746 | NW_004517375.1 | Scaffold2421 | 40746                   | CC                              | TT                | 1946680094               |
| SNP_P3_167961_40977 | NW_004517375.1 | Scaffold2421 | 40977                   | GG                              | AA                | 1946680096               |
| SNP_P3_167962_41145 | NW_004517375.1 | Scaffold2421 | 41145                   | AA                              | GG                | 1946680098               |
| SNP_P3_167963_41182 | NW_004517375.1 | Scaffold2421 | 41182                   | GG                              | AA                | 1946680100               |
| SNP_P3_167964_44074 | NW_004517375.1 | Scaffold2421 | 44074                   | TT                              | CC                | 1946680102               |
| SNP_P3_167965_44450 | NW_004517375.1 | Scaffold2421 | 44450                   | CC                              | GG                | 1946680104               |
| SNP_P3_167966_44474 | NW_004517375.1 | Scaffold2421 | 44474                   | GG                              | TT                | 1946680106               |
| SNP_P3_167967_44486 | NW_004517375.1 | Scaffold2421 | 44486                   | GG                              | AA                | 1946680109               |
| SNP_P3_167968_44505 | NW_004517375.1 | Scaffold2421 | 44505                   | AA                              | CC                | 1946680111               |
| SNP_P3_167969_44525 | NW_004517375.1 | Scaffold2421 | 44525                   | GG                              | CC                | 1946680113               |
| SNP_P3_167970_44581 | NW_004517375.1 | Scaffold2421 | 44581                   | TT                              | AA                | 1946680115               |
| SNP_P3_167971_44603 | NW_004517375.1 | Scaffold2421 | 44603                   | CC                              | AA                | 1946680117               |
| SNP_P3_167972_46899 | NW_004517375.1 | Scaffold2421 | 46899                   | CC                              | AA                | 1946680119               |
| SNP_P3_167973_47313 | NW_004517375.1 | Scaffold2421 | 47313                   | CC                              | TT                | 1946680121               |
| SNP_P3_167974_47638 | NW_004517375.1 | Scaffold2421 | 47638                   | AA                              | CC                | 1946680123               |
| SNP_P3_167975_47655 | NW_004517375.1 | Scaffold2421 | 47655                   | TT                              | AA                | 1946680125               |
| SNP_P3_167976_47675 | NW_004517375.1 | Scaffold2421 | 47675                   | GG                              | AA                | 1946680127               |
| SNP_P3_167977_48511 | NW_004517375.1 | Scaffold2421 | 48511                   | CC                              | TT                | 1946680129               |
| SNP_P3_167978_48536 | NW_004517375.1 | Scaffold2421 | 48536                   | CC                              | GG                | 1946680131               |
| SNP_P3_167979_48748 | NW_004517375.1 | Scaffold2421 | 48748                   | AA                              | TT                | 1946680134               |
| SNP_P3_167980_48858 | NW_004517375.1 | Scaffold2421 | 48858                   | AA                              | GG                | 1946680136               |
| SNP_P3_167981_48876 | NW_004517375.1 | Scaffold2421 | 48876                   | GG                              | TT                | 1946680138               |
| SNP_P3_167982_48893 | NW_004517375.1 | Scaffold2421 | 48893                   | CC                              | TT                | 1946680141               |
| SNP_P3_167983_49149 | NW_004517375.1 | Scaffold2421 | 49149                   | GG                              | AA                | 1946680143               |
| SNP_P3_167984_49177 | NW_004517375.1 | Scaffold2421 | 49177                   | AA                              | GG                | 1946680145               |
| SNP_P3_167985_49273 | NW_004517375.1 | Scaffold2421 | 49273                   | TT                              | CC                | 1946680147               |
| SNP_P3_167986_49333 | NW_004517375.1 | Scaffold2421 | 49333                   | AA                              | TT                | 1946680149               |
| SNP_P3_167987_49338 | NW_004517375.1 | Scaffold2421 | 49338                   | AA                              | GG                | 1946680151               |
| SNP_P3_167988_49440 | NW_004517375.1 | Scaffold2421 | 49440                   | GG                              | TT                | 1946680153               |
| SNP_P3_167989_49444 | NW_004517375.1 | Scaffold2421 | 49444                   | GG                              | TT                | 1946680155               |

| SNPs IDs            | Chromosome IDs | Chromosomes  | Physical positions (bp) | CDC Frontier (Reference genome) | (Pusa 256 & HPNB) | NCBI SNPdb Accession IDs |
|---------------------|----------------|--------------|-------------------------|---------------------------------|-------------------|--------------------------|
| SNP_P3_167990_49449 | NW_004517375.1 | Scaffold2421 | 49449                   | GG                              | AA                | 1946680157               |
| SNP_P3_167991_49903 | NW_004517375.1 | Scaffold2421 | 49903                   | GG                              | AA                | 1946680159               |
| SNP_P3_167992_50175 | NW_004517375.1 | Scaffold2421 | 50175                   | AA                              | GG                | 1946680161               |
| SNP_P3_167993_50300 | NW_004517375.1 | Scaffold2421 | 50300                   | CC                              | TT                | 1946680163               |
| SNP_P3_167994_50417 | NW_004517375.1 | Scaffold2421 | 50417                   | GG                              | AA                | 1946680165               |
| SNP_P3_167995_55115 | NW_004517375.1 | Scaffold2421 | 55115                   | GG                              | AA                | 1946680167               |
| SNP_P3_167996_55118 | NW_004517375.1 | Scaffold2421 | 55118                   | TT                              | AA                | 1946680169               |
| SNP_P3_167997_55120 | NW_004517375.1 | Scaffold2421 | 55120                   | TT                              | GG                | 1946680172               |
| SNP_P3_167998_55129 | NW_004517375.1 | Scaffold2421 | 55129                   | AA                              | GG                | 1946680174               |
| SNP_P3_168000_60462 | NW_004517375.1 | Scaffold2421 | 60462                   | AA                              | CC                | 1946680176               |
| SNP_P3_168001_60465 | NW_004517375.1 | Scaffold2421 | 60465                   | TT                              | AA                | 1946680178               |
| SNP_P3_168002_60467 | NW_004517375.1 | Scaffold2421 | 60467                   | TT                              | AA                | 1946680180               |
| SNP_P3_168003_60468 | NW_004517375.1 | Scaffold2421 | 60468                   | TT                              | CC                | 1946680182               |
| SNP_P3_168004_60543 | NW_004517375.1 | Scaffold2421 | 60543                   | CC                              | TT                | 1946680185               |
| SNP_P3_168005_60563 | NW_004517375.1 | Scaffold2421 | 60563                   | GG                              | AA                | 1946680187               |
| SNP_P3_168006_60600 | NW_004517375.1 | Scaffold2421 | 60600                   | TT                              | CC                | 1946680189               |
| SNP_P3_168007_60656 | NW_004517375.1 | Scaffold2421 | 60656                   | AA                              | CC                | 1946680191               |
| SNP_P3_168008_60832 | NW_004517375.1 | Scaffold2421 | 60832                   | CC                              | TT                | 1946680193               |
| SNP_P3_168009_60926 | NW_004517375.1 | Scaffold2421 | 60926                   | GG                              | AA                | 1946680195               |
| SNP_P3_168010_60977 | NW_004517375.1 | Scaffold2421 | 60977                   | AA                              | GG                | 1946680197               |
| SNP_P3_168011_61070 | NW_004517375.1 | Scaffold2421 | 61070                   | CC                              | AA                | 1946680199               |
| SNP_P3_168012_61097 | NW_004517375.1 | Scaffold2421 | 61097                   | AA                              | TT                | 1946680201               |
| SNP_P3_168013_61132 | NW_004517375.1 | Scaffold2421 | 61132                   | AA                              | GG                | 1946680203               |
| SNP_P3_168014_61166 | NW_004517375.1 | Scaffold2421 | 61166                   | CC                              | GG                | 1946680205               |
| SNP_P3_168016_61225 | NW_004517375.1 | Scaffold2421 | 61225                   | TT                              | GG                | 1946680207               |
| SNP_P3_168017_609   | NW_004517379.1 | Scaffold2429 | 609                     | TT                              | CC                | 1946680209               |
| SNP_P3_168018_1464  | NW_004517383.1 | Scaffold2433 | 1464                    | AA                              | CC                | 1946680211               |
| SNP_P3_168019_2014  | NW_004517383.1 | Scaffold2433 | 2014                    | AA                              | GG                | 1946680213               |
| SNP_P3_168021_2145  | NW_004517383.1 | Scaffold2433 | 2145                    | AA                              | GG                | 1946680215               |
| SNP_P3_168022_2379  | NW_004517383.1 | Scaffold2433 | 2379                    | CC                              | AA                | 1946680217               |
| SNP_P3_168023_2458  | NW_004517383.1 | Scaffold2433 | 2458                    | CC                              | TT                | 1946680219               |
| SNP_P3_168024_2779  | NW_004517383.1 | Scaffold2433 | 2779                    | AA                              | CC                | 1946680221               |
| SNP_P3_168025_3249  | NW_004517383.1 | Scaffold2433 | 3249                    | GG                              | AA                | 1946680223               |
| SNP_P3_168026_3309  | NW_004517383.1 | Scaffold2433 | 3309                    | GG                              | AA                | 1946680226               |
| SNP_P3_168027_5325  | NW_004517383.1 | Scaffold2433 | 5325                    | GG                              | CC                | 1946680227               |
| SNP_P3_168028_5357  | NW_004517383.1 | Scaffold2433 | 5357                    | AA                              | GG                | 1946680229               |
| SNP_P3_168029_9470  | NW_004517383.1 | Scaffold2433 | 9470                    | AA                              | GG                | 1946680232               |
| SNP_P3_168030_9755  | NW_004517383.1 | Scaffold2433 | 9755                    | GG                              | TT                | 1946680234               |
| SNP_P3_168031_9831  | NW_004517383.1 | Scaffold2433 | 9831                    | TT                              | CC                | 1946680236               |
| SNP_P3_168032_10189 | NW_004517383.1 | Scaffold2433 | 10189                   | GG                              | AA                | 1946680238               |
| SNP_P3_168033_10193 | NW_004517383.1 | Scaffold2433 | 10193                   | AA                              | TT                | 1946680240               |
| SNP_P3_168034_10209 | NW_004517383.1 | Scaffold2433 | 10209                   | CC                              | TT                | 1946680243               |

| SNPs IDs            | Chromosome IDs | Chromosomes  | Physical positions (bp) | CDC Frontier (Reference genome) | (Pusa 256 & HPNB) | NCBI SNPdb Accession IDs |
|---------------------|----------------|--------------|-------------------------|---------------------------------|-------------------|--------------------------|
| SNP_P3_168035_10210 | NW_004517383.1 | Scaffold2433 | 10210                   | AA                              | CC                | 1946680245               |
| SNP_P3_168036_16673 | NW_004517383.1 | Scaffold2433 | 16673                   | GG                              | AA                | 1946680247               |
| SNP_P3_168037_16686 | NW_004517383.1 | Scaffold2433 | 16686                   | CC                              | AA                | 1946680249               |
| SNP_P3_168038_16701 | NW_004517383.1 | Scaffold2433 | 16701                   | TT                              | CC                | 1946680251               |
| SNP_P3_168039_16706 | NW_004517383.1 | Scaffold2433 | 16706                   | AA                              | GG                | 1946680253               |
| SNP_P3_168040_16761 | NW_004517383.1 | Scaffold2433 | 16761                   | CC                              | TT                | 1946680255               |
| SNP_P3_168041_16795 | NW_004517383.1 | Scaffold2433 | 16795                   | CC                              | TT                | 1946680257               |
| SNP_P3_168042_16830 | NW_004517383.1 | Scaffold2433 | 16830                   | AA                              | GG                | 1946680259               |
| SNP_P3_168043_16878 | NW_004517383.1 | Scaffold2433 | 16878                   | CC                              | TT                | 1946680261               |
| SNP_P3_168044_16922 | NW_004517383.1 | Scaffold2433 | 16922                   | AA                              | GG                | 1946680264               |
| SNP_P3_168046_17050 | NW_004517383.1 | Scaffold2433 | 17050                   | CC                              | TT                | 1946680266               |
| SNP_P3_168047_17079 | NW_004517383.1 | Scaffold2433 | 17079                   | TT                              | GG                | 1946680268               |
| SNP_P3_168048_17111 | NW_004517383.1 | Scaffold2433 | 17111                   | TT                              | GG                | 1946680270               |
| SNP_P3_168049_17112 | NW_004517383.1 | Scaffold2433 | 17112                   | CC                              | TT                | 1946680272               |
| SNP_P3_168050_17256 | NW_004517383.1 | Scaffold2433 | 17256                   | AA                              | GG                | 1946680274               |
| SNP_P3_168052_2667  | NW_004517384.1 | Scaffold2434 | 2667                    | TT                              | AA                | 1946680276               |
| SNP_P3_168053_2939  | NW_004517384.1 | Scaffold2434 | 2939                    | GG                              | AA                | 1946680278               |
| SNP_P3_168054_3352  | NW_004517384.1 | Scaffold2434 | 3352                    | GG                              | TT                | 1946680280               |
| SNP_P3_168055_12839 | NW_004517384.1 | Scaffold2434 | 12839                   | CC                              | TT                | 1946680282               |
| SNP_P3_168056_13054 | NW_004517384.1 | Scaffold2434 | 13054                   | TT                              | CC                | 1946680284               |
| SNP_P3_168057_15241 | NW_004517384.1 | Scaffold2434 | 15241                   | TT                              | CC                | 1946680286               |
| SNP_P3_168058_15246 | NW_004517384.1 | Scaffold2434 | 15246                   | TT                              | GG                | 1946680288               |
| SNP_P3_168059_15271 | NW_004517384.1 | Scaffold2434 | 15271                   | GG                              | TT                | 1946680290               |
| SNP_P3_168060_15902 | NW_004517384.1 | Scaffold2434 | 15902                   | GG                              | TT                | 1946680292               |
| SNP_P3_168061_15973 | NW_004517384.1 | Scaffold2434 | 15973                   | TT                              | GG                | 1946680294               |
| SNP_P3_168062_17996 | NW_004517384.1 | Scaffold2434 | 17996                   | CC                              | TT                | 1946680296               |
| SNP_P3_168063_18002 | NW_004517384.1 | Scaffold2434 | 18002                   | GG                              | TT                | 1946680298               |
| SNP_P3_168065_18341 | NW_004517384.1 | Scaffold2434 | 18341                   | TT                              | CC                | 1946680301               |
| SNP_P3_168066_18346 | NW_004517384.1 | Scaffold2434 | 18346                   | CC                              | TT                | 1946680303               |
| SNP_P3_168067_18374 | NW_004517384.1 | Scaffold2434 | 18374                   | GG                              | TT                | 1946680305               |
| SNP_P3_168068_28291 | NW_004517384.1 | Scaffold2434 | 28291                   | AA                              | TT                | 1946680307               |
| SNP_P3_168069_28794 | NW_004517384.1 | Scaffold2434 | 28794                   | CC                              | TT                | 1946680309               |
| SNP_P3_168070_28811 | NW_004517384.1 | Scaffold2434 | 28811                   | GG                              | TT                | 1946680312               |
| SNP_P3_168071_29472 | NW_004517384.1 | Scaffold2434 | 29472                   | TT                              | GG                | 1946680314               |
| SNP_P3_168072_29490 | NW_004517384.1 | Scaffold2434 | 29490                   | AA                              | TT                | 1946680316               |
| SNP_P3_168073_29634 | NW_004517384.1 | Scaffold2434 | 29634                   | AA                              | GG                | 1946680318               |
| SNP_P3_168074_29700 | NW_004517384.1 | Scaffold2434 | 29700                   | TT                              | CC                | 1946680320               |
| SNP_P3_168075_29727 | NW_004517384.1 | Scaffold2434 | 29727                   | TT                              | CC                | 1946680323               |
| SNP_P3_168076_29771 | NW_004517384.1 | Scaffold2434 | 29771                   | GG                              | AA                | 1946680325               |
| SNP_P3_168077_29785 | NW_004517384.1 | Scaffold2434 | 29785                   | CC                              | TT                | 1946680328               |
| SNP_P3_168078_29790 | NW_004517384.1 | Scaffold2434 | 29790                   | AA                              | GG                | 1946680330               |
| SNP_P3_168079_29808 | NW_004517384.1 | Scaffold2434 | 29808                   | TT                              | GG                | 1946680332               |

| SNPs IDs            | Chromosome IDs | Chromosomes  | Physical positions (bp) | CDC Frontier (Reference genome) | (Pusa 256 & HPNB) | NCBI SNPdb Accession IDs |
|---------------------|----------------|--------------|-------------------------|---------------------------------|-------------------|--------------------------|
| SNP_P3_168080_44876 | NW_004517384.1 | Scaffold2434 | 44876                   | GG                              | AA                | 1946680334               |
| SNP_P3_168081_44908 | NW_004517384.1 | Scaffold2434 | 44908                   | TT                              | AA                | 1946680336               |
| SNP_P3_168082_45356 | NW_004517384.1 | Scaffold2434 | 45356                   | TT                              | AA                | 1946680338               |
| SNP_P3_168083_45399 | NW_004517384.1 | Scaffold2434 | 45399                   | AA                              | TT                | 1946680340               |
| SNP_P3_168084_45410 | NW_004517384.1 | Scaffold2434 | 45410                   | TT                              | AA                | 1946680342               |
| SNP_P3_168085_45469 | NW_004517384.1 | Scaffold2434 | 45469                   | GG                              | AA                | 1946680344               |
| SNP_P3_168086_45710 | NW_004517384.1 | Scaffold2434 | 45710                   | AA                              | GG                | 1946680346               |
| SNP_P3_168087_45745 | NW_004517384.1 | Scaffold2434 | 45745                   | AA                              | GG                | 1946680348               |
| SNP_P3_168088_45765 | NW_004517384.1 | Scaffold2434 | 45765                   | GG                              | AA                | 1946680350               |
| SNP_P3_168089_71671 | NW_004517384.1 | Scaffold2434 | 71671                   | TT                              | GG                | 1946680352               |
| SNP_P3_168090_72076 | NW_004517384.1 | Scaffold2434 | 72076                   | AA                              | TT                | 1946680354               |
| SNP_P3_168091_72120 | NW_004517384.1 | Scaffold2434 | 72120                   | AA                              | GG                | 1946680356               |
| SNP_P3_168092_72139 | NW_004517384.1 | Scaffold2434 | 72139                   | CC                              | TT                | 1946680358               |
| SNP_P3_168093_72149 | NW_004517384.1 | Scaffold2434 | 72149                   | CC                              | TT                | 1946680360               |
| SNP_P3_168094_72165 | NW_004517384.1 | Scaffold2434 | 72165                   | TT                              | CC                | 1946680362               |
| SNP_P3_168095_72188 | NW_004517384.1 | Scaffold2434 | 72188                   | AA                              | TT                | 1946680366               |
| SNP_P3_168096_73934 | NW_004517384.1 | Scaffold2434 | 73934                   | AA                              | TT                | 1946680368               |
| SNP_P3_168097_73935 | NW_004517384.1 | Scaffold2434 | 73935                   | AA                              | TT                | 1946680370               |
| SNP_P3_168098_76122 | NW_004517384.1 | Scaffold2434 | 76122                   | GG                              | AA                | 1946680372               |
| SNP_P3_168099_76217 | NW_004517384.1 | Scaffold2434 | 76217                   | CC                              | GG                | 1946680374               |
| SNP_P3_168102_502   | NW_004517385.1 | Scaffold2435 | 502                     | TT                              | GG                | 1946680376               |
| SNP_P3_168103_346   | NW_004517387.1 | Scaffold2439 | 346                     | TT                              | CC                | 1946680378               |
| SNP_P3_168104_348   | NW_004517387.1 | Scaffold2439 | 348                     | TT                              | GG                | 1946680380               |
| SNP_P3_168105_64    | NW_004517388.1 | Scaffold2440 | 64                      | CC                              | TT                | 1946680382               |
| SNP_P3_168106_1048  | NW_004517388.1 | Scaffold2440 | 1048                    | AA                              | CC                | 1946680384               |
| SNP_P3_168107_1235  | NW_004517388.1 | Scaffold2440 | 1235                    | TT                              | CC                | 1946680386               |
| SNP_P3_168108_7926  | NW_004517392.1 | Scaffold2445 | 7926                    | GG                              | AA                | 1946680389               |
| SNP_P3_168109_10051 | NW_004517392.1 | Scaffold2445 | 10051                   | AA                              | CC                | 1946680391               |
| SNP_P3_168110_10086 | NW_004517392.1 | Scaffold2445 | 10086                   | GG                              | AA                | 1946680393               |
| SNP_P3_168111_10530 | NW_004517392.1 | Scaffold2445 | 10530                   | TT                              | CC                | 1946680395               |
| SNP_P3_168112_10644 | NW_004517392.1 | Scaffold2445 | 10644                   | CC                              | TT                | 1946680397               |
| SNP_P3_168113_10873 | NW_004517392.1 | Scaffold2445 | 10873                   | CC                              | TT                | 1946680399               |
| SNP_P3_168114_10881 | NW_004517392.1 | Scaffold2445 | 10881                   | AA                              | GG                | 1946680401               |
| SNP_P3_168115_10882 | NW_004517392.1 | Scaffold2445 | 10882                   | GG                              | TT                | 1946680403               |
| SNP_P3_168116_10926 | NW_004517392.1 | Scaffold2445 | 10926                   | GG                              | TT                | 1946680405               |
| SNP_P3_168117_10944 | NW_004517392.1 | Scaffold2445 | 10944                   | CC                              | TT                | 1946680407               |
| SNP_P3_168118_10976 | NW_004517392.1 | Scaffold2445 | 10976                   | CC                              | TT                | 1946680409               |
| SNP_P3_168119_10989 | NW_004517392.1 | Scaffold2445 | 10989                   | TT                              | AA                | 1946680411               |
| SNP_P3_168120_19737 | NW_004517392.1 | Scaffold2445 | 19737                   | CC                              | TT                | 1946680413               |
| SNP_P3_168121_19760 | NW_004517392.1 | Scaffold2445 | 19760                   | GG                              | AA                | 1946680415               |
| SNP_P3_168122_20056 | NW_004517392.1 | Scaffold2445 | 20056                   | TT                              | AA                | 1946680417               |
| SNP_P3_168123_20650 | NW_004517392.1 | Scaffold2445 | 20650                   | AA                              | TT                | 1946680419               |

| SNPs IDs            | Chromosome IDs | Chromosomes  | Physical positions (bp) | CDC Frontier (Reference genome) | (Pusa 256 & HPNB) | NCBI SNPdb Accession IDs |
|---------------------|----------------|--------------|-------------------------|---------------------------------|-------------------|--------------------------|
| SNP_P3_168125_24443 | NW_004517392.1 | Scaffold2445 | 24443                   | TT                              | GG                | 1946680421               |
| SNP_P3_168126_26015 | NW_004517392.1 | Scaffold2445 | 26015                   | CC                              | TT                | 1946680423               |
| SNP_P3_168127_354   | NW_004517393.1 | Scaffold2446 | 354                     | CC                              | AA                | 1946680425               |
| SNP_P3_168128_5151  | NW_004517393.1 | Scaffold2446 | 5151                    | AA                              | TT                | 1946680427               |
| SNP_P3_168129_5989  | NW_004517393.1 | Scaffold2446 | 5989                    | AA                              | TT                | 1946680429               |
| SNP_P3_168130_6003  | NW_004517393.1 | Scaffold2446 | 6003                    | GG                              | AA                | 1946680431               |
| SNP_P3_168131_6023  | NW_004517393.1 | Scaffold2446 | 6023                    | TT                              | CC                | 1946680433               |
| SNP_P3_168132_6229  | NW_004517393.1 | Scaffold2446 | 6229                    | CC                              | AA                | 1946680435               |
| SNP_P3_168133_6312  | NW_004517393.1 | Scaffold2446 | 6312                    | TT                              | AA                | 1946680437               |
| SNP_P3_168134_6411  | NW_004517393.1 | Scaffold2446 | 6411                    | AA                              | TT                | 1946680439               |
| SNP_P3_168135_6423  | NW_004517393.1 | Scaffold2446 | 6423                    | CC                              | TT                | 1946680441               |
| SNP_P3_168136_6720  | NW_004517393.1 | Scaffold2446 | 6720                    | GG                              | CC                | 1946680443               |
| SNP_P3_168137_6728  | NW_004517393.1 | Scaffold2446 | 6728                    | TT                              | GG                | 1946680446               |
| SNP_P3_168138_6772  | NW_004517393.1 | Scaffold2446 | 6772                    | AA                              | TT                | 1946680448               |
| SNP_P3_168140_10077 | NW_004517393.1 | Scaffold2446 | 10077                   | TT                              | AA                | 1946680450               |
| SNP_P3_168141_11595 | NW_004517393.1 | Scaffold2446 | 11595                   | TT                              | CC                | 1946680452               |
| SNP_P3_168142_13973 | NW_004517393.1 | Scaffold2446 | 13973                   | CC                              | AA                | 1946680454               |
| SNP_P3_168143_14181 | NW_004517393.1 | Scaffold2446 | 14181                   | GG                              | CC                | 1946680456               |
| SNP_P3_168144_926   | NW_004517394.1 | Scaffold2449 | 926                     | AA                              | TT                | 1946680458               |
| SNP_P3_168145_929   | NW_004517394.1 | Scaffold2449 | 929                     | CC                              | TT                | 1946680460               |
| SNP_P3_168146_729   | NW_004517396.1 | Scaffold2451 | 729                     | AA                              | CC                | 1946680462               |
| SNP_P3_168147_1800  | NW_004517398.1 | Scaffold2456 | 1800                    | GG                              | AA                | 1946680464               |
| SNP_P3_168148_2339  | NW_004517398.1 | Scaffold2456 | 2339                    | CC                              | TT                | 1946680467               |
| SNP_P3_168149_1128  | NW_004517400.1 | Scaffold2458 | 1128                    | AA                              | GG                | 1946680469               |
| SNP_P3_168150_1796  | NW_004517400.1 | Scaffold2458 | 1796                    | AA                              | TT                | 1946680471               |
| SNP_P3_168151_1806  | NW_004517400.1 | Scaffold2458 | 1806                    | GG                              | AA                | 1946680473               |
| SNP_P3_168152_20092 | NW_004517401.1 | Scaffold2459 | 20092                   | CC                              | TT                | 1946680475               |
| SNP_P3_168153_20166 | NW_004517401.1 | Scaffold2459 | 20166                   | TT                              | CC                | 1946680477               |
| SNP_P3_168154_20180 | NW_004517401.1 | Scaffold2459 | 20180                   | AA                              | CC                | 1946680479               |
| SNP_P3_168155_21669 | NW_004517401.1 | Scaffold2459 | 21669                   | TT                              | CC                | 1946680481               |
| SNP_P3_168156_21695 | NW_004517401.1 | Scaffold2459 | 21695                   | TT                              | CC                | 1946680483               |
| SNP_P3_168157_37754 | NW_004517401.1 | Scaffold2459 | 37754                   | GG                              | TT                | 1946680485               |
| SNP_P3_168158_38105 | NW_004517401.1 | Scaffold2459 | 38105                   | TT                              | CC                | 1946680487               |
| SNP_P3_168159_42218 | NW_004517401.1 | Scaffold2459 | 42218                   | AA                              | CC                | 1946680489               |
| SNP_P3_168160_42489 | NW_004517401.1 | Scaffold2459 | 42489                   | CC                              | GG                | 1946680491               |
| SNP_P3_168161_42673 | NW_004517401.1 | Scaffold2459 | 42673                   | CC                              | TT                | 1946680493               |
| SNP_P3_168162_42758 | NW_004517401.1 | Scaffold2459 | 42758                   | TT                              | GG                | 1946680495               |
| SNP_P3_168163_53929 | NW_004517401.1 | Scaffold2459 | 53929                   | GG                              | CC                | 1946680497               |
| SNP_P3_168164_63538 | NW_004517401.1 | Scaffold2459 | 63538                   | TT                              | CC                | 1946680498               |
| SNP_P3_168165_65579 | NW_004517401.1 | Scaffold2459 | 65579                   | TT                              | CC                | 1946680500               |
| SNP_P3_168166_66095 | NW_004517401.1 | Scaffold2459 | 66095                   | TT                              | CC                | 1946680502               |
| SNP_P3_168167_66099 | NW_004517401.1 | Scaffold2459 | 66099                   | AA                              | GG                | 1946680504               |

| SNPs IDs            | Chromosome IDs | Chromosomes  | Physical positions (bp) | CDC Frontier (Reference genome) | (Pusa 256 & HPNB) | NCBI SNPdb Accession IDs |
|---------------------|----------------|--------------|-------------------------|---------------------------------|-------------------|--------------------------|
| SNP_P3_168168_66277 | NW_004517401.1 | Scaffold2459 | 66277                   | GG                              | AA                | 1946680506               |
| SNP_P3_168169_66342 | NW_004517401.1 | Scaffold2459 | 66342                   | AA                              | GG                | 1946680508               |
| SNP_P3_168171_66397 | NW_004517401.1 | Scaffold2459 | 66397                   | CC                              | TT                | 1946680510               |
| SNP_P3_168172_66411 | NW_004517401.1 | Scaffold2459 | 66411                   | GG                              | AA                | 1946680512               |
| SNP_P3_168173_69236 | NW_004517401.1 | Scaffold2459 | 69236                   | AA                              | TT                | 1946680514               |
| SNP_P3_168174_72113 | NW_004517401.1 | Scaffold2459 | 72113                   | CC                              | TT                | 1946680516               |
| SNP_P3_168175_72135 | NW_004517401.1 | Scaffold2459 | 72135                   | CC                              | TT                | 1946680518               |
| SNP_P3_168176_72611 | NW_004517401.1 | Scaffold2459 | 72611                   | CC                              | TT                | 1946680520               |
| SNP_P3_168177_80577 | NW_004517401.1 | Scaffold2459 | 80577                   | TT                              | CC                | 1946680529               |
| SNP_P3_168178_80657 | NW_004517401.1 | Scaffold2459 | 80657                   | GG                              | TT                | 1946680531               |
| SNP_P3_168179_80658 | NW_004517401.1 | Scaffold2459 | 80658                   | AA                              | GG                | 1946680533               |
| SNP_P3_168180_80662 | NW_004517401.1 | Scaffold2459 | 80662                   | TT                              | AA                | 1946680535               |
| SNP_P3_168182_9692  | NW_004517405.1 | Scaffold2466 | 9692                    | AA                              | GG                | 1946680537               |
| SNP_P3_168183_326   | NW_004517406.1 | Scaffold2467 | 326                     | CC                              | TT                | 1946680539               |
| SNP_P3_168184_783   | NW_004517406.1 | Scaffold2467 | 783                     | CC                              | TT                | 1946680541               |
| SNP_P3_168185_802   | NW_004517406.1 | Scaffold2467 | 802                     | TT                              | CC                | 1946680543               |
| SNP_P3_168186_810   | NW_004517406.1 | Scaffold2467 | 810                     | TT                              | GG                | 1946680545               |
| SNP_P3_168187_6056  | NW_004517408.1 | Scaffold2470 | 6056                    | TT                              | CC                | 1946680548               |
| SNP_P3_168188_6057  | NW_004517408.1 | Scaffold2470 | 6057                    | AA                              | CC                | 1946680550               |
| SNP_P3_168189_6070  | NW_004517408.1 | Scaffold2470 | 6070                    | GG                              | AA                | 1946680552               |
| SNP_P3_168191_7096  | NW_004517408.1 | Scaffold2470 | 7096                    | TT                              | GG                | 1946680553               |
| SNP_P3_168192_10933 | NW_004517408.1 | Scaffold2470 | 10933                   | AA                              | GG                | 1946680555               |
| SNP_P3_168193_10983 | NW_004517408.1 | Scaffold2470 | 10983                   | AA                              | TT                | 1946680557               |
| SNP_P3_168194_11288 | NW_004517408.1 | Scaffold2470 | 11288                   | CC                              | AA                | 1946680559               |
| SNP_P3_168195_11297 | NW_004517408.1 | Scaffold2470 | 11297                   | AA                              | TT                | 1946680561               |
| SNP_P3_168196_11325 | NW_004517408.1 | Scaffold2470 | 11325                   | TT                              | CC                | 1946680563               |
| SNP_P3_168197_11345 | NW_004517408.1 | Scaffold2470 | 11345                   | GG                              | TT                | 1946680565               |
| SNP_P3_168198_11349 | NW_004517408.1 | Scaffold2470 | 11349                   | GG                              | CC                | 1946680567               |
| SNP_P3_168199_251   | NW_004517409.1 | Scaffold2471 | 251                     | TT                              | GG                | 1946680568               |
| SNP_P3_168200_281   | NW_004517409.1 | Scaffold2471 | 281                     | CC                              | AA                | 1946680570               |
| SNP_P3_168201_403   | NW_004517409.1 | Scaffold2471 | 403                     | CC                              | TT                | 1946680572               |
| SNP_P3_168202_537   | NW_004517409.1 | Scaffold2471 | 537                     | TT                              | GG                | 1946680575               |
| SNP_P3_168203_952   | NW_004517409.1 | Scaffold2471 | 952                     | CC                              | TT                | 1946680577               |
| SNP_P3_168204_959   | NW_004517409.1 | Scaffold2471 | 959                     | CC                              | TT                | 1946680579               |
| SNP_P3_168205_1516  | NW_004517409.1 | Scaffold2471 | 1516                    | CC                              | AA                | 1946680581               |
| SNP_P3_168207_2240  | NW_004517411.1 | Scaffold2473 | 2240                    | GG                              | AA                | 1946680583               |
| SNP_P3_168208_2260  | NW_004517411.1 | Scaffold2473 | 2260                    | AA                              | TT                | 1946680585               |
| SNP_P3_168209_2731  | NW_004517411.1 | Scaffold2473 | 2731                    | GG                              | CC                | 1946680587               |
| SNP_P3_168210_6417  | NW_004517411.1 | Scaffold2473 | 6417                    | CC                              | TT                | 1946680589               |
| SNP_P3_168211_6439  | NW_004517411.1 | Scaffold2473 | 6439                    | GG                              | AA                | 1946680591               |
| SNP_P3_168212_6471  | NW_004517411.1 | Scaffold2473 | 6471                    | CC                              | TT                | 1946680593               |
| SNP_P3_168213_6674  | NW_004517411.1 | Scaffold2473 | 6674                    | TT                              | CC                | 1946680595               |



| SNPs IDs            | Chromosome IDs | Chromosomes  | Physical positions (bp) | CDC Frontier (Reference genome) | (Pusa 256 & HPNB) | NCBI SNPdb Accession IDs |
|---------------------|----------------|--------------|-------------------------|---------------------------------|-------------------|--------------------------|
| SNP_P3_168214_6734  | NW_004517411.1 | Scaffold2473 | 6734                    | GG                              | AA                | 1946680597               |
| SNP_P3_168215_7175  | NW_004517411.1 | Scaffold2473 | 7175                    | AA                              | CC                | 1946680599               |
| SNP_P3_168216_442   | NW_004517413.1 | Scaffold2477 | 442                     | AA                              | TT                | 1946680601               |
| SNP_P3_168217_15546 | NW_004517413.1 | Scaffold2477 | 15546                   | TT                              | AA                | 1946680603               |
| SNP_P3_168218_15587 | NW_004517413.1 | Scaffold2477 | 15587                   | TT                              | AA                | 1946680605               |
| SNP_P3_168219_15666 | NW_004517413.1 | Scaffold2477 | 15666                   | AA                              | TT                | 1946680607               |
| SNP_P3_168220_15727 | NW_004517413.1 | Scaffold2477 | 15727                   | CC                              | TT                | 1946680610               |
| SNP_P3_168221_15749 | NW_004517413.1 | Scaffold2477 | 15749                   | CC                              | TT                | 1946680612               |
| SNP_P3_168222_15849 | NW_004517413.1 | Scaffold2477 | 15849                   | TT                              | GG                | 1946680614               |
| SNP_P3_168223_15850 | NW_004517413.1 | Scaffold2477 | 15850                   | GG                              | TT                | 1946680616               |
| SNP_P3_168224_15880 | NW_004517413.1 | Scaffold2477 | 15880                   | TT                              | AA                | 1946680618               |
| SNP_P3_168225_17075 | NW_004517413.1 | Scaffold2477 | 17075                   | TT                              | CC                | 1946680620               |
| SNP_P3_168226_17705 | NW_004517413.1 | Scaffold2477 | 17705                   | CC                              | TT                | 1946680622               |
| SNP_P3_168227_17765 | NW_004517413.1 | Scaffold2477 | 17765                   | AA                              | CC                | 1946680624               |
| SNP_P3_168228_315   | NW_004517415.1 | Scaffold2482 | 315                     | GG                              | AA                | 1946680626               |
| SNP_P3_168229_1073  | NW_004517415.1 | Scaffold2482 | 1073                    | AA                              | TT                | 1946680628               |
| SNP_P3_168230_1100  | NW_004517415.1 | Scaffold2482 | 1100                    | CC                              | TT                | 1946680630               |
| SNP_P3_168231_1101  | NW_004517415.1 | Scaffold2482 | 1101                    | TT                              | CC                | 1946680632               |
| SNP_P3_168233_6192  | NW_004517415.1 | Scaffold2482 | 6192                    | TT                              | CC                | 1946680635               |
| SNP_P3_168234_6269  | NW_004517415.1 | Scaffold2482 | 6269                    | CC                              | AA                | 1946680637               |
| SNP_P3_168235_8226  | NW_004517415.1 | Scaffold2482 | 8226                    | GG                              | AA                | 1946680639               |
| SNP_P3_168236_8250  | NW_004517415.1 | Scaffold2482 | 8250                    | GG                              | AA                | 1946680641               |
| SNP_P3_168237_8276  | NW_004517415.1 | Scaffold2482 | 8276                    | GG                              | CC                | 1946680643               |
| SNP_P3_168238_8282  | NW_004517415.1 | Scaffold2482 | 8282                    | CC                              | TT                | 1946680645               |
| SNP_P3_168239_8299  | NW_004517415.1 | Scaffold2482 | 8299                    | TT                              | GG                | 1946680647               |
| SNP_P3_168240_8690  | NW_004517415.1 | Scaffold2482 | 8690                    | AA                              | GG                | 1946680649               |
| SNP_P3_168241_11616 | NW_004517415.1 | Scaffold2482 | 11616                   | CC                              | GG                | 1946680652               |
| SNP_P3_168243_11667 | NW_004517415.1 | Scaffold2482 | 11667                   | AA                              | GG                | 1946680654               |
| SNP_P3_168244_11671 | NW_004517415.1 | Scaffold2482 | 11671                   | AA                              | CC                | 1946680656               |
| SNP_P3_168245_11761 | NW_004517415.1 | Scaffold2482 | 11761                   | TT                              | GG                | 1946680658               |
| SNP_P3_168246_11806 | NW_004517415.1 | Scaffold2482 | 11806                   | CC                              | AA                | 1946680661               |
| SNP_P3_168247_398   | NW_004517416.1 | Scaffold2483 | 398                     | CC                              | AA                | 1946680663               |
| SNP_P3_168248_755   | NW_004517416.1 | Scaffold2483 | 755                     | TT                              | AA                | 1946680665               |
| SNP_P3_168249_911   | NW_004517416.1 | Scaffold2483 | 911                     | AA                              | GG                | 1946680667               |
| SNP_P3_168250_1072  | NW_004517416.1 | Scaffold2483 | 1072                    | CC                              | TT                | 1946680669               |
| SNP_P3_168251_1090  | NW_004517416.1 | Scaffold2483 | 1090                    | GG                              | TT                | 1946680671               |
| SNP_P3_168252_1138  | NW_004517416.1 | Scaffold2483 | 1138                    | AA                              | TT                | 1946680673               |
| SNP_P3_168253_66    | NW_004517417.1 | Scaffold2484 | 66                      | AA                              | CC                | 1946680675               |
| SNP_P3_168254_80    | NW_004517417.1 | Scaffold2484 | 80                      | AA                              | GG                | 1946680677               |
| SNP_P3_168255_308   | NW_004517417.1 | Scaffold2484 | 308                     | CC                              | AA                | 1946680679               |
| SNP_P3_168256_310   | NW_004517417.1 | Scaffold2484 | 310                     | AA                              | TT                | 1946680681               |
| SNP_P3_168257_311   | NW_004517417.1 | Scaffold2484 | 311                     | TT                              | AA                | 1946680684               |

| SNPs IDs            | Chromosome IDs | Chromosomes  | Physical positions (bp) | CDC Frontier (Reference genome) | (Pusa 256 & HPNB) | NCBI SNPdb Accession IDs |
|---------------------|----------------|--------------|-------------------------|---------------------------------|-------------------|--------------------------|
| SNP_P3_168258_343   | NW_004517417.1 | Scaffold2484 | 343                     | GG                              | TT                | 1946680686               |
| SNP_P3_168259_344   | NW_004517417.1 | Scaffold2484 | 344                     | AA                              | TT                | 1946680688               |
| SNP_P3_168260_356   | NW_004517417.1 | Scaffold2484 | 356                     | TT                              | CC                | 1946680690               |
| SNP_P3_168261_362   | NW_004517417.1 | Scaffold2484 | 362                     | GG                              | AA                | 1946680692               |
| SNP_P3_168262_731   | NW_004517419.1 | Scaffold2486 | 731                     | TT                              | AA                | 1946680694               |
| SNP_P3_168263_2600  | NW_004517419.1 | Scaffold2486 | 2600                    | AA                              | GG                | 1946680696               |
| SNP_P3_168264_2847  | NW_004517419.1 | Scaffold2486 | 2847                    | GG                              | CC                | 1946680725               |
| SNP_P3_168265_2848  | NW_004517419.1 | Scaffold2486 | 2848                    | GG                              | TT                | 1946680727               |
| SNP_P3_168266_6764  | NW_004517419.1 | Scaffold2486 | 6764                    | GG                              | CC                | 1946680730               |
| SNP_P3_168267_6838  | NW_004517419.1 | Scaffold2486 | 6838                    | TT                              | AA                | 1946680732               |
| SNP_P3_168268_7040  | NW_004517419.1 | Scaffold2486 | 7040                    | AA                              | CC                | 1946680734               |
| SNP_P3_168269_7210  | NW_004517419.1 | Scaffold2486 | 7210                    | TT                              | GG                | 1946680736               |
| SNP_P3_168270_7255  | NW_004517419.1 | Scaffold2486 | 7255                    | AA                              | CC                | 1946680738               |
| SNP_P3_168271_7287  | NW_004517419.1 | Scaffold2486 | 7287                    | GG                              | AA                | 1946680740               |
| SNP_P3_168272_7553  | NW_004517419.1 | Scaffold2486 | 7553                    | GG                              | TT                | 1946680742               |
| SNP_P3_168273_7612  | NW_004517419.1 | Scaffold2486 | 7612                    | GG                              | AA                | 1946680745               |
| SNP_P3_168274_7837  | NW_004517419.1 | Scaffold2486 | 7837                    | AA                              | CC                | 1946680747               |
| SNP_P3_168275_8298  | NW_004517419.1 | Scaffold2486 | 8298                    | GG                              | AA                | 1946680749               |
| SNP_P3_168276_8441  | NW_004517419.1 | Scaffold2486 | 8441                    | GG                              | CC                | 1946680751               |
| SNP_P3_168277_8682  | NW_004517419.1 | Scaffold2486 | 8682                    | AA                              | GG                | 1946680753               |
| SNP_P3_168278_8696  | NW_004517419.1 | Scaffold2486 | 8696                    | AA                              | TT                | 1946680755               |
| SNP_P3_168279_8714  | NW_004517419.1 | Scaffold2486 | 8714                    | CC                              | AA                | 1946680757               |
| SNP_P3_168280_8815  | NW_004517419.1 | Scaffold2486 | 8815                    | GG                              | CC                | 1946680759               |
| SNP_P3_168281_9104  | NW_004517419.1 | Scaffold2486 | 9104                    | GG                              | CC                | 1946680762               |
| SNP_P3_168283_11560 | NW_004517419.1 | Scaffold2486 | 11560                   | TT                              | AA                | 1946680764               |
| SNP_P3_168284_11561 | NW_004517419.1 | Scaffold2486 | 11561                   | TT                              | AA                | 1946680766               |
| SNP_P3_168285_11578 | NW_004517419.1 | Scaffold2486 | 11578                   | AA                              | TT                | 1946680769               |
| SNP_P3_168286_11579 | NW_004517419.1 | Scaffold2486 | 11579                   | CC                              | TT                | 1946680771               |
| SNP_P3_168287_11818 | NW_004517419.1 | Scaffold2486 | 11818                   | AA                              | CC                | 1946680773               |
| SNP_P3_168288_11857 | NW_004517419.1 | Scaffold2486 | 11857                   | AA                              | GG                | 1946680775               |
| SNP_P3_168289_214   | NW_004517420.1 | Scaffold2487 | 214                     | GG                              | AA                | 1946680777               |
| SNP_P3_168290_410   | NW_004517420.1 | Scaffold2487 | 410                     | AA                              | GG                | 1946680779               |
| SNP_P3_168291_524   | NW_004517420.1 | Scaffold2487 | 524                     | AA                              | CC                | 1946680781               |
| SNP_P3_168292_599   | NW_004517420.1 | Scaffold2487 | 599                     | AA                              | TT                | 1946680783               |
| SNP_P3_168293_603   | NW_004517420.1 | Scaffold2487 | 603                     | GG                              | AA                | 1946680785               |
| SNP_P3_168294_682   | NW_004517420.1 | Scaffold2487 | 682                     | CC                              | TT                | 1946680787               |
| SNP_P3_168295_931   | NW_004517420.1 | Scaffold2487 | 931                     | TT                              | CC                | 1946680789               |
| SNP_P3_168296_1881  | NW_004517420.1 | Scaffold2487 | 1881                    | GG                              | AA                | 1946680792               |
| SNP_P3_168297_1999  | NW_004517420.1 | Scaffold2487 | 1999                    | CC                              | TT                | 1946680794               |
| SNP_P3_168298_2000  | NW_004517420.1 | Scaffold2487 | 2000                    | GG                              | AA                | 1946680796               |
| SNP_P3_168299_2008  | NW_004517420.1 | Scaffold2487 | 2008                    | AA                              | GG                | 1946680798               |
| SNP_P3_168300_2027  | NW_004517420.1 | Scaffold2487 | 2027                    | CC                              | TT                | 1946680800               |

| SNPs IDs           | Chromosome IDs | Chromosomes  | Physical positions (bp) | CDC Frontier (Reference genome) | (Pusa 256 & HPNB) | NCBI SNPdb Accession IDs |
|--------------------|----------------|--------------|-------------------------|---------------------------------|-------------------|--------------------------|
| SNP_P3_168301_5900 | NW_004517420.1 | Scaffold2487 | 5900                    | GG                              | AA                | 1946680802               |
| SNP_P3_168302_5902 | NW_004517420.1 | Scaffold2487 | 5902                    | AA                              | CC                | 1946680804               |
| SNP_P3_168303_5908 | NW_004517420.1 | Scaffold2487 | 5908                    | AA                              | CC                | 1946680807               |
| SNP_P3_168304_6023 | NW_004517420.1 | Scaffold2487 | 6023                    | AA                              | TT                | 1946680809               |
| SNP_P3_168305_6071 | NW_004517420.1 | Scaffold2487 | 6071                    | TT                              | CC                | 1946680811               |
| SNP_P3_168306_6084 | NW_004517420.1 | Scaffold2487 | 6084                    | CC                              | TT                | 1946680813               |
| SNP_P3_168307_6117 | NW_004517420.1 | Scaffold2487 | 6117                    | TT                              | CC                | 1946680816               |
| SNP_P3_168308_6256 | NW_004517420.1 | Scaffold2487 | 6256                    | AA                              | CC                | 1946680818               |
| SNP_P3_168309_6336 | NW_004517420.1 | Scaffold2487 | 6336                    | GG                              | TT                | 1946680820               |
| SNP_P3_168310_6422 | NW_004517420.1 | Scaffold2487 | 6422                    | TT                              | CC                | 1946680822               |
| SNP_P3_168311_64   | NW_004517422.1 | Scaffold2489 | 64                      | CC                              | TT                | 1946680824               |
| SNP_P3_168312_66   | NW_004517422.1 | Scaffold2489 | 66                      | CC                              | GG                | 1946680826               |
| SNP_P3_168313_1772 | NW_004517422.1 | Scaffold2489 | 1772                    | CC                              | AA                | 1946680828               |
| SNP_P3_168315_2080 | NW_004517422.1 | Scaffold2489 | 2080                    | CC                              | AA                | 1946680830               |
| SNP_P3_168316_2123 | NW_004517422.1 | Scaffold2489 | 2123                    | AA                              | GG                | 1946680832               |
| SNP_P3_168317_3997 | NW_004517422.1 | Scaffold2489 | 3997                    | TT                              | GG                | 1946680835               |
| SNP_P3_168318_365  | NW_004517423.1 | Scaffold2490 | 365                     | GG                              | CC                | 1946680837               |
| SNP_P3_168319_5609 | NW_004517424.1 | Scaffold2491 | 5609                    | TT                              | CC                | 1946680840               |
| SNP_P3_168320_5795 | NW_004517424.1 | Scaffold2491 | 5795                    | AA                              | GG                | 1946680842               |
| SNP_P3_168321_6132 | NW_004517424.1 | Scaffold2491 | 6132                    | TT                              | CC                | 1946680844               |
| SNP_P3_168323_6363 | NW_004517424.1 | Scaffold2491 | 6363                    | CC                              | TT                | 1946680846               |
| SNP_P3_168324_6586 | NW_004517424.1 | Scaffold2491 | 6586                    | CC                              | TT                | 1946680848               |
| SNP_P3_168325_6606 | NW_004517424.1 | Scaffold2491 | 6606                    | TT                              | CC                | 1946680850               |
| SNP_P3_168326_6937 | NW_004517424.1 | Scaffold2491 | 6937                    | AA                              | TT                | 1946680852               |
| SNP_P3_168327_6939 | NW_004517424.1 | Scaffold2491 | 6939                    | AA                              | CC                | 1946680854               |
| SNP_P3_168328_7182 | NW_004517424.1 | Scaffold2491 | 7182                    | AA                              | GG                | 1946680856               |
| SNP_P3_168329_7221 | NW_004517424.1 | Scaffold2491 | 7221                    | AA                              | GG                | 1946680858               |
| SNP_P3_168330_7363 | NW_004517424.1 | Scaffold2491 | 7363                    | TT                              | CC                | 1946680860               |
| SNP_P3_168331_7406 | NW_004517424.1 | Scaffold2491 | 7406                    | CC                              | GG                | 1946680862               |
| SNP_P3_168332_239  | NW_004517425.1 | Scaffold2492 | 239                     | CC                              | TT                | 1946680864               |
| SNP_P3_168333_590  | NW_004517425.1 | Scaffold2492 | 590                     | TT                              | CC                | 1946680866               |
| SNP_P3_168334_628  | NW_004517425.1 | Scaffold2492 | 628                     | GG                              | TT                | 1946680868               |
| SNP_P3_168335_665  | NW_004517430.1 | Scaffold2497 | 665                     | CC                              | GG                | 1946680870               |
| SNP_P3_168336_704  | NW_004517430.1 | Scaffold2497 | 704                     | AA                              | GG                | 1946680872               |
| SNP_P3_168337_756  | NW_004517430.1 | Scaffold2497 | 756                     | TT                              | AA                | 1946680874               |
| SNP_P3_168338_765  | NW_004517430.1 | Scaffold2497 | 765                     | AA                              | GG                | 1946680876               |
| SNP_P3_168339_947  | NW_004517430.1 | Scaffold2497 | 947                     | AA                              | GG                | 1946680878               |
| SNP_P3_168340_963  | NW_004517430.1 | Scaffold2497 | 963                     | TT                              | AA                | 1946680880               |
| SNP_P3_168341_1011 | NW_004517430.1 | Scaffold2497 | 1011                    | CC                              | TT                | 1946680882               |
| SNP_P3_168342_1243 | NW_004517430.1 | Scaffold2497 | 1243                    | AA                              | TT                | 1946680884               |
| SNP_P3_168343_1252 | NW_004517430.1 | Scaffold2497 | 1252                    | GG                              | AA                | 1946680886               |
| SNP_P3_168344_1284 | NW_004517430.1 | Scaffold2497 | 1284                    | AA                              | GG                | 1946680888               |

| SNPs IDs            | Chromosome IDs | Chromosomes  | Physical positions (bp) | CDC Frontier (Reference genome) | (Pusa 256 & HPNB) | NCBI SNPdb Accession IDs |
|---------------------|----------------|--------------|-------------------------|---------------------------------|-------------------|--------------------------|
| SNP_P3_168345_1314  | NW_004517430.1 | Scaffold2497 | 1314                    | AA                              | GG                | 1946680890               |
| SNP_P3_168346_712   | NW_004517431.1 | Scaffold2498 | 712                     | AA                              | GG                | 1946680892               |
| SNP_P3_168347_1133  | NW_004517431.1 | Scaffold2498 | 1133                    | AA                              | GG                | 1946680894               |
| SNP_P3_168348_1402  | NW_004517431.1 | Scaffold2498 | 1402                    | CC                              | TT                | 1946680896               |
| SNP_P3_168349_1602  | NW_004517431.1 | Scaffold2498 | 1602                    | AA                              | GG                | 1946680898               |
| SNP_P3_168350_2371  | NW_004517431.1 | Scaffold2498 | 2371                    | AA                              | GG                | 1946680900               |
| SNP_P3_168351_2797  | NW_004517431.1 | Scaffold2498 | 2797                    | TT                              | CC                | 1946680902               |
| SNP_P3_168352_17316 | NW_004517431.1 | Scaffold2498 | 17316                   | CC                              | TT                | 1946680904               |
| SNP_P3_168353_27880 | NW_004517431.1 | Scaffold2498 | 27880                   | GG                              | AA                | 1946680906               |
| SNP_P3_168354_4609  | NW_004517433.1 | Scaffold2501 | 4609                    | AA                              | CC                | 1946680909               |
| SNP_P3_168356_748   | NW_004517436.1 | Scaffold2505 | 748                     | CC                              | TT                | 1946680911               |
| SNP_P3_168357_787   | NW_004517436.1 | Scaffold2505 | 787                     | AA                              | GG                | 1946680913               |
| SNP_P3_168358_788   | NW_004517436.1 | Scaffold2505 | 788                     | GG                              | AA                | 1946680915               |
| SNP_P3_168359_794   | NW_004517436.1 | Scaffold2505 | 794                     | TT                              | GG                | 1946680917               |
| SNP_P3_168360_796   | NW_004517436.1 | Scaffold2505 | 796                     | AA                              | GG                | 1946680919               |
| SNP_P3_168362_839   | NW_004517436.1 | Scaffold2505 | 839                     | CC                              | AA                | 1946680922               |
| SNP_P3_168363_895   | NW_004517436.1 | Scaffold2505 | 895                     | TT                              | AA                | 1946680924               |
| SNP_P3_168364_908   | NW_004517436.1 | Scaffold2505 | 908                     | AA                              | TT                | 1946680926               |
| SNP_P3_168365_1056  | NW_004517436.1 | Scaffold2505 | 1056                    | TT                              | GG                | 1946680928               |
| SNP_P3_168366_1078  | NW_004517436.1 | Scaffold2505 | 1078                    | AA                              | GG                | 1946680930               |
| SNP_P3_168367_1272  | NW_004517436.1 | Scaffold2505 | 1272                    | AA                              | GG                | 1946680932               |
| SNP_P3_168368_1424  | NW_004517436.1 | Scaffold2505 | 1424                    | AA                              | TT                | 1946680934               |
| SNP_P3_168370_1785  | NW_004517436.1 | Scaffold2505 | 1785                    | TT                              | AA                | 1946680936               |
| SNP_P3_168372_1924  | NW_004517436.1 | Scaffold2505 | 1924                    | TT                              | AA                | 1946680938               |
| SNP_P3_168373_2133  | NW_004517436.1 | Scaffold2505 | 2133                    | AA                              | CC                | 1946680940               |
| SNP_P3_168374_2314  | NW_004517436.1 | Scaffold2505 | 2314                    | AA                              | GG                | 1946680942               |
| SNP_P3_168375_2315  | NW_004517436.1 | Scaffold2505 | 2315                    | CC                              | GG                | 1946680945               |
| SNP_P3_168376_2368  | NW_004517436.1 | Scaffold2505 | 2368                    | AA                              | GG                | 1946680947               |
| SNP_P3_168377_2426  | NW_004517436.1 | Scaffold2505 | 2426                    | GG                              | TT                | 1946680949               |
| SNP_P3_168378_2489  | NW_004517436.1 | Scaffold2505 | 2489                    | AA                              | TT                | 1946680951               |
| SNP_P3_168379_2499  | NW_004517436.1 | Scaffold2505 | 2499                    | GG                              | CC                | 1946680953               |
| SNP_P3_168380_2501  | NW_004517436.1 | Scaffold2505 | 2501                    | GG                              | AA                | 1946680955               |
| SNP_P3_168381_2540  | NW_004517436.1 | Scaffold2505 | 2540                    | CC                              | AA                | 1946680957               |
| SNP_P3_168382_2542  | NW_004517436.1 | Scaffold2505 | 2542                    | TT                              | CC                | 1946680959               |
| SNP_P3_168383_2727  | NW_004517436.1 | Scaffold2505 | 2727                    | AA                              | GG                | 1946680961               |
| SNP_P3_168384_2787  | NW_004517436.1 | Scaffold2505 | 2787                    | TT                              | AA                | 1946680964               |
| SNP_P3_168385_2798  | NW_004517436.1 | Scaffold2505 | 2798                    | GG                              | CC                | 1946680967               |
| SNP_P3_168386_2841  | NW_004517436.1 | Scaffold2505 | 2841                    | TT                              | GG                | 1946680969               |
| SNP_P3_168387_2906  | NW_004517436.1 | Scaffold2505 | 2906                    | CC                              | GG                | 1946680971               |
| SNP_P3_168388_291   | NW_004517437.1 | Scaffold2506 | 291                     | TT                              | CC                | 1946680973               |
| SNP_P3_168389_484   | NW_004517437.1 | Scaffold2506 | 484                     | GG                              | AA                | 1946680975               |
| SNP_P3_168390_485   | NW_004517437.1 | Scaffold2506 | 485                     | GG                              | AA                | 1946680977               |

| SNPs IDs            | Chromosome IDs | Chromosomes  | Physical positions (bp) | CDC Frontier (Reference genome) | (Pusa 256 & HPNB) | NCBI SNPdb Accession IDs |
|---------------------|----------------|--------------|-------------------------|---------------------------------|-------------------|--------------------------|
| SNP_P3_168391_1354  | NW_004517437.1 | Scaffold2506 | 1354                    | CC                              | AA                | 1946680979               |
| SNP_P3_168392_1537  | NW_004517437.1 | Scaffold2506 | 1537                    | AA                              | TT                | 1946680981               |
| SNP_P3_168393_1584  | NW_004517437.1 | Scaffold2506 | 1584                    | CC                              | GG                | 1946680983               |
| SNP_P3_168394_1600  | NW_004517437.1 | Scaffold2506 | 1600                    | AA                              | TT                | 1946680985               |
| SNP_P3_168395_9883  | NW_004517437.1 | Scaffold2506 | 9883                    | TT                              | GG                | 1946680987               |
| SNP_P3_168396_540   | NW_004517439.1 | Scaffold2511 | 540                     | TT                              | CC                | 1946680990               |
| SNP_P3_168397_1230  | NW_004517439.1 | Scaffold2511 | 1230                    | AA                              | GG                | 1946680992               |
| SNP_P3_168398_1290  | NW_004517439.1 | Scaffold2511 | 1290                    | AA                              | CC                | 1946680994               |
| SNP_P3_168399_1294  | NW_004517439.1 | Scaffold2511 | 1294                    | CC                              | TT                | 1946680996               |
| SNP_P3_168401_1888  | NW_004517439.1 | Scaffold2511 | 1888                    | CC                              | GG                | 1946680998               |
| SNP_P3_168402_1900  | NW_004517439.1 | Scaffold2511 | 1900                    | AA                              | GG                | 1946681000               |
| SNP_P3_168403_2966  | NW_004517439.1 | Scaffold2511 | 2966                    | GG                              | AA                | 1946681003               |
| SNP_P3_168404_3048  | NW_004517439.1 | Scaffold2511 | 3048                    | CC                              | TT                | 1946681005               |
| SNP_P3_168405_3204  | NW_004517439.1 | Scaffold2511 | 3204                    | AA                              | GG                | 1946681007               |
| SNP_P3_168406_3234  | NW_004517439.1 | Scaffold2511 | 3234                    | CC                              | GG                | 1946681009               |
| SNP_P3_168408_3419  | NW_004517439.1 | Scaffold2511 | 3419                    | TT                              | GG                | 1946681011               |
| SNP_P3_168409_3461  | NW_004517439.1 | Scaffold2511 | 3461                    | TT                              | CC                | 1946681014               |
| SNP_P3_168410_3736  | NW_004517439.1 | Scaffold2511 | 3736                    | GG                              | TT                | 1946681016               |
| SNP_P3_168411_3878  | NW_004517439.1 | Scaffold2511 | 3878                    | CC                              | TT                | 1946681018               |
| SNP_P3_168412_4473  | NW_004517439.1 | Scaffold2511 | 4473                    | TT                              | CC                | 1946681020               |
| SNP_P3_168413_4545  | NW_004517439.1 | Scaffold2511 | 4545                    | GG                              | TT                | 1946681022               |
| SNP_P3_168414_4674  | NW_004517439.1 | Scaffold2511 | 4674                    | AA                              | GG                | 1946681024               |
| SNP_P3_168415_4683  | NW_004517439.1 | Scaffold2511 | 4683                    | GG                              | TT                | 1946681026               |
| SNP_P3_168416_4760  | NW_004517439.1 | Scaffold2511 | 4760                    | AA                              | GG                | 1946681028               |
| SNP_P3_168417_4878  | NW_004517439.1 | Scaffold2511 | 4878                    | CC                              | TT                | 1946681031               |
| SNP_P3_168418_4917  | NW_004517439.1 | Scaffold2511 | 4917                    | GG                              | CC                | 1946681033               |
| SNP_P3_168419_4932  | NW_004517439.1 | Scaffold2511 | 4932                    | CC                              | AA                | 1946681035               |
| SNP_P3_168420_5036  | NW_004517439.1 | Scaffold2511 | 5036                    | GG                              | AA                | 1946681038               |
| SNP_P3_168421_5266  | NW_004517439.1 | Scaffold2511 | 5266                    | TT                              | CC                | 1946681040               |
| SNP_P3_168422_5286  | NW_004517439.1 | Scaffold2511 | 5286                    | CC                              | TT                | 1946681042               |
| SNP_P3_168423_5287  | NW_004517439.1 | Scaffold2511 | 5287                    | TT                              | CC                | 1946681044               |
| SNP_P3_168424_5735  | NW_004517439.1 | Scaffold2511 | 5735                    | CC                              | TT                | 1946681046               |
| SNP_P3_168425_5740  | NW_004517439.1 | Scaffold2511 | 5740                    | AA                              | TT                | 1946681048               |
| SNP_P3_168426_6247  | NW_004517439.1 | Scaffold2511 | 6247                    | AA                              | TT                | 1946681050               |
| SNP_P3_168427_6333  | NW_004517439.1 | Scaffold2511 | 6333                    | AA                              | GG                | 1946681052               |
| SNP_P3_168428_6385  | NW_004517439.1 | Scaffold2511 | 6385                    | GG                              | TT                | 1946681054               |
| SNP_P3_168429_6570  | NW_004517439.1 | Scaffold2511 | 6570                    | AA                              | TT                | 1946681056               |
| SNP_P3_168430_6698  | NW_004517439.1 | Scaffold2511 | 6698                    | GG                              | AA                | 1946681058               |
| SNP_P3_168431_7366  | NW_004517439.1 | Scaffold2511 | 7366                    | AA                              | GG                | 1946681061               |
| SNP_P3_168432_7375  | NW_004517439.1 | Scaffold2511 | 7375                    | CC                              | TT                | 1946681063               |
| SNP_P3_168434_24950 | NW_004517439.1 | Scaffold2511 | 24950                   | GG                              | TT                | 1946681065               |
| SNP_P3_168435_24999 | NW_004517439.1 | Scaffold2511 | 24999                   | AA                              | GG                | 1946681067               |

| SNPs IDs            | Chromosome IDs | Chromosomes  | Physical positions (bp) | CDC Frontier (Reference genome) | (Pusa 256 & HPNB) | NCBI SNPdb Accession IDs |
|---------------------|----------------|--------------|-------------------------|---------------------------------|-------------------|--------------------------|
| SNP_P3_168436_25029 | NW_004517439.1 | Scaffold2511 | 25029                   | AA                              | GG                | 1946681069               |
| SNP_P3_168437_25128 | NW_004517439.1 | Scaffold2511 | 25128                   | CC                              | GG                | 1946681071               |
| SNP_P3_168438_29572 | NW_004517439.1 | Scaffold2511 | 29572                   | AA                              | GG                | 1946681073               |
| SNP_P3_168439_59604 | NW_004517439.1 | Scaffold2511 | 59604                   | TT                              | CC                | 1946681075               |
| SNP_P3_168440_60505 | NW_004517439.1 | Scaffold2511 | 60505                   | GG                              | AA                | 1946681077               |
| SNP_P3_168441_60654 | NW_004517439.1 | Scaffold2511 | 60654                   | AA                              | GG                | 1946681079               |
| SNP_P3_168442_60845 | NW_004517439.1 | Scaffold2511 | 60845                   | AA                              | TT                | 1946681081               |
| SNP_P3_168443_60890 | NW_004517439.1 | Scaffold2511 | 60890                   | GG                              | AA                | 1946681083               |
| SNP_P3_168444_60916 | NW_004517439.1 | Scaffold2511 | 60916                   | AA                              | TT                | 1946681086               |
| SNP_P3_168445_60978 | NW_004517439.1 | Scaffold2511 | 60978                   | CC                              | GG                | 1946681088               |
| SNP_P3_168446_61013 | NW_004517439.1 | Scaffold2511 | 61013                   | AA                              | CC                | 1946681090               |
| SNP_P3_168447_61145 | NW_004517439.1 | Scaffold2511 | 61145                   | CC                              | TT                | 1946681092               |
| SNP_P3_168448_61728 | NW_004517439.1 | Scaffold2511 | 61728                   | CC                              | TT                | 1946681094               |
| SNP_P3_168449_61853 | NW_004517439.1 | Scaffold2511 | 61853                   | TT                              | CC                | 1946681096               |
| SNP_P3_168450_61875 | NW_004517439.1 | Scaffold2511 | 61875                   | AA                              | CC                | 1946681098               |
| SNP_P3_168451_61894 | NW_004517439.1 | Scaffold2511 | 61894                   | CC                              | AA                | 1946681100               |
| SNP_P3_168452_62086 | NW_004517439.1 | Scaffold2511 | 62086                   | AA                              | GG                | 1946681102               |
| SNP_P3_168453_62163 | NW_004517439.1 | Scaffold2511 | 62163                   | TT                              | AA                | 1946681104               |
| SNP_P3_168454_62276 | NW_004517439.1 | Scaffold2511 | 62276                   | TT                              | AA                | 1946681106               |
| SNP_P3_168455_62523 | NW_004517439.1 | Scaffold2511 | 62523                   | TT                              | CC                | 1946681108               |
| SNP_P3_168456_63836 | NW_004517439.1 | Scaffold2511 | 63836                   | GG                              | TT                | 1946681110               |
| SNP_P3_168457_64315 | NW_004517439.1 | Scaffold2511 | 64315                   | TT                              | AA                | 1946681113               |
| SNP_P3_168458_64476 | NW_004517439.1 | Scaffold2511 | 64476                   | AA                              | GG                | 1946681115               |
| SNP_P3_168459_64478 | NW_004517439.1 | Scaffold2511 | 64478                   | TT                              | GG                | 1946681117               |
| SNP_P3_168460_64488 | NW_004517439.1 | Scaffold2511 | 64488                   | TT                              | AA                | 1946681119               |
| SNP_P3_168461_64489 | NW_004517439.1 | Scaffold2511 | 64489                   | TT                              | CC                | 1946681121               |
| SNP_P3_168462_64494 | NW_004517439.1 | Scaffold2511 | 64494                   | AA                              | CC                | 1946681123               |
| SNP_P3_168463_64495 | NW_004517439.1 | Scaffold2511 | 64495                   | CC                              | TT                | 1946681125               |
| SNP_P3_168464_64503 | NW_004517439.1 | Scaffold2511 | 64503                   | TT                              | CC                | 1946681127               |
| SNP_P3_168465_64876 | NW_004517439.1 | Scaffold2511 | 64876                   | TT                              | GG                | 1946681129               |
| SNP_P3_168466_64877 | NW_004517439.1 | Scaffold2511 | 64877                   | AA                              | GG                | 1946681131               |
| SNP_P3_168467_64891 | NW_004517439.1 | Scaffold2511 | 64891                   | GG                              | AA                | 1946681133               |
| SNP_P3_168468_64892 | NW_004517439.1 | Scaffold2511 | 64892                   | TT                              | AA                | 1946681136               |
| SNP_P3_168469_65376 | NW_004517439.1 | Scaffold2511 | 65376                   | TT                              | CC                | 1946681138               |
| SNP_P3_168470_65526 | NW_004517439.1 | Scaffold2511 | 65526                   | AA                              | CC                | 1946681140               |
| SNP_P3_168471_65539 | NW_004517439.1 | Scaffold2511 | 65539                   | TT                              | CC                | 1946681142               |
| SNP_P3_168472_65629 | NW_004517439.1 | Scaffold2511 | 65629                   | TT                              | AA                | 1946681144               |
| SNP_P3_168473_66183 | NW_004517439.1 | Scaffold2511 | 66183                   | AA                              | TT                | 1946681146               |
| SNP_P3_168474_66384 | NW_004517439.1 | Scaffold2511 | 66384                   | AA                              | CC                | 1946681148               |
| SNP_P3_168475_66993 | NW_004517439.1 | Scaffold2511 | 66993                   | AA                              | TT                | 1946681150               |
| SNP_P3_168476_389   | NW_004517440.1 | Scaffold2512 | 389                     | TT                              | GG                | 1946681152               |
| SNP_P3_168477_424   | NW_004517440.1 | Scaffold2512 | 424                     | TT                              | AA                | 1946681154               |

| SNPs IDs            | Chromosome IDs | Chromosomes  | Physical positions (bp) | CDC Frontier (Reference genome) | (Pusa 256 & HPNB) | NCBI SNPdb Accession IDs |
|---------------------|----------------|--------------|-------------------------|---------------------------------|-------------------|--------------------------|
| SNP_P3_168478_445   | NW_004517440.1 | Scaffold2512 | 445                     | AA                              | TT                | 1946681156               |
| SNP_P3_168479_448   | NW_004517440.1 | Scaffold2512 | 448                     | AA                              | GG                | 1946681158               |
| SNP_P3_168480_474   | NW_004517440.1 | Scaffold2512 | 474                     | TT                              | AA                | 1946681161               |
| SNP_P3_168481_753   | NW_004517440.1 | Scaffold2512 | 753                     | GG                              | TT                | 1946681163               |
| SNP_P3_168483_87284 | NW_004517442.1 | Scaffold2516 | 87284                   | GG                              | AA                | 1946681165               |
| SNP_P3_168484_87302 | NW_004517442.1 | Scaffold2516 | 87302                   | TT                              | CC                | 1946681167               |
| SNP_P3_168485_87319 | NW_004517442.1 | Scaffold2516 | 87319                   | TT                              | CC                | 1946681169               |
| SNP_P3_168486_87347 | NW_004517442.1 | Scaffold2516 | 87347                   | TT                              | CC                | 1946681171               |
| SNP_P3_168487_87353 | NW_004517442.1 | Scaffold2516 | 87353                   | TT                              | CC                | 1946681173               |
| SNP_P3_168488_87792 | NW_004517442.1 | Scaffold2516 | 87792                   | TT                              | CC                | 1946681175               |
| SNP_P3_168489_87838 | NW_004517442.1 | Scaffold2516 | 87838                   | TT                              | CC                | 1946681176               |
| SNP_P3_168490_98276 | NW_004517442.1 | Scaffold2516 | 98276                   | TT                              | AA                | 1946681177               |
| SNP_P3_168491_20192 | NW_004517446.1 | Scaffold2521 | 20192                   | TT                              | CC                | 1946681178               |
| SNP_P3_168492_23932 | NW_004517446.1 | Scaffold2521 | 23932                   | TT                              | AA                | 1946681179               |
| SNP_P3_168493_23933 | NW_004517446.1 | Scaffold2521 | 23933                   | GG                              | AA                | 1946681180               |
| SNP_P3_168494_31037 | NW_004517446.1 | Scaffold2521 | 31037                   | CC                              | TT                | 1946681181               |
| SNP_P3_168495_31039 | NW_004517446.1 | Scaffold2521 | 31039                   | TT                              | CC                | 1946681182               |
| SNP_P3_168496_31053 | NW_004517446.1 | Scaffold2521 | 31053                   | GG                              | AA                | 1946681183               |
| SNP_P3_168497_56794 | NW_004517446.1 | Scaffold2521 | 56794                   | TT                              | CC                | 1946681184               |
| SNP_P3_168498_56848 | NW_004517446.1 | Scaffold2521 | 56848                   | GG                              | TT                | 1946681185               |
| SNP_P3_168499_56903 | NW_004517446.1 | Scaffold2521 | 56903                   | TT                              | GG                | 1946681186               |
| SNP_P3_168501_69322 | NW_004517446.1 | Scaffold2521 | 69322                   | AA                              | TT                | 1946681187               |
| SNP_P3_168502_22679 | NW_004517447.1 | Scaffold2522 | 22679                   | GG                              | TT                | 1946681188               |
| SNP_P3_168503_22731 | NW_004517447.1 | Scaffold2522 | 22731                   | CC                              | TT                | 1946681189               |
| SNP_P3_168504_23754 | NW_004517447.1 | Scaffold2522 | 23754                   | AA                              | TT                | 1946681190               |
| SNP_P3_168505_23774 | NW_004517447.1 | Scaffold2522 | 23774                   | GG                              | AA                | 1946681191               |
| SNP_P3_168506_23801 | NW_004517447.1 | Scaffold2522 | 23801                   | AA                              | CC                | 1946681192               |
| SNP_P3_168508_24148 | NW_004517447.1 | Scaffold2522 | 24148                   | AA                              | GG                | 1946681193               |
| SNP_P3_168510_64    | NW_004517448.1 | Scaffold2523 | 64                      | GG                              | TT                | 1946681194               |
| SNP_P3_168511_66    | NW_004517448.1 | Scaffold2523 | 66                      | AA                              | TT                | 1946681195               |
| SNP_P3_168512_79    | NW_004517448.1 | Scaffold2523 | 79                      | GG                              | AA                | 1946681196               |
| SNP_P3_168513_90    | NW_004517448.1 | Scaffold2523 | 90                      | GG                              | TT                | 1946681197               |
| SNP_P3_168514_350   | NW_004517448.1 | Scaffold2523 | 350                     | CC                              | TT                | 1946681198               |
| SNP_P3_168515_631   | NW_004517449.1 | Scaffold2524 | 631                     | CC                              | GG                | 1946681199               |
| SNP_P3_168516_21024 | NW_004517450.1 | Scaffold2526 | 21024                   | TT                              | AA                | 1946681200               |
| SNP_P3_168517_21026 | NW_004517450.1 | Scaffold2526 | 21026                   | CC                              | TT                | 1946681201               |
| SNP_P3_168518_21525 | NW_004517450.1 | Scaffold2526 | 21525                   | TT                              | AA                | 1946681202               |
| SNP_P3_168520_5009  | NW_004517452.1 | Scaffold2528 | 5009                    | GG                              | AA                | 1946681204               |
| SNP_P3_168521_5010  | NW_004517452.1 | Scaffold2528 | 5010                    | GG                              | TT                | 1946681207               |
| SNP_P3_168522_5161  | NW_004517452.1 | Scaffold2528 | 5161                    | TT                              | CC                | 1946681209               |
| SNP_P3_168523_12304 | NW_004517452.1 | Scaffold2528 | 12304                   | GG                              | AA                | 1946681211               |
| SNP_P3_168524_12748 | NW_004517452.1 | Scaffold2528 | 12748                   | GG                              | TT                | 1946681213               |

| SNPs IDs            | Chromosome IDs | Chromosomes  | Physical positions (bp) | CDC Frontier (Reference genome) | (Pusa 256 & HPNB) | NCBI SNPdb Accession IDs |
|---------------------|----------------|--------------|-------------------------|---------------------------------|-------------------|--------------------------|
| SNP_P3_168525_13125 | NW_004517452.1 | Scaffold2528 | 13125                   | AA                              | TT                | 1946681215               |
| SNP_P3_168526_13211 | NW_004517452.1 | Scaffold2528 | 13211                   | AA                              | CC                | 1946681217               |
| SNP_P3_168527_13270 | NW_004517452.1 | Scaffold2528 | 13270                   | TT                              | AA                | 1946681218               |
| SNP_P3_168528_19221 | NW_004517452.1 | Scaffold2528 | 19221                   | TT                              | GG                | 1946681220               |
| SNP_P3_168529_19236 | NW_004517452.1 | Scaffold2528 | 19236                   | AA                              | GG                | 1946681222               |
| SNP_P3_168530_19307 | NW_004517452.1 | Scaffold2528 | 19307                   | CC                              | TT                | 1946681224               |
| SNP_P3_168531_19335 | NW_004517452.1 | Scaffold2528 | 19335                   | CC                              | GG                | 1946681226               |
| SNP_P3_168532_19411 | NW_004517452.1 | Scaffold2528 | 19411                   | TT                              | CC                | 1946681229               |
| SNP_P3_168533_19477 | NW_004517452.1 | Scaffold2528 | 19477                   | GG                              | AA                | 1946681232               |
| SNP_P3_168535_19523 | NW_004517452.1 | Scaffold2528 | 19523                   | TT                              | CC                | 1946681234               |
| SNP_P3_168536_19566 | NW_004517452.1 | Scaffold2528 | 19566                   | GG                              | AA                | 1946681236               |
| SNP_P3_168537_19599 | NW_004517452.1 | Scaffold2528 | 19599                   | TT                              | AA                | 1946681238               |
| SNP_P3_168538_19710 | NW_004517452.1 | Scaffold2528 | 19710                   | AA                              | CC                | 1946681240               |
| SNP_P3_168539_19711 | NW_004517452.1 | Scaffold2528 | 19711                   | TT                              | AA                | 1946681242               |
| SNP_P3_168540_19898 | NW_004517452.1 | Scaffold2528 | 19898                   | AA                              | GG                | 1946681244               |
| SNP_P3_168541_19903 | NW_004517452.1 | Scaffold2528 | 19903                   | GG                              | AA                | 1946681246               |
| SNP_P3_168542_19932 | NW_004517452.1 | Scaffold2528 | 19932                   | TT                              | GG                | 1946681248               |
| SNP_P3_168543_19946 | NW_004517452.1 | Scaffold2528 | 19946                   | GG                              | TT                | 1946681250               |
| SNP_P3_168544_23725 | NW_004517452.1 | Scaffold2528 | 23725                   | TT                              | AA                | 1946681252               |
| SNP_P3_168545_23733 | NW_004517452.1 | Scaffold2528 | 23733                   | AA                              | CC                | 1946681255               |
| SNP_P3_168546_25409 | NW_004517456.1 | Scaffold2534 | 25409                   | AA                              | GG                | 1946681257               |
| SNP_P3_168547_25872 | NW_004517456.1 | Scaffold2534 | 25872                   | AA                              | GG                | 1946681259               |
| SNP_P3_168549_27983 | NW_004517456.1 | Scaffold2534 | 27983                   | TT                              | AA                | 1946681261               |
| SNP_P3_168550_27999 | NW_004517456.1 | Scaffold2534 | 27999                   | AA                              | TT                | 1946681263               |
| SNP_P3_168551_28008 | NW_004517456.1 | Scaffold2534 | 28008                   | TT                              | CC                | 1946681264               |
| SNP_P3_168552_28104 | NW_004517456.1 | Scaffold2534 | 28104                   | TT                              | CC                | 1946681265               |
| SNP_P3_168553_28147 | NW_004517456.1 | Scaffold2534 | 28147                   | CC                              | GG                | 1946681266               |
| SNP_P3_168554_28150 | NW_004517456.1 | Scaffold2534 | 28150                   | AA                              | GG                | 1946681268               |
| SNP_P3_168555_28188 | NW_004517456.1 | Scaffold2534 | 28188                   | TT                              | CC                | 1946681270               |
| SNP_P3_168556_42387 | NW_004517456.1 | Scaffold2534 | 42387                   | GG                              | AA                | 1946681272               |
| SNP_P3_168557_46163 | NW_004517456.1 | Scaffold2534 | 46163                   | CC                              | TT                | 1946681274               |
| SNP_P3_168558_46192 | NW_004517456.1 | Scaffold2534 | 46192                   | CC                              | TT                | 1946681276               |
| SNP_P3_168559_46202 | NW_004517456.1 | Scaffold2534 | 46202                   | AA                              | GG                | 1946681280               |
| SNP_P3_168560_46228 | NW_004517456.1 | Scaffold2534 | 46228                   | TT                              | CC                | 1946681282               |
| SNP_P3_168561_46240 | NW_004517456.1 | Scaffold2534 | 46240                   | AA                              | CC                | 1946681284               |
| SNP_P3_168562_46245 | NW_004517456.1 | Scaffold2534 | 46245                   | AA                              | TT                | 1946681286               |
| SNP_P3_168563_46319 | NW_004517456.1 | Scaffold2534 | 46319                   | CC                              | AA                | 1946681288               |
| SNP_P3_168564_63241 | NW_004517456.1 | Scaffold2534 | 63241                   | GG                              | AA                | 1946681290               |
| SNP_P3_168565_63266 | NW_004517456.1 | Scaffold2534 | 63266                   | AA                              | GG                | 1946681292               |
| SNP_P3_168566_63511 | NW_004517456.1 | Scaffold2534 | 63511                   | CC                              | TT                | 1946681294               |
| SNP_P3_168567_63731 | NW_004517456.1 | Scaffold2534 | 63731                   | AA                              | TT                | 1946681297               |
| SNP_P3_168568_19156 | NW_004517457.1 | Scaffold2535 | 19156                   | GG                              | AA                | 1946681299               |



| SNPs IDs            | Chromosome IDs | Chromosomes  | Physical positions (bp) | CDC Frontier (Reference genome) | (Pusa 256 & HPNB) | NCBI SNPdb Accession IDs |
|---------------------|----------------|--------------|-------------------------|---------------------------------|-------------------|--------------------------|
| SNP_P3_168569_19612 | NW_004517457.1 | Scaffold2535 | 19612                   | GG                              | TT                | 1946681301               |
| SNP_P3_168570_19714 | NW_004517457.1 | Scaffold2535 | 19714                   | AA                              | TT                | 1946681304               |
| SNP_P3_168571_20028 | NW_004517457.1 | Scaffold2535 | 20028                   | AA                              | GG                | 1946681306               |
| SNP_P3_168572_27618 | NW_004517457.1 | Scaffold2535 | 27618                   | TT                              | CC                | 1946681308               |
| SNP_P3_168573_27874 | NW_004517457.1 | Scaffold2535 | 27874                   | AA                              | CC                | 1946681310               |
| SNP_P3_168574_27929 | NW_004517457.1 | Scaffold2535 | 27929                   | GG                              | AA                | 1946681312               |
| SNP_P3_168575_27942 | NW_004517457.1 | Scaffold2535 | 27942                   | TT                              | GG                | 1946681314               |
| SNP_P3_168576_27989 | NW_004517457.1 | Scaffold2535 | 27989                   | TT                              | GG                | 1946681317               |
| SNP_P3_168577_29686 | NW_004517457.1 | Scaffold2535 | 29686                   | CC                              | GG                | 1946681319               |
| SNP_P3_168578_29956 | NW_004517457.1 | Scaffold2535 | 29956                   | TT                              | AA                | 1946681321               |
| SNP_P3_168579_30176 | NW_004517457.1 | Scaffold2535 | 30176                   | AA                              | CC                | 1946681323               |
| SNP_P3_168580_30614 | NW_004517457.1 | Scaffold2535 | 30614                   | AA                              | GG                | 1946681325               |
| SNP_P3_168581_30648 | NW_004517457.1 | Scaffold2535 | 30648                   | TT                              | CC                | 1946681328               |
| SNP_P3_168582_30716 | NW_004517457.1 | Scaffold2535 | 30716                   | TT                              | CC                | 1946681330               |
| SNP_P3_168583_7349  | NW_004517460.1 | Scaffold2539 | 7349                    | AA                              | GG                | 1946681332               |
| SNP_P3_168584_1993  | NW_004517461.1 | Scaffold2542 | 1993                    | AA                              | GG                | 1946681334               |
| SNP_P3_168585_2201  | NW_004517461.1 | Scaffold2542 | 2201                    | CC                              | TT                | 1946681336               |
| SNP_P3_168587_2318  | NW_004517461.1 | Scaffold2542 | 2318                    | TT                              | AA                | 1946681338               |
| SNP_P3_168588_2400  | NW_004517461.1 | Scaffold2542 | 2400                    | CC                              | AA                | 1946681340               |
| SNP_P3_168589_2686  | NW_004517461.1 | Scaffold2542 | 2686                    | GG                              | AA                | 1946681342               |
| SNP_P3_168591_11389 | NW_004517461.1 | Scaffold2542 | 11389                   | AA                              | GG                | 1946681345               |
| SNP_P3_168592_14611 | NW_004517461.1 | Scaffold2542 | 14611                   | TT                              | CC                | 1946681347               |
| SNP_P3_168593_24155 | NW_004517461.1 | Scaffold2542 | 24155                   | AA                              | GG                | 1946681349               |
| SNP_P3_168594_24177 | NW_004517461.1 | Scaffold2542 | 24177                   | GG                              | TT                | 1946681351               |
| SNP_P3_168595_24340 | NW_004517461.1 | Scaffold2542 | 24340                   | TT                              | CC                | 1946681353               |
| SNP_P3_168596_24607 | NW_004517461.1 | Scaffold2542 | 24607                   | AA                              | CC                | 1946681356               |
| SNP_P3_168597_26189 | NW_004517461.1 | Scaffold2542 | 26189                   | GG                              | AA                | 1946681358               |
| SNP_P3_168598_26238 | NW_004517461.1 | Scaffold2542 | 26238                   | AA                              | GG                | 1946681360               |
| SNP_P3_168599_26434 | NW_004517461.1 | Scaffold2542 | 26434                   | CC                              | TT                | 1946681362               |
| SNP_P3_168600_219   | NW_004517464.1 | Scaffold2547 | 219                     | AA                              | TT                | 1946681364               |
| SNP_P3_168601_3631  | NW_004517464.1 | Scaffold2547 | 3631                    | AA                              | TT                | 1946681366               |
| SNP_P3_168602_3703  | NW_004517464.1 | Scaffold2547 | 3703                    | GG                              | CC                | 1946681368               |
| SNP_P3_168603_720   | NW_004517465.1 | Scaffold2548 | 720                     | CC                              | GG                | 1946681370               |
| SNP_P3_168604_724   | NW_004517465.1 | Scaffold2548 | 724                     | AA                              | TT                | 1946681372               |
| SNP_P3_168605_752   | NW_004517465.1 | Scaffold2548 | 752                     | TT                              | GG                | 1946681374               |
| SNP_P3_168606_760   | NW_004517465.1 | Scaffold2548 | 760                     | TT                              | CC                | 1946681376               |
| SNP_P3_168607_766   | NW_004517465.1 | Scaffold2548 | 766                     | TT                              | CC                | 1946681378               |
| SNP_P3_168608_864   | NW_004517465.1 | Scaffold2548 | 864                     | TT                              | AA                | 1946681381               |
| SNP_P3_168609_875   | NW_004517465.1 | Scaffold2548 | 875                     | CC                              | TT                | 1946681383               |
| SNP_P3_168610_883   | NW_004517465.1 | Scaffold2548 | 883                     | AA                              | TT                | 1946681385               |
| SNP_P3_168611_885   | NW_004517465.1 | Scaffold2548 | 885                     | TT                              | GG                | 1946681387               |
| SNP_P3_168612_886   | NW_004517465.1 | Scaffold2548 | 886                     | AA                              | GG                | 1946681389               |

| SNPs IDs            | Chromosome IDs | Chromosomes  | Physical positions (bp) | CDC Frontier (Reference genome) | (Pusa 256 & HPNB) | NCBI SNPdb Accession IDs |
|---------------------|----------------|--------------|-------------------------|---------------------------------|-------------------|--------------------------|
| SNP_P3_168613_905   | NW_004517465.1 | Scaffold2548 | 905                     | AA                              | GG                | 1946681391               |
| SNP_P3_168614_1039  | NW_004517465.1 | Scaffold2548 | 1039                    | TT                              | AA                | 1946681393               |
| SNP_P3_168616_1063  | NW_004517465.1 | Scaffold2548 | 1063                    | AA                              | TT                | 1946681395               |
| SNP_P3_168617_1172  | NW_004517465.1 | Scaffold2548 | 1172                    | GG                              | TT                | 1946681397               |
| SNP_P3_168618_1333  | NW_004517465.1 | Scaffold2548 | 1333                    | TT                              | GG                | 1946681399               |
| SNP_P3_168619_1349  | NW_004517465.1 | Scaffold2548 | 1349                    | CC                              | TT                | 1946681401               |
| SNP_P3_168620_1357  | NW_004517465.1 | Scaffold2548 | 1357                    | AA                              | TT                | 1946681403               |
| SNP_P3_168621_1396  | NW_004517465.1 | Scaffold2548 | 1396                    | GG                              | AA                | 1946681406               |
| SNP_P3_168622_1401  | NW_004517465.1 | Scaffold2548 | 1401                    | TT                              | AA                | 1946681408               |
| SNP_P3_168623_1402  | NW_004517465.1 | Scaffold2548 | 1402                    | GG                              | TT                | 1946681410               |
| SNP_P3_168624_1431  | NW_004517465.1 | Scaffold2548 | 1431                    | TT                              | AA                | 1946681412               |
| SNP_P3_168625_1434  | NW_004517465.1 | Scaffold2548 | 1434                    | TT                              | CC                | 1946681414               |
| SNP_P3_168626_1442  | NW_004517465.1 | Scaffold2548 | 1442                    | AA                              | TT                | 1946681416               |
| SNP_P3_168627_1466  | NW_004517465.1 | Scaffold2548 | 1466                    | TT                              | CC                | 1946681418               |
| SNP_P3_168628_1476  | NW_004517465.1 | Scaffold2548 | 1476                    | CC                              | GG                | 1946681420               |
| SNP_P3_168629_2515  | NW_004517465.1 | Scaffold2548 | 2515                    | GG                              | TT                | 1946681422               |
| SNP_P3_168630_2521  | NW_004517465.1 | Scaffold2548 | 2521                    | CC                              | TT                | 1946681424               |
| SNP_P3_168631_2526  | NW_004517465.1 | Scaffold2548 | 2526                    | TT                              | CC                | 1946681426               |
| SNP_P3_168632_2532  | NW_004517465.1 | Scaffold2548 | 2532                    | CC                              | AA                | 1946681428               |
| SNP_P3_168633_2550  | NW_004517465.1 | Scaffold2548 | 2550                    | CC                              | TT                | 1946681430               |
| SNP_P3_168634_1726  | NW_004517468.1 | Scaffold2555 | 1726                    | CC                              | TT                | 1946681433               |
| SNP_P3_168635_3426  | NW_004517468.1 | Scaffold2555 | 3426                    | AA                              | TT                | 1946681435               |
| SNP_P3_168636_3435  | NW_004517468.1 | Scaffold2555 | 3435                    | CC                              | AA                | 1946681438               |
| SNP_P3_168637_3437  | NW_004517468.1 | Scaffold2555 | 3437                    | AA                              | GG                | 1946681440               |
| SNP_P3_168638_3462  | NW_004517468.1 | Scaffold2555 | 3462                    | CC                              | AA                | 1946681442               |
| SNP_P3_168639_3477  | NW_004517468.1 | Scaffold2555 | 3477                    | TT                              | GG                | 1946681444               |
| SNP_P3_168640_3510  | NW_004517468.1 | Scaffold2555 | 3510                    | AA                              | TT                | 1946681446               |
| SNP_P3_168641_16239 | NW_004517468.1 | Scaffold2555 | 16239                   | TT                              | AA                | 1946681448               |
| SNP_P3_168642_18818 | NW_004517468.1 | Scaffold2555 | 18818                   | TT                              | CC                | 1946681450               |
| SNP_P3_168643_19312 | NW_004517468.1 | Scaffold2555 | 19312                   | CC                              | TT                | 1946681452               |
| SNP_P3_168644_19397 | NW_004517468.1 | Scaffold2555 | 19397                   | CC                              | TT                | 1946681454               |
| SNP_P3_168645_19875 | NW_004517468.1 | Scaffold2555 | 19875                   | TT                              | CC                | 1946681456               |
| SNP_P3_168646_20244 | NW_004517468.1 | Scaffold2555 | 20244                   | AA                              | TT                | 1946681458               |
| SNP_P3_168647_20245 | NW_004517468.1 | Scaffold2555 | 20245                   | GG                              | TT                | 1946681461               |
| SNP_P3_168648_20257 | NW_004517468.1 | Scaffold2555 | 20257                   | AA                              | CC                | 1946681463               |
| SNP_P3_168649_21680 | NW_004517468.1 | Scaffold2555 | 21680                   | AA                              | TT                | 1946681465               |
| SNP_P3_168650_21932 | NW_004517468.1 | Scaffold2555 | 21932                   | TT                              | CC                | 1946681467               |
| SNP_P3_168651_21951 | NW_004517468.1 | Scaffold2555 | 21951                   | AA                              | TT                | 1946681469               |
| SNP_P3_168652_22005 | NW_004517468.1 | Scaffold2555 | 22005                   | GG                              | TT                | 1946681471               |
| SNP_P3_168653_22249 | NW_004517468.1 | Scaffold2555 | 22249                   | CC                              | TT                | 1946681473               |
| SNP_P3_168654_22309 | NW_004517468.1 | Scaffold2555 | 22309                   | CC                              | GG                | 1946681475               |
| SNP_P3_168655_24066 | NW_004517468.1 | Scaffold2555 | 24066                   | GG                              | CC                | 1946681477               |

| SNPs IDs            | Chromosome IDs | Chromosomes  | Physical positions (bp) | CDC Frontier (Reference genome) | (Pusa 256 & HPNB) | NCBI SNPdb Accession IDs |
|---------------------|----------------|--------------|-------------------------|---------------------------------|-------------------|--------------------------|
| SNP_P3_168656_24097 | NW_004517468.1 | Scaffold2555 | 24097                   | TT                              | CC                | 1946681479               |
| SNP_P3_168657_30429 | NW_004517468.1 | Scaffold2555 | 30429                   | GG                              | TT                | 1946681481               |
| SNP_P3_168658_30439 | NW_004517468.1 | Scaffold2555 | 30439                   | AA                              | GG                | 1946681483               |
| SNP_P3_168659_44270 | NW_004517468.1 | Scaffold2555 | 44270                   | CC                              | AA                | 1946681485               |
| SNP_P3_168661_44389 | NW_004517468.1 | Scaffold2555 | 44389                   | CC                              | TT                | 1946681488               |
| SNP_P3_168662_51455 | NW_004517468.1 | Scaffold2555 | 51455                   | TT                              | AA                | 1946681490               |
| SNP_P3_168665_58953 | NW_004517468.1 | Scaffold2555 | 58953                   | TT                              | CC                | 1946681493               |
| SNP_P3_168666_915   | NW_004517469.1 | Scaffold2556 | 915                     | CC                              | GG                | 1946681495               |
| SNP_P3_168667_922   | NW_004517469.1 | Scaffold2556 | 922                     | CC                              | TT                | 1946681496               |
| SNP_P3_168668_1006  | NW_004517469.1 | Scaffold2556 | 1006                    | TT                              | AA                | 1946681497               |
| SNP_P3_168669_1064  | NW_004517469.1 | Scaffold2556 | 1064                    | AA                              | TT                | 1946681498               |
| SNP_P3_168670_1066  | NW_004517469.1 | Scaffold2556 | 1066                    | CC                              | AA                | 1946681499               |
| SNP_P3_168671_1074  | NW_004517469.1 | Scaffold2556 | 1074                    | CC                              | GG                | 1946681500               |
| SNP_P3_168672_1126  | NW_004517469.1 | Scaffold2556 | 1126                    | TT                              | AA                | 1946681501               |
| SNP_P3_168673_1134  | NW_004517469.1 | Scaffold2556 | 1134                    | AA                              | GG                | 1946681502               |
| SNP_P3_168674_1270  | NW_004517469.1 | Scaffold2556 | 1270                    | CC                              | AA                | 1946681503               |
| SNP_P3_168676_2286  | NW_004517470.1 | Scaffold2557 | 2286                    | TT                              | AA                | 1946681505               |
| SNP_P3_168677_2317  | NW_004517470.1 | Scaffold2557 | 2317                    | AA                              | CC                | 1946681507               |
| SNP_P3_168678_8773  | NW_004517470.1 | Scaffold2557 | 8773                    | GG                              | AA                | 1946681509               |
| SNP_P3_168679_8822  | NW_004517470.1 | Scaffold2557 | 8822                    | CC                              | TT                | 1946681511               |
| SNP_P3_168680_9130  | NW_004517470.1 | Scaffold2557 | 9130                    | AA                              | CC                | 1946681513               |
| SNP_P3_168681_9152  | NW_004517470.1 | Scaffold2557 | 9152                    | AA                              | GG                | 1946681515               |
| SNP_P3_168682_9180  | NW_004517470.1 | Scaffold2557 | 9180                    | GG                              | AA                | 1946681517               |
| SNP_P3_168683_12218 | NW_004517470.1 | Scaffold2557 | 12218                   | CC                              | TT                | 1946681519               |
| SNP_P3_168684_12279 | NW_004517470.1 | Scaffold2557 | 12279                   | AA                              | CC                | 1946681521               |
| SNP_P3_168685_12343 | NW_004517470.1 | Scaffold2557 | 12343                   | AA                              | GG                | 1946681523               |
| SNP_P3_168686_12348 | NW_004517470.1 | Scaffold2557 | 12348                   | AA                              | GG                | 1946681525               |
| SNP_P3_168687_12797 | NW_004517470.1 | Scaffold2557 | 12797                   | AA                              | CC                | 1946681527               |
| SNP_P3_168688_14305 | NW_004517470.1 | Scaffold2557 | 14305                   | TT                              | AA                | 1946681529               |
| SNP_P3_168689_14726 | NW_004517470.1 | Scaffold2557 | 14726                   | TT                              | AA                | 1946681531               |
| SNP_P3_168690_14841 | NW_004517470.1 | Scaffold2557 | 14841                   | CC                              | TT                | 1946681533               |
| SNP_P3_168691_14843 | NW_004517470.1 | Scaffold2557 | 14843                   | AA                              | CC                | 1946681535               |
| SNP_P3_168692_14998 | NW_004517470.1 | Scaffold2557 | 14998                   | TT                              | CC                | 1946681537               |
| SNP_P3_168693_23212 | NW_004517470.1 | Scaffold2557 | 23212                   | AA                              | CC                | 1946681539               |
| SNP_P3_168694_27299 | NW_004517470.1 | Scaffold2557 | 27299                   | AA                              | CC                | 1946681541               |
| SNP_P3_168696_47613 | NW_004517470.1 | Scaffold2557 | 47613                   | AA                              | TT                | 1946681543               |
| SNP_P3_168697_47616 | NW_004517470.1 | Scaffold2557 | 47616                   | AA                              | GG                | 1946681545               |
| SNP_P3_168698_47643 | NW_004517470.1 | Scaffold2557 | 47643                   | TT                              | GG                | 1946681547               |
| SNP_P3_168699_47655 | NW_004517470.1 | Scaffold2557 | 47655                   | TT                              | CC                | 1946681549               |
| SNP_P3_168700_47656 | NW_004517470.1 | Scaffold2557 | 47656                   | AA                              | CC                | 1946681552               |
| SNP_P3_168701_47675 | NW_004517470.1 | Scaffold2557 | 47675                   | CC                              | TT                | 1946681554               |
| SNP_P3_168702_47682 | NW_004517470.1 | Scaffold2557 | 47682                   | CC                              | AA                | 1946681556               |

| SNPs IDs            | Chromosome IDs | Chromosomes  | Physical positions (bp) | CDC Frontier (Reference genome) | (Pusa 256 & HPNB) | NCBI SNPdb Accession IDs |
|---------------------|----------------|--------------|-------------------------|---------------------------------|-------------------|--------------------------|
| SNP_P3_168703_47687 | NW_004517470.1 | Scaffold2557 | 47687                   | TT                              | CC                | 1946681558               |
| SNP_P3_168704_47707 | NW_004517470.1 | Scaffold2557 | 47707                   | TT                              | AA                | 1946681560               |
| SNP_P3_168705_47752 | NW_004517470.1 | Scaffold2557 | 47752                   | AA                              | TT                | 1946681562               |
| SNP_P3_168706_49866 | NW_004517470.1 | Scaffold2557 | 49866                   | CC                              | GG                | 1946681564               |
| SNP_P3_168707_49890 | NW_004517470.1 | Scaffold2557 | 49890                   | TT                              | CC                | 1946681566               |
| SNP_P3_168708_49916 | NW_004517470.1 | Scaffold2557 | 49916                   | CC                              | TT                | 1946681568               |
| SNP_P3_168710_49995 | NW_004517470.1 | Scaffold2557 | 49995                   | AA                              | GG                | 1946681569               |
| SNP_P3_168711_50037 | NW_004517470.1 | Scaffold2557 | 50037                   | AA                              | CC                | 1946681571               |
| SNP_P3_168712_50047 | NW_004517470.1 | Scaffold2557 | 50047                   | AA                              | GG                | 1946681573               |
| SNP_P3_168713_50060 | NW_004517470.1 | Scaffold2557 | 50060                   | GG                              | AA                | 1946681575               |
| SNP_P3_168714_50074 | NW_004517470.1 | Scaffold2557 | 50074                   | AA                              | GG                | 1946681577               |
| SNP_P3_168715_50086 | NW_004517470.1 | Scaffold2557 | 50086                   | TT                              | CC                | 1946681580               |
| SNP_P3_168716_50134 | NW_004517470.1 | Scaffold2557 | 50134                   | GG                              | AA                | 1946681582               |
| SNP_P3_168717_50144 | NW_004517470.1 | Scaffold2557 | 50144                   | AA                              | GG                | 1946681584               |
| SNP_P3_168718_50305 | NW_004517470.1 | Scaffold2557 | 50305                   | AA                              | TT                | 1946681586               |
| SNP_P3_168719_50326 | NW_004517470.1 | Scaffold2557 | 50326                   | GG                              | AA                | 1946681588               |
| SNP_P3_168720_50386 | NW_004517470.1 | Scaffold2557 | 50386                   | CC                              | GG                | 1946681590               |
| SNP_P3_168721_51731 | NW_004517470.1 | Scaffold2557 | 51731                   | AA                              | GG                | 1946681592               |
| SNP_P3_168722_51753 | NW_004517470.1 | Scaffold2557 | 51753                   | AA                              | TT                | 1946681594               |
| SNP_P3_168723_52074 | NW_004517470.1 | Scaffold2557 | 52074                   | AA                              | TT                | 1946681596               |
| SNP_P3_168724_55712 | NW_004517470.1 | Scaffold2557 | 55712                   | TT                              | AA                | 1946681598               |
| SNP_P3_168725_55713 | NW_004517470.1 | Scaffold2557 | 55713                   | TT                              | AA                | 1946681600               |
| SNP_P3_168726_56380 | NW_004517470.1 | Scaffold2557 | 56380                   | AA                              | CC                | 1946681602               |
| SNP_P3_168727_56406 | NW_004517470.1 | Scaffold2557 | 56406                   | CC                              | TT                | 1946681604               |
| SNP_P3_168728_56728 | NW_004517470.1 | Scaffold2557 | 56728                   | AA                              | GG                | 1946681606               |
| SNP_P3_168730_61484 | NW_004517470.1 | Scaffold2557 | 61484                   | CC                              | TT                | 1946681608               |
| SNP_P3_168731_61494 | NW_004517470.1 | Scaffold2557 | 61494                   | CC                              | AA                | 1946681610               |
| SNP_P3_168732_61504 | NW_004517470.1 | Scaffold2557 | 61504                   | TT                              | AA                | 1946681612               |
| SNP_P3_168733_61506 | NW_004517470.1 | Scaffold2557 | 61506                   | TT                              | CC                | 1946681615               |
| SNP_P3_168734_61569 | NW_004517470.1 | Scaffold2557 | 61569                   | TT                              | CC                | 1946681617               |
| SNP_P3_168735_61570 | NW_004517470.1 | Scaffold2557 | 61570                   | GG                              | AA                | 1946681619               |
| SNP_P3_168736_61585 | NW_004517470.1 | Scaffold2557 | 61585                   | AA                              | GG                | 1946681621               |
| SNP_P3_168737_61612 | NW_004517470.1 | Scaffold2557 | 61612                   | TT                              | GG                | 1946681623               |
| SNP_P3_168738_61632 | NW_004517470.1 | Scaffold2557 | 61632                   | CC                              | TT                | 1946681625               |
| SNP_P3_168739_61833 | NW_004517470.1 | Scaffold2557 | 61833                   | CC                              | GG                | 1946681627               |
| SNP_P3_168740_61882 | NW_004517470.1 | Scaffold2557 | 61882                   | TT                              | CC                | 1946681629               |
| SNP_P3_168742_61950 | NW_004517470.1 | Scaffold2557 | 61950                   | TT                              | AA                | 1946681631               |
| SNP_P3_168743_61953 | NW_004517470.1 | Scaffold2557 | 61953                   | CC                              | AA                | 1946681633               |
| SNP_P3_168744_62016 | NW_004517470.1 | Scaffold2557 | 62016                   | CC                              | TT                | 1946681635               |
| SNP_P3_168745_62023 | NW_004517470.1 | Scaffold2557 | 62023                   | AA                              | TT                | 1946681637               |
| SNP_P3_168746_62030 | NW_004517470.1 | Scaffold2557 | 62030                   | CC                              | GG                | 1946681639               |
| SNP_P3_168747_62053 | NW_004517470.1 | Scaffold2557 | 62053                   | AA                              | TT                | 1946681641               |

| SNPs IDs             | Chromosome IDs | Chromosomes  | Physical positions (bp) | CDC Frontier (Reference genome) | (Pusa 256 & HPNB) | NCBI SNPdb Accession IDs |
|----------------------|----------------|--------------|-------------------------|---------------------------------|-------------------|--------------------------|
| SNP_P3_168748_62122  | NW_004517470.1 | Scaffold2557 | 62122                   | CC                              | GG                | 1946681643               |
| SNP_P3_168750_62168  | NW_004517470.1 | Scaffold2557 | 62168                   | GG                              | AA                | 1946681645               |
| SNP_P3_168751_62196  | NW_004517470.1 | Scaffold2557 | 62196                   | TT                              | AA                | 1946681647               |
| SNP_P3_168752_62202  | NW_004517470.1 | Scaffold2557 | 62202                   | AA                              | TT                | 1946681649               |
| SNP_P3_168753_62962  | NW_004517470.1 | Scaffold2557 | 62962                   | TT                              | GG                | 1946681652               |
| SNP_P3_168754_63529  | NW_004517470.1 | Scaffold2557 | 63529                   | CC                              | AA                | 1946681654               |
| SNP_P3_168755_66905  | NW_004517470.1 | Scaffold2557 | 66905                   | GG                              | CC                | 1946681656               |
| SNP_P3_168756_79588  | NW_004517470.1 | Scaffold2557 | 79588                   | TT                              | CC                | 1946681658               |
| SNP_P3_168758_86074  | NW_004517470.1 | Scaffold2557 | 86074                   | CC                              | TT                | 1946681660               |
| SNP_P3_168759_86076  | NW_004517470.1 | Scaffold2557 | 86076                   | AA                              | GG                | 1946681661               |
| SNP_P3_168760_86097  | NW_004517470.1 | Scaffold2557 | 86097                   | AA                              | GG                | 1946681662               |
| SNP_P3_168761_86363  | NW_004517470.1 | Scaffold2557 | 86363                   | AA                              | CC                | 1946681663               |
| SNP_P3_168762_86401  | NW_004517470.1 | Scaffold2557 | 86401                   | AA                              | CC                | 1946681664               |
| SNP_P3_168763_93619  | NW_004517470.1 | Scaffold2557 | 93619                   | GG                              | AA                | 1946681666               |
| SNP_P3_168764_154045 | NW_004517470.1 | Scaffold2557 | 154045                  | TT                              | CC                | 1946681668               |
| SNP_P3_168765_172007 | NW_004517470.1 | Scaffold2557 | 172007                  | GG                              | AA                | 1946681670               |
| SNP_P3_168766_172010 | NW_004517470.1 | Scaffold2557 | 172010                  | AA                              | GG                | 1946681672               |
| SNP_P3_168767_172034 | NW_004517470.1 | Scaffold2557 | 172034                  | CC                              | TT                | 1946681674               |
| SNP_P3_168768_172061 | NW_004517470.1 | Scaffold2557 | 172061                  | AA                              | GG                | 1946681676               |
| SNP_P3_168769_172079 | NW_004517470.1 | Scaffold2557 | 172079                  | CC                              | TT                | 1946681679               |
| SNP_P3_168770_172086 | NW_004517470.1 | Scaffold2557 | 172086                  | AA                              | GG                | 1946681681               |
| SNP_P3_168771_172132 | NW_004517470.1 | Scaffold2557 | 172132                  | TT                              | GG                | 1946681683               |
| SNP_P3_168772_172152 | NW_004517470.1 | Scaffold2557 | 172152                  | AA                              | GG                | 1946681685               |
| SNP_P3_168773_172484 | NW_004517470.1 | Scaffold2557 | 172484                  | AA                              | GG                | 1946681687               |
| SNP_P3_168774_172532 | NW_004517470.1 | Scaffold2557 | 172532                  | AA                              | GG                | 1946681689               |
| SNP_P3_168775_3376   | NW_004517471.1 | Scaffold2558 | 3376                    | GG                              | AA                | 1946681691               |
| SNP_P3_168776_6328   | NW_004517471.1 | Scaffold2558 | 6328                    | CC                              | TT                | 1946681693               |
| SNP_P3_168777_6359   | NW_004517471.1 | Scaffold2558 | 6359                    | AA                              | TT                | 1946681695               |
| SNP_P3_168778_6383   | NW_004517471.1 | Scaffold2558 | 6383                    | TT                              | AA                | 1946681697               |
| SNP_P3_168779_6388   | NW_004517471.1 | Scaffold2558 | 6388                    | AA                              | CC                | 1946681698               |
| SNP_P3_168780_6395   | NW_004517471.1 | Scaffold2558 | 6395                    | AA                              | CC                | 1946681699               |
| SNP_P3_168781_6715   | NW_004517471.1 | Scaffold2558 | 6715                    | TT                              | CC                | 1946681701               |
| SNP_P3_168782_22992  | NW_004517471.1 | Scaffold2558 | 22992                   | TT                              | AA                | 1946681703               |
| SNP_P3_168783_27913  | NW_004517471.1 | Scaffold2558 | 27913                   | CC                              | AA                | 1946681705               |
| SNP_P3_168784_19867  | NW_004517473.1 | Scaffold2560 | 19867                   | TT                              | CC                | 1946681707               |
| SNP_P3_168785_19897  | NW_004517473.1 | Scaffold2560 | 19897                   | GG                              | AA                | 1946681709               |
| SNP_P3_168786_19898  | NW_004517473.1 | Scaffold2560 | 19898                   | GG                              | AA                | 1946681711               |
| SNP_P3_168788_40714  | NW_004517473.1 | Scaffold2560 | 40714                   | GG                              | TT                | 1946681713               |
| SNP_P3_168789_45415  | NW_004517473.1 | Scaffold2560 | 45415                   | AA                              | TT                | 1946681715               |
| SNP_P3_168790_45522  | NW_004517473.1 | Scaffold2560 | 45522                   | AA                              | GG                | 1946681717               |
| SNP_P3_168791_60091  | NW_004517473.1 | Scaffold2560 | 60091                   | GG                              | AA                | 1946681718               |
| SNP_P3_168792_60165  | NW_004517473.1 | Scaffold2560 | 60165                   | CC                              | TT                | 1946681720               |

| SNPs IDs            | Chromosome IDs | Chromosomes  | Physical positions (bp) | CDC Frontier (Reference genome) | (Pusa 256 & HPNB) | NCBI SNPdb Accession IDs |
|---------------------|----------------|--------------|-------------------------|---------------------------------|-------------------|--------------------------|
| SNP_P3_168794_60679 | NW_004517473.1 | Scaffold2560 | 60679                   | CC                              | TT                | 1946681722               |
| SNP_P3_168795_60728 | NW_004517473.1 | Scaffold2560 | 60728                   | GG                              | TT                | 1946681724               |
| SNP_P3_168796_60807 | NW_004517473.1 | Scaffold2560 | 60807                   | GG                              | AA                | 1946681726               |
| SNP_P3_168797_61151 | NW_004517473.1 | Scaffold2560 | 61151                   | AA                              | CC                | 1946681728               |
| SNP_P3_168799_61291 | NW_004517473.1 | Scaffold2560 | 61291                   | TT                              | GG                | 1946681730               |
| SNP_P3_168800_61393 | NW_004517473.1 | Scaffold2560 | 61393                   | GG                              | AA                | 1946681732               |
| SNP_P3_168801_61608 | NW_004517473.1 | Scaffold2560 | 61608                   | AA                              | GG                | 1946681734               |
| SNP_P3_168802_61703 | NW_004517473.1 | Scaffold2560 | 61703                   | CC                              | AA                | 1946681736               |
| SNP_P3_168803_61776 | NW_004517473.1 | Scaffold2560 | 61776                   | AA                              | TT                | 1946681738               |
| SNP_P3_168804_61788 | NW_004517473.1 | Scaffold2560 | 61788                   | AA                              | GG                | 1946681740               |
| SNP_P3_168805_61851 | NW_004517473.1 | Scaffold2560 | 61851                   | CC                              | GG                | 1946681742               |
| SNP_P3_168806_62075 | NW_004517473.1 | Scaffold2560 | 62075                   | AA                              | GG                | 1946681744               |
| SNP_P3_168807_62329 | NW_004517473.1 | Scaffold2560 | 62329                   | GG                              | CC                | 1946681746               |
| SNP_P3_168808_62599 | NW_004517473.1 | Scaffold2560 | 62599                   | GG                              | TT                | 1946681748               |
| SNP_P3_168809_63522 | NW_004517473.1 | Scaffold2560 | 63522                   | AA                              | CC                | 1946681750               |
| SNP_P3_168810_16165 | NW_004517476.1 | Scaffold2564 | 16165                   | TT                              | GG                | 1946681752               |
| SNP_P3_168811_16610 | NW_004517476.1 | Scaffold2564 | 16610                   | CC                              | TT                | 1946681754               |
| SNP_P3_168812_16614 | NW_004517476.1 | Scaffold2564 | 16614                   | TT                              | AA                | 1946681756               |
| SNP_P3_168813_16665 | NW_004517476.1 | Scaffold2564 | 16665                   | GG                              | AA                | 1946681758               |
| SNP_P3_168814_28477 | NW_004517476.1 | Scaffold2564 | 28477                   | GG                              | CC                | 1946681760               |
| SNP_P3_168815_28485 | NW_004517476.1 | Scaffold2564 | 28485                   | AA                              | TT                | 1946681762               |
| SNP_P3_168816_28589 | NW_004517476.1 | Scaffold2564 | 28589                   | AA                              | GG                | 1946681764               |
| SNP_P3_168817_28701 | NW_004517476.1 | Scaffold2564 | 28701                   | GG                              | AA                | 1946681767               |
| SNP_P3_168818_28725 | NW_004517476.1 | Scaffold2564 | 28725                   | TT                              | GG                | 1946681769               |
| SNP_P3_168819_29290 | NW_004517476.1 | Scaffold2564 | 29290                   | CC                              | TT                | 1946681771               |
| SNP_P3_168820_29316 | NW_004517476.1 | Scaffold2564 | 29316                   | GG                              | TT                | 1946681773               |
| SNP_P3_168821_29321 | NW_004517476.1 | Scaffold2564 | 29321                   | AA                              | GG                | 1946681775               |
| SNP_P3_168822_29548 | NW_004517476.1 | Scaffold2564 | 29548                   | AA                              | CC                | 1946681777               |
| SNP_P3_168823_30788 | NW_004517476.1 | Scaffold2564 | 30788                   | GG                              | AA                | 1946681779               |
| SNP_P3_168824_31030 | NW_004517476.1 | Scaffold2564 | 31030                   | GG                              | AA                | 1946681781               |
| SNP_P3_168825_270   | NW_004517479.1 | Scaffold2568 | 270                     | AA                              | GG                | 1946681783               |
| SNP_P3_168826_450   | NW_004517479.1 | Scaffold2568 | 450                     | GG                              | AA                | 1946681785               |
| SNP_P3_168827_804   | NW_004517479.1 | Scaffold2568 | 804                     | CC                              | TT                | 1946681787               |
| SNP_P3_168828_22143 | NW_004517480.1 | Scaffold2569 | 22143                   | GG                              | AA                | 1946681789               |
| SNP_P3_168829_22283 | NW_004517480.1 | Scaffold2569 | 22283                   | AA                              | CC                | 1946681791               |
| SNP_P3_168830_22409 | NW_004517480.1 | Scaffold2569 | 22409                   | CC                              | TT                | 1946681792               |
| SNP_P3_168831_22419 | NW_004517480.1 | Scaffold2569 | 22419                   | TT                              | CC                | 1946681794               |
| SNP_P3_168832_22438 | NW_004517480.1 | Scaffold2569 | 22438                   | AA                              | CC                | 1946681796               |
| SNP_P3_168833_22536 | NW_004517480.1 | Scaffold2569 | 22536                   | TT                              | CC                | 1946681798               |
| SNP_P3_168834_23247 | NW_004517480.1 | Scaffold2569 | 23247                   | GG                              | AA                | 1946681800               |
| SNP_P3_168835_23276 | NW_004517480.1 | Scaffold2569 | 23276                   | TT                              | AA                | 1946681803               |
| SNP_P3_168836_23279 | NW_004517480.1 | Scaffold2569 | 23279                   | AA                              | GG                | 1946681805               |

| SNPs IDs             | Chromosome IDs | Chromosomes  | Physical positions (bp) | CDC Frontier (Reference genome) | (Pusa 256 & HPNB) | NCBI SNPdb Accession IDs |
|----------------------|----------------|--------------|-------------------------|---------------------------------|-------------------|--------------------------|
| SNP_P3_168837_23299  | NW_004517480.1 | Scaffold2569 | 23299                   | GG                              | AA                | 1946681806               |
| SNP_P3_168838_23356  | NW_004517480.1 | Scaffold2569 | 23356                   | TT                              | CC                | 1946681808               |
| SNP_P3_168839_65295  | NW_004517480.1 | Scaffold2569 | 65295                   | AA                              | GG                | 1946681810               |
| SNP_P3_168840_65305  | NW_004517480.1 | Scaffold2569 | 65305                   | CC                              | GG                | 1946681812               |
| SNP_P3_168841_68965  | NW_004517480.1 | Scaffold2569 | 68965                   | TT                              | GG                | 1946681814               |
| SNP_P3_168842_99056  | NW_004517480.1 | Scaffold2569 | 99056                   | AA                              | TT                | 1946681816               |
| SNP_P3_168843_99326  | NW_004517480.1 | Scaffold2569 | 99326                   | AA                              | GG                | 1946681818               |
| SNP_P3_168844_106306 | NW_004517480.1 | Scaffold2569 | 106306                  | TT                              | AA                | 1946681820               |
| SNP_P3_168845_106319 | NW_004517480.1 | Scaffold2569 | 106319                  | CC                              | AA                | 1946681822               |
| SNP_P3_168846_106770 | NW_004517480.1 | Scaffold2569 | 106770                  | CC                              | GG                | 1946681824               |
| SNP_P3_168847_959    | NW_004517482.1 | Scaffold2571 | 959                     | TT                              | AA                | 1946681825               |
| SNP_P3_168848_5042   | NW_004517485.1 | Scaffold2574 | 5042                    | TT                              | CC                | 1946681827               |
| SNP_P3_168849_5414   | NW_004517485.1 | Scaffold2574 | 5414                    | CC                              | TT                | 1946681829               |
| SNP_P3_168851_15397  | NW_004517485.1 | Scaffold2574 | 15397                   | GG                              | CC                | 1946681831               |
| SNP_P3_168852_19515  | NW_004517485.1 | Scaffold2574 | 19515                   | AA                              | GG                | 1946681833               |
| SNP_P3_168853_21553  | NW_004517485.1 | Scaffold2574 | 21553                   | CC                              | TT                | 1946681836               |
| SNP_P3_168854_46333  | NW_004517485.1 | Scaffold2574 | 46333                   | CC                              | TT                | 1946681838               |
| SNP_P3_168855_50560  | NW_004517485.1 | Scaffold2574 | 50560                   | GG                              | AA                | 1946681840               |
| SNP_P3_168856_51355  | NW_004517485.1 | Scaffold2574 | 51355                   | GG                              | AA                | 1946681842               |
| SNP_P3_168857_80439  | NW_004517486.1 | Scaffold2575 | 80439                   | GG                              | AA                | 1946681844               |
| SNP_P3_168858_114526 | NW_004517486.1 | Scaffold2575 | 114526                  | AA                              | TT                | 1946681846               |
| SNP_P3_168859_114530 | NW_004517486.1 | Scaffold2575 | 114530                  | AA                              | CC                | 1946681848               |
| SNP_P3_168860_131498 | NW_004517486.1 | Scaffold2575 | 131498                  | GG                              | AA                | 1946681850               |
| SNP_P3_168861_131500 | NW_004517486.1 | Scaffold2575 | 131500                  | AA                              | GG                | 1946681852               |
| SNP_P3_168862_131546 | NW_004517486.1 | Scaffold2575 | 131546                  | GG                              | AA                | 1946681854               |
| SNP_P3_168863_131561 | NW_004517486.1 | Scaffold2575 | 131561                  | TT                              | CC                | 1946681856               |
| SNP_P3_168864_131577 | NW_004517486.1 | Scaffold2575 | 131577                  | AA                              | CC                | 1946681858               |
| SNP_P3_168865_131882 | NW_004517486.1 | Scaffold2575 | 131882                  | CC                              | GG                | 1946681860               |
| SNP_P3_168867_193391 | NW_004517486.1 | Scaffold2575 | 193391                  | AA                              | GG                | 1946681862               |
| SNP_P3_168868_193518 | NW_004517486.1 | Scaffold2575 | 193518                  | TT                              | GG                | 1946681864               |
| SNP_P3_168869_193529 | NW_004517486.1 | Scaffold2575 | 193529                  | TT                              | CC                | 1946681866               |
| SNP_P3_168870_193532 | NW_004517486.1 | Scaffold2575 | 193532                  | GG                              | TT                | 1946681869               |
| SNP_P3_168871_193584 | NW_004517486.1 | Scaffold2575 | 193584                  | TT                              | AA                | 1946681871               |
| SNP_P3_168872_193677 | NW_004517486.1 | Scaffold2575 | 193677                  | AA                              | GG                | 1946681873               |
| SNP_P3_168873_193784 | NW_004517486.1 | Scaffold2575 | 193784                  | AA                              | GG                | 1946681875               |
| SNP_P3_168874_195813 | NW_004517486.1 | Scaffold2575 | 195813                  | TT                              | CC                | 1946681876               |
| SNP_P3_168875_195914 | NW_004517486.1 | Scaffold2575 | 195914                  | TT                              | CC                | 1946681878               |
| SNP_P3_168876_195944 | NW_004517486.1 | Scaffold2575 | 195944                  | TT                              | GG                | 1946681880               |
| SNP_P3_168877_195961 | NW_004517486.1 | Scaffold2575 | 195961                  | CC                              | TT                | 1946681882               |
| SNP_P3_168879_196140 | NW_004517486.1 | Scaffold2575 | 196140                  | AA                              | TT                | 1946681884               |
| SNP_P3_168880_196160 | NW_004517486.1 | Scaffold2575 | 196160                  | AA                              | GG                | 1946681886               |
| SNP_P3_168881_196253 | NW_004517486.1 | Scaffold2575 | 196253                  | TT                              | CC                | 1946681888               |

| SNPs IDs             | Chromosome IDs | Chromosomes  | Physical positions (bp) | CDC Frontier (Reference genome) | (Pusa 256 & HPNB) | NCBI SNPdb Accession IDs |
|----------------------|----------------|--------------|-------------------------|---------------------------------|-------------------|--------------------------|
| SNP_P3_168882_197208 | NW_004517486.1 | Scaffold2575 | 197208                  | CC                              | TT                | 1946681890               |
| SNP_P3_168883_197209 | NW_004517486.1 | Scaffold2575 | 197209                  | AA                              | GG                | 1946681892               |
| SNP_P3_168884_205871 | NW_004517486.1 | Scaffold2575 | 205871                  | TT                              | CC                | 1946681894               |
| SNP_P3_168885_205886 | NW_004517486.1 | Scaffold2575 | 205886                  | TT                              | CC                | 1946681896               |
| SNP_P3_168886_208339 | NW_004517486.1 | Scaffold2575 | 208339                  | CC                              | GG                | 1946681900               |
| SNP_P3_168887_208342 | NW_004517486.1 | Scaffold2575 | 208342                  | GG                              | AA                | 1946681902               |
| SNP_P3_168888_208680 | NW_004517486.1 | Scaffold2575 | 208680                  | TT                              | CC                | 1946681904               |
| SNP_P3_168889_208711 | NW_004517486.1 | Scaffold2575 | 208711                  | AA                              | CC                | 1946681906               |
| SNP_P3_168890_208726 | NW_004517486.1 | Scaffold2575 | 208726                  | AA                              | GG                | 1946681908               |
| SNP_P3_168891_208941 | NW_004517486.1 | Scaffold2575 | 208941                  | TT                              | GG                | 1946681909               |
| SNP_P3_168892_219728 | NW_004517486.1 | Scaffold2575 | 219728                  | TT                              | GG                | 1946681910               |
| SNP_P3_168893_219738 | NW_004517486.1 | Scaffold2575 | 219738                  | GG                              | CC                | 1946681911               |
| SNP_P3_168894_219782 | NW_004517486.1 | Scaffold2575 | 219782                  | TT                              | GG                | 1946681912               |
| SNP_P3_168895_219843 | NW_004517486.1 | Scaffold2575 | 219843                  | AA                              | GG                | 1946681913               |
| SNP_P3_168896_231514 | NW_004517486.1 | Scaffold2575 | 231514                  | GG                              | CC                | 1946681914               |
| SNP_P3_168898_240768 | NW_004517486.1 | Scaffold2575 | 240768                  | TT                              | AA                | 1946681915               |
| SNP_P3_168899_247722 | NW_004517486.1 | Scaffold2575 | 247722                  | AA                              | TT                | 1946681917               |
| SNP_P3_168901_260457 | NW_004517486.1 | Scaffold2575 | 260457                  | TT                              | GG                | 1946681918               |
| SNP_P3_168902_269310 | NW_004517486.1 | Scaffold2575 | 269310                  | GG                              | TT                | 1946681919               |
| SNP_P3_168903_269520 | NW_004517486.1 | Scaffold2575 | 269520                  | CC                              | TT                | 1946681920               |
| SNP_P3_168904_269523 | NW_004517486.1 | Scaffold2575 | 269523                  | AA                              | CC                | 1946681921               |
| SNP_P3_168905_271195 | NW_004517486.1 | Scaffold2575 | 271195                  | GG                              | AA                | 1946681922               |
| SNP_P3_168906_271206 | NW_004517486.1 | Scaffold2575 | 271206                  | GG                              | AA                | 1946681923               |
| SNP_P3_168907_271237 | NW_004517486.1 | Scaffold2575 | 271237                  | TT                              | CC                | 1946681924               |
| SNP_P3_168909_271276 | NW_004517486.1 | Scaffold2575 | 271276                  | TT                              | CC                | 1946681925               |
| SNP_P3_168910_271390 | NW_004517486.1 | Scaffold2575 | 271390                  | TT                              | GG                | 1946681926               |
| SNP_P3_168911_271402 | NW_004517486.1 | Scaffold2575 | 271402                  | CC                              | TT                | 1946681927               |
| SNP_P3_168912_271411 | NW_004517486.1 | Scaffold2575 | 271411                  | AA                              | GG                | 1946681929               |
| SNP_P3_168913_271429 | NW_004517486.1 | Scaffold2575 | 271429                  | CC                              | TT                | 1946681930               |
| SNP_P3_168914_271464 | NW_004517486.1 | Scaffold2575 | 271464                  | TT                              | GG                | 1946681931               |
| SNP_P3_168915_271628 | NW_004517486.1 | Scaffold2575 | 271628                  | TT                              | CC                | 1946681932               |
| SNP_P3_168916_271682 | NW_004517486.1 | Scaffold2575 | 271682                  | TT                              | CC                | 1946681934               |
| SNP_P3_168917_271709 | NW_004517486.1 | Scaffold2575 | 271709                  | TT                              | CC                | 1946681937               |
| SNP_P3_168918_271718 | NW_004517486.1 | Scaffold2575 | 271718                  | AA                              | GG                | 1946681939               |
| SNP_P3_168919_271724 | NW_004517486.1 | Scaffold2575 | 271724                  | TT                              | AA                | 1946681941               |
| SNP_P3_168920_271727 | NW_004517486.1 | Scaffold2575 | 271727                  | TT                              | CC                | 1946681943               |
| SNP_P3_168921_274531 | NW_004517486.1 | Scaffold2575 | 274531                  | CC                              | TT                | 1946681945               |
| SNP_P3_168922_278382 | NW_004517486.1 | Scaffold2575 | 278382                  | GG                              | AA                | 1946681947               |
| SNP_P3_168923_278417 | NW_004517486.1 | Scaffold2575 | 278417                  | TT                              | CC                | 1946681949               |
| SNP_P3_168924_278436 | NW_004517486.1 | Scaffold2575 | 278436                  | CC                              | TT                | 1946681951               |
| SNP_P3_168925_278441 | NW_004517486.1 | Scaffold2575 | 278441                  | TT                              | CC                | 1946681953               |
| SNP_P3_168926_278551 | NW_004517486.1 | Scaffold2575 | 278551                  | CC                              | AA                | 1946681955               |



| SNPs IDs             | Chromosome IDs | Chromosomes  | Physical positions (bp) | CDC Frontier (Reference genome) | (Pusa 256 & HPNB) | NCBI SNPdb Accession IDs |
|----------------------|----------------|--------------|-------------------------|---------------------------------|-------------------|--------------------------|
| SNP_P3_168927_278561 | NW_004517486.1 | Scaffold2575 | 278561                  | TT                              | CC                | 1946681957               |
| SNP_P3_168928_278565 | NW_004517486.1 | Scaffold2575 | 278565                  | CC                              | AA                | 1946681959               |
| SNP_P3_168929_278590 | NW_004517486.1 | Scaffold2575 | 278590                  | AA                              | TT                | 1946681961               |
| SNP_P3_168930_278605 | NW_004517486.1 | Scaffold2575 | 278605                  | GG                              | AA                | 1946681963               |
| SNP_P3_168932_278673 | NW_004517486.1 | Scaffold2575 | 278673                  | AA                              | TT                | 1946681965               |
| SNP_P3_168933_278685 | NW_004517486.1 | Scaffold2575 | 278685                  | TT                              | AA                | 1946681967               |
| SNP_P3_168934_278725 | NW_004517486.1 | Scaffold2575 | 278725                  | TT                              | AA                | 1946681969               |
| SNP_P3_168935_278783 | NW_004517486.1 | Scaffold2575 | 278783                  | TT                              | CC                | 1946681971               |
| SNP_P3_168936_278787 | NW_004517486.1 | Scaffold2575 | 278787                  | AA                              | CC                | 1946681973               |
| SNP_P3_168937_278827 | NW_004517486.1 | Scaffold2575 | 278827                  | CC                              | TT                | 1946681975               |
| SNP_P3_168938_278849 | NW_004517486.1 | Scaffold2575 | 278849                  | CC                              | TT                | 1946681978               |
| SNP_P3_168939_278869 | NW_004517486.1 | Scaffold2575 | 278869                  | TT                              | CC                | 1946681980               |
| SNP_P3_168940_278916 | NW_004517486.1 | Scaffold2575 | 278916                  | CC                              | AA                | 1946681982               |
| SNP_P3_168941_278945 | NW_004517486.1 | Scaffold2575 | 278945                  | AA                              | TT                | 1946681984               |
| SNP_P3_168942_278962 | NW_004517486.1 | Scaffold2575 | 278962                  | CC                              | AA                | 1946681986               |
| SNP_P3_168943_278966 | NW_004517486.1 | Scaffold2575 | 278966                  | GG                              | AA                | 1946681988               |
| SNP_P3_168944_279026 | NW_004517486.1 | Scaffold2575 | 279026                  | CC                              | AA                | 1946681990               |
| SNP_P3_168945_279029 | NW_004517486.1 | Scaffold2575 | 279029                  | GG                              | TT                | 1946681992               |
| SNP_P3_168946_279043 | NW_004517486.1 | Scaffold2575 | 279043                  | GG                              | AA                | 1946681994               |
| SNP_P3_168947_279110 | NW_004517486.1 | Scaffold2575 | 279110                  | CC                              | TT                | 1946681997               |
| SNP_P3_168948_279130 | NW_004517486.1 | Scaffold2575 | 279130                  | TT                              | CC                | 1946681999               |
| SNP_P3_168949_279153 | NW_004517486.1 | Scaffold2575 | 279153                  | GG                              | TT                | 1946682001               |
| SNP_P3_168950_279191 | NW_004517486.1 | Scaffold2575 | 279191                  | CC                              | TT                | 1946682003               |
| SNP_P3_168951_279240 | NW_004517486.1 | Scaffold2575 | 279240                  | CC                              | AA                | 1946682005               |
| SNP_P3_168952_279281 | NW_004517486.1 | Scaffold2575 | 279281                  | AA                              | GG                | 1946682007               |
| SNP_P3_168954_279374 | NW_004517486.1 | Scaffold2575 | 279374                  | TT                              | GG                | 1946682009               |
| SNP_P3_168955_279381 | NW_004517486.1 | Scaffold2575 | 279381                  | GG                              | AA                | 1946682012               |
| SNP_P3_168956_279388 | NW_004517486.1 | Scaffold2575 | 279388                  | AA                              | GG                | 1946682014               |
| SNP_P3_168957_279409 | NW_004517486.1 | Scaffold2575 | 279409                  | GG                              | AA                | 1946682015               |
| SNP_P3_168958_279483 | NW_004517486.1 | Scaffold2575 | 279483                  | GG                              | CC                | 1946682018               |
| SNP_P3_168959_279492 | NW_004517486.1 | Scaffold2575 | 279492                  | GG                              | AA                | 1946682020               |
| SNP_P3_168960_279710 | NW_004517486.1 | Scaffold2575 | 279710                  | CC                              | GG                | 1946682022               |
| SNP_P3_168961_279731 | NW_004517486.1 | Scaffold2575 | 279731                  | AA                              | CC                | 1946682024               |
| SNP_P3_168962_279836 | NW_004517486.1 | Scaffold2575 | 279836                  | TT                              | AA                | 1946682026               |
| SNP_P3_168963_279938 | NW_004517486.1 | Scaffold2575 | 279938                  | CC                              | AA                | 1946682028               |
| SNP_P3_168965_280089 | NW_004517486.1 | Scaffold2575 | 280089                  | CC                              | TT                | 1946682031               |
| SNP_P3_168966_280120 | NW_004517486.1 | Scaffold2575 | 280120                  | CC                              | TT                | 1946682033               |
| SNP_P3_168967_280143 | NW_004517486.1 | Scaffold2575 | 280143                  | TT                              | CC                | 1946682035               |
| SNP_P3_168968_280165 | NW_004517486.1 | Scaffold2575 | 280165                  | TT                              | CC                | 1946682037               |
| SNP_P3_168969_280166 | NW_004517486.1 | Scaffold2575 | 280166                  | TT                              | CC                | 1946682039               |
| SNP_P3_168970_280167 | NW_004517486.1 | Scaffold2575 | 280167                  | GG                              | AA                | 1946682041               |
| SNP_P3_168972_280221 | NW_004517486.1 | Scaffold2575 | 280221                  | GG                              | CC                | 1946682043               |

| SNPs IDs             | Chromosome IDs | Chromosomes  | Physical positions (bp) | CDC Frontier (Reference genome) | (Pusa 256 & HPNB) | NCBI SNPdb Accession IDs |
|----------------------|----------------|--------------|-------------------------|---------------------------------|-------------------|--------------------------|
| SNP_P3_168973_280224 | NW_004517486.1 | Scaffold2575 | 280224                  | TT                              | CC                | 1946682045               |
| SNP_P3_168974_280284 | NW_004517486.1 | Scaffold2575 | 280284                  | CC                              | TT                | 1946682047               |
| SNP_P3_168975_280317 | NW_004517486.1 | Scaffold2575 | 280317                  | TT                              | CC                | 1946682049               |
| SNP_P3_168976_280358 | NW_004517486.1 | Scaffold2575 | 280358                  | AA                              | CC                | 1946682051               |
| SNP_P3_168977_280413 | NW_004517486.1 | Scaffold2575 | 280413                  | TT                              | CC                | 1946682053               |
| SNP_P3_168978_280425 | NW_004517486.1 | Scaffold2575 | 280425                  | CC                              | AA                | 1946682055               |
| SNP_P3_168979_280432 | NW_004517486.1 | Scaffold2575 | 280432                  | CC                              | TT                | 1946682057               |
| SNP_P3_168980_280467 | NW_004517486.1 | Scaffold2575 | 280467                  | GG                              | AA                | 1946682059               |
| SNP_P3_168981_280562 | NW_004517486.1 | Scaffold2575 | 280562                  | CC                              | GG                | 1946682061               |
| SNP_P3_168982_280587 | NW_004517486.1 | Scaffold2575 | 280587                  | CC                              | TT                | 1946682063               |
| SNP_P3_168983_280626 | NW_004517486.1 | Scaffold2575 | 280626                  | GG                              | AA                | 1946682066               |
| SNP_P3_168984_280639 | NW_004517486.1 | Scaffold2575 | 280639                  | TT                              | CC                | 1946682068               |
| SNP_P3_168985_280646 | NW_004517486.1 | Scaffold2575 | 280646                  | AA                              | TT                | 1946682070               |
| SNP_P3_168986_280669 | NW_004517486.1 | Scaffold2575 | 280669                  | AA                              | GG                | 1946682072               |
| SNP_P3_168987_280673 | NW_004517486.1 | Scaffold2575 | 280673                  | TT                              | CC                | 1946682074               |
| SNP_P3_168988_280708 | NW_004517486.1 | Scaffold2575 | 280708                  | GG                              | AA                | 1946682076               |
| SNP_P3_168989_280909 | NW_004517486.1 | Scaffold2575 | 280909                  | AA                              | CC                | 1946682078               |
| SNP_P3_168990_281667 | NW_004517486.1 | Scaffold2575 | 281667                  | TT                              | AA                | 1946682080               |
| SNP_P3_168991_281679 | NW_004517486.1 | Scaffold2575 | 281679                  | GG                              | AA                | 1946682082               |
| SNP_P3_168992_281978 | NW_004517486.1 | Scaffold2575 | 281978                  | AA                              | TT                | 1946682084               |
| SNP_P3_168994_282053 | NW_004517486.1 | Scaffold2575 | 282053                  | AA                              | GG                | 1946682086               |
| SNP_P3_168995_282077 | NW_004517486.1 | Scaffold2575 | 282077                  | CC                              | AA                | 1946682088               |
| SNP_P3_168996_282275 | NW_004517486.1 | Scaffold2575 | 282275                  | TT                              | GG                | 1946682090               |
| SNP_P3_168997_282294 | NW_004517486.1 | Scaffold2575 | 282294                  | AA                              | CC                | 1946682092               |
| SNP_P3_168998_282383 | NW_004517486.1 | Scaffold2575 | 282383                  | GG                              | AA                | 1946682094               |
| SNP_P3_168999_282390 | NW_004517486.1 | Scaffold2575 | 282390                  | CC                              | TT                | 1946682097               |
| SNP_P3_169000_282396 | NW_004517486.1 | Scaffold2575 | 282396                  | GG                              | AA                | 1946682098               |
| SNP_P3_169001_282428 | NW_004517486.1 | Scaffold2575 | 282428                  | GG                              | AA                | 1946682100               |
| SNP_P3_169002_160    | NW_004517487.1 | Scaffold2577 | 160                     | CC                              | TT                | 1946682104               |
| SNP_P3_169003_223    | NW_004517487.1 | Scaffold2577 | 223                     | TT                              | CC                | 1946682105               |
| SNP_P3_169004_2239   | NW_004517491.1 | Scaffold2583 | 2239                    | TT                              | AA                | 1946682107               |
| SNP_P3_169005_2784   | NW_004517491.1 | Scaffold2583 | 2784                    | GG                              | CC                | 1946682109               |
| SNP_P3_169007_1116   | NW_004517493.1 | Scaffold2585 | 1116                    | TT                              | CC                | 1946682111               |
| SNP_P3_169008_1190   | NW_004517493.1 | Scaffold2585 | 1190                    | TT                              | CC                | 1946682113               |
| SNP_P3_169009_1203   | NW_004517493.1 | Scaffold2585 | 1203                    | GG                              | TT                | 1946682115               |
| SNP_P3_169010_35124  | NW_004517495.1 | Scaffold2587 | 35124                   | TT                              | CC                | 1946682117               |
| SNP_P3_169011_42796  | NW_004517495.1 | Scaffold2587 | 42796                   | TT                              | CC                | 1946682119               |
| SNP_P3_169012_42814  | NW_004517495.1 | Scaffold2587 | 42814                   | AA                              | CC                | 1946682121               |
| SNP_P3_169013_43186  | NW_004517495.1 | Scaffold2587 | 43186                   | TT                              | GG                | 1946682123               |
| SNP_P3_169014_43239  | NW_004517495.1 | Scaffold2587 | 43239                   | GG                              | CC                | 1946682125               |
| SNP_P3_169015_46502  | NW_004517495.1 | Scaffold2587 | 46502                   | GG                              | AA                | 1946682127               |
| SNP_P3_169016_47709  | NW_004517495.1 | Scaffold2587 | 47709                   | CC                              | TT                | 1946682129               |

| SNPs IDs            | Chromosome IDs | Chromosomes  | Physical positions (bp) | CDC Frontier (Reference genome) | (Pusa 256 & HPNB) | NCBI SNPdb Accession IDs |
|---------------------|----------------|--------------|-------------------------|---------------------------------|-------------------|--------------------------|
| SNP_P3_169017_320   | NW_004517496.1 | Scaffold2591 | 320                     | AA                              | GG                | 1946682131               |
| SNP_P3_169018_348   | NW_004517496.1 | Scaffold2591 | 348                     | AA                              | CC                | 1946682135               |
| SNP_P3_169019_1432  | NW_004517496.1 | Scaffold2591 | 1432                    | TT                              | CC                | 1946682138               |
| SNP_P3_169020_1583  | NW_004517496.1 | Scaffold2591 | 1583                    | GG                              | AA                | 1946682140               |
| SNP_P3_169021_1625  | NW_004517496.1 | Scaffold2591 | 1625                    | GG                              | AA                | 1946682142               |
| SNP_P3_169022_1662  | NW_004517496.1 | Scaffold2591 | 1662                    | TT                              | AA                | 1946682144               |
| SNP_P3_169023_1858  | NW_004517496.1 | Scaffold2591 | 1858                    | TT                              | GG                | 1946682146               |
| SNP_P3_169024_1883  | NW_004517496.1 | Scaffold2591 | 1883                    | CC                              | GG                | 1946682149               |
| SNP_P3_169025_2091  | NW_004517496.1 | Scaffold2591 | 2091                    | CC                              | TT                | 1946682151               |
| SNP_P3_169026_2102  | NW_004517496.1 | Scaffold2591 | 2102                    | TT                              | CC                | 1946682153               |
| SNP_P3_169027_2105  | NW_004517496.1 | Scaffold2591 | 2105                    | AA                              | GG                | 1946682155               |
| SNP_P3_169028_2194  | NW_004517496.1 | Scaffold2591 | 2194                    | AA                              | CC                | 1946682157               |
| SNP_P3_169029_2462  | NW_004517496.1 | Scaffold2591 | 2462                    | TT                              | AA                | 1946682159               |
| SNP_P3_169030_5293  | NW_004517496.1 | Scaffold2591 | 5293                    | AA                              | CC                | 1946682161               |
| SNP_P3_169031_5337  | NW_004517496.1 | Scaffold2591 | 5337                    | TT                              | GG                | 1946682163               |
| SNP_P3_169032_5345  | NW_004517496.1 | Scaffold2591 | 5345                    | AA                              | TT                | 1946682166               |
| SNP_P3_169034_1594  | NW_004517498.1 | Scaffold2594 | 1594                    | TT                              | CC                | 1946682168               |
| SNP_P3_169037_33536 | NW_004517498.1 | Scaffold2594 | 33536                   | TT                              | CC                | 1946682170               |
| SNP_P3_169038_33553 | NW_004517498.1 | Scaffold2594 | 33553                   | AA                              | CC                | 1946682172               |
| SNP_P3_169039_352   | NW_004517500.1 | Scaffold2596 | 352                     | AA                              | GG                | 1946682174               |
| SNP_P3_169040_754   | NW_004517501.1 | Scaffold2598 | 754                     | TT                              | GG                | 1946682176               |
| SNP_P3_169041_1036  | NW_004517501.1 | Scaffold2598 | 1036                    | GG                              | AA                | 1946682178               |
| SNP_P3_169042_1937  | NW_004517501.1 | Scaffold2598 | 1937                    | GG                              | TT                | 1946682180               |
| SNP_P3_169043_2145  | NW_004517501.1 | Scaffold2598 | 2145                    | CC                              | AA                | 1946682182               |
| SNP_P3_169044_2226  | NW_004517501.1 | Scaffold2598 | 2226                    | AA                              | GG                | 1946682184               |
| SNP_P3_169045_4332  | NW_004517501.1 | Scaffold2598 | 4332                    | TT                              | CC                | 1946682186               |
| SNP_P3_169046_4724  | NW_004517501.1 | Scaffold2598 | 4724                    | CC                              | TT                | 1946682188               |
| SNP_P3_169047_8681  | NW_004517501.1 | Scaffold2598 | 8681                    | CC                              | TT                | 1946682190               |
| SNP_P3_169048_8826  | NW_004517501.1 | Scaffold2598 | 8826                    | CC                              | GG                | 1946682192               |
| SNP_P3_169049_9208  | NW_004517501.1 | Scaffold2598 | 9208                    | CC                              | AA                | 1946682194               |
| SNP_P3_169051_6316  | NW_004517502.1 | Scaffold2599 | 6316                    | TT                              | CC                | 1946682196               |
| SNP_P3_169052_6351  | NW_004517502.1 | Scaffold2599 | 6351                    | GG                              | TT                | 1946682198               |
| SNP_P3_169053_6630  | NW_004517502.1 | Scaffold2599 | 6630                    | GG                              | CC                | 1946682199               |
| SNP_P3_169054_6905  | NW_004517502.1 | Scaffold2599 | 6905                    | GG                              | AA                | 1946682201               |
| SNP_P3_169055_19033 | NW_004517502.1 | Scaffold2599 | 19033                   | AA                              | TT                | 1946682205               |
| SNP_P3_169056_2217  | NW_004517503.1 | Scaffold2600 | 2217                    | AA                              | GG                | 1946682207               |
| SNP_P3_169057_2218  | NW_004517503.1 | Scaffold2600 | 2218                    | AA                              | TT                | 1946682209               |
| SNP_P3_169058_3152  | NW_004517503.1 | Scaffold2600 | 3152                    | AA                              | TT                | 1946682210               |
| SNP_P3_169059_8620  | NW_004517503.1 | Scaffold2600 | 8620                    | TT                              | CC                | 1946682212               |
| SNP_P3_169060_9478  | NW_004517503.1 | Scaffold2600 | 9478                    | TT                              | CC                | 1946682214               |
| SNP_P3_169062_4956  | NW_004517506.1 | Scaffold2603 | 4956                    | TT                              | GG                | 1946682216               |
| SNP_P3_169063_6254  | NW_004517506.1 | Scaffold2603 | 6254                    | AA                              | TT                | 1946682218               |

| SNPs IDs            | Chromosome IDs | Chromosomes  | Physical positions (bp) | CDC Frontier (Reference genome) | (Pusa 256 & HPNB) | NCBI SNPdb Accession IDs |
|---------------------|----------------|--------------|-------------------------|---------------------------------|-------------------|--------------------------|
| SNP_P3_169064_6269  | NW_004517506.1 | Scaffold2603 | 6269                    | CC                              | TT                | 1946682220               |
| SNP_P3_169067_6607  | NW_004517506.1 | Scaffold2603 | 6607                    | CC                              | TT                | 1946682222               |
| SNP_P3_169068_6855  | NW_004517506.1 | Scaffold2603 | 6855                    | CC                              | AA                | 1946682224               |
| SNP_P3_169069_6909  | NW_004517506.1 | Scaffold2603 | 6909                    | AA                              | TT                | 1946682226               |
| SNP_P3_169071_7762  | NW_004517506.1 | Scaffold2603 | 7762                    | TT                              | CC                | 1946682228               |
| SNP_P3_169073_17492 | NW_004517506.1 | Scaffold2603 | 17492                   | GG                              | AA                | 1946682230               |
| SNP_P3_169074_17519 | NW_004517506.1 | Scaffold2603 | 17519                   | TT                              | CC                | 1946682232               |
| SNP_P3_169075_41131 | NW_004517506.1 | Scaffold2603 | 41131                   | GG                              | AA                | 1946682234               |
| SNP_P3_169076_50793 | NW_004517506.1 | Scaffold2603 | 50793                   | AA                              | TT                | 1946682236               |
| SNP_P3_169077_53720 | NW_004517506.1 | Scaffold2603 | 53720                   | AA                              | GG                | 1946682238               |
| SNP_P3_169078_57803 | NW_004517506.1 | Scaffold2603 | 57803                   | TT                              | AA                | 1946682240               |
| SNP_P3_169079_57813 | NW_004517506.1 | Scaffold2603 | 57813                   | TT                              | CC                | 1946682242               |
| SNP_P3_169080_58179 | NW_004517506.1 | Scaffold2603 | 58179                   | CC                              | TT                | 1946682245               |
| SNP_P3_169081_58189 | NW_004517506.1 | Scaffold2603 | 58189                   | CC                              | TT                | 1946682247               |
| SNP_P3_169082_67082 | NW_004517506.1 | Scaffold2603 | 67082                   | GG                              | AA                | 1946682249               |
| SNP_P3_169083_67352 | NW_004517506.1 | Scaffold2603 | 67352                   | TT                              | CC                | 1946682251               |
| SNP_P3_169085_67475 | NW_004517506.1 | Scaffold2603 | 67475                   | AA                              | TT                | 1946682253               |
| SNP_P3_169086_67491 | NW_004517506.1 | Scaffold2603 | 67491                   | AA                              | TT                | 1946682255               |
| SNP_P3_169087_67573 | NW_004517506.1 | Scaffold2603 | 67573                   | CC                              | TT                | 1946682257               |
| SNP_P3_169088_67642 | NW_004517506.1 | Scaffold2603 | 67642                   | TT                              | AA                | 1946682258               |
| SNP_P3_169089_67652 | NW_004517506.1 | Scaffold2603 | 67652                   | GG                              | AA                | 1946682260               |
| SNP_P3_169090_67654 | NW_004517506.1 | Scaffold2603 | 67654                   | CC                              | TT                | 1946682262               |
| SNP_P3_169091_67677 | NW_004517506.1 | Scaffold2603 | 67677                   | TT                              | CC                | 1946682264               |
| SNP_P3_169092_67716 | NW_004517506.1 | Scaffold2603 | 67716                   | GG                              | CC                | 1946682266               |
| SNP_P3_169093_67741 | NW_004517506.1 | Scaffold2603 | 67741                   | AA                              | CC                | 1946682268               |
| SNP_P3_169094_67793 | NW_004517506.1 | Scaffold2603 | 67793                   | GG                              | AA                | 1946682270               |
| SNP_P3_169095_67828 | NW_004517506.1 | Scaffold2603 | 67828                   | AA                              | GG                | 1946682272               |
| SNP_P3_169096_67851 | NW_004517506.1 | Scaffold2603 | 67851                   | TT                              | AA                | 1946682274               |
| SNP_P3_169097_67858 | NW_004517506.1 | Scaffold2603 | 67858                   | TT                              | CC                | 1946682276               |
| SNP_P3_169098_67860 | NW_004517506.1 | Scaffold2603 | 67860                   | AA                              | GG                | 1946682278               |
| SNP_P3_169099_67870 | NW_004517506.1 | Scaffold2603 | 67870                   | AA                              | GG                | 1946682280               |
| SNP_P3_169100_67889 | NW_004517506.1 | Scaffold2603 | 67889                   | TT                              | AA                | 1946682281               |
| SNP_P3_169101_4357  | NW_004517507.1 | Scaffold2604 | 4357                    | GG                              | CC                | 1946682283               |
| SNP_P3_169102_4694  | NW_004517507.1 | Scaffold2604 | 4694                    | AA                              | CC                | 1946682287               |
| SNP_P3_169103_1192  | NW_004517509.1 | Scaffold2606 | 1192                    | CC                              | TT                | 1946682289               |
| SNP_P3_169104_1240  | NW_004517509.1 | Scaffold2606 | 1240                    | GG                              | CC                | 1946682291               |
| SNP_P3_169105_1395  | NW_004517509.1 | Scaffold2606 | 1395                    | TT                              | AA                | 1946682293               |
| SNP_P3_169106_1408  | NW_004517509.1 | Scaffold2606 | 1408                    | TT                              | CC                | 1946682295               |
| SNP_P3_169107_1449  | NW_004517509.1 | Scaffold2606 | 1449                    | TT                              | GG                | 1946682297               |
| SNP_P3_169108_1615  | NW_004517509.1 | Scaffold2606 | 1615                    | GG                              | AA                | 1946682299               |
| SNP_P3_169109_1622  | NW_004517509.1 | Scaffold2606 | 1622                    | AA                              | GG                | 1946682301               |
| SNP_P3_169110_4195  | NW_004517509.1 | Scaffold2606 | 4195                    | TT                              | CC                | 1946682303               |

| SNPs IDs            | Chromosome IDs | Chromosomes  | Physical positions (bp) | CDC Frontier (Reference genome) | (Pusa 256 & HPNB) | NCBI SNPdb Accession IDs |
|---------------------|----------------|--------------|-------------------------|---------------------------------|-------------------|--------------------------|
| SNP_P3_169111_4201  | NW_004517509.1 | Scaffold2606 | 4201                    | CC                              | TT                | 1946682305               |
| SNP_P3_169112_4267  | NW_004517509.1 | Scaffold2606 | 4267                    | CC                              | TT                | 1946682307               |
| SNP_P3_169113_4329  | NW_004517509.1 | Scaffold2606 | 4329                    | CC                              | TT                | 1946682309               |
| SNP_P3_169114_5375  | NW_004517509.1 | Scaffold2606 | 5375                    | GG                              | AA                | 1946682311               |
| SNP_P3_169115_5639  | NW_004517509.1 | Scaffold2606 | 5639                    | CC                              | AA                | 1946682313               |
| SNP_P3_169116_21779 | NW_004517509.1 | Scaffold2606 | 21779                   | AA                              | CC                | 1946682315               |
| SNP_P3_169117_21825 | NW_004517509.1 | Scaffold2606 | 21825                   | CC                              | GG                | 1946682317               |
| SNP_P3_169118_22461 | NW_004517509.1 | Scaffold2606 | 22461                   | GG                              | CC                | 1946682319               |
| SNP_P3_169119_22488 | NW_004517509.1 | Scaffold2606 | 22488                   | TT                              | CC                | 1946682321               |
| SNP_P3_169120_27367 | NW_004517509.1 | Scaffold2606 | 27367                   | GG                              | CC                | 1946682324               |
| SNP_P3_169121_28753 | NW_004517509.1 | Scaffold2606 | 28753                   | TT                              | CC                | 1946682326               |
| SNP_P3_169122_28777 | NW_004517509.1 | Scaffold2606 | 28777                   | AA                              | GG                | 1946682328               |
| SNP_P3_169124_28821 | NW_004517509.1 | Scaffold2606 | 28821                   | TT                              | CC                | 1946682330               |
| SNP_P3_169125_438   | NW_004517510.1 | Scaffold2607 | 438                     | TT                              | GG                | 1946682332               |
| SNP_P3_169126_465   | NW_004517510.1 | Scaffold2607 | 465                     | AA                              | GG                | 1946682334               |
| SNP_P3_169127_483   | NW_004517510.1 | Scaffold2607 | 483                     | TT                              | AA                | 1946682336               |
| SNP_P3_169128_1009  | NW_004517510.1 | Scaffold2607 | 1009                    | AA                              | TT                | 1946682338               |
| SNP_P3_169129_1347  | NW_004517510.1 | Scaffold2607 | 1347                    | CC                              | TT                | 1946682340               |
| SNP_P3_169130_1374  | NW_004517510.1 | Scaffold2607 | 1374                    | GG                              | TT                | 1946682342               |
| SNP_P3_169131_1268  | NW_004517511.1 | Scaffold2608 | 1268                    | TT                              | CC                | 1946682344               |
| SNP_P3_169132_1270  | NW_004517511.1 | Scaffold2608 | 1270                    | CC                              | TT                | 1946682346               |
| SNP_P3_169133_104   | NW_004517512.1 | Scaffold2610 | 104                     | GG                              | CC                | 1946682348               |
| SNP_P3_169134_5301  | NW_004517514.1 | Scaffold2612 | 5301                    | CC                              | AA                | 1946682350               |
| SNP_P3_169135_5886  | NW_004517514.1 | Scaffold2612 | 5886                    | AA                              | GG                | 1946682352               |
| SNP_P3_169136_5944  | NW_004517514.1 | Scaffold2612 | 5944                    | CC                              | TT                | 1946682354               |
| SNP_P3_169137_5981  | NW_004517514.1 | Scaffold2612 | 5981                    | CC                              | TT                | 1946682356               |
| SNP_P3_169138_6091  | NW_004517514.1 | Scaffold2612 | 6091                    | TT                              | AA                | 1946682358               |
| SNP_P3_169139_6165  | NW_004517514.1 | Scaffold2612 | 6165                    | TT                              | AA                | 1946682361               |
| SNP_P3_169140_6531  | NW_004517514.1 | Scaffold2612 | 6531                    | CC                              | TT                | 1946682364               |
| SNP_P3_169141_5327  | NW_004517515.1 | Scaffold2613 | 5327                    | TT                              | GG                | 1946682366               |
| SNP_P3_169142_12506 | NW_004517518.1 | Scaffold2616 | 12506                   | TT                              | AA                | 1946682368               |
| SNP_P3_169143_364   | NW_004517519.1 | Scaffold2617 | 364                     | CC                              | TT                | 1946682370               |
| SNP_P3_169144_15841 | NW_004517519.1 | Scaffold2617 | 15841                   | AA                              | GG                | 1946682372               |
| SNP_P3_169145_20672 | NW_004517519.1 | Scaffold2617 | 20672                   | CC                              | TT                | 1946682375               |
| SNP_P3_169146_29541 | NW_004517519.1 | Scaffold2617 | 29541                   | AA                              | TT                | 1946682377               |
| SNP_P3_169147_29742 | NW_004517519.1 | Scaffold2617 | 29742                   | GG                              | AA                | 1946682379               |
| SNP_P3_169148_29771 | NW_004517519.1 | Scaffold2617 | 29771                   | CC                              | AA                | 1946682381               |
| SNP_P3_169149_29780 | NW_004517519.1 | Scaffold2617 | 29780                   | CC                              | GG                | 1946682383               |
| SNP_P3_169150_30029 | NW_004517519.1 | Scaffold2617 | 30029                   | GG                              | AA                | 1946682385               |
| SNP_P3_169151_30035 | NW_004517519.1 | Scaffold2617 | 30035                   | GG                              | AA                | 1946682386               |
| SNP_P3_169152_31408 | NW_004517519.1 | Scaffold2617 | 31408                   | AA                              | CC                | 1946682389               |
| SNP_P3_169153_31547 | NW_004517519.1 | Scaffold2617 | 31547                   | CC                              | TT                | 1946682391               |

| SNPs IDs             | Chromosome IDs | Chromosomes  | Physical positions (bp) | CDC Frontier (Reference genome) | (Pusa 256 & HPNB) | NCBI SNPdb Accession IDs |
|----------------------|----------------|--------------|-------------------------|---------------------------------|-------------------|--------------------------|
| SNP_P3_169154_31608  | NW_004517519.1 | Scaffold2617 | 31608                   | TT                              | CC                | 1946682392               |
| SNP_P3_169155_31610  | NW_004517519.1 | Scaffold2617 | 31610                   | TT                              | CC                | 1946682394               |
| SNP_P3_169156_31616  | NW_004517519.1 | Scaffold2617 | 31616                   | TT                              | CC                | 1946682396               |
| SNP_P3_169157_31715  | NW_004517519.1 | Scaffold2617 | 31715                   | AA                              | GG                | 1946682398               |
| SNP_P3_169158_31726  | NW_004517519.1 | Scaffold2617 | 31726                   | GG                              | AA                | 1946682400               |
| SNP_P3_169159_31769  | NW_004517519.1 | Scaffold2617 | 31769                   | AA                              | GG                | 1946682402               |
| SNP_P3_169160_37380  | NW_004517519.1 | Scaffold2617 | 37380                   | GG                              | AA                | 1946682404               |
| SNP_P3_169162_83710  | NW_004517519.1 | Scaffold2617 | 83710                   | AA                              | GG                | 1946682406               |
| SNP_P3_169163_88481  | NW_004517519.1 | Scaffold2617 | 88481                   | GG                              | TT                | 1946682408               |
| SNP_P3_169164_88488  | NW_004517519.1 | Scaffold2617 | 88488                   | GG                              | TT                | 1946682410               |
| SNP_P3_169165_88493  | NW_004517519.1 | Scaffold2617 | 88493                   | AA                              | CC                | 1946682412               |
| SNP_P3_169166_110076 | NW_004517519.1 | Scaffold2617 | 110076                  | GG                              | TT                | 1946682414               |
| SNP_P3_169167_110173 | NW_004517519.1 | Scaffold2617 | 110173                  | AA                              | CC                | 1946682416               |
| SNP_P3_169168_110443 | NW_004517519.1 | Scaffold2617 | 110443                  | TT                              | GG                | 1946682418               |
| SNP_P3_169169_110489 | NW_004517519.1 | Scaffold2617 | 110489                  | AA                              | GG                | 1946682420               |
| SNP_P3_169170_110513 | NW_004517519.1 | Scaffold2617 | 110513                  | TT                              | CC                | 1946682422               |
| SNP_P3_169171_110527 | NW_004517519.1 | Scaffold2617 | 110527                  | AA                              | TT                | 1946682424               |
| SNP_P3_169172_110560 | NW_004517519.1 | Scaffold2617 | 110560                  | AA                              | GG                | 1946682426               |
| SNP_P3_169173_110579 | NW_004517519.1 | Scaffold2617 | 110579                  | TT                              | CC                | 1946682428               |
| SNP_P3_169174_111540 | NW_004517519.1 | Scaffold2617 | 111540                  | AA                              | GG                | 1946682430               |
| SNP_P3_169175_111665 | NW_004517519.1 | Scaffold2617 | 111665                  | AA                              | GG                | 1946682432               |
| SNP_P3_169176_111704 | NW_004517519.1 | Scaffold2617 | 111704                  | AA                              | GG                | 1946682434               |
| SNP_P3_169177_111767 | NW_004517519.1 | Scaffold2617 | 111767                  | GG                              | AA                | 1946682435               |
| SNP_P3_169178_111878 | NW_004517519.1 | Scaffold2617 | 111878                  | TT                              | CC                | 1946682437               |
| SNP_P3_169179_111940 | NW_004517519.1 | Scaffold2617 | 111940                  | TT                              | CC                | 1946682439               |
| SNP_P3_169180_112006 | NW_004517519.1 | Scaffold2617 | 112006                  | TT                              | CC                | 1946682441               |
| SNP_P3_169181_112050 | NW_004517519.1 | Scaffold2617 | 112050                  | AA                              | GG                | 1946682444               |
| SNP_P3_169182_112057 | NW_004517519.1 | Scaffold2617 | 112057                  | CC                              | TT                | 1946682446               |
| SNP_P3_169183_112123 | NW_004517519.1 | Scaffold2617 | 112123                  | GG                              | AA                | 1946682448               |
| SNP_P3_169184_112221 | NW_004517519.1 | Scaffold2617 | 112221                  | GG                              | AA                | 1946682450               |
| SNP_P3_169185_112268 | NW_004517519.1 | Scaffold2617 | 112268                  | CC                              | AA                | 1946682452               |
| SNP_P3_169186_112284 | NW_004517519.1 | Scaffold2617 | 112284                  | GG                              | AA                | 1946682454               |
| SNP_P3_169187_112285 | NW_004517519.1 | Scaffold2617 | 112285                  | TT                              | CC                | 1946682456               |
| SNP_P3_169188_112338 | NW_004517519.1 | Scaffold2617 | 112338                  | TT                              | CC                | 1946682458               |
| SNP_P3_169189_112383 | NW_004517519.1 | Scaffold2617 | 112383                  | GG                              | AA                | 1946682460               |
| SNP_P3_169190_126076 | NW_004517519.1 | Scaffold2617 | 126076                  | TT                              | GG                | 1946682462               |
| SNP_P3_169192_138803 | NW_004517519.1 | Scaffold2617 | 138803                  | CC                              | AA                | 1946682464               |
| SNP_P3_169193_138980 | NW_004517519.1 | Scaffold2617 | 138980                  | CC                              | GG                | 1946682466               |
| SNP_P3_169194_139043 | NW_004517519.1 | Scaffold2617 | 139043                  | GG                              | AA                | 1946682468               |
| SNP_P3_169195_195184 | NW_004517519.1 | Scaffold2617 | 195184                  | AA                              | GG                | 1946682470               |
| SNP_P3_169196_195187 | NW_004517519.1 | Scaffold2617 | 195187                  | GG                              | AA                | 1946682472               |
| SNP_P3_169197_195189 | NW_004517519.1 | Scaffold2617 | 195189                  | TT                              | CC                | 1946682474               |

| SNPs IDs             | Chromosome IDs | Chromosomes  | Physical positions (bp) | CDC Frontier (Reference genome) | (Pusa 256 & HPNB) | NCBI SNPdb Accession IDs |
|----------------------|----------------|--------------|-------------------------|---------------------------------|-------------------|--------------------------|
| SNP_P3_169198_195282 | NW_004517519.1 | Scaffold2617 | 195282                  | CC                              | TT                | 1946682476               |
| SNP_P3_169200_231599 | NW_004517519.1 | Scaffold2617 | 231599                  | AA                              | TT                | 1946682479               |
| SNP_P3_169202_248938 | NW_004517519.1 | Scaffold2617 | 248938                  | GG                              | AA                | 1946682481               |
| SNP_P3_169203_248966 | NW_004517519.1 | Scaffold2617 | 248966                  | TT                              | AA                | 1946682483               |
| SNP_P3_169204_249153 | NW_004517519.1 | Scaffold2617 | 249153                  | AA                              | TT                | 1946682485               |
| SNP_P3_169205_261237 | NW_004517519.1 | Scaffold2617 | 261237                  | AA                              | CC                | 1946682487               |
| SNP_P3_169207_277543 | NW_004517519.1 | Scaffold2617 | 277543                  | AA                              | TT                | 1946682489               |
| SNP_P3_169209_320743 | NW_004517519.1 | Scaffold2617 | 320743                  | GG                              | AA                | 1946682491               |
| SNP_P3_169210_320833 | NW_004517519.1 | Scaffold2617 | 320833                  | GG                              | TT                | 1946682493               |
| SNP_P3_169212_321057 | NW_004517519.1 | Scaffold2617 | 321057                  | GG                              | CC                | 1946682495               |
| SNP_P3_169213_321162 | NW_004517519.1 | Scaffold2617 | 321162                  | GG                              | TT                | 1946682497               |
| SNP_P3_169214_321247 | NW_004517519.1 | Scaffold2617 | 321247                  | CC                              | AA                | 1946682499               |
| SNP_P3_169215_321424 | NW_004517519.1 | Scaffold2617 | 321424                  | TT                              | GG                | 1946682501               |
| SNP_P3_169217_321495 | NW_004517519.1 | Scaffold2617 | 321495                  | CC                              | AA                | 1946682503               |
| SNP_P3_169218_321773 | NW_004517519.1 | Scaffold2617 | 321773                  | TT                              | CC                | 1946682505               |
| SNP_P3_169220_321846 | NW_004517519.1 | Scaffold2617 | 321846                  | AA                              | TT                | 1946682507               |
| SNP_P3_169221_321848 | NW_004517519.1 | Scaffold2617 | 321848                  | TT                              | AA                | 1946682509               |
| SNP_P3_169223_322065 | NW_004517519.1 | Scaffold2617 | 322065                  | GG                              | TT                | 1946682511               |
| SNP_P3_169224_322080 | NW_004517519.1 | Scaffold2617 | 322080                  | TT                              | AA                | 1946682513               |
| SNP_P3_169225_322085 | NW_004517519.1 | Scaffold2617 | 322085                  | GG                              | AA                | 1946682516               |
| SNP_P3_169226_322219 | NW_004517519.1 | Scaffold2617 | 322219                  | TT                              | CC                | 1946682518               |
| SNP_P3_169227_322284 | NW_004517519.1 | Scaffold2617 | 322284                  | CC                              | TT                | 1946682520               |
| SNP_P3_169228_322349 | NW_004517519.1 | Scaffold2617 | 322349                  | TT                              | CC                | 1946682522               |
| SNP_P3_169229_322358 | NW_004517519.1 | Scaffold2617 | 322358                  | GG                              | AA                | 1946682524               |
| SNP_P3_169230_322392 | NW_004517519.1 | Scaffold2617 | 322392                  | GG                              | AA                | 1946682526               |
| SNP_P3_169231_322401 | NW_004517519.1 | Scaffold2617 | 322401                  | GG                              | TT                | 1946682528               |
| SNP_P3_169232_322430 | NW_004517519.1 | Scaffold2617 | 322430                  | GG                              | AA                | 1946682530               |
| SNP_P3_169233_322540 | NW_004517519.1 | Scaffold2617 | 322540                  | CC                              | TT                | 1946682532               |
| SNP_P3_169234_322643 | NW_004517519.1 | Scaffold2617 | 322643                  | GG                              | AA                | 1946682534               |
| SNP_P3_169235_322858 | NW_004517519.1 | Scaffold2617 | 322858                  | AA                              | GG                | 1946682536               |
| SNP_P3_169236_322894 | NW_004517519.1 | Scaffold2617 | 322894                  | TT                              | CC                | 1946682538               |
| SNP_P3_169237_322934 | NW_004517519.1 | Scaffold2617 | 322934                  | CC                              | GG                | 1946682540               |
| SNP_P3_169238_322937 | NW_004517519.1 | Scaffold2617 | 322937                  | AA                              | TT                | 1946682542               |
| SNP_P3_169239_322943 | NW_004517519.1 | Scaffold2617 | 322943                  | CC                              | TT                | 1946682545               |
| SNP_P3_169240_322970 | NW_004517519.1 | Scaffold2617 | 322970                  | TT                              | CC                | 1946682547               |
| SNP_P3_169241_323015 | NW_004517519.1 | Scaffold2617 | 323015                  | TT                              | AA                | 1946682549               |
| SNP_P3_169242_323030 | NW_004517519.1 | Scaffold2617 | 323030                  | AA                              | GG                | 1946682551               |
| SNP_P3_169243_323067 | NW_004517519.1 | Scaffold2617 | 323067                  | GG                              | TT                | 1946682553               |
| SNP_P3_169244_323077 | NW_004517519.1 | Scaffold2617 | 323077                  | AA                              | GG                | 1946682556               |
| SNP_P3_169245_323247 | NW_004517519.1 | Scaffold2617 | 323247                  | GG                              | TT                | 1946682558               |
| SNP_P3_169246_323416 | NW_004517519.1 | Scaffold2617 | 323416                  | CC                              | AA                | 1946682560               |
| SNP_P3_169247_323920 | NW_004517519.1 | Scaffold2617 | 323920                  | AA                              | GG                | 1946682562               |

| SNPs IDs             | Chromosome IDs | Chromosomes  | Physical positions (bp) | CDC Frontier (Reference genome) | (Pusa 256 & HPNB) | NCBI SNPdb Accession IDs |
|----------------------|----------------|--------------|-------------------------|---------------------------------|-------------------|--------------------------|
| SNP_P3_169249_324639 | NW_004517519.1 | Scaffold2617 | 324639                  | GG                              | AA                | 1946682564               |
| SNP_P3_169250_324652 | NW_004517519.1 | Scaffold2617 | 324652                  | CC                              | AA                | 1946682566               |
| SNP_P3_169251_324835 | NW_004517519.1 | Scaffold2617 | 324835                  | CC                              | TT                | 1946682568               |
| SNP_P3_169252_324860 | NW_004517519.1 | Scaffold2617 | 324860                  | AA                              | CC                | 1946682570               |
| SNP_P3_169253_339751 | NW_004517519.1 | Scaffold2617 | 339751                  | AA                              | GG                | 1946682572               |
| SNP_P3_169254_339753 | NW_004517519.1 | Scaffold2617 | 339753                  | GG                              | TT                | 1946682574               |
| SNP_P3_169255_340006 | NW_004517519.1 | Scaffold2617 | 340006                  | TT                              | CC                | 1946682576               |
| SNP_P3_169256_341579 | NW_004517519.1 | Scaffold2617 | 341579                  | TT                              | GG                | 1946682578               |
| SNP_P3_169257_341580 | NW_004517519.1 | Scaffold2617 | 341580                  | GG                              | TT                | 1946682580               |
| SNP_P3_169258_341581 | NW_004517519.1 | Scaffold2617 | 341581                  | TT                              | AA                | 1946682582               |
| SNP_P3_169259_367601 | NW_004517519.1 | Scaffold2617 | 367601                  | GG                              | AA                | 1946682584               |
| SNP_P3_169261_371449 | NW_004517519.1 | Scaffold2617 | 371449                  | AA                              | GG                | 1946682586               |
| SNP_P3_169262_371466 | NW_004517519.1 | Scaffold2617 | 371466                  | TT                              | GG                | 1946682588               |
| SNP_P3_169263_371480 | NW_004517519.1 | Scaffold2617 | 371480                  | TT                              | CC                | 1946682590               |
| SNP_P3_169264_386620 | NW_004517519.1 | Scaffold2617 | 386620                  | CC                              | AA                | 1946682592               |
| SNP_P3_169265_390345 | NW_004517519.1 | Scaffold2617 | 390345                  | AA                              | CC                | 1946682594               |
| SNP_P3_169266_402141 | NW_004517519.1 | Scaffold2617 | 402141                  | CC                              | TT                | 1946682596               |
| SNP_P3_169267_402214 | NW_004517519.1 | Scaffold2617 | 402214                  | AA                              | GG                | 1946682598               |
| SNP_P3_169268_402425 | NW_004517519.1 | Scaffold2617 | 402425                  | AA                              | TT                | 1946682600               |
| SNP_P3_169271_402545 | NW_004517519.1 | Scaffold2617 | 402545                  | AA                              | TT                | 1946682602               |
| SNP_P3_169272_402577 | NW_004517519.1 | Scaffold2617 | 402577                  | GG                              | AA                | 1946682619               |
| SNP_P3_169274_402702 | NW_004517519.1 | Scaffold2617 | 402702                  | TT                              | CC                | 1946682621               |
| SNP_P3_169275_402712 | NW_004517519.1 | Scaffold2617 | 402712                  | GG                              | AA                | 1946682623               |
| SNP_P3_169277_402796 | NW_004517519.1 | Scaffold2617 | 402796                  | CC                              | TT                | 1946682625               |
| SNP_P3_169278_402803 | NW_004517519.1 | Scaffold2617 | 402803                  | AA                              | GG                | 1946682627               |
| SNP_P3_169279_402886 | NW_004517519.1 | Scaffold2617 | 402886                  | GG                              | AA                | 1946682629               |
| SNP_P3_169280_402910 | NW_004517519.1 | Scaffold2617 | 402910                  | AA                              | GG                | 1946682631               |
| SNP_P3_169281_413730 | NW_004517519.1 | Scaffold2617 | 413730                  | CC                              | AA                | 1946682633               |
| SNP_P3_169282_418036 | NW_004517519.1 | Scaffold2617 | 418036                  | AA                              | GG                | 1946682635               |
| SNP_P3_169283_418050 | NW_004517519.1 | Scaffold2617 | 418050                  | TT                              | CC                | 1946682637               |
| SNP_P3_169284_418433 | NW_004517519.1 | Scaffold2617 | 418433                  | GG                              | AA                | 1946682639               |
| SNP_P3_169285_418810 | NW_004517519.1 | Scaffold2617 | 418810                  | CC                              | TT                | 1946682641               |
| SNP_P3_169286_418824 | NW_004517519.1 | Scaffold2617 | 418824                  | AA                              | GG                | 1946682643               |
| SNP_P3_169287_418868 | NW_004517519.1 | Scaffold2617 | 418868                  | TT                              | AA                | 1946682645               |
| SNP_P3_169288_433709 | NW_004517519.1 | Scaffold2617 | 433709                  | AA                              | GG                | 1946682647               |
| SNP_P3_169289_433767 | NW_004517519.1 | Scaffold2617 | 433767                  | AA                              | GG                | 1946682649               |
| SNP_P3_169290_444225 | NW_004517519.1 | Scaffold2617 | 444225                  | AA                              | CC                | 1946682651               |
| SNP_P3_169291_444399 | NW_004517519.1 | Scaffold2617 | 444399                  | AA                              | GG                | 1946682653               |
| SNP_P3_169292_444449 | NW_004517519.1 | Scaffold2617 | 444449                  | AA                              | GG                | 1946682655               |
| SNP_P3_169293_444458 | NW_004517519.1 | Scaffold2617 | 444458                  | GG                              | AA                | 1946682657               |
| SNP_P3_169294_444472 | NW_004517519.1 | Scaffold2617 | 444472                  | TT                              | CC                | 1946682659               |
| SNP_P3_169295_444491 | NW_004517519.1 | Scaffold2617 | 444491                  | AA                              | GG                | 1946682661               |



| SNPs IDs             | Chromosome IDs | Chromosomes  | Physical positions (bp) | CDC Frontier (Reference genome) | (Pusa 256 & HPNB) | NCBI SNPdb Accession IDs |
|----------------------|----------------|--------------|-------------------------|---------------------------------|-------------------|--------------------------|
| SNP_P3_169296_474621 | NW_004517519.1 | Scaffold2617 | 474621                  | GG                              | AA                | 1946682663               |
| SNP_P3_169297_474624 | NW_004517519.1 | Scaffold2617 | 474624                  | CC                              | TT                | 1946682665               |
| SNP_P3_169298_474648 | NW_004517519.1 | Scaffold2617 | 474648                  | AA                              | TT                | 1946682667               |
| SNP_P3_169299_474727 | NW_004517519.1 | Scaffold2617 | 474727                  | CC                              | TT                | 1946682669               |
| SNP_P3_169300_476321 | NW_004517519.1 | Scaffold2617 | 476321                  | TT                              | GG                | 1946682671               |
| SNP_P3_169301_506635 | NW_004517519.1 | Scaffold2617 | 506635                  | CC                              | TT                | 1946682672               |
| SNP_P3_169302_513562 | NW_004517519.1 | Scaffold2617 | 513562                  | CC                              | AA                | 1946682674               |
| SNP_P3_169303_513724 | NW_004517519.1 | Scaffold2617 | 513724                  | CC                              | TT                | 1946682676               |
| SNP_P3_169304_513744 | NW_004517519.1 | Scaffold2617 | 513744                  | GG                              | CC                | 1946682678               |
| SNP_P3_169305_513931 | NW_004517519.1 | Scaffold2617 | 513931                  | AA                              | GG                | 1946682680               |
| SNP_P3_169306_513970 | NW_004517519.1 | Scaffold2617 | 513970                  | AA                              | GG                | 1946682683               |
| SNP_P3_169307_514032 | NW_004517519.1 | Scaffold2617 | 514032                  | GG                              | AA                | 1946682686               |
| SNP_P3_169308_514123 | NW_004517519.1 | Scaffold2617 | 514123                  | AA                              | CC                | 1946682688               |
| SNP_P3_169309_514151 | NW_004517519.1 | Scaffold2617 | 514151                  | TT                              | GG                | 1946682690               |
| SNP_P3_169310_514197 | NW_004517519.1 | Scaffold2617 | 514197                  | TT                              | GG                | 1946682692               |
| SNP_P3_169311_514273 | NW_004517519.1 | Scaffold2617 | 514273                  | AA                              | TT                | 1946682694               |
| SNP_P3_169312_992    | NW_004517520.1 | Scaffold2618 | 992                     | AA                              | TT                | 1946682696               |
| SNP_P3_169313_4268   | NW_004517520.1 | Scaffold2618 | 4268                    | GG                              | TT                | 1946682698               |
| SNP_P3_169315_4837   | NW_004517520.1 | Scaffold2618 | 4837                    | TT                              | CC                | 1946682700               |
| SNP_P3_169316_4865   | NW_004517520.1 | Scaffold2618 | 4865                    | TT                              | AA                | 1946682702               |
| SNP_P3_169317_19751  | NW_004517521.1 | Scaffold2620 | 19751                   | TT                              | AA                | 1946682704               |
| SNP_P3_169318_21872  | NW_004517521.1 | Scaffold2620 | 21872                   | CC                              | AA                | 1946682706               |
| SNP_P3_169319_26666  | NW_004517521.1 | Scaffold2620 | 26666                   | AA                              | CC                | 1946682708               |
| SNP_P3_169320_27923  | NW_004517521.1 | Scaffold2620 | 27923                   | AA                              | GG                | 1946682710               |
| SNP_P3_169321_27939  | NW_004517521.1 | Scaffold2620 | 27939                   | AA                              | GG                | 1946682712               |
| SNP_P3_169322_27978  | NW_004517521.1 | Scaffold2620 | 27978                   | AA                              | GG                | 1946682714               |
| SNP_P3_169323_28015  | NW_004517521.1 | Scaffold2620 | 28015                   | TT                              | CC                | 1946682716               |
| SNP_P3_169324_28041  | NW_004517521.1 | Scaffold2620 | 28041                   | AA                              | TT                | 1946682718               |
| SNP_P3_169325_28166  | NW_004517521.1 | Scaffold2620 | 28166                   | CC                              | TT                | 1946682720               |
| SNP_P3_169326_28231  | NW_004517521.1 | Scaffold2620 | 28231                   | CC                              | TT                | 1946682722               |
| SNP_P3_169327_28344  | NW_004517521.1 | Scaffold2620 | 28344                   | CC                              | TT                | 1946682725               |
| SNP_P3_169328_28379  | NW_004517521.1 | Scaffold2620 | 28379                   | CC                              | TT                | 1946682727               |
| SNP_P3_169329_28387  | NW_004517521.1 | Scaffold2620 | 28387                   | TT                              | CC                | 1946682729               |
| SNP_P3_169330_28388  | NW_004517521.1 | Scaffold2620 | 28388                   | AA                              | CC                | 1946682731               |
| SNP_P3_169331_28390  | NW_004517521.1 | Scaffold2620 | 28390                   | AA                              | GG                | 1946682733               |
| SNP_P3_169332_28401  | NW_004517521.1 | Scaffold2620 | 28401                   | CC                              | GG                | 1946682735               |
| SNP_P3_169333_28412  | NW_004517521.1 | Scaffold2620 | 28412                   | GG                              | TT                | 1946682737               |
| SNP_P3_169334_28668  | NW_004517521.1 | Scaffold2620 | 28668                   | CC                              | TT                | 1946682739               |
| SNP_P3_169335_29632  | NW_004517521.1 | Scaffold2620 | 29632                   | AA                              | TT                | 1946682741               |
| SNP_P3_169337_34031  | NW_004517521.1 | Scaffold2620 | 34031                   | GG                              | TT                | 1946682743               |
| SNP_P3_169339_5619   | NW_004517522.1 | Scaffold2621 | 5619                    | TT                              | CC                | 1946682745               |
| SNP_P3_169340_5630   | NW_004517522.1 | Scaffold2621 | 5630                    | AA                              | GG                | 1946682747               |

| SNPs IDs            | Chromosome IDs | Chromosomes  | Physical positions (bp) | CDC Frontier (Reference genome) | (Pusa 256 & HPNB) | NCBI SNPdb Accession IDs |
|---------------------|----------------|--------------|-------------------------|---------------------------------|-------------------|--------------------------|
| SNP_P3_169341_5653  | NW_004517522.1 | Scaffold2621 | 5653                    | GG                              | AA                | 1946682749               |
| SNP_P3_169342_5677  | NW_004517522.1 | Scaffold2621 | 5677                    | AA                              | TT                | 1946682751               |
| SNP_P3_169343_5699  | NW_004517522.1 | Scaffold2621 | 5699                    | TT                              | CC                | 1946682753               |
| SNP_P3_169344_6178  | NW_004517522.1 | Scaffold2621 | 6178                    | CC                              | AA                | 1946682755               |
| SNP_P3_169345_6469  | NW_004517522.1 | Scaffold2621 | 6469                    | TT                              | CC                | 1946682757               |
| SNP_P3_169346_6520  | NW_004517522.1 | Scaffold2621 | 6520                    | GG                              | TT                | 1946682759               |
| SNP_P3_169347_6917  | NW_004517522.1 | Scaffold2621 | 6917                    | GG                              | CC                | 1946682761               |
| SNP_P3_169348_6928  | NW_004517522.1 | Scaffold2621 | 6928                    | TT                              | CC                | 1946682764               |
| SNP_P3_169349_521   | NW_004517523.1 | Scaffold2623 | 521                     | TT                              | CC                | 1946682766               |
| SNP_P3_169350_723   | NW_004517523.1 | Scaffold2623 | 723                     | AA                              | TT                | 1946682768               |
| SNP_P3_169351_369   | NW_004517524.1 | Scaffold2624 | 369                     | CC                              | TT                | 1946682770               |
| SNP_P3_169352_770   | NW_004517524.1 | Scaffold2624 | 770                     | GG                              | TT                | 1946682772               |
| SNP_P3_169353_9932  | NW_004517524.1 | Scaffold2624 | 9932                    | TT                              | CC                | 1946682774               |
| SNP_P3_169354_14536 | NW_004517524.1 | Scaffold2624 | 14536                   | TT                              | CC                | 1946682776               |
| SNP_P3_169355_16274 | NW_004517524.1 | Scaffold2624 | 16274                   | TT                              | CC                | 1946682778               |
| SNP_P3_169356_17982 | NW_004517524.1 | Scaffold2624 | 17982                   | AA                              | TT                | 1946682780               |
| SNP_P3_169357_17983 | NW_004517524.1 | Scaffold2624 | 17983                   | AA                              | GG                | 1946682782               |
| SNP_P3_169358_18008 | NW_004517524.1 | Scaffold2624 | 18008                   | AA                              | TT                | 1946682784               |
| SNP_P3_169359_18214 | NW_004517524.1 | Scaffold2624 | 18214                   | CC                              | TT                | 1946682786               |
| SNP_P3_169361_18385 | NW_004517524.1 | Scaffold2624 | 18385                   | CC                              | TT                | 1946682788               |
| SNP_P3_169362_18399 | NW_004517524.1 | Scaffold2624 | 18399                   | AA                              | TT                | 1946682790               |
| SNP_P3_169363_21759 | NW_004517524.1 | Scaffold2624 | 21759                   | TT                              | AA                | 1946682792               |
| SNP_P3_169364_21768 | NW_004517524.1 | Scaffold2624 | 21768                   | TT                              | AA                | 1946682794               |
| SNP_P3_169365_8592  | NW_004517525.1 | Scaffold2625 | 8592                    | CC                              | GG                | 1946682796               |
| SNP_P3_169367_9846  | NW_004517525.1 | Scaffold2625 | 9846                    | TT                              | AA                | 1946682798               |
| SNP_P3_169368_671   | NW_004517526.1 | Scaffold2626 | 671                     | TT                              | GG                | 1946682800               |
| SNP_P3_169369_984   | NW_004517526.1 | Scaffold2626 | 984                     | AA                              | GG                | 1946682803               |
| SNP_P3_169370_990   | NW_004517526.1 | Scaffold2626 | 990                     | AA                              | GG                | 1946682805               |
| SNP_P3_169371_1074  | NW_004517526.1 | Scaffold2626 | 1074                    | TT                              | CC                | 1946682807               |
| SNP_P3_169372_1104  | NW_004517526.1 | Scaffold2626 | 1104                    | CC                              | AA                | 1946682809               |
| SNP_P3_169373_1188  | NW_004517526.1 | Scaffold2626 | 1188                    | TT                              | GG                | 1946682811               |
| SNP_P3_169374_264   | NW_004517527.1 | Scaffold2627 | 264                     | AA                              | GG                | 1946682813               |
| SNP_P3_169375_342   | NW_004517527.1 | Scaffold2627 | 342                     | CC                              | GG                | 1946682815               |
| SNP_P3_169376_685   | NW_004517527.1 | Scaffold2627 | 685                     | GG                              | AA                | 1946682817               |
| SNP_P3_169377_624   | NW_004517529.1 | Scaffold2632 | 624                     | TT                              | GG                | 1946682819               |
| SNP_P3_169379_710   | NW_004517530.1 | Scaffold2633 | 710                     | TT                              | AA                | 1946682821               |
| SNP_P3_169380_17534 | NW_004517530.1 | Scaffold2633 | 17534                   | AA                              | GG                | 1946682823               |
| SNP_P3_169381_17549 | NW_004517530.1 | Scaffold2633 | 17549                   | TT                              | CC                | 1946682825               |
| SNP_P3_169382_21603 | NW_004517530.1 | Scaffold2633 | 21603                   | TT                              | CC                | 1946682827               |
| SNP_P3_169383_21622 | NW_004517530.1 | Scaffold2633 | 21622                   | GG                              | AA                | 1946682829               |
| SNP_P3_169384_21737 | NW_004517530.1 | Scaffold2633 | 21737                   | GG                              | AA                | 1946682831               |
| SNP_P3_169385_26011 | NW_004517530.1 | Scaffold2633 | 26011                   | GG                              | TT                | 1946682833               |

| SNPs IDs            | Chromosome IDs | Chromosomes  | Physical positions (bp) | CDC Frontier (Reference genome) | (Pusa 256 & HPNB) | NCBI SNPdb Accession IDs |
|---------------------|----------------|--------------|-------------------------|---------------------------------|-------------------|--------------------------|
| SNP_P3_169386_1013  | NW_004517532.1 | Scaffold2636 | 1013                    | TT                              | GG                | 1946682835               |
| SNP_P3_169387_1036  | NW_004517532.1 | Scaffold2636 | 1036                    | TT                              | CC                | 1946682837               |
| SNP_P3_169388_2554  | NW_004517533.1 | Scaffold2637 | 2554                    | AA                              | TT                | 1946682839               |
| SNP_P3_169389_2566  | NW_004517533.1 | Scaffold2637 | 2566                    | AA                              | CC                | 1946682841               |
| SNP_P3_169390_2601  | NW_004517533.1 | Scaffold2637 | 2601                    | TT                              | AA                | 1946682843               |
| SNP_P3_169391_3030  | NW_004517533.1 | Scaffold2637 | 3030                    | TT                              | GG                | 1946682845               |
| SNP_P3_169392_3937  | NW_004517533.1 | Scaffold2637 | 3937                    | GG                              | TT                | 1946682847               |
| SNP_P3_169393_3967  | NW_004517533.1 | Scaffold2637 | 3967                    | GG                              | AA                | 1946682849               |
| SNP_P3_169394_4017  | NW_004517533.1 | Scaffold2637 | 4017                    | CC                              | AA                | 1946682851               |
| SNP_P3_169395_1430  | NW_004517536.1 | Scaffold2642 | 1430                    | TT                              | CC                | 1946682854               |
| SNP_P3_169396_1450  | NW_004517536.1 | Scaffold2642 | 1450                    | GG                              | AA                | 1946682856               |
| SNP_P3_169397_1480  | NW_004517536.1 | Scaffold2642 | 1480                    | GG                              | TT                | 1946682858               |
| SNP_P3_169398_753   | NW_004517537.1 | Scaffold2644 | 753                     | CC                              | TT                | 1946682860               |
| SNP_P3_169399_4804  | NW_004517537.1 | Scaffold2644 | 4804                    | GG                              | AA                | 1946682862               |
| SNP_P3_169400_4814  | NW_004517537.1 | Scaffold2644 | 4814                    | TT                              | CC                | 1946682864               |
| SNP_P3_169401_4820  | NW_004517537.1 | Scaffold2644 | 4820                    | CC                              | AA                | 1946682866               |
| SNP_P3_169402_4861  | NW_004517537.1 | Scaffold2644 | 4861                    | AA                              | GG                | 1946682869               |
| SNP_P3_169403_6946  | NW_004517537.1 | Scaffold2644 | 6946                    | GG                              | TT                | 1946682871               |
| SNP_P3_169404_10679 | NW_004517537.1 | Scaffold2644 | 10679                   | AA                              | CC                | 1946682873               |
| SNP_P3_169405_11882 | NW_004517537.1 | Scaffold2644 | 11882                   | AA                              | TT                | 1946682875               |
| SNP_P3_169406_11984 | NW_004517537.1 | Scaffold2644 | 11984                   | CC                              | TT                | 1946682877               |
| SNP_P3_169407_12112 | NW_004517537.1 | Scaffold2644 | 12112                   | AA                              | GG                | 1946682879               |
| SNP_P3_169408_12136 | NW_004517537.1 | Scaffold2644 | 12136                   | TT                              | AA                | 1946682880               |
| SNP_P3_169409_12281 | NW_004517537.1 | Scaffold2644 | 12281                   | TT                              | AA                | 1946682882               |
| SNP_P3_169410_14672 | NW_004517537.1 | Scaffold2644 | 14672                   | AA                              | TT                | 1946682884               |
| SNP_P3_169411_19919 | NW_004517537.1 | Scaffold2644 | 19919                   | AA                              | GG                | 1946682886               |
| SNP_P3_169412_20131 | NW_004517537.1 | Scaffold2644 | 20131                   | CC                              | TT                | 1946682888               |
| SNP_P3_169413_20203 | NW_004517537.1 | Scaffold2644 | 20203                   | TT                              | AA                | 1946682890               |
| SNP_P3_169414_20250 | NW_004517537.1 | Scaffold2644 | 20250                   | GG                              | TT                | 1946682892               |
| SNP_P3_169415_20296 | NW_004517537.1 | Scaffold2644 | 20296                   | TT                              | GG                | 1946682894               |
| SNP_P3_169416_20455 | NW_004517537.1 | Scaffold2644 | 20455                   | TT                              | CC                | 1946682896               |
| SNP_P3_169417_20503 | NW_004517537.1 | Scaffold2644 | 20503                   | AA                              | CC                | 1946682898               |
| SNP_P3_169418_21441 | NW_004517537.1 | Scaffold2644 | 21441                   | TT                              | AA                | 1946682900               |
| SNP_P3_169419_21573 | NW_004517537.1 | Scaffold2644 | 21573                   | AA                              | GG                | 1946682902               |
| SNP_P3_169420_21621 | NW_004517537.1 | Scaffold2644 | 21621                   | AA                              | GG                | 1946682904               |
| SNP_P3_169421_21662 | NW_004517537.1 | Scaffold2644 | 21662                   | AA                              | GG                | 1946682906               |
| SNP_P3_169422_22425 | NW_004517537.1 | Scaffold2644 | 22425                   | GG                              | AA                | 1946682908               |
| SNP_P3_169423_23056 | NW_004517537.1 | Scaffold2644 | 23056                   | TT                              | AA                | 1946682910               |
| SNP_P3_169424_23115 | NW_004517537.1 | Scaffold2644 | 23115                   | AA                              | GG                | 1946682912               |
| SNP_P3_169425_23616 | NW_004517537.1 | Scaffold2644 | 23616                   | CC                              | AA                | 1946682914               |
| SNP_P3_169426_24826 | NW_004517537.1 | Scaffold2644 | 24826                   | TT                              | CC                | 1946682916               |
| SNP_P3_169427_25218 | NW_004517537.1 | Scaffold2644 | 25218                   | AA                              | GG                | 1946682918               |

| SNPs IDs            | Chromosome IDs | Chromosomes  | Physical positions (bp) | CDC Frontier (Reference genome) | (Pusa 256 & HPNB) | NCBI SNPdb Accession IDs |
|---------------------|----------------|--------------|-------------------------|---------------------------------|-------------------|--------------------------|
| SNP_P3_169428_25221 | NW_004517537.1 | Scaffold2644 | 25221                   | CC                              | TT                | 1946682920               |
| SNP_P3_169429_762   | NW_004517539.1 | Scaffold2646 | 762                     | TT                              | CC                | 1946682922               |
| SNP_P3_169430_26901 | NW_004517541.1 | Scaffold2649 | 26901                   | TT                              | AA                | 1946682924               |
| SNP_P3_169431_27111 | NW_004517541.1 | Scaffold2649 | 27111                   | CC                              | TT                | 1946682926               |
| SNP_P3_169433_27733 | NW_004517541.1 | Scaffold2649 | 27733                   | AA                              | GG                | 1946682928               |
| SNP_P3_169434_27784 | NW_004517541.1 | Scaffold2649 | 27784                   | TT                              | CC                | 1946682930               |
| SNP_P3_169435_27814 | NW_004517541.1 | Scaffold2649 | 27814                   | GG                              | AA                | 1946682932               |
| SNP_P3_169436_64    | NW_004517542.1 | Scaffold2650 | 64                      | TT                              | CC                | 1946682934               |
| SNP_P3_169437_107   | NW_004517542.1 | Scaffold2650 | 107                     | TT                              | GG                | 1946682935               |
| SNP_P3_169438_109   | NW_004517542.1 | Scaffold2650 | 109                     | CC                              | GG                | 1946682937               |
| SNP_P3_169439_134   | NW_004517542.1 | Scaffold2650 | 134                     | GG                              | AA                | 1946682939               |
| SNP_P3_169440_176   | NW_004517542.1 | Scaffold2650 | 176                     | GG                              | TT                | 1946682941               |
| SNP_P3_169441_2046  | NW_004517542.1 | Scaffold2650 | 2046                    | TT                              | AA                | 1946682943               |
| SNP_P3_169442_2060  | NW_004517542.1 | Scaffold2650 | 2060                    | TT                              | CC                | 1946682945               |
| SNP_P3_169443_2219  | NW_004517542.1 | Scaffold2650 | 2219                    | AA                              | GG                | 1946682947               |
| SNP_P3_169444_2220  | NW_004517542.1 | Scaffold2650 | 2220                    | CC                              | AA                | 1946682950               |
| SNP_P3_169445_464   | NW_004517543.1 | Scaffold2651 | 464                     | AA                              | CC                | 1946682952               |
| SNP_P3_169446_506   | NW_004517543.1 | Scaffold2651 | 506                     | TT                              | CC                | 1946682954               |
| SNP_P3_169447_694   | NW_004517543.1 | Scaffold2651 | 694                     | AA                              | CC                | 1946682956               |
| SNP_P3_169448_962   | NW_004517543.1 | Scaffold2651 | 962                     | TT                              | CC                | 1946682958               |
| SNP_P3_169449_987   | NW_004517543.1 | Scaffold2651 | 987                     | AA                              | GG                | 1946682960               |
| SNP_P3_169450_4304  | NW_004517543.1 | Scaffold2651 | 4304                    | CC                              | GG                | 1946682962               |
| SNP_P3_169451_4329  | NW_004517543.1 | Scaffold2651 | 4329                    | AA                              | GG                | 1946682964               |
| SNP_P3_169452_4448  | NW_004517543.1 | Scaffold2651 | 4448                    | TT                              | AA                | 1946682966               |
| SNP_P3_169453_4567  | NW_004517543.1 | Scaffold2651 | 4567                    | TT                              | AA                | 1946682968               |
| SNP_P3_169454_10268 | NW_004517543.1 | Scaffold2651 | 10268                   | GG                              | AA                | 1946682970               |
| SNP_P3_169455_13550 | NW_004517543.1 | Scaffold2651 | 13550                   | GG                              | TT                | 1946682972               |
| SNP_P3_169456_25909 | NW_004517543.1 | Scaffold2651 | 25909                   | GG                              | AA                | 1946682974               |
| SNP_P3_169457_32341 | NW_004517543.1 | Scaffold2651 | 32341                   | AA                              | TT                | 1946682975               |
| SNP_P3_169458_32414 | NW_004517543.1 | Scaffold2651 | 32414                   | GG                              | TT                | 1946682977               |
| SNP_P3_169459_32457 | NW_004517543.1 | Scaffold2651 | 32457                   | AA                              | TT                | 1946682979               |
| SNP_P3_169460_32772 | NW_004517543.1 | Scaffold2651 | 32772                   | AA                              | GG                | 1946682981               |
| SNP_P3_169461_42328 | NW_004517543.1 | Scaffold2651 | 42328                   | TT                              | AA                | 1946682983               |
| SNP_P3_169462_42349 | NW_004517543.1 | Scaffold2651 | 42349                   | AA                              | GG                | 1946682985               |
| SNP_P3_169464_12930 | NW_004517544.1 | Scaffold2653 | 12930                   | TT                              | CC                | 1946682987               |
| SNP_P3_169465_13216 | NW_004517544.1 | Scaffold2653 | 13216                   | CC                              | AA                | 1946682990               |
| SNP_P3_169466_14550 | NW_004517544.1 | Scaffold2653 | 14550                   | GG                              | CC                | 1946682992               |
| SNP_P3_169467_14742 | NW_004517544.1 | Scaffold2653 | 14742                   | TT                              | CC                | 1946682994               |
| SNP_P3_169468_23873 | NW_004517544.1 | Scaffold2653 | 23873                   | CC                              | TT                | 1946682996               |
| SNP_P3_169469_25423 | NW_004517544.1 | Scaffold2653 | 25423                   | TT                              | GG                | 1946682998               |
| SNP_P3_169470_29384 | NW_004517544.1 | Scaffold2653 | 29384                   | AA                              | CC                | 1946683000               |
| SNP_P3_169471_1815  | NW_004517546.1 | Scaffold2655 | 1815                    | TT                              | GG                | 1946683002               |

| SNPs IDs            | Chromosome IDs | Chromosomes  | Physical positions (bp) | CDC Frontier (Reference genome) | (Pusa 256 & HPNB) | NCBI SNPdb Accession IDs |
|---------------------|----------------|--------------|-------------------------|---------------------------------|-------------------|--------------------------|
| SNP_P3_169472_1885  | NW_004517546.1 | Scaffold2655 | 1885                    | AA                              | TT                | 1946683004               |
| SNP_P3_169473_1922  | NW_004517546.1 | Scaffold2655 | 1922                    | TT                              | CC                | 1946683006               |
| SNP_P3_169474_2095  | NW_004517546.1 | Scaffold2655 | 2095                    | GG                              | AA                | 1946683008               |
| SNP_P3_169475_2098  | NW_004517546.1 | Scaffold2655 | 2098                    | CC                              | TT                | 1946683010               |
| SNP_P3_169476_4199  | NW_004517546.1 | Scaffold2655 | 4199                    | CC                              | TT                | 1946683012               |
| SNP_P3_169477_478   | NW_004517547.1 | Scaffold2660 | 478                     | AA                              | GG                | 1946683014               |
| SNP_P3_169478_1674  | NW_004517547.1 | Scaffold2660 | 1674                    | CC                              | AA                | 1946683016               |
| SNP_P3_169479_3820  | NW_004517547.1 | Scaffold2660 | 3820                    | AA                              | TT                | 1946683018               |
| SNP_P3_169480_5103  | NW_004517547.1 | Scaffold2660 | 5103                    | CC                              | GG                | 1946683020               |
| SNP_P3_169481_6273  | NW_004517547.1 | Scaffold2660 | 6273                    | GG                              | AA                | 1946683022               |
| SNP_P3_169482_6274  | NW_004517547.1 | Scaffold2660 | 6274                    | GG                              | AA                | 1946683024               |
| SNP_P3_169483_8345  | NW_004517547.1 | Scaffold2660 | 8345                    | TT                              | GG                | 1946683026               |
| SNP_P3_169484_12300 | NW_004517547.1 | Scaffold2660 | 12300                   | TT                              | AA                | 1946683028               |
| SNP_P3_169486_425   | NW_004517548.1 | Scaffold2662 | 425                     | GG                              | AA                | 1946683030               |
| SNP_P3_169487_690   | NW_004517548.1 | Scaffold2662 | 690                     | AA                              | GG                | 1946683032               |
| SNP_P3_169488_825   | NW_004517548.1 | Scaffold2662 | 825                     | CC                              | AA                | 1946683034               |
| SNP_P3_169489_1284  | NW_004517548.1 | Scaffold2662 | 1284                    | TT                              | GG                | 1946683036               |
| SNP_P3_169491_1557  | NW_004517548.1 | Scaffold2662 | 1557                    | TT                              | CC                | 1946683038               |
| SNP_P3_169492_5804  | NW_004517548.1 | Scaffold2662 | 5804                    | TT                              | CC                | 1946683039               |
| SNP_P3_169494_19349 | NW_004517548.1 | Scaffold2662 | 19349                   | GG                              | AA                | 1946683041               |
| SNP_P3_169495_21972 | NW_004517548.1 | Scaffold2662 | 21972                   | GG                              | AA                | 1946683043               |
| SNP_P3_169496_25841 | NW_004517548.1 | Scaffold2662 | 25841                   | GG                              | TT                | 1946683045               |
| SNP_P3_169498_26414 | NW_004517548.1 | Scaffold2662 | 26414                   | TT                              | GG                | 1946683047               |
| SNP_P3_169499_28088 | NW_004517548.1 | Scaffold2662 | 28088                   | CC                              | TT                | 1946683049               |
| SNP_P3_169500_28260 | NW_004517548.1 | Scaffold2662 | 28260                   | TT                              | CC                | 1946683051               |
| SNP_P3_169501_28270 | NW_004517548.1 | Scaffold2662 | 28270                   | TT                              | CC                | 1946683053               |
| SNP_P3_169503_31436 | NW_004517548.1 | Scaffold2662 | 31436                   | CC                              | TT                | 1946683055               |
| SNP_P3_169504_31862 | NW_004517548.1 | Scaffold2662 | 31862                   | GG                              | TT                | 1946683057               |
| SNP_P3_169506_34084 | NW_004517548.1 | Scaffold2662 | 34084                   | CC                              | TT                | 1946683059               |
| SNP_P3_169507_34098 | NW_004517548.1 | Scaffold2662 | 34098                   | GG                              | AA                | 1946683061               |
| SNP_P3_169508_34380 | NW_004517548.1 | Scaffold2662 | 34380                   | TT                              | CC                | 1946683063               |
| SNP_P3_169509_34402 | NW_004517548.1 | Scaffold2662 | 34402                   | AA                              | CC                | 1946683064               |
| SNP_P3_169510_34532 | NW_004517548.1 | Scaffold2662 | 34532                   | GG                              | CC                | 1946683066               |
| SNP_P3_169511_37819 | NW_004517548.1 | Scaffold2662 | 37819                   | AA                              | CC                | 1946683068               |
| SNP_P3_169512_37997 | NW_004517548.1 | Scaffold2662 | 37997                   | GG                              | AA                | 1946683070               |
| SNP_P3_169513_38021 | NW_004517548.1 | Scaffold2662 | 38021                   | CC                              | TT                | 1946683072               |
| SNP_P3_169514_38083 | NW_004517548.1 | Scaffold2662 | 38083                   | CC                              | AA                | 1946683074               |
| SNP_P3_169516_43752 | NW_004517548.1 | Scaffold2662 | 43752                   | AA                              | GG                | 1946683076               |
| SNP_P3_169518_47785 | NW_004517548.1 | Scaffold2662 | 47785                   | TT                              | CC                | 1946683078               |
| SNP_P3_169519_1424  | NW_004517549.1 | Scaffold2663 | 1424                    | AA                              | TT                | 1946683080               |
| SNP_P3_169520_1435  | NW_004517549.1 | Scaffold2663 | 1435                    | AA                              | GG                | 1946683083               |
| SNP_P3_169521_1436  | NW_004517549.1 | Scaffold2663 | 1436                    | TT                              | CC                | 1946683085               |

| SNPs IDs            | Chromosome IDs | Chromosomes  | Physical positions (bp) | CDC Frontier (Reference genome) | (Pusa 256 & HPNB) | NCBI SNPdb Accession IDs |
|---------------------|----------------|--------------|-------------------------|---------------------------------|-------------------|--------------------------|
| SNP_P3_169522_2015  | NW_004517549.1 | Scaffold2663 | 2015                    | CC                              | AA                | 1946683087               |
| SNP_P3_169523_2291  | NW_004517549.1 | Scaffold2663 | 2291                    | GG                              | AA                | 1946683089               |
| SNP_P3_169524_2445  | NW_004517549.1 | Scaffold2663 | 2445                    | GG                              | AA                | 1946683091               |
| SNP_P3_169525_11697 | NW_004517550.1 | Scaffold2664 | 11697                   | AA                              | CC                | 1946683092               |
| SNP_P3_169526_11707 | NW_004517550.1 | Scaffold2664 | 11707                   | GG                              | CC                | 1946683094               |
| SNP_P3_169527_11714 | NW_004517550.1 | Scaffold2664 | 11714                   | GG                              | AA                | 1946683096               |
| SNP_P3_169528_13013 | NW_004517553.1 | Scaffold2668 | 13013                   | TT                              | CC                | 1946683098               |
| SNP_P3_169529_13262 | NW_004517553.1 | Scaffold2668 | 13262                   | AA                              | GG                | 1946683100               |
| SNP_P3_169530_13263 | NW_004517553.1 | Scaffold2668 | 13263                   | TT                              | AA                | 1946683102               |
| SNP_P3_169531_13317 | NW_004517553.1 | Scaffold2668 | 13317                   | TT                              | GG                | 1946683105               |
| SNP_P3_169532_13363 | NW_004517553.1 | Scaffold2668 | 13363                   | AA                              | CC                | 1946683107               |
| SNP_P3_169533_13370 | NW_004517553.1 | Scaffold2668 | 13370                   | TT                              | GG                | 1946683109               |
| SNP_P3_169535_4299  | NW_004517554.1 | Scaffold2669 | 4299                    | CC                              | TT                | 1946683111               |
| SNP_P3_169536_11991 | NW_004517554.1 | Scaffold2669 | 11991                   | GG                              | TT                | 1946683113               |
| SNP_P3_169537_12041 | NW_004517554.1 | Scaffold2669 | 12041                   | TT                              | CC                | 1946683115               |
| SNP_P3_169538_12103 | NW_004517554.1 | Scaffold2669 | 12103                   | CC                              | TT                | 1946683117               |
| SNP_P3_169539_12116 | NW_004517554.1 | Scaffold2669 | 12116                   | TT                              | CC                | 1946683119               |
| SNP_P3_169540_12203 | NW_004517554.1 | Scaffold2669 | 12203                   | CC                              | AA                | 1946683121               |
| SNP_P3_169541_12256 | NW_004517554.1 | Scaffold2669 | 12256                   | TT                              | CC                | 1946683124               |
| SNP_P3_169542_12316 | NW_004517554.1 | Scaffold2669 | 12316                   | CC                              | TT                | 1946683126               |
| SNP_P3_169543_12341 | NW_004517554.1 | Scaffold2669 | 12341                   | AA                              | GG                | 1946683128               |
| SNP_P3_169545_12666 | NW_004517554.1 | Scaffold2669 | 12666                   | TT                              | CC                | 1946683130               |
| SNP_P3_169546_15556 | NW_004517554.1 | Scaffold2669 | 15556                   | TT                              | GG                | 1946683132               |
| SNP_P3_169548_16452 | NW_004517554.1 | Scaffold2669 | 16452                   | AA                              | GG                | 1946683135               |
| SNP_P3_169549_1224  | NW_004517555.1 | Scaffold2670 | 1224                    | CC                              | GG                | 1946683137               |
| SNP_P3_169550_1236  | NW_004517555.1 | Scaffold2670 | 1236                    | AA                              | GG                | 1946683139               |
| SNP_P3_169551_1262  | NW_004517555.1 | Scaffold2670 | 1262                    | CC                              | TT                | 1946683141               |
| SNP_P3_169552_1349  | NW_004517555.1 | Scaffold2670 | 1349                    | CC                              | GG                | 1946683143               |
| SNP_P3_169553_1351  | NW_004517555.1 | Scaffold2670 | 1351                    | AA                              | GG                | 1946683145               |
| SNP_P3_169554_1367  | NW_004517555.1 | Scaffold2670 | 1367                    | AA                              | GG                | 1946683147               |
| SNP_P3_169555_1443  | NW_004517555.1 | Scaffold2670 | 1443                    | TT                              | CC                | 1946683149               |
| SNP_P3_169556_1469  | NW_004517555.1 | Scaffold2670 | 1469                    | AA                              | TT                | 1946683151               |
| SNP_P3_169557_1584  | NW_004517555.1 | Scaffold2670 | 1584                    | AA                              | TT                | 1946683153               |
| SNP_P3_169558_1585  | NW_004517555.1 | Scaffold2670 | 1585                    | TT                              | CC                | 1946683155               |
| SNP_P3_169559_1686  | NW_004517555.1 | Scaffold2670 | 1686                    | TT                              | GG                | 1946683157               |
| SNP_P3_169560_1692  | NW_004517555.1 | Scaffold2670 | 1692                    | TT                              | CC                | 1946683159               |
| SNP_P3_169561_1706  | NW_004517555.1 | Scaffold2670 | 1706                    | AA                              | TT                | 1946683161               |
| SNP_P3_169562_1710  | NW_004517555.1 | Scaffold2670 | 1710                    | TT                              | CC                | 1946683163               |
| SNP_P3_169563_1711  | NW_004517555.1 | Scaffold2670 | 1711                    | CC                              | AA                | 1946683165               |
| SNP_P3_169564_1712  | NW_004517555.1 | Scaffold2670 | 1712                    | GG                              | AA                | 1946683167               |
| SNP_P3_169565_4723  | NW_004517555.1 | Scaffold2670 | 4723                    | AA                              | GG                | 1946683169               |
| SNP_P3_169566_5086  | NW_004517555.1 | Scaffold2670 | 5086                    | TT                              | CC                | 1946683171               |

| SNPs IDs            | Chromosome IDs | Chromosomes  | Physical positions (bp) | CDC Frontier (Reference genome) | (Pusa 256 & HPNB) | NCBI SNPdb Accession IDs |
|---------------------|----------------|--------------|-------------------------|---------------------------------|-------------------|--------------------------|
| SNP_P3_169567_5214  | NW_004517555.1 | Scaffold2670 | 5214                    | TT                              | CC                | 1946683173               |
| SNP_P3_169568_6235  | NW_004517555.1 | Scaffold2670 | 6235                    | TT                              | CC                | 1946683175               |
| SNP_P3_169569_26154 | NW_004517555.1 | Scaffold2670 | 26154                   | TT                              | CC                | 1946683177               |
| SNP_P3_169570_26215 | NW_004517555.1 | Scaffold2670 | 26215                   | AA                              | GG                | 1946683179               |
| SNP_P3_169571_26219 | NW_004517555.1 | Scaffold2670 | 26219                   | AA                              | CC                | 1946683181               |
| SNP_P3_169572_26220 | NW_004517555.1 | Scaffold2670 | 26220                   | AA                              | TT                | 1946683183               |
| SNP_P3_169573_26227 | NW_004517555.1 | Scaffold2670 | 26227                   | AA                              | TT                | 1946683185               |
| SNP_P3_169574_26271 | NW_004517555.1 | Scaffold2670 | 26271                   | AA                              | CC                | 1946683187               |
| SNP_P3_169575_26326 | NW_004517555.1 | Scaffold2670 | 26326                   | TT                              | AA                | 1946683189               |
| SNP_P3_169576_26411 | NW_004517555.1 | Scaffold2670 | 26411                   | CC                              | GG                | 1946683191               |
| SNP_P3_169577_26510 | NW_004517555.1 | Scaffold2670 | 26510                   | CC                              | TT                | 1946683193               |
| SNP_P3_169578_26569 | NW_004517555.1 | Scaffold2670 | 26569                   | TT                              | CC                | 1946683195               |
| SNP_P3_169579_26634 | NW_004517555.1 | Scaffold2670 | 26634                   | AA                              | CC                | 1946683197               |
| SNP_P3_169580_26643 | NW_004517555.1 | Scaffold2670 | 26643                   | CC                              | AA                | 1946683199               |
| SNP_P3_169581_26650 | NW_004517555.1 | Scaffold2670 | 26650                   | CC                              | AA                | 1946683201               |
| SNP_P3_169582_26670 | NW_004517555.1 | Scaffold2670 | 26670                   | GG                              | TT                | 1946683203               |
| SNP_P3_169583_26812 | NW_004517555.1 | Scaffold2670 | 26812                   | AA                              | GG                | 1946683205               |
| SNP_P3_169584_26836 | NW_004517555.1 | Scaffold2670 | 26836                   | AA                              | GG                | 1946683208               |
| SNP_P3_169585_26851 | NW_004517555.1 | Scaffold2670 | 26851                   | AA                              | CC                | 1946683210               |
| SNP_P3_169586_26865 | NW_004517555.1 | Scaffold2670 | 26865                   | AA                              | TT                | 1946683212               |
| SNP_P3_169587_26881 | NW_004517555.1 | Scaffold2670 | 26881                   | AA                              | CC                | 1946683214               |
| SNP_P3_169588_29170 | NW_004517555.1 | Scaffold2670 | 29170                   | TT                              | CC                | 1946683216               |
| SNP_P3_169589_30558 | NW_004517555.1 | Scaffold2670 | 30558                   | AA                              | CC                | 1946683218               |
| SNP_P3_169590_30570 | NW_004517555.1 | Scaffold2670 | 30570                   | TT                              | AA                | 1946683220               |
| SNP_P3_169591_34641 | NW_004517555.1 | Scaffold2670 | 34641                   | TT                              | CC                | 1946683222               |
| SNP_P3_169592_34890 | NW_004517555.1 | Scaffold2670 | 34890                   | CC                              | GG                | 1946683224               |
| SNP_P3_169593_34923 | NW_004517555.1 | Scaffold2670 | 34923                   | TT                              | CC                | 1946683226               |
| SNP_P3_169594_34949 | NW_004517555.1 | Scaffold2670 | 34949                   | CC                              | TT                | 1946683228               |
| SNP_P3_169595_36638 | NW_004517555.1 | Scaffold2670 | 36638                   | TT                              | CC                | 1946683230               |
| SNP_P3_169596_36662 | NW_004517555.1 | Scaffold2670 | 36662                   | GG                              | CC                | 1946683232               |
| SNP_P3_169597_36699 | NW_004517555.1 | Scaffold2670 | 36699                   | CC                              | GG                | 1946683234               |
| SNP_P3_169598_36771 | NW_004517555.1 | Scaffold2670 | 36771                   | TT                              | CC                | 1946683235               |
| SNP_P3_169599_36792 | NW_004517555.1 | Scaffold2670 | 36792                   | TT                              | CC                | 1946683236               |
| SNP_P3_169600_36865 | NW_004517555.1 | Scaffold2670 | 36865                   | CC                              | TT                | 1946683237               |
| SNP_P3_169602_36909 | NW_004517555.1 | Scaffold2670 | 36909                   | CC                              | TT                | 1946683238               |
| SNP_P3_169603_37018 | NW_004517555.1 | Scaffold2670 | 37018                   | TT                              | CC                | 1946683240               |
| SNP_P3_169604_37040 | NW_004517555.1 | Scaffold2670 | 37040                   | CC                              | TT                | 1946683241               |
| SNP_P3_169605_37041 | NW_004517555.1 | Scaffold2670 | 37041                   | CC                              | AA                | 1946683242               |
| SNP_P3_169606_37077 | NW_004517555.1 | Scaffold2670 | 37077                   | CC                              | TT                | 1946683243               |
| SNP_P3_169607_37169 | NW_004517555.1 | Scaffold2670 | 37169                   | TT                              | CC                | 1946683244               |
| SNP_P3_169608_37171 | NW_004517555.1 | Scaffold2670 | 37171                   | GG                              | TT                | 1946683245               |
| SNP_P3_169609_37195 | NW_004517555.1 | Scaffold2670 | 37195                   | CC                              | TT                | 1946683247               |

| SNPs IDs            | Chromosome IDs | Chromosomes  | Physical positions (bp) | CDC Frontier (Reference genome) | (Pusa 256 & HPNB) | NCBI SNPdb Accession IDs |
|---------------------|----------------|--------------|-------------------------|---------------------------------|-------------------|--------------------------|
| SNP_P3_169610_37228 | NW_004517555.1 | Scaffold2670 | 37228                   | AA                              | GG                | 1946683249               |
| SNP_P3_169611_37277 | NW_004517555.1 | Scaffold2670 | 37277                   | AA                              | TT                | 1946683251               |
| SNP_P3_169612_42727 | NW_004517555.1 | Scaffold2670 | 42727                   | CC                              | GG                | 1946683253               |
| SNP_P3_169613_42731 | NW_004517555.1 | Scaffold2670 | 42731                   | AA                              | GG                | 1946683255               |
| SNP_P3_169614_42769 | NW_004517555.1 | Scaffold2670 | 42769                   | AA                              | GG                | 1946683257               |
| SNP_P3_169615_42787 | NW_004517555.1 | Scaffold2670 | 42787                   | AA                              | GG                | 1946683259               |
| SNP_P3_169616_42835 | NW_004517555.1 | Scaffold2670 | 42835                   | CC                              | GG                | 1946683261               |
| SNP_P3_169617_42874 | NW_004517555.1 | Scaffold2670 | 42874                   | CC                              | TT                | 1946683263               |
| SNP_P3_169618_42893 | NW_004517555.1 | Scaffold2670 | 42893                   | TT                              | AA                | 1946683266               |
| SNP_P3_169619_42951 | NW_004517555.1 | Scaffold2670 | 42951                   | CC                              | TT                | 1946683268               |
| SNP_P3_169620_42967 | NW_004517555.1 | Scaffold2670 | 42967                   | CC                              | TT                | 1946683270               |
| SNP_P3_169621_42968 | NW_004517555.1 | Scaffold2670 | 42968                   | CC                              | TT                | 1946683272               |
| SNP_P3_169622_43022 | NW_004517555.1 | Scaffold2670 | 43022                   | GG                              | CC                | 1946683274               |
| SNP_P3_169623_43458 | NW_004517555.1 | Scaffold2670 | 43458                   | AA                              | TT                | 1946683276               |
| SNP_P3_169624_43468 | NW_004517555.1 | Scaffold2670 | 43468                   | GG                              | TT                | 1946683278               |
| SNP_P3_169625_43534 | NW_004517555.1 | Scaffold2670 | 43534                   | TT                              | AA                | 1946683280               |
| SNP_P3_169626_43544 | NW_004517555.1 | Scaffold2670 | 43544                   | GG                              | AA                | 1946683282               |
| SNP_P3_169627_43550 | NW_004517555.1 | Scaffold2670 | 43550                   | AA                              | GG                | 1946683284               |
| SNP_P3_169628_43661 | NW_004517555.1 | Scaffold2670 | 43661                   | TT                              | AA                | 1946683286               |
| SNP_P3_169629_43693 | NW_004517555.1 | Scaffold2670 | 43693                   | AA                              | CC                | 1946683288               |
| SNP_P3_169630_43751 | NW_004517555.1 | Scaffold2670 | 43751                   | CC                              | TT                | 1946683290               |
| SNP_P3_169631_43835 | NW_004517555.1 | Scaffold2670 | 43835                   | CC                              | TT                | 1946683292               |
| SNP_P3_169632_43838 | NW_004517555.1 | Scaffold2670 | 43838                   | GG                              | AA                | 1946683294               |
| SNP_P3_169633_43854 | NW_004517555.1 | Scaffold2670 | 43854                   | AA                              | TT                | 1946683297               |
| SNP_P3_169634_43859 | NW_004517555.1 | Scaffold2670 | 43859                   | TT                              | GG                | 1946683299               |
| SNP_P3_169635_43942 | NW_004517555.1 | Scaffold2670 | 43942                   | CC                              | TT                | 1946683301               |
| SNP_P3_169636_43975 | NW_004517555.1 | Scaffold2670 | 43975                   | GG                              | AA                | 1946683302               |
| SNP_P3_169637_43984 | NW_004517555.1 | Scaffold2670 | 43984                   | CC                              | AA                | 1946683304               |
| SNP_P3_169638_43986 | NW_004517555.1 | Scaffold2670 | 43986                   | CC                              | AA                | 1946683306               |
| SNP_P3_169639_44067 | NW_004517555.1 | Scaffold2670 | 44067                   | AA                              | GG                | 1946683308               |
| SNP_P3_169640_44072 | NW_004517555.1 | Scaffold2670 | 44072                   | TT                              | GG                | 1946683310               |
| SNP_P3_169641_44074 | NW_004517555.1 | Scaffold2670 | 44074                   | CC                              | GG                | 1946683312               |
| SNP_P3_169642_44619 | NW_004517555.1 | Scaffold2670 | 44619                   | AA                              | GG                | 1946683314               |
| SNP_P3_169643_44620 | NW_004517555.1 | Scaffold2670 | 44620                   | TT                              | AA                | 1946683316               |
| SNP_P3_169644_44628 | NW_004517555.1 | Scaffold2670 | 44628                   | CC                              | AA                | 1946683318               |
| SNP_P3_169645_44823 | NW_004517555.1 | Scaffold2670 | 44823                   | TT                              | GG                | 1946683320               |
| SNP_P3_169646_44844 | NW_004517555.1 | Scaffold2670 | 44844                   | GG                              | AA                | 1946683327               |
| SNP_P3_169647_44885 | NW_004517555.1 | Scaffold2670 | 44885                   | AA                              | TT                | 1946683329               |
| SNP_P3_169648_44924 | NW_004517555.1 | Scaffold2670 | 44924                   | CC                              | AA                | 1946683331               |
| SNP_P3_169649_44933 | NW_004517555.1 | Scaffold2670 | 44933                   | GG                              | TT                | 1946683333               |
| SNP_P3_169650_44934 | NW_004517555.1 | Scaffold2670 | 44934                   | GG                              | CC                | 1946683335               |
| SNP_P3_169651_44944 | NW_004517555.1 | Scaffold2670 | 44944                   | AA                              | CC                | 1946683337               |



| SNPs IDs             | Chromosome IDs | Chromosomes  | Physical positions (bp) | CDC Frontier (Reference genome) | (Pusa 256 & HPNB) | NCBI SNPdb Accession IDs |
|----------------------|----------------|--------------|-------------------------|---------------------------------|-------------------|--------------------------|
| SNP_P3_169652_44984  | NW_004517555.1 | Scaffold2670 | 44984                   | CC                              | AA                | 1946683339               |
| SNP_P3_169653_45013  | NW_004517555.1 | Scaffold2670 | 45013                   | CC                              | TT                | 1946683341               |
| SNP_P3_169654_45024  | NW_004517555.1 | Scaffold2670 | 45024                   | CC                              | AA                | 1946683343               |
| SNP_P3_169655_45030  | NW_004517555.1 | Scaffold2670 | 45030                   | AA                              | GG                | 1946683345               |
| SNP_P3_169656_45419  | NW_004517555.1 | Scaffold2670 | 45419                   | GG                              | CC                | 1946683347               |
| SNP_P3_169657_62379  | NW_004517555.1 | Scaffold2670 | 62379                   | TT                              | AA                | 1946683349               |
| SNP_P3_169658_62447  | NW_004517555.1 | Scaffold2670 | 62447                   | AA                              | CC                | 1946683351               |
| SNP_P3_169659_63196  | NW_004517555.1 | Scaffold2670 | 63196                   | CC                              | TT                | 1946683353               |
| SNP_P3_169660_65974  | NW_004517555.1 | Scaffold2670 | 65974                   | AA                              | TT                | 1946683355               |
| SNP_P3_169661_66175  | NW_004517555.1 | Scaffold2670 | 66175                   | CC                              | AA                | 1946683359               |
| SNP_P3_169662_66215  | NW_004517555.1 | Scaffold2670 | 66215                   | TT                              | CC                | 1946683361               |
| SNP_P3_169663_66816  | NW_004517555.1 | Scaffold2670 | 66816                   | AA                              | CC                | 1946683363               |
| SNP_P3_169664_66874  | NW_004517555.1 | Scaffold2670 | 66874                   | TT                              | AA                | 1946683365               |
| SNP_P3_169665_66905  | NW_004517555.1 | Scaffold2670 | 66905                   | AA                              | CC                | 1946683367               |
| SNP_P3_169666_66935  | NW_004517555.1 | Scaffold2670 | 66935                   | TT                              | CC                | 1946683369               |
| SNP_P3_169667_66936  | NW_004517555.1 | Scaffold2670 | 66936                   | GG                              | CC                | 1946683371               |
| SNP_P3_169669_67135  | NW_004517555.1 | Scaffold2670 | 67135                   | TT                              | CC                | 1946683373               |
| SNP_P3_169670_67140  | NW_004517555.1 | Scaffold2670 | 67140                   | GG                              | TT                | 1946683375               |
| SNP_P3_169671_67189  | NW_004517555.1 | Scaffold2670 | 67189                   | TT                              | GG                | 1946683377               |
| SNP_P3_169672_67215  | NW_004517555.1 | Scaffold2670 | 67215                   | GG                              | AA                | 1946683379               |
| SNP_P3_169673_67240  | NW_004517555.1 | Scaffold2670 | 67240                   | AA                              | GG                | 1946683381               |
| SNP_P3_169674_73787  | NW_004517555.1 | Scaffold2670 | 73787                   | CC                              | TT                | 1946683383               |
| SNP_P3_169675_73789  | NW_004517555.1 | Scaffold2670 | 73789                   | CC                              | GG                | 1946683385               |
| SNP_P3_169676_97110  | NW_004517555.1 | Scaffold2670 | 97110                   | AA                              | TT                | 1946683387               |
| SNP_P3_169677_97715  | NW_004517555.1 | Scaffold2670 | 97715                   | AA                              | TT                | 1946683390               |
| SNP_P3_169678_98119  | NW_004517555.1 | Scaffold2670 | 98119                   | GG                              | TT                | 1946683392               |
| SNP_P3_169679_98588  | NW_004517555.1 | Scaffold2670 | 98588                   | GG                              | AA                | 1946683394               |
| SNP_P3_169680_98594  | NW_004517555.1 | Scaffold2670 | 98594                   | AA                              | GG                | 1946683396               |
| SNP_P3_169681_130064 | NW_004517555.1 | Scaffold2670 | 130064                  | CC                              | AA                | 1946683398               |
| SNP_P3_169682_130067 | NW_004517555.1 | Scaffold2670 | 130067                  | CC                              | TT                | 1946683400               |
| SNP_P3_169683_133235 | NW_004517555.1 | Scaffold2670 | 133235                  | GG                              | AA                | 1946683402               |
| SNP_P3_169684_133247 | NW_004517555.1 | Scaffold2670 | 133247                  | TT                              | GG                | 1946683404               |
| SNP_P3_169685_133292 | NW_004517555.1 | Scaffold2670 | 133292                  | TT                              | CC                | 1946683406               |
| SNP_P3_169686_133305 | NW_004517555.1 | Scaffold2670 | 133305                  | TT                              | GG                | 1946683408               |
| SNP_P3_169687_133325 | NW_004517555.1 | Scaffold2670 | 133325                  | TT                              | CC                | 1946683410               |
| SNP_P3_169688_133327 | NW_004517555.1 | Scaffold2670 | 133327                  | AA                              | GG                | 1946683412               |
| SNP_P3_169689_133338 | NW_004517555.1 | Scaffold2670 | 133338                  | AA                              | GG                | 1946683415               |
| SNP_P3_169690_133363 | NW_004517555.1 | Scaffold2670 | 133363                  | AA                              | TT                | 1946683417               |
| SNP_P3_169691_133367 | NW_004517555.1 | Scaffold2670 | 133367                  | AA                              | GG                | 1946683420               |
| SNP_P3_169692_136732 | NW_004517555.1 | Scaffold2670 | 136732                  | TT                              | CC                | 1946683422               |
| SNP_P3_169693_140565 | NW_004517555.1 | Scaffold2670 | 140565                  | AA                              | GG                | 1946683424               |
| SNP_P3_169694_149131 | NW_004517555.1 | Scaffold2670 | 149131                  | AA                              | CC                | 1946683426               |

| SNPs IDs             | Chromosome IDs | Chromosomes  | Physical positions (bp) | CDC Frontier (Reference genome) | (Pusa 256 & HPNB) | NCBI SNPdb Accession IDs |
|----------------------|----------------|--------------|-------------------------|---------------------------------|-------------------|--------------------------|
| SNP_P3_169695_149154 | NW_004517555.1 | Scaffold2670 | 149154                  | TT                              | CC                | 1946683428               |
| SNP_P3_169696_149198 | NW_004517555.1 | Scaffold2670 | 149198                  | TT                              | CC                | 1946683430               |
| SNP_P3_169697_149426 | NW_004517555.1 | Scaffold2670 | 149426                  | AA                              | CC                | 1946683432               |
| SNP_P3_169698_149429 | NW_004517555.1 | Scaffold2670 | 149429                  | CC                              | TT                | 1946683434               |
| SNP_P3_169699_149438 | NW_004517555.1 | Scaffold2670 | 149438                  | TT                              | CC                | 1946683436               |
| SNP_P3_169700_149468 | NW_004517555.1 | Scaffold2670 | 149468                  | CC                              | AA                | 1946683438               |
| SNP_P3_169701_149501 | NW_004517555.1 | Scaffold2670 | 149501                  | GG                              | CC                | 1946683440               |
| SNP_P3_169702_149606 | NW_004517555.1 | Scaffold2670 | 149606                  | AA                              | GG                | 1946683442               |
| SNP_P3_169703_149653 | NW_004517555.1 | Scaffold2670 | 149653                  | CC                              | TT                | 1946683444               |
| SNP_P3_169704_4330   | NW_004517556.1 | Scaffold2672 | 4330                    | GG                              | AA                | 1946683446               |
| SNP_P3_169705_4341   | NW_004517556.1 | Scaffold2672 | 4341                    | TT                              | CC                | 1946683449               |
| SNP_P3_169706_4363   | NW_004517556.1 | Scaffold2672 | 4363                    | AA                              | TT                | 1946683452               |
| SNP_P3_169707_4512   | NW_004517556.1 | Scaffold2672 | 4512                    | TT                              | GG                | 1946683453               |
| SNP_P3_169708_4517   | NW_004517556.1 | Scaffold2672 | 4517                    | TT                              | GG                | 1946683455               |
| SNP_P3_169709_4623   | NW_004517556.1 | Scaffold2672 | 4623                    | GG                              | TT                | 1946683457               |
| SNP_P3_169710_4631   | NW_004517556.1 | Scaffold2672 | 4631                    | GG                              | AA                | 1946683459               |
| SNP_P3_169711_4649   | NW_004517556.1 | Scaffold2672 | 4649                    | GG                              | TT                | 1946683461               |
| SNP_P3_169712_4654   | NW_004517556.1 | Scaffold2672 | 4654                    | AA                              | CC                | 1946683463               |
| SNP_P3_169713_4718   | NW_004517556.1 | Scaffold2672 | 4718                    | GG                              | AA                | 1946683465               |
| SNP_P3_169714_5349   | NW_004517556.1 | Scaffold2672 | 5349                    | GG                              | CC                | 1946683467               |
| SNP_P3_169715_5372   | NW_004517556.1 | Scaffold2672 | 5372                    | TT                              | AA                | 1946683469               |
| SNP_P3_169716_1477   | NW_004517557.1 | Scaffold2675 | 1477                    | CC                              | TT                | 1946683472               |
| SNP_P3_169717_1491   | NW_004517557.1 | Scaffold2675 | 1491                    | CC                              | AA                | 1946683474               |
| SNP_P3_169718_1492   | NW_004517557.1 | Scaffold2675 | 1492                    | TT                              | GG                | 1946683476               |
| SNP_P3_169719_3220   | NW_004517559.1 | Scaffold2678 | 3220                    | AA                              | TT                | 1946683478               |
| SNP_P3_169720_3347   | NW_004517559.1 | Scaffold2678 | 3347                    | AA                              | TT                | 1946683480               |
| SNP_P3_169722_92313  | NW_004517559.1 | Scaffold2678 | 92313                   | TT                              | GG                | 1946683482               |
| SNP_P3_169723_92320  | NW_004517559.1 | Scaffold2678 | 92320                   | TT                              | CC                | 1946683484               |
| SNP_P3_169724_92577  | NW_004517559.1 | Scaffold2678 | 92577                   | AA                              | GG                | 1946683486               |
| SNP_P3_169725_101434 | NW_004517559.1 | Scaffold2678 | 101434                  | CC                              | TT                | 1946683488               |
| SNP_P3_169726_1775   | NW_004517562.1 | Scaffold2684 | 1775                    | AA                              | CC                | 1946683490               |
| SNP_P3_169727_1785   | NW_004517562.1 | Scaffold2684 | 1785                    | TT                              | GG                | 1946683492               |
| SNP_P3_169728_2344   | NW_004517562.1 | Scaffold2684 | 2344                    | GG                              | TT                | 1946683494               |
| SNP_P3_169729_6641   | NW_004517564.1 | Scaffold2686 | 6641                    | TT                              | GG                | 1946683496               |
| SNP_P3_169730_772    | NW_004517565.1 | Scaffold2687 | 772                     | AA                              | CC                | 1946683498               |
| SNP_P3_169731_311    | NW_004517568.1 | Scaffold2691 | 311                     | TT                              | GG                | 1946683499               |
| SNP_P3_169732_595    | NW_004517568.1 | Scaffold2691 | 595                     | TT                              | AA                | 1946683503               |
| SNP_P3_169733_628    | NW_004517568.1 | Scaffold2691 | 628                     | CC                              | TT                | 1946683505               |
| SNP_P3_169734_672    | NW_004517568.1 | Scaffold2691 | 672                     | AA                              | TT                | 1946683506               |
| SNP_P3_169735_718    | NW_004517568.1 | Scaffold2691 | 718                     | TT                              | CC                | 1946683508               |
| SNP_P3_169736_748    | NW_004517568.1 | Scaffold2691 | 748                     | CC                              | TT                | 1946683510               |
| SNP_P3_169737_934    | NW_004517568.1 | Scaffold2691 | 934                     | GG                              | TT                | 1946683512               |

| SNPs IDs            | Chromosome IDs | Chromosomes  | Physical positions (bp) | CDC Frontier (Reference genome) | (Pusa 256 & HPNB) | NCBI SNPdb Accession IDs |
|---------------------|----------------|--------------|-------------------------|---------------------------------|-------------------|--------------------------|
| SNP_P3_169738_955   | NW_004517568.1 | Scaffold2691 | 955                     | CC                              | TT                | 1946683514               |
| SNP_P3_169739_959   | NW_004517569.1 | Scaffold2692 | 959                     | TT                              | GG                | 1946683516               |
| SNP_P3_169740_1057  | NW_004517569.1 | Scaffold2692 | 1057                    | AA                              | TT                | 1946683518               |
| SNP_P3_169741_1228  | NW_004517569.1 | Scaffold2692 | 1228                    | GG                              | TT                | 1946683520               |
| SNP_P3_169742_1245  | NW_004517569.1 | Scaffold2692 | 1245                    | TT                              | AA                | 1946683522               |
| SNP_P3_169743_1335  | NW_004517569.1 | Scaffold2692 | 1335                    | CC                              | GG                | 1946683524               |
| SNP_P3_169745_2983  | NW_004517569.1 | Scaffold2692 | 2983                    | GG                              | CC                | 1946683526               |
| SNP_P3_169746_2984  | NW_004517569.1 | Scaffold2692 | 2984                    | AA                              | GG                | 1946683528               |
| SNP_P3_169747_8886  | NW_004517569.1 | Scaffold2692 | 8886                    | AA                              | TT                | 1946683530               |
| SNP_P3_169748_12655 | NW_004517569.1 | Scaffold2692 | 12655                   | AA                              | TT                | 1946683533               |
| SNP_P3_169749_12725 | NW_004517569.1 | Scaffold2692 | 12725                   | CC                              | TT                | 1946683535               |
| SNP_P3_169750_12829 | NW_004517569.1 | Scaffold2692 | 12829                   | AA                              | GG                | 1946683537               |
| SNP_P3_169751_12846 | NW_004517569.1 | Scaffold2692 | 12846                   | CC                              | TT                | 1946683539               |
| SNP_P3_169752_12850 | NW_004517569.1 | Scaffold2692 | 12850                   | GG                              | TT                | 1946683541               |
| SNP_P3_169753_12861 | NW_004517569.1 | Scaffold2692 | 12861                   | TT                              | CC                | 1946683543               |
| SNP_P3_169754_13173 | NW_004517569.1 | Scaffold2692 | 13173                   | GG                              | AA                | 1946683545               |
| SNP_P3_169755_13278 | NW_004517569.1 | Scaffold2692 | 13278                   | AA                              | TT                | 1946683547               |
| SNP_P3_169757_14283 | NW_004517569.1 | Scaffold2692 | 14283                   | CC                              | TT                | 1946683549               |
| SNP_P3_169758_14453 | NW_004517569.1 | Scaffold2692 | 14453                   | CC                              | GG                | 1946683551               |
| SNP_P3_169760_14651 | NW_004517569.1 | Scaffold2692 | 14651                   | TT                              | CC                | 1946683553               |
| SNP_P3_169761_14743 | NW_004517569.1 | Scaffold2692 | 14743                   | CC                              | TT                | 1946683555               |
| SNP_P3_169763_14983 | NW_004517569.1 | Scaffold2692 | 14983                   | TT                              | CC                | 1946683557               |
| SNP_P3_169764_15008 | NW_004517569.1 | Scaffold2692 | 15008                   | GG                              | AA                | 1946683559               |
| SNP_P3_169765_15031 | NW_004517569.1 | Scaffold2692 | 15031                   | CC                              | TT                | 1946683561               |
| SNP_P3_169766_15088 | NW_004517569.1 | Scaffold2692 | 15088                   | AA                              | TT                | 1946683563               |
| SNP_P3_169767_47    | NW_004517571.1 | Scaffold2695 | 47                      | TT                              | CC                | 1946683565               |
| SNP_P3_169768_65    | NW_004517571.1 | Scaffold2695 | 65                      | TT                              | AA                | 1946683567               |
| SNP_P3_169769_116   | NW_004517571.1 | Scaffold2695 | 116                     | GG                              | CC                | 1946683570               |
| SNP_P3_169770_126   | NW_004517571.1 | Scaffold2695 | 126                     | AA                              | TT                | 1946683572               |
| SNP_P3_169771_386   | NW_004517571.1 | Scaffold2695 | 386                     | TT                              | GG                | 1946683574               |
| SNP_P3_169772_406   | NW_004517571.1 | Scaffold2695 | 406                     | GG                              | CC                | 1946683576               |
| SNP_P3_169773_7672  | NW_004517571.1 | Scaffold2695 | 7672                    | TT                              | CC                | 1946683578               |
| SNP_P3_169774_12404 | NW_004517571.1 | Scaffold2695 | 12404                   | TT                              | AA                | 1946683580               |
| SNP_P3_169775_3630  | NW_004517575.1 | Scaffold2700 | 3630                    | CC                              | TT                | 1946683582               |
| SNP_P3_169776_3634  | NW_004517575.1 | Scaffold2700 | 3634                    | TT                              | AA                | 1946683584               |
| SNP_P3_169777_4034  | NW_004517575.1 | Scaffold2700 | 4034                    | CC                              | TT                | 1946683586               |
| SNP_P3_169778_4094  | NW_004517575.1 | Scaffold2700 | 4094                    | CC                              | TT                | 1946683588               |
| SNP_P3_169779_10303 | NW_004517575.1 | Scaffold2700 | 10303                   | GG                              | AA                | 1946683590               |
| SNP_P3_169780_10318 | NW_004517575.1 | Scaffold2700 | 10318                   | CC                              | GG                | 1946683592               |
| SNP_P3_169781_10348 | NW_004517575.1 | Scaffold2700 | 10348                   | AA                              | GG                | 1946683594               |
| SNP_P3_169782_10606 | NW_004517575.1 | Scaffold2700 | 10606                   | GG                              | TT                | 1946683596               |
| SNP_P3_169783_10649 | NW_004517575.1 | Scaffold2700 | 10649                   | TT                              | GG                | 1946683599               |

| SNPs IDs            | Chromosome IDs | Chromosomes  | Physical positions (bp) | CDC Frontier (Reference genome) | (Pusa 256 & HPNB) | NCBI SNPdb Accession IDs |
|---------------------|----------------|--------------|-------------------------|---------------------------------|-------------------|--------------------------|
| SNP_P3_169784_10871 | NW_004517575.1 | Scaffold2700 | 10871                   | GG                              | AA                | 1946683601               |
| SNP_P3_169785_11067 | NW_004517575.1 | Scaffold2700 | 11067                   | AA                              | CC                | 1946683603               |
| SNP_P3_169786_749   | NW_004517577.1 | Scaffold2703 | 749                     | CC                              | TT                | 1946683605               |
| SNP_P3_169787_2558  | NW_004517577.1 | Scaffold2703 | 2558                    | CC                              | TT                | 1946683607               |
| SNP_P3_169788_335   | NW_004517578.1 | Scaffold2705 | 335                     | CC                              | AA                | 1946683609               |
| SNP_P3_169789_409   | NW_004517578.1 | Scaffold2705 | 409                     | TT                              | AA                | 1946683611               |
| SNP_P3_169790_459   | NW_004517578.1 | Scaffold2705 | 459                     | GG                              | CC                | 1946683613               |
| SNP_P3_169791_519   | NW_004517578.1 | Scaffold2705 | 519                     | AA                              | GG                | 1946683615               |
| SNP_P3_169792_566   | NW_004517578.1 | Scaffold2705 | 566                     | GG                              | TT                | 1946683618               |
| SNP_P3_169793_653   | NW_004517578.1 | Scaffold2705 | 653                     | AA                              | GG                | 1946683620               |
| SNP_P3_169794_738   | NW_004517578.1 | Scaffold2705 | 738                     | AA                              | GG                | 1946683623               |
| SNP_P3_169795_799   | NW_004517578.1 | Scaffold2705 | 799                     | CC                              | GG                | 1946683626               |
| SNP_P3_169796_826   | NW_004517578.1 | Scaffold2705 | 826                     | AA                              | GG                | 1946683628               |
| SNP_P3_169797_916   | NW_004517578.1 | Scaffold2705 | 916                     | AA                              | GG                | 1946683631               |
| SNP_P3_169798_920   | NW_004517578.1 | Scaffold2705 | 920                     | TT                              | CC                | 1946683634               |
| SNP_P3_169799_953   | NW_004517578.1 | Scaffold2705 | 953                     | GG                              | TT                | 1946683636               |
| SNP_P3_169800_1376  | NW_004517578.1 | Scaffold2705 | 1376                    | TT                              | CC                | 1946683639               |
| SNP_P3_169801_1599  | NW_004517578.1 | Scaffold2705 | 1599                    | TT                              | AA                | 1946683641               |
| SNP_P3_169802_5934  | NW_004517579.1 | Scaffold2706 | 5934                    | CC                              | TT                | 1946683644               |
| SNP_P3_169803_5976  | NW_004517579.1 | Scaffold2706 | 5976                    | GG                              | AA                | 1946683647               |
| SNP_P3_169804_5979  | NW_004517579.1 | Scaffold2706 | 5979                    | TT                              | CC                | 1946683649               |
| SNP_P3_169805_7520  | NW_004517579.1 | Scaffold2706 | 7520                    | GG                              | TT                | 1946683652               |
| SNP_P3_169807_17635 | NW_004517580.1 | Scaffold2707 | 17635                   | AA                              | TT                | 1946683654               |
| SNP_P3_169808_17660 | NW_004517580.1 | Scaffold2707 | 17660                   | TT                              | GG                | 1946683656               |
| SNP_P3_169809_17749 | NW_004517580.1 | Scaffold2707 | 17749                   | TT                              | CC                | 1946683658               |
| SNP_P3_169810_17784 | NW_004517580.1 | Scaffold2707 | 17784                   | TT                              | CC                | 1946683660               |
| SNP_P3_169811_17785 | NW_004517580.1 | Scaffold2707 | 17785                   | GG                              | AA                | 1946683662               |
| SNP_P3_169812_17836 | NW_004517580.1 | Scaffold2707 | 17836                   | AA                              | TT                | 1946683664               |
| SNP_P3_169813_17919 | NW_004517580.1 | Scaffold2707 | 17919                   | GG                              | AA                | 1946683667               |
| SNP_P3_169814_18549 | NW_004517580.1 | Scaffold2707 | 18549                   | AA                              | GG                | 1946683669               |
| SNP_P3_169815_33420 | NW_004517580.1 | Scaffold2707 | 33420                   | TT                              | AA                | 1946683671               |
| SNP_P3_169816_5083  | NW_004517581.1 | Scaffold2709 | 5083                    | TT                              | CC                | 1946683673               |
| SNP_P3_169817_9538  | NW_004517581.1 | Scaffold2709 | 9538                    | TT                              | CC                | 1946683680               |
| SNP_P3_169818_9564  | NW_004517581.1 | Scaffold2709 | 9564                    | CC                              | AA                | 1946683687               |
| SNP_P3_169819_17588 | NW_004517581.1 | Scaffold2709 | 17588                   | AA                              | TT                | 1946683694               |
| SNP_P3_169820_19134 | NW_004517581.1 | Scaffold2709 | 19134                   | GG                              | AA                | 1946683703               |
| SNP_P3_169821_20185 | NW_004517581.1 | Scaffold2709 | 20185                   | GG                              | CC                | 1946683711               |
| SNP_P3_169822_21526 | NW_004517581.1 | Scaffold2709 | 21526                   | CC                              | TT                | 1946683718               |
| SNP_P3_169823_21832 | NW_004517581.1 | Scaffold2709 | 21832                   | CC                              | TT                | 1946683722               |
| SNP_P3_169824_21895 | NW_004517581.1 | Scaffold2709 | 21895                   | GG                              | AA                | 1946683724               |
| SNP_P3_169825_28794 | NW_004517581.1 | Scaffold2709 | 28794                   | TT                              | AA                | 1946683726               |
| SNP_P3_169826_28980 | NW_004517581.1 | Scaffold2709 | 28980                   | CC                              | TT                | 1946683728               |

| SNPs IDs            | Chromosome IDs | Chromosomes  | Physical positions (bp) | CDC Frontier (Reference genome) | (Pusa 256 & HPNB) | NCBI SNPdb Accession IDs |
|---------------------|----------------|--------------|-------------------------|---------------------------------|-------------------|--------------------------|
| SNP_P3_169827_34443 | NW_004517581.1 | Scaffold2709 | 34443                   | GG                              | AA                | 1946683730               |
| SNP_P3_169828_34463 | NW_004517581.1 | Scaffold2709 | 34463                   | GG                              | AA                | 1946683733               |
| SNP_P3_169829_35043 | NW_004517581.1 | Scaffold2709 | 35043                   | CC                              | TT                | 1946683735               |
| SNP_P3_169830_705   | NW_004517582.1 | Scaffold2710 | 705                     | GG                              | TT                | 1946683737               |
| SNP_P3_169831_730   | NW_004517582.1 | Scaffold2710 | 730                     | AA                              | GG                | 1946683739               |
| SNP_P3_169832_4603  | NW_004517583.1 | Scaffold2711 | 4603                    | AA                              | GG                | 1946683741               |
| SNP_P3_169833_4615  | NW_004517583.1 | Scaffold2711 | 4615                    | CC                              | AA                | 1946683743               |
| SNP_P3_169834_4629  | NW_004517583.1 | Scaffold2711 | 4629                    | CC                              | TT                | 1946683745               |
| SNP_P3_169835_4949  | NW_004517583.1 | Scaffold2711 | 4949                    | TT                              | AA                | 1946683749               |
| SNP_P3_169836_4950  | NW_004517583.1 | Scaffold2711 | 4950                    | TT                              | AA                | 1946683751               |
| SNP_P3_169837_20440 | NW_004517583.1 | Scaffold2711 | 20440                   | TT                              | CC                | 1946683753               |
| SNP_P3_169838_20469 | NW_004517583.1 | Scaffold2711 | 20469                   | TT                              | CC                | 1946683755               |
| SNP_P3_169839_20510 | NW_004517583.1 | Scaffold2711 | 20510                   | GG                              | AA                | 1946683757               |
| SNP_P3_169840_36678 | NW_004517586.1 | Scaffold2715 | 36678                   | AA                              | GG                | 1946683759               |
| SNP_P3_169841_39965 | NW_004517586.1 | Scaffold2715 | 39965                   | AA                              | TT                | 1946683761               |
| SNP_P3_169842_39984 | NW_004517586.1 | Scaffold2715 | 39984                   | TT                              | CC                | 1946683763               |
| SNP_P3_169843_39997 | NW_004517586.1 | Scaffold2715 | 39997                   | GG                              | AA                | 1946683765               |
| SNP_P3_169844_39998 | NW_004517586.1 | Scaffold2715 | 39998                   | GG                              | AA                | 1946683767               |
| SNP_P3_169845_40007 | NW_004517586.1 | Scaffold2715 | 40007                   | TT                              | CC                | 1946683769               |
| SNP_P3_169846_41510 | NW_004517586.1 | Scaffold2715 | 41510                   | AA                              | GG                | 1946683771               |
| SNP_P3_169847_41576 | NW_004517586.1 | Scaffold2715 | 41576                   | CC                              | AA                | 1946683773               |
| SNP_P3_169848_41712 | NW_004517586.1 | Scaffold2715 | 41712                   | TT                              | AA                | 1946683775               |
| SNP_P3_169849_41744 | NW_004517586.1 | Scaffold2715 | 41744                   | AA                              | CC                | 1946683778               |
| SNP_P3_169850_41763 | NW_004517586.1 | Scaffold2715 | 41763                   | AA                              | GG                | 1946683781               |
| SNP_P3_169851_41781 | NW_004517586.1 | Scaffold2715 | 41781                   | GG                              | AA                | 1946683783               |
| SNP_P3_169852_41784 | NW_004517586.1 | Scaffold2715 | 41784                   | TT                              | GG                | 1946683785               |
| SNP_P3_169853_41791 | NW_004517586.1 | Scaffold2715 | 41791                   | CC                              | TT                | 1946683787               |
| SNP_P3_169854_41800 | NW_004517586.1 | Scaffold2715 | 41800                   | TT                              | GG                | 1946683789               |
| SNP_P3_169855_41832 | NW_004517586.1 | Scaffold2715 | 41832                   | TT                              | AA                | 1946683791               |
| SNP_P3_169856_42208 | NW_004517586.1 | Scaffold2715 | 42208                   | AA                              | GG                | 1946683793               |
| SNP_P3_169857_42474 | NW_004517586.1 | Scaffold2715 | 42474                   | GG                              | CC                | 1946683796               |
| SNP_P3_169858_14962 | NW_004517588.1 | Scaffold2717 | 14962                   | CC                              | GG                | 1946683798               |
| SNP_P3_169859_14974 | NW_004517588.1 | Scaffold2717 | 14974                   | TT                              | CC                | 1946683800               |
| SNP_P3_169860_15020 | NW_004517588.1 | Scaffold2717 | 15020                   | AA                              | GG                | 1946683802               |
| SNP_P3_169861_152   | NW_004517589.1 | Scaffold2719 | 152                     | AA                              | CC                | 1946683805               |
| SNP_P3_169862_233   | NW_004517589.1 | Scaffold2719 | 233                     | GG                              | CC                | 1946683807               |
| SNP_P3_169863_359   | NW_004517589.1 | Scaffold2719 | 359                     | GG                              | TT                | 1946683809               |
| SNP_P3_169864_2382  | NW_004517589.1 | Scaffold2719 | 2382                    | CC                              | TT                | 1946683811               |
| SNP_P3_169865_2601  | NW_004517590.1 | Scaffold2720 | 2601                    | CC                              | GG                | 1946683813               |
| SNP_P3_169866_2604  | NW_004517590.1 | Scaffold2720 | 2604                    | CC                              | AA                | 1946683815               |
| SNP_P3_169867_2606  | NW_004517590.1 | Scaffold2720 | 2606                    | TT                              | GG                | 1946683817               |
| SNP_P3_169868_2636  | NW_004517590.1 | Scaffold2720 | 2636                    | TT                              | CC                | 1946683819               |

| SNPs IDs             | Chromosome IDs | Chromosomes  | Physical positions (bp) | CDC Frontier (Reference genome) | (Pusa 256 & HPNB) | NCBI SNPdb Accession IDs |
|----------------------|----------------|--------------|-------------------------|---------------------------------|-------------------|--------------------------|
| SNP_P3_169869_26386  | NW_004517590.1 | Scaffold2720 | 26386                   | AA                              | GG                | 1946683821               |
| SNP_P3_169870_26424  | NW_004517590.1 | Scaffold2720 | 26424                   | CC                              | TT                | 1946683823               |
| SNP_P3_169871_26603  | NW_004517590.1 | Scaffold2720 | 26603                   | AA                              | CC                | 1946683825               |
| SNP_P3_169872_26698  | NW_004517590.1 | Scaffold2720 | 26698                   | CC                              | AA                | 1946683827               |
| SNP_P3_169873_26700  | NW_004517590.1 | Scaffold2720 | 26700                   | GG                              | AA                | 1946683830               |
| SNP_P3_169874_27349  | NW_004517590.1 | Scaffold2720 | 27349                   | CC                              | TT                | 1946683832               |
| SNP_P3_169875_28143  | NW_004517590.1 | Scaffold2720 | 28143                   | GG                              | AA                | 1946683834               |
| SNP_P3_169876_28221  | NW_004517590.1 | Scaffold2720 | 28221                   | TT                              | GG                | 1946683836               |
| SNP_P3_169877_28326  | NW_004517590.1 | Scaffold2720 | 28326                   | AA                              | TT                | 1946683838               |
| SNP_P3_169878_28595  | NW_004517590.1 | Scaffold2720 | 28595                   | GG                              | TT                | 1946683840               |
| SNP_P3_169879_28647  | NW_004517590.1 | Scaffold2720 | 28647                   | GG                              | CC                | 1946683843               |
| SNP_P3_169880_28732  | NW_004517590.1 | Scaffold2720 | 28732                   | CC                              | TT                | 1946683845               |
| SNP_P3_169881_28944  | NW_004517590.1 | Scaffold2720 | 28944                   | CC                              | GG                | 1946683847               |
| SNP_P3_169882_28967  | NW_004517590.1 | Scaffold2720 | 28967                   | TT                              | CC                | 1946683850               |
| SNP_P3_169883_29020  | NW_004517590.1 | Scaffold2720 | 29020                   | TT                              | CC                | 1946683852               |
| SNP_P3_169884_29026  | NW_004517590.1 | Scaffold2720 | 29026                   | AA                              | GG                | 1946683854               |
| SNP_P3_169885_29045  | NW_004517590.1 | Scaffold2720 | 29045                   | TT                              | AA                | 1946683856               |
| SNP_P3_169886_73297  | NW_004517590.1 | Scaffold2720 | 73297                   | CC                              | GG                | 1946683858               |
| SNP_P3_169888_85138  | NW_004517590.1 | Scaffold2720 | 85138                   | CC                              | AA                | 1946683860               |
| SNP_P3_169889_85567  | NW_004517590.1 | Scaffold2720 | 85567                   | AA                              | GG                | 1946683862               |
| SNP_P3_169890_85627  | NW_004517590.1 | Scaffold2720 | 85627                   | TT                              | AA                | 1946683864               |
| SNP_P3_169891_85662  | NW_004517590.1 | Scaffold2720 | 85662                   | TT                              | CC                | 1946683866               |
| SNP_P3_169892_112789 | NW_004517590.1 | Scaffold2720 | 112789                  | TT                              | GG                | 1946683868               |
| SNP_P3_169893_120125 | NW_004517590.1 | Scaffold2720 | 120125                  | TT                              | GG                | 1946683870               |
| SNP_P3_169894_123625 | NW_004517590.1 | Scaffold2720 | 123625                  | AA                              | GG                | 1946683873               |
| SNP_P3_169895_123891 | NW_004517590.1 | Scaffold2720 | 123891                  | CC                              | TT                | 1946683875               |
| SNP_P3_169896_123922 | NW_004517590.1 | Scaffold2720 | 123922                  | GG                              | TT                | 1946683877               |
| SNP_P3_169897_123935 | NW_004517590.1 | Scaffold2720 | 123935                  | CC                              | TT                | 1946683880               |
| SNP_P3_169898_126751 | NW_004517590.1 | Scaffold2720 | 126751                  | TT                              | CC                | 1946683882               |
| SNP_P3_169899_127128 | NW_004517590.1 | Scaffold2720 | 127128                  | TT                              | CC                | 1946683884               |
| SNP_P3_169900_127150 | NW_004517590.1 | Scaffold2720 | 127150                  | AA                              | GG                | 1946683886               |
| SNP_P3_169902_128528 | NW_004517590.1 | Scaffold2720 | 128528                  | CC                              | TT                | 1946683888               |
| SNP_P3_169903_128534 | NW_004517590.1 | Scaffold2720 | 128534                  | TT                              | CC                | 1946683890               |
| SNP_P3_169904_131606 | NW_004517590.1 | Scaffold2720 | 131606                  | CC                              | TT                | 1946683892               |
| SNP_P3_169905_131882 | NW_004517590.1 | Scaffold2720 | 131882                  | AA                              | GG                | 1946683894               |
| SNP_P3_169906_131946 | NW_004517590.1 | Scaffold2720 | 131946                  | CC                              | TT                | 1946683896               |
| SNP_P3_169907_131951 | NW_004517590.1 | Scaffold2720 | 131951                  | AA                              | GG                | 1946683898               |
| SNP_P3_169909_132021 | NW_004517590.1 | Scaffold2720 | 132021                  | CC                              | GG                | 1946683900               |
| SNP_P3_169910_132022 | NW_004517590.1 | Scaffold2720 | 132022                  | CC                              | TT                | 1946683903               |
| SNP_P3_169911_132111 | NW_004517590.1 | Scaffold2720 | 132111                  | AA                              | GG                | 1946683905               |
| SNP_P3_169912_132572 | NW_004517590.1 | Scaffold2720 | 132572                  | AA                              | GG                | 1946683907               |
| SNP_P3_169913_137974 | NW_004517590.1 | Scaffold2720 | 137974                  | AA                              | CC                | 1946683909               |

| SNPs IDs             | Chromosome IDs | Chromosomes  | Physical positions (bp) | CDC Frontier (Reference genome) | (Pusa 256 & HPNB) | NCBI SNPdb Accession IDs |
|----------------------|----------------|--------------|-------------------------|---------------------------------|-------------------|--------------------------|
| SNP_P3_169914_140205 | NW_004517590.1 | Scaffold2720 | 140205                  | CC                              | TT                | 1946683911               |
| SNP_P3_169915_174053 | NW_004517590.1 | Scaffold2720 | 174053                  | AA                              | CC                | 1946683913               |
| SNP_P3_169916_174285 | NW_004517590.1 | Scaffold2720 | 174285                  | CC                              | TT                | 1946683915               |
| SNP_P3_169917_174293 | NW_004517590.1 | Scaffold2720 | 174293                  | GG                              | AA                | 1946683917               |
| SNP_P3_169918_174347 | NW_004517590.1 | Scaffold2720 | 174347                  | CC                              | TT                | 1946683919               |
| SNP_P3_169919_174404 | NW_004517590.1 | Scaffold2720 | 174404                  | AA                              | TT                | 1946683921               |
| SNP_P3_169920_174419 | NW_004517590.1 | Scaffold2720 | 174419                  | TT                              | CC                | 1946683923               |
| SNP_P3_169921_174485 | NW_004517590.1 | Scaffold2720 | 174485                  | AA                              | GG                | 1946683925               |
| SNP_P3_169922_176066 | NW_004517590.1 | Scaffold2720 | 176066                  | GG                              | AA                | 1946683927               |
| SNP_P3_169923_176082 | NW_004517590.1 | Scaffold2720 | 176082                  | GG                              | AA                | 1946683931               |
| SNP_P3_169924_182827 | NW_004517590.1 | Scaffold2720 | 182827                  | TT                              | CC                | 1946683933               |
| SNP_P3_169925_182884 | NW_004517590.1 | Scaffold2720 | 182884                  | TT                              | CC                | 1946683935               |
| SNP_P3_169926_182906 | NW_004517590.1 | Scaffold2720 | 182906                  | AA                              | GG                | 1946683937               |
| SNP_P3_169927_182931 | NW_004517590.1 | Scaffold2720 | 182931                  | AA                              | GG                | 1946683939               |
| SNP_P3_169928_182952 | NW_004517590.1 | Scaffold2720 | 182952                  | AA                              | GG                | 1946683941               |
| SNP_P3_169929_182966 | NW_004517590.1 | Scaffold2720 | 182966                  | TT                              | CC                | 1946683943               |
| SNP_P3_169930_182991 | NW_004517590.1 | Scaffold2720 | 182991                  | AA                              | GG                | 1946683945               |
| SNP_P3_169931_183026 | NW_004517590.1 | Scaffold2720 | 183026                  | AA                              | TT                | 1946683947               |
| SNP_P3_169932_183027 | NW_004517590.1 | Scaffold2720 | 183027                  | TT                              | CC                | 1946683949               |
| SNP_P3_169933_183038 | NW_004517590.1 | Scaffold2720 | 183038                  | AA                              | GG                | 1946683951               |
| SNP_P3_169934_183280 | NW_004517590.1 | Scaffold2720 | 183280                  | TT                              | CC                | 1946683953               |
| SNP_P3_169935_209625 | NW_004517590.1 | Scaffold2720 | 209625                  | CC                              | AA                | 1946683955               |
| SNP_P3_169936_214320 | NW_004517590.1 | Scaffold2720 | 214320                  | TT                              | CC                | 1946683959               |
| SNP_P3_169937_215132 | NW_004517590.1 | Scaffold2720 | 215132                  | CC                              | GG                | 1946683961               |
| SNP_P3_169938_223949 | NW_004517590.1 | Scaffold2720 | 223949                  | CC                              | TT                | 1946683963               |
| SNP_P3_169939_223974 | NW_004517590.1 | Scaffold2720 | 223974                  | CC                              | AA                | 1946683965               |
| SNP_P3_169940_224015 | NW_004517590.1 | Scaffold2720 | 224015                  | CC                              | TT                | 1946683967               |
| SNP_P3_169941_224024 | NW_004517590.1 | Scaffold2720 | 224024                  | TT                              | CC                | 1946683969               |
| SNP_P3_169942_224039 | NW_004517590.1 | Scaffold2720 | 224039                  | GG                              | TT                | 1946683971               |
| SNP_P3_169943_224050 | NW_004517590.1 | Scaffold2720 | 224050                  | CC                              | TT                | 1946683973               |
| SNP_P3_169944_224051 | NW_004517590.1 | Scaffold2720 | 224051                  | AA                              | GG                | 1946683975               |
| SNP_P3_169945_224060 | NW_004517590.1 | Scaffold2720 | 224060                  | CC                              | TT                | 1946683977               |
| SNP_P3_169946_224066 | NW_004517590.1 | Scaffold2720 | 224066                  | CC                              | TT                | 1946683979               |
| SNP_P3_169947_224067 | NW_004517590.1 | Scaffold2720 | 224067                  | CC                              | TT                | 1946683981               |
| SNP_P3_169948_224257 | NW_004517590.1 | Scaffold2720 | 224257                  | TT                              | CC                | 1946683983               |
| SNP_P3_169949_224423 | NW_004517590.1 | Scaffold2720 | 224423                  | GG                              | AA                | 1946683987               |
| SNP_P3_169950_224429 | NW_004517590.1 | Scaffold2720 | 224429                  | AA                              | GG                | 1946683989               |
| SNP_P3_169951_224432 | NW_004517590.1 | Scaffold2720 | 224432                  | GG                              | AA                | 1946683991               |
| SNP_P3_169952_224444 | NW_004517590.1 | Scaffold2720 | 224444                  | AA                              | GG                | 1946683993               |
| SNP_P3_169954_804    | NW_004517591.1 | Scaffold2722 | 804                     | GG                              | TT                | 1946683995               |
| SNP_P3_169955_811    | NW_004517591.1 | Scaffold2722 | 811                     | GG                              | TT                | 1946683997               |
| SNP_P3_169956_825    | NW_004517591.1 | Scaffold2722 | 825                     | AA                              | TT                | 1946683999               |

| SNPs IDs            | Chromosome IDs | Chromosomes  | Physical positions (bp) | CDC Frontier (Reference genome) | (Pusa 256 & HPNB) | NCBI SNPdb Accession IDs |
|---------------------|----------------|--------------|-------------------------|---------------------------------|-------------------|--------------------------|
| SNP_P3_169957_903   | NW_004517591.1 | Scaffold2722 | 903                     | GG                              | AA                | 1946684009               |
| SNP_P3_169958_906   | NW_004517591.1 | Scaffold2722 | 906                     | AA                              | GG                | 1946684011               |
| SNP_P3_169959_916   | NW_004517591.1 | Scaffold2722 | 916                     | AA                              | GG                | 1946684013               |
| SNP_P3_169960_951   | NW_004517591.1 | Scaffold2722 | 951                     | AA                              | GG                | 1946684015               |
| SNP_P3_169961_964   | NW_004517591.1 | Scaffold2722 | 964                     | GG                              | AA                | 1946684017               |
| SNP_P3_169962_1949  | NW_004517591.1 | Scaffold2722 | 1949                    | CC                              | AA                | 1946684019               |
| SNP_P3_169963_1960  | NW_004517591.1 | Scaffold2722 | 1960                    | AA                              | GG                | 1946684021               |
| SNP_P3_169964_2116  | NW_004517591.1 | Scaffold2722 | 2116                    | GG                              | AA                | 1946684023               |
| SNP_P3_169965_18165 | NW_004517591.1 | Scaffold2722 | 18165                   | CC                              | AA                | 1946684025               |
| SNP_P3_169966_24164 | NW_004517591.1 | Scaffold2722 | 24164                   | AA                              | TT                | 1946684027               |
| SNP_P3_169967_27153 | NW_004517591.1 | Scaffold2722 | 27153                   | TT                              | AA                | 1946684029               |
| SNP_P3_169968_27154 | NW_004517591.1 | Scaffold2722 | 27154                   | CC                              | AA                | 1946684031               |
| SNP_P3_169970_30566 | NW_004517591.1 | Scaffold2722 | 30566                   | AA                              | TT                | 1946684033               |
| SNP_P3_169971_32283 | NW_004517591.1 | Scaffold2722 | 32283                   | CC                              | AA                | 1946684036               |
| SNP_P3_169972_41060 | NW_004517591.1 | Scaffold2722 | 41060                   | AA                              | GG                | 1946684038               |
| SNP_P3_169973_41236 | NW_004517591.1 | Scaffold2722 | 41236                   | GG                              | AA                | 1946684040               |
| SNP_P3_169974_41281 | NW_004517591.1 | Scaffold2722 | 41281                   | GG                              | TT                | 1946684042               |
| SNP_P3_169975_42121 | NW_004517591.1 | Scaffold2722 | 42121                   | GG                              | AA                | 1946684044               |
| SNP_P3_169976_52676 | NW_004517591.1 | Scaffold2722 | 52676                   | AA                              | TT                | 1946684046               |
| SNP_P3_169977_56078 | NW_004517591.1 | Scaffold2722 | 56078                   | AA                              | GG                | 1946684048               |
| SNP_P3_169980_77996 | NW_004517591.1 | Scaffold2722 | 77996                   | CC                              | TT                | 1946684050               |
| SNP_P3_169982_81290 | NW_004517591.1 | Scaffold2722 | 81290                   | AA                              | TT                | 1946684052               |
| SNP_P3_169983_83045 | NW_004517591.1 | Scaffold2722 | 83045                   | GG                              | AA                | 1946684054               |
| SNP_P3_169984_4746  | NW_004517592.1 | Scaffold2724 | 4746                    | CC                              | TT                | 1946684056               |
| SNP_P3_169985_6535  | NW_004517592.1 | Scaffold2724 | 6535                    | TT                              | CC                | 1946684058               |
| SNP_P3_169986_6585  | NW_004517592.1 | Scaffold2724 | 6585                    | AA                              | TT                | 1946684060               |
| SNP_P3_169987_18853 | NW_004517592.1 | Scaffold2724 | 18853                   | GG                              | CC                | 1946684062               |
| SNP_P3_169988_64    | NW_004517593.1 | Scaffold2725 | 64                      | CC                              | TT                | 1946684064               |
| SNP_P3_169989_94    | NW_004517593.1 | Scaffold2725 | 94                      | AA                              | GG                | 1946684066               |
| SNP_P3_169990_417   | NW_004517593.1 | Scaffold2725 | 417                     | GG                              | TT                | 1946684068               |
| SNP_P3_169991_1033  | NW_004517593.1 | Scaffold2725 | 1033                    | TT                              | CC                | 1946684070               |
| SNP_P3_169992_3069  | NW_004517593.1 | Scaffold2725 | 3069                    | TT                              | GG                | 1946684072               |
| SNP_P3_169993_3115  | NW_004517593.1 | Scaffold2725 | 3115                    | GG                              | AA                | 1946684074               |
| SNP_P3_169994_3603  | NW_004517593.1 | Scaffold2725 | 3603                    | AA                              | GG                | 1946684076               |
| SNP_P3_169995_3899  | NW_004517593.1 | Scaffold2725 | 3899                    | AA                              | GG                | 1946684078               |
| SNP_P3_169996_3198  | NW_004517594.1 | Scaffold2726 | 3198                    | TT                              | AA                | 1946684081               |
| SNP_P3_169997_3269  | NW_004517594.1 | Scaffold2726 | 3269                    | TT                              | GG                | 1946684083               |
| SNP_P3_169998_3276  | NW_004517594.1 | Scaffold2726 | 3276                    | AA                              | CC                | 1946684085               |
| SNP_P3_169999_4189  | NW_004517594.1 | Scaffold2726 | 4189                    | CC                              | AA                | 1946684087               |
| SNP_P3_170000_4387  | NW_004517594.1 | Scaffold2726 | 4387                    | TT                              | GG                | 1946684089               |
| SNP_P3_170001_4389  | NW_004517594.1 | Scaffold2726 | 4389                    | CC                              | AA                | 1946684091               |
| SNP_P3_170003_4542  | NW_004517594.1 | Scaffold2726 | 4542                    | AA                              | TT                | 1946684093               |



| SNPs IDs           | Chromosome IDs | Chromosomes  | Physical positions (bp) | CDC Frontier (Reference genome) | (Pusa 256 & HPNB) | NCBI SNPdb Accession IDs |
|--------------------|----------------|--------------|-------------------------|---------------------------------|-------------------|--------------------------|
| SNP_P3_170004_4748 | NW_004517594.1 | Scaffold2726 | 4748                    | GG                              | AA                | 1946684095               |
| SNP_P3_170005_1074 | NW_004517595.1 | Scaffold2727 | 1074                    | CC                              | TT                | 1946684097               |
| SNP_P3_170006_1407 | NW_004517595.1 | Scaffold2727 | 1407                    | TT                              | AA                | 1946684099               |
| SNP_P3_170007_1509 | NW_004517595.1 | Scaffold2727 | 1509                    | TT                              | CC                | 1946684101               |
| SNP_P3_170008_1535 | NW_004517595.1 | Scaffold2727 | 1535                    | CC                              | TT                | 1946684103               |
| SNP_P3_170009_1720 | NW_004517595.1 | Scaffold2727 | 1720                    | CC                              | GG                | 1946684105               |
| SNP_P3_170010_1749 | NW_004517595.1 | Scaffold2727 | 1749                    | CC                              | GG                | 1946684107               |
| SNP_P3_170011_1760 | NW_004517595.1 | Scaffold2727 | 1760                    | AA                              | GG                | 1946684109               |
| SNP_P3_170013_966  | NW_004517596.1 | Scaffold2728 | 966                     | AA                              | CC                | 1946684111               |
| SNP_P3_170014_980  | NW_004517596.1 | Scaffold2728 | 980                     | GG                              | AA                | 1946684113               |
| SNP_P3_170016_964  | NW_004517597.1 | Scaffold2729 | 964                     | AA                              | GG                | 1946684115               |
| SNP_P3_170017_1156 | NW_004517597.1 | Scaffold2729 | 1156                    | CC                              | TT                | 1946684118               |
| SNP_P3_170018_1210 | NW_004517597.1 | Scaffold2729 | 1210                    | AA                              | TT                | 1946684120               |
| SNP_P3_170019_1232 | NW_004517597.1 | Scaffold2729 | 1232                    | AA                              | GG                | 1946684123               |
| SNP_P3_170020_1285 | NW_004517597.1 | Scaffold2729 | 1285                    | AA                              | GG                | 1946684125               |
| SNP_P3_170021_1313 | NW_004517597.1 | Scaffold2729 | 1313                    | TT                              | CC                | 1946684127               |
| SNP_P3_170022_1392 | NW_004517597.1 | Scaffold2729 | 1392                    | CC                              | TT                | 1946684129               |
| SNP_P3_170023_3286 | NW_004517597.1 | Scaffold2729 | 3286                    | CC                              | TT                | 1946684131               |
| SNP_P3_170024_3306 | NW_004517597.1 | Scaffold2729 | 3306                    | CC                              | AA                | 1946684133               |
| SNP_P3_170025_5232 | NW_004517597.1 | Scaffold2729 | 5232                    | AA                              | CC                | 1946684135               |
| SNP_P3_170026_5246 | NW_004517597.1 | Scaffold2729 | 5246                    | TT                              | AA                | 1946684137               |
| SNP_P3_170028_5554 | NW_004517597.1 | Scaffold2729 | 5554                    | CC                              | AA                | 1946684139               |
| SNP_P3_170029_5595 | NW_004517597.1 | Scaffold2729 | 5595                    | GG                              | AA                | 1946684141               |
| SNP_P3_170030_5848 | NW_004517597.1 | Scaffold2729 | 5848                    | TT                              | CC                | 1946684143               |
| SNP_P3_170031_5850 | NW_004517597.1 | Scaffold2729 | 5850                    | GG                              | AA                | 1946684145               |
| SNP_P3_170032_5861 | NW_004517597.1 | Scaffold2729 | 5861                    | CC                              | TT                | 1946684147               |
| SNP_P3_170034_5906 | NW_004517597.1 | Scaffold2729 | 5906                    | CC                              | AA                | 1946684149               |
| SNP_P3_170035_5927 | NW_004517597.1 | Scaffold2729 | 5927                    | GG                              | AA                | 1946684151               |
| SNP_P3_170036_5946 | NW_004517597.1 | Scaffold2729 | 5946                    | GG                              | AA                | 1946684153               |
| SNP_P3_170037_6145 | NW_004517597.1 | Scaffold2729 | 6145                    | GG                              | TT                | 1946684155               |
| SNP_P3_170038_6194 | NW_004517597.1 | Scaffold2729 | 6194                    | CC                              | GG                | 1946684157               |
| SNP_P3_170039_6322 | NW_004517597.1 | Scaffold2729 | 6322                    | AA                              | TT                | 1946684159               |
| SNP_P3_170040_6453 | NW_004517597.1 | Scaffold2729 | 6453                    | TT                              | CC                | 1946684161               |
| SNP_P3_170041_6503 | NW_004517597.1 | Scaffold2729 | 6503                    | GG                              | AA                | 1946684164               |
| SNP_P3_170042_6507 | NW_004517597.1 | Scaffold2729 | 6507                    | GG                              | AA                | 1946684167               |
| SNP_P3_170043_6562 | NW_004517597.1 | Scaffold2729 | 6562                    | GG                              | AA                | 1946684169               |
| SNP_P3_170044_6820 | NW_004517597.1 | Scaffold2729 | 6820                    | CC                              | TT                | 1946684171               |
| SNP_P3_170045_6836 | NW_004517597.1 | Scaffold2729 | 6836                    | AA                              | GG                | 1946684173               |
| SNP_P3_170046_6838 | NW_004517597.1 | Scaffold2729 | 6838                    | CC                              | TT                | 1946684175               |
| SNP_P3_170047_6855 | NW_004517597.1 | Scaffold2729 | 6855                    | TT                              | GG                | 1946684177               |
| SNP_P3_170048_6905 | NW_004517597.1 | Scaffold2729 | 6905                    | GG                              | AA                | 1946684179               |
| SNP_P3_170049_6922 | NW_004517597.1 | Scaffold2729 | 6922                    | TT                              | AA                | 1946684181               |

| SNPs IDs             | Chromosome IDs | Chromosomes  | Physical positions (bp) | CDC Frontier (Reference genome) | (Pusa 256 & HPNB) | NCBI SNPdb Accession IDs |
|----------------------|----------------|--------------|-------------------------|---------------------------------|-------------------|--------------------------|
| SNP_P3_170050_6936   | NW_004517597.1 | Scaffold2729 | 6936                    | GG                              | AA                | 1946684183               |
| SNP_P3_170051_6973   | NW_004517597.1 | Scaffold2729 | 6973                    | CC                              | GG                | 1946684185               |
| SNP_P3_170052_6987   | NW_004517597.1 | Scaffold2729 | 6987                    | GG                              | AA                | 1946684187               |
| SNP_P3_170053_6988   | NW_004517597.1 | Scaffold2729 | 6988                    | CC                              | TT                | 1946684189               |
| SNP_P3_170054_7870   | NW_004517597.1 | Scaffold2729 | 7870                    | TT                              | CC                | 1946684191               |
| SNP_P3_170055_8646   | NW_004517597.1 | Scaffold2729 | 8646                    | TT                              | AA                | 1946684193               |
| SNP_P3_170056_12143  | NW_004517597.1 | Scaffold2729 | 12143                   | TT                              | AA                | 1946684196               |
| SNP_P3_170057_4700   | NW_004517598.1 | Scaffold2730 | 4700                    | AA                              | GG                | 1946684198               |
| SNP_P3_170058_1866   | NW_004517600.1 | Scaffold2733 | 1866                    | CC                              | AA                | 1946684200               |
| SNP_P3_170059_125    | NW_004517601.1 | Scaffold2734 | 125                     | TT                              | CC                | 1946684203               |
| SNP_P3_170060_326    | NW_004517601.1 | Scaffold2734 | 326                     | CC                              | AA                | 1946684205               |
| SNP_P3_170061_428    | NW_004517601.1 | Scaffold2734 | 428                     | AA                              | TT                | 1946684207               |
| SNP_P3_170062_508    | NW_004517601.1 | Scaffold2734 | 508                     | AA                              | GG                | 1946684209               |
| SNP_P3_170064_657    | NW_004517601.1 | Scaffold2734 | 657                     | TT                              | GG                | 1946684211               |
| SNP_P3_170065_771    | NW_004517601.1 | Scaffold2734 | 771                     | TT                              | CC                | 1946684213               |
| SNP_P3_170066_953    | NW_004517601.1 | Scaffold2734 | 953                     | CC                              | TT                | 1946684215               |
| SNP_P3_170067_961    | NW_004517601.1 | Scaffold2734 | 961                     | AA                              | GG                | 1946684217               |
| SNP_P3_170068_965    | NW_004517601.1 | Scaffold2734 | 965                     | CC                              | AA                | 1946684219               |
| SNP_P3_170069_1046   | NW_004517601.1 | Scaffold2734 | 1046                    | TT                              | CC                | 1946684221               |
| SNP_P3_170070_1431   | NW_004517601.1 | Scaffold2734 | 1431                    | AA                              | GG                | 1946684224               |
| SNP_P3_170071_1442   | NW_004517601.1 | Scaffold2734 | 1442                    | GG                              | CC                | 1946684226               |
| SNP_P3_170072_1478   | NW_004517601.1 | Scaffold2734 | 1478                    | AA                              | CC                | 1946684228               |
| SNP_P3_170073_1482   | NW_004517601.1 | Scaffold2734 | 1482                    | TT                              | CC                | 1946684230               |
| SNP_P3_170074_1489   | NW_004517601.1 | Scaffold2734 | 1489                    | CC                              | TT                | 1946684232               |
| SNP_P3_170075_13890  | NW_004517601.1 | Scaffold2734 | 13890                   | AA                              | TT                | 1946684234               |
| SNP_P3_170076_13926  | NW_004517601.1 | Scaffold2734 | 13926                   | GG                              | TT                | 1946684236               |
| SNP_P3_170077_16390  | NW_004517601.1 | Scaffold2734 | 16390                   | CC                              | TT                | 1946684238               |
| SNP_P3_170078_16451  | NW_004517601.1 | Scaffold2734 | 16451                   | GG                              | TT                | 1946684240               |
| SNP_P3_170079_59294  | NW_004517601.1 | Scaffold2734 | 59294                   | AA                              | TT                | 1946684242               |
| SNP_P3_170080_76913  | NW_004517601.1 | Scaffold2734 | 76913                   | TT                              | AA                | 1946684244               |
| SNP_P3_170081_86587  | NW_004517601.1 | Scaffold2734 | 86587                   | AA                              | CC                | 1946684246               |
| SNP_P3_170082_90577  | NW_004517601.1 | Scaffold2734 | 90577                   | CC                              | TT                | 1946684248               |
| SNP_P3_170083_115198 | NW_004517601.1 | Scaffold2734 | 115198                  | AA                              | GG                | 1946684250               |
| SNP_P3_170084_115224 | NW_004517601.1 | Scaffold2734 | 115224                  | TT                              | CC                | 1946684252               |
| SNP_P3_170085_115377 | NW_004517601.1 | Scaffold2734 | 115377                  | TT                              | CC                | 1946684254               |
| SNP_P3_170087_422    | NW_004517602.1 | Scaffold2736 | 422                     | GG                              | AA                | 1946684257               |
| SNP_P3_170088_3058   | NW_004517602.1 | Scaffold2736 | 3058                    | GG                              | CC                | 1946684259               |
| SNP_P3_170089_3336   | NW_004517602.1 | Scaffold2736 | 3336                    | AA                              | GG                | 1946684261               |
| SNP_P3_170090_3424   | NW_004517602.1 | Scaffold2736 | 3424                    | TT                              | GG                | 1946684263               |
| SNP_P3_170092_3645   | NW_004517602.1 | Scaffold2736 | 3645                    | AA                              | GG                | 1946684265               |
| SNP_P3_170093_3659   | NW_004517602.1 | Scaffold2736 | 3659                    | AA                              | GG                | 1946684267               |
| SNP_P3_170094_3688   | NW_004517602.1 | Scaffold2736 | 3688                    | TT                              | CC                | 1946684268               |

| SNPs IDs            | Chromosome IDs | Chromosomes  | Physical positions (bp) | CDC Frontier (Reference genome) | (Pusa 256 & HPNB) | NCBI SNPdb Accession IDs |
|---------------------|----------------|--------------|-------------------------|---------------------------------|-------------------|--------------------------|
| SNP_P3_170095_3808  | NW_004517602.1 | Scaffold2736 | 3808                    | TT                              | GG                | 1946684270               |
| SNP_P3_170096_3817  | NW_004517602.1 | Scaffold2736 | 3817                    | GG                              | TT                | 1946684272               |
| SNP_P3_170097_3848  | NW_004517602.1 | Scaffold2736 | 3848                    | CC                              | TT                | 1946684274               |
| SNP_P3_170098_3945  | NW_004517602.1 | Scaffold2736 | 3945                    | TT                              | CC                | 1946684276               |
| SNP_P3_170099_4007  | NW_004517602.1 | Scaffold2736 | 4007                    | CC                              | AA                | 1946684278               |
| SNP_P3_170100_4146  | NW_004517602.1 | Scaffold2736 | 4146                    | GG                              | AA                | 1946684280               |
| SNP_P3_170101_4193  | NW_004517602.1 | Scaffold2736 | 4193                    | CC                              | TT                | 1946684282               |
| SNP_P3_170102_4287  | NW_004517602.1 | Scaffold2736 | 4287                    | TT                              | CC                | 1946684284               |
| SNP_P3_170103_4298  | NW_004517602.1 | Scaffold2736 | 4298                    | CC                              | TT                | 1946684286               |
| SNP_P3_170104_4350  | NW_004517602.1 | Scaffold2736 | 4350                    | CC                              | GG                | 1946684288               |
| SNP_P3_170105_4541  | NW_004517602.1 | Scaffold2736 | 4541                    | TT                              | CC                | 1946684290               |
| SNP_P3_170106_4651  | NW_004517602.1 | Scaffold2736 | 4651                    | GG                              | AA                | 1946684292               |
| SNP_P3_170107_4167  | NW_004517603.1 | Scaffold2737 | 4167                    | TT                              | AA                | 1946684294               |
| SNP_P3_170108_8946  | NW_004517603.1 | Scaffold2737 | 8946                    | TT                              | AA                | 1946684295               |
| SNP_P3_170109_9243  | NW_004517603.1 | Scaffold2737 | 9243                    | CC                              | AA                | 1946684299               |
| SNP_P3_170110_9288  | NW_004517603.1 | Scaffold2737 | 9288                    | CC                              | AA                | 1946684301               |
| SNP_P3_170111_9361  | NW_004517603.1 | Scaffold2737 | 9361                    | AA                              | CC                | 1946684303               |
| SNP_P3_170113_9544  | NW_004517603.1 | Scaffold2737 | 9544                    | GG                              | AA                | 1946684305               |
| SNP_P3_170114_9636  | NW_004517603.1 | Scaffold2737 | 9636                    | AA                              | TT                | 1946684307               |
| SNP_P3_170115_9731  | NW_004517603.1 | Scaffold2737 | 9731                    | AA                              | CC                | 1946684309               |
| SNP_P3_170116_2741  | NW_004517604.1 | Scaffold2738 | 2741                    | AA                              | GG                | 1946684311               |
| SNP_P3_170117_3979  | NW_004517604.1 | Scaffold2738 | 3979                    | AA                              | TT                | 1946684313               |
| SNP_P3_170118_5005  | NW_004517604.1 | Scaffold2738 | 5005                    | CC                              | TT                | 1946684315               |
| SNP_P3_170119_7951  | NW_004517604.1 | Scaffold2738 | 7951                    | CC                              | TT                | 1946684317               |
| SNP_P3_170120_7963  | NW_004517604.1 | Scaffold2738 | 7963                    | TT                              | CC                | 1946684318               |
| SNP_P3_170121_8156  | NW_004517604.1 | Scaffold2738 | 8156                    | GG                              | AA                | 1946684320               |
| SNP_P3_170122_9784  | NW_004517604.1 | Scaffold2738 | 9784                    | TT                              | GG                | 1946684322               |
| SNP_P3_170123_10067 | NW_004517604.1 | Scaffold2738 | 10067                   | AA                              | CC                | 1946684324               |
| SNP_P3_170124_10165 | NW_004517604.1 | Scaffold2738 | 10165                   | TT                              | CC                | 1946684326               |
| SNP_P3_170125_10556 | NW_004517604.1 | Scaffold2738 | 10556                   | CC                              | TT                | 1946684328               |
| SNP_P3_170126_10598 | NW_004517604.1 | Scaffold2738 | 10598                   | GG                              | CC                | 1946684331               |
| SNP_P3_170127_10601 | NW_004517604.1 | Scaffold2738 | 10601                   | AA                              | TT                | 1946684333               |
| SNP_P3_170128_10776 | NW_004517604.1 | Scaffold2738 | 10776                   | CC                              | TT                | 1946684335               |
| SNP_P3_170129_10782 | NW_004517604.1 | Scaffold2738 | 10782                   | TT                              | CC                | 1946684337               |
| SNP_P3_170130_10783 | NW_004517604.1 | Scaffold2738 | 10783                   | GG                              | AA                | 1946684339               |
| SNP_P3_170131_11535 | NW_004517604.1 | Scaffold2738 | 11535                   | GG                              | AA                | 1946684341               |
| SNP_P3_170132_11547 | NW_004517604.1 | Scaffold2738 | 11547                   | TT                              | CC                | 1946684343               |
| SNP_P3_170133_11618 | NW_004517604.1 | Scaffold2738 | 11618                   | TT                              | CC                | 1946684345               |
| SNP_P3_170134_12098 | NW_004517604.1 | Scaffold2738 | 12098                   | AA                              | GG                | 1946684347               |
| SNP_P3_170135_26580 | NW_004517604.1 | Scaffold2738 | 26580                   | AA                              | GG                | 1946684349               |
| SNP_P3_170136_26599 | NW_004517604.1 | Scaffold2738 | 26599                   | AA                              | GG                | 1946684351               |
| SNP_P3_170137_27485 | NW_004517604.1 | Scaffold2738 | 27485                   | GG                              | TT                | 1946684353               |

| SNPs IDs            | Chromosome IDs | Chromosomes  | Physical positions (bp) | CDC Frontier (Reference genome) | (Pusa 256 & HPNB) | NCBI SNPdb Accession IDs |
|---------------------|----------------|--------------|-------------------------|---------------------------------|-------------------|--------------------------|
| SNP_P3_170138_28445 | NW_004517604.1 | Scaffold2738 | 28445                   | AA                              | GG                | 1946684355               |
| SNP_P3_170139_29181 | NW_004517604.1 | Scaffold2738 | 29181                   | GG                              | AA                | 1946684357               |
| SNP_P3_170140_29552 | NW_004517604.1 | Scaffold2738 | 29552                   | CC                              | TT                | 1946684359               |
| SNP_P3_170141_29827 | NW_004517604.1 | Scaffold2738 | 29827                   | AA                              | CC                | 1946684362               |
| SNP_P3_170142_29989 | NW_004517604.1 | Scaffold2738 | 29989                   | GG                              | AA                | 1946684364               |
| SNP_P3_170143_30045 | NW_004517604.1 | Scaffold2738 | 30045                   | TT                              | CC                | 1946684366               |
| SNP_P3_170144_30089 | NW_004517604.1 | Scaffold2738 | 30089                   | AA                              | CC                | 1946684368               |
| SNP_P3_170145_30411 | NW_004517604.1 | Scaffold2738 | 30411                   | AA                              | GG                | 1946684370               |
| SNP_P3_170146_30551 | NW_004517604.1 | Scaffold2738 | 30551                   | GG                              | AA                | 1946684372               |
| SNP_P3_170149_31389 | NW_004517604.1 | Scaffold2738 | 31389                   | TT                              | CC                | 1946684374               |
| SNP_P3_170150_31496 | NW_004517604.1 | Scaffold2738 | 31496                   | GG                              | AA                | 1946684376               |
| SNP_P3_170151_31603 | NW_004517604.1 | Scaffold2738 | 31603                   | CC                              | GG                | 1946684378               |
| SNP_P3_170152_31627 | NW_004517604.1 | Scaffold2738 | 31627                   | TT                              | GG                | 1946684380               |
| SNP_P3_170153_31725 | NW_004517604.1 | Scaffold2738 | 31725                   | TT                              | CC                | 1946684382               |
| SNP_P3_170154_31732 | NW_004517604.1 | Scaffold2738 | 31732                   | AA                              | TT                | 1946684384               |
| SNP_P3_170155_31747 | NW_004517604.1 | Scaffold2738 | 31747                   | AA                              | GG                | 1946684386               |
| SNP_P3_170156_31914 | NW_004517604.1 | Scaffold2738 | 31914                   | AA                              | TT                | 1946684388               |
| SNP_P3_170157_20148 | NW_004517605.1 | Scaffold2739 | 20148                   | TT                              | CC                | 1946684390               |
| SNP_P3_170158_20326 | NW_004517605.1 | Scaffold2739 | 20326                   | CC                              | AA                | 1946684392               |
| SNP_P3_170159_20351 | NW_004517605.1 | Scaffold2739 | 20351                   | CC                              | AA                | 1946684395               |
| SNP_P3_170160_20466 | NW_004517605.1 | Scaffold2739 | 20466                   | AA                              | TT                | 1946684397               |
| SNP_P3_170161_20469 | NW_004517605.1 | Scaffold2739 | 20469                   | CC                              | TT                | 1946684399               |
| SNP_P3_170162_20473 | NW_004517605.1 | Scaffold2739 | 20473                   | TT                              | CC                | 1946684401               |
| SNP_P3_170163_20474 | NW_004517605.1 | Scaffold2739 | 20474                   | AA                              | TT                | 1946684403               |
| SNP_P3_170164_20504 | NW_004517605.1 | Scaffold2739 | 20504                   | TT                              | AA                | 1946684405               |
| SNP_P3_170165_20510 | NW_004517605.1 | Scaffold2739 | 20510                   | CC                              | AA                | 1946684407               |
| SNP_P3_170166_21450 | NW_004517605.1 | Scaffold2739 | 21450                   | CC                              | TT                | 1946684409               |
| SNP_P3_170167_21534 | NW_004517605.1 | Scaffold2739 | 21534                   | TT                              | GG                | 1946684411               |
| SNP_P3_170168_21607 | NW_004517605.1 | Scaffold2739 | 21607                   | TT                              | GG                | 1946684413               |
| SNP_P3_170169_21647 | NW_004517605.1 | Scaffold2739 | 21647                   | TT                              | GG                | 1946684415               |
| SNP_P3_170170_21657 | NW_004517605.1 | Scaffold2739 | 21657                   | AA                              | GG                | 1946684417               |
| SNP_P3_170171_21979 | NW_004517605.1 | Scaffold2739 | 21979                   | AA                              | TT                | 1946684419               |
| SNP_P3_170172_22155 | NW_004517605.1 | Scaffold2739 | 22155                   | GG                              | AA                | 1946684421               |
| SNP_P3_170173_4448  | NW_004517607.1 | Scaffold2742 | 4448                    | AA                              | TT                | 1946684422               |
| SNP_P3_170174_13055 | NW_004517607.1 | Scaffold2742 | 13055                   | TT                              | AA                | 1946684424               |
| SNP_P3_170175_13130 | NW_004517607.1 | Scaffold2742 | 13130                   | CC                              | GG                | 1946684428               |
| SNP_P3_170176_13303 | NW_004517607.1 | Scaffold2742 | 13303                   | GG                              | AA                | 1946684430               |
| SNP_P3_170177_17603 | NW_004517607.1 | Scaffold2742 | 17603                   | TT                              | CC                | 1946684432               |
| SNP_P3_170178_17622 | NW_004517607.1 | Scaffold2742 | 17622                   | AA                              | GG                | 1946684434               |
| SNP_P3_170179_17779 | NW_004517607.1 | Scaffold2742 | 17779                   | TT                              | CC                | 1946684436               |
| SNP_P3_170180_18259 | NW_004517607.1 | Scaffold2742 | 18259                   | GG                              | AA                | 1946684438               |
| SNP_P3_170181_1267  | NW_004517608.1 | Scaffold2743 | 1267                    | TT                              | GG                | 1946684440               |

| SNPs IDs            | Chromosome IDs | Chromosomes  | Physical positions (bp) | CDC Frontier (Reference genome) | (Pusa 256 & HPNB) | NCBI SNPdb Accession IDs |
|---------------------|----------------|--------------|-------------------------|---------------------------------|-------------------|--------------------------|
| SNP_P3_170182_1292  | NW_004517608.1 | Scaffold2743 | 1292                    | AA                              | GG                | 1946684442               |
| SNP_P3_170183_3057  | NW_004517609.1 | Scaffold2744 | 3057                    | CC                              | TT                | 1946684444               |
| SNP_P3_170184_3069  | NW_004517609.1 | Scaffold2744 | 3069                    | GG                              | AA                | 1946684446               |
| SNP_P3_170185_3076  | NW_004517609.1 | Scaffold2744 | 3076                    | TT                              | CC                | 1946684448               |
| SNP_P3_170186_3095  | NW_004517609.1 | Scaffold2744 | 3095                    | GG                              | CC                | 1946684450               |
| SNP_P3_170187_3177  | NW_004517609.1 | Scaffold2744 | 3177                    | TT                              | CC                | 1946684452               |
| SNP_P3_170188_3554  | NW_004517609.1 | Scaffold2744 | 3554                    | GG                              | TT                | 1946684454               |
| SNP_P3_170189_3677  | NW_004517609.1 | Scaffold2744 | 3677                    | GG                              | AA                | 1946684456               |
| SNP_P3_170190_10220 | NW_004517609.1 | Scaffold2744 | 10220                   | TT                              | CC                | 1946684459               |
| SNP_P3_170191_28300 | NW_004517609.1 | Scaffold2744 | 28300                   | CC                              | TT                | 1946684461               |
| SNP_P3_170192_28321 | NW_004517609.1 | Scaffold2744 | 28321                   | TT                              | CC                | 1946684463               |
| SNP_P3_170193_28327 | NW_004517609.1 | Scaffold2744 | 28327                   | AA                              | CC                | 1946684465               |
| SNP_P3_170194_31052 | NW_004517609.1 | Scaffold2744 | 31052                   | AA                              | GG                | 1946684467               |
| SNP_P3_170195_31082 | NW_004517609.1 | Scaffold2744 | 31082                   | TT                              | CC                | 1946684469               |
| SNP_P3_170196_31153 | NW_004517609.1 | Scaffold2744 | 31153                   | TT                              | CC                | 1946684471               |
| SNP_P3_170197_31163 | NW_004517609.1 | Scaffold2744 | 31163                   | TT                              | CC                | 1946684473               |
| SNP_P3_170198_31164 | NW_004517609.1 | Scaffold2744 | 31164                   | TT                              | CC                | 1946684475               |
| SNP_P3_170199_31165 | NW_004517609.1 | Scaffold2744 | 31165                   | TT                              | CC                | 1946684477               |
| SNP_P3_170200_31177 | NW_004517609.1 | Scaffold2744 | 31177                   | AA                              | GG                | 1946684479               |
| SNP_P3_170201_31183 | NW_004517609.1 | Scaffold2744 | 31183                   | GG                              | AA                | 1946684481               |
| SNP_P3_170202_31222 | NW_004517609.1 | Scaffold2744 | 31222                   | CC                              | TT                | 1946684483               |
| SNP_P3_170203_31240 | NW_004517609.1 | Scaffold2744 | 31240                   | AA                              | TT                | 1946684485               |
| SNP_P3_170204_31261 | NW_004517609.1 | Scaffold2744 | 31261                   | AA                              | CC                | 1946684487               |
| SNP_P3_170205_31279 | NW_004517609.1 | Scaffold2744 | 31279                   | AA                              | GG                | 1946684489               |
| SNP_P3_170206_40111 | NW_004517609.1 | Scaffold2744 | 40111                   | AA                              | CC                | 1946684491               |
| SNP_P3_170207_40985 | NW_004517609.1 | Scaffold2744 | 40985                   | TT                              | CC                | 1946684493               |
| SNP_P3_170208_42005 | NW_004517609.1 | Scaffold2744 | 42005                   | TT                              | CC                | 1946684495               |
| SNP_P3_170209_42039 | NW_004517609.1 | Scaffold2744 | 42039                   | CC                              | AA                | 1946684497               |
| SNP_P3_170210_42046 | NW_004517609.1 | Scaffold2744 | 42046                   | CC                              | AA                | 1946684499               |
| SNP_P3_170211_42048 | NW_004517609.1 | Scaffold2744 | 42048                   | CC                              | TT                | 1946684501               |
| SNP_P3_170212_42086 | NW_004517609.1 | Scaffold2744 | 42086                   | AA                              | CC                | 1946684503               |
| SNP_P3_170213_42312 | NW_004517609.1 | Scaffold2744 | 42312                   | CC                              | AA                | 1946684505               |
| SNP_P3_170214_42405 | NW_004517609.1 | Scaffold2744 | 42405                   | TT                              | CC                | 1946684507               |
| SNP_P3_170216_42408 | NW_004517609.1 | Scaffold2744 | 42408                   | CC                              | TT                | 1946684509               |
| SNP_P3_170217_42418 | NW_004517609.1 | Scaffold2744 | 42418                   | TT                              | AA                | 1946684511               |
| SNP_P3_170218_42425 | NW_004517609.1 | Scaffold2744 | 42425                   | CC                              | AA                | 1946684513               |
| SNP_P3_170219_42444 | NW_004517609.1 | Scaffold2744 | 42444                   | TT                              | AA                | 1946684515               |
| SNP_P3_170220_47281 | NW_004517609.1 | Scaffold2744 | 47281                   | AA                              | GG                | 1946684517               |
| SNP_P3_170221_51878 | NW_004517609.1 | Scaffold2744 | 51878                   | AA                              | GG                | 1946684519               |
| SNP_P3_170222_51879 | NW_004517609.1 | Scaffold2744 | 51879                   | AA                              | TT                | 1946684521               |
| SNP_P3_170224_55289 | NW_004517609.1 | Scaffold2744 | 55289                   | CC                              | TT                | 1946684523               |
| SNP_P3_170225_65372 | NW_004517609.1 | Scaffold2744 | 65372                   | CC                              | TT                | 1946684525               |

| SNPs IDs            | Chromosome IDs | Chromosomes  | Physical positions (bp) | CDC Frontier (Reference genome) | (Pusa 256 & HPNB) | NCBI SNPdb Accession IDs |
|---------------------|----------------|--------------|-------------------------|---------------------------------|-------------------|--------------------------|
| SNP_P3_170227_65668 | NW_004517609.1 | Scaffold2744 | 65668                   | GG                              | AA                | 1946684527               |
| SNP_P3_170228_65703 | NW_004517609.1 | Scaffold2744 | 65703                   | TT                              | AA                | 1946684529               |
| SNP_P3_170229_87703 | NW_004517609.1 | Scaffold2744 | 87703                   | GG                              | AA                | 1946684531               |
| SNP_P3_170230_87895 | NW_004517609.1 | Scaffold2744 | 87895                   | GG                              | AA                | 1946684533               |
| SNP_P3_170231_88037 | NW_004517609.1 | Scaffold2744 | 88037                   | GG                              | AA                | 1946684535               |
| SNP_P3_170232_88048 | NW_004517609.1 | Scaffold2744 | 88048                   | TT                              | AA                | 1946684537               |
| SNP_P3_170234_88666 | NW_004517609.1 | Scaffold2744 | 88666                   | GG                              | CC                | 1946684539               |
| SNP_P3_170235_88692 | NW_004517609.1 | Scaffold2744 | 88692                   | AA                              | GG                | 1946684541               |
| SNP_P3_170236_88918 | NW_004517609.1 | Scaffold2744 | 88918                   | TT                              | GG                | 1946684543               |
| SNP_P3_170237_89010 | NW_004517609.1 | Scaffold2744 | 89010                   | TT                              | AA                | 1946684545               |
| SNP_P3_170238_91838 | NW_004517609.1 | Scaffold2744 | 91838                   | AA                              | TT                | 1946684547               |
| SNP_P3_170239_92938 | NW_004517609.1 | Scaffold2744 | 92938                   | AA                              | GG                | 1946684549               |
| SNP_P3_170240_341   | NW_004517611.1 | Scaffold2746 | 341                     | GG                              | TT                | 1946684551               |
| SNP_P3_170241_353   | NW_004517611.1 | Scaffold2746 | 353                     | CC                              | GG                | 1946684553               |
| SNP_P3_170242_427   | NW_004517611.1 | Scaffold2746 | 427                     | TT                              | GG                | 1946684555               |
| SNP_P3_170243_541   | NW_004517611.1 | Scaffold2746 | 541                     | AA                              | CC                | 1946684557               |
| SNP_P3_170244_544   | NW_004517611.1 | Scaffold2746 | 544                     | CC                              | TT                | 1946684558               |
| SNP_P3_170245_668   | NW_004517613.1 | Scaffold2748 | 668                     | GG                              | CC                | 1946684560               |
| SNP_P3_170246_711   | NW_004517613.1 | Scaffold2748 | 711                     | AA                              | GG                | 1946684562               |
| SNP_P3_170247_1275  | NW_004517613.1 | Scaffold2748 | 1275                    | TT                              | CC                | 1946684564               |
| SNP_P3_170248_1346  | NW_004517613.1 | Scaffold2748 | 1346                    | TT                              | AA                | 1946684566               |
| SNP_P3_170249_1349  | NW_004517613.1 | Scaffold2748 | 1349                    | TT                              | CC                | 1946684568               |
| SNP_P3_170250_1362  | NW_004517613.1 | Scaffold2748 | 1362                    | GG                              | AA                | 1946684570               |
| SNP_P3_170251_1367  | NW_004517613.1 | Scaffold2748 | 1367                    | AA                              | TT                | 1946684572               |
| SNP_P3_170252_1433  | NW_004517613.1 | Scaffold2748 | 1433                    | TT                              | CC                | 1946684574               |
| SNP_P3_170253_19864 | NW_004517613.1 | Scaffold2748 | 19864                   | GG                              | AA                | 1946684576               |
| SNP_P3_170254_19884 | NW_004517613.1 | Scaffold2748 | 19884                   | GG                              | CC                | 1946684578               |
| SNP_P3_170255_19985 | NW_004517613.1 | Scaffold2748 | 19985                   | CC                              | TT                | 1946684580               |
| SNP_P3_170256_20041 | NW_004517613.1 | Scaffold2748 | 20041                   | AA                              | GG                | 1946684583               |
| SNP_P3_170257_20057 | NW_004517613.1 | Scaffold2748 | 20057                   | TT                              | GG                | 1946684586               |
| SNP_P3_170258_20447 | NW_004517613.1 | Scaffold2748 | 20447                   | AA                              | TT                | 1946684588               |
| SNP_P3_170259_22724 | NW_004517613.1 | Scaffold2748 | 22724                   | AA                              | TT                | 1946684590               |
| SNP_P3_170260_23620 | NW_004517613.1 | Scaffold2748 | 23620                   | TT                              | GG                | 1946684592               |
| SNP_P3_170261_23765 | NW_004517613.1 | Scaffold2748 | 23765                   | AA                              | GG                | 1946684594               |
| SNP_P3_170262_23959 | NW_004517613.1 | Scaffold2748 | 23959                   | GG                              | AA                | 1946684596               |
| SNP_P3_170263_24518 | NW_004517613.1 | Scaffold2748 | 24518                   | CC                              | TT                | 1946684598               |
| SNP_P3_170264_24582 | NW_004517613.1 | Scaffold2748 | 24582                   | GG                              | TT                | 1946684600               |
| SNP_P3_170265_24803 | NW_004517613.1 | Scaffold2748 | 24803                   | AA                              | TT                | 1946684601               |
| SNP_P3_170266_24982 | NW_004517613.1 | Scaffold2748 | 24982                   | TT                              | GG                | 1946684603               |
| SNP_P3_170267_25063 | NW_004517613.1 | Scaffold2748 | 25063                   | AA                              | TT                | 1946684605               |
| SNP_P3_170268_25098 | NW_004517613.1 | Scaffold2748 | 25098                   | GG                              | CC                | 1946684607               |
| SNP_P3_170269_25359 | NW_004517613.1 | Scaffold2748 | 25359                   | CC                              | TT                | 1946684609               |

| SNPs IDs             | Chromosome IDs | Chromosomes  | Physical positions (bp) | CDC Frontier (Reference genome) | (Pusa 256 & HPNB) | NCBI SNPdb Accession IDs |
|----------------------|----------------|--------------|-------------------------|---------------------------------|-------------------|--------------------------|
| SNP_P3_170270_25414  | NW_004517613.1 | Scaffold2748 | 25414                   | TT                              | AA                | 1946684611               |
| SNP_P3_170271_25418  | NW_004517613.1 | Scaffold2748 | 25418                   | AA                              | TT                | 1946684613               |
| SNP_P3_170273_26361  | NW_004517613.1 | Scaffold2748 | 26361                   | TT                              | AA                | 1946684615               |
| SNP_P3_170275_26678  | NW_004517613.1 | Scaffold2748 | 26678                   | GG                              | CC                | 1946684617               |
| SNP_P3_170276_27677  | NW_004517613.1 | Scaffold2748 | 27677                   | CC                              | AA                | 1946684619               |
| SNP_P3_170278_2233   | NW_004517615.1 | Scaffold2751 | 2233                    | TT                              | GG                | 1946684621               |
| SNP_P3_170279_2574   | NW_004517615.1 | Scaffold2751 | 2574                    | AA                              | CC                | 1946684624               |
| SNP_P3_170281_4126   | NW_004517619.1 | Scaffold2758 | 4126                    | TT                              | GG                | 1946684626               |
| SNP_P3_170282_4423   | NW_004517619.1 | Scaffold2758 | 4423                    | AA                              | GG                | 1946684628               |
| SNP_P3_170283_4437   | NW_004517619.1 | Scaffold2758 | 4437                    | GG                              | TT                | 1946684630               |
| SNP_P3_170284_367    | NW_004517623.1 | Scaffold2763 | 367                     | TT                              | CC                | 1946684632               |
| SNP_P3_170285_808    | NW_004517623.1 | Scaffold2763 | 808                     | GG                              | CC                | 1946684634               |
| SNP_P3_170288_9481   | NW_004517623.1 | Scaffold2763 | 9481                    | AA                              | GG                | 1946684636               |
| SNP_P3_170290_9771   | NW_004517623.1 | Scaffold2763 | 9771                    | TT                              | GG                | 1946684638               |
| SNP_P3_170291_13537  | NW_004517623.1 | Scaffold2763 | 13537                   | GG                              | TT                | 1946684640               |
| SNP_P3_170292_38277  | NW_004517623.1 | Scaffold2763 | 38277                   | TT                              | CC                | 1946684642               |
| SNP_P3_170293_54950  | NW_004517623.1 | Scaffold2763 | 54950                   | GG                              | AA                | 1946684644               |
| SNP_P3_170295_74579  | NW_004517623.1 | Scaffold2763 | 74579                   | AA                              | GG                | 1946684646               |
| SNP_P3_170296_74909  | NW_004517623.1 | Scaffold2763 | 74909                   | AA                              | GG                | 1946684648               |
| SNP_P3_170297_96155  | NW_004517623.1 | Scaffold2763 | 96155                   | GG                              | AA                | 1946684650               |
| SNP_P3_170298_136775 | NW_004517623.1 | Scaffold2763 | 136775                  | TT                              | CC                | 1946684652               |
| SNP_P3_170299_136877 | NW_004517623.1 | Scaffold2763 | 136877                  | TT                              | GG                | 1946684655               |
| SNP_P3_170300_140323 | NW_004517623.1 | Scaffold2763 | 140323                  | TT                              | AA                | 1946684657               |
| SNP_P3_170301_141663 | NW_004517623.1 | Scaffold2763 | 141663                  | AA                              | GG                | 1946684659               |
| SNP_P3_170302_154145 | NW_004517623.1 | Scaffold2763 | 154145                  | AA                              | GG                | 1946684661               |
| SNP_P3_170303_160997 | NW_004517623.1 | Scaffold2763 | 160997                  | GG                              | AA                | 1946684663               |
| SNP_P3_170304_171833 | NW_004517623.1 | Scaffold2763 | 171833                  | AA                              | GG                | 1946684665               |
| SNP_P3_170306_206982 | NW_004517623.1 | Scaffold2763 | 206982                  | AA                              | GG                | 1946684667               |
| SNP_P3_170307_208021 | NW_004517623.1 | Scaffold2763 | 208021                  | TT                              | CC                | 1946684669               |
| SNP_P3_170309_442    | NW_004517624.1 | Scaffold2764 | 442                     | GG                              | AA                | 1946684671               |
| SNP_P3_170310_453    | NW_004517624.1 | Scaffold2764 | 453                     | GG                              | AA                | 1946684673               |
| SNP_P3_170311_405    | NW_004517625.1 | Scaffold2766 | 405                     | GG                              | AA                | 1946684675               |
| SNP_P3_170312_13128  | NW_004517625.1 | Scaffold2766 | 13128                   | AA                              | GG                | 1946684677               |
| SNP_P3_170313_13472  | NW_004517625.1 | Scaffold2766 | 13472                   | TT                              | GG                | 1946684679               |
| SNP_P3_170314_13481  | NW_004517625.1 | Scaffold2766 | 13481                   | GG                              | AA                | 1946684681               |
| SNP_P3_170315_13496  | NW_004517625.1 | Scaffold2766 | 13496                   | AA                              | GG                | 1946684683               |
| SNP_P3_170316_13511  | NW_004517625.1 | Scaffold2766 | 13511                   | GG                              | AA                | 1946684685               |
| SNP_P3_170317_17970  | NW_004517625.1 | Scaffold2766 | 17970                   | CC                              | AA                | 1946684687               |
| SNP_P3_170318_525    | NW_004517626.1 | Scaffold2769 | 525                     | GG                              | CC                | 1946684689               |
| SNP_P3_170319_547    | NW_004517626.1 | Scaffold2769 | 547                     | TT                              | CC                | 1946684691               |
| SNP_P3_170320_838    | NW_004517626.1 | Scaffold2769 | 838                     | GG                              | AA                | 1946684693               |
| SNP_P3_170321_1009   | NW_004517626.1 | Scaffold2769 | 1009                    | CC                              | AA                | 1946684695               |

| SNPs IDs           | Chromosome IDs | Chromosomes  | Physical positions (bp) | CDC Frontier (Reference genome) | (Pusa 256 & HPNB) | NCBI SNPdb Accession IDs |
|--------------------|----------------|--------------|-------------------------|---------------------------------|-------------------|--------------------------|
| SNP_P3_170322_1011 | NW_004517626.1 | Scaffold2769 | 1011                    | TT                              | CC                | 1946684698               |
| SNP_P3_170323_2278 | NW_004517626.1 | Scaffold2769 | 2278                    | AA                              | GG                | 1946684700               |
| SNP_P3_170324_167  | NW_004517628.1 | Scaffold2772 | 167                     | CC                              | AA                | 1946684702               |
| SNP_P3_170325_172  | NW_004517628.1 | Scaffold2772 | 172                     | AA                              | GG                | 1946684704               |
| SNP_P3_170326_464  | NW_004517628.1 | Scaffold2772 | 464                     | GG                              | AA                | 1946684706               |
| SNP_P3_170327_142  | NW_004517631.1 | Scaffold2777 | 142                     | AA                              | CC                | 1946684708               |
| SNP_P3_170328_285  | NW_004517631.1 | Scaffold2777 | 285                     | CC                              | GG                | 1946684710               |
| SNP_P3_170329_1762 | NW_004517631.1 | Scaffold2777 | 1762                    | CC                              | TT                | 1946684712               |
| SNP_P3_170330_2062 | NW_004517631.1 | Scaffold2777 | 2062                    | GG                              | AA                | 1946684714               |
| SNP_P3_170332_2390 | NW_004517631.1 | Scaffold2777 | 2390                    | GG                              | AA                | 1946684716               |
| SNP_P3_170333_2496 | NW_004517631.1 | Scaffold2777 | 2496                    | AA                              | GG                | 1946684718               |
| SNP_P3_170334_2827 | NW_004517631.1 | Scaffold2777 | 2827                    | TT                              | CC                | 1946684720               |
| SNP_P3_170336_4487 | NW_004517631.1 | Scaffold2777 | 4487                    | AA                              | TT                | 1946684722               |
| SNP_P3_170337_5023 | NW_004517631.1 | Scaffold2777 | 5023                    | TT                              | AA                | 1946684724               |
| SNP_P3_170339_5418 | NW_004517631.1 | Scaffold2777 | 5418                    | CC                              | GG                | 1946684726               |
| SNP_P3_170340_5858 | NW_004517631.1 | Scaffold2777 | 5858                    | CC                              | TT                | 1946684728               |
| SNP_P3_170341_5943 | NW_004517631.1 | Scaffold2777 | 5943                    | TT                              | CC                | 1946684730               |
| SNP_P3_170342_81   | NW_004517632.1 | Scaffold2778 | 81                      | AA                              | CC                | 1946684732               |
| SNP_P3_170343_84   | NW_004517632.1 | Scaffold2778 | 84                      | AA                              | GG                | 1946684736               |
| SNP_P3_170344_93   | NW_004517632.1 | Scaffold2778 | 93                      | CC                              | TT                | 1946684738               |
| SNP_P3_170345_4249 | NW_004517632.1 | Scaffold2778 | 4249                    | GG                              | AA                | 1946684740               |
| SNP_P3_170346_4348 | NW_004517632.1 | Scaffold2778 | 4348                    | TT                              | GG                | 1946684742               |
| SNP_P3_170347_4380 | NW_004517632.1 | Scaffold2778 | 4380                    | AA                              | GG                | 1946684744               |
| SNP_P3_170348_5021 | NW_004517632.1 | Scaffold2778 | 5021                    | AA                              | GG                | 1946684746               |
| SNP_P3_170349_5043 | NW_004517632.1 | Scaffold2778 | 5043                    | AA                              | GG                | 1946684748               |
| SNP_P3_170350_5046 | NW_004517632.1 | Scaffold2778 | 5046                    | TT                              | CC                | 1946684750               |
| SNP_P3_170351_5341 | NW_004517632.1 | Scaffold2778 | 5341                    | GG                              | TT                | 1946684752               |
| SNP_P3_170352_5366 | NW_004517632.1 | Scaffold2778 | 5366                    | GG                              | AA                | 1946684754               |
| SNP_P3_170353_6482 | NW_004517632.1 | Scaffold2778 | 6482                    | AA                              | GG                | 1946684756               |
| SNP_P3_170354_6491 | NW_004517632.1 | Scaffold2778 | 6491                    | CC                              | AA                | 1946684758               |
| SNP_P3_170355_6633 | NW_004517632.1 | Scaffold2778 | 6633                    | CC                              | GG                | 1946684760               |
| SNP_P3_170356_6674 | NW_004517632.1 | Scaffold2778 | 6674                    | TT                              | GG                | 1946684762               |
| SNP_P3_170357_6901 | NW_004517632.1 | Scaffold2778 | 6901                    | CC                              | TT                | 1946684764               |
| SNP_P3_170358_7036 | NW_004517632.1 | Scaffold2778 | 7036                    | GG                              | CC                | 1946684766               |
| SNP_P3_170359_7186 | NW_004517632.1 | Scaffold2778 | 7186                    | GG                              | AA                | 1946684768               |
| SNP_P3_170360_7239 | NW_004517632.1 | Scaffold2778 | 7239                    | TT                              | CC                | 1946684770               |
| SNP_P3_170361_7252 | NW_004517632.1 | Scaffold2778 | 7252                    | TT                              | GG                | 1946684772               |
| SNP_P3_170362_7349 | NW_004517632.1 | Scaffold2778 | 7349                    | GG                              | AA                | 1946684775               |
| SNP_P3_170363_7419 | NW_004517632.1 | Scaffold2778 | 7419                    | CC                              | TT                | 1946684777               |
| SNP_P3_170364_7488 | NW_004517632.1 | Scaffold2778 | 7488                    | CC                              | TT                | 1946684779               |
| SNP_P3_170365_7491 | NW_004517632.1 | Scaffold2778 | 7491                    | GG                              | CC                | 1946684781               |
| SNP_P3_170366_7514 | NW_004517632.1 | Scaffold2778 | 7514                    | CC                              | TT                | 1946684784               |



| SNPs IDs            | Chromosome IDs | Chromosomes  | Physical positions (bp) | CDC Frontier (Reference genome) | (Pusa 256 & HPNB) | NCBI SNPdb Accession IDs |
|---------------------|----------------|--------------|-------------------------|---------------------------------|-------------------|--------------------------|
| SNP_P3_170367_11302 | NW_004517632.1 | Scaffold2778 | 11302                   | CC                              | AA                | 1946684786               |
| SNP_P3_170368_11364 | NW_004517632.1 | Scaffold2778 | 11364                   | AA                              | TT                | 1946684788               |
| SNP_P3_170369_11367 | NW_004517632.1 | Scaffold2778 | 11367                   | TT                              | AA                | 1946684790               |
| SNP_P3_170370_11369 | NW_004517632.1 | Scaffold2778 | 11369                   | TT                              | CC                | 1946684792               |
| SNP_P3_170371_11391 | NW_004517632.1 | Scaffold2778 | 11391                   | TT                              | AA                | 1946684794               |
| SNP_P3_170372_12153 | NW_004517632.1 | Scaffold2778 | 12153                   | TT                              | CC                | 1946684796               |
| SNP_P3_170373_12526 | NW_004517632.1 | Scaffold2778 | 12526                   | CC                              | TT                | 1946684798               |
| SNP_P3_170374_12587 | NW_004517632.1 | Scaffold2778 | 12587                   | GG                              | AA                | 1946684800               |
| SNP_P3_170375_1957  | NW_004517633.1 | Scaffold2779 | 1957                    | TT                              | AA                | 1946684803               |
| SNP_P3_170376_1986  | NW_004517633.1 | Scaffold2779 | 1986                    | AA                              | TT                | 1946684805               |
| SNP_P3_170377_2399  | NW_004517633.1 | Scaffold2779 | 2399                    | TT                              | GG                | 1946684807               |
| SNP_P3_170378_2408  | NW_004517633.1 | Scaffold2779 | 2408                    | AA                              | GG                | 1946684809               |
| SNP_P3_170379_2440  | NW_004517633.1 | Scaffold2779 | 2440                    | AA                              | TT                | 1946684812               |
| SNP_P3_170380_3281  | NW_004517633.1 | Scaffold2779 | 3281                    | TT                              | CC                | 1946684814               |
| SNP_P3_170381_3402  | NW_004517633.1 | Scaffold2779 | 3402                    | TT                              | CC                | 1946684816               |
| SNP_P3_170382_6117  | NW_004517633.1 | Scaffold2779 | 6117                    | CC                              | TT                | 1946684819               |
| SNP_P3_170383_6222  | NW_004517633.1 | Scaffold2779 | 6222                    | CC                              | TT                | 1946684821               |
| SNP_P3_170384_6622  | NW_004517633.1 | Scaffold2779 | 6622                    | TT                              | AA                | 1946684823               |
| SNP_P3_170385_6838  | NW_004517633.1 | Scaffold2779 | 6838                    | GG                              | TT                | 1946684825               |
| SNP_P3_170387_7071  | NW_004517633.1 | Scaffold2779 | 7071                    | GG                              | TT                | 1946684828               |
| SNP_P3_170388_8290  | NW_004517633.1 | Scaffold2779 | 8290                    | TT                              | AA                | 1946684830               |
| SNP_P3_170389_8455  | NW_004517633.1 | Scaffold2779 | 8455                    | CC                              | GG                | 1946684833               |
| SNP_P3_170390_8776  | NW_004517633.1 | Scaffold2779 | 8776                    | GG                              | TT                | 1946684836               |
| SNP_P3_170391_8823  | NW_004517633.1 | Scaffold2779 | 8823                    | CC                              | TT                | 1946684838               |
| SNP_P3_170392_11285 | NW_004517633.1 | Scaffold2779 | 11285                   | GG                              | AA                | 1946684841               |
| SNP_P3_170393_13126 | NW_004517633.1 | Scaffold2779 | 13126                   | TT                              | CC                | 1946684843               |
| SNP_P3_170394_17539 | NW_004517633.1 | Scaffold2779 | 17539                   | AA                              | GG                | 1946684846               |
| SNP_P3_170395_17708 | NW_004517633.1 | Scaffold2779 | 17708                   | AA                              | GG                | 1946684848               |
| SNP_P3_170396_17725 | NW_004517633.1 | Scaffold2779 | 17725                   | TT                              | CC                | 1946684850               |
| SNP_P3_170397_17761 | NW_004517633.1 | Scaffold2779 | 17761                   | GG                              | AA                | 1946684852               |
| SNP_P3_170398_17823 | NW_004517633.1 | Scaffold2779 | 17823                   | TT                              | CC                | 1946684854               |
| SNP_P3_170399_17835 | NW_004517633.1 | Scaffold2779 | 17835                   | TT                              | CC                | 1946684856               |
| SNP_P3_170400_17892 | NW_004517633.1 | Scaffold2779 | 17892                   | GG                              | TT                | 1946684858               |
| SNP_P3_170401_17983 | NW_004517633.1 | Scaffold2779 | 17983                   | GG                              | TT                | 1946684861               |
| SNP_P3_170402_18098 | NW_004517633.1 | Scaffold2779 | 18098                   | GG                              | TT                | 1946684863               |
| SNP_P3_170403_18100 | NW_004517633.1 | Scaffold2779 | 18100                   | AA                              | TT                | 1946684865               |
| SNP_P3_170404_18126 | NW_004517633.1 | Scaffold2779 | 18126                   | TT                              | AA                | 1946684867               |
| SNP_P3_170405_18164 | NW_004517633.1 | Scaffold2779 | 18164                   | GG                              | TT                | 1946684869               |
| SNP_P3_170406_18422 | NW_004517633.1 | Scaffold2779 | 18422                   | TT                              | CC                | 1946684871               |
| SNP_P3_170407_1398  | NW_004517634.1 | Scaffold2780 | 1398                    | CC                              | TT                | 1946684873               |
| SNP_P3_170408_4477  | NW_004517635.1 | Scaffold2782 | 4477                    | AA                              | GG                | 1946684875               |
| SNP_P3_170409_4666  | NW_004517635.1 | Scaffold2782 | 4666                    | GG                              | CC                | 1946684876               |

| SNPs IDs            | Chromosome IDs | Chromosomes  | Physical positions (bp) | CDC Frontier (Reference genome) | (Pusa 256 & HPNB) | NCBI SNPdb Accession IDs |
|---------------------|----------------|--------------|-------------------------|---------------------------------|-------------------|--------------------------|
| SNP_P3_170410_4719  | NW_004517635.1 | Scaffold2782 | 4719                    | CC                              | GG                | 1946684878               |
| SNP_P3_170411_5846  | NW_004517635.1 | Scaffold2782 | 5846                    | AA                              | GG                | 1946684880               |
| SNP_P3_170412_6017  | NW_004517635.1 | Scaffold2782 | 6017                    | TT                              | CC                | 1946684883               |
| SNP_P3_170413_6158  | NW_004517635.1 | Scaffold2782 | 6158                    | AA                              | GG                | 1946684885               |
| SNP_P3_170414_6204  | NW_004517635.1 | Scaffold2782 | 6204                    | CC                              | TT                | 1946684887               |
| SNP_P3_170416_6293  | NW_004517635.1 | Scaffold2782 | 6293                    | GG                              | AA                | 1946684889               |
| SNP_P3_170417_6372  | NW_004517635.1 | Scaffold2782 | 6372                    | AA                              | GG                | 1946684891               |
| SNP_P3_170418_7243  | NW_004517635.1 | Scaffold2782 | 7243                    | GG                              | CC                | 1946684893               |
| SNP_P3_170419_7273  | NW_004517635.1 | Scaffold2782 | 7273                    | GG                              | CC                | 1946684895               |
| SNP_P3_170420_7380  | NW_004517635.1 | Scaffold2782 | 7380                    | CC                              | GG                | 1946684897               |
| SNP_P3_170421_7392  | NW_004517635.1 | Scaffold2782 | 7392                    | CC                              | GG                | 1946684899               |
| SNP_P3_170422_8592  | NW_004517635.1 | Scaffold2782 | 8592                    | GG                              | TT                | 1946684901               |
| SNP_P3_170423_8611  | NW_004517635.1 | Scaffold2782 | 8611                    | CC                              | AA                | 1946684903               |
| SNP_P3_170424_8744  | NW_004517635.1 | Scaffold2782 | 8744                    | CC                              | AA                | 1946684905               |
| SNP_P3_170425_8993  | NW_004517635.1 | Scaffold2782 | 8993                    | TT                              | GG                | 1946684907               |
| SNP_P3_170426_10422 | NW_004517635.1 | Scaffold2782 | 10422                   | AA                              | TT                | 1946684909               |
| SNP_P3_170427_10443 | NW_004517635.1 | Scaffold2782 | 10443                   | CC                              | GG                | 1946684911               |
| SNP_P3_170428_10494 | NW_004517635.1 | Scaffold2782 | 10494                   | CC                              | TT                | 1946684914               |
| SNP_P3_170429_10997 | NW_004517635.1 | Scaffold2782 | 10997                   | CC                              | TT                | 1946684916               |
| SNP_P3_170430_11057 | NW_004517635.1 | Scaffold2782 | 11057                   | TT                              | CC                | 1946684918               |
| SNP_P3_170431_26084 | NW_004517635.1 | Scaffold2782 | 26084                   | AA                              | GG                | 1946684921               |
| SNP_P3_170432_26098 | NW_004517635.1 | Scaffold2782 | 26098                   | TT                              | CC                | 1946684924               |
| SNP_P3_170433_26904 | NW_004517635.1 | Scaffold2782 | 26904                   | CC                              | AA                | 1946684926               |
| SNP_P3_170434_26910 | NW_004517635.1 | Scaffold2782 | 26910                   | TT                              | AA                | 1946684929               |
| SNP_P3_170435_26921 | NW_004517635.1 | Scaffold2782 | 26921                   | CC                              | AA                | 1946684931               |
| SNP_P3_170436_26939 | NW_004517635.1 | Scaffold2782 | 26939                   | TT                              | CC                | 1946684933               |
| SNP_P3_170437_27119 | NW_004517635.1 | Scaffold2782 | 27119                   | TT                              | AA                | 1946684935               |
| SNP_P3_170438_27122 | NW_004517635.1 | Scaffold2782 | 27122                   | AA                              | GG                | 1946684937               |
| SNP_P3_170439_39878 | NW_004517635.1 | Scaffold2782 | 39878                   | GG                              | AA                | 1946684940               |
| SNP_P3_170440_39890 | NW_004517635.1 | Scaffold2782 | 39890                   | AA                              | TT                | 1946684942               |
| SNP_P3_170441_39946 | NW_004517635.1 | Scaffold2782 | 39946                   | TT                              | GG                | 1946684944               |
| SNP_P3_170442_40001 | NW_004517635.1 | Scaffold2782 | 40001                   | CC                              | TT                | 1946684946               |
| SNP_P3_170443_40070 | NW_004517635.1 | Scaffold2782 | 40070                   | GG                              | TT                | 1946684948               |
| SNP_P3_170444_40115 | NW_004517635.1 | Scaffold2782 | 40115                   | AA                              | GG                | 1946684950               |
| SNP_P3_170445_42328 | NW_004517635.1 | Scaffold2782 | 42328                   | GG                              | AA                | 1946684952               |
| SNP_P3_170446_42691 | NW_004517635.1 | Scaffold2782 | 42691                   | AA                              | CC                | 1946684954               |
| SNP_P3_170447_42738 | NW_004517635.1 | Scaffold2782 | 42738                   | GG                              | AA                | 1946684956               |
| SNP_P3_170448_42756 | NW_004517635.1 | Scaffold2782 | 42756                   | CC                              | TT                | 1946684958               |
| SNP_P3_170449_55336 | NW_004517635.1 | Scaffold2782 | 55336                   | AA                              | TT                | 1946684961               |
| SNP_P3_170450_55352 | NW_004517635.1 | Scaffold2782 | 55352                   | CC                              | AA                | 1946684963               |
| SNP_P3_170451_60330 | NW_004517635.1 | Scaffold2782 | 60330                   | CC                              | AA                | 1946684965               |
| SNP_P3_170452_60366 | NW_004517635.1 | Scaffold2782 | 60366                   | GG                              | AA                | 1946684967               |

| SNPs IDs             | Chromosome IDs | Chromosomes  | Physical positions (bp) | CDC Frontier (Reference genome) | (Pusa 256 & HPNB) | NCBI SNPdb Accession IDs |
|----------------------|----------------|--------------|-------------------------|---------------------------------|-------------------|--------------------------|
| SNP_P3_170453_60446  | NW_004517635.1 | Scaffold2782 | 60446                   | TT                              | AA                | 1946684969               |
| SNP_P3_170454_60447  | NW_004517635.1 | Scaffold2782 | 60447                   | AA                              | TT                | 1946684971               |
| SNP_P3_170455_60579  | NW_004517635.1 | Scaffold2782 | 60579                   | AA                              | CC                | 1946684973               |
| SNP_P3_170456_67460  | NW_004517635.1 | Scaffold2782 | 67460                   | CC                              | AA                | 1946684975               |
| SNP_P3_170457_71572  | NW_004517635.1 | Scaffold2782 | 71572                   | TT                              | CC                | 1946684978               |
| SNP_P3_170458_75683  | NW_004517635.1 | Scaffold2782 | 75683                   | TT                              | CC                | 1946684980               |
| SNP_P3_170459_80321  | NW_004517635.1 | Scaffold2782 | 80321                   | CC                              | TT                | 1946684982               |
| SNP_P3_170460_80337  | NW_004517635.1 | Scaffold2782 | 80337                   | TT                              | GG                | 1946684984               |
| SNP_P3_170461_80580  | NW_004517635.1 | Scaffold2782 | 80580                   | CC                              | TT                | 1946684986               |
| SNP_P3_170462_81034  | NW_004517635.1 | Scaffold2782 | 81034                   | CC                              | TT                | 1946684988               |
| SNP_P3_170463_83745  | NW_004517635.1 | Scaffold2782 | 83745                   | GG                              | AA                | 1946684990               |
| SNP_P3_170464_86348  | NW_004517635.1 | Scaffold2782 | 86348                   | TT                              | AA                | 1946684992               |
| SNP_P3_170465_86725  | NW_004517635.1 | Scaffold2782 | 86725                   | TT                              | GG                | 1946684994               |
| SNP_P3_170466_86742  | NW_004517635.1 | Scaffold2782 | 86742                   | GG                              | AA                | 1946684996               |
| SNP_P3_170467_86924  | NW_004517635.1 | Scaffold2782 | 86924                   | AA                              | CC                | 1946684999               |
| SNP_P3_170468_86946  | NW_004517635.1 | Scaffold2782 | 86946                   | GG                              | AA                | 1946685001               |
| SNP_P3_170469_87065  | NW_004517635.1 | Scaffold2782 | 87065                   | TT                              | CC                | 1946685003               |
| SNP_P3_170470_87312  | NW_004517635.1 | Scaffold2782 | 87312                   | TT                              | AA                | 1946685005               |
| SNP_P3_170471_89762  | NW_004517635.1 | Scaffold2782 | 89762                   | GG                              | AA                | 1946685007               |
| SNP_P3_170472_89788  | NW_004517635.1 | Scaffold2782 | 89788                   | CC                              | AA                | 1946685009               |
| SNP_P3_170473_89803  | NW_004517635.1 | Scaffold2782 | 89803                   | TT                              | AA                | 1946685011               |
| SNP_P3_170474_89826  | NW_004517635.1 | Scaffold2782 | 89826                   | GG                              | AA                | 1946685013               |
| SNP_P3_170475_89904  | NW_004517635.1 | Scaffold2782 | 89904                   | AA                              | CC                | 1946685015               |
| SNP_P3_170476_90206  | NW_004517635.1 | Scaffold2782 | 90206                   | GG                              | AA                | 1946685017               |
| SNP_P3_170477_105935 | NW_004517635.1 | Scaffold2782 | 105935                  | AA                              | GG                | 1946685019               |
| SNP_P3_170478_106025 | NW_004517635.1 | Scaffold2782 | 106025                  | AA                              | TT                | 1946685021               |
| SNP_P3_170479_108872 | NW_004517635.1 | Scaffold2782 | 108872                  | AA                              | GG                | 1946685023               |
| SNP_P3_170480_108902 | NW_004517635.1 | Scaffold2782 | 108902                  | GG                              | CC                | 1946685025               |
| SNP_P3_170481_109199 | NW_004517635.1 | Scaffold2782 | 109199                  | TT                              | CC                | 1946685027               |
| SNP_P3_170482_109306 | NW_004517635.1 | Scaffold2782 | 109306                  | AA                              | CC                | 1946685029               |
| SNP_P3_170483_109421 | NW_004517635.1 | Scaffold2782 | 109421                  | GG                              | AA                | 1946685031               |
| SNP_P3_170484_109479 | NW_004517635.1 | Scaffold2782 | 109479                  | TT                              | GG                | 1946685033               |
| SNP_P3_170485_109552 | NW_004517635.1 | Scaffold2782 | 109552                  | CC                              | GG                | 1946685035               |
| SNP_P3_170486_109563 | NW_004517635.1 | Scaffold2782 | 109563                  | AA                              | GG                | 1946685039               |
| SNP_P3_170487_109632 | NW_004517635.1 | Scaffold2782 | 109632                  | TT                              | CC                | 1946685041               |
| SNP_P3_170488_109667 | NW_004517635.1 | Scaffold2782 | 109667                  | GG                              | AA                | 1946685043               |
| SNP_P3_170489_109693 | NW_004517635.1 | Scaffold2782 | 109693                  | AA                              | CC                | 1946685045               |
| SNP_P3_170490_109740 | NW_004517635.1 | Scaffold2782 | 109740                  | CC                              | AA                | 1946685047               |
| SNP_P3_170491_109772 | NW_004517635.1 | Scaffold2782 | 109772                  | TT                              | CC                | 1946685049               |
| SNP_P3_170492_109908 | NW_004517635.1 | Scaffold2782 | 109908                  | TT                              | CC                | 1946685051               |
| SNP_P3_170493_109920 | NW_004517635.1 | Scaffold2782 | 109920                  | AA                              | TT                | 1946685053               |
| SNP_P3_170494_109950 | NW_004517635.1 | Scaffold2782 | 109950                  | CC                              | AA                | 1946685055               |

| SNPs IDs             | Chromosome IDs | Chromosomes  | Physical positions (bp) | CDC Frontier (Reference genome) | (Pusa 256 & HPNB) | NCBI SNPdb Accession IDs |
|----------------------|----------------|--------------|-------------------------|---------------------------------|-------------------|--------------------------|
| SNP_P3_170495_111792 | NW_004517635.1 | Scaffold2782 | 111792                  | CC                              | AA                | 1946685057               |
| SNP_P3_170496_111796 | NW_004517635.1 | Scaffold2782 | 111796                  | AA                              | CC                | 1946685059               |
| SNP_P3_170497_111903 | NW_004517635.1 | Scaffold2782 | 111903                  | TT                              | GG                | 1946685061               |
| SNP_P3_170498_112033 | NW_004517635.1 | Scaffold2782 | 112033                  | AA                              | CC                | 1946685063               |
| SNP_P3_170499_112034 | NW_004517635.1 | Scaffold2782 | 112034                  | GG                              | AA                | 1946685065               |
| SNP_P3_170500_113107 | NW_004517635.1 | Scaffold2782 | 113107                  | TT                              | AA                | 1946685067               |
| SNP_P3_170501_113152 | NW_004517635.1 | Scaffold2782 | 113152                  | AA                              | GG                | 1946685069               |
| SNP_P3_170502_8466   | NW_004517636.1 | Scaffold2783 | 8466                    | CC                              | GG                | 1946685071               |
| SNP_P3_170503_2447   | NW_004517637.1 | Scaffold2784 | 2447                    | TT                              | AA                | 1946685073               |
| SNP_P3_170504_2571   | NW_004517637.1 | Scaffold2784 | 2571                    | AA                              | CC                | 1946685076               |
| SNP_P3_170505_2697   | NW_004517637.1 | Scaffold2784 | 2697                    | CC                              | GG                | 1946685079               |
| SNP_P3_170506_2723   | NW_004517637.1 | Scaffold2784 | 2723                    | TT                              | GG                | 1946685081               |
| SNP_P3_170507_2728   | NW_004517637.1 | Scaffold2784 | 2728                    | CC                              | TT                | 1946685083               |
| SNP_P3_170508_9600   | NW_004517637.1 | Scaffold2784 | 9600                    | TT                              | GG                | 1946685085               |
| SNP_P3_170509_13954  | NW_004517637.1 | Scaffold2784 | 13954                   | GG                              | CC                | 1946685087               |
| SNP_P3_170510_14212  | NW_004517637.1 | Scaffold2784 | 14212                   | GG                              | AA                | 1946685089               |
| SNP_P3_170511_14216  | NW_004517637.1 | Scaffold2784 | 14216                   | CC                              | TT                | 1946685091               |
| SNP_P3_170512_14275  | NW_004517637.1 | Scaffold2784 | 14275                   | AA                              | CC                | 1946685093               |
| SNP_P3_170513_14334  | NW_004517637.1 | Scaffold2784 | 14334                   | AA                              | GG                | 1946685095               |
| SNP_P3_170514_14370  | NW_004517637.1 | Scaffold2784 | 14370                   | AA                              | GG                | 1946685097               |
| SNP_P3_170515_14386  | NW_004517637.1 | Scaffold2784 | 14386                   | AA                              | TT                | 1946685099               |
| SNP_P3_170516_15245  | NW_004517637.1 | Scaffold2784 | 15245                   | TT                              | CC                | 1946685102               |
| SNP_P3_170517_2370   | NW_004517639.1 | Scaffold2786 | 2370                    | CC                              | GG                | 1946685104               |
| SNP_P3_170518_2375   | NW_004517639.1 | Scaffold2786 | 2375                    | GG                              | TT                | 1946685114               |
| SNP_P3_170519_2697   | NW_004517642.1 | Scaffold2792 | 2697                    | TT                              | AA                | 1946685117               |
| SNP_P3_170520_2943   | NW_004517642.1 | Scaffold2792 | 2943                    | GG                              | AA                | 1946685119               |
| SNP_P3_170521_2965   | NW_004517642.1 | Scaffold2792 | 2965                    | CC                              | AA                | 1946685121               |
| SNP_P3_170522_2988   | NW_004517642.1 | Scaffold2792 | 2988                    | GG                              | TT                | 1946685123               |
| SNP_P3_170523_7482   | NW_004517642.1 | Scaffold2792 | 7482                    | TT                              | AA                | 1946685125               |
| SNP_P3_170524_13700  | NW_004517642.1 | Scaffold2792 | 13700                   | TT                              | CC                | 1946685127               |
| SNP_P3_170525_13901  | NW_004517642.1 | Scaffold2792 | 13901                   | AA                              | GG                | 1946685129               |
| SNP_P3_170526_13975  | NW_004517642.1 | Scaffold2792 | 13975                   | AA                              | GG                | 1946685131               |
| SNP_P3_170527_14070  | NW_004517642.1 | Scaffold2792 | 14070                   | TT                              | GG                | 1946685134               |
| SNP_P3_170528_14148  | NW_004517642.1 | Scaffold2792 | 14148                   | TT                              | CC                | 1946685136               |
| SNP_P3_170529_14157  | NW_004517642.1 | Scaffold2792 | 14157                   | AA                              | TT                | 1946685138               |
| SNP_P3_170530_14335  | NW_004517642.1 | Scaffold2792 | 14335                   | CC                              | TT                | 1946685140               |
| SNP_P3_170531_14699  | NW_004517642.1 | Scaffold2792 | 14699                   | CC                              | GG                | 1946685142               |
| SNP_P3_170532_14788  | NW_004517642.1 | Scaffold2792 | 14788                   | GG                              | CC                | 1946685144               |
| SNP_P3_170533_28265  | NW_004517642.1 | Scaffold2792 | 28265                   | GG                              | CC                | 1946685147               |
| SNP_P3_170534_1752   | NW_004517645.1 | Scaffold2795 | 1752                    | GG                              | AA                | 1946685149               |
| SNP_P3_170535_1768   | NW_004517645.1 | Scaffold2795 | 1768                    | GG                              | AA                | 1946685152               |
| SNP_P3_170536_1847   | NW_004517645.1 | Scaffold2795 | 1847                    | TT                              | CC                | 1946685154               |

| SNPs IDs            | Chromosome IDs | Chromosomes  | Physical positions (bp) | CDC Frontier (Reference genome) | (Pusa 256 & HPNB) | NCBI SNPdb Accession IDs |
|---------------------|----------------|--------------|-------------------------|---------------------------------|-------------------|--------------------------|
| SNP_P3_170537_1869  | NW_004517645.1 | Scaffold2795 | 1869                    | TT                              | GG                | 1946685156               |
| SNP_P3_170538_2261  | NW_004517645.1 | Scaffold2795 | 2261                    | AA                              | GG                | 1946685158               |
| SNP_P3_170539_2353  | NW_004517645.1 | Scaffold2795 | 2353                    | GG                              | CC                | 1946685160               |
| SNP_P3_170540_2392  | NW_004517645.1 | Scaffold2795 | 2392                    | AA                              | CC                | 1946685162               |
| SNP_P3_170541_2595  | NW_004517645.1 | Scaffold2795 | 2595                    | TT                              | CC                | 1946685164               |
| SNP_P3_170542_2646  | NW_004517645.1 | Scaffold2795 | 2646                    | AA                              | GG                | 1946685166               |
| SNP_P3_170543_2882  | NW_004517645.1 | Scaffold2795 | 2882                    | GG                              | CC                | 1946685168               |
| SNP_P3_170544_2912  | NW_004517645.1 | Scaffold2795 | 2912                    | TT                              | CC                | 1946685170               |
| SNP_P3_170545_6904  | NW_004517645.1 | Scaffold2795 | 6904                    | TT                              | CC                | 1946685172               |
| SNP_P3_170546_791   | NW_004517648.1 | Scaffold2799 | 791                     | CC                              | AA                | 1946685174               |
| SNP_P3_170547_800   | NW_004517648.1 | Scaffold2799 | 800                     | GG                              | CC                | 1946685177               |
| SNP_P3_170548_876   | NW_004517648.1 | Scaffold2799 | 876                     | CC                              | GG                | 1946685180               |
| SNP_P3_170549_900   | NW_004517648.1 | Scaffold2799 | 900                     | CC                              | TT                | 1946685182               |
| SNP_P3_170550_903   | NW_004517648.1 | Scaffold2799 | 903                     | AA                              | CC                | 1946685184               |
| SNP_P3_170551_1059  | NW_004517648.1 | Scaffold2799 | 1059                    | AA                              | TT                | 1946685186               |
| SNP_P3_170552_1102  | NW_004517648.1 | Scaffold2799 | 1102                    | AA                              | GG                | 1946685188               |
| SNP_P3_170553_1123  | NW_004517648.1 | Scaffold2799 | 1123                    | TT                              | AA                | 1946685190               |
| SNP_P3_170554_5963  | NW_004517648.1 | Scaffold2799 | 5963                    | GG                              | AA                | 1946685192               |
| SNP_P3_170555_6593  | NW_004517648.1 | Scaffold2799 | 6593                    | CC                              | TT                | 1946685194               |
| SNP_P3_170556_8181  | NW_004517648.1 | Scaffold2799 | 8181                    | GG                              | TT                | 1946685196               |
| SNP_P3_170557_8489  | NW_004517648.1 | Scaffold2799 | 8489                    | CC                              | TT                | 1946685198               |
| SNP_P3_170558_18155 | NW_004517648.1 | Scaffold2799 | 18155                   | AA                              | GG                | 1946685201               |
| SNP_P3_170559_19681 | NW_004517648.1 | Scaffold2799 | 19681                   | CC                              | TT                | 1946685203               |
| SNP_P3_170560_19740 | NW_004517648.1 | Scaffold2799 | 19740                   | TT                              | AA                | 1946685206               |
| SNP_P3_170561_22582 | NW_004517648.1 | Scaffold2799 | 22582                   | GG                              | AA                | 1946685208               |
| SNP_P3_170562_22590 | NW_004517648.1 | Scaffold2799 | 22590                   | AA                              | GG                | 1946685210               |
| SNP_P3_170563_22616 | NW_004517648.1 | Scaffold2799 | 22616                   | TT                              | CC                | 1946685212               |
| SNP_P3_170564_22938 | NW_004517648.1 | Scaffold2799 | 22938                   | GG                              | AA                | 1946685214               |
| SNP_P3_170565_33881 | NW_004517648.1 | Scaffold2799 | 33881                   | CC                              | TT                | 1946685216               |
| SNP_P3_170566_33890 | NW_004517648.1 | Scaffold2799 | 33890                   | TT                              | CC                | 1946685218               |
| SNP_P3_170567_34204 | NW_004517648.1 | Scaffold2799 | 34204                   | GG                              | TT                | 1946685220               |
| SNP_P3_170568_34729 | NW_004517648.1 | Scaffold2799 | 34729                   | AA                              | GG                | 1946685222               |
| SNP_P3_170569_34736 | NW_004517648.1 | Scaffold2799 | 34736                   | CC                              | TT                | 1946685224               |
| SNP_P3_170570_36536 | NW_004517648.1 | Scaffold2799 | 36536                   | CC                              | AA                | 1946685226               |
| SNP_P3_170571_38369 | NW_004517648.1 | Scaffold2799 | 38369                   | GG                              | AA                | 1946685229               |
| SNP_P3_170572_43448 | NW_004517648.1 | Scaffold2799 | 43448                   | GG                              | CC                | 1946685231               |
| SNP_P3_170573_45911 | NW_004517648.1 | Scaffold2799 | 45911                   | AA                              | GG                | 1946685234               |
| SNP_P3_170574_45912 | NW_004517648.1 | Scaffold2799 | 45912                   | AA                              | GG                | 1946685236               |
| SNP_P3_170575_45919 | NW_004517648.1 | Scaffold2799 | 45919                   | CC                              | TT                | 1946685238               |
| SNP_P3_170576_45921 | NW_004517648.1 | Scaffold2799 | 45921                   | GG                              | TT                | 1946685240               |
| SNP_P3_170577_45927 | NW_004517648.1 | Scaffold2799 | 45927                   | AA                              | TT                | 1946685242               |
| SNP_P3_170578_45932 | NW_004517648.1 | Scaffold2799 | 45932                   | CC                              | TT                | 1946685244               |

| SNPs IDs            | Chromosome IDs | Chromosomes  | Physical positions (bp) | CDC Frontier (Reference genome) | (Pusa 256 & HPNB) | NCBI SNPdb Accession IDs |
|---------------------|----------------|--------------|-------------------------|---------------------------------|-------------------|--------------------------|
| SNP_P3_170579_45948 | NW_004517648.1 | Scaffold2799 | 45948                   | CC                              | AA                | 1946685246               |
| SNP_P3_170580_46020 | NW_004517648.1 | Scaffold2799 | 46020                   | AA                              | GG                | 1946685248               |
| SNP_P3_170581_46055 | NW_004517648.1 | Scaffold2799 | 46055                   | GG                              | AA                | 1946685250               |
| SNP_P3_170582_46062 | NW_004517648.1 | Scaffold2799 | 46062                   | AA                              | GG                | 1946685252               |
| SNP_P3_170583_46073 | NW_004517648.1 | Scaffold2799 | 46073                   | AA                              | GG                | 1946685254               |
| SNP_P3_170584_46086 | NW_004517648.1 | Scaffold2799 | 46086                   | TT                              | CC                | 1946685256               |
| SNP_P3_170585_46326 | NW_004517648.1 | Scaffold2799 | 46326                   | GG                              | AA                | 1946685258               |
| SNP_P3_170586_46366 | NW_004517648.1 | Scaffold2799 | 46366                   | GG                              | AA                | 1946685261               |
| SNP_P3_170587_46375 | NW_004517648.1 | Scaffold2799 | 46375                   | AA                              | TT                | 1946685263               |
| SNP_P3_170588_46384 | NW_004517648.1 | Scaffold2799 | 46384                   | TT                              | GG                | 1946685265               |
| SNP_P3_170589_46420 | NW_004517648.1 | Scaffold2799 | 46420                   | CC                              | TT                | 1946685267               |
| SNP_P3_170590_54    | NW_004517650.1 | Scaffold2801 | 54                      | CC                              | TT                | 1946685270               |
| SNP_P3_170591_55    | NW_004517650.1 | Scaffold2801 | 55                      | AA                              | TT                | 1946685272               |
| SNP_P3_170592_64    | NW_004517650.1 | Scaffold2801 | 64                      | AA                              | CC                | 1946685274               |
| SNP_P3_170593_81    | NW_004517650.1 | Scaffold2801 | 81                      | TT                              | CC                | 1946685276               |
| SNP_P3_170594_214   | NW_004517652.1 | Scaffold2803 | 214                     | AA                              | GG                | 1946685278               |
| SNP_P3_170595_811   | NW_004517652.1 | Scaffold2803 | 811                     | CC                              | AA                | 1946685280               |
| SNP_P3_170596_1449  | NW_004517652.1 | Scaffold2803 | 1449                    | GG                              | CC                | 1946685282               |
| SNP_P3_170597_1750  | NW_004517652.1 | Scaffold2803 | 1750                    | AA                              | TT                | 1946685284               |
| SNP_P3_170598_12240 | NW_004517657.1 | Scaffold2812 | 12240                   | GG                              | AA                | 1946685287               |
| SNP_P3_170599_15730 | NW_004517657.1 | Scaffold2812 | 15730                   | GG                              | AA                | 1946685290               |
| SNP_P3_170600_16123 | NW_004517657.1 | Scaffold2812 | 16123                   | TT                              | CC                | 1946685292               |
| SNP_P3_170602_16896 | NW_004517657.1 | Scaffold2812 | 16896                   | AA                              | TT                | 1946685294               |
| SNP_P3_170603_17100 | NW_004517657.1 | Scaffold2812 | 17100                   | AA                              | GG                | 1946685296               |
| SNP_P3_170604_18098 | NW_004517657.1 | Scaffold2812 | 18098                   | AA                              | TT                | 1946685298               |
| SNP_P3_170605_18408 | NW_004517657.1 | Scaffold2812 | 18408                   | TT                              | CC                | 1946685300               |
| SNP_P3_170606_19128 | NW_004517657.1 | Scaffold2812 | 19128                   | CC                              | TT                | 1946685302               |
| SNP_P3_170607_19448 | NW_004517657.1 | Scaffold2812 | 19448                   | TT                              | AA                | 1946685305               |
| SNP_P3_170608_19991 | NW_004517657.1 | Scaffold2812 | 19991                   | GG                              | AA                | 1946685307               |
| SNP_P3_170609_21202 | NW_004517657.1 | Scaffold2812 | 21202                   | AA                              | TT                | 1946685309               |
| SNP_P3_170610_21258 | NW_004517657.1 | Scaffold2812 | 21258                   | TT                              | CC                | 1946685311               |
| SNP_P3_170611_22776 | NW_004517657.1 | Scaffold2812 | 22776                   | CC                              | TT                | 1946685313               |
| SNP_P3_170612_25417 | NW_004517657.1 | Scaffold2812 | 25417                   | CC                              | AA                | 1946685316               |
| SNP_P3_170613_30530 | NW_004517657.1 | Scaffold2812 | 30530                   | CC                              | GG                | 1946685318               |
| SNP_P3_170614_31133 | NW_004517657.1 | Scaffold2812 | 31133                   | TT                              | CC                | 1946685320               |
| SNP_P3_170615_31772 | NW_004517657.1 | Scaffold2812 | 31772                   | TT                              | CC                | 1946685322               |
| SNP_P3_170616_31779 | NW_004517657.1 | Scaffold2812 | 31779                   | AA                              | CC                | 1946685324               |
| SNP_P3_170617_31787 | NW_004517657.1 | Scaffold2812 | 31787                   | TT                              | GG                | 1946685326               |
| SNP_P3_170618_31798 | NW_004517657.1 | Scaffold2812 | 31798                   | AA                              | GG                | 1946685328               |
| SNP_P3_170619_37919 | NW_004517657.1 | Scaffold2812 | 37919                   | AA                              | TT                | 1946685330               |
| SNP_P3_170620_42948 | NW_004517657.1 | Scaffold2812 | 42948                   | TT                              | CC                | 1946685331               |
| SNP_P3_170622_43191 | NW_004517657.1 | Scaffold2812 | 43191                   | AA                              | TT                | 1946685332               |

| SNPs IDs            | Chromosome IDs | Chromosomes  | Physical positions (bp) | CDC Frontier (Reference genome) | (Pusa 256 & HPNB) | NCBI SNPdb Accession IDs |
|---------------------|----------------|--------------|-------------------------|---------------------------------|-------------------|--------------------------|
| SNP_P3_170623_43202 | NW_004517657.1 | Scaffold2812 | 43202                   | CC                              | GG                | 1946685333               |
| SNP_P3_170624_43203 | NW_004517657.1 | Scaffold2812 | 43203                   | AA                              | GG                | 1946685334               |
| SNP_P3_170625_43443 | NW_004517657.1 | Scaffold2812 | 43443                   | GG                              | AA                | 1946685335               |
| SNP_P3_170626_45524 | NW_004517657.1 | Scaffold2812 | 45524                   | TT                              | AA                | 1946685337               |
| SNP_P3_170627_45651 | NW_004517657.1 | Scaffold2812 | 45651                   | CC                              | TT                | 1946685340               |
| SNP_P3_170628_45671 | NW_004517657.1 | Scaffold2812 | 45671                   | TT                              | AA                | 1946685342               |
| SNP_P3_170629_50792 | NW_004517657.1 | Scaffold2812 | 50792                   | AA                              | GG                | 1946685344               |
| SNP_P3_170631_60183 | NW_004517657.1 | Scaffold2812 | 60183                   | CC                              | TT                | 1946685346               |
| SNP_P3_170632_60185 | NW_004517657.1 | Scaffold2812 | 60185                   | AA                              | GG                | 1946685348               |
| SNP_P3_170633_60190 | NW_004517657.1 | Scaffold2812 | 60190                   | AA                              | GG                | 1946685350               |
| SNP_P3_170634_60636 | NW_004517657.1 | Scaffold2812 | 60636                   | CC                              | TT                | 1946685352               |
| SNP_P3_170635_60643 | NW_004517657.1 | Scaffold2812 | 60643                   | GG                              | AA                | 1946685354               |
| SNP_P3_170636_65226 | NW_004517657.1 | Scaffold2812 | 65226                   | GG                              | TT                | 1946685356               |
| SNP_P3_170638_95955 | NW_004517657.1 | Scaffold2812 | 95955                   | AA                              | TT                | 1946685358               |
| SNP_P3_170639_265   | NW_004517658.1 | Scaffold2813 | 265                     | AA                              | GG                | 1946685360               |
| SNP_P3_170640_610   | NW_004517658.1 | Scaffold2813 | 610                     | TT                              | CC                | 1946685363               |
| SNP_P3_170641_2877  | NW_004517658.1 | Scaffold2813 | 2877                    | CC                              | TT                | 1946685366               |
| SNP_P3_170642_2952  | NW_004517658.1 | Scaffold2813 | 2952                    | GG                              | AA                | 1946685368               |
| SNP_P3_170643_3727  | NW_004517658.1 | Scaffold2813 | 3727                    | AA                              | CC                | 1946685370               |
| SNP_P3_170644_3736  | NW_004517658.1 | Scaffold2813 | 3736                    | AA                              | CC                | 1946685372               |
| SNP_P3_170645_3741  | NW_004517658.1 | Scaffold2813 | 3741                    | CC                              | AA                | 1946685374               |
| SNP_P3_170646_1148  | NW_004517659.1 | Scaffold2815 | 1148                    | AA                              | TT                | 1946685376               |
| SNP_P3_170647_1162  | NW_004517659.1 | Scaffold2815 | 1162                    | GG                              | AA                | 1946685378               |
| SNP_P3_170648_1167  | NW_004517659.1 | Scaffold2815 | 1167                    | CC                              | TT                | 1946685380               |
| SNP_P3_170649_28525 | NW_004517659.1 | Scaffold2815 | 28525                   | AA                              | TT                | 1946685382               |
| SNP_P3_170650_29618 | NW_004517659.1 | Scaffold2815 | 29618                   | AA                              | GG                | 1946685384               |
| SNP_P3_170651_48601 | NW_004517659.1 | Scaffold2815 | 48601                   | GG                              | AA                | 1946685386               |
| SNP_P3_170653_70895 | NW_004517659.1 | Scaffold2815 | 70895                   | TT                              | CC                | 1946685388               |
| SNP_P3_170654_70951 | NW_004517659.1 | Scaffold2815 | 70951                   | GG                              | AA                | 1946685390               |
| SNP_P3_170655_70986 | NW_004517659.1 | Scaffold2815 | 70986                   | TT                              | AA                | 1946685392               |
| SNP_P3_170656_71066 | NW_004517659.1 | Scaffold2815 | 71066                   | TT                              | CC                | 1946685396               |
| SNP_P3_170657_71085 | NW_004517659.1 | Scaffold2815 | 71085                   | AA                              | CC                | 1946685398               |
| SNP_P3_170658_71241 | NW_004517659.1 | Scaffold2815 | 71241                   | GG                              | AA                | 1946685400               |
| SNP_P3_170660_71354 | NW_004517659.1 | Scaffold2815 | 71354                   | GG                              | AA                | 1946685402               |
| SNP_P3_170661_71399 | NW_004517659.1 | Scaffold2815 | 71399                   | GG                              | AA                | 1946685404               |
| SNP_P3_170662_71411 | NW_004517659.1 | Scaffold2815 | 71411                   | TT                              | CC                | 1946685406               |
| SNP_P3_170663_71439 | NW_004517659.1 | Scaffold2815 | 71439                   | CC                              | TT                | 1946685408               |
| SNP_P3_170664_71533 | NW_004517659.1 | Scaffold2815 | 71533                   | TT                              | CC                | 1946685410               |
| SNP_P3_170665_71598 | NW_004517659.1 | Scaffold2815 | 71598                   | TT                              | AA                | 1946685412               |
| SNP_P3_170666_71846 | NW_004517659.1 | Scaffold2815 | 71846                   | CC                              | TT                | 1946685414               |
| SNP_P3_170667_71920 | NW_004517659.1 | Scaffold2815 | 71920                   | GG                              | TT                | 1946685416               |
| SNP_P3_170668_81246 | NW_004517659.1 | Scaffold2815 | 81246                   | CC                              | GG                | 1946685418               |

| SNPs IDs            | Chromosome IDs | Chromosomes  | Physical positions (bp) | CDC Frontier (Reference genome) | (Pusa 256 & HPNB) | NCBI SNPdb Accession IDs |
|---------------------|----------------|--------------|-------------------------|---------------------------------|-------------------|--------------------------|
| SNP_P3_170669_83193 | NW_004517659.1 | Scaffold2815 | 83193                   | GG                              | AA                | 1946685420               |
| SNP_P3_170670_781   | NW_004517661.1 | Scaffold2817 | 781                     | GG                              | TT                | 1946685423               |
| SNP_P3_170671_855   | NW_004517661.1 | Scaffold2817 | 855                     | AA                              | GG                | 1946685425               |
| SNP_P3_170672_873   | NW_004517661.1 | Scaffold2817 | 873                     | TT                              | AA                | 1946685427               |
| SNP_P3_170673_882   | NW_004517661.1 | Scaffold2817 | 882                     | GG                              | AA                | 1946685430               |
| SNP_P3_170674_895   | NW_004517661.1 | Scaffold2817 | 895                     | AA                              | GG                | 1946685432               |
| SNP_P3_170675_926   | NW_004517661.1 | Scaffold2817 | 926                     | AA                              | GG                | 1946685434               |
| SNP_P3_170676_478   | NW_004517662.1 | Scaffold2818 | 478                     | GG                              | AA                | 1946685436               |
| SNP_P3_170677_11263 | NW_004517663.1 | Scaffold2819 | 11263                   | AA                              | GG                | 1946685438               |
| SNP_P3_170678_12314 | NW_004517663.1 | Scaffold2819 | 12314                   | AA                              | GG                | 1946685440               |
| SNP_P3_170679_12351 | NW_004517663.1 | Scaffold2819 | 12351                   | TT                              | GG                | 1946685442               |
| SNP_P3_170680_12539 | NW_004517663.1 | Scaffold2819 | 12539                   | TT                              | CC                | 1946685445               |
| SNP_P3_170681_12551 | NW_004517663.1 | Scaffold2819 | 12551                   | TT                              | AA                | 1946685447               |
| SNP_P3_170682_12615 | NW_004517663.1 | Scaffold2819 | 12615                   | CC                              | AA                | 1946685450               |
| SNP_P3_170683_12655 | NW_004517663.1 | Scaffold2819 | 12655                   | CC                              | AA                | 1946685452               |
| SNP_P3_170684_12689 | NW_004517663.1 | Scaffold2819 | 12689                   | TT                              | CC                | 1946685454               |
| SNP_P3_170685_12825 | NW_004517663.1 | Scaffold2819 | 12825                   | AA                              | GG                | 1946685456               |
| SNP_P3_170686_12833 | NW_004517663.1 | Scaffold2819 | 12833                   | TT                              | CC                | 1946685458               |
| SNP_P3_170687_12935 | NW_004517663.1 | Scaffold2819 | 12935                   | TT                              | CC                | 1946685460               |
| SNP_P3_170688_13026 | NW_004517663.1 | Scaffold2819 | 13026                   | AA                              | GG                | 1946685462               |
| SNP_P3_170689_13082 | NW_004517663.1 | Scaffold2819 | 13082                   | AA                              | GG                | 1946685465               |
| SNP_P3_170690_13085 | NW_004517663.1 | Scaffold2819 | 13085                   | AA                              | TT                | 1946685467               |
| SNP_P3_170691_13098 | NW_004517663.1 | Scaffold2819 | 13098                   | CC                              | TT                | 1946685469               |
| SNP_P3_170692_13103 | NW_004517663.1 | Scaffold2819 | 13103                   | GG                              | AA                | 1946685471               |
| SNP_P3_170693_13126 | NW_004517663.1 | Scaffold2819 | 13126                   | TT                              | CC                | 1946685473               |
| SNP_P3_170694_13437 | NW_004517663.1 | Scaffold2819 | 13437                   | CC                              | TT                | 1946685475               |
| SNP_P3_170695_18173 | NW_004517663.1 | Scaffold2819 | 18173                   | CC                              | AA                | 1946685478               |
| SNP_P3_170696_18224 | NW_004517663.1 | Scaffold2819 | 18224                   | AA                              | TT                | 1946685480               |
| SNP_P3_170697_18228 | NW_004517663.1 | Scaffold2819 | 18228                   | GG                              | AA                | 1946685482               |
| SNP_P3_170698_18505 | NW_004517663.1 | Scaffold2819 | 18505                   | AA                              | GG                | 1946685484               |
| SNP_P3_170699_18767 | NW_004517663.1 | Scaffold2819 | 18767                   | TT                              | CC                | 1946685486               |
| SNP_P3_170700_18774 | NW_004517663.1 | Scaffold2819 | 18774                   | CC                              | TT                | 1946685488               |
| SNP_P3_170701_18778 | NW_004517663.1 | Scaffold2819 | 18778                   | CC                              | TT                | 1946685491               |
| SNP_P3_170702_18836 | NW_004517663.1 | Scaffold2819 | 18836                   | AA                              | GG                | 1946685493               |
| SNP_P3_170703_18917 | NW_004517663.1 | Scaffold2819 | 18917                   | TT                              | CC                | 1946685495               |
| SNP_P3_170704_18919 | NW_004517663.1 | Scaffold2819 | 18919                   | AA                              | GG                | 1946685496               |
| SNP_P3_170705_3737  | NW_004517666.1 | Scaffold2823 | 3737                    | AA                              | CC                | 1946685497               |
| SNP_P3_170706_3741  | NW_004517666.1 | Scaffold2823 | 3741                    | CC                              | AA                | 1946685498               |
| SNP_P3_170707_6276  | NW_004517666.1 | Scaffold2823 | 6276                    | AA                              | GG                | 1946685499               |
| SNP_P3_170708_8715  | NW_004517666.1 | Scaffold2823 | 8715                    | GG                              | AA                | 1946685501               |
| SNP_P3_170709_12213 | NW_004517666.1 | Scaffold2823 | 12213                   | TT                              | CC                | 1946685503               |
| SNP_P3_170710_12225 | NW_004517666.1 | Scaffold2823 | 12225                   | TT                              | AA                | 1946685505               |



| SNPs IDs            | Chromosome IDs | Chromosomes  | Physical positions (bp) | CDC Frontier (Reference genome) | (Pusa 256 & HPNB) | NCBI SNPdb Accession IDs |
|---------------------|----------------|--------------|-------------------------|---------------------------------|-------------------|--------------------------|
| SNP_P3_170711_12238 | NW_004517666.1 | Scaffold2823 | 12238                   | TT                              | AA                | 1946685507               |
| SNP_P3_170712_12243 | NW_004517666.1 | Scaffold2823 | 12243                   | AA                              | TT                | 1946685509               |
| SNP_P3_170713_12246 | NW_004517666.1 | Scaffold2823 | 12246                   | CC                              | TT                | 1946685511               |
| SNP_P3_170714_4869  | NW_004517667.1 | Scaffold2824 | 4869                    | GG                              | CC                | 1946685513               |
| SNP_P3_170715_5689  | NW_004517667.1 | Scaffold2824 | 5689                    | TT                              | CC                | 1946685515               |
| SNP_P3_170716_5779  | NW_004517667.1 | Scaffold2824 | 5779                    | CC                              | AA                | 1946685517               |
| SNP_P3_170717_5793  | NW_004517667.1 | Scaffold2824 | 5793                    | TT                              | CC                | 1946685519               |
| SNP_P3_170718_5805  | NW_004517667.1 | Scaffold2824 | 5805                    | AA                              | GG                | 1946685521               |
| SNP_P3_170719_5933  | NW_004517667.1 | Scaffold2824 | 5933                    | TT                              | CC                | 1946685523               |
| SNP_P3_170720_5936  | NW_004517667.1 | Scaffold2824 | 5936                    | TT                              | CC                | 1946685526               |
| SNP_P3_170721_8982  | NW_004517667.1 | Scaffold2824 | 8982                    | GG                              | AA                | 1946685528               |
| SNP_P3_170722_998   | NW_004517668.1 | Scaffold2825 | 998                     | AA                              | TT                | 1946685530               |
| SNP_P3_170723_20083 | NW_004517669.1 | Scaffold2827 | 20083                   | AA                              | GG                | 1946685532               |
| SNP_P3_170724_20503 | NW_004517669.1 | Scaffold2827 | 20503                   | AA                              | GG                | 1946685534               |
| SNP_P3_170725_20549 | NW_004517669.1 | Scaffold2827 | 20549                   | GG                              | AA                | 1946685536               |
| SNP_P3_170726_4770  | NW_004517670.1 | Scaffold2829 | 4770                    | AA                              | TT                | 1946685538               |
| SNP_P3_170727_9608  | NW_004517670.1 | Scaffold2829 | 9608                    | CC                              | GG                | 1946685540               |
| SNP_P3_170728_349   | NW_004517672.1 | Scaffold2833 | 349                     | GG                              | AA                | 1946685542               |
| SNP_P3_170729_735   | NW_004517672.1 | Scaffold2833 | 735                     | GG                              | AA                | 1946685544               |
| SNP_P3_170730_736   | NW_004517672.1 | Scaffold2833 | 736                     | AA                              | GG                | 1946685547               |
| SNP_P3_170731_749   | NW_004517672.1 | Scaffold2833 | 749                     | CC                              | AA                | 1946685549               |
| SNP_P3_170732_2735  | NW_004517673.1 | Scaffold2834 | 2735                    | AA                              | TT                | 1946685551               |
| SNP_P3_170733_6663  | NW_004517673.1 | Scaffold2834 | 6663                    | CC                              | AA                | 1946685553               |
| SNP_P3_170734_6667  | NW_004517673.1 | Scaffold2834 | 6667                    | TT                              | CC                | 1946685556               |
| SNP_P3_170735_6696  | NW_004517673.1 | Scaffold2834 | 6696                    | GG                              | AA                | 1946685558               |
| SNP_P3_170736_6938  | NW_004517673.1 | Scaffold2834 | 6938                    | AA                              | GG                | 1946685560               |
| SNP_P3_170737_6947  | NW_004517673.1 | Scaffold2834 | 6947                    | AA                              | TT                | 1946685562               |
| SNP_P3_170738_6972  | NW_004517673.1 | Scaffold2834 | 6972                    | CC                              | TT                | 1946685564               |
| SNP_P3_170739_7022  | NW_004517673.1 | Scaffold2834 | 7022                    | CC                              | AA                | 1946685566               |
| SNP_P3_170740_7027  | NW_004517673.1 | Scaffold2834 | 7027                    | TT                              | AA                | 1946685568               |
| SNP_P3_170741_7030  | NW_004517673.1 | Scaffold2834 | 7030                    | CC                              | TT                | 1946685570               |
| SNP_P3_170742_29614 | NW_004517673.1 | Scaffold2834 | 29614                   | GG                              | AA                | 1946685572               |
| SNP_P3_170743_33579 | NW_004517673.1 | Scaffold2834 | 33579                   | TT                              | CC                | 1946685574               |
| SNP_P3_170744_1687  | NW_004517674.1 | Scaffold2835 | 1687                    | AA                              | CC                | 1946685577               |
| SNP_P3_170745_1706  | NW_004517674.1 | Scaffold2835 | 1706                    | CC                              | AA                | 1946685579               |
| SNP_P3_170746_1721  | NW_004517674.1 | Scaffold2835 | 1721                    | GG                              | AA                | 1946685581               |
| SNP_P3_170747_1722  | NW_004517674.1 | Scaffold2835 | 1722                    | TT                              | AA                | 1946685583               |
| SNP_P3_170748_2624  | NW_004517674.1 | Scaffold2835 | 2624                    | CC                              | AA                | 1946685586               |
| SNP_P3_170749_2643  | NW_004517674.1 | Scaffold2835 | 2643                    | AA                              | GG                | 1946685588               |
| SNP_P3_170750_2676  | NW_004517674.1 | Scaffold2835 | 2676                    | CC                              | TT                | 1946685590               |
| SNP_P3_170751_2705  | NW_004517674.1 | Scaffold2835 | 2705                    | CC                              | TT                | 1946685592               |
| SNP_P3_170752_2947  | NW_004517674.1 | Scaffold2835 | 2947                    | CC                              | AA                | 1946685594               |

| SNPs IDs            | Chromosome IDs | Chromosomes  | Physical positions (bp) | CDC Frontier (Reference genome) | (Pusa 256 & HPNB) | NCBI SNPdb Accession IDs |
|---------------------|----------------|--------------|-------------------------|---------------------------------|-------------------|--------------------------|
| SNP_P3_170753_3006  | NW_004517674.1 | Scaffold2835 | 3006                    | AA                              | GG                | 1946685596               |
| SNP_P3_170754_3035  | NW_004517674.1 | Scaffold2835 | 3035                    | AA                              | TT                | 1946685598               |
| SNP_P3_170755_5408  | NW_004517674.1 | Scaffold2835 | 5408                    | TT                              | CC                | 1946685600               |
| SNP_P3_170756_5569  | NW_004517674.1 | Scaffold2835 | 5569                    | TT                              | AA                | 1946685602               |
| SNP_P3_170758_61839 | NW_004517676.1 | Scaffold2837 | 61839                   | GG                              | AA                | 1946685604               |
| SNP_P3_170759_62410 | NW_004517676.1 | Scaffold2837 | 62410                   | AA                              | GG                | 1946685607               |
| SNP_P3_170760_62654 | NW_004517676.1 | Scaffold2837 | 62654                   | AA                              | GG                | 1946685609               |
| SNP_P3_170761_483   | NW_004517678.1 | Scaffold2839 | 483                     | AA                              | GG                | 1946685611               |
| SNP_P3_170762_2652  | NW_004517679.1 | Scaffold2840 | 2652                    | CC                              | GG                | 1946685613               |
| SNP_P3_170763_3173  | NW_004517679.1 | Scaffold2840 | 3173                    | TT                              | CC                | 1946685615               |
| SNP_P3_170764_3180  | NW_004517679.1 | Scaffold2840 | 3180                    | GG                              | CC                | 1946685617               |
| SNP_P3_170765_3187  | NW_004517679.1 | Scaffold2840 | 3187                    | GG                              | AA                | 1946685619               |
| SNP_P3_170766_444   | NW_004517681.1 | Scaffold2842 | 444                     | CC                              | TT                | 1946685621               |
| SNP_P3_170767_716   | NW_004517681.1 | Scaffold2842 | 716                     | CC                              | AA                | 1946685623               |
| SNP_P3_170768_981   | NW_004517681.1 | Scaffold2842 | 981                     | GG                              | TT                | 1946685625               |
| SNP_P3_170769_1019  | NW_004517681.1 | Scaffold2842 | 1019                    | AA                              | GG                | 1946685628               |
| SNP_P3_170771_3298  | NW_004517683.1 | Scaffold2845 | 3298                    | CC                              | TT                | 1946685630               |
| SNP_P3_170772_3306  | NW_004517683.1 | Scaffold2845 | 3306                    | AA                              | GG                | 1946685632               |
| SNP_P3_170773_17489 | NW_004517683.1 | Scaffold2845 | 17489                   | CC                              | TT                | 1946685634               |
| SNP_P3_170774_18140 | NW_004517683.1 | Scaffold2845 | 18140                   | TT                              | CC                | 1946685636               |
| SNP_P3_170775_26654 | NW_004517683.1 | Scaffold2845 | 26654                   | CC                              | GG                | 1946685638               |
| SNP_P3_170776_26851 | NW_004517683.1 | Scaffold2845 | 26851                   | AA                              | CC                | 1946685641               |
| SNP_P3_170777_26860 | NW_004517683.1 | Scaffold2845 | 26860                   | GG                              | AA                | 1946685643               |
| SNP_P3_170778_26864 | NW_004517683.1 | Scaffold2845 | 26864                   | CC                              | AA                | 1946685645               |
| SNP_P3_170779_26897 | NW_004517683.1 | Scaffold2845 | 26897                   | CC                              | TT                | 1946685647               |
| SNP_P3_170780_26898 | NW_004517683.1 | Scaffold2845 | 26898                   | AA                              | GG                | 1946685649               |
| SNP_P3_170781_26908 | NW_004517683.1 | Scaffold2845 | 26908                   | CC                              | GG                | 1946685651               |
| SNP_P3_170782_26951 | NW_004517683.1 | Scaffold2845 | 26951                   | CC                              | TT                | 1946685653               |
| SNP_P3_170783_31012 | NW_004517683.1 | Scaffold2845 | 31012                   | CC                              | TT                | 1946685655               |
| SNP_P3_170784_5355  | NW_004517685.1 | Scaffold2847 | 5355                    | GG                              | CC                | 1946685657               |
| SNP_P3_170785_5733  | NW_004517685.1 | Scaffold2847 | 5733                    | GG                              | AA                | 1946685659               |
| SNP_P3_170786_5780  | NW_004517685.1 | Scaffold2847 | 5780                    | AA                              | GG                | 1946685662               |
| SNP_P3_170787_5800  | NW_004517685.1 | Scaffold2847 | 5800                    | AA                              | GG                | 1946685664               |
| SNP_P3_170789_4769  | NW_004517686.1 | Scaffold2848 | 4769                    | TT                              | GG                | 1946685666               |
| SNP_P3_170790_13778 | NW_004517686.1 | Scaffold2848 | 13778                   | CC                              | TT                | 1946685668               |
| SNP_P3_170791_16197 | NW_004517686.1 | Scaffold2848 | 16197                   | GG                              | AA                | 1946685670               |
| SNP_P3_170792_16757 | NW_004517686.1 | Scaffold2848 | 16757                   | AA                              | GG                | 1946685672               |
| SNP_P3_170793_16834 | NW_004517686.1 | Scaffold2848 | 16834                   | AA                              | TT                | 1946685674               |
| SNP_P3_170794_31968 | NW_004517686.1 | Scaffold2848 | 31968                   | TT                              | GG                | 1946685676               |
| SNP_P3_170795_33512 | NW_004517686.1 | Scaffold2848 | 33512                   | CC                              | TT                | 1946685678               |
| SNP_P3_170796_34350 | NW_004517686.1 | Scaffold2848 | 34350                   | AA                              | GG                | 1946685680               |
| SNP_P3_170797_54164 | NW_004517686.1 | Scaffold2848 | 54164                   | AA                              | GG                | 1946685682               |

| SNPs IDs            | Chromosome IDs | Chromosomes  | Physical positions (bp) | CDC Frontier (Reference genome) | (Pusa 256 & HPNB) | NCBI SNPdb Accession IDs |
|---------------------|----------------|--------------|-------------------------|---------------------------------|-------------------|--------------------------|
| SNP_P3_170798_54792 | NW_004517686.1 | Scaffold2848 | 54792                   | TT                              | GG                | 1946685684               |
| SNP_P3_170799_28205 | NW_004517687.1 | Scaffold2850 | 28205                   | TT                              | AA                | 1946685686               |
| SNP_P3_170800_28207 | NW_004517687.1 | Scaffold2850 | 28207                   | TT                              | GG                | 1946685688               |
| SNP_P3_170801_1431  | NW_004517688.1 | Scaffold2851 | 1431                    | CC                              | TT                | 1946685691               |
| SNP_P3_170802_1433  | NW_004517688.1 | Scaffold2851 | 1433                    | AA                              | GG                | 1946685693               |
| SNP_P3_170803_1729  | NW_004517688.1 | Scaffold2851 | 1729                    | CC                              | GG                | 1946685695               |
| SNP_P3_170804_1752  | NW_004517688.1 | Scaffold2851 | 1752                    | TT                              | GG                | 1946685697               |
| SNP_P3_170805_3672  | NW_004517689.1 | Scaffold2852 | 3672                    | CC                              | AA                | 1946685699               |
| SNP_P3_170806_3673  | NW_004517689.1 | Scaffold2852 | 3673                    | CC                              | TT                | 1946685702               |
| SNP_P3_170807_4178  | NW_004517689.1 | Scaffold2852 | 4178                    | CC                              | TT                | 1946685704               |
| SNP_P3_170808_7837  | NW_004517689.1 | Scaffold2852 | 7837                    | CC                              | TT                | 1946685706               |
| SNP_P3_170809_8177  | NW_004517689.1 | Scaffold2852 | 8177                    | AA                              | CC                | 1946685708               |
| SNP_P3_170810_8183  | NW_004517689.1 | Scaffold2852 | 8183                    | TT                              | AA                | 1946685710               |
| SNP_P3_170811_8772  | NW_004517689.1 | Scaffold2852 | 8772                    | AA                              | TT                | 1946685712               |
| SNP_P3_170812_8773  | NW_004517689.1 | Scaffold2852 | 8773                    | CC                              | TT                | 1946685714               |
| SNP_P3_170813_9791  | NW_004517689.1 | Scaffold2852 | 9791                    | TT                              | GG                | 1946685716               |
| SNP_P3_170814_19265 | NW_004517689.1 | Scaffold2852 | 19265                   | AA                              | GG                | 1946685718               |
| SNP_P3_170815_19650 | NW_004517689.1 | Scaffold2852 | 19650                   | TT                              | AA                | 1946685720               |
| SNP_P3_170816_4067  | NW_004517690.1 | Scaffold2853 | 4067                    | TT                              | CC                | 1946685722               |
| SNP_P3_170818_9723  | NW_004517690.1 | Scaffold2853 | 9723                    | CC                              | GG                | 1946685724               |
| SNP_P3_170819_9754  | NW_004517690.1 | Scaffold2853 | 9754                    | GG                              | AA                | 1946685726               |
| SNP_P3_170821_11804 | NW_004517690.1 | Scaffold2853 | 11804                   | GG                              | TT                | 1946685728               |
| SNP_P3_170822_12104 | NW_004517690.1 | Scaffold2853 | 12104                   | TT                              | CC                | 1946685732               |
| SNP_P3_170823_12143 | NW_004517690.1 | Scaffold2853 | 12143                   | AA                              | TT                | 1946685734               |
| SNP_P3_170824_12176 | NW_004517690.1 | Scaffold2853 | 12176                   | AA                              | CC                | 1946685736               |
| SNP_P3_170825_12202 | NW_004517690.1 | Scaffold2853 | 12202                   | TT                              | GG                | 1946685738               |
| SNP_P3_170826_12349 | NW_004517690.1 | Scaffold2853 | 12349                   | CC                              | TT                | 1946685740               |
| SNP_P3_170827_15953 | NW_004517690.1 | Scaffold2853 | 15953                   | GG                              | AA                | 1946685742               |
| SNP_P3_170828_15964 | NW_004517690.1 | Scaffold2853 | 15964                   | AA                              | TT                | 1946685744               |
| SNP_P3_170829_16204 | NW_004517690.1 | Scaffold2853 | 16204                   | GG                              | AA                | 1946685746               |
| SNP_P3_170830_16283 | NW_004517690.1 | Scaffold2853 | 16283                   | TT                              | CC                | 1946685748               |
| SNP_P3_170831_16287 | NW_004517690.1 | Scaffold2853 | 16287                   | AA                              | GG                | 1946685750               |
| SNP_P3_170832_16311 | NW_004517690.1 | Scaffold2853 | 16311                   | CC                              | TT                | 1946685752               |
| SNP_P3_170833_16459 | NW_004517690.1 | Scaffold2853 | 16459                   | TT                              | GG                | 1946685754               |
| SNP_P3_170834_16471 | NW_004517690.1 | Scaffold2853 | 16471                   | TT                              | GG                | 1946685756               |
| SNP_P3_170835_16478 | NW_004517690.1 | Scaffold2853 | 16478                   | TT                              | GG                | 1946685758               |
| SNP_P3_170836_16485 | NW_004517690.1 | Scaffold2853 | 16485                   | TT                              | GG                | 1946685762               |
| SNP_P3_170837_16492 | NW_004517690.1 | Scaffold2853 | 16492                   | GG                              | TT                | 1946685764               |
| SNP_P3_170838_16499 | NW_004517690.1 | Scaffold2853 | 16499                   | TT                              | GG                | 1946685766               |
| SNP_P3_170839_16541 | NW_004517690.1 | Scaffold2853 | 16541                   | AA                              | GG                | 1946685768               |
| SNP_P3_170840_16569 | NW_004517690.1 | Scaffold2853 | 16569                   | TT                              | CC                | 1946685770               |
| SNP_P3_170841_16795 | NW_004517690.1 | Scaffold2853 | 16795                   | CC                              | TT                | 1946685772               |

| SNPs IDs            | Chromosome IDs | Chromosomes  | Physical positions (bp) | CDC Frontier (Reference genome) | (Pusa 256 & HPNB) | NCBI SNPdb Accession IDs |
|---------------------|----------------|--------------|-------------------------|---------------------------------|-------------------|--------------------------|
| SNP_P3_170842_16806 | NW_004517690.1 | Scaffold2853 | 16806                   | AA                              | CC                | 1946685774               |
| SNP_P3_170843_16807 | NW_004517690.1 | Scaffold2853 | 16807                   | AA                              | GG                | 1946685776               |
| SNP_P3_170844_16829 | NW_004517690.1 | Scaffold2853 | 16829                   | TT                              | GG                | 1946685778               |
| SNP_P3_170845_17011 | NW_004517690.1 | Scaffold2853 | 17011                   | TT                              | CC                | 1946685780               |
| SNP_P3_170846_17025 | NW_004517690.1 | Scaffold2853 | 17025                   | TT                              | CC                | 1946685782               |
| SNP_P3_170847_17057 | NW_004517690.1 | Scaffold2853 | 17057                   | TT                              | CC                | 1946685784               |
| SNP_P3_170849_17144 | NW_004517690.1 | Scaffold2853 | 17144                   | CC                              | TT                | 1946685786               |
| SNP_P3_170853_21452 | NW_004517690.1 | Scaffold2853 | 21452                   | AA                              | GG                | 1946685788               |
| SNP_P3_170854_21576 | NW_004517690.1 | Scaffold2853 | 21576                   | AA                              | TT                | 1946685790               |
| SNP_P3_170855_21607 | NW_004517690.1 | Scaffold2853 | 21607                   | AA                              | TT                | 1946685792               |
| SNP_P3_170856_25918 | NW_004517690.1 | Scaffold2853 | 25918                   | AA                              | GG                | 1946685794               |
| SNP_P3_170857_25937 | NW_004517690.1 | Scaffold2853 | 25937                   | GG                              | TT                | 1946685797               |
| SNP_P3_170858_26119 | NW_004517690.1 | Scaffold2853 | 26119                   | CC                              | TT                | 1946685799               |
| SNP_P3_170859_26294 | NW_004517690.1 | Scaffold2853 | 26294                   | CC                              | TT                | 1946685801               |
| SNP_P3_170860_26324 | NW_004517690.1 | Scaffold2853 | 26324                   | CC                              | AA                | 1946685803               |
| SNP_P3_170861_26336 | NW_004517690.1 | Scaffold2853 | 26336                   | AA                              | GG                | 1946685805               |
| SNP_P3_170862_142   | NW_004517695.1 | Scaffold2861 | 142                     | CC                              | GG                | 1946685807               |
| SNP_P3_170863_572   | NW_004517695.1 | Scaffold2861 | 572                     | TT                              | CC                | 1946685809               |
| SNP_P3_170864_9616  | NW_004517695.1 | Scaffold2861 | 9616                    | TT                              | CC                | 1946685813               |
| SNP_P3_170865_9624  | NW_004517695.1 | Scaffold2861 | 9624                    | AA                              | TT                | 1946685815               |
| SNP_P3_170866_9634  | NW_004517695.1 | Scaffold2861 | 9634                    | GG                              | AA                | 1946685817               |
| SNP_P3_170867_1347  | NW_004517696.1 | Scaffold2863 | 1347                    | CC                              | GG                | 1946685819               |
| SNP_P3_170868_2212  | NW_004517696.1 | Scaffold2863 | 2212                    | TT                              | AA                | 1946685821               |
| SNP_P3_170869_2235  | NW_004517696.1 | Scaffold2863 | 2235                    | TT                              | GG                | 1946685824               |
| SNP_P3_170870_2238  | NW_004517696.1 | Scaffold2863 | 2238                    | TT                              | AA                | 1946685826               |
| SNP_P3_170872_2356  | NW_004517696.1 | Scaffold2863 | 2356                    | CC                              | AA                | 1946685828               |
| SNP_P3_170873_2419  | NW_004517696.1 | Scaffold2863 | 2419                    | GG                              | AA                | 1946685830               |
| SNP_P3_170874_5310  | NW_004517698.1 | Scaffold2866 | 5310                    | TT                              | AA                | 1946685832               |
| SNP_P3_170875_5325  | NW_004517698.1 | Scaffold2866 | 5325                    | TT                              | GG                | 1946685834               |
| SNP_P3_170876_12942 | NW_004517698.1 | Scaffold2866 | 12942                   | CC                              | AA                | 1946685836               |
| SNP_P3_170877_3027  | NW_004517700.1 | Scaffold2869 | 3027                    | AA                              | GG                | 1946685838               |
| SNP_P3_170878_17628 | NW_004517700.1 | Scaffold2869 | 17628                   | GG                              | AA                | 1946685842               |
| SNP_P3_170879_30212 | NW_004517700.1 | Scaffold2869 | 30212                   | GG                              | AA                | 1946685844               |
| SNP_P3_170880_30241 | NW_004517700.1 | Scaffold2869 | 30241                   | AA                              | GG                | 1946685846               |
| SNP_P3_170881_30725 | NW_004517700.1 | Scaffold2869 | 30725                   | GG                              | AA                | 1946685848               |
| SNP_P3_170882_266   | NW_004517701.1 | Scaffold2870 | 266                     | CC                              | AA                | 1946685850               |
| SNP_P3_170883_267   | NW_004517701.1 | Scaffold2870 | 267                     | AA                              | GG                | 1946685852               |
| SNP_P3_170884_272   | NW_004517701.1 | Scaffold2870 | 272                     | CC                              | TT                | 1946685854               |
| SNP_P3_170885_558   | NW_004517701.1 | Scaffold2870 | 558                     | CC                              | TT                | 1946685856               |
| SNP_P3_170886_561   | NW_004517701.1 | Scaffold2870 | 561                     | GG                              | AA                | 1946685858               |
| SNP_P3_170887_571   | NW_004517701.1 | Scaffold2870 | 571                     | CC                              | TT                | 1946685860               |
| SNP_P3_170888_12234 | NW_004517702.1 | Scaffold2871 | 12234                   | GG                              | AA                | 1946685862               |

| SNPs IDs            | Chromosome IDs | Chromosomes  | Physical positions (bp) | CDC Frontier (Reference genome) | (Pusa 256 & HPNB) | NCBI SNPdb Accession IDs |
|---------------------|----------------|--------------|-------------------------|---------------------------------|-------------------|--------------------------|
| SNP_P3_170889_12355 | NW_004517702.1 | Scaffold2871 | 12355                   | AA                              | GG                | 1946685864               |
| SNP_P3_170890_12615 | NW_004517702.1 | Scaffold2871 | 12615                   | TT                              | GG                | 1946685866               |
| SNP_P3_170891_12665 | NW_004517702.1 | Scaffold2871 | 12665                   | CC                              | AA                | 1946685868               |
| SNP_P3_170892_12730 | NW_004517702.1 | Scaffold2871 | 12730                   | TT                              | CC                | 1946685870               |
| SNP_P3_170893_18618 | NW_004517702.1 | Scaffold2871 | 18618                   | CC                              | GG                | 1946685873               |
| SNP_P3_170894_23421 | NW_004517702.1 | Scaffold2871 | 23421                   | GG                              | TT                | 1946685876               |
| SNP_P3_170895_23422 | NW_004517702.1 | Scaffold2871 | 23422                   | CC                              | TT                | 1946685878               |
| SNP_P3_170896_30409 | NW_004517702.1 | Scaffold2871 | 30409                   | CC                              | TT                | 1946685880               |
| SNP_P3_170898_30425 | NW_004517702.1 | Scaffold2871 | 30425                   | TT                              | CC                | 1946685882               |
| SNP_P3_170899_30812 | NW_004517702.1 | Scaffold2871 | 30812                   | CC                              | AA                | 1946685884               |
| SNP_P3_170900_31225 | NW_004517702.1 | Scaffold2871 | 31225                   | GG                              | AA                | 1946685886               |
| SNP_P3_170901_34575 | NW_004517702.1 | Scaffold2871 | 34575                   | GG                              | CC                | 1946685888               |
| SNP_P3_170902_34809 | NW_004517702.1 | Scaffold2871 | 34809                   | CC                              | AA                | 1946685890               |
| SNP_P3_170904_1745  | NW_004517707.1 | Scaffold2876 | 1745                    | CC                              | GG                | 1946685892               |
| SNP_P3_170905_1876  | NW_004517707.1 | Scaffold2876 | 1876                    | CC                              | GG                | 1946685894               |
| SNP_P3_170906_962   | NW_004517708.1 | Scaffold2878 | 962                     | CC                              | GG                | 1946685896               |
| SNP_P3_170907_5781  | NW_004517712.1 | Scaffold2882 | 5781                    | GG                              | AA                | 1946685898               |
| SNP_P3_170908_5911  | NW_004517712.1 | Scaffold2882 | 5911                    | GG                              | TT                | 1946685900               |
| SNP_P3_170909_5922  | NW_004517712.1 | Scaffold2882 | 5922                    | GG                              | CC                | 1946685902               |
| SNP_P3_170910_6267  | NW_004517712.1 | Scaffold2882 | 6267                    | GG                              | CC                | 1946685904               |
| SNP_P3_170911_12740 | NW_004517712.1 | Scaffold2882 | 12740                   | AA                              | CC                | 1946685906               |
| SNP_P3_170912_14448 | NW_004517712.1 | Scaffold2882 | 14448                   | CC                              | GG                | 1946685908               |
| SNP_P3_170913_14690 | NW_004517712.1 | Scaffold2882 | 14690                   | AA                              | CC                | 1946685910               |
| SNP_P3_170914_14697 | NW_004517712.1 | Scaffold2882 | 14697                   | AA                              | TT                | 1946685912               |
| SNP_P3_170915_17397 | NW_004517712.1 | Scaffold2882 | 17397                   | AA                              | CC                | 1946685915               |
| SNP_P3_170916_25334 | NW_004517712.1 | Scaffold2882 | 25334                   | CC                              | TT                | 1946685917               |
| SNP_P3_170917_25342 | NW_004517712.1 | Scaffold2882 | 25342                   | AA                              | CC                | 1946685919               |
| SNP_P3_170918_25343 | NW_004517712.1 | Scaffold2882 | 25343                   | TT                              | AA                | 1946685921               |
| SNP_P3_170919_26118 | NW_004517712.1 | Scaffold2882 | 26118                   | AA                              | TT                | 1946685923               |
| SNP_P3_170920_26170 | NW_004517712.1 | Scaffold2882 | 26170                   | GG                              | AA                | 1946685925               |
| SNP_P3_170921_26184 | NW_004517712.1 | Scaffold2882 | 26184                   | CC                              | AA                | 1946685927               |
| SNP_P3_170922_26193 | NW_004517712.1 | Scaffold2882 | 26193                   | TT                              | GG                | 1946685929               |
| SNP_P3_170923_26194 | NW_004517712.1 | Scaffold2882 | 26194                   | AA                              | TT                | 1946685931               |
| SNP_P3_170925_1584  | NW_004517714.1 | Scaffold2884 | 1584                    | CC                              | AA                | 1946685933               |
| SNP_P3_170926_542   | NW_004517716.1 | Scaffold2886 | 542                     | TT                              | CC                | 1946685935               |
| SNP_P3_170928_17950 | NW_004517717.1 | Scaffold2887 | 17950                   | CC                              | GG                | 1946685937               |
| SNP_P3_170930_3512  | NW_004517718.1 | Scaffold2888 | 3512                    | TT                              | AA                | 1946685939               |
| SNP_P3_170931_3639  | NW_004517718.1 | Scaffold2888 | 3639                    | TT                              | CC                | 1946685941               |
| SNP_P3_170932_5266  | NW_004517718.1 | Scaffold2888 | 5266                    | AA                              | CC                | 1946685943               |
| SNP_P3_170933_10343 | NW_004517721.1 | Scaffold2893 | 10343                   | AA                              | TT                | 1946685944               |
| SNP_P3_170934_10381 | NW_004517721.1 | Scaffold2893 | 10381                   | AA                              | GG                | 1946685945               |
| SNP_P3_170935_10537 | NW_004517721.1 | Scaffold2893 | 10537                   | CC                              | TT                | 1946685946               |

| SNPs IDs            | Chromosome IDs | Chromosomes  | Physical positions (bp) | CDC Frontier (Reference genome) | (Pusa 256 & HPNB) | NCBI SNPdb Accession IDs |
|---------------------|----------------|--------------|-------------------------|---------------------------------|-------------------|--------------------------|
| SNP_P3_170936_10639 | NW_004517721.1 | Scaffold2893 | 10639                   | CC                              | TT                | 1946685948               |
| SNP_P3_170938_10722 | NW_004517721.1 | Scaffold2893 | 10722                   | AA                              | GG                | 1946685950               |
| SNP_P3_170939_11508 | NW_004517721.1 | Scaffold2893 | 11508                   | TT                              | CC                | 1946685952               |
| SNP_P3_170940_13791 | NW_004517721.1 | Scaffold2893 | 13791                   | TT                              | AA                | 1946685954               |
| SNP_P3_170941_16661 | NW_004517721.1 | Scaffold2893 | 16661                   | AA                              | CC                | 1946685956               |
| SNP_P3_170942_17908 | NW_004517721.1 | Scaffold2893 | 17908                   | TT                              | AA                | 1946685958               |
| SNP_P3_170943_19525 | NW_004517721.1 | Scaffold2893 | 19525                   | AA                              | GG                | 1946685960               |
| SNP_P3_170944_25846 | NW_004517721.1 | Scaffold2893 | 25846                   | CC                              | GG                | 1946685962               |
| SNP_P3_170945_25997 | NW_004517721.1 | Scaffold2893 | 25997                   | TT                              | CC                | 1946685964               |
| SNP_P3_170946_26125 | NW_004517721.1 | Scaffold2893 | 26125                   | GG                              | AA                | 1946685965               |
| SNP_P3_170947_26286 | NW_004517721.1 | Scaffold2893 | 26286                   | AA                              | TT                | 1946685967               |
| SNP_P3_170948_26344 | NW_004517721.1 | Scaffold2893 | 26344                   | TT                              | AA                | 1946685969               |
| SNP_P3_170949_26371 | NW_004517721.1 | Scaffold2893 | 26371                   | GG                              | AA                | 1946685971               |
| SNP_P3_170950_26704 | NW_004517721.1 | Scaffold2893 | 26704                   | TT                              | GG                | 1946685973               |
| SNP_P3_170951_27176 | NW_004517721.1 | Scaffold2893 | 27176                   | GG                              | CC                | 1946685975               |
| SNP_P3_170952_27191 | NW_004517721.1 | Scaffold2893 | 27191                   | GG                              | TT                | 1946685978               |
| SNP_P3_170953_27237 | NW_004517721.1 | Scaffold2893 | 27237                   | CC                              | TT                | 1946685980               |
| SNP_P3_170954_27316 | NW_004517721.1 | Scaffold2893 | 27316                   | AA                              | GG                | 1946685982               |
| SNP_P3_170955_27538 | NW_004517721.1 | Scaffold2893 | 27538                   | TT                              | CC                | 1946685984               |
| SNP_P3_170956_27598 | NW_004517721.1 | Scaffold2893 | 27598                   | AA                              | GG                | 1946685986               |
| SNP_P3_170957_27761 | NW_004517721.1 | Scaffold2893 | 27761                   | CC                              | AA                | 1946685988               |
| SNP_P3_170958_14724 | NW_004517723.1 | Scaffold2896 | 14724                   | GG                              | CC                | 1946685990               |
| SNP_P3_170959_26099 | NW_004517723.1 | Scaffold2896 | 26099                   | AA                              | TT                | 1946685992               |
| SNP_P3_170960_32806 | NW_004517723.1 | Scaffold2896 | 32806                   | AA                              | GG                | 1946685994               |
| SNP_P3_170961_32843 | NW_004517723.1 | Scaffold2896 | 32843                   | CC                              | TT                | 1946685996               |
| SNP_P3_170962_35448 | NW_004517723.1 | Scaffold2896 | 35448                   | AA                              | GG                | 1946685998               |
| SNP_P3_170963_35456 | NW_004517723.1 | Scaffold2896 | 35456                   | CC                              | GG                | 1946686000               |
| SNP_P3_170964_36313 | NW_004517723.1 | Scaffold2896 | 36313                   | GG                              | AA                | 1946686002               |
| SNP_P3_170965_36377 | NW_004517723.1 | Scaffold2896 | 36377                   | CC                              | TT                | 1946686004               |
| SNP_P3_170966_54322 | NW_004517723.1 | Scaffold2896 | 54322                   | CC                              | AA                | 1946686006               |
| SNP_P3_170967_54927 | NW_004517723.1 | Scaffold2896 | 54927                   | CC                              | TT                | 1946686009               |
| SNP_P3_170969_1343  | NW_004517727.1 | Scaffold2900 | 1343                    | AA                              | TT                | 1946686011               |
| SNP_P3_170970_1596  | NW_004517727.1 | Scaffold2900 | 1596                    | GG                              | AA                | 1946686013               |
| SNP_P3_170971_1837  | NW_004517727.1 | Scaffold2900 | 1837                    | TT                              | AA                | 1946686015               |
| SNP_P3_170972_2036  | NW_004517727.1 | Scaffold2900 | 2036                    | TT                              | CC                | 1946686017               |
| SNP_P3_170973_2134  | NW_004517727.1 | Scaffold2900 | 2134                    | GG                              | CC                | 1946686019               |
| SNP_P3_170974_5179  | NW_004517727.1 | Scaffold2900 | 5179                    | TT                              | AA                | 1946686021               |
| SNP_P3_170975_5298  | NW_004517727.1 | Scaffold2900 | 5298                    | AA                              | CC                | 1946686023               |
| SNP_P3_170976_5453  | NW_004517727.1 | Scaffold2900 | 5453                    | GG                              | AA                | 1946686025               |
| SNP_P3_170977_7046  | NW_004517727.1 | Scaffold2900 | 7046                    | GG                              | AA                | 1946686027               |
| SNP_P3_170978_7198  | NW_004517727.1 | Scaffold2900 | 7198                    | TT                              | CC                | 1946686028               |
| SNP_P3_170979_7480  | NW_004517727.1 | Scaffold2900 | 7480                    | CC                              | AA                | 1946686030               |

| SNPs IDs            | Chromosome IDs | Chromosomes  | Physical positions (bp) | CDC Frontier (Reference genome) | (Pusa 256 & HPNB) | NCBI SNPdb Accession IDs |
|---------------------|----------------|--------------|-------------------------|---------------------------------|-------------------|--------------------------|
| SNP_P3_170980_7681  | NW_004517727.1 | Scaffold2900 | 7681                    | TT                              | GG                | 1946686032               |
| SNP_P3_170981_7823  | NW_004517727.1 | Scaffold2900 | 7823                    | GG                              | TT                | 1946686034               |
| SNP_P3_170983_8196  | NW_004517727.1 | Scaffold2900 | 8196                    | AA                              | GG                | 1946686036               |
| SNP_P3_170984_8214  | NW_004517727.1 | Scaffold2900 | 8214                    | CC                              | GG                | 1946686040               |
| SNP_P3_170985_8334  | NW_004517727.1 | Scaffold2900 | 8334                    | TT                              | CC                | 1946686042               |
| SNP_P3_170986_8418  | NW_004517727.1 | Scaffold2900 | 8418                    | AA                              | TT                | 1946686044               |
| SNP_P3_170987_9514  | NW_004517727.1 | Scaffold2900 | 9514                    | GG                              | AA                | 1946686046               |
| SNP_P3_170988_9568  | NW_004517727.1 | Scaffold2900 | 9568                    | TT                              | CC                | 1946686048               |
| SNP_P3_170989_9570  | NW_004517727.1 | Scaffold2900 | 9570                    | CC                              | TT                | 1946686050               |
| SNP_P3_170990_13284 | NW_004517727.1 | Scaffold2900 | 13284                   | GG                              | TT                | 1946686052               |
| SNP_P3_170991_13360 | NW_004517727.1 | Scaffold2900 | 13360                   | CC                              | GG                | 1946686054               |
| SNP_P3_170992_13406 | NW_004517727.1 | Scaffold2900 | 13406                   | GG                              | TT                | 1946686056               |
| SNP_P3_170993_13488 | NW_004517727.1 | Scaffold2900 | 13488                   | GG                              | TT                | 1946686058               |
| SNP_P3_170994_4242  | NW_004517730.1 | Scaffold2904 | 4242                    | TT                              | CC                | 1946686060               |
| SNP_P3_170995_4258  | NW_004517730.1 | Scaffold2904 | 4258                    | CC                              | AA                | 1946686062               |
| SNP_P3_170996_4321  | NW_004517730.1 | Scaffold2904 | 4321                    | CC                              | TT                | 1946686064               |
| SNP_P3_170997_4329  | NW_004517730.1 | Scaffold2904 | 4329                    | CC                              | TT                | 1946686066               |
| SNP_P3_170998_4344  | NW_004517730.1 | Scaffold2904 | 4344                    | TT                              | CC                | 1946686069               |
| SNP_P3_170999_4408  | NW_004517730.1 | Scaffold2904 | 4408                    | CC                              | TT                | 1946686071               |
| SNP_P3_171000_6007  | NW_004517730.1 | Scaffold2904 | 6007                    | CC                              | TT                | 1946686073               |
| SNP_P3_171001_6058  | NW_004517730.1 | Scaffold2904 | 6058                    | AA                              | GG                | 1946686075               |
| SNP_P3_171002_6070  | NW_004517730.1 | Scaffold2904 | 6070                    | AA                              | GG                | 1946686077               |
| SNP_P3_171003_6190  | NW_004517730.1 | Scaffold2904 | 6190                    | GG                              | TT                | 1946686079               |
| SNP_P3_171004_6193  | NW_004517730.1 | Scaffold2904 | 6193                    | TT                              | CC                | 1946686081               |
| SNP_P3_171005_6196  | NW_004517730.1 | Scaffold2904 | 6196                    | GG                              | AA                | 1946686083               |
| SNP_P3_171006_6208  | NW_004517730.1 | Scaffold2904 | 6208                    | CC                              | TT                | 1946686085               |
| SNP_P3_171007_7233  | NW_004517730.1 | Scaffold2904 | 7233                    | TT                              | CC                | 1946686087               |
| SNP_P3_171008_261   | NW_004517731.1 | Scaffold2905 | 261                     | TT                              | AA                | 1946686089               |
| SNP_P3_171009_263   | NW_004517731.1 | Scaffold2905 | 263                     | TT                              | AA                | 1946686090               |
| SNP_P3_171010_863   | NW_004517731.1 | Scaffold2905 | 863                     | GG                              | AA                | 1946686092               |
| SNP_P3_171011_20787 | NW_004517733.1 | Scaffold2907 | 20787                   | TT                              | CC                | 1946686094               |
| SNP_P3_171014_30837 | NW_004517733.1 | Scaffold2907 | 30837                   | CC                              | GG                | 1946686096               |
| SNP_P3_171015_749   | NW_004517737.1 | Scaffold2914 | 749                     | TT                              | CC                | 1946686098               |
| SNP_P3_171016_4051  | NW_004517737.1 | Scaffold2914 | 4051                    | TT                              | CC                | 1946686101               |
| SNP_P3_171017_4281  | NW_004517737.1 | Scaffold2914 | 4281                    | AA                              | CC                | 1946686103               |
| SNP_P3_171018_4300  | NW_004517737.1 | Scaffold2914 | 4300                    | AA                              | GG                | 1946686105               |
| SNP_P3_171019_4301  | NW_004517737.1 | Scaffold2914 | 4301                    | TT                              | CC                | 1946686107               |
| SNP_P3_171020_4318  | NW_004517737.1 | Scaffold2914 | 4318                    | TT                              | CC                | 1946686109               |
| SNP_P3_171021_4352  | NW_004517737.1 | Scaffold2914 | 4352                    | AA                              | GG                | 1946686111               |
| SNP_P3_171022_4358  | NW_004517737.1 | Scaffold2914 | 4358                    | AA                              | GG                | 1946686113               |
| SNP_P3_171023_4369  | NW_004517737.1 | Scaffold2914 | 4369                    | AA                              | TT                | 1946686115               |
| SNP_P3_171024_4381  | NW_004517737.1 | Scaffold2914 | 4381                    | AA                              | GG                | 1946686117               |

| SNPs IDs            | Chromosome IDs | Chromosomes  | Physical positions (bp) | CDC Frontier (Reference genome) | (Pusa 256 & HPNB) | NCBI SNPdb Accession IDs |
|---------------------|----------------|--------------|-------------------------|---------------------------------|-------------------|--------------------------|
| SNP_P3_171025_4384  | NW_004517737.1 | Scaffold2914 | 4384                    | AA                              | GG                | 1946686119               |
| SNP_P3_171026_4397  | NW_004517737.1 | Scaffold2914 | 4397                    | AA                              | GG                | 1946686121               |
| SNP_P3_171027_4400  | NW_004517737.1 | Scaffold2914 | 4400                    | AA                              | GG                | 1946686123               |
| SNP_P3_171028_4436  | NW_004517737.1 | Scaffold2914 | 4436                    | AA                              | GG                | 1946686125               |
| SNP_P3_171029_4459  | NW_004517737.1 | Scaffold2914 | 4459                    | AA                              | GG                | 1946686127               |
| SNP_P3_171030_4462  | NW_004517737.1 | Scaffold2914 | 4462                    | AA                              | GG                | 1946686129               |
| SNP_P3_171031_4468  | NW_004517737.1 | Scaffold2914 | 4468                    | GG                              | AA                | 1946686132               |
| SNP_P3_171032_4473  | NW_004517737.1 | Scaffold2914 | 4473                    | AA                              | GG                | 1946686134               |
| SNP_P3_171033_4474  | NW_004517737.1 | Scaffold2914 | 4474                    | GG                              | AA                | 1946686136               |
| SNP_P3_171034_4480  | NW_004517737.1 | Scaffold2914 | 4480                    | TT                              | CC                | 1946686138               |
| SNP_P3_171035_4490  | NW_004517737.1 | Scaffold2914 | 4490                    | AA                              | CC                | 1946686140               |
| SNP_P3_171036_4501  | NW_004517737.1 | Scaffold2914 | 4501                    | AA                              | GG                | 1946686142               |
| SNP_P3_171037_4531  | NW_004517737.1 | Scaffold2914 | 4531                    | AA                              | TT                | 1946686144               |
| SNP_P3_171038_4543  | NW_004517737.1 | Scaffold2914 | 4543                    | AA                              | TT                | 1946686146               |
| SNP_P3_171039_4803  | NW_004517737.1 | Scaffold2914 | 4803                    | AA                              | GG                | 1946686148               |
| SNP_P3_171040_7009  | NW_004517737.1 | Scaffold2914 | 7009                    | CC                              | TT                | 1946686150               |
| SNP_P3_171041_7011  | NW_004517737.1 | Scaffold2914 | 7011                    | CC                              | AA                | 1946686152               |
| SNP_P3_171042_7012  | NW_004517737.1 | Scaffold2914 | 7012                    | TT                              | GG                | 1946686154               |
| SNP_P3_171043_7027  | NW_004517737.1 | Scaffold2914 | 7027                    | TT                              | CC                | 1946686156               |
| SNP_P3_171045_9439  | NW_004517738.1 | Scaffold2915 | 9439                    | AA                              | TT                | 1946686158               |
| SNP_P3_171046_10954 | NW_004517738.1 | Scaffold2915 | 10954                   | TT                              | CC                | 1946686160               |
| SNP_P3_171047_14255 | NW_004517739.1 | Scaffold2916 | 14255                   | GG                              | AA                | 1946686164               |
| SNP_P3_171048_14257 | NW_004517739.1 | Scaffold2916 | 14257                   | GG                              | TT                | 1946686166               |
| SNP_P3_171049_14258 | NW_004517739.1 | Scaffold2916 | 14258                   | AA                              | TT                | 1946686168               |
| SNP_P3_171050_14261 | NW_004517739.1 | Scaffold2916 | 14261                   | AA                              | CC                | 1946686170               |
| SNP_P3_171051_14262 | NW_004517739.1 | Scaffold2916 | 14262                   | AA                              | TT                | 1946686172               |
| SNP_P3_171052_14263 | NW_004517739.1 | Scaffold2916 | 14263                   | TT                              | AA                | 1946686174               |
| SNP_P3_171053_14637 | NW_004517739.1 | Scaffold2916 | 14637                   | AA                              | GG                | 1946686176               |
| SNP_P3_171054_15830 | NW_004517739.1 | Scaffold2916 | 15830                   | CC                              | TT                | 1946686178               |
| SNP_P3_171056_20878 | NW_004517739.1 | Scaffold2916 | 20878                   | TT                              | AA                | 1946686180               |
| SNP_P3_171057_31480 | NW_004517739.1 | Scaffold2916 | 31480                   | GG                              | TT                | 1946686182               |
| SNP_P3_171058_67867 | NW_004517739.1 | Scaffold2916 | 67867                   | AA                              | TT                | 1946686184               |
| SNP_P3_171060_4514  | NW_004517742.1 | Scaffold2919 | 4514                    | TT                              | CC                | 1946686186               |
| SNP_P3_171061_8574  | NW_004517742.1 | Scaffold2919 | 8574                    | GG                              | CC                | 1946686188               |
| SNP_P3_171062_8588  | NW_004517742.1 | Scaffold2919 | 8588                    | GG                              | AA                | 1946686190               |
| SNP_P3_171063_8624  | NW_004517742.1 | Scaffold2919 | 8624                    | AA                              | CC                | 1946686193               |
| SNP_P3_171064_8641  | NW_004517742.1 | Scaffold2919 | 8641                    | GG                              | AA                | 1946686195               |
| SNP_P3_171065_8695  | NW_004517742.1 | Scaffold2919 | 8695                    | AA                              | TT                | 1946686197               |
| SNP_P3_171066_1640  | NW_004517744.1 | Scaffold2921 | 1640                    | CC                              | TT                | 1946686199               |
| SNP_P3_171067_1811  | NW_004517744.1 | Scaffold2921 | 1811                    | AA                              | GG                | 1946686201               |
| SNP_P3_171068_2082  | NW_004517744.1 | Scaffold2921 | 2082                    | AA                              | GG                | 1946686203               |
| SNP_P3_171069_8082  | NW_004517744.1 | Scaffold2921 | 8082                    | CC                              | AA                | 1946686205               |



| SNPs IDs            | Chromosome IDs | Chromosomes  | Physical positions (bp) | CDC Frontier (Reference genome) | (Pusa 256 & HPNB) | NCBI SNPdb Accession IDs |
|---------------------|----------------|--------------|-------------------------|---------------------------------|-------------------|--------------------------|
| SNP_P3_171070_8519  | NW_004517744.1 | Scaffold2921 | 8519                    | TT                              | CC                | 1946686207               |
| SNP_P3_171071_8521  | NW_004517744.1 | Scaffold2921 | 8521                    | CC                              | TT                | 1946686209               |
| SNP_P3_171072_8523  | NW_004517744.1 | Scaffold2921 | 8523                    | AA                              | GG                | 1946686211               |
| SNP_P3_171073_8931  | NW_004517744.1 | Scaffold2921 | 8931                    | TT                              | GG                | 1946686213               |
| SNP_P3_171074_8940  | NW_004517744.1 | Scaffold2921 | 8940                    | AA                              | GG                | 1946686215               |
| SNP_P3_171075_8955  | NW_004517744.1 | Scaffold2921 | 8955                    | GG                              | CC                | 1946686217               |
| SNP_P3_171076_9260  | NW_004517744.1 | Scaffold2921 | 9260                    | GG                              | AA                | 1946686219               |
| SNP_P3_171077_11312 | NW_004517744.1 | Scaffold2921 | 11312                   | TT                              | CC                | 1946686221               |
| SNP_P3_171078_11349 | NW_004517744.1 | Scaffold2921 | 11349                   | CC                              | TT                | 1946686224               |
| SNP_P3_171079_11652 | NW_004517744.1 | Scaffold2921 | 11652                   | AA                              | TT                | 1946686226               |
| SNP_P3_171080_11726 | NW_004517744.1 | Scaffold2921 | 11726                   | TT                              | CC                | 1946686228               |
| SNP_P3_171081_248   | NW_004517745.1 | Scaffold2922 | 248                     | AA                              | GG                | 1946686230               |
| SNP_P3_171082_253   | NW_004517745.1 | Scaffold2922 | 253                     | CC                              | TT                | 1946686232               |
| SNP_P3_171083_272   | NW_004517745.1 | Scaffold2922 | 272                     | CC                              | TT                | 1946686234               |
| SNP_P3_171084_2335  | NW_004517745.1 | Scaffold2922 | 2335                    | GG                              | AA                | 1946686236               |
| SNP_P3_171085_2365  | NW_004517745.1 | Scaffold2922 | 2365                    | AA                              | CC                | 1946686238               |
| SNP_P3_171086_2377  | NW_004517745.1 | Scaffold2922 | 2377                    | AA                              | GG                | 1946686240               |
| SNP_P3_171087_2507  | NW_004517745.1 | Scaffold2922 | 2507                    | AA                              | GG                | 1946686242               |
| SNP_P3_171088_5335  | NW_004517745.1 | Scaffold2922 | 5335                    | CC                              | GG                | 1946686244               |
| SNP_P3_171089_5717  | NW_004517745.1 | Scaffold2922 | 5717                    | AA                              | GG                | 1946686247               |
| SNP_P3_171090_6419  | NW_004517745.1 | Scaffold2922 | 6419                    | TT                              | GG                | 1946686249               |
| SNP_P3_171091_6585  | NW_004517745.1 | Scaffold2922 | 6585                    | AA                              | TT                | 1946686252               |
| SNP_P3_171092_6758  | NW_004517745.1 | Scaffold2922 | 6758                    | CC                              | TT                | 1946686254               |
| SNP_P3_171093_6993  | NW_004517745.1 | Scaffold2922 | 6993                    | CC                              | TT                | 1946686256               |
| SNP_P3_171094_7102  | NW_004517745.1 | Scaffold2922 | 7102                    | TT                              | CC                | 1946686260               |
| SNP_P3_171095_7461  | NW_004517745.1 | Scaffold2922 | 7461                    | TT                              | CC                | 1946686261               |
| SNP_P3_171097_7557  | NW_004517745.1 | Scaffold2922 | 7557                    | GG                              | AA                | 1946686263               |
| SNP_P3_171098_7919  | NW_004517745.1 | Scaffold2922 | 7919                    | GG                              | AA                | 1946686265               |
| SNP_P3_171099_8048  | NW_004517745.1 | Scaffold2922 | 8048                    | CC                              | TT                | 1946686267               |
| SNP_P3_171100_8142  | NW_004517745.1 | Scaffold2922 | 8142                    | AA                              | GG                | 1946686269               |
| SNP_P3_171101_8213  | NW_004517745.1 | Scaffold2922 | 8213                    | TT                              | CC                | 1946686271               |
| SNP_P3_171102_8218  | NW_004517745.1 | Scaffold2922 | 8218                    | GG                              | AA                | 1946686273               |
| SNP_P3_171104_8407  | NW_004517745.1 | Scaffold2922 | 8407                    | AA                              | CC                | 1946686275               |
| SNP_P3_171105_8419  | NW_004517745.1 | Scaffold2922 | 8419                    | CC                              | TT                | 1946686277               |
| SNP_P3_171106_8492  | NW_004517745.1 | Scaffold2922 | 8492                    | CC                              | AA                | 1946686279               |
| SNP_P3_171107_8566  | NW_004517745.1 | Scaffold2922 | 8566                    | GG                              | TT                | 1946686281               |
| SNP_P3_171108_8891  | NW_004517745.1 | Scaffold2922 | 8891                    | CC                              | TT                | 1946686283               |
| SNP_P3_171109_143   | NW_004517746.1 | Scaffold2924 | 143                     | CC                              | AA                | 1946686285               |
| SNP_P3_171110_152   | NW_004517746.1 | Scaffold2924 | 152                     | AA                              | GG                | 1946686287               |
| SNP_P3_171111_168   | NW_004517746.1 | Scaffold2924 | 168                     | AA                              | CC                | 1946686290               |
| SNP_P3_171112_327   | NW_004517746.1 | Scaffold2924 | 327                     | TT                              | AA                | 1946686292               |
| SNP_P3_171114_11979 | NW_004517746.1 | Scaffold2924 | 11979                   | AA                              | TT                | 1946686294               |

| SNPs IDs            | Chromosome IDs | Chromosomes  | Physical positions (bp) | CDC Frontier (Reference genome) | (Pusa 256 & HPNB) | NCBI SNPdb Accession IDs |
|---------------------|----------------|--------------|-------------------------|---------------------------------|-------------------|--------------------------|
| SNP_P3_171115_12042 | NW_004517746.1 | Scaffold2924 | 12042                   | TT                              | CC                | 1946686296               |
| SNP_P3_171116_12167 | NW_004517746.1 | Scaffold2924 | 12167                   | AA                              | GG                | 1946686298               |
| SNP_P3_171117_16071 | NW_004517746.1 | Scaffold2924 | 16071                   | AA                              | CC                | 1946686300               |
| SNP_P3_171118_16091 | NW_004517746.1 | Scaffold2924 | 16091                   | TT                              | AA                | 1946686302               |
| SNP_P3_171119_16250 | NW_004517746.1 | Scaffold2924 | 16250                   | TT                              | AA                | 1946686304               |
| SNP_P3_171120_16326 | NW_004517746.1 | Scaffold2924 | 16326                   | CC                              | AA                | 1946686306               |
| SNP_P3_171121_16485 | NW_004517746.1 | Scaffold2924 | 16485                   | CC                              | GG                | 1946686308               |
| SNP_P3_171122_16486 | NW_004517746.1 | Scaffold2924 | 16486                   | GG                              | AA                | 1946686310               |
| SNP_P3_171123_26789 | NW_004517746.1 | Scaffold2924 | 26789                   | CC                              | TT                | 1946686317               |
| SNP_P3_171124_26904 | NW_004517746.1 | Scaffold2924 | 26904                   | GG                              | TT                | 1946686319               |
| SNP_P3_171126_27355 | NW_004517746.1 | Scaffold2924 | 27355                   | AA                              | CC                | 1946686321               |
| SNP_P3_171127_27364 | NW_004517746.1 | Scaffold2924 | 27364                   | TT                              | CC                | 1946686323               |
| SNP_P3_171128_1871  | NW_004517749.1 | Scaffold2928 | 1871                    | CC                              | AA                | 1946686325               |
| SNP_P3_171129_1958  | NW_004517749.1 | Scaffold2928 | 1958                    | AA                              | CC                | 1946686327               |
| SNP_P3_171130_2086  | NW_004517749.1 | Scaffold2928 | 2086                    | CC                              | AA                | 1946686329               |
| SNP_P3_171131_2171  | NW_004517749.1 | Scaffold2928 | 2171                    | AA                              | GG                | 1946686331               |
| SNP_P3_171132_2314  | NW_004517749.1 | Scaffold2928 | 2314                    | CC                              | TT                | 1946686333               |
| SNP_P3_171133_2408  | NW_004517749.1 | Scaffold2928 | 2408                    | CC                              | AA                | 1946686335               |
| SNP_P3_171134_2672  | NW_004517749.1 | Scaffold2928 | 2672                    | TT                              | GG                | 1946686337               |
| SNP_P3_171135_7123  | NW_004517749.1 | Scaffold2928 | 7123                    | TT                              | AA                | 1946686339               |
| SNP_P3_171136_7164  | NW_004517749.1 | Scaffold2928 | 7164                    | TT                              | AA                | 1946686341               |
| SNP_P3_171137_7183  | NW_004517749.1 | Scaffold2928 | 7183                    | GG                              | AA                | 1946686343               |
| SNP_P3_171138_7189  | NW_004517749.1 | Scaffold2928 | 7189                    | GG                              | AA                | 1946686346               |
| SNP_P3_171139_7201  | NW_004517749.1 | Scaffold2928 | 7201                    | CC                              | TT                | 1946686348               |
| SNP_P3_171140_7222  | NW_004517749.1 | Scaffold2928 | 7222                    | TT                              | AA                | 1946686350               |
| SNP_P3_171141_7229  | NW_004517749.1 | Scaffold2928 | 7229                    | CC                              | TT                | 1946686352               |
| SNP_P3_171142_8127  | NW_004517749.1 | Scaffold2928 | 8127                    | GG                              | AA                | 1946686355               |
| SNP_P3_171143_8143  | NW_004517749.1 | Scaffold2928 | 8143                    | GG                              | TT                | 1946686357               |
| SNP_P3_171144_8292  | NW_004517749.1 | Scaffold2928 | 8292                    | AA                              | TT                | 1946686359               |
| SNP_P3_171145_8719  | NW_004517749.1 | Scaffold2928 | 8719                    | TT                              | CC                | 1946686361               |
| SNP_P3_171146_10241 | NW_004517749.1 | Scaffold2928 | 10241                   | CC                              | TT                | 1946686363               |
| SNP_P3_171147_10257 | NW_004517749.1 | Scaffold2928 | 10257                   | AA                              | TT                | 1946686365               |
| SNP_P3_171148_10290 | NW_004517749.1 | Scaffold2928 | 10290                   | CC                              | AA                | 1946686367               |
| SNP_P3_171149_12378 | NW_004517749.1 | Scaffold2928 | 12378                   | AA                              | CC                | 1946686369               |
| SNP_P3_171150_12996 | NW_004517749.1 | Scaffold2928 | 12996                   | GG                              | CC                | 1946686371               |
| SNP_P3_171151_13023 | NW_004517749.1 | Scaffold2928 | 13023                   | TT                              | GG                | 1946686375               |
| SNP_P3_171152_13156 | NW_004517749.1 | Scaffold2928 | 13156                   | CC                              | TT                | 1946686377               |
| SNP_P3_171153_16246 | NW_004517749.1 | Scaffold2928 | 16246                   | TT                              | CC                | 1946686380               |
| SNP_P3_171154_18736 | NW_004517749.1 | Scaffold2928 | 18736                   | GG                              | AA                | 1946686383               |
| SNP_P3_171155_19146 | NW_004517749.1 | Scaffold2928 | 19146                   | GG                              | AA                | 1946686385               |
| SNP_P3_171156_22693 | NW_004517749.1 | Scaffold2928 | 22693                   | AA                              | CC                | 1946686388               |
| SNP_P3_171158_22961 | NW_004517749.1 | Scaffold2928 | 22961                   | CC                              | TT                | 1946686391               |

| SNPs IDs            | Chromosome IDs | Chromosomes  | Physical positions (bp) | CDC Frontier (Reference genome) | (Pusa 256 & HPNB) | NCBI SNPdb Accession IDs |
|---------------------|----------------|--------------|-------------------------|---------------------------------|-------------------|--------------------------|
| SNP_P3_171159_22984 | NW_004517749.1 | Scaffold2928 | 22984                   | AA                              | GG                | 1946686393               |
| SNP_P3_171160_23054 | NW_004517749.1 | Scaffold2928 | 23054                   | AA                              | TT                | 1946686396               |
| SNP_P3_171161_23061 | NW_004517749.1 | Scaffold2928 | 23061                   | TT                              | GG                | 1946686399               |
| SNP_P3_171162_23156 | NW_004517749.1 | Scaffold2928 | 23156                   | AA                              | TT                | 1946686401               |
| SNP_P3_171163_23179 | NW_004517749.1 | Scaffold2928 | 23179                   | GG                              | CC                | 1946686403               |
| SNP_P3_171164_23192 | NW_004517749.1 | Scaffold2928 | 23192                   | AA                              | GG                | 1946686405               |
| SNP_P3_171165_23349 | NW_004517749.1 | Scaffold2928 | 23349                   | AA                              | CC                | 1946686407               |
| SNP_P3_171166_23474 | NW_004517749.1 | Scaffold2928 | 23474                   | TT                              | AA                | 1946686409               |
| SNP_P3_171167_23510 | NW_004517749.1 | Scaffold2928 | 23510                   | GG                              | TT                | 1946686411               |
| SNP_P3_171168_23520 | NW_004517749.1 | Scaffold2928 | 23520                   | TT                              | AA                | 1946686413               |
| SNP_P3_171169_23631 | NW_004517749.1 | Scaffold2928 | 23631                   | AA                              | CC                | 1946686415               |
| SNP_P3_171170_23661 | NW_004517749.1 | Scaffold2928 | 23661                   | GG                              | AA                | 1946686417               |
| SNP_P3_171172_23739 | NW_004517749.1 | Scaffold2928 | 23739                   | TT                              | CC                | 1946686419               |
| SNP_P3_171173_23745 | NW_004517749.1 | Scaffold2928 | 23745                   | TT                              | CC                | 1946686421               |
| SNP_P3_171174_23809 | NW_004517749.1 | Scaffold2928 | 23809                   | GG                              | TT                | 1946686423               |
| SNP_P3_171175_23816 | NW_004517749.1 | Scaffold2928 | 23816                   | TT                              | CC                | 1946686425               |
| SNP_P3_171176_23839 | NW_004517749.1 | Scaffold2928 | 23839                   | GG                              | CC                | 1946686428               |
| SNP_P3_171177_23850 | NW_004517749.1 | Scaffold2928 | 23850                   | GG                              | CC                | 1946686430               |
| SNP_P3_171178_23854 | NW_004517749.1 | Scaffold2928 | 23854                   | TT                              | CC                | 1946686432               |
| SNP_P3_171179_23880 | NW_004517749.1 | Scaffold2928 | 23880                   | GG                              | AA                | 1946686434               |
| SNP_P3_171180_23900 | NW_004517749.1 | Scaffold2928 | 23900                   | TT                              | CC                | 1946686436               |
| SNP_P3_171181_23946 | NW_004517749.1 | Scaffold2928 | 23946                   | AA                              | TT                | 1946686438               |
| SNP_P3_171182_24034 | NW_004517749.1 | Scaffold2928 | 24034                   | TT                              | AA                | 1946686440               |
| SNP_P3_171183_24299 | NW_004517749.1 | Scaffold2928 | 24299                   | GG                              | TT                | 1946686442               |
| SNP_P3_171184_24323 | NW_004517749.1 | Scaffold2928 | 24323                   | TT                              | CC                | 1946686444               |
| SNP_P3_171185_24401 | NW_004517749.1 | Scaffold2928 | 24401                   | GG                              | AA                | 1946686447               |
| SNP_P3_171186_24487 | NW_004517749.1 | Scaffold2928 | 24487                   | AA                              | GG                | 1946686449               |
| SNP_P3_171187_24661 | NW_004517749.1 | Scaffold2928 | 24661                   | GG                              | AA                | 1946686450               |
| SNP_P3_171188_24696 | NW_004517749.1 | Scaffold2928 | 24696                   | GG                              | TT                | 1946686452               |
| SNP_P3_171189_24762 | NW_004517749.1 | Scaffold2928 | 24762                   | GG                              | TT                | 1946686454               |
| SNP_P3_171190_24783 | NW_004517749.1 | Scaffold2928 | 24783                   | GG                              | TT                | 1946686456               |
| SNP_P3_171191_24829 | NW_004517749.1 | Scaffold2928 | 24829                   | CC                              | TT                | 1946686458               |
| SNP_P3_171192_24830 | NW_004517749.1 | Scaffold2928 | 24830                   | GG                              | AA                | 1946686460               |
| SNP_P3_171193_24912 | NW_004517749.1 | Scaffold2928 | 24912                   | AA                              | GG                | 1946686462               |
| SNP_P3_171194_24987 | NW_004517749.1 | Scaffold2928 | 24987                   | AA                              | TT                | 1946686465               |
| SNP_P3_171195_25018 | NW_004517749.1 | Scaffold2928 | 25018                   | CC                              | TT                | 1946686467               |
| SNP_P3_171196_25023 | NW_004517749.1 | Scaffold2928 | 25023                   | CC                              | TT                | 1946686469               |
| SNP_P3_171197_25042 | NW_004517749.1 | Scaffold2928 | 25042                   | AA                              | CC                | 1946686471               |
| SNP_P3_171198_25268 | NW_004517749.1 | Scaffold2928 | 25268                   | TT                              | GG                | 1946686473               |
| SNP_P3_171199_25372 | NW_004517749.1 | Scaffold2928 | 25372                   | CC                              | AA                | 1946686475               |
| SNP_P3_171200_25490 | NW_004517749.1 | Scaffold2928 | 25490                   | TT                              | GG                | 1946686477               |
| SNP_P3_171201_25574 | NW_004517749.1 | Scaffold2928 | 25574                   | GG                              | CC                | 1946686479               |

| SNPs IDs            | Chromosome IDs | Chromosomes  | Physical positions (bp) | CDC Frontier (Reference genome) | (Pusa 256 & HPNB) | NCBI SNPdb Accession IDs |
|---------------------|----------------|--------------|-------------------------|---------------------------------|-------------------|--------------------------|
| SNP_P3_171202_25597 | NW_004517749.1 | Scaffold2928 | 25597                   | CC                              | GG                | 1946686481               |
| SNP_P3_171203_25613 | NW_004517749.1 | Scaffold2928 | 25613                   | GG                              | CC                | 1946686483               |
| SNP_P3_171204_25749 | NW_004517749.1 | Scaffold2928 | 25749                   | CC                              | AA                | 1946686485               |
| SNP_P3_171205_30745 | NW_004517749.1 | Scaffold2928 | 30745                   | AA                              | CC                | 1946686487               |
| SNP_P3_171206_30936 | NW_004517749.1 | Scaffold2928 | 30936                   | CC                              | TT                | 1946686489               |
| SNP_P3_171207_30990 | NW_004517749.1 | Scaffold2928 | 30990                   | AA                              | GG                | 1946686491               |
| SNP_P3_171208_31836 | NW_004517749.1 | Scaffold2928 | 31836                   | TT                              | GG                | 1946686493               |
| SNP_P3_171209_34445 | NW_004517749.1 | Scaffold2928 | 34445                   | CC                              | TT                | 1946686496               |
| SNP_P3_171210_34453 | NW_004517749.1 | Scaffold2928 | 34453                   | AA                              | CC                | 1946686499               |
| SNP_P3_171211_34500 | NW_004517749.1 | Scaffold2928 | 34500                   | GG                              | CC                | 1946686501               |
| SNP_P3_171212_34636 | NW_004517749.1 | Scaffold2928 | 34636                   | AA                              | CC                | 1946686503               |
| SNP_P3_171213_34974 | NW_004517749.1 | Scaffold2928 | 34974                   | CC                              | TT                | 1946686505               |
| SNP_P3_171214_35613 | NW_004517749.1 | Scaffold2928 | 35613                   | AA                              | CC                | 1946686507               |
| SNP_P3_171215_35666 | NW_004517749.1 | Scaffold2928 | 35666                   | AA                              | GG                | 1946686509               |
| SNP_P3_171216_36436 | NW_004517749.1 | Scaffold2928 | 36436                   | TT                              | CC                | 1946686511               |
| SNP_P3_171217_36575 | NW_004517749.1 | Scaffold2928 | 36575                   | GG                              | TT                | 1946686513               |
| SNP_P3_171218_36890 | NW_004517749.1 | Scaffold2928 | 36890                   | GG                              | AA                | 1946686515               |
| SNP_P3_171219_36931 | NW_004517749.1 | Scaffold2928 | 36931                   | AA                              | CC                | 1946686517               |
| SNP_P3_171220_37206 | NW_004517749.1 | Scaffold2928 | 37206                   | CC                              | TT                | 1946686519               |
| SNP_P3_171221_38660 | NW_004517749.1 | Scaffold2928 | 38660                   | GG                              | AA                | 1946686521               |
| SNP_P3_171222_38919 | NW_004517749.1 | Scaffold2928 | 38919                   | AA                              | GG                | 1946686523               |
| SNP_P3_171223_39035 | NW_004517749.1 | Scaffold2928 | 39035                   | AA                              | TT                | 1946686525               |
| SNP_P3_171224_42601 | NW_004517749.1 | Scaffold2928 | 42601                   | TT                              | GG                | 1946686528               |
| SNP_P3_171225_43472 | NW_004517749.1 | Scaffold2928 | 43472                   | AA                              | TT                | 1946686530               |
| SNP_P3_171226_43570 | NW_004517749.1 | Scaffold2928 | 43570                   | AA                              | TT                | 1946686532               |
| SNP_P3_171227_43639 | NW_004517749.1 | Scaffold2928 | 43639                   | GG                              | AA                | 1946686534               |
| SNP_P3_171230_43818 | NW_004517749.1 | Scaffold2928 | 43818                   | TT                              | CC                | 1946686536               |
| SNP_P3_171231_43833 | NW_004517749.1 | Scaffold2928 | 43833                   | GG                              | TT                | 1946686538               |
| SNP_P3_171232_43884 | NW_004517749.1 | Scaffold2928 | 43884                   | AA                              | GG                | 1946686540               |
| SNP_P3_171233_43952 | NW_004517749.1 | Scaffold2928 | 43952                   | AA                              | CC                | 1946686542               |
| SNP_P3_171234_44257 | NW_004517749.1 | Scaffold2928 | 44257                   | TT                              | CC                | 1946686545               |
| SNP_P3_171235_44402 | NW_004517749.1 | Scaffold2928 | 44402                   | GG                              | AA                | 1946686547               |
| SNP_P3_171236_44571 | NW_004517749.1 | Scaffold2928 | 44571                   | GG                              | AA                | 1946686549               |
| SNP_P3_171237_44587 | NW_004517749.1 | Scaffold2928 | 44587                   | TT                              | AA                | 1946686551               |
| SNP_P3_171238_44595 | NW_004517749.1 | Scaffold2928 | 44595                   | AA                              | GG                | 1946686553               |
| SNP_P3_171239_44685 | NW_004517749.1 | Scaffold2928 | 44685                   | CC                              | TT                | 1946686555               |
| SNP_P3_171240_44704 | NW_004517749.1 | Scaffold2928 | 44704                   | TT                              | AA                | 1946686557               |
| SNP_P3_171241_44705 | NW_004517749.1 | Scaffold2928 | 44705                   | GG                              | TT                | 1946686559               |
| SNP_P3_171242_44762 | NW_004517749.1 | Scaffold2928 | 44762                   | TT                              | CC                | 1946686561               |
| SNP_P3_171243_44898 | NW_004517749.1 | Scaffold2928 | 44898                   | AA                              | CC                | 1946686563               |
| SNP_P3_171244_45079 | NW_004517749.1 | Scaffold2928 | 45079                   | TT                              | AA                | 1946686565               |
| SNP_P3_171245_706   | NW_004517750.1 | Scaffold2930 | 706                     | AA                              | CC                | 1946686567               |

| SNPs IDs            | Chromosome IDs | Chromosomes  | Physical positions (bp) | CDC Frontier (Reference genome) | (Pusa 256 & HPNB) | NCBI SNPdb Accession IDs |
|---------------------|----------------|--------------|-------------------------|---------------------------------|-------------------|--------------------------|
| SNP_P3_171247_1869  | NW_004517752.1 | Scaffold2932 | 1869                    | GG                              | TT                | 1946686570               |
| SNP_P3_171248_2003  | NW_004517752.1 | Scaffold2932 | 2003                    | GG                              | TT                | 1946686572               |
| SNP_P3_171249_2243  | NW_004517752.1 | Scaffold2932 | 2243                    | GG                              | CC                | 1946686574               |
| SNP_P3_171251_2391  | NW_004517752.1 | Scaffold2932 | 2391                    | TT                              | GG                | 1946686576               |
| SNP_P3_171252_2417  | NW_004517752.1 | Scaffold2932 | 2417                    | AA                              | TT                | 1946686578               |
| SNP_P3_171253_2926  | NW_004517752.1 | Scaffold2932 | 2926                    | GG                              | AA                | 1946686580               |
| SNP_P3_171254_3014  | NW_004517752.1 | Scaffold2932 | 3014                    | GG                              | AA                | 1946686582               |
| SNP_P3_171255_3079  | NW_004517752.1 | Scaffold2932 | 3079                    | TT                              | CC                | 1946686584               |
| SNP_P3_171256_3139  | NW_004517752.1 | Scaffold2932 | 3139                    | TT                              | GG                | 1946686586               |
| SNP_P3_171257_3370  | NW_004517752.1 | Scaffold2932 | 3370                    | TT                              | CC                | 1946686588               |
| SNP_P3_171258_3396  | NW_004517752.1 | Scaffold2932 | 3396                    | AA                              | TT                | 1946686591               |
| SNP_P3_171259_3428  | NW_004517752.1 | Scaffold2932 | 3428                    | CC                              | AA                | 1946686593               |
| SNP_P3_171260_3471  | NW_004517752.1 | Scaffold2932 | 3471                    | GG                              | AA                | 1946686595               |
| SNP_P3_171261_3613  | NW_004517752.1 | Scaffold2932 | 3613                    | CC                              | GG                | 1946686597               |
| SNP_P3_171263_3770  | NW_004517752.1 | Scaffold2932 | 3770                    | CC                              | AA                | 1946686599               |
| SNP_P3_171264_3793  | NW_004517752.1 | Scaffold2932 | 3793                    | AA                              | CC                | 1946686601               |
| SNP_P3_171265_3797  | NW_004517752.1 | Scaffold2932 | 3797                    | CC                              | GG                | 1946686603               |
| SNP_P3_171266_3870  | NW_004517752.1 | Scaffold2932 | 3870                    | CC                              | TT                | 1946686607               |
| SNP_P3_171267_4175  | NW_004517752.1 | Scaffold2932 | 4175                    | TT                              | AA                | 1946686610               |
| SNP_P3_171268_4594  | NW_004517752.1 | Scaffold2932 | 4594                    | TT                              | AA                | 1946686612               |
| SNP_P3_171269_4780  | NW_004517752.1 | Scaffold2932 | 4780                    | TT                              | AA                | 1946686614               |
| SNP_P3_171270_4983  | NW_004517752.1 | Scaffold2932 | 4983                    | AA                              | GG                | 1946686617               |
| SNP_P3_171271_5387  | NW_004517752.1 | Scaffold2932 | 5387                    | GG                              | TT                | 1946686619               |
| SNP_P3_171272_6020  | NW_004517752.1 | Scaffold2932 | 6020                    | GG                              | AA                | 1946686621               |
| SNP_P3_171273_6211  | NW_004517752.1 | Scaffold2932 | 6211                    | GG                              | CC                | 1946686623               |
| SNP_P3_171274_6407  | NW_004517752.1 | Scaffold2932 | 6407                    | CC                              | AA                | 1946686625               |
| SNP_P3_171275_6438  | NW_004517752.1 | Scaffold2932 | 6438                    | AA                              | TT                | 1946686627               |
| SNP_P3_171276_6447  | NW_004517752.1 | Scaffold2932 | 6447                    | TT                              | CC                | 1946686629               |
| SNP_P3_171277_6493  | NW_004517752.1 | Scaffold2932 | 6493                    | TT                              | AA                | 1946686631               |
| SNP_P3_171278_6538  | NW_004517752.1 | Scaffold2932 | 6538                    | TT                              | AA                | 1946686633               |
| SNP_P3_171279_6542  | NW_004517752.1 | Scaffold2932 | 6542                    | CC                              | TT                | 1946686635               |
| SNP_P3_171280_6681  | NW_004517752.1 | Scaffold2932 | 6681                    | GG                              | AA                | 1946686637               |
| SNP_P3_171281_6698  | NW_004517752.1 | Scaffold2932 | 6698                    | CC                              | TT                | 1946686639               |
| SNP_P3_171282_6707  | NW_004517752.1 | Scaffold2932 | 6707                    | CC                              | TT                | 1946686641               |
| SNP_P3_171283_6943  | NW_004517752.1 | Scaffold2932 | 6943                    | AA                              | TT                | 1946686643               |
| SNP_P3_171284_7149  | NW_004517752.1 | Scaffold2932 | 7149                    | GG                              | AA                | 1946686645               |
| SNP_P3_171285_7152  | NW_004517752.1 | Scaffold2932 | 7152                    | CC                              | TT                | 1946686647               |
| SNP_P3_171286_7181  | NW_004517752.1 | Scaffold2932 | 7181                    | GG                              | AA                | 1946686650               |
| SNP_P3_171287_10368 | NW_004517752.1 | Scaffold2932 | 10368                   | TT                              | AA                | 1946686652               |
| SNP_P3_171288_10717 | NW_004517752.1 | Scaffold2932 | 10717                   | AA                              | TT                | 1946686654               |
| SNP_P3_171289_10847 | NW_004517752.1 | Scaffold2932 | 10847                   | GG                              | AA                | 1946686656               |
| SNP_P3_171290_12429 | NW_004517752.1 | Scaffold2932 | 12429                   | AA                              | TT                | 1946686658               |

| SNPs IDs            | Chromosome IDs | Chromosomes  | Physical positions (bp) | CDC Frontier (Reference genome) | (Pusa 256 & HPNB) | NCBI SNPdb Accession IDs |
|---------------------|----------------|--------------|-------------------------|---------------------------------|-------------------|--------------------------|
| SNP_P3_171291_12813 | NW_004517752.1 | Scaffold2932 | 12813                   | TT                              | AA                | 1946686660               |
| SNP_P3_171292_12835 | NW_004517752.1 | Scaffold2932 | 12835                   | GG                              | AA                | 1946686662               |
| SNP_P3_171293_13156 | NW_004517752.1 | Scaffold2932 | 13156                   | TT                              | CC                | 1946686664               |
| SNP_P3_171294_13194 | NW_004517752.1 | Scaffold2932 | 13194                   | TT                              | AA                | 1946686666               |
| SNP_P3_171296_13313 | NW_004517752.1 | Scaffold2932 | 13313                   | GG                              | AA                | 1946686668               |
| SNP_P3_171297_16427 | NW_004517752.1 | Scaffold2932 | 16427                   | TT                              | CC                | 1946686670               |
| SNP_P3_171298_17173 | NW_004517752.1 | Scaffold2932 | 17173                   | AA                              | TT                | 1946686672               |
| SNP_P3_171299_18243 | NW_004517752.1 | Scaffold2932 | 18243                   | GG                              | TT                | 1946686674               |
| SNP_P3_171300_18612 | NW_004517752.1 | Scaffold2932 | 18612                   | GG                              | TT                | 1946686676               |
| SNP_P3_171301_24939 | NW_004517752.1 | Scaffold2932 | 24939                   | GG                              | TT                | 1946686678               |
| SNP_P3_171302_24995 | NW_004517752.1 | Scaffold2932 | 24995                   | GG                              | AA                | 1946686680               |
| SNP_P3_171303_25037 | NW_004517752.1 | Scaffold2932 | 25037                   | AA                              | GG                | 1946686682               |
| SNP_P3_171304_25365 | NW_004517752.1 | Scaffold2932 | 25365                   | CC                              | GG                | 1946686684               |
| SNP_P3_171305_25381 | NW_004517752.1 | Scaffold2932 | 25381                   | TT                              | AA                | 1946686686               |
| SNP_P3_171306_25438 | NW_004517752.1 | Scaffold2932 | 25438                   | TT                              | CC                | 1946686688               |
| SNP_P3_171307_25849 | NW_004517752.1 | Scaffold2932 | 25849                   | AA                              | TT                | 1946686690               |
| SNP_P3_171309_26053 | NW_004517752.1 | Scaffold2932 | 26053                   | TT                              | AA                | 1946686692               |
| SNP_P3_171310_26155 | NW_004517752.1 | Scaffold2932 | 26155                   | GG                              | AA                | 1946686694               |
| SNP_P3_171311_26309 | NW_004517752.1 | Scaffold2932 | 26309                   | CC                              | TT                | 1946686696               |
| SNP_P3_171312_27204 | NW_004517752.1 | Scaffold2932 | 27204                   | CC                              | AA                | 1946686698               |
| SNP_P3_171313_27723 | NW_004517752.1 | Scaffold2932 | 27723                   | AA                              | TT                | 1946686700               |
| SNP_P3_171314_27741 | NW_004517752.1 | Scaffold2932 | 27741                   | TT                              | AA                | 1946686702               |
| SNP_P3_171315_64    | NW_004517753.1 | Scaffold2933 | 64                      | TT                              | AA                | 1946686704               |
| SNP_P3_171316_69    | NW_004517753.1 | Scaffold2933 | 69                      | GG                              | AA                | 1946686706               |
| SNP_P3_171317_94    | NW_004517753.1 | Scaffold2933 | 94                      | TT                              | CC                | 1946686708               |
| SNP_P3_171318_136   | NW_004517753.1 | Scaffold2933 | 136                     | AA                              | GG                | 1946686710               |
| SNP_P3_171319_423   | NW_004517753.1 | Scaffold2933 | 423                     | TT                              | CC                | 1946686712               |
| SNP_P3_171320_1058  | NW_004517753.1 | Scaffold2933 | 1058                    | AA                              | TT                | 1946686714               |
| SNP_P3_171321_1102  | NW_004517753.1 | Scaffold2933 | 1102                    | CC                              | GG                | 1946686716               |
| SNP_P3_171322_1143  | NW_004517753.1 | Scaffold2933 | 1143                    | TT                              | GG                | 1946686718               |
| SNP_P3_171323_1533  | NW_004517753.1 | Scaffold2933 | 1533                    | CC                              | GG                | 1946686720               |
| SNP_P3_171324_1535  | NW_004517753.1 | Scaffold2933 | 1535                    | AA                              | TT                | 1946686722               |
| SNP_P3_171325_1479  | NW_004517754.1 | Scaffold2934 | 1479                    | TT                              | GG                | 1946686724               |
| SNP_P3_171326_1488  | NW_004517754.1 | Scaffold2934 | 1488                    | CC                              | AA                | 1946686726               |
| SNP_P3_171327_1499  | NW_004517754.1 | Scaffold2934 | 1499                    | AA                              | GG                | 1946686728               |
| SNP_P3_171328_1699  | NW_004517754.1 | Scaffold2934 | 1699                    | CC                              | GG                | 1946686730               |
| SNP_P3_171330_1744  | NW_004517754.1 | Scaffold2934 | 1744                    | AA                              | CC                | 1946686732               |
| SNP_P3_171331_64    | NW_004517760.1 | Scaffold2940 | 64                      | GG                              | TT                | 1946686734               |
| SNP_P3_171332_118   | NW_004517760.1 | Scaffold2940 | 118                     | CC                              | TT                | 1946686736               |
| SNP_P3_171333_142   | NW_004517760.1 | Scaffold2940 | 142                     | AA                              | GG                | 1946686738               |
| SNP_P3_171335_378   | NW_004517760.1 | Scaffold2940 | 378                     | CC                              | TT                | 1946686740               |
| SNP_P3_171336_795   | NW_004517760.1 | Scaffold2940 | 795                     | CC                              | GG                | 1946686742               |

| SNPs IDs            | Chromosome IDs | Chromosomes  | Physical positions (bp) | CDC Frontier (Reference genome) | (Pusa 256 & HPNB) | NCBI SNPdb Accession IDs |
|---------------------|----------------|--------------|-------------------------|---------------------------------|-------------------|--------------------------|
| SNP_P3_171337_1031  | NW_004517760.1 | Scaffold2940 | 1031                    | GG                              | AA                | 1946686744               |
| SNP_P3_171338_1039  | NW_004517760.1 | Scaffold2940 | 1039                    | AA                              | GG                | 1946686746               |
| SNP_P3_171339_1055  | NW_004517760.1 | Scaffold2940 | 1055                    | TT                              | AA                | 1946686748               |
| SNP_P3_171340_1089  | NW_004517760.1 | Scaffold2940 | 1089                    | CC                              | GG                | 1946686750               |
| SNP_P3_171341_1096  | NW_004517760.1 | Scaffold2940 | 1096                    | CC                              | AA                | 1946686752               |
| SNP_P3_171342_1100  | NW_004517760.1 | Scaffold2940 | 1100                    | AA                              | GG                | 1946686754               |
| SNP_P3_171343_1101  | NW_004517760.1 | Scaffold2940 | 1101                    | TT                              | CC                | 1946686756               |
| SNP_P3_171344_1142  | NW_004517760.1 | Scaffold2940 | 1142                    | CC                              | TT                | 1946686758               |
| SNP_P3_171346_4373  | NW_004517760.1 | Scaffold2940 | 4373                    | GG                              | TT                | 1946686760               |
| SNP_P3_171347_24584 | NW_004517760.1 | Scaffold2940 | 24584                   | GG                              | TT                | 1946686762               |
| SNP_P3_171348_25411 | NW_004517760.1 | Scaffold2940 | 25411                   | CC                              | TT                | 1946686764               |
| SNP_P3_171349_25438 | NW_004517760.1 | Scaffold2940 | 25438                   | TT                              | AA                | 1946686766               |
| SNP_P3_171350_25453 | NW_004517760.1 | Scaffold2940 | 25453                   | TT                              | CC                | 1946686768               |
| SNP_P3_171351_25499 | NW_004517760.1 | Scaffold2940 | 25499                   | TT                              | GG                | 1946686770               |
| SNP_P3_171352_25556 | NW_004517760.1 | Scaffold2940 | 25556                   | CC                              | TT                | 1946686773               |
| SNP_P3_171354_1922  | NW_004517763.1 | Scaffold2946 | 1922                    | AA                              | TT                | 1946686775               |
| SNP_P3_171355_7864  | NW_004517763.1 | Scaffold2946 | 7864                    | GG                              | CC                | 1946686777               |
| SNP_P3_171356_8679  | NW_004517763.1 | Scaffold2946 | 8679                    | AA                              | GG                | 1946686780               |
| SNP_P3_171357_20314 | NW_004517763.1 | Scaffold2946 | 20314                   | GG                              | AA                | 1946686782               |
| SNP_P3_171358_22061 | NW_004517763.1 | Scaffold2946 | 22061                   | GG                              | AA                | 1946686784               |
| SNP_P3_171359_29080 | NW_004517763.1 | Scaffold2946 | 29080                   | TT                              | AA                | 1946686786               |
| SNP_P3_171360_29089 | NW_004517763.1 | Scaffold2946 | 29089                   | GG                              | TT                | 1946686788               |
| SNP_P3_171361_399   | NW_004517765.1 | Scaffold2950 | 399                     | CC                              | TT                | 1946686790               |
| SNP_P3_171362_488   | NW_004517765.1 | Scaffold2950 | 488                     | AA                              | GG                | 1946686793               |
| SNP_P3_171363_507   | NW_004517765.1 | Scaffold2950 | 507                     | TT                              | CC                | 1946686795               |
| SNP_P3_171364_514   | NW_004517765.1 | Scaffold2950 | 514                     | AA                              | TT                | 1946686797               |
| SNP_P3_171365_517   | NW_004517765.1 | Scaffold2950 | 517                     | AA                              | TT                | 1946686799               |
| SNP_P3_171366_583   | NW_004517765.1 | Scaffold2950 | 583                     | AA                              | GG                | 1946686802               |
| SNP_P3_171367_615   | NW_004517765.1 | Scaffold2950 | 615                     | CC                              | TT                | 1946686805               |
| SNP_P3_171368_634   | NW_004517765.1 | Scaffold2950 | 634                     | CC                              | TT                | 1946686807               |
| SNP_P3_171369_636   | NW_004517765.1 | Scaffold2950 | 636                     | TT                              | CC                | 1946686809               |
| SNP_P3_171370_850   | NW_004517765.1 | Scaffold2950 | 850                     | AA                              | GG                | 1946686811               |
| SNP_P3_171371_1000  | NW_004517765.1 | Scaffold2950 | 1000                    | AA                              | TT                | 1946686813               |
| SNP_P3_171373_4281  | NW_004517765.1 | Scaffold2950 | 4281                    | CC                              | TT                | 1946686815               |
| SNP_P3_171374_6464  | NW_004517765.1 | Scaffold2950 | 6464                    | TT                              | CC                | 1946686817               |
| SNP_P3_171375_6471  | NW_004517765.1 | Scaffold2950 | 6471                    | CC                              | TT                | 1946686819               |
| SNP_P3_171378_6930  | NW_004517765.1 | Scaffold2950 | 6930                    | TT                              | AA                | 1946686821               |
| SNP_P3_171379_7738  | NW_004517765.1 | Scaffold2950 | 7738                    | CC                              | TT                | 1946686823               |
| SNP_P3_171381_7793  | NW_004517765.1 | Scaffold2950 | 7793                    | CC                              | TT                | 1946686825               |
| SNP_P3_171382_8111  | NW_004517765.1 | Scaffold2950 | 8111                    | TT                              | CC                | 1946686827               |
| SNP_P3_171383_8183  | NW_004517765.1 | Scaffold2950 | 8183                    | TT                              | CC                | 1946686829               |
| SNP_P3_171385_8404  | NW_004517765.1 | Scaffold2950 | 8404                    | TT                              | CC                | 1946686831               |

| SNPs IDs            | Chromosome IDs | Chromosomes  | Physical positions (bp) | CDC Frontier (Reference genome) | (Pusa 256 & HPNB) | NCBI SNPdb Accession IDs |
|---------------------|----------------|--------------|-------------------------|---------------------------------|-------------------|--------------------------|
| SNP_P3_171386_8516  | NW_004517765.1 | Scaffold2950 | 8516                    | CC                              | GG                | 1946686834               |
| SNP_P3_171387_8524  | NW_004517765.1 | Scaffold2950 | 8524                    | CC                              | GG                | 1946686836               |
| SNP_P3_171388_8534  | NW_004517765.1 | Scaffold2950 | 8534                    | GG                              | AA                | 1946686838               |
| SNP_P3_171389_8609  | NW_004517765.1 | Scaffold2950 | 8609                    | TT                              | CC                | 1946686840               |
| SNP_P3_171390_8613  | NW_004517765.1 | Scaffold2950 | 8613                    | AA                              | CC                | 1946686842               |
| SNP_P3_171391_10103 | NW_004517765.1 | Scaffold2950 | 10103                   | GG                              | AA                | 1946686846               |
| SNP_P3_171393_10218 | NW_004517765.1 | Scaffold2950 | 10218                   | GG                              | TT                | 1946686848               |
| SNP_P3_171394_10318 | NW_004517765.1 | Scaffold2950 | 10318                   | GG                              | CC                | 1946686851               |
| SNP_P3_171395_10370 | NW_004517765.1 | Scaffold2950 | 10370                   | CC                              | GG                | 1946686853               |
| SNP_P3_171396_10559 | NW_004517765.1 | Scaffold2950 | 10559                   | AA                              | GG                | 1946686855               |
| SNP_P3_171398_10710 | NW_004517765.1 | Scaffold2950 | 10710                   | TT                              | GG                | 1946686857               |
| SNP_P3_171399_10713 | NW_004517765.1 | Scaffold2950 | 10713                   | CC                              | TT                | 1946686859               |
| SNP_P3_171400_10717 | NW_004517765.1 | Scaffold2950 | 10717                   | AA                              | CC                | 1946686861               |
| SNP_P3_171401_10798 | NW_004517765.1 | Scaffold2950 | 10798                   | CC                              | AA                | 1946686863               |
| SNP_P3_171402_10957 | NW_004517765.1 | Scaffold2950 | 10957                   | TT                              | CC                | 1946686865               |
| SNP_P3_171403_11035 | NW_004517765.1 | Scaffold2950 | 11035                   | GG                              | TT                | 1946686867               |
| SNP_P3_171404_11159 | NW_004517765.1 | Scaffold2950 | 11159                   | TT                              | GG                | 1946686870               |
| SNP_P3_171405_11353 | NW_004517765.1 | Scaffold2950 | 11353                   | GG                              | AA                | 1946686872               |
| SNP_P3_171406_11372 | NW_004517765.1 | Scaffold2950 | 11372                   | CC                              | TT                | 1946686874               |
| SNP_P3_171407_11610 | NW_004517765.1 | Scaffold2950 | 11610                   | AA                              | GG                | 1946686876               |
| SNP_P3_171408_11663 | NW_004517765.1 | Scaffold2950 | 11663                   | GG                              | AA                | 1946686878               |
| SNP_P3_171409_11906 | NW_004517765.1 | Scaffold2950 | 11906                   | AA                              | TT                | 1946686880               |
| SNP_P3_171410_12126 | NW_004517765.1 | Scaffold2950 | 12126                   | AA                              | GG                | 1946686882               |
| SNP_P3_171411_12292 | NW_004517765.1 | Scaffold2950 | 12292                   | CC                              | AA                | 1946686884               |
| SNP_P3_171412_13980 | NW_004517765.1 | Scaffold2950 | 13980                   | GG                              | CC                | 1946686886               |
| SNP_P3_171413_52    | NW_004517766.1 | Scaffold2951 | 52                      | CC                              | TT                | 1946686888               |
| SNP_P3_171414_64    | NW_004517766.1 | Scaffold2951 | 64                      | AA                              | CC                | 1946686890               |
| SNP_P3_171415_66    | NW_004517766.1 | Scaffold2951 | 66                      | GG                              | AA                | 1946686892               |
| SNP_P3_171416_80    | NW_004517766.1 | Scaffold2951 | 80                      | GG                              | AA                | 1946686894               |
| SNP_P3_171417_83    | NW_004517766.1 | Scaffold2951 | 83                      | TT                              | CC                | 1946686896               |
| SNP_P3_171418_194   | NW_004517766.1 | Scaffold2951 | 194                     | TT                              | CC                | 1946686898               |
| SNP_P3_171419_199   | NW_004517766.1 | Scaffold2951 | 199                     | TT                              | AA                | 1946686899               |
| SNP_P3_171420_8333  | NW_004517767.1 | Scaffold2954 | 8333                    | AA                              | TT                | 1946686901               |
| SNP_P3_171421_12645 | NW_004517767.1 | Scaffold2954 | 12645                   | AA                              | TT                | 1946686903               |
| SNP_P3_171422_12841 | NW_004517767.1 | Scaffold2954 | 12841                   | CC                              | TT                | 1946686905               |
| SNP_P3_171423_12853 | NW_004517767.1 | Scaffold2954 | 12853                   | CC                              | TT                | 1946686909               |
| SNP_P3_171424_882   | NW_004517768.1 | Scaffold2955 | 882                     | CC                              | GG                | 1946686911               |
| SNP_P3_171425_900   | NW_004517768.1 | Scaffold2955 | 900                     | CC                              | TT                | 1946686913               |
| SNP_P3_171426_902   | NW_004517768.1 | Scaffold2955 | 902                     | GG                              | AA                | 1946686915               |
| SNP_P3_171427_5767  | NW_004517768.1 | Scaffold2955 | 5767                    | TT                              | CC                | 1946686917               |
| SNP_P3_171428_5922  | NW_004517768.1 | Scaffold2955 | 5922                    | TT                              | GG                | 1946686919               |
| SNP_P3_171429_6006  | NW_004517768.1 | Scaffold2955 | 6006                    | CC                              | AA                | 1946686921               |



| SNPs IDs            | Chromosome IDs | Chromosomes  | Physical positions (bp) | CDC Frontier (Reference genome) | (Pusa 256 & HPNB) | NCBI SNPdb Accession IDs |
|---------------------|----------------|--------------|-------------------------|---------------------------------|-------------------|--------------------------|
| SNP_P3_171430_6064  | NW_004517768.1 | Scaffold2955 | 6064                    | TT                              | CC                | 1946686923               |
| SNP_P3_171431_7745  | NW_004517768.1 | Scaffold2955 | 7745                    | TT                              | CC                | 1946686925               |
| SNP_P3_171432_7847  | NW_004517768.1 | Scaffold2955 | 7847                    | CC                              | GG                | 1946686927               |
| SNP_P3_171433_7955  | NW_004517768.1 | Scaffold2955 | 7955                    | TT                              | GG                | 1946686929               |
| SNP_P3_171434_8000  | NW_004517768.1 | Scaffold2955 | 8000                    | TT                              | CC                | 1946686931               |
| SNP_P3_171435_8019  | NW_004517768.1 | Scaffold2955 | 8019                    | CC                              | TT                | 1946686933               |
| SNP_P3_171436_8104  | NW_004517768.1 | Scaffold2955 | 8104                    | CC                              | TT                | 1946686935               |
| SNP_P3_171437_9117  | NW_004517768.1 | Scaffold2955 | 9117                    | GG                              | CC                | 1946686937               |
| SNP_P3_171438_9298  | NW_004517768.1 | Scaffold2955 | 9298                    | AA                              | GG                | 1946686939               |
| SNP_P3_171439_9418  | NW_004517768.1 | Scaffold2955 | 9418                    | AA                              | CC                | 1946686941               |
| SNP_P3_171440_9449  | NW_004517768.1 | Scaffold2955 | 9449                    | CC                              | GG                | 1946686943               |
| SNP_P3_171441_9491  | NW_004517768.1 | Scaffold2955 | 9491                    | TT                              | CC                | 1946686945               |
| SNP_P3_171442_9511  | NW_004517768.1 | Scaffold2955 | 9511                    | AA                              | GG                | 1946686948               |
| SNP_P3_171443_9512  | NW_004517768.1 | Scaffold2955 | 9512                    | AA                              | TT                | 1946686950               |
| SNP_P3_171444_9554  | NW_004517768.1 | Scaffold2955 | 9554                    | AA                              | GG                | 1946686952               |
| SNP_P3_171445_9563  | NW_004517768.1 | Scaffold2955 | 9563                    | GG                              | AA                | 1946686954               |
| SNP_P3_171446_9599  | NW_004517768.1 | Scaffold2955 | 9599                    | GG                              | AA                | 1946686956               |
| SNP_P3_171447_9613  | NW_004517768.1 | Scaffold2955 | 9613                    | AA                              | GG                | 1946686957               |
| SNP_P3_171448_9623  | NW_004517768.1 | Scaffold2955 | 9623                    | AA                              | GG                | 1946686958               |
| SNP_P3_171450_9794  | NW_004517768.1 | Scaffold2955 | 9794                    | GG                              | AA                | 1946686959               |
| SNP_P3_171452_10096 | NW_004517768.1 | Scaffold2955 | 10096                   | TT                              | CC                | 1946686960               |
| SNP_P3_171453_10157 | NW_004517768.1 | Scaffold2955 | 10157                   | GG                              | AA                | 1946686962               |
| SNP_P3_171454_10167 | NW_004517768.1 | Scaffold2955 | 10167                   | GG                              | AA                | 1946686964               |
| SNP_P3_171456_11405 | NW_004517768.1 | Scaffold2955 | 11405                   | CC                              | AA                | 1946686966               |
| SNP_P3_171457_11565 | NW_004517768.1 | Scaffold2955 | 11565                   | AA                              | TT                | 1946686968               |
| SNP_P3_171458_11642 | NW_004517768.1 | Scaffold2955 | 11642                   | CC                              | AA                | 1946686970               |
| SNP_P3_171459_11643 | NW_004517768.1 | Scaffold2955 | 11643                   | GG                              | AA                | 1946686972               |
| SNP_P3_171460_11650 | NW_004517768.1 | Scaffold2955 | 11650                   | CC                              | TT                | 1946686974               |
| SNP_P3_171461_11700 | NW_004517768.1 | Scaffold2955 | 11700                   | AA                              | TT                | 1946686976               |
| SNP_P3_171462_11736 | NW_004517768.1 | Scaffold2955 | 11736                   | TT                              | CC                | 1946686978               |
| SNP_P3_171463_11807 | NW_004517768.1 | Scaffold2955 | 11807                   | CC                              | GG                | 1946686980               |
| SNP_P3_171464_11861 | NW_004517768.1 | Scaffold2955 | 11861                   | TT                              | AA                | 1946686982               |
| SNP_P3_171466_11949 | NW_004517768.1 | Scaffold2955 | 11949                   | TT                              | CC                | 1946686984               |
| SNP_P3_171467_11980 | NW_004517768.1 | Scaffold2955 | 11980                   | CC                              | TT                | 1946686986               |
| SNP_P3_171468_12623 | NW_004517768.1 | Scaffold2955 | 12623                   | GG                              | AA                | 1946686988               |
| SNP_P3_171470_41730 | NW_004517768.1 | Scaffold2955 | 41730                   | CC                              | AA                | 1946686990               |
| SNP_P3_171471_43379 | NW_004517768.1 | Scaffold2955 | 43379                   | CC                              | TT                | 1946686992               |
| SNP_P3_171472_43505 | NW_004517768.1 | Scaffold2955 | 43505                   | AA                              | TT                | 1946686994               |
| SNP_P3_171473_43518 | NW_004517768.1 | Scaffold2955 | 43518                   | TT                              | CC                | 1946686996               |
| SNP_P3_171474_43615 | NW_004517768.1 | Scaffold2955 | 43615                   | GG                              | AA                | 1946686998               |
| SNP_P3_171475_43632 | NW_004517768.1 | Scaffold2955 | 43632                   | TT                              | GG                | 1946687000               |
| SNP_P3_171476_46892 | NW_004517768.1 | Scaffold2955 | 46892                   | AA                              | TT                | 1946687002               |

| SNPs IDs            | Chromosome IDs | Chromosomes  | Physical positions (bp) | CDC Frontier (Reference genome) | (Pusa 256 & HPNB) | NCBI SNPdb Accession IDs |
|---------------------|----------------|--------------|-------------------------|---------------------------------|-------------------|--------------------------|
| SNP_P3_171477_541   | NW_004517769.1 | Scaffold2956 | 541                     | CC                              | AA                | 1946687004               |
| SNP_P3_171478_542   | NW_004517769.1 | Scaffold2956 | 542                     | AA                              | TT                | 1946687006               |
| SNP_P3_171479_3497  | NW_004517769.1 | Scaffold2956 | 3497                    | GG                              | TT                | 1946687008               |
| SNP_P3_171481_919   | NW_004517770.1 | Scaffold2957 | 919                     | TT                              | CC                | 1946687010               |
| SNP_P3_171482_1046  | NW_004517770.1 | Scaffold2957 | 1046                    | CC                              | TT                | 1946687012               |
| SNP_P3_171483_1404  | NW_004517770.1 | Scaffold2957 | 1404                    | CC                              | GG                | 1946687014               |
| SNP_P3_171484_1440  | NW_004517770.1 | Scaffold2957 | 1440                    | TT                              | CC                | 1946687016               |
| SNP_P3_171485_2753  | NW_004517770.1 | Scaffold2957 | 2753                    | GG                              | AA                | 1946687018               |
| SNP_P3_171486_2870  | NW_004517770.1 | Scaffold2957 | 2870                    | CC                              | AA                | 1946687020               |
| SNP_P3_171487_9523  | NW_004517770.1 | Scaffold2957 | 9523                    | AA                              | TT                | 1946687022               |
| SNP_P3_171488_9956  | NW_004517770.1 | Scaffold2957 | 9956                    | AA                              | CC                | 1946687024               |
| SNP_P3_171489_10043 | NW_004517770.1 | Scaffold2957 | 10043                   | TT                              | GG                | 1946687026               |
| SNP_P3_171490_10724 | NW_004517770.1 | Scaffold2957 | 10724                   | TT                              | CC                | 1946687027               |
| SNP_P3_171492_13607 | NW_004517772.1 | Scaffold2959 | 13607                   | AA                              | TT                | 1946687029               |
| SNP_P3_171493_13669 | NW_004517772.1 | Scaffold2959 | 13669                   | CC                              | GG                | 1946687031               |
| SNP_P3_171494_13689 | NW_004517772.1 | Scaffold2959 | 13689                   | TT                              | CC                | 1946687033               |
| SNP_P3_171495_13862 | NW_004517772.1 | Scaffold2959 | 13862                   | TT                              | CC                | 1946687035               |
| SNP_P3_171496_14097 | NW_004517772.1 | Scaffold2959 | 14097                   | TT                              | CC                | 1946687037               |
| SNP_P3_171497_54    | NW_004517773.1 | Scaffold2960 | 54                      | TT                              | CC                | 1946687039               |
| SNP_P3_171498_116   | NW_004517773.1 | Scaffold2960 | 116                     | AA                              | GG                | 1946687041               |
| SNP_P3_171500_750   | NW_004517774.1 | Scaffold2962 | 750                     | CC                              | TT                | 1946687043               |
| SNP_P3_171501_66    | NW_004517775.1 | Scaffold2964 | 66                      | CC                              | GG                | 1946687045               |
| SNP_P3_171502_100   | NW_004517775.1 | Scaffold2964 | 100                     | GG                              | CC                | 1946687047               |
| SNP_P3_171503_208   | NW_004517775.1 | Scaffold2964 | 208                     | GG                              | CC                | 1946687049               |
| SNP_P3_171504_209   | NW_004517775.1 | Scaffold2964 | 209                     | AA                              | TT                | 1946687051               |
| SNP_P3_171505_213   | NW_004517775.1 | Scaffold2964 | 213                     | AA                              | TT                | 1946687053               |
| SNP_P3_171507_311   | NW_004517775.1 | Scaffold2964 | 311                     | GG                              | AA                | 1946687055               |
| SNP_P3_171508_503   | NW_004517775.1 | Scaffold2964 | 503                     | CC                              | AA                | 1946687057               |
| SNP_P3_171509_1035  | NW_004517778.1 | Scaffold2967 | 1035                    | CC                              | TT                | 1946687059               |
| SNP_P3_171510_1079  | NW_004517778.1 | Scaffold2967 | 1079                    | AA                              | GG                | 1946687061               |
| SNP_P3_171511_9683  | NW_004517779.1 | Scaffold2968 | 9683                    | GG                              | AA                | 1946687063               |
| SNP_P3_171513_21780 | NW_004517779.1 | Scaffold2968 | 21780                   | AA                              | CC                | 1946687065               |
| SNP_P3_171514_22115 | NW_004517779.1 | Scaffold2968 | 22115                   | CC                              | TT                | 1946687067               |
| SNP_P3_171516_16700 | NW_004517780.1 | Scaffold2969 | 16700                   | TT                              | CC                | 1946687069               |
| SNP_P3_171517_23683 | NW_004517780.1 | Scaffold2969 | 23683                   | TT                              | CC                | 1946687071               |
| SNP_P3_171518_23685 | NW_004517780.1 | Scaffold2969 | 23685                   | CC                              | TT                | 1946687073               |
| SNP_P3_171519_23717 | NW_004517780.1 | Scaffold2969 | 23717                   | GG                              | TT                | 1946687075               |
| SNP_P3_171520_23788 | NW_004517780.1 | Scaffold2969 | 23788                   | AA                              | GG                | 1946687077               |
| SNP_P3_171521_25623 | NW_004517780.1 | Scaffold2969 | 25623                   | AA                              | CC                | 1946687079               |
| SNP_P3_171522_25624 | NW_004517780.1 | Scaffold2969 | 25624                   | TT                              | CC                | 1946687081               |
| SNP_P3_171523_25801 | NW_004517780.1 | Scaffold2969 | 25801                   | GG                              | AA                | 1946687083               |
| SNP_P3_171524_25807 | NW_004517780.1 | Scaffold2969 | 25807                   | TT                              | CC                | 1946687085               |

| SNPs IDs            | Chromosome IDs | Chromosomes  | Physical positions (bp) | CDC Frontier (Reference genome) | (Pusa 256 & HPNB) | NCBI SNPdb Accession IDs |
|---------------------|----------------|--------------|-------------------------|---------------------------------|-------------------|--------------------------|
| SNP_P3_171525_25809 | NW_004517780.1 | Scaffold2969 | 25809                   | AA                              | CC                | 1946687087               |
| SNP_P3_171526_25820 | NW_004517780.1 | Scaffold2969 | 25820                   | CC                              | TT                | 1946687089               |
| SNP_P3_171528_34514 | NW_004517780.1 | Scaffold2969 | 34514                   | AA                              | GG                | 1946687091               |
| SNP_P3_171529_34518 | NW_004517780.1 | Scaffold2969 | 34518                   | CC                              | TT                | 1946687093               |
| SNP_P3_171530_45900 | NW_004517780.1 | Scaffold2969 | 45900                   | TT                              | AA                | 1946687095               |
| SNP_P3_171531_46357 | NW_004517780.1 | Scaffold2969 | 46357                   | TT                              | CC                | 1946687097               |
| SNP_P3_171532_46398 | NW_004517780.1 | Scaffold2969 | 46398                   | GG                              | TT                | 1946687099               |
| SNP_P3_171533_46661 | NW_004517780.1 | Scaffold2969 | 46661                   | AA                              | GG                | 1946687101               |
| SNP_P3_171534_47108 | NW_004517780.1 | Scaffold2969 | 47108                   | TT                              | AA                | 1946687103               |
| SNP_P3_171535_47136 | NW_004517780.1 | Scaffold2969 | 47136                   | GG                              | AA                | 1946687105               |
| SNP_P3_171536_50489 | NW_004517780.1 | Scaffold2969 | 50489                   | TT                              | CC                | 1946687107               |
| SNP_P3_171537_141   | NW_004517782.1 | Scaffold2974 | 141                     | TT                              | AA                | 1946687109               |
| SNP_P3_171538_396   | NW_004517782.1 | Scaffold2974 | 396                     | TT                              | AA                | 1946687111               |
| SNP_P3_171539_416   | NW_004517782.1 | Scaffold2974 | 416                     | TT                              | CC                | 1946687113               |
| SNP_P3_171540_1391  | NW_004517782.1 | Scaffold2974 | 1391                    | AA                              | TT                | 1946687115               |
| SNP_P3_171541_462   | NW_004517785.1 | Scaffold2979 | 462                     | AA                              | GG                | 1946687117               |
| SNP_P3_171542_544   | NW_004517785.1 | Scaffold2979 | 544                     | GG                              | AA                | 1946687119               |
| SNP_P3_171543_563   | NW_004517785.1 | Scaffold2979 | 563                     | AA                              | TT                | 1946687121               |
| SNP_P3_171544_565   | NW_004517785.1 | Scaffold2979 | 565                     | TT                              | CC                | 1946687123               |
| SNP_P3_171545_583   | NW_004517785.1 | Scaffold2979 | 583                     | GG                              | TT                | 1946687125               |
| SNP_P3_171546_586   | NW_004517785.1 | Scaffold2979 | 586                     | GG                              | CC                | 1946687127               |
| SNP_P3_171547_625   | NW_004517785.1 | Scaffold2979 | 625                     | GG                              | AA                | 1946687129               |
| SNP_P3_171548_1587  | NW_004517787.1 | Scaffold2981 | 1587                    | AA                              | GG                | 1946687131               |
| SNP_P3_171549_1923  | NW_004517787.1 | Scaffold2981 | 1923                    | TT                              | CC                | 1946687133               |
| SNP_P3_171550_4406  | NW_004517787.1 | Scaffold2981 | 4406                    | TT                              | CC                | 1946687135               |
| SNP_P3_171551_7003  | NW_004517787.1 | Scaffold2981 | 7003                    | CC                              | AA                | 1946687137               |
| SNP_P3_171552_9027  | NW_004517787.1 | Scaffold2981 | 9027                    | CC                              | AA                | 1946687139               |
| SNP_P3_171553_9319  | NW_004517787.1 | Scaffold2981 | 9319                    | GG                              | CC                | 1946687142               |
| SNP_P3_171554_9372  | NW_004517787.1 | Scaffold2981 | 9372                    | AA                              | TT                | 1946687144               |
| SNP_P3_171555_9390  | NW_004517787.1 | Scaffold2981 | 9390                    | TT                              | CC                | 1946687146               |
| SNP_P3_171556_11062 | NW_004517787.1 | Scaffold2981 | 11062                   | CC                              | TT                | 1946687148               |
| SNP_P3_171557_14347 | NW_004517787.1 | Scaffold2981 | 14347                   | AA                              | TT                | 1946687150               |
| SNP_P3_171558_20609 | NW_004517787.1 | Scaffold2981 | 20609                   | CC                              | AA                | 1946687152               |
| SNP_P3_171559_20642 | NW_004517787.1 | Scaffold2981 | 20642                   | CC                              | GG                | 1946687154               |
| SNP_P3_171560_20649 | NW_004517787.1 | Scaffold2981 | 20649                   | GG                              | CC                | 1946687156               |
| SNP_P3_171561_20654 | NW_004517787.1 | Scaffold2981 | 20654                   | TT                              | CC                | 1946687158               |
| SNP_P3_171562_20658 | NW_004517787.1 | Scaffold2981 | 20658                   | GG                              | TT                | 1946687160               |
| SNP_P3_171563_21479 | NW_004517787.1 | Scaffold2981 | 21479                   | AA                              | TT                | 1946687162               |
| SNP_P3_171564_30227 | NW_004517787.1 | Scaffold2981 | 30227                   | CC                              | GG                | 1946687164               |
| SNP_P3_171565_32493 | NW_004517787.1 | Scaffold2981 | 32493                   | TT                              | CC                | 1946687166               |
| SNP_P3_171566_32612 | NW_004517787.1 | Scaffold2981 | 32612                   | GG                              | AA                | 1946687168               |
| SNP_P3_171567_32613 | NW_004517787.1 | Scaffold2981 | 32613                   | TT                              | CC                | 1946687170               |

| SNPs IDs            | Chromosome IDs | Chromosomes  | Physical positions (bp) | CDC Frontier (Reference genome) | (Pusa 256 & HPNB) | NCBI SNPdb Accession IDs |
|---------------------|----------------|--------------|-------------------------|---------------------------------|-------------------|--------------------------|
| SNP_P3_171568_32635 | NW_004517787.1 | Scaffold2981 | 32635                   | CC                              | TT                | 1946687172               |
| SNP_P3_171569_32675 | NW_004517787.1 | Scaffold2981 | 32675                   | GG                              | TT                | 1946687174               |
| SNP_P3_171570_32692 | NW_004517787.1 | Scaffold2981 | 32692                   | TT                              | CC                | 1946687177               |
| SNP_P3_171571_32818 | NW_004517787.1 | Scaffold2981 | 32818                   | TT                              | GG                | 1946687179               |
| SNP_P3_171572_32978 | NW_004517787.1 | Scaffold2981 | 32978                   | CC                              | TT                | 1946687181               |
| SNP_P3_171573_32987 | NW_004517787.1 | Scaffold2981 | 32987                   | CC                              | AA                | 1946687183               |
| SNP_P3_171574_33066 | NW_004517787.1 | Scaffold2981 | 33066                   | TT                              | CC                | 1946687185               |
| SNP_P3_171575_33082 | NW_004517787.1 | Scaffold2981 | 33082                   | TT                              | GG                | 1946687187               |
| SNP_P3_171576_33104 | NW_004517787.1 | Scaffold2981 | 33104                   | TT                              | CC                | 1946687189               |
| SNP_P3_171577_33195 | NW_004517787.1 | Scaffold2981 | 33195                   | TT                              | AA                | 1946687191               |
| SNP_P3_171578_33196 | NW_004517787.1 | Scaffold2981 | 33196                   | AA                              | TT                | 1946687194               |
| SNP_P3_171579_5621  | NW_004517789.1 | Scaffold2984 | 5621                    | TT                              | CC                | 1946687196               |
| SNP_P3_171580_5653  | NW_004517789.1 | Scaffold2984 | 5653                    | GG                              | AA                | 1946687198               |
| SNP_P3_171581_14742 | NW_004517789.1 | Scaffold2984 | 14742                   | TT                              | CC                | 1946687201               |
| SNP_P3_171582_14751 | NW_004517789.1 | Scaffold2984 | 14751                   | TT                              | CC                | 1946687203               |
| SNP_P3_171583_20861 | NW_004517789.1 | Scaffold2984 | 20861                   | TT                              | CC                | 1946687206               |
| SNP_P3_171584_20948 | NW_004517789.1 | Scaffold2984 | 20948                   | TT                              | CC                | 1946687208               |
| SNP_P3_171585_21560 | NW_004517789.1 | Scaffold2984 | 21560                   | CC                              | TT                | 1946687210               |
| SNP_P3_171586_21563 | NW_004517789.1 | Scaffold2984 | 21563                   | TT                              | GG                | 1946687212               |
| SNP_P3_171587_21715 | NW_004517789.1 | Scaffold2984 | 21715                   | CC                              | TT                | 1946687215               |
| SNP_P3_171588_21784 | NW_004517789.1 | Scaffold2984 | 21784                   | TT                              | CC                | 1946687217               |
| SNP_P3_171589_21801 | NW_004517789.1 | Scaffold2984 | 21801                   | TT                              | CC                | 1946687219               |
| SNP_P3_171591_21960 | NW_004517789.1 | Scaffold2984 | 21960                   | TT                              | GG                | 1946687221               |
| SNP_P3_171592_21961 | NW_004517789.1 | Scaffold2984 | 21961                   | TT                              | CC                | 1946687223               |
| SNP_P3_171593_21962 | NW_004517789.1 | Scaffold2984 | 21962                   | GG                              | CC                | 1946687225               |
| SNP_P3_171594_22074 | NW_004517789.1 | Scaffold2984 | 22074                   | CC                              | GG                | 1946687227               |
| SNP_P3_171595_22156 | NW_004517789.1 | Scaffold2984 | 22156                   | TT                              | CC                | 1946687229               |
| SNP_P3_171596_22391 | NW_004517789.1 | Scaffold2984 | 22391                   | TT                              | GG                | 1946687231               |
| SNP_P3_171597_22717 | NW_004517789.1 | Scaffold2984 | 22717                   | GG                              | AA                | 1946687233               |
| SNP_P3_171598_23023 | NW_004517789.1 | Scaffold2984 | 23023                   | TT                              | CC                | 1946687235               |
| SNP_P3_171599_23234 | NW_004517789.1 | Scaffold2984 | 23234                   | GG                              | AA                | 1946687237               |
| SNP_P3_171600_24345 | NW_004517789.1 | Scaffold2984 | 24345                   | GG                              | TT                | 1946687239               |
| SNP_P3_171601_24625 | NW_004517789.1 | Scaffold2984 | 24625                   | TT                              | GG                | 1946687241               |
| SNP_P3_171602_24678 | NW_004517789.1 | Scaffold2984 | 24678                   | GG                              | AA                | 1946687243               |
| SNP_P3_171603_24998 | NW_004517789.1 | Scaffold2984 | 24998                   | CC                              | TT                | 1946687245               |
| SNP_P3_171604_25048 | NW_004517789.1 | Scaffold2984 | 25048                   | CC                              | TT                | 1946687247               |
| SNP_P3_171605_25371 | NW_004517789.1 | Scaffold2984 | 25371                   | AA                              | GG                | 1946687249               |
| SNP_P3_171606_25845 | NW_004517789.1 | Scaffold2984 | 25845                   | TT                              | GG                | 1946687251               |
| SNP_P3_171607_25980 | NW_004517789.1 | Scaffold2984 | 25980                   | CC                              | TT                | 1946687252               |
| SNP_P3_171608_26148 | NW_004517789.1 | Scaffold2984 | 26148                   | TT                              | CC                | 1946687255               |
| SNP_P3_171609_26193 | NW_004517789.1 | Scaffold2984 | 26193                   | CC                              | TT                | 1946687257               |
| SNP_P3_171610_26278 | NW_004517789.1 | Scaffold2984 | 26278                   | AA                              | CC                | 1946687259               |

| SNPs IDs            | Chromosome IDs | Chromosomes  | Physical positions (bp) | CDC Frontier (Reference genome) | (Pusa 256 & HPNB) | NCBI SNPdb Accession IDs |
|---------------------|----------------|--------------|-------------------------|---------------------------------|-------------------|--------------------------|
| SNP_P3_171611_26280 | NW_004517789.1 | Scaffold2984 | 26280                   | TT                              | AA                | 1946687261               |
| SNP_P3_171612_26951 | NW_004517789.1 | Scaffold2984 | 26951                   | CC                              | AA                | 1946687263               |
| SNP_P3_171613_26968 | NW_004517789.1 | Scaffold2984 | 26968                   | AA                              | CC                | 1946687265               |
| SNP_P3_171614_27046 | NW_004517789.1 | Scaffold2984 | 27046                   | GG                              | AA                | 1946687267               |
| SNP_P3_171615_2893  | NW_004517792.1 | Scaffold2988 | 2893                    | TT                              | CC                | 1946687269               |
| SNP_P3_171616_5898  | NW_004517792.1 | Scaffold2988 | 5898                    | AA                              | CC                | 1946687271               |
| SNP_P3_171617_6062  | NW_004517792.1 | Scaffold2988 | 6062                    | TT                              | AA                | 1946687273               |
| SNP_P3_171618_9274  | NW_004517792.1 | Scaffold2988 | 9274                    | AA                              | TT                | 1946687275               |
| SNP_P3_171619_15593 | NW_004517792.1 | Scaffold2988 | 15593                   | GG                              | AA                | 1946687277               |
| SNP_P3_171620_15621 | NW_004517792.1 | Scaffold2988 | 15621                   | TT                              | CC                | 1946687279               |
| SNP_P3_171621_15731 | NW_004517792.1 | Scaffold2988 | 15731                   | AA                              | GG                | 1946687281               |
| SNP_P3_171622_15733 | NW_004517792.1 | Scaffold2988 | 15733                   | CC                              | TT                | 1946687283               |
| SNP_P3_171623_15744 | NW_004517792.1 | Scaffold2988 | 15744                   | AA                              | GG                | 1946687285               |
| SNP_P3_171624_15777 | NW_004517792.1 | Scaffold2988 | 15777                   | TT                              | AA                | 1946687286               |
| SNP_P3_171625_15822 | NW_004517792.1 | Scaffold2988 | 15822                   | AA                              | CC                | 1946687289               |
| SNP_P3_171626_15971 | NW_004517792.1 | Scaffold2988 | 15971                   | TT                              | CC                | 1946687291               |
| SNP_P3_171627_16087 | NW_004517792.1 | Scaffold2988 | 16087                   | CC                              | TT                | 1946687293               |
| SNP_P3_171628_16095 | NW_004517792.1 | Scaffold2988 | 16095                   | AA                              | CC                | 1946687295               |
| SNP_P3_171630_18024 | NW_004517792.1 | Scaffold2988 | 18024                   | TT                              | CC                | 1946687298               |
| SNP_P3_171631_23296 | NW_004517792.1 | Scaffold2988 | 23296                   | GG                              | CC                | 1946687300               |
| SNP_P3_171632_23322 | NW_004517792.1 | Scaffold2988 | 23322                   | TT                              | AA                | 1946687302               |
| SNP_P3_171634_23458 | NW_004517792.1 | Scaffold2988 | 23458                   | AA                              | GG                | 1946687305               |
| SNP_P3_171635_23486 | NW_004517792.1 | Scaffold2988 | 23486                   | GG                              | AA                | 1946687307               |
| SNP_P3_171636_23493 | NW_004517792.1 | Scaffold2988 | 23493                   | AA                              | CC                | 1946687309               |
| SNP_P3_171637_23508 | NW_004517792.1 | Scaffold2988 | 23508                   | GG                              | AA                | 1946687311               |
| SNP_P3_171638_23539 | NW_004517792.1 | Scaffold2988 | 23539                   | AA                              | TT                | 1946687313               |
| SNP_P3_171639_23543 | NW_004517792.1 | Scaffold2988 | 23543                   | TT                              | CC                | 1946687315               |
| SNP_P3_171640_23580 | NW_004517792.1 | Scaffold2988 | 23580                   | AA                              | GG                | 1946687317               |
| SNP_P3_171641_37981 | NW_004517792.1 | Scaffold2988 | 37981                   | CC                              | TT                | 1946687319               |
| SNP_P3_171642_37991 | NW_004517792.1 | Scaffold2988 | 37991                   | AA                              | TT                | 1946687321               |
| SNP_P3_171643_38017 | NW_004517792.1 | Scaffold2988 | 38017                   | TT                              | CC                | 1946687323               |
| SNP_P3_171644_38022 | NW_004517792.1 | Scaffold2988 | 38022                   | AA                              | CC                | 1946687325               |
| SNP_P3_171645_38370 | NW_004517792.1 | Scaffold2988 | 38370                   | CC                              | GG                | 1946687327               |
| SNP_P3_171646_38380 | NW_004517792.1 | Scaffold2988 | 38380                   | AA                              | CC                | 1946687329               |
| SNP_P3_171647_38381 | NW_004517792.1 | Scaffold2988 | 38381                   | CC                              | TT                | 1946687331               |
| SNP_P3_171648_38384 | NW_004517792.1 | Scaffold2988 | 38384                   | AA                              | GG                | 1946687334               |
| SNP_P3_171649_38388 | NW_004517792.1 | Scaffold2988 | 38388                   | GG                              | AA                | 1946687336               |
| SNP_P3_171650_38389 | NW_004517792.1 | Scaffold2988 | 38389                   | GG                              | AA                | 1946687338               |
| SNP_P3_171651_38395 | NW_004517792.1 | Scaffold2988 | 38395                   | AA                              | TT                | 1946687340               |
| SNP_P3_171652_45804 | NW_004517792.1 | Scaffold2988 | 45804                   | GG                              | AA                | 1946687342               |
| SNP_P3_171653_47210 | NW_004517792.1 | Scaffold2988 | 47210                   | CC                              | TT                | 1946687344               |
| SNP_P3_171654_47316 | NW_004517792.1 | Scaffold2988 | 47316                   | TT                              | CC                | 1946687346               |

| SNPs IDs            | Chromosome IDs | Chromosomes  | Physical positions (bp) | CDC Frontier (Reference genome) | (Pusa 256 & HPNB) | NCBI SNPdb Accession IDs |
|---------------------|----------------|--------------|-------------------------|---------------------------------|-------------------|--------------------------|
| SNP_P3_171655_47360 | NW_004517792.1 | Scaffold2988 | 47360                   | AA                              | TT                | 1946687348               |
| SNP_P3_171656_47529 | NW_004517792.1 | Scaffold2988 | 47529                   | TT                              | AA                | 1946687350               |
| SNP_P3_171657_53275 | NW_004517792.1 | Scaffold2988 | 53275                   | GG                              | AA                | 1946687352               |
| SNP_P3_171658_53320 | NW_004517792.1 | Scaffold2988 | 53320                   | TT                              | CC                | 1946687354               |
| SNP_P3_171659_53340 | NW_004517792.1 | Scaffold2988 | 53340                   | GG                              | AA                | 1946687356               |
| SNP_P3_171660_53474 | NW_004517792.1 | Scaffold2988 | 53474                   | TT                              | GG                | 1946687360               |
| SNP_P3_171661_53535 | NW_004517792.1 | Scaffold2988 | 53535                   | CC                              | TT                | 1946687362               |
| SNP_P3_171662_58648 | NW_004517792.1 | Scaffold2988 | 58648                   | CC                              | TT                | 1946687364               |
| SNP_P3_171663_58683 | NW_004517792.1 | Scaffold2988 | 58683                   | AA                              | CC                | 1946687366               |
| SNP_P3_171664_58799 | NW_004517792.1 | Scaffold2988 | 58799                   | CC                              | TT                | 1946687370               |
| SNP_P3_171665_59176 | NW_004517792.1 | Scaffold2988 | 59176                   | CC                              | TT                | 1946687372               |
| SNP_P3_171666_59224 | NW_004517792.1 | Scaffold2988 | 59224                   | TT                              | AA                | 1946687374               |
| SNP_P3_171667_8984  | NW_004517793.1 | Scaffold2989 | 8984                    | CC                              | TT                | 1946687376               |
| SNP_P3_171668_8989  | NW_004517793.1 | Scaffold2989 | 8989                    | AA                              | GG                | 1946687378               |
| SNP_P3_171669_8996  | NW_004517793.1 | Scaffold2989 | 8996                    | CC                              | GG                | 1946687380               |
| SNP_P3_171670_9008  | NW_004517793.1 | Scaffold2989 | 9008                    | CC                              | GG                | 1946687382               |
| SNP_P3_171671_9809  | NW_004517793.1 | Scaffold2989 | 9809                    | GG                              | AA                | 1946687385               |
| SNP_P3_171672_14764 | NW_004517793.1 | Scaffold2989 | 14764                   | AA                              | CC                | 1946687387               |
| SNP_P3_171673_14821 | NW_004517793.1 | Scaffold2989 | 14821                   | AA                              | GG                | 1946687389               |
| SNP_P3_171674_14951 | NW_004517793.1 | Scaffold2989 | 14951                   | CC                              | TT                | 1946687391               |
| SNP_P3_171675_15652 | NW_004517793.1 | Scaffold2989 | 15652                   | TT                              | CC                | 1946687392               |
| SNP_P3_171676_6073  | NW_004517794.1 | Scaffold2990 | 6073                    | TT                              | CC                | 1946687393               |
| SNP_P3_171677_6084  | NW_004517794.1 | Scaffold2990 | 6084                    | TT                              | CC                | 1946687394               |
| SNP_P3_171678_6172  | NW_004517794.1 | Scaffold2990 | 6172                    | AA                              | GG                | 1946687395               |
| SNP_P3_171680_6304  | NW_004517794.1 | Scaffold2990 | 6304                    | GG                              | AA                | 1946687396               |
| SNP_P3_171681_6313  | NW_004517794.1 | Scaffold2990 | 6313                    | CC                              | TT                | 1946687397               |
| SNP_P3_171682_6334  | NW_004517794.1 | Scaffold2990 | 6334                    | AA                              | CC                | 1946687398               |
| SNP_P3_171683_6413  | NW_004517794.1 | Scaffold2990 | 6413                    | AA                              | TT                | 1946687399               |
| SNP_P3_171684_6505  | NW_004517794.1 | Scaffold2990 | 6505                    | AA                              | TT                | 1946687400               |
| SNP_P3_171685_6527  | NW_004517794.1 | Scaffold2990 | 6527                    | CC                              | TT                | 1946687402               |
| SNP_P3_171686_6563  | NW_004517794.1 | Scaffold2990 | 6563                    | AA                              | TT                | 1946687404               |
| SNP_P3_171687_6570  | NW_004517794.1 | Scaffold2990 | 6570                    | TT                              | CC                | 1946687406               |
| SNP_P3_171688_6597  | NW_004517794.1 | Scaffold2990 | 6597                    | TT                              | GG                | 1946687408               |
| SNP_P3_171689_6645  | NW_004517794.1 | Scaffold2990 | 6645                    | CC                              | AA                | 1946687410               |
| SNP_P3_171690_6647  | NW_004517794.1 | Scaffold2990 | 6647                    | AA                              | GG                | 1946687411               |
| SNP_P3_171691_6682  | NW_004517794.1 | Scaffold2990 | 6682                    | TT                              | GG                | 1946687413               |
| SNP_P3_171692_6687  | NW_004517794.1 | Scaffold2990 | 6687                    | CC                              | TT                | 1946687415               |
| SNP_P3_171693_6689  | NW_004517794.1 | Scaffold2990 | 6689                    | AA                              | GG                | 1946687417               |
| SNP_P3_171694_6703  | NW_004517794.1 | Scaffold2990 | 6703                    | AA                              | GG                | 1946687419               |
| SNP_P3_171695_6719  | NW_004517794.1 | Scaffold2990 | 6719                    | GG                              | TT                | 1946687421               |
| SNP_P3_171696_6773  | NW_004517794.1 | Scaffold2990 | 6773                    | AA                              | TT                | 1946687423               |
| SNP_P3_171697_6782  | NW_004517794.1 | Scaffold2990 | 6782                    | TT                              | CC                | 1946687425               |

| SNPs IDs            | Chromosome IDs | Chromosomes  | Physical positions (bp) | CDC Frontier (Reference genome) | (Pusa 256 & HPNB) | NCBI SNPdb Accession IDs |
|---------------------|----------------|--------------|-------------------------|---------------------------------|-------------------|--------------------------|
| SNP_P3_171698_8186  | NW_004517794.1 | Scaffold2990 | 8186                    | CC                              | TT                | 1946687427               |
| SNP_P3_171699_8193  | NW_004517794.1 | Scaffold2990 | 8193                    | CC                              | GG                | 1946687429               |
| SNP_P3_171700_10243 | NW_004517794.1 | Scaffold2990 | 10243                   | CC                              | AA                | 1946687431               |
| SNP_P3_171701_13899 | NW_004517794.1 | Scaffold2990 | 13899                   | CC                              | TT                | 1946687433               |
| SNP_P3_171702_13954 | NW_004517794.1 | Scaffold2990 | 13954                   | AA                              | TT                | 1946687435               |
| SNP_P3_171703_13999 | NW_004517794.1 | Scaffold2990 | 13999                   | TT                              | CC                | 1946687437               |
| SNP_P3_171704_14004 | NW_004517794.1 | Scaffold2990 | 14004                   | GG                              | AA                | 1946687440               |
| SNP_P3_171705_14007 | NW_004517794.1 | Scaffold2990 | 14007                   | GG                              | TT                | 1946687442               |
| SNP_P3_171706_14008 | NW_004517794.1 | Scaffold2990 | 14008                   | TT                              | CC                | 1946687444               |
| SNP_P3_171707_14009 | NW_004517794.1 | Scaffold2990 | 14009                   | GG                              | AA                | 1946687446               |
| SNP_P3_171708_438   | NW_004517797.1 | Scaffold2994 | 438                     | GG                              | AA                | 1946687448               |
| SNP_P3_171709_4242  | NW_004517798.1 | Scaffold2996 | 4242                    | TT                              | CC                | 1946687450               |
| SNP_P3_171710_4565  | NW_004517798.1 | Scaffold2996 | 4565                    | AA                              | GG                | 1946687452               |
| SNP_P3_171711_4582  | NW_004517798.1 | Scaffold2996 | 4582                    | CC                              | TT                | 1946687454               |
| SNP_P3_171712_3264  | NW_004517799.1 | Scaffold2997 | 3264                    | TT                              | CC                | 1946687456               |
| SNP_P3_171713_3027  | NW_004517800.1 | Scaffold2998 | 3027                    | TT                              | CC                | 1946687458               |
| SNP_P3_171714_3043  | NW_004517800.1 | Scaffold2998 | 3043                    | TT                              | CC                | 1946687460               |
| SNP_P3_171715_4984  | NW_004517800.1 | Scaffold2998 | 4984                    | TT                              | AA                | 1946687462               |
| SNP_P3_171716_5002  | NW_004517800.1 | Scaffold2998 | 5002                    | AA                              | TT                | 1946687464               |
| SNP_P3_171717_5121  | NW_004517800.1 | Scaffold2998 | 5121                    | GG                              | AA                | 1946687466               |
| SNP_P3_171718_5155  | NW_004517800.1 | Scaffold2998 | 5155                    | AA                              | TT                | 1946687468               |
| SNP_P3_171719_5157  | NW_004517800.1 | Scaffold2998 | 5157                    | CC                              | TT                | 1946687470               |
| SNP_P3_171720_5185  | NW_004517800.1 | Scaffold2998 | 5185                    | AA                              | GG                | 1946687472               |
| SNP_P3_171721_5209  | NW_004517800.1 | Scaffold2998 | 5209                    | TT                              | CC                | 1946687474               |
| SNP_P3_171722_5530  | NW_004517800.1 | Scaffold2998 | 5530                    | CC                              | TT                | 1946687476               |
| SNP_P3_171723_5684  | NW_004517800.1 | Scaffold2998 | 5684                    | GG                              | AA                | 1946687478               |
| SNP_P3_171724_5689  | NW_004517800.1 | Scaffold2998 | 5689                    | AA                              | GG                | 1946687481               |
| SNP_P3_171725_475   | NW_004517802.1 | Scaffold3002 | 475                     | CC                              | TT                | 1946687483               |
| SNP_P3_171726_512   | NW_004517802.1 | Scaffold3002 | 512                     | TT                              | CC                | 1946687485               |
| SNP_P3_171727_581   | NW_004517802.1 | Scaffold3002 | 581                     | TT                              | GG                | 1946687487               |
| SNP_P3_171728_633   | NW_004517802.1 | Scaffold3002 | 633                     | GG                              | AA                | 1946687489               |
| SNP_P3_171729_853   | NW_004517802.1 | Scaffold3002 | 853                     | GG                              | AA                | 1946687491               |
| SNP_P3_171730_960   | NW_004517802.1 | Scaffold3002 | 960                     | TT                              | AA                | 1946687493               |
| SNP_P3_171732_1806  | NW_004517802.1 | Scaffold3002 | 1806                    | TT                              | AA                | 1946687495               |
| SNP_P3_171733_1822  | NW_004517802.1 | Scaffold3002 | 1822                    | TT                              | CC                | 1946687497               |
| SNP_P3_171734_2944  | NW_004517802.1 | Scaffold3002 | 2944                    | GG                              | TT                | 1946687499               |
| SNP_P3_171735_3127  | NW_004517802.1 | Scaffold3002 | 3127                    | CC                              | TT                | 1946687501               |
| SNP_P3_171736_3963  | NW_004517806.1 | Scaffold3007 | 3963                    | CC                              | TT                | 1946687503               |
| SNP_P3_171737_3965  | NW_004517806.1 | Scaffold3007 | 3965                    | GG                              | CC                | 1946687505               |
| SNP_P3_171738_4258  | NW_004517806.1 | Scaffold3007 | 4258                    | TT                              | AA                | 1946687507               |
| SNP_P3_171739_199   | NW_004517807.1 | Scaffold3008 | 199                     | GG                              | AA                | 1946687509               |
| SNP_P3_171740_478   | NW_004517807.1 | Scaffold3008 | 478                     | CC                              | TT                | 1946687511               |

| SNPs IDs            | Chromosome IDs | Chromosomes  | Physical positions (bp) | CDC Frontier (Reference genome) | (Pusa 256 & HPNB) | NCBI SNPdb Accession IDs |
|---------------------|----------------|--------------|-------------------------|---------------------------------|-------------------|--------------------------|
| SNP_P3_171741_545   | NW_004517807.1 | Scaffold3008 | 545                     | AA                              | GG                | 1946687513               |
| SNP_P3_171742_617   | NW_004517807.1 | Scaffold3008 | 617                     | GG                              | TT                | 1946687515               |
| SNP_P3_171743_318   | NW_004517809.1 | Scaffold3011 | 318                     | GG                              | AA                | 1946687517               |
| SNP_P3_171744_324   | NW_004517809.1 | Scaffold3011 | 324                     | GG                              | AA                | 1946687519               |
| SNP_P3_171745_8680  | NW_004517813.1 | Scaffold3015 | 8680                    | AA                              | CC                | 1946687521               |
| SNP_P3_171746_10033 | NW_004517813.1 | Scaffold3015 | 10033                   | GG                              | AA                | 1946687523               |
| SNP_P3_171747_21829 | NW_004517813.1 | Scaffold3015 | 21829                   | CC                              | AA                | 1946687525               |
| SNP_P3_171749_34796 | NW_004517813.1 | Scaffold3015 | 34796                   | AA                              | GG                | 1946687527               |
| SNP_P3_171750_35070 | NW_004517813.1 | Scaffold3015 | 35070                   | AA                              | GG                | 1946687530               |
| SNP_P3_171751_35087 | NW_004517813.1 | Scaffold3015 | 35087                   | TT                              | CC                | 1946687532               |
| SNP_P3_171752_35118 | NW_004517813.1 | Scaffold3015 | 35118                   | TT                              | CC                | 1946687534               |
| SNP_P3_171753_56053 | NW_004517813.1 | Scaffold3015 | 56053                   | TT                              | AA                | 1946687536               |
| SNP_P3_171754_56088 | NW_004517813.1 | Scaffold3015 | 56088                   | AA                              | GG                | 1946687538               |
| SNP_P3_171755_59984 | NW_004517813.1 | Scaffold3015 | 59984                   | GG                              | AA                | 1946687540               |
| SNP_P3_171756_60049 | NW_004517813.1 | Scaffold3015 | 60049                   | AA                              | TT                | 1946687542               |
| SNP_P3_171757_60159 | NW_004517813.1 | Scaffold3015 | 60159                   | CC                              | GG                | 1946687544               |
| SNP_P3_171758_60254 | NW_004517813.1 | Scaffold3015 | 60254                   | GG                              | AA                | 1946687546               |
| SNP_P3_171759_60266 | NW_004517813.1 | Scaffold3015 | 60266                   | GG                              | AA                | 1946687548               |
| SNP_P3_171760_60285 | NW_004517813.1 | Scaffold3015 | 60285                   | CC                              | TT                | 1946687550               |
| SNP_P3_171761_60288 | NW_004517813.1 | Scaffold3015 | 60288                   | CC                              | AA                | 1946687552               |
| SNP_P3_171762_60431 | NW_004517813.1 | Scaffold3015 | 60431                   | GG                              | AA                | 1946687554               |
| SNP_P3_171763_60493 | NW_004517813.1 | Scaffold3015 | 60493                   | GG                              | AA                | 1946687556               |
| SNP_P3_171764_68133 | NW_004517813.1 | Scaffold3015 | 68133                   | CC                              | TT                | 1946687558               |
| SNP_P3_171765_68142 | NW_004517813.1 | Scaffold3015 | 68142                   | CC                              | TT                | 1946687560               |
| SNP_P3_171766_68158 | NW_004517813.1 | Scaffold3015 | 68158                   | GG                              | AA                | 1946687562               |
| SNP_P3_171767_68346 | NW_004517813.1 | Scaffold3015 | 68346                   | CC                              | TT                | 1946687564               |
| SNP_P3_171768_68424 | NW_004517813.1 | Scaffold3015 | 68424                   | AA                              | GG                | 1946687566               |
| SNP_P3_171770_68465 | NW_004517813.1 | Scaffold3015 | 68465                   | TT                              | GG                | 1946687568               |
| SNP_P3_171771_68471 | NW_004517813.1 | Scaffold3015 | 68471                   | CC                              | AA                | 1946687570               |
| SNP_P3_171772_68483 | NW_004517813.1 | Scaffold3015 | 68483                   | AA                              | GG                | 1946687572               |
| SNP_P3_171773_68531 | NW_004517813.1 | Scaffold3015 | 68531                   | CC                              | TT                | 1946687575               |
| SNP_P3_171774_68549 | NW_004517813.1 | Scaffold3015 | 68549                   | TT                              | AA                | 1946687577               |
| SNP_P3_171775_68555 | NW_004517813.1 | Scaffold3015 | 68555                   | GG                              | AA                | 1946687579               |
| SNP_P3_171776_68559 | NW_004517813.1 | Scaffold3015 | 68559                   | TT                              | AA                | 1946687581               |
| SNP_P3_171777_68576 | NW_004517813.1 | Scaffold3015 | 68576                   | AA                              | GG                | 1946687583               |
| SNP_P3_171778_68581 | NW_004517813.1 | Scaffold3015 | 68581                   | AA                              | TT                | 1946687585               |
| SNP_P3_171779_68597 | NW_004517813.1 | Scaffold3015 | 68597                   | GG                              | AA                | 1946687587               |
| SNP_P3_171780_68642 | NW_004517813.1 | Scaffold3015 | 68642                   | CC                              | AA                | 1946687589               |
| SNP_P3_171782_68672 | NW_004517813.1 | Scaffold3015 | 68672                   | TT                              | GG                | 1946687591               |
| SNP_P3_171783_68704 | NW_004517813.1 | Scaffold3015 | 68704                   | TT                              | CC                | 1946687593               |
| SNP_P3_171784_68756 | NW_004517813.1 | Scaffold3015 | 68756                   | TT                              | CC                | 1946687595               |
| SNP_P3_171785_68897 | NW_004517813.1 | Scaffold3015 | 68897                   | AA                              | TT                | 1946687597               |



| SNPs IDs            | Chromosome IDs | Chromosomes  | Physical positions (bp) | CDC Frontier (Reference genome) | (Pusa 256 & HPNB) | NCBI SNPdb Accession IDs |
|---------------------|----------------|--------------|-------------------------|---------------------------------|-------------------|--------------------------|
| SNP_P3_171786_68940 | NW_004517813.1 | Scaffold3015 | 68940                   | AA                              | CC                | 1946687599               |
| SNP_P3_171787_69034 | NW_004517813.1 | Scaffold3015 | 69034                   | AA                              | CC                | 1946687601               |
| SNP_P3_171788_69035 | NW_004517813.1 | Scaffold3015 | 69035                   | AA                              | TT                | 1946687603               |
| SNP_P3_171789_69050 | NW_004517813.1 | Scaffold3015 | 69050                   | TT                              | CC                | 1946687605               |
| SNP_P3_171790_69052 | NW_004517813.1 | Scaffold3015 | 69052                   | TT                              | AA                | 1946687607               |
| SNP_P3_171791_69151 | NW_004517813.1 | Scaffold3015 | 69151                   | TT                              | CC                | 1946687608               |
| SNP_P3_171793_69237 | NW_004517813.1 | Scaffold3015 | 69237                   | AA                              | TT                | 1946687610               |
| SNP_P3_171794_72040 | NW_004517813.1 | Scaffold3015 | 72040                   | AA                              | GG                | 1946687612               |
| SNP_P3_171795_73256 | NW_004517813.1 | Scaffold3015 | 73256                   | CC                              | TT                | 1946687615               |
| SNP_P3_171797_73369 | NW_004517813.1 | Scaffold3015 | 73369                   | TT                              | AA                | 1946687617               |
| SNP_P3_171798_73409 | NW_004517813.1 | Scaffold3015 | 73409                   | AA                              | CC                | 1946687619               |
| SNP_P3_171799_73430 | NW_004517813.1 | Scaffold3015 | 73430                   | AA                              | GG                | 1946687621               |
| SNP_P3_171801_73610 | NW_004517813.1 | Scaffold3015 | 73610                   | CC                              | TT                | 1946687623               |
| SNP_P3_171802_73612 | NW_004517813.1 | Scaffold3015 | 73612                   | CC                              | TT                | 1946687625               |
| SNP_P3_171803_73639 | NW_004517813.1 | Scaffold3015 | 73639                   | AA                              | GG                | 1946687627               |
| SNP_P3_171804_73688 | NW_004517813.1 | Scaffold3015 | 73688                   | AA                              | GG                | 1946687629               |
| SNP_P3_171805_73809 | NW_004517813.1 | Scaffold3015 | 73809                   | CC                              | TT                | 1946687631               |
| SNP_P3_171806_73838 | NW_004517813.1 | Scaffold3015 | 73838                   | GG                              | CC                | 1946687633               |
| SNP_P3_171807_73930 | NW_004517813.1 | Scaffold3015 | 73930                   | TT                              | CC                | 1946687635               |
| SNP_P3_171809_73968 | NW_004517813.1 | Scaffold3015 | 73968                   | AA                              | TT                | 1946687637               |
| SNP_P3_171810_73988 | NW_004517813.1 | Scaffold3015 | 73988                   | AA                              | GG                | 1946687639               |
| SNP_P3_171812_74121 | NW_004517813.1 | Scaffold3015 | 74121                   | CC                              | GG                | 1946687641               |
| SNP_P3_171814_74191 | NW_004517813.1 | Scaffold3015 | 74191                   | CC                              | GG                | 1946687643               |
| SNP_P3_171815_74229 | NW_004517813.1 | Scaffold3015 | 74229                   | TT                              | CC                | 1946687645               |
| SNP_P3_171816_74263 | NW_004517813.1 | Scaffold3015 | 74263                   | GG                              | CC                | 1946687647               |
| SNP_P3_171817_74335 | NW_004517813.1 | Scaffold3015 | 74335                   | AA                              | GG                | 1946687649               |
| SNP_P3_171818_74426 | NW_004517813.1 | Scaffold3015 | 74426                   | AA                              | GG                | 1946687651               |
| SNP_P3_171820_76631 | NW_004517813.1 | Scaffold3015 | 76631                   | TT                              | GG                | 1946687654               |
| SNP_P3_171822_76863 | NW_004517813.1 | Scaffold3015 | 76863                   | CC                              | TT                | 1946687656               |
| SNP_P3_171823_77036 | NW_004517813.1 | Scaffold3015 | 77036                   | TT                              | CC                | 1946687658               |
| SNP_P3_171824_77055 | NW_004517813.1 | Scaffold3015 | 77055                   | CC                              | TT                | 1946687660               |
| SNP_P3_171825_77060 | NW_004517813.1 | Scaffold3015 | 77060                   | TT                              | AA                | 1946687662               |
| SNP_P3_171826_80389 | NW_004517813.1 | Scaffold3015 | 80389                   | GG                              | AA                | 1946687664               |
| SNP_P3_171827_80418 | NW_004517813.1 | Scaffold3015 | 80418                   | GG                              | AA                | 1946687666               |
| SNP_P3_171828_80540 | NW_004517813.1 | Scaffold3015 | 80540                   | CC                              | TT                | 1946687668               |
| SNP_P3_171829_80542 | NW_004517813.1 | Scaffold3015 | 80542                   | CC                              | TT                | 1946687669               |
| SNP_P3_171830_80616 | NW_004517813.1 | Scaffold3015 | 80616                   | CC                              | AA                | 1946687671               |
| SNP_P3_171831_80839 | NW_004517813.1 | Scaffold3015 | 80839                   | CC                              | TT                | 1946687673               |
| SNP_P3_171832_80842 | NW_004517813.1 | Scaffold3015 | 80842                   | AA                              | GG                | 1946687675               |
| SNP_P3_171833_80890 | NW_004517813.1 | Scaffold3015 | 80890                   | GG                              | AA                | 1946687677               |
| SNP_P3_171834_80892 | NW_004517813.1 | Scaffold3015 | 80892                   | GG                              | AA                | 1946687679               |
| SNP_P3_171835_80893 | NW_004517813.1 | Scaffold3015 | 80893                   | TT                              | CC                | 1946687681               |

| SNPs IDs             | Chromosome IDs | Chromosomes  | Physical positions (bp) | CDC Frontier (Reference genome) | (Pusa 256 & HPNB) | NCBI SNPdb Accession IDs |
|----------------------|----------------|--------------|-------------------------|---------------------------------|-------------------|--------------------------|
| SNP_P3_171836_80944  | NW_004517813.1 | Scaffold3015 | 80944                   | TT                              | CC                | 1946687683               |
| SNP_P3_171837_80984  | NW_004517813.1 | Scaffold3015 | 80984                   | GG                              | AA                | 1946687685               |
| SNP_P3_171838_81514  | NW_004517813.1 | Scaffold3015 | 81514                   | TT                              | CC                | 1946687686               |
| SNP_P3_171839_81554  | NW_004517813.1 | Scaffold3015 | 81554                   | GG                              | TT                | 1946687688               |
| SNP_P3_171840_81559  | NW_004517813.1 | Scaffold3015 | 81559                   | AA                              | GG                | 1946687690               |
| SNP_P3_171841_81603  | NW_004517813.1 | Scaffold3015 | 81603                   | CC                              | AA                | 1946687693               |
| SNP_P3_171842_81614  | NW_004517813.1 | Scaffold3015 | 81614                   | GG                              | AA                | 1946687695               |
| SNP_P3_171843_81620  | NW_004517813.1 | Scaffold3015 | 81620                   | TT                              | CC                | 1946687697               |
| SNP_P3_171844_81648  | NW_004517813.1 | Scaffold3015 | 81648                   | TT                              | AA                | 1946687699               |
| SNP_P3_171845_83085  | NW_004517813.1 | Scaffold3015 | 83085                   | TT                              | CC                | 1946687701               |
| SNP_P3_171846_85137  | NW_004517813.1 | Scaffold3015 | 85137                   | GG                              | AA                | 1946687703               |
| SNP_P3_171847_26590  | NW_004517814.1 | Scaffold3016 | 26590                   | CC                              | TT                | 1946687705               |
| SNP_P3_171848_39228  | NW_004517814.1 | Scaffold3016 | 39228                   | AA                              | TT                | 1946687707               |
| SNP_P3_171849_51906  | NW_004517814.1 | Scaffold3016 | 51906                   | TT                              | AA                | 1946687709               |
| SNP_P3_171850_51907  | NW_004517814.1 | Scaffold3016 | 51907                   | TT                              | AA                | 1946687711               |
| SNP_P3_171851_57124  | NW_004517814.1 | Scaffold3016 | 57124                   | TT                              | AA                | 1946687713               |
| SNP_P3_171852_57133  | NW_004517814.1 | Scaffold3016 | 57133                   | CC                              | TT                | 1946687715               |
| SNP_P3_171853_57140  | NW_004517814.1 | Scaffold3016 | 57140                   | CC                              | TT                | 1946687717               |
| SNP_P3_171854_57166  | NW_004517814.1 | Scaffold3016 | 57166                   | AA                              | GG                | 1946687718               |
| SNP_P3_171855_57170  | NW_004517814.1 | Scaffold3016 | 57170                   | CC                              | TT                | 1946687720               |
| SNP_P3_171856_57391  | NW_004517814.1 | Scaffold3016 | 57391                   | AA                              | TT                | 1946687722               |
| SNP_P3_171857_57801  | NW_004517814.1 | Scaffold3016 | 57801                   | CC                              | TT                | 1946687724               |
| SNP_P3_171858_57867  | NW_004517814.1 | Scaffold3016 | 57867                   | GG                              | AA                | 1946687726               |
| SNP_P3_171859_57883  | NW_004517814.1 | Scaffold3016 | 57883                   | GG                              | AA                | 1946687728               |
| SNP_P3_171861_71915  | NW_004517814.1 | Scaffold3016 | 71915                   | AA                              | TT                | 1946687730               |
| SNP_P3_171862_72550  | NW_004517814.1 | Scaffold3016 | 72550                   | GG                              | AA                | 1946687732               |
| SNP_P3_171864_120326 | NW_004517814.1 | Scaffold3016 | 120326                  | TT                              | CC                | 1946687735               |
| SNP_P3_171865_120673 | NW_004517814.1 | Scaffold3016 | 120673                  | AA                              | CC                | 1946687737               |
| SNP_P3_171866_1900   | NW_004517816.1 | Scaffold3018 | 1900                    | AA                              | GG                | 1946687739               |
| SNP_P3_171867_7142   | NW_004517816.1 | Scaffold3018 | 7142                    | CC                              | TT                | 1946687741               |
| SNP_P3_171869_893    | NW_004517817.1 | Scaffold3019 | 893                     | TT                              | CC                | 1946687743               |
| SNP_P3_171870_1029   | NW_004517817.1 | Scaffold3019 | 1029                    | CC                              | TT                | 1946687746               |
| SNP_P3_171871_16661  | NW_004517817.1 | Scaffold3019 | 16661                   | TT                              | AA                | 1946687748               |
| SNP_P3_171873_17705  | NW_004517817.1 | Scaffold3019 | 17705                   | CC                              | AA                | 1946687749               |
| SNP_P3_171875_18139  | NW_004517817.1 | Scaffold3019 | 18139                   | AA                              | CC                | 1946687751               |
| SNP_P3_171876_18321  | NW_004517817.1 | Scaffold3019 | 18321                   | CC                              | GG                | 1946687753               |
| SNP_P3_171877_18382  | NW_004517817.1 | Scaffold3019 | 18382                   | CC                              | AA                | 1946687755               |
| SNP_P3_171878_18501  | NW_004517817.1 | Scaffold3019 | 18501                   | TT                              | CC                | 1946687757               |
| SNP_P3_171879_18668  | NW_004517817.1 | Scaffold3019 | 18668                   | CC                              | AA                | 1946687759               |
| SNP_P3_171881_18808  | NW_004517817.1 | Scaffold3019 | 18808                   | GG                              | AA                | 1946687761               |
| SNP_P3_171882_18892  | NW_004517817.1 | Scaffold3019 | 18892                   | GG                              | AA                | 1946687763               |
| SNP_P3_171883_18937  | NW_004517817.1 | Scaffold3019 | 18937                   | AA                              | CC                | 1946687765               |

| SNPs IDs            | Chromosome IDs | Chromosomes  | Physical positions (bp) | CDC Frontier (Reference genome) | (Pusa 256 & HPNB) | NCBI SNPdb Accession IDs |
|---------------------|----------------|--------------|-------------------------|---------------------------------|-------------------|--------------------------|
| SNP_P3_171884_19620 | NW_004517817.1 | Scaffold3019 | 19620                   | GG                              | AA                | 1946687767               |
| SNP_P3_171885_19622 | NW_004517817.1 | Scaffold3019 | 19622                   | AA                              | TT                | 1946687769               |
| SNP_P3_171886_19883 | NW_004517817.1 | Scaffold3019 | 19883                   | GG                              | TT                | 1946687771               |
| SNP_P3_171888_19921 | NW_004517817.1 | Scaffold3019 | 19921                   | GG                              | AA                | 1946687774               |
| SNP_P3_171889_19966 | NW_004517817.1 | Scaffold3019 | 19966                   | AA                              | TT                | 1946687776               |
| SNP_P3_171890_20131 | NW_004517817.1 | Scaffold3019 | 20131                   | CC                              | TT                | 1946687778               |
| SNP_P3_171891_20303 | NW_004517817.1 | Scaffold3019 | 20303                   | CC                              | AA                | 1946687780               |
| SNP_P3_171892_20406 | NW_004517817.1 | Scaffold3019 | 20406                   | CC                              | TT                | 1946687782               |
| SNP_P3_171893_20499 | NW_004517817.1 | Scaffold3019 | 20499                   | TT                              | GG                | 1946687784               |
| SNP_P3_171894_20510 | NW_004517817.1 | Scaffold3019 | 20510                   | AA                              | GG                | 1946687786               |
| SNP_P3_171895_20607 | NW_004517817.1 | Scaffold3019 | 20607                   | GG                              | TT                | 1946687788               |
| SNP_P3_171896_20611 | NW_004517817.1 | Scaffold3019 | 20611                   | AA                              | CC                | 1946687790               |
| SNP_P3_171897_20792 | NW_004517817.1 | Scaffold3019 | 20792                   | TT                              | CC                | 1946687792               |
| SNP_P3_171898_20795 | NW_004517817.1 | Scaffold3019 | 20795                   | AA                              | CC                | 1946687794               |
| SNP_P3_171900_20918 | NW_004517817.1 | Scaffold3019 | 20918                   | CC                              | TT                | 1946687796               |
| SNP_P3_171901_21056 | NW_004517817.1 | Scaffold3019 | 21056                   | AA                              | GG                | 1946687797               |
| SNP_P3_171902_21235 | NW_004517817.1 | Scaffold3019 | 21235                   | GG                              | AA                | 1946687799               |
| SNP_P3_171903_21243 | NW_004517817.1 | Scaffold3019 | 21243                   | TT                              | AA                | 1946687801               |
| SNP_P3_171905_21329 | NW_004517817.1 | Scaffold3019 | 21329                   | AA                              | GG                | 1946687803               |
| SNP_P3_171906_21343 | NW_004517817.1 | Scaffold3019 | 21343                   | TT                              | AA                | 1946687805               |
| SNP_P3_171907_21395 | NW_004517817.1 | Scaffold3019 | 21395                   | AA                              | GG                | 1946687807               |
| SNP_P3_171908_21432 | NW_004517817.1 | Scaffold3019 | 21432                   | CC                              | TT                | 1946687809               |
| SNP_P3_171909_21502 | NW_004517817.1 | Scaffold3019 | 21502                   | CC                              | AA                | 1946687811               |
| SNP_P3_171910_21558 | NW_004517817.1 | Scaffold3019 | 21558                   | AA                              | TT                | 1946687814               |
| SNP_P3_171911_21569 | NW_004517817.1 | Scaffold3019 | 21569                   | CC                              | AA                | 1946687816               |
| SNP_P3_171913_6751  | NW_004517820.1 | Scaffold3022 | 6751                    | GG                              | AA                | 1946687818               |
| SNP_P3_171914_6784  | NW_004517820.1 | Scaffold3022 | 6784                    | CC                              | TT                | 1946687820               |
| SNP_P3_171915_6806  | NW_004517820.1 | Scaffold3022 | 6806                    | GG                              | AA                | 1946687822               |
| SNP_P3_171916_6877  | NW_004517820.1 | Scaffold3022 | 6877                    | AA                              | GG                | 1946687824               |
| SNP_P3_171917_6878  | NW_004517820.1 | Scaffold3022 | 6878                    | CC                              | TT                | 1946687826               |
| SNP_P3_171918_6904  | NW_004517820.1 | Scaffold3022 | 6904                    | GG                              | AA                | 1946687828               |
| SNP_P3_171919_7088  | NW_004517820.1 | Scaffold3022 | 7088                    | GG                              | TT                | 1946687830               |
| SNP_P3_171920_7107  | NW_004517820.1 | Scaffold3022 | 7107                    | AA                              | TT                | 1946687832               |
| SNP_P3_171921_7189  | NW_004517820.1 | Scaffold3022 | 7189                    | GG                              | AA                | 1946687834               |
| SNP_P3_171922_7220  | NW_004517820.1 | Scaffold3022 | 7220                    | GG                              | TT                | 1946687836               |
| SNP_P3_171923_7459  | NW_004517820.1 | Scaffold3022 | 7459                    | GG                              | AA                | 1946687838               |
| SNP_P3_171924_7489  | NW_004517820.1 | Scaffold3022 | 7489                    | GG                              | TT                | 1946687840               |
| SNP_P3_171925_9756  | NW_004517820.1 | Scaffold3022 | 9756                    | AA                              | GG                | 1946687842               |
| SNP_P3_171926_10589 | NW_004517820.1 | Scaffold3022 | 10589                   | AA                              | GG                | 1946687844               |
| SNP_P3_171927_10623 | NW_004517820.1 | Scaffold3022 | 10623                   | GG                              | AA                | 1946687846               |
| SNP_P3_171928_19867 | NW_004517820.1 | Scaffold3022 | 19867                   | TT                              | CC                | 1946687848               |
| SNP_P3_171929_20201 | NW_004517820.1 | Scaffold3022 | 20201                   | TT                              | AA                | 1946687850               |

| SNPs IDs            | Chromosome IDs | Chromosomes  | Physical positions (bp) | CDC Frontier (Reference genome) | (Pusa 256 & HPNB) | NCBI SNPdb Accession IDs |
|---------------------|----------------|--------------|-------------------------|---------------------------------|-------------------|--------------------------|
| SNP_P3_171930_20899 | NW_004517820.1 | Scaffold3022 | 20899                   | AA                              | GG                | 1946687852               |
| SNP_P3_171931_20953 | NW_004517820.1 | Scaffold3022 | 20953                   | TT                              | AA                | 1946687854               |
| SNP_P3_171932_21441 | NW_004517820.1 | Scaffold3022 | 21441                   | AA                              | GG                | 1946687857               |
| SNP_P3_171933_2647  | NW_004517822.1 | Scaffold3026 | 2647                    | CC                              | TT                | 1946687859               |
| SNP_P3_171934_2662  | NW_004517822.1 | Scaffold3026 | 2662                    | CC                              | TT                | 1946687861               |
| SNP_P3_171935_2684  | NW_004517822.1 | Scaffold3026 | 2684                    | TT                              | CC                | 1946687863               |
| SNP_P3_171936_2887  | NW_004517822.1 | Scaffold3026 | 2887                    | CC                              | TT                | 1946687865               |
| SNP_P3_171937_2891  | NW_004517822.1 | Scaffold3026 | 2891                    | TT                              | CC                | 1946687867               |
| SNP_P3_171938_2955  | NW_004517822.1 | Scaffold3026 | 2955                    | AA                              | GG                | 1946687869               |
| SNP_P3_171939_5101  | NW_004517822.1 | Scaffold3026 | 5101                    | GG                              | AA                | 1946687871               |
| SNP_P3_171940_5171  | NW_004517822.1 | Scaffold3026 | 5171                    | TT                              | CC                | 1946687873               |
| SNP_P3_171941_5192  | NW_004517822.1 | Scaffold3026 | 5192                    | CC                              | TT                | 1946687875               |
| SNP_P3_171942_5423  | NW_004517822.1 | Scaffold3026 | 5423                    | TT                              | AA                | 1946687877               |
| SNP_P3_171943_5453  | NW_004517822.1 | Scaffold3026 | 5453                    | AA                              | TT                | 1946687879               |
| SNP_P3_171944_5464  | NW_004517822.1 | Scaffold3026 | 5464                    | CC                              | TT                | 1946687881               |
| SNP_P3_171945_5478  | NW_004517822.1 | Scaffold3026 | 5478                    | TT                              | AA                | 1946687883               |
| SNP_P3_171946_5510  | NW_004517822.1 | Scaffold3026 | 5510                    | TT                              | GG                | 1946687885               |
| SNP_P3_171947_7004  | NW_004517822.1 | Scaffold3026 | 7004                    | GG                              | AA                | 1946687887               |
| SNP_P3_171948_7010  | NW_004517822.1 | Scaffold3026 | 7010                    | TT                              | CC                | 1946687889               |
| SNP_P3_171950_7222  | NW_004517822.1 | Scaffold3026 | 7222                    | GG                              | TT                | 1946687891               |
| SNP_P3_171951_7224  | NW_004517822.1 | Scaffold3026 | 7224                    | CC                              | AA                | 1946687893               |
| SNP_P3_171952_7313  | NW_004517822.1 | Scaffold3026 | 7313                    | CC                              | AA                | 1946687895               |
| SNP_P3_171953_7343  | NW_004517822.1 | Scaffold3026 | 7343                    | AA                              | GG                | 1946687897               |
| SNP_P3_171954_7352  | NW_004517822.1 | Scaffold3026 | 7352                    | CC                              | AA                | 1946687898               |
| SNP_P3_171955_9047  | NW_004517822.1 | Scaffold3026 | 9047                    | TT                              | AA                | 1946687899               |
| SNP_P3_171956_9199  | NW_004517822.1 | Scaffold3026 | 9199                    | AA                              | TT                | 1946687900               |
| SNP_P3_171957_9326  | NW_004517822.1 | Scaffold3026 | 9326                    | GG                              | AA                | 1946687901               |
| SNP_P3_171958_9351  | NW_004517822.1 | Scaffold3026 | 9351                    | AA                              | GG                | 1946687902               |
| SNP_P3_171959_9583  | NW_004517822.1 | Scaffold3026 | 9583                    | GG                              | AA                | 1946687903               |
| SNP_P3_171960_3364  | NW_004517823.1 | Scaffold3028 | 3364                    | TT                              | AA                | 1946687904               |
| SNP_P3_171961_3405  | NW_004517823.1 | Scaffold3028 | 3405                    | TT                              | AA                | 1946687905               |
| SNP_P3_171962_3469  | NW_004517823.1 | Scaffold3028 | 3469                    | TT                              | CC                | 1946687906               |
| SNP_P3_171963_3717  | NW_004517823.1 | Scaffold3028 | 3717                    | CC                              | AA                | 1946687907               |
| SNP_P3_171965_6577  | NW_004517823.1 | Scaffold3028 | 6577                    | CC                              | TT                | 1946687908               |
| SNP_P3_171966_6581  | NW_004517823.1 | Scaffold3028 | 6581                    | CC                              | TT                | 1946687909               |
| SNP_P3_171967_6583  | NW_004517823.1 | Scaffold3028 | 6583                    | AA                              | GG                | 1946687911               |
| SNP_P3_171968_7564  | NW_004517823.1 | Scaffold3028 | 7564                    | GG                              | AA                | 1946687913               |
| SNP_P3_171969_9838  | NW_004517823.1 | Scaffold3028 | 9838                    | AA                              | TT                | 1946687915               |
| SNP_P3_171970_131   | NW_004517824.1 | Scaffold3029 | 131                     | GG                              | AA                | 1946687917               |
| SNP_P3_171971_173   | NW_004517824.1 | Scaffold3029 | 173                     | TT                              | CC                | 1946687919               |
| SNP_P3_171972_363   | NW_004517824.1 | Scaffold3029 | 363                     | CC                              | GG                | 1946687922               |
| SNP_P3_171975_585   | NW_004517824.1 | Scaffold3029 | 585                     | AA                              | TT                | 1946687925               |

| SNPs IDs            | Chromosome IDs | Chromosomes  | Physical positions (bp) | CDC Frontier (Reference genome) | (Pusa 256 & HPNB) | NCBI SNPdb Accession IDs |
|---------------------|----------------|--------------|-------------------------|---------------------------------|-------------------|--------------------------|
| SNP_P3_171976_592   | NW_004517824.1 | Scaffold3029 | 592                     | GG                              | CC                | 1946687927               |
| SNP_P3_171977_596   | NW_004517824.1 | Scaffold3029 | 596                     | TT                              | AA                | 1946687930               |
| SNP_P3_171978_634   | NW_004517824.1 | Scaffold3029 | 634                     | TT                              | CC                | 1946687933               |
| SNP_P3_171979_2644  | NW_004517824.1 | Scaffold3029 | 2644                    | TT                              | AA                | 1946687936               |
| SNP_P3_171980_9789  | NW_004517824.1 | Scaffold3029 | 9789                    | AA                              | GG                | 1946687938               |
| SNP_P3_171981_10466 | NW_004517824.1 | Scaffold3029 | 10466                   | CC                              | AA                | 1946687941               |
| SNP_P3_171982_10706 | NW_004517824.1 | Scaffold3029 | 10706                   | TT                              | CC                | 1946687944               |
| SNP_P3_171983_14079 | NW_004517824.1 | Scaffold3029 | 14079                   | TT                              | GG                | 1946687946               |
| SNP_P3_171984_14135 | NW_004517824.1 | Scaffold3029 | 14135                   | TT                              | AA                | 1946687949               |
| SNP_P3_171985_14670 | NW_004517824.1 | Scaffold3029 | 14670                   | CC                              | TT                | 1946687952               |
| SNP_P3_171986_14672 | NW_004517824.1 | Scaffold3029 | 14672                   | AA                              | GG                | 1946687954               |
| SNP_P3_171987_14674 | NW_004517824.1 | Scaffold3029 | 14674                   | TT                              | GG                | 1946687958               |
| SNP_P3_171988_14677 | NW_004517824.1 | Scaffold3029 | 14677                   | TT                              | GG                | 1946687960               |
| SNP_P3_171989_14752 | NW_004517824.1 | Scaffold3029 | 14752                   | GG                              | CC                | 1946687963               |
| SNP_P3_171990_14858 | NW_004517824.1 | Scaffold3029 | 14858                   | GG                              | CC                | 1946687965               |
| SNP_P3_171992_152   | NW_004517825.1 | Scaffold3030 | 152                     | CC                              | TT                | 1946687967               |
| SNP_P3_171993_153   | NW_004517825.1 | Scaffold3030 | 153                     | CC                              | TT                | 1946687969               |
| SNP_P3_171994_7853  | NW_004517827.1 | Scaffold3032 | 7853                    | CC                              | TT                | 1946687971               |
| SNP_P3_171995_7952  | NW_004517827.1 | Scaffold3032 | 7952                    | TT                              | AA                | 1946687973               |
| SNP_P3_171996_8259  | NW_004517827.1 | Scaffold3032 | 8259                    | TT                              | AA                | 1946687975               |
| SNP_P3_171997_8299  | NW_004517827.1 | Scaffold3032 | 8299                    | TT                              | CC                | 1946687977               |
| SNP_P3_171998_11182 | NW_004517827.1 | Scaffold3032 | 11182                   | CC                              | TT                | 1946687979               |
| SNP_P3_171999_11604 | NW_004517827.1 | Scaffold3032 | 11604                   | TT                              | AA                | 1946687981               |
| SNP_P3_172000_12033 | NW_004517827.1 | Scaffold3032 | 12033                   | GG                              | AA                | 1946687983               |
| SNP_P3_172001_12148 | NW_004517827.1 | Scaffold3032 | 12148                   | GG                              | AA                | 1946687985               |
| SNP_P3_172002_701   | NW_004517828.1 | Scaffold3033 | 701                     | TT                              | GG                | 1946687987               |
| SNP_P3_172003_894   | NW_004517828.1 | Scaffold3033 | 894                     | CC                              | AA                | 1946687989               |
| SNP_P3_172004_691   | NW_004517829.1 | Scaffold3036 | 691                     | TT                              | AA                | 1946687991               |
| SNP_P3_172005_5823  | NW_004517831.1 | Scaffold3038 | 5823                    | AA                              | TT                | 1946687993               |
| SNP_P3_172006_5826  | NW_004517831.1 | Scaffold3038 | 5826                    | TT                              | CC                | 1946687996               |
| SNP_P3_172008_17440 | NW_004517831.1 | Scaffold3038 | 17440                   | CC                              | TT                | 1946687998               |
| SNP_P3_172009_17666 | NW_004517831.1 | Scaffold3038 | 17666                   | GG                              | TT                | 1946688000               |
| SNP_P3_172010_17759 | NW_004517831.1 | Scaffold3038 | 17759                   | AA                              | TT                | 1946688002               |
| SNP_P3_172012_17936 | NW_004517831.1 | Scaffold3038 | 17936                   | GG                              | AA                | 1946688004               |
| SNP_P3_172013_19202 | NW_004517831.1 | Scaffold3038 | 19202                   | GG                              | AA                | 1946688006               |
| SNP_P3_172014_19214 | NW_004517831.1 | Scaffold3038 | 19214                   | TT                              | GG                | 1946688008               |
| SNP_P3_172015_19343 | NW_004517831.1 | Scaffold3038 | 19343                   | TT                              | AA                | 1946688010               |
| SNP_P3_172016_21115 | NW_004517831.1 | Scaffold3038 | 21115                   | CC                              | TT                | 1946688012               |
| SNP_P3_172017_21153 | NW_004517831.1 | Scaffold3038 | 21153                   | TT                              | CC                | 1946688014               |
| SNP_P3_172018_21423 | NW_004517831.1 | Scaffold3038 | 21423                   | TT                              | CC                | 1946688016               |
| SNP_P3_172019_21549 | NW_004517831.1 | Scaffold3038 | 21549                   | TT                              | GG                | 1946688018               |
| SNP_P3_172020_21646 | NW_004517831.1 | Scaffold3038 | 21646                   | GG                              | CC                | 1946688020               |

| SNPs IDs            | Chromosome IDs | Chromosomes  | Physical positions (bp) | CDC Frontier (Reference genome) | (Pusa 256 & HPNB) | NCBI SNPdb Accession IDs |
|---------------------|----------------|--------------|-------------------------|---------------------------------|-------------------|--------------------------|
| SNP_P3_172021_24177 | NW_004517831.1 | Scaffold3038 | 24177                   | CC                              | GG                | 1946688022               |
| SNP_P3_172022_24230 | NW_004517831.1 | Scaffold3038 | 24230                   | AA                              | GG                | 1946688024               |
| SNP_P3_172023_24247 | NW_004517831.1 | Scaffold3038 | 24247                   | TT                              | CC                | 1946688026               |
| SNP_P3_172024_24308 | NW_004517831.1 | Scaffold3038 | 24308                   | GG                              | AA                | 1946688028               |
| SNP_P3_172025_24405 | NW_004517831.1 | Scaffold3038 | 24405                   | TT                              | GG                | 1946688029               |
| SNP_P3_172026_24552 | NW_004517831.1 | Scaffold3038 | 24552                   | TT                              | CC                | 1946688031               |
| SNP_P3_172027_26136 | NW_004517831.1 | Scaffold3038 | 26136                   | TT                              | CC                | 1946688033               |
| SNP_P3_172028_27631 | NW_004517831.1 | Scaffold3038 | 27631                   | AA                              | TT                | 1946688036               |
| SNP_P3_172029_27903 | NW_004517831.1 | Scaffold3038 | 27903                   | TT                              | GG                | 1946688038               |
| SNP_P3_172031_49233 | NW_004517831.1 | Scaffold3038 | 49233                   | TT                              | CC                | 1946688040               |
| SNP_P3_172032_51714 | NW_004517831.1 | Scaffold3038 | 51714                   | TT                              | GG                | 1946688042               |
| SNP_P3_172033_51733 | NW_004517831.1 | Scaffold3038 | 51733                   | CC                              | TT                | 1946688044               |
| SNP_P3_172034_51783 | NW_004517831.1 | Scaffold3038 | 51783                   | CC                              | TT                | 1946688046               |
| SNP_P3_172035_590   | NW_004517834.1 | Scaffold3043 | 590                     | CC                              | TT                | 1946688048               |
| SNP_P3_172036_14422 | NW_004517836.1 | Scaffold3046 | 14422                   | CC                              | TT                | 1946688050               |
| SNP_P3_172038_14477 | NW_004517836.1 | Scaffold3046 | 14477                   | CC                              | GG                | 1946688052               |
| SNP_P3_172039_14501 | NW_004517836.1 | Scaffold3046 | 14501                   | CC                              | AA                | 1946688054               |
| SNP_P3_172040_14517 | NW_004517836.1 | Scaffold3046 | 14517                   | TT                              | GG                | 1946688055               |
| SNP_P3_172041_14778 | NW_004517836.1 | Scaffold3046 | 14778                   | TT                              | GG                | 1946688057               |
| SNP_P3_172042_14824 | NW_004517836.1 | Scaffold3046 | 14824                   | CC                              | AA                | 1946688059               |
| SNP_P3_172043_417   | NW_004517839.1 | Scaffold3049 | 417                     | TT                              | CC                | 1946688061               |
| SNP_P3_172044_501   | NW_004517839.1 | Scaffold3049 | 501                     | AA                              | GG                | 1946688063               |
| SNP_P3_172045_1073  | NW_004517839.1 | Scaffold3049 | 1073                    | GG                              | TT                | 1946688065               |
| SNP_P3_172046_1125  | NW_004517839.1 | Scaffold3049 | 1125                    | TT                              | CC                | 1946688067               |
| SNP_P3_172047_1345  | NW_004517839.1 | Scaffold3049 | 1345                    | TT                              | AA                | 1946688069               |
| SNP_P3_172048_178   | NW_004517840.1 | Scaffold3050 | 178                     | CC                              | TT                | 1946688071               |
| SNP_P3_172049_425   | NW_004517840.1 | Scaffold3050 | 425                     | GG                              | AA                | 1946688073               |
| SNP_P3_172050_426   | NW_004517840.1 | Scaffold3050 | 426                     | AA                              | GG                | 1946688076               |
| SNP_P3_172051_452   | NW_004517840.1 | Scaffold3050 | 452                     | GG                              | TT                | 1946688078               |
| SNP_P3_172052_458   | NW_004517840.1 | Scaffold3050 | 458                     | TT                              | AA                | 1946688080               |
| SNP_P3_172053_520   | NW_004517840.1 | Scaffold3050 | 520                     | TT                              | AA                | 1946688082               |
| SNP_P3_172054_554   | NW_004517840.1 | Scaffold3050 | 554                     | CC                              | GG                | 1946688084               |
| SNP_P3_172055_725   | NW_004517840.1 | Scaffold3050 | 725                     | CC                              | GG                | 1946688086               |
| SNP_P3_172056_737   | NW_004517840.1 | Scaffold3050 | 737                     | CC                              | AA                | 1946688088               |
| SNP_P3_172057_4874  | NW_004517841.1 | Scaffold3051 | 4874                    | GG                              | CC                | 1946688090               |
| SNP_P3_172058_4877  | NW_004517841.1 | Scaffold3051 | 4877                    | TT                              | CC                | 1946688092               |
| SNP_P3_172059_4964  | NW_004517841.1 | Scaffold3051 | 4964                    | GG                              | CC                | 1946688094               |
| SNP_P3_172060_4976  | NW_004517841.1 | Scaffold3051 | 4976                    | GG                              | AA                | 1946688096               |
| SNP_P3_172061_4994  | NW_004517841.1 | Scaffold3051 | 4994                    | AA                              | GG                | 1946688098               |
| SNP_P3_172062_5093  | NW_004517841.1 | Scaffold3051 | 5093                    | CC                              | TT                | 1946688100               |
| SNP_P3_172063_5209  | NW_004517841.1 | Scaffold3051 | 5209                    | GG                              | CC                | 1946688102               |
| SNP_P3_172064_5236  | NW_004517841.1 | Scaffold3051 | 5236                    | CC                              | TT                | 1946688103               |

| SNPs IDs            | Chromosome IDs | Chromosomes  | Physical positions (bp) | CDC Frontier (Reference genome) | (Pusa 256 & HPNB) | NCBI SNPdb Accession IDs |
|---------------------|----------------|--------------|-------------------------|---------------------------------|-------------------|--------------------------|
| SNP_P3_172065_5282  | NW_004517841.1 | Scaffold3051 | 5282                    | AA                              | GG                | 1946688105               |
| SNP_P3_172066_5292  | NW_004517841.1 | Scaffold3051 | 5292                    | GG                              | AA                | 1946688107               |
| SNP_P3_172067_5301  | NW_004517841.1 | Scaffold3051 | 5301                    | GG                              | AA                | 1946688109               |
| SNP_P3_172068_5547  | NW_004517841.1 | Scaffold3051 | 5547                    | CC                              | TT                | 1946688111               |
| SNP_P3_172069_5559  | NW_004517841.1 | Scaffold3051 | 5559                    | GG                              | TT                | 1946688113               |
| SNP_P3_172070_5595  | NW_004517841.1 | Scaffold3051 | 5595                    | TT                              | GG                | 1946688116               |
| SNP_P3_172071_5902  | NW_004517841.1 | Scaffold3051 | 5902                    | GG                              | AA                | 1946688118               |
| SNP_P3_172072_5924  | NW_004517841.1 | Scaffold3051 | 5924                    | GG                              | AA                | 1946688120               |
| SNP_P3_172073_8456  | NW_004517841.1 | Scaffold3051 | 8456                    | GG                              | CC                | 1946688122               |
| SNP_P3_172074_10814 | NW_004517841.1 | Scaffold3051 | 10814                   | TT                              | CC                | 1946688124               |
| SNP_P3_172075_16946 | NW_004517841.1 | Scaffold3051 | 16946                   | TT                              | CC                | 1946688126               |
| SNP_P3_172076_17833 | NW_004517841.1 | Scaffold3051 | 17833                   | AA                              | GG                | 1946688128               |
| SNP_P3_172077_17877 | NW_004517841.1 | Scaffold3051 | 17877                   | CC                              | AA                | 1946688130               |
| SNP_P3_172078_18373 | NW_004517841.1 | Scaffold3051 | 18373                   | CC                              | TT                | 1946688132               |
| SNP_P3_172079_18526 | NW_004517841.1 | Scaffold3051 | 18526                   | TT                              | GG                | 1946688134               |
| SNP_P3_172080_18644 | NW_004517841.1 | Scaffold3051 | 18644                   | CC                              | AA                | 1946688136               |
| SNP_P3_172081_18862 | NW_004517841.1 | Scaffold3051 | 18862                   | GG                              | TT                | 1946688138               |
| SNP_P3_172082_19009 | NW_004517841.1 | Scaffold3051 | 19009                   | GG                              | AA                | 1946688140               |
| SNP_P3_172083_1556  | NW_004517842.1 | Scaffold3052 | 1556                    | CC                              | GG                | 1946688142               |
| SNP_P3_172084_6996  | NW_004517842.1 | Scaffold3052 | 6996                    | AA                              | CC                | 1946688144               |
| SNP_P3_172085_9375  | NW_004517842.1 | Scaffold3052 | 9375                    | GG                              | AA                | 1946688146               |
| SNP_P3_172086_12646 | NW_004517842.1 | Scaffold3052 | 12646                   | AA                              | TT                | 1946688148               |
| SNP_P3_172088_3573  | NW_004517844.1 | Scaffold3057 | 3573                    | GG                              | AA                | 1946688150               |
| SNP_P3_172089_4736  | NW_004517844.1 | Scaffold3057 | 4736                    | GG                              | TT                | 1946688151               |
| SNP_P3_172090_7344  | NW_004517845.1 | Scaffold3058 | 7344                    | CC                              | TT                | 1946688155               |
| SNP_P3_172091_7355  | NW_004517845.1 | Scaffold3058 | 7355                    | GG                              | CC                | 1946688157               |
| SNP_P3_172092_7741  | NW_004517845.1 | Scaffold3058 | 7741                    | TT                              | CC                | 1946688159               |
| SNP_P3_172094_27721 | NW_004517845.1 | Scaffold3058 | 27721                   | AA                              | CC                | 1946688161               |
| SNP_P3_172095_27774 | NW_004517845.1 | Scaffold3058 | 27774                   | TT                              | AA                | 1946688163               |
| SNP_P3_172096_27787 | NW_004517845.1 | Scaffold3058 | 27787                   | TT                              | CC                | 1946688165               |
| SNP_P3_172097_27811 | NW_004517845.1 | Scaffold3058 | 27811                   | AA                              | CC                | 1946688167               |
| SNP_P3_172098_27813 | NW_004517845.1 | Scaffold3058 | 27813                   | CC                              | AA                | 1946688170               |
| SNP_P3_172099_27974 | NW_004517845.1 | Scaffold3058 | 27974                   | GG                              | AA                | 1946688172               |
| SNP_P3_172100_28092 | NW_004517845.1 | Scaffold3058 | 28092                   | GG                              | TT                | 1946688175               |
| SNP_P3_172101_28179 | NW_004517845.1 | Scaffold3058 | 28179                   | GG                              | AA                | 1946688177               |
| SNP_P3_172102_1411  | NW_004517846.1 | Scaffold3059 | 1411                    | TT                              | CC                | 1946688179               |
| SNP_P3_172103_2128  | NW_004517846.1 | Scaffold3059 | 2128                    | GG                              | AA                | 1946688181               |
| SNP_P3_172104_2405  | NW_004517846.1 | Scaffold3059 | 2405                    | TT                              | AA                | 1946688183               |
| SNP_P3_172105_3019  | NW_004517846.1 | Scaffold3059 | 3019                    | AA                              | GG                | 1946688186               |
| SNP_P3_172106_3057  | NW_004517846.1 | Scaffold3059 | 3057                    | AA                              | GG                | 1946688188               |
| SNP_P3_172107_3687  | NW_004517846.1 | Scaffold3059 | 3687                    | AA                              | GG                | 1946688190               |
| SNP_P3_172108_4008  | NW_004517846.1 | Scaffold3059 | 4008                    | GG                              | TT                | 1946688193               |

| SNPs IDs            | Chromosome IDs | Chromosomes  | Physical positions (bp) | CDC Frontier (Reference genome) | (Pusa 256 & HPNB) | NCBI SNPdb Accession IDs |
|---------------------|----------------|--------------|-------------------------|---------------------------------|-------------------|--------------------------|
| SNP_P3_172109_4204  | NW_004517846.1 | Scaffold3059 | 4204                    | CC                              | TT                | 1946688195               |
| SNP_P3_172110_64    | NW_004517848.1 | Scaffold3061 | 64                      | AA                              | GG                | 1946688197               |
| SNP_P3_172111_94    | NW_004517848.1 | Scaffold3061 | 94                      | TT                              | CC                | 1946688199               |
| SNP_P3_172112_148   | NW_004517848.1 | Scaffold3061 | 148                     | TT                              | AA                | 1946688201               |
| SNP_P3_172113_192   | NW_004517848.1 | Scaffold3061 | 192                     | AA                              | GG                | 1946688203               |
| SNP_P3_172114_498   | NW_004517848.1 | Scaffold3061 | 498                     | GG                              | CC                | 1946688205               |
| SNP_P3_172115_512   | NW_004517848.1 | Scaffold3061 | 512                     | CC                              | TT                | 1946688207               |
| SNP_P3_172117_620   | NW_004517848.1 | Scaffold3061 | 620                     | GG                              | CC                | 1946688209               |
| SNP_P3_172118_682   | NW_004517848.1 | Scaffold3061 | 682                     | AA                              | GG                | 1946688211               |
| SNP_P3_172119_689   | NW_004517848.1 | Scaffold3061 | 689                     | TT                              | CC                | 1946688213               |
| SNP_P3_172120_707   | NW_004517848.1 | Scaffold3061 | 707                     | GG                              | AA                | 1946688215               |
| SNP_P3_172121_718   | NW_004517848.1 | Scaffold3061 | 718                     | CC                              | TT                | 1946688217               |
| SNP_P3_172122_750   | NW_004517848.1 | Scaffold3061 | 750                     | CC                              | AA                | 1946688219               |
| SNP_P3_172123_779   | NW_004517848.1 | Scaffold3061 | 779                     | AA                              | GG                | 1946688221               |
| SNP_P3_172124_794   | NW_004517848.1 | Scaffold3061 | 794                     | TT                              | CC                | 1946688223               |
| SNP_P3_172125_2182  | NW_004517850.1 | Scaffold3064 | 2182                    | CC                              | TT                | 1946688225               |
| SNP_P3_172126_1872  | NW_004517851.1 | Scaffold3067 | 1872                    | CC                              | TT                | 1946688227               |
| SNP_P3_172127_2028  | NW_004517851.1 | Scaffold3067 | 2028                    | AA                              | GG                | 1946688229               |
| SNP_P3_172129_2038  | NW_004517857.1 | Scaffold3075 | 2038                    | CC                              | TT                | 1946688231               |
| SNP_P3_172130_2040  | NW_004517857.1 | Scaffold3075 | 2040                    | CC                              | TT                | 1946688233               |
| SNP_P3_172131_4647  | NW_004517857.1 | Scaffold3075 | 4647                    | AA                              | CC                | 1946688235               |
| SNP_P3_172132_264   | NW_004517858.1 | Scaffold3076 | 264                     | CC                              | TT                | 1946688238               |
| SNP_P3_172133_317   | NW_004517858.1 | Scaffold3076 | 317                     | TT                              | CC                | 1946688240               |
| SNP_P3_172134_530   | NW_004517858.1 | Scaffold3076 | 530                     | TT                              | CC                | 1946688242               |
| SNP_P3_172135_588   | NW_004517858.1 | Scaffold3076 | 588                     | GG                              | TT                | 1946688244               |
| SNP_P3_172136_641   | NW_004517858.1 | Scaffold3076 | 641                     | CC                              | TT                | 1946688246               |
| SNP_P3_172137_705   | NW_004517858.1 | Scaffold3076 | 705                     | AA                              | GG                | 1946688248               |
| SNP_P3_172138_837   | NW_004517858.1 | Scaffold3076 | 837                     | AA                              | TT                | 1946688250               |
| SNP_P3_172139_865   | NW_004517858.1 | Scaffold3076 | 865                     | TT                              | CC                | 1946688252               |
| SNP_P3_172140_902   | NW_004517858.1 | Scaffold3076 | 902                     | CC                              | TT                | 1946688254               |
| SNP_P3_172141_1137  | NW_004517858.1 | Scaffold3076 | 1137                    | AA                              | TT                | 1946688256               |
| SNP_P3_172142_1347  | NW_004517858.1 | Scaffold3076 | 1347                    | GG                              | TT                | 1946688258               |
| SNP_P3_172143_1655  | NW_004517858.1 | Scaffold3076 | 1655                    | CC                              | TT                | 1946688260               |
| SNP_P3_172144_1950  | NW_004517858.1 | Scaffold3076 | 1950                    | CC                              | AA                | 1946688262               |
| SNP_P3_172145_1988  | NW_004517858.1 | Scaffold3076 | 1988                    | TT                              | GG                | 1946688264               |
| SNP_P3_172146_6833  | NW_004517858.1 | Scaffold3076 | 6833                    | AA                              | GG                | 1946688266               |
| SNP_P3_172147_9011  | NW_004517858.1 | Scaffold3076 | 9011                    | CC                              | TT                | 1946688268               |
| SNP_P3_172148_9029  | NW_004517858.1 | Scaffold3076 | 9029                    | TT                              | CC                | 1946688270               |
| SNP_P3_172149_11178 | NW_004517858.1 | Scaffold3076 | 11178                   | CC                              | AA                | 1946688272               |
| SNP_P3_172150_11232 | NW_004517858.1 | Scaffold3076 | 11232                   | CC                              | TT                | 1946688273               |
| SNP_P3_172151_11233 | NW_004517858.1 | Scaffold3076 | 11233                   | CC                              | TT                | 1946688275               |
| SNP_P3_172152_11522 | NW_004517858.1 | Scaffold3076 | 11522                   | GG                              | TT                | 1946688279               |



| SNPs IDs            | Chromosome IDs | Chromosomes  | Physical positions (bp) | CDC Frontier (Reference genome) | (Pusa 256 & HPNB) | NCBI SNPdb Accession IDs |
|---------------------|----------------|--------------|-------------------------|---------------------------------|-------------------|--------------------------|
| SNP_P3_172153_5774  | NW_004517860.1 | Scaffold3079 | 5774                    | AA                              | CC                | 1946688281               |
| SNP_P3_172155_6413  | NW_004517860.1 | Scaffold3079 | 6413                    | GG                              | AA                | 1946688283               |
| SNP_P3_172156_6453  | NW_004517860.1 | Scaffold3079 | 6453                    | AA                              | TT                | 1946688285               |
| SNP_P3_172157_6533  | NW_004517860.1 | Scaffold3079 | 6533                    | GG                              | AA                | 1946688287               |
| SNP_P3_172159_6767  | NW_004517860.1 | Scaffold3079 | 6767                    | CC                              | GG                | 1946688289               |
| SNP_P3_172160_6808  | NW_004517860.1 | Scaffold3079 | 6808                    | CC                              | TT                | 1946688291               |
| SNP_P3_172161_7409  | NW_004517860.1 | Scaffold3079 | 7409                    | AA                              | GG                | 1946688293               |
| SNP_P3_172162_2495  | NW_004517862.1 | Scaffold3082 | 2495                    | AA                              | GG                | 1946688295               |
| SNP_P3_172163_2839  | NW_004517862.1 | Scaffold3082 | 2839                    | TT                              | AA                | 1946688297               |
| SNP_P3_172164_7405  | NW_004517862.1 | Scaffold3082 | 7405                    | TT                              | CC                | 1946688299               |
| SNP_P3_172165_7413  | NW_004517862.1 | Scaffold3082 | 7413                    | AA                              | CC                | 1946688301               |
| SNP_P3_172166_7459  | NW_004517862.1 | Scaffold3082 | 7459                    | AA                              | GG                | 1946688303               |
| SNP_P3_172167_7460  | NW_004517862.1 | Scaffold3082 | 7460                    | CC                              | TT                | 1946688305               |
| SNP_P3_172169_3577  | NW_004517864.1 | Scaffold3084 | 3577                    | AA                              | GG                | 1946688307               |
| SNP_P3_172170_699   | NW_004517865.1 | Scaffold3086 | 699                     | GG                              | TT                | 1946688309               |
| SNP_P3_172171_339   | NW_004517868.1 | Scaffold3092 | 339                     | TT                              | AA                | 1946688311               |
| SNP_P3_172173_426   | NW_004517868.1 | Scaffold3092 | 426                     | GG                              | AA                | 1946688313               |
| SNP_P3_172174_652   | NW_004517868.1 | Scaffold3092 | 652                     | TT                              | CC                | 1946688315               |
| SNP_P3_172176_1308  | NW_004517868.1 | Scaffold3092 | 1308                    | AA                              | GG                | 1946688318               |
| SNP_P3_172177_19377 | NW_004517869.1 | Scaffold3093 | 19377                   | AA                              | GG                | 1946688320               |
| SNP_P3_172179_19758 | NW_004517869.1 | Scaffold3093 | 19758                   | CC                              | TT                | 1946688322               |
| SNP_P3_172180_19792 | NW_004517869.1 | Scaffold3093 | 19792                   | AA                              | GG                | 1946688324               |
| SNP_P3_172181_19835 | NW_004517869.1 | Scaffold3093 | 19835                   | GG                              | TT                | 1946688326               |
| SNP_P3_172182_19883 | NW_004517869.1 | Scaffold3093 | 19883                   | CC                              | TT                | 1946688328               |
| SNP_P3_172183_19941 | NW_004517869.1 | Scaffold3093 | 19941                   | AA                              | GG                | 1946688330               |
| SNP_P3_172184_20124 | NW_004517869.1 | Scaffold3093 | 20124                   | GG                              | TT                | 1946688332               |
| SNP_P3_172185_20130 | NW_004517869.1 | Scaffold3093 | 20130                   | GG                              | CC                | 1946688334               |
| SNP_P3_172186_552   | NW_004517870.1 | Scaffold3094 | 552                     | CC                              | TT                | 1946688336               |
| SNP_P3_172187_918   | NW_004517870.1 | Scaffold3094 | 918                     | AA                              | CC                | 1946688337               |
| SNP_P3_172188_959   | NW_004517870.1 | Scaffold3094 | 959                     | CC                              | GG                | 1946688339               |
| SNP_P3_172189_990   | NW_004517870.1 | Scaffold3094 | 990                     | TT                              | CC                | 1946688341               |
| SNP_P3_172191_9796  | NW_004517870.1 | Scaffold3094 | 9796                    | CC                              | TT                | 1946688343               |
| SNP_P3_172192_11931 | NW_004517870.1 | Scaffold3094 | 11931                   | AA                              | TT                | 1946688345               |
| SNP_P3_172193_799   | NW_004517871.1 | Scaffold3095 | 799                     | GG                              | CC                | 1946688347               |
| SNP_P3_172194_837   | NW_004517871.1 | Scaffold3095 | 837                     | GG                              | AA                | 1946688349               |
| SNP_P3_172195_948   | NW_004517871.1 | Scaffold3095 | 948                     | TT                              | AA                | 1946688351               |
| SNP_P3_172196_1001  | NW_004517871.1 | Scaffold3095 | 1001                    | AA                              | GG                | 1946688353               |
| SNP_P3_172197_1111  | NW_004517871.1 | Scaffold3095 | 1111                    | GG                              | CC                | 1946688355               |
| SNP_P3_172198_1133  | NW_004517871.1 | Scaffold3095 | 1133                    | AA                              | TT                | 1946688358               |
| SNP_P3_172199_14225 | NW_004517871.1 | Scaffold3095 | 14225                   | CC                              | TT                | 1946688360               |
| SNP_P3_172200_14246 | NW_004517871.1 | Scaffold3095 | 14246                   | TT                              | CC                | 1946688362               |
| SNP_P3_172201_14471 | NW_004517871.1 | Scaffold3095 | 14471                   | AA                              | TT                | 1946688364               |

| SNPs IDs            | Chromosome IDs | Chromosomes  | Physical positions (bp) | CDC Frontier (Reference genome) | (Pusa 256 & HPNB) | NCBI SNPdb Accession IDs |
|---------------------|----------------|--------------|-------------------------|---------------------------------|-------------------|--------------------------|
| SNP_P3_172202_14710 | NW_004517871.1 | Scaffold3095 | 14710                   | AA                              | TT                | 1946688366               |
| SNP_P3_172203_14756 | NW_004517871.1 | Scaffold3095 | 14756                   | AA                              | GG                | 1946688368               |
| SNP_P3_172204_14761 | NW_004517871.1 | Scaffold3095 | 14761                   | CC                              | AA                | 1946688370               |
| SNP_P3_172205_14794 | NW_004517871.1 | Scaffold3095 | 14794                   | GG                              | AA                | 1946688372               |
| SNP_P3_172206_14807 | NW_004517871.1 | Scaffold3095 | 14807                   | TT                              | CC                | 1946688374               |
| SNP_P3_172207_14922 | NW_004517871.1 | Scaffold3095 | 14922                   | AA                              | CC                | 1946688376               |
| SNP_P3_172208_15091 | NW_004517871.1 | Scaffold3095 | 15091                   | AA                              | GG                | 1946688378               |
| SNP_P3_172209_15253 | NW_004517871.1 | Scaffold3095 | 15253                   | GG                              | AA                | 1946688379               |
| SNP_P3_172210_15290 | NW_004517871.1 | Scaffold3095 | 15290                   | AA                              | CC                | 1946688381               |
| SNP_P3_172211_15714 | NW_004517871.1 | Scaffold3095 | 15714                   | CC                              | AA                | 1946688383               |
| SNP_P3_172212_15731 | NW_004517871.1 | Scaffold3095 | 15731                   | CC                              | AA                | 1946688385               |
| SNP_P3_172213_15752 | NW_004517871.1 | Scaffold3095 | 15752                   | GG                              | AA                | 1946688387               |
| SNP_P3_172214_15776 | NW_004517871.1 | Scaffold3095 | 15776                   | TT                              | CC                | 1946688389               |
| SNP_P3_172215_15788 | NW_004517871.1 | Scaffold3095 | 15788                   | TT                              | AA                | 1946688391               |
| SNP_P3_172216_15946 | NW_004517871.1 | Scaffold3095 | 15946                   | CC                              | GG                | 1946688393               |
| SNP_P3_172217_4798  | NW_004517873.1 | Scaffold3097 | 4798                    | CC                              | GG                | 1946688395               |
| SNP_P3_172218_4851  | NW_004517873.1 | Scaffold3097 | 4851                    | CC                              | TT                | 1946688398               |
| SNP_P3_172219_4899  | NW_004517873.1 | Scaffold3097 | 4899                    | CC                              | AA                | 1946688400               |
| SNP_P3_172220_4926  | NW_004517873.1 | Scaffold3097 | 4926                    | CC                              | TT                | 1946688402               |
| SNP_P3_172221_4941  | NW_004517873.1 | Scaffold3097 | 4941                    | GG                              | TT                | 1946688404               |
| SNP_P3_172222_4981  | NW_004517873.1 | Scaffold3097 | 4981                    | CC                              | GG                | 1946688406               |
| SNP_P3_172223_5006  | NW_004517873.1 | Scaffold3097 | 5006                    | CC                              | TT                | 1946688408               |
| SNP_P3_172224_5024  | NW_004517873.1 | Scaffold3097 | 5024                    | CC                              | TT                | 1946688410               |
| SNP_P3_172225_5061  | NW_004517873.1 | Scaffold3097 | 5061                    | CC                              | AA                | 1946688412               |
| SNP_P3_172226_5062  | NW_004517873.1 | Scaffold3097 | 5062                    | GG                              | AA                | 1946688414               |
| SNP_P3_172227_5086  | NW_004517873.1 | Scaffold3097 | 5086                    | GG                              | AA                | 1946688416               |
| SNP_P3_172228_5094  | NW_004517873.1 | Scaffold3097 | 5094                    | TT                              | CC                | 1946688418               |
| SNP_P3_172229_5183  | NW_004517873.1 | Scaffold3097 | 5183                    | TT                              | GG                | 1946688420               |
| SNP_P3_172230_5230  | NW_004517873.1 | Scaffold3097 | 5230                    | CC                              | AA                | 1946688422               |
| SNP_P3_172231_5352  | NW_004517873.1 | Scaffold3097 | 5352                    | GG                              | AA                | 1946688424               |
| SNP_P3_172232_5355  | NW_004517873.1 | Scaffold3097 | 5355                    | GG                              | CC                | 1946688426               |
| SNP_P3_172233_5370  | NW_004517873.1 | Scaffold3097 | 5370                    | GG                              | CC                | 1946688428               |
| SNP_P3_172234_6318  | NW_004517873.1 | Scaffold3097 | 6318                    | CC                              | TT                | 1946688430               |
| SNP_P3_172235_6495  | NW_004517873.1 | Scaffold3097 | 6495                    | GG                              | TT                | 1946688432               |
| SNP_P3_172236_6850  | NW_004517873.1 | Scaffold3097 | 6850                    | GG                              | TT                | 1946688433               |
| SNP_P3_172237_6934  | NW_004517873.1 | Scaffold3097 | 6934                    | AA                              | GG                | 1946688436               |
| SNP_P3_172238_6989  | NW_004517873.1 | Scaffold3097 | 6989                    | AA                              | CC                | 1946688438               |
| SNP_P3_172239_7263  | NW_004517873.1 | Scaffold3097 | 7263                    | GG                              | AA                | 1946688440               |
| SNP_P3_172240_7309  | NW_004517873.1 | Scaffold3097 | 7309                    | GG                              | AA                | 1946688442               |
| SNP_P3_172241_7314  | NW_004517873.1 | Scaffold3097 | 7314                    | GG                              | AA                | 1946688444               |
| SNP_P3_172242_7552  | NW_004517873.1 | Scaffold3097 | 7552                    | GG                              | AA                | 1946688446               |
| SNP_P3_172243_7630  | NW_004517873.1 | Scaffold3097 | 7630                    | GG                              | AA                | 1946688448               |

| SNPs IDs            | Chromosome IDs | Chromosomes  | Physical positions (bp) | CDC Frontier (Reference genome) | (Pusa 256 & HPNB) | NCBI SNPdb Accession IDs |
|---------------------|----------------|--------------|-------------------------|---------------------------------|-------------------|--------------------------|
| SNP_P3_172244_7706  | NW_004517873.1 | Scaffold3097 | 7706                    | TT                              | GG                | 1946688450               |
| SNP_P3_172245_7710  | NW_004517873.1 | Scaffold3097 | 7710                    | TT                              | CC                | 1946688452               |
| SNP_P3_172246_7724  | NW_004517873.1 | Scaffold3097 | 7724                    | GG                              | CC                | 1946688454               |
| SNP_P3_172247_7744  | NW_004517873.1 | Scaffold3097 | 7744                    | GG                              | AA                | 1946688456               |
| SNP_P3_172248_7860  | NW_004517873.1 | Scaffold3097 | 7860                    | TT                              | GG                | 1946688458               |
| SNP_P3_172249_8008  | NW_004517873.1 | Scaffold3097 | 8008                    | GG                              | TT                | 1946688460               |
| SNP_P3_172250_10073 | NW_004517873.1 | Scaffold3097 | 10073                   | TT                              | GG                | 1946688462               |
| SNP_P3_172251_10074 | NW_004517873.1 | Scaffold3097 | 10074                   | TT                              | GG                | 1946688464               |
| SNP_P3_172252_10404 | NW_004517873.1 | Scaffold3097 | 10404                   | CC                              | TT                | 1946688466               |
| SNP_P3_172253_10435 | NW_004517873.1 | Scaffold3097 | 10435                   | CC                              | GG                | 1946688467               |
| SNP_P3_172254_10610 | NW_004517873.1 | Scaffold3097 | 10610                   | TT                              | GG                | 1946688469               |
| SNP_P3_172255_10680 | NW_004517873.1 | Scaffold3097 | 10680                   | GG                              | CC                | 1946688471               |
| SNP_P3_172256_10687 | NW_004517873.1 | Scaffold3097 | 10687                   | AA                              | CC                | 1946688473               |
| SNP_P3_172257_11037 | NW_004517873.1 | Scaffold3097 | 11037                   | GG                              | AA                | 1946688476               |
| SNP_P3_172258_11827 | NW_004517873.1 | Scaffold3097 | 11827                   | TT                              | CC                | 1946688478               |
| SNP_P3_172259_1206  | NW_004517876.1 | Scaffold3100 | 1206                    | GG                              | CC                | 1946688480               |
| SNP_P3_172260_1238  | NW_004517876.1 | Scaffold3100 | 1238                    | AA                              | TT                | 1946688482               |
| SNP_P3_172261_485   | NW_004517877.1 | Scaffold3101 | 485                     | AA                              | GG                | 1946688484               |
| SNP_P3_172262_1079  | NW_004517878.1 | Scaffold3104 | 1079                    | CC                              | GG                | 1946688486               |
| SNP_P3_172263_130   | NW_004517879.1 | Scaffold3106 | 130                     | AA                              | GG                | 1946688488               |
| SNP_P3_172264_472   | NW_004517879.1 | Scaffold3106 | 472                     | CC                              | TT                | 1946688490               |
| SNP_P3_172265_698   | NW_004517879.1 | Scaffold3106 | 698                     | AA                              | CC                | 1946688492               |
| SNP_P3_172266_705   | NW_004517879.1 | Scaffold3106 | 705                     | GG                              | AA                | 1946688494               |
| SNP_P3_172267_722   | NW_004517879.1 | Scaffold3106 | 722                     | GG                              | CC                | 1946688496               |
| SNP_P3_172268_754   | NW_004517879.1 | Scaffold3106 | 754                     | CC                              | AA                | 1946688498               |
| SNP_P3_172269_815   | NW_004517879.1 | Scaffold3106 | 815                     | AA                              | GG                | 1946688500               |
| SNP_P3_172270_1008  | NW_004517879.1 | Scaffold3106 | 1008                    | CC                              | AA                | 1946688502               |
| SNP_P3_172271_1028  | NW_004517879.1 | Scaffold3106 | 1028                    | AA                              | GG                | 1946688504               |
| SNP_P3_172272_1197  | NW_004517879.1 | Scaffold3106 | 1197                    | GG                              | TT                | 1946688506               |
| SNP_P3_172273_1245  | NW_004517879.1 | Scaffold3106 | 1245                    | CC                              | AA                | 1946688507               |
| SNP_P3_172274_6043  | NW_004517882.1 | Scaffold3111 | 6043                    | TT                              | AA                | 1946688509               |
| SNP_P3_172275_6054  | NW_004517882.1 | Scaffold3111 | 6054                    | CC                              | TT                | 1946688511               |
| SNP_P3_172276_6231  | NW_004517882.1 | Scaffold3111 | 6231                    | AA                              | TT                | 1946688513               |
| SNP_P3_172277_6296  | NW_004517882.1 | Scaffold3111 | 6296                    | GG                              | AA                | 1946688516               |
| SNP_P3_172278_6343  | NW_004517882.1 | Scaffold3111 | 6343                    | CC                              | TT                | 1946688518               |
| SNP_P3_172279_7818  | NW_004517882.1 | Scaffold3111 | 7818                    | AA                              | GG                | 1946688520               |
| SNP_P3_172280_7845  | NW_004517882.1 | Scaffold3111 | 7845                    | AA                              | TT                | 1946688522               |
| SNP_P3_172281_7883  | NW_004517882.1 | Scaffold3111 | 7883                    | TT                              | CC                | 1946688524               |
| SNP_P3_172282_7890  | NW_004517882.1 | Scaffold3111 | 7890                    | AA                              | GG                | 1946688526               |
| SNP_P3_172283_8078  | NW_004517882.1 | Scaffold3111 | 8078                    | AA                              | GG                | 1946688528               |
| SNP_P3_172284_8121  | NW_004517882.1 | Scaffold3111 | 8121                    | TT                              | CC                | 1946688530               |
| SNP_P3_172285_8136  | NW_004517882.1 | Scaffold3111 | 8136                    | AA                              | TT                | 1946688532               |

| SNPs IDs             | Chromosome IDs | Chromosomes  | Physical positions (bp) | CDC Frontier (Reference genome) | (Pusa 256 & HPNB) | NCBI SNPdb Accession IDs |
|----------------------|----------------|--------------|-------------------------|---------------------------------|-------------------|--------------------------|
| SNP_P3_172286_8203   | NW_004517882.1 | Scaffold3111 | 8203                    | GG                              | AA                | 1946688534               |
| SNP_P3_172287_672    | NW_004517884.1 | Scaffold3115 | 672                     | TT                              | CC                | 1946688536               |
| SNP_P3_172288_18298  | NW_004517884.1 | Scaffold3115 | 18298                   | AA                              | CC                | 1946688538               |
| SNP_P3_172289_19685  | NW_004517884.1 | Scaffold3115 | 19685                   | AA                              | GG                | 1946688540               |
| SNP_P3_172290_19955  | NW_004517884.1 | Scaffold3115 | 19955                   | TT                              | AA                | 1946688541               |
| SNP_P3_172292_27476  | NW_004517884.1 | Scaffold3115 | 27476                   | TT                              | CC                | 1946688543               |
| SNP_P3_172293_27529  | NW_004517884.1 | Scaffold3115 | 27529                   | GG                              | CC                | 1946688545               |
| SNP_P3_172294_27553  | NW_004517884.1 | Scaffold3115 | 27553                   | TT                              | AA                | 1946688547               |
| SNP_P3_172295_27586  | NW_004517884.1 | Scaffold3115 | 27586                   | TT                              | CC                | 1946688549               |
| SNP_P3_172296_27702  | NW_004517884.1 | Scaffold3115 | 27702                   | TT                              | AA                | 1946688551               |
| SNP_P3_172297_27928  | NW_004517884.1 | Scaffold3115 | 27928                   | AA                              | GG                | 1946688553               |
| SNP_P3_172298_28063  | NW_004517884.1 | Scaffold3115 | 28063                   | AA                              | GG                | 1946688555               |
| SNP_P3_172299_28270  | NW_004517884.1 | Scaffold3115 | 28270                   | CC                              | GG                | 1946688558               |
| SNP_P3_172300_47044  | NW_004517884.1 | Scaffold3115 | 47044                   | GG                              | AA                | 1946688560               |
| SNP_P3_172301_47086  | NW_004517884.1 | Scaffold3115 | 47086                   | CC                              | AA                | 1946688561               |
| SNP_P3_172302_47121  | NW_004517884.1 | Scaffold3115 | 47121                   | GG                              | AA                | 1946688563               |
| SNP_P3_172303_48522  | NW_004517884.1 | Scaffold3115 | 48522                   | AA                              | GG                | 1946688565               |
| SNP_P3_172304_48547  | NW_004517884.1 | Scaffold3115 | 48547                   | CC                              | TT                | 1946688567               |
| SNP_P3_172305_48632  | NW_004517884.1 | Scaffold3115 | 48632                   | TT                              | CC                | 1946688569               |
| SNP_P3_172306_59521  | NW_004517884.1 | Scaffold3115 | 59521                   | TT                              | AA                | 1946688571               |
| SNP_P3_172307_61879  | NW_004517884.1 | Scaffold3115 | 61879                   | CC                              | GG                | 1946688573               |
| SNP_P3_172309_62021  | NW_004517884.1 | Scaffold3115 | 62021                   | GG                              | AA                | 1946688575               |
| SNP_P3_172310_62226  | NW_004517884.1 | Scaffold3115 | 62226                   | AA                              | GG                | 1946688577               |
| SNP_P3_172311_62572  | NW_004517884.1 | Scaffold3115 | 62572                   | CC                              | TT                | 1946688579               |
| SNP_P3_172316_63828  | NW_004517884.1 | Scaffold3115 | 63828                   | CC                              | TT                | 1946688581               |
| SNP_P3_172317_63876  | NW_004517884.1 | Scaffold3115 | 63876                   | CC                              | AA                | 1946688583               |
| SNP_P3_172318_63939  | NW_004517884.1 | Scaffold3115 | 63939                   | TT                              | CC                | 1946688585               |
| SNP_P3_172320_64037  | NW_004517884.1 | Scaffold3115 | 64037                   | GG                              | TT                | 1946688586               |
| SNP_P3_172321_74382  | NW_004517884.1 | Scaffold3115 | 74382                   | TT                              | GG                | 1946688588               |
| SNP_P3_172322_77015  | NW_004517884.1 | Scaffold3115 | 77015                   | TT                              | GG                | 1946688590               |
| SNP_P3_172323_77055  | NW_004517884.1 | Scaffold3115 | 77055                   | AA                              | TT                | 1946688592               |
| SNP_P3_172324_77076  | NW_004517884.1 | Scaffold3115 | 77076                   | TT                              | AA                | 1946688594               |
| SNP_P3_172325_88254  | NW_004517884.1 | Scaffold3115 | 88254                   | GG                              | TT                | 1946688597               |
| SNP_P3_172326_100158 | NW_004517884.1 | Scaffold3115 | 100158                  | TT                              | CC                | 1946688599               |
| SNP_P3_172328_1522   | NW_004517885.1 | Scaffold3116 | 1522                    | TT                              | AA                | 1946688601               |
| SNP_P3_172329_24129  | NW_004517885.1 | Scaffold3116 | 24129                   | TT                              | AA                | 1946688603               |
| SNP_P3_172330_24143  | NW_004517885.1 | Scaffold3116 | 24143                   | TT                              | AA                | 1946688605               |
| SNP_P3_172331_24145  | NW_004517885.1 | Scaffold3116 | 24145                   | AA                              | CC                | 1946688607               |
| SNP_P3_172332_24201  | NW_004517885.1 | Scaffold3116 | 24201                   | CC                              | TT                | 1946688609               |
| SNP_P3_172333_40     | NW_004517886.1 | Scaffold3117 | 40                      | AA                              | CC                | 1946688611               |
| SNP_P3_172334_43     | NW_004517886.1 | Scaffold3117 | 43                      | TT                              | CC                | 1946688613               |
| SNP_P3_172335_61     | NW_004517886.1 | Scaffold3117 | 61                      | AA                              | TT                | 1946688615               |

| SNPs IDs            | Chromosome IDs | Chromosomes  | Physical positions (bp) | CDC Frontier (Reference genome) | (Pusa 256 & HPNB) | NCBI SNPdb Accession IDs |
|---------------------|----------------|--------------|-------------------------|---------------------------------|-------------------|--------------------------|
| SNP_P3_172336_64    | NW_004517886.1 | Scaffold3117 | 64                      | AA                              | TT                | 1946688617               |
| SNP_P3_172337_66    | NW_004517886.1 | Scaffold3117 | 66                      | TT                              | GG                | 1946688619               |
| SNP_P3_172338_80    | NW_004517886.1 | Scaffold3117 | 80                      | TT                              | GG                | 1946688621               |
| SNP_P3_172339_91    | NW_004517886.1 | Scaffold3117 | 91                      | AA                              | CC                | 1946688623               |
| SNP_P3_172341_167   | NW_004517886.1 | Scaffold3117 | 167                     | TT                              | GG                | 1946688625               |
| SNP_P3_172342_2831  | NW_004517887.1 | Scaffold3118 | 2831                    | AA                              | CC                | 1946688627               |
| SNP_P3_172343_2842  | NW_004517887.1 | Scaffold3118 | 2842                    | CC                              | TT                | 1946688629               |
| SNP_P3_172344_3322  | NW_004517887.1 | Scaffold3118 | 3322                    | GG                              | AA                | 1946688630               |
| SNP_P3_172345_3457  | NW_004517887.1 | Scaffold3118 | 3457                    | CC                              | AA                | 1946688632               |
| SNP_P3_172346_3508  | NW_004517887.1 | Scaffold3118 | 3508                    | GG                              | TT                | 1946688634               |
| SNP_P3_172347_3559  | NW_004517887.1 | Scaffold3118 | 3559                    | CC                              | AA                | 1946688637               |
| SNP_P3_172348_3611  | NW_004517887.1 | Scaffold3118 | 3611                    | AA                              | CC                | 1946688639               |
| SNP_P3_172349_3638  | NW_004517887.1 | Scaffold3118 | 3638                    | AA                              | TT                | 1946688641               |
| SNP_P3_172350_3690  | NW_004517887.1 | Scaffold3118 | 3690                    | TT                              | CC                | 1946688643               |
| SNP_P3_172351_3729  | NW_004517887.1 | Scaffold3118 | 3729                    | TT                              | CC                | 1946688645               |
| SNP_P3_172352_4532  | NW_004517887.1 | Scaffold3118 | 4532                    | TT                              | GG                | 1946688647               |
| SNP_P3_172353_6534  | NW_004517887.1 | Scaffold3118 | 6534                    | TT                              | AA                | 1946688648               |
| SNP_P3_172354_6568  | NW_004517887.1 | Scaffold3118 | 6568                    | AA                              | CC                | 1946688650               |
| SNP_P3_172355_6580  | NW_004517887.1 | Scaffold3118 | 6580                    | CC                              | GG                | 1946688652               |
| SNP_P3_172356_6582  | NW_004517887.1 | Scaffold3118 | 6582                    | CC                              | AA                | 1946688654               |
| SNP_P3_172357_6586  | NW_004517887.1 | Scaffold3118 | 6586                    | GG                              | AA                | 1946688656               |
| SNP_P3_172358_6607  | NW_004517887.1 | Scaffold3118 | 6607                    | AA                              | GG                | 1946688658               |
| SNP_P3_172359_6799  | NW_004517887.1 | Scaffold3118 | 6799                    | AA                              | CC                | 1946688660               |
| SNP_P3_172360_6824  | NW_004517887.1 | Scaffold3118 | 6824                    | AA                              | GG                | 1946688662               |
| SNP_P3_172361_6880  | NW_004517887.1 | Scaffold3118 | 6880                    | AA                              | GG                | 1946688664               |
| SNP_P3_172362_6888  | NW_004517887.1 | Scaffold3118 | 6888                    | AA                              | TT                | 1946688666               |
| SNP_P3_172363_319   | NW_004517889.1 | Scaffold3120 | 319                     | TT                              | CC                | 1946688668               |
| SNP_P3_172364_375   | NW_004517889.1 | Scaffold3120 | 375                     | TT                              | GG                | 1946688670               |
| SNP_P3_172365_4801  | NW_004517890.1 | Scaffold3121 | 4801                    | TT                              | AA                | 1946688672               |
| SNP_P3_172366_4897  | NW_004517890.1 | Scaffold3121 | 4897                    | GG                              | AA                | 1946688674               |
| SNP_P3_172368_6319  | NW_004517890.1 | Scaffold3121 | 6319                    | CC                              | TT                | 1946688676               |
| SNP_P3_172369_8063  | NW_004517890.1 | Scaffold3121 | 8063                    | TT                              | CC                | 1946688679               |
| SNP_P3_172370_8064  | NW_004517890.1 | Scaffold3121 | 8064                    | AA                              | CC                | 1946688681               |
| SNP_P3_172371_8868  | NW_004517890.1 | Scaffold3121 | 8868                    | CC                              | GG                | 1946688683               |
| SNP_P3_172372_8883  | NW_004517890.1 | Scaffold3121 | 8883                    | CC                              | TT                | 1946688685               |
| SNP_P3_172373_8932  | NW_004517890.1 | Scaffold3121 | 8932                    | TT                              | CC                | 1946688687               |
| SNP_P3_172374_8942  | NW_004517890.1 | Scaffold3121 | 8942                    | TT                              | AA                | 1946688689               |
| SNP_P3_172375_8952  | NW_004517890.1 | Scaffold3121 | 8952                    | GG                              | TT                | 1946688691               |
| SNP_P3_172376_9080  | NW_004517890.1 | Scaffold3121 | 9080                    | AA                              | TT                | 1946688693               |
| SNP_P3_172377_9084  | NW_004517890.1 | Scaffold3121 | 9084                    | GG                              | AA                | 1946688695               |
| SNP_P3_172378_20242 | NW_004517890.1 | Scaffold3121 | 20242                   | GG                              | AA                | 1946688697               |
| SNP_P3_172379_3745  | NW_004517892.1 | Scaffold3124 | 3745                    | GG                              | AA                | 1946688699               |

| SNPs IDs            | Chromosome IDs | Chromosomes  | Physical positions (bp) | CDC Frontier (Reference genome) | (Pusa 256 & HPNB) | NCBI SNPdb Accession IDs |
|---------------------|----------------|--------------|-------------------------|---------------------------------|-------------------|--------------------------|
| SNP_P3_172381_3847  | NW_004517892.1 | Scaffold3124 | 3847                    | CC                              | AA                | 1946688700               |
| SNP_P3_172382_3873  | NW_004517892.1 | Scaffold3124 | 3873                    | GG                              | CC                | 1946688702               |
| SNP_P3_172383_3884  | NW_004517892.1 | Scaffold3124 | 3884                    | TT                              | GG                | 1946688704               |
| SNP_P3_172384_3900  | NW_004517892.1 | Scaffold3124 | 3900                    | TT                              | GG                | 1946688706               |
| SNP_P3_172385_3919  | NW_004517892.1 | Scaffold3124 | 3919                    | CC                              | TT                | 1946688708               |
| SNP_P3_172386_4020  | NW_004517892.1 | Scaffold3124 | 4020                    | TT                              | CC                | 1946688710               |
| SNP_P3_172387_4040  | NW_004517892.1 | Scaffold3124 | 4040                    | CC                              | GG                | 1946688712               |
| SNP_P3_172388_4047  | NW_004517892.1 | Scaffold3124 | 4047                    | AA                              | TT                | 1946688714               |
| SNP_P3_172389_4130  | NW_004517892.1 | Scaffold3124 | 4130                    | CC                              | TT                | 1946688716               |
| SNP_P3_172390_4186  | NW_004517892.1 | Scaffold3124 | 4186                    | TT                              | GG                | 1946688719               |
| SNP_P3_172391_4222  | NW_004517892.1 | Scaffold3124 | 4222                    | TT                              | GG                | 1946688721               |
| SNP_P3_172392_4254  | NW_004517892.1 | Scaffold3124 | 4254                    | TT                              | GG                | 1946688723               |
| SNP_P3_172393_4309  | NW_004517892.1 | Scaffold3124 | 4309                    | GG                              | TT                | 1946688725               |
| SNP_P3_172394_4331  | NW_004517892.1 | Scaffold3124 | 4331                    | GG                              | AA                | 1946688727               |
| SNP_P3_172395_4378  | NW_004517892.1 | Scaffold3124 | 4378                    | TT                              | AA                | 1946688729               |
| SNP_P3_172396_4398  | NW_004517892.1 | Scaffold3124 | 4398                    | AA                              | GG                | 1946688731               |
| SNP_P3_172398_5046  | NW_004517892.1 | Scaffold3124 | 5046                    | TT                              | CC                | 1946688733               |
| SNP_P3_172399_1062  | NW_004517893.1 | Scaffold3125 | 1062                    | TT                              | GG                | 1946688735               |
| SNP_P3_172400_1674  | NW_004517893.1 | Scaffold3125 | 1674                    | GG                              | TT                | 1946688737               |
| SNP_P3_172401_1694  | NW_004517893.1 | Scaffold3125 | 1694                    | TT                              | CC                | 1946688739               |
| SNP_P3_172402_1964  | NW_004517893.1 | Scaffold3125 | 1964                    | GG                              | AA                | 1946688741               |
| SNP_P3_172403_601   | NW_004517894.1 | Scaffold3126 | 601                     | AA                              | CC                | 1946688743               |
| SNP_P3_172404_20279 | NW_004517894.1 | Scaffold3126 | 20279                   | GG                              | TT                | 1946688745               |
| SNP_P3_172405_20294 | NW_004517894.1 | Scaffold3126 | 20294                   | AA                              | GG                | 1946688747               |
| SNP_P3_172406_20311 | NW_004517894.1 | Scaffold3126 | 20311                   | AA                              | GG                | 1946688749               |
| SNP_P3_172407_20327 | NW_004517894.1 | Scaffold3126 | 20327                   | CC                              | TT                | 1946688751               |
| SNP_P3_172408_20355 | NW_004517894.1 | Scaffold3126 | 20355                   | AA                              | GG                | 1946688753               |
| SNP_P3_172409_20360 | NW_004517894.1 | Scaffold3126 | 20360                   | CC                              | TT                | 1946688755               |
| SNP_P3_172410_20369 | NW_004517894.1 | Scaffold3126 | 20369                   | CC                              | TT                | 1946688758               |
| SNP_P3_172411_20390 | NW_004517894.1 | Scaffold3126 | 20390                   | CC                              | TT                | 1946688761               |
| SNP_P3_172412_20399 | NW_004517894.1 | Scaffold3126 | 20399                   | AA                              | GG                | 1946688763               |
| SNP_P3_172413_20420 | NW_004517894.1 | Scaffold3126 | 20420                   | AA                              | GG                | 1946688765               |
| SNP_P3_172414_20435 | NW_004517894.1 | Scaffold3126 | 20435                   | GG                              | AA                | 1946688767               |
| SNP_P3_172415_20584 | NW_004517894.1 | Scaffold3126 | 20584                   | TT                              | AA                | 1946688769               |
| SNP_P3_172416_20704 | NW_004517894.1 | Scaffold3126 | 20704                   | TT                              | CC                | 1946688771               |
| SNP_P3_172417_26334 | NW_004517894.1 | Scaffold3126 | 26334                   | AA                              | TT                | 1946688773               |
| SNP_P3_172418_217   | NW_004517895.1 | Scaffold3127 | 217                     | CC                              | AA                | 1946688775               |
| SNP_P3_172419_279   | NW_004517895.1 | Scaffold3127 | 279                     | GG                              | TT                | 1946688777               |
| SNP_P3_172420_349   | NW_004517895.1 | Scaffold3127 | 349                     | TT                              | AA                | 1946688779               |
| SNP_P3_172421_986   | NW_004517895.1 | Scaffold3127 | 986                     | TT                              | CC                | 1946688781               |
| SNP_P3_172422_1020  | NW_004517895.1 | Scaffold3127 | 1020                    | AA                              | TT                | 1946688783               |
| SNP_P3_172423_2177  | NW_004517895.1 | Scaffold3127 | 2177                    | TT                              | CC                | 1946688785               |

| SNPs IDs            | Chromosome IDs | Chromosomes  | Physical positions (bp) | CDC Frontier (Reference genome) | (Pusa 256 & HPNB) | NCBI SNPdb Accession IDs |
|---------------------|----------------|--------------|-------------------------|---------------------------------|-------------------|--------------------------|
| SNP_P3_172425_2239  | NW_004517895.1 | Scaffold3127 | 2239                    | GG                              | TT                | 1946688787               |
| SNP_P3_172426_2615  | NW_004517895.1 | Scaffold3127 | 2615                    | GG                              | AA                | 1946688789               |
| SNP_P3_172427_2673  | NW_004517895.1 | Scaffold3127 | 2673                    | GG                              | CC                | 1946688791               |
| SNP_P3_172428_2713  | NW_004517895.1 | Scaffold3127 | 2713                    | CC                              | GG                | 1946688793               |
| SNP_P3_172429_2774  | NW_004517895.1 | Scaffold3127 | 2774                    | GG                              | CC                | 1946688795               |
| SNP_P3_172430_2781  | NW_004517895.1 | Scaffold3127 | 2781                    | CC                              | TT                | 1946688797               |
| SNP_P3_172431_2884  | NW_004517895.1 | Scaffold3127 | 2884                    | CC                              | GG                | 1946688799               |
| SNP_P3_172432_2892  | NW_004517895.1 | Scaffold3127 | 2892                    | AA                              | CC                | 1946688801               |
| SNP_P3_172433_3239  | NW_004517895.1 | Scaffold3127 | 3239                    | AA                              | GG                | 1946688803               |
| SNP_P3_172434_3579  | NW_004517895.1 | Scaffold3127 | 3579                    | TT                              | GG                | 1946688805               |
| SNP_P3_172435_3596  | NW_004517895.1 | Scaffold3127 | 3596                    | CC                              | GG                | 1946688807               |
| SNP_P3_172436_3647  | NW_004517895.1 | Scaffold3127 | 3647                    | TT                              | GG                | 1946688809               |
| SNP_P3_172437_3764  | NW_004517895.1 | Scaffold3127 | 3764                    | TT                              | GG                | 1946688811               |
| SNP_P3_172438_3867  | NW_004517895.1 | Scaffold3127 | 3867                    | AA                              | TT                | 1946688813               |
| SNP_P3_172439_4088  | NW_004517895.1 | Scaffold3127 | 4088                    | AA                              | CC                | 1946688815               |
| SNP_P3_172440_4140  | NW_004517895.1 | Scaffold3127 | 4140                    | AA                              | CC                | 1946688817               |
| SNP_P3_172441_4301  | NW_004517895.1 | Scaffold3127 | 4301                    | GG                              | AA                | 1946688819               |
| SNP_P3_172442_8577  | NW_004517895.1 | Scaffold3127 | 8577                    | AA                              | CC                | 1946688821               |
| SNP_P3_172443_8655  | NW_004517895.1 | Scaffold3127 | 8655                    | CC                              | TT                | 1946688823               |
| SNP_P3_172444_8834  | NW_004517895.1 | Scaffold3127 | 8834                    | GG                              | CC                | 1946688825               |
| SNP_P3_172446_8880  | NW_004517895.1 | Scaffold3127 | 8880                    | GG                              | AA                | 1946688827               |
| SNP_P3_172447_8890  | NW_004517895.1 | Scaffold3127 | 8890                    | TT                              | GG                | 1946688829               |
| SNP_P3_172448_8984  | NW_004517895.1 | Scaffold3127 | 8984                    | GG                              | AA                | 1946688831               |
| SNP_P3_172449_9014  | NW_004517895.1 | Scaffold3127 | 9014                    | CC                              | GG                | 1946688833               |
| SNP_P3_172450_9175  | NW_004517895.1 | Scaffold3127 | 9175                    | AA                              | TT                | 1946688835               |
| SNP_P3_172451_9484  | NW_004517895.1 | Scaffold3127 | 9484                    | TT                              | CC                | 1946688837               |
| SNP_P3_172452_9700  | NW_004517895.1 | Scaffold3127 | 9700                    | AA                              | GG                | 1946688839               |
| SNP_P3_172453_9838  | NW_004517895.1 | Scaffold3127 | 9838                    | CC                              | AA                | 1946688841               |
| SNP_P3_172454_9876  | NW_004517895.1 | Scaffold3127 | 9876                    | TT                              | AA                | 1946688843               |
| SNP_P3_172455_9878  | NW_004517895.1 | Scaffold3127 | 9878                    | GG                              | TT                | 1946688845               |
| SNP_P3_172456_9885  | NW_004517895.1 | Scaffold3127 | 9885                    | AA                              | GG                | 1946688847               |
| SNP_P3_172457_9919  | NW_004517895.1 | Scaffold3127 | 9919                    | GG                              | CC                | 1946688849               |
| SNP_P3_172459_11917 | NW_004517895.1 | Scaffold3127 | 11917                   | AA                              | CC                | 1946688851               |
| SNP_P3_172460_12083 | NW_004517895.1 | Scaffold3127 | 12083                   | CC                              | TT                | 1946688853               |
| SNP_P3_172461_12084 | NW_004517895.1 | Scaffold3127 | 12084                   | CC                              | TT                | 1946688856               |
| SNP_P3_172462_12095 | NW_004517895.1 | Scaffold3127 | 12095                   | GG                              | AA                | 1946688858               |
| SNP_P3_172463_12101 | NW_004517895.1 | Scaffold3127 | 12101                   | GG                              | AA                | 1946688860               |
| SNP_P3_172464_12102 | NW_004517895.1 | Scaffold3127 | 12102                   | AA                              | TT                | 1946688863               |
| SNP_P3_172465_12113 | NW_004517895.1 | Scaffold3127 | 12113                   | AA                              | TT                | 1946688865               |
| SNP_P3_172466_12116 | NW_004517895.1 | Scaffold3127 | 12116                   | AA                              | CC                | 1946688869               |
| SNP_P3_172467_12129 | NW_004517895.1 | Scaffold3127 | 12129                   | TT                              | CC                | 1946688871               |
| SNP_P3_172468_12130 | NW_004517895.1 | Scaffold3127 | 12130                   | GG                              | AA                | 1946688873               |

| SNPs IDs            | Chromosome IDs | Chromosomes  | Physical positions (bp) | CDC Frontier (Reference genome) | (Pusa 256 & HPNB) | NCBI SNPdb Accession IDs |
|---------------------|----------------|--------------|-------------------------|---------------------------------|-------------------|--------------------------|
| SNP_P3_172469_12131 | NW_004517895.1 | Scaffold3127 | 12131                   | AA                              | CC                | 1946688875               |
| SNP_P3_172470_12134 | NW_004517895.1 | Scaffold3127 | 12134                   | TT                              | CC                | 1946688877               |
| SNP_P3_172471_12170 | NW_004517895.1 | Scaffold3127 | 12170                   | TT                              | GG                | 1946688878               |
| SNP_P3_172472_12264 | NW_004517895.1 | Scaffold3127 | 12264                   | CC                              | AA                | 1946688880               |
| SNP_P3_172473_12265 | NW_004517895.1 | Scaffold3127 | 12265                   | TT                              | AA                | 1946688882               |
| SNP_P3_172474_12743 | NW_004517895.1 | Scaffold3127 | 12743                   | AA                              | CC                | 1946688884               |
| SNP_P3_172475_12803 | NW_004517895.1 | Scaffold3127 | 12803                   | TT                              | CC                | 1946688886               |
| SNP_P3_172476_12960 | NW_004517895.1 | Scaffold3127 | 12960                   | TT                              | AA                | 1946688888               |
| SNP_P3_172477_13086 | NW_004517895.1 | Scaffold3127 | 13086                   | AA                              | GG                | 1946688890               |
| SNP_P3_172478_13100 | NW_004517895.1 | Scaffold3127 | 13100                   | CC                              | GG                | 1946688892               |
| SNP_P3_172479_13103 | NW_004517895.1 | Scaffold3127 | 13103                   | CC                              | AA                | 1946688894               |
| SNP_P3_172480_13125 | NW_004517895.1 | Scaffold3127 | 13125                   | AA                              | GG                | 1946688896               |
| SNP_P3_172481_13128 | NW_004517895.1 | Scaffold3127 | 13128                   | CC                              | TT                | 1946688898               |
| SNP_P3_172482_17479 | NW_004517895.1 | Scaffold3127 | 17479                   | AA                              | TT                | 1946688900               |
| SNP_P3_172483_18663 | NW_004517895.1 | Scaffold3127 | 18663                   | TT                              | CC                | 1946688902               |
| SNP_P3_172484_18788 | NW_004517895.1 | Scaffold3127 | 18788                   | AA                              | CC                | 1946688904               |
| SNP_P3_172485_18969 | NW_004517895.1 | Scaffold3127 | 18969                   | AA                              | GG                | 1946688906               |
| SNP_P3_172486_19051 | NW_004517895.1 | Scaffold3127 | 19051                   | TT                              | CC                | 1946688908               |
| SNP_P3_172487_19120 | NW_004517895.1 | Scaffold3127 | 19120                   | CC                              | GG                | 1946688910               |
| SNP_P3_172488_19239 | NW_004517895.1 | Scaffold3127 | 19239                   | TT                              | AA                | 1946688912               |
| SNP_P3_172489_19245 | NW_004517895.1 | Scaffold3127 | 19245                   | AA                              | GG                | 1946688914               |
| SNP_P3_172490_19651 | NW_004517895.1 | Scaffold3127 | 19651                   | TT                              | CC                | 1946688916               |
| SNP_P3_172491_1267  | NW_004517898.1 | Scaffold3130 | 1267                    | AA                              | TT                | 1946688918               |
| SNP_P3_172492_168   | NW_004517902.1 | Scaffold3134 | 168                     | CC                              | AA                | 1946688920               |
| SNP_P3_172493_527   | NW_004517902.1 | Scaffold3134 | 527                     | CC                              | TT                | 1946688922               |
| SNP_P3_172494_672   | NW_004517902.1 | Scaffold3134 | 672                     | CC                              | AA                | 1946688924               |
| SNP_P3_172495_685   | NW_004517902.1 | Scaffold3134 | 685                     | AA                              | GG                | 1946688926               |
| SNP_P3_172496_729   | NW_004517902.1 | Scaffold3134 | 729                     | AA                              | GG                | 1946688928               |
| SNP_P3_172497_732   | NW_004517902.1 | Scaffold3134 | 732                     | CC                              | AA                | 1946688930               |
| SNP_P3_172498_4429  | NW_004517902.1 | Scaffold3134 | 4429                    | CC                              | TT                | 1946688932               |
| SNP_P3_172499_4455  | NW_004517902.1 | Scaffold3134 | 4455                    | AA                              | TT                | 1946688934               |
| SNP_P3_172500_4461  | NW_004517902.1 | Scaffold3134 | 4461                    | AA                              | GG                | 1946688936               |
| SNP_P3_172501_4515  | NW_004517902.1 | Scaffold3134 | 4515                    | CC                              | TT                | 1946688938               |
| SNP_P3_172502_4585  | NW_004517902.1 | Scaffold3134 | 4585                    | AA                              | CC                | 1946688940               |
| SNP_P3_172503_4805  | NW_004517902.1 | Scaffold3134 | 4805                    | AA                              | TT                | 1946688942               |
| SNP_P3_172504_4821  | NW_004517902.1 | Scaffold3134 | 4821                    | AA                              | CC                | 1946688944               |
| SNP_P3_172505_5687  | NW_004517902.1 | Scaffold3134 | 5687                    | AA                              | TT                | 1946688945               |
| SNP_P3_172506_12105 | NW_004517902.1 | Scaffold3134 | 12105                   | CC                              | TT                | 1946688947               |
| SNP_P3_172507_12117 | NW_004517902.1 | Scaffold3134 | 12117                   | AA                              | GG                | 1946688951               |
| SNP_P3_172510_12243 | NW_004517902.1 | Scaffold3134 | 12243                   | TT                              | AA                | 1946688953               |
| SNP_P3_172511_12518 | NW_004517902.1 | Scaffold3134 | 12518                   | CC                              | AA                | 1946688955               |
| SNP_P3_172512_12544 | NW_004517902.1 | Scaffold3134 | 12544                   | AA                              | GG                | 1946688957               |



| SNPs IDs             | Chromosome IDs | Chromosomes  | Physical positions (bp) | CDC Frontier (Reference genome) | (Pusa 256 & HPNB) | NCBI SNPdb Accession IDs |
|----------------------|----------------|--------------|-------------------------|---------------------------------|-------------------|--------------------------|
| SNP_P3_172513_12559  | NW_004517902.1 | Scaffold3134 | 12559                   | TT                              | GG                | 1946688959               |
| SNP_P3_172514_12567  | NW_004517902.1 | Scaffold3134 | 12567                   | TT                              | CC                | 1946688961               |
| SNP_P3_172515_12682  | NW_004517902.1 | Scaffold3134 | 12682                   | TT                              | CC                | 1946688963               |
| SNP_P3_172516_12742  | NW_004517902.1 | Scaffold3134 | 12742                   | AA                              | GG                | 1946688965               |
| SNP_P3_172517_12868  | NW_004517902.1 | Scaffold3134 | 12868                   | CC                              | TT                | 1946688967               |
| SNP_P3_172518_13012  | NW_004517902.1 | Scaffold3134 | 13012                   | TT                              | CC                | 1946688969               |
| SNP_P3_172519_13047  | NW_004517902.1 | Scaffold3134 | 13047                   | GG                              | AA                | 1946688971               |
| SNP_P3_172520_13263  | NW_004517902.1 | Scaffold3134 | 13263                   | AA                              | GG                | 1946688972               |
| SNP_P3_172522_13535  | NW_004517902.1 | Scaffold3134 | 13535                   | CC                              | AA                | 1946688974               |
| SNP_P3_172523_13544  | NW_004517902.1 | Scaffold3134 | 13544                   | AA                              | GG                | 1946688976               |
| SNP_P3_172524_13549  | NW_004517902.1 | Scaffold3134 | 13549                   | TT                              | CC                | 1946688978               |
| SNP_P3_172527_13683  | NW_004517902.1 | Scaffold3134 | 13683                   | AA                              | GG                | 1946688980               |
| SNP_P3_172528_13688  | NW_004517902.1 | Scaffold3134 | 13688                   | TT                              | CC                | 1946688982               |
| SNP_P3_172529_13697  | NW_004517902.1 | Scaffold3134 | 13697                   | AA                              | TT                | 1946688984               |
| SNP_P3_172531_13925  | NW_004517902.1 | Scaffold3134 | 13925                   | AA                              | TT                | 1946688986               |
| SNP_P3_172532_14024  | NW_004517902.1 | Scaffold3134 | 14024                   | AA                              | GG                | 1946688988               |
| SNP_P3_172533_14042  | NW_004517902.1 | Scaffold3134 | 14042                   | AA                              | GG                | 1946688991               |
| SNP_P3_172534_14119  | NW_004517902.1 | Scaffold3134 | 14119                   | AA                              | CC                | 1946688993               |
| SNP_P3_172535_14295  | NW_004517902.1 | Scaffold3134 | 14295                   | AA                              | CC                | 1946688995               |
| SNP_P3_172536_14470  | NW_004517902.1 | Scaffold3134 | 14470                   | GG                              | CC                | 1946688996               |
| SNP_P3_172537_14681  | NW_004517902.1 | Scaffold3134 | 14681                   | GG                              | AA                | 1946688998               |
| SNP_P3_172539_15510  | NW_004517902.1 | Scaffold3134 | 15510                   | TT                              | CC                | 1946689000               |
| SNP_P3_172540_17872  | NW_004517902.1 | Scaffold3134 | 17872                   | GG                              | AA                | 1946689002               |
| SNP_P3_172541_30191  | NW_004517902.1 | Scaffold3134 | 30191                   | AA                              | GG                | 1946689004               |
| SNP_P3_172542_47809  | NW_004517902.1 | Scaffold3134 | 47809                   | GG                              | AA                | 1946689006               |
| SNP_P3_172543_59381  | NW_004517902.1 | Scaffold3134 | 59381                   | CC                              | AA                | 1946689008               |
| SNP_P3_172544_61380  | NW_004517902.1 | Scaffold3134 | 61380                   | CC                              | TT                | 1946689010               |
| SNP_P3_172545_67129  | NW_004517902.1 | Scaffold3134 | 67129                   | GG                              | AA                | 1946689012               |
| SNP_P3_172546_67216  | NW_004517902.1 | Scaffold3134 | 67216                   | TT                              | CC                | 1946689014               |
| SNP_P3_172547_67270  | NW_004517902.1 | Scaffold3134 | 67270                   | CC                              | AA                | 1946689016               |
| SNP_P3_172548_67316  | NW_004517902.1 | Scaffold3134 | 67316                   | CC                              | AA                | 1946689018               |
| SNP_P3_172550_71665  | NW_004517902.1 | Scaffold3134 | 71665                   | TT                              | AA                | 1946689020               |
| SNP_P3_172551_76204  | NW_004517902.1 | Scaffold3134 | 76204                   | CC                              | TT                | 1946689022               |
| SNP_P3_172552_76208  | NW_004517902.1 | Scaffold3134 | 76208                   | GG                              | AA                | 1946689024               |
| SNP_P3_172553_76268  | NW_004517902.1 | Scaffold3134 | 76268                   | GG                              | TT                | 1946689026               |
| SNP_P3_172554_76292  | NW_004517902.1 | Scaffold3134 | 76292                   | AA                              | GG                | 1946689028               |
| SNP_P3_172555_80617  | NW_004517902.1 | Scaffold3134 | 80617                   | AA                              | CC                | 1946689030               |
| SNP_P3_172558_140043 | NW_004517902.1 | Scaffold3134 | 140043                  | GG                              | CC                | 1946689032               |
| SNP_P3_172559_313    | NW_004517903.1 | Scaffold3135 | 313                     | GG                              | AA                | 1946689034               |
| SNP_P3_172560_4017   | NW_004517903.1 | Scaffold3135 | 4017                    | GG                              | AA                | 1946689036               |
| SNP_P3_172561_4151   | NW_004517903.1 | Scaffold3135 | 4151                    | GG                              | CC                | 1946689038               |
| SNP_P3_172563_4447   | NW_004517903.1 | Scaffold3135 | 4447                    | GG                              | AA                | 1946689040               |

| SNPs IDs            | Chromosome IDs | Chromosomes  | Physical positions (bp) | CDC Frontier (Reference genome) | (Pusa 256 & HPNB) | NCBI SNPdb Accession IDs |
|---------------------|----------------|--------------|-------------------------|---------------------------------|-------------------|--------------------------|
| SNP_P3_172564_938   | NW_004517907.1 | Scaffold3139 | 938                     | TT                              | GG                | 1946689042               |
| SNP_P3_172567_966   | NW_004517907.1 | Scaffold3139 | 966                     | GG                              | AA                | 1946689044               |
| SNP_P3_172568_986   | NW_004517907.1 | Scaffold3139 | 986                     | TT                              | GG                | 1946689046               |
| SNP_P3_172570_4121  | NW_004517909.1 | Scaffold3141 | 4121                    | CC                              | AA                | 1946689048               |
| SNP_P3_172571_4157  | NW_004517909.1 | Scaffold3141 | 4157                    | TT                              | CC                | 1946689050               |
| SNP_P3_172572_246   | NW_004517911.1 | Scaffold3144 | 246                     | TT                              | CC                | 1946689053               |
| SNP_P3_172573_247   | NW_004517911.1 | Scaffold3144 | 247                     | TT                              | AA                | 1946689055               |
| SNP_P3_172574_282   | NW_004517911.1 | Scaffold3144 | 282                     | TT                              | CC                | 1946689058               |
| SNP_P3_172576_600   | NW_004517911.1 | Scaffold3144 | 600                     | TT                              | AA                | 1946689061               |
| SNP_P3_172577_682   | NW_004517911.1 | Scaffold3144 | 682                     | TT                              | CC                | 1946689063               |
| SNP_P3_172578_12497 | NW_004517911.1 | Scaffold3144 | 12497                   | GG                              | CC                | 1946689065               |
| SNP_P3_172579_228   | NW_004517913.1 | Scaffold3147 | 228                     | GG                              | TT                | 1946689068               |
| SNP_P3_172580_511   | NW_004517913.1 | Scaffold3147 | 511                     | GG                              | AA                | 1946689070               |
| SNP_P3_172581_4475  | NW_004517914.1 | Scaffold3148 | 4475                    | CC                              | AA                | 1946689073               |
| SNP_P3_172582_4540  | NW_004517914.1 | Scaffold3148 | 4540                    | GG                              | CC                | 1946689075               |
| SNP_P3_172583_4561  | NW_004517914.1 | Scaffold3148 | 4561                    | AA                              | CC                | 1946689078               |
| SNP_P3_172584_5141  | NW_004517914.1 | Scaffold3148 | 5141                    | TT                              | CC                | 1946689080               |
| SNP_P3_172585_5161  | NW_004517914.1 | Scaffold3148 | 5161                    | GG                              | AA                | 1946689082               |
| SNP_P3_172586_5196  | NW_004517914.1 | Scaffold3148 | 5196                    | GG                              | AA                | 1946689084               |
| SNP_P3_172587_1178  | NW_004517915.1 | Scaffold3149 | 1178                    | AA                              | GG                | 1946689086               |
| SNP_P3_172588_1208  | NW_004517915.1 | Scaffold3149 | 1208                    | GG                              | AA                | 1946689088               |
| SNP_P3_172589_1210  | NW_004517915.1 | Scaffold3149 | 1210                    | AA                              | CC                | 1946689090               |
| SNP_P3_172590_1258  | NW_004517915.1 | Scaffold3149 | 1258                    | AA                              | CC                | 1946689093               |
| SNP_P3_172591_1263  | NW_004517915.1 | Scaffold3149 | 1263                    | GG                              | AA                | 1946689095               |
| SNP_P3_172592_3039  | NW_004517915.1 | Scaffold3149 | 3039                    | GG                              | TT                | 1946689097               |
| SNP_P3_172593_3576  | NW_004517915.1 | Scaffold3149 | 3576                    | CC                              | AA                | 1946689100               |
| SNP_P3_172594_3688  | NW_004517915.1 | Scaffold3149 | 3688                    | CC                              | TT                | 1946689102               |
| SNP_P3_172595_3867  | NW_004517915.1 | Scaffold3149 | 3867                    | TT                              | AA                | 1946689104               |
| SNP_P3_172596_3879  | NW_004517915.1 | Scaffold3149 | 3879                    | CC                              | TT                | 1946689106               |
| SNP_P3_172597_3882  | NW_004517915.1 | Scaffold3149 | 3882                    | AA                              | GG                | 1946689108               |
| SNP_P3_172598_3994  | NW_004517915.1 | Scaffold3149 | 3994                    | TT                              | CC                | 1946689110               |
| SNP_P3_172599_4145  | NW_004517915.1 | Scaffold3149 | 4145                    | CC                              | TT                | 1946689112               |
| SNP_P3_172600_4267  | NW_004517915.1 | Scaffold3149 | 4267                    | TT                              | AA                | 1946689114               |
| SNP_P3_172601_4800  | NW_004517915.1 | Scaffold3149 | 4800                    | TT                              | CC                | 1946689119               |
| SNP_P3_172602_4807  | NW_004517915.1 | Scaffold3149 | 4807                    | CC                              | TT                | 1946689121               |
| SNP_P3_172603_4861  | NW_004517915.1 | Scaffold3149 | 4861                    | CC                              | AA                | 1946689123               |
| SNP_P3_172604_5048  | NW_004517915.1 | Scaffold3149 | 5048                    | CC                              | GG                | 1946689125               |
| SNP_P3_172605_5143  | NW_004517915.1 | Scaffold3149 | 5143                    | TT                              | GG                | 1946689129               |
| SNP_P3_172606_5152  | NW_004517915.1 | Scaffold3149 | 5152                    | GG                              | AA                | 1946689131               |
| SNP_P3_172607_5157  | NW_004517915.1 | Scaffold3149 | 5157                    | GG                              | AA                | 1946689133               |
| SNP_P3_172608_5162  | NW_004517915.1 | Scaffold3149 | 5162                    | AA                              | GG                | 1946689135               |
| SNP_P3_172609_5214  | NW_004517915.1 | Scaffold3149 | 5214                    | TT                              | CC                | 1946689137               |

| SNPs IDs            | Chromosome IDs | Chromosomes  | Physical positions (bp) | CDC Frontier (Reference genome) | (Pusa 256 & HPNB) | NCBI SNPdb Accession IDs |
|---------------------|----------------|--------------|-------------------------|---------------------------------|-------------------|--------------------------|
| SNP_P3_172610_5249  | NW_004517915.1 | Scaffold3149 | 5249                    | GG                              | AA                | 1946689139               |
| SNP_P3_172611_5283  | NW_004517915.1 | Scaffold3149 | 5283                    | AA                              | GG                | 1946689141               |
| SNP_P3_172612_5291  | NW_004517915.1 | Scaffold3149 | 5291                    | TT                              | CC                | 1946689143               |
| SNP_P3_172613_5317  | NW_004517915.1 | Scaffold3149 | 5317                    | CC                              | TT                | 1946689145               |
| SNP_P3_172614_5434  | NW_004517915.1 | Scaffold3149 | 5434                    | TT                              | GG                | 1946689147               |
| SNP_P3_172615_5536  | NW_004517915.1 | Scaffold3149 | 5536                    | TT                              | AA                | 1946689149               |
| SNP_P3_172616_5570  | NW_004517915.1 | Scaffold3149 | 5570                    | TT                              | CC                | 1946689150               |
| SNP_P3_172617_5585  | NW_004517915.1 | Scaffold3149 | 5585                    | CC                              | TT                | 1946689151               |
| SNP_P3_172618_5641  | NW_004517915.1 | Scaffold3149 | 5641                    | GG                              | TT                | 1946689152               |
| SNP_P3_172619_9130  | NW_004517915.1 | Scaffold3149 | 9130                    | AA                              | TT                | 1946689153               |
| SNP_P3_172620_9143  | NW_004517915.1 | Scaffold3149 | 9143                    | TT                              | CC                | 1946689154               |
| SNP_P3_172621_9175  | NW_004517915.1 | Scaffold3149 | 9175                    | CC                              | TT                | 1946689155               |
| SNP_P3_172622_9184  | NW_004517915.1 | Scaffold3149 | 9184                    | TT                              | GG                | 1946689157               |
| SNP_P3_172623_9251  | NW_004517915.1 | Scaffold3149 | 9251                    | CC                              | AA                | 1946689159               |
| SNP_P3_172624_9450  | NW_004517915.1 | Scaffold3149 | 9450                    | CC                              | TT                | 1946689161               |
| SNP_P3_172625_9487  | NW_004517915.1 | Scaffold3149 | 9487                    | AA                              | TT                | 1946689163               |
| SNP_P3_172626_9513  | NW_004517915.1 | Scaffold3149 | 9513                    | AA                              | GG                | 1946689165               |
| SNP_P3_172628_9736  | NW_004517915.1 | Scaffold3149 | 9736                    | GG                              | AA                | 1946689167               |
| SNP_P3_172629_9787  | NW_004517915.1 | Scaffold3149 | 9787                    | CC                              | GG                | 1946689169               |
| SNP_P3_172630_9850  | NW_004517915.1 | Scaffold3149 | 9850                    | TT                              | GG                | 1946689172               |
| SNP_P3_172631_9870  | NW_004517915.1 | Scaffold3149 | 9870                    | AA                              | GG                | 1946689174               |
| SNP_P3_172632_9960  | NW_004517915.1 | Scaffold3149 | 9960                    | CC                              | TT                | 1946689176               |
| SNP_P3_172633_10103 | NW_004517915.1 | Scaffold3149 | 10103                   | GG                              | TT                | 1946689178               |
| SNP_P3_172634_10184 | NW_004517915.1 | Scaffold3149 | 10184                   | AA                              | CC                | 1946689180               |
| SNP_P3_172635_10433 | NW_004517915.1 | Scaffold3149 | 10433                   | GG                              | CC                | 1946689182               |
| SNP_P3_172636_10445 | NW_004517915.1 | Scaffold3149 | 10445                   | GG                              | TT                | 1946689184               |
| SNP_P3_172637_22926 | NW_004517915.1 | Scaffold3149 | 22926                   | TT                              | CC                | 1946689186               |
| SNP_P3_172638_26623 | NW_004517915.1 | Scaffold3149 | 26623                   | TT                              | GG                | 1946689188               |
| SNP_P3_172639_115   | NW_004517917.1 | Scaffold3155 | 115                     | AA                              | TT                | 1946689190               |
| SNP_P3_172640_351   | NW_004517917.1 | Scaffold3155 | 351                     | AA                              | GG                | 1946689192               |
| SNP_P3_172641_367   | NW_004517917.1 | Scaffold3155 | 367                     | GG                              | AA                | 1946689194               |
| SNP_P3_172642_487   | NW_004517917.1 | Scaffold3155 | 487                     | AA                              | GG                | 1946689196               |
| SNP_P3_172643_489   | NW_004517917.1 | Scaffold3155 | 489                     | TT                              | AA                | 1946689198               |
| SNP_P3_172645_524   | NW_004517917.1 | Scaffold3155 | 524                     | AA                              | GG                | 1946689201               |
| SNP_P3_172646_555   | NW_004517917.1 | Scaffold3155 | 555                     | TT                              | AA                | 1946689203               |
| SNP_P3_172647_583   | NW_004517917.1 | Scaffold3155 | 583                     | AA                              | GG                | 1946689205               |
| SNP_P3_172648_5550  | NW_004517917.1 | Scaffold3155 | 5550                    | CC                              | AA                | 1946689207               |
| SNP_P3_172649_5558  | NW_004517917.1 | Scaffold3155 | 5558                    | TT                              | CC                | 1946689210               |
| SNP_P3_172650_5559  | NW_004517917.1 | Scaffold3155 | 5559                    | GG                              | CC                | 1946689212               |
| SNP_P3_172651_5579  | NW_004517917.1 | Scaffold3155 | 5579                    | TT                              | CC                | 1946689214               |
| SNP_P3_172652_5580  | NW_004517917.1 | Scaffold3155 | 5580                    | GG                              | CC                | 1946689216               |
| SNP_P3_172653_5609  | NW_004517917.1 | Scaffold3155 | 5609                    | CC                              | GG                | 1946689218               |

| SNPs IDs           | Chromosome IDs | Chromosomes  | Physical positions (bp) | CDC Frontier (Reference genome) | (Pusa 256 & HPNB) | NCBI SNPdb Accession IDs |
|--------------------|----------------|--------------|-------------------------|---------------------------------|-------------------|--------------------------|
| SNP_P3_172654_5610 | NW_004517917.1 | Scaffold3155 | 5610                    | TT                              | CC                | 1946689220               |
| SNP_P3_172655_5672 | NW_004517917.1 | Scaffold3155 | 5672                    | TT                              | GG                | 1946689222               |
| SNP_P3_172656_5697 | NW_004517917.1 | Scaffold3155 | 5697                    | GG                              | TT                | 1946689224               |
| SNP_P3_172657_5735 | NW_004517917.1 | Scaffold3155 | 5735                    | AA                              | GG                | 1946689226               |
| SNP_P3_172658_5748 | NW_004517917.1 | Scaffold3155 | 5748                    | AA                              | GG                | 1946689228               |
| SNP_P3_172659_5773 | NW_004517917.1 | Scaffold3155 | 5773                    | AA                              | GG                | 1946689230               |
| SNP_P3_172662_2550 | NW_004517918.1 | Scaffold3156 | 2550                    | AA                              | CC                | 1946689233               |
| SNP_P3_172663_2780 | NW_004517918.1 | Scaffold3156 | 2780                    | TT                              | CC                | 1946689235               |
| SNP_P3_172664_282  | NW_004517920.1 | Scaffold3159 | 282                     | TT                              | AA                | 1946689237               |
| SNP_P3_172665_625  | NW_004517920.1 | Scaffold3159 | 625                     | CC                              | GG                | 1946689239               |
| SNP_P3_172666_1660 | NW_004517920.1 | Scaffold3159 | 1660                    | AA                              | TT                | 1946689241               |
| SNP_P3_172667_5878 | NW_004517921.1 | Scaffold3160 | 5878                    | TT                              | CC                | 1946689243               |
| SNP_P3_172668_5898 | NW_004517921.1 | Scaffold3160 | 5898                    | CC                              | TT                | 1946689245               |
| SNP_P3_172669_5938 | NW_004517921.1 | Scaffold3160 | 5938                    | GG                              | TT                | 1946689247               |
| SNP_P3_172670_5971 | NW_004517921.1 | Scaffold3160 | 5971                    | GG                              | AA                | 1946689249               |
| SNP_P3_172671_5978 | NW_004517921.1 | Scaffold3160 | 5978                    | AA                              | GG                | 1946689251               |
| SNP_P3_172672_6023 | NW_004517921.1 | Scaffold3160 | 6023                    | GG                              | CC                | 1946689253               |
| SNP_P3_172673_6139 | NW_004517921.1 | Scaffold3160 | 6139                    | CC                              | TT                | 1946689256               |
| SNP_P3_172674_7602 | NW_004517921.1 | Scaffold3160 | 7602                    | TT                              | AA                | 1946689258               |
| SNP_P3_172675_7608 | NW_004517921.1 | Scaffold3160 | 7608                    | CC                              | TT                | 1946689260               |
| SNP_P3_172676_7619 | NW_004517921.1 | Scaffold3160 | 7619                    | AA                              | GG                | 1946689262               |
| SNP_P3_172677_7640 | NW_004517921.1 | Scaffold3160 | 7640                    | CC                              | AA                | 1946689264               |
| SNP_P3_172678_7730 | NW_004517921.1 | Scaffold3160 | 7730                    | GG                              | TT                | 1946689266               |
| SNP_P3_172679_7913 | NW_004517921.1 | Scaffold3160 | 7913                    | TT                              | CC                | 1946689269               |
| SNP_P3_172680_7914 | NW_004517921.1 | Scaffold3160 | 7914                    | GG                              | AA                | 1946689271               |
| SNP_P3_172681_7946 | NW_004517921.1 | Scaffold3160 | 7946                    | GG                              | AA                | 1946689273               |
| SNP_P3_172682_7965 | NW_004517921.1 | Scaffold3160 | 7965                    | TT                              | AA                | 1946689275               |
| SNP_P3_172683_7996 | NW_004517921.1 | Scaffold3160 | 7996                    | AA                              | TT                | 1946689277               |
| SNP_P3_172684_7997 | NW_004517921.1 | Scaffold3160 | 7997                    | AA                              | TT                | 1946689279               |
| SNP_P3_172685_7999 | NW_004517921.1 | Scaffold3160 | 7999                    | TT                              | GG                | 1946689281               |
| SNP_P3_172686_8075 | NW_004517921.1 | Scaffold3160 | 8075                    | AA                              | GG                | 1946689283               |
| SNP_P3_172688_8342 | NW_004517921.1 | Scaffold3160 | 8342                    | TT                              | AA                | 1946689285               |
| SNP_P3_172689_8396 | NW_004517921.1 | Scaffold3160 | 8396                    | AA                              | GG                | 1946689287               |
| SNP_P3_172690_8603 | NW_004517921.1 | Scaffold3160 | 8603                    | CC                              | TT                | 1946689289               |
| SNP_P3_172691_8607 | NW_004517921.1 | Scaffold3160 | 8607                    | AA                              | TT                | 1946689291               |
| SNP_P3_172692_8763 | NW_004517921.1 | Scaffold3160 | 8763                    | CC                              | GG                | 1946689293               |
| SNP_P3_172693_8808 | NW_004517921.1 | Scaffold3160 | 8808                    | AA                              | GG                | 1946689295               |
| SNP_P3_172694_8814 | NW_004517921.1 | Scaffold3160 | 8814                    | CC                              | AA                | 1946689297               |
| SNP_P3_172695_8833 | NW_004517921.1 | Scaffold3160 | 8833                    | AA                              | TT                | 1946689299               |
| SNP_P3_172696_8841 | NW_004517921.1 | Scaffold3160 | 8841                    | CC                              | TT                | 1946689301               |
| SNP_P3_172697_8852 | NW_004517921.1 | Scaffold3160 | 8852                    | CC                              | TT                | 1946689303               |
| SNP_P3_172699_8896 | NW_004517921.1 | Scaffold3160 | 8896                    | GG                              | CC                | 1946689305               |

| SNPs IDs            | Chromosome IDs | Chromosomes  | Physical positions (bp) | CDC Frontier (Reference genome) | (Pusa 256 & HPNB) | NCBI SNPdb Accession IDs |
|---------------------|----------------|--------------|-------------------------|---------------------------------|-------------------|--------------------------|
| SNP_P3_172700_8965  | NW_004517921.1 | Scaffold3160 | 8965                    | GG                              | CC                | 1946689307               |
| SNP_P3_172701_8991  | NW_004517921.1 | Scaffold3160 | 8991                    | TT                              | CC                | 1946689309               |
| SNP_P3_172702_9066  | NW_004517921.1 | Scaffold3160 | 9066                    | TT                              | GG                | 1946689311               |
| SNP_P3_172703_9093  | NW_004517921.1 | Scaffold3160 | 9093                    | GG                              | AA                | 1946689313               |
| SNP_P3_172704_9131  | NW_004517921.1 | Scaffold3160 | 9131                    | GG                              | AA                | 1946689315               |
| SNP_P3_172705_9239  | NW_004517921.1 | Scaffold3160 | 9239                    | GG                              | AA                | 1946689317               |
| SNP_P3_172706_9267  | NW_004517921.1 | Scaffold3160 | 9267                    | GG                              | AA                | 1946689319               |
| SNP_P3_172707_9321  | NW_004517921.1 | Scaffold3160 | 9321                    | GG                              | CC                | 1946689321               |
| SNP_P3_172708_9361  | NW_004517921.1 | Scaffold3160 | 9361                    | TT                              | GG                | 1946689323               |
| SNP_P3_172709_9423  | NW_004517921.1 | Scaffold3160 | 9423                    | AA                              | CC                | 1946689325               |
| SNP_P3_172710_9454  | NW_004517921.1 | Scaffold3160 | 9454                    | CC                              | AA                | 1946689327               |
| SNP_P3_172711_9495  | NW_004517921.1 | Scaffold3160 | 9495                    | TT                              | CC                | 1946689329               |
| SNP_P3_172712_9522  | NW_004517921.1 | Scaffold3160 | 9522                    | TT                              | CC                | 1946689331               |
| SNP_P3_172713_9629  | NW_004517921.1 | Scaffold3160 | 9629                    | TT                              | GG                | 1946689333               |
| SNP_P3_172714_9630  | NW_004517921.1 | Scaffold3160 | 9630                    | TT                              | AA                | 1946689335               |
| SNP_P3_172715_9760  | NW_004517921.1 | Scaffold3160 | 9760                    | CC                              | TT                | 1946689337               |
| SNP_P3_172716_9761  | NW_004517921.1 | Scaffold3160 | 9761                    | GG                              | TT                | 1946689339               |
| SNP_P3_172717_9778  | NW_004517921.1 | Scaffold3160 | 9778                    | CC                              | TT                | 1946689342               |
| SNP_P3_172718_9790  | NW_004517921.1 | Scaffold3160 | 9790                    | AA                              | GG                | 1946689344               |
| SNP_P3_172720_9844  | NW_004517921.1 | Scaffold3160 | 9844                    | AA                              | GG                | 1946689346               |
| SNP_P3_172721_9864  | NW_004517921.1 | Scaffold3160 | 9864                    | TT                              | AA                | 1946689348               |
| SNP_P3_172722_9895  | NW_004517921.1 | Scaffold3160 | 9895                    | AA                              | GG                | 1946689350               |
| SNP_P3_172723_9947  | NW_004517921.1 | Scaffold3160 | 9947                    | AA                              | GG                | 1946689352               |
| SNP_P3_172724_9977  | NW_004517921.1 | Scaffold3160 | 9977                    | CC                              | TT                | 1946689354               |
| SNP_P3_172725_10033 | NW_004517921.1 | Scaffold3160 | 10033                   | AA                              | CC                | 1946689356               |
| SNP_P3_172726_10075 | NW_004517921.1 | Scaffold3160 | 10075                   | TT                              | AA                | 1946689358               |
| SNP_P3_172727_10166 | NW_004517921.1 | Scaffold3160 | 10166                   | AA                              | GG                | 1946689360               |
| SNP_P3_172728_10196 | NW_004517921.1 | Scaffold3160 | 10196                   | AA                              | GG                | 1946689362               |
| SNP_P3_172729_10232 | NW_004517921.1 | Scaffold3160 | 10232                   | TT                              | AA                | 1946689364               |
| SNP_P3_172730_10349 | NW_004517921.1 | Scaffold3160 | 10349                   | CC                              | TT                | 1946689366               |
| SNP_P3_172731_10361 | NW_004517921.1 | Scaffold3160 | 10361                   | CC                              | AA                | 1946689368               |
| SNP_P3_172732_10408 | NW_004517921.1 | Scaffold3160 | 10408                   | AA                              | GG                | 1946689370               |
| SNP_P3_172734_10588 | NW_004517921.1 | Scaffold3160 | 10588                   | TT                              | CC                | 1946689372               |
| SNP_P3_172735_10633 | NW_004517921.1 | Scaffold3160 | 10633                   | CC                              | TT                | 1946689374               |
| SNP_P3_172736_10695 | NW_004517921.1 | Scaffold3160 | 10695                   | TT                              | AA                | 1946689376               |
| SNP_P3_172737_10754 | NW_004517921.1 | Scaffold3160 | 10754                   | TT                              | GG                | 1946689378               |
| SNP_P3_172738_10795 | NW_004517921.1 | Scaffold3160 | 10795                   | GG                              | TT                | 1946689381               |
| SNP_P3_172739_11035 | NW_004517921.1 | Scaffold3160 | 11035                   | GG                              | TT                | 1946689383               |
| SNP_P3_172740_22945 | NW_004517921.1 | Scaffold3160 | 22945                   | TT                              | GG                | 1946689385               |
| SNP_P3_172741_22966 | NW_004517921.1 | Scaffold3160 | 22966                   | CC                              | TT                | 1946689387               |
| SNP_P3_172742_830   | NW_004517922.1 | Scaffold3161 | 830                     | CC                              | AA                | 1946689389               |
| SNP_P3_172743_4393  | NW_004517922.1 | Scaffold3161 | 4393                    | AA                              | CC                | 1946689391               |

| SNPs IDs           | Chromosome IDs | Chromosomes  | Physical positions (bp) | CDC Frontier (Reference genome) | (Pusa 256 & HPNB) | NCBI SNPdb Accession IDs |
|--------------------|----------------|--------------|-------------------------|---------------------------------|-------------------|--------------------------|
| SNP_P3_172744_5376 | NW_004517922.1 | Scaffold3161 | 5376                    | GG                              | TT                | 1946689393               |
| SNP_P3_172745_5799 | NW_004517922.1 | Scaffold3161 | 5799                    | TT                              | GG                | 1946689395               |
| SNP_P3_172746_5813 | NW_004517922.1 | Scaffold3161 | 5813                    | TT                              | CC                | 1946689397               |
| SNP_P3_172747_5838 | NW_004517922.1 | Scaffold3161 | 5838                    | TT                              | CC                | 1946689399               |
| SNP_P3_172748_5848 | NW_004517922.1 | Scaffold3161 | 5848                    | GG                              | TT                | 1946689401               |
| SNP_P3_172750_369  | NW_004517923.1 | Scaffold3163 | 369                     | TT                              | AA                | 1946689403               |
| SNP_P3_172751_403  | NW_004517923.1 | Scaffold3163 | 403                     | AA                              | TT                | 1946689405               |
| SNP_P3_172752_455  | NW_004517923.1 | Scaffold3163 | 455                     | TT                              | CC                | 1946689407               |
| SNP_P3_172753_582  | NW_004517923.1 | Scaffold3163 | 582                     | CC                              | TT                | 1946689409               |
| SNP_P3_172754_614  | NW_004517923.1 | Scaffold3163 | 614                     | GG                              | TT                | 1946689411               |
| SNP_P3_172755_670  | NW_004517923.1 | Scaffold3163 | 670                     | AA                              | GG                | 1946689413               |
| SNP_P3_172756_686  | NW_004517923.1 | Scaffold3163 | 686                     | CC                              | TT                | 1946689415               |
| SNP_P3_172757_705  | NW_004517923.1 | Scaffold3163 | 705                     | AA                              | GG                | 1946689417               |
| SNP_P3_172758_954  | NW_004517923.1 | Scaffold3163 | 954                     | AA                              | TT                | 1946689419               |
| SNP_P3_172759_973  | NW_004517923.1 | Scaffold3163 | 973                     | CC                              | TT                | 1946689421               |
| SNP_P3_172760_1083 | NW_004517923.1 | Scaffold3163 | 1083                    | AA                              | CC                | 1946689423               |
| SNP_P3_172761_1111 | NW_004517923.1 | Scaffold3163 | 1111                    | AA                              | TT                | 1946689425               |
| SNP_P3_172763_2411 | NW_004517924.1 | Scaffold3164 | 2411                    | TT                              | CC                | 1946689427               |
| SNP_P3_172764_2469 | NW_004517924.1 | Scaffold3164 | 2469                    | CC                              | TT                | 1946689429               |
| SNP_P3_172765_2472 | NW_004517924.1 | Scaffold3164 | 2472                    | TT                              | CC                | 1946689431               |
| SNP_P3_172766_2773 | NW_004517924.1 | Scaffold3164 | 2773                    | TT                              | CC                | 1946689433               |
| SNP_P3_172767_2802 | NW_004517924.1 | Scaffold3164 | 2802                    | CC                              | TT                | 1946689435               |
| SNP_P3_172768_2804 | NW_004517924.1 | Scaffold3164 | 2804                    | AA                              | TT                | 1946689437               |
| SNP_P3_172769_6139 | NW_004517924.1 | Scaffold3164 | 6139                    | CC                              | TT                | 1946689439               |
| SNP_P3_172770_6193 | NW_004517924.1 | Scaffold3164 | 6193                    | TT                              | CC                | 1946689441               |
| SNP_P3_172771_6212 | NW_004517924.1 | Scaffold3164 | 6212                    | AA                              | CC                | 1946689444               |
| SNP_P3_172772_6991 | NW_004517924.1 | Scaffold3164 | 6991                    | CC                              | TT                | 1946689446               |
| SNP_P3_172773_64   | NW_004517926.1 | Scaffold3168 | 64                      | GG                              | AA                | 1946689448               |
| SNP_P3_172774_110  | NW_004517926.1 | Scaffold3168 | 110                     | AA                              | CC                | 1946689450               |
| SNP_P3_172775_206  | NW_004517926.1 | Scaffold3168 | 206                     | AA                              | GG                | 1946689452               |
| SNP_P3_172776_307  | NW_004517926.1 | Scaffold3168 | 307                     | CC                              | TT                | 1946689454               |
| SNP_P3_172777_365  | NW_004517926.1 | Scaffold3168 | 365                     | TT                              | CC                | 1946689456               |
| SNP_P3_172778_497  | NW_004517926.1 | Scaffold3168 | 497                     | AA                              | GG                | 1946689458               |
| SNP_P3_172780_524  | NW_004517926.1 | Scaffold3168 | 524                     | AA                              | TT                | 1946689460               |
| SNP_P3_172781_606  | NW_004517926.1 | Scaffold3168 | 606                     | AA                              | GG                | 1946689462               |
| SNP_P3_172782_689  | NW_004517926.1 | Scaffold3168 | 689                     | AA                              | GG                | 1946689464               |
| SNP_P3_172783_705  | NW_004517926.1 | Scaffold3168 | 705                     | TT                              | CC                | 1946689467               |
| SNP_P3_172784_753  | NW_004517926.1 | Scaffold3168 | 753                     | TT                              | AA                | 1946689469               |
| SNP_P3_172785_812  | NW_004517926.1 | Scaffold3168 | 812                     | TT                              | CC                | 1946689471               |
| SNP_P3_172786_836  | NW_004517926.1 | Scaffold3168 | 836                     | CC                              | TT                | 1946689473               |
| SNP_P3_172787_976  | NW_004517926.1 | Scaffold3168 | 976                     | CC                              | TT                | 1946689475               |
| SNP_P3_172788_985  | NW_004517926.1 | Scaffold3168 | 985                     | TT                              | CC                | 1946689477               |

| SNPs IDs             | Chromosome IDs | Chromosomes  | Physical positions (bp) | CDC Frontier (Reference genome) | (Pusa 256 & HPNB) | NCBI SNPdb Accession IDs |
|----------------------|----------------|--------------|-------------------------|---------------------------------|-------------------|--------------------------|
| SNP_P3_172789_1038   | NW_004517926.1 | Scaffold3168 | 1038                    | TT                              | AA                | 1946689479               |
| SNP_P3_172790_1049   | NW_004517926.1 | Scaffold3168 | 1049                    | CC                              | TT                | 1946689482               |
| SNP_P3_172791_1076   | NW_004517926.1 | Scaffold3168 | 1076                    | CC                              | TT                | 1946689484               |
| SNP_P3_172792_1364   | NW_004517926.1 | Scaffold3168 | 1364                    | TT                              | AA                | 1946689486               |
| SNP_P3_172793_1427   | NW_004517926.1 | Scaffold3168 | 1427                    | AA                              | GG                | 1946689488               |
| SNP_P3_172794_1459   | NW_004517926.1 | Scaffold3168 | 1459                    | CC                              | AA                | 1946689490               |
| SNP_P3_172795_1487   | NW_004517926.1 | Scaffold3168 | 1487                    | TT                              | CC                | 1946689492               |
| SNP_P3_172796_1489   | NW_004517926.1 | Scaffold3168 | 1489                    | TT                              | CC                | 1946689494               |
| SNP_P3_172797_1507   | NW_004517926.1 | Scaffold3168 | 1507                    | AA                              | GG                | 1946689496               |
| SNP_P3_172798_1717   | NW_004517926.1 | Scaffold3168 | 1717                    | CC                              | TT                | 1946689498               |
| SNP_P3_172799_1871   | NW_004517926.1 | Scaffold3168 | 1871                    | AA                              | TT                | 1946689500               |
| SNP_P3_172800_1872   | NW_004517926.1 | Scaffold3168 | 1872                    | TT                              | CC                | 1946689502               |
| SNP_P3_172801_1887   | NW_004517926.1 | Scaffold3168 | 1887                    | CC                              | TT                | 1946689504               |
| SNP_P3_172802_1895   | NW_004517926.1 | Scaffold3168 | 1895                    | GG                              | AA                | 1946689506               |
| SNP_P3_172803_1907   | NW_004517926.1 | Scaffold3168 | 1907                    | CC                              | TT                | 1946689508               |
| SNP_P3_172804_2016   | NW_004517926.1 | Scaffold3168 | 2016                    | AA                              | GG                | 1946689510               |
| SNP_P3_172805_122    | NW_004517928.1 | Scaffold3170 | 122                     | AA                              | CC                | 1946689512               |
| SNP_P3_172806_543    | NW_004517928.1 | Scaffold3170 | 543                     | AA                              | GG                | 1946689514               |
| SNP_P3_172807_545    | NW_004517928.1 | Scaffold3170 | 545                     | GG                              | AA                | 1946689516               |
| SNP_P3_172808_5148   | NW_004517928.1 | Scaffold3170 | 5148                    | AA                              | GG                | 1946689518               |
| SNP_P3_172809_10811  | NW_004517928.1 | Scaffold3170 | 10811                   | AA                              | TT                | 1946689520               |
| SNP_P3_172810_12764  | NW_004517928.1 | Scaffold3170 | 12764                   | TT                              | GG                | 1946689522               |
| SNP_P3_172811_32686  | NW_004517928.1 | Scaffold3170 | 32686                   | TT                              | CC                | 1946689524               |
| SNP_P3_172812_44408  | NW_004517928.1 | Scaffold3170 | 44408                   | AA                              | GG                | 1946689526               |
| SNP_P3_172813_45870  | NW_004517928.1 | Scaffold3170 | 45870                   | GG                              | AA                | 1946689528               |
| SNP_P3_172814_73345  | NW_004517928.1 | Scaffold3170 | 73345                   | AA                              | CC                | 1946689530               |
| SNP_P3_172815_73737  | NW_004517928.1 | Scaffold3170 | 73737                   | CC                              | TT                | 1946689532               |
| SNP_P3_172816_76890  | NW_004517928.1 | Scaffold3170 | 76890                   | GG                              | AA                | 1946689534               |
| SNP_P3_172817_77463  | NW_004517928.1 | Scaffold3170 | 77463                   | CC                              | TT                | 1946689536               |
| SNP_P3_172818_102241 | NW_004517928.1 | Scaffold3170 | 102241                  | TT                              | CC                | 1946689538               |
| SNP_P3_172819_102304 | NW_004517928.1 | Scaffold3170 | 102304                  | GG                              | AA                | 1946689540               |
| SNP_P3_172821_124436 | NW_004517928.1 | Scaffold3170 | 124436                  | CC                              | TT                | 1946689542               |
| SNP_P3_172822_150684 | NW_004517928.1 | Scaffold3170 | 150684                  | TT                              | CC                | 1946689544               |
| SNP_P3_172823_164496 | NW_004517928.1 | Scaffold3170 | 164496                  | GG                              | TT                | 1946689546               |
| SNP_P3_172824_178302 | NW_004517928.1 | Scaffold3170 | 178302                  | AA                              | GG                | 1946689548               |
| SNP_P3_172826_204746 | NW_004517928.1 | Scaffold3170 | 204746                  | GG                              | AA                | 1946689550               |
| SNP_P3_172827_204764 | NW_004517928.1 | Scaffold3170 | 204764                  | AA                              | CC                | 1946689552               |
| SNP_P3_172828_204936 | NW_004517928.1 | Scaffold3170 | 204936                  | AA                              | GG                | 1946689554               |
| SNP_P3_172829_205058 | NW_004517928.1 | Scaffold3170 | 205058                  | GG                              | AA                | 1946689556               |
| SNP_P3_172830_205073 | NW_004517928.1 | Scaffold3170 | 205073                  | GG                              | TT                | 1946689558               |
| SNP_P3_172831_205218 | NW_004517928.1 | Scaffold3170 | 205218                  | TT                              | AA                | 1946689560               |
| SNP_P3_172832_205240 | NW_004517928.1 | Scaffold3170 | 205240                  | AA                              | GG                | 1946689562               |

| SNPs IDs             | Chromosome IDs | Chromosomes  | Physical positions (bp) | CDC Frontier (Reference genome) | (Pusa 256 & HPNB) | NCBI SNPdb Accession IDs |
|----------------------|----------------|--------------|-------------------------|---------------------------------|-------------------|--------------------------|
| SNP_P3_172833_205251 | NW_004517928.1 | Scaffold3170 | 205251                  | TT                              | CC                | 1946689564               |
| SNP_P3_172834_205263 | NW_004517928.1 | Scaffold3170 | 205263                  | GG                              | AA                | 1946689566               |
| SNP_P3_172835_205266 | NW_004517928.1 | Scaffold3170 | 205266                  | TT                              | CC                | 1946689568               |
| SNP_P3_172836_205633 | NW_004517928.1 | Scaffold3170 | 205633                  | TT                              | CC                | 1946689570               |
| SNP_P3_172837_208064 | NW_004517928.1 | Scaffold3170 | 208064                  | TT                              | AA                | 1946689572               |
| SNP_P3_172838_208068 | NW_004517928.1 | Scaffold3170 | 208068                  | AA                              | TT                | 1946689574               |
| SNP_P3_172839_212377 | NW_004517928.1 | Scaffold3170 | 212377                  | GG                              | AA                | 1946689576               |
| SNP_P3_172840_216004 | NW_004517928.1 | Scaffold3170 | 216004                  | AA                              | CC                | 1946689578               |
| SNP_P3_172841_1021   | NW_004517929.1 | Scaffold3171 | 1021                    | TT                              | GG                | 1946689580               |
| SNP_P3_172842_1240   | NW_004517929.1 | Scaffold3171 | 1240                    | AA                              | GG                | 1946689582               |
| SNP_P3_172843_1258   | NW_004517929.1 | Scaffold3171 | 1258                    | TT                              | AA                | 1946689584               |
| SNP_P3_172844_1369   | NW_004517929.1 | Scaffold3171 | 1369                    | TT                              | GG                | 1946689586               |
| SNP_P3_172845_1377   | NW_004517929.1 | Scaffold3171 | 1377                    | CC                              | TT                | 1946689588               |
| SNP_P3_172846_1855   | NW_004517929.1 | Scaffold3171 | 1855                    | GG                              | AA                | 1946689590               |
| SNP_P3_172847_1998   | NW_004517929.1 | Scaffold3171 | 1998                    | AA                              | GG                | 1946689592               |
| SNP_P3_172848_2006   | NW_004517929.1 | Scaffold3171 | 2006                    | TT                              | GG                | 1946689594               |
| SNP_P3_172849_2103   | NW_004517929.1 | Scaffold3171 | 2103                    | GG                              | TT                | 1946689596               |
| SNP_P3_172850_2148   | NW_004517929.1 | Scaffold3171 | 2148                    | GG                              | AA                | 1946689598               |
| SNP_P3_172851_2157   | NW_004517929.1 | Scaffold3171 | 2157                    | AA                              | GG                | 1946689600               |
| SNP_P3_172852_2180   | NW_004517929.1 | Scaffold3171 | 2180                    | AA                              | GG                | 1946689602               |
| SNP_P3_172854_2235   | NW_004517929.1 | Scaffold3171 | 2235                    | GG                              | AA                | 1946689604               |
| SNP_P3_172855_2298   | NW_004517929.1 | Scaffold3171 | 2298                    | CC                              | GG                | 1946689606               |
| SNP_P3_172856_2366   | NW_004517929.1 | Scaffold3171 | 2366                    | GG                              | TT                | 1946689608               |
| SNP_P3_172857_2375   | NW_004517929.1 | Scaffold3171 | 2375                    | CC                              | TT                | 1946689610               |
| SNP_P3_172858_2391   | NW_004517929.1 | Scaffold3171 | 2391                    | GG                              | TT                | 1946689612               |
| SNP_P3_172860_2435   | NW_004517929.1 | Scaffold3171 | 2435                    | AA                              | TT                | 1946689614               |
| SNP_P3_172861_2441   | NW_004517929.1 | Scaffold3171 | 2441                    | TT                              | GG                | 1946689617               |
| SNP_P3_172862_2632   | NW_004517929.1 | Scaffold3171 | 2632                    | AA                              | GG                | 1946689619               |
| SNP_P3_172863_2639   | NW_004517929.1 | Scaffold3171 | 2639                    | AA                              | TT                | 1946689621               |
| SNP_P3_172865_2658   | NW_004517929.1 | Scaffold3171 | 2658                    | AA                              | GG                | 1946689623               |
| SNP_P3_172866_2753   | NW_004517929.1 | Scaffold3171 | 2753                    | CC                              | TT                | 1946689625               |
| SNP_P3_172867_2765   | NW_004517929.1 | Scaffold3171 | 2765                    | TT                              | GG                | 1946689627               |
| SNP_P3_172868_2770   | NW_004517929.1 | Scaffold3171 | 2770                    | TT                              | AA                | 1946689629               |
| SNP_P3_172869_64     | NW_004517930.1 | Scaffold3172 | 64                      | AA                              | GG                | 1946689631               |
| SNP_P3_172870_66     | NW_004517930.1 | Scaffold3172 | 66                      | TT                              | CC                | 1946689633               |
| SNP_P3_172871_142    | NW_004517930.1 | Scaffold3172 | 142                     | GG                              | CC                | 1946689635               |
| SNP_P3_172872_362    | NW_004517930.1 | Scaffold3172 | 362                     | CC                              | AA                | 1946689637               |
| SNP_P3_172873_578    | NW_004517930.1 | Scaffold3172 | 578                     | TT                              | AA                | 1946689639               |
| SNP_P3_172874_3858   | NW_004517931.1 | Scaffold3173 | 3858                    | TT                              | AA                | 1946689642               |
| SNP_P3_172875_6941   | NW_004517932.1 | Scaffold3174 | 6941                    | CC                              | GG                | 1946689645               |
| SNP_P3_172876_6995   | NW_004517932.1 | Scaffold3174 | 6995                    | GG                              | TT                | 1946689647               |
| SNP_P3_172877_7224   | NW_004517932.1 | Scaffold3174 | 7224                    | AA                              | TT                | 1946689649               |



| SNPs IDs            | Chromosome IDs | Chromosomes  | Physical positions (bp) | CDC Frontier (Reference genome) | (Pusa 256 & HPNB) | NCBI SNPdb Accession IDs |
|---------------------|----------------|--------------|-------------------------|---------------------------------|-------------------|--------------------------|
| SNP_P3_172878_2939  | NW_004517933.1 | Scaffold3175 | 2939                    | AA                              | GG                | 1946689651               |
| SNP_P3_172879_2969  | NW_004517933.1 | Scaffold3175 | 2969                    | TT                              | GG                | 1946689653               |
| SNP_P3_172880_2982  | NW_004517933.1 | Scaffold3175 | 2982                    | GG                              | AA                | 1946689655               |
| SNP_P3_172881_2992  | NW_004517933.1 | Scaffold3175 | 2992                    | TT                              | CC                | 1946689657               |
| SNP_P3_172882_6025  | NW_004517933.1 | Scaffold3175 | 6025                    | AA                              | GG                | 1946689659               |
| SNP_P3_172883_11651 | NW_004517933.1 | Scaffold3175 | 11651                   | AA                              | GG                | 1946689661               |
| SNP_P3_172885_12258 | NW_004517933.1 | Scaffold3175 | 12258                   | AA                              | GG                | 1946689663               |
| SNP_P3_172886_17099 | NW_004517933.1 | Scaffold3175 | 17099                   | AA                              | GG                | 1946689665               |
| SNP_P3_172887_17333 | NW_004517933.1 | Scaffold3175 | 17333                   | AA                              | CC                | 1946689667               |
| SNP_P3_172888_17346 | NW_004517933.1 | Scaffold3175 | 17346                   | TT                              | CC                | 1946689669               |
| SNP_P3_172889_17363 | NW_004517933.1 | Scaffold3175 | 17363                   | GG                              | AA                | 1946689671               |
| SNP_P3_172890_17469 | NW_004517933.1 | Scaffold3175 | 17469                   | GG                              | AA                | 1946689673               |
| SNP_P3_172891_18895 | NW_004517933.1 | Scaffold3175 | 18895                   | CC                              | TT                | 1946689675               |
| SNP_P3_172892_18902 | NW_004517933.1 | Scaffold3175 | 18902                   | CC                              | AA                | 1946689677               |
| SNP_P3_172893_18914 | NW_004517933.1 | Scaffold3175 | 18914                   | TT                              | CC                | 1946689679               |
| SNP_P3_172894_18920 | NW_004517933.1 | Scaffold3175 | 18920                   | GG                              | AA                | 1946689681               |
| SNP_P3_172895_18959 | NW_004517933.1 | Scaffold3175 | 18959                   | TT                              | CC                | 1946689684               |
| SNP_P3_172896_19116 | NW_004517933.1 | Scaffold3175 | 19116                   | TT                              | CC                | 1946689686               |
| SNP_P3_172897_19146 | NW_004517933.1 | Scaffold3175 | 19146                   | CC                              | TT                | 1946689688               |
| SNP_P3_172898_19261 | NW_004517933.1 | Scaffold3175 | 19261                   | CC                              | AA                | 1946689690               |
| SNP_P3_172899_19490 | NW_004517933.1 | Scaffold3175 | 19490                   | AA                              | GG                | 1946689692               |
| SNP_P3_172900_1373  | NW_004517934.1 | Scaffold3176 | 1373                    | AA                              | GG                | 1946689694               |
| SNP_P3_172901_1396  | NW_004517934.1 | Scaffold3176 | 1396                    | CC                              | TT                | 1946689696               |
| SNP_P3_172902_1412  | NW_004517934.1 | Scaffold3176 | 1412                    | CC                              | TT                | 1946689698               |
| SNP_P3_172903_1847  | NW_004517934.1 | Scaffold3176 | 1847                    | TT                              | AA                | 1946689700               |
| SNP_P3_172904_757   | NW_004517939.1 | Scaffold3181 | 757                     | CC                              | TT                | 1946689702               |
| SNP_P3_172905_773   | NW_004517939.1 | Scaffold3181 | 773                     | AA                              | TT                | 1946689704               |
| SNP_P3_172906_779   | NW_004517939.1 | Scaffold3181 | 779                     | TT                              | AA                | 1946689706               |
| SNP_P3_172907_376   | NW_004517941.1 | Scaffold3183 | 376                     | CC                              | TT                | 1946689709               |
| SNP_P3_172908_430   | NW_004517941.1 | Scaffold3183 | 430                     | CC                              | TT                | 1946689711               |
| SNP_P3_172909_466   | NW_004517941.1 | Scaffold3183 | 466                     | AA                              | TT                | 1946689713               |
| SNP_P3_172910_1466  | NW_004517941.1 | Scaffold3183 | 1466                    | CC                              | GG                | 1946689715               |
| SNP_P3_172911_1547  | NW_004517941.1 | Scaffold3183 | 1547                    | AA                              | TT                | 1946689717               |
| SNP_P3_172912_1914  | NW_004517943.1 | Scaffold3187 | 1914                    | GG                              | AA                | 1946689720               |
| SNP_P3_172913_2632  | NW_004517943.1 | Scaffold3187 | 2632                    | AA                              | TT                | 1946689722               |
| SNP_P3_172914_2684  | NW_004517943.1 | Scaffold3187 | 2684                    | TT                              | GG                | 1946689724               |
| SNP_P3_172915_2700  | NW_004517943.1 | Scaffold3187 | 2700                    | AA                              | GG                | 1946689726               |
| SNP_P3_172916_6031  | NW_004517943.1 | Scaffold3187 | 6031                    | AA                              | GG                | 1946689728               |
| SNP_P3_172917_6210  | NW_004517943.1 | Scaffold3187 | 6210                    | GG                              | TT                | 1946689730               |
| SNP_P3_172918_6292  | NW_004517943.1 | Scaffold3187 | 6292                    | TT                              | AA                | 1946689732               |
| SNP_P3_172920_7585  | NW_004517943.1 | Scaffold3187 | 7585                    | GG                              | AA                | 1946689734               |
| SNP_P3_172921_8298  | NW_004517943.1 | Scaffold3187 | 8298                    | CC                              | AA                | 1946689736               |

| SNPs IDs            | Chromosome IDs | Chromosomes  | Physical positions (bp) | CDC Frontier (Reference genome) | (Pusa 256 & HPNB) | NCBI SNPdb Accession IDs |
|---------------------|----------------|--------------|-------------------------|---------------------------------|-------------------|--------------------------|
| SNP_P3_172922_8302  | NW_004517943.1 | Scaffold3187 | 8302                    | GG                              | AA                | 1946689738               |
| SNP_P3_172923_8310  | NW_004517943.1 | Scaffold3187 | 8310                    | AA                              | GG                | 1946689740               |
| SNP_P3_172924_8313  | NW_004517943.1 | Scaffold3187 | 8313                    | TT                              | GG                | 1946689743               |
| SNP_P3_172925_8329  | NW_004517943.1 | Scaffold3187 | 8329                    | TT                              | AA                | 1946689746               |
| SNP_P3_172926_8793  | NW_004517943.1 | Scaffold3187 | 8793                    | TT                              | AA                | 1946689748               |
| SNP_P3_172927_9264  | NW_004517943.1 | Scaffold3187 | 9264                    | GG                              | AA                | 1946689750               |
| SNP_P3_172928_9734  | NW_004517944.1 | Scaffold3188 | 9734                    | CC                              | TT                | 1946689752               |
| SNP_P3_172929_9743  | NW_004517944.1 | Scaffold3188 | 9743                    | GG                              | AA                | 1946689754               |
| SNP_P3_172930_9787  | NW_004517944.1 | Scaffold3188 | 9787                    | GG                              | AA                | 1946689756               |
| SNP_P3_172931_10848 | NW_004517944.1 | Scaffold3188 | 10848                   | CC                              | GG                | 1946689758               |
| SNP_P3_172932_10883 | NW_004517944.1 | Scaffold3188 | 10883                   | AA                              | GG                | 1946689760               |
| SNP_P3_172933_10884 | NW_004517944.1 | Scaffold3188 | 10884                   | CC                              | TT                | 1946689762               |
| SNP_P3_172934_24881 | NW_004517947.1 | Scaffold3191 | 24881                   | TT                              | CC                | 1946689764               |
| SNP_P3_172935_25148 | NW_004517947.1 | Scaffold3191 | 25148                   | GG                              | TT                | 1946689766               |
| SNP_P3_172936_25158 | NW_004517947.1 | Scaffold3191 | 25158                   | AA                              | GG                | 1946689768               |
| SNP_P3_172937_25217 | NW_004517947.1 | Scaffold3191 | 25217                   | CC                              | GG                | 1946689770               |
| SNP_P3_172938_25293 | NW_004517947.1 | Scaffold3191 | 25293                   | AA                              | GG                | 1946689772               |
| SNP_P3_172939_25368 | NW_004517947.1 | Scaffold3191 | 25368                   | CC                              | GG                | 1946689774               |
| SNP_P3_172940_25381 | NW_004517947.1 | Scaffold3191 | 25381                   | TT                              | CC                | 1946689776               |
| SNP_P3_172941_25423 | NW_004517947.1 | Scaffold3191 | 25423                   | TT                              | AA                | 1946689778               |
| SNP_P3_172942_25443 | NW_004517947.1 | Scaffold3191 | 25443                   | AA                              | TT                | 1946689780               |
| SNP_P3_172943_25477 | NW_004517947.1 | Scaffold3191 | 25477                   | TT                              | AA                | 1946689783               |
| SNP_P3_172944_25482 | NW_004517947.1 | Scaffold3191 | 25482                   | GG                              | AA                | 1946689785               |
| SNP_P3_172945_25491 | NW_004517947.1 | Scaffold3191 | 25491                   | AA                              | TT                | 1946689787               |
| SNP_P3_172946_25516 | NW_004517947.1 | Scaffold3191 | 25516                   | AA                              | GG                | 1946689789               |
| SNP_P3_172947_25537 | NW_004517947.1 | Scaffold3191 | 25537                   | TT                              | CC                | 1946689791               |
| SNP_P3_172948_25569 | NW_004517947.1 | Scaffold3191 | 25569                   | AA                              | GG                | 1946689793               |
| SNP_P3_172949_25720 | NW_004517947.1 | Scaffold3191 | 25720                   | CC                              | TT                | 1946689795               |
| SNP_P3_172950_25722 | NW_004517947.1 | Scaffold3191 | 25722                   | GG                              | AA                | 1946689797               |
| SNP_P3_172951_25727 | NW_004517947.1 | Scaffold3191 | 25727                   | GG                              | TT                | 1946689799               |
| SNP_P3_172952_25737 | NW_004517947.1 | Scaffold3191 | 25737                   | CC                              | GG                | 1946689801               |
| SNP_P3_172953_25740 | NW_004517947.1 | Scaffold3191 | 25740                   | CC                              | TT                | 1946689803               |
| SNP_P3_172954_25741 | NW_004517947.1 | Scaffold3191 | 25741                   | CC                              | TT                | 1946689805               |
| SNP_P3_172955_25864 | NW_004517947.1 | Scaffold3191 | 25864                   | CC                              | GG                | 1946689807               |
| SNP_P3_172956_25894 | NW_004517947.1 | Scaffold3191 | 25894                   | GG                              | CC                | 1946689809               |
| SNP_P3_172957_25916 | NW_004517947.1 | Scaffold3191 | 25916                   | AA                              | GG                | 1946689811               |
| SNP_P3_172958_25943 | NW_004517947.1 | Scaffold3191 | 25943                   | AA                              | CC                | 1946689813               |
| SNP_P3_172959_26209 | NW_004517947.1 | Scaffold3191 | 26209                   | GG                              | AA                | 1946689816               |
| SNP_P3_172961_30167 | NW_004517947.1 | Scaffold3191 | 30167                   | TT                              | CC                | 1946689818               |
| SNP_P3_172962_31885 | NW_004517947.1 | Scaffold3191 | 31885                   | GG                              | AA                | 1946689820               |
| SNP_P3_172963_3018  | NW_004517951.1 | Scaffold3195 | 3018                    | CC                              | AA                | 1946689822               |
| SNP_P3_172964_336   | NW_004517952.1 | Scaffold3198 | 336                     | AA                              | CC                | 1946689824               |

| SNPs IDs           | Chromosome IDs | Chromosomes  | Physical positions (bp) | CDC Frontier (Reference genome) | (Pusa 256 & HPNB) | NCBI SNPdb Accession IDs |
|--------------------|----------------|--------------|-------------------------|---------------------------------|-------------------|--------------------------|
| SNP_P3_172965_348  | NW_004517952.1 | Scaffold3198 | 348                     | TT                              | AA                | 1946689826               |
| SNP_P3_172966_399  | NW_004517953.1 | Scaffold3199 | 399                     | TT                              | AA                | 1946689828               |
| SNP_P3_172967_401  | NW_004517953.1 | Scaffold3199 | 401                     | GG                              | AA                | 1946689830               |
| SNP_P3_172968_606  | NW_004517953.1 | Scaffold3199 | 606                     | GG                              | CC                | 1946689832               |
| SNP_P3_172969_673  | NW_004517953.1 | Scaffold3199 | 673                     | TT                              | GG                | 1946689834               |
| SNP_P3_172970_803  | NW_004517953.1 | Scaffold3199 | 803                     | GG                              | AA                | 1946689836               |
| SNP_P3_172971_972  | NW_004517953.1 | Scaffold3199 | 972                     | GG                              | AA                | 1946689838               |
| SNP_P3_172972_1046 | NW_004517953.1 | Scaffold3199 | 1046                    | AA                              | GG                | 1946689840               |
| SNP_P3_172973_637  | NW_004517958.1 | Scaffold3204 | 637                     | AA                              | TT                | 1946689842               |
| SNP_P3_172974_639  | NW_004517958.1 | Scaffold3204 | 639                     | TT                              | GG                | 1946689844               |
| SNP_P3_172975_646  | NW_004517958.1 | Scaffold3204 | 646                     | GG                              | TT                | 1946689846               |
| SNP_P3_172976_647  | NW_004517958.1 | Scaffold3204 | 647                     | AA                              | TT                | 1946689848               |
| SNP_P3_172977_1011 | NW_004517958.1 | Scaffold3204 | 1011                    | TT                              | CC                | 1946689850               |
| SNP_P3_172978_483  | NW_004517961.1 | Scaffold3208 | 483                     | CC                              | TT                | 1946689854               |
| SNP_P3_172979_673  | NW_004517961.1 | Scaffold3208 | 673                     | AA                              | GG                | 1946689856               |
| SNP_P3_172980_771  | NW_004517961.1 | Scaffold3208 | 771                     | GG                              | AA                | 1946689858               |
| SNP_P3_172981_802  | NW_004517961.1 | Scaffold3208 | 802                     | CC                              | TT                | 1946689860               |
| SNP_P3_172982_910  | NW_004517961.1 | Scaffold3208 | 910                     | TT                              | AA                | 1946689862               |
| SNP_P3_172983_1189 | NW_004517961.1 | Scaffold3208 | 1189                    | GG                              | AA                | 1946689864               |
| SNP_P3_172984_1281 | NW_004517961.1 | Scaffold3208 | 1281                    | GG                              | AA                | 1946689866               |
| SNP_P3_172985_1362 | NW_004517961.1 | Scaffold3208 | 1362                    | AA                              | GG                | 1946689868               |
| SNP_P3_172986_1536 | NW_004517961.1 | Scaffold3208 | 1536                    | AA                              | TT                | 1946689870               |
| SNP_P3_172987_705  | NW_004517962.1 | Scaffold3209 | 705                     | GG                              | AA                | 1946689872               |
| SNP_P3_172988_629  | NW_004517963.1 | Scaffold3210 | 629                     | AA                              | GG                | 1946689874               |
| SNP_P3_172989_5599 | NW_004517963.1 | Scaffold3210 | 5599                    | CC                              | GG                | 1946689876               |
| SNP_P3_172990_5614 | NW_004517963.1 | Scaffold3210 | 5614                    | TT                              | CC                | 1946689878               |
| SNP_P3_172991_5729 | NW_004517963.1 | Scaffold3210 | 5729                    | GG                              | TT                | 1946689880               |
| SNP_P3_172992_5732 | NW_004517963.1 | Scaffold3210 | 5732                    | TT                              | CC                | 1946689882               |
| SNP_P3_172993_5738 | NW_004517963.1 | Scaffold3210 | 5738                    | TT                              | AA                | 1946689884               |
| SNP_P3_172994_5744 | NW_004517963.1 | Scaffold3210 | 5744                    | AA                              | CC                | 1946689886               |
| SNP_P3_172995_5763 | NW_004517963.1 | Scaffold3210 | 5763                    | AA                              | GG                | 1946689888               |
| SNP_P3_172996_5792 | NW_004517963.1 | Scaffold3210 | 5792                    | CC                              | TT                | 1946689892               |
| SNP_P3_172997_5946 | NW_004517963.1 | Scaffold3210 | 5946                    | TT                              | GG                | 1946689894               |
| SNP_P3_172998_5949 | NW_004517963.1 | Scaffold3210 | 5949                    | TT                              | CC                | 1946689896               |
| SNP_P3_172999_5971 | NW_004517963.1 | Scaffold3210 | 5971                    | AA                              | GG                | 1946689898               |
| SNP_P3_173000_5998 | NW_004517963.1 | Scaffold3210 | 5998                    | CC                              | TT                | 1946689900               |
| SNP_P3_173001_6021 | NW_004517963.1 | Scaffold3210 | 6021                    | TT                              | AA                | 1946689905               |
| SNP_P3_173002_6053 | NW_004517963.1 | Scaffold3210 | 6053                    | GG                              | CC                | 1946689907               |
| SNP_P3_173003_91   | NW_004517965.1 | Scaffold3212 | 91                      | GG                              | AA                | 1946689909               |
| SNP_P3_173004_118  | NW_004517965.1 | Scaffold3212 | 118                     | CC                              | AA                | 1946689911               |
| SNP_P3_173005_246  | NW_004517965.1 | Scaffold3212 | 246                     | AA                              | GG                | 1946689913               |
| SNP_P3_173006_286  | NW_004517965.1 | Scaffold3212 | 286                     | AA                              | TT                | 1946689915               |

| SNPs IDs           | Chromosome IDs | Chromosomes  | Physical positions (bp) | CDC Frontier (Reference genome) | (Pusa 256 & HPNB) | NCBI SNPdb Accession IDs |
|--------------------|----------------|--------------|-------------------------|---------------------------------|-------------------|--------------------------|
| SNP_P3_173007_373  | NW_004517965.1 | Scaffold3212 | 373                     | TT                              | CC                | 1946689917               |
| SNP_P3_173008_628  | NW_004517965.1 | Scaffold3212 | 628                     | TT                              | AA                | 1946689919               |
| SNP_P3_173009_697  | NW_004517965.1 | Scaffold3212 | 697                     | GG                              | TT                | 1946689921               |
| SNP_P3_173011_762  | NW_004517965.1 | Scaffold3212 | 762                     | CC                              | AA                | 1946689923               |
| SNP_P3_173012_774  | NW_004517965.1 | Scaffold3212 | 774                     | AA                              | GG                | 1946689926               |
| SNP_P3_173013_1333 | NW_004517965.1 | Scaffold3212 | 1333                    | CC                              | GG                | 1946689928               |
| SNP_P3_173015_1577 | NW_004517965.1 | Scaffold3212 | 1577                    | CC                              | TT                | 1946689930               |
| SNP_P3_173016_1637 | NW_004517965.1 | Scaffold3212 | 1637                    | AA                              | GG                | 1946689932               |
| SNP_P3_173018_1883 | NW_004517965.1 | Scaffold3212 | 1883                    | GG                              | CC                | 1946689934               |
| SNP_P3_173019_2174 | NW_004517965.1 | Scaffold3212 | 2174                    | TT                              | GG                | 1946689936               |
| SNP_P3_173020_2224 | NW_004517965.1 | Scaffold3212 | 2224                    | AA                              | TT                | 1946689938               |
| SNP_P3_173021_2225 | NW_004517965.1 | Scaffold3212 | 2225                    | TT                              | AA                | 1946689940               |
| SNP_P3_173022_2369 | NW_004517965.1 | Scaffold3212 | 2369                    | GG                              | AA                | 1946689942               |
| SNP_P3_173023_2392 | NW_004517965.1 | Scaffold3212 | 2392                    | TT                              | CC                | 1946689944               |
| SNP_P3_173024_2412 | NW_004517965.1 | Scaffold3212 | 2412                    | CC                              | TT                | 1946689946               |
| SNP_P3_173025_2536 | NW_004517965.1 | Scaffold3212 | 2536                    | AA                              | TT                | 1946689948               |
| SNP_P3_173026_2548 | NW_004517965.1 | Scaffold3212 | 2548                    | CC                              | TT                | 1946689950               |
| SNP_P3_173028_2578 | NW_004517965.1 | Scaffold3212 | 2578                    | CC                              | TT                | 1946689952               |
| SNP_P3_173029_2664 | NW_004517965.1 | Scaffold3212 | 2664                    | CC                              | GG                | 1946689954               |
| SNP_P3_173030_2707 | NW_004517965.1 | Scaffold3212 | 2707                    | AA                              | GG                | 1946689956               |
| SNP_P3_173031_2711 | NW_004517965.1 | Scaffold3212 | 2711                    | CC                              | TT                | 1946689958               |
| SNP_P3_173032_2796 | NW_004517965.1 | Scaffold3212 | 2796                    | GG                              | TT                | 1946689960               |
| SNP_P3_173033_2830 | NW_004517965.1 | Scaffold3212 | 2830                    | GG                              | CC                | 1946689962               |
| SNP_P3_173034_2935 | NW_004517965.1 | Scaffold3212 | 2935                    | TT                              | AA                | 1946689964               |
| SNP_P3_173035_3032 | NW_004517965.1 | Scaffold3212 | 3032                    | GG                              | CC                | 1946689966               |
| SNP_P3_173036_3057 | NW_004517965.1 | Scaffold3212 | 3057                    | CC                              | GG                | 1946689968               |
| SNP_P3_173037_3076 | NW_004517965.1 | Scaffold3212 | 3076                    | AA                              | CC                | 1946689970               |
| SNP_P3_173038_3487 | NW_004517965.1 | Scaffold3212 | 3487                    | AA                              | GG                | 1946689972               |
| SNP_P3_173039_3558 | NW_004517965.1 | Scaffold3212 | 3558                    | CC                              | AA                | 1946689974               |
| SNP_P3_173040_3599 | NW_004517965.1 | Scaffold3212 | 3599                    | TT                              | CC                | 1946689976               |
| SNP_P3_173041_3669 | NW_004517965.1 | Scaffold3212 | 3669                    | AA                              | TT                | 1946689978               |
| SNP_P3_173042_3681 | NW_004517965.1 | Scaffold3212 | 3681                    | TT                              | AA                | 1946689980               |
| SNP_P3_173044_3838 | NW_004517965.1 | Scaffold3212 | 3838                    | CC                              | TT                | 1946689982               |
| SNP_P3_173045_3929 | NW_004517965.1 | Scaffold3212 | 3929                    | AA                              | TT                | 1946689984               |
| SNP_P3_173046_3953 | NW_004517965.1 | Scaffold3212 | 3953                    | TT                              | CC                | 1946689986               |
| SNP_P3_173047_3985 | NW_004517965.1 | Scaffold3212 | 3985                    | TT                              | CC                | 1946689988               |
| SNP_P3_173048_3996 | NW_004517965.1 | Scaffold3212 | 3996                    | CC                              | TT                | 1946689990               |
| SNP_P3_173049_4038 | NW_004517965.1 | Scaffold3212 | 4038                    | TT                              | CC                | 1946689992               |
| SNP_P3_173050_4166 | NW_004517965.1 | Scaffold3212 | 4166                    | AA                              | TT                | 1946689994               |
| SNP_P3_173051_4399 | NW_004517965.1 | Scaffold3212 | 4399                    | AA                              | CC                | 1946689996               |
| SNP_P3_173052_4495 | NW_004517965.1 | Scaffold3212 | 4495                    | AA                              | CC                | 1946689998               |
| SNP_P3_173053_5451 | NW_004517965.1 | Scaffold3212 | 5451                    | GG                              | TT                | 1946690000               |

| SNPs IDs           | Chromosome IDs | Chromosomes  | Physical positions (bp) | CDC Frontier (Reference genome) | (Pusa 256 & HPNB) | NCBI SNPdb Accession IDs |
|--------------------|----------------|--------------|-------------------------|---------------------------------|-------------------|--------------------------|
| SNP_P3_173054_5586 | NW_004517965.1 | Scaffold3212 | 5586                    | AA                              | GG                | 1946690002               |
| SNP_P3_173055_5589 | NW_004517965.1 | Scaffold3212 | 5589                    | GG                              | AA                | 1946690004               |
| SNP_P3_173056_5763 | NW_004517965.1 | Scaffold3212 | 5763                    | TT                              | CC                | 1946690006               |
| SNP_P3_173057_5837 | NW_004517965.1 | Scaffold3212 | 5837                    | AA                              | CC                | 1946690008               |
| SNP_P3_173058_5944 | NW_004517965.1 | Scaffold3212 | 5944                    | AA                              | GG                | 1946690009               |
| SNP_P3_173059_5945 | NW_004517965.1 | Scaffold3212 | 5945                    | GG                              | TT                | 1946690011               |
| SNP_P3_173060_5951 | NW_004517965.1 | Scaffold3212 | 5951                    | TT                              | CC                | 1946690013               |
| SNP_P3_173061_6060 | NW_004517965.1 | Scaffold3212 | 6060                    | GG                              | TT                | 1946690015               |
| SNP_P3_173062_6141 | NW_004517965.1 | Scaffold3212 | 6141                    | GG                              | CC                | 1946690017               |
| SNP_P3_173063_6217 | NW_004517965.1 | Scaffold3212 | 6217                    | GG                              | AA                | 1946690019               |
| SNP_P3_173065_6375 | NW_004517965.1 | Scaffold3212 | 6375                    | TT                              | CC                | 1946690021               |
| SNP_P3_173066_6400 | NW_004517965.1 | Scaffold3212 | 6400                    | AA                              | CC                | 1946690023               |
| SNP_P3_173067_6451 | NW_004517965.1 | Scaffold3212 | 6451                    | TT                              | CC                | 1946690025               |
| SNP_P3_173068_6469 | NW_004517965.1 | Scaffold3212 | 6469                    | GG                              | TT                | 1946690027               |
| SNP_P3_173069_6597 | NW_004517965.1 | Scaffold3212 | 6597                    | CC                              | TT                | 1946690029               |
| SNP_P3_173070_6598 | NW_004517965.1 | Scaffold3212 | 6598                    | GG                              | AA                | 1946690031               |
| SNP_P3_173071_6692 | NW_004517965.1 | Scaffold3212 | 6692                    | CC                              | TT                | 1946690033               |
| SNP_P3_173072_6717 | NW_004517965.1 | Scaffold3212 | 6717                    | CC                              | TT                | 1946690035               |
| SNP_P3_173073_6736 | NW_004517965.1 | Scaffold3212 | 6736                    | CC                              | TT                | 1946690037               |
| SNP_P3_173074_6755 | NW_004517965.1 | Scaffold3212 | 6755                    | GG                              | CC                | 1946690039               |
| SNP_P3_173075_6845 | NW_004517965.1 | Scaffold3212 | 6845                    | CC                              | AA                | 1946690041               |
| SNP_P3_173076_6849 | NW_004517965.1 | Scaffold3212 | 6849                    | TT                              | GG                | 1946690043               |
| SNP_P3_173077_7037 | NW_004517965.1 | Scaffold3212 | 7037                    | TT                              | CC                | 1946690045               |
| SNP_P3_173078_7263 | NW_004517965.1 | Scaffold3212 | 7263                    | CC                              | TT                | 1946690047               |
| SNP_P3_173079_7812 | NW_004517965.1 | Scaffold3212 | 7812                    | TT                              | CC                | 1946690050               |
| SNP_P3_173080_7996 | NW_004517965.1 | Scaffold3212 | 7996                    | GG                              | TT                | 1946690052               |
| SNP_P3_173081_8029 | NW_004517965.1 | Scaffold3212 | 8029                    | GG                              | AA                | 1946690054               |
| SNP_P3_173082_8159 | NW_004517965.1 | Scaffold3212 | 8159                    | AA                              | GG                | 1946690056               |
| SNP_P3_173083_8204 | NW_004517965.1 | Scaffold3212 | 8204                    | GG                              | AA                | 1946690058               |
| SNP_P3_173084_8262 | NW_004517965.1 | Scaffold3212 | 8262                    | CC                              | GG                | 1946690060               |
| SNP_P3_173085_8274 | NW_004517965.1 | Scaffold3212 | 8274                    | CC                              | TT                | 1946690062               |
| SNP_P3_173086_8455 | NW_004517965.1 | Scaffold3212 | 8455                    | CC                              | TT                | 1946690064               |
| SNP_P3_173087_8457 | NW_004517965.1 | Scaffold3212 | 8457                    | AA                              | GG                | 1946690066               |
| SNP_P3_173088_8662 | NW_004517965.1 | Scaffold3212 | 8662                    | CC                              | TT                | 1946690068               |
| SNP_P3_173089_8946 | NW_004517965.1 | Scaffold3212 | 8946                    | TT                              | CC                | 1946690069               |
| SNP_P3_173090_9000 | NW_004517965.1 | Scaffold3212 | 9000                    | GG                              | TT                | 1946690071               |
| SNP_P3_173091_9352 | NW_004517965.1 | Scaffold3212 | 9352                    | GG                              | TT                | 1946690073               |
| SNP_P3_173092_9672 | NW_004517965.1 | Scaffold3212 | 9672                    | AA                              | TT                | 1946690075               |
| SNP_P3_173093_9696 | NW_004517965.1 | Scaffold3212 | 9696                    | TT                              | CC                | 1946690078               |
| SNP_P3_173094_9767 | NW_004517965.1 | Scaffold3212 | 9767                    | GG                              | AA                | 1946690080               |
| SNP_P3_173095_9829 | NW_004517965.1 | Scaffold3212 | 9829                    | CC                              | AA                | 1946690082               |
| SNP_P3_173096_9830 | NW_004517965.1 | Scaffold3212 | 9830                    | CC                              | GG                | 1946690085               |

| SNPs IDs            | Chromosome IDs | Chromosomes  | Physical positions (bp) | CDC Frontier (Reference genome) | (Pusa 256 & HPNB) | NCBI SNPdb Accession IDs |
|---------------------|----------------|--------------|-------------------------|---------------------------------|-------------------|--------------------------|
| SNP_P3_173097_9889  | NW_004517965.1 | Scaffold3212 | 9889                    | TT                              | CC                | 1946690087               |
| SNP_P3_173098_9890  | NW_004517965.1 | Scaffold3212 | 9890                    | GG                              | AA                | 1946690089               |
| SNP_P3_173099_10050 | NW_004517965.1 | Scaffold3212 | 10050                   | TT                              | CC                | 1946690091               |
| SNP_P3_173100_10080 | NW_004517965.1 | Scaffold3212 | 10080                   | CC                              | AA                | 1946690093               |
| SNP_P3_173101_10105 | NW_004517965.1 | Scaffold3212 | 10105                   | GG                              | TT                | 1946690095               |
| SNP_P3_173102_10114 | NW_004517965.1 | Scaffold3212 | 10114                   | CC                              | AA                | 1946690097               |
| SNP_P3_173103_10174 | NW_004517965.1 | Scaffold3212 | 10174                   | TT                              | CC                | 1946690099               |
| SNP_P3_173104_10183 | NW_004517965.1 | Scaffold3212 | 10183                   | TT                              | CC                | 1946690101               |
| SNP_P3_173105_10307 | NW_004517965.1 | Scaffold3212 | 10307                   | CC                              | TT                | 1946690104               |
| SNP_P3_173106_10334 | NW_004517965.1 | Scaffold3212 | 10334                   | TT                              | AA                | 1946690106               |
| SNP_P3_173107_10372 | NW_004517965.1 | Scaffold3212 | 10372                   | GG                              | AA                | 1946690108               |
| SNP_P3_173108_10468 | NW_004517965.1 | Scaffold3212 | 10468                   | CC                              | TT                | 1946690111               |
| SNP_P3_173109_10738 | NW_004517965.1 | Scaffold3212 | 10738                   | TT                              | AA                | 1946690113               |
| SNP_P3_173110_10794 | NW_004517965.1 | Scaffold3212 | 10794                   | AA                              | GG                | 1946690115               |
| SNP_P3_173111_11463 | NW_004517965.1 | Scaffold3212 | 11463                   | GG                              | TT                | 1946690117               |
| SNP_P3_173112_11606 | NW_004517965.1 | Scaffold3212 | 11606                   | TT                              | GG                | 1946690119               |
| SNP_P3_173113_5854  | NW_004517966.1 | Scaffold3213 | 5854                    | TT                              | GG                | 1946690121               |
| SNP_P3_173114_18200 | NW_004517966.1 | Scaffold3213 | 18200                   | TT                              | AA                | 1946690124               |
| SNP_P3_173115_800   | NW_004517968.1 | Scaffold3215 | 800                     | CC                              | TT                | 1946690126               |
| SNP_P3_173116_886   | NW_004517968.1 | Scaffold3215 | 886                     | TT                              | CC                | 1946690129               |
| SNP_P3_173117_903   | NW_004517968.1 | Scaffold3215 | 903                     | CC                              | GG                | 1946690131               |
| SNP_P3_173118_904   | NW_004517968.1 | Scaffold3215 | 904                     | TT                              | GG                | 1946690133               |
| SNP_P3_173119_914   | NW_004517968.1 | Scaffold3215 | 914                     | GG                              | TT                | 1946690135               |
| SNP_P3_173120_1077  | NW_004517968.1 | Scaffold3215 | 1077                    | TT                              | CC                | 1946690137               |
| SNP_P3_173121_1114  | NW_004517968.1 | Scaffold3215 | 1114                    | CC                              | GG                | 1946690139               |
| SNP_P3_173122_1340  | NW_004517968.1 | Scaffold3215 | 1340                    | GG                              | TT                | 1946690141               |
| SNP_P3_173123_568   | NW_004517969.1 | Scaffold3216 | 568                     | GG                              | AA                | 1946690143               |
| SNP_P3_173124_761   | NW_004517969.1 | Scaffold3216 | 761                     | AA                              | TT                | 1946690144               |
| SNP_P3_173125_1904  | NW_004517969.1 | Scaffold3216 | 1904                    | AA                              | CC                | 1946690147               |
| SNP_P3_173126_9011  | NW_004517969.1 | Scaffold3216 | 9011                    | AA                              | TT                | 1946690149               |
| SNP_P3_173127_9027  | NW_004517969.1 | Scaffold3216 | 9027                    | AA                              | GG                | 1946690151               |
| SNP_P3_173128_9044  | NW_004517969.1 | Scaffold3216 | 9044                    | AA                              | CC                | 1946690153               |
| SNP_P3_173129_4107  | NW_004517970.1 | Scaffold3217 | 4107                    | AA                              | GG                | 1946690155               |
| SNP_P3_173130_4117  | NW_004517970.1 | Scaffold3217 | 4117                    | AA                              | GG                | 1946690157               |
| SNP_P3_173131_4134  | NW_004517970.1 | Scaffold3217 | 4134                    | GG                              | TT                | 1946690159               |
| SNP_P3_173132_4135  | NW_004517970.1 | Scaffold3217 | 4135                    | CC                              | TT                | 1946690162               |
| SNP_P3_173133_4188  | NW_004517970.1 | Scaffold3217 | 4188                    | AA                              | GG                | 1946690164               |
| SNP_P3_173134_4226  | NW_004517970.1 | Scaffold3217 | 4226                    | CC                              | AA                | 1946690166               |
| SNP_P3_173135_4275  | NW_004517970.1 | Scaffold3217 | 4275                    | CC                              | TT                | 1946690168               |
| SNP_P3_173136_4296  | NW_004517970.1 | Scaffold3217 | 4296                    | AA                              | GG                | 1946690169               |
| SNP_P3_173137_4337  | NW_004517970.1 | Scaffold3217 | 4337                    | TT                              | AA                | 1946690171               |
| SNP_P3_173138_4343  | NW_004517970.1 | Scaffold3217 | 4343                    | CC                              | AA                | 1946690173               |

| SNPs IDs            | Chromosome IDs | Chromosomes  | Physical positions (bp) | CDC Frontier (Reference genome) | (Pusa 256 & HPNB) | NCBI SNPdb Accession IDs |
|---------------------|----------------|--------------|-------------------------|---------------------------------|-------------------|--------------------------|
| SNP_P3_173139_4364  | NW_004517970.1 | Scaffold3217 | 4364                    | AA                              | GG                | 1946690175               |
| SNP_P3_173140_4412  | NW_004517970.1 | Scaffold3217 | 4412                    | TT                              | GG                | 1946690177               |
| SNP_P3_173141_4414  | NW_004517970.1 | Scaffold3217 | 4414                    | AA                              | GG                | 1946690179               |
| SNP_P3_173142_4422  | NW_004517970.1 | Scaffold3217 | 4422                    | AA                              | GG                | 1946690181               |
| SNP_P3_173143_4584  | NW_004517970.1 | Scaffold3217 | 4584                    | CC                              | AA                | 1946690183               |
| SNP_P3_173144_4601  | NW_004517970.1 | Scaffold3217 | 4601                    | AA                              | GG                | 1946690185               |
| SNP_P3_173146_4767  | NW_004517970.1 | Scaffold3217 | 4767                    | AA                              | CC                | 1946690187               |
| SNP_P3_173147_4779  | NW_004517970.1 | Scaffold3217 | 4779                    | GG                              | TT                | 1946690189               |
| SNP_P3_173148_4985  | NW_004517970.1 | Scaffold3217 | 4985                    | GG                              | AA                | 1946690191               |
| SNP_P3_173149_5020  | NW_004517970.1 | Scaffold3217 | 5020                    | TT                              | CC                | 1946690194               |
| SNP_P3_173150_11019 | NW_004517970.1 | Scaffold3217 | 11019                   | GG                              | AA                | 1946690196               |
| SNP_P3_173151_13502 | NW_004517970.1 | Scaffold3217 | 13502                   | TT                              | AA                | 1946690198               |
| SNP_P3_173152_13734 | NW_004517970.1 | Scaffold3217 | 13734                   | AA                              | GG                | 1946690200               |
| SNP_P3_173153_13849 | NW_004517970.1 | Scaffold3217 | 13849                   | CC                              | TT                | 1946690202               |
| SNP_P3_173154_14160 | NW_004517970.1 | Scaffold3217 | 14160                   | AA                              | GG                | 1946690204               |
| SNP_P3_173155_15304 | NW_004517970.1 | Scaffold3217 | 15304                   | AA                              | CC                | 1946690206               |
| SNP_P3_173156_15341 | NW_004517970.1 | Scaffold3217 | 15341                   | TT                              | CC                | 1946690208               |
| SNP_P3_173157_15392 | NW_004517970.1 | Scaffold3217 | 15392                   | TT                              | GG                | 1946690210               |
| SNP_P3_173158_15548 | NW_004517970.1 | Scaffold3217 | 15548                   | CC                              | GG                | 1946690212               |
| SNP_P3_173159_15774 | NW_004517970.1 | Scaffold3217 | 15774                   | TT                              | CC                | 1946690214               |
| SNP_P3_173160_15775 | NW_004517970.1 | Scaffold3217 | 15775                   | TT                              | CC                | 1946690216               |
| SNP_P3_173161_15796 | NW_004517970.1 | Scaffold3217 | 15796                   | CC                              | TT                | 1946690218               |
| SNP_P3_173162_15826 | NW_004517970.1 | Scaffold3217 | 15826                   | CC                              | TT                | 1946690219               |
| SNP_P3_173163_15838 | NW_004517970.1 | Scaffold3217 | 15838                   | AA                              | GG                | 1946690221               |
| SNP_P3_173164_15849 | NW_004517970.1 | Scaffold3217 | 15849                   | AA                              | CC                | 1946690223               |
| SNP_P3_173165_15915 | NW_004517970.1 | Scaffold3217 | 15915                   | AA                              | GG                | 1946690225               |
| SNP_P3_173166_26509 | NW_004517970.1 | Scaffold3217 | 26509                   | AA                              | GG                | 1946690227               |
| SNP_P3_173167_36238 | NW_004517970.1 | Scaffold3217 | 36238                   | AA                              | GG                | 1946690229               |
| SNP_P3_173168_36291 | NW_004517970.1 | Scaffold3217 | 36291                   | AA                              | CC                | 1946690231               |
| SNP_P3_173170_375   | NW_004517976.1 | Scaffold3225 | 375                     | CC                              | GG                | 1946690234               |
| SNP_P3_173171_766   | NW_004517976.1 | Scaffold3225 | 766                     | AA                              | GG                | 1946690237               |
| SNP_P3_173172_915   | NW_004517976.1 | Scaffold3225 | 915                     | TT                              | CC                | 1946690239               |
| SNP_P3_173173_5514  | NW_004517976.1 | Scaffold3225 | 5514                    | TT                              | CC                | 1946690241               |
| SNP_P3_173174_5712  | NW_004517976.1 | Scaffold3225 | 5712                    | AA                              | GG                | 1946690242               |
| SNP_P3_173175_5713  | NW_004517976.1 | Scaffold3225 | 5713                    | CC                              | TT                | 1946690244               |
| SNP_P3_173176_8616  | NW_004517976.1 | Scaffold3225 | 8616                    | TT                              | CC                | 1946690246               |
| SNP_P3_173177_8632  | NW_004517976.1 | Scaffold3225 | 8632                    | TT                              | CC                | 1946690248               |
| SNP_P3_173178_8635  | NW_004517976.1 | Scaffold3225 | 8635                    | AA                              | GG                | 1946690250               |
| SNP_P3_173179_8665  | NW_004517976.1 | Scaffold3225 | 8665                    | TT                              | CC                | 1946690252               |
| SNP_P3_173180_8668  | NW_004517976.1 | Scaffold3225 | 8668                    | CC                              | AA                | 1946690254               |
| SNP_P3_173181_8682  | NW_004517976.1 | Scaffold3225 | 8682                    | TT                              | CC                | 1946690256               |
| SNP_P3_173182_8718  | NW_004517976.1 | Scaffold3225 | 8718                    | TT                              | CC                | 1946690258               |

| SNPs IDs            | Chromosome IDs | Chromosomes  | Physical positions (bp) | CDC Frontier (Reference genome) | (Pusa 256 & HPNB) | NCBI SNPdb Accession IDs |
|---------------------|----------------|--------------|-------------------------|---------------------------------|-------------------|--------------------------|
| SNP_P3_173183_8743  | NW_004517976.1 | Scaffold3225 | 8743                    | AA                              | GG                | 1946690260               |
| SNP_P3_173184_8841  | NW_004517976.1 | Scaffold3225 | 8841                    | CC                              | TT                | 1946690262               |
| SNP_P3_173185_8895  | NW_004517976.1 | Scaffold3225 | 8895                    | TT                              | CC                | 1946690264               |
| SNP_P3_173186_21848 | NW_004517976.1 | Scaffold3225 | 21848                   | CC                              | GG                | 1946690268               |
| SNP_P3_173187_21860 | NW_004517976.1 | Scaffold3225 | 21860                   | AA                              | CC                | 1946690270               |
| SNP_P3_173188_21865 | NW_004517976.1 | Scaffold3225 | 21865                   | AA                              | GG                | 1946690272               |
| SNP_P3_173190_1718  | NW_004517979.1 | Scaffold3228 | 1718                    | GG                              | AA                | 1946690275               |
| SNP_P3_173191_1755  | NW_004517979.1 | Scaffold3228 | 1755                    | GG                              | TT                | 1946690277               |
| SNP_P3_173192_1759  | NW_004517979.1 | Scaffold3228 | 1759                    | AA                              | GG                | 1946690279               |
| SNP_P3_173193_1770  | NW_004517979.1 | Scaffold3228 | 1770                    | TT                              | CC                | 1946690281               |
| SNP_P3_173194_1773  | NW_004517979.1 | Scaffold3228 | 1773                    | AA                              | GG                | 1946690283               |
| SNP_P3_173196_1989  | NW_004517979.1 | Scaffold3228 | 1989                    | AA                              | TT                | 1946690286               |
| SNP_P3_173197_3261  | NW_004517979.1 | Scaffold3228 | 3261                    | CC                              | TT                | 1946690288               |
| SNP_P3_173198_5095  | NW_004517979.1 | Scaffold3228 | 5095                    | GG                              | AA                | 1946690290               |
| SNP_P3_173199_5179  | NW_004517979.1 | Scaffold3228 | 5179                    | TT                              | GG                | 1946690292               |
| SNP_P3_173200_5203  | NW_004517979.1 | Scaffold3228 | 5203                    | TT                              | CC                | 1946690294               |
| SNP_P3_173201_5239  | NW_004517979.1 | Scaffold3228 | 5239                    | CC                              | GG                | 1946690297               |
| SNP_P3_173202_5256  | NW_004517979.1 | Scaffold3228 | 5256                    | AA                              | GG                | 1946690299               |
| SNP_P3_173203_8028  | NW_004517979.1 | Scaffold3228 | 8028                    | GG                              | CC                | 1946690301               |
| SNP_P3_173204_8510  | NW_004517979.1 | Scaffold3228 | 8510                    | AA                              | GG                | 1946690303               |
| SNP_P3_173205_8518  | NW_004517979.1 | Scaffold3228 | 8518                    | AA                              | GG                | 1946690305               |
| SNP_P3_173206_8534  | NW_004517979.1 | Scaffold3228 | 8534                    | AA                              | GG                | 1946690307               |
| SNP_P3_173207_8546  | NW_004517979.1 | Scaffold3228 | 8546                    | AA                              | CC                | 1946690309               |
| SNP_P3_173208_8553  | NW_004517979.1 | Scaffold3228 | 8553                    | AA                              | GG                | 1946690311               |
| SNP_P3_173209_9298  | NW_004517979.1 | Scaffold3228 | 9298                    | GG                              | AA                | 1946690313               |
| SNP_P3_173210_14859 | NW_004517979.1 | Scaffold3228 | 14859                   | GG                              | AA                | 1946690315               |
| SNP_P3_173211_15187 | NW_004517979.1 | Scaffold3228 | 15187                   | GG                              | AA                | 1946690317               |
| SNP_P3_173212_20869 | NW_004517979.1 | Scaffold3228 | 20869                   | CC                              | GG                | 1946690319               |
| SNP_P3_173213_21255 | NW_004517979.1 | Scaffold3228 | 21255                   | TT                              | CC                | 1946690321               |
| SNP_P3_173214_22173 | NW_004517979.1 | Scaffold3228 | 22173                   | TT                              | CC                | 1946690323               |
| SNP_P3_173216_23711 | NW_004517979.1 | Scaffold3228 | 23711                   | TT                              | AA                | 1946690325               |
| SNP_P3_173217_26609 | NW_004517979.1 | Scaffold3228 | 26609                   | CC                              | AA                | 1946690327               |
| SNP_P3_173218_42698 | NW_004517979.1 | Scaffold3228 | 42698                   | CC                              | AA                | 1946690329               |
| SNP_P3_173219_43373 | NW_004517979.1 | Scaffold3228 | 43373                   | AA                              | GG                | 1946690332               |
| SNP_P3_173220_54378 | NW_004517979.1 | Scaffold3228 | 54378                   | CC                              | TT                | 1946690334               |
| SNP_P3_173221_54394 | NW_004517979.1 | Scaffold3228 | 54394                   | TT                              | CC                | 1946690337               |
| SNP_P3_173222_54441 | NW_004517979.1 | Scaffold3228 | 54441                   | CC                              | TT                | 1946690339               |
| SNP_P3_173223_54667 | NW_004517979.1 | Scaffold3228 | 54667                   | TT                              | AA                | 1946690341               |
| SNP_P3_173224_54668 | NW_004517979.1 | Scaffold3228 | 54668                   | AA                              | TT                | 1946690343               |
| SNP_P3_173225_56047 | NW_004517979.1 | Scaffold3228 | 56047                   | AA                              | TT                | 1946690345               |
| SNP_P3_173226_56222 | NW_004517979.1 | Scaffold3228 | 56222                   | CC                              | GG                | 1946690347               |
| SNP_P3_173227_56247 | NW_004517979.1 | Scaffold3228 | 56247                   | CC                              | TT                | 1946690349               |



| SNPs IDs           | Chromosome IDs | Chromosomes  | Physical positions (bp) | CDC Frontier (Reference genome) | (Pusa 256 & HPNB) | NCBI SNPdb Accession IDs |
|--------------------|----------------|--------------|-------------------------|---------------------------------|-------------------|--------------------------|
| SNP_P3_173229_890  | NW_004517980.1 | Scaffold3229 | 890                     | GG                              | AA                | 1946690351               |
| SNP_P3_173230_961  | NW_004517980.1 | Scaffold3229 | 961                     | CC                              | AA                | 1946690353               |
| SNP_P3_173231_1210 | NW_004517980.1 | Scaffold3229 | 1210                    | GG                              | AA                | 1946690355               |
| SNP_P3_173232_1211 | NW_004517980.1 | Scaffold3229 | 1211                    | TT                              | AA                | 1946690357               |
| SNP_P3_173233_1229 | NW_004517980.1 | Scaffold3229 | 1229                    | TT                              | AA                | 1946690359               |
| SNP_P3_173234_1381 | NW_004517980.1 | Scaffold3229 | 1381                    | GG                              | CC                | 1946690361               |
| SNP_P3_173235_1450 | NW_004517980.1 | Scaffold3229 | 1450                    | GG                              | AA                | 1946690363               |
| SNP_P3_173236_1568 | NW_004517980.1 | Scaffold3229 | 1568                    | CC                              | AA                | 1946690366               |
| SNP_P3_173237_1701 | NW_004517980.1 | Scaffold3229 | 1701                    | TT                              | AA                | 1946690368               |
| SNP_P3_173238_4880 | NW_004517980.1 | Scaffold3229 | 4880                    | CC                              | AA                | 1946690370               |
| SNP_P3_173239_4907 | NW_004517980.1 | Scaffold3229 | 4907                    | TT                              | CC                | 1946690372               |
| SNP_P3_173240_4918 | NW_004517980.1 | Scaffold3229 | 4918                    | AA                              | GG                | 1946690374               |
| SNP_P3_173241_4932 | NW_004517980.1 | Scaffold3229 | 4932                    | AA                              | GG                | 1946690376               |
| SNP_P3_173242_4987 | NW_004517980.1 | Scaffold3229 | 4987                    | GG                              | AA                | 1946690378               |
| SNP_P3_173243_5012 | NW_004517980.1 | Scaffold3229 | 5012                    | GG                              | AA                | 1946690380               |
| SNP_P3_173244_5108 | NW_004517980.1 | Scaffold3229 | 5108                    | AA                              | CC                | 1946690382               |
| SNP_P3_173246_5273 | NW_004517980.1 | Scaffold3229 | 5273                    | TT                              | AA                | 1946690384               |
| SNP_P3_173247_5281 | NW_004517980.1 | Scaffold3229 | 5281                    | AA                              | TT                | 1946690386               |
| SNP_P3_173248_5287 | NW_004517980.1 | Scaffold3229 | 5287                    | TT                              | AA                | 1946690388               |
| SNP_P3_173250_5410 | NW_004517980.1 | Scaffold3229 | 5410                    | AA                              | CC                | 1946690390               |
| SNP_P3_173251_5412 | NW_004517980.1 | Scaffold3229 | 5412                    | CC                              | AA                | 1946690392               |
| SNP_P3_173252_5419 | NW_004517980.1 | Scaffold3229 | 5419                    | AA                              | TT                | 1946690394               |
| SNP_P3_173253_5421 | NW_004517980.1 | Scaffold3229 | 5421                    | AA                              | CC                | 1946690396               |
| SNP_P3_173254_5500 | NW_004517980.1 | Scaffold3229 | 5500                    | CC                              | TT                | 1946690398               |
| SNP_P3_173255_5555 | NW_004517980.1 | Scaffold3229 | 5555                    | TT                              | AA                | 1946690400               |
| SNP_P3_173256_5608 | NW_004517980.1 | Scaffold3229 | 5608                    | AA                              | GG                | 1946690402               |
| SNP_P3_173257_5667 | NW_004517980.1 | Scaffold3229 | 5667                    | GG                              | AA                | 1946690405               |
| SNP_P3_173258_5802 | NW_004517980.1 | Scaffold3229 | 5802                    | TT                              | CC                | 1946690407               |
| SNP_P3_173260_5805 | NW_004517980.1 | Scaffold3229 | 5805                    | TT                              | AA                | 1946690409               |
| SNP_P3_173261_5806 | NW_004517980.1 | Scaffold3229 | 5806                    | CC                              | AA                | 1946690411               |
| SNP_P3_173263_5968 | NW_004517980.1 | Scaffold3229 | 5968                    | GG                              | AA                | 1946690413               |
| SNP_P3_173264_5977 | NW_004517980.1 | Scaffold3229 | 5977                    | CC                              | AA                | 1946690415               |
| SNP_P3_173265_6036 | NW_004517980.1 | Scaffold3229 | 6036                    | TT                              | CC                | 1946690417               |
| SNP_P3_173266_6079 | NW_004517980.1 | Scaffold3229 | 6079                    | AA                              | GG                | 1946690420               |
| SNP_P3_173267_6102 | NW_004517980.1 | Scaffold3229 | 6102                    | CC                              | AA                | 1946690422               |
| SNP_P3_173268_6167 | NW_004517980.1 | Scaffold3229 | 6167                    | CC                              | TT                | 1946690424               |
| SNP_P3_173269_6288 | NW_004517980.1 | Scaffold3229 | 6288                    | AA                              | GG                | 1946690426               |
| SNP_P3_173270_6290 | NW_004517980.1 | Scaffold3229 | 6290                    | AA                              | GG                | 1946690428               |
| SNP_P3_173271_6303 | NW_004517980.1 | Scaffold3229 | 6303                    | GG                              | AA                | 1946690430               |
| SNP_P3_173272_6389 | NW_004517980.1 | Scaffold3229 | 6389                    | TT                              | CC                | 1946690432               |
| SNP_P3_173273_6410 | NW_004517980.1 | Scaffold3229 | 6410                    | CC                              | TT                | 1946690434               |
| SNP_P3_173274_6424 | NW_004517980.1 | Scaffold3229 | 6424                    | AA                              | TT                | 1946690436               |

| SNPs IDs            | Chromosome IDs | Chromosomes  | Physical positions (bp) | CDC Frontier (Reference genome) | (Pusa 256 & HPNB) | NCBI SNPdb Accession IDs |
|---------------------|----------------|--------------|-------------------------|---------------------------------|-------------------|--------------------------|
| SNP_P3_173275_6464  | NW_004517980.1 | Scaffold3229 | 6464                    | TT                              | AA                | 1946690438               |
| SNP_P3_173276_6563  | NW_004517980.1 | Scaffold3229 | 6563                    | GG                              | AA                | 1946690441               |
| SNP_P3_173277_6577  | NW_004517980.1 | Scaffold3229 | 6577                    | TT                              | AA                | 1946690443               |
| SNP_P3_173278_6587  | NW_004517980.1 | Scaffold3229 | 6587                    | GG                              | AA                | 1946690445               |
| SNP_P3_173279_6607  | NW_004517980.1 | Scaffold3229 | 6607                    | TT                              | CC                | 1946690447               |
| SNP_P3_173280_6671  | NW_004517980.1 | Scaffold3229 | 6671                    | TT                              | GG                | 1946690449               |
| SNP_P3_173281_6729  | NW_004517980.1 | Scaffold3229 | 6729                    | TT                              | CC                | 1946690451               |
| SNP_P3_173282_6833  | NW_004517980.1 | Scaffold3229 | 6833                    | GG                              | AA                | 1946690454               |
| SNP_P3_173283_6935  | NW_004517980.1 | Scaffold3229 | 6935                    | GG                              | AA                | 1946690456               |
| SNP_P3_173284_6974  | NW_004517980.1 | Scaffold3229 | 6974                    | AA                              | TT                | 1946690458               |
| SNP_P3_173286_7334  | NW_004517980.1 | Scaffold3229 | 7334                    | GG                              | TT                | 1946690460               |
| SNP_P3_173287_7368  | NW_004517980.1 | Scaffold3229 | 7368                    | AA                              | GG                | 1946690462               |
| SNP_P3_173289_7719  | NW_004517980.1 | Scaffold3229 | 7719                    | TT                              | GG                | 1946690464               |
| SNP_P3_173290_7751  | NW_004517980.1 | Scaffold3229 | 7751                    | AA                              | CC                | 1946690466               |
| SNP_P3_173291_7752  | NW_004517980.1 | Scaffold3229 | 7752                    | TT                              | AA                | 1946690468               |
| SNP_P3_173292_8460  | NW_004517980.1 | Scaffold3229 | 8460                    | CC                              | TT                | 1946690470               |
| SNP_P3_173293_8769  | NW_004517980.1 | Scaffold3229 | 8769                    | AA                              | TT                | 1946690472               |
| SNP_P3_173294_8785  | NW_004517980.1 | Scaffold3229 | 8785                    | AA                              | TT                | 1946690474               |
| SNP_P3_173295_8887  | NW_004517980.1 | Scaffold3229 | 8887                    | CC                              | GG                | 1946690477               |
| SNP_P3_173296_8920  | NW_004517980.1 | Scaffold3229 | 8920                    | TT                              | CC                | 1946690479               |
| SNP_P3_173298_9104  | NW_004517980.1 | Scaffold3229 | 9104                    | GG                              | AA                | 1946690481               |
| SNP_P3_173299_9267  | NW_004517980.1 | Scaffold3229 | 9267                    | CC                              | TT                | 1946690483               |
| SNP_P3_173301_9330  | NW_004517980.1 | Scaffold3229 | 9330                    | GG                              | AA                | 1946690485               |
| SNP_P3_173302_9364  | NW_004517980.1 | Scaffold3229 | 9364                    | AA                              | CC                | 1946690487               |
| SNP_P3_173303_9423  | NW_004517980.1 | Scaffold3229 | 9423                    | TT                              | CC                | 1946690489               |
| SNP_P3_173304_9437  | NW_004517980.1 | Scaffold3229 | 9437                    | GG                              | CC                | 1946690491               |
| SNP_P3_173305_9461  | NW_004517980.1 | Scaffold3229 | 9461                    | TT                              | CC                | 1946690493               |
| SNP_P3_173307_1237  | NW_004517981.1 | Scaffold3230 | 1237                    | TT                              | CC                | 1946690495               |
| SNP_P3_173308_1419  | NW_004517981.1 | Scaffold3230 | 1419                    | AA                              | CC                | 1946690497               |
| SNP_P3_173309_1535  | NW_004517981.1 | Scaffold3230 | 1535                    | CC                              | GG                | 1946690499               |
| SNP_P3_173310_1564  | NW_004517981.1 | Scaffold3230 | 1564                    | GG                              | TT                | 1946690501               |
| SNP_P3_173311_887   | NW_004517982.1 | Scaffold3233 | 887                     | TT                              | CC                | 1946690503               |
| SNP_P3_173312_1887  | NW_004517982.1 | Scaffold3233 | 1887                    | TT                              | CC                | 1946690505               |
| SNP_P3_173313_727   | NW_004517983.1 | Scaffold3234 | 727                     | GG                              | TT                | 1946690507               |
| SNP_P3_173314_3909  | NW_004517983.1 | Scaffold3234 | 3909                    | CC                              | TT                | 1946690509               |
| SNP_P3_173315_5748  | NW_004517983.1 | Scaffold3234 | 5748                    | CC                              | TT                | 1946690511               |
| SNP_P3_173317_8486  | NW_004517983.1 | Scaffold3234 | 8486                    | CC                              | AA                | 1946690514               |
| SNP_P3_173318_8498  | NW_004517983.1 | Scaffold3234 | 8498                    | TT                              | AA                | 1946690516               |
| SNP_P3_173319_8535  | NW_004517983.1 | Scaffold3234 | 8535                    | CC                              | TT                | 1946690518               |
| SNP_P3_173320_10260 | NW_004517983.1 | Scaffold3234 | 10260                   | GG                              | AA                | 1946690520               |
| SNP_P3_173321_11260 | NW_004517983.1 | Scaffold3234 | 11260                   | TT                              | AA                | 1946690522               |
| SNP_P3_173322_11261 | NW_004517983.1 | Scaffold3234 | 11261                   | GG                              | AA                | 1946690524               |

| SNPs IDs            | Chromosome IDs | Chromosomes  | Physical positions (bp) | CDC Frontier (Reference genome) | (Pusa 256 & HPNB) | NCBI SNPdb Accession IDs |
|---------------------|----------------|--------------|-------------------------|---------------------------------|-------------------|--------------------------|
| SNP_P3_173323_11262 | NW_004517983.1 | Scaffold3234 | 11262                   | CC                              | TT                | 1946690526               |
| SNP_P3_173324_11327 | NW_004517983.1 | Scaffold3234 | 11327                   | TT                              | CC                | 1946690528               |
| SNP_P3_173325_11509 | NW_004517983.1 | Scaffold3234 | 11509                   | AA                              | GG                | 1946690530               |
| SNP_P3_173327_12096 | NW_004517983.1 | Scaffold3234 | 12096                   | CC                              | GG                | 1946690532               |
| SNP_P3_173328_12151 | NW_004517983.1 | Scaffold3234 | 12151                   | GG                              | TT                | 1946690534               |
| SNP_P3_173329_12185 | NW_004517983.1 | Scaffold3234 | 12185                   | CC                              | TT                | 1946690536               |
| SNP_P3_173330_12257 | NW_004517983.1 | Scaffold3234 | 12257                   | TT                              | CC                | 1946690539               |
| SNP_P3_173331_12556 | NW_004517983.1 | Scaffold3234 | 12556                   | AA                              | GG                | 1946690541               |
| SNP_P3_173332_12970 | NW_004517983.1 | Scaffold3234 | 12970                   | TT                              | AA                | 1946690543               |
| SNP_P3_173333_712   | NW_004517984.1 | Scaffold3235 | 712                     | CC                              | TT                | 1946690545               |
| SNP_P3_173334_906   | NW_004517984.1 | Scaffold3235 | 906                     | GG                              | AA                | 1946690547               |
| SNP_P3_173335_910   | NW_004517984.1 | Scaffold3235 | 910                     | CC                              | TT                | 1946690549               |
| SNP_P3_173336_930   | NW_004517984.1 | Scaffold3235 | 930                     | TT                              | CC                | 1946690552               |
| SNP_P3_173337_1013  | NW_004517984.1 | Scaffold3235 | 1013                    | GG                              | TT                | 1946690555               |
| SNP_P3_173338_1927  | NW_004517984.1 | Scaffold3235 | 1927                    | GG                              | AA                | 1946690557               |
| SNP_P3_173339_1192  | NW_004517986.1 | Scaffold3237 | 1192                    | AA                              | GG                | 1946690559               |
| SNP_P3_173340_1196  | NW_004517986.1 | Scaffold3237 | 1196                    | CC                              | AA                | 1946690561               |
| SNP_P3_173341_1232  | NW_004517986.1 | Scaffold3237 | 1232                    | TT                              | CC                | 1946690563               |
| SNP_P3_173342_1261  | NW_004517986.1 | Scaffold3237 | 1261                    | TT                              | CC                | 1946690565               |
| SNP_P3_173343_63    | NW_004517989.1 | Scaffold3241 | 63                      | AA                              | CC                | 1946690567               |
| SNP_P3_173344_64    | NW_004517989.1 | Scaffold3241 | 64                      | AA                              | GG                | 1946690569               |
| SNP_P3_173345_72    | NW_004517989.1 | Scaffold3241 | 72                      | TT                              | CC                | 1946690571               |
| SNP_P3_173346_170   | NW_004517989.1 | Scaffold3241 | 170                     | GG                              | AA                | 1946690573               |
| SNP_P3_173347_456   | NW_004517989.1 | Scaffold3241 | 456                     | CC                              | AA                | 1946690575               |
| SNP_P3_173348_499   | NW_004517989.1 | Scaffold3241 | 499                     | TT                              | GG                | 1946690577               |
| SNP_P3_173349_536   | NW_004517989.1 | Scaffold3241 | 536                     | GG                              | AA                | 1946690579               |
| SNP_P3_173350_552   | NW_004517989.1 | Scaffold3241 | 552                     | CC                              | TT                | 1946690580               |
| SNP_P3_173351_611   | NW_004517989.1 | Scaffold3241 | 611                     | GG                              | AA                | 1946690582               |
| SNP_P3_173352_682   | NW_004517989.1 | Scaffold3241 | 682                     | TT                              | CC                | 1946690584               |
| SNP_P3_173353_751   | NW_004517989.1 | Scaffold3241 | 751                     | AA                              | GG                | 1946690587               |
| SNP_P3_173354_753   | NW_004517989.1 | Scaffold3241 | 753                     | TT                              | GG                | 1946690589               |
| SNP_P3_173355_879   | NW_004517989.1 | Scaffold3241 | 879                     | GG                              | AA                | 1946690591               |
| SNP_P3_173357_1082  | NW_004517989.1 | Scaffold3241 | 1082                    | GG                              | CC                | 1946690593               |
| SNP_P3_173358_1135  | NW_004517989.1 | Scaffold3241 | 1135                    | AA                              | TT                | 1946690595               |
| SNP_P3_173359_972   | NW_004517990.1 | Scaffold3242 | 972                     | GG                              | AA                | 1946690597               |
| SNP_P3_173360_983   | NW_004517990.1 | Scaffold3242 | 983                     | GG                              | AA                | 1946690599               |
| SNP_P3_173361_2849  | NW_004517990.1 | Scaffold3242 | 2849                    | TT                              | CC                | 1946690601               |
| SNP_P3_173362_2860  | NW_004517990.1 | Scaffold3242 | 2860                    | CC                              | TT                | 1946690603               |
| SNP_P3_173363_3138  | NW_004517990.1 | Scaffold3242 | 3138                    | AA                              | GG                | 1946690605               |
| SNP_P3_173364_3434  | NW_004517990.1 | Scaffold3242 | 3434                    | GG                              | AA                | 1946690607               |
| SNP_P3_173365_3512  | NW_004517990.1 | Scaffold3242 | 3512                    | GG                              | AA                | 1946690609               |
| SNP_P3_173366_3517  | NW_004517990.1 | Scaffold3242 | 3517                    | TT                              | GG                | 1946690611               |

| SNPs IDs            | Chromosome IDs | Chromosomes  | Physical positions (bp) | CDC Frontier (Reference genome) | (Pusa 256 & HPNB) | NCBI SNPdb Accession IDs |
|---------------------|----------------|--------------|-------------------------|---------------------------------|-------------------|--------------------------|
| SNP_P3_173367_6157  | NW_004517990.1 | Scaffold3242 | 6157                    | CC                              | AA                | 1946690613               |
| SNP_P3_173368_6511  | NW_004517990.1 | Scaffold3242 | 6511                    | TT                              | CC                | 1946690615               |
| SNP_P3_173369_6521  | NW_004517990.1 | Scaffold3242 | 6521                    | AA                              | GG                | 1946690617               |
| SNP_P3_173370_6560  | NW_004517990.1 | Scaffold3242 | 6560                    | CC                              | TT                | 1946690619               |
| SNP_P3_173371_6635  | NW_004517990.1 | Scaffold3242 | 6635                    | AA                              | GG                | 1946690621               |
| SNP_P3_173372_6641  | NW_004517990.1 | Scaffold3242 | 6641                    | GG                              | AA                | 1946690624               |
| SNP_P3_173373_6650  | NW_004517990.1 | Scaffold3242 | 6650                    | AA                              | CC                | 1946690626               |
| SNP_P3_173374_6666  | NW_004517990.1 | Scaffold3242 | 6666                    | TT                              | CC                | 1946690628               |
| SNP_P3_173375_6686  | NW_004517990.1 | Scaffold3242 | 6686                    | CC                              | TT                | 1946690630               |
| SNP_P3_173376_8075  | NW_004517991.1 | Scaffold3243 | 8075                    | TT                              | AA                | 1946690633               |
| SNP_P3_173377_19252 | NW_004517991.1 | Scaffold3243 | 19252                   | GG                              | AA                | 1946690635               |
| SNP_P3_173378_19633 | NW_004517991.1 | Scaffold3243 | 19633                   | AA                              | TT                | 1946690638               |
| SNP_P3_173379_19651 | NW_004517991.1 | Scaffold3243 | 19651                   | CC                              | TT                | 1946690640               |
| SNP_P3_173380_19657 | NW_004517991.1 | Scaffold3243 | 19657                   | CC                              | TT                | 1946690642               |
| SNP_P3_173381_19898 | NW_004517991.1 | Scaffold3243 | 19898                   | TT                              | GG                | 1946690644               |
| SNP_P3_173382_19928 | NW_004517991.1 | Scaffold3243 | 19928                   | TT                              | GG                | 1946690646               |
| SNP_P3_173383_20453 | NW_004517991.1 | Scaffold3243 | 20453                   | GG                              | AA                | 1946690648               |
| SNP_P3_173384_20470 | NW_004517991.1 | Scaffold3243 | 20470                   | GG                              | AA                | 1946690650               |
| SNP_P3_173385_20480 | NW_004517991.1 | Scaffold3243 | 20480                   | GG                              | CC                | 1946690652               |
| SNP_P3_173386_20555 | NW_004517991.1 | Scaffold3243 | 20555                   | GG                              | AA                | 1946690654               |
| SNP_P3_173387_20654 | NW_004517991.1 | Scaffold3243 | 20654                   | AA                              | TT                | 1946690656               |
| SNP_P3_173388_20675 | NW_004517991.1 | Scaffold3243 | 20675                   | CC                              | GG                | 1946690658               |
| SNP_P3_173389_20695 | NW_004517991.1 | Scaffold3243 | 20695                   | AA                              | CC                | 1946690660               |
| SNP_P3_173390_20721 | NW_004517991.1 | Scaffold3243 | 20721                   | AA                              | TT                | 1946690662               |
| SNP_P3_173391_20782 | NW_004517991.1 | Scaffold3243 | 20782                   | CC                              | TT                | 1946690664               |
| SNP_P3_173392_20897 | NW_004517991.1 | Scaffold3243 | 20897                   | GG                              | AA                | 1946690666               |
| SNP_P3_173393_20961 | NW_004517991.1 | Scaffold3243 | 20961                   | GG                              | CC                | 1946690668               |
| SNP_P3_173394_21473 | NW_004517991.1 | Scaffold3243 | 21473                   | CC                              | GG                | 1946690671               |
| SNP_P3_173395_21479 | NW_004517991.1 | Scaffold3243 | 21479                   | AA                              | GG                | 1946690673               |
| SNP_P3_173396_10042 | NW_004517992.1 | Scaffold3245 | 10042                   | GG                              | CC                | 1946690675               |
| SNP_P3_173397_10049 | NW_004517992.1 | Scaffold3245 | 10049                   | TT                              | AA                | 1946690677               |
| SNP_P3_173398_10050 | NW_004517992.1 | Scaffold3245 | 10050                   | TT                              | GG                | 1946690679               |
| SNP_P3_173399_10403 | NW_004517992.1 | Scaffold3245 | 10403                   | CC                              | AA                | 1946690680               |
| SNP_P3_173400_10411 | NW_004517992.1 | Scaffold3245 | 10411                   | AA                              | GG                | 1946690682               |
| SNP_P3_173402_13460 | NW_004517992.1 | Scaffold3245 | 13460                   | CC                              | TT                | 1946690684               |
| SNP_P3_173403_13483 | NW_004517992.1 | Scaffold3245 | 13483                   | AA                              | GG                | 1946690686               |
| SNP_P3_173404_13650 | NW_004517992.1 | Scaffold3245 | 13650                   | GG                              | AA                | 1946690688               |
| SNP_P3_173405_13677 | NW_004517992.1 | Scaffold3245 | 13677                   | GG                              | AA                | 1946690690               |
| SNP_P3_173406_13680 | NW_004517992.1 | Scaffold3245 | 13680                   | TT                              | CC                | 1946690692               |
| SNP_P3_173407_13690 | NW_004517992.1 | Scaffold3245 | 13690                   | TT                              | CC                | 1946690694               |
| SNP_P3_173408_13744 | NW_004517992.1 | Scaffold3245 | 13744                   | CC                              | TT                | 1946690696               |
| SNP_P3_173409_13817 | NW_004517992.1 | Scaffold3245 | 13817                   | AA                              | GG                | 1946690698               |

| SNPs IDs             | Chromosome IDs | Chromosomes    | Physical positions (bp) | CDC Frontier (Reference genome) | (Pusa 256 & HPNB) | NCBI SNPdb Accession IDs |
|----------------------|----------------|----------------|-------------------------|---------------------------------|-------------------|--------------------------|
| SNP_P3_173410_13831  | NW_004517992.1 | Scaffold3245   | 13831                   | TT                              | CC                | 1946690700               |
| SNP_P3_173411_13867  | NW_004517992.1 | Scaffold3245   | 13867                   | TT                              | AA                | 1946690703               |
| SNP_P3_173412_13873  | NW_004517992.1 | Scaffold3245   | 13873                   | TT                              | AA                | 1946690706               |
| SNP_P3_173413_13874  | NW_004517992.1 | Scaffold3245   | 13874                   | GG                              | AA                | 1946690708               |
| SNP_P3_173414_13933  | NW_004517992.1 | Scaffold3245   | 13933                   | TT                              | CC                | 1946690710               |
| SNP_P3_173415_13939  | NW_004517992.1 | Scaffold3245   | 13939                   | CC                              | TT                | 1946690712               |
| SNP_P3_173416_64     | NW_004517994.1 | Scaffold3248   | 64                      | AA                              | CC                | 1946690714               |
| SNP_P3_173417_329    | NW_004517994.1 | Scaffold3248   | 329                     | CC                              | AA                | 1946690716               |
| SNP_P3_173418_348    | NW_004517994.1 | Scaffold3248   | 348                     | AA                              | CC                | 1946690718               |
| SNP_P3_173419_523    | NW_004517995.1 | Scaffold3251   | 523                     | CC                              | AA                | 1946690720               |
| SNP_P3_173420_2756   | NW_004517995.1 | Scaffold3251   | 2756                    | GG                              | TT                | 1946690722               |
| SNP_P3_173421_2766   | NW_004517995.1 | Scaffold3251   | 2766                    | CC                              | TT                | 1946690724               |
| SNP_P3_173422_2772   | NW_004517995.1 | Scaffold3251   | 2772                    | AA                              | GG                | 1946690726               |
| SNP_P3_173423_2776   | NW_004517995.1 | Scaffold3251   | 2776                    | TT                              | AA                | 1946690728               |
| SNP_P3_173424_5532   | NW_004517995.1 | Scaffold3251   | 5532                    | CC                              | GG                | 1946690730               |
| SNP_P3_173425_6936   | NW_004517995.1 | Scaffold3251   | 6936                    | AA                              | GG                | 1946690732               |
| SNP_P3_173426_9075   | NW_004517995.1 | Scaffold3251   | 9075                    | TT                              | CC                | 1946690734               |
| SNP_P3_173427_9436   | NW_004517995.1 | Scaffold3251   | 9436                    | GG                              | AA                | 1946690736               |
| SNP_P3_173428_11362  | NW_004517995.1 | Scaffold3251   | 11362                   | CC                              | TT                | 1946690739               |
| SNP_P3_173429_11413  | NW_004517995.1 | Scaffold3251   | 11413                   | GG                              | AA                | 1946690741               |
| SNP_P3_173430_13360  | NW_004517995.1 | Scaffold3251   | 13360                   | CC                              | AA                | 1946690743               |
| SNP_P3_173431_14842  | NW_004517995.1 | Scaffold3251   | 14842                   | TT                              | AA                | 1946690745               |
| SNP_P3_173432_14843  | NW_004517995.1 | Scaffold3251   | 14843                   | CC                              | TT                | 1946690747               |
| SNP_P3_173433_17629  | NW_004517995.1 | Scaffold3251   | 17629                   | AA                              | CC                | 1946690749               |
| SNP_P3_173434_17692  | NW_004517995.1 | Scaffold3251   | 17692                   | TT                              | AA                | 1946690751               |
| SNP_P3_173435_17694  | NW_004517995.1 | Scaffold3251   | 17694                   | TT                              | AA                | 1946690753               |
| SNP_P3_173436_742    | NW_004517997.1 | Scaffold3254_2 | 742                     | TT                              | CC                | 1946690755               |
| SNP_P3_173437_775    | NW_004517997.1 | Scaffold3254_2 | 775                     | AA                              | GG                | 1946690758               |
| SNP_P3_173438_876    | NW_004517997.1 | Scaffold3254_2 | 876                     | CC                              | TT                | 1946690760               |
| SNP_P3_173439_13041  | NW_004517997.1 | Scaffold3254_2 | 13041                   | TT                              | CC                | 1946690762               |
| SNP_P3_173440_20201  | NW_004517997.1 | Scaffold3254_2 | 20201                   | AA                              | GG                | 1946690764               |
| SNP_P3_173442_73714  | NW_004517997.1 | Scaffold3254_2 | 73714                   | AA                              | GG                | 1946690766               |
| SNP_P3_173443_73725  | NW_004517997.1 | Scaffold3254_2 | 73725                   | CC                              | TT                | 1946690768               |
| SNP_P3_173444_73731  | NW_004517997.1 | Scaffold3254_2 | 73731                   | TT                              | CC                | 1946690770               |
| SNP_P3_173445_73733  | NW_004517997.1 | Scaffold3254_2 | 73733                   | AA                              | GG                | 1946690771               |
| SNP_P3_173446_92576  | NW_004517997.1 | Scaffold3254_2 | 92576                   | TT                              | GG                | 1946690773               |
| SNP_P3_173448_104590 | NW_004517997.1 | Scaffold3254_2 | 104590                  | GG                              | AA                | 1946690776               |
| SNP_P3_173449_118095 | NW_004517997.1 | Scaffold3254_2 | 118095                  | GG                              | AA                | 1946690778               |
| SNP_P3_173451_137529 | NW_004517997.1 | Scaffold3254_2 | 137529                  | TT                              | GG                | 1946690780               |
| SNP_P3_173452_150841 | NW_004517997.1 | Scaffold3254_2 | 150841                  | TT                              | GG                | 1946690782               |
| SNP_P3_173454_183926 | NW_004517997.1 | Scaffold3254_2 | 183926                  | GG                              | TT                | 1946690784               |
| SNP_P3_173456_194727 | NW_004517997.1 | Scaffold3254_2 | 194727                  | TT                              | AA                | 1946690786               |

| SNPs IDs             | Chromosome IDs | Chromosomes    | Physical positions (bp) | CDC Frontier (Reference genome) | (Pusa 256 & HPNB) | NCBI SNPdb Accession IDs |
|----------------------|----------------|----------------|-------------------------|---------------------------------|-------------------|--------------------------|
| SNP_P3_173457_201191 | NW_004517997.1 | Scaffold3254_2 | 201191                  | TT                              | AA                | 1946690788               |
| SNP_P3_173458_202242 | NW_004517997.1 | Scaffold3254_2 | 202242                  | GG                              | AA                | 1946690790               |
| SNP_P3_173460_227181 | NW_004517997.1 | Scaffold3254_2 | 227181                  | AA                              | TT                | 1946690792               |
| SNP_P3_173462_18908  | NW_004518000.1 | Scaffold3258   | 18908                   | CC                              | GG                | 1946690794               |
| SNP_P3_173463_19467  | NW_004518000.1 | Scaffold3258   | 19467                   | GG                              | AA                | 1946690796               |
| SNP_P3_173464_19506  | NW_004518000.1 | Scaffold3258   | 19506                   | TT                              | CC                | 1946690798               |
| SNP_P3_173465_20508  | NW_004518000.1 | Scaffold3258   | 20508                   | CC                              | TT                | 1946690800               |
| SNP_P3_173466_24490  | NW_004518000.1 | Scaffold3258   | 24490                   | GG                              | AA                | 1946690802               |
| SNP_P3_173467_29564  | NW_004518000.1 | Scaffold3258   | 29564                   | GG                              | AA                | 1946690804               |
| SNP_P3_173468_29605  | NW_004518000.1 | Scaffold3258   | 29605                   | AA                              | GG                | 1946690806               |
| SNP_P3_173469_31838  | NW_004518000.1 | Scaffold3258   | 31838                   | GG                              | AA                | 1946690809               |
| SNP_P3_173470_32143  | NW_004518000.1 | Scaffold3258   | 32143                   | CC                              | AA                | 1946690811               |
| SNP_P3_173471_33163  | NW_004518000.1 | Scaffold3258   | 33163                   | AA                              | TT                | 1946690813               |
| SNP_P3_173472_33172  | NW_004518000.1 | Scaffold3258   | 33172                   | CC                              | AA                | 1946690816               |
| SNP_P3_173473_33473  | NW_004518000.1 | Scaffold3258   | 33473                   | CC                              | TT                | 1946690818               |
| SNP_P3_173474_33848  | NW_004518000.1 | Scaffold3258   | 33848                   | TT                              | AA                | 1946690820               |
| SNP_P3_173477_34532  | NW_004518000.1 | Scaffold3258   | 34532                   | CC                              | GG                | 1946690822               |
| SNP_P3_173478_35548  | NW_004518000.1 | Scaffold3258   | 35548                   | CC                              | TT                | 1946690824               |
| SNP_P3_173479_35645  | NW_004518000.1 | Scaffold3258   | 35645                   | CC                              | GG                | 1946690826               |
| SNP_P3_173480_35853  | NW_004518000.1 | Scaffold3258   | 35853                   | GG                              | TT                | 1946690828               |
| SNP_P3_173481_35971  | NW_004518000.1 | Scaffold3258   | 35971                   | TT                              | CC                | 1946690830               |
| SNP_P3_173482_37765  | NW_004518000.1 | Scaffold3258   | 37765                   | TT                              | CC                | 1946690832               |
| SNP_P3_173483_39777  | NW_004518000.1 | Scaffold3258   | 39777                   | TT                              | CC                | 1946690834               |
| SNP_P3_173484_40047  | NW_004518000.1 | Scaffold3258   | 40047                   | CC                              | TT                | 1946690836               |
| SNP_P3_173485_40324  | NW_004518000.1 | Scaffold3258   | 40324                   | CC                              | AA                | 1946690838               |
| SNP_P3_173486_41261  | NW_004518000.1 | Scaffold3258   | 41261                   | TT                              | CC                | 1946690840               |
| SNP_P3_173487_41387  | NW_004518000.1 | Scaffold3258   | 41387                   | AA                              | GG                | 1946690842               |
| SNP_P3_173489_41507  | NW_004518000.1 | Scaffold3258   | 41507                   | CC                              | TT                | 1946690844               |
| SNP_P3_173490_41840  | NW_004518000.1 | Scaffold3258   | 41840                   | AA                              | GG                | 1946690846               |
| SNP_P3_173491_42948  | NW_004518000.1 | Scaffold3258   | 42948                   | AA                              | GG                | 1946690848               |
| SNP_P3_173492_43898  | NW_004518000.1 | Scaffold3258   | 43898                   | GG                              | TT                | 1946690850               |
| SNP_P3_173493_45551  | NW_004518000.1 | Scaffold3258   | 45551                   | GG                              | AA                | 1946690852               |
| SNP_P3_173494_45976  | NW_004518000.1 | Scaffold3258   | 45976                   | TT                              | GG                | 1946690854               |
| SNP_P3_173496_47285  | NW_004518000.1 | Scaffold3258   | 47285                   | CC                              | TT                | 1946690856               |
| SNP_P3_173497_47685  | NW_004518000.1 | Scaffold3258   | 47685                   | GG                              | TT                | 1946690858               |
| SNP_P3_173498_47686  | NW_004518000.1 | Scaffold3258   | 47686                   | CC                              | TT                | 1946690860               |
| SNP_P3_173499_48327  | NW_004518000.1 | Scaffold3258   | 48327                   | AA                              | CC                | 1946690862               |
| SNP_P3_173500_48578  | NW_004518000.1 | Scaffold3258   | 48578                   | CC                              | TT                | 1946690864               |
| SNP_P3_173501_48607  | NW_004518000.1 | Scaffold3258   | 48607                   | GG                              | AA                | 1946690866               |
| SNP_P3_173502_48717  | NW_004518000.1 | Scaffold3258   | 48717                   | CC                              | TT                | 1946690868               |
| SNP_P3_173503_48806  | NW_004518000.1 | Scaffold3258   | 48806                   | TT                              | AA                | 1946690870               |
| SNP_P3_173505_48971  | NW_004518000.1 | Scaffold3258   | 48971                   | GG                              | AA                | 1946690872               |

| SNPs IDs            | Chromosome IDs | Chromosomes  | Physical positions (bp) | CDC Frontier (Reference genome) | (Pusa 256 & HPNB) | NCBI SNPdb Accession IDs |
|---------------------|----------------|--------------|-------------------------|---------------------------------|-------------------|--------------------------|
| SNP_P3_173508_52453 | NW_004518000.1 | Scaffold3258 | 52453                   | TT                              | GG                | 1946690874               |
| SNP_P3_173509_52740 | NW_004518000.1 | Scaffold3258 | 52740                   | TT                              | CC                | 1946690876               |
| SNP_P3_173510_54397 | NW_004518000.1 | Scaffold3258 | 54397                   | TT                              | AA                | 1946690878               |
| SNP_P3_173511_55923 | NW_004518000.1 | Scaffold3258 | 55923                   | TT                              | CC                | 1946690880               |
| SNP_P3_173512_55924 | NW_004518000.1 | Scaffold3258 | 55924                   | AA                              | TT                | 1946690882               |
| SNP_P3_173513_58295 | NW_004518000.1 | Scaffold3258 | 58295                   | CC                              | TT                | 1946690884               |
| SNP_P3_173514_58755 | NW_004518000.1 | Scaffold3258 | 58755                   | TT                              | CC                | 1946690886               |
| SNP_P3_173515_59048 | NW_004518000.1 | Scaffold3258 | 59048                   | AA                              | GG                | 1946690889               |
| SNP_P3_173516_60400 | NW_004518000.1 | Scaffold3258 | 60400                   | AA                              | GG                | 1946690891               |
| SNP_P3_173517_66087 | NW_004518000.1 | Scaffold3258 | 66087                   | AA                              | GG                | 1946690893               |
| SNP_P3_173518_66521 | NW_004518000.1 | Scaffold3258 | 66521                   | AA                              | GG                | 1946690895               |
| SNP_P3_173520_68069 | NW_004518000.1 | Scaffold3258 | 68069                   | AA                              | GG                | 1946690897               |
| SNP_P3_173521_68820 | NW_004518000.1 | Scaffold3258 | 68820                   | TT                              | CC                | 1946690899               |
| SNP_P3_173522_69007 | NW_004518000.1 | Scaffold3258 | 69007                   | GG                              | AA                | 1946690902               |
| SNP_P3_173523_69138 | NW_004518000.1 | Scaffold3258 | 69138                   | TT                              | AA                | 1946690904               |
| SNP_P3_173524_69307 | NW_004518000.1 | Scaffold3258 | 69307                   | AA                              | TT                | 1946690906               |
| SNP_P3_173525_69360 | NW_004518000.1 | Scaffold3258 | 69360                   | TT                              | GG                | 1946690908               |
| SNP_P3_173526_69629 | NW_004518000.1 | Scaffold3258 | 69629                   | AA                              | GG                | 1946690910               |
| SNP_P3_173527_69677 | NW_004518000.1 | Scaffold3258 | 69677                   | TT                              | CC                | 1946690912               |
| SNP_P3_173528_69711 | NW_004518000.1 | Scaffold3258 | 69711                   | AA                              | GG                | 1946690915               |
| SNP_P3_173529_69740 | NW_004518000.1 | Scaffold3258 | 69740                   | TT                              | AA                | 1946690917               |
| SNP_P3_173530_70440 | NW_004518000.1 | Scaffold3258 | 70440                   | GG                              | AA                | 1946690919               |
| SNP_P3_173531_70631 | NW_004518000.1 | Scaffold3258 | 70631                   | TT                              | GG                | 1946690921               |
| SNP_P3_173532_70787 | NW_004518000.1 | Scaffold3258 | 70787                   | AA                              | GG                | 1946690924               |
| SNP_P3_173533_71125 | NW_004518000.1 | Scaffold3258 | 71125                   | GG                              | AA                | 1946690926               |
| SNP_P3_173535_71495 | NW_004518000.1 | Scaffold3258 | 71495                   | TT                              | AA                | 1946690928               |
| SNP_P3_173536_71849 | NW_004518000.1 | Scaffold3258 | 71849                   | TT                              | AA                | 1946690930               |
| SNP_P3_173537_72427 | NW_004518000.1 | Scaffold3258 | 72427                   | GG                              | TT                | 1946690932               |
| SNP_P3_173538_72646 | NW_004518000.1 | Scaffold3258 | 72646                   | CC                              | TT                | 1946690934               |
| SNP_P3_173539_72759 | NW_004518000.1 | Scaffold3258 | 72759                   | CC                              | TT                | 1946690936               |
| SNP_P3_173540_72760 | NW_004518000.1 | Scaffold3258 | 72760                   | AA                              | TT                | 1946690938               |
| SNP_P3_173541_72946 | NW_004518000.1 | Scaffold3258 | 72946                   | GG                              | AA                | 1946690940               |
| SNP_P3_173542_73983 | NW_004518000.1 | Scaffold3258 | 73983                   | AA                              | GG                | 1946690942               |
| SNP_P3_173544_74077 | NW_004518000.1 | Scaffold3258 | 74077                   | CC                              | TT                | 1946690944               |
| SNP_P3_173545_74258 | NW_004518000.1 | Scaffold3258 | 74258                   | GG                              | AA                | 1946690946               |
| SNP_P3_173546_74576 | NW_004518000.1 | Scaffold3258 | 74576                   | CC                              | TT                | 1946690948               |
| SNP_P3_173547_74622 | NW_004518000.1 | Scaffold3258 | 74622                   | AA                              | TT                | 1946690950               |
| SNP_P3_173549_75855 | NW_004518000.1 | Scaffold3258 | 75855                   | AA                              | CC                | 1946690951               |
| SNP_P3_173550_76032 | NW_004518000.1 | Scaffold3258 | 76032                   | CC                              | AA                | 1946690953               |
| SNP_P3_173551_76160 | NW_004518000.1 | Scaffold3258 | 76160                   | CC                              | TT                | 1946690955               |
| SNP_P3_173552_77045 | NW_004518000.1 | Scaffold3258 | 77045                   | CC                              | TT                | 1946690957               |
| SNP_P3_173553_77245 | NW_004518000.1 | Scaffold3258 | 77245                   | AA                              | GG                | 1946690959               |

| SNPs IDs            | Chromosome IDs | Chromosomes  | Physical positions (bp) | CDC Frontier (Reference genome) | (Pusa 256 & HPNB) | NCBI SNPdb Accession IDs |
|---------------------|----------------|--------------|-------------------------|---------------------------------|-------------------|--------------------------|
| SNP_P3_173554_77348 | NW_004518000.1 | Scaffold3258 | 77348                   | CC                              | TT                | 1946690961               |
| SNP_P3_173556_77642 | NW_004518000.1 | Scaffold3258 | 77642                   | AA                              | TT                | 1946690963               |
| SNP_P3_173557_77645 | NW_004518000.1 | Scaffold3258 | 77645                   | TT                              | AA                | 1946690965               |
| SNP_P3_173558_77742 | NW_004518000.1 | Scaffold3258 | 77742                   | GG                              | AA                | 1946690967               |
| SNP_P3_173559_79412 | NW_004518000.1 | Scaffold3258 | 79412                   | CC                              | TT                | 1946690970               |
| SNP_P3_173560_79437 | NW_004518000.1 | Scaffold3258 | 79437                   | TT                              | CC                | 1946690972               |
| SNP_P3_173561_79458 | NW_004518000.1 | Scaffold3258 | 79458                   | CC                              | GG                | 1946690974               |
| SNP_P3_173562_79462 | NW_004518000.1 | Scaffold3258 | 79462                   | GG                              | TT                | 1946690976               |
| SNP_P3_173563_79544 | NW_004518000.1 | Scaffold3258 | 79544                   | TT                              | CC                | 1946690978               |
| SNP_P3_173564_79585 | NW_004518000.1 | Scaffold3258 | 79585                   | CC                              | TT                | 1946690980               |
| SNP_P3_173565_79588 | NW_004518000.1 | Scaffold3258 | 79588                   | TT                              | GG                | 1946690982               |
| SNP_P3_173566_79603 | NW_004518000.1 | Scaffold3258 | 79603                   | TT                              | CC                | 1946690984               |
| SNP_P3_173567_79607 | NW_004518000.1 | Scaffold3258 | 79607                   | AA                              | TT                | 1946690986               |
| SNP_P3_173568_79610 | NW_004518000.1 | Scaffold3258 | 79610                   | GG                              | AA                | 1946690988               |
| SNP_P3_173569_79618 | NW_004518000.1 | Scaffold3258 | 79618                   | AA                              | GG                | 1946690990               |
| SNP_P3_173570_79630 | NW_004518000.1 | Scaffold3258 | 79630                   | TT                              | GG                | 1946690992               |
| SNP_P3_173571_79649 | NW_004518000.1 | Scaffold3258 | 79649                   | AA                              | TT                | 1946690994               |
| SNP_P3_173572_79651 | NW_004518000.1 | Scaffold3258 | 79651                   | AA                              | CC                | 1946690996               |
| SNP_P3_173573_79663 | NW_004518000.1 | Scaffold3258 | 79663                   | CC                              | TT                | 1946690998               |
| SNP_P3_173574_79933 | NW_004518000.1 | Scaffold3258 | 79933                   | TT                              | CC                | 1946691000               |
| SNP_P3_173575_79940 | NW_004518000.1 | Scaffold3258 | 79940                   | TT                              | GG                | 1946691002               |
| SNP_P3_173576_80028 | NW_004518000.1 | Scaffold3258 | 80028                   | GG                              | AA                | 1946691004               |
| SNP_P3_173577_80108 | NW_004518000.1 | Scaffold3258 | 80108                   | AA                              | GG                | 1946691006               |
| SNP_P3_173578_80110 | NW_004518000.1 | Scaffold3258 | 80110                   | GG                              | AA                | 1946691008               |
| SNP_P3_173579_80117 | NW_004518000.1 | Scaffold3258 | 80117                   | AA                              | GG                | 1946691010               |
| SNP_P3_173580_80273 | NW_004518000.1 | Scaffold3258 | 80273                   | GG                              | AA                | 1946691012               |
| SNP_P3_173581_81266 | NW_004518000.1 | Scaffold3258 | 81266                   | TT                              | CC                | 1946691014               |
| SNP_P3_173582_81857 | NW_004518000.1 | Scaffold3258 | 81857                   | TT                              | CC                | 1946691016               |
| SNP_P3_173583_82907 | NW_004518000.1 | Scaffold3258 | 82907                   | GG                              | TT                | 1946691018               |
| SNP_P3_173584_83145 | NW_004518000.1 | Scaffold3258 | 83145                   | AA                              | GG                | 1946691020               |
| SNP_P3_173585_83180 | NW_004518000.1 | Scaffold3258 | 83180                   | AA                              | GG                | 1946691022               |
| SNP_P3_173586_84134 | NW_004518000.1 | Scaffold3258 | 84134                   | TT                              | CC                | 1946691024               |
| SNP_P3_173587_84196 | NW_004518000.1 | Scaffold3258 | 84196                   | CC                              | TT                | 1946691026               |
| SNP_P3_173588_84286 | NW_004518000.1 | Scaffold3258 | 84286                   | TT                              | GG                | 1946691028               |
| SNP_P3_173589_84387 | NW_004518000.1 | Scaffold3258 | 84387                   | AA                              | CC                | 1946691030               |
| SNP_P3_173590_84480 | NW_004518000.1 | Scaffold3258 | 84480                   | GG                              | AA                | 1946691032               |
| SNP_P3_173591_85057 | NW_004518000.1 | Scaffold3258 | 85057                   | AA                              | GG                | 1946691034               |
| SNP_P3_173592_85585 | NW_004518000.1 | Scaffold3258 | 85585                   | GG                              | CC                | 1946691036               |
| SNP_P3_173593_87145 | NW_004518000.1 | Scaffold3258 | 87145                   | AA                              | GG                | 1946691038               |
| SNP_P3_173594_87911 | NW_004518000.1 | Scaffold3258 | 87911                   | TT                              | AA                | 1946691041               |
| SNP_P3_173595_88172 | NW_004518000.1 | Scaffold3258 | 88172                   | CC                              | GG                | 1946691043               |
| SNP_P3_173596_91166 | NW_004518000.1 | Scaffold3258 | 91166                   | TT                              | CC                | 1946691044               |



| SNPs IDs            | Chromosome IDs | Chromosomes  | Physical positions (bp) | CDC Frontier (Reference genome) | (Pusa 256 & HPNB) | NCBI SNPdb Accession IDs |
|---------------------|----------------|--------------|-------------------------|---------------------------------|-------------------|--------------------------|
| SNP_P3_173597_91180 | NW_004518000.1 | Scaffold3258 | 91180                   | GG                              | AA                | 1946691046               |
| SNP_P3_173598_91182 | NW_004518000.1 | Scaffold3258 | 91182                   | TT                              | CC                | 1946691048               |
| SNP_P3_173599_92093 | NW_004518000.1 | Scaffold3258 | 92093                   | AA                              | CC                | 1946691050               |
| SNP_P3_173600_92310 | NW_004518000.1 | Scaffold3258 | 92310                   | CC                              | GG                | 1946691052               |
| SNP_P3_173601_92403 | NW_004518000.1 | Scaffold3258 | 92403                   | CC                              | TT                | 1946691054               |
| SNP_P3_173602_93007 | NW_004518000.1 | Scaffold3258 | 93007                   | TT                              | GG                | 1946691056               |
| SNP_P3_173603_93271 | NW_004518000.1 | Scaffold3258 | 93271                   | AA                              | TT                | 1946691058               |
| SNP_P3_173604_93453 | NW_004518000.1 | Scaffold3258 | 93453                   | CC                              | GG                | 1946691060               |
| SNP_P3_173605_94190 | NW_004518000.1 | Scaffold3258 | 94190                   | GG                              | AA                | 1946691062               |
| SNP_P3_173606_94259 | NW_004518000.1 | Scaffold3258 | 94259                   | AA                              | GG                | 1946691064               |
| SNP_P3_173607_470   | NW_004518005.1 | Scaffold3272 | 470                     | GG                              | CC                | 1946691066               |
| SNP_P3_173608_2569  | NW_004518005.1 | Scaffold3272 | 2569                    | AA                              | GG                | 1946691068               |
| SNP_P3_173609_554   | NW_004518009.1 | Scaffold3276 | 554                     | TT                              | CC                | 1946691070               |
| SNP_P3_173610_2192  | NW_004518010.1 | Scaffold3277 | 2192                    | GG                              | AA                | 1946691073               |
| SNP_P3_173611_2223  | NW_004518010.1 | Scaffold3277 | 2223                    | CC                              | TT                | 1946691075               |
| SNP_P3_173613_2250  | NW_004518010.1 | Scaffold3277 | 2250                    | GG                              | TT                | 1946691077               |
| SNP_P3_173614_2267  | NW_004518010.1 | Scaffold3277 | 2267                    | TT                              | GG                | 1946691079               |
| SNP_P3_173615_2269  | NW_004518010.1 | Scaffold3277 | 2269                    | GG                              | TT                | 1946691081               |
| SNP_P3_173616_2270  | NW_004518010.1 | Scaffold3277 | 2270                    | AA                              | GG                | 1946691083               |
| SNP_P3_173617_2411  | NW_004518010.1 | Scaffold3277 | 2411                    | AA                              | GG                | 1946691085               |
| SNP_P3_173618_2414  | NW_004518010.1 | Scaffold3277 | 2414                    | GG                              | AA                | 1946691087               |
| SNP_P3_173619_2646  | NW_004518010.1 | Scaffold3277 | 2646                    | TT                              | CC                | 1946691089               |
| SNP_P3_173620_2969  | NW_004518010.1 | Scaffold3277 | 2969                    | AA                              | TT                | 1946691091               |
| SNP_P3_173621_3000  | NW_004518010.1 | Scaffold3277 | 3000                    | CC                              | TT                | 1946691093               |
| SNP_P3_173622_34351 | NW_004518010.1 | Scaffold3277 | 34351                   | TT                              | CC                | 1946691094               |
| SNP_P3_173623_5324  | NW_004518012.1 | Scaffold3279 | 5324                    | CC                              | AA                | 1946691096               |
| SNP_P3_173624_17587 | NW_004518013.1 | Scaffold3280 | 17587                   | TT                              | GG                | 1946691098               |
| SNP_P3_173625_17597 | NW_004518013.1 | Scaffold3280 | 17597                   | TT                              | CC                | 1946691100               |
| SNP_P3_173626_19478 | NW_004518013.1 | Scaffold3280 | 19478                   | CC                              | TT                | 1946691102               |
| SNP_P3_173627_19692 | NW_004518013.1 | Scaffold3280 | 19692                   | CC                              | TT                | 1946691105               |
| SNP_P3_173628_20371 | NW_004518013.1 | Scaffold3280 | 20371                   | TT                              | AA                | 1946691107               |
| SNP_P3_173630_23269 | NW_004518013.1 | Scaffold3280 | 23269                   | CC                              | AA                | 1946691109               |
| SNP_P3_173631_23296 | NW_004518013.1 | Scaffold3280 | 23296                   | GG                              | AA                | 1946691111               |
| SNP_P3_173632_33464 | NW_004518013.1 | Scaffold3280 | 33464                   | GG                              | AA                | 1946691113               |
| SNP_P3_173633_37048 | NW_004518013.1 | Scaffold3280 | 37048                   | TT                              | CC                | 1946691115               |
| SNP_P3_173634_37231 | NW_004518013.1 | Scaffold3280 | 37231                   | CC                              | AA                | 1946691117               |
| SNP_P3_173635_37385 | NW_004518013.1 | Scaffold3280 | 37385                   | GG                              | TT                | 1946691119               |
| SNP_P3_173636_42839 | NW_004518013.1 | Scaffold3280 | 42839                   | TT                              | CC                | 1946691121               |
| SNP_P3_173637_65062 | NW_004518013.1 | Scaffold3280 | 65062                   | AA                              | GG                | 1946691123               |
| SNP_P3_173638_65136 | NW_004518013.1 | Scaffold3280 | 65136                   | CC                              | TT                | 1946691125               |
| SNP_P3_173639_65143 | NW_004518013.1 | Scaffold3280 | 65143                   | CC                              | TT                | 1946691128               |
| SNP_P3_173640_98182 | NW_004518013.1 | Scaffold3280 | 98182                   | CC                              | TT                | 1946691130               |

| SNPs IDs             | Chromosome IDs | Chromosomes  | Physical positions (bp) | CDC Frontier (Reference genome) | (Pusa 256 & HPNB) | NCBI SNPdb Accession IDs |
|----------------------|----------------|--------------|-------------------------|---------------------------------|-------------------|--------------------------|
| SNP_P3_173641_98185  | NW_004518013.1 | Scaffold3280 | 98185                   | CC                              | TT                | 1946691132               |
| SNP_P3_173642_98222  | NW_004518013.1 | Scaffold3280 | 98222                   | GG                              | AA                | 1946691133               |
| SNP_P3_173643_98223  | NW_004518013.1 | Scaffold3280 | 98223                   | GG                              | TT                | 1946691136               |
| SNP_P3_173644_100490 | NW_004518013.1 | Scaffold3280 | 100490                  | TT                              | AA                | 1946691138               |
| SNP_P3_173645_116556 | NW_004518013.1 | Scaffold3280 | 116556                  | TT                              | CC                | 1946691140               |
| SNP_P3_173646_116623 | NW_004518013.1 | Scaffold3280 | 116623                  | CC                              | TT                | 1946691142               |
| SNP_P3_173647_116633 | NW_004518013.1 | Scaffold3280 | 116633                  | AA                              | GG                | 1946691144               |
| SNP_P3_173648_116972 | NW_004518013.1 | Scaffold3280 | 116972                  | GG                              | AA                | 1946691146               |
| SNP_P3_173649_116980 | NW_004518013.1 | Scaffold3280 | 116980                  | TT                              | CC                | 1946691148               |
| SNP_P3_173650_116982 | NW_004518013.1 | Scaffold3280 | 116982                  | AA                              | TT                | 1946691150               |
| SNP_P3_173651_135106 | NW_004518013.1 | Scaffold3280 | 135106                  | GG                              | AA                | 1946691152               |
| SNP_P3_173652_135445 | NW_004518013.1 | Scaffold3280 | 135445                  | TT                              | GG                | 1946691154               |
| SNP_P3_173653_586    | NW_004518014.1 | Scaffold3281 | 586                     | GG                              | CC                | 1946691156               |
| SNP_P3_173654_919    | NW_004518014.1 | Scaffold3281 | 919                     | TT                              | GG                | 1946691157               |
| SNP_P3_173655_981    | NW_004518014.1 | Scaffold3281 | 981                     | CC                              | GG                | 1946691159               |
| SNP_P3_173656_4856   | NW_004518016.1 | Scaffold3283 | 4856                    | AA                              | GG                | 1946691161               |
| SNP_P3_173657_4858   | NW_004518016.1 | Scaffold3283 | 4858                    | AA                              | GG                | 1946691163               |
| SNP_P3_173658_5094   | NW_004518016.1 | Scaffold3283 | 5094                    | CC                              | TT                | 1946691165               |
| SNP_P3_173659_5352   | NW_004518016.1 | Scaffold3283 | 5352                    | TT                              | GG                | 1946691167               |
| SNP_P3_173660_19643  | NW_004518016.1 | Scaffold3283 | 19643                   | AA                              | GG                | 1946691170               |
| SNP_P3_173661_19657  | NW_004518016.1 | Scaffold3283 | 19657                   | AA                              | CC                | 1946691172               |
| SNP_P3_173662_28783  | NW_004518016.1 | Scaffold3283 | 28783                   | TT                              | AA                | 1946691174               |
| SNP_P3_173663_64887  | NW_004518016.1 | Scaffold3283 | 64887                   | GG                              | TT                | 1946691176               |
| SNP_P3_173664_64891  | NW_004518016.1 | Scaffold3283 | 64891                   | GG                              | AA                | 1946691178               |
| SNP_P3_173665_86632  | NW_004518016.1 | Scaffold3283 | 86632                   | GG                              | AA                | 1946691180               |
| SNP_P3_173666_516    | NW_004518017.1 | Scaffold3284 | 516                     | AA                              | TT                | 1946691182               |
| SNP_P3_173667_546    | NW_004518017.1 | Scaffold3284 | 546                     | GG                              | TT                | 1946691184               |
| SNP_P3_173668_739    | NW_004518017.1 | Scaffold3284 | 739                     | TT                              | GG                | 1946691186               |
| SNP_P3_173669_767    | NW_004518017.1 | Scaffold3284 | 767                     | CC                              | AA                | 1946691188               |
| SNP_P3_173670_784    | NW_004518017.1 | Scaffold3284 | 784                     | TT                              | CC                | 1946691190               |
| SNP_P3_173671_900    | NW_004518017.1 | Scaffold3284 | 900                     | AA                              | CC                | 1946691192               |
| SNP_P3_173672_2292   | NW_004518017.1 | Scaffold3284 | 2292                    | CC                              | TT                | 1946691194               |
| SNP_P3_173673_2325   | NW_004518017.1 | Scaffold3284 | 2325                    | CC                              | TT                | 1946691196               |
| SNP_P3_173674_2501   | NW_004518017.1 | Scaffold3284 | 2501                    | TT                              | AA                | 1946691198               |
| SNP_P3_173675_2705   | NW_004518017.1 | Scaffold3284 | 2705                    | CC                              | TT                | 1946691200               |
| SNP_P3_173676_2723   | NW_004518017.1 | Scaffold3284 | 2723                    | CC                              | TT                | 1946691202               |
| SNP_P3_173677_2777   | NW_004518017.1 | Scaffold3284 | 2777                    | CC                              | TT                | 1946691204               |
| SNP_P3_173678_765    | NW_004518020.1 | Scaffold3288 | 765                     | TT                              | AA                | 1946691207               |
| SNP_P3_173679_1134   | NW_004518023.1 | Scaffold3293 | 1134                    | AA                              | GG                | 1946691209               |
| SNP_P3_173680_5431   | NW_004518023.1 | Scaffold3293 | 5431                    | TT                              | CC                | 1946691211               |
| SNP_P3_173681_5467   | NW_004518023.1 | Scaffold3293 | 5467                    | CC                              | TT                | 1946691213               |
| SNP_P3_173682_5486   | NW_004518023.1 | Scaffold3293 | 5486                    | GG                              | AA                | 1946691215               |

| SNPs IDs            | Chromosome IDs | Chromosomes  | Physical positions (bp) | CDC Frontier (Reference genome) | (Pusa 256 & HPNB) | NCBI SNPdb Accession IDs |
|---------------------|----------------|--------------|-------------------------|---------------------------------|-------------------|--------------------------|
| SNP_P3_173683_5719  | NW_004518023.1 | Scaffold3293 | 5719                    | GG                              | AA                | 1946691217               |
| SNP_P3_173684_6484  | NW_004518023.1 | Scaffold3293 | 6484                    | CC                              | AA                | 1946691219               |
| SNP_P3_173685_7296  | NW_004518023.1 | Scaffold3293 | 7296                    | TT                              | CC                | 1946691221               |
| SNP_P3_173686_7311  | NW_004518023.1 | Scaffold3293 | 7311                    | GG                              | AA                | 1946691223               |
| SNP_P3_173687_7340  | NW_004518023.1 | Scaffold3293 | 7340                    | AA                              | GG                | 1946691225               |
| SNP_P3_173688_7699  | NW_004518023.1 | Scaffold3293 | 7699                    | CC                              | TT                | 1946691227               |
| SNP_P3_173689_9951  | NW_004518023.1 | Scaffold3293 | 9951                    | CC                              | TT                | 1946691229               |
| SNP_P3_173690_9957  | NW_004518023.1 | Scaffold3293 | 9957                    | TT                              | CC                | 1946691231               |
| SNP_P3_173691_9990  | NW_004518023.1 | Scaffold3293 | 9990                    | TT                              | AA                | 1946691233               |
| SNP_P3_173692_9993  | NW_004518023.1 | Scaffold3293 | 9993                    | AA                              | TT                | 1946691235               |
| SNP_P3_173693_9999  | NW_004518023.1 | Scaffold3293 | 9999                    | GG                              | AA                | 1946691237               |
| SNP_P3_173694_10185 | NW_004518023.1 | Scaffold3293 | 10185                   | AA                              | GG                | 1946691239               |
| SNP_P3_173695_10416 | NW_004518023.1 | Scaffold3293 | 10416                   | AA                              | GG                | 1946691242               |
| SNP_P3_173696_10628 | NW_004518023.1 | Scaffold3293 | 10628                   | TT                              | CC                | 1946691244               |
| SNP_P3_173697_10836 | NW_004518023.1 | Scaffold3293 | 10836                   | AA                              | GG                | 1946691246               |
| SNP_P3_173698_10913 | NW_004518023.1 | Scaffold3293 | 10913                   | TT                              | CC                | 1946691248               |
| SNP_P3_173699_11282 | NW_004518023.1 | Scaffold3293 | 11282                   | GG                              | CC                | 1946691250               |
| SNP_P3_173700_11303 | NW_004518023.1 | Scaffold3293 | 11303                   | GG                              | AA                | 1946691252               |
| SNP_P3_173701_14112 | NW_004518023.1 | Scaffold3293 | 14112                   | TT                              | CC                | 1946691254               |
| SNP_P3_173702_14118 | NW_004518023.1 | Scaffold3293 | 14118                   | GG                              | CC                | 1946691256               |
| SNP_P3_173703_19641 | NW_004518023.1 | Scaffold3293 | 19641                   | TT                              | GG                | 1946691258               |
| SNP_P3_173704_1296  | NW_004518024.1 | Scaffold3297 | 1296                    | TT                              | AA                | 1946691260               |
| SNP_P3_173706_64    | NW_004518031.1 | Scaffold3307 | 64                      | AA                              | CC                | 1946691263               |
| SNP_P3_173707_104   | NW_004518031.1 | Scaffold3307 | 104                     | CC                              | AA                | 1946691265               |
| SNP_P3_173708_124   | NW_004518031.1 | Scaffold3307 | 124                     | TT                              | AA                | 1946691267               |
| SNP_P3_173709_372   | NW_004518031.1 | Scaffold3307 | 372                     | GG                              | CC                | 1946691269               |
| SNP_P3_173710_382   | NW_004518031.1 | Scaffold3307 | 382                     | GG                              | TT                | 1946691271               |
| SNP_P3_173711_502   | NW_004518031.1 | Scaffold3307 | 502                     | TT                              | CC                | 1946691273               |
| SNP_P3_173712_691   | NW_004518031.1 | Scaffold3307 | 691                     | AA                              | GG                | 1946691275               |
| SNP_P3_173713_2451  | NW_004518031.1 | Scaffold3307 | 2451                    | AA                              | CC                | 1946691278               |
| SNP_P3_173714_3810  | NW_004518031.1 | Scaffold3307 | 3810                    | GG                              | AA                | 1946691280               |
| SNP_P3_173715_3945  | NW_004518031.1 | Scaffold3307 | 3945                    | AA                              | TT                | 1946691282               |
| SNP_P3_173716_4935  | NW_004518031.1 | Scaffold3307 | 4935                    | AA                              | TT                | 1946691284               |
| SNP_P3_173717_4972  | NW_004518031.1 | Scaffold3307 | 4972                    | AA                              | GG                | 1946691286               |
| SNP_P3_173718_5125  | NW_004518031.1 | Scaffold3307 | 5125                    | AA                              | GG                | 1946691288               |
| SNP_P3_173719_5165  | NW_004518031.1 | Scaffold3307 | 5165                    | TT                              | GG                | 1946691290               |
| SNP_P3_173720_5221  | NW_004518031.1 | Scaffold3307 | 5221                    | GG                              | TT                | 1946691292               |
| SNP_P3_173721_5222  | NW_004518031.1 | Scaffold3307 | 5222                    | AA                              | TT                | 1946691294               |
| SNP_P3_173722_5257  | NW_004518031.1 | Scaffold3307 | 5257                    | CC                              | TT                | 1946691296               |
| SNP_P3_173723_5362  | NW_004518031.1 | Scaffold3307 | 5362                    | CC                              | AA                | 1946691298               |
| SNP_P3_173724_9898  | NW_004518031.1 | Scaffold3307 | 9898                    | TT                              | AA                | 1946691300               |
| SNP_P3_173725_9900  | NW_004518031.1 | Scaffold3307 | 9900                    | CC                              | TT                | 1946691302               |

| SNPs IDs            | Chromosome IDs | Chromosomes  | Physical positions (bp) | CDC Frontier (Reference genome) | (Pusa 256 & HPNB) | NCBI SNPdb Accession IDs |
|---------------------|----------------|--------------|-------------------------|---------------------------------|-------------------|--------------------------|
| SNP_P3_173726_9913  | NW_004518031.1 | Scaffold3307 | 9913                    | TT                              | CC                | 1946691304               |
| SNP_P3_173727_10004 | NW_004518031.1 | Scaffold3307 | 10004                   | GG                              | AA                | 1946691305               |
| SNP_P3_173728_10379 | NW_004518031.1 | Scaffold3307 | 10379                   | CC                              | TT                | 1946691306               |
| SNP_P3_173729_10394 | NW_004518031.1 | Scaffold3307 | 10394                   | TT                              | CC                | 1946691307               |
| SNP_P3_173730_10415 | NW_004518031.1 | Scaffold3307 | 10415                   | TT                              | CC                | 1946691308               |
| SNP_P3_173731_10666 | NW_004518031.1 | Scaffold3307 | 10666                   | AA                              | GG                | 1946691309               |
| SNP_P3_173732_10678 | NW_004518031.1 | Scaffold3307 | 10678                   | TT                              | GG                | 1946691310               |
| SNP_P3_173733_10933 | NW_004518031.1 | Scaffold3307 | 10933                   | TT                              | CC                | 1946691311               |
| SNP_P3_173734_10996 | NW_004518031.1 | Scaffold3307 | 10996                   | CC                              | TT                | 1946691312               |
| SNP_P3_173735_11029 | NW_004518031.1 | Scaffold3307 | 11029                   | CC                              | TT                | 1946691313               |
| SNP_P3_173736_11030 | NW_004518031.1 | Scaffold3307 | 11030                   | TT                              | GG                | 1946691314               |
| SNP_P3_173737_11057 | NW_004518031.1 | Scaffold3307 | 11057                   | CC                              | TT                | 1946691315               |
| SNP_P3_173738_11058 | NW_004518031.1 | Scaffold3307 | 11058                   | TT                              | CC                | 1946691316               |
| SNP_P3_173739_11280 | NW_004518031.1 | Scaffold3307 | 11280                   | GG                              | AA                | 1946691317               |
| SNP_P3_173740_11339 | NW_004518031.1 | Scaffold3307 | 11339                   | TT                              | CC                | 1946691318               |
| SNP_P3_173742_15022 | NW_004518031.1 | Scaffold3307 | 15022                   | CC                              | TT                | 1946691319               |
| SNP_P3_173743_15040 | NW_004518031.1 | Scaffold3307 | 15040                   | AA                              | GG                | 1946691320               |
| SNP_P3_173744_15048 | NW_004518031.1 | Scaffold3307 | 15048                   | GG                              | TT                | 1946691321               |
| SNP_P3_173745_15070 | NW_004518031.1 | Scaffold3307 | 15070                   | AA                              | GG                | 1946691322               |
| SNP_P3_173747_15338 | NW_004518031.1 | Scaffold3307 | 15338                   | TT                              | CC                | 1946691323               |
| SNP_P3_173748_15343 | NW_004518031.1 | Scaffold3307 | 15343                   | GG                              | AA                | 1946691324               |
| SNP_P3_173749_15391 | NW_004518031.1 | Scaffold3307 | 15391                   | CC                              | AA                | 1946691325               |
| SNP_P3_173750_17784 | NW_004518031.1 | Scaffold3307 | 17784                   | TT                              | AA                | 1946691326               |
| SNP_P3_173751_17799 | NW_004518031.1 | Scaffold3307 | 17799                   | CC                              | GG                | 1946691327               |
| SNP_P3_173752_17857 | NW_004518031.1 | Scaffold3307 | 17857                   | AA                              | GG                | 1946691329               |
| SNP_P3_173753_17865 | NW_004518031.1 | Scaffold3307 | 17865                   | TT                              | CC                | 1946691331               |
| SNP_P3_173754_17875 | NW_004518031.1 | Scaffold3307 | 17875                   | TT                              | CC                | 1946691333               |
| SNP_P3_173755_17905 | NW_004518031.1 | Scaffold3307 | 17905                   | GG                              | TT                | 1946691335               |
| SNP_P3_173756_17907 | NW_004518031.1 | Scaffold3307 | 17907                   | CC                              | GG                | 1946691337               |
| SNP_P3_173757_17990 | NW_004518031.1 | Scaffold3307 | 17990                   | TT                              | AA                | 1946691339               |
| SNP_P3_173758_18171 | NW_004518031.1 | Scaffold3307 | 18171                   | TT                              | CC                | 1946691341               |
| SNP_P3_173759_18205 | NW_004518031.1 | Scaffold3307 | 18205                   | GG                              | TT                | 1946691343               |
| SNP_P3_173760_18231 | NW_004518031.1 | Scaffold3307 | 18231                   | TT                              | AA                | 1946691345               |
| SNP_P3_173761_18270 | NW_004518031.1 | Scaffold3307 | 18270                   | AA                              | GG                | 1946691347               |
| SNP_P3_173762_18290 | NW_004518031.1 | Scaffold3307 | 18290                   | GG                              | TT                | 1946691349               |
| SNP_P3_173763_18292 | NW_004518031.1 | Scaffold3307 | 18292                   | TT                              | CC                | 1946691351               |
| SNP_P3_173764_18296 | NW_004518031.1 | Scaffold3307 | 18296                   | CC                              | AA                | 1946691353               |
| SNP_P3_173765_18346 | NW_004518031.1 | Scaffold3307 | 18346                   | AA                              | GG                | 1946691355               |
| SNP_P3_173766_21891 | NW_004518031.1 | Scaffold3307 | 21891                   | CC                              | TT                | 1946691357               |
| SNP_P3_173767_21917 | NW_004518031.1 | Scaffold3307 | 21917                   | AA                              | TT                | 1946691359               |
| SNP_P3_173768_22132 | NW_004518031.1 | Scaffold3307 | 22132                   | GG                              | AA                | 1946691361               |
| SNP_P3_173769_22208 | NW_004518031.1 | Scaffold3307 | 22208                   | CC                              | TT                | 1946691363               |

| SNPs IDs            | Chromosome IDs | Chromosomes  | Physical positions (bp) | CDC Frontier (Reference genome) | (Pusa 256 & HPNB) | NCBI SNPdb Accession IDs |
|---------------------|----------------|--------------|-------------------------|---------------------------------|-------------------|--------------------------|
| SNP_P3_173770_22264 | NW_004518031.1 | Scaffold3307 | 22264                   | AA                              | GG                | 1946691365               |
| SNP_P3_173771_22343 | NW_004518031.1 | Scaffold3307 | 22343                   | AA                              | GG                | 1946691367               |
| SNP_P3_173772_22367 | NW_004518031.1 | Scaffold3307 | 22367                   | CC                              | TT                | 1946691369               |
| SNP_P3_173773_22453 | NW_004518031.1 | Scaffold3307 | 22453                   | TT                              | CC                | 1946691371               |
| SNP_P3_173774_22629 | NW_004518031.1 | Scaffold3307 | 22629                   | GG                              | AA                | 1946691374               |
| SNP_P3_173775_22729 | NW_004518031.1 | Scaffold3307 | 22729                   | CC                              | GG                | 1946691376               |
| SNP_P3_173776_23146 | NW_004518031.1 | Scaffold3307 | 23146                   | GG                              | AA                | 1946691378               |
| SNP_P3_173777_23148 | NW_004518031.1 | Scaffold3307 | 23148                   | CC                              | GG                | 1946691380               |
| SNP_P3_173778_23444 | NW_004518031.1 | Scaffold3307 | 23444                   | AA                              | CC                | 1946691382               |
| SNP_P3_173780_1133  | NW_004518036.1 | Scaffold3312 | 1133                    | TT                              | AA                | 1946691384               |
| SNP_P3_173781_1135  | NW_004518036.1 | Scaffold3312 | 1135                    | TT                              | GG                | 1946691387               |
| SNP_P3_173782_5603  | NW_004518038.1 | Scaffold3314 | 5603                    | GG                              | AA                | 1946691389               |
| SNP_P3_173783_5660  | NW_004518038.1 | Scaffold3314 | 5660                    | GG                              | AA                | 1946691391               |
| SNP_P3_173784_5688  | NW_004518038.1 | Scaffold3314 | 5688                    | CC                              | TT                | 1946691393               |
| SNP_P3_173785_5689  | NW_004518038.1 | Scaffold3314 | 5689                    | CC                              | TT                | 1946691395               |
| SNP_P3_173786_5784  | NW_004518038.1 | Scaffold3314 | 5784                    | TT                              | AA                | 1946691397               |
| SNP_P3_173787_5832  | NW_004518038.1 | Scaffold3314 | 5832                    | CC                              | GG                | 1946691399               |
| SNP_P3_173788_5883  | NW_004518038.1 | Scaffold3314 | 5883                    | TT                              | AA                | 1946691401               |
| SNP_P3_173789_5989  | NW_004518038.1 | Scaffold3314 | 5989                    | GG                              | TT                | 1946691403               |
| SNP_P3_173790_6008  | NW_004518038.1 | Scaffold3314 | 6008                    | TT                              | CC                | 1946691405               |
| SNP_P3_173791_6371  | NW_004518038.1 | Scaffold3314 | 6371                    | CC                              | TT                | 1946691407               |
| SNP_P3_173792_6667  | NW_004518038.1 | Scaffold3314 | 6667                    | CC                              | TT                | 1946691409               |
| SNP_P3_173793_7348  | NW_004518038.1 | Scaffold3314 | 7348                    | AA                              | TT                | 1946691411               |
| SNP_P3_173795_7452  | NW_004518038.1 | Scaffold3314 | 7452                    | TT                              | CC                | 1946691413               |
| SNP_P3_173796_7453  | NW_004518038.1 | Scaffold3314 | 7453                    | AA                              | GG                | 1946691415               |
| SNP_P3_173797_7510  | NW_004518038.1 | Scaffold3314 | 7510                    | CC                              | GG                | 1946691417               |
| SNP_P3_173798_7656  | NW_004518038.1 | Scaffold3314 | 7656                    | GG                              | AA                | 1946691420               |
| SNP_P3_173799_7717  | NW_004518038.1 | Scaffold3314 | 7717                    | AA                              | GG                | 1946691422               |
| SNP_P3_173800_7797  | NW_004518038.1 | Scaffold3314 | 7797                    | TT                              | CC                | 1946691424               |
| SNP_P3_173801_7801  | NW_004518038.1 | Scaffold3314 | 7801                    | AA                              | TT                | 1946691426               |
| SNP_P3_173802_7809  | NW_004518038.1 | Scaffold3314 | 7809                    | TT                              | CC                | 1946691428               |
| SNP_P3_173803_7919  | NW_004518038.1 | Scaffold3314 | 7919                    | AA                              | GG                | 1946691430               |
| SNP_P3_173804_40    | NW_004518040.1 | Scaffold3316 | 40                      | CC                              | GG                | 1946691432               |
| SNP_P3_173805_64    | NW_004518040.1 | Scaffold3316 | 64                      | AA                              | GG                | 1946691434               |
| SNP_P3_173806_287   | NW_004518041.1 | Scaffold3317 | 287                     | CC                              | GG                | 1946691436               |
| SNP_P3_173807_294   | NW_004518041.1 | Scaffold3317 | 294                     | AA                              | CC                | 1946691438               |
| SNP_P3_173808_299   | NW_004518041.1 | Scaffold3317 | 299                     | TT                              | GG                | 1946691440               |
| SNP_P3_173809_334   | NW_004518041.1 | Scaffold3317 | 334                     | CC                              | GG                | 1946691442               |
| SNP_P3_173810_3329  | NW_004518041.1 | Scaffold3317 | 3329                    | GG                              | TT                | 1946691444               |
| SNP_P3_173812_3356  | NW_004518041.1 | Scaffold3317 | 3356                    | CC                              | TT                | 1946691446               |
| SNP_P3_173813_33    | NW_004518043.1 | Scaffold3321 | 33                      | AA                              | GG                | 1946691448               |
| SNP_P3_173814_76    | NW_004518043.1 | Scaffold3321 | 76                      | GG                              | CC                | 1946691450               |

| SNPs IDs            | Chromosome IDs | Chromosomes  | Physical positions (bp) | CDC Frontier (Reference genome) | (Pusa 256 & HPNB) | NCBI SNPdb Accession IDs |
|---------------------|----------------|--------------|-------------------------|---------------------------------|-------------------|--------------------------|
| SNP_P3_173815_709   | NW_004518043.1 | Scaffold3321 | 709                     | CC                              | TT                | 1946691453               |
| SNP_P3_173816_6553  | NW_004518043.1 | Scaffold3321 | 6553                    | GG                              | AA                | 1946691455               |
| SNP_P3_173817_6563  | NW_004518043.1 | Scaffold3321 | 6563                    | TT                              | GG                | 1946691457               |
| SNP_P3_173818_9782  | NW_004518043.1 | Scaffold3321 | 9782                    | GG                              | AA                | 1946691459               |
| SNP_P3_173819_10999 | NW_004518043.1 | Scaffold3321 | 10999                   | CC                              | TT                | 1946691461               |
| SNP_P3_173820_11019 | NW_004518043.1 | Scaffold3321 | 11019                   | TT                              | CC                | 1946691463               |
| SNP_P3_173821_11022 | NW_004518043.1 | Scaffold3321 | 11022                   | AA                              | GG                | 1946691465               |
| SNP_P3_173822_11298 | NW_004518043.1 | Scaffold3321 | 11298                   | AA                              | TT                | 1946691467               |
| SNP_P3_173823_11410 | NW_004518043.1 | Scaffold3321 | 11410                   | TT                              | CC                | 1946691469               |
| SNP_P3_173824_12607 | NW_004518043.1 | Scaffold3321 | 12607                   | CC                              | AA                | 1946691471               |
| SNP_P3_173825_13008 | NW_004518043.1 | Scaffold3321 | 13008                   | TT                              | CC                | 1946691473               |
| SNP_P3_173826_13053 | NW_004518043.1 | Scaffold3321 | 13053                   | TT                              | AA                | 1946691475               |
| SNP_P3_173827_13332 | NW_004518043.1 | Scaffold3321 | 13332                   | CC                              | AA                | 1946691477               |
| SNP_P3_173828_23990 | NW_004518043.1 | Scaffold3321 | 23990                   | GG                              | AA                | 1946691479               |
| SNP_P3_173830_38061 | NW_004518043.1 | Scaffold3321 | 38061                   | CC                              | GG                | 1946691481               |
| SNP_P3_173831_38068 | NW_004518043.1 | Scaffold3321 | 38068                   | CC                              | AA                | 1946691483               |
| SNP_P3_173832_51045 | NW_004518043.1 | Scaffold3321 | 51045                   | GG                              | AA                | 1946691485               |
| SNP_P3_173833_69004 | NW_004518043.1 | Scaffold3321 | 69004                   | CC                              | TT                | 1946691487               |
| SNP_P3_173834_69353 | NW_004518043.1 | Scaffold3321 | 69353                   | AA                              | GG                | 1946691489               |
| SNP_P3_173835_69576 | NW_004518043.1 | Scaffold3321 | 69576                   | AA                              | GG                | 1946691491               |
| SNP_P3_173836_69609 | NW_004518043.1 | Scaffold3321 | 69609                   | GG                              | AA                | 1946691493               |
| SNP_P3_173838_69836 | NW_004518043.1 | Scaffold3321 | 69836                   | GG                              | AA                | 1946691495               |
| SNP_P3_173839_69876 | NW_004518043.1 | Scaffold3321 | 69876                   | GG                              | AA                | 1946691497               |
| SNP_P3_173840_168   | NW_004518044.1 | Scaffold3322 | 168                     | TT                              | CC                | 1946691499               |
| SNP_P3_173841_3001  | NW_004518044.1 | Scaffold3322 | 3001                    | AA                              | GG                | 1946691501               |
| SNP_P3_173842_5025  | NW_004518044.1 | Scaffold3322 | 5025                    | CC                              | AA                | 1946691503               |
| SNP_P3_173843_5107  | NW_004518044.1 | Scaffold3322 | 5107                    | AA                              | GG                | 1946691505               |
| SNP_P3_173845_8754  | NW_004518045.1 | Scaffold3323 | 8754                    | TT                              | CC                | 1946691507               |
| SNP_P3_173846_9182  | NW_004518045.1 | Scaffold3323 | 9182                    | GG                              | AA                | 1946691509               |
| SNP_P3_173847_9192  | NW_004518045.1 | Scaffold3323 | 9192                    | TT                              | CC                | 1946691511               |
| SNP_P3_173848_9228  | NW_004518045.1 | Scaffold3323 | 9228                    | AA                              | TT                | 1946691513               |
| SNP_P3_173849_9373  | NW_004518045.1 | Scaffold3323 | 9373                    | TT                              | CC                | 1946691515               |
| SNP_P3_173850_4281  | NW_004518048.1 | Scaffold3326 | 4281                    | TT                              | GG                | 1946691517               |
| SNP_P3_173851_4438  | NW_004518048.1 | Scaffold3326 | 4438                    | TT                              | AA                | 1946691519               |
| SNP_P3_173852_4995  | NW_004518048.1 | Scaffold3326 | 4995                    | AA                              | GG                | 1946691521               |
| SNP_P3_173853_4996  | NW_004518048.1 | Scaffold3326 | 4996                    | CC                              | AA                | 1946691523               |
| SNP_P3_173854_6003  | NW_004518048.1 | Scaffold3326 | 6003                    | TT                              | GG                | 1946691525               |
| SNP_P3_173855_193   | NW_004518049.1 | Scaffold3328 | 193                     | TT                              | CC                | 1946691526               |
| SNP_P3_173856_561   | NW_004518049.1 | Scaffold3328 | 561                     | TT                              | GG                | 1946691528               |
| SNP_P3_173857_3966  | NW_004518050.1 | Scaffold3329 | 3966                    | TT                              | CC                | 1946691530               |
| SNP_P3_173858_3998  | NW_004518050.1 | Scaffold3329 | 3998                    | TT                              | CC                | 1946691532               |
| SNP_P3_173859_4016  | NW_004518050.1 | Scaffold3329 | 4016                    | TT                              | GG                | 1946691534               |

| SNPs IDs            | Chromosome IDs | Chromosomes  | Physical positions (bp) | CDC Frontier (Reference genome) | (Pusa 256 & HPNB) | NCBI SNPdb Accession IDs |
|---------------------|----------------|--------------|-------------------------|---------------------------------|-------------------|--------------------------|
| SNP_P3_173860_4203  | NW_004518050.1 | Scaffold3329 | 4203                    | GG                              | AA                | 1946691536               |
| SNP_P3_173861_4208  | NW_004518050.1 | Scaffold3329 | 4208                    | CC                              | TT                | 1946691539               |
| SNP_P3_173862_1254  | NW_004518053.1 | Scaffold3333 | 1254                    | CC                              | GG                | 1946691541               |
| SNP_P3_173863_1269  | NW_004518053.1 | Scaffold3333 | 1269                    | GG                              | TT                | 1946691543               |
| SNP_P3_173864_1587  | NW_004518053.1 | Scaffold3333 | 1587                    | CC                              | AA                | 1946691545               |
| SNP_P3_173865_31    | NW_004518055.1 | Scaffold3336 | 31                      | CC                              | TT                | 1946691547               |
| SNP_P3_173866_64    | NW_004518055.1 | Scaffold3336 | 64                      | GG                              | AA                | 1946691550               |
| SNP_P3_173867_73    | NW_004518055.1 | Scaffold3336 | 73                      | TT                              | CC                | 1946691552               |
| SNP_P3_173868_99    | NW_004518055.1 | Scaffold3336 | 99                      | GG                              | AA                | 1946691554               |
| SNP_P3_173869_131   | NW_004518055.1 | Scaffold3336 | 131                     | TT                              | CC                | 1946691556               |
| SNP_P3_173870_159   | NW_004518055.1 | Scaffold3336 | 159                     | CC                              | GG                | 1946691558               |
| SNP_P3_173871_607   | NW_004518055.1 | Scaffold3336 | 607                     | TT                              | CC                | 1946691560               |
| SNP_P3_173872_618   | NW_004518055.1 | Scaffold3336 | 618                     | CC                              | TT                | 1946691562               |
| SNP_P3_173873_814   | NW_004518055.1 | Scaffold3336 | 814                     | CC                              | TT                | 1946691563               |
| SNP_P3_173874_850   | NW_004518055.1 | Scaffold3336 | 850                     | AA                              | GG                | 1946691566               |
| SNP_P3_173875_871   | NW_004518055.1 | Scaffold3336 | 871                     | GG                              | TT                | 1946691568               |
| SNP_P3_173876_873   | NW_004518055.1 | Scaffold3336 | 873                     | TT                              | GG                | 1946691570               |
| SNP_P3_173877_874   | NW_004518055.1 | Scaffold3336 | 874                     | TT                              | CC                | 1946691572               |
| SNP_P3_173878_1834  | NW_004518055.1 | Scaffold3336 | 1834                    | CC                              | TT                | 1946691574               |
| SNP_P3_173879_1870  | NW_004518055.1 | Scaffold3336 | 1870                    | AA                              | TT                | 1946691576               |
| SNP_P3_173880_7107  | NW_004518055.1 | Scaffold3336 | 7107                    | CC                              | TT                | 1946691577               |
| SNP_P3_173881_11853 | NW_004518055.1 | Scaffold3336 | 11853                   | GG                              | CC                | 1946691579               |
| SNP_P3_173882_12456 | NW_004518055.1 | Scaffold3336 | 12456                   | TT                              | GG                | 1946691582               |
| SNP_P3_173883_35329 | NW_004518055.1 | Scaffold3336 | 35329                   | TT                              | CC                | 1946691584               |
| SNP_P3_173884_52818 | NW_004518055.1 | Scaffold3336 | 52818                   | GG                              | CC                | 1946691586               |
| SNP_P3_173885_63905 | NW_004518055.1 | Scaffold3336 | 63905                   | TT                              | AA                | 1946691588               |
| SNP_P3_173886_63906 | NW_004518055.1 | Scaffold3336 | 63906                   | GG                              | AA                | 1946691590               |
| SNP_P3_173887_63956 | NW_004518055.1 | Scaffold3336 | 63956                   | AA                              | TT                | 1946691592               |
| SNP_P3_173888_66522 | NW_004518055.1 | Scaffold3336 | 66522                   | CC                              | TT                | 1946691594               |
| SNP_P3_173889_66813 | NW_004518055.1 | Scaffold3336 | 66813                   | TT                              | AA                | 1946691596               |
| SNP_P3_173890_2041  | NW_004518056.1 | Scaffold3337 | 2041                    | GG                              | AA                | 1946691597               |
| SNP_P3_173892_21902 | NW_004518056.1 | Scaffold3337 | 21902                   | AA                              | TT                | 1946691599               |
| SNP_P3_173893_21916 | NW_004518056.1 | Scaffold3337 | 21916                   | GG                              | AA                | 1946691601               |
| SNP_P3_173894_22072 | NW_004518056.1 | Scaffold3337 | 22072                   | GG                              | CC                | 1946691603               |
| SNP_P3_173895_25256 | NW_004518056.1 | Scaffold3337 | 25256                   | AA                              | TT                | 1946691605               |
| SNP_P3_173896_25280 | NW_004518056.1 | Scaffold3337 | 25280                   | TT                              | CC                | 1946691607               |
| SNP_P3_173897_2121  | NW_004518064.1 | Scaffold3347 | 2121                    | CC                              | TT                | 1946691609               |
| SNP_P3_173898_2142  | NW_004518064.1 | Scaffold3347 | 2142                    | CC                              | TT                | 1946691611               |
| SNP_P3_173899_2155  | NW_004518064.1 | Scaffold3347 | 2155                    | CC                              | GG                | 1946691613               |
| SNP_P3_173900_2161  | NW_004518064.1 | Scaffold3347 | 2161                    | TT                              | AA                | 1946691616               |
| SNP_P3_173901_2178  | NW_004518064.1 | Scaffold3347 | 2178                    | AA                              | TT                | 1946691618               |
| SNP_P3_173902_2179  | NW_004518064.1 | Scaffold3347 | 2179                    | AA                              | TT                | 1946691620               |

| SNPs IDs            | Chromosome IDs | Chromosomes  | Physical positions (bp) | CDC Frontier (Reference genome) | (Pusa 256 & HPNB) | NCBI SNPdb Accession IDs |
|---------------------|----------------|--------------|-------------------------|---------------------------------|-------------------|--------------------------|
| SNP_P3_173903_2210  | NW_004518064.1 | Scaffold3347 | 2210                    | AA                              | TT                | 1946691622               |
| SNP_P3_173904_2340  | NW_004518064.1 | Scaffold3347 | 2340                    | CC                              | TT                | 1946691624               |
| SNP_P3_173905_2474  | NW_004518064.1 | Scaffold3347 | 2474                    | TT                              | CC                | 1946691626               |
| SNP_P3_173906_2477  | NW_004518064.1 | Scaffold3347 | 2477                    | CC                              | GG                | 1946691627               |
| SNP_P3_173907_2480  | NW_004518064.1 | Scaffold3347 | 2480                    | GG                              | AA                | 1946691629               |
| SNP_P3_173908_2726  | NW_004518064.1 | Scaffold3347 | 2726                    | AA                              | GG                | 1946691631               |
| SNP_P3_173909_2792  | NW_004518064.1 | Scaffold3347 | 2792                    | AA                              | CC                | 1946691633               |
| SNP_P3_173910_2801  | NW_004518064.1 | Scaffold3347 | 2801                    | TT                              | CC                | 1946691635               |
| SNP_P3_173911_2828  | NW_004518064.1 | Scaffold3347 | 2828                    | GG                              | CC                | 1946691637               |
| SNP_P3_173912_823   | NW_004518065.1 | Scaffold3348 | 823                     | TT                              | GG                | 1946691639               |
| SNP_P3_173913_1139  | NW_004518065.1 | Scaffold3348 | 1139                    | AA                              | GG                | 1946691641               |
| SNP_P3_173914_5039  | NW_004518069.1 | Scaffold3353 | 5039                    | TT                              | CC                | 1946691643               |
| SNP_P3_173915_5047  | NW_004518069.1 | Scaffold3353 | 5047                    | TT                              | CC                | 1946691645               |
| SNP_P3_173916_7094  | NW_004518069.1 | Scaffold3353 | 7094                    | AA                              | TT                | 1946691647               |
| SNP_P3_173917_7135  | NW_004518069.1 | Scaffold3353 | 7135                    | GG                              | TT                | 1946691650               |
| SNP_P3_173919_7276  | NW_004518069.1 | Scaffold3353 | 7276                    | TT                              | GG                | 1946691652               |
| SNP_P3_173920_7284  | NW_004518069.1 | Scaffold3353 | 7284                    | CC                              | TT                | 1946691654               |
| SNP_P3_173921_7307  | NW_004518069.1 | Scaffold3353 | 7307                    | AA                              | GG                | 1946691656               |
| SNP_P3_173922_7313  | NW_004518069.1 | Scaffold3353 | 7313                    | CC                              | TT                | 1946691658               |
| SNP_P3_173923_7337  | NW_004518069.1 | Scaffold3353 | 7337                    | GG                              | CC                | 1946691660               |
| SNP_P3_173924_159   | NW_004518070.1 | Scaffold3354 | 159                     | TT                              | CC                | 1946691662               |
| SNP_P3_173925_523   | NW_004518070.1 | Scaffold3354 | 523                     | GG                              | TT                | 1946691664               |
| SNP_P3_173926_714   | NW_004518070.1 | Scaffold3354 | 714                     | CC                              | TT                | 1946691666               |
| SNP_P3_173927_990   | NW_004518070.1 | Scaffold3354 | 990                     | GG                              | TT                | 1946691668               |
| SNP_P3_173928_1266  | NW_004518070.1 | Scaffold3354 | 1266                    | CC                              | TT                | 1946691670               |
| SNP_P3_173929_1337  | NW_004518070.1 | Scaffold3354 | 1337                    | GG                              | AA                | 1946691672               |
| SNP_P3_173930_1376  | NW_004518070.1 | Scaffold3354 | 1376                    | AA                              | CC                | 1946691674               |
| SNP_P3_173931_2197  | NW_004518070.1 | Scaffold3354 | 2197                    | TT                              | AA                | 1946691676               |
| SNP_P3_173932_2372  | NW_004518070.1 | Scaffold3354 | 2372                    | AA                              | TT                | 1946691678               |
| SNP_P3_173933_2467  | NW_004518070.1 | Scaffold3354 | 2467                    | CC                              | TT                | 1946691680               |
| SNP_P3_173934_2709  | NW_004518070.1 | Scaffold3354 | 2709                    | AA                              | GG                | 1946691682               |
| SNP_P3_173935_2966  | NW_004518070.1 | Scaffold3354 | 2966                    | AA                              | GG                | 1946691684               |
| SNP_P3_173936_10604 | NW_004518070.1 | Scaffold3354 | 10604                   | TT                              | CC                | 1946691686               |
| SNP_P3_173937_2157  | NW_004518073.1 | Scaffold3357 | 2157                    | TT                              | AA                | 1946691688               |
| SNP_P3_173938_2160  | NW_004518073.1 | Scaffold3357 | 2160                    | AA                              | CC                | 1946691690               |
| SNP_P3_173939_2400  | NW_004518073.1 | Scaffold3357 | 2400                    | GG                              | AA                | 1946691692               |
| SNP_P3_173940_2499  | NW_004518073.1 | Scaffold3357 | 2499                    | GG                              | CC                | 1946691694               |
| SNP_P3_173941_95    | NW_004518074.1 | Scaffold3359 | 95                      | GG                              | AA                | 1946691696               |
| SNP_P3_173942_157   | NW_004518074.1 | Scaffold3359 | 157                     | GG                              | TT                | 1946691698               |
| SNP_P3_173943_164   | NW_004518074.1 | Scaffold3359 | 164                     | AA                              | TT                | 1946691700               |
| SNP_P3_173944_197   | NW_004518074.1 | Scaffold3359 | 197                     | AA                              | GG                | 1946691702               |
| SNP_P3_173945_294   | NW_004518074.1 | Scaffold3359 | 294                     | AA                              | GG                | 1946691704               |



| SNPs IDs             | Chromosome IDs | Chromosomes  | Physical positions (bp) | CDC Frontier (Reference genome) | (Pusa 256 & HPNB) | NCBI SNPdb Accession IDs |
|----------------------|----------------|--------------|-------------------------|---------------------------------|-------------------|--------------------------|
| SNP_P3_173946_296    | NW_004518074.1 | Scaffold3359 | 296                     | CC                              | TT                | 1946691706               |
| SNP_P3_173947_308    | NW_004518074.1 | Scaffold3359 | 308                     | TT                              | GG                | 1946691707               |
| SNP_P3_173948_371    | NW_004518074.1 | Scaffold3359 | 371                     | AA                              | GG                | 1946691709               |
| SNP_P3_173949_450    | NW_004518074.1 | Scaffold3359 | 450                     | AA                              | CC                | 1946691711               |
| SNP_P3_173950_536    | NW_004518074.1 | Scaffold3359 | 536                     | CC                              | TT                | 1946691714               |
| SNP_P3_173951_605    | NW_004518074.1 | Scaffold3359 | 605                     | GG                              | AA                | 1946691716               |
| SNP_P3_173952_649    | NW_004518074.1 | Scaffold3359 | 649                     | AA                              | GG                | 1946691718               |
| SNP_P3_173953_666    | NW_004518074.1 | Scaffold3359 | 666                     | CC                              | TT                | 1946691720               |
| SNP_P3_173954_681    | NW_004518074.1 | Scaffold3359 | 681                     | TT                              | AA                | 1946691722               |
| SNP_P3_173955_612    | NW_004518075.1 | Scaffold3360 | 612                     | TT                              | GG                | 1946691724               |
| SNP_P3_173956_1202   | NW_004518076.1 | Scaffold3362 | 1202                    | CC                              | AA                | 1946691726               |
| SNP_P3_173957_1218   | NW_004518076.1 | Scaffold3362 | 1218                    | TT                              | GG                | 1946691728               |
| SNP_P3_173958_1240   | NW_004518076.1 | Scaffold3362 | 1240                    | CC                              | TT                | 1946691730               |
| SNP_P3_173960_1266   | NW_004518076.1 | Scaffold3362 | 1266                    | CC                              | TT                | 1946691732               |
| SNP_P3_173961_1288   | NW_004518076.1 | Scaffold3362 | 1288                    | AA                              | GG                | 1946691734               |
| SNP_P3_173962_1312   | NW_004518076.1 | Scaffold3362 | 1312                    | TT                              | GG                | 1946691736               |
| SNP_P3_173963_1343   | NW_004518076.1 | Scaffold3362 | 1343                    | TT                              | CC                | 1946691738               |
| SNP_P3_173964_26802  | NW_004518076.1 | Scaffold3362 | 26802                   | GG                              | TT                | 1946691740               |
| SNP_P3_173965_27855  | NW_004518076.1 | Scaffold3362 | 27855                   | AA                              | GG                | 1946691741               |
| SNP_P3_173966_27865  | NW_004518076.1 | Scaffold3362 | 27865                   | GG                              | TT                | 1946691743               |
| SNP_P3_173967_27877  | NW_004518076.1 | Scaffold3362 | 27877                   | TT                              | CC                | 1946691746               |
| SNP_P3_173968_33027  | NW_004518076.1 | Scaffold3362 | 33027                   | TT                              | CC                | 1946691748               |
| SNP_P3_173969_33194  | NW_004518076.1 | Scaffold3362 | 33194                   | TT                              | GG                | 1946691750               |
| SNP_P3_173971_49155  | NW_004518076.1 | Scaffold3362 | 49155                   | GG                              | TT                | 1946691752               |
| SNP_P3_173972_49166  | NW_004518076.1 | Scaffold3362 | 49166                   | AA                              | GG                | 1946691754               |
| SNP_P3_173975_109403 | NW_004518076.1 | Scaffold3362 | 109403                  | TT                              | CC                | 1946691756               |
| SNP_P3_173976_110966 | NW_004518076.1 | Scaffold3362 | 110966                  | GG                              | TT                | 1946691758               |
| SNP_P3_173977_111110 | NW_004518076.1 | Scaffold3362 | 111110                  | AA                              | GG                | 1946691760               |
| SNP_P3_173978_111231 | NW_004518076.1 | Scaffold3362 | 111231                  | AA                              | GG                | 1946691762               |
| SNP_P3_173979_111817 | NW_004518076.1 | Scaffold3362 | 111817                  | CC                              | TT                | 1946691764               |
| SNP_P3_173980_111821 | NW_004518076.1 | Scaffold3362 | 111821                  | TT                              | GG                | 1946691766               |
| SNP_P3_173981_111865 | NW_004518076.1 | Scaffold3362 | 111865                  | GG                              | TT                | 1946691768               |
| SNP_P3_173982_112022 | NW_004518076.1 | Scaffold3362 | 112022                  | TT                              | GG                | 1946691770               |
| SNP_P3_173983_112074 | NW_004518076.1 | Scaffold3362 | 112074                  | AA                              | GG                | 1946691772               |
| SNP_P3_173984_112177 | NW_004518076.1 | Scaffold3362 | 112177                  | CC                              | TT                | 1946691774               |
| SNP_P3_173985_112217 | NW_004518076.1 | Scaffold3362 | 112217                  | TT                              | CC                | 1946691776               |
| SNP_P3_173986_110    | NW_004518078.1 | Scaffold3364 | 110                     | TT                              | CC                | 1946691778               |
| SNP_P3_173987_133    | NW_004518078.1 | Scaffold3364 | 133                     | TT                              | CC                | 1946691781               |
| SNP_P3_173988_199    | NW_004518078.1 | Scaffold3364 | 199                     | TT                              | CC                | 1946691783               |
| SNP_P3_173989_213    | NW_004518078.1 | Scaffold3364 | 213                     | GG                              | TT                | 1946691784               |
| SNP_P3_173990_293    | NW_004518078.1 | Scaffold3364 | 293                     | CC                              | GG                | 1946691786               |
| SNP_P3_173991_305    | NW_004518078.1 | Scaffold3364 | 305                     | AA                              | GG                | 1946691788               |

| SNPs IDs            | Chromosome IDs | Chromosomes  | Physical positions (bp) | CDC Frontier (Reference genome) | (Pusa 256 & HPNB) | NCBI SNPdb Accession IDs |
|---------------------|----------------|--------------|-------------------------|---------------------------------|-------------------|--------------------------|
| SNP_P3_173992_331   | NW_004518078.1 | Scaffold3364 | 331                     | CC                              | TT                | 1946691790               |
| SNP_P3_173993_476   | NW_004518078.1 | Scaffold3364 | 476                     | AA                              | GG                | 1946691793               |
| SNP_P3_173994_551   | NW_004518078.1 | Scaffold3364 | 551                     | CC                              | GG                | 1946691795               |
| SNP_P3_173995_562   | NW_004518078.1 | Scaffold3364 | 562                     | GG                              | TT                | 1946691797               |
| SNP_P3_173996_564   | NW_004518078.1 | Scaffold3364 | 564                     | AA                              | GG                | 1946691799               |
| SNP_P3_173997_588   | NW_004518078.1 | Scaffold3364 | 588                     | TT                              | AA                | 1946691801               |
| SNP_P3_173998_649   | NW_004518078.1 | Scaffold3364 | 649                     | AA                              | TT                | 1946691803               |
| SNP_P3_173999_656   | NW_004518078.1 | Scaffold3364 | 656                     | CC                              | TT                | 1946691805               |
| SNP_P3_174000_2300  | NW_004518078.1 | Scaffold3364 | 2300                    | AA                              | TT                | 1946691807               |
| SNP_P3_174001_11523 | NW_004518078.1 | Scaffold3364 | 11523                   | AA                              | GG                | 1946691809               |
| SNP_P3_174002_17403 | NW_004518078.1 | Scaffold3364 | 17403                   | TT                              | GG                | 1946691811               |
| SNP_P3_174003_19247 | NW_004518078.1 | Scaffold3364 | 19247                   | AA                              | GG                | 1946691814               |
| SNP_P3_174004_33070 | NW_004518078.1 | Scaffold3364 | 33070                   | CC                              | AA                | 1946691816               |
| SNP_P3_174005_33969 | NW_004518078.1 | Scaffold3364 | 33969                   | TT                              | AA                | 1946691818               |
| SNP_P3_174006_34141 | NW_004518078.1 | Scaffold3364 | 34141                   | GG                              | CC                | 1946691820               |
| SNP_P3_174008_34875 | NW_004518078.1 | Scaffold3364 | 34875                   | CC                              | AA                | 1946691822               |
| SNP_P3_174009_34876 | NW_004518078.1 | Scaffold3364 | 34876                   | AA                              | GG                | 1946691824               |
| SNP_P3_174010_35077 | NW_004518078.1 | Scaffold3364 | 35077                   | AA                              | GG                | 1946691826               |
| SNP_P3_174011_35376 | NW_004518078.1 | Scaffold3364 | 35376                   | AA                              | TT                | 1946691828               |
| SNP_P3_174012_36001 | NW_004518078.1 | Scaffold3364 | 36001                   | GG                              | AA                | 1946691830               |
| SNP_P3_174013_37911 | NW_004518078.1 | Scaffold3364 | 37911                   | AA                              | GG                | 1946691832               |
| SNP_P3_174014_38131 | NW_004518078.1 | Scaffold3364 | 38131                   | AA                              | GG                | 1946691836               |
| SNP_P3_174015_40529 | NW_004518078.1 | Scaffold3364 | 40529                   | TT                              | AA                | 1946691838               |
| SNP_P3_174016_43276 | NW_004518078.1 | Scaffold3364 | 43276                   | AA                              | TT                | 1946691840               |
| SNP_P3_174018_46200 | NW_004518078.1 | Scaffold3364 | 46200                   | AA                              | CC                | 1946691842               |
| SNP_P3_174019_46915 | NW_004518078.1 | Scaffold3364 | 46915                   | AA                              | GG                | 1946691844               |
| SNP_P3_174020_47244 | NW_004518078.1 | Scaffold3364 | 47244                   | AA                              | TT                | 1946691846               |
| SNP_P3_174021_47286 | NW_004518078.1 | Scaffold3364 | 47286                   | AA                              | GG                | 1946691848               |
| SNP_P3_174022_47407 | NW_004518078.1 | Scaffold3364 | 47407                   | AA                              | TT                | 1946691850               |
| SNP_P3_174023_47637 | NW_004518078.1 | Scaffold3364 | 47637                   | TT                              | CC                | 1946691852               |
| SNP_P3_174024_50074 | NW_004518078.1 | Scaffold3364 | 50074                   | TT                              | CC                | 1946691854               |
| SNP_P3_174025_50106 | NW_004518078.1 | Scaffold3364 | 50106                   | CC                              | TT                | 1946691856               |
| SNP_P3_174026_50107 | NW_004518078.1 | Scaffold3364 | 50107                   | GG                              | AA                | 1946691858               |
| SNP_P3_174027_50116 | NW_004518078.1 | Scaffold3364 | 50116                   | GG                              | TT                | 1946691860               |
| SNP_P3_174028_5213  | NW_004518079.1 | Scaffold3366 | 5213                    | GG                              | AA                | 1946691862               |
| SNP_P3_174029_2597  | NW_004518080.1 | Scaffold3368 | 2597                    | AA                              | CC                | 1946691864               |
| SNP_P3_174030_2680  | NW_004518080.1 | Scaffold3368 | 2680                    | TT                              | AA                | 1946691866               |
| SNP_P3_174031_2988  | NW_004518080.1 | Scaffold3368 | 2988                    | TT                              | AA                | 1946691869               |
| SNP_P3_174032_3046  | NW_004518080.1 | Scaffold3368 | 3046                    | GG                              | CC                | 1946691871               |
| SNP_P3_174033_3060  | NW_004518080.1 | Scaffold3368 | 3060                    | CC                              | TT                | 1946691874               |
| SNP_P3_174034_16845 | NW_004518081.1 | Scaffold3369 | 16845                   | CC                              | AA                | 1946691876               |
| SNP_P3_174035_16874 | NW_004518081.1 | Scaffold3369 | 16874                   | AA                              | GG                | 1946691878               |

| SNPs IDs            | Chromosome IDs | Chromosomes  | Physical positions (bp) | CDC Frontier (Reference genome) | (Pusa 256 & HPNB) | NCBI SNPdb Accession IDs |
|---------------------|----------------|--------------|-------------------------|---------------------------------|-------------------|--------------------------|
| SNP_P3_174036_17329 | NW_004518081.1 | Scaffold3369 | 17329                   | GG                              | AA                | 1946691880               |
| SNP_P3_174037_17686 | NW_004518081.1 | Scaffold3369 | 17686                   | TT                              | AA                | 1946691882               |
| SNP_P3_174038_17748 | NW_004518081.1 | Scaffold3369 | 17748                   | TT                              | CC                | 1946691884               |
| SNP_P3_174039_17845 | NW_004518081.1 | Scaffold3369 | 17845                   | AA                              | CC                | 1946691887               |
| SNP_P3_174040_17857 | NW_004518081.1 | Scaffold3369 | 17857                   | AA                              | GG                | 1946691889               |
| SNP_P3_174041_18098 | NW_004518081.1 | Scaffold3369 | 18098                   | TT                              | CC                | 1946691891               |
| SNP_P3_174042_18224 | NW_004518081.1 | Scaffold3369 | 18224                   | CC                              | TT                | 1946691893               |
| SNP_P3_174043_18555 | NW_004518081.1 | Scaffold3369 | 18555                   | TT                              | CC                | 1946691895               |
| SNP_P3_174045_20758 | NW_004518081.1 | Scaffold3369 | 20758                   | AA                              | GG                | 1946691897               |
| SNP_P3_174046_20801 | NW_004518081.1 | Scaffold3369 | 20801                   | AA                              | GG                | 1946691900               |
| SNP_P3_174047_20912 | NW_004518081.1 | Scaffold3369 | 20912                   | CC                              | TT                | 1946691902               |
| SNP_P3_174048_21143 | NW_004518081.1 | Scaffold3369 | 21143                   | AA                              | TT                | 1946691904               |
| SNP_P3_174049_21347 | NW_004518081.1 | Scaffold3369 | 21347                   | TT                              | CC                | 1946691906               |
| SNP_P3_174051_23183 | NW_004518081.1 | Scaffold3369 | 23183                   | CC                              | TT                | 1946691908               |
| SNP_P3_174052_23197 | NW_004518081.1 | Scaffold3369 | 23197                   | AA                              | GG                | 1946691910               |
| SNP_P3_174053_6913  | NW_004518082.1 | Scaffold3371 | 6913                    | GG                              | CC                | 1946691912               |
| SNP_P3_174054_19778 | NW_004518082.1 | Scaffold3371 | 19778                   | TT                              | AA                | 1946691914               |
| SNP_P3_174056_19833 | NW_004518082.1 | Scaffold3371 | 19833                   | AA                              | GG                | 1946691916               |
| SNP_P3_174057_33839 | NW_004518082.1 | Scaffold3371 | 33839                   | GG                              | CC                | 1946691918               |
| SNP_P3_174059_34156 | NW_004518082.1 | Scaffold3371 | 34156                   | GG                              | AA                | 1946691920               |
| SNP_P3_174060_34167 | NW_004518082.1 | Scaffold3371 | 34167                   | TT                              | AA                | 1946691922               |
| SNP_P3_174061_658   | NW_004518088.1 | Scaffold3380 | 658                     | AA                              | CC                | 1946691924               |
| SNP_P3_174062_1914  | NW_004518088.1 | Scaffold3380 | 1914                    | TT                              | CC                | 1946691926               |
| SNP_P3_174063_1945  | NW_004518088.1 | Scaffold3380 | 1945                    | AA                              | GG                | 1946691928               |
| SNP_P3_174064_1984  | NW_004518088.1 | Scaffold3380 | 1984                    | AA                              | CC                | 1946691930               |
| SNP_P3_174065_2026  | NW_004518088.1 | Scaffold3380 | 2026                    | AA                              | GG                | 1946691932               |
| SNP_P3_174066_2034  | NW_004518088.1 | Scaffold3380 | 2034                    | TT                              | CC                | 1946691934               |
| SNP_P3_174067_2309  | NW_004518088.1 | Scaffold3380 | 2309                    | TT                              | CC                | 1946691936               |
| SNP_P3_174068_2310  | NW_004518088.1 | Scaffold3380 | 2310                    | TT                              | CC                | 1946691938               |
| SNP_P3_174069_2313  | NW_004518088.1 | Scaffold3380 | 2313                    | AA                              | GG                | 1946691940               |
| SNP_P3_174070_2344  | NW_004518088.1 | Scaffold3380 | 2344                    | AA                              | GG                | 1946691942               |
| SNP_P3_174071_2392  | NW_004518088.1 | Scaffold3380 | 2392                    | AA                              | GG                | 1946691944               |
| SNP_P3_174072_2406  | NW_004518088.1 | Scaffold3380 | 2406                    | GG                              | AA                | 1946691946               |
| SNP_P3_174073_2439  | NW_004518088.1 | Scaffold3380 | 2439                    | CC                              | TT                | 1946691948               |
| SNP_P3_174074_2518  | NW_004518088.1 | Scaffold3380 | 2518                    | GG                              | CC                | 1946691950               |
| SNP_P3_174075_2532  | NW_004518088.1 | Scaffold3380 | 2532                    | GG                              | AA                | 1946691952               |
| SNP_P3_174076_2591  | NW_004518088.1 | Scaffold3380 | 2591                    | AA                              | CC                | 1946691954               |
| SNP_P3_174077_3920  | NW_004518088.1 | Scaffold3380 | 3920                    | TT                              | CC                | 1946691956               |
| SNP_P3_174078_3933  | NW_004518088.1 | Scaffold3380 | 3933                    | AA                              | GG                | 1946691958               |
| SNP_P3_174079_3952  | NW_004518088.1 | Scaffold3380 | 3952                    | AA                              | GG                | 1946691960               |
| SNP_P3_174080_4005  | NW_004518088.1 | Scaffold3380 | 4005                    | CC                              | TT                | 1946691962               |
| SNP_P3_174081_4123  | NW_004518088.1 | Scaffold3380 | 4123                    | GG                              | AA                | 1946691964               |

| SNPs IDs            | Chromosome IDs | Chromosomes  | Physical positions (bp) | CDC Frontier (Reference genome) | (Pusa 256 & HPNB) | NCBI SNPdb Accession IDs |
|---------------------|----------------|--------------|-------------------------|---------------------------------|-------------------|--------------------------|
| SNP_P3_174082_4139  | NW_004518088.1 | Scaffold3380 | 4139                    | CC                              | TT                | 1946691966               |
| SNP_P3_174083_4226  | NW_004518088.1 | Scaffold3380 | 4226                    | GG                              | TT                | 1946691968               |
| SNP_P3_174084_4259  | NW_004518088.1 | Scaffold3380 | 4259                    | GG                              | TT                | 1946691970               |
| SNP_P3_174085_4334  | NW_004518088.1 | Scaffold3380 | 4334                    | AA                              | GG                | 1946691972               |
| SNP_P3_174086_4375  | NW_004518088.1 | Scaffold3380 | 4375                    | CC                              | TT                | 1946691974               |
| SNP_P3_174087_4387  | NW_004518088.1 | Scaffold3380 | 4387                    | GG                              | AA                | 1946691977               |
| SNP_P3_174088_4945  | NW_004518088.1 | Scaffold3380 | 4945                    | GG                              | CC                | 1946691979               |
| SNP_P3_174089_5201  | NW_004518088.1 | Scaffold3380 | 5201                    | TT                              | AA                | 1946691981               |
| SNP_P3_174090_299   | NW_004518089.1 | Scaffold3381 | 299                     | TT                              | AA                | 1946691983               |
| SNP_P3_174091_377   | NW_004518089.1 | Scaffold3381 | 377                     | CC                              | GG                | 1946691985               |
| SNP_P3_174092_649   | NW_004518089.1 | Scaffold3381 | 649                     | CC                              | AA                | 1946691987               |
| SNP_P3_174093_785   | NW_004518089.1 | Scaffold3381 | 785                     | TT                              | CC                | 1946691989               |
| SNP_P3_174094_823   | NW_004518089.1 | Scaffold3381 | 823                     | TT                              | GG                | 1946691991               |
| SNP_P3_174095_1022  | NW_004518089.1 | Scaffold3381 | 1022                    | AA                              | GG                | 1946691993               |
| SNP_P3_174096_1025  | NW_004518089.1 | Scaffold3381 | 1025                    | TT                              | AA                | 1946691995               |
| SNP_P3_174097_1086  | NW_004518089.1 | Scaffold3381 | 1086                    | AA                              | GG                | 1946691997               |
| SNP_P3_174098_1093  | NW_004518089.1 | Scaffold3381 | 1093                    | TT                              | CC                | 1946691999               |
| SNP_P3_174099_1114  | NW_004518089.1 | Scaffold3381 | 1114                    | CC                              | TT                | 1946692001               |
| SNP_P3_174100_1121  | NW_004518089.1 | Scaffold3381 | 1121                    | TT                              | GG                | 1946692003               |
| SNP_P3_174101_1181  | NW_004518089.1 | Scaffold3381 | 1181                    | TT                              | CC                | 1946692005               |
| SNP_P3_174102_1429  | NW_004518089.1 | Scaffold3381 | 1429                    | AA                              | CC                | 1946692008               |
| SNP_P3_174103_1477  | NW_004518089.1 | Scaffold3381 | 1477                    | AA                              | TT                | 1946692010               |
| SNP_P3_174104_1509  | NW_004518089.1 | Scaffold3381 | 1509                    | TT                              | AA                | 1946692012               |
| SNP_P3_174105_1544  | NW_004518089.1 | Scaffold3381 | 1544                    | CC                              | GG                | 1946692014               |
| SNP_P3_174106_1576  | NW_004518089.1 | Scaffold3381 | 1576                    | TT                              | AA                | 1946692016               |
| SNP_P3_174108_3242  | NW_004518092.1 | Scaffold3384 | 3242                    | AA                              | GG                | 1946692018               |
| SNP_P3_174109_1165  | NW_004518093.1 | Scaffold3385 | 1165                    | CC                              | TT                | 1946692020               |
| SNP_P3_174110_1184  | NW_004518093.1 | Scaffold3385 | 1184                    | AA                              | GG                | 1946692022               |
| SNP_P3_174111_2110  | NW_004518093.1 | Scaffold3385 | 2110                    | TT                              | AA                | 1946692024               |
| SNP_P3_174112_2990  | NW_004518093.1 | Scaffold3385 | 2990                    | GG                              | CC                | 1946692026               |
| SNP_P3_174113_2996  | NW_004518093.1 | Scaffold3385 | 2996                    | TT                              | CC                | 1946692028               |
| SNP_P3_174114_6914  | NW_004518093.1 | Scaffold3385 | 6914                    | CC                              | GG                | 1946692030               |
| SNP_P3_174115_8420  | NW_004518093.1 | Scaffold3385 | 8420                    | TT                              | GG                | 1946692032               |
| SNP_P3_174117_565   | NW_004518098.1 | Scaffold3392 | 565                     | AA                              | TT                | 1946692034               |
| SNP_P3_174118_602   | NW_004518098.1 | Scaffold3392 | 602                     | CC                              | TT                | 1946692036               |
| SNP_P3_174120_714   | NW_004518098.1 | Scaffold3392 | 714                     | AA                              | TT                | 1946692038               |
| SNP_P3_174121_1013  | NW_004518098.1 | Scaffold3392 | 1013                    | CC                              | AA                | 1946692039               |
| SNP_P3_174122_1635  | NW_004518102.1 | Scaffold3396 | 1635                    | GG                              | AA                | 1946692041               |
| SNP_P3_174123_3885  | NW_004518102.1 | Scaffold3396 | 3885                    | AA                              | CC                | 1946692043               |
| SNP_P3_174124_13142 | NW_004518102.1 | Scaffold3396 | 13142                   | GG                              | AA                | 1946692045               |
| SNP_P3_174125_13169 | NW_004518102.1 | Scaffold3396 | 13169                   | AA                              | TT                | 1946692047               |
| SNP_P3_174126_18189 | NW_004518102.1 | Scaffold3396 | 18189                   | GG                              | CC                | 1946692049               |

| SNPs IDs             | Chromosome IDs | Chromosomes  | Physical positions (bp) | CDC Frontier (Reference genome) | (Pusa 256 & HPNB) | NCBI SNPdb Accession IDs |
|----------------------|----------------|--------------|-------------------------|---------------------------------|-------------------|--------------------------|
| SNP_P3_174127_18975  | NW_004518102.1 | Scaffold3396 | 18975                   | CC                              | GG                | 1946692051               |
| SNP_P3_174128_21021  | NW_004518102.1 | Scaffold3396 | 21021                   | CC                              | TT                | 1946692053               |
| SNP_P3_174129_21030  | NW_004518102.1 | Scaffold3396 | 21030                   | GG                              | CC                | 1946692055               |
| SNP_P3_174130_21378  | NW_004518102.1 | Scaffold3396 | 21378                   | GG                              | TT                | 1946692057               |
| SNP_P3_174131_21394  | NW_004518102.1 | Scaffold3396 | 21394                   | CC                              | GG                | 1946692059               |
| SNP_P3_174132_21934  | NW_004518102.1 | Scaffold3396 | 21934                   | CC                              | TT                | 1946692061               |
| SNP_P3_174133_8084   | NW_004518103.1 | Scaffold3397 | 8084                    | AA                              | GG                | 1946692064               |
| SNP_P3_174137_18024  | NW_004518103.1 | Scaffold3397 | 18024                   | TT                              | CC                | 1946692066               |
| SNP_P3_174138_18032  | NW_004518103.1 | Scaffold3397 | 18032                   | TT                              | CC                | 1946692068               |
| SNP_P3_174139_18626  | NW_004518103.1 | Scaffold3397 | 18626                   | CC                              | TT                | 1946692070               |
| SNP_P3_174140_18627  | NW_004518103.1 | Scaffold3397 | 18627                   | AA                              | GG                | 1946692072               |
| SNP_P3_174141_20347  | NW_004518103.1 | Scaffold3397 | 20347                   | CC                              | TT                | 1946692074               |
| SNP_P3_174143_28299  | NW_004518103.1 | Scaffold3397 | 28299                   | GG                              | AA                | 1946692076               |
| SNP_P3_174144_28303  | NW_004518103.1 | Scaffold3397 | 28303                   | GG                              | TT                | 1946692078               |
| SNP_P3_174145_41365  | NW_004518103.1 | Scaffold3397 | 41365                   | TT                              | CC                | 1946692079               |
| SNP_P3_174146_43306  | NW_004518103.1 | Scaffold3397 | 43306                   | TT                              | AA                | 1946692081               |
| SNP_P3_174147_43363  | NW_004518103.1 | Scaffold3397 | 43363                   | TT                              | CC                | 1946692083               |
| SNP_P3_174148_48449  | NW_004518103.1 | Scaffold3397 | 48449                   | TT                              | GG                | 1946692085               |
| SNP_P3_174149_50206  | NW_004518103.1 | Scaffold3397 | 50206                   | CC                              | TT                | 1946692087               |
| SNP_P3_174150_50899  | NW_004518103.1 | Scaffold3397 | 50899                   | AA                              | TT                | 1946692089               |
| SNP_P3_174151_54352  | NW_004518103.1 | Scaffold3397 | 54352                   | TT                              | CC                | 1946692091               |
| SNP_P3_174152_55196  | NW_004518103.1 | Scaffold3397 | 55196                   | GG                              | AA                | 1946692093               |
| SNP_P3_174154_58680  | NW_004518103.1 | Scaffold3397 | 58680                   | AA                              | TT                | 1946692096               |
| SNP_P3_174155_62768  | NW_004518103.1 | Scaffold3397 | 62768                   | GG                              | AA                | 1946692098               |
| SNP_P3_174156_65978  | NW_004518103.1 | Scaffold3397 | 65978                   | AA                              | GG                | 1946692100               |
| SNP_P3_174157_69479  | NW_004518103.1 | Scaffold3397 | 69479                   | CC                              | TT                | 1946692102               |
| SNP_P3_174158_69864  | NW_004518103.1 | Scaffold3397 | 69864                   | AA                              | GG                | 1946692104               |
| SNP_P3_174159_69884  | NW_004518103.1 | Scaffold3397 | 69884                   | AA                              | GG                | 1946692106               |
| SNP_P3_174161_75807  | NW_004518103.1 | Scaffold3397 | 75807                   | AA                              | GG                | 1946692108               |
| SNP_P3_174163_94585  | NW_004518103.1 | Scaffold3397 | 94585                   | TT                              | CC                | 1946692110               |
| SNP_P3_174164_94759  | NW_004518103.1 | Scaffold3397 | 94759                   | TT                              | CC                | 1946692112               |
| SNP_P3_174165_107163 | NW_004518103.1 | Scaffold3397 | 107163                  | AA                              | TT                | 1946692114               |
| SNP_P3_174167_107496 | NW_004518103.1 | Scaffold3397 | 107496                  | TT                              | CC                | 1946692116               |
| SNP_P3_174168_107768 | NW_004518103.1 | Scaffold3397 | 107768                  | TT                              | GG                | 1946692118               |
| SNP_P3_174169_108564 | NW_004518103.1 | Scaffold3397 | 108564                  | AA                              | GG                | 1946692120               |
| SNP_P3_174170_109476 | NW_004518103.1 | Scaffold3397 | 109476                  | CC                              | TT                | 1946692122               |
| SNP_P3_174172_951    | NW_004518105.1 | Scaffold3403 | 951                     | TT                              | AA                | 1946692124               |
| SNP_P3_174173_1117   | NW_004518105.1 | Scaffold3403 | 1117                    | AA                              | TT                | 1946692126               |
| SNP_P3_174174_1749   | NW_004518105.1 | Scaffold3403 | 1749                    | CC                              | AA                | 1946692128               |
| SNP_P3_174176_1099   | NW_004518106.1 | Scaffold3404 | 1099                    | CC                              | TT                | 1946692131               |
| SNP_P3_174177_1183   | NW_004518106.1 | Scaffold3404 | 1183                    | GG                              | AA                | 1946692133               |
| SNP_P3_174178_1236   | NW_004518106.1 | Scaffold3404 | 1236                    | TT                              | CC                | 1946692135               |

| SNPs IDs           | Chromosome IDs | Chromosomes  | Physical positions (bp) | CDC Frontier (Reference genome) | (Pusa 256 & HPNB) | NCBI SNPdb Accession IDs |
|--------------------|----------------|--------------|-------------------------|---------------------------------|-------------------|--------------------------|
| SNP_P3_174179_1239 | NW_004518106.1 | Scaffold3404 | 1239                    | TT                              | GG                | 1946692137               |
| SNP_P3_174181_1287 | NW_004518106.1 | Scaffold3404 | 1287                    | AA                              | GG                | 1946692139               |
| SNP_P3_174182_1297 | NW_004518106.1 | Scaffold3404 | 1297                    | GG                              | AA                | 1946692141               |
| SNP_P3_174183_1705 | NW_004518106.1 | Scaffold3404 | 1705                    | TT                              | CC                | 1946692143               |
| SNP_P3_174184_1757 | NW_004518106.1 | Scaffold3404 | 1757                    | GG                              | CC                | 1946692145               |
| SNP_P3_174185_1811 | NW_004518106.1 | Scaffold3404 | 1811                    | CC                              | AA                | 1946692147               |
| SNP_P3_174186_1863 | NW_004518106.1 | Scaffold3404 | 1863                    | CC                              | TT                | 1946692149               |
| SNP_P3_174187_1869 | NW_004518106.1 | Scaffold3404 | 1869                    | GG                              | TT                | 1946692151               |
| SNP_P3_174188_1893 | NW_004518106.1 | Scaffold3404 | 1893                    | GG                              | AA                | 1946692153               |
| SNP_P3_174189_2035 | NW_004518106.1 | Scaffold3404 | 2035                    | CC                              | AA                | 1946692155               |
| SNP_P3_174190_2130 | NW_004518106.1 | Scaffold3404 | 2130                    | TT                              | CC                | 1946692157               |
| SNP_P3_174192_2160 | NW_004518106.1 | Scaffold3404 | 2160                    | GG                              | TT                | 1946692159               |
| SNP_P3_174193_2290 | NW_004518106.1 | Scaffold3404 | 2290                    | AA                              | GG                | 1946692161               |
| SNP_P3_174194_2300 | NW_004518106.1 | Scaffold3404 | 2300                    | TT                              | AA                | 1946692163               |
| SNP_P3_174196_1274 | NW_004518108.1 | Scaffold3406 | 1274                    | AA                              | TT                | 1946692165               |
| SNP_P3_174197_1359 | NW_004518108.1 | Scaffold3406 | 1359                    | AA                              | TT                | 1946692168               |
| SNP_P3_174198_1497 | NW_004518108.1 | Scaffold3406 | 1497                    | AA                              | TT                | 1946692170               |
| SNP_P3_174199_1565 | NW_004518108.1 | Scaffold3406 | 1565                    | GG                              | AA                | 1946692172               |
| SNP_P3_174200_1606 | NW_004518108.1 | Scaffold3406 | 1606                    | AA                              | TT                | 1946692174               |
| SNP_P3_174202_1852 | NW_004518108.1 | Scaffold3406 | 1852                    | TT                              | AA                | 1946692176               |
| SNP_P3_174205_479  | NW_004518109.1 | Scaffold3407 | 479                     | CC                              | TT                | 1946692178               |
| SNP_P3_174206_278  | NW_004518111.1 | Scaffold3410 | 278                     | GG                              | CC                | 1946692180               |
| SNP_P3_174207_521  | NW_004518111.1 | Scaffold3410 | 521                     | AA                              | TT                | 1946692182               |
| SNP_P3_174208_538  | NW_004518111.1 | Scaffold3410 | 538                     | CC                              | TT                | 1946692184               |
| SNP_P3_174209_2667 | NW_004518112.1 | Scaffold3411 | 2667                    | AA                              | GG                | 1946692186               |
| SNP_P3_174210_5785 | NW_004518112.1 | Scaffold3411 | 5785                    | GG                              | AA                | 1946692188               |
| SNP_P3_174211_5796 | NW_004518112.1 | Scaffold3411 | 5796                    | CC                              | TT                | 1946692191               |
| SNP_P3_174212_5825 | NW_004518112.1 | Scaffold3411 | 5825                    | AA                              | TT                | 1946692193               |
| SNP_P3_174213_5858 | NW_004518112.1 | Scaffold3411 | 5858                    | TT                              | GG                | 1946692195               |
| SNP_P3_174214_6148 | NW_004518112.1 | Scaffold3411 | 6148                    | TT                              | CC                | 1946692197               |
| SNP_P3_174215_6218 | NW_004518112.1 | Scaffold3411 | 6218                    | TT                              | AA                | 1946692199               |
| SNP_P3_174216_6229 | NW_004518112.1 | Scaffold3411 | 6229                    | GG                              | AA                | 1946692200               |
| SNP_P3_174217_6241 | NW_004518112.1 | Scaffold3411 | 6241                    | AA                              | CC                | 1946692202               |
| SNP_P3_174218_6255 | NW_004518112.1 | Scaffold3411 | 6255                    | AA                              | TT                | 1946692206               |
| SNP_P3_174219_6274 | NW_004518112.1 | Scaffold3411 | 6274                    | AA                              | TT                | 1946692208               |
| SNP_P3_174220_689  | NW_004518113.1 | Scaffold3412 | 689                     | AA                              | TT                | 1946692210               |
| SNP_P3_174221_697  | NW_004518113.1 | Scaffold3412 | 697                     | CC                              | AA                | 1946692212               |
| SNP_P3_174222_698  | NW_004518113.1 | Scaffold3412 | 698                     | AA                              | TT                | 1946692214               |
| SNP_P3_174223_699  | NW_004518113.1 | Scaffold3412 | 699                     | AA                              | GG                | 1946692216               |
| SNP_P3_174224_707  | NW_004518113.1 | Scaffold3412 | 707                     | TT                              | CC                | 1946692218               |
| SNP_P3_174225_804  | NW_004518113.1 | Scaffold3412 | 804                     | TT                              | GG                | 1946692220               |
| SNP_P3_174226_973  | NW_004518113.1 | Scaffold3412 | 973                     | CC                              | AA                | 1946692222               |

| SNPs IDs             | Chromosome IDs | Chromosomes  | Physical positions (bp) | CDC Frontier (Reference genome) | (Pusa 256 & HPNB) | NCBI SNPdb Accession IDs |
|----------------------|----------------|--------------|-------------------------|---------------------------------|-------------------|--------------------------|
| SNP_P3_174227_154    | NW_004518114.1 | Scaffold3414 | 154                     | TT                              | GG                | 1946692224               |
| SNP_P3_174228_689    | NW_004518114.1 | Scaffold3414 | 689                     | GG                              | AA                | 1946692226               |
| SNP_P3_174229_23506  | NW_004518119.1 | Scaffold3422 | 23506                   | TT                              | CC                | 1946692229               |
| SNP_P3_174230_23515  | NW_004518119.1 | Scaffold3422 | 23515                   | CC                              | TT                | 1946692231               |
| SNP_P3_174231_33865  | NW_004518119.1 | Scaffold3422 | 33865                   | TT                              | CC                | 1946692233               |
| SNP_P3_174232_97021  | NW_004518119.1 | Scaffold3422 | 97021                   | TT                              | GG                | 1946692235               |
| SNP_P3_174234_141842 | NW_004518119.1 | Scaffold3422 | 141842                  | TT                              | CC                | 1946692237               |
| SNP_P3_174235_143970 | NW_004518119.1 | Scaffold3422 | 143970                  | CC                              | TT                | 1946692239               |
| SNP_P3_174236_196    | NW_004518120.1 | Scaffold3423 | 196                     | GG                              | TT                | 1946692242               |
| SNP_P3_174237_323    | NW_004518120.1 | Scaffold3423 | 323                     | CC                              | AA                | 1946692244               |
| SNP_P3_174238_342    | NW_004518120.1 | Scaffold3423 | 342                     | AA                              | TT                | 1946692247               |
| SNP_P3_174239_343    | NW_004518120.1 | Scaffold3423 | 343                     | CC                              | TT                | 1946692249               |
| SNP_P3_174240_356    | NW_004518120.1 | Scaffold3423 | 356                     | CC                              | TT                | 1946692251               |
| SNP_P3_174241_378    | NW_004518120.1 | Scaffold3423 | 378                     | AA                              | CC                | 1946692253               |
| SNP_P3_174242_399    | NW_004518120.1 | Scaffold3423 | 399                     | TT                              | CC                | 1946692256               |
| SNP_P3_174243_475    | NW_004518120.1 | Scaffold3423 | 475                     | CC                              | TT                | 1946692258               |
| SNP_P3_174244_479    | NW_004518120.1 | Scaffold3423 | 479                     | GG                              | CC                | 1946692260               |
| SNP_P3_174245_482    | NW_004518120.1 | Scaffold3423 | 482                     | AA                              | TT                | 1946692262               |
| SNP_P3_174246_493    | NW_004518120.1 | Scaffold3423 | 493                     | CC                              | TT                | 1946692264               |
| SNP_P3_174247_503    | NW_004518120.1 | Scaffold3423 | 503                     | CC                              | GG                | 1946692266               |
| SNP_P3_174248_513    | NW_004518120.1 | Scaffold3423 | 513                     | GG                              | AA                | 1946692268               |
| SNP_P3_174249_523    | NW_004518120.1 | Scaffold3423 | 523                     | GG                              | AA                | 1946692270               |
| SNP_P3_174250_530    | NW_004518120.1 | Scaffold3423 | 530                     | AA                              | GG                | 1946692272               |
| SNP_P3_174251_563    | NW_004518120.1 | Scaffold3423 | 563                     | TT                              | AA                | 1946692273               |
| SNP_P3_174252_571    | NW_004518120.1 | Scaffold3423 | 571                     | TT                              | AA                | 1946692274               |
| SNP_P3_174253_682    | NW_004518120.1 | Scaffold3423 | 682                     | TT                              | CC                | 1946692275               |
| SNP_P3_174254_911    | NW_004518120.1 | Scaffold3423 | 911                     | GG                              | AA                | 1946692276               |
| SNP_P3_174256_336    | NW_004518121.1 | Scaffold3424 | 336                     | TT                              | CC                | 1946692278               |
| SNP_P3_174257_558    | NW_004518121.1 | Scaffold3424 | 558                     | AA                              | TT                | 1946692280               |
| SNP_P3_174258_567    | NW_004518121.1 | Scaffold3424 | 567                     | AA                              | CC                | 1946692282               |
| SNP_P3_174259_760    | NW_004518121.1 | Scaffold3424 | 760                     | TT                              | GG                | 1946692284               |
| SNP_P3_174260_775    | NW_004518121.1 | Scaffold3424 | 775                     | GG                              | AA                | 1946692286               |
| SNP_P3_174261_323    | NW_004518122.1 | Scaffold3426 | 323                     | AA                              | GG                | 1946692289               |
| SNP_P3_174262_412    | NW_004518122.1 | Scaffold3426 | 412                     | AA                              | GG                | 1946692291               |
| SNP_P3_174263_422    | NW_004518122.1 | Scaffold3426 | 422                     | AA                              | TT                | 1946692293               |
| SNP_P3_174264_424    | NW_004518122.1 | Scaffold3426 | 424                     | AA                              | TT                | 1946692295               |
| SNP_P3_174265_509    | NW_004518122.1 | Scaffold3426 | 509                     | TT                              | CC                | 1946692296               |
| SNP_P3_174266_652    | NW_004518123.1 | Scaffold3427 | 652                     | TT                              | CC                | 1946692298               |
| SNP_P3_174267_1459   | NW_004518125.1 | Scaffold3429 | 1459                    | GG                              | CC                | 1946692300               |
| SNP_P3_174268_1460   | NW_004518125.1 | Scaffold3429 | 1460                    | TT                              | CC                | 1946692302               |
| SNP_P3_174269_1462   | NW_004518125.1 | Scaffold3429 | 1462                    | GG                              | TT                | 1946692304               |
| SNP_P3_174270_1464   | NW_004518125.1 | Scaffold3429 | 1464                    | TT                              | CC                | 1946692306               |

| SNPs IDs            | Chromosome IDs | Chromosomes  | Physical positions (bp) | CDC Frontier (Reference genome) | (Pusa 256 & HPNB) | NCBI SNPdb Accession IDs |
|---------------------|----------------|--------------|-------------------------|---------------------------------|-------------------|--------------------------|
| SNP_P3_174271_1472  | NW_004518125.1 | Scaffold3429 | 1472                    | AA                              | TT                | 1946692308               |
| SNP_P3_174272_10356 | NW_004518125.1 | Scaffold3429 | 10356                   | GG                              | CC                | 1946692310               |
| SNP_P3_174273_10372 | NW_004518125.1 | Scaffold3429 | 10372                   | CC                              | TT                | 1946692313               |
| SNP_P3_174274_10862 | NW_004518125.1 | Scaffold3429 | 10862                   | GG                              | TT                | 1946692315               |
| SNP_P3_174275_11065 | NW_004518125.1 | Scaffold3429 | 11065                   | AA                              | GG                | 1946692317               |
| SNP_P3_174276_11080 | NW_004518125.1 | Scaffold3429 | 11080                   | AA                              | GG                | 1946692319               |
| SNP_P3_174277_11224 | NW_004518125.1 | Scaffold3429 | 11224                   | AA                              | GG                | 1946692321               |
| SNP_P3_174278_469   | NW_004518127.1 | Scaffold3432 | 469                     | GG                              | AA                | 1946692323               |
| SNP_P3_174280_23889 | NW_004518127.1 | Scaffold3432 | 23889                   | CC                              | AA                | 1946692325               |
| SNP_P3_174282_24059 | NW_004518127.1 | Scaffold3432 | 24059                   | GG                              | TT                | 1946692327               |
| SNP_P3_174283_24352 | NW_004518127.1 | Scaffold3432 | 24352                   | AA                              | TT                | 1946692329               |
| SNP_P3_174284_24365 | NW_004518127.1 | Scaffold3432 | 24365                   | CC                              | TT                | 1946692331               |
| SNP_P3_174285_24539 | NW_004518127.1 | Scaffold3432 | 24539                   | GG                              | AA                | 1946692333               |
| SNP_P3_174286_24709 | NW_004518127.1 | Scaffold3432 | 24709                   | AA                              | TT                | 1946692334               |
| SNP_P3_174287_25064 | NW_004518127.1 | Scaffold3432 | 25064                   | TT                              | CC                | 1946692336               |
| SNP_P3_174288_25071 | NW_004518127.1 | Scaffold3432 | 25071                   | TT                              | CC                | 1946692338               |
| SNP_P3_174289_25076 | NW_004518127.1 | Scaffold3432 | 25076                   | GG                              | TT                | 1946692340               |
| SNP_P3_174290_25621 | NW_004518127.1 | Scaffold3432 | 25621                   | TT                              | GG                | 1946692342               |
| SNP_P3_174291_25665 | NW_004518127.1 | Scaffold3432 | 25665                   | CC                              | TT                | 1946692344               |
| SNP_P3_174292_26441 | NW_004518127.1 | Scaffold3432 | 26441                   | AA                              | GG                | 1946692346               |
| SNP_P3_174293_28397 | NW_004518127.1 | Scaffold3432 | 28397                   | TT                              | GG                | 1946692349               |
| SNP_P3_174294_29782 | NW_004518127.1 | Scaffold3432 | 29782                   | AA                              | CC                | 1946692351               |
| SNP_P3_174295_29790 | NW_004518127.1 | Scaffold3432 | 29790                   | TT                              | AA                | 1946692353               |
| SNP_P3_174296_29827 | NW_004518127.1 | Scaffold3432 | 29827                   | AA                              | CC                | 1946692355               |
| SNP_P3_174297_30091 | NW_004518127.1 | Scaffold3432 | 30091                   | GG                              | AA                | 1946692357               |
| SNP_P3_174298_30135 | NW_004518127.1 | Scaffold3432 | 30135                   | AA                              | GG                | 1946692359               |
| SNP_P3_174299_30141 | NW_004518127.1 | Scaffold3432 | 30141                   | CC                              | AA                | 1946692361               |
| SNP_P3_174300_30143 | NW_004518127.1 | Scaffold3432 | 30143                   | TT                              | CC                | 1946692363               |
| SNP_P3_174301_30185 | NW_004518127.1 | Scaffold3432 | 30185                   | GG                              | TT                | 1946692365               |
| SNP_P3_174302_35410 | NW_004518127.1 | Scaffold3432 | 35410                   | CC                              | TT                | 1946692367               |
| SNP_P3_174303_35427 | NW_004518127.1 | Scaffold3432 | 35427                   | CC                              | TT                | 1946692369               |
| SNP_P3_174304_35435 | NW_004518127.1 | Scaffold3432 | 35435                   | CC                              | TT                | 1946692371               |
| SNP_P3_174306_35684 | NW_004518127.1 | Scaffold3432 | 35684                   | AA                              | TT                | 1946692373               |
| SNP_P3_174307_38726 | NW_004518127.1 | Scaffold3432 | 38726                   | CC                              | TT                | 1946692375               |
| SNP_P3_174308_43981 | NW_004518127.1 | Scaffold3432 | 43981                   | GG                              | TT                | 1946692378               |
| SNP_P3_174309_43994 | NW_004518127.1 | Scaffold3432 | 43994                   | AA                              | GG                | 1946692380               |
| SNP_P3_174310_44014 | NW_004518127.1 | Scaffold3432 | 44014                   | AA                              | GG                | 1946692382               |
| SNP_P3_174311_44016 | NW_004518127.1 | Scaffold3432 | 44016                   | AA                              | GG                | 1946692384               |
| SNP_P3_174312_61284 | NW_004518127.1 | Scaffold3432 | 61284                   | AA                              | GG                | 1946692386               |
| SNP_P3_174313_61285 | NW_004518127.1 | Scaffold3432 | 61285                   | TT                              | GG                | 1946692388               |
| SNP_P3_174314_67762 | NW_004518127.1 | Scaffold3432 | 67762                   | GG                              | AA                | 1946692390               |
| SNP_P3_174315_67982 | NW_004518127.1 | Scaffold3432 | 67982                   | TT                              | CC                | 1946692392               |



| SNPs IDs            | Chromosome IDs | Chromosomes  | Physical positions (bp) | CDC Frontier (Reference genome) | (Pusa 256 & HPNB) | NCBI SNPdb Accession IDs |
|---------------------|----------------|--------------|-------------------------|---------------------------------|-------------------|--------------------------|
| SNP_P3_174316_68054 | NW_004518127.1 | Scaffold3432 | 68054                   | CC                              | TT                | 1946692394               |
| SNP_P3_174317_68252 | NW_004518127.1 | Scaffold3432 | 68252                   | CC                              | TT                | 1946692396               |
| SNP_P3_174318_73398 | NW_004518127.1 | Scaffold3432 | 73398                   | AA                              | GG                | 1946692398               |
| SNP_P3_174319_74085 | NW_004518127.1 | Scaffold3432 | 74085                   | GG                              | AA                | 1946692400               |
| SNP_P3_174320_79273 | NW_004518127.1 | Scaffold3432 | 79273                   | GG                              | TT                | 1946692402               |
| SNP_P3_174321_79541 | NW_004518127.1 | Scaffold3432 | 79541                   | AA                              | TT                | 1946692404               |
| SNP_P3_174322_81703 | NW_004518127.1 | Scaffold3432 | 81703                   | TT                              | CC                | 1946692406               |
| SNP_P3_174323_81798 | NW_004518127.1 | Scaffold3432 | 81798                   | CC                              | TT                | 1946692408               |
| SNP_P3_174324_85452 | NW_004518127.1 | Scaffold3432 | 85452                   | CC                              | TT                | 1946692410               |
| SNP_P3_174325_85464 | NW_004518127.1 | Scaffold3432 | 85464                   | CC                              | TT                | 1946692412               |
| SNP_P3_174326_94069 | NW_004518127.1 | Scaffold3432 | 94069                   | TT                              | CC                | 1946692415               |
| SNP_P3_174327_94384 | NW_004518127.1 | Scaffold3432 | 94384                   | TT                              | CC                | 1946692417               |
| SNP_P3_174328_7189  | NW_004518129.1 | Scaffold3434 | 7189                    | CC                              | GG                | 1946692419               |
| SNP_P3_174330_7685  | NW_004518129.1 | Scaffold3434 | 7685                    | TT                              | AA                | 1946692421               |
| SNP_P3_174331_7686  | NW_004518129.1 | Scaffold3434 | 7686                    | AA                              | TT                | 1946692423               |
| SNP_P3_174332_8129  | NW_004518129.1 | Scaffold3434 | 8129                    | TT                              | GG                | 1946692425               |
| SNP_P3_174333_10330 | NW_004518129.1 | Scaffold3434 | 10330                   | TT                              | AA                | 1946692427               |
| SNP_P3_174334_10332 | NW_004518129.1 | Scaffold3434 | 10332                   | TT                              | CC                | 1946692429               |
| SNP_P3_174335_10942 | NW_004518129.1 | Scaffold3434 | 10942                   | GG                              | AA                | 1946692431               |
| SNP_P3_174336_10943 | NW_004518129.1 | Scaffold3434 | 10943                   | AA                              | GG                | 1946692433               |
| SNP_P3_174337_10976 | NW_004518129.1 | Scaffold3434 | 10976                   | TT                              | CC                | 1946692435               |
| SNP_P3_174338_11005 | NW_004518129.1 | Scaffold3434 | 11005                   | AA                              | GG                | 1946692437               |
| SNP_P3_174340_11762 | NW_004518129.1 | Scaffold3434 | 11762                   | GG                              | AA                | 1946692439               |
| SNP_P3_174341_11770 | NW_004518129.1 | Scaffold3434 | 11770                   | TT                              | CC                | 1946692441               |
| SNP_P3_174342_11868 | NW_004518129.1 | Scaffold3434 | 11868                   | GG                              | TT                | 1946692443               |
| SNP_P3_174343_11920 | NW_004518129.1 | Scaffold3434 | 11920                   | CC                              | TT                | 1946692445               |
| SNP_P3_174344_12021 | NW_004518129.1 | Scaffold3434 | 12021                   | CC                              | AA                | 1946692448               |
| SNP_P3_174345_2281  | NW_004518130.1 | Scaffold3435 | 2281                    | TT                              | CC                | 1946692451               |
| SNP_P3_174346_2894  | NW_004518130.1 | Scaffold3435 | 2894                    | AA                              | CC                | 1946692453               |
| SNP_P3_174347_3855  | NW_004518130.1 | Scaffold3435 | 3855                    | GG                              | AA                | 1946692455               |
| SNP_P3_174348_5733  | NW_004518130.1 | Scaffold3435 | 5733                    | AA                              | TT                | 1946692457               |
| SNP_P3_174349_9757  | NW_004518130.1 | Scaffold3435 | 9757                    | GG                              | AA                | 1946692459               |
| SNP_P3_174350_9782  | NW_004518130.1 | Scaffold3435 | 9782                    | AA                              | GG                | 1946692461               |
| SNP_P3_174351_10605 | NW_004518130.1 | Scaffold3435 | 10605                   | AA                              | GG                | 1946692463               |
| SNP_P3_174352_10802 | NW_004518130.1 | Scaffold3435 | 10802                   | CC                              | TT                | 1946692465               |
| SNP_P3_174353_10817 | NW_004518130.1 | Scaffold3435 | 10817                   | AA                              | GG                | 1946692467               |
| SNP_P3_174354_16153 | NW_004518130.1 | Scaffold3435 | 16153                   | TT                              | CC                | 1946692469               |
| SNP_P3_174355_16157 | NW_004518130.1 | Scaffold3435 | 16157                   | GG                              | TT                | 1946692471               |
| SNP_P3_174356_16168 | NW_004518130.1 | Scaffold3435 | 16168                   | CC                              | AA                | 1946692473               |
| SNP_P3_174357_16190 | NW_004518130.1 | Scaffold3435 | 16190                   | TT                              | CC                | 1946692475               |
| SNP_P3_174358_16209 | NW_004518130.1 | Scaffold3435 | 16209                   | AA                              | GG                | 1946692477               |
| SNP_P3_174359_16218 | NW_004518130.1 | Scaffold3435 | 16218                   | TT                              | GG                | 1946692479               |

| SNPs IDs            | Chromosome IDs | Chromosomes  | Physical positions (bp) | CDC Frontier (Reference genome) | (Pusa 256 & HPNB) | NCBI SNPdb Accession IDs |
|---------------------|----------------|--------------|-------------------------|---------------------------------|-------------------|--------------------------|
| SNP_P3_174360_16239 | NW_004518130.1 | Scaffold3435 | 16239                   | AA                              | CC                | 1946692481               |
| SNP_P3_174361_16262 | NW_004518130.1 | Scaffold3435 | 16262                   | AA                              | GG                | 1946692484               |
| SNP_P3_174362_16332 | NW_004518130.1 | Scaffold3435 | 16332                   | GG                              | AA                | 1946692486               |
| SNP_P3_174363_16385 | NW_004518130.1 | Scaffold3435 | 16385                   | GG                              | AA                | 1946692488               |
| SNP_P3_174364_16392 | NW_004518130.1 | Scaffold3435 | 16392                   | AA                              | GG                | 1946692490               |
| SNP_P3_174365_16435 | NW_004518130.1 | Scaffold3435 | 16435                   | AA                              | GG                | 1946692492               |
| SNP_P3_174366_1645  | NW_004518131.1 | Scaffold3436 | 1645                    | CC                              | TT                | 1946692494               |
| SNP_P3_174367_7378  | NW_004518131.1 | Scaffold3436 | 7378                    | GG                              | TT                | 1946692497               |
| SNP_P3_174368_8881  | NW_004518131.1 | Scaffold3436 | 8881                    | TT                              | AA                | 1946692499               |
| SNP_P3_174369_9251  | NW_004518131.1 | Scaffold3436 | 9251                    | TT                              | GG                | 1946692501               |
| SNP_P3_174372_9569  | NW_004518131.1 | Scaffold3436 | 9569                    | TT                              | GG                | 1946692503               |
| SNP_P3_174373_9668  | NW_004518131.1 | Scaffold3436 | 9668                    | AA                              | TT                | 1946692505               |
| SNP_P3_174375_10225 | NW_004518131.1 | Scaffold3436 | 10225                   | AA                              | TT                | 1946692507               |
| SNP_P3_174376_10284 | NW_004518131.1 | Scaffold3436 | 10284                   | TT                              | AA                | 1946692509               |
| SNP_P3_174377_11103 | NW_004518131.1 | Scaffold3436 | 11103                   | TT                              | CC                | 1946692511               |
| SNP_P3_174378_12162 | NW_004518131.1 | Scaffold3436 | 12162                   | GG                              | CC                | 1946692513               |
| SNP_P3_174379_13038 | NW_004518131.1 | Scaffold3436 | 13038                   | CC                              | TT                | 1946692515               |
| SNP_P3_174380_13048 | NW_004518131.1 | Scaffold3436 | 13048                   | GG                              | AA                | 1946692518               |
| SNP_P3_174381_13094 | NW_004518131.1 | Scaffold3436 | 13094                   | CC                              | TT                | 1946692521               |
| SNP_P3_174382_13098 | NW_004518131.1 | Scaffold3436 | 13098                   | GG                              | AA                | 1946692523               |
| SNP_P3_174383_13136 | NW_004518131.1 | Scaffold3436 | 13136                   | CC                              | GG                | 1946692525               |
| SNP_P3_174384_13182 | NW_004518131.1 | Scaffold3436 | 13182                   | GG                              | AA                | 1946692527               |
| SNP_P3_174385_13195 | NW_004518131.1 | Scaffold3436 | 13195                   | GG                              | TT                | 1946692529               |
| SNP_P3_174386_13208 | NW_004518131.1 | Scaffold3436 | 13208                   | AA                              | GG                | 1946692531               |
| SNP_P3_174387_13213 | NW_004518131.1 | Scaffold3436 | 13213                   | GG                              | AA                | 1946692533               |
| SNP_P3_174388_13220 | NW_004518131.1 | Scaffold3436 | 13220                   | TT                              | GG                | 1946692535               |
| SNP_P3_174389_13263 | NW_004518131.1 | Scaffold3436 | 13263                   | CC                              | AA                | 1946692537               |
| SNP_P3_174390_13296 | NW_004518131.1 | Scaffold3436 | 13296                   | AA                              | GG                | 1946692540               |
| SNP_P3_174391_13355 | NW_004518131.1 | Scaffold3436 | 13355                   | TT                              | CC                | 1946692542               |
| SNP_P3_174392_13523 | NW_004518131.1 | Scaffold3436 | 13523                   | GG                              | CC                | 1946692544               |
| SNP_P3_174393_13563 | NW_004518131.1 | Scaffold3436 | 13563                   | TT                              | AA                | 1946692546               |
| SNP_P3_174394_13773 | NW_004518131.1 | Scaffold3436 | 13773                   | CC                              | TT                | 1946692548               |
| SNP_P3_174396_13852 | NW_004518131.1 | Scaffold3436 | 13852                   | CC                              | TT                | 1946692550               |
| SNP_P3_174397_1625  | NW_004518132.1 | Scaffold3437 | 1625                    | AA                              | GG                | 1946692553               |
| SNP_P3_174398_1629  | NW_004518132.1 | Scaffold3437 | 1629                    | AA                              | TT                | 1946692556               |
| SNP_P3_174399_2947  | NW_004518133.1 | Scaffold3438 | 2947                    | AA                              | TT                | 1946692558               |
| SNP_P3_174400_3088  | NW_004518133.1 | Scaffold3438 | 3088                    | TT                              | AA                | 1946692560               |
| SNP_P3_174401_3089  | NW_004518133.1 | Scaffold3438 | 3089                    | AA                              | TT                | 1946692562               |
| SNP_P3_174402_3090  | NW_004518133.1 | Scaffold3438 | 3090                    | AA                              | TT                | 1946692564               |
| SNP_P3_174403_3344  | NW_004518133.1 | Scaffold3438 | 3344                    | AA                              | CC                | 1946692566               |
| SNP_P3_174404_3346  | NW_004518133.1 | Scaffold3438 | 3346                    | CC                              | TT                | 1946692568               |
| SNP_P3_174405_3369  | NW_004518133.1 | Scaffold3438 | 3369                    | AA                              | TT                | 1946692570               |

| SNPs IDs            | Chromosome IDs | Chromosomes  | Physical positions (bp) | CDC Frontier (Reference genome) | (Pusa 256 & HPNB) | NCBI SNPdb Accession IDs |
|---------------------|----------------|--------------|-------------------------|---------------------------------|-------------------|--------------------------|
| SNP_P3_174406_3372  | NW_004518133.1 | Scaffold3438 | 3372                    | GG                              | AA                | 1946692572               |
| SNP_P3_174407_3373  | NW_004518133.1 | Scaffold3438 | 3373                    | GG                              | AA                | 1946692574               |
| SNP_P3_174408_3381  | NW_004518133.1 | Scaffold3438 | 3381                    | AA                              | GG                | 1946692576               |
| SNP_P3_174409_3432  | NW_004518133.1 | Scaffold3438 | 3432                    | TT                              | AA                | 1946692578               |
| SNP_P3_174410_4318  | NW_004518133.1 | Scaffold3438 | 4318                    | AA                              | TT                | 1946692580               |
| SNP_P3_174411_4320  | NW_004518133.1 | Scaffold3438 | 4320                    | CC                              | AA                | 1946692582               |
| SNP_P3_174412_4703  | NW_004518133.1 | Scaffold3438 | 4703                    | CC                              | TT                | 1946692583               |
| SNP_P3_174413_7654  | NW_004518133.1 | Scaffold3438 | 7654                    | AA                              | CC                | 1946692585               |
| SNP_P3_174414_9363  | NW_004518133.1 | Scaffold3438 | 9363                    | CC                              | TT                | 1946692588               |
| SNP_P3_174415_9431  | NW_004518133.1 | Scaffold3438 | 9431                    | TT                              | CC                | 1946692590               |
| SNP_P3_174416_9773  | NW_004518133.1 | Scaffold3438 | 9773                    | AA                              | TT                | 1946692592               |
| SNP_P3_174417_11298 | NW_004518133.1 | Scaffold3438 | 11298                   | AA                              | GG                | 1946692594               |
| SNP_P3_174419_12038 | NW_004518133.1 | Scaffold3438 | 12038                   | TT                              | AA                | 1946692596               |
| SNP_P3_174420_12384 | NW_004518133.1 | Scaffold3438 | 12384                   | TT                              | AA                | 1946692598               |
| SNP_P3_174421_12392 | NW_004518133.1 | Scaffold3438 | 12392                   | TT                              | GG                | 1946692600               |
| SNP_P3_174422_12393 | NW_004518133.1 | Scaffold3438 | 12393                   | GG                              | TT                | 1946692602               |
| SNP_P3_174423_12416 | NW_004518133.1 | Scaffold3438 | 12416                   | AA                              | CC                | 1946692604               |
| SNP_P3_174424_12419 | NW_004518133.1 | Scaffold3438 | 12419                   | GG                              | TT                | 1946692606               |
| SNP_P3_174425_12434 | NW_004518133.1 | Scaffold3438 | 12434                   | TT                              | GG                | 1946692608               |
| SNP_P3_174427_12596 | NW_004518133.1 | Scaffold3438 | 12596                   | TT                              | AA                | 1946692610               |
| SNP_P3_174428_12607 | NW_004518133.1 | Scaffold3438 | 12607                   | CC                              | AA                | 1946692612               |
| SNP_P3_174429_12609 | NW_004518133.1 | Scaffold3438 | 12609                   | TT                              | AA                | 1946692614               |
| SNP_P3_174430_12611 | NW_004518133.1 | Scaffold3438 | 12611                   | CC                              | AA                | 1946692616               |
| SNP_P3_174431_12636 | NW_004518133.1 | Scaffold3438 | 12636                   | CC                              | TT                | 1946692618               |
| SNP_P3_174432_12645 | NW_004518133.1 | Scaffold3438 | 12645                   | TT                              | CC                | 1946692620               |
| SNP_P3_174434_12870 | NW_004518133.1 | Scaffold3438 | 12870                   | CC                              | TT                | 1946692622               |
| SNP_P3_174435_12877 | NW_004518133.1 | Scaffold3438 | 12877                   | AA                              | GG                | 1946692624               |
| SNP_P3_174436_12916 | NW_004518133.1 | Scaffold3438 | 12916                   | GG                              | AA                | 1946692626               |
| SNP_P3_174437_12947 | NW_004518133.1 | Scaffold3438 | 12947                   | TT                              | AA                | 1946692628               |
| SNP_P3_174438_12960 | NW_004518133.1 | Scaffold3438 | 12960                   | CC                              | TT                | 1946692629               |
| SNP_P3_174439_13107 | NW_004518133.1 | Scaffold3438 | 13107                   | CC                              | TT                | 1946692631               |
| SNP_P3_174440_13149 | NW_004518133.1 | Scaffold3438 | 13149                   | AA                              | GG                | 1946692633               |
| SNP_P3_174441_13535 | NW_004518133.1 | Scaffold3438 | 13535                   | TT                              | CC                | 1946692635               |
| SNP_P3_174442_22501 | NW_004518133.1 | Scaffold3438 | 22501                   | GG                              | AA                | 1946692637               |
| SNP_P3_174443_22537 | NW_004518133.1 | Scaffold3438 | 22537                   | TT                              | AA                | 1946692639               |
| SNP_P3_174445_22919 | NW_004518133.1 | Scaffold3438 | 22919                   | TT                              | CC                | 1946692641               |
| SNP_P3_174446_23814 | NW_004518133.1 | Scaffold3438 | 23814                   | GG                              | AA                | 1946692643               |
| SNP_P3_174447_289   | NW_004518138.1 | Scaffold3444 | 289                     | AA                              | GG                | 1946692645               |
| SNP_P3_174448_10949 | NW_004518138.1 | Scaffold3444 | 10949                   | AA                              | GG                | 1946692647               |
| SNP_P3_174449_12896 | NW_004518138.1 | Scaffold3444 | 12896                   | GG                              | AA                | 1946692649               |
| SNP_P3_174450_12900 | NW_004518138.1 | Scaffold3444 | 12900                   | TT                              | CC                | 1946692652               |
| SNP_P3_174451_7073  | NW_004518139.1 | Scaffold3445 | 7073                    | AA                              | GG                | 1946692654               |

| SNPs IDs            | Chromosome IDs | Chromosomes  | Physical positions (bp) | CDC Frontier (Reference genome) | (Pusa 256 & HPNB) | NCBI SNPdb Accession IDs |
|---------------------|----------------|--------------|-------------------------|---------------------------------|-------------------|--------------------------|
| SNP_P3_174452_11419 | NW_004518139.1 | Scaffold3445 | 11419                   | TT                              | CC                | 1946692656               |
| SNP_P3_174453_19420 | NW_004518139.1 | Scaffold3445 | 19420                   | CC                              | AA                | 1946692658               |
| SNP_P3_174454_19470 | NW_004518139.1 | Scaffold3445 | 19470                   | TT                              | AA                | 1946692660               |
| SNP_P3_174455_19502 | NW_004518139.1 | Scaffold3445 | 19502                   | TT                              | AA                | 1946692662               |
| SNP_P3_174456_19801 | NW_004518139.1 | Scaffold3445 | 19801                   | AA                              | GG                | 1946692664               |
| SNP_P3_174457_17152 | NW_004518141.1 | Scaffold3447 | 17152                   | GG                              | AA                | 1946692666               |
| SNP_P3_174458_18590 | NW_004518141.1 | Scaffold3447 | 18590                   | AA                              | CC                | 1946692668               |
| SNP_P3_174459_22379 | NW_004518141.1 | Scaffold3447 | 22379                   | CC                              | TT                | 1946692670               |
| SNP_P3_174460_22414 | NW_004518141.1 | Scaffold3447 | 22414                   | CC                              | TT                | 1946692672               |
| SNP_P3_174461_22424 | NW_004518141.1 | Scaffold3447 | 22424                   | TT                              | CC                | 1946692674               |
| SNP_P3_174462_27446 | NW_004518141.1 | Scaffold3447 | 27446                   | GG                              | AA                | 1946692676               |
| SNP_P3_174463_30868 | NW_004518141.1 | Scaffold3447 | 30868                   | CC                              | GG                | 1946692678               |
| SNP_P3_174464_31577 | NW_004518141.1 | Scaffold3447 | 31577                   | GG                              | AA                | 1946692680               |
| SNP_P3_174465_33735 | NW_004518141.1 | Scaffold3447 | 33735                   | AA                              | GG                | 1946692682               |
| SNP_P3_174467_2441  | NW_004518142.1 | Scaffold3448 | 2441                    | TT                              | AA                | 1946692685               |
| SNP_P3_174468_4959  | NW_004518142.1 | Scaffold3448 | 4959                    | CC                              | TT                | 1946692687               |
| SNP_P3_174469_4974  | NW_004518142.1 | Scaffold3448 | 4974                    | AA                              | GG                | 1946692689               |
| SNP_P3_174470_5227  | NW_004518142.1 | Scaffold3448 | 5227                    | AA                              | CC                | 1946692691               |
| SNP_P3_174471_5279  | NW_004518142.1 | Scaffold3448 | 5279                    | AA                              | GG                | 1946692693               |
| SNP_P3_174472_5308  | NW_004518142.1 | Scaffold3448 | 5308                    | AA                              | GG                | 1946692695               |
| SNP_P3_174473_5425  | NW_004518142.1 | Scaffold3448 | 5425                    | AA                              | TT                | 1946692697               |
| SNP_P3_174474_5489  | NW_004518142.1 | Scaffold3448 | 5489                    | CC                              | TT                | 1946692699               |
| SNP_P3_174475_5618  | NW_004518142.1 | Scaffold3448 | 5618                    | TT                              | CC                | 1946692701               |
| SNP_P3_174476_5796  | NW_004518142.1 | Scaffold3448 | 5796                    | CC                              | TT                | 1946692703               |
| SNP_P3_174477_5836  | NW_004518142.1 | Scaffold3448 | 5836                    | TT                              | CC                | 1946692705               |
| SNP_P3_174478_5897  | NW_004518142.1 | Scaffold3448 | 5897                    | TT                              | GG                | 1946692707               |
| SNP_P3_174479_5953  | NW_004518142.1 | Scaffold3448 | 5953                    | AA                              | TT                | 1946692709               |
| SNP_P3_174480_6017  | NW_004518142.1 | Scaffold3448 | 6017                    | AA                              | GG                | 1946692711               |
| SNP_P3_174481_6025  | NW_004518142.1 | Scaffold3448 | 6025                    | CC                              | AA                | 1946692713               |
| SNP_P3_174483_8179  | NW_004518142.1 | Scaffold3448 | 8179                    | AA                              | GG                | 1946692715               |
| SNP_P3_174485_1387  | NW_004518143.1 | Scaffold3450 | 1387                    | TT                              | AA                | 1946692717               |
| SNP_P3_174486_3206  | NW_004518143.1 | Scaffold3450 | 3206                    | TT                              | AA                | 1946692720               |
| SNP_P3_174487_13478 | NW_004518143.1 | Scaffold3450 | 13478                   | TT                              | CC                | 1946692722               |
| SNP_P3_174488_15089 | NW_004518143.1 | Scaffold3450 | 15089                   | AA                              | GG                | 1946692724               |
| SNP_P3_174489_15100 | NW_004518143.1 | Scaffold3450 | 15100                   | GG                              | CC                | 1946692726               |
| SNP_P3_174490_15103 | NW_004518143.1 | Scaffold3450 | 15103                   | AA                              | TT                | 1946692728               |
| SNP_P3_174491_15931 | NW_004518143.1 | Scaffold3450 | 15931                   | GG                              | AA                | 1946692730               |
| SNP_P3_174493_1922  | NW_004518145.1 | Scaffold3453 | 1922                    | TT                              | CC                | 1946692731               |
| SNP_P3_174494_2035  | NW_004518145.1 | Scaffold3453 | 2035                    | TT                              | CC                | 1946692733               |
| SNP_P3_174495_2157  | NW_004518145.1 | Scaffold3453 | 2157                    | AA                              | TT                | 1946692736               |
| SNP_P3_174496_2158  | NW_004518145.1 | Scaffold3453 | 2158                    | TT                              | GG                | 1946692738               |
| SNP_P3_174497_67    | NW_004518147.1 | Scaffold3455 | 67                      | GG                              | AA                | 1946692739               |

| SNPs IDs            | Chromosome IDs | Chromosomes  | Physical positions (bp) | CDC Frontier (Reference genome) | (Pusa 256 & HPNB) | NCBI SNPdb Accession IDs |
|---------------------|----------------|--------------|-------------------------|---------------------------------|-------------------|--------------------------|
| SNP_P3_174498_110   | NW_004518147.1 | Scaffold3455 | 110                     | GG                              | AA                | 1946692741               |
| SNP_P3_174499_299   | NW_004518147.1 | Scaffold3455 | 299                     | TT                              | CC                | 1946692743               |
| SNP_P3_174500_413   | NW_004518147.1 | Scaffold3455 | 413                     | CC                              | AA                | 1946692745               |
| SNP_P3_174501_675   | NW_004518147.1 | Scaffold3455 | 675                     | AA                              | GG                | 1946692747               |
| SNP_P3_174502_676   | NW_004518147.1 | Scaffold3455 | 676                     | AA                              | TT                | 1946692749               |
| SNP_P3_174503_709   | NW_004518147.1 | Scaffold3455 | 709                     | TT                              | CC                | 1946692751               |
| SNP_P3_174504_769   | NW_004518147.1 | Scaffold3455 | 769                     | AA                              | TT                | 1946692754               |
| SNP_P3_174505_902   | NW_004518147.1 | Scaffold3455 | 902                     | GG                              | AA                | 1946692756               |
| SNP_P3_174506_903   | NW_004518147.1 | Scaffold3455 | 903                     | AA                              | GG                | 1946692758               |
| SNP_P3_174507_1064  | NW_004518147.1 | Scaffold3455 | 1064                    | TT                              | CC                | 1946692760               |
| SNP_P3_174508_1102  | NW_004518147.1 | Scaffold3455 | 1102                    | CC                              | TT                | 1946692762               |
| SNP_P3_174509_1165  | NW_004518147.1 | Scaffold3455 | 1165                    | AA                              | GG                | 1946692765               |
| SNP_P3_174510_113   | NW_004518148.1 | Scaffold3457 | 113                     | AA                              | CC                | 1946692767               |
| SNP_P3_174511_501   | NW_004518148.1 | Scaffold3457 | 501                     | AA                              | TT                | 1946692769               |
| SNP_P3_174512_522   | NW_004518148.1 | Scaffold3457 | 522                     | TT                              | AA                | 1946692771               |
| SNP_P3_174513_541   | NW_004518148.1 | Scaffold3457 | 541                     | CC                              | TT                | 1946692773               |
| SNP_P3_174514_951   | NW_004518148.1 | Scaffold3457 | 951                     | AA                              | GG                | 1946692775               |
| SNP_P3_174515_1936  | NW_004518148.1 | Scaffold3457 | 1936                    | AA                              | TT                | 1946692777               |
| SNP_P3_174516_2321  | NW_004518148.1 | Scaffold3457 | 2321                    | AA                              | TT                | 1946692779               |
| SNP_P3_174517_4426  | NW_004518148.1 | Scaffold3457 | 4426                    | TT                              | GG                | 1946692781               |
| SNP_P3_174518_4668  | NW_004518148.1 | Scaffold3457 | 4668                    | AA                              | GG                | 1946692783               |
| SNP_P3_174519_4717  | NW_004518148.1 | Scaffold3457 | 4717                    | GG                              | AA                | 1946692785               |
| SNP_P3_174520_4804  | NW_004518148.1 | Scaffold3457 | 4804                    | AA                              | GG                | 1946692788               |
| SNP_P3_174521_4854  | NW_004518148.1 | Scaffold3457 | 4854                    | CC                              | TT                | 1946692790               |
| SNP_P3_174522_4855  | NW_004518148.1 | Scaffold3457 | 4855                    | GG                              | TT                | 1946692792               |
| SNP_P3_174523_4898  | NW_004518148.1 | Scaffold3457 | 4898                    | CC                              | TT                | 1946692794               |
| SNP_P3_174524_4920  | NW_004518148.1 | Scaffold3457 | 4920                    | TT                              | CC                | 1946692796               |
| SNP_P3_174525_5064  | NW_004518148.1 | Scaffold3457 | 5064                    | CC                              | TT                | 1946692798               |
| SNP_P3_174526_7002  | NW_004518149.1 | Scaffold3458 | 7002                    | TT                              | CC                | 1946692800               |
| SNP_P3_174527_7056  | NW_004518149.1 | Scaffold3458 | 7056                    | GG                              | AA                | 1946692802               |
| SNP_P3_174528_7126  | NW_004518149.1 | Scaffold3458 | 7126                    | GG                              | AA                | 1946692804               |
| SNP_P3_174529_7222  | NW_004518149.1 | Scaffold3458 | 7222                    | GG                              | AA                | 1946692806               |
| SNP_P3_174530_7271  | NW_004518149.1 | Scaffold3458 | 7271                    | AA                              | CC                | 1946692808               |
| SNP_P3_174531_7329  | NW_004518149.1 | Scaffold3458 | 7329                    | GG                              | TT                | 1946692811               |
| SNP_P3_174532_7361  | NW_004518149.1 | Scaffold3458 | 7361                    | TT                              | CC                | 1946692813               |
| SNP_P3_174533_7418  | NW_004518149.1 | Scaffold3458 | 7418                    | CC                              | TT                | 1946692815               |
| SNP_P3_174534_7501  | NW_004518149.1 | Scaffold3458 | 7501                    | GG                              | AA                | 1946692817               |
| SNP_P3_174535_9755  | NW_004518149.1 | Scaffold3458 | 9755                    | AA                              | GG                | 1946692819               |
| SNP_P3_174536_9964  | NW_004518149.1 | Scaffold3458 | 9964                    | CC                              | TT                | 1946692822               |
| SNP_P3_174537_10016 | NW_004518149.1 | Scaffold3458 | 10016                   | AA                              | TT                | 1946692823               |
| SNP_P3_174538_10045 | NW_004518149.1 | Scaffold3458 | 10045                   | AA                              | GG                | 1946692825               |
| SNP_P3_174539_10099 | NW_004518149.1 | Scaffold3458 | 10099                   | CC                              | AA                | 1946692827               |

| SNPs IDs            | Chromosome IDs | Chromosomes  | Physical positions (bp) | CDC Frontier (Reference genome) | (Pusa 256 & HPNB) | NCBI SNPdb Accession IDs |
|---------------------|----------------|--------------|-------------------------|---------------------------------|-------------------|--------------------------|
| SNP_P3_174540_10128 | NW_004518149.1 | Scaffold3458 | 10128                   | AA                              | CC                | 1946692829               |
| SNP_P3_174541_10151 | NW_004518149.1 | Scaffold3458 | 10151                   | TT                              | CC                | 1946692831               |
| SNP_P3_174542_11712 | NW_004518149.1 | Scaffold3458 | 11712                   | CC                              | TT                | 1946692833               |
| SNP_P3_174543_11728 | NW_004518149.1 | Scaffold3458 | 11728                   | AA                              | TT                | 1946692835               |
| SNP_P3_174544_11908 | NW_004518149.1 | Scaffold3458 | 11908                   | GG                              | CC                | 1946692837               |
| SNP_P3_174545_11912 | NW_004518149.1 | Scaffold3458 | 11912                   | CC                              | GG                | 1946692839               |
| SNP_P3_174546_13660 | NW_004518149.1 | Scaffold3458 | 13660                   | AA                              | TT                | 1946692841               |
| SNP_P3_174547_14023 | NW_004518149.1 | Scaffold3458 | 14023                   | AA                              | TT                | 1946692843               |
| SNP_P3_174548_15974 | NW_004518149.1 | Scaffold3458 | 15974                   | AA                              | GG                | 1946692845               |
| SNP_P3_174549_16083 | NW_004518149.1 | Scaffold3458 | 16083                   | TT                              | AA                | 1946692847               |
| SNP_P3_174550_16256 | NW_004518149.1 | Scaffold3458 | 16256                   | GG                              | AA                | 1946692849               |
| SNP_P3_174551_17829 | NW_004518149.1 | Scaffold3458 | 17829                   | TT                              | GG                | 1946692851               |
| SNP_P3_174552_60    | NW_004518151.1 | Scaffold3460 | 60                      | AA                              | GG                | 1946692853               |
| SNP_P3_174553_9181  | NW_004518154.1 | Scaffold3463 | 9181                    | GG                              | TT                | 1946692855               |
| SNP_P3_174554_9227  | NW_004518154.1 | Scaffold3463 | 9227                    | GG                              | AA                | 1946692858               |
| SNP_P3_174556_9559  | NW_004518154.1 | Scaffold3463 | 9559                    | CC                              | TT                | 1946692860               |
| SNP_P3_174557_10724 | NW_004518154.1 | Scaffold3463 | 10724                   | TT                              | CC                | 1946692862               |
| SNP_P3_174558_10731 | NW_004518154.1 | Scaffold3463 | 10731                   | AA                              | GG                | 1946692864               |
| SNP_P3_174559_10768 | NW_004518154.1 | Scaffold3463 | 10768                   | GG                              | AA                | 1946692866               |
| SNP_P3_174560_11638 | NW_004518154.1 | Scaffold3463 | 11638                   | TT                              | GG                | 1946692868               |
| SNP_P3_174561_12773 | NW_004518154.1 | Scaffold3463 | 12773                   | CC                              | TT                | 1946692870               |
| SNP_P3_174562_12848 | NW_004518154.1 | Scaffold3463 | 12848                   | AA                              | GG                | 1946692872               |
| SNP_P3_174563_15600 | NW_004518154.1 | Scaffold3463 | 15600                   | TT                              | AA                | 1946692874               |
| SNP_P3_174564_15617 | NW_004518154.1 | Scaffold3463 | 15617                   | GG                              | CC                | 1946692876               |
| SNP_P3_174565_15659 | NW_004518154.1 | Scaffold3463 | 15659                   | AA                              | TT                | 1946692878               |
| SNP_P3_174566_15664 | NW_004518154.1 | Scaffold3463 | 15664                   | TT                              | GG                | 1946692880               |
| SNP_P3_174567_15862 | NW_004518154.1 | Scaffold3463 | 15862                   | CC                              | AA                | 1946692881               |
| SNP_P3_174568_15876 | NW_004518154.1 | Scaffold3463 | 15876                   | AA                              | TT                | 1946692883               |
| SNP_P3_174569_15948 | NW_004518154.1 | Scaffold3463 | 15948                   | TT                              | CC                | 1946692885               |
| SNP_P3_174570_5419  | NW_004518155.1 | Scaffold3464 | 5419                    | CC                              | TT                | 1946692887               |
| SNP_P3_174571_11243 | NW_004518155.1 | Scaffold3464 | 11243                   | TT                              | CC                | 1946692889               |
| SNP_P3_174572_13499 | NW_004518155.1 | Scaffold3464 | 13499                   | TT                              | CC                | 1946692892               |
| SNP_P3_174573_13525 | NW_004518155.1 | Scaffold3464 | 13525                   | GG                              | AA                | 1946692894               |
| SNP_P3_174574_17027 | NW_004518155.1 | Scaffold3464 | 17027                   | CC                              | TT                | 1946692896               |
| SNP_P3_174575_17082 | NW_004518155.1 | Scaffold3464 | 17082                   | CC                              | TT                | 1946692898               |
| SNP_P3_174576_17139 | NW_004518155.1 | Scaffold3464 | 17139                   | CC                              | AA                | 1946692900               |
| SNP_P3_174577_17170 | NW_004518155.1 | Scaffold3464 | 17170                   | AA                              | TT                | 1946692902               |
| SNP_P3_174578_971   | NW_004518157.1 | Scaffold3466 | 971                     | GG                              | AA                | 1946692904               |
| SNP_P3_174579_982   | NW_004518157.1 | Scaffold3466 | 982                     | CC                              | AA                | 1946692906               |
| SNP_P3_174580_64    | NW_004518159.1 | Scaffold3468 | 64                      | TT                              | GG                | 1946692908               |
| SNP_P3_174581_67    | NW_004518159.1 | Scaffold3468 | 67                      | TT                              | GG                | 1946692910               |
| SNP_P3_174582_108   | NW_004518159.1 | Scaffold3468 | 108                     | CC                              | TT                | 1946692912               |

| SNPs IDs            | Chromosome IDs | Chromosomes  | Physical positions (bp) | CDC Frontier (Reference genome) | (Pusa 256 & HPNB) | NCBI SNPdb Accession IDs |
|---------------------|----------------|--------------|-------------------------|---------------------------------|-------------------|--------------------------|
| SNP_P3_174583_236   | NW_004518159.1 | Scaffold3468 | 236                     | AA                              | GG                | 1946692914               |
| SNP_P3_174584_257   | NW_004518159.1 | Scaffold3468 | 257                     | AA                              | GG                | 1946692916               |
| SNP_P3_174585_331   | NW_004518159.1 | Scaffold3468 | 331                     | TT                              | AA                | 1946692918               |
| SNP_P3_174586_379   | NW_004518159.1 | Scaffold3468 | 379                     | AA                              | GG                | 1946692920               |
| SNP_P3_174587_1258  | NW_004518159.1 | Scaffold3468 | 1258                    | AA                              | CC                | 1946692922               |
| SNP_P3_174588_1389  | NW_004518159.1 | Scaffold3468 | 1389                    | GG                              | AA                | 1946692924               |
| SNP_P3_174589_1412  | NW_004518159.1 | Scaffold3468 | 1412                    | AA                              | TT                | 1946692926               |
| SNP_P3_174590_1733  | NW_004518159.1 | Scaffold3468 | 1733                    | TT                              | GG                | 1946692929               |
| SNP_P3_174591_1936  | NW_004518159.1 | Scaffold3468 | 1936                    | TT                              | GG                | 1946692931               |
| SNP_P3_174592_2088  | NW_004518160.1 | Scaffold3470 | 2088                    | CC                              | TT                | 1946692933               |
| SNP_P3_174593_6671  | NW_004518160.1 | Scaffold3470 | 6671                    | AA                              | TT                | 1946692935               |
| SNP_P3_174594_6677  | NW_004518160.1 | Scaffold3470 | 6677                    | AA                              | GG                | 1946692937               |
| SNP_P3_174595_6695  | NW_004518160.1 | Scaffold3470 | 6695                    | GG                              | AA                | 1946692939               |
| SNP_P3_174596_6698  | NW_004518160.1 | Scaffold3470 | 6698                    | GG                              | TT                | 1946692941               |
| SNP_P3_174597_6699  | NW_004518160.1 | Scaffold3470 | 6699                    | TT                              | AA                | 1946692943               |
| SNP_P3_174598_6700  | NW_004518160.1 | Scaffold3470 | 6700                    | GG                              | TT                | 1946692944               |
| SNP_P3_174599_6709  | NW_004518160.1 | Scaffold3470 | 6709                    | AA                              | GG                | 1946692946               |
| SNP_P3_174600_6711  | NW_004518160.1 | Scaffold3470 | 6711                    | TT                              | AA                | 1946692948               |
| SNP_P3_174601_20034 | NW_004518160.1 | Scaffold3470 | 20034                   | CC                              | GG                | 1946692950               |
| SNP_P3_174602_21568 | NW_004518160.1 | Scaffold3470 | 21568                   | CC                              | TT                | 1946692952               |
| SNP_P3_174603_26976 | NW_004518160.1 | Scaffold3470 | 26976                   | CC                              | TT                | 1946692954               |
| SNP_P3_174604_36607 | NW_004518160.1 | Scaffold3470 | 36607                   | TT                              | CC                | 1946692956               |
| SNP_P3_174605_36610 | NW_004518160.1 | Scaffold3470 | 36610                   | GG                              | AA                | 1946692958               |
| SNP_P3_174606_36619 | NW_004518160.1 | Scaffold3470 | 36619                   | AA                              | TT                | 1946692960               |
| SNP_P3_174607_37734 | NW_004518160.1 | Scaffold3470 | 37734                   | CC                              | AA                | 1946692962               |
| SNP_P3_174608_37769 | NW_004518160.1 | Scaffold3470 | 37769                   | AA                              | TT                | 1946692964               |
| SNP_P3_174609_37908 | NW_004518160.1 | Scaffold3470 | 37908                   | AA                              | TT                | 1946692966               |
| SNP_P3_174610_38103 | NW_004518160.1 | Scaffold3470 | 38103                   | TT                              | CC                | 1946692969               |
| SNP_P3_174611_38582 | NW_004518160.1 | Scaffold3470 | 38582                   | TT                              | GG                | 1946692971               |
| SNP_P3_174612_38601 | NW_004518160.1 | Scaffold3470 | 38601                   | AA                              | GG                | 1946692973               |
| SNP_P3_174613_41960 | NW_004518160.1 | Scaffold3470 | 41960                   | TT                              | CC                | 1946692975               |
| SNP_P3_174614_43024 | NW_004518160.1 | Scaffold3470 | 43024                   | GG                              | AA                | 1946692977               |
| SNP_P3_174615_44813 | NW_004518160.1 | Scaffold3470 | 44813                   | TT                              | AA                | 1946692979               |
| SNP_P3_174616_45184 | NW_004518160.1 | Scaffold3470 | 45184                   | CC                              | TT                | 1946692981               |
| SNP_P3_174617_45219 | NW_004518160.1 | Scaffold3470 | 45219                   | CC                              | TT                | 1946692983               |
| SNP_P3_174618_46772 | NW_004518160.1 | Scaffold3470 | 46772                   | TT                              | CC                | 1946692985               |
| SNP_P3_174619_47959 | NW_004518160.1 | Scaffold3470 | 47959                   | CC                              | TT                | 1946692987               |
| SNP_P3_174620_75266 | NW_004518160.1 | Scaffold3470 | 75266                   | TT                              | CC                | 1946692989               |
| SNP_P3_174621_78744 | NW_004518160.1 | Scaffold3470 | 78744                   | TT                              | AA                | 1946692991               |
| SNP_P3_174622_78766 | NW_004518160.1 | Scaffold3470 | 78766                   | CC                              | AA                | 1946692992               |
| SNP_P3_174623_78883 | NW_004518160.1 | Scaffold3470 | 78883                   | TT                              | CC                | 1946692994               |
| SNP_P3_174624_78892 | NW_004518160.1 | Scaffold3470 | 78892                   | CC                              | TT                | 1946692996               |

| SNPs IDs            | Chromosome IDs | Chromosomes  | Physical positions (bp) | CDC Frontier (Reference genome) | (Pusa 256 & HPNB) | NCBI SNPdb Accession IDs |
|---------------------|----------------|--------------|-------------------------|---------------------------------|-------------------|--------------------------|
| SNP_P3_174625_78901 | NW_004518160.1 | Scaffold3470 | 78901                   | AA                              | GG                | 1946692998               |
| SNP_P3_174626_79124 | NW_004518160.1 | Scaffold3470 | 79124                   | AA                              | GG                | 1946693000               |
| SNP_P3_174627_81395 | NW_004518160.1 | Scaffold3470 | 81395                   | CC                              | TT                | 1946693002               |
| SNP_P3_174628_81465 | NW_004518160.1 | Scaffold3470 | 81465                   | AA                              | TT                | 1946693004               |
| SNP_P3_174629_81467 | NW_004518160.1 | Scaffold3470 | 81467                   | CC                              | AA                | 1946693006               |
| SNP_P3_174630_82184 | NW_004518160.1 | Scaffold3470 | 82184                   | GG                              | CC                | 1946693008               |
| SNP_P3_174631_82513 | NW_004518160.1 | Scaffold3470 | 82513                   | AA                              | TT                | 1946693010               |
| SNP_P3_174632_82529 | NW_004518160.1 | Scaffold3470 | 82529                   | GG                              | CC                | 1946693012               |
| SNP_P3_174633_82609 | NW_004518160.1 | Scaffold3470 | 82609                   | TT                              | CC                | 1946693014               |
| SNP_P3_174634_82631 | NW_004518160.1 | Scaffold3470 | 82631                   | AA                              | GG                | 1946693016               |
| SNP_P3_174635_82636 | NW_004518160.1 | Scaffold3470 | 82636                   | AA                              | GG                | 1946693018               |
| SNP_P3_174636_82641 | NW_004518160.1 | Scaffold3470 | 82641                   | GG                              | AA                | 1946693020               |
| SNP_P3_174637_98353 | NW_004518160.1 | Scaffold3470 | 98353                   | AA                              | GG                | 1946693022               |
| SNP_P3_174638_98702 | NW_004518160.1 | Scaffold3470 | 98702                   | TT                              | CC                | 1946693024               |
| SNP_P3_174639_98786 | NW_004518160.1 | Scaffold3470 | 98786                   | AA                              | TT                | 1946693026               |
| SNP_P3_174640_98787 | NW_004518160.1 | Scaffold3470 | 98787                   | TT                              | GG                | 1946693028               |
| SNP_P3_174642_6967  | NW_004518162.1 | Scaffold3472 | 6967                    | GG                              | TT                | 1946693030               |
| SNP_P3_174643_7108  | NW_004518162.1 | Scaffold3472 | 7108                    | CC                              | AA                | 1946693032               |
| SNP_P3_174644_7131  | NW_004518162.1 | Scaffold3472 | 7131                    | TT                              | CC                | 1946693034               |
| SNP_P3_174645_7133  | NW_004518162.1 | Scaffold3472 | 7133                    | GG                              | AA                | 1946693036               |
| SNP_P3_174647_7278  | NW_004518162.1 | Scaffold3472 | 7278                    | GG                              | AA                | 1946693038               |
| SNP_P3_174648_7499  | NW_004518162.1 | Scaffold3472 | 7499                    | TT                              | CC                | 1946693040               |
| SNP_P3_174649_8643  | NW_004518162.1 | Scaffold3472 | 8643                    | CC                              | TT                | 1946693042               |
| SNP_P3_174650_8759  | NW_004518162.1 | Scaffold3472 | 8759                    | AA                              | GG                | 1946693044               |
| SNP_P3_174651_8876  | NW_004518162.1 | Scaffold3472 | 8876                    | TT                              | CC                | 1946693047               |
| SNP_P3_174652_8894  | NW_004518162.1 | Scaffold3472 | 8894                    | AA                              | GG                | 1946693048               |
| SNP_P3_174653_8990  | NW_004518162.1 | Scaffold3472 | 8990                    | GG                              | AA                | 1946693050               |
| SNP_P3_174655_9135  | NW_004518162.1 | Scaffold3472 | 9135                    | AA                              | GG                | 1946693052               |
| SNP_P3_174656_9305  | NW_004518162.1 | Scaffold3472 | 9305                    | CC                              | TT                | 1946693054               |
| SNP_P3_174658_9533  | NW_004518162.1 | Scaffold3472 | 9533                    | GG                              | AA                | 1946693056               |
| SNP_P3_174659_9573  | NW_004518162.1 | Scaffold3472 | 9573                    | CC                              | TT                | 1946693058               |
| SNP_P3_174660_9583  | NW_004518162.1 | Scaffold3472 | 9583                    | AA                              | CC                | 1946693060               |
| SNP_P3_174661_9627  | NW_004518162.1 | Scaffold3472 | 9627                    | CC                              | GG                | 1946693062               |
| SNP_P3_174662_9837  | NW_004518162.1 | Scaffold3472 | 9837                    | CC                              | TT                | 1946693064               |
| SNP_P3_174663_9902  | NW_004518162.1 | Scaffold3472 | 9902                    | CC                              | TT                | 1946693066               |
| SNP_P3_174664_9919  | NW_004518162.1 | Scaffold3472 | 9919                    | CC                              | TT                | 1946693068               |
| SNP_P3_174665_9959  | NW_004518162.1 | Scaffold3472 | 9959                    | CC                              | TT                | 1946693069               |
| SNP_P3_174666_10072 | NW_004518162.1 | Scaffold3472 | 10072                   | TT                              | CC                | 1946693071               |
| SNP_P3_174667_10232 | NW_004518162.1 | Scaffold3472 | 10232                   | TT                              | CC                | 1946693073               |
| SNP_P3_174668_10235 | NW_004518162.1 | Scaffold3472 | 10235                   | TT                              | AA                | 1946693075               |
| SNP_P3_174671_75287 | NW_004518162.1 | Scaffold3472 | 75287                   | GG                              | AA                | 1946693077               |
| SNP_P3_174672_75357 | NW_004518162.1 | Scaffold3472 | 75357                   | GG                              | AA                | 1946693079               |



| SNPs IDs            | Chromosome IDs | Chromosomes  | Physical positions (bp) | CDC Frontier (Reference genome) | (Pusa 256 & HPNB) | NCBI SNPdb Accession IDs |
|---------------------|----------------|--------------|-------------------------|---------------------------------|-------------------|--------------------------|
| SNP_P3_174673_80063 | NW_004518162.1 | Scaffold3472 | 80063                   | TT                              | GG                | 1946693082               |
| SNP_P3_174674_82640 | NW_004518162.1 | Scaffold3472 | 82640                   | CC                              | TT                | 1946693084               |
| SNP_P3_174675_526   | NW_004518163.1 | Scaffold3473 | 526                     | TT                              | CC                | 1946693086               |
| SNP_P3_174676_674   | NW_004518163.1 | Scaffold3473 | 674                     | CC                              | TT                | 1946693088               |
| SNP_P3_174677_734   | NW_004518163.1 | Scaffold3473 | 734                     | TT                              | GG                | 1946693090               |
| SNP_P3_174678_764   | NW_004518163.1 | Scaffold3473 | 764                     | TT                              | CC                | 1946693092               |
| SNP_P3_174679_898   | NW_004518163.1 | Scaffold3473 | 898                     | AA                              | GG                | 1946693093               |
| SNP_P3_174681_455   | NW_004518164.1 | Scaffold3474 | 455                     | TT                              | CC                | 1946693095               |
| SNP_P3_174682_827   | NW_004518164.1 | Scaffold3474 | 827                     | AA                              | GG                | 1946693097               |
| SNP_P3_174683_870   | NW_004518164.1 | Scaffold3474 | 870                     | TT                              | CC                | 1946693099               |
| SNP_P3_174684_993   | NW_004518164.1 | Scaffold3474 | 993                     | GG                              | AA                | 1946693101               |
| SNP_P3_174685_1009  | NW_004518164.1 | Scaffold3474 | 1009                    | TT                              | CC                | 1946693103               |
| SNP_P3_174686_1015  | NW_004518164.1 | Scaffold3474 | 1015                    | AA                              | GG                | 1946693105               |
| SNP_P3_174687_386   | NW_004518165.1 | Scaffold3475 | 386                     | TT                              | AA                | 1946693107               |
| SNP_P3_174688_389   | NW_004518165.1 | Scaffold3475 | 389                     | AA                              | GG                | 1946693109               |
| SNP_P3_174689_580   | NW_004518165.1 | Scaffold3475 | 580                     | CC                              | TT                | 1946693111               |
| SNP_P3_174690_704   | NW_004518165.1 | Scaffold3475 | 704                     | GG                              | AA                | 1946693113               |
| SNP_P3_174691_973   | NW_004518165.1 | Scaffold3475 | 973                     | AA                              | GG                | 1946693115               |
| SNP_P3_174692_1141  | NW_004518165.1 | Scaffold3475 | 1141                    | AA                              | TT                | 1946693118               |
| SNP_P3_174693_1417  | NW_004518165.1 | Scaffold3475 | 1417                    | AA                              | GG                | 1946693120               |
| SNP_P3_174694_1478  | NW_004518165.1 | Scaffold3475 | 1478                    | CC                              | GG                | 1946693122               |
| SNP_P3_174695_1507  | NW_004518165.1 | Scaffold3475 | 1507                    | AA                              | GG                | 1946693124               |
| SNP_P3_174696_1510  | NW_004518165.1 | Scaffold3475 | 1510                    | AA                              | CC                | 1946693126               |
| SNP_P3_174697_5328  | NW_004518165.1 | Scaffold3475 | 5328                    | GG                              | AA                | 1946693128               |
| SNP_P3_174698_5534  | NW_004518165.1 | Scaffold3475 | 5534                    | TT                              | AA                | 1946693130               |
| SNP_P3_174699_5535  | NW_004518165.1 | Scaffold3475 | 5535                    | CC                              | AA                | 1946693132               |
| SNP_P3_174700_5809  | NW_004518165.1 | Scaffold3475 | 5809                    | TT                              | CC                | 1946693134               |
| SNP_P3_174701_5896  | NW_004518165.1 | Scaffold3475 | 5896                    | CC                              | TT                | 1946693136               |
| SNP_P3_174702_6046  | NW_004518165.1 | Scaffold3475 | 6046                    | GG                              | AA                | 1946693138               |
| SNP_P3_174703_6047  | NW_004518165.1 | Scaffold3475 | 6047                    | TT                              | CC                | 1946693140               |
| SNP_P3_174705_6237  | NW_004518165.1 | Scaffold3475 | 6237                    | CC                              | TT                | 1946693142               |
| SNP_P3_174706_6299  | NW_004518165.1 | Scaffold3475 | 6299                    | GG                              | AA                | 1946693144               |
| SNP_P3_174707_6357  | NW_004518165.1 | Scaffold3475 | 6357                    | CC                              | TT                | 1946693146               |
| SNP_P3_174708_6362  | NW_004518165.1 | Scaffold3475 | 6362                    | CC                              | TT                | 1946693148               |
| SNP_P3_174709_6411  | NW_004518165.1 | Scaffold3475 | 6411                    | GG                              | TT                | 1946693149               |
| SNP_P3_174710_7171  | NW_004518165.1 | Scaffold3475 | 7171                    | AA                              | GG                | 1946693151               |
| SNP_P3_174711_7438  | NW_004518165.1 | Scaffold3475 | 7438                    | TT                              | CC                | 1946693153               |
| SNP_P3_174712_7623  | NW_004518165.1 | Scaffold3475 | 7623                    | AA                              | TT                | 1946693156               |
| SNP_P3_174713_7721  | NW_004518165.1 | Scaffold3475 | 7721                    | GG                              | AA                | 1946693158               |
| SNP_P3_174714_7853  | NW_004518165.1 | Scaffold3475 | 7853                    | CC                              | TT                | 1946693160               |
| SNP_P3_174715_7998  | NW_004518165.1 | Scaffold3475 | 7998                    | GG                              | CC                | 1946693162               |
| SNP_P3_174716_8101  | NW_004518165.1 | Scaffold3475 | 8101                    | CC                              | GG                | 1946693164               |

| SNPs IDs            | Chromosome IDs | Chromosomes  | Physical positions (bp) | CDC Frontier (Reference genome) | (Pusa 256 & HPNB) | NCBI SNPdb Accession IDs |
|---------------------|----------------|--------------|-------------------------|---------------------------------|-------------------|--------------------------|
| SNP_P3_174717_8124  | NW_004518165.1 | Scaffold3475 | 8124                    | TT                              | CC                | 1946693166               |
| SNP_P3_174718_8254  | NW_004518165.1 | Scaffold3475 | 8254                    | CC                              | TT                | 1946693168               |
| SNP_P3_174719_8497  | NW_004518165.1 | Scaffold3475 | 8497                    | GG                              | AA                | 1946693170               |
| SNP_P3_174720_9816  | NW_004518165.1 | Scaffold3475 | 9816                    | AA                              | GG                | 1946693172               |
| SNP_P3_174721_9975  | NW_004518165.1 | Scaffold3475 | 9975                    | AA                              | GG                | 1946693173               |
| SNP_P3_174722_10158 | NW_004518165.1 | Scaffold3475 | 10158                   | AA                              | GG                | 1946693175               |
| SNP_P3_174723_10273 | NW_004518165.1 | Scaffold3475 | 10273                   | CC                              | TT                | 1946693177               |
| SNP_P3_174724_10326 | NW_004518165.1 | Scaffold3475 | 10326                   | AA                              | CC                | 1946693179               |
| SNP_P3_174725_10388 | NW_004518165.1 | Scaffold3475 | 10388                   | CC                              | AA                | 1946693181               |
| SNP_P3_174726_10429 | NW_004518165.1 | Scaffold3475 | 10429                   | TT                              | CC                | 1946693183               |
| SNP_P3_174727_10498 | NW_004518165.1 | Scaffold3475 | 10498                   | GG                              | AA                | 1946693184               |
| SNP_P3_174728_10594 | NW_004518165.1 | Scaffold3475 | 10594                   | AA                              | GG                | 1946693186               |
| SNP_P3_174729_16319 | NW_004518165.1 | Scaffold3475 | 16319                   | TT                              | GG                | 1946693188               |
| SNP_P3_174730_18195 | NW_004518165.1 | Scaffold3475 | 18195                   | GG                              | AA                | 1946693190               |
| SNP_P3_174731_22514 | NW_004518165.1 | Scaffold3475 | 22514                   | GG                              | TT                | 1946693193               |
| SNP_P3_174732_27234 | NW_004518165.1 | Scaffold3475 | 27234                   | AA                              | TT                | 1946693195               |
| SNP_P3_174733_27260 | NW_004518165.1 | Scaffold3475 | 27260                   | TT                              | AA                | 1946693197               |
| SNP_P3_174734_27318 | NW_004518165.1 | Scaffold3475 | 27318                   | AA                              | GG                | 1946693199               |
| SNP_P3_174735_27343 | NW_004518165.1 | Scaffold3475 | 27343                   | TT                              | CC                | 1946693201               |
| SNP_P3_174736_27397 | NW_004518165.1 | Scaffold3475 | 27397                   | TT                              | CC                | 1946693203               |
| SNP_P3_174737_27400 | NW_004518165.1 | Scaffold3475 | 27400                   | AA                              | GG                | 1946693205               |
| SNP_P3_174738_27509 | NW_004518165.1 | Scaffold3475 | 27509                   | CC                              | GG                | 1946693207               |
| SNP_P3_174739_27526 | NW_004518165.1 | Scaffold3475 | 27526                   | GG                              | AA                | 1946693208               |
| SNP_P3_174740_27708 | NW_004518165.1 | Scaffold3475 | 27708                   | TT                              | AA                | 1946693210               |
| SNP_P3_174741_27755 | NW_004518165.1 | Scaffold3475 | 27755                   | CC                              | TT                | 1946693212               |
| SNP_P3_174742_27779 | NW_004518165.1 | Scaffold3475 | 27779                   | TT                              | CC                | 1946693214               |
| SNP_P3_174743_29061 | NW_004518165.1 | Scaffold3475 | 29061                   | AA                              | CC                | 1946693216               |
| SNP_P3_174744_29072 | NW_004518165.1 | Scaffold3475 | 29072                   | AA                              | CC                | 1946693218               |
| SNP_P3_174745_29332 | NW_004518165.1 | Scaffold3475 | 29332                   | TT                              | GG                | 1946693220               |
| SNP_P3_174746_29909 | NW_004518165.1 | Scaffold3475 | 29909                   | AA                              | GG                | 1946693221               |
| SNP_P3_174747_29946 | NW_004518165.1 | Scaffold3475 | 29946                   | TT                              | GG                | 1946693223               |
| SNP_P3_174748_30039 | NW_004518165.1 | Scaffold3475 | 30039                   | GG                              | AA                | 1946693225               |
| SNP_P3_174749_30047 | NW_004518165.1 | Scaffold3475 | 30047                   | AA                              | GG                | 1946693228               |
| SNP_P3_174750_30210 | NW_004518165.1 | Scaffold3475 | 30210                   | CC                              | GG                | 1946693230               |
| SNP_P3_174751_30329 | NW_004518165.1 | Scaffold3475 | 30329                   | CC                              | AA                | 1946693232               |
| SNP_P3_174752_30356 | NW_004518165.1 | Scaffold3475 | 30356                   | GG                              | AA                | 1946693234               |
| SNP_P3_174753_30396 | NW_004518165.1 | Scaffold3475 | 30396                   | AA                              | CC                | 1946693236               |
| SNP_P3_174754_30452 | NW_004518165.1 | Scaffold3475 | 30452                   | GG                              | AA                | 1946693238               |
| SNP_P3_174755_30499 | NW_004518165.1 | Scaffold3475 | 30499                   | AA                              | GG                | 1946693240               |
| SNP_P3_174756_30602 | NW_004518165.1 | Scaffold3475 | 30602                   | GG                              | AA                | 1946693242               |
| SNP_P3_174757_30751 | NW_004518165.1 | Scaffold3475 | 30751                   | AA                              | CC                | 1946693244               |
| SNP_P3_174758_30755 | NW_004518165.1 | Scaffold3475 | 30755                   | TT                              | GG                | 1946693246               |

| SNPs IDs            | Chromosome IDs | Chromosomes  | Physical positions (bp) | CDC Frontier (Reference genome) | (Pusa 256 & HPNB) | NCBI SNPdb Accession IDs |
|---------------------|----------------|--------------|-------------------------|---------------------------------|-------------------|--------------------------|
| SNP_P3_174759_30778 | NW_004518165.1 | Scaffold3475 | 30778                   | AA                              | GG                | 1946693248               |
| SNP_P3_174760_30934 | NW_004518165.1 | Scaffold3475 | 30934                   | CC                              | TT                | 1946693250               |
| SNP_P3_174761_30970 | NW_004518165.1 | Scaffold3475 | 30970                   | CC                              | TT                | 1946693252               |
| SNP_P3_174762_30985 | NW_004518165.1 | Scaffold3475 | 30985                   | GG                              | AA                | 1946693254               |
| SNP_P3_174763_31159 | NW_004518165.1 | Scaffold3475 | 31159                   | AA                              | GG                | 1946693256               |
| SNP_P3_174764_31172 | NW_004518165.1 | Scaffold3475 | 31172                   | AA                              | GG                | 1946693258               |
| SNP_P3_174765_31251 | NW_004518165.1 | Scaffold3475 | 31251                   | GG                              | AA                | 1946693260               |
| SNP_P3_174767_31337 | NW_004518165.1 | Scaffold3475 | 31337                   | CC                              | AA                | 1946693262               |
| SNP_P3_174768_31658 | NW_004518165.1 | Scaffold3475 | 31658                   | GG                              | AA                | 1946693263               |
| SNP_P3_174769_31908 | NW_004518165.1 | Scaffold3475 | 31908                   | CC                              | TT                | 1946693265               |
| SNP_P3_174770_31922 | NW_004518165.1 | Scaffold3475 | 31922                   | CC                              | AA                | 1946693267               |
| SNP_P3_174772_34735 | NW_004518165.1 | Scaffold3475 | 34735                   | CC                              | TT                | 1946693269               |
| SNP_P3_174773_36895 | NW_004518165.1 | Scaffold3475 | 36895                   | TT                              | AA                | 1946693271               |
| SNP_P3_174774_36902 | NW_004518165.1 | Scaffold3475 | 36902                   | CC                              | GG                | 1946693273               |
| SNP_P3_174775_37129 | NW_004518165.1 | Scaffold3475 | 37129                   | TT                              | CC                | 1946693276               |
| SNP_P3_174776_38158 | NW_004518165.1 | Scaffold3475 | 38158                   | AA                              | TT                | 1946693278               |
| SNP_P3_174777_38888 | NW_004518165.1 | Scaffold3475 | 38888                   | GG                              | TT                | 1946693280               |
| SNP_P3_174778_38963 | NW_004518165.1 | Scaffold3475 | 38963                   | TT                              | CC                | 1946693282               |
| SNP_P3_174779_38973 | NW_004518165.1 | Scaffold3475 | 38973                   | AA                              | GG                | 1946693284               |
| SNP_P3_174780_41995 | NW_004518165.1 | Scaffold3475 | 41995                   | TT                              | AA                | 1946693286               |
| SNP_P3_174781_42792 | NW_004518165.1 | Scaffold3475 | 42792                   | GG                              | AA                | 1946693288               |
| SNP_P3_174782_43008 | NW_004518165.1 | Scaffold3475 | 43008                   | TT                              | CC                | 1946693290               |
| SNP_P3_174783_43050 | NW_004518165.1 | Scaffold3475 | 43050                   | TT                              | CC                | 1946693292               |
| SNP_P3_174784_43194 | NW_004518165.1 | Scaffold3475 | 43194                   | AA                              | GG                | 1946693294               |
| SNP_P3_174785_45207 | NW_004518165.1 | Scaffold3475 | 45207                   | AA                              | CC                | 1946693296               |
| SNP_P3_174786_52421 | NW_004518165.1 | Scaffold3475 | 52421                   | AA                              | GG                | 1946693298               |
| SNP_P3_174787_56093 | NW_004518165.1 | Scaffold3475 | 56093                   | CC                              | GG                | 1946693300               |
| SNP_P3_174788_56143 | NW_004518165.1 | Scaffold3475 | 56143                   | TT                              | CC                | 1946693302               |
| SNP_P3_174789_56373 | NW_004518165.1 | Scaffold3475 | 56373                   | GG                              | TT                | 1946693304               |
| SNP_P3_174790_56774 | NW_004518165.1 | Scaffold3475 | 56774                   | TT                              | GG                | 1946693306               |
| SNP_P3_174791_60745 | NW_004518165.1 | Scaffold3475 | 60745                   | CC                              | TT                | 1946693308               |
| SNP_P3_174792_60767 | NW_004518165.1 | Scaffold3475 | 60767                   | AA                              | CC                | 1946693310               |
| SNP_P3_174793_73581 | NW_004518165.1 | Scaffold3475 | 73581                   | TT                              | CC                | 1946693313               |
| SNP_P3_174794_73584 | NW_004518165.1 | Scaffold3475 | 73584                   | GG                              | AA                | 1946693315               |
| SNP_P3_174795_73783 | NW_004518165.1 | Scaffold3475 | 73783                   | TT                              | CC                | 1946693317               |
| SNP_P3_174796_5716  | NW_004518166.1 | Scaffold3476 | 5716                    | CC                              | AA                | 1946693319               |
| SNP_P3_174797_6027  | NW_004518166.1 | Scaffold3476 | 6027                    | GG                              | AA                | 1946693321               |
| SNP_P3_174798_20972 | NW_004518168.1 | Scaffold3481 | 20972                   | AA                              | CC                | 1946693323               |
| SNP_P3_174799_20989 | NW_004518168.1 | Scaffold3481 | 20989                   | TT                              | CC                | 1946693325               |
| SNP_P3_174800_1281  | NW_004518170.1 | Scaffold3483 | 1281                    | TT                              | GG                | 1946693327               |
| SNP_P3_174802_273   | NW_004518172.1 | Scaffold3485 | 273                     | AA                              | TT                | 1946693329               |
| SNP_P3_174803_418   | NW_004518172.1 | Scaffold3485 | 418                     | TT                              | AA                | 1946693331               |

| SNPs IDs            | Chromosome IDs | Chromosomes  | Physical positions (bp) | CDC Frontier (Reference genome) | (Pusa 256 & HPNB) | NCBI SNPdb Accession IDs |
|---------------------|----------------|--------------|-------------------------|---------------------------------|-------------------|--------------------------|
| SNP_P3_174804_467   | NW_004518172.1 | Scaffold3485 | 467                     | AA                              | TT                | 1946693333               |
| SNP_P3_174806_1642  | NW_004518172.1 | Scaffold3485 | 1642                    | CC                              | TT                | 1946693335               |
| SNP_P3_174807_1717  | NW_004518172.1 | Scaffold3485 | 1717                    | AA                              | TT                | 1946693337               |
| SNP_P3_174809_1850  | NW_004518172.1 | Scaffold3485 | 1850                    | AA                              | TT                | 1946693339               |
| SNP_P3_174810_1875  | NW_004518172.1 | Scaffold3485 | 1875                    | TT                              | AA                | 1946693341               |
| SNP_P3_174811_2060  | NW_004518172.1 | Scaffold3485 | 2060                    | TT                              | AA                | 1946693343               |
| SNP_P3_174812_2064  | NW_004518172.1 | Scaffold3485 | 2064                    | CC                              | GG                | 1946693346               |
| SNP_P3_174813_2115  | NW_004518172.1 | Scaffold3485 | 2115                    | CC                              | GG                | 1946693348               |
| SNP_P3_174814_2153  | NW_004518172.1 | Scaffold3485 | 2153                    | TT                              | CC                | 1946693350               |
| SNP_P3_174815_2176  | NW_004518172.1 | Scaffold3485 | 2176                    | TT                              | GG                | 1946693352               |
| SNP_P3_174816_2206  | NW_004518172.1 | Scaffold3485 | 2206                    | AA                              | GG                | 1946693354               |
| SNP_P3_174817_4438  | NW_004518172.1 | Scaffold3485 | 4438                    | GG                              | AA                | 1946693356               |
| SNP_P3_174819_4729  | NW_004518172.1 | Scaffold3485 | 4729                    | CC                              | TT                | 1946693358               |
| SNP_P3_174820_4768  | NW_004518172.1 | Scaffold3485 | 4768                    | TT                              | AA                | 1946693360               |
| SNP_P3_174821_5064  | NW_004518172.1 | Scaffold3485 | 5064                    | TT                              | AA                | 1946693362               |
| SNP_P3_174822_5105  | NW_004518172.1 | Scaffold3485 | 5105                    | AA                              | TT                | 1946693364               |
| SNP_P3_174823_5386  | NW_004518172.1 | Scaffold3485 | 5386                    | AA                              | GG                | 1946693366               |
| SNP_P3_174824_5504  | NW_004518172.1 | Scaffold3485 | 5504                    | AA                              | GG                | 1946693368               |
| SNP_P3_174825_5547  | NW_004518172.1 | Scaffold3485 | 5547                    | AA                              | TT                | 1946693370               |
| SNP_P3_174826_5738  | NW_004518172.1 | Scaffold3485 | 5738                    | CC                              | TT                | 1946693372               |
| SNP_P3_174827_5802  | NW_004518172.1 | Scaffold3485 | 5802                    | AA                              | GG                | 1946693374               |
| SNP_P3_174828_5830  | NW_004518172.1 | Scaffold3485 | 5830                    | TT                              | CC                | 1946693376               |
| SNP_P3_174830_4993  | NW_004518173.1 | Scaffold3486 | 4993                    | GG                              | AA                | 1946693377               |
| SNP_P3_174831_5029  | NW_004518173.1 | Scaffold3486 | 5029                    | TT                              | CC                | 1946693379               |
| SNP_P3_174832_7561  | NW_004518173.1 | Scaffold3486 | 7561                    | CC                              | TT                | 1946693382               |
| SNP_P3_174833_11659 | NW_004518173.1 | Scaffold3486 | 11659                   | GG                              | CC                | 1946693384               |
| SNP_P3_174834_12197 | NW_004518173.1 | Scaffold3486 | 12197                   | GG                              | TT                | 1946693386               |
| SNP_P3_174835_14761 | NW_004518173.1 | Scaffold3486 | 14761                   | CC                              | GG                | 1946693388               |
| SNP_P3_174836_14763 | NW_004518173.1 | Scaffold3486 | 14763                   | TT                              | CC                | 1946693390               |
| SNP_P3_174837_20736 | NW_004518173.1 | Scaffold3486 | 20736                   | CC                              | AA                | 1946693392               |
| SNP_P3_174838_21936 | NW_004518173.1 | Scaffold3486 | 21936                   | TT                              | CC                | 1946693395               |
| SNP_P3_174839_22022 | NW_004518173.1 | Scaffold3486 | 22022                   | TT                              | CC                | 1946693397               |
| SNP_P3_174840_293   | NW_004518175.1 | Scaffold3488 | 293                     | CC                              | GG                | 1946693399               |
| SNP_P3_174843_2296  | NW_004518176.1 | Scaffold3489 | 2296                    | AA                              | TT                | 1946693401               |
| SNP_P3_174844_2321  | NW_004518176.1 | Scaffold3489 | 2321                    | AA                              | GG                | 1946693403               |
| SNP_P3_174845_2364  | NW_004518176.1 | Scaffold3489 | 2364                    | GG                              | AA                | 1946693405               |
| SNP_P3_174847_2444  | NW_004518176.1 | Scaffold3489 | 2444                    | CC                              | TT                | 1946693407               |
| SNP_P3_174848_2451  | NW_004518176.1 | Scaffold3489 | 2451                    | GG                              | TT                | 1946693409               |
| SNP_P3_174849_2505  | NW_004518176.1 | Scaffold3489 | 2505                    | AA                              | TT                | 1946693411               |
| SNP_P3_174850_2574  | NW_004518176.1 | Scaffold3489 | 2574                    | TT                              | GG                | 1946693413               |
| SNP_P3_174851_3563  | NW_004518176.1 | Scaffold3489 | 3563                    | AA                              | TT                | 1946693415               |
| SNP_P3_174852_4613  | NW_004518176.1 | Scaffold3489 | 4613                    | CC                              | TT                | 1946693417               |

| SNPs IDs             | Chromosome IDs | Chromosomes  | Physical positions (bp) | CDC Frontier (Reference genome) | (Pusa 256 & HPNB) | NCBI SNPdb Accession IDs |
|----------------------|----------------|--------------|-------------------------|---------------------------------|-------------------|--------------------------|
| SNP_P3_174853_4684   | NW_004518176.1 | Scaffold3489 | 4684                    | AA                              | GG                | 1946693420               |
| SNP_P3_174854_4693   | NW_004518176.1 | Scaffold3489 | 4693                    | AA                              | CC                | 1946693422               |
| SNP_P3_174855_4760   | NW_004518176.1 | Scaffold3489 | 4760                    | AA                              | CC                | 1946693424               |
| SNP_P3_174856_4811   | NW_004518176.1 | Scaffold3489 | 4811                    | CC                              | AA                | 1946693426               |
| SNP_P3_174857_4954   | NW_004518176.1 | Scaffold3489 | 4954                    | AA                              | TT                | 1946693429               |
| SNP_P3_174858_5156   | NW_004518176.1 | Scaffold3489 | 5156                    | GG                              | AA                | 1946693431               |
| SNP_P3_174859_5701   | NW_004518176.1 | Scaffold3489 | 5701                    | GG                              | CC                | 1946693433               |
| SNP_P3_174860_5710   | NW_004518176.1 | Scaffold3489 | 5710                    | GG                              | CC                | 1946693435               |
| SNP_P3_174861_5716   | NW_004518176.1 | Scaffold3489 | 5716                    | TT                              | AA                | 1946693437               |
| SNP_P3_174862_5732   | NW_004518176.1 | Scaffold3489 | 5732                    | GG                              | AA                | 1946693439               |
| SNP_P3_174863_634    | NW_004518180.1 | Scaffold3494 | 634                     | TT                              | GG                | 1946693441               |
| SNP_P3_174864_649    | NW_004518180.1 | Scaffold3494 | 649                     | GG                              | TT                | 1946693443               |
| SNP_P3_174865_650    | NW_004518180.1 | Scaffold3494 | 650                     | GG                              | TT                | 1946693445               |
| SNP_P3_174866_1178   | NW_004518182.1 | Scaffold3497 | 1178                    | TT                              | CC                | 1946693447               |
| SNP_P3_174867_7492   | NW_004518182.1 | Scaffold3497 | 7492                    | CC                              | GG                | 1946693449               |
| SNP_P3_174868_9403   | NW_004518182.1 | Scaffold3497 | 9403                    | GG                              | TT                | 1946693452               |
| SNP_P3_174869_9678   | NW_004518182.1 | Scaffold3497 | 9678                    | AA                              | CC                | 1946693454               |
| SNP_P3_174870_9698   | NW_004518182.1 | Scaffold3497 | 9698                    | TT                              | GG                | 1946693456               |
| SNP_P3_174871_9800   | NW_004518182.1 | Scaffold3497 | 9800                    | CC                              | TT                | 1946693458               |
| SNP_P3_174872_10100  | NW_004518182.1 | Scaffold3497 | 10100                   | AA                              | CC                | 1946693460               |
| SNP_P3_174873_10152  | NW_004518182.1 | Scaffold3497 | 10152                   | GG                              | AA                | 1946693462               |
| SNP_P3_174874_10536  | NW_004518182.1 | Scaffold3497 | 10536                   | CC                              | TT                | 1946693464               |
| SNP_P3_174875_13450  | NW_004518182.1 | Scaffold3497 | 13450                   | GG                              | AA                | 1946693466               |
| SNP_P3_174876_13452  | NW_004518182.1 | Scaffold3497 | 13452                   | CC                              | GG                | 1946693468               |
| SNP_P3_174877_13461  | NW_004518182.1 | Scaffold3497 | 13461                   | TT                              | CC                | 1946693471               |
| SNP_P3_174878_13466  | NW_004518182.1 | Scaffold3497 | 13466                   | CC                              | TT                | 1946693473               |
| SNP_P3_174879_13545  | NW_004518182.1 | Scaffold3497 | 13545                   | AA                              | GG                | 1946693475               |
| SNP_P3_174880_13557  | NW_004518182.1 | Scaffold3497 | 13557                   | AA                              | CC                | 1946693477               |
| SNP_P3_174881_13558  | NW_004518182.1 | Scaffold3497 | 13558                   | AA                              | CC                | 1946693479               |
| SNP_P3_174882_13604  | NW_004518182.1 | Scaffold3497 | 13604                   | TT                              | AA                | 1946693481               |
| SNP_P3_174883_13661  | NW_004518182.1 | Scaffold3497 | 13661                   | AA                              | TT                | 1946693483               |
| SNP_P3_174884_13763  | NW_004518182.1 | Scaffold3497 | 13763                   | AA                              | GG                | 1946693486               |
| SNP_P3_174885_13804  | NW_004518182.1 | Scaffold3497 | 13804                   | GG                              | AA                | 1946693488               |
| SNP_P3_174886_13831  | NW_004518182.1 | Scaffold3497 | 13831                   | GG                              | TT                | 1946693490               |
| SNP_P3_174887_1924   | NW_004518183.1 | Scaffold3498 | 1924                    | AA                              | CC                | 1946693492               |
| SNP_P3_174888_6060   | NW_004518184.1 | Scaffold3500 | 6060                    | AA                              | GG                | 1946693494               |
| SNP_P3_174890_6182   | NW_004518184.1 | Scaffold3500 | 6182                    | TT                              | CC                | 1946693496               |
| SNP_P3_174891_14001  | NW_004518184.1 | Scaffold3500 | 14001                   | CC                              | TT                | 1946693498               |
| SNP_P3_174892_14273  | NW_004518184.1 | Scaffold3500 | 14273                   | AA                              | GG                | 1946693500               |
| SNP_P3_174893_48545  | NW_004518184.1 | Scaffold3500 | 48545                   | AA                              | GG                | 1946693502               |
| SNP_P3_174895_111798 | NW_004518184.1 | Scaffold3500 | 111798                  | GG                              | AA                | 1946693504               |
| SNP_P3_174896_435    | NW_004518186.1 | Scaffold3502 | 435                     | GG                              | TT                | 1946693506               |

| SNPs IDs            | Chromosome IDs | Chromosomes  | Physical positions (bp) | CDC Frontier (Reference genome) | (Pusa 256 & HPNB) | NCBI SNPdb Accession IDs |
|---------------------|----------------|--------------|-------------------------|---------------------------------|-------------------|--------------------------|
| SNP_P3_174897_487   | NW_004518186.1 | Scaffold3502 | 487                     | TT                              | CC                | 1946693508               |
| SNP_P3_174898_490   | NW_004518186.1 | Scaffold3502 | 490                     | TT                              | CC                | 1946693510               |
| SNP_P3_174899_500   | NW_004518186.1 | Scaffold3502 | 500                     | TT                              | GG                | 1946693512               |
| SNP_P3_174900_367   | NW_004518188.1 | Scaffold3504 | 367                     | GG                              | AA                | 1946693514               |
| SNP_P3_174901_414   | NW_004518188.1 | Scaffold3504 | 414                     | TT                              | AA                | 1946693516               |
| SNP_P3_174902_436   | NW_004518188.1 | Scaffold3504 | 436                     | CC                              | TT                | 1946693518               |
| SNP_P3_174903_661   | NW_004518189.1 | Scaffold3505 | 661                     | TT                              | GG                | 1946693521               |
| SNP_P3_174904_698   | NW_004518189.1 | Scaffold3505 | 698                     | AA                              | CC                | 1946693523               |
| SNP_P3_174905_3261  | NW_004518189.1 | Scaffold3505 | 3261                    | AA                              | GG                | 1946693525               |
| SNP_P3_174906_1979  | NW_004518192.1 | Scaffold3509 | 1979                    | TT                              | CC                | 1946693527               |
| SNP_P3_174907_2340  | NW_004518192.1 | Scaffold3509 | 2340                    | AA                              | CC                | 1946693529               |
| SNP_P3_174908_2344  | NW_004518192.1 | Scaffold3509 | 2344                    | AA                              | GG                | 1946693531               |
| SNP_P3_174909_2385  | NW_004518192.1 | Scaffold3509 | 2385                    | TT                              | CC                | 1946693533               |
| SNP_P3_174910_1019  | NW_004518193.1 | Scaffold3512 | 1019                    | CC                              | TT                | 1946693535               |
| SNP_P3_174911_1086  | NW_004518193.1 | Scaffold3512 | 1086                    | GG                              | AA                | 1946693537               |
| SNP_P3_174912_2297  | NW_004518193.1 | Scaffold3512 | 2297                    | GG                              | AA                | 1946693539               |
| SNP_P3_174913_2448  | NW_004518193.1 | Scaffold3512 | 2448                    | AA                              | GG                | 1946693542               |
| SNP_P3_174914_2460  | NW_004518193.1 | Scaffold3512 | 2460                    | TT                              | CC                | 1946693544               |
| SNP_P3_174915_2522  | NW_004518193.1 | Scaffold3512 | 2522                    | TT                              | CC                | 1946693546               |
| SNP_P3_174916_348   | NW_004518194.1 | Scaffold3513 | 348                     | AA                              | CC                | 1946693548               |
| SNP_P3_174917_351   | NW_004518194.1 | Scaffold3513 | 351                     | TT                              | AA                | 1946693550               |
| SNP_P3_174918_19138 | NW_004518194.1 | Scaffold3513 | 19138                   | GG                              | AA                | 1946693552               |
| SNP_P3_174919_19561 | NW_004518194.1 | Scaffold3513 | 19561                   | GG                              | AA                | 1946693555               |
| SNP_P3_174920_19585 | NW_004518194.1 | Scaffold3513 | 19585                   | CC                              | GG                | 1946693558               |
| SNP_P3_174921_19615 | NW_004518194.1 | Scaffold3513 | 19615                   | GG                              | AA                | 1946693560               |
| SNP_P3_174922_19760 | NW_004518194.1 | Scaffold3513 | 19760                   | AA                              | GG                | 1946693562               |
| SNP_P3_174923_19830 | NW_004518194.1 | Scaffold3513 | 19830                   | GG                              | TT                | 1946693564               |
| SNP_P3_174924_19862 | NW_004518194.1 | Scaffold3513 | 19862                   | AA                              | TT                | 1946693566               |
| SNP_P3_174925_19874 | NW_004518194.1 | Scaffold3513 | 19874                   | CC                              | GG                | 1946693568               |
| SNP_P3_174927_20065 | NW_004518194.1 | Scaffold3513 | 20065                   | AA                              | CC                | 1946693570               |
| SNP_P3_174928_20108 | NW_004518194.1 | Scaffold3513 | 20108                   | CC                              | GG                | 1946693572               |
| SNP_P3_174929_20674 | NW_004518194.1 | Scaffold3513 | 20674                   | GG                              | AA                | 1946693574               |
| SNP_P3_174930_20681 | NW_004518194.1 | Scaffold3513 | 20681                   | CC                              | TT                | 1946693576               |
| SNP_P3_174931_20685 | NW_004518194.1 | Scaffold3513 | 20685                   | TT                              | AA                | 1946693578               |
| SNP_P3_174932_20687 | NW_004518194.1 | Scaffold3513 | 20687                   | AA                              | GG                | 1946693580               |
| SNP_P3_174933_20744 | NW_004518194.1 | Scaffold3513 | 20744                   | AA                              | GG                | 1946693582               |
| SNP_P3_174934_20847 | NW_004518194.1 | Scaffold3513 | 20847                   | CC                              | TT                | 1946693584               |
| SNP_P3_174935_20888 | NW_004518194.1 | Scaffold3513 | 20888                   | TT                              | CC                | 1946693586               |
| SNP_P3_174936_20939 | NW_004518194.1 | Scaffold3513 | 20939                   | GG                              | AA                | 1946693589               |
| SNP_P3_174937_20977 | NW_004518194.1 | Scaffold3513 | 20977                   | AA                              | GG                | 1946693591               |
| SNP_P3_174938_21056 | NW_004518194.1 | Scaffold3513 | 21056                   | TT                              | GG                | 1946693593               |
| SNP_P3_174939_21124 | NW_004518194.1 | Scaffold3513 | 21124                   | AA                              | GG                | 1946693595               |

| SNPs IDs            | Chromosome IDs | Chromosomes  | Physical positions (bp) | CDC Frontier (Reference genome) | (Pusa 256 & HPNB) | NCBI SNPdb Accession IDs |
|---------------------|----------------|--------------|-------------------------|---------------------------------|-------------------|--------------------------|
| SNP_P3_174940_21153 | NW_004518194.1 | Scaffold3513 | 21153                   | TT                              | CC                | 1946693597               |
| SNP_P3_174941_21155 | NW_004518194.1 | Scaffold3513 | 21155                   | GG                              | AA                | 1946693599               |
| SNP_P3_174942_21171 | NW_004518194.1 | Scaffold3513 | 21171                   | AA                              | TT                | 1946693601               |
| SNP_P3_174943_21173 | NW_004518194.1 | Scaffold3513 | 21173                   | CC                              | GG                | 1946693603               |
| SNP_P3_174944_21206 | NW_004518194.1 | Scaffold3513 | 21206                   | GG                              | CC                | 1946693605               |
| SNP_P3_174945_21335 | NW_004518194.1 | Scaffold3513 | 21335                   | GG                              | TT                | 1946693607               |
| SNP_P3_174946_21360 | NW_004518194.1 | Scaffold3513 | 21360                   | CC                              | TT                | 1946693609               |
| SNP_P3_174947_21381 | NW_004518194.1 | Scaffold3513 | 21381                   | AA                              | GG                | 1946693611               |
| SNP_P3_174948_21540 | NW_004518194.1 | Scaffold3513 | 21540                   | GG                              | CC                | 1946693613               |
| SNP_P3_174949_21545 | NW_004518194.1 | Scaffold3513 | 21545                   | AA                              | CC                | 1946693615               |
| SNP_P3_174950_21568 | NW_004518194.1 | Scaffold3513 | 21568                   | GG                              | TT                | 1946693616               |
| SNP_P3_174951_21671 | NW_004518194.1 | Scaffold3513 | 21671                   | GG                              | TT                | 1946693617               |
| SNP_P3_174952_21711 | NW_004518194.1 | Scaffold3513 | 21711                   | CC                              | TT                | 1946693619               |
| SNP_P3_174953_22029 | NW_004518194.1 | Scaffold3513 | 22029                   | TT                              | GG                | 1946693621               |
| SNP_P3_174954_22054 | NW_004518194.1 | Scaffold3513 | 22054                   | AA                              | GG                | 1946693623               |
| SNP_P3_174955_22058 | NW_004518194.1 | Scaffold3513 | 22058                   | TT                              | CC                | 1946693625               |
| SNP_P3_174956_22490 | NW_004518194.1 | Scaffold3513 | 22490                   | TT                              | CC                | 1946693627               |
| SNP_P3_174957_22529 | NW_004518194.1 | Scaffold3513 | 22529                   | AA                              | TT                | 1946693629               |
| SNP_P3_174958_22566 | NW_004518194.1 | Scaffold3513 | 22566                   | AA                              | GG                | 1946693631               |
| SNP_P3_174959_22579 | NW_004518194.1 | Scaffold3513 | 22579                   | CC                              | TT                | 1946693633               |
| SNP_P3_174960_22741 | NW_004518194.1 | Scaffold3513 | 22741                   | TT                              | CC                | 1946693635               |
| SNP_P3_174961_22744 | NW_004518194.1 | Scaffold3513 | 22744                   | AA                              | TT                | 1946693637               |
| SNP_P3_174962_22761 | NW_004518194.1 | Scaffold3513 | 22761                   | AA                              | GG                | 1946693639               |
| SNP_P3_174963_22763 | NW_004518194.1 | Scaffold3513 | 22763                   | AA                              | CC                | 1946693641               |
| SNP_P3_174964_544   | NW_004518195.1 | Scaffold3514 | 544                     | TT                              | GG                | 1946693643               |
| SNP_P3_174965_550   | NW_004518195.1 | Scaffold3514 | 550                     | CC                              | TT                | 1946693645               |
| SNP_P3_174966_2055  | NW_004518195.1 | Scaffold3514 | 2055                    | GG                              | AA                | 1946693647               |
| SNP_P3_174968_13503 | NW_004518195.1 | Scaffold3514 | 13503                   | CC                              | TT                | 1946693649               |
| SNP_P3_174969_14335 | NW_004518195.1 | Scaffold3514 | 14335                   | TT                              | AA                | 1946693651               |
| SNP_P3_174971_14639 | NW_004518195.1 | Scaffold3514 | 14639                   | TT                              | CC                | 1946693653               |
| SNP_P3_174972_19793 | NW_004518195.1 | Scaffold3514 | 19793                   | AA                              | CC                | 1946693655               |
| SNP_P3_174973_20442 | NW_004518195.1 | Scaffold3514 | 20442                   | TT                              | CC                | 1946693657               |
| SNP_P3_174974_20819 | NW_004518195.1 | Scaffold3514 | 20819                   | TT                              | GG                | 1946693659               |
| SNP_P3_174975_23839 | NW_004518195.1 | Scaffold3514 | 23839                   | AA                              | GG                | 1946693661               |
| SNP_P3_174976_24089 | NW_004518195.1 | Scaffold3514 | 24089                   | AA                              | GG                | 1946693663               |
| SNP_P3_174977_24108 | NW_004518195.1 | Scaffold3514 | 24108                   | TT                              | CC                | 1946693665               |
| SNP_P3_174978_24126 | NW_004518195.1 | Scaffold3514 | 24126                   | AA                              | GG                | 1946693667               |
| SNP_P3_174979_24398 | NW_004518195.1 | Scaffold3514 | 24398                   | TT                              | CC                | 1946693669               |
| SNP_P3_174980_24680 | NW_004518195.1 | Scaffold3514 | 24680                   | CC                              | TT                | 1946693671               |
| SNP_P3_174981_40276 | NW_004518195.1 | Scaffold3514 | 40276                   | CC                              | GG                | 1946693673               |
| SNP_P3_174982_40284 | NW_004518195.1 | Scaffold3514 | 40284                   | AA                              | CC                | 1946693675               |
| SNP_P3_174983_40295 | NW_004518195.1 | Scaffold3514 | 40295                   | GG                              | CC                | 1946693677               |

| SNPs IDs            | Chromosome IDs | Chromosomes  | Physical positions (bp) | CDC Frontier (Reference genome) | (Pusa 256 & HPNB) | NCBI SNPdb Accession IDs |
|---------------------|----------------|--------------|-------------------------|---------------------------------|-------------------|--------------------------|
| SNP_P3_174984_40310 | NW_004518195.1 | Scaffold3514 | 40310                   | CC                              | TT                | 1946693679               |
| SNP_P3_174985_40387 | NW_004518195.1 | Scaffold3514 | 40387                   | TT                              | GG                | 1946693681               |
| SNP_P3_174986_40405 | NW_004518195.1 | Scaffold3514 | 40405                   | TT                              | AA                | 1946693683               |
| SNP_P3_174987_40406 | NW_004518195.1 | Scaffold3514 | 40406                   | TT                              | AA                | 1946693685               |
| SNP_P3_174988_40469 | NW_004518195.1 | Scaffold3514 | 40469                   | AA                              | GG                | 1946693687               |
| SNP_P3_174989_40644 | NW_004518195.1 | Scaffold3514 | 40644                   | AA                              | GG                | 1946693689               |
| SNP_P3_174991_41061 | NW_004518195.1 | Scaffold3514 | 41061                   | CC                              | TT                | 1946693691               |
| SNP_P3_174992_41317 | NW_004518195.1 | Scaffold3514 | 41317                   | GG                              | AA                | 1946693693               |
| SNP_P3_174993_41337 | NW_004518195.1 | Scaffold3514 | 41337                   | TT                              | GG                | 1946693695               |
| SNP_P3_174994_41847 | NW_004518195.1 | Scaffold3514 | 41847                   | CC                              | TT                | 1946693697               |
| SNP_P3_174995_47702 | NW_004518195.1 | Scaffold3514 | 47702                   | GG                              | AA                | 1946693699               |
| SNP_P3_174996_47732 | NW_004518195.1 | Scaffold3514 | 47732                   | GG                              | AA                | 1946693701               |
| SNP_P3_174997_47969 | NW_004518195.1 | Scaffold3514 | 47969                   | CC                              | TT                | 1946693703               |
| SNP_P3_174998_47992 | NW_004518195.1 | Scaffold3514 | 47992                   | CC                              | TT                | 1946693705               |
| SNP_P3_174999_48163 | NW_004518195.1 | Scaffold3514 | 48163                   | AA                              | GG                | 1946693707               |
| SNP_P3_175000_48342 | NW_004518195.1 | Scaffold3514 | 48342                   | GG                              | AA                | 1946693709               |
| SNP_P3_175001_48363 | NW_004518195.1 | Scaffold3514 | 48363                   | CC                              | TT                | 1946693724               |
| SNP_P3_175002_48429 | NW_004518195.1 | Scaffold3514 | 48429                   | CC                              | TT                | 1946693726               |
| SNP_P3_175003_48454 | NW_004518195.1 | Scaffold3514 | 48454                   | GG                              | TT                | 1946693728               |
| SNP_P3_175004_48515 | NW_004518195.1 | Scaffold3514 | 48515                   | GG                              | TT                | 1946693730               |
| SNP_P3_175005_454   | NW_004518197.1 | Scaffold3516 | 454                     | AA                              | GG                | 1946693732               |
| SNP_P3_175006_7362  | NW_004518197.1 | Scaffold3516 | 7362                    | CC                              | TT                | 1946693734               |
| SNP_P3_175007_602   | NW_004518198.1 | Scaffold3517 | 602                     | TT                              | CC                | 1946693736               |
| SNP_P3_175008_595   | NW_004518200.1 | Scaffold3520 | 595                     | CC                              | AA                | 1946693738               |
| SNP_P3_175009_837   | NW_004518200.1 | Scaffold3520 | 837                     | AA                              | GG                | 1946693740               |
| SNP_P3_175010_1313  | NW_004518200.1 | Scaffold3520 | 1313                    | TT                              | CC                | 1946693747               |
| SNP_P3_175011_1856  | NW_004518200.1 | Scaffold3520 | 1856                    | AA                              | TT                | 1946693749               |
| SNP_P3_175012_3254  | NW_004518200.1 | Scaffold3520 | 3254                    | AA                              | TT                | 1946693751               |
| SNP_P3_175013_4199  | NW_004518200.1 | Scaffold3520 | 4199                    | TT                              | CC                | 1946693753               |
| SNP_P3_175014_4333  | NW_004518200.1 | Scaffold3520 | 4333                    | AA                              | GG                | 1946693755               |
| SNP_P3_175015_4374  | NW_004518200.1 | Scaffold3520 | 4374                    | AA                              | CC                | 1946693757               |
| SNP_P3_175016_4379  | NW_004518200.1 | Scaffold3520 | 4379                    | TT                              | AA                | 1946693759               |
| SNP_P3_175017_4505  | NW_004518200.1 | Scaffold3520 | 4505                    | GG                              | AA                | 1946693761               |
| SNP_P3_175018_5180  | NW_004518200.1 | Scaffold3520 | 5180                    | CC                              | TT                | 1946693763               |
| SNP_P3_175020_5744  | NW_004518200.1 | Scaffold3520 | 5744                    | AA                              | CC                | 1946693765               |
| SNP_P3_175021_5898  | NW_004518200.1 | Scaffold3520 | 5898                    | CC                              | TT                | 1946693767               |
| SNP_P3_175022_6112  | NW_004518200.1 | Scaffold3520 | 6112                    | GG                              | AA                | 1946693769               |
| SNP_P3_175023_6348  | NW_004518200.1 | Scaffold3520 | 6348                    | AA                              | GG                | 1946693771               |
| SNP_P3_175024_7558  | NW_004518200.1 | Scaffold3520 | 7558                    | CC                              | TT                | 1946693773               |
| SNP_P3_175025_7596  | NW_004518200.1 | Scaffold3520 | 7596                    | GG                              | AA                | 1946693775               |
| SNP_P3_175026_7783  | NW_004518200.1 | Scaffold3520 | 7783                    | CC                              | TT                | 1946693777               |
| SNP_P3_175027_7790  | NW_004518200.1 | Scaffold3520 | 7790                    | TT                              | CC                | 1946693779               |



| SNPs IDs            | Chromosome IDs | Chromosomes  | Physical positions (bp) | CDC Frontier (Reference genome) | (Pusa 256 & HPNB) | NCBI SNPdb Accession IDs |
|---------------------|----------------|--------------|-------------------------|---------------------------------|-------------------|--------------------------|
| SNP_P3_175028_729   | NW_004518206.1 | Scaffold3527 | 729                     | AA                              | GG                | 1946693781               |
| SNP_P3_175029_804   | NW_004518206.1 | Scaffold3527 | 804                     | GG                              | TT                | 1946693783               |
| SNP_P3_175030_834   | NW_004518206.1 | Scaffold3527 | 834                     | AA                              | TT                | 1946693785               |
| SNP_P3_175031_1149  | NW_004518206.1 | Scaffold3527 | 1149                    | TT                              | GG                | 1946693787               |
| SNP_P3_175032_989   | NW_004518208.1 | Scaffold3529 | 989                     | TT                              | CC                | 1946693789               |
| SNP_P3_175033_1018  | NW_004518208.1 | Scaffold3529 | 1018                    | TT                              | AA                | 1946693791               |
| SNP_P3_175034_2675  | NW_004518208.1 | Scaffold3529 | 2675                    | TT                              | GG                | 1946693793               |
| SNP_P3_175035_2836  | NW_004518208.1 | Scaffold3529 | 2836                    | AA                              | CC                | 1946693795               |
| SNP_P3_175036_2837  | NW_004518208.1 | Scaffold3529 | 2837                    | TT                              | AA                | 1946693797               |
| SNP_P3_175037_2856  | NW_004518208.1 | Scaffold3529 | 2856                    | CC                              | GG                | 1946693799               |
| SNP_P3_175039_9797  | NW_004518208.1 | Scaffold3529 | 9797                    | GG                              | CC                | 1946693801               |
| SNP_P3_175040_10116 | NW_004518208.1 | Scaffold3529 | 10116                   | AA                              | GG                | 1946693803               |
| SNP_P3_175041_10121 | NW_004518208.1 | Scaffold3529 | 10121                   | GG                              | TT                | 1946693805               |
| SNP_P3_175042_10126 | NW_004518208.1 | Scaffold3529 | 10126                   | TT                              | GG                | 1946693807               |
| SNP_P3_175043_12363 | NW_004518208.1 | Scaffold3529 | 12363                   | CC                              | GG                | 1946693809               |
| SNP_P3_175044_12379 | NW_004518208.1 | Scaffold3529 | 12379                   | AA                              | GG                | 1946693811               |
| SNP_P3_175045_12380 | NW_004518208.1 | Scaffold3529 | 12380                   | GG                              | CC                | 1946693813               |
| SNP_P3_175046_12398 | NW_004518208.1 | Scaffold3529 | 12398                   | AA                              | TT                | 1946693815               |
| SNP_P3_175047_17302 | NW_004518208.1 | Scaffold3529 | 17302                   | AA                              | CC                | 1946693817               |
| SNP_P3_175048_17523 | NW_004518208.1 | Scaffold3529 | 17523                   | TT                              | AA                | 1946693819               |
| SNP_P3_175049_17525 | NW_004518208.1 | Scaffold3529 | 17525                   | TT                              | GG                | 1946693821               |
| SNP_P3_175050_18285 | NW_004518208.1 | Scaffold3529 | 18285                   | TT                              | CC                | 1946693823               |
| SNP_P3_175051_18319 | NW_004518208.1 | Scaffold3529 | 18319                   | GG                              | AA                | 1946693825               |
| SNP_P3_175052_18560 | NW_004518208.1 | Scaffold3529 | 18560                   | AA                              | GG                | 1946693827               |
| SNP_P3_175053_18863 | NW_004518208.1 | Scaffold3529 | 18863                   | AA                              | GG                | 1946693829               |
| SNP_P3_175054_20486 | NW_004518208.1 | Scaffold3529 | 20486                   | TT                              | AA                | 1946693831               |
| SNP_P3_175055_20488 | NW_004518208.1 | Scaffold3529 | 20488                   | TT                              | GG                | 1946693833               |
| SNP_P3_175056_20637 | NW_004518208.1 | Scaffold3529 | 20637                   | TT                              | AA                | 1946693835               |
| SNP_P3_175057_20742 | NW_004518208.1 | Scaffold3529 | 20742                   | TT                              | GG                | 1946693837               |
| SNP_P3_175058_20777 | NW_004518208.1 | Scaffold3529 | 20777                   | TT                              | CC                | 1946693839               |
| SNP_P3_175059_20779 | NW_004518208.1 | Scaffold3529 | 20779                   | AA                              | GG                | 1946693841               |
| SNP_P3_175060_21005 | NW_004518208.1 | Scaffold3529 | 21005                   | GG                              | AA                | 1946693843               |
| SNP_P3_175061_21018 | NW_004518208.1 | Scaffold3529 | 21018                   | GG                              | CC                | 1946693845               |
| SNP_P3_175062_21145 | NW_004518208.1 | Scaffold3529 | 21145                   | GG                              | AA                | 1946693847               |
| SNP_P3_175063_23198 | NW_004518208.1 | Scaffold3529 | 23198                   | GG                              | AA                | 1946693849               |
| SNP_P3_175064_23234 | NW_004518208.1 | Scaffold3529 | 23234                   | GG                              | AA                | 1946693851               |
| SNP_P3_175065_23328 | NW_004518208.1 | Scaffold3529 | 23328                   | TT                              | AA                | 1946693853               |
| SNP_P3_175066_23428 | NW_004518208.1 | Scaffold3529 | 23428                   | TT                              | CC                | 1946693855               |
| SNP_P3_175067_23445 | NW_004518208.1 | Scaffold3529 | 23445                   | TT                              | GG                | 1946693857               |
| SNP_P3_175069_244   | NW_004518216.1 | Scaffold3539 | 244                     | GG                              | AA                | 1946693859               |
| SNP_P3_175070_5431  | NW_004518216.1 | Scaffold3539 | 5431                    | CC                              | TT                | 1946693861               |
| SNP_P3_175073_580   | NW_004518219.1 | Scaffold3542 | 580                     | CC                              | TT                | 1946693863               |

| SNPs IDs            | Chromosome IDs | Chromosomes  | Physical positions (bp) | CDC Frontier (Reference genome) | (Pusa 256 & HPNB) | NCBI SNPdb Accession IDs |
|---------------------|----------------|--------------|-------------------------|---------------------------------|-------------------|--------------------------|
| SNP_P3_175074_720   | NW_004518219.1 | Scaffold3542 | 720                     | AA                              | TT                | 1946693865               |
| SNP_P3_175075_6702  | NW_004518219.1 | Scaffold3542 | 6702                    | TT                              | AA                | 1946693867               |
| SNP_P3_175076_7113  | NW_004518219.1 | Scaffold3542 | 7113                    | CC                              | TT                | 1946693870               |
| SNP_P3_175077_7115  | NW_004518219.1 | Scaffold3542 | 7115                    | AA                              | GG                | 1946693872               |
| SNP_P3_175078_7123  | NW_004518219.1 | Scaffold3542 | 7123                    | TT                              | CC                | 1946693874               |
| SNP_P3_175079_7135  | NW_004518219.1 | Scaffold3542 | 7135                    | AA                              | GG                | 1946693876               |
| SNP_P3_175080_7137  | NW_004518219.1 | Scaffold3542 | 7137                    | GG                              | AA                | 1946693878               |
| SNP_P3_175081_7140  | NW_004518219.1 | Scaffold3542 | 7140                    | TT                              | AA                | 1946693880               |
| SNP_P3_175082_20547 | NW_004518219.1 | Scaffold3542 | 20547                   | AA                              | TT                | 1946693882               |
| SNP_P3_175083_20592 | NW_004518219.1 | Scaffold3542 | 20592                   | GG                              | CC                | 1946693884               |
| SNP_P3_175084_20627 | NW_004518219.1 | Scaffold3542 | 20627                   | TT                              | AA                | 1946693886               |
| SNP_P3_175085_20628 | NW_004518219.1 | Scaffold3542 | 20628                   | AA                              | TT                | 1946693889               |
| SNP_P3_175086_20862 | NW_004518219.1 | Scaffold3542 | 20862                   | AA                              | GG                | 1946693891               |
| SNP_P3_175087_20887 | NW_004518219.1 | Scaffold3542 | 20887                   | TT                              | CC                | 1946693893               |
| SNP_P3_175088_20968 | NW_004518219.1 | Scaffold3542 | 20968                   | AA                              | GG                | 1946693895               |
| SNP_P3_175089_21000 | NW_004518219.1 | Scaffold3542 | 21000                   | TT                              | CC                | 1946693897               |
| SNP_P3_175090_21086 | NW_004518219.1 | Scaffold3542 | 21086                   | TT                              | CC                | 1946693899               |
| SNP_P3_175091_21087 | NW_004518219.1 | Scaffold3542 | 21087                   | TT                              | CC                | 1946693901               |
| SNP_P3_175092_21093 | NW_004518219.1 | Scaffold3542 | 21093                   | AA                              | GG                | 1946693904               |
| SNP_P3_175093_21124 | NW_004518219.1 | Scaffold3542 | 21124                   | AA                              | CC                | 1946693906               |
| SNP_P3_175094_21353 | NW_004518219.1 | Scaffold3542 | 21353                   | TT                              | CC                | 1946693908               |
| SNP_P3_175095_21365 | NW_004518219.1 | Scaffold3542 | 21365                   | TT                              | CC                | 1946693911               |
| SNP_P3_175096_21420 | NW_004518219.1 | Scaffold3542 | 21420                   | TT                              | CC                | 1946693913               |
| SNP_P3_175097_21439 | NW_004518219.1 | Scaffold3542 | 21439                   | TT                              | CC                | 1946693915               |
| SNP_P3_175098_21453 | NW_004518219.1 | Scaffold3542 | 21453                   | AA                              | GG                | 1946693917               |
| SNP_P3_175099_21458 | NW_004518219.1 | Scaffold3542 | 21458                   | TT                              | CC                | 1946693919               |
| SNP_P3_175100_21526 | NW_004518219.1 | Scaffold3542 | 21526                   | AA                              | TT                | 1946693922               |
| SNP_P3_175101_21541 | NW_004518219.1 | Scaffold3542 | 21541                   | AA                              | CC                | 1946693924               |
| SNP_P3_175102_21563 | NW_004518219.1 | Scaffold3542 | 21563                   | AA                              | TT                | 1946693926               |
| SNP_P3_175103_21565 | NW_004518219.1 | Scaffold3542 | 21565                   | GG                              | TT                | 1946693928               |
| SNP_P3_175104_21572 | NW_004518219.1 | Scaffold3542 | 21572                   | AA                              | GG                | 1946693930               |
| SNP_P3_175105_21588 | NW_004518219.1 | Scaffold3542 | 21588                   | CC                              | GG                | 1946693932               |
| SNP_P3_175106_21609 | NW_004518219.1 | Scaffold3542 | 21609                   | AA                              | TT                | 1946693934               |
| SNP_P3_175107_21634 | NW_004518219.1 | Scaffold3542 | 21634                   | GG                              | AA                | 1946693937               |
| SNP_P3_175108_21699 | NW_004518219.1 | Scaffold3542 | 21699                   | CC                              | AA                | 1946693939               |
| SNP_P3_175109_21716 | NW_004518219.1 | Scaffold3542 | 21716                   | GG                              | AA                | 1946693941               |
| SNP_P3_175110_21722 | NW_004518219.1 | Scaffold3542 | 21722                   | AA                              | TT                | 1946693944               |
| SNP_P3_175112_21748 | NW_004518219.1 | Scaffold3542 | 21748                   | AA                              | GG                | 1946693945               |
| SNP_P3_175113_21802 | NW_004518219.1 | Scaffold3542 | 21802                   | GG                              | AA                | 1946693946               |
| SNP_P3_175114_21840 | NW_004518219.1 | Scaffold3542 | 21840                   | GG                              | AA                | 1946693947               |
| SNP_P3_175115_21872 | NW_004518219.1 | Scaffold3542 | 21872                   | TT                              | AA                | 1946693948               |
| SNP_P3_175116_21932 | NW_004518219.1 | Scaffold3542 | 21932                   | GG                              | TT                | 1946693950               |

| SNPs IDs            | Chromosome IDs | Chromosomes  | Physical positions (bp) | CDC Frontier (Reference genome) | (Pusa 256 & HPNB) | NCBI SNPdb Accession IDs |
|---------------------|----------------|--------------|-------------------------|---------------------------------|-------------------|--------------------------|
| SNP_P3_175117_22048 | NW_004518219.1 | Scaffold3542 | 22048                   | GG                              | TT                | 1946693952               |
| SNP_P3_175118_22086 | NW_004518219.1 | Scaffold3542 | 22086                   | TT                              | CC                | 1946693954               |
| SNP_P3_175119_22157 | NW_004518219.1 | Scaffold3542 | 22157                   | GG                              | CC                | 1946693956               |
| SNP_P3_175120_22192 | NW_004518219.1 | Scaffold3542 | 22192                   | CC                              | TT                | 1946693958               |
| SNP_P3_175121_22249 | NW_004518219.1 | Scaffold3542 | 22249                   | CC                              | TT                | 1946693960               |
| SNP_P3_175122_24378 | NW_004518219.1 | Scaffold3542 | 24378                   | TT                              | GG                | 1946693962               |
| SNP_P3_175123_24752 | NW_004518219.1 | Scaffold3542 | 24752                   | GG                              | AA                | 1946693965               |
| SNP_P3_175124_24758 | NW_004518219.1 | Scaffold3542 | 24758                   | TT                              | CC                | 1946693968               |
| SNP_P3_175125_24827 | NW_004518219.1 | Scaffold3542 | 24827                   | TT                              | CC                | 1946693970               |
| SNP_P3_175126_24874 | NW_004518219.1 | Scaffold3542 | 24874                   | AA                              | CC                | 1946693972               |
| SNP_P3_175127_24875 | NW_004518219.1 | Scaffold3542 | 24875                   | AA                              | GG                | 1946693974               |
| SNP_P3_175128_24882 | NW_004518219.1 | Scaffold3542 | 24882                   | TT                              | CC                | 1946693976               |
| SNP_P3_175129_24941 | NW_004518219.1 | Scaffold3542 | 24941                   | TT                              | CC                | 1946693978               |
| SNP_P3_175130_24992 | NW_004518219.1 | Scaffold3542 | 24992                   | GG                              | CC                | 1946693980               |
| SNP_P3_175133_33932 | NW_004518219.1 | Scaffold3542 | 33932                   | CC                              | GG                | 1946693982               |
| SNP_P3_175134_33954 | NW_004518219.1 | Scaffold3542 | 33954                   | TT                              | CC                | 1946693984               |
| SNP_P3_175135_33956 | NW_004518219.1 | Scaffold3542 | 33956                   | TT                              | CC                | 1946693986               |
| SNP_P3_175136_34058 | NW_004518219.1 | Scaffold3542 | 34058                   | AA                              | CC                | 1946693989               |
| SNP_P3_175137_34060 | NW_004518219.1 | Scaffold3542 | 34060                   | TT                              | GG                | 1946693991               |
| SNP_P3_175138_34061 | NW_004518219.1 | Scaffold3542 | 34061                   | AA                              | GG                | 1946693993               |
| SNP_P3_175139_34064 | NW_004518219.1 | Scaffold3542 | 34064                   | AA                              | GG                | 1946693995               |
| SNP_P3_175140_34079 | NW_004518219.1 | Scaffold3542 | 34079                   | TT                              | AA                | 1946693997               |
| SNP_P3_175141_34225 | NW_004518219.1 | Scaffold3542 | 34225                   | GG                              | TT                | 1946693999               |
| SNP_P3_175142_34245 | NW_004518219.1 | Scaffold3542 | 34245                   | TT                              | CC                | 1946694001               |
| SNP_P3_175143_34248 | NW_004518219.1 | Scaffold3542 | 34248                   | AA                              | TT                | 1946694004               |
| SNP_P3_175144_34278 | NW_004518219.1 | Scaffold3542 | 34278                   | CC                              | AA                | 1946694007               |
| SNP_P3_175146_34334 | NW_004518219.1 | Scaffold3542 | 34334                   | TT                              | GG                | 1946694009               |
| SNP_P3_175147_34337 | NW_004518219.1 | Scaffold3542 | 34337                   | AA                              | GG                | 1946694011               |
| SNP_P3_175148_34501 | NW_004518219.1 | Scaffold3542 | 34501                   | AA                              | TT                | 1946694013               |
| SNP_P3_175149_34523 | NW_004518219.1 | Scaffold3542 | 34523                   | TT                              | GG                | 1946694015               |
| SNP_P3_175150_34619 | NW_004518219.1 | Scaffold3542 | 34619                   | GG                              | TT                | 1946694017               |
| SNP_P3_175151_34628 | NW_004518219.1 | Scaffold3542 | 34628                   | TT                              | CC                | 1946694019               |
| SNP_P3_175152_34683 | NW_004518219.1 | Scaffold3542 | 34683                   | AA                              | CC                | 1946694021               |
| SNP_P3_175153_34687 | NW_004518219.1 | Scaffold3542 | 34687                   | TT                              | GG                | 1946694023               |
| SNP_P3_175154_34695 | NW_004518219.1 | Scaffold3542 | 34695                   | AA                              | TT                | 1946694025               |
| SNP_P3_175155_34700 | NW_004518219.1 | Scaffold3542 | 34700                   | TT                              | CC                | 1946694028               |
| SNP_P3_175156_37364 | NW_004518219.1 | Scaffold3542 | 37364                   | GG                              | TT                | 1946694030               |
| SNP_P3_175157_105   | NW_004518222.1 | Scaffold3545 | 105                     | CC                              | TT                | 1946694032               |
| SNP_P3_175158_199   | NW_004518222.1 | Scaffold3545 | 199                     | TT                              | AA                | 1946694034               |
| SNP_P3_175159_367   | NW_004518222.1 | Scaffold3545 | 367                     | TT                              | CC                | 1946694036               |
| SNP_P3_175160_560   | NW_004518222.1 | Scaffold3545 | 560                     | TT                              | AA                | 1946694038               |
| SNP_P3_175162_189   | NW_004518225.1 | Scaffold3549 | 189                     | AA                              | TT                | 1946694040               |

| SNPs IDs            | Chromosome IDs | Chromosomes  | Physical positions (bp) | CDC Frontier (Reference genome) | (Pusa 256 & HPNB) | NCBI SNPdb Accession IDs |
|---------------------|----------------|--------------|-------------------------|---------------------------------|-------------------|--------------------------|
| SNP_P3_175163_192   | NW_004518225.1 | Scaffold3549 | 192                     | CC                              | TT                | 1946694042               |
| SNP_P3_175164_349   | NW_004518225.1 | Scaffold3549 | 349                     | AA                              | CC                | 1946694044               |
| SNP_P3_175165_851   | NW_004518225.1 | Scaffold3549 | 851                     | TT                              | AA                | 1946694046               |
| SNP_P3_175166_903   | NW_004518227.1 | Scaffold3554 | 903                     | TT                              | AA                | 1946694048               |
| SNP_P3_175167_937   | NW_004518227.1 | Scaffold3554 | 937                     | CC                              | AA                | 1946694051               |
| SNP_P3_175168_469   | NW_004518228.1 | Scaffold3555 | 469                     | AA                              | GG                | 1946694053               |
| SNP_P3_175169_549   | NW_004518228.1 | Scaffold3555 | 549                     | AA                              | GG                | 1946694056               |
| SNP_P3_175170_743   | NW_004518228.1 | Scaffold3555 | 743                     | TT                              | GG                | 1946694058               |
| SNP_P3_175171_979   | NW_004518228.1 | Scaffold3555 | 979                     | GG                              | AA                | 1946694060               |
| SNP_P3_175172_1222  | NW_004518228.1 | Scaffold3555 | 1222                    | TT                              | GG                | 1946694062               |
| SNP_P3_175173_1359  | NW_004518228.1 | Scaffold3555 | 1359                    | CC                              | GG                | 1946694064               |
| SNP_P3_175174_34224 | NW_004518229.1 | Scaffold3557 | 34224                   | CC                              | TT                | 1946694066               |
| SNP_P3_175175_324   | NW_004518232.1 | Scaffold3562 | 324                     | GG                              | CC                | 1946694068               |
| SNP_P3_175176_1032  | NW_004518232.1 | Scaffold3562 | 1032                    | AA                              | CC                | 1946694070               |
| SNP_P3_175178_1116  | NW_004518232.1 | Scaffold3562 | 1116                    | AA                              | CC                | 1946694072               |
| SNP_P3_175179_983   | NW_004518235.1 | Scaffold3565 | 983                     | TT                              | CC                | 1946694074               |
| SNP_P3_175180_994   | NW_004518235.1 | Scaffold3565 | 994                     | AA                              | CC                | 1946694076               |
| SNP_P3_175182_1029  | NW_004518235.1 | Scaffold3565 | 1029                    | TT                              | CC                | 1946694079               |
| SNP_P3_175183_1055  | NW_004518235.1 | Scaffold3565 | 1055                    | CC                              | AA                | 1946694081               |
| SNP_P3_175184_437   | NW_004518241.1 | Scaffold3576 | 437                     | TT                              | AA                | 1946694083               |
| SNP_P3_175185_438   | NW_004518241.1 | Scaffold3576 | 438                     | AA                              | TT                | 1946694085               |
| SNP_P3_175186_638   | NW_004518241.1 | Scaffold3576 | 638                     | AA                              | GG                | 1946694087               |
| SNP_P3_175187_174   | NW_004518243.1 | Scaffold3579 | 174                     | CC                              | AA                | 1946694089               |
| SNP_P3_175188_215   | NW_004518244.1 | Scaffold3581 | 215                     | TT                              | CC                | 1946694091               |
| SNP_P3_175189_253   | NW_004518244.1 | Scaffold3581 | 253                     | CC                              | AA                | 1946694093               |
| SNP_P3_175190_283   | NW_004518244.1 | Scaffold3581 | 283                     | AA                              | GG                | 1946694095               |
| SNP_P3_175191_306   | NW_004518244.1 | Scaffold3581 | 306                     | AA                              | TT                | 1946694097               |
| SNP_P3_175192_308   | NW_004518244.1 | Scaffold3581 | 308                     | TT                              | GG                | 1946694099               |
| SNP_P3_175193_342   | NW_004518244.1 | Scaffold3581 | 342                     | CC                              | AA                | 1946694101               |
| SNP_P3_175194_607   | NW_004518244.1 | Scaffold3581 | 607                     | GG                              | AA                | 1946694103               |
| SNP_P3_175195_1190  | NW_004518244.1 | Scaffold3581 | 1190                    | AA                              | CC                | 1946694106               |
| SNP_P3_175196_121   | NW_004518247.1 | Scaffold3585 | 121                     | TT                              | CC                | 1946694108               |
| SNP_P3_175197_136   | NW_004518247.1 | Scaffold3585 | 136                     | TT                              | GG                | 1946694110               |
| SNP_P3_175198_156   | NW_004518247.1 | Scaffold3585 | 156                     | TT                              | AA                | 1946694112               |
| SNP_P3_175199_468   | NW_004518247.1 | Scaffold3585 | 468                     | CC                              | AA                | 1946694114               |
| SNP_P3_175200_586   | NW_004518247.1 | Scaffold3585 | 586                     | TT                              | CC                | 1946694117               |
| SNP_P3_175201_4074  | NW_004518249.1 | Scaffold3588 | 4074                    | CC                              | AA                | 1946694121               |
| SNP_P3_175202_5459  | NW_004518249.1 | Scaffold3588 | 5459                    | TT                              | CC                | 1946694123               |
| SNP_P3_175203_236   | NW_004518250.1 | Scaffold3589 | 236                     | AA                              | GG                | 1946694125               |
| SNP_P3_175204_317   | NW_004518250.1 | Scaffold3589 | 317                     | GG                              | AA                | 1946694127               |
| SNP_P3_175205_498   | NW_004518250.1 | Scaffold3589 | 498                     | TT                              | CC                | 1946694129               |
| SNP_P3_175206_505   | NW_004518250.1 | Scaffold3589 | 505                     | AA                              | GG                | 1946694131               |

| SNPs IDs            | Chromosome IDs | Chromosomes  | Physical positions (bp) | CDC Frontier (Reference genome) | (Pusa 256 & HPNB) | NCBI SNPdb Accession IDs |
|---------------------|----------------|--------------|-------------------------|---------------------------------|-------------------|--------------------------|
| SNP_P3_175207_579   | NW_004518250.1 | Scaffold3589 | 579                     | CC                              | TT                | 1946694134               |
| SNP_P3_175208_610   | NW_004518250.1 | Scaffold3589 | 610                     | GG                              | CC                | 1946694136               |
| SNP_P3_175209_937   | NW_004518250.1 | Scaffold3589 | 937                     | AA                              | CC                | 1946694138               |
| SNP_P3_175210_980   | NW_004518250.1 | Scaffold3589 | 980                     | AA                              | TT                | 1946694140               |
| SNP_P3_175211_4785  | NW_004518252.1 | Scaffold3593 | 4785                    | GG                              | CC                | 1946694142               |
| SNP_P3_175212_4794  | NW_004518252.1 | Scaffold3593 | 4794                    | TT                              | GG                | 1946694144               |
| SNP_P3_175213_4803  | NW_004518252.1 | Scaffold3593 | 4803                    | CC                              | GG                | 1946694148               |
| SNP_P3_175214_12628 | NW_004518252.1 | Scaffold3593 | 12628                   | AA                              | GG                | 1946694150               |
| SNP_P3_175215_14598 | NW_004518252.1 | Scaffold3593 | 14598                   | CC                              | TT                | 1946694152               |
| SNP_P3_175216_14607 | NW_004518252.1 | Scaffold3593 | 14607                   | CC                              | TT                | 1946694154               |
| SNP_P3_175217_14725 | NW_004518252.1 | Scaffold3593 | 14725                   | CC                              | AA                | 1946694156               |
| SNP_P3_175218_14837 | NW_004518252.1 | Scaffold3593 | 14837                   | AA                              | TT                | 1946694158               |
| SNP_P3_175219_14867 | NW_004518252.1 | Scaffold3593 | 14867                   | CC                              | AA                | 1946694160               |
| SNP_P3_175220_644   | NW_004518253.1 | Scaffold3594 | 644                     | AA                              | TT                | 1946694162               |
| SNP_P3_175221_773   | NW_004518253.1 | Scaffold3594 | 773                     | GG                              | CC                | 1946694164               |
| SNP_P3_175222_776   | NW_004518253.1 | Scaffold3594 | 776                     | TT                              | GG                | 1946694166               |
| SNP_P3_175223_779   | NW_004518253.1 | Scaffold3594 | 779                     | AA                              | GG                | 1946694168               |
| SNP_P3_175225_809   | NW_004518253.1 | Scaffold3594 | 809                     | GG                              | AA                | 1946694171               |
| SNP_P3_175226_815   | NW_004518253.1 | Scaffold3594 | 815                     | AA                              | GG                | 1946694173               |
| SNP_P3_175227_868   | NW_004518253.1 | Scaffold3594 | 868                     | AA                              | CC                | 1946694175               |
| SNP_P3_175228_870   | NW_004518253.1 | Scaffold3594 | 870                     | AA                              | GG                | 1946694177               |
| SNP_P3_175229_931   | NW_004518253.1 | Scaffold3594 | 931                     | AA                              | CC                | 1946694179               |
| SNP_P3_175231_1332  | NW_004518253.1 | Scaffold3594 | 1332                    | CC                              | GG                | 1946694181               |
| SNP_P3_175232_1372  | NW_004518253.1 | Scaffold3594 | 1372                    | GG                              | AA                | 1946694183               |
| SNP_P3_175233_1376  | NW_004518253.1 | Scaffold3594 | 1376                    | TT                              | AA                | 1946694186               |
| SNP_P3_175234_1548  | NW_004518253.1 | Scaffold3594 | 1548                    | TT                              | CC                | 1946694189               |
| SNP_P3_175235_1638  | NW_004518253.1 | Scaffold3594 | 1638                    | CC                              | TT                | 1946694191               |
| SNP_P3_175236_1722  | NW_004518253.1 | Scaffold3594 | 1722                    | AA                              | TT                | 1946694193               |
| SNP_P3_175237_1797  | NW_004518253.1 | Scaffold3594 | 1797                    | TT                              | CC                | 1946694195               |
| SNP_P3_175238_1798  | NW_004518253.1 | Scaffold3594 | 1798                    | TT                              | CC                | 1946694197               |
| SNP_P3_175239_1822  | NW_004518253.1 | Scaffold3594 | 1822                    | TT                              | AA                | 1946694200               |
| SNP_P3_175240_6305  | NW_004518253.1 | Scaffold3594 | 6305                    | TT                              | CC                | 1946694202               |
| SNP_P3_175241_6495  | NW_004518253.1 | Scaffold3594 | 6495                    | CC                              | GG                | 1946694204               |
| SNP_P3_175242_6775  | NW_004518253.1 | Scaffold3594 | 6775                    | TT                              | GG                | 1946694206               |
| SNP_P3_175243_7787  | NW_004518253.1 | Scaffold3594 | 7787                    | CC                              | AA                | 1946694208               |
| SNP_P3_175244_64    | NW_004518254.1 | Scaffold3596 | 64                      | GG                              | CC                | 1946694210               |
| SNP_P3_175245_137   | NW_004518254.1 | Scaffold3596 | 137                     | AA                              | GG                | 1946694213               |
| SNP_P3_175246_538   | NW_004518254.1 | Scaffold3596 | 538                     | AA                              | GG                | 1946694215               |
| SNP_P3_175247_1430  | NW_004518254.1 | Scaffold3596 | 1430                    | AA                              | GG                | 1946694217               |
| SNP_P3_175248_1522  | NW_004518254.1 | Scaffold3596 | 1522                    | TT                              | GG                | 1946694219               |
| SNP_P3_175249_1559  | NW_004518254.1 | Scaffold3596 | 1559                    | TT                              | CC                | 1946694221               |
| SNP_P3_175250_1739  | NW_004518254.1 | Scaffold3596 | 1739                    | AA                              | GG                | 1946694223               |

| SNPs IDs           | Chromosome IDs | Chromosomes  | Physical positions (bp) | CDC Frontier (Reference genome) | (Pusa 256 & HPNB) | NCBI SNPdb Accession IDs |
|--------------------|----------------|--------------|-------------------------|---------------------------------|-------------------|--------------------------|
| SNP_P3_175251_1857 | NW_004518254.1 | Scaffold3596 | 1857                    | GG                              | TT                | 1946694226               |
| SNP_P3_175252_1882 | NW_004518254.1 | Scaffold3596 | 1882                    | GG                              | AA                | 1946694229               |
| SNP_P3_175253_2260 | NW_004518254.1 | Scaffold3596 | 2260                    | TT                              | AA                | 1946694231               |
| SNP_P3_175254_2267 | NW_004518254.1 | Scaffold3596 | 2267                    | AA                              | GG                | 1946694233               |
| SNP_P3_175255_2399 | NW_004518254.1 | Scaffold3596 | 2399                    | GG                              | AA                | 1946694236               |
| SNP_P3_175256_2549 | NW_004518254.1 | Scaffold3596 | 2549                    | TT                              | GG                | 1946694238               |
| SNP_P3_175257_2584 | NW_004518254.1 | Scaffold3596 | 2584                    | AA                              | TT                | 1946694240               |
| SNP_P3_175258_2642 | NW_004518254.1 | Scaffold3596 | 2642                    | CC                              | TT                | 1946694242               |
| SNP_P3_175259_2914 | NW_004518254.1 | Scaffold3596 | 2914                    | CC                              | AA                | 1946694244               |
| SNP_P3_175260_2923 | NW_004518254.1 | Scaffold3596 | 2923                    | CC                              | TT                | 1946694246               |
| SNP_P3_175261_3203 | NW_004518256.1 | Scaffold3598 | 3203                    | TT                              | CC                | 1946694248               |
| SNP_P3_175262_3286 | NW_004518256.1 | Scaffold3598 | 3286                    | AA                              | CC                | 1946694251               |
| SNP_P3_175263_3439 | NW_004518256.1 | Scaffold3598 | 3439                    | TT                              | GG                | 1946694253               |
| SNP_P3_175264_3486 | NW_004518256.1 | Scaffold3598 | 3486                    | AA                              | CC                | 1946694255               |
| SNP_P3_175265_374  | NW_004518258.1 | Scaffold3600 | 374                     | GG                              | AA                | 1946694257               |
| SNP_P3_175266_517  | NW_004518258.1 | Scaffold3600 | 517                     | GG                              | AA                | 1946694260               |
| SNP_P3_175267_620  | NW_004518258.1 | Scaffold3600 | 620                     | TT                              | GG                | 1946694262               |
| SNP_P3_175268_631  | NW_004518258.1 | Scaffold3600 | 631                     | CC                              | TT                | 1946694264               |
| SNP_P3_175269_813  | NW_004518258.1 | Scaffold3600 | 813                     | TT                              | CC                | 1946694268               |
| SNP_P3_175270_821  | NW_004518258.1 | Scaffold3600 | 821                     | AA                              | CC                | 1946694270               |
| SNP_P3_175271_885  | NW_004518258.1 | Scaffold3600 | 885                     | TT                              | GG                | 1946694272               |
| SNP_P3_175272_930  | NW_004518258.1 | Scaffold3600 | 930                     | TT                              | GG                | 1946694274               |
| SNP_P3_175273_968  | NW_004518258.1 | Scaffold3600 | 968                     | AA                              | TT                | 1946694276               |
| SNP_P3_175275_1010 | NW_004518258.1 | Scaffold3600 | 1010                    | TT                              | CC                | 1946694278               |
| SNP_P3_175276_1114 | NW_004518258.1 | Scaffold3600 | 1114                    | AA                              | GG                | 1946694280               |
| SNP_P3_175277_1116 | NW_004518258.1 | Scaffold3600 | 1116                    | CC                              | TT                | 1946694283               |
| SNP_P3_175278_1143 | NW_004518258.1 | Scaffold3600 | 1143                    | AA                              | GG                | 1946694285               |
| SNP_P3_175279_1203 | NW_004518258.1 | Scaffold3600 | 1203                    | AA                              | CC                | 1946694287               |
| SNP_P3_175281_3601 | NW_004518258.1 | Scaffold3600 | 3601                    | GG                              | AA                | 1946694289               |
| SNP_P3_175282_3647 | NW_004518258.1 | Scaffold3600 | 3647                    | AA                              | GG                | 1946694291               |
| SNP_P3_175283_3687 | NW_004518258.1 | Scaffold3600 | 3687                    | GG                              | AA                | 1946694294               |
| SNP_P3_175284_3690 | NW_004518258.1 | Scaffold3600 | 3690                    | AA                              | GG                | 1946694296               |
| SNP_P3_175285_3747 | NW_004518258.1 | Scaffold3600 | 3747                    | GG                              | AA                | 1946694298               |
| SNP_P3_175286_3927 | NW_004518258.1 | Scaffold3600 | 3927                    | AA                              | GG                | 1946694300               |
| SNP_P3_175287_3964 | NW_004518258.1 | Scaffold3600 | 3964                    | GG                              | CC                | 1946694302               |
| SNP_P3_175288_3989 | NW_004518258.1 | Scaffold3600 | 3989                    | GG                              | CC                | 1946694304               |
| SNP_P3_175289_4185 | NW_004518258.1 | Scaffold3600 | 4185                    | TT                              | CC                | 1946694308               |
| SNP_P3_175290_4455 | NW_004518258.1 | Scaffold3600 | 4455                    | TT                              | CC                | 1946694310               |
| SNP_P3_175292_4504 | NW_004518258.1 | Scaffold3600 | 4504                    | AA                              | CC                | 1946694312               |
| SNP_P3_175293_4571 | NW_004518258.1 | Scaffold3600 | 4571                    | AA                              | GG                | 1946694314               |
| SNP_P3_175294_6569 | NW_004518258.1 | Scaffold3600 | 6569                    | CC                              | TT                | 1946694317               |
| SNP_P3_175295_1782 | NW_004518260.1 | Scaffold3602 | 1782                    | TT                              | CC                | 1946694319               |

| SNPs IDs           | Chromosome IDs | Chromosomes  | Physical positions (bp) | CDC Frontier (Reference genome) | (Pusa 256 & HPNB) | NCBI SNPdb Accession IDs |
|--------------------|----------------|--------------|-------------------------|---------------------------------|-------------------|--------------------------|
| SNP_P3_175296_1983 | NW_004518260.1 | Scaffold3602 | 1983                    | CC                              | TT                | 1946694321               |
| SNP_P3_175297_2012 | NW_004518260.1 | Scaffold3602 | 2012                    | AA                              | GG                | 1946694323               |
| SNP_P3_175298_2026 | NW_004518260.1 | Scaffold3602 | 2026                    | GG                              | TT                | 1946694325               |
| SNP_P3_175299_2044 | NW_004518260.1 | Scaffold3602 | 2044                    | CC                              | TT                | 1946694331               |
| SNP_P3_175300_2047 | NW_004518260.1 | Scaffold3602 | 2047                    | GG                              | TT                | 1946694333               |
| SNP_P3_175301_2075 | NW_004518260.1 | Scaffold3602 | 2075                    | TT                              | CC                | 1946694335               |
| SNP_P3_175302_2076 | NW_004518260.1 | Scaffold3602 | 2076                    | AA                              | GG                | 1946694337               |
| SNP_P3_175303_211  | NW_004518262.1 | Scaffold3604 | 211                     | AA                              | GG                | 1946694339               |
| SNP_P3_175304_525  | NW_004518262.1 | Scaffold3604 | 525                     | TT                              | CC                | 1946694341               |
| SNP_P3_175305_680  | NW_004518262.1 | Scaffold3604 | 680                     | AA                              | GG                | 1946694343               |
| SNP_P3_175306_952  | NW_004518262.1 | Scaffold3604 | 952                     | CC                              | AA                | 1946694345               |
| SNP_P3_175307_989  | NW_004518262.1 | Scaffold3604 | 989                     | GG                              | AA                | 1946694347               |
| SNP_P3_175308_999  | NW_004518262.1 | Scaffold3604 | 999                     | TT                              | CC                | 1946694350               |
| SNP_P3_175309_1023 | NW_004518262.1 | Scaffold3604 | 1023                    | TT                              | CC                | 1946694352               |
| SNP_P3_175310_1038 | NW_004518262.1 | Scaffold3604 | 1038                    | TT                              | AA                | 1946694354               |
| SNP_P3_175311_237  | NW_004518264.1 | Scaffold3606 | 237                     | GG                              | AA                | 1946694356               |
| SNP_P3_175312_204  | NW_004518271.1 | Scaffold3615 | 204                     | CC                              | TT                | 1946694358               |
| SNP_P3_175313_242  | NW_004518271.1 | Scaffold3615 | 242                     | AA                              | CC                | 1946694360               |
| SNP_P3_175314_708  | NW_004518271.1 | Scaffold3615 | 708                     | TT                              | GG                | 1946694362               |
| SNP_P3_175315_724  | NW_004518271.1 | Scaffold3615 | 724                     | AA                              | TT                | 1946694364               |
| SNP_P3_175316_303  | NW_004518272.1 | Scaffold3616 | 303                     | AA                              | GG                | 1946694366               |
| SNP_P3_175317_318  | NW_004518272.1 | Scaffold3616 | 318                     | TT                              | CC                | 1946694368               |
| SNP_P3_175318_400  | NW_004518272.1 | Scaffold3616 | 400                     | CC                              | TT                | 1946694370               |
| SNP_P3_175319_504  | NW_004518272.1 | Scaffold3616 | 504                     | AA                              | GG                | 1946694372               |
| SNP_P3_175320_756  | NW_004518272.1 | Scaffold3616 | 756                     | CC                              | TT                | 1946694374               |
| SNP_P3_175321_88   | NW_004518275.1 | Scaffold3619 | 88                      | CC                              | AA                | 1946694376               |
| SNP_P3_175322_90   | NW_004518275.1 | Scaffold3619 | 90                      | TT                              | CC                | 1946694378               |
| SNP_P3_175323_2283 | NW_004518275.1 | Scaffold3619 | 2283                    | AA                              | GG                | 1946694382               |
| SNP_P3_175325_694  | NW_004518277.1 | Scaffold3621 | 694                     | GG                              | AA                | 1946694384               |
| SNP_P3_175326_4314 | NW_004518277.1 | Scaffold3621 | 4314                    | AA                              | GG                | 1946694386               |
| SNP_P3_175327_139  | NW_004518282.1 | Scaffold3628 | 139                     | TT                              | GG                | 1946694388               |
| SNP_P3_175328_379  | NW_004518282.1 | Scaffold3628 | 379                     | TT                              | CC                | 1946694390               |
| SNP_P3_175329_931  | NW_004518282.1 | Scaffold3628 | 931                     | TT                              | CC                | 1946694392               |
| SNP_P3_175330_935  | NW_004518282.1 | Scaffold3628 | 935                     | AA                              | TT                | 1946694394               |
| SNP_P3_175331_956  | NW_004518282.1 | Scaffold3628 | 956                     | CC                              | TT                | 1946694396               |
| SNP_P3_175332_1066 | NW_004518282.1 | Scaffold3628 | 1066                    | CC                              | GG                | 1946694398               |
| SNP_P3_175333_1105 | NW_004518282.1 | Scaffold3628 | 1105                    | AA                              | GG                | 1946694400               |
| SNP_P3_175334_1199 | NW_004518282.1 | Scaffold3628 | 1199                    | TT                              | CC                | 1946694402               |
| SNP_P3_175335_1717 | NW_004518282.1 | Scaffold3628 | 1717                    | TT                              | CC                | 1946694404               |
| SNP_P3_175336_1747 | NW_004518282.1 | Scaffold3628 | 1747                    | AA                              | GG                | 1946694406               |
| SNP_P3_175337_1974 | NW_004518282.1 | Scaffold3628 | 1974                    | TT                              | CC                | 1946694409               |
| SNP_P3_175338_1975 | NW_004518282.1 | Scaffold3628 | 1975                    | AA                              | TT                | 1946694411               |

| SNPs IDs            | Chromosome IDs | Chromosomes  | Physical positions (bp) | CDC Frontier (Reference genome) | (Pusa 256 & HPNB) | NCBI SNPdb Accession IDs |
|---------------------|----------------|--------------|-------------------------|---------------------------------|-------------------|--------------------------|
| SNP_P3_175339_1981  | NW_004518282.1 | Scaffold3628 | 1981                    | TT                              | CC                | 1946694413               |
| SNP_P3_175340_2013  | NW_004518282.1 | Scaffold3628 | 2013                    | AA                              | TT                | 1946694415               |
| SNP_P3_175341_2044  | NW_004518282.1 | Scaffold3628 | 2044                    | GG                              | AA                | 1946694417               |
| SNP_P3_175342_2069  | NW_004518282.1 | Scaffold3628 | 2069                    | AA                              | CC                | 1946694419               |
| SNP_P3_175343_2099  | NW_004518282.1 | Scaffold3628 | 2099                    | GG                              | CC                | 1946694422               |
| SNP_P3_175344_2169  | NW_004518282.1 | Scaffold3628 | 2169                    | TT                              | AA                | 1946694424               |
| SNP_P3_175345_2251  | NW_004518282.1 | Scaffold3628 | 2251                    | CC                              | TT                | 1946694426               |
| SNP_P3_175346_4033  | NW_004518282.1 | Scaffold3628 | 4033                    | TT                              | GG                | 1946694428               |
| SNP_P3_175347_4066  | NW_004518282.1 | Scaffold3628 | 4066                    | AA                              | CC                | 1946694430               |
| SNP_P3_175348_4128  | NW_004518282.1 | Scaffold3628 | 4128                    | CC                              | AA                | 1946694432               |
| SNP_P3_175349_4405  | NW_004518282.1 | Scaffold3628 | 4405                    | TT                              | AA                | 1946694434               |
| SNP_P3_175350_4483  | NW_004518282.1 | Scaffold3628 | 4483                    | GG                              | TT                | 1946694437               |
| SNP_P3_175351_397   | NW_004518283.1 | Scaffold3631 | 397                     | GG                              | TT                | 1946694439               |
| SNP_P3_175352_470   | NW_004518283.1 | Scaffold3631 | 470                     | CC                              | AA                | 1946694441               |
| SNP_P3_175353_8650  | NW_004518283.1 | Scaffold3631 | 8650                    | TT                              | AA                | 1946694443               |
| SNP_P3_175354_8947  | NW_004518283.1 | Scaffold3631 | 8947                    | CC                              | GG                | 1946694445               |
| SNP_P3_175355_8953  | NW_004518283.1 | Scaffold3631 | 8953                    | AA                              | TT                | 1946694447               |
| SNP_P3_175356_9476  | NW_004518283.1 | Scaffold3631 | 9476                    | GG                              | TT                | 1946694449               |
| SNP_P3_175357_9540  | NW_004518283.1 | Scaffold3631 | 9540                    | AA                              | TT                | 1946694451               |
| SNP_P3_175358_9611  | NW_004518283.1 | Scaffold3631 | 9611                    | AA                              | CC                | 1946694453               |
| SNP_P3_175359_9626  | NW_004518283.1 | Scaffold3631 | 9626                    | TT                              | AA                | 1946694455               |
| SNP_P3_175360_11310 | NW_004518283.1 | Scaffold3631 | 11310                   | TT                              | AA                | 1946694458               |
| SNP_P3_175361_11589 | NW_004518283.1 | Scaffold3631 | 11589                   | AA                              | GG                | 1946694461               |
| SNP_P3_175362_11732 | NW_004518283.1 | Scaffold3631 | 11732                   | GG                              | AA                | 1946694463               |
| SNP_P3_175363_11792 | NW_004518283.1 | Scaffold3631 | 11792                   | CC                              | TT                | 1946694465               |
| SNP_P3_175364_12098 | NW_004518283.1 | Scaffold3631 | 12098                   | CC                              | TT                | 1946694467               |
| SNP_P3_175365_12103 | NW_004518283.1 | Scaffold3631 | 12103                   | CC                              | TT                | 1946694469               |
| SNP_P3_175367_12363 | NW_004518283.1 | Scaffold3631 | 12363                   | CC                              | TT                | 1946694471               |
| SNP_P3_175368_13028 | NW_004518283.1 | Scaffold3631 | 13028                   | AA                              | GG                | 1946694473               |
| SNP_P3_175369_13283 | NW_004518283.1 | Scaffold3631 | 13283                   | GG                              | AA                | 1946694475               |
| SNP_P3_175370_13350 | NW_004518283.1 | Scaffold3631 | 13350                   | AA                              | GG                | 1946694477               |
| SNP_P3_175371_64    | NW_004518284.1 | Scaffold3632 | 64                      | AA                              | CC                | 1946694479               |
| SNP_P3_175372_67    | NW_004518284.1 | Scaffold3632 | 67                      | TT                              | CC                | 1946694481               |
| SNP_P3_175373_252   | NW_004518284.1 | Scaffold3632 | 252                     | TT                              | AA                | 1946694483               |
| SNP_P3_175374_365   | NW_004518284.1 | Scaffold3632 | 365                     | GG                              | TT                | 1946694485               |
| SNP_P3_175375_11122 | NW_004518286.1 | Scaffold3637 | 11122                   | TT                              | CC                | 1946694487               |
| SNP_P3_175377_11716 | NW_004518286.1 | Scaffold3637 | 11716                   | AA                              | CC                | 1946694490               |
| SNP_P3_175378_12039 | NW_004518286.1 | Scaffold3637 | 12039                   | TT                              | AA                | 1946694492               |
| SNP_P3_175379_12054 | NW_004518286.1 | Scaffold3637 | 12054                   | TT                              | CC                | 1946694494               |
| SNP_P3_175380_12148 | NW_004518286.1 | Scaffold3637 | 12148                   | TT                              | AA                | 1946694496               |
| SNP_P3_175382_1013  | NW_004518288.1 | Scaffold3640 | 1013                    | GG                              | AA                | 1946694498               |
| SNP_P3_175383_1100  | NW_004518289.1 | Scaffold3643 | 1100                    | GG                              | AA                | 1946694501               |



| SNPs IDs            | Chromosome IDs | Chromosomes  | Physical positions (bp) | CDC Frontier (Reference genome) | (Pusa 256 & HPNB) | NCBI SNPdb Accession IDs |
|---------------------|----------------|--------------|-------------------------|---------------------------------|-------------------|--------------------------|
| SNP_P3_175384_1140  | NW_004518289.1 | Scaffold3643 | 1140                    | GG                              | AA                | 1946694504               |
| SNP_P3_175385_1207  | NW_004518289.1 | Scaffold3643 | 1207                    | AA                              | TT                | 1946694506               |
| SNP_P3_175386_1232  | NW_004518289.1 | Scaffold3643 | 1232                    | TT                              | CC                | 1946694508               |
| SNP_P3_175387_1237  | NW_004518289.1 | Scaffold3643 | 1237                    | CC                              | TT                | 1946694510               |
| SNP_P3_175388_1253  | NW_004518289.1 | Scaffold3643 | 1253                    | TT                              | CC                | 1946694513               |
| SNP_P3_175389_1316  | NW_004518289.1 | Scaffold3643 | 1316                    | CC                              | AA                | 1946694515               |
| SNP_P3_175390_1323  | NW_004518289.1 | Scaffold3643 | 1323                    | TT                              | GG                | 1946694517               |
| SNP_P3_175391_1453  | NW_004518289.1 | Scaffold3643 | 1453                    | CC                              | AA                | 1946694519               |
| SNP_P3_175392_1456  | NW_004518289.1 | Scaffold3643 | 1456                    | GG                              | CC                | 1946694521               |
| SNP_P3_175393_1473  | NW_004518289.1 | Scaffold3643 | 1473                    | TT                              | CC                | 1946694523               |
| SNP_P3_175394_1522  | NW_004518289.1 | Scaffold3643 | 1522                    | GG                              | AA                | 1946694525               |
| SNP_P3_175395_1528  | NW_004518289.1 | Scaffold3643 | 1528                    | TT                              | AA                | 1946694528               |
| SNP_P3_175396_22088 | NW_004518289.1 | Scaffold3643 | 22088                   | AA                              | TT                | 1946694530               |
| SNP_P3_175397_22120 | NW_004518289.1 | Scaffold3643 | 22120                   | GG                              | CC                | 1946694532               |
| SNP_P3_175398_22476 | NW_004518289.1 | Scaffold3643 | 22476                   | CC                              | TT                | 1946694534               |
| SNP_P3_175400_22979 | NW_004518289.1 | Scaffold3643 | 22979                   | GG                              | AA                | 1946694536               |
| SNP_P3_175401_23994 | NW_004518289.1 | Scaffold3643 | 23994                   | TT                              | CC                | 1946694538               |
| SNP_P3_175402_24029 | NW_004518289.1 | Scaffold3643 | 24029                   | TT                              | GG                | 1946694542               |
| SNP_P3_175403_24126 | NW_004518289.1 | Scaffold3643 | 24126                   | GG                              | TT                | 1946694544               |
| SNP_P3_175404_24391 | NW_004518289.1 | Scaffold3643 | 24391                   | CC                              | GG                | 1946694546               |
| SNP_P3_175405_764   | NW_004518290.1 | Scaffold3644 | 764                     | GG                              | AA                | 1946694548               |
| SNP_P3_175406_774   | NW_004518290.1 | Scaffold3644 | 774                     | GG                              | AA                | 1946694550               |
| SNP_P3_175407_776   | NW_004518290.1 | Scaffold3644 | 776                     | CC                              | TT                | 1946694552               |
| SNP_P3_175408_879   | NW_004518290.1 | Scaffold3644 | 879                     | GG                              | AA                | 1946694554               |
| SNP_P3_175409_988   | NW_004518290.1 | Scaffold3644 | 988                     | GG                              | CC                | 1946694556               |
| SNP_P3_175410_1031  | NW_004518290.1 | Scaffold3644 | 1031                    | TT                              | AA                | 1946694558               |
| SNP_P3_175411_1065  | NW_004518290.1 | Scaffold3644 | 1065                    | TT                              | AA                | 1946694560               |
| SNP_P3_175412_1135  | NW_004518290.1 | Scaffold3644 | 1135                    | GG                              | AA                | 1946694562               |
| SNP_P3_175413_1225  | NW_004518290.1 | Scaffold3644 | 1225                    | CC                              | GG                | 1946694564               |
| SNP_P3_175414_1226  | NW_004518290.1 | Scaffold3644 | 1226                    | CC                              | TT                | 1946694566               |
| SNP_P3_175415_1318  | NW_004518290.1 | Scaffold3644 | 1318                    | GG                              | CC                | 1946694568               |
| SNP_P3_175416_1323  | NW_004518290.1 | Scaffold3644 | 1323                    | TT                              | AA                | 1946694570               |
| SNP_P3_175417_1408  | NW_004518290.1 | Scaffold3644 | 1408                    | GG                              | CC                | 1946694572               |
| SNP_P3_175418_1551  | NW_004518290.1 | Scaffold3644 | 1551                    | GG                              | TT                | 1946694575               |
| SNP_P3_175419_1646  | NW_004518290.1 | Scaffold3644 | 1646                    | GG                              | AA                | 1946694577               |
| SNP_P3_175420_1656  | NW_004518290.1 | Scaffold3644 | 1656                    | AA                              | CC                | 1946694579               |
| SNP_P3_175421_1688  | NW_004518290.1 | Scaffold3644 | 1688                    | CC                              | AA                | 1946694581               |
| SNP_P3_175422_1963  | NW_004518290.1 | Scaffold3644 | 1963                    | GG                              | TT                | 1946694583               |
| SNP_P3_175423_1967  | NW_004518290.1 | Scaffold3644 | 1967                    | AA                              | TT                | 1946694585               |
| SNP_P3_175424_1971  | NW_004518290.1 | Scaffold3644 | 1971                    | TT                              | CC                | 1946694587               |
| SNP_P3_175425_1978  | NW_004518290.1 | Scaffold3644 | 1978                    | CC                              | AA                | 1946694589               |
| SNP_P3_175426_1983  | NW_004518290.1 | Scaffold3644 | 1983                    | TT                              | CC                | 1946694591               |

| SNPs IDs           | Chromosome IDs | Chromosomes  | Physical positions (bp) | CDC Frontier (Reference genome) | (Pusa 256 & HPNB) | NCBI SNPdb Accession IDs |
|--------------------|----------------|--------------|-------------------------|---------------------------------|-------------------|--------------------------|
| SNP_P3_175427_1991 | NW_004518290.1 | Scaffold3644 | 1991                    | TT                              | CC                | 1946694593               |
| SNP_P3_175428_2004 | NW_004518290.1 | Scaffold3644 | 2004                    | AA                              | CC                | 1946694595               |
| SNP_P3_175429_2020 | NW_004518290.1 | Scaffold3644 | 2020                    | AA                              | TT                | 1946694597               |
| SNP_P3_175430_2027 | NW_004518290.1 | Scaffold3644 | 2027                    | TT                              | GG                | 1946694599               |
| SNP_P3_175431_2037 | NW_004518290.1 | Scaffold3644 | 2037                    | AA                              | CC                | 1946694602               |
| SNP_P3_175432_2062 | NW_004518290.1 | Scaffold3644 | 2062                    | AA                              | CC                | 1946694604               |
| SNP_P3_175433_2069 | NW_004518290.1 | Scaffold3644 | 2069                    | TT                              | CC                | 1946694606               |
| SNP_P3_175434_2149 | NW_004518290.1 | Scaffold3644 | 2149                    | GG                              | TT                | 1946694608               |
| SNP_P3_175435_2175 | NW_004518290.1 | Scaffold3644 | 2175                    | AA                              | TT                | 1946694611               |
| SNP_P3_175436_2193 | NW_004518290.1 | Scaffold3644 | 2193                    | GG                              | TT                | 1946694613               |
| SNP_P3_175438_2492 | NW_004518290.1 | Scaffold3644 | 2492                    | AA                              | TT                | 1946694615               |
| SNP_P3_175439_2567 | NW_004518290.1 | Scaffold3644 | 2567                    | GG                              | AA                | 1946694617               |
| SNP_P3_175440_2572 | NW_004518290.1 | Scaffold3644 | 2572                    | CC                              | TT                | 1946694619               |
| SNP_P3_175441_2597 | NW_004518290.1 | Scaffold3644 | 2597                    | TT                              | CC                | 1946694621               |
| SNP_P3_175442_2604 | NW_004518290.1 | Scaffold3644 | 2604                    | GG                              | TT                | 1946694623               |
| SNP_P3_175443_367  | NW_004518291.1 | Scaffold3645 | 367                     | CC                              | AA                | 1946694625               |
| SNP_P3_175444_392  | NW_004518291.1 | Scaffold3645 | 392                     | AA                              | GG                | 1946694627               |
| SNP_P3_175445_401  | NW_004518291.1 | Scaffold3645 | 401                     | GG                              | AA                | 1946694629               |
| SNP_P3_175446_403  | NW_004518291.1 | Scaffold3645 | 403                     | AA                              | CC                | 1946694631               |
| SNP_P3_175447_472  | NW_004518291.1 | Scaffold3645 | 472                     | AA                              | GG                | 1946694633               |
| SNP_P3_175448_7607 | NW_004518291.1 | Scaffold3645 | 7607                    | CC                              | TT                | 1946694635               |
| SNP_P3_175449_5353 | NW_004518292.1 | Scaffold3651 | 5353                    | CC                              | TT                | 1946694637               |
| SNP_P3_175450_5734 | NW_004518292.1 | Scaffold3651 | 5734                    | AA                              | CC                | 1946694640               |
| SNP_P3_175451_5764 | NW_004518292.1 | Scaffold3651 | 5764                    | CC                              | TT                | 1946694642               |
| SNP_P3_175452_6123 | NW_004518292.1 | Scaffold3651 | 6123                    | CC                              | TT                | 1946694644               |
| SNP_P3_175453_6126 | NW_004518292.1 | Scaffold3651 | 6126                    | CC                              | TT                | 1946694646               |
| SNP_P3_175454_6136 | NW_004518292.1 | Scaffold3651 | 6136                    | CC                              | TT                | 1946694649               |
| SNP_P3_175455_6238 | NW_004518292.1 | Scaffold3651 | 6238                    | GG                              | TT                | 1946694651               |
| SNP_P3_175456_6262 | NW_004518292.1 | Scaffold3651 | 6262                    | TT                              | AA                | 1946694653               |
| SNP_P3_175457_6310 | NW_004518292.1 | Scaffold3651 | 6310                    | CC                              | TT                | 1946694655               |
| SNP_P3_175458_6396 | NW_004518292.1 | Scaffold3651 | 6396                    | AA                              | GG                | 1946694657               |
| SNP_P3_175459_6624 | NW_004518292.1 | Scaffold3651 | 6624                    | TT                              | GG                | 1946694659               |
| SNP_P3_175460_6663 | NW_004518292.1 | Scaffold3651 | 6663                    | TT                              | CC                | 1946694661               |
| SNP_P3_175461_6749 | NW_004518292.1 | Scaffold3651 | 6749                    | TT                              | CC                | 1946694663               |
| SNP_P3_175462_6750 | NW_004518292.1 | Scaffold3651 | 6750                    | TT                              | CC                | 1946694665               |
| SNP_P3_175463_7740 | NW_004518292.1 | Scaffold3651 | 7740                    | GG                              | AA                | 1946694667               |
| SNP_P3_175464_7741 | NW_004518292.1 | Scaffold3651 | 7741                    | TT                              | CC                | 1946694669               |
| SNP_P3_175465_7744 | NW_004518292.1 | Scaffold3651 | 7744                    | AA                              | CC                | 1946694671               |
| SNP_P3_175466_7745 | NW_004518292.1 | Scaffold3651 | 7745                    | GG                              | AA                | 1946694673               |
| SNP_P3_175467_7746 | NW_004518292.1 | Scaffold3651 | 7746                    | GG                              | AA                | 1946694675               |
| SNP_P3_175468_532  | NW_004518298.1 | Scaffold3657 | 532                     | AA                              | TT                | 1946694677               |
| SNP_P3_175470_1964 | NW_004518299.1 | Scaffold3658 | 1964                    | CC                              | AA                | 1946694679               |

| SNPs IDs            | Chromosome IDs | Chromosomes  | Physical positions (bp) | CDC Frontier (Reference genome) | (Pusa 256 & HPNB) | NCBI SNPdb Accession IDs |
|---------------------|----------------|--------------|-------------------------|---------------------------------|-------------------|--------------------------|
| SNP_P3_175471_2649  | NW_004518299.1 | Scaffold3658 | 2649                    | CC                              | TT                | 1946694682               |
| SNP_P3_175472_1381  | NW_004518300.1 | Scaffold3659 | 1381                    | AA                              | TT                | 1946694684               |
| SNP_P3_175473_1414  | NW_004518300.1 | Scaffold3659 | 1414                    | CC                              | TT                | 1946694687               |
| SNP_P3_175475_1768  | NW_004518300.1 | Scaffold3659 | 1768                    | AA                              | GG                | 1946694689               |
| SNP_P3_175478_6777  | NW_004518300.1 | Scaffold3659 | 6777                    | AA                              | GG                | 1946694691               |
| SNP_P3_175480_6924  | NW_004518300.1 | Scaffold3659 | 6924                    | GG                              | AA                | 1946694693               |
| SNP_P3_175481_6938  | NW_004518300.1 | Scaffold3659 | 6938                    | TT                              | GG                | 1946694695               |
| SNP_P3_175482_6953  | NW_004518300.1 | Scaffold3659 | 6953                    | CC                              | TT                | 1946694698               |
| SNP_P3_175483_7146  | NW_004518300.1 | Scaffold3659 | 7146                    | CC                              | TT                | 1946694700               |
| SNP_P3_175484_7350  | NW_004518300.1 | Scaffold3659 | 7350                    | TT                              | GG                | 1946694702               |
| SNP_P3_175485_7385  | NW_004518300.1 | Scaffold3659 | 7385                    | GG                              | AA                | 1946694704               |
| SNP_P3_175486_7453  | NW_004518300.1 | Scaffold3659 | 7453                    | TT                              | AA                | 1946694706               |
| SNP_P3_175487_7529  | NW_004518300.1 | Scaffold3659 | 7529                    | GG                              | CC                | 1946694709               |
| SNP_P3_175488_7644  | NW_004518300.1 | Scaffold3659 | 7644                    | TT                              | AA                | 1946694711               |
| SNP_P3_175489_7675  | NW_004518300.1 | Scaffold3659 | 7675                    | GG                              | CC                | 1946694713               |
| SNP_P3_175490_7693  | NW_004518300.1 | Scaffold3659 | 7693                    | CC                              | AA                | 1946694715               |
| SNP_P3_175491_395   | NW_004518301.1 | Scaffold3660 | 395                     | GG                              | AA                | 1946694718               |
| SNP_P3_175492_404   | NW_004518301.1 | Scaffold3660 | 404                     | CC                              | GG                | 1946694720               |
| SNP_P3_175493_478   | NW_004518301.1 | Scaffold3660 | 478                     | CC                              | TT                | 1946694722               |
| SNP_P3_175494_479   | NW_004518301.1 | Scaffold3660 | 479                     | CC                              | AA                | 1946694725               |
| SNP_P3_175495_481   | NW_004518301.1 | Scaffold3660 | 481                     | AA                              | CC                | 1946694727               |
| SNP_P3_175496_485   | NW_004518301.1 | Scaffold3660 | 485                     | GG                              | CC                | 1946694730               |
| SNP_P3_175497_511   | NW_004518301.1 | Scaffold3660 | 511                     | CC                              | TT                | 1946694732               |
| SNP_P3_175498_589   | NW_004518301.1 | Scaffold3660 | 589                     | CC                              | GG                | 1946694734               |
| SNP_P3_175499_631   | NW_004518301.1 | Scaffold3660 | 631                     | TT                              | CC                | 1946694736               |
| SNP_P3_175500_662   | NW_004518301.1 | Scaffold3660 | 662                     | TT                              | AA                | 1946694739               |
| SNP_P3_175501_723   | NW_004518301.1 | Scaffold3660 | 723                     | GG                              | AA                | 1946694741               |
| SNP_P3_175502_736   | NW_004518301.1 | Scaffold3660 | 736                     | TT                              | AA                | 1946694743               |
| SNP_P3_175503_912   | NW_004518301.1 | Scaffold3660 | 912                     | AA                              | GG                | 1946694745               |
| SNP_P3_175504_962   | NW_004518301.1 | Scaffold3660 | 962                     | TT                              | CC                | 1946694747               |
| SNP_P3_175505_967   | NW_004518301.1 | Scaffold3660 | 967                     | TT                              | CC                | 1946694749               |
| SNP_P3_175506_1017  | NW_004518301.1 | Scaffold3660 | 1017                    | TT                              | CC                | 1946694751               |
| SNP_P3_175507_1039  | NW_004518301.1 | Scaffold3660 | 1039                    | CC                              | GG                | 1946694753               |
| SNP_P3_175508_8182  | NW_004518302.1 | Scaffold3661 | 8182                    | GG                              | AA                | 1946694756               |
| SNP_P3_175509_8247  | NW_004518302.1 | Scaffold3661 | 8247                    | TT                              | CC                | 1946694757               |
| SNP_P3_175510_10048 | NW_004518302.1 | Scaffold3661 | 10048                   | AA                              | GG                | 1946694761               |
| SNP_P3_175511_15883 | NW_004518302.1 | Scaffold3661 | 15883                   | AA                              | GG                | 1946694763               |
| SNP_P3_175512_451   | NW_004518304.1 | Scaffold3663 | 451                     | CC                              | TT                | 1946694765               |
| SNP_P3_175513_672   | NW_004518304.1 | Scaffold3663 | 672                     | GG                              | CC                | 1946694767               |
| SNP_P3_175514_3946  | NW_004518304.1 | Scaffold3663 | 3946                    | TT                              | AA                | 1946694769               |
| SNP_P3_175516_4144  | NW_004518304.1 | Scaffold3663 | 4144                    | TT                              | AA                | 1946694772               |
| SNP_P3_175517_4197  | NW_004518304.1 | Scaffold3663 | 4197                    | TT                              | CC                | 1946694774               |

| SNPs IDs            | Chromosome IDs | Chromosomes  | Physical positions (bp) | CDC Frontier (Reference genome) | (Pusa 256 & HPNB) | NCBI SNPdb Accession IDs |
|---------------------|----------------|--------------|-------------------------|---------------------------------|-------------------|--------------------------|
| SNP_P3_175518_4238  | NW_004518304.1 | Scaffold3663 | 4238                    | TT                              | AA                | 1946694776               |
| SNP_P3_175519_4345  | NW_004518304.1 | Scaffold3663 | 4345                    | TT                              | GG                | 1946694778               |
| SNP_P3_175520_4421  | NW_004518304.1 | Scaffold3663 | 4421                    | AA                              | TT                | 1946694781               |
| SNP_P3_175522_4450  | NW_004518304.1 | Scaffold3663 | 4450                    | TT                              | AA                | 1946694783               |
| SNP_P3_175523_4509  | NW_004518304.1 | Scaffold3663 | 4509                    | AA                              | TT                | 1946694785               |
| SNP_P3_175524_4731  | NW_004518304.1 | Scaffold3663 | 4731                    | TT                              | AA                | 1946694787               |
| SNP_P3_175525_9038  | NW_004518304.1 | Scaffold3663 | 9038                    | CC                              | TT                | 1946694789               |
| SNP_P3_175526_9103  | NW_004518304.1 | Scaffold3663 | 9103                    | GG                              | AA                | 1946694791               |
| SNP_P3_175527_9301  | NW_004518304.1 | Scaffold3663 | 9301                    | TT                              | CC                | 1946694793               |
| SNP_P3_175528_13885 | NW_004518304.1 | Scaffold3663 | 13885                   | CC                              | AA                | 1946694795               |
| SNP_P3_175529_13952 | NW_004518304.1 | Scaffold3663 | 13952                   | TT                              | GG                | 1946694797               |
| SNP_P3_175530_14086 | NW_004518304.1 | Scaffold3663 | 14086                   | CC                              | TT                | 1946694799               |
| SNP_P3_175531_14335 | NW_004518304.1 | Scaffold3663 | 14335                   | TT                              | CC                | 1946694801               |
| SNP_P3_175532_14369 | NW_004518304.1 | Scaffold3663 | 14369                   | AA                              | GG                | 1946694803               |
| SNP_P3_175534_15419 | NW_004518304.1 | Scaffold3663 | 15419                   | CC                              | AA                | 1946694806               |
| SNP_P3_175535_3267  | NW_004518305.1 | Scaffold3664 | 3267                    | TT                              | GG                | 1946694808               |
| SNP_P3_175536_3290  | NW_004518305.1 | Scaffold3664 | 3290                    | CC                              | GG                | 1946694810               |
| SNP_P3_175538_3642  | NW_004518305.1 | Scaffold3664 | 3642                    | TT                              | AA                | 1946694812               |
| SNP_P3_175539_3716  | NW_004518305.1 | Scaffold3664 | 3716                    | GG                              | AA                | 1946694815               |
| SNP_P3_175540_274   | NW_004518306.1 | Scaffold3665 | 274                     | CC                              | GG                | 1946694817               |
| SNP_P3_175541_832   | NW_004518307.1 | Scaffold3666 | 832                     | GG                              | AA                | 1946694819               |
| SNP_P3_175542_1024  | NW_004518307.1 | Scaffold3666 | 1024                    | AA                              | GG                | 1946694821               |
| SNP_P3_175543_2489  | NW_004518307.1 | Scaffold3666 | 2489                    | AA                              | GG                | 1946694823               |
| SNP_P3_175544_2599  | NW_004518307.1 | Scaffold3666 | 2599                    | CC                              | TT                | 1946694825               |
| SNP_P3_175545_2620  | NW_004518307.1 | Scaffold3666 | 2620                    | CC                              | TT                | 1946694828               |
| SNP_P3_175546_3839  | NW_004518307.1 | Scaffold3666 | 3839                    | AA                              | TT                | 1946694830               |
| SNP_P3_175547_4073  | NW_004518307.1 | Scaffold3666 | 4073                    | AA                              | TT                | 1946694833               |
| SNP_P3_175548_6281  | NW_004518307.1 | Scaffold3666 | 6281                    | CC                              | TT                | 1946694835               |
| SNP_P3_175549_6332  | NW_004518307.1 | Scaffold3666 | 6332                    | GG                              | AA                | 1946694838               |
| SNP_P3_175550_1116  | NW_004518308.1 | Scaffold3668 | 1116                    | CC                              | GG                | 1946694840               |
| SNP_P3_175552_394   | NW_004518311.1 | Scaffold3672 | 394                     | TT                              | AA                | 1946694842               |
| SNP_P3_175553_466   | NW_004518311.1 | Scaffold3672 | 466                     | CC                              | GG                | 1946694844               |
| SNP_P3_175554_528   | NW_004518311.1 | Scaffold3672 | 528                     | TT                              | AA                | 1946694846               |
| SNP_P3_175555_131   | NW_004518312.1 | Scaffold3673 | 131                     | GG                              | AA                | 1946694848               |
| SNP_P3_175556_764   | NW_004518314.1 | Scaffold3675 | 764                     | TT                              | CC                | 1946694851               |
| SNP_P3_175557_767   | NW_004518314.1 | Scaffold3675 | 767                     | TT                              | CC                | 1946694853               |
| SNP_P3_175558_768   | NW_004518314.1 | Scaffold3675 | 768                     | GG                              | TT                | 1946694855               |
| SNP_P3_175559_784   | NW_004518314.1 | Scaffold3675 | 784                     | AA                              | TT                | 1946694857               |
| SNP_P3_175560_788   | NW_004518314.1 | Scaffold3675 | 788                     | AA                              | GG                | 1946694859               |
| SNP_P3_175561_107   | NW_004518315.1 | Scaffold3676 | 107                     | GG                              | AA                | 1946694861               |
| SNP_P3_175562_279   | NW_004518315.1 | Scaffold3676 | 279                     | TT                              | GG                | 1946694862               |
| SNP_P3_175563_558   | NW_004518315.1 | Scaffold3676 | 558                     | GG                              | AA                | 1946694864               |

| SNPs IDs            | Chromosome IDs | Chromosomes  | Physical positions (bp) | CDC Frontier (Reference genome) | (Pusa 256 & HPNB) | NCBI SNPdb Accession IDs |
|---------------------|----------------|--------------|-------------------------|---------------------------------|-------------------|--------------------------|
| SNP_P3_175564_602   | NW_004518315.1 | Scaffold3676 | 602                     | GG                              | AA                | 1946694868               |
| SNP_P3_175565_3600  | NW_004518315.1 | Scaffold3676 | 3600                    | GG                              | CC                | 1946694870               |
| SNP_P3_175566_4111  | NW_004518315.1 | Scaffold3676 | 4111                    | AA                              | CC                | 1946694872               |
| SNP_P3_175567_4219  | NW_004518315.1 | Scaffold3676 | 4219                    | CC                              | GG                | 1946694874               |
| SNP_P3_175568_4227  | NW_004518315.1 | Scaffold3676 | 4227                    | CC                              | TT                | 1946694876               |
| SNP_P3_175569_4661  | NW_004518315.1 | Scaffold3676 | 4661                    | CC                              | TT                | 1946694878               |
| SNP_P3_175570_4718  | NW_004518315.1 | Scaffold3676 | 4718                    | AA                              | GG                | 1946694880               |
| SNP_P3_175571_4826  | NW_004518315.1 | Scaffold3676 | 4826                    | GG                              | AA                | 1946694882               |
| SNP_P3_175572_4915  | NW_004518315.1 | Scaffold3676 | 4915                    | TT                              | AA                | 1946694884               |
| SNP_P3_175573_5001  | NW_004518315.1 | Scaffold3676 | 5001                    | CC                              | TT                | 1946694886               |
| SNP_P3_175574_5071  | NW_004518315.1 | Scaffold3676 | 5071                    | CC                              | TT                | 1946694888               |
| SNP_P3_175575_5183  | NW_004518315.1 | Scaffold3676 | 5183                    | GG                              | CC                | 1946694890               |
| SNP_P3_175576_5217  | NW_004518315.1 | Scaffold3676 | 5217                    | AA                              | TT                | 1946694892               |
| SNP_P3_175577_5243  | NW_004518315.1 | Scaffold3676 | 5243                    | GG                              | TT                | 1946694894               |
| SNP_P3_175578_5443  | NW_004518315.1 | Scaffold3676 | 5443                    | AA                              | GG                | 1946694897               |
| SNP_P3_175579_5562  | NW_004518315.1 | Scaffold3676 | 5562                    | TT                              | CC                | 1946694899               |
| SNP_P3_175580_6820  | NW_004518315.1 | Scaffold3676 | 6820                    | AA                              | TT                | 1946694901               |
| SNP_P3_175581_7400  | NW_004518315.1 | Scaffold3676 | 7400                    | CC                              | AA                | 1946694903               |
| SNP_P3_175582_8038  | NW_004518315.1 | Scaffold3676 | 8038                    | GG                              | TT                | 1946694906               |
| SNP_P3_175583_8057  | NW_004518315.1 | Scaffold3676 | 8057                    | AA                              | TT                | 1946694908               |
| SNP_P3_175584_8234  | NW_004518315.1 | Scaffold3676 | 8234                    | TT                              | AA                | 1946694910               |
| SNP_P3_175585_8263  | NW_004518315.1 | Scaffold3676 | 8263                    | TT                              | CC                | 1946694912               |
| SNP_P3_175586_8420  | NW_004518315.1 | Scaffold3676 | 8420                    | AA                              | CC                | 1946694914               |
| SNP_P3_175587_8441  | NW_004518315.1 | Scaffold3676 | 8441                    | GG                              | AA                | 1946694916               |
| SNP_P3_175588_8449  | NW_004518315.1 | Scaffold3676 | 8449                    | AA                              | CC                | 1946694918               |
| SNP_P3_175589_9393  | NW_004518315.1 | Scaffold3676 | 9393                    | AA                              | TT                | 1946694920               |
| SNP_P3_175590_9688  | NW_004518315.1 | Scaffold3676 | 9688                    | CC                              | AA                | 1946694922               |
| SNP_P3_175591_9692  | NW_004518315.1 | Scaffold3676 | 9692                    | TT                              | AA                | 1946694925               |
| SNP_P3_175592_9951  | NW_004518315.1 | Scaffold3676 | 9951                    | CC                              | GG                | 1946694927               |
| SNP_P3_175593_12722 | NW_004518315.1 | Scaffold3676 | 12722                   | GG                              | TT                | 1946694929               |
| SNP_P3_175594_12787 | NW_004518315.1 | Scaffold3676 | 12787                   | TT                              | GG                | 1946694931               |
| SNP_P3_175596_13043 | NW_004518315.1 | Scaffold3676 | 13043                   | CC                              | AA                | 1946694934               |
| SNP_P3_175597_13087 | NW_004518315.1 | Scaffold3676 | 13087                   | AA                              | GG                | 1946694936               |
| SNP_P3_175598_13171 | NW_004518315.1 | Scaffold3676 | 13171                   | GG                              | CC                | 1946694938               |
| SNP_P3_175599_13211 | NW_004518315.1 | Scaffold3676 | 13211                   | AA                              | CC                | 1946694940               |
| SNP_P3_175600_13242 | NW_004518315.1 | Scaffold3676 | 13242                   | AA                              | CC                | 1946694944               |
| SNP_P3_175601_28980 | NW_004518315.1 | Scaffold3676 | 28980                   | CC                              | AA                | 1946694946               |
| SNP_P3_175602_29381 | NW_004518315.1 | Scaffold3676 | 29381                   | TT                              | CC                | 1946694948               |
| SNP_P3_175603_277   | NW_004518318.1 | Scaffold3681 | 277                     | CC                              | TT                | 1946694950               |
| SNP_P3_175604_520   | NW_004518318.1 | Scaffold3681 | 520                     | AA                              | CC                | 1946694953               |
| SNP_P3_175605_532   | NW_004518318.1 | Scaffold3681 | 532                     | GG                              | AA                | 1946694955               |
| SNP_P3_175606_535   | NW_004518318.1 | Scaffold3681 | 535                     | TT                              | CC                | 1946694957               |

| SNPs IDs             | Chromosome IDs | Chromosomes  | Physical positions (bp) | CDC Frontier (Reference genome) | (Pusa 256 & HPNB) | NCBI SNPdb Accession IDs |
|----------------------|----------------|--------------|-------------------------|---------------------------------|-------------------|--------------------------|
| SNP_P3_175607_543    | NW_004518318.1 | Scaffold3681 | 543                     | TT                              | GG                | 1946694959               |
| SNP_P3_175608_627    | NW_004518318.1 | Scaffold3681 | 627                     | TT                              | CC                | 1946694961               |
| SNP_P3_175609_651    | NW_004518318.1 | Scaffold3681 | 651                     | TT                              | CC                | 1946694964               |
| SNP_P3_175610_3176   | NW_004518320.1 | Scaffold3683 | 3176                    | TT                              | AA                | 1946694966               |
| SNP_P3_175611_88     | NW_004518322.1 | Scaffold3685 | 88                      | GG                              | AA                | 1946694968               |
| SNP_P3_175612_441    | NW_004518322.1 | Scaffold3685 | 441                     | AA                              | GG                | 1946694970               |
| SNP_P3_175613_516    | NW_004518322.1 | Scaffold3685 | 516                     | GG                              | CC                | 1946694972               |
| SNP_P3_175614_523    | NW_004518322.1 | Scaffold3685 | 523                     | CC                              | GG                | 1946694974               |
| SNP_P3_175615_570    | NW_004518322.1 | Scaffold3685 | 570                     | TT                              | CC                | 1946694976               |
| SNP_P3_175616_571    | NW_004518322.1 | Scaffold3685 | 571                     | AA                              | CC                | 1946694978               |
| SNP_P3_175617_573    | NW_004518322.1 | Scaffold3685 | 573                     | AA                              | GG                | 1946694980               |
| SNP_P3_175618_847    | NW_004518322.1 | Scaffold3685 | 847                     | AA                              | GG                | 1946694984               |
| SNP_P3_175619_856    | NW_004518322.1 | Scaffold3685 | 856                     | CC                              | GG                | 1946694986               |
| SNP_P3_175620_33671  | NW_004518323.1 | Scaffold3687 | 33671                   | TT                              | GG                | 1946694988               |
| SNP_P3_175621_61404  | NW_004518323.1 | Scaffold3687 | 61404                   | CC                              | TT                | 1946694990               |
| SNP_P3_175622_63100  | NW_004518323.1 | Scaffold3687 | 63100                   | TT                              | CC                | 1946694992               |
| SNP_P3_175623_64100  | NW_004518323.1 | Scaffold3687 | 64100                   | AA                              | GG                | 1946694994               |
| SNP_P3_175624_65449  | NW_004518323.1 | Scaffold3687 | 65449                   | GG                              | TT                | 1946694996               |
| SNP_P3_175625_65464  | NW_004518323.1 | Scaffold3687 | 65464                   | GG                              | TT                | 1946694998               |
| SNP_P3_175626_65879  | NW_004518323.1 | Scaffold3687 | 65879                   | AA                              | GG                | 1946695000               |
| SNP_P3_175627_69267  | NW_004518323.1 | Scaffold3687 | 69267                   | CC                              | TT                | 1946695002               |
| SNP_P3_175629_83492  | NW_004518323.1 | Scaffold3687 | 83492                   | GG                              | CC                | 1946695004               |
| SNP_P3_175630_84632  | NW_004518323.1 | Scaffold3687 | 84632                   | TT                              | CC                | 1946695006               |
| SNP_P3_175632_105910 | NW_004518323.1 | Scaffold3687 | 105910                  | CC                              | AA                | 1946695008               |
| SNP_P3_175633_119027 | NW_004518323.1 | Scaffold3687 | 119027                  | AA                              | GG                | 1946695010               |
| SNP_P3_175634_119420 | NW_004518323.1 | Scaffold3687 | 119420                  | AA                              | CC                | 1946695012               |
| SNP_P3_175635_119673 | NW_004518323.1 | Scaffold3687 | 119673                  | AA                              | CC                | 1946695014               |
| SNP_P3_175636_119679 | NW_004518323.1 | Scaffold3687 | 119679                  | CC                              | TT                | 1946695016               |
| SNP_P3_175637_119703 | NW_004518323.1 | Scaffold3687 | 119703                  | GG                              | AA                | 1946695020               |
| SNP_P3_175638_119782 | NW_004518323.1 | Scaffold3687 | 119782                  | AA                              | GG                | 1946695022               |
| SNP_P3_175640_120076 | NW_004518323.1 | Scaffold3687 | 120076                  | TT                              | CC                | 1946695024               |
| SNP_P3_175641_131646 | NW_004518323.1 | Scaffold3687 | 131646                  | TT                              | CC                | 1946695026               |
| SNP_P3_175642_131868 | NW_004518323.1 | Scaffold3687 | 131868                  | AA                              | GG                | 1946695028               |
| SNP_P3_175643_132037 | NW_004518323.1 | Scaffold3687 | 132037                  | GG                              | AA                | 1946695030               |
| SNP_P3_175644_132043 | NW_004518323.1 | Scaffold3687 | 132043                  | AA                              | GG                | 1946695032               |
| SNP_P3_175645_132048 | NW_004518323.1 | Scaffold3687 | 132048                  | CC                              | AA                | 1946695034               |
| SNP_P3_175646_132100 | NW_004518323.1 | Scaffold3687 | 132100                  | TT                              | CC                | 1946695037               |
| SNP_P3_175648_132136 | NW_004518323.1 | Scaffold3687 | 132136                  | CC                              | TT                | 1946695039               |
| SNP_P3_175649_132283 | NW_004518323.1 | Scaffold3687 | 132283                  | TT                              | CC                | 1946695041               |
| SNP_P3_175650_140626 | NW_004518323.1 | Scaffold3687 | 140626                  | GG                              | TT                | 1946695043               |
| SNP_P3_175651_140695 | NW_004518323.1 | Scaffold3687 | 140695                  | TT                              | GG                | 1946695045               |
| SNP_P3_175652_140752 | NW_004518323.1 | Scaffold3687 | 140752                  | TT                              | CC                | 1946695047               |

| SNPs IDs             | Chromosome IDs | Chromosomes  | Physical positions (bp) | CDC Frontier (Reference genome) | (Pusa 256 & HPNB) | NCBI SNPdb Accession IDs |
|----------------------|----------------|--------------|-------------------------|---------------------------------|-------------------|--------------------------|
| SNP_P3_175653_140756 | NW_004518323.1 | Scaffold3687 | 140756                  | CC                              | TT                | 1946695049               |
| SNP_P3_175654_140799 | NW_004518323.1 | Scaffold3687 | 140799                  | GG                              | AA                | 1946695051               |
| SNP_P3_175655_140806 | NW_004518323.1 | Scaffold3687 | 140806                  | TT                              | CC                | 1946695053               |
| SNP_P3_175656_140922 | NW_004518323.1 | Scaffold3687 | 140922                  | CC                              | AA                | 1946695055               |
| SNP_P3_175657_141032 | NW_004518323.1 | Scaffold3687 | 141032                  | TT                              | CC                | 1946695057               |
| SNP_P3_175658_142832 | NW_004518323.1 | Scaffold3687 | 142832                  | GG                              | AA                | 1946695060               |
| SNP_P3_175659_143146 | NW_004518323.1 | Scaffold3687 | 143146                  | AA                              | CC                | 1946695063               |
| SNP_P3_175661_443    | NW_004518325.1 | Scaffold3689 | 443                     | TT                              | AA                | 1946695065               |
| SNP_P3_175662_456    | NW_004518325.1 | Scaffold3689 | 456                     | GG                              | TT                | 1946695067               |
| SNP_P3_175663_635    | NW_004518325.1 | Scaffold3689 | 635                     | AA                              | GG                | 1946695069               |
| SNP_P3_175664_15592  | NW_004518325.1 | Scaffold3689 | 15592                   | GG                              | CC                | 1946695071               |
| SNP_P3_175665_15659  | NW_004518325.1 | Scaffold3689 | 15659                   | CC                              | AA                | 1946695073               |
| SNP_P3_175666_15787  | NW_004518325.1 | Scaffold3689 | 15787                   | CC                              | TT                | 1946695075               |
| SNP_P3_175667_16055  | NW_004518325.1 | Scaffold3689 | 16055                   | GG                              | AA                | 1946695077               |
| SNP_P3_175668_16103  | NW_004518325.1 | Scaffold3689 | 16103                   | TT                              | CC                | 1946695079               |
| SNP_P3_175669_16157  | NW_004518325.1 | Scaffold3689 | 16157                   | CC                              | GG                | 1946695081               |
| SNP_P3_175671_16351  | NW_004518325.1 | Scaffold3689 | 16351                   | GG                              | AA                | 1946695084               |
| SNP_P3_175672_64     | NW_004518326.1 | Scaffold3690 | 64                      | CC                              | AA                | 1946695086               |
| SNP_P3_175673_156    | NW_004518326.1 | Scaffold3690 | 156                     | AA                              | TT                | 1946695088               |
| SNP_P3_175674_475    | NW_004518326.1 | Scaffold3690 | 475                     | TT                              | GG                | 1946695090               |
| SNP_P3_175675_478    | NW_004518326.1 | Scaffold3690 | 478                     | AA                              | CC                | 1946695092               |
| SNP_P3_175676_817    | NW_004518329.1 | Scaffold3693 | 817                     | CC                              | TT                | 1946695094               |
| SNP_P3_175677_1000   | NW_004518329.1 | Scaffold3693 | 1000                    | CC                              | TT                | 1946695096               |
| SNP_P3_175678_1037   | NW_004518329.1 | Scaffold3693 | 1037                    | TT                              | CC                | 1946695100               |
| SNP_P3_175679_1069   | NW_004518329.1 | Scaffold3693 | 1069                    | TT                              | AA                | 1946695102               |
| SNP_P3_175680_1076   | NW_004518329.1 | Scaffold3693 | 1076                    | AA                              | GG                | 1946695104               |
| SNP_P3_175681_1077   | NW_004518329.1 | Scaffold3693 | 1077                    | TT                              | AA                | 1946695106               |
| SNP_P3_175682_20673  | NW_004518329.1 | Scaffold3693 | 20673                   | TT                              | CC                | 1946695108               |
| SNP_P3_175683_24614  | NW_004518329.1 | Scaffold3693 | 24614                   | TT                              | GG                | 1946695110               |
| SNP_P3_175684_33118  | NW_004518329.1 | Scaffold3693 | 33118                   | TT                              | GG                | 1946695112               |
| SNP_P3_175685_35159  | NW_004518329.1 | Scaffold3693 | 35159                   | AA                              | GG                | 1946695115               |
| SNP_P3_175686_35163  | NW_004518329.1 | Scaffold3693 | 35163                   | AA                              | GG                | 1946695117               |
| SNP_P3_175687_35185  | NW_004518329.1 | Scaffold3693 | 35185                   | CC                              | TT                | 1946695119               |
| SNP_P3_175688_35206  | NW_004518329.1 | Scaffold3693 | 35206                   | TT                              | GG                | 1946695121               |
| SNP_P3_175689_35215  | NW_004518329.1 | Scaffold3693 | 35215                   | CC                              | TT                | 1946695124               |
| SNP_P3_175690_35221  | NW_004518329.1 | Scaffold3693 | 35221                   | TT                              | CC                | 1946695126               |
| SNP_P3_175691_35349  | NW_004518329.1 | Scaffold3693 | 35349                   | CC                              | TT                | 1946695128               |
| SNP_P3_175692_35393  | NW_004518329.1 | Scaffold3693 | 35393                   | AA                              | GG                | 1946695130               |
| SNP_P3_175693_35495  | NW_004518329.1 | Scaffold3693 | 35495                   | GG                              | AA                | 1946695133               |
| SNP_P3_175694_35650  | NW_004518329.1 | Scaffold3693 | 35650                   | GG                              | AA                | 1946695135               |
| SNP_P3_175695_35699  | NW_004518329.1 | Scaffold3693 | 35699                   | TT                              | CC                | 1946695138               |
| SNP_P3_175696_81068  | NW_004518329.1 | Scaffold3693 | 81068                   | CC                              | TT                | 1946695140               |

| SNPs IDs           | Chromosome IDs | Chromosomes  | Physical positions (bp) | CDC Frontier (Reference genome) | (Pusa 256 & HPNB) | NCBI SNPdb Accession IDs |
|--------------------|----------------|--------------|-------------------------|---------------------------------|-------------------|--------------------------|
| SNP_P3_175697_475  | NW_004518332.1 | Scaffold3696 | 475                     | TT                              | GG                | 1946695142               |
| SNP_P3_175698_492  | NW_004518332.1 | Scaffold3696 | 492                     | AA                              | TT                | 1946695144               |
| SNP_P3_175699_306  | NW_004518334.1 | Scaffold3698 | 306                     | CC                              | TT                | 1946695147               |
| SNP_P3_175700_2577 | NW_004518334.1 | Scaffold3698 | 2577                    | CC                              | TT                | 1946695149               |
| SNP_P3_175701_2581 | NW_004518334.1 | Scaffold3698 | 2581                    | TT                              | CC                | 1946695151               |
| SNP_P3_175702_426  | NW_004518335.1 | Scaffold3700 | 426                     | CC                              | TT                | 1946695153               |
| SNP_P3_175703_652  | NW_004518335.1 | Scaffold3700 | 652                     | GG                              | CC                | 1946695155               |
| SNP_P3_175704_657  | NW_004518335.1 | Scaffold3700 | 657                     | CC                              | AA                | 1946695157               |
| SNP_P3_175705_724  | NW_004518335.1 | Scaffold3700 | 724                     | CC                              | TT                | 1946695159               |
| SNP_P3_175706_739  | NW_004518335.1 | Scaffold3700 | 739                     | TT                              | AA                | 1946695161               |
| SNP_P3_175707_860  | NW_004518335.1 | Scaffold3700 | 860                     | CC                              | AA                | 1946695163               |
| SNP_P3_175708_1065 | NW_004518335.1 | Scaffold3700 | 1065                    | TT                              | AA                | 1946695165               |
| SNP_P3_175709_1111 | NW_004518335.1 | Scaffold3700 | 1111                    | TT                              | AA                | 1946695168               |
| SNP_P3_175710_1121 | NW_004518335.1 | Scaffold3700 | 1121                    | CC                              | TT                | 1946695170               |
| SNP_P3_175711_336  | NW_004518336.1 | Scaffold3701 | 336                     | CC                              | AA                | 1946695172               |
| SNP_P3_175712_395  | NW_004518339.1 | Scaffold3705 | 395                     | GG                              | TT                | 1946695174               |
| SNP_P3_175713_428  | NW_004518339.1 | Scaffold3705 | 428                     | AA                              | GG                | 1946695178               |
| SNP_P3_175714_492  | NW_004518339.1 | Scaffold3705 | 492                     | TT                              | CC                | 1946695180               |
| SNP_P3_175715_673  | NW_004518339.1 | Scaffold3705 | 673                     | AA                              | GG                | 1946695182               |
| SNP_P3_175716_675  | NW_004518339.1 | Scaffold3705 | 675                     | GG                              | AA                | 1946695184               |
| SNP_P3_175717_719  | NW_004518339.1 | Scaffold3705 | 719                     | TT                              | CC                | 1946695186               |
| SNP_P3_175718_739  | NW_004518339.1 | Scaffold3705 | 739                     | CC                              | AA                | 1946695188               |
| SNP_P3_175720_4125 | NW_004518339.1 | Scaffold3705 | 4125                    | AA                              | TT                | 1946695190               |
| SNP_P3_175721_4141 | NW_004518339.1 | Scaffold3705 | 4141                    | AA                              | GG                | 1946695193               |
| SNP_P3_175722_4155 | NW_004518339.1 | Scaffold3705 | 4155                    | GG                              | TT                | 1946695195               |
| SNP_P3_175723_4164 | NW_004518339.1 | Scaffold3705 | 4164                    | CC                              | GG                | 1946695197               |
| SNP_P3_175724_763  | NW_004518341.1 | Scaffold3707 | 763                     | AA                              | TT                | 1946695199               |
| SNP_P3_175725_800  | NW_004518341.1 | Scaffold3707 | 800                     | CC                              | GG                | 1946695201               |
| SNP_P3_175727_1087 | NW_004518341.1 | Scaffold3707 | 1087                    | TT                              | AA                | 1946695203               |
| SNP_P3_175728_1447 | NW_004518341.1 | Scaffold3707 | 1447                    | AA                              | CC                | 1946695206               |
| SNP_P3_175729_1528 | NW_004518341.1 | Scaffold3707 | 1528                    | TT                              | CC                | 1946695208               |
| SNP_P3_175730_1590 | NW_004518341.1 | Scaffold3707 | 1590                    | TT                              | AA                | 1946695210               |
| SNP_P3_175731_1593 | NW_004518341.1 | Scaffold3707 | 1593                    | TT                              | GG                | 1946695212               |
| SNP_P3_175732_1693 | NW_004518341.1 | Scaffold3707 | 1693                    | CC                              | TT                | 1946695214               |
| SNP_P3_175733_1715 | NW_004518341.1 | Scaffold3707 | 1715                    | GG                              | AA                | 1946695216               |
| SNP_P3_175734_1733 | NW_004518341.1 | Scaffold3707 | 1733                    | GG                              | TT                | 1946695218               |
| SNP_P3_175735_1735 | NW_004518341.1 | Scaffold3707 | 1735                    | AA                              | TT                | 1946695220               |
| SNP_P3_175736_1736 | NW_004518341.1 | Scaffold3707 | 1736                    | AA                              | TT                | 1946695222               |
| SNP_P3_175737_1737 | NW_004518341.1 | Scaffold3707 | 1737                    | AA                              | TT                | 1946695224               |
| SNP_P3_175738_1742 | NW_004518341.1 | Scaffold3707 | 1742                    | TT                              | AA                | 1946695226               |
| SNP_P3_175739_1807 | NW_004518341.1 | Scaffold3707 | 1807                    | AA                              | CC                | 1946695228               |
| SNP_P3_175740_1882 | NW_004518341.1 | Scaffold3707 | 1882                    | CC                              | AA                | 1946695230               |



| SNPs IDs            | Chromosome IDs | Chromosomes  | Physical positions (bp) | CDC Frontier (Reference genome) | (Pusa 256 & HPNB) | NCBI SNPdb Accession IDs |
|---------------------|----------------|--------------|-------------------------|---------------------------------|-------------------|--------------------------|
| SNP_P3_175741_4037  | NW_004518341.1 | Scaffold3707 | 4037                    | CC                              | TT                | 1946695232               |
| SNP_P3_175742_4216  | NW_004518341.1 | Scaffold3707 | 4216                    | AA                              | TT                | 1946695234               |
| SNP_P3_175743_67    | NW_004518342.1 | Scaffold3708 | 67                      | GG                              | AA                | 1946695236               |
| SNP_P3_175744_342   | NW_004518342.1 | Scaffold3708 | 342                     | GG                              | AA                | 1946695238               |
| SNP_P3_175745_1119  | NW_004518342.1 | Scaffold3708 | 1119                    | GG                              | AA                | 1946695241               |
| SNP_P3_175746_1388  | NW_004518342.1 | Scaffold3708 | 1388                    | AA                              | GG                | 1946695244               |
| SNP_P3_175747_1417  | NW_004518342.1 | Scaffold3708 | 1417                    | TT                              | AA                | 1946695246               |
| SNP_P3_175748_1420  | NW_004518342.1 | Scaffold3708 | 1420                    | TT                              | CC                | 1946695248               |
| SNP_P3_175749_642   | NW_004518344.1 | Scaffold3714 | 642                     | TT                              | CC                | 1946695250               |
| SNP_P3_175750_687   | NW_004518344.1 | Scaffold3714 | 687                     | TT                              | GG                | 1946695252               |
| SNP_P3_175751_696   | NW_004518344.1 | Scaffold3714 | 696                     | AA                              | GG                | 1946695254               |
| SNP_P3_175752_699   | NW_004518344.1 | Scaffold3714 | 699                     | AA                              | CC                | 1946695256               |
| SNP_P3_175753_854   | NW_004518344.1 | Scaffold3714 | 854                     | AA                              | TT                | 1946695258               |
| SNP_P3_175754_879   | NW_004518344.1 | Scaffold3714 | 879                     | TT                              | CC                | 1946695260               |
| SNP_P3_175755_887   | NW_004518344.1 | Scaffold3714 | 887                     | TT                              | AA                | 1946695262               |
| SNP_P3_175756_896   | NW_004518344.1 | Scaffold3714 | 896                     | CC                              | AA                | 1946695264               |
| SNP_P3_175757_924   | NW_004518344.1 | Scaffold3714 | 924                     | GG                              | AA                | 1946695266               |
| SNP_P3_175758_1267  | NW_004518344.1 | Scaffold3714 | 1267                    | GG                              | TT                | 1946695268               |
| SNP_P3_175759_340   | NW_004518345.1 | Scaffold3715 | 340                     | AA                              | GG                | 1946695271               |
| SNP_P3_175760_1840  | NW_004518351.1 | Scaffold3722 | 1840                    | AA                              | CC                | 1946695273               |
| SNP_P3_175761_1842  | NW_004518351.1 | Scaffold3722 | 1842                    | AA                              | CC                | 1946695275               |
| SNP_P3_175762_1869  | NW_004518351.1 | Scaffold3722 | 1869                    | CC                              | GG                | 1946695278               |
| SNP_P3_175763_2130  | NW_004518351.1 | Scaffold3722 | 2130                    | TT                              | AA                | 1946695280               |
| SNP_P3_175764_4312  | NW_004518353.1 | Scaffold3724 | 4312                    | TT                              | GG                | 1946695282               |
| SNP_P3_175765_4742  | NW_004518353.1 | Scaffold3724 | 4742                    | CC                              | GG                | 1946695284               |
| SNP_P3_175766_17059 | NW_004518353.1 | Scaffold3724 | 17059                   | AA                              | TT                | 1946695286               |
| SNP_P3_175767_88784 | NW_004518353.1 | Scaffold3724 | 88784                   | CC                              | TT                | 1946695288               |
| SNP_P3_175768_89101 | NW_004518353.1 | Scaffold3724 | 89101                   | AA                              | TT                | 1946695290               |
| SNP_P3_175769_89109 | NW_004518353.1 | Scaffold3724 | 89109                   | AA                              | GG                | 1946695292               |
| SNP_P3_175770_90562 | NW_004518353.1 | Scaffold3724 | 90562                   | CC                              | AA                | 1946695294               |
| SNP_P3_175771_98569 | NW_004518353.1 | Scaffold3724 | 98569                   | GG                              | AA                | 1946695296               |
| SNP_P3_175772_99536 | NW_004518353.1 | Scaffold3724 | 99536                   | AA                              | GG                | 1946695298               |
| SNP_P3_175773_146   | NW_004518357.1 | Scaffold3728 | 146                     | CC                              | TT                | 1946695301               |
| SNP_P3_175774_316   | NW_004518357.1 | Scaffold3728 | 316                     | CC                              | TT                | 1946695303               |
| SNP_P3_175775_317   | NW_004518357.1 | Scaffold3728 | 317                     | CC                              | TT                | 1946695305               |
| SNP_P3_175776_413   | NW_004518357.1 | Scaffold3728 | 413                     | AA                              | GG                | 1946695307               |
| SNP_P3_175777_419   | NW_004518357.1 | Scaffold3728 | 419                     | AA                              | TT                | 1946695309               |
| SNP_P3_175778_426   | NW_004518357.1 | Scaffold3728 | 426                     | GG                              | CC                | 1946695311               |
| SNP_P3_175779_465   | NW_004518357.1 | Scaffold3728 | 465                     | GG                              | AA                | 1946695313               |
| SNP_P3_175780_489   | NW_004518357.1 | Scaffold3728 | 489                     | GG                              | AA                | 1946695316               |
| SNP_P3_175781_499   | NW_004518357.1 | Scaffold3728 | 499                     | GG                              | TT                | 1946695318               |
| SNP_P3_175782_1211  | NW_004518358.1 | Scaffold3729 | 1211                    | CC                              | TT                | 1946695320               |

| SNPs IDs            | Chromosome IDs | Chromosomes  | Physical positions (bp) | CDC Frontier (Reference genome) | (Pusa 256 & HPNB) | NCBI SNPdb Accession IDs |
|---------------------|----------------|--------------|-------------------------|---------------------------------|-------------------|--------------------------|
| SNP_P3_175783_454   | NW_004518359.1 | Scaffold3731 | 454                     | CC                              | TT                | 1946695322               |
| SNP_P3_175784_822   | NW_004518359.1 | Scaffold3731 | 822                     | GG                              | TT                | 1946695324               |
| SNP_P3_175785_834   | NW_004518359.1 | Scaffold3731 | 834                     | GG                              | TT                | 1946695326               |
| SNP_P3_175786_846   | NW_004518359.1 | Scaffold3731 | 846                     | TT                              | GG                | 1946695329               |
| SNP_P3_175787_852   | NW_004518359.1 | Scaffold3731 | 852                     | AA                              | TT                | 1946695331               |
| SNP_P3_175788_879   | NW_004518359.1 | Scaffold3731 | 879                     | CC                              | TT                | 1946695333               |
| SNP_P3_175789_892   | NW_004518359.1 | Scaffold3731 | 892                     | TT                              | GG                | 1946695335               |
| SNP_P3_175790_894   | NW_004518359.1 | Scaffold3731 | 894                     | TT                              | AA                | 1946695337               |
| SNP_P3_175791_897   | NW_004518359.1 | Scaffold3731 | 897                     | GG                              | TT                | 1946695339               |
| SNP_P3_175792_915   | NW_004518359.1 | Scaffold3731 | 915                     | TT                              | GG                | 1946695341               |
| SNP_P3_175793_921   | NW_004518359.1 | Scaffold3731 | 921                     | GG                              | AA                | 1946695344               |
| SNP_P3_175794_930   | NW_004518359.1 | Scaffold3731 | 930                     | GG                              | TT                | 1946695346               |
| SNP_P3_175796_951   | NW_004518359.1 | Scaffold3731 | 951                     | GG                              | AA                | 1946695348               |
| SNP_P3_175797_966   | NW_004518359.1 | Scaffold3731 | 966                     | TT                              | GG                | 1946695351               |
| SNP_P3_175798_976   | NW_004518359.1 | Scaffold3731 | 976                     | GG                              | AA                | 1946695353               |
| SNP_P3_175799_977   | NW_004518359.1 | Scaffold3731 | 977                     | TT                              | CC                | 1946695355               |
| SNP_P3_175801_984   | NW_004518359.1 | Scaffold3731 | 984                     | AA                              | GG                | 1946695357               |
| SNP_P3_175802_988   | NW_004518359.1 | Scaffold3731 | 988                     | TT                              | AA                | 1946695359               |
| SNP_P3_175803_123   | NW_004518366.1 | Scaffold3742 | 123                     | GG                              | AA                | 1946695361               |
| SNP_P3_175804_146   | NW_004518366.1 | Scaffold3742 | 146                     | TT                              | AA                | 1946695363               |
| SNP_P3_175805_374   | NW_004518366.1 | Scaffold3742 | 374                     | TT                              | CC                | 1946695365               |
| SNP_P3_175806_405   | NW_004518366.1 | Scaffold3742 | 405                     | AA                              | TT                | 1946695367               |
| SNP_P3_175807_439   | NW_004518366.1 | Scaffold3742 | 439                     | AA                              | GG                | 1946695369               |
| SNP_P3_175808_603   | NW_004518366.1 | Scaffold3742 | 603                     | CC                              | TT                | 1946695371               |
| SNP_P3_175809_643   | NW_004518366.1 | Scaffold3742 | 643                     | CC                              | GG                | 1946695373               |
| SNP_P3_175810_665   | NW_004518366.1 | Scaffold3742 | 665                     | CC                              | TT                | 1946695375               |
| SNP_P3_175811_688   | NW_004518366.1 | Scaffold3742 | 688                     | TT                              | CC                | 1946695377               |
| SNP_P3_175812_3719  | NW_004518366.1 | Scaffold3742 | 3719                    | AA                              | GG                | 1946695379               |
| SNP_P3_175813_3733  | NW_004518366.1 | Scaffold3742 | 3733                    | CC                              | AA                | 1946695382               |
| SNP_P3_175814_3735  | NW_004518366.1 | Scaffold3742 | 3735                    | AA                              | CC                | 1946695384               |
| SNP_P3_175815_3790  | NW_004518366.1 | Scaffold3742 | 3790                    | CC                              | AA                | 1946695387               |
| SNP_P3_175817_3826  | NW_004518366.1 | Scaffold3742 | 3826                    | CC                              | TT                | 1946695389               |
| SNP_P3_175818_4039  | NW_004518366.1 | Scaffold3742 | 4039                    | GG                              | CC                | 1946695391               |
| SNP_P3_175820_4088  | NW_004518366.1 | Scaffold3742 | 4088                    | GG                              | TT                | 1946695393               |
| SNP_P3_175821_4135  | NW_004518366.1 | Scaffold3742 | 4135                    | AA                              | TT                | 1946695395               |
| SNP_P3_175822_4178  | NW_004518366.1 | Scaffold3742 | 4178                    | CC                              | TT                | 1946695397               |
| SNP_P3_175823_5915  | NW_004518366.1 | Scaffold3742 | 5915                    | TT                              | GG                | 1946695399               |
| SNP_P3_175824_6940  | NW_004518366.1 | Scaffold3742 | 6940                    | GG                              | AA                | 1946695401               |
| SNP_P3_175825_10167 | NW_004518366.1 | Scaffold3742 | 10167                   | GG                              | AA                | 1946695403               |
| SNP_P3_175826_10818 | NW_004518366.1 | Scaffold3742 | 10818                   | TT                              | CC                | 1946695405               |
| SNP_P3_175827_10935 | NW_004518366.1 | Scaffold3742 | 10935                   | CC                              | TT                | 1946695407               |
| SNP_P3_175828_11065 | NW_004518366.1 | Scaffold3742 | 11065                   | AA                              | CC                | 1946695409               |

| SNPs IDs            | Chromosome IDs | Chromosomes  | Physical positions (bp) | CDC Frontier (Reference genome) | (Pusa 256 & HPNB) | NCBI SNPdb Accession IDs |
|---------------------|----------------|--------------|-------------------------|---------------------------------|-------------------|--------------------------|
| SNP_P3_175829_11074 | NW_004518366.1 | Scaffold3742 | 11074                   | TT                              | CC                | 1946695411               |
| SNP_P3_175830_11469 | NW_004518366.1 | Scaffold3742 | 11469                   | TT                              | AA                | 1946695413               |
| SNP_P3_175831_12032 | NW_004518366.1 | Scaffold3742 | 12032                   | TT                              | CC                | 1946695415               |
| SNP_P3_175832_15048 | NW_004518366.1 | Scaffold3742 | 15048                   | CC                              | TT                | 1946695417               |
| SNP_P3_175833_4666  | NW_004518368.1 | Scaffold3744 | 4666                    | TT                              | GG                | 1946695419               |
| SNP_P3_175834_271   | NW_004518369.1 | Scaffold3745 | 271                     | AA                              | GG                | 1946695421               |
| SNP_P3_175835_3275  | NW_004518369.1 | Scaffold3745 | 3275                    | CC                              | TT                | 1946695423               |
| SNP_P3_175836_3476  | NW_004518371.1 | Scaffold3748 | 3476                    | AA                              | CC                | 1946695425               |
| SNP_P3_175837_7907  | NW_004518377.1 | Scaffold3755 | 7907                    | AA                              | GG                | 1946695427               |
| SNP_P3_175838_7918  | NW_004518377.1 | Scaffold3755 | 7918                    | CC                              | TT                | 1946695429               |
| SNP_P3_175839_64    | NW_004518379.1 | Scaffold3757 | 64                      | TT                              | CC                | 1946695431               |
| SNP_P3_175840_73    | NW_004518379.1 | Scaffold3757 | 73                      | CC                              | TT                | 1946695433               |
| SNP_P3_175841_116   | NW_004518379.1 | Scaffold3757 | 116                     | TT                              | AA                | 1946695435               |
| SNP_P3_175842_222   | NW_004518379.1 | Scaffold3757 | 222                     | CC                              | TT                | 1946695437               |
| SNP_P3_175843_234   | NW_004518379.1 | Scaffold3757 | 234                     | AA                              | GG                | 1946695439               |
| SNP_P3_175844_258   | NW_004518379.1 | Scaffold3757 | 258                     | AA                              | CC                | 1946695441               |
| SNP_P3_175845_537   | NW_004518379.1 | Scaffold3757 | 537                     | CC                              | AA                | 1946695443               |
| SNP_P3_175846_3265  | NW_004518379.1 | Scaffold3757 | 3265                    | CC                              | GG                | 1946695445               |
| SNP_P3_175848_3427  | NW_004518379.1 | Scaffold3757 | 3427                    | TT                              | GG                | 1946695447               |
| SNP_P3_175849_3975  | NW_004518379.1 | Scaffold3757 | 3975                    | TT                              | CC                | 1946695449               |
| SNP_P3_175850_4006  | NW_004518379.1 | Scaffold3757 | 4006                    | TT                              | GG                | 1946695451               |
| SNP_P3_175851_4046  | NW_004518379.1 | Scaffold3757 | 4046                    | GG                              | AA                | 1946695453               |
| SNP_P3_175852_4076  | NW_004518379.1 | Scaffold3757 | 4076                    | AA                              | GG                | 1946695456               |
| SNP_P3_175853_4211  | NW_004518379.1 | Scaffold3757 | 4211                    | AA                              | GG                | 1946695458               |
| SNP_P3_175854_4257  | NW_004518379.1 | Scaffold3757 | 4257                    | TT                              | GG                | 1946695460               |
| SNP_P3_175855_4278  | NW_004518379.1 | Scaffold3757 | 4278                    | TT                              | AA                | 1946695462               |
| SNP_P3_175856_4426  | NW_004518379.1 | Scaffold3757 | 4426                    | AA                              | CC                | 1946695464               |
| SNP_P3_175857_4454  | NW_004518379.1 | Scaffold3757 | 4454                    | GG                              | AA                | 1946695466               |
| SNP_P3_175858_4457  | NW_004518379.1 | Scaffold3757 | 4457                    | AA                              | GG                | 1946695468               |
| SNP_P3_175859_4473  | NW_004518379.1 | Scaffold3757 | 4473                    | AA                              | GG                | 1946695470               |
| SNP_P3_175860_4475  | NW_004518379.1 | Scaffold3757 | 4475                    | CC                              | TT                | 1946695472               |
| SNP_P3_175861_4500  | NW_004518379.1 | Scaffold3757 | 4500                    | CC                              | TT                | 1946695475               |
| SNP_P3_175862_4705  | NW_004518379.1 | Scaffold3757 | 4705                    | AA                              | GG                | 1946695477               |
| SNP_P3_175863_4713  | NW_004518379.1 | Scaffold3757 | 4713                    | AA                              | GG                | 1946695479               |
| SNP_P3_175864_4717  | NW_004518379.1 | Scaffold3757 | 4717                    | TT                              | CC                | 1946695481               |
| SNP_P3_175865_4722  | NW_004518379.1 | Scaffold3757 | 4722                    | AA                              | GG                | 1946695483               |
| SNP_P3_175866_4875  | NW_004518379.1 | Scaffold3757 | 4875                    | CC                              | TT                | 1946695485               |
| SNP_P3_175867_4924  | NW_004518379.1 | Scaffold3757 | 4924                    | CC                              | TT                | 1946695487               |
| SNP_P3_175868_4927  | NW_004518379.1 | Scaffold3757 | 4927                    | GG                              | TT                | 1946695489               |
| SNP_P3_175869_5073  | NW_004518379.1 | Scaffold3757 | 5073                    | CC                              | TT                | 1946695492               |
| SNP_P3_175870_5315  | NW_004518379.1 | Scaffold3757 | 5315                    | AA                              | GG                | 1946695494               |
| SNP_P3_175871_5389  | NW_004518379.1 | Scaffold3757 | 5389                    | CC                              | AA                | 1946695496               |

| SNPs IDs            | Chromosome IDs | Chromosomes  | Physical positions (bp) | CDC Frontier (Reference genome) | (Pusa 256 & HPNB) | NCBI SNPdb Accession IDs |
|---------------------|----------------|--------------|-------------------------|---------------------------------|-------------------|--------------------------|
| SNP_P3_175872_6513  | NW_004518379.1 | Scaffold3757 | 6513                    | GG                              | AA                | 1946695499               |
| SNP_P3_175873_6944  | NW_004518379.1 | Scaffold3757 | 6944                    | TT                              | CC                | 1946695501               |
| SNP_P3_175874_7043  | NW_004518379.1 | Scaffold3757 | 7043                    | TT                              | CC                | 1946695503               |
| SNP_P3_175875_7264  | NW_004518379.1 | Scaffold3757 | 7264                    | CC                              | TT                | 1946695505               |
| SNP_P3_175876_7467  | NW_004518379.1 | Scaffold3757 | 7467                    | AA                              | TT                | 1946695508               |
| SNP_P3_175877_7505  | NW_004518379.1 | Scaffold3757 | 7505                    | TT                              | GG                | 1946695510               |
| SNP_P3_175878_7663  | NW_004518379.1 | Scaffold3757 | 7663                    | AA                              | CC                | 1946695512               |
| SNP_P3_175879_7677  | NW_004518379.1 | Scaffold3757 | 7677                    | TT                              | GG                | 1946695514               |
| SNP_P3_175880_7724  | NW_004518379.1 | Scaffold3757 | 7724                    | CC                              | TT                | 1946695516               |
| SNP_P3_175881_7767  | NW_004518379.1 | Scaffold3757 | 7767                    | AA                              | GG                | 1946695518               |
| SNP_P3_175882_7897  | NW_004518379.1 | Scaffold3757 | 7897                    | AA                              | GG                | 1946695520               |
| SNP_P3_175883_7967  | NW_004518379.1 | Scaffold3757 | 7967                    | AA                              | GG                | 1946695522               |
| SNP_P3_175884_9140  | NW_004518379.1 | Scaffold3757 | 9140                    | TT                              | GG                | 1946695524               |
| SNP_P3_175885_9214  | NW_004518379.1 | Scaffold3757 | 9214                    | GG                              | TT                | 1946695526               |
| SNP_P3_175886_9601  | NW_004518379.1 | Scaffold3757 | 9601                    | AA                              | TT                | 1946695528               |
| SNP_P3_175887_522   | NW_004518383.1 | Scaffold3765 | 522                     | TT                              | CC                | 1946695530               |
| SNP_P3_175888_618   | NW_004518383.1 | Scaffold3765 | 618                     | CC                              | TT                | 1946695532               |
| SNP_P3_175889_1613  | NW_004518383.1 | Scaffold3765 | 1613                    | TT                              | AA                | 1946695534               |
| SNP_P3_175890_1616  | NW_004518383.1 | Scaffold3765 | 1616                    | TT                              | AA                | 1946695537               |
| SNP_P3_175891_1619  | NW_004518383.1 | Scaffold3765 | 1619                    | AA                              | GG                | 1946695539               |
| SNP_P3_175892_4236  | NW_004518383.1 | Scaffold3765 | 4236                    | CC                              | GG                | 1946695541               |
| SNP_P3_175893_2781  | NW_004518388.1 | Scaffold3771 | 2781                    | AA                              | GG                | 1946695543               |
| SNP_P3_175894_3890  | NW_004518388.1 | Scaffold3771 | 3890                    | TT                              | AA                | 1946695545               |
| SNP_P3_175895_6211  | NW_004518388.1 | Scaffold3771 | 6211                    | CC                              | TT                | 1946695547               |
| SNP_P3_175896_6226  | NW_004518388.1 | Scaffold3771 | 6226                    | CC                              | TT                | 1946695549               |
| SNP_P3_175897_6621  | NW_004518388.1 | Scaffold3771 | 6621                    | TT                              | AA                | 1946695551               |
| SNP_P3_175898_11249 | NW_004518388.1 | Scaffold3771 | 11249                   | TT                              | GG                | 1946695553               |
| SNP_P3_175899_11360 | NW_004518388.1 | Scaffold3771 | 11360                   | CC                              | TT                | 1946695555               |
| SNP_P3_175900_11507 | NW_004518388.1 | Scaffold3771 | 11507                   | TT                              | CC                | 1946695557               |
| SNP_P3_175901_11640 | NW_004518388.1 | Scaffold3771 | 11640                   | AA                              | GG                | 1946695559               |
| SNP_P3_175902_11843 | NW_004518388.1 | Scaffold3771 | 11843                   | AA                              | GG                | 1946695561               |
| SNP_P3_175903_11860 | NW_004518388.1 | Scaffold3771 | 11860                   | CC                              | AA                | 1946695563               |
| SNP_P3_175904_12766 | NW_004518388.1 | Scaffold3771 | 12766                   | GG                              | TT                | 1946695565               |
| SNP_P3_175905_12776 | NW_004518388.1 | Scaffold3771 | 12776                   | AA                              | GG                | 1946695567               |
| SNP_P3_175906_1364  | NW_004518389.1 | Scaffold3772 | 1364                    | TT                              | AA                | 1946695569               |
| SNP_P3_175907_260   | NW_004518392.1 | Scaffold3780 | 260                     | GG                              | AA                | 1946695571               |
| SNP_P3_175908_293   | NW_004518392.1 | Scaffold3780 | 293                     | GG                              | CC                | 1946695573               |
| SNP_P3_175910_7463  | NW_004518392.1 | Scaffold3780 | 7463                    | AA                              | TT                | 1946695575               |
| SNP_P3_175911_7553  | NW_004518392.1 | Scaffold3780 | 7553                    | GG                              | CC                | 1946695577               |
| SNP_P3_175912_7586  | NW_004518392.1 | Scaffold3780 | 7586                    | GG                              | CC                | 1946695579               |
| SNP_P3_175913_7902  | NW_004518392.1 | Scaffold3780 | 7902                    | AA                              | GG                | 1946695581               |
| SNP_P3_175916_9717  | NW_004518392.1 | Scaffold3780 | 9717                    | AA                              | TT                | 1946695584               |

| SNPs IDs            | Chromosome IDs | Chromosomes  | Physical positions (bp) | CDC Frontier (Reference genome) | (Pusa 256 & HPNB) | NCBI SNPdb Accession IDs |
|---------------------|----------------|--------------|-------------------------|---------------------------------|-------------------|--------------------------|
| SNP_P3_175918_21224 | NW_004518392.1 | Scaffold3780 | 21224                   | TT                              | CC                | 1946695586               |
| SNP_P3_175919_21225 | NW_004518392.1 | Scaffold3780 | 21225                   | AA                              | CC                | 1946695588               |
| SNP_P3_175920_21270 | NW_004518392.1 | Scaffold3780 | 21270                   | AA                              | TT                | 1946695590               |
| SNP_P3_175921_21451 | NW_004518392.1 | Scaffold3780 | 21451                   | AA                              | TT                | 1946695592               |
| SNP_P3_175922_1225  | NW_004518393.1 | Scaffold3782 | 1225                    | TT                              | CC                | 1946695594               |
| SNP_P3_175923_1231  | NW_004518393.1 | Scaffold3782 | 1231                    | CC                              | AA                | 1946695596               |
| SNP_P3_175924_2010  | NW_004518394.1 | Scaffold3784 | 2010                    | AA                              | CC                | 1946695598               |
| SNP_P3_175925_2031  | NW_004518394.1 | Scaffold3784 | 2031                    | TT                              | CC                | 1946695600               |
| SNP_P3_175926_2056  | NW_004518394.1 | Scaffold3784 | 2056                    | GG                              | AA                | 1946695602               |
| SNP_P3_175927_2239  | NW_004518394.1 | Scaffold3784 | 2239                    | GG                              | TT                | 1946695604               |
| SNP_P3_175928_503   | NW_004518395.1 | Scaffold3789 | 503                     | AA                              | GG                | 1946695606               |
| SNP_P3_175929_1305  | NW_004518395.1 | Scaffold3789 | 1305                    | AA                              | TT                | 1946695608               |
| SNP_P3_175931_2894  | NW_004518395.1 | Scaffold3789 | 2894                    | GG                              | AA                | 1946695611               |
| SNP_P3_175932_3329  | NW_004518395.1 | Scaffold3789 | 3329                    | CC                              | AA                | 1946695613               |
| SNP_P3_175933_3940  | NW_004518395.1 | Scaffold3789 | 3940                    | GG                              | TT                | 1946695615               |
| SNP_P3_175934_4222  | NW_004518395.1 | Scaffold3789 | 4222                    | TT                              | GG                | 1946695618               |
| SNP_P3_175935_4228  | NW_004518395.1 | Scaffold3789 | 4228                    | AA                              | GG                | 1946695620               |
| SNP_P3_175936_4230  | NW_004518395.1 | Scaffold3789 | 4230                    | AA                              | CC                | 1946695622               |
| SNP_P3_175937_5782  | NW_004518395.1 | Scaffold3789 | 5782                    | GG                              | AA                | 1946695625               |
| SNP_P3_175938_5815  | NW_004518395.1 | Scaffold3789 | 5815                    | GG                              | AA                | 1946695627               |
| SNP_P3_175939_5821  | NW_004518395.1 | Scaffold3789 | 5821                    | AA                              | TT                | 1946695629               |
| SNP_P3_175940_5823  | NW_004518395.1 | Scaffold3789 | 5823                    | AA                              | CC                | 1946695631               |
| SNP_P3_175941_6081  | NW_004518395.1 | Scaffold3789 | 6081                    | CC                              | AA                | 1946695633               |
| SNP_P3_175942_6189  | NW_004518395.1 | Scaffold3789 | 6189                    | AA                              | GG                | 1946695635               |
| SNP_P3_175943_6309  | NW_004518395.1 | Scaffold3789 | 6309                    | CC                              | TT                | 1946695637               |
| SNP_P3_175944_6409  | NW_004518395.1 | Scaffold3789 | 6409                    | CC                              | AA                | 1946695639               |
| SNP_P3_175945_6868  | NW_004518395.1 | Scaffold3789 | 6868                    | AA                              | CC                | 1946695641               |
| SNP_P3_175946_6871  | NW_004518395.1 | Scaffold3789 | 6871                    | TT                              | CC                | 1946695643               |
| SNP_P3_175947_7021  | NW_004518395.1 | Scaffold3789 | 7021                    | CC                              | TT                | 1946695645               |
| SNP_P3_175948_7048  | NW_004518395.1 | Scaffold3789 | 7048                    | CC                              | TT                | 1946695647               |
| SNP_P3_175949_7063  | NW_004518395.1 | Scaffold3789 | 7063                    | CC                              | AA                | 1946695649               |
| SNP_P3_175950_7075  | NW_004518395.1 | Scaffold3789 | 7075                    | TT                              | CC                | 1946695651               |
| SNP_P3_175951_7122  | NW_004518395.1 | Scaffold3789 | 7122                    | TT                              | GG                | 1946695653               |
| SNP_P3_175952_3095  | NW_004518397.1 | Scaffold3794 | 3095                    | TT                              | CC                | 1946695656               |
| SNP_P3_175953_3107  | NW_004518397.1 | Scaffold3794 | 3107                    | GG                              | AA                | 1946695658               |
| SNP_P3_175955_6015  | NW_004518397.1 | Scaffold3794 | 6015                    | GG                              | AA                | 1946695660               |
| SNP_P3_175956_13554 | NW_004518397.1 | Scaffold3794 | 13554                   | CC                              | TT                | 1946695662               |
| SNP_P3_175957_14858 | NW_004518397.1 | Scaffold3794 | 14858                   | AA                              | TT                | 1946695664               |
| SNP_P3_175958_15174 | NW_004518397.1 | Scaffold3794 | 15174                   | TT                              | CC                | 1946695666               |
| SNP_P3_175960_18026 | NW_004518397.1 | Scaffold3794 | 18026                   | AA                              | GG                | 1946695668               |
| SNP_P3_175961_20688 | NW_004518397.1 | Scaffold3794 | 20688                   | GG                              | AA                | 1946695670               |
| SNP_P3_175962_23438 | NW_004518397.1 | Scaffold3794 | 23438                   | CC                              | GG                | 1946695672               |

| SNPs IDs            | Chromosome IDs | Chromosomes  | Physical positions (bp) | CDC Frontier (Reference genome) | (Pusa 256 & HPNB) | NCBI SNPdb Accession IDs |
|---------------------|----------------|--------------|-------------------------|---------------------------------|-------------------|--------------------------|
| SNP_P3_175963_32242 | NW_004518397.1 | Scaffold3794 | 32242                   | AA                              | TT                | 1946695674               |
| SNP_P3_175965_33898 | NW_004518397.1 | Scaffold3794 | 33898                   | TT                              | CC                | 1946695676               |
| SNP_P3_175968_35616 | NW_004518397.1 | Scaffold3794 | 35616                   | TT                              | AA                | 1946695678               |
| SNP_P3_175969_37061 | NW_004518397.1 | Scaffold3794 | 37061                   | AA                              | TT                | 1946695680               |
| SNP_P3_175972_41952 | NW_004518397.1 | Scaffold3794 | 41952                   | GG                              | CC                | 1946695682               |
| SNP_P3_175973_43073 | NW_004518397.1 | Scaffold3794 | 43073                   | AA                              | GG                | 1946695684               |
| SNP_P3_175975_47504 | NW_004518397.1 | Scaffold3794 | 47504                   | GG                              | CC                | 1946695686               |
| SNP_P3_175977_50831 | NW_004518397.1 | Scaffold3794 | 50831                   | AA                              | GG                | 1946695688               |
| SNP_P3_175980_56253 | NW_004518397.1 | Scaffold3794 | 56253                   | CC                              | TT                | 1946695690               |
| SNP_P3_175981_56676 | NW_004518397.1 | Scaffold3794 | 56676                   | TT                              | CC                | 1946695692               |
| SNP_P3_175982_57756 | NW_004518397.1 | Scaffold3794 | 57756                   | TT                              | CC                | 1946695694               |
| SNP_P3_175983_58786 | NW_004518397.1 | Scaffold3794 | 58786                   | AA                              | GG                | 1946695697               |
| SNP_P3_175984_59092 | NW_004518397.1 | Scaffold3794 | 59092                   | CC                              | TT                | 1946695699               |
| SNP_P3_175985_61482 | NW_004518397.1 | Scaffold3794 | 61482                   | AA                              | TT                | 1946695701               |
| SNP_P3_175986_63950 | NW_004518397.1 | Scaffold3794 | 63950                   | GG                              | AA                | 1946695703               |
| SNP_P3_175987_68782 | NW_004518397.1 | Scaffold3794 | 68782                   | CC                              | TT                | 1946695705               |
| SNP_P3_175988_70911 | NW_004518397.1 | Scaffold3794 | 70911                   | CC                              | GG                | 1946695707               |
| SNP_P3_175989_71853 | NW_004518397.1 | Scaffold3794 | 71853                   | AA                              | GG                | 1946695709               |
| SNP_P3_175991_72456 | NW_004518397.1 | Scaffold3794 | 72456                   | TT                              | CC                | 1946695711               |
| SNP_P3_175992_72464 | NW_004518397.1 | Scaffold3794 | 72464                   | TT                              | CC                | 1946695713               |
| SNP_P3_175993_72484 | NW_004518397.1 | Scaffold3794 | 72484                   | TT                              | CC                | 1946695715               |
| SNP_P3_175994_72514 | NW_004518397.1 | Scaffold3794 | 72514                   | GG                              | AA                | 1946695717               |
| SNP_P3_175995_72519 | NW_004518397.1 | Scaffold3794 | 72519                   | TT                              | CC                | 1946695719               |
| SNP_P3_175996_76657 | NW_004518397.1 | Scaffold3794 | 76657                   | GG                              | TT                | 1946695721               |
| SNP_P3_175997_77176 | NW_004518397.1 | Scaffold3794 | 77176                   | AA                              | CC                | 1946695723               |
| SNP_P3_175998_78516 | NW_004518397.1 | Scaffold3794 | 78516                   | CC                              | AA                | 1946695725               |
| SNP_P3_175999_79418 | NW_004518397.1 | Scaffold3794 | 79418                   | TT                              | CC                | 1946695727               |
| SNP_P3_176001_82525 | NW_004518397.1 | Scaffold3794 | 82525                   | AA                              | GG                | 1946695729               |
| SNP_P3_176002_86278 | NW_004518397.1 | Scaffold3794 | 86278                   | CC                              | TT                | 1946695731               |
| SNP_P3_176004_17776 | NW_004518406.1 | Scaffold3810 | 17776                   | TT                              | CC                | 1946695733               |
| SNP_P3_176005_17808 | NW_004518406.1 | Scaffold3810 | 17808                   | TT                              | CC                | 1946695735               |
| SNP_P3_176006_17851 | NW_004518406.1 | Scaffold3810 | 17851                   | CC                              | AA                | 1946695738               |
| SNP_P3_176007_21139 | NW_004518406.1 | Scaffold3810 | 21139                   | CC                              | TT                | 1946695740               |
| SNP_P3_176008_21185 | NW_004518406.1 | Scaffold3810 | 21185                   | TT                              | CC                | 1946695742               |
| SNP_P3_176009_21204 | NW_004518406.1 | Scaffold3810 | 21204                   | CC                              | TT                | 1946695744               |
| SNP_P3_176011_21444 | NW_004518406.1 | Scaffold3810 | 21444                   | AA                              | CC                | 1946695746               |
| SNP_P3_176012_21478 | NW_004518406.1 | Scaffold3810 | 21478                   | AA                              | GG                | 1946695748               |
| SNP_P3_176013_21555 | NW_004518406.1 | Scaffold3810 | 21555                   | GG                              | CC                | 1946695750               |
| SNP_P3_176014_21574 | NW_004518406.1 | Scaffold3810 | 21574                   | TT                              | CC                | 1946695752               |
| SNP_P3_176015_23167 | NW_004518406.1 | Scaffold3810 | 23167                   | AA                              | TT                | 1946695754               |
| SNP_P3_176016_4825  | NW_004518407.1 | Scaffold3811 | 4825                    | AA                              | TT                | 1946695756               |
| SNP_P3_176017_4827  | NW_004518407.1 | Scaffold3811 | 4827                    | TT                              | GG                | 1946695758               |

| SNPs IDs            | Chromosome IDs | Chromosomes  | Physical positions (bp) | CDC Frontier (Reference genome) | (Pusa 256 & HPNB) | NCBI SNPdb Accession IDs |
|---------------------|----------------|--------------|-------------------------|---------------------------------|-------------------|--------------------------|
| SNP_P3_176018_11132 | NW_004518407.1 | Scaffold3811 | 11132                   | CC                              | TT                | 1946695760               |
| SNP_P3_176019_19508 | NW_004518407.1 | Scaffold3811 | 19508                   | AA                              | GG                | 1946695762               |
| SNP_P3_176020_19603 | NW_004518407.1 | Scaffold3811 | 19603                   | AA                              | CC                | 1946695764               |
| SNP_P3_176021_19623 | NW_004518407.1 | Scaffold3811 | 19623                   | AA                              | GG                | 1946695766               |
| SNP_P3_176022_19641 | NW_004518407.1 | Scaffold3811 | 19641                   | AA                              | GG                | 1946695768               |
| SNP_P3_176023_19879 | NW_004518407.1 | Scaffold3811 | 19879                   | CC                              | AA                | 1946695770               |
| SNP_P3_176024_24578 | NW_004518407.1 | Scaffold3811 | 24578                   | TT                              | CC                | 1946695772               |
| SNP_P3_176025_24597 | NW_004518407.1 | Scaffold3811 | 24597                   | AA                              | GG                | 1946695774               |
| SNP_P3_176026_24632 | NW_004518407.1 | Scaffold3811 | 24632                   | TT                              | AA                | 1946695776               |
| SNP_P3_176028_24857 | NW_004518407.1 | Scaffold3811 | 24857                   | TT                              | AA                | 1946695779               |
| SNP_P3_176029_24958 | NW_004518407.1 | Scaffold3811 | 24958                   | TT                              | CC                | 1946695781               |
| SNP_P3_176030_1282  | NW_004518409.1 | Scaffold3813 | 1282                    | TT                              | CC                | 1946695783               |
| SNP_P3_176031_1411  | NW_004518409.1 | Scaffold3813 | 1411                    | CC                              | GG                | 1946695785               |
| SNP_P3_176032_2977  | NW_004518410.1 | Scaffold3815 | 2977                    | TT                              | AA                | 1946695787               |
| SNP_P3_176033_987   | NW_004518411.1 | Scaffold3816 | 987                     | CC                              | TT                | 1946695789               |
| SNP_P3_176034_1230  | NW_004518411.1 | Scaffold3816 | 1230                    | TT                              | CC                | 1946695791               |
| SNP_P3_176035_1531  | NW_004518411.1 | Scaffold3816 | 1531                    | CC                              | AA                | 1946695793               |
| SNP_P3_176036_8482  | NW_004518412.1 | Scaffold3817 | 8482                    | CC                              | GG                | 1946695795               |
| SNP_P3_176037_21060 | NW_004518412.1 | Scaffold3817 | 21060                   | GG                              | AA                | 1946695797               |
| SNP_P3_176038_21432 | NW_004518412.1 | Scaffold3817 | 21432                   | AA                              | GG                | 1946695799               |
| SNP_P3_176039_22312 | NW_004518412.1 | Scaffold3817 | 22312                   | TT                              | CC                | 1946695801               |
| SNP_P3_176040_22321 | NW_004518412.1 | Scaffold3817 | 22321                   | CC                              | TT                | 1946695803               |
| SNP_P3_176041_22374 | NW_004518412.1 | Scaffold3817 | 22374                   | GG                              | AA                | 1946695805               |
| SNP_P3_176042_22388 | NW_004518412.1 | Scaffold3817 | 22388                   | TT                              | AA                | 1946695807               |
| SNP_P3_176043_1243  | NW_004518413.1 | Scaffold3818 | 1243                    | TT                              | CC                | 1946695809               |
| SNP_P3_176044_2727  | NW_004518415.1 | Scaffold3823 | 2727                    | AA                              | GG                | 1946695811               |
| SNP_P3_176045_2750  | NW_004518415.1 | Scaffold3823 | 2750                    | AA                              | GG                | 1946695813               |
| SNP_P3_176046_3223  | NW_004518415.1 | Scaffold3823 | 3223                    | AA                              | CC                | 1946695815               |
| SNP_P3_176047_3709  | NW_004518415.1 | Scaffold3823 | 3709                    | TT                              | GG                | 1946695817               |
| SNP_P3_176048_3892  | NW_004518415.1 | Scaffold3823 | 3892                    | AA                              | GG                | 1946695820               |
| SNP_P3_176049_3907  | NW_004518415.1 | Scaffold3823 | 3907                    | TT                              | AA                | 1946695822               |
| SNP_P3_176050_3909  | NW_004518415.1 | Scaffold3823 | 3909                    | CC                              | TT                | 1946695824               |
| SNP_P3_176052_3972  | NW_004518415.1 | Scaffold3823 | 3972                    | AA                              | GG                | 1946695826               |
| SNP_P3_176053_4045  | NW_004518415.1 | Scaffold3823 | 4045                    | TT                              | GG                | 1946695828               |
| SNP_P3_176054_4202  | NW_004518415.1 | Scaffold3823 | 4202                    | TT                              | GG                | 1946695830               |
| SNP_P3_176055_8977  | NW_004518416.1 | Scaffold3824 | 8977                    | GG                              | TT                | 1946695832               |
| SNP_P3_176056_9095  | NW_004518416.1 | Scaffold3824 | 9095                    | TT                              | GG                | 1946695834               |
| SNP_P3_176058_11676 | NW_004518416.1 | Scaffold3824 | 11676                   | CC                              | TT                | 1946695836               |
| SNP_P3_176059_21888 | NW_004518416.1 | Scaffold3824 | 21888                   | TT                              | GG                | 1946695838               |
| SNP_P3_176061_22047 | NW_004518416.1 | Scaffold3824 | 22047                   | TT                              | GG                | 1946695840               |
| SNP_P3_176062_22456 | NW_004518416.1 | Scaffold3824 | 22456                   | GG                              | AA                | 1946695842               |
| SNP_P3_176063_24630 | NW_004518416.1 | Scaffold3824 | 24630                   | AA                              | GG                | 1946695844               |

| SNPs IDs           | Chromosome IDs | Chromosomes  | Physical positions (bp) | CDC Frontier (Reference genome) | (Pusa 256 & HPNB) | NCBI SNPdb Accession IDs |
|--------------------|----------------|--------------|-------------------------|---------------------------------|-------------------|--------------------------|
| SNP_P3_176064_2103 | NW_004518423.1 | Scaffold3837 | 2103                    | TT                              | CC                | 1946695846               |
| SNP_P3_176065_2139 | NW_004518423.1 | Scaffold3837 | 2139                    | CC                              | GG                | 1946695848               |
| SNP_P3_176067_2448 | NW_004518423.1 | Scaffold3837 | 2448                    | AA                              | TT                | 1946695850               |
| SNP_P3_176068_2548 | NW_004518423.1 | Scaffold3837 | 2548                    | AA                              | TT                | 1946695852               |
| SNP_P3_176069_2604 | NW_004518423.1 | Scaffold3837 | 2604                    | AA                              | GG                | 1946695854               |
| SNP_P3_176070_2606 | NW_004518423.1 | Scaffold3837 | 2606                    | GG                              | TT                | 1946695855               |
| SNP_P3_176071_2623 | NW_004518423.1 | Scaffold3837 | 2623                    | CC                              | TT                | 1946695856               |
| SNP_P3_176072_2646 | NW_004518423.1 | Scaffold3837 | 2646                    | CC                              | TT                | 1946695857               |
| SNP_P3_176073_2647 | NW_004518423.1 | Scaffold3837 | 2647                    | CC                              | TT                | 1946695858               |
| SNP_P3_176074_2676 | NW_004518423.1 | Scaffold3837 | 2676                    | CC                              | TT                | 1946695859               |
| SNP_P3_176075_2700 | NW_004518423.1 | Scaffold3837 | 2700                    | TT                              | AA                | 1946695860               |
| SNP_P3_176076_2708 | NW_004518423.1 | Scaffold3837 | 2708                    | TT                              | CC                | 1946695861               |
| SNP_P3_176077_2718 | NW_004518423.1 | Scaffold3837 | 2718                    | TT                              | AA                | 1946695862               |
| SNP_P3_176078_3187 | NW_004518423.1 | Scaffold3837 | 3187                    | AA                              | GG                | 1946695863               |
| SNP_P3_176079_3219 | NW_004518423.1 | Scaffold3837 | 3219                    | AA                              | GG                | 1946695864               |
| SNP_P3_176080_3430 | NW_004518423.1 | Scaffold3837 | 3430                    | TT                              | AA                | 1946695865               |
| SNP_P3_176081_3457 | NW_004518423.1 | Scaffold3837 | 3457                    | AA                              | TT                | 1946695866               |
| SNP_P3_176082_3570 | NW_004518423.1 | Scaffold3837 | 3570                    | TT                              | CC                | 1946695868               |
| SNP_P3_176083_3614 | NW_004518423.1 | Scaffold3837 | 3614                    | TT                              | CC                | 1946695870               |
| SNP_P3_176084_3643 | NW_004518423.1 | Scaffold3837 | 3643                    | TT                              | CC                | 1946695872               |
| SNP_P3_176085_5028 | NW_004518423.1 | Scaffold3837 | 5028                    | AA                              | GG                | 1946695874               |
| SNP_P3_176086_5403 | NW_004518423.1 | Scaffold3837 | 5403                    | CC                              | TT                | 1946695876               |
| SNP_P3_176087_5421 | NW_004518423.1 | Scaffold3837 | 5421                    | CC                              | TT                | 1946695878               |
| SNP_P3_176088_5429 | NW_004518423.1 | Scaffold3837 | 5429                    | CC                              | TT                | 1946695880               |
| SNP_P3_176089_5443 | NW_004518423.1 | Scaffold3837 | 5443                    | TT                              | CC                | 1946695882               |
| SNP_P3_176090_5477 | NW_004518423.1 | Scaffold3837 | 5477                    | CC                              | TT                | 1946695884               |
| SNP_P3_176091_5480 | NW_004518423.1 | Scaffold3837 | 5480                    | TT                              | AA                | 1946695886               |
| SNP_P3_176092_5607 | NW_004518423.1 | Scaffold3837 | 5607                    | GG                              | TT                | 1946695888               |
| SNP_P3_176093_5641 | NW_004518423.1 | Scaffold3837 | 5641                    | TT                              | CC                | 1946695890               |
| SNP_P3_176095_5689 | NW_004518423.1 | Scaffold3837 | 5689                    | TT                              | CC                | 1946695892               |
| SNP_P3_176096_5704 | NW_004518423.1 | Scaffold3837 | 5704                    | CC                              | TT                | 1946695894               |
| SNP_P3_176097_5716 | NW_004518423.1 | Scaffold3837 | 5716                    | TT                              | GG                | 1946695896               |
| SNP_P3_176098_5747 | NW_004518423.1 | Scaffold3837 | 5747                    | CC                              | GG                | 1946695898               |
| SNP_P3_176099_5787 | NW_004518423.1 | Scaffold3837 | 5787                    | TT                              | CC                | 1946695900               |
| SNP_P3_176100_5797 | NW_004518423.1 | Scaffold3837 | 5797                    | TT                              | GG                | 1946695902               |
| SNP_P3_176101_5812 | NW_004518423.1 | Scaffold3837 | 5812                    | CC                              | TT                | 1946695904               |
| SNP_P3_176102_5837 | NW_004518423.1 | Scaffold3837 | 5837                    | TT                              | CC                | 1946695906               |
| SNP_P3_176103_5849 | NW_004518423.1 | Scaffold3837 | 5849                    | CC                              | TT                | 1946695908               |
| SNP_P3_176104_5914 | NW_004518423.1 | Scaffold3837 | 5914                    | TT                              | CC                | 1946695910               |
| SNP_P3_176105_5989 | NW_004518423.1 | Scaffold3837 | 5989                    | CC                              | TT                | 1946695912               |
| SNP_P3_176106_6410 | NW_004518423.1 | Scaffold3837 | 6410                    | TT                              | GG                | 1946695914               |
| SNP_P3_176107_6416 | NW_004518423.1 | Scaffold3837 | 6416                    | AA                              | GG                | 1946695916               |



| SNPs IDs            | Chromosome IDs | Chromosomes  | Physical positions (bp) | CDC Frontier (Reference genome) | (Pusa 256 & HPNB) | NCBI SNPdb Accession IDs |
|---------------------|----------------|--------------|-------------------------|---------------------------------|-------------------|--------------------------|
| SNP_P3_176108_6431  | NW_004518423.1 | Scaffold3837 | 6431                    | AA                              | GG                | 1946695918               |
| SNP_P3_176109_6446  | NW_004518423.1 | Scaffold3837 | 6446                    | CC                              | TT                | 1946695920               |
| SNP_P3_176110_6505  | NW_004518423.1 | Scaffold3837 | 6505                    | AA                              | GG                | 1946695922               |
| SNP_P3_176111_6541  | NW_004518423.1 | Scaffold3837 | 6541                    | TT                              | CC                | 1946695924               |
| SNP_P3_176112_6577  | NW_004518423.1 | Scaffold3837 | 6577                    | AA                              | GG                | 1946695926               |
| SNP_P3_176113_6603  | NW_004518423.1 | Scaffold3837 | 6603                    | GG                              | AA                | 1946695928               |
| SNP_P3_176114_6612  | NW_004518423.1 | Scaffold3837 | 6612                    | GG                              | CC                | 1946695930               |
| SNP_P3_176115_6675  | NW_004518423.1 | Scaffold3837 | 6675                    | TT                              | CC                | 1946695932               |
| SNP_P3_176116_6751  | NW_004518423.1 | Scaffold3837 | 6751                    | TT                              | CC                | 1946695934               |
| SNP_P3_176117_6916  | NW_004518423.1 | Scaffold3837 | 6916                    | AA                              | GG                | 1946695937               |
| SNP_P3_176118_6927  | NW_004518423.1 | Scaffold3837 | 6927                    | GG                              | AA                | 1946695940               |
| SNP_P3_176119_7089  | NW_004518423.1 | Scaffold3837 | 7089                    | TT                              | AA                | 1946695942               |
| SNP_P3_176120_7174  | NW_004518423.1 | Scaffold3837 | 7174                    | GG                              | AA                | 1946695944               |
| SNP_P3_176121_10123 | NW_004518423.1 | Scaffold3837 | 10123                   | GG                              | AA                | 1946695946               |
| SNP_P3_176122_10431 | NW_004518423.1 | Scaffold3837 | 10431                   | AA                              | CC                | 1946695948               |
| SNP_P3_176123_2564  | NW_004518425.1 | Scaffold3840 | 2564                    | AA                              | GG                | 1946695950               |
| SNP_P3_176124_2653  | NW_004518425.1 | Scaffold3840 | 2653                    | GG                              | TT                | 1946695952               |
| SNP_P3_176125_516   | NW_004518426.1 | Scaffold3842 | 516                     | TT                              | CC                | 1946695954               |
| SNP_P3_176126_1335  | NW_004518426.1 | Scaffold3842 | 1335                    | AA                              | TT                | 1946695956               |
| SNP_P3_176127_2138  | NW_004518426.1 | Scaffold3842 | 2138                    | CC                              | TT                | 1946695958               |
| SNP_P3_176129_2284  | NW_004518432.1 | Scaffold3850 | 2284                    | TT                              | AA                | 1946695960               |
| SNP_P3_176130_4444  | NW_004518432.1 | Scaffold3850 | 4444                    | AA                              | CC                | 1946695962               |
| SNP_P3_176131_4886  | NW_004518432.1 | Scaffold3850 | 4886                    | AA                              | GG                | 1946695964               |
| SNP_P3_176132_5843  | NW_004518432.1 | Scaffold3850 | 5843                    | CC                              | AA                | 1946695966               |
| SNP_P3_176133_5875  | NW_004518432.1 | Scaffold3850 | 5875                    | AA                              | CC                | 1946695968               |
| SNP_P3_176135_13175 | NW_004518432.1 | Scaffold3850 | 13175                   | TT                              | AA                | 1946695970               |
| SNP_P3_176136_674   | NW_004518433.1 | Scaffold3851 | 674                     | TT                              | AA                | 1946695972               |
| SNP_P3_176137_1438  | NW_004518433.1 | Scaffold3851 | 1438                    | TT                              | GG                | 1946695974               |
| SNP_P3_176138_1491  | NW_004518433.1 | Scaffold3851 | 1491                    | TT                              | AA                | 1946695977               |
| SNP_P3_176139_1512  | NW_004518433.1 | Scaffold3851 | 1512                    | AA                              | TT                | 1946695979               |
| SNP_P3_176140_1574  | NW_004518433.1 | Scaffold3851 | 1574                    | TT                              | GG                | 1946695981               |
| SNP_P3_176141_1585  | NW_004518433.1 | Scaffold3851 | 1585                    | TT                              | CC                | 1946695983               |
| SNP_P3_176142_1609  | NW_004518433.1 | Scaffold3851 | 1609                    | CC                              | AA                | 1946695985               |
| SNP_P3_176143_1854  | NW_004518433.1 | Scaffold3851 | 1854                    | GG                              | CC                | 1946695987               |
| SNP_P3_176144_3173  | NW_004518434.1 | Scaffold3852 | 3173                    | AA                              | GG                | 1946695989               |
| SNP_P3_176145_3209  | NW_004518434.1 | Scaffold3852 | 3209                    | AA                              | TT                | 1946695991               |
| SNP_P3_176146_3216  | NW_004518434.1 | Scaffold3852 | 3216                    | TT                              | CC                | 1946695993               |
| SNP_P3_176147_424   | NW_004518436.1 | Scaffold3856 | 424                     | AA                              | TT                | 1946695995               |
| SNP_P3_176148_571   | NW_004518436.1 | Scaffold3856 | 571                     | GG                              | TT                | 1946695997               |
| SNP_P3_176149_615   | NW_004518436.1 | Scaffold3856 | 615                     | AA                              | GG                | 1946695999               |
| SNP_P3_176150_5566  | NW_004518436.1 | Scaffold3856 | 5566                    | TT                              | CC                | 1946696001               |
| SNP_P3_176151_5732  | NW_004518436.1 | Scaffold3856 | 5732                    | CC                              | TT                | 1946696003               |

| SNPs IDs            | Chromosome IDs | Chromosomes  | Physical positions (bp) | CDC Frontier (Reference genome) | (Pusa 256 & HPNB) | NCBI SNPdb Accession IDs |
|---------------------|----------------|--------------|-------------------------|---------------------------------|-------------------|--------------------------|
| SNP_P3_176152_5901  | NW_004518436.1 | Scaffold3856 | 5901                    | AA                              | GG                | 1946696005               |
| SNP_P3_176153_6117  | NW_004518436.1 | Scaffold3856 | 6117                    | AA                              | TT                | 1946696007               |
| SNP_P3_176154_6148  | NW_004518436.1 | Scaffold3856 | 6148                    | TT                              | CC                | 1946696009               |
| SNP_P3_176155_6157  | NW_004518436.1 | Scaffold3856 | 6157                    | GG                              | TT                | 1946696011               |
| SNP_P3_176156_6695  | NW_004518436.1 | Scaffold3856 | 6695                    | GG                              | TT                | 1946696013               |
| SNP_P3_176157_6786  | NW_004518436.1 | Scaffold3856 | 6786                    | TT                              | CC                | 1946696015               |
| SNP_P3_176158_6826  | NW_004518436.1 | Scaffold3856 | 6826                    | TT                              | GG                | 1946696019               |
| SNP_P3_176159_10177 | NW_004518436.1 | Scaffold3856 | 10177                   | GG                              | AA                | 1946696021               |
| SNP_P3_176160_813   | NW_004518438.1 | Scaffold3858 | 813                     | GG                              | AA                | 1946696023               |
| SNP_P3_176161_15517 | NW_004518444.1 | Scaffold3865 | 15517                   | CC                              | AA                | 1946696025               |
| SNP_P3_176163_63138 | NW_004518444.1 | Scaffold3865 | 63138                   | CC                              | GG                | 1946696027               |
| SNP_P3_176164_63145 | NW_004518444.1 | Scaffold3865 | 63145                   | CC                              | TT                | 1946696029               |
| SNP_P3_176165_63148 | NW_004518444.1 | Scaffold3865 | 63148                   | AA                              | GG                | 1946696031               |
| SNP_P3_176166_63167 | NW_004518444.1 | Scaffold3865 | 63167                   | GG                              | CC                | 1946696033               |
| SNP_P3_176167_63169 | NW_004518444.1 | Scaffold3865 | 63169                   | TT                              | CC                | 1946696035               |
| SNP_P3_176168_63177 | NW_004518444.1 | Scaffold3865 | 63177                   | TT                              | GG                | 1946696037               |
| SNP_P3_176169_63235 | NW_004518444.1 | Scaffold3865 | 63235                   | TT                              | CC                | 1946696039               |
| SNP_P3_176170_63464 | NW_004518444.1 | Scaffold3865 | 63464                   | AA                              | TT                | 1946696042               |
| SNP_P3_176171_63963 | NW_004518444.1 | Scaffold3865 | 63963                   | AA                              | CC                | 1946696045               |
| SNP_P3_176172_64278 | NW_004518444.1 | Scaffold3865 | 64278                   | AA                              | CC                | 1946696048               |
| SNP_P3_176173_64294 | NW_004518444.1 | Scaffold3865 | 64294                   | AA                              | TT                | 1946696050               |
| SNP_P3_176174_64317 | NW_004518444.1 | Scaffold3865 | 64317                   | GG                              | TT                | 1946696052               |
| SNP_P3_176175_64361 | NW_004518444.1 | Scaffold3865 | 64361                   | TT                              | CC                | 1946696055               |
| SNP_P3_176176_64397 | NW_004518444.1 | Scaffold3865 | 64397                   | TT                              | CC                | 1946696057               |
| SNP_P3_176177_64439 | NW_004518444.1 | Scaffold3865 | 64439                   | TT                              | AA                | 1946696059               |
| SNP_P3_176178_64486 | NW_004518444.1 | Scaffold3865 | 64486                   | TT                              | AA                | 1946696061               |
| SNP_P3_176179_64581 | NW_004518444.1 | Scaffold3865 | 64581                   | GG                              | CC                | 1946696063               |
| SNP_P3_176180_64613 | NW_004518444.1 | Scaffold3865 | 64613                   | AA                              | TT                | 1946696065               |
| SNP_P3_176181_2514  | NW_004518450.1 | Scaffold3874 | 2514                    | AA                              | GG                | 1946696068               |
| SNP_P3_176182_2531  | NW_004518450.1 | Scaffold3874 | 2531                    | TT                              | CC                | 1946696070               |
| SNP_P3_176183_2627  | NW_004518450.1 | Scaffold3874 | 2627                    | TT                              | CC                | 1946696072               |
| SNP_P3_176184_2680  | NW_004518450.1 | Scaffold3874 | 2680                    | AA                              | CC                | 1946696074               |
| SNP_P3_176185_2885  | NW_004518450.1 | Scaffold3874 | 2885                    | AA                              | GG                | 1946696076               |
| SNP_P3_176186_7513  | NW_004518450.1 | Scaffold3874 | 7513                    | AA                              | TT                | 1946696078               |
| SNP_P3_176187_7557  | NW_004518450.1 | Scaffold3874 | 7557                    | GG                              | CC                | 1946696080               |
| SNP_P3_176188_7571  | NW_004518450.1 | Scaffold3874 | 7571                    | AA                              | CC                | 1946696082               |
| SNP_P3_176189_7854  | NW_004518450.1 | Scaffold3874 | 7854                    | TT                              | CC                | 1946696084               |
| SNP_P3_176190_8006  | NW_004518450.1 | Scaffold3874 | 8006                    | GG                              | TT                | 1946696086               |
| SNP_P3_176191_8013  | NW_004518450.1 | Scaffold3874 | 8013                    | AA                              | GG                | 1946696088               |
| SNP_P3_176192_8020  | NW_004518450.1 | Scaffold3874 | 8020                    | CC                              | TT                | 1946696090               |
| SNP_P3_176193_8055  | NW_004518450.1 | Scaffold3874 | 8055                    | AA                              | GG                | 1946696092               |
| SNP_P3_176194_9201  | NW_004518450.1 | Scaffold3874 | 9201                    | AA                              | GG                | 1946696094               |

| SNPs IDs            | Chromosome IDs | Chromosomes  | Physical positions (bp) | CDC Frontier (Reference genome) | (Pusa 256 & HPNB) | NCBI SNPdb Accession IDs |
|---------------------|----------------|--------------|-------------------------|---------------------------------|-------------------|--------------------------|
| SNP_P3_176195_9393  | NW_004518450.1 | Scaffold3874 | 9393                    | AA                              | TT                | 1946696096               |
| SNP_P3_176196_9445  | NW_004518450.1 | Scaffold3874 | 9445                    | AA                              | CC                | 1946696098               |
| SNP_P3_176197_9474  | NW_004518450.1 | Scaffold3874 | 9474                    | AA                              | GG                | 1946696100               |
| SNP_P3_176198_9484  | NW_004518450.1 | Scaffold3874 | 9484                    | TT                              | CC                | 1946696102               |
| SNP_P3_176199_9531  | NW_004518450.1 | Scaffold3874 | 9531                    | GG                              | AA                | 1946696105               |
| SNP_P3_176200_15901 | NW_004518450.1 | Scaffold3874 | 15901                   | TT                              | CC                | 1946696107               |
| SNP_P3_176201_16124 | NW_004518450.1 | Scaffold3874 | 16124                   | TT                              | CC                | 1946696109               |
| SNP_P3_176202_16169 | NW_004518450.1 | Scaffold3874 | 16169                   | AA                              | TT                | 1946696111               |
| SNP_P3_176203_16226 | NW_004518450.1 | Scaffold3874 | 16226                   | GG                              | TT                | 1946696113               |
| SNP_P3_176204_16767 | NW_004518450.1 | Scaffold3874 | 16767                   | AA                              | CC                | 1946696115               |
| SNP_P3_176205_4845  | NW_004518451.1 | Scaffold3876 | 4845                    | AA                              | TT                | 1946696118               |
| SNP_P3_176206_5322  | NW_004518451.1 | Scaffold3876 | 5322                    | CC                              | GG                | 1946696120               |
| SNP_P3_176207_11584 | NW_004518451.1 | Scaffold3876 | 11584                   | TT                              | AA                | 1946696122               |
| SNP_P3_176208_11696 | NW_004518451.1 | Scaffold3876 | 11696                   | CC                              | TT                | 1946696124               |
| SNP_P3_176209_29823 | NW_004518451.1 | Scaffold3876 | 29823                   | GG                              | AA                | 1946696127               |
| SNP_P3_176210_29830 | NW_004518451.1 | Scaffold3876 | 29830                   | TT                              | GG                | 1946696129               |
| SNP_P3_176211_29869 | NW_004518451.1 | Scaffold3876 | 29869                   | AA                              | GG                | 1946696131               |
| SNP_P3_176212_32793 | NW_004518451.1 | Scaffold3876 | 32793                   | AA                              | GG                | 1946696133               |
| SNP_P3_176213_33266 | NW_004518451.1 | Scaffold3876 | 33266                   | CC                              | GG                | 1946696135               |
| SNP_P3_176214_1978  | NW_004518453.1 | Scaffold3878 | 1978                    | GG                              | AA                | 1946696137               |
| SNP_P3_176215_1997  | NW_004518453.1 | Scaffold3878 | 1997                    | AA                              | GG                | 1946696139               |
| SNP_P3_176216_2270  | NW_004518453.1 | Scaffold3878 | 2270                    | CC                              | GG                | 1946696141               |
| SNP_P3_176217_2062  | NW_004518455.1 | Scaffold3881 | 2062                    | TT                              | GG                | 1946696143               |
| SNP_P3_176218_6240  | NW_004518455.1 | Scaffold3881 | 6240                    | AA                              | TT                | 1946696145               |
| SNP_P3_176219_8527  | NW_004518455.1 | Scaffold3881 | 8527                    | AA                              | GG                | 1946696147               |
| SNP_P3_176220_8528  | NW_004518455.1 | Scaffold3881 | 8528                    | TT                              | GG                | 1946696149               |
| SNP_P3_176221_1699  | NW_004518456.1 | Scaffold3882 | 1699                    | TT                              | CC                | 1946696152               |
| SNP_P3_176222_1744  | NW_004518456.1 | Scaffold3882 | 1744                    | CC                              | AA                | 1946696154               |
| SNP_P3_176223_1748  | NW_004518456.1 | Scaffold3882 | 1748                    | AA                              | CC                | 1946696156               |
| SNP_P3_176224_1952  | NW_004518456.1 | Scaffold3882 | 1952                    | AA                              | GG                | 1946696158               |
| SNP_P3_176225_1960  | NW_004518456.1 | Scaffold3882 | 1960                    | TT                              | CC                | 1946696161               |
| SNP_P3_176226_2001  | NW_004518456.1 | Scaffold3882 | 2001                    | TT                              | GG                | 1946696163               |
| SNP_P3_176227_2053  | NW_004518456.1 | Scaffold3882 | 2053                    | AA                              | GG                | 1946696165               |
| SNP_P3_176228_2054  | NW_004518456.1 | Scaffold3882 | 2054                    | CC                              | GG                | 1946696167               |
| SNP_P3_176229_2078  | NW_004518456.1 | Scaffold3882 | 2078                    | TT                              | CC                | 1946696169               |
| SNP_P3_176230_563   | NW_004518457.1 | Scaffold3883 | 563                     | GG                              | AA                | 1946696171               |
| SNP_P3_176231_818   | NW_004518457.1 | Scaffold3883 | 818                     | AA                              | TT                | 1946696173               |
| SNP_P3_176232_823   | NW_004518457.1 | Scaffold3883 | 823                     | TT                              | CC                | 1946696175               |
| SNP_P3_176233_849   | NW_004518457.1 | Scaffold3883 | 849                     | TT                              | AA                | 1946696178               |
| SNP_P3_176234_1318  | NW_004518457.1 | Scaffold3883 | 1318                    | AA                              | TT                | 1946696180               |
| SNP_P3_176235_1668  | NW_004518457.1 | Scaffold3883 | 1668                    | CC                              | TT                | 1946696182               |
| SNP_P3_176236_691   | NW_004518463.1 | Scaffold3890 | 691                     | CC                              | TT                | 1946696184               |

| SNPs IDs            | Chromosome IDs | Chromosomes  | Physical positions (bp) | CDC Frontier (Reference genome) | (Pusa 256 & HPNB) | NCBI SNPdb Accession IDs |
|---------------------|----------------|--------------|-------------------------|---------------------------------|-------------------|--------------------------|
| SNP_P3_176237_947   | NW_004518463.1 | Scaffold3890 | 947                     | GG                              | AA                | 1946696186               |
| SNP_P3_176238_964   | NW_004518463.1 | Scaffold3890 | 964                     | GG                              | AA                | 1946696188               |
| SNP_P3_176239_1070  | NW_004518463.1 | Scaffold3890 | 1070                    | TT                              | CC                | 1946696190               |
| SNP_P3_176240_1110  | NW_004518463.1 | Scaffold3890 | 1110                    | TT                              | CC                | 1946696192               |
| SNP_P3_176241_5424  | NW_004518463.1 | Scaffold3890 | 5424                    | GG                              | AA                | 1946696194               |
| SNP_P3_176242_5593  | NW_004518463.1 | Scaffold3890 | 5593                    | GG                              | AA                | 1946696195               |
| SNP_P3_176243_5635  | NW_004518463.1 | Scaffold3890 | 5635                    | TT                              | CC                | 1946696198               |
| SNP_P3_176244_5708  | NW_004518463.1 | Scaffold3890 | 5708                    | TT                              | AA                | 1946696200               |
| SNP_P3_176245_5775  | NW_004518463.1 | Scaffold3890 | 5775                    | CC                              | TT                | 1946696202               |
| SNP_P3_176246_8248  | NW_004518463.1 | Scaffold3890 | 8248                    | TT                              | CC                | 1946696205               |
| SNP_P3_176247_8267  | NW_004518463.1 | Scaffold3890 | 8267                    | TT                              | CC                | 1946696207               |
| SNP_P3_176248_8653  | NW_004518463.1 | Scaffold3890 | 8653                    | TT                              | AA                | 1946696209               |
| SNP_P3_176249_9031  | NW_004518463.1 | Scaffold3890 | 9031                    | TT                              | AA                | 1946696211               |
| SNP_P3_176250_9151  | NW_004518463.1 | Scaffold3890 | 9151                    | TT                              | CC                | 1946696213               |
| SNP_P3_176251_9157  | NW_004518463.1 | Scaffold3890 | 9157                    | CC                              | AA                | 1946696215               |
| SNP_P3_176252_10941 | NW_004518463.1 | Scaffold3890 | 10941                   | AA                              | GG                | 1946696217               |
| SNP_P3_176254_765   | NW_004518466.1 | Scaffold3896 | 765                     | CC                              | TT                | 1946696219               |
| SNP_P3_176255_784   | NW_004518466.1 | Scaffold3896 | 784                     | CC                              | TT                | 1946696221               |
| SNP_P3_176256_1116  | NW_004518466.1 | Scaffold3896 | 1116                    | CC                              | AA                | 1946696223               |
| SNP_P3_176258_2265  | NW_004518466.1 | Scaffold3896 | 2265                    | CC                              | TT                | 1946696225               |
| SNP_P3_176259_64    | NW_004518469.1 | Scaffold3900 | 64                      | AA                              | GG                | 1946696227               |
| SNP_P3_176261_4631  | NW_004518469.1 | Scaffold3900 | 4631                    | TT                              | GG                | 1946696229               |
| SNP_P3_176262_4655  | NW_004518469.1 | Scaffold3900 | 4655                    | GG                              | CC                | 1946696231               |
| SNP_P3_176264_4727  | NW_004518469.1 | Scaffold3900 | 4727                    | AA                              | GG                | 1946696233               |
| SNP_P3_176265_4746  | NW_004518469.1 | Scaffold3900 | 4746                    | AA                              | TT                | 1946696235               |
| SNP_P3_176266_5055  | NW_004518469.1 | Scaffold3900 | 5055                    | CC                              | GG                | 1946696237               |
| SNP_P3_176267_5319  | NW_004518469.1 | Scaffold3900 | 5319                    | AA                              | TT                | 1946696239               |
| SNP_P3_176268_5338  | NW_004518469.1 | Scaffold3900 | 5338                    | TT                              | AA                | 1946696242               |
| SNP_P3_176269_6959  | NW_004518469.1 | Scaffold3900 | 6959                    | TT                              | GG                | 1946696244               |
| SNP_P3_176270_6990  | NW_004518469.1 | Scaffold3900 | 6990                    | GG                              | AA                | 1946696246               |
| SNP_P3_176271_7176  | NW_004518469.1 | Scaffold3900 | 7176                    | TT                              | GG                | 1946696248               |
| SNP_P3_176272_7178  | NW_004518469.1 | Scaffold3900 | 7178                    | TT                              | CC                | 1946696250               |
| SNP_P3_176273_7355  | NW_004518469.1 | Scaffold3900 | 7355                    | AA                              | CC                | 1946696252               |
| SNP_P3_176274_7414  | NW_004518469.1 | Scaffold3900 | 7414                    | TT                              | CC                | 1946696254               |
| SNP_P3_176275_7458  | NW_004518469.1 | Scaffold3900 | 7458                    | AA                              | GG                | 1946696256               |
| SNP_P3_176276_7552  | NW_004518469.1 | Scaffold3900 | 7552                    | AA                              | TT                | 1946696258               |
| SNP_P3_176277_7704  | NW_004518469.1 | Scaffold3900 | 7704                    | GG                              | AA                | 1946696260               |
| SNP_P3_176278_7810  | NW_004518469.1 | Scaffold3900 | 7810                    | AA                              | TT                | 1946696262               |
| SNP_P3_176279_7811  | NW_004518469.1 | Scaffold3900 | 7811                    | AA                              | GG                | 1946696264               |
| SNP_P3_176280_7812  | NW_004518469.1 | Scaffold3900 | 7812                    | TT                              | CC                | 1946696266               |
| SNP_P3_176281_7900  | NW_004518469.1 | Scaffold3900 | 7900                    | GG                              | TT                | 1946696268               |
| SNP_P3_176282_8768  | NW_004518469.1 | Scaffold3900 | 8768                    | TT                              | GG                | 1946696270               |

| SNPs IDs            | Chromosome IDs | Chromosomes  | Physical positions (bp) | CDC Frontier (Reference genome) | (Pusa 256 & HPNB) | NCBI SNPdb Accession IDs |
|---------------------|----------------|--------------|-------------------------|---------------------------------|-------------------|--------------------------|
| SNP_P3_176283_9088  | NW_004518469.1 | Scaffold3900 | 9088                    | TT                              | AA                | 1946696272               |
| SNP_P3_176284_9337  | NW_004518469.1 | Scaffold3900 | 9337                    | CC                              | GG                | 1946696274               |
| SNP_P3_176285_9389  | NW_004518469.1 | Scaffold3900 | 9389                    | TT                              | CC                | 1946696276               |
| SNP_P3_176286_13822 | NW_004518469.1 | Scaffold3900 | 13822                   | AA                              | TT                | 1946696278               |
| SNP_P3_176287_13855 | NW_004518469.1 | Scaffold3900 | 13855                   | AA                              | GG                | 1946696280               |
| SNP_P3_176288_13965 | NW_004518469.1 | Scaffold3900 | 13965                   | TT                              | AA                | 1946696282               |
| SNP_P3_176289_14068 | NW_004518469.1 | Scaffold3900 | 14068                   | GG                              | TT                | 1946696284               |
| SNP_P3_176290_14140 | NW_004518469.1 | Scaffold3900 | 14140                   | TT                              | CC                | 1946696286               |
| SNP_P3_176291_14504 | NW_004518469.1 | Scaffold3900 | 14504                   | AA                              | CC                | 1946696288               |
| SNP_P3_176292_14544 | NW_004518469.1 | Scaffold3900 | 14544                   | GG                              | AA                | 1946696292               |
| SNP_P3_176293_14583 | NW_004518469.1 | Scaffold3900 | 14583                   | CC                              | GG                | 1946696294               |
| SNP_P3_176294_14586 | NW_004518469.1 | Scaffold3900 | 14586                   | GG                              | TT                | 1946696296               |
| SNP_P3_176295_52    | NW_004518470.1 | Scaffold3901 | 52                      | AA                              | GG                | 1946696298               |
| SNP_P3_176296_81    | NW_004518470.1 | Scaffold3901 | 81                      | GG                              | AA                | 1946696299               |
| SNP_P3_176297_165   | NW_004518470.1 | Scaffold3901 | 165                     | CC                              | TT                | 1946696301               |
| SNP_P3_176298_443   | NW_004518470.1 | Scaffold3901 | 443                     | AA                              | GG                | 1946696303               |
| SNP_P3_176299_482   | NW_004518470.1 | Scaffold3901 | 482                     | AA                              | CC                | 1946696305               |
| SNP_P3_176300_2928  | NW_004518471.1 | Scaffold3902 | 2928                    | GG                              | TT                | 1946696307               |
| SNP_P3_176301_2939  | NW_004518471.1 | Scaffold3902 | 2939                    | TT                              | CC                | 1946696309               |
| SNP_P3_176302_3082  | NW_004518471.1 | Scaffold3902 | 3082                    | GG                              | TT                | 1946696311               |
| SNP_P3_176303_3119  | NW_004518471.1 | Scaffold3902 | 3119                    | GG                              | TT                | 1946696313               |
| SNP_P3_176304_3126  | NW_004518471.1 | Scaffold3902 | 3126                    | TT                              | CC                | 1946696315               |
| SNP_P3_176305_3202  | NW_004518471.1 | Scaffold3902 | 3202                    | AA                              | GG                | 1946696317               |
| SNP_P3_176306_3205  | NW_004518471.1 | Scaffold3902 | 3205                    | GG                              | AA                | 1946696320               |
| SNP_P3_176307_3247  | NW_004518471.1 | Scaffold3902 | 3247                    | TT                              | CC                | 1946696322               |
| SNP_P3_176308_3477  | NW_004518471.1 | Scaffold3902 | 3477                    | AA                              | CC                | 1946696324               |
| SNP_P3_176309_3487  | NW_004518471.1 | Scaffold3902 | 3487                    | GG                              | AA                | 1946696326               |
| SNP_P3_176310_3495  | NW_004518471.1 | Scaffold3902 | 3495                    | TT                              | CC                | 1946696328               |
| SNP_P3_176311_3537  | NW_004518471.1 | Scaffold3902 | 3537                    | CC                              | AA                | 1946696330               |
| SNP_P3_176312_3546  | NW_004518471.1 | Scaffold3902 | 3546                    | CC                              | GG                | 1946696333               |
| SNP_P3_176313_3597  | NW_004518471.1 | Scaffold3902 | 3597                    | AA                              | GG                | 1946696335               |
| SNP_P3_176314_371   | NW_004518474.1 | Scaffold3906 | 371                     | CC                              | TT                | 1946696337               |
| SNP_P3_176315_373   | NW_004518474.1 | Scaffold3906 | 373                     | AA                              | GG                | 1946696339               |
| SNP_P3_176316_730   | NW_004518474.1 | Scaffold3906 | 730                     | TT                              | CC                | 1946696342               |
| SNP_P3_176317_402   | NW_004518475.1 | Scaffold3907 | 402                     | AA                              | CC                | 1946696344               |
| SNP_P3_176318_469   | NW_004518475.1 | Scaffold3907 | 469                     | CC                              | TT                | 1946696346               |
| SNP_P3_176320_3548  | NW_004518475.1 | Scaffold3907 | 3548                    | TT                              | CC                | 1946696348               |
| SNP_P3_176321_3598  | NW_004518475.1 | Scaffold3907 | 3598                    | GG                              | AA                | 1946696351               |
| SNP_P3_176322_3625  | NW_004518475.1 | Scaffold3907 | 3625                    | CC                              | TT                | 1946696353               |
| SNP_P3_176323_3671  | NW_004518475.1 | Scaffold3907 | 3671                    | TT                              | CC                | 1946696355               |
| SNP_P3_176324_4927  | NW_004518475.1 | Scaffold3907 | 4927                    | AA                              | CC                | 1946696357               |
| SNP_P3_176325_6021  | NW_004518475.1 | Scaffold3907 | 6021                    | CC                              | TT                | 1946696359               |

| SNPs IDs            | Chromosome IDs | Chromosomes  | Physical positions (bp) | CDC Frontier (Reference genome) | (Pusa 256 & HPNB) | NCBI SNPdb Accession IDs |
|---------------------|----------------|--------------|-------------------------|---------------------------------|-------------------|--------------------------|
| SNP_P3_176326_6056  | NW_004518475.1 | Scaffold3907 | 6056                    | GG                              | AA                | 1946696361               |
| SNP_P3_176327_6527  | NW_004518475.1 | Scaffold3907 | 6527                    | AA                              | GG                | 1946696363               |
| SNP_P3_176328_7801  | NW_004518477.1 | Scaffold3909 | 7801                    | AA                              | TT                | 1946696365               |
| SNP_P3_176329_8085  | NW_004518477.1 | Scaffold3909 | 8085                    | CC                              | TT                | 1946696367               |
| SNP_P3_176330_8122  | NW_004518477.1 | Scaffold3909 | 8122                    | GG                              | TT                | 1946696369               |
| SNP_P3_176331_8603  | NW_004518477.1 | Scaffold3909 | 8603                    | TT                              | AA                | 1946696372               |
| SNP_P3_176332_8604  | NW_004518477.1 | Scaffold3909 | 8604                    | AA                              | TT                | 1946696374               |
| SNP_P3_176333_32475 | NW_004518477.1 | Scaffold3909 | 32475                   | GG                              | TT                | 1946696376               |
| SNP_P3_176334_39382 | NW_004518477.1 | Scaffold3909 | 39382                   | AA                              | GG                | 1946696378               |
| SNP_P3_176336_6805  | NW_004518480.1 | Scaffold3912 | 6805                    | CC                              | GG                | 1946696380               |
| SNP_P3_176337_3403  | NW_004518482.1 | Scaffold3915 | 3403                    | CC                              | TT                | 1946696382               |
| SNP_P3_176339_7263  | NW_004518482.1 | Scaffold3915 | 7263                    | GG                              | AA                | 1946696384               |
| SNP_P3_176340_7314  | NW_004518482.1 | Scaffold3915 | 7314                    | TT                              | CC                | 1946696386               |
| SNP_P3_176341_7413  | NW_004518482.1 | Scaffold3915 | 7413                    | CC                              | TT                | 1946696388               |
| SNP_P3_176342_7715  | NW_004518482.1 | Scaffold3915 | 7715                    | TT                              | CC                | 1946696390               |
| SNP_P3_176343_1912  | NW_004518484.1 | Scaffold3917 | 1912                    | TT                              | CC                | 1946696392               |
| SNP_P3_176344_1952  | NW_004518484.1 | Scaffold3917 | 1952                    | AA                              | CC                | 1946696394               |
| SNP_P3_176345_1953  | NW_004518484.1 | Scaffold3917 | 1953                    | GG                              | AA                | 1946696396               |
| SNP_P3_176346_2192  | NW_004518484.1 | Scaffold3917 | 2192                    | CC                              | AA                | 1946696398               |
| SNP_P3_176347_2222  | NW_004518484.1 | Scaffold3917 | 2222                    | GG                              | AA                | 1946696400               |
| SNP_P3_176348_2298  | NW_004518484.1 | Scaffold3917 | 2298                    | GG                              | AA                | 1946696402               |
| SNP_P3_176349_2331  | NW_004518484.1 | Scaffold3917 | 2331                    | CC                              | AA                | 1946696404               |
| SNP_P3_176350_2526  | NW_004518484.1 | Scaffold3917 | 2526                    | CC                              | AA                | 1946696406               |
| SNP_P3_176351_2604  | NW_004518484.1 | Scaffold3917 | 2604                    | AA                              | GG                | 1946696408               |
| SNP_P3_176352_2821  | NW_004518484.1 | Scaffold3917 | 2821                    | CC                              | TT                | 1946696410               |
| SNP_P3_176353_3031  | NW_004518484.1 | Scaffold3917 | 3031                    | AA                              | TT                | 1946696412               |
| SNP_P3_176354_3121  | NW_004518484.1 | Scaffold3917 | 3121                    | CC                              | TT                | 1946696415               |
| SNP_P3_176355_3128  | NW_004518484.1 | Scaffold3917 | 3128                    | TT                              | CC                | 1946696417               |
| SNP_P3_176356_3183  | NW_004518484.1 | Scaffold3917 | 3183                    | AA                              | GG                | 1946696419               |
| SNP_P3_176357_3251  | NW_004518484.1 | Scaffold3917 | 3251                    | AA                              | CC                | 1946696421               |
| SNP_P3_176358_3304  | NW_004518484.1 | Scaffold3917 | 3304                    | TT                              | CC                | 1946696423               |
| SNP_P3_176359_3319  | NW_004518484.1 | Scaffold3917 | 3319                    | TT                              | AA                | 1946696425               |
| SNP_P3_176360_3356  | NW_004518484.1 | Scaffold3917 | 3356                    | TT                              | CC                | 1946696427               |
| SNP_P3_176361_3375  | NW_004518484.1 | Scaffold3917 | 3375                    | CC                              | AA                | 1946696429               |
| SNP_P3_176362_3468  | NW_004518484.1 | Scaffold3917 | 3468                    | GG                              | TT                | 1946696431               |
| SNP_P3_176363_3557  | NW_004518484.1 | Scaffold3917 | 3557                    | TT                              | AA                | 1946696433               |
| SNP_P3_176364_3843  | NW_004518484.1 | Scaffold3917 | 3843                    | TT                              | CC                | 1946696435               |
| SNP_P3_176365_3890  | NW_004518484.1 | Scaffold3917 | 3890                    | AA                              | TT                | 1946696437               |
| SNP_P3_176366_4233  | NW_004518484.1 | Scaffold3917 | 4233                    | TT                              | CC                | 1946696439               |
| SNP_P3_176367_4373  | NW_004518484.1 | Scaffold3917 | 4373                    | TT                              | CC                | 1946696441               |
| SNP_P3_176368_4418  | NW_004518484.1 | Scaffold3917 | 4418                    | CC                              | AA                | 1946696442               |
| SNP_P3_176369_4423  | NW_004518484.1 | Scaffold3917 | 4423                    | CC                              | TT                | 1946696444               |

| SNPs IDs           | Chromosome IDs | Chromosomes  | Physical positions (bp) | CDC Frontier (Reference genome) | (Pusa 256 & HPNB) | NCBI SNPdb Accession IDs |
|--------------------|----------------|--------------|-------------------------|---------------------------------|-------------------|--------------------------|
| SNP_P3_176370_4440 | NW_004518484.1 | Scaffold3917 | 4440                    | CC                              | TT                | 1946696446               |
| SNP_P3_176371_4483 | NW_004518484.1 | Scaffold3917 | 4483                    | GG                              | AA                | 1946696448               |
| SNP_P3_176372_3942 | NW_004518485.1 | Scaffold3918 | 3942                    | TT                              | CC                | 1946696450               |
| SNP_P3_176373_3987 | NW_004518485.1 | Scaffold3918 | 3987                    | AA                              | GG                | 1946696452               |
| SNP_P3_176374_4003 | NW_004518485.1 | Scaffold3918 | 4003                    | TT                              | GG                | 1946696454               |
| SNP_P3_176375_4012 | NW_004518485.1 | Scaffold3918 | 4012                    | AA                              | GG                | 1946696456               |
| SNP_P3_176376_4073 | NW_004518485.1 | Scaffold3918 | 4073                    | AA                              | TT                | 1946696458               |
| SNP_P3_176377_4104 | NW_004518485.1 | Scaffold3918 | 4104                    | CC                              | AA                | 1946696460               |
| SNP_P3_176378_4139 | NW_004518485.1 | Scaffold3918 | 4139                    | AA                              | TT                | 1946696462               |
| SNP_P3_176379_4242 | NW_004518485.1 | Scaffold3918 | 4242                    | AA                              | CC                | 1946696464               |
| SNP_P3_176381_4390 | NW_004518485.1 | Scaffold3918 | 4390                    | AA                              | TT                | 1946696466               |
| SNP_P3_176382_4405 | NW_004518485.1 | Scaffold3918 | 4405                    | AA                              | GG                | 1946696468               |
| SNP_P3_176384_4654 | NW_004518485.1 | Scaffold3918 | 4654                    | CC                              | AA                | 1946696470               |
| SNP_P3_176385_4655 | NW_004518485.1 | Scaffold3918 | 4655                    | GG                              | AA                | 1946696472               |
| SNP_P3_176386_4696 | NW_004518485.1 | Scaffold3918 | 4696                    | AA                              | TT                | 1946696474               |
| SNP_P3_176387_4836 | NW_004518485.1 | Scaffold3918 | 4836                    | CC                              | AA                | 1946696476               |
| SNP_P3_176388_4852 | NW_004518485.1 | Scaffold3918 | 4852                    | GG                              | AA                | 1946696478               |
| SNP_P3_176389_4860 | NW_004518485.1 | Scaffold3918 | 4860                    | GG                              | CC                | 1946696480               |
| SNP_P3_176390_4984 | NW_004518485.1 | Scaffold3918 | 4984                    | TT                              | CC                | 1946696482               |
| SNP_P3_176391_5065 | NW_004518485.1 | Scaffold3918 | 5065                    | CC                              | TT                | 1946696484               |
| SNP_P3_176392_5085 | NW_004518485.1 | Scaffold3918 | 5085                    | TT                              | AA                | 1946696486               |
| SNP_P3_176393_5112 | NW_004518485.1 | Scaffold3918 | 5112                    | AA                              | GG                | 1946696488               |
| SNP_P3_176394_5129 | NW_004518485.1 | Scaffold3918 | 5129                    | CC                              | TT                | 1946696490               |
| SNP_P3_176395_5143 | NW_004518485.1 | Scaffold3918 | 5143                    | AA                              | CC                | 1946696492               |
| SNP_P3_176396_5199 | NW_004518485.1 | Scaffold3918 | 5199                    | TT                              | CC                | 1946696494               |
| SNP_P3_176397_5267 | NW_004518485.1 | Scaffold3918 | 5267                    | TT                              | CC                | 1946696496               |
| SNP_P3_176398_5385 | NW_004518485.1 | Scaffold3918 | 5385                    | TT                              | CC                | 1946696499               |
| SNP_P3_176399_5398 | NW_004518485.1 | Scaffold3918 | 5398                    | AA                              | CC                | 1946696501               |
| SNP_P3_176400_5409 | NW_004518485.1 | Scaffold3918 | 5409                    | TT                              | CC                | 1946696503               |
| SNP_P3_176401_5442 | NW_004518485.1 | Scaffold3918 | 5442                    | TT                              | CC                | 1946696505               |
| SNP_P3_176402_5460 | NW_004518485.1 | Scaffold3918 | 5460                    | CC                              | TT                | 1946696508               |
| SNP_P3_176403_5481 | NW_004518485.1 | Scaffold3918 | 5481                    | GG                              | TT                | 1946696510               |
| SNP_P3_176404_5521 | NW_004518485.1 | Scaffold3918 | 5521                    | GG                              | CC                | 1946696512               |
| SNP_P3_176405_5582 | NW_004518485.1 | Scaffold3918 | 5582                    | TT                              | AA                | 1946696514               |
| SNP_P3_176406_5597 | NW_004518485.1 | Scaffold3918 | 5597                    | TT                              | AA                | 1946696516               |
| SNP_P3_176407_5632 | NW_004518485.1 | Scaffold3918 | 5632                    | CC                              | GG                | 1946696519               |
| SNP_P3_176408_5650 | NW_004518485.1 | Scaffold3918 | 5650                    | TT                              | CC                | 1946696521               |
| SNP_P3_176409_5696 | NW_004518485.1 | Scaffold3918 | 5696                    | TT                              | AA                | 1946696523               |
| SNP_P3_176410_5965 | NW_004518485.1 | Scaffold3918 | 5965                    | TT                              | AA                | 1946696525               |
| SNP_P3_176411_6080 | NW_004518485.1 | Scaffold3918 | 6080                    | GG                              | AA                | 1946696527               |
| SNP_P3_176412_6086 | NW_004518485.1 | Scaffold3918 | 6086                    | TT                              | GG                | 1946696529               |
| SNP_P3_176413_6225 | NW_004518485.1 | Scaffold3918 | 6225                    | AA                              | TT                | 1946696531               |

| SNPs IDs           | Chromosome IDs | Chromosomes  | Physical positions (bp) | CDC Frontier (Reference genome) | (Pusa 256 & HPNB) | NCBI SNPdb Accession IDs |
|--------------------|----------------|--------------|-------------------------|---------------------------------|-------------------|--------------------------|
| SNP_P3_176414_6307 | NW_004518485.1 | Scaffold3918 | 6307                    | TT                              | AA                | 1946696533               |
| SNP_P3_176415_6356 | NW_004518485.1 | Scaffold3918 | 6356                    | TT                              | CC                | 1946696535               |
| SNP_P3_176416_6421 | NW_004518485.1 | Scaffold3918 | 6421                    | AA                              | TT                | 1946696538               |
| SNP_P3_176417_6494 | NW_004518485.1 | Scaffold3918 | 6494                    | AA                              | CC                | 1946696540               |
| SNP_P3_176418_6502 | NW_004518485.1 | Scaffold3918 | 6502                    | GG                              | AA                | 1946696542               |
| SNP_P3_176419_6535 | NW_004518485.1 | Scaffold3918 | 6535                    | TT                              | CC                | 1946696545               |
| SNP_P3_176420_6548 | NW_004518485.1 | Scaffold3918 | 6548                    | TT                              | CC                | 1946696548               |
| SNP_P3_176421_6602 | NW_004518485.1 | Scaffold3918 | 6602                    | AA                              | CC                | 1946696550               |
| SNP_P3_176422_6690 | NW_004518485.1 | Scaffold3918 | 6690                    | CC                              | TT                | 1946696552               |
| SNP_P3_176423_6909 | NW_004518485.1 | Scaffold3918 | 6909                    | CC                              | AA                | 1946696554               |
| SNP_P3_176424_291  | NW_004518486.1 | Scaffold3919 | 291                     | TT                              | CC                | 1946696557               |
| SNP_P3_176425_292  | NW_004518486.1 | Scaffold3919 | 292                     | GG                              | AA                | 1946696559               |
| SNP_P3_176426_673  | NW_004518486.1 | Scaffold3919 | 673                     | CC                              | AA                | 1946696561               |
| SNP_P3_176427_116  | NW_004518487.1 | Scaffold3920 | 116                     | CC                              | TT                | 1946696563               |
| SNP_P3_176428_351  | NW_004518487.1 | Scaffold3920 | 351                     | AA                              | GG                | 1946696565               |
| SNP_P3_176429_453  | NW_004518487.1 | Scaffold3920 | 453                     | AA                              | CC                | 1946696567               |
| SNP_P3_176430_475  | NW_004518487.1 | Scaffold3920 | 475                     | GG                              | AA                | 1946696569               |
| SNP_P3_176431_495  | NW_004518487.1 | Scaffold3920 | 495                     | GG                              | AA                | 1946696571               |
| SNP_P3_176432_207  | NW_004518489.1 | Scaffold3923 | 207                     | TT                              | CC                | 1946696573               |
| SNP_P3_176433_1704 | NW_004518489.1 | Scaffold3923 | 1704                    | AA                              | GG                | 1946696575               |
| SNP_P3_176434_1845 | NW_004518489.1 | Scaffold3923 | 1845                    | CC                              | TT                | 1946696577               |
| SNP_P3_176435_1849 | NW_004518489.1 | Scaffold3923 | 1849                    | TT                              | GG                | 1946696579               |
| SNP_P3_176436_1859 | NW_004518489.1 | Scaffold3923 | 1859                    | GG                              | AA                | 1946696582               |
| SNP_P3_176437_1862 | NW_004518489.1 | Scaffold3923 | 1862                    | TT                              | CC                | 1946696585               |
| SNP_P3_176438_1924 | NW_004518489.1 | Scaffold3923 | 1924                    | AA                              | GG                | 1946696587               |
| SNP_P3_176439_1928 | NW_004518489.1 | Scaffold3923 | 1928                    | AA                              | GG                | 1946696589               |
| SNP_P3_176440_2003 | NW_004518489.1 | Scaffold3923 | 2003                    | GG                              | TT                | 1946696591               |
| SNP_P3_176441_2018 | NW_004518489.1 | Scaffold3923 | 2018                    | AA                              | GG                | 1946696593               |
| SNP_P3_176442_2246 | NW_004518489.1 | Scaffold3923 | 2246                    | CC                              | AA                | 1946696595               |
| SNP_P3_176443_2880 | NW_004518489.1 | Scaffold3923 | 2880                    | CC                              | TT                | 1946696597               |
| SNP_P3_176444_2980 | NW_004518489.1 | Scaffold3923 | 2980                    | GG                              | AA                | 1946696599               |
| SNP_P3_176445_3172 | NW_004518489.1 | Scaffold3923 | 3172                    | GG                              | TT                | 1946696614               |
| SNP_P3_176447_3256 | NW_004518489.1 | Scaffold3923 | 3256                    | AA                              | GG                | 1946696616               |
| SNP_P3_176448_3295 | NW_004518489.1 | Scaffold3923 | 3295                    | AA                              | GG                | 1946696618               |
| SNP_P3_176450_4239 | NW_004518489.1 | Scaffold3923 | 4239                    | TT                              | CC                | 1946696620               |
| SNP_P3_176451_4402 | NW_004518489.1 | Scaffold3923 | 4402                    | TT                              | AA                | 1946696622               |
| SNP_P3_176452_5552 | NW_004518491.1 | Scaffold3925 | 5552                    | GG                              | AA                | 1946696624               |
| SNP_P3_176453_5869 | NW_004518491.1 | Scaffold3925 | 5869                    | GG                              | CC                | 1946696626               |
| SNP_P3_176455_508  | NW_004518493.1 | Scaffold3927 | 508                     | TT                              | CC                | 1946696629               |
| SNP_P3_176456_1360 | NW_004518493.1 | Scaffold3927 | 1360                    | TT                              | AA                | 1946696631               |
| SNP_P3_176457_1443 | NW_004518493.1 | Scaffold3927 | 1443                    | TT                              | CC                | 1946696633               |
| SNP_P3_176459_732  | NW_004518495.1 | Scaffold3932 | 732                     | AA                              | GG                | 1946696635               |



| SNPs IDs            | Chromosome IDs | Chromosomes  | Physical positions (bp) | CDC Frontier (Reference genome) | (Pusa 256 & HPNB) | NCBI SNPdb Accession IDs |
|---------------------|----------------|--------------|-------------------------|---------------------------------|-------------------|--------------------------|
| SNP_P3_176460_2056  | NW_004518495.1 | Scaffold3932 | 2056                    | AA                              | GG                | 1946696637               |
| SNP_P3_176461_2082  | NW_004518495.1 | Scaffold3932 | 2082                    | CC                              | AA                | 1946696639               |
| SNP_P3_176462_2096  | NW_004518495.1 | Scaffold3932 | 2096                    | CC                              | AA                | 1946696641               |
| SNP_P3_176463_2251  | NW_004518495.1 | Scaffold3932 | 2251                    | AA                              | TT                | 1946696643               |
| SNP_P3_176464_1387  | NW_004518496.1 | Scaffold3933 | 1387                    | CC                              | AA                | 1946696645               |
| SNP_P3_176466_1013  | NW_004518497.1 | Scaffold3934 | 1013                    | TT                              | AA                | 1946696647               |
| SNP_P3_176467_1055  | NW_004518497.1 | Scaffold3934 | 1055                    | TT                              | CC                | 1946696649               |
| SNP_P3_176468_3842  | NW_004518497.1 | Scaffold3934 | 3842                    | CC                              | TT                | 1946696651               |
| SNP_P3_176469_3851  | NW_004518497.1 | Scaffold3934 | 3851                    | GG                              | AA                | 1946696654               |
| SNP_P3_176470_4328  | NW_004518497.1 | Scaffold3934 | 4328                    | GG                              | AA                | 1946696656               |
| SNP_P3_176471_4641  | NW_004518497.1 | Scaffold3934 | 4641                    | GG                              | TT                | 1946696658               |
| SNP_P3_176472_14138 | NW_004518497.1 | Scaffold3934 | 14138                   | TT                              | GG                | 1946696660               |
| SNP_P3_176473_14663 | NW_004518497.1 | Scaffold3934 | 14663                   | CC                              | TT                | 1946696662               |
| SNP_P3_176474_17375 | NW_004518497.1 | Scaffold3934 | 17375                   | CC                              | AA                | 1946696664               |
| SNP_P3_176475_17400 | NW_004518497.1 | Scaffold3934 | 17400                   | GG                              | TT                | 1946696666               |
| SNP_P3_176476_17464 | NW_004518497.1 | Scaffold3934 | 17464                   | GG                              | AA                | 1946696668               |
| SNP_P3_176477_18063 | NW_004518497.1 | Scaffold3934 | 18063                   | TT                              | CC                | 1946696670               |
| SNP_P3_176478_18125 | NW_004518497.1 | Scaffold3934 | 18125                   | GG                              | AA                | 1946696673               |
| SNP_P3_176479_342   | NW_004518498.1 | Scaffold3935 | 342                     | GG                              | AA                | 1946696675               |
| SNP_P3_176480_1116  | NW_004518500.1 | Scaffold3938 | 1116                    | TT                              | CC                | 1946696677               |
| SNP_P3_176481_3376  | NW_004518501.1 | Scaffold3939 | 3376                    | TT                              | AA                | 1946696679               |
| SNP_P3_176483_4844  | NW_004518504.1 | Scaffold3942 | 4844                    | CC                              | TT                | 1946696681               |
| SNP_P3_176484_4859  | NW_004518504.1 | Scaffold3942 | 4859                    | TT                              | CC                | 1946696683               |
| SNP_P3_176485_4889  | NW_004518504.1 | Scaffold3942 | 4889                    | GG                              | AA                | 1946696685               |
| SNP_P3_176486_4910  | NW_004518504.1 | Scaffold3942 | 4910                    | GG                              | AA                | 1946696687               |
| SNP_P3_176487_5029  | NW_004518504.1 | Scaffold3942 | 5029                    | TT                              | CC                | 1946696689               |
| SNP_P3_176488_5077  | NW_004518504.1 | Scaffold3942 | 5077                    | GG                              | CC                | 1946696691               |
| SNP_P3_176489_5079  | NW_004518504.1 | Scaffold3942 | 5079                    | TT                              | GG                | 1946696693               |
| SNP_P3_176490_2866  | NW_004518507.1 | Scaffold3945 | 2866                    | GG                              | TT                | 1946696695               |
| SNP_P3_176492_5216  | NW_004518507.1 | Scaffold3945 | 5216                    | GG                              | CC                | 1946696697               |
| SNP_P3_176493_11332 | NW_004518507.1 | Scaffold3945 | 11332                   | TT                              | GG                | 1946696699               |
| SNP_P3_176494_11391 | NW_004518507.1 | Scaffold3945 | 11391                   | TT                              | GG                | 1946696701               |
| SNP_P3_176495_11541 | NW_004518507.1 | Scaffold3945 | 11541                   | AA                              | CC                | 1946696703               |
| SNP_P3_176496_11597 | NW_004518507.1 | Scaffold3945 | 11597                   | GG                              | CC                | 1946696705               |
| SNP_P3_176498_13004 | NW_004518507.1 | Scaffold3945 | 13004                   | TT                              | CC                | 1946696707               |
| SNP_P3_176499_28624 | NW_004518507.1 | Scaffold3945 | 28624                   | GG                              | TT                | 1946696709               |
| SNP_P3_176500_28629 | NW_004518507.1 | Scaffold3945 | 28629                   | TT                              | CC                | 1946696711               |
| SNP_P3_176502_31783 | NW_004518507.1 | Scaffold3945 | 31783                   | AA                              | TT                | 1946696713               |
| SNP_P3_176504_6007  | NW_004518509.1 | Scaffold3947 | 6007                    | CC                              | AA                | 1946696715               |
| SNP_P3_176506_6114  | NW_004518509.1 | Scaffold3947 | 6114                    | TT                              | CC                | 1946696717               |
| SNP_P3_176507_6122  | NW_004518509.1 | Scaffold3947 | 6122                    | TT                              | AA                | 1946696719               |
| SNP_P3_176508_11141 | NW_004518509.1 | Scaffold3947 | 11141                   | CC                              | TT                | 1946696721               |

| SNPs IDs            | Chromosome IDs | Chromosomes  | Physical positions (bp) | CDC Frontier (Reference genome) | (Pusa 256 & HPNB) | NCBI SNPdb Accession IDs |
|---------------------|----------------|--------------|-------------------------|---------------------------------|-------------------|--------------------------|
| SNP_P3_176509_11297 | NW_004518509.1 | Scaffold3947 | 11297                   | CC                              | TT                | 1946696723               |
| SNP_P3_176510_11325 | NW_004518509.1 | Scaffold3947 | 11325                   | CC                              | TT                | 1946696725               |
| SNP_P3_176511_11486 | NW_004518509.1 | Scaffold3947 | 11486                   | TT                              | GG                | 1946696727               |
| SNP_P3_176512_11493 | NW_004518509.1 | Scaffold3947 | 11493                   | TT                              | AA                | 1946696729               |
| SNP_P3_176513_11575 | NW_004518509.1 | Scaffold3947 | 11575                   | TT                              | AA                | 1946696731               |
| SNP_P3_176514_12384 | NW_004518509.1 | Scaffold3947 | 12384                   | GG                              | TT                | 1946696732               |
| SNP_P3_176515_12395 | NW_004518509.1 | Scaffold3947 | 12395                   | TT                              | AA                | 1946696734               |
| SNP_P3_176516_12399 | NW_004518509.1 | Scaffold3947 | 12399                   | AA                              | GG                | 1946696736               |
| SNP_P3_176517_12400 | NW_004518509.1 | Scaffold3947 | 12400                   | GG                              | AA                | 1946696738               |
| SNP_P3_176518_13016 | NW_004518509.1 | Scaffold3947 | 13016                   | CC                              | TT                | 1946696740               |
| SNP_P3_176519_13031 | NW_004518509.1 | Scaffold3947 | 13031                   | CC                              | TT                | 1946696742               |
| SNP_P3_176520_19708 | NW_004518509.1 | Scaffold3947 | 19708                   | GG                              | TT                | 1946696744               |
| SNP_P3_176521_22159 | NW_004518509.1 | Scaffold3947 | 22159                   | AA                              | GG                | 1946696746               |
| SNP_P3_176522_64    | NW_004518510.1 | Scaffold3948 | 64                      | CC                              | GG                | 1946696748               |
| SNP_P3_176523_109   | NW_004518510.1 | Scaffold3948 | 109                     | TT                              | AA                | 1946696750               |
| SNP_P3_176524_111   | NW_004518510.1 | Scaffold3948 | 111                     | CC                              | GG                | 1946696752               |
| SNP_P3_176525_332   | NW_004518510.1 | Scaffold3948 | 332                     | CC                              | GG                | 1946696754               |
| SNP_P3_176526_806   | NW_004518511.1 | Scaffold3950 | 806                     | CC                              | TT                | 1946696756               |
| SNP_P3_176527_1740  | NW_004518511.1 | Scaffold3950 | 1740                    | GG                              | TT                | 1946696758               |
| SNP_P3_176528_1747  | NW_004518511.1 | Scaffold3950 | 1747                    | TT                              | AA                | 1946696761               |
| SNP_P3_176529_4185  | NW_004518511.1 | Scaffold3950 | 4185                    | GG                              | AA                | 1946696763               |
| SNP_P3_176530_4211  | NW_004518511.1 | Scaffold3950 | 4211                    | AA                              | GG                | 1946696765               |
| SNP_P3_176531_4293  | NW_004518511.1 | Scaffold3950 | 4293                    | CC                              | TT                | 1946696767               |
| SNP_P3_176532_4326  | NW_004518511.1 | Scaffold3950 | 4326                    | AA                              | GG                | 1946696769               |
| SNP_P3_176533_4459  | NW_004518511.1 | Scaffold3950 | 4459                    | CC                              | TT                | 1946696771               |
| SNP_P3_176534_4565  | NW_004518511.1 | Scaffold3950 | 4565                    | AA                              | GG                | 1946696773               |
| SNP_P3_176535_4588  | NW_004518511.1 | Scaffold3950 | 4588                    | CC                              | TT                | 1946696774               |
| SNP_P3_176536_4766  | NW_004518511.1 | Scaffold3950 | 4766                    | CC                              | TT                | 1946696776               |
| SNP_P3_176537_4772  | NW_004518511.1 | Scaffold3950 | 4772                    | AA                              | GG                | 1946696778               |
| SNP_P3_176538_6748  | NW_004518511.1 | Scaffold3950 | 6748                    | CC                              | AA                | 1946696780               |
| SNP_P3_176540_6958  | NW_004518511.1 | Scaffold3950 | 6958                    | TT                              | GG                | 1946696782               |
| SNP_P3_176541_7026  | NW_004518511.1 | Scaffold3950 | 7026                    | CC                              | TT                | 1946696784               |
| SNP_P3_176542_7107  | NW_004518511.1 | Scaffold3950 | 7107                    | TT                              | CC                | 1946696786               |
| SNP_P3_176543_7114  | NW_004518511.1 | Scaffold3950 | 7114                    | TT                              | GG                | 1946696788               |
| SNP_P3_176544_7252  | NW_004518511.1 | Scaffold3950 | 7252                    | CC                              | TT                | 1946696790               |
| SNP_P3_176546_7432  | NW_004518511.1 | Scaffold3950 | 7432                    | TT                              | CC                | 1946696792               |
| SNP_P3_176547_7497  | NW_004518511.1 | Scaffold3950 | 7497                    | TT                              | AA                | 1946696794               |
| SNP_P3_176548_7543  | NW_004518511.1 | Scaffold3950 | 7543                    | AA                              | GG                | 1946696796               |
| SNP_P3_176549_7620  | NW_004518511.1 | Scaffold3950 | 7620                    | GG                              | TT                | 1946696799               |
| SNP_P3_176552_8033  | NW_004518511.1 | Scaffold3950 | 8033                    | AA                              | GG                | 1946696801               |
| SNP_P3_176553_8132  | NW_004518511.1 | Scaffold3950 | 8132                    | AA                              | GG                | 1946696803               |
| SNP_P3_176555_8203  | NW_004518511.1 | Scaffold3950 | 8203                    | TT                              | CC                | 1946696805               |

| SNPs IDs            | Chromosome IDs | Chromosomes  | Physical positions (bp) | CDC Frontier (Reference genome) | (Pusa 256 & HPNB) | NCBI SNPdb Accession IDs |
|---------------------|----------------|--------------|-------------------------|---------------------------------|-------------------|--------------------------|
| SNP_P3_176556_8206  | NW_004518511.1 | Scaffold3950 | 8206                    | TT                              | AA                | 1946696808               |
| SNP_P3_176557_8336  | NW_004518511.1 | Scaffold3950 | 8336                    | CC                              | TT                | 1946696811               |
| SNP_P3_176558_8434  | NW_004518511.1 | Scaffold3950 | 8434                    | TT                              | CC                | 1946696813               |
| SNP_P3_176560_8554  | NW_004518511.1 | Scaffold3950 | 8554                    | CC                              | TT                | 1946696815               |
| SNP_P3_176562_8707  | NW_004518511.1 | Scaffold3950 | 8707                    | GG                              | TT                | 1946696820               |
| SNP_P3_176563_8750  | NW_004518511.1 | Scaffold3950 | 8750                    | AA                              | CC                | 1946696822               |
| SNP_P3_176565_8906  | NW_004518511.1 | Scaffold3950 | 8906                    | CC                              | TT                | 1946696824               |
| SNP_P3_176566_8942  | NW_004518511.1 | Scaffold3950 | 8942                    | AA                              | TT                | 1946696826               |
| SNP_P3_176567_8944  | NW_004518511.1 | Scaffold3950 | 8944                    | TT                              | CC                | 1946696828               |
| SNP_P3_176568_8965  | NW_004518511.1 | Scaffold3950 | 8965                    | GG                              | AA                | 1946696830               |
| SNP_P3_176569_9105  | NW_004518511.1 | Scaffold3950 | 9105                    | AA                              | GG                | 1946696832               |
| SNP_P3_176570_9124  | NW_004518511.1 | Scaffold3950 | 9124                    | TT                              | GG                | 1946696834               |
| SNP_P3_176571_9139  | NW_004518511.1 | Scaffold3950 | 9139                    | CC                              | TT                | 1946696836               |
| SNP_P3_176572_9164  | NW_004518511.1 | Scaffold3950 | 9164                    | AA                              | GG                | 1946696838               |
| SNP_P3_176573_9217  | NW_004518511.1 | Scaffold3950 | 9217                    | AA                              | GG                | 1946696840               |
| SNP_P3_176575_12849 | NW_004518511.1 | Scaffold3950 | 12849                   | TT                              | CC                | 1946696842               |
| SNP_P3_176576_13049 | NW_004518511.1 | Scaffold3950 | 13049                   | CC                              | AA                | 1946696844               |
| SNP_P3_176577_15069 | NW_004518511.1 | Scaffold3950 | 15069                   | CC                              | TT                | 1946696846               |
| SNP_P3_176578_1132  | NW_004518512.1 | Scaffold3951 | 1132                    | TT                              | AA                | 1946696849               |
| SNP_P3_176579_1136  | NW_004518512.1 | Scaffold3951 | 1136                    | TT                              | AA                | 1946696851               |
| SNP_P3_176580_1142  | NW_004518512.1 | Scaffold3951 | 1142                    | CC                              | AA                | 1946696853               |
| SNP_P3_176581_1156  | NW_004518512.1 | Scaffold3951 | 1156                    | AA                              | GG                | 1946696855               |
| SNP_P3_176582_1923  | NW_004518512.1 | Scaffold3951 | 1923                    | CC                              | TT                | 1946696857               |
| SNP_P3_176583_1925  | NW_004518512.1 | Scaffold3951 | 1925                    | CC                              | TT                | 1946696859               |
| SNP_P3_176584_1926  | NW_004518512.1 | Scaffold3951 | 1926                    | CC                              | TT                | 1946696861               |
| SNP_P3_176585_1930  | NW_004518512.1 | Scaffold3951 | 1930                    | GG                              | TT                | 1946696863               |
| SNP_P3_176586_1937  | NW_004518512.1 | Scaffold3951 | 1937                    | AA                              | GG                | 1946696865               |
| SNP_P3_176587_1941  | NW_004518512.1 | Scaffold3951 | 1941                    | GG                              | AA                | 1946696867               |
| SNP_P3_176588_2785  | NW_004518512.1 | Scaffold3951 | 2785                    | TT                              | AA                | 1946696869               |
| SNP_P3_176589_797   | NW_004518513.1 | Scaffold3952 | 797                     | CC                              | TT                | 1946696871               |
| SNP_P3_176590_809   | NW_004518513.1 | Scaffold3952 | 809                     | AA                              | GG                | 1946696873               |
| SNP_P3_176592_1046  | NW_004518513.1 | Scaffold3952 | 1046                    | CC                              | TT                | 1946696875               |
| SNP_P3_176593_1058  | NW_004518513.1 | Scaffold3952 | 1058                    | TT                              | CC                | 1946696877               |
| SNP_P3_176594_1104  | NW_004518513.1 | Scaffold3952 | 1104                    | AA                              | GG                | 1946696879               |
| SNP_P3_176595_1174  | NW_004518513.1 | Scaffold3952 | 1174                    | AA                              | GG                | 1946696881               |
| SNP_P3_176596_1253  | NW_004518513.1 | Scaffold3952 | 1253                    | TT                              | CC                | 1946696883               |
| SNP_P3_176597_1283  | NW_004518513.1 | Scaffold3952 | 1283                    | TT                              | GG                | 1946696886               |
| SNP_P3_176598_1288  | NW_004518513.1 | Scaffold3952 | 1288                    | TT                              | CC                | 1946696889               |
| SNP_P3_176599_1412  | NW_004518513.1 | Scaffold3952 | 1412                    | AA                              | CC                | 1946696891               |
| SNP_P3_176600_397   | NW_004518514.1 | Scaffold3953 | 397                     | CC                              | TT                | 1946696893               |
| SNP_P3_176601_417   | NW_004518514.1 | Scaffold3953 | 417                     | GG                              | AA                | 1946696895               |
| SNP_P3_176603_485   | NW_004518514.1 | Scaffold3953 | 485                     | CC                              | TT                | 1946696897               |

| SNPs IDs            | Chromosome IDs | Chromosomes  | Physical positions (bp) | CDC Frontier (Reference genome) | (Pusa 256 & HPNB) | NCBI SNPdb Accession IDs |
|---------------------|----------------|--------------|-------------------------|---------------------------------|-------------------|--------------------------|
| SNP_P3_176604_521   | NW_004518514.1 | Scaffold3953 | 521                     | GG                              | AA                | 1946696899               |
| SNP_P3_176605_549   | NW_004518514.1 | Scaffold3953 | 549                     | CC                              | TT                | 1946696901               |
| SNP_P3_176606_600   | NW_004518514.1 | Scaffold3953 | 600                     | AA                              | GG                | 1946696903               |
| SNP_P3_176607_56    | NW_004518519.1 | Scaffold3962 | 56                      | CC                              | TT                | 1946696905               |
| SNP_P3_176608_64    | NW_004518519.1 | Scaffold3962 | 64                      | TT                              | GG                | 1946696907               |
| SNP_P3_176609_68    | NW_004518519.1 | Scaffold3962 | 68                      | GG                              | AA                | 1946696909               |
| SNP_P3_176610_82    | NW_004518519.1 | Scaffold3962 | 82                      | CC                              | AA                | 1946696911               |
| SNP_P3_176611_169   | NW_004518519.1 | Scaffold3962 | 169                     | TT                              | CC                | 1946696913               |
| SNP_P3_176612_388   | NW_004518519.1 | Scaffold3962 | 388                     | AA                              | CC                | 1946696915               |
| SNP_P3_176613_389   | NW_004518519.1 | Scaffold3962 | 389                     | CC                              | TT                | 1946696917               |
| SNP_P3_176614_447   | NW_004518519.1 | Scaffold3962 | 447                     | TT                              | AA                | 1946696919               |
| SNP_P3_176615_345   | NW_004518522.1 | Scaffold3966 | 345                     | CC                              | TT                | 1946696922               |
| SNP_P3_176616_3774  | NW_004518523.1 | Scaffold3967 | 3774                    | GG                              | AA                | 1946696924               |
| SNP_P3_176617_4948  | NW_004518525.1 | Scaffold3970 | 4948                    | CC                              | AA                | 1946696926               |
| SNP_P3_176618_4980  | NW_004518525.1 | Scaffold3970 | 4980                    | CC                              | AA                | 1946696929               |
| SNP_P3_176619_5285  | NW_004518525.1 | Scaffold3970 | 5285                    | GG                              | AA                | 1946696931               |
| SNP_P3_176620_5468  | NW_004518525.1 | Scaffold3970 | 5468                    | GG                              | CC                | 1946696933               |
| SNP_P3_176621_681   | NW_004518528.1 | Scaffold3973 | 681                     | AA                              | TT                | 1946696935               |
| SNP_P3_176622_1301  | NW_004518528.1 | Scaffold3973 | 1301                    | GG                              | AA                | 1946696937               |
| SNP_P3_176623_1683  | NW_004518528.1 | Scaffold3973 | 1683                    | CC                              | AA                | 1946696939               |
| SNP_P3_176624_290   | NW_004518533.1 | Scaffold3979 | 290                     | AA                              | TT                | 1946696941               |
| SNP_P3_176625_422   | NW_004518535.1 | Scaffold3982 | 422                     | TT                              | CC                | 1946696943               |
| SNP_P3_176626_430   | NW_004518535.1 | Scaffold3982 | 430                     | CC                              | TT                | 1946696945               |
| SNP_P3_176627_459   | NW_004518535.1 | Scaffold3982 | 459                     | GG                              | TT                | 1946696947               |
| SNP_P3_176628_1016  | NW_004518541.1 | Scaffold3989 | 1016                    | TT                              | GG                | 1946696949               |
| SNP_P3_176629_1064  | NW_004518546.1 | Scaffold3995 | 1064                    | GG                              | TT                | 1946696951               |
| SNP_P3_176630_1109  | NW_004518546.1 | Scaffold3995 | 1109                    | CC                              | TT                | 1946696953               |
| SNP_P3_176631_419   | NW_004518547.1 | Scaffold3996 | 419                     | TT                              | GG                | 1946696955               |
| SNP_P3_176632_665   | NW_004518547.1 | Scaffold3996 | 665                     | TT                              | GG                | 1946696957               |
| SNP_P3_176633_702   | NW_004518547.1 | Scaffold3996 | 702                     | TT                              | CC                | 1946696959               |
| SNP_P3_176634_994   | NW_004518547.1 | Scaffold3996 | 994                     | GG                              | CC                | 1946696961               |
| SNP_P3_176635_1107  | NW_004518547.1 | Scaffold3996 | 1107                    | CC                              | TT                | 1946696963               |
| SNP_P3_176636_1135  | NW_004518547.1 | Scaffold3996 | 1135                    | AA                              | TT                | 1946696965               |
| SNP_P3_176637_870   | NW_004518550.1 | Scaffold4002 | 870                     | AA                              | GG                | 1946696967               |
| SNP_P3_176638_880   | NW_004518550.1 | Scaffold4002 | 880                     | GG                              | AA                | 1946696971               |
| SNP_P3_176639_1120  | NW_004518550.1 | Scaffold4002 | 1120                    | CC                              | AA                | 1946696973               |
| SNP_P3_176640_1477  | NW_004518550.1 | Scaffold4002 | 1477                    | AA                              | CC                | 1946696975               |
| SNP_P3_176641_1516  | NW_004518550.1 | Scaffold4002 | 1516                    | GG                              | AA                | 1946696977               |
| SNP_P3_176642_22310 | NW_004518551.1 | Scaffold4003 | 22310                   | TT                              | CC                | 1946696979               |
| SNP_P3_176643_22336 | NW_004518551.1 | Scaffold4003 | 22336                   | TT                              | CC                | 1946696981               |
| SNP_P3_176644_331   | NW_004518553.1 | Scaffold4006 | 331                     | CC                              | GG                | 1946696983               |
| SNP_P3_176645_28    | NW_004518554.1 | Scaffold4007 | 28                      | AA                              | GG                | 1946696986               |

| SNPs IDs             | Chromosome IDs | Chromosomes  | Physical positions (bp) | CDC Frontier (Reference genome) | (Pusa 256 & HPNB) | NCBI SNPdb Accession IDs |
|----------------------|----------------|--------------|-------------------------|---------------------------------|-------------------|--------------------------|
| SNP_P3_176646_33     | NW_004518554.1 | Scaffold4007 | 33                      | GG                              | CC                | 1946696988               |
| SNP_P3_176647_64     | NW_004518554.1 | Scaffold4007 | 64                      | GG                              | AA                | 1946696990               |
| SNP_P3_176648_68     | NW_004518554.1 | Scaffold4007 | 68                      | CC                              | AA                | 1946696992               |
| SNP_P3_176649_84     | NW_004518554.1 | Scaffold4007 | 84                      | TT                              | CC                | 1946696994               |
| SNP_P3_176650_90     | NW_004518554.1 | Scaffold4007 | 90                      | CC                              | TT                | 1946696996               |
| SNP_P3_176651_266    | NW_004518554.1 | Scaffold4007 | 266                     | GG                              | AA                | 1946696998               |
| SNP_P3_176652_394    | NW_004518554.1 | Scaffold4007 | 394                     | CC                              | GG                | 1946697000               |
| SNP_P3_176653_461    | NW_004518554.1 | Scaffold4007 | 461                     | AA                              | GG                | 1946697002               |
| SNP_P3_176654_1423   | NW_004518554.1 | Scaffold4007 | 1423                    | AA                              | GG                | 1946697004               |
| SNP_P3_176656_38513  | NW_004518557.1 | Scaffold4011 | 38513                   | TT                              | AA                | 1946697007               |
| SNP_P3_176657_57064  | NW_004518557.1 | Scaffold4011 | 57064                   | GG                              | AA                | 1946697009               |
| SNP_P3_176658_65207  | NW_004518557.1 | Scaffold4011 | 65207                   | AA                              | GG                | 1946697012               |
| SNP_P3_176659_76606  | NW_004518557.1 | Scaffold4011 | 76606                   | GG                              | AA                | 1946697014               |
| SNP_P3_176660_104601 | NW_004518557.1 | Scaffold4011 | 104601                  | GG                              | AA                | 1946697016               |
| SNP_P3_176661_107402 | NW_004518557.1 | Scaffold4011 | 107402                  | GG                              | AA                | 1946697018               |
| SNP_P3_176662_467    | NW_004518563.1 | Scaffold4020 | 467                     | AA                              | TT                | 1946697021               |
| SNP_P3_176663_562    | NW_004518563.1 | Scaffold4020 | 562                     | GG                              | CC                | 1946697023               |
| SNP_P3_176664_582    | NW_004518563.1 | Scaffold4020 | 582                     | CC                              | TT                | 1946697025               |
| SNP_P3_176665_1000   | NW_004518563.1 | Scaffold4020 | 1000                    | TT                              | AA                | 1946697104               |
| SNP_P3_176666_1009   | NW_004518563.1 | Scaffold4020 | 1009                    | GG                              | TT                | 1946697107               |
| SNP_P3_176667_6076   | NW_004518563.1 | Scaffold4020 | 6076                    | TT                              | GG                | 1946697109               |
| SNP_P3_176668_10576  | NW_004518563.1 | Scaffold4020 | 10576                   | GG                              | AA                | 1946697112               |
| SNP_P3_176669_10919  | NW_004518563.1 | Scaffold4020 | 10919                   | CC                              | GG                | 1946697114               |
| SNP_P3_176670_11041  | NW_004518563.1 | Scaffold4020 | 11041                   | TT                              | CC                | 1946697116               |
| SNP_P3_176671_11306  | NW_004518563.1 | Scaffold4020 | 11306                   | TT                              | GG                | 1946697118               |
| SNP_P3_176674_3650   | NW_004518565.1 | Scaffold4024 | 3650                    | AA                              | TT                | 1946697120               |
| SNP_P3_176675_3734   | NW_004518565.1 | Scaffold4024 | 3734                    | GG                              | TT                | 1946697122               |
| SNP_P3_176677_6230   | NW_004518565.1 | Scaffold4024 | 6230                    | CC                              | TT                | 1946697125               |
| SNP_P3_176678_325    | NW_004518567.1 | Scaffold4026 | 325                     | CC                              | TT                | 1946697127               |
| SNP_P3_176679_365    | NW_004518567.1 | Scaffold4026 | 365                     | TT                              | AA                | 1946697129               |
| SNP_P3_176680_402    | NW_004518567.1 | Scaffold4026 | 402                     | TT                              | CC                | 1946697131               |
| SNP_P3_176681_1071   | NW_004518568.1 | Scaffold4028 | 1071                    | TT                              | CC                | 1946697133               |
| SNP_P3_176682_1093   | NW_004518568.1 | Scaffold4028 | 1093                    | AA                              | TT                | 1946697135               |
| SNP_P3_176683_8233   | NW_004518568.1 | Scaffold4028 | 8233                    | AA                              | CC                | 1946697137               |
| SNP_P3_176684_8238   | NW_004518568.1 | Scaffold4028 | 8238                    | AA                              | GG                | 1946697139               |
| SNP_P3_176685_8313   | NW_004518568.1 | Scaffold4028 | 8313                    | TT                              | CC                | 1946697141               |
| SNP_P3_176686_8318   | NW_004518568.1 | Scaffold4028 | 8318                    | GG                              | CC                | 1946697143               |
| SNP_P3_176687_8377   | NW_004518568.1 | Scaffold4028 | 8377                    | TT                              | CC                | 1946697145               |
| SNP_P3_176689_8507   | NW_004518568.1 | Scaffold4028 | 8507                    | TT                              | GG                | 1946697147               |
| SNP_P3_176690_8586   | NW_004518568.1 | Scaffold4028 | 8586                    | AA                              | GG                | 1946697150               |
| SNP_P3_176691_8677   | NW_004518568.1 | Scaffold4028 | 8677                    | AA                              | TT                | 1946697153               |
| SNP_P3_176692_8690   | NW_004518568.1 | Scaffold4028 | 8690                    | TT                              | CC                | 1946697155               |

| SNPs IDs            | Chromosome IDs | Chromosomes  | Physical positions (bp) | CDC Frontier (Reference genome) | (Pusa 256 & HPNB) | NCBI SNPdb Accession IDs |
|---------------------|----------------|--------------|-------------------------|---------------------------------|-------------------|--------------------------|
| SNP_P3_176693_8780  | NW_004518568.1 | Scaffold4028 | 8780                    | CC                              | AA                | 1946697157               |
| SNP_P3_176694_14265 | NW_004518568.1 | Scaffold4028 | 14265                   | TT                              | AA                | 1946697159               |
| SNP_P3_176695_14277 | NW_004518568.1 | Scaffold4028 | 14277                   | TT                              | GG                | 1946697161               |
| SNP_P3_176696_14598 | NW_004518568.1 | Scaffold4028 | 14598                   | TT                              | CC                | 1946697163               |
| SNP_P3_176697_14629 | NW_004518568.1 | Scaffold4028 | 14629                   | CC                              | AA                | 1946697166               |
| SNP_P3_176698_14685 | NW_004518568.1 | Scaffold4028 | 14685                   | GG                              | TT                | 1946697168               |
| SNP_P3_176699_14695 | NW_004518568.1 | Scaffold4028 | 14695                   | CC                              | AA                | 1946697170               |
| SNP_P3_176700_27005 | NW_004518568.1 | Scaffold4028 | 27005                   | AA                              | GG                | 1946697172               |
| SNP_P3_176701_27055 | NW_004518568.1 | Scaffold4028 | 27055                   | AA                              | TT                | 1946697174               |
| SNP_P3_176702_27236 | NW_004518568.1 | Scaffold4028 | 27236                   | AA                              | GG                | 1946697177               |
| SNP_P3_176704_28429 | NW_004518568.1 | Scaffold4028 | 28429                   | GG                              | AA                | 1946697179               |
| SNP_P3_176705_29069 | NW_004518568.1 | Scaffold4028 | 29069                   | CC                              | AA                | 1946697181               |
| SNP_P3_176706_42401 | NW_004518568.1 | Scaffold4028 | 42401                   | AA                              | CC                | 1946697183               |
| SNP_P3_176707_532   | NW_004518570.1 | Scaffold4031 | 532                     | TT                              | CC                | 1946697185               |
| SNP_P3_176708_565   | NW_004518570.1 | Scaffold4031 | 565                     | GG                              | AA                | 1946697187               |
| SNP_P3_176709_580   | NW_004518570.1 | Scaffold4031 | 580                     | CC                              | TT                | 1946697190               |
| SNP_P3_176710_630   | NW_004518570.1 | Scaffold4031 | 630                     | AA                              | GG                | 1946697193               |
| SNP_P3_176711_648   | NW_004518570.1 | Scaffold4031 | 648                     | GG                              | AA                | 1946697195               |
| SNP_P3_176712_730   | NW_004518570.1 | Scaffold4031 | 730                     | AA                              | GG                | 1946697197               |
| SNP_P3_176713_732   | NW_004518570.1 | Scaffold4031 | 732                     | AA                              | CC                | 1946697199               |
| SNP_P3_176714_900   | NW_004518570.1 | Scaffold4031 | 900                     | AA                              | CC                | 1946697201               |
| SNP_P3_176715_1087  | NW_004518570.1 | Scaffold4031 | 1087                    | GG                              | AA                | 1946697204               |
| SNP_P3_176716_1113  | NW_004518570.1 | Scaffold4031 | 1113                    | CC                              | GG                | 1946697206               |
| SNP_P3_176717_1270  | NW_004518571.1 | Scaffold4032 | 1270                    | CC                              | TT                | 1946697208               |
| SNP_P3_176718_2185  | NW_004518571.1 | Scaffold4032 | 2185                    | CC                              | TT                | 1946697210               |
| SNP_P3_176719_2218  | NW_004518571.1 | Scaffold4032 | 2218                    | TT                              | AA                | 1946697212               |
| SNP_P3_176720_2250  | NW_004518571.1 | Scaffold4032 | 2250                    | TT                              | AA                | 1946697214               |
| SNP_P3_176721_2287  | NW_004518571.1 | Scaffold4032 | 2287                    | AA                              | CC                | 1946697216               |
| SNP_P3_176722_2518  | NW_004518571.1 | Scaffold4032 | 2518                    | GG                              | AA                | 1946697218               |
| SNP_P3_176723_2585  | NW_004518571.1 | Scaffold4032 | 2585                    | AA                              | TT                | 1946697220               |
| SNP_P3_176724_2586  | NW_004518571.1 | Scaffold4032 | 2586                    | AA                              | CC                | 1946697222               |
| SNP_P3_176725_2640  | NW_004518571.1 | Scaffold4032 | 2640                    | CC                              | GG                | 1946697225               |
| SNP_P3_176726_2704  | NW_004518571.1 | Scaffold4032 | 2704                    | AA                              | CC                | 1946697227               |
| SNP_P3_176727_6843  | NW_004518571.1 | Scaffold4032 | 6843                    | TT                              | AA                | 1946697229               |
| SNP_P3_176728_6846  | NW_004518571.1 | Scaffold4032 | 6846                    | CC                              | AA                | 1946697231               |
| SNP_P3_176729_6851  | NW_004518571.1 | Scaffold4032 | 6851                    | GG                              | AA                | 1946697233               |
| SNP_P3_176730_2884  | NW_004518572.1 | Scaffold4034 | 2884                    | TT                              | AA                | 1946697236               |
| SNP_P3_176731_2898  | NW_004518572.1 | Scaffold4034 | 2898                    | GG                              | TT                | 1946697238               |
| SNP_P3_176732_2900  | NW_004518572.1 | Scaffold4034 | 2900                    | AA                              | CC                | 1946697240               |
| SNP_P3_176733_2902  | NW_004518572.1 | Scaffold4034 | 2902                    | GG                              | AA                | 1946697242               |
| SNP_P3_176734_2923  | NW_004518572.1 | Scaffold4034 | 2923                    | TT                              | CC                | 1946697244               |
| SNP_P3_176735_3154  | NW_004518572.1 | Scaffold4034 | 3154                    | TT                              | CC                | 1946697246               |

| SNPs IDs            | Chromosome IDs | Chromosomes  | Physical positions (bp) | CDC Frontier (Reference genome) | (Pusa 256 & HPNB) | NCBI SNPdb Accession IDs |
|---------------------|----------------|--------------|-------------------------|---------------------------------|-------------------|--------------------------|
| SNP_P3_176736_3162  | NW_004518572.1 | Scaffold4034 | 3162                    | AA                              | GG                | 1946697248               |
| SNP_P3_176737_391   | NW_004518575.1 | Scaffold4038 | 391                     | CC                              | TT                | 1946697251               |
| SNP_P3_176738_798   | NW_004518575.1 | Scaffold4038 | 798                     | TT                              | GG                | 1946697253               |
| SNP_P3_176739_813   | NW_004518575.1 | Scaffold4038 | 813                     | AA                              | GG                | 1946697255               |
| SNP_P3_176740_874   | NW_004518575.1 | Scaffold4038 | 874                     | AA                              | GG                | 1946697257               |
| SNP_P3_176741_980   | NW_004518575.1 | Scaffold4038 | 980                     | AA                              | TT                | 1946697259               |
| SNP_P3_176742_994   | NW_004518575.1 | Scaffold4038 | 994                     | AA                              | CC                | 1946697261               |
| SNP_P3_176743_1145  | NW_004518575.1 | Scaffold4038 | 1145                    | TT                              | GG                | 1946697263               |
| SNP_P3_176744_1250  | NW_004518575.1 | Scaffold4038 | 1250                    | TT                              | CC                | 1946697267               |
| SNP_P3_176745_1277  | NW_004518575.1 | Scaffold4038 | 1277                    | GG                              | AA                | 1946697269               |
| SNP_P3_176746_405   | NW_004518577.1 | Scaffold4040 | 405                     | GG                              | AA                | 1946697271               |
| SNP_P3_176747_64    | NW_004518578.1 | Scaffold4041 | 64                      | TT                              | AA                | 1946697273               |
| SNP_P3_176748_99    | NW_004518578.1 | Scaffold4041 | 99                      | CC                              | AA                | 1946697275               |
| SNP_P3_176749_150   | NW_004518578.1 | Scaffold4041 | 150                     | TT                              | GG                | 1946697277               |
| SNP_P3_176750_249   | NW_004518578.1 | Scaffold4041 | 249                     | GG                              | CC                | 1946697279               |
| SNP_P3_176751_971   | NW_004518578.1 | Scaffold4041 | 971                     | GG                              | TT                | 1946697281               |
| SNP_P3_176752_978   | NW_004518578.1 | Scaffold4041 | 978                     | GG                              | AA                | 1946697284               |
| SNP_P3_176755_11980 | NW_004518578.1 | Scaffold4041 | 11980                   | AA                              | GG                | 1946697286               |
| SNP_P3_176756_13864 | NW_004518578.1 | Scaffold4041 | 13864                   | AA                              | GG                | 1946697288               |
| SNP_P3_176757_13889 | NW_004518578.1 | Scaffold4041 | 13889                   | GG                              | AA                | 1946697290               |
| SNP_P3_176758_15330 | NW_004518578.1 | Scaffold4041 | 15330                   | AA                              | GG                | 1946697292               |
| SNP_P3_176759_15413 | NW_004518578.1 | Scaffold4041 | 15413                   | AA                              | TT                | 1946697294               |
| SNP_P3_176760_15431 | NW_004518578.1 | Scaffold4041 | 15431                   | GG                              | AA                | 1946697297               |
| SNP_P3_176761_15454 | NW_004518578.1 | Scaffold4041 | 15454                   | TT                              | CC                | 1946697299               |
| SNP_P3_176762_15501 | NW_004518578.1 | Scaffold4041 | 15501                   | GG                              | CC                | 1946697301               |
| SNP_P3_176763_15539 | NW_004518578.1 | Scaffold4041 | 15539                   | TT                              | AA                | 1946697304               |
| SNP_P3_176765_15666 | NW_004518578.1 | Scaffold4041 | 15666                   | TT                              | CC                | 1946697307               |
| SNP_P3_176766_15667 | NW_004518578.1 | Scaffold4041 | 15667                   | TT                              | AA                | 1946697309               |
| SNP_P3_176768_15746 | NW_004518578.1 | Scaffold4041 | 15746                   | TT                              | CC                | 1946697311               |
| SNP_P3_176770_15777 | NW_004518578.1 | Scaffold4041 | 15777                   | CC                              | GG                | 1946697313               |
| SNP_P3_176771_15784 | NW_004518578.1 | Scaffold4041 | 15784                   | GG                              | CC                | 1946697315               |
| SNP_P3_176772_15847 | NW_004518578.1 | Scaffold4041 | 15847                   | CC                              | TT                | 1946697317               |
| SNP_P3_176774_15873 | NW_004518578.1 | Scaffold4041 | 15873                   | TT                              | CC                | 1946697319               |
| SNP_P3_176775_15905 | NW_004518578.1 | Scaffold4041 | 15905                   | AA                              | TT                | 1946697322               |
| SNP_P3_176777_16001 | NW_004518578.1 | Scaffold4041 | 16001                   | CC                              | TT                | 1946697324               |
| SNP_P3_176778_16018 | NW_004518578.1 | Scaffold4041 | 16018                   | CC                              | TT                | 1946697326               |
| SNP_P3_176779_16116 | NW_004518578.1 | Scaffold4041 | 16116                   | TT                              | AA                | 1946697328               |
| SNP_P3_176780_16142 | NW_004518578.1 | Scaffold4041 | 16142                   | AA                              | CC                | 1946697330               |
| SNP_P3_176781_16146 | NW_004518578.1 | Scaffold4041 | 16146                   | AA                              | GG                | 1946697332               |
| SNP_P3_176782_16148 | NW_004518578.1 | Scaffold4041 | 16148                   | CC                              | TT                | 1946697334               |
| SNP_P3_176784_16221 | NW_004518578.1 | Scaffold4041 | 16221                   | TT                              | AA                | 1946697337               |
| SNP_P3_176785_16312 | NW_004518578.1 | Scaffold4041 | 16312                   | TT                              | CC                | 1946697339               |

| SNPs IDs            | Chromosome IDs | Chromosomes  | Physical positions (bp) | CDC Frontier (Reference genome) | (Pusa 256 & HPNB) | NCBI SNPdb Accession IDs |
|---------------------|----------------|--------------|-------------------------|---------------------------------|-------------------|--------------------------|
| SNP_P3_176786_16346 | NW_004518578.1 | Scaffold4041 | 16346                   | GG                              | AA                | 1946697341               |
| SNP_P3_176787_16399 | NW_004518578.1 | Scaffold4041 | 16399                   | GG                              | AA                | 1946697344               |
| SNP_P3_176788_16403 | NW_004518578.1 | Scaffold4041 | 16403                   | TT                              | AA                | 1946697346               |
| SNP_P3_176790_16718 | NW_004518578.1 | Scaffold4041 | 16718                   | GG                              | AA                | 1946697348               |
| SNP_P3_176792_38289 | NW_004518578.1 | Scaffold4041 | 38289                   | TT                              | CC                | 1946697350               |
| SNP_P3_176793_38695 | NW_004518578.1 | Scaffold4041 | 38695                   | GG                              | AA                | 1946697353               |
| SNP_P3_176794_38757 | NW_004518578.1 | Scaffold4041 | 38757                   | CC                              | TT                | 1946697355               |
| SNP_P3_176796_39282 | NW_004518578.1 | Scaffold4041 | 39282                   | AA                              | GG                | 1946697357               |
| SNP_P3_176797_39693 | NW_004518578.1 | Scaffold4041 | 39693                   | GG                              | AA                | 1946697359               |
| SNP_P3_176798_239   | NW_004518580.1 | Scaffold4045 | 239                     | AA                              | CC                | 1946697361               |
| SNP_P3_176799_240   | NW_004518580.1 | Scaffold4045 | 240                     | CC                              | AA                | 1946697363               |
| SNP_P3_176800_546   | NW_004518580.1 | Scaffold4045 | 546                     | AA                              | GG                | 1946697365               |
| SNP_P3_176801_558   | NW_004518580.1 | Scaffold4045 | 558                     | AA                              | TT                | 1946697368               |
| SNP_P3_176802_567   | NW_004518580.1 | Scaffold4045 | 567                     | TT                              | CC                | 1946697370               |
| SNP_P3_176803_590   | NW_004518580.1 | Scaffold4045 | 590                     | AA                              | GG                | 1946697372               |
| SNP_P3_176804_63    | NW_004518583.1 | Scaffold4050 | 63                      | TT                              | GG                | 1946697374               |
| SNP_P3_176805_161   | NW_004518583.1 | Scaffold4050 | 161                     | CC                              | GG                | 1946697376               |
| SNP_P3_176809_6617  | NW_004518588.1 | Scaffold4057 | 6617                    | GG                              | AA                | 1946697379               |
| SNP_P3_176810_6630  | NW_004518588.1 | Scaffold4057 | 6630                    | CC                              | TT                | 1946697381               |
| SNP_P3_176811_7006  | NW_004518588.1 | Scaffold4057 | 7006                    | GG                              | TT                | 1946697383               |
| SNP_P3_176812_7565  | NW_004518588.1 | Scaffold4057 | 7565                    | AA                              | GG                | 1946697385               |
| SNP_P3_176813_18988 | NW_004518588.1 | Scaffold4057 | 18988                   | TT                              | AA                | 1946697387               |
| SNP_P3_176814_31396 | NW_004518588.1 | Scaffold4057 | 31396                   | TT                              | AA                | 1946697389               |
| SNP_P3_176815_2736  | NW_004518590.1 | Scaffold4061 | 2736                    | AA                              | TT                | 1946697391               |
| SNP_P3_176816_2772  | NW_004518590.1 | Scaffold4061 | 2772                    | AA                              | CC                | 1946697394               |
| SNP_P3_176817_7082  | NW_004518590.1 | Scaffold4061 | 7082                    | TT                              | CC                | 1946697396               |
| SNP_P3_176818_7197  | NW_004518590.1 | Scaffold4061 | 7197                    | TT                              | CC                | 1946697398               |
| SNP_P3_176819_7205  | NW_004518590.1 | Scaffold4061 | 7205                    | TT                              | GG                | 1946697400               |
| SNP_P3_176820_7238  | NW_004518590.1 | Scaffold4061 | 7238                    | GG                              | AA                | 1946697402               |
| SNP_P3_176821_7265  | NW_004518590.1 | Scaffold4061 | 7265                    | AA                              | CC                | 1946697405               |
| SNP_P3_176822_7366  | NW_004518590.1 | Scaffold4061 | 7366                    | TT                              | AA                | 1946697407               |
| SNP_P3_176823_7534  | NW_004518590.1 | Scaffold4061 | 7534                    | CC                              | TT                | 1946697409               |
| SNP_P3_176824_10446 | NW_004518590.1 | Scaffold4061 | 10446                   | GG                              | AA                | 1946697411               |
| SNP_P3_176825_12172 | NW_004518590.1 | Scaffold4061 | 12172                   | CC                              | TT                | 1946697413               |
| SNP_P3_176826_556   | NW_004518592.1 | Scaffold4064 | 556                     | TT                              | GG                | 1946697415               |
| SNP_P3_176827_601   | NW_004518592.1 | Scaffold4064 | 601                     | CC                              | GG                | 1946697417               |
| SNP_P3_176828_694   | NW_004518592.1 | Scaffold4064 | 694                     | AA                              | GG                | 1946697419               |
| SNP_P3_176829_704   | NW_004518592.1 | Scaffold4064 | 704                     | GG                              | AA                | 1946697422               |
| SNP_P3_176830_754   | NW_004518592.1 | Scaffold4064 | 754                     | TT                              | CC                | 1946697424               |
| SNP_P3_176832_912   | NW_004518592.1 | Scaffold4064 | 912                     | AA                              | GG                | 1946697426               |
| SNP_P3_176833_987   | NW_004518592.1 | Scaffold4064 | 987                     | TT                              | GG                | 1946697428               |
| SNP_P3_176834_1018  | NW_004518592.1 | Scaffold4064 | 1018                    | AA                              | GG                | 1946697430               |



| SNPs IDs           | Chromosome IDs | Chromosomes  | Physical positions (bp) | CDC Frontier (Reference genome) | (Pusa 256 & HPNB) | NCBI SNPdb Accession IDs |
|--------------------|----------------|--------------|-------------------------|---------------------------------|-------------------|--------------------------|
| SNP_P3_176836_1349 | NW_004518592.1 | Scaffold4064 | 1349                    | CC                              | GG                | 1946697432               |
| SNP_P3_176838_1498 | NW_004518592.1 | Scaffold4064 | 1498                    | AA                              | GG                | 1946697434               |
| SNP_P3_176839_1560 | NW_004518592.1 | Scaffold4064 | 1560                    | TT                              | CC                | 1946697436               |
| SNP_P3_176840_1662 | NW_004518592.1 | Scaffold4064 | 1662                    | AA                              | TT                | 1946697439               |
| SNP_P3_176841_1967 | NW_004518592.1 | Scaffold4064 | 1967                    | CC                              | AA                | 1946697441               |
| SNP_P3_176842_2014 | NW_004518592.1 | Scaffold4064 | 2014                    | GG                              | TT                | 1946697443               |
| SNP_P3_176843_2180 | NW_004518592.1 | Scaffold4064 | 2180                    | AA                              | GG                | 1946697445               |
| SNP_P3_176844_2548 | NW_004518592.1 | Scaffold4064 | 2548                    | TT                              | AA                | 1946697448               |
| SNP_P3_176845_2750 | NW_004518592.1 | Scaffold4064 | 2750                    | GG                              | TT                | 1946697450               |
| SNP_P3_176846_2979 | NW_004518592.1 | Scaffold4064 | 2979                    | AA                              | TT                | 1946697452               |
| SNP_P3_176847_3215 | NW_004518592.1 | Scaffold4064 | 3215                    | TT                              | AA                | 1946697454               |
| SNP_P3_176848_3255 | NW_004518592.1 | Scaffold4064 | 3255                    | CC                              | TT                | 1946697457               |
| SNP_P3_176849_3338 | NW_004518592.1 | Scaffold4064 | 3338                    | CC                              | AA                | 1946697459               |
| SNP_P3_176850_3369 | NW_004518592.1 | Scaffold4064 | 3369                    | AA                              | GG                | 1946697461               |
| SNP_P3_176851_3520 | NW_004518592.1 | Scaffold4064 | 3520                    | GG                              | AA                | 1946697463               |
| SNP_P3_176852_3533 | NW_004518592.1 | Scaffold4064 | 3533                    | TT                              | GG                | 1946697465               |
| SNP_P3_176853_3562 | NW_004518592.1 | Scaffold4064 | 3562                    | CC                              | TT                | 1946697468               |
| SNP_P3_176854_3581 | NW_004518592.1 | Scaffold4064 | 3581                    | GG                              | AA                | 1946697470               |
| SNP_P3_176855_3661 | NW_004518592.1 | Scaffold4064 | 3661                    | CC                              | TT                | 1946697472               |
| SNP_P3_176856_3700 | NW_004518592.1 | Scaffold4064 | 3700                    | AA                              | TT                | 1946697474               |
| SNP_P3_176857_3733 | NW_004518592.1 | Scaffold4064 | 3733                    | CC                              | TT                | 1946697477               |
| SNP_P3_176858_3841 | NW_004518592.1 | Scaffold4064 | 3841                    | CC                              | TT                | 1946697479               |
| SNP_P3_176859_3860 | NW_004518592.1 | Scaffold4064 | 3860                    | GG                              | TT                | 1946697481               |
| SNP_P3_176860_3883 | NW_004518592.1 | Scaffold4064 | 3883                    | GG                              | TT                | 1946697483               |
| SNP_P3_176861_3944 | NW_004518592.1 | Scaffold4064 | 3944                    | GG                              | TT                | 1946697485               |
| SNP_P3_176862_3984 | NW_004518592.1 | Scaffold4064 | 3984                    | CC                              | TT                | 1946697487               |
| SNP_P3_176863_4025 | NW_004518592.1 | Scaffold4064 | 4025                    | TT                              | CC                | 1946697489               |
| SNP_P3_176864_4034 | NW_004518592.1 | Scaffold4064 | 4034                    | TT                              | CC                | 1946697491               |
| SNP_P3_176865_4091 | NW_004518592.1 | Scaffold4064 | 4091                    | GG                              | TT                | 1946697494               |
| SNP_P3_176866_4212 | NW_004518592.1 | Scaffold4064 | 4212                    | AA                              | GG                | 1946697496               |
| SNP_P3_176867_4307 | NW_004518592.1 | Scaffold4064 | 4307                    | TT                              | CC                | 1946697498               |
| SNP_P3_176868_4633 | NW_004518592.1 | Scaffold4064 | 4633                    | AA                              | TT                | 1946697500               |
| SNP_P3_176869_4670 | NW_004518592.1 | Scaffold4064 | 4670                    | AA                              | GG                | 1946697502               |
| SNP_P3_176870_4781 | NW_004518592.1 | Scaffold4064 | 4781                    | AA                              | GG                | 1946697504               |
| SNP_P3_176871_4791 | NW_004518592.1 | Scaffold4064 | 4791                    | GG                              | AA                | 1946697506               |
| SNP_P3_176872_4816 | NW_004518592.1 | Scaffold4064 | 4816                    | TT                              | AA                | 1946697508               |
| SNP_P3_176873_4994 | NW_004518592.1 | Scaffold4064 | 4994                    | CC                              | AA                | 1946697510               |
| SNP_P3_176874_5052 | NW_004518592.1 | Scaffold4064 | 5052                    | TT                              | CC                | 1946697512               |
| SNP_P3_176875_5147 | NW_004518592.1 | Scaffold4064 | 5147                    | CC                              | TT                | 1946697514               |
| SNP_P3_176876_5268 | NW_004518592.1 | Scaffold4064 | 5268                    | TT                              | CC                | 1946697517               |
| SNP_P3_176877_5331 | NW_004518592.1 | Scaffold4064 | 5331                    | TT                              | CC                | 1946697519               |
| SNP_P3_176879_5435 | NW_004518592.1 | Scaffold4064 | 5435                    | AA                              | CC                | 1946697521               |

| SNPs IDs            | Chromosome IDs | Chromosomes  | Physical positions (bp) | CDC Frontier (Reference genome) | (Pusa 256 & HPNB) | NCBI SNPdb Accession IDs |
|---------------------|----------------|--------------|-------------------------|---------------------------------|-------------------|--------------------------|
| SNP_P3_176880_5657  | NW_004518592.1 | Scaffold4064 | 5657                    | AA                              | CC                | 1946697524               |
| SNP_P3_176881_84    | NW_004518605.1 | Scaffold4081 | 84                      | TT                              | CC                | 1946697526               |
| SNP_P3_176882_292   | NW_004518605.1 | Scaffold4081 | 292                     | TT                              | GG                | 1946697528               |
| SNP_P3_176883_373   | NW_004518605.1 | Scaffold4081 | 373                     | GG                              | TT                | 1946697530               |
| SNP_P3_176884_378   | NW_004518605.1 | Scaffold4081 | 378                     | GG                              | AA                | 1946697532               |
| SNP_P3_176885_505   | NW_004518605.1 | Scaffold4081 | 505                     | TT                              | AA                | 1946697534               |
| SNP_P3_176886_553   | NW_004518605.1 | Scaffold4081 | 553                     | CC                              | TT                | 1946697536               |
| SNP_P3_176887_569   | NW_004518605.1 | Scaffold4081 | 569                     | CC                              | TT                | 1946697538               |
| SNP_P3_176888_608   | NW_004518605.1 | Scaffold4081 | 608                     | GG                              | AA                | 1946697540               |
| SNP_P3_176889_609   | NW_004518605.1 | Scaffold4081 | 609                     | GG                              | AA                | 1946697543               |
| SNP_P3_176890_626   | NW_004518605.1 | Scaffold4081 | 626                     | GG                              | AA                | 1946697545               |
| SNP_P3_176891_64    | NW_004518607.1 | Scaffold4083 | 64                      | AA                              | CC                | 1946697547               |
| SNP_P3_176892_92    | NW_004518607.1 | Scaffold4083 | 92                      | AA                              | TT                | 1946697549               |
| SNP_P3_176893_99    | NW_004518607.1 | Scaffold4083 | 99                      | GG                              | AA                | 1946697556               |
| SNP_P3_176894_119   | NW_004518607.1 | Scaffold4083 | 119                     | GG                              | TT                | 1946697558               |
| SNP_P3_176896_5213  | NW_004518611.1 | Scaffold4088 | 5213                    | GG                              | AA                | 1946697560               |
| SNP_P3_176898_5688  | NW_004518611.1 | Scaffold4088 | 5688                    | CC                              | TT                | 1946697562               |
| SNP_P3_176899_5947  | NW_004518611.1 | Scaffold4088 | 5947                    | GG                              | AA                | 1946697564               |
| SNP_P3_176900_11533 | NW_004518611.1 | Scaffold4088 | 11533                   | GG                              | AA                | 1946697566               |
| SNP_P3_176901_11569 | NW_004518611.1 | Scaffold4088 | 11569                   | TT                              | CC                | 1946697568               |
| SNP_P3_176903_13228 | NW_004518611.1 | Scaffold4088 | 13228                   | CC                              | AA                | 1946697570               |
| SNP_P3_176904_14520 | NW_004518611.1 | Scaffold4088 | 14520                   | AA                              | GG                | 1946697572               |
| SNP_P3_176905_14801 | NW_004518611.1 | Scaffold4088 | 14801                   | CC                              | TT                | 1946697574               |
| SNP_P3_176906_14922 | NW_004518611.1 | Scaffold4088 | 14922                   | AA                              | GG                | 1946697576               |
| SNP_P3_176907_14953 | NW_004518611.1 | Scaffold4088 | 14953                   | TT                              | CC                | 1946697578               |
| SNP_P3_176908_15058 | NW_004518611.1 | Scaffold4088 | 15058                   | AA                              | CC                | 1946697580               |
| SNP_P3_176909_15090 | NW_004518611.1 | Scaffold4088 | 15090                   | AA                              | CC                | 1946697582               |
| SNP_P3_176910_15311 | NW_004518611.1 | Scaffold4088 | 15311                   | CC                              | TT                | 1946697584               |
| SNP_P3_176911_17363 | NW_004518611.1 | Scaffold4088 | 17363                   | TT                              | GG                | 1946697586               |
| SNP_P3_176912_17468 | NW_004518611.1 | Scaffold4088 | 17468                   | CC                              | GG                | 1946697588               |
| SNP_P3_176913_17469 | NW_004518611.1 | Scaffold4088 | 17469                   | CC                              | TT                | 1946697590               |
| SNP_P3_176914_17564 | NW_004518611.1 | Scaffold4088 | 17564                   | CC                              | TT                | 1946697592               |
| SNP_P3_176915_17565 | NW_004518611.1 | Scaffold4088 | 17565                   | AA                              | GG                | 1946697594               |
| SNP_P3_176916_17642 | NW_004518611.1 | Scaffold4088 | 17642                   | TT                              | CC                | 1946697596               |
| SNP_P3_176917_17682 | NW_004518611.1 | Scaffold4088 | 17682                   | CC                              | TT                | 1946697598               |
| SNP_P3_176918_17980 | NW_004518611.1 | Scaffold4088 | 17980                   | AA                              | GG                | 1946697600               |
| SNP_P3_176919_25944 | NW_004518611.1 | Scaffold4088 | 25944                   | AA                              | TT                | 1946697602               |
| SNP_P3_176920_25974 | NW_004518611.1 | Scaffold4088 | 25974                   | CC                              | TT                | 1946697604               |
| SNP_P3_176921_26036 | NW_004518611.1 | Scaffold4088 | 26036                   | TT                              | CC                | 1946697606               |
| SNP_P3_176922_26266 | NW_004518611.1 | Scaffold4088 | 26266                   | GG                              | AA                | 1946697608               |
| SNP_P3_176923_19313 | NW_004518612.1 | Scaffold4089 | 19313                   | CC                              | GG                | 1946697610               |
| SNP_P3_176924_19484 | NW_004518612.1 | Scaffold4089 | 19484                   | GG                              | TT                | 1946697612               |

| SNPs IDs            | Chromosome IDs | Chromosomes  | Physical positions (bp) | CDC Frontier (Reference genome) | (Pusa 256 & HPNB) | NCBI SNPdb Accession IDs |
|---------------------|----------------|--------------|-------------------------|---------------------------------|-------------------|--------------------------|
| SNP_P3_176925_19546 | NW_004518612.1 | Scaffold4089 | 19546                   | AA                              | TT                | 1946697614               |
| SNP_P3_176926_19547 | NW_004518612.1 | Scaffold4089 | 19547                   | TT                              | CC                | 1946697616               |
| SNP_P3_176927_222   | NW_004518620.1 | Scaffold4100 | 222                     | GG                              | AA                | 1946697618               |
| SNP_P3_176928_255   | NW_004518620.1 | Scaffold4100 | 255                     | CC                              | AA                | 1946697620               |
| SNP_P3_176929_279   | NW_004518620.1 | Scaffold4100 | 279                     | AA                              | GG                | 1946697622               |
| SNP_P3_176930_499   | NW_004518620.1 | Scaffold4100 | 499                     | TT                              | GG                | 1946697625               |
| SNP_P3_176931_572   | NW_004518620.1 | Scaffold4100 | 572                     | AA                              | TT                | 1946697627               |
| SNP_P3_176932_583   | NW_004518620.1 | Scaffold4100 | 583                     | AA                              | TT                | 1946697629               |
| SNP_P3_176933_1358  | NW_004518623.1 | Scaffold4106 | 1358                    | CC                              | AA                | 1946697631               |
| SNP_P3_176934_2230  | NW_004518624.1 | Scaffold4107 | 2230                    | CC                              | AA                | 1946697633               |
| SNP_P3_176935_2242  | NW_004518624.1 | Scaffold4107 | 2242                    | TT                              | CC                | 1946697635               |
| SNP_P3_176937_9621  | NW_004518624.1 | Scaffold4107 | 9621                    | AA                              | TT                | 1946697637               |
| SNP_P3_176939_4114  | NW_004518625.1 | Scaffold4108 | 4114                    | CC                              | GG                | 1946697639               |
| SNP_P3_176940_4968  | NW_004518625.1 | Scaffold4108 | 4968                    | GG                              | AA                | 1946697641               |
| SNP_P3_176941_4972  | NW_004518625.1 | Scaffold4108 | 4972                    | CC                              | AA                | 1946697643               |
| SNP_P3_176942_5100  | NW_004518625.1 | Scaffold4108 | 5100                    | GG                              | CC                | 1946697645               |
| SNP_P3_176943_5169  | NW_004518625.1 | Scaffold4108 | 5169                    | CC                              | GG                | 1946697647               |
| SNP_P3_176944_5261  | NW_004518625.1 | Scaffold4108 | 5261                    | AA                              | GG                | 1946697649               |
| SNP_P3_176945_5320  | NW_004518625.1 | Scaffold4108 | 5320                    | GG                              | AA                | 1946697652               |
| SNP_P3_176946_5340  | NW_004518625.1 | Scaffold4108 | 5340                    | AA                              | TT                | 1946697655               |
| SNP_P3_176947_5465  | NW_004518625.1 | Scaffold4108 | 5465                    | GG                              | AA                | 1946697657               |
| SNP_P3_176948_6348  | NW_004518625.1 | Scaffold4108 | 6348                    | TT                              | CC                | 1946697659               |
| SNP_P3_176949_6349  | NW_004518625.1 | Scaffold4108 | 6349                    | TT                              | CC                | 1946697661               |
| SNP_P3_176950_6357  | NW_004518625.1 | Scaffold4108 | 6357                    | AA                              | GG                | 1946697663               |
| SNP_P3_176951_8051  | NW_004518625.1 | Scaffold4108 | 8051                    | CC                              | GG                | 1946697665               |
| SNP_P3_176952_8087  | NW_004518625.1 | Scaffold4108 | 8087                    | AA                              | TT                | 1946697667               |
| SNP_P3_176953_8156  | NW_004518625.1 | Scaffold4108 | 8156                    | TT                              | CC                | 1946697669               |
| SNP_P3_176954_8514  | NW_004518625.1 | Scaffold4108 | 8514                    | GG                              | AA                | 1946697671               |
| SNP_P3_176955_8521  | NW_004518625.1 | Scaffold4108 | 8521                    | TT                              | AA                | 1946697673               |
| SNP_P3_176956_8728  | NW_004518625.1 | Scaffold4108 | 8728                    | AA                              | TT                | 1946697675               |
| SNP_P3_176958_9178  | NW_004518625.1 | Scaffold4108 | 9178                    | AA                              | TT                | 1946697677               |
| SNP_P3_176959_9576  | NW_004518625.1 | Scaffold4108 | 9576                    | GG                              | AA                | 1946697679               |
| SNP_P3_176960_11568 | NW_004518625.1 | Scaffold4108 | 11568                   | CC                              | GG                | 1946697681               |
| SNP_P3_176961_11129 | NW_004518627.1 | Scaffold4110 | 11129                   | CC                              | GG                | 1946697683               |
| SNP_P3_176962_11136 | NW_004518627.1 | Scaffold4110 | 11136                   | AA                              | TT                | 1946697685               |
| SNP_P3_176963_11137 | NW_004518627.1 | Scaffold4110 | 11137                   | CC                              | GG                | 1946697687               |
| SNP_P3_176964_11139 | NW_004518627.1 | Scaffold4110 | 11139                   | AA                              | GG                | 1946697689               |
| SNP_P3_176965_11158 | NW_004518627.1 | Scaffold4110 | 11158                   | GG                              | TT                | 1946697691               |
| SNP_P3_176966_11161 | NW_004518627.1 | Scaffold4110 | 11161                   | TT                              | CC                | 1946697693               |
| SNP_P3_176967_1179  | NW_004518628.1 | Scaffold4113 | 1179                    | TT                              | AA                | 1946697697               |
| SNP_P3_176968_77    | NW_004518631.1 | Scaffold4116 | 77                      | GG                              | AA                | 1946697699               |
| SNP_P3_176969_470   | NW_004518632.1 | Scaffold4117 | 470                     | TT                              | GG                | 1946697701               |

| SNPs IDs            | Chromosome IDs | Chromosomes  | Physical positions (bp) | CDC Frontier (Reference genome) | (Pusa 256 & HPNB) | NCBI SNPdb Accession IDs |
|---------------------|----------------|--------------|-------------------------|---------------------------------|-------------------|--------------------------|
| SNP_P3_176970_495   | NW_004518632.1 | Scaffold4117 | 495                     | AA                              | GG                | 1946697703               |
| SNP_P3_176971_783   | NW_004518632.1 | Scaffold4117 | 783                     | AA                              | GG                | 1946697705               |
| SNP_P3_176972_5472  | NW_004518633.1 | Scaffold4118 | 5472                    | TT                              | CC                | 1946697707               |
| SNP_P3_176973_7283  | NW_004518633.1 | Scaffold4118 | 7283                    | AA                              | TT                | 1946697709               |
| SNP_P3_176974_11381 | NW_004518633.1 | Scaffold4118 | 11381                   | CC                              | TT                | 1946697711               |
| SNP_P3_176975_11862 | NW_004518633.1 | Scaffold4118 | 11862                   | GG                              | CC                | 1946697713               |
| SNP_P3_176976_11919 | NW_004518633.1 | Scaffold4118 | 11919                   | AA                              | GG                | 1946697715               |
| SNP_P3_176977_15027 | NW_004518633.1 | Scaffold4118 | 15027                   | AA                              | CC                | 1946697717               |
| SNP_P3_176978_15286 | NW_004518633.1 | Scaffold4118 | 15286                   | GG                              | TT                | 1946697719               |
| SNP_P3_176979_15390 | NW_004518633.1 | Scaffold4118 | 15390                   | CC                              | GG                | 1946697721               |
| SNP_P3_176980_15900 | NW_004518633.1 | Scaffold4118 | 15900                   | AA                              | TT                | 1946697723               |
| SNP_P3_176981_15910 | NW_004518633.1 | Scaffold4118 | 15910                   | TT                              | AA                | 1946697725               |
| SNP_P3_176983_18924 | NW_004518633.1 | Scaffold4118 | 18924                   | GG                              | AA                | 1946697727               |
| SNP_P3_176984_18935 | NW_004518633.1 | Scaffold4118 | 18935                   | CC                              | AA                | 1946697729               |
| SNP_P3_176985_21298 | NW_004518633.1 | Scaffold4118 | 21298                   | TT                              | CC                | 1946697731               |
| SNP_P3_176986_21336 | NW_004518633.1 | Scaffold4118 | 21336                   | TT                              | GG                | 1946697733               |
| SNP_P3_176987_22091 | NW_004518633.1 | Scaffold4118 | 22091                   | AA                              | GG                | 1946697735               |
| SNP_P3_176988_22263 | NW_004518633.1 | Scaffold4118 | 22263                   | CC                              | TT                | 1946697736               |
| SNP_P3_176989_22264 | NW_004518633.1 | Scaffold4118 | 22264                   | AA                              | GG                | 1946697738               |
| SNP_P3_176990_26645 | NW_004518633.1 | Scaffold4118 | 26645                   | CC                              | AA                | 1946697741               |
| SNP_P3_176991_27055 | NW_004518633.1 | Scaffold4118 | 27055                   | AA                              | TT                | 1946697743               |
| SNP_P3_176992_404   | NW_004518636.1 | Scaffold4122 | 404                     | AA                              | GG                | 1946697745               |
| SNP_P3_176993_536   | NW_004518636.1 | Scaffold4122 | 536                     | GG                              | AA                | 1946697747               |
| SNP_P3_176994_654   | NW_004518647.1 | Scaffold4141 | 654                     | AA                              | GG                | 1946697749               |
| SNP_P3_176995_739   | NW_004518647.1 | Scaffold4141 | 739                     | GG                              | TT                | 1946697752               |
| SNP_P3_176996_547   | NW_004518648.1 | Scaffold4142 | 547                     | CC                              | TT                | 1946697754               |
| SNP_P3_176997_1303  | NW_004518648.1 | Scaffold4142 | 1303                    | CC                              | GG                | 1946697756               |
| SNP_P3_176998_2240  | NW_004518648.1 | Scaffold4142 | 2240                    | TT                              | AA                | 1946697758               |
| SNP_P3_176999_2484  | NW_004518648.1 | Scaffold4142 | 2484                    | CC                              | TT                | 1946697760               |
| SNP_P3_177000_2505  | NW_004518648.1 | Scaffold4142 | 2505                    | AA                              | CC                | 1946697762               |
| SNP_P3_177001_2566  | NW_004518648.1 | Scaffold4142 | 2566                    | TT                              | GG                | 1946697764               |
| SNP_P3_177002_2584  | NW_004518648.1 | Scaffold4142 | 2584                    | TT                              | CC                | 1946697766               |
| SNP_P3_177003_2628  | NW_004518648.1 | Scaffold4142 | 2628                    | AA                              | GG                | 1946697769               |
| SNP_P3_177004_2773  | NW_004518648.1 | Scaffold4142 | 2773                    | CC                              | TT                | 1946697771               |
| SNP_P3_177005_2785  | NW_004518648.1 | Scaffold4142 | 2785                    | GG                              | AA                | 1946697773               |
| SNP_P3_177006_2806  | NW_004518648.1 | Scaffold4142 | 2806                    | GG                              | AA                | 1946697775               |
| SNP_P3_177007_6143  | NW_004518648.1 | Scaffold4142 | 6143                    | GG                              | CC                | 1946697778               |
| SNP_P3_177008_12814 | NW_004518648.1 | Scaffold4142 | 12814                   | GG                              | AA                | 1946697781               |
| SNP_P3_177009_13191 | NW_004518648.1 | Scaffold4142 | 13191                   | CC                              | TT                | 1946697783               |
| SNP_P3_177010_13650 | NW_004518648.1 | Scaffold4142 | 13650                   | AA                              | CC                | 1946697785               |
| SNP_P3_177011_13767 | NW_004518648.1 | Scaffold4142 | 13767                   | TT                              | CC                | 1946697787               |
| SNP_P3_177012_1068  | NW_004518650.1 | Scaffold4144 | 1068                    | CC                              | TT                | 1946697789               |

| SNPs IDs            | Chromosome IDs | Chromosomes  | Physical positions (bp) | CDC Frontier (Reference genome) | (Pusa 256 & HPNB) | NCBI SNPdb Accession IDs |
|---------------------|----------------|--------------|-------------------------|---------------------------------|-------------------|--------------------------|
| SNP_P3_177013_1073  | NW_004518650.1 | Scaffold4144 | 1073                    | GG                              | TT                | 1946697791               |
| SNP_P3_177014_10952 | NW_004518652.1 | Scaffold4149 | 10952                   | AA                              | GG                | 1946697793               |
| SNP_P3_177015_11036 | NW_004518652.1 | Scaffold4149 | 11036                   | GG                              | AA                | 1946697795               |
| SNP_P3_177016_11097 | NW_004518652.1 | Scaffold4149 | 11097                   | CC                              | TT                | 1946697798               |
| SNP_P3_177017_11256 | NW_004518652.1 | Scaffold4149 | 11256                   | AA                              | CC                | 1946697800               |
| SNP_P3_177018_11303 | NW_004518652.1 | Scaffold4149 | 11303                   | AA                              | CC                | 1946697802               |
| SNP_P3_177019_11341 | NW_004518652.1 | Scaffold4149 | 11341                   | AA                              | GG                | 1946697804               |
| SNP_P3_177020_11349 | NW_004518652.1 | Scaffold4149 | 11349                   | TT                              | AA                | 1946697806               |
| SNP_P3_177021_11430 | NW_004518652.1 | Scaffold4149 | 11430                   | GG                              | AA                | 1946697809               |
| SNP_P3_177022_11709 | NW_004518652.1 | Scaffold4149 | 11709                   | AA                              | CC                | 1946697811               |
| SNP_P3_177023_11723 | NW_004518652.1 | Scaffold4149 | 11723                   | CC                              | TT                | 1946697813               |
| SNP_P3_177024_11748 | NW_004518652.1 | Scaffold4149 | 11748                   | TT                              | CC                | 1946697815               |
| SNP_P3_177025_11762 | NW_004518652.1 | Scaffold4149 | 11762                   | AA                              | CC                | 1946697817               |
| SNP_P3_177026_11763 | NW_004518652.1 | Scaffold4149 | 11763                   | CC                              | TT                | 1946697819               |
| SNP_P3_177027_12428 | NW_004518652.1 | Scaffold4149 | 12428                   | AA                              | GG                | 1946697822               |
| SNP_P3_177028_12474 | NW_004518652.1 | Scaffold4149 | 12474                   | GG                              | CC                | 1946697824               |
| SNP_P3_177029_12507 | NW_004518652.1 | Scaffold4149 | 12507                   | AA                              | GG                | 1946697827               |
| SNP_P3_177030_12534 | NW_004518652.1 | Scaffold4149 | 12534                   | TT                              | CC                | 1946697829               |
| SNP_P3_177031_12849 | NW_004518652.1 | Scaffold4149 | 12849                   | TT                              | CC                | 1946697831               |
| SNP_P3_177032_12993 | NW_004518652.1 | Scaffold4149 | 12993                   | AA                              | GG                | 1946697833               |
| SNP_P3_177033_494   | NW_004518654.1 | Scaffold4155 | 494                     | GG                              | TT                | 1946697835               |
| SNP_P3_177034_978   | NW_004518654.1 | Scaffold4155 | 978                     | TT                              | AA                | 1946697837               |
| SNP_P3_177036_8708  | NW_004518654.1 | Scaffold4155 | 8708                    | CC                              | TT                | 1946697839               |
| SNP_P3_177037_9897  | NW_004518654.1 | Scaffold4155 | 9897                    | CC                              | TT                | 1946697840               |
| SNP_P3_177038_11575 | NW_004518654.1 | Scaffold4155 | 11575                   | AA                              | CC                | 1946697841               |
| SNP_P3_177039_11576 | NW_004518654.1 | Scaffold4155 | 11576                   | TT                              | CC                | 1946697842               |
| SNP_P3_177040_12060 | NW_004518654.1 | Scaffold4155 | 12060                   | CC                              | GG                | 1946697844               |
| SNP_P3_177041_12312 | NW_004518654.1 | Scaffold4155 | 12312                   | TT                              | AA                | 1946697845               |
| SNP_P3_177042_12384 | NW_004518654.1 | Scaffold4155 | 12384                   | TT                              | CC                | 1946697846               |
| SNP_P3_177043_12385 | NW_004518654.1 | Scaffold4155 | 12385                   | AA                              | CC                | 1946697847               |
| SNP_P3_177044_21688 | NW_004518654.1 | Scaffold4155 | 21688                   | GG                              | TT                | 1946697849               |
| SNP_P3_177045_21696 | NW_004518654.1 | Scaffold4155 | 21696                   | AA                              | GG                | 1946697851               |
| SNP_P3_177046_569   | NW_004518655.1 | Scaffold4156 | 569                     | AA                              | GG                | 1946697854               |
| SNP_P3_177047_1288  | NW_004518655.1 | Scaffold4156 | 1288                    | GG                              | TT                | 1946697856               |
| SNP_P3_177048_1340  | NW_004518655.1 | Scaffold4156 | 1340                    | CC                              | TT                | 1946697858               |
| SNP_P3_177049_1382  | NW_004518655.1 | Scaffold4156 | 1382                    | AA                              | GG                | 1946697860               |
| SNP_P3_177050_1425  | NW_004518655.1 | Scaffold4156 | 1425                    | AA                              | GG                | 1946697862               |
| SNP_P3_177051_503   | NW_004518656.1 | Scaffold4157 | 503                     | TT                              | CC                | 1946697865               |
| SNP_P3_177052_543   | NW_004518656.1 | Scaffold4157 | 543                     | AA                              | CC                | 1946697867               |
| SNP_P3_177053_550   | NW_004518656.1 | Scaffold4157 | 550                     | CC                              | TT                | 1946697869               |
| SNP_P3_177054_556   | NW_004518656.1 | Scaffold4157 | 556                     | GG                              | AA                | 1946697871               |
| SNP_P3_177055_3625  | NW_004518656.1 | Scaffold4157 | 3625                    | TT                              | CC                | 1946697873               |

| SNPs IDs            | Chromosome IDs | Chromosomes  | Physical positions (bp) | CDC Frontier (Reference genome) | (Pusa 256 & HPNB) | NCBI SNPdb Accession IDs |
|---------------------|----------------|--------------|-------------------------|---------------------------------|-------------------|--------------------------|
| SNP_P3_177056_3672  | NW_004518656.1 | Scaffold4157 | 3672                    | CC                              | TT                | 1946697876               |
| SNP_P3_177057_3712  | NW_004518656.1 | Scaffold4157 | 3712                    | CC                              | GG                | 1946697878               |
| SNP_P3_177058_3729  | NW_004518656.1 | Scaffold4157 | 3729                    | TT                              | AA                | 1946697880               |
| SNP_P3_177060_9455  | NW_004518656.1 | Scaffold4157 | 9455                    | GG                              | AA                | 1946697882               |
| SNP_P3_177061_9595  | NW_004518656.1 | Scaffold4157 | 9595                    | AA                              | GG                | 1946697884               |
| SNP_P3_177062_9604  | NW_004518656.1 | Scaffold4157 | 9604                    | CC                              | AA                | 1946697886               |
| SNP_P3_177063_9605  | NW_004518656.1 | Scaffold4157 | 9605                    | AA                              | CC                | 1946697888               |
| SNP_P3_177064_10199 | NW_004518656.1 | Scaffold4157 | 10199                   | CC                              | AA                | 1946697890               |
| SNP_P3_177065_10215 | NW_004518656.1 | Scaffold4157 | 10215                   | AA                              | GG                | 1946697893               |
| SNP_P3_177066_10601 | NW_004518656.1 | Scaffold4157 | 10601                   | CC                              | AA                | 1946697895               |
| SNP_P3_177067_11816 | NW_004518656.1 | Scaffold4157 | 11816                   | GG                              | TT                | 1946697897               |
| SNP_P3_177068_12352 | NW_004518656.1 | Scaffold4157 | 12352                   | TT                              | CC                | 1946697899               |
| SNP_P3_177069_12428 | NW_004518656.1 | Scaffold4157 | 12428                   | AA                              | GG                | 1946697901               |
| SNP_P3_177070_754   | NW_004518657.1 | Scaffold4158 | 754                     | AA                              | TT                | 1946697903               |
| SNP_P3_177071_917   | NW_004518657.1 | Scaffold4158 | 917                     | TT                              | GG                | 1946697906               |
| SNP_P3_177072_975   | NW_004518657.1 | Scaffold4158 | 975                     | TT                              | AA                | 1946697908               |
| SNP_P3_177073_438   | NW_004518659.1 | Scaffold4161 | 438                     | CC                              | AA                | 1946697910               |
| SNP_P3_177074_439   | NW_004518659.1 | Scaffold4161 | 439                     | AA                              | TT                | 1946697912               |
| SNP_P3_177075_1590  | NW_004518665.1 | Scaffold4167 | 1590                    | GG                              | AA                | 1946697914               |
| SNP_P3_177076_1742  | NW_004518665.1 | Scaffold4167 | 1742                    | CC                              | TT                | 1946697916               |
| SNP_P3_177078_2672  | NW_004518665.1 | Scaffold4167 | 2672                    | GG                              | AA                | 1946697918               |
| SNP_P3_177079_2675  | NW_004518665.1 | Scaffold4167 | 2675                    | GG                              | AA                | 1946697921               |
| SNP_P3_177080_4033  | NW_004518665.1 | Scaffold4167 | 4033                    | AA                              | GG                | 1946697924               |
| SNP_P3_177081_4069  | NW_004518665.1 | Scaffold4167 | 4069                    | AA                              | GG                | 1946697926               |
| SNP_P3_177082_4109  | NW_004518665.1 | Scaffold4167 | 4109                    | TT                              | CC                | 1946697928               |
| SNP_P3_177083_4133  | NW_004518665.1 | Scaffold4167 | 4133                    | TT                              | CC                | 1946697930               |
| SNP_P3_177084_4152  | NW_004518665.1 | Scaffold4167 | 4152                    | CC                              | TT                | 1946697932               |
| SNP_P3_177085_4191  | NW_004518665.1 | Scaffold4167 | 4191                    | AA                              | CC                | 1946697934               |
| SNP_P3_177086_4221  | NW_004518665.1 | Scaffold4167 | 4221                    | TT                              | AA                | 1946697937               |
| SNP_P3_177087_4246  | NW_004518665.1 | Scaffold4167 | 4246                    | TT                              | GG                | 1946697939               |
| SNP_P3_177088_4277  | NW_004518665.1 | Scaffold4167 | 4277                    | TT                              | CC                | 1946697941               |
| SNP_P3_177089_4307  | NW_004518665.1 | Scaffold4167 | 4307                    | TT                              | CC                | 1946697943               |
| SNP_P3_177090_4330  | NW_004518665.1 | Scaffold4167 | 4330                    | GG                              | AA                | 1946697945               |
| SNP_P3_177091_15438 | NW_004518665.1 | Scaffold4167 | 15438                   | CC                              | TT                | 1946697947               |
| SNP_P3_177092_33066 | NW_004518665.1 | Scaffold4167 | 33066                   | TT                              | GG                | 1946697950               |
| SNP_P3_177093_33101 | NW_004518665.1 | Scaffold4167 | 33101                   | TT                              | CC                | 1946697952               |
| SNP_P3_177094_33279 | NW_004518665.1 | Scaffold4167 | 33279                   | CC                              | TT                | 1946697954               |
| SNP_P3_177095_33385 | NW_004518665.1 | Scaffold4167 | 33385                   | CC                              | TT                | 1946697956               |
| SNP_P3_177096_33399 | NW_004518665.1 | Scaffold4167 | 33399                   | TT                              | GG                | 1946697958               |
| SNP_P3_177097_33511 | NW_004518665.1 | Scaffold4167 | 33511                   | TT                              | CC                | 1946697960               |
| SNP_P3_177098_33545 | NW_004518665.1 | Scaffold4167 | 33545                   | CC                              | TT                | 1946697963               |
| SNP_P3_177099_33547 | NW_004518665.1 | Scaffold4167 | 33547                   | AA                              | GG                | 1946697966               |

| SNPs IDs            | Chromosome IDs | Chromosomes  | Physical positions (bp) | CDC Frontier (Reference genome) | (Pusa 256 & HPNB) | NCBI SNPdb Accession IDs |
|---------------------|----------------|--------------|-------------------------|---------------------------------|-------------------|--------------------------|
| SNP_P3_177100_33557 | NW_004518665.1 | Scaffold4167 | 33557                   | GG                              | TT                | 1946697968               |
| SNP_P3_177103_581   | NW_004518669.1 | Scaffold4171 | 581                     | TT                              | AA                | 1946697970               |
| SNP_P3_177104_585   | NW_004518669.1 | Scaffold4171 | 585                     | AA                              | GG                | 1946697972               |
| SNP_P3_177105_651   | NW_004518669.1 | Scaffold4171 | 651                     | TT                              | CC                | 1946697974               |
| SNP_P3_177107_1015  | NW_004518669.1 | Scaffold4171 | 1015                    | AA                              | GG                | 1946697976               |
| SNP_P3_177109_481   | NW_004518672.1 | Scaffold4176 | 481                     | TT                              | AA                | 1946697978               |
| SNP_P3_177110_612   | NW_004518672.1 | Scaffold4176 | 612                     | AA                              | GG                | 1946697980               |
| SNP_P3_177111_685   | NW_004518672.1 | Scaffold4176 | 685                     | GG                              | AA                | 1946697983               |
| SNP_P3_177112_692   | NW_004518672.1 | Scaffold4176 | 692                     | GG                              | TT                | 1946697985               |
| SNP_P3_177113_718   | NW_004518672.1 | Scaffold4176 | 718                     | AA                              | GG                | 1946697987               |
| SNP_P3_177114_894   | NW_004518672.1 | Scaffold4176 | 894                     | GG                              | AA                | 1946697989               |
| SNP_P3_177115_1014  | NW_004518672.1 | Scaffold4176 | 1014                    | TT                              | CC                | 1946697991               |
| SNP_P3_177116_1050  | NW_004518672.1 | Scaffold4176 | 1050                    | TT                              | CC                | 1946697993               |
| SNP_P3_177117_1051  | NW_004518672.1 | Scaffold4176 | 1051                    | GG                              | AA                | 1946697996               |
| SNP_P3_177118_2305  | NW_004518672.1 | Scaffold4176 | 2305                    | AA                              | TT                | 1946697998               |
| SNP_P3_177119_4062  | NW_004518672.1 | Scaffold4176 | 4062                    | AA                              | GG                | 1946698000               |
| SNP_P3_177120_4148  | NW_004518672.1 | Scaffold4176 | 4148                    | AA                              | TT                | 1946698002               |
| SNP_P3_177121_4360  | NW_004518672.1 | Scaffold4176 | 4360                    | GG                              | AA                | 1946698005               |
| SNP_P3_177122_4383  | NW_004518672.1 | Scaffold4176 | 4383                    | GG                              | AA                | 1946698008               |
| SNP_P3_177123_4448  | NW_004518672.1 | Scaffold4176 | 4448                    | AA                              | TT                | 1946698010               |
| SNP_P3_177124_4561  | NW_004518672.1 | Scaffold4176 | 4561                    | AA                              | GG                | 1946698012               |
| SNP_P3_177125_4565  | NW_004518672.1 | Scaffold4176 | 4565                    | CC                              | GG                | 1946698014               |
| SNP_P3_177126_4688  | NW_004518672.1 | Scaffold4176 | 4688                    | TT                              | CC                | 1946698016               |
| SNP_P3_177127_4735  | NW_004518672.1 | Scaffold4176 | 4735                    | AA                              | CC                | 1946698018               |
| SNP_P3_177128_4915  | NW_004518672.1 | Scaffold4176 | 4915                    | TT                              | CC                | 1946698020               |
| SNP_P3_177129_6740  | NW_004518672.1 | Scaffold4176 | 6740                    | CC                              | TT                | 1946698022               |
| SNP_P3_177130_7534  | NW_004518672.1 | Scaffold4176 | 7534                    | GG                              | AA                | 1946698024               |
| SNP_P3_177131_7671  | NW_004518672.1 | Scaffold4176 | 7671                    | AA                              | GG                | 1946698027               |
| SNP_P3_177132_7747  | NW_004518672.1 | Scaffold4176 | 7747                    | CC                              | TT                | 1946698029               |
| SNP_P3_177133_7775  | NW_004518672.1 | Scaffold4176 | 7775                    | GG                              | AA                | 1946698031               |
| SNP_P3_177134_7810  | NW_004518672.1 | Scaffold4176 | 7810                    | GG                              | AA                | 1946698033               |
| SNP_P3_177135_7882  | NW_004518672.1 | Scaffold4176 | 7882                    | CC                              | TT                | 1946698035               |
| SNP_P3_177136_7903  | NW_004518672.1 | Scaffold4176 | 7903                    | CC                              | TT                | 1946698037               |
| SNP_P3_177137_7928  | NW_004518672.1 | Scaffold4176 | 7928                    | CC                              | AA                | 1946698039               |
| SNP_P3_177138_7987  | NW_004518672.1 | Scaffold4176 | 7987                    | GG                              | AA                | 1946698041               |
| SNP_P3_177139_8005  | NW_004518672.1 | Scaffold4176 | 8005                    | AA                              | GG                | 1946698043               |
| SNP_P3_177140_8045  | NW_004518672.1 | Scaffold4176 | 8045                    | AA                              | CC                | 1946698045               |
| SNP_P3_177141_8148  | NW_004518672.1 | Scaffold4176 | 8148                    | CC                              | TT                | 1946698047               |
| SNP_P3_177142_8153  | NW_004518672.1 | Scaffold4176 | 8153                    | GG                              | AA                | 1946698049               |
| SNP_P3_177143_8174  | NW_004518672.1 | Scaffold4176 | 8174                    | CC                              | TT                | 1946698051               |
| SNP_P3_177144_8306  | NW_004518672.1 | Scaffold4176 | 8306                    | CC                              | TT                | 1946698053               |
| SNP_P3_177145_11169 | NW_004518672.1 | Scaffold4176 | 11169                   | GG                              | AA                | 1946698055               |

| SNPs IDs            | Chromosome IDs | Chromosomes  | Physical positions (bp) | CDC Frontier (Reference genome) | (Pusa 256 & HPNB) | NCBI SNPdb Accession IDs |
|---------------------|----------------|--------------|-------------------------|---------------------------------|-------------------|--------------------------|
| SNP_P3_177146_11335 | NW_004518672.1 | Scaffold4176 | 11335                   | TT                              | AA                | 1946698057               |
| SNP_P3_177147_11339 | NW_004518672.1 | Scaffold4176 | 11339                   | AA                              | GG                | 1946698059               |
| SNP_P3_177148_17186 | NW_004518672.1 | Scaffold4176 | 17186                   | TT                              | AA                | 1946698061               |
| SNP_P3_177149_17197 | NW_004518672.1 | Scaffold4176 | 17197                   | TT                              | GG                | 1946698063               |
| SNP_P3_177150_17278 | NW_004518672.1 | Scaffold4176 | 17278                   | AA                              | TT                | 1946698066               |
| SNP_P3_177151_17328 | NW_004518672.1 | Scaffold4176 | 17328                   | TT                              | CC                | 1946698068               |
| SNP_P3_177152_17516 | NW_004518672.1 | Scaffold4176 | 17516                   | TT                              | CC                | 1946698070               |
| SNP_P3_177153_590   | NW_004518673.1 | Scaffold4178 | 590                     | CC                              | TT                | 1946698072               |
| SNP_P3_177154_716   | NW_004518673.1 | Scaffold4178 | 716                     | CC                              | AA                | 1946698074               |
| SNP_P3_177155_771   | NW_004518673.1 | Scaffold4178 | 771                     | AA                              | GG                | 1946698076               |
| SNP_P3_177156_820   | NW_004518673.1 | Scaffold4178 | 820                     | AA                              | CC                | 1946698078               |
| SNP_P3_177157_1294  | NW_004518673.1 | Scaffold4178 | 1294                    | GG                              | AA                | 1946698080               |
| SNP_P3_177158_367   | NW_004518676.1 | Scaffold4182 | 367                     | AA                              | GG                | 1946698082               |
| SNP_P3_177159_395   | NW_004518676.1 | Scaffold4182 | 395                     | GG                              | TT                | 1946698084               |
| SNP_P3_177160_760   | NW_004518676.1 | Scaffold4182 | 760                     | TT                              | AA                | 1946698086               |
| SNP_P3_177161_7546  | NW_004518676.1 | Scaffold4182 | 7546                    | CC                              | GG                | 1946698088               |
| SNP_P3_177162_7889  | NW_004518676.1 | Scaffold4182 | 7889                    | TT                              | CC                | 1946698090               |
| SNP_P3_177163_7913  | NW_004518676.1 | Scaffold4182 | 7913                    | AA                              | GG                | 1946698092               |
| SNP_P3_177164_7939  | NW_004518676.1 | Scaffold4182 | 7939                    | TT                              | CC                | 1946698096               |
| SNP_P3_177165_7945  | NW_004518676.1 | Scaffold4182 | 7945                    | AA                              | GG                | 1946698098               |
| SNP_P3_177166_8015  | NW_004518676.1 | Scaffold4182 | 8015                    | AA                              | GG                | 1946698100               |
| SNP_P3_177167_8395  | NW_004518676.1 | Scaffold4182 | 8395                    | TT                              | AA                | 1946698102               |
| SNP_P3_177168_8495  | NW_004518676.1 | Scaffold4182 | 8495                    | CC                              | TT                | 1946698104               |
| SNP_P3_177169_8676  | NW_004518676.1 | Scaffold4182 | 8676                    | GG                              | CC                | 1946698106               |
| SNP_P3_177170_9104  | NW_004518676.1 | Scaffold4182 | 9104                    | GG                              | TT                | 1946698108               |
| SNP_P3_177171_9108  | NW_004518676.1 | Scaffold4182 | 9108                    | TT                              | CC                | 1946698110               |
| SNP_P3_177172_9118  | NW_004518676.1 | Scaffold4182 | 9118                    | AA                              | GG                | 1946698112               |
| SNP_P3_177173_9194  | NW_004518676.1 | Scaffold4182 | 9194                    | CC                              | TT                | 1946698114               |
| SNP_P3_177174_9227  | NW_004518676.1 | Scaffold4182 | 9227                    | AA                              | GG                | 1946698116               |
| SNP_P3_177176_9583  | NW_004518676.1 | Scaffold4182 | 9583                    | TT                              | GG                | 1946698118               |
| SNP_P3_177177_9595  | NW_004518676.1 | Scaffold4182 | 9595                    | AA                              | CC                | 1946698121               |
| SNP_P3_177178_304   | NW_004518681.1 | Scaffold4189 | 304                     | TT                              | AA                | 1946698123               |
| SNP_P3_177179_21890 | NW_004518681.1 | Scaffold4189 | 21890                   | CC                              | TT                | 1946698125               |
| SNP_P3_177180_22091 | NW_004518681.1 | Scaffold4189 | 22091                   | TT                              | CC                | 1946698127               |
| SNP_P3_177181_22154 | NW_004518681.1 | Scaffold4189 | 22154                   | TT                              | CC                | 1946698129               |
| SNP_P3_177182_22155 | NW_004518681.1 | Scaffold4189 | 22155                   | CC                              | TT                | 1946698131               |
| SNP_P3_177183_22173 | NW_004518681.1 | Scaffold4189 | 22173                   | GG                              | AA                | 1946698133               |
| SNP_P3_177184_22179 | NW_004518681.1 | Scaffold4189 | 22179                   | GG                              | TT                | 1946698135               |
| SNP_P3_177185_22466 | NW_004518681.1 | Scaffold4189 | 22466                   | GG                              | CC                | 1946698139               |
| SNP_P3_177186_22536 | NW_004518681.1 | Scaffold4189 | 22536                   | TT                              | CC                | 1946698141               |
| SNP_P3_177187_35011 | NW_004518681.1 | Scaffold4189 | 35011                   | TT                              | GG                | 1946698143               |
| SNP_P3_177188_36114 | NW_004518681.1 | Scaffold4189 | 36114                   | GG                              | TT                | 1946698145               |



| SNPs IDs            | Chromosome IDs | Chromosomes  | Physical positions (bp) | CDC Frontier (Reference genome) | (Pusa 256 & HPNB) | NCBI SNPdb Accession IDs |
|---------------------|----------------|--------------|-------------------------|---------------------------------|-------------------|--------------------------|
| SNP_P3_177189_41345 | NW_004518681.1 | Scaffold4189 | 41345                   | TT                              | GG                | 1946698148               |
| SNP_P3_177190_41527 | NW_004518681.1 | Scaffold4189 | 41527                   | GG                              | CC                | 1946698150               |
| SNP_P3_177191_41545 | NW_004518681.1 | Scaffold4189 | 41545                   | AA                              | GG                | 1946698153               |
| SNP_P3_177192_41572 | NW_004518681.1 | Scaffold4189 | 41572                   | AA                              | GG                | 1946698155               |
| SNP_P3_177193_41895 | NW_004518681.1 | Scaffold4189 | 41895                   | GG                              | AA                | 1946698157               |
| SNP_P3_177194_41900 | NW_004518681.1 | Scaffold4189 | 41900                   | TT                              | GG                | 1946698159               |
| SNP_P3_177195_41905 | NW_004518681.1 | Scaffold4189 | 41905                   | CC                              | TT                | 1946698162               |
| SNP_P3_177196_2819  | NW_004518683.1 | Scaffold4192 | 2819                    | TT                              | CC                | 1946698164               |
| SNP_P3_177197_2899  | NW_004518683.1 | Scaffold4192 | 2899                    | CC                              | AA                | 1946698166               |
| SNP_P3_177198_2933  | NW_004518683.1 | Scaffold4192 | 2933                    | TT                              | AA                | 1946698169               |
| SNP_P3_177199_3074  | NW_004518683.1 | Scaffold4192 | 3074                    | GG                              | TT                | 1946698171               |
| SNP_P3_177200_3116  | NW_004518683.1 | Scaffold4192 | 3116                    | CC                              | TT                | 1946698173               |
| SNP_P3_177201_3189  | NW_004518683.1 | Scaffold4192 | 3189                    | AA                              | GG                | 1946698175               |
| SNP_P3_177202_3221  | NW_004518683.1 | Scaffold4192 | 3221                    | AA                              | GG                | 1946698178               |
| SNP_P3_177204_3366  | NW_004518683.1 | Scaffold4192 | 3366                    | GG                              | TT                | 1946698180               |
| SNP_P3_177205_3380  | NW_004518683.1 | Scaffold4192 | 3380                    | GG                              | AA                | 1946698182               |
| SNP_P3_177206_3452  | NW_004518683.1 | Scaffold4192 | 3452                    | AA                              | GG                | 1946698185               |
| SNP_P3_177207_3526  | NW_004518683.1 | Scaffold4192 | 3526                    | AA                              | CC                | 1946698187               |
| SNP_P3_177208_3607  | NW_004518683.1 | Scaffold4192 | 3607                    | TT                              | GG                | 1946698189               |
| SNP_P3_177209_3608  | NW_004518683.1 | Scaffold4192 | 3608                    | GG                              | AA                | 1946698191               |
| SNP_P3_177210_3615  | NW_004518683.1 | Scaffold4192 | 3615                    | AA                              | GG                | 1946698193               |
| SNP_P3_177211_3649  | NW_004518683.1 | Scaffold4192 | 3649                    | GG                              | AA                | 1946698195               |
| SNP_P3_177213_3821  | NW_004518683.1 | Scaffold4192 | 3821                    | AA                              | CC                | 1946698197               |
| SNP_P3_177214_4001  | NW_004518683.1 | Scaffold4192 | 4001                    | AA                              | CC                | 1946698200               |
| SNP_P3_177215_4019  | NW_004518683.1 | Scaffold4192 | 4019                    | GG                              | TT                | 1946698202               |
| SNP_P3_177216_4029  | NW_004518683.1 | Scaffold4192 | 4029                    | GG                              | TT                | 1946698204               |
| SNP_P3_177217_4054  | NW_004518683.1 | Scaffold4192 | 4054                    | AA                              | TT                | 1946698206               |
| SNP_P3_177218_4075  | NW_004518683.1 | Scaffold4192 | 4075                    | TT                              | AA                | 1946698208               |
| SNP_P3_177219_4098  | NW_004518683.1 | Scaffold4192 | 4098                    | CC                              | AA                | 1946698210               |
| SNP_P3_177220_4283  | NW_004518683.1 | Scaffold4192 | 4283                    | TT                              | GG                | 1946698212               |
| SNP_P3_177221_4305  | NW_004518683.1 | Scaffold4192 | 4305                    | TT                              | CC                | 1946698215               |
| SNP_P3_177222_4406  | NW_004518683.1 | Scaffold4192 | 4406                    | CC                              | TT                | 1946698217               |
| SNP_P3_177223_4440  | NW_004518683.1 | Scaffold4192 | 4440                    | TT                              | AA                | 1946698219               |
| SNP_P3_177224_4500  | NW_004518683.1 | Scaffold4192 | 4500                    | AA                              | GG                | 1946698221               |
| SNP_P3_177225_4550  | NW_004518683.1 | Scaffold4192 | 4550                    | GG                              | AA                | 1946698223               |
| SNP_P3_177226_4836  | NW_004518683.1 | Scaffold4192 | 4836                    | AA                              | TT                | 1946698225               |
| SNP_P3_177227_4848  | NW_004518683.1 | Scaffold4192 | 4848                    | CC                              | TT                | 1946698227               |
| SNP_P3_177228_4864  | NW_004518683.1 | Scaffold4192 | 4864                    | TT                              | CC                | 1946698229               |
| SNP_P3_177229_2298  | NW_004518684.1 | Scaffold4194 | 2298                    | TT                              | AA                | 1946698231               |
| SNP_P3_177230_627   | NW_004518685.1 | Scaffold4195 | 627                     | CC                              | TT                | 1946698233               |
| SNP_P3_177231_15974 | NW_004518687.1 | Scaffold4197 | 15974                   | CC                              | TT                | 1946698235               |
| SNP_P3_177232_16019 | NW_004518687.1 | Scaffold4197 | 16019                   | GG                              | AA                | 1946698237               |

| SNPs IDs            | Chromosome IDs | Chromosomes  | Physical positions (bp) | CDC Frontier (Reference genome) | (Pusa 256 & HPNB) | NCBI SNPdb Accession IDs |
|---------------------|----------------|--------------|-------------------------|---------------------------------|-------------------|--------------------------|
| SNP_P3_177233_16196 | NW_004518687.1 | Scaffold4197 | 16196                   | CC                              | TT                | 1946698239               |
| SNP_P3_177236_16392 | NW_004518687.1 | Scaffold4197 | 16392                   | AA                              | GG                | 1946698242               |
| SNP_P3_177237_16414 | NW_004518687.1 | Scaffold4197 | 16414                   | GG                              | TT                | 1946698244               |
| SNP_P3_177238_16416 | NW_004518687.1 | Scaffold4197 | 16416                   | TT                              | GG                | 1946698246               |
| SNP_P3_177239_16488 | NW_004518687.1 | Scaffold4197 | 16488                   | TT                              | CC                | 1946698249               |
| SNP_P3_177240_16510 | NW_004518687.1 | Scaffold4197 | 16510                   | CC                              | AA                | 1946698251               |
| SNP_P3_177241_16513 | NW_004518687.1 | Scaffold4197 | 16513                   | GG                              | TT                | 1946698253               |
| SNP_P3_177242_22430 | NW_004518687.1 | Scaffold4197 | 22430                   | TT                              | CC                | 1946698255               |
| SNP_P3_177243_22517 | NW_004518687.1 | Scaffold4197 | 22517                   | CC                              | AA                | 1946698257               |
| SNP_P3_177244_81051 | NW_004518687.1 | Scaffold4197 | 81051                   | TT                              | GG                | 1946698259               |
| SNP_P3_177245_43    | NW_004518695.1 | Scaffold4210 | 43                      | GG                              | AA                | 1946698261               |
| SNP_P3_177246_64    | NW_004518695.1 | Scaffold4210 | 64                      | GG                              | CC                | 1946698263               |
| SNP_P3_177247_81    | NW_004518695.1 | Scaffold4210 | 81                      | CC                              | TT                | 1946698265               |
| SNP_P3_177248_181   | NW_004518695.1 | Scaffold4210 | 181                     | AA                              | CC                | 1946698268               |
| SNP_P3_177249_186   | NW_004518695.1 | Scaffold4210 | 186                     | AA                              | TT                | 1946698270               |
| SNP_P3_177250_230   | NW_004518695.1 | Scaffold4210 | 230                     | AA                              | TT                | 1946698272               |
| SNP_P3_177251_297   | NW_004518695.1 | Scaffold4210 | 297                     | AA                              | CC                | 1946698274               |
| SNP_P3_177252_9135  | NW_004518696.1 | Scaffold4211 | 9135                    | CC                              | TT                | 1946698276               |
| SNP_P3_177253_9176  | NW_004518696.1 | Scaffold4211 | 9176                    | TT                              | CC                | 1946698278               |
| SNP_P3_177254_9227  | NW_004518696.1 | Scaffold4211 | 9227                    | CC                              | GG                | 1946698280               |
| SNP_P3_177255_9237  | NW_004518696.1 | Scaffold4211 | 9237                    | TT                              | CC                | 1946698283               |
| SNP_P3_177256_9249  | NW_004518696.1 | Scaffold4211 | 9249                    | AA                              | GG                | 1946698285               |
| SNP_P3_177257_9252  | NW_004518696.1 | Scaffold4211 | 9252                    | AA                              | GG                | 1946698287               |
| SNP_P3_177258_9268  | NW_004518696.1 | Scaffold4211 | 9268                    | CC                              | TT                | 1946698289               |
| SNP_P3_177259_9493  | NW_004518696.1 | Scaffold4211 | 9493                    | GG                              | AA                | 1946698291               |
| SNP_P3_177260_9498  | NW_004518696.1 | Scaffold4211 | 9498                    | GG                              | CC                | 1946698293               |
| SNP_P3_177261_9504  | NW_004518696.1 | Scaffold4211 | 9504                    | TT                              | AA                | 1946698295               |
| SNP_P3_177262_9514  | NW_004518696.1 | Scaffold4211 | 9514                    | GG                              | AA                | 1946698297               |
| SNP_P3_177263_9521  | NW_004518696.1 | Scaffold4211 | 9521                    | GG                              | AA                | 1946698299               |
| SNP_P3_177264_9522  | NW_004518696.1 | Scaffold4211 | 9522                    | CC                              | AA                | 1946698301               |
| SNP_P3_177265_9523  | NW_004518696.1 | Scaffold4211 | 9523                    | AA                              | TT                | 1946698303               |
| SNP_P3_177266_9525  | NW_004518696.1 | Scaffold4211 | 9525                    | CC                              | TT                | 1946698305               |
| SNP_P3_177267_9533  | NW_004518696.1 | Scaffold4211 | 9533                    | TT                              | CC                | 1946698307               |
| SNP_P3_177268_9559  | NW_004518696.1 | Scaffold4211 | 9559                    | GG                              | AA                | 1946698309               |
| SNP_P3_177269_13886 | NW_004518696.1 | Scaffold4211 | 13886                   | GG                              | TT                | 1946698311               |
| SNP_P3_177270_627   | NW_004518697.1 | Scaffold4212 | 627                     | CC                              | GG                | 1946698313               |
| SNP_P3_177271_727   | NW_004518697.1 | Scaffold4212 | 727                     | TT                              | CC                | 1946698315               |
| SNP_P3_177272_1364  | NW_004518697.1 | Scaffold4212 | 1364                    | TT                              | CC                | 1946698317               |
| SNP_P3_177273_1987  | NW_004518698.1 | Scaffold4213 | 1987                    | AA                              | TT                | 1946698319               |
| SNP_P3_177274_2050  | NW_004518698.1 | Scaffold4213 | 2050                    | TT                              | AA                | 1946698321               |
| SNP_P3_177275_2338  | NW_004518698.1 | Scaffold4213 | 2338                    | CC                              | TT                | 1946698323               |
| SNP_P3_177276_2473  | NW_004518698.1 | Scaffold4213 | 2473                    | CC                              | GG                | 1946698327               |

| SNPs IDs           | Chromosome IDs | Chromosomes  | Physical positions (bp) | CDC Frontier (Reference genome) | (Pusa 256 & HPNB) | NCBI SNPdb Accession IDs |
|--------------------|----------------|--------------|-------------------------|---------------------------------|-------------------|--------------------------|
| SNP_P3_177278_2836 | NW_004518698.1 | Scaffold4213 | 2836                    | CC                              | AA                | 1946698329               |
| SNP_P3_177279_3173 | NW_004518698.1 | Scaffold4213 | 3173                    | GG                              | AA                | 1946698331               |
| SNP_P3_177280_5189 | NW_004518701.1 | Scaffold4219 | 5189                    | TT                              | CC                | 1946698333               |
| SNP_P3_177281_15   | NW_004518703.1 | Scaffold4221 | 15                      | AA                              | GG                | 1946698335               |
| SNP_P3_177282_38   | NW_004518703.1 | Scaffold4221 | 38                      | GG                              | AA                | 1946698337               |
| SNP_P3_177283_54   | NW_004518703.1 | Scaffold4221 | 54                      | AA                              | TT                | 1946698339               |
| SNP_P3_177284_55   | NW_004518703.1 | Scaffold4221 | 55                      | TT                              | CC                | 1946698341               |
| SNP_P3_177285_64   | NW_004518703.1 | Scaffold4221 | 64                      | CC                              | TT                | 1946698343               |
| SNP_P3_177286_74   | NW_004518703.1 | Scaffold4221 | 74                      | AA                              | CC                | 1946698345               |
| SNP_P3_177287_76   | NW_004518703.1 | Scaffold4221 | 76                      | TT                              | CC                | 1946698347               |
| SNP_P3_177288_105  | NW_004518703.1 | Scaffold4221 | 105                     | GG                              | AA                | 1946698349               |
| SNP_P3_177289_111  | NW_004518703.1 | Scaffold4221 | 111                     | AA                              | GG                | 1946698351               |
| SNP_P3_177290_116  | NW_004518703.1 | Scaffold4221 | 116                     | CC                              | TT                | 1946698353               |
| SNP_P3_177291_173  | NW_004518703.1 | Scaffold4221 | 173                     | CC                              | TT                | 1946698355               |
| SNP_P3_177292_211  | NW_004518703.1 | Scaffold4221 | 211                     | GG                              | AA                | 1946698357               |
| SNP_P3_177293_282  | NW_004518703.1 | Scaffold4221 | 282                     | TT                              | CC                | 1946698359               |
| SNP_P3_177294_304  | NW_004518703.1 | Scaffold4221 | 304                     | TT                              | GG                | 1946698361               |
| SNP_P3_177295_323  | NW_004518703.1 | Scaffold4221 | 323                     | GG                              | TT                | 1946698363               |
| SNP_P3_177296_345  | NW_004518703.1 | Scaffold4221 | 345                     | TT                              | AA                | 1946698367               |
| SNP_P3_177297_369  | NW_004518703.1 | Scaffold4221 | 369                     | GG                              | AA                | 1946698369               |
| SNP_P3_177298_371  | NW_004518703.1 | Scaffold4221 | 371                     | GG                              | TT                | 1946698371               |
| SNP_P3_177300_530  | NW_004518703.1 | Scaffold4221 | 530                     | GG                              | TT                | 1946698373               |
| SNP_P3_177301_540  | NW_004518703.1 | Scaffold4221 | 540                     | CC                              | GG                | 1946698375               |
| SNP_P3_177303_622  | NW_004518703.1 | Scaffold4221 | 622                     | CC                              | TT                | 1946698377               |
| SNP_P3_177304_644  | NW_004518703.1 | Scaffold4221 | 644                     | AA                              | GG                | 1946698379               |
| SNP_P3_177305_669  | NW_004518703.1 | Scaffold4221 | 669                     | TT                              | GG                | 1946698381               |
| SNP_P3_177307_712  | NW_004518703.1 | Scaffold4221 | 712                     | TT                              | GG                | 1946698383               |
| SNP_P3_177308_729  | NW_004518703.1 | Scaffold4221 | 729                     | TT                              | CC                | 1946698385               |
| SNP_P3_177309_748  | NW_004518703.1 | Scaffold4221 | 748                     | TT                              | CC                | 1946698387               |
| SNP_P3_177310_794  | NW_004518703.1 | Scaffold4221 | 794                     | CC                              | TT                | 1946698389               |
| SNP_P3_177311_819  | NW_004518703.1 | Scaffold4221 | 819                     | CC                              | TT                | 1946698391               |
| SNP_P3_177312_870  | NW_004518703.1 | Scaffold4221 | 870                     | GG                              | TT                | 1946698393               |
| SNP_P3_177313_885  | NW_004518703.1 | Scaffold4221 | 885                     | GG                              | AA                | 1946698395               |
| SNP_P3_177314_992  | NW_004518703.1 | Scaffold4221 | 992                     | TT                              | AA                | 1946698397               |
| SNP_P3_177315_994  | NW_004518703.1 | Scaffold4221 | 994                     | TT                              | CC                | 1946698399               |
| SNP_P3_177316_997  | NW_004518703.1 | Scaffold4221 | 997                     | AA                              | CC                | 1946698401               |
| SNP_P3_177317_1002 | NW_004518703.1 | Scaffold4221 | 1002                    | AA                              | CC                | 1946698403               |
| SNP_P3_177318_1036 | NW_004518703.1 | Scaffold4221 | 1036                    | GG                              | TT                | 1946698405               |
| SNP_P3_177319_1054 | NW_004518703.1 | Scaffold4221 | 1054                    | AA                              | GG                | 1946698408               |
| SNP_P3_177320_1089 | NW_004518703.1 | Scaffold4221 | 1089                    | GG                              | TT                | 1946698411               |
| SNP_P3_177321_1090 | NW_004518703.1 | Scaffold4221 | 1090                    | GG                              | AA                | 1946698413               |
| SNP_P3_177323_1566 | NW_004518703.1 | Scaffold4221 | 1566                    | GG                              | AA                | 1946698415               |

| SNPs IDs            | Chromosome IDs | Chromosomes  | Physical positions (bp) | CDC Frontier (Reference genome) | (Pusa 256 & HPNB) | NCBI SNPdb Accession IDs |
|---------------------|----------------|--------------|-------------------------|---------------------------------|-------------------|--------------------------|
| SNP_P3_177324_1908  | NW_004518703.1 | Scaffold4221 | 1908                    | AA                              | GG                | 1946698417               |
| SNP_P3_177325_1916  | NW_004518703.1 | Scaffold4221 | 1916                    | AA                              | GG                | 1946698419               |
| SNP_P3_177326_2022  | NW_004518703.1 | Scaffold4221 | 2022                    | CC                              | AA                | 1946698421               |
| SNP_P3_177327_2024  | NW_004518703.1 | Scaffold4221 | 2024                    | AA                              | GG                | 1946698423               |
| SNP_P3_177328_2053  | NW_004518703.1 | Scaffold4221 | 2053                    | AA                              | GG                | 1946698425               |
| SNP_P3_177329_7560  | NW_004518703.1 | Scaffold4221 | 7560                    | AA                              | GG                | 1946698427               |
| SNP_P3_177330_7648  | NW_004518703.1 | Scaffold4221 | 7648                    | AA                              | GG                | 1946698429               |
| SNP_P3_177331_7649  | NW_004518703.1 | Scaffold4221 | 7649                    | AA                              | TT                | 1946698431               |
| SNP_P3_177332_7656  | NW_004518703.1 | Scaffold4221 | 7656                    | TT                              | GG                | 1946698434               |
| SNP_P3_177334_7774  | NW_004518703.1 | Scaffold4221 | 7774                    | AA                              | GG                | 1946698436               |
| SNP_P3_177335_7845  | NW_004518703.1 | Scaffold4221 | 7845                    | AA                              | GG                | 1946698438               |
| SNP_P3_177336_7847  | NW_004518703.1 | Scaffold4221 | 7847                    | TT                              | AA                | 1946698440               |
| SNP_P3_177337_7958  | NW_004518703.1 | Scaffold4221 | 7958                    | CC                              | TT                | 1946698442               |
| SNP_P3_177338_9213  | NW_004518703.1 | Scaffold4221 | 9213                    | GG                              | AA                | 1946698444               |
| SNP_P3_177339_12806 | NW_004518703.1 | Scaffold4221 | 12806                   | GG                              | CC                | 1946698446               |
| SNP_P3_177340_12812 | NW_004518703.1 | Scaffold4221 | 12812                   | CC                              | TT                | 1946698450               |
| SNP_P3_177341_15055 | NW_004518703.1 | Scaffold4221 | 15055                   | TT                              | CC                | 1946698452               |
| SNP_P3_177342_27458 | NW_004518703.1 | Scaffold4221 | 27458                   | CC                              | TT                | 1946698454               |
| SNP_P3_177343_40684 | NW_004518703.1 | Scaffold4221 | 40684                   | AA                              | CC                | 1946698456               |
| SNP_P3_177344_40851 | NW_004518703.1 | Scaffold4221 | 40851                   | GG                              | AA                | 1946698458               |
| SNP_P3_177345_40926 | NW_004518703.1 | Scaffold4221 | 40926                   | GG                              | AA                | 1946698460               |
| SNP_P3_177346_40948 | NW_004518703.1 | Scaffold4221 | 40948                   | AA                              | GG                | 1946698462               |
| SNP_P3_177347_40961 | NW_004518703.1 | Scaffold4221 | 40961                   | GG                              | CC                | 1946698464               |
| SNP_P3_177348_40966 | NW_004518703.1 | Scaffold4221 | 40966                   | CC                              | TT                | 1946698466               |
| SNP_P3_177349_40996 | NW_004518703.1 | Scaffold4221 | 40996                   | AA                              | GG                | 1946698468               |
| SNP_P3_177350_41019 | NW_004518703.1 | Scaffold4221 | 41019                   | AA                              | GG                | 1946698470               |
| SNP_P3_177351_41198 | NW_004518703.1 | Scaffold4221 | 41198                   | GG                              | TT                | 1946698472               |
| SNP_P3_177352_41214 | NW_004518703.1 | Scaffold4221 | 41214                   | CC                              | GG                | 1946698474               |
| SNP_P3_177353_41317 | NW_004518703.1 | Scaffold4221 | 41317                   | AA                              | GG                | 1946698476               |
| SNP_P3_177354_41513 | NW_004518703.1 | Scaffold4221 | 41513                   | TT                              | AA                | 1946698478               |
| SNP_P3_177355_41521 | NW_004518703.1 | Scaffold4221 | 41521                   | AA                              | CC                | 1946698480               |
| SNP_P3_177356_41570 | NW_004518703.1 | Scaffold4221 | 41570                   | TT                              | GG                | 1946698482               |
| SNP_P3_177357_41722 | NW_004518703.1 | Scaffold4221 | 41722                   | TT                              | CC                | 1946698484               |
| SNP_P3_177358_41973 | NW_004518703.1 | Scaffold4221 | 41973                   | GG                              | AA                | 1946698486               |
| SNP_P3_177359_42537 | NW_004518703.1 | Scaffold4221 | 42537                   | CC                              | GG                | 1946698488               |
| SNP_P3_177360_42540 | NW_004518703.1 | Scaffold4221 | 42540                   | CC                              | AA                | 1946698490               |
| SNP_P3_177361_47093 | NW_004518703.1 | Scaffold4221 | 47093                   | TT                              | AA                | 1946698492               |
| SNP_P3_177362_47578 | NW_004518703.1 | Scaffold4221 | 47578                   | GG                              | CC                | 1946698494               |
| SNP_P3_177363_47966 | NW_004518703.1 | Scaffold4221 | 47966                   | GG                              | AA                | 1946698496               |
| SNP_P3_177364_47968 | NW_004518703.1 | Scaffold4221 | 47968                   | AA                              | GG                | 1946698498               |
| SNP_P3_177365_48016 | NW_004518703.1 | Scaffold4221 | 48016                   | TT                              | AA                | 1946698500               |
| SNP_P3_177366_48020 | NW_004518703.1 | Scaffold4221 | 48020                   | TT                              | CC                | 1946698502               |

| SNPs IDs            | Chromosome IDs | Chromosomes  | Physical positions (bp) | CDC Frontier (Reference genome) | (Pusa 256 & HPNB) | NCBI SNPdb Accession IDs |
|---------------------|----------------|--------------|-------------------------|---------------------------------|-------------------|--------------------------|
| SNP_P3_177367_48094 | NW_004518703.1 | Scaffold4221 | 48094                   | CC                              | TT                | 1946698504               |
| SNP_P3_177369_48114 | NW_004518703.1 | Scaffold4221 | 48114                   | CC                              | TT                | 1946698506               |
| SNP_P3_177370_48187 | NW_004518703.1 | Scaffold4221 | 48187                   | TT                              | GG                | 1946698508               |
| SNP_P3_177371_48196 | NW_004518703.1 | Scaffold4221 | 48196                   | CC                              | TT                | 1946698510               |
| SNP_P3_177372_48199 | NW_004518703.1 | Scaffold4221 | 48199                   | TT                              | CC                | 1946698512               |
| SNP_P3_177373_48212 | NW_004518703.1 | Scaffold4221 | 48212                   | AA                              | GG                | 1946698514               |
| SNP_P3_177374_48233 | NW_004518703.1 | Scaffold4221 | 48233                   | AA                              | CC                | 1946698516               |
| SNP_P3_177375_48291 | NW_004518703.1 | Scaffold4221 | 48291                   | CC                              | TT                | 1946698520               |
| SNP_P3_177376_48406 | NW_004518703.1 | Scaffold4221 | 48406                   | TT                              | CC                | 1946698522               |
| SNP_P3_177377_48439 | NW_004518703.1 | Scaffold4221 | 48439                   | GG                              | AA                | 1946698524               |
| SNP_P3_177378_48442 | NW_004518703.1 | Scaffold4221 | 48442                   | TT                              | CC                | 1946698526               |
| SNP_P3_177379_48470 | NW_004518703.1 | Scaffold4221 | 48470                   | AA                              | GG                | 1946698528               |
| SNP_P3_177380_48473 | NW_004518703.1 | Scaffold4221 | 48473                   | TT                              | CC                | 1946698530               |
| SNP_P3_177381_48560 | NW_004518703.1 | Scaffold4221 | 48560                   | AA                              | GG                | 1946698532               |
| SNP_P3_177382_53317 | NW_004518703.1 | Scaffold4221 | 53317                   | CC                              | AA                | 1946698534               |
| SNP_P3_177383_53374 | NW_004518703.1 | Scaffold4221 | 53374                   | TT                              | CC                | 1946698536               |
| SNP_P3_177384_53441 | NW_004518703.1 | Scaffold4221 | 53441                   | CC                              | AA                | 1946698538               |
| SNP_P3_177385_53448 | NW_004518703.1 | Scaffold4221 | 53448                   | TT                              | CC                | 1946698540               |
| SNP_P3_177386_53474 | NW_004518703.1 | Scaffold4221 | 53474                   | AA                              | GG                | 1946698542               |
| SNP_P3_177387_53479 | NW_004518703.1 | Scaffold4221 | 53479                   | AA                              | GG                | 1946698544               |
| SNP_P3_177388_53772 | NW_004518703.1 | Scaffold4221 | 53772                   | GG                              | AA                | 1946698546               |
| SNP_P3_177389_53780 | NW_004518703.1 | Scaffold4221 | 53780                   | CC                              | GG                | 1946698548               |
| SNP_P3_177390_53861 | NW_004518703.1 | Scaffold4221 | 53861                   | GG                              | TT                | 1946698550               |
| SNP_P3_177391_53868 | NW_004518703.1 | Scaffold4221 | 53868                   | AA                              | TT                | 1946698552               |
| SNP_P3_177392_54164 | NW_004518703.1 | Scaffold4221 | 54164                   | CC                              | TT                | 1946698554               |
| SNP_P3_177393_54256 | NW_004518703.1 | Scaffold4221 | 54256                   | TT                              | GG                | 1946698556               |
| SNP_P3_177394_54338 | NW_004518703.1 | Scaffold4221 | 54338                   | AA                              | TT                | 1946698558               |
| SNP_P3_177395_54342 | NW_004518703.1 | Scaffold4221 | 54342                   | TT                              | AA                | 1946698562               |
| SNP_P3_177396_54387 | NW_004518703.1 | Scaffold4221 | 54387                   | TT                              | CC                | 1946698564               |
| SNP_P3_177397_54499 | NW_004518703.1 | Scaffold4221 | 54499                   | AA                              | GG                | 1946698567               |
| SNP_P3_177399_54524 | NW_004518703.1 | Scaffold4221 | 54524                   | AA                              | TT                | 1946698569               |
| SNP_P3_177401_54867 | NW_004518703.1 | Scaffold4221 | 54867                   | TT                              | CC                | 1946698571               |
| SNP_P3_177402_54899 | NW_004518703.1 | Scaffold4221 | 54899                   | CC                              | AA                | 1946698573               |
| SNP_P3_177403_54900 | NW_004518703.1 | Scaffold4221 | 54900                   | AA                              | TT                | 1946698575               |
| SNP_P3_177404_55361 | NW_004518703.1 | Scaffold4221 | 55361                   | TT                              | GG                | 1946698577               |
| SNP_P3_177405_66208 | NW_004518703.1 | Scaffold4221 | 66208                   | TT                              | AA                | 1946698579               |
| SNP_P3_177406_66789 | NW_004518703.1 | Scaffold4221 | 66789                   | CC                              | TT                | 1946698581               |
| SNP_P3_177407_6114  | NW_004518706.1 | Scaffold4225 | 6114                    | GG                              | TT                | 1946698583               |
| SNP_P3_177408_7278  | NW_004518706.1 | Scaffold4225 | 7278                    | GG                              | CC                | 1946698585               |
| SNP_P3_177409_7355  | NW_004518706.1 | Scaffold4225 | 7355                    | CC                              | TT                | 1946698587               |
| SNP_P3_177410_7376  | NW_004518706.1 | Scaffold4225 | 7376                    | TT                              | CC                | 1946698589               |
| SNP_P3_177411_7578  | NW_004518706.1 | Scaffold4225 | 7578                    | GG                              | AA                | 1946698592               |

| SNPs IDs            | Chromosome IDs | Chromosomes  | Physical positions (bp) | CDC Frontier (Reference genome) | (Pusa 256 & HPNB) | NCBI SNPdb Accession IDs |
|---------------------|----------------|--------------|-------------------------|---------------------------------|-------------------|--------------------------|
| SNP_P3_177412_7742  | NW_004518706.1 | Scaffold4225 | 7742                    | TT                              | CC                | 1946698594               |
| SNP_P3_177413_14235 | NW_004518706.1 | Scaffold4225 | 14235                   | CC                              | TT                | 1946698596               |
| SNP_P3_177414_14346 | NW_004518706.1 | Scaffold4225 | 14346                   | AA                              | TT                | 1946698598               |
| SNP_P3_177415_14624 | NW_004518706.1 | Scaffold4225 | 14624                   | TT                              | CC                | 1946698601               |
| SNP_P3_177416_14740 | NW_004518706.1 | Scaffold4225 | 14740                   | AA                              | CC                | 1946698604               |
| SNP_P3_177417_14774 | NW_004518706.1 | Scaffold4225 | 14774                   | TT                              | CC                | 1946698606               |
| SNP_P3_177418_14804 | NW_004518706.1 | Scaffold4225 | 14804                   | TT                              | AA                | 1946698608               |
| SNP_P3_177419_5602  | NW_004518713.1 | Scaffold4236 | 5602                    | AA                              | CC                | 1946698610               |
| SNP_P3_177420_8075  | NW_004518713.1 | Scaffold4236 | 8075                    | CC                              | AA                | 1946698612               |
| SNP_P3_177421_8104  | NW_004518713.1 | Scaffold4236 | 8104                    | TT                              | CC                | 1946698614               |
| SNP_P3_177422_8127  | NW_004518713.1 | Scaffold4236 | 8127                    | AA                              | GG                | 1946698615               |
| SNP_P3_177423_8182  | NW_004518713.1 | Scaffold4236 | 8182                    | GG                              | AA                | 1946698616               |
| SNP_P3_177424_8195  | NW_004518713.1 | Scaffold4236 | 8195                    | TT                              | CC                | 1946698617               |
| SNP_P3_177425_8221  | NW_004518713.1 | Scaffold4236 | 8221                    | AA                              | TT                | 1946698618               |
| SNP_P3_177426_8235  | NW_004518713.1 | Scaffold4236 | 8235                    | TT                              | CC                | 1946698620               |
| SNP_P3_177427_8259  | NW_004518713.1 | Scaffold4236 | 8259                    | AA                              | TT                | 1946698622               |
| SNP_P3_177428_8421  | NW_004518713.1 | Scaffold4236 | 8421                    | GG                              | CC                | 1946698625               |
| SNP_P3_177429_8443  | NW_004518713.1 | Scaffold4236 | 8443                    | GG                              | CC                | 1946698627               |
| SNP_P3_177430_8485  | NW_004518713.1 | Scaffold4236 | 8485                    | CC                              | TT                | 1946698629               |
| SNP_P3_177431_8489  | NW_004518713.1 | Scaffold4236 | 8489                    | CC                              | TT                | 1946698631               |
| SNP_P3_177432_8519  | NW_004518713.1 | Scaffold4236 | 8519                    | TT                              | CC                | 1946698633               |
| SNP_P3_177433_8782  | NW_004518713.1 | Scaffold4236 | 8782                    | CC                              | TT                | 1946698635               |
| SNP_P3_177434_873   | NW_004518715.1 | Scaffold4238 | 873                     | TT                              | CC                | 1946698637               |
| SNP_P3_177435_886   | NW_004518715.1 | Scaffold4238 | 886                     | CC                              | AA                | 1946698639               |
| SNP_P3_177436_1542  | NW_004518715.1 | Scaffold4238 | 1542                    | TT                              | CC                | 1946698642               |
| SNP_P3_177437_1640  | NW_004518717.1 | Scaffold4241 | 1640                    | GG                              | CC                | 1946698645               |
| SNP_P3_177438_1672  | NW_004518717.1 | Scaffold4241 | 1672                    | GG                              | TT                | 1946698647               |
| SNP_P3_177439_558   | NW_004518718.1 | Scaffold4243 | 558                     | TT                              | AA                | 1946698649               |
| SNP_P3_177440_817   | NW_004518718.1 | Scaffold4243 | 817                     | AA                              | TT                | 1946698651               |
| SNP_P3_177441_836   | NW_004518718.1 | Scaffold4243 | 836                     | TT                              | CC                | 1946698653               |
| SNP_P3_177442_840   | NW_004518718.1 | Scaffold4243 | 840                     | TT                              | AA                | 1946698655               |
| SNP_P3_177443_912   | NW_004518718.1 | Scaffold4243 | 912                     | GG                              | AA                | 1946698657               |
| SNP_P3_177444_1028  | NW_004518718.1 | Scaffold4243 | 1028                    | CC                              | AA                | 1946698659               |
| SNP_P3_177446_1265  | NW_004518718.1 | Scaffold4243 | 1265                    | GG                              | AA                | 1946698661               |
| SNP_P3_177447_1341  | NW_004518718.1 | Scaffold4243 | 1341                    | TT                              | AA                | 1946698663               |
| SNP_P3_177448_1550  | NW_004518718.1 | Scaffold4243 | 1550                    | TT                              | CC                | 1946698665               |
| SNP_P3_177449_1581  | NW_004518718.1 | Scaffold4243 | 1581                    | TT                              | CC                | 1946698667               |
| SNP_P3_177450_5526  | NW_004518718.1 | Scaffold4243 | 5526                    | AA                              | GG                | 1946698669               |
| SNP_P3_177451_5805  | NW_004518718.1 | Scaffold4243 | 5805                    | TT                              | AA                | 1946698671               |
| SNP_P3_177452_6123  | NW_004518718.1 | Scaffold4243 | 6123                    | GG                              | AA                | 1946698673               |
| SNP_P3_177453_7180  | NW_004518718.1 | Scaffold4243 | 7180                    | TT                              | CC                | 1946698675               |
| SNP_P3_177454_7278  | NW_004518718.1 | Scaffold4243 | 7278                    | GG                              | TT                | 1946698678               |

| SNPs IDs            | Chromosome IDs | Chromosomes  | Physical positions (bp) | CDC Frontier (Reference genome) | (Pusa 256 & HPNB) | NCBI SNPdb Accession IDs |
|---------------------|----------------|--------------|-------------------------|---------------------------------|-------------------|--------------------------|
| SNP_P3_177455_7290  | NW_004518718.1 | Scaffold4243 | 7290                    | TT                              | AA                | 1946698680               |
| SNP_P3_177456_7303  | NW_004518718.1 | Scaffold4243 | 7303                    | CC                              | TT                | 1946698682               |
| SNP_P3_177457_7467  | NW_004518718.1 | Scaffold4243 | 7467                    | CC                              | TT                | 1946698684               |
| SNP_P3_177459_7548  | NW_004518718.1 | Scaffold4243 | 7548                    | TT                              | CC                | 1946698686               |
| SNP_P3_177460_7552  | NW_004518718.1 | Scaffold4243 | 7552                    | GG                              | AA                | 1946698688               |
| SNP_P3_177461_7606  | NW_004518718.1 | Scaffold4243 | 7606                    | GG                              | AA                | 1946698690               |
| SNP_P3_177462_14521 | NW_004518718.1 | Scaffold4243 | 14521                   | TT                              | GG                | 1946698692               |
| SNP_P3_177463_14537 | NW_004518718.1 | Scaffold4243 | 14537                   | TT                              | GG                | 1946698694               |
| SNP_P3_177464_14559 | NW_004518718.1 | Scaffold4243 | 14559                   | TT                              | CC                | 1946698696               |
| SNP_P3_177465_14585 | NW_004518718.1 | Scaffold4243 | 14585                   | AA                              | CC                | 1946698698               |
| SNP_P3_177467_14926 | NW_004518718.1 | Scaffold4243 | 14926                   | GG                              | AA                | 1946698700               |
| SNP_P3_177468_14937 | NW_004518718.1 | Scaffold4243 | 14937                   | CC                              | TT                | 1946698702               |
| SNP_P3_177469_15615 | NW_004518718.1 | Scaffold4243 | 15615                   | CC                              | TT                | 1946698704               |
| SNP_P3_177470_15846 | NW_004518718.1 | Scaffold4243 | 15846                   | CC                              | TT                | 1946698706               |
| SNP_P3_177471_16090 | NW_004518718.1 | Scaffold4243 | 16090                   | GG                              | AA                | 1946698708               |
| SNP_P3_177472_16353 | NW_004518718.1 | Scaffold4243 | 16353                   | TT                              | AA                | 1946698712               |
| SNP_P3_177473_16573 | NW_004518718.1 | Scaffold4243 | 16573                   | AA                              | GG                | 1946698714               |
| SNP_P3_177474_16658 | NW_004518718.1 | Scaffold4243 | 16658                   | AA                              | TT                | 1946698716               |
| SNP_P3_177475_16719 | NW_004518718.1 | Scaffold4243 | 16719                   | TT                              | GG                | 1946698718               |
| SNP_P3_177476_16998 | NW_004518718.1 | Scaffold4243 | 16998                   | GG                              | TT                | 1946698720               |
| SNP_P3_177477_17066 | NW_004518718.1 | Scaffold4243 | 17066                   | AA                              | GG                | 1946698722               |
| SNP_P3_177478_17082 | NW_004518718.1 | Scaffold4243 | 17082                   | TT                              | AA                | 1946698724               |
| SNP_P3_177479_17095 | NW_004518718.1 | Scaffold4243 | 17095                   | CC                              | TT                | 1946698726               |
| SNP_P3_177480_17189 | NW_004518718.1 | Scaffold4243 | 17189                   | CC                              | AA                | 1946698728               |
| SNP_P3_177481_17295 | NW_004518718.1 | Scaffold4243 | 17295                   | AA                              | CC                | 1946698730               |
| SNP_P3_177482_17348 | NW_004518718.1 | Scaffold4243 | 17348                   | GG                              | AA                | 1946698732               |
| SNP_P3_177483_17671 | NW_004518718.1 | Scaffold4243 | 17671                   | TT                              | AA                | 1946698735               |
| SNP_P3_177485_17724 | NW_004518718.1 | Scaffold4243 | 17724                   | CC                              | TT                | 1946698737               |
| SNP_P3_177486_17743 | NW_004518718.1 | Scaffold4243 | 17743                   | GG                              | CC                | 1946698739               |
| SNP_P3_177487_17831 | NW_004518718.1 | Scaffold4243 | 17831                   | TT                              | CC                | 1946698741               |
| SNP_P3_177488_17840 | NW_004518718.1 | Scaffold4243 | 17840                   | CC                              | TT                | 1946698743               |
| SNP_P3_177489_17872 | NW_004518718.1 | Scaffold4243 | 17872                   | TT                              | CC                | 1946698745               |
| SNP_P3_177490_17884 | NW_004518718.1 | Scaffold4243 | 17884                   | TT                              | CC                | 1946698747               |
| SNP_P3_177491_17894 | NW_004518718.1 | Scaffold4243 | 17894                   | TT                              | GG                | 1946698749               |
| SNP_P3_177492_18010 | NW_004518718.1 | Scaffold4243 | 18010                   | GG                              | AA                | 1946698753               |
| SNP_P3_177493_18192 | NW_004518718.1 | Scaffold4243 | 18192                   | AA                              | GG                | 1946698755               |
| SNP_P3_177494_23279 | NW_004518718.1 | Scaffold4243 | 23279                   | AA                              | GG                | 1946698757               |
| SNP_P3_177495_23359 | NW_004518718.1 | Scaffold4243 | 23359                   | CC                              | TT                | 1946698759               |
| SNP_P3_177496_23385 | NW_004518718.1 | Scaffold4243 | 23385                   | TT                              | AA                | 1946698761               |
| SNP_P3_177497_23426 | NW_004518718.1 | Scaffold4243 | 23426                   | CC                              | TT                | 1946698763               |
| SNP_P3_177498_23439 | NW_004518718.1 | Scaffold4243 | 23439                   | GG                              | AA                | 1946698765               |
| SNP_P3_177499_23450 | NW_004518718.1 | Scaffold4243 | 23450                   | CC                              | TT                | 1946698767               |

| SNPs IDs            | Chromosome IDs | Chromosomes  | Physical positions (bp) | CDC Frontier genome (Reference) | (Pusa 256 & HPNB) | NCBI SNPdb Accession IDs |
|---------------------|----------------|--------------|-------------------------|---------------------------------|-------------------|--------------------------|
| SNP_P3_177500_23453 | NW_004518718.1 | Scaffold4243 | 23453                   | GG                              | TT                | 1946698769               |
| SNP_P3_177501_23465 | NW_004518718.1 | Scaffold4243 | 23465                   | AA                              | GG                | 1946698771               |
| SNP_P3_177502_23586 | NW_004518718.1 | Scaffold4243 | 23586                   | TT                              | CC                | 1946698773               |
| SNP_P3_177503_23653 | NW_004518718.1 | Scaffold4243 | 23653                   | GG                              | AA                | 1946698776               |
| SNP_P3_177504_23671 | NW_004518718.1 | Scaffold4243 | 23671                   | GG                              | TT                | 1946698779               |
| SNP_P3_177505_23693 | NW_004518718.1 | Scaffold4243 | 23693                   | AA                              | CC                | 1946698781               |
| SNP_P3_177506_23742 | NW_004518718.1 | Scaffold4243 | 23742                   | TT                              | CC                | 1946698783               |
| SNP_P3_177507_23750 | NW_004518718.1 | Scaffold4243 | 23750                   | AA                              | GG                | 1946698785               |
| SNP_P3_177508_26781 | NW_004518718.1 | Scaffold4243 | 26781                   | GG                              | TT                | 1946698787               |
| SNP_P3_177509_32908 | NW_004518718.1 | Scaffold4243 | 32908                   | GG                              | CC                | 1946698789               |
| SNP_P3_177511_2147  | NW_004518720.1 | Scaffold4245 | 2147                    | CC                              | TT                | 1946698793               |
| SNP_P3_177512_333   | NW_004518721.1 | Scaffold4247 | 333                     | TT                              | CC                | 1946698795               |
| SNP_P3_177513_360   | NW_004518721.1 | Scaffold4247 | 360                     | AA                              | GG                | 1946698797               |
| SNP_P3_177514_454   | NW_004518721.1 | Scaffold4247 | 454                     | GG                              | AA                | 1946698800               |
| SNP_P3_177515_614   | NW_004518721.1 | Scaffold4247 | 614                     | AA                              | CC                | 1946698802               |
| SNP_P3_177516_671   | NW_004518721.1 | Scaffold4247 | 671                     | GG                              | AA                | 1946698804               |
| SNP_P3_177517_932   | NW_004518721.1 | Scaffold4247 | 932                     | CC                              | TT                | 1946698806               |
| SNP_P3_177518_970   | NW_004518721.1 | Scaffold4247 | 970                     | GG                              | TT                | 1946698808               |
| SNP_P3_177519_992   | NW_004518721.1 | Scaffold4247 | 992                     | AA                              | TT                | 1946698811               |
| SNP_P3_177520_1379  | NW_004518721.1 | Scaffold4247 | 1379                    | AA                              | GG                | 1946698813               |
| SNP_P3_177521_1443  | NW_004518721.1 | Scaffold4247 | 1443                    | TT                              | AA                | 1946698815               |
| SNP_P3_177522_754   | NW_004518722.1 | Scaffold4248 | 754                     | GG                              | TT                | 1946698817               |
| SNP_P3_177523_1025  | NW_004518722.1 | Scaffold4248 | 1025                    | TT                              | CC                | 1946698820               |
| SNP_P3_177524_821   | NW_004518723.1 | Scaffold4250 | 821                     | TT                              | CC                | 1946698822               |
| SNP_P3_177525_1049  | NW_004518723.1 | Scaffold4250 | 1049                    | CC                              | AA                | 1946698824               |
| SNP_P3_177526_1448  | NW_004518723.1 | Scaffold4250 | 1448                    | TT                              | AA                | 1946698826               |
| SNP_P3_177527_494   | NW_004518724.1 | Scaffold4251 | 494                     | AA                              | GG                | 1946698828               |
| SNP_P3_177528_574   | NW_004518724.1 | Scaffold4251 | 574                     | TT                              | GG                | 1946698832               |
| SNP_P3_177529_618   | NW_004518724.1 | Scaffold4251 | 618                     | GG                              | AA                | 1946698834               |
| SNP_P3_177530_626   | NW_004518724.1 | Scaffold4251 | 626                     | TT                              | CC                | 1946698836               |
| SNP_P3_177531_665   | NW_004518724.1 | Scaffold4251 | 665                     | GG                              | AA                | 1946698838               |
| SNP_P3_177532_688   | NW_004518724.1 | Scaffold4251 | 688                     | GG                              | CC                | 1946698840               |
| SNP_P3_177533_740   | NW_004518724.1 | Scaffold4251 | 740                     | GG                              | AA                | 1946698843               |
| SNP_P3_177534_3682  | NW_004518727.1 | Scaffold4255 | 3682                    | AA                              | TT                | 1946698845               |
| SNP_P3_177535_4022  | NW_004518727.1 | Scaffold4255 | 4022                    | TT                              | GG                | 1946698847               |
| SNP_P3_177536_4287  | NW_004518727.1 | Scaffold4255 | 4287                    | GG                              | TT                | 1946698849               |
| SNP_P3_177537_4643  | NW_004518727.1 | Scaffold4255 | 4643                    | TT                              | AA                | 1946698851               |
| SNP_P3_177538_4864  | NW_004518727.1 | Scaffold4255 | 4864                    | GG                              | AA                | 1946698853               |
| SNP_P3_177539_4946  | NW_004518727.1 | Scaffold4255 | 4946                    | GG                              | AA                | 1946698855               |
| SNP_P3_177540_5137  | NW_004518727.1 | Scaffold4255 | 5137                    | CC                              | AA                | 1946698857               |
| SNP_P3_177541_5202  | NW_004518727.1 | Scaffold4255 | 5202                    | CC                              | AA                | 1946698859               |
| SNP_P3_177542_5588  | NW_004518727.1 | Scaffold4255 | 5588                    | TT                              | CC                | 1946698861               |



| SNPs IDs            | Chromosome IDs | Chromosomes  | Physical positions (bp) | CDC Frontier (Reference genome) | (Pusa 256 & HPNB) | NCBI SNPdb Accession IDs |
|---------------------|----------------|--------------|-------------------------|---------------------------------|-------------------|--------------------------|
| SNP_P3_177543_5953  | NW_004518727.1 | Scaffold4255 | 5953                    | GG                              | AA                | 1946698863               |
| SNP_P3_177544_5964  | NW_004518727.1 | Scaffold4255 | 5964                    | TT                              | AA                | 1946698865               |
| SNP_P3_177545_2039  | NW_004518728.1 | Scaffold4256 | 2039                    | CC                              | GG                | 1946698867               |
| SNP_P3_177546_3117  | NW_004518728.1 | Scaffold4256 | 3117                    | AA                              | CC                | 1946698870               |
| SNP_P3_177547_3165  | NW_004518728.1 | Scaffold4256 | 3165                    | AA                              | GG                | 1946698873               |
| SNP_P3_177548_3202  | NW_004518728.1 | Scaffold4256 | 3202                    | TT                              | GG                | 1946698875               |
| SNP_P3_177549_4790  | NW_004518729.1 | Scaffold4257 | 4790                    | TT                              | GG                | 1946698877               |
| SNP_P3_177550_4816  | NW_004518729.1 | Scaffold4257 | 4816                    | AA                              | GG                | 1946698879               |
| SNP_P3_177551_719   | NW_004518730.1 | Scaffold4259 | 719                     | TT                              | CC                | 1946698882               |
| SNP_P3_177552_969   | NW_004518730.1 | Scaffold4259 | 969                     | TT                              | CC                | 1946698884               |
| SNP_P3_177553_7077  | NW_004518731.1 | Scaffold4260 | 7077                    | GG                              | TT                | 1946698886               |
| SNP_P3_177554_7100  | NW_004518731.1 | Scaffold4260 | 7100                    | TT                              | AA                | 1946698888               |
| SNP_P3_177555_7561  | NW_004518731.1 | Scaffold4260 | 7561                    | TT                              | AA                | 1946698890               |
| SNP_P3_177556_7562  | NW_004518731.1 | Scaffold4260 | 7562                    | CC                              | AA                | 1946698892               |
| SNP_P3_177557_7578  | NW_004518731.1 | Scaffold4260 | 7578                    | AA                              | GG                | 1946698894               |
| SNP_P3_177558_7584  | NW_004518731.1 | Scaffold4260 | 7584                    | TT                              | CC                | 1946698896               |
| SNP_P3_177559_7634  | NW_004518731.1 | Scaffold4260 | 7634                    | TT                              | GG                | 1946698898               |
| SNP_P3_177560_7638  | NW_004518731.1 | Scaffold4260 | 7638                    | GG                              | TT                | 1946698900               |
| SNP_P3_177562_10222 | NW_004518731.1 | Scaffold4260 | 10222                   | CC                              | TT                | 1946698902               |
| SNP_P3_177563_10230 | NW_004518731.1 | Scaffold4260 | 10230                   | GG                              | AA                | 1946698904               |
| SNP_P3_177564_10240 | NW_004518731.1 | Scaffold4260 | 10240                   | AA                              | GG                | 1946698906               |
| SNP_P3_177565_10246 | NW_004518731.1 | Scaffold4260 | 10246                   | CC                              | TT                | 1946698908               |
| SNP_P3_177566_10255 | NW_004518731.1 | Scaffold4260 | 10255                   | TT                              | AA                | 1946698910               |
| SNP_P3_177567_10363 | NW_004518731.1 | Scaffold4260 | 10363                   | TT                              | CC                | 1946698914               |
| SNP_P3_177568_10405 | NW_004518731.1 | Scaffold4260 | 10405                   | CC                              | AA                | 1946698916               |
| SNP_P3_177569_11167 | NW_004518731.1 | Scaffold4260 | 11167                   | TT                              | CC                | 1946698918               |
| SNP_P3_177570_11799 | NW_004518731.1 | Scaffold4260 | 11799                   | GG                              | AA                | 1946698920               |
| SNP_P3_177571_929   | NW_004518732.1 | Scaffold4262 | 929                     | CC                              | AA                | 1946698922               |
| SNP_P3_177572_101   | NW_004518733.1 | Scaffold4263 | 101                     | TT                              | CC                | 1946698924               |
| SNP_P3_177574_4261  | NW_004518733.1 | Scaffold4263 | 4261                    | AA                              | CC                | 1946698926               |
| SNP_P3_177575_4266  | NW_004518733.1 | Scaffold4263 | 4266                    | GG                              | CC                | 1946698929               |
| SNP_P3_177576_4333  | NW_004518733.1 | Scaffold4263 | 4333                    | AA                              | GG                | 1946698931               |
| SNP_P3_177577_4351  | NW_004518733.1 | Scaffold4263 | 4351                    | CC                              | TT                | 1946698933               |
| SNP_P3_177578_4377  | NW_004518733.1 | Scaffold4263 | 4377                    | CC                              | AA                | 1946698935               |
| SNP_P3_177579_4378  | NW_004518733.1 | Scaffold4263 | 4378                    | TT                              | AA                | 1946698938               |
| SNP_P3_177580_4380  | NW_004518733.1 | Scaffold4263 | 4380                    | GG                              | TT                | 1946698940               |
| SNP_P3_177581_4685  | NW_004518733.1 | Scaffold4263 | 4685                    | TT                              | CC                | 1946698942               |
| SNP_P3_177582_4714  | NW_004518733.1 | Scaffold4263 | 4714                    | TT                              | CC                | 1946698944               |
| SNP_P3_177583_4746  | NW_004518733.1 | Scaffold4263 | 4746                    | AA                              | CC                | 1946698946               |
| SNP_P3_177584_4760  | NW_004518733.1 | Scaffold4263 | 4760                    | CC                              | AA                | 1946698948               |
| SNP_P3_177585_4761  | NW_004518733.1 | Scaffold4263 | 4761                    | GG                              | TT                | 1946698950               |
| SNP_P3_177586_4774  | NW_004518733.1 | Scaffold4263 | 4774                    | GG                              | AA                | 1946698953               |

| SNPs IDs            | Chromosome IDs | Chromosomes  | Physical positions (bp) | CDC Frontier (Reference genome) | (Pusa 256 & HPNB) | NCBI SNPdb Accession IDs |
|---------------------|----------------|--------------|-------------------------|---------------------------------|-------------------|--------------------------|
| SNP_P3_177587_4779  | NW_004518733.1 | Scaffold4263 | 4779                    | GG                              | AA                | 1946698955               |
| SNP_P3_177588_4901  | NW_004518733.1 | Scaffold4263 | 4901                    | AA                              | CC                | 1946698958               |
| SNP_P3_177589_4902  | NW_004518733.1 | Scaffold4263 | 4902                    | CC                              | AA                | 1946698960               |
| SNP_P3_177590_8953  | NW_004518733.1 | Scaffold4263 | 8953                    | CC                              | TT                | 1946698962               |
| SNP_P3_177591_9761  | NW_004518733.1 | Scaffold4263 | 9761                    | GG                              | TT                | 1946698964               |
| SNP_P3_177592_16044 | NW_004518733.1 | Scaffold4263 | 16044                   | TT                              | CC                | 1946698966               |
| SNP_P3_177593_368   | NW_004518734.1 | Scaffold4265 | 368                     | TT                              | GG                | 1946698968               |
| SNP_P3_177594_7122  | NW_004518734.1 | Scaffold4265 | 7122                    | CC                              | AA                | 1946698970               |
| SNP_P3_177595_7170  | NW_004518734.1 | Scaffold4265 | 7170                    | CC                              | TT                | 1946698973               |
| SNP_P3_177596_7217  | NW_004518734.1 | Scaffold4265 | 7217                    | GG                              | AA                | 1946698975               |
| SNP_P3_177597_7259  | NW_004518734.1 | Scaffold4265 | 7259                    | CC                              | TT                | 1946698977               |
| SNP_P3_177598_7574  | NW_004518734.1 | Scaffold4265 | 7574                    | GG                              | AA                | 1946698979               |
| SNP_P3_177599_7599  | NW_004518734.1 | Scaffold4265 | 7599                    | AA                              | GG                | 1946698981               |
| SNP_P3_177600_7603  | NW_004518734.1 | Scaffold4265 | 7603                    | AA                              | GG                | 1946698983               |
| SNP_P3_177601_11674 | NW_004518736.1 | Scaffold4269 | 11674                   | CC                              | TT                | 1946698985               |
| SNP_P3_177602_11711 | NW_004518736.1 | Scaffold4269 | 11711                   | GG                              | CC                | 1946698987               |
| SNP_P3_177603_13936 | NW_004518736.1 | Scaffold4269 | 13936                   | AA                              | GG                | 1946698989               |
| SNP_P3_177604_21884 | NW_004518736.1 | Scaffold4269 | 21884                   | AA                              | CC                | 1946698991               |
| SNP_P3_177605_22098 | NW_004518736.1 | Scaffold4269 | 22098                   | GG                              | AA                | 1946698995               |
| SNP_P3_177606_22485 | NW_004518736.1 | Scaffold4269 | 22485                   | AA                              | CC                | 1946698997               |
| SNP_P3_177607_22488 | NW_004518736.1 | Scaffold4269 | 22488                   | GG                              | AA                | 1946698999               |
| SNP_P3_177608_22707 | NW_004518736.1 | Scaffold4269 | 22707                   | CC                              | TT                | 1946699001               |
| SNP_P3_177609_22904 | NW_004518736.1 | Scaffold4269 | 22904                   | CC                              | TT                | 1946699003               |
| SNP_P3_177610_26491 | NW_004518736.1 | Scaffold4269 | 26491                   | GG                              | AA                | 1946699005               |
| SNP_P3_177611_30416 | NW_004518736.1 | Scaffold4269 | 30416                   | GG                              | TT                | 1946699007               |
| SNP_P3_177612_35289 | NW_004518736.1 | Scaffold4269 | 35289                   | CC                              | AA                | 1946699009               |
| SNP_P3_177613_35291 | NW_004518736.1 | Scaffold4269 | 35291                   | AA                              | TT                | 1946699012               |
| SNP_P3_177614_9117  | NW_004518741.1 | Scaffold4277 | 9117                    | TT                              | CC                | 1946699014               |
| SNP_P3_177615_9186  | NW_004518741.1 | Scaffold4277 | 9186                    | TT                              | CC                | 1946699016               |
| SNP_P3_177616_9360  | NW_004518741.1 | Scaffold4277 | 9360                    | CC                              | AA                | 1946699018               |
| SNP_P3_177617_9384  | NW_004518741.1 | Scaffold4277 | 9384                    | CC                              | TT                | 1946699020               |
| SNP_P3_177618_9386  | NW_004518741.1 | Scaffold4277 | 9386                    | AA                              | GG                | 1946699022               |
| SNP_P3_177619_9397  | NW_004518741.1 | Scaffold4277 | 9397                    | CC                              | AA                | 1946699025               |
| SNP_P3_177620_9411  | NW_004518741.1 | Scaffold4277 | 9411                    | AA                              | TT                | 1946699027               |
| SNP_P3_177621_9434  | NW_004518741.1 | Scaffold4277 | 9434                    | CC                              | GG                | 1946699029               |
| SNP_P3_177622_9440  | NW_004518741.1 | Scaffold4277 | 9440                    | AA                              | CC                | 1946699031               |
| SNP_P3_177623_9445  | NW_004518741.1 | Scaffold4277 | 9445                    | AA                              | CC                | 1946699033               |
| SNP_P3_177624_18224 | NW_004518741.1 | Scaffold4277 | 18224                   | TT                              | AA                | 1946699035               |
| SNP_P3_177625_18227 | NW_004518741.1 | Scaffold4277 | 18227                   | TT                              | CC                | 1946699037               |
| SNP_P3_177626_18251 | NW_004518741.1 | Scaffold4277 | 18251                   | AA                              | CC                | 1946699040               |
| SNP_P3_177627_18272 | NW_004518741.1 | Scaffold4277 | 18272                   | GG                              | AA                | 1946699042               |
| SNP_P3_177628_18486 | NW_004518741.1 | Scaffold4277 | 18486                   | AA                              | GG                | 1946699044               |

| SNPs IDs            | Chromosome IDs | Chromosomes  | Physical positions (bp) | CDC Frontier (Reference genome) | (Pusa 256 & HPNB) | NCBI SNPdb Accession IDs |
|---------------------|----------------|--------------|-------------------------|---------------------------------|-------------------|--------------------------|
| SNP_P3_177629_18488 | NW_004518741.1 | Scaffold4277 | 18488                   | CC                              | TT                | 1946699046               |
| SNP_P3_177630_18534 | NW_004518741.1 | Scaffold4277 | 18534                   | AA                              | CC                | 1946699048               |
| SNP_P3_177631_18639 | NW_004518741.1 | Scaffold4277 | 18639                   | TT                              | CC                | 1946699050               |
| SNP_P3_177632_2468  | NW_004518742.1 | Scaffold4279 | 2468                    | TT                              | CC                | 1946699052               |
| SNP_P3_177633_473   | NW_004518745.1 | Scaffold4285 | 473                     | TT                              | AA                | 1946699054               |
| SNP_P3_177634_137   | NW_004518747.1 | Scaffold4287 | 137                     | GG                              | AA                | 1946699056               |
| SNP_P3_177635_538   | NW_004518747.1 | Scaffold4287 | 538                     | AA                              | TT                | 1946699058               |
| SNP_P3_177636_547   | NW_004518747.1 | Scaffold4287 | 547                     | GG                              | CC                | 1946699060               |
| SNP_P3_177637_5136  | NW_004518747.1 | Scaffold4287 | 5136                    | CC                              | AA                | 1946699062               |
| SNP_P3_177638_7400  | NW_004518747.1 | Scaffold4287 | 7400                    | AA                              | GG                | 1946699064               |
| SNP_P3_177639_670   | NW_004518749.1 | Scaffold4289 | 670                     | CC                              | AA                | 1946699066               |
| SNP_P3_177640_5446  | NW_004518751.1 | Scaffold4291 | 5446                    | TT                              | CC                | 1946699068               |
| SNP_P3_177641_5465  | NW_004518751.1 | Scaffold4291 | 5465                    | AA                              | TT                | 1946699070               |
| SNP_P3_177642_5509  | NW_004518751.1 | Scaffold4291 | 5509                    | TT                              | AA                | 1946699072               |
| SNP_P3_177643_5582  | NW_004518751.1 | Scaffold4291 | 5582                    | TT                              | GG                | 1946699074               |
| SNP_P3_177644_2650  | NW_004518753.1 | Scaffold4293 | 2650                    | AA                              | TT                | 1946699076               |
| SNP_P3_177645_2890  | NW_004518753.1 | Scaffold4293 | 2890                    | TT                              | CC                | 1946699078               |
| SNP_P3_177646_3031  | NW_004518753.1 | Scaffold4293 | 3031                    | AA                              | CC                | 1946699080               |
| SNP_P3_177647_1898  | NW_004518754.1 | Scaffold4294 | 1898                    | CC                              | TT                | 1946699084               |
| SNP_P3_177648_1933  | NW_004518754.1 | Scaffold4294 | 1933                    | GG                              | AA                | 1946699086               |
| SNP_P3_177649_1999  | NW_004518754.1 | Scaffold4294 | 1999                    | TT                              | CC                | 1946699088               |
| SNP_P3_177650_2098  | NW_004518754.1 | Scaffold4294 | 2098                    | TT                              | AA                | 1946699090               |
| SNP_P3_177651_2099  | NW_004518754.1 | Scaffold4294 | 2099                    | GG                              | TT                | 1946699092               |
| SNP_P3_177652_178   | NW_004518756.1 | Scaffold4296 | 178                     | AA                              | CC                | 1946699094               |
| SNP_P3_177653_2061  | NW_004518756.1 | Scaffold4296 | 2061                    | GG                              | CC                | 1946699096               |
| SNP_P3_177654_2066  | NW_004518756.1 | Scaffold4296 | 2066                    | AA                              | CC                | 1946699098               |
| SNP_P3_177655_2072  | NW_004518756.1 | Scaffold4296 | 2072                    | AA                              | GG                | 1946699100               |
| SNP_P3_177656_2081  | NW_004518756.1 | Scaffold4296 | 2081                    | TT                              | CC                | 1946699102               |
| SNP_P3_177657_2094  | NW_004518756.1 | Scaffold4296 | 2094                    | GG                              | AA                | 1946699104               |
| SNP_P3_177658_2096  | NW_004518756.1 | Scaffold4296 | 2096                    | AA                              | GG                | 1946699106               |
| SNP_P3_177659_2149  | NW_004518756.1 | Scaffold4296 | 2149                    | TT                              | AA                | 1946699108               |
| SNP_P3_177660_2160  | NW_004518756.1 | Scaffold4296 | 2160                    | CC                              | TT                | 1946699111               |
| SNP_P3_177661_2180  | NW_004518756.1 | Scaffold4296 | 2180                    | AA                              | GG                | 1946699113               |
| SNP_P3_177662_2238  | NW_004518756.1 | Scaffold4296 | 2238                    | AA                              | GG                | 1946699115               |
| SNP_P3_177663_2260  | NW_004518756.1 | Scaffold4296 | 2260                    | AA                              | TT                | 1946699117               |
| SNP_P3_177664_2262  | NW_004518756.1 | Scaffold4296 | 2262                    | GG                              | AA                | 1946699119               |
| SNP_P3_177665_2328  | NW_004518756.1 | Scaffold4296 | 2328                    | AA                              | CC                | 1946699121               |
| SNP_P3_177666_2403  | NW_004518756.1 | Scaffold4296 | 2403                    | AA                              | TT                | 1946699123               |
| SNP_P3_177667_2437  | NW_004518756.1 | Scaffold4296 | 2437                    | TT                              | AA                | 1946699126               |
| SNP_P3_177668_158   | NW_004518758.1 | Scaffold4300 | 158                     | TT                              | GG                | 1946699128               |
| SNP_P3_177669_261   | NW_004518758.1 | Scaffold4300 | 261                     | TT                              | CC                | 1946699130               |
| SNP_P3_177670_476   | NW_004518758.1 | Scaffold4300 | 476                     | TT                              | GG                | 1946699133               |

| SNPs IDs            | Chromosome IDs | Chromosomes  | Physical positions (bp) | CDC Frontier (Reference genome) | (Pusa 256 & HPNB) | NCBI SNPdb Accession IDs |
|---------------------|----------------|--------------|-------------------------|---------------------------------|-------------------|--------------------------|
| SNP_P3_177671_483   | NW_004518758.1 | Scaffold4300 | 483                     | TT                              | CC                | 1946699135               |
| SNP_P3_177672_1058  | NW_004518758.1 | Scaffold4300 | 1058                    | TT                              | CC                | 1946699137               |
| SNP_P3_177673_1117  | NW_004518758.1 | Scaffold4300 | 1117                    | TT                              | GG                | 1946699139               |
| SNP_P3_177674_1870  | NW_004518758.1 | Scaffold4300 | 1870                    | CC                              | TT                | 1946699141               |
| SNP_P3_177676_1439  | NW_004518765.1 | Scaffold4316 | 1439                    | TT                              | AA                | 1946699143               |
| SNP_P3_177677_3638  | NW_004518765.1 | Scaffold4316 | 3638                    | GG                              | TT                | 1946699145               |
| SNP_P3_177678_3775  | NW_004518765.1 | Scaffold4316 | 3775                    | TT                              | AA                | 1946699147               |
| SNP_P3_177680_5472  | NW_004518765.1 | Scaffold4316 | 5472                    | GG                              | TT                | 1946699149               |
| SNP_P3_177681_5474  | NW_004518765.1 | Scaffold4316 | 5474                    | AA                              | CC                | 1946699151               |
| SNP_P3_177682_943   | NW_004518767.1 | Scaffold4319 | 943                     | GG                              | AA                | 1946699153               |
| SNP_P3_177683_968   | NW_004518767.1 | Scaffold4319 | 968                     | GG                              | AA                | 1946699155               |
| SNP_P3_177684_970   | NW_004518767.1 | Scaffold4319 | 970                     | CC                              | TT                | 1946699157               |
| SNP_P3_177686_1105  | NW_004518767.1 | Scaffold4319 | 1105                    | AA                              | CC                | 1946699159               |
| SNP_P3_177689_424   | NW_004518777.1 | Scaffold4330 | 424                     | TT                              | CC                | 1946699161               |
| SNP_P3_177690_586   | NW_004518777.1 | Scaffold4330 | 586                     | CC                              | AA                | 1946699164               |
| SNP_P3_177691_859   | NW_004518777.1 | Scaffold4330 | 859                     | CC                              | GG                | 1946699167               |
| SNP_P3_177692_865   | NW_004518777.1 | Scaffold4330 | 865                     | AA                              | GG                | 1946699169               |
| SNP_P3_177693_884   | NW_004518777.1 | Scaffold4330 | 884                     | TT                              | CC                | 1946699171               |
| SNP_P3_177694_906   | NW_004518777.1 | Scaffold4330 | 906                     | TT                              | AA                | 1946699173               |
| SNP_P3_177695_954   | NW_004518777.1 | Scaffold4330 | 954                     | AA                              | TT                | 1946699175               |
| SNP_P3_177696_957   | NW_004518777.1 | Scaffold4330 | 957                     | TT                              | CC                | 1946699178               |
| SNP_P3_177697_1514  | NW_004518778.1 | Scaffold4331 | 1514                    | AA                              | GG                | 1946699180               |
| SNP_P3_177698_1628  | NW_004518778.1 | Scaffold4331 | 1628                    | CC                              | TT                | 1946699182               |
| SNP_P3_177699_1637  | NW_004518778.1 | Scaffold4331 | 1637                    | GG                              | TT                | 1946699184               |
| SNP_P3_177700_1640  | NW_004518778.1 | Scaffold4331 | 1640                    | TT                              | CC                | 1946699186               |
| SNP_P3_177702_1679  | NW_004518778.1 | Scaffold4331 | 1679                    | AA                              | TT                | 1946699188               |
| SNP_P3_177703_1687  | NW_004518778.1 | Scaffold4331 | 1687                    | AA                              | GG                | 1946699191               |
| SNP_P3_177704_2313  | NW_004518778.1 | Scaffold4331 | 2313                    | TT                              | CC                | 1946699193               |
| SNP_P3_177705_10704 | NW_004518778.1 | Scaffold4331 | 10704                   | AA                              | CC                | 1946699195               |
| SNP_P3_177706_34467 | NW_004518778.1 | Scaffold4331 | 34467                   | TT                              | AA                | 1946699198               |
| SNP_P3_177707_43    | NW_004518779.1 | Scaffold4333 | 43                      | AA                              | TT                | 1946699200               |
| SNP_P3_177708_69    | NW_004518779.1 | Scaffold4333 | 69                      | GG                              | TT                | 1946699202               |
| SNP_P3_177709_80    | NW_004518779.1 | Scaffold4333 | 80                      | GG                              | AA                | 1946699204               |
| SNP_P3_177710_100   | NW_004518779.1 | Scaffold4333 | 100                     | AA                              | TT                | 1946699206               |
| SNP_P3_177711_315   | NW_004518779.1 | Scaffold4333 | 315                     | CC                              | TT                | 1946699209               |
| SNP_P3_177712_2468  | NW_004518781.1 | Scaffold4335 | 2468                    | GG                              | CC                | 1946699211               |
| SNP_P3_177713_2524  | NW_004518781.1 | Scaffold4335 | 2524                    | GG                              | TT                | 1946699213               |
| SNP_P3_177714_2533  | NW_004518781.1 | Scaffold4335 | 2533                    | AA                              | TT                | 1946699215               |
| SNP_P3_177715_2770  | NW_004518781.1 | Scaffold4335 | 2770                    | TT                              | GG                | 1946699217               |
| SNP_P3_177716_2798  | NW_004518781.1 | Scaffold4335 | 2798                    | GG                              | AA                | 1946699219               |
| SNP_P3_177717_2863  | NW_004518781.1 | Scaffold4335 | 2863                    | CC                              | AA                | 1946699221               |
| SNP_P3_177718_124   | NW_004518782.1 | Scaffold4336 | 124                     | TT                              | GG                | 1946699223               |

| SNPs IDs           | Chromosome IDs | Chromosomes  | Physical positions (bp) | CDC Frontier (Reference genome) | (Pusa 256 & HPNB) | NCBI SNPdb Accession IDs |
|--------------------|----------------|--------------|-------------------------|---------------------------------|-------------------|--------------------------|
| SNP_P3_177719_508  | NW_004518782.1 | Scaffold4336 | 508                     | TT                              | GG                | 1946699226               |
| SNP_P3_177720_570  | NW_004518782.1 | Scaffold4336 | 570                     | GG                              | CC                | 1946699228               |
| SNP_P3_177721_3506 | NW_004518782.1 | Scaffold4336 | 3506                    | GG                              | CC                | 1946699230               |
| SNP_P3_177722_930  | NW_004518786.1 | Scaffold4347 | 930                     | AA                              | TT                | 1946699232               |
| SNP_P3_177723_484  | NW_004518787.1 | Scaffold4348 | 484                     | AA                              | TT                | 1946699234               |
| SNP_P3_177724_821  | NW_004518787.1 | Scaffold4348 | 821                     | TT                              | AA                | 1946699236               |
| SNP_P3_177725_822  | NW_004518787.1 | Scaffold4348 | 822                     | TT                              | CC                | 1946699238               |
| SNP_P3_177726_932  | NW_004518787.1 | Scaffold4348 | 932                     | CC                              | AA                | 1946699240               |
| SNP_P3_177727_938  | NW_004518787.1 | Scaffold4348 | 938                     | AA                              | CC                | 1946699242               |
| SNP_P3_177728_940  | NW_004518787.1 | Scaffold4348 | 940                     | AA                              | GG                | 1946699244               |
| SNP_P3_177729_1169 | NW_004518787.1 | Scaffold4348 | 1169                    | TT                              | CC                | 1946699246               |
| SNP_P3_177730_2167 | NW_004518787.1 | Scaffold4348 | 2167                    | AA                              | TT                | 1946699250               |
| SNP_P3_177731_2175 | NW_004518787.1 | Scaffold4348 | 2175                    | TT                              | CC                | 1946699252               |
| SNP_P3_177733_1493 | NW_004518788.1 | Scaffold4349 | 1493                    | TT                              | AA                | 1946699254               |
| SNP_P3_177734_1733 | NW_004518788.1 | Scaffold4349 | 1733                    | AA                              | TT                | 1946699256               |
| SNP_P3_177735_1764 | NW_004518788.1 | Scaffold4349 | 1764                    | GG                              | TT                | 1946699258               |
| SNP_P3_177737_1855 | NW_004518788.1 | Scaffold4349 | 1855                    | GG                              | TT                | 1946699260               |
| SNP_P3_177738_1645 | NW_004518789.1 | Scaffold4352 | 1645                    | TT                              | AA                | 1946699262               |
| SNP_P3_177739_1027 | NW_004518790.1 | Scaffold4353 | 1027                    | CC                              | GG                | 1946699264               |
| SNP_P3_177740_64   | NW_004518791.1 | Scaffold4354 | 64                      | CC                              | GG                | 1946699266               |
| SNP_P3_177741_246  | NW_004518791.1 | Scaffold4354 | 246                     | TT                              | AA                | 1946699268               |
| SNP_P3_177742_410  | NW_004518791.1 | Scaffold4354 | 410                     | CC                              | AA                | 1946699270               |
| SNP_P3_177743_919  | NW_004518793.1 | Scaffold4357 | 919                     | GG                              | AA                | 1946699272               |
| SNP_P3_177744_1035 | NW_004518793.1 | Scaffold4357 | 1035                    | CC                              | TT                | 1946699274               |
| SNP_P3_177745_1084 | NW_004518793.1 | Scaffold4357 | 1084                    | TT                              | CC                | 1946699276               |
| SNP_P3_177746_521  | NW_004518796.1 | Scaffold4364 | 521                     | AA                              | GG                | 1946699278               |
| SNP_P3_177748_3186 | NW_004518798.1 | Scaffold4366 | 3186                    | CC                              | AA                | 1946699280               |
| SNP_P3_177749_388  | NW_004518799.1 | Scaffold4367 | 388                     | AA                              | GG                | 1946699282               |
| SNP_P3_177750_921  | NW_004518799.1 | Scaffold4367 | 921                     | GG                              | TT                | 1946699284               |
| SNP_P3_177751_951  | NW_004518799.1 | Scaffold4367 | 951                     | TT                              | AA                | 1946699287               |
| SNP_P3_177752_4564 | NW_004518799.1 | Scaffold4367 | 4564                    | CC                              | TT                | 1946699289               |
| SNP_P3_177753_4574 | NW_004518799.1 | Scaffold4367 | 4574                    | TT                              | CC                | 1946699291               |
| SNP_P3_177754_5200 | NW_004518799.1 | Scaffold4367 | 5200                    | AA                              | CC                | 1946699293               |
| SNP_P3_177755_5210 | NW_004518799.1 | Scaffold4367 | 5210                    | GG                              | CC                | 1946699295               |
| SNP_P3_177756_5885 | NW_004518799.1 | Scaffold4367 | 5885                    | AA                              | GG                | 1946699297               |
| SNP_P3_177757_6243 | NW_004518799.1 | Scaffold4367 | 6243                    | GG                              | AA                | 1946699299               |
| SNP_P3_177758_6321 | NW_004518799.1 | Scaffold4367 | 6321                    | CC                              | GG                | 1946699301               |
| SNP_P3_177759_6970 | NW_004518799.1 | Scaffold4367 | 6970                    | TT                              | AA                | 1946699303               |
| SNP_P3_177760_7873 | NW_004518799.1 | Scaffold4367 | 7873                    | TT                              | GG                | 1946699305               |
| SNP_P3_177761_7995 | NW_004518799.1 | Scaffold4367 | 7995                    | CC                              | AA                | 1946699307               |
| SNP_P3_177762_8163 | NW_004518799.1 | Scaffold4367 | 8163                    | TT                              | GG                | 1946699309               |
| SNP_P3_177763_8640 | NW_004518799.1 | Scaffold4367 | 8640                    | AA                              | GG                | 1946699311               |

| SNPs IDs            | Chromosome IDs | Chromosomes  | Physical positions (bp) | CDC Frontier (Reference genome) | (Pusa 256 & HPNB) | NCBI SNPdb Accession IDs |
|---------------------|----------------|--------------|-------------------------|---------------------------------|-------------------|--------------------------|
| SNP_P3_177764_9103  | NW_004518799.1 | Scaffold4367 | 9103                    | GG                              | TT                | 1946699313               |
| SNP_P3_177765_9226  | NW_004518799.1 | Scaffold4367 | 9226                    | TT                              | AA                | 1946699315               |
| SNP_P3_177766_9264  | NW_004518799.1 | Scaffold4367 | 9264                    | AA                              | CC                | 1946699317               |
| SNP_P3_177767_9777  | NW_004518799.1 | Scaffold4367 | 9777                    | CC                              | AA                | 1946699319               |
| SNP_P3_177768_10020 | NW_004518799.1 | Scaffold4367 | 10020                   | AA                              | GG                | 1946699321               |
| SNP_P3_177769_10251 | NW_004518799.1 | Scaffold4367 | 10251                   | CC                              | AA                | 1946699323               |
| SNP_P3_177770_10263 | NW_004518799.1 | Scaffold4367 | 10263                   | CC                              | TT                | 1946699325               |
| SNP_P3_177771_10265 | NW_004518799.1 | Scaffold4367 | 10265                   | CC                              | TT                | 1946699328               |
| SNP_P3_177772_11260 | NW_004518799.1 | Scaffold4367 | 11260                   | CC                              | TT                | 1946699331               |
| SNP_P3_177773_11351 | NW_004518799.1 | Scaffold4367 | 11351                   | GG                              | AA                | 1946699333               |
| SNP_P3_177774_11386 | NW_004518799.1 | Scaffold4367 | 11386                   | GG                              | TT                | 1946699335               |
| SNP_P3_177775_11590 | NW_004518799.1 | Scaffold4367 | 11590                   | CC                              | TT                | 1946699337               |
| SNP_P3_177776_11666 | NW_004518799.1 | Scaffold4367 | 11666                   | AA                              | GG                | 1946699339               |
| SNP_P3_177777_11682 | NW_004518799.1 | Scaffold4367 | 11682                   | CC                              | TT                | 1946699341               |
| SNP_P3_177778_11945 | NW_004518799.1 | Scaffold4367 | 11945                   | GG                              | AA                | 1946699343               |
| SNP_P3_177779_11946 | NW_004518799.1 | Scaffold4367 | 11946                   | TT                              | CC                | 1946699345               |
| SNP_P3_177780_11947 | NW_004518799.1 | Scaffold4367 | 11947                   | TT                              | CC                | 1946699347               |
| SNP_P3_177781_12132 | NW_004518799.1 | Scaffold4367 | 12132                   | AA                              | GG                | 1946699349               |
| SNP_P3_177782_12561 | NW_004518799.1 | Scaffold4367 | 12561                   | CC                              | GG                | 1946699351               |
| SNP_P3_177783_12735 | NW_004518799.1 | Scaffold4367 | 12735                   | GG                              | AA                | 1946699354               |
| SNP_P3_177784_12739 | NW_004518799.1 | Scaffold4367 | 12739                   | GG                              | AA                | 1946699356               |
| SNP_P3_177785_15939 | NW_004518799.1 | Scaffold4367 | 15939                   | TT                              | CC                | 1946699358               |
| SNP_P3_177786_16004 | NW_004518799.1 | Scaffold4367 | 16004                   | AA                              | TT                | 1946699361               |
| SNP_P3_177787_16111 | NW_004518799.1 | Scaffold4367 | 16111                   | AA                              | GG                | 1946699363               |
| SNP_P3_177788_16139 | NW_004518799.1 | Scaffold4367 | 16139                   | TT                              | GG                | 1946699365               |
| SNP_P3_177789_16171 | NW_004518799.1 | Scaffold4367 | 16171                   | CC                              | GG                | 1946699367               |
| SNP_P3_177790_23477 | NW_004518799.1 | Scaffold4367 | 23477                   | CC                              | AA                | 1946699369               |
| SNP_P3_177791_24085 | NW_004518799.1 | Scaffold4367 | 24085                   | GG                              | TT                | 1946699371               |
| SNP_P3_177792_29684 | NW_004518799.1 | Scaffold4367 | 29684                   | TT                              | AA                | 1946699373               |
| SNP_P3_177793_29685 | NW_004518799.1 | Scaffold4367 | 29685                   | TT                              | CC                | 1946699375               |
| SNP_P3_177794_29809 | NW_004518799.1 | Scaffold4367 | 29809                   | TT                              | GG                | 1946699377               |
| SNP_P3_177795_29992 | NW_004518799.1 | Scaffold4367 | 29992                   | AA                              | CC                | 1946699379               |
| SNP_P3_177796_30091 | NW_004518799.1 | Scaffold4367 | 30091                   | AA                              | GG                | 1946699381               |
| SNP_P3_177797_30180 | NW_004518799.1 | Scaffold4367 | 30180                   | AA                              | GG                | 1946699383               |
| SNP_P3_177798_30564 | NW_004518799.1 | Scaffold4367 | 30564                   | TT                              | GG                | 1946699385               |
| SNP_P3_177799_30755 | NW_004518799.1 | Scaffold4367 | 30755                   | CC                              | TT                | 1946699387               |
| SNP_P3_177800_30803 | NW_004518799.1 | Scaffold4367 | 30803                   | TT                              | GG                | 1946699389               |
| SNP_P3_177801_30841 | NW_004518799.1 | Scaffold4367 | 30841                   | CC                              | AA                | 1946699391               |
| SNP_P3_177802_30842 | NW_004518799.1 | Scaffold4367 | 30842                   | AA                              | TT                | 1946699393               |
| SNP_P3_177803_30849 | NW_004518799.1 | Scaffold4367 | 30849                   | CC                              | TT                | 1946699396               |
| SNP_P3_177804_31124 | NW_004518799.1 | Scaffold4367 | 31124                   | GG                              | AA                | 1946699398               |
| SNP_P3_177805_36354 | NW_004518799.1 | Scaffold4367 | 36354                   | AA                              | GG                | 1946699400               |

| SNPs IDs            | Chromosome IDs | Chromosomes  | Physical positions (bp) | CDC Frontier (Reference genome) | (Pusa 256 & HPNB) | NCBI SNPdb Accession IDs |
|---------------------|----------------|--------------|-------------------------|---------------------------------|-------------------|--------------------------|
| SNP_P3_177806_37231 | NW_004518799.1 | Scaffold4367 | 37231                   | TT                              | GG                | 1946699402               |
| SNP_P3_177807_37287 | NW_004518799.1 | Scaffold4367 | 37287                   | GG                              | AA                | 1946699404               |
| SNP_P3_177808_37627 | NW_004518799.1 | Scaffold4367 | 37627                   | TT                              | AA                | 1946699406               |
| SNP_P3_177809_37677 | NW_004518799.1 | Scaffold4367 | 37677                   | CC                              | GG                | 1946699408               |
| SNP_P3_177810_1111  | NW_004518801.1 | Scaffold4371 | 1111                    | GG                              | TT                | 1946699410               |
| SNP_P3_177811_3014  | NW_004518801.1 | Scaffold4371 | 3014                    | GG                              | AA                | 1946699412               |
| SNP_P3_177812_3052  | NW_004518801.1 | Scaffold4371 | 3052                    | AA                              | GG                | 1946699414               |
| SNP_P3_177813_212   | NW_004518803.1 | Scaffold4373 | 212                     | TT                              | CC                | 1946699416               |
| SNP_P3_177814_465   | NW_004518803.1 | Scaffold4373 | 465                     | GG                              | AA                | 1946699418               |
| SNP_P3_177815_69    | NW_004518804.1 | Scaffold4374 | 69                      | CC                              | AA                | 1946699420               |
| SNP_P3_177816_198   | NW_004518804.1 | Scaffold4374 | 198                     | GG                              | AA                | 1946699422               |
| SNP_P3_177817_209   | NW_004518804.1 | Scaffold4374 | 209                     | GG                              | TT                | 1946699424               |
| SNP_P3_177818_386   | NW_004518804.1 | Scaffold4374 | 386                     | CC                              | AA                | 1946699426               |
| SNP_P3_177819_405   | NW_004518804.1 | Scaffold4374 | 405                     | TT                              | CC                | 1946699428               |
| SNP_P3_177820_424   | NW_004518804.1 | Scaffold4374 | 424                     | TT                              | CC                | 1946699430               |
| SNP_P3_177821_587   | NW_004518804.1 | Scaffold4374 | 587                     | AA                              | GG                | 1946699432               |
| SNP_P3_177822_713   | NW_004518804.1 | Scaffold4374 | 713                     | AA                              | CC                | 1946699435               |
| SNP_P3_177824_772   | NW_004518804.1 | Scaffold4374 | 772                     | TT                              | CC                | 1946699437               |
| SNP_P3_177825_808   | NW_004518804.1 | Scaffold4374 | 808                     | CC                              | TT                | 1946699439               |
| SNP_P3_177826_986   | NW_004518804.1 | Scaffold4374 | 986                     | CC                              | AA                | 1946699442               |
| SNP_P3_177827_993   | NW_004518804.1 | Scaffold4374 | 993                     | CC                              | AA                | 1946699444               |
| SNP_P3_177828_1000  | NW_004518804.1 | Scaffold4374 | 1000                    | CC                              | AA                | 1946699446               |
| SNP_P3_177829_1007  | NW_004518804.1 | Scaffold4374 | 1007                    | CC                              | AA                | 1946699448               |
| SNP_P3_177830_1137  | NW_004518804.1 | Scaffold4374 | 1137                    | AA                              | CC                | 1946699450               |
| SNP_P3_177832_1802  | NW_004518804.1 | Scaffold4374 | 1802                    | TT                              | AA                | 1946699452               |
| SNP_P3_177833_1814  | NW_004518804.1 | Scaffold4374 | 1814                    | AA                              | GG                | 1946699454               |
| SNP_P3_177834_1947  | NW_004518804.1 | Scaffold4374 | 1947                    | TT                              | CC                | 1946699456               |
| SNP_P3_177835_1790  | NW_004518806.1 | Scaffold4377 | 1790                    | AA                              | TT                | 1946699458               |
| SNP_P3_177836_1809  | NW_004518806.1 | Scaffold4377 | 1809                    | GG                              | AA                | 1946699460               |
| SNP_P3_177838_27275 | NW_004518806.1 | Scaffold4377 | 27275                   | GG                              | TT                | 1946699462               |
| SNP_P3_177839_33731 | NW_004518806.1 | Scaffold4377 | 33731                   | TT                              | AA                | 1946699464               |
| SNP_P3_177840_33735 | NW_004518806.1 | Scaffold4377 | 33735                   | GG                              | AA                | 1946699466               |
| SNP_P3_177841_33802 | NW_004518806.1 | Scaffold4377 | 33802                   | GG                              | CC                | 1946699468               |
| SNP_P3_177842_34019 | NW_004518806.1 | Scaffold4377 | 34019                   | AA                              | TT                | 1946699470               |
| SNP_P3_177843_46804 | NW_004518806.1 | Scaffold4377 | 46804                   | GG                              | TT                | 1946699472               |
| SNP_P3_177844_47076 | NW_004518806.1 | Scaffold4377 | 47076                   | CC                              | GG                | 1946699474               |
| SNP_P3_177845_47106 | NW_004518806.1 | Scaffold4377 | 47106                   | TT                              | AA                | 1946699476               |
| SNP_P3_177846_47190 | NW_004518806.1 | Scaffold4377 | 47190                   | CC                              | TT                | 1946699478               |
| SNP_P3_177847_47840 | NW_004518806.1 | Scaffold4377 | 47840                   | TT                              | CC                | 1946699480               |
| SNP_P3_177848_48233 | NW_004518806.1 | Scaffold4377 | 48233                   | TT                              | CC                | 1946699482               |
| SNP_P3_177849_48332 | NW_004518806.1 | Scaffold4377 | 48332                   | AA                              | CC                | 1946699485               |
| SNP_P3_177850_48601 | NW_004518806.1 | Scaffold4377 | 48601                   | TT                              | GG                | 1946699487               |

| SNPs IDs            | Chromosome IDs | Chromosomes  | Physical positions (bp) | CDC Frontier (Reference genome) | (Pusa 256 & HPNB) | NCBI SNPdb Accession IDs |
|---------------------|----------------|--------------|-------------------------|---------------------------------|-------------------|--------------------------|
| SNP_P3_177851_48648 | NW_004518806.1 | Scaffold4377 | 48648                   | GG                              | AA                | 1946699489               |
| SNP_P3_177852_48711 | NW_004518806.1 | Scaffold4377 | 48711                   | TT                              | CC                | 1946699491               |
| SNP_P3_177853_50794 | NW_004518806.1 | Scaffold4377 | 50794                   | CC                              | GG                | 1946699493               |
| SNP_P3_177854_50990 | NW_004518806.1 | Scaffold4377 | 50990                   | TT                              | AA                | 1946699495               |
| SNP_P3_177855_11855 | NW_004518807.1 | Scaffold4379 | 11855                   | GG                              | AA                | 1946699497               |
| SNP_P3_177856_12338 | NW_004518807.1 | Scaffold4379 | 12338                   | CC                              | GG                | 1946699499               |
| SNP_P3_177857_14894 | NW_004518807.1 | Scaffold4379 | 14894                   | AA                              | TT                | 1946699501               |
| SNP_P3_177858_16958 | NW_004518807.1 | Scaffold4379 | 16958                   | AA                              | GG                | 1946699503               |
| SNP_P3_177859_19461 | NW_004518807.1 | Scaffold4379 | 19461                   | GG                              | AA                | 1946699505               |
| SNP_P3_177860_23278 | NW_004518807.1 | Scaffold4379 | 23278                   | GG                              | TT                | 1946699507               |
| SNP_P3_177861_23279 | NW_004518807.1 | Scaffold4379 | 23279                   | TT                              | AA                | 1946699509               |
| SNP_P3_177862_384   | NW_004518810.1 | Scaffold4383 | 384                     | GG                              | TT                | 1946699511               |
| SNP_P3_177863_22491 | NW_004518810.1 | Scaffold4383 | 22491                   | GG                              | CC                | 1946699513               |
| SNP_P3_177864_22496 | NW_004518810.1 | Scaffold4383 | 22496                   | GG                              | CC                | 1946699515               |
| SNP_P3_177865_22613 | NW_004518810.1 | Scaffold4383 | 22613                   | TT                              | CC                | 1946699518               |
| SNP_P3_177866_22843 | NW_004518810.1 | Scaffold4383 | 22843                   | AA                              | GG                | 1946699520               |
| SNP_P3_177867_22882 | NW_004518810.1 | Scaffold4383 | 22882                   | AA                              | GG                | 1946699522               |
| SNP_P3_177868_22889 | NW_004518810.1 | Scaffold4383 | 22889                   | AA                              | GG                | 1946699524               |
| SNP_P3_177869_24671 | NW_004518810.1 | Scaffold4383 | 24671                   | CC                              | TT                | 1946699526               |
| SNP_P3_177870_24861 | NW_004518810.1 | Scaffold4383 | 24861                   | AA                              | TT                | 1946699528               |
| SNP_P3_177871_24863 | NW_004518810.1 | Scaffold4383 | 24863                   | GG                              | CC                | 1946699531               |
| SNP_P3_177872_24877 | NW_004518810.1 | Scaffold4383 | 24877                   | CC                              | TT                | 1946699533               |
| SNP_P3_177873_24884 | NW_004518810.1 | Scaffold4383 | 24884                   | TT                              | GG                | 1946699535               |
| SNP_P3_177874_24971 | NW_004518810.1 | Scaffold4383 | 24971                   | CC                              | TT                | 1946699537               |
| SNP_P3_177875_25008 | NW_004518810.1 | Scaffold4383 | 25008                   | GG                              | CC                | 1946699539               |
| SNP_P3_177876_25040 | NW_004518810.1 | Scaffold4383 | 25040                   | AA                              | CC                | 1946699541               |
| SNP_P3_177877_25222 | NW_004518810.1 | Scaffold4383 | 25222                   | GG                              | AA                | 1946699543               |
| SNP_P3_177878_25276 | NW_004518810.1 | Scaffold4383 | 25276                   | CC                              | AA                | 1946699545               |
| SNP_P3_177879_25295 | NW_004518810.1 | Scaffold4383 | 25295                   | GG                              | TT                | 1946699547               |
| SNP_P3_177880_25301 | NW_004518810.1 | Scaffold4383 | 25301                   | TT                              | CC                | 1946699549               |
| SNP_P3_177882_26149 | NW_004518810.1 | Scaffold4383 | 26149                   | CC                              | GG                | 1946699551               |
| SNP_P3_177883_30320 | NW_004518810.1 | Scaffold4383 | 30320                   | AA                              | GG                | 1946699553               |
| SNP_P3_177884_30359 | NW_004518810.1 | Scaffold4383 | 30359                   | GG                              | AA                | 1946699555               |
| SNP_P3_177885_30364 | NW_004518810.1 | Scaffold4383 | 30364                   | GG                              | CC                | 1946699557               |
| SNP_P3_177886_30366 | NW_004518810.1 | Scaffold4383 | 30366                   | AA                              | GG                | 1946699559               |
| SNP_P3_177887_885   | NW_004518811.1 | Scaffold4385 | 885                     | CC                              | AA                | 1946699561               |
| SNP_P3_177888_6419  | NW_004518811.1 | Scaffold4385 | 6419                    | GG                              | CC                | 1946699563               |
| SNP_P3_177889_6442  | NW_004518811.1 | Scaffold4385 | 6442                    | TT                              | CC                | 1946699565               |
| SNP_P3_177890_6478  | NW_004518811.1 | Scaffold4385 | 6478                    | AA                              | GG                | 1946699567               |
| SNP_P3_177891_6479  | NW_004518811.1 | Scaffold4385 | 6479                    | AA                              | GG                | 1946699569               |
| SNP_P3_177892_6921  | NW_004518811.1 | Scaffold4385 | 6921                    | GG                              | AA                | 1946699571               |
| SNP_P3_177893_6971  | NW_004518811.1 | Scaffold4385 | 6971                    | TT                              | CC                | 1946699573               |



| SNPs IDs           | Chromosome IDs | Chromosomes  | Physical positions (bp) | CDC Frontier (Reference genome) | (Pusa 256 & HPNB) | NCBI SNPdb Accession IDs |
|--------------------|----------------|--------------|-------------------------|---------------------------------|-------------------|--------------------------|
| SNP_P3_177894_7003 | NW_004518811.1 | Scaffold4385 | 7003                    | TT                              | GG                | 1946699575               |
| SNP_P3_177895_7032 | NW_004518811.1 | Scaffold4385 | 7032                    | TT                              | CC                | 1946699577               |
| SNP_P3_177896_7221 | NW_004518811.1 | Scaffold4385 | 7221                    | TT                              | CC                | 1946699579               |
| SNP_P3_177897_7669 | NW_004518811.1 | Scaffold4385 | 7669                    | TT                              | CC                | 1946699581               |
| SNP_P3_177898_7711 | NW_004518811.1 | Scaffold4385 | 7711                    | CC                              | AA                | 1946699584               |
| SNP_P3_177899_7735 | NW_004518811.1 | Scaffold4385 | 7735                    | TT                              | AA                | 1946699586               |
| SNP_P3_177900_69   | NW_004518812.1 | Scaffold4386 | 69                      | CC                              | TT                | 1946699588               |
| SNP_P3_177901_622  | NW_004518813.1 | Scaffold4387 | 622                     | TT                              | AA                | 1946699590               |
| SNP_P3_177902_699  | NW_004518813.1 | Scaffold4387 | 699                     | TT                              | CC                | 1946699592               |
| SNP_P3_177903_807  | NW_004518813.1 | Scaffold4387 | 807                     | AA                              | TT                | 1946699595               |
| SNP_P3_177904_4955 | NW_004518813.1 | Scaffold4387 | 4955                    | CC                              | TT                | 1946699597               |
| SNP_P3_177905_4966 | NW_004518813.1 | Scaffold4387 | 4966                    | TT                              | AA                | 1946699599               |
| SNP_P3_177906_5019 | NW_004518813.1 | Scaffold4387 | 5019                    | GG                              | AA                | 1946699601               |
| SNP_P3_177907_5171 | NW_004518813.1 | Scaffold4387 | 5171                    | CC                              | GG                | 1946699604               |
| SNP_P3_177908_5178 | NW_004518813.1 | Scaffold4387 | 5178                    | CC                              | TT                | 1946699606               |
| SNP_P3_177909_5232 | NW_004518813.1 | Scaffold4387 | 5232                    | TT                              | CC                | 1946699608               |
| SNP_P3_177910_5260 | NW_004518813.1 | Scaffold4387 | 5260                    | AA                              | GG                | 1946699610               |
| SNP_P3_177911_5351 | NW_004518813.1 | Scaffold4387 | 5351                    | GG                              | AA                | 1946699612               |
| SNP_P3_177912_5407 | NW_004518813.1 | Scaffold4387 | 5407                    | TT                              | GG                | 1946699615               |
| SNP_P3_177913_5452 | NW_004518813.1 | Scaffold4387 | 5452                    | AA                              | TT                | 1946699617               |
| SNP_P3_177914_5476 | NW_004518813.1 | Scaffold4387 | 5476                    | AA                              | TT                | 1946699619               |
| SNP_P3_177915_5483 | NW_004518813.1 | Scaffold4387 | 5483                    | AA                              | TT                | 1946699622               |
| SNP_P3_177917_5538 | NW_004518813.1 | Scaffold4387 | 5538                    | TT                              | CC                | 1946699625               |
| SNP_P3_177918_5560 | NW_004518813.1 | Scaffold4387 | 5560                    | TT                              | CC                | 1946699627               |
| SNP_P3_177919_5570 | NW_004518813.1 | Scaffold4387 | 5570                    | GG                              | AA                | 1946699630               |
| SNP_P3_177920_5595 | NW_004518813.1 | Scaffold4387 | 5595                    | CC                              | TT                | 1946699632               |
| SNP_P3_177924_5886 | NW_004518813.1 | Scaffold4387 | 5886                    | CC                              | GG                | 1946699634               |
| SNP_P3_177925_5944 | NW_004518813.1 | Scaffold4387 | 5944                    | GG                              | TT                | 1946699636               |
| SNP_P3_177926_6583 | NW_004518813.1 | Scaffold4387 | 6583                    | CC                              | TT                | 1946699638               |
| SNP_P3_177927_6641 | NW_004518813.1 | Scaffold4387 | 6641                    | CC                              | AA                | 1946699642               |
| SNP_P3_177928_6667 | NW_004518813.1 | Scaffold4387 | 6667                    | TT                              | CC                | 1946699644               |
| SNP_P3_177929_6851 | NW_004518813.1 | Scaffold4387 | 6851                    | AA                              | GG                | 1946699646               |
| SNP_P3_177930_400  | NW_004518814.1 | Scaffold4388 | 400                     | AA                              | CC                | 1946699648               |
| SNP_P3_177931_404  | NW_004518814.1 | Scaffold4388 | 404                     | AA                              | CC                | 1946699651               |
| SNP_P3_177932_414  | NW_004518814.1 | Scaffold4388 | 414                     | TT                              | GG                | 1946699653               |
| SNP_P3_177933_422  | NW_004518814.1 | Scaffold4388 | 422                     | GG                              | AA                | 1946699655               |
| SNP_P3_177934_500  | NW_004518814.1 | Scaffold4388 | 500                     | CC                              | TT                | 1946699658               |
| SNP_P3_177935_521  | NW_004518814.1 | Scaffold4388 | 521                     | TT                              | CC                | 1946699660               |
| SNP_P3_177936_543  | NW_004518814.1 | Scaffold4388 | 543                     | TT                              | GG                | 1946699662               |
| SNP_P3_177937_556  | NW_004518814.1 | Scaffold4388 | 556                     | GG                              | AA                | 1946699664               |
| SNP_P3_177938_832  | NW_004518814.1 | Scaffold4388 | 832                     | GG                              | AA                | 1946699666               |
| SNP_P3_177939_180  | NW_004518821.1 | Scaffold4398 | 180                     | TT                              | CC                | 1946699668               |

| SNPs IDs           | Chromosome IDs | Chromosomes  | Physical positions (bp) | CDC Frontier (Reference genome) | (Pusa 256 & HPNB) | NCBI SNPdb Accession IDs |
|--------------------|----------------|--------------|-------------------------|---------------------------------|-------------------|--------------------------|
| SNP_P3_177940_283  | NW_004518821.1 | Scaffold4398 | 283                     | GG                              | CC                | 1946699671               |
| SNP_P3_177943_483  | NW_004518821.1 | Scaffold4398 | 483                     | AA                              | TT                | 1946699673               |
| SNP_P3_177944_192  | NW_004518823.1 | Scaffold4402 | 192                     | CC                              | TT                | 1946699675               |
| SNP_P3_177945_198  | NW_004518823.1 | Scaffold4402 | 198                     | AA                              | GG                | 1946699677               |
| SNP_P3_177946_264  | NW_004518823.1 | Scaffold4402 | 264                     | CC                              | TT                | 1946699680               |
| SNP_P3_177947_402  | NW_004518823.1 | Scaffold4402 | 402                     | AA                              | GG                | 1946699682               |
| SNP_P3_177948_403  | NW_004518823.1 | Scaffold4402 | 403                     | GG                              | TT                | 1946699684               |
| SNP_P3_177949_448  | NW_004518823.1 | Scaffold4402 | 448                     | GG                              | AA                | 1946699686               |
| SNP_P3_177950_454  | NW_004518823.1 | Scaffold4402 | 454                     | CC                              | TT                | 1946699688               |
| SNP_P3_177951_461  | NW_004518823.1 | Scaffold4402 | 461                     | CC                              | TT                | 1946699690               |
| SNP_P3_177952_657  | NW_004518823.1 | Scaffold4402 | 657                     | AA                              | GG                | 1946699692               |
| SNP_P3_177953_64   | NW_004518824.1 | Scaffold4404 | 64                      | AA                              | TT                | 1946699694               |
| SNP_P3_177954_69   | NW_004518824.1 | Scaffold4404 | 69                      | TT                              | AA                | 1946699696               |
| SNP_P3_177955_321  | NW_004518825.1 | Scaffold4405 | 321                     | CC                              | TT                | 1946699699               |
| SNP_P3_177956_310  | NW_004518829.1 | Scaffold4414 | 310                     | AA                              | CC                | 1946699701               |
| SNP_P3_177957_340  | NW_004518829.1 | Scaffold4414 | 340                     | TT                              | GG                | 1946699703               |
| SNP_P3_177958_346  | NW_004518829.1 | Scaffold4414 | 346                     | GG                              | AA                | 1946699705               |
| SNP_P3_177959_369  | NW_004518829.1 | Scaffold4414 | 369                     | TT                              | CC                | 1946699707               |
| SNP_P3_177960_466  | NW_004518829.1 | Scaffold4414 | 466                     | GG                              | AA                | 1946699709               |
| SNP_P3_177961_477  | NW_004518829.1 | Scaffold4414 | 477                     | GG                              | AA                | 1946699711               |
| SNP_P3_177962_523  | NW_004518829.1 | Scaffold4414 | 523                     | AA                              | CC                | 1946699713               |
| SNP_P3_177963_604  | NW_004518829.1 | Scaffold4414 | 604                     | GG                              | CC                | 1946699715               |
| SNP_P3_177964_257  | NW_004518832.1 | Scaffold4417 | 257                     | GG                              | TT                | 1946699717               |
| SNP_P3_177965_258  | NW_004518832.1 | Scaffold4417 | 258                     | TT                              | AA                | 1946699719               |
| SNP_P3_177966_563  | NW_004518832.1 | Scaffold4417 | 563                     | TT                              | CC                | 1946699721               |
| SNP_P3_177967_727  | NW_004518832.1 | Scaffold4417 | 727                     | CC                              | TT                | 1946699725               |
| SNP_P3_177968_852  | NW_004518832.1 | Scaffold4417 | 852                     | GG                              | AA                | 1946699727               |
| SNP_P3_177970_881  | NW_004518832.1 | Scaffold4417 | 881                     | TT                              | AA                | 1946699729               |
| SNP_P3_177971_1124 | NW_004518832.1 | Scaffold4417 | 1124                    | CC                              | TT                | 1946699730               |
| SNP_P3_177972_1133 | NW_004518832.1 | Scaffold4417 | 1133                    | TT                              | CC                | 1946699731               |
| SNP_P3_177973_1139 | NW_004518832.1 | Scaffold4417 | 1139                    | GG                              | CC                | 1946699732               |
| SNP_P3_177974_1151 | NW_004518832.1 | Scaffold4417 | 1151                    | GG                              | CC                | 1946699733               |
| SNP_P3_177975_3421 | NW_004518833.1 | Scaffold4418 | 3421                    | CC                              | TT                | 1946699734               |
| SNP_P3_177976_3637 | NW_004518833.1 | Scaffold4418 | 3637                    | CC                              | TT                | 1946699735               |
| SNP_P3_177978_534  | NW_004518837.1 | Scaffold4426 | 534                     | TT                              | GG                | 1946699736               |
| SNP_P3_177979_546  | NW_004518837.1 | Scaffold4426 | 546                     | CC                              | TT                | 1946699737               |
| SNP_P3_177980_548  | NW_004518837.1 | Scaffold4426 | 548                     | TT                              | AA                | 1946699738               |
| SNP_P3_177981_930  | NW_004518837.1 | Scaffold4426 | 930                     | TT                              | CC                | 1946699739               |
| SNP_P3_177982_931  | NW_004518837.1 | Scaffold4426 | 931                     | GG                              | CC                | 1946699740               |
| SNP_P3_177983_953  | NW_004518837.1 | Scaffold4426 | 953                     | TT                              | AA                | 1946699741               |
| SNP_P3_177984_962  | NW_004518837.1 | Scaffold4426 | 962                     | GG                              | TT                | 1946699745               |
| SNP_P3_177985_981  | NW_004518837.1 | Scaffold4426 | 981                     | TT                              | GG                | 1946699747               |

| SNPs IDs           | Chromosome IDs | Chromosomes  | Physical positions (bp) | CDC Frontier (Reference genome) | (Pusa 256 & HPNB) | NCBI SNPdb Accession IDs |
|--------------------|----------------|--------------|-------------------------|---------------------------------|-------------------|--------------------------|
| SNP_P3_177986_994  | NW_004518837.1 | Scaffold4426 | 994                     | GG                              | AA                | 1946699749               |
| SNP_P3_177987_1010 | NW_004518837.1 | Scaffold4426 | 1010                    | TT                              | CC                | 1946699751               |
| SNP_P3_177988_405  | NW_004518838.1 | Scaffold4427 | 405                     | AA                              | TT                | 1946699754               |
| SNP_P3_177989_413  | NW_004518838.1 | Scaffold4427 | 413                     | GG                              | CC                | 1946699756               |
| SNP_P3_177990_658  | NW_004518838.1 | Scaffold4427 | 658                     | AA                              | TT                | 1946699758               |
| SNP_P3_177991_43   | NW_004518840.1 | Scaffold4431 | 43                      | TT                              | CC                | 1946699760               |
| SNP_P3_177992_2699 | NW_004518843.1 | Scaffold4436 | 2699                    | CC                              | GG                | 1946699762               |
| SNP_P3_177993_3435 | NW_004518843.1 | Scaffold4436 | 3435                    | AA                              | GG                | 1946699764               |
| SNP_P3_177994_3437 | NW_004518843.1 | Scaffold4436 | 3437                    | AA                              | GG                | 1946699767               |
| SNP_P3_177995_3450 | NW_004518843.1 | Scaffold4436 | 3450                    | AA                              | GG                | 1946699769               |
| SNP_P3_177996_3488 | NW_004518843.1 | Scaffold4436 | 3488                    | AA                              | TT                | 1946699771               |
| SNP_P3_177997_3491 | NW_004518843.1 | Scaffold4436 | 3491                    | TT                              | GG                | 1946699773               |
| SNP_P3_177998_3517 | NW_004518843.1 | Scaffold4436 | 3517                    | AA                              | CC                | 1946699775               |
| SNP_P3_177999_3573 | NW_004518843.1 | Scaffold4436 | 3573                    | AA                              | TT                | 1946699777               |
| SNP_P3_178000_3598 | NW_004518843.1 | Scaffold4436 | 3598                    | GG                              | AA                | 1946699779               |
| SNP_P3_178001_3602 | NW_004518843.1 | Scaffold4436 | 3602                    | TT                              | AA                | 1946699781               |
| SNP_P3_178002_3606 | NW_004518843.1 | Scaffold4436 | 3606                    | AA                              | GG                | 1946699783               |
| SNP_P3_178003_3631 | NW_004518843.1 | Scaffold4436 | 3631                    | AA                              | GG                | 1946699786               |
| SNP_P3_178004_5640 | NW_004518843.1 | Scaffold4436 | 5640                    | GG                              | AA                | 1946699788               |
| SNP_P3_178005_5643 | NW_004518843.1 | Scaffold4436 | 5643                    | GG                              | TT                | 1946699790               |
| SNP_P3_178006_5659 | NW_004518843.1 | Scaffold4436 | 5659                    | CC                              | GG                | 1946699792               |
| SNP_P3_178007_5942 | NW_004518843.1 | Scaffold4436 | 5942                    | TT                              | AA                | 1946699794               |
| SNP_P3_178008_927  | NW_004518844.1 | Scaffold4437 | 927                     | GG                              | CC                | 1946699796               |
| SNP_P3_178009_945  | NW_004518844.1 | Scaffold4437 | 945                     | AA                              | CC                | 1946699798               |
| SNP_P3_178010_963  | NW_004518844.1 | Scaffold4437 | 963                     | GG                              | AA                | 1946699800               |
| SNP_P3_178011_965  | NW_004518844.1 | Scaffold4437 | 965                     | AA                              | CC                | 1946699802               |
| SNP_P3_178012_1035 | NW_004518844.1 | Scaffold4437 | 1035                    | GG                              | AA                | 1946699804               |
| SNP_P3_178013_1205 | NW_004518844.1 | Scaffold4437 | 1205                    | TT                              | CC                | 1946699806               |
| SNP_P3_178014_1253 | NW_004518844.1 | Scaffold4437 | 1253                    | TT                              | CC                | 1946699809               |
| SNP_P3_178015_4885 | NW_004518845.1 | Scaffold4439 | 4885                    | AA                              | CC                | 1946699811               |
| SNP_P3_178016_5594 | NW_004518845.1 | Scaffold4439 | 5594                    | CC                              | GG                | 1946699813               |
| SNP_P3_178017_5843 | NW_004518845.1 | Scaffold4439 | 5843                    | AA                              | TT                | 1946699815               |
| SNP_P3_178018_5844 | NW_004518845.1 | Scaffold4439 | 5844                    | AA                              | GG                | 1946699817               |
| SNP_P3_178019_6052 | NW_004518845.1 | Scaffold4439 | 6052                    | TT                              | AA                | 1946699819               |
| SNP_P3_178020_6064 | NW_004518845.1 | Scaffold4439 | 6064                    | GG                              | AA                | 1946699823               |
| SNP_P3_178021_6124 | NW_004518845.1 | Scaffold4439 | 6124                    | AA                              | GG                | 1946699825               |
| SNP_P3_178022_6147 | NW_004518845.1 | Scaffold4439 | 6147                    | TT                              | AA                | 1946699827               |
| SNP_P3_178023_6174 | NW_004518845.1 | Scaffold4439 | 6174                    | AA                              | GG                | 1946699829               |
| SNP_P3_178024_6207 | NW_004518845.1 | Scaffold4439 | 6207                    | GG                              | TT                | 1946699831               |
| SNP_P3_178025_6324 | NW_004518845.1 | Scaffold4439 | 6324                    | AA                              | TT                | 1946699833               |
| SNP_P3_178026_6503 | NW_004518845.1 | Scaffold4439 | 6503                    | AA                              | GG                | 1946699835               |
| SNP_P3_178027_6632 | NW_004518845.1 | Scaffold4439 | 6632                    | TT                              | AA                | 1946699837               |

| SNPs IDs            | Chromosome IDs | Chromosomes  | Physical positions (bp) | CDC Frontier (Reference genome) | (Pusa 256 & HPNB) | NCBI SNPdb Accession IDs |
|---------------------|----------------|--------------|-------------------------|---------------------------------|-------------------|--------------------------|
| SNP_P3_178028_6677  | NW_004518845.1 | Scaffold4439 | 6677                    | TT                              | GG                | 1946699839               |
| SNP_P3_178029_6695  | NW_004518845.1 | Scaffold4439 | 6695                    | GG                              | TT                | 1946699841               |
| SNP_P3_178030_6713  | NW_004518845.1 | Scaffold4439 | 6713                    | TT                              | GG                | 1946699843               |
| SNP_P3_178031_6849  | NW_004518845.1 | Scaffold4439 | 6849                    | TT                              | CC                | 1946699845               |
| SNP_P3_178032_6851  | NW_004518845.1 | Scaffold4439 | 6851                    | AA                              | CC                | 1946699847               |
| SNP_P3_178033_6863  | NW_004518845.1 | Scaffold4439 | 6863                    | TT                              | GG                | 1946699849               |
| SNP_P3_178034_6866  | NW_004518845.1 | Scaffold4439 | 6866                    | TT                              | AA                | 1946699851               |
| SNP_P3_178035_6876  | NW_004518845.1 | Scaffold4439 | 6876                    | GG                              | TT                | 1946699853               |
| SNP_P3_178036_6895  | NW_004518845.1 | Scaffold4439 | 6895                    | AA                              | CC                | 1946699856               |
| SNP_P3_178037_1452  | NW_004518849.1 | Scaffold4443 | 1452                    | CC                              | TT                | 1946699858               |
| SNP_P3_178038_1545  | NW_004518849.1 | Scaffold4443 | 1545                    | TT                              | GG                | 1946699860               |
| SNP_P3_178039_1559  | NW_004518849.1 | Scaffold4443 | 1559                    | TT                              | CC                | 1946699863               |
| SNP_P3_178040_1816  | NW_004518849.1 | Scaffold4443 | 1816                    | GG                              | AA                | 1946699865               |
| SNP_P3_178042_2015  | NW_004518849.1 | Scaffold4443 | 2015                    | TT                              | CC                | 1946699867               |
| SNP_P3_178043_7011  | NW_004518851.1 | Scaffold4446 | 7011                    | GG                              | AA                | 1946699869               |
| SNP_P3_178044_7012  | NW_004518851.1 | Scaffold4446 | 7012                    | AA                              | TT                | 1946699871               |
| SNP_P3_178046_2801  | NW_004518855.1 | Scaffold4452 | 2801                    | CC                              | TT                | 1946699873               |
| SNP_P3_178047_2815  | NW_004518855.1 | Scaffold4452 | 2815                    | TT                              | CC                | 1946699875               |
| SNP_P3_178048_3259  | NW_004518855.1 | Scaffold4452 | 3259                    | GG                              | AA                | 1946699877               |
| SNP_P3_178049_3265  | NW_004518855.1 | Scaffold4452 | 3265                    | GG                              | TT                | 1946699879               |
| SNP_P3_178050_5191  | NW_004518855.1 | Scaffold4452 | 5191                    | CC                              | TT                | 1946699881               |
| SNP_P3_178051_5240  | NW_004518855.1 | Scaffold4452 | 5240                    | AA                              | GG                | 1946699883               |
| SNP_P3_178052_5332  | NW_004518855.1 | Scaffold4452 | 5332                    | AA                              | GG                | 1946699885               |
| SNP_P3_178053_7435  | NW_004518855.1 | Scaffold4452 | 7435                    | AA                              | GG                | 1946699887               |
| SNP_P3_178054_12965 | NW_004518855.1 | Scaffold4452 | 12965                   | GG                              | TT                | 1946699889               |
| SNP_P3_178055_12971 | NW_004518855.1 | Scaffold4452 | 12971                   | TT                              | CC                | 1946699891               |
| SNP_P3_178056_13778 | NW_004518855.1 | Scaffold4452 | 13778                   | CC                              | TT                | 1946699893               |
| SNP_P3_178057_13803 | NW_004518855.1 | Scaffold4452 | 13803                   | GG                              | AA                | 1946699896               |
| SNP_P3_178058_13947 | NW_004518855.1 | Scaffold4452 | 13947                   | TT                              | CC                | 1946699898               |
| SNP_P3_178059_14387 | NW_004518855.1 | Scaffold4452 | 14387                   | CC                              | TT                | 1946699900               |
| SNP_P3_178060_14394 | NW_004518855.1 | Scaffold4452 | 14394                   | GG                              | CC                | 1946699904               |
| SNP_P3_178061_14536 | NW_004518855.1 | Scaffold4452 | 14536                   | TT                              | GG                | 1946699906               |
| SNP_P3_178062_14551 | NW_004518855.1 | Scaffold4452 | 14551                   | AA                              | GG                | 1946699908               |
| SNP_P3_178063_14567 | NW_004518855.1 | Scaffold4452 | 14567                   | CC                              | TT                | 1946699910               |
| SNP_P3_178064_14975 | NW_004518855.1 | Scaffold4452 | 14975                   | CC                              | TT                | 1946699913               |
| SNP_P3_178065_15224 | NW_004518855.1 | Scaffold4452 | 15224                   | TT                              | AA                | 1946699915               |
| SNP_P3_178066_15261 | NW_004518855.1 | Scaffold4452 | 15261                   | CC                              | GG                | 1946699917               |
| SNP_P3_178067_58156 | NW_004518855.1 | Scaffold4452 | 58156                   | GG                              | AA                | 1946699919               |
| SNP_P3_178068_58355 | NW_004518855.1 | Scaffold4452 | 58355                   | TT                              | CC                | 1946699921               |
| SNP_P3_178071_91316 | NW_004518855.1 | Scaffold4452 | 91316                   | AA                              | CC                | 1946699924               |
| SNP_P3_178072_91838 | NW_004518855.1 | Scaffold4452 | 91838                   | AA                              | GG                | 1946699926               |
| SNP_P3_178073_91857 | NW_004518855.1 | Scaffold4452 | 91857                   | AA                              | TT                | 1946699928               |

| SNPs IDs             | Chromosome IDs | Chromosomes  | Physical positions (bp) | CDC Frontier (Reference genome) | (Pusa 256 & HPNB) | NCBI SNPdb Accession IDs |
|----------------------|----------------|--------------|-------------------------|---------------------------------|-------------------|--------------------------|
| SNP_P3_178074_91859  | NW_004518855.1 | Scaffold4452 | 91859                   | AA                              | CC                | 1946699930               |
| SNP_P3_178075_125890 | NW_004518855.1 | Scaffold4452 | 125890                  | CC                              | AA                | 1946699932               |
| SNP_P3_178076_125953 | NW_004518855.1 | Scaffold4452 | 125953                  | CC                              | AA                | 1946699935               |
| SNP_P3_178077_126016 | NW_004518855.1 | Scaffold4452 | 126016                  | AA                              | GG                | 1946699937               |
| SNP_P3_178078_126046 | NW_004518855.1 | Scaffold4452 | 126046                  | CC                              | AA                | 1946699939               |
| SNP_P3_178079_126117 | NW_004518855.1 | Scaffold4452 | 126117                  | AA                              | TT                | 1946699941               |
| SNP_P3_178080_126121 | NW_004518855.1 | Scaffold4452 | 126121                  | GG                              | AA                | 1946699944               |
| SNP_P3_178081_126130 | NW_004518855.1 | Scaffold4452 | 126130                  | CC                              | TT                | 1946699946               |
| SNP_P3_178082_126143 | NW_004518855.1 | Scaffold4452 | 126143                  | AA                              | TT                | 1946699949               |
| SNP_P3_178083_126144 | NW_004518855.1 | Scaffold4452 | 126144                  | AA                              | TT                | 1946699951               |
| SNP_P3_178085_126205 | NW_004518855.1 | Scaffold4452 | 126205                  | GG                              | AA                | 1946699953               |
| SNP_P3_178086_126206 | NW_004518855.1 | Scaffold4452 | 126206                  | AA                              | CC                | 1946699955               |
| SNP_P3_178087_126247 | NW_004518855.1 | Scaffold4452 | 126247                  | AA                              | CC                | 1946699957               |
| SNP_P3_178088_126281 | NW_004518855.1 | Scaffold4452 | 126281                  | GG                              | TT                | 1946699959               |
| SNP_P3_178089_126324 | NW_004518855.1 | Scaffold4452 | 126324                  | CC                              | TT                | 1946699962               |
| SNP_P3_178090_992    | NW_004518856.1 | Scaffold4453 | 992                     | TT                              | AA                | 1946699964               |
| SNP_P3_178091_1577   | NW_004518857.1 | Scaffold4455 | 1577                    | GG                              | AA                | 1946699966               |
| SNP_P3_178092_1742   | NW_004518857.1 | Scaffold4455 | 1742                    | CC                              | TT                | 1946699968               |
| SNP_P3_178093_604    | NW_004518858.1 | Scaffold4456 | 604                     | TT                              | AA                | 1946699970               |
| SNP_P3_178094_759    | NW_004518858.1 | Scaffold4456 | 759                     | AA                              | GG                | 1946699973               |
| SNP_P3_178095_764    | NW_004518858.1 | Scaffold4456 | 764                     | CC                              | AA                | 1946699975               |
| SNP_P3_178096_1023   | NW_004518858.1 | Scaffold4456 | 1023                    | TT                              | AA                | 1946699977               |
| SNP_P3_178097_230    | NW_004518860.1 | Scaffold4461 | 230                     | CC                              | TT                | 1946699979               |
| SNP_P3_178098_254    | NW_004518860.1 | Scaffold4461 | 254                     | AA                              | GG                | 1946699981               |
| SNP_P3_178099_282    | NW_004518860.1 | Scaffold4461 | 282                     | AA                              | TT                | 1946699985               |
| SNP_P3_178100_666    | NW_004518860.1 | Scaffold4461 | 666                     | CC                              | TT                | 1946699987               |
| SNP_P3_178102_2781   | NW_004518861.1 | Scaffold4462 | 2781                    | TT                              | CC                | 1946699989               |
| SNP_P3_178103_2807   | NW_004518861.1 | Scaffold4462 | 2807                    | AA                              | CC                | 1946699991               |
| SNP_P3_178104_2817   | NW_004518861.1 | Scaffold4462 | 2817                    | GG                              | TT                | 1946699993               |
| SNP_P3_178105_2833   | NW_004518861.1 | Scaffold4462 | 2833                    | TT                              | CC                | 1946699995               |
| SNP_P3_178106_2874   | NW_004518861.1 | Scaffold4462 | 2874                    | CC                              | AA                | 1946699997               |
| SNP_P3_178107_2885   | NW_004518861.1 | Scaffold4462 | 2885                    | TT                              | CC                | 1946700000               |
| SNP_P3_178108_2898   | NW_004518861.1 | Scaffold4462 | 2898                    | AA                              | GG                | 1946700002               |
| SNP_P3_178109_2904   | NW_004518861.1 | Scaffold4462 | 2904                    | CC                              | GG                | 1946700004               |
| SNP_P3_178110_2915   | NW_004518861.1 | Scaffold4462 | 2915                    | CC                              | TT                | 1946700006               |
| SNP_P3_178111_2916   | NW_004518861.1 | Scaffold4462 | 2916                    | CC                              | TT                | 1946700008               |
| SNP_P3_178112_3059   | NW_004518861.1 | Scaffold4462 | 3059                    | AA                              | GG                | 1946700011               |
| SNP_P3_178113_3064   | NW_004518861.1 | Scaffold4462 | 3064                    | GG                              | TT                | 1946700013               |
| SNP_P3_178114_3065   | NW_004518861.1 | Scaffold4462 | 3065                    | AA                              | GG                | 1946700015               |
| SNP_P3_178115_600    | NW_004518862.1 | Scaffold4465 | 600                     | GG                              | TT                | 1946700017               |
| SNP_P3_178116_662    | NW_004518862.1 | Scaffold4465 | 662                     | GG                              | AA                | 1946700020               |
| SNP_P3_178117_2369   | NW_004518862.1 | Scaffold4465 | 2369                    | TT                              | GG                | 1946700023               |

| SNPs IDs            | Chromosome IDs | Chromosomes  | Physical positions (bp) | CDC Frontier (Reference genome) | (Pusa 256 & HPNB) | NCBI SNPdb Accession IDs |
|---------------------|----------------|--------------|-------------------------|---------------------------------|-------------------|--------------------------|
| SNP_P3_178118_2437  | NW_004518862.1 | Scaffold4465 | 2437                    | TT                              | AA                | 1946700025               |
| SNP_P3_178119_650   | NW_004518869.1 | Scaffold4475 | 650                     | GG                              | CC                | 1946700027               |
| SNP_P3_178120_1308  | NW_004518872.1 | Scaffold4478 | 1308                    | TT                              | GG                | 1946700029               |
| SNP_P3_178121_1669  | NW_004518873.1 | Scaffold4481 | 1669                    | GG                              | AA                | 1946700031               |
| SNP_P3_178122_1868  | NW_004518873.1 | Scaffold4481 | 1868                    | CC                              | GG                | 1946700034               |
| SNP_P3_178123_2246  | NW_004518873.1 | Scaffold4481 | 2246                    | GG                              | AA                | 1946700036               |
| SNP_P3_178124_2263  | NW_004518873.1 | Scaffold4481 | 2263                    | GG                              | AA                | 1946700038               |
| SNP_P3_178125_8480  | NW_004518873.1 | Scaffold4481 | 8480                    | TT                              | AA                | 1946700040               |
| SNP_P3_178126_9589  | NW_004518873.1 | Scaffold4481 | 9589                    | CC                              | AA                | 1946700042               |
| SNP_P3_178127_9596  | NW_004518873.1 | Scaffold4481 | 9596                    | CC                              | TT                | 1946700045               |
| SNP_P3_178128_9597  | NW_004518873.1 | Scaffold4481 | 9597                    | AA                              | CC                | 1946700047               |
| SNP_P3_178129_10363 | NW_004518873.1 | Scaffold4481 | 10363                   | AA                              | TT                | 1946700049               |
| SNP_P3_178130_10678 | NW_004518873.1 | Scaffold4481 | 10678                   | GG                              | CC                | 1946700051               |
| SNP_P3_178131_159   | NW_004518878.1 | Scaffold4488 | 159                     | TT                              | AA                | 1946700053               |
| SNP_P3_178132_58    | NW_004518880.1 | Scaffold4491 | 58                      | AA                              | TT                | 1946700055               |
| SNP_P3_178133_131   | NW_004518880.1 | Scaffold4491 | 131                     | GG                              | AA                | 1946700057               |
| SNP_P3_178134_63    | NW_004518882.1 | Scaffold4494 | 63                      | TT                              | GG                | 1946700059               |
| SNP_P3_178135_69    | NW_004518882.1 | Scaffold4494 | 69                      | CC                              | GG                | 1946700062               |
| SNP_P3_178136_391   | NW_004518882.1 | Scaffold4494 | 391                     | TT                              | AA                | 1946700065               |
| SNP_P3_178137_104   | NW_004518883.1 | Scaffold4495 | 104                     | AA                              | TT                | 1946700067               |
| SNP_P3_178138_419   | NW_004518883.1 | Scaffold4495 | 419                     | TT                              | CC                | 1946700069               |
| SNP_P3_178139_1357  | NW_004518888.1 | Scaffold4503 | 1357                    | TT                              | CC                | 1946700071               |
| SNP_P3_178140_1382  | NW_004518888.1 | Scaffold4503 | 1382                    | AA                              | GG                | 1946700073               |
| SNP_P3_178141_1581  | NW_004518888.1 | Scaffold4503 | 1581                    | TT                              | AA                | 1946700076               |
| SNP_P3_178142_458   | NW_004518890.1 | Scaffold4505 | 458                     | GG                              | AA                | 1946700078               |
| SNP_P3_178143_1674  | NW_004518890.1 | Scaffold4505 | 1674                    | CC                              | AA                | 1946700080               |
| SNP_P3_178144_1683  | NW_004518890.1 | Scaffold4505 | 1683                    | CC                              | TT                | 1946700082               |
| SNP_P3_178145_1756  | NW_004518890.1 | Scaffold4505 | 1756                    | GG                              | CC                | 1946700084               |
| SNP_P3_178146_542   | NW_004518891.1 | Scaffold4506 | 542                     | CC                              | TT                | 1946700086               |
| SNP_P3_178147_996   | NW_004518891.1 | Scaffold4506 | 996                     | CC                              | TT                | 1946700088               |
| SNP_P3_178149_1038  | NW_004518891.1 | Scaffold4506 | 1038                    | CC                              | AA                | 1946700090               |
| SNP_P3_178150_1066  | NW_004518891.1 | Scaffold4506 | 1066                    | GG                              | AA                | 1946700093               |
| SNP_P3_178151_1076  | NW_004518891.1 | Scaffold4506 | 1076                    | AA                              | GG                | 1946700095               |
| SNP_P3_178152_1104  | NW_004518891.1 | Scaffold4506 | 1104                    | TT                              | CC                | 1946700097               |
| SNP_P3_178153_1128  | NW_004518891.1 | Scaffold4506 | 1128                    | AA                              | GG                | 1946700099               |
| SNP_P3_178154_442   | NW_004518892.1 | Scaffold4507 | 442                     | GG                              | AA                | 1946700101               |
| SNP_P3_178155_603   | NW_004518892.1 | Scaffold4507 | 603                     | CC                              | TT                | 1946700104               |
| SNP_P3_178156_648   | NW_004518892.1 | Scaffold4507 | 648                     | AA                              | GG                | 1946700106               |
| SNP_P3_178157_2985  | NW_004518893.1 | Scaffold4508 | 2985                    | TT                              | AA                | 1946700108               |
| SNP_P3_178158_11619 | NW_004518893.1 | Scaffold4508 | 11619                   | GG                              | AA                | 1946700110               |
| SNP_P3_178159_20959 | NW_004518893.1 | Scaffold4508 | 20959                   | AA                              | GG                | 1946700112               |
| SNP_P3_178160_21426 | NW_004518893.1 | Scaffold4508 | 21426                   | AA                              | GG                | 1946700115               |

| SNPs IDs            | Chromosome IDs | Chromosomes  | Physical positions (bp) | CDC Frontier (Reference genome) | (Pusa 256 & HPNB) | NCBI SNPdb Accession IDs |
|---------------------|----------------|--------------|-------------------------|---------------------------------|-------------------|--------------------------|
| SNP_P3_178161_21428 | NW_004518893.1 | Scaffold4508 | 21428                   | TT                              | CC                | 1946700117               |
| SNP_P3_178163_33669 | NW_004518893.1 | Scaffold4508 | 33669                   | CC                              | TT                | 1946700119               |
| SNP_P3_178165_33696 | NW_004518893.1 | Scaffold4508 | 33696                   | AA                              | CC                | 1946700121               |
| SNP_P3_178166_33902 | NW_004518893.1 | Scaffold4508 | 33902                   | CC                              | AA                | 1946700123               |
| SNP_P3_178167_36663 | NW_004518893.1 | Scaffold4508 | 36663                   | CC                              | TT                | 1946700125               |
| SNP_P3_178169_36838 | NW_004518893.1 | Scaffold4508 | 36838                   | GG                              | TT                | 1946700127               |
| SNP_P3_178170_36840 | NW_004518893.1 | Scaffold4508 | 36840                   | GG                              | CC                | 1946700129               |
| SNP_P3_178171_37003 | NW_004518893.1 | Scaffold4508 | 37003                   | CC                              | TT                | 1946700131               |
| SNP_P3_178172_37079 | NW_004518893.1 | Scaffold4508 | 37079                   | CC                              | TT                | 1946700133               |
| SNP_P3_178173_37098 | NW_004518893.1 | Scaffold4508 | 37098                   | AA                              | GG                | 1946700135               |
| SNP_P3_178174_115   | NW_004518894.1 | Scaffold4509 | 115                     | GG                              | TT                | 1946700137               |
| SNP_P3_178175_116   | NW_004518894.1 | Scaffold4509 | 116                     | TT                              | GG                | 1946700139               |
| SNP_P3_178176_260   | NW_004518894.1 | Scaffold4509 | 260                     | AA                              | GG                | 1946700141               |
| SNP_P3_178177_383   | NW_004518894.1 | Scaffold4509 | 383                     | AA                              | GG                | 1946700144               |
| SNP_P3_178178_512   | NW_004518894.1 | Scaffold4509 | 512                     | TT                              | CC                | 1946700146               |
| SNP_P3_178179_527   | NW_004518894.1 | Scaffold4509 | 527                     | GG                              | AA                | 1946700148               |
| SNP_P3_178180_555   | NW_004518894.1 | Scaffold4509 | 555                     | AA                              | CC                | 1946700150               |
| SNP_P3_178181_680   | NW_004518894.1 | Scaffold4509 | 680                     | AA                              | GG                | 1946700152               |
| SNP_P3_178182_699   | NW_004518894.1 | Scaffold4509 | 699                     | AA                              | GG                | 1946700154               |
| SNP_P3_178183_767   | NW_004518894.1 | Scaffold4509 | 767                     | GG                              | CC                | 1946700157               |
| SNP_P3_178184_802   | NW_004518894.1 | Scaffold4509 | 802                     | AA                              | TT                | 1946700159               |
| SNP_P3_178186_1369  | NW_004518894.1 | Scaffold4509 | 1369                    | AA                              | GG                | 1946700160               |
| SNP_P3_178187_1459  | NW_004518894.1 | Scaffold4509 | 1459                    | AA                              | TT                | 1946700161               |
| SNP_P3_178188_1636  | NW_004518894.1 | Scaffold4509 | 1636                    | GG                              | AA                | 1946700162               |
| SNP_P3_178189_934   | NW_004518895.1 | Scaffold4510 | 934                     | CC                              | TT                | 1946700163               |
| SNP_P3_178190_2453  | NW_004518896.1 | Scaffold4511 | 2453                    | TT                              | GG                | 1946700164               |
| SNP_P3_178191_11302 | NW_004518896.1 | Scaffold4511 | 11302                   | AA                              | TT                | 1946700165               |
| SNP_P3_178192_11529 | NW_004518896.1 | Scaffold4511 | 11529                   | CC                              | GG                | 1946700166               |
| SNP_P3_178193_11671 | NW_004518896.1 | Scaffold4511 | 11671                   | CC                              | TT                | 1946700168               |
| SNP_P3_178194_12899 | NW_004518896.1 | Scaffold4511 | 12899                   | AA                              | TT                | 1946700171               |
| SNP_P3_178195_22607 | NW_004518896.1 | Scaffold4511 | 22607                   | CC                              | GG                | 1946700173               |
| SNP_P3_178196_22734 | NW_004518896.1 | Scaffold4511 | 22734                   | AA                              | TT                | 1946700175               |
| SNP_P3_178197_22760 | NW_004518896.1 | Scaffold4511 | 22760                   | TT                              | CC                | 1946700177               |
| SNP_P3_178198_22828 | NW_004518896.1 | Scaffold4511 | 22828                   | AA                              | GG                | 1946700179               |
| SNP_P3_178200_23071 | NW_004518896.1 | Scaffold4511 | 23071                   | TT                              | CC                | 1946700181               |
| SNP_P3_178201_23188 | NW_004518896.1 | Scaffold4511 | 23188                   | AA                              | GG                | 1946700184               |
| SNP_P3_178202_23267 | NW_004518896.1 | Scaffold4511 | 23267                   | CC                              | TT                | 1946700186               |
| SNP_P3_178203_25308 | NW_004518896.1 | Scaffold4511 | 25308                   | TT                              | CC                | 1946700189               |
| SNP_P3_178204_25440 | NW_004518896.1 | Scaffold4511 | 25440                   | AA                              | TT                | 1946700191               |
| SNP_P3_178205_28661 | NW_004518896.1 | Scaffold4511 | 28661                   | AA                              | TT                | 1946700193               |
| SNP_P3_178207_43615 | NW_004518896.1 | Scaffold4511 | 43615                   | TT                              | CC                | 1946700195               |
| SNP_P3_178208_43617 | NW_004518896.1 | Scaffold4511 | 43617                   | TT                              | CC                | 1946700197               |

| SNPs IDs           | Chromosome IDs | Chromosomes  | Physical positions (bp) | CDC Frontier (Reference genome) | (Pusa 256 & HPNB) | NCBI SNPdb Accession IDs |
|--------------------|----------------|--------------|-------------------------|---------------------------------|-------------------|--------------------------|
| SNP_P3_178209_371  | NW_004518898.1 | Scaffold4513 | 371                     | GG                              | AA                | 1946700200               |
| SNP_P3_178210_3112 | NW_004518898.1 | Scaffold4513 | 3112                    | GG                              | TT                | 1946700202               |
| SNP_P3_178211_3140 | NW_004518898.1 | Scaffold4513 | 3140                    | TT                              | AA                | 1946700204               |
| SNP_P3_178212_3171 | NW_004518898.1 | Scaffold4513 | 3171                    | TT                              | AA                | 1946700206               |
| SNP_P3_178213_3257 | NW_004518898.1 | Scaffold4513 | 3257                    | GG                              | AA                | 1946700208               |
| SNP_P3_178214_3265 | NW_004518898.1 | Scaffold4513 | 3265                    | TT                              | AA                | 1946700210               |
| SNP_P3_178215_3271 | NW_004518898.1 | Scaffold4513 | 3271                    | TT                              | CC                | 1946700212               |
| SNP_P3_178216_3317 | NW_004518898.1 | Scaffold4513 | 3317                    | CC                              | AA                | 1946700215               |
| SNP_P3_178217_3354 | NW_004518898.1 | Scaffold4513 | 3354                    | CC                              | AA                | 1946700217               |
| SNP_P3_178218_3363 | NW_004518898.1 | Scaffold4513 | 3363                    | TT                              | CC                | 1946700219               |
| SNP_P3_178219_3512 | NW_004518898.1 | Scaffold4513 | 3512                    | TT                              | CC                | 1946700221               |
| SNP_P3_178220_3540 | NW_004518898.1 | Scaffold4513 | 3540                    | GG                              | AA                | 1946700223               |
| SNP_P3_178221_3541 | NW_004518898.1 | Scaffold4513 | 3541                    | CC                              | TT                | 1946700225               |
| SNP_P3_178222_3571 | NW_004518898.1 | Scaffold4513 | 3571                    | TT                              | CC                | 1946700227               |
| SNP_P3_178223_3641 | NW_004518898.1 | Scaffold4513 | 3641                    | CC                              | TT                | 1946700231               |
| SNP_P3_178224_3689 | NW_004518898.1 | Scaffold4513 | 3689                    | GG                              | AA                | 1946700233               |
| SNP_P3_178225_443  | NW_004518900.1 | Scaffold4515 | 443                     | CC                              | AA                | 1946700235               |
| SNP_P3_178226_456  | NW_004518900.1 | Scaffold4515 | 456                     | AA                              | CC                | 1946700237               |
| SNP_P3_178227_458  | NW_004518900.1 | Scaffold4515 | 458                     | TT                              | AA                | 1946700239               |
| SNP_P3_178228_475  | NW_004518900.1 | Scaffold4515 | 475                     | GG                              | AA                | 1946700241               |
| SNP_P3_178229_756  | NW_004518900.1 | Scaffold4515 | 756                     | GG                              | CC                | 1946700244               |
| SNP_P3_178230_450  | NW_004518904.1 | Scaffold4521 | 450                     | GG                              | AA                | 1946700246               |
| SNP_P3_178231_479  | NW_004518904.1 | Scaffold4521 | 479                     | GG                              | AA                | 1946700248               |
| SNP_P3_178232_2256 | NW_004518906.1 | Scaffold4524 | 2256                    | CC                              | TT                | 1946700250               |
| SNP_P3_178233_2288 | NW_004518906.1 | Scaffold4524 | 2288                    | TT                              | CC                | 1946700252               |
| SNP_P3_178234_3031 | NW_004518906.1 | Scaffold4524 | 3031                    | TT                              | GG                | 1946700255               |
| SNP_P3_178235_3047 | NW_004518906.1 | Scaffold4524 | 3047                    | TT                              | CC                | 1946700257               |
| SNP_P3_178236_400  | NW_004518907.1 | Scaffold4525 | 400                     | AA                              | TT                | 1946700259               |
| SNP_P3_178237_485  | NW_004518907.1 | Scaffold4525 | 485                     | GG                              | TT                | 1946700261               |
| SNP_P3_178238_520  | NW_004518907.1 | Scaffold4525 | 520                     | GG                              | AA                | 1946700263               |
| SNP_P3_178239_687  | NW_004518907.1 | Scaffold4525 | 687                     | GG                              | TT                | 1946700265               |
| SNP_P3_178240_819  | NW_004518907.1 | Scaffold4525 | 819                     | AA                              | GG                | 1946700268               |
| SNP_P3_178241_822  | NW_004518907.1 | Scaffold4525 | 822                     | TT                              | GG                | 1946700271               |
| SNP_P3_178242_942  | NW_004518907.1 | Scaffold4525 | 942                     | AA                              | GG                | 1946700273               |
| SNP_P3_178243_615  | NW_004518910.1 | Scaffold4528 | 615                     | CC                              | TT                | 1946700275               |
| SNP_P3_178244_857  | NW_004518910.1 | Scaffold4528 | 857                     | AA                              | TT                | 1946700277               |
| SNP_P3_178245_64   | NW_004518911.1 | Scaffold4529 | 64                      | AA                              | TT                | 1946700279               |
| SNP_P3_178246_96   | NW_004518911.1 | Scaffold4529 | 96                      | AA                              | GG                | 1946700282               |
| SNP_P3_178247_1540 | NW_004518913.1 | Scaffold4531 | 1540                    | AA                              | TT                | 1946700284               |
| SNP_P3_178248_1561 | NW_004518913.1 | Scaffold4531 | 1561                    | GG                              | TT                | 1946700286               |
| SNP_P3_178249_300  | NW_004518915.1 | Scaffold4533 | 300                     | TT                              | GG                | 1946700288               |
| SNP_P3_178250_2062 | NW_004518915.1 | Scaffold4533 | 2062                    | TT                              | GG                | 1946700290               |



| SNPs IDs            | Chromosome IDs | Chromosomes  | Physical positions (bp) | CDC Frontier (Reference genome) | (Pusa 256 & HPNB) | NCBI SNPdb Accession IDs |
|---------------------|----------------|--------------|-------------------------|---------------------------------|-------------------|--------------------------|
| SNP_P3_178251_23962 | NW_004518915.1 | Scaffold4533 | 23962                   | AA                              | GG                | 1946700293               |
| SNP_P3_178252_23971 | NW_004518915.1 | Scaffold4533 | 23971                   | TT                              | GG                | 1946700295               |
| SNP_P3_178253_23972 | NW_004518915.1 | Scaffold4533 | 23972                   | TT                              | GG                | 1946700297               |
| SNP_P3_178254_23974 | NW_004518915.1 | Scaffold4533 | 23974                   | CC                              | TT                | 1946700299               |
| SNP_P3_178255_24018 | NW_004518915.1 | Scaffold4533 | 24018                   | GG                              | AA                | 1946700301               |
| SNP_P3_178256_24029 | NW_004518915.1 | Scaffold4533 | 24029                   | TT                              | CC                | 1946700303               |
| SNP_P3_178257_155   | NW_004518916.1 | Scaffold4534 | 155                     | GG                              | AA                | 1946700306               |
| SNP_P3_178258_212   | NW_004518916.1 | Scaffold4534 | 212                     | AA                              | GG                | 1946700309               |
| SNP_P3_178259_346   | NW_004518916.1 | Scaffold4534 | 346                     | AA                              | CC                | 1946700311               |
| SNP_P3_178260_381   | NW_004518916.1 | Scaffold4534 | 381                     | AA                              | GG                | 1946700314               |
| SNP_P3_178261_476   | NW_004518916.1 | Scaffold4534 | 476                     | TT                              | AA                | 1946700316               |
| SNP_P3_178262_500   | NW_004518916.1 | Scaffold4534 | 500                     | AA                              | TT                | 1946700318               |
| SNP_P3_178263_710   | NW_004518916.1 | Scaffold4534 | 710                     | AA                              | TT                | 1946700321               |
| SNP_P3_178264_731   | NW_004518916.1 | Scaffold4534 | 731                     | GG                              | AA                | 1946700323               |
| SNP_P3_178265_734   | NW_004518916.1 | Scaffold4534 | 734                     | CC                              | TT                | 1946700325               |
| SNP_P3_178266_763   | NW_004518916.1 | Scaffold4534 | 763                     | TT                              | CC                | 1946700327               |
| SNP_P3_178267_836   | NW_004518916.1 | Scaffold4534 | 836                     | CC                              | AA                | 1946700329               |
| SNP_P3_178268_2876  | NW_004518916.1 | Scaffold4534 | 2876                    | TT                              | AA                | 1946700331               |
| SNP_P3_178269_3046  | NW_004518916.1 | Scaffold4534 | 3046                    | TT                              | AA                | 1946700334               |
| SNP_P3_178270_4757  | NW_004518916.1 | Scaffold4534 | 4757                    | GG                              | AA                | 1946700336               |
| SNP_P3_178271_4759  | NW_004518916.1 | Scaffold4534 | 4759                    | AA                              | TT                | 1946700338               |
| SNP_P3_178272_1402  | NW_004518919.1 | Scaffold4538 | 1402                    | AA                              | CC                | 1946700340               |
| SNP_P3_178273_1412  | NW_004518919.1 | Scaffold4538 | 1412                    | TT                              | AA                | 1946700342               |
| SNP_P3_178274_1413  | NW_004518919.1 | Scaffold4538 | 1413                    | AA                              | TT                | 1946700344               |
| SNP_P3_178275_1436  | NW_004518919.1 | Scaffold4538 | 1436                    | CC                              | TT                | 1946700346               |
| SNP_P3_178276_1439  | NW_004518919.1 | Scaffold4538 | 1439                    | GG                              | AA                | 1946700349               |
| SNP_P3_178277_1599  | NW_004518919.1 | Scaffold4538 | 1599                    | TT                              | CC                | 1946700351               |
| SNP_P3_178278_1603  | NW_004518919.1 | Scaffold4538 | 1603                    | GG                              | AA                | 1946700353               |
| SNP_P3_178279_1604  | NW_004518919.1 | Scaffold4538 | 1604                    | AA                              | GG                | 1946700356               |
| SNP_P3_178280_1635  | NW_004518919.1 | Scaffold4538 | 1635                    | TT                              | CC                | 1946700358               |
| SNP_P3_178281_1638  | NW_004518919.1 | Scaffold4538 | 1638                    | TT                              | AA                | 1946700360               |
| SNP_P3_178282_1656  | NW_004518919.1 | Scaffold4538 | 1656                    | AA                              | CC                | 1946700362               |
| SNP_P3_178283_1729  | NW_004518919.1 | Scaffold4538 | 1729                    | GG                              | TT                | 1946700364               |
| SNP_P3_178284_1738  | NW_004518919.1 | Scaffold4538 | 1738                    | AA                              | GG                | 1946700366               |
| SNP_P3_178285_1808  | NW_004518919.1 | Scaffold4538 | 1808                    | AA                              | GG                | 1946700368               |
| SNP_P3_178286_3446  | NW_004518919.1 | Scaffold4538 | 3446                    | AA                              | TT                | 1946700370               |
| SNP_P3_178287_3479  | NW_004518919.1 | Scaffold4538 | 3479                    | TT                              | AA                | 1946700372               |
| SNP_P3_178288_3630  | NW_004518919.1 | Scaffold4538 | 3630                    | TT                              | AA                | 1946700374               |
| SNP_P3_178289_4428  | NW_004518922.1 | Scaffold4543 | 4428                    | TT                              | AA                | 1946700377               |
| SNP_P3_178290_4615  | NW_004518922.1 | Scaffold4543 | 4615                    | TT                              | AA                | 1946700379               |
| SNP_P3_178291_5392  | NW_004518922.1 | Scaffold4543 | 5392                    | TT                              | CC                | 1946700381               |
| SNP_P3_178292_52    | NW_004518924.1 | Scaffold4549 | 52                      | GG                              | AA                | 1946700383               |

| SNPs IDs            | Chromosome IDs | Chromosomes  | Physical positions (bp) | CDC Frontier (Reference genome) | (Pusa 256 & HPNB) | NCBI SNPdb Accession IDs |
|---------------------|----------------|--------------|-------------------------|---------------------------------|-------------------|--------------------------|
| SNP_P3_178293_67    | NW_004518924.1 | Scaffold4549 | 67                      | GG                              | AA                | 1946700385               |
| SNP_P3_178294_69    | NW_004518924.1 | Scaffold4549 | 69                      | TT                              | AA                | 1946700387               |
| SNP_P3_178295_84    | NW_004518924.1 | Scaffold4549 | 84                      | AA                              | CC                | 1946700390               |
| SNP_P3_178296_91    | NW_004518924.1 | Scaffold4549 | 91                      | AA                              | GG                | 1946700393               |
| SNP_P3_178297_103   | NW_004518924.1 | Scaffold4549 | 103                     | AA                              | GG                | 1946700395               |
| SNP_P3_178298_141   | NW_004518924.1 | Scaffold4549 | 141                     | AA                              | GG                | 1946700397               |
| SNP_P3_178299_190   | NW_004518924.1 | Scaffold4549 | 190                     | CC                              | TT                | 1946700399               |
| SNP_P3_178300_196   | NW_004518924.1 | Scaffold4549 | 196                     | GG                              | AA                | 1946700401               |
| SNP_P3_178301_472   | NW_004518924.1 | Scaffold4549 | 472                     | AA                              | TT                | 1946700403               |
| SNP_P3_178302_483   | NW_004518924.1 | Scaffold4549 | 483                     | GG                              | AA                | 1946700405               |
| SNP_P3_178303_2681  | NW_004518926.1 | Scaffold4551 | 2681                    | TT                              | AA                | 1946700407               |
| SNP_P3_178304_2686  | NW_004518926.1 | Scaffold4551 | 2686                    | CC                              | GG                | 1946700410               |
| SNP_P3_178305_2713  | NW_004518926.1 | Scaffold4551 | 2713                    | AA                              | GG                | 1946700412               |
| SNP_P3_178306_2751  | NW_004518926.1 | Scaffold4551 | 2751                    | GG                              | CC                | 1946700414               |
| SNP_P3_178307_2780  | NW_004518926.1 | Scaffold4551 | 2780                    | AA                              | TT                | 1946700416               |
| SNP_P3_178308_3741  | NW_004518926.1 | Scaffold4551 | 3741                    | CC                              | GG                | 1946700418               |
| SNP_P3_178309_5784  | NW_004518926.1 | Scaffold4551 | 5784                    | TT                              | CC                | 1946700420               |
| SNP_P3_178310_6094  | NW_004518926.1 | Scaffold4551 | 6094                    | CC                              | AA                | 1946700422               |
| SNP_P3_178311_6439  | NW_004518926.1 | Scaffold4551 | 6439                    | AA                              | TT                | 1946700425               |
| SNP_P3_178313_8860  | NW_004518926.1 | Scaffold4551 | 8860                    | TT                              | CC                | 1946700427               |
| SNP_P3_178314_17106 | NW_004518926.1 | Scaffold4551 | 17106                   | TT                              | AA                | 1946700429               |
| SNP_P3_178315_17142 | NW_004518926.1 | Scaffold4551 | 17142                   | CC                              | AA                | 1946700431               |
| SNP_P3_178316_17192 | NW_004518926.1 | Scaffold4551 | 17192                   | TT                              | GG                | 1946700434               |
| SNP_P3_178317_18717 | NW_004518926.1 | Scaffold4551 | 18717                   | TT                              | GG                | 1946700436               |
| SNP_P3_178318_18790 | NW_004518926.1 | Scaffold4551 | 18790                   | CC                              | GG                | 1946700438               |
| SNP_P3_178319_18873 | NW_004518926.1 | Scaffold4551 | 18873                   | GG                              | CC                | 1946700441               |
| SNP_P3_178320_18876 | NW_004518926.1 | Scaffold4551 | 18876                   | AA                              | TT                | 1946700443               |
| SNP_P3_178321_18895 | NW_004518926.1 | Scaffold4551 | 18895                   | TT                              | AA                | 1946700445               |
| SNP_P3_178322_18902 | NW_004518926.1 | Scaffold4551 | 18902                   | TT                              | AA                | 1946700447               |
| SNP_P3_178323_19001 | NW_004518926.1 | Scaffold4551 | 19001                   | TT                              | AA                | 1946700449               |
| SNP_P3_178324_19006 | NW_004518926.1 | Scaffold4551 | 19006                   | AA                              | GG                | 1946700451               |
| SNP_P3_178325_19020 | NW_004518926.1 | Scaffold4551 | 19020                   | GG                              | TT                | 1946700454               |
| SNP_P3_178326_19065 | NW_004518926.1 | Scaffold4551 | 19065                   | GG                              | AA                | 1946700457               |
| SNP_P3_178327_19066 | NW_004518926.1 | Scaffold4551 | 19066                   | AA                              | CC                | 1946700459               |
| SNP_P3_178328_19076 | NW_004518926.1 | Scaffold4551 | 19076                   | AA                              | TT                | 1946700462               |
| SNP_P3_178329_19122 | NW_004518926.1 | Scaffold4551 | 19122                   | CC                              | TT                | 1946700464               |
| SNP_P3_178330_19146 | NW_004518926.1 | Scaffold4551 | 19146                   | TT                              | CC                | 1946700466               |
| SNP_P3_178331_19148 | NW_004518926.1 | Scaffold4551 | 19148                   | AA                              | GG                | 1946700468               |
| SNP_P3_178332_19154 | NW_004518926.1 | Scaffold4551 | 19154                   | GG                              | TT                | 1946700470               |
| SNP_P3_178333_19157 | NW_004518926.1 | Scaffold4551 | 19157                   | TT                              | CC                | 1946700473               |
| SNP_P3_178334_19170 | NW_004518926.1 | Scaffold4551 | 19170                   | CC                              | TT                | 1946700475               |
| SNP_P3_178335_19193 | NW_004518926.1 | Scaffold4551 | 19193                   | AA                              | TT                | 1946700478               |

| SNPs IDs            | Chromosome IDs | Chromosomes  | Physical positions (bp) | CDC Frontier (Reference genome) | (Pusa 256 & HPNB) | NCBI SNPdb Accession IDs |
|---------------------|----------------|--------------|-------------------------|---------------------------------|-------------------|--------------------------|
| SNP_P3_178336_2421  | NW_004518928.1 | Scaffold4554 | 2421                    | GG                              | AA                | 1946700480               |
| SNP_P3_178337_2422  | NW_004518928.1 | Scaffold4554 | 2422                    | CC                              | TT                | 1946700482               |
| SNP_P3_178338_374   | NW_004518930.1 | Scaffold4557 | 374                     | TT                              | CC                | 1946700485               |
| SNP_P3_178339_563   | NW_004518930.1 | Scaffold4557 | 563                     | AA                              | CC                | 1946700487               |
| SNP_P3_178340_566   | NW_004518930.1 | Scaffold4557 | 566                     | TT                              | CC                | 1946700489               |
| SNP_P3_178341_581   | NW_004518930.1 | Scaffold4557 | 581                     | TT                              | CC                | 1946700491               |
| SNP_P3_178342_807   | NW_004518930.1 | Scaffold4557 | 807                     | TT                              | AA                | 1946700493               |
| SNP_P3_178343_823   | NW_004518930.1 | Scaffold4557 | 823                     | TT                              | GG                | 1946700496               |
| SNP_P3_178344_2296  | NW_004518938.1 | Scaffold4570 | 2296                    | TT                              | CC                | 1946700498               |
| SNP_P3_178345_2305  | NW_004518938.1 | Scaffold4570 | 2305                    | AA                              | GG                | 1946700500               |
| SNP_P3_178346_10463 | NW_004518938.1 | Scaffold4570 | 10463                   | AA                              | CC                | 1946700502               |
| SNP_P3_178347_10620 | NW_004518938.1 | Scaffold4570 | 10620                   | CC                              | TT                | 1946700504               |
| SNP_P3_178348_10631 | NW_004518938.1 | Scaffold4570 | 10631                   | AA                              | TT                | 1946700506               |
| SNP_P3_178349_10686 | NW_004518938.1 | Scaffold4570 | 10686                   | AA                              | GG                | 1946700508               |
| SNP_P3_178350_235   | NW_004518939.1 | Scaffold4572 | 235                     | AA                              | TT                | 1946700511               |
| SNP_P3_178351_378   | NW_004518939.1 | Scaffold4572 | 378                     | AA                              | TT                | 1946700513               |
| SNP_P3_178352_541   | NW_004518939.1 | Scaffold4572 | 541                     | AA                              | TT                | 1946700515               |
| SNP_P3_178353_599   | NW_004518939.1 | Scaffold4572 | 599                     | AA                              | TT                | 1946700518               |
| SNP_P3_178354_679   | NW_004518939.1 | Scaffold4572 | 679                     | AA                              | TT                | 1946700520               |
| SNP_P3_178355_1951  | NW_004518939.1 | Scaffold4572 | 1951                    | CC                              | AA                | 1946700522               |
| SNP_P3_178356_2000  | NW_004518939.1 | Scaffold4572 | 2000                    | TT                              | CC                | 1946700524               |
| SNP_P3_178357_2298  | NW_004518939.1 | Scaffold4572 | 2298                    | CC                              | GG                | 1946700526               |
| SNP_P3_178358_2300  | NW_004518939.1 | Scaffold4572 | 2300                    | TT                              | CC                | 1946700529               |
| SNP_P3_178359_2337  | NW_004518939.1 | Scaffold4572 | 2337                    | GG                              | CC                | 1946700531               |
| SNP_P3_178360_2344  | NW_004518939.1 | Scaffold4572 | 2344                    | CC                              | AA                | 1946700533               |
| SNP_P3_178361_2422  | NW_004518939.1 | Scaffold4572 | 2422                    | GG                              | AA                | 1946700535               |
| SNP_P3_178362_2438  | NW_004518939.1 | Scaffold4572 | 2438                    | AA                              | TT                | 1946700537               |
| SNP_P3_178363_2443  | NW_004518939.1 | Scaffold4572 | 2443                    | AA                              | CC                | 1946700539               |
| SNP_P3_178364_4169  | NW_004518939.1 | Scaffold4572 | 4169                    | TT                              | GG                | 1946700541               |
| SNP_P3_178365_8729  | NW_004518939.1 | Scaffold4572 | 8729                    | CC                              | AA                | 1946700545               |
| SNP_P3_178366_8916  | NW_004518939.1 | Scaffold4572 | 8916                    | TT                              | CC                | 1946700547               |
| SNP_P3_178367_8979  | NW_004518939.1 | Scaffold4572 | 8979                    | GG                              | CC                | 1946700550               |
| SNP_P3_178368_8987  | NW_004518939.1 | Scaffold4572 | 8987                    | TT                              | GG                | 1946700552               |
| SNP_P3_178369_9811  | NW_004518939.1 | Scaffold4572 | 9811                    | TT                              | AA                | 1946700554               |
| SNP_P3_178370_9846  | NW_004518939.1 | Scaffold4572 | 9846                    | CC                              | TT                | 1946700557               |
| SNP_P3_178371_10381 | NW_004518939.1 | Scaffold4572 | 10381                   | TT                              | CC                | 1946700559               |
| SNP_P3_178372_10431 | NW_004518939.1 | Scaffold4572 | 10431                   | GG                              | CC                | 1946700561               |
| SNP_P3_178373_10445 | NW_004518939.1 | Scaffold4572 | 10445                   | TT                              | GG                | 1946700563               |
| SNP_P3_178374_954   | NW_004518940.1 | Scaffold4573 | 954                     | GG                              | AA                | 1946700565               |
| SNP_P3_178375_6576  | NW_004518940.1 | Scaffold4573 | 6576                    | CC                              | AA                | 1946700567               |
| SNP_P3_178376_10803 | NW_004518940.1 | Scaffold4573 | 10803                   | CC                              | GG                | 1946700569               |
| SNP_P3_178377_10825 | NW_004518940.1 | Scaffold4573 | 10825                   | GG                              | AA                | 1946700572               |

| SNPs IDs            | Chromosome IDs | Chromosomes  | Physical positions (bp) | CDC Frontier (Reference genome) | (Pusa 256 & HPNB) | NCBI SNPdb Accession IDs |
|---------------------|----------------|--------------|-------------------------|---------------------------------|-------------------|--------------------------|
| SNP_P3_178378_11210 | NW_004518940.1 | Scaffold4573 | 11210                   | GG                              | TT                | 1946700574               |
| SNP_P3_178379_794   | NW_004518941.1 | Scaffold4574 | 794                     | AA                              | GG                | 1946700576               |
| SNP_P3_178380_23550 | NW_004518943.1 | Scaffold4576 | 23550                   | CC                              | GG                | 1946700578               |
| SNP_P3_178381_566   | NW_004518945.1 | Scaffold4578 | 566                     | GG                              | CC                | 1946700580               |
| SNP_P3_178382_840   | NW_004518945.1 | Scaffold4578 | 840                     | TT                              | GG                | 1946700582               |
| SNP_P3_178383_875   | NW_004518945.1 | Scaffold4578 | 875                     | GG                              | AA                | 1946700584               |
| SNP_P3_178384_1070  | NW_004518947.1 | Scaffold4582 | 1070                    | GG                              | TT                | 1946700586               |
| SNP_P3_178385_1097  | NW_004518947.1 | Scaffold4582 | 1097                    | AA                              | TT                | 1946700588               |
| SNP_P3_178386_6078  | NW_004518947.1 | Scaffold4582 | 6078                    | GG                              | CC                | 1946700590               |
| SNP_P3_178387_6119  | NW_004518947.1 | Scaffold4582 | 6119                    | TT                              | CC                | 1946700592               |
| SNP_P3_178388_6345  | NW_004518947.1 | Scaffold4582 | 6345                    | TT                              | AA                | 1946700594               |
| SNP_P3_178389_6371  | NW_004518947.1 | Scaffold4582 | 6371                    | AA                              | CC                | 1946700597               |
| SNP_P3_178390_6407  | NW_004518947.1 | Scaffold4582 | 6407                    | AA                              | GG                | 1946700599               |
| SNP_P3_178391_6500  | NW_004518947.1 | Scaffold4582 | 6500                    | CC                              | GG                | 1946700602               |
| SNP_P3_178392_6581  | NW_004518947.1 | Scaffold4582 | 6581                    | GG                              | AA                | 1946700604               |
| SNP_P3_178393_6755  | NW_004518947.1 | Scaffold4582 | 6755                    | TT                              | CC                | 1946700606               |
| SNP_P3_178394_7072  | NW_004518947.1 | Scaffold4582 | 7072                    | CC                              | TT                | 1946700608               |
| SNP_P3_178395_7183  | NW_004518947.1 | Scaffold4582 | 7183                    | GG                              | AA                | 1946700610               |
| SNP_P3_178396_7218  | NW_004518947.1 | Scaffold4582 | 7218                    | AA                              | GG                | 1946700612               |
| SNP_P3_178397_7220  | NW_004518947.1 | Scaffold4582 | 7220                    | CC                              | AA                | 1946700614               |
| SNP_P3_178398_7249  | NW_004518947.1 | Scaffold4582 | 7249                    | CC                              | AA                | 1946700617               |
| SNP_P3_178399_7295  | NW_004518947.1 | Scaffold4582 | 7295                    | TT                              | CC                | 1946700619               |
| SNP_P3_178400_7403  | NW_004518947.1 | Scaffold4582 | 7403                    | CC                              | AA                | 1946700621               |
| SNP_P3_178401_7407  | NW_004518947.1 | Scaffold4582 | 7407                    | CC                              | TT                | 1946700623               |
| SNP_P3_178402_7492  | NW_004518947.1 | Scaffold4582 | 7492                    | TT                              | CC                | 1946700625               |
| SNP_P3_178403_7570  | NW_004518947.1 | Scaffold4582 | 7570                    | TT                              | CC                | 1946700627               |
| SNP_P3_178405_7685  | NW_004518947.1 | Scaffold4582 | 7685                    | TT                              | CC                | 1946700629               |
| SNP_P3_178406_7692  | NW_004518947.1 | Scaffold4582 | 7692                    | CC                              | TT                | 1946700631               |
| SNP_P3_178407_7724  | NW_004518947.1 | Scaffold4582 | 7724                    | TT                              | CC                | 1946700633               |
| SNP_P3_178408_7732  | NW_004518947.1 | Scaffold4582 | 7732                    | GG                              | AA                | 1946700635               |
| SNP_P3_178409_7952  | NW_004518947.1 | Scaffold4582 | 7952                    | AA                              | GG                | 1946700639               |
| SNP_P3_178410_7979  | NW_004518947.1 | Scaffold4582 | 7979                    | TT                              | CC                | 1946700641               |
| SNP_P3_178411_9112  | NW_004518947.1 | Scaffold4582 | 9112                    | GG                              | TT                | 1946700643               |
| SNP_P3_178412_9401  | NW_004518947.1 | Scaffold4582 | 9401                    | CC                              | GG                | 1946700645               |
| SNP_P3_178413_11346 | NW_004518947.1 | Scaffold4582 | 11346                   | GG                              | TT                | 1946700648               |
| SNP_P3_178414_13626 | NW_004518947.1 | Scaffold4582 | 13626                   | TT                              | AA                | 1946700650               |
| SNP_P3_178415_1740  | NW_004518950.1 | Scaffold4586 | 1740                    | TT                              | CC                | 1946700652               |
| SNP_P3_178416_2715  | NW_004518955.1 | Scaffold4591 | 2715                    | GG                              | TT                | 1946700654               |
| SNP_P3_178417_5592  | NW_004518955.1 | Scaffold4591 | 5592                    | TT                              | AA                | 1946700656               |
| SNP_P3_178418_5599  | NW_004518955.1 | Scaffold4591 | 5599                    | AA                              | CC                | 1946700658               |
| SNP_P3_178419_6397  | NW_004518955.1 | Scaffold4591 | 6397                    | AA                              | TT                | 1946700660               |
| SNP_P3_178420_6521  | NW_004518955.1 | Scaffold4591 | 6521                    | TT                              | AA                | 1946700662               |

| SNPs IDs            | Chromosome IDs | Chromosomes  | Physical positions (bp) | CDC Frontier (Reference genome) | (Pusa 256 & HPNB) | NCBI SNPdb Accession IDs |
|---------------------|----------------|--------------|-------------------------|---------------------------------|-------------------|--------------------------|
| SNP_P3_178421_6723  | NW_004518955.1 | Scaffold4591 | 6723                    | AA                              | GG                | 1946700664               |
| SNP_P3_178422_7048  | NW_004518955.1 | Scaffold4591 | 7048                    | TT                              | CC                | 1946700668               |
| SNP_P3_178423_1308  | NW_004518962.1 | Scaffold4600 | 1308                    | GG                              | TT                | 1946700670               |
| SNP_P3_178424_1332  | NW_004518962.1 | Scaffold4600 | 1332                    | AA                              | GG                | 1946700672               |
| SNP_P3_178425_1407  | NW_004518962.1 | Scaffold4600 | 1407                    | TT                              | CC                | 1946700674               |
| SNP_P3_178426_1650  | NW_004518962.1 | Scaffold4600 | 1650                    | AA                              | GG                | 1946700676               |
| SNP_P3_178427_1770  | NW_004518962.1 | Scaffold4600 | 1770                    | GG                              | AA                | 1946700679               |
| SNP_P3_178428_1825  | NW_004518962.1 | Scaffold4600 | 1825                    | GG                              | TT                | 1946700681               |
| SNP_P3_178429_5571  | NW_004518963.1 | Scaffold4602 | 5571                    | CC                              | TT                | 1946700683               |
| SNP_P3_178430_5608  | NW_004518963.1 | Scaffold4602 | 5608                    | TT                              | CC                | 1946700684               |
| SNP_P3_178431_5613  | NW_004518963.1 | Scaffold4602 | 5613                    | GG                              | AA                | 1946700685               |
| SNP_P3_178432_5846  | NW_004518963.1 | Scaffold4602 | 5846                    | TT                              | CC                | 1946700686               |
| SNP_P3_178433_5873  | NW_004518963.1 | Scaffold4602 | 5873                    | CC                              | TT                | 1946700687               |
| SNP_P3_178434_5883  | NW_004518963.1 | Scaffold4602 | 5883                    | AA                              | GG                | 1946700689               |
| SNP_P3_178435_7369  | NW_004518963.1 | Scaffold4602 | 7369                    | CC                              | AA                | 1946700691               |
| SNP_P3_178436_7374  | NW_004518963.1 | Scaffold4602 | 7374                    | AA                              | GG                | 1946700693               |
| SNP_P3_178437_7400  | NW_004518963.1 | Scaffold4602 | 7400                    | GG                              | AA                | 1946700696               |
| SNP_P3_178438_7491  | NW_004518963.1 | Scaffold4602 | 7491                    | AA                              | GG                | 1946700698               |
| SNP_P3_178439_7744  | NW_004518963.1 | Scaffold4602 | 7744                    | AA                              | GG                | 1946700700               |
| SNP_P3_178440_7776  | NW_004518963.1 | Scaffold4602 | 7776                    | AA                              | CC                | 1946700704               |
| SNP_P3_178441_7826  | NW_004518963.1 | Scaffold4602 | 7826                    | TT                              | CC                | 1946700706               |
| SNP_P3_178442_7878  | NW_004518963.1 | Scaffold4602 | 7878                    | AA                              | GG                | 1946700708               |
| SNP_P3_178443_7947  | NW_004518963.1 | Scaffold4602 | 7947                    | AA                              | CC                | 1946700711               |
| SNP_P3_178444_8123  | NW_004518963.1 | Scaffold4602 | 8123                    | TT                              | CC                | 1946700713               |
| SNP_P3_178445_8256  | NW_004518963.1 | Scaffold4602 | 8256                    | GG                              | AA                | 1946700715               |
| SNP_P3_178446_8322  | NW_004518963.1 | Scaffold4602 | 8322                    | AA                              | GG                | 1946700718               |
| SNP_P3_178447_8329  | NW_004518963.1 | Scaffold4602 | 8329                    | AA                              | GG                | 1946700720               |
| SNP_P3_178448_10115 | NW_004518963.1 | Scaffold4602 | 10115                   | AA                              | GG                | 1946700722               |
| SNP_P3_178449_19335 | NW_004518963.1 | Scaffold4602 | 19335                   | GG                              | AA                | 1946700724               |
| SNP_P3_178450_19339 | NW_004518963.1 | Scaffold4602 | 19339                   | CC                              | GG                | 1946700726               |
| SNP_P3_178451_19359 | NW_004518963.1 | Scaffold4602 | 19359                   | TT                              | GG                | 1946700728               |
| SNP_P3_178452_19361 | NW_004518963.1 | Scaffold4602 | 19361                   | AA                              | GG                | 1946700731               |
| SNP_P3_178453_19417 | NW_004518963.1 | Scaffold4602 | 19417                   | GG                              | AA                | 1946700733               |
| SNP_P3_178454_19461 | NW_004518963.1 | Scaffold4602 | 19461                   | CC                              | TT                | 1946700735               |
| SNP_P3_178456_97    | NW_004518965.1 | Scaffold4605 | 97                      | CC                              | AA                | 1946700737               |
| SNP_P3_178457_17131 | NW_004518965.1 | Scaffold4605 | 17131                   | AA                              | GG                | 1946700739               |
| SNP_P3_178458_21853 | NW_004518965.1 | Scaffold4605 | 21853                   | TT                              | GG                | 1946700742               |
| SNP_P3_178459_22248 | NW_004518965.1 | Scaffold4605 | 22248                   | GG                              | CC                | 1946700744               |
| SNP_P3_178460_23232 | NW_004518965.1 | Scaffold4605 | 23232                   | GG                              | CC                | 1946700746               |
| SNP_P3_178461_23321 | NW_004518965.1 | Scaffold4605 | 23321                   | GG                              | AA                | 1946700748               |
| SNP_P3_178462_23346 | NW_004518965.1 | Scaffold4605 | 23346                   | TT                              | GG                | 1946700750               |
| SNP_P3_178463_24207 | NW_004518965.1 | Scaffold4605 | 24207                   | GG                              | AA                | 1946700752               |

| SNPs IDs            | Chromosome IDs | Chromosomes  | Physical positions (bp) | CDC Frontier (Reference genome) | (Pusa 256 & HPNB) | NCBI SNPdb Accession IDs |
|---------------------|----------------|--------------|-------------------------|---------------------------------|-------------------|--------------------------|
| SNP_P3_178464_24378 | NW_004518965.1 | Scaffold4605 | 24378                   | TT                              | GG                | 1946700754               |
| SNP_P3_178465_24417 | NW_004518965.1 | Scaffold4605 | 24417                   | GG                              | AA                | 1946700756               |
| SNP_P3_178466_24446 | NW_004518965.1 | Scaffold4605 | 24446                   | GG                              | CC                | 1946700758               |
| SNP_P3_178467_24611 | NW_004518965.1 | Scaffold4605 | 24611                   | CC                              | GG                | 1946700760               |
| SNP_P3_178468_24655 | NW_004518965.1 | Scaffold4605 | 24655                   | GG                              | AA                | 1946700762               |
| SNP_P3_178469_24769 | NW_004518965.1 | Scaffold4605 | 24769                   | AA                              | GG                | 1946700765               |
| SNP_P3_178471_24879 | NW_004518965.1 | Scaffold4605 | 24879                   | TT                              | AA                | 1946700767               |
| SNP_P3_178473_24934 | NW_004518965.1 | Scaffold4605 | 24934                   | TT                              | AA                | 1946700769               |
| SNP_P3_178474_24970 | NW_004518965.1 | Scaffold4605 | 24970                   | CC                              | AA                | 1946700771               |
| SNP_P3_178475_25308 | NW_004518965.1 | Scaffold4605 | 25308                   | GG                              | AA                | 1946700773               |
| SNP_P3_178476_25353 | NW_004518965.1 | Scaffold4605 | 25353                   | AA                              | CC                | 1946700775               |
| SNP_P3_178477_4327  | NW_004518966.1 | Scaffold4607 | 4327                    | TT                              | GG                | 1946700777               |
| SNP_P3_178478_4368  | NW_004518966.1 | Scaffold4607 | 4368                    | AA                              | CC                | 1946700779               |
| SNP_P3_178479_4381  | NW_004518966.1 | Scaffold4607 | 4381                    | TT                              | CC                | 1946700781               |
| SNP_P3_178480_4387  | NW_004518966.1 | Scaffold4607 | 4387                    | CC                              | AA                | 1946700783               |
| SNP_P3_178481_4463  | NW_004518966.1 | Scaffold4607 | 4463                    | TT                              | CC                | 1946700785               |
| SNP_P3_178482_1981  | NW_004518970.1 | Scaffold4615 | 1981                    | TT                              | AA                | 1946700787               |
| SNP_P3_178483_2294  | NW_004518970.1 | Scaffold4615 | 2294                    | AA                              | GG                | 1946700789               |
| SNP_P3_178484_20687 | NW_004518972.1 | Scaffold4620 | 20687                   | TT                              | AA                | 1946700791               |
| SNP_P3_178485_321   | NW_004518978.1 | Scaffold4628 | 321                     | TT                              | CC                | 1946700793               |
| SNP_P3_178486_511   | NW_004518978.1 | Scaffold4628 | 511                     | GG                              | TT                | 1946700795               |
| SNP_P3_178487_560   | NW_004518978.1 | Scaffold4628 | 560                     | TT                              | CC                | 1946700797               |
| SNP_P3_178488_747   | NW_004518978.1 | Scaffold4628 | 747                     | CC                              | TT                | 1946700799               |
| SNP_P3_178489_1157  | NW_004518979.1 | Scaffold4629 | 1157                    | TT                              | CC                | 1946700802               |
| SNP_P3_178490_1158  | NW_004518979.1 | Scaffold4629 | 1158                    | AA                              | GG                | 1946700804               |
| SNP_P3_178491_1166  | NW_004518979.1 | Scaffold4629 | 1166                    | AA                              | GG                | 1946700806               |
| SNP_P3_178492_5827  | NW_004518979.1 | Scaffold4629 | 5827                    | CC                              | TT                | 1946700808               |
| SNP_P3_178493_5947  | NW_004518979.1 | Scaffold4629 | 5947                    | CC                              | TT                | 1946700810               |
| SNP_P3_178494_5975  | NW_004518979.1 | Scaffold4629 | 5975                    | GG                              | AA                | 1946700812               |
| SNP_P3_178495_6055  | NW_004518979.1 | Scaffold4629 | 6055                    | GG                              | AA                | 1946700814               |
| SNP_P3_178496_6094  | NW_004518979.1 | Scaffold4629 | 6094                    | CC                              | TT                | 1946700817               |
| SNP_P3_178497_6140  | NW_004518979.1 | Scaffold4629 | 6140                    | AA                              | GG                | 1946700819               |
| SNP_P3_178498_6204  | NW_004518979.1 | Scaffold4629 | 6204                    | GG                              | AA                | 1946700822               |
| SNP_P3_178499_874   | NW_004518981.1 | Scaffold4633 | 874                     | AA                              | GG                | 1946700824               |
| SNP_P3_178500_1398  | NW_004518981.1 | Scaffold4633 | 1398                    | AA                              | TT                | 1946700826               |
| SNP_P3_178501_1405  | NW_004518981.1 | Scaffold4633 | 1405                    | AA                              | TT                | 1946700828               |
| SNP_P3_178502_1618  | NW_004518981.1 | Scaffold4633 | 1618                    | AA                              | GG                | 1946700830               |
| SNP_P3_178503_1636  | NW_004518981.1 | Scaffold4633 | 1636                    | AA                              | TT                | 1946700832               |
| SNP_P3_178504_1887  | NW_004518981.1 | Scaffold4633 | 1887                    | AA                              | CC                | 1946700834               |
| SNP_P3_178505_1910  | NW_004518981.1 | Scaffold4633 | 1910                    | GG                              | AA                | 1946700836               |
| SNP_P3_178506_1324  | NW_004518982.1 | Scaffold4634 | 1324                    | CC                              | GG                | 1946700839               |
| SNP_P3_178507_1343  | NW_004518982.1 | Scaffold4634 | 1343                    | GG                              | AA                | 1946700841               |

| SNPs IDs            | Chromosome IDs | Chromosomes  | Physical positions (bp) | CDC Frontier (Reference genome) | (Pusa 256 & HPNB) | NCBI SNPdb Accession IDs |
|---------------------|----------------|--------------|-------------------------|---------------------------------|-------------------|--------------------------|
| SNP_P3_178508_1607  | NW_004518982.1 | Scaffold4634 | 1607                    | CC                              | AA                | 1946700843               |
| SNP_P3_178509_1615  | NW_004518982.1 | Scaffold4634 | 1615                    | AA                              | GG                | 1946700845               |
| SNP_P3_178510_1850  | NW_004518982.1 | Scaffold4634 | 1850                    | TT                              | CC                | 1946700847               |
| SNP_P3_178511_6459  | NW_004518982.1 | Scaffold4634 | 6459                    | CC                              | GG                | 1946700849               |
| SNP_P3_178512_6655  | NW_004518982.1 | Scaffold4634 | 6655                    | TT                              | CC                | 1946700851               |
| SNP_P3_178513_6851  | NW_004518982.1 | Scaffold4634 | 6851                    | TT                              | AA                | 1946700853               |
| SNP_P3_178514_3578  | NW_004518983.1 | Scaffold4635 | 3578                    | CC                              | TT                | 1946700856               |
| SNP_P3_178515_379   | NW_004518986.1 | Scaffold4638 | 379                     | AA                              | GG                | 1946700858               |
| SNP_P3_178516_729   | NW_004518986.1 | Scaffold4638 | 729                     | AA                              | TT                | 1946700861               |
| SNP_P3_178517_774   | NW_004518986.1 | Scaffold4638 | 774                     | GG                              | AA                | 1946700864               |
| SNP_P3_178518_795   | NW_004518986.1 | Scaffold4638 | 795                     | TT                              | CC                | 1946700866               |
| SNP_P3_178519_927   | NW_004518986.1 | Scaffold4638 | 927                     | AA                              | TT                | 1946700868               |
| SNP_P3_178520_510   | NW_004518989.1 | Scaffold4642 | 510                     | GG                              | AA                | 1946700870               |
| SNP_P3_178521_985   | NW_004518989.1 | Scaffold4642 | 985                     | CC                              | GG                | 1946700872               |
| SNP_P3_178522_1037  | NW_004518989.1 | Scaffold4642 | 1037                    | CC                              | TT                | 1946700874               |
| SNP_P3_178523_1070  | NW_004518989.1 | Scaffold4642 | 1070                    | GG                              | CC                | 1946700876               |
| SNP_P3_178524_1247  | NW_004518989.1 | Scaffold4642 | 1247                    | GG                              | TT                | 1946700879               |
| SNP_P3_178525_1276  | NW_004518989.1 | Scaffold4642 | 1276                    | CC                              | TT                | 1946700881               |
| SNP_P3_178526_1295  | NW_004518989.1 | Scaffold4642 | 1295                    | AA                              | CC                | 1946700883               |
| SNP_P3_178527_1781  | NW_004518989.1 | Scaffold4642 | 1781                    | CC                              | TT                | 1946700885               |
| SNP_P3_178528_1977  | NW_004518989.1 | Scaffold4642 | 1977                    | AA                              | TT                | 1946700887               |
| SNP_P3_178529_3792  | NW_004518989.1 | Scaffold4642 | 3792                    | TT                              | GG                | 1946700890               |
| SNP_P3_178530_3995  | NW_004518989.1 | Scaffold4642 | 3995                    | TT                              | GG                | 1946700893               |
| SNP_P3_178531_3996  | NW_004518989.1 | Scaffold4642 | 3996                    | GG                              | AA                | 1946700895               |
| SNP_P3_178532_3997  | NW_004518989.1 | Scaffold4642 | 3997                    | AA                              | GG                | 1946700897               |
| SNP_P3_178533_24110 | NW_004518990.1 | Scaffold4643 | 24110                   | GG                              | AA                | 1946700900               |
| SNP_P3_178534_24561 | NW_004518990.1 | Scaffold4643 | 24561                   | AA                              | TT                | 1946700902               |
| SNP_P3_178535_24581 | NW_004518990.1 | Scaffold4643 | 24581                   | TT                              | CC                | 1946700904               |
| SNP_P3_178536_24610 | NW_004518990.1 | Scaffold4643 | 24610                   | CC                              | TT                | 1946700906               |
| SNP_P3_178537_24629 | NW_004518990.1 | Scaffold4643 | 24629                   | CC                              | TT                | 1946700908               |
| SNP_P3_178538_25050 | NW_004518990.1 | Scaffold4643 | 25050                   | AA                              | TT                | 1946700910               |
| SNP_P3_178539_61    | NW_004518992.1 | Scaffold4647 | 61                      | GG                              | TT                | 1946700913               |
| SNP_P3_178540_360   | NW_004518992.1 | Scaffold4647 | 360                     | AA                              | TT                | 1946700915               |
| SNP_P3_178541_361   | NW_004518992.1 | Scaffold4647 | 361                     | CC                              | TT                | 1946700917               |
| SNP_P3_178542_376   | NW_004518992.1 | Scaffold4647 | 376                     | TT                              | AA                | 1946700919               |
| SNP_P3_178543_547   | NW_004518992.1 | Scaffold4647 | 547                     | AA                              | GG                | 1946700921               |
| SNP_P3_178544_1190  | NW_004518992.1 | Scaffold4647 | 1190                    | TT                              | CC                | 1946700923               |
| SNP_P3_178545_1195  | NW_004518992.1 | Scaffold4647 | 1195                    | GG                              | AA                | 1946700926               |
| SNP_P3_178546_1464  | NW_004518992.1 | Scaffold4647 | 1464                    | CC                              | TT                | 1946700928               |
| SNP_P3_178547_1485  | NW_004518992.1 | Scaffold4647 | 1485                    | AA                              | GG                | 1946700930               |
| SNP_P3_178548_1645  | NW_004518992.1 | Scaffold4647 | 1645                    | GG                              | AA                | 1946700933               |
| SNP_P3_178549_1646  | NW_004518992.1 | Scaffold4647 | 1646                    | TT                              | AA                | 1946700935               |

| SNPs IDs            | Chromosome IDs | Chromosomes  | Physical positions (bp) | CDC Frontier (Reference genome) | (Pusa 256 & HPNB) | NCBI SNPdb Accession IDs |
|---------------------|----------------|--------------|-------------------------|---------------------------------|-------------------|--------------------------|
| SNP_P3_178550_1683  | NW_004518992.1 | Scaffold4647 | 1683                    | GG                              | CC                | 1946700937               |
| SNP_P3_178551_1684  | NW_004518992.1 | Scaffold4647 | 1684                    | CC                              | GG                | 1946700939               |
| SNP_P3_178552_1854  | NW_004518992.1 | Scaffold4647 | 1854                    | AA                              | GG                | 1946700942               |
| SNP_P3_178553_1987  | NW_004518992.1 | Scaffold4647 | 1987                    | TT                              | AA                | 1946700944               |
| SNP_P3_178554_2502  | NW_004518992.1 | Scaffold4647 | 2502                    | GG                              | AA                | 1946700946               |
| SNP_P3_178555_2774  | NW_004518992.1 | Scaffold4647 | 2774                    | CC                              | GG                | 1946700948               |
| SNP_P3_178556_2887  | NW_004518992.1 | Scaffold4647 | 2887                    | CC                              | GG                | 1946700950               |
| SNP_P3_178557_5492  | NW_004518992.1 | Scaffold4647 | 5492                    | AA                              | TT                | 1946700952               |
| SNP_P3_178558_6712  | NW_004518992.1 | Scaffold4647 | 6712                    | CC                              | TT                | 1946700955               |
| SNP_P3_178559_6806  | NW_004518992.1 | Scaffold4647 | 6806                    | CC                              | TT                | 1946700957               |
| SNP_P3_178560_6814  | NW_004518992.1 | Scaffold4647 | 6814                    | CC                              | AA                | 1946700959               |
| SNP_P3_178561_595   | NW_004518994.1 | Scaffold4651 | 595                     | AA                              | GG                | 1946700961               |
| SNP_P3_178562_926   | NW_004518994.1 | Scaffold4651 | 926                     | TT                              | CC                | 1946700963               |
| SNP_P3_178563_779   | NW_004518996.1 | Scaffold4654 | 779                     | GG                              | TT                | 1946700965               |
| SNP_P3_178565_3220  | NW_004519000.1 | Scaffold4662 | 3220                    | TT                              | GG                | 1946700968               |
| SNP_P3_178566_3224  | NW_004519000.1 | Scaffold4662 | 3224                    | AA                              | CC                | 1946700970               |
| SNP_P3_178567_3231  | NW_004519000.1 | Scaffold4662 | 3231                    | TT                              | GG                | 1946700972               |
| SNP_P3_178568_3233  | NW_004519000.1 | Scaffold4662 | 3233                    | CC                              | AA                | 1946700974               |
| SNP_P3_178569_3236  | NW_004519000.1 | Scaffold4662 | 3236                    | CC                              | TT                | 1946700976               |
| SNP_P3_178570_28068 | NW_004519000.1 | Scaffold4662 | 28068                   | GG                              | AA                | 1946700979               |
| SNP_P3_178571_28439 | NW_004519000.1 | Scaffold4662 | 28439                   | TT                              | CC                | 1946700981               |
| SNP_P3_178572_28460 | NW_004519000.1 | Scaffold4662 | 28460                   | TT                              | GG                | 1946700983               |
| SNP_P3_178573_28904 | NW_004519000.1 | Scaffold4662 | 28904                   | AA                              | TT                | 1946700985               |
| SNP_P3_178574_28967 | NW_004519000.1 | Scaffold4662 | 28967                   | TT                              | GG                | 1946700987               |
| SNP_P3_178575_29033 | NW_004519000.1 | Scaffold4662 | 29033                   | CC                              | TT                | 1946700989               |
| SNP_P3_178576_29075 | NW_004519000.1 | Scaffold4662 | 29075                   | GG                              | AA                | 1946700992               |
| SNP_P3_178577_29087 | NW_004519000.1 | Scaffold4662 | 29087                   | GG                              | AA                | 1946700994               |
| SNP_P3_178578_29093 | NW_004519000.1 | Scaffold4662 | 29093                   | TT                              | AA                | 1946700996               |
| SNP_P3_178579_29111 | NW_004519000.1 | Scaffold4662 | 29111                   | TT                              | CC                | 1946700998               |
| SNP_P3_178580_29233 | NW_004519000.1 | Scaffold4662 | 29233                   | TT                              | CC                | 1946701000               |
| SNP_P3_178581_29265 | NW_004519000.1 | Scaffold4662 | 29265                   | CC                              | TT                | 1946701003               |
| SNP_P3_178582_29275 | NW_004519000.1 | Scaffold4662 | 29275                   | AA                              | GG                | 1946701005               |
| SNP_P3_178583_29278 | NW_004519000.1 | Scaffold4662 | 29278                   | GG                              | AA                | 1946701009               |
| SNP_P3_178584_30025 | NW_004519000.1 | Scaffold4662 | 30025                   | AA                              | GG                | 1946701011               |
| SNP_P3_178585_30148 | NW_004519000.1 | Scaffold4662 | 30148                   | GG                              | CC                | 1946701013               |
| SNP_P3_178586_46301 | NW_004519000.1 | Scaffold4662 | 46301                   | GG                              | TT                | 1946701015               |
| SNP_P3_178587_1083  | NW_004519002.1 | Scaffold4666 | 1083                    | CC                              | AA                | 1946701017               |
| SNP_P3_178588_4831  | NW_004519004.1 | Scaffold4668 | 4831                    | TT                              | CC                | 1946701019               |
| SNP_P3_178589_4909  | NW_004519004.1 | Scaffold4668 | 4909                    | AA                              | GG                | 1946701021               |
| SNP_P3_178590_5074  | NW_004519004.1 | Scaffold4668 | 5074                    | AA                              | GG                | 1946701024               |
| SNP_P3_178591_5123  | NW_004519004.1 | Scaffold4668 | 5123                    | CC                              | GG                | 1946701026               |
| SNP_P3_178592_5205  | NW_004519004.1 | Scaffold4668 | 5205                    | GG                              | CC                | 1946701028               |



| SNPs IDs            | Chromosome IDs | Chromosomes  | Physical positions (bp) | CDC Frontier (Reference genome) | (Pusa 256 & HPNB) | NCBI SNPdb Accession IDs |
|---------------------|----------------|--------------|-------------------------|---------------------------------|-------------------|--------------------------|
| SNP_P3_178593_5462  | NW_004519004.1 | Scaffold4668 | 5462                    | CC                              | TT                | 1946701030               |
| SNP_P3_178594_8374  | NW_004519008.1 | Scaffold4673 | 8374                    | CC                              | TT                | 1946701032               |
| SNP_P3_178595_8386  | NW_004519008.1 | Scaffold4673 | 8386                    | CC                              | TT                | 1946701034               |
| SNP_P3_178596_8844  | NW_004519008.1 | Scaffold4673 | 8844                    | CC                              | TT                | 1946701036               |
| SNP_P3_178597_8978  | NW_004519008.1 | Scaffold4673 | 8978                    | AA                              | GG                | 1946701038               |
| SNP_P3_178598_13304 | NW_004519008.1 | Scaffold4673 | 13304                   | TT                              | CC                | 1946701040               |
| SNP_P3_178599_13340 | NW_004519008.1 | Scaffold4673 | 13340                   | GG                              | AA                | 1946701042               |
| SNP_P3_178600_14549 | NW_004519008.1 | Scaffold4673 | 14549                   | AA                              | GG                | 1946701044               |
| SNP_P3_178601_20155 | NW_004519008.1 | Scaffold4673 | 20155                   | AA                              | GG                | 1946701048               |
| SNP_P3_178602_978   | NW_004519011.1 | Scaffold4679 | 978                     | AA                              | GG                | 1946701050               |
| SNP_P3_178603_1069  | NW_004519011.1 | Scaffold4679 | 1069                    | GG                              | AA                | 1946701052               |
| SNP_P3_178604_1076  | NW_004519011.1 | Scaffold4679 | 1076                    | AA                              | GG                | 1946701054               |
| SNP_P3_178605_64    | NW_004519015.1 | Scaffold4689 | 64                      | TT                              | CC                | 1946701056               |
| SNP_P3_178606_130   | NW_004519015.1 | Scaffold4689 | 130                     | TT                              | AA                | 1946701058               |
| SNP_P3_178607_171   | NW_004519015.1 | Scaffold4689 | 171                     | TT                              | CC                | 1946701061               |
| SNP_P3_178608_190   | NW_004519015.1 | Scaffold4689 | 190                     | AA                              | TT                | 1946701063               |
| SNP_P3_178609_211   | NW_004519015.1 | Scaffold4689 | 211                     | AA                              | TT                | 1946701065               |
| SNP_P3_178610_220   | NW_004519015.1 | Scaffold4689 | 220                     | CC                              | TT                | 1946701067               |
| SNP_P3_178611_323   | NW_004519015.1 | Scaffold4689 | 323                     | AA                              | CC                | 1946701069               |
| SNP_P3_178612_24    | NW_004519018.1 | Scaffold4692 | 24                      | GG                              | AA                | 1946701071               |
| SNP_P3_178613_39    | NW_004519018.1 | Scaffold4692 | 39                      | GG                              | AA                | 1946701073               |
| SNP_P3_178614_64    | NW_004519018.1 | Scaffold4692 | 64                      | GG                              | AA                | 1946701076               |
| SNP_P3_178615_69    | NW_004519018.1 | Scaffold4692 | 69                      | GG                              | AA                | 1946701078               |
| SNP_P3_178616_168   | NW_004519018.1 | Scaffold4692 | 168                     | AA                              | TT                | 1946701080               |
| SNP_P3_178617_313   | NW_004519018.1 | Scaffold4692 | 313                     | AA                              | TT                | 1946701082               |
| SNP_P3_178618_399   | NW_004519018.1 | Scaffold4692 | 399                     | AA                              | TT                | 1946701084               |
| SNP_P3_178619_456   | NW_004519018.1 | Scaffold4692 | 456                     | AA                              | GG                | 1946701086               |
| SNP_P3_178620_529   | NW_004519018.1 | Scaffold4692 | 529                     | CC                              | GG                | 1946701090               |
| SNP_P3_178621_578   | NW_004519018.1 | Scaffold4692 | 578                     | GG                              | TT                | 1946701092               |
| SNP_P3_178622_369   | NW_004519019.1 | Scaffold4693 | 369                     | CC                              | TT                | 1946701094               |
| SNP_P3_178624_434   | NW_004519019.1 | Scaffold4693 | 434                     | TT                              | AA                | 1946701096               |
| SNP_P3_178625_435   | NW_004519019.1 | Scaffold4693 | 435                     | GG                              | AA                | 1946701098               |
| SNP_P3_178626_448   | NW_004519019.1 | Scaffold4693 | 448                     | GG                              | AA                | 1946701100               |
| SNP_P3_178628_158   | NW_004519020.1 | Scaffold4695 | 158                     | CC                              | AA                | 1946701102               |
| SNP_P3_178629_449   | NW_004519020.1 | Scaffold4695 | 449                     | GG                              | AA                | 1946701104               |
| SNP_P3_178630_470   | NW_004519020.1 | Scaffold4695 | 470                     | CC                              | AA                | 1946701106               |
| SNP_P3_178631_495   | NW_004519020.1 | Scaffold4695 | 495                     | GG                              | AA                | 1946701108               |
| SNP_P3_178632_543   | NW_004519020.1 | Scaffold4695 | 543                     | TT                              | GG                | 1946701110               |
| SNP_P3_178633_581   | NW_004519020.1 | Scaffold4695 | 581                     | GG                              | AA                | 1946701113               |
| SNP_P3_178634_602   | NW_004519020.1 | Scaffold4695 | 602                     | CC                              | AA                | 1946701115               |
| SNP_P3_178635_640   | NW_004519020.1 | Scaffold4695 | 640                     | AA                              | GG                | 1946701117               |
| SNP_P3_178636_656   | NW_004519020.1 | Scaffold4695 | 656                     | TT                              | CC                | 1946701119               |

| SNPs IDs            | Chromosome IDs | Chromosomes  | Physical positions (bp) | CDC Frontier (Reference genome) | (Pusa 256 & HPNB) | NCBI SNPdb Accession IDs |
|---------------------|----------------|--------------|-------------------------|---------------------------------|-------------------|--------------------------|
| SNP_P3_178637_776   | NW_004519020.1 | Scaffold4695 | 776                     | TT                              | CC                | 1946701121               |
| SNP_P3_178638_780   | NW_004519020.1 | Scaffold4695 | 780                     | AA                              | GG                | 1946701123               |
| SNP_P3_178639_891   | NW_004519020.1 | Scaffold4695 | 891                     | CC                              | TT                | 1946701126               |
| SNP_P3_178640_5600  | NW_004519020.1 | Scaffold4695 | 5600                    | AA                              | GG                | 1946701128               |
| SNP_P3_178642_3201  | NW_004519021.1 | Scaffold4696 | 3201                    | AA                              | GG                | 1946701131               |
| SNP_P3_178643_400   | NW_004519025.1 | Scaffold4702 | 400                     | GG                              | TT                | 1946701133               |
| SNP_P3_178644_428   | NW_004519025.1 | Scaffold4702 | 428                     | AA                              | TT                | 1946701135               |
| SNP_P3_178645_1059  | NW_004519025.1 | Scaffold4702 | 1059                    | GG                              | CC                | 1946701137               |
| SNP_P3_178646_1116  | NW_004519025.1 | Scaffold4702 | 1116                    | GG                              | AA                | 1946701139               |
| SNP_P3_178647_1183  | NW_004519025.1 | Scaffold4702 | 1183                    | GG                              | AA                | 1946701142               |
| SNP_P3_178648_346   | NW_004519028.1 | Scaffold4708 | 346                     | TT                              | GG                | 1946701144               |
| SNP_P3_178649_708   | NW_004519028.1 | Scaffold4708 | 708                     | TT                              | CC                | 1946701146               |
| SNP_P3_178650_760   | NW_004519028.1 | Scaffold4708 | 760                     | CC                              | TT                | 1946701148               |
| SNP_P3_178651_827   | NW_004519028.1 | Scaffold4708 | 827                     | CC                              | TT                | 1946701150               |
| SNP_P3_178652_938   | NW_004519028.1 | Scaffold4708 | 938                     | CC                              | TT                | 1946701152               |
| SNP_P3_178653_1023  | NW_004519028.1 | Scaffold4708 | 1023                    | TT                              | AA                | 1946701154               |
| SNP_P3_178654_1041  | NW_004519028.1 | Scaffold4708 | 1041                    | AA                              | GG                | 1946701156               |
| SNP_P3_178655_1085  | NW_004519028.1 | Scaffold4708 | 1085                    | AA                              | GG                | 1946701158               |
| SNP_P3_178656_1287  | NW_004519028.1 | Scaffold4708 | 1287                    | AA                              | GG                | 1946701160               |
| SNP_P3_178657_3072  | NW_004519028.1 | Scaffold4708 | 3072                    | CC                              | GG                | 1946701162               |
| SNP_P3_178658_3166  | NW_004519028.1 | Scaffold4708 | 3166                    | TT                              | AA                | 1946701164               |
| SNP_P3_178659_3260  | NW_004519028.1 | Scaffold4708 | 3260                    | CC                              | TT                | 1946701166               |
| SNP_P3_178660_3303  | NW_004519028.1 | Scaffold4708 | 3303                    | GG                              | CC                | 1946701168               |
| SNP_P3_178661_3428  | NW_004519028.1 | Scaffold4708 | 3428                    | CC                              | TT                | 1946701170               |
| SNP_P3_178662_3435  | NW_004519028.1 | Scaffold4708 | 3435                    | AA                              | CC                | 1946701174               |
| SNP_P3_178663_6624  | NW_004519028.1 | Scaffold4708 | 6624                    | TT                              | AA                | 1946701176               |
| SNP_P3_178664_6785  | NW_004519028.1 | Scaffold4708 | 6785                    | TT                              | AA                | 1946701178               |
| SNP_P3_178665_6822  | NW_004519028.1 | Scaffold4708 | 6822                    | GG                              | AA                | 1946701180               |
| SNP_P3_178666_14687 | NW_004519028.1 | Scaffold4708 | 14687                   | CC                              | GG                | 1946701182               |
| SNP_P3_178667_14850 | NW_004519028.1 | Scaffold4708 | 14850                   | TT                              | GG                | 1946701184               |
| SNP_P3_178668_15063 | NW_004519028.1 | Scaffold4708 | 15063                   | CC                              | TT                | 1946701186               |
| SNP_P3_178669_17343 | NW_004519028.1 | Scaffold4708 | 17343                   | GG                              | TT                | 1946701188               |
| SNP_P3_178670_17543 | NW_004519028.1 | Scaffold4708 | 17543                   | AA                              | CC                | 1946701190               |
| SNP_P3_178671_17681 | NW_004519028.1 | Scaffold4708 | 17681                   | GG                              | AA                | 1946701192               |
| SNP_P3_178672_17707 | NW_004519028.1 | Scaffold4708 | 17707                   | GG                              | AA                | 1946701194               |
| SNP_P3_178673_17817 | NW_004519028.1 | Scaffold4708 | 17817                   | TT                              | CC                | 1946701196               |
| SNP_P3_178674_17830 | NW_004519028.1 | Scaffold4708 | 17830                   | TT                              | AA                | 1946701198               |
| SNP_P3_178675_19807 | NW_004519028.1 | Scaffold4708 | 19807                   | TT                              | AA                | 1946701200               |
| SNP_P3_178676_19966 | NW_004519028.1 | Scaffold4708 | 19966                   | TT                              | AA                | 1946701202               |
| SNP_P3_178677_20860 | NW_004519028.1 | Scaffold4708 | 20860                   | TT                              | CC                | 1946701204               |
| SNP_P3_178678_21034 | NW_004519028.1 | Scaffold4708 | 21034                   | AA                              | GG                | 1946701206               |
| SNP_P3_178679_21049 | NW_004519028.1 | Scaffold4708 | 21049                   | AA                              | GG                | 1946701208               |

| SNPs IDs            | Chromosome IDs | Chromosomes  | Physical positions (bp) | CDC Frontier (Reference genome) | (Pusa 256 & HPNB) | NCBI SNPdb Accession IDs |
|---------------------|----------------|--------------|-------------------------|---------------------------------|-------------------|--------------------------|
| SNP_P3_178680_21098 | NW_004519028.1 | Scaffold4708 | 21098                   | GG                              | AA                | 1946701210               |
| SNP_P3_178681_21118 | NW_004519028.1 | Scaffold4708 | 21118                   | CC                              | AA                | 1946701212               |
| SNP_P3_178682_21500 | NW_004519028.1 | Scaffold4708 | 21500                   | AA                              | GG                | 1946701214               |
| SNP_P3_178683_21554 | NW_004519028.1 | Scaffold4708 | 21554                   | TT                              | CC                | 1946701216               |
| SNP_P3_178684_21582 | NW_004519028.1 | Scaffold4708 | 21582                   | TT                              | CC                | 1946701218               |
| SNP_P3_178685_22217 | NW_004519028.1 | Scaffold4708 | 22217                   | TT                              | AA                | 1946701220               |
| SNP_P3_178686_22500 | NW_004519028.1 | Scaffold4708 | 22500                   | AA                              | CC                | 1946701222               |
| SNP_P3_178687_22615 | NW_004519028.1 | Scaffold4708 | 22615                   | AA                              | GG                | 1946701224               |
| SNP_P3_178688_22616 | NW_004519028.1 | Scaffold4708 | 22616                   | GG                              | AA                | 1946701226               |
| SNP_P3_178689_24848 | NW_004519028.1 | Scaffold4708 | 24848                   | AA                              | TT                | 1946701228               |
| SNP_P3_178690_505   | NW_004519031.1 | Scaffold4711 | 505                     | AA                              | TT                | 1946701230               |
| SNP_P3_178691_1203  | NW_004519031.1 | Scaffold4711 | 1203                    | AA                              | GG                | 1946701232               |
| SNP_P3_178692_1423  | NW_004519031.1 | Scaffold4711 | 1423                    | TT                              | CC                | 1946701234               |
| SNP_P3_178693_1499  | NW_004519031.1 | Scaffold4711 | 1499                    | AA                              | GG                | 1946701236               |
| SNP_P3_178694_1838  | NW_004519031.1 | Scaffold4711 | 1838                    | CC                              | AA                | 1946701238               |
| SNP_P3_178695_2532  | NW_004519031.1 | Scaffold4711 | 2532                    | TT                              | CC                | 1946701240               |
| SNP_P3_178696_2611  | NW_004519031.1 | Scaffold4711 | 2611                    | AA                              | GG                | 1946701242               |
| SNP_P3_178697_2646  | NW_004519031.1 | Scaffold4711 | 2646                    | CC                              | TT                | 1946701244               |
| SNP_P3_178698_2772  | NW_004519031.1 | Scaffold4711 | 2772                    | TT                              | GG                | 1946701246               |
| SNP_P3_178699_2847  | NW_004519031.1 | Scaffold4711 | 2847                    | GG                              | CC                | 1946701250               |
| SNP_P3_178700_2977  | NW_004519031.1 | Scaffold4711 | 2977                    | GG                              | AA                | 1946701252               |
| SNP_P3_178701_3529  | NW_004519031.1 | Scaffold4711 | 3529                    | TT                              | CC                | 1946701254               |
| SNP_P3_178702_3637  | NW_004519031.1 | Scaffold4711 | 3637                    | GG                              | AA                | 1946701256               |
| SNP_P3_178703_3638  | NW_004519031.1 | Scaffold4711 | 3638                    | TT                              | AA                | 1946701258               |
| SNP_P3_178704_3653  | NW_004519031.1 | Scaffold4711 | 3653                    | TT                              | GG                | 1946701260               |
| SNP_P3_178705_4274  | NW_004519031.1 | Scaffold4711 | 4274                    | TT                              | CC                | 1946701262               |
| SNP_P3_178706_4854  | NW_004519031.1 | Scaffold4711 | 4854                    | TT                              | AA                | 1946701264               |
| SNP_P3_178707_4869  | NW_004519031.1 | Scaffold4711 | 4869                    | AA                              | GG                | 1946701266               |
| SNP_P3_178709_5841  | NW_004519031.1 | Scaffold4711 | 5841                    | TT                              | AA                | 1946701268               |
| SNP_P3_178710_5845  | NW_004519031.1 | Scaffold4711 | 5845                    | GG                              | TT                | 1946701270               |
| SNP_P3_178711_5997  | NW_004519031.1 | Scaffold4711 | 5997                    | CC                              | AA                | 1946701273               |
| SNP_P3_178712_6115  | NW_004519031.1 | Scaffold4711 | 6115                    | GG                              | TT                | 1946701275               |
| SNP_P3_178714_6510  | NW_004519031.1 | Scaffold4711 | 6510                    | CC                              | GG                | 1946701277               |
| SNP_P3_178715_6560  | NW_004519031.1 | Scaffold4711 | 6560                    | TT                              | AA                | 1946701279               |
| SNP_P3_178716_8307  | NW_004519031.1 | Scaffold4711 | 8307                    | CC                              | AA                | 1946701281               |
| SNP_P3_178717_8309  | NW_004519031.1 | Scaffold4711 | 8309                    | GG                              | AA                | 1946701283               |
| SNP_P3_178718_8471  | NW_004519031.1 | Scaffold4711 | 8471                    | AA                              | CC                | 1946701285               |
| SNP_P3_178719_8998  | NW_004519031.1 | Scaffold4711 | 8998                    | TT                              | GG                | 1946701286               |
| SNP_P3_178721_9277  | NW_004519031.1 | Scaffold4711 | 9277                    | TT                              | AA                | 1946701288               |
| SNP_P3_178722_9284  | NW_004519031.1 | Scaffold4711 | 9284                    | GG                              | CC                | 1946701291               |
| SNP_P3_178723_9292  | NW_004519031.1 | Scaffold4711 | 9292                    | TT                              | GG                | 1946701293               |
| SNP_P3_178724_9508  | NW_004519031.1 | Scaffold4711 | 9508                    | TT                              | CC                | 1946701295               |

| SNPs IDs            | Chromosome IDs | Chromosomes  | Physical positions (bp) | CDC Frontier (Reference genome) | (Pusa 256 & HPNB) | NCBI SNPdb Accession IDs |
|---------------------|----------------|--------------|-------------------------|---------------------------------|-------------------|--------------------------|
| SNP_P3_178725_9551  | NW_004519031.1 | Scaffold4711 | 9551                    | AA                              | GG                | 1946701297               |
| SNP_P3_178726_9557  | NW_004519031.1 | Scaffold4711 | 9557                    | TT                              | CC                | 1946701299               |
| SNP_P3_178727_9681  | NW_004519031.1 | Scaffold4711 | 9681                    | AA                              | GG                | 1946701301               |
| SNP_P3_178728_1664  | NW_004519033.1 | Scaffold4713 | 1664                    | AA                              | GG                | 1946701303               |
| SNP_P3_178729_1670  | NW_004519033.1 | Scaffold4713 | 1670                    | TT                              | GG                | 1946701305               |
| SNP_P3_178731_214   | NW_004519039.1 | Scaffold4720 | 214                     | TT                              | AA                | 1946701307               |
| SNP_P3_178732_289   | NW_004519039.1 | Scaffold4720 | 289                     | AA                              | GG                | 1946701309               |
| SNP_P3_178733_471   | NW_004519039.1 | Scaffold4720 | 471                     | TT                              | AA                | 1946701312               |
| SNP_P3_178734_481   | NW_004519039.1 | Scaffold4720 | 481                     | CC                              | TT                | 1946701314               |
| SNP_P3_178735_985   | NW_004519039.1 | Scaffold4720 | 985                     | TT                              | GG                | 1946701316               |
| SNP_P3_178736_4414  | NW_004519039.1 | Scaffold4720 | 4414                    | CC                              | TT                | 1946701318               |
| SNP_P3_178737_4432  | NW_004519039.1 | Scaffold4720 | 4432                    | CC                              | TT                | 1946701320               |
| SNP_P3_178738_4627  | NW_004519039.1 | Scaffold4720 | 4627                    | AA                              | CC                | 1946701322               |
| SNP_P3_178740_546   | NW_004519044.1 | Scaffold4726 | 546                     | TT                              | CC                | 1946701324               |
| SNP_P3_178741_550   | NW_004519044.1 | Scaffold4726 | 550                     | AA                              | TT                | 1946701326               |
| SNP_P3_178742_2484  | NW_004519047.1 | Scaffold4729 | 2484                    | TT                              | CC                | 1946701328               |
| SNP_P3_178743_2518  | NW_004519047.1 | Scaffold4729 | 2518                    | TT                              | CC                | 1946701330               |
| SNP_P3_178744_664   | NW_004519048.1 | Scaffold4731 | 664                     | TT                              | CC                | 1946701332               |
| SNP_P3_178745_852   | NW_004519048.1 | Scaffold4731 | 852                     | TT                              | AA                | 1946701334               |
| SNP_P3_178746_1215  | NW_004519048.1 | Scaffold4731 | 1215                    | GG                              | CC                | 1946701336               |
| SNP_P3_178747_4046  | NW_004519048.1 | Scaffold4731 | 4046                    | GG                              | CC                | 1946701338               |
| SNP_P3_178749_151   | NW_004519049.1 | Scaffold4733 | 151                     | GG                              | AA                | 1946701340               |
| SNP_P3_178750_180   | NW_004519049.1 | Scaffold4733 | 180                     | TT                              | CC                | 1946701342               |
| SNP_P3_178751_240   | NW_004519049.1 | Scaffold4733 | 240                     | TT                              | CC                | 1946701344               |
| SNP_P3_178752_273   | NW_004519049.1 | Scaffold4733 | 273                     | CC                              | TT                | 1946701346               |
| SNP_P3_178753_441   | NW_004519049.1 | Scaffold4733 | 441                     | TT                              | CC                | 1946701349               |
| SNP_P3_178754_457   | NW_004519049.1 | Scaffold4733 | 457                     | CC                              | TT                | 1946701351               |
| SNP_P3_178756_543   | NW_004519049.1 | Scaffold4733 | 543                     | AA                              | GG                | 1946701353               |
| SNP_P3_178757_558   | NW_004519049.1 | Scaffold4733 | 558                     | GG                              | AA                | 1946701355               |
| SNP_P3_178759_745   | NW_004519051.1 | Scaffold4735 | 745                     | AA                              | CC                | 1946701357               |
| SNP_P3_178760_207   | NW_004519052.1 | Scaffold4736 | 207                     | AA                              | TT                | 1946701360               |
| SNP_P3_178761_1911  | NW_004519055.1 | Scaffold4740 | 1911                    | CC                              | TT                | 1946701363               |
| SNP_P3_178762_2047  | NW_004519055.1 | Scaffold4740 | 2047                    | GG                              | AA                | 1946701366               |
| SNP_P3_178763_2131  | NW_004519055.1 | Scaffold4740 | 2131                    | AA                              | GG                | 1946701368               |
| SNP_P3_178764_2357  | NW_004519055.1 | Scaffold4740 | 2357                    | CC                              | GG                | 1946701370               |
| SNP_P3_178765_2426  | NW_004519055.1 | Scaffold4740 | 2426                    | GG                              | AA                | 1946701373               |
| SNP_P3_178766_2688  | NW_004519055.1 | Scaffold4740 | 2688                    | TT                              | AA                | 1946701375               |
| SNP_P3_178767_2737  | NW_004519055.1 | Scaffold4740 | 2737                    | AA                              | GG                | 1946701377               |
| SNP_P3_178768_2811  | NW_004519055.1 | Scaffold4740 | 2811                    | GG                              | TT                | 1946701379               |
| SNP_P3_178769_4816  | NW_004519055.1 | Scaffold4740 | 4816                    | AA                              | TT                | 1946701382               |
| SNP_P3_178770_11643 | NW_004519055.1 | Scaffold4740 | 11643                   | AA                              | CC                | 1946701384               |
| SNP_P3_178771_11672 | NW_004519055.1 | Scaffold4740 | 11672                   | TT                              | CC                | 1946701386               |

| SNPs IDs            | Chromosome IDs | Chromosomes  | Physical positions (bp) | CDC Frontier (Reference genome) | (Pusa 256 & HPNB) | NCBI SNPdb Accession IDs |
|---------------------|----------------|--------------|-------------------------|---------------------------------|-------------------|--------------------------|
| SNP_P3_178772_11756 | NW_004519055.1 | Scaffold4740 | 11756                   | CC                              | TT                | 1946701388               |
| SNP_P3_178774_20131 | NW_004519057.1 | Scaffold4745 | 20131                   | TT                              | CC                | 1946701390               |
| SNP_P3_178775_22542 | NW_004519057.1 | Scaffold4745 | 22542                   | GG                              | AA                | 1946701392               |
| SNP_P3_178776_22570 | NW_004519057.1 | Scaffold4745 | 22570                   | AA                              | GG                | 1946701395               |
| SNP_P3_178777_22578 | NW_004519057.1 | Scaffold4745 | 22578                   | TT                              | CC                | 1946701397               |
| SNP_P3_178778_22587 | NW_004519057.1 | Scaffold4745 | 22587                   | GG                              | AA                | 1946701399               |
| SNP_P3_178779_22594 | NW_004519057.1 | Scaffold4745 | 22594                   | GG                              | CC                | 1946701401               |
| SNP_P3_178780_23386 | NW_004519057.1 | Scaffold4745 | 23386                   | TT                              | GG                | 1946701404               |
| SNP_P3_178782_429   | NW_004519065.1 | Scaffold4759 | 429                     | CC                              | TT                | 1946701407               |
| SNP_P3_178783_452   | NW_004519065.1 | Scaffold4759 | 452                     | CC                              | TT                | 1946701409               |
| SNP_P3_178784_464   | NW_004519065.1 | Scaffold4759 | 464                     | GG                              | TT                | 1946701411               |
| SNP_P3_178785_26210 | NW_004519065.1 | Scaffold4759 | 26210                   | TT                              | CC                | 1946701413               |
| SNP_P3_178786_35577 | NW_004519065.1 | Scaffold4759 | 35577                   | GG                              | TT                | 1946701415               |
| SNP_P3_178787_35581 | NW_004519065.1 | Scaffold4759 | 35581                   | AA                              | GG                | 1946701417               |
| SNP_P3_178789_5492  | NW_004519071.1 | Scaffold4769 | 5492                    | AA                              | CC                | 1946701420               |
| SNP_P3_178790_5498  | NW_004519071.1 | Scaffold4769 | 5498                    | TT                              | AA                | 1946701422               |
| SNP_P3_178791_955   | NW_004519072.1 | Scaffold4771 | 955                     | TT                              | GG                | 1946701424               |
| SNP_P3_178792_4485  | NW_004519072.1 | Scaffold4771 | 4485                    | CC                              | TT                | 1946701426               |
| SNP_P3_178793_5370  | NW_004519072.1 | Scaffold4771 | 5370                    | TT                              | AA                | 1946701428               |
| SNP_P3_178794_501   | NW_004519073.1 | Scaffold4773 | 501                     | TT                              | CC                | 1946701430               |
| SNP_P3_178795_2149  | NW_004519073.1 | Scaffold4773 | 2149                    | GG                              | AA                | 1946701433               |
| SNP_P3_178796_2176  | NW_004519073.1 | Scaffold4773 | 2176                    | GG                              | AA                | 1946701435               |
| SNP_P3_178797_2228  | NW_004519073.1 | Scaffold4773 | 2228                    | CC                              | TT                | 1946701437               |
| SNP_P3_178798_2396  | NW_004519073.1 | Scaffold4773 | 2396                    | AA                              | GG                | 1946701439               |
| SNP_P3_178799_2418  | NW_004519073.1 | Scaffold4773 | 2418                    | AA                              | GG                | 1946701442               |
| SNP_P3_178800_2463  | NW_004519073.1 | Scaffold4773 | 2463                    | AA                              | CC                | 1946701444               |
| SNP_P3_178801_2474  | NW_004519073.1 | Scaffold4773 | 2474                    | GG                              | AA                | 1946701447               |
| SNP_P3_178802_2582  | NW_004519073.1 | Scaffold4773 | 2582                    | TT                              | AA                | 1946701449               |
| SNP_P3_178803_2642  | NW_004519073.1 | Scaffold4773 | 2642                    | TT                              | CC                | 1946701451               |
| SNP_P3_178804_13532 | NW_004519073.1 | Scaffold4773 | 13532                   | CC                              | TT                | 1946701454               |
| SNP_P3_178805_13547 | NW_004519073.1 | Scaffold4773 | 13547                   | TT                              | AA                | 1946701456               |
| SNP_P3_178806_13548 | NW_004519073.1 | Scaffold4773 | 13548                   | CC                              | TT                | 1946701458               |
| SNP_P3_178807_13550 | NW_004519073.1 | Scaffold4773 | 13550                   | TT                              | AA                | 1946701460               |
| SNP_P3_178808_13554 | NW_004519073.1 | Scaffold4773 | 13554                   | CC                              | TT                | 1946701462               |
| SNP_P3_178809_14558 | NW_004519073.1 | Scaffold4773 | 14558                   | GG                              | AA                | 1946701465               |
| SNP_P3_178810_14797 | NW_004519073.1 | Scaffold4773 | 14797                   | CC                              | TT                | 1946701467               |
| SNP_P3_178811_15072 | NW_004519073.1 | Scaffold4773 | 15072                   | AA                              | TT                | 1946701469               |
| SNP_P3_178812_15375 | NW_004519073.1 | Scaffold4773 | 15375                   | TT                              | GG                | 1946701471               |
| SNP_P3_178813_15417 | NW_004519073.1 | Scaffold4773 | 15417                   | AA                              | GG                | 1946701473               |
| SNP_P3_178814_15699 | NW_004519073.1 | Scaffold4773 | 15699                   | GG                              | TT                | 1946701476               |
| SNP_P3_178815_15726 | NW_004519073.1 | Scaffold4773 | 15726                   | GG                              | AA                | 1946701478               |
| SNP_P3_178816_15852 | NW_004519073.1 | Scaffold4773 | 15852                   | TT                              | AA                | 1946701480               |

| SNPs IDs            | Chromosome IDs | Chromosomes  | Physical positions (bp) | CDC Frontier (Reference genome) | (Pusa 256 & HPNB) | NCBI SNPdb Accession IDs |
|---------------------|----------------|--------------|-------------------------|---------------------------------|-------------------|--------------------------|
| SNP_P3_178817_15899 | NW_004519073.1 | Scaffold4773 | 15899                   | CC                              | TT                | 1946701482               |
| SNP_P3_178818_16025 | NW_004519073.1 | Scaffold4773 | 16025                   | TT                              | CC                | 1946701484               |
| SNP_P3_178819_16117 | NW_004519073.1 | Scaffold4773 | 16117                   | CC                              | AA                | 1946701487               |
| SNP_P3_178821_16795 | NW_004519073.1 | Scaffold4773 | 16795                   | GG                              | CC                | 1946701490               |
| SNP_P3_178822_16818 | NW_004519073.1 | Scaffold4773 | 16818                   | TT                              | AA                | 1946701492               |
| SNP_P3_178824_17057 | NW_004519073.1 | Scaffold4773 | 17057                   | GG                              | TT                | 1946701494               |
| SNP_P3_178825_17259 | NW_004519073.1 | Scaffold4773 | 17259                   | CC                              | GG                | 1946701497               |
| SNP_P3_178826_18204 | NW_004519073.1 | Scaffold4773 | 18204                   | CC                              | AA                | 1946701499               |
| SNP_P3_178827_18398 | NW_004519073.1 | Scaffold4773 | 18398                   | AA                              | GG                | 1946701501               |
| SNP_P3_178828_19289 | NW_004519073.1 | Scaffold4773 | 19289                   | TT                              | CC                | 1946701503               |
| SNP_P3_178829_20616 | NW_004519073.1 | Scaffold4773 | 20616                   | CC                              | TT                | 1946701506               |
| SNP_P3_178830_22834 | NW_004519073.1 | Scaffold4773 | 22834                   | CC                              | TT                | 1946701508               |
| SNP_P3_178831_23902 | NW_004519073.1 | Scaffold4773 | 23902                   | GG                              | TT                | 1946701510               |
| SNP_P3_178832_24321 | NW_004519073.1 | Scaffold4773 | 24321                   | GG                              | CC                | 1946701512               |
| SNP_P3_178834_25298 | NW_004519073.1 | Scaffold4773 | 25298                   | TT                              | CC                | 1946701514               |
| SNP_P3_178835_25319 | NW_004519073.1 | Scaffold4773 | 25319                   | AA                              | GG                | 1946701516               |
| SNP_P3_178836_25565 | NW_004519073.1 | Scaffold4773 | 25565                   | TT                              | AA                | 1946701518               |
| SNP_P3_178837_25570 | NW_004519073.1 | Scaffold4773 | 25570                   | GG                              | AA                | 1946701521               |
| SNP_P3_178838_25628 | NW_004519073.1 | Scaffold4773 | 25628                   | AA                              | GG                | 1946701523               |
| SNP_P3_178839_25637 | NW_004519073.1 | Scaffold4773 | 25637                   | AA                              | CC                | 1946701525               |
| SNP_P3_178840_25641 | NW_004519073.1 | Scaffold4773 | 25641                   | AA                              | GG                | 1946701527               |
| SNP_P3_178841_25654 | NW_004519073.1 | Scaffold4773 | 25654                   | AA                              | GG                | 1946701530               |
| SNP_P3_178842_27426 | NW_004519073.1 | Scaffold4773 | 27426                   | AA                              | CC                | 1946701533               |
| SNP_P3_178843_27608 | NW_004519073.1 | Scaffold4773 | 27608                   | AA                              | TT                | 1946701535               |
| SNP_P3_178845_28237 | NW_004519073.1 | Scaffold4773 | 28237                   | AA                              | TT                | 1946701537               |
| SNP_P3_178846_28243 | NW_004519073.1 | Scaffold4773 | 28243                   | AA                              | GG                | 1946701539               |
| SNP_P3_178847_28250 | NW_004519073.1 | Scaffold4773 | 28250                   | AA                              | GG                | 1946701541               |
| SNP_P3_178848_28404 | NW_004519073.1 | Scaffold4773 | 28404                   | CC                              | AA                | 1946701543               |
| SNP_P3_178849_28477 | NW_004519073.1 | Scaffold4773 | 28477                   | TT                              | CC                | 1946701545               |
| SNP_P3_178850_28526 | NW_004519073.1 | Scaffold4773 | 28526                   | AA                              | GG                | 1946701547               |
| SNP_P3_178851_28586 | NW_004519073.1 | Scaffold4773 | 28586                   | GG                              | AA                | 1946701549               |
| SNP_P3_178852_28632 | NW_004519073.1 | Scaffold4773 | 28632                   | AA                              | GG                | 1946701551               |
| SNP_P3_178853_28664 | NW_004519073.1 | Scaffold4773 | 28664                   | AA                              | GG                | 1946701553               |
| SNP_P3_178854_28741 | NW_004519073.1 | Scaffold4773 | 28741                   | TT                              | CC                | 1946701555               |
| SNP_P3_178855_29119 | NW_004519073.1 | Scaffold4773 | 29119                   | GG                              | CC                | 1946701557               |
| SNP_P3_178856_29165 | NW_004519073.1 | Scaffold4773 | 29165                   | CC                              | TT                | 1946701559               |
| SNP_P3_178857_30837 | NW_004519073.1 | Scaffold4773 | 30837                   | CC                              | TT                | 1946701561               |
| SNP_P3_178859_33605 | NW_004519073.1 | Scaffold4773 | 33605                   | TT                              | AA                | 1946701563               |
| SNP_P3_178860_34356 | NW_004519073.1 | Scaffold4773 | 34356                   | AA                              | TT                | 1946701565               |
| SNP_P3_178861_58288 | NW_004519073.1 | Scaffold4773 | 58288                   | AA                              | TT                | 1946701567               |
| SNP_P3_178862_58326 | NW_004519073.1 | Scaffold4773 | 58326                   | CC                              | AA                | 1946701569               |
| SNP_P3_178863_58538 | NW_004519073.1 | Scaffold4773 | 58538                   | AA                              | GG                | 1946701571               |

| SNPs IDs             | Chromosome IDs | Chromosomes  | Physical positions (bp) | CDC Frontier (Reference genome) | (Pusa 256 & HPNB) | NCBI SNPdb Accession IDs |
|----------------------|----------------|--------------|-------------------------|---------------------------------|-------------------|--------------------------|
| SNP_P3_178864_178    | NW_004519074.1 | Scaffold4775 | 178                     | TT                              | AA                | 1946701573               |
| SNP_P3_178865_441    | NW_004519074.1 | Scaffold4775 | 441                     | TT                              | GG                | 1946701575               |
| SNP_P3_178866_471    | NW_004519074.1 | Scaffold4775 | 471                     | TT                              | GG                | 1946701577               |
| SNP_P3_178868_48186  | NW_004519076.1 | Scaffold4777 | 48186                   | GG                              | AA                | 1946701579               |
| SNP_P3_178869_48189  | NW_004519076.1 | Scaffold4777 | 48189                   | CC                              | TT                | 1946701582               |
| SNP_P3_178870_48231  | NW_004519076.1 | Scaffold4777 | 48231                   | TT                              | CC                | 1946701584               |
| SNP_P3_178871_75513  | NW_004519076.1 | Scaffold4777 | 75513                   | CC                              | TT                | 1946701586               |
| SNP_P3_178873_112452 | NW_004519076.1 | Scaffold4777 | 112452                  | AA                              | GG                | 1946701588               |
| SNP_P3_178874_112496 | NW_004519076.1 | Scaffold4777 | 112496                  | AA                              | CC                | 1946701590               |
| SNP_P3_178875_112507 | NW_004519076.1 | Scaffold4777 | 112507                  | AA                              | CC                | 1946701592               |
| SNP_P3_178876_112544 | NW_004519076.1 | Scaffold4777 | 112544                  | CC                              | TT                | 1946701594               |
| SNP_P3_178877_112792 | NW_004519076.1 | Scaffold4777 | 112792                  | GG                              | TT                | 1946701596               |
| SNP_P3_178878_112886 | NW_004519076.1 | Scaffold4777 | 112886                  | CC                              | AA                | 1946701598               |
| SNP_P3_178879_113115 | NW_004519076.1 | Scaffold4777 | 113115                  | CC                              | TT                | 1946701600               |
| SNP_P3_178880_113447 | NW_004519076.1 | Scaffold4777 | 113447                  | AA                              | TT                | 1946701602               |
| SNP_P3_178881_113547 | NW_004519076.1 | Scaffold4777 | 113547                  | AA                              | GG                | 1946701604               |
| SNP_P3_178882_113923 | NW_004519076.1 | Scaffold4777 | 113923                  | CC                              | TT                | 1946701606               |
| SNP_P3_178883_114190 | NW_004519076.1 | Scaffold4777 | 114190                  | CC                              | AA                | 1946701608               |
| SNP_P3_178884_114267 | NW_004519076.1 | Scaffold4777 | 114267                  | AA                              | TT                | 1946701610               |
| SNP_P3_178885_114274 | NW_004519076.1 | Scaffold4777 | 114274                  | GG                              | AA                | 1946701613               |
| SNP_P3_178886_117629 | NW_004519076.1 | Scaffold4777 | 117629                  | CC                              | TT                | 1946701616               |
| SNP_P3_178887_117775 | NW_004519076.1 | Scaffold4777 | 117775                  | CC                              | AA                | 1946701618               |
| SNP_P3_178888_117869 | NW_004519076.1 | Scaffold4777 | 117869                  | CC                              | AA                | 1946701620               |
| SNP_P3_178889_118507 | NW_004519076.1 | Scaffold4777 | 118507                  | CC                              | TT                | 1946701622               |
| SNP_P3_178890_118549 | NW_004519076.1 | Scaffold4777 | 118549                  | GG                              | AA                | 1946701624               |
| SNP_P3_178891_118569 | NW_004519076.1 | Scaffold4777 | 118569                  | TT                              | CC                | 1946701626               |
| SNP_P3_178892_118683 | NW_004519076.1 | Scaffold4777 | 118683                  | GG                              | AA                | 1946701629               |
| SNP_P3_178894_118769 | NW_004519076.1 | Scaffold4777 | 118769                  | TT                              | CC                | 1946701631               |
| SNP_P3_178895_119123 | NW_004519076.1 | Scaffold4777 | 119123                  | TT                              | AA                | 1946701633               |
| SNP_P3_178896_119329 | NW_004519076.1 | Scaffold4777 | 119329                  | GG                              | AA                | 1946701635               |
| SNP_P3_178897_119356 | NW_004519076.1 | Scaffold4777 | 119356                  | GG                              | AA                | 1946701637               |
| SNP_P3_178898_119368 | NW_004519076.1 | Scaffold4777 | 119368                  | CC                              | AA                | 1946701639               |
| SNP_P3_178899_119372 | NW_004519076.1 | Scaffold4777 | 119372                  | CC                              | TT                | 1946701641               |
| SNP_P3_178900_119558 | NW_004519076.1 | Scaffold4777 | 119558                  | GG                              | CC                | 1946701643               |
| SNP_P3_178901_119589 | NW_004519076.1 | Scaffold4777 | 119589                  | AA                              | TT                | 1946701645               |
| SNP_P3_178902_119620 | NW_004519076.1 | Scaffold4777 | 119620                  | GG                              | CC                | 1946701647               |
| SNP_P3_178903_119638 | NW_004519076.1 | Scaffold4777 | 119638                  | AA                              | CC                | 1946701649               |
| SNP_P3_178904_119735 | NW_004519076.1 | Scaffold4777 | 119735                  | TT                              | CC                | 1946701651               |
| SNP_P3_178905_119762 | NW_004519076.1 | Scaffold4777 | 119762                  | TT                              | CC                | 1946701653               |
| SNP_P3_178906_538    | NW_004519079.1 | Scaffold4781 | 538                     | TT                              | CC                | 1946701657               |
| SNP_P3_178907_1434   | NW_004519080.1 | Scaffold4782 | 1434                    | AA                              | GG                | 1946701659               |
| SNP_P3_178909_1516   | NW_004519080.1 | Scaffold4782 | 1516                    | TT                              | CC                | 1946701661               |

| SNPs IDs           | Chromosome IDs | Chromosomes  | Physical positions (bp) | CDC Frontier (Reference genome) | (Pusa 256 & HPNB) | NCBI SNPdb Accession IDs |
|--------------------|----------------|--------------|-------------------------|---------------------------------|-------------------|--------------------------|
| SNP_P3_178910_1779 | NW_004519080.1 | Scaffold4782 | 1779                    | TT                              | CC                | 1946701663               |
| SNP_P3_178911_1782 | NW_004519080.1 | Scaffold4782 | 1782                    | CC                              | TT                | 1946701665               |
| SNP_P3_178912_1788 | NW_004519080.1 | Scaffold4782 | 1788                    | GG                              | AA                | 1946701667               |
| SNP_P3_178913_1834 | NW_004519080.1 | Scaffold4782 | 1834                    | CC                              | GG                | 1946701669               |
| SNP_P3_178914_1851 | NW_004519080.1 | Scaffold4782 | 1851                    | CC                              | TT                | 1946701671               |
| SNP_P3_178915_1852 | NW_004519080.1 | Scaffold4782 | 1852                    | GG                              | TT                | 1946701673               |
| SNP_P3_178916_1854 | NW_004519080.1 | Scaffold4782 | 1854                    | TT                              | CC                | 1946701675               |
| SNP_P3_178917_1884 | NW_004519080.1 | Scaffold4782 | 1884                    | TT                              | CC                | 1946701677               |
| SNP_P3_178918_550  | NW_004519081.1 | Scaffold4783 | 550                     | TT                              | AA                | 1946701679               |
| SNP_P3_178919_181  | NW_004519082.1 | Scaffold4784 | 181                     | AA                              | TT                | 1946701681               |
| SNP_P3_178920_190  | NW_004519082.1 | Scaffold4784 | 190                     | TT                              | GG                | 1946701684               |
| SNP_P3_178921_224  | NW_004519082.1 | Scaffold4784 | 224                     | GG                              | AA                | 1946701686               |
| SNP_P3_178922_247  | NW_004519082.1 | Scaffold4784 | 247                     | CC                              | AA                | 1946701688               |
| SNP_P3_178923_253  | NW_004519082.1 | Scaffold4784 | 253                     | GG                              | AA                | 1946701690               |
| SNP_P3_178924_298  | NW_004519082.1 | Scaffold4784 | 298                     | TT                              | CC                | 1946701694               |
| SNP_P3_178925_300  | NW_004519082.1 | Scaffold4784 | 300                     | GG                              | AA                | 1946701696               |
| SNP_P3_178926_313  | NW_004519082.1 | Scaffold4784 | 313                     | AA                              | GG                | 1946701698               |
| SNP_P3_178927_441  | NW_004519082.1 | Scaffold4784 | 441                     | CC                              | TT                | 1946701700               |
| SNP_P3_178928_571  | NW_004519082.1 | Scaffold4784 | 571                     | GG                              | AA                | 1946701702               |
| SNP_P3_178929_613  | NW_004519082.1 | Scaffold4784 | 613                     | CC                              | TT                | 1946701704               |
| SNP_P3_178930_616  | NW_004519082.1 | Scaffold4784 | 616                     | GG                              | AA                | 1946701706               |
| SNP_P3_178931_626  | NW_004519082.1 | Scaffold4784 | 626                     | CC                              | TT                | 1946701708               |
| SNP_P3_178932_638  | NW_004519082.1 | Scaffold4784 | 638                     | AA                              | GG                | 1946701711               |
| SNP_P3_178933_641  | NW_004519082.1 | Scaffold4784 | 641                     | CC                              | GG                | 1946701713               |
| SNP_P3_178935_865  | NW_004519082.1 | Scaffold4784 | 865                     | TT                              | CC                | 1946701715               |
| SNP_P3_178936_1001 | NW_004519082.1 | Scaffold4784 | 1001                    | TT                              | AA                | 1946701717               |
| SNP_P3_178937_2300 | NW_004519083.1 | Scaffold4787 | 2300                    | GG                              | CC                | 1946701719               |
| SNP_P3_178938_2321 | NW_004519083.1 | Scaffold4787 | 2321                    | TT                              | AA                | 1946701721               |
| SNP_P3_178939_340  | NW_004519087.1 | Scaffold4791 | 340                     | AA                              | CC                | 1946701723               |
| SNP_P3_178940_341  | NW_004519087.1 | Scaffold4791 | 341                     | CC                              | AA                | 1946701726               |
| SNP_P3_178941_342  | NW_004519087.1 | Scaffold4791 | 342                     | CC                              | TT                | 1946701728               |
| SNP_P3_178942_346  | NW_004519087.1 | Scaffold4791 | 346                     | TT                              | CC                | 1946701730               |
| SNP_P3_178943_371  | NW_004519087.1 | Scaffold4791 | 371                     | AA                              | TT                | 1946701733               |
| SNP_P3_178944_666  | NW_004519087.1 | Scaffold4791 | 666                     | AA                              | GG                | 1946701735               |
| SNP_P3_178945_1017 | NW_004519087.1 | Scaffold4791 | 1017                    | CC                              | AA                | 1946701737               |
| SNP_P3_178946_1045 | NW_004519088.1 | Scaffold4792 | 1045                    | CC                              | AA                | 1946701740               |
| SNP_P3_178947_5362 | NW_004519088.1 | Scaffold4792 | 5362                    | AA                              | CC                | 1946701742               |
| SNP_P3_178948_5365 | NW_004519088.1 | Scaffold4792 | 5365                    | CC                              | TT                | 1946701744               |
| SNP_P3_178949_5366 | NW_004519088.1 | Scaffold4792 | 5366                    | TT                              | AA                | 1946701746               |
| SNP_P3_178950_5589 | NW_004519088.1 | Scaffold4792 | 5589                    | AA                              | GG                | 1946701747               |
| SNP_P3_178951_5624 | NW_004519088.1 | Scaffold4792 | 5624                    | AA                              | TT                | 1946701749               |
| SNP_P3_178952_5786 | NW_004519088.1 | Scaffold4792 | 5786                    | TT                              | GG                | 1946701751               |



| SNPs IDs           | Chromosome IDs | Chromosomes  | Physical positions (bp) | CDC Frontier (Reference genome) | (Pusa 256 & HPNB) | NCBI SNPdb Accession IDs |
|--------------------|----------------|--------------|-------------------------|---------------------------------|-------------------|--------------------------|
| SNP_P3_178953_5788 | NW_004519088.1 | Scaffold4792 | 5788                    | CC                              | AA                | 1946701753               |
| SNP_P3_178954_64   | NW_004519090.1 | Scaffold4795 | 64                      | AA                              | TT                | 1946701755               |
| SNP_P3_178955_141  | NW_004519090.1 | Scaffold4795 | 141                     | AA                              | GG                | 1946701758               |
| SNP_P3_178956_1773 | NW_004519093.1 | Scaffold4798 | 1773                    | CC                              | TT                | 1946701760               |
| SNP_P3_178957_2128 | NW_004519093.1 | Scaffold4798 | 2128                    | TT                              | GG                | 1946701762               |
| SNP_P3_178958_2176 | NW_004519093.1 | Scaffold4798 | 2176                    | TT                              | AA                | 1946701764               |
| SNP_P3_178959_723  | NW_004519096.1 | Scaffold4804 | 723                     | AA                              | TT                | 1946701766               |
| SNP_P3_178960_789  | NW_004519096.1 | Scaffold4804 | 789                     | AA                              | TT                | 1946701768               |
| SNP_P3_178961_793  | NW_004519096.1 | Scaffold4804 | 793                     | TT                              | GG                | 1946701770               |
| SNP_P3_178962_854  | NW_004519096.1 | Scaffold4804 | 854                     | GG                              | CC                | 1946701773               |
| SNP_P3_178963_1010 | NW_004519096.1 | Scaffold4804 | 1010                    | CC                              | GG                | 1946701775               |
| SNP_P3_178964_1027 | NW_004519096.1 | Scaffold4804 | 1027                    | GG                              | AA                | 1946701777               |
| SNP_P3_178965_1028 | NW_004519096.1 | Scaffold4804 | 1028                    | GG                              | AA                | 1946701779               |
| SNP_P3_178966_1062 | NW_004519096.1 | Scaffold4804 | 1062                    | GG                              | AA                | 1946701781               |
| SNP_P3_178967_1133 | NW_004519096.1 | Scaffold4804 | 1133                    | GG                              | AA                | 1946701783               |
| SNP_P3_178968_1159 | NW_004519096.1 | Scaffold4804 | 1159                    | AA                              | CC                | 1946701785               |
| SNP_P3_178969_1607 | NW_004519096.1 | Scaffold4804 | 1607                    | CC                              | TT                | 1946701787               |
| SNP_P3_178970_1625 | NW_004519096.1 | Scaffold4804 | 1625                    | CC                              | AA                | 1946701789               |
| SNP_P3_178971_1832 | NW_004519096.1 | Scaffold4804 | 1832                    | CC                              | GG                | 1946701791               |
| SNP_P3_178973_1977 | NW_004519096.1 | Scaffold4804 | 1977                    | GG                              | AA                | 1946701793               |
| SNP_P3_178975_3049 | NW_004519096.1 | Scaffold4804 | 3049                    | CC                              | GG                | 1946701795               |
| SNP_P3_178976_3051 | NW_004519096.1 | Scaffold4804 | 3051                    | TT                              | AA                | 1946701797               |
| SNP_P3_178977_3056 | NW_004519096.1 | Scaffold4804 | 3056                    | AA                              | CC                | 1946701799               |
| SNP_P3_178978_3058 | NW_004519096.1 | Scaffold4804 | 3058                    | TT                              | CC                | 1946701800               |
| SNP_P3_178979_3117 | NW_004519096.1 | Scaffold4804 | 3117                    | AA                              | TT                | 1946701802               |
| SNP_P3_178980_3135 | NW_004519096.1 | Scaffold4804 | 3135                    | CC                              | AA                | 1946701804               |
| SNP_P3_178981_3150 | NW_004519096.1 | Scaffold4804 | 3150                    | TT                              | AA                | 1946701806               |
| SNP_P3_178982_3264 | NW_004519096.1 | Scaffold4804 | 3264                    | TT                              | AA                | 1946701808               |
| SNP_P3_178983_3326 | NW_004519096.1 | Scaffold4804 | 3326                    | CC                              | TT                | 1946701810               |
| SNP_P3_178984_3419 | NW_004519096.1 | Scaffold4804 | 3419                    | AA                              | GG                | 1946701813               |
| SNP_P3_178985_3519 | NW_004519096.1 | Scaffold4804 | 3519                    | AA                              | GG                | 1946701815               |
| SNP_P3_178986_8400 | NW_004519096.1 | Scaffold4804 | 8400                    | CC                              | AA                | 1946701817               |
| SNP_P3_178987_8406 | NW_004519096.1 | Scaffold4804 | 8406                    | CC                              | GG                | 1946701819               |
| SNP_P3_178988_8627 | NW_004519096.1 | Scaffold4804 | 8627                    | TT                              | CC                | 1946701821               |
| SNP_P3_178989_8632 | NW_004519096.1 | Scaffold4804 | 8632                    | TT                              | AA                | 1946701823               |
| SNP_P3_178990_8727 | NW_004519096.1 | Scaffold4804 | 8727                    | GG                              | CC                | 1946701825               |
| SNP_P3_178991_8845 | NW_004519096.1 | Scaffold4804 | 8845                    | TT                              | AA                | 1946701827               |
| SNP_P3_178992_8859 | NW_004519096.1 | Scaffold4804 | 8859                    | TT                              | AA                | 1946701829               |
| SNP_P3_178994_9015 | NW_004519096.1 | Scaffold4804 | 9015                    | AA                              | TT                | 1946701831               |
| SNP_P3_178995_9028 | NW_004519096.1 | Scaffold4804 | 9028                    | CC                              | AA                | 1946701833               |
| SNP_P3_178996_9037 | NW_004519096.1 | Scaffold4804 | 9037                    | CC                              | GG                | 1946701835               |
| SNP_P3_178997_9042 | NW_004519096.1 | Scaffold4804 | 9042                    | CC                              | TT                | 1946701837               |

| SNPs IDs            | Chromosome IDs | Chromosomes  | Physical positions (bp) | CDC Frontier (Reference genome) | (Pusa 256 & HPNB) | NCBI SNPdb Accession IDs |
|---------------------|----------------|--------------|-------------------------|---------------------------------|-------------------|--------------------------|
| SNP_P3_178998_9050  | NW_004519096.1 | Scaffold4804 | 9050                    | AA                              | CC                | 1946701839               |
| SNP_P3_178999_9192  | NW_004519096.1 | Scaffold4804 | 9192                    | AA                              | GG                | 1946701841               |
| SNP_P3_179000_9278  | NW_004519096.1 | Scaffold4804 | 9278                    | TT                              | CC                | 1946701843               |
| SNP_P3_179001_9392  | NW_004519096.1 | Scaffold4804 | 9392                    | AA                              | GG                | 1946701845               |
| SNP_P3_179002_9434  | NW_004519096.1 | Scaffold4804 | 9434                    | AA                              | CC                | 1946701847               |
| SNP_P3_179003_9630  | NW_004519096.1 | Scaffold4804 | 9630                    | GG                              | CC                | 1946701849               |
| SNP_P3_179004_9747  | NW_004519096.1 | Scaffold4804 | 9747                    | TT                              | GG                | 1946701851               |
| SNP_P3_179006_9874  | NW_004519096.1 | Scaffold4804 | 9874                    | GG                              | CC                | 1946701853               |
| SNP_P3_179007_10082 | NW_004519096.1 | Scaffold4804 | 10082                   | AA                              | CC                | 1946701855               |
| SNP_P3_179008_11820 | NW_004519096.1 | Scaffold4804 | 11820                   | TT                              | GG                | 1946701857               |
| SNP_P3_179009_11888 | NW_004519096.1 | Scaffold4804 | 11888                   | AA                              | CC                | 1946701859               |
| SNP_P3_179010_11903 | NW_004519096.1 | Scaffold4804 | 11903                   | AA                              | GG                | 1946701861               |
| SNP_P3_179011_11947 | NW_004519096.1 | Scaffold4804 | 11947                   | AA                              | CC                | 1946701863               |
| SNP_P3_179012_12189 | NW_004519096.1 | Scaffold4804 | 12189                   | CC                              | AA                | 1946701865               |
| SNP_P3_179013_17111 | NW_004519096.1 | Scaffold4804 | 17111                   | GG                              | TT                | 1946701867               |
| SNP_P3_179014_17235 | NW_004519096.1 | Scaffold4804 | 17235                   | AA                              | GG                | 1946701869               |
| SNP_P3_179015_17385 | NW_004519096.1 | Scaffold4804 | 17385                   | GG                              | AA                | 1946701871               |
| SNP_P3_179016_17506 | NW_004519096.1 | Scaffold4804 | 17506                   | TT                              | CC                | 1946701873               |
| SNP_P3_179017_17616 | NW_004519096.1 | Scaffold4804 | 17616                   | AA                              | CC                | 1946701875               |
| SNP_P3_179018_17793 | NW_004519096.1 | Scaffold4804 | 17793                   | AA                              | GG                | 1946701877               |
| SNP_P3_179019_17838 | NW_004519096.1 | Scaffold4804 | 17838                   | GG                              | CC                | 1946701879               |
| SNP_P3_179020_17870 | NW_004519096.1 | Scaffold4804 | 17870                   | CC                              | TT                | 1946701881               |
| SNP_P3_179021_77    | NW_004519097.1 | Scaffold4805 | 77                      | GG                              | CC                | 1946701883               |
| SNP_P3_179022_393   | NW_004519097.1 | Scaffold4805 | 393                     | AA                              | TT                | 1946701885               |
| SNP_P3_179023_10948 | NW_004519097.1 | Scaffold4805 | 10948                   | AA                              | GG                | 1946701887               |
| SNP_P3_179024_11030 | NW_004519097.1 | Scaffold4805 | 11030                   | TT                              | CC                | 1946701889               |
| SNP_P3_179025_11061 | NW_004519097.1 | Scaffold4805 | 11061                   | TT                              | CC                | 1946701891               |
| SNP_P3_179026_11278 | NW_004519097.1 | Scaffold4805 | 11278                   | AA                              | TT                | 1946701894               |
| SNP_P3_179027_772   | NW_004519098.1 | Scaffold4806 | 772                     | GG                              | AA                | 1946701896               |
| SNP_P3_179028_778   | NW_004519098.1 | Scaffold4806 | 778                     | TT                              | AA                | 1946701898               |
| SNP_P3_179029_786   | NW_004519098.1 | Scaffold4806 | 786                     | TT                              | CC                | 1946701900               |
| SNP_P3_179030_64    | NW_004519100.1 | Scaffold4808 | 64                      | CC                              | AA                | 1946701902               |
| SNP_P3_179031_119   | NW_004519100.1 | Scaffold4808 | 119                     | GG                              | AA                | 1946701904               |
| SNP_P3_179032_508   | NW_004519100.1 | Scaffold4808 | 508                     | GG                              | CC                | 1946701906               |
| SNP_P3_179033_747   | NW_004519100.1 | Scaffold4808 | 747                     | GG                              | TT                | 1946701908               |
| SNP_P3_179034_760   | NW_004519100.1 | Scaffold4808 | 760                     | TT                              | CC                | 1946701910               |
| SNP_P3_179035_819   | NW_004519100.1 | Scaffold4808 | 819                     | GG                              | CC                | 1946701912               |
| SNP_P3_179036_922   | NW_004519100.1 | Scaffold4808 | 922                     | TT                              | GG                | 1946701914               |
| SNP_P3_179037_996   | NW_004519100.1 | Scaffold4808 | 996                     | CC                              | AA                | 1946701916               |
| SNP_P3_179038_1118  | NW_004519100.1 | Scaffold4808 | 1118                    | GG                              | CC                | 1946701918               |
| SNP_P3_179039_994   | NW_004519102.1 | Scaffold4810 | 994                     | GG                              | CC                | 1946701920               |
| SNP_P3_179040_999   | NW_004519102.1 | Scaffold4810 | 999                     | CC                              | GG                | 1946701922               |

| SNPs IDs           | Chromosome IDs | Chromosomes  | Physical positions (bp) | CDC Frontier (Reference genome) | (Pusa 256 & HPNB) | NCBI SNPdb Accession IDs |
|--------------------|----------------|--------------|-------------------------|---------------------------------|-------------------|--------------------------|
| SNP_P3_179041_1001 | NW_004519102.1 | Scaffold4810 | 1001                    | AA                              | GG                | 1946701924               |
| SNP_P3_179042_1894 | NW_004519102.1 | Scaffold4810 | 1894                    | TT                              | GG                | 1946701926               |
| SNP_P3_179043_2299 | NW_004519102.1 | Scaffold4810 | 2299                    | GG                              | AA                | 1946701929               |
| SNP_P3_179044_4510 | NW_004519102.1 | Scaffold4810 | 4510                    | TT                              | AA                | 1946701931               |
| SNP_P3_179045_781  | NW_004519106.1 | Scaffold4817 | 781                     | CC                              | TT                | 1946701933               |
| SNP_P3_179046_876  | NW_004519106.1 | Scaffold4817 | 876                     | TT                              | AA                | 1946701936               |
| SNP_P3_179047_878  | NW_004519106.1 | Scaffold4817 | 878                     | CC                              | TT                | 1946701938               |
| SNP_P3_179048_933  | NW_004519106.1 | Scaffold4817 | 933                     | TT                              | GG                | 1946701940               |
| SNP_P3_179049_1781 | NW_004519108.1 | Scaffold4820 | 1781                    | TT                              | CC                | 1946701942               |
| SNP_P3_179050_81   | NW_004519110.1 | Scaffold4822 | 81                      | GG                              | TT                | 1946701944               |
| SNP_P3_179052_710  | NW_004519115.1 | Scaffold4828 | 710                     | AA                              | GG                | 1946701946               |
| SNP_P3_179053_1741 | NW_004519115.1 | Scaffold4828 | 1741                    | AA                              | GG                | 1946701948               |
| SNP_P3_179054_1742 | NW_004519115.1 | Scaffold4828 | 1742                    | TT                              | CC                | 1946701950               |
| SNP_P3_179055_4199 | NW_004519115.1 | Scaffold4828 | 4199                    | AA                              | TT                | 1946701952               |
| SNP_P3_179057_1333 | NW_004519116.1 | Scaffold4829 | 1333                    | GG                              | AA                | 1946701954               |
| SNP_P3_179058_1380 | NW_004519116.1 | Scaffold4829 | 1380                    | GG                              | AA                | 1946701956               |
| SNP_P3_179059_1387 | NW_004519116.1 | Scaffold4829 | 1387                    | TT                              | AA                | 1946701958               |
| SNP_P3_179060_1437 | NW_004519116.1 | Scaffold4829 | 1437                    | AA                              | GG                | 1946701960               |
| SNP_P3_179061_1518 | NW_004519116.1 | Scaffold4829 | 1518                    | CC                              | TT                | 1946701962               |
| SNP_P3_179062_1551 | NW_004519116.1 | Scaffold4829 | 1551                    | TT                              | GG                | 1946701964               |
| SNP_P3_179063_2114 | NW_004519116.1 | Scaffold4829 | 2114                    | AA                              | GG                | 1946701966               |
| SNP_P3_179064_2117 | NW_004519116.1 | Scaffold4829 | 2117                    | TT                              | CC                | 1946701968               |
| SNP_P3_179065_5927 | NW_004519116.1 | Scaffold4829 | 5927                    | AA                              | GG                | 1946701970               |
| SNP_P3_179066_5946 | NW_004519116.1 | Scaffold4829 | 5946                    | GG                              | TT                | 1946701972               |
| SNP_P3_179067_5960 | NW_004519116.1 | Scaffold4829 | 5960                    | TT                              | GG                | 1946701974               |
| SNP_P3_179068_5984 | NW_004519116.1 | Scaffold4829 | 5984                    | GG                              | AA                | 1946701977               |
| SNP_P3_179069_6211 | NW_004519116.1 | Scaffold4829 | 6211                    | TT                              | GG                | 1946701979               |
| SNP_P3_179070_6231 | NW_004519116.1 | Scaffold4829 | 6231                    | GG                              | AA                | 1946701981               |
| SNP_P3_179072_6349 | NW_004519116.1 | Scaffold4829 | 6349                    | AA                              | GG                | 1946701983               |
| SNP_P3_179073_6366 | NW_004519116.1 | Scaffold4829 | 6366                    | TT                              | CC                | 1946701985               |
| SNP_P3_179074_6369 | NW_004519116.1 | Scaffold4829 | 6369                    | GG                              | CC                | 1946701987               |
| SNP_P3_179075_6420 | NW_004519116.1 | Scaffold4829 | 6420                    | TT                              | CC                | 1946701989               |
| SNP_P3_179076_6456 | NW_004519116.1 | Scaffold4829 | 6456                    | CC                              | GG                | 1946701991               |
| SNP_P3_179078_6666 | NW_004519116.1 | Scaffold4829 | 6666                    | CC                              | GG                | 1946701993               |
| SNP_P3_179079_6693 | NW_004519116.1 | Scaffold4829 | 6693                    | TT                              | CC                | 1946701995               |
| SNP_P3_179080_6734 | NW_004519116.1 | Scaffold4829 | 6734                    | TT                              | CC                | 1946701997               |
| SNP_P3_179081_6892 | NW_004519116.1 | Scaffold4829 | 6892                    | GG                              | TT                | 1946701999               |
| SNP_P3_179082_8020 | NW_004519116.1 | Scaffold4829 | 8020                    | AA                              | GG                | 1946702001               |
| SNP_P3_179084_8277 | NW_004519116.1 | Scaffold4829 | 8277                    | AA                              | GG                | 1946702003               |
| SNP_P3_179085_8285 | NW_004519116.1 | Scaffold4829 | 8285                    | CC                              | TT                | 1946702005               |
| SNP_P3_179086_8328 | NW_004519116.1 | Scaffold4829 | 8328                    | TT                              | AA                | 1946702009               |
| SNP_P3_179087_8471 | NW_004519116.1 | Scaffold4829 | 8471                    | AA                              | CC                | 1946702011               |

| SNPs IDs            | Chromosome IDs | Chromosomes  | Physical positions (bp) | CDC Frontier (Reference genome) | (Pusa 256 & HPNB) | NCBI SNPdb Accession IDs |
|---------------------|----------------|--------------|-------------------------|---------------------------------|-------------------|--------------------------|
| SNP_P3_179088_8483  | NW_004519116.1 | Scaffold4829 | 8483                    | AA                              | GG                | 1946702013               |
| SNP_P3_179089_8635  | NW_004519116.1 | Scaffold4829 | 8635                    | CC                              | TT                | 1946702015               |
| SNP_P3_179090_580   | NW_004519118.1 | Scaffold4833 | 580                     | AA                              | GG                | 1946702017               |
| SNP_P3_179091_675   | NW_004519118.1 | Scaffold4833 | 675                     | TT                              | AA                | 1946702019               |
| SNP_P3_179093_1060  | NW_004519118.1 | Scaffold4833 | 1060                    | AA                              | CC                | 1946702021               |
| SNP_P3_179094_1187  | NW_004519118.1 | Scaffold4833 | 1187                    | AA                              | TT                | 1946702023               |
| SNP_P3_179095_1243  | NW_004519118.1 | Scaffold4833 | 1243                    | GG                              | AA                | 1946702025               |
| SNP_P3_179096_1369  | NW_004519118.1 | Scaffold4833 | 1369                    | AA                              | TT                | 1946702027               |
| SNP_P3_179097_3484  | NW_004519118.1 | Scaffold4833 | 3484                    | CC                              | AA                | 1946702029               |
| SNP_P3_179098_3499  | NW_004519118.1 | Scaffold4833 | 3499                    | CC                              | AA                | 1946702031               |
| SNP_P3_179099_3755  | NW_004519118.1 | Scaffold4833 | 3755                    | GG                              | TT                | 1946702033               |
| SNP_P3_179101_5751  | NW_004519118.1 | Scaffold4833 | 5751                    | TT                              | AA                | 1946702035               |
| SNP_P3_179102_5759  | NW_004519118.1 | Scaffold4833 | 5759                    | GG                              | AA                | 1946702037               |
| SNP_P3_179103_5788  | NW_004519118.1 | Scaffold4833 | 5788                    | TT                              | CC                | 1946702039               |
| SNP_P3_179104_5822  | NW_004519118.1 | Scaffold4833 | 5822                    | AA                              | GG                | 1946702041               |
| SNP_P3_179106_15206 | NW_004519122.1 | Scaffold4837 | 15206                   | AA                              | GG                | 1946702043               |
| SNP_P3_179107_1817  | NW_004519125.1 | Scaffold4845 | 1817                    | AA                              | GG                | 1946702045               |
| SNP_P3_179108_1842  | NW_004519125.1 | Scaffold4845 | 1842                    | GG                              | CC                | 1946702048               |
| SNP_P3_179109_5798  | NW_004519126.1 | Scaffold4846 | 5798                    | TT                              | CC                | 1946702050               |
| SNP_P3_179110_5886  | NW_004519126.1 | Scaffold4846 | 5886                    | GG                              | CC                | 1946702052               |
| SNP_P3_179111_5892  | NW_004519126.1 | Scaffold4846 | 5892                    | GG                              | TT                | 1946702054               |
| SNP_P3_179112_5930  | NW_004519126.1 | Scaffold4846 | 5930                    | GG                              | AA                | 1946702056               |
| SNP_P3_179113_6285  | NW_004519126.1 | Scaffold4846 | 6285                    | GG                              | CC                | 1946702058               |
| SNP_P3_179114_658   | NW_004519128.1 | Scaffold4848 | 658                     | TT                              | GG                | 1946702060               |
| SNP_P3_179115_659   | NW_004519128.1 | Scaffold4848 | 659                     | GG                              | AA                | 1946702062               |
| SNP_P3_179116_922   | NW_004519130.1 | Scaffold4850 | 922                     | TT                              | AA                | 1946702065               |
| SNP_P3_179117_923   | NW_004519130.1 | Scaffold4850 | 923                     | TT                              | CC                | 1946702067               |
| SNP_P3_179119_2088  | NW_004519130.1 | Scaffold4850 | 2088                    | GG                              | AA                | 1946702069               |
| SNP_P3_179120_3130  | NW_004519131.1 | Scaffold4851 | 3130                    | GG                              | TT                | 1946702071               |
| SNP_P3_179121_3224  | NW_004519131.1 | Scaffold4851 | 3224                    | CC                              | AA                | 1946702073               |
| SNP_P3_179122_3461  | NW_004519131.1 | Scaffold4851 | 3461                    | TT                              | AA                | 1946702075               |
| SNP_P3_179124_3578  | NW_004519131.1 | Scaffold4851 | 3578                    | AA                              | GG                | 1946702077               |
| SNP_P3_179125_3588  | NW_004519131.1 | Scaffold4851 | 3588                    | TT                              | AA                | 1946702079               |
| SNP_P3_179126_3601  | NW_004519131.1 | Scaffold4851 | 3601                    | AA                              | CC                | 1946702082               |
| SNP_P3_179128_3639  | NW_004519131.1 | Scaffold4851 | 3639                    | GG                              | AA                | 1946702084               |
| SNP_P3_179129_3686  | NW_004519131.1 | Scaffold4851 | 3686                    | AA                              | GG                | 1946702087               |
| SNP_P3_179130_3806  | NW_004519131.1 | Scaffold4851 | 3806                    | AA                              | GG                | 1946702089               |
| SNP_P3_179131_3974  | NW_004519131.1 | Scaffold4851 | 3974                    | GG                              | TT                | 1946702091               |
| SNP_P3_179133_5151  | NW_004519136.1 | Scaffold4859 | 5151                    | CC                              | TT                | 1946702093               |
| SNP_P3_179134_5350  | NW_004519136.1 | Scaffold4859 | 5350                    | CC                              | GG                | 1946702095               |
| SNP_P3_179135_5514  | NW_004519136.1 | Scaffold4859 | 5514                    | CC                              | TT                | 1946702097               |
| SNP_P3_179136_981   | NW_004519139.1 | Scaffold4862 | 981                     | AA                              | TT                | 1946702099               |

| SNPs IDs            | Chromosome IDs | Chromosomes  | Physical positions (bp) | CDC Frontier (Reference genome) | (Pusa 256 & HPNB) | NCBI SNPdb Accession IDs |
|---------------------|----------------|--------------|-------------------------|---------------------------------|-------------------|--------------------------|
| SNP_P3_179138_617   | NW_004519140.1 | Scaffold4863 | 617                     | CC                              | TT                | 1946702101               |
| SNP_P3_179139_1911  | NW_004519140.1 | Scaffold4863 | 1911                    | CC                              | TT                | 1946702103               |
| SNP_P3_179140_1938  | NW_004519140.1 | Scaffold4863 | 1938                    | GG                              | AA                | 1946702105               |
| SNP_P3_179141_2007  | NW_004519140.1 | Scaffold4863 | 2007                    | AA                              | GG                | 1946702107               |
| SNP_P3_179142_716   | NW_004519141.1 | Scaffold4864 | 716                     | GG                              | AA                | 1946702109               |
| SNP_P3_179143_560   | NW_004519142.1 | Scaffold4865 | 560                     | CC                              | AA                | 1946702111               |
| SNP_P3_179144_766   | NW_004519142.1 | Scaffold4865 | 766                     | TT                              | CC                | 1946702113               |
| SNP_P3_179145_796   | NW_004519142.1 | Scaffold4865 | 796                     | CC                              | TT                | 1946702115               |
| SNP_P3_179147_1205  | NW_004519142.1 | Scaffold4865 | 1205                    | GG                              | AA                | 1946702117               |
| SNP_P3_179148_1221  | NW_004519142.1 | Scaffold4865 | 1221                    | CC                              | TT                | 1946702119               |
| SNP_P3_179149_1506  | NW_004519143.1 | Scaffold4866 | 1506                    | TT                              | CC                | 1946702121               |
| SNP_P3_179150_402   | NW_004519146.1 | Scaffold4869 | 402                     | CC                              | AA                | 1946702123               |
| SNP_P3_179151_436   | NW_004519146.1 | Scaffold4869 | 436                     | GG                              | TT                | 1946702127               |
| SNP_P3_179152_633   | NW_004519146.1 | Scaffold4869 | 633                     | CC                              | AA                | 1946702129               |
| SNP_P3_179153_640   | NW_004519146.1 | Scaffold4869 | 640                     | GG                              | AA                | 1946702131               |
| SNP_P3_179154_751   | NW_004519146.1 | Scaffold4869 | 751                     | TT                              | CC                | 1946702133               |
| SNP_P3_179155_770   | NW_004519146.1 | Scaffold4869 | 770                     | TT                              | AA                | 1946702135               |
| SNP_P3_179157_921   | NW_004519146.1 | Scaffold4869 | 921                     | GG                              | AA                | 1946702137               |
| SNP_P3_179158_949   | NW_004519146.1 | Scaffold4869 | 949                     | CC                              | GG                | 1946702139               |
| SNP_P3_179160_1221  | NW_004519146.1 | Scaffold4869 | 1221                    | TT                              | AA                | 1946702141               |
| SNP_P3_179161_1240  | NW_004519146.1 | Scaffold4869 | 1240                    | AA                              | TT                | 1946702143               |
| SNP_P3_179164_7769  | NW_004519148.1 | Scaffold4874 | 7769                    | AA                              | GG                | 1946702145               |
| SNP_P3_179165_7805  | NW_004519148.1 | Scaffold4874 | 7805                    | CC                              | TT                | 1946702147               |
| SNP_P3_179166_7827  | NW_004519148.1 | Scaffold4874 | 7827                    | AA                              | GG                | 1946702149               |
| SNP_P3_179167_7982  | NW_004519148.1 | Scaffold4874 | 7982                    | GG                              | AA                | 1946702151               |
| SNP_P3_179168_8022  | NW_004519148.1 | Scaffold4874 | 8022                    | GG                              | AA                | 1946702153               |
| SNP_P3_179169_8031  | NW_004519148.1 | Scaffold4874 | 8031                    | AA                              | GG                | 1946702155               |
| SNP_P3_179170_8032  | NW_004519148.1 | Scaffold4874 | 8032                    | AA                              | GG                | 1946702157               |
| SNP_P3_179171_8065  | NW_004519148.1 | Scaffold4874 | 8065                    | GG                              | CC                | 1946702159               |
| SNP_P3_179172_8131  | NW_004519148.1 | Scaffold4874 | 8131                    | CC                              | AA                | 1946702161               |
| SNP_P3_179173_8146  | NW_004519148.1 | Scaffold4874 | 8146                    | AA                              | GG                | 1946702165               |
| SNP_P3_179174_8184  | NW_004519148.1 | Scaffold4874 | 8184                    | AA                              | GG                | 1946702167               |
| SNP_P3_179175_8229  | NW_004519148.1 | Scaffold4874 | 8229                    | CC                              | TT                | 1946702169               |
| SNP_P3_179176_8236  | NW_004519148.1 | Scaffold4874 | 8236                    | GG                              | AA                | 1946702171               |
| SNP_P3_179177_14504 | NW_004519148.1 | Scaffold4874 | 14504                   | GG                              | AA                | 1946702173               |
| SNP_P3_179178_3460  | NW_004519150.1 | Scaffold4879 | 3460                    | CC                              | TT                | 1946702175               |
| SNP_P3_179179_3762  | NW_004519150.1 | Scaffold4879 | 3762                    | TT                              | GG                | 1946702177               |
| SNP_P3_179180_3800  | NW_004519150.1 | Scaffold4879 | 3800                    | CC                              | TT                | 1946702179               |
| SNP_P3_179181_3806  | NW_004519150.1 | Scaffold4879 | 3806                    | GG                              | AA                | 1946702181               |
| SNP_P3_179182_64    | NW_004519153.1 | Scaffold4884 | 64                      | GG                              | AA                | 1946702183               |
| SNP_P3_179183_178   | NW_004519153.1 | Scaffold4884 | 178                     | AA                              | CC                | 1946702185               |
| SNP_P3_179184_799   | NW_004519153.1 | Scaffold4884 | 799                     | TT                              | CC                | 1946702187               |

| SNPs IDs            | Chromosome IDs | Chromosomes  | Physical positions (bp) | CDC Frontier (Reference genome) | (Pusa 256 & HPNB) | NCBI SNPdb Accession IDs |
|---------------------|----------------|--------------|-------------------------|---------------------------------|-------------------|--------------------------|
| SNP_P3_179185_943   | NW_004519153.1 | Scaffold4884 | 943                     | TT                              | GG                | 1946702189               |
| SNP_P3_179186_1077  | NW_004519153.1 | Scaffold4884 | 1077                    | AA                              | GG                | 1946702191               |
| SNP_P3_179187_1096  | NW_004519153.1 | Scaffold4884 | 1096                    | TT                              | CC                | 1946702193               |
| SNP_P3_179188_1117  | NW_004519153.1 | Scaffold4884 | 1117                    | GG                              | CC                | 1946702195               |
| SNP_P3_179189_1733  | NW_004519153.1 | Scaffold4884 | 1733                    | TT                              | GG                | 1946702197               |
| SNP_P3_179190_1859  | NW_004519153.1 | Scaffold4884 | 1859                    | TT                              | AA                | 1946702199               |
| SNP_P3_179191_1876  | NW_004519153.1 | Scaffold4884 | 1876                    | AA                              | GG                | 1946702202               |
| SNP_P3_179192_1921  | NW_004519153.1 | Scaffold4884 | 1921                    | AA                              | TT                | 1946702204               |
| SNP_P3_179193_1966  | NW_004519153.1 | Scaffold4884 | 1966                    | AA                              | GG                | 1946702206               |
| SNP_P3_179194_703   | NW_004519155.1 | Scaffold4888 | 703                     | CC                              | AA                | 1946702209               |
| SNP_P3_179195_939   | NW_004519155.1 | Scaffold4888 | 939                     | AA                              | GG                | 1946702211               |
| SNP_P3_179196_958   | NW_004519155.1 | Scaffold4888 | 958                     | AA                              | GG                | 1946702213               |
| SNP_P3_179197_1755  | NW_004519156.1 | Scaffold4889 | 1755                    | TT                              | CC                | 1946702215               |
| SNP_P3_179198_1802  | NW_004519156.1 | Scaffold4889 | 1802                    | TT                              | GG                | 1946702217               |
| SNP_P3_179199_1434  | NW_004519158.1 | Scaffold4892 | 1434                    | GG                              | TT                | 1946702219               |
| SNP_P3_179200_2069  | NW_004519158.1 | Scaffold4892 | 2069                    | GG                              | CC                | 1946702221               |
| SNP_P3_179201_2075  | NW_004519158.1 | Scaffold4892 | 2075                    | CC                              | AA                | 1946702223               |
| SNP_P3_179202_173   | NW_004519160.1 | Scaffold4894 | 173                     | GG                              | AA                | 1946702225               |
| SNP_P3_179203_186   | NW_004519160.1 | Scaffold4894 | 186                     | TT                              | GG                | 1946702227               |
| SNP_P3_179204_392   | NW_004519160.1 | Scaffold4894 | 392                     | TT                              | CC                | 1946702229               |
| SNP_P3_179206_384   | NW_004519165.1 | Scaffold4901 | 384                     | CC                              | TT                | 1946702231               |
| SNP_P3_179209_8635  | NW_004519166.1 | Scaffold4902 | 8635                    | TT                              | CC                | 1946702233               |
| SNP_P3_179210_10140 | NW_004519166.1 | Scaffold4902 | 10140                   | GG                              | AA                | 1946702235               |
| SNP_P3_179212_66460 | NW_004519166.1 | Scaffold4902 | 66460                   | AA                              | CC                | 1946702237               |
| SNP_P3_179213_70142 | NW_004519166.1 | Scaffold4902 | 70142                   | AA                              | TT                | 1946702239               |
| SNP_P3_179214_72792 | NW_004519166.1 | Scaffold4902 | 72792                   | TT                              | AA                | 1946702242               |
| SNP_P3_179215_73370 | NW_004519166.1 | Scaffold4902 | 73370                   | TT                              | CC                | 1946702244               |
| SNP_P3_179216_73396 | NW_004519166.1 | Scaffold4902 | 73396                   | CC                              | TT                | 1946702246               |
| SNP_P3_179217_73687 | NW_004519166.1 | Scaffold4902 | 73687                   | GG                              | AA                | 1946702248               |
| SNP_P3_179218_73692 | NW_004519166.1 | Scaffold4902 | 73692                   | TT                              | GG                | 1946702250               |
| SNP_P3_179219_73732 | NW_004519166.1 | Scaffold4902 | 73732                   | TT                              | AA                | 1946702252               |
| SNP_P3_179220_74512 | NW_004519166.1 | Scaffold4902 | 74512                   | TT                              | AA                | 1946702254               |
| SNP_P3_179221_76057 | NW_004519166.1 | Scaffold4902 | 76057                   | GG                              | AA                | 1946702256               |
| SNP_P3_179222_76477 | NW_004519166.1 | Scaffold4902 | 76477                   | AA                              | TT                | 1946702258               |
| SNP_P3_179223_76522 | NW_004519166.1 | Scaffold4902 | 76522                   | AA                              | GG                | 1946702260               |
| SNP_P3_179224_85451 | NW_004519166.1 | Scaffold4902 | 85451                   | TT                              | AA                | 1946702262               |
| SNP_P3_179225_91253 | NW_004519166.1 | Scaffold4902 | 91253                   | AA                              | CC                | 1946702264               |
| SNP_P3_179226_64    | NW_004519169.1 | Scaffold4905 | 64                      | TT                              | GG                | 1946702266               |
| SNP_P3_179227_382   | NW_004519169.1 | Scaffold4905 | 382                     | AA                              | GG                | 1946702269               |
| SNP_P3_179228_2406  | NW_004519175.1 | Scaffold4917 | 2406                    | TT                              | CC                | 1946702271               |
| SNP_P3_179229_2506  | NW_004519175.1 | Scaffold4917 | 2506                    | TT                              | CC                | 1946702273               |
| SNP_P3_179230_2549  | NW_004519175.1 | Scaffold4917 | 2549                    | TT                              | AA                | 1946702275               |

| SNPs IDs            | Chromosome IDs | Chromosomes  | Physical positions (bp) | CDC Frontier (Reference genome) | (Pusa 256 & HPNB) | NCBI SNPdb Accession IDs |
|---------------------|----------------|--------------|-------------------------|---------------------------------|-------------------|--------------------------|
| SNP_P3_179231_4207  | NW_004519175.1 | Scaffold4917 | 4207                    | AA                              | GG                | 1946702278               |
| SNP_P3_179232_4244  | NW_004519175.1 | Scaffold4917 | 4244                    | CC                              | AA                | 1946702280               |
| SNP_P3_179233_4254  | NW_004519175.1 | Scaffold4917 | 4254                    | TT                              | AA                | 1946702282               |
| SNP_P3_179234_4419  | NW_004519175.1 | Scaffold4917 | 4419                    | TT                              | GG                | 1946702284               |
| SNP_P3_179235_4778  | NW_004519175.1 | Scaffold4917 | 4778                    | TT                              | AA                | 1946702286               |
| SNP_P3_179236_4909  | NW_004519175.1 | Scaffold4917 | 4909                    | GG                              | AA                | 1946702289               |
| SNP_P3_179237_4959  | NW_004519175.1 | Scaffold4917 | 4959                    | AA                              | TT                | 1946702291               |
| SNP_P3_179238_4964  | NW_004519175.1 | Scaffold4917 | 4964                    | CC                              | AA                | 1946702293               |
| SNP_P3_179239_4992  | NW_004519175.1 | Scaffold4917 | 4992                    | AA                              | TT                | 1946702295               |
| SNP_P3_179240_5036  | NW_004519175.1 | Scaffold4917 | 5036                    | TT                              | AA                | 1946702297               |
| SNP_P3_179241_5066  | NW_004519175.1 | Scaffold4917 | 5066                    | AA                              | CC                | 1946702299               |
| SNP_P3_179242_5067  | NW_004519175.1 | Scaffold4917 | 5067                    | GG                              | AA                | 1946702301               |
| SNP_P3_179243_5288  | NW_004519175.1 | Scaffold4917 | 5288                    | GG                              | AA                | 1946702303               |
| SNP_P3_179244_5309  | NW_004519175.1 | Scaffold4917 | 5309                    | GG                              | TT                | 1946702305               |
| SNP_P3_179245_5472  | NW_004519175.1 | Scaffold4917 | 5472                    | CC                              | GG                | 1946702307               |
| SNP_P3_179246_5558  | NW_004519175.1 | Scaffold4917 | 5558                    | TT                              | GG                | 1946702309               |
| SNP_P3_179247_5583  | NW_004519175.1 | Scaffold4917 | 5583                    | AA                              | CC                | 1946702312               |
| SNP_P3_179248_5600  | NW_004519175.1 | Scaffold4917 | 5600                    | GG                              | AA                | 1946702314               |
| SNP_P3_179249_5625  | NW_004519175.1 | Scaffold4917 | 5625                    | AA                              | TT                | 1946702316               |
| SNP_P3_179250_5637  | NW_004519175.1 | Scaffold4917 | 5637                    | TT                              | AA                | 1946702318               |
| SNP_P3_179251_521   | NW_004519176.1 | Scaffold4919 | 521                     | AA                              | GG                | 1946702320               |
| SNP_P3_179252_524   | NW_004519176.1 | Scaffold4919 | 524                     | AA                              | CC                | 1946702322               |
| SNP_P3_179254_19088 | NW_004519177.1 | Scaffold4920 | 19088                   | AA                              | TT                | 1946702324               |
| SNP_P3_179255_19335 | NW_004519177.1 | Scaffold4920 | 19335                   | TT                              | CC                | 1946702326               |
| SNP_P3_179256_19337 | NW_004519177.1 | Scaffold4920 | 19337                   | GG                              | AA                | 1946702328               |
| SNP_P3_179257_19408 | NW_004519177.1 | Scaffold4920 | 19408                   | TT                              | AA                | 1946702330               |
| SNP_P3_179258_19450 | NW_004519177.1 | Scaffold4920 | 19450                   | AA                              | GG                | 1946702332               |
| SNP_P3_179259_19462 | NW_004519177.1 | Scaffold4920 | 19462                   | TT                              | AA                | 1946702334               |
| SNP_P3_179260_19509 | NW_004519177.1 | Scaffold4920 | 19509                   | CC                              | TT                | 1946702336               |
| SNP_P3_179261_19511 | NW_004519177.1 | Scaffold4920 | 19511                   | AA                              | GG                | 1946702338               |
| SNP_P3_179262_20945 | NW_004519177.1 | Scaffold4920 | 20945                   | CC                              | GG                | 1946702341               |
| SNP_P3_179263_21029 | NW_004519177.1 | Scaffold4920 | 21029                   | GG                              | CC                | 1946702343               |
| SNP_P3_179264_3902  | NW_004519180.1 | Scaffold4923 | 3902                    | AA                              | GG                | 1946702345               |
| SNP_P3_179265_3934  | NW_004519180.1 | Scaffold4923 | 3934                    | CC                              | TT                | 1946702347               |
| SNP_P3_179266_3935  | NW_004519180.1 | Scaffold4923 | 3935                    | AA                              | GG                | 1946702349               |
| SNP_P3_179267_3946  | NW_004519180.1 | Scaffold4923 | 3946                    | GG                              | CC                | 1946702351               |
| SNP_P3_179268_3950  | NW_004519180.1 | Scaffold4923 | 3950                    | GG                              | CC                | 1946702353               |
| SNP_P3_179269_3963  | NW_004519180.1 | Scaffold4923 | 3963                    | TT                              | AA                | 1946702355               |
| SNP_P3_179271_10778 | NW_004519180.1 | Scaffold4923 | 10778                   | GG                              | CC                | 1946702357               |
| SNP_P3_179272_10783 | NW_004519180.1 | Scaffold4923 | 10783                   | GG                              | AA                | 1946702360               |
| SNP_P3_179273_10819 | NW_004519180.1 | Scaffold4923 | 10819                   | CC                              | TT                | 1946702362               |
| SNP_P3_179274_10862 | NW_004519180.1 | Scaffold4923 | 10862                   | CC                              | GG                | 1946702364               |

| SNPs IDs            | Chromosome IDs | Chromosomes  | Physical positions (bp) | CDC Frontier (Reference genome) | (Pusa 256 & HPNB) | NCBI SNPdb Accession IDs |
|---------------------|----------------|--------------|-------------------------|---------------------------------|-------------------|--------------------------|
| SNP_P3_179275_10875 | NW_004519180.1 | Scaffold4923 | 10875                   | CC                              | TT                | 1946702366               |
| SNP_P3_179276_10946 | NW_004519180.1 | Scaffold4923 | 10946                   | TT                              | CC                | 1946702368               |
| SNP_P3_179277_11028 | NW_004519180.1 | Scaffold4923 | 11028                   | CC                              | GG                | 1946702370               |
| SNP_P3_179278_11059 | NW_004519180.1 | Scaffold4923 | 11059                   | TT                              | AA                | 1946702373               |
| SNP_P3_179279_11060 | NW_004519180.1 | Scaffold4923 | 11060                   | CC                              | TT                | 1946702375               |
| SNP_P3_179280_11086 | NW_004519180.1 | Scaffold4923 | 11086                   | AA                              | GG                | 1946702377               |
| SNP_P3_179281_11116 | NW_004519180.1 | Scaffold4923 | 11116                   | CC                              | GG                | 1946702379               |
| SNP_P3_179282_11136 | NW_004519180.1 | Scaffold4923 | 11136                   | CC                              | AA                | 1946702381               |
| SNP_P3_179283_19692 | NW_004519180.1 | Scaffold4923 | 19692                   | TT                              | CC                | 1946702383               |
| SNP_P3_179284_19729 | NW_004519180.1 | Scaffold4923 | 19729                   | AA                              | GG                | 1946702385               |
| SNP_P3_179285_19828 | NW_004519180.1 | Scaffold4923 | 19828                   | AA                              | GG                | 1946702387               |
| SNP_P3_179286_19865 | NW_004519180.1 | Scaffold4923 | 19865                   | TT                              | AA                | 1946702389               |
| SNP_P3_179287_3067  | NW_004519182.1 | Scaffold4925 | 3067                    | GG                              | AA                | 1946702391               |
| SNP_P3_179288_634   | NW_004519184.1 | Scaffold4928 | 634                     | GG                              | AA                | 1946702393               |
| SNP_P3_179289_642   | NW_004519184.1 | Scaffold4928 | 642                     | AA                              | GG                | 1946702395               |
| SNP_P3_179290_651   | NW_004519184.1 | Scaffold4928 | 651                     | TT                              | AA                | 1946702398               |
| SNP_P3_179291_2053  | NW_004519184.1 | Scaffold4928 | 2053                    | AA                              | GG                | 1946702400               |
| SNP_P3_179292_2100  | NW_004519184.1 | Scaffold4928 | 2100                    | TT                              | GG                | 1946702402               |
| SNP_P3_179293_598   | NW_004519188.1 | Scaffold4932 | 598                     | TT                              | CC                | 1946702404               |
| SNP_P3_179294_537   | NW_004519192.1 | Scaffold4937 | 537                     | TT                              | AA                | 1946702406               |
| SNP_P3_179295_666   | NW_004519192.1 | Scaffold4937 | 666                     | AA                              | CC                | 1946702408               |
| SNP_P3_179296_677   | NW_004519192.1 | Scaffold4937 | 677                     | GG                              | TT                | 1946702410               |
| SNP_P3_179297_224   | NW_004519194.1 | Scaffold4939 | 224                     | AA                              | TT                | 1946702412               |
| SNP_P3_179298_262   | NW_004519196.1 | Scaffold4941 | 262                     | CC                              | TT                | 1946702415               |
| SNP_P3_179299_379   | NW_004519196.1 | Scaffold4941 | 379                     | GG                              | AA                | 1946702417               |
| SNP_P3_179300_390   | NW_004519196.1 | Scaffold4941 | 390                     | AA                              | TT                | 1946702419               |
| SNP_P3_179302_490   | NW_004519197.1 | Scaffold4943 | 490                     | CC                              | AA                | 1946702421               |
| SNP_P3_179303_558   | NW_004519197.1 | Scaffold4943 | 558                     | AA                              | TT                | 1946702424               |
| SNP_P3_179305_1380  | NW_004519197.1 | Scaffold4943 | 1380                    | TT                              | CC                | 1946702426               |
| SNP_P3_179306_1384  | NW_004519197.1 | Scaffold4943 | 1384                    | AA                              | CC                | 1946702428               |
| SNP_P3_179307_1501  | NW_004519197.1 | Scaffold4943 | 1501                    | AA                              | TT                | 1946702430               |
| SNP_P3_179308_1701  | NW_004519197.1 | Scaffold4943 | 1701                    | GG                              | AA                | 1946702432               |
| SNP_P3_179309_3974  | NW_004519199.1 | Scaffold4945 | 3974                    | TT                              | CC                | 1946702434               |
| SNP_P3_179310_3977  | NW_004519199.1 | Scaffold4945 | 3977                    | TT                              | AA                | 1946702436               |
| SNP_P3_179311_3982  | NW_004519199.1 | Scaffold4945 | 3982                    | TT                              | CC                | 1946702438               |
| SNP_P3_179312_3991  | NW_004519199.1 | Scaffold4945 | 3991                    | AA                              | GG                | 1946702440               |
| SNP_P3_179313_4002  | NW_004519199.1 | Scaffold4945 | 4002                    | TT                              | CC                | 1946702442               |
| SNP_P3_179314_4051  | NW_004519199.1 | Scaffold4945 | 4051                    | CC                              | GG                | 1946702444               |
| SNP_P3_179315_4187  | NW_004519199.1 | Scaffold4945 | 4187                    | GG                              | AA                | 1946702446               |
| SNP_P3_179316_4198  | NW_004519199.1 | Scaffold4945 | 4198                    | CC                              | AA                | 1946702449               |
| SNP_P3_179317_4249  | NW_004519199.1 | Scaffold4945 | 4249                    | CC                              | TT                | 1946702451               |
| SNP_P3_179318_4250  | NW_004519199.1 | Scaffold4945 | 4250                    | AA                              | GG                | 1946702453               |



| SNPs IDs            | Chromosome IDs | Chromosomes  | Physical positions (bp) | CDC Frontier (Reference genome) | (Pusa 256 & HPNB) | NCBI SNPdb Accession IDs |
|---------------------|----------------|--------------|-------------------------|---------------------------------|-------------------|--------------------------|
| SNP_P3_179319_4313  | NW_004519199.1 | Scaffold4945 | 4313                    | GG                              | AA                | 1946702455               |
| SNP_P3_179320_4321  | NW_004519199.1 | Scaffold4945 | 4321                    | CC                              | TT                | 1946702457               |
| SNP_P3_179321_4335  | NW_004519199.1 | Scaffold4945 | 4335                    | TT                              | CC                | 1946702459               |
| SNP_P3_179322_4370  | NW_004519199.1 | Scaffold4945 | 4370                    | TT                              | GG                | 1946702461               |
| SNP_P3_179323_4424  | NW_004519199.1 | Scaffold4945 | 4424                    | AA                              | GG                | 1946702463               |
| SNP_P3_179324_8702  | NW_004519199.1 | Scaffold4945 | 8702                    | CC                              | TT                | 1946702465               |
| SNP_P3_179325_8846  | NW_004519199.1 | Scaffold4945 | 8846                    | TT                              | CC                | 1946702467               |
| SNP_P3_179326_430   | NW_004519200.1 | Scaffold4946 | 430                     | TT                              | CC                | 1946702469               |
| SNP_P3_179327_649   | NW_004519200.1 | Scaffold4946 | 649                     | TT                              | AA                | 1946702471               |
| SNP_P3_179328_842   | NW_004519200.1 | Scaffold4946 | 842                     | AA                              | GG                | 1946702473               |
| SNP_P3_179329_500   | NW_004519203.1 | Scaffold4950 | 500                     | AA                              | GG                | 1946702475               |
| SNP_P3_179330_734   | NW_004519207.1 | Scaffold4954 | 734                     | CC                              | TT                | 1946702477               |
| SNP_P3_179331_754   | NW_004519207.1 | Scaffold4954 | 754                     | AA                              | GG                | 1946702480               |
| SNP_P3_179332_779   | NW_004519207.1 | Scaffold4954 | 779                     | CC                              | GG                | 1946702482               |
| SNP_P3_179333_784   | NW_004519207.1 | Scaffold4954 | 784                     | TT                              | CC                | 1946702484               |
| SNP_P3_179334_790   | NW_004519207.1 | Scaffold4954 | 790                     | TT                              | CC                | 1946702486               |
| SNP_P3_179335_1011  | NW_004519207.1 | Scaffold4954 | 1011                    | GG                              | CC                | 1946702488               |
| SNP_P3_179336_635   | NW_004519210.1 | Scaffold4957 | 635                     | CC                              | AA                | 1946702490               |
| SNP_P3_179337_792   | NW_004519210.1 | Scaffold4957 | 792                     | TT                              | AA                | 1946702492               |
| SNP_P3_179338_794   | NW_004519210.1 | Scaffold4957 | 794                     | TT                              | GG                | 1946702494               |
| SNP_P3_179339_796   | NW_004519210.1 | Scaffold4957 | 796                     | AA                              | TT                | 1946702496               |
| SNP_P3_179340_840   | NW_004519210.1 | Scaffold4957 | 840                     | TT                              | GG                | 1946702499               |
| SNP_P3_179341_841   | NW_004519210.1 | Scaffold4957 | 841                     | GG                              | AA                | 1946702501               |
| SNP_P3_179342_843   | NW_004519211.1 | Scaffold4958 | 843                     | GG                              | TT                | 1946702503               |
| SNP_P3_179343_857   | NW_004519211.1 | Scaffold4958 | 857                     | AA                              | GG                | 1946702505               |
| SNP_P3_179344_858   | NW_004519211.1 | Scaffold4958 | 858                     | AA                              | GG                | 1946702507               |
| SNP_P3_179345_1096  | NW_004519212.1 | Scaffold4960 | 1096                    | CC                              | AA                | 1946702509               |
| SNP_P3_179346_1125  | NW_004519218.1 | Scaffold4970 | 1125                    | CC                              | TT                | 1946702512               |
| SNP_P3_179347_1126  | NW_004519218.1 | Scaffold4970 | 1126                    | AA                              | GG                | 1946702514               |
| SNP_P3_179348_1345  | NW_004519218.1 | Scaffold4970 | 1345                    | AA                              | GG                | 1946702516               |
| SNP_P3_179349_1423  | NW_004519218.1 | Scaffold4970 | 1423                    | GG                              | TT                | 1946702518               |
| SNP_P3_179350_1400  | NW_004519220.1 | Scaffold4972 | 1400                    | TT                              | GG                | 1946702521               |
| SNP_P3_179351_1463  | NW_004519220.1 | Scaffold4972 | 1463                    | AA                              | TT                | 1946702523               |
| SNP_P3_179352_1465  | NW_004519220.1 | Scaffold4972 | 1465                    | GG                              | TT                | 1946702525               |
| SNP_P3_179353_904   | NW_004519225.1 | Scaffold4978 | 904                     | AA                              | GG                | 1946702527               |
| SNP_P3_179355_930   | NW_004519225.1 | Scaffold4978 | 930                     | AA                              | GG                | 1946702529               |
| SNP_P3_179356_1032  | NW_004519225.1 | Scaffold4978 | 1032                    | GG                              | AA                | 1946702531               |
| SNP_P3_179357_1199  | NW_004519225.1 | Scaffold4978 | 1199                    | GG                              | TT                | 1946702533               |
| SNP_P3_179358_16024 | NW_004519225.1 | Scaffold4978 | 16024                   | TT                              | CC                | 1946702535               |
| SNP_P3_179359_16224 | NW_004519225.1 | Scaffold4978 | 16224                   | TT                              | GG                | 1946702537               |
| SNP_P3_179360_16251 | NW_004519225.1 | Scaffold4978 | 16251                   | GG                              | AA                | 1946702539               |
| SNP_P3_179362_25611 | NW_004519225.1 | Scaffold4978 | 25611                   | TT                              | CC                | 1946702542               |

| SNPs IDs            | Chromosome IDs | Chromosomes  | Physical positions (bp) | CDC Frontier (Reference genome) | (Pusa 256 & HPNB) | NCBI SNPdb Accession IDs |
|---------------------|----------------|--------------|-------------------------|---------------------------------|-------------------|--------------------------|
| SNP_P3_179364_27104 | NW_004519225.1 | Scaffold4978 | 27104                   | CC                              | TT                | 1946702544               |
| SNP_P3_179365_29934 | NW_004519225.1 | Scaffold4978 | 29934                   | CC                              | AA                | 1946702546               |
| SNP_P3_179366_33225 | NW_004519225.1 | Scaffold4978 | 33225                   | AA                              | GG                | 1946702548               |
| SNP_P3_179367_33227 | NW_004519225.1 | Scaffold4978 | 33227                   | TT                              | AA                | 1946702550               |
| SNP_P3_179368_33264 | NW_004519225.1 | Scaffold4978 | 33264                   | AA                              | GG                | 1946702553               |
| SNP_P3_179369_33533 | NW_004519225.1 | Scaffold4978 | 33533                   | AA                              | GG                | 1946702555               |
| SNP_P3_179370_33555 | NW_004519225.1 | Scaffold4978 | 33555                   | AA                              | GG                | 1946702557               |
| SNP_P3_179371_41874 | NW_004519225.1 | Scaffold4978 | 41874                   | GG                              | AA                | 1946702559               |
| SNP_P3_179372_126   | NW_004519226.1 | Scaffold4979 | 126                     | TT                              | CC                | 1946702561               |
| SNP_P3_179373_367   | NW_004519226.1 | Scaffold4979 | 367                     | TT                              | AA                | 1946702563               |
| SNP_P3_179374_64    | NW_004519228.1 | Scaffold4981 | 64                      | AA                              | GG                | 1946702565               |
| SNP_P3_179375_72    | NW_004519228.1 | Scaffold4981 | 72                      | AA                              | GG                | 1946702567               |
| SNP_P3_179376_1071  | NW_004519228.1 | Scaffold4981 | 1071                    | CC                              | GG                | 1946702569               |
| SNP_P3_179377_1141  | NW_004519229.1 | Scaffold4982 | 1141                    | CC                              | TT                | 1946702571               |
| SNP_P3_179378_1142  | NW_004519229.1 | Scaffold4982 | 1142                    | GG                              | CC                | 1946702574               |
| SNP_P3_179379_1186  | NW_004519229.1 | Scaffold4982 | 1186                    | GG                              | TT                | 1946702576               |
| SNP_P3_179380_1245  | NW_004519229.1 | Scaffold4982 | 1245                    | AA                              | TT                | 1946702578               |
| SNP_P3_179381_506   | NW_004519230.1 | Scaffold4983 | 506                     | CC                              | TT                | 1946702580               |
| SNP_P3_179382_1049  | NW_004519230.1 | Scaffold4983 | 1049                    | AA                              | CC                | 1946702582               |
| SNP_P3_179383_1166  | NW_004519230.1 | Scaffold4983 | 1166                    | TT                              | CC                | 1946702584               |
| SNP_P3_179384_20810 | NW_004519230.1 | Scaffold4983 | 20810                   | GG                              | AA                | 1946702586               |
| SNP_P3_179385_20813 | NW_004519230.1 | Scaffold4983 | 20813                   | GG                              | AA                | 1946702588               |
| SNP_P3_179386_20843 | NW_004519230.1 | Scaffold4983 | 20843                   | TT                              | CC                | 1946702590               |
| SNP_P3_179387_20853 | NW_004519230.1 | Scaffold4983 | 20853                   | CC                              | GG                | 1946702592               |
| SNP_P3_179388_20901 | NW_004519230.1 | Scaffold4983 | 20901                   | AA                              | CC                | 1946702594               |
| SNP_P3_179389_21181 | NW_004519230.1 | Scaffold4983 | 21181                   | AA                              | TT                | 1946702597               |
| SNP_P3_179390_21187 | NW_004519230.1 | Scaffold4983 | 21187                   | GG                              | TT                | 1946702600               |
| SNP_P3_179391_21196 | NW_004519230.1 | Scaffold4983 | 21196                   | AA                              | GG                | 1946702602               |
| SNP_P3_179392_21208 | NW_004519230.1 | Scaffold4983 | 21208                   | AA                              | GG                | 1946702604               |
| SNP_P3_179393_21256 | NW_004519230.1 | Scaffold4983 | 21256                   | AA                              | CC                | 1946702606               |
| SNP_P3_179394_23863 | NW_004519230.1 | Scaffold4983 | 23863                   | GG                              | AA                | 1946702608               |
| SNP_P3_179395_23900 | NW_004519230.1 | Scaffold4983 | 23900                   | CC                              | TT                | 1946702610               |
| SNP_P3_179396_23901 | NW_004519230.1 | Scaffold4983 | 23901                   | AA                              | GG                | 1946702612               |
| SNP_P3_179397_23916 | NW_004519230.1 | Scaffold4983 | 23916                   | CC                              | AA                | 1946702614               |
| SNP_P3_179398_26981 | NW_004519230.1 | Scaffold4983 | 26981                   | TT                              | CC                | 1946702616               |
| SNP_P3_179402_27474 | NW_004519230.1 | Scaffold4983 | 27474                   | CC                              | AA                | 1946702618               |
| SNP_P3_179403_27481 | NW_004519230.1 | Scaffold4983 | 27481                   | GG                              | AA                | 1946702620               |
| SNP_P3_179404_27976 | NW_004519230.1 | Scaffold4983 | 27976                   | TT                              | CC                | 1946702622               |
| SNP_P3_179405_64    | NW_004519231.1 | Scaffold4984 | 64                      | TT                              | AA                | 1946702624               |
| SNP_P3_179406_117   | NW_004519231.1 | Scaffold4984 | 117                     | TT                              | GG                | 1946702626               |
| SNP_P3_179407_516   | NW_004519231.1 | Scaffold4984 | 516                     | GG                              | TT                | 1946702629               |
| SNP_P3_179408_648   | NW_004519231.1 | Scaffold4984 | 648                     | CC                              | GG                | 1946702631               |

| SNPs IDs            | Chromosome IDs | Chromosomes  | Physical positions (bp) | CDC Frontier (Reference genome) | (Pusa 256 & HPNB) | NCBI SNPdb Accession IDs |
|---------------------|----------------|--------------|-------------------------|---------------------------------|-------------------|--------------------------|
| SNP_P3_179409_999   | NW_004519231.1 | Scaffold4984 | 999                     | AA                              | GG                | 1946702632               |
| SNP_P3_179410_1012  | NW_004519231.1 | Scaffold4984 | 1012                    | AA                              | GG                | 1946702633               |
| SNP_P3_179411_1323  | NW_004519231.1 | Scaffold4984 | 1323                    | AA                              | CC                | 1946702634               |
| SNP_P3_179412_1899  | NW_004519234.1 | Scaffold4989 | 1899                    | CC                              | TT                | 1946702636               |
| SNP_P3_179413_6731  | NW_004519234.1 | Scaffold4989 | 6731                    | TT                              | CC                | 1946702638               |
| SNP_P3_179414_7252  | NW_004519234.1 | Scaffold4989 | 7252                    | CC                              | TT                | 1946702640               |
| SNP_P3_179415_7253  | NW_004519234.1 | Scaffold4989 | 7253                    | GG                              | CC                | 1946702641               |
| SNP_P3_179416_7257  | NW_004519234.1 | Scaffold4989 | 7257                    | CC                              | TT                | 1946702642               |
| SNP_P3_179417_7259  | NW_004519234.1 | Scaffold4989 | 7259                    | TT                              | GG                | 1946702643               |
| SNP_P3_179418_4861  | NW_004519235.1 | Scaffold4991 | 4861                    | AA                              | GG                | 1946702644               |
| SNP_P3_179419_4871  | NW_004519235.1 | Scaffold4991 | 4871                    | GG                              | AA                | 1946702645               |
| SNP_P3_179420_976   | NW_004519238.1 | Scaffold4994 | 976                     | TT                              | GG                | 1946702647               |
| SNP_P3_179421_408   | NW_004519239.1 | Scaffold4996 | 408                     | CC                              | TT                | 1946702649               |
| SNP_P3_179422_622   | NW_004519239.1 | Scaffold4996 | 622                     | TT                              | CC                | 1946702651               |
| SNP_P3_179423_654   | NW_004519239.1 | Scaffold4996 | 654                     | AA                              | GG                | 1946702653               |
| SNP_P3_179424_1689  | NW_004519239.1 | Scaffold4996 | 1689                    | CC                              | TT                | 1946702655               |
| SNP_P3_179425_1734  | NW_004519239.1 | Scaffold4996 | 1734                    | TT                              | CC                | 1946702657               |
| SNP_P3_179426_1770  | NW_004519239.1 | Scaffold4996 | 1770                    | AA                              | GG                | 1946702659               |
| SNP_P3_179427_2127  | NW_004519239.1 | Scaffold4996 | 2127                    | AA                              | TT                | 1946702661               |
| SNP_P3_179428_532   | NW_004519240.1 | Scaffold4998 | 532                     | CC                              | TT                | 1946702663               |
| SNP_P3_179429_3816  | NW_004519240.1 | Scaffold4998 | 3816                    | TT                              | CC                | 1946702666               |
| SNP_P3_179430_13491 | NW_004519240.1 | Scaffold4998 | 13491                   | GG                              | AA                | 1946702668               |
| SNP_P3_179431_13516 | NW_004519240.1 | Scaffold4998 | 13516                   | CC                              | TT                | 1946702670               |
| SNP_P3_179432_142   | NW_004519241.1 | Scaffold4999 | 142                     | CC                              | TT                | 1946702672               |
| SNP_P3_179433_426   | NW_004519242.1 | Scaffold5001 | 426                     | CC                              | TT                | 1946702674               |
| SNP_P3_179434_642   | NW_004519242.1 | Scaffold5001 | 642                     | AA                              | TT                | 1946702676               |
| SNP_P3_179435_659   | NW_004519242.1 | Scaffold5001 | 659                     | AA                              | GG                | 1946702678               |
| SNP_P3_179436_695   | NW_004519242.1 | Scaffold5001 | 695                     | TT                              | CC                | 1946702680               |
| SNP_P3_179437_704   | NW_004519242.1 | Scaffold5001 | 704                     | AA                              | GG                | 1946702682               |
| SNP_P3_179438_872   | NW_004519242.1 | Scaffold5001 | 872                     | AA                              | CC                | 1946702684               |
| SNP_P3_179439_958   | NW_004519242.1 | Scaffold5001 | 958                     | CC                              | TT                | 1946702686               |
| SNP_P3_179440_1091  | NW_004519242.1 | Scaffold5001 | 1091                    | TT                              | GG                | 1946702688               |
| SNP_P3_179442_2017  | NW_004519244.1 | Scaffold5005 | 2017                    | TT                              | GG                | 1946702691               |
| SNP_P3_179444_175   | NW_004519245.1 | Scaffold5006 | 175                     | AA                              | TT                | 1946702693               |
| SNP_P3_179445_398   | NW_004519247.1 | Scaffold5010 | 398                     | GG                              | TT                | 1946702695               |
| SNP_P3_179446_545   | NW_004519247.1 | Scaffold5010 | 545                     | CC                              | TT                | 1946702697               |
| SNP_P3_179447_551   | NW_004519247.1 | Scaffold5010 | 551                     | CC                              | GG                | 1946702699               |
| SNP_P3_179448_356   | NW_004519249.1 | Scaffold5013 | 356                     | GG                              | TT                | 1946702701               |
| SNP_P3_179449_551   | NW_004519249.1 | Scaffold5013 | 551                     | TT                              | GG                | 1946702703               |
| SNP_P3_179450_564   | NW_004519249.1 | Scaffold5013 | 564                     | CC                              | GG                | 1946702705               |
| SNP_P3_179451_4114  | NW_004519251.1 | Scaffold5016 | 4114                    | AA                              | GG                | 1946702707               |
| SNP_P3_179452_4366  | NW_004519251.1 | Scaffold5016 | 4366                    | TT                              | GG                | 1946702709               |

| SNPs IDs            | Chromosome IDs | Chromosomes  | Physical positions (bp) | CDC Frontier (Reference genome) | (Pusa 256 & HPNB) | NCBI SNPdb Accession IDs |
|---------------------|----------------|--------------|-------------------------|---------------------------------|-------------------|--------------------------|
| SNP_P3_179453_4367  | NW_004519251.1 | Scaffold5016 | 4367                    | TT                              | CC                | 1946702711               |
| SNP_P3_179454_4374  | NW_004519251.1 | Scaffold5016 | 4374                    | CC                              | TT                | 1946702713               |
| SNP_P3_179455_4389  | NW_004519251.1 | Scaffold5016 | 4389                    | GG                              | CC                | 1946702715               |
| SNP_P3_179456_4405  | NW_004519251.1 | Scaffold5016 | 4405                    | TT                              | AA                | 1946702718               |
| SNP_P3_179457_4406  | NW_004519251.1 | Scaffold5016 | 4406                    | TT                              | CC                | 1946702720               |
| SNP_P3_179458_4424  | NW_004519251.1 | Scaffold5016 | 4424                    | AA                              | GG                | 1946702723               |
| SNP_P3_179459_4435  | NW_004519251.1 | Scaffold5016 | 4435                    | CC                              | GG                | 1946702725               |
| SNP_P3_179460_4925  | NW_004519251.1 | Scaffold5016 | 4925                    | TT                              | CC                | 1946702727               |
| SNP_P3_179461_1027  | NW_004519254.1 | Scaffold5023 | 1027                    | CC                              | TT                | 1946702729               |
| SNP_P3_179462_1338  | NW_004519254.1 | Scaffold5023 | 1338                    | TT                              | CC                | 1946702731               |
| SNP_P3_179463_1467  | NW_004519254.1 | Scaffold5023 | 1467                    | CC                              | TT                | 1946702733               |
| SNP_P3_179464_5265  | NW_004519254.1 | Scaffold5023 | 5265                    | AA                              | TT                | 1946702735               |
| SNP_P3_179466_8231  | NW_004519254.1 | Scaffold5023 | 8231                    | TT                              | CC                | 1946702737               |
| SNP_P3_179467_9100  | NW_004519254.1 | Scaffold5023 | 9100                    | AA                              | GG                | 1946702739               |
| SNP_P3_179468_9124  | NW_004519254.1 | Scaffold5023 | 9124                    | TT                              | GG                | 1946702742               |
| SNP_P3_179469_9193  | NW_004519254.1 | Scaffold5023 | 9193                    | CC                              | TT                | 1946702744               |
| SNP_P3_179470_9229  | NW_004519254.1 | Scaffold5023 | 9229                    | CC                              | GG                | 1946702746               |
| SNP_P3_179471_9504  | NW_004519254.1 | Scaffold5023 | 9504                    | AA                              | TT                | 1946702749               |
| SNP_P3_179472_9618  | NW_004519254.1 | Scaffold5023 | 9618                    | TT                              | AA                | 1946702751               |
| SNP_P3_179473_654   | NW_004519258.1 | Scaffold5028 | 654                     | TT                              | CC                | 1946702753               |
| SNP_P3_179474_670   | NW_004519258.1 | Scaffold5028 | 670                     | GG                              | CC                | 1946702755               |
| SNP_P3_179475_698   | NW_004519258.1 | Scaffold5028 | 698                     | TT                              | CC                | 1946702757               |
| SNP_P3_179476_781   | NW_004519258.1 | Scaffold5028 | 781                     | AA                              | GG                | 1946702759               |
| SNP_P3_179477_868   | NW_004519258.1 | Scaffold5028 | 868                     | CC                              | AA                | 1946702761               |
| SNP_P3_179478_960   | NW_004519258.1 | Scaffold5028 | 960                     | GG                              | AA                | 1946702763               |
| SNP_P3_179479_979   | NW_004519258.1 | Scaffold5028 | 979                     | CC                              | AA                | 1946702765               |
| SNP_P3_179480_981   | NW_004519258.1 | Scaffold5028 | 981                     | AA                              | GG                | 1946702767               |
| SNP_P3_179481_1039  | NW_004519258.1 | Scaffold5028 | 1039                    | AA                              | GG                | 1946702771               |
| SNP_P3_179482_1054  | NW_004519258.1 | Scaffold5028 | 1054                    | TT                              | GG                | 1946702773               |
| SNP_P3_179483_1075  | NW_004519258.1 | Scaffold5028 | 1075                    | AA                              | CC                | 1946702775               |
| SNP_P3_179484_403   | NW_004519260.1 | Scaffold5030 | 403                     | GG                              | AA                | 1946702777               |
| SNP_P3_179485_527   | NW_004519260.1 | Scaffold5030 | 527                     | GG                              | CC                | 1946702779               |
| SNP_P3_179486_803   | NW_004519260.1 | Scaffold5030 | 803                     | GG                              | AA                | 1946702781               |
| SNP_P3_179488_985   | NW_004519260.1 | Scaffold5030 | 985                     | GG                              | TT                | 1946702782               |
| SNP_P3_179489_1194  | NW_004519260.1 | Scaffold5030 | 1194                    | TT                              | CC                | 1946702784               |
| SNP_P3_179490_6559  | NW_004519260.1 | Scaffold5030 | 6559                    | TT                              | CC                | 1946702786               |
| SNP_P3_179491_11445 | NW_004519260.1 | Scaffold5030 | 11445                   | CC                              | TT                | 1946702788               |
| SNP_P3_179493_18514 | NW_004519260.1 | Scaffold5030 | 18514                   | CC                              | TT                | 1946702790               |
| SNP_P3_179494_18551 | NW_004519260.1 | Scaffold5030 | 18551                   | TT                              | CC                | 1946702792               |
| SNP_P3_179495_18693 | NW_004519260.1 | Scaffold5030 | 18693                   | AA                              | GG                | 1946702795               |
| SNP_P3_179496_18885 | NW_004519260.1 | Scaffold5030 | 18885                   | TT                              | CC                | 1946702797               |
| SNP_P3_179497_19120 | NW_004519260.1 | Scaffold5030 | 19120                   | AA                              | GG                | 1946702799               |

| SNPs IDs            | Chromosome IDs | Chromosomes  | Physical positions (bp) | CDC Frontier (Reference genome) | (Pusa 256 & HPNB) | NCBI SNPdb Accession IDs |
|---------------------|----------------|--------------|-------------------------|---------------------------------|-------------------|--------------------------|
| SNP_P3_179498_20198 | NW_004519260.1 | Scaffold5030 | 20198                   | TT                              | CC                | 1946702801               |
| SNP_P3_179499_138   | NW_004519261.1 | Scaffold5031 | 138                     | AA                              | GG                | 1946702803               |
| SNP_P3_179500_468   | NW_004519261.1 | Scaffold5031 | 468                     | GG                              | AA                | 1946702805               |
| SNP_P3_179501_19971 | NW_004519262.1 | Scaffold5032 | 19971                   | TT                              | CC                | 1946702808               |
| SNP_P3_179502_20292 | NW_004519262.1 | Scaffold5032 | 20292                   | TT                              | CC                | 1946702810               |
| SNP_P3_179503_408   | NW_004519263.1 | Scaffold5033 | 408                     | AA                              | TT                | 1946702812               |
| SNP_P3_179504_416   | NW_004519263.1 | Scaffold5033 | 416                     | CC                              | GG                | 1946702814               |
| SNP_P3_179505_1714  | NW_004519263.1 | Scaffold5033 | 1714                    | TT                              | GG                | 1946702816               |
| SNP_P3_179506_1724  | NW_004519263.1 | Scaffold5033 | 1724                    | CC                              | TT                | 1946702818               |
| SNP_P3_179507_2085  | NW_004519263.1 | Scaffold5033 | 2085                    | AA                              | GG                | 1946702820               |
| SNP_P3_179508_2151  | NW_004519263.1 | Scaffold5033 | 2151                    | CC                              | TT                | 1946702823               |
| SNP_P3_179509_2176  | NW_004519263.1 | Scaffold5033 | 2176                    | AA                              | TT                | 1946702825               |
| SNP_P3_179510_979   | NW_004519264.1 | Scaffold5034 | 979                     | CC                              | GG                | 1946702827               |
| SNP_P3_179511_599   | NW_004519266.1 | Scaffold5037 | 599                     | CC                              | TT                | 1946702829               |
| SNP_P3_179512_603   | NW_004519266.1 | Scaffold5037 | 603                     | TT                              | AA                | 1946702831               |
| SNP_P3_179513_605   | NW_004519266.1 | Scaffold5037 | 605                     | AA                              | TT                | 1946702833               |
| SNP_P3_179514_1346  | NW_004519270.1 | Scaffold5047 | 1346                    | AA                              | GG                | 1946702835               |
| SNP_P3_179515_1361  | NW_004519270.1 | Scaffold5047 | 1361                    | GG                              | CC                | 1946702837               |
| SNP_P3_179516_563   | NW_004519273.1 | Scaffold5052 | 563                     | AA                              | TT                | 1946702839               |
| SNP_P3_179517_841   | NW_004519274.1 | Scaffold5053 | 841                     | CC                              | TT                | 1946702841               |
| SNP_P3_179518_842   | NW_004519274.1 | Scaffold5053 | 842                     | CC                              | AA                | 1946702843               |
| SNP_P3_179519_157   | NW_004519278.1 | Scaffold5059 | 157                     | GG                              | AA                | 1946702846               |
| SNP_P3_179520_223   | NW_004519278.1 | Scaffold5059 | 223                     | AA                              | GG                | 1946702848               |
| SNP_P3_179521_480   | NW_004519278.1 | Scaffold5059 | 480                     | AA                              | CC                | 1946702851               |
| SNP_P3_179522_507   | NW_004519278.1 | Scaffold5059 | 507                     | GG                              | CC                | 1946702853               |
| SNP_P3_179523_816   | NW_004519278.1 | Scaffold5059 | 816                     | TT                              | CC                | 1946702855               |
| SNP_P3_179524_828   | NW_004519278.1 | Scaffold5059 | 828                     | CC                              | TT                | 1946702857               |
| SNP_P3_179525_90    | NW_004519286.1 | Scaffold5072 | 90                      | CC                              | GG                | 1946702859               |
| SNP_P3_179526_114   | NW_004519286.1 | Scaffold5072 | 114                     | TT                              | AA                | 1946702861               |
| SNP_P3_179527_133   | NW_004519286.1 | Scaffold5072 | 133                     | GG                              | CC                | 1946702863               |
| SNP_P3_179528_136   | NW_004519286.1 | Scaffold5072 | 136                     | GG                              | CC                | 1946702865               |
| SNP_P3_179529_222   | NW_004519286.1 | Scaffold5072 | 222                     | GG                              | AA                | 1946702868               |
| SNP_P3_179530_256   | NW_004519286.1 | Scaffold5072 | 256                     | TT                              | GG                | 1946702870               |
| SNP_P3_179531_519   | NW_004519286.1 | Scaffold5072 | 519                     | TT                              | AA                | 1946702873               |
| SNP_P3_179532_5655  | NW_004519286.1 | Scaffold5072 | 5655                    | AA                              | TT                | 1946702875               |
| SNP_P3_179533_5668  | NW_004519286.1 | Scaffold5072 | 5668                    | TT                              | CC                | 1946702877               |
| SNP_P3_179534_5687  | NW_004519286.1 | Scaffold5072 | 5687                    | AA                              | GG                | 1946702879               |
| SNP_P3_179535_5716  | NW_004519286.1 | Scaffold5072 | 5716                    | CC                              | TT                | 1946702881               |
| SNP_P3_179536_5746  | NW_004519286.1 | Scaffold5072 | 5746                    | CC                              | AA                | 1946702883               |
| SNP_P3_179537_5851  | NW_004519286.1 | Scaffold5072 | 5851                    | TT                              | CC                | 1946702885               |
| SNP_P3_179538_5896  | NW_004519286.1 | Scaffold5072 | 5896                    | CC                              | TT                | 1946702887               |
| SNP_P3_179539_5969  | NW_004519286.1 | Scaffold5072 | 5969                    | GG                              | AA                | 1946702889               |

| SNPs IDs           | Chromosome IDs | Chromosomes  | Physical positions (bp) | CDC Frontier (Reference genome) | (Pusa 256 & HPNB) | NCBI SNPdb Accession IDs |
|--------------------|----------------|--------------|-------------------------|---------------------------------|-------------------|--------------------------|
| SNP_P3_179540_6028 | NW_004519286.1 | Scaffold5072 | 6028                    | TT                              | CC                | 1946702891               |
| SNP_P3_179541_6235 | NW_004519286.1 | Scaffold5072 | 6235                    | GG                              | AA                | 1946702893               |
| SNP_P3_179542_6264 | NW_004519286.1 | Scaffold5072 | 6264                    | CC                              | AA                | 1946702896               |
| SNP_P3_179543_6320 | NW_004519286.1 | Scaffold5072 | 6320                    | AA                              | GG                | 1946702898               |
| SNP_P3_179544_6407 | NW_004519286.1 | Scaffold5072 | 6407                    | CC                              | GG                | 1946702900               |
| SNP_P3_179545_1228 | NW_004519290.1 | Scaffold5076 | 1228                    | GG                              | TT                | 1946702902               |
| SNP_P3_179546_1233 | NW_004519290.1 | Scaffold5076 | 1233                    | AA                              | GG                | 1946702905               |
| SNP_P3_179547_1238 | NW_004519290.1 | Scaffold5076 | 1238                    | AA                              | GG                | 1946702907               |
| SNP_P3_179548_1260 | NW_004519290.1 | Scaffold5076 | 1260                    | TT                              | AA                | 1946702909               |
| SNP_P3_179549_1387 | NW_004519290.1 | Scaffold5076 | 1387                    | GG                              | TT                | 1946702911               |
| SNP_P3_179550_1396 | NW_004519290.1 | Scaffold5076 | 1396                    | AA                              | GG                | 1946702913               |
| SNP_P3_179551_63   | NW_004519293.1 | Scaffold5081 | 63                      | CC                              | TT                | 1946702915               |
| SNP_P3_179552_107  | NW_004519293.1 | Scaffold5081 | 107                     | GG                              | AA                | 1946702917               |
| SNP_P3_179553_551  | NW_004519293.1 | Scaffold5081 | 551                     | AA                              | GG                | 1946702919               |
| SNP_P3_179554_1764 | NW_004519293.1 | Scaffold5081 | 1764                    | CC                              | AA                | 1946702922               |
| SNP_P3_179555_5080 | NW_004519293.1 | Scaffold5081 | 5080                    | GG                              | AA                | 1946702924               |
| SNP_P3_179556_6023 | NW_004519293.1 | Scaffold5081 | 6023                    | CC                              | AA                | 1946702926               |
| SNP_P3_179557_376  | NW_004519294.1 | Scaffold5082 | 376                     | AA                              | GG                | 1946702928               |
| SNP_P3_179558_509  | NW_004519294.1 | Scaffold5082 | 509                     | TT                              | CC                | 1946702931               |
| SNP_P3_179559_808  | NW_004519294.1 | Scaffold5082 | 808                     | AA                              | CC                | 1946702933               |
| SNP_P3_179560_955  | NW_004519294.1 | Scaffold5082 | 955                     | CC                              | TT                | 1946702935               |
| SNP_P3_179561_966  | NW_004519294.1 | Scaffold5082 | 966                     | TT                              | GG                | 1946702937               |
| SNP_P3_179562_64   | NW_004519295.1 | Scaffold5083 | 64                      | CC                              | TT                | 1946702939               |
| SNP_P3_179563_101  | NW_004519295.1 | Scaffold5083 | 101                     | AA                              | GG                | 1946702941               |
| SNP_P3_179564_613  | NW_004519295.1 | Scaffold5083 | 613                     | AA                              | TT                | 1946702943               |
| SNP_P3_179565_787  | NW_004519295.1 | Scaffold5083 | 787                     | CC                              | AA                | 1946702945               |
| SNP_P3_179566_899  | NW_004519295.1 | Scaffold5083 | 899                     | AA                              | CC                | 1946702948               |
| SNP_P3_179567_1023 | NW_004519295.1 | Scaffold5083 | 1023                    | AA                              | GG                | 1946702950               |
| SNP_P3_179569_3995 | NW_004519295.1 | Scaffold5083 | 3995                    | TT                              | CC                | 1946702952               |
| SNP_P3_179570_4002 | NW_004519295.1 | Scaffold5083 | 4002                    | CC                              | TT                | 1946702954               |
| SNP_P3_179571_4003 | NW_004519295.1 | Scaffold5083 | 4003                    | AA                              | GG                | 1946702957               |
| SNP_P3_179572_4010 | NW_004519295.1 | Scaffold5083 | 4010                    | CC                              | GG                | 1946702959               |
| SNP_P3_179573_4019 | NW_004519295.1 | Scaffold5083 | 4019                    | AA                              | CC                | 1946702961               |
| SNP_P3_179574_4108 | NW_004519295.1 | Scaffold5083 | 4108                    | CC                              | AA                | 1946702963               |
| SNP_P3_179575_4120 | NW_004519295.1 | Scaffold5083 | 4120                    | CC                              | AA                | 1946702965               |
| SNP_P3_179577_6072 | NW_004519295.1 | Scaffold5083 | 6072                    | CC                              | TT                | 1946702967               |
| SNP_P3_179578_6219 | NW_004519295.1 | Scaffold5083 | 6219                    | TT                              | CC                | 1946702969               |
| SNP_P3_179579_6251 | NW_004519295.1 | Scaffold5083 | 6251                    | GG                              | AA                | 1946702971               |
| SNP_P3_179580_6314 | NW_004519295.1 | Scaffold5083 | 6314                    | AA                              | GG                | 1946702975               |
| SNP_P3_179581_6386 | NW_004519295.1 | Scaffold5083 | 6386                    | TT                              | CC                | 1946702977               |
| SNP_P3_179583_3459 | NW_004519297.1 | Scaffold5086 | 3459                    | AA                              | TT                | 1946702979               |
| SNP_P3_179584_3640 | NW_004519297.1 | Scaffold5086 | 3640                    | GG                              | AA                | 1946702981               |

| SNPs IDs           | Chromosome IDs | Chromosomes  | Physical positions (bp) | CDC Frontier (Reference genome) | (Pusa 256 & HPNB) | NCBI SNPdb Accession IDs |
|--------------------|----------------|--------------|-------------------------|---------------------------------|-------------------|--------------------------|
| SNP_P3_179585_3124 | NW_004519298.1 | Scaffold5089 | 3124                    | CC                              | TT                | 1946702983               |
| SNP_P3_179586_3162 | NW_004519298.1 | Scaffold5089 | 3162                    | AA                              | GG                | 1946702986               |
| SNP_P3_179587_3185 | NW_004519298.1 | Scaffold5089 | 3185                    | TT                              | CC                | 1946702988               |
| SNP_P3_179588_3193 | NW_004519298.1 | Scaffold5089 | 3193                    | CC                              | GG                | 1946702990               |
| SNP_P3_179589_3213 | NW_004519298.1 | Scaffold5089 | 3213                    | GG                              | AA                | 1946702992               |
| SNP_P3_179590_3271 | NW_004519298.1 | Scaffold5089 | 3271                    | CC                              | TT                | 1946702994               |
| SNP_P3_179591_3286 | NW_004519298.1 | Scaffold5089 | 3286                    | AA                              | GG                | 1946702996               |
| SNP_P3_179592_3383 | NW_004519298.1 | Scaffold5089 | 3383                    | GG                              | AA                | 1946702999               |
| SNP_P3_179593_3396 | NW_004519298.1 | Scaffold5089 | 3396                    | TT                              | CC                | 1946703001               |
| SNP_P3_179594_3417 | NW_004519298.1 | Scaffold5089 | 3417                    | AA                              | GG                | 1946703004               |
| SNP_P3_179595_3421 | NW_004519298.1 | Scaffold5089 | 3421                    | TT                              | CC                | 1946703006               |
| SNP_P3_179596_3432 | NW_004519298.1 | Scaffold5089 | 3432                    | CC                              | TT                | 1946703008               |
| SNP_P3_179597_3473 | NW_004519298.1 | Scaffold5089 | 3473                    | AA                              | GG                | 1946703010               |
| SNP_P3_179598_3483 | NW_004519298.1 | Scaffold5089 | 3483                    | CC                              | AA                | 1946703012               |
| SNP_P3_179599_3489 | NW_004519298.1 | Scaffold5089 | 3489                    | AA                              | GG                | 1946703015               |
| SNP_P3_179600_3530 | NW_004519298.1 | Scaffold5089 | 3530                    | AA                              | GG                | 1946703017               |
| SNP_P3_179601_3535 | NW_004519298.1 | Scaffold5089 | 3535                    | GG                              | TT                | 1946703019               |
| SNP_P3_179602_3578 | NW_004519298.1 | Scaffold5089 | 3578                    | GG                              | AA                | 1946703021               |
| SNP_P3_179604_3735 | NW_004519298.1 | Scaffold5089 | 3735                    | TT                              | GG                | 1946703023               |
| SNP_P3_179605_4170 | NW_004519298.1 | Scaffold5089 | 4170                    | AA                              | CC                | 1946703027               |
| SNP_P3_179606_6062 | NW_004519298.1 | Scaffold5089 | 6062                    | TT                              | GG                | 1946703029               |
| SNP_P3_179607_7358 | NW_004519298.1 | Scaffold5089 | 7358                    | AA                              | GG                | 1946703031               |
| SNP_P3_179608_952  | NW_004519299.1 | Scaffold5090 | 952                     | CC                              | TT                | 1946703033               |
| SNP_P3_179609_1019 | NW_004519299.1 | Scaffold5090 | 1019                    | CC                              | TT                | 1946703035               |
| SNP_P3_179610_707  | NW_004519300.1 | Scaffold5094 | 707                     | AA                              | CC                | 1946703037               |
| SNP_P3_179611_1044 | NW_004519300.1 | Scaffold5094 | 1044                    | CC                              | TT                | 1946703039               |
| SNP_P3_179612_2180 | NW_004519300.1 | Scaffold5094 | 2180                    | TT                              | CC                | 1946703041               |
| SNP_P3_179614_2342 | NW_004519300.1 | Scaffold5094 | 2342                    | TT                              | GG                | 1946703043               |
| SNP_P3_179615_70   | NW_004519305.1 | Scaffold5103 | 70                      | TT                              | AA                | 1946703045               |
| SNP_P3_179616_71   | NW_004519305.1 | Scaffold5103 | 71                      | AA                              | TT                | 1946703047               |
| SNP_P3_179617_156  | NW_004519305.1 | Scaffold5103 | 156                     | AA                              | TT                | 1946703049               |
| SNP_P3_179618_168  | NW_004519305.1 | Scaffold5103 | 168                     | TT                              | CC                | 1946703051               |
| SNP_P3_179619_181  | NW_004519305.1 | Scaffold5103 | 181                     | GG                              | TT                | 1946703053               |
| SNP_P3_179620_578  | NW_004519308.1 | Scaffold5111 | 578                     | CC                              | TT                | 1946703057               |
| SNP_P3_179621_582  | NW_004519308.1 | Scaffold5111 | 582                     | TT                              | CC                | 1946703059               |
| SNP_P3_179622_603  | NW_004519308.1 | Scaffold5111 | 603                     | CC                              | AA                | 1946703061               |
| SNP_P3_179623_776  | NW_004519308.1 | Scaffold5111 | 776                     | AA                              | TT                | 1946703063               |
| SNP_P3_179624_793  | NW_004519308.1 | Scaffold5111 | 793                     | TT                              | AA                | 1946703065               |
| SNP_P3_179625_808  | NW_004519308.1 | Scaffold5111 | 808                     | AA                              | TT                | 1946703067               |
| SNP_P3_179626_919  | NW_004519308.1 | Scaffold5111 | 919                     | TT                              | CC                | 1946703069               |
| SNP_P3_179627_961  | NW_004519308.1 | Scaffold5111 | 961                     | CC                              | TT                | 1946703071               |
| SNP_P3_179628_965  | NW_004519308.1 | Scaffold5111 | 965                     | GG                              | TT                | 1946703074               |

| SNPs IDs            | Chromosome IDs | Chromosomes  | Physical positions (bp) | CDC Frontier (Reference genome) | (Pusa 256 & HPNB) | NCBI SNPdb Accession IDs |
|---------------------|----------------|--------------|-------------------------|---------------------------------|-------------------|--------------------------|
| SNP_P3_179629_976   | NW_004519308.1 | Scaffold5111 | 976                     | GG                              | AA                | 1946703076               |
| SNP_P3_179630_977   | NW_004519308.1 | Scaffold5111 | 977                     | AA                              | GG                | 1946703078               |
| SNP_P3_179631_4245  | NW_004519309.1 | Scaffold5113 | 4245                    | AA                              | GG                | 1946703080               |
| SNP_P3_179632_4513  | NW_004519309.1 | Scaffold5113 | 4513                    | AA                              | TT                | 1946703082               |
| SNP_P3_179633_5963  | NW_004519309.1 | Scaffold5113 | 5963                    | CC                              | AA                | 1946703084               |
| SNP_P3_179635_20134 | NW_004519311.1 | Scaffold5115 | 20134                   | GG                              | AA                | 1946703087               |
| SNP_P3_179636_20422 | NW_004519311.1 | Scaffold5115 | 20422                   | GG                              | TT                | 1946703089               |
| SNP_P3_179637_20506 | NW_004519311.1 | Scaffold5115 | 20506                   | AA                              | CC                | 1946703091               |
| SNP_P3_179638_7750  | NW_004519314.1 | Scaffold5120 | 7750                    | TT                              | GG                | 1946703093               |
| SNP_P3_179641_15237 | NW_004519314.1 | Scaffold5120 | 15237                   | CC                              | TT                | 1946703095               |
| SNP_P3_179643_15563 | NW_004519314.1 | Scaffold5120 | 15563                   | TT                              | CC                | 1946703097               |
| SNP_P3_179644_16153 | NW_004519314.1 | Scaffold5120 | 16153                   | GG                              | AA                | 1946703099               |
| SNP_P3_179645_16242 | NW_004519314.1 | Scaffold5120 | 16242                   | GG                              | CC                | 1946703101               |
| SNP_P3_179646_16403 | NW_004519314.1 | Scaffold5120 | 16403                   | CC                              | AA                | 1946703104               |
| SNP_P3_179647_16593 | NW_004519314.1 | Scaffold5120 | 16593                   | GG                              | AA                | 1946703106               |
| SNP_P3_179648_531   | NW_004519318.1 | Scaffold5125 | 531                     | TT                              | AA                | 1946703108               |
| SNP_P3_179649_617   | NW_004519318.1 | Scaffold5125 | 617                     | GG                              | TT                | 1946703110               |
| SNP_P3_179650_6776  | NW_004519319.1 | Scaffold5126 | 6776                    | CC                              | GG                | 1946703112               |
| SNP_P3_179651_9466  | NW_004519319.1 | Scaffold5126 | 9466                    | CC                              | TT                | 1946703114               |
| SNP_P3_179652_9641  | NW_004519319.1 | Scaffold5126 | 9641                    | AA                              | CC                | 1946703117               |
| SNP_P3_179653_9648  | NW_004519319.1 | Scaffold5126 | 9648                    | TT                              | AA                | 1946703119               |
| SNP_P3_179654_9868  | NW_004519319.1 | Scaffold5126 | 9868                    | AA                              | TT                | 1946703122               |
| SNP_P3_179655_9887  | NW_004519319.1 | Scaffold5126 | 9887                    | TT                              | AA                | 1946703124               |
| SNP_P3_179656_9907  | NW_004519319.1 | Scaffold5126 | 9907                    | AA                              | TT                | 1946703126               |
| SNP_P3_179657_1706  | NW_004519322.1 | Scaffold5129 | 1706                    | CC                              | TT                | 1946703129               |
| SNP_P3_179658_1728  | NW_004519322.1 | Scaffold5129 | 1728                    | TT                              | CC                | 1946703131               |
| SNP_P3_179659_89    | NW_004519324.1 | Scaffold5135 | 89                      | CC                              | TT                | 1946703133               |
| SNP_P3_179660_116   | NW_004519324.1 | Scaffold5135 | 116                     | CC                              | TT                | 1946703135               |
| SNP_P3_179661_118   | NW_004519324.1 | Scaffold5135 | 118                     | AA                              | TT                | 1946703137               |
| SNP_P3_179662_3260  | NW_004519324.1 | Scaffold5135 | 3260                    | AA                              | GG                | 1946703139               |
| SNP_P3_179663_146   | NW_004519328.1 | Scaffold5143 | 146                     | CC                              | TT                | 1946703141               |
| SNP_P3_179664_152   | NW_004519328.1 | Scaffold5143 | 152                     | GG                              | TT                | 1946703144               |
| SNP_P3_179666_264   | NW_004519331.1 | Scaffold5146 | 264                     | TT                              | GG                | 1946703147               |
| SNP_P3_179667_511   | NW_004519331.1 | Scaffold5146 | 511                     | AA                              | TT                | 1946703149               |
| SNP_P3_179669_2378  | NW_004519331.1 | Scaffold5146 | 2378                    | CC                              | AA                | 1946703151               |
| SNP_P3_179670_2391  | NW_004519331.1 | Scaffold5146 | 2391                    | AA                              | TT                | 1946703153               |
| SNP_P3_179671_2397  | NW_004519331.1 | Scaffold5146 | 2397                    | TT                              | AA                | 1946703155               |
| SNP_P3_179673_1866  | NW_004519337.1 | Scaffold5155 | 1866                    | TT                              | CC                | 1946703157               |
| SNP_P3_179674_1869  | NW_004519337.1 | Scaffold5155 | 1869                    | GG                              | AA                | 1946703159               |
| SNP_P3_179675_1938  | NW_004519337.1 | Scaffold5155 | 1938                    | CC                              | AA                | 1946703161               |
| SNP_P3_179676_1999  | NW_004519337.1 | Scaffold5155 | 1999                    | AA                              | GG                | 1946703163               |
| SNP_P3_179677_2061  | NW_004519337.1 | Scaffold5155 | 2061                    | GG                              | CC                | 1946703165               |



| SNPs IDs            | Chromosome IDs | Chromosomes  | Physical positions (bp) | CDC Frontier (Reference genome) | (Pusa 256 & HPNB) | NCBI SNPdb Accession IDs |
|---------------------|----------------|--------------|-------------------------|---------------------------------|-------------------|--------------------------|
| SNP_P3_179678_2109  | NW_004519337.1 | Scaffold5155 | 2109                    | AA                              | TT                | 1946703169               |
| SNP_P3_179679_2121  | NW_004519337.1 | Scaffold5155 | 2121                    | AA                              | TT                | 1946703171               |
| SNP_P3_179680_2141  | NW_004519337.1 | Scaffold5155 | 2141                    | GG                              | AA                | 1946703173               |
| SNP_P3_179681_2146  | NW_004519337.1 | Scaffold5155 | 2146                    | TT                              | AA                | 1946703175               |
| SNP_P3_179682_2155  | NW_004519337.1 | Scaffold5155 | 2155                    | GG                              | AA                | 1946703177               |
| SNP_P3_179683_2167  | NW_004519337.1 | Scaffold5155 | 2167                    | AA                              | GG                | 1946703179               |
| SNP_P3_179684_2179  | NW_004519337.1 | Scaffold5155 | 2179                    | AA                              | CC                | 1946703181               |
| SNP_P3_179685_2235  | NW_004519337.1 | Scaffold5155 | 2235                    | AA                              | GG                | 1946703183               |
| SNP_P3_179686_2242  | NW_004519337.1 | Scaffold5155 | 2242                    | GG                              | AA                | 1946703185               |
| SNP_P3_179687_2251  | NW_004519337.1 | Scaffold5155 | 2251                    | TT                              | GG                | 1946703187               |
| SNP_P3_179688_2390  | NW_004519337.1 | Scaffold5155 | 2390                    | GG                              | AA                | 1946703189               |
| SNP_P3_179689_4734  | NW_004519339.1 | Scaffold5157 | 4734                    | TT                              | AA                | 1946703192               |
| SNP_P3_179690_11819 | NW_004519339.1 | Scaffold5157 | 11819                   | AA                              | GG                | 1946703195               |
| SNP_P3_179691_13559 | NW_004519339.1 | Scaffold5157 | 13559                   | CC                              | AA                | 1946703198               |
| SNP_P3_179692_13647 | NW_004519339.1 | Scaffold5157 | 13647                   | GG                              | AA                | 1946703200               |
| SNP_P3_179693_13668 | NW_004519339.1 | Scaffold5157 | 13668                   | AA                              | GG                | 1946703203               |
| SNP_P3_179694_13739 | NW_004519339.1 | Scaffold5157 | 13739                   | TT                              | CC                | 1946703206               |
| SNP_P3_179695_13950 | NW_004519339.1 | Scaffold5157 | 13950                   | AA                              | GG                | 1946703208               |
| SNP_P3_179696_22155 | NW_004519339.1 | Scaffold5157 | 22155                   | CC                              | GG                | 1946703210               |
| SNP_P3_179698_5336  | NW_004519340.1 | Scaffold5158 | 5336                    | CC                              | AA                | 1946703212               |
| SNP_P3_179699_5436  | NW_004519340.1 | Scaffold5158 | 5436                    | CC                              | TT                | 1946703214               |
| SNP_P3_179700_5804  | NW_004519340.1 | Scaffold5158 | 5804                    | AA                              | GG                | 1946703216               |
| SNP_P3_179701_6279  | NW_004519340.1 | Scaffold5158 | 6279                    | AA                              | GG                | 1946703218               |
| SNP_P3_179702_6473  | NW_004519340.1 | Scaffold5158 | 6473                    | TT                              | CC                | 1946703220               |
| SNP_P3_179705_6597  | NW_004519340.1 | Scaffold5158 | 6597                    | TT                              | CC                | 1946703222               |
| SNP_P3_179706_6620  | NW_004519340.1 | Scaffold5158 | 6620                    | GG                              | TT                | 1946703224               |
| SNP_P3_179707_6808  | NW_004519340.1 | Scaffold5158 | 6808                    | TT                              | AA                | 1946703226               |
| SNP_P3_179708_6846  | NW_004519340.1 | Scaffold5158 | 6846                    | TT                              | AA                | 1946703228               |
| SNP_P3_179709_8320  | NW_004519340.1 | Scaffold5158 | 8320                    | GG                              | AA                | 1946703230               |
| SNP_P3_179710_8538  | NW_004519340.1 | Scaffold5158 | 8538                    | GG                              | TT                | 1946703232               |
| SNP_P3_179711_8552  | NW_004519340.1 | Scaffold5158 | 8552                    | GG                              | TT                | 1946703234               |
| SNP_P3_179712_9955  | NW_004519340.1 | Scaffold5158 | 9955                    | CC                              | AA                | 1946703236               |
| SNP_P3_179713_10351 | NW_004519340.1 | Scaffold5158 | 10351                   | AA                              | TT                | 1946703238               |
| SNP_P3_179714_10500 | NW_004519340.1 | Scaffold5158 | 10500                   | AA                              | GG                | 1946703241               |
| SNP_P3_179715_11095 | NW_004519340.1 | Scaffold5158 | 11095                   | TT                              | CC                | 1946703243               |
| SNP_P3_179716_12738 | NW_004519340.1 | Scaffold5158 | 12738                   | GG                              | AA                | 1946703245               |
| SNP_P3_179717_12769 | NW_004519340.1 | Scaffold5158 | 12769                   | AA                              | CC                | 1946703247               |
| SNP_P3_179718_12947 | NW_004519340.1 | Scaffold5158 | 12947                   | AA                              | GG                | 1946703249               |
| SNP_P3_179719_12980 | NW_004519340.1 | Scaffold5158 | 12980                   | GG                              | CC                | 1946703251               |
| SNP_P3_179720_12999 | NW_004519340.1 | Scaffold5158 | 12999                   | CC                              | TT                | 1946703253               |
| SNP_P3_179721_13165 | NW_004519340.1 | Scaffold5158 | 13165                   | CC                              | AA                | 1946703255               |
| SNP_P3_179722_13365 | NW_004519340.1 | Scaffold5158 | 13365                   | GG                              | AA                | 1946703257               |

| SNPs IDs            | Chromosome IDs | Chromosomes  | Physical positions (bp) | CDC Frontier (Reference genome) | (Pusa 256 & HPNB) | NCBI SNPdb Accession IDs |
|---------------------|----------------|--------------|-------------------------|---------------------------------|-------------------|--------------------------|
| SNP_P3_179723_13376 | NW_004519340.1 | Scaffold5158 | 13376                   | AA                              | CC                | 1946703259               |
| SNP_P3_179724_14304 | NW_004519340.1 | Scaffold5158 | 14304                   | AA                              | GG                | 1946703261               |
| SNP_P3_179725_14316 | NW_004519340.1 | Scaffold5158 | 14316                   | GG                              | TT                | 1946703263               |
| SNP_P3_179726_14325 | NW_004519340.1 | Scaffold5158 | 14325                   | AA                              | TT                | 1946703266               |
| SNP_P3_179727_14494 | NW_004519340.1 | Scaffold5158 | 14494                   | GG                              | TT                | 1946703268               |
| SNP_P3_179728_16544 | NW_004519340.1 | Scaffold5158 | 16544                   | TT                              | AA                | 1946703270               |
| SNP_P3_179729_16579 | NW_004519340.1 | Scaffold5158 | 16579                   | CC                              | TT                | 1946703272               |
| SNP_P3_179730_16673 | NW_004519340.1 | Scaffold5158 | 16673                   | CC                              | TT                | 1946703274               |
| SNP_P3_179731_16702 | NW_004519340.1 | Scaffold5158 | 16702                   | TT                              | CC                | 1946703277               |
| SNP_P3_179732_16746 | NW_004519340.1 | Scaffold5158 | 16746                   | CC                              | TT                | 1946703279               |
| SNP_P3_179733_16812 | NW_004519340.1 | Scaffold5158 | 16812                   | GG                              | AA                | 1946703281               |
| SNP_P3_179734_16843 | NW_004519340.1 | Scaffold5158 | 16843                   | AA                              | GG                | 1946703283               |
| SNP_P3_179735_16941 | NW_004519340.1 | Scaffold5158 | 16941                   | GG                              | AA                | 1946703285               |
| SNP_P3_179736_17025 | NW_004519340.1 | Scaffold5158 | 17025                   | AA                              | GG                | 1946703287               |
| SNP_P3_179738_17115 | NW_004519340.1 | Scaffold5158 | 17115                   | TT                              | CC                | 1946703290               |
| SNP_P3_179739_17138 | NW_004519340.1 | Scaffold5158 | 17138                   | CC                              | AA                | 1946703292               |
| SNP_P3_179740_17140 | NW_004519340.1 | Scaffold5158 | 17140                   | GG                              | AA                | 1946703294               |
| SNP_P3_179741_17208 | NW_004519340.1 | Scaffold5158 | 17208                   | AA                              | GG                | 1946703296               |
| SNP_P3_179742_17289 | NW_004519340.1 | Scaffold5158 | 17289                   | AA                              | GG                | 1946703298               |
| SNP_P3_179743_17298 | NW_004519340.1 | Scaffold5158 | 17298                   | TT                              | GG                | 1946703300               |
| SNP_P3_179744_17347 | NW_004519340.1 | Scaffold5158 | 17347                   | TT                              | CC                | 1946703302               |
| SNP_P3_179745_17405 | NW_004519340.1 | Scaffold5158 | 17405                   | GG                              | AA                | 1946703304               |
| SNP_P3_179746_17410 | NW_004519340.1 | Scaffold5158 | 17410                   | TT                              | CC                | 1946703306               |
| SNP_P3_179747_17436 | NW_004519340.1 | Scaffold5158 | 17436                   | GG                              | AA                | 1946703308               |
| SNP_P3_179748_17490 | NW_004519340.1 | Scaffold5158 | 17490                   | AA                              | GG                | 1946703312               |
| SNP_P3_179749_17631 | NW_004519340.1 | Scaffold5158 | 17631                   | GG                              | AA                | 1946703314               |
| SNP_P3_179750_17683 | NW_004519340.1 | Scaffold5158 | 17683                   | TT                              | CC                | 1946703316               |
| SNP_P3_179751_17684 | NW_004519340.1 | Scaffold5158 | 17684                   | GG                              | AA                | 1946703318               |
| SNP_P3_179752_17794 | NW_004519340.1 | Scaffold5158 | 17794                   | CC                              | TT                | 1946703320               |
| SNP_P3_179753_17850 | NW_004519340.1 | Scaffold5158 | 17850                   | TT                              | CC                | 1946703322               |
| SNP_P3_179755_18308 | NW_004519340.1 | Scaffold5158 | 18308                   | AA                              | GG                | 1946703324               |
| SNP_P3_179756_18485 | NW_004519340.1 | Scaffold5158 | 18485                   | TT                              | AA                | 1946703326               |
| SNP_P3_179757_18937 | NW_004519340.1 | Scaffold5158 | 18937                   | TT                              | CC                | 1946703328               |
| SNP_P3_179758_19012 | NW_004519340.1 | Scaffold5158 | 19012                   | AA                              | GG                | 1946703330               |
| SNP_P3_179760_19188 | NW_004519340.1 | Scaffold5158 | 19188                   | CC                              | AA                | 1946703332               |
| SNP_P3_179761_21446 | NW_004519340.1 | Scaffold5158 | 21446                   | GG                              | AA                | 1946703334               |
| SNP_P3_179762_21492 | NW_004519340.1 | Scaffold5158 | 21492                   | CC                              | TT                | 1946703336               |
| SNP_P3_179763_21584 | NW_004519340.1 | Scaffold5158 | 21584                   | TT                              | CC                | 1946703338               |
| SNP_P3_179764_22811 | NW_004519340.1 | Scaffold5158 | 22811                   | TT                              | CC                | 1946703340               |
| SNP_P3_179765_9194  | NW_004519342.1 | Scaffold5160 | 9194                    | TT                              | AA                | 1946703342               |
| SNP_P3_179766_9200  | NW_004519342.1 | Scaffold5160 | 9200                    | AA                              | GG                | 1946703344               |
| SNP_P3_179767_1278  | NW_004519343.1 | Scaffold5161 | 1278                    | TT                              | CC                | 1946703346               |

| SNPs IDs           | Chromosome IDs | Chromosomes  | Physical positions (bp) | CDC Frontier (Reference genome) | (Pusa 256 & HPNB) | NCBI SNPdb Accession IDs |
|--------------------|----------------|--------------|-------------------------|---------------------------------|-------------------|--------------------------|
| SNP_P3_179768_932  | NW_004519347.1 | Scaffold5165 | 932                     | AA                              | GG                | 1946703348               |
| SNP_P3_179769_1098 | NW_004519347.1 | Scaffold5165 | 1098                    | TT                              | CC                | 1946703352               |
| SNP_P3_179770_1127 | NW_004519347.1 | Scaffold5165 | 1127                    | AA                              | TT                | 1946703354               |
| SNP_P3_179771_1141 | NW_004519347.1 | Scaffold5165 | 1141                    | CC                              | AA                | 1946703356               |
| SNP_P3_179772_1255 | NW_004519347.1 | Scaffold5165 | 1255                    | CC                              | AA                | 1946703358               |
| SNP_P3_179773_1311 | NW_004519347.1 | Scaffold5165 | 1311                    | TT                              | AA                | 1946703360               |
| SNP_P3_179774_1322 | NW_004519347.1 | Scaffold5165 | 1322                    | GG                              | TT                | 1946703362               |
| SNP_P3_179775_1331 | NW_004519347.1 | Scaffold5165 | 1331                    | CC                              | AA                | 1946703364               |
| SNP_P3_179776_1363 | NW_004519347.1 | Scaffold5165 | 1363                    | CC                              | TT                | 1946703366               |
| SNP_P3_179777_1429 | NW_004519347.1 | Scaffold5165 | 1429                    | TT                              | AA                | 1946703369               |
| SNP_P3_179778_1431 | NW_004519347.1 | Scaffold5165 | 1431                    | GG                              | TT                | 1946703371               |
| SNP_P3_179779_1434 | NW_004519347.1 | Scaffold5165 | 1434                    | GG                              | CC                | 1946703373               |
| SNP_P3_179780_1763 | NW_004519347.1 | Scaffold5165 | 1763                    | TT                              | CC                | 1946703375               |
| SNP_P3_179781_1829 | NW_004519347.1 | Scaffold5165 | 1829                    | AA                              | CC                | 1946703377               |
| SNP_P3_179782_1473 | NW_004519353.1 | Scaffold5175 | 1473                    | GG                              | TT                | 1946703379               |
| SNP_P3_179783_330  | NW_004519354.1 | Scaffold5177 | 330                     | GG                              | AA                | 1946703381               |
| SNP_P3_179784_519  | NW_004519354.1 | Scaffold5177 | 519                     | GG                              | AA                | 1946703383               |
| SNP_P3_179785_548  | NW_004519354.1 | Scaffold5177 | 548                     | AA                              | GG                | 1946703385               |
| SNP_P3_179786_553  | NW_004519354.1 | Scaffold5177 | 553                     | CC                              | AA                | 1946703387               |
| SNP_P3_179787_579  | NW_004519354.1 | Scaffold5177 | 579                     | AA                              | CC                | 1946703390               |
| SNP_P3_179788_1371 | NW_004519354.1 | Scaffold5177 | 1371                    | CC                              | TT                | 1946703392               |
| SNP_P3_179789_352  | NW_004519356.1 | Scaffold5180 | 352                     | GG                              | AA                | 1946703394               |
| SNP_P3_179790_463  | NW_004519356.1 | Scaffold5180 | 463                     | CC                              | TT                | 1946703396               |
| SNP_P3_179791_5141 | NW_004519358.1 | Scaffold5185 | 5141                    | CC                              | GG                | 1946703398               |
| SNP_P3_179792_5145 | NW_004519358.1 | Scaffold5185 | 5145                    | CC                              | TT                | 1946703400               |
| SNP_P3_179793_5418 | NW_004519358.1 | Scaffold5185 | 5418                    | AA                              | CC                | 1946703402               |
| SNP_P3_179794_5437 | NW_004519358.1 | Scaffold5185 | 5437                    | AA                              | GG                | 1946703404               |
| SNP_P3_179795_5793 | NW_004519358.1 | Scaffold5185 | 5793                    | TT                              | GG                | 1946703406               |
| SNP_P3_179796_6028 | NW_004519358.1 | Scaffold5185 | 6028                    | AA                              | GG                | 1946703409               |
| SNP_P3_179797_6060 | NW_004519358.1 | Scaffold5185 | 6060                    | GG                              | CC                | 1946703411               |
| SNP_P3_179798_6881 | NW_004519359.1 | Scaffold5186 | 6881                    | GG                              | TT                | 1946703413               |
| SNP_P3_179799_7460 | NW_004519359.1 | Scaffold5186 | 7460                    | CC                              | TT                | 1946703415               |
| SNP_P3_179800_7606 | NW_004519359.1 | Scaffold5186 | 7606                    | CC                              | AA                | 1946703417               |
| SNP_P3_179801_7643 | NW_004519359.1 | Scaffold5186 | 7643                    | AA                              | TT                | 1946703419               |
| SNP_P3_179802_7717 | NW_004519359.1 | Scaffold5186 | 7717                    | TT                              | CC                | 1946703421               |
| SNP_P3_179803_7975 | NW_004519359.1 | Scaffold5186 | 7975                    | AA                              | GG                | 1946703423               |
| SNP_P3_179804_8015 | NW_004519359.1 | Scaffold5186 | 8015                    | TT                              | CC                | 1946703425               |
| SNP_P3_179805_8253 | NW_004519359.1 | Scaffold5186 | 8253                    | CC                              | GG                | 1946703429               |
| SNP_P3_179806_8264 | NW_004519359.1 | Scaffold5186 | 8264                    | AA                              | GG                | 1946703431               |
| SNP_P3_179807_8396 | NW_004519359.1 | Scaffold5186 | 8396                    | TT                              | CC                | 1946703433               |
| SNP_P3_179808_8400 | NW_004519359.1 | Scaffold5186 | 8400                    | CC                              | TT                | 1946703435               |
| SNP_P3_179809_8461 | NW_004519359.1 | Scaffold5186 | 8461                    | CC                              | AA                | 1946703437               |

| SNPs IDs            | Chromosome IDs | Chromosomes  | Physical positions (bp) | CDC Frontier (Reference genome) | (Pusa 256 & HPNB) | NCBI SNPdb Accession IDs |
|---------------------|----------------|--------------|-------------------------|---------------------------------|-------------------|--------------------------|
| SNP_P3_179810_8469  | NW_004519359.1 | Scaffold5186 | 8469                    | TT                              | CC                | 1946703439               |
| SNP_P3_179812_9064  | NW_004519359.1 | Scaffold5186 | 9064                    | GG                              | TT                | 1946703442               |
| SNP_P3_179813_9113  | NW_004519359.1 | Scaffold5186 | 9113                    | AA                              | CC                | 1946703444               |
| SNP_P3_179814_9146  | NW_004519359.1 | Scaffold5186 | 9146                    | AA                              | GG                | 1946703446               |
| SNP_P3_179816_10073 | NW_004519359.1 | Scaffold5186 | 10073                   | GG                              | CC                | 1946703448               |
| SNP_P3_179817_10074 | NW_004519359.1 | Scaffold5186 | 10074                   | GG                              | TT                | 1946703450               |
| SNP_P3_179818_10075 | NW_004519359.1 | Scaffold5186 | 10075                   | TT                              | GG                | 1946703452               |
| SNP_P3_179819_10076 | NW_004519359.1 | Scaffold5186 | 10076                   | TT                              | AA                | 1946703454               |
| SNP_P3_179821_10090 | NW_004519359.1 | Scaffold5186 | 10090                   | AA                              | GG                | 1946703456               |
| SNP_P3_179822_10093 | NW_004519359.1 | Scaffold5186 | 10093                   | TT                              | CC                | 1946703458               |
| SNP_P3_179823_10148 | NW_004519359.1 | Scaffold5186 | 10148                   | CC                              | TT                | 1946703460               |
| SNP_P3_179824_10263 | NW_004519359.1 | Scaffold5186 | 10263                   | TT                              | CC                | 1946703462               |
| SNP_P3_179825_10577 | NW_004519359.1 | Scaffold5186 | 10577                   | TT                              | GG                | 1946703466               |
| SNP_P3_179826_10782 | NW_004519359.1 | Scaffold5186 | 10782                   | TT                              | CC                | 1946703468               |
| SNP_P3_179827_10793 | NW_004519359.1 | Scaffold5186 | 10793                   | TT                              | CC                | 1946703470               |
| SNP_P3_179828_10794 | NW_004519359.1 | Scaffold5186 | 10794                   | AA                              | GG                | 1946703472               |
| SNP_P3_179829_10863 | NW_004519359.1 | Scaffold5186 | 10863                   | AA                              | TT                | 1946703474               |
| SNP_P3_179830_10898 | NW_004519359.1 | Scaffold5186 | 10898                   | CC                              | TT                | 1946703476               |
| SNP_P3_179831_11267 | NW_004519359.1 | Scaffold5186 | 11267                   | TT                              | AA                | 1946703478               |
| SNP_P3_179832_11545 | NW_004519359.1 | Scaffold5186 | 11545                   | GG                              | AA                | 1946703480               |
| SNP_P3_179833_11746 | NW_004519359.1 | Scaffold5186 | 11746                   | TT                              | CC                | 1946703482               |
| SNP_P3_179834_12137 | NW_004519359.1 | Scaffold5186 | 12137                   | TT                              | AA                | 1946703485               |
| SNP_P3_179835_12422 | NW_004519359.1 | Scaffold5186 | 12422                   | CC                              | GG                | 1946703487               |
| SNP_P3_179836_12966 | NW_004519359.1 | Scaffold5186 | 12966                   | TT                              | AA                | 1946703489               |
| SNP_P3_179837_13008 | NW_004519359.1 | Scaffold5186 | 13008                   | TT                              | GG                | 1946703491               |
| SNP_P3_179838_13266 | NW_004519359.1 | Scaffold5186 | 13266                   | AA                              | TT                | 1946703493               |
| SNP_P3_179839_14494 | NW_004519359.1 | Scaffold5186 | 14494                   | TT                              | CC                | 1946703495               |
| SNP_P3_179840_14932 | NW_004519359.1 | Scaffold5186 | 14932                   | TT                              | CC                | 1946703497               |
| SNP_P3_179841_14988 | NW_004519359.1 | Scaffold5186 | 14988                   | TT                              | CC                | 1946703499               |
| SNP_P3_179842_14990 | NW_004519359.1 | Scaffold5186 | 14990                   | CC                              | TT                | 1946703501               |
| SNP_P3_179843_15027 | NW_004519359.1 | Scaffold5186 | 15027                   | AA                              | TT                | 1946703503               |
| SNP_P3_179844_15051 | NW_004519359.1 | Scaffold5186 | 15051                   | AA                              | CC                | 1946703505               |
| SNP_P3_179845_15066 | NW_004519359.1 | Scaffold5186 | 15066                   | TT                              | GG                | 1946703507               |
| SNP_P3_179846_15096 | NW_004519359.1 | Scaffold5186 | 15096                   | GG                              | AA                | 1946703509               |
| SNP_P3_179847_15165 | NW_004519359.1 | Scaffold5186 | 15165                   | GG                              | TT                | 1946703511               |
| SNP_P3_179848_15244 | NW_004519359.1 | Scaffold5186 | 15244                   | CC                              | AA                | 1946703513               |
| SNP_P3_179849_15295 | NW_004519359.1 | Scaffold5186 | 15295                   | GG                              | CC                | 1946703515               |
| SNP_P3_179850_15333 | NW_004519359.1 | Scaffold5186 | 15333                   | GG                              | TT                | 1946703517               |
| SNP_P3_179851_15365 | NW_004519359.1 | Scaffold5186 | 15365                   | TT                              | GG                | 1946703519               |
| SNP_P3_179852_15397 | NW_004519359.1 | Scaffold5186 | 15397                   | GG                              | AA                | 1946703521               |
| SNP_P3_179853_15449 | NW_004519359.1 | Scaffold5186 | 15449                   | CC                              | TT                | 1946703523               |
| SNP_P3_179854_15573 | NW_004519359.1 | Scaffold5186 | 15573                   | CC                              | TT                | 1946703525               |

| SNPs IDs            | Chromosome IDs | Chromosomes  | Physical positions (bp) | CDC Frontier (Reference genome) | (Pusa 256 & HPNB) | NCBI SNPdb Accession IDs |
|---------------------|----------------|--------------|-------------------------|---------------------------------|-------------------|--------------------------|
| SNP_P3_179855_15678 | NW_004519359.1 | Scaffold5186 | 15678                   | AA                              | CC                | 1946703527               |
| SNP_P3_179856_15817 | NW_004519359.1 | Scaffold5186 | 15817                   | TT                              | CC                | 1946703530               |
| SNP_P3_179857_15842 | NW_004519359.1 | Scaffold5186 | 15842                   | CC                              | TT                | 1946703532               |
| SNP_P3_179858_15863 | NW_004519359.1 | Scaffold5186 | 15863                   | GG                              | AA                | 1946703536               |
| SNP_P3_179859_16040 | NW_004519359.1 | Scaffold5186 | 16040                   | CC                              | GG                | 1946703538               |
| SNP_P3_179860_16108 | NW_004519359.1 | Scaffold5186 | 16108                   | CC                              | TT                | 1946703540               |
| SNP_P3_179861_16226 | NW_004519359.1 | Scaffold5186 | 16226                   | CC                              | GG                | 1946703542               |
| SNP_P3_179862_16236 | NW_004519359.1 | Scaffold5186 | 16236                   | CC                              | AA                | 1946703544               |
| SNP_P3_179863_17122 | NW_004519359.1 | Scaffold5186 | 17122                   | TT                              | CC                | 1946703546               |
| SNP_P3_179864_19889 | NW_004519359.1 | Scaffold5186 | 19889                   | AA                              | GG                | 1946703548               |
| SNP_P3_179865_19892 | NW_004519359.1 | Scaffold5186 | 19892                   | CC                              | AA                | 1946703550               |
| SNP_P3_179866_19942 | NW_004519359.1 | Scaffold5186 | 19942                   | AA                              | CC                | 1946703552               |
| SNP_P3_179867_19983 | NW_004519359.1 | Scaffold5186 | 19983                   | GG                              | AA                | 1946703554               |
| SNP_P3_179868_20213 | NW_004519359.1 | Scaffold5186 | 20213                   | TT                              | AA                | 1946703556               |
| SNP_P3_179869_20312 | NW_004519359.1 | Scaffold5186 | 20312                   | GG                              | AA                | 1946703559               |
| SNP_P3_179870_20338 | NW_004519359.1 | Scaffold5186 | 20338                   | AA                              | GG                | 1946703561               |
| SNP_P3_179871_20452 | NW_004519359.1 | Scaffold5186 | 20452                   | AA                              | CC                | 1946703563               |
| SNP_P3_179872_20601 | NW_004519359.1 | Scaffold5186 | 20601                   | AA                              | GG                | 1946703564               |
| SNP_P3_179873_20646 | NW_004519359.1 | Scaffold5186 | 20646                   | GG                              | CC                | 1946703565               |
| SNP_P3_179874_20752 | NW_004519359.1 | Scaffold5186 | 20752                   | CC                              | TT                | 1946703566               |
| SNP_P3_179875_20804 | NW_004519359.1 | Scaffold5186 | 20804                   | AA                              | TT                | 1946703567               |
| SNP_P3_179876_20807 | NW_004519359.1 | Scaffold5186 | 20807                   | AA                              | TT                | 1946703568               |
| SNP_P3_179877_21198 | NW_004519359.1 | Scaffold5186 | 21198                   | TT                              | GG                | 1946703569               |
| SNP_P3_179878_21207 | NW_004519359.1 | Scaffold5186 | 21207                   | CC                              | TT                | 1946703570               |
| SNP_P3_179879_21239 | NW_004519359.1 | Scaffold5186 | 21239                   | CC                              | TT                | 1946703571               |
| SNP_P3_179880_21246 | NW_004519359.1 | Scaffold5186 | 21246                   | CC                              | AA                | 1946703572               |
| SNP_P3_179881_21263 | NW_004519359.1 | Scaffold5186 | 21263                   | TT                              | CC                | 1946703573               |
| SNP_P3_179882_21300 | NW_004519359.1 | Scaffold5186 | 21300                   | AA                              | CC                | 1946703574               |
| SNP_P3_179883_23550 | NW_004519359.1 | Scaffold5186 | 23550                   | CC                              | AA                | 1946703575               |
| SNP_P3_179884_23576 | NW_004519359.1 | Scaffold5186 | 23576                   | GG                              | TT                | 1946703576               |
| SNP_P3_179885_26907 | NW_004519359.1 | Scaffold5186 | 26907                   | GG                              | TT                | 1946703577               |
| SNP_P3_179886_27055 | NW_004519359.1 | Scaffold5186 | 27055                   | CC                              | TT                | 1946703578               |
| SNP_P3_179887_4343  | NW_004519361.1 | Scaffold5189 | 4343                    | TT                              | AA                | 1946703579               |
| SNP_P3_179889_5234  | NW_004519364.1 | Scaffold5195 | 5234                    | AA                              | GG                | 1946703580               |
| SNP_P3_179890_5274  | NW_004519364.1 | Scaffold5195 | 5274                    | TT                              | CC                | 1946703581               |
| SNP_P3_179891_5332  | NW_004519364.1 | Scaffold5195 | 5332                    | TT                              | CC                | 1946703582               |
| SNP_P3_179892_5333  | NW_004519364.1 | Scaffold5195 | 5333                    | TT                              | AA                | 1946703583               |
| SNP_P3_179893_6370  | NW_004519364.1 | Scaffold5195 | 6370                    | CC                              | AA                | 1946703584               |
| SNP_P3_179894_6374  | NW_004519364.1 | Scaffold5195 | 6374                    | CC                              | GG                | 1946703585               |
| SNP_P3_179896_1243  | NW_004519365.1 | Scaffold5198 | 1243                    | GG                              | TT                | 1946703586               |
| SNP_P3_179897_3733  | NW_004519365.1 | Scaffold5198 | 3733                    | CC                              | TT                | 1946703587               |
| SNP_P3_179898_3981  | NW_004519365.1 | Scaffold5198 | 3981                    | CC                              | AA                | 1946703588               |

| SNPs IDs           | Chromosome IDs | Chromosomes  | Physical positions (bp) | CDC Frontier (Reference genome) | (Pusa 256 & HPNB) | NCBI SNPdb Accession IDs |
|--------------------|----------------|--------------|-------------------------|---------------------------------|-------------------|--------------------------|
| SNP_P3_179899_4038 | NW_004519365.1 | Scaffold5198 | 4038                    | CC                              | TT                | 1946703589               |
| SNP_P3_179900_4039 | NW_004519365.1 | Scaffold5198 | 4039                    | GG                              | AA                | 1946703590               |
| SNP_P3_179901_4043 | NW_004519365.1 | Scaffold5198 | 4043                    | CC                              | GG                | 1946703591               |
| SNP_P3_179902_4044 | NW_004519365.1 | Scaffold5198 | 4044                    | AA                              | TT                | 1946703592               |
| SNP_P3_179903_4068 | NW_004519365.1 | Scaffold5198 | 4068                    | GG                              | AA                | 1946703593               |
| SNP_P3_179904_4251 | NW_004519365.1 | Scaffold5198 | 4251                    | CC                              | TT                | 1946703594               |
| SNP_P3_179906_385  | NW_004519366.1 | Scaffold5199 | 385                     | TT                              | CC                | 1946703595               |
| SNP_P3_179907_451  | NW_004519366.1 | Scaffold5199 | 451                     | TT                              | GG                | 1946703596               |
| SNP_P3_179908_475  | NW_004519366.1 | Scaffold5199 | 475                     | AA                              | CC                | 1946703597               |
| SNP_P3_179910_829  | NW_004519366.1 | Scaffold5199 | 829                     | AA                              | TT                | 1946703598               |
| SNP_P3_179911_838  | NW_004519366.1 | Scaffold5199 | 838                     | TT                              | AA                | 1946703599               |
| SNP_P3_179912_1065 | NW_004519366.1 | Scaffold5199 | 1065                    | CC                              | GG                | 1946703600               |
| SNP_P3_179913_1084 | NW_004519366.1 | Scaffold5199 | 1084                    | AA                              | GG                | 1946703601               |
| SNP_P3_179914_312  | NW_004519367.1 | Scaffold5200 | 312                     | AA                              | GG                | 1946703602               |
| SNP_P3_179915_106  | NW_004519369.1 | Scaffold5202 | 106                     | AA                              | GG                | 1946703603               |
| SNP_P3_179916_375  | NW_004519369.1 | Scaffold5202 | 375                     | GG                              | TT                | 1946703604               |
| SNP_P3_179917_491  | NW_004519370.1 | Scaffold5204 | 491                     | AA                              | GG                | 1946703605               |
| SNP_P3_179918_569  | NW_004519370.1 | Scaffold5204 | 569                     | GG                              | AA                | 1946703606               |
| SNP_P3_179919_573  | NW_004519370.1 | Scaffold5204 | 573                     | CC                              | TT                | 1946703607               |
| SNP_P3_179920_616  | NW_004519370.1 | Scaffold5204 | 616                     | GG                              | CC                | 1946703608               |
| SNP_P3_179921_1000 | NW_004519370.1 | Scaffold5204 | 1000                    | TT                              | AA                | 1946703609               |
| SNP_P3_179922_1039 | NW_004519370.1 | Scaffold5204 | 1039                    | CC                              | AA                | 1946703610               |
| SNP_P3_179923_1048 | NW_004519370.1 | Scaffold5204 | 1048                    | AA                              | CC                | 1946703611               |
| SNP_P3_179924_1057 | NW_004519370.1 | Scaffold5204 | 1057                    | GG                              | AA                | 1946703612               |
| SNP_P3_179925_1115 | NW_004519370.1 | Scaffold5204 | 1115                    | AA                              | TT                | 1946703613               |
| SNP_P3_179926_1270 | NW_004519370.1 | Scaffold5204 | 1270                    | AA                              | GG                | 1946703614               |
| SNP_P3_179927_1317 | NW_004519370.1 | Scaffold5204 | 1317                    | AA                              | GG                | 1946703615               |
| SNP_P3_179928_217  | NW_004519371.1 | Scaffold5206 | 217                     | CC                              | TT                | 1946703616               |
| SNP_P3_179929_224  | NW_004519371.1 | Scaffold5206 | 224                     | CC                              | TT                | 1946703617               |
| SNP_P3_179930_529  | NW_004519371.1 | Scaffold5206 | 529                     | TT                              | CC                | 1946703618               |
| SNP_P3_179931_611  | NW_004519372.1 | Scaffold5207 | 611                     | CC                              | TT                | 1946703619               |
| SNP_P3_179932_749  | NW_004519372.1 | Scaffold5207 | 749                     | CC                              | TT                | 1946703620               |
| SNP_P3_179933_751  | NW_004519372.1 | Scaffold5207 | 751                     | TT                              | CC                | 1946703621               |
| SNP_P3_179934_948  | NW_004519376.1 | Scaffold5211 | 948                     | AA                              | TT                | 1946703622               |
| SNP_P3_179935_1179 | NW_004519376.1 | Scaffold5211 | 1179                    | GG                              | TT                | 1946703623               |
| SNP_P3_179936_1281 | NW_004519376.1 | Scaffold5211 | 1281                    | CC                              | TT                | 1946703624               |
| SNP_P3_179937_1357 | NW_004519376.1 | Scaffold5211 | 1357                    | CC                              | AA                | 1946703625               |
| SNP_P3_179938_1659 | NW_004519376.1 | Scaffold5211 | 1659                    | CC                              | TT                | 1946703626               |
| SNP_P3_179939_1804 | NW_004519376.1 | Scaffold5211 | 1804                    | TT                              | CC                | 1946703627               |
| SNP_P3_179940_1869 | NW_004519376.1 | Scaffold5211 | 1869                    | CC                              | TT                | 1946703628               |
| SNP_P3_179941_2216 | NW_004519376.1 | Scaffold5211 | 2216                    | AA                              | GG                | 1946703629               |
| SNP_P3_179942_2317 | NW_004519376.1 | Scaffold5211 | 2317                    | TT                              | CC                | 1946703630               |

| SNPs IDs           | Chromosome IDs | Chromosomes  | Physical positions (bp) | CDC Frontier (Reference genome) | (Pusa 256 & HPNB) | NCBI SNPdb Accession IDs |
|--------------------|----------------|--------------|-------------------------|---------------------------------|-------------------|--------------------------|
| SNP_P3_179943_2386 | NW_004519376.1 | Scaffold5211 | 2386                    | AA                              | GG                | 1946703631               |
| SNP_P3_179944_2738 | NW_004519376.1 | Scaffold5211 | 2738                    | GG                              | TT                | 1946703632               |
| SNP_P3_179945_2782 | NW_004519376.1 | Scaffold5211 | 2782                    | CC                              | AA                | 1946703633               |
| SNP_P3_179946_2893 | NW_004519376.1 | Scaffold5211 | 2893                    | GG                              | AA                | 1946703634               |
| SNP_P3_179947_2928 | NW_004519376.1 | Scaffold5211 | 2928                    | CC                              | GG                | 1946703635               |
| SNP_P3_179948_3088 | NW_004519376.1 | Scaffold5211 | 3088                    | AA                              | GG                | 1946703636               |
| SNP_P3_179949_3382 | NW_004519376.1 | Scaffold5211 | 3382                    | TT                              | CC                | 1946703637               |
| SNP_P3_179950_3522 | NW_004519376.1 | Scaffold5211 | 3522                    | GG                              | AA                | 1946703638               |
| SNP_P3_179951_3657 | NW_004519376.1 | Scaffold5211 | 3657                    | CC                              | TT                | 1946703639               |
| SNP_P3_179953_3778 | NW_004519376.1 | Scaffold5211 | 3778                    | GG                              | TT                | 1946703640               |
| SNP_P3_179954_3789 | NW_004519376.1 | Scaffold5211 | 3789                    | AA                              | CC                | 1946703641               |
| SNP_P3_179955_3816 | NW_004519376.1 | Scaffold5211 | 3816                    | CC                              | AA                | 1946703642               |
| SNP_P3_179956_3850 | NW_004519376.1 | Scaffold5211 | 3850                    | CC                              | TT                | 1946703643               |
| SNP_P3_179957_3869 | NW_004519376.1 | Scaffold5211 | 3869                    | AA                              | CC                | 1946703644               |
| SNP_P3_179958_4094 | NW_004519376.1 | Scaffold5211 | 4094                    | GG                              | AA                | 1946703645               |
| SNP_P3_179959_4104 | NW_004519376.1 | Scaffold5211 | 4104                    | TT                              | CC                | 1946703646               |
| SNP_P3_179960_4565 | NW_004519376.1 | Scaffold5211 | 4565                    | AA                              | GG                | 1946703647               |
| SNP_P3_179961_4900 | NW_004519376.1 | Scaffold5211 | 4900                    | GG                              | AA                | 1946703648               |
| SNP_P3_179962_4971 | NW_004519376.1 | Scaffold5211 | 4971                    | AA                              | GG                | 1946703649               |
| SNP_P3_179963_5329 | NW_004519376.1 | Scaffold5211 | 5329                    | AA                              | GG                | 1946703650               |
| SNP_P3_179964_5474 | NW_004519376.1 | Scaffold5211 | 5474                    | TT                              | CC                | 1946703651               |
| SNP_P3_179966_5808 | NW_004519376.1 | Scaffold5211 | 5808                    | CC                              | GG                | 1946703652               |
| SNP_P3_179967_546  | NW_004519381.1 | Scaffold5222 | 546                     | CC                              | TT                | 1946703653               |
| SNP_P3_179968_569  | NW_004519381.1 | Scaffold5222 | 569                     | CC                              | GG                | 1946703654               |
| SNP_P3_179969_2876 | NW_004519384.1 | Scaffold5225 | 2876                    | TT                              | CC                | 1946703655               |
| SNP_P3_179970_2923 | NW_004519384.1 | Scaffold5225 | 2923                    | GG                              | CC                | 1946703656               |
| SNP_P3_179971_2957 | NW_004519384.1 | Scaffold5225 | 2957                    | TT                              | AA                | 1946703657               |
| SNP_P3_179972_2983 | NW_004519384.1 | Scaffold5225 | 2983                    | CC                              | TT                | 1946703658               |
| SNP_P3_179973_2994 | NW_004519384.1 | Scaffold5225 | 2994                    | GG                              | AA                | 1946703659               |
| SNP_P3_179974_4441 | NW_004519385.1 | Scaffold5226 | 4441                    | TT                              | AA                | 1946703660               |
| SNP_P3_179975_7494 | NW_004519385.1 | Scaffold5226 | 7494                    | CC                              | TT                | 1946703661               |
| SNP_P3_179976_53   | NW_004519389.1 | Scaffold5232 | 53                      | AA                              | CC                | 1946703662               |
| SNP_P3_179977_72   | NW_004519389.1 | Scaffold5232 | 72                      | TT                              | AA                | 1946703663               |
| SNP_P3_179978_73   | NW_004519389.1 | Scaffold5232 | 73                      | TT                              | CC                | 1946703664               |
| SNP_P3_179979_119  | NW_004519390.1 | Scaffold5234 | 119                     | TT                              | CC                | 1946703665               |
| SNP_P3_179981_461  | NW_004519390.1 | Scaffold5234 | 461                     | GG                              | AA                | 1946703666               |
| SNP_P3_179983_800  | NW_004519390.1 | Scaffold5234 | 800                     | GG                              | AA                | 1946703667               |
| SNP_P3_179984_814  | NW_004519390.1 | Scaffold5234 | 814                     | AA                              | GG                | 1946703668               |
| SNP_P3_179986_3337 | NW_004519390.1 | Scaffold5234 | 3337                    | AA                              | CC                | 1946703669               |
| SNP_P3_179988_1137 | NW_004519391.1 | Scaffold5235 | 1137                    | TT                              | CC                | 1946703670               |
| SNP_P3_179989_1158 | NW_004519391.1 | Scaffold5235 | 1158                    | CC                              | TT                | 1946703671               |
| SNP_P3_179990_6068 | NW_004519391.1 | Scaffold5235 | 6068                    | AA                              | GG                | 1946703672               |

| SNPs IDs           | Chromosome IDs | Chromosomes  | Physical positions (bp) | CDC Frontier (Reference genome) | (Pusa 256 & HPNB) | NCBI SNPdb Accession IDs |
|--------------------|----------------|--------------|-------------------------|---------------------------------|-------------------|--------------------------|
| SNP_P3_179991_6365 | NW_004519391.1 | Scaffold5235 | 6365                    | TT                              | CC                | 1946703673               |
| SNP_P3_179992_6395 | NW_004519391.1 | Scaffold5235 | 6395                    | CC                              | TT                | 1946703674               |
| SNP_P3_179993_1328 | NW_004519393.1 | Scaffold5238 | 1328                    | CC                              | TT                | 1946703675               |
| SNP_P3_179994_1448 | NW_004519393.1 | Scaffold5238 | 1448                    | CC                              | TT                | 1946703676               |
| SNP_P3_179995_1699 | NW_004519393.1 | Scaffold5238 | 1699                    | GG                              | TT                | 1946703677               |
| SNP_P3_179996_1700 | NW_004519393.1 | Scaffold5238 | 1700                    | AA                              | GG                | 1946703678               |
| SNP_P3_179997_1759 | NW_004519393.1 | Scaffold5238 | 1759                    | CC                              | TT                | 1946703679               |
| SNP_P3_179998_6352 | NW_004519394.1 | Scaffold5239 | 6352                    | TT                              | CC                | 1946703680               |
| SNP_P3_180000_865  | NW_004519396.1 | Scaffold5242 | 865                     | AA                              | TT                | 1946703681               |
| SNP_P3_180001_371  | NW_004519397.1 | Scaffold5249 | 371                     | AA                              | GG                | 1946703682               |
| SNP_P3_180002_376  | NW_004519397.1 | Scaffold5249 | 376                     | CC                              | TT                | 1946703683               |
| SNP_P3_180003_1679 | NW_004519397.1 | Scaffold5249 | 1679                    | CC                              | AA                | 1946703684               |
| SNP_P3_180004_210  | NW_004519398.1 | Scaffold5251 | 210                     | GG                              | AA                | 1946703685               |
| SNP_P3_180005_261  | NW_004519398.1 | Scaffold5251 | 261                     | CC                              | TT                | 1946703686               |
| SNP_P3_180006_265  | NW_004519398.1 | Scaffold5251 | 265                     | AA                              | CC                | 1946703687               |
| SNP_P3_180007_454  | NW_004519398.1 | Scaffold5251 | 454                     | AA                              | GG                | 1946703688               |
| SNP_P3_180008_489  | NW_004519398.1 | Scaffold5251 | 489                     | CC                              | TT                | 1946703689               |
| SNP_P3_180009_620  | NW_004519398.1 | Scaffold5251 | 620                     | CC                              | TT                | 1946703690               |
| SNP_P3_180010_665  | NW_004519398.1 | Scaffold5251 | 665                     | TT                              | CC                | 1946703691               |
| SNP_P3_180011_681  | NW_004519398.1 | Scaffold5251 | 681                     | CC                              | AA                | 1946703692               |
| SNP_P3_180012_804  | NW_004519398.1 | Scaffold5251 | 804                     | CC                              | TT                | 1946703693               |
| SNP_P3_180013_875  | NW_004519398.1 | Scaffold5251 | 875                     | GG                              | AA                | 1946703694               |
| SNP_P3_180014_1019 | NW_004519398.1 | Scaffold5251 | 1019                    | CC                              | TT                | 1946703695               |
| SNP_P3_180015_1053 | NW_004519398.1 | Scaffold5251 | 1053                    | TT                              | GG                | 1946703696               |
| SNP_P3_180016_1054 | NW_004519398.1 | Scaffold5251 | 1054                    | GG                              | AA                | 1946703697               |
| SNP_P3_180017_1173 | NW_004519398.1 | Scaffold5251 | 1173                    | TT                              | CC                | 1946703698               |
| SNP_P3_180019_1207 | NW_004519398.1 | Scaffold5251 | 1207                    | CC                              | GG                | 1946703699               |
| SNP_P3_180020_2185 | NW_004519398.1 | Scaffold5251 | 2185                    | AA                              | GG                | 1946703700               |
| SNP_P3_180021_2220 | NW_004519398.1 | Scaffold5251 | 2220                    | GG                              | CC                | 1946703701               |
| SNP_P3_180022_2281 | NW_004519398.1 | Scaffold5251 | 2281                    | TT                              | GG                | 1946703702               |
| SNP_P3_180023_1719 | NW_004519400.1 | Scaffold5253 | 1719                    | AA                              | CC                | 1946703703               |
| SNP_P3_180024_1799 | NW_004519400.1 | Scaffold5253 | 1799                    | TT                              | CC                | 1946703704               |
| SNP_P3_180025_1990 | NW_004519400.1 | Scaffold5253 | 1990                    | CC                              | GG                | 1946703705               |
| SNP_P3_180026_2124 | NW_004519400.1 | Scaffold5253 | 2124                    | GG                              | AA                | 1946703706               |
| SNP_P3_180027_1827 | NW_004519402.1 | Scaffold5258 | 1827                    | GG                              | CC                | 1946703707               |
| SNP_P3_180028_1878 | NW_004519402.1 | Scaffold5258 | 1878                    | AA                              | CC                | 1946703708               |
| SNP_P3_180029_395  | NW_004519403.1 | Scaffold5259 | 395                     | AA                              | TT                | 1946703709               |
| SNP_P3_180030_738  | NW_004519403.1 | Scaffold5259 | 738                     | TT                              | CC                | 1946703710               |
| SNP_P3_180031_1160 | NW_004519403.1 | Scaffold5259 | 1160                    | CC                              | TT                | 1946703711               |
| SNP_P3_180032_1457 | NW_004519403.1 | Scaffold5259 | 1457                    | CC                              | TT                | 1946703712               |
| SNP_P3_180033_1459 | NW_004519403.1 | Scaffold5259 | 1459                    | AA                              | CC                | 1946703713               |
| SNP_P3_180034_1715 | NW_004519403.1 | Scaffold5259 | 1715                    | CC                              | TT                | 1946703714               |



| SNPs IDs            | Chromosome IDs | Chromosomes  | Physical positions (bp) | CDC Frontier (Reference genome) | (Pusa 256 & HPNB) | NCBI SNPdb Accession IDs |
|---------------------|----------------|--------------|-------------------------|---------------------------------|-------------------|--------------------------|
| SNP_P3_180035_1724  | NW_004519403.1 | Scaffold5259 | 1724                    | GG                              | TT                | 1946703715               |
| SNP_P3_180036_179   | NW_004519404.1 | Scaffold5261 | 179                     | AA                              | CC                | 1946703716               |
| SNP_P3_180037_14272 | NW_004519404.1 | Scaffold5261 | 14272                   | CC                              | TT                | 1946703717               |
| SNP_P3_180038_14279 | NW_004519404.1 | Scaffold5261 | 14279                   | CC                              | TT                | 1946703718               |
| SNP_P3_180039_656   | NW_004519405.1 | Scaffold5262 | 656                     | TT                              | AA                | 1946703719               |
| SNP_P3_180040_804   | NW_004519405.1 | Scaffold5262 | 804                     | AA                              | GG                | 1946703720               |
| SNP_P3_180041_918   | NW_004519405.1 | Scaffold5262 | 918                     | TT                              | CC                | 1946703721               |
| SNP_P3_180042_981   | NW_004519405.1 | Scaffold5262 | 981                     | AA                              | GG                | 1946703722               |
| SNP_P3_180043_1010  | NW_004519405.1 | Scaffold5262 | 1010                    | AA                              | GG                | 1946703723               |
| SNP_P3_180044_1089  | NW_004519405.1 | Scaffold5262 | 1089                    | AA                              | GG                | 1946703724               |
| SNP_P3_180045_1152  | NW_004519405.1 | Scaffold5262 | 1152                    | TT                              | CC                | 1946703725               |
| SNP_P3_180046_1274  | NW_004519405.1 | Scaffold5262 | 1274                    | AA                              | GG                | 1946703726               |
| SNP_P3_180047_1300  | NW_004519405.1 | Scaffold5262 | 1300                    | GG                              | AA                | 1946703727               |
| SNP_P3_180048_1326  | NW_004519405.1 | Scaffold5262 | 1326                    | AA                              | CC                | 1946703728               |
| SNP_P3_180049_1636  | NW_004519405.1 | Scaffold5262 | 1636                    | AA                              | GG                | 1946703729               |
| SNP_P3_180050_4904  | NW_004519405.1 | Scaffold5262 | 4904                    | GG                              | TT                | 1946703730               |
| SNP_P3_180051_4957  | NW_004519405.1 | Scaffold5262 | 4957                    | GG                              | AA                | 1946703731               |
| SNP_P3_180052_4990  | NW_004519405.1 | Scaffold5262 | 4990                    | AA                              | CC                | 1946703732               |
| SNP_P3_180053_25619 | NW_004519406.1 | Scaffold5263 | 25619                   | TT                              | CC                | 1946703733               |
| SNP_P3_180054_25627 | NW_004519406.1 | Scaffold5263 | 25627                   | GG                              | CC                | 1946703734               |
| SNP_P3_180055_25629 | NW_004519406.1 | Scaffold5263 | 25629                   | CC                              | TT                | 1946703735               |
| SNP_P3_180056_25645 | NW_004519406.1 | Scaffold5263 | 25645                   | AA                              | TT                | 1946703736               |
| SNP_P3_180057_25667 | NW_004519406.1 | Scaffold5263 | 25667                   | CC                              | TT                | 1946703737               |
| SNP_P3_180058_25712 | NW_004519406.1 | Scaffold5263 | 25712                   | AA                              | GG                | 1946703738               |
| SNP_P3_180059_25736 | NW_004519406.1 | Scaffold5263 | 25736                   | CC                              | TT                | 1946703739               |
| SNP_P3_180060_25933 | NW_004519406.1 | Scaffold5263 | 25933                   | AA                              | TT                | 1946703740               |
| SNP_P3_180061_26023 | NW_004519406.1 | Scaffold5263 | 26023                   | TT                              | AA                | 1946703741               |
| SNP_P3_180062_26105 | NW_004519406.1 | Scaffold5263 | 26105                   | AA                              | GG                | 1946703742               |
| SNP_P3_180063_26890 | NW_004519406.1 | Scaffold5263 | 26890                   | GG                              | AA                | 1946703743               |
| SNP_P3_180064_26914 | NW_004519406.1 | Scaffold5263 | 26914                   | CC                              | TT                | 1946703744               |
| SNP_P3_180065_27401 | NW_004519406.1 | Scaffold5263 | 27401                   | AA                              | GG                | 1946703745               |
| SNP_P3_180066_27543 | NW_004519406.1 | Scaffold5263 | 27543                   | AA                              | TT                | 1946703746               |
| SNP_P3_180067_27663 | NW_004519406.1 | Scaffold5263 | 27663                   | CC                              | GG                | 1946703747               |
| SNP_P3_180068_27745 | NW_004519406.1 | Scaffold5263 | 27745                   | CC                              | TT                | 1946703748               |
| SNP_P3_180069_311   | NW_004519410.1 | Scaffold5269 | 311                     | TT                              | CC                | 1946703749               |
| SNP_P3_180070_3287  | NW_004519413.1 | Scaffold5272 | 3287                    | AA                              | TT                | 1946703750               |
| SNP_P3_180071_3895  | NW_004519413.1 | Scaffold5272 | 3895                    | TT                              | GG                | 1946703751               |
| SNP_P3_180072_3913  | NW_004519413.1 | Scaffold5272 | 3913                    | TT                              | AA                | 1946703752               |
| SNP_P3_180073_3914  | NW_004519413.1 | Scaffold5272 | 3914                    | TT                              | CC                | 1946703753               |
| SNP_P3_180074_302   | NW_004519416.1 | Scaffold5275 | 302                     | GG                              | TT                | 1946703754               |
| SNP_P3_180075_417   | NW_004519416.1 | Scaffold5275 | 417                     | AA                              | GG                | 1946703755               |
| SNP_P3_180077_437   | NW_004519416.1 | Scaffold5275 | 437                     | TT                              | CC                | 1946703756               |

| SNPs IDs           | Chromosome IDs | Chromosomes  | Physical positions (bp) | CDC Frontier (Reference genome) | (Pusa 256 & HPNB) | NCBI SNPdb Accession IDs |
|--------------------|----------------|--------------|-------------------------|---------------------------------|-------------------|--------------------------|
| SNP_P3_180078_460  | NW_004519416.1 | Scaffold5275 | 460                     | CC                              | AA                | 1946703757               |
| SNP_P3_180079_466  | NW_004519416.1 | Scaffold5275 | 466                     | CC                              | AA                | 1946703758               |
| SNP_P3_180080_467  | NW_004519416.1 | Scaffold5275 | 467                     | AA                              | GG                | 1946703759               |
| SNP_P3_180081_490  | NW_004519416.1 | Scaffold5275 | 490                     | AA                              | CC                | 1946703760               |
| SNP_P3_180082_517  | NW_004519416.1 | Scaffold5275 | 517                     | CC                              | AA                | 1946703761               |
| SNP_P3_180083_679  | NW_004519416.1 | Scaffold5275 | 679                     | AA                              | GG                | 1946703762               |
| SNP_P3_180084_691  | NW_004519416.1 | Scaffold5275 | 691                     | AA                              | GG                | 1946703763               |
| SNP_P3_180085_962  | NW_004519416.1 | Scaffold5275 | 962                     | AA                              | GG                | 1946703764               |
| SNP_P3_180086_1022 | NW_004519416.1 | Scaffold5275 | 1022                    | TT                              | CC                | 1946703765               |
| SNP_P3_180087_1068 | NW_004519416.1 | Scaffold5275 | 1068                    | TT                              | CC                | 1946703766               |
| SNP_P3_180088_1108 | NW_004519416.1 | Scaffold5275 | 1108                    | GG                              | AA                | 1946703767               |
| SNP_P3_180089_1126 | NW_004519416.1 | Scaffold5275 | 1126                    | AA                              | GG                | 1946703768               |
| SNP_P3_180090_1142 | NW_004519416.1 | Scaffold5275 | 1142                    | TT                              | GG                | 1946703769               |
| SNP_P3_180091_1182 | NW_004519416.1 | Scaffold5275 | 1182                    | GG                              | TT                | 1946703770               |
| SNP_P3_180092_1284 | NW_004519416.1 | Scaffold5275 | 1284                    | CC                              | TT                | 1946703771               |
| SNP_P3_180093_4045 | NW_004519416.1 | Scaffold5275 | 4045                    | GG                              | AA                | 1946703772               |
| SNP_P3_180096_3095 | NW_004519420.1 | Scaffold5279 | 3095                    | CC                              | GG                | 1946703773               |
| SNP_P3_180097_444  | NW_004519421.1 | Scaffold5280 | 444                     | CC                              | TT                | 1946703774               |
| SNP_P3_180099_2843 | NW_004519421.1 | Scaffold5280 | 2843                    | AA                              | TT                | 1946703775               |
| SNP_P3_180100_4135 | NW_004519421.1 | Scaffold5280 | 4135                    | GG                              | AA                | 1946703776               |
| SNP_P3_180101_5735 | NW_004519421.1 | Scaffold5280 | 5735                    | CC                              | AA                | 1946703777               |
| SNP_P3_180102_5778 | NW_004519421.1 | Scaffold5280 | 5778                    | CC                              | TT                | 1946703778               |
| SNP_P3_180103_5820 | NW_004519421.1 | Scaffold5280 | 5820                    | AA                              | GG                | 1946703779               |
| SNP_P3_180104_5988 | NW_004519421.1 | Scaffold5280 | 5988                    | AA                              | GG                | 1946703780               |
| SNP_P3_180105_6007 | NW_004519421.1 | Scaffold5280 | 6007                    | TT                              | CC                | 1946703781               |
| SNP_P3_180106_6058 | NW_004519421.1 | Scaffold5280 | 6058                    | GG                              | AA                | 1946703782               |
| SNP_P3_180107_6193 | NW_004519421.1 | Scaffold5280 | 6193                    | CC                              | TT                | 1946703783               |
| SNP_P3_180108_6277 | NW_004519421.1 | Scaffold5280 | 6277                    | TT                              | AA                | 1946703784               |
| SNP_P3_180109_6290 | NW_004519421.1 | Scaffold5280 | 6290                    | TT                              | AA                | 1946703785               |
| SNP_P3_180110_6356 | NW_004519421.1 | Scaffold5280 | 6356                    | CC                              | TT                | 1946703786               |
| SNP_P3_180111_6373 | NW_004519421.1 | Scaffold5280 | 6373                    | AA                              | GG                | 1946703787               |
| SNP_P3_180112_6425 | NW_004519421.1 | Scaffold5280 | 6425                    | GG                              | CC                | 1946703788               |
| SNP_P3_180113_6473 | NW_004519421.1 | Scaffold5280 | 6473                    | CC                              | TT                | 1946703789               |
| SNP_P3_180114_6602 | NW_004519421.1 | Scaffold5280 | 6602                    | TT                              | CC                | 1946703790               |
| SNP_P3_180115_6664 | NW_004519421.1 | Scaffold5280 | 6664                    | GG                              | AA                | 1946703791               |
| SNP_P3_180116_6677 | NW_004519421.1 | Scaffold5280 | 6677                    | CC                              | TT                | 1946703792               |
| SNP_P3_180117_6679 | NW_004519421.1 | Scaffold5280 | 6679                    | CC                              | GG                | 1946703793               |
| SNP_P3_180118_6704 | NW_004519421.1 | Scaffold5280 | 6704                    | AA                              | TT                | 1946703794               |
| SNP_P3_180119_6713 | NW_004519421.1 | Scaffold5280 | 6713                    | CC                              | TT                | 1946703795               |
| SNP_P3_180120_6746 | NW_004519421.1 | Scaffold5280 | 6746                    | AA                              | GG                | 1946703796               |
| SNP_P3_180121_6857 | NW_004519421.1 | Scaffold5280 | 6857                    | CC                              | GG                | 1946703797               |
| SNP_P3_180122_7015 | NW_004519421.1 | Scaffold5280 | 7015                    | TT                              | CC                | 1946703798               |

| SNPs IDs            | Chromosome IDs | Chromosomes  | Physical positions (bp) | CDC Frontier (Reference genome) | (Pusa 256 & HPNB) | NCBI SNPdb Accession IDs |
|---------------------|----------------|--------------|-------------------------|---------------------------------|-------------------|--------------------------|
| SNP_P3_180123_7032  | NW_004519421.1 | Scaffold5280 | 7032                    | AA                              | CC                | 1946703799               |
| SNP_P3_180124_2987  | NW_004519428.1 | Scaffold5291 | 2987                    | TT                              | GG                | 1946703800               |
| SNP_P3_180125_4788  | NW_004519428.1 | Scaffold5291 | 4788                    | GG                              | AA                | 1946703801               |
| SNP_P3_180126_5174  | NW_004519428.1 | Scaffold5291 | 5174                    | TT                              | GG                | 1946703802               |
| SNP_P3_180128_1458  | NW_004519431.1 | Scaffold5294 | 1458                    | GG                              | AA                | 1946703804               |
| SNP_P3_180129_2262  | NW_004519431.1 | Scaffold5294 | 2262                    | CC                              | GG                | 1946703806               |
| SNP_P3_180130_307   | NW_004519432.1 | Scaffold5296 | 307                     | TT                              | AA                | 1946703808               |
| SNP_P3_180131_449   | NW_004519432.1 | Scaffold5296 | 449                     | TT                              | AA                | 1946703811               |
| SNP_P3_180132_7515  | NW_004519433.1 | Scaffold5297 | 7515                    | CC                              | TT                | 1946703813               |
| SNP_P3_180133_7530  | NW_004519433.1 | Scaffold5297 | 7530                    | TT                              | CC                | 1946703816               |
| SNP_P3_180134_7572  | NW_004519433.1 | Scaffold5297 | 7572                    | GG                              | AA                | 1946703818               |
| SNP_P3_180136_7693  | NW_004519433.1 | Scaffold5297 | 7693                    | CC                              | TT                | 1946703820               |
| SNP_P3_180137_7720  | NW_004519433.1 | Scaffold5297 | 7720                    | TT                              | GG                | 1946703822               |
| SNP_P3_180138_7723  | NW_004519433.1 | Scaffold5297 | 7723                    | AA                              | TT                | 1946703824               |
| SNP_P3_180139_7864  | NW_004519433.1 | Scaffold5297 | 7864                    | CC                              | AA                | 1946703826               |
| SNP_P3_180140_7968  | NW_004519433.1 | Scaffold5297 | 7968                    | AA                              | GG                | 1946703828               |
| SNP_P3_180141_7985  | NW_004519433.1 | Scaffold5297 | 7985                    | GG                              | AA                | 1946703830               |
| SNP_P3_180142_8046  | NW_004519433.1 | Scaffold5297 | 8046                    | CC                              | TT                | 1946703832               |
| SNP_P3_180143_71    | NW_004519436.1 | Scaffold5302 | 71                      | TT                              | GG                | 1946703834               |
| SNP_P3_180144_74    | NW_004519436.1 | Scaffold5302 | 74                      | AA                              | GG                | 1946703836               |
| SNP_P3_180145_315   | NW_004519436.1 | Scaffold5302 | 315                     | AA                              | CC                | 1946703839               |
| SNP_P3_180146_424   | NW_004519436.1 | Scaffold5302 | 424                     | CC                              | TT                | 1946703842               |
| SNP_P3_180147_484   | NW_004519436.1 | Scaffold5302 | 484                     | TT                              | CC                | 1946703844               |
| SNP_P3_180148_427   | NW_004519439.1 | Scaffold5305 | 427                     | TT                              | CC                | 1946703846               |
| SNP_P3_180149_721   | NW_004519439.1 | Scaffold5305 | 721                     | CC                              | GG                | 1946703848               |
| SNP_P3_180150_772   | NW_004519439.1 | Scaffold5305 | 772                     | GG                              | TT                | 1946703850               |
| SNP_P3_180151_6989  | NW_004519440.1 | Scaffold5306 | 6989                    | AA                              | CC                | 1946703852               |
| SNP_P3_180152_7023  | NW_004519440.1 | Scaffold5306 | 7023                    | TT                              | AA                | 1946703854               |
| SNP_P3_180153_7043  | NW_004519440.1 | Scaffold5306 | 7043                    | TT                              | CC                | 1946703856               |
| SNP_P3_180154_7055  | NW_004519440.1 | Scaffold5306 | 7055                    | TT                              | CC                | 1946703858               |
| SNP_P3_180155_7662  | NW_004519440.1 | Scaffold5306 | 7662                    | CC                              | TT                | 1946703860               |
| SNP_P3_180156_7672  | NW_004519440.1 | Scaffold5306 | 7672                    | CC                              | TT                | 1946703862               |
| SNP_P3_180157_7986  | NW_004519440.1 | Scaffold5306 | 7986                    | TT                              | AA                | 1946703864               |
| SNP_P3_180158_8047  | NW_004519440.1 | Scaffold5306 | 8047                    | TT                              | AA                | 1946703866               |
| SNP_P3_180159_11044 | NW_004519440.1 | Scaffold5306 | 11044                   | TT                              | CC                | 1946703868               |
| SNP_P3_180160_11047 | NW_004519440.1 | Scaffold5306 | 11047                   | AA                              | CC                | 1946703870               |
| SNP_P3_180161_14924 | NW_004519440.1 | Scaffold5306 | 14924                   | GG                              | AA                | 1946703872               |
| SNP_P3_180162_14966 | NW_004519440.1 | Scaffold5306 | 14966                   | GG                              | AA                | 1946703874               |
| SNP_P3_180163_15002 | NW_004519440.1 | Scaffold5306 | 15002                   | GG                              | AA                | 1946703876               |
| SNP_P3_180164_15062 | NW_004519440.1 | Scaffold5306 | 15062                   | AA                              | GG                | 1946703878               |
| SNP_P3_180165_15101 | NW_004519440.1 | Scaffold5306 | 15101                   | GG                              | AA                | 1946703881               |
| SNP_P3_180166_15106 | NW_004519440.1 | Scaffold5306 | 15106                   | TT                              | CC                | 1946703883               |

| SNPs IDs            | Chromosome IDs | Chromosomes  | Physical positions (bp) | CDC Frontier (Reference genome) | (Pusa 256 & HPNB) | NCBI SNPdb Accession IDs |
|---------------------|----------------|--------------|-------------------------|---------------------------------|-------------------|--------------------------|
| SNP_P3_180167_15498 | NW_004519440.1 | Scaffold5306 | 15498                   | GG                              | AA                | 1946703885               |
| SNP_P3_180168_15501 | NW_004519440.1 | Scaffold5306 | 15501                   | TT                              | AA                | 1946703887               |
| SNP_P3_180169_855   | NW_004519441.1 | Scaffold5307 | 855                     | AA                              | GG                | 1946703889               |
| SNP_P3_180170_1095  | NW_004519441.1 | Scaffold5307 | 1095                    | TT                              | CC                | 1946703891               |
| SNP_P3_180171_1799  | NW_004519441.1 | Scaffold5307 | 1799                    | CC                              | TT                | 1946703893               |
| SNP_P3_180172_2002  | NW_004519441.1 | Scaffold5307 | 2002                    | AA                              | GG                | 1946703895               |
| SNP_P3_180173_2062  | NW_004519441.1 | Scaffold5307 | 2062                    | AA                              | GG                | 1946703897               |
| SNP_P3_180174_2441  | NW_004519441.1 | Scaffold5307 | 2441                    | CC                              | GG                | 1946703899               |
| SNP_P3_180175_2448  | NW_004519441.1 | Scaffold5307 | 2448                    | GG                              | CC                | 1946703901               |
| SNP_P3_180176_2618  | NW_004519441.1 | Scaffold5307 | 2618                    | CC                              | GG                | 1946703903               |
| SNP_P3_180177_3886  | NW_004519441.1 | Scaffold5307 | 3886                    | AA                              | GG                | 1946703905               |
| SNP_P3_180178_3890  | NW_004519441.1 | Scaffold5307 | 3890                    | AA                              | GG                | 1946703907               |
| SNP_P3_180179_3931  | NW_004519441.1 | Scaffold5307 | 3931                    | GG                              | CC                | 1946703909               |
| SNP_P3_180180_3965  | NW_004519441.1 | Scaffold5307 | 3965                    | CC                              | TT                | 1946703911               |
| SNP_P3_180181_3996  | NW_004519441.1 | Scaffold5307 | 3996                    | TT                              | GG                | 1946703913               |
| SNP_P3_180182_4002  | NW_004519441.1 | Scaffold5307 | 4002                    | AA                              | TT                | 1946703915               |
| SNP_P3_180183_4367  | NW_004519441.1 | Scaffold5307 | 4367                    | AA                              | TT                | 1946703917               |
| SNP_P3_180184_4459  | NW_004519441.1 | Scaffold5307 | 4459                    | AA                              | GG                | 1946703919               |
| SNP_P3_180185_4516  | NW_004519441.1 | Scaffold5307 | 4516                    | AA                              | TT                | 1946703921               |
| SNP_P3_180186_4772  | NW_004519441.1 | Scaffold5307 | 4772                    | AA                              | GG                | 1946703923               |
| SNP_P3_180187_4949  | NW_004519441.1 | Scaffold5307 | 4949                    | AA                              | CC                | 1946703925               |
| SNP_P3_180188_4966  | NW_004519441.1 | Scaffold5307 | 4966                    | AA                              | GG                | 1946703927               |
| SNP_P3_180189_4968  | NW_004519441.1 | Scaffold5307 | 4968                    | TT                              | AA                | 1946703929               |
| SNP_P3_180191_5178  | NW_004519441.1 | Scaffold5307 | 5178                    | AA                              | GG                | 1946703931               |
| SNP_P3_180192_5302  | NW_004519441.1 | Scaffold5307 | 5302                    | AA                              | GG                | 1946703933               |
| SNP_P3_180193_5321  | NW_004519441.1 | Scaffold5307 | 5321                    | CC                              | TT                | 1946703935               |
| SNP_P3_180194_5381  | NW_004519441.1 | Scaffold5307 | 5381                    | AA                              | GG                | 1946703937               |
| SNP_P3_180195_5395  | NW_004519441.1 | Scaffold5307 | 5395                    | TT                              | CC                | 1946703939               |
| SNP_P3_180196_5396  | NW_004519441.1 | Scaffold5307 | 5396                    | CC                              | TT                | 1946703941               |
| SNP_P3_180197_5850  | NW_004519441.1 | Scaffold5307 | 5850                    | AA                              | GG                | 1946703943               |
| SNP_P3_180198_5985  | NW_004519441.1 | Scaffold5307 | 5985                    | AA                              | CC                | 1946703946               |
| SNP_P3_180199_6040  | NW_004519441.1 | Scaffold5307 | 6040                    | CC                              | TT                | 1946703948               |
| SNP_P3_180200_6219  | NW_004519441.1 | Scaffold5307 | 6219                    | AA                              | GG                | 1946703950               |
| SNP_P3_180201_6233  | NW_004519441.1 | Scaffold5307 | 6233                    | TT                              | CC                | 1946703952               |
| SNP_P3_180202_306   | NW_004519442.1 | Scaffold5309 | 306                     | AA                              | TT                | 1946703954               |
| SNP_P3_180203_662   | NW_004519442.1 | Scaffold5309 | 662                     | AA                              | TT                | 1946703957               |
| SNP_P3_180204_694   | NW_004519442.1 | Scaffold5309 | 694                     | GG                              | AA                | 1946703959               |
| SNP_P3_180205_712   | NW_004519442.1 | Scaffold5309 | 712                     | TT                              | AA                | 1946703961               |
| SNP_P3_180206_713   | NW_004519442.1 | Scaffold5309 | 713                     | TT                              | GG                | 1946703963               |
| SNP_P3_180207_735   | NW_004519442.1 | Scaffold5309 | 735                     | AA                              | CC                | 1946703965               |
| SNP_P3_180208_1060  | NW_004519442.1 | Scaffold5309 | 1060                    | GG                              | AA                | 1946703967               |
| SNP_P3_180209_651   | NW_004519444.1 | Scaffold5311 | 651                     | TT                              | GG                | 1946703969               |

| SNPs IDs            | Chromosome IDs | Chromosomes  | Physical positions (bp) | CDC Frontier (Reference genome) | (Pusa 256 & HPNB) | NCBI SNPdb Accession IDs |
|---------------------|----------------|--------------|-------------------------|---------------------------------|-------------------|--------------------------|
| SNP_P3_180210_699   | NW_004519445.1 | Scaffold5312 | 699                     | AA                              | CC                | 1946703971               |
| SNP_P3_180212_4426  | NW_004519445.1 | Scaffold5312 | 4426                    | AA                              | GG                | 1946703973               |
| SNP_P3_180213_4799  | NW_004519445.1 | Scaffold5312 | 4799                    | TT                              | CC                | 1946703975               |
| SNP_P3_180214_396   | NW_004519446.1 | Scaffold5313 | 396                     | AA                              | GG                | 1946703977               |
| SNP_P3_180215_637   | NW_004519446.1 | Scaffold5313 | 637                     | AA                              | GG                | 1946703980               |
| SNP_P3_180216_644   | NW_004519446.1 | Scaffold5313 | 644                     | TT                              | AA                | 1946703982               |
| SNP_P3_180217_20072 | NW_004519448.1 | Scaffold5321 | 20072                   | GG                              | AA                | 1946703984               |
| SNP_P3_180218_22096 | NW_004519448.1 | Scaffold5321 | 22096                   | TT                              | CC                | 1946703986               |
| SNP_P3_180219_43569 | NW_004519448.1 | Scaffold5321 | 43569                   | GG                              | AA                | 1946703988               |
| SNP_P3_180220_43908 | NW_004519448.1 | Scaffold5321 | 43908                   | TT                              | GG                | 1946703990               |
| SNP_P3_180221_47435 | NW_004519448.1 | Scaffold5321 | 47435                   | GG                              | AA                | 1946703993               |
| SNP_P3_180222_425   | NW_004519452.1 | Scaffold5326 | 425                     | AA                              | GG                | 1946703995               |
| SNP_P3_180223_466   | NW_004519452.1 | Scaffold5326 | 466                     | CC                              | TT                | 1946703997               |
| SNP_P3_180224_484   | NW_004519452.1 | Scaffold5326 | 484                     | TT                              | AA                | 1946703999               |
| SNP_P3_180225_485   | NW_004519452.1 | Scaffold5326 | 485                     | AA                              | TT                | 1946704001               |
| SNP_P3_180226_494   | NW_004519452.1 | Scaffold5326 | 494                     | GG                              | AA                | 1946704003               |
| SNP_P3_180227_500   | NW_004519452.1 | Scaffold5326 | 500                     | CC                              | TT                | 1946704005               |
| SNP_P3_180228_18779 | NW_004519454.1 | Scaffold5328 | 18779                   | AA                              | GG                | 1946704007               |
| SNP_P3_180229_96    | NW_004519456.1 | Scaffold5331 | 96                      | GG                              | CC                | 1946704009               |
| SNP_P3_180230_835   | NW_004519456.1 | Scaffold5331 | 835                     | CC                              | TT                | 1946704013               |
| SNP_P3_180231_844   | NW_004519456.1 | Scaffold5331 | 844                     | AA                              | CC                | 1946704015               |
| SNP_P3_180232_1152  | NW_004519457.1 | Scaffold5333 | 1152                    | TT                              | AA                | 1946704017               |
| SNP_P3_180233_1275  | NW_004519457.1 | Scaffold5333 | 1275                    | AA                              | GG                | 1946704019               |
| SNP_P3_180234_1282  | NW_004519457.1 | Scaffold5333 | 1282                    | AA                              | GG                | 1946704021               |
| SNP_P3_180235_486   | NW_004519460.1 | Scaffold5338 | 486                     | TT                              | AA                | 1946704023               |
| SNP_P3_180236_614   | NW_004519460.1 | Scaffold5338 | 614                     | CC                              | TT                | 1946704024               |
| SNP_P3_180237_663   | NW_004519460.1 | Scaffold5338 | 663                     | GG                              | TT                | 1946704026               |
| SNP_P3_180238_772   | NW_004519460.1 | Scaffold5338 | 772                     | CC                              | TT                | 1946704028               |
| SNP_P3_180239_716   | NW_004519461.1 | Scaffold5340 | 716                     | AA                              | GG                | 1946704030               |
| SNP_P3_180240_985   | NW_004519461.1 | Scaffold5340 | 985                     | TT                              | CC                | 1946704032               |
| SNP_P3_180243_1357  | NW_004519461.1 | Scaffold5340 | 1357                    | CC                              | TT                | 1946704034               |
| SNP_P3_180244_1366  | NW_004519461.1 | Scaffold5340 | 1366                    | CC                              | TT                | 1946704036               |
| SNP_P3_180245_1384  | NW_004519461.1 | Scaffold5340 | 1384                    | AA                              | GG                | 1946704038               |
| SNP_P3_180247_11940 | NW_004519469.1 | Scaffold5358 | 11940                   | CC                              | TT                | 1946704041               |
| SNP_P3_180248_64    | NW_004519470.1 | Scaffold5360 | 64                      | CC                              | GG                | 1946704043               |
| SNP_P3_180249_90    | NW_004519470.1 | Scaffold5360 | 90                      | TT                              | GG                | 1946704045               |
| SNP_P3_180250_272   | NW_004519470.1 | Scaffold5360 | 272                     | TT                              | GG                | 1946704047               |
| SNP_P3_180251_280   | NW_004519470.1 | Scaffold5360 | 280                     | CC                              | AA                | 1946704049               |
| SNP_P3_180253_419   | NW_004519470.1 | Scaffold5360 | 419                     | GG                              | AA                | 1946704051               |
| SNP_P3_180254_724   | NW_004519470.1 | Scaffold5360 | 724                     | AA                              | GG                | 1946704053               |
| SNP_P3_180255_739   | NW_004519470.1 | Scaffold5360 | 739                     | CC                              | TT                | 1946704055               |
| SNP_P3_180256_751   | NW_004519471.1 | Scaffold5361 | 751                     | AA                              | TT                | 1946704057               |

| SNPs IDs            | Chromosome IDs | Chromosomes  | Physical positions (bp) | CDC Frontier (Reference genome) | (Pusa 256 & HPNB) | NCBI SNPdb Accession IDs |
|---------------------|----------------|--------------|-------------------------|---------------------------------|-------------------|--------------------------|
| SNP_P3_180257_20688 | NW_004519478.1 | Scaffold5374 | 20688                   | GG                              | AA                | 1946704059               |
| SNP_P3_180258_23285 | NW_004519478.1 | Scaffold5374 | 23285                   | CC                              | TT                | 1946704061               |
| SNP_P3_180259_122   | NW_004519479.1 | Scaffold5375 | 122                     | AA                              | TT                | 1946704063               |
| SNP_P3_180260_5926  | NW_004519481.1 | Scaffold5377 | 5926                    | CC                              | TT                | 1946704065               |
| SNP_P3_180261_5933  | NW_004519481.1 | Scaffold5377 | 5933                    | TT                              | CC                | 1946704067               |
| SNP_P3_180262_6097  | NW_004519481.1 | Scaffold5377 | 6097                    | GG                              | TT                | 1946704069               |
| SNP_P3_180263_6181  | NW_004519481.1 | Scaffold5377 | 6181                    | GG                              | AA                | 1946704071               |
| SNP_P3_180264_6193  | NW_004519481.1 | Scaffold5377 | 6193                    | AA                              | TT                | 1946704073               |
| SNP_P3_180265_1405  | NW_004519485.1 | Scaffold5384 | 1405                    | GG                              | CC                | 1946704076               |
| SNP_P3_180266_1714  | NW_004519485.1 | Scaffold5384 | 1714                    | TT                              | CC                | 1946704078               |
| SNP_P3_180267_1738  | NW_004519485.1 | Scaffold5384 | 1738                    | CC                              | TT                | 1946704080               |
| SNP_P3_180268_3934  | NW_004519485.1 | Scaffold5384 | 3934                    | TT                              | CC                | 1946704082               |
| SNP_P3_180269_3939  | NW_004519485.1 | Scaffold5384 | 3939                    | AA                              | CC                | 1946704084               |
| SNP_P3_180270_4009  | NW_004519485.1 | Scaffold5384 | 4009                    | CC                              | TT                | 1946704086               |
| SNP_P3_180272_164   | NW_004519486.1 | Scaffold5385 | 164                     | TT                              | AA                | 1946704088               |
| SNP_P3_180273_1150  | NW_004519486.1 | Scaffold5385 | 1150                    | TT                              | AA                | 1946704090               |
| SNP_P3_180274_1178  | NW_004519486.1 | Scaffold5385 | 1178                    | CC                              | GG                | 1946704092               |
| SNP_P3_180275_1227  | NW_004519486.1 | Scaffold5385 | 1227                    | AA                              | TT                | 1946704094               |
| SNP_P3_180276_2278  | NW_004519486.1 | Scaffold5385 | 2278                    | AA                              | GG                | 1946704096               |
| SNP_P3_180277_8603  | NW_004519488.1 | Scaffold5389 | 8603                    | TT                              | GG                | 1946704098               |
| SNP_P3_180278_8822  | NW_004519488.1 | Scaffold5389 | 8822                    | TT                              | AA                | 1946704100               |
| SNP_P3_180279_8905  | NW_004519488.1 | Scaffold5389 | 8905                    | AA                              | TT                | 1946704102               |
| SNP_P3_180280_786   | NW_004519494.1 | Scaffold5401 | 786                     | GG                              | AA                | 1946704104               |
| SNP_P3_180281_985   | NW_004519496.1 | Scaffold5404 | 985                     | TT                              | GG                | 1946704106               |
| SNP_P3_180282_1188  | NW_004519499.1 | Scaffold5409 | 1188                    | AA                              | GG                | 1946704109               |
| SNP_P3_180283_6477  | NW_004519501.1 | Scaffold5413 | 6477                    | CC                              | TT                | 1946704111               |
| SNP_P3_180284_7282  | NW_004519501.1 | Scaffold5413 | 7282                    | GG                              | CC                | 1946704113               |
| SNP_P3_180285_7297  | NW_004519501.1 | Scaffold5413 | 7297                    | AA                              | GG                | 1946704115               |
| SNP_P3_180286_7539  | NW_004519501.1 | Scaffold5413 | 7539                    | GG                              | CC                | 1946704117               |
| SNP_P3_180287_10630 | NW_004519501.1 | Scaffold5413 | 10630                   | CC                              | AA                | 1946704119               |
| SNP_P3_180288_760   | NW_004519503.1 | Scaffold5416 | 760                     | AA                              | GG                | 1946704121               |
| SNP_P3_180289_766   | NW_004519503.1 | Scaffold5416 | 766                     | TT                              | CC                | 1946704123               |
| SNP_P3_180290_785   | NW_004519503.1 | Scaffold5416 | 785                     | AA                              | CC                | 1946704125               |
| SNP_P3_180291_858   | NW_004519504.1 | Scaffold5418 | 858                     | AA                              | GG                | 1946704127               |
| SNP_P3_180292_859   | NW_004519504.1 | Scaffold5418 | 859                     | AA                              | TT                | 1946704129               |
| SNP_P3_180293_1764  | NW_004519504.1 | Scaffold5418 | 1764                    | TT                              | CC                | 1946704131               |
| SNP_P3_180294_1785  | NW_004519504.1 | Scaffold5418 | 1785                    | AA                              | GG                | 1946704133               |
| SNP_P3_180295_241   | NW_004519505.1 | Scaffold5420 | 241                     | AA                              | TT                | 1946704135               |
| SNP_P3_180296_285   | NW_004519505.1 | Scaffold5420 | 285                     | GG                              | AA                | 1946704137               |
| SNP_P3_180297_400   | NW_004519505.1 | Scaffold5420 | 400                     | TT                              | AA                | 1946704139               |
| SNP_P3_180298_490   | NW_004519505.1 | Scaffold5420 | 490                     | AA                              | TT                | 1946704142               |
| SNP_P3_180299_608   | NW_004519505.1 | Scaffold5420 | 608                     | AA                              | TT                | 1946704144               |

| SNPs IDs           | Chromosome IDs | Chromosomes  | Physical positions (bp) | CDC Frontier (Reference genome) | (Pusa 256 & HPNB) | NCBI SNPdb Accession IDs |
|--------------------|----------------|--------------|-------------------------|---------------------------------|-------------------|--------------------------|
| SNP_P3_180302_705  | NW_004519505.1 | Scaffold5420 | 705                     | AA                              | GG                | 1946704146               |
| SNP_P3_180303_867  | NW_004519505.1 | Scaffold5420 | 867                     | TT                              | CC                | 1946704148               |
| SNP_P3_180304_918  | NW_004519505.1 | Scaffold5420 | 918                     | AA                              | GG                | 1946704150               |
| SNP_P3_180305_933  | NW_004519505.1 | Scaffold5420 | 933                     | GG                              | AA                | 1946704152               |
| SNP_P3_180306_936  | NW_004519505.1 | Scaffold5420 | 936                     | AA                              | TT                | 1946704154               |
| SNP_P3_180307_960  | NW_004519505.1 | Scaffold5420 | 960                     | GG                              | TT                | 1946704156               |
| SNP_P3_180308_1013 | NW_004519505.1 | Scaffold5420 | 1013                    | TT                              | AA                | 1946704158               |
| SNP_P3_180309_1332 | NW_004519505.1 | Scaffold5420 | 1332                    | TT                              | GG                | 1946704160               |
| SNP_P3_180310_1345 | NW_004519505.1 | Scaffold5420 | 1345                    | TT                              | CC                | 1946704162               |
| SNP_P3_180312_2474 | NW_004519508.1 | Scaffold5426 | 2474                    | TT                              | AA                | 1946704164               |
| SNP_P3_180313_2477 | NW_004519508.1 | Scaffold5426 | 2477                    | GG                              | TT                | 1946704166               |
| SNP_P3_180314_2493 | NW_004519508.1 | Scaffold5426 | 2493                    | CC                              | GG                | 1946704168               |
| SNP_P3_180315_2509 | NW_004519508.1 | Scaffold5426 | 2509                    | TT                              | CC                | 1946704170               |
| SNP_P3_180316_235  | NW_004519511.1 | Scaffold5434 | 235                     | GG                              | TT                | 1946704172               |
| SNP_P3_180317_252  | NW_004519511.1 | Scaffold5434 | 252                     | TT                              | CC                | 1946704175               |
| SNP_P3_180318_288  | NW_004519511.1 | Scaffold5434 | 288                     | AA                              | CC                | 1946704177               |
| SNP_P3_180319_410  | NW_004519511.1 | Scaffold5434 | 410                     | TT                              | CC                | 1946704179               |
| SNP_P3_180320_570  | NW_004519511.1 | Scaffold5434 | 570                     | TT                              | GG                | 1946704181               |
| SNP_P3_180321_797  | NW_004519511.1 | Scaffold5434 | 797                     | TT                              | CC                | 1946704183               |
| SNP_P3_180322_1000 | NW_004519511.1 | Scaffold5434 | 1000                    | TT                              | AA                | 1946704185               |
| SNP_P3_180323_2124 | NW_004519520.1 | Scaffold5449 | 2124                    | TT                              | AA                | 1946704187               |
| SNP_P3_180324_2128 | NW_004519520.1 | Scaffold5449 | 2128                    | AA                              | TT                | 1946704189               |
| SNP_P3_180325_2138 | NW_004519520.1 | Scaffold5449 | 2138                    | CC                              | TT                | 1946704191               |
| SNP_P3_180326_2199 | NW_004519520.1 | Scaffold5449 | 2199                    | TT                              | GG                | 1946704193               |
| SNP_P3_180328_2265 | NW_004519520.1 | Scaffold5449 | 2265                    | AA                              | GG                | 1946704195               |
| SNP_P3_180329_410  | NW_004519523.1 | Scaffold5452 | 410                     | AA                              | GG                | 1946704197               |
| SNP_P3_180330_499  | NW_004519523.1 | Scaffold5452 | 499                     | TT                              | AA                | 1946704199               |
| SNP_P3_180331_626  | NW_004519523.1 | Scaffold5452 | 626                     | GG                              | AA                | 1946704201               |
| SNP_P3_180332_667  | NW_004519523.1 | Scaffold5452 | 667                     | GG                              | CC                | 1946704203               |
| SNP_P3_180333_699  | NW_004519523.1 | Scaffold5452 | 699                     | TT                              | GG                | 1946704205               |
| SNP_P3_180334_822  | NW_004519523.1 | Scaffold5452 | 822                     | AA                              | TT                | 1946704207               |
| SNP_P3_180335_845  | NW_004519523.1 | Scaffold5452 | 845                     | CC                              | TT                | 1946704209               |
| SNP_P3_180336_864  | NW_004519523.1 | Scaffold5452 | 864                     | CC                              | TT                | 1946704211               |
| SNP_P3_180337_907  | NW_004519523.1 | Scaffold5452 | 907                     | AA                              | GG                | 1946704213               |
| SNP_P3_180338_1017 | NW_004519523.1 | Scaffold5452 | 1017                    | AA                              | GG                | 1946704215               |
| SNP_P3_180339_1040 | NW_004519523.1 | Scaffold5452 | 1040                    | TT                              | AA                | 1946704217               |
| SNP_P3_180340_1134 | NW_004519523.1 | Scaffold5452 | 1134                    | GG                              | AA                | 1946704219               |
| SNP_P3_180341_1180 | NW_004519523.1 | Scaffold5452 | 1180                    | GG                              | CC                | 1946704221               |
| SNP_P3_180342_1191 | NW_004519523.1 | Scaffold5452 | 1191                    | GG                              | AA                | 1946704223               |
| SNP_P3_180343_1325 | NW_004519523.1 | Scaffold5452 | 1325                    | CC                              | TT                | 1946704225               |
| SNP_P3_180344_1475 | NW_004519523.1 | Scaffold5452 | 1475                    | TT                              | CC                | 1946704227               |
| SNP_P3_180345_1593 | NW_004519523.1 | Scaffold5452 | 1593                    | AA                              | CC                | 1946704229               |

| SNPs IDs            | Chromosome IDs | Chromosomes  | Physical positions (bp) | CDC Frontier (Reference genome) | (Pusa 256 & HPNB) | NCBI SNPdb Accession IDs |
|---------------------|----------------|--------------|-------------------------|---------------------------------|-------------------|--------------------------|
| SNP_P3_180346_1638  | NW_004519523.1 | Scaffold5452 | 1638                    | TT                              | CC                | 1946704231               |
| SNP_P3_180347_1605  | NW_004519524.1 | Scaffold5453 | 1605                    | AA                              | TT                | 1946704233               |
| SNP_P3_180348_11247 | NW_004519528.1 | Scaffold5458 | 11247                   | TT                              | CC                | 1946704235               |
| SNP_P3_180349_11264 | NW_004519528.1 | Scaffold5458 | 11264                   | TT                              | GG                | 1946704237               |
| SNP_P3_180350_11266 | NW_004519528.1 | Scaffold5458 | 11266                   | TT                              | AA                | 1946704239               |
| SNP_P3_180351_11792 | NW_004519528.1 | Scaffold5458 | 11792                   | CC                              | TT                | 1946704241               |
| SNP_P3_180352_11800 | NW_004519528.1 | Scaffold5458 | 11800                   | CC                              | AA                | 1946704244               |
| SNP_P3_180353_11801 | NW_004519528.1 | Scaffold5458 | 11801                   | AA                              | CC                | 1946704246               |
| SNP_P3_180354_11810 | NW_004519528.1 | Scaffold5458 | 11810                   | CC                              | TT                | 1946704248               |
| SNP_P3_180355_13381 | NW_004519528.1 | Scaffold5458 | 13381                   | CC                              | TT                | 1946704249               |
| SNP_P3_180356_13387 | NW_004519528.1 | Scaffold5458 | 13387                   | AA                              | GG                | 1946704251               |
| SNP_P3_180357_13388 | NW_004519528.1 | Scaffold5458 | 13388                   | AA                              | GG                | 1946704253               |
| SNP_P3_180359_415   | NW_004519530.1 | Scaffold5460 | 415                     | AA                              | GG                | 1946704255               |
| SNP_P3_180360_5495  | NW_004519533.1 | Scaffold5465 | 5495                    | GG                              | CC                | 1946704257               |
| SNP_P3_180361_5541  | NW_004519533.1 | Scaffold5465 | 5541                    | CC                              | GG                | 1946704259               |
| SNP_P3_180362_362   | NW_004519535.1 | Scaffold5472 | 362                     | TT                              | AA                | 1946704261               |
| SNP_P3_180363_500   | NW_004519535.1 | Scaffold5472 | 500                     | CC                              | AA                | 1946704263               |
| SNP_P3_180364_649   | NW_004519535.1 | Scaffold5472 | 649                     | CC                              | TT                | 1946704265               |
| SNP_P3_180365_658   | NW_004519535.1 | Scaffold5472 | 658                     | AA                              | GG                | 1946704267               |
| SNP_P3_180366_673   | NW_004519535.1 | Scaffold5472 | 673                     | AA                              | CC                | 1946704269               |
| SNP_P3_180367_684   | NW_004519535.1 | Scaffold5472 | 684                     | GG                              | TT                | 1946704271               |
| SNP_P3_180368_825   | NW_004519535.1 | Scaffold5472 | 825                     | TT                              | CC                | 1946704273               |
| SNP_P3_180369_981   | NW_004519544.1 | Scaffold5484 | 981                     | TT                              | AA                | 1946704276               |
| SNP_P3_180370_1179  | NW_004519544.1 | Scaffold5484 | 1179                    | TT                              | AA                | 1946704278               |
| SNP_P3_180371_1222  | NW_004519544.1 | Scaffold5484 | 1222                    | AA                              | TT                | 1946704281               |
| SNP_P3_180372_1224  | NW_004519544.1 | Scaffold5484 | 1224                    | AA                              | GG                | 1946704283               |
| SNP_P3_180373_1230  | NW_004519544.1 | Scaffold5484 | 1230                    | GG                              | AA                | 1946704285               |
| SNP_P3_180374_1247  | NW_004519544.1 | Scaffold5484 | 1247                    | AA                              | GG                | 1946704287               |
| SNP_P3_180376_1271  | NW_004519544.1 | Scaffold5484 | 1271                    | AA                              | GG                | 1946704289               |
| SNP_P3_180377_3633  | NW_004519544.1 | Scaffold5484 | 3633                    | AA                              | CC                | 1946704291               |
| SNP_P3_180378_3647  | NW_004519544.1 | Scaffold5484 | 3647                    | GG                              | AA                | 1946704293               |
| SNP_P3_180379_3778  | NW_004519544.1 | Scaffold5484 | 3778                    | CC                              | TT                | 1946704296               |
| SNP_P3_180380_3782  | NW_004519544.1 | Scaffold5484 | 3782                    | TT                              | GG                | 1946704298               |
| SNP_P3_180381_4513  | NW_004519544.1 | Scaffold5484 | 4513                    | CC                              | AA                | 1946704300               |
| SNP_P3_180382_4174  | NW_004519551.1 | Scaffold5492 | 4174                    | AA                              | GG                | 1946704302               |
| SNP_P3_180383_336   | NW_004519553.1 | Scaffold5497 | 336                     | GG                              | AA                | 1946704304               |
| SNP_P3_180384_590   | NW_004519553.1 | Scaffold5497 | 590                     | CC                              | TT                | 1946704306               |
| SNP_P3_180385_899   | NW_004519553.1 | Scaffold5497 | 899                     | CC                              | GG                | 1946704308               |
| SNP_P3_180386_933   | NW_004519553.1 | Scaffold5497 | 933                     | AA                              | GG                | 1946704310               |
| SNP_P3_180388_956   | NW_004519553.1 | Scaffold5497 | 956                     | TT                              | CC                | 1946704314               |
| SNP_P3_180390_1371  | NW_004519561.1 | Scaffold5509 | 1371                    | GG                              | TT                | 1946704316               |
| SNP_P3_180391_1506  | NW_004519561.1 | Scaffold5509 | 1506                    | TT                              | CC                | 1946704318               |



| SNPs IDs            | Chromosome IDs | Chromosomes  | Physical positions (bp) | CDC Frontier (Reference genome) | (Pusa 256 & HPNB) | NCBI SNPdb Accession IDs |
|---------------------|----------------|--------------|-------------------------|---------------------------------|-------------------|--------------------------|
| SNP_P3_180392_12847 | NW_004519562.1 | Scaffold5511 | 12847                   | GG                              | AA                | 1946704320               |
| SNP_P3_180393_12855 | NW_004519562.1 | Scaffold5511 | 12855                   | GG                              | TT                | 1946704322               |
| SNP_P3_180394_664   | NW_004519565.1 | Scaffold5514 | 664                     | CC                              | TT                | 1946704324               |
| SNP_P3_180395_687   | NW_004519565.1 | Scaffold5514 | 687                     | TT                              | CC                | 1946704326               |
| SNP_P3_180396_688   | NW_004519565.1 | Scaffold5514 | 688                     | TT                              | CC                | 1946704328               |
| SNP_P3_180397_3843  | NW_004519565.1 | Scaffold5514 | 3843                    | AA                              | CC                | 1946704331               |
| SNP_P3_180398_3865  | NW_004519565.1 | Scaffold5514 | 3865                    | AA                              | GG                | 1946704333               |
| SNP_P3_180399_3966  | NW_004519565.1 | Scaffold5514 | 3966                    | CC                              | TT                | 1946704335               |
| SNP_P3_180400_3975  | NW_004519565.1 | Scaffold5514 | 3975                    | AA                              | CC                | 1946704337               |
| SNP_P3_180401_5506  | NW_004519565.1 | Scaffold5514 | 5506                    | CC                              | TT                | 1946704339               |
| SNP_P3_180402_5861  | NW_004519565.1 | Scaffold5514 | 5861                    | TT                              | AA                | 1946704341               |
| SNP_P3_180403_5888  | NW_004519565.1 | Scaffold5514 | 5888                    | GG                              | TT                | 1946704344               |
| SNP_P3_180404_5894  | NW_004519565.1 | Scaffold5514 | 5894                    | AA                              | GG                | 1946704346               |
| SNP_P3_180405_5907  | NW_004519565.1 | Scaffold5514 | 5907                    | TT                              | CC                | 1946704349               |
| SNP_P3_180406_5924  | NW_004519565.1 | Scaffold5514 | 5924                    | AA                              | GG                | 1946704351               |
| SNP_P3_180407_20902 | NW_004519578.1 | Scaffold5537 | 20902                   | GG                              | TT                | 1946704353               |
| SNP_P3_180408_20970 | NW_004519578.1 | Scaffold5537 | 20970                   | TT                              | CC                | 1946704355               |
| SNP_P3_180409_64    | NW_004519579.1 | Scaffold5538 | 64                      | TT                              | CC                | 1946704357               |
| SNP_P3_180410_97    | NW_004519579.1 | Scaffold5538 | 97                      | TT                              | CC                | 1946704359               |
| SNP_P3_180411_102   | NW_004519579.1 | Scaffold5538 | 102                     | AA                              | GG                | 1946704362               |
| SNP_P3_180412_224   | NW_004519579.1 | Scaffold5538 | 224                     | TT                              | AA                | 1946704364               |
| SNP_P3_180414_1111  | NW_004519579.1 | Scaffold5538 | 1111                    | AA                              | GG                | 1946704366               |
| SNP_P3_180415_1112  | NW_004519579.1 | Scaffold5538 | 1112                    | AA                              | TT                | 1946704368               |
| SNP_P3_180416_1163  | NW_004519579.1 | Scaffold5538 | 1163                    | GG                              | AA                | 1946704370               |
| SNP_P3_180417_1206  | NW_004519579.1 | Scaffold5538 | 1206                    | AA                              | TT                | 1946704372               |
| SNP_P3_180418_1282  | NW_004519579.1 | Scaffold5538 | 1282                    | GG                              | AA                | 1946704375               |
| SNP_P3_180419_1406  | NW_004519579.1 | Scaffold5538 | 1406                    | CC                              | TT                | 1946704377               |
| SNP_P3_180420_1410  | NW_004519579.1 | Scaffold5538 | 1410                    | AA                              | GG                | 1946704379               |
| SNP_P3_180421_1414  | NW_004519579.1 | Scaffold5538 | 1414                    | CC                              | AA                | 1946704381               |
| SNP_P3_180422_1714  | NW_004519579.1 | Scaffold5538 | 1714                    | CC                              | TT                | 1946704385               |
| SNP_P3_180423_1994  | NW_004519579.1 | Scaffold5538 | 1994                    | AA                              | TT                | 1946704387               |
| SNP_P3_180424_2026  | NW_004519579.1 | Scaffold5538 | 2026                    | AA                              | GG                | 1946704389               |
| SNP_P3_180425_31    | NW_004519580.1 | Scaffold5541 | 31                      | TT                              | CC                | 1946704391               |
| SNP_P3_180426_35    | NW_004519580.1 | Scaffold5541 | 35                      | CC                              | TT                | 1946704393               |
| SNP_P3_180427_64    | NW_004519580.1 | Scaffold5541 | 64                      | AA                              | CC                | 1946704395               |
| SNP_P3_180428_72    | NW_004519580.1 | Scaffold5541 | 72                      | AA                              | TT                | 1946704397               |
| SNP_P3_180430_84    | NW_004519580.1 | Scaffold5541 | 84                      | GG                              | AA                | 1946704399               |
| SNP_P3_180431_131   | NW_004519580.1 | Scaffold5541 | 131                     | TT                              | CC                | 1946704401               |
| SNP_P3_180432_153   | NW_004519580.1 | Scaffold5541 | 153                     | GG                              | TT                | 1946704404               |
| SNP_P3_180433_627   | NW_004519580.1 | Scaffold5541 | 627                     | AA                              | GG                | 1946704406               |
| SNP_P3_180434_697   | NW_004519580.1 | Scaffold5541 | 697                     | CC                              | GG                | 1946704408               |
| SNP_P3_180435_702   | NW_004519580.1 | Scaffold5541 | 702                     | AA                              | TT                | 1946704410               |

| SNPs IDs           | Chromosome IDs | Chromosomes  | Physical positions (bp) | CDC Frontier (Reference genome) | (Pusa 256 & HPNB) | NCBI SNPdb Accession IDs |
|--------------------|----------------|--------------|-------------------------|---------------------------------|-------------------|--------------------------|
| SNP_P3_180436_722  | NW_004519580.1 | Scaffold5541 | 722                     | GG                              | AA                | 1946704412               |
| SNP_P3_180437_723  | NW_004519580.1 | Scaffold5541 | 723                     | GG                              | TT                | 1946704414               |
| SNP_P3_180438_729  | NW_004519580.1 | Scaffold5541 | 729                     | AA                              | GG                | 1946704416               |
| SNP_P3_180439_760  | NW_004519580.1 | Scaffold5541 | 760                     | GG                              | AA                | 1946704418               |
| SNP_P3_180440_792  | NW_004519580.1 | Scaffold5541 | 792                     | AA                              | GG                | 1946704421               |
| SNP_P3_180441_806  | NW_004519580.1 | Scaffold5541 | 806                     | TT                              | CC                | 1946704423               |
| SNP_P3_180442_807  | NW_004519580.1 | Scaffold5541 | 807                     | AA                              | TT                | 1946704425               |
| SNP_P3_180443_819  | NW_004519580.1 | Scaffold5541 | 819                     | TT                              | CC                | 1946704427               |
| SNP_P3_180444_826  | NW_004519580.1 | Scaffold5541 | 826                     | AA                              | TT                | 1946704429               |
| SNP_P3_180445_875  | NW_004519580.1 | Scaffold5541 | 875                     | TT                              | CC                | 1946704432               |
| SNP_P3_180446_913  | NW_004519580.1 | Scaffold5541 | 913                     | GG                              | AA                | 1946704435               |
| SNP_P3_180447_986  | NW_004519580.1 | Scaffold5541 | 986                     | CC                              | AA                | 1946704437               |
| SNP_P3_180448_1051 | NW_004519580.1 | Scaffold5541 | 1051                    | AA                              | GG                | 1946704439               |
| SNP_P3_180449_1070 | NW_004519580.1 | Scaffold5541 | 1070                    | GG                              | TT                | 1946704441               |
| SNP_P3_180450_1100 | NW_004519580.1 | Scaffold5541 | 1100                    | AA                              | CC                | 1946704443               |
| SNP_P3_180451_1146 | NW_004519580.1 | Scaffold5541 | 1146                    | AA                              | GG                | 1946704446               |
| SNP_P3_180452_1166 | NW_004519580.1 | Scaffold5541 | 1166                    | TT                              | AA                | 1946704448               |
| SNP_P3_180453_1189 | NW_004519580.1 | Scaffold5541 | 1189                    | GG                              | AA                | 1946704450               |
| SNP_P3_180454_1198 | NW_004519580.1 | Scaffold5541 | 1198                    | TT                              | AA                | 1946704452               |
| SNP_P3_180455_1204 | NW_004519580.1 | Scaffold5541 | 1204                    | AA                              | TT                | 1946704455               |
| SNP_P3_180456_1208 | NW_004519580.1 | Scaffold5541 | 1208                    | TT                              | CC                | 1946704458               |
| SNP_P3_180457_1215 | NW_004519580.1 | Scaffold5541 | 1215                    | GG                              | TT                | 1946704460               |
| SNP_P3_180458_1228 | NW_004519580.1 | Scaffold5541 | 1228                    | AA                              | TT                | 1946704462               |
| SNP_P3_180459_1241 | NW_004519580.1 | Scaffold5541 | 1241                    | GG                              | CC                | 1946704464               |
| SNP_P3_180460_1280 | NW_004519580.1 | Scaffold5541 | 1280                    | GG                              | AA                | 1946704467               |
| SNP_P3_180461_1332 | NW_004519580.1 | Scaffold5541 | 1332                    | AA                              | CC                | 1946704469               |
| SNP_P3_180462_187  | NW_004519582.1 | Scaffold5545 | 187                     | GG                              | AA                | 1946704471               |
| SNP_P3_180463_202  | NW_004519582.1 | Scaffold5545 | 202                     | CC                              | GG                | 1946704473               |
| SNP_P3_180466_466  | NW_004519586.1 | Scaffold5549 | 466                     | GG                              | TT                | 1946704476               |
| SNP_P3_180467_503  | NW_004519586.1 | Scaffold5549 | 503                     | AA                              | TT                | 1946704478               |
| SNP_P3_180469_559  | NW_004519586.1 | Scaffold5549 | 559                     | TT                              | CC                | 1946704480               |
| SNP_P3_180471_112  | NW_004519587.1 | Scaffold5551 | 112                     | TT                              | CC                | 1946704482               |
| SNP_P3_180472_116  | NW_004519587.1 | Scaffold5551 | 116                     | AA                              | CC                | 1946704484               |
| SNP_P3_180473_144  | NW_004519587.1 | Scaffold5551 | 144                     | AA                              | GG                | 1946704486               |
| SNP_P3_180474_307  | NW_004519587.1 | Scaffold5551 | 307                     | CC                              | GG                | 1946704489               |
| SNP_P3_180475_357  | NW_004519587.1 | Scaffold5551 | 357                     | AA                              | CC                | 1946704491               |
| SNP_P3_180476_368  | NW_004519587.1 | Scaffold5551 | 368                     | AA                              | GG                | 1946704494               |
| SNP_P3_180477_376  | NW_004519587.1 | Scaffold5551 | 376                     | AA                              | CC                | 1946704496               |
| SNP_P3_180478_410  | NW_004519587.1 | Scaffold5551 | 410                     | CC                              | TT                | 1946704499               |
| SNP_P3_180479_507  | NW_004519587.1 | Scaffold5551 | 507                     | TT                              | CC                | 1946704501               |
| SNP_P3_180480_510  | NW_004519587.1 | Scaffold5551 | 510                     | GG                              | CC                | 1946704503               |
| SNP_P3_180481_512  | NW_004519587.1 | Scaffold5551 | 512                     | CC                              | AA                | 1946704505               |

| SNPs IDs            | Chromosome IDs | Chromosomes  | Physical positions (bp) | CDC Frontier (Reference genome) | (Pusa 256 & HPNB) | NCBI SNPdb Accession IDs |
|---------------------|----------------|--------------|-------------------------|---------------------------------|-------------------|--------------------------|
| SNP_P3_180483_670   | NW_004519587.1 | Scaffold5551 | 670                     | CC                              | TT                | 1946704508               |
| SNP_P3_180484_721   | NW_004519587.1 | Scaffold5551 | 721                     | CC                              | GG                | 1946704510               |
| SNP_P3_180486_783   | NW_004519587.1 | Scaffold5551 | 783                     | TT                              | CC                | 1946704512               |
| SNP_P3_180487_843   | NW_004519587.1 | Scaffold5551 | 843                     | AA                              | GG                | 1946704514               |
| SNP_P3_180488_114   | NW_004519589.1 | Scaffold5553 | 114                     | TT                              | GG                | 1946704516               |
| SNP_P3_180489_232   | NW_004519589.1 | Scaffold5553 | 232                     | TT                              | CC                | 1946704518               |
| SNP_P3_180490_406   | NW_004519589.1 | Scaffold5553 | 406                     | GG                              | AA                | 1946704520               |
| SNP_P3_180491_413   | NW_004519589.1 | Scaffold5553 | 413                     | AA                              | CC                | 1946704522               |
| SNP_P3_180492_457   | NW_004519589.1 | Scaffold5553 | 457                     | GG                              | TT                | 1946704524               |
| SNP_P3_180493_467   | NW_004519589.1 | Scaffold5553 | 467                     | GG                              | AA                | 1946704526               |
| SNP_P3_180494_521   | NW_004519589.1 | Scaffold5553 | 521                     | TT                              | CC                | 1946704530               |
| SNP_P3_180495_582   | NW_004519589.1 | Scaffold5553 | 582                     | AA                              | TT                | 1946704532               |
| SNP_P3_180496_619   | NW_004519589.1 | Scaffold5553 | 619                     | AA                              | TT                | 1946704534               |
| SNP_P3_180497_630   | NW_004519589.1 | Scaffold5553 | 630                     | CC                              | TT                | 1946704536               |
| SNP_P3_180498_694   | NW_004519589.1 | Scaffold5553 | 694                     | AA                              | GG                | 1946704538               |
| SNP_P3_180499_709   | NW_004519589.1 | Scaffold5553 | 709                     | TT                              | GG                | 1946704540               |
| SNP_P3_180500_720   | NW_004519589.1 | Scaffold5553 | 720                     | AA                              | TT                | 1946704542               |
| SNP_P3_180501_6838  | NW_004519589.1 | Scaffold5553 | 6838                    | GG                              | TT                | 1946704544               |
| SNP_P3_180502_11651 | NW_004519589.1 | Scaffold5553 | 11651                   | TT                              | GG                | 1946704546               |
| SNP_P3_180503_11711 | NW_004519589.1 | Scaffold5553 | 11711                   | TT                              | AA                | 1946704548               |
| SNP_P3_180504_11719 | NW_004519589.1 | Scaffold5553 | 11719                   | CC                              | TT                | 1946704550               |
| SNP_P3_180505_12385 | NW_004519589.1 | Scaffold5553 | 12385                   | CC                              | TT                | 1946704552               |
| SNP_P3_180506_12772 | NW_004519589.1 | Scaffold5553 | 12772                   | AA                              | TT                | 1946704554               |
| SNP_P3_180507_12904 | NW_004519589.1 | Scaffold5553 | 12904                   | GG                              | AA                | 1946704557               |
| SNP_P3_180508_439   | NW_004519591.1 | Scaffold5556 | 439                     | GG                              | AA                | 1946704559               |
| SNP_P3_180509_482   | NW_004519591.1 | Scaffold5556 | 482                     | AA                              | CC                | 1946704561               |
| SNP_P3_180510_630   | NW_004519599.1 | Scaffold5569 | 630                     | CC                              | TT                | 1946704563               |
| SNP_P3_180511_891   | NW_004519599.1 | Scaffold5569 | 891                     | AA                              | CC                | 1946704566               |
| SNP_P3_180512_971   | NW_004519599.1 | Scaffold5569 | 971                     | AA                              | GG                | 1946704568               |
| SNP_P3_180513_807   | NW_004519603.1 | Scaffold5578 | 807                     | AA                              | CC                | 1946704571               |
| SNP_P3_180514_685   | NW_004519604.1 | Scaffold5579 | 685                     | CC                              | TT                | 1946704573               |
| SNP_P3_180515_834   | NW_004519605.1 | Scaffold5580 | 834                     | CC                              | GG                | 1946704575               |
| SNP_P3_180516_841   | NW_004519605.1 | Scaffold5580 | 841                     | GG                              | TT                | 1946704577               |
| SNP_P3_180517_843   | NW_004519605.1 | Scaffold5580 | 843                     | TT                              | CC                | 1946704579               |
| SNP_P3_180518_1049  | NW_004519605.1 | Scaffold5580 | 1049                    | GG                              | AA                | 1946704581               |
| SNP_P3_180519_1062  | NW_004519605.1 | Scaffold5580 | 1062                    | AA                              | GG                | 1946704583               |
| SNP_P3_180521_1403  | NW_004519605.1 | Scaffold5580 | 1403                    | GG                              | AA                | 1946704586               |
| SNP_P3_180523_2341  | NW_004519606.1 | Scaffold5581 | 2341                    | AA                              | CC                | 1946704588               |
| SNP_P3_180524_6402  | NW_004519608.1 | Scaffold5586 | 6402                    | AA                              | GG                | 1946704590               |
| SNP_P3_180525_1632  | NW_004519609.1 | Scaffold5587 | 1632                    | AA                              | CC                | 1946704592               |
| SNP_P3_180527_214   | NW_004519615.1 | Scaffold5593 | 214                     | GG                              | AA                | 1946704594               |
| SNP_P3_180528_256   | NW_004519615.1 | Scaffold5593 | 256                     | TT                              | CC                | 1946704596               |

| SNPs IDs           | Chromosome IDs | Chromosomes  | Physical positions (bp) | CDC Frontier (Reference genome) | (Pusa 256 & HPNB) | NCBI SNPdb Accession IDs |
|--------------------|----------------|--------------|-------------------------|---------------------------------|-------------------|--------------------------|
| SNP_P3_180529_269  | NW_004519615.1 | Scaffold5593 | 269                     | AA                              | GG                | 1946704598               |
| SNP_P3_180530_338  | NW_004519615.1 | Scaffold5593 | 338                     | GG                              | CC                | 1946704600               |
| SNP_P3_180531_418  | NW_004519615.1 | Scaffold5593 | 418                     | AA                              | GG                | 1946704604               |
| SNP_P3_180532_477  | NW_004519615.1 | Scaffold5593 | 477                     | TT                              | CC                | 1946704606               |
| SNP_P3_180533_482  | NW_004519615.1 | Scaffold5593 | 482                     | CC                              | TT                | 1946704608               |
| SNP_P3_180534_513  | NW_004519615.1 | Scaffold5593 | 513                     | GG                              | CC                | 1946704610               |
| SNP_P3_180535_527  | NW_004519615.1 | Scaffold5593 | 527                     | CC                              | TT                | 1946704612               |
| SNP_P3_180536_529  | NW_004519615.1 | Scaffold5593 | 529                     | GG                              | AA                | 1946704614               |
| SNP_P3_180537_543  | NW_004519615.1 | Scaffold5593 | 543                     | TT                              | CC                | 1946704616               |
| SNP_P3_180538_706  | NW_004519615.1 | Scaffold5593 | 706                     | CC                              | TT                | 1946704618               |
| SNP_P3_180539_358  | NW_004519617.1 | Scaffold5596 | 358                     | AA                              | GG                | 1946704620               |
| SNP_P3_180540_776  | NW_004519617.1 | Scaffold5596 | 776                     | AA                              | GG                | 1946704622               |
| SNP_P3_180541_986  | NW_004519618.1 | Scaffold5598 | 986                     | AA                              | TT                | 1946704624               |
| SNP_P3_180542_987  | NW_004519618.1 | Scaffold5598 | 987                     | TT                              | AA                | 1946704626               |
| SNP_P3_180543_989  | NW_004519618.1 | Scaffold5598 | 989                     | TT                              | CC                | 1946704628               |
| SNP_P3_180544_3081 | NW_004519618.1 | Scaffold5598 | 3081                    | TT                              | CC                | 1946704630               |
| SNP_P3_180545_3254 | NW_004519618.1 | Scaffold5598 | 3254                    | AA                              | TT                | 1946704634               |
| SNP_P3_180546_3276 | NW_004519618.1 | Scaffold5598 | 3276                    | TT                              | GG                | 1946704636               |
| SNP_P3_180547_3492 | NW_004519618.1 | Scaffold5598 | 3492                    | TT                              | CC                | 1946704638               |
| SNP_P3_180548_3773 | NW_004519618.1 | Scaffold5598 | 3773                    | AA                              | CC                | 1946704640               |
| SNP_P3_180549_4892 | NW_004519618.1 | Scaffold5598 | 4892                    | CC                              | GG                | 1946704642               |
| SNP_P3_180550_5005 | NW_004519618.1 | Scaffold5598 | 5005                    | TT                              | CC                | 1946704644               |
| SNP_P3_180551_5065 | NW_004519618.1 | Scaffold5598 | 5065                    | GG                              | CC                | 1946704646               |
| SNP_P3_180552_5097 | NW_004519618.1 | Scaffold5598 | 5097                    | AA                              | GG                | 1946704649               |
| SNP_P3_180553_5142 | NW_004519618.1 | Scaffold5598 | 5142                    | CC                              | TT                | 1946704651               |
| SNP_P3_180554_5189 | NW_004519618.1 | Scaffold5598 | 5189                    | AA                              | CC                | 1946704653               |
| SNP_P3_180555_5240 | NW_004519618.1 | Scaffold5598 | 5240                    | GG                              | CC                | 1946704655               |
| SNP_P3_180556_5316 | NW_004519618.1 | Scaffold5598 | 5316                    | CC                              | AA                | 1946704657               |
| SNP_P3_180557_5411 | NW_004519618.1 | Scaffold5598 | 5411                    | CC                              | AA                | 1946704659               |
| SNP_P3_180558_5920 | NW_004519618.1 | Scaffold5598 | 5920                    | CC                              | TT                | 1946704661               |
| SNP_P3_180559_6165 | NW_004519618.1 | Scaffold5598 | 6165                    | CC                              | TT                | 1946704664               |
| SNP_P3_180560_6433 | NW_004519618.1 | Scaffold5598 | 6433                    | AA                              | CC                | 1946704666               |
| SNP_P3_180561_6518 | NW_004519618.1 | Scaffold5598 | 6518                    | CC                              | TT                | 1946704668               |
| SNP_P3_180562_6645 | NW_004519618.1 | Scaffold5598 | 6645                    | AA                              | GG                | 1946704670               |
| SNP_P3_180563_6739 | NW_004519618.1 | Scaffold5598 | 6739                    | TT                              | CC                | 1946704673               |
| SNP_P3_180564_7281 | NW_004519618.1 | Scaffold5598 | 7281                    | GG                              | AA                | 1946704675               |
| SNP_P3_180565_7383 | NW_004519618.1 | Scaffold5598 | 7383                    | GG                              | AA                | 1946704677               |
| SNP_P3_180566_7404 | NW_004519618.1 | Scaffold5598 | 7404                    | AA                              | CC                | 1946704679               |
| SNP_P3_180567_7421 | NW_004519618.1 | Scaffold5598 | 7421                    | TT                              | AA                | 1946704681               |
| SNP_P3_180568_7524 | NW_004519618.1 | Scaffold5598 | 7524                    | GG                              | AA                | 1946704683               |
| SNP_P3_180569_7530 | NW_004519618.1 | Scaffold5598 | 7530                    | AA                              | CC                | 1946704685               |
| SNP_P3_180570_7987 | NW_004519618.1 | Scaffold5598 | 7987                    | GG                              | CC                | 1946704687               |

| SNPs IDs            | Chromosome IDs | Chromosomes  | Physical positions (bp) | CDC Frontier (Reference genome) | (Pusa 256 & HPNB) | NCBI SNPdb Accession IDs |
|---------------------|----------------|--------------|-------------------------|---------------------------------|-------------------|--------------------------|
| SNP_P3_180571_8291  | NW_004519618.1 | Scaffold5598 | 8291                    | GG                              | AA                | 1946704689               |
| SNP_P3_180572_8809  | NW_004519618.1 | Scaffold5598 | 8809                    | TT                              | AA                | 1946704691               |
| SNP_P3_180573_8893  | NW_004519618.1 | Scaffold5598 | 8893                    | CC                              | AA                | 1946704693               |
| SNP_P3_180574_9450  | NW_004519618.1 | Scaffold5598 | 9450                    | TT                              | AA                | 1946704695               |
| SNP_P3_180576_11178 | NW_004519618.1 | Scaffold5598 | 11178                   | AA                              | GG                | 1946704697               |
| SNP_P3_180577_11909 | NW_004519618.1 | Scaffold5598 | 11909                   | AA                              | GG                | 1946704699               |
| SNP_P3_180578_13174 | NW_004519618.1 | Scaffold5598 | 13174                   | AA                              | GG                | 1946704701               |
| SNP_P3_180579_13189 | NW_004519618.1 | Scaffold5598 | 13189                   | TT                              | AA                | 1946704703               |
| SNP_P3_180580_13207 | NW_004519618.1 | Scaffold5598 | 13207                   | TT                              | GG                | 1946704705               |
| SNP_P3_180581_13222 | NW_004519618.1 | Scaffold5598 | 13222                   | AA                              | GG                | 1946704708               |
| SNP_P3_180582_13377 | NW_004519618.1 | Scaffold5598 | 13377                   | CC                              | GG                | 1946704710               |
| SNP_P3_180585_13730 | NW_004519618.1 | Scaffold5598 | 13730                   | CC                              | TT                | 1946704713               |
| SNP_P3_180586_13798 | NW_004519618.1 | Scaffold5598 | 13798                   | GG                              | AA                | 1946704715               |
| SNP_P3_180587_13949 | NW_004519618.1 | Scaffold5598 | 13949                   | CC                              | TT                | 1946704717               |
| SNP_P3_180589_261   | NW_004519619.1 | Scaffold5599 | 261                     | AA                              | GG                | 1946704719               |
| SNP_P3_180590_750   | NW_004519619.1 | Scaffold5599 | 750                     | AA                              | TT                | 1946704721               |
| SNP_P3_180591_5322  | NW_004519619.1 | Scaffold5599 | 5322                    | GG                              | AA                | 1946704723               |
| SNP_P3_180592_5636  | NW_004519619.1 | Scaffold5599 | 5636                    | CC                              | GG                | 1946704724               |
| SNP_P3_180593_5863  | NW_004519619.1 | Scaffold5599 | 5863                    | GG                              | AA                | 1946704725               |
| SNP_P3_180594_463   | NW_004519620.1 | Scaffold5600 | 463                     | GG                              | AA                | 1946704726               |
| SNP_P3_180596_849   | NW_004519620.1 | Scaffold5600 | 849                     | TT                              | CC                | 1946704728               |
| SNP_P3_180597_870   | NW_004519620.1 | Scaffold5600 | 870                     | CC                              | AA                | 1946704730               |
| SNP_P3_180598_935   | NW_004519620.1 | Scaffold5600 | 935                     | AA                              | TT                | 1946704732               |
| SNP_P3_180599_1029  | NW_004519620.1 | Scaffold5600 | 1029                    | AA                              | CC                | 1946704734               |
| SNP_P3_180600_1030  | NW_004519620.1 | Scaffold5600 | 1030                    | TT                              | AA                | 1946704736               |
| SNP_P3_180601_4140  | NW_004519622.1 | Scaffold5602 | 4140                    | AA                              | GG                | 1946704739               |
| SNP_P3_180602_4166  | NW_004519622.1 | Scaffold5602 | 4166                    | CC                              | TT                | 1946704741               |
| SNP_P3_180603_4262  | NW_004519622.1 | Scaffold5602 | 4262                    | TT                              | CC                | 1946704743               |
| SNP_P3_180606_92    | NW_004519625.1 | Scaffold5606 | 92                      | AA                              | GG                | 1946704745               |
| SNP_P3_180607_393   | NW_004519625.1 | Scaffold5606 | 393                     | CC                              | TT                | 1946704747               |
| SNP_P3_180608_553   | NW_004519625.1 | Scaffold5606 | 553                     | TT                              | CC                | 1946704749               |
| SNP_P3_180609_3288  | NW_004519630.1 | Scaffold5613 | 3288                    | AA                              | CC                | 1946704751               |
| SNP_P3_180610_321   | NW_004519631.1 | Scaffold5614 | 321                     | AA                              | GG                | 1946704753               |
| SNP_P3_180611_369   | NW_004519631.1 | Scaffold5614 | 369                     | CC                              | TT                | 1946704755               |
| SNP_P3_180612_905   | NW_004519631.1 | Scaffold5614 | 905                     | GG                              | CC                | 1946704757               |
| SNP_P3_180613_3432  | NW_004519631.1 | Scaffold5614 | 3432                    | GG                              | AA                | 1946704759               |
| SNP_P3_180614_4160  | NW_004519631.1 | Scaffold5614 | 4160                    | CC                              | GG                | 1946704761               |
| SNP_P3_180615_4164  | NW_004519631.1 | Scaffold5614 | 4164                    | TT                              | AA                | 1946704763               |
| SNP_P3_180616_4170  | NW_004519631.1 | Scaffold5614 | 4170                    | AA                              | TT                | 1946704765               |
| SNP_P3_180617_4175  | NW_004519631.1 | Scaffold5614 | 4175                    | CC                              | AA                | 1946704767               |
| SNP_P3_180618_4924  | NW_004519631.1 | Scaffold5614 | 4924                    | TT                              | GG                | 1946704769               |
| SNP_P3_180619_5150  | NW_004519631.1 | Scaffold5614 | 5150                    | GG                              | AA                | 1946704772               |

| SNPs IDs            | Chromosome IDs | Chromosomes  | Physical positions (bp) | CDC Frontier (Reference genome) | (Pusa 256 & HPNB) | NCBI SNPdb Accession IDs |
|---------------------|----------------|--------------|-------------------------|---------------------------------|-------------------|--------------------------|
| SNP_P3_180620_5494  | NW_004519631.1 | Scaffold5614 | 5494                    | TT                              | AA                | 1946704774               |
| SNP_P3_180621_5587  | NW_004519631.1 | Scaffold5614 | 5587                    | GG                              | CC                | 1946704776               |
| SNP_P3_180622_5626  | NW_004519631.1 | Scaffold5614 | 5626                    | GG                              | CC                | 1946704778               |
| SNP_P3_180623_255   | NW_004519634.1 | Scaffold5617 | 255                     | GG                              | TT                | 1946704780               |
| SNP_P3_180624_969   | NW_004519634.1 | Scaffold5617 | 969                     | GG                              | AA                | 1946704782               |
| SNP_P3_180625_998   | NW_004519634.1 | Scaffold5617 | 998                     | AA                              | GG                | 1946704784               |
| SNP_P3_180626_1064  | NW_004519634.1 | Scaffold5617 | 1064                    | TT                              | CC                | 1946704786               |
| SNP_P3_180627_1091  | NW_004519634.1 | Scaffold5617 | 1091                    | GG                              | TT                | 1946704788               |
| SNP_P3_180628_1139  | NW_004519634.1 | Scaffold5617 | 1139                    | CC                              | TT                | 1946704790               |
| SNP_P3_180629_1344  | NW_004519634.1 | Scaffold5617 | 1344                    | AA                              | CC                | 1946704792               |
| SNP_P3_180630_1365  | NW_004519634.1 | Scaffold5617 | 1365                    | TT                              | CC                | 1946704794               |
| SNP_P3_180631_1398  | NW_004519634.1 | Scaffold5617 | 1398                    | TT                              | CC                | 1946704796               |
| SNP_P3_180632_1410  | NW_004519634.1 | Scaffold5617 | 1410                    | TT                              | CC                | 1946704798               |
| SNP_P3_180633_1434  | NW_004519634.1 | Scaffold5617 | 1434                    | AA                              | GG                | 1946704800               |
| SNP_P3_180634_1456  | NW_004519634.1 | Scaffold5617 | 1456                    | TT                              | GG                | 1946704802               |
| SNP_P3_180635_1462  | NW_004519634.1 | Scaffold5617 | 1462                    | TT                              | AA                | 1946704804               |
| SNP_P3_180636_1467  | NW_004519634.1 | Scaffold5617 | 1467                    | TT                              | AA                | 1946704807               |
| SNP_P3_180637_1485  | NW_004519634.1 | Scaffold5617 | 1485                    | TT                              | CC                | 1946704809               |
| SNP_P3_180638_52    | NW_004519635.1 | Scaffold5619 | 52                      | CC                              | GG                | 1946704811               |
| SNP_P3_180639_64    | NW_004519635.1 | Scaffold5619 | 64                      | GG                              | TT                | 1946704813               |
| SNP_P3_180640_72    | NW_004519635.1 | Scaffold5619 | 72                      | TT                              | CC                | 1946704815               |
| SNP_P3_180641_375   | NW_004519635.1 | Scaffold5619 | 375                     | GG                              | AA                | 1946704817               |
| SNP_P3_180642_463   | NW_004519635.1 | Scaffold5619 | 463                     | TT                              | CC                | 1946704819               |
| SNP_P3_180643_493   | NW_004519635.1 | Scaffold5619 | 493                     | AA                              | CC                | 1946704821               |
| SNP_P3_180644_803   | NW_004519635.1 | Scaffold5619 | 803                     | CC                              | AA                | 1946704823               |
| SNP_P3_180645_1210  | NW_004519635.1 | Scaffold5619 | 1210                    | TT                              | CC                | 1946704825               |
| SNP_P3_180646_930   | NW_004519636.1 | Scaffold5624 | 930                     | AA                              | GG                | 1946704827               |
| SNP_P3_180647_938   | NW_004519636.1 | Scaffold5624 | 938                     | CC                              | TT                | 1946704829               |
| SNP_P3_180648_1153  | NW_004519636.1 | Scaffold5624 | 1153                    | TT                              | GG                | 1946704831               |
| SNP_P3_180649_80    | NW_004519638.1 | Scaffold5627 | 80                      | CC                              | GG                | 1946704833               |
| SNP_P3_180650_113   | NW_004519638.1 | Scaffold5627 | 113                     | TT                              | CC                | 1946704835               |
| SNP_P3_180651_118   | NW_004519638.1 | Scaffold5627 | 118                     | TT                              | CC                | 1946704837               |
| SNP_P3_180652_164   | NW_004519638.1 | Scaffold5627 | 164                     | AA                              | GG                | 1946704840               |
| SNP_P3_180653_4631  | NW_004519638.1 | Scaffold5627 | 4631                    | GG                              | AA                | 1946704843               |
| SNP_P3_180654_8705  | NW_004519638.1 | Scaffold5627 | 8705                    | AA                              | CC                | 1946704844               |
| SNP_P3_180655_10362 | NW_004519638.1 | Scaffold5627 | 10362                   | GG                              | AA                | 1946704845               |
| SNP_P3_180656_10741 | NW_004519638.1 | Scaffold5627 | 10741                   | AA                              | GG                | 1946704846               |
| SNP_P3_180658_1195  | NW_004519641.1 | Scaffold5634 | 1195                    | CC                              | TT                | 1946704848               |
| SNP_P3_180659_1201  | NW_004519641.1 | Scaffold5634 | 1201                    | AA                              | TT                | 1946704850               |
| SNP_P3_180660_1465  | NW_004519641.1 | Scaffold5634 | 1465                    | TT                              | GG                | 1946704852               |
| SNP_P3_180661_64    | NW_004519649.1 | Scaffold5647 | 64                      | AA                              | CC                | 1946704854               |
| SNP_P3_180662_2247  | NW_004519652.1 | Scaffold5650 | 2247                    | CC                              | TT                | 1946704856               |

| SNPs IDs            | Chromosome IDs | Chromosomes  | Physical positions (bp) | CDC Frontier (Reference genome) | (Pusa 256 & HPNB) | NCBI SNPdb Accession IDs |
|---------------------|----------------|--------------|-------------------------|---------------------------------|-------------------|--------------------------|
| SNP_P3_180663_2304  | NW_004519652.1 | Scaffold5650 | 2304                    | TT                              | CC                | 1946704858               |
| SNP_P3_180664_2628  | NW_004519652.1 | Scaffold5650 | 2628                    | GG                              | AA                | 1946704860               |
| SNP_P3_180665_2646  | NW_004519652.1 | Scaffold5650 | 2646                    | TT                              | AA                | 1946704862               |
| SNP_P3_180666_2774  | NW_004519652.1 | Scaffold5650 | 2774                    | CC                              | AA                | 1946704864               |
| SNP_P3_180667_2913  | NW_004519652.1 | Scaffold5650 | 2913                    | TT                              | GG                | 1946704866               |
| SNP_P3_180668_3078  | NW_004519652.1 | Scaffold5650 | 3078                    | AA                              | GG                | 1946704868               |
| SNP_P3_180669_3081  | NW_004519652.1 | Scaffold5650 | 3081                    | AA                              | CC                | 1946704871               |
| SNP_P3_180670_508   | NW_004519654.1 | Scaffold5653 | 508                     | CC                              | GG                | 1946704873               |
| SNP_P3_180671_584   | NW_004519654.1 | Scaffold5653 | 584                     | GG                              | AA                | 1946704875               |
| SNP_P3_180672_1528  | NW_004519654.1 | Scaffold5653 | 1528                    | AA                              | TT                | 1946704877               |
| SNP_P3_180673_1601  | NW_004519654.1 | Scaffold5653 | 1601                    | AA                              | CC                | 1946704879               |
| SNP_P3_180675_29450 | NW_004519654.1 | Scaffold5653 | 29450                   | CC                              | TT                | 1946704881               |
| SNP_P3_180676_29519 | NW_004519654.1 | Scaffold5653 | 29519                   | TT                              | AA                | 1946704883               |
| SNP_P3_180677_30305 | NW_004519654.1 | Scaffold5653 | 30305                   | TT                              | CC                | 1946704885               |
| SNP_P3_180678_30307 | NW_004519654.1 | Scaffold5653 | 30307                   | GG                              | AA                | 1946704887               |
| SNP_P3_180679_30328 | NW_004519654.1 | Scaffold5653 | 30328                   | CC                              | TT                | 1946704889               |
| SNP_P3_180680_30515 | NW_004519654.1 | Scaffold5653 | 30515                   | CC                              | TT                | 1946704891               |
| SNP_P3_180681_30623 | NW_004519654.1 | Scaffold5653 | 30623                   | TT                              | GG                | 1946704893               |
| SNP_P3_180682_30663 | NW_004519654.1 | Scaffold5653 | 30663                   | TT                              | CC                | 1946704895               |
| SNP_P3_180683_612   | NW_004519657.1 | Scaffold5656 | 612                     | GG                              | AA                | 1946704898               |
| SNP_P3_180684_951   | NW_004519657.1 | Scaffold5656 | 951                     | CC                              | GG                | 1946704900               |
| SNP_P3_180685_982   | NW_004519657.1 | Scaffold5656 | 982                     | CC                              | AA                | 1946704902               |
| SNP_P3_180686_807   | NW_004519664.1 | Scaffold5666 | 807                     | AA                              | GG                | 1946704905               |
| SNP_P3_180687_864   | NW_004519664.1 | Scaffold5666 | 864                     | AA                              | GG                | 1946704907               |
| SNP_P3_180688_973   | NW_004519664.1 | Scaffold5666 | 973                     | GG                              | AA                | 1946704909               |
| SNP_P3_180689_998   | NW_004519664.1 | Scaffold5666 | 998                     | TT                              | CC                | 1946704911               |
| SNP_P3_180690_1089  | NW_004519664.1 | Scaffold5666 | 1089                    | TT                              | CC                | 1946704913               |
| SNP_P3_180691_1110  | NW_004519664.1 | Scaffold5666 | 1110                    | CC                              | TT                | 1946704916               |
| SNP_P3_180692_1167  | NW_004519664.1 | Scaffold5666 | 1167                    | CC                              | TT                | 1946704918               |
| SNP_P3_180693_1262  | NW_004519664.1 | Scaffold5666 | 1262                    | CC                              | GG                | 1946704920               |
| SNP_P3_180694_1305  | NW_004519664.1 | Scaffold5666 | 1305                    | CC                              | AA                | 1946704922               |
| SNP_P3_180695_1386  | NW_004519664.1 | Scaffold5666 | 1386                    | AA                              | TT                | 1946704924               |
| SNP_P3_180696_2143  | NW_004519667.1 | Scaffold5671 | 2143                    | AA                              | GG                | 1946704926               |
| SNP_P3_180697_2296  | NW_004519667.1 | Scaffold5671 | 2296                    | TT                              | CC                | 1946704928               |
| SNP_P3_180698_2344  | NW_004519667.1 | Scaffold5671 | 2344                    | AA                              | TT                | 1946704930               |
| SNP_P3_180699_2426  | NW_004519667.1 | Scaffold5671 | 2426                    | CC                              | GG                | 1946704933               |
| SNP_P3_180700_612   | NW_004519668.1 | Scaffold5672 | 612                     | CC                              | TT                | 1946704935               |
| SNP_P3_180701_15742 | NW_004519670.1 | Scaffold5674 | 15742                   | AA                              | GG                | 1946704938               |
| SNP_P3_180702_15745 | NW_004519670.1 | Scaffold5674 | 15745                   | AA                              | CC                | 1946704940               |
| SNP_P3_180703_287   | NW_004519673.1 | Scaffold5679 | 287                     | AA                              | GG                | 1946704942               |
| SNP_P3_180704_424   | NW_004519673.1 | Scaffold5679 | 424                     | GG                              | CC                | 1946704944               |
| SNP_P3_180705_441   | NW_004519673.1 | Scaffold5679 | 441                     | TT                              | GG                | 1946704946               |

| SNPs IDs            | Chromosome IDs | Chromosomes  | Physical positions (bp) | CDC Frontier (Reference genome) | (Pusa 256 & HPNB) | NCBI SNPdb Accession IDs |
|---------------------|----------------|--------------|-------------------------|---------------------------------|-------------------|--------------------------|
| SNP_P3_180706_456   | NW_004519673.1 | Scaffold5679 | 456                     | CC                              | TT                | 1946704948               |
| SNP_P3_180707_476   | NW_004519673.1 | Scaffold5679 | 476                     | GG                              | AA                | 1946704950               |
| SNP_P3_180708_525   | NW_004519673.1 | Scaffold5679 | 525                     | GG                              | AA                | 1946704952               |
| SNP_P3_180709_1296  | NW_004519678.1 | Scaffold5687 | 1296                    | AA                              | TT                | 1946704954               |
| SNP_P3_180710_73    | NW_004519680.1 | Scaffold5691 | 73                      | AA                              | TT                | 1946704956               |
| SNP_P3_180711_362   | NW_004519680.1 | Scaffold5691 | 362                     | TT                              | GG                | 1946704958               |
| SNP_P3_180713_1337  | NW_004519680.1 | Scaffold5691 | 1337                    | TT                              | AA                | 1946704960               |
| SNP_P3_180714_1389  | NW_004519680.1 | Scaffold5691 | 1389                    | AA                              | CC                | 1946704962               |
| SNP_P3_180715_1480  | NW_004519682.1 | Scaffold5694 | 1480                    | TT                              | CC                | 1946704964               |
| SNP_P3_180716_1462  | NW_004519684.1 | Scaffold5698 | 1462                    | AA                              | TT                | 1946704966               |
| SNP_P3_180717_1677  | NW_004519684.1 | Scaffold5698 | 1677                    | AA                              | GG                | 1946704969               |
| SNP_P3_180718_3411  | NW_004519684.1 | Scaffold5698 | 3411                    | AA                              | GG                | 1946704971               |
| SNP_P3_180719_4287  | NW_004519684.1 | Scaffold5698 | 4287                    | AA                              | GG                | 1946704974               |
| SNP_P3_180720_121   | NW_004519686.1 | Scaffold5700 | 121                     | TT                              | AA                | 1946704976               |
| SNP_P3_180721_8197  | NW_004519686.1 | Scaffold5700 | 8197                    | AA                              | CC                | 1946704978               |
| SNP_P3_180722_8225  | NW_004519686.1 | Scaffold5700 | 8225                    | TT                              | AA                | 1946704981               |
| SNP_P3_180723_48    | NW_004519689.1 | Scaffold5703 | 48                      | AA                              | TT                | 1946704983               |
| SNP_P3_180724_64    | NW_004519689.1 | Scaffold5703 | 64                      | CC                              | AA                | 1946704985               |
| SNP_P3_180725_103   | NW_004519689.1 | Scaffold5703 | 103                     | CC                              | AA                | 1946704987               |
| SNP_P3_180726_121   | NW_004519689.1 | Scaffold5703 | 121                     | CC                              | GG                | 1946704989               |
| SNP_P3_180727_134   | NW_004519689.1 | Scaffold5703 | 134                     | AA                              | GG                | 1946704991               |
| SNP_P3_180728_155   | NW_004519689.1 | Scaffold5703 | 155                     | TT                              | AA                | 1946704994               |
| SNP_P3_180729_3124  | NW_004519690.1 | Scaffold5704 | 3124                    | GG                              | TT                | 1946704996               |
| SNP_P3_180730_3490  | NW_004519690.1 | Scaffold5704 | 3490                    | TT                              | AA                | 1946704998               |
| SNP_P3_180731_3495  | NW_004519690.1 | Scaffold5704 | 3495                    | AA                              | CC                | 1946705000               |
| SNP_P3_180732_3508  | NW_004519690.1 | Scaffold5704 | 3508                    | GG                              | TT                | 1946705002               |
| SNP_P3_180733_15344 | NW_004519693.1 | Scaffold5714 | 15344                   | CC                              | TT                | 1946705004               |
| SNP_P3_180734_15703 | NW_004519693.1 | Scaffold5714 | 15703                   | AA                              | CC                | 1946705006               |
| SNP_P3_180735_4502  | NW_004519694.1 | Scaffold5715 | 4502                    | TT                              | GG                | 1946705008               |
| SNP_P3_180736_538   | NW_004519695.1 | Scaffold5717 | 538                     | CC                              | AA                | 1946705010               |
| SNP_P3_180737_2274  | NW_004519695.1 | Scaffold5717 | 2274                    | TT                              | GG                | 1946705014               |
| SNP_P3_180738_1575  | NW_004519697.1 | Scaffold5719 | 1575                    | TT                              | AA                | 1946705016               |
| SNP_P3_180739_1586  | NW_004519697.1 | Scaffold5719 | 1586                    | CC                              | GG                | 1946705018               |
| SNP_P3_180740_129   | NW_004519699.1 | Scaffold5721 | 129                     | AA                              | TT                | 1946705020               |
| SNP_P3_180741_186   | NW_004519699.1 | Scaffold5721 | 186                     | CC                              | TT                | 1946705022               |
| SNP_P3_180742_189   | NW_004519699.1 | Scaffold5721 | 189                     | AA                              | CC                | 1946705024               |
| SNP_P3_180743_240   | NW_004519699.1 | Scaffold5721 | 240                     | GG                              | TT                | 1946705026               |
| SNP_P3_180744_260   | NW_004519699.1 | Scaffold5721 | 260                     | TT                              | AA                | 1946705028               |
| SNP_P3_180745_382   | NW_004519699.1 | Scaffold5721 | 382                     | GG                              | AA                | 1946705030               |
| SNP_P3_180746_5301  | NW_004519701.1 | Scaffold5725 | 5301                    | AA                              | CC                | 1946705032               |
| SNP_P3_180747_5390  | NW_004519701.1 | Scaffold5725 | 5390                    | TT                              | AA                | 1946705035               |
| SNP_P3_180748_64    | NW_004519704.1 | Scaffold5730 | 64                      | AA                              | GG                | 1946705037               |



| SNPs IDs           | Chromosome IDs | Chromosomes  | Physical positions (bp) | CDC Frontier (Reference genome) | (Pusa 256 & HPNB) | NCBI SNPdb Accession IDs |
|--------------------|----------------|--------------|-------------------------|---------------------------------|-------------------|--------------------------|
| SNP_P3_180749_96   | NW_004519704.1 | Scaffold5730 | 96                      | TT                              | GG                | 1946705039               |
| SNP_P3_180750_100  | NW_004519704.1 | Scaffold5730 | 100                     | TT                              | CC                | 1946705041               |
| SNP_P3_180751_105  | NW_004519704.1 | Scaffold5730 | 105                     | AA                              | GG                | 1946705043               |
| SNP_P3_180752_106  | NW_004519704.1 | Scaffold5730 | 106                     | CC                              | GG                | 1946705046               |
| SNP_P3_180753_192  | NW_004519704.1 | Scaffold5730 | 192                     | AA                              | GG                | 1946705048               |
| SNP_P3_180754_239  | NW_004519704.1 | Scaffold5730 | 239                     | GG                              | AA                | 1946705050               |
| SNP_P3_180755_240  | NW_004519704.1 | Scaffold5730 | 240                     | CC                              | TT                | 1946705052               |
| SNP_P3_180756_345  | NW_004519704.1 | Scaffold5730 | 345                     | CC                              | TT                | 1946705054               |
| SNP_P3_180757_421  | NW_004519704.1 | Scaffold5730 | 421                     | GG                              | AA                | 1946705056               |
| SNP_P3_180758_425  | NW_004519704.1 | Scaffold5730 | 425                     | GG                              | TT                | 1946705058               |
| SNP_P3_180759_459  | NW_004519704.1 | Scaffold5730 | 459                     | AA                              | GG                | 1946705061               |
| SNP_P3_180760_470  | NW_004519704.1 | Scaffold5730 | 470                     | TT                              | AA                | 1946705063               |
| SNP_P3_180762_711  | NW_004519704.1 | Scaffold5730 | 711                     | AA                              | CC                | 1946705065               |
| SNP_P3_180763_722  | NW_004519704.1 | Scaffold5730 | 722                     | TT                              | CC                | 1946705067               |
| SNP_P3_180764_808  | NW_004519704.1 | Scaffold5730 | 808                     | CC                              | TT                | 1946705069               |
| SNP_P3_180765_202  | NW_004519705.1 | Scaffold5734 | 202                     | GG                              | AA                | 1946705071               |
| SNP_P3_180766_223  | NW_004519705.1 | Scaffold5734 | 223                     | TT                              | AA                | 1946705073               |
| SNP_P3_180767_861  | NW_004519705.1 | Scaffold5734 | 861                     | TT                              | GG                | 1946705075               |
| SNP_P3_180768_892  | NW_004519705.1 | Scaffold5734 | 892                     | CC                              | TT                | 1946705076               |
| SNP_P3_180769_898  | NW_004519706.1 | Scaffold5735 | 898                     | AA                              | GG                | 1946705079               |
| SNP_P3_180770_908  | NW_004519706.1 | Scaffold5735 | 908                     | TT                              | CC                | 1946705081               |
| SNP_P3_180771_978  | NW_004519706.1 | Scaffold5735 | 978                     | TT                              | AA                | 1946705083               |
| SNP_P3_180772_1296 | NW_004519706.1 | Scaffold5735 | 1296                    | TT                              | CC                | 1946705085               |
| SNP_P3_180773_1301 | NW_004519706.1 | Scaffold5735 | 1301                    | GG                              | TT                | 1946705087               |
| SNP_P3_180774_1308 | NW_004519706.1 | Scaffold5735 | 1308                    | GG                              | AA                | 1946705090               |
| SNP_P3_180775_1322 | NW_004519706.1 | Scaffold5735 | 1322                    | GG                              | AA                | 1946705092               |
| SNP_P3_180776_1329 | NW_004519706.1 | Scaffold5735 | 1329                    | TT                              | CC                | 1946705094               |
| SNP_P3_180777_1351 | NW_004519706.1 | Scaffold5735 | 1351                    | CC                              | TT                | 1946705096               |
| SNP_P3_180778_1358 | NW_004519706.1 | Scaffold5735 | 1358                    | AA                              | TT                | 1946705098               |
| SNP_P3_180779_1236 | NW_004519707.1 | Scaffold5737 | 1236                    | TT                              | AA                | 1946705100               |
| SNP_P3_180780_530  | NW_004519709.1 | Scaffold5739 | 530                     | GG                              | AA                | 1946705102               |
| SNP_P3_180781_672  | NW_004519709.1 | Scaffold5739 | 672                     | TT                              | CC                | 1946705104               |
| SNP_P3_180782_843  | NW_004519709.1 | Scaffold5739 | 843                     | CC                              | TT                | 1946705106               |
| SNP_P3_180783_866  | NW_004519709.1 | Scaffold5739 | 866                     | CC                              | TT                | 1946705108               |
| SNP_P3_180784_914  | NW_004519709.1 | Scaffold5739 | 914                     | AA                              | CC                | 1946705110               |
| SNP_P3_180785_937  | NW_004519709.1 | Scaffold5739 | 937                     | GG                              | TT                | 1946705113               |
| SNP_P3_180786_946  | NW_004519709.1 | Scaffold5739 | 946                     | CC                              | AA                | 1946705115               |
| SNP_P3_180787_947  | NW_004519709.1 | Scaffold5739 | 947                     | TT                              | CC                | 1946705117               |
| SNP_P3_180788_950  | NW_004519709.1 | Scaffold5739 | 950                     | CC                              | TT                | 1946705119               |
| SNP_P3_180789_954  | NW_004519709.1 | Scaffold5739 | 954                     | AA                              | GG                | 1946705121               |
| SNP_P3_180790_955  | NW_004519709.1 | Scaffold5739 | 955                     | GG                              | AA                | 1946705123               |
| SNP_P3_180791_1021 | NW_004519709.1 | Scaffold5739 | 1021                    | TT                              | GG                | 1946705125               |

| SNPs IDs            | Chromosome IDs | Chromosomes  | Physical positions (bp) | CDC Frontier (Reference genome) | (Pusa 256 & HPNB) | NCBI SNPdb Accession IDs |
|---------------------|----------------|--------------|-------------------------|---------------------------------|-------------------|--------------------------|
| SNP_P3_180792_1075  | NW_004519709.1 | Scaffold5739 | 1075                    | AA                              | GG                | 1946705127               |
| SNP_P3_180793_1091  | NW_004519709.1 | Scaffold5739 | 1091                    | AA                              | CC                | 1946705130               |
| SNP_P3_180794_1124  | NW_004519709.1 | Scaffold5739 | 1124                    | CC                              | TT                | 1946705131               |
| SNP_P3_180795_1172  | NW_004519709.1 | Scaffold5739 | 1172                    | CC                              | TT                | 1946705133               |
| SNP_P3_180796_1219  | NW_004519709.1 | Scaffold5739 | 1219                    | CC                              | TT                | 1946705135               |
| SNP_P3_180797_452   | NW_004519710.1 | Scaffold5740 | 452                     | TT                              | CC                | 1946705137               |
| SNP_P3_180798_1187  | NW_004519712.1 | Scaffold5742 | 1187                    | GG                              | AA                | 1946705139               |
| SNP_P3_180799_1878  | NW_004519713.1 | Scaffold5744 | 1878                    | AA                              | GG                | 1946705141               |
| SNP_P3_180800_1886  | NW_004519713.1 | Scaffold5744 | 1886                    | TT                              | CC                | 1946705144               |
| SNP_P3_180801_3297  | NW_004519713.1 | Scaffold5744 | 3297                    | CC                              | GG                | 1946705146               |
| SNP_P3_180802_3326  | NW_004519713.1 | Scaffold5744 | 3326                    | AA                              | TT                | 1946705148               |
| SNP_P3_180803_3384  | NW_004519713.1 | Scaffold5744 | 3384                    | CC                              | AA                | 1946705150               |
| SNP_P3_180804_3391  | NW_004519713.1 | Scaffold5744 | 3391                    | CC                              | TT                | 1946705152               |
| SNP_P3_180805_3688  | NW_004519713.1 | Scaffold5744 | 3688                    | GG                              | AA                | 1946705154               |
| SNP_P3_180806_15423 | NW_004519713.1 | Scaffold5744 | 15423                   | AA                              | GG                | 1946705156               |
| SNP_P3_180807_15515 | NW_004519713.1 | Scaffold5744 | 15515                   | AA                              | TT                | 1946705158               |
| SNP_P3_180808_15565 | NW_004519713.1 | Scaffold5744 | 15565                   | AA                              | CC                | 1946705160               |
| SNP_P3_180809_15566 | NW_004519713.1 | Scaffold5744 | 15566                   | AA                              | TT                | 1946705162               |
| SNP_P3_180810_15629 | NW_004519713.1 | Scaffold5744 | 15629                   | CC                              | TT                | 1946705164               |
| SNP_P3_180811_15698 | NW_004519713.1 | Scaffold5744 | 15698                   | TT                              | AA                | 1946705166               |
| SNP_P3_180812_17007 | NW_004519713.1 | Scaffold5744 | 17007                   | AA                              | GG                | 1946705168               |
| SNP_P3_180813_17011 | NW_004519713.1 | Scaffold5744 | 17011                   | AA                              | GG                | 1946705170               |
| SNP_P3_180814_17047 | NW_004519713.1 | Scaffold5744 | 17047                   | TT                              | CC                | 1946705172               |
| SNP_P3_180815_17527 | NW_004519713.1 | Scaffold5744 | 17527                   | TT                              | CC                | 1946705174               |
| SNP_P3_180816_17696 | NW_004519713.1 | Scaffold5744 | 17696                   | TT                              | AA                | 1946705176               |
| SNP_P3_180817_17774 | NW_004519713.1 | Scaffold5744 | 17774                   | GG                              | CC                | 1946705178               |
| SNP_P3_180818_17793 | NW_004519713.1 | Scaffold5744 | 17793                   | CC                              | TT                | 1946705180               |
| SNP_P3_180819_17808 | NW_004519713.1 | Scaffold5744 | 17808                   | GG                              | CC                | 1946705183               |
| SNP_P3_180820_17838 | NW_004519713.1 | Scaffold5744 | 17838                   | TT                              | CC                | 1946705185               |
| SNP_P3_180821_17853 | NW_004519713.1 | Scaffold5744 | 17853                   | TT                              | CC                | 1946705187               |
| SNP_P3_180822_17858 | NW_004519713.1 | Scaffold5744 | 17858                   | TT                              | CC                | 1946705189               |
| SNP_P3_180823_18064 | NW_004519713.1 | Scaffold5744 | 18064                   | TT                              | CC                | 1946705191               |
| SNP_P3_180824_18174 | NW_004519713.1 | Scaffold5744 | 18174                   | GG                              | TT                | 1946705193               |
| SNP_P3_180825_18177 | NW_004519713.1 | Scaffold5744 | 18177                   | CC                              | TT                | 1946705196               |
| SNP_P3_180826_18227 | NW_004519713.1 | Scaffold5744 | 18227                   | TT                              | CC                | 1946705198               |
| SNP_P3_180827_18248 | NW_004519713.1 | Scaffold5744 | 18248                   | GG                              | TT                | 1946705200               |
| SNP_P3_180828_1248  | NW_004519714.1 | Scaffold5745 | 1248                    | GG                              | TT                | 1946705201               |
| SNP_P3_180829_320   | NW_004519715.1 | Scaffold5746 | 320                     | AA                              | GG                | 1946705203               |
| SNP_P3_180830_388   | NW_004519715.1 | Scaffold5746 | 388                     | TT                              | CC                | 1946705205               |
| SNP_P3_180831_656   | NW_004519715.1 | Scaffold5746 | 656                     | CC                              | TT                | 1946705207               |
| SNP_P3_180832_728   | NW_004519715.1 | Scaffold5746 | 728                     | CC                              | GG                | 1946705209               |
| SNP_P3_180833_1362  | NW_004519715.1 | Scaffold5746 | 1362                    | GG                              | AA                | 1946705212               |

| SNPs IDs           | Chromosome IDs | Chromosomes  | Physical positions (bp) | CDC Frontier (Reference genome) | (Pusa 256 & HPNB) | NCBI SNPdb Accession IDs |
|--------------------|----------------|--------------|-------------------------|---------------------------------|-------------------|--------------------------|
| SNP_P3_180834_1400 | NW_004519715.1 | Scaffold5746 | 1400                    | CC                              | TT                | 1946705214               |
| SNP_P3_180835_1470 | NW_004519715.1 | Scaffold5746 | 1470                    | AA                              | CC                | 1946705216               |
| SNP_P3_180836_1601 | NW_004519715.1 | Scaffold5746 | 1601                    | AA                              | GG                | 1946705218               |
| SNP_P3_180837_1624 | NW_004519715.1 | Scaffold5746 | 1624                    | CC                              | GG                | 1946705220               |
| SNP_P3_180838_1712 | NW_004519715.1 | Scaffold5746 | 1712                    | GG                              | AA                | 1946705222               |
| SNP_P3_180839_1724 | NW_004519715.1 | Scaffold5746 | 1724                    | AA                              | TT                | 1946705224               |
| SNP_P3_180840_1877 | NW_004519715.1 | Scaffold5746 | 1877                    | GG                              | AA                | 1946705226               |
| SNP_P3_180841_1907 | NW_004519715.1 | Scaffold5746 | 1907                    | AA                              | CC                | 1946705228               |
| SNP_P3_180842_1961 | NW_004519715.1 | Scaffold5746 | 1961                    | GG                              | CC                | 1946705230               |
| SNP_P3_180843_2046 | NW_004519715.1 | Scaffold5746 | 2046                    | AA                              | CC                | 1946705232               |
| SNP_P3_180844_2122 | NW_004519715.1 | Scaffold5746 | 2122                    | TT                              | GG                | 1946705234               |
| SNP_P3_180845_458  | NW_004519718.1 | Scaffold5750 | 458                     | TT                              | GG                | 1946705236               |
| SNP_P3_180846_465  | NW_004519718.1 | Scaffold5750 | 465                     | AA                              | TT                | 1946705238               |
| SNP_P3_180847_203  | NW_004519719.1 | Scaffold5753 | 203                     | AA                              | CC                | 1946705240               |
| SNP_P3_180848_232  | NW_004519719.1 | Scaffold5753 | 232                     | AA                              | CC                | 1946705242               |
| SNP_P3_180849_956  | NW_004519721.1 | Scaffold5757 | 956                     | CC                              | TT                | 1946705244               |
| SNP_P3_180850_964  | NW_004519721.1 | Scaffold5757 | 964                     | AA                              | TT                | 1946705247               |
| SNP_P3_180852_71   | NW_004519723.1 | Scaffold5759 | 71                      | AA                              | CC                | 1946705249               |
| SNP_P3_180853_671  | NW_004519723.1 | Scaffold5759 | 671                     | AA                              | CC                | 1946705251               |
| SNP_P3_180854_757  | NW_004519723.1 | Scaffold5759 | 757                     | TT                              | CC                | 1946705254               |
| SNP_P3_180855_740  | NW_004519724.1 | Scaffold5761 | 740                     | AA                              | GG                | 1946705256               |
| SNP_P3_180856_776  | NW_004519724.1 | Scaffold5761 | 776                     | AA                              | GG                | 1946705258               |
| SNP_P3_180857_780  | NW_004519724.1 | Scaffold5761 | 780                     | CC                              | AA                | 1946705260               |
| SNP_P3_180858_790  | NW_004519724.1 | Scaffold5761 | 790                     | AA                              | GG                | 1946705262               |
| SNP_P3_180860_857  | NW_004519724.1 | Scaffold5761 | 857                     | CC                              | AA                | 1946705264               |
| SNP_P3_180861_984  | NW_004519724.1 | Scaffold5761 | 984                     | GG                              | AA                | 1946705266               |
| SNP_P3_180863_1224 | NW_004519724.1 | Scaffold5761 | 1224                    | AA                              | CC                | 1946705269               |
| SNP_P3_180864_1677 | NW_004519724.1 | Scaffold5761 | 1677                    | AA                              | CC                | 1946705271               |
| SNP_P3_180865_381  | NW_004519727.1 | Scaffold5765 | 381                     | CC                              | AA                | 1946705273               |
| SNP_P3_180866_382  | NW_004519727.1 | Scaffold5765 | 382                     | CC                              | TT                | 1946705275               |
| SNP_P3_180867_458  | NW_004519727.1 | Scaffold5765 | 458                     | TT                              | AA                | 1946705277               |
| SNP_P3_180869_632  | NW_004519727.1 | Scaffold5765 | 632                     | GG                              | AA                | 1946705280               |
| SNP_P3_180870_1913 | NW_004519727.1 | Scaffold5765 | 1913                    | TT                              | CC                | 1946705282               |
| SNP_P3_180871_1927 | NW_004519727.1 | Scaffold5765 | 1927                    | TT                              | CC                | 1946705284               |
| SNP_P3_180872_2353 | NW_004519727.1 | Scaffold5765 | 2353                    | CC                              | TT                | 1946705286               |
| SNP_P3_180873_247  | NW_004519729.1 | Scaffold5767 | 247                     | CC                              | TT                | 1946705288               |
| SNP_P3_180874_287  | NW_004519731.1 | Scaffold5775 | 287                     | TT                              | AA                | 1946705290               |
| SNP_P3_180875_410  | NW_004519731.1 | Scaffold5775 | 410                     | AA                              | GG                | 1946705293               |
| SNP_P3_180876_465  | NW_004519731.1 | Scaffold5775 | 465                     | AA                              | TT                | 1946705295               |
| SNP_P3_180877_970  | NW_004519731.1 | Scaffold5775 | 970                     | GG                              | AA                | 1946705297               |
| SNP_P3_180878_1031 | NW_004519731.1 | Scaffold5775 | 1031                    | GG                              | CC                | 1946705299               |
| SNP_P3_180879_1122 | NW_004519731.1 | Scaffold5775 | 1122                    | CC                              | TT                | 1946705302               |

| SNPs IDs            | Chromosome IDs | Chromosomes  | Physical positions (bp) | CDC Frontier (Reference genome) | (Pusa 256 & HPNB) | NCBI SNPdb Accession IDs |
|---------------------|----------------|--------------|-------------------------|---------------------------------|-------------------|--------------------------|
| SNP_P3_180880_1132  | NW_004519731.1 | Scaffold5775 | 1132                    | TT                              | CC                | 1946705304               |
| SNP_P3_180881_1192  | NW_004519731.1 | Scaffold5775 | 1192                    | CC                              | TT                | 1946705306               |
| SNP_P3_180882_1209  | NW_004519731.1 | Scaffold5775 | 1209                    | AA                              | GG                | 1946705308               |
| SNP_P3_180883_1313  | NW_004519731.1 | Scaffold5775 | 1313                    | GG                              | TT                | 1946705310               |
| SNP_P3_180884_2892  | NW_004519733.1 | Scaffold5777 | 2892                    | AA                              | TT                | 1946705312               |
| SNP_P3_180885_2974  | NW_004519733.1 | Scaffold5777 | 2974                    | TT                              | CC                | 1946705315               |
| SNP_P3_180886_3249  | NW_004519733.1 | Scaffold5777 | 3249                    | GG                              | AA                | 1946705317               |
| SNP_P3_180887_3289  | NW_004519733.1 | Scaffold5777 | 3289                    | GG                              | TT                | 1946705319               |
| SNP_P3_180888_3359  | NW_004519733.1 | Scaffold5777 | 3359                    | TT                              | GG                | 1946705321               |
| SNP_P3_180889_3421  | NW_004519733.1 | Scaffold5777 | 3421                    | AA                              | TT                | 1946705323               |
| SNP_P3_180890_3439  | NW_004519733.1 | Scaffold5777 | 3439                    | GG                              | AA                | 1946705325               |
| SNP_P3_180891_7826  | NW_004519733.1 | Scaffold5777 | 7826                    | TT                              | CC                | 1946705327               |
| SNP_P3_180892_7831  | NW_004519733.1 | Scaffold5777 | 7831                    | CC                              | TT                | 1946705329               |
| SNP_P3_180893_7891  | NW_004519733.1 | Scaffold5777 | 7891                    | AA                              | GG                | 1946705331               |
| SNP_P3_180894_7908  | NW_004519733.1 | Scaffold5777 | 7908                    | CC                              | TT                | 1946705333               |
| SNP_P3_180895_8355  | NW_004519733.1 | Scaffold5777 | 8355                    | TT                              | CC                | 1946705336               |
| SNP_P3_180896_8911  | NW_004519733.1 | Scaffold5777 | 8911                    | CC                              | TT                | 1946705338               |
| SNP_P3_180897_8934  | NW_004519733.1 | Scaffold5777 | 8934                    | TT                              | CC                | 1946705340               |
| SNP_P3_180898_9122  | NW_004519733.1 | Scaffold5777 | 9122                    | CC                              | TT                | 1946705342               |
| SNP_P3_180899_9240  | NW_004519733.1 | Scaffold5777 | 9240                    | AA                              | GG                | 1946705344               |
| SNP_P3_180900_10039 | NW_004519733.1 | Scaffold5777 | 10039                   | TT                              | CC                | 1946705346               |
| SNP_P3_180901_10070 | NW_004519733.1 | Scaffold5777 | 10070                   | TT                              | GG                | 1946705348               |
| SNP_P3_180902_10130 | NW_004519733.1 | Scaffold5777 | 10130                   | TT                              | AA                | 1946705350               |
| SNP_P3_180903_10143 | NW_004519733.1 | Scaffold5777 | 10143                   | CC                              | TT                | 1946705353               |
| SNP_P3_180904_10337 | NW_004519733.1 | Scaffold5777 | 10337                   | AA                              | GG                | 1946705355               |
| SNP_P3_180905_10345 | NW_004519733.1 | Scaffold5777 | 10345                   | AA                              | GG                | 1946705357               |
| SNP_P3_180906_10348 | NW_004519733.1 | Scaffold5777 | 10348                   | AA                              | GG                | 1946705359               |
| SNP_P3_180907_11006 | NW_004519733.1 | Scaffold5777 | 11006                   | AA                              | GG                | 1946705361               |
| SNP_P3_180908_16313 | NW_004519733.1 | Scaffold5777 | 16313                   | GG                              | CC                | 1946705363               |
| SNP_P3_180910_16532 | NW_004519733.1 | Scaffold5777 | 16532                   | GG                              | CC                | 1946705365               |
| SNP_P3_180912_16798 | NW_004519733.1 | Scaffold5777 | 16798                   | TT                              | AA                | 1946705368               |
| SNP_P3_180913_17078 | NW_004519733.1 | Scaffold5777 | 17078                   | CC                              | TT                | 1946705370               |
| SNP_P3_180914_17165 | NW_004519733.1 | Scaffold5777 | 17165                   | TT                              | CC                | 1946705372               |
| SNP_P3_180915_17207 | NW_004519733.1 | Scaffold5777 | 17207                   | CC                              | GG                | 1946705374               |
| SNP_P3_180916_1119  | NW_004519735.1 | Scaffold5780 | 1119                    | AA                              | GG                | 1946705376               |
| SNP_P3_180918_2715  | NW_004519735.1 | Scaffold5780 | 2715                    | TT                              | CC                | 1946705378               |
| SNP_P3_180919_2792  | NW_004519735.1 | Scaffold5780 | 2792                    | GG                              | AA                | 1946705380               |
| SNP_P3_180920_2849  | NW_004519735.1 | Scaffold5780 | 2849                    | CC                              | AA                | 1946705382               |
| SNP_P3_180922_2923  | NW_004519735.1 | Scaffold5780 | 2923                    | GG                              | AA                | 1946705385               |
| SNP_P3_180923_3170  | NW_004519735.1 | Scaffold5780 | 3170                    | GG                              | AA                | 1946705387               |
| SNP_P3_180924_3234  | NW_004519735.1 | Scaffold5780 | 3234                    | GG                              | TT                | 1946705389               |
| SNP_P3_180925_3357  | NW_004519735.1 | Scaffold5780 | 3357                    | TT                              | CC                | 1946705391               |

| SNPs IDs           | Chromosome IDs | Chromosomes  | Physical positions (bp) | CDC Frontier (Reference genome) | (Pusa 256 & HPNB) | NCBI SNPdb Accession IDs |
|--------------------|----------------|--------------|-------------------------|---------------------------------|-------------------|--------------------------|
| SNP_P3_180926_3574 | NW_004519735.1 | Scaffold5780 | 3574                    | CC                              | TT                | 1946705393               |
| SNP_P3_180927_4574 | NW_004519735.1 | Scaffold5780 | 4574                    | GG                              | AA                | 1946705395               |
| SNP_P3_180928_4628 | NW_004519735.1 | Scaffold5780 | 4628                    | GG                              | AA                | 1946705397               |
| SNP_P3_180929_4792 | NW_004519735.1 | Scaffold5780 | 4792                    | AA                              | GG                | 1946705399               |
| SNP_P3_180930_4990 | NW_004519735.1 | Scaffold5780 | 4990                    | AA                              | GG                | 1946705401               |
| SNP_P3_180931_5013 | NW_004519735.1 | Scaffold5780 | 5013                    | GG                              | AA                | 1946705403               |
| SNP_P3_180932_5022 | NW_004519735.1 | Scaffold5780 | 5022                    | CC                              | TT                | 1946705405               |
| SNP_P3_180933_5223 | NW_004519735.1 | Scaffold5780 | 5223                    | TT                              | CC                | 1946705407               |
| SNP_P3_180934_5230 | NW_004519735.1 | Scaffold5780 | 5230                    | AA                              | GG                | 1946705409               |
| SNP_P3_180935_5242 | NW_004519735.1 | Scaffold5780 | 5242                    | GG                              | AA                | 1946705411               |
| SNP_P3_180936_5344 | NW_004519735.1 | Scaffold5780 | 5344                    | AA                              | GG                | 1946705413               |
| SNP_P3_180939_5505 | NW_004519735.1 | Scaffold5780 | 5505                    | AA                              | TT                | 1946705415               |
| SNP_P3_180940_5506 | NW_004519735.1 | Scaffold5780 | 5506                    | AA                              | CC                | 1946705418               |
| SNP_P3_180941_5564 | NW_004519735.1 | Scaffold5780 | 5564                    | GG                              | TT                | 1946705420               |
| SNP_P3_180942_5649 | NW_004519735.1 | Scaffold5780 | 5649                    | TT                              | CC                | 1946705422               |
| SNP_P3_180943_5663 | NW_004519735.1 | Scaffold5780 | 5663                    | GG                              | AA                | 1946705424               |
| SNP_P3_180944_5673 | NW_004519735.1 | Scaffold5780 | 5673                    | AA                              | GG                | 1946705426               |
| SNP_P3_180945_5680 | NW_004519735.1 | Scaffold5780 | 5680                    | TT                              | CC                | 1946705428               |
| SNP_P3_180946_5689 | NW_004519735.1 | Scaffold5780 | 5689                    | TT                              | CC                | 1946705433               |
| SNP_P3_180947_5690 | NW_004519735.1 | Scaffold5780 | 5690                    | GG                              | AA                | 1946705435               |
| SNP_P3_180948_5726 | NW_004519735.1 | Scaffold5780 | 5726                    | CC                              | AA                | 1946705437               |
| SNP_P3_180949_5731 | NW_004519735.1 | Scaffold5780 | 5731                    | AA                              | GG                | 1946705439               |
| SNP_P3_180950_5733 | NW_004519735.1 | Scaffold5780 | 5733                    | AA                              | TT                | 1946705441               |
| SNP_P3_180951_5746 | NW_004519735.1 | Scaffold5780 | 5746                    | TT                              | GG                | 1946705443               |
| SNP_P3_180952_5852 | NW_004519735.1 | Scaffold5780 | 5852                    | AA                              | GG                | 1946705445               |
| SNP_P3_180954_6033 | NW_004519735.1 | Scaffold5780 | 6033                    | TT                              | CC                | 1946705448               |
| SNP_P3_180955_6098 | NW_004519735.1 | Scaffold5780 | 6098                    | GG                              | AA                | 1946705450               |
| SNP_P3_180956_6100 | NW_004519735.1 | Scaffold5780 | 6100                    | GG                              | TT                | 1946705452               |
| SNP_P3_180957_6142 | NW_004519735.1 | Scaffold5780 | 6142                    | GG                              | AA                | 1946705454               |
| SNP_P3_180958_6195 | NW_004519735.1 | Scaffold5780 | 6195                    | AA                              | GG                | 1946705456               |
| SNP_P3_180959_6288 | NW_004519735.1 | Scaffold5780 | 6288                    | AA                              | GG                | 1946705458               |
| SNP_P3_180960_6292 | NW_004519735.1 | Scaffold5780 | 6292                    | TT                              | CC                | 1946705460               |
| SNP_P3_180961_6308 | NW_004519735.1 | Scaffold5780 | 6308                    | TT                              | CC                | 1946705462               |
| SNP_P3_180962_6315 | NW_004519735.1 | Scaffold5780 | 6315                    | AA                              | GG                | 1946705464               |
| SNP_P3_180963_6515 | NW_004519735.1 | Scaffold5780 | 6515                    | AA                              | TT                | 1946705466               |
| SNP_P3_180964_6516 | NW_004519735.1 | Scaffold5780 | 6516                    | TT                              | CC                | 1946705468               |
| SNP_P3_180965_6662 | NW_004519735.1 | Scaffold5780 | 6662                    | TT                              | GG                | 1946705470               |
| SNP_P3_180966_6736 | NW_004519735.1 | Scaffold5780 | 6736                    | GG                              | AA                | 1946705472               |
| SNP_P3_180967_6790 | NW_004519735.1 | Scaffold5780 | 6790                    | CC                              | TT                | 1946705474               |
| SNP_P3_180968_6903 | NW_004519735.1 | Scaffold5780 | 6903                    | TT                              | AA                | 1946705476               |
| SNP_P3_180969_8727 | NW_004519735.1 | Scaffold5780 | 8727                    | CC                              | AA                | 1946705478               |
| SNP_P3_180971_8753 | NW_004519735.1 | Scaffold5780 | 8753                    | GG                              | AA                | 1946705480               |

| SNPs IDs            | Chromosome IDs | Chromosomes  | Physical positions (bp) | CDC Frontier (Reference genome) | (Pusa 256 & HPNB) | NCBI SNPdb Accession IDs |
|---------------------|----------------|--------------|-------------------------|---------------------------------|-------------------|--------------------------|
| SNP_P3_180972_8788  | NW_004519735.1 | Scaffold5780 | 8788                    | CC                              | TT                | 1946705483               |
| SNP_P3_180973_8802  | NW_004519735.1 | Scaffold5780 | 8802                    | GG                              | TT                | 1946705485               |
| SNP_P3_180974_8803  | NW_004519735.1 | Scaffold5780 | 8803                    | CC                              | GG                | 1946705487               |
| SNP_P3_180975_8853  | NW_004519735.1 | Scaffold5780 | 8853                    | TT                              | CC                | 1946705490               |
| SNP_P3_180976_8916  | NW_004519735.1 | Scaffold5780 | 8916                    | AA                              | GG                | 1946705492               |
| SNP_P3_180977_8963  | NW_004519735.1 | Scaffold5780 | 8963                    | CC                              | AA                | 1946705494               |
| SNP_P3_180978_8984  | NW_004519735.1 | Scaffold5780 | 8984                    | GG                              | AA                | 1946705496               |
| SNP_P3_180980_9464  | NW_004519735.1 | Scaffold5780 | 9464                    | TT                              | AA                | 1946705498               |
| SNP_P3_180981_9668  | NW_004519735.1 | Scaffold5780 | 9668                    | TT                              | CC                | 1946705500               |
| SNP_P3_180982_9834  | NW_004519735.1 | Scaffold5780 | 9834                    | TT                              | CC                | 1946705502               |
| SNP_P3_180983_9976  | NW_004519735.1 | Scaffold5780 | 9976                    | GG                              | TT                | 1946705504               |
| SNP_P3_180984_9990  | NW_004519735.1 | Scaffold5780 | 9990                    | AA                              | CC                | 1946705506               |
| SNP_P3_180985_10024 | NW_004519735.1 | Scaffold5780 | 10024                   | TT                              | CC                | 1946705508               |
| SNP_P3_180986_10130 | NW_004519735.1 | Scaffold5780 | 10130                   | GG                              | AA                | 1946705511               |
| SNP_P3_180987_10333 | NW_004519735.1 | Scaffold5780 | 10333                   | AA                              | CC                | 1946705513               |
| SNP_P3_180988_10359 | NW_004519735.1 | Scaffold5780 | 10359                   | CC                              | TT                | 1946705515               |
| SNP_P3_180989_10600 | NW_004519735.1 | Scaffold5780 | 10600                   | TT                              | CC                | 1946705517               |
| SNP_P3_180990_10773 | NW_004519735.1 | Scaffold5780 | 10773                   | GG                              | AA                | 1946705519               |
| SNP_P3_180991_10910 | NW_004519735.1 | Scaffold5780 | 10910                   | CC                              | TT                | 1946705521               |
| SNP_P3_180992_11020 | NW_004519735.1 | Scaffold5780 | 11020                   | AA                              | GG                | 1946705523               |
| SNP_P3_180993_15396 | NW_004519735.1 | Scaffold5780 | 15396                   | AA                              | GG                | 1946705525               |
| SNP_P3_180994_2167  | NW_004519736.1 | Scaffold5781 | 2167                    | AA                              | TT                | 1946705527               |
| SNP_P3_180995_2517  | NW_004519736.1 | Scaffold5781 | 2517                    | AA                              | CC                | 1946705529               |
| SNP_P3_180996_2566  | NW_004519736.1 | Scaffold5781 | 2566                    | CC                              | TT                | 1946705531               |
| SNP_P3_180997_3014  | NW_004519736.1 | Scaffold5781 | 3014                    | CC                              | GG                | 1946705533               |
| SNP_P3_180998_3027  | NW_004519736.1 | Scaffold5781 | 3027                    | TT                              | CC                | 1946705535               |
| SNP_P3_180999_3050  | NW_004519736.1 | Scaffold5781 | 3050                    | AA                              | GG                | 1946705538               |
| SNP_P3_181000_3113  | NW_004519736.1 | Scaffold5781 | 3113                    | CC                              | GG                | 1946705541               |
| SNP_P3_181001_3189  | NW_004519736.1 | Scaffold5781 | 3189                    | CC                              | TT                | 1946705543               |
| SNP_P3_181002_3354  | NW_004519736.1 | Scaffold5781 | 3354                    | AA                              | GG                | 1946705545               |
| SNP_P3_181003_3430  | NW_004519736.1 | Scaffold5781 | 3430                    | AA                              | GG                | 1946705547               |
| SNP_P3_181004_3522  | NW_004519736.1 | Scaffold5781 | 3522                    | GG                              | AA                | 1946705549               |
| SNP_P3_181005_3535  | NW_004519736.1 | Scaffold5781 | 3535                    | GG                              | AA                | 1946705551               |
| SNP_P3_181006_3544  | NW_004519736.1 | Scaffold5781 | 3544                    | AA                              | TT                | 1946705553               |
| SNP_P3_181007_3563  | NW_004519736.1 | Scaffold5781 | 3563                    | GG                              | AA                | 1946705555               |
| SNP_P3_181008_3631  | NW_004519736.1 | Scaffold5781 | 3631                    | GG                              | TT                | 1946705557               |
| SNP_P3_181009_3911  | NW_004519736.1 | Scaffold5781 | 3911                    | TT                              | CC                | 1946705559               |
| SNP_P3_181010_4015  | NW_004519736.1 | Scaffold5781 | 4015                    | AA                              | TT                | 1946705561               |
| SNP_P3_181011_8834  | NW_004519736.1 | Scaffold5781 | 8834                    | AA                              | TT                | 1946705563               |
| SNP_P3_181013_12552 | NW_004519736.1 | Scaffold5781 | 12552                   | TT                              | CC                | 1946705565               |
| SNP_P3_181014_12587 | NW_004519736.1 | Scaffold5781 | 12587                   | CC                              | TT                | 1946705567               |
| SNP_P3_181015_12596 | NW_004519736.1 | Scaffold5781 | 12596                   | AA                              | GG                | 1946705569               |

| SNPs IDs             | Chromosome IDs | Chromosomes  | Physical positions (bp) | CDC Frontier (Reference genome) | (Pusa 256 & HPNB) | NCBI SNPdb Accession IDs |
|----------------------|----------------|--------------|-------------------------|---------------------------------|-------------------|--------------------------|
| SNP_P3_181016_12653  | NW_004519736.1 | Scaffold5781 | 12653                   | GG                              | AA                | 1946705571               |
| SNP_P3_181017_12828  | NW_004519736.1 | Scaffold5781 | 12828                   | TT                              | CC                | 1946705573               |
| SNP_P3_181018_13166  | NW_004519736.1 | Scaffold5781 | 13166                   | TT                              | GG                | 1946705575               |
| SNP_P3_181019_13184  | NW_004519736.1 | Scaffold5781 | 13184                   | CC                              | AA                | 1946705577               |
| SNP_P3_181020_324    | NW_004519737.1 | Scaffold5782 | 324                     | AA                              | GG                | 1946705579               |
| SNP_P3_181021_329    | NW_004519737.1 | Scaffold5782 | 329                     | GG                              | CC                | 1946705582               |
| SNP_P3_181022_693    | NW_004519737.1 | Scaffold5782 | 693                     | CC                              | TT                | 1946705584               |
| SNP_P3_181023_712    | NW_004519737.1 | Scaffold5782 | 712                     | AA                              | GG                | 1946705586               |
| SNP_P3_181024_755    | NW_004519737.1 | Scaffold5782 | 755                     | TT                              | CC                | 1946705588               |
| SNP_P3_181025_1046   | NW_004519737.1 | Scaffold5782 | 1046                    | AA                              | GG                | 1946705590               |
| SNP_P3_181026_1058   | NW_004519737.1 | Scaffold5782 | 1058                    | TT                              | AA                | 1946705592               |
| SNP_P3_181027_681    | NW_004519738.1 | Scaffold5783 | 681                     | GG                              | AA                | 1946705594               |
| SNP_P3_181028_713    | NW_004519738.1 | Scaffold5783 | 713                     | CC                              | TT                | 1946705596               |
| SNP_P3_181029_723    | NW_004519738.1 | Scaffold5783 | 723                     | TT                              | CC                | 1946705598               |
| SNP_P3_181030_773    | NW_004519738.1 | Scaffold5783 | 773                     | TT                              | GG                | 1946705600               |
| SNP_P3_181031_827    | NW_004519738.1 | Scaffold5783 | 827                     | TT                              | CC                | 1946705602               |
| SNP_P3_181032_1221   | NW_004519738.1 | Scaffold5783 | 1221                    | CC                              | GG                | 1946705604               |
| SNP_P3_181033_1332   | NW_004519738.1 | Scaffold5783 | 1332                    | AA                              | GG                | 1946705606               |
| SNP_P3_181034_1723   | NW_004519738.1 | Scaffold5783 | 1723                    | CC                              | GG                | 1946705608               |
| SNP_P3_181035_1747   | NW_004519738.1 | Scaffold5783 | 1747                    | GG                              | AA                | 1946705610               |
| SNP_P3_181036_754    | NW_004519739.1 | Scaffold5786 | 754                     | GG                              | AA                | 1946705612               |
| SNP_P3_181037_112    | NW_004519740.1 | Scaffold5788 | 112                     | AA                              | GG                | 1946705614               |
| SNP_P3_181038_1378   | NW_004519740.1 | Scaffold5788 | 1378                    | CC                              | TT                | 1946705616               |
| SNP_P3_181039_1901   | NW_004519740.1 | Scaffold5788 | 1901                    | TT                              | AA                | 1946705619               |
| SNP_P3_181040_814    | NW_004519744.1 | Scaffold5792 | 814                     | CC                              | AA                | 1946705621               |
| SNP_P3_181041_23332  | NW_004519744.1 | Scaffold5792 | 23332                   | GG                              | AA                | 1946705623               |
| SNP_P3_181042_23351  | NW_004519744.1 | Scaffold5792 | 23351                   | AA                              | TT                | 1946705625               |
| SNP_P3_181043_23352  | NW_004519744.1 | Scaffold5792 | 23352                   | AA                              | CC                | 1946705627               |
| SNP_P3_181044_33101  | NW_004519744.1 | Scaffold5792 | 33101                   | CC                              | TT                | 1946705629               |
| SNP_P3_181045_37801  | NW_004519744.1 | Scaffold5792 | 37801                   | GG                              | AA                | 1946705631               |
| SNP_P3_181047_74180  | NW_004519744.1 | Scaffold5792 | 74180                   | TT                              | CC                | 1946705634               |
| SNP_P3_181048_103452 | NW_004519744.1 | Scaffold5792 | 103452                  | AA                              | GG                | 1946705637               |
| SNP_P3_181049_5888   | NW_004519746.1 | Scaffold5794 | 5888                    | AA                              | CC                | 1946705639               |
| SNP_P3_181050_5956   | NW_004519746.1 | Scaffold5794 | 5956                    | TT                              | AA                | 1946705641               |
| SNP_P3_181051_7523   | NW_004519746.1 | Scaffold5794 | 7523                    | AA                              | TT                | 1946705643               |
| SNP_P3_181052_8189   | NW_004519746.1 | Scaffold5794 | 8189                    | GG                              | AA                | 1946705645               |
| SNP_P3_181053_8247   | NW_004519746.1 | Scaffold5794 | 8247                    | AA                              | TT                | 1946705647               |
| SNP_P3_181054_8397   | NW_004519746.1 | Scaffold5794 | 8397                    | AA                              | TT                | 1946705649               |
| SNP_P3_181055_8481   | NW_004519746.1 | Scaffold5794 | 8481                    | TT                              | AA                | 1946705651               |
| SNP_P3_181056_8546   | NW_004519746.1 | Scaffold5794 | 8546                    | GG                              | TT                | 1946705653               |
| SNP_P3_181057_8560   | NW_004519746.1 | Scaffold5794 | 8560                    | CC                              | AA                | 1946705655               |
| SNP_P3_181058_8638   | NW_004519746.1 | Scaffold5794 | 8638                    | CC                              | GG                | 1946705657               |

| SNPs IDs           | Chromosome IDs | Chromosomes  | Physical positions (bp) | CDC Frontier (Reference genome) | (Pusa 256 & HPNB) | NCBI SNPdb Accession IDs |
|--------------------|----------------|--------------|-------------------------|---------------------------------|-------------------|--------------------------|
| SNP_P3_181059_8707 | NW_004519746.1 | Scaffold5794 | 8707                    | CC                              | GG                | 1946705660               |
| SNP_P3_181060_1042 | NW_004519747.1 | Scaffold5795 | 1042                    | TT                              | CC                | 1946705663               |
| SNP_P3_181061_1440 | NW_004519747.1 | Scaffold5795 | 1440                    | CC                              | AA                | 1946705666               |
| SNP_P3_181062_1446 | NW_004519747.1 | Scaffold5795 | 1446                    | CC                              | TT                | 1946705669               |
| SNP_P3_181063_1466 | NW_004519747.1 | Scaffold5795 | 1466                    | CC                              | AA                | 1946705671               |
| SNP_P3_181065_101  | NW_004519749.1 | Scaffold5797 | 101                     | TT                              | CC                | 1946705673               |
| SNP_P3_181066_5352 | NW_004519749.1 | Scaffold5797 | 5352                    | GG                              | AA                | 1946705675               |
| SNP_P3_181067_5354 | NW_004519749.1 | Scaffold5797 | 5354                    | TT                              | CC                | 1946705677               |
| SNP_P3_181068_5392 | NW_004519749.1 | Scaffold5797 | 5392                    | AA                              | GG                | 1946705679               |
| SNP_P3_181069_5474 | NW_004519749.1 | Scaffold5797 | 5474                    | CC                              | TT                | 1946705682               |
| SNP_P3_181070_5480 | NW_004519749.1 | Scaffold5797 | 5480                    | TT                              | GG                | 1946705684               |
| SNP_P3_181071_5488 | NW_004519749.1 | Scaffold5797 | 5488                    | AA                              | GG                | 1946705686               |
| SNP_P3_181072_5514 | NW_004519749.1 | Scaffold5797 | 5514                    | CC                              | TT                | 1946705688               |
| SNP_P3_181073_5631 | NW_004519749.1 | Scaffold5797 | 5631                    | AA                              | TT                | 1946705690               |
| SNP_P3_181074_5709 | NW_004519749.1 | Scaffold5797 | 5709                    | CC                              | AA                | 1946705693               |
| SNP_P3_181075_5723 | NW_004519749.1 | Scaffold5797 | 5723                    | CC                              | GG                | 1946705695               |
| SNP_P3_181076_5778 | NW_004519749.1 | Scaffold5797 | 5778                    | AA                              | CC                | 1946705697               |
| SNP_P3_181077_5854 | NW_004519749.1 | Scaffold5797 | 5854                    | GG                              | AA                | 1946705699               |
| SNP_P3_181078_5855 | NW_004519749.1 | Scaffold5797 | 5855                    | AA                              | TT                | 1946705702               |
| SNP_P3_181079_6000 | NW_004519749.1 | Scaffold5797 | 6000                    | AA                              | GG                | 1946705704               |
| SNP_P3_181080_8632 | NW_004519749.1 | Scaffold5797 | 8632                    | AA                              | TT                | 1946705707               |
| SNP_P3_181081_8658 | NW_004519749.1 | Scaffold5797 | 8658                    | CC                              | AA                | 1946705709               |
| SNP_P3_181082_8678 | NW_004519749.1 | Scaffold5797 | 8678                    | AA                              | CC                | 1946705711               |
| SNP_P3_181083_8736 | NW_004519749.1 | Scaffold5797 | 8736                    | TT                              | CC                | 1946705713               |
| SNP_P3_181084_8922 | NW_004519749.1 | Scaffold5797 | 8922                    | CC                              | AA                | 1946705715               |
| SNP_P3_181085_9015 | NW_004519749.1 | Scaffold5797 | 9015                    | CC                              | TT                | 1946705717               |
| SNP_P3_181086_9017 | NW_004519749.1 | Scaffold5797 | 9017                    | GG                              | TT                | 1946705719               |
| SNP_P3_181087_9029 | NW_004519749.1 | Scaffold5797 | 9029                    | AA                              | GG                | 1946705721               |
| SNP_P3_181088_9069 | NW_004519749.1 | Scaffold5797 | 9069                    | AA                              | GG                | 1946705724               |
| SNP_P3_181089_9086 | NW_004519749.1 | Scaffold5797 | 9086                    | GG                              | CC                | 1946705726               |
| SNP_P3_181090_9113 | NW_004519749.1 | Scaffold5797 | 9113                    | AA                              | CC                | 1946705728               |
| SNP_P3_181091_9219 | NW_004519749.1 | Scaffold5797 | 9219                    | GG                              | AA                | 1946705730               |
| SNP_P3_181092_9532 | NW_004519749.1 | Scaffold5797 | 9532                    | CC                              | TT                | 1946705732               |
| SNP_P3_181093_9549 | NW_004519749.1 | Scaffold5797 | 9549                    | AA                              | CC                | 1946705734               |
| SNP_P3_181094_9557 | NW_004519749.1 | Scaffold5797 | 9557                    | TT                              | AA                | 1946705736               |
| SNP_P3_181095_338  | NW_004519750.1 | Scaffold5801 | 338                     | GG                              | AA                | 1946705738               |
| SNP_P3_181096_361  | NW_004519750.1 | Scaffold5801 | 361                     | GG                              | AA                | 1946705741               |
| SNP_P3_181097_370  | NW_004519750.1 | Scaffold5801 | 370                     | GG                              | TT                | 1946705743               |
| SNP_P3_181098_492  | NW_004519750.1 | Scaffold5801 | 492                     | TT                              | CC                | 1946705745               |
| SNP_P3_181099_591  | NW_004519750.1 | Scaffold5801 | 591                     | AA                              | CC                | 1946705747               |
| SNP_P3_181100_812  | NW_004519750.1 | Scaffold5801 | 812                     | GG                              | AA                | 1946705749               |
| SNP_P3_181102_2011 | NW_004519750.1 | Scaffold5801 | 2011                    | TT                              | CC                | 1946705751               |



| SNPs IDs            | Chromosome IDs | Chromosomes  | Physical positions (bp) | CDC Frontier (Reference genome) | (Pusa 256 & HPNB) | NCBI SNPdb Accession IDs |
|---------------------|----------------|--------------|-------------------------|---------------------------------|-------------------|--------------------------|
| SNP_P3_181103_2212  | NW_004519750.1 | Scaffold5801 | 2212                    | TT                              | AA                | 1946705753               |
| SNP_P3_181104_2332  | NW_004519750.1 | Scaffold5801 | 2332                    | GG                              | AA                | 1946705755               |
| SNP_P3_181105_2504  | NW_004519750.1 | Scaffold5801 | 2504                    | CC                              | TT                | 1946705757               |
| SNP_P3_181106_2644  | NW_004519750.1 | Scaffold5801 | 2644                    | CC                              | TT                | 1946705759               |
| SNP_P3_181107_2687  | NW_004519750.1 | Scaffold5801 | 2687                    | CC                              | TT                | 1946705761               |
| SNP_P3_181108_2696  | NW_004519750.1 | Scaffold5801 | 2696                    | CC                              | TT                | 1946705763               |
| SNP_P3_181109_2743  | NW_004519750.1 | Scaffold5801 | 2743                    | CC                              | TT                | 1946705765               |
| SNP_P3_181111_6570  | NW_004519755.1 | Scaffold5812 | 6570                    | GG                              | AA                | 1946705767               |
| SNP_P3_181112_16178 | NW_004519755.1 | Scaffold5812 | 16178                   | AA                              | GG                | 1946705769               |
| SNP_P3_181113_18430 | NW_004519755.1 | Scaffold5812 | 18430                   | TT                              | CC                | 1946705771               |
| SNP_P3_181114_30171 | NW_004519755.1 | Scaffold5812 | 30171                   | CC                              | GG                | 1946705773               |
| SNP_P3_181115_30292 | NW_004519755.1 | Scaffold5812 | 30292                   | CC                              | TT                | 1946705775               |
| SNP_P3_181116_30299 | NW_004519755.1 | Scaffold5812 | 30299                   | TT                              | AA                | 1946705777               |
| SNP_P3_181118_45382 | NW_004519755.1 | Scaffold5812 | 45382                   | AA                              | GG                | 1946705779               |
| SNP_P3_181119_45404 | NW_004519755.1 | Scaffold5812 | 45404                   | TT                              | CC                | 1946705781               |
| SNP_P3_181120_45422 | NW_004519755.1 | Scaffold5812 | 45422                   | AA                              | GG                | 1946705783               |
| SNP_P3_181121_45748 | NW_004519755.1 | Scaffold5812 | 45748                   | TT                              | CC                | 1946705785               |
| SNP_P3_181122_46737 | NW_004519755.1 | Scaffold5812 | 46737                   | GG                              | AA                | 1946705787               |
| SNP_P3_181123_46773 | NW_004519755.1 | Scaffold5812 | 46773                   | AA                              | CC                | 1946705789               |
| SNP_P3_181124_47443 | NW_004519755.1 | Scaffold5812 | 47443                   | CC                              | TT                | 1946705791               |
| SNP_P3_181125_47464 | NW_004519755.1 | Scaffold5812 | 47464                   | AA                              | TT                | 1946705794               |
| SNP_P3_181126_47512 | NW_004519755.1 | Scaffold5812 | 47512                   | AA                              | GG                | 1946705796               |
| SNP_P3_181127_47758 | NW_004519755.1 | Scaffold5812 | 47758                   | GG                              | AA                | 1946705798               |
| SNP_P3_181129_2756  | NW_004519756.1 | Scaffold5813 | 2756                    | GG                              | TT                | 1946705800               |
| SNP_P3_181130_2776  | NW_004519756.1 | Scaffold5813 | 2776                    | CC                              | AA                | 1946705802               |
| SNP_P3_181131_2786  | NW_004519756.1 | Scaffold5813 | 2786                    | GG                              | CC                | 1946705804               |
| SNP_P3_181132_2955  | NW_004519756.1 | Scaffold5813 | 2955                    | AA                              | CC                | 1946705806               |
| SNP_P3_181133_3101  | NW_004519756.1 | Scaffold5813 | 3101                    | CC                              | TT                | 1946705808               |
| SNP_P3_181134_4509  | NW_004519756.1 | Scaffold5813 | 4509                    | AA                              | CC                | 1946705810               |
| SNP_P3_181135_799   | NW_004519758.1 | Scaffold5815 | 799                     | TT                              | AA                | 1946705812               |
| SNP_P3_181136_1121  | NW_004519758.1 | Scaffold5815 | 1121                    | AA                              | GG                | 1946705814               |
| SNP_P3_181137_1220  | NW_004519758.1 | Scaffold5815 | 1220                    | AA                              | GG                | 1946705816               |
| SNP_P3_181138_1402  | NW_004519758.1 | Scaffold5815 | 1402                    | TT                              | CC                | 1946705818               |
| SNP_P3_181139_1427  | NW_004519758.1 | Scaffold5815 | 1427                    | AA                              | CC                | 1946705820               |
| SNP_P3_181140_1437  | NW_004519758.1 | Scaffold5815 | 1437                    | TT                              | CC                | 1946705823               |
| SNP_P3_181141_1457  | NW_004519758.1 | Scaffold5815 | 1457                    | AA                              | TT                | 1946705825               |
| SNP_P3_181142_1458  | NW_004519758.1 | Scaffold5815 | 1458                    | CC                              | AA                | 1946705827               |
| SNP_P3_181143_1466  | NW_004519758.1 | Scaffold5815 | 1466                    | AA                              | CC                | 1946705830               |
| SNP_P3_181144_1550  | NW_004519758.1 | Scaffold5815 | 1550                    | CC                              | GG                | 1946705833               |
| SNP_P3_181145_1753  | NW_004519758.1 | Scaffold5815 | 1753                    | AA                              | TT                | 1946705835               |
| SNP_P3_181146_1798  | NW_004519758.1 | Scaffold5815 | 1798                    | AA                              | GG                | 1946705837               |
| SNP_P3_181147_2988  | NW_004519758.1 | Scaffold5815 | 2988                    | CC                              | TT                | 1946705839               |

| SNPs IDs           | Chromosome IDs | Chromosomes  | Physical positions (bp) | CDC Frontier (Reference genome) | (Pusa 256 & HPNB) | NCBI SNPdb Accession IDs |
|--------------------|----------------|--------------|-------------------------|---------------------------------|-------------------|--------------------------|
| SNP_P3_181148_3145 | NW_004519758.1 | Scaffold5815 | 3145                    | GG                              | TT                | 1946705841               |
| SNP_P3_181149_5165 | NW_004519759.1 | Scaffold5816 | 5165                    | GG                              | CC                | 1946705843               |
| SNP_P3_181150_5312 | NW_004519759.1 | Scaffold5816 | 5312                    | GG                              | TT                | 1946705845               |
| SNP_P3_181151_5316 | NW_004519759.1 | Scaffold5816 | 5316                    | CC                              | TT                | 1946705847               |
| SNP_P3_181152_5548 | NW_004519759.1 | Scaffold5816 | 5548                    | CC                              | TT                | 1946705849               |
| SNP_P3_181153_7045 | NW_004519759.1 | Scaffold5816 | 7045                    | AA                              | GG                | 1946705851               |
| SNP_P3_181154_500  | NW_004519760.1 | Scaffold5817 | 500                     | GG                              | AA                | 1946705853               |
| SNP_P3_181155_509  | NW_004519760.1 | Scaffold5817 | 509                     | AA                              | CC                | 1946705855               |
| SNP_P3_181156_646  | NW_004519760.1 | Scaffold5817 | 646                     | TT                              | GG                | 1946705857               |
| SNP_P3_181157_793  | NW_004519760.1 | Scaffold5817 | 793                     | GG                              | TT                | 1946705859               |
| SNP_P3_181158_892  | NW_004519760.1 | Scaffold5817 | 892                     | AA                              | GG                | 1946705861               |
| SNP_P3_181159_992  | NW_004519760.1 | Scaffold5817 | 992                     | TT                              | AA                | 1946705863               |
| SNP_P3_181160_2617 | NW_004519762.1 | Scaffold5820 | 2617                    | TT                              | AA                | 1946705865               |
| SNP_P3_181161_2639 | NW_004519762.1 | Scaffold5820 | 2639                    | CC                              | AA                | 1946705867               |
| SNP_P3_181163_2717 | NW_004519762.1 | Scaffold5820 | 2717                    | GG                              | AA                | 1946705869               |
| SNP_P3_181164_2765 | NW_004519762.1 | Scaffold5820 | 2765                    | AA                              | GG                | 1946705871               |
| SNP_P3_181165_69   | NW_004519764.1 | Scaffold5823 | 69                      | CC                              | TT                | 1946705873               |
| SNP_P3_181166_113  | NW_004519764.1 | Scaffold5823 | 113                     | CC                              | AA                | 1946705875               |
| SNP_P3_181167_339  | NW_004519764.1 | Scaffold5823 | 339                     | GG                              | TT                | 1946705877               |
| SNP_P3_181168_624  | NW_004519764.1 | Scaffold5823 | 624                     | CC                              | TT                | 1946705879               |
| SNP_P3_181169_1529 | NW_004519764.1 | Scaffold5823 | 1529                    | AA                              | GG                | 1946705881               |
| SNP_P3_181170_1534 | NW_004519764.1 | Scaffold5823 | 1534                    | AA                              | TT                | 1946705883               |
| SNP_P3_181171_1542 | NW_004519764.1 | Scaffold5823 | 1542                    | CC                              | GG                | 1946705885               |
| SNP_P3_181172_1544 | NW_004519764.1 | Scaffold5823 | 1544                    | AA                              | CC                | 1946705888               |
| SNP_P3_181173_906  | NW_004519765.1 | Scaffold5824 | 906                     | TT                              | AA                | 1946705890               |
| SNP_P3_181174_1009 | NW_004519765.1 | Scaffold5824 | 1009                    | GG                              | CC                | 1946705892               |
| SNP_P3_181175_1033 | NW_004519765.1 | Scaffold5824 | 1033                    | CC                              | GG                | 1946705894               |
| SNP_P3_181176_605  | NW_004519767.1 | Scaffold5826 | 605                     | GG                              | CC                | 1946705896               |
| SNP_P3_181178_1862 | NW_004519772.1 | Scaffold5831 | 1862                    | AA                              | GG                | 1946705898               |
| SNP_P3_181179_3663 | NW_004519774.1 | Scaffold5833 | 3663                    | AA                              | TT                | 1946705900               |
| SNP_P3_181180_924  | NW_004519776.1 | Scaffold5836 | 924                     | GG                              | AA                | 1946705902               |
| SNP_P3_181181_6976 | NW_004519778.1 | Scaffold5839 | 6976                    | GG                              | TT                | 1946705905               |
| SNP_P3_181182_6979 | NW_004519778.1 | Scaffold5839 | 6979                    | TT                              | AA                | 1946705907               |
| SNP_P3_181183_7089 | NW_004519778.1 | Scaffold5839 | 7089                    | TT                              | CC                | 1946705909               |
| SNP_P3_181184_7229 | NW_004519778.1 | Scaffold5839 | 7229                    | CC                              | GG                | 1946705911               |
| SNP_P3_181185_7403 | NW_004519778.1 | Scaffold5839 | 7403                    | GG                              | TT                | 1946705913               |
| SNP_P3_181186_7409 | NW_004519778.1 | Scaffold5839 | 7409                    | GG                              | AA                | 1946705915               |
| SNP_P3_181187_7507 | NW_004519778.1 | Scaffold5839 | 7507                    | CC                              | AA                | 1946705917               |
| SNP_P3_181188_7617 | NW_004519778.1 | Scaffold5839 | 7617                    | CC                              | AA                | 1946705919               |
| SNP_P3_181189_7720 | NW_004519778.1 | Scaffold5839 | 7720                    | TT                              | GG                | 1946705921               |
| SNP_P3_181190_7743 | NW_004519778.1 | Scaffold5839 | 7743                    | TT                              | CC                | 1946705922               |
| SNP_P3_181191_7747 | NW_004519778.1 | Scaffold5839 | 7747                    | AA                              | TT                | 1946705924               |

| SNPs IDs            | Chromosome IDs | Chromosomes  | Physical positions (bp) | CDC Frontier (Reference genome) | (Pusa 256 & HPNB) | NCBI SNPdb Accession IDs |
|---------------------|----------------|--------------|-------------------------|---------------------------------|-------------------|--------------------------|
| SNP_P3_181192_7791  | NW_004519778.1 | Scaffold5839 | 7791                    | CC                              | AA                | 1946705926               |
| SNP_P3_181193_7807  | NW_004519778.1 | Scaffold5839 | 7807                    | AA                              | CC                | 1946705928               |
| SNP_P3_181194_7822  | NW_004519778.1 | Scaffold5839 | 7822                    | TT                              | AA                | 1946705930               |
| SNP_P3_181195_7823  | NW_004519778.1 | Scaffold5839 | 7823                    | TT                              | AA                | 1946705932               |
| SNP_P3_181196_7849  | NW_004519778.1 | Scaffold5839 | 7849                    | CC                              | TT                | 1946705934               |
| SNP_P3_181197_7898  | NW_004519778.1 | Scaffold5839 | 7898                    | AA                              | GG                | 1946705936               |
| SNP_P3_181198_7914  | NW_004519778.1 | Scaffold5839 | 7914                    | TT                              | GG                | 1946705938               |
| SNP_P3_181199_7925  | NW_004519778.1 | Scaffold5839 | 7925                    | CC                              | GG                | 1946705940               |
| SNP_P3_181200_7975  | NW_004519778.1 | Scaffold5839 | 7975                    | TT                              | GG                | 1946705943               |
| SNP_P3_181202_8145  | NW_004519778.1 | Scaffold5839 | 8145                    | AA                              | GG                | 1946705945               |
| SNP_P3_181203_8192  | NW_004519778.1 | Scaffold5839 | 8192                    | GG                              | AA                | 1946705947               |
| SNP_P3_181204_8284  | NW_004519778.1 | Scaffold5839 | 8284                    | TT                              | CC                | 1946705949               |
| SNP_P3_181205_8285  | NW_004519778.1 | Scaffold5839 | 8285                    | TT                              | CC                | 1946705951               |
| SNP_P3_181206_8321  | NW_004519778.1 | Scaffold5839 | 8321                    | AA                              | CC                | 1946705953               |
| SNP_P3_181207_8327  | NW_004519778.1 | Scaffold5839 | 8327                    | AA                              | GG                | 1946705954               |
| SNP_P3_181208_8333  | NW_004519778.1 | Scaffold5839 | 8333                    | CC                              | TT                | 1946705955               |
| SNP_P3_181209_8375  | NW_004519778.1 | Scaffold5839 | 8375                    | CC                              | TT                | 1946705956               |
| SNP_P3_181210_22688 | NW_004519778.1 | Scaffold5839 | 22688                   | AA                              | GG                | 1946705958               |
| SNP_P3_181213_22856 | NW_004519778.1 | Scaffold5839 | 22856                   | AA                              | TT                | 1946705960               |
| SNP_P3_181214_948   | NW_004519780.1 | Scaffold5841 | 948                     | CC                              | TT                | 1946705962               |
| SNP_P3_181215_223   | NW_004519782.1 | Scaffold5843 | 223                     | GG                              | AA                | 1946705964               |
| SNP_P3_181216_226   | NW_004519782.1 | Scaffold5843 | 226                     | AA                              | GG                | 1946705966               |
| SNP_P3_181217_251   | NW_004519782.1 | Scaffold5843 | 251                     | AA                              | TT                | 1946705968               |
| SNP_P3_181218_255   | NW_004519782.1 | Scaffold5843 | 255                     | AA                              | GG                | 1946705970               |
| SNP_P3_181219_256   | NW_004519782.1 | Scaffold5843 | 256                     | CC                              | TT                | 1946705972               |
| SNP_P3_181220_288   | NW_004519782.1 | Scaffold5843 | 288                     | CC                              | TT                | 1946705973               |
| SNP_P3_181222_364   | NW_004519782.1 | Scaffold5843 | 364                     | GG                              | TT                | 1946705975               |
| SNP_P3_181223_381   | NW_004519782.1 | Scaffold5843 | 381                     | TT                              | CC                | 1946705977               |
| SNP_P3_181224_691   | NW_004519782.1 | Scaffold5843 | 691                     | GG                              | AA                | 1946705979               |
| SNP_P3_181225_739   | NW_004519782.1 | Scaffold5843 | 739                     | AA                              | GG                | 1946705982               |
| SNP_P3_181226_1415  | NW_004519793.1 | Scaffold5857 | 1415                    | AA                              | GG                | 1946705984               |
| SNP_P3_181227_1260  | NW_004519796.1 | Scaffold5864 | 1260                    | TT                              | CC                | 1946705986               |
| SNP_P3_181228_1436  | NW_004519796.1 | Scaffold5864 | 1436                    | CC                              | GG                | 1946705988               |
| SNP_P3_181229_1491  | NW_004519796.1 | Scaffold5864 | 1491                    | GG                              | CC                | 1946705990               |
| SNP_P3_181230_478   | NW_004519797.1 | Scaffold5867 | 478                     | GG                              | TT                | 1946705992               |
| SNP_P3_181231_490   | NW_004519797.1 | Scaffold5867 | 490                     | AA                              | GG                | 1946705994               |
| SNP_P3_181232_623   | NW_004519797.1 | Scaffold5867 | 623                     | GG                              | AA                | 1946705996               |
| SNP_P3_181233_660   | NW_004519797.1 | Scaffold5867 | 660                     | CC                              | GG                | 1946705998               |
| SNP_P3_181234_696   | NW_004519797.1 | Scaffold5867 | 696                     | CC                              | AA                | 1946706000               |
| SNP_P3_181235_769   | NW_004519797.1 | Scaffold5867 | 769                     | AA                              | GG                | 1946706002               |
| SNP_P3_181236_905   | NW_004519797.1 | Scaffold5867 | 905                     | TT                              | GG                | 1946706004               |
| SNP_P3_181237_948   | NW_004519797.1 | Scaffold5867 | 948                     | GG                              | CC                | 1946706006               |

| SNPs IDs            | Chromosome IDs | Chromosomes  | Physical positions (bp) | CDC Frontier (Reference genome) | (Pusa 256 & HPNB) | NCBI SNPdb Accession IDs |
|---------------------|----------------|--------------|-------------------------|---------------------------------|-------------------|--------------------------|
| SNP_P3_181238_957   | NW_004519797.1 | Scaffold5867 | 957                     | GG                              | CC                | 1946706008               |
| SNP_P3_181239_961   | NW_004519797.1 | Scaffold5867 | 961                     | TT                              | CC                | 1946706010               |
| SNP_P3_181240_993   | NW_004519797.1 | Scaffold5867 | 993                     | CC                              | TT                | 1946706012               |
| SNP_P3_181241_1008  | NW_004519797.1 | Scaffold5867 | 1008                    | GG                              | AA                | 1946706014               |
| SNP_P3_181242_371   | NW_004519798.1 | Scaffold5869 | 371                     | TT                              | CC                | 1946706016               |
| SNP_P3_181243_429   | NW_004519798.1 | Scaffold5869 | 429                     | AA                              | GG                | 1946706018               |
| SNP_P3_181244_732   | NW_004519798.1 | Scaffold5869 | 732                     | AA                              | GG                | 1946706020               |
| SNP_P3_181245_817   | NW_004519798.1 | Scaffold5869 | 817                     | CC                              | AA                | 1946706023               |
| SNP_P3_181246_935   | NW_004519798.1 | Scaffold5869 | 935                     | GG                              | AA                | 1946706025               |
| SNP_P3_181248_5277  | NW_004519798.1 | Scaffold5869 | 5277                    | GG                              | AA                | 1946706027               |
| SNP_P3_181250_5496  | NW_004519798.1 | Scaffold5869 | 5496                    | CC                              | TT                | 1946706029               |
| SNP_P3_181251_5634  | NW_004519798.1 | Scaffold5869 | 5634                    | GG                              | AA                | 1946706031               |
| SNP_P3_181252_5853  | NW_004519798.1 | Scaffold5869 | 5853                    | TT                              | CC                | 1946706033               |
| SNP_P3_181253_7772  | NW_004519798.1 | Scaffold5869 | 7772                    | AA                              | GG                | 1946706035               |
| SNP_P3_181254_7811  | NW_004519798.1 | Scaffold5869 | 7811                    | GG                              | AA                | 1946706037               |
| SNP_P3_181255_7815  | NW_004519798.1 | Scaffold5869 | 7815                    | AA                              | GG                | 1946706040               |
| SNP_P3_181256_7951  | NW_004519798.1 | Scaffold5869 | 7951                    | AA                              | GG                | 1946706042               |
| SNP_P3_181257_7963  | NW_004519798.1 | Scaffold5869 | 7963                    | AA                              | TT                | 1946706044               |
| SNP_P3_181258_8044  | NW_004519798.1 | Scaffold5869 | 8044                    | AA                              | GG                | 1946706046               |
| SNP_P3_181259_8068  | NW_004519798.1 | Scaffold5869 | 8068                    | TT                              | CC                | 1946706048               |
| SNP_P3_181260_8085  | NW_004519798.1 | Scaffold5869 | 8085                    | GG                              | AA                | 1946706050               |
| SNP_P3_181261_8116  | NW_004519798.1 | Scaffold5869 | 8116                    | CC                              | TT                | 1946706052               |
| SNP_P3_181262_8143  | NW_004519798.1 | Scaffold5869 | 8143                    | AA                              | GG                | 1946706054               |
| SNP_P3_181263_12565 | NW_004519798.1 | Scaffold5869 | 12565                   | AA                              | GG                | 1946706056               |
| SNP_P3_181264_12591 | NW_004519798.1 | Scaffold5869 | 12591                   | TT                              | GG                | 1946706058               |
| SNP_P3_181266_17897 | NW_004519798.1 | Scaffold5869 | 17897                   | CC                              | TT                | 1946706060               |
| SNP_P3_181267_17919 | NW_004519798.1 | Scaffold5869 | 17919                   | AA                              | GG                | 1946706062               |
| SNP_P3_181268_18089 | NW_004519798.1 | Scaffold5869 | 18089                   | GG                              | AA                | 1946706064               |
| SNP_P3_181269_18147 | NW_004519798.1 | Scaffold5869 | 18147                   | CC                              | TT                | 1946706066               |
| SNP_P3_181271_392   | NW_004519799.1 | Scaffold5871 | 392                     | TT                              | CC                | 1946706068               |
| SNP_P3_181272_865   | NW_004519799.1 | Scaffold5871 | 865                     | CC                              | GG                | 1946706070               |
| SNP_P3_181274_832   | NW_004519802.1 | Scaffold5874 | 832                     | CC                              | TT                | 1946706073               |
| SNP_P3_181275_58    | NW_004519803.1 | Scaffold5876 | 58                      | CC                              | AA                | 1946706074               |
| SNP_P3_181276_6040  | NW_004519807.1 | Scaffold5881 | 6040                    | CC                              | TT                | 1946706076               |
| SNP_P3_181277_105   | NW_004519809.1 | Scaffold5883 | 105                     | AA                              | TT                | 1946706078               |
| SNP_P3_181278_238   | NW_004519809.1 | Scaffold5883 | 238                     | AA                              | GG                | 1946706080               |
| SNP_P3_181279_717   | NW_004519809.1 | Scaffold5883 | 717                     | TT                              | GG                | 1946706082               |
| SNP_P3_181280_726   | NW_004519809.1 | Scaffold5883 | 726                     | TT                              | CC                | 1946706084               |
| SNP_P3_181281_1107  | NW_004519809.1 | Scaffold5883 | 1107                    | GG                              | CC                | 1946706086               |
| SNP_P3_181282_1155  | NW_004519809.1 | Scaffold5883 | 1155                    | AA                              | CC                | 1946706087               |
| SNP_P3_181283_774   | NW_004519812.1 | Scaffold5889 | 774                     | AA                              | GG                | 1946706088               |
| SNP_P3_181284_814   | NW_004519812.1 | Scaffold5889 | 814                     | GG                              | AA                | 1946706089               |

| SNPs IDs            | Chromosome IDs | Chromosomes  | Physical positions (bp) | CDC Frontier (Reference genome) | (Pusa 256 & HPNB) | NCBI SNPdb Accession IDs |
|---------------------|----------------|--------------|-------------------------|---------------------------------|-------------------|--------------------------|
| SNP_P3_181285_819   | NW_004519812.1 | Scaffold5889 | 819                     | CC                              | TT                | 1946706090               |
| SNP_P3_181286_827   | NW_004519812.1 | Scaffold5889 | 827                     | AA                              | TT                | 1946706092               |
| SNP_P3_181287_20176 | NW_004519812.1 | Scaffold5889 | 20176                   | CC                              | AA                | 1946706094               |
| SNP_P3_181288_20417 | NW_004519812.1 | Scaffold5889 | 20417                   | CC                              | TT                | 1946706096               |
| SNP_P3_181289_20890 | NW_004519812.1 | Scaffold5889 | 20890                   | TT                              | CC                | 1946706098               |
| SNP_P3_181290_21023 | NW_004519812.1 | Scaffold5889 | 21023                   | TT                              | AA                | 1946706099               |
| SNP_P3_181291_21033 | NW_004519812.1 | Scaffold5889 | 21033                   | TT                              | GG                | 1946706101               |
| SNP_P3_181292_21270 | NW_004519812.1 | Scaffold5889 | 21270                   | TT                              | CC                | 1946706103               |
| SNP_P3_181293_869   | NW_004519813.1 | Scaffold5891 | 869                     | GG                              | TT                | 1946706105               |
| SNP_P3_181294_895   | NW_004519813.1 | Scaffold5891 | 895                     | GG                              | AA                | 1946706107               |
| SNP_P3_181296_4961  | NW_004519813.1 | Scaffold5891 | 4961                    | AA                              | TT                | 1946706109               |
| SNP_P3_181297_5069  | NW_004519813.1 | Scaffold5891 | 5069                    | CC                              | TT                | 1946706111               |
| SNP_P3_181298_5070  | NW_004519813.1 | Scaffold5891 | 5070                    | AA                              | GG                | 1946706114               |
| SNP_P3_181299_5116  | NW_004519813.1 | Scaffold5891 | 5116                    | AA                              | TT                | 1946706116               |
| SNP_P3_181300_5130  | NW_004519813.1 | Scaffold5891 | 5130                    | AA                              | CC                | 1946706118               |
| SNP_P3_181301_5131  | NW_004519813.1 | Scaffold5891 | 5131                    | TT                              | AA                | 1946706120               |
| SNP_P3_181302_5893  | NW_004519813.1 | Scaffold5891 | 5893                    | GG                              | TT                | 1946706122               |
| SNP_P3_181303_3355  | NW_004519815.1 | Scaffold5893 | 3355                    | TT                              | CC                | 1946706124               |
| SNP_P3_181304_11464 | NW_004519815.1 | Scaffold5893 | 11464                   | GG                              | TT                | 1946706126               |
| SNP_P3_181305_73    | NW_004519818.1 | Scaffold5898 | 73                      | GG                              | AA                | 1946706128               |
| SNP_P3_181306_126   | NW_004519820.1 | Scaffold5900 | 126                     | TT                              | CC                | 1946706130               |
| SNP_P3_181307_184   | NW_004519820.1 | Scaffold5900 | 184                     | AA                              | GG                | 1946706132               |
| SNP_P3_181308_291   | NW_004519820.1 | Scaffold5900 | 291                     | TT                              | CC                | 1946706134               |
| SNP_P3_181309_332   | NW_004519820.1 | Scaffold5900 | 332                     | AA                              | GG                | 1946706136               |
| SNP_P3_181310_353   | NW_004519820.1 | Scaffold5900 | 353                     | CC                              | TT                | 1946706138               |
| SNP_P3_181311_489   | NW_004519820.1 | Scaffold5900 | 489                     | TT                              | AA                | 1946706140               |
| SNP_P3_181312_516   | NW_004519820.1 | Scaffold5900 | 516                     | CC                              | AA                | 1946706142               |
| SNP_P3_181313_519   | NW_004519820.1 | Scaffold5900 | 519                     | GG                              | TT                | 1946706144               |
| SNP_P3_181314_526   | NW_004519820.1 | Scaffold5900 | 526                     | AA                              | GG                | 1946706146               |
| SNP_P3_181315_539   | NW_004519820.1 | Scaffold5900 | 539                     | AA                              | GG                | 1946706148               |
| SNP_P3_181316_547   | NW_004519820.1 | Scaffold5900 | 547                     | GG                              | CC                | 1946706150               |
| SNP_P3_181317_591   | NW_004519820.1 | Scaffold5900 | 591                     | AA                              | GG                | 1946706152               |
| SNP_P3_181318_593   | NW_004519820.1 | Scaffold5900 | 593                     | TT                              | CC                | 1946706154               |
| SNP_P3_181319_654   | NW_004519820.1 | Scaffold5900 | 654                     | TT                              | CC                | 1946706157               |
| SNP_P3_181320_661   | NW_004519820.1 | Scaffold5900 | 661                     | AA                              | GG                | 1946706159               |
| SNP_P3_181321_693   | NW_004519820.1 | Scaffold5900 | 693                     | AA                              | CC                | 1946706161               |
| SNP_P3_181322_4993  | NW_004519821.1 | Scaffold5901 | 4993                    | CC                              | TT                | 1946706163               |
| SNP_P3_181323_5003  | NW_004519821.1 | Scaffold5901 | 5003                    | GG                              | AA                | 1946706165               |
| SNP_P3_181324_5006  | NW_004519821.1 | Scaffold5901 | 5006                    | TT                              | CC                | 1946706167               |
| SNP_P3_181325_5103  | NW_004519821.1 | Scaffold5901 | 5103                    | GG                              | AA                | 1946706169               |
| SNP_P3_181327_5246  | NW_004519821.1 | Scaffold5901 | 5246                    | GG                              | TT                | 1946706171               |
| SNP_P3_181328_214   | NW_004519823.1 | Scaffold5904 | 214                     | TT                              | CC                | 1946706173               |

| SNPs IDs            | Chromosome IDs | Chromosomes  | Physical positions (bp) | CDC Frontier (Reference genome) | (Pusa 256 & HPNB) | NCBI SNPdb Accession IDs |
|---------------------|----------------|--------------|-------------------------|---------------------------------|-------------------|--------------------------|
| SNP_P3_181329_17254 | NW_004519823.1 | Scaffold5904 | 17254                   | TT                              | GG                | 1946706175               |
| SNP_P3_181330_17455 | NW_004519823.1 | Scaffold5904 | 17455                   | GG                              | AA                | 1946706177               |
| SNP_P3_181331_17495 | NW_004519823.1 | Scaffold5904 | 17495                   | AA                              | CC                | 1946706179               |
| SNP_P3_181332_17582 | NW_004519823.1 | Scaffold5904 | 17582                   | TT                              | CC                | 1946706181               |
| SNP_P3_181333_17679 | NW_004519823.1 | Scaffold5904 | 17679                   | TT                              | AA                | 1946706183               |
| SNP_P3_181334_17802 | NW_004519823.1 | Scaffold5904 | 17802                   | GG                              | TT                | 1946706185               |
| SNP_P3_181335_17820 | NW_004519823.1 | Scaffold5904 | 17820                   | TT                              | AA                | 1946706187               |
| SNP_P3_181336_21220 | NW_004519823.1 | Scaffold5904 | 21220                   | GG                              | AA                | 1946706189               |
| SNP_P3_181338_22469 | NW_004519823.1 | Scaffold5904 | 22469                   | AA                              | CC                | 1946706191               |
| SNP_P3_181339_22626 | NW_004519823.1 | Scaffold5904 | 22626                   | CC                              | TT                | 1946706193               |
| SNP_P3_181340_22683 | NW_004519823.1 | Scaffold5904 | 22683                   | TT                              | CC                | 1946706196               |
| SNP_P3_181341_22727 | NW_004519823.1 | Scaffold5904 | 22727                   | CC                              | TT                | 1946706198               |
| SNP_P3_181342_22829 | NW_004519823.1 | Scaffold5904 | 22829                   | GG                              | AA                | 1946706200               |
| SNP_P3_181343_22832 | NW_004519823.1 | Scaffold5904 | 22832                   | AA                              | TT                | 1946706202               |
| SNP_P3_181344_2156  | NW_004519826.1 | Scaffold5907 | 2156                    | AA                              | GG                | 1946706204               |
| SNP_P3_181345_1490  | NW_004519827.1 | Scaffold5909 | 1490                    | TT                              | AA                | 1946706206               |
| SNP_P3_181346_1492  | NW_004519827.1 | Scaffold5909 | 1492                    | GG                              | CC                | 1946706208               |
| SNP_P3_181347_1496  | NW_004519827.1 | Scaffold5909 | 1496                    | CC                              | GG                | 1946706210               |
| SNP_P3_181348_2503  | NW_004519827.1 | Scaffold5909 | 2503                    | GG                              | CC                | 1946706212               |
| SNP_P3_181349_451   | NW_004519828.1 | Scaffold5912 | 451                     | AA                              | TT                | 1946706214               |
| SNP_P3_181350_930   | NW_004519829.1 | Scaffold5913 | 930                     | AA                              | CC                | 1946706216               |
| SNP_P3_181352_1002  | NW_004519829.1 | Scaffold5913 | 1002                    | TT                              | CC                | 1946706218               |
| SNP_P3_181353_1053  | NW_004519829.1 | Scaffold5913 | 1053                    | GG                              | TT                | 1946706220               |
| SNP_P3_181354_1064  | NW_004519829.1 | Scaffold5913 | 1064                    | TT                              | CC                | 1946706223               |
| SNP_P3_181355_1070  | NW_004519829.1 | Scaffold5913 | 1070                    | TT                              | AA                | 1946706225               |
| SNP_P3_181356_1083  | NW_004519829.1 | Scaffold5913 | 1083                    | CC                              | TT                | 1946706227               |
| SNP_P3_181357_1098  | NW_004519829.1 | Scaffold5913 | 1098                    | GG                              | TT                | 1946706229               |
| SNP_P3_181358_1114  | NW_004519829.1 | Scaffold5913 | 1114                    | AA                              | TT                | 1946706231               |
| SNP_P3_181359_1223  | NW_004519830.1 | Scaffold5914 | 1223                    | AA                              | CC                | 1946706234               |
| SNP_P3_181360_830   | NW_004519832.1 | Scaffold5916 | 830                     | AA                              | TT                | 1946706237               |
| SNP_P3_181361_835   | NW_004519832.1 | Scaffold5916 | 835                     | GG                              | AA                | 1946706239               |
| SNP_P3_181363_894   | NW_004519832.1 | Scaffold5916 | 894                     | CC                              | GG                | 1946706241               |
| SNP_P3_181364_911   | NW_004519832.1 | Scaffold5916 | 911                     | AA                              | GG                | 1946706243               |
| SNP_P3_181365_918   | NW_004519832.1 | Scaffold5916 | 918                     | TT                              | CC                | 1946706245               |
| SNP_P3_181366_957   | NW_004519832.1 | Scaffold5916 | 957                     | TT                              | CC                | 1946706247               |
| SNP_P3_181367_962   | NW_004519832.1 | Scaffold5916 | 962                     | CC                              | AA                | 1946706249               |
| SNP_P3_181368_971   | NW_004519832.1 | Scaffold5916 | 971                     | CC                              | AA                | 1946706251               |
| SNP_P3_181369_987   | NW_004519832.1 | Scaffold5916 | 987                     | CC                              | GG                | 1946706253               |
| SNP_P3_181370_1080  | NW_004519832.1 | Scaffold5916 | 1080                    | TT                              | GG                | 1946706256               |
| SNP_P3_181372_1246  | NW_004519832.1 | Scaffold5916 | 1246                    | TT                              | AA                | 1946706258               |
| SNP_P3_181373_1331  | NW_004519832.1 | Scaffold5916 | 1331                    | CC                              | TT                | 1946706260               |
| SNP_P3_181374_1437  | NW_004519832.1 | Scaffold5916 | 1437                    | TT                              | CC                | 1946706262               |

| SNPs IDs           | Chromosome IDs | Chromosomes  | Physical positions (bp) | CDC Frontier (Reference genome) | (Pusa 256 & HPNB) | NCBI SNPdb Accession IDs |
|--------------------|----------------|--------------|-------------------------|---------------------------------|-------------------|--------------------------|
| SNP_P3_181375_731  | NW_004519833.1 | Scaffold5917 | 731                     | TT                              | CC                | 1946706264               |
| SNP_P3_181376_868  | NW_004519833.1 | Scaffold5917 | 868                     | GG                              | TT                | 1946706266               |
| SNP_P3_181377_63   | NW_004519834.1 | Scaffold5918 | 63                      | CC                              | TT                | 1946706268               |
| SNP_P3_181378_64   | NW_004519834.1 | Scaffold5918 | 64                      | CC                              | AA                | 1946706271               |
| SNP_P3_181380_116  | NW_004519834.1 | Scaffold5918 | 116                     | CC                              | TT                | 1946706273               |
| SNP_P3_181381_118  | NW_004519834.1 | Scaffold5918 | 118                     | AA                              | CC                | 1946706275               |
| SNP_P3_181382_132  | NW_004519834.1 | Scaffold5918 | 132                     | AA                              | GG                | 1946706277               |
| SNP_P3_181383_133  | NW_004519834.1 | Scaffold5918 | 133                     | AA                              | GG                | 1946706279               |
| SNP_P3_181384_217  | NW_004519834.1 | Scaffold5918 | 217                     | GG                              | AA                | 1946706281               |
| SNP_P3_181385_285  | NW_004519834.1 | Scaffold5918 | 285                     | AA                              | CC                | 1946706283               |
| SNP_P3_181386_310  | NW_004519834.1 | Scaffold5918 | 310                     | GG                              | AA                | 1946706285               |
| SNP_P3_181387_312  | NW_004519834.1 | Scaffold5918 | 312                     | GG                              | TT                | 1946706287               |
| SNP_P3_181388_522  | NW_004519834.1 | Scaffold5918 | 522                     | GG                              | AA                | 1946706289               |
| SNP_P3_181389_540  | NW_004519834.1 | Scaffold5918 | 540                     | GG                              | AA                | 1946706290               |
| SNP_P3_181390_591  | NW_004519834.1 | Scaffold5918 | 591                     | TT                              | CC                | 1946706291               |
| SNP_P3_181391_734  | NW_004519834.1 | Scaffold5918 | 734                     | GG                              | CC                | 1946706292               |
| SNP_P3_181392_812  | NW_004519834.1 | Scaffold5918 | 812                     | TT                              | GG                | 1946706293               |
| SNP_P3_181393_829  | NW_004519834.1 | Scaffold5918 | 829                     | GG                              | TT                | 1946706295               |
| SNP_P3_181394_845  | NW_004519834.1 | Scaffold5918 | 845                     | AA                              | GG                | 1946706297               |
| SNP_P3_181395_871  | NW_004519834.1 | Scaffold5918 | 871                     | GG                              | AA                | 1946706299               |
| SNP_P3_181396_896  | NW_004519834.1 | Scaffold5918 | 896                     | CC                              | TT                | 1946706301               |
| SNP_P3_181397_899  | NW_004519834.1 | Scaffold5918 | 899                     | CC                              | AA                | 1946706303               |
| SNP_P3_181398_912  | NW_004519834.1 | Scaffold5918 | 912                     | GG                              | AA                | 1946706306               |
| SNP_P3_181399_1066 | NW_004519834.1 | Scaffold5918 | 1066                    | TT                              | CC                | 1946706308               |
| SNP_P3_181400_1088 | NW_004519834.1 | Scaffold5918 | 1088                    | GG                              | AA                | 1946706310               |
| SNP_P3_181401_840  | NW_004519836.1 | Scaffold5920 | 840                     | CC                              | TT                | 1946706312               |
| SNP_P3_181403_6305 | NW_004519836.1 | Scaffold5920 | 6305                    | CC                              | AA                | 1946706314               |
| SNP_P3_181404_443  | NW_004519837.1 | Scaffold5921 | 443                     | CC                              | TT                | 1946706316               |
| SNP_P3_181405_687  | NW_004519837.1 | Scaffold5921 | 687                     | GG                              | CC                | 1946706318               |
| SNP_P3_181406_725  | NW_004519837.1 | Scaffold5921 | 725                     | TT                              | AA                | 1946706320               |
| SNP_P3_181407_729  | NW_004519837.1 | Scaffold5921 | 729                     | TT                              | GG                | 1946706322               |
| SNP_P3_181409_190  | NW_004519839.1 | Scaffold5923 | 190                     | AA                              | GG                | 1946706324               |
| SNP_P3_181410_389  | NW_004519839.1 | Scaffold5923 | 389                     | GG                              | AA                | 1946706326               |
| SNP_P3_181411_489  | NW_004519839.1 | Scaffold5923 | 489                     | GG                              | CC                | 1946706328               |
| SNP_P3_181412_1175 | NW_004519840.1 | Scaffold5925 | 1175                    | GG                              | AA                | 1946706330               |
| SNP_P3_181413_1199 | NW_004519840.1 | Scaffold5925 | 1199                    | TT                              | AA                | 1946706331               |
| SNP_P3_181414_1459 | NW_004519840.1 | Scaffold5925 | 1459                    | AA                              | GG                | 1946706333               |
| SNP_P3_181415_1531 | NW_004519840.1 | Scaffold5925 | 1531                    | GG                              | AA                | 1946706335               |
| SNP_P3_181416_1692 | NW_004519840.1 | Scaffold5925 | 1692                    | AA                              | TT                | 1946706337               |
| SNP_P3_181417_1915 | NW_004519840.1 | Scaffold5925 | 1915                    | GG                              | AA                | 1946706339               |
| SNP_P3_181418_536  | NW_004519843.1 | Scaffold5928 | 536                     | GG                              | AA                | 1946706341               |
| SNP_P3_181419_748  | NW_004519843.1 | Scaffold5928 | 748                     | CC                              | TT                | 1946706343               |

| SNPs IDs           | Chromosome IDs | Chromosomes  | Physical positions (bp) | CDC Frontier (Reference genome) | (Pusa 256 & HPNB) | NCBI SNPdb Accession IDs |
|--------------------|----------------|--------------|-------------------------|---------------------------------|-------------------|--------------------------|
| SNP_P3_181420_850  | NW_004519843.1 | Scaffold5928 | 850                     | AA                              | CC                | 1946706345               |
| SNP_P3_181421_1031 | NW_004519843.1 | Scaffold5928 | 1031                    | AA                              | GG                | 1946706347               |
| SNP_P3_181422_1050 | NW_004519843.1 | Scaffold5928 | 1050                    | GG                              | AA                | 1946706349               |
| SNP_P3_181423_1066 | NW_004519843.1 | Scaffold5928 | 1066                    | AA                              | TT                | 1946706351               |
| SNP_P3_181424_1074 | NW_004519843.1 | Scaffold5928 | 1074                    | GG                              | CC                | 1946706353               |
| SNP_P3_181425_1312 | NW_004519843.1 | Scaffold5928 | 1312                    | GG                              | AA                | 1946706355               |
| SNP_P3_181426_1358 | NW_004519843.1 | Scaffold5928 | 1358                    | CC                              | TT                | 1946706357               |
| SNP_P3_181427_1365 | NW_004519843.1 | Scaffold5928 | 1365                    | GG                              | AA                | 1946706359               |
| SNP_P3_181428_1372 | NW_004519843.1 | Scaffold5928 | 1372                    | GG                              | CC                | 1946706361               |
| SNP_P3_181429_1388 | NW_004519843.1 | Scaffold5928 | 1388                    | TT                              | CC                | 1946706364               |
| SNP_P3_181430_1411 | NW_004519843.1 | Scaffold5928 | 1411                    | TT                              | AA                | 1946706366               |
| SNP_P3_181431_1501 | NW_004519843.1 | Scaffold5928 | 1501                    | TT                              | CC                | 1946706368               |
| SNP_P3_181432_1810 | NW_004519843.1 | Scaffold5928 | 1810                    | TT                              | GG                | 1946706370               |
| SNP_P3_181433_1836 | NW_004519843.1 | Scaffold5928 | 1836                    | AA                              | GG                | 1946706373               |
| SNP_P3_181434_1909 | NW_004519843.1 | Scaffold5928 | 1909                    | TT                              | AA                | 1946706375               |
| SNP_P3_181435_2022 | NW_004519843.1 | Scaffold5928 | 2022                    | AA                              | GG                | 1946706377               |
| SNP_P3_181436_2409 | NW_004519843.1 | Scaffold5928 | 2409                    | AA                              | GG                | 1946706379               |
| SNP_P3_181437_2422 | NW_004519843.1 | Scaffold5928 | 2422                    | CC                              | AA                | 1946706381               |
| SNP_P3_181438_2428 | NW_004519843.1 | Scaffold5928 | 2428                    | AA                              | CC                | 1946706383               |
| SNP_P3_181439_2437 | NW_004519843.1 | Scaffold5928 | 2437                    | GG                              | AA                | 1946706385               |
| SNP_P3_181440_2489 | NW_004519843.1 | Scaffold5928 | 2489                    | TT                              | CC                | 1946706387               |
| SNP_P3_181441_2563 | NW_004519843.1 | Scaffold5928 | 2563                    | AA                              | GG                | 1946706389               |
| SNP_P3_181442_2697 | NW_004519843.1 | Scaffold5928 | 2697                    | TT                              | GG                | 1946706391               |
| SNP_P3_181443_2732 | NW_004519843.1 | Scaffold5928 | 2732                    | TT                              | CC                | 1946706393               |
| SNP_P3_181444_2803 | NW_004519843.1 | Scaffold5928 | 2803                    | GG                              | AA                | 1946706395               |
| SNP_P3_181445_2901 | NW_004519843.1 | Scaffold5928 | 2901                    | CC                              | TT                | 1946706397               |
| SNP_P3_181446_2939 | NW_004519843.1 | Scaffold5928 | 2939                    | CC                              | TT                | 1946706399               |
| SNP_P3_181447_2980 | NW_004519843.1 | Scaffold5928 | 2980                    | TT                              | CC                | 1946706401               |
| SNP_P3_181448_3694 | NW_004519843.1 | Scaffold5928 | 3694                    | TT                              | CC                | 1946706403               |
| SNP_P3_181449_3724 | NW_004519843.1 | Scaffold5928 | 3724                    | GG                              | AA                | 1946706405               |
| SNP_P3_181450_3758 | NW_004519843.1 | Scaffold5928 | 3758                    | CC                              | TT                | 1946706407               |
| SNP_P3_181451_3796 | NW_004519843.1 | Scaffold5928 | 3796                    | TT                              | GG                | 1946706409               |
| SNP_P3_181452_3823 | NW_004519843.1 | Scaffold5928 | 3823                    | GG                              | AA                | 1946706411               |
| SNP_P3_181453_3851 | NW_004519843.1 | Scaffold5928 | 3851                    | GG                              | AA                | 1946706413               |
| SNP_P3_181455_4118 | NW_004519843.1 | Scaffold5928 | 4118                    | CC                              | AA                | 1946706416               |
| SNP_P3_181456_4135 | NW_004519843.1 | Scaffold5928 | 4135                    | CC                              | TT                | 1946706418               |
| SNP_P3_181457_4374 | NW_004519843.1 | Scaffold5928 | 4374                    | AA                              | TT                | 1946706420               |
| SNP_P3_181458_8124 | NW_004519843.1 | Scaffold5928 | 8124                    | AA                              | TT                | 1946706422               |
| SNP_P3_181459_8125 | NW_004519843.1 | Scaffold5928 | 8125                    | TT                              | CC                | 1946706424               |
| SNP_P3_181460_8155 | NW_004519843.1 | Scaffold5928 | 8155                    | CC                              | AA                | 1946706426               |
| SNP_P3_181461_8181 | NW_004519843.1 | Scaffold5928 | 8181                    | GG                              | TT                | 1946706428               |
| SNP_P3_181462_8185 | NW_004519843.1 | Scaffold5928 | 8185                    | CC                              | TT                | 1946706430               |



| SNPs IDs            | Chromosome IDs | Chromosomes  | Physical positions (bp) | CDC Frontier (Reference genome) | (Pusa 256 & HPNB) | NCBI SNPdb Accession IDs |
|---------------------|----------------|--------------|-------------------------|---------------------------------|-------------------|--------------------------|
| SNP_P3_181463_8220  | NW_004519843.1 | Scaffold5928 | 8220                    | TT                              | GG                | 1946706432               |
| SNP_P3_181464_8268  | NW_004519843.1 | Scaffold5928 | 8268                    | AA                              | TT                | 1946706434               |
| SNP_P3_181465_8276  | NW_004519843.1 | Scaffold5928 | 8276                    | CC                              | TT                | 1946706436               |
| SNP_P3_181466_8280  | NW_004519843.1 | Scaffold5928 | 8280                    | AA                              | CC                | 1946706439               |
| SNP_P3_181467_8285  | NW_004519843.1 | Scaffold5928 | 8285                    | TT                              | CC                | 1946706441               |
| SNP_P3_181468_8291  | NW_004519843.1 | Scaffold5928 | 8291                    | TT                              | AA                | 1946706443               |
| SNP_P3_181469_8300  | NW_004519843.1 | Scaffold5928 | 8300                    | AA                              | GG                | 1946706445               |
| SNP_P3_181470_8355  | NW_004519843.1 | Scaffold5928 | 8355                    | CC                              | GG                | 1946706447               |
| SNP_P3_181471_8382  | NW_004519843.1 | Scaffold5928 | 8382                    | GG                              | AA                | 1946706449               |
| SNP_P3_181472_8402  | NW_004519843.1 | Scaffold5928 | 8402                    | TT                              | GG                | 1946706451               |
| SNP_P3_181474_8662  | NW_004519843.1 | Scaffold5928 | 8662                    | TT                              | GG                | 1946706453               |
| SNP_P3_181475_8676  | NW_004519843.1 | Scaffold5928 | 8676                    | AA                              | CC                | 1946706456               |
| SNP_P3_181476_8784  | NW_004519843.1 | Scaffold5928 | 8784                    | TT                              | AA                | 1946706458               |
| SNP_P3_181477_8857  | NW_004519843.1 | Scaffold5928 | 8857                    | AA                              | TT                | 1946706460               |
| SNP_P3_181478_9003  | NW_004519843.1 | Scaffold5928 | 9003                    | TT                              | GG                | 1946706462               |
| SNP_P3_181479_9259  | NW_004519843.1 | Scaffold5928 | 9259                    | AA                              | TT                | 1946706464               |
| SNP_P3_181480_9519  | NW_004519843.1 | Scaffold5928 | 9519                    | TT                              | CC                | 1946706466               |
| SNP_P3_181481_1674  | NW_004519844.1 | Scaffold5929 | 1674                    | AA                              | CC                | 1946706468               |
| SNP_P3_181482_20734 | NW_004519846.1 | Scaffold5932 | 20734                   | AA                              | GG                | 1946706471               |
| SNP_P3_181484_22368 | NW_004519848.1 | Scaffold5934 | 22368                   | GG                              | AA                | 1946706473               |
| SNP_P3_181485_28938 | NW_004519848.1 | Scaffold5934 | 28938                   | CC                              | TT                | 1946706475               |
| SNP_P3_181486_28971 | NW_004519848.1 | Scaffold5934 | 28971                   | TT                              | CC                | 1946706477               |
| SNP_P3_181487_28983 | NW_004519848.1 | Scaffold5934 | 28983                   | AA                              | GG                | 1946706479               |
| SNP_P3_181488_28998 | NW_004519848.1 | Scaffold5934 | 28998                   | AA                              | GG                | 1946706481               |
| SNP_P3_181489_782   | NW_004519851.1 | Scaffold5937 | 782                     | AA                              | CC                | 1946706483               |
| SNP_P3_181490_14    | NW_004519852.1 | Scaffold5938 | 14                      | GG                              | AA                | 1946706485               |
| SNP_P3_181491_32    | NW_004519852.1 | Scaffold5938 | 32                      | GG                              | AA                | 1946706487               |
| SNP_P3_181492_64    | NW_004519852.1 | Scaffold5938 | 64                      | TT                              | GG                | 1946706489               |
| SNP_P3_181493_105   | NW_004519852.1 | Scaffold5938 | 105                     | CC                              | TT                | 1946706491               |
| SNP_P3_181494_415   | NW_004519853.1 | Scaffold5939 | 415                     | AA                              | GG                | 1946706493               |
| SNP_P3_181495_5959  | NW_004519854.1 | Scaffold5941 | 5959                    | CC                              | AA                | 1946706495               |
| SNP_P3_181496_5997  | NW_004519854.1 | Scaffold5941 | 5997                    | AA                              | TT                | 1946706497               |
| SNP_P3_181497_449   | NW_004519856.1 | Scaffold5945 | 449                     | CC                              | AA                | 1946706499               |
| SNP_P3_181498_465   | NW_004519856.1 | Scaffold5945 | 465                     | GG                              | AA                | 1946706501               |
| SNP_P3_181499_486   | NW_004519856.1 | Scaffold5945 | 486                     | TT                              | AA                | 1946706503               |
| SNP_P3_181500_491   | NW_004519856.1 | Scaffold5945 | 491                     | GG                              | AA                | 1946706505               |
| SNP_P3_181501_595   | NW_004519856.1 | Scaffold5945 | 595                     | AA                              | GG                | 1946706507               |
| SNP_P3_181502_1043  | NW_004519856.1 | Scaffold5945 | 1043                    | CC                              | TT                | 1946706510               |
| SNP_P3_181503_1048  | NW_004519856.1 | Scaffold5945 | 1048                    | TT                              | CC                | 1946706512               |
| SNP_P3_181504_1054  | NW_004519856.1 | Scaffold5945 | 1054                    | CC                              | TT                | 1946706514               |
| SNP_P3_181505_1055  | NW_004519856.1 | Scaffold5945 | 1055                    | GG                              | AA                | 1946706516               |
| SNP_P3_181506_1103  | NW_004519856.1 | Scaffold5945 | 1103                    | TT                              | AA                | 1946706518               |

| SNPs IDs           | Chromosome IDs | Chromosomes  | Physical positions (bp) | CDC Frontier (Reference genome) | (Pusa 256 & HPNB) | NCBI SNPdb Accession IDs |
|--------------------|----------------|--------------|-------------------------|---------------------------------|-------------------|--------------------------|
| SNP_P3_181507_1149 | NW_004519856.1 | Scaffold5945 | 1149                    | TT                              | GG                | 1946706520               |
| SNP_P3_181508_1181 | NW_004519856.1 | Scaffold5945 | 1181                    | CC                              | AA                | 1946706522               |
| SNP_P3_181509_1259 | NW_004519856.1 | Scaffold5945 | 1259                    | TT                              | CC                | 1946706525               |
| SNP_P3_181510_1310 | NW_004519856.1 | Scaffold5945 | 1310                    | TT                              | CC                | 1946706527               |
| SNP_P3_181511_793  | NW_004519857.1 | Scaffold5946 | 793                     | AA                              | TT                | 1946706529               |
| SNP_P3_181512_1564 | NW_004519859.1 | Scaffold5952 | 1564                    | AA                              | TT                | 1946706532               |
| SNP_P3_181513_1565 | NW_004519859.1 | Scaffold5952 | 1565                    | AA                              | CC                | 1946706534               |
| SNP_P3_181514_2066 | NW_004519859.1 | Scaffold5952 | 2066                    | AA                              | TT                | 1946706536               |
| SNP_P3_181515_2119 | NW_004519859.1 | Scaffold5952 | 2119                    | TT                              | GG                | 1946706538               |
| SNP_P3_181516_2126 | NW_004519859.1 | Scaffold5952 | 2126                    | AA                              | TT                | 1946706540               |
| SNP_P3_181517_670  | NW_004519861.1 | Scaffold5954 | 670                     | CC                              | TT                | 1946706542               |
| SNP_P3_181518_684  | NW_004519861.1 | Scaffold5954 | 684                     | CC                              | AA                | 1946706544               |
| SNP_P3_181519_704  | NW_004519861.1 | Scaffold5954 | 704                     | AA                              | TT                | 1946706546               |
| SNP_P3_181521_745  | NW_004519861.1 | Scaffold5954 | 745                     | AA                              | GG                | 1946706548               |
| SNP_P3_181522_840  | NW_004519861.1 | Scaffold5954 | 840                     | AA                              | TT                | 1946706550               |
| SNP_P3_181523_1067 | NW_004519861.1 | Scaffold5954 | 1067                    | GG                              | AA                | 1946706552               |
| SNP_P3_181524_1097 | NW_004519861.1 | Scaffold5954 | 1097                    | AA                              | TT                | 1946706554               |
| SNP_P3_181525_1213 | NW_004519861.1 | Scaffold5954 | 1213                    | TT                              | AA                | 1946706556               |
| SNP_P3_181526_1318 | NW_004519861.1 | Scaffold5954 | 1318                    | CC                              | TT                | 1946706558               |
| SNP_P3_181527_1406 | NW_004519861.1 | Scaffold5954 | 1406                    | GG                              | AA                | 1946706560               |
| SNP_P3_181529_1448 | NW_004519861.1 | Scaffold5954 | 1448                    | AA                              | TT                | 1946706562               |
| SNP_P3_181531_762  | NW_004519862.1 | Scaffold5955 | 762                     | AA                              | GG                | 1946706564               |
| SNP_P3_181532_842  | NW_004519862.1 | Scaffold5955 | 842                     | AA                              | GG                | 1946706566               |
| SNP_P3_181533_902  | NW_004519862.1 | Scaffold5955 | 902                     | CC                              | AA                | 1946706568               |
| SNP_P3_181534_908  | NW_004519862.1 | Scaffold5955 | 908                     | AA                              | GG                | 1946706570               |
| SNP_P3_181535_1445 | NW_004519862.1 | Scaffold5955 | 1445                    | TT                              | GG                | 1946706572               |
| SNP_P3_181536_1475 | NW_004519862.1 | Scaffold5955 | 1475                    | TT                              | GG                | 1946706574               |
| SNP_P3_181537_1492 | NW_004519862.1 | Scaffold5955 | 1492                    | AA                              | GG                | 1946706599               |
| SNP_P3_181538_1503 | NW_004519862.1 | Scaffold5955 | 1503                    | TT                              | CC                | 1946706601               |
| SNP_P3_181539_1508 | NW_004519862.1 | Scaffold5955 | 1508                    | AA                              | GG                | 1946706603               |
| SNP_P3_181540_1509 | NW_004519862.1 | Scaffold5955 | 1509                    | TT                              | CC                | 1946706605               |
| SNP_P3_181541_1543 | NW_004519862.1 | Scaffold5955 | 1543                    | AA                              | CC                | 1946706607               |
| SNP_P3_181542_1585 | NW_004519862.1 | Scaffold5955 | 1585                    | TT                              | CC                | 1946706609               |
| SNP_P3_181543_1630 | NW_004519862.1 | Scaffold5955 | 1630                    | TT                              | CC                | 1946706612               |
| SNP_P3_181544_1642 | NW_004519862.1 | Scaffold5955 | 1642                    | AA                              | GG                | 1946706614               |
| SNP_P3_181545_1645 | NW_004519862.1 | Scaffold5955 | 1645                    | AA                              | CC                | 1946706617               |
| SNP_P3_181546_1655 | NW_004519862.1 | Scaffold5955 | 1655                    | AA                              | GG                | 1946706619               |
| SNP_P3_181547_1427 | NW_004519864.1 | Scaffold5957 | 1427                    | TT                              | GG                | 1946706621               |
| SNP_P3_181548_64   | NW_004519866.1 | Scaffold5959 | 64                      | CC                              | AA                | 1946706623               |
| SNP_P3_181549_732  | NW_004519867.1 | Scaffold5960 | 732                     | CC                              | GG                | 1946706625               |
| SNP_P3_181550_749  | NW_004519867.1 | Scaffold5960 | 749                     | TT                              | CC                | 1946706627               |
| SNP_P3_181551_819  | NW_004519867.1 | Scaffold5960 | 819                     | TT                              | AA                | 1946706629               |

| SNPs IDs            | Chromosome IDs | Chromosomes  | Physical positions (bp) | CDC Frontier (Reference genome) | (Pusa 256 & HPNB) | NCBI SNPdb Accession IDs |
|---------------------|----------------|--------------|-------------------------|---------------------------------|-------------------|--------------------------|
| SNP_P3_181552_878   | NW_004519867.1 | Scaffold5960 | 878                     | TT                              | CC                | 1946706631               |
| SNP_P3_181553_904   | NW_004519868.1 | Scaffold5963 | 904                     | AA                              | TT                | 1946706633               |
| SNP_P3_181554_6301  | NW_004519873.1 | Scaffold5974 | 6301                    | TT                              | GG                | 1946706635               |
| SNP_P3_181555_6318  | NW_004519873.1 | Scaffold5974 | 6318                    | AA                              | TT                | 1946706637               |
| SNP_P3_181556_6413  | NW_004519873.1 | Scaffold5974 | 6413                    | TT                              | CC                | 1946706639               |
| SNP_P3_181557_6513  | NW_004519873.1 | Scaffold5974 | 6513                    | TT                              | GG                | 1946706641               |
| SNP_P3_181558_6774  | NW_004519873.1 | Scaffold5974 | 6774                    | CC                              | TT                | 1946706643               |
| SNP_P3_181559_6852  | NW_004519873.1 | Scaffold5974 | 6852                    | AA                              | GG                | 1946706645               |
| SNP_P3_181560_64    | NW_004519874.1 | Scaffold5975 | 64                      | GG                              | CC                | 1946706647               |
| SNP_P3_181561_74    | NW_004519874.1 | Scaffold5975 | 74                      | TT                              | AA                | 1946706649               |
| SNP_P3_181562_747   | NW_004519876.1 | Scaffold5977 | 747                     | GG                              | CC                | 1946706651               |
| SNP_P3_181563_990   | NW_004519876.1 | Scaffold5977 | 990                     | TT                              | GG                | 1946706653               |
| SNP_P3_181564_1819  | NW_004519876.1 | Scaffold5977 | 1819                    | GG                              | TT                | 1946706655               |
| SNP_P3_181565_1893  | NW_004519876.1 | Scaffold5977 | 1893                    | AA                              | CC                | 1946706657               |
| SNP_P3_181566_3923  | NW_004519876.1 | Scaffold5977 | 3923                    | GG                              | TT                | 1946706659               |
| SNP_P3_181567_3936  | NW_004519876.1 | Scaffold5977 | 3936                    | CC                              | TT                | 1946706661               |
| SNP_P3_181568_4521  | NW_004519876.1 | Scaffold5977 | 4521                    | AA                              | GG                | 1946706663               |
| SNP_P3_181569_4552  | NW_004519876.1 | Scaffold5977 | 4552                    | CC                              | TT                | 1946706665               |
| SNP_P3_181570_4560  | NW_004519876.1 | Scaffold5977 | 4560                    | AA                              | GG                | 1946706667               |
| SNP_P3_181571_4663  | NW_004519876.1 | Scaffold5977 | 4663                    | GG                              | AA                | 1946706669               |
| SNP_P3_181572_4703  | NW_004519876.1 | Scaffold5977 | 4703                    | GG                              | TT                | 1946706671               |
| SNP_P3_181573_4712  | NW_004519876.1 | Scaffold5977 | 4712                    | GG                              | AA                | 1946706673               |
| SNP_P3_181574_4717  | NW_004519876.1 | Scaffold5977 | 4717                    | CC                              | AA                | 1946706675               |
| SNP_P3_181575_4743  | NW_004519876.1 | Scaffold5977 | 4743                    | GG                              | TT                | 1946706678               |
| SNP_P3_181576_4786  | NW_004519876.1 | Scaffold5977 | 4786                    | GG                              | AA                | 1946706680               |
| SNP_P3_181577_4791  | NW_004519876.1 | Scaffold5977 | 4791                    | AA                              | TT                | 1946706682               |
| SNP_P3_181578_4802  | NW_004519876.1 | Scaffold5977 | 4802                    | TT                              | CC                | 1946706684               |
| SNP_P3_181579_4825  | NW_004519876.1 | Scaffold5977 | 4825                    | GG                              | AA                | 1946706686               |
| SNP_P3_181580_4887  | NW_004519876.1 | Scaffold5977 | 4887                    | AA                              | GG                | 1946706689               |
| SNP_P3_181581_14513 | NW_004519876.1 | Scaffold5977 | 14513                   | AA                              | CC                | 1946706690               |
| SNP_P3_181582_14528 | NW_004519876.1 | Scaffold5977 | 14528                   | TT                              | AA                | 1946706692               |
| SNP_P3_181583_14562 | NW_004519876.1 | Scaffold5977 | 14562                   | AA                              | GG                | 1946706694               |
| SNP_P3_181584_14565 | NW_004519876.1 | Scaffold5977 | 14565                   | AA                              | CC                | 1946706696               |
| SNP_P3_181585_14667 | NW_004519876.1 | Scaffold5977 | 14667                   | CC                              | TT                | 1946706698               |
| SNP_P3_181586_364   | NW_004519877.1 | Scaffold5979 | 364                     | CC                              | AA                | 1946706700               |
| SNP_P3_181587_521   | NW_004519877.1 | Scaffold5979 | 521                     | GG                              | CC                | 1946706702               |
| SNP_P3_181588_569   | NW_004519877.1 | Scaffold5979 | 569                     | TT                              | CC                | 1946706704               |
| SNP_P3_181589_604   | NW_004519877.1 | Scaffold5979 | 604                     | AA                              | GG                | 1946706706               |
| SNP_P3_181590_618   | NW_004519877.1 | Scaffold5979 | 618                     | TT                              | CC                | 1946706708               |
| SNP_P3_181591_622   | NW_004519877.1 | Scaffold5979 | 622                     | TT                              | GG                | 1946706710               |
| SNP_P3_181592_1047  | NW_004519882.1 | Scaffold5988 | 1047                    | GG                              | AA                | 1946706712               |
| SNP_P3_181593_74    | NW_004519884.1 | Scaffold5992 | 74                      | CC                              | TT                | 1946706714               |

| SNPs IDs            | Chromosome IDs | Chromosomes  | Physical positions (bp) | CDC Frontier (Reference genome) | (Pusa 256 & HPNB) | NCBI SNPdb Accession IDs |
|---------------------|----------------|--------------|-------------------------|---------------------------------|-------------------|--------------------------|
| SNP_P3_181594_370   | NW_004519884.1 | Scaffold5992 | 370                     | GG                              | TT                | 1946706716               |
| SNP_P3_181595_381   | NW_004519884.1 | Scaffold5992 | 381                     | GG                              | AA                | 1946706718               |
| SNP_P3_181596_412   | NW_004519884.1 | Scaffold5992 | 412                     | GG                              | AA                | 1946706720               |
| SNP_P3_181597_534   | NW_004519884.1 | Scaffold5992 | 534                     | TT                              | GG                | 1946706722               |
| SNP_P3_181598_556   | NW_004519884.1 | Scaffold5992 | 556                     | GG                              | AA                | 1946706724               |
| SNP_P3_181599_1516  | NW_004519884.1 | Scaffold5992 | 1516                    | GG                              | AA                | 1946706726               |
| SNP_P3_181601_1556  | NW_004519884.1 | Scaffold5992 | 1556                    | CC                              | GG                | 1946706728               |
| SNP_P3_181602_1674  | NW_004519884.1 | Scaffold5992 | 1674                    | AA                              | CC                | 1946706730               |
| SNP_P3_181603_646   | NW_004519885.1 | Scaffold5993 | 646                     | TT                              | GG                | 1946706732               |
| SNP_P3_181604_952   | NW_004519885.1 | Scaffold5993 | 952                     | TT                              | AA                | 1946706734               |
| SNP_P3_181605_17863 | NW_004519885.1 | Scaffold5993 | 17863                   | GG                              | AA                | 1946706736               |
| SNP_P3_181606_17898 | NW_004519885.1 | Scaffold5993 | 17898                   | TT                              | AA                | 1946706738               |
| SNP_P3_181607_17912 | NW_004519885.1 | Scaffold5993 | 17912                   | GG                              | TT                | 1946706740               |
| SNP_P3_181608_18022 | NW_004519885.1 | Scaffold5993 | 18022                   | TT                              | CC                | 1946706743               |
| SNP_P3_181609_18092 | NW_004519885.1 | Scaffold5993 | 18092                   | AA                              | GG                | 1946706745               |
| SNP_P3_181610_18120 | NW_004519885.1 | Scaffold5993 | 18120                   | AA                              | TT                | 1946706747               |
| SNP_P3_181611_18167 | NW_004519885.1 | Scaffold5993 | 18167                   | AA                              | TT                | 1946706749               |
| SNP_P3_181612_18198 | NW_004519885.1 | Scaffold5993 | 18198                   | GG                              | AA                | 1946706751               |
| SNP_P3_181613_18286 | NW_004519885.1 | Scaffold5993 | 18286                   | AA                              | TT                | 1946706753               |
| SNP_P3_181614_18320 | NW_004519885.1 | Scaffold5993 | 18320                   | CC                              | TT                | 1946706755               |
| SNP_P3_181615_18534 | NW_004519885.1 | Scaffold5993 | 18534                   | CC                              | TT                | 1946706757               |
| SNP_P3_181616_18546 | NW_004519885.1 | Scaffold5993 | 18546                   | TT                              | CC                | 1946706760               |
| SNP_P3_181619_18720 | NW_004519885.1 | Scaffold5993 | 18720                   | TT                              | GG                | 1946706762               |
| SNP_P3_181620_18759 | NW_004519885.1 | Scaffold5993 | 18759                   | TT                              | AA                | 1946706764               |
| SNP_P3_181621_18830 | NW_004519885.1 | Scaffold5993 | 18830                   | AA                              | CC                | 1946706766               |
| SNP_P3_181622_4286  | NW_004519886.1 | Scaffold5994 | 4286                    | CC                              | AA                | 1946706769               |
| SNP_P3_181623_4448  | NW_004519886.1 | Scaffold5994 | 4448                    | GG                              | AA                | 1946706771               |
| SNP_P3_181624_4644  | NW_004519886.1 | Scaffold5994 | 4644                    | TT                              | GG                | 1946706774               |
| SNP_P3_181625_4876  | NW_004519886.1 | Scaffold5994 | 4876                    | GG                              | AA                | 1946706776               |
| SNP_P3_181626_5032  | NW_004519886.1 | Scaffold5994 | 5032                    | CC                              | AA                | 1946706778               |
| SNP_P3_181627_5033  | NW_004519886.1 | Scaffold5994 | 5033                    | AA                              | GG                | 1946706780               |
| SNP_P3_181628_745   | NW_004519889.1 | Scaffold5997 | 745                     | CC                              | AA                | 1946706782               |
| SNP_P3_181629_1061  | NW_004519889.1 | Scaffold5997 | 1061                    | GG                              | TT                | 1946706784               |
| SNP_P3_181630_1118  | NW_004519889.1 | Scaffold5997 | 1118                    | GG                              | AA                | 1946706786               |
| SNP_P3_181631_2146  | NW_004519889.1 | Scaffold5997 | 2146                    | CC                              | TT                | 1946706789               |
| SNP_P3_181632_2196  | NW_004519889.1 | Scaffold5997 | 2196                    | TT                              | CC                | 1946706791               |
| SNP_P3_181633_2215  | NW_004519889.1 | Scaffold5997 | 2215                    | AA                              | TT                | 1946706793               |
| SNP_P3_181634_2055  | NW_004519890.1 | Scaffold5998 | 2055                    | AA                              | CC                | 1946706795               |
| SNP_P3_181635_810   | NW_004519891.1 | Scaffold5999 | 810                     | GG                              | TT                | 1946706797               |
| SNP_P3_181636_821   | NW_004519891.1 | Scaffold5999 | 821                     | AA                              | TT                | 1946706799               |
| SNP_P3_181637_826   | NW_004519891.1 | Scaffold5999 | 826                     | TT                              | AA                | 1946706801               |
| SNP_P3_181638_855   | NW_004519891.1 | Scaffold5999 | 855                     | TT                              | GG                | 1946706804               |

| SNPs IDs            | Chromosome IDs | Chromosomes  | Physical positions (bp) | CDC Frontier (Reference genome) | (Pusa 256 & HPNB) | NCBI SNPdb Accession IDs |
|---------------------|----------------|--------------|-------------------------|---------------------------------|-------------------|--------------------------|
| SNP_P3_181639_881   | NW_004519891.1 | Scaffold5999 | 881                     | TT                              | CC                | 1946706807               |
| SNP_P3_181640_898   | NW_004519891.1 | Scaffold5999 | 898                     | AA                              | CC                | 1946706809               |
| SNP_P3_181641_902   | NW_004519891.1 | Scaffold5999 | 902                     | AA                              | TT                | 1946706811               |
| SNP_P3_181642_1137  | NW_004519891.1 | Scaffold5999 | 1137                    | AA                              | CC                | 1946706813               |
| SNP_P3_181643_1160  | NW_004519891.1 | Scaffold5999 | 1160                    | GG                              | TT                | 1946706815               |
| SNP_P3_181644_1181  | NW_004519891.1 | Scaffold5999 | 1181                    | TT                              | AA                | 1946706817               |
| SNP_P3_181645_1256  | NW_004519891.1 | Scaffold5999 | 1256                    | GG                              | AA                | 1946706819               |
| SNP_P3_181646_1271  | NW_004519891.1 | Scaffold5999 | 1271                    | TT                              | CC                | 1946706821               |
| SNP_P3_181647_1289  | NW_004519891.1 | Scaffold5999 | 1289                    | CC                              | AA                | 1946706823               |
| SNP_P3_181648_559   | NW_004519894.1 | Scaffold6003 | 559                     | AA                              | TT                | 1946706825               |
| SNP_P3_181650_2690  | NW_004519895.1 | Scaffold6005 | 2690                    | AA                              | TT                | 1946706827               |
| SNP_P3_181651_831   | NW_004519901.1 | Scaffold6012 | 831                     | TT                              | CC                | 1946706829               |
| SNP_P3_181652_870   | NW_004519901.1 | Scaffold6012 | 870                     | GG                              | AA                | 1946706831               |
| SNP_P3_181653_5918  | NW_004519901.1 | Scaffold6012 | 5918                    | GG                              | CC                | 1946706833               |
| SNP_P3_181654_6035  | NW_004519901.1 | Scaffold6012 | 6035                    | GG                              | AA                | 1946706835               |
| SNP_P3_181655_6122  | NW_004519901.1 | Scaffold6012 | 6122                    | GG                              | AA                | 1946706837               |
| SNP_P3_181656_6251  | NW_004519901.1 | Scaffold6012 | 6251                    | CC                              | TT                | 1946706839               |
| SNP_P3_181657_6329  | NW_004519901.1 | Scaffold6012 | 6329                    | CC                              | TT                | 1946706841               |
| SNP_P3_181658_10765 | NW_004519901.1 | Scaffold6012 | 10765                   | TT                              | CC                | 1946706843               |
| SNP_P3_181659_13985 | NW_004519901.1 | Scaffold6012 | 13985                   | TT                              | CC                | 1946706846               |
| SNP_P3_181660_18092 | NW_004519901.1 | Scaffold6012 | 18092                   | AA                              | TT                | 1946706848               |
| SNP_P3_181661_18552 | NW_004519901.1 | Scaffold6012 | 18552                   | TT                              | CC                | 1946706850               |
| SNP_P3_181662_22115 | NW_004519901.1 | Scaffold6012 | 22115                   | TT                              | AA                | 1946706853               |
| SNP_P3_181663_22309 | NW_004519901.1 | Scaffold6012 | 22309                   | CC                              | TT                | 1946706855               |
| SNP_P3_181664_22333 | NW_004519901.1 | Scaffold6012 | 22333                   | TT                              | CC                | 1946706857               |
| SNP_P3_181665_22430 | NW_004519901.1 | Scaffold6012 | 22430                   | TT                              | GG                | 1946706859               |
| SNP_P3_181666_22463 | NW_004519901.1 | Scaffold6012 | 22463                   | TT                              | AA                | 1946706861               |
| SNP_P3_181667_306   | NW_004519902.1 | Scaffold6014 | 306                     | CC                              | TT                | 1946706863               |
| SNP_P3_181668_1566  | NW_004519905.1 | Scaffold6017 | 1566                    | TT                              | GG                | 1946706865               |
| SNP_P3_181669_47    | NW_004519907.1 | Scaffold6020 | 47                      | TT                              | AA                | 1946706868               |
| SNP_P3_181670_64    | NW_004519907.1 | Scaffold6020 | 64                      | TT                              | CC                | 1946706870               |
| SNP_P3_181671_77    | NW_004519907.1 | Scaffold6020 | 77                      | TT                              | GG                | 1946706872               |
| SNP_P3_181672_138   | NW_004519907.1 | Scaffold6020 | 138                     | TT                              | CC                | 1946706874               |
| SNP_P3_181673_457   | NW_004519907.1 | Scaffold6020 | 457                     | CC                              | GG                | 1946706876               |
| SNP_P3_181674_461   | NW_004519907.1 | Scaffold6020 | 461                     | TT                              | AA                | 1946706878               |
| SNP_P3_181675_468   | NW_004519907.1 | Scaffold6020 | 468                     | TT                              | AA                | 1946706881               |
| SNP_P3_181677_1420  | NW_004519907.1 | Scaffold6020 | 1420                    | TT                              | GG                | 1946706883               |
| SNP_P3_181678_1444  | NW_004519907.1 | Scaffold6020 | 1444                    | TT                              | CC                | 1946706885               |
| SNP_P3_181679_18860 | NW_004519909.1 | Scaffold6022 | 18860                   | GG                              | TT                | 1946706888               |
| SNP_P3_181680_19902 | NW_004519909.1 | Scaffold6022 | 19902                   | TT                              | CC                | 1946706890               |
| SNP_P3_181681_19930 | NW_004519909.1 | Scaffold6022 | 19930                   | GG                              | AA                | 1946706892               |
| SNP_P3_181682_19940 | NW_004519909.1 | Scaffold6022 | 19940                   | TT                              | CC                | 1946706894               |

| SNPs IDs            | Chromosome IDs | Chromosomes  | Physical positions (bp) | CDC Frontier (Reference genome) | (Pusa 256 & HPNB) | NCBI SNPdb Accession IDs |
|---------------------|----------------|--------------|-------------------------|---------------------------------|-------------------|--------------------------|
| SNP_P3_181683_19955 | NW_004519909.1 | Scaffold6022 | 19955                   | TT                              | GG                | 1946706896               |
| SNP_P3_181684_19988 | NW_004519909.1 | Scaffold6022 | 19988                   | AA                              | GG                | 1946706898               |
| SNP_P3_181685_19998 | NW_004519909.1 | Scaffold6022 | 19998                   | TT                              | CC                | 1946706900               |
| SNP_P3_181686_20018 | NW_004519909.1 | Scaffold6022 | 20018                   | GG                              | CC                | 1946706902               |
| SNP_P3_181687_20022 | NW_004519909.1 | Scaffold6022 | 20022                   | GG                              | TT                | 1946706904               |
| SNP_P3_181688_20069 | NW_004519909.1 | Scaffold6022 | 20069                   | AA                              | GG                | 1946706906               |
| SNP_P3_181689_21465 | NW_004519909.1 | Scaffold6022 | 21465                   | TT                              | CC                | 1946706908               |
| SNP_P3_181690_21472 | NW_004519909.1 | Scaffold6022 | 21472                   | TT                              | AA                | 1946706910               |
| SNP_P3_181692_21527 | NW_004519909.1 | Scaffold6022 | 21527                   | TT                              | GG                | 1946706912               |
| SNP_P3_181693_22293 | NW_004519909.1 | Scaffold6022 | 22293                   | TT                              | CC                | 1946706914               |
| SNP_P3_181694_329   | NW_004519912.1 | Scaffold6027 | 329                     | TT                              | CC                | 1946706916               |
| SNP_P3_181695_15162 | NW_004519912.1 | Scaffold6027 | 15162                   | AA                              | TT                | 1946706918               |
| SNP_P3_181696_2173  | NW_004519915.1 | Scaffold6034 | 2173                    | GG                              | TT                | 1946706920               |
| SNP_P3_181697_368   | NW_004519920.1 | Scaffold6043 | 368                     | TT                              | GG                | 1946706922               |
| SNP_P3_181698_8466  | NW_004519927.1 | Scaffold6055 | 8466                    | TT                              | GG                | 1946706924               |
| SNP_P3_181699_8501  | NW_004519927.1 | Scaffold6055 | 8501                    | CC                              | GG                | 1946706926               |
| SNP_P3_181700_8504  | NW_004519927.1 | Scaffold6055 | 8504                    | GG                              | TT                | 1946706929               |
| SNP_P3_181701_8509  | NW_004519927.1 | Scaffold6055 | 8509                    | GG                              | TT                | 1946706931               |
| SNP_P3_181702_8511  | NW_004519927.1 | Scaffold6055 | 8511                    | AA                              | CC                | 1946706933               |
| SNP_P3_181703_8555  | NW_004519927.1 | Scaffold6055 | 8555                    | TT                              | AA                | 1946706935               |
| SNP_P3_181704_8605  | NW_004519927.1 | Scaffold6055 | 8605                    | AA                              | CC                | 1946706937               |
| SNP_P3_181705_8845  | NW_004519927.1 | Scaffold6055 | 8845                    | GG                              | TT                | 1946706939               |
| SNP_P3_181707_13777 | NW_004519927.1 | Scaffold6055 | 13777                   | CC                              | TT                | 1946706941               |
| SNP_P3_181708_14242 | NW_004519927.1 | Scaffold6055 | 14242                   | GG                              | AA                | 1946706943               |
| SNP_P3_181709_588   | NW_004519928.1 | Scaffold6057 | 588                     | AA                              | CC                | 1946706945               |
| SNP_P3_181710_63    | NW_004519929.1 | Scaffold6058 | 63                      | AA                              | GG                | 1946706947               |
| SNP_P3_181711_10740 | NW_004519929.1 | Scaffold6058 | 10740                   | TT                              | AA                | 1946706949               |
| SNP_P3_181712_10803 | NW_004519929.1 | Scaffold6058 | 10803                   | AA                              | CC                | 1946706951               |
| SNP_P3_181713_11232 | NW_004519929.1 | Scaffold6058 | 11232                   | CC                              | TT                | 1946706953               |
| SNP_P3_181714_1618  | NW_004519930.1 | Scaffold6059 | 1618                    | GG                              | AA                | 1946706955               |
| SNP_P3_181715_1139  | NW_004519933.1 | Scaffold6064 | 1139                    | TT                              | CC                | 1946706957               |
| SNP_P3_181716_1334  | NW_004519933.1 | Scaffold6064 | 1334                    | GG                              | AA                | 1946706959               |
| SNP_P3_181717_1665  | NW_004519933.1 | Scaffold6064 | 1665                    | GG                              | TT                | 1946706961               |
| SNP_P3_181718_2697  | NW_004519935.1 | Scaffold6066 | 2697                    | GG                              | AA                | 1946706963               |
| SNP_P3_181719_2749  | NW_004519935.1 | Scaffold6066 | 2749                    | GG                              | AA                | 1946706965               |
| SNP_P3_181720_2866  | NW_004519935.1 | Scaffold6066 | 2866                    | CC                              | TT                | 1946706968               |
| SNP_P3_181721_2986  | NW_004519935.1 | Scaffold6066 | 2986                    | TT                              | AA                | 1946706970               |
| SNP_P3_181722_2995  | NW_004519935.1 | Scaffold6066 | 2995                    | TT                              | AA                | 1946706972               |
| SNP_P3_181723_2999  | NW_004519935.1 | Scaffold6066 | 2999                    | GG                              | AA                | 1946706974               |
| SNP_P3_181724_2580  | NW_004519937.1 | Scaffold6069 | 2580                    | AA                              | TT                | 1946706976               |
| SNP_P3_181725_2589  | NW_004519937.1 | Scaffold6069 | 2589                    | CC                              | TT                | 1946706978               |
| SNP_P3_181726_2955  | NW_004519937.1 | Scaffold6069 | 2955                    | GG                              | AA                | 1946706980               |

| SNPs IDs            | Chromosome IDs | Chromosomes  | Physical positions (bp) | CDC Frontier (Reference genome) | (Pusa 256 & HPNB) | NCBI SNPdb Accession IDs |
|---------------------|----------------|--------------|-------------------------|---------------------------------|-------------------|--------------------------|
| SNP_P3_181727_64    | NW_004519939.1 | Scaffold6071 | 64                      | CC                              | TT                | 1946706982               |
| SNP_P3_181728_88    | NW_004519939.1 | Scaffold6071 | 88                      | AA                              | GG                | 1946706984               |
| SNP_P3_181729_419   | NW_004519939.1 | Scaffold6071 | 419                     | AA                              | GG                | 1946706986               |
| SNP_P3_181730_488   | NW_004519939.1 | Scaffold6071 | 488                     | CC                              | TT                | 1946706988               |
| SNP_P3_181731_603   | NW_004519940.1 | Scaffold6072 | 603                     | GG                              | AA                | 1946706990               |
| SNP_P3_181732_2066  | NW_004519941.1 | Scaffold6074 | 2066                    | CC                              | AA                | 1946706992               |
| SNP_P3_181733_2089  | NW_004519941.1 | Scaffold6074 | 2089                    | TT                              | GG                | 1946706995               |
| SNP_P3_181734_2090  | NW_004519941.1 | Scaffold6074 | 2090                    | CC                              | TT                | 1946706997               |
| SNP_P3_181735_2106  | NW_004519941.1 | Scaffold6074 | 2106                    | AA                              | TT                | 1946706999               |
| SNP_P3_181736_781   | NW_004519942.1 | Scaffold6075 | 781                     | CC                              | TT                | 1946707001               |
| SNP_P3_181737_1005  | NW_004519942.1 | Scaffold6075 | 1005                    | AA                              | GG                | 1946707003               |
| SNP_P3_181738_1079  | NW_004519942.1 | Scaffold6075 | 1079                    | TT                              | GG                | 1946707005               |
| SNP_P3_181739_1503  | NW_004519946.1 | Scaffold6081 | 1503                    | CC                              | TT                | 1946707008               |
| SNP_P3_181740_126   | NW_004519948.1 | Scaffold6085 | 126                     | TT                              | AA                | 1946707010               |
| SNP_P3_181741_164   | NW_004519948.1 | Scaffold6085 | 164                     | AA                              | TT                | 1946707012               |
| SNP_P3_181742_16396 | NW_004519951.1 | Scaffold6091 | 16396                   | AA                              | TT                | 1946707014               |
| SNP_P3_181743_97    | NW_004519952.1 | Scaffold6092 | 97                      | GG                              | AA                | 1946707016               |
| SNP_P3_181744_105   | NW_004519952.1 | Scaffold6092 | 105                     | CC                              | AA                | 1946707018               |
| SNP_P3_181745_160   | NW_004519952.1 | Scaffold6092 | 160                     | CC                              | TT                | 1946707020               |
| SNP_P3_181746_265   | NW_004519952.1 | Scaffold6092 | 265                     | AA                              | CC                | 1946707022               |
| SNP_P3_181747_351   | NW_004519952.1 | Scaffold6092 | 351                     | GG                              | AA                | 1946707024               |
| SNP_P3_181748_363   | NW_004519952.1 | Scaffold6092 | 363                     | AA                              | GG                | 1946707026               |
| SNP_P3_181749_372   | NW_004519952.1 | Scaffold6092 | 372                     | TT                              | CC                | 1946707028               |
| SNP_P3_181750_407   | NW_004519952.1 | Scaffold6092 | 407                     | AA                              | GG                | 1946707030               |
| SNP_P3_181751_460   | NW_004519952.1 | Scaffold6092 | 460                     | AA                              | GG                | 1946707032               |
| SNP_P3_181752_700   | NW_004519952.1 | Scaffold6092 | 700                     | GG                              | TT                | 1946707034               |
| SNP_P3_181753_710   | NW_004519952.1 | Scaffold6092 | 710                     | AA                              | GG                | 1946707036               |
| SNP_P3_181755_1184  | NW_004519952.1 | Scaffold6092 | 1184                    | AA                              | GG                | 1946707038               |
| SNP_P3_181756_903   | NW_004519954.1 | Scaffold6095 | 903                     | AA                              | CC                | 1946707040               |
| SNP_P3_181758_2738  | NW_004519954.1 | Scaffold6095 | 2738                    | TT                              | GG                | 1946707042               |
| SNP_P3_181759_1135  | NW_004519965.1 | Scaffold6113 | 1135                    | CC                              | TT                | 1946707044               |
| SNP_P3_181760_1154  | NW_004519965.1 | Scaffold6113 | 1154                    | TT                              | AA                | 1946707047               |
| SNP_P3_181761_1379  | NW_004519965.1 | Scaffold6113 | 1379                    | TT                              | CC                | 1946707049               |
| SNP_P3_181762_1428  | NW_004519965.1 | Scaffold6113 | 1428                    | CC                              | TT                | 1946707051               |
| SNP_P3_181764_1749  | NW_004519965.1 | Scaffold6113 | 1749                    | TT                              | AA                | 1946707053               |
| SNP_P3_181765_1750  | NW_004519965.1 | Scaffold6113 | 1750                    | AA                              | CC                | 1946707055               |
| SNP_P3_181766_1776  | NW_004519965.1 | Scaffold6113 | 1776                    | TT                              | AA                | 1946707057               |
| SNP_P3_181767_1829  | NW_004519965.1 | Scaffold6113 | 1829                    | CC                              | AA                | 1946707059               |
| SNP_P3_181768_826   | NW_004519967.1 | Scaffold6115 | 826                     | AA                              | CC                | 1946707061               |
| SNP_P3_181769_827   | NW_004519967.1 | Scaffold6115 | 827                     | TT                              | AA                | 1946707063               |
| SNP_P3_181770_781   | NW_004519968.1 | Scaffold6116 | 781                     | GG                              | CC                | 1946707065               |
| SNP_P3_181771_4671  | NW_004519969.1 | Scaffold6117 | 4671                    | GG                              | CC                | 1946707067               |

| SNPs IDs            | Chromosome IDs | Chromosomes  | Physical positions (bp) | CDC Frontier (Reference genome) | (Pusa 256 & HPNB) | NCBI SNPdb Accession IDs |
|---------------------|----------------|--------------|-------------------------|---------------------------------|-------------------|--------------------------|
| SNP_P3_181772_5344  | NW_004519969.1 | Scaffold6117 | 5344                    | AA                              | TT                | 1946707069               |
| SNP_P3_181773_5365  | NW_004519969.1 | Scaffold6117 | 5365                    | TT                              | CC                | 1946707071               |
| SNP_P3_181774_5470  | NW_004519969.1 | Scaffold6117 | 5470                    | TT                              | CC                | 1946707073               |
| SNP_P3_181775_5499  | NW_004519969.1 | Scaffold6117 | 5499                    | GG                              | TT                | 1946707075               |
| SNP_P3_181776_5695  | NW_004519969.1 | Scaffold6117 | 5695                    | TT                              | CC                | 1946707077               |
| SNP_P3_181778_1563  | NW_004519970.1 | Scaffold6120 | 1563                    | CC                              | TT                | 1946707079               |
| SNP_P3_181779_1652  | NW_004519970.1 | Scaffold6120 | 1652                    | AA                              | GG                | 1946707081               |
| SNP_P3_181780_1808  | NW_004519970.1 | Scaffold6120 | 1808                    | AA                              | GG                | 1946707083               |
| SNP_P3_181781_1919  | NW_004519970.1 | Scaffold6120 | 1919                    | GG                              | AA                | 1946707087               |
| SNP_P3_181782_2013  | NW_004519970.1 | Scaffold6120 | 2013                    | CC                              | TT                | 1946707089               |
| SNP_P3_181783_2322  | NW_004519970.1 | Scaffold6120 | 2322                    | AA                              | TT                | 1946707091               |
| SNP_P3_181784_2549  | NW_004519970.1 | Scaffold6120 | 2549                    | TT                              | GG                | 1946707093               |
| SNP_P3_181785_3090  | NW_004519970.1 | Scaffold6120 | 3090                    | AA                              | GG                | 1946707095               |
| SNP_P3_181786_3118  | NW_004519970.1 | Scaffold6120 | 3118                    | CC                              | TT                | 1946707097               |
| SNP_P3_181787_3133  | NW_004519970.1 | Scaffold6120 | 3133                    | GG                              | AA                | 1946707099               |
| SNP_P3_181789_3342  | NW_004519970.1 | Scaffold6120 | 3342                    | AA                              | GG                | 1946707101               |
| SNP_P3_181790_3461  | NW_004519970.1 | Scaffold6120 | 3461                    | AA                              | GG                | 1946707103               |
| SNP_P3_181791_3542  | NW_004519970.1 | Scaffold6120 | 3542                    | AA                              | TT                | 1946707105               |
| SNP_P3_181792_3589  | NW_004519970.1 | Scaffold6120 | 3589                    | TT                              | AA                | 1946707107               |
| SNP_P3_181793_3606  | NW_004519970.1 | Scaffold6120 | 3606                    | CC                              | TT                | 1946707109               |
| SNP_P3_181794_3664  | NW_004519970.1 | Scaffold6120 | 3664                    | CC                              | TT                | 1946707111               |
| SNP_P3_181795_3668  | NW_004519970.1 | Scaffold6120 | 3668                    | GG                              | AA                | 1946707113               |
| SNP_P3_181796_3701  | NW_004519970.1 | Scaffold6120 | 3701                    | GG                              | AA                | 1946707115               |
| SNP_P3_181797_3807  | NW_004519970.1 | Scaffold6120 | 3807                    | GG                              | AA                | 1946707117               |
| SNP_P3_181798_3813  | NW_004519970.1 | Scaffold6120 | 3813                    | AA                              | GG                | 1946707119               |
| SNP_P3_181799_3831  | NW_004519970.1 | Scaffold6120 | 3831                    | CC                              | TT                | 1946707121               |
| SNP_P3_181800_3847  | NW_004519970.1 | Scaffold6120 | 3847                    | GG                              | AA                | 1946707123               |
| SNP_P3_181801_6527  | NW_004519970.1 | Scaffold6120 | 6527                    | CC                              | TT                | 1946707126               |
| SNP_P3_181802_476   | NW_004519971.1 | Scaffold6121 | 476                     | CC                              | TT                | 1946707128               |
| SNP_P3_181803_16109 | NW_004519971.1 | Scaffold6121 | 16109                   | TT                              | GG                | 1946707130               |
| SNP_P3_181804_16174 | NW_004519971.1 | Scaffold6121 | 16174                   | GG                              | TT                | 1946707132               |
| SNP_P3_181805_16182 | NW_004519971.1 | Scaffold6121 | 16182                   | AA                              | CC                | 1946707134               |
| SNP_P3_181806_16395 | NW_004519971.1 | Scaffold6121 | 16395                   | GG                              | AA                | 1946707136               |
| SNP_P3_181807_16496 | NW_004519971.1 | Scaffold6121 | 16496                   | CC                              | TT                | 1946707138               |
| SNP_P3_181808_74    | NW_004519972.1 | Scaffold6122 | 74                      | AA                              | GG                | 1946707140               |
| SNP_P3_181809_5103  | NW_004519973.1 | Scaffold6123 | 5103                    | CC                              | TT                | 1946707142               |
| SNP_P3_181810_5116  | NW_004519973.1 | Scaffold6123 | 5116                    | GG                              | AA                | 1946707144               |
| SNP_P3_181811_439   | NW_004519975.1 | Scaffold6125 | 439                     | GG                              | AA                | 1946707146               |
| SNP_P3_181812_1034  | NW_004519975.1 | Scaffold6125 | 1034                    | AA                              | TT                | 1946707148               |
| SNP_P3_181813_1067  | NW_004519975.1 | Scaffold6125 | 1067                    | TT                              | AA                | 1946707151               |
| SNP_P3_181814_1106  | NW_004519975.1 | Scaffold6125 | 1106                    | CC                              | TT                | 1946707153               |
| SNP_P3_181815_1183  | NW_004519975.1 | Scaffold6125 | 1183                    | AA                              | GG                | 1946707155               |



| SNPs IDs            | Chromosome IDs | Chromosomes  | Physical positions (bp) | CDC Frontier (Reference genome) | (Pusa 256 & HPNB) | NCBI SNPdb Accession IDs |
|---------------------|----------------|--------------|-------------------------|---------------------------------|-------------------|--------------------------|
| SNP_P3_181816_1323  | NW_004519975.1 | Scaffold6125 | 1323                    | TT                              | AA                | 1946707157               |
| SNP_P3_181817_1371  | NW_004519975.1 | Scaffold6125 | 1371                    | AA                              | GG                | 1946707159               |
| SNP_P3_181818_1402  | NW_004519975.1 | Scaffold6125 | 1402                    | AA                              | GG                | 1946707161               |
| SNP_P3_181819_1435  | NW_004519975.1 | Scaffold6125 | 1435                    | CC                              | TT                | 1946707165               |
| SNP_P3_181821_1563  | NW_004519975.1 | Scaffold6125 | 1563                    | CC                              | AA                | 1946707167               |
| SNP_P3_181822_1568  | NW_004519975.1 | Scaffold6125 | 1568                    | AA                              | GG                | 1946707169               |
| SNP_P3_181823_1620  | NW_004519975.1 | Scaffold6125 | 1620                    | TT                              | GG                | 1946707171               |
| SNP_P3_181824_1647  | NW_004519975.1 | Scaffold6125 | 1647                    | TT                              | CC                | 1946707173               |
| SNP_P3_181825_1724  | NW_004519975.1 | Scaffold6125 | 1724                    | CC                              | TT                | 1946707175               |
| SNP_P3_181826_2623  | NW_004519975.1 | Scaffold6125 | 2623                    | TT                              | CC                | 1946707177               |
| SNP_P3_181827_2921  | NW_004519975.1 | Scaffold6125 | 2921                    | CC                              | TT                | 1946707179               |
| SNP_P3_181828_2961  | NW_004519975.1 | Scaffold6125 | 2961                    | GG                              | AA                | 1946707181               |
| SNP_P3_181829_2968  | NW_004519975.1 | Scaffold6125 | 2968                    | GG                              | AA                | 1946707183               |
| SNP_P3_181830_23027 | NW_004519977.1 | Scaffold6127 | 23027                   | TT                              | GG                | 1946707185               |
| SNP_P3_181831_91    | NW_004519978.1 | Scaffold6128 | 91                      | CC                              | GG                | 1946707187               |
| SNP_P3_181832_87    | NW_004519980.1 | Scaffold6131 | 87                      | CC                              | AA                | 1946707189               |
| SNP_P3_181833_799   | NW_004519980.1 | Scaffold6131 | 799                     | CC                              | GG                | 1946707192               |
| SNP_P3_181834_8776  | NW_004519980.1 | Scaffold6131 | 8776                    | AA                              | GG                | 1946707194               |
| SNP_P3_181835_8780  | NW_004519980.1 | Scaffold6131 | 8780                    | AA                              | CC                | 1946707196               |
| SNP_P3_181836_8838  | NW_004519980.1 | Scaffold6131 | 8838                    | CC                              | GG                | 1946707199               |
| SNP_P3_181837_8846  | NW_004519980.1 | Scaffold6131 | 8846                    | AA                              | GG                | 1946707201               |
| SNP_P3_181838_9553  | NW_004519980.1 | Scaffold6131 | 9553                    | TT                              | AA                | 1946707204               |
| SNP_P3_181839_9862  | NW_004519980.1 | Scaffold6131 | 9862                    | AA                              | TT                | 1946707206               |
| SNP_P3_181840_9917  | NW_004519980.1 | Scaffold6131 | 9917                    | GG                              | CC                | 1946707208               |
| SNP_P3_181841_10109 | NW_004519980.1 | Scaffold6131 | 10109                   | TT                              | CC                | 1946707210               |
| SNP_P3_181843_10768 | NW_004519980.1 | Scaffold6131 | 10768                   | TT                              | CC                | 1946707212               |
| SNP_P3_181844_1360  | NW_004519981.1 | Scaffold6133 | 1360                    | AA                              | CC                | 1946707214               |
| SNP_P3_181845_177   | NW_004519983.1 | Scaffold6135 | 177                     | AA                              | GG                | 1946707216               |
| SNP_P3_181846_162   | NW_004519985.1 | Scaffold6137 | 162                     | AA                              | TT                | 1946707218               |
| SNP_P3_181847_635   | NW_004519985.1 | Scaffold6137 | 635                     | AA                              | TT                | 1946707220               |
| SNP_P3_181848_3616  | NW_004519985.1 | Scaffold6137 | 3616                    | CC                              | TT                | 1946707222               |
| SNP_P3_181849_629   | NW_004519989.1 | Scaffold6149 | 629                     | GG                              | TT                | 1946707224               |
| SNP_P3_181850_705   | NW_004519989.1 | Scaffold6149 | 705                     | TT                              | AA                | 1946707226               |
| SNP_P3_181851_855   | NW_004519989.1 | Scaffold6149 | 855                     | GG                              | CC                | 1946707228               |
| SNP_P3_181852_1453  | NW_004519989.1 | Scaffold6149 | 1453                    | GG                              | TT                | 1946707230               |
| SNP_P3_181853_19273 | NW_004519992.1 | Scaffold6153 | 19273                   | TT                              | AA                | 1946707232               |
| SNP_P3_181854_20381 | NW_004519992.1 | Scaffold6153 | 20381                   | CC                              | AA                | 1946707234               |
| SNP_P3_181856_127   | NW_004519993.1 | Scaffold6154 | 127                     | CC                              | GG                | 1946707236               |
| SNP_P3_181857_153   | NW_004519993.1 | Scaffold6154 | 153                     | AA                              | GG                | 1946707238               |
| SNP_P3_181858_225   | NW_004519993.1 | Scaffold6154 | 225                     | CC                              | AA                | 1946707240               |
| SNP_P3_181859_295   | NW_004519993.1 | Scaffold6154 | 295                     | CC                              | TT                | 1946707241               |
| SNP_P3_181860_426   | NW_004519993.1 | Scaffold6154 | 426                     | GG                              | AA                | 1946707243               |

| SNPs IDs            | Chromosome IDs | Chromosomes  | Physical positions (bp) | CDC Frontier (Reference genome) | (Pusa 256 & HPNB) | NCBI SNPdb Accession IDs |
|---------------------|----------------|--------------|-------------------------|---------------------------------|-------------------|--------------------------|
| SNP_P3_181861_436   | NW_004519993.1 | Scaffold6154 | 436                     | TT                              | CC                | 1946707245               |
| SNP_P3_181862_490   | NW_004519993.1 | Scaffold6154 | 490                     | CC                              | AA                | 1946707247               |
| SNP_P3_181863_507   | NW_004519993.1 | Scaffold6154 | 507                     | GG                              | TT                | 1946707249               |
| SNP_P3_181864_510   | NW_004519993.1 | Scaffold6154 | 510                     | GG                              | AA                | 1946707251               |
| SNP_P3_181866_563   | NW_004519993.1 | Scaffold6154 | 563                     | CC                              | AA                | 1946707253               |
| SNP_P3_181868_611   | NW_004519993.1 | Scaffold6154 | 611                     | CC                              | AA                | 1946707255               |
| SNP_P3_181869_745   | NW_004519993.1 | Scaffold6154 | 745                     | GG                              | TT                | 1946707257               |
| SNP_P3_181870_806   | NW_004519993.1 | Scaffold6154 | 806                     | AA                              | GG                | 1946707259               |
| SNP_P3_181871_1523  | NW_004519995.1 | Scaffold6157 | 1523                    | CC                              | TT                | 1946707261               |
| SNP_P3_181872_1680  | NW_004519995.1 | Scaffold6157 | 1680                    | TT                              | AA                | 1946707263               |
| SNP_P3_181873_242   | NW_004519996.1 | Scaffold6158 | 242                     | AA                              | TT                | 1946707265               |
| SNP_P3_181874_284   | NW_004519996.1 | Scaffold6158 | 284                     | CC                              | TT                | 1946707267               |
| SNP_P3_181876_599   | NW_004519996.1 | Scaffold6158 | 599                     | TT                              | CC                | 1946707269               |
| SNP_P3_181877_716   | NW_004519996.1 | Scaffold6158 | 716                     | CC                              | AA                | 1946707272               |
| SNP_P3_181878_726   | NW_004519996.1 | Scaffold6158 | 726                     | AA                              | GG                | 1946707274               |
| SNP_P3_181879_1124  | NW_004519996.1 | Scaffold6158 | 1124                    | AA                              | CC                | 1946707276               |
| SNP_P3_181880_1300  | NW_004519996.1 | Scaffold6158 | 1300                    | AA                              | TT                | 1946707278               |
| SNP_P3_181881_1812  | NW_004519996.1 | Scaffold6158 | 1812                    | GG                              | CC                | 1946707280               |
| SNP_P3_181882_1879  | NW_004519996.1 | Scaffold6158 | 1879                    | AA                              | GG                | 1946707282               |
| SNP_P3_181883_386   | NW_004520001.1 | Scaffold6165 | 386                     | CC                              | TT                | 1946707284               |
| SNP_P3_181884_553   | NW_004520003.1 | Scaffold6169 | 553                     | TT                              | CC                | 1946707286               |
| SNP_P3_181885_655   | NW_004520003.1 | Scaffold6169 | 655                     | AA                              | CC                | 1946707288               |
| SNP_P3_181886_830   | NW_004520003.1 | Scaffold6169 | 830                     | TT                              | AA                | 1946707290               |
| SNP_P3_181887_875   | NW_004520003.1 | Scaffold6169 | 875                     | CC                              | TT                | 1946707292               |
| SNP_P3_181888_931   | NW_004520003.1 | Scaffold6169 | 931                     | TT                              | GG                | 1946707294               |
| SNP_P3_181889_1050  | NW_004520003.1 | Scaffold6169 | 1050                    | TT                              | AA                | 1946707296               |
| SNP_P3_181890_1337  | NW_004520004.1 | Scaffold6170 | 1337                    | CC                              | GG                | 1946707298               |
| SNP_P3_181891_75    | NW_004520005.1 | Scaffold6171 | 75                      | AA                              | GG                | 1946707301               |
| SNP_P3_181892_861   | NW_004520005.1 | Scaffold6171 | 861                     | TT                              | GG                | 1946707303               |
| SNP_P3_181893_962   | NW_004520005.1 | Scaffold6171 | 962                     | TT                              | CC                | 1946707305               |
| SNP_P3_181894_1347  | NW_004520005.1 | Scaffold6171 | 1347                    | CC                              | TT                | 1946707307               |
| SNP_P3_181895_19048 | NW_004520006.1 | Scaffold6172 | 19048                   | GG                              | AA                | 1946707309               |
| SNP_P3_181896_19469 | NW_004520006.1 | Scaffold6172 | 19469                   | GG                              | TT                | 1946707310               |
| SNP_P3_181897_19480 | NW_004520006.1 | Scaffold6172 | 19480                   | TT                              | GG                | 1946707312               |
| SNP_P3_181898_19614 | NW_004520006.1 | Scaffold6172 | 19614                   | TT                              | CC                | 1946707314               |
| SNP_P3_181899_19619 | NW_004520006.1 | Scaffold6172 | 19619                   | GG                              | AA                | 1946707316               |
| SNP_P3_181900_19716 | NW_004520006.1 | Scaffold6172 | 19716                   | CC                              | TT                | 1946707318               |
| SNP_P3_181901_19934 | NW_004520006.1 | Scaffold6172 | 19934                   | AA                              | CC                | 1946707320               |
| SNP_P3_181902_20086 | NW_004520006.1 | Scaffold6172 | 20086                   | TT                              | CC                | 1946707322               |
| SNP_P3_181903_20145 | NW_004520006.1 | Scaffold6172 | 20145                   | CC                              | TT                | 1946707324               |
| SNP_P3_181904_20234 | NW_004520006.1 | Scaffold6172 | 20234                   | AA                              | GG                | 1946707326               |
| SNP_P3_181905_20462 | NW_004520006.1 | Scaffold6172 | 20462                   | AA                              | GG                | 1946707328               |

| SNPs IDs            | Chromosome IDs | Chromosomes  | Physical positions (bp) | CDC Frontier (Reference genome) | (Pusa 256 & HPNB) | NCBI SNPdb Accession IDs |
|---------------------|----------------|--------------|-------------------------|---------------------------------|-------------------|--------------------------|
| SNP_P3_181906_27912 | NW_004520006.1 | Scaffold6172 | 27912                   | AA                              | GG                | 1946707330               |
| SNP_P3_181907_28171 | NW_004520006.1 | Scaffold6172 | 28171                   | GG                              | AA                | 1946707332               |
| SNP_P3_181908_28402 | NW_004520006.1 | Scaffold6172 | 28402                   | CC                              | TT                | 1946707334               |
| SNP_P3_181909_29917 | NW_004520006.1 | Scaffold6172 | 29917                   | TT                              | CC                | 1946707336               |
| SNP_P3_181910_30113 | NW_004520006.1 | Scaffold6172 | 30113                   | AA                              | CC                | 1946707338               |
| SNP_P3_181911_30186 | NW_004520006.1 | Scaffold6172 | 30186                   | GG                              | AA                | 1946707340               |
| SNP_P3_181912_30480 | NW_004520006.1 | Scaffold6172 | 30480                   | CC                              | GG                | 1946707342               |
| SNP_P3_181914_37206 | NW_004520006.1 | Scaffold6172 | 37206                   | GG                              | TT                | 1946707345               |
| SNP_P3_181915_37233 | NW_004520006.1 | Scaffold6172 | 37233                   | CC                              | AA                | 1946707347               |
| SNP_P3_181916_37290 | NW_004520006.1 | Scaffold6172 | 37290                   | AA                              | GG                | 1946707349               |
| SNP_P3_181917_37295 | NW_004520006.1 | Scaffold6172 | 37295                   | AA                              | CC                | 1946707351               |
| SNP_P3_181918_37311 | NW_004520006.1 | Scaffold6172 | 37311                   | AA                              | TT                | 1946707353               |
| SNP_P3_181919_37312 | NW_004520006.1 | Scaffold6172 | 37312                   | AA                              | GG                | 1946707355               |
| SNP_P3_181921_37394 | NW_004520006.1 | Scaffold6172 | 37394                   | TT                              | CC                | 1946707357               |
| SNP_P3_181922_37395 | NW_004520006.1 | Scaffold6172 | 37395                   | TT                              | AA                | 1946707359               |
| SNP_P3_181923_37415 | NW_004520006.1 | Scaffold6172 | 37415                   | CC                              | AA                | 1946707361               |
| SNP_P3_181924_37991 | NW_004520006.1 | Scaffold6172 | 37991                   | TT                              | GG                | 1946707363               |
| SNP_P3_181925_184   | NW_004520007.1 | Scaffold6173 | 184                     | CC                              | GG                | 1946707365               |
| SNP_P3_181926_442   | NW_004520007.1 | Scaffold6173 | 442                     | TT                              | GG                | 1946707367               |
| SNP_P3_181927_448   | NW_004520007.1 | Scaffold6173 | 448                     | TT                              | AA                | 1946707369               |
| SNP_P3_181928_487   | NW_004520007.1 | Scaffold6173 | 487                     | CC                              | GG                | 1946707371               |
| SNP_P3_181929_536   | NW_004520008.1 | Scaffold6174 | 536                     | TT                              | AA                | 1946707374               |
| SNP_P3_181930_684   | NW_004520008.1 | Scaffold6174 | 684                     | AA                              | GG                | 1946707377               |
| SNP_P3_181931_704   | NW_004520008.1 | Scaffold6174 | 704                     | GG                              | AA                | 1946707379               |
| SNP_P3_181932_749   | NW_004520008.1 | Scaffold6174 | 749                     | TT                              | GG                | 1946707381               |
| SNP_P3_181933_758   | NW_004520008.1 | Scaffold6174 | 758                     | TT                              | GG                | 1946707383               |
| SNP_P3_181934_776   | NW_004520008.1 | Scaffold6174 | 776                     | AA                              | GG                | 1946707385               |
| SNP_P3_181935_927   | NW_004520008.1 | Scaffold6174 | 927                     | CC                              | TT                | 1946707388               |
| SNP_P3_181936_951   | NW_004520008.1 | Scaffold6174 | 951                     | CC                              | GG                | 1946707390               |
| SNP_P3_181937_981   | NW_004520008.1 | Scaffold6174 | 981                     | TT                              | AA                | 1946707392               |
| SNP_P3_181938_982   | NW_004520008.1 | Scaffold6174 | 982                     | AA                              | TT                | 1946707394               |
| SNP_P3_181939_1042  | NW_004520008.1 | Scaffold6174 | 1042                    | CC                              | AA                | 1946707396               |
| SNP_P3_181940_919   | NW_004520011.1 | Scaffold6177 | 919                     | AA                              | TT                | 1946707398               |
| SNP_P3_181941_1006  | NW_004520011.1 | Scaffold6177 | 1006                    | AA                              | GG                | 1946707400               |
| SNP_P3_181942_3365  | NW_004520011.1 | Scaffold6177 | 3365                    | AA                              | TT                | 1946707402               |
| SNP_P3_181943_3634  | NW_004520011.1 | Scaffold6177 | 3634                    | AA                              | TT                | 1946707404               |
| SNP_P3_181944_3640  | NW_004520011.1 | Scaffold6177 | 3640                    | GG                              | AA                | 1946707406               |
| SNP_P3_181946_3725  | NW_004520011.1 | Scaffold6177 | 3725                    | GG                              | AA                | 1946707408               |
| SNP_P3_181947_4304  | NW_004520011.1 | Scaffold6177 | 4304                    | TT                              | GG                | 1946707410               |
| SNP_P3_181948_4331  | NW_004520011.1 | Scaffold6177 | 4331                    | GG                              | AA                | 1946707412               |
| SNP_P3_181949_4779  | NW_004520011.1 | Scaffold6177 | 4779                    | TT                              | AA                | 1946707414               |
| SNP_P3_181950_4805  | NW_004520011.1 | Scaffold6177 | 4805                    | TT                              | GG                | 1946707416               |

| SNPs IDs           | Chromosome IDs | Chromosomes  | Physical positions (bp) | CDC Frontier (Reference genome) | (Pusa 256 & HPNB) | NCBI SNPdb Accession IDs |
|--------------------|----------------|--------------|-------------------------|---------------------------------|-------------------|--------------------------|
| SNP_P3_181951_4835 | NW_004520011.1 | Scaffold6177 | 4835                    | CC                              | AA                | 1946707419               |
| SNP_P3_181952_887  | NW_004520013.1 | Scaffold6179 | 887                     | CC                              | GG                | 1946707421               |
| SNP_P3_181953_912  | NW_004520013.1 | Scaffold6179 | 912                     | GG                              | CC                | 1946707423               |
| SNP_P3_181955_1613 | NW_004520017.1 | Scaffold6184 | 1613                    | TT                              | GG                | 1946707425               |
| SNP_P3_181956_77   | NW_004520018.1 | Scaffold6185 | 77                      | TT                              | GG                | 1946707427               |
| SNP_P3_181957_123  | NW_004520018.1 | Scaffold6185 | 123                     | AA                              | TT                | 1946707429               |
| SNP_P3_181958_168  | NW_004520018.1 | Scaffold6185 | 168                     | AA                              | CC                | 1946707431               |
| SNP_P3_181959_233  | NW_004520018.1 | Scaffold6185 | 233                     | AA                              | GG                | 1946707433               |
| SNP_P3_181960_381  | NW_004520018.1 | Scaffold6185 | 381                     | AA                              | GG                | 1946707435               |
| SNP_P3_181961_383  | NW_004520018.1 | Scaffold6185 | 383                     | CC                              | AA                | 1946707437               |
| SNP_P3_181962_398  | NW_004520018.1 | Scaffold6185 | 398                     | CC                              | GG                | 1946707439               |
| SNP_P3_181964_542  | NW_004520018.1 | Scaffold6185 | 542                     | AA                              | CC                | 1946707441               |
| SNP_P3_181965_559  | NW_004520018.1 | Scaffold6185 | 559                     | TT                              | CC                | 1946707443               |
| SNP_P3_181966_617  | NW_004520018.1 | Scaffold6185 | 617                     | GG                              | AA                | 1946707445               |
| SNP_P3_181967_658  | NW_004520018.1 | Scaffold6185 | 658                     | AA                              | GG                | 1946707447               |
| SNP_P3_181968_745  | NW_004520018.1 | Scaffold6185 | 745                     | TT                              | CC                | 1946707449               |
| SNP_P3_181969_774  | NW_004520018.1 | Scaffold6185 | 774                     | GG                              | AA                | 1946707451               |
| SNP_P3_181970_799  | NW_004520018.1 | Scaffold6185 | 799                     | AA                              | GG                | 1946707454               |
| SNP_P3_181971_846  | NW_004520018.1 | Scaffold6185 | 846                     | CC                              | TT                | 1946707456               |
| SNP_P3_181972_856  | NW_004520018.1 | Scaffold6185 | 856                     | CC                              | AA                | 1946707458               |
| SNP_P3_181973_959  | NW_004520018.1 | Scaffold6185 | 959                     | GG                              | AA                | 1946707461               |
| SNP_P3_181974_989  | NW_004520018.1 | Scaffold6185 | 989                     | TT                              | AA                | 1946707463               |
| SNP_P3_181975_1021 | NW_004520018.1 | Scaffold6185 | 1021                    | CC                              | AA                | 1946707465               |
| SNP_P3_181976_1042 | NW_004520018.1 | Scaffold6185 | 1042                    | GG                              | AA                | 1946707467               |
| SNP_P3_181977_1045 | NW_004520018.1 | Scaffold6185 | 1045                    | TT                              | GG                | 1946707469               |
| SNP_P3_181978_1048 | NW_004520018.1 | Scaffold6185 | 1048                    | CC                              | TT                | 1946707471               |
| SNP_P3_181979_1055 | NW_004520018.1 | Scaffold6185 | 1055                    | CC                              | TT                | 1946707473               |
| SNP_P3_181980_1069 | NW_004520018.1 | Scaffold6185 | 1069                    | TT                              | GG                | 1946707475               |
| SNP_P3_181981_1100 | NW_004520018.1 | Scaffold6185 | 1100                    | GG                              | AA                | 1946707477               |
| SNP_P3_181982_1140 | NW_004520018.1 | Scaffold6185 | 1140                    | AA                              | CC                | 1946707479               |
| SNP_P3_181983_1144 | NW_004520018.1 | Scaffold6185 | 1144                    | TT                              | CC                | 1946707481               |
| SNP_P3_181984_1194 | NW_004520018.1 | Scaffold6185 | 1194                    | TT                              | AA                | 1946707483               |
| SNP_P3_181985_1296 | NW_004520018.1 | Scaffold6185 | 1296                    | AA                              | CC                | 1946707485               |
| SNP_P3_181986_1355 | NW_004520018.1 | Scaffold6185 | 1355                    | CC                              | GG                | 1946707487               |
| SNP_P3_181987_1438 | NW_004520018.1 | Scaffold6185 | 1438                    | GG                              | CC                | 1946707489               |
| SNP_P3_181988_2220 | NW_004520018.1 | Scaffold6185 | 2220                    | GG                              | TT                | 1946707491               |
| SNP_P3_181989_2270 | NW_004520018.1 | Scaffold6185 | 2270                    | CC                              | AA                | 1946707493               |
| SNP_P3_181990_2637 | NW_004520018.1 | Scaffold6185 | 2637                    | AA                              | GG                | 1946707495               |
| SNP_P3_181991_2764 | NW_004520018.1 | Scaffold6185 | 2764                    | GG                              | AA                | 1946707497               |
| SNP_P3_181992_2964 | NW_004520018.1 | Scaffold6185 | 2964                    | AA                              | GG                | 1946707499               |
| SNP_P3_181993_2977 | NW_004520018.1 | Scaffold6185 | 2977                    | TT                              | CC                | 1946707501               |
| SNP_P3_181994_3058 | NW_004520018.1 | Scaffold6185 | 3058                    | TT                              | CC                | 1946707505               |

| SNPs IDs           | Chromosome IDs | Chromosomes  | Physical positions (bp) | CDC Frontier (Reference genome) | (Pusa 256 & HPNB) | NCBI SNPdb Accession IDs |
|--------------------|----------------|--------------|-------------------------|---------------------------------|-------------------|--------------------------|
| SNP_P3_181995_3060 | NW_004520018.1 | Scaffold6185 | 3060                    | AA                              | GG                | 1946707507               |
| SNP_P3_181996_3087 | NW_004520018.1 | Scaffold6185 | 3087                    | AA                              | TT                | 1946707509               |
| SNP_P3_181997_3108 | NW_004520018.1 | Scaffold6185 | 3108                    | CC                              | AA                | 1946707511               |
| SNP_P3_181998_3139 | NW_004520018.1 | Scaffold6185 | 3139                    | GG                              | AA                | 1946707513               |
| SNP_P3_181999_3260 | NW_004520018.1 | Scaffold6185 | 3260                    | CC                              | TT                | 1946707515               |
| SNP_P3_182000_3365 | NW_004520018.1 | Scaffold6185 | 3365                    | GG                              | AA                | 1946707517               |
| SNP_P3_182001_3416 | NW_004520018.1 | Scaffold6185 | 3416                    | CC                              | TT                | 1946707519               |
| SNP_P3_182002_3419 | NW_004520018.1 | Scaffold6185 | 3419                    | TT                              | AA                | 1946707521               |
| SNP_P3_182004_3488 | NW_004520018.1 | Scaffold6185 | 3488                    | CC                              | AA                | 1946707523               |
| SNP_P3_182005_3533 | NW_004520018.1 | Scaffold6185 | 3533                    | CC                              | TT                | 1946707525               |
| SNP_P3_182006_3706 | NW_004520018.1 | Scaffold6185 | 3706                    | GG                              | AA                | 1946707527               |
| SNP_P3_182007_3719 | NW_004520018.1 | Scaffold6185 | 3719                    | CC                              | TT                | 1946707529               |
| SNP_P3_182008_3723 | NW_004520018.1 | Scaffold6185 | 3723                    | CC                              | TT                | 1946707532               |
| SNP_P3_182009_3856 | NW_004520018.1 | Scaffold6185 | 3856                    | GG                              | TT                | 1946707534               |
| SNP_P3_182010_498  | NW_004520019.1 | Scaffold6187 | 498                     | AA                              | TT                | 1946707536               |
| SNP_P3_182011_531  | NW_004520019.1 | Scaffold6187 | 531                     | TT                              | CC                | 1946707538               |
| SNP_P3_182012_540  | NW_004520019.1 | Scaffold6187 | 540                     | AA                              | GG                | 1946707540               |
| SNP_P3_182013_623  | NW_004520019.1 | Scaffold6187 | 623                     | AA                              | CC                | 1946707542               |
| SNP_P3_182014_728  | NW_004520019.1 | Scaffold6187 | 728                     | GG                              | AA                | 1946707545               |
| SNP_P3_182015_889  | NW_004520019.1 | Scaffold6187 | 889                     | AA                              | GG                | 1946707547               |
| SNP_P3_182016_1025 | NW_004520019.1 | Scaffold6187 | 1025                    | TT                              | GG                | 1946707550               |
| SNP_P3_182017_585  | NW_004520020.1 | Scaffold6188 | 585                     | GG                              | TT                | 1946707552               |
| SNP_P3_182018_1085 | NW_004520020.1 | Scaffold6188 | 1085                    | TT                              | CC                | 1946707554               |
| SNP_P3_182019_1089 | NW_004520020.1 | Scaffold6188 | 1089                    | AA                              | GG                | 1946707556               |
| SNP_P3_182020_1099 | NW_004520020.1 | Scaffold6188 | 1099                    | CC                              | TT                | 1946707559               |
| SNP_P3_182021_1446 | NW_004520020.1 | Scaffold6188 | 1446                    | CC                              | TT                | 1946707561               |
| SNP_P3_182022_1788 | NW_004520021.1 | Scaffold6189 | 1788                    | TT                              | CC                | 1946707563               |
| SNP_P3_182023_1793 | NW_004520021.1 | Scaffold6189 | 1793                    | CC                              | GG                | 1946707565               |
| SNP_P3_182024_1826 | NW_004520021.1 | Scaffold6189 | 1826                    | TT                              | CC                | 1946707567               |
| SNP_P3_182025_2037 | NW_004520021.1 | Scaffold6189 | 2037                    | GG                              | TT                | 1946707569               |
| SNP_P3_182026_2042 | NW_004520021.1 | Scaffold6189 | 2042                    | TT                              | CC                | 1946707571               |
| SNP_P3_182027_2045 | NW_004520021.1 | Scaffold6189 | 2045                    | GG                              | AA                | 1946707573               |
| SNP_P3_182028_447  | NW_004520024.1 | Scaffold6193 | 447                     | TT                              | GG                | 1946707575               |
| SNP_P3_182029_1435 | NW_004520024.1 | Scaffold6193 | 1435                    | TT                              | AA                | 1946707577               |
| SNP_P3_182030_659  | NW_004520025.1 | Scaffold6194 | 659                     | AA                              | TT                | 1946707579               |
| SNP_P3_182031_696  | NW_004520025.1 | Scaffold6194 | 696                     | AA                              | GG                | 1946707581               |
| SNP_P3_182032_697  | NW_004520025.1 | Scaffold6194 | 697                     | AA                              | CC                | 1946707585               |
| SNP_P3_182033_508  | NW_004520030.1 | Scaffold6199 | 508                     | TT                              | AA                | 1946707587               |
| SNP_P3_182034_561  | NW_004520030.1 | Scaffold6199 | 561                     | TT                              | AA                | 1946707589               |
| SNP_P3_182035_575  | NW_004520030.1 | Scaffold6199 | 575                     | CC                              | TT                | 1946707591               |
| SNP_P3_182036_612  | NW_004520030.1 | Scaffold6199 | 612                     | AA                              | CC                | 1946707593               |
| SNP_P3_182037_654  | NW_004520030.1 | Scaffold6199 | 654                     | TT                              | GG                | 1946707595               |

| SNPs IDs           | Chromosome IDs | Chromosomes  | Physical positions (bp) | CDC Frontier (Reference genome) | (Pusa 256 & HPNB) | NCBI SNPdb Accession IDs |
|--------------------|----------------|--------------|-------------------------|---------------------------------|-------------------|--------------------------|
| SNP_P3_182039_1093 | NW_004520031.1 | Scaffold6201 | 1093                    | TT                              | CC                | 1946707597               |
| SNP_P3_182040_4090 | NW_004520038.1 | Scaffold6212 | 4090                    | AA                              | TT                | 1946707599               |
| SNP_P3_182041_4142 | NW_004520038.1 | Scaffold6212 | 4142                    | GG                              | AA                | 1946707601               |
| SNP_P3_182042_4881 | NW_004520038.1 | Scaffold6212 | 4881                    | TT                              | CC                | 1946707603               |
| SNP_P3_182043_5026 | NW_004520038.1 | Scaffold6212 | 5026                    | AA                              | CC                | 1946707605               |
| SNP_P3_182044_2441 | NW_004520039.1 | Scaffold6214 | 2441                    | AA                              | TT                | 1946707607               |
| SNP_P3_182045_7374 | NW_004520039.1 | Scaffold6214 | 7374                    | CC                              | TT                | 1946707609               |
| SNP_P3_182046_48   | NW_004520045.1 | Scaffold6225 | 48                      | AA                              | CC                | 1946707611               |
| SNP_P3_182047_99   | NW_004520045.1 | Scaffold6225 | 99                      | GG                              | TT                | 1946707613               |
| SNP_P3_182048_718  | NW_004520045.1 | Scaffold6225 | 718                     | CC                              | AA                | 1946707615               |
| SNP_P3_182049_722  | NW_004520045.1 | Scaffold6225 | 722                     | CC                              | GG                | 1946707617               |
| SNP_P3_182050_726  | NW_004520045.1 | Scaffold6225 | 726                     | TT                              | GG                | 1946707619               |
| SNP_P3_182051_731  | NW_004520045.1 | Scaffold6225 | 731                     | AA                              | TT                | 1946707622               |
| SNP_P3_182053_369  | NW_004520050.1 | Scaffold6232 | 369                     | AA                              | TT                | 1946707625               |
| SNP_P3_182054_372  | NW_004520050.1 | Scaffold6232 | 372                     | TT                              | CC                | 1946707627               |
| SNP_P3_182055_1705 | NW_004520055.1 | Scaffold6238 | 1705                    | GG                              | TT                | 1946707629               |
| SNP_P3_182056_1721 | NW_004520055.1 | Scaffold6238 | 1721                    | CC                              | AA                | 1946707631               |
| SNP_P3_182058_1749 | NW_004520055.1 | Scaffold6238 | 1749                    | GG                              | AA                | 1946707633               |
| SNP_P3_182059_1779 | NW_004520055.1 | Scaffold6238 | 1779                    | AA                              | GG                | 1946707635               |
| SNP_P3_182060_64   | NW_004520060.1 | Scaffold6256 | 64                      | TT                              | CC                | 1946707637               |
| SNP_P3_182061_88   | NW_004520060.1 | Scaffold6256 | 88                      | TT                              | GG                | 1946707639               |
| SNP_P3_182062_107  | NW_004520060.1 | Scaffold6256 | 107                     | CC                              | GG                | 1946707641               |
| SNP_P3_182063_134  | NW_004520063.1 | Scaffold6262 | 134                     | GG                              | TT                | 1946707643               |
| SNP_P3_182064_220  | NW_004520063.1 | Scaffold6262 | 220                     | TT                              | GG                | 1946707645               |
| SNP_P3_182065_1387 | NW_004520072.1 | Scaffold6276 | 1387                    | AA                              | TT                | 1946707647               |
| SNP_P3_182066_433  | NW_004520075.1 | Scaffold6283 | 433                     | TT                              | GG                | 1946707649               |
| SNP_P3_182067_651  | NW_004520075.1 | Scaffold6283 | 651                     | TT                              | GG                | 1946707651               |
| SNP_P3_182068_678  | NW_004520075.1 | Scaffold6283 | 678                     | GG                              | TT                | 1946707653               |
| SNP_P3_182069_1036 | NW_004520084.1 | Scaffold6294 | 1036                    | CC                              | AA                | 1946707655               |
| SNP_P3_182070_1039 | NW_004520084.1 | Scaffold6294 | 1039                    | TT                              | CC                | 1946707657               |
| SNP_P3_182071_658  | NW_004520087.1 | Scaffold6300 | 658                     | GG                              | TT                | 1946707659               |
| SNP_P3_182072_890  | NW_004520087.1 | Scaffold6300 | 890                     | GG                              | CC                | 1946707662               |
| SNP_P3_182073_1143 | NW_004520087.1 | Scaffold6300 | 1143                    | AA                              | TT                | 1946707664               |
| SNP_P3_182074_1185 | NW_004520087.1 | Scaffold6300 | 1185                    | GG                              | CC                | 1946707666               |
| SNP_P3_182075_1240 | NW_004520087.1 | Scaffold6300 | 1240                    | TT                              | CC                | 1946707668               |
| SNP_P3_182076_1246 | NW_004520087.1 | Scaffold6300 | 1246                    | TT                              | AA                | 1946707669               |
| SNP_P3_182077_1289 | NW_004520087.1 | Scaffold6300 | 1289                    | TT                              | AA                | 1946707670               |
| SNP_P3_182078_1367 | NW_004520087.1 | Scaffold6300 | 1367                    | GG                              | TT                | 1946707671               |
| SNP_P3_182079_1369 | NW_004520087.1 | Scaffold6300 | 1369                    | GG                              | AA                | 1946707672               |
| SNP_P3_182080_1375 | NW_004520087.1 | Scaffold6300 | 1375                    | TT                              | AA                | 1946707674               |
| SNP_P3_182081_1405 | NW_004520087.1 | Scaffold6300 | 1405                    | TT                              | GG                | 1946707676               |
| SNP_P3_182082_1421 | NW_004520087.1 | Scaffold6300 | 1421                    | TT                              | CC                | 1946707678               |

| SNPs IDs            | Chromosome IDs | Chromosomes  | Physical positions (bp) | CDC Frontier (Reference genome) | (Pusa 256 & HPNB) | NCBI SNPdb Accession IDs |
|---------------------|----------------|--------------|-------------------------|---------------------------------|-------------------|--------------------------|
| SNP_P3_182083_1432  | NW_004520087.1 | Scaffold6300 | 1432                    | CC                              | TT                | 1946707680               |
| SNP_P3_182084_1550  | NW_004520087.1 | Scaffold6300 | 1550                    | TT                              | CC                | 1946707682               |
| SNP_P3_182085_1679  | NW_004520087.1 | Scaffold6300 | 1679                    | TT                              | CC                | 1946707684               |
| SNP_P3_182086_1884  | NW_004520087.1 | Scaffold6300 | 1884                    | CC                              | TT                | 1946707686               |
| SNP_P3_182087_2506  | NW_004520087.1 | Scaffold6300 | 2506                    | CC                              | GG                | 1946707688               |
| SNP_P3_182088_2530  | NW_004520087.1 | Scaffold6300 | 2530                    | GG                              | CC                | 1946707690               |
| SNP_P3_182089_2634  | NW_004520087.1 | Scaffold6300 | 2634                    | GG                              | AA                | 1946707692               |
| SNP_P3_182090_3051  | NW_004520087.1 | Scaffold6300 | 3051                    | AA                              | TT                | 1946707694               |
| SNP_P3_182091_3182  | NW_004520087.1 | Scaffold6300 | 3182                    | AA                              | CC                | 1946707696               |
| SNP_P3_182092_3270  | NW_004520087.1 | Scaffold6300 | 3270                    | AA                              | TT                | 1946707698               |
| SNP_P3_182093_3309  | NW_004520087.1 | Scaffold6300 | 3309                    | TT                              | AA                | 1946707700               |
| SNP_P3_182094_3341  | NW_004520087.1 | Scaffold6300 | 3341                    | AA                              | TT                | 1946707702               |
| SNP_P3_182095_3343  | NW_004520087.1 | Scaffold6300 | 3343                    | GG                              | TT                | 1946707704               |
| SNP_P3_182096_3385  | NW_004520087.1 | Scaffold6300 | 3385                    | AA                              | GG                | 1946707706               |
| SNP_P3_182097_3429  | NW_004520087.1 | Scaffold6300 | 3429                    | GG                              | CC                | 1946707708               |
| SNP_P3_182098_3500  | NW_004520087.1 | Scaffold6300 | 3500                    | AA                              | GG                | 1946707710               |
| SNP_P3_182099_4412  | NW_004520087.1 | Scaffold6300 | 4412                    | AA                              | CC                | 1946707712               |
| SNP_P3_182100_4645  | NW_004520087.1 | Scaffold6300 | 4645                    | CC                              | AA                | 1946707714               |
| SNP_P3_182101_11044 | NW_004520087.1 | Scaffold6300 | 11044                   | TT                              | GG                | 1946707716               |
| SNP_P3_182102_11149 | NW_004520087.1 | Scaffold6300 | 11149                   | AA                              | TT                | 1946707718               |
| SNP_P3_182103_11212 | NW_004520087.1 | Scaffold6300 | 11212                   | GG                              | TT                | 1946707720               |
| SNP_P3_182104_11240 | NW_004520087.1 | Scaffold6300 | 11240                   | GG                              | CC                | 1946707722               |
| SNP_P3_182105_11251 | NW_004520087.1 | Scaffold6300 | 11251                   | TT                              | CC                | 1946707724               |
| SNP_P3_182106_11266 | NW_004520087.1 | Scaffold6300 | 11266                   | GG                              | AA                | 1946707726               |
| SNP_P3_182107_11334 | NW_004520087.1 | Scaffold6300 | 11334                   | AA                              | GG                | 1946707728               |
| SNP_P3_182108_3587  | NW_004520090.1 | Scaffold6303 | 3587                    | AA                              | TT                | 1946707730               |
| SNP_P3_182109_346   | NW_004520091.1 | Scaffold6304 | 346                     | CC                              | TT                | 1946707732               |
| SNP_P3_182110_359   | NW_004520091.1 | Scaffold6304 | 359                     | GG                              | CC                | 1946707734               |
| SNP_P3_182111_460   | NW_004520091.1 | Scaffold6304 | 460                     | AA                              | GG                | 1946707736               |
| SNP_P3_182112_515   | NW_004520091.1 | Scaffold6304 | 515                     | AA                              | GG                | 1946707738               |
| SNP_P3_182114_448   | NW_004520093.1 | Scaffold6307 | 448                     | AA                              | GG                | 1946707740               |
| SNP_P3_182115_826   | NW_004520093.1 | Scaffold6307 | 826                     | AA                              | TT                | 1946707742               |
| SNP_P3_182117_958   | NW_004520093.1 | Scaffold6307 | 958                     | GG                              | AA                | 1946707745               |
| SNP_P3_182118_706   | NW_004520096.1 | Scaffold6314 | 706                     | CC                              | TT                | 1946707747               |
| SNP_P3_182119_1012  | NW_004520096.1 | Scaffold6314 | 1012                    | TT                              | AA                | 1946707750               |
| SNP_P3_182120_1179  | NW_004520096.1 | Scaffold6314 | 1179                    | TT                              | GG                | 1946707752               |
| SNP_P3_182121_1242  | NW_004520096.1 | Scaffold6314 | 1242                    | AA                              | TT                | 1946707754               |
| SNP_P3_182122_1245  | NW_004520096.1 | Scaffold6314 | 1245                    | AA                              | GG                | 1946707756               |
| SNP_P3_182123_627   | NW_004520097.1 | Scaffold6317 | 627                     | GG                              | TT                | 1946707758               |
| SNP_P3_182124_633   | NW_004520097.1 | Scaffold6317 | 633                     | GG                              | AA                | 1946707761               |
| SNP_P3_182125_661   | NW_004520097.1 | Scaffold6317 | 661                     | CC                              | TT                | 1946707763               |
| SNP_P3_182126_7382  | NW_004520098.1 | Scaffold6318 | 7382                    | CC                              | TT                | 1946707765               |

| SNPs IDs            | Chromosome IDs | Chromosomes  | Physical positions (bp) | CDC Frontier (Reference genome) | (Pusa 256 & HPNB) | NCBI SNPdb Accession IDs |
|---------------------|----------------|--------------|-------------------------|---------------------------------|-------------------|--------------------------|
| SNP_P3_182127_16857 | NW_004520098.1 | Scaffold6318 | 16857                   | GG                              | AA                | 1946707767               |
| SNP_P3_182128_16960 | NW_004520098.1 | Scaffold6318 | 16960                   | GG                              | TT                | 1946707769               |
| SNP_P3_182129_16973 | NW_004520098.1 | Scaffold6318 | 16973                   | TT                              | CC                | 1946707771               |
| SNP_P3_182130_17123 | NW_004520098.1 | Scaffold6318 | 17123                   | TT                              | AA                | 1946707774               |
| SNP_P3_182131_17190 | NW_004520098.1 | Scaffold6318 | 17190                   | CC                              | AA                | 1946707776               |
| SNP_P3_182132_17883 | NW_004520098.1 | Scaffold6318 | 17883                   | TT                              | GG                | 1946707778               |
| SNP_P3_182133_17888 | NW_004520098.1 | Scaffold6318 | 17888                   | GG                              | AA                | 1946707780               |
| SNP_P3_182134_4373  | NW_004520100.1 | Scaffold6322 | 4373                    | CC                              | AA                | 1946707782               |
| SNP_P3_182135_4374  | NW_004520100.1 | Scaffold6322 | 4374                    | TT                              | CC                | 1946707785               |
| SNP_P3_182136_4426  | NW_004520100.1 | Scaffold6322 | 4426                    | AA                              | GG                | 1946707787               |
| SNP_P3_182137_4443  | NW_004520100.1 | Scaffold6322 | 4443                    | AA                              | CC                | 1946707790               |
| SNP_P3_182138_4480  | NW_004520100.1 | Scaffold6322 | 4480                    | CC                              | GG                | 1946707792               |
| SNP_P3_182139_4483  | NW_004520100.1 | Scaffold6322 | 4483                    | AA                              | GG                | 1946707794               |
| SNP_P3_182140_4485  | NW_004520100.1 | Scaffold6322 | 4485                    | TT                              | AA                | 1946707797               |
| SNP_P3_182141_470   | NW_004520101.1 | Scaffold6324 | 470                     | CC                              | GG                | 1946707800               |
| SNP_P3_182142_523   | NW_004520101.1 | Scaffold6324 | 523                     | AA                              | TT                | 1946707802               |
| SNP_P3_182143_579   | NW_004520101.1 | Scaffold6324 | 579                     | GG                              | AA                | 1946707804               |
| SNP_P3_182144_694   | NW_004520101.1 | Scaffold6324 | 694                     | TT                              | GG                | 1946707806               |
| SNP_P3_182145_709   | NW_004520101.1 | Scaffold6324 | 709                     | GG                              | AA                | 1946707809               |
| SNP_P3_182146_827   | NW_004520101.1 | Scaffold6324 | 827                     | CC                              | TT                | 1946707811               |
| SNP_P3_182147_891   | NW_004520101.1 | Scaffold6324 | 891                     | GG                              | AA                | 1946707813               |
| SNP_P3_182148_240   | NW_004520104.1 | Scaffold6327 | 240                     | AA                              | CC                | 1946707815               |
| SNP_P3_182149_242   | NW_004520104.1 | Scaffold6327 | 242                     | AA                              | TT                | 1946707817               |
| SNP_P3_182150_245   | NW_004520104.1 | Scaffold6327 | 245                     | AA                              | TT                | 1946707819               |
| SNP_P3_182151_246   | NW_004520104.1 | Scaffold6327 | 246                     | AA                              | TT                | 1946707821               |
| SNP_P3_182152_247   | NW_004520104.1 | Scaffold6327 | 247                     | TT                              | GG                | 1946707823               |
| SNP_P3_182153_2767  | NW_004520106.1 | Scaffold6330 | 2767                    | AA                              | GG                | 1946707825               |
| SNP_P3_182154_346   | NW_004520108.1 | Scaffold6332 | 346                     | AA                              | GG                | 1946707827               |
| SNP_P3_182155_385   | NW_004520108.1 | Scaffold6332 | 385                     | GG                              | AA                | 1946707829               |
| SNP_P3_182156_439   | NW_004520108.1 | Scaffold6332 | 439                     | CC                              | TT                | 1946707832               |
| SNP_P3_182157_2032  | NW_004520108.1 | Scaffold6332 | 2032                    | AA                              | TT                | 1946707834               |
| SNP_P3_182158_688   | NW_004520111.1 | Scaffold6335 | 688                     | AA                              | TT                | 1946707837               |
| SNP_P3_182159_750   | NW_004520111.1 | Scaffold6335 | 750                     | TT                              | AA                | 1946707839               |
| SNP_P3_182160_774   | NW_004520111.1 | Scaffold6335 | 774                     | GG                              | CC                | 1946707841               |
| SNP_P3_182161_803   | NW_004520111.1 | Scaffold6335 | 803                     | AA                              | GG                | 1946707843               |
| SNP_P3_182162_819   | NW_004520111.1 | Scaffold6335 | 819                     | AA                              | CC                | 1946707845               |
| SNP_P3_182163_848   | NW_004520111.1 | Scaffold6335 | 848                     | AA                              | CC                | 1946707847               |
| SNP_P3_182164_871   | NW_004520111.1 | Scaffold6335 | 871                     | GG                              | TT                | 1946707849               |
| SNP_P3_182165_873   | NW_004520111.1 | Scaffold6335 | 873                     | AA                              | GG                | 1946707852               |
| SNP_P3_182166_889   | NW_004520111.1 | Scaffold6335 | 889                     | AA                              | GG                | 1946707854               |
| SNP_P3_182167_915   | NW_004520111.1 | Scaffold6335 | 915                     | AA                              | CC                | 1946707856               |
| SNP_P3_182168_919   | NW_004520111.1 | Scaffold6335 | 919                     | TT                              | CC                | 1946707858               |



| SNPs IDs            | Chromosome IDs | Chromosomes  | Physical positions (bp) | CDC Frontier (Reference genome) | (Pusa 256 & HPNB) | NCBI SNPdb Accession IDs |
|---------------------|----------------|--------------|-------------------------|---------------------------------|-------------------|--------------------------|
| SNP_P3_182169_923   | NW_004520111.1 | Scaffold6335 | 923                     | GG                              | TT                | 1946707860               |
| SNP_P3_182170_983   | NW_004520111.1 | Scaffold6335 | 983                     | GG                              | AA                | 1946707862               |
| SNP_P3_182171_989   | NW_004520111.1 | Scaffold6335 | 989                     | AA                              | GG                | 1946707864               |
| SNP_P3_182172_990   | NW_004520111.1 | Scaffold6335 | 990                     | TT                              | GG                | 1946707866               |
| SNP_P3_182173_991   | NW_004520111.1 | Scaffold6335 | 991                     | TT                              | GG                | 1946707868               |
| SNP_P3_182174_997   | NW_004520111.1 | Scaffold6335 | 997                     | AA                              | GG                | 1946707870               |
| SNP_P3_182176_1342  | NW_004520114.1 | Scaffold6343 | 1342                    | GG                              | TT                | 1946707872               |
| SNP_P3_182177_2277  | NW_004520114.1 | Scaffold6343 | 2277                    | TT                              | CC                | 1946707874               |
| SNP_P3_182178_2285  | NW_004520114.1 | Scaffold6343 | 2285                    | AA                              | GG                | 1946707878               |
| SNP_P3_182179_2316  | NW_004520114.1 | Scaffold6343 | 2316                    | AA                              | CC                | 1946707880               |
| SNP_P3_182180_2467  | NW_004520114.1 | Scaffold6343 | 2467                    | GG                              | TT                | 1946707882               |
| SNP_P3_182181_488   | NW_004520123.1 | Scaffold6360 | 488                     | TT                              | AA                | 1946707884               |
| SNP_P3_182182_32175 | NW_004520126.1 | Scaffold6367 | 32175                   | AA                              | GG                | 1946707886               |
| SNP_P3_182183_32181 | NW_004520126.1 | Scaffold6367 | 32181                   | AA                              | GG                | 1946707888               |
| SNP_P3_182184_32215 | NW_004520126.1 | Scaffold6367 | 32215                   | TT                              | CC                | 1946707890               |
| SNP_P3_182185_32228 | NW_004520126.1 | Scaffold6367 | 32228                   | GG                              | AA                | 1946707892               |
| SNP_P3_182186_32239 | NW_004520126.1 | Scaffold6367 | 32239                   | GG                              | AA                | 1946707894               |
| SNP_P3_182187_32287 | NW_004520126.1 | Scaffold6367 | 32287                   | TT                              | GG                | 1946707896               |
| SNP_P3_182188_32367 | NW_004520126.1 | Scaffold6367 | 32367                   | AA                              | GG                | 1946707898               |
| SNP_P3_182189_32385 | NW_004520126.1 | Scaffold6367 | 32385                   | GG                              | AA                | 1946707900               |
| SNP_P3_182190_32411 | NW_004520126.1 | Scaffold6367 | 32411                   | CC                              | AA                | 1946707902               |
| SNP_P3_182191_32456 | NW_004520126.1 | Scaffold6367 | 32456                   | TT                              | GG                | 1946707904               |
| SNP_P3_182192_32460 | NW_004520126.1 | Scaffold6367 | 32460                   | AA                              | TT                | 1946707906               |
| SNP_P3_182193_32461 | NW_004520126.1 | Scaffold6367 | 32461                   | AA                              | TT                | 1946707908               |
| SNP_P3_182194_32462 | NW_004520126.1 | Scaffold6367 | 32462                   | AA                              | TT                | 1946707910               |
| SNP_P3_182195_32465 | NW_004520126.1 | Scaffold6367 | 32465                   | CC                              | TT                | 1946707912               |
| SNP_P3_182196_32467 | NW_004520126.1 | Scaffold6367 | 32467                   | TT                              | CC                | 1946707914               |
| SNP_P3_182197_32469 | NW_004520126.1 | Scaffold6367 | 32469                   | AA                              | TT                | 1946707916               |
| SNP_P3_182198_32501 | NW_004520126.1 | Scaffold6367 | 32501                   | GG                              | CC                | 1946707920               |
| SNP_P3_182199_32553 | NW_004520126.1 | Scaffold6367 | 32553                   | TT                              | AA                | 1946707922               |
| SNP_P3_182200_32630 | NW_004520126.1 | Scaffold6367 | 32630                   | GG                              | AA                | 1946707924               |
| SNP_P3_182201_32651 | NW_004520126.1 | Scaffold6367 | 32651                   | AA                              | TT                | 1946707926               |
| SNP_P3_182202_32653 | NW_004520126.1 | Scaffold6367 | 32653                   | GG                              | AA                | 1946707928               |
| SNP_P3_182203_32727 | NW_004520126.1 | Scaffold6367 | 32727                   | AA                              | GG                | 1946707930               |
| SNP_P3_182204_32731 | NW_004520126.1 | Scaffold6367 | 32731                   | CC                              | TT                | 1946707932               |
| SNP_P3_182205_32733 | NW_004520126.1 | Scaffold6367 | 32733                   | GG                              | AA                | 1946707934               |
| SNP_P3_182206_32831 | NW_004520126.1 | Scaffold6367 | 32831                   | AA                              | GG                | 1946707936               |
| SNP_P3_182207_32856 | NW_004520126.1 | Scaffold6367 | 32856                   | CC                              | GG                | 1946707938               |
| SNP_P3_182208_32902 | NW_004520126.1 | Scaffold6367 | 32902                   | TT                              | GG                | 1946707940               |
| SNP_P3_182209_32966 | NW_004520126.1 | Scaffold6367 | 32966                   | CC                              | TT                | 1946707942               |
| SNP_P3_182210_32985 | NW_004520126.1 | Scaffold6367 | 32985                   | AA                              | GG                | 1946707944               |
| SNP_P3_182211_33029 | NW_004520126.1 | Scaffold6367 | 33029                   | GG                              | TT                | 1946707946               |

| SNPs IDs            | Chromosome IDs | Chromosomes  | Physical positions (bp) | CDC Frontier (Reference genome) | (Pusa 256 & HPNB) | NCBI SNPdb Accession IDs |
|---------------------|----------------|--------------|-------------------------|---------------------------------|-------------------|--------------------------|
| SNP_P3_182212_33053 | NW_004520126.1 | Scaffold6367 | 33053                   | GG                              | AA                | 1946707948               |
| SNP_P3_182213_33068 | NW_004520126.1 | Scaffold6367 | 33068                   | TT                              | CC                | 1946707950               |
| SNP_P3_182214_33144 | NW_004520126.1 | Scaffold6367 | 33144                   | GG                              | CC                | 1946707952               |
| SNP_P3_182215_33148 | NW_004520126.1 | Scaffold6367 | 33148                   | AA                              | GG                | 1946707954               |
| SNP_P3_182216_33175 | NW_004520126.1 | Scaffold6367 | 33175                   | CC                              | TT                | 1946707956               |
| SNP_P3_182217_33179 | NW_004520126.1 | Scaffold6367 | 33179                   | GG                              | AA                | 1946707960               |
| SNP_P3_182218_33186 | NW_004520126.1 | Scaffold6367 | 33186                   | GG                              | AA                | 1946707962               |
| SNP_P3_182219_1082  | NW_004520127.1 | Scaffold6373 | 1082                    | CC                              | AA                | 1946707964               |
| SNP_P3_182220_1283  | NW_004520127.1 | Scaffold6373 | 1283                    | GG                              | AA                | 1946707966               |
| SNP_P3_182221_1291  | NW_004520127.1 | Scaffold6373 | 1291                    | AA                              | CC                | 1946707968               |
| SNP_P3_182222_1300  | NW_004520127.1 | Scaffold6373 | 1300                    | GG                              | AA                | 1946707970               |
| SNP_P3_182223_1301  | NW_004520127.1 | Scaffold6373 | 1301                    | TT                              | CC                | 1946707972               |
| SNP_P3_182224_1306  | NW_004520127.1 | Scaffold6373 | 1306                    | GG                              | AA                | 1946707974               |
| SNP_P3_182225_1316  | NW_004520127.1 | Scaffold6373 | 1316                    | GG                              | AA                | 1946707976               |
| SNP_P3_182226_614   | NW_004520129.1 | Scaffold6375 | 614                     | GG                              | CC                | 1946707978               |
| SNP_P3_182227_643   | NW_004520129.1 | Scaffold6375 | 643                     | GG                              | CC                | 1946707980               |
| SNP_P3_182228_708   | NW_004520129.1 | Scaffold6375 | 708                     | TT                              | CC                | 1946707982               |
| SNP_P3_182229_817   | NW_004520129.1 | Scaffold6375 | 817                     | AA                              | GG                | 1946707983               |
| SNP_P3_182230_837   | NW_004520129.1 | Scaffold6375 | 837                     | CC                              | GG                | 1946707985               |
| SNP_P3_182231_900   | NW_004520129.1 | Scaffold6375 | 900                     | AA                              | TT                | 1946707987               |
| SNP_P3_182232_937   | NW_004520130.1 | Scaffold6376 | 937                     | AA                              | GG                | 1946707989               |
| SNP_P3_182235_1246  | NW_004520130.1 | Scaffold6376 | 1246                    | AA                              | CC                | 1946707991               |
| SNP_P3_182236_1254  | NW_004520130.1 | Scaffold6376 | 1254                    | AA                              | GG                | 1946707993               |
| SNP_P3_182237_1307  | NW_004520130.1 | Scaffold6376 | 1307                    | TT                              | AA                | 1946707995               |
| SNP_P3_182238_2738  | NW_004520131.1 | Scaffold6377 | 2738                    | GG                              | TT                | 1946707997               |
| SNP_P3_182239_2739  | NW_004520131.1 | Scaffold6377 | 2739                    | AA                              | CC                | 1946707999               |
| SNP_P3_182240_2972  | NW_004520131.1 | Scaffold6377 | 2972                    | GG                              | AA                | 1946708001               |
| SNP_P3_182241_3050  | NW_004520131.1 | Scaffold6377 | 3050                    | TT                              | CC                | 1946708003               |
| SNP_P3_182242_3150  | NW_004520131.1 | Scaffold6377 | 3150                    | AA                              | GG                | 1946708005               |
| SNP_P3_182243_796   | NW_004520134.1 | Scaffold6382 | 796                     | GG                              | CC                | 1946708007               |
| SNP_P3_182244_807   | NW_004520134.1 | Scaffold6382 | 807                     | CC                              | TT                | 1946708009               |
| SNP_P3_182246_252   | NW_004520135.1 | Scaffold6389 | 252                     | TT                              | CC                | 1946708011               |
| SNP_P3_182247_290   | NW_004520135.1 | Scaffold6389 | 290                     | GG                              | AA                | 1946708013               |
| SNP_P3_182248_608   | NW_004520135.1 | Scaffold6389 | 608                     | CC                              | AA                | 1946708015               |
| SNP_P3_182249_609   | NW_004520135.1 | Scaffold6389 | 609                     | AA                              | GG                | 1946708017               |
| SNP_P3_182250_213   | NW_004520136.1 | Scaffold6391 | 213                     | CC                              | TT                | 1946708019               |
| SNP_P3_182251_2292  | NW_004520136.1 | Scaffold6391 | 2292                    | TT                              | CC                | 1946708021               |
| SNP_P3_182252_2369  | NW_004520136.1 | Scaffold6391 | 2369                    | GG                              | AA                | 1946708023               |
| SNP_P3_182253_3124  | NW_004520136.1 | Scaffold6391 | 3124                    | AA                              | GG                | 1946708025               |
| SNP_P3_182254_3163  | NW_004520136.1 | Scaffold6391 | 3163                    | CC                              | AA                | 1946708027               |
| SNP_P3_182255_713   | NW_004520137.1 | Scaffold6393 | 713                     | TT                              | AA                | 1946708029               |
| SNP_P3_182256_987   | NW_004520138.1 | Scaffold6394 | 987                     | GG                              | AA                | 1946708031               |

| SNPs IDs           | Chromosome IDs | Chromosomes  | Physical positions (bp) | CDC Frontier (Reference genome) | (Pusa 256 & HPNB) | NCBI SNPdb Accession IDs |
|--------------------|----------------|--------------|-------------------------|---------------------------------|-------------------|--------------------------|
| SNP_P3_182257_1225 | NW_004520138.1 | Scaffold6394 | 1225                    | CC                              | TT                | 1946708034               |
| SNP_P3_182258_64   | NW_004520139.1 | Scaffold6395 | 64                      | GG                              | AA                | 1946708036               |
| SNP_P3_182259_75   | NW_004520139.1 | Scaffold6395 | 75                      | CC                              | AA                | 1946708038               |
| SNP_P3_182260_329  | NW_004520139.1 | Scaffold6395 | 329                     | GG                              | AA                | 1946708040               |
| SNP_P3_182261_553  | NW_004520139.1 | Scaffold6395 | 553                     | AA                              | GG                | 1946708042               |
| SNP_P3_182262_184  | NW_004520144.1 | Scaffold6403 | 184                     | AA                              | GG                | 1946708044               |
| SNP_P3_182263_248  | NW_004520144.1 | Scaffold6403 | 248                     | AA                              | CC                | 1946708046               |
| SNP_P3_182264_507  | NW_004520144.1 | Scaffold6403 | 507                     | TT                              | GG                | 1946708048               |
| SNP_P3_182265_512  | NW_004520144.1 | Scaffold6403 | 512                     | AA                              | GG                | 1946708050               |
| SNP_P3_182266_1421 | NW_004520145.1 | Scaffold6404 | 1421                    | AA                              | TT                | 1946708052               |
| SNP_P3_182267_1558 | NW_004520145.1 | Scaffold6404 | 1558                    | TT                              | AA                | 1946708054               |
| SNP_P3_182268_2060 | NW_004520145.1 | Scaffold6404 | 2060                    | AA                              | TT                | 1946708056               |
| SNP_P3_182269_64   | NW_004520146.1 | Scaffold6405 | 64                      | AA                              | TT                | 1946708058               |
| SNP_P3_182270_1917 | NW_004520148.1 | Scaffold6410 | 1917                    | CC                              | TT                | 1946708060               |
| SNP_P3_182271_1944 | NW_004520148.1 | Scaffold6410 | 1944                    | GG                              | AA                | 1946708062               |
| SNP_P3_182272_1949 | NW_004520148.1 | Scaffold6410 | 1949                    | TT                              | AA                | 1946708064               |
| SNP_P3_182273_1982 | NW_004520148.1 | Scaffold6410 | 1982                    | CC                              | TT                | 1946708066               |
| SNP_P3_182274_2142 | NW_004520148.1 | Scaffold6410 | 2142                    | AA                              | TT                | 1946708068               |
| SNP_P3_182275_2160 | NW_004520148.1 | Scaffold6410 | 2160                    | GG                              | AA                | 1946708070               |
| SNP_P3_182276_2169 | NW_004520148.1 | Scaffold6410 | 2169                    | TT                              | AA                | 1946708073               |
| SNP_P3_182277_2181 | NW_004520148.1 | Scaffold6410 | 2181                    | CC                              | TT                | 1946708075               |
| SNP_P3_182278_2182 | NW_004520148.1 | Scaffold6410 | 2182                    | CC                              | TT                | 1946708077               |
| SNP_P3_182279_2203 | NW_004520148.1 | Scaffold6410 | 2203                    | TT                              | CC                | 1946708079               |
| SNP_P3_182280_3727 | NW_004520148.1 | Scaffold6410 | 3727                    | GG                              | AA                | 1946708081               |
| SNP_P3_182281_3806 | NW_004520148.1 | Scaffold6410 | 3806                    | TT                              | AA                | 1946708083               |
| SNP_P3_182282_3809 | NW_004520148.1 | Scaffold6410 | 3809                    | TT                              | CC                | 1946708085               |
| SNP_P3_182283_3832 | NW_004520148.1 | Scaffold6410 | 3832                    | TT                              | CC                | 1946708087               |
| SNP_P3_182284_3887 | NW_004520148.1 | Scaffold6410 | 3887                    | CC                              | TT                | 1946708089               |
| SNP_P3_182285_3889 | NW_004520148.1 | Scaffold6410 | 3889                    | AA                              | GG                | 1946708091               |
| SNP_P3_182286_3975 | NW_004520148.1 | Scaffold6410 | 3975                    | GG                              | AA                | 1946708093               |
| SNP_P3_182287_3976 | NW_004520148.1 | Scaffold6410 | 3976                    | AA                              | GG                | 1946708095               |
| SNP_P3_182288_3990 | NW_004520148.1 | Scaffold6410 | 3990                    | TT                              | GG                | 1946708097               |
| SNP_P3_182289_3999 | NW_004520148.1 | Scaffold6410 | 3999                    | GG                              | TT                | 1946708099               |
| SNP_P3_182290_4018 | NW_004520148.1 | Scaffold6410 | 4018                    | CC                              | GG                | 1946708101               |
| SNP_P3_182291_4028 | NW_004520148.1 | Scaffold6410 | 4028                    | GG                              | AA                | 1946708103               |
| SNP_P3_182292_4069 | NW_004520148.1 | Scaffold6410 | 4069                    | GG                              | AA                | 1946708105               |
| SNP_P3_182293_4135 | NW_004520148.1 | Scaffold6410 | 4135                    | TT                              | AA                | 1946708107               |
| SNP_P3_182294_4146 | NW_004520148.1 | Scaffold6410 | 4146                    | GG                              | CC                | 1946708109               |
| SNP_P3_182295_4198 | NW_004520148.1 | Scaffold6410 | 4198                    | AA                              | TT                | 1946708112               |
| SNP_P3_182296_4236 | NW_004520148.1 | Scaffold6410 | 4236                    | CC                              | TT                | 1946708114               |
| SNP_P3_182297_4340 | NW_004520148.1 | Scaffold6410 | 4340                    | AA                              | GG                | 1946708116               |
| SNP_P3_182298_680  | NW_004520151.1 | Scaffold6414 | 680                     | TT                              | CC                | 1946708118               |

| SNPs IDs            | Chromosome IDs | Chromosomes  | Physical positions (bp) | CDC Frontier (Reference genome) | (Pusa 256 & HPNB) | NCBI SNPdb Accession IDs |
|---------------------|----------------|--------------|-------------------------|---------------------------------|-------------------|--------------------------|
| SNP_P3_182299_1960  | NW_004520151.1 | Scaffold6414 | 1960                    | TT                              | CC                | 1946708120               |
| SNP_P3_182300_145   | NW_004520157.1 | Scaffold6429 | 145                     | TT                              | CC                | 1946708122               |
| SNP_P3_182301_147   | NW_004520157.1 | Scaffold6429 | 147                     | AA                              | TT                | 1946708124               |
| SNP_P3_182302_165   | NW_004520157.1 | Scaffold6429 | 165                     | TT                              | GG                | 1946708126               |
| SNP_P3_182303_244   | NW_004520157.1 | Scaffold6429 | 244                     | AA                              | GG                | 1946708128               |
| SNP_P3_182304_361   | NW_004520157.1 | Scaffold6429 | 361                     | GG                              | TT                | 1946708130               |
| SNP_P3_182305_670   | NW_004520157.1 | Scaffold6429 | 670                     | GG                              | CC                | 1946708132               |
| SNP_P3_182306_4080  | NW_004520157.1 | Scaffold6429 | 4080                    | AA                              | TT                | 1946708134               |
| SNP_P3_182307_4213  | NW_004520157.1 | Scaffold6429 | 4213                    | TT                              | CC                | 1946708136               |
| SNP_P3_182308_4801  | NW_004520157.1 | Scaffold6429 | 4801                    | GG                              | TT                | 1946708139               |
| SNP_P3_182310_4975  | NW_004520157.1 | Scaffold6429 | 4975                    | AA                              | TT                | 1946708141               |
| SNP_P3_182311_4985  | NW_004520157.1 | Scaffold6429 | 4985                    | GG                              | AA                | 1946708143               |
| SNP_P3_182312_5730  | NW_004520157.1 | Scaffold6429 | 5730                    | CC                              | TT                | 1946708145               |
| SNP_P3_182313_5822  | NW_004520157.1 | Scaffold6429 | 5822                    | TT                              | AA                | 1946708147               |
| SNP_P3_182314_131   | NW_004520159.1 | Scaffold6432 | 131                     | TT                              | CC                | 1946708150               |
| SNP_P3_182315_146   | NW_004520159.1 | Scaffold6432 | 146                     | AA                              | GG                | 1946708152               |
| SNP_P3_182316_181   | NW_004520159.1 | Scaffold6432 | 181                     | GG                              | AA                | 1946708154               |
| SNP_P3_182317_214   | NW_004520159.1 | Scaffold6432 | 214                     | GG                              | AA                | 1946708157               |
| SNP_P3_182318_215   | NW_004520159.1 | Scaffold6432 | 215                     | GG                              | AA                | 1946708159               |
| SNP_P3_182319_550   | NW_004520159.1 | Scaffold6432 | 550                     | GG                              | AA                | 1946708161               |
| SNP_P3_182320_3188  | NW_004520159.1 | Scaffold6432 | 3188                    | GG                              | AA                | 1946708163               |
| SNP_P3_182321_3406  | NW_004520159.1 | Scaffold6432 | 3406                    | CC                              | AA                | 1946708165               |
| SNP_P3_182322_3413  | NW_004520159.1 | Scaffold6432 | 3413                    | TT                              | CC                | 1946708167               |
| SNP_P3_182323_3532  | NW_004520159.1 | Scaffold6432 | 3532                    | GG                              | TT                | 1946708169               |
| SNP_P3_182324_3582  | NW_004520159.1 | Scaffold6432 | 3582                    | CC                              | TT                | 1946708171               |
| SNP_P3_182325_3592  | NW_004520159.1 | Scaffold6432 | 3592                    | AA                              | TT                | 1946708173               |
| SNP_P3_182326_406   | NW_004520164.1 | Scaffold6437 | 406                     | TT                              | GG                | 1946708175               |
| SNP_P3_182327_483   | NW_004520164.1 | Scaffold6437 | 483                     | GG                              | AA                | 1946708177               |
| SNP_P3_182328_498   | NW_004520164.1 | Scaffold6437 | 498                     | GG                              | AA                | 1946708179               |
| SNP_P3_182329_560   | NW_004520164.1 | Scaffold6437 | 560                     | AA                              | GG                | 1946708181               |
| SNP_P3_182330_643   | NW_004520164.1 | Scaffold6437 | 643                     | AA                              | TT                | 1946708183               |
| SNP_P3_182331_716   | NW_004520164.1 | Scaffold6437 | 716                     | TT                              | AA                | 1946708185               |
| SNP_P3_182332_1165  | NW_004520164.1 | Scaffold6437 | 1165                    | TT                              | CC                | 1946708187               |
| SNP_P3_182333_873   | NW_004520166.1 | Scaffold6440 | 873                     | AA                              | TT                | 1946708190               |
| SNP_P3_182334_365   | NW_004520171.1 | Scaffold6449 | 365                     | AA                              | CC                | 1946708193               |
| SNP_P3_182335_377   | NW_004520171.1 | Scaffold6449 | 377                     | AA                              | TT                | 1946708195               |
| SNP_P3_182336_309   | NW_004520172.1 | Scaffold6451 | 309                     | TT                              | CC                | 1946708197               |
| SNP_P3_182337_329   | NW_004520172.1 | Scaffold6451 | 329                     | AA                              | TT                | 1946708199               |
| SNP_P3_182338_618   | NW_004520175.1 | Scaffold6458 | 618                     | TT                              | AA                | 1946708201               |
| SNP_P3_182339_14479 | NW_004520175.1 | Scaffold6458 | 14479                   | TT                              | AA                | 1946708203               |
| SNP_P3_182340_14604 | NW_004520175.1 | Scaffold6458 | 14604                   | GG                              | CC                | 1946708205               |
| SNP_P3_182341_20602 | NW_004520175.1 | Scaffold6458 | 20602                   | TT                              | AA                | 1946708207               |

| SNPs IDs            | Chromosome IDs | Chromosomes  | Physical positions (bp) | CDC Frontier (Reference genome) | (Pusa 256 & HPNB) | NCBI SNPdb Accession IDs |
|---------------------|----------------|--------------|-------------------------|---------------------------------|-------------------|--------------------------|
| SNP_P3_182342_1613  | NW_004520180.1 | Scaffold6466 | 1613                    | AA                              | CC                | 1946708209               |
| SNP_P3_182343_1022  | NW_004520181.1 | Scaffold6469 | 1022                    | TT                              | AA                | 1946708211               |
| SNP_P3_182344_1327  | NW_004520181.1 | Scaffold6469 | 1327                    | CC                              | AA                | 1946708213               |
| SNP_P3_182345_1331  | NW_004520181.1 | Scaffold6469 | 1331                    | GG                              | AA                | 1946708215               |
| SNP_P3_182346_418   | NW_004520184.1 | Scaffold6472 | 418                     | AA                              | GG                | 1946708217               |
| SNP_P3_182347_468   | NW_004520184.1 | Scaffold6472 | 468                     | GG                              | CC                | 1946708219               |
| SNP_P3_182348_1167  | NW_004520185.1 | Scaffold6478 | 1167                    | AA                              | TT                | 1946708221               |
| SNP_P3_182349_1263  | NW_004520185.1 | Scaffold6478 | 1263                    | AA                              | GG                | 1946708223               |
| SNP_P3_182350_1293  | NW_004520185.1 | Scaffold6478 | 1293                    | AA                              | GG                | 1946708225               |
| SNP_P3_182351_21908 | NW_004520185.1 | Scaffold6478 | 21908                   | CC                              | GG                | 1946708229               |
| SNP_P3_182352_21988 | NW_004520185.1 | Scaffold6478 | 21988                   | TT                              | CC                | 1946708231               |
| SNP_P3_182353_22006 | NW_004520185.1 | Scaffold6478 | 22006                   | AA                              | GG                | 1946708233               |
| SNP_P3_182354_122   | NW_004520187.1 | Scaffold6480 | 122                     | GG                              | AA                | 1946708235               |
| SNP_P3_182355_143   | NW_004520187.1 | Scaffold6480 | 143                     | CC                              | GG                | 1946708238               |
| SNP_P3_182356_158   | NW_004520187.1 | Scaffold6480 | 158                     | AA                              | GG                | 1946708240               |
| SNP_P3_182357_299   | NW_004520187.1 | Scaffold6480 | 299                     | CC                              | TT                | 1946708242               |
| SNP_P3_182359_430   | NW_004520187.1 | Scaffold6480 | 430                     | CC                              | TT                | 1946708244               |
| SNP_P3_182360_436   | NW_004520187.1 | Scaffold6480 | 436                     | TT                              | CC                | 1946708246               |
| SNP_P3_182361_512   | NW_004520187.1 | Scaffold6480 | 512                     | TT                              | AA                | 1946708248               |
| SNP_P3_182363_569   | NW_004520187.1 | Scaffold6480 | 569                     | CC                              | TT                | 1946708250               |
| SNP_P3_182364_585   | NW_004520187.1 | Scaffold6480 | 585                     | AA                              | TT                | 1946708252               |
| SNP_P3_182365_607   | NW_004520187.1 | Scaffold6480 | 607                     | GG                              | AA                | 1946708254               |
| SNP_P3_182366_638   | NW_004520187.1 | Scaffold6480 | 638                     | AA                              | TT                | 1946708257               |
| SNP_P3_182368_751   | NW_004520187.1 | Scaffold6480 | 751                     | CC                              | TT                | 1946708259               |
| SNP_P3_182369_861   | NW_004520187.1 | Scaffold6480 | 861                     | GG                              | TT                | 1946708261               |
| SNP_P3_182370_878   | NW_004520187.1 | Scaffold6480 | 878                     | GG                              | CC                | 1946708263               |
| SNP_P3_182371_887   | NW_004520187.1 | Scaffold6480 | 887                     | CC                              | GG                | 1946708265               |
| SNP_P3_182372_890   | NW_004520187.1 | Scaffold6480 | 890                     | AA                              | CC                | 1946708268               |
| SNP_P3_182373_967   | NW_004520187.1 | Scaffold6480 | 967                     | CC                              | TT                | 1946708270               |
| SNP_P3_182374_974   | NW_004520187.1 | Scaffold6480 | 974                     | TT                              | AA                | 1946708272               |
| SNP_P3_182375_993   | NW_004520187.1 | Scaffold6480 | 993                     | GG                              | AA                | 1946708274               |
| SNP_P3_182376_1013  | NW_004520187.1 | Scaffold6480 | 1013                    | TT                              | CC                | 1946708276               |
| SNP_P3_182377_1144  | NW_004520187.1 | Scaffold6480 | 1144                    | TT                              | CC                | 1946708278               |
| SNP_P3_182378_1185  | NW_004520187.1 | Scaffold6480 | 1185                    | TT                              | CC                | 1946708280               |
| SNP_P3_182379_1217  | NW_004520187.1 | Scaffold6480 | 1217                    | AA                              | GG                | 1946708282               |
| SNP_P3_182380_1218  | NW_004520187.1 | Scaffold6480 | 1218                    | AA                              | GG                | 1946708284               |
| SNP_P3_182381_1290  | NW_004520187.1 | Scaffold6480 | 1290                    | TT                              | CC                | 1946708286               |
| SNP_P3_182382_1330  | NW_004520192.1 | Scaffold6489 | 1330                    | AA                              | TT                | 1946708288               |
| SNP_P3_182383_1337  | NW_004520192.1 | Scaffold6489 | 1337                    | AA                              | GG                | 1946708290               |
| SNP_P3_182384_1410  | NW_004520192.1 | Scaffold6489 | 1410                    | AA                              | GG                | 1946708293               |
| SNP_P3_182385_1415  | NW_004520192.1 | Scaffold6489 | 1415                    | AA                              | TT                | 1946708295               |
| SNP_P3_182386_1441  | NW_004520192.1 | Scaffold6489 | 1441                    | GG                              | AA                | 1946708297               |

| SNPs IDs           | Chromosome IDs | Chromosomes  | Physical positions (bp) | CDC Frontier (Reference genome) | (Pusa 256 & HPNB) | NCBI SNPdb Accession IDs |
|--------------------|----------------|--------------|-------------------------|---------------------------------|-------------------|--------------------------|
| SNP_P3_182387_1479 | NW_004520192.1 | Scaffold6489 | 1479                    | GG                              | AA                | 1946708299               |
| SNP_P3_182388_64   | NW_004520193.1 | Scaffold6490 | 64                      | GG                              | CC                | 1946708302               |
| SNP_P3_182389_180  | NW_004520193.1 | Scaffold6490 | 180                     | CC                              | AA                | 1946708304               |
| SNP_P3_182390_1725 | NW_004520194.1 | Scaffold6491 | 1725                    | TT                              | AA                | 1946708306               |
| SNP_P3_182391_412  | NW_004520195.1 | Scaffold6492 | 412                     | CC                              | TT                | 1946708308               |
| SNP_P3_182392_815  | NW_004520195.1 | Scaffold6492 | 815                     | CC                              | TT                | 1946708310               |
| SNP_P3_182394_848  | NW_004520195.1 | Scaffold6492 | 848                     | GG                              | TT                | 1946708312               |
| SNP_P3_182396_4322 | NW_004520196.1 | Scaffold6493 | 4322                    | GG                              | AA                | 1946708314               |
| SNP_P3_182397_4395 | NW_004520196.1 | Scaffold6493 | 4395                    | AA                              | GG                | 1946708316               |
| SNP_P3_182398_4936 | NW_004520196.1 | Scaffold6493 | 4936                    | AA                              | GG                | 1946708318               |
| SNP_P3_182399_1577 | NW_004520197.1 | Scaffold6494 | 1577                    | AA                              | GG                | 1946708320               |
| SNP_P3_182400_1578 | NW_004520197.1 | Scaffold6494 | 1578                    | GG                              | AA                | 1946708322               |
| SNP_P3_182401_1599 | NW_004520197.1 | Scaffold6494 | 1599                    | GG                              | CC                | 1946708324               |
| SNP_P3_182402_1604 | NW_004520197.1 | Scaffold6494 | 1604                    | GG                              | AA                | 1946708326               |
| SNP_P3_182403_3170 | NW_004520197.1 | Scaffold6494 | 3170                    | AA                              | CC                | 1946708328               |
| SNP_P3_182404_98   | NW_004520199.1 | Scaffold6496 | 98                      | CC                              | TT                | 1946708331               |
| SNP_P3_182405_162  | NW_004520199.1 | Scaffold6496 | 162                     | AA                              | TT                | 1946708333               |
| SNP_P3_182406_174  | NW_004520199.1 | Scaffold6496 | 174                     | AA                              | GG                | 1946708335               |
| SNP_P3_182408_491  | NW_004520199.1 | Scaffold6496 | 491                     | AA                              | CC                | 1946708337               |
| SNP_P3_182409_497  | NW_004520199.1 | Scaffold6496 | 497                     | TT                              | AA                | 1946708339               |
| SNP_P3_182410_503  | NW_004520199.1 | Scaffold6496 | 503                     | GG                              | AA                | 1946708341               |
| SNP_P3_182411_816  | NW_004520199.1 | Scaffold6496 | 816                     | CC                              | TT                | 1946708343               |
| SNP_P3_182412_842  | NW_004520199.1 | Scaffold6496 | 842                     | AA                              | TT                | 1946708345               |
| SNP_P3_182413_845  | NW_004520199.1 | Scaffold6496 | 845                     | AA                              | CC                | 1946708347               |
| SNP_P3_182415_932  | NW_004520199.1 | Scaffold6496 | 932                     | AA                              | GG                | 1946708349               |
| SNP_P3_182416_955  | NW_004520199.1 | Scaffold6496 | 955                     | GG                              | TT                | 1946708351               |
| SNP_P3_182417_957  | NW_004520199.1 | Scaffold6496 | 957                     | CC                              | AA                | 1946708353               |
| SNP_P3_182418_959  | NW_004520199.1 | Scaffold6496 | 959                     | CC                              | GG                | 1946708355               |
| SNP_P3_182419_972  | NW_004520199.1 | Scaffold6496 | 972                     | CC                              | TT                | 1946708358               |
| SNP_P3_182420_978  | NW_004520199.1 | Scaffold6496 | 978                     | CC                              | TT                | 1946708360               |
| SNP_P3_182421_990  | NW_004520199.1 | Scaffold6496 | 990                     | GG                              | AA                | 1946708362               |
| SNP_P3_182422_1014 | NW_004520199.1 | Scaffold6496 | 1014                    | GG                              | AA                | 1946708364               |
| SNP_P3_182423_1029 | NW_004520199.1 | Scaffold6496 | 1029                    | CC                              | GG                | 1946708366               |
| SNP_P3_182424_1044 | NW_004520199.1 | Scaffold6496 | 1044                    | TT                              | AA                | 1946708368               |
| SNP_P3_182425_1053 | NW_004520199.1 | Scaffold6496 | 1053                    | CC                              | AA                | 1946708370               |
| SNP_P3_182426_1055 | NW_004520199.1 | Scaffold6496 | 1055                    | GG                              | TT                | 1946708372               |
| SNP_P3_182428_1165 | NW_004520199.1 | Scaffold6496 | 1165                    | TT                              | AA                | 1946708374               |
| SNP_P3_182429_1193 | NW_004520199.1 | Scaffold6496 | 1193                    | CC                              | GG                | 1946708376               |
| SNP_P3_182430_1132 | NW_004520201.1 | Scaffold6498 | 1132                    | GG                              | AA                | 1946708378               |
| SNP_P3_182431_1185 | NW_004520201.1 | Scaffold6498 | 1185                    | CC                              | GG                | 1946708380               |
| SNP_P3_182432_1397 | NW_004520201.1 | Scaffold6498 | 1397                    | AA                              | GG                | 1946708383               |
| SNP_P3_182433_1449 | NW_004520201.1 | Scaffold6498 | 1449                    | GG                              | CC                | 1946708386               |

| SNPs IDs           | Chromosome IDs | Chromosomes  | Physical positions (bp) | CDC Frontier (Reference genome) | (Pusa 256 & HPNB) | NCBI SNPdb Accession IDs |
|--------------------|----------------|--------------|-------------------------|---------------------------------|-------------------|--------------------------|
| SNP_P3_182434_246  | NW_004520204.1 | Scaffold6505 | 246                     | AA                              | TT                | 1946708388               |
| SNP_P3_182435_342  | NW_004520204.1 | Scaffold6505 | 342                     | CC                              | GG                | 1946708390               |
| SNP_P3_182436_1082 | NW_004520207.1 | Scaffold6509 | 1082                    | GG                              | TT                | 1946708392               |
| SNP_P3_182437_769  | NW_004520212.1 | Scaffold6521 | 769                     | CC                              | TT                | 1946708394               |
| SNP_P3_182438_833  | NW_004520212.1 | Scaffold6521 | 833                     | TT                              | GG                | 1946708396               |
| SNP_P3_182439_1129 | NW_004520212.1 | Scaffold6521 | 1129                    | TT                              | GG                | 1946708398               |
| SNP_P3_182440_744  | NW_004520213.1 | Scaffold6522 | 744                     | CC                              | AA                | 1946708400               |
| SNP_P3_182441_753  | NW_004520213.1 | Scaffold6522 | 753                     | CC                              | TT                | 1946708402               |
| SNP_P3_182442_305  | NW_004520214.1 | Scaffold6525 | 305                     | CC                              | GG                | 1946708404               |
| SNP_P3_182443_461  | NW_004520214.1 | Scaffold6525 | 461                     | TT                              | CC                | 1946708406               |
| SNP_P3_182444_945  | NW_004520214.1 | Scaffold6525 | 945                     | CC                              | AA                | 1946708408               |
| SNP_P3_182445_1068 | NW_004520214.1 | Scaffold6525 | 1068                    | CC                              | TT                | 1946708410               |
| SNP_P3_182446_1150 | NW_004520214.1 | Scaffold6525 | 1150                    | AA                              | TT                | 1946708412               |
| SNP_P3_182447_1383 | NW_004520214.1 | Scaffold6525 | 1383                    | AA                              | TT                | 1946708414               |
| SNP_P3_182448_1822 | NW_004520214.1 | Scaffold6525 | 1822                    | TT                              | CC                | 1946708416               |
| SNP_P3_182449_1829 | NW_004520214.1 | Scaffold6525 | 1829                    | CC                              | AA                | 1946708418               |
| SNP_P3_182450_1841 | NW_004520214.1 | Scaffold6525 | 1841                    | CC                              | TT                | 1946708420               |
| SNP_P3_182451_2093 | NW_004520214.1 | Scaffold6525 | 2093                    | GG                              | CC                | 1946708422               |
| SNP_P3_182452_2189 | NW_004520214.1 | Scaffold6525 | 2189                    | GG                              | AA                | 1946708425               |
| SNP_P3_182453_114  | NW_004520215.1 | Scaffold6527 | 114                     | GG                              | AA                | 1946708427               |
| SNP_P3_182454_149  | NW_004520215.1 | Scaffold6527 | 149                     | TT                              | AA                | 1946708429               |
| SNP_P3_182456_458  | NW_004520215.1 | Scaffold6527 | 458                     | AA                              | GG                | 1946708431               |
| SNP_P3_182457_641  | NW_004520215.1 | Scaffold6527 | 641                     | TT                              | CC                | 1946708433               |
| SNP_P3_182458_646  | NW_004520215.1 | Scaffold6527 | 646                     | TT                              | CC                | 1946708435               |
| SNP_P3_182459_622  | NW_004520216.1 | Scaffold6528 | 622                     | CC                              | TT                | 1946708437               |
| SNP_P3_182460_1100 | NW_004520216.1 | Scaffold6528 | 1100                    | GG                              | TT                | 1946708439               |
| SNP_P3_182461_824  | NW_004520217.1 | Scaffold6529 | 824                     | TT                              | CC                | 1946708441               |
| SNP_P3_182462_524  | NW_004520221.1 | Scaffold6537 | 524                     | AA                              | CC                | 1946708443               |
| SNP_P3_182463_595  | NW_004520221.1 | Scaffold6537 | 595                     | AA                              | GG                | 1946708445               |
| SNP_P3_182464_1126 | NW_004520221.1 | Scaffold6537 | 1126                    | CC                              | TT                | 1946708447               |
| SNP_P3_182465_1319 | NW_004520221.1 | Scaffold6537 | 1319                    | TT                              | GG                | 1946708449               |
| SNP_P3_182466_1384 | NW_004520221.1 | Scaffold6537 | 1384                    | TT                              | CC                | 1946708451               |
| SNP_P3_182467_1388 | NW_004520221.1 | Scaffold6537 | 1388                    | TT                              | GG                | 1946708453               |
| SNP_P3_182468_1417 | NW_004520221.1 | Scaffold6537 | 1417                    | TT                              | AA                | 1946708455               |
| SNP_P3_182469_1474 | NW_004520221.1 | Scaffold6537 | 1474                    | AA                              | GG                | 1946708457               |
| SNP_P3_182470_1608 | NW_004520221.1 | Scaffold6537 | 1608                    | CC                              | AA                | 1946708459               |
| SNP_P3_182471_1741 | NW_004520221.1 | Scaffold6537 | 1741                    | GG                              | TT                | 1946708461               |
| SNP_P3_182472_1748 | NW_004520221.1 | Scaffold6537 | 1748                    | GG                              | TT                | 1946708464               |
| SNP_P3_182473_1879 | NW_004520221.1 | Scaffold6537 | 1879                    | GG                              | AA                | 1946708466               |
| SNP_P3_182474_2058 | NW_004520221.1 | Scaffold6537 | 2058                    | AA                              | GG                | 1946708469               |
| SNP_P3_182475_2087 | NW_004520221.1 | Scaffold6537 | 2087                    | AA                              | GG                | 1946708471               |
| SNP_P3_182476_2109 | NW_004520221.1 | Scaffold6537 | 2109                    | CC                              | GG                | 1946708474               |

| SNPs IDs           | Chromosome IDs | Chromosomes  | Physical positions (bp) | CDC Frontier (Reference genome) | (Pusa 256 & HPNB) | NCBI SNPdb Accession IDs |
|--------------------|----------------|--------------|-------------------------|---------------------------------|-------------------|--------------------------|
| SNP_P3_182477_2161 | NW_004520221.1 | Scaffold6537 | 2161                    | TT                              | GG                | 1946708476               |
| SNP_P3_182478_2221 | NW_004520221.1 | Scaffold6537 | 2221                    | TT                              | CC                | 1946708478               |
| SNP_P3_182479_2250 | NW_004520221.1 | Scaffold6537 | 2250                    | TT                              | GG                | 1946708480               |
| SNP_P3_182480_2346 | NW_004520221.1 | Scaffold6537 | 2346                    | CC                              | TT                | 1946708482               |
| SNP_P3_182481_2355 | NW_004520221.1 | Scaffold6537 | 2355                    | CC                              | GG                | 1946708484               |
| SNP_P3_182482_2361 | NW_004520221.1 | Scaffold6537 | 2361                    | CC                              | TT                | 1946708486               |
| SNP_P3_182483_2364 | NW_004520221.1 | Scaffold6537 | 2364                    | TT                              | CC                | 1946708489               |
| SNP_P3_182484_2501 | NW_004520221.1 | Scaffold6537 | 2501                    | CC                              | AA                | 1946708491               |
| SNP_P3_182485_2753 | NW_004520221.1 | Scaffold6537 | 2753                    | AA                              | GG                | 1946708493               |
| SNP_P3_182486_2853 | NW_004520221.1 | Scaffold6537 | 2853                    | CC                              | TT                | 1946708495               |
| SNP_P3_182487_2875 | NW_004520221.1 | Scaffold6537 | 2875                    | TT                              | AA                | 1946708497               |
| SNP_P3_182488_2921 | NW_004520221.1 | Scaffold6537 | 2921                    | CC                              | GG                | 1946708499               |
| SNP_P3_182489_1686 | NW_004520223.1 | Scaffold6539 | 1686                    | AA                              | GG                | 1946708501               |
| SNP_P3_182490_729  | NW_004520224.1 | Scaffold6540 | 729                     | GG                              | AA                | 1946708503               |
| SNP_P3_182491_734  | NW_004520224.1 | Scaffold6540 | 734                     | TT                              | CC                | 1946708505               |
| SNP_P3_182492_765  | NW_004520224.1 | Scaffold6540 | 765                     | TT                              | CC                | 1946708508               |
| SNP_P3_182493_844  | NW_004520224.1 | Scaffold6540 | 844                     | AA                              | GG                | 1946708512               |
| SNP_P3_182494_935  | NW_004520224.1 | Scaffold6540 | 935                     | AA                              | GG                | 1946708514               |
| SNP_P3_182495_1121 | NW_004520224.1 | Scaffold6540 | 1121                    | TT                              | AA                | 1946708516               |
| SNP_P3_182496_1122 | NW_004520224.1 | Scaffold6540 | 1122                    | GG                              | AA                | 1946708518               |
| SNP_P3_182497_1248 | NW_004520224.1 | Scaffold6540 | 1248                    | TT                              | CC                | 1946708520               |
| SNP_P3_182499_4074 | NW_004520224.1 | Scaffold6540 | 4074                    | CC                              | GG                | 1946708522               |
| SNP_P3_182500_691  | NW_004520226.1 | Scaffold6543 | 691                     | TT                              | GG                | 1946708524               |
| SNP_P3_182501_2243 | NW_004520228.1 | Scaffold6546 | 2243                    | AA                              | GG                | 1946708526               |
| SNP_P3_182502_2251 | NW_004520228.1 | Scaffold6546 | 2251                    | CC                              | TT                | 1946708528               |
| SNP_P3_182503_2322 | NW_004520228.1 | Scaffold6546 | 2322                    | AA                              | GG                | 1946708532               |
| SNP_P3_182504_2326 | NW_004520228.1 | Scaffold6546 | 2326                    | AA                              | CC                | 1946708534               |
| SNP_P3_182505_2856 | NW_004520228.1 | Scaffold6546 | 2856                    | AA                              | GG                | 1946708536               |
| SNP_P3_182506_7792 | NW_004520228.1 | Scaffold6546 | 7792                    | AA                              | GG                | 1946708538               |
| SNP_P3_182507_7857 | NW_004520228.1 | Scaffold6546 | 7857                    | CC                              | AA                | 1946708541               |
| SNP_P3_182508_7866 | NW_004520228.1 | Scaffold6546 | 7866                    | TT                              | GG                | 1946708544               |
| SNP_P3_182509_7922 | NW_004520228.1 | Scaffold6546 | 7922                    | GG                              | AA                | 1946708546               |
| SNP_P3_182510_1141 | NW_004520231.1 | Scaffold6554 | 1141                    | GG                              | AA                | 1946708549               |
| SNP_P3_182511_1333 | NW_004520231.1 | Scaffold6554 | 1333                    | AA                              | TT                | 1946708552               |
| SNP_P3_182512_308  | NW_004520236.1 | Scaffold6561 | 308                     | CC                              | GG                | 1946708554               |
| SNP_P3_182514_599  | NW_004520236.1 | Scaffold6561 | 599                     | TT                              | GG                | 1946708556               |
| SNP_P3_182515_602  | NW_004520236.1 | Scaffold6561 | 602                     | AA                              | GG                | 1946708558               |
| SNP_P3_182516_783  | NW_004520236.1 | Scaffold6561 | 783                     | TT                              | AA                | 1946708560               |
| SNP_P3_182517_810  | NW_004520236.1 | Scaffold6561 | 810                     | TT                              | GG                | 1946708562               |
| SNP_P3_182518_827  | NW_004520236.1 | Scaffold6561 | 827                     | GG                              | TT                | 1946708564               |
| SNP_P3_182519_843  | NW_004520236.1 | Scaffold6561 | 843                     | AA                              | TT                | 1946708566               |
| SNP_P3_182520_846  | NW_004520236.1 | Scaffold6561 | 846                     | AA                              | GG                | 1946708568               |



| SNPs IDs           | Chromosome IDs | Chromosomes  | Physical positions (bp) | CDC Frontier (Reference genome) | (Pusa 256 & HPNB) | NCBI SNPdb Accession IDs |
|--------------------|----------------|--------------|-------------------------|---------------------------------|-------------------|--------------------------|
| SNP_P3_182521_860  | NW_004520236.1 | Scaffold6561 | 860                     | TT                              | GG                | 1946708571               |
| SNP_P3_182522_871  | NW_004520236.1 | Scaffold6561 | 871                     | GG                              | AA                | 1946708573               |
| SNP_P3_182523_879  | NW_004520236.1 | Scaffold6561 | 879                     | TT                              | CC                | 1946708575               |
| SNP_P3_182524_925  | NW_004520236.1 | Scaffold6561 | 925                     | TT                              | AA                | 1946708577               |
| SNP_P3_182525_927  | NW_004520236.1 | Scaffold6561 | 927                     | AA                              | TT                | 1946708579               |
| SNP_P3_182526_1020 | NW_004520236.1 | Scaffold6561 | 1020                    | TT                              | GG                | 1946708581               |
| SNP_P3_182527_1128 | NW_004520236.1 | Scaffold6561 | 1128                    | TT                              | GG                | 1946708583               |
| SNP_P3_182528_1285 | NW_004520236.1 | Scaffold6561 | 1285                    | AA                              | GG                | 1946708585               |
| SNP_P3_182529_1307 | NW_004520236.1 | Scaffold6561 | 1307                    | AA                              | GG                | 1946708587               |
| SNP_P3_182530_1313 | NW_004520236.1 | Scaffold6561 | 1313                    | TT                              | CC                | 1946708589               |
| SNP_P3_182531_1316 | NW_004520236.1 | Scaffold6561 | 1316                    | GG                              | AA                | 1946708591               |
| SNP_P3_182532_1375 | NW_004520236.1 | Scaffold6561 | 1375                    | TT                              | AA                | 1946708594               |
| SNP_P3_182533_1515 | NW_004520236.1 | Scaffold6561 | 1515                    | TT                              | GG                | 1946708596               |
| SNP_P3_182534_1581 | NW_004520236.1 | Scaffold6561 | 1581                    | GG                              | AA                | 1946708598               |
| SNP_P3_182536_166  | NW_004520240.1 | Scaffold6566 | 166                     | AA                              | TT                | 1946708600               |
| SNP_P3_182537_220  | NW_004520240.1 | Scaffold6566 | 220                     | GG                              | AA                | 1946708602               |
| SNP_P3_182538_221  | NW_004520240.1 | Scaffold6566 | 221                     | GG                              | TT                | 1946708605               |
| SNP_P3_182539_345  | NW_004520240.1 | Scaffold6566 | 345                     | AA                              | TT                | 1946708607               |
| SNP_P3_182540_435  | NW_004520240.1 | Scaffold6566 | 435                     | GG                              | TT                | 1946708609               |
| SNP_P3_182541_580  | NW_004520240.1 | Scaffold6566 | 580                     | CC                              | TT                | 1946708611               |
| SNP_P3_182542_596  | NW_004520240.1 | Scaffold6566 | 596                     | TT                              | CC                | 1946708613               |
| SNP_P3_182543_611  | NW_004520240.1 | Scaffold6566 | 611                     | TT                              | CC                | 1946708615               |
| SNP_P3_182546_911  | NW_004520241.1 | Scaffold6568 | 911                     | GG                              | CC                | 1946708617               |
| SNP_P3_182547_1130 | NW_004520241.1 | Scaffold6568 | 1130                    | TT                              | CC                | 1946708619               |
| SNP_P3_182548_1307 | NW_004520241.1 | Scaffold6568 | 1307                    | AA                              | TT                | 1946708621               |
| SNP_P3_182549_1649 | NW_004520241.1 | Scaffold6568 | 1649                    | TT                              | CC                | 1946708623               |
| SNP_P3_182550_1692 | NW_004520241.1 | Scaffold6568 | 1692                    | GG                              | AA                | 1946708625               |
| SNP_P3_182551_1782 | NW_004520241.1 | Scaffold6568 | 1782                    | CC                              | AA                | 1946708627               |
| SNP_P3_182552_2033 | NW_004520241.1 | Scaffold6568 | 2033                    | GG                              | AA                | 1946708629               |
| SNP_P3_182553_2291 | NW_004520241.1 | Scaffold6568 | 2291                    | CC                              | GG                | 1946708631               |
| SNP_P3_182554_2500 | NW_004520241.1 | Scaffold6568 | 2500                    | CC                              | TT                | 1946708633               |
| SNP_P3_182555_605  | NW_004520242.1 | Scaffold6569 | 605                     | AA                              | TT                | 1946708635               |
| SNP_P3_182556_980  | NW_004520242.1 | Scaffold6569 | 980                     | CC                              | TT                | 1946708637               |
| SNP_P3_182557_992  | NW_004520242.1 | Scaffold6569 | 992                     | TT                              | GG                | 1946708639               |
| SNP_P3_182558_1023 | NW_004520242.1 | Scaffold6569 | 1023                    | AA                              | CC                | 1946708642               |
| SNP_P3_182559_1465 | NW_004520242.1 | Scaffold6569 | 1465                    | TT                              | CC                | 1946708645               |
| SNP_P3_182560_310  | NW_004520245.1 | Scaffold6572 | 310                     | CC                              | AA                | 1946708647               |
| SNP_P3_182561_311  | NW_004520245.1 | Scaffold6572 | 311                     | CC                              | AA                | 1946708649               |
| SNP_P3_182562_772  | NW_004520245.1 | Scaffold6572 | 772                     | TT                              | GG                | 1946708651               |
| SNP_P3_182563_860  | NW_004520245.1 | Scaffold6572 | 860                     | AA                              | CC                | 1946708653               |
| SNP_P3_182564_944  | NW_004520245.1 | Scaffold6572 | 944                     | AA                              | GG                | 1946708657               |
| SNP_P3_182565_1036 | NW_004520245.1 | Scaffold6572 | 1036                    | GG                              | AA                | 1946708659               |

| SNPs IDs           | Chromosome IDs | Chromosomes  | Physical positions (bp) | CDC Frontier (Reference genome) | (Pusa 256 & HPNB) | NCBI SNPdb Accession IDs |
|--------------------|----------------|--------------|-------------------------|---------------------------------|-------------------|--------------------------|
| SNP_P3_182566_1243 | NW_004520245.1 | Scaffold6572 | 1243                    | TT                              | CC                | 1946708661               |
| SNP_P3_182567_1398 | NW_004520245.1 | Scaffold6572 | 1398                    | GG                              | AA                | 1946708663               |
| SNP_P3_182568_1432 | NW_004520245.1 | Scaffold6572 | 1432                    | AA                              | CC                | 1946708665               |
| SNP_P3_182569_1469 | NW_004520245.1 | Scaffold6572 | 1469                    | CC                              | TT                | 1946708667               |
| SNP_P3_182570_1481 | NW_004520245.1 | Scaffold6572 | 1481                    | CC                              | AA                | 1946708669               |
| SNP_P3_182571_1482 | NW_004520245.1 | Scaffold6572 | 1482                    | AA                              | GG                | 1946708672               |
| SNP_P3_182572_1582 | NW_004520245.1 | Scaffold6572 | 1582                    | GG                              | AA                | 1946708674               |
| SNP_P3_182573_1583 | NW_004520245.1 | Scaffold6572 | 1583                    | GG                              | AA                | 1946708676               |
| SNP_P3_182574_1641 | NW_004520245.1 | Scaffold6572 | 1641                    | TT                              | CC                | 1946708678               |
| SNP_P3_182575_1795 | NW_004520245.1 | Scaffold6572 | 1795                    | CC                              | TT                | 1946708680               |
| SNP_P3_182576_1807 | NW_004520245.1 | Scaffold6572 | 1807                    | TT                              | CC                | 1946708682               |
| SNP_P3_182577_1867 | NW_004520245.1 | Scaffold6572 | 1867                    | AA                              | GG                | 1946708684               |
| SNP_P3_182578_1953 | NW_004520245.1 | Scaffold6572 | 1953                    | GG                              | AA                | 1946708686               |
| SNP_P3_182579_2035 | NW_004520245.1 | Scaffold6572 | 2035                    | CC                              | TT                | 1946708688               |
| SNP_P3_182580_2068 | NW_004520245.1 | Scaffold6572 | 2068                    | AA                              | GG                | 1946708690               |
| SNP_P3_182581_2103 | NW_004520245.1 | Scaffold6572 | 2103                    | CC                              | TT                | 1946708692               |
| SNP_P3_182582_2108 | NW_004520245.1 | Scaffold6572 | 2108                    | CC                              | TT                | 1946708694               |
| SNP_P3_182583_2211 | NW_004520245.1 | Scaffold6572 | 2211                    | CC                              | TT                | 1946708696               |
| SNP_P3_182584_2282 | NW_004520245.1 | Scaffold6572 | 2282                    | TT                              | CC                | 1946708698               |
| SNP_P3_182585_2342 | NW_004520245.1 | Scaffold6572 | 2342                    | CC                              | TT                | 1946708700               |
| SNP_P3_182586_2378 | NW_004520245.1 | Scaffold6572 | 2378                    | GG                              | AA                | 1946708702               |
| SNP_P3_182587_2530 | NW_004520245.1 | Scaffold6572 | 2530                    | CC                              | TT                | 1946708704               |
| SNP_P3_182588_2905 | NW_004520245.1 | Scaffold6572 | 2905                    | CC                              | AA                | 1946708706               |
| SNP_P3_182589_3727 | NW_004520245.1 | Scaffold6572 | 3727                    | TT                              | GG                | 1946708708               |
| SNP_P3_182590_3729 | NW_004520245.1 | Scaffold6572 | 3729                    | GG                              | AA                | 1946708710               |
| SNP_P3_182591_3760 | NW_004520245.1 | Scaffold6572 | 3760                    | AA                              | TT                | 1946708714               |
| SNP_P3_182592_3772 | NW_004520245.1 | Scaffold6572 | 3772                    | GG                              | AA                | 1946708716               |
| SNP_P3_182593_4082 | NW_004520245.1 | Scaffold6572 | 4082                    | CC                              | TT                | 1946708718               |
| SNP_P3_182594_4104 | NW_004520245.1 | Scaffold6572 | 4104                    | GG                              | TT                | 1946708720               |
| SNP_P3_182595_4218 | NW_004520245.1 | Scaffold6572 | 4218                    | AA                              | GG                | 1946708723               |
| SNP_P3_182596_4236 | NW_004520245.1 | Scaffold6572 | 4236                    | GG                              | CC                | 1946708725               |
| SNP_P3_182597_4387 | NW_004520245.1 | Scaffold6572 | 4387                    | GG                              | AA                | 1946708727               |
| SNP_P3_182598_4396 | NW_004520245.1 | Scaffold6572 | 4396                    | AA                              | CC                | 1946708729               |
| SNP_P3_182599_4403 | NW_004520245.1 | Scaffold6572 | 4403                    | TT                              | CC                | 1946708731               |
| SNP_P3_182600_4555 | NW_004520245.1 | Scaffold6572 | 4555                    | CC                              | AA                | 1946708733               |
| SNP_P3_182601_5038 | NW_004520245.1 | Scaffold6572 | 5038                    | TT                              | CC                | 1946708736               |
| SNP_P3_182602_5045 | NW_004520245.1 | Scaffold6572 | 5045                    | TT                              | CC                | 1946708738               |
| SNP_P3_182603_5119 | NW_004520245.1 | Scaffold6572 | 5119                    | CC                              | TT                | 1946708740               |
| SNP_P3_182604_5184 | NW_004520245.1 | Scaffold6572 | 5184                    | CC                              | GG                | 1946708742               |
| SNP_P3_182605_5337 | NW_004520245.1 | Scaffold6572 | 5337                    | CC                              | TT                | 1946708744               |
| SNP_P3_182606_5359 | NW_004520245.1 | Scaffold6572 | 5359                    | GG                              | AA                | 1946708746               |
| SNP_P3_182607_5559 | NW_004520245.1 | Scaffold6572 | 5559                    | AA                              | GG                | 1946708748               |

| SNPs IDs           | Chromosome IDs | Chromosomes  | Physical positions (bp) | CDC Frontier (Reference genome) | (Pusa 256 & HPNB) | NCBI SNPdb Accession IDs |
|--------------------|----------------|--------------|-------------------------|---------------------------------|-------------------|--------------------------|
| SNP_P3_182608_5571 | NW_004520245.1 | Scaffold6572 | 5571                    | AA                              | GG                | 1946708750               |
| SNP_P3_182609_5626 | NW_004520245.1 | Scaffold6572 | 5626                    | GG                              | AA                | 1946708753               |
| SNP_P3_182610_5908 | NW_004520245.1 | Scaffold6572 | 5908                    | AA                              | GG                | 1946708755               |
| SNP_P3_182611_5926 | NW_004520245.1 | Scaffold6572 | 5926                    | AA                              | CC                | 1946708757               |
| SNP_P3_182612_797  | NW_004520250.1 | Scaffold6579 | 797                     | AA                              | GG                | 1946708759               |
| SNP_P3_182613_798  | NW_004520250.1 | Scaffold6579 | 798                     | AA                              | GG                | 1946708761               |
| SNP_P3_182614_357  | NW_004520252.1 | Scaffold6581 | 357                     | GG                              | AA                | 1946708763               |
| SNP_P3_182615_396  | NW_004520252.1 | Scaffold6581 | 396                     | CC                              | TT                | 1946708765               |
| SNP_P3_182616_875  | NW_004520252.1 | Scaffold6581 | 875                     | GG                              | AA                | 1946708767               |
| SNP_P3_182617_882  | NW_004520252.1 | Scaffold6581 | 882                     | AA                              | GG                | 1946708769               |
| SNP_P3_182618_886  | NW_004520252.1 | Scaffold6581 | 886                     | GG                              | AA                | 1946708771               |
| SNP_P3_182619_914  | NW_004520252.1 | Scaffold6581 | 914                     | AA                              | GG                | 1946708773               |
| SNP_P3_182620_211  | NW_004520253.1 | Scaffold6582 | 211                     | AA                              | GG                | 1946708775               |
| SNP_P3_182621_224  | NW_004520253.1 | Scaffold6582 | 224                     | TT                              | CC                | 1946708777               |
| SNP_P3_182622_230  | NW_004520253.1 | Scaffold6582 | 230                     | AA                              | GG                | 1946708779               |
| SNP_P3_182623_250  | NW_004520253.1 | Scaffold6582 | 250                     | AA                              | TT                | 1946708781               |
| SNP_P3_182624_280  | NW_004520253.1 | Scaffold6582 | 280                     | TT                              | GG                | 1946708783               |
| SNP_P3_182625_423  | NW_004520253.1 | Scaffold6582 | 423                     | AA                              | GG                | 1946708785               |
| SNP_P3_182626_457  | NW_004520253.1 | Scaffold6582 | 457                     | CC                              | TT                | 1946708787               |
| SNP_P3_182627_708  | NW_004520253.1 | Scaffold6582 | 708                     | AA                              | CC                | 1946708789               |
| SNP_P3_182628_710  | NW_004520253.1 | Scaffold6582 | 710                     | CC                              | TT                | 1946708791               |
| SNP_P3_182629_836  | NW_004520253.1 | Scaffold6582 | 836                     | AA                              | GG                | 1946708793               |
| SNP_P3_182630_494  | NW_004520258.1 | Scaffold6590 | 494                     | TT                              | CC                | 1946708795               |
| SNP_P3_182631_752  | NW_004520258.1 | Scaffold6590 | 752                     | TT                              | GG                | 1946708797               |
| SNP_P3_182632_818  | NW_004520258.1 | Scaffold6590 | 818                     | TT                              | CC                | 1946708799               |
| SNP_P3_182633_830  | NW_004520258.1 | Scaffold6590 | 830                     | TT                              | GG                | 1946708801               |
| SNP_P3_182634_914  | NW_004520258.1 | Scaffold6590 | 914                     | CC                              | TT                | 1946708803               |
| SNP_P3_182635_926  | NW_004520258.1 | Scaffold6590 | 926                     | AA                              | CC                | 1946708805               |
| SNP_P3_182636_1024 | NW_004520258.1 | Scaffold6590 | 1024                    | AA                              | TT                | 1946708807               |
| SNP_P3_182637_1342 | NW_004520258.1 | Scaffold6590 | 1342                    | TT                              | AA                | 1946708809               |
| SNP_P3_182638_1402 | NW_004520258.1 | Scaffold6590 | 1402                    | AA                              | GG                | 1946708811               |
| SNP_P3_182639_1489 | NW_004520258.1 | Scaffold6590 | 1489                    | GG                              | TT                | 1946708813               |
| SNP_P3_182640_1646 | NW_004520258.1 | Scaffold6590 | 1646                    | TT                              | AA                | 1946708815               |
| SNP_P3_182641_536  | NW_004520261.1 | Scaffold6594 | 536                     | AA                              | GG                | 1946708817               |
| SNP_P3_182642_611  | NW_004520261.1 | Scaffold6594 | 611                     | AA                              | CC                | 1946708819               |
| SNP_P3_182643_673  | NW_004520261.1 | Scaffold6594 | 673                     | TT                              | AA                | 1946708821               |
| SNP_P3_182644_679  | NW_004520261.1 | Scaffold6594 | 679                     | GG                              | AA                | 1946708823               |
| SNP_P3_182645_685  | NW_004520261.1 | Scaffold6594 | 685                     | AA                              | GG                | 1946708825               |
| SNP_P3_182646_742  | NW_004520261.1 | Scaffold6594 | 742                     | GG                              | TT                | 1946708827               |
| SNP_P3_182647_760  | NW_004520261.1 | Scaffold6594 | 760                     | GG                              | AA                | 1946708829               |
| SNP_P3_182648_761  | NW_004520261.1 | Scaffold6594 | 761                     | AA                              | CC                | 1946708830               |
| SNP_P3_182649_763  | NW_004520261.1 | Scaffold6594 | 763                     | AA                              | GG                | 1946708832               |

| SNPs IDs            | Chromosome IDs | Chromosomes  | Physical positions (bp) | CDC Frontier (Reference genome) | (Pusa 256 & HPNB) | NCBI SNPdb Accession IDs |
|---------------------|----------------|--------------|-------------------------|---------------------------------|-------------------|--------------------------|
| SNP_P3_182650_964   | NW_004520261.1 | Scaffold6594 | 964                     | CC                              | TT                | 1946708834               |
| SNP_P3_182651_1045  | NW_004520261.1 | Scaffold6594 | 1045                    | GG                              | TT                | 1946708836               |
| SNP_P3_182652_1108  | NW_004520261.1 | Scaffold6594 | 1108                    | GG                              | AA                | 1946708838               |
| SNP_P3_182653_1134  | NW_004520261.1 | Scaffold6594 | 1134                    | TT                              | AA                | 1946708840               |
| SNP_P3_182654_185   | NW_004520262.1 | Scaffold6597 | 185                     | AA                              | TT                | 1946708842               |
| SNP_P3_182655_253   | NW_004520262.1 | Scaffold6597 | 253                     | AA                              | GG                | 1946708844               |
| SNP_P3_182656_413   | NW_004520262.1 | Scaffold6597 | 413                     | GG                              | TT                | 1946708846               |
| SNP_P3_182657_481   | NW_004520262.1 | Scaffold6597 | 481                     | GG                              | CC                | 1946708848               |
| SNP_P3_182658_528   | NW_004520262.1 | Scaffold6597 | 528                     | GG                              | AA                | 1946708850               |
| SNP_P3_182659_592   | NW_004520262.1 | Scaffold6597 | 592                     | TT                              | CC                | 1946708852               |
| SNP_P3_182660_643   | NW_004520262.1 | Scaffold6597 | 643                     | TT                              | GG                | 1946708854               |
| SNP_P3_182661_1319  | NW_004520265.1 | Scaffold6601 | 1319                    | GG                              | TT                | 1946708856               |
| SNP_P3_182662_14820 | NW_004520269.1 | Scaffold6610 | 14820                   | CC                              | TT                | 1946708858               |
| SNP_P3_182663_14936 | NW_004520269.1 | Scaffold6610 | 14936                   | TT                              | AA                | 1946708860               |
| SNP_P3_182664_16533 | NW_004520269.1 | Scaffold6610 | 16533                   | AA                              | TT                | 1946708862               |
| SNP_P3_182666_398   | NW_004520272.1 | Scaffold6613 | 398                     | CC                              | TT                | 1946708864               |
| SNP_P3_182667_421   | NW_004520272.1 | Scaffold6613 | 421                     | TT                              | AA                | 1946708866               |
| SNP_P3_182668_712   | NW_004520272.1 | Scaffold6613 | 712                     | AA                              | CC                | 1946708869               |
| SNP_P3_182669_713   | NW_004520272.1 | Scaffold6613 | 713                     | AA                              | TT                | 1946708871               |
| SNP_P3_182670_761   | NW_004520272.1 | Scaffold6613 | 761                     | AA                              | GG                | 1946708873               |
| SNP_P3_182671_923   | NW_004520272.1 | Scaffold6613 | 923                     | TT                              | CC                | 1946708875               |
| SNP_P3_182672_20705 | NW_004520275.1 | Scaffold6617 | 20705                   | GG                              | AA                | 1946708877               |
| SNP_P3_182673_51    | NW_004520281.1 | Scaffold6623 | 51                      | TT                              | CC                | 1946708879               |
| SNP_P3_182674_289   | NW_004520281.1 | Scaffold6623 | 289                     | GG                              | AA                | 1946708881               |
| SNP_P3_182675_290   | NW_004520281.1 | Scaffold6623 | 290                     | GG                              | CC                | 1946708883               |
| SNP_P3_182676_633   | NW_004520281.1 | Scaffold6623 | 633                     | GG                              | CC                | 1946708885               |
| SNP_P3_182677_652   | NW_004520281.1 | Scaffold6623 | 652                     | AA                              | TT                | 1946708888               |
| SNP_P3_182678_473   | NW_004520285.1 | Scaffold6628 | 473                     | CC                              | GG                | 1946708889               |
| SNP_P3_182679_211   | NW_004520291.1 | Scaffold6646 | 211                     | AA                              | GG                | 1946708891               |
| SNP_P3_182680_250   | NW_004520291.1 | Scaffold6646 | 250                     | CC                              | GG                | 1946708893               |
| SNP_P3_182681_463   | NW_004520291.1 | Scaffold6646 | 463                     | TT                              | AA                | 1946708895               |
| SNP_P3_182682_479   | NW_004520291.1 | Scaffold6646 | 479                     | GG                              | AA                | 1946708896               |
| SNP_P3_182683_508   | NW_004520291.1 | Scaffold6646 | 508                     | TT                              | AA                | 1946708897               |
| SNP_P3_182684_676   | NW_004520291.1 | Scaffold6646 | 676                     | TT                              | CC                | 1946708898               |
| SNP_P3_182685_680   | NW_004520291.1 | Scaffold6646 | 680                     | GG                              | AA                | 1946708900               |
| SNP_P3_182686_809   | NW_004520291.1 | Scaffold6646 | 809                     | TT                              | AA                | 1946708903               |
| SNP_P3_182687_1113  | NW_004520291.1 | Scaffold6646 | 1113                    | AA                              | GG                | 1946708905               |
| SNP_P3_182688_1488  | NW_004520291.1 | Scaffold6646 | 1488                    | TT                              | CC                | 1946708907               |
| SNP_P3_182689_1490  | NW_004520291.1 | Scaffold6646 | 1490                    | GG                              | CC                | 1946708909               |
| SNP_P3_182690_1644  | NW_004520291.1 | Scaffold6646 | 1644                    | CC                              | TT                | 1946708912               |
| SNP_P3_182691_1656  | NW_004520291.1 | Scaffold6646 | 1656                    | CC                              | TT                | 1946708914               |
| SNP_P3_182692_1881  | NW_004520291.1 | Scaffold6646 | 1881                    | AA                              | TT                | 1946708916               |

| SNPs IDs            | Chromosome IDs | Chromosomes  | Physical positions (bp) | CDC Frontier (Reference genome) | (Pusa 256 & HPNB) | NCBI SNPdb Accession IDs |
|---------------------|----------------|--------------|-------------------------|---------------------------------|-------------------|--------------------------|
| SNP_P3_182693_1903  | NW_004520291.1 | Scaffold6646 | 1903                    | GG                              | CC                | 1946708918               |
| SNP_P3_182694_2019  | NW_004520291.1 | Scaffold6646 | 2019                    | AA                              | TT                | 1946708920               |
| SNP_P3_182695_2062  | NW_004520291.1 | Scaffold6646 | 2062                    | TT                              | GG                | 1946708922               |
| SNP_P3_182696_636   | NW_004520292.1 | Scaffold6647 | 636                     | GG                              | CC                | 1946708924               |
| SNP_P3_182697_671   | NW_004520292.1 | Scaffold6647 | 671                     | GG                              | AA                | 1946708926               |
| SNP_P3_182698_956   | NW_004520293.1 | Scaffold6653 | 956                     | CC                              | TT                | 1946708928               |
| SNP_P3_182699_1703  | NW_004520293.1 | Scaffold6653 | 1703                    | CC                              | GG                | 1946708930               |
| SNP_P3_182700_1727  | NW_004520293.1 | Scaffold6653 | 1727                    | GG                              | TT                | 1946708932               |
| SNP_P3_182701_1731  | NW_004520293.1 | Scaffold6653 | 1731                    | AA                              | CC                | 1946708934               |
| SNP_P3_182702_754   | NW_004520304.1 | Scaffold6669 | 754                     | CC                              | TT                | 1946708936               |
| SNP_P3_182703_64    | NW_004520305.1 | Scaffold6671 | 64                      | TT                              | AA                | 1946708938               |
| SNP_P3_182704_93    | NW_004520305.1 | Scaffold6671 | 93                      | GG                              | AA                | 1946708940               |
| SNP_P3_182705_693   | NW_004520305.1 | Scaffold6671 | 693                     | AA                              | CC                | 1946708944               |
| SNP_P3_182706_1213  | NW_004520305.1 | Scaffold6671 | 1213                    | TT                              | AA                | 1946708946               |
| SNP_P3_182707_1214  | NW_004520305.1 | Scaffold6671 | 1214                    | AA                              | CC                | 1946708948               |
| SNP_P3_182708_739   | NW_004520306.1 | Scaffold6672 | 739                     | TT                              | AA                | 1946708950               |
| SNP_P3_182709_835   | NW_004520306.1 | Scaffold6672 | 835                     | GG                              | AA                | 1946708952               |
| SNP_P3_182710_1068  | NW_004520306.1 | Scaffold6672 | 1068                    | AA                              | GG                | 1946708954               |
| SNP_P3_182712_329   | NW_004520307.1 | Scaffold6673 | 329                     | TT                              | AA                | 1946708956               |
| SNP_P3_182713_331   | NW_004520307.1 | Scaffold6673 | 331                     | TT                              | AA                | 1946708958               |
| SNP_P3_182714_445   | NW_004520307.1 | Scaffold6673 | 445                     | TT                              | CC                | 1946708960               |
| SNP_P3_182715_494   | NW_004520307.1 | Scaffold6673 | 494                     | AA                              | CC                | 1946708962               |
| SNP_P3_182716_564   | NW_004520307.1 | Scaffold6673 | 564                     | CC                              | AA                | 1946708964               |
| SNP_P3_182717_650   | NW_004520307.1 | Scaffold6673 | 650                     | CC                              | TT                | 1946708966               |
| SNP_P3_182718_663   | NW_004520307.1 | Scaffold6673 | 663                     | GG                              | AA                | 1946708968               |
| SNP_P3_182719_823   | NW_004520307.1 | Scaffold6673 | 823                     | CC                              | TT                | 1946708971               |
| SNP_P3_182720_934   | NW_004520307.1 | Scaffold6673 | 934                     | AA                              | GG                | 1946708973               |
| SNP_P3_182721_1107  | NW_004520307.1 | Scaffold6673 | 1107                    | AA                              | GG                | 1946708975               |
| SNP_P3_182722_1125  | NW_004520307.1 | Scaffold6673 | 1125                    | GG                              | TT                | 1946708977               |
| SNP_P3_182723_1220  | NW_004520314.1 | Scaffold6684 | 1220                    | TT                              | CC                | 1946708979               |
| SNP_P3_182724_4618  | NW_004520317.1 | Scaffold6687 | 4618                    | AA                              | GG                | 1946708981               |
| SNP_P3_182725_12892 | NW_004520317.1 | Scaffold6687 | 12892                   | TT                              | GG                | 1946708983               |
| SNP_P3_182726_13947 | NW_004520317.1 | Scaffold6687 | 13947                   | GG                              | TT                | 1946708985               |
| SNP_P3_182727_14365 | NW_004520317.1 | Scaffold6687 | 14365                   | CC                              | TT                | 1946708987               |
| SNP_P3_182728_14639 | NW_004520317.1 | Scaffold6687 | 14639                   | AA                              | GG                | 1946708989               |
| SNP_P3_182729_14697 | NW_004520317.1 | Scaffold6687 | 14697                   | CC                              | TT                | 1946708991               |
| SNP_P3_182730_687   | NW_004520321.1 | Scaffold6694 | 687                     | GG                              | TT                | 1946708993               |
| SNP_P3_182731_826   | NW_004520321.1 | Scaffold6694 | 826                     | TT                              | GG                | 1946708995               |
| SNP_P3_182732_851   | NW_004520321.1 | Scaffold6694 | 851                     | CC                              | AA                | 1946708997               |
| SNP_P3_182733_1507  | NW_004520321.1 | Scaffold6694 | 1507                    | GG                              | AA                | 1946708999               |
| SNP_P3_182734_1584  | NW_004520321.1 | Scaffold6694 | 1584                    | GG                              | AA                | 1946709001               |
| SNP_P3_182735_1626  | NW_004520321.1 | Scaffold6694 | 1626                    | CC                              | AA                | 1946709003               |

| SNPs IDs           | Chromosome IDs | Chromosomes  | Physical positions (bp) | CDC Frontier (Reference genome) | (Pusa 256 & HPNB) | NCBI SNPdb Accession IDs |
|--------------------|----------------|--------------|-------------------------|---------------------------------|-------------------|--------------------------|
| SNP_P3_182737_1927 | NW_004520321.1 | Scaffold6694 | 1927                    | GG                              | TT                | 1946709005               |
| SNP_P3_182738_2027 | NW_004520321.1 | Scaffold6694 | 2027                    | GG                              | TT                | 1946709007               |
| SNP_P3_182739_2072 | NW_004520321.1 | Scaffold6694 | 2072                    | AA                              | TT                | 1946709009               |
| SNP_P3_182740_2280 | NW_004520321.1 | Scaffold6694 | 2280                    | GG                              | AA                | 1946709012               |
| SNP_P3_182741_2341 | NW_004520321.1 | Scaffold6694 | 2341                    | TT                              | CC                | 1946709014               |
| SNP_P3_182742_64   | NW_004520322.1 | Scaffold6695 | 64                      | CC                              | GG                | 1946709016               |
| SNP_P3_182743_669  | NW_004520322.1 | Scaffold6695 | 669                     | AA                              | GG                | 1946709018               |
| SNP_P3_182744_710  | NW_004520322.1 | Scaffold6695 | 710                     | TT                              | CC                | 1946709021               |
| SNP_P3_182745_1248 | NW_004520322.1 | Scaffold6695 | 1248                    | TT                              | CC                | 1946709023               |
| SNP_P3_182746_939  | NW_004520323.1 | Scaffold6696 | 939                     | AA                              | TT                | 1946709025               |
| SNP_P3_182747_952  | NW_004520323.1 | Scaffold6696 | 952                     | AA                              | TT                | 1946709027               |
| SNP_P3_182748_953  | NW_004520323.1 | Scaffold6696 | 953                     | GG                              | TT                | 1946709029               |
| SNP_P3_182749_983  | NW_004520323.1 | Scaffold6696 | 983                     | CC                              | TT                | 1946709031               |
| SNP_P3_182750_1000 | NW_004520323.1 | Scaffold6696 | 1000                    | TT                              | CC                | 1946709033               |
| SNP_P3_182751_1049 | NW_004520323.1 | Scaffold6696 | 1049                    | TT                              | CC                | 1946709035               |
| SNP_P3_182752_1127 | NW_004520323.1 | Scaffold6696 | 1127                    | CC                              | AA                | 1946709037               |
| SNP_P3_182753_1165 | NW_004520323.1 | Scaffold6696 | 1165                    | TT                              | CC                | 1946709039               |
| SNP_P3_182754_1485 | NW_004520323.1 | Scaffold6696 | 1485                    | TT                              | CC                | 1946709041               |
| SNP_P3_182755_2523 | NW_004520323.1 | Scaffold6696 | 2523                    | AA                              | GG                | 1946709043               |
| SNP_P3_182756_2949 | NW_004520323.1 | Scaffold6696 | 2949                    | TT                              | GG                | 1946709045               |
| SNP_P3_182757_2951 | NW_004520323.1 | Scaffold6696 | 2951                    | GG                              | AA                | 1946709047               |
| SNP_P3_182758_78   | NW_004520327.1 | Scaffold6700 | 78                      | CC                              | GG                | 1946709049               |
| SNP_P3_182759_90   | NW_004520327.1 | Scaffold6700 | 90                      | TT                              | AA                | 1946709051               |
| SNP_P3_182760_201  | NW_004520327.1 | Scaffold6700 | 201                     | AA                              | TT                | 1946709053               |
| SNP_P3_182761_202  | NW_004520327.1 | Scaffold6700 | 202                     | GG                              | AA                | 1946709055               |
| SNP_P3_182762_210  | NW_004520327.1 | Scaffold6700 | 210                     | AA                              | GG                | 1946709057               |
| SNP_P3_182763_303  | NW_004520327.1 | Scaffold6700 | 303                     | GG                              | AA                | 1946709059               |
| SNP_P3_182764_361  | NW_004520327.1 | Scaffold6700 | 361                     | AA                              | GG                | 1946709061               |
| SNP_P3_182765_384  | NW_004520327.1 | Scaffold6700 | 384                     | TT                              | GG                | 1946709063               |
| SNP_P3_182766_395  | NW_004520327.1 | Scaffold6700 | 395                     | CC                              | TT                | 1946709065               |
| SNP_P3_182767_411  | NW_004520327.1 | Scaffold6700 | 411                     | TT                              | AA                | 1946709067               |
| SNP_P3_182768_527  | NW_004520327.1 | Scaffold6700 | 527                     | TT                              | CC                | 1946709069               |
| SNP_P3_182769_536  | NW_004520327.1 | Scaffold6700 | 536                     | AA                              | GG                | 1946709071               |
| SNP_P3_182770_568  | NW_004520327.1 | Scaffold6700 | 568                     | AA                              | TT                | 1946709073               |
| SNP_P3_182771_574  | NW_004520327.1 | Scaffold6700 | 574                     | TT                              | CC                | 1946709075               |
| SNP_P3_182772_635  | NW_004520327.1 | Scaffold6700 | 635                     | GG                              | AA                | 1946709078               |
| SNP_P3_182773_642  | NW_004520327.1 | Scaffold6700 | 642                     | AA                              | CC                | 1946709080               |
| SNP_P3_182774_661  | NW_004520327.1 | Scaffold6700 | 661                     | TT                              | CC                | 1946709082               |
| SNP_P3_182775_679  | NW_004520327.1 | Scaffold6700 | 679                     | TT                              | AA                | 1946709084               |
| SNP_P3_182776_689  | NW_004520327.1 | Scaffold6700 | 689                     | TT                              | AA                | 1946709086               |
| SNP_P3_182777_719  | NW_004520327.1 | Scaffold6700 | 719                     | AA                              | GG                | 1946709088               |
| SNP_P3_182778_738  | NW_004520327.1 | Scaffold6700 | 738                     | TT                              | CC                | 1946709090               |

| SNPs IDs           | Chromosome IDs | Chromosomes  | Physical positions (bp) | CDC Frontier (Reference genome) | (Pusa 256 & HPNB) | NCBI SNPdb Accession IDs |
|--------------------|----------------|--------------|-------------------------|---------------------------------|-------------------|--------------------------|
| SNP_P3_182779_830  | NW_004520327.1 | Scaffold6700 | 830                     | TT                              | AA                | 1946709093               |
| SNP_P3_182780_858  | NW_004520327.1 | Scaffold6700 | 858                     | AA                              | GG                | 1946709095               |
| SNP_P3_182781_864  | NW_004520327.1 | Scaffold6700 | 864                     | TT                              | CC                | 1946709098               |
| SNP_P3_182782_1174 | NW_004520327.1 | Scaffold6700 | 1174                    | GG                              | AA                | 1946709100               |
| SNP_P3_182783_1471 | NW_004520327.1 | Scaffold6700 | 1471                    | CC                              | AA                | 1946709102               |
| SNP_P3_182784_1671 | NW_004520327.1 | Scaffold6700 | 1671                    | TT                              | GG                | 1946709104               |
| SNP_P3_182785_178  | NW_004520329.1 | Scaffold6707 | 178                     | CC                              | GG                | 1946709106               |
| SNP_P3_182786_562  | NW_004520329.1 | Scaffold6707 | 562                     | AA                              | GG                | 1946709108               |
| SNP_P3_182787_615  | NW_004520329.1 | Scaffold6707 | 615                     | CC                              | AA                | 1946709110               |
| SNP_P3_182788_1008 | NW_004520331.1 | Scaffold6710 | 1008                    | TT                              | GG                | 1946709112               |
| SNP_P3_182789_1851 | NW_004520333.1 | Scaffold6714 | 1851                    | CC                              | AA                | 1946709114               |
| SNP_P3_182790_2102 | NW_004520333.1 | Scaffold6714 | 2102                    | AA                              | TT                | 1946709116               |
| SNP_P3_182791_2109 | NW_004520333.1 | Scaffold6714 | 2109                    | AA                              | GG                | 1946709118               |
| SNP_P3_182792_2130 | NW_004520333.1 | Scaffold6714 | 2130                    | GG                              | AA                | 1946709120               |
| SNP_P3_182794_587  | NW_004520336.1 | Scaffold6719 | 587                     | GG                              | AA                | 1946709122               |
| SNP_P3_182797_4664 | NW_004520337.1 | Scaffold6720 | 4664                    | GG                              | TT                | 1946709124               |
| SNP_P3_182798_5155 | NW_004520337.1 | Scaffold6720 | 5155                    | AA                              | GG                | 1946709126               |
| SNP_P3_182800_5333 | NW_004520337.1 | Scaffold6720 | 5333                    | AA                              | TT                | 1946709128               |
| SNP_P3_182801_5348 | NW_004520337.1 | Scaffold6720 | 5348                    | CC                              | TT                | 1946709131               |
| SNP_P3_182802_5379 | NW_004520337.1 | Scaffold6720 | 5379                    | AA                              | TT                | 1946709133               |
| SNP_P3_182803_5482 | NW_004520337.1 | Scaffold6720 | 5482                    | CC                              | TT                | 1946709135               |
| SNP_P3_182804_463  | NW_004520338.1 | Scaffold6721 | 463                     | GG                              | TT                | 1946709137               |
| SNP_P3_182805_454  | NW_004520339.1 | Scaffold6722 | 454                     | CC                              | GG                | 1946709139               |
| SNP_P3_182806_557  | NW_004520339.1 | Scaffold6722 | 557                     | CC                              | TT                | 1946709141               |
| SNP_P3_182807_719  | NW_004520339.1 | Scaffold6722 | 719                     | TT                              | AA                | 1946709143               |
| SNP_P3_182808_772  | NW_004520339.1 | Scaffold6722 | 772                     | CC                              | TT                | 1946709145               |
| SNP_P3_182809_783  | NW_004520339.1 | Scaffold6722 | 783                     | GG                              | TT                | 1946709147               |
| SNP_P3_182810_799  | NW_004520339.1 | Scaffold6722 | 799                     | GG                              | CC                | 1946709149               |
| SNP_P3_182811_830  | NW_004520339.1 | Scaffold6722 | 830                     | GG                              | TT                | 1946709151               |
| SNP_P3_182812_845  | NW_004520339.1 | Scaffold6722 | 845                     | AA                              | GG                | 1946709153               |
| SNP_P3_182813_894  | NW_004520339.1 | Scaffold6722 | 894                     | TT                              | GG                | 1946709155               |
| SNP_P3_182814_976  | NW_004520339.1 | Scaffold6722 | 976                     | TT                              | AA                | 1946709157               |
| SNP_P3_182815_979  | NW_004520339.1 | Scaffold6722 | 979                     | CC                              | TT                | 1946709159               |
| SNP_P3_182816_980  | NW_004520339.1 | Scaffold6722 | 980                     | CC                              | TT                | 1946709163               |
| SNP_P3_182817_981  | NW_004520339.1 | Scaffold6722 | 981                     | CC                              | TT                | 1946709165               |
| SNP_P3_182818_982  | NW_004520339.1 | Scaffold6722 | 982                     | GG                              | CC                | 1946709167               |
| SNP_P3_182819_984  | NW_004520339.1 | Scaffold6722 | 984                     | TT                              | GG                | 1946709170               |
| SNP_P3_182820_985  | NW_004520339.1 | Scaffold6722 | 985                     | CC                              | GG                | 1946709172               |
| SNP_P3_182821_987  | NW_004520339.1 | Scaffold6722 | 987                     | TT                              | GG                | 1946709174               |
| SNP_P3_182822_989  | NW_004520339.1 | Scaffold6722 | 989                     | AA                              | CC                | 1946709176               |
| SNP_P3_182823_993  | NW_004520339.1 | Scaffold6722 | 993                     | TT                              | CC                | 1946709178               |
| SNP_P3_182824_995  | NW_004520339.1 | Scaffold6722 | 995                     | AA                              | TT                | 1946709180               |

| SNPs IDs            | Chromosome IDs | Chromosomes  | Physical positions (bp) | CDC Frontier (Reference genome) | (Pusa 256 & HPNB) | NCBI SNPdb Accession IDs |
|---------------------|----------------|--------------|-------------------------|---------------------------------|-------------------|--------------------------|
| SNP_P3_182825_1038  | NW_004520339.1 | Scaffold6722 | 1038                    | GG                              | AA                | 1946709182               |
| SNP_P3_182826_1120  | NW_004520339.1 | Scaffold6722 | 1120                    | GG                              | AA                | 1946709184               |
| SNP_P3_182827_1149  | NW_004520339.1 | Scaffold6722 | 1149                    | AA                              | CC                | 1946709186               |
| SNP_P3_182828_1202  | NW_004520339.1 | Scaffold6722 | 1202                    | AA                              | CC                | 1946709188               |
| SNP_P3_182829_1309  | NW_004520339.1 | Scaffold6722 | 1309                    | AA                              | GG                | 1946709190               |
| SNP_P3_182830_1367  | NW_004520339.1 | Scaffold6722 | 1367                    | AA                              | TT                | 1946709191               |
| SNP_P3_182831_1472  | NW_004520339.1 | Scaffold6722 | 1472                    | TT                              | CC                | 1946709192               |
| SNP_P3_182832_1524  | NW_004520339.1 | Scaffold6722 | 1524                    | GG                              | AA                | 1946709193               |
| SNP_P3_182833_1544  | NW_004520339.1 | Scaffold6722 | 1544                    | AA                              | TT                | 1946709194               |
| SNP_P3_182834_1552  | NW_004520339.1 | Scaffold6722 | 1552                    | AA                              | GG                | 1946709195               |
| SNP_P3_182835_1881  | NW_004520339.1 | Scaffold6722 | 1881                    | TT                              | GG                | 1946709196               |
| SNP_P3_182836_1887  | NW_004520339.1 | Scaffold6722 | 1887                    | AA                              | GG                | 1946709197               |
| SNP_P3_182837_941   | NW_004520340.1 | Scaffold6725 | 941                     | AA                              | GG                | 1946709198               |
| SNP_P3_182838_1011  | NW_004520340.1 | Scaffold6725 | 1011                    | AA                              | GG                | 1946709199               |
| SNP_P3_182839_1454  | NW_004520340.1 | Scaffold6725 | 1454                    | AA                              | CC                | 1946709200               |
| SNP_P3_182840_1544  | NW_004520340.1 | Scaffold6725 | 1544                    | GG                              | TT                | 1946709201               |
| SNP_P3_182841_1700  | NW_004520340.1 | Scaffold6725 | 1700                    | AA                              | CC                | 1946709202               |
| SNP_P3_182842_1979  | NW_004520340.1 | Scaffold6725 | 1979                    | CC                              | TT                | 1946709203               |
| SNP_P3_182844_2013  | NW_004520340.1 | Scaffold6725 | 2013                    | AA                              | GG                | 1946709204               |
| SNP_P3_182845_2014  | NW_004520340.1 | Scaffold6725 | 2014                    | AA                              | TT                | 1946709205               |
| SNP_P3_182846_2041  | NW_004520340.1 | Scaffold6725 | 2041                    | CC                              | TT                | 1946709206               |
| SNP_P3_182847_4934  | NW_004520341.1 | Scaffold6728 | 4934                    | CC                              | GG                | 1946709207               |
| SNP_P3_182848_5211  | NW_004520341.1 | Scaffold6728 | 5211                    | GG                              | CC                | 1946709208               |
| SNP_P3_182849_9507  | NW_004520341.1 | Scaffold6728 | 9507                    | AA                              | GG                | 1946709209               |
| SNP_P3_182850_9508  | NW_004520341.1 | Scaffold6728 | 9508                    | AA                              | TT                | 1946709210               |
| SNP_P3_182851_9549  | NW_004520341.1 | Scaffold6728 | 9549                    | AA                              | CC                | 1946709211               |
| SNP_P3_182852_9598  | NW_004520341.1 | Scaffold6728 | 9598                    | AA                              | CC                | 1946709212               |
| SNP_P3_182853_10014 | NW_004520341.1 | Scaffold6728 | 10014                   | AA                              | GG                | 1946709213               |
| SNP_P3_182854_378   | NW_004520343.1 | Scaffold6731 | 378                     | TT                              | CC                | 1946709214               |
| SNP_P3_182855_732   | NW_004520343.1 | Scaffold6731 | 732                     | TT                              | GG                | 1946709215               |
| SNP_P3_182856_993   | NW_004520343.1 | Scaffold6731 | 993                     | GG                              | CC                | 1946709216               |
| SNP_P3_182857_1225  | NW_004520343.1 | Scaffold6731 | 1225                    | GG                              | TT                | 1946709217               |
| SNP_P3_182858_1267  | NW_004520343.1 | Scaffold6731 | 1267                    | TT                              | CC                | 1946709218               |
| SNP_P3_182859_1321  | NW_004520343.1 | Scaffold6731 | 1321                    | GG                              | CC                | 1946709219               |
| SNP_P3_182860_100   | NW_004520345.1 | Scaffold6734 | 100                     | AA                              | CC                | 1946709220               |
| SNP_P3_182861_732   | NW_004520345.1 | Scaffold6734 | 732                     | AA                              | CC                | 1946709221               |
| SNP_P3_182862_64    | NW_004520346.1 | Scaffold6736 | 64                      | AA                              | CC                | 1946709222               |
| SNP_P3_182863_1790  | NW_004520347.1 | Scaffold6737 | 1790                    | GG                              | AA                | 1946709223               |
| SNP_P3_182864_1822  | NW_004520347.1 | Scaffold6737 | 1822                    | TT                              | CC                | 1946709224               |
| SNP_P3_182865_1974  | NW_004520347.1 | Scaffold6737 | 1974                    | AA                              | TT                | 1946709225               |
| SNP_P3_182866_2019  | NW_004520347.1 | Scaffold6737 | 2019                    | TT                              | GG                | 1946709226               |
| SNP_P3_182867_2123  | NW_004520347.1 | Scaffold6737 | 2123                    | GG                              | CC                | 1946709227               |



| SNPs IDs           | Chromosome IDs | Chromosomes  | Physical positions (bp) | CDC Frontier (Reference genome) | (Pusa 256 & HPNB) | NCBI SNPdb Accession IDs |
|--------------------|----------------|--------------|-------------------------|---------------------------------|-------------------|--------------------------|
| SNP_P3_182868_2454 | NW_004520347.1 | Scaffold6737 | 2454                    | AA                              | GG                | 1946709228               |
| SNP_P3_182869_2517 | NW_004520347.1 | Scaffold6737 | 2517                    | CC                              | TT                | 1946709229               |
| SNP_P3_182870_2721 | NW_004520347.1 | Scaffold6737 | 2721                    | TT                              | CC                | 1946709230               |
| SNP_P3_182871_2802 | NW_004520347.1 | Scaffold6737 | 2802                    | AA                              | GG                | 1946709231               |
| SNP_P3_182872_2940 | NW_004520347.1 | Scaffold6737 | 2940                    | CC                              | TT                | 1946709232               |
| SNP_P3_182873_3354 | NW_004520347.1 | Scaffold6737 | 3354                    | AA                              | GG                | 1946709233               |
| SNP_P3_182874_3647 | NW_004520347.1 | Scaffold6737 | 3647                    | TT                              | CC                | 1946709234               |
| SNP_P3_182875_3658 | NW_004520347.1 | Scaffold6737 | 3658                    | AA                              | TT                | 1946709235               |
| SNP_P3_182876_3754 | NW_004520347.1 | Scaffold6737 | 3754                    | CC                              | GG                | 1946709236               |
| SNP_P3_182877_3777 | NW_004520347.1 | Scaffold6737 | 3777                    | TT                              | AA                | 1946709237               |
| SNP_P3_182878_3906 | NW_004520347.1 | Scaffold6737 | 3906                    | AA                              | CC                | 1946709238               |
| SNP_P3_182879_3910 | NW_004520347.1 | Scaffold6737 | 3910                    | AA                              | CC                | 1946709239               |
| SNP_P3_182880_3914 | NW_004520347.1 | Scaffold6737 | 3914                    | CC                              | GG                | 1946709240               |
| SNP_P3_182881_3960 | NW_004520347.1 | Scaffold6737 | 3960                    | CC                              | GG                | 1946709241               |
| SNP_P3_182882_4026 | NW_004520347.1 | Scaffold6737 | 4026                    | TT                              | CC                | 1946709242               |
| SNP_P3_182883_4063 | NW_004520347.1 | Scaffold6737 | 4063                    | CC                              | TT                | 1946709243               |
| SNP_P3_182884_4126 | NW_004520347.1 | Scaffold6737 | 4126                    | AA                              | CC                | 1946709244               |
| SNP_P3_182885_4458 | NW_004520347.1 | Scaffold6737 | 4458                    | GG                              | TT                | 1946709245               |
| SNP_P3_182886_4516 | NW_004520347.1 | Scaffold6737 | 4516                    | TT                              | GG                | 1946709246               |
| SNP_P3_182887_4539 | NW_004520347.1 | Scaffold6737 | 4539                    | GG                              | AA                | 1946709247               |
| SNP_P3_182888_4549 | NW_004520347.1 | Scaffold6737 | 4549                    | CC                              | GG                | 1946709248               |
| SNP_P3_182889_4814 | NW_004520347.1 | Scaffold6737 | 4814                    | TT                              | AA                | 1946709249               |
| SNP_P3_182890_4862 | NW_004520347.1 | Scaffold6737 | 4862                    | CC                              | TT                | 1946709250               |
| SNP_P3_182891_4915 | NW_004520347.1 | Scaffold6737 | 4915                    | GG                              | AA                | 1946709251               |
| SNP_P3_182892_4916 | NW_004520347.1 | Scaffold6737 | 4916                    | GG                              | AA                | 1946709252               |
| SNP_P3_182893_5232 | NW_004520347.1 | Scaffold6737 | 5232                    | AA                              | GG                | 1946709253               |
| SNP_P3_182894_5291 | NW_004520347.1 | Scaffold6737 | 5291                    | CC                              | AA                | 1946709254               |
| SNP_P3_182895_5560 | NW_004520347.1 | Scaffold6737 | 5560                    | CC                              | GG                | 1946709255               |
| SNP_P3_182896_6268 | NW_004520347.1 | Scaffold6737 | 6268                    | AA                              | CC                | 1946709256               |
| SNP_P3_182897_6647 | NW_004520347.1 | Scaffold6737 | 6647                    | AA                              | GG                | 1946709257               |
| SNP_P3_182898_6696 | NW_004520347.1 | Scaffold6737 | 6696                    | CC                              | TT                | 1946709258               |
| SNP_P3_182899_7147 | NW_004520347.1 | Scaffold6737 | 7147                    | AA                              | GG                | 1946709259               |
| SNP_P3_182900_7151 | NW_004520347.1 | Scaffold6737 | 7151                    | GG                              | AA                | 1946709260               |
| SNP_P3_182901_7152 | NW_004520347.1 | Scaffold6737 | 7152                    | AA                              | GG                | 1946709261               |
| SNP_P3_182902_7494 | NW_004520347.1 | Scaffold6737 | 7494                    | AA                              | GG                | 1946709262               |
| SNP_P3_182903_7506 | NW_004520347.1 | Scaffold6737 | 7506                    | AA                              | TT                | 1946709263               |
| SNP_P3_182904_320  | NW_004520348.1 | Scaffold6738 | 320                     | AA                              | CC                | 1946709264               |
| SNP_P3_182905_325  | NW_004520348.1 | Scaffold6738 | 325                     | CC                              | TT                | 1946709265               |
| SNP_P3_182906_329  | NW_004520348.1 | Scaffold6738 | 329                     | TT                              | CC                | 1946709266               |
| SNP_P3_182907_330  | NW_004520348.1 | Scaffold6738 | 330                     | TT                              | CC                | 1946709267               |
| SNP_P3_182908_332  | NW_004520348.1 | Scaffold6738 | 332                     | GG                              | CC                | 1946709268               |
| SNP_P3_182909_339  | NW_004520348.1 | Scaffold6738 | 339                     | CC                              | TT                | 1946709269               |

| SNPs IDs            | Chromosome IDs | Chromosomes  | Physical positions (bp) | CDC Frontier (Reference genome) | (Pusa 256 & HPNB) | NCBI SNPdb Accession IDs |
|---------------------|----------------|--------------|-------------------------|---------------------------------|-------------------|--------------------------|
| SNP_P3_182910_346   | NW_004520348.1 | Scaffold6738 | 346                     | TT                              | AA                | 1946709270               |
| SNP_P3_182911_349   | NW_004520348.1 | Scaffold6738 | 349                     | TT                              | CC                | 1946709271               |
| SNP_P3_182912_350   | NW_004520348.1 | Scaffold6738 | 350                     | CC                              | TT                | 1946709272               |
| SNP_P3_182913_437   | NW_004520348.1 | Scaffold6738 | 437                     | TT                              | GG                | 1946709273               |
| SNP_P3_182914_1609  | NW_004520349.1 | Scaffold6741 | 1609                    | CC                              | AA                | 1946709274               |
| SNP_P3_182915_4047  | NW_004520354.1 | Scaffold6750 | 4047                    | AA                              | GG                | 1946709275               |
| SNP_P3_182916_4055  | NW_004520354.1 | Scaffold6750 | 4055                    | TT                              | GG                | 1946709276               |
| SNP_P3_182917_4393  | NW_004520354.1 | Scaffold6750 | 4393                    | AA                              | TT                | 1946709277               |
| SNP_P3_182918_4424  | NW_004520354.1 | Scaffold6750 | 4424                    | GG                              | AA                | 1946709278               |
| SNP_P3_182919_5650  | NW_004520354.1 | Scaffold6750 | 5650                    | TT                              | AA                | 1946709279               |
| SNP_P3_182920_5692  | NW_004520354.1 | Scaffold6750 | 5692                    | AA                              | GG                | 1946709280               |
| SNP_P3_182922_6712  | NW_004520354.1 | Scaffold6750 | 6712                    | AA                              | CC                | 1946709281               |
| SNP_P3_182923_6716  | NW_004520354.1 | Scaffold6750 | 6716                    | TT                              | CC                | 1946709282               |
| SNP_P3_182924_592   | NW_004520359.1 | Scaffold6759 | 592                     | TT                              | AA                | 1946709283               |
| SNP_P3_182925_595   | NW_004520359.1 | Scaffold6759 | 595                     | CC                              | GG                | 1946709284               |
| SNP_P3_182926_64    | NW_004520360.1 | Scaffold6760 | 64                      | TT                              | CC                | 1946709285               |
| SNP_P3_182927_72    | NW_004520360.1 | Scaffold6760 | 72                      | AA                              | GG                | 1946709286               |
| SNP_P3_182928_73    | NW_004520360.1 | Scaffold6760 | 73                      | GG                              | AA                | 1946709287               |
| SNP_P3_182929_77    | NW_004520360.1 | Scaffold6760 | 77                      | GG                              | AA                | 1946709288               |
| SNP_P3_182930_82    | NW_004520360.1 | Scaffold6760 | 82                      | CC                              | GG                | 1946709289               |
| SNP_P3_182931_132   | NW_004520360.1 | Scaffold6760 | 132                     | CC                              | TT                | 1946709290               |
| SNP_P3_182932_195   | NW_004520360.1 | Scaffold6760 | 195                     | TT                              | AA                | 1946709291               |
| SNP_P3_182933_370   | NW_004520360.1 | Scaffold6760 | 370                     | GG                              | TT                | 1946709292               |
| SNP_P3_182934_416   | NW_004520360.1 | Scaffold6760 | 416                     | AA                              | TT                | 1946709293               |
| SNP_P3_182935_427   | NW_004520360.1 | Scaffold6760 | 427                     | AA                              | TT                | 1946709294               |
| SNP_P3_182936_451   | NW_004520360.1 | Scaffold6760 | 451                     | TT                              | AA                | 1946709295               |
| SNP_P3_182937_503   | NW_004520360.1 | Scaffold6760 | 503                     | AA                              | GG                | 1946709296               |
| SNP_P3_182938_514   | NW_004520360.1 | Scaffold6760 | 514                     | AA                              | GG                | 1946709297               |
| SNP_P3_182939_613   | NW_004520360.1 | Scaffold6760 | 613                     | TT                              | AA                | 1946709298               |
| SNP_P3_182942_701   | NW_004520360.1 | Scaffold6760 | 701                     | GG                              | TT                | 1946709299               |
| SNP_P3_182943_788   | NW_004520360.1 | Scaffold6760 | 788                     | CC                              | TT                | 1946709300               |
| SNP_P3_182945_873   | NW_004520360.1 | Scaffold6760 | 873                     | TT                              | CC                | 1946709301               |
| SNP_P3_182946_879   | NW_004520360.1 | Scaffold6760 | 879                     | CC                              | AA                | 1946709302               |
| SNP_P3_182948_957   | NW_004520360.1 | Scaffold6760 | 957                     | CC                              | TT                | 1946709303               |
| SNP_P3_182949_1007  | NW_004520360.1 | Scaffold6760 | 1007                    | GG                              | TT                | 1946709304               |
| SNP_P3_182951_500   | NW_004520366.1 | Scaffold6773 | 500                     | TT                              | CC                | 1946709305               |
| SNP_P3_182952_501   | NW_004520366.1 | Scaffold6773 | 501                     | CC                              | GG                | 1946709306               |
| SNP_P3_182953_549   | NW_004520366.1 | Scaffold6773 | 549                     | TT                              | GG                | 1946709307               |
| SNP_P3_182954_1439  | NW_004520366.1 | Scaffold6773 | 1439                    | TT                              | AA                | 1946709308               |
| SNP_P3_182955_146   | NW_004520368.1 | Scaffold6775 | 146                     | CC                              | AA                | 1946709309               |
| SNP_P3_182956_11326 | NW_004520369.1 | Scaffold6778 | 11326                   | TT                              | AA                | 1946709310               |
| SNP_P3_182957_11338 | NW_004520369.1 | Scaffold6778 | 11338                   | GG                              | AA                | 1946709311               |

| SNPs IDs            | Chromosome IDs | Chromosomes  | Physical positions (bp) | CDC Frontier (Reference genome) | (Pusa 256 & HPNB) | NCBI SNPdb Accession IDs |
|---------------------|----------------|--------------|-------------------------|---------------------------------|-------------------|--------------------------|
| SNP_P3_182958_11533 | NW_004520369.1 | Scaffold6778 | 11533                   | GG                              | AA                | 1946709312               |
| SNP_P3_182959_11633 | NW_004520369.1 | Scaffold6778 | 11633                   | TT                              | GG                | 1946709313               |
| SNP_P3_182960_11693 | NW_004520369.1 | Scaffold6778 | 11693                   | TT                              | CC                | 1946709314               |
| SNP_P3_182961_11731 | NW_004520369.1 | Scaffold6778 | 11731                   | GG                              | CC                | 1946709315               |
| SNP_P3_182962_11795 | NW_004520369.1 | Scaffold6778 | 11795                   | AA                              | TT                | 1946709316               |
| SNP_P3_182963_81    | NW_004520371.1 | Scaffold6782 | 81                      | TT                              | CC                | 1946709317               |
| SNP_P3_182964_202   | NW_004520371.1 | Scaffold6782 | 202                     | AA                              | TT                | 1946709318               |
| SNP_P3_182965_307   | NW_004520371.1 | Scaffold6782 | 307                     | AA                              | GG                | 1946709319               |
| SNP_P3_182966_384   | NW_004520371.1 | Scaffold6782 | 384                     | TT                              | CC                | 1946709320               |
| SNP_P3_182967_425   | NW_004520371.1 | Scaffold6782 | 425                     | CC                              | AA                | 1946709321               |
| SNP_P3_182969_724   | NW_004520371.1 | Scaffold6782 | 724                     | CC                              | TT                | 1946709322               |
| SNP_P3_182971_775   | NW_004520371.1 | Scaffold6782 | 775                     | GG                              | AA                | 1946709323               |
| SNP_P3_182974_1243  | NW_004520371.1 | Scaffold6782 | 1243                    | CC                              | TT                | 1946709324               |
| SNP_P3_182976_271   | NW_004520372.1 | Scaffold6784 | 271                     | TT                              | AA                | 1946709325               |
| SNP_P3_182977_296   | NW_004520372.1 | Scaffold6784 | 296                     | GG                              | AA                | 1946709326               |
| SNP_P3_182978_104   | NW_004520376.1 | Scaffold6790 | 104                     | CC                              | TT                | 1946709327               |
| SNP_P3_182979_232   | NW_004520376.1 | Scaffold6790 | 232                     | TT                              | GG                | 1946709328               |
| SNP_P3_182980_580   | NW_004520376.1 | Scaffold6790 | 580                     | GG                              | AA                | 1946709329               |
| SNP_P3_182982_1052  | NW_004520376.1 | Scaffold6790 | 1052                    | GG                              | TT                | 1946709330               |
| SNP_P3_182983_1114  | NW_004520376.1 | Scaffold6790 | 1114                    | AA                              | CC                | 1946709331               |
| SNP_P3_182984_1123  | NW_004520376.1 | Scaffold6790 | 1123                    | CC                              | TT                | 1946709332               |
| SNP_P3_182985_1149  | NW_004520376.1 | Scaffold6790 | 1149                    | CC                              | TT                | 1946709333               |
| SNP_P3_182986_1157  | NW_004520376.1 | Scaffold6790 | 1157                    | CC                              | TT                | 1946709334               |
| SNP_P3_182987_1222  | NW_004520376.1 | Scaffold6790 | 1222                    | CC                              | AA                | 1946709335               |
| SNP_P3_182988_1238  | NW_004520376.1 | Scaffold6790 | 1238                    | GG                              | AA                | 1946709336               |
| SNP_P3_182989_1321  | NW_004520376.1 | Scaffold6790 | 1321                    | GG                              | TT                | 1946709337               |
| SNP_P3_182991_1477  | NW_004520376.1 | Scaffold6790 | 1477                    | AA                              | GG                | 1946709338               |
| SNP_P3_182992_1478  | NW_004520376.1 | Scaffold6790 | 1478                    | CC                              | TT                | 1946709339               |
| SNP_P3_182993_1540  | NW_004520376.1 | Scaffold6790 | 1540                    | AA                              | TT                | 1946709340               |
| SNP_P3_182994_2201  | NW_004520376.1 | Scaffold6790 | 2201                    | TT                              | CC                | 1946709341               |
| SNP_P3_182995_2207  | NW_004520376.1 | Scaffold6790 | 2207                    | GG                              | AA                | 1946709342               |
| SNP_P3_182996_2232  | NW_004520376.1 | Scaffold6790 | 2232                    | TT                              | CC                | 1946709343               |
| SNP_P3_182998_2300  | NW_004520376.1 | Scaffold6790 | 2300                    | TT                              | CC                | 1946709344               |
| SNP_P3_182999_2384  | NW_004520376.1 | Scaffold6790 | 2384                    | GG                              | TT                | 1946709345               |
| SNP_P3_183000_2439  | NW_004520376.1 | Scaffold6790 | 2439                    | CC                              | TT                | 1946709346               |
| SNP_P3_183001_2531  | NW_004520376.1 | Scaffold6790 | 2531                    | TT                              | CC                | 1946709347               |
| SNP_P3_183002_2707  | NW_004520376.1 | Scaffold6790 | 2707                    | AA                              | TT                | 1946709348               |
| SNP_P3_183003_2726  | NW_004520376.1 | Scaffold6790 | 2726                    | GG                              | AA                | 1946709349               |
| SNP_P3_183004_2756  | NW_004520376.1 | Scaffold6790 | 2756                    | CC                              | AA                | 1946709350               |
| SNP_P3_183006_2859  | NW_004520376.1 | Scaffold6790 | 2859                    | GG                              | AA                | 1946709351               |
| SNP_P3_183007_2902  | NW_004520376.1 | Scaffold6790 | 2902                    | CC                              | TT                | 1946709352               |
| SNP_P3_183008_2999  | NW_004520376.1 | Scaffold6790 | 2999                    | TT                              | AA                | 1946709353               |

| SNPs IDs            | Chromosome IDs | Chromosomes  | Physical positions (bp) | CDC Frontier (Reference genome) | (Pusa 256 & HPNB) | NCBI SNPdb Accession IDs |
|---------------------|----------------|--------------|-------------------------|---------------------------------|-------------------|--------------------------|
| SNP_P3_183009_3075  | NW_004520376.1 | Scaffold6790 | 3075                    | TT                              | CC                | 1946709354               |
| SNP_P3_183010_3126  | NW_004520376.1 | Scaffold6790 | 3126                    | AA                              | GG                | 1946709355               |
| SNP_P3_183011_3191  | NW_004520376.1 | Scaffold6790 | 3191                    | AA                              | GG                | 1946709356               |
| SNP_P3_183012_3202  | NW_004520376.1 | Scaffold6790 | 3202                    | TT                              | CC                | 1946709357               |
| SNP_P3_183013_3215  | NW_004520376.1 | Scaffold6790 | 3215                    | CC                              | TT                | 1946709358               |
| SNP_P3_183014_3856  | NW_004520377.1 | Scaffold6791 | 3856                    | GG                              | TT                | 1946709359               |
| SNP_P3_183015_3899  | NW_004520377.1 | Scaffold6791 | 3899                    | GG                              | TT                | 1946709360               |
| SNP_P3_183016_3904  | NW_004520377.1 | Scaffold6791 | 3904                    | CC                              | GG                | 1946709361               |
| SNP_P3_183017_4096  | NW_004520377.1 | Scaffold6791 | 4096                    | TT                              | CC                | 1946709362               |
| SNP_P3_183018_4114  | NW_004520377.1 | Scaffold6791 | 4114                    | TT                              | GG                | 1946709363               |
| SNP_P3_183019_4115  | NW_004520377.1 | Scaffold6791 | 4115                    | GG                              | CC                | 1946709364               |
| SNP_P3_183020_4144  | NW_004520377.1 | Scaffold6791 | 4144                    | AA                              | TT                | 1946709365               |
| SNP_P3_183021_4460  | NW_004520377.1 | Scaffold6791 | 4460                    | TT                              | AA                | 1946709366               |
| SNP_P3_183022_7656  | NW_004520377.1 | Scaffold6791 | 7656                    | AA                              | GG                | 1946709367               |
| SNP_P3_183023_13488 | NW_004520377.1 | Scaffold6791 | 13488                   | TT                              | CC                | 1946709368               |
| SNP_P3_183024_13549 | NW_004520377.1 | Scaffold6791 | 13549                   | TT                              | CC                | 1946709369               |
| SNP_P3_183025_13564 | NW_004520377.1 | Scaffold6791 | 13564                   | TT                              | AA                | 1946709370               |
| SNP_P3_183026_13787 | NW_004520377.1 | Scaffold6791 | 13787                   | TT                              | GG                | 1946709371               |
| SNP_P3_183027_17009 | NW_004520377.1 | Scaffold6791 | 17009                   | GG                              | AA                | 1946709372               |
| SNP_P3_183028_18793 | NW_004520377.1 | Scaffold6791 | 18793                   | CC                              | TT                | 1946709373               |
| SNP_P3_183029_18795 | NW_004520377.1 | Scaffold6791 | 18795                   | GG                              | AA                | 1946709374               |
| SNP_P3_183030_24417 | NW_004520377.1 | Scaffold6791 | 24417                   | CC                              | TT                | 1946709375               |
| SNP_P3_183031_26017 | NW_004520377.1 | Scaffold6791 | 26017                   | GG                              | AA                | 1946709376               |
| SNP_P3_183032_26020 | NW_004520377.1 | Scaffold6791 | 26020                   | AA                              | GG                | 1946709377               |
| SNP_P3_183033_26222 | NW_004520377.1 | Scaffold6791 | 26222                   | AA                              | GG                | 1946709378               |
| SNP_P3_183034_26228 | NW_004520377.1 | Scaffold6791 | 26228                   | TT                              | CC                | 1946709379               |
| SNP_P3_183035_26246 | NW_004520377.1 | Scaffold6791 | 26246                   | TT                              | CC                | 1946709380               |
| SNP_P3_183037_1115  | NW_004520381.1 | Scaffold6799 | 1115                    | AA                              | GG                | 1946709381               |
| SNP_P3_183038_1316  | NW_004520381.1 | Scaffold6799 | 1316                    | TT                              | GG                | 1946709382               |
| SNP_P3_183039_1360  | NW_004520381.1 | Scaffold6799 | 1360                    | TT                              | GG                | 1946709383               |
| SNP_P3_183040_2427  | NW_004520381.1 | Scaffold6799 | 2427                    | GG                              | CC                | 1946709384               |
| SNP_P3_183041_113   | NW_004520382.1 | Scaffold6801 | 113                     | TT                              | AA                | 1946709385               |
| SNP_P3_183042_239   | NW_004520384.1 | Scaffold6808 | 239                     | GG                              | AA                | 1946709386               |
| SNP_P3_183043_330   | NW_004520384.1 | Scaffold6808 | 330                     | CC                              | TT                | 1946709387               |
| SNP_P3_183044_493   | NW_004520384.1 | Scaffold6808 | 493                     | TT                              | AA                | 1946709388               |
| SNP_P3_183045_609   | NW_004520384.1 | Scaffold6808 | 609                     | CC                              | AA                | 1946709389               |
| SNP_P3_183046_614   | NW_004520384.1 | Scaffold6808 | 614                     | CC                              | TT                | 1946709390               |
| SNP_P3_183047_509   | NW_004520387.1 | Scaffold6813 | 509                     | CC                              | AA                | 1946709391               |
| SNP_P3_183048_494   | NW_004520388.1 | Scaffold6814 | 494                     | CC                              | GG                | 1946709392               |
| SNP_P3_183049_525   | NW_004520388.1 | Scaffold6814 | 525                     | GG                              | AA                | 1946709393               |
| SNP_P3_183050_532   | NW_004520388.1 | Scaffold6814 | 532                     | TT                              | AA                | 1946709394               |
| SNP_P3_183051_337   | NW_004520390.1 | Scaffold6817 | 337                     | GG                              | AA                | 1946709395               |

| SNPs IDs           | Chromosome IDs | Chromosomes  | Physical positions (bp) | CDC Frontier (Reference genome) | (Pusa 256 & HPNB) | NCBI SNPdb Accession IDs |
|--------------------|----------------|--------------|-------------------------|---------------------------------|-------------------|--------------------------|
| SNP_P3_183052_653  | NW_004520392.1 | Scaffold6820 | 653                     | AA                              | CC                | 1946709396               |
| SNP_P3_183053_699  | NW_004520392.1 | Scaffold6820 | 699                     | AA                              | TT                | 1946709397               |
| SNP_P3_183054_877  | NW_004520392.1 | Scaffold6820 | 877                     | CC                              | TT                | 1946709398               |
| SNP_P3_183055_949  | NW_004520392.1 | Scaffold6820 | 949                     | CC                              | TT                | 1946709399               |
| SNP_P3_183056_964  | NW_004520392.1 | Scaffold6820 | 964                     | TT                              | CC                | 1946709400               |
| SNP_P3_183057_965  | NW_004520392.1 | Scaffold6820 | 965                     | CC                              | AA                | 1946709401               |
| SNP_P3_183058_989  | NW_004520392.1 | Scaffold6820 | 989                     | AA                              | CC                | 1946709402               |
| SNP_P3_183059_2509 | NW_004520397.1 | Scaffold6827 | 2509                    | TT                              | CC                | 1946709403               |
| SNP_P3_183060_371  | NW_004520398.1 | Scaffold6828 | 371                     | AA                              | GG                | 1946709404               |
| SNP_P3_183062_522  | NW_004520398.1 | Scaffold6828 | 522                     | GG                              | AA                | 1946709405               |
| SNP_P3_183063_729  | NW_004520398.1 | Scaffold6828 | 729                     | TT                              | CC                | 1946709406               |
| SNP_P3_183064_945  | NW_004520398.1 | Scaffold6828 | 945                     | CC                              | TT                | 1946709407               |
| SNP_P3_183065_115  | NW_004520399.1 | Scaffold6830 | 115                     | TT                              | AA                | 1946709408               |
| SNP_P3_183066_141  | NW_004520399.1 | Scaffold6830 | 141                     | CC                              | TT                | 1946709409               |
| SNP_P3_183067_176  | NW_004520399.1 | Scaffold6830 | 176                     | CC                              | TT                | 1946709410               |
| SNP_P3_183068_1256 | NW_004520399.1 | Scaffold6830 | 1256                    | TT                              | AA                | 1946709411               |
| SNP_P3_183069_2247 | NW_004520403.1 | Scaffold6837 | 2247                    | GG                              | TT                | 1946709412               |
| SNP_P3_183070_2535 | NW_004520403.1 | Scaffold6837 | 2535                    | AA                              | CC                | 1946709413               |
| SNP_P3_183071_2539 | NW_004520403.1 | Scaffold6837 | 2539                    | AA                              | TT                | 1946709414               |
| SNP_P3_183072_2622 | NW_004520403.1 | Scaffold6837 | 2622                    | AA                              | TT                | 1946709415               |
| SNP_P3_183073_49   | NW_004520405.1 | Scaffold6841 | 49                      | AA                              | GG                | 1946709416               |
| SNP_P3_183074_89   | NW_004520405.1 | Scaffold6841 | 89                      | TT                              | AA                | 1946709417               |
| SNP_P3_183075_1302 | NW_004520405.1 | Scaffold6841 | 1302                    | GG                              | AA                | 1946709418               |
| SNP_P3_183076_64   | NW_004520406.1 | Scaffold6842 | 64                      | GG                              | TT                | 1946709419               |
| SNP_P3_183077_107  | NW_004520406.1 | Scaffold6842 | 107                     | AA                              | TT                | 1946709420               |
| SNP_P3_183078_109  | NW_004520406.1 | Scaffold6842 | 109                     | TT                              | GG                | 1946709421               |
| SNP_P3_183079_318  | NW_004520406.1 | Scaffold6842 | 318                     | TT                              | CC                | 1946709422               |
| SNP_P3_183080_1808 | NW_004520406.1 | Scaffold6842 | 1808                    | AA                              | CC                | 1946709423               |
| SNP_P3_183081_1821 | NW_004520406.1 | Scaffold6842 | 1821                    | CC                              | TT                | 1946709424               |
| SNP_P3_183082_1254 | NW_004520407.1 | Scaffold6843 | 1254                    | TT                              | GG                | 1946709425               |
| SNP_P3_183083_1353 | NW_004520407.1 | Scaffold6843 | 1353                    | AA                              | GG                | 1946709426               |
| SNP_P3_183084_434  | NW_004520408.1 | Scaffold6845 | 434                     | GG                              | CC                | 1946709427               |
| SNP_P3_183085_513  | NW_004520408.1 | Scaffold6845 | 513                     | AA                              | CC                | 1946709428               |
| SNP_P3_183086_702  | NW_004520408.1 | Scaffold6845 | 702                     | CC                              | AA                | 1946709429               |
| SNP_P3_183087_737  | NW_004520408.1 | Scaffold6845 | 737                     | AA                              | TT                | 1946709430               |
| SNP_P3_183088_873  | NW_004520408.1 | Scaffold6845 | 873                     | TT                              | GG                | 1946709431               |
| SNP_P3_183089_1005 | NW_004520408.1 | Scaffold6845 | 1005                    | AA                              | TT                | 1946709432               |
| SNP_P3_183090_509  | NW_004520409.1 | Scaffold6846 | 509                     | TT                              | AA                | 1946709433               |
| SNP_P3_183092_537  | NW_004520409.1 | Scaffold6846 | 537                     | AA                              | TT                | 1946709434               |
| SNP_P3_183093_627  | NW_004520409.1 | Scaffold6846 | 627                     | CC                              | AA                | 1946709435               |
| SNP_P3_183094_701  | NW_004520409.1 | Scaffold6846 | 701                     | TT                              | AA                | 1946709436               |
| SNP_P3_183095_724  | NW_004520409.1 | Scaffold6846 | 724                     | TT                              | AA                | 1946709437               |

| SNPs IDs           | Chromosome IDs | Chromosomes  | Physical positions (bp) | CDC Frontier (Reference genome) | (Pusa 256 & HPNB) | NCBI SNPdb Accession IDs |
|--------------------|----------------|--------------|-------------------------|---------------------------------|-------------------|--------------------------|
| SNP_P3_183096_730  | NW_004520409.1 | Scaffold6846 | 730                     | TT                              | GG                | 1946709438               |
| SNP_P3_183097_747  | NW_004520409.1 | Scaffold6846 | 747                     | AA                              | GG                | 1946709439               |
| SNP_P3_183098_826  | NW_004520409.1 | Scaffold6846 | 826                     | CC                              | TT                | 1946709440               |
| SNP_P3_183099_827  | NW_004520409.1 | Scaffold6846 | 827                     | AA                              | CC                | 1946709441               |
| SNP_P3_183100_828  | NW_004520409.1 | Scaffold6846 | 828                     | TT                              | AA                | 1946709442               |
| SNP_P3_183101_895  | NW_004520409.1 | Scaffold6846 | 895                     | TT                              | CC                | 1946709443               |
| SNP_P3_183102_918  | NW_004520409.1 | Scaffold6846 | 918                     | CC                              | GG                | 1946709444               |
| SNP_P3_183103_1393 | NW_004520409.1 | Scaffold6846 | 1393                    | CC                              | AA                | 1946709445               |
| SNP_P3_183104_1407 | NW_004520409.1 | Scaffold6846 | 1407                    | AA                              | GG                | 1946709446               |
| SNP_P3_183105_1568 | NW_004520409.1 | Scaffold6846 | 1568                    | CC                              | GG                | 1946709447               |
| SNP_P3_183106_1628 | NW_004520409.1 | Scaffold6846 | 1628                    | AA                              | CC                | 1946709448               |
| SNP_P3_183107_1679 | NW_004520409.1 | Scaffold6846 | 1679                    | CC                              | TT                | 1946709449               |
| SNP_P3_183108_1867 | NW_004520409.1 | Scaffold6846 | 1867                    | AA                              | GG                | 1946709450               |
| SNP_P3_183109_2368 | NW_004520409.1 | Scaffold6846 | 2368                    | TT                              | AA                | 1946709451               |
| SNP_P3_183110_2369 | NW_004520409.1 | Scaffold6846 | 2369                    | GG                              | TT                | 1946709452               |
| SNP_P3_183111_2431 | NW_004520409.1 | Scaffold6846 | 2431                    | CC                              | AA                | 1946709453               |
| SNP_P3_183112_2691 | NW_004520409.1 | Scaffold6846 | 2691                    | TT                              | CC                | 1946709454               |
| SNP_P3_183113_2718 | NW_004520409.1 | Scaffold6846 | 2718                    | AA                              | TT                | 1946709455               |
| SNP_P3_183114_79   | NW_004520411.1 | Scaffold6851 | 79                      | TT                              | CC                | 1946709456               |
| SNP_P3_183115_128  | NW_004520411.1 | Scaffold6851 | 128                     | AA                              | GG                | 1946709457               |
| SNP_P3_183116_150  | NW_004520411.1 | Scaffold6851 | 150                     | TT                              | CC                | 1946709458               |
| SNP_P3_183117_186  | NW_004520411.1 | Scaffold6851 | 186                     | AA                              | GG                | 1946709459               |
| SNP_P3_183118_219  | NW_004520411.1 | Scaffold6851 | 219                     | GG                              | CC                | 1946709460               |
| SNP_P3_183119_381  | NW_004520411.1 | Scaffold6851 | 381                     | AA                              | TT                | 1946709461               |
| SNP_P3_183120_398  | NW_004520411.1 | Scaffold6851 | 398                     | AA                              | CC                | 1946709462               |
| SNP_P3_183121_443  | NW_004520411.1 | Scaffold6851 | 443                     | AA                              | GG                | 1946709463               |
| SNP_P3_183122_448  | NW_004520411.1 | Scaffold6851 | 448                     | AA                              | TT                | 1946709464               |
| SNP_P3_183123_467  | NW_004520411.1 | Scaffold6851 | 467                     | GG                              | CC                | 1946709465               |
| SNP_P3_183124_516  | NW_004520411.1 | Scaffold6851 | 516                     | TT                              | CC                | 1946709466               |
| SNP_P3_183125_593  | NW_004520411.1 | Scaffold6851 | 593                     | AA                              | TT                | 1946709467               |
| SNP_P3_183126_669  | NW_004520411.1 | Scaffold6851 | 669                     | GG                              | TT                | 1946709468               |
| SNP_P3_183127_743  | NW_004520411.1 | Scaffold6851 | 743                     | TT                              | CC                | 1946709469               |
| SNP_P3_183128_1535 | NW_004520411.1 | Scaffold6851 | 1535                    | TT                              | GG                | 1946709470               |
| SNP_P3_183129_1604 | NW_004520411.1 | Scaffold6851 | 1604                    | AA                              | CC                | 1946709471               |
| SNP_P3_183130_361  | NW_004520412.1 | Scaffold6852 | 361                     | TT                              | GG                | 1946709472               |
| SNP_P3_183131_391  | NW_004520412.1 | Scaffold6852 | 391                     | GG                              | CC                | 1946709473               |
| SNP_P3_183132_586  | NW_004520412.1 | Scaffold6852 | 586                     | CC                              | AA                | 1946709474               |
| SNP_P3_183133_659  | NW_004520412.1 | Scaffold6852 | 659                     | AA                              | TT                | 1946709475               |
| SNP_P3_183134_268  | NW_004520414.1 | Scaffold6854 | 268                     | CC                              | TT                | 1946709476               |
| SNP_P3_183135_342  | NW_004520414.1 | Scaffold6854 | 342                     | CC                              | TT                | 1946709477               |
| SNP_P3_183136_573  | NW_004520414.1 | Scaffold6854 | 573                     | TT                              | CC                | 1946709478               |
| SNP_P3_183137_584  | NW_004520414.1 | Scaffold6854 | 584                     | AA                              | CC                | 1946709479               |

| SNPs IDs           | Chromosome IDs | Chromosomes  | Physical positions (bp) | CDC Frontier (Reference genome) | (Pusa 256 & HPNB) | NCBI SNPdb Accession IDs |
|--------------------|----------------|--------------|-------------------------|---------------------------------|-------------------|--------------------------|
| SNP_P3_183138_586  | NW_004520414.1 | Scaffold6854 | 586                     | GG                              | AA                | 1946709480               |
| SNP_P3_183139_589  | NW_004520414.1 | Scaffold6854 | 589                     | CC                              | TT                | 1946709481               |
| SNP_P3_183140_660  | NW_004520414.1 | Scaffold6854 | 660                     | AA                              | GG                | 1946709482               |
| SNP_P3_183141_704  | NW_004520414.1 | Scaffold6854 | 704                     | AA                              | TT                | 1946709483               |
| SNP_P3_183142_720  | NW_004520414.1 | Scaffold6854 | 720                     | TT                              | AA                | 1946709484               |
| SNP_P3_183143_806  | NW_004520414.1 | Scaffold6854 | 806                     | AA                              | GG                | 1946709485               |
| SNP_P3_183144_900  | NW_004520414.1 | Scaffold6854 | 900                     | TT                              | GG                | 1946709486               |
| SNP_P3_183145_962  | NW_004520414.1 | Scaffold6854 | 962                     | AA                              | GG                | 1946709487               |
| SNP_P3_183146_989  | NW_004520414.1 | Scaffold6854 | 989                     | CC                              | TT                | 1946709488               |
| SNP_P3_183147_1008 | NW_004520414.1 | Scaffold6854 | 1008                    | GG                              | AA                | 1946709489               |
| SNP_P3_183149_729  | NW_004520421.1 | Scaffold6867 | 729                     | CC                              | TT                | 1946709490               |
| SNP_P3_183150_801  | NW_004520421.1 | Scaffold6867 | 801                     | GG                              | AA                | 1946709491               |
| SNP_P3_183151_539  | NW_004520423.1 | Scaffold6869 | 539                     | CC                              | GG                | 1946709492               |
| SNP_P3_183152_542  | NW_004520423.1 | Scaffold6869 | 542                     | TT                              | CC                | 1946709493               |
| SNP_P3_183153_602  | NW_004520423.1 | Scaffold6869 | 602                     | AA                              | CC                | 1946709494               |
| SNP_P3_183154_646  | NW_004520423.1 | Scaffold6869 | 646                     | AA                              | TT                | 1946709495               |
| SNP_P3_183155_692  | NW_004520423.1 | Scaffold6869 | 692                     | TT                              | CC                | 1946709496               |
| SNP_P3_183156_707  | NW_004520423.1 | Scaffold6869 | 707                     | TT                              | CC                | 1946709497               |
| SNP_P3_183157_813  | NW_004520423.1 | Scaffold6869 | 813                     | TT                              | CC                | 1946709498               |
| SNP_P3_183158_629  | NW_004520425.1 | Scaffold6873 | 629                     | AA                              | GG                | 1946709499               |
| SNP_P3_183159_637  | NW_004520425.1 | Scaffold6873 | 637                     | AA                              | CC                | 1946709500               |
| SNP_P3_183160_645  | NW_004520425.1 | Scaffold6873 | 645                     | TT                              | GG                | 1946709501               |
| SNP_P3_183161_983  | NW_004520425.1 | Scaffold6873 | 983                     | CC                              | AA                | 1946709502               |
| SNP_P3_183162_1028 | NW_004520425.1 | Scaffold6873 | 1028                    | CC                              | GG                | 1946709503               |
| SNP_P3_183163_1113 | NW_004520425.1 | Scaffold6873 | 1113                    | CC                              | GG                | 1946709504               |
| SNP_P3_183164_1436 | NW_004520425.1 | Scaffold6873 | 1436                    | AA                              | CC                | 1946709505               |
| SNP_P3_183165_1541 | NW_004520425.1 | Scaffold6873 | 1541                    | TT                              | CC                | 1946709506               |
| SNP_P3_183166_1845 | NW_004520425.1 | Scaffold6873 | 1845                    | TT                              | CC                | 1946709507               |
| SNP_P3_183167_1039 | NW_004520426.1 | Scaffold6874 | 1039                    | AA                              | TT                | 1946709508               |
| SNP_P3_183168_612  | NW_004520427.1 | Scaffold6876 | 612                     | CC                              | AA                | 1946709509               |
| SNP_P3_183169_613  | NW_004520427.1 | Scaffold6876 | 613                     | AA                              | TT                | 1946709510               |
| SNP_P3_183170_686  | NW_004520427.1 | Scaffold6876 | 686                     | GG                              | AA                | 1946709511               |
| SNP_P3_183171_1529 | NW_004520427.1 | Scaffold6876 | 1529                    | CC                              | GG                | 1946709512               |
| SNP_P3_183172_1554 | NW_004520427.1 | Scaffold6876 | 1554                    | TT                              | CC                | 1946709513               |
| SNP_P3_183173_1647 | NW_004520427.1 | Scaffold6876 | 1647                    | AA                              | CC                | 1946709514               |
| SNP_P3_183174_1710 | NW_004520427.1 | Scaffold6876 | 1710                    | GG                              | TT                | 1946709515               |
| SNP_P3_183175_1750 | NW_004520427.1 | Scaffold6876 | 1750                    | TT                              | AA                | 1946709516               |
| SNP_P3_183176_1765 | NW_004520427.1 | Scaffold6876 | 1765                    | GG                              | AA                | 1946709517               |
| SNP_P3_183177_1874 | NW_004520427.1 | Scaffold6876 | 1874                    | GG                              | TT                | 1946709519               |
| SNP_P3_183178_1884 | NW_004520427.1 | Scaffold6876 | 1884                    | CC                              | AA                | 1946709521               |
| SNP_P3_183179_1891 | NW_004520427.1 | Scaffold6876 | 1891                    | GG                              | AA                | 1946709523               |
| SNP_P3_183180_1896 | NW_004520427.1 | Scaffold6876 | 1896                    | TT                              | CC                | 1946709525               |

| SNPs IDs           | Chromosome IDs | Chromosomes  | Physical positions (bp) | CDC Frontier (Reference genome) | (Pusa 256 & HPNB) | NCBI SNPdb Accession IDs |
|--------------------|----------------|--------------|-------------------------|---------------------------------|-------------------|--------------------------|
| SNP_P3_183181_1906 | NW_004520427.1 | Scaffold6876 | 1906                    | AA                              | GG                | 1946709527               |
| SNP_P3_183182_1951 | NW_004520427.1 | Scaffold6876 | 1951                    | CC                              | AA                | 1946709529               |
| SNP_P3_183183_1965 | NW_004520427.1 | Scaffold6876 | 1965                    | CC                              | AA                | 1946709532               |
| SNP_P3_183184_1975 | NW_004520427.1 | Scaffold6876 | 1975                    | GG                              | AA                | 1946709534               |
| SNP_P3_183185_2039 | NW_004520427.1 | Scaffold6876 | 2039                    | CC                              | TT                | 1946709536               |
| SNP_P3_183186_2051 | NW_004520427.1 | Scaffold6876 | 2051                    | CC                              | TT                | 1946709538               |
| SNP_P3_183187_2124 | NW_004520427.1 | Scaffold6876 | 2124                    | TT                              | CC                | 1946709540               |
| SNP_P3_183188_2126 | NW_004520427.1 | Scaffold6876 | 2126                    | GG                              | AA                | 1946709542               |
| SNP_P3_183189_2127 | NW_004520427.1 | Scaffold6876 | 2127                    | CC                              | AA                | 1946709544               |
| SNP_P3_183190_2142 | NW_004520427.1 | Scaffold6876 | 2142                    | CC                              | AA                | 1946709546               |
| SNP_P3_183191_2144 | NW_004520427.1 | Scaffold6876 | 2144                    | AA                              | GG                | 1946709548               |
| SNP_P3_183192_2163 | NW_004520427.1 | Scaffold6876 | 2163                    | TT                              | CC                | 1946709550               |
| SNP_P3_183193_2164 | NW_004520427.1 | Scaffold6876 | 2164                    | CC                              | TT                | 1946709552               |
| SNP_P3_183194_2193 | NW_004520427.1 | Scaffold6876 | 2193                    | CC                              | TT                | 1946709555               |
| SNP_P3_183195_2242 | NW_004520427.1 | Scaffold6876 | 2242                    | GG                              | AA                | 1946709557               |
| SNP_P3_183196_2290 | NW_004520427.1 | Scaffold6876 | 2290                    | TT                              | CC                | 1946709560               |
| SNP_P3_183197_350  | NW_004520428.1 | Scaffold6877 | 350                     | TT                              | AA                | 1946709562               |
| SNP_P3_183198_437  | NW_004520429.1 | Scaffold6878 | 437                     | AA                              | CC                | 1946709564               |
| SNP_P3_183199_811  | NW_004520429.1 | Scaffold6878 | 811                     | AA                              | GG                | 1946709566               |
| SNP_P3_183200_1637 | NW_004520429.1 | Scaffold6878 | 1637                    | CC                              | TT                | 1946709568               |
| SNP_P3_183201_1677 | NW_004520429.1 | Scaffold6878 | 1677                    | CC                              | TT                | 1946709570               |
| SNP_P3_183202_1699 | NW_004520429.1 | Scaffold6878 | 1699                    | TT                              | CC                | 1946709572               |
| SNP_P3_183204_1881 | NW_004520429.1 | Scaffold6878 | 1881                    | CC                              | GG                | 1946709574               |
| SNP_P3_183205_2078 | NW_004520429.1 | Scaffold6878 | 2078                    | GG                              | AA                | 1946709576               |
| SNP_P3_183206_2269 | NW_004520429.1 | Scaffold6878 | 2269                    | GG                              | AA                | 1946709578               |
| SNP_P3_183207_2353 | NW_004520429.1 | Scaffold6878 | 2353                    | AA                              | TT                | 1946709582               |
| SNP_P3_183208_1656 | NW_004520430.1 | Scaffold6879 | 1656                    | CC                              | AA                | 1946709584               |
| SNP_P3_183209_1658 | NW_004520430.1 | Scaffold6879 | 1658                    | CC                              | GG                | 1946709587               |
| SNP_P3_183210_1667 | NW_004520430.1 | Scaffold6879 | 1667                    | AA                              | GG                | 1946709589               |
| SNP_P3_183211_1668 | NW_004520430.1 | Scaffold6879 | 1668                    | AA                              | TT                | 1946709591               |
| SNP_P3_183212_1821 | NW_004520430.1 | Scaffold6879 | 1821                    | CC                              | TT                | 1946709593               |
| SNP_P3_183213_1844 | NW_004520430.1 | Scaffold6879 | 1844                    | GG                              | TT                | 1946709595               |
| SNP_P3_183214_1854 | NW_004520430.1 | Scaffold6879 | 1854                    | CC                              | TT                | 1946709598               |
| SNP_P3_183215_1862 | NW_004520430.1 | Scaffold6879 | 1862                    | TT                              | GG                | 1946709600               |
| SNP_P3_183216_1885 | NW_004520430.1 | Scaffold6879 | 1885                    | GG                              | CC                | 1946709602               |
| SNP_P3_183217_1896 | NW_004520430.1 | Scaffold6879 | 1896                    | CC                              | AA                | 1946709604               |
| SNP_P3_183218_1930 | NW_004520430.1 | Scaffold6879 | 1930                    | CC                              | TT                | 1946709606               |
| SNP_P3_183219_2103 | NW_004520430.1 | Scaffold6879 | 2103                    | TT                              | AA                | 1946709608               |
| SNP_P3_183220_2140 | NW_004520430.1 | Scaffold6879 | 2140                    | AA                              | TT                | 1946709616               |
| SNP_P3_183221_73   | NW_004520431.1 | Scaffold6882 | 73                      | CC                              | TT                | 1946709618               |
| SNP_P3_183222_115  | NW_004520431.1 | Scaffold6882 | 115                     | GG                              | AA                | 1946709620               |
| SNP_P3_183223_204  | NW_004520431.1 | Scaffold6882 | 204                     | CC                              | GG                | 1946709622               |



| SNPs IDs            | Chromosome IDs | Chromosomes  | Physical positions (bp) | CDC Frontier (Reference genome) | (Pusa 256 & HPNB) | NCBI SNPdb Accession IDs |
|---------------------|----------------|--------------|-------------------------|---------------------------------|-------------------|--------------------------|
| SNP_P3_183225_1094  | NW_004520438.1 | Scaffold6895 | 1094                    | GG                              | AA                | 1946709624               |
| SNP_P3_183226_1095  | NW_004520438.1 | Scaffold6895 | 1095                    | AA                              | GG                | 1946709626               |
| SNP_P3_183227_1096  | NW_004520438.1 | Scaffold6895 | 1096                    | TT                              | CC                | 1946709628               |
| SNP_P3_183228_1136  | NW_004520438.1 | Scaffold6895 | 1136                    | GG                              | TT                | 1946709630               |
| SNP_P3_183229_1183  | NW_004520438.1 | Scaffold6895 | 1183                    | AA                              | GG                | 1946709632               |
| SNP_P3_183230_1342  | NW_004520439.1 | Scaffold6896 | 1342                    | CC                              | AA                | 1946709634               |
| SNP_P3_183231_1405  | NW_004520439.1 | Scaffold6896 | 1405                    | CC                              | TT                | 1946709636               |
| SNP_P3_183232_1450  | NW_004520439.1 | Scaffold6896 | 1450                    | CC                              | AA                | 1946709638               |
| SNP_P3_183233_1819  | NW_004520439.1 | Scaffold6896 | 1819                    | GG                              | TT                | 1946709641               |
| SNP_P3_183234_1902  | NW_004520439.1 | Scaffold6896 | 1902                    | CC                              | TT                | 1946709643               |
| SNP_P3_183235_2235  | NW_004520439.1 | Scaffold6896 | 2235                    | CC                              | TT                | 1946709645               |
| SNP_P3_183236_2287  | NW_004520439.1 | Scaffold6896 | 2287                    | CC                              | GG                | 1946709647               |
| SNP_P3_183237_1684  | NW_004520442.1 | Scaffold6900 | 1684                    | AA                              | TT                | 1946709649               |
| SNP_P3_183239_5443  | NW_004520444.1 | Scaffold6903 | 5443                    | CC                              | AA                | 1946709651               |
| SNP_P3_183240_5487  | NW_004520444.1 | Scaffold6903 | 5487                    | TT                              | CC                | 1946709653               |
| SNP_P3_183242_23705 | NW_004520444.1 | Scaffold6903 | 23705                   | AA                              | GG                | 1946709657               |
| SNP_P3_183243_848   | NW_004520451.1 | Scaffold6915 | 848                     | GG                              | TT                | 1946709660               |
| SNP_P3_183244_710   | NW_004520454.1 | Scaffold6919 | 710                     | TT                              | CC                | 1946709662               |
| SNP_P3_183245_2446  | NW_004520456.1 | Scaffold6923 | 2446                    | GG                              | AA                | 1946709664               |
| SNP_P3_183246_2607  | NW_004520456.1 | Scaffold6923 | 2607                    | GG                              | AA                | 1946709666               |
| SNP_P3_183247_2927  | NW_004520456.1 | Scaffold6923 | 2927                    | GG                              | CC                | 1946709668               |
| SNP_P3_183248_3077  | NW_004520456.1 | Scaffold6923 | 3077                    | CC                              | AA                | 1946709670               |
| SNP_P3_183249_3119  | NW_004520456.1 | Scaffold6923 | 3119                    | TT                              | GG                | 1946709672               |
| SNP_P3_183250_3120  | NW_004520456.1 | Scaffold6923 | 3120                    | GG                              | TT                | 1946709674               |
| SNP_P3_183251_3238  | NW_004520456.1 | Scaffold6923 | 3238                    | TT                              | CC                | 1946709676               |
| SNP_P3_183252_3276  | NW_004520456.1 | Scaffold6923 | 3276                    | AA                              | GG                | 1946709678               |
| SNP_P3_183253_3490  | NW_004520456.1 | Scaffold6923 | 3490                    | GG                              | AA                | 1946709680               |
| SNP_P3_183254_3595  | NW_004520456.1 | Scaffold6923 | 3595                    | TT                              | CC                | 1946709682               |
| SNP_P3_183255_3776  | NW_004520456.1 | Scaffold6923 | 3776                    | AA                              | CC                | 1946709684               |
| SNP_P3_183256_3795  | NW_004520456.1 | Scaffold6923 | 3795                    | TT                              | AA                | 1946709686               |
| SNP_P3_183257_546   | NW_004520459.1 | Scaffold6926 | 546                     | CC                              | AA                | 1946709688               |
| SNP_P3_183258_725   | NW_004520459.1 | Scaffold6926 | 725                     | CC                              | AA                | 1946709690               |
| SNP_P3_183259_736   | NW_004520459.1 | Scaffold6926 | 736                     | TT                              | GG                | 1946709692               |
| SNP_P3_183260_747   | NW_004520459.1 | Scaffold6926 | 747                     | GG                              | CC                | 1946709694               |
| SNP_P3_183261_751   | NW_004520459.1 | Scaffold6926 | 751                     | CC                              | TT                | 1946709696               |
| SNP_P3_183262_756   | NW_004520459.1 | Scaffold6926 | 756                     | AA                              | CC                | 1946709699               |
| SNP_P3_183263_765   | NW_004520459.1 | Scaffold6926 | 765                     | AA                              | TT                | 1946709701               |
| SNP_P3_183264_774   | NW_004520459.1 | Scaffold6926 | 774                     | AA                              | CC                | 1946709703               |
| SNP_P3_183265_1368  | NW_004520460.1 | Scaffold6927 | 1368                    | CC                              | TT                | 1946709705               |
| SNP_P3_183266_2423  | NW_004520460.1 | Scaffold6927 | 2423                    | CC                              | GG                | 1946709707               |
| SNP_P3_183267_2427  | NW_004520460.1 | Scaffold6927 | 2427                    | AA                              | GG                | 1946709709               |
| SNP_P3_183268_2442  | NW_004520460.1 | Scaffold6927 | 2442                    | AA                              | TT                | 1946709711               |

| SNPs IDs           | Chromosome IDs | Chromosomes  | Physical positions (bp) | CDC Frontier (Reference genome) | (Pusa 256 & HPNB) | NCBI SNPdb Accession IDs |
|--------------------|----------------|--------------|-------------------------|---------------------------------|-------------------|--------------------------|
| SNP_P3_183269_2489 | NW_004520460.1 | Scaffold6927 | 2489                    | CC                              | GG                | 1946709713               |
| SNP_P3_183270_2550 | NW_004520460.1 | Scaffold6927 | 2550                    | AA                              | TT                | 1946709715               |
| SNP_P3_183272_2111 | NW_004520462.1 | Scaffold6932 | 2111                    | AA                              | TT                | 1946709717               |
| SNP_P3_183273_1890 | NW_004520464.1 | Scaffold6934 | 1890                    | GG                              | TT                | 1946709719               |
| SNP_P3_183274_2096 | NW_004520464.1 | Scaffold6934 | 2096                    | CC                              | AA                | 1946709721               |
| SNP_P3_183275_2479 | NW_004520464.1 | Scaffold6934 | 2479                    | CC                              | GG                | 1946709724               |
| SNP_P3_183276_2523 | NW_004520464.1 | Scaffold6934 | 2523                    | AA                              | GG                | 1946709726               |
| SNP_P3_183277_2564 | NW_004520464.1 | Scaffold6934 | 2564                    | AA                              | TT                | 1946709728               |
| SNP_P3_183278_4061 | NW_004520464.1 | Scaffold6934 | 4061                    | AA                              | CC                | 1946709730               |
| SNP_P3_183279_4082 | NW_004520464.1 | Scaffold6934 | 4082                    | TT                              | CC                | 1946709732               |
| SNP_P3_183280_4137 | NW_004520464.1 | Scaffold6934 | 4137                    | CC                              | GG                | 1946709734               |
| SNP_P3_183281_4143 | NW_004520464.1 | Scaffold6934 | 4143                    | CC                              | TT                | 1946709736               |
| SNP_P3_183282_4190 | NW_004520464.1 | Scaffold6934 | 4190                    | GG                              | CC                | 1946709738               |
| SNP_P3_183283_4412 | NW_004520464.1 | Scaffold6934 | 4412                    | CC                              | TT                | 1946709742               |
| SNP_P3_183284_4448 | NW_004520464.1 | Scaffold6934 | 4448                    | CC                              | AA                | 1946709744               |
| SNP_P3_183285_944  | NW_004520466.1 | Scaffold6939 | 944                     | CC                              | TT                | 1946709746               |
| SNP_P3_183286_1027 | NW_004520466.1 | Scaffold6939 | 1027                    | GG                              | AA                | 1946709748               |
| SNP_P3_183287_1043 | NW_004520466.1 | Scaffold6939 | 1043                    | CC                              | TT                | 1946709750               |
| SNP_P3_183288_1128 | NW_004520466.1 | Scaffold6939 | 1128                    | AA                              | GG                | 1946709752               |
| SNP_P3_183289_1181 | NW_004520466.1 | Scaffold6939 | 1181                    | AA                              | GG                | 1946709754               |
| SNP_P3_183290_1495 | NW_004520466.1 | Scaffold6939 | 1495                    | CC                              | AA                | 1946709756               |
| SNP_P3_183291_126  | NW_004520468.1 | Scaffold6941 | 126                     | TT                              | CC                | 1946709758               |
| SNP_P3_183292_189  | NW_004520468.1 | Scaffold6941 | 189                     | CC                              | AA                | 1946709760               |
| SNP_P3_183293_195  | NW_004520468.1 | Scaffold6941 | 195                     | GG                              | AA                | 1946709762               |
| SNP_P3_183294_213  | NW_004520468.1 | Scaffold6941 | 213                     | TT                              | CC                | 1946709764               |
| SNP_P3_183295_246  | NW_004520468.1 | Scaffold6941 | 246                     | CC                              | TT                | 1946709766               |
| SNP_P3_183296_298  | NW_004520468.1 | Scaffold6941 | 298                     | TT                              | AA                | 1946709768               |
| SNP_P3_183297_455  | NW_004520468.1 | Scaffold6941 | 455                     | TT                              | GG                | 1946709770               |
| SNP_P3_183298_1248 | NW_004520470.1 | Scaffold6943 | 1248                    | AA                              | GG                | 1946709772               |
| SNP_P3_183299_1773 | NW_004520470.1 | Scaffold6943 | 1773                    | TT                              | AA                | 1946709774               |
| SNP_P3_183300_985  | NW_004520477.1 | Scaffold6951 | 985                     | GG                              | AA                | 1946709776               |
| SNP_P3_183301_1412 | NW_004520477.1 | Scaffold6951 | 1412                    | GG                              | AA                | 1946709778               |
| SNP_P3_183302_5855 | NW_004520477.1 | Scaffold6951 | 5855                    | TT                              | AA                | 1946709782               |
| SNP_P3_183303_5877 | NW_004520477.1 | Scaffold6951 | 5877                    | GG                              | AA                | 1946709784               |
| SNP_P3_183304_6244 | NW_004520477.1 | Scaffold6951 | 6244                    | GG                              | AA                | 1946709786               |
| SNP_P3_183306_6534 | NW_004520477.1 | Scaffold6951 | 6534                    | CC                              | AA                | 1946709788               |
| SNP_P3_183307_6908 | NW_004520477.1 | Scaffold6951 | 6908                    | AA                              | GG                | 1946709790               |
| SNP_P3_183308_149  | NW_004520484.1 | Scaffold6963 | 149                     | CC                              | AA                | 1946709792               |
| SNP_P3_183309_494  | NW_004520484.1 | Scaffold6963 | 494                     | CC                              | GG                | 1946709794               |
| SNP_P3_183310_196  | NW_004520486.1 | Scaffold6965 | 196                     | TT                              | CC                | 1946709796               |
| SNP_P3_183311_1889 | NW_004520487.1 | Scaffold6968 | 1889                    | TT                              | CC                | 1946709798               |
| SNP_P3_183312_1925 | NW_004520487.1 | Scaffold6968 | 1925                    | GG                              | TT                | 1946709801               |

| SNPs IDs            | Chromosome IDs | Chromosomes  | Physical positions (bp) | CDC Frontier (Reference genome) | (Pusa 256 & HPNB) | NCBI SNPdb Accession IDs |
|---------------------|----------------|--------------|-------------------------|---------------------------------|-------------------|--------------------------|
| SNP_P3_183313_245   | NW_004520496.1 | Scaffold6980 | 245                     | TT                              | CC                | 1946709803               |
| SNP_P3_183314_15589 | NW_004520496.1 | Scaffold6980 | 15589                   | GG                              | AA                | 1946709805               |
| SNP_P3_183315_26774 | NW_004520496.1 | Scaffold6980 | 26774                   | GG                              | AA                | 1946709807               |
| SNP_P3_183316_53043 | NW_004520496.1 | Scaffold6980 | 53043                   | TT                              | CC                | 1946709809               |
| SNP_P3_183317_53060 | NW_004520496.1 | Scaffold6980 | 53060                   | CC                              | TT                | 1946709811               |
| SNP_P3_183319_67316 | NW_004520496.1 | Scaffold6980 | 67316                   | GG                              | AA                | 1946709813               |
| SNP_P3_183320_1174  | NW_004520499.1 | Scaffold6985 | 1174                    | AA                              | TT                | 1946709815               |
| SNP_P3_183321_1230  | NW_004520499.1 | Scaffold6985 | 1230                    | TT                              | AA                | 1946709817               |
| SNP_P3_183322_1251  | NW_004520499.1 | Scaffold6985 | 1251                    | AA                              | GG                | 1946709819               |
| SNP_P3_183323_587   | NW_004520504.1 | Scaffold6995 | 587                     | AA                              | TT                | 1946709822               |
| SNP_P3_183324_920   | NW_004520504.1 | Scaffold6995 | 920                     | GG                              | AA                | 1946709825               |
| SNP_P3_183325_992   | NW_004520504.1 | Scaffold6995 | 992                     | GG                              | CC                | 1946709827               |
| SNP_P3_183326_1417  | NW_004520506.1 | Scaffold6999 | 1417                    | CC                              | TT                | 1946709829               |
| SNP_P3_183327_1472  | NW_004520506.1 | Scaffold6999 | 1472                    | AA                              | TT                | 1946709831               |
| SNP_P3_183328_378   | NW_004520510.1 | Scaffold7006 | 378                     | AA                              | TT                | 1946709834               |
| SNP_P3_183329_383   | NW_004520510.1 | Scaffold7006 | 383                     | CC                              | AA                | 1946709836               |
| SNP_P3_183330_487   | NW_004520511.1 | Scaffold7007 | 487                     | CC                              | TT                | 1946709838               |
| SNP_P3_183331_760   | NW_004520511.1 | Scaffold7007 | 760                     | TT                              | CC                | 1946709841               |
| SNP_P3_183332_49    | NW_004520513.1 | Scaffold7010 | 49                      | AA                              | CC                | 1946709843               |
| SNP_P3_183334_105   | NW_004520513.1 | Scaffold7010 | 105                     | AA                              | CC                | 1946709845               |
| SNP_P3_183335_320   | NW_004520513.1 | Scaffold7010 | 320                     | TT                              | CC                | 1946709847               |
| SNP_P3_183336_487   | NW_004520513.1 | Scaffold7010 | 487                     | TT                              | CC                | 1946709849               |
| SNP_P3_183337_596   | NW_004520513.1 | Scaffold7010 | 596                     | GG                              | AA                | 1946709851               |
| SNP_P3_183338_700   | NW_004520513.1 | Scaffold7010 | 700                     | AA                              | GG                | 1946709853               |
| SNP_P3_183339_1324  | NW_004520513.1 | Scaffold7010 | 1324                    | GG                              | AA                | 1946709855               |
| SNP_P3_183340_1361  | NW_004520513.1 | Scaffold7010 | 1361                    | GG                              | TT                | 1946709857               |
| SNP_P3_183341_1373  | NW_004520513.1 | Scaffold7010 | 1373                    | GG                              | AA                | 1946709859               |
| SNP_P3_183342_1690  | NW_004520513.1 | Scaffold7010 | 1690                    | TT                              | AA                | 1946709863               |
| SNP_P3_183343_383   | NW_004520518.1 | Scaffold7021 | 383                     | CC                              | TT                | 1946709865               |
| SNP_P3_183344_770   | NW_004520518.1 | Scaffold7021 | 770                     | TT                              | CC                | 1946709867               |
| SNP_P3_183345_801   | NW_004520518.1 | Scaffold7021 | 801                     | GG                              | AA                | 1946709869               |
| SNP_P3_183346_814   | NW_004520518.1 | Scaffold7021 | 814                     | TT                              | CC                | 1946709871               |
| SNP_P3_183347_844   | NW_004520518.1 | Scaffold7021 | 844                     | AA                              | TT                | 1946709873               |
| SNP_P3_183348_849   | NW_004520518.1 | Scaffold7021 | 849                     | TT                              | CC                | 1946709875               |
| SNP_P3_183349_903   | NW_004520518.1 | Scaffold7021 | 903                     | AA                              | CC                | 1946709877               |
| SNP_P3_183350_913   | NW_004520518.1 | Scaffold7021 | 913                     | CC                              | AA                | 1946709879               |
| SNP_P3_183351_1100  | NW_004520519.1 | Scaffold7022 | 1100                    | AA                              | TT                | 1946709881               |
| SNP_P3_183352_1552  | NW_004520521.1 | Scaffold7033 | 1552                    | AA                              | TT                | 1946709883               |
| SNP_P3_183353_1554  | NW_004520521.1 | Scaffold7033 | 1554                    | TT                              | GG                | 1946709885               |
| SNP_P3_183354_266   | NW_004520522.1 | Scaffold7034 | 266                     | TT                              | CC                | 1946709887               |
| SNP_P3_183355_327   | NW_004520522.1 | Scaffold7034 | 327                     | AA                              | GG                | 1946709889               |
| SNP_P3_183356_517   | NW_004520522.1 | Scaffold7034 | 517                     | CC                              | GG                | 1946709891               |

| SNPs IDs           | Chromosome IDs | Chromosomes  | Physical positions (bp) | CDC Frontier (Reference genome) | (Pusa 256 & HPNB) | NCBI SNPdb Accession IDs |
|--------------------|----------------|--------------|-------------------------|---------------------------------|-------------------|--------------------------|
| SNP_P3_183357_608  | NW_004520522.1 | Scaffold7034 | 608                     | TT                              | CC                | 1946709893               |
| SNP_P3_183358_796  | NW_004520522.1 | Scaffold7034 | 796                     | AA                              | TT                | 1946709896               |
| SNP_P3_183359_822  | NW_004520522.1 | Scaffold7034 | 822                     | GG                              | TT                | 1946709898               |
| SNP_P3_183360_64   | NW_004520528.1 | Scaffold7041 | 64                      | TT                              | AA                | 1946709900               |
| SNP_P3_183361_65   | NW_004520528.1 | Scaffold7041 | 65                      | TT                              | GG                | 1946709902               |
| SNP_P3_183362_79   | NW_004520528.1 | Scaffold7041 | 79                      | TT                              | CC                | 1946709905               |
| SNP_P3_183363_95   | NW_004520528.1 | Scaffold7041 | 95                      | AA                              | GG                | 1946709907               |
| SNP_P3_183364_166  | NW_004520528.1 | Scaffold7041 | 166                     | TT                              | GG                | 1946709909               |
| SNP_P3_183365_183  | NW_004520528.1 | Scaffold7041 | 183                     | GG                              | TT                | 1946709911               |
| SNP_P3_183366_185  | NW_004520528.1 | Scaffold7041 | 185                     | AA                              | GG                | 1946709913               |
| SNP_P3_183367_186  | NW_004520528.1 | Scaffold7041 | 186                     | GG                              | AA                | 1946709915               |
| SNP_P3_183368_917  | NW_004520528.1 | Scaffold7041 | 917                     | AA                              | GG                | 1946709917               |
| SNP_P3_183369_1019 | NW_004520528.1 | Scaffold7041 | 1019                    | CC                              | TT                | 1946709919               |
| SNP_P3_183370_1039 | NW_004520528.1 | Scaffold7041 | 1039                    | TT                              | AA                | 1946709921               |
| SNP_P3_183371_1064 | NW_004520528.1 | Scaffold7041 | 1064                    | GG                              | TT                | 1946709923               |
| SNP_P3_183373_5424 | NW_004520530.1 | Scaffold7046 | 5424                    | TT                              | CC                | 1946709925               |
| SNP_P3_183375_652  | NW_004520535.1 | Scaffold7055 | 652                     | TT                              | AA                | 1946709927               |
| SNP_P3_183376_674  | NW_004520535.1 | Scaffold7055 | 674                     | TT                              | GG                | 1946709929               |
| SNP_P3_183377_918  | NW_004520535.1 | Scaffold7055 | 918                     | TT                              | CC                | 1946709931               |
| SNP_P3_183378_1016 | NW_004520535.1 | Scaffold7055 | 1016                    | CC                              | GG                | 1946709933               |
| SNP_P3_183379_1045 | NW_004520535.1 | Scaffold7055 | 1045                    | AA                              | TT                | 1946709935               |
| SNP_P3_183380_440  | NW_004520537.1 | Scaffold7059 | 440                     | CC                              | TT                | 1946709937               |
| SNP_P3_183381_794  | NW_004520537.1 | Scaffold7059 | 794                     | TT                              | GG                | 1946709939               |
| SNP_P3_183382_808  | NW_004520537.1 | Scaffold7059 | 808                     | TT                              | GG                | 1946709941               |
| SNP_P3_183383_985  | NW_004520537.1 | Scaffold7059 | 985                     | CC                              | TT                | 1946709943               |
| SNP_P3_183384_1213 | NW_004520537.1 | Scaffold7059 | 1213                    | GG                              | AA                | 1946709945               |
| SNP_P3_183385_1288 | NW_004520537.1 | Scaffold7059 | 1288                    | GG                              | AA                | 1946709947               |
| SNP_P3_183386_1323 | NW_004520537.1 | Scaffold7059 | 1323                    | AA                              | GG                | 1946709949               |
| SNP_P3_183387_1390 | NW_004520537.1 | Scaffold7059 | 1390                    | TT                              | CC                | 1946709951               |
| SNP_P3_183388_1402 | NW_004520537.1 | Scaffold7059 | 1402                    | AA                              | GG                | 1946709953               |
| SNP_P3_183389_256  | NW_004520538.1 | Scaffold7060 | 256                     | AA                              | GG                | 1946709955               |
| SNP_P3_183390_484  | NW_004520538.1 | Scaffold7060 | 484                     | TT                              | GG                | 1946709957               |
| SNP_P3_183391_539  | NW_004520538.1 | Scaffold7060 | 539                     | AA                              | CC                | 1946709959               |
| SNP_P3_183392_545  | NW_004520538.1 | Scaffold7060 | 545                     | AA                              | GG                | 1946709961               |
| SNP_P3_183393_576  | NW_004520538.1 | Scaffold7060 | 576                     | TT                              | GG                | 1946709963               |
| SNP_P3_183394_609  | NW_004520538.1 | Scaffold7060 | 609                     | CC                              | TT                | 1946709965               |
| SNP_P3_183395_610  | NW_004520538.1 | Scaffold7060 | 610                     | GG                              | AA                | 1946709967               |
| SNP_P3_183396_931  | NW_004520538.1 | Scaffold7060 | 931                     | GG                              | CC                | 1946709969               |
| SNP_P3_183397_60   | NW_004520539.1 | Scaffold7063 | 60                      | AA                              | GG                | 1946709971               |
| SNP_P3_183398_74   | NW_004520539.1 | Scaffold7063 | 74                      | AA                              | GG                | 1946709974               |
| SNP_P3_183399_198  | NW_004520539.1 | Scaffold7063 | 198                     | TT                              | AA                | 1946709976               |
| SNP_P3_183400_213  | NW_004520539.1 | Scaffold7063 | 213                     | CC                              | GG                | 1946709978               |

| SNPs IDs           | Chromosome IDs | Chromosomes  | Physical positions (bp) | CDC Frontier (Reference genome) | (Pusa 256 & HPNB) | NCBI SNPdb Accession IDs |
|--------------------|----------------|--------------|-------------------------|---------------------------------|-------------------|--------------------------|
| SNP_P3_183401_262  | NW_004520539.1 | Scaffold7063 | 262                     | TT                              | CC                | 1946709980               |
| SNP_P3_183402_318  | NW_004520539.1 | Scaffold7063 | 318                     | TT                              | AA                | 1946709983               |
| SNP_P3_183403_947  | NW_004520540.1 | Scaffold7067 | 947                     | TT                              | CC                | 1946709985               |
| SNP_P3_183404_949  | NW_004520540.1 | Scaffold7067 | 949                     | TT                              | CC                | 1946709987               |
| SNP_P3_183405_950  | NW_004520540.1 | Scaffold7067 | 950                     | TT                              | CC                | 1946709989               |
| SNP_P3_183406_951  | NW_004520540.1 | Scaffold7067 | 951                     | GG                              | TT                | 1946709991               |
| SNP_P3_183407_952  | NW_004520540.1 | Scaffold7067 | 952                     | GG                              | AA                | 1946709993               |
| SNP_P3_183408_452  | NW_004520543.1 | Scaffold7073 | 452                     | GG                              | CC                | 1946709995               |
| SNP_P3_183409_500  | NW_004520545.1 | Scaffold7075 | 500                     | AA                              | TT                | 1946709997               |
| SNP_P3_183410_535  | NW_004520545.1 | Scaffold7075 | 535                     | TT                              | GG                | 1946710000               |
| SNP_P3_183411_1088 | NW_004520545.1 | Scaffold7075 | 1088                    | AA                              | CC                | 1946710002               |
| SNP_P3_183412_1106 | NW_004520545.1 | Scaffold7075 | 1106                    | GG                              | AA                | 1946710004               |
| SNP_P3_183413_2331 | NW_004520548.1 | Scaffold7081 | 2331                    | GG                              | TT                | 1946710006               |
| SNP_P3_183414_2423 | NW_004520548.1 | Scaffold7081 | 2423                    | GG                              | TT                | 1946710008               |
| SNP_P3_183416_2465 | NW_004520548.1 | Scaffold7081 | 2465                    | GG                              | TT                | 1946710010               |
| SNP_P3_183417_2470 | NW_004520548.1 | Scaffold7081 | 2470                    | TT                              | CC                | 1946710012               |
| SNP_P3_183418_2473 | NW_004520548.1 | Scaffold7081 | 2473                    | TT                              | AA                | 1946710014               |
| SNP_P3_183420_2568 | NW_004520548.1 | Scaffold7081 | 2568                    | GG                              | AA                | 1946710017               |
| SNP_P3_183421_2657 | NW_004520548.1 | Scaffold7081 | 2657                    | TT                              | GG                | 1946710019               |
| SNP_P3_183422_2695 | NW_004520548.1 | Scaffold7081 | 2695                    | TT                              | CC                | 1946710021               |
| SNP_P3_183424_391  | NW_004520549.1 | Scaffold7082 | 391                     | TT                              | AA                | 1946710024               |
| SNP_P3_183425_581  | NW_004520549.1 | Scaffold7082 | 581                     | TT                              | CC                | 1946710026               |
| SNP_P3_183426_647  | NW_004520549.1 | Scaffold7082 | 647                     | GG                              | TT                | 1946710028               |
| SNP_P3_183427_673  | NW_004520549.1 | Scaffold7082 | 673                     | AA                              | GG                | 1946710030               |
| SNP_P3_183428_681  | NW_004520549.1 | Scaffold7082 | 681                     | AA                              | CC                | 1946710032               |
| SNP_P3_183429_697  | NW_004520549.1 | Scaffold7082 | 697                     | GG                              | AA                | 1946710034               |
| SNP_P3_183430_734  | NW_004520549.1 | Scaffold7082 | 734                     | AA                              | CC                | 1946710036               |
| SNP_P3_183431_807  | NW_004520549.1 | Scaffold7082 | 807                     | AA                              | GG                | 1946710039               |
| SNP_P3_183432_525  | NW_004520552.1 | Scaffold7087 | 525                     | CC                              | TT                | 1946710041               |
| SNP_P3_183433_846  | NW_004520552.1 | Scaffold7087 | 846                     | CC                              | TT                | 1946710043               |
| SNP_P3_183434_876  | NW_004520552.1 | Scaffold7087 | 876                     | AA                              | CC                | 1946710045               |
| SNP_P3_183435_278  | NW_004520555.1 | Scaffold7091 | 278                     | GG                              | AA                | 1946710048               |
| SNP_P3_183436_569  | NW_004520555.1 | Scaffold7091 | 569                     | GG                              | AA                | 1946710050               |
| SNP_P3_183437_649  | NW_004520555.1 | Scaffold7091 | 649                     | AA                              | GG                | 1946710052               |
| SNP_P3_183438_773  | NW_004520555.1 | Scaffold7091 | 773                     | TT                              | CC                | 1946710054               |
| SNP_P3_183439_781  | NW_004520555.1 | Scaffold7091 | 781                     | GG                              | AA                | 1946710056               |
| SNP_P3_183440_881  | NW_004520555.1 | Scaffold7091 | 881                     | TT                              | AA                | 1946710060               |
| SNP_P3_183441_916  | NW_004520555.1 | Scaffold7091 | 916                     | AA                              | GG                | 1946710062               |
| SNP_P3_183442_1022 | NW_004520555.1 | Scaffold7091 | 1022                    | TT                              | CC                | 1946710064               |
| SNP_P3_183443_1143 | NW_004520555.1 | Scaffold7091 | 1143                    | TT                              | CC                | 1946710066               |
| SNP_P3_183444_1184 | NW_004520555.1 | Scaffold7091 | 1184                    | GG                              | AA                | 1946710068               |
| SNP_P3_183445_1185 | NW_004520555.1 | Scaffold7091 | 1185                    | AA                              | TT                | 1946710070               |

| SNPs IDs            | Chromosome IDs | Chromosomes  | Physical positions (bp) | CDC Frontier (Reference genome) | (Pusa 256 & HPNB) | NCBI SNPdb Accession IDs |
|---------------------|----------------|--------------|-------------------------|---------------------------------|-------------------|--------------------------|
| SNP_P3_183446_1242  | NW_004520555.1 | Scaffold7091 | 1242                    | AA                              | GG                | 1946710072               |
| SNP_P3_183447_1271  | NW_004520555.1 | Scaffold7091 | 1271                    | GG                              | AA                | 1946710074               |
| SNP_P3_183448_1390  | NW_004520555.1 | Scaffold7091 | 1390                    | TT                              | CC                | 1946710076               |
| SNP_P3_183449_1581  | NW_004520555.1 | Scaffold7091 | 1581                    | GG                              | TT                | 1946710078               |
| SNP_P3_183450_64    | NW_004520558.1 | Scaffold7095 | 64                      | TT                              | CC                | 1946710080               |
| SNP_P3_183451_293   | NW_004520558.1 | Scaffold7095 | 293                     | TT                              | CC                | 1946710082               |
| SNP_P3_183452_4728  | NW_004520558.1 | Scaffold7095 | 4728                    | AA                              | CC                | 1946710084               |
| SNP_P3_183453_5048  | NW_004520558.1 | Scaffold7095 | 5048                    | AA                              | CC                | 1946710086               |
| SNP_P3_183454_5126  | NW_004520558.1 | Scaffold7095 | 5126                    | TT                              | GG                | 1946710088               |
| SNP_P3_183455_5143  | NW_004520558.1 | Scaffold7095 | 5143                    | AA                              | GG                | 1946710090               |
| SNP_P3_183456_5440  | NW_004520558.1 | Scaffold7095 | 5440                    | GG                              | CC                | 1946710092               |
| SNP_P3_183457_5520  | NW_004520558.1 | Scaffold7095 | 5520                    | TT                              | CC                | 1946710094               |
| SNP_P3_183458_5560  | NW_004520558.1 | Scaffold7095 | 5560                    | CC                              | GG                | 1946710096               |
| SNP_P3_183459_5602  | NW_004520558.1 | Scaffold7095 | 5602                    | GG                              | AA                | 1946710098               |
| SNP_P3_183460_5732  | NW_004520558.1 | Scaffold7095 | 5732                    | TT                              | GG                | 1946710100               |
| SNP_P3_183461_5807  | NW_004520558.1 | Scaffold7095 | 5807                    | TT                              | CC                | 1946710102               |
| SNP_P3_183462_5854  | NW_004520558.1 | Scaffold7095 | 5854                    | GG                              | AA                | 1946710104               |
| SNP_P3_183463_64    | NW_004520559.1 | Scaffold7098 | 64                      | AA                              | GG                | 1946710106               |
| SNP_P3_183464_83    | NW_004520559.1 | Scaffold7098 | 83                      | AA                              | GG                | 1946710108               |
| SNP_P3_183465_322   | NW_004520559.1 | Scaffold7098 | 322                     | AA                              | GG                | 1946710110               |
| SNP_P3_183466_345   | NW_004520559.1 | Scaffold7098 | 345                     | AA                              | TT                | 1946710112               |
| SNP_P3_183467_1796  | NW_004520561.1 | Scaffold7102 | 1796                    | TT                              | GG                | 1946710115               |
| SNP_P3_183468_1914  | NW_004520561.1 | Scaffold7102 | 1914                    | CC                              | AA                | 1946710117               |
| SNP_P3_183469_1041  | NW_004520562.1 | Scaffold7104 | 1041                    | CC                              | GG                | 1946710119               |
| SNP_P3_183470_660   | NW_004520563.1 | Scaffold7105 | 660                     | AA                              | GG                | 1946710121               |
| SNP_P3_183471_681   | NW_004520563.1 | Scaffold7105 | 681                     | CC                              | TT                | 1946710123               |
| SNP_P3_183472_994   | NW_004520563.1 | Scaffold7105 | 994                     | AA                              | GG                | 1946710125               |
| SNP_P3_183473_1000  | NW_004520563.1 | Scaffold7105 | 1000                    | AA                              | GG                | 1946710127               |
| SNP_P3_183474_1008  | NW_004520563.1 | Scaffold7105 | 1008                    | AA                              | GG                | 1946710129               |
| SNP_P3_183476_12077 | NW_004520565.1 | Scaffold7107 | 12077                   | GG                              | TT                | 1946710131               |
| SNP_P3_183478_12200 | NW_004520565.1 | Scaffold7107 | 12200                   | TT                              | CC                | 1946710133               |
| SNP_P3_183479_12205 | NW_004520565.1 | Scaffold7107 | 12205                   | TT                              | CC                | 1946710135               |
| SNP_P3_183480_12224 | NW_004520565.1 | Scaffold7107 | 12224                   | TT                              | CC                | 1946710137               |
| SNP_P3_183481_12375 | NW_004520565.1 | Scaffold7107 | 12375                   | AA                              | TT                | 1946710139               |
| SNP_P3_183482_12458 | NW_004520565.1 | Scaffold7107 | 12458                   | AA                              | TT                | 1946710141               |
| SNP_P3_183483_12589 | NW_004520565.1 | Scaffold7107 | 12589                   | TT                              | GG                | 1946710143               |
| SNP_P3_183484_12661 | NW_004520565.1 | Scaffold7107 | 12661                   | TT                              | CC                | 1946710145               |
| SNP_P3_183485_12662 | NW_004520565.1 | Scaffold7107 | 12662                   | GG                              | TT                | 1946710147               |
| SNP_P3_183486_12765 | NW_004520565.1 | Scaffold7107 | 12765                   | GG                              | AA                | 1946710149               |
| SNP_P3_183487_12805 | NW_004520565.1 | Scaffold7107 | 12805                   | AA                              | GG                | 1946710151               |
| SNP_P3_183489_12860 | NW_004520565.1 | Scaffold7107 | 12860                   | CC                              | TT                | 1946710153               |
| SNP_P3_183490_13170 | NW_004520565.1 | Scaffold7107 | 13170                   | GG                              | AA                | 1946710155               |

| SNPs IDs            | Chromosome IDs | Chromosomes  | Physical positions (bp) | CDC Frontier (Reference genome) | (Pusa 256 & HPNB) | NCBI SNPdb Accession IDs |
|---------------------|----------------|--------------|-------------------------|---------------------------------|-------------------|--------------------------|
| SNP_P3_183491_13256 | NW_004520565.1 | Scaffold7107 | 13256                   | AA                              | GG                | 1946710157               |
| SNP_P3_183492_13266 | NW_004520565.1 | Scaffold7107 | 13266                   | TT                              | CC                | 1946710159               |
| SNP_P3_183493_13299 | NW_004520565.1 | Scaffold7107 | 13299                   | CC                              | GG                | 1946710161               |
| SNP_P3_183496_13483 | NW_004520565.1 | Scaffold7107 | 13483                   | GG                              | AA                | 1946710163               |
| SNP_P3_183497_13778 | NW_004520565.1 | Scaffold7107 | 13778                   | AA                              | CC                | 1946710165               |
| SNP_P3_183498_14174 | NW_004520565.1 | Scaffold7107 | 14174                   | TT                              | CC                | 1946710167               |
| SNP_P3_183499_14260 | NW_004520565.1 | Scaffold7107 | 14260                   | CC                              | TT                | 1946710169               |
| SNP_P3_183500_14298 | NW_004520565.1 | Scaffold7107 | 14298                   | AA                              | CC                | 1946710171               |
| SNP_P3_183501_14314 | NW_004520565.1 | Scaffold7107 | 14314                   | CC                              | AA                | 1946710173               |
| SNP_P3_183504_14849 | NW_004520565.1 | Scaffold7107 | 14849                   | GG                              | TT                | 1946710176               |
| SNP_P3_183505_15204 | NW_004520565.1 | Scaffold7107 | 15204                   | GG                              | AA                | 1946710178               |
| SNP_P3_183506_15288 | NW_004520565.1 | Scaffold7107 | 15288                   | TT                              | CC                | 1946710179               |
| SNP_P3_183507_15486 | NW_004520565.1 | Scaffold7107 | 15486                   | CC                              | TT                | 1946710181               |
| SNP_P3_183508_15784 | NW_004520565.1 | Scaffold7107 | 15784                   | TT                              | GG                | 1946710183               |
| SNP_P3_183510_16244 | NW_004520565.1 | Scaffold7107 | 16244                   | TT                              | AA                | 1946710185               |
| SNP_P3_183511_16246 | NW_004520565.1 | Scaffold7107 | 16246                   | AA                              | TT                | 1946710187               |
| SNP_P3_183512_16256 | NW_004520565.1 | Scaffold7107 | 16256                   | CC                              | TT                | 1946710189               |
| SNP_P3_183513_16299 | NW_004520565.1 | Scaffold7107 | 16299                   | GG                              | CC                | 1946710191               |
| SNP_P3_183516_17851 | NW_004520565.1 | Scaffold7107 | 17851                   | GG                              | AA                | 1946710193               |
| SNP_P3_183517_17936 | NW_004520565.1 | Scaffold7107 | 17936                   | TT                              | CC                | 1946710195               |
| SNP_P3_183518_18211 | NW_004520565.1 | Scaffold7107 | 18211                   | GG                              | AA                | 1946710198               |
| SNP_P3_183519_19880 | NW_004520565.1 | Scaffold7107 | 19880                   | AA                              | GG                | 1946710200               |
| SNP_P3_183520_19930 | NW_004520565.1 | Scaffold7107 | 19930                   | GG                              | CC                | 1946710202               |
| SNP_P3_183521_20219 | NW_004520565.1 | Scaffold7107 | 20219                   | TT                              | CC                | 1946710204               |
| SNP_P3_183522_20314 | NW_004520565.1 | Scaffold7107 | 20314                   | AA                              | GG                | 1946710206               |
| SNP_P3_183523_20332 | NW_004520565.1 | Scaffold7107 | 20332                   | TT                              | CC                | 1946710208               |
| SNP_P3_183524_20483 | NW_004520565.1 | Scaffold7107 | 20483                   | GG                              | AA                | 1946710211               |
| SNP_P3_183525_20582 | NW_004520565.1 | Scaffold7107 | 20582                   | TT                              | CC                | 1946710214               |
| SNP_P3_183526_20586 | NW_004520565.1 | Scaffold7107 | 20586                   | TT                              | AA                | 1946710216               |
| SNP_P3_183527_20590 | NW_004520565.1 | Scaffold7107 | 20590                   | GG                              | AA                | 1946710218               |
| SNP_P3_183528_20594 | NW_004520565.1 | Scaffold7107 | 20594                   | GG                              | AA                | 1946710220               |
| SNP_P3_183529_20595 | NW_004520565.1 | Scaffold7107 | 20595                   | CC                              | AA                | 1946710222               |
| SNP_P3_183530_20686 | NW_004520565.1 | Scaffold7107 | 20686                   | GG                              | AA                | 1946710224               |
| SNP_P3_183531_21706 | NW_004520565.1 | Scaffold7107 | 21706                   | TT                              | AA                | 1946710227               |
| SNP_P3_183532_21879 | NW_004520565.1 | Scaffold7107 | 21879                   | TT                              | CC                | 1946710229               |
| SNP_P3_183533_21996 | NW_004520565.1 | Scaffold7107 | 21996                   | TT                              | CC                | 1946710231               |
| SNP_P3_183534_22100 | NW_004520565.1 | Scaffold7107 | 22100                   | TT                              | CC                | 1946710233               |
| SNP_P3_183535_22161 | NW_004520565.1 | Scaffold7107 | 22161                   | TT                              | CC                | 1946710235               |
| SNP_P3_183536_22206 | NW_004520565.1 | Scaffold7107 | 22206                   | CC                              | AA                | 1946710238               |
| SNP_P3_183537_26817 | NW_004520565.1 | Scaffold7107 | 26817                   | GG                              | TT                | 1946710240               |
| SNP_P3_183538_998   | NW_004520566.1 | Scaffold7108 | 998                     | GG                              | TT                | 1946710242               |
| SNP_P3_183539_1016  | NW_004520566.1 | Scaffold7108 | 1016                    | AA                              | CC                | 1946710244               |

| SNPs IDs           | Chromosome IDs | Chromosomes  | Physical positions (bp) | CDC Frontier (Reference genome) | (Pusa 256 & HPNB) | NCBI SNPdb Accession IDs |
|--------------------|----------------|--------------|-------------------------|---------------------------------|-------------------|--------------------------|
| SNP_P3_183540_1018 | NW_004520566.1 | Scaffold7108 | 1018                    | AA                              | GG                | 1946710246               |
| SNP_P3_183541_1042 | NW_004520566.1 | Scaffold7108 | 1042                    | TT                              | AA                | 1946710249               |
| SNP_P3_183542_1082 | NW_004520566.1 | Scaffold7108 | 1082                    | TT                              | GG                | 1946710252               |
| SNP_P3_183543_1090 | NW_004520566.1 | Scaffold7108 | 1090                    | AA                              | GG                | 1946710254               |
| SNP_P3_183544_1095 | NW_004520566.1 | Scaffold7108 | 1095                    | GG                              | AA                | 1946710256               |
| SNP_P3_183545_1099 | NW_004520566.1 | Scaffold7108 | 1099                    | CC                              | AA                | 1946710258               |
| SNP_P3_183546_1128 | NW_004520566.1 | Scaffold7108 | 1128                    | CC                              | AA                | 1946710260               |
| SNP_P3_183547_1213 | NW_004520566.1 | Scaffold7108 | 1213                    | TT                              | GG                | 1946710262               |
| SNP_P3_183548_5452 | NW_004520566.1 | Scaffold7108 | 5452                    | TT                              | GG                | 1946710264               |
| SNP_P3_183549_5458 | NW_004520566.1 | Scaffold7108 | 5458                    | AA                              | GG                | 1946710266               |
| SNP_P3_183550_5490 | NW_004520566.1 | Scaffold7108 | 5490                    | TT                              | AA                | 1946710268               |
| SNP_P3_183551_5502 | NW_004520566.1 | Scaffold7108 | 5502                    | GG                              | CC                | 1946710270               |
| SNP_P3_183552_5548 | NW_004520566.1 | Scaffold7108 | 5548                    | TT                              | CC                | 1946710272               |
| SNP_P3_183553_5570 | NW_004520566.1 | Scaffold7108 | 5570                    | AA                              | CC                | 1946710274               |
| SNP_P3_183554_5610 | NW_004520566.1 | Scaffold7108 | 5610                    | GG                              | AA                | 1946710276               |
| SNP_P3_183555_5672 | NW_004520566.1 | Scaffold7108 | 5672                    | CC                              | GG                | 1946710278               |
| SNP_P3_183556_5673 | NW_004520566.1 | Scaffold7108 | 5673                    | AA                              | TT                | 1946710280               |
| SNP_P3_183557_5691 | NW_004520566.1 | Scaffold7108 | 5691                    | CC                              | TT                | 1946710282               |
| SNP_P3_183558_5859 | NW_004520566.1 | Scaffold7108 | 5859                    | CC                              | AA                | 1946710284               |
| SNP_P3_183559_6040 | NW_004520566.1 | Scaffold7108 | 6040                    | GG                              | AA                | 1946710286               |
| SNP_P3_183560_6092 | NW_004520566.1 | Scaffold7108 | 6092                    | AA                              | GG                | 1946710288               |
| SNP_P3_183561_6138 | NW_004520566.1 | Scaffold7108 | 6138                    | GG                              | CC                | 1946710290               |
| SNP_P3_183562_1281 | NW_004520567.1 | Scaffold7109 | 1281                    | AA                              | TT                | 1946710292               |
| SNP_P3_183563_2632 | NW_004520567.1 | Scaffold7109 | 2632                    | AA                              | GG                | 1946710294               |
| SNP_P3_183564_2658 | NW_004520567.1 | Scaffold7109 | 2658                    | AA                              | TT                | 1946710296               |
| SNP_P3_183566_2699 | NW_004520567.1 | Scaffold7109 | 2699                    | TT                              | CC                | 1946710298               |
| SNP_P3_183567_2874 | NW_004520567.1 | Scaffold7109 | 2874                    | AA                              | TT                | 1946710300               |
| SNP_P3_183568_2910 | NW_004520567.1 | Scaffold7109 | 2910                    | GG                              | AA                | 1946710302               |
| SNP_P3_183569_3115 | NW_004520567.1 | Scaffold7109 | 3115                    | CC                              | TT                | 1946710304               |
| SNP_P3_183570_646  | NW_004520569.1 | Scaffold7111 | 646                     | AA                              | CC                | 1946710306               |
| SNP_P3_183571_648  | NW_004520571.1 | Scaffold7113 | 648                     | GG                              | CC                | 1946710308               |
| SNP_P3_183572_895  | NW_004520572.1 | Scaffold7114 | 895                     | TT                              | CC                | 1946710310               |
| SNP_P3_183573_1215 | NW_004520572.1 | Scaffold7114 | 1215                    | TT                              | CC                | 1946710312               |
| SNP_P3_183575_739  | NW_004520581.1 | Scaffold7129 | 739                     | TT                              | CC                | 1946710314               |
| SNP_P3_183576_457  | NW_004520592.1 | Scaffold7148 | 457                     | AA                              | GG                | 1946710316               |
| SNP_P3_183577_493  | NW_004520592.1 | Scaffold7148 | 493                     | CC                              | AA                | 1946710318               |
| SNP_P3_183578_981  | NW_004520592.1 | Scaffold7148 | 981                     | CC                              | AA                | 1946710321               |
| SNP_P3_183579_1022 | NW_004520592.1 | Scaffold7148 | 1022                    | TT                              | CC                | 1946710324               |
| SNP_P3_183580_2590 | NW_004520592.1 | Scaffold7148 | 2590                    | GG                              | CC                | 1946710326               |
| SNP_P3_183581_2739 | NW_004520592.1 | Scaffold7148 | 2739                    | AA                              | GG                | 1946710328               |
| SNP_P3_183582_2783 | NW_004520592.1 | Scaffold7148 | 2783                    | TT                              | CC                | 1946710330               |
| SNP_P3_183583_3389 | NW_004520592.1 | Scaffold7148 | 3389                    | GG                              | AA                | 1946710332               |



| SNPs IDs           | Chromosome IDs | Chromosomes  | Physical positions (bp) | CDC Frontier (Reference genome) | (Pusa 256 & HPNB) | NCBI SNPdb Accession IDs |
|--------------------|----------------|--------------|-------------------------|---------------------------------|-------------------|--------------------------|
| SNP_P3_183584_4246 | NW_004520592.1 | Scaffold7148 | 4246                    | GG                              | AA                | 1946710334               |
| SNP_P3_183585_4254 | NW_004520592.1 | Scaffold7148 | 4254                    | TT                              | CC                | 1946710336               |
| SNP_P3_183586_7517 | NW_004520592.1 | Scaffold7148 | 7517                    | CC                              | TT                | 1946710338               |
| SNP_P3_183587_7567 | NW_004520592.1 | Scaffold7148 | 7567                    | AA                              | TT                | 1946710340               |
| SNP_P3_183588_7592 | NW_004520592.1 | Scaffold7148 | 7592                    | CC                              | AA                | 1946710342               |
| SNP_P3_183589_7593 | NW_004520592.1 | Scaffold7148 | 7593                    | TT                              | CC                | 1946710344               |
| SNP_P3_183590_7595 | NW_004520592.1 | Scaffold7148 | 7595                    | GG                              | TT                | 1946710346               |
| SNP_P3_183591_833  | NW_004520593.1 | Scaffold7152 | 833                     | TT                              | GG                | 1946710348               |
| SNP_P3_183592_1029 | NW_004520593.1 | Scaffold7152 | 1029                    | TT                              | CC                | 1946710350               |
| SNP_P3_183594_378  | NW_004520595.1 | Scaffold7154 | 378                     | TT                              | CC                | 1946710352               |
| SNP_P3_183595_582  | NW_004520595.1 | Scaffold7154 | 582                     | AA                              | GG                | 1946710354               |
| SNP_P3_183596_846  | NW_004520595.1 | Scaffold7154 | 846                     | AA                              | GG                | 1946710356               |
| SNP_P3_183597_7432 | NW_004520595.1 | Scaffold7154 | 7432                    | GG                              | AA                | 1946710358               |
| SNP_P3_183598_1014 | NW_004520597.1 | Scaffold7156 | 1014                    | GG                              | AA                | 1946710360               |
| SNP_P3_183599_1251 | NW_004520597.1 | Scaffold7156 | 1251                    | GG                              | TT                | 1946710362               |
| SNP_P3_183600_1312 | NW_004520597.1 | Scaffold7156 | 1312                    | GG                              | TT                | 1946710365               |
| SNP_P3_183601_967  | NW_004520598.1 | Scaffold7157 | 967                     | AA                              | TT                | 1946710367               |
| SNP_P3_183602_1007 | NW_004520598.1 | Scaffold7157 | 1007                    | TT                              | CC                | 1946710369               |
| SNP_P3_183603_1041 | NW_004520598.1 | Scaffold7157 | 1041                    | GG                              | CC                | 1946710371               |
| SNP_P3_183604_1082 | NW_004520598.1 | Scaffold7157 | 1082                    | TT                              | GG                | 1946710373               |
| SNP_P3_183605_1107 | NW_004520598.1 | Scaffold7157 | 1107                    | TT                              | AA                | 1946710375               |
| SNP_P3_183606_1111 | NW_004520598.1 | Scaffold7157 | 1111                    | TT                              | AA                | 1946710377               |
| SNP_P3_183607_1134 | NW_004520598.1 | Scaffold7157 | 1134                    | TT                              | CC                | 1946710379               |
| SNP_P3_183608_1137 | NW_004520598.1 | Scaffold7157 | 1137                    | GG                              | AA                | 1946710381               |
| SNP_P3_183610_686  | NW_004520602.1 | Scaffold7165 | 686                     | AA                              | TT                | 1946710383               |
| SNP_P3_183611_794  | NW_004520605.1 | Scaffold7168 | 794                     | AA                              | TT                | 1946710385               |
| SNP_P3_183612_416  | NW_004520608.1 | Scaffold7172 | 416                     | CC                              | TT                | 1946710387               |
| SNP_P3_183613_1024 | NW_004520610.1 | Scaffold7174 | 1024                    | AA                              | GG                | 1946710389               |
| SNP_P3_183614_3748 | NW_004520611.1 | Scaffold7176 | 3748                    | TT                              | GG                | 1946710391               |
| SNP_P3_183615_3751 | NW_004520611.1 | Scaffold7176 | 3751                    | GG                              | AA                | 1946710393               |
| SNP_P3_183616_3827 | NW_004520611.1 | Scaffold7176 | 3827                    | AA                              | CC                | 1946710395               |
| SNP_P3_183617_3873 | NW_004520611.1 | Scaffold7176 | 3873                    | TT                              | CC                | 1946710397               |
| SNP_P3_183618_4208 | NW_004520611.1 | Scaffold7176 | 4208                    | AA                              | GG                | 1946710399               |
| SNP_P3_183619_4257 | NW_004520611.1 | Scaffold7176 | 4257                    | GG                              | AA                | 1946710401               |
| SNP_P3_183620_4316 | NW_004520611.1 | Scaffold7176 | 4316                    | TT                              | CC                | 1946710403               |
| SNP_P3_183621_430  | NW_004520614.1 | Scaffold7182 | 430                     | AA                              | GG                | 1946710405               |
| SNP_P3_183622_358  | NW_004520615.1 | Scaffold7183 | 358                     | GG                              | AA                | 1946710407               |
| SNP_P3_183623_303  | NW_004520619.1 | Scaffold7187 | 303                     | CC                              | AA                | 1946710409               |
| SNP_P3_183624_624  | NW_004520619.1 | Scaffold7187 | 624                     | AA                              | CC                | 1946710411               |
| SNP_P3_183625_646  | NW_004520619.1 | Scaffold7187 | 646                     | GG                              | CC                | 1946710413               |
| SNP_P3_183627_906  | NW_004520619.1 | Scaffold7187 | 906                     | GG                              | AA                | 1946710415               |
| SNP_P3_183628_940  | NW_004520619.1 | Scaffold7187 | 940                     | CC                              | TT                | 1946710417               |

| SNPs IDs           | Chromosome IDs | Chromosomes  | Physical positions (bp) | CDC Frontier (Reference genome) | (Pusa 256 & HPNB) | NCBI SNPdb Accession IDs |
|--------------------|----------------|--------------|-------------------------|---------------------------------|-------------------|--------------------------|
| SNP_P3_183629_976  | NW_004520619.1 | Scaffold7187 | 976                     | TT                              | GG                | 1946710419               |
| SNP_P3_183630_991  | NW_004520619.1 | Scaffold7187 | 991                     | AA                              | TT                | 1946710421               |
| SNP_P3_183631_1044 | NW_004520619.1 | Scaffold7187 | 1044                    | CC                              | TT                | 1946710423               |
| SNP_P3_183632_1154 | NW_004520619.1 | Scaffold7187 | 1154                    | TT                              | AA                | 1946710425               |
| SNP_P3_183633_953  | NW_004520623.1 | Scaffold7193 | 953                     | CC                              | TT                | 1946710427               |
| SNP_P3_183634_999  | NW_004520623.1 | Scaffold7193 | 999                     | GG                              | AA                | 1946710429               |
| SNP_P3_183635_338  | NW_004520625.1 | Scaffold7196 | 338                     | AA                              | CC                | 1946710431               |
| SNP_P3_183636_374  | NW_004520625.1 | Scaffold7196 | 374                     | GG                              | TT                | 1946710434               |
| SNP_P3_183637_517  | NW_004520625.1 | Scaffold7196 | 517                     | AA                              | TT                | 1946710436               |
| SNP_P3_183638_518  | NW_004520625.1 | Scaffold7196 | 518                     | TT                              | GG                | 1946710438               |
| SNP_P3_183639_560  | NW_004520625.1 | Scaffold7196 | 560                     | CC                              | TT                | 1946710441               |
| SNP_P3_183640_612  | NW_004520625.1 | Scaffold7196 | 612                     | GG                              | AA                | 1946710443               |
| SNP_P3_183641_732  | NW_004520625.1 | Scaffold7196 | 732                     | AA                              | CC                | 1946710445               |
| SNP_P3_183642_774  | NW_004520625.1 | Scaffold7196 | 774                     | TT                              | CC                | 1946710447               |
| SNP_P3_183643_786  | NW_004520625.1 | Scaffold7196 | 786                     | TT                              | CC                | 1946710449               |
| SNP_P3_183644_889  | NW_004520625.1 | Scaffold7196 | 889                     | GG                              | TT                | 1946710451               |
| SNP_P3_183645_2095 | NW_004520625.1 | Scaffold7196 | 2095                    | AA                              | GG                | 1946710453               |
| SNP_P3_183646_2165 | NW_004520625.1 | Scaffold7196 | 2165                    | AA                              | GG                | 1946710455               |
| SNP_P3_183648_1726 | NW_004520626.1 | Scaffold7197 | 1726                    | GG                              | AA                | 1946710457               |
| SNP_P3_183649_64   | NW_004520629.1 | Scaffold7201 | 64                      | TT                              | AA                | 1946710459               |
| SNP_P3_183650_80   | NW_004520629.1 | Scaffold7201 | 80                      | TT                              | GG                | 1946710461               |
| SNP_P3_183651_504  | NW_004520630.1 | Scaffold7202 | 504                     | CC                              | TT                | 1946710463               |
| SNP_P3_183652_514  | NW_004520630.1 | Scaffold7202 | 514                     | AA                              | TT                | 1946710465               |
| SNP_P3_183653_527  | NW_004520630.1 | Scaffold7202 | 527                     | AA                              | TT                | 1946710467               |
| SNP_P3_183654_529  | NW_004520630.1 | Scaffold7202 | 529                     | TT                              | GG                | 1946710469               |
| SNP_P3_183655_963  | NW_004520631.1 | Scaffold7203 | 963                     | GG                              | AA                | 1946710471               |
| SNP_P3_183656_968  | NW_004520631.1 | Scaffold7203 | 968                     | TT                              | AA                | 1946710473               |
| SNP_P3_183658_1679 | NW_004520634.1 | Scaffold7210 | 1679                    | TT                              | CC                | 1946710475               |
| SNP_P3_183659_1824 | NW_004520634.1 | Scaffold7210 | 1824                    | AA                              | TT                | 1946710477               |
| SNP_P3_183660_1914 | NW_004520634.1 | Scaffold7210 | 1914                    | GG                              | TT                | 1946710480               |
| SNP_P3_183661_2033 | NW_004520634.1 | Scaffold7210 | 2033                    | TT                              | AA                | 1946710482               |
| SNP_P3_183662_6997 | NW_004520634.1 | Scaffold7210 | 6997                    | TT                              | CC                | 1946710484               |
| SNP_P3_183663_7032 | NW_004520634.1 | Scaffold7210 | 7032                    | AA                              | GG                | 1946710486               |
| SNP_P3_183665_7209 | NW_004520634.1 | Scaffold7210 | 7209                    | AA                              | TT                | 1946710488               |
| SNP_P3_183667_7727 | NW_004520634.1 | Scaffold7210 | 7727                    | GG                              | CC                | 1946710490               |
| SNP_P3_183668_7749 | NW_004520634.1 | Scaffold7210 | 7749                    | GG                              | AA                | 1946710492               |
| SNP_P3_183669_7802 | NW_004520634.1 | Scaffold7210 | 7802                    | TT                              | GG                | 1946710494               |
| SNP_P3_183670_7854 | NW_004520634.1 | Scaffold7210 | 7854                    | GG                              | TT                | 1946710496               |
| SNP_P3_183671_185  | NW_004520636.1 | Scaffold7216 | 185                     | AA                              | CC                | 1946710498               |
| SNP_P3_183672_200  | NW_004520636.1 | Scaffold7216 | 200                     | AA                              | GG                | 1946710500               |
| SNP_P3_183673_226  | NW_004520636.1 | Scaffold7216 | 226                     | TT                              | AA                | 1946710501               |
| SNP_P3_183674_229  | NW_004520636.1 | Scaffold7216 | 229                     | AA                              | GG                | 1946710503               |

| SNPs IDs           | Chromosome IDs | Chromosomes  | Physical positions (bp) | CDC Frontier (Reference genome) | (Pusa 256 & HPNB) | NCBI SNPdb Accession IDs |
|--------------------|----------------|--------------|-------------------------|---------------------------------|-------------------|--------------------------|
| SNP_P3_183675_259  | NW_004520636.1 | Scaffold7216 | 259                     | CC                              | TT                | 1946710506               |
| SNP_P3_183676_283  | NW_004520636.1 | Scaffold7216 | 283                     | AA                              | GG                | 1946710508               |
| SNP_P3_183677_307  | NW_004520636.1 | Scaffold7216 | 307                     | AA                              | GG                | 1946710510               |
| SNP_P3_183678_568  | NW_004520636.1 | Scaffold7216 | 568                     | CC                              | TT                | 1946710512               |
| SNP_P3_183679_580  | NW_004520636.1 | Scaffold7216 | 580                     | TT                              | AA                | 1946710514               |
| SNP_P3_183680_591  | NW_004520636.1 | Scaffold7216 | 591                     | AA                              | GG                | 1946710516               |
| SNP_P3_183681_646  | NW_004520636.1 | Scaffold7216 | 646                     | AA                              | GG                | 1946710519               |
| SNP_P3_183682_2948 | NW_004520636.1 | Scaffold7216 | 2948                    | AA                              | TT                | 1946710521               |
| SNP_P3_183683_366  | NW_004520645.1 | Scaffold7229 | 366                     | TT                              | AA                | 1946710524               |
| SNP_P3_183684_468  | NW_004520645.1 | Scaffold7229 | 468                     | TT                              | CC                | 1946710526               |
| SNP_P3_183685_410  | NW_004520646.1 | Scaffold7231 | 410                     | CC                              | TT                | 1946710528               |
| SNP_P3_183686_414  | NW_004520646.1 | Scaffold7231 | 414                     | AA                              | GG                | 1946710530               |
| SNP_P3_183687_1431 | NW_004520646.1 | Scaffold7231 | 1431                    | CC                              | AA                | 1946710532               |
| SNP_P3_183688_40   | NW_004520647.1 | Scaffold7235 | 40                      | GG                              | AA                | 1946710534               |
| SNP_P3_183689_43   | NW_004520647.1 | Scaffold7235 | 43                      | GG                              | TT                | 1946710536               |
| SNP_P3_183690_44   | NW_004520647.1 | Scaffold7235 | 44                      | TT                              | CC                | 1946710538               |
| SNP_P3_183691_45   | NW_004520647.1 | Scaffold7235 | 45                      | GG                              | AA                | 1946710540               |
| SNP_P3_183692_332  | NW_004520648.1 | Scaffold7238 | 332                     | TT                              | AA                | 1946710542               |
| SNP_P3_183693_139  | NW_004520650.1 | Scaffold7241 | 139                     | AA                              | TT                | 1946710544               |
| SNP_P3_183694_149  | NW_004520650.1 | Scaffold7241 | 149                     | TT                              | CC                | 1946710546               |
| SNP_P3_183695_1048 | NW_004520653.1 | Scaffold7245 | 1048                    | AA                              | GG                | 1946710549               |
| SNP_P3_183696_1088 | NW_004520653.1 | Scaffold7245 | 1088                    | CC                              | AA                | 1946710551               |
| SNP_P3_183697_1287 | NW_004520656.1 | Scaffold7249 | 1287                    | TT                              | GG                | 1946710553               |
| SNP_P3_183698_1337 | NW_004520656.1 | Scaffold7249 | 1337                    | TT                              | GG                | 1946710555               |
| SNP_P3_183699_1354 | NW_004520656.1 | Scaffold7249 | 1354                    | GG                              | AA                | 1946710557               |
| SNP_P3_183700_1391 | NW_004520656.1 | Scaffold7249 | 1391                    | AA                              | CC                | 1946710561               |
| SNP_P3_183701_1404 | NW_004520656.1 | Scaffold7249 | 1404                    | CC                              | TT                | 1946710563               |
| SNP_P3_183702_1597 | NW_004520656.1 | Scaffold7249 | 1597                    | CC                              | TT                | 1946710565               |
| SNP_P3_183703_502  | NW_004520661.1 | Scaffold7254 | 502                     | GG                              | AA                | 1946710568               |
| SNP_P3_183704_547  | NW_004520661.1 | Scaffold7254 | 547                     | CC                              | AA                | 1946710570               |
| SNP_P3_183705_548  | NW_004520661.1 | Scaffold7254 | 548                     | TT                              | CC                | 1946710572               |
| SNP_P3_183706_781  | NW_004520661.1 | Scaffold7254 | 781                     | AA                              | GG                | 1946710574               |
| SNP_P3_183707_785  | NW_004520661.1 | Scaffold7254 | 785                     | TT                              | GG                | 1946710576               |
| SNP_P3_183708_4762 | NW_004520668.1 | Scaffold7267 | 4762                    | GG                              | TT                | 1946710578               |
| SNP_P3_183709_4801 | NW_004520668.1 | Scaffold7267 | 4801                    | CC                              | GG                | 1946710580               |
| SNP_P3_183710_4844 | NW_004520668.1 | Scaffold7267 | 4844                    | TT                              | CC                | 1946710582               |
| SNP_P3_183711_5024 | NW_004520668.1 | Scaffold7267 | 5024                    | CC                              | GG                | 1946710584               |
| SNP_P3_183712_5054 | NW_004520668.1 | Scaffold7267 | 5054                    | GG                              | TT                | 1946710586               |
| SNP_P3_183713_448  | NW_004520670.1 | Scaffold7269 | 448                     | GG                              | AA                | 1946710589               |
| SNP_P3_183714_525  | NW_004520670.1 | Scaffold7269 | 525                     | TT                              | CC                | 1946710590               |
| SNP_P3_183715_579  | NW_004520670.1 | Scaffold7269 | 579                     | AA                              | CC                | 1946710592               |
| SNP_P3_183716_629  | NW_004520670.1 | Scaffold7269 | 629                     | CC                              | AA                | 1946710594               |

| SNPs IDs            | Chromosome IDs | Chromosomes  | Physical positions (bp) | CDC Frontier (Reference genome) | (Pusa 256 & HPNB) | NCBI SNPdb Accession IDs |
|---------------------|----------------|--------------|-------------------------|---------------------------------|-------------------|--------------------------|
| SNP_P3_183717_640   | NW_004520670.1 | Scaffold7269 | 640                     | AA                              | GG                | 1946710598               |
| SNP_P3_183718_660   | NW_004520670.1 | Scaffold7269 | 660                     | AA                              | TT                | 1946710600               |
| SNP_P3_183719_809   | NW_004520670.1 | Scaffold7269 | 809                     | CC                              | TT                | 1946710602               |
| SNP_P3_183720_64    | NW_004520671.1 | Scaffold7272 | 64                      | AA                              | CC                | 1946710604               |
| SNP_P3_183722_127   | NW_004520671.1 | Scaffold7272 | 127                     | TT                              | GG                | 1946710606               |
| SNP_P3_183723_385   | NW_004520671.1 | Scaffold7272 | 385                     | AA                              | CC                | 1946710608               |
| SNP_P3_183724_440   | NW_004520671.1 | Scaffold7272 | 440                     | AA                              | GG                | 1946710611               |
| SNP_P3_183725_1138  | NW_004520673.1 | Scaffold7278 | 1138                    | CC                              | AA                | 1946710613               |
| SNP_P3_183728_1040  | NW_004520674.1 | Scaffold7279 | 1040                    | GG                              | AA                | 1946710615               |
| SNP_P3_183729_1074  | NW_004520674.1 | Scaffold7279 | 1074                    | CC                              | TT                | 1946710618               |
| SNP_P3_183730_230   | NW_004520675.1 | Scaffold7280 | 230                     | AA                              | GG                | 1946710620               |
| SNP_P3_183732_1214  | NW_004520675.1 | Scaffold7280 | 1214                    | AA                              | GG                | 1946710622               |
| SNP_P3_183735_912   | NW_004520677.1 | Scaffold7289 | 912                     | GG                              | TT                | 1946710624               |
| SNP_P3_183736_914   | NW_004520677.1 | Scaffold7289 | 914                     | GG                              | CC                | 1946710626               |
| SNP_P3_183737_12830 | NW_004520678.1 | Scaffold7293 | 12830                   | CC                              | GG                | 1946710628               |
| SNP_P3_183738_12944 | NW_004520678.1 | Scaffold7293 | 12944                   | GG                              | AA                | 1946710630               |
| SNP_P3_183739_13077 | NW_004520678.1 | Scaffold7293 | 13077                   | AA                              | GG                | 1946710632               |
| SNP_P3_183740_13083 | NW_004520678.1 | Scaffold7293 | 13083                   | CC                              | TT                | 1946710636               |
| SNP_P3_183741_13099 | NW_004520678.1 | Scaffold7293 | 13099                   | GG                              | TT                | 1946710638               |
| SNP_P3_183744_13252 | NW_004520678.1 | Scaffold7293 | 13252                   | GG                              | TT                | 1946710640               |
| SNP_P3_183745_13280 | NW_004520678.1 | Scaffold7293 | 13280                   | AA                              | TT                | 1946710642               |
| SNP_P3_183746_13305 | NW_004520678.1 | Scaffold7293 | 13305                   | CC                              | TT                | 1946710644               |
| SNP_P3_183747_13351 | NW_004520678.1 | Scaffold7293 | 13351                   | TT                              | CC                | 1946710646               |
| SNP_P3_183748_13406 | NW_004520678.1 | Scaffold7293 | 13406                   | AA                              | GG                | 1946710648               |
| SNP_P3_183749_13442 | NW_004520678.1 | Scaffold7293 | 13442                   | AA                              | GG                | 1946710650               |
| SNP_P3_183750_13457 | NW_004520678.1 | Scaffold7293 | 13457                   | GG                              | AA                | 1946710652               |
| SNP_P3_183751_13500 | NW_004520678.1 | Scaffold7293 | 13500                   | GG                              | AA                | 1946710654               |
| SNP_P3_183752_13760 | NW_004520678.1 | Scaffold7293 | 13760                   | CC                              | GG                | 1946710656               |
| SNP_P3_183753_13764 | NW_004520678.1 | Scaffold7293 | 13764                   | CC                              | TT                | 1946710658               |
| SNP_P3_183754_13790 | NW_004520678.1 | Scaffold7293 | 13790                   | CC                              | TT                | 1946710660               |
| SNP_P3_183755_13885 | NW_004520678.1 | Scaffold7293 | 13885                   | TT                              | CC                | 1946710662               |
| SNP_P3_183756_13935 | NW_004520678.1 | Scaffold7293 | 13935                   | AA                              | GG                | 1946710664               |
| SNP_P3_183757_13993 | NW_004520678.1 | Scaffold7293 | 13993                   | AA                              | TT                | 1946710666               |
| SNP_P3_183758_14006 | NW_004520678.1 | Scaffold7293 | 14006                   | GG                              | TT                | 1946710668               |
| SNP_P3_183759_14085 | NW_004520678.1 | Scaffold7293 | 14085                   | GG                              | AA                | 1946710670               |
| SNP_P3_183760_14128 | NW_004520678.1 | Scaffold7293 | 14128                   | GG                              | TT                | 1946710673               |
| SNP_P3_183761_14161 | NW_004520678.1 | Scaffold7293 | 14161                   | TT                              | AA                | 1946710676               |
| SNP_P3_183762_14163 | NW_004520678.1 | Scaffold7293 | 14163                   | AA                              | GG                | 1946710679               |
| SNP_P3_183763_14244 | NW_004520678.1 | Scaffold7293 | 14244                   | CC                              | TT                | 1946710681               |
| SNP_P3_183764_14342 | NW_004520678.1 | Scaffold7293 | 14342                   | CC                              | GG                | 1946710684               |
| SNP_P3_183765_14385 | NW_004520678.1 | Scaffold7293 | 14385                   | CC                              | TT                | 1946710686               |
| SNP_P3_183766_14401 | NW_004520678.1 | Scaffold7293 | 14401                   | AA                              | GG                | 1946710689               |

| SNPs IDs            | Chromosome IDs | Chromosomes  | Physical positions (bp) | CDC Frontier (Reference genome) | (Pusa 256 & HPNB) | NCBI SNPdb Accession IDs |
|---------------------|----------------|--------------|-------------------------|---------------------------------|-------------------|--------------------------|
| SNP_P3_183767_14415 | NW_004520678.1 | Scaffold7293 | 14415                   | GG                              | TT                | 1946710692               |
| SNP_P3_183768_14498 | NW_004520678.1 | Scaffold7293 | 14498                   | GG                              | AA                | 1946710694               |
| SNP_P3_183769_14502 | NW_004520678.1 | Scaffold7293 | 14502                   | AA                              | TT                | 1946710696               |
| SNP_P3_183770_14507 | NW_004520678.1 | Scaffold7293 | 14507                   | GG                              | AA                | 1946710698               |
| SNP_P3_183771_14530 | NW_004520678.1 | Scaffold7293 | 14530                   | CC                              | GG                | 1946710700               |
| SNP_P3_183772_14556 | NW_004520678.1 | Scaffold7293 | 14556                   | TT                              | CC                | 1946710702               |
| SNP_P3_183773_14658 | NW_004520678.1 | Scaffold7293 | 14658                   | CC                              | TT                | 1946710704               |
| SNP_P3_183774_14660 | NW_004520678.1 | Scaffold7293 | 14660                   | GG                              | AA                | 1946710706               |
| SNP_P3_183775_14685 | NW_004520678.1 | Scaffold7293 | 14685                   | CC                              | GG                | 1946710708               |
| SNP_P3_183776_14707 | NW_004520678.1 | Scaffold7293 | 14707                   | TT                              | CC                | 1946710712               |
| SNP_P3_183777_14758 | NW_004520678.1 | Scaffold7293 | 14758                   | TT                              | CC                | 1946710714               |
| SNP_P3_183778_14790 | NW_004520678.1 | Scaffold7293 | 14790                   | TT                              | GG                | 1946710716               |
| SNP_P3_183779_14860 | NW_004520678.1 | Scaffold7293 | 14860                   | TT                              | GG                | 1946710718               |
| SNP_P3_183780_14924 | NW_004520678.1 | Scaffold7293 | 14924                   | GG                              | AA                | 1946710720               |
| SNP_P3_183781_14948 | NW_004520678.1 | Scaffold7293 | 14948                   | AA                              | GG                | 1946710722               |
| SNP_P3_183782_14961 | NW_004520678.1 | Scaffold7293 | 14961                   | GG                              | AA                | 1946710724               |
| SNP_P3_183783_14977 | NW_004520678.1 | Scaffold7293 | 14977                   | CC                              | TT                | 1946710726               |
| SNP_P3_183784_15017 | NW_004520678.1 | Scaffold7293 | 15017                   | GG                              | AA                | 1946710728               |
| SNP_P3_183785_15203 | NW_004520678.1 | Scaffold7293 | 15203                   | CC                              | TT                | 1946710730               |
| SNP_P3_183786_15221 | NW_004520678.1 | Scaffold7293 | 15221                   | TT                              | AA                | 1946710732               |
| SNP_P3_183787_15234 | NW_004520678.1 | Scaffold7293 | 15234                   | TT                              | GG                | 1946710734               |
| SNP_P3_183788_15359 | NW_004520678.1 | Scaffold7293 | 15359                   | CC                              | AA                | 1946710736               |
| SNP_P3_183789_15423 | NW_004520678.1 | Scaffold7293 | 15423                   | GG                              | AA                | 1946710738               |
| SNP_P3_183791_15584 | NW_004520678.1 | Scaffold7293 | 15584                   | CC                              | TT                | 1946710740               |
| SNP_P3_183792_15684 | NW_004520678.1 | Scaffold7293 | 15684                   | CC                              | AA                | 1946710742               |
| SNP_P3_183793_15704 | NW_004520678.1 | Scaffold7293 | 15704                   | GG                              | AA                | 1946710744               |
| SNP_P3_183794_15812 | NW_004520678.1 | Scaffold7293 | 15812                   | AA                              | GG                | 1946710746               |
| SNP_P3_183795_15944 | NW_004520678.1 | Scaffold7293 | 15944                   | CC                              | TT                | 1946710748               |
| SNP_P3_183796_19356 | NW_004520678.1 | Scaffold7293 | 19356                   | CC                              | TT                | 1946710751               |
| SNP_P3_183797_19411 | NW_004520678.1 | Scaffold7293 | 19411                   | CC                              | TT                | 1946710753               |
| SNP_P3_183798_19499 | NW_004520678.1 | Scaffold7293 | 19499                   | GG                              | AA                | 1946710755               |
| SNP_P3_183799_19545 | NW_004520678.1 | Scaffold7293 | 19545                   | TT                              | AA                | 1946710757               |
| SNP_P3_183800_19616 | NW_004520678.1 | Scaffold7293 | 19616                   | AA                              | GG                | 1946710758               |
| SNP_P3_183802_19689 | NW_004520678.1 | Scaffold7293 | 19689                   | TT                              | GG                | 1946710760               |
| SNP_P3_183803_19719 | NW_004520678.1 | Scaffold7293 | 19719                   | AA                              | GG                | 1946710762               |
| SNP_P3_183804_19731 | NW_004520678.1 | Scaffold7293 | 19731                   | AA                              | GG                | 1946710764               |
| SNP_P3_183805_19775 | NW_004520678.1 | Scaffold7293 | 19775                   | CC                              | TT                | 1946710766               |
| SNP_P3_183806_19777 | NW_004520678.1 | Scaffold7293 | 19777                   | GG                              | AA                | 1946710768               |
| SNP_P3_183807_19779 | NW_004520678.1 | Scaffold7293 | 19779                   | CC                              | AA                | 1946710770               |
| SNP_P3_183808_19837 | NW_004520678.1 | Scaffold7293 | 19837                   | GG                              | CC                | 1946710772               |
| SNP_P3_183809_19843 | NW_004520678.1 | Scaffold7293 | 19843                   | AA                              | CC                | 1946710774               |
| SNP_P3_183810_19923 | NW_004520678.1 | Scaffold7293 | 19923                   | TT                              | AA                | 1946710776               |

| SNPs IDs            | Chromosome IDs | Chromosomes  | Physical positions (bp) | CDC Frontier (Reference genome) | (Pusa 256 & HPNB) | NCBI SNPdb Accession IDs |
|---------------------|----------------|--------------|-------------------------|---------------------------------|-------------------|--------------------------|
| SNP_P3_183811_19988 | NW_004520678.1 | Scaffold7293 | 19988                   | TT                              | AA                | 1946710778               |
| SNP_P3_183812_20048 | NW_004520678.1 | Scaffold7293 | 20048                   | GG                              | AA                | 1946710780               |
| SNP_P3_183813_20056 | NW_004520678.1 | Scaffold7293 | 20056                   | TT                              | AA                | 1946710782               |
| SNP_P3_183814_20080 | NW_004520678.1 | Scaffold7293 | 20080                   | CC                              | TT                | 1946710784               |
| SNP_P3_183815_20188 | NW_004520678.1 | Scaffold7293 | 20188                   | CC                              | TT                | 1946710786               |
| SNP_P3_183817_20222 | NW_004520678.1 | Scaffold7293 | 20222                   | CC                              | TT                | 1946710788               |
| SNP_P3_183818_20227 | NW_004520678.1 | Scaffold7293 | 20227                   | TT                              | GG                | 1946710791               |
| SNP_P3_183819_20294 | NW_004520678.1 | Scaffold7293 | 20294                   | TT                              | AA                | 1946710793               |
| SNP_P3_183820_20437 | NW_004520678.1 | Scaffold7293 | 20437                   | CC                              | TT                | 1946710795               |
| SNP_P3_183821_20460 | NW_004520678.1 | Scaffold7293 | 20460                   | AA                              | TT                | 1946710797               |
| SNP_P3_183822_20535 | NW_004520678.1 | Scaffold7293 | 20535                   | CC                              | GG                | 1946710799               |
| SNP_P3_183823_20615 | NW_004520678.1 | Scaffold7293 | 20615                   | TT                              | CC                | 1946710801               |
| SNP_P3_183824_20639 | NW_004520678.1 | Scaffold7293 | 20639                   | GG                              | AA                | 1946710803               |
| SNP_P3_183825_20689 | NW_004520678.1 | Scaffold7293 | 20689                   | AA                              | GG                | 1946710805               |
| SNP_P3_183826_20707 | NW_004520678.1 | Scaffold7293 | 20707                   | TT                              | CC                | 1946710806               |
| SNP_P3_183827_21207 | NW_004520678.1 | Scaffold7293 | 21207                   | AA                              | CC                | 1946710808               |
| SNP_P3_183828_21240 | NW_004520678.1 | Scaffold7293 | 21240                   | TT                              | GG                | 1946710810               |
| SNP_P3_183830_21363 | NW_004520678.1 | Scaffold7293 | 21363                   | TT                              | CC                | 1946710811               |
| SNP_P3_183831_21523 | NW_004520678.1 | Scaffold7293 | 21523                   | GG                              | AA                | 1946710813               |
| SNP_P3_183832_21589 | NW_004520678.1 | Scaffold7293 | 21589                   | TT                              | GG                | 1946710815               |
| SNP_P3_183833_21611 | NW_004520678.1 | Scaffold7293 | 21611                   | CC                              | TT                | 1946710817               |
| SNP_P3_183834_21657 | NW_004520678.1 | Scaffold7293 | 21657                   | CC                              | AA                | 1946710819               |
| SNP_P3_183835_21699 | NW_004520678.1 | Scaffold7293 | 21699                   | CC                              | TT                | 1946710821               |
| SNP_P3_183836_21703 | NW_004520678.1 | Scaffold7293 | 21703                   | CC                              | TT                | 1946710823               |
| SNP_P3_183837_21744 | NW_004520678.1 | Scaffold7293 | 21744                   | TT                              | CC                | 1946710825               |
| SNP_P3_183838_22155 | NW_004520678.1 | Scaffold7293 | 22155                   | GG                              | AA                | 1946710828               |
| SNP_P3_183839_22243 | NW_004520678.1 | Scaffold7293 | 22243                   | CC                              | AA                | 1946710831               |
| SNP_P3_183840_387   | NW_004520680.1 | Scaffold7295 | 387                     | TT                              | GG                | 1946710834               |
| SNP_P3_183841_414   | NW_004520680.1 | Scaffold7295 | 414                     | TT                              | GG                | 1946710836               |
| SNP_P3_183842_589   | NW_004520680.1 | Scaffold7295 | 589                     | CC                              | GG                | 1946710838               |
| SNP_P3_183843_855   | NW_004520680.1 | Scaffold7295 | 855                     | AA                              | GG                | 1946710840               |
| SNP_P3_183844_907   | NW_004520680.1 | Scaffold7295 | 907                     | AA                              | CC                | 1946710842               |
| SNP_P3_183845_932   | NW_004520680.1 | Scaffold7295 | 932                     | AA                              | GG                | 1946710844               |
| SNP_P3_183847_865   | NW_004520682.1 | Scaffold7299 | 865                     | GG                              | AA                | 1946710846               |
| SNP_P3_183848_1041  | NW_004520684.1 | Scaffold7302 | 1041                    | AA                              | TT                | 1946710848               |
| SNP_P3_183849_1371  | NW_004520684.1 | Scaffold7302 | 1371                    | AA                              | CC                | 1946710850               |
| SNP_P3_183850_109   | NW_004520686.1 | Scaffold7304 | 109                     | GG                              | AA                | 1946710852               |
| SNP_P3_183851_112   | NW_004520686.1 | Scaffold7304 | 112                     | GG                              | TT                | 1946710854               |
| SNP_P3_183852_114   | NW_004520686.1 | Scaffold7304 | 114                     | GG                              | AA                | 1946710856               |
| SNP_P3_183853_118   | NW_004520686.1 | Scaffold7304 | 118                     | AA                              | GG                | 1946710858               |
| SNP_P3_183854_445   | NW_004520686.1 | Scaffold7304 | 445                     | CC                              | GG                | 1946710860               |
| SNP_P3_183856_1064  | NW_004520686.1 | Scaffold7304 | 1064                    | CC                              | TT                | 1946710862               |

| SNPs IDs           | Chromosome IDs | Chromosomes  | Physical positions (bp) | CDC Frontier (Reference genome) | (Pusa 256 & HPNB) | NCBI SNPdb Accession IDs |
|--------------------|----------------|--------------|-------------------------|---------------------------------|-------------------|--------------------------|
| SNP_P3_183857_352  | NW_004520689.1 | Scaffold7313 | 352                     | AA                              | CC                | 1946710865               |
| SNP_P3_183858_427  | NW_004520689.1 | Scaffold7313 | 427                     | GG                              | TT                | 1946710867               |
| SNP_P3_183859_497  | NW_004520689.1 | Scaffold7313 | 497                     | CC                              | AA                | 1946710870               |
| SNP_P3_183860_500  | NW_004520689.1 | Scaffold7313 | 500                     | AA                              | CC                | 1946710872               |
| SNP_P3_183861_510  | NW_004520689.1 | Scaffold7313 | 510                     | GG                              | AA                | 1946710874               |
| SNP_P3_183862_516  | NW_004520689.1 | Scaffold7313 | 516                     | AA                              | TT                | 1946710876               |
| SNP_P3_183863_520  | NW_004520689.1 | Scaffold7313 | 520                     | CC                              | TT                | 1946710878               |
| SNP_P3_183864_521  | NW_004520689.1 | Scaffold7313 | 521                     | AA                              | TT                | 1946710880               |
| SNP_P3_183865_702  | NW_004520689.1 | Scaffold7313 | 702                     | AA                              | GG                | 1946710882               |
| SNP_P3_183866_723  | NW_004520689.1 | Scaffold7313 | 723                     | TT                              | CC                | 1946710884               |
| SNP_P3_183867_994  | NW_004520689.1 | Scaffold7313 | 994                     | AA                              | GG                | 1946710886               |
| SNP_P3_183868_1001 | NW_004520689.1 | Scaffold7313 | 1001                    | AA                              | CC                | 1946710887               |
| SNP_P3_183869_1089 | NW_004520689.1 | Scaffold7313 | 1089                    | TT                              | GG                | 1946710888               |
| SNP_P3_183870_1343 | NW_004520689.1 | Scaffold7313 | 1343                    | CC                              | AA                | 1946710889               |
| SNP_P3_183871_1410 | NW_004520689.1 | Scaffold7313 | 1410                    | AA                              | TT                | 1946710890               |
| SNP_P3_183872_1411 | NW_004520689.1 | Scaffold7313 | 1411                    | GG                              | CC                | 1946710892               |
| SNP_P3_183873_1451 | NW_004520689.1 | Scaffold7313 | 1451                    | CC                              | GG                | 1946710894               |
| SNP_P3_183874_1659 | NW_004520689.1 | Scaffold7313 | 1659                    | TT                              | CC                | 1946710896               |
| SNP_P3_183875_1683 | NW_004520689.1 | Scaffold7313 | 1683                    | AA                              | GG                | 1946710898               |
| SNP_P3_183876_1225 | NW_004520690.1 | Scaffold7314 | 1225                    | CC                              | TT                | 1946710901               |
| SNP_P3_183877_1278 | NW_004520690.1 | Scaffold7314 | 1278                    | CC                              | TT                | 1946710903               |
| SNP_P3_183878_1297 | NW_004520690.1 | Scaffold7314 | 1297                    | CC                              | TT                | 1946710905               |
| SNP_P3_183879_1302 | NW_004520690.1 | Scaffold7314 | 1302                    | CC                              | TT                | 1946710907               |
| SNP_P3_183880_1342 | NW_004520690.1 | Scaffold7314 | 1342                    | CC                              | TT                | 1946710909               |
| SNP_P3_183881_1375 | NW_004520690.1 | Scaffold7314 | 1375                    | GG                              | AA                | 1946710911               |
| SNP_P3_183882_1414 | NW_004520690.1 | Scaffold7314 | 1414                    | GG                              | AA                | 1946710913               |
| SNP_P3_183883_1505 | NW_004520690.1 | Scaffold7314 | 1505                    | GG                              | AA                | 1946710915               |
| SNP_P3_183884_1507 | NW_004520690.1 | Scaffold7314 | 1507                    | GG                              | TT                | 1946710917               |
| SNP_P3_183885_1572 | NW_004520690.1 | Scaffold7314 | 1572                    | TT                              | GG                | 1946710919               |
| SNP_P3_183886_1723 | NW_004520690.1 | Scaffold7314 | 1723                    | CC                              | TT                | 1946710921               |
| SNP_P3_183887_1726 | NW_004520690.1 | Scaffold7314 | 1726                    | AA                              | GG                | 1946710922               |
| SNP_P3_183888_1729 | NW_004520690.1 | Scaffold7314 | 1729                    | CC                              | TT                | 1946710924               |
| SNP_P3_183889_1804 | NW_004520690.1 | Scaffold7314 | 1804                    | CC                              | TT                | 1946710926               |
| SNP_P3_183890_1856 | NW_004520690.1 | Scaffold7314 | 1856                    | TT                              | AA                | 1946710928               |
| SNP_P3_183891_1869 | NW_004520690.1 | Scaffold7314 | 1869                    | GG                              | TT                | 1946710930               |
| SNP_P3_183892_1880 | NW_004520690.1 | Scaffold7314 | 1880                    | GG                              | AA                | 1946710932               |
| SNP_P3_183893_1882 | NW_004520690.1 | Scaffold7314 | 1882                    | AA                              | GG                | 1946710934               |
| SNP_P3_183894_716  | NW_004520691.1 | Scaffold7315 | 716                     | GG                              | CC                | 1946710936               |
| SNP_P3_183895_718  | NW_004520691.1 | Scaffold7315 | 718                     | TT                              | AA                | 1946710938               |
| SNP_P3_183896_734  | NW_004520691.1 | Scaffold7315 | 734                     | CC                              | TT                | 1946710941               |
| SNP_P3_183897_760  | NW_004520691.1 | Scaffold7315 | 760                     | CC                              | TT                | 1946710943               |
| SNP_P3_183898_284  | NW_004520692.1 | Scaffold7316 | 284                     | TT                              | CC                | 1946710945               |

| SNPs IDs           | Chromosome IDs | Chromosomes  | Physical positions (bp) | CDC Frontier (Reference genome) | (Pusa 256 & HPNB) | NCBI SNPdb Accession IDs |
|--------------------|----------------|--------------|-------------------------|---------------------------------|-------------------|--------------------------|
| SNP_P3_183899_409  | NW_004520692.1 | Scaffold7316 | 409                     | AA                              | GG                | 1946710947               |
| SNP_P3_183900_626  | NW_004520692.1 | Scaffold7316 | 626                     | CC                              | TT                | 1946710949               |
| SNP_P3_183901_719  | NW_004520692.1 | Scaffold7316 | 719                     | GG                              | AA                | 1946710951               |
| SNP_P3_183902_791  | NW_004520692.1 | Scaffold7316 | 791                     | GG                              | AA                | 1946710953               |
| SNP_P3_183903_796  | NW_004520692.1 | Scaffold7316 | 796                     | AA                              | CC                | 1946710955               |
| SNP_P3_183904_857  | NW_004520692.1 | Scaffold7316 | 857                     | GG                              | AA                | 1946710957               |
| SNP_P3_183905_1102 | NW_004520692.1 | Scaffold7316 | 1102                    | TT                              | CC                | 1946710959               |
| SNP_P3_183906_1281 | NW_004520692.1 | Scaffold7316 | 1281                    | GG                              | TT                | 1946710961               |
| SNP_P3_183907_64   | NW_004520693.1 | Scaffold7318 | 64                      | TT                              | GG                | 1946710963               |
| SNP_P3_183908_80   | NW_004520693.1 | Scaffold7318 | 80                      | AA                              | GG                | 1946710965               |
| SNP_P3_183909_172  | NW_004520693.1 | Scaffold7318 | 172                     | TT                              | CC                | 1946710967               |
| SNP_P3_183910_175  | NW_004520693.1 | Scaffold7318 | 175                     | TT                              | GG                | 1946710969               |
| SNP_P3_183911_384  | NW_004520693.1 | Scaffold7318 | 384                     | CC                              | AA                | 1946710971               |
| SNP_P3_183912_657  | NW_004520693.1 | Scaffold7318 | 657                     | CC                              | GG                | 1946710973               |
| SNP_P3_183913_8308 | NW_004520698.1 | Scaffold7327 | 8308                    | CC                              | AA                | 1946710975               |
| SNP_P3_183914_8330 | NW_004520698.1 | Scaffold7327 | 8330                    | TT                              | CC                | 1946710977               |
| SNP_P3_183915_445  | NW_004520699.1 | Scaffold7329 | 445                     | AA                              | TT                | 1946710980               |
| SNP_P3_183916_471  | NW_004520699.1 | Scaffold7329 | 471                     | AA                              | GG                | 1946710982               |
| SNP_P3_183917_1492 | NW_004520699.1 | Scaffold7329 | 1492                    | AA                              | TT                | 1946710984               |
| SNP_P3_183918_1869 | NW_004520700.1 | Scaffold7330 | 1869                    | AA                              | GG                | 1946710986               |
| SNP_P3_183919_2036 | NW_004520700.1 | Scaffold7330 | 2036                    | AA                              | GG                | 1946710988               |
| SNP_P3_183920_2060 | NW_004520700.1 | Scaffold7330 | 2060                    | TT                              | GG                | 1946710990               |
| SNP_P3_183921_2170 | NW_004520700.1 | Scaffold7330 | 2170                    | CC                              | TT                | 1946710992               |
| SNP_P3_183923_2282 | NW_004520700.1 | Scaffold7330 | 2282                    | GG                              | TT                | 1946710993               |
| SNP_P3_183924_2284 | NW_004520700.1 | Scaffold7330 | 2284                    | GG                              | AA                | 1946710995               |
| SNP_P3_183925_2298 | NW_004520700.1 | Scaffold7330 | 2298                    | TT                              | GG                | 1946710997               |
| SNP_P3_183926_2311 | NW_004520700.1 | Scaffold7330 | 2311                    | AA                              | TT                | 1946710999               |
| SNP_P3_183927_2312 | NW_004520700.1 | Scaffold7330 | 2312                    | TT                              | AA                | 1946711001               |
| SNP_P3_183928_2747 | NW_004520700.1 | Scaffold7330 | 2747                    | GG                              | TT                | 1946711003               |
| SNP_P3_183929_2755 | NW_004520700.1 | Scaffold7330 | 2755                    | AA                              | TT                | 1946711005               |
| SNP_P3_183931_81   | NW_004520703.1 | Scaffold7335 | 81                      | CC                              | GG                | 1946711007               |
| SNP_P3_183933_81   | NW_004520705.1 | Scaffold7340 | 81                      | TT                              | AA                | 1946711008               |
| SNP_P3_183934_214  | NW_004520709.1 | Scaffold7346 | 214                     | GG                              | AA                | 1946711010               |
| SNP_P3_183935_732  | NW_004520709.1 | Scaffold7346 | 732                     | AA                              | TT                | 1946711012               |
| SNP_P3_183936_733  | NW_004520709.1 | Scaffold7346 | 733                     | TT                              | AA                | 1946711015               |
| SNP_P3_183938_2839 | NW_004520713.1 | Scaffold7355 | 2839                    | GG                              | AA                | 1946711017               |
| SNP_P3_183939_2857 | NW_004520713.1 | Scaffold7355 | 2857                    | GG                              | AA                | 1946711020               |
| SNP_P3_183940_2958 | NW_004520713.1 | Scaffold7355 | 2958                    | GG                              | AA                | 1946711023               |
| SNP_P3_183941_3003 | NW_004520713.1 | Scaffold7355 | 3003                    | GG                              | AA                | 1946711026               |
| SNP_P3_183943_7895 | NW_004520713.1 | Scaffold7355 | 7895                    | TT                              | AA                | 1946711028               |
| SNP_P3_183944_7897 | NW_004520713.1 | Scaffold7355 | 7897                    | GG                              | AA                | 1946711031               |
| SNP_P3_183945_7903 | NW_004520713.1 | Scaffold7355 | 7903                    | CC                              | AA                | 1946711033               |



| SNPs IDs            | Chromosome IDs | Chromosomes  | Physical positions (bp) | CDC Frontier (Reference genome) | (Pusa 256 & HPNB) | NCBI SNPdb Accession IDs |
|---------------------|----------------|--------------|-------------------------|---------------------------------|-------------------|--------------------------|
| SNP_P3_183946_7915  | NW_004520713.1 | Scaffold7355 | 7915                    | CC                              | TT                | 1946711035               |
| SNP_P3_183947_8524  | NW_004520713.1 | Scaffold7355 | 8524                    | TT                              | CC                | 1946711037               |
| SNP_P3_183948_8581  | NW_004520713.1 | Scaffold7355 | 8581                    | CC                              | GG                | 1946711039               |
| SNP_P3_183949_8588  | NW_004520713.1 | Scaffold7355 | 8588                    | AA                              | CC                | 1946711042               |
| SNP_P3_183950_8600  | NW_004520713.1 | Scaffold7355 | 8600                    | TT                              | CC                | 1946711044               |
| SNP_P3_183951_8827  | NW_004520713.1 | Scaffold7355 | 8827                    | AA                              | GG                | 1946711046               |
| SNP_P3_183953_9089  | NW_004520713.1 | Scaffold7355 | 9089                    | AA                              | CC                | 1946711048               |
| SNP_P3_183954_10272 | NW_004520713.1 | Scaffold7355 | 10272                   | TT                              | AA                | 1946711050               |
| SNP_P3_183956_10568 | NW_004520713.1 | Scaffold7355 | 10568                   | GG                              | AA                | 1946711053               |
| SNP_P3_183957_10575 | NW_004520713.1 | Scaffold7355 | 10575                   | AA                              | GG                | 1946711056               |
| SNP_P3_183958_10585 | NW_004520713.1 | Scaffold7355 | 10585                   | TT                              | CC                | 1946711058               |
| SNP_P3_183959_14383 | NW_004520713.1 | Scaffold7355 | 14383                   | GG                              | AA                | 1946711060               |
| SNP_P3_183960_14819 | NW_004520713.1 | Scaffold7355 | 14819                   | CC                              | AA                | 1946711062               |
| SNP_P3_183961_14833 | NW_004520713.1 | Scaffold7355 | 14833                   | AA                              | TT                | 1946711064               |
| SNP_P3_183962_14841 | NW_004520713.1 | Scaffold7355 | 14841                   | AA                              | GG                | 1946711066               |
| SNP_P3_183963_14908 | NW_004520713.1 | Scaffold7355 | 14908                   | CC                              | TT                | 1946711068               |
| SNP_P3_183964_14912 | NW_004520713.1 | Scaffold7355 | 14912                   | GG                              | AA                | 1946711070               |
| SNP_P3_183965_15031 | NW_004520713.1 | Scaffold7355 | 15031                   | AA                              | GG                | 1946711073               |
| SNP_P3_183966_15051 | NW_004520713.1 | Scaffold7355 | 15051                   | AA                              | GG                | 1946711075               |
| SNP_P3_183967_15151 | NW_004520713.1 | Scaffold7355 | 15151                   | CC                              | AA                | 1946711077               |
| SNP_P3_183968_15167 | NW_004520713.1 | Scaffold7355 | 15167                   | AA                              | GG                | 1946711079               |
| SNP_P3_183969_15182 | NW_004520713.1 | Scaffold7355 | 15182                   | GG                              | AA                | 1946711081               |
| SNP_P3_183970_15645 | NW_004520713.1 | Scaffold7355 | 15645                   | GG                              | AA                | 1946711083               |
| SNP_P3_183971_18003 | NW_004520713.1 | Scaffold7355 | 18003                   | GG                              | AA                | 1946711085               |
| SNP_P3_183973_18519 | NW_004520713.1 | Scaffold7355 | 18519                   | AA                              | TT                | 1946711087               |
| SNP_P3_183975_18806 | NW_004520713.1 | Scaffold7355 | 18806                   | TT                              | AA                | 1946711089               |
| SNP_P3_183976_18931 | NW_004520713.1 | Scaffold7355 | 18931                   | AA                              | CC                | 1946711091               |
| SNP_P3_183977_19256 | NW_004520713.1 | Scaffold7355 | 19256                   | TT                              | CC                | 1946711093               |
| SNP_P3_183978_19262 | NW_004520713.1 | Scaffold7355 | 19262                   | AA                              | GG                | 1946711096               |
| SNP_P3_183979_19264 | NW_004520713.1 | Scaffold7355 | 19264                   | AA                              | GG                | 1946711098               |
| SNP_P3_183980_19882 | NW_004520713.1 | Scaffold7355 | 19882                   | TT                              | CC                | 1946711100               |
| SNP_P3_183981_19903 | NW_004520713.1 | Scaffold7355 | 19903                   | TT                              | AA                | 1946711102               |
| SNP_P3_183982_20090 | NW_004520713.1 | Scaffold7355 | 20090                   | TT                              | AA                | 1946711104               |
| SNP_P3_183983_20192 | NW_004520713.1 | Scaffold7355 | 20192                   | GG                              | AA                | 1946711106               |
| SNP_P3_183984_21517 | NW_004520713.1 | Scaffold7355 | 21517                   | CC                              | TT                | 1946711108               |
| SNP_P3_183985_21538 | NW_004520713.1 | Scaffold7355 | 21538                   | CC                              | AA                | 1946711110               |
| SNP_P3_183986_21786 | NW_004520713.1 | Scaffold7355 | 21786                   | TT                              | CC                | 1946711112               |
| SNP_P3_183988_21998 | NW_004520713.1 | Scaffold7355 | 21998                   | GG                              | AA                | 1946711114               |
| SNP_P3_183989_22003 | NW_004520713.1 | Scaffold7355 | 22003                   | GG                              | TT                | 1946711116               |
| SNP_P3_183990_22435 | NW_004520713.1 | Scaffold7355 | 22435                   | AA                              | CC                | 1946711118               |
| SNP_P3_183991_22735 | NW_004520713.1 | Scaffold7355 | 22735                   | AA                              | GG                | 1946711121               |
| SNP_P3_183992_22754 | NW_004520713.1 | Scaffold7355 | 22754                   | AA                              | TT                | 1946711123               |

| SNPs IDs            | Chromosome IDs | Chromosomes  | Physical positions (bp) | CDC Frontier (Reference genome) | (Pusa 256 & HPNB) | NCBI SNPdb Accession IDs |
|---------------------|----------------|--------------|-------------------------|---------------------------------|-------------------|--------------------------|
| SNP_P3_183993_22762 | NW_004520713.1 | Scaffold7355 | 22762                   | GG                              | AA                | 1946711125               |
| SNP_P3_183994_23413 | NW_004520713.1 | Scaffold7355 | 23413                   | CC                              | AA                | 1946711127               |
| SNP_P3_183995_23636 | NW_004520713.1 | Scaffold7355 | 23636                   | AA                              | GG                | 1946711129               |
| SNP_P3_183997_23777 | NW_004520713.1 | Scaffold7355 | 23777                   | AA                              | GG                | 1946711131               |
| SNP_P3_183999_24132 | NW_004520713.1 | Scaffold7355 | 24132                   | CC                              | TT                | 1946711133               |
| SNP_P3_184000_845   | NW_004520715.1 | Scaffold7363 | 845                     | AA                              | GG                | 1946711135               |
| SNP_P3_184001_2109  | NW_004520716.1 | Scaffold7364 | 2109                    | CC                              | AA                | 1946711138               |
| SNP_P3_184004_2849  | NW_004520716.1 | Scaffold7364 | 2849                    | AA                              | CC                | 1946711140               |
| SNP_P3_184005_4232  | NW_004520716.1 | Scaffold7364 | 4232                    | TT                              | AA                | 1946711142               |
| SNP_P3_184006_4839  | NW_004520716.1 | Scaffold7364 | 4839                    | TT                              | AA                | 1946711144               |
| SNP_P3_184007_1454  | NW_004520721.1 | Scaffold7370 | 1454                    | AA                              | CC                | 1946711146               |
| SNP_P3_184008_1487  | NW_004520721.1 | Scaffold7370 | 1487                    | CC                              | TT                | 1946711148               |
| SNP_P3_184009_1494  | NW_004520721.1 | Scaffold7370 | 1494                    | TT                              | AA                | 1946711150               |
| SNP_P3_184010_1500  | NW_004520721.1 | Scaffold7370 | 1500                    | TT                              | AA                | 1946711152               |
| SNP_P3_184011_1541  | NW_004520721.1 | Scaffold7370 | 1541                    | AA                              | GG                | 1946711154               |
| SNP_P3_184012_1544  | NW_004520721.1 | Scaffold7370 | 1544                    | TT                              | CC                | 1946711156               |
| SNP_P3_184013_1550  | NW_004520721.1 | Scaffold7370 | 1550                    | TT                              | CC                | 1946711158               |
| SNP_P3_184014_1554  | NW_004520721.1 | Scaffold7370 | 1554                    | AA                              | CC                | 1946711160               |
| SNP_P3_184015_1556  | NW_004520721.1 | Scaffold7370 | 1556                    | AA                              | GG                | 1946711162               |
| SNP_P3_184016_4626  | NW_004520722.1 | Scaffold7371 | 4626                    | CC                              | GG                | 1946711164               |
| SNP_P3_184017_40    | NW_004520726.1 | Scaffold7377 | 40                      | AA                              | GG                | 1946711166               |
| SNP_P3_184018_53    | NW_004520726.1 | Scaffold7377 | 53                      | CC                              | TT                | 1946711168               |
| SNP_P3_184019_64    | NW_004520726.1 | Scaffold7377 | 64                      | AA                              | GG                | 1946711170               |
| SNP_P3_184020_81    | NW_004520726.1 | Scaffold7377 | 81                      | TT                              | AA                | 1946711173               |
| SNP_P3_184021_92    | NW_004520726.1 | Scaffold7377 | 92                      | AA                              | GG                | 1946711176               |
| SNP_P3_184022_110   | NW_004520726.1 | Scaffold7377 | 110                     | TT                              | AA                | 1946711178               |
| SNP_P3_184023_234   | NW_004520726.1 | Scaffold7377 | 234                     | AA                              | GG                | 1946711180               |
| SNP_P3_184024_235   | NW_004520726.1 | Scaffold7377 | 235                     | CC                              | TT                | 1946711182               |
| SNP_P3_184025_284   | NW_004520726.1 | Scaffold7377 | 284                     | GG                              | AA                | 1946711184               |
| SNP_P3_184026_411   | NW_004520726.1 | Scaffold7377 | 411                     | TT                              | GG                | 1946711186               |
| SNP_P3_184029_550   | NW_004520726.1 | Scaffold7377 | 550                     | GG                              | CC                | 1946711188               |
| SNP_P3_184030_637   | NW_004520726.1 | Scaffold7377 | 637                     | GG                              | AA                | 1946711190               |
| SNP_P3_184031_667   | NW_004520726.1 | Scaffold7377 | 667                     | TT                              | AA                | 1946711192               |
| SNP_P3_184032_196   | NW_004520728.1 | Scaffold7379 | 196                     | AA                              | CC                | 1946711194               |
| SNP_P3_184033_64    | NW_004520729.1 | Scaffold7380 | 64                      | AA                              | GG                | 1946711196               |
| SNP_P3_184035_359   | NW_004520729.1 | Scaffold7380 | 359                     | AA                              | TT                | 1946711197               |
| SNP_P3_184036_471   | NW_004520729.1 | Scaffold7380 | 471                     | GG                              | AA                | 1946711200               |
| SNP_P3_184037_771   | NW_004520733.1 | Scaffold7389 | 771                     | GG                              | CC                | 1946711202               |
| SNP_P3_184038_3785  | NW_004520733.1 | Scaffold7389 | 3785                    | CC                              | TT                | 1946711204               |
| SNP_P3_184039_3871  | NW_004520733.1 | Scaffold7389 | 3871                    | CC                              | TT                | 1946711206               |
| SNP_P3_184040_1253  | NW_004520737.1 | Scaffold7397 | 1253                    | CC                              | TT                | 1946711208               |
| SNP_P3_184041_1291  | NW_004520737.1 | Scaffold7397 | 1291                    | AA                              | TT                | 1946711210               |

| SNPs IDs            | Chromosome IDs | Chromosomes  | Physical positions (bp) | CDC Frontier (Reference genome) | (Pusa 256 & HPNB) | NCBI SNPdb Accession IDs |
|---------------------|----------------|--------------|-------------------------|---------------------------------|-------------------|--------------------------|
| SNP_P3_184042_1645  | NW_004520737.1 | Scaffold7397 | 1645                    | CC                              | AA                | 1946711213               |
| SNP_P3_184043_587   | NW_004520738.1 | Scaffold7398 | 587                     | AA                              | TT                | 1946711216               |
| SNP_P3_184044_654   | NW_004520738.1 | Scaffold7398 | 654                     | CC                              | TT                | 1946711218               |
| SNP_P3_184045_668   | NW_004520738.1 | Scaffold7398 | 668                     | AA                              | TT                | 1946711220               |
| SNP_P3_184046_699   | NW_004520738.1 | Scaffold7398 | 699                     | CC                              | TT                | 1946711222               |
| SNP_P3_184047_456   | NW_004520740.1 | Scaffold7405 | 456                     | AA                              | GG                | 1946711224               |
| SNP_P3_184048_374   | NW_004520741.1 | Scaffold7406 | 374                     | CC                              | TT                | 1946711226               |
| SNP_P3_184049_389   | NW_004520741.1 | Scaffold7406 | 389                     | TT                              | CC                | 1946711228               |
| SNP_P3_184050_400   | NW_004520741.1 | Scaffold7406 | 400                     | TT                              | AA                | 1946711230               |
| SNP_P3_184051_3924  | NW_004520746.1 | Scaffold7414 | 3924                    | AA                              | GG                | 1946711232               |
| SNP_P3_184052_4097  | NW_004520746.1 | Scaffold7414 | 4097                    | CC                              | TT                | 1946711234               |
| SNP_P3_184053_4102  | NW_004520746.1 | Scaffold7414 | 4102                    | CC                              | AA                | 1946711236               |
| SNP_P3_184054_4304  | NW_004520746.1 | Scaffold7414 | 4304                    | CC                              | AA                | 1946711238               |
| SNP_P3_184055_4437  | NW_004520746.1 | Scaffold7414 | 4437                    | CC                              | TT                | 1946711240               |
| SNP_P3_184056_4454  | NW_004520746.1 | Scaffold7414 | 4454                    | GG                              | AA                | 1946711242               |
| SNP_P3_184057_4613  | NW_004520746.1 | Scaffold7414 | 4613                    | TT                              | CC                | 1946711244               |
| SNP_P3_184058_887   | NW_004520749.1 | Scaffold7421 | 887                     | CC                              | GG                | 1946711246               |
| SNP_P3_184060_5446  | NW_004520753.1 | Scaffold7427 | 5446                    | CC                              | TT                | 1946711248               |
| SNP_P3_184062_7561  | NW_004520753.1 | Scaffold7427 | 7561                    | AA                              | CC                | 1946711250               |
| SNP_P3_184063_7567  | NW_004520753.1 | Scaffold7427 | 7567                    | CC                              | TT                | 1946711254               |
| SNP_P3_184064_7703  | NW_004520753.1 | Scaffold7427 | 7703                    | GG                              | CC                | 1946711256               |
| SNP_P3_184065_7725  | NW_004520753.1 | Scaffold7427 | 7725                    | CC                              | TT                | 1946711258               |
| SNP_P3_184066_7920  | NW_004520753.1 | Scaffold7427 | 7920                    | AA                              | GG                | 1946711260               |
| SNP_P3_184067_7944  | NW_004520753.1 | Scaffold7427 | 7944                    | GG                              | TT                | 1946711262               |
| SNP_P3_184068_7956  | NW_004520753.1 | Scaffold7427 | 7956                    | AA                              | TT                | 1946711264               |
| SNP_P3_184070_183   | NW_004520754.1 | Scaffold7432 | 183                     | AA                              | CC                | 1946711266               |
| SNP_P3_184071_900   | NW_004520760.1 | Scaffold7442 | 900                     | TT                              | GG                | 1946711268               |
| SNP_P3_184072_307   | NW_004520762.1 | Scaffold7448 | 307                     | CC                              | TT                | 1946711270               |
| SNP_P3_184073_678   | NW_004520762.1 | Scaffold7448 | 678                     | GG                              | TT                | 1946711272               |
| SNP_P3_184074_737   | NW_004520762.1 | Scaffold7448 | 737                     | AA                              | GG                | 1946711274               |
| SNP_P3_184075_13542 | NW_004520762.1 | Scaffold7448 | 13542                   | GG                              | AA                | 1946711276               |
| SNP_P3_184077_13567 | NW_004520762.1 | Scaffold7448 | 13567                   | CC                              | TT                | 1946711278               |
| SNP_P3_184078_13631 | NW_004520762.1 | Scaffold7448 | 13631                   | TT                              | AA                | 1946711280               |
| SNP_P3_184079_13725 | NW_004520762.1 | Scaffold7448 | 13725                   | GG                              | AA                | 1946711282               |
| SNP_P3_184080_13990 | NW_004520762.1 | Scaffold7448 | 13990                   | AA                              | GG                | 1946711284               |
| SNP_P3_184081_14045 | NW_004520762.1 | Scaffold7448 | 14045                   | AA                              | CC                | 1946711286               |
| SNP_P3_184082_14127 | NW_004520762.1 | Scaffold7448 | 14127                   | TT                              | AA                | 1946711288               |
| SNP_P3_184083_14507 | NW_004520762.1 | Scaffold7448 | 14507                   | CC                              | TT                | 1946711291               |
| SNP_P3_184084_14589 | NW_004520762.1 | Scaffold7448 | 14589                   | AA                              | GG                | 1946711294               |
| SNP_P3_184085_17162 | NW_004520762.1 | Scaffold7448 | 17162                   | TT                              | AA                | 1946711296               |
| SNP_P3_184086_20326 | NW_004520762.1 | Scaffold7448 | 20326                   | GG                              | AA                | 1946711298               |
| SNP_P3_184087_20572 | NW_004520762.1 | Scaffold7448 | 20572                   | GG                              | TT                | 1946711300               |

| SNPs IDs            | Chromosome IDs | Chromosomes  | Physical positions (bp) | CDC Frontier (Reference genome) | (Pusa 256 & HPNB) | NCBI SNPdb Accession IDs |
|---------------------|----------------|--------------|-------------------------|---------------------------------|-------------------|--------------------------|
| SNP_P3_184088_20671 | NW_004520762.1 | Scaffold7448 | 20671                   | AA                              | GG                | 1946711302               |
| SNP_P3_184089_20701 | NW_004520762.1 | Scaffold7448 | 20701                   | TT                              | GG                | 1946711304               |
| SNP_P3_184090_20733 | NW_004520762.1 | Scaffold7448 | 20733                   | TT                              | CC                | 1946711306               |
| SNP_P3_184091_20830 | NW_004520762.1 | Scaffold7448 | 20830                   | TT                              | CC                | 1946711308               |
| SNP_P3_184092_20857 | NW_004520762.1 | Scaffold7448 | 20857                   | CC                              | GG                | 1946711310               |
| SNP_P3_184093_20859 | NW_004520762.1 | Scaffold7448 | 20859                   | GG                              | AA                | 1946711312               |
| SNP_P3_184094_21156 | NW_004520762.1 | Scaffold7448 | 21156                   | GG                              | AA                | 1946711314               |
| SNP_P3_184095_21242 | NW_004520762.1 | Scaffold7448 | 21242                   | AA                              | TT                | 1946711316               |
| SNP_P3_184096_21272 | NW_004520762.1 | Scaffold7448 | 21272                   | TT                              | AA                | 1946711318               |
| SNP_P3_184097_21307 | NW_004520762.1 | Scaffold7448 | 21307                   | GG                              | CC                | 1946711320               |
| SNP_P3_184099_21681 | NW_004520762.1 | Scaffold7448 | 21681                   | GG                              | AA                | 1946711322               |
| SNP_P3_184100_21745 | NW_004520762.1 | Scaffold7448 | 21745                   | CC                              | TT                | 1946711324               |
| SNP_P3_184101_21863 | NW_004520762.1 | Scaffold7448 | 21863                   | GG                              | AA                | 1946711326               |
| SNP_P3_184102_21880 | NW_004520762.1 | Scaffold7448 | 21880                   | AA                              | TT                | 1946711328               |
| SNP_P3_184103_22261 | NW_004520762.1 | Scaffold7448 | 22261                   | GG                              | AA                | 1946711331               |
| SNP_P3_184104_23196 | NW_004520762.1 | Scaffold7448 | 23196                   | GG                              | AA                | 1946711333               |
| SNP_P3_184105_23260 | NW_004520762.1 | Scaffold7448 | 23260                   | AA                              | CC                | 1946711336               |
| SNP_P3_184106_23293 | NW_004520762.1 | Scaffold7448 | 23293                   | TT                              | CC                | 1946711338               |
| SNP_P3_184107_23405 | NW_004520762.1 | Scaffold7448 | 23405                   | AA                              | TT                | 1946711339               |
| SNP_P3_184108_23469 | NW_004520762.1 | Scaffold7448 | 23469                   | AA                              | CC                | 1946711340               |
| SNP_P3_184109_23573 | NW_004520762.1 | Scaffold7448 | 23573                   | CC                              | TT                | 1946711341               |
| SNP_P3_184110_23612 | NW_004520762.1 | Scaffold7448 | 23612                   | CC                              | AA                | 1946711342               |
| SNP_P3_184111_2403  | NW_004520765.1 | Scaffold7452 | 2403                    | AA                              | TT                | 1946711343               |
| SNP_P3_184112_2404  | NW_004520765.1 | Scaffold7452 | 2404                    | TT                              | GG                | 1946711344               |
| SNP_P3_184113_2430  | NW_004520765.1 | Scaffold7452 | 2430                    | TT                              | AA                | 1946711345               |
| SNP_P3_184114_2605  | NW_004520765.1 | Scaffold7452 | 2605                    | AA                              | GG                | 1946711346               |
| SNP_P3_184115_2629  | NW_004520765.1 | Scaffold7452 | 2629                    | TT                              | AA                | 1946711347               |
| SNP_P3_184116_2638  | NW_004520765.1 | Scaffold7452 | 2638                    | AA                              | GG                | 1946711348               |
| SNP_P3_184117_2886  | NW_004520765.1 | Scaffold7452 | 2886                    | AA                              | TT                | 1946711350               |
| SNP_P3_184118_2906  | NW_004520765.1 | Scaffold7452 | 2906                    | GG                              | CC                | 1946711352               |
| SNP_P3_184119_2940  | NW_004520765.1 | Scaffold7452 | 2940                    | CC                              | GG                | 1946711354               |
| SNP_P3_184120_2942  | NW_004520765.1 | Scaffold7452 | 2942                    | AA                              | TT                | 1946711356               |
| SNP_P3_184121_2946  | NW_004520765.1 | Scaffold7452 | 2946                    | GG                              | AA                | 1946711358               |
| SNP_P3_184122_3216  | NW_004520765.1 | Scaffold7452 | 3216                    | AA                              | TT                | 1946711360               |
| SNP_P3_184123_3326  | NW_004520765.1 | Scaffold7452 | 3326                    | CC                              | TT                | 1946711364               |
| SNP_P3_184124_3351  | NW_004520765.1 | Scaffold7452 | 3351                    | AA                              | GG                | 1946711366               |
| SNP_P3_184125_3479  | NW_004520765.1 | Scaffold7452 | 3479                    | TT                              | GG                | 1946711368               |
| SNP_P3_184126_3483  | NW_004520765.1 | Scaffold7452 | 3483                    | AA                              | TT                | 1946711370               |
| SNP_P3_184127_3578  | NW_004520765.1 | Scaffold7452 | 3578                    | CC                              | TT                | 1946711372               |
| SNP_P3_184128_398   | NW_004520770.1 | Scaffold7460 | 398                     | CC                              | TT                | 1946711375               |
| SNP_P3_184129_681   | NW_004520776.1 | Scaffold7470 | 681                     | AA                              | GG                | 1946711377               |
| SNP_P3_184130_720   | NW_004520776.1 | Scaffold7470 | 720                     | AA                              | TT                | 1946711379               |

| SNPs IDs            | Chromosome IDs | Chromosomes  | Physical positions (bp) | CDC Frontier (Reference genome) | (Pusa 256 & HPNB) | NCBI SNPdb Accession IDs |
|---------------------|----------------|--------------|-------------------------|---------------------------------|-------------------|--------------------------|
| SNP_P3_184131_721   | NW_004520776.1 | Scaffold7470 | 721                     | AA                              | GG                | 1946711381               |
| SNP_P3_184132_1000  | NW_004520776.1 | Scaffold7470 | 1000                    | GG                              | AA                | 1946711383               |
| SNP_P3_184133_1235  | NW_004520776.1 | Scaffold7470 | 1235                    | CC                              | AA                | 1946711385               |
| SNP_P3_184134_1262  | NW_004520776.1 | Scaffold7470 | 1262                    | AA                              | GG                | 1946711387               |
| SNP_P3_184135_1328  | NW_004520776.1 | Scaffold7470 | 1328                    | AA                              | GG                | 1946711389               |
| SNP_P3_184136_1845  | NW_004520776.1 | Scaffold7470 | 1845                    | AA                              | TT                | 1946711391               |
| SNP_P3_184138_2022  | NW_004520776.1 | Scaffold7470 | 2022                    | TT                              | CC                | 1946711393               |
| SNP_P3_184139_2121  | NW_004520776.1 | Scaffold7470 | 2121                    | GG                              | CC                | 1946711395               |
| SNP_P3_184141_2435  | NW_004520776.1 | Scaffold7470 | 2435                    | CC                              | GG                | 1946711397               |
| SNP_P3_184142_2474  | NW_004520776.1 | Scaffold7470 | 2474                    | GG                              | CC                | 1946711399               |
| SNP_P3_184143_2479  | NW_004520776.1 | Scaffold7470 | 2479                    | GG                              | CC                | 1946711403               |
| SNP_P3_184144_2713  | NW_004520776.1 | Scaffold7470 | 2713                    | TT                              | AA                | 1946711405               |
| SNP_P3_184145_2973  | NW_004520776.1 | Scaffold7470 | 2973                    | AA                              | CC                | 1946711407               |
| SNP_P3_184146_857   | NW_004520779.1 | Scaffold7474 | 857                     | TT                              | CC                | 1946711409               |
| SNP_P3_184147_5494  | NW_004520780.1 | Scaffold7475 | 5494                    | TT                              | AA                | 1946711411               |
| SNP_P3_184148_5518  | NW_004520780.1 | Scaffold7475 | 5518                    | AA                              | TT                | 1946711413               |
| SNP_P3_184149_5520  | NW_004520780.1 | Scaffold7475 | 5520                    | GG                              | CC                | 1946711415               |
| SNP_P3_184150_5891  | NW_004520780.1 | Scaffold7475 | 5891                    | CC                              | TT                | 1946711417               |
| SNP_P3_184151_5898  | NW_004520780.1 | Scaffold7475 | 5898                    | CC                              | TT                | 1946711419               |
| SNP_P3_184152_973   | NW_004520781.1 | Scaffold7477 | 973                     | CC                              | TT                | 1946711421               |
| SNP_P3_184153_1063  | NW_004520781.1 | Scaffold7477 | 1063                    | CC                              | TT                | 1946711423               |
| SNP_P3_184154_1350  | NW_004520781.1 | Scaffold7477 | 1350                    | AA                              | GG                | 1946711425               |
| SNP_P3_184155_1439  | NW_004520781.1 | Scaffold7477 | 1439                    | CC                              | TT                | 1946711427               |
| SNP_P3_184156_2062  | NW_004520781.1 | Scaffold7477 | 2062                    | TT                              | CC                | 1946711429               |
| SNP_P3_184157_2130  | NW_004520781.1 | Scaffold7477 | 2130                    | GG                              | TT                | 1946711431               |
| SNP_P3_184158_2151  | NW_004520781.1 | Scaffold7477 | 2151                    | CC                              | AA                | 1946711433               |
| SNP_P3_184160_2402  | NW_004520781.1 | Scaffold7477 | 2402                    | TT                              | CC                | 1946711435               |
| SNP_P3_184161_6372  | NW_004520781.1 | Scaffold7477 | 6372                    | AA                              | GG                | 1946711437               |
| SNP_P3_184162_6406  | NW_004520781.1 | Scaffold7477 | 6406                    | AA                              | TT                | 1946711439               |
| SNP_P3_184163_6485  | NW_004520781.1 | Scaffold7477 | 6485                    | GG                              | AA                | 1946711441               |
| SNP_P3_184165_6912  | NW_004520781.1 | Scaffold7477 | 6912                    | TT                              | CC                | 1946711443               |
| SNP_P3_184166_20705 | NW_004520781.1 | Scaffold7477 | 20705                   | TT                              | CC                | 1946711445               |
| SNP_P3_184167_20981 | NW_004520781.1 | Scaffold7477 | 20981                   | TT                              | GG                | 1946711447               |
| SNP_P3_184168_20987 | NW_004520781.1 | Scaffold7477 | 20987                   | GG                              | AA                | 1946711449               |
| SNP_P3_184169_20988 | NW_004520781.1 | Scaffold7477 | 20988                   | TT                              | GG                | 1946711451               |
| SNP_P3_184170_21044 | NW_004520781.1 | Scaffold7477 | 21044                   | AA                              | GG                | 1946711453               |
| SNP_P3_184171_624   | NW_004520784.1 | Scaffold7480 | 624                     | GG                              | TT                | 1946711455               |
| SNP_P3_184172_691   | NW_004520784.1 | Scaffold7480 | 691                     | CC                              | AA                | 1946711457               |
| SNP_P3_184173_81    | NW_004520785.1 | Scaffold7481 | 81                      | TT                              | AA                | 1946711459               |
| SNP_P3_184174_538   | NW_004520785.1 | Scaffold7481 | 538                     | CC                              | GG                | 1946711461               |
| SNP_P3_184175_504   | NW_004520788.1 | Scaffold7484 | 504                     | CC                              | TT                | 1946711463               |
| SNP_P3_184176_19641 | NW_004520788.1 | Scaffold7484 | 19641                   | GG                              | AA                | 1946711465               |

| SNPs IDs            | Chromosome IDs | Chromosomes  | Physical positions (bp) | CDC Frontier (Reference genome) | (Pusa 256 & HPNB) | NCBI SNPdb Accession IDs |
|---------------------|----------------|--------------|-------------------------|---------------------------------|-------------------|--------------------------|
| SNP_P3_184177_19727 | NW_004520788.1 | Scaffold7484 | 19727                   | TT                              | CC                | 1946711467               |
| SNP_P3_184178_19883 | NW_004520788.1 | Scaffold7484 | 19883                   | CC                              | AA                | 1946711469               |
| SNP_P3_184179_19913 | NW_004520788.1 | Scaffold7484 | 19913                   | TT                              | CC                | 1946711471               |
| SNP_P3_184180_20012 | NW_004520788.1 | Scaffold7484 | 20012                   | GG                              | AA                | 1946711473               |
| SNP_P3_184182_679   | NW_004520791.1 | Scaffold7489 | 679                     | TT                              | CC                | 1946711476               |
| SNP_P3_184183_680   | NW_004520791.1 | Scaffold7489 | 680                     | CC                              | TT                | 1946711478               |
| SNP_P3_184184_697   | NW_004520791.1 | Scaffold7489 | 697                     | AA                              | GG                | 1946711480               |
| SNP_P3_184185_741   | NW_004520791.1 | Scaffold7489 | 741                     | CC                              | TT                | 1946711482               |
| SNP_P3_184186_752   | NW_004520791.1 | Scaffold7489 | 752                     | TT                              | CC                | 1946711484               |
| SNP_P3_184188_860   | NW_004520791.1 | Scaffold7489 | 860                     | CC                              | AA                | 1946711486               |
| SNP_P3_184189_871   | NW_004520791.1 | Scaffold7489 | 871                     | GG                              | TT                | 1946711488               |
| SNP_P3_184190_882   | NW_004520791.1 | Scaffold7489 | 882                     | CC                              | TT                | 1946711490               |
| SNP_P3_184191_889   | NW_004520791.1 | Scaffold7489 | 889                     | TT                              | CC                | 1946711492               |
| SNP_P3_184192_932   | NW_004520791.1 | Scaffold7489 | 932                     | CC                              | TT                | 1946711494               |
| SNP_P3_184193_936   | NW_004520791.1 | Scaffold7489 | 936                     | AA                              | GG                | 1946711496               |
| SNP_P3_184194_1079  | NW_004520791.1 | Scaffold7489 | 1079                    | TT                              | AA                | 1946711498               |
| SNP_P3_184195_1168  | NW_004520791.1 | Scaffold7489 | 1168                    | GG                              | TT                | 1946711500               |
| SNP_P3_184196_1217  | NW_004520791.1 | Scaffold7489 | 1217                    | GG                              | AA                | 1946711502               |
| SNP_P3_184197_1274  | NW_004520791.1 | Scaffold7489 | 1274                    | AA                              | GG                | 1946711504               |
| SNP_P3_184198_1361  | NW_004520791.1 | Scaffold7489 | 1361                    | TT                              | GG                | 1946711506               |
| SNP_P3_184199_1369  | NW_004520791.1 | Scaffold7489 | 1369                    | TT                              | CC                | 1946711509               |
| SNP_P3_184200_1457  | NW_004520791.1 | Scaffold7489 | 1457                    | CC                              | GG                | 1946711511               |
| SNP_P3_184201_1559  | NW_004520791.1 | Scaffold7489 | 1559                    | CC                              | AA                | 1946711514               |
| SNP_P3_184202_1602  | NW_004520791.1 | Scaffold7489 | 1602                    | AA                              | GG                | 1946711516               |
| SNP_P3_184203_1619  | NW_004520791.1 | Scaffold7489 | 1619                    | AA                              | TT                | 1946711519               |
| SNP_P3_184204_1663  | NW_004520791.1 | Scaffold7489 | 1663                    | GG                              | AA                | 1946711521               |
| SNP_P3_184205_1696  | NW_004520791.1 | Scaffold7489 | 1696                    | CC                              | TT                | 1946711523               |
| SNP_P3_184206_1765  | NW_004520791.1 | Scaffold7489 | 1765                    | TT                              | AA                | 1946711525               |
| SNP_P3_184207_1773  | NW_004520791.1 | Scaffold7489 | 1773                    | AA                              | GG                | 1946711527               |
| SNP_P3_184208_1788  | NW_004520791.1 | Scaffold7489 | 1788                    | GG                              | AA                | 1946711529               |
| SNP_P3_184212_630   | NW_004520796.1 | Scaffold7502 | 630                     | CC                              | GG                | 1946711532               |
| SNP_P3_184213_635   | NW_004520796.1 | Scaffold7502 | 635                     | TT                              | AA                | 1946711533               |
| SNP_P3_184214_654   | NW_004520796.1 | Scaffold7502 | 654                     | TT                              | CC                | 1946711535               |
| SNP_P3_184215_677   | NW_004520796.1 | Scaffold7502 | 677                     | TT                              | AA                | 1946711537               |
| SNP_P3_184216_735   | NW_004520796.1 | Scaffold7502 | 735                     | CC                              | TT                | 1946711539               |
| SNP_P3_184217_864   | NW_004520796.1 | Scaffold7502 | 864                     | CC                              | AA                | 1946711541               |
| SNP_P3_184218_906   | NW_004520796.1 | Scaffold7502 | 906                     | AA                              | TT                | 1946711543               |
| SNP_P3_184219_908   | NW_004520796.1 | Scaffold7502 | 908                     | AA                              | GG                | 1946711545               |
| SNP_P3_184220_932   | NW_004520796.1 | Scaffold7502 | 932                     | AA                              | TT                | 1946711547               |
| SNP_P3_184221_1123  | NW_004520796.1 | Scaffold7502 | 1123                    | TT                              | CC                | 1946711549               |
| SNP_P3_184222_1174  | NW_004520796.1 | Scaffold7502 | 1174                    | TT                              | AA                | 1946711551               |
| SNP_P3_184223_1177  | NW_004520796.1 | Scaffold7502 | 1177                    | GG                              | AA                | 1946711555               |

| SNPs IDs           | Chromosome IDs | Chromosomes  | Physical positions (bp) | CDC Frontier (Reference genome) | (Pusa 256 & HPNB) | NCBI SNPdb Accession IDs |
|--------------------|----------------|--------------|-------------------------|---------------------------------|-------------------|--------------------------|
| SNP_P3_184225_5154 | NW_004520802.1 | Scaffold7509 | 5154                    | CC                              | GG                | 1946711557               |
| SNP_P3_184226_5167 | NW_004520802.1 | Scaffold7509 | 5167                    | GG                              | CC                | 1946711559               |
| SNP_P3_184227_63   | NW_004520803.1 | Scaffold7511 | 63                      | GG                              | CC                | 1946711561               |
| SNP_P3_184228_64   | NW_004520803.1 | Scaffold7511 | 64                      | GG                              | CC                | 1946711563               |
| SNP_P3_184229_72   | NW_004520803.1 | Scaffold7511 | 72                      | AA                              | GG                | 1946711565               |
| SNP_P3_184230_119  | NW_004520803.1 | Scaffold7511 | 119                     | TT                              | CC                | 1946711567               |
| SNP_P3_184231_154  | NW_004520803.1 | Scaffold7511 | 154                     | GG                              | AA                | 1946711569               |
| SNP_P3_184232_433  | NW_004520803.1 | Scaffold7511 | 433                     | TT                              | GG                | 1946711571               |
| SNP_P3_184233_451  | NW_004520803.1 | Scaffold7511 | 451                     | GG                              | AA                | 1946711573               |
| SNP_P3_184234_1066 | NW_004520803.1 | Scaffold7511 | 1066                    | CC                              | AA                | 1946711575               |
| SNP_P3_184235_1106 | NW_004520803.1 | Scaffold7511 | 1106                    | TT                              | CC                | 1946711577               |
| SNP_P3_184236_1029 | NW_004520804.1 | Scaffold7513 | 1029                    | GG                              | AA                | 1946711579               |
| SNP_P3_184237_1033 | NW_004520804.1 | Scaffold7513 | 1033                    | TT                              | AA                | 1946711581               |
| SNP_P3_184238_1067 | NW_004520804.1 | Scaffold7513 | 1067                    | TT                              | GG                | 1946711583               |
| SNP_P3_184239_777  | NW_004520808.1 | Scaffold7522 | 777                     | AA                              | GG                | 1946711585               |
| SNP_P3_184240_818  | NW_004520808.1 | Scaffold7522 | 818                     | CC                              | TT                | 1946711587               |
| SNP_P3_184241_1089 | NW_004520808.1 | Scaffold7522 | 1089                    | AA                              | GG                | 1946711589               |
| SNP_P3_184242_1134 | NW_004520808.1 | Scaffold7522 | 1134                    | CC                              | TT                | 1946711591               |
| SNP_P3_184243_1679 | NW_004520808.1 | Scaffold7522 | 1679                    | GG                              | AA                | 1946711593               |
| SNP_P3_184244_1705 | NW_004520808.1 | Scaffold7522 | 1705                    | TT                              | CC                | 1946711596               |
| SNP_P3_184245_1719 | NW_004520808.1 | Scaffold7522 | 1719                    | CC                              | TT                | 1946711598               |
| SNP_P3_184246_351  | NW_004520812.1 | Scaffold7528 | 351                     | GG                              | TT                | 1946711600               |
| SNP_P3_184247_752  | NW_004520812.1 | Scaffold7528 | 752                     | AA                              | GG                | 1946711602               |
| SNP_P3_184248_1090 | NW_004520812.1 | Scaffold7528 | 1090                    | CC                              | AA                | 1946711604               |
| SNP_P3_184249_1092 | NW_004520812.1 | Scaffold7528 | 1092                    | TT                              | CC                | 1946711606               |
| SNP_P3_184250_1117 | NW_004520812.1 | Scaffold7528 | 1117                    | CC                              | AA                | 1946711608               |
| SNP_P3_184251_1141 | NW_004520812.1 | Scaffold7528 | 1141                    | TT                              | AA                | 1946711610               |
| SNP_P3_184252_1686 | NW_004520812.1 | Scaffold7528 | 1686                    | AA                              | TT                | 1946711612               |
| SNP_P3_184253_3967 | NW_004520812.1 | Scaffold7528 | 3967                    | CC                              | TT                | 1946711614               |
| SNP_P3_184254_4782 | NW_004520812.1 | Scaffold7528 | 4782                    | TT                              | CC                | 1946711616               |
| SNP_P3_184255_4835 | NW_004520812.1 | Scaffold7528 | 4835                    | GG                              | AA                | 1946711618               |
| SNP_P3_184256_7495 | NW_004520812.1 | Scaffold7528 | 7495                    | TT                              | CC                | 1946711620               |
| SNP_P3_184257_7592 | NW_004520812.1 | Scaffold7528 | 7592                    | AA                              | GG                | 1946711622               |
| SNP_P3_184258_7615 | NW_004520812.1 | Scaffold7528 | 7615                    | CC                              | TT                | 1946711624               |
| SNP_P3_184259_7765 | NW_004520812.1 | Scaffold7528 | 7765                    | AA                              | GG                | 1946711626               |
| SNP_P3_184260_7802 | NW_004520812.1 | Scaffold7528 | 7802                    | GG                              | AA                | 1946711628               |
| SNP_P3_184261_7824 | NW_004520812.1 | Scaffold7528 | 7824                    | GG                              | TT                | 1946711630               |
| SNP_P3_184262_7872 | NW_004520812.1 | Scaffold7528 | 7872                    | AA                              | CC                | 1946711632               |
| SNP_P3_184263_8066 | NW_004520812.1 | Scaffold7528 | 8066                    | CC                              | AA                | 1946711634               |
| SNP_P3_184264_8776 | NW_004520812.1 | Scaffold7528 | 8776                    | TT                              | CC                | 1946711636               |
| SNP_P3_184265_8853 | NW_004520812.1 | Scaffold7528 | 8853                    | CC                              | TT                | 1946711638               |
| SNP_P3_184266_8864 | NW_004520812.1 | Scaffold7528 | 8864                    | TT                              | GG                | 1946711640               |

| SNPs IDs            | Chromosome IDs | Chromosomes  | Physical positions (bp) | CDC Frontier (Reference genome) | (Pusa 256 & HPNB) | NCBI SNPdb Accession IDs |
|---------------------|----------------|--------------|-------------------------|---------------------------------|-------------------|--------------------------|
| SNP_P3_184267_9136  | NW_004520812.1 | Scaffold7528 | 9136                    | GG                              | AA                | 1946711642               |
| SNP_P3_184268_9495  | NW_004520812.1 | Scaffold7528 | 9495                    | TT                              | CC                | 1946711644               |
| SNP_P3_184269_9525  | NW_004520812.1 | Scaffold7528 | 9525                    | TT                              | GG                | 1946711646               |
| SNP_P3_184270_9691  | NW_004520812.1 | Scaffold7528 | 9691                    | TT                              | GG                | 1946711648               |
| SNP_P3_184271_11117 | NW_004520812.1 | Scaffold7528 | 11117                   | TT                              | CC                | 1946711650               |
| SNP_P3_184272_13981 | NW_004520812.1 | Scaffold7528 | 13981                   | GG                              | CC                | 1946711652               |
| SNP_P3_184273_14088 | NW_004520812.1 | Scaffold7528 | 14088                   | CC                              | GG                | 1946711654               |
| SNP_P3_184274_14144 | NW_004520812.1 | Scaffold7528 | 14144                   | CC                              | TT                | 1946711656               |
| SNP_P3_184275_14470 | NW_004520812.1 | Scaffold7528 | 14470                   | TT                              | CC                | 1946711658               |
| SNP_P3_184276_14816 | NW_004520812.1 | Scaffold7528 | 14816                   | GG                              | CC                | 1946711660               |
| SNP_P3_184277_14985 | NW_004520812.1 | Scaffold7528 | 14985                   | AA                              | CC                | 1946711662               |
| SNP_P3_184278_15023 | NW_004520812.1 | Scaffold7528 | 15023                   | TT                              | CC                | 1946711664               |
| SNP_P3_184279_15425 | NW_004520812.1 | Scaffold7528 | 15425                   | TT                              | GG                | 1946711666               |
| SNP_P3_184280_741   | NW_004520813.1 | Scaffold7529 | 741                     | AA                              | CC                | 1946711668               |
| SNP_P3_184281_792   | NW_004520813.1 | Scaffold7529 | 792                     | TT                              | GG                | 1946711670               |
| SNP_P3_184282_1041  | NW_004520813.1 | Scaffold7529 | 1041                    | GG                              | CC                | 1946711672               |
| SNP_P3_184283_391   | NW_004520817.1 | Scaffold7540 | 391                     | AA                              | GG                | 1946711674               |
| SNP_P3_184284_431   | NW_004520817.1 | Scaffold7540 | 431                     | TT                              | AA                | 1946711676               |
| SNP_P3_184285_1078  | NW_004520817.1 | Scaffold7540 | 1078                    | CC                              | TT                | 1946711678               |
| SNP_P3_184286_1200  | NW_004520817.1 | Scaffold7540 | 1200                    | TT                              | CC                | 1946711680               |
| SNP_P3_184287_1226  | NW_004520817.1 | Scaffold7540 | 1226                    | TT                              | AA                | 1946711682               |
| SNP_P3_184288_1310  | NW_004520817.1 | Scaffold7540 | 1310                    | CC                              | AA                | 1946711684               |
| SNP_P3_184289_1352  | NW_004520817.1 | Scaffold7540 | 1352                    | GG                              | CC                | 1946711686               |
| SNP_P3_184290_1544  | NW_004520817.1 | Scaffold7540 | 1544                    | AA                              | GG                | 1946711688               |
| SNP_P3_184291_154   | NW_004520818.1 | Scaffold7541 | 154                     | GG                              | CC                | 1946711690               |
| SNP_P3_184292_832   | NW_004520819.1 | Scaffold7542 | 832                     | AA                              | CC                | 1946711692               |
| SNP_P3_184293_478   | NW_004520822.1 | Scaffold7546 | 478                     | TT                              | AA                | 1946711693               |
| SNP_P3_184294_1420  | NW_004520822.1 | Scaffold7546 | 1420                    | CC                              | GG                | 1946711695               |
| SNP_P3_184295_197   | NW_004520824.1 | Scaffold7551 | 197                     | CC                              | TT                | 1946711697               |
| SNP_P3_184296_312   | NW_004520824.1 | Scaffold7551 | 312                     | AA                              | TT                | 1946711699               |
| SNP_P3_184297_477   | NW_004520824.1 | Scaffold7551 | 477                     | CC                              | TT                | 1946711701               |
| SNP_P3_184298_495   | NW_004520824.1 | Scaffold7551 | 495                     | GG                              | TT                | 1946711703               |
| SNP_P3_184299_545   | NW_004520824.1 | Scaffold7551 | 545                     | GG                              | AA                | 1946711705               |
| SNP_P3_184300_553   | NW_004520824.1 | Scaffold7551 | 553                     | AA                              | GG                | 1946711707               |
| SNP_P3_184301_559   | NW_004520824.1 | Scaffold7551 | 559                     | GG                              | AA                | 1946711709               |
| SNP_P3_184302_2072  | NW_004520829.1 | Scaffold7559 | 2072                    | TT                              | AA                | 1946711712               |
| SNP_P3_184303_2120  | NW_004520829.1 | Scaffold7559 | 2120                    | TT                              | AA                | 1946711714               |
| SNP_P3_184304_2131  | NW_004520829.1 | Scaffold7559 | 2131                    | TT                              | AA                | 1946711716               |
| SNP_P3_184305_1899  | NW_004520832.1 | Scaffold7564 | 1899                    | AA                              | GG                | 1946711718               |
| SNP_P3_184306_1925  | NW_004520832.1 | Scaffold7564 | 1925                    | AA                              | CC                | 1946711721               |
| SNP_P3_184307_1987  | NW_004520832.1 | Scaffold7564 | 1987                    | CC                              | TT                | 1946711723               |
| SNP_P3_184308_2000  | NW_004520832.1 | Scaffold7564 | 2000                    | CC                              | TT                | 1946711725               |



| SNPs IDs           | Chromosome IDs | Chromosomes  | Physical positions (bp) | CDC Frontier (Reference genome) | (Pusa 256 & HPNB) | NCBI SNPdb Accession IDs |
|--------------------|----------------|--------------|-------------------------|---------------------------------|-------------------|--------------------------|
| SNP_P3_184309_2059 | NW_004520832.1 | Scaffold7564 | 2059                    | AA                              | TT                | 1946711727               |
| SNP_P3_184310_2083 | NW_004520832.1 | Scaffold7564 | 2083                    | CC                              | AA                | 1946711729               |
| SNP_P3_184311_2161 | NW_004520832.1 | Scaffold7564 | 2161                    | TT                              | GG                | 1946711731               |
| SNP_P3_184312_450  | NW_004520833.1 | Scaffold7565 | 450                     | TT                              | CC                | 1946711733               |
| SNP_P3_184313_646  | NW_004520833.1 | Scaffold7565 | 646                     | CC                              | TT                | 1946711735               |
| SNP_P3_184314_707  | NW_004520833.1 | Scaffold7565 | 707                     | GG                              | CC                | 1946711737               |
| SNP_P3_184315_1071 | NW_004520833.1 | Scaffold7565 | 1071                    | TT                              | GG                | 1946711739               |
| SNP_P3_184316_1161 | NW_004520833.1 | Scaffold7565 | 1161                    | TT                              | AA                | 1946711741               |
| SNP_P3_184317_1815 | NW_004520833.1 | Scaffold7565 | 1815                    | TT                              | CC                | 1946711743               |
| SNP_P3_184318_1922 | NW_004520833.1 | Scaffold7565 | 1922                    | CC                              | GG                | 1946711745               |
| SNP_P3_184319_2359 | NW_004520833.1 | Scaffold7565 | 2359                    | AA                              | GG                | 1946711746               |
| SNP_P3_184320_2417 | NW_004520833.1 | Scaffold7565 | 2417                    | GG                              | AA                | 1946711748               |
| SNP_P3_184321_2430 | NW_004520833.1 | Scaffold7565 | 2430                    | CC                              | TT                | 1946711752               |
| SNP_P3_184322_2589 | NW_004520833.1 | Scaffold7565 | 2589                    | TT                              | AA                | 1946711755               |
| SNP_P3_184323_2609 | NW_004520833.1 | Scaffold7565 | 2609                    | GG                              | CC                | 1946711757               |
| SNP_P3_184324_2790 | NW_004520833.1 | Scaffold7565 | 2790                    | CC                              | AA                | 1946711759               |
| SNP_P3_184325_2797 | NW_004520833.1 | Scaffold7565 | 2797                    | GG                              | AA                | 1946711760               |
| SNP_P3_184326_4443 | NW_004520833.1 | Scaffold7565 | 4443                    | GG                              | AA                | 1946711762               |
| SNP_P3_184327_4736 | NW_004520833.1 | Scaffold7565 | 4736                    | TT                              | CC                | 1946711764               |
| SNP_P3_184328_4788 | NW_004520833.1 | Scaffold7565 | 4788                    | AA                              | GG                | 1946711766               |
| SNP_P3_184329_4814 | NW_004520833.1 | Scaffold7565 | 4814                    | TT                              | CC                | 1946711768               |
| SNP_P3_184330_4854 | NW_004520833.1 | Scaffold7565 | 4854                    | AA                              | TT                | 1946711770               |
| SNP_P3_184331_4877 | NW_004520833.1 | Scaffold7565 | 4877                    | TT                              | CC                | 1946711772               |
| SNP_P3_184332_4925 | NW_004520833.1 | Scaffold7565 | 4925                    | TT                              | CC                | 1946711774               |
| SNP_P3_184333_4993 | NW_004520833.1 | Scaffold7565 | 4993                    | AA                              | GG                | 1946711776               |
| SNP_P3_184334_5050 | NW_004520833.1 | Scaffold7565 | 5050                    | GG                              | AA                | 1946711778               |
| SNP_P3_184335_5107 | NW_004520833.1 | Scaffold7565 | 5107                    | GG                              | AA                | 1946711780               |
| SNP_P3_184336_5163 | NW_004520833.1 | Scaffold7565 | 5163                    | AA                              | TT                | 1946711782               |
| SNP_P3_184337_5316 | NW_004520833.1 | Scaffold7565 | 5316                    | AA                              | TT                | 1946711784               |
| SNP_P3_184338_5334 | NW_004520833.1 | Scaffold7565 | 5334                    | GG                              | AA                | 1946711786               |
| SNP_P3_184339_84   | NW_004520836.1 | Scaffold7569 | 84                      | TT                              | CC                | 1946711788               |
| SNP_P3_184340_119  | NW_004520836.1 | Scaffold7569 | 119                     | CC                              | GG                | 1946711792               |
| SNP_P3_184341_143  | NW_004520836.1 | Scaffold7569 | 143                     | CC                              | TT                | 1946711794               |
| SNP_P3_184342_296  | NW_004520836.1 | Scaffold7569 | 296                     | AA                              | GG                | 1946711796               |
| SNP_P3_184343_384  | NW_004520836.1 | Scaffold7569 | 384                     | AA                              | TT                | 1946711798               |
| SNP_P3_184344_469  | NW_004520836.1 | Scaffold7569 | 469                     | AA                              | GG                | 1946711799               |
| SNP_P3_184346_578  | NW_004520836.1 | Scaffold7569 | 578                     | GG                              | CC                | 1946711801               |
| SNP_P3_184347_718  | NW_004520836.1 | Scaffold7569 | 718                     | TT                              | GG                | 1946711803               |
| SNP_P3_184348_729  | NW_004520836.1 | Scaffold7569 | 729                     | AA                              | GG                | 1946711805               |
| SNP_P3_184349_747  | NW_004520836.1 | Scaffold7569 | 747                     | CC                              | TT                | 1946711807               |
| SNP_P3_184350_749  | NW_004520836.1 | Scaffold7569 | 749                     | TT                              | CC                | 1946711810               |
| SNP_P3_184351_266  | NW_004520837.1 | Scaffold7571 | 266                     | TT                              | GG                | 1946711812               |

| SNPs IDs           | Chromosome IDs | Chromosomes  | Physical positions (bp) | CDC Frontier (Reference genome) | (Pusa 256 & HPNB) | NCBI SNPdb Accession IDs |
|--------------------|----------------|--------------|-------------------------|---------------------------------|-------------------|--------------------------|
| SNP_P3_184352_691  | NW_004520837.1 | Scaffold7571 | 691                     | CC                              | TT                | 1946711813               |
| SNP_P3_184353_440  | NW_004520838.1 | Scaffold7572 | 440                     | TT                              | AA                | 1946711815               |
| SNP_P3_184354_3264 | NW_004520841.1 | Scaffold7575 | 3264                    | AA                              | GG                | 1946711818               |
| SNP_P3_184355_359  | NW_004520842.1 | Scaffold7576 | 359                     | GG                              | AA                | 1946711820               |
| SNP_P3_184356_406  | NW_004520842.1 | Scaffold7576 | 406                     | GG                              | AA                | 1946711822               |
| SNP_P3_184357_514  | NW_004520842.1 | Scaffold7576 | 514                     | AA                              | TT                | 1946711824               |
| SNP_P3_184358_599  | NW_004520842.1 | Scaffold7576 | 599                     | TT                              | CC                | 1946711826               |
| SNP_P3_184359_608  | NW_004520842.1 | Scaffold7576 | 608                     | AA                              | GG                | 1946711829               |
| SNP_P3_184360_686  | NW_004520842.1 | Scaffold7576 | 686                     | CC                              | GG                | 1946711831               |
| SNP_P3_184361_732  | NW_004520842.1 | Scaffold7576 | 732                     | AA                              | CC                | 1946711833               |
| SNP_P3_184362_826  | NW_004520842.1 | Scaffold7576 | 826                     | CC                              | TT                | 1946711835               |
| SNP_P3_184364_1019 | NW_004520842.1 | Scaffold7576 | 1019                    | CC                              | TT                | 1946711837               |
| SNP_P3_184366_297  | NW_004520847.1 | Scaffold7584 | 297                     | CC                              | GG                | 1946711839               |
| SNP_P3_184367_331  | NW_004520847.1 | Scaffold7584 | 331                     | AA                              | GG                | 1946711841               |
| SNP_P3_184368_353  | NW_004520847.1 | Scaffold7584 | 353                     | CC                              | AA                | 1946711843               |
| SNP_P3_184369_413  | NW_004520847.1 | Scaffold7584 | 413                     | AA                              | TT                | 1946711845               |
| SNP_P3_184370_426  | NW_004520847.1 | Scaffold7584 | 426                     | CC                              | AA                | 1946711847               |
| SNP_P3_184371_596  | NW_004520847.1 | Scaffold7584 | 596                     | CC                              | GG                | 1946711849               |
| SNP_P3_184372_764  | NW_004520847.1 | Scaffold7584 | 764                     | AA                              | TT                | 1946711851               |
| SNP_P3_184373_779  | NW_004520847.1 | Scaffold7584 | 779                     | TT                              | CC                | 1946711853               |
| SNP_P3_184374_826  | NW_004520847.1 | Scaffold7584 | 826                     | AA                              | TT                | 1946711855               |
| SNP_P3_184376_958  | NW_004520847.1 | Scaffold7584 | 958                     | TT                              | GG                | 1946711857               |
| SNP_P3_184377_1036 | NW_004520847.1 | Scaffold7584 | 1036                    | TT                              | AA                | 1946711859               |
| SNP_P3_184378_1042 | NW_004520847.1 | Scaffold7584 | 1042                    | TT                              | CC                | 1946711861               |
| SNP_P3_184379_1059 | NW_004520847.1 | Scaffold7584 | 1059                    | AA                              | TT                | 1946711863               |
| SNP_P3_184380_4735 | NW_004520849.1 | Scaffold7590 | 4735                    | GG                              | TT                | 1946711865               |
| SNP_P3_184381_4797 | NW_004520849.1 | Scaffold7590 | 4797                    | TT                              | CC                | 1946711868               |
| SNP_P3_184382_4875 | NW_004520849.1 | Scaffold7590 | 4875                    | AA                              | CC                | 1946711870               |
| SNP_P3_184383_4998 | NW_004520849.1 | Scaffold7590 | 4998                    | TT                              | CC                | 1946711872               |
| SNP_P3_184384_5000 | NW_004520849.1 | Scaffold7590 | 5000                    | TT                              | CC                | 1946711874               |
| SNP_P3_184385_5085 | NW_004520849.1 | Scaffold7590 | 5085                    | AA                              | GG                | 1946711876               |
| SNP_P3_184386_5102 | NW_004520849.1 | Scaffold7590 | 5102                    | GG                              | AA                | 1946711878               |
| SNP_P3_184387_5168 | NW_004520849.1 | Scaffold7590 | 5168                    | TT                              | CC                | 1946711880               |
| SNP_P3_184388_5176 | NW_004520849.1 | Scaffold7590 | 5176                    | GG                              | AA                | 1946711882               |
| SNP_P3_184389_5202 | NW_004520849.1 | Scaffold7590 | 5202                    | AA                              | GG                | 1946711884               |
| SNP_P3_184390_5229 | NW_004520849.1 | Scaffold7590 | 5229                    | AA                              | CC                | 1946711886               |
| SNP_P3_184391_5301 | NW_004520849.1 | Scaffold7590 | 5301                    | AA                              | GG                | 1946711888               |
| SNP_P3_184392_5327 | NW_004520849.1 | Scaffold7590 | 5327                    | AA                              | GG                | 1946711890               |
| SNP_P3_184393_5488 | NW_004520849.1 | Scaffold7590 | 5488                    | GG                              | AA                | 1946711892               |
| SNP_P3_184394_5506 | NW_004520849.1 | Scaffold7590 | 5506                    | AA                              | TT                | 1946711894               |
| SNP_P3_184395_5573 | NW_004520849.1 | Scaffold7590 | 5573                    | AA                              | TT                | 1946711896               |
| SNP_P3_184396_100  | NW_004520853.1 | Scaffold7595 | 100                     | CC                              | GG                | 1946711898               |

| SNPs IDs           | Chromosome IDs | Chromosomes  | Physical positions (bp) | CDC Frontier (Reference genome) | (Pusa 256 & HPNB) | NCBI SNPdb Accession IDs |
|--------------------|----------------|--------------|-------------------------|---------------------------------|-------------------|--------------------------|
| SNP_P3_184397_277  | NW_004520853.1 | Scaffold7595 | 277                     | GG                              | TT                | 1946711900               |
| SNP_P3_184398_378  | NW_004520853.1 | Scaffold7595 | 378                     | TT                              | CC                | 1946711902               |
| SNP_P3_184399_412  | NW_004520853.1 | Scaffold7595 | 412                     | CC                              | TT                | 1946711904               |
| SNP_P3_184400_478  | NW_004520853.1 | Scaffold7595 | 478                     | CC                              | GG                | 1946711906               |
| SNP_P3_184401_521  | NW_004520853.1 | Scaffold7595 | 521                     | AA                              | CC                | 1946711909               |
| SNP_P3_184402_552  | NW_004520853.1 | Scaffold7595 | 552                     | AA                              | TT                | 1946711911               |
| SNP_P3_184403_617  | NW_004520853.1 | Scaffold7595 | 617                     | GG                              | TT                | 1946711913               |
| SNP_P3_184404_620  | NW_004520853.1 | Scaffold7595 | 620                     | GG                              | TT                | 1946711915               |
| SNP_P3_184405_708  | NW_004520853.1 | Scaffold7595 | 708                     | TT                              | CC                | 1946711917               |
| SNP_P3_184406_724  | NW_004520853.1 | Scaffold7595 | 724                     | CC                              | TT                | 1946711919               |
| SNP_P3_184407_733  | NW_004520853.1 | Scaffold7595 | 733                     | TT                              | AA                | 1946711921               |
| SNP_P3_184408_1101 | NW_004520854.1 | Scaffold7596 | 1101                    | AA                              | CC                | 1946711923               |
| SNP_P3_184409_151  | NW_004520855.1 | Scaffold7599 | 151                     | CC                              | TT                | 1946711925               |
| SNP_P3_184410_820  | NW_004520855.1 | Scaffold7599 | 820                     | AA                              | GG                | 1946711927               |
| SNP_P3_184411_887  | NW_004520855.1 | Scaffold7599 | 887                     | CC                              | GG                | 1946711929               |
| SNP_P3_184412_1426 | NW_004520859.1 | Scaffold7604 | 1426                    | AA                              | TT                | 1946711931               |
| SNP_P3_184413_1427 | NW_004520859.1 | Scaffold7604 | 1427                    | TT                              | CC                | 1946711933               |
| SNP_P3_184414_64   | NW_004520861.1 | Scaffold7610 | 64                      | AA                              | TT                | 1946711935               |
| SNP_P3_184415_350  | NW_004520861.1 | Scaffold7610 | 350                     | GG                              | AA                | 1946711937               |
| SNP_P3_184416_469  | NW_004520861.1 | Scaffold7610 | 469                     | CC                              | AA                | 1946711939               |
| SNP_P3_184417_1094 | NW_004520861.1 | Scaffold7610 | 1094                    | AA                              | GG                | 1946711940               |
| SNP_P3_184418_1113 | NW_004520861.1 | Scaffold7610 | 1113                    | GG                              | AA                | 1946711942               |
| SNP_P3_184419_903  | NW_004520864.1 | Scaffold7616 | 903                     | AA                              | GG                | 1946711944               |
| SNP_P3_184420_965  | NW_004520864.1 | Scaffold7616 | 965                     | TT                              | AA                | 1946711947               |
| SNP_P3_184421_1001 | NW_004520864.1 | Scaffold7616 | 1001                    | AA                              | GG                | 1946711949               |
| SNP_P3_184422_1070 | NW_004520864.1 | Scaffold7616 | 1070                    | CC                              | TT                | 1946711951               |
| SNP_P3_184423_279  | NW_004520865.1 | Scaffold7617 | 279                     | GG                              | AA                | 1946711953               |
| SNP_P3_184424_358  | NW_004520865.1 | Scaffold7617 | 358                     | AA                              | TT                | 1946711955               |
| SNP_P3_184425_385  | NW_004520865.1 | Scaffold7617 | 385                     | GG                              | CC                | 1946711957               |
| SNP_P3_184426_402  | NW_004520865.1 | Scaffold7617 | 402                     | AA                              | GG                | 1946711959               |
| SNP_P3_184427_442  | NW_004520865.1 | Scaffold7617 | 442                     | TT                              | GG                | 1946711961               |
| SNP_P3_184428_449  | NW_004520865.1 | Scaffold7617 | 449                     | AA                              | CC                | 1946711963               |
| SNP_P3_184429_455  | NW_004520865.1 | Scaffold7617 | 455                     | CC                              | TT                | 1946711965               |
| SNP_P3_184430_457  | NW_004520865.1 | Scaffold7617 | 457                     | GG                              | AA                | 1946711967               |
| SNP_P3_184431_488  | NW_004520865.1 | Scaffold7617 | 488                     | CC                              | TT                | 1946711969               |
| SNP_P3_184432_498  | NW_004520865.1 | Scaffold7617 | 498                     | AA                              | GG                | 1946711971               |
| SNP_P3_184433_526  | NW_004520865.1 | Scaffold7617 | 526                     | AA                              | TT                | 1946711973               |
| SNP_P3_184434_569  | NW_004520865.1 | Scaffold7617 | 569                     | CC                              | TT                | 1946711975               |
| SNP_P3_184435_713  | NW_004520865.1 | Scaffold7617 | 713                     | CC                              | AA                | 1946711977               |
| SNP_P3_184436_714  | NW_004520865.1 | Scaffold7617 | 714                     | CC                              | TT                | 1946711979               |
| SNP_P3_184437_731  | NW_004520865.1 | Scaffold7617 | 731                     | GG                              | AA                | 1946711981               |
| SNP_P3_184438_820  | NW_004520865.1 | Scaffold7617 | 820                     | GG                              | AA                | 1946711983               |

| SNPs IDs            | Chromosome IDs | Chromosomes  | Physical positions (bp) | CDC Frontier (Reference genome) | (Pusa 256 & HPNB) | NCBI SNPdb Accession IDs |
|---------------------|----------------|--------------|-------------------------|---------------------------------|-------------------|--------------------------|
| SNP_P3_184439_831   | NW_004520865.1 | Scaffold7617 | 831                     | AA                              | TT                | 1946711985               |
| SNP_P3_184440_834   | NW_004520865.1 | Scaffold7617 | 834                     | AA                              | CC                | 1946711989               |
| SNP_P3_184441_856   | NW_004520865.1 | Scaffold7617 | 856                     | GG                              | TT                | 1946711991               |
| SNP_P3_184442_873   | NW_004520865.1 | Scaffold7617 | 873                     | AA                              | TT                | 1946711993               |
| SNP_P3_184443_895   | NW_004520865.1 | Scaffold7617 | 895                     | TT                              | GG                | 1946711995               |
| SNP_P3_184444_917   | NW_004520865.1 | Scaffold7617 | 917                     | GG                              | CC                | 1946711997               |
| SNP_P3_184445_943   | NW_004520865.1 | Scaffold7617 | 943                     | AA                              | CC                | 1946711999               |
| SNP_P3_184446_953   | NW_004520865.1 | Scaffold7617 | 953                     | CC                              | AA                | 1946712001               |
| SNP_P3_184447_965   | NW_004520865.1 | Scaffold7617 | 965                     | GG                              | TT                | 1946712004               |
| SNP_P3_184448_975   | NW_004520865.1 | Scaffold7617 | 975                     | GG                              | CC                | 1946712006               |
| SNP_P3_184449_1022  | NW_004520865.1 | Scaffold7617 | 1022                    | TT                              | GG                | 1946712008               |
| SNP_P3_184450_1038  | NW_004520865.1 | Scaffold7617 | 1038                    | AA                              | TT                | 1946712010               |
| SNP_P3_184451_1048  | NW_004520865.1 | Scaffold7617 | 1048                    | TT                              | GG                | 1946712012               |
| SNP_P3_184452_1055  | NW_004520865.1 | Scaffold7617 | 1055                    | CC                              | TT                | 1946712015               |
| SNP_P3_184453_1072  | NW_004520865.1 | Scaffold7617 | 1072                    | TT                              | CC                | 1946712017               |
| SNP_P3_184454_1218  | NW_004520865.1 | Scaffold7617 | 1218                    | TT                              | CC                | 1946712019               |
| SNP_P3_184455_1239  | NW_004520865.1 | Scaffold7617 | 1239                    | TT                              | AA                | 1946712021               |
| SNP_P3_184456_1259  | NW_004520865.1 | Scaffold7617 | 1259                    | TT                              | AA                | 1946712023               |
| SNP_P3_184457_1260  | NW_004520865.1 | Scaffold7617 | 1260                    | TT                              | AA                | 1946712025               |
| SNP_P3_184458_1828  | NW_004520866.1 | Scaffold7621 | 1828                    | CC                              | TT                | 1946712029               |
| SNP_P3_184459_35    | NW_004520868.1 | Scaffold7624 | 35                      | TT                              | CC                | 1946712031               |
| SNP_P3_184460_53    | NW_004520868.1 | Scaffold7624 | 53                      | GG                              | AA                | 1946712033               |
| SNP_P3_184461_55    | NW_004520868.1 | Scaffold7624 | 55                      | GG                              | TT                | 1946712035               |
| SNP_P3_184462_62    | NW_004520868.1 | Scaffold7624 | 62                      | TT                              | AA                | 1946712037               |
| SNP_P3_184463_64    | NW_004520868.1 | Scaffold7624 | 64                      | TT                              | AA                | 1946712040               |
| SNP_P3_184464_98    | NW_004520868.1 | Scaffold7624 | 98                      | TT                              | GG                | 1946712042               |
| SNP_P3_184465_380   | NW_004520868.1 | Scaffold7624 | 380                     | TT                              | AA                | 1946712045               |
| SNP_P3_184466_654   | NW_004520871.1 | Scaffold7632 | 654                     | CC                              | TT                | 1946712047               |
| SNP_P3_184467_672   | NW_004520871.1 | Scaffold7632 | 672                     | TT                              | CC                | 1946712049               |
| SNP_P3_184468_673   | NW_004520871.1 | Scaffold7632 | 673                     | CC                              | AA                | 1946712051               |
| SNP_P3_184469_814   | NW_004520871.1 | Scaffold7632 | 814                     | TT                              | GG                | 1946712053               |
| SNP_P3_184470_1832  | NW_004520872.1 | Scaffold7633 | 1832                    | TT                              | GG                | 1946712055               |
| SNP_P3_184471_1211  | NW_004520877.1 | Scaffold7644 | 1211                    | GG                              | TT                | 1946712057               |
| SNP_P3_184472_2479  | NW_004520879.1 | Scaffold7650 | 2479                    | GG                              | CC                | 1946712060               |
| SNP_P3_184473_9099  | NW_004520879.1 | Scaffold7650 | 9099                    | TT                              | GG                | 1946712062               |
| SNP_P3_184475_9781  | NW_004520879.1 | Scaffold7650 | 9781                    | GG                              | AA                | 1946712064               |
| SNP_P3_184477_9997  | NW_004520879.1 | Scaffold7650 | 9997                    | GG                              | AA                | 1946712067               |
| SNP_P3_184478_10148 | NW_004520879.1 | Scaffold7650 | 10148                   | GG                              | TT                | 1946712069               |
| SNP_P3_184479_10248 | NW_004520879.1 | Scaffold7650 | 10248                   | CC                              | AA                | 1946712072               |
| SNP_P3_184480_10256 | NW_004520879.1 | Scaffold7650 | 10256                   | CC                              | TT                | 1946712074               |
| SNP_P3_184481_4964  | NW_004520884.1 | Scaffold7655 | 4964                    | GG                              | TT                | 1946712076               |
| SNP_P3_184482_4975  | NW_004520884.1 | Scaffold7655 | 4975                    | GG                              | CC                | 1946712078               |

| SNPs IDs           | Chromosome IDs | Chromosomes  | Physical positions (bp) | CDC Frontier (Reference genome) | (Pusa 256 & HPNB) | NCBI SNPdb Accession IDs |
|--------------------|----------------|--------------|-------------------------|---------------------------------|-------------------|--------------------------|
| SNP_P3_184483_647  | NW_004520885.1 | Scaffold7657 | 647                     | AA                              | GG                | 1946712080               |
| SNP_P3_184484_651  | NW_004520885.1 | Scaffold7657 | 651                     | AA                              | TT                | 1946712082               |
| SNP_P3_184486_781  | NW_004520885.1 | Scaffold7657 | 781                     | TT                              | AA                | 1946712084               |
| SNP_P3_184487_802  | NW_004520885.1 | Scaffold7657 | 802                     | GG                              | AA                | 1946712086               |
| SNP_P3_184488_854  | NW_004520885.1 | Scaffold7657 | 854                     | AA                              | GG                | 1946712088               |
| SNP_P3_184489_570  | NW_004520887.1 | Scaffold7661 | 570                     | TT                              | AA                | 1946712092               |
| SNP_P3_184490_697  | NW_004520887.1 | Scaffold7661 | 697                     | CC                              | TT                | 1946712094               |
| SNP_P3_184491_834  | NW_004520887.1 | Scaffold7661 | 834                     | CC                              | AA                | 1946712096               |
| SNP_P3_184492_909  | NW_004520887.1 | Scaffold7661 | 909                     | AA                              | TT                | 1946712098               |
| SNP_P3_184493_92   | NW_004520888.1 | Scaffold7663 | 92                      | GG                              | AA                | 1946712100               |
| SNP_P3_184494_336  | NW_004520888.1 | Scaffold7663 | 336                     | AA                              | CC                | 1946712102               |
| SNP_P3_184495_356  | NW_004520888.1 | Scaffold7663 | 356                     | GG                              | TT                | 1946712104               |
| SNP_P3_184497_903  | NW_004520894.1 | Scaffold7674 | 903                     | GG                              | AA                | 1946712106               |
| SNP_P3_184498_822  | NW_004520896.1 | Scaffold7679 | 822                     | GG                              | AA                | 1946712108               |
| SNP_P3_184499_2280 | NW_004520896.1 | Scaffold7679 | 2280                    | CC                              | AA                | 1946712110               |
| SNP_P3_184500_2653 | NW_004520896.1 | Scaffold7679 | 2653                    | GG                              | CC                | 1946712112               |
| SNP_P3_184501_2969 | NW_004520896.1 | Scaffold7679 | 2969                    | AA                              | CC                | 1946712114               |
| SNP_P3_184502_3366 | NW_004520896.1 | Scaffold7679 | 3366                    | CC                              | GG                | 1946712116               |
| SNP_P3_184503_4013 | NW_004520896.1 | Scaffold7679 | 4013                    | TT                              | CC                | 1946712118               |
| SNP_P3_184504_4358 | NW_004520896.1 | Scaffold7679 | 4358                    | GG                              | AA                | 1946712120               |
| SNP_P3_184505_35   | NW_004520898.1 | Scaffold7681 | 35                      | AA                              | GG                | 1946712122               |
| SNP_P3_184506_86   | NW_004520908.1 | Scaffold7697 | 86                      | GG                              | CC                | 1946712124               |
| SNP_P3_184507_163  | NW_004520908.1 | Scaffold7697 | 163                     | CC                              | TT                | 1946712126               |
| SNP_P3_184508_444  | NW_004520908.1 | Scaffold7697 | 444                     | GG                              | CC                | 1946712129               |
| SNP_P3_184510_653  | NW_004520908.1 | Scaffold7697 | 653                     | AA                              | GG                | 1946712131               |
| SNP_P3_184511_676  | NW_004520908.1 | Scaffold7697 | 676                     | GG                              | CC                | 1946712133               |
| SNP_P3_184512_729  | NW_004520908.1 | Scaffold7697 | 729                     | AA                              | TT                | 1946712135               |
| SNP_P3_184513_790  | NW_004520908.1 | Scaffold7697 | 790                     | TT                              | CC                | 1946712137               |
| SNP_P3_184514_411  | NW_004520909.1 | Scaffold7698 | 411                     | AA                              | TT                | 1946712139               |
| SNP_P3_184515_419  | NW_004520909.1 | Scaffold7698 | 419                     | GG                              | AA                | 1946712141               |
| SNP_P3_184516_420  | NW_004520909.1 | Scaffold7698 | 420                     | AA                              | GG                | 1946712143               |
| SNP_P3_184517_535  | NW_004520909.1 | Scaffold7698 | 535                     | GG                              | AA                | 1946712145               |
| SNP_P3_184518_668  | NW_004520909.1 | Scaffold7698 | 668                     | GG                              | CC                | 1946712147               |
| SNP_P3_184519_704  | NW_004520909.1 | Scaffold7698 | 704                     | AA                              | TT                | 1946712149               |
| SNP_P3_184520_890  | NW_004520909.1 | Scaffold7698 | 890                     | AA                              | GG                | 1946712151               |
| SNP_P3_184521_979  | NW_004520909.1 | Scaffold7698 | 979                     | CC                              | GG                | 1946712153               |
| SNP_P3_184522_1012 | NW_004520909.1 | Scaffold7698 | 1012                    | AA                              | GG                | 1946712155               |
| SNP_P3_184523_1027 | NW_004520909.1 | Scaffold7698 | 1027                    | CC                              | AA                | 1946712157               |
| SNP_P3_184525_1125 | NW_004520909.1 | Scaffold7698 | 1125                    | TT                              | CC                | 1946712159               |
| SNP_P3_184526_1222 | NW_004520909.1 | Scaffold7698 | 1222                    | CC                              | TT                | 1946712161               |
| SNP_P3_184527_1300 | NW_004520910.1 | Scaffold7699 | 1300                    | GG                              | AA                | 1946712163               |
| SNP_P3_184528_1397 | NW_004520910.1 | Scaffold7699 | 1397                    | AA                              | GG                | 1946712166               |

| SNPs IDs           | Chromosome IDs | Chromosomes  | Physical positions (bp) | CDC Frontier (Reference genome) | (Pusa 256 & HPNB) | NCBI SNPdb Accession IDs |
|--------------------|----------------|--------------|-------------------------|---------------------------------|-------------------|--------------------------|
| SNP_P3_184529_1398 | NW_004520910.1 | Scaffold7699 | 1398                    | GG                              | AA                | 1946712168               |
| SNP_P3_184530_542  | NW_004520912.1 | Scaffold7701 | 542                     | AA                              | TT                | 1946712170               |
| SNP_P3_184531_644  | NW_004520912.1 | Scaffold7701 | 644                     | TT                              | GG                | 1946712172               |
| SNP_P3_184532_645  | NW_004520912.1 | Scaffold7701 | 645                     | AA                              | GG                | 1946712174               |
| SNP_P3_184533_883  | NW_004520912.1 | Scaffold7701 | 883                     | TT                              | GG                | 1946712176               |
| SNP_P3_184534_922  | NW_004520912.1 | Scaffold7701 | 922                     | AA                              | GG                | 1946712178               |
| SNP_P3_184535_1547 | NW_004520913.1 | Scaffold7702 | 1547                    | GG                              | AA                | 1946712180               |
| SNP_P3_184536_264  | NW_004520915.1 | Scaffold7704 | 264                     | AA                              | TT                | 1946712182               |
| SNP_P3_184537_276  | NW_004520915.1 | Scaffold7704 | 276                     | CC                              | GG                | 1946712184               |
| SNP_P3_184538_668  | NW_004520915.1 | Scaffold7704 | 668                     | CC                              | GG                | 1946712186               |
| SNP_P3_184539_831  | NW_004520915.1 | Scaffold7704 | 831                     | TT                              | AA                | 1946712188               |
| SNP_P3_184540_189  | NW_004520916.1 | Scaffold7709 | 189                     | TT                              | CC                | 1946712190               |
| SNP_P3_184541_5737 | NW_004520919.1 | Scaffold7715 | 5737                    | AA                              | TT                | 1946712192               |
| SNP_P3_184542_5759 | NW_004520919.1 | Scaffold7715 | 5759                    | AA                              | GG                | 1946712194               |
| SNP_P3_184543_5795 | NW_004520919.1 | Scaffold7715 | 5795                    | GG                              | CC                | 1946712196               |
| SNP_P3_184544_5852 | NW_004520919.1 | Scaffold7715 | 5852                    | TT                              | CC                | 1946712198               |
| SNP_P3_184545_5874 | NW_004520919.1 | Scaffold7715 | 5874                    | AA                              | TT                | 1946712201               |
| SNP_P3_184546_6084 | NW_004520919.1 | Scaffold7715 | 6084                    | TT                              | CC                | 1946712203               |
| SNP_P3_184547_1312 | NW_004520921.1 | Scaffold7717 | 1312                    | TT                              | CC                | 1946712206               |
| SNP_P3_184548_403  | NW_004520922.1 | Scaffold7722 | 403                     | TT                              | CC                | 1946712208               |
| SNP_P3_184549_322  | NW_004520923.1 | Scaffold7724 | 322                     | AA                              | GG                | 1946712210               |
| SNP_P3_184550_1022 | NW_004520923.1 | Scaffold7724 | 1022                    | CC                              | TT                | 1946712212               |
| SNP_P3_184551_1105 | NW_004520923.1 | Scaffold7724 | 1105                    | GG                              | TT                | 1946712214               |
| SNP_P3_184553_1118 | NW_004520923.1 | Scaffold7724 | 1118                    | AA                              | CC                | 1946712216               |
| SNP_P3_184554_1198 | NW_004520923.1 | Scaffold7724 | 1198                    | TT                              | CC                | 1946712218               |
| SNP_P3_184555_1230 | NW_004520923.1 | Scaffold7724 | 1230                    | CC                              | TT                | 1946712220               |
| SNP_P3_184556_1470 | NW_004520923.1 | Scaffold7724 | 1470                    | TT                              | GG                | 1946712222               |
| SNP_P3_184557_1474 | NW_004520923.1 | Scaffold7724 | 1474                    | AA                              | TT                | 1946712224               |
| SNP_P3_184559_1597 | NW_004520923.1 | Scaffold7724 | 1597                    | AA                              | GG                | 1946712226               |
| SNP_P3_184560_2484 | NW_004520923.1 | Scaffold7724 | 2484                    | TT                              | GG                | 1946712228               |
| SNP_P3_184561_3567 | NW_004520923.1 | Scaffold7724 | 3567                    | GG                              | AA                | 1946712230               |
| SNP_P3_184562_7787 | NW_004520923.1 | Scaffold7724 | 7787                    | GG                              | AA                | 1946712232               |
| SNP_P3_184563_692  | NW_004520927.1 | Scaffold7731 | 692                     | GG                              | CC                | 1946712235               |
| SNP_P3_184564_731  | NW_004520927.1 | Scaffold7731 | 731                     | CC                              | AA                | 1946712237               |
| SNP_P3_184565_742  | NW_004520927.1 | Scaffold7731 | 742                     | CC                              | AA                | 1946712240               |
| SNP_P3_184566_819  | NW_004520927.1 | Scaffold7731 | 819                     | TT                              | CC                | 1946712243               |
| SNP_P3_184567_845  | NW_004520927.1 | Scaffold7731 | 845                     | AA                              | GG                | 1946712245               |
| SNP_P3_184568_881  | NW_004520927.1 | Scaffold7731 | 881                     | CC                              | TT                | 1946712247               |
| SNP_P3_184569_1182 | NW_004520927.1 | Scaffold7731 | 1182                    | TT                              | CC                | 1946712249               |
| SNP_P3_184570_1228 | NW_004520927.1 | Scaffold7731 | 1228                    | CC                              | TT                | 1946712251               |
| SNP_P3_184571_1402 | NW_004520927.1 | Scaffold7731 | 1402                    | AA                              | CC                | 1946712253               |
| SNP_P3_184572_140  | NW_004520932.1 | Scaffold7739 | 140                     | CC                              | TT                | 1946712255               |

| SNPs IDs           | Chromosome IDs | Chromosomes  | Physical positions (bp) | CDC Frontier (Reference genome) | (Pusa 256 & HPNB) | NCBI SNPdb Accession IDs |
|--------------------|----------------|--------------|-------------------------|---------------------------------|-------------------|--------------------------|
| SNP_P3_184573_696  | NW_004520933.1 | Scaffold7740 | 696                     | TT                              | GG                | 1946712257               |
| SNP_P3_184574_1618 | NW_004520933.1 | Scaffold7740 | 1618                    | CC                              | TT                | 1946712259               |
| SNP_P3_184575_1802 | NW_004520933.1 | Scaffold7740 | 1802                    | GG                              | AA                | 1946712261               |
| SNP_P3_184576_2230 | NW_004520933.1 | Scaffold7740 | 2230                    | CC                              | TT                | 1946712263               |
| SNP_P3_184577_2257 | NW_004520933.1 | Scaffold7740 | 2257                    | AA                              | TT                | 1946712265               |
| SNP_P3_184578_2538 | NW_004520933.1 | Scaffold7740 | 2538                    | GG                              | AA                | 1946712267               |
| SNP_P3_184579_815  | NW_004520937.1 | Scaffold7752 | 815                     | TT                              | CC                | 1946712269               |
| SNP_P3_184580_969  | NW_004520937.1 | Scaffold7752 | 969                     | AA                              | GG                | 1946712271               |
| SNP_P3_184581_1078 | NW_004520937.1 | Scaffold7752 | 1078                    | AA                              | TT                | 1946712274               |
| SNP_P3_184582_1086 | NW_004520937.1 | Scaffold7752 | 1086                    | AA                              | GG                | 1946712276               |
| SNP_P3_184583_1438 | NW_004520937.1 | Scaffold7752 | 1438                    | CC                              | TT                | 1946712278               |
| SNP_P3_184584_788  | NW_004520938.1 | Scaffold7753 | 788                     | AA                              | CC                | 1946712280               |
| SNP_P3_184585_813  | NW_004520938.1 | Scaffold7753 | 813                     | GG                              | TT                | 1946712283               |
| SNP_P3_184586_821  | NW_004520938.1 | Scaffold7753 | 821                     | AA                              | CC                | 1946712285               |
| SNP_P3_184587_893  | NW_004520938.1 | Scaffold7753 | 893                     | CC                              | AA                | 1946712288               |
| SNP_P3_184588_924  | NW_004520938.1 | Scaffold7753 | 924                     | TT                              | AA                | 1946712289               |
| SNP_P3_184589_928  | NW_004520938.1 | Scaffold7753 | 928                     | TT                              | GG                | 1946712290               |
| SNP_P3_184591_64   | NW_004520941.1 | Scaffold7765 | 64                      | CC                              | AA                | 1946712291               |
| SNP_P3_184592_109  | NW_004520941.1 | Scaffold7765 | 109                     | AA                              | GG                | 1946712292               |
| SNP_P3_184593_309  | NW_004520941.1 | Scaffold7765 | 309                     | TT                              | CC                | 1946712293               |
| SNP_P3_184594_503  | NW_004520941.1 | Scaffold7765 | 503                     | CC                              | TT                | 1946712294               |
| SNP_P3_184595_886  | NW_004520941.1 | Scaffold7765 | 886                     | GG                              | AA                | 1946712295               |
| SNP_P3_184596_960  | NW_004520941.1 | Scaffold7765 | 960                     | CC                              | GG                | 1946712296               |
| SNP_P3_184598_1063 | NW_004520941.1 | Scaffold7765 | 1063                    | TT                              | GG                | 1946712297               |
| SNP_P3_184599_533  | NW_004520942.1 | Scaffold7767 | 533                     | AA                              | TT                | 1946712298               |
| SNP_P3_184600_674  | NW_004520949.1 | Scaffold7777 | 674                     | AA                              | GG                | 1946712299               |
| SNP_P3_184601_84   | NW_004520950.1 | Scaffold7778 | 84                      | CC                              | AA                | 1946712300               |
| SNP_P3_184602_195  | NW_004520950.1 | Scaffold7778 | 195                     | CC                              | TT                | 1946712301               |
| SNP_P3_184603_268  | NW_004520950.1 | Scaffold7778 | 268                     | AA                              | CC                | 1946712302               |
| SNP_P3_184604_433  | NW_004520950.1 | Scaffold7778 | 433                     | AA                              | GG                | 1946712303               |
| SNP_P3_184605_447  | NW_004520950.1 | Scaffold7778 | 447                     | TT                              | CC                | 1946712304               |
| SNP_P3_184606_451  | NW_004520950.1 | Scaffold7778 | 451                     | TT                              | CC                | 1946712305               |
| SNP_P3_184607_599  | NW_004520955.1 | Scaffold7786 | 599                     | AA                              | CC                | 1946712306               |
| SNP_P3_184609_244  | NW_004520956.1 | Scaffold7791 | 244                     | CC                              | TT                | 1946712307               |
| SNP_P3_184610_261  | NW_004520956.1 | Scaffold7791 | 261                     | CC                              | TT                | 1946712308               |
| SNP_P3_184611_801  | NW_004520959.1 | Scaffold7795 | 801                     | TT                              | CC                | 1946712309               |
| SNP_P3_184612_1053 | NW_004520959.1 | Scaffold7795 | 1053                    | GG                              | CC                | 1946712310               |
| SNP_P3_184613_1892 | NW_004520960.1 | Scaffold7797 | 1892                    | CC                              | TT                | 1946712311               |
| SNP_P3_184615_2240 | NW_004520960.1 | Scaffold7797 | 2240                    | AA                              | GG                | 1946712312               |
| SNP_P3_184616_213  | NW_004520963.1 | Scaffold7801 | 213                     | CC                              | AA                | 1946712313               |
| SNP_P3_184617_2624 | NW_004520963.1 | Scaffold7801 | 2624                    | AA                              | GG                | 1946712314               |
| SNP_P3_184618_2645 | NW_004520963.1 | Scaffold7801 | 2645                    | TT                              | AA                | 1946712315               |

| SNPs IDs           | Chromosome IDs | Chromosomes  | Physical positions (bp) | CDC Frontier (Reference genome) | (Pusa 256 & HPNB) | NCBI SNPdb Accession IDs |
|--------------------|----------------|--------------|-------------------------|---------------------------------|-------------------|--------------------------|
| SNP_P3_184619_2713 | NW_004520963.1 | Scaffold7801 | 2713                    | GG                              | CC                | 1946712316               |
| SNP_P3_184620_1356 | NW_004520964.1 | Scaffold7802 | 1356                    | CC                              | GG                | 1946712317               |
| SNP_P3_184621_1361 | NW_004520964.1 | Scaffold7802 | 1361                    | CC                              | TT                | 1946712318               |
| SNP_P3_184622_1430 | NW_004520964.1 | Scaffold7802 | 1430                    | AA                              | GG                | 1946712319               |
| SNP_P3_184623_1442 | NW_004520964.1 | Scaffold7802 | 1442                    | TT                              | AA                | 1946712320               |
| SNP_P3_184624_1447 | NW_004520964.1 | Scaffold7802 | 1447                    | GG                              | AA                | 1946712321               |
| SNP_P3_184625_1457 | NW_004520964.1 | Scaffold7802 | 1457                    | GG                              | CC                | 1946712322               |
| SNP_P3_184626_465  | NW_004520965.1 | Scaffold7803 | 465                     | AA                              | GG                | 1946712323               |
| SNP_P3_184628_1111 | NW_004520966.1 | Scaffold7805 | 1111                    | AA                              | CC                | 1946712324               |
| SNP_P3_184629_329  | NW_004520967.1 | Scaffold7807 | 329                     | GG                              | TT                | 1946712325               |
| SNP_P3_184630_2003 | NW_004520967.1 | Scaffold7807 | 2003                    | TT                              | CC                | 1946712326               |
| SNP_P3_184631_2009 | NW_004520967.1 | Scaffold7807 | 2009                    | GG                              | CC                | 1946712327               |
| SNP_P3_184632_2078 | NW_004520967.1 | Scaffold7807 | 2078                    | AA                              | CC                | 1946712328               |
| SNP_P3_184633_6025 | NW_004520967.1 | Scaffold7807 | 6025                    | GG                              | AA                | 1946712329               |
| SNP_P3_184634_469  | NW_004520968.1 | Scaffold7808 | 469                     | CC                              | AA                | 1946712330               |
| SNP_P3_184635_475  | NW_004520968.1 | Scaffold7808 | 475                     | AA                              | TT                | 1946712331               |
| SNP_P3_184636_515  | NW_004520968.1 | Scaffold7808 | 515                     | AA                              | GG                | 1946712332               |
| SNP_P3_184637_544  | NW_004520968.1 | Scaffold7808 | 544                     | TT                              | CC                | 1946712333               |
| SNP_P3_184638_547  | NW_004520968.1 | Scaffold7808 | 547                     | AA                              | TT                | 1946712334               |
| SNP_P3_184639_379  | NW_004520972.1 | Scaffold7815 | 379                     | GG                              | CC                | 1946712335               |
| SNP_P3_184640_605  | NW_004520972.1 | Scaffold7815 | 605                     | AA                              | GG                | 1946712336               |
| SNP_P3_184641_4322 | NW_004520972.1 | Scaffold7815 | 4322                    | GG                              | CC                | 1946712337               |
| SNP_P3_184642_5003 | NW_004520972.1 | Scaffold7815 | 5003                    | TT                              | AA                | 1946712338               |
| SNP_P3_184643_64   | NW_004520978.1 | Scaffold7821 | 64                      | GG                              | TT                | 1946712339               |
| SNP_P3_184645_110  | NW_004520978.1 | Scaffold7821 | 110                     | CC                              | TT                | 1946712340               |
| SNP_P3_184646_174  | NW_004520978.1 | Scaffold7821 | 174                     | CC                              | TT                | 1946712341               |
| SNP_P3_184647_180  | NW_004520978.1 | Scaffold7821 | 180                     | GG                              | AA                | 1946712342               |
| SNP_P3_184648_195  | NW_004520978.1 | Scaffold7821 | 195                     | TT                              | CC                | 1946712343               |
| SNP_P3_184649_200  | NW_004520978.1 | Scaffold7821 | 200                     | CC                              | GG                | 1946712344               |
| SNP_P3_184650_201  | NW_004520978.1 | Scaffold7821 | 201                     | CC                              | TT                | 1946712345               |
| SNP_P3_184651_203  | NW_004520978.1 | Scaffold7821 | 203                     | AA                              | TT                | 1946712346               |
| SNP_P3_184652_207  | NW_004520978.1 | Scaffold7821 | 207                     | CC                              | TT                | 1946712347               |
| SNP_P3_184653_238  | NW_004520978.1 | Scaffold7821 | 238                     | TT                              | CC                | 1946712348               |
| SNP_P3_184654_285  | NW_004520978.1 | Scaffold7821 | 285                     | TT                              | CC                | 1946712349               |
| SNP_P3_184655_291  | NW_004520978.1 | Scaffold7821 | 291                     | AA                              | GG                | 1946712350               |
| SNP_P3_184656_301  | NW_004520978.1 | Scaffold7821 | 301                     | AA                              | CC                | 1946712351               |
| SNP_P3_184657_306  | NW_004520978.1 | Scaffold7821 | 306                     | GG                              | AA                | 1946712352               |
| SNP_P3_184658_312  | NW_004520978.1 | Scaffold7821 | 312                     | TT                              | CC                | 1946712353               |
| SNP_P3_184660_436  | NW_004520979.1 | Scaffold7823 | 436                     | TT                              | CC                | 1946712354               |
| SNP_P3_184661_458  | NW_004520979.1 | Scaffold7823 | 458                     | GG                              | TT                | 1946712355               |
| SNP_P3_184662_932  | NW_004520979.1 | Scaffold7823 | 932                     | TT                              | AA                | 1946712356               |
| SNP_P3_184663_1166 | NW_004520979.1 | Scaffold7823 | 1166                    | AA                              | GG                | 1946712357               |



| SNPs IDs            | Chromosome IDs | Chromosomes  | Physical positions (bp) | CDC Frontier (Reference genome) | (Pusa 256 & HPNB) | NCBI SNPdb Accession IDs |
|---------------------|----------------|--------------|-------------------------|---------------------------------|-------------------|--------------------------|
| SNP_P3_184664_1967  | NW_004520979.1 | Scaffold7823 | 1967                    | CC                              | TT                | 1946712358               |
| SNP_P3_184665_2111  | NW_004520979.1 | Scaffold7823 | 2111                    | TT                              | CC                | 1946712359               |
| SNP_P3_184666_2112  | NW_004520979.1 | Scaffold7823 | 2112                    | TT                              | CC                | 1946712360               |
| SNP_P3_184667_2113  | NW_004520979.1 | Scaffold7823 | 2113                    | GG                              | CC                | 1946712361               |
| SNP_P3_184668_2117  | NW_004520979.1 | Scaffold7823 | 2117                    | TT                              | CC                | 1946712362               |
| SNP_P3_184669_2130  | NW_004520979.1 | Scaffold7823 | 2130                    | CC                              | TT                | 1946712363               |
| SNP_P3_184670_2173  | NW_004520979.1 | Scaffold7823 | 2173                    | AA                              | GG                | 1946712364               |
| SNP_P3_184671_2190  | NW_004520979.1 | Scaffold7823 | 2190                    | AA                              | GG                | 1946712365               |
| SNP_P3_184672_2202  | NW_004520979.1 | Scaffold7823 | 2202                    | AA                              | GG                | 1946712366               |
| SNP_P3_184673_2204  | NW_004520979.1 | Scaffold7823 | 2204                    | TT                              | CC                | 1946712367               |
| SNP_P3_184674_2211  | NW_004520979.1 | Scaffold7823 | 2211                    | TT                              | CC                | 1946712368               |
| SNP_P3_184675_2214  | NW_004520979.1 | Scaffold7823 | 2214                    | TT                              | CC                | 1946712369               |
| SNP_P3_184676_2220  | NW_004520979.1 | Scaffold7823 | 2220                    | CC                              | TT                | 1946712370               |
| SNP_P3_184677_4800  | NW_004520979.1 | Scaffold7823 | 4800                    | TT                              | CC                | 1946712371               |
| SNP_P3_184678_4844  | NW_004520979.1 | Scaffold7823 | 4844                    | CC                              | TT                | 1946712372               |
| SNP_P3_184679_4864  | NW_004520979.1 | Scaffold7823 | 4864                    | AA                              | GG                | 1946712373               |
| SNP_P3_184680_4891  | NW_004520979.1 | Scaffold7823 | 4891                    | CC                              | AA                | 1946712374               |
| SNP_P3_184681_4960  | NW_004520979.1 | Scaffold7823 | 4960                    | TT                              | AA                | 1946712375               |
| SNP_P3_184682_598   | NW_004520980.1 | Scaffold7825 | 598                     | CC                              | GG                | 1946712376               |
| SNP_P3_184683_777   | NW_004520980.1 | Scaffold7825 | 777                     | GG                              | AA                | 1946712377               |
| SNP_P3_184684_1194  | NW_004520985.1 | Scaffold7837 | 1194                    | CC                              | TT                | 1946712378               |
| SNP_P3_184685_1206  | NW_004520985.1 | Scaffold7837 | 1206                    | GG                              | AA                | 1946712379               |
| SNP_P3_184687_1363  | NW_004520985.1 | Scaffold7837 | 1363                    | GG                              | TT                | 1946712380               |
| SNP_P3_184688_1369  | NW_004520985.1 | Scaffold7837 | 1369                    | GG                              | AA                | 1946712381               |
| SNP_P3_184689_1370  | NW_004520985.1 | Scaffold7837 | 1370                    | GG                              | AA                | 1946712382               |
| SNP_P3_184690_1430  | NW_004520985.1 | Scaffold7837 | 1430                    | TT                              | CC                | 1946712383               |
| SNP_P3_184691_1432  | NW_004520985.1 | Scaffold7837 | 1432                    | TT                              | AA                | 1946712384               |
| SNP_P3_184692_1738  | NW_004520985.1 | Scaffold7837 | 1738                    | AA                              | TT                | 1946712385               |
| SNP_P3_184693_4577  | NW_004520986.1 | Scaffold7839 | 4577                    | AA                              | GG                | 1946712386               |
| SNP_P3_184694_4811  | NW_004520986.1 | Scaffold7839 | 4811                    | GG                              | AA                | 1946712387               |
| SNP_P3_184695_5032  | NW_004520986.1 | Scaffold7839 | 5032                    | TT                              | CC                | 1946712388               |
| SNP_P3_184696_5040  | NW_004520986.1 | Scaffold7839 | 5040                    | AA                              | TT                | 1946712389               |
| SNP_P3_184697_5068  | NW_004520986.1 | Scaffold7839 | 5068                    | AA                              | GG                | 1946712390               |
| SNP_P3_184698_5131  | NW_004520986.1 | Scaffold7839 | 5131                    | AA                              | GG                | 1946712391               |
| SNP_P3_184699_5150  | NW_004520986.1 | Scaffold7839 | 5150                    | AA                              | GG                | 1946712392               |
| SNP_P3_184700_288   | NW_004520987.1 | Scaffold7842 | 288                     | CC                              | AA                | 1946712393               |
| SNP_P3_184702_19251 | NW_004520987.1 | Scaffold7842 | 19251                   | CC                              | TT                | 1946712394               |
| SNP_P3_184703_19867 | NW_004520987.1 | Scaffold7842 | 19867                   | TT                              | CC                | 1946712395               |
| SNP_P3_184704_20102 | NW_004520987.1 | Scaffold7842 | 20102                   | AA                              | GG                | 1946712396               |
| SNP_P3_184705_20195 | NW_004520987.1 | Scaffold7842 | 20195                   | AA                              | GG                | 1946712397               |
| SNP_P3_184706_20296 | NW_004520987.1 | Scaffold7842 | 20296                   | AA                              | TT                | 1946712398               |
| SNP_P3_184707_20299 | NW_004520987.1 | Scaffold7842 | 20299                   | TT                              | AA                | 1946712399               |

| SNPs IDs            | Chromosome IDs | Chromosomes  | Physical positions (bp) | CDC Frontier (Reference genome) | (Pusa 256 & HPNB) | NCBI SNPdb Accession IDs |
|---------------------|----------------|--------------|-------------------------|---------------------------------|-------------------|--------------------------|
| SNP_P3_184708_20308 | NW_004520987.1 | Scaffold7842 | 20308                   | CC                              | GG                | 1946712400               |
| SNP_P3_184709_20342 | NW_004520987.1 | Scaffold7842 | 20342                   | TT                              | GG                | 1946712401               |
| SNP_P3_184710_20357 | NW_004520987.1 | Scaffold7842 | 20357                   | TT                              | AA                | 1946712402               |
| SNP_P3_184712_20506 | NW_004520987.1 | Scaffold7842 | 20506                   | TT                              | CC                | 1946712403               |
| SNP_P3_184713_20507 | NW_004520987.1 | Scaffold7842 | 20507                   | AA                              | CC                | 1946712404               |
| SNP_P3_184714_20533 | NW_004520987.1 | Scaffold7842 | 20533                   | AA                              | TT                | 1946712405               |
| SNP_P3_184716_1112  | NW_004520988.1 | Scaffold7847 | 1112                    | CC                              | TT                | 1946712406               |
| SNP_P3_184717_420   | NW_004520993.1 | Scaffold7857 | 420                     | CC                              | TT                | 1946712407               |
| SNP_P3_184718_481   | NW_004520993.1 | Scaffold7857 | 481                     | TT                              | CC                | 1946712408               |
| SNP_P3_184719_646   | NW_004520993.1 | Scaffold7857 | 646                     | GG                              | AA                | 1946712409               |
| SNP_P3_184720_647   | NW_004520993.1 | Scaffold7857 | 647                     | GG                              | AA                | 1946712410               |
| SNP_P3_184721_727   | NW_004520993.1 | Scaffold7857 | 727                     | AA                              | TT                | 1946712411               |
| SNP_P3_184722_728   | NW_004520993.1 | Scaffold7857 | 728                     | TT                              | GG                | 1946712412               |
| SNP_P3_184723_781   | NW_004520993.1 | Scaffold7857 | 781                     | AA                              | TT                | 1946712413               |
| SNP_P3_184724_792   | NW_004520993.1 | Scaffold7857 | 792                     | AA                              | CC                | 1946712414               |
| SNP_P3_184725_888   | NW_004520993.1 | Scaffold7857 | 888                     | GG                              | CC                | 1946712415               |
| SNP_P3_184726_1569  | NW_004520999.1 | Scaffold7868 | 1569                    | TT                              | CC                | 1946712416               |
| SNP_P3_184727_1570  | NW_004520999.1 | Scaffold7868 | 1570                    | GG                              | AA                | 1946712417               |
| SNP_P3_184728_1597  | NW_004520999.1 | Scaffold7868 | 1597                    | AA                              | TT                | 1946712418               |
| SNP_P3_184729_1612  | NW_004520999.1 | Scaffold7868 | 1612                    | TT                              | CC                | 1946712419               |
| SNP_P3_184730_1620  | NW_004520999.1 | Scaffold7868 | 1620                    | GG                              | CC                | 1946712420               |
| SNP_P3_184731_5695  | NW_004521005.1 | Scaffold7882 | 5695                    | CC                              | TT                | 1946712421               |
| SNP_P3_184732_6047  | NW_004521005.1 | Scaffold7882 | 6047                    | GG                              | AA                | 1946712422               |
| SNP_P3_184733_1087  | NW_004521008.1 | Scaffold7886 | 1087                    | CC                              | TT                | 1946712423               |
| SNP_P3_184734_251   | NW_004521009.1 | Scaffold7887 | 251                     | CC                              | TT                | 1946712424               |
| SNP_P3_184735_577   | NW_004521009.1 | Scaffold7887 | 577                     | AA                              | GG                | 1946712425               |
| SNP_P3_184736_1886  | NW_004521010.1 | Scaffold7889 | 1886                    | AA                              | TT                | 1946712426               |
| SNP_P3_184737_1898  | NW_004521010.1 | Scaffold7889 | 1898                    | AA                              | GG                | 1946712427               |
| SNP_P3_184738_1927  | NW_004521010.1 | Scaffold7889 | 1927                    | AA                              | GG                | 1946712428               |
| SNP_P3_184739_84    | NW_004521011.1 | Scaffold7890 | 84                      | CC                              | AA                | 1946712429               |
| SNP_P3_184740_106   | NW_004521011.1 | Scaffold7890 | 106                     | GG                              | CC                | 1946712430               |
| SNP_P3_184741_151   | NW_004521011.1 | Scaffold7890 | 151                     | AA                              | TT                | 1946712431               |
| SNP_P3_184742_427   | NW_004521011.1 | Scaffold7890 | 427                     | CC                              | TT                | 1946712432               |
| SNP_P3_184743_438   | NW_004521011.1 | Scaffold7890 | 438                     | GG                              | AA                | 1946712433               |
| SNP_P3_184744_481   | NW_004521011.1 | Scaffold7890 | 481                     | AA                              | TT                | 1946712434               |
| SNP_P3_184745_530   | NW_004521011.1 | Scaffold7890 | 530                     | AA                              | CC                | 1946712435               |
| SNP_P3_184746_605   | NW_004521011.1 | Scaffold7890 | 605                     | TT                              | GG                | 1946712436               |
| SNP_P3_184747_673   | NW_004521011.1 | Scaffold7890 | 673                     | GG                              | AA                | 1946712437               |
| SNP_P3_184749_773   | NW_004521011.1 | Scaffold7890 | 773                     | TT                              | CC                | 1946712438               |
| SNP_P3_184750_774   | NW_004521011.1 | Scaffold7890 | 774                     | CC                              | TT                | 1946712439               |
| SNP_P3_184751_796   | NW_004521011.1 | Scaffold7890 | 796                     | TT                              | CC                | 1946712440               |
| SNP_P3_184752_841   | NW_004521011.1 | Scaffold7890 | 841                     | TT                              | CC                | 1946712441               |

| SNPs IDs           | Chromosome IDs | Chromosomes  | Physical positions (bp) | CDC Frontier (Reference genome) | (Pusa 256 & HPNB) | NCBI SNPdb Accession IDs |
|--------------------|----------------|--------------|-------------------------|---------------------------------|-------------------|--------------------------|
| SNP_P3_184753_2240 | NW_004521012.1 | Scaffold7891 | 2240                    | CC                              | TT                | 1946712442               |
| SNP_P3_184754_2901 | NW_004521012.1 | Scaffold7891 | 2901                    | CC                              | AA                | 1946712443               |
| SNP_P3_184755_2911 | NW_004521012.1 | Scaffold7891 | 2911                    | GG                              | AA                | 1946712444               |
| SNP_P3_184756_3035 | NW_004521012.1 | Scaffold7891 | 3035                    | GG                              | AA                | 1946712445               |
| SNP_P3_184757_3062 | NW_004521012.1 | Scaffold7891 | 3062                    | AA                              | GG                | 1946712446               |
| SNP_P3_184758_3085 | NW_004521012.1 | Scaffold7891 | 3085                    | TT                              | GG                | 1946712447               |
| SNP_P3_184759_3335 | NW_004521012.1 | Scaffold7891 | 3335                    | AA                              | GG                | 1946712448               |
| SNP_P3_184760_3376 | NW_004521012.1 | Scaffold7891 | 3376                    | CC                              | TT                | 1946712449               |
| SNP_P3_184761_3420 | NW_004521012.1 | Scaffold7891 | 3420                    | TT                              | CC                | 1946712450               |
| SNP_P3_184762_3429 | NW_004521012.1 | Scaffold7891 | 3429                    | AA                              | GG                | 1946712451               |
| SNP_P3_184763_3746 | NW_004521012.1 | Scaffold7891 | 3746                    | AA                              | GG                | 1946712452               |
| SNP_P3_184764_3749 | NW_004521012.1 | Scaffold7891 | 3749                    | GG                              | TT                | 1946712453               |
| SNP_P3_184766_3854 | NW_004521012.1 | Scaffold7891 | 3854                    | CC                              | TT                | 1946712454               |
| SNP_P3_184767_3873 | NW_004521012.1 | Scaffold7891 | 3873                    | TT                              | CC                | 1946712455               |
| SNP_P3_184768_3888 | NW_004521012.1 | Scaffold7891 | 3888                    | TT                              | CC                | 1946712456               |
| SNP_P3_184769_4033 | NW_004521012.1 | Scaffold7891 | 4033                    | TT                              | GG                | 1946712457               |
| SNP_P3_184770_4046 | NW_004521012.1 | Scaffold7891 | 4046                    | AA                              | CC                | 1946712458               |
| SNP_P3_184771_4050 | NW_004521012.1 | Scaffold7891 | 4050                    | CC                              | TT                | 1946712459               |
| SNP_P3_184772_4088 | NW_004521012.1 | Scaffold7891 | 4088                    | AA                              | GG                | 1946712460               |
| SNP_P3_184773_4093 | NW_004521012.1 | Scaffold7891 | 4093                    | CC                              | TT                | 1946712461               |
| SNP_P3_184774_4094 | NW_004521012.1 | Scaffold7891 | 4094                    | AA                              | GG                | 1946712462               |
| SNP_P3_184775_4126 | NW_004521012.1 | Scaffold7891 | 4126                    | TT                              | CC                | 1946712463               |
| SNP_P3_184776_4202 | NW_004521012.1 | Scaffold7891 | 4202                    | AA                              | CC                | 1946712464               |
| SNP_P3_184777_4248 | NW_004521012.1 | Scaffold7891 | 4248                    | AA                              | TT                | 1946712465               |
| SNP_P3_184778_4251 | NW_004521012.1 | Scaffold7891 | 4251                    | GG                              | AA                | 1946712466               |
| SNP_P3_184779_4349 | NW_004521012.1 | Scaffold7891 | 4349                    | AA                              | GG                | 1946712467               |
| SNP_P3_184780_4429 | NW_004521012.1 | Scaffold7891 | 4429                    | GG                              | TT                | 1946712468               |
| SNP_P3_184781_4455 | NW_004521012.1 | Scaffold7891 | 4455                    | TT                              | CC                | 1946712469               |
| SNP_P3_184782_4456 | NW_004521012.1 | Scaffold7891 | 4456                    | GG                              | AA                | 1946712470               |
| SNP_P3_184783_4496 | NW_004521012.1 | Scaffold7891 | 4496                    | TT                              | CC                | 1946712471               |
| SNP_P3_184784_4525 | NW_004521012.1 | Scaffold7891 | 4525                    | AA                              | CC                | 1946712472               |
| SNP_P3_184785_4540 | NW_004521012.1 | Scaffold7891 | 4540                    | TT                              | CC                | 1946712473               |
| SNP_P3_184786_4547 | NW_004521012.1 | Scaffold7891 | 4547                    | CC                              | GG                | 1946712474               |
| SNP_P3_184787_4572 | NW_004521012.1 | Scaffold7891 | 4572                    | CC                              | TT                | 1946712475               |
| SNP_P3_184788_4659 | NW_004521012.1 | Scaffold7891 | 4659                    | TT                              | GG                | 1946712476               |
| SNP_P3_184789_4850 | NW_004521012.1 | Scaffold7891 | 4850                    | TT                              | AA                | 1946712477               |
| SNP_P3_184790_4867 | NW_004521012.1 | Scaffold7891 | 4867                    | AA                              | GG                | 1946712478               |
| SNP_P3_184791_95   | NW_004521017.1 | Scaffold7898 | 95                      | TT                              | CC                | 1946712479               |
| SNP_P3_184792_325  | NW_004521017.1 | Scaffold7898 | 325                     | TT                              | AA                | 1946712480               |
| SNP_P3_184793_326  | NW_004521017.1 | Scaffold7898 | 326                     | CC                              | TT                | 1946712481               |
| SNP_P3_184794_595  | NW_004521017.1 | Scaffold7898 | 595                     | AA                              | TT                | 1946712482               |
| SNP_P3_184795_895  | NW_004521017.1 | Scaffold7898 | 895                     | TT                              | AA                | 1946712483               |

| SNPs IDs            | Chromosome IDs | Chromosomes  | Physical positions (bp) | CDC Frontier (Reference genome) | (Pusa 256 & HPNB) | NCBI SNPdb Accession IDs |
|---------------------|----------------|--------------|-------------------------|---------------------------------|-------------------|--------------------------|
| SNP_P3_184796_936   | NW_004521017.1 | Scaffold7898 | 936                     | GG                              | AA                | 1946712484               |
| SNP_P3_184797_975   | NW_004521017.1 | Scaffold7898 | 975                     | TT                              | CC                | 1946712485               |
| SNP_P3_184798_422   | NW_004521019.1 | Scaffold7902 | 422                     | TT                              | GG                | 1946712486               |
| SNP_P3_184799_664   | NW_004521019.1 | Scaffold7902 | 664                     | CC                              | TT                | 1946712487               |
| SNP_P3_184801_905   | NW_004521019.1 | Scaffold7902 | 905                     | GG                              | AA                | 1946712488               |
| SNP_P3_184802_1458  | NW_004521019.1 | Scaffold7902 | 1458                    | TT                              | CC                | 1946712489               |
| SNP_P3_184803_1549  | NW_004521019.1 | Scaffold7902 | 1549                    | AA                              | GG                | 1946712490               |
| SNP_P3_184804_1573  | NW_004521019.1 | Scaffold7902 | 1573                    | AA                              | GG                | 1946712491               |
| SNP_P3_184805_1764  | NW_004521019.1 | Scaffold7902 | 1764                    | AA                              | GG                | 1946712492               |
| SNP_P3_184807_1958  | NW_004521022.1 | Scaffold7906 | 1958                    | CC                              | TT                | 1946712493               |
| SNP_P3_184808_1968  | NW_004521022.1 | Scaffold7906 | 1968                    | GG                              | AA                | 1946712494               |
| SNP_P3_184809_2015  | NW_004521022.1 | Scaffold7906 | 2015                    | GG                              | AA                | 1946712495               |
| SNP_P3_184810_4834  | NW_004521029.1 | Scaffold7922 | 4834                    | AA                              | TT                | 1946712496               |
| SNP_P3_184811_4960  | NW_004521029.1 | Scaffold7922 | 4960                    | GG                              | AA                | 1946712497               |
| SNP_P3_184812_5044  | NW_004521029.1 | Scaffold7922 | 5044                    | GG                              | AA                | 1946712498               |
| SNP_P3_184813_5134  | NW_004521029.1 | Scaffold7922 | 5134                    | AA                              | TT                | 1946712499               |
| SNP_P3_184816_2482  | NW_004521030.1 | Scaffold7923 | 2482                    | CC                              | TT                | 1946712500               |
| SNP_P3_184817_22091 | NW_004521030.1 | Scaffold7923 | 22091                   | CC                              | TT                | 1946712501               |
| SNP_P3_184819_22265 | NW_004521030.1 | Scaffold7923 | 22265                   | TT                              | CC                | 1946712502               |
| SNP_P3_184820_22306 | NW_004521030.1 | Scaffold7923 | 22306                   | TT                              | CC                | 1946712503               |
| SNP_P3_184821_22310 | NW_004521030.1 | Scaffold7923 | 22310                   | AA                              | TT                | 1946712504               |
| SNP_P3_184822_22440 | NW_004521030.1 | Scaffold7923 | 22440                   | GG                              | AA                | 1946712505               |
| SNP_P3_184823_22548 | NW_004521030.1 | Scaffold7923 | 22548                   | CC                              | TT                | 1946712506               |
| SNP_P3_184824_22561 | NW_004521030.1 | Scaffold7923 | 22561                   | GG                              | TT                | 1946712507               |
| SNP_P3_184825_22619 | NW_004521030.1 | Scaffold7923 | 22619                   | AA                              | GG                | 1946712508               |
| SNP_P3_184826_22778 | NW_004521030.1 | Scaffold7923 | 22778                   | AA                              | GG                | 1946712509               |
| SNP_P3_184827_22830 | NW_004521030.1 | Scaffold7923 | 22830                   | CC                              | TT                | 1946712510               |
| SNP_P3_184828_23098 | NW_004521030.1 | Scaffold7923 | 23098                   | GG                              | TT                | 1946712511               |
| SNP_P3_184829_24993 | NW_004521030.1 | Scaffold7923 | 24993                   | AA                              | TT                | 1946712512               |
| SNP_P3_184830_25028 | NW_004521030.1 | Scaffold7923 | 25028                   | CC                              | TT                | 1946712513               |
| SNP_P3_184832_25947 | NW_004521030.1 | Scaffold7923 | 25947                   | CC                              | TT                | 1946712514               |
| SNP_P3_184833_2520  | NW_004521032.1 | Scaffold7927 | 2520                    | AA                              | TT                | 1946712515               |
| SNP_P3_184834_2532  | NW_004521032.1 | Scaffold7927 | 2532                    | GG                              | TT                | 1946712516               |
| SNP_P3_184835_2545  | NW_004521032.1 | Scaffold7927 | 2545                    | CC                              | TT                | 1946712517               |
| SNP_P3_184836_2787  | NW_004521032.1 | Scaffold7927 | 2787                    | CC                              | TT                | 1946712518               |
| SNP_P3_184837_191   | NW_004521035.1 | Scaffold7934 | 191                     | AA                              | GG                | 1946712519               |
| SNP_P3_184838_359   | NW_004521035.1 | Scaffold7934 | 359                     | CC                              | TT                | 1946712521               |
| SNP_P3_184839_466   | NW_004521035.1 | Scaffold7934 | 466                     | AA                              | GG                | 1946712524               |
| SNP_P3_184840_590   | NW_004521035.1 | Scaffold7934 | 590                     | GG                              | TT                | 1946712525               |
| SNP_P3_184841_2148  | NW_004521035.1 | Scaffold7934 | 2148                    | CC                              | TT                | 1946712527               |
| SNP_P3_184842_2292  | NW_004521035.1 | Scaffold7934 | 2292                    | TT                              | CC                | 1946712529               |
| SNP_P3_184843_2448  | NW_004521035.1 | Scaffold7934 | 2448                    | TT                              | GG                | 1946712531               |

| SNPs IDs           | Chromosome IDs | Chromosomes  | Physical positions (bp) | CDC Frontier (Reference genome) | (Pusa 256 & HPNB) | NCBI SNPdb Accession IDs |
|--------------------|----------------|--------------|-------------------------|---------------------------------|-------------------|--------------------------|
| SNP_P3_184844_2463 | NW_004521035.1 | Scaffold7934 | 2463                    | TT                              | AA                | 1946712533               |
| SNP_P3_184845_2678 | NW_004521035.1 | Scaffold7934 | 2678                    | GG                              | AA                | 1946712535               |
| SNP_P3_184846_2837 | NW_004521035.1 | Scaffold7934 | 2837                    | GG                              | AA                | 1946712537               |
| SNP_P3_184847_2912 | NW_004521035.1 | Scaffold7934 | 2912                    | TT                              | AA                | 1946712539               |
| SNP_P3_184848_3009 | NW_004521035.1 | Scaffold7934 | 3009                    | AA                              | TT                | 1946712541               |
| SNP_P3_184849_3086 | NW_004521035.1 | Scaffold7934 | 3086                    | AA                              | GG                | 1946712543               |
| SNP_P3_184850_3099 | NW_004521035.1 | Scaffold7934 | 3099                    | TT                              | CC                | 1946712545               |
| SNP_P3_184851_583  | NW_004521039.1 | Scaffold7943 | 583                     | CC                              | GG                | 1946712547               |
| SNP_P3_184852_593  | NW_004521039.1 | Scaffold7943 | 593                     | TT                              | CC                | 1946712549               |
| SNP_P3_184853_549  | NW_004521044.1 | Scaffold7953 | 549                     | AA                              | CC                | 1946712551               |
| SNP_P3_184854_946  | NW_004521046.1 | Scaffold7956 | 946                     | GG                              | AA                | 1946712553               |
| SNP_P3_184855_1063 | NW_004521046.1 | Scaffold7956 | 1063                    | CC                              | TT                | 1946712555               |
| SNP_P3_184856_1064 | NW_004521046.1 | Scaffold7956 | 1064                    | TT                              | CC                | 1946712557               |
| SNP_P3_184857_1367 | NW_004521046.1 | Scaffold7956 | 1367                    | CC                              | TT                | 1946712560               |
| SNP_P3_184858_222  | NW_004521048.1 | Scaffold7958 | 222                     | GG                              | AA                | 1946712562               |
| SNP_P3_184859_255  | NW_004521048.1 | Scaffold7958 | 255                     | AA                              | TT                | 1946712564               |
| SNP_P3_184860_388  | NW_004521048.1 | Scaffold7958 | 388                     | GG                              | TT                | 1946712566               |
| SNP_P3_184861_489  | NW_004521048.1 | Scaffold7958 | 489                     | AA                              | CC                | 1946712568               |
| SNP_P3_184862_512  | NW_004521048.1 | Scaffold7958 | 512                     | TT                              | CC                | 1946712570               |
| SNP_P3_184863_612  | NW_004521048.1 | Scaffold7958 | 612                     | CC                              | AA                | 1946712572               |
| SNP_P3_184864_745  | NW_004521048.1 | Scaffold7958 | 745                     | TT                              | AA                | 1946712574               |
| SNP_P3_184865_881  | NW_004521048.1 | Scaffold7958 | 881                     | AA                              | TT                | 1946712576               |
| SNP_P3_184866_988  | NW_004521048.1 | Scaffold7958 | 988                     | TT                              | CC                | 1946712578               |
| SNP_P3_184867_1010 | NW_004521048.1 | Scaffold7958 | 1010                    | AA                              | TT                | 1946712580               |
| SNP_P3_184868_476  | NW_004521049.1 | Scaffold7961 | 476                     | TT                              | CC                | 1946712582               |
| SNP_P3_184869_530  | NW_004521049.1 | Scaffold7961 | 530                     | GG                              | AA                | 1946712584               |
| SNP_P3_184870_652  | NW_004521049.1 | Scaffold7961 | 652                     | GG                              | AA                | 1946712586               |
| SNP_P3_184871_1095 | NW_004521049.1 | Scaffold7961 | 1095                    | TT                              | AA                | 1946712589               |
| SNP_P3_184872_1079 | NW_004521051.1 | Scaffold7965 | 1079                    | CC                              | AA                | 1946712591               |
| SNP_P3_184873_2371 | NW_004521052.1 | Scaffold7967 | 2371                    | TT                              | CC                | 1946712593               |
| SNP_P3_184874_2477 | NW_004521052.1 | Scaffold7967 | 2477                    | CC                              | GG                | 1946712595               |
| SNP_P3_184875_2530 | NW_004521052.1 | Scaffold7967 | 2530                    | GG                              | AA                | 1946712597               |
| SNP_P3_184876_2600 | NW_004521052.1 | Scaffold7967 | 2600                    | CC                              | TT                | 1946712599               |
| SNP_P3_184877_4628 | NW_004521057.1 | Scaffold7980 | 4628                    | AA                              | TT                | 1946712601               |
| SNP_P3_184878_5017 | NW_004521057.1 | Scaffold7980 | 5017                    | GG                              | AA                | 1946712603               |
| SNP_P3_184879_5019 | NW_004521057.1 | Scaffold7980 | 5019                    | AA                              | CC                | 1946712605               |
| SNP_P3_184881_5085 | NW_004521057.1 | Scaffold7980 | 5085                    | TT                              | CC                | 1946712607               |
| SNP_P3_184882_219  | NW_004521059.1 | Scaffold7985 | 219                     | TT                              | CC                | 1946712609               |
| SNP_P3_184883_296  | NW_004521059.1 | Scaffold7985 | 296                     | CC                              | AA                | 1946712611               |
| SNP_P3_184884_352  | NW_004521059.1 | Scaffold7985 | 352                     | AA                              | TT                | 1946712613               |
| SNP_P3_184885_544  | NW_004521059.1 | Scaffold7985 | 544                     | GG                              | AA                | 1946712615               |
| SNP_P3_184886_572  | NW_004521059.1 | Scaffold7985 | 572                     | AA                              | GG                | 1946712617               |

| SNPs IDs            | Chromosome IDs | Chromosomes  | Physical positions (bp) | CDC Frontier (Reference genome) | (Pusa 256 & HPNB) | NCBI SNPdb Accession IDs |
|---------------------|----------------|--------------|-------------------------|---------------------------------|-------------------|--------------------------|
| SNP_P3_184887_618   | NW_004521059.1 | Scaffold7985 | 618                     | AA                              | GG                | 1946712619               |
| SNP_P3_184888_653   | NW_004521059.1 | Scaffold7985 | 653                     | CC                              | GG                | 1946712621               |
| SNP_P3_184889_668   | NW_004521059.1 | Scaffold7985 | 668                     | TT                              | CC                | 1946712624               |
| SNP_P3_184890_742   | NW_004521059.1 | Scaffold7985 | 742                     | GG                              | TT                | 1946712626               |
| SNP_P3_184891_747   | NW_004521059.1 | Scaffold7985 | 747                     | CC                              | GG                | 1946712628               |
| SNP_P3_184892_775   | NW_004521059.1 | Scaffold7985 | 775                     | AA                              | TT                | 1946712630               |
| SNP_P3_184893_785   | NW_004521059.1 | Scaffold7985 | 785                     | TT                              | GG                | 1946712632               |
| SNP_P3_184894_812   | NW_004521059.1 | Scaffold7985 | 812                     | AA                              | CC                | 1946712634               |
| SNP_P3_184895_817   | NW_004521059.1 | Scaffold7985 | 817                     | CC                              | TT                | 1946712636               |
| SNP_P3_184896_824   | NW_004521059.1 | Scaffold7985 | 824                     | TT                              | CC                | 1946712639               |
| SNP_P3_184897_856   | NW_004521059.1 | Scaffold7985 | 856                     | TT                              | CC                | 1946712641               |
| SNP_P3_184898_860   | NW_004521059.1 | Scaffold7985 | 860                     | TT                              | CC                | 1946712643               |
| SNP_P3_184899_940   | NW_004521059.1 | Scaffold7985 | 940                     | AA                              | GG                | 1946712645               |
| SNP_P3_184900_1111  | NW_004521059.1 | Scaffold7985 | 1111                    | TT                              | GG                | 1946712647               |
| SNP_P3_184901_1136  | NW_004521059.1 | Scaffold7985 | 1136                    | TT                              | CC                | 1946712649               |
| SNP_P3_184902_1171  | NW_004521059.1 | Scaffold7985 | 1171                    | TT                              | CC                | 1946712651               |
| SNP_P3_184903_1189  | NW_004521059.1 | Scaffold7985 | 1189                    | AA                              | GG                | 1946712653               |
| SNP_P3_184904_1233  | NW_004521059.1 | Scaffold7985 | 1233                    | AA                              | CC                | 1946712655               |
| SNP_P3_184905_1270  | NW_004521059.1 | Scaffold7985 | 1270                    | AA                              | GG                | 1946712659               |
| SNP_P3_184906_20249 | NW_004521059.1 | Scaffold7985 | 20249                   | AA                              | GG                | 1946712661               |
| SNP_P3_184907_20401 | NW_004521059.1 | Scaffold7985 | 20401                   | AA                              | GG                | 1946712730               |
| SNP_P3_184908_21124 | NW_004521059.1 | Scaffold7985 | 21124                   | GG                              | CC                | 1946712732               |
| SNP_P3_184909_82    | NW_004521062.1 | Scaffold7989 | 82                      | TT                              | GG                | 1946712734               |
| SNP_P3_184910_85    | NW_004521062.1 | Scaffold7989 | 85                      | CC                              | TT                | 1946712736               |
| SNP_P3_184911_348   | NW_004521062.1 | Scaffold7989 | 348                     | TT                              | CC                | 1946712738               |
| SNP_P3_184912_488   | NW_004521062.1 | Scaffold7989 | 488                     | TT                              | AA                | 1946712740               |
| SNP_P3_184913_410   | NW_004521063.1 | Scaffold7990 | 410                     | CC                              | GG                | 1946712742               |
| SNP_P3_184914_427   | NW_004521063.1 | Scaffold7990 | 427                     | CC                              | TT                | 1946712744               |
| SNP_P3_184915_446   | NW_004521063.1 | Scaffold7990 | 446                     | AA                              | GG                | 1946712746               |
| SNP_P3_184916_473   | NW_004521063.1 | Scaffold7990 | 473                     | CC                              | TT                | 1946712748               |
| SNP_P3_184917_667   | NW_004521063.1 | Scaffold7990 | 667                     | GG                              | AA                | 1946712750               |
| SNP_P3_184918_793   | NW_004521063.1 | Scaffold7990 | 793                     | AA                              | CC                | 1946712752               |
| SNP_P3_184919_840   | NW_004521063.1 | Scaffold7990 | 840                     | AA                              | TT                | 1946712754               |
| SNP_P3_184920_929   | NW_004521063.1 | Scaffold7990 | 929                     | TT                              | GG                | 1946712756               |
| SNP_P3_184921_978   | NW_004521063.1 | Scaffold7990 | 978                     | GG                              | AA                | 1946712758               |
| SNP_P3_184922_1248  | NW_004521063.1 | Scaffold7990 | 1248                    | TT                              | AA                | 1946712760               |
| SNP_P3_184923_1278  | NW_004521063.1 | Scaffold7990 | 1278                    | AA                              | TT                | 1946712762               |
| SNP_P3_184924_1406  | NW_004521063.1 | Scaffold7990 | 1406                    | GG                              | TT                | 1946712763               |
| SNP_P3_184925_1221  | NW_004521065.1 | Scaffold7992 | 1221                    | TT                              | GG                | 1946712765               |
| SNP_P3_184926_1232  | NW_004521065.1 | Scaffold7992 | 1232                    | CC                              | GG                | 1946712767               |
| SNP_P3_184927_1241  | NW_004521065.1 | Scaffold7992 | 1241                    | AA                              | GG                | 1946712769               |
| SNP_P3_184928_1243  | NW_004521065.1 | Scaffold7992 | 1243                    | GG                              | AA                | 1946712771               |

| SNPs IDs           | Chromosome IDs | Chromosomes  | Physical positions (bp) | CDC Frontier (Reference genome) | (Pusa 256 & HPNB) | NCBI SNPdb Accession IDs |
|--------------------|----------------|--------------|-------------------------|---------------------------------|-------------------|--------------------------|
| SNP_P3_184929_1260 | NW_004521065.1 | Scaffold7992 | 1260                    | GG                              | TT                | 1946712773               |
| SNP_P3_184930_1281 | NW_004521069.1 | Scaffold7997 | 1281                    | AA                              | GG                | 1946712775               |
| SNP_P3_184931_507  | NW_004521071.1 | Scaffold8004 | 507                     | TT                              | CC                | 1946712777               |
| SNP_P3_184932_545  | NW_004521071.1 | Scaffold8004 | 545                     | TT                              | GG                | 1946712779               |
| SNP_P3_184933_4510 | NW_004521071.1 | Scaffold8004 | 4510                    | GG                              | AA                | 1946712781               |
| SNP_P3_184934_4616 | NW_004521071.1 | Scaffold8004 | 4616                    | AA                              | GG                | 1946712783               |
| SNP_P3_184935_4622 | NW_004521071.1 | Scaffold8004 | 4622                    | AA                              | CC                | 1946712785               |
| SNP_P3_184936_104  | NW_004521076.1 | Scaffold8015 | 104                     | TT                              | AA                | 1946712787               |
| SNP_P3_184937_238  | NW_004521076.1 | Scaffold8015 | 238                     | TT                              | CC                | 1946712789               |
| SNP_P3_184938_496  | NW_004521076.1 | Scaffold8015 | 496                     | AA                              | GG                | 1946712791               |
| SNP_P3_184939_665  | NW_004521076.1 | Scaffold8015 | 665                     | TT                              | AA                | 1946712793               |
| SNP_P3_184940_948  | NW_004521076.1 | Scaffold8015 | 948                     | CC                              | TT                | 1946712795               |
| SNP_P3_184941_2639 | NW_004521079.1 | Scaffold8018 | 2639                    | CC                              | TT                | 1946712797               |
| SNP_P3_184942_2666 | NW_004521079.1 | Scaffold8018 | 2666                    | TT                              | GG                | 1946712799               |
| SNP_P3_184943_2693 | NW_004521079.1 | Scaffold8018 | 2693                    | GG                              | AA                | 1946712801               |
| SNP_P3_184944_2939 | NW_004521079.1 | Scaffold8018 | 2939                    | AA                              | TT                | 1946712803               |
| SNP_P3_184945_3140 | NW_004521079.1 | Scaffold8018 | 3140                    | CC                              | AA                | 1946712805               |
| SNP_P3_184946_3351 | NW_004521079.1 | Scaffold8018 | 3351                    | GG                              | AA                | 1946712808               |
| SNP_P3_184947_7100 | NW_004521079.1 | Scaffold8018 | 7100                    | TT                              | AA                | 1946712811               |
| SNP_P3_184948_7678 | NW_004521079.1 | Scaffold8018 | 7678                    | TT                              | GG                | 1946712813               |
| SNP_P3_184949_7687 | NW_004521079.1 | Scaffold8018 | 7687                    | CC                              | TT                | 1946712815               |
| SNP_P3_184950_7967 | NW_004521079.1 | Scaffold8018 | 7967                    | AA                              | CC                | 1946712817               |
| SNP_P3_184951_577  | NW_004521080.1 | Scaffold8023 | 577                     | GG                              | CC                | 1946712819               |
| SNP_P3_184952_652  | NW_004521080.1 | Scaffold8023 | 652                     | GG                              | AA                | 1946712822               |
| SNP_P3_184953_699  | NW_004521080.1 | Scaffold8023 | 699                     | CC                              | TT                | 1946712824               |
| SNP_P3_184954_526  | NW_004521082.1 | Scaffold8029 | 526                     | CC                              | TT                | 1946712827               |
| SNP_P3_184955_570  | NW_004521082.1 | Scaffold8029 | 570                     | AA                              | GG                | 1946712829               |
| SNP_P3_184956_1127 | NW_004521082.1 | Scaffold8029 | 1127                    | CC                              | TT                | 1946712831               |
| SNP_P3_184957_1164 | NW_004521082.1 | Scaffold8029 | 1164                    | AA                              | CC                | 1946712834               |
| SNP_P3_184958_5247 | NW_004521083.1 | Scaffold8030 | 5247                    | CC                              | GG                | 1946712836               |
| SNP_P3_184959_5356 | NW_004521083.1 | Scaffold8030 | 5356                    | CC                              | AA                | 1946712838               |
| SNP_P3_184960_5378 | NW_004521083.1 | Scaffold8030 | 5378                    | AA                              | GG                | 1946712840               |
| SNP_P3_184961_5380 | NW_004521083.1 | Scaffold8030 | 5380                    | CC                              | TT                | 1946712842               |
| SNP_P3_184962_5557 | NW_004521083.1 | Scaffold8030 | 5557                    | TT                              | CC                | 1946712844               |
| SNP_P3_184963_6587 | NW_004521083.1 | Scaffold8030 | 6587                    | CC                              | TT                | 1946712846               |
| SNP_P3_184964_89   | NW_004521092.1 | Scaffold8050 | 89                      | AA                              | CC                | 1946712849               |
| SNP_P3_184965_1004 | NW_004521092.1 | Scaffold8050 | 1004                    | GG                              | TT                | 1946712851               |
| SNP_P3_184966_1034 | NW_004521092.1 | Scaffold8050 | 1034                    | AA                              | TT                | 1946712853               |
| SNP_P3_184967_1060 | NW_004521092.1 | Scaffold8050 | 1060                    | CC                              | TT                | 1946712855               |
| SNP_P3_184968_1063 | NW_004521092.1 | Scaffold8050 | 1063                    | TT                              | AA                | 1946712858               |
| SNP_P3_184969_1327 | NW_004521092.1 | Scaffold8050 | 1327                    | TT                              | AA                | 1946712861               |
| SNP_P3_184970_1342 | NW_004521092.1 | Scaffold8050 | 1342                    | TT                              | CC                | 1946712863               |

| SNPs IDs           | Chromosome IDs | Chromosomes  | Physical positions (bp) | CDC Frontier (Reference genome) | (Pusa 256 & HPNB) | NCBI SNPdb Accession IDs |
|--------------------|----------------|--------------|-------------------------|---------------------------------|-------------------|--------------------------|
| SNP_P3_184971_1391 | NW_004521092.1 | Scaffold8050 | 1391                    | TT                              | AA                | 1946712865               |
| SNP_P3_184972_1480 | NW_004521092.1 | Scaffold8050 | 1480                    | CC                              | TT                | 1946712867               |
| SNP_P3_184973_1344 | NW_004521094.1 | Scaffold8052 | 1344                    | TT                              | CC                | 1946712869               |
| SNP_P3_184974_295  | NW_004521095.1 | Scaffold8054 | 295                     | AA                              | GG                | 1946712871               |
| SNP_P3_184975_430  | NW_004521095.1 | Scaffold8054 | 430                     | AA                              | GG                | 1946712873               |
| SNP_P3_184976_545  | NW_004521095.1 | Scaffold8054 | 545                     | GG                              | AA                | 1946712875               |
| SNP_P3_184977_746  | NW_004521095.1 | Scaffold8054 | 746                     | TT                              | AA                | 1946712877               |
| SNP_P3_184978_780  | NW_004521095.1 | Scaffold8054 | 780                     | GG                              | AA                | 1946712879               |
| SNP_P3_184979_1083 | NW_004521095.1 | Scaffold8054 | 1083                    | GG                              | AA                | 1946712881               |
| SNP_P3_184980_1755 | NW_004521095.1 | Scaffold8054 | 1755                    | AA                              | GG                | 1946712883               |
| SNP_P3_184981_1881 | NW_004521095.1 | Scaffold8054 | 1881                    | TT                              | AA                | 1946712886               |
| SNP_P3_184983_1936 | NW_004521095.1 | Scaffold8054 | 1936                    | AA                              | TT                | 1946712888               |
| SNP_P3_184984_1942 | NW_004521095.1 | Scaffold8054 | 1942                    | CC                              | AA                | 1946712890               |
| SNP_P3_184985_1972 | NW_004521095.1 | Scaffold8054 | 1972                    | CC                              | TT                | 1946712892               |
| SNP_P3_184986_2045 | NW_004521095.1 | Scaffold8054 | 2045                    | CC                              | GG                | 1946712894               |
| SNP_P3_184987_2080 | NW_004521095.1 | Scaffold8054 | 2080                    | AA                              | TT                | 1946712896               |
| SNP_P3_184988_2151 | NW_004521095.1 | Scaffold8054 | 2151                    | GG                              | AA                | 1946712898               |
| SNP_P3_184989_3129 | NW_004521095.1 | Scaffold8054 | 3129                    | CC                              | AA                | 1946712900               |
| SNP_P3_184990_3267 | NW_004521095.1 | Scaffold8054 | 3267                    | CC                              | GG                | 1946712902               |
| SNP_P3_184991_3632 | NW_004521095.1 | Scaffold8054 | 3632                    | TT                              | CC                | 1946712904               |
| SNP_P3_184992_3770 | NW_004521095.1 | Scaffold8054 | 3770                    | CC                              | TT                | 1946712907               |
| SNP_P3_184993_86   | NW_004521100.1 | Scaffold8063 | 86                      | TT                              | GG                | 1946712909               |
| SNP_P3_184994_93   | NW_004521100.1 | Scaffold8063 | 93                      | CC                              | TT                | 1946712911               |
| SNP_P3_184995_104  | NW_004521100.1 | Scaffold8063 | 104                     | AA                              | CC                | 1946712913               |
| SNP_P3_184996_532  | NW_004521100.1 | Scaffold8063 | 532                     | AA                              | GG                | 1946712916               |
| SNP_P3_184997_548  | NW_004521100.1 | Scaffold8063 | 548                     | AA                              | CC                | 1946712918               |
| SNP_P3_184998_572  | NW_004521100.1 | Scaffold8063 | 572                     | CC                              | TT                | 1946712920               |
| SNP_P3_184999_574  | NW_004521100.1 | Scaffold8063 | 574                     | TT                              | CC                | 1946712922               |
| SNP_P3_185000_576  | NW_004521100.1 | Scaffold8063 | 576                     | CC                              | AA                | 1946712925               |
| SNP_P3_185001_60   | NW_004521102.1 | Scaffold8066 | 60                      | TT                              | CC                | 1946712927               |
| SNP_P3_185002_86   | NW_004521102.1 | Scaffold8066 | 86                      | TT                              | AA                | 1946712929               |
| SNP_P3_185003_233  | NW_004521102.1 | Scaffold8066 | 233                     | CC                              | AA                | 1946712931               |
| SNP_P3_185004_281  | NW_004521102.1 | Scaffold8066 | 281                     | TT                              | CC                | 1946712933               |
| SNP_P3_185005_283  | NW_004521102.1 | Scaffold8066 | 283                     | TT                              | CC                | 1946712935               |
| SNP_P3_185006_286  | NW_004521102.1 | Scaffold8066 | 286                     | AA                              | TT                | 1946712937               |
| SNP_P3_185007_291  | NW_004521102.1 | Scaffold8066 | 291                     | TT                              | CC                | 1946712939               |
| SNP_P3_185008_338  | NW_004521102.1 | Scaffold8066 | 338                     | AA                              | GG                | 1946712941               |
| SNP_P3_185009_474  | NW_004521102.1 | Scaffold8066 | 474                     | TT                              | AA                | 1946712943               |
| SNP_P3_185010_445  | NW_004521103.1 | Scaffold8068 | 445                     | GG                              | AA                | 1946712946               |
| SNP_P3_185011_478  | NW_004521103.1 | Scaffold8068 | 478                     | TT                              | CC                | 1946712948               |
| SNP_P3_185012_511  | NW_004521103.1 | Scaffold8068 | 511                     | CC                              | AA                | 1946712950               |
| SNP_P3_185013_542  | NW_004521103.1 | Scaffold8068 | 542                     | CC                              | TT                | 1946712952               |



| SNPs IDs           | Chromosome IDs | Chromosomes  | Physical positions (bp) | CDC Frontier (Reference genome) | (Pusa 256 & HPNB) | NCBI SNPdb Accession IDs |
|--------------------|----------------|--------------|-------------------------|---------------------------------|-------------------|--------------------------|
| SNP_P3_185014_557  | NW_004521103.1 | Scaffold8068 | 557                     | TT                              | AA                | 1946712954               |
| SNP_P3_185015_724  | NW_004521103.1 | Scaffold8068 | 724                     | GG                              | AA                | 1946712958               |
| SNP_P3_185016_754  | NW_004521103.1 | Scaffold8068 | 754                     | AA                              | TT                | 1946712960               |
| SNP_P3_185017_755  | NW_004521103.1 | Scaffold8068 | 755                     | CC                              | TT                | 1946712962               |
| SNP_P3_185018_788  | NW_004521103.1 | Scaffold8068 | 788                     | AA                              | CC                | 1946712964               |
| SNP_P3_185019_789  | NW_004521103.1 | Scaffold8068 | 789                     | AA                              | GG                | 1946712966               |
| SNP_P3_185020_793  | NW_004521103.1 | Scaffold8068 | 793                     | GG                              | CC                | 1946712968               |
| SNP_P3_185021_870  | NW_004521103.1 | Scaffold8068 | 870                     | AA                              | GG                | 1946712970               |
| SNP_P3_185022_872  | NW_004521103.1 | Scaffold8068 | 872                     | CC                              | AA                | 1946712972               |
| SNP_P3_185023_894  | NW_004521103.1 | Scaffold8068 | 894                     | CC                              | GG                | 1946712974               |
| SNP_P3_185024_952  | NW_004521103.1 | Scaffold8068 | 952                     | GG                              | AA                | 1946712976               |
| SNP_P3_185025_964  | NW_004521103.1 | Scaffold8068 | 964                     | GG                              | CC                | 1946712978               |
| SNP_P3_185026_978  | NW_004521103.1 | Scaffold8068 | 978                     | GG                              | AA                | 1946712981               |
| SNP_P3_185027_1035 | NW_004521103.1 | Scaffold8068 | 1035                    | AA                              | CC                | 1946712983               |
| SNP_P3_185028_1074 | NW_004521103.1 | Scaffold8068 | 1074                    | GG                              | AA                | 1946712985               |
| SNP_P3_185029_1077 | NW_004521103.1 | Scaffold8068 | 1077                    | AA                              | GG                | 1946712987               |
| SNP_P3_185030_683  | NW_004521107.1 | Scaffold8079 | 683                     | TT                              | CC                | 1946712989               |
| SNP_P3_185031_684  | NW_004521107.1 | Scaffold8079 | 684                     | GG                              | AA                | 1946712991               |
| SNP_P3_185032_637  | NW_004521111.1 | Scaffold8087 | 637                     | CC                              | TT                | 1946712993               |
| SNP_P3_185033_759  | NW_004521111.1 | Scaffold8087 | 759                     | AA                              | CC                | 1946712995               |
| SNP_P3_185034_833  | NW_004521111.1 | Scaffold8087 | 833                     | AA                              | GG                | 1946712997               |
| SNP_P3_185036_286  | NW_004521115.1 | Scaffold8094 | 286                     | GG                              | CC                | 1946712999               |
| SNP_P3_185037_640  | NW_004521119.1 | Scaffold8104 | 640                     | AA                              | TT                | 1946713001               |
| SNP_P3_185038_8285 | NW_004521128.1 | Scaffold8127 | 8285                    | TT                              | CC                | 1946713003               |
| SNP_P3_185039_8307 | NW_004521128.1 | Scaffold8127 | 8307                    | TT                              | CC                | 1946713005               |
| SNP_P3_185040_152  | NW_004521130.1 | Scaffold8131 | 152                     | TT                              | CC                | 1946713007               |
| SNP_P3_185041_563  | NW_004521130.1 | Scaffold8131 | 563                     | GG                              | CC                | 1946713020               |
| SNP_P3_185042_725  | NW_004521130.1 | Scaffold8131 | 725                     | AA                              | TT                | 1946713029               |
| SNP_P3_185043_2716 | NW_004521130.1 | Scaffold8131 | 2716                    | AA                              | TT                | 1946713040               |
| SNP_P3_185044_2719 | NW_004521130.1 | Scaffold8131 | 2719                    | GG                              | TT                | 1946713049               |
| SNP_P3_185045_2729 | NW_004521130.1 | Scaffold8131 | 2729                    | TT                              | CC                | 1946713050               |
| SNP_P3_185046_2736 | NW_004521130.1 | Scaffold8131 | 2736                    | TT                              | AA                | 1946713051               |
| SNP_P3_185047_2774 | NW_004521130.1 | Scaffold8131 | 2774                    | AA                              | TT                | 1946713052               |
| SNP_P3_185049_37   | NW_004521132.1 | Scaffold8135 | 37                      | CC                              | TT                | 1946713053               |
| SNP_P3_185050_70   | NW_004521132.1 | Scaffold8135 | 70                      | GG                              | AA                | 1946713054               |
| SNP_P3_185051_86   | NW_004521132.1 | Scaffold8135 | 86                      | TT                              | CC                | 1946713056               |
| SNP_P3_185052_882  | NW_004521138.1 | Scaffold8146 | 882                     | AA                              | GG                | 1946713058               |
| SNP_P3_185053_932  | NW_004521138.1 | Scaffold8146 | 932                     | CC                              | TT                | 1946713060               |
| SNP_P3_185054_1112 | NW_004521138.1 | Scaffold8146 | 1112                    | CC                              | TT                | 1946713062               |
| SNP_P3_185055_1159 | NW_004521138.1 | Scaffold8146 | 1159                    | GG                              | AA                | 1946713064               |
| SNP_P3_185056_1361 | NW_004521141.1 | Scaffold8154 | 1361                    | TT                              | GG                | 1946713066               |
| SNP_P3_185057_1826 | NW_004521141.1 | Scaffold8154 | 1826                    | AA                              | TT                | 1946713068               |

| SNPs IDs           | Chromosome IDs | Chromosomes  | Physical positions (bp) | CDC Frontier (Reference genome) | (Pusa 256 & HPNB) | NCBI SNPdb Accession IDs |
|--------------------|----------------|--------------|-------------------------|---------------------------------|-------------------|--------------------------|
| SNP_P3_185058_1835 | NW_004521141.1 | Scaffold8154 | 1835                    | TT                              | AA                | 1946713070               |
| SNP_P3_185059_1858 | NW_004521141.1 | Scaffold8154 | 1858                    | TT                              | AA                | 1946713072               |
| SNP_P3_185060_1871 | NW_004521141.1 | Scaffold8154 | 1871                    | AA                              | GG                | 1946713074               |
| SNP_P3_185061_1887 | NW_004521141.1 | Scaffold8154 | 1887                    | GG                              | AA                | 1946713076               |
| SNP_P3_185062_1896 | NW_004521141.1 | Scaffold8154 | 1896                    | CC                              | GG                | 1946713079               |
| SNP_P3_185063_1898 | NW_004521141.1 | Scaffold8154 | 1898                    | AA                              | GG                | 1946713081               |
| SNP_P3_185064_1909 | NW_004521141.1 | Scaffold8154 | 1909                    | TT                              | CC                | 1946713083               |
| SNP_P3_185065_591  | NW_004521146.1 | Scaffold8162 | 591                     | CC                              | TT                | 1946713085               |
| SNP_P3_185066_915  | NW_004521146.1 | Scaffold8162 | 915                     | AA                              | GG                | 1946713088               |
| SNP_P3_185067_965  | NW_004521146.1 | Scaffold8162 | 965                     | GG                              | TT                | 1946713090               |
| SNP_P3_185068_1055 | NW_004521146.1 | Scaffold8162 | 1055                    | AA                              | CC                | 1946713092               |
| SNP_P3_185069_1064 | NW_004521146.1 | Scaffold8162 | 1064                    | AA                              | GG                | 1946713094               |
| SNP_P3_185070_195  | NW_004521147.1 | Scaffold8163 | 195                     | CC                              | TT                | 1946713096               |
| SNP_P3_185071_210  | NW_004521147.1 | Scaffold8163 | 210                     | TT                              | CC                | 1946713098               |
| SNP_P3_185072_234  | NW_004521147.1 | Scaffold8163 | 234                     | GG                              | AA                | 1946713100               |
| SNP_P3_185073_291  | NW_004521147.1 | Scaffold8163 | 291                     | GG                              | AA                | 1946713102               |
| SNP_P3_185074_300  | NW_004521147.1 | Scaffold8163 | 300                     | TT                              | AA                | 1946713105               |
| SNP_P3_185075_369  | NW_004521147.1 | Scaffold8163 | 369                     | AA                              | GG                | 1946713107               |
| SNP_P3_185076_398  | NW_004521147.1 | Scaffold8163 | 398                     | GG                              | AA                | 1946713109               |
| SNP_P3_185077_581  | NW_004521147.1 | Scaffold8163 | 581                     | TT                              | AA                | 1946713111               |
| SNP_P3_185078_619  | NW_004521147.1 | Scaffold8163 | 619                     | AA                              | GG                | 1946713115               |
| SNP_P3_185079_632  | NW_004521147.1 | Scaffold8163 | 632                     | TT                              | CC                | 1946713117               |
| SNP_P3_185080_638  | NW_004521147.1 | Scaffold8163 | 638                     | TT                              | CC                | 1946713119               |
| SNP_P3_185081_665  | NW_004521147.1 | Scaffold8163 | 665                     | GG                              | AA                | 1946713121               |
| SNP_P3_185082_681  | NW_004521148.1 | Scaffold8164 | 681                     | TT                              | GG                | 1946713123               |
| SNP_P3_185083_2470 | NW_004521148.1 | Scaffold8164 | 2470                    | CC                              | TT                | 1946713125               |
| SNP_P3_185084_2572 | NW_004521148.1 | Scaffold8164 | 2572                    | AA                              | TT                | 1946713127               |
| SNP_P3_185085_2582 | NW_004521148.1 | Scaffold8164 | 2582                    | AA                              | TT                | 1946713129               |
| SNP_P3_185086_2685 | NW_004521148.1 | Scaffold8164 | 2685                    | GG                              | TT                | 1946713131               |
| SNP_P3_185087_3483 | NW_004521148.1 | Scaffold8164 | 3483                    | AA                              | TT                | 1946713133               |
| SNP_P3_185088_4287 | NW_004521148.1 | Scaffold8164 | 4287                    | TT                              | AA                | 1946713135               |
| SNP_P3_185089_4558 | NW_004521148.1 | Scaffold8164 | 4558                    | GG                              | TT                | 1946713137               |
| SNP_P3_185090_4565 | NW_004521148.1 | Scaffold8164 | 4565                    | AA                              | TT                | 1946713139               |
| SNP_P3_185091_64   | NW_004521150.1 | Scaffold8168 | 64                      | AA                              | CC                | 1946713142               |
| SNP_P3_185092_445  | NW_004521150.1 | Scaffold8168 | 445                     | TT                              | GG                | 1946713144               |
| SNP_P3_185093_234  | NW_004521154.1 | Scaffold8177 | 234                     | CC                              | GG                | 1946713146               |
| SNP_P3_185094_733  | NW_004521158.1 | Scaffold8181 | 733                     | AA                              | TT                | 1946713148               |
| SNP_P3_185095_1245 | NW_004521159.1 | Scaffold8182 | 1245                    | TT                              | CC                | 1946713150               |
| SNP_P3_185096_1271 | NW_004521159.1 | Scaffold8182 | 1271                    | TT                              | GG                | 1946713152               |
| SNP_P3_185097_1563 | NW_004521159.1 | Scaffold8182 | 1563                    | CC                              | GG                | 1946713154               |
| SNP_P3_185098_486  | NW_004521161.1 | Scaffold8185 | 486                     | TT                              | CC                | 1946713157               |
| SNP_P3_185099_531  | NW_004521161.1 | Scaffold8185 | 531                     | TT                              | GG                | 1946713187               |

| SNPs IDs           | Chromosome IDs | Chromosomes  | Physical positions (bp) | CDC Frontier (Reference genome) | (Pusa 256 & HPNB) | NCBI SNPdb Accession IDs |
|--------------------|----------------|--------------|-------------------------|---------------------------------|-------------------|--------------------------|
| SNP_P3_185100_591  | NW_004521161.1 | Scaffold8185 | 591                     | AA                              | TT                | 1946713189               |
| SNP_P3_185101_598  | NW_004521161.1 | Scaffold8185 | 598                     | TT                              | CC                | 1946713191               |
| SNP_P3_185102_617  | NW_004521161.1 | Scaffold8185 | 617                     | TT                              | CC                | 1946713193               |
| SNP_P3_185103_661  | NW_004521161.1 | Scaffold8185 | 661                     | AA                              | GG                | 1946713195               |
| SNP_P3_185105_1076 | NW_004521167.1 | Scaffold8196 | 1076                    | CC                              | TT                | 1946713205               |
| SNP_P3_185106_426  | NW_004521169.1 | Scaffold8200 | 426                     | TT                              | AA                | 1946713208               |
| SNP_P3_185107_456  | NW_004521169.1 | Scaffold8200 | 456                     | CC                              | TT                | 1946713210               |
| SNP_P3_185109_742  | NW_004521169.1 | Scaffold8200 | 742                     | GG                              | AA                | 1946713212               |
| SNP_P3_185110_1011 | NW_004521169.1 | Scaffold8200 | 1011                    | CC                              | TT                | 1946713214               |
| SNP_P3_185111_1026 | NW_004521169.1 | Scaffold8200 | 1026                    | TT                              | AA                | 1946713216               |
| SNP_P3_185112_1200 | NW_004521169.1 | Scaffold8200 | 1200                    | GG                              | CC                | 1946713218               |
| SNP_P3_185113_361  | NW_004521173.1 | Scaffold8207 | 361                     | CC                              | TT                | 1946713220               |
| SNP_P3_185114_440  | NW_004521173.1 | Scaffold8207 | 440                     | AA                              | TT                | 1946713222               |
| SNP_P3_185115_636  | NW_004521173.1 | Scaffold8207 | 636                     | AA                              | GG                | 1946713224               |
| SNP_P3_185116_700  | NW_004521173.1 | Scaffold8207 | 700                     | GG                              | AA                | 1946713226               |
| SNP_P3_185117_707  | NW_004521173.1 | Scaffold8207 | 707                     | GG                              | AA                | 1946713228               |
| SNP_P3_185118_763  | NW_004521173.1 | Scaffold8207 | 763                     | TT                              | GG                | 1946713230               |
| SNP_P3_185119_790  | NW_004521173.1 | Scaffold8207 | 790                     | GG                              | AA                | 1946713232               |
| SNP_P3_185120_812  | NW_004521173.1 | Scaffold8207 | 812                     | GG                              | AA                | 1946713234               |
| SNP_P3_185121_949  | NW_004521173.1 | Scaffold8207 | 949                     | GG                              | TT                | 1946713237               |
| SNP_P3_185122_977  | NW_004521173.1 | Scaffold8207 | 977                     | AA                              | GG                | 1946713239               |
| SNP_P3_185123_1004 | NW_004521173.1 | Scaffold8207 | 1004                    | GG                              | TT                | 1946713241               |
| SNP_P3_185124_1045 | NW_004521173.1 | Scaffold8207 | 1045                    | AA                              | CC                | 1946713243               |
| SNP_P3_185125_707  | NW_004521174.1 | Scaffold8210 | 707                     | AA                              | GG                | 1946713245               |
| SNP_P3_185126_724  | NW_004521174.1 | Scaffold8210 | 724                     | GG                              | AA                | 1946713247               |
| SNP_P3_185127_751  | NW_004521174.1 | Scaffold8210 | 751                     | TT                              | GG                | 1946713250               |
| SNP_P3_185129_941  | NW_004521174.1 | Scaffold8210 | 941                     | GG                              | AA                | 1946713252               |
| SNP_P3_185130_1062 | NW_004521174.1 | Scaffold8210 | 1062                    | AA                              | GG                | 1946713254               |
| SNP_P3_185131_1252 | NW_004521174.1 | Scaffold8210 | 1252                    | TT                              | CC                | 1946713256               |
| SNP_P3_185132_1008 | NW_004521181.1 | Scaffold8224 | 1008                    | TT                              | CC                | 1946713257               |
| SNP_P3_185134_534  | NW_004521186.1 | Scaffold8232 | 534                     | AA                              | GG                | 1946713258               |
| SNP_P3_185135_1109 | NW_004521186.1 | Scaffold8232 | 1109                    | GG                              | AA                | 1946713259               |
| SNP_P3_185136_1180 | NW_004521186.1 | Scaffold8232 | 1180                    | AA                              | CC                | 1946713260               |
| SNP_P3_185138_1466 | NW_004521193.1 | Scaffold8241 | 1466                    | GG                              | CC                | 1946713261               |
| SNP_P3_185139_1469 | NW_004521193.1 | Scaffold8241 | 1469                    | GG                              | CC                | 1946713262               |
| SNP_P3_185140_1474 | NW_004521193.1 | Scaffold8241 | 1474                    | TT                              | AA                | 1946713263               |
| SNP_P3_185141_1520 | NW_004521193.1 | Scaffold8241 | 1520                    | CC                              | GG                | 1946713264               |
| SNP_P3_185142_2178 | NW_004521193.1 | Scaffold8241 | 2178                    | AA                              | TT                | 1946713265               |
| SNP_P3_185143_780  | NW_004521195.1 | Scaffold8244 | 780                     | GG                              | AA                | 1946713266               |
| SNP_P3_185144_736  | NW_004521198.1 | Scaffold8248 | 736                     | CC                              | GG                | 1946713267               |
| SNP_P3_185145_1052 | NW_004521198.1 | Scaffold8248 | 1052                    | CC                              | AA                | 1946713268               |
| SNP_P3_185146_2485 | NW_004521201.1 | Scaffold8253 | 2485                    | CC                              | TT                | 1946713269               |

| SNPs IDs           | Chromosome IDs | Chromosomes  | Physical positions (bp) | CDC Frontier (Reference genome) | (Pusa 256 & HPNB) | NCBI SNPdb Accession IDs |
|--------------------|----------------|--------------|-------------------------|---------------------------------|-------------------|--------------------------|
| SNP_P3_185147_2496 | NW_004521201.1 | Scaffold8253 | 2496                    | CC                              | TT                | 1946713270               |
| SNP_P3_185148_2498 | NW_004521201.1 | Scaffold8253 | 2498                    | GG                              | TT                | 1946713271               |
| SNP_P3_185149_3415 | NW_004521201.1 | Scaffold8253 | 3415                    | GG                              | CC                | 1946713272               |
| SNP_P3_185150_3416 | NW_004521201.1 | Scaffold8253 | 3416                    | AA                              | CC                | 1946713273               |
| SNP_P3_185151_3439 | NW_004521201.1 | Scaffold8253 | 3439                    | CC                              | AA                | 1946713274               |
| SNP_P3_185152_3440 | NW_004521201.1 | Scaffold8253 | 3440                    | TT                              | CC                | 1946713275               |
| SNP_P3_185153_3695 | NW_004521201.1 | Scaffold8253 | 3695                    | GG                              | AA                | 1946713276               |
| SNP_P3_185155_58   | NW_004521214.1 | Scaffold8274 | 58                      | GG                              | AA                | 1946713277               |
| SNP_P3_185156_64   | NW_004521214.1 | Scaffold8274 | 64                      | AA                              | GG                | 1946713278               |
| SNP_P3_185157_123  | NW_004521214.1 | Scaffold8274 | 123                     | AA                              | GG                | 1946713279               |
| SNP_P3_185158_124  | NW_004521214.1 | Scaffold8274 | 124                     | AA                              | TT                | 1946713280               |
| SNP_P3_185159_1093 | NW_004521214.1 | Scaffold8274 | 1093                    | GG                              | AA                | 1946713281               |
| SNP_P3_185160_210  | NW_004521215.1 | Scaffold8275 | 210                     | AA                              | TT                | 1946713282               |
| SNP_P3_185161_263  | NW_004521215.1 | Scaffold8275 | 263                     | GG                              | AA                | 1946713283               |
| SNP_P3_185162_391  | NW_004521215.1 | Scaffold8275 | 391                     | TT                              | GG                | 1946713284               |
| SNP_P3_185163_483  | NW_004521215.1 | Scaffold8275 | 483                     | GG                              | CC                | 1946713285               |
| SNP_P3_185164_510  | NW_004521215.1 | Scaffold8275 | 510                     | TT                              | CC                | 1946713286               |
| SNP_P3_185165_1215 | NW_004521219.1 | Scaffold8283 | 1215                    | TT                              | AA                | 1946713287               |
| SNP_P3_185166_122  | NW_004521220.1 | Scaffold8291 | 122                     | AA                              | CC                | 1946713288               |
| SNP_P3_185167_346  | NW_004521221.1 | Scaffold8292 | 346                     | TT                              | CC                | 1946713289               |
| SNP_P3_185168_90   | NW_004521222.1 | Scaffold8294 | 90                      | CC                              | TT                | 1946713290               |
| SNP_P3_185169_242  | NW_004521222.1 | Scaffold8294 | 242                     | GG                              | AA                | 1946713291               |
| SNP_P3_185170_360  | NW_004521222.1 | Scaffold8294 | 360                     | GG                              | AA                | 1946713292               |
| SNP_P3_185171_536  | NW_004521222.1 | Scaffold8294 | 536                     | CC                              | AA                | 1946713294               |
| SNP_P3_185172_31   | NW_004521223.1 | Scaffold8297 | 31                      | AA                              | GG                | 1946713296               |
| SNP_P3_185173_79   | NW_004521223.1 | Scaffold8297 | 79                      | TT                              | GG                | 1946713298               |
| SNP_P3_185175_157  | NW_004521223.1 | Scaffold8297 | 157                     | TT                              | CC                | 1946713300               |
| SNP_P3_185176_161  | NW_004521223.1 | Scaffold8297 | 161                     | TT                              | CC                | 1946713302               |
| SNP_P3_185177_162  | NW_004521223.1 | Scaffold8297 | 162                     | GG                              | AA                | 1946713304               |
| SNP_P3_185178_241  | NW_004521223.1 | Scaffold8297 | 241                     | GG                              | CC                | 1946713306               |
| SNP_P3_185180_425  | NW_004521223.1 | Scaffold8297 | 425                     | GG                              | AA                | 1946713308               |
| SNP_P3_185181_1454 | NW_004521223.1 | Scaffold8297 | 1454                    | CC                              | TT                | 1946713310               |
| SNP_P3_185182_1919 | NW_004521223.1 | Scaffold8297 | 1919                    | CC                              | AA                | 1946713312               |
| SNP_P3_185183_1923 | NW_004521223.1 | Scaffold8297 | 1923                    | TT                              | AA                | 1946713314               |
| SNP_P3_185184_1924 | NW_004521223.1 | Scaffold8297 | 1924                    | TT                              | AA                | 1946713316               |
| SNP_P3_185185_1997 | NW_004521223.1 | Scaffold8297 | 1997                    | CC                              | AA                | 1946713318               |
| SNP_P3_185186_2805 | NW_004521223.1 | Scaffold8297 | 2805                    | AA                              | TT                | 1946713321               |
| SNP_P3_185187_2935 | NW_004521223.1 | Scaffold8297 | 2935                    | CC                              | AA                | 1946713323               |
| SNP_P3_185188_3191 | NW_004521223.1 | Scaffold8297 | 3191                    | GG                              | AA                | 1946713325               |
| SNP_P3_185189_3246 | NW_004521223.1 | Scaffold8297 | 3246                    | GG                              | AA                | 1946713328               |
| SNP_P3_185190_3281 | NW_004521223.1 | Scaffold8297 | 3281                    | TT                              | CC                | 1946713330               |
| SNP_P3_185191_3291 | NW_004521223.1 | Scaffold8297 | 3291                    | GG                              | AA                | 1946713332               |

| SNPs IDs            | Chromosome IDs | Chromosomes  | Physical positions (bp) | CDC Frontier (Reference genome) | (Pusa 256 & HPNB) | NCBI SNPdb Accession IDs |
|---------------------|----------------|--------------|-------------------------|---------------------------------|-------------------|--------------------------|
| SNP_P3_185192_1250  | NW_004521224.1 | Scaffold8301 | 1250                    | GG                              | AA                | 1946713334               |
| SNP_P3_185194_6608  | NW_004521224.1 | Scaffold8301 | 6608                    | GG                              | TT                | 1946713336               |
| SNP_P3_185195_6624  | NW_004521224.1 | Scaffold8301 | 6624                    | AA                              | TT                | 1946713338               |
| SNP_P3_185196_6689  | NW_004521224.1 | Scaffold8301 | 6689                    | CC                              | TT                | 1946713340               |
| SNP_P3_185197_6762  | NW_004521224.1 | Scaffold8301 | 6762                    | TT                              | CC                | 1946713342               |
| SNP_P3_185198_6876  | NW_004521224.1 | Scaffold8301 | 6876                    | GG                              | AA                | 1946713344               |
| SNP_P3_185199_6880  | NW_004521224.1 | Scaffold8301 | 6880                    | AA                              | GG                | 1946713346               |
| SNP_P3_185200_6923  | NW_004521224.1 | Scaffold8301 | 6923                    | TT                              | AA                | 1946713348               |
| SNP_P3_185201_6941  | NW_004521224.1 | Scaffold8301 | 6941                    | CC                              | TT                | 1946713350               |
| SNP_P3_185202_480   | NW_004521227.1 | Scaffold8305 | 480                     | TT                              | GG                | 1946713352               |
| SNP_P3_185203_788   | NW_004521227.1 | Scaffold8305 | 788                     | AA                              | CC                | 1946713354               |
| SNP_P3_185204_64    | NW_004521228.1 | Scaffold8306 | 64                      | GG                              | AA                | 1946713356               |
| SNP_P3_185205_88    | NW_004521228.1 | Scaffold8306 | 88                      | AA                              | CC                | 1946713358               |
| SNP_P3_185206_178   | NW_004521231.1 | Scaffold8309 | 178                     | CC                              | TT                | 1946713360               |
| SNP_P3_185207_185   | NW_004521231.1 | Scaffold8309 | 185                     | AA                              | GG                | 1946713362               |
| SNP_P3_185208_187   | NW_004521231.1 | Scaffold8309 | 187                     | AA                              | CC                | 1946713364               |
| SNP_P3_185209_104   | NW_004521233.1 | Scaffold8313 | 104                     | TT                              | AA                | 1946713366               |
| SNP_P3_185211_542   | NW_004521234.1 | Scaffold8314 | 542                     | TT                              | CC                | 1946713370               |
| SNP_P3_185212_614   | NW_004521234.1 | Scaffold8314 | 614                     | AA                              | TT                | 1946713372               |
| SNP_P3_185213_637   | NW_004521234.1 | Scaffold8314 | 637                     | GG                              | AA                | 1946713374               |
| SNP_P3_185214_703   | NW_004521234.1 | Scaffold8314 | 703                     | AA                              | GG                | 1946713376               |
| SNP_P3_185215_718   | NW_004521234.1 | Scaffold8314 | 718                     | GG                              | AA                | 1946713378               |
| SNP_P3_185216_835   | NW_004521234.1 | Scaffold8314 | 835                     | TT                              | CC                | 1946713380               |
| SNP_P3_185217_839   | NW_004521234.1 | Scaffold8314 | 839                     | CC                              | TT                | 1946713383               |
| SNP_P3_185218_849   | NW_004521234.1 | Scaffold8314 | 849                     | AA                              | CC                | 1946713385               |
| SNP_P3_185219_851   | NW_004521234.1 | Scaffold8314 | 851                     | AA                              | GG                | 1946713387               |
| SNP_P3_185220_856   | NW_004521234.1 | Scaffold8314 | 856                     | AA                              | GG                | 1946713389               |
| SNP_P3_185222_914   | NW_004521234.1 | Scaffold8314 | 914                     | AA                              | GG                | 1946713391               |
| SNP_P3_185223_930   | NW_004521234.1 | Scaffold8314 | 930                     | GG                              | AA                | 1946713393               |
| SNP_P3_185224_951   | NW_004521234.1 | Scaffold8314 | 951                     | TT                              | CC                | 1946713395               |
| SNP_P3_185225_958   | NW_004521234.1 | Scaffold8314 | 958                     | GG                              | CC                | 1946713397               |
| SNP_P3_185226_972   | NW_004521234.1 | Scaffold8314 | 972                     | GG                              | AA                | 1946713399               |
| SNP_P3_185227_1019  | NW_004521234.1 | Scaffold8314 | 1019                    | AA                              | GG                | 1946713401               |
| SNP_P3_185228_1027  | NW_004521234.1 | Scaffold8314 | 1027                    | TT                              | GG                | 1946713403               |
| SNP_P3_185229_1036  | NW_004521234.1 | Scaffold8314 | 1036                    | AA                              | GG                | 1946713405               |
| SNP_P3_185230_1107  | NW_004521234.1 | Scaffold8314 | 1107                    | TT                              | AA                | 1946713407               |
| SNP_P3_185231_1177  | NW_004521234.1 | Scaffold8314 | 1177                    | TT                              | GG                | 1946713409               |
| SNP_P3_185232_1212  | NW_004521234.1 | Scaffold8314 | 1212                    | CC                              | AA                | 1946713411               |
| SNP_P3_185233_1238  | NW_004521234.1 | Scaffold8314 | 1238                    | TT                              | GG                | 1946713413               |
| SNP_P3_185235_1355  | NW_004521234.1 | Scaffold8314 | 1355                    | CC                              | TT                | 1946713416               |
| SNP_P3_185236_17491 | NW_004521235.1 | Scaffold8315 | 17491                   | TT                              | AA                | 1946713418               |
| SNP_P3_185237_17533 | NW_004521235.1 | Scaffold8315 | 17533                   | TT                              | CC                | 1946713420               |

| SNPs IDs            | Chromosome IDs | Chromosomes  | Physical positions (bp) | CDC Frontier (Reference genome) | (Pusa 256 & HPNB) | NCBI SNPdb Accession IDs |
|---------------------|----------------|--------------|-------------------------|---------------------------------|-------------------|--------------------------|
| SNP_P3_185238_17550 | NW_004521235.1 | Scaffold8315 | 17550                   | TT                              | AA                | 1946713422               |
| SNP_P3_185239_17776 | NW_004521235.1 | Scaffold8315 | 17776                   | CC                              | TT                | 1946713424               |
| SNP_P3_185241_18003 | NW_004521235.1 | Scaffold8315 | 18003                   | GG                              | AA                | 1946713426               |
| SNP_P3_185242_18136 | NW_004521235.1 | Scaffold8315 | 18136                   | TT                              | AA                | 1946713428               |
| SNP_P3_185243_18252 | NW_004521235.1 | Scaffold8315 | 18252                   | AA                              | TT                | 1946713430               |
| SNP_P3_185244_18316 | NW_004521235.1 | Scaffold8315 | 18316                   | AA                              | GG                | 1946713432               |
| SNP_P3_185245_18384 | NW_004521235.1 | Scaffold8315 | 18384                   | TT                              | GG                | 1946713434               |
| SNP_P3_185246_18573 | NW_004521235.1 | Scaffold8315 | 18573                   | AA                              | GG                | 1946713436               |
| SNP_P3_185248_19284 | NW_004521235.1 | Scaffold8315 | 19284                   | AA                              | CC                | 1946713438               |
| SNP_P3_185249_19301 | NW_004521235.1 | Scaffold8315 | 19301                   | CC                              | TT                | 1946713440               |
| SNP_P3_185250_19494 | NW_004521235.1 | Scaffold8315 | 19494                   | GG                              | TT                | 1946713442               |
| SNP_P3_185251_19625 | NW_004521235.1 | Scaffold8315 | 19625                   | CC                              | TT                | 1946713444               |
| SNP_P3_185252_19915 | NW_004521235.1 | Scaffold8315 | 19915                   | CC                              | TT                | 1946713446               |
| SNP_P3_185253_20215 | NW_004521235.1 | Scaffold8315 | 20215                   | CC                              | AA                | 1946713448               |
| SNP_P3_185254_20410 | NW_004521235.1 | Scaffold8315 | 20410                   | TT                              | GG                | 1946713451               |
| SNP_P3_185255_20412 | NW_004521235.1 | Scaffold8315 | 20412                   | GG                              | TT                | 1946713453               |
| SNP_P3_185256_20414 | NW_004521235.1 | Scaffold8315 | 20414                   | AA                              | TT                | 1946713455               |
| SNP_P3_185257_20416 | NW_004521235.1 | Scaffold8315 | 20416                   | CC                              | GG                | 1946713457               |
| SNP_P3_185258_20417 | NW_004521235.1 | Scaffold8315 | 20417                   | GG                              | AA                | 1946713458               |
| SNP_P3_185259_20418 | NW_004521235.1 | Scaffold8315 | 20418                   | TT                              | AA                | 1946713460               |
| SNP_P3_185260_20419 | NW_004521235.1 | Scaffold8315 | 20419                   | TT                              | AA                | 1946713461               |
| SNP_P3_185261_20420 | NW_004521235.1 | Scaffold8315 | 20420                   | AA                              | TT                | 1946713463               |
| SNP_P3_185262_20424 | NW_004521235.1 | Scaffold8315 | 20424                   | AA                              | TT                | 1946713465               |
| SNP_P3_185263_20440 | NW_004521235.1 | Scaffold8315 | 20440                   | GG                              | TT                | 1946713466               |
| SNP_P3_185265_20517 | NW_004521235.1 | Scaffold8315 | 20517                   | TT                              | CC                | 1946713467               |
| SNP_P3_185266_20573 | NW_004521235.1 | Scaffold8315 | 20573                   | TT                              | GG                | 1946713469               |
| SNP_P3_185267_20645 | NW_004521235.1 | Scaffold8315 | 20645                   | TT                              | GG                | 1946713470               |
| SNP_P3_185268_20711 | NW_004521235.1 | Scaffold8315 | 20711                   | CC                              | TT                | 1946713471               |
| SNP_P3_185269_20818 | NW_004521235.1 | Scaffold8315 | 20818                   | GG                              | CC                | 1946713473               |
| SNP_P3_185270_20827 | NW_004521235.1 | Scaffold8315 | 20827                   | TT                              | GG                | 1946713474               |
| SNP_P3_185271_20972 | NW_004521235.1 | Scaffold8315 | 20972                   | GG                              | AA                | 1946713475               |
| SNP_P3_185272_5363  | NW_004521236.1 | Scaffold8317 | 5363                    | AA                              | TT                | 1946713476               |
| SNP_P3_185274_900   | NW_004521245.1 | Scaffold8332 | 900                     | TT                              | CC                | 1946713478               |
| SNP_P3_185275_1045  | NW_004521245.1 | Scaffold8332 | 1045                    | GG                              | TT                | 1946713479               |
| SNP_P3_185276_110   | NW_004521250.1 | Scaffold8340 | 110                     | TT                              | AA                | 1946713480               |
| SNP_P3_185277_454   | NW_004521250.1 | Scaffold8340 | 454                     | GG                              | TT                | 1946713482               |
| SNP_P3_185278_483   | NW_004521250.1 | Scaffold8340 | 483                     | CC                              | TT                | 1946713483               |
| SNP_P3_185279_578   | NW_004521250.1 | Scaffold8340 | 578                     | CC                              | AA                | 1946713484               |
| SNP_P3_185280_659   | NW_004521250.1 | Scaffold8340 | 659                     | AA                              | CC                | 1946713485               |
| SNP_P3_185281_254   | NW_004521252.1 | Scaffold8345 | 254                     | CC                              | GG                | 1946713486               |
| SNP_P3_185282_64    | NW_004521257.1 | Scaffold8357 | 64                      | GG                              | AA                | 1946713487               |
| SNP_P3_185283_89    | NW_004521257.1 | Scaffold8357 | 89                      | AA                              | GG                | 1946713488               |

| SNPs IDs           | Chromosome IDs | Chromosomes  | Physical positions (bp) | CDC Frontier (Reference genome) | (Pusa 256 & HPNB) | NCBI SNPdb Accession IDs |
|--------------------|----------------|--------------|-------------------------|---------------------------------|-------------------|--------------------------|
| SNP_P3_185284_98   | NW_004521257.1 | Scaffold8357 | 98                      | AA                              | TT                | 1946713489               |
| SNP_P3_185285_342  | NW_004521257.1 | Scaffold8357 | 342                     | TT                              | AA                | 1946713490               |
| SNP_P3_185286_412  | NW_004521257.1 | Scaffold8357 | 412                     | GG                              | TT                | 1946713491               |
| SNP_P3_185287_523  | NW_004521257.1 | Scaffold8357 | 523                     | AA                              | GG                | 1946713493               |
| SNP_P3_185288_814  | NW_004521257.1 | Scaffold8357 | 814                     | GG                              | AA                | 1946713494               |
| SNP_P3_185289_852  | NW_004521257.1 | Scaffold8357 | 852                     | CC                              | AA                | 1946713496               |
| SNP_P3_185290_856  | NW_004521257.1 | Scaffold8357 | 856                     | GG                              | AA                | 1946713497               |
| SNP_P3_185291_504  | NW_004521261.1 | Scaffold8366 | 504                     | CC                              | TT                | 1946713498               |
| SNP_P3_185292_1442 | NW_004521261.1 | Scaffold8366 | 1442                    | AA                              | TT                | 1946713499               |
| SNP_P3_185293_1453 | NW_004521261.1 | Scaffold8366 | 1453                    | TT                              | GG                | 1946713501               |
| SNP_P3_185294_2212 | NW_004521261.1 | Scaffold8366 | 2212                    | AA                              | TT                | 1946713502               |
| SNP_P3_185295_89   | NW_004521263.1 | Scaffold8368 | 89                      | TT                              | GG                | 1946713503               |
| SNP_P3_185296_101  | NW_004521263.1 | Scaffold8368 | 101                     | AA                              | GG                | 1946713505               |
| SNP_P3_185297_120  | NW_004521263.1 | Scaffold8368 | 120                     | TT                              | AA                | 1946713507               |
| SNP_P3_185298_220  | NW_004521263.1 | Scaffold8368 | 220                     | AA                              | CC                | 1946713509               |
| SNP_P3_185299_503  | NW_004521263.1 | Scaffold8368 | 503                     | AA                              | CC                | 1946713511               |
| SNP_P3_185300_619  | NW_004521263.1 | Scaffold8368 | 619                     | AA                              | GG                | 1946713512               |
| SNP_P3_185301_976  | NW_004521263.1 | Scaffold8368 | 976                     | AA                              | GG                | 1946713514               |
| SNP_P3_185302_1092 | NW_004521263.1 | Scaffold8368 | 1092                    | CC                              | AA                | 1946713516               |
| SNP_P3_185303_260  | NW_004521267.1 | Scaffold8377 | 260                     | AA                              | TT                | 1946713518               |
| SNP_P3_185304_872  | NW_004521268.1 | Scaffold8378 | 872                     | GG                              | TT                | 1946713520               |
| SNP_P3_185305_876  | NW_004521268.1 | Scaffold8378 | 876                     | GG                              | AA                | 1946713522               |
| SNP_P3_185306_912  | NW_004521268.1 | Scaffold8378 | 912                     | GG                              | AA                | 1946713524               |
| SNP_P3_185307_984  | NW_004521268.1 | Scaffold8378 | 984                     | GG                              | AA                | 1946713526               |
| SNP_P3_185308_1832 | NW_004521268.1 | Scaffold8378 | 1832                    | GG                              | AA                | 1946713528               |
| SNP_P3_185310_222  | NW_004521270.1 | Scaffold8380 | 222                     | GG                              | AA                | 1946713530               |
| SNP_P3_185311_253  | NW_004521270.1 | Scaffold8380 | 253                     | TT                              | CC                | 1946713532               |
| SNP_P3_185312_507  | NW_004521270.1 | Scaffold8380 | 507                     | TT                              | CC                | 1946713534               |
| SNP_P3_185313_515  | NW_004521270.1 | Scaffold8380 | 515                     | CC                              | TT                | 1946713536               |
| SNP_P3_185314_537  | NW_004521270.1 | Scaffold8380 | 537                     | GG                              | AA                | 1946713538               |
| SNP_P3_185315_546  | NW_004521270.1 | Scaffold8380 | 546                     | AA                              | GG                | 1946713540               |
| SNP_P3_185316_555  | NW_004521270.1 | Scaffold8380 | 555                     | CC                              | AA                | 1946713542               |
| SNP_P3_185317_607  | NW_004521270.1 | Scaffold8380 | 607                     | AA                              | GG                | 1946713544               |
| SNP_P3_185318_671  | NW_004521270.1 | Scaffold8380 | 671                     | TT                              | CC                | 1946713546               |
| SNP_P3_185319_674  | NW_004521270.1 | Scaffold8380 | 674                     | TT                              | AA                | 1946713548               |
| SNP_P3_185321_89   | NW_004521273.1 | Scaffold8385 | 89                      | TT                              | AA                | 1946713550               |
| SNP_P3_185322_141  | NW_004521273.1 | Scaffold8385 | 141                     | TT                              | GG                | 1946713552               |
| SNP_P3_185323_146  | NW_004521273.1 | Scaffold8385 | 146                     | GG                              | CC                | 1946713554               |
| SNP_P3_185324_276  | NW_004521273.1 | Scaffold8385 | 276                     | TT                              | AA                | 1946713556               |
| SNP_P3_185325_279  | NW_004521273.1 | Scaffold8385 | 279                     | TT                              | CC                | 1946713558               |
| SNP_P3_185326_373  | NW_004521273.1 | Scaffold8385 | 373                     | CC                              | TT                | 1946713560               |
| SNP_P3_185327_396  | NW_004521273.1 | Scaffold8385 | 396                     | CC                              | TT                | 1946713562               |

| SNPs IDs           | Chromosome IDs | Chromosomes  | Physical positions (bp) | CDC Frontier (Reference genome) | (Pusa 256 & HPNB) | NCBI SNPdb Accession IDs |
|--------------------|----------------|--------------|-------------------------|---------------------------------|-------------------|--------------------------|
| SNP_P3_185328_435  | NW_004521273.1 | Scaffold8385 | 435                     | CC                              | AA                | 1946713564               |
| SNP_P3_185329_178  | NW_004521276.1 | Scaffold8393 | 178                     | CC                              | TT                | 1946713566               |
| SNP_P3_185330_1094 | NW_004521276.1 | Scaffold8393 | 1094                    | TT                              | AA                | 1946713568               |
| SNP_P3_185331_1134 | NW_004521276.1 | Scaffold8393 | 1134                    | CC                              | AA                | 1946713570               |
| SNP_P3_185332_1323 | NW_004521276.1 | Scaffold8393 | 1323                    | AA                              | GG                | 1946713572               |
| SNP_P3_185333_1440 | NW_004521276.1 | Scaffold8393 | 1440                    | CC                              | AA                | 1946713574               |
| SNP_P3_185334_1597 | NW_004521276.1 | Scaffold8393 | 1597                    | CC                              | TT                | 1946713576               |
| SNP_P3_185335_632  | NW_004521281.1 | Scaffold8403 | 632                     | GG                              | CC                | 1946713578               |
| SNP_P3_185336_692  | NW_004521281.1 | Scaffold8403 | 692                     | CC                              | TT                | 1946713581               |
| SNP_P3_185337_965  | NW_004521283.1 | Scaffold8406 | 965                     | CC                              | AA                | 1946713583               |
| SNP_P3_185338_924  | NW_004521284.1 | Scaffold8412 | 924                     | CC                              | TT                | 1946713585               |
| SNP_P3_185340_1010 | NW_004521284.1 | Scaffold8412 | 1010                    | AA                              | TT                | 1946713587               |
| SNP_P3_185341_1225 | NW_004521284.1 | Scaffold8412 | 1225                    | AA                              | GG                | 1946713589               |
| SNP_P3_185342_403  | NW_004521286.1 | Scaffold8421 | 403                     | AA                              | TT                | 1946713591               |
| SNP_P3_185343_412  | NW_004521286.1 | Scaffold8421 | 412                     | GG                              | AA                | 1946713593               |
| SNP_P3_185344_420  | NW_004521286.1 | Scaffold8421 | 420                     | TT                              | AA                | 1946713595               |
| SNP_P3_185345_429  | NW_004521286.1 | Scaffold8421 | 429                     | AA                              | GG                | 1946713597               |
| SNP_P3_185346_853  | NW_004521290.1 | Scaffold8439 | 853                     | TT                              | GG                | 1946713599               |
| SNP_P3_185347_1417 | NW_004521292.1 | Scaffold8442 | 1417                    | TT                              | CC                | 1946713601               |
| SNP_P3_185349_1779 | NW_004521292.1 | Scaffold8442 | 1779                    | TT                              | AA                | 1946713603               |
| SNP_P3_185350_1871 | NW_004521292.1 | Scaffold8442 | 1871                    | TT                              | CC                | 1946713605               |
| SNP_P3_185351_1948 | NW_004521292.1 | Scaffold8442 | 1948                    | GG                              | AA                | 1946713607               |
| SNP_P3_185352_1982 | NW_004521292.1 | Scaffold8442 | 1982                    | AA                              | CC                | 1946713608               |
| SNP_P3_185353_2147 | NW_004521292.1 | Scaffold8442 | 2147                    | GG                              | AA                | 1946713610               |
| SNP_P3_185354_2601 | NW_004521292.1 | Scaffold8442 | 2601                    | AA                              | CC                | 1946713613               |
| SNP_P3_185355_2602 | NW_004521292.1 | Scaffold8442 | 2602                    | TT                              | CC                | 1946713615               |
| SNP_P3_185356_2850 | NW_004521292.1 | Scaffold8442 | 2850                    | AA                              | TT                | 1946713617               |
| SNP_P3_185357_2864 | NW_004521292.1 | Scaffold8442 | 2864                    | AA                              | TT                | 1946713619               |
| SNP_P3_185359_2935 | NW_004521292.1 | Scaffold8442 | 2935                    | TT                              | CC                | 1946713621               |
| SNP_P3_185360_334  | NW_004521294.1 | Scaffold8445 | 334                     | GG                              | CC                | 1946713623               |
| SNP_P3_185362_4874 | NW_004521294.1 | Scaffold8445 | 4874                    | AA                              | CC                | 1946713625               |
| SNP_P3_185363_4890 | NW_004521294.1 | Scaffold8445 | 4890                    | TT                              | CC                | 1946713627               |
| SNP_P3_185364_4910 | NW_004521294.1 | Scaffold8445 | 4910                    | AA                              | GG                | 1946713629               |
| SNP_P3_185365_4920 | NW_004521294.1 | Scaffold8445 | 4920                    | AA                              | CC                | 1946713631               |
| SNP_P3_185366_4944 | NW_004521294.1 | Scaffold8445 | 4944                    | TT                              | CC                | 1946713633               |
| SNP_P3_185367_4957 | NW_004521294.1 | Scaffold8445 | 4957                    | GG                              | AA                | 1946713636               |
| SNP_P3_185368_4995 | NW_004521294.1 | Scaffold8445 | 4995                    | AA                              | TT                | 1946713638               |
| SNP_P3_185369_5063 | NW_004521294.1 | Scaffold8445 | 5063                    | TT                              | AA                | 1946713640               |
| SNP_P3_185370_5129 | NW_004521294.1 | Scaffold8445 | 5129                    | TT                              | GG                | 1946713642               |
| SNP_P3_185371_5148 | NW_004521294.1 | Scaffold8445 | 5148                    | CC                              | TT                | 1946713644               |
| SNP_P3_185372_5274 | NW_004521294.1 | Scaffold8445 | 5274                    | GG                              | CC                | 1946713646               |
| SNP_P3_185373_5361 | NW_004521294.1 | Scaffold8445 | 5361                    | AA                              | GG                | 1946713648               |



| SNPs IDs           | Chromosome IDs | Chromosomes  | Physical positions (bp) | CDC Frontier (Reference genome) | (Pusa 256 & HPNB) | NCBI SNPdb Accession IDs |
|--------------------|----------------|--------------|-------------------------|---------------------------------|-------------------|--------------------------|
| SNP_P3_185374_5389 | NW_004521294.1 | Scaffold8445 | 5389                    | CC                              | TT                | 1946713650               |
| SNP_P3_185375_5426 | NW_004521294.1 | Scaffold8445 | 5426                    | GG                              | TT                | 1946713652               |
| SNP_P3_185376_5528 | NW_004521294.1 | Scaffold8445 | 5528                    | AA                              | GG                | 1946713654               |
| SNP_P3_185377_5641 | NW_004521294.1 | Scaffold8445 | 5641                    | TT                              | AA                | 1946713656               |
| SNP_P3_185379_5780 | NW_004521294.1 | Scaffold8445 | 5780                    | AA                              | TT                | 1946713658               |
| SNP_P3_185380_5815 | NW_004521294.1 | Scaffold8445 | 5815                    | CC                              | AA                | 1946713660               |
| SNP_P3_185381_5971 | NW_004521294.1 | Scaffold8445 | 5971                    | TT                              | AA                | 1946713662               |
| SNP_P3_185382_6044 | NW_004521294.1 | Scaffold8445 | 6044                    | CC                              | AA                | 1946713664               |
| SNP_P3_185383_6092 | NW_004521294.1 | Scaffold8445 | 6092                    | AA                              | TT                | 1946713666               |
| SNP_P3_185384_6186 | NW_004521294.1 | Scaffold8445 | 6186                    | CC                              | AA                | 1946713668               |
| SNP_P3_185385_6212 | NW_004521294.1 | Scaffold8445 | 6212                    | AA                              | GG                | 1946713670               |
| SNP_P3_185386_6387 | NW_004521294.1 | Scaffold8445 | 6387                    | GG                              | AA                | 1946713672               |
| SNP_P3_185387_280  | NW_004521297.1 | Scaffold8455 | 280                     | GG                              | CC                | 1946713674               |
| SNP_P3_185388_290  | NW_004521297.1 | Scaffold8455 | 290                     | GG                              | AA                | 1946713676               |
| SNP_P3_185389_360  | NW_004521297.1 | Scaffold8455 | 360                     | TT                              | AA                | 1946713678               |
| SNP_P3_185390_384  | NW_004521297.1 | Scaffold8455 | 384                     | GG                              | AA                | 1946713680               |
| SNP_P3_185391_644  | NW_004521297.1 | Scaffold8455 | 644                     | TT                              | GG                | 1946713682               |
| SNP_P3_185392_647  | NW_004521297.1 | Scaffold8455 | 647                     | TT                              | CC                | 1946713684               |
| SNP_P3_185393_667  | NW_004521297.1 | Scaffold8455 | 667                     | CC                              | TT                | 1946713686               |
| SNP_P3_185394_713  | NW_004521297.1 | Scaffold8455 | 713                     | GG                              | AA                | 1946713688               |
| SNP_P3_185395_714  | NW_004521297.1 | Scaffold8455 | 714                     | GG                              | AA                | 1946713690               |
| SNP_P3_185396_731  | NW_004521297.1 | Scaffold8455 | 731                     | GG                              | TT                | 1946713692               |
| SNP_P3_185397_2731 | NW_004521301.1 | Scaffold8461 | 2731                    | AA                              | TT                | 1946713694               |
| SNP_P3_185398_3638 | NW_004521301.1 | Scaffold8461 | 3638                    | AA                              | CC                | 1946713696               |
| SNP_P3_185399_3664 | NW_004521301.1 | Scaffold8461 | 3664                    | GG                              | TT                | 1946713698               |
| SNP_P3_185400_64   | NW_004521306.1 | Scaffold8469 | 64                      | AA                              | GG                | 1946713700               |
| SNP_P3_185401_220  | NW_004521306.1 | Scaffold8469 | 220                     | GG                              | AA                | 1946713702               |
| SNP_P3_185402_227  | NW_004521306.1 | Scaffold8469 | 227                     | AA                              | GG                | 1946713704               |
| SNP_P3_185403_375  | NW_004521306.1 | Scaffold8469 | 375                     | GG                              | CC                | 1946713706               |
| SNP_P3_185404_468  | NW_004521306.1 | Scaffold8469 | 468                     | GG                              | CC                | 1946713708               |
| SNP_P3_185405_354  | NW_004521307.1 | Scaffold8471 | 354                     | GG                              | TT                | 1946713710               |
| SNP_P3_185406_2023 | NW_004521309.1 | Scaffold8474 | 2023                    | CC                              | TT                | 1946713713               |
| SNP_P3_185407_2331 | NW_004521309.1 | Scaffold8474 | 2331                    | AA                              | GG                | 1946713714               |
| SNP_P3_185408_2332 | NW_004521309.1 | Scaffold8474 | 2332                    | TT                              | AA                | 1946713716               |
| SNP_P3_185409_2333 | NW_004521309.1 | Scaffold8474 | 2333                    | TT                              | GG                | 1946713718               |
| SNP_P3_185410_2352 | NW_004521309.1 | Scaffold8474 | 2352                    | AA                              | GG                | 1946713719               |
| SNP_P3_185411_2372 | NW_004521309.1 | Scaffold8474 | 2372                    | AA                              | GG                | 1946713721               |
| SNP_P3_185412_2375 | NW_004521309.1 | Scaffold8474 | 2375                    | TT                              | CC                | 1946713723               |
| SNP_P3_185413_2382 | NW_004521309.1 | Scaffold8474 | 2382                    | AA                              | GG                | 1946713725               |
| SNP_P3_185414_478  | NW_004521312.1 | Scaffold8478 | 478                     | TT                              | CC                | 1946713729               |
| SNP_P3_185415_64   | NW_004521313.1 | Scaffold8479 | 64                      | AA                              | GG                | 1946713733               |
| SNP_P3_185416_116  | NW_004521313.1 | Scaffold8479 | 116                     | GG                              | CC                | 1946713736               |

| SNPs IDs           | Chromosome IDs | Chromosomes  | Physical positions (bp) | CDC Frontier (Reference genome) | (Pusa 256 & HPNB) | NCBI SNPdb Accession IDs |
|--------------------|----------------|--------------|-------------------------|---------------------------------|-------------------|--------------------------|
| SNP_P3_185417_147  | NW_004521313.1 | Scaffold8479 | 147                     | CC                              | TT                | 1946713738               |
| SNP_P3_185418_160  | NW_004521313.1 | Scaffold8479 | 160                     | TT                              | AA                | 1946713740               |
| SNP_P3_185419_173  | NW_004521313.1 | Scaffold8479 | 173                     | GG                              | TT                | 1946713742               |
| SNP_P3_185420_243  | NW_004521313.1 | Scaffold8479 | 243                     | CC                              | TT                | 1946713744               |
| SNP_P3_185421_262  | NW_004521313.1 | Scaffold8479 | 262                     | CC                              | TT                | 1946713746               |
| SNP_P3_185422_326  | NW_004521313.1 | Scaffold8479 | 326                     | AA                              | TT                | 1946713748               |
| SNP_P3_185423_352  | NW_004521313.1 | Scaffold8479 | 352                     | CC                              | TT                | 1946713750               |
| SNP_P3_185424_376  | NW_004521313.1 | Scaffold8479 | 376                     | AA                              | CC                | 1946713752               |
| SNP_P3_185425_385  | NW_004521313.1 | Scaffold8479 | 385                     | TT                              | GG                | 1946713754               |
| SNP_P3_185426_475  | NW_004521313.1 | Scaffold8479 | 475                     | AA                              | TT                | 1946713757               |
| SNP_P3_185427_510  | NW_004521313.1 | Scaffold8479 | 510                     | GG                              | CC                | 1946713759               |
| SNP_P3_185428_560  | NW_004521313.1 | Scaffold8479 | 560                     | AA                              | GG                | 1946713762               |
| SNP_P3_185429_706  | NW_004521313.1 | Scaffold8479 | 706                     | CC                              | TT                | 1946713765               |
| SNP_P3_185430_840  | NW_004521313.1 | Scaffold8479 | 840                     | AA                              | TT                | 1946713768               |
| SNP_P3_185431_900  | NW_004521313.1 | Scaffold8479 | 900                     | TT                              | GG                | 1946713771               |
| SNP_P3_185432_972  | NW_004521313.1 | Scaffold8479 | 972                     | CC                              | AA                | 1946713773               |
| SNP_P3_185433_976  | NW_004521313.1 | Scaffold8479 | 976                     | CC                              | TT                | 1946713775               |
| SNP_P3_185434_979  | NW_004521313.1 | Scaffold8479 | 979                     | CC                              | GG                | 1946713777               |
| SNP_P3_185436_1108 | NW_004521313.1 | Scaffold8479 | 1108                    | CC                              | TT                | 1946713779               |
| SNP_P3_185437_1110 | NW_004521313.1 | Scaffold8479 | 1110                    | CC                              | TT                | 1946713782               |
| SNP_P3_185438_1170 | NW_004521313.1 | Scaffold8479 | 1170                    | CC                              | TT                | 1946713784               |
| SNP_P3_185439_1601 | NW_004521313.1 | Scaffold8479 | 1601                    | GG                              | AA                | 1946713787               |
| SNP_P3_185440_1602 | NW_004521313.1 | Scaffold8479 | 1602                    | TT                              | AA                | 1946713791               |
| SNP_P3_185441_1603 | NW_004521313.1 | Scaffold8479 | 1603                    | TT                              | AA                | 1946713794               |
| SNP_P3_185442_1706 | NW_004521313.1 | Scaffold8479 | 1706                    | TT                              | CC                | 1946713797               |
| SNP_P3_185443_1714 | NW_004521313.1 | Scaffold8479 | 1714                    | AA                              | CC                | 1946713800               |
| SNP_P3_185444_1776 | NW_004521313.1 | Scaffold8479 | 1776                    | CC                              | TT                | 1946713803               |
| SNP_P3_185445_1796 | NW_004521313.1 | Scaffold8479 | 1796                    | AA                              | GG                | 1946713806               |
| SNP_P3_185448_294  | NW_004521316.1 | Scaffold8487 | 294                     | CC                              | TT                | 1946713808               |
| SNP_P3_185449_406  | NW_004521316.1 | Scaffold8487 | 406                     | TT                              | GG                | 1946713810               |
| SNP_P3_185450_550  | NW_004521316.1 | Scaffold8487 | 550                     | CC                              | AA                | 1946713813               |
| SNP_P3_185451_4027 | NW_004521320.1 | Scaffold8493 | 4027                    | GG                              | AA                | 1946713816               |
| SNP_P3_185452_4139 | NW_004521320.1 | Scaffold8493 | 4139                    | GG                              | AA                | 1946713819               |
| SNP_P3_185453_4170 | NW_004521320.1 | Scaffold8493 | 4170                    | GG                              | AA                | 1946713821               |
| SNP_P3_185454_4173 | NW_004521320.1 | Scaffold8493 | 4173                    | GG                              | TT                | 1946713824               |
| SNP_P3_185455_4175 | NW_004521320.1 | Scaffold8493 | 4175                    | AA                              | GG                | 1946713827               |
| SNP_P3_185456_4181 | NW_004521320.1 | Scaffold8493 | 4181                    | GG                              | CC                | 1946713829               |
| SNP_P3_185457_4183 | NW_004521320.1 | Scaffold8493 | 4183                    | TT                              | CC                | 1946713832               |
| SNP_P3_185458_4190 | NW_004521320.1 | Scaffold8493 | 4190                    | GG                              | AA                | 1946713834               |
| SNP_P3_185459_4193 | NW_004521320.1 | Scaffold8493 | 4193                    | TT                              | CC                | 1946713837               |
| SNP_P3_185460_4567 | NW_004521320.1 | Scaffold8493 | 4567                    | CC                              | TT                | 1946713839               |
| SNP_P3_185461_5858 | NW_004521320.1 | Scaffold8493 | 5858                    | TT                              | AA                | 1946713841               |

| SNPs IDs            | Chromosome IDs | Chromosomes  | Physical positions (bp) | CDC Frontier (Reference genome) | (Pusa 256 & HPNB) | NCBI SNPdb Accession IDs |
|---------------------|----------------|--------------|-------------------------|---------------------------------|-------------------|--------------------------|
| SNP_P3_185462_6882  | NW_004521320.1 | Scaffold8493 | 6882                    | CC                              | TT                | 1946713844               |
| SNP_P3_185463_7150  | NW_004521320.1 | Scaffold8493 | 7150                    | TT                              | CC                | 1946713846               |
| SNP_P3_185464_8321  | NW_004521320.1 | Scaffold8493 | 8321                    | CC                              | TT                | 1946713848               |
| SNP_P3_185466_9110  | NW_004521320.1 | Scaffold8493 | 9110                    | GG                              | TT                | 1946713850               |
| SNP_P3_185468_9834  | NW_004521320.1 | Scaffold8493 | 9834                    | AA                              | CC                | 1946713853               |
| SNP_P3_185470_9969  | NW_004521320.1 | Scaffold8493 | 9969                    | AA                              | TT                | 1946713855               |
| SNP_P3_185471_10594 | NW_004521320.1 | Scaffold8493 | 10594                   | GG                              | AA                | 1946713858               |
| SNP_P3_185472_10603 | NW_004521320.1 | Scaffold8493 | 10603                   | GG                              | TT                | 1946713860               |
| SNP_P3_185473_10775 | NW_004521320.1 | Scaffold8493 | 10775                   | TT                              | CC                | 1946713862               |
| SNP_P3_185474_11054 | NW_004521320.1 | Scaffold8493 | 11054                   | CC                              | GG                | 1946713865               |
| SNP_P3_185475_11098 | NW_004521320.1 | Scaffold8493 | 11098                   | TT                              | CC                | 1946713867               |
| SNP_P3_185476_11653 | NW_004521320.1 | Scaffold8493 | 11653                   | TT                              | AA                | 1946713869               |
| SNP_P3_185477_12194 | NW_004521320.1 | Scaffold8493 | 12194                   | AA                              | CC                | 1946713872               |
| SNP_P3_185478_12908 | NW_004521320.1 | Scaffold8493 | 12908                   | TT                              | AA                | 1946713875               |
| SNP_P3_185479_14964 | NW_004521320.1 | Scaffold8493 | 14964                   | GG                              | AA                | 1946713877               |
| SNP_P3_185480_14995 | NW_004521320.1 | Scaffold8493 | 14995                   | GG                              | TT                | 1946713879               |
| SNP_P3_185481_16110 | NW_004521320.1 | Scaffold8493 | 16110                   | TT                              | CC                | 1946713881               |
| SNP_P3_185482_16201 | NW_004521320.1 | Scaffold8493 | 16201                   | GG                              | AA                | 1946713884               |
| SNP_P3_185483_16322 | NW_004521320.1 | Scaffold8493 | 16322                   | AA                              | CC                | 1946713886               |
| SNP_P3_185484_16486 | NW_004521320.1 | Scaffold8493 | 16486                   | TT                              | CC                | 1946713888               |
| SNP_P3_185485_16740 | NW_004521320.1 | Scaffold8493 | 16740                   | AA                              | TT                | 1946713891               |
| SNP_P3_185486_17878 | NW_004521320.1 | Scaffold8493 | 17878                   | GG                              | CC                | 1946713893               |
| SNP_P3_185488_18284 | NW_004521320.1 | Scaffold8493 | 18284                   | GG                              | AA                | 1946713895               |
| SNP_P3_185489_18289 | NW_004521320.1 | Scaffold8493 | 18289                   | CC                              | TT                | 1946713897               |
| SNP_P3_185490_18461 | NW_004521320.1 | Scaffold8493 | 18461                   | CC                              | AA                | 1946713899               |
| SNP_P3_185492_487   | NW_004521321.1 | Scaffold8495 | 487                     | TT                              | CC                | 1946713901               |
| SNP_P3_185493_138   | NW_004521322.1 | Scaffold8497 | 138                     | GG                              | TT                | 1946713904               |
| SNP_P3_185494_1069  | NW_004521325.1 | Scaffold8501 | 1069                    | GG                              | AA                | 1946713907               |
| SNP_P3_185495_1266  | NW_004521325.1 | Scaffold8501 | 1266                    | AA                              | TT                | 1946713909               |
| SNP_P3_185496_347   | NW_004521326.1 | Scaffold8502 | 347                     | GG                              | CC                | 1946713912               |
| SNP_P3_185497_439   | NW_004521326.1 | Scaffold8502 | 439                     | GG                              | AA                | 1946713914               |
| SNP_P3_185498_741   | NW_004521326.1 | Scaffold8502 | 741                     | GG                              | AA                | 1946713916               |
| SNP_P3_185499_1594  | NW_004521332.1 | Scaffold8518 | 1594                    | AA                              | GG                | 1946713918               |
| SNP_P3_185500_64    | NW_004521336.1 | Scaffold8522 | 64                      | TT                              | CC                | 1946713920               |
| SNP_P3_185501_90    | NW_004521336.1 | Scaffold8522 | 90                      | GG                              | AA                | 1946713922               |
| SNP_P3_185502_200   | NW_004521336.1 | Scaffold8522 | 200                     | CC                              | GG                | 1946713925               |
| SNP_P3_185503_356   | NW_004521336.1 | Scaffold8522 | 356                     | TT                              | GG                | 1946713928               |
| SNP_P3_185504_481   | NW_004521336.1 | Scaffold8522 | 481                     | AA                              | TT                | 1946713930               |
| SNP_P3_185505_488   | NW_004521336.1 | Scaffold8522 | 488                     | AA                              | TT                | 1946713932               |
| SNP_P3_185506_551   | NW_004521336.1 | Scaffold8522 | 551                     | AA                              | TT                | 1946713935               |
| SNP_P3_185507_591   | NW_004521336.1 | Scaffold8522 | 591                     | TT                              | GG                | 1946713938               |
| SNP_P3_185508_583   | NW_004521341.1 | Scaffold8533 | 583                     | TT                              | AA                | 1946713940               |

| SNPs IDs           | Chromosome IDs | Chromosomes  | Physical positions (bp) | CDC Frontier (Reference genome) | (Pusa 256 & HPNB) | NCBI SNPdb Accession IDs |
|--------------------|----------------|--------------|-------------------------|---------------------------------|-------------------|--------------------------|
| SNP_P3_185509_945  | NW_004521341.1 | Scaffold8533 | 945                     | AA                              | TT                | 1946713942               |
| SNP_P3_185510_1003 | NW_004521341.1 | Scaffold8533 | 1003                    | TT                              | GG                | 1946713944               |
| SNP_P3_185511_1018 | NW_004521341.1 | Scaffold8533 | 1018                    | GG                              | CC                | 1946713947               |
| SNP_P3_185512_91   | NW_004521348.1 | Scaffold8550 | 91                      | TT                              | CC                | 1946713949               |
| SNP_P3_185513_358  | NW_004521348.1 | Scaffold8550 | 358                     | AA                              | CC                | 1946713951               |
| SNP_P3_185514_396  | NW_004521348.1 | Scaffold8550 | 396                     | AA                              | CC                | 1946713953               |
| SNP_P3_185515_441  | NW_004521348.1 | Scaffold8550 | 441                     | AA                              | TT                | 1946713955               |
| SNP_P3_185516_488  | NW_004521348.1 | Scaffold8550 | 488                     | TT                              | CC                | 1946713957               |
| SNP_P3_185517_663  | NW_004521348.1 | Scaffold8550 | 663                     | GG                              | TT                | 1946713959               |
| SNP_P3_185518_690  | NW_004521348.1 | Scaffold8550 | 690                     | AA                              | GG                | 1946713961               |
| SNP_P3_185519_709  | NW_004521348.1 | Scaffold8550 | 709                     | GG                              | AA                | 1946713963               |
| SNP_P3_185520_731  | NW_004521348.1 | Scaffold8550 | 731                     | CC                              | AA                | 1946713965               |
| SNP_P3_185521_576  | NW_004521350.1 | Scaffold8553 | 576                     | CC                              | AA                | 1946713968               |
| SNP_P3_185522_587  | NW_004521350.1 | Scaffold8553 | 587                     | TT                              | AA                | 1946713970               |
| SNP_P3_185524_876  | NW_004521350.1 | Scaffold8553 | 876                     | AA                              | GG                | 1946713972               |
| SNP_P3_185525_944  | NW_004521350.1 | Scaffold8553 | 944                     | CC                              | TT                | 1946713974               |
| SNP_P3_185526_946  | NW_004521350.1 | Scaffold8553 | 946                     | AA                              | GG                | 1946713976               |
| SNP_P3_185527_958  | NW_004521350.1 | Scaffold8553 | 958                     | TT                              | AA                | 1946713978               |
| SNP_P3_185528_959  | NW_004521350.1 | Scaffold8553 | 959                     | GG                              | AA                | 1946713980               |
| SNP_P3_185529_962  | NW_004521350.1 | Scaffold8553 | 962                     | TT                              | CC                | 1946713982               |
| SNP_P3_185530_91   | NW_004521351.1 | Scaffold8558 | 91                      | GG                              | AA                | 1946713984               |
| SNP_P3_185531_472  | NW_004521353.1 | Scaffold8564 | 472                     | CC                              | GG                | 1946713986               |
| SNP_P3_185532_528  | NW_004521353.1 | Scaffold8564 | 528                     | GG                              | CC                | 1946713988               |
| SNP_P3_185533_654  | NW_004521353.1 | Scaffold8564 | 654                     | AA                              | GG                | 1946713990               |
| SNP_P3_185534_655  | NW_004521353.1 | Scaffold8564 | 655                     | GG                              | AA                | 1946713992               |
| SNP_P3_185535_1019 | NW_004521353.1 | Scaffold8564 | 1019                    | TT                              | CC                | 1946713994               |
| SNP_P3_185536_1034 | NW_004521353.1 | Scaffold8564 | 1034                    | TT                              | CC                | 1946713996               |
| SNP_P3_185537_4578 | NW_004521354.1 | Scaffold8565 | 4578                    | GG                              | AA                | 1946713999               |
| SNP_P3_185538_6446 | NW_004521354.1 | Scaffold8565 | 6446                    | AA                              | CC                | 1946714001               |
| SNP_P3_185539_6788 | NW_004521354.1 | Scaffold8565 | 6788                    | AA                              | CC                | 1946714003               |
| SNP_P3_185541_6905 | NW_004521354.1 | Scaffold8565 | 6905                    | TT                              | AA                | 1946714005               |
| SNP_P3_185542_7013 | NW_004521354.1 | Scaffold8565 | 7013                    | CC                              | TT                | 1946714007               |
| SNP_P3_185544_7184 | NW_004521354.1 | Scaffold8565 | 7184                    | AA                              | CC                | 1946714009               |
| SNP_P3_185545_7265 | NW_004521354.1 | Scaffold8565 | 7265                    | AA                              | TT                | 1946714012               |
| SNP_P3_185546_64   | NW_004521355.1 | Scaffold8571 | 64                      | GG                              | AA                | 1946714014               |
| SNP_P3_185547_335  | NW_004521355.1 | Scaffold8571 | 335                     | GG                              | CC                | 1946714016               |
| SNP_P3_185548_351  | NW_004521355.1 | Scaffold8571 | 351                     | TT                              | AA                | 1946714018               |
| SNP_P3_185549_377  | NW_004521355.1 | Scaffold8571 | 377                     | GG                              | TT                | 1946714020               |
| SNP_P3_185550_383  | NW_004521355.1 | Scaffold8571 | 383                     | AA                              | GG                | 1946714022               |
| SNP_P3_185551_509  | NW_004521355.1 | Scaffold8571 | 509                     | TT                              | AA                | 1946714024               |
| SNP_P3_185552_514  | NW_004521355.1 | Scaffold8571 | 514                     | AA                              | CC                | 1946714027               |
| SNP_P3_185553_548  | NW_004521355.1 | Scaffold8571 | 548                     | TT                              | CC                | 1946714030               |

| SNPs IDs            | Chromosome IDs | Chromosomes  | Physical positions (bp) | CDC Frontier (Reference genome) | (Pusa 256 & HPNB) | NCBI SNPdb Accession IDs |
|---------------------|----------------|--------------|-------------------------|---------------------------------|-------------------|--------------------------|
| SNP_P3_185554_602   | NW_004521355.1 | Scaffold8571 | 602                     | GG                              | AA                | 1946714033               |
| SNP_P3_185555_1060  | NW_004521355.1 | Scaffold8571 | 1060                    | GG                              | AA                | 1946714036               |
| SNP_P3_185556_6475  | NW_004521356.1 | Scaffold8572 | 6475                    | GG                              | TT                | 1946714039               |
| SNP_P3_185557_791   | NW_004521357.1 | Scaffold8577 | 791                     | CC                              | AA                | 1946714041               |
| SNP_P3_185558_795   | NW_004521357.1 | Scaffold8577 | 795                     | CC                              | TT                | 1946714043               |
| SNP_P3_185559_958   | NW_004521362.1 | Scaffold8586 | 958                     | AA                              | GG                | 1946714045               |
| SNP_P3_185560_20705 | NW_004521368.1 | Scaffold8594 | 20705                   | GG                              | CC                | 1946714047               |
| SNP_P3_185561_149   | NW_004521370.1 | Scaffold8602 | 149                     | TT                              | AA                | 1946714049               |
| SNP_P3_185562_151   | NW_004521370.1 | Scaffold8602 | 151                     | CC                              | GG                | 1946714052               |
| SNP_P3_185563_450   | NW_004521370.1 | Scaffold8602 | 450                     | TT                              | GG                | 1946714055               |
| SNP_P3_185564_64    | NW_004521372.1 | Scaffold8604 | 64                      | AA                              | CC                | 1946714059               |
| SNP_P3_185565_91    | NW_004521372.1 | Scaffold8604 | 91                      | TT                              | CC                | 1946714061               |
| SNP_P3_185566_101   | NW_004521372.1 | Scaffold8604 | 101                     | AA                              | TT                | 1946714063               |
| SNP_P3_185567_102   | NW_004521372.1 | Scaffold8604 | 102                     | AA                              | GG                | 1946714065               |
| SNP_P3_185568_108   | NW_004521372.1 | Scaffold8604 | 108                     | AA                              | GG                | 1946714067               |
| SNP_P3_185569_120   | NW_004521372.1 | Scaffold8604 | 120                     | AA                              | CC                | 1946714070               |
| SNP_P3_185570_245   | NW_004521372.1 | Scaffold8604 | 245                     | CC                              | TT                | 1946714072               |
| SNP_P3_185571_246   | NW_004521372.1 | Scaffold8604 | 246                     | TT                              | AA                | 1946714075               |
| SNP_P3_185572_375   | NW_004521372.1 | Scaffold8604 | 375                     | CC                              | TT                | 1946714078               |
| SNP_P3_185573_667   | NW_004521372.1 | Scaffold8604 | 667                     | GG                              | AA                | 1946714080               |
| SNP_P3_185575_691   | NW_004521372.1 | Scaffold8604 | 691                     | GG                              | AA                | 1946714082               |
| SNP_P3_185576_770   | NW_004521372.1 | Scaffold8604 | 770                     | AA                              | CC                | 1946714084               |
| SNP_P3_185577_898   | NW_004521372.1 | Scaffold8604 | 898                     | TT                              | GG                | 1946714087               |
| SNP_P3_185578_1295  | NW_004521372.1 | Scaffold8604 | 1295                    | CC                              | TT                | 1946714090               |
| SNP_P3_185579_1350  | NW_004521372.1 | Scaffold8604 | 1350                    | TT                              | CC                | 1946714092               |
| SNP_P3_185580_1401  | NW_004521372.1 | Scaffold8604 | 1401                    | AA                              | TT                | 1946714094               |
| SNP_P3_185581_336   | NW_004521377.1 | Scaffold8620 | 336                     | AA                              | TT                | 1946714096               |
| SNP_P3_185582_532   | NW_004521377.1 | Scaffold8620 | 532                     | AA                              | GG                | 1946714098               |
| SNP_P3_185583_629   | NW_004521377.1 | Scaffold8620 | 629                     | GG                              | AA                | 1946714100               |
| SNP_P3_185584_646   | NW_004521377.1 | Scaffold8620 | 646                     | GG                              | AA                | 1946714103               |
| SNP_P3_185585_699   | NW_004521377.1 | Scaffold8620 | 699                     | GG                              | TT                | 1946714105               |
| SNP_P3_185586_989   | NW_004521377.1 | Scaffold8620 | 989                     | TT                              | AA                | 1946714108               |
| SNP_P3_185587_991   | NW_004521377.1 | Scaffold8620 | 991                     | AA                              | GG                | 1946714110               |
| SNP_P3_185588_1000  | NW_004521377.1 | Scaffold8620 | 1000                    | AA                              | CC                | 1946714113               |
| SNP_P3_185589_1011  | NW_004521377.1 | Scaffold8620 | 1011                    | GG                              | TT                | 1946714117               |
| SNP_P3_185590_1197  | NW_004521377.1 | Scaffold8620 | 1197                    | TT                              | CC                | 1946714120               |
| SNP_P3_185591_1270  | NW_004521377.1 | Scaffold8620 | 1270                    | CC                              | GG                | 1946714122               |
| SNP_P3_185592_1330  | NW_004521377.1 | Scaffold8620 | 1330                    | TT                              | GG                | 1946714125               |
| SNP_P3_185593_1360  | NW_004521377.1 | Scaffold8620 | 1360                    | CC                              | GG                | 1946714128               |
| SNP_P3_185594_1610  | NW_004521377.1 | Scaffold8620 | 1610                    | CC                              | TT                | 1946714131               |
| SNP_P3_185595_1639  | NW_004521377.1 | Scaffold8620 | 1639                    | TT                              | CC                | 1946714134               |
| SNP_P3_185596_1656  | NW_004521377.1 | Scaffold8620 | 1656                    | CC                              | TT                | 1946714136               |

| SNPs IDs            | Chromosome IDs | Chromosomes  | Physical positions (bp) | CDC Frontier (Reference genome) | (Pusa 256 & HPNB) | NCBI SNPdb Accession IDs |
|---------------------|----------------|--------------|-------------------------|---------------------------------|-------------------|--------------------------|
| SNP_P3_185597_20481 | NW_004521382.1 | Scaffold8626 | 20481                   | CC                              | TT                | 1946714138               |
| SNP_P3_185598_20488 | NW_004521382.1 | Scaffold8626 | 20488                   | GG                              | AA                | 1946714140               |
| SNP_P3_185599_20519 | NW_004521382.1 | Scaffold8626 | 20519                   | TT                              | CC                | 1946714142               |
| SNP_P3_185600_958   | NW_004521384.1 | Scaffold8628 | 958                     | TT                              | GG                | 1946714144               |
| SNP_P3_185601_1734  | NW_004521384.1 | Scaffold8628 | 1734                    | TT                              | CC                | 1946714146               |
| SNP_P3_185602_2027  | NW_004521384.1 | Scaffold8628 | 2027                    | TT                              | CC                | 1946714148               |
| SNP_P3_185603_352   | NW_004521388.1 | Scaffold8639 | 352                     | CC                              | AA                | 1946714151               |
| SNP_P3_185604_541   | NW_004521388.1 | Scaffold8639 | 541                     | AA                              | TT                | 1946714154               |
| SNP_P3_185605_727   | NW_004521388.1 | Scaffold8639 | 727                     | TT                              | GG                | 1946714157               |
| SNP_P3_185606_758   | NW_004521388.1 | Scaffold8639 | 758                     | GG                              | TT                | 1946714160               |
| SNP_P3_185607_833   | NW_004521388.1 | Scaffold8639 | 833                     | GG                              | AA                | 1946714162               |
| SNP_P3_185608_965   | NW_004521388.1 | Scaffold8639 | 965                     | CC                              | TT                | 1946714164               |
| SNP_P3_185609_1093  | NW_004521388.1 | Scaffold8639 | 1093                    | GG                              | AA                | 1946714167               |
| SNP_P3_185610_1222  | NW_004521388.1 | Scaffold8639 | 1222                    | AA                              | GG                | 1946714170               |
| SNP_P3_185611_1234  | NW_004521388.1 | Scaffold8639 | 1234                    | TT                              | GG                | 1946714172               |
| SNP_P3_185612_1544  | NW_004521388.1 | Scaffold8639 | 1544                    | GG                              | AA                | 1946714174               |
| SNP_P3_185613_1706  | NW_004521388.1 | Scaffold8639 | 1706                    | AA                              | CC                | 1946714176               |
| SNP_P3_185614_813   | NW_004521390.1 | Scaffold8641 | 813                     | AA                              | CC                | 1946714178               |
| SNP_P3_185615_814   | NW_004521390.1 | Scaffold8641 | 814                     | CC                              | TT                | 1946714180               |
| SNP_P3_185616_854   | NW_004521390.1 | Scaffold8641 | 854                     | CC                              | TT                | 1946714183               |
| SNP_P3_185617_87    | NW_004521391.1 | Scaffold8645 | 87                      | CC                              | TT                | 1946714185               |
| SNP_P3_185618_92    | NW_004521391.1 | Scaffold8645 | 92                      | CC                              | AA                | 1946714188               |
| SNP_P3_185619_400   | NW_004521391.1 | Scaffold8645 | 400                     | TT                              | CC                | 1946714190               |
| SNP_P3_185620_432   | NW_004521391.1 | Scaffold8645 | 432                     | GG                              | AA                | 1946714193               |
| SNP_P3_185621_445   | NW_004521391.1 | Scaffold8645 | 445                     | TT                              | CC                | 1946714196               |
| SNP_P3_185622_606   | NW_004521391.1 | Scaffold8645 | 606                     | TT                              | GG                | 1946714198               |
| SNP_P3_185623_659   | NW_004521391.1 | Scaffold8645 | 659                     | TT                              | CC                | 1946714200               |
| SNP_P3_185624_717   | NW_004521391.1 | Scaffold8645 | 717                     | CC                              | TT                | 1946714202               |
| SNP_P3_185625_1658  | NW_004521392.1 | Scaffold8646 | 1658                    | AA                              | GG                | 1946714204               |
| SNP_P3_185626_1856  | NW_004521392.1 | Scaffold8646 | 1856                    | GG                              | AA                | 1946714206               |
| SNP_P3_185627_1973  | NW_004521392.1 | Scaffold8646 | 1973                    | CC                              | TT                | 1946714209               |
| SNP_P3_185628_1997  | NW_004521392.1 | Scaffold8646 | 1997                    | AA                              | GG                | 1946714211               |
| SNP_P3_185629_2029  | NW_004521392.1 | Scaffold8646 | 2029                    | GG                              | AA                | 1946714213               |
| SNP_P3_185630_2033  | NW_004521392.1 | Scaffold8646 | 2033                    | CC                              | TT                | 1946714215               |
| SNP_P3_185631_2056  | NW_004521392.1 | Scaffold8646 | 2056                    | TT                              | AA                | 1946714217               |
| SNP_P3_185632_2210  | NW_004521392.1 | Scaffold8646 | 2210                    | CC                              | AA                | 1946714219               |
| SNP_P3_185633_2344  | NW_004521392.1 | Scaffold8646 | 2344                    | CC                              | TT                | 1946714222               |
| SNP_P3_185634_2401  | NW_004521392.1 | Scaffold8646 | 2401                    | GG                              | TT                | 1946714224               |
| SNP_P3_185635_2402  | NW_004521392.1 | Scaffold8646 | 2402                    | GG                              | AA                | 1946714226               |
| SNP_P3_185636_2540  | NW_004521392.1 | Scaffold8646 | 2540                    | TT                              | AA                | 1946714229               |
| SNP_P3_185637_2553  | NW_004521392.1 | Scaffold8646 | 2553                    | TT                              | AA                | 1946714231               |
| SNP_P3_185641_7094  | NW_004521392.1 | Scaffold8646 | 7094                    | TT                              | CC                | 1946714233               |

| SNPs IDs           | Chromosome IDs | Chromosomes  | Physical positions (bp) | CDC Frontier (Reference genome) | (Pusa 256 & HPNB) | NCBI SNPdb Accession IDs |
|--------------------|----------------|--------------|-------------------------|---------------------------------|-------------------|--------------------------|
| SNP_P3_185643_2433 | NW_004521393.1 | Scaffold8648 | 2433                    | CC                              | TT                | 1946714235               |
| SNP_P3_185644_2446 | NW_004521393.1 | Scaffold8648 | 2446                    | AA                              | GG                | 1946714237               |
| SNP_P3_185645_2476 | NW_004521393.1 | Scaffold8648 | 2476                    | TT                              | CC                | 1946714239               |
| SNP_P3_185646_2497 | NW_004521393.1 | Scaffold8648 | 2497                    | AA                              | GG                | 1946714241               |
| SNP_P3_185647_2722 | NW_004521393.1 | Scaffold8648 | 2722                    | AA                              | GG                | 1946714243               |
| SNP_P3_185648_2760 | NW_004521393.1 | Scaffold8648 | 2760                    | AA                              | TT                | 1946714245               |
| SNP_P3_185649_2783 | NW_004521393.1 | Scaffold8648 | 2783                    | CC                              | GG                | 1946714248               |
| SNP_P3_185650_2827 | NW_004521393.1 | Scaffold8648 | 2827                    | CC                              | AA                | 1946714252               |
| SNP_P3_185651_2829 | NW_004521393.1 | Scaffold8648 | 2829                    | CC                              | TT                | 1946714254               |
| SNP_P3_185652_3403 | NW_004521393.1 | Scaffold8648 | 3403                    | AA                              | TT                | 1946714256               |
| SNP_P3_185653_3409 | NW_004521393.1 | Scaffold8648 | 3409                    | AA                              | GG                | 1946714258               |
| SNP_P3_185654_3458 | NW_004521393.1 | Scaffold8648 | 3458                    | CC                              | GG                | 1946714261               |
| SNP_P3_185655_3489 | NW_004521393.1 | Scaffold8648 | 3489                    | AA                              | TT                | 1946714263               |
| SNP_P3_185656_3498 | NW_004521393.1 | Scaffold8648 | 3498                    | TT                              | AA                | 1946714265               |
| SNP_P3_185657_3521 | NW_004521393.1 | Scaffold8648 | 3521                    | AA                              | CC                | 1946714268               |
| SNP_P3_185658_3839 | NW_004521393.1 | Scaffold8648 | 3839                    | TT                              | GG                | 1946714270               |
| SNP_P3_185659_4179 | NW_004521393.1 | Scaffold8648 | 4179                    | AA                              | GG                | 1946714273               |
| SNP_P3_185660_4210 | NW_004521393.1 | Scaffold8648 | 4210                    | TT                              | CC                | 1946714276               |
| SNP_P3_185661_4269 | NW_004521393.1 | Scaffold8648 | 4269                    | TT                              | GG                | 1946714278               |
| SNP_P3_185662_4319 | NW_004521393.1 | Scaffold8648 | 4319                    | GG                              | AA                | 1946714281               |
| SNP_P3_185663_4395 | NW_004521393.1 | Scaffold8648 | 4395                    | CC                              | GG                | 1946714283               |
| SNP_P3_185664_4480 | NW_004521393.1 | Scaffold8648 | 4480                    | TT                              | CC                | 1946714285               |
| SNP_P3_185665_4722 | NW_004521393.1 | Scaffold8648 | 4722                    | TT                              | AA                | 1946714287               |
| SNP_P3_185666_4757 | NW_004521393.1 | Scaffold8648 | 4757                    | AA                              | GG                | 1946714289               |
| SNP_P3_185667_4758 | NW_004521393.1 | Scaffold8648 | 4758                    | AA                              | GG                | 1946714291               |
| SNP_P3_185668_4774 | NW_004521393.1 | Scaffold8648 | 4774                    | TT                              | CC                | 1946714294               |
| SNP_P3_185669_4797 | NW_004521393.1 | Scaffold8648 | 4797                    | CC                              | AA                | 1946714297               |
| SNP_P3_185670_4836 | NW_004521393.1 | Scaffold8648 | 4836                    | CC                              | TT                | 1946714300               |
| SNP_P3_185671_4860 | NW_004521393.1 | Scaffold8648 | 4860                    | GG                              | TT                | 1946714302               |
| SNP_P3_185672_2349 | NW_004521397.1 | Scaffold8653 | 2349                    | CC                              | GG                | 1946714304               |
| SNP_P3_185673_64   | NW_004521398.1 | Scaffold8654 | 64                      | AA                              | TT                | 1946714306               |
| SNP_P3_185674_357  | NW_004521398.1 | Scaffold8654 | 357                     | AA                              | CC                | 1946714308               |
| SNP_P3_185675_371  | NW_004521398.1 | Scaffold8654 | 371                     | GG                              | TT                | 1946714310               |
| SNP_P3_185676_385  | NW_004521398.1 | Scaffold8654 | 385                     | AA                              | CC                | 1946714312               |
| SNP_P3_185677_511  | NW_004521398.1 | Scaffold8654 | 511                     | TT                              | CC                | 1946714314               |
| SNP_P3_185678_586  | NW_004521398.1 | Scaffold8654 | 586                     | GG                              | AA                | 1946714317               |
| SNP_P3_185679_587  | NW_004521398.1 | Scaffold8654 | 587                     | TT                              | AA                | 1946714320               |
| SNP_P3_185680_596  | NW_004521398.1 | Scaffold8654 | 596                     | AA                              | CC                | 1946714323               |
| SNP_P3_185681_5294 | NW_004521398.1 | Scaffold8654 | 5294                    | TT                              | GG                | 1946714326               |
| SNP_P3_185682_5473 | NW_004521398.1 | Scaffold8654 | 5473                    | GG                              | TT                | 1946714328               |
| SNP_P3_185683_5555 | NW_004521398.1 | Scaffold8654 | 5555                    | CC                              | AA                | 1946714330               |
| SNP_P3_185684_5661 | NW_004521398.1 | Scaffold8654 | 5661                    | AA                              | TT                | 1946714333               |

| SNPs IDs           | Chromosome IDs | Chromosomes  | Physical positions (bp) | CDC Frontier (Reference genome) | (Pusa 256 & HPNB) | NCBI SNPdb Accession IDs |
|--------------------|----------------|--------------|-------------------------|---------------------------------|-------------------|--------------------------|
| SNP_P3_185685_5684 | NW_004521398.1 | Scaffold8654 | 5684                    | GG                              | TT                | 1946714335               |
| SNP_P3_185686_5746 | NW_004521398.1 | Scaffold8654 | 5746                    | CC                              | GG                | 1946714337               |
| SNP_P3_185687_5828 | NW_004521398.1 | Scaffold8654 | 5828                    | AA                              | CC                | 1946714340               |
| SNP_P3_185688_5880 | NW_004521398.1 | Scaffold8654 | 5880                    | CC                              | AA                | 1946714343               |
| SNP_P3_185689_444  | NW_004521402.1 | Scaffold8662 | 444                     | TT                              | GG                | 1946714345               |
| SNP_P3_185690_447  | NW_004521405.1 | Scaffold8668 | 447                     | TT                              | CC                | 1946714347               |
| SNP_P3_185691_494  | NW_004521405.1 | Scaffold8668 | 494                     | GG                              | AA                | 1946714349               |
| SNP_P3_185692_17   | NW_004521406.1 | Scaffold8669 | 17                      | TT                              | CC                | 1946714351               |
| SNP_P3_185693_18   | NW_004521406.1 | Scaffold8669 | 18                      | GG                              | CC                | 1946714353               |
| SNP_P3_185694_23   | NW_004521406.1 | Scaffold8669 | 23                      | AA                              | GG                | 1946714355               |
| SNP_P3_185695_35   | NW_004521406.1 | Scaffold8669 | 35                      | GG                              | AA                | 1946714357               |
| SNP_P3_185696_40   | NW_004521406.1 | Scaffold8669 | 40                      | TT                              | AA                | 1946714359               |
| SNP_P3_185697_44   | NW_004521406.1 | Scaffold8669 | 44                      | GG                              | AA                | 1946714361               |
| SNP_P3_185698_92   | NW_004521406.1 | Scaffold8669 | 92                      | GG                              | AA                | 1946714363               |
| SNP_P3_185699_262  | NW_004521406.1 | Scaffold8669 | 262                     | AA                              | GG                | 1946714365               |
| SNP_P3_185700_643  | NW_004521406.1 | Scaffold8669 | 643                     | CC                              | AA                | 1946714367               |
| SNP_P3_185701_648  | NW_004521406.1 | Scaffold8669 | 648                     | AA                              | TT                | 1946714369               |
| SNP_P3_185703_720  | NW_004521406.1 | Scaffold8669 | 720                     | AA                              | CC                | 1946714371               |
| SNP_P3_185704_748  | NW_004521406.1 | Scaffold8669 | 748                     | GG                              | CC                | 1946714373               |
| SNP_P3_185705_563  | NW_004521407.1 | Scaffold8671 | 563                     | AA                              | CC                | 1946714375               |
| SNP_P3_185706_795  | NW_004521407.1 | Scaffold8671 | 795                     | AA                              | GG                | 1946714377               |
| SNP_P3_185707_846  | NW_004521411.1 | Scaffold8675 | 846                     | CC                              | TT                | 1946714379               |
| SNP_P3_185708_945  | NW_004521415.1 | Scaffold8686 | 945                     | CC                              | AA                | 1946714381               |
| SNP_P3_185709_983  | NW_004521415.1 | Scaffold8686 | 983                     | AA                              | TT                | 1946714383               |
| SNP_P3_185710_985  | NW_004521415.1 | Scaffold8686 | 985                     | GG                              | CC                | 1946714385               |
| SNP_P3_185711_1155 | NW_004521415.1 | Scaffold8686 | 1155                    | CC                              | AA                | 1946714387               |
| SNP_P3_185712_64   | NW_004521416.1 | Scaffold8687 | 64                      | GG                              | TT                | 1946714389               |
| SNP_P3_185713_100  | NW_004521416.1 | Scaffold8687 | 100                     | GG                              | TT                | 1946714391               |
| SNP_P3_185714_790  | NW_004521416.1 | Scaffold8687 | 790                     | GG                              | TT                | 1946714393               |
| SNP_P3_185715_677  | NW_004521419.1 | Scaffold8690 | 677                     | GG                              | CC                | 1946714395               |
| SNP_P3_185716_734  | NW_004521419.1 | Scaffold8690 | 734                     | GG                              | CC                | 1946714397               |
| SNP_P3_185717_749  | NW_004521419.1 | Scaffold8690 | 749                     | GG                              | AA                | 1946714399               |
| SNP_P3_185718_64   | NW_004521422.1 | Scaffold8696 | 64                      | TT                              | AA                | 1946714401               |
| SNP_P3_185719_148  | NW_004521422.1 | Scaffold8696 | 148                     | GG                              | AA                | 1946714403               |
| SNP_P3_185720_381  | NW_004521422.1 | Scaffold8696 | 381                     | AA                              | CC                | 1946714405               |
| SNP_P3_185721_848  | NW_004521422.1 | Scaffold8696 | 848                     | TT                              | CC                | 1946714407               |
| SNP_P3_185722_870  | NW_004521422.1 | Scaffold8696 | 870                     | TT                              | GG                | 1946714409               |
| SNP_P3_185723_456  | NW_004521423.1 | Scaffold8702 | 456                     | CC                              | TT                | 1946714411               |
| SNP_P3_185724_658  | NW_004521423.1 | Scaffold8702 | 658                     | TT                              | GG                | 1946714413               |
| SNP_P3_185725_958  | NW_004521423.1 | Scaffold8702 | 958                     | CC                              | TT                | 1946714415               |
| SNP_P3_185726_427  | NW_004521425.1 | Scaffold8705 | 427                     | AA                              | GG                | 1946714417               |
| SNP_P3_185728_1081 | NW_004521425.1 | Scaffold8705 | 1081                    | AA                              | GG                | 1946714419               |



| SNPs IDs           | Chromosome IDs | Chromosomes  | Physical positions (bp) | CDC Frontier (Reference genome) | (Pusa 256 & HPNB) | NCBI SNPdb Accession IDs |
|--------------------|----------------|--------------|-------------------------|---------------------------------|-------------------|--------------------------|
| SNP_P3_185729_103  | NW_004521426.1 | Scaffold8707 | 103                     | TT                              | GG                | 1946714421               |
| SNP_P3_185730_498  | NW_004521426.1 | Scaffold8707 | 498                     | TT                              | CC                | 1946714423               |
| SNP_P3_185731_842  | NW_004521426.1 | Scaffold8707 | 842                     | CC                              | GG                | 1946714425               |
| SNP_P3_185732_851  | NW_004521426.1 | Scaffold8707 | 851                     | CC                              | AA                | 1946714427               |
| SNP_P3_185733_1299 | NW_004521426.1 | Scaffold8707 | 1299                    | GG                              | CC                | 1946714429               |
| SNP_P3_185735_1680 | NW_004521426.1 | Scaffold8707 | 1680                    | GG                              | CC                | 1946714431               |
| SNP_P3_185736_1723 | NW_004521426.1 | Scaffold8707 | 1723                    | CC                              | TT                | 1946714433               |
| SNP_P3_185737_1855 | NW_004521426.1 | Scaffold8707 | 1855                    | TT                              | AA                | 1946714435               |
| SNP_P3_185738_64   | NW_004521428.1 | Scaffold8709 | 64                      | CC                              | TT                | 1946714437               |
| SNP_P3_185739_649  | NW_004521428.1 | Scaffold8709 | 649                     | TT                              | GG                | 1946714439               |
| SNP_P3_185740_966  | NW_004521428.1 | Scaffold8709 | 966                     | GG                              | AA                | 1946714441               |
| SNP_P3_185741_561  | NW_004521430.1 | Scaffold8715 | 561                     | AA                              | CC                | 1946714443               |
| SNP_P3_185742_562  | NW_004521430.1 | Scaffold8715 | 562                     | TT                              | CC                | 1946714445               |
| SNP_P3_185743_591  | NW_004521430.1 | Scaffold8715 | 591                     | GG                              | AA                | 1946714447               |
| SNP_P3_185744_645  | NW_004521430.1 | Scaffold8715 | 645                     | TT                              | GG                | 1946714449               |
| SNP_P3_185745_776  | NW_004521430.1 | Scaffold8715 | 776                     | TT                              | AA                | 1946714451               |
| SNP_P3_185746_987  | NW_004521430.1 | Scaffold8715 | 987                     | TT                              | CC                | 1946714453               |
| SNP_P3_185747_1072 | NW_004521430.1 | Scaffold8715 | 1072                    | GG                              | AA                | 1946714455               |
| SNP_P3_185748_1109 | NW_004521430.1 | Scaffold8715 | 1109                    | AA                              | GG                | 1946714457               |
| SNP_P3_185749_64   | NW_004521434.1 | Scaffold8730 | 64                      | GG                              | AA                | 1946714459               |
| SNP_P3_185751_149  | NW_004521434.1 | Scaffold8730 | 149                     | CC                              | TT                | 1946714461               |
| SNP_P3_185752_150  | NW_004521434.1 | Scaffold8730 | 150                     | AA                              | GG                | 1946714463               |
| SNP_P3_185753_154  | NW_004521434.1 | Scaffold8730 | 154                     | TT                              | CC                | 1946714465               |
| SNP_P3_185754_205  | NW_004521434.1 | Scaffold8730 | 205                     | GG                              | AA                | 1946714467               |
| SNP_P3_185755_284  | NW_004521434.1 | Scaffold8730 | 284                     | AA                              | TT                | 1946714469               |
| SNP_P3_185756_371  | NW_004521434.1 | Scaffold8730 | 371                     | AA                              | TT                | 1946714471               |
| SNP_P3_185757_383  | NW_004521434.1 | Scaffold8730 | 383                     | CC                              | TT                | 1946714473               |
| SNP_P3_185758_386  | NW_004521434.1 | Scaffold8730 | 386                     | TT                              | CC                | 1946714475               |
| SNP_P3_185759_389  | NW_004521434.1 | Scaffold8730 | 389                     | GG                              | TT                | 1946714477               |
| SNP_P3_185760_485  | NW_004521434.1 | Scaffold8730 | 485                     | AA                              | GG                | 1946714479               |
| SNP_P3_185761_573  | NW_004521434.1 | Scaffold8730 | 573                     | AA                              | CC                | 1946714481               |
| SNP_P3_185762_1805 | NW_004521434.1 | Scaffold8730 | 1805                    | AA                              | GG                | 1946714483               |
| SNP_P3_185763_2100 | NW_004521434.1 | Scaffold8730 | 2100                    | TT                              | CC                | 1946714485               |
| SNP_P3_185765_471  | NW_004521436.1 | Scaffold8733 | 471                     | CC                              | TT                | 1946714487               |
| SNP_P3_185766_515  | NW_004521436.1 | Scaffold8733 | 515                     | GG                              | AA                | 1946714489               |
| SNP_P3_185767_534  | NW_004521436.1 | Scaffold8733 | 534                     | CC                              | TT                | 1946714491               |
| SNP_P3_185768_271  | NW_004521437.1 | Scaffold8734 | 271                     | AA                              | GG                | 1946714493               |
| SNP_P3_185769_286  | NW_004521437.1 | Scaffold8734 | 286                     | AA                              | GG                | 1946714494               |
| SNP_P3_185770_299  | NW_004521437.1 | Scaffold8734 | 299                     | TT                              | CC                | 1946714496               |
| SNP_P3_185771_320  | NW_004521437.1 | Scaffold8734 | 320                     | GG                              | AA                | 1946714498               |
| SNP_P3_185772_358  | NW_004521437.1 | Scaffold8734 | 358                     | TT                              | CC                | 1946714500               |
| SNP_P3_185773_540  | NW_004521437.1 | Scaffold8734 | 540                     | AA                              | TT                | 1946714502               |

| SNPs IDs           | Chromosome IDs | Chromosomes  | Physical positions (bp) | CDC Frontier (Reference genome) | (Pusa 256 & HPNB) | NCBI SNPdb Accession IDs |
|--------------------|----------------|--------------|-------------------------|---------------------------------|-------------------|--------------------------|
| SNP_P3_185774_624  | NW_004521437.1 | Scaffold8734 | 624                     | TT                              | CC                | 1946714504               |
| SNP_P3_185775_648  | NW_004521437.1 | Scaffold8734 | 648                     | CC                              | GG                | 1946714506               |
| SNP_P3_185776_707  | NW_004521437.1 | Scaffold8734 | 707                     | AA                              | TT                | 1946714508               |
| SNP_P3_185777_786  | NW_004521437.1 | Scaffold8734 | 786                     | CC                              | GG                | 1946714510               |
| SNP_P3_185779_839  | NW_004521437.1 | Scaffold8734 | 839                     | AA                              | TT                | 1946714512               |
| SNP_P3_185780_867  | NW_004521437.1 | Scaffold8734 | 867                     | AA                              | TT                | 1946714514               |
| SNP_P3_185781_876  | NW_004521437.1 | Scaffold8734 | 876                     | CC                              | AA                | 1946714516               |
| SNP_P3_185782_947  | NW_004521437.1 | Scaffold8734 | 947                     | TT                              | AA                | 1946714518               |
| SNP_P3_185783_1062 | NW_004521437.1 | Scaffold8734 | 1062                    | AA                              | GG                | 1946714520               |
| SNP_P3_185785_1168 | NW_004521437.1 | Scaffold8734 | 1168                    | CC                              | TT                | 1946714522               |
| SNP_P3_185786_2354 | NW_004521437.1 | Scaffold8734 | 2354                    | TT                              | CC                | 1946714523               |
| SNP_P3_185787_1344 | NW_004521441.1 | Scaffold8746 | 1344                    | AA                              | GG                | 1946714525               |
| SNP_P3_185788_1730 | NW_004521441.1 | Scaffold8746 | 1730                    | CC                              | TT                | 1946714527               |
| SNP_P3_185789_2174 | NW_004521441.1 | Scaffold8746 | 2174                    | AA                              | CC                | 1946714529               |
| SNP_P3_185790_2750 | NW_004521441.1 | Scaffold8746 | 2750                    | GG                              | AA                | 1946714531               |
| SNP_P3_185791_6000 | NW_004521441.1 | Scaffold8746 | 6000                    | TT                              | AA                | 1946714533               |
| SNP_P3_185792_6406 | NW_004521441.1 | Scaffold8746 | 6406                    | AA                              | GG                | 1946714535               |
| SNP_P3_185793_6414 | NW_004521441.1 | Scaffold8746 | 6414                    | GG                              | AA                | 1946714537               |
| SNP_P3_185794_6514 | NW_004521441.1 | Scaffold8746 | 6514                    | TT                              | CC                | 1946714539               |
| SNP_P3_185795_7004 | NW_004521441.1 | Scaffold8746 | 7004                    | AA                              | GG                | 1946714541               |
| SNP_P3_185796_7219 | NW_004521441.1 | Scaffold8746 | 7219                    | AA                              | GG                | 1946714543               |
| SNP_P3_185797_528  | NW_004521443.1 | Scaffold8751 | 528                     | CC                              | TT                | 1946714545               |
| SNP_P3_185798_556  | NW_004521443.1 | Scaffold8751 | 556                     | AA                              | GG                | 1946714547               |
| SNP_P3_185799_569  | NW_004521443.1 | Scaffold8751 | 569                     | TT                              | AA                | 1946714549               |
| SNP_P3_185800_572  | NW_004521443.1 | Scaffold8751 | 572                     | CC                              | AA                | 1946714551               |
| SNP_P3_185802_652  | NW_004521445.1 | Scaffold8755 | 652                     | CC                              | TT                | 1946714553               |
| SNP_P3_185803_701  | NW_004521445.1 | Scaffold8755 | 701                     | TT                              | AA                | 1946714555               |
| SNP_P3_185804_731  | NW_004521445.1 | Scaffold8755 | 731                     | TT                              | CC                | 1946714557               |
| SNP_P3_185805_738  | NW_004521445.1 | Scaffold8755 | 738                     | GG                              | TT                | 1946714558               |
| SNP_P3_185806_822  | NW_004521445.1 | Scaffold8755 | 822                     | GG                              | AA                | 1946714560               |
| SNP_P3_185807_894  | NW_004521445.1 | Scaffold8755 | 894                     | TT                              | CC                | 1946714562               |
| SNP_P3_185808_1109 | NW_004521445.1 | Scaffold8755 | 1109                    | AA                              | GG                | 1946714564               |
| SNP_P3_185809_733  | NW_004521450.1 | Scaffold8766 | 733                     | AA                              | CC                | 1946714566               |
| SNP_P3_185810_102  | NW_004521454.1 | Scaffold8778 | 102                     | GG                              | AA                | 1946714568               |
| SNP_P3_185811_207  | NW_004521454.1 | Scaffold8778 | 207                     | CC                              | AA                | 1946714570               |
| SNP_P3_185812_481  | NW_004521454.1 | Scaffold8778 | 481                     | GG                              | AA                | 1946714572               |
| SNP_P3_185813_555  | NW_004521454.1 | Scaffold8778 | 555                     | CC                              | GG                | 1946714574               |
| SNP_P3_185814_580  | NW_004521454.1 | Scaffold8778 | 580                     | TT                              | AA                | 1946714576               |
| SNP_P3_185815_119  | NW_004521458.1 | Scaffold8789 | 119                     | GG                              | CC                | 1946714578               |
| SNP_P3_185816_246  | NW_004521458.1 | Scaffold8789 | 246                     | TT                              | GG                | 1946714580               |
| SNP_P3_185817_350  | NW_004521458.1 | Scaffold8789 | 350                     | TT                              | GG                | 1946714582               |
| SNP_P3_185818_376  | NW_004521458.1 | Scaffold8789 | 376                     | CC                              | AA                | 1946714584               |

| SNPs IDs            | Chromosome IDs | Chromosomes  | Physical positions (bp) | CDC Frontier (Reference genome) | (Pusa 256 & HPNB) | NCBI SNPdb Accession IDs |
|---------------------|----------------|--------------|-------------------------|---------------------------------|-------------------|--------------------------|
| SNP_P3_185819_393   | NW_004521458.1 | Scaffold8789 | 393                     | AA                              | GG                | 1946714586               |
| SNP_P3_185820_406   | NW_004521458.1 | Scaffold8789 | 406                     | GG                              | AA                | 1946714587               |
| SNP_P3_185821_443   | NW_004521458.1 | Scaffold8789 | 443                     | TT                              | AA                | 1946714589               |
| SNP_P3_185822_466   | NW_004521458.1 | Scaffold8789 | 466                     | AA                              | CC                | 1946714591               |
| SNP_P3_185823_477   | NW_004521458.1 | Scaffold8789 | 477                     | AA                              | GG                | 1946714593               |
| SNP_P3_185824_545   | NW_004521458.1 | Scaffold8789 | 545                     | AA                              | GG                | 1946714595               |
| SNP_P3_185826_658   | NW_004521458.1 | Scaffold8789 | 658                     | CC                              | AA                | 1946714597               |
| SNP_P3_185827_666   | NW_004521458.1 | Scaffold8789 | 666                     | AA                              | CC                | 1946714599               |
| SNP_P3_185828_690   | NW_004521458.1 | Scaffold8789 | 690                     | TT                              | GG                | 1946714601               |
| SNP_P3_185829_741   | NW_004521458.1 | Scaffold8789 | 741                     | AA                              | GG                | 1946714603               |
| SNP_P3_185830_771   | NW_004521458.1 | Scaffold8789 | 771                     | CC                              | GG                | 1946714605               |
| SNP_P3_185831_784   | NW_004521458.1 | Scaffold8789 | 784                     | AA                              | GG                | 1946714607               |
| SNP_P3_185832_846   | NW_004521458.1 | Scaffold8789 | 846                     | TT                              | CC                | 1946714609               |
| SNP_P3_185833_1611  | NW_004521458.1 | Scaffold8789 | 1611                    | GG                              | AA                | 1946714611               |
| SNP_P3_185834_1916  | NW_004521458.1 | Scaffold8789 | 1916                    | TT                              | GG                | 1946714613               |
| SNP_P3_185835_1961  | NW_004521459.1 | Scaffold8791 | 1961                    | TT                              | CC                | 1946714615               |
| SNP_P3_185836_204   | NW_004521460.1 | Scaffold8792 | 204                     | AA                              | TT                | 1946714617               |
| SNP_P3_185838_770   | NW_004521461.1 | Scaffold8795 | 770                     | GG                              | TT                | 1946714619               |
| SNP_P3_185839_94    | NW_004521464.1 | Scaffold8801 | 94                      | TT                              | AA                | 1946714621               |
| SNP_P3_185840_20347 | NW_004521464.1 | Scaffold8801 | 20347                   | AA                              | TT                | 1946714623               |
| SNP_P3_185841_20424 | NW_004521464.1 | Scaffold8801 | 20424                   | GG                              | CC                | 1946714625               |
| SNP_P3_185842_20450 | NW_004521464.1 | Scaffold8801 | 20450                   | GG                              | AA                | 1946714627               |
| SNP_P3_185843_20493 | NW_004521464.1 | Scaffold8801 | 20493                   | TT                              | AA                | 1946714629               |
| SNP_P3_185844_5919  | NW_004521465.1 | Scaffold8803 | 5919                    | CC                              | TT                | 1946714631               |
| SNP_P3_185845_1194  | NW_004521466.1 | Scaffold8806 | 1194                    | AA                              | GG                | 1946714633               |
| SNP_P3_185846_164   | NW_004521474.1 | Scaffold8821 | 164                     | CC                              | AA                | 1946714635               |
| SNP_P3_185847_175   | NW_004521474.1 | Scaffold8821 | 175                     | CC                              | GG                | 1946714637               |
| SNP_P3_185848_389   | NW_004521474.1 | Scaffold8821 | 389                     | AA                              | CC                | 1946714639               |
| SNP_P3_185849_446   | NW_004521474.1 | Scaffold8821 | 446                     | CC                              | TT                | 1946714641               |
| SNP_P3_185850_765   | NW_004521474.1 | Scaffold8821 | 765                     | AA                              | CC                | 1946714643               |
| SNP_P3_185851_632   | NW_004521475.1 | Scaffold8822 | 632                     | AA                              | GG                | 1946714645               |
| SNP_P3_185852_643   | NW_004521475.1 | Scaffold8822 | 643                     | GG                              | AA                | 1946714647               |
| SNP_P3_185853_662   | NW_004521475.1 | Scaffold8822 | 662                     | AA                              | GG                | 1946714649               |
| SNP_P3_185854_878   | NW_004521475.1 | Scaffold8822 | 878                     | AA                              | GG                | 1946714651               |
| SNP_P3_185855_1108  | NW_004521475.1 | Scaffold8822 | 1108                    | GG                              | AA                | 1946714653               |
| SNP_P3_185856_346   | NW_004521476.1 | Scaffold8824 | 346                     | TT                              | CC                | 1946714655               |
| SNP_P3_185857_364   | NW_004521476.1 | Scaffold8824 | 364                     | CC                              | TT                | 1946714657               |
| SNP_P3_185858_381   | NW_004521476.1 | Scaffold8824 | 381                     | GG                              | AA                | 1946714659               |
| SNP_P3_185859_587   | NW_004521477.1 | Scaffold8825 | 587                     | TT                              | CC                | 1946714661               |
| SNP_P3_185860_598   | NW_004521477.1 | Scaffold8825 | 598                     | AA                              | GG                | 1946714663               |
| SNP_P3_185861_619   | NW_004521477.1 | Scaffold8825 | 619                     | AA                              | TT                | 1946714665               |
| SNP_P3_185862_626   | NW_004521477.1 | Scaffold8825 | 626                     | GG                              | AA                | 1946714667               |

| SNPs IDs           | Chromosome IDs | Chromosomes  | Physical positions (bp) | CDC Frontier (Reference genome) | (Pusa 256 & HPNB) | NCBI SNPdb Accession IDs |
|--------------------|----------------|--------------|-------------------------|---------------------------------|-------------------|--------------------------|
| SNP_P3_185864_1020 | NW_004521477.1 | Scaffold8825 | 1020                    | CC                              | GG                | 1946714669               |
| SNP_P3_185865_1063 | NW_004521477.1 | Scaffold8825 | 1063                    | GG                              | TT                | 1946714671               |
| SNP_P3_185866_1091 | NW_004521477.1 | Scaffold8825 | 1091                    | GG                              | AA                | 1946714673               |
| SNP_P3_185867_679  | NW_004521478.1 | Scaffold8826 | 679                     | TT                              | CC                | 1946714675               |
| SNP_P3_185868_718  | NW_004521478.1 | Scaffold8826 | 718                     | TT                              | CC                | 1946714677               |
| SNP_P3_185869_983  | NW_004521478.1 | Scaffold8826 | 983                     | TT                              | CC                | 1946714679               |
| SNP_P3_185870_1427 | NW_004521478.1 | Scaffold8826 | 1427                    | TT                              | CC                | 1946714681               |
| SNP_P3_185871_825  | NW_004521479.1 | Scaffold8831 | 825                     | TT                              | GG                | 1946714683               |
| SNP_P3_185872_865  | NW_004521481.1 | Scaffold8835 | 865                     | AA                              | GG                | 1946714685               |
| SNP_P3_185873_866  | NW_004521481.1 | Scaffold8835 | 866                     | GG                              | CC                | 1946714687               |
| SNP_P3_185874_875  | NW_004521481.1 | Scaffold8835 | 875                     | GG                              | AA                | 1946714689               |
| SNP_P3_185875_856  | NW_004521482.1 | Scaffold8836 | 856                     | CC                              | TT                | 1946714691               |
| SNP_P3_185876_901  | NW_004521482.1 | Scaffold8836 | 901                     | TT                              | CC                | 1946714693               |
| SNP_P3_185877_939  | NW_004521482.1 | Scaffold8836 | 939                     | AA                              | GG                | 1946714695               |
| SNP_P3_185879_1105 | NW_004521482.1 | Scaffold8836 | 1105                    | AA                              | TT                | 1946714697               |
| SNP_P3_185880_1129 | NW_004521482.1 | Scaffold8836 | 1129                    | GG                              | AA                | 1946714699               |
| SNP_P3_185881_1161 | NW_004521482.1 | Scaffold8836 | 1161                    | CC                              | TT                | 1946714701               |
| SNP_P3_185882_1197 | NW_004521482.1 | Scaffold8836 | 1197                    | AA                              | GG                | 1946714703               |
| SNP_P3_185883_1222 | NW_004521482.1 | Scaffold8836 | 1222                    | TT                              | CC                | 1946714704               |
| SNP_P3_185885_1309 | NW_004521482.1 | Scaffold8836 | 1309                    | TT                              | GG                | 1946714706               |
| SNP_P3_185886_213  | NW_004521485.1 | Scaffold8842 | 213                     | AA                              | TT                | 1946714708               |
| SNP_P3_185887_440  | NW_004521485.1 | Scaffold8842 | 440                     | CC                              | TT                | 1946714710               |
| SNP_P3_185888_509  | NW_004521485.1 | Scaffold8842 | 509                     | GG                              | AA                | 1946714712               |
| SNP_P3_185889_584  | NW_004521485.1 | Scaffold8842 | 584                     | AA                              | CC                | 1946714713               |
| SNP_P3_185890_602  | NW_004521485.1 | Scaffold8842 | 602                     | CC                              | AA                | 1946714714               |
| SNP_P3_185891_860  | NW_004521485.1 | Scaffold8842 | 860                     | AA                              | TT                | 1946714716               |
| SNP_P3_185892_888  | NW_004521485.1 | Scaffold8842 | 888                     | TT                              | CC                | 1946714718               |
| SNP_P3_185893_948  | NW_004521485.1 | Scaffold8842 | 948                     | CC                              | TT                | 1946714720               |
| SNP_P3_185894_1008 | NW_004521486.1 | Scaffold8844 | 1008                    | AA                              | CC                | 1946714722               |
| SNP_P3_185895_1268 | NW_004521486.1 | Scaffold8844 | 1268                    | TT                              | CC                | 1946714724               |
| SNP_P3_185896_1271 | NW_004521486.1 | Scaffold8844 | 1271                    | TT                              | AA                | 1946714726               |
| SNP_P3_185897_1360 | NW_004521486.1 | Scaffold8844 | 1360                    | CC                              | TT                | 1946714728               |
| SNP_P3_185898_1995 | NW_004521487.1 | Scaffold8845 | 1995                    | AA                              | GG                | 1946714730               |
| SNP_P3_185899_2554 | NW_004521487.1 | Scaffold8845 | 2554                    | AA                              | GG                | 1946714732               |
| SNP_P3_185900_3129 | NW_004521487.1 | Scaffold8845 | 3129                    | AA                              | GG                | 1946714734               |
| SNP_P3_185901_3130 | NW_004521487.1 | Scaffold8845 | 3130                    | CC                              | AA                | 1946714736               |
| SNP_P3_185902_3202 | NW_004521487.1 | Scaffold8845 | 3202                    | AA                              | GG                | 1946714738               |
| SNP_P3_185903_395  | NW_004521488.1 | Scaffold8847 | 395                     | AA                              | GG                | 1946714740               |
| SNP_P3_185904_446  | NW_004521488.1 | Scaffold8847 | 446                     | AA                              | GG                | 1946714742               |
| SNP_P3_185905_984  | NW_004521489.1 | Scaffold8848 | 984                     | CC                              | TT                | 1946714744               |
| SNP_P3_185906_1146 | NW_004521489.1 | Scaffold8848 | 1146                    | TT                              | GG                | 1946714746               |
| SNP_P3_185907_555  | NW_004521492.1 | Scaffold8852 | 555                     | GG                              | AA                | 1946714748               |

| SNPs IDs           | Chromosome IDs | Chromosomes  | Physical positions (bp) | CDC Frontier (Reference genome) | (Pusa 256 & HPNB) | NCBI SNPdb Accession IDs |
|--------------------|----------------|--------------|-------------------------|---------------------------------|-------------------|--------------------------|
| SNP_P3_185908_731  | NW_004521492.1 | Scaffold8852 | 731                     | AA                              | GG                | 1946714750               |
| SNP_P3_185909_799  | NW_004521492.1 | Scaffold8852 | 799                     | TT                              | AA                | 1946714752               |
| SNP_P3_185910_840  | NW_004521492.1 | Scaffold8852 | 840                     | TT                              | CC                | 1946714754               |
| SNP_P3_185911_896  | NW_004521492.1 | Scaffold8852 | 896                     | AA                              | GG                | 1946714756               |
| SNP_P3_185912_922  | NW_004521492.1 | Scaffold8852 | 922                     | TT                              | AA                | 1946714758               |
| SNP_P3_185913_1044 | NW_004521492.1 | Scaffold8852 | 1044                    | GG                              | AA                | 1946714760               |
| SNP_P3_185914_1114 | NW_004521492.1 | Scaffold8852 | 1114                    | TT                              | AA                | 1946714762               |
| SNP_P3_185915_1200 | NW_004521492.1 | Scaffold8852 | 1200                    | TT                              | CC                | 1946714764               |
| SNP_P3_185916_1304 | NW_004521492.1 | Scaffold8852 | 1304                    | CC                              | TT                | 1946714766               |
| SNP_P3_185917_1353 | NW_004521492.1 | Scaffold8852 | 1353                    | TT                              | GG                | 1946714768               |
| SNP_P3_185918_1375 | NW_004521492.1 | Scaffold8852 | 1375                    | CC                              | TT                | 1946714769               |
| SNP_P3_185920_368  | NW_004521497.1 | Scaffold8857 | 368                     | CC                              | TT                | 1946714770               |
| SNP_P3_185921_5535 | NW_004521497.1 | Scaffold8857 | 5535                    | AA                              | CC                | 1946714771               |
| SNP_P3_185922_5559 | NW_004521497.1 | Scaffold8857 | 5559                    | GG                              | AA                | 1946714772               |
| SNP_P3_185923_5617 | NW_004521497.1 | Scaffold8857 | 5617                    | GG                              | AA                | 1946714773               |
| SNP_P3_185924_5744 | NW_004521497.1 | Scaffold8857 | 5744                    | TT                              | AA                | 1946714774               |
| SNP_P3_185925_5937 | NW_004521497.1 | Scaffold8857 | 5937                    | GG                              | AA                | 1946714775               |
| SNP_P3_185926_769  | NW_004521498.1 | Scaffold8859 | 769                     | GG                              | AA                | 1946714776               |
| SNP_P3_185927_545  | NW_004521501.1 | Scaffold8866 | 545                     | TT                              | CC                | 1946714777               |
| SNP_P3_185928_2385 | NW_004521501.1 | Scaffold8866 | 2385                    | AA                              | GG                | 1946714778               |
| SNP_P3_185930_2906 | NW_004521501.1 | Scaffold8866 | 2906                    | TT                              | AA                | 1946714779               |
| SNP_P3_185931_2925 | NW_004521501.1 | Scaffold8866 | 2925                    | TT                              | GG                | 1946714780               |
| SNP_P3_185932_2942 | NW_004521501.1 | Scaffold8866 | 2942                    | CC                              | AA                | 1946714782               |
| SNP_P3_185933_2945 | NW_004521501.1 | Scaffold8866 | 2945                    | AA                              | TT                | 1946714784               |
| SNP_P3_185934_2962 | NW_004521501.1 | Scaffold8866 | 2962                    | CC                              | AA                | 1946714785               |
| SNP_P3_185935_64   | NW_004521506.1 | Scaffold8876 | 64                      | TT                              | CC                | 1946714787               |
| SNP_P3_185936_101  | NW_004521506.1 | Scaffold8876 | 101                     | AA                              | GG                | 1946714789               |
| SNP_P3_185937_187  | NW_004521506.1 | Scaffold8876 | 187                     | TT                              | GG                | 1946714791               |
| SNP_P3_185938_222  | NW_004521506.1 | Scaffold8876 | 222                     | TT                              | AA                | 1946714793               |
| SNP_P3_185939_398  | NW_004521506.1 | Scaffold8876 | 398                     | CC                              | AA                | 1946714795               |
| SNP_P3_185940_486  | NW_004521506.1 | Scaffold8876 | 486                     | TT                              | GG                | 1946714797               |
| SNP_P3_185941_538  | NW_004521506.1 | Scaffold8876 | 538                     | TT                              | GG                | 1946714799               |
| SNP_P3_185942_558  | NW_004521506.1 | Scaffold8876 | 558                     | AA                              | TT                | 1946714801               |
| SNP_P3_185943_622  | NW_004521506.1 | Scaffold8876 | 622                     | CC                              | TT                | 1946714803               |
| SNP_P3_185944_636  | NW_004521506.1 | Scaffold8876 | 636                     | TT                              | CC                | 1946714805               |
| SNP_P3_185945_643  | NW_004521506.1 | Scaffold8876 | 643                     | CC                              | TT                | 1946714807               |
| SNP_P3_185946_644  | NW_004521506.1 | Scaffold8876 | 644                     | CC                              | TT                | 1946714809               |
| SNP_P3_185947_670  | NW_004521506.1 | Scaffold8876 | 670                     | GG                              | AA                | 1946714811               |
| SNP_P3_185948_885  | NW_004521506.1 | Scaffold8876 | 885                     | CC                              | TT                | 1946714813               |
| SNP_P3_185949_901  | NW_004521506.1 | Scaffold8876 | 901                     | AA                              | GG                | 1946714815               |
| SNP_P3_185950_195  | NW_004521507.1 | Scaffold8877 | 195                     | TT                              | GG                | 1946714817               |
| SNP_P3_185951_229  | NW_004521507.1 | Scaffold8877 | 229                     | TT                              | CC                | 1946714821               |

| SNPs IDs            | Chromosome IDs | Chromosomes  | Physical positions (bp) | CDC Frontier (Reference genome) | (Pusa 256 & HPNB) | NCBI SNPdb Accession IDs |
|---------------------|----------------|--------------|-------------------------|---------------------------------|-------------------|--------------------------|
| SNP_P3_185953_501   | NW_004521507.1 | Scaffold8877 | 501                     | CC                              | AA                | 1946714822               |
| SNP_P3_185954_520   | NW_004521507.1 | Scaffold8877 | 520                     | GG                              | AA                | 1946714823               |
| SNP_P3_185956_570   | NW_004521507.1 | Scaffold8877 | 570                     | TT                              | AA                | 1946714824               |
| SNP_P3_185957_733   | NW_004521507.1 | Scaffold8877 | 733                     | GG                              | AA                | 1946714825               |
| SNP_P3_185958_754   | NW_004521507.1 | Scaffold8877 | 754                     | TT                              | AA                | 1946714827               |
| SNP_P3_185959_761   | NW_004521507.1 | Scaffold8877 | 761                     | GG                              | AA                | 1946714829               |
| SNP_P3_185960_767   | NW_004521507.1 | Scaffold8877 | 767                     | AA                              | GG                | 1946714831               |
| SNP_P3_185961_853   | NW_004521507.1 | Scaffold8877 | 853                     | TT                              | CC                | 1946714833               |
| SNP_P3_185962_19865 | NW_004521507.1 | Scaffold8877 | 19865                   | AA                              | TT                | 1946714835               |
| SNP_P3_185963_19882 | NW_004521507.1 | Scaffold8877 | 19882                   | AA                              | GG                | 1946714837               |
| SNP_P3_185964_20349 | NW_004521507.1 | Scaffold8877 | 20349                   | TT                              | GG                | 1946714839               |
| SNP_P3_185965_20387 | NW_004521507.1 | Scaffold8877 | 20387                   | GG                              | AA                | 1946714841               |
| SNP_P3_185966_20602 | NW_004521507.1 | Scaffold8877 | 20602                   | TT                              | AA                | 1946714843               |
| SNP_P3_185967_20603 | NW_004521507.1 | Scaffold8877 | 20603                   | AA                              | TT                | 1946714845               |
| SNP_P3_185968_20648 | NW_004521507.1 | Scaffold8877 | 20648                   | TT                              | CC                | 1946714847               |
| SNP_P3_185969_20652 | NW_004521507.1 | Scaffold8877 | 20652                   | CC                              | AA                | 1946714849               |
| SNP_P3_185970_20752 | NW_004521507.1 | Scaffold8877 | 20752                   | GG                              | TT                | 1946714851               |
| SNP_P3_185971_20795 | NW_004521507.1 | Scaffold8877 | 20795                   | AA                              | GG                | 1946714853               |
| SNP_P3_185972_95    | NW_004521508.1 | Scaffold8879 | 95                      | AA                              | CC                | 1946714855               |
| SNP_P3_185973_420   | NW_004521509.1 | Scaffold8881 | 420                     | CC                              | AA                | 1946714857               |
| SNP_P3_185974_470   | NW_004521509.1 | Scaffold8881 | 470                     | AA                              | CC                | 1946714859               |
| SNP_P3_185975_624   | NW_004521510.1 | Scaffold8883 | 624                     | CC                              | TT                | 1946714861               |
| SNP_P3_185977_723   | NW_004521514.1 | Scaffold8892 | 723                     | CC                              | AA                | 1946714863               |
| SNP_P3_185978_931   | NW_004521514.1 | Scaffold8892 | 931                     | TT                              | CC                | 1946714865               |
| SNP_P3_185979_962   | NW_004521514.1 | Scaffold8892 | 962                     | AA                              | TT                | 1946714867               |
| SNP_P3_185980_6177  | NW_004521514.1 | Scaffold8892 | 6177                    | TT                              | GG                | 1946714869               |
| SNP_P3_185981_1937  | NW_004521516.1 | Scaffold8896 | 1937                    | AA                              | TT                | 1946714871               |
| SNP_P3_185982_95    | NW_004521517.1 | Scaffold8897 | 95                      | TT                              | AA                | 1946714873               |
| SNP_P3_185983_785   | NW_004521517.1 | Scaffold8897 | 785                     | TT                              | CC                | 1946714875               |
| SNP_P3_185984_831   | NW_004521517.1 | Scaffold8897 | 831                     | CC                              | TT                | 1946714877               |
| SNP_P3_185985_872   | NW_004521517.1 | Scaffold8897 | 872                     | TT                              | CC                | 1946714879               |
| SNP_P3_185986_932   | NW_004521517.1 | Scaffold8897 | 932                     | GG                              | AA                | 1946714880               |
| SNP_P3_185987_938   | NW_004521517.1 | Scaffold8897 | 938                     | TT                              | GG                | 1946714882               |
| SNP_P3_185988_979   | NW_004521517.1 | Scaffold8897 | 979                     | GG                              | TT                | 1946714884               |
| SNP_P3_185989_1167  | NW_004521517.1 | Scaffold8897 | 1167                    | TT                              | CC                | 1946714886               |
| SNP_P3_185990_1184  | NW_004521517.1 | Scaffold8897 | 1184                    | TT                              | GG                | 1946714888               |
| SNP_P3_185991_1196  | NW_004521517.1 | Scaffold8897 | 1196                    | TT                              | GG                | 1946714890               |
| SNP_P3_185992_324   | NW_004521518.1 | Scaffold8898 | 324                     | GG                              | CC                | 1946714892               |
| SNP_P3_185993_710   | NW_004521521.1 | Scaffold8907 | 710                     | GG                              | AA                | 1946714894               |
| SNP_P3_185994_732   | NW_004521521.1 | Scaffold8907 | 732                     | GG                              | AA                | 1946714895               |
| SNP_P3_185995_857   | NW_004521521.1 | Scaffold8907 | 857                     | CC                              | TT                | 1946714897               |
| SNP_P3_185996_89    | NW_004521522.1 | Scaffold8913 | 89                      | TT                              | AA                | 1946714899               |

| SNPs IDs           | Chromosome IDs | Chromosomes  | Physical positions (bp) | CDC Frontier (Reference genome) | (Pusa 256 & HPNB) | NCBI SNPdb Accession IDs |
|--------------------|----------------|--------------|-------------------------|---------------------------------|-------------------|--------------------------|
| SNP_P3_185997_1269 | NW_004521522.1 | Scaffold8913 | 1269                    | CC                              | TT                | 1946714901               |
| SNP_P3_185998_1273 | NW_004521522.1 | Scaffold8913 | 1273                    | CC                              | GG                | 1946714903               |
| SNP_P3_185999_1281 | NW_004521522.1 | Scaffold8913 | 1281                    | CC                              | TT                | 1946714905               |
| SNP_P3_186000_1297 | NW_004521522.1 | Scaffold8913 | 1297                    | GG                              | AA                | 1946714907               |
| SNP_P3_186001_1779 | NW_004521522.1 | Scaffold8913 | 1779                    | GG                              | AA                | 1946714909               |
| SNP_P3_186002_1880 | NW_004521522.1 | Scaffold8913 | 1880                    | TT                              | CC                | 1946714911               |
| SNP_P3_186003_1901 | NW_004521522.1 | Scaffold8913 | 1901                    | CC                              | GG                | 1946714913               |
| SNP_P3_186004_1902 | NW_004521522.1 | Scaffold8913 | 1902                    | GG                              | CC                | 1946714914               |
| SNP_P3_186005_1909 | NW_004521522.1 | Scaffold8913 | 1909                    | GG                              | CC                | 1946714916               |
| SNP_P3_186006_1925 | NW_004521522.1 | Scaffold8913 | 1925                    | GG                              | TT                | 1946714918               |
| SNP_P3_186007_1969 | NW_004521522.1 | Scaffold8913 | 1969                    | GG                              | CC                | 1946714920               |
| SNP_P3_186008_1973 | NW_004521522.1 | Scaffold8913 | 1973                    | CC                              | GG                | 1946714922               |
| SNP_P3_186009_2079 | NW_004521522.1 | Scaffold8913 | 2079                    | CC                              | AA                | 1946714924               |
| SNP_P3_186010_2109 | NW_004521522.1 | Scaffold8913 | 2109                    | AA                              | GG                | 1946714926               |
| SNP_P3_186011_2147 | NW_004521522.1 | Scaffold8913 | 2147                    | AA                              | TT                | 1946714927               |
| SNP_P3_186012_2152 | NW_004521522.1 | Scaffold8913 | 2152                    | TT                              | GG                | 1946714929               |
| SNP_P3_186015_2297 | NW_004521522.1 | Scaffold8913 | 2297                    | AA                              | GG                | 1946714931               |
| SNP_P3_186016_2439 | NW_004521522.1 | Scaffold8913 | 2439                    | CC                              | TT                | 1946714933               |
| SNP_P3_186017_2448 | NW_004521522.1 | Scaffold8913 | 2448                    | CC                              | TT                | 1946714935               |
| SNP_P3_186018_2470 | NW_004521522.1 | Scaffold8913 | 2470                    | TT                              | GG                | 1946714937               |
| SNP_P3_186020_1117 | NW_004521525.1 | Scaffold8920 | 1117                    | GG                              | AA                | 1946714939               |
| SNP_P3_186022_752  | NW_004521528.1 | Scaffold8930 | 752                     | GG                              | TT                | 1946714941               |
| SNP_P3_186023_796  | NW_004521533.1 | Scaffold8943 | 796                     | CC                              | TT                | 1946714943               |
| SNP_P3_186024_960  | NW_004521533.1 | Scaffold8943 | 960                     | CC                              | TT                | 1946714945               |
| SNP_P3_186025_996  | NW_004521533.1 | Scaffold8943 | 996                     | CC                              | AA                | 1946714947               |
| SNP_P3_186026_64   | NW_004521539.1 | Scaffold8960 | 64                      | CC                              | TT                | 1946714949               |
| SNP_P3_186027_268  | NW_004521539.1 | Scaffold8960 | 268                     | GG                              | AA                | 1946714951               |
| SNP_P3_186028_535  | NW_004521539.1 | Scaffold8960 | 535                     | TT                              | CC                | 1946714953               |
| SNP_P3_186029_647  | NW_004521539.1 | Scaffold8960 | 647                     | GG                              | AA                | 1946714955               |
| SNP_P3_186030_708  | NW_004521539.1 | Scaffold8960 | 708                     | GG                              | AA                | 1946714957               |
| SNP_P3_186031_103  | NW_004521541.1 | Scaffold8962 | 103                     | TT                              | AA                | 1946714959               |
| SNP_P3_186032_439  | NW_004521541.1 | Scaffold8962 | 439                     | CC                              | TT                | 1946714961               |
| SNP_P3_186033_1656 | NW_004521542.1 | Scaffold8964 | 1656                    | CC                              | AA                | 1946714963               |
| SNP_P3_186034_1966 | NW_004521542.1 | Scaffold8964 | 1966                    | CC                              | TT                | 1946714965               |
| SNP_P3_186035_939  | NW_004521544.1 | Scaffold8967 | 939                     | GG                              | TT                | 1946714967               |
| SNP_P3_186036_984  | NW_004521544.1 | Scaffold8967 | 984                     | CC                              | TT                | 1946714969               |
| SNP_P3_186037_1010 | NW_004521544.1 | Scaffold8967 | 1010                    | CC                              | AA                | 1946714971               |
| SNP_P3_186038_1018 | NW_004521544.1 | Scaffold8967 | 1018                    | GG                              | AA                | 1946714973               |
| SNP_P3_186039_732  | NW_004521545.1 | Scaffold8968 | 732                     | TT                              | AA                | 1946714975               |
| SNP_P3_186040_753  | NW_004521545.1 | Scaffold8968 | 753                     | AA                              | GG                | 1946714977               |
| SNP_P3_186041_1377 | NW_004521545.1 | Scaffold8968 | 1377                    | AA                              | TT                | 1946714979               |
| SNP_P3_186042_1632 | NW_004521552.1 | Scaffold8987 | 1632                    | TT                              | CC                | 1946714981               |

| SNPs IDs           | Chromosome IDs | Chromosomes  | Physical positions (bp) | CDC Frontier (Reference genome) | (Pusa 256 & HPNB) | NCBI SNPdb Accession IDs |
|--------------------|----------------|--------------|-------------------------|---------------------------------|-------------------|--------------------------|
| SNP_P3_186043_1634 | NW_004521552.1 | Scaffold8987 | 1634                    | GG                              | CC                | 1946714983               |
| SNP_P3_186044_1641 | NW_004521552.1 | Scaffold8987 | 1641                    | GG                              | AA                | 1946714985               |
| SNP_P3_186045_518  | NW_004521554.1 | Scaffold8990 | 518                     | AA                              | TT                | 1946714987               |
| SNP_P3_186046_846  | NW_004521554.1 | Scaffold8990 | 846                     | GG                              | AA                | 1946714989               |
| SNP_P3_186047_998  | NW_004521554.1 | Scaffold8990 | 998                     | GG                              | CC                | 1946714991               |
| SNP_P3_186048_1132 | NW_004521554.1 | Scaffold8990 | 1132                    | GG                              | TT                | 1946714993               |
| SNP_P3_186049_1254 | NW_004521554.1 | Scaffold8990 | 1254                    | CC                              | TT                | 1946714995               |
| SNP_P3_186050_5884 | NW_004521554.1 | Scaffold8990 | 5884                    | TT                              | AA                | 1946714997               |
| SNP_P3_186051_6246 | NW_004521554.1 | Scaffold8990 | 6246                    | TT                              | CC                | 1946714999               |
| SNP_P3_186053_1123 | NW_004521556.1 | Scaffold8996 | 1123                    | AA                              | GG                | 1946715001               |
| SNP_P3_186054_628  | NW_004521558.1 | Scaffold8999 | 628                     | AA                              | CC                | 1946715003               |
| SNP_P3_186055_852  | NW_004521558.1 | Scaffold8999 | 852                     | AA                              | TT                | 1946715005               |
| SNP_P3_186056_856  | NW_004521558.1 | Scaffold8999 | 856                     | AA                              | TT                | 1946715007               |
| SNP_P3_186057_1360 | NW_004521558.1 | Scaffold8999 | 1360                    | CC                              | TT                | 1946715009               |
| SNP_P3_186058_1366 | NW_004521558.1 | Scaffold8999 | 1366                    | CC                              | GG                | 1946715011               |
| SNP_P3_186059_1422 | NW_004521558.1 | Scaffold8999 | 1422                    | AA                              | CC                | 1946715013               |
| SNP_P3_186060_622  | NW_004521559.1 | Scaffold9000 | 622                     | AA                              | TT                | 1946715015               |
| SNP_P3_186061_3003 | NW_004521559.1 | Scaffold9000 | 3003                    | AA                              | GG                | 1946715017               |
| SNP_P3_186062_3290 | NW_004521559.1 | Scaffold9000 | 3290                    | AA                              | CC                | 1946715019               |
| SNP_P3_186063_1232 | NW_004521562.1 | Scaffold9006 | 1232                    | GG                              | AA                | 1946715021               |
| SNP_P3_186064_1247 | NW_004521562.1 | Scaffold9006 | 1247                    | AA                              | TT                | 1946715022               |
| SNP_P3_186066_1475 | NW_004521562.1 | Scaffold9006 | 1475                    | TT                              | GG                | 1946715024               |
| SNP_P3_186067_496  | NW_004521563.1 | Scaffold9013 | 496                     | CC                              | AA                | 1946715026               |
| SNP_P3_186068_116  | NW_004521568.1 | Scaffold9023 | 116                     | AA                              | GG                | 1946715028               |
| SNP_P3_186069_153  | NW_004521568.1 | Scaffold9023 | 153                     | CC                              | AA                | 1946715030               |
| SNP_P3_186070_166  | NW_004521568.1 | Scaffold9023 | 166                     | AA                              | GG                | 1946715032               |
| SNP_P3_186071_229  | NW_004521568.1 | Scaffold9023 | 229                     | TT                              | GG                | 1946715034               |
| SNP_P3_186072_252  | NW_004521568.1 | Scaffold9023 | 252                     | CC                              | TT                | 1946715036               |
| SNP_P3_186073_323  | NW_004521568.1 | Scaffold9023 | 323                     | GG                              | TT                | 1946715038               |
| SNP_P3_186074_379  | NW_004521568.1 | Scaffold9023 | 379                     | CC                              | AA                | 1946715040               |
| SNP_P3_186075_384  | NW_004521568.1 | Scaffold9023 | 384                     | AA                              | TT                | 1946715042               |
| SNP_P3_186076_515  | NW_004521568.1 | Scaffold9023 | 515                     | GG                              | AA                | 1946715044               |
| SNP_P3_186077_537  | NW_004521568.1 | Scaffold9023 | 537                     | TT                              | CC                | 1946715046               |
| SNP_P3_186078_563  | NW_004521568.1 | Scaffold9023 | 563                     | CC                              | TT                | 1946715048               |
| SNP_P3_186079_662  | NW_004521568.1 | Scaffold9023 | 662                     | CC                              | TT                | 1946715050               |
| SNP_P3_186080_675  | NW_004521568.1 | Scaffold9023 | 675                     | CC                              | TT                | 1946715052               |
| SNP_P3_186081_734  | NW_004521568.1 | Scaffold9023 | 734                     | AA                              | CC                | 1946715054               |
| SNP_P3_186082_767  | NW_004521568.1 | Scaffold9023 | 767                     | TT                              | AA                | 1946715056               |
| SNP_P3_186083_864  | NW_004521568.1 | Scaffold9023 | 864                     | AA                              | GG                | 1946715058               |
| SNP_P3_186084_909  | NW_004521568.1 | Scaffold9023 | 909                     | AA                              | GG                | 1946715060               |
| SNP_P3_186085_1006 | NW_004521568.1 | Scaffold9023 | 1006                    | AA                              | GG                | 1946715062               |
| SNP_P3_186086_1506 | NW_004521569.1 | Scaffold9024 | 1506                    | CC                              | AA                | 1946715064               |



| SNPs IDs           | Chromosome IDs | Chromosomes  | Physical positions (bp) | CDC Frontier (Reference genome) | (Pusa 256 & HPNB) | NCBI SNPdb Accession IDs |
|--------------------|----------------|--------------|-------------------------|---------------------------------|-------------------|--------------------------|
| SNP_P3_186087_270  | NW_004521571.1 | Scaffold9026 | 270                     | AA                              | GG                | 1946715066               |
| SNP_P3_186088_530  | NW_004521571.1 | Scaffold9026 | 530                     | TT                              | AA                | 1946715068               |
| SNP_P3_186089_99   | NW_004521572.1 | Scaffold9028 | 99                      | AA                              | GG                | 1946715070               |
| SNP_P3_186090_274  | NW_004521572.1 | Scaffold9028 | 274                     | CC                              | AA                | 1946715072               |
| SNP_P3_186091_423  | NW_004521572.1 | Scaffold9028 | 423                     | AA                              | CC                | 1946715074               |
| SNP_P3_186092_440  | NW_004521572.1 | Scaffold9028 | 440                     | AA                              | GG                | 1946715076               |
| SNP_P3_186093_569  | NW_004521572.1 | Scaffold9028 | 569                     | AA                              | GG                | 1946715078               |
| SNP_P3_186094_581  | NW_004521572.1 | Scaffold9028 | 581                     | CC                              | GG                | 1946715080               |
| SNP_P3_186095_615  | NW_004521572.1 | Scaffold9028 | 615                     | CC                              | AA                | 1946715124               |
| SNP_P3_186096_627  | NW_004521572.1 | Scaffold9028 | 627                     | CC                              | TT                | 1946715126               |
| SNP_P3_186097_664  | NW_004521572.1 | Scaffold9028 | 664                     | TT                              | GG                | 1946715128               |
| SNP_P3_186098_715  | NW_004521572.1 | Scaffold9028 | 715                     | GG                              | CC                | 1946715130               |
| SNP_P3_186099_64   | NW_004521575.1 | Scaffold9037 | 64                      | AA                              | CC                | 1946715132               |
| SNP_P3_186100_100  | NW_004521575.1 | Scaffold9037 | 100                     | TT                              | AA                | 1946715134               |
| SNP_P3_186101_190  | NW_004521575.1 | Scaffold9037 | 190                     | AA                              | GG                | 1946715136               |
| SNP_P3_186103_528  | NW_004521575.1 | Scaffold9037 | 528                     | GG                              | TT                | 1946715138               |
| SNP_P3_186104_35   | NW_004521576.1 | Scaffold9043 | 35                      | AA                              | CC                | 1946715140               |
| SNP_P3_186105_97   | NW_004521576.1 | Scaffold9043 | 97                      | AA                              | GG                | 1946715142               |
| SNP_P3_186106_392  | NW_004521576.1 | Scaffold9043 | 392                     | CC                              | GG                | 1946715144               |
| SNP_P3_186107_569  | NW_004521576.1 | Scaffold9043 | 569                     | TT                              | AA                | 1946715146               |
| SNP_P3_186108_247  | NW_004521577.1 | Scaffold9047 | 247                     | GG                              | TT                | 1946715148               |
| SNP_P3_186109_263  | NW_004521577.1 | Scaffold9047 | 263                     | TT                              | CC                | 1946715150               |
| SNP_P3_186110_271  | NW_004521577.1 | Scaffold9047 | 271                     | AA                              | CC                | 1946715152               |
| SNP_P3_186111_275  | NW_004521577.1 | Scaffold9047 | 275                     | CC                              | AA                | 1946715154               |
| SNP_P3_186112_281  | NW_004521577.1 | Scaffold9047 | 281                     | AA                              | GG                | 1946715156               |
| SNP_P3_186113_622  | NW_004521577.1 | Scaffold9047 | 622                     | GG                              | TT                | 1946715158               |
| SNP_P3_186114_3298 | NW_004521578.1 | Scaffold9048 | 3298                    | CC                              | AA                | 1946715160               |
| SNP_P3_186115_3398 | NW_004521578.1 | Scaffold9048 | 3398                    | CC                              | AA                | 1946715162               |
| SNP_P3_186116_3427 | NW_004521578.1 | Scaffold9048 | 3427                    | AA                              | GG                | 1946715164               |
| SNP_P3_186117_3436 | NW_004521578.1 | Scaffold9048 | 3436                    | AA                              | GG                | 1946715166               |
| SNP_P3_186118_415  | NW_004521581.1 | Scaffold9059 | 415                     | TT                              | CC                | 1946715168               |
| SNP_P3_186120_486  | NW_004521581.1 | Scaffold9059 | 486                     | TT                              | CC                | 1946715170               |
| SNP_P3_186122_808  | NW_004521581.1 | Scaffold9059 | 808                     | AA                              | GG                | 1946715172               |
| SNP_P3_186123_942  | NW_004521581.1 | Scaffold9059 | 942                     | AA                              | GG                | 1946715174               |
| SNP_P3_186124_1263 | NW_004521581.1 | Scaffold9059 | 1263                    | TT                              | AA                | 1946715176               |
| SNP_P3_186125_1264 | NW_004521581.1 | Scaffold9059 | 1264                    | AA                              | TT                | 1946715178               |
| SNP_P3_186126_1265 | NW_004521581.1 | Scaffold9059 | 1265                    | GG                              | AA                | 1946715180               |
| SNP_P3_186127_1333 | NW_004521581.1 | Scaffold9059 | 1333                    | CC                              | AA                | 1946715182               |
| SNP_P3_186128_97   | NW_004521584.1 | Scaffold9070 | 97                      | AA                              | GG                | 1946715184               |
| SNP_P3_186129_775  | NW_004521584.1 | Scaffold9070 | 775                     | AA                              | TT                | 1946715186               |
| SNP_P3_186130_802  | NW_004521584.1 | Scaffold9070 | 802                     | GG                              | TT                | 1946715187               |
| SNP_P3_186131_902  | NW_004521584.1 | Scaffold9070 | 902                     | CC                              | TT                | 1946715189               |

| SNPs IDs           | Chromosome IDs | Chromosomes  | Physical positions (bp) | CDC Frontier (Reference genome) | (Pusa 256 & HPNB) | NCBI SNPdb Accession IDs |
|--------------------|----------------|--------------|-------------------------|---------------------------------|-------------------|--------------------------|
| SNP_P3_186132_932  | NW_004521584.1 | Scaffold9070 | 932                     | GG                              | AA                | 1946715191               |
| SNP_P3_186133_1156 | NW_004521584.1 | Scaffold9070 | 1156                    | TT                              | AA                | 1946715193               |
| SNP_P3_186134_591  | NW_004521585.1 | Scaffold9074 | 591                     | CC                              | TT                | 1946715195               |
| SNP_P3_186136_1047 | NW_004521585.1 | Scaffold9074 | 1047                    | CC                              | GG                | 1946715196               |
| SNP_P3_186138_596  | NW_004521588.1 | Scaffold9079 | 596                     | GG                              | TT                | 1946715197               |
| SNP_P3_186139_640  | NW_004521588.1 | Scaffold9079 | 640                     | GG                              | AA                | 1946715198               |
| SNP_P3_186140_942  | NW_004521588.1 | Scaffold9079 | 942                     | CC                              | GG                | 1946715200               |
| SNP_P3_186141_982  | NW_004521588.1 | Scaffold9079 | 982                     | CC                              | AA                | 1946715202               |
| SNP_P3_186142_5015 | NW_004521593.1 | Scaffold9086 | 5015                    | AA                              | CC                | 1946715204               |
| SNP_P3_186143_5353 | NW_004521593.1 | Scaffold9086 | 5353                    | AA                              | GG                | 1946715206               |
| SNP_P3_186144_5435 | NW_004521593.1 | Scaffold9086 | 5435                    | TT                              | GG                | 1946715208               |
| SNP_P3_186145_5503 | NW_004521593.1 | Scaffold9086 | 5503                    | GG                              | AA                | 1946715210               |
| SNP_P3_186146_5633 | NW_004521593.1 | Scaffold9086 | 5633                    | GG                              | AA                | 1946715212               |
| SNP_P3_186147_1328 | NW_004521598.1 | Scaffold9106 | 1328                    | AA                              | CC                | 1946715214               |
| SNP_P3_186148_445  | NW_004521603.1 | Scaffold9118 | 445                     | GG                              | AA                | 1946715216               |
| SNP_P3_186149_660  | NW_004521603.1 | Scaffold9118 | 660                     | AA                              | TT                | 1946715218               |
| SNP_P3_186150_1309 | NW_004521604.1 | Scaffold9122 | 1309                    | TT                              | CC                | 1946715220               |
| SNP_P3_186151_1439 | NW_004521604.1 | Scaffold9122 | 1439                    | TT                              | CC                | 1946715222               |
| SNP_P3_186152_1542 | NW_004521604.1 | Scaffold9122 | 1542                    | AA                              | GG                | 1946715224               |
| SNP_P3_186153_1566 | NW_004521604.1 | Scaffold9122 | 1566                    | GG                              | AA                | 1946715226               |
| SNP_P3_186154_1974 | NW_004521604.1 | Scaffold9122 | 1974                    | GG                              | AA                | 1946715228               |
| SNP_P3_186155_2014 | NW_004521604.1 | Scaffold9122 | 2014                    | CC                              | AA                | 1946715230               |
| SNP_P3_186156_2162 | NW_004521604.1 | Scaffold9122 | 2162                    | AA                              | GG                | 1946715232               |
| SNP_P3_186157_6721 | NW_004521604.1 | Scaffold9122 | 6721                    | CC                              | AA                | 1946715234               |
| SNP_P3_186158_337  | NW_004521605.1 | Scaffold9125 | 337                     | TT                              | CC                | 1946715236               |
| SNP_P3_186159_382  | NW_004521605.1 | Scaffold9125 | 382                     | AA                              | GG                | 1946715238               |
| SNP_P3_186160_654  | NW_004521605.1 | Scaffold9125 | 654                     | CC                              | TT                | 1946715240               |
| SNP_P3_186162_766  | NW_004521605.1 | Scaffold9125 | 766                     | AA                              | GG                | 1946715242               |
| SNP_P3_186163_1452 | NW_004521605.1 | Scaffold9125 | 1452                    | CC                              | GG                | 1946715244               |
| SNP_P3_186165_1277 | NW_004521606.1 | Scaffold9126 | 1277                    | CC                              | TT                | 1946715246               |
| SNP_P3_186167_1049 | NW_004521609.1 | Scaffold9135 | 1049                    | TT                              | AA                | 1946715248               |
| SNP_P3_186168_1062 | NW_004521609.1 | Scaffold9135 | 1062                    | AA                              | TT                | 1946715250               |
| SNP_P3_186171_1140 | NW_004521609.1 | Scaffold9135 | 1140                    | TT                              | CC                | 1946715252               |
| SNP_P3_186172_908  | NW_004521612.1 | Scaffold9149 | 908                     | AA                              | GG                | 1946715254               |
| SNP_P3_186173_963  | NW_004521612.1 | Scaffold9149 | 963                     | GG                              | CC                | 1946715256               |
| SNP_P3_186174_1015 | NW_004521612.1 | Scaffold9149 | 1015                    | AA                              | TT                | 1946715258               |
| SNP_P3_186175_1155 | NW_004521612.1 | Scaffold9149 | 1155                    | AA                              | GG                | 1946715260               |
| SNP_P3_186176_1235 | NW_004521612.1 | Scaffold9149 | 1235                    | AA                              | GG                | 1946715262               |
| SNP_P3_186177_1257 | NW_004521612.1 | Scaffold9149 | 1257                    | TT                              | AA                | 1946715264               |
| SNP_P3_186178_1261 | NW_004521612.1 | Scaffold9149 | 1261                    | GG                              | AA                | 1946715266               |
| SNP_P3_186179_3728 | NW_004521617.1 | Scaffold9162 | 3728                    | TT                              | GG                | 1946715268               |
| SNP_P3_186180_467  | NW_004521619.1 | Scaffold9168 | 467                     | TT                              | CC                | 1946715270               |

| SNPs IDs           | Chromosome IDs | Chromosomes  | Physical positions (bp) | CDC Frontier (Reference genome) | (Pusa 256 & HPNB) | NCBI SNPdb Accession IDs |
|--------------------|----------------|--------------|-------------------------|---------------------------------|-------------------|--------------------------|
| SNP_P3_186181_492  | NW_004521619.1 | Scaffold9168 | 492                     | AA                              | GG                | 1946715272               |
| SNP_P3_186182_701  | NW_004521619.1 | Scaffold9168 | 701                     | TT                              | CC                | 1946715274               |
| SNP_P3_186183_711  | NW_004521619.1 | Scaffold9168 | 711                     | AA                              | GG                | 1946715276               |
| SNP_P3_186184_736  | NW_004521619.1 | Scaffold9168 | 736                     | GG                              | AA                | 1946715277               |
| SNP_P3_186185_1365 | NW_004521620.1 | Scaffold9171 | 1365                    | AA                              | GG                | 1946715279               |
| SNP_P3_186186_382  | NW_004521621.1 | Scaffold9172 | 382                     | TT                              | GG                | 1946715281               |
| SNP_P3_186187_2479 | NW_004521625.1 | Scaffold9185 | 2479                    | AA                              | GG                | 1946715283               |
| SNP_P3_186188_145  | NW_004521630.1 | Scaffold9195 | 145                     | CC                              | GG                | 1946715285               |
| SNP_P3_186189_241  | NW_004521630.1 | Scaffold9195 | 241                     | CC                              | AA                | 1946715287               |
| SNP_P3_186191_674  | NW_004521630.1 | Scaffold9195 | 674                     | GG                              | AA                | 1946715289               |
| SNP_P3_186192_710  | NW_004521630.1 | Scaffold9195 | 710                     | TT                              | AA                | 1946715291               |
| SNP_P3_186193_859  | NW_004521630.1 | Scaffold9195 | 859                     | GG                              | AA                | 1946715293               |
| SNP_P3_186194_883  | NW_004521630.1 | Scaffold9195 | 883                     | TT                              | CC                | 1946715295               |
| SNP_P3_186196_1072 | NW_004521630.1 | Scaffold9195 | 1072                    | AA                              | TT                | 1946715297               |
| SNP_P3_186197_121  | NW_004521631.1 | Scaffold9197 | 121                     | GG                              | TT                | 1946715299               |
| SNP_P3_186198_411  | NW_004521631.1 | Scaffold9197 | 411                     | TT                              | CC                | 1946715301               |
| SNP_P3_186199_453  | NW_004521631.1 | Scaffold9197 | 453                     | GG                              | TT                | 1946715303               |
| SNP_P3_186200_458  | NW_004521631.1 | Scaffold9197 | 458                     | AA                              | CC                | 1946715305               |
| SNP_P3_186201_730  | NW_004521631.1 | Scaffold9197 | 730                     | GG                              | AA                | 1946715307               |
| SNP_P3_186202_893  | NW_004521633.1 | Scaffold9210 | 893                     | TT                              | AA                | 1946715309               |
| SNP_P3_186203_1079 | NW_004521633.1 | Scaffold9210 | 1079                    | GG                              | AA                | 1946715310               |
| SNP_P3_186208_355  | NW_004521635.1 | Scaffold9216 | 355                     | AA                              | CC                | 1946715312               |
| SNP_P3_186209_363  | NW_004521635.1 | Scaffold9216 | 363                     | TT                              | CC                | 1946715314               |
| SNP_P3_186210_370  | NW_004521635.1 | Scaffold9216 | 370                     | AA                              | CC                | 1946715316               |
| SNP_P3_186211_377  | NW_004521635.1 | Scaffold9216 | 377                     | CC                              | GG                | 1946715318               |
| SNP_P3_186212_400  | NW_004521635.1 | Scaffold9216 | 400                     | AA                              | TT                | 1946715320               |
| SNP_P3_186213_504  | NW_004521635.1 | Scaffold9216 | 504                     | TT                              | CC                | 1946715322               |
| SNP_P3_186214_535  | NW_004521635.1 | Scaffold9216 | 535                     | TT                              | CC                | 1946715324               |
| SNP_P3_186215_576  | NW_004521635.1 | Scaffold9216 | 576                     | CC                              | TT                | 1946715326               |
| SNP_P3_186216_583  | NW_004521635.1 | Scaffold9216 | 583                     | CC                              | GG                | 1946715328               |
| SNP_P3_186217_585  | NW_004521635.1 | Scaffold9216 | 585                     | AA                              | TT                | 1946715330               |
| SNP_P3_186218_1155 | NW_004521635.1 | Scaffold9216 | 1155                    | GG                              | TT                | 1946715332               |
| SNP_P3_186219_1520 | NW_004521635.1 | Scaffold9216 | 1520                    | CC                              | GG                | 1946715334               |
| SNP_P3_186220_367  | NW_004521639.1 | Scaffold9223 | 367                     | AA                              | CC                | 1946715336               |
| SNP_P3_186221_100  | NW_004521641.1 | Scaffold9230 | 100                     | TT                              | GG                | 1946715338               |
| SNP_P3_186222_1073 | NW_004521644.1 | Scaffold9236 | 1073                    | AA                              | CC                | 1946715340               |
| SNP_P3_186223_1110 | NW_004521644.1 | Scaffold9236 | 1110                    | AA                              | GG                | 1946715342               |
| SNP_P3_186225_1506 | NW_004521644.1 | Scaffold9236 | 1506                    | TT                              | CC                | 1946715344               |
| SNP_P3_186226_1771 | NW_004521644.1 | Scaffold9236 | 1771                    | CC                              | TT                | 1946715346               |
| SNP_P3_186227_1810 | NW_004521644.1 | Scaffold9236 | 1810                    | GG                              | CC                | 1946715348               |
| SNP_P3_186228_1812 | NW_004521644.1 | Scaffold9236 | 1812                    | GG                              | CC                | 1946715350               |
| SNP_P3_186230_107  | NW_004521645.1 | Scaffold9240 | 107                     | TT                              | CC                | 1946715352               |

| SNPs IDs            | Chromosome IDs | Chromosomes  | Physical positions (bp) | CDC Frontier (Reference genome) | (Pusa 256 & HPNB) | NCBI SNPdb Accession IDs |
|---------------------|----------------|--------------|-------------------------|---------------------------------|-------------------|--------------------------|
| SNP_P3_186231_396   | NW_004521645.1 | Scaffold9240 | 396                     | TT                              | CC                | 1946715354               |
| SNP_P3_186232_464   | NW_004521645.1 | Scaffold9240 | 464                     | GG                              | CC                | 1946715356               |
| SNP_P3_186233_523   | NW_004521645.1 | Scaffold9240 | 523                     | AA                              | GG                | 1946715358               |
| SNP_P3_186234_777   | NW_004521645.1 | Scaffold9240 | 777                     | GG                              | CC                | 1946715360               |
| SNP_P3_186235_53    | NW_004521649.1 | Scaffold9247 | 53                      | GG                              | AA                | 1946715362               |
| SNP_P3_186236_54    | NW_004521649.1 | Scaffold9247 | 54                      | AA                              | TT                | 1946715364               |
| SNP_P3_186237_64    | NW_004521649.1 | Scaffold9247 | 64                      | GG                              | AA                | 1946715366               |
| SNP_P3_186238_99    | NW_004521649.1 | Scaffold9247 | 99                      | AA                              | GG                | 1946715368               |
| SNP_P3_186239_100   | NW_004521649.1 | Scaffold9247 | 100                     | TT                              | AA                | 1946715369               |
| SNP_P3_186240_399   | NW_004521649.1 | Scaffold9247 | 399                     | AA                              | TT                | 1946715372               |
| SNP_P3_186241_600   | NW_004521649.1 | Scaffold9247 | 600                     | TT                              | CC                | 1946715374               |
| SNP_P3_186242_721   | NW_004521652.1 | Scaffold9252 | 721                     | TT                              | CC                | 1946715376               |
| SNP_P3_186243_101   | NW_004521655.1 | Scaffold9258 | 101                     | AA                              | CC                | 1946715378               |
| SNP_P3_186245_976   | NW_004521655.1 | Scaffold9258 | 976                     | AA                              | GG                | 1946715380               |
| SNP_P3_186246_1040  | NW_004521655.1 | Scaffold9258 | 1040                    | GG                              | AA                | 1946715383               |
| SNP_P3_186247_1048  | NW_004521655.1 | Scaffold9258 | 1048                    | AA                              | GG                | 1946715385               |
| SNP_P3_186248_1152  | NW_004521655.1 | Scaffold9258 | 1152                    | CC                              | AA                | 1946715387               |
| SNP_P3_186249_1189  | NW_004521655.1 | Scaffold9258 | 1189                    | AA                              | TT                | 1946715389               |
| SNP_P3_186250_1220  | NW_004521655.1 | Scaffold9258 | 1220                    | TT                              | CC                | 1946715391               |
| SNP_P3_186251_19968 | NW_004521659.1 | Scaffold9267 | 19968                   | TT                              | AA                | 1946715393               |
| SNP_P3_186252_20508 | NW_004521659.1 | Scaffold9267 | 20508                   | AA                              | CC                | 1946715395               |
| SNP_P3_186253_756   | NW_004521662.1 | Scaffold9273 | 756                     | AA                              | GG                | 1946715397               |
| SNP_P3_186254_422   | NW_004521664.1 | Scaffold9279 | 422                     | AA                              | GG                | 1946715399               |
| SNP_P3_186255_101   | NW_004521666.1 | Scaffold9281 | 101                     | AA                              | CC                | 1946715401               |
| SNP_P3_186256_149   | NW_004521666.1 | Scaffold9281 | 149                     | GG                              | AA                | 1946715403               |
| SNP_P3_186257_252   | NW_004521666.1 | Scaffold9281 | 252                     | AA                              | GG                | 1946715405               |
| SNP_P3_186258_349   | NW_004521666.1 | Scaffold9281 | 349                     | TT                              | CC                | 1946715407               |
| SNP_P3_186259_359   | NW_004521666.1 | Scaffold9281 | 359                     | AA                              | GG                | 1946715409               |
| SNP_P3_186260_378   | NW_004521666.1 | Scaffold9281 | 378                     | CC                              | TT                | 1946715411               |
| SNP_P3_186261_412   | NW_004521666.1 | Scaffold9281 | 412                     | TT                              | AA                | 1946715413               |
| SNP_P3_186262_493   | NW_004521666.1 | Scaffold9281 | 493                     | GG                              | AA                | 1946715415               |
| SNP_P3_186263_555   | NW_004521666.1 | Scaffold9281 | 555                     | TT                              | AA                | 1946715417               |
| SNP_P3_186264_588   | NW_004521666.1 | Scaffold9281 | 588                     | AA                              | GG                | 1946715419               |
| SNP_P3_186265_685   | NW_004521666.1 | Scaffold9281 | 685                     | CC                              | AA                | 1946715421               |
| SNP_P3_186266_3606  | NW_004521666.1 | Scaffold9281 | 3606                    | TT                              | CC                | 1946715423               |
| SNP_P3_186267_3649  | NW_004521666.1 | Scaffold9281 | 3649                    | CC                              | AA                | 1946715425               |
| SNP_P3_186268_3775  | NW_004521666.1 | Scaffold9281 | 3775                    | GG                              | CC                | 1946715427               |
| SNP_P3_186269_4003  | NW_004521666.1 | Scaffold9281 | 4003                    | AA                              | CC                | 1946715429               |
| SNP_P3_186270_4136  | NW_004521666.1 | Scaffold9281 | 4136                    | TT                              | CC                | 1946715431               |
| SNP_P3_186271_4145  | NW_004521666.1 | Scaffold9281 | 4145                    | TT                              | AA                | 1946715433               |
| SNP_P3_186272_4193  | NW_004521666.1 | Scaffold9281 | 4193                    | GG                              | AA                | 1946715435               |
| SNP_P3_186274_4505  | NW_004521666.1 | Scaffold9281 | 4505                    | TT                              | CC                | 1946715437               |

| SNPs IDs           | Chromosome IDs | Chromosomes  | Physical positions (bp) | CDC Frontier (Reference genome) | (Pusa 256 & HPNB) | NCBI SNPdb Accession IDs |
|--------------------|----------------|--------------|-------------------------|---------------------------------|-------------------|--------------------------|
| SNP_P3_186275_4524 | NW_004521666.1 | Scaffold9281 | 4524                    | GG                              | AA                | 1946715439               |
| SNP_P3_186276_236  | NW_004521668.1 | Scaffold9287 | 236                     | CC                              | TT                | 1946715442               |
| SNP_P3_186277_505  | NW_004521668.1 | Scaffold9287 | 505                     | TT                              | CC                | 1946715444               |
| SNP_P3_186278_580  | NW_004521668.1 | Scaffold9287 | 580                     | TT                              | CC                | 1946715446               |
| SNP_P3_186279_1198 | NW_004521671.1 | Scaffold9294 | 1198                    | CC                              | GG                | 1946715447               |
| SNP_P3_186280_1304 | NW_004521671.1 | Scaffold9294 | 1304                    | AA                              | TT                | 1946715448               |
| SNP_P3_186281_1447 | NW_004521671.1 | Scaffold9294 | 1447                    | AA                              | GG                | 1946715449               |
| SNP_P3_186282_1494 | NW_004521671.1 | Scaffold9294 | 1494                    | AA                              | CC                | 1946715450               |
| SNP_P3_186283_64   | NW_004521672.1 | Scaffold9295 | 64                      | GG                              | TT                | 1946715452               |
| SNP_P3_186284_59   | NW_004521673.1 | Scaffold9303 | 59                      | GG                              | TT                | 1946715454               |
| SNP_P3_186285_64   | NW_004521673.1 | Scaffold9303 | 64                      | AA                              | CC                | 1946715456               |
| SNP_P3_186286_82   | NW_004521673.1 | Scaffold9303 | 82                      | CC                              | TT                | 1946715458               |
| SNP_P3_186287_137  | NW_004521673.1 | Scaffold9303 | 137                     | TT                              | CC                | 1946715460               |
| SNP_P3_186288_142  | NW_004521673.1 | Scaffold9303 | 142                     | TT                              | CC                | 1946715462               |
| SNP_P3_186289_193  | NW_004521673.1 | Scaffold9303 | 193                     | CC                              | TT                | 1946715464               |
| SNP_P3_186290_427  | NW_004521673.1 | Scaffold9303 | 427                     | GG                              | AA                | 1946715466               |
| SNP_P3_186291_1063 | NW_004521673.1 | Scaffold9303 | 1063                    | TT                              | CC                | 1946715468               |
| SNP_P3_186292_1077 | NW_004521673.1 | Scaffold9303 | 1077                    | CC                              | TT                | 1946715470               |
| SNP_P3_186293_1115 | NW_004521673.1 | Scaffold9303 | 1115                    | TT                              | GG                | 1946715472               |
| SNP_P3_186295_1228 | NW_004521673.1 | Scaffold9303 | 1228                    | AA                              | TT                | 1946715474               |
| SNP_P3_186296_1230 | NW_004521673.1 | Scaffold9303 | 1230                    | TT                              | AA                | 1946715476               |
| SNP_P3_186297_1323 | NW_004521673.1 | Scaffold9303 | 1323                    | TT                              | GG                | 1946715478               |
| SNP_P3_186298_1350 | NW_004521673.1 | Scaffold9303 | 1350                    | AA                              | TT                | 1946715480               |
| SNP_P3_186299_1494 | NW_004521673.1 | Scaffold9303 | 1494                    | AA                              | TT                | 1946715482               |
| SNP_P3_186300_302  | NW_004521675.1 | Scaffold9308 | 302                     | AA                              | GG                | 1946715484               |
| SNP_P3_186302_915  | NW_004521678.1 | Scaffold9314 | 915                     | CC                              | GG                | 1946715486               |
| SNP_P3_186303_979  | NW_004521678.1 | Scaffold9314 | 979                     | AA                              | TT                | 1946715488               |
| SNP_P3_186304_1009 | NW_004521678.1 | Scaffold9314 | 1009                    | CC                              | GG                | 1946715491               |
| SNP_P3_186305_1436 | NW_004521678.1 | Scaffold9314 | 1436                    | GG                              | AA                | 1946715493               |
| SNP_P3_186306_1650 | NW_004521680.1 | Scaffold9321 | 1650                    | TT                              | GG                | 1946715495               |
| SNP_P3_186307_815  | NW_004521681.1 | Scaffold9322 | 815                     | CC                              | GG                | 1946715497               |
| SNP_P3_186308_876  | NW_004521682.1 | Scaffold9323 | 876                     | CC                              | AA                | 1946715499               |
| SNP_P3_186309_909  | NW_004521682.1 | Scaffold9323 | 909                     | CC                              | TT                | 1946715501               |
| SNP_P3_186311_4545 | NW_004521682.1 | Scaffold9323 | 4545                    | GG                              | AA                | 1946715503               |
| SNP_P3_186312_4588 | NW_004521682.1 | Scaffold9323 | 4588                    | TT                              | CC                | 1946715505               |
| SNP_P3_186313_5259 | NW_004521682.1 | Scaffold9323 | 5259                    | GG                              | AA                | 1946715507               |
| SNP_P3_186314_5289 | NW_004521682.1 | Scaffold9323 | 5289                    | TT                              | GG                | 1946715509               |
| SNP_P3_186315_5549 | NW_004521682.1 | Scaffold9323 | 5549                    | CC                              | TT                | 1946715511               |
| SNP_P3_186316_5585 | NW_004521682.1 | Scaffold9323 | 5585                    | GG                              | AA                | 1946715513               |
| SNP_P3_186317_5913 | NW_004521682.1 | Scaffold9323 | 5913                    | GG                              | AA                | 1946715515               |
| SNP_P3_186318_5924 | NW_004521682.1 | Scaffold9323 | 5924                    | TT                              | GG                | 1946715517               |
| SNP_P3_186319_199  | NW_004521685.1 | Scaffold9326 | 199                     | CC                              | GG                | 1946715519               |

| SNPs IDs           | Chromosome IDs | Chromosomes  | Physical positions (bp) | CDC Frontier (Reference genome) | (Pusa 256 & HPNB) | NCBI SNPdb Accession IDs |
|--------------------|----------------|--------------|-------------------------|---------------------------------|-------------------|--------------------------|
| SNP_P3_186320_253  | NW_004521685.1 | Scaffold9326 | 253                     | TT                              | AA                | 1946715522               |
| SNP_P3_186322_531  | NW_004521685.1 | Scaffold9326 | 531                     | AA                              | CC                | 1946715524               |
| SNP_P3_186323_601  | NW_004521685.1 | Scaffold9326 | 601                     | AA                              | TT                | 1946715526               |
| SNP_P3_186324_646  | NW_004521685.1 | Scaffold9326 | 646                     | CC                              | GG                | 1946715528               |
| SNP_P3_186325_689  | NW_004521685.1 | Scaffold9326 | 689                     | TT                              | AA                | 1946715530               |
| SNP_P3_186326_753  | NW_004521685.1 | Scaffold9326 | 753                     | AA                              | TT                | 1946715532               |
| SNP_P3_186327_1082 | NW_004521687.1 | Scaffold9334 | 1082                    | TT                              | AA                | 1946715534               |
| SNP_P3_186328_2049 | NW_004521687.1 | Scaffold9334 | 2049                    | AA                              | TT                | 1946715536               |
| SNP_P3_186329_2087 | NW_004521687.1 | Scaffold9334 | 2087                    | TT                              | AA                | 1946715538               |
| SNP_P3_186330_766  | NW_004521697.1 | Scaffold9361 | 766                     | TT                              | AA                | 1946715540               |
| SNP_P3_186331_777  | NW_004521697.1 | Scaffold9361 | 777                     | CC                              | TT                | 1946715542               |
| SNP_P3_186332_1313 | NW_004521697.1 | Scaffold9361 | 1313                    | GG                              | AA                | 1946715544               |
| SNP_P3_186333_1318 | NW_004521697.1 | Scaffold9361 | 1318                    | CC                              | AA                | 1946715546               |
| SNP_P3_186335_747  | NW_004521700.1 | Scaffold9367 | 747                     | TT                              | GG                | 1946715548               |
| SNP_P3_186336_64   | NW_004521702.1 | Scaffold9371 | 64                      | CC                              | GG                | 1946715550               |
| SNP_P3_186337_123  | NW_004521702.1 | Scaffold9371 | 123                     | TT                              | AA                | 1946715552               |
| SNP_P3_186338_124  | NW_004521702.1 | Scaffold9371 | 124                     | GG                              | AA                | 1946715555               |
| SNP_P3_186339_133  | NW_004521702.1 | Scaffold9371 | 133                     | GG                              | TT                | 1946715557               |
| SNP_P3_186340_171  | NW_004521702.1 | Scaffold9371 | 171                     | GG                              | AA                | 1946715559               |
| SNP_P3_186342_296  | NW_004521702.1 | Scaffold9371 | 296                     | GG                              | CC                | 1946715560               |
| SNP_P3_186343_305  | NW_004521702.1 | Scaffold9371 | 305                     | AA                              | TT                | 1946715563               |
| SNP_P3_186344_309  | NW_004521702.1 | Scaffold9371 | 309                     | CC                              | AA                | 1946715565               |
| SNP_P3_186345_331  | NW_004521702.1 | Scaffold9371 | 331                     | TT                              | CC                | 1946715567               |
| SNP_P3_186346_396  | NW_004521702.1 | Scaffold9371 | 396                     | TT                              | CC                | 1946715568               |
| SNP_P3_186347_426  | NW_004521702.1 | Scaffold9371 | 426                     | AA                              | CC                | 1946715570               |
| SNP_P3_186348_470  | NW_004521702.1 | Scaffold9371 | 470                     | GG                              | AA                | 1946715572               |
| SNP_P3_186349_482  | NW_004521702.1 | Scaffold9371 | 482                     | AA                              | TT                | 1946715575               |
| SNP_P3_186350_486  | NW_004521702.1 | Scaffold9371 | 486                     | AA                              | TT                | 1946715577               |
| SNP_P3_186351_504  | NW_004521702.1 | Scaffold9371 | 504                     | GG                              | AA                | 1946715579               |
| SNP_P3_186352_554  | NW_004521702.1 | Scaffold9371 | 554                     | AA                              | CC                | 1946715580               |
| SNP_P3_186353_619  | NW_004521702.1 | Scaffold9371 | 619                     | TT                              | AA                | 1946715582               |
| SNP_P3_186355_649  | NW_004521702.1 | Scaffold9371 | 649                     | AA                              | GG                | 1946715584               |
| SNP_P3_186356_678  | NW_004521702.1 | Scaffold9371 | 678                     | GG                              | CC                | 1946715586               |
| SNP_P3_186357_914  | NW_004521702.1 | Scaffold9371 | 914                     | GG                              | AA                | 1946715588               |
| SNP_P3_186358_1067 | NW_004521704.1 | Scaffold9374 | 1067                    | CC                              | TT                | 1946715591               |
| SNP_P3_186359_1068 | NW_004521704.1 | Scaffold9374 | 1068                    | GG                              | AA                | 1946715592               |
| SNP_P3_186360_1381 | NW_004521704.1 | Scaffold9374 | 1381                    | AA                              | TT                | 1946715594               |
| SNP_P3_186361_1397 | NW_004521704.1 | Scaffold9374 | 1397                    | AA                              | CC                | 1946715596               |
| SNP_P3_186362_1460 | NW_004521704.1 | Scaffold9374 | 1460                    | CC                              | AA                | 1946715598               |
| SNP_P3_186363_1463 | NW_004521704.1 | Scaffold9374 | 1463                    | TT                              | AA                | 1946715600               |
| SNP_P3_186364_1485 | NW_004521704.1 | Scaffold9374 | 1485                    | AA                              | CC                | 1946715603               |
| SNP_P3_186365_398  | NW_004521705.1 | Scaffold9375 | 398                     | GG                              | CC                | 1946715605               |

| SNPs IDs           | Chromosome IDs | Chromosomes  | Physical positions (bp) | CDC Frontier (Reference genome) | (Pusa 256 & HPNB) | NCBI SNPdb Accession IDs |
|--------------------|----------------|--------------|-------------------------|---------------------------------|-------------------|--------------------------|
| SNP_P3_186366_836  | NW_004521705.1 | Scaffold9375 | 836                     | TT                              | AA                | 1946715607               |
| SNP_P3_186367_725  | NW_004521706.1 | Scaffold9377 | 725                     | CC                              | GG                | 1946715609               |
| SNP_P3_186368_739  | NW_004521706.1 | Scaffold9377 | 739                     | TT                              | GG                | 1946715611               |
| SNP_P3_186369_732  | NW_004521712.1 | Scaffold9391 | 732                     | TT                              | GG                | 1946715613               |
| SNP_P3_186370_448  | NW_004521716.1 | Scaffold9396 | 448                     | AA                              | GG                | 1946715615               |
| SNP_P3_186371_477  | NW_004521716.1 | Scaffold9396 | 477                     | TT                              | CC                | 1946715617               |
| SNP_P3_186373_501  | NW_004521716.1 | Scaffold9396 | 501                     | GG                              | AA                | 1946715619               |
| SNP_P3_186374_565  | NW_004521716.1 | Scaffold9396 | 565                     | TT                              | CC                | 1946715621               |
| SNP_P3_186375_576  | NW_004521716.1 | Scaffold9396 | 576                     | GG                              | AA                | 1946715623               |
| SNP_P3_186376_633  | NW_004521716.1 | Scaffold9396 | 633                     | CC                              | GG                | 1946715625               |
| SNP_P3_186377_655  | NW_004521716.1 | Scaffold9396 | 655                     | AA                              | GG                | 1946715627               |
| SNP_P3_186378_672  | NW_004521716.1 | Scaffold9396 | 672                     | AA                              | GG                | 1946715629               |
| SNP_P3_186379_725  | NW_004521716.1 | Scaffold9396 | 725                     | TT                              | CC                | 1946715631               |
| SNP_P3_186380_928  | NW_004521716.1 | Scaffold9396 | 928                     | CC                              | TT                | 1946715633               |
| SNP_P3_186381_958  | NW_004521716.1 | Scaffold9396 | 958                     | TT                              | AA                | 1946715635               |
| SNP_P3_186382_985  | NW_004521716.1 | Scaffold9396 | 985                     | TT                              | CC                | 1946715637               |
| SNP_P3_186383_1047 | NW_004521716.1 | Scaffold9396 | 1047                    | TT                              | CC                | 1946715639               |
| SNP_P3_186384_1296 | NW_004521716.1 | Scaffold9396 | 1296                    | GG                              | CC                | 1946715642               |
| SNP_P3_186385_103  | NW_004521719.1 | Scaffold9402 | 103                     | AA                              | TT                | 1946715644               |
| SNP_P3_186386_713  | NW_004521719.1 | Scaffold9402 | 713                     | AA                              | GG                | 1946715646               |
| SNP_P3_186387_737  | NW_004521719.1 | Scaffold9402 | 737                     | AA                              | TT                | 1946715648               |
| SNP_P3_186388_2682 | NW_004521721.1 | Scaffold9411 | 2682                    | TT                              | AA                | 1946715650               |
| SNP_P3_186389_2858 | NW_004521721.1 | Scaffold9411 | 2858                    | AA                              | TT                | 1946715652               |
| SNP_P3_186390_2882 | NW_004521721.1 | Scaffold9411 | 2882                    | TT                              | CC                | 1946715654               |
| SNP_P3_186392_3088 | NW_004521721.1 | Scaffold9411 | 3088                    | AA                              | GG                | 1946715657               |
| SNP_P3_186393_3202 | NW_004521721.1 | Scaffold9411 | 3202                    | GG                              | AA                | 1946715659               |
| SNP_P3_186394_3207 | NW_004521721.1 | Scaffold9411 | 3207                    | TT                              | CC                | 1946715661               |
| SNP_P3_186396_3749 | NW_004521721.1 | Scaffold9411 | 3749                    | TT                              | AA                | 1946715663               |
| SNP_P3_186397_3782 | NW_004521721.1 | Scaffold9411 | 3782                    | TT                              | GG                | 1946715665               |
| SNP_P3_186398_3789 | NW_004521721.1 | Scaffold9411 | 3789                    | AA                              | TT                | 1946715667               |
| SNP_P3_186401_5655 | NW_004521721.1 | Scaffold9411 | 5655                    | TT                              | GG                | 1946715669               |
| SNP_P3_186402_5694 | NW_004521721.1 | Scaffold9411 | 5694                    | GG                              | CC                | 1946715671               |
| SNP_P3_186403_5941 | NW_004521721.1 | Scaffold9411 | 5941                    | AA                              | TT                | 1946715673               |
| SNP_P3_186404_153  | NW_004521722.1 | Scaffold9416 | 153                     | GG                              | AA                | 1946715675               |
| SNP_P3_186405_380  | NW_004521722.1 | Scaffold9416 | 380                     | CC                              | TT                | 1946715677               |
| SNP_P3_186406_405  | NW_004521722.1 | Scaffold9416 | 405                     | CC                              | TT                | 1946715679               |
| SNP_P3_186407_643  | NW_004521722.1 | Scaffold9416 | 643                     | CC                              | GG                | 1946715681               |
| SNP_P3_186408_761  | NW_004521722.1 | Scaffold9416 | 761                     | AA                              | CC                | 1946715683               |
| SNP_P3_186409_818  | NW_004521722.1 | Scaffold9416 | 818                     | GG                              | CC                | 1946715684               |
| SNP_P3_186410_554  | NW_004521724.1 | Scaffold9419 | 554                     | GG                              | CC                | 1946715686               |
| SNP_P3_186411_1150 | NW_004521731.1 | Scaffold9433 | 1150                    | GG                              | TT                | 1946715688               |
| SNP_P3_186412_1351 | NW_004521731.1 | Scaffold9433 | 1351                    | GG                              | TT                | 1946715690               |

| SNPs IDs           | Chromosome IDs | Chromosomes  | Physical positions (bp) | CDC Frontier (Reference genome) | (Pusa 256 & HPNB) | NCBI SNPdb Accession IDs |
|--------------------|----------------|--------------|-------------------------|---------------------------------|-------------------|--------------------------|
| SNP_P3_186413_1455 | NW_004521731.1 | Scaffold9433 | 1455                    | TT                              | CC                | 1946715692               |
| SNP_P3_186414_1493 | NW_004521731.1 | Scaffold9433 | 1493                    | CC                              | TT                | 1946715694               |
| SNP_P3_186415_967  | NW_004521732.1 | Scaffold9435 | 967                     | AA                              | GG                | 1946715696               |
| SNP_P3_186416_64   | NW_004521734.1 | Scaffold9444 | 64                      | AA                              | GG                | 1946715698               |
| SNP_P3_186417_177  | NW_004521734.1 | Scaffold9444 | 177                     | TT                              | AA                | 1946715700               |
| SNP_P3_186418_299  | NW_004521734.1 | Scaffold9444 | 299                     | AA                              | GG                | 1946715702               |
| SNP_P3_186419_377  | NW_004521734.1 | Scaffold9444 | 377                     | GG                              | AA                | 1946715704               |
| SNP_P3_186420_388  | NW_004521734.1 | Scaffold9444 | 388                     | TT                              | CC                | 1946715706               |
| SNP_P3_186421_396  | NW_004521734.1 | Scaffold9444 | 396                     | AA                              | CC                | 1946715708               |
| SNP_P3_186422_670  | NW_004521734.1 | Scaffold9444 | 670                     | CC                              | TT                | 1946715710               |
| SNP_P3_186423_694  | NW_004521734.1 | Scaffold9444 | 694                     | GG                              | AA                | 1946715712               |
| SNP_P3_186424_854  | NW_004521734.1 | Scaffold9444 | 854                     | CC                              | GG                | 1946715714               |
| SNP_P3_186425_2337 | NW_004521734.1 | Scaffold9444 | 2337                    | GG                              | TT                | 1946715716               |
| SNP_P3_186426_2393 | NW_004521734.1 | Scaffold9444 | 2393                    | TT                              | CC                | 1946715718               |
| SNP_P3_186427_3349 | NW_004521734.1 | Scaffold9444 | 3349                    | CC                              | TT                | 1946715720               |
| SNP_P3_186429_3520 | NW_004521734.1 | Scaffold9444 | 3520                    | TT                              | CC                | 1946715722               |
| SNP_P3_186430_3743 | NW_004521734.1 | Scaffold9444 | 3743                    | CC                              | GG                | 1946715724               |
| SNP_P3_186431_3852 | NW_004521734.1 | Scaffold9444 | 3852                    | TT                              | AA                | 1946715726               |
| SNP_P3_186432_3956 | NW_004521734.1 | Scaffold9444 | 3956                    | TT                              | AA                | 1946715728               |
| SNP_P3_186433_4026 | NW_004521734.1 | Scaffold9444 | 4026                    | AA                              | GG                | 1946715731               |
| SNP_P3_186434_4100 | NW_004521734.1 | Scaffold9444 | 4100                    | AA                              | CC                | 1946715732               |
| SNP_P3_186435_4172 | NW_004521734.1 | Scaffold9444 | 4172                    | GG                              | AA                | 1946715734               |
| SNP_P3_186436_4303 | NW_004521734.1 | Scaffold9444 | 4303                    | TT                              | CC                | 1946715736               |
| SNP_P3_186437_4397 | NW_004521734.1 | Scaffold9444 | 4397                    | CC                              | GG                | 1946715738               |
| SNP_P3_186438_4461 | NW_004521734.1 | Scaffold9444 | 4461                    | TT                              | AA                | 1946715740               |
| SNP_P3_186439_4530 | NW_004521734.1 | Scaffold9444 | 4530                    | CC                              | TT                | 1946715742               |
| SNP_P3_186440_4614 | NW_004521734.1 | Scaffold9444 | 4614                    | CC                              | TT                | 1946715744               |
| SNP_P3_186441_4642 | NW_004521734.1 | Scaffold9444 | 4642                    | CC                              | TT                | 1946715746               |
| SNP_P3_186442_4976 | NW_004521734.1 | Scaffold9444 | 4976                    | TT                              | GG                | 1946715748               |
| SNP_P3_186443_936  | NW_004521736.1 | Scaffold9451 | 936                     | AA                              | GG                | 1946715750               |
| SNP_P3_186444_472  | NW_004521737.1 | Scaffold9454 | 472                     | CC                              | TT                | 1946715752               |
| SNP_P3_186445_476  | NW_004521737.1 | Scaffold9454 | 476                     | AA                              | GG                | 1946715754               |
| SNP_P3_186446_509  | NW_004521737.1 | Scaffold9454 | 509                     | AA                              | TT                | 1946715756               |
| SNP_P3_186447_705  | NW_004521737.1 | Scaffold9454 | 705                     | GG                              | AA                | 1946715758               |
| SNP_P3_186448_722  | NW_004521737.1 | Scaffold9454 | 722                     | AA                              | TT                | 1946715760               |
| SNP_P3_186449_773  | NW_004521737.1 | Scaffold9454 | 773                     | GG                              | AA                | 1946715762               |
| SNP_P3_186450_1137 | NW_004521747.1 | Scaffold9484 | 1137                    | GG                              | CC                | 1946715764               |
| SNP_P3_186451_1149 | NW_004521747.1 | Scaffold9484 | 1149                    | GG                              | AA                | 1946715766               |
| SNP_P3_186452_1230 | NW_004521747.1 | Scaffold9484 | 1230                    | TT                              | AA                | 1946715768               |
| SNP_P3_186453_1323 | NW_004521747.1 | Scaffold9484 | 1323                    | TT                              | CC                | 1946715770               |
| SNP_P3_186454_1347 | NW_004521747.1 | Scaffold9484 | 1347                    | TT                              | GG                | 1946715772               |
| SNP_P3_186455_1356 | NW_004521747.1 | Scaffold9484 | 1356                    | GG                              | AA                | 1946715774               |



| SNPs IDs           | Chromosome IDs | Chromosomes  | Physical positions (bp) | CDC Frontier (Reference genome) | (Pusa 256 & HPNB) | NCBI SNPdb Accession IDs |
|--------------------|----------------|--------------|-------------------------|---------------------------------|-------------------|--------------------------|
| SNP_P3_186456_1403 | NW_004521747.1 | Scaffold9484 | 1403                    | AA                              | GG                | 1946715776               |
| SNP_P3_186457_1434 | NW_004521747.1 | Scaffold9484 | 1434                    | AA                              | GG                | 1946715778               |
| SNP_P3_186458_1583 | NW_004521747.1 | Scaffold9484 | 1583                    | AA                              | GG                | 1946715780               |
| SNP_P3_186459_1625 | NW_004521747.1 | Scaffold9484 | 1625                    | AA                              | GG                | 1946715782               |
| SNP_P3_186460_1668 | NW_004521747.1 | Scaffold9484 | 1668                    | TT                              | CC                | 1946715784               |
| SNP_P3_186461_1713 | NW_004521747.1 | Scaffold9484 | 1713                    | AA                              | CC                | 1946715786               |
| SNP_P3_186462_1734 | NW_004521747.1 | Scaffold9484 | 1734                    | AA                              | CC                | 1946715788               |
| SNP_P3_186463_514  | NW_004521748.1 | Scaffold9486 | 514                     | AA                              | TT                | 1946715790               |
| SNP_P3_186464_2058 | NW_004521748.1 | Scaffold9486 | 2058                    | TT                              | AA                | 1946715792               |
| SNP_P3_186465_2120 | NW_004521748.1 | Scaffold9486 | 2120                    | AA                              | GG                | 1946715794               |
| SNP_P3_186466_204  | NW_004521751.1 | Scaffold9493 | 204                     | AA                              | GG                | 1946715796               |
| SNP_P3_186467_413  | NW_004521751.1 | Scaffold9493 | 413                     | AA                              | CC                | 1946715798               |
| SNP_P3_186468_487  | NW_004521751.1 | Scaffold9493 | 487                     | TT                              | CC                | 1946715800               |
| SNP_P3_186469_427  | NW_004521754.1 | Scaffold9506 | 427                     | CC                              | AA                | 1946715802               |
| SNP_P3_186470_1170 | NW_004521754.1 | Scaffold9506 | 1170                    | GG                              | AA                | 1946715804               |
| SNP_P3_186471_1480 | NW_004521754.1 | Scaffold9506 | 1480                    | GG                              | AA                | 1946715806               |
| SNP_P3_186472_1481 | NW_004521754.1 | Scaffold9506 | 1481                    | GG                              | TT                | 1946715808               |
| SNP_P3_186473_1514 | NW_004521754.1 | Scaffold9506 | 1514                    | AA                              | TT                | 1946715810               |
| SNP_P3_186474_382  | NW_004521755.1 | Scaffold9507 | 382                     | TT                              | AA                | 1946715812               |
| SNP_P3_186475_422  | NW_004521755.1 | Scaffold9507 | 422                     | GG                              | TT                | 1946715814               |
| SNP_P3_186476_493  | NW_004521755.1 | Scaffold9507 | 493                     | AA                              | TT                | 1946715816               |
| SNP_P3_186477_529  | NW_004521755.1 | Scaffold9507 | 529                     | AA                              | TT                | 1946715818               |
| SNP_P3_186478_885  | NW_004521755.1 | Scaffold9507 | 885                     | TT                              | GG                | 1946715820               |
| SNP_P3_186479_173  | NW_004521757.1 | Scaffold9523 | 173                     | TT                              | GG                | 1946715832               |
| SNP_P3_186480_512  | NW_004521757.1 | Scaffold9523 | 512                     | AA                              | TT                | 1946715834               |
| SNP_P3_186481_516  | NW_004521757.1 | Scaffold9523 | 516                     | AA                              | TT                | 1946715836               |
| SNP_P3_186482_208  | NW_004521760.1 | Scaffold9534 | 208                     | AA                              | GG                | 1946715838               |
| SNP_P3_186483_494  | NW_004521760.1 | Scaffold9534 | 494                     | AA                              | GG                | 1946715840               |
| SNP_P3_186484_318  | NW_004521761.1 | Scaffold9535 | 318                     | AA                              | TT                | 1946715842               |
| SNP_P3_186485_122  | NW_004521766.1 | Scaffold9550 | 122                     | AA                              | TT                | 1946715844               |
| SNP_P3_186486_4930 | NW_004521766.1 | Scaffold9550 | 4930                    | GG                              | AA                | 1946715846               |
| SNP_P3_186487_64   | NW_004521768.1 | Scaffold9555 | 64                      | CC                              | GG                | 1946715848               |
| SNP_P3_186488_109  | NW_004521768.1 | Scaffold9555 | 109                     | CC                              | TT                | 1946715850               |
| SNP_P3_186489_127  | NW_004521768.1 | Scaffold9555 | 127                     | GG                              | TT                | 1946715852               |
| SNP_P3_186490_1810 | NW_004521769.1 | Scaffold9556 | 1810                    | TT                              | CC                | 1946715854               |
| SNP_P3_186491_1813 | NW_004521769.1 | Scaffold9556 | 1813                    | GG                              | TT                | 1946715856               |
| SNP_P3_186492_1852 | NW_004521769.1 | Scaffold9556 | 1852                    | AA                              | TT                | 1946715858               |
| SNP_P3_186493_1914 | NW_004521769.1 | Scaffold9556 | 1914                    | CC                              | GG                | 1946715860               |
| SNP_P3_186494_1935 | NW_004521769.1 | Scaffold9556 | 1935                    | GG                              | TT                | 1946715862               |
| SNP_P3_186495_913  | NW_004521777.1 | Scaffold9587 | 913                     | AA                              | GG                | 1946715864               |
| SNP_P3_186496_922  | NW_004521777.1 | Scaffold9587 | 922                     | GG                              | AA                | 1946715866               |
| SNP_P3_186497_1007 | NW_004521777.1 | Scaffold9587 | 1007                    | AA                              | GG                | 1946715868               |

| SNPs IDs           | Chromosome IDs | Chromosomes  | Physical positions (bp) | CDC Frontier (Reference genome) | (Pusa 256 & HPNB) | NCBI SNPdb Accession IDs |
|--------------------|----------------|--------------|-------------------------|---------------------------------|-------------------|--------------------------|
| SNP_P3_186498_1018 | NW_004521777.1 | Scaffold9587 | 1018                    | TT                              | CC                | 1946715870               |
| SNP_P3_186499_1135 | NW_004521777.1 | Scaffold9587 | 1135                    | AA                              | GG                | 1946715871               |
| SNP_P3_186500_1156 | NW_004521777.1 | Scaffold9587 | 1156                    | TT                              | GG                | 1946715873               |
| SNP_P3_186501_1186 | NW_004521777.1 | Scaffold9587 | 1186                    | TT                              | AA                | 1946715875               |
| SNP_P3_186502_1540 | NW_004521777.1 | Scaffold9587 | 1540                    | GG                              | TT                | 1946715877               |
| SNP_P3_186503_1547 | NW_004521777.1 | Scaffold9587 | 1547                    | AA                              | GG                | 1946715879               |
| SNP_P3_186504_701  | NW_004521778.1 | Scaffold9588 | 701                     | TT                              | AA                | 1946715881               |
| SNP_P3_186505_744  | NW_004521778.1 | Scaffold9588 | 744                     | AA                              | GG                | 1946715883               |
| SNP_P3_186506_760  | NW_004521778.1 | Scaffold9588 | 760                     | AA                              | GG                | 1946715885               |
| SNP_P3_186507_957  | NW_004521778.1 | Scaffold9588 | 957                     | CC                              | TT                | 1946715887               |
| SNP_P3_186508_5095 | NW_004521784.1 | Scaffold9609 | 5095                    | GG                              | AA                | 1946715889               |
| SNP_P3_186509_691  | NW_004521786.1 | Scaffold9612 | 691                     | TT                              | CC                | 1946715891               |
| SNP_P3_186510_785  | NW_004521786.1 | Scaffold9612 | 785                     | GG                              | CC                | 1946715893               |
| SNP_P3_186511_788  | NW_004521786.1 | Scaffold9612 | 788                     | AA                              | GG                | 1946715895               |
| SNP_P3_186512_848  | NW_004521786.1 | Scaffold9612 | 848                     | AA                              | GG                | 1946715897               |
| SNP_P3_186513_1182 | NW_004521786.1 | Scaffold9612 | 1182                    | CC                              | AA                | 1946715899               |
| SNP_P3_186514_1235 | NW_004521786.1 | Scaffold9612 | 1235                    | GG                              | AA                | 1946715901               |
| SNP_P3_186515_1254 | NW_004521786.1 | Scaffold9612 | 1254                    | TT                              | AA                | 1946715903               |
| SNP_P3_186516_1480 | NW_004521786.1 | Scaffold9612 | 1480                    | AA                              | CC                | 1946715905               |
| SNP_P3_186517_1577 | NW_004521786.1 | Scaffold9612 | 1577                    | AA                              | GG                | 1946715907               |
| SNP_P3_186518_1749 | NW_004521786.1 | Scaffold9612 | 1749                    | AA                              | GG                | 1946715909               |
| SNP_P3_186519_1924 | NW_004521786.1 | Scaffold9612 | 1924                    | AA                              | TT                | 1946715910               |
| SNP_P3_186520_2039 | NW_004521786.1 | Scaffold9612 | 2039                    | CC                              | GG                | 1946715912               |
| SNP_P3_186521_2084 | NW_004521786.1 | Scaffold9612 | 2084                    | TT                              | AA                | 1946715915               |
| SNP_P3_186522_231  | NW_004521787.1 | Scaffold9613 | 231                     | GG                              | AA                | 1946715917               |
| SNP_P3_186523_1850 | NW_004521792.1 | Scaffold9627 | 1850                    | TT                              | CC                | 1946715919               |
| SNP_P3_186524_2341 | NW_004521792.1 | Scaffold9627 | 2341                    | AA                              | TT                | 1946715921               |
| SNP_P3_186525_2356 | NW_004521792.1 | Scaffold9627 | 2356                    | TT                              | CC                | 1946715923               |
| SNP_P3_186526_1136 | NW_004521793.1 | Scaffold9629 | 1136                    | GG                              | AA                | 1946715925               |
| SNP_P3_186527_5814 | NW_004521793.1 | Scaffold9629 | 5814                    | GG                              | TT                | 1946715927               |
| SNP_P3_186528_5872 | NW_004521793.1 | Scaffold9629 | 5872                    | TT                              | CC                | 1946715929               |
| SNP_P3_186529_5908 | NW_004521793.1 | Scaffold9629 | 5908                    | AA                              | GG                | 1946715931               |
| SNP_P3_186530_5992 | NW_004521793.1 | Scaffold9629 | 5992                    | AA                              | GG                | 1946715933               |
| SNP_P3_186531_6037 | NW_004521793.1 | Scaffold9629 | 6037                    | GG                              | AA                | 1946715936               |
| SNP_P3_186532_6309 | NW_004521793.1 | Scaffold9629 | 6309                    | GG                              | AA                | 1946715939               |
| SNP_P3_186533_6347 | NW_004521793.1 | Scaffold9629 | 6347                    | GG                              | TT                | 1946715941               |
| SNP_P3_186534_305  | NW_004521794.1 | Scaffold9632 | 305                     | TT                              | CC                | 1946715943               |
| SNP_P3_186535_502  | NW_004521794.1 | Scaffold9632 | 502                     | TT                              | GG                | 1946715945               |
| SNP_P3_186536_775  | NW_004521794.1 | Scaffold9632 | 775                     | AA                              | TT                | 1946715947               |
| SNP_P3_186537_791  | NW_004521794.1 | Scaffold9632 | 791                     | GG                              | AA                | 1946715949               |
| SNP_P3_186538_1028 | NW_004521794.1 | Scaffold9632 | 1028                    | AA                              | GG                | 1946715951               |
| SNP_P3_186539_1143 | NW_004521794.1 | Scaffold9632 | 1143                    | TT                              | AA                | 1946715953               |

| SNPs IDs           | Chromosome IDs | Chromosomes  | Physical positions (bp) | CDC Frontier (Reference genome) | (Pusa 256 & HPNB) | NCBI SNPdb Accession IDs |
|--------------------|----------------|--------------|-------------------------|---------------------------------|-------------------|--------------------------|
| SNP_P3_186540_1687 | NW_004521794.1 | Scaffold9632 | 1687                    | CC                              | TT                | 1946715955               |
| SNP_P3_186541_1778 | NW_004521794.1 | Scaffold9632 | 1778                    | GG                              | CC                | 1946715957               |
| SNP_P3_186542_1805 | NW_004521794.1 | Scaffold9632 | 1805                    | CC                              | TT                | 1946715959               |
| SNP_P3_186543_2039 | NW_004521794.1 | Scaffold9632 | 2039                    | AA                              | GG                | 1946715961               |
| SNP_P3_186544_2042 | NW_004521794.1 | Scaffold9632 | 2042                    | TT                              | AA                | 1946715963               |
| SNP_P3_186545_700  | NW_004521795.1 | Scaffold9635 | 700                     | GG                              | AA                | 1946715965               |
| SNP_P3_186546_307  | NW_004521796.1 | Scaffold9636 | 307                     | AA                              | GG                | 1946715967               |
| SNP_P3_186547_506  | NW_004521796.1 | Scaffold9636 | 506                     | TT                              | GG                | 1946715969               |
| SNP_P3_186548_694  | NW_004521796.1 | Scaffold9636 | 694                     | CC                              | AA                | 1946715971               |
| SNP_P3_186549_833  | NW_004521796.1 | Scaffold9636 | 833                     | TT                              | AA                | 1946715973               |
| SNP_P3_186550_112  | NW_004521800.1 | Scaffold9644 | 112                     | TT                              | CC                | 1946715975               |
| SNP_P3_186551_178  | NW_004521800.1 | Scaffold9644 | 178                     | TT                              | CC                | 1946715977               |
| SNP_P3_186552_228  | NW_004521800.1 | Scaffold9644 | 228                     | TT                              | CC                | 1946715979               |
| SNP_P3_186553_280  | NW_004521800.1 | Scaffold9644 | 280                     | GG                              | TT                | 1946715981               |
| SNP_P3_186554_438  | NW_004521800.1 | Scaffold9644 | 438                     | AA                              | CC                | 1946715983               |
| SNP_P3_186555_565  | NW_004521800.1 | Scaffold9644 | 565                     | CC                              | TT                | 1946715985               |
| SNP_P3_186556_664  | NW_004521800.1 | Scaffold9644 | 664                     | CC                              | GG                | 1946715987               |
| SNP_P3_186557_734  | NW_004521800.1 | Scaffold9644 | 734                     | AA                              | CC                | 1946715989               |
| SNP_P3_186558_843  | NW_004521800.1 | Scaffold9644 | 843                     | AA                              | GG                | 1946715991               |
| SNP_P3_186559_4314 | NW_004521800.1 | Scaffold9644 | 4314                    | GG                              | AA                | 1946715993               |
| SNP_P3_186560_4317 | NW_004521800.1 | Scaffold9644 | 4317                    | CC                              | TT                | 1946715995               |
| SNP_P3_186561_4331 | NW_004521800.1 | Scaffold9644 | 4331                    | AA                              | GG                | 1946715997               |
| SNP_P3_186562_4395 | NW_004521800.1 | Scaffold9644 | 4395                    | AA                              | GG                | 1946715999               |
| SNP_P3_186563_4525 | NW_004521800.1 | Scaffold9644 | 4525                    | GG                              | TT                | 1946716001               |
| SNP_P3_186564_4530 | NW_004521800.1 | Scaffold9644 | 4530                    | AA                              | CC                | 1946716003               |
| SNP_P3_186565_4540 | NW_004521800.1 | Scaffold9644 | 4540                    | GG                              | AA                | 1946716005               |
| SNP_P3_186566_4608 | NW_004521800.1 | Scaffold9644 | 4608                    | CC                              | TT                | 1946716007               |
| SNP_P3_186567_4682 | NW_004521800.1 | Scaffold9644 | 4682                    | AA                              | GG                | 1946716009               |
| SNP_P3_186568_4688 | NW_004521800.1 | Scaffold9644 | 4688                    | CC                              | TT                | 1946716011               |
| SNP_P3_186569_4710 | NW_004521800.1 | Scaffold9644 | 4710                    | GG                              | TT                | 1946716013               |
| SNP_P3_186570_4750 | NW_004521800.1 | Scaffold9644 | 4750                    | AA                              | CC                | 1946716015               |
| SNP_P3_186571_4780 | NW_004521800.1 | Scaffold9644 | 4780                    | GG                              | TT                | 1946716017               |
| SNP_P3_186572_4839 | NW_004521800.1 | Scaffold9644 | 4839                    | CC                              | AA                | 1946716019               |
| SNP_P3_186573_4852 | NW_004521800.1 | Scaffold9644 | 4852                    | AA                              | GG                | 1946716021               |
| SNP_P3_186574_4860 | NW_004521800.1 | Scaffold9644 | 4860                    | GG                              | AA                | 1946716023               |
| SNP_P3_186575_4938 | NW_004521800.1 | Scaffold9644 | 4938                    | CC                              | TT                | 1946716025               |
| SNP_P3_186576_5009 | NW_004521800.1 | Scaffold9644 | 5009                    | GG                              | TT                | 1946716027               |
| SNP_P3_186577_5023 | NW_004521800.1 | Scaffold9644 | 5023                    | AA                              | GG                | 1946716029               |
| SNP_P3_186578_5252 | NW_004521800.1 | Scaffold9644 | 5252                    | TT                              | GG                | 1946716030               |
| SNP_P3_186579_5260 | NW_004521800.1 | Scaffold9644 | 5260                    | TT                              | CC                | 1946716032               |
| SNP_P3_186580_363  | NW_004521801.1 | Scaffold9646 | 363                     | TT                              | CC                | 1946716034               |
| SNP_P3_186581_110  | NW_004521802.1 | Scaffold9647 | 110                     | AA                              | TT                | 1946716036               |

| SNPs IDs            | Chromosome IDs | Chromosomes  | Physical positions (bp) | CDC Frontier (Reference genome) | (Pusa 256 & HPNB) | NCBI SNPdb Accession IDs |
|---------------------|----------------|--------------|-------------------------|---------------------------------|-------------------|--------------------------|
| SNP_P3_186582_172   | NW_004521802.1 | Scaffold9647 | 172                     | TT                              | GG                | 1946716038               |
| SNP_P3_186583_5022  | NW_004521802.1 | Scaffold9647 | 5022                    | TT                              | AA                | 1946716040               |
| SNP_P3_186584_690   | NW_004521803.1 | Scaffold9648 | 690                     | AA                              | GG                | 1946716042               |
| SNP_P3_186585_1151  | NW_004521805.1 | Scaffold9655 | 1151                    | CC                              | TT                | 1946716044               |
| SNP_P3_186586_1224  | NW_004521805.1 | Scaffold9655 | 1224                    | CC                              | TT                | 1946716046               |
| SNP_P3_186587_1554  | NW_004521805.1 | Scaffold9655 | 1554                    | AA                              | CC                | 1946716048               |
| SNP_P3_186588_64    | NW_004521808.1 | Scaffold9660 | 64                      | GG                              | CC                | 1946716050               |
| SNP_P3_186589_110   | NW_004521808.1 | Scaffold9660 | 110                     | TT                              | GG                | 1946716052               |
| SNP_P3_186590_126   | NW_004521808.1 | Scaffold9660 | 126                     | TT                              | CC                | 1946716054               |
| SNP_P3_186591_150   | NW_004521808.1 | Scaffold9660 | 150                     | AA                              | TT                | 1946716056               |
| SNP_P3_186592_506   | NW_004521808.1 | Scaffold9660 | 506                     | CC                              | TT                | 1946716058               |
| SNP_P3_186593_723   | NW_004521808.1 | Scaffold9660 | 723                     | TT                              | CC                | 1946716060               |
| SNP_P3_186594_19472 | NW_004521808.1 | Scaffold9660 | 19472                   | CC                              | TT                | 1946716062               |
| SNP_P3_186595_19497 | NW_004521808.1 | Scaffold9660 | 19497                   | GG                              | AA                | 1946716064               |
| SNP_P3_186596_561   | NW_004521811.1 | Scaffold9667 | 561                     | GG                              | AA                | 1946716066               |
| SNP_P3_186597_562   | NW_004521811.1 | Scaffold9667 | 562                     | GG                              | AA                | 1946716068               |
| SNP_P3_186598_20200 | NW_004521815.1 | Scaffold9673 | 20200                   | GG                              | AA                | 1946716070               |
| SNP_P3_186599_20334 | NW_004521815.1 | Scaffold9673 | 20334                   | AA                              | TT                | 1946716071               |
| SNP_P3_186600_20366 | NW_004521815.1 | Scaffold9673 | 20366                   | AA                              | GG                | 1946716073               |
| SNP_P3_186601_20411 | NW_004521815.1 | Scaffold9673 | 20411                   | GG                              | AA                | 1946716075               |
| SNP_P3_186602_20542 | NW_004521815.1 | Scaffold9673 | 20542                   | AA                              | CC                | 1946716077               |
| SNP_P3_186603_20630 | NW_004521815.1 | Scaffold9673 | 20630                   | TT                              | CC                | 1946716079               |
| SNP_P3_186604_20668 | NW_004521815.1 | Scaffold9673 | 20668                   | TT                              | CC                | 1946716081               |
| SNP_P3_186605_20698 | NW_004521815.1 | Scaffold9673 | 20698                   | CC                              | AA                | 1946716083               |
| SNP_P3_186606_20934 | NW_004521815.1 | Scaffold9673 | 20934                   | TT                              | AA                | 1946716085               |
| SNP_P3_186607_20969 | NW_004521815.1 | Scaffold9673 | 20969                   | AA                              | CC                | 1946716087               |
| SNP_P3_186608_1042  | NW_004521816.1 | Scaffold9675 | 1042                    | CC                              | TT                | 1946716089               |
| SNP_P3_186609_110   | NW_004521819.1 | Scaffold9683 | 110                     | CC                              | TT                | 1946716091               |
| SNP_P3_186610_242   | NW_004521819.1 | Scaffold9683 | 242                     | TT                              | CC                | 1946716093               |
| SNP_P3_186611_407   | NW_004521819.1 | Scaffold9683 | 407                     | GG                              | AA                | 1946716095               |
| SNP_P3_186612_421   | NW_004521819.1 | Scaffold9683 | 421                     | CC                              | TT                | 1946716097               |
| SNP_P3_186613_434   | NW_004521819.1 | Scaffold9683 | 434                     | CC                              | TT                | 1946716099               |
| SNP_P3_186614_508   | NW_004521819.1 | Scaffold9683 | 508                     | CC                              | GG                | 1946716101               |
| SNP_P3_186615_512   | NW_004521819.1 | Scaffold9683 | 512                     | AA                              | TT                | 1946716102               |
| SNP_P3_186616_537   | NW_004521819.1 | Scaffold9683 | 537                     | AA                              | GG                | 1946716104               |
| SNP_P3_186617_550   | NW_004521819.1 | Scaffold9683 | 550                     | AA                              | GG                | 1946716106               |
| SNP_P3_186618_610   | NW_004521819.1 | Scaffold9683 | 610                     | AA                              | GG                | 1946716108               |
| SNP_P3_186619_842   | NW_004521819.1 | Scaffold9683 | 842                     | AA                              | TT                | 1946716110               |
| SNP_P3_186620_937   | NW_004521819.1 | Scaffold9683 | 937                     | TT                              | CC                | 1946716112               |
| SNP_P3_186621_945   | NW_004521819.1 | Scaffold9683 | 945                     | TT                              | AA                | 1946716114               |
| SNP_P3_186622_299   | NW_004521820.1 | Scaffold9686 | 299                     | GG                              | AA                | 1946716116               |
| SNP_P3_186623_304   | NW_004521820.1 | Scaffold9686 | 304                     | TT                              | GG                | 1946716118               |

| SNPs IDs            | Chromosome IDs | Chromosomes  | Physical positions (bp) | CDC Frontier (Reference genome) | (Pusa 256 & HPNB) | NCBI SNPdb Accession IDs |
|---------------------|----------------|--------------|-------------------------|---------------------------------|-------------------|--------------------------|
| SNP_P3_186624_475   | NW_004521820.1 | Scaffold9686 | 475                     | TT                              | CC                | 1946716120               |
| SNP_P3_186625_588   | NW_004521820.1 | Scaffold9686 | 588                     | TT                              | CC                | 1946716122               |
| SNP_P3_186626_601   | NW_004521820.1 | Scaffold9686 | 601                     | CC                              | GG                | 1946716124               |
| SNP_P3_186627_855   | NW_004521820.1 | Scaffold9686 | 855                     | GG                              | AA                | 1946716126               |
| SNP_P3_186628_869   | NW_004521820.1 | Scaffold9686 | 869                     | CC                              | TT                | 1946716128               |
| SNP_P3_186629_898   | NW_004521820.1 | Scaffold9686 | 898                     | GG                              | AA                | 1946716130               |
| SNP_P3_186630_907   | NW_004521820.1 | Scaffold9686 | 907                     | TT                              | CC                | 1946716132               |
| SNP_P3_186631_1137  | NW_004521820.1 | Scaffold9686 | 1137                    | CC                              | TT                | 1946716134               |
| SNP_P3_186632_263   | NW_004521822.1 | Scaffold9697 | 263                     | CC                              | AA                | 1946716136               |
| SNP_P3_186633_303   | NW_004521822.1 | Scaffold9697 | 303                     | GG                              | AA                | 1946716138               |
| SNP_P3_186634_591   | NW_004521822.1 | Scaffold9697 | 591                     | AA                              | TT                | 1946716140               |
| SNP_P3_186635_864   | NW_004521823.1 | Scaffold9699 | 864                     | AA                              | CC                | 1946716142               |
| SNP_P3_186636_19614 | NW_004521826.1 | Scaffold9704 | 19614                   | AA                              | CC                | 1946716144               |
| SNP_P3_186637_722   | NW_004521834.1 | Scaffold9727 | 722                     | TT                              | AA                | 1946716146               |
| SNP_P3_186638_818   | NW_004521834.1 | Scaffold9727 | 818                     | TT                              | CC                | 1946716148               |
| SNP_P3_186639_504   | NW_004521835.1 | Scaffold9728 | 504                     | CC                              | AA                | 1946716150               |
| SNP_P3_186640_506   | NW_004521835.1 | Scaffold9728 | 506                     | GG                              | AA                | 1946716153               |
| SNP_P3_186641_697   | NW_004521835.1 | Scaffold9728 | 697                     | GG                              | AA                | 1946716155               |
| SNP_P3_186642_698   | NW_004521835.1 | Scaffold9728 | 698                     | CC                              | AA                | 1946716157               |
| SNP_P3_186643_936   | NW_004521835.1 | Scaffold9728 | 936                     | GG                              | AA                | 1946716159               |
| SNP_P3_186644_981   | NW_004521835.1 | Scaffold9728 | 981                     | TT                              | CC                | 1946716161               |
| SNP_P3_186645_1048  | NW_004521835.1 | Scaffold9728 | 1048                    | CC                              | AA                | 1946716163               |
| SNP_P3_186647_512   | NW_004521840.1 | Scaffold9740 | 512                     | GG                              | AA                | 1946716165               |
| SNP_P3_186648_548   | NW_004521840.1 | Scaffold9740 | 548                     | TT                              | GG                | 1946716167               |
| SNP_P3_186649_565   | NW_004521840.1 | Scaffold9740 | 565                     | CC                              | TT                | 1946716169               |
| SNP_P3_186650_568   | NW_004521840.1 | Scaffold9740 | 568                     | CC                              | TT                | 1946716170               |
| SNP_P3_186652_748   | NW_004521840.1 | Scaffold9740 | 748                     | AA                              | CC                | 1946716171               |
| SNP_P3_186653_792   | NW_004521840.1 | Scaffold9740 | 792                     | AA                              | TT                | 1946716172               |
| SNP_P3_186654_1251  | NW_004521841.1 | Scaffold9742 | 1251                    | AA                              | GG                | 1946716173               |
| SNP_P3_186655_1615  | NW_004521841.1 | Scaffold9742 | 1615                    | TT                              | GG                | 1946716174               |
| SNP_P3_186656_64    | NW_004521847.1 | Scaffold9757 | 64                      | CC                              | TT                | 1946716175               |
| SNP_P3_186657_118   | NW_004521847.1 | Scaffold9757 | 118                     | GG                              | CC                | 1946716177               |
| SNP_P3_186659_891   | NW_004521847.1 | Scaffold9757 | 891                     | AA                              | GG                | 1946716179               |
| SNP_P3_186660_944   | NW_004521847.1 | Scaffold9757 | 944                     | CC                              | GG                | 1946716182               |
| SNP_P3_186661_997   | NW_004521847.1 | Scaffold9757 | 997                     | AA                              | CC                | 1946716184               |
| SNP_P3_186662_999   | NW_004521847.1 | Scaffold9757 | 999                     | CC                              | AA                | 1946716186               |
| SNP_P3_186663_344   | NW_004521849.1 | Scaffold9762 | 344                     | TT                              | CC                | 1946716188               |
| SNP_P3_186664_540   | NW_004521850.1 | Scaffold9764 | 540                     | AA                              | GG                | 1946716190               |
| SNP_P3_186665_1093  | NW_004521853.1 | Scaffold9774 | 1093                    | AA                              | GG                | 1946716192               |
| SNP_P3_186666_299   | NW_004521854.1 | Scaffold9776 | 299                     | AA                              | GG                | 1946716194               |
| SNP_P3_186667_585   | NW_004521854.1 | Scaffold9776 | 585                     | GG                              | AA                | 1946716196               |
| SNP_P3_186668_531   | NW_004521855.1 | Scaffold9777 | 531                     | AA                              | CC                | 1946716198               |

| SNPs IDs           | Chromosome IDs | Chromosomes  | Physical positions (bp) | CDC Frontier (Reference genome) | (Pusa 256 & HPNB) | NCBI SNPdb Accession IDs |
|--------------------|----------------|--------------|-------------------------|---------------------------------|-------------------|--------------------------|
| SNP_P3_186669_571  | NW_004521855.1 | Scaffold9777 | 571                     | TT                              | GG                | 1946716200               |
| SNP_P3_186670_357  | NW_004521856.1 | Scaffold9779 | 357                     | TT                              | AA                | 1946716203               |
| SNP_P3_186671_488  | NW_004521856.1 | Scaffold9779 | 488                     | AA                              | CC                | 1946716205               |
| SNP_P3_186672_490  | NW_004521856.1 | Scaffold9779 | 490                     | GG                              | AA                | 1946716207               |
| SNP_P3_186673_412  | NW_004521857.1 | Scaffold9781 | 412                     | AA                              | TT                | 1946716209               |
| SNP_P3_186674_498  | NW_004521857.1 | Scaffold9781 | 498                     | AA                              | TT                | 1946716211               |
| SNP_P3_186675_499  | NW_004521857.1 | Scaffold9781 | 499                     | CC                              | AA                | 1946716213               |
| SNP_P3_186676_791  | NW_004521857.1 | Scaffold9781 | 791                     | AA                              | CC                | 1946716215               |
| SNP_P3_186677_362  | NW_004521858.1 | Scaffold9784 | 362                     | AA                              | CC                | 1946716217               |
| SNP_P3_186679_899  | NW_004521858.1 | Scaffold9784 | 899                     | TT                              | AA                | 1946716219               |
| SNP_P3_186680_909  | NW_004521858.1 | Scaffold9784 | 909                     | GG                              | AA                | 1946716221               |
| SNP_P3_186681_6016 | NW_004521859.1 | Scaffold9786 | 6016                    | GG                              | AA                | 1946716223               |
| SNP_P3_186682_1083 | NW_004521860.1 | Scaffold9787 | 1083                    | TT                              | AA                | 1946716225               |
| SNP_P3_186683_947  | NW_004521863.1 | Scaffold9797 | 947                     | AA                              | GG                | 1946716227               |
| SNP_P3_186684_1238 | NW_004521863.1 | Scaffold9797 | 1238                    | CC                              | GG                | 1946716229               |
| SNP_P3_186685_1325 | NW_004521863.1 | Scaffold9797 | 1325                    | AA                              | TT                | 1946716231               |
| SNP_P3_186686_1461 | NW_004521863.1 | Scaffold9797 | 1461                    | CC                              | TT                | 1946716233               |
| SNP_P3_186687_1468 | NW_004521863.1 | Scaffold9797 | 1468                    | TT                              | AA                | 1946716235               |
| SNP_P3_186688_610  | NW_004521865.1 | Scaffold9801 | 610                     | AA                              | GG                | 1946716237               |
| SNP_P3_186689_1276 | NW_004521865.1 | Scaffold9801 | 1276                    | CC                              | TT                | 1946716240               |
| SNP_P3_186690_1029 | NW_004521867.1 | Scaffold9807 | 1029                    | TT                              | CC                | 1946716242               |
| SNP_P3_186691_1039 | NW_004521867.1 | Scaffold9807 | 1039                    | TT                              | GG                | 1946716244               |
| SNP_P3_186692_1044 | NW_004521867.1 | Scaffold9807 | 1044                    | CC                              | TT                | 1946716246               |
| SNP_P3_186693_114  | NW_004521869.1 | Scaffold9809 | 114                     | TT                              | CC                | 1946716248               |
| SNP_P3_186694_165  | NW_004521869.1 | Scaffold9809 | 165                     | TT                              | GG                | 1946716250               |
| SNP_P3_186695_233  | NW_004521869.1 | Scaffold9809 | 233                     | CC                              | TT                | 1946716252               |
| SNP_P3_186696_391  | NW_004521869.1 | Scaffold9809 | 391                     | GG                              | AA                | 1946716254               |
| SNP_P3_186697_427  | NW_004521869.1 | Scaffold9809 | 427                     | CC                              | TT                | 1946716256               |
| SNP_P3_186698_485  | NW_004521869.1 | Scaffold9809 | 485                     | AA                              | CC                | 1946716259               |
| SNP_P3_186699_662  | NW_004521869.1 | Scaffold9809 | 662                     | CC                              | TT                | 1946716261               |
| SNP_P3_186701_1007 | NW_004521869.1 | Scaffold9809 | 1007                    | AA                              | GG                | 1946716263               |
| SNP_P3_186702_114  | NW_004521870.1 | Scaffold9813 | 114                     | GG                              | TT                | 1946716265               |
| SNP_P3_186703_363  | NW_004521870.1 | Scaffold9813 | 363                     | CC                              | GG                | 1946716267               |
| SNP_P3_186704_421  | NW_004521870.1 | Scaffold9813 | 421                     | GG                              | TT                | 1946716269               |
| SNP_P3_186705_549  | NW_004521870.1 | Scaffold9813 | 549                     | CC                              | TT                | 1946716271               |
| SNP_P3_186706_553  | NW_004521870.1 | Scaffold9813 | 553                     | TT                              | AA                | 1946716273               |
| SNP_P3_186707_678  | NW_004521870.1 | Scaffold9813 | 678                     | CC                              | AA                | 1946716275               |
| SNP_P3_186708_739  | NW_004521870.1 | Scaffold9813 | 739                     | CC                              | AA                | 1946716277               |
| SNP_P3_186709_771  | NW_004521870.1 | Scaffold9813 | 771                     | TT                              | GG                | 1946716279               |
| SNP_P3_186710_1110 | NW_004521870.1 | Scaffold9813 | 1110                    | CC                              | GG                | 1946716281               |
| SNP_P3_186712_1281 | NW_004521870.1 | Scaffold9813 | 1281                    | GG                              | CC                | 1946716283               |
| SNP_P3_186713_1541 | NW_004521870.1 | Scaffold9813 | 1541                    | CC                              | TT                | 1946716285               |

| SNPs IDs           | Chromosome IDs | Chromosomes  | Physical positions (bp) | CDC Frontier (Reference genome) | (Pusa 256 & HPNB) | NCBI SNPdb Accession IDs |
|--------------------|----------------|--------------|-------------------------|---------------------------------|-------------------|--------------------------|
| SNP_P3_186714_1616 | NW_004521870.1 | Scaffold9813 | 1616                    | CC                              | AA                | 1946716287               |
| SNP_P3_186715_1641 | NW_004521870.1 | Scaffold9813 | 1641                    | GG                              | TT                | 1946716289               |
| SNP_P3_186716_5078 | NW_004521870.1 | Scaffold9813 | 5078                    | GG                              | CC                | 1946716292               |
| SNP_P3_186717_5188 | NW_004521870.1 | Scaffold9813 | 5188                    | CC                              | AA                | 1946716294               |
| SNP_P3_186718_5417 | NW_004521870.1 | Scaffold9813 | 5417                    | CC                              | TT                | 1946716296               |
| SNP_P3_186719_5420 | NW_004521870.1 | Scaffold9813 | 5420                    | AA                              | GG                | 1946716298               |
| SNP_P3_186720_5432 | NW_004521870.1 | Scaffold9813 | 5432                    | TT                              | GG                | 1946716300               |
| SNP_P3_186721_5483 | NW_004521870.1 | Scaffold9813 | 5483                    | AA                              | GG                | 1946716302               |
| SNP_P3_186722_5593 | NW_004521870.1 | Scaffold9813 | 5593                    | GG                              | AA                | 1946716304               |
| SNP_P3_186723_491  | NW_004521871.1 | Scaffold9817 | 491                     | TT                              | CC                | 1946716306               |
| SNP_P3_186724_1102 | NW_004521872.1 | Scaffold9818 | 1102                    | TT                              | CC                | 1946716308               |
| SNP_P3_186725_1289 | NW_004521872.1 | Scaffold9818 | 1289                    | CC                              | GG                | 1946716310               |
| SNP_P3_186726_1308 | NW_004521872.1 | Scaffold9818 | 1308                    | AA                              | TT                | 1946716312               |
| SNP_P3_186727_1606 | NW_004521872.1 | Scaffold9818 | 1606                    | AA                              | GG                | 1946716314               |
| SNP_P3_186728_1635 | NW_004521872.1 | Scaffold9818 | 1635                    | GG                              | AA                | 1946716316               |
| SNP_P3_186729_1659 | NW_004521872.1 | Scaffold9818 | 1659                    | TT                              | GG                | 1946716318               |
| SNP_P3_186730_184  | NW_004521873.1 | Scaffold9819 | 184                     | AA                              | CC                | 1946716320               |
| SNP_P3_186731_190  | NW_004521873.1 | Scaffold9819 | 190                     | AA                              | GG                | 1946716322               |
| SNP_P3_186732_347  | NW_004521873.1 | Scaffold9819 | 347                     | GG                              | AA                | 1946716324               |
| SNP_P3_186733_513  | NW_004521873.1 | Scaffold9819 | 513                     | CC                              | TT                | 1946716326               |
| SNP_P3_186734_819  | NW_004521873.1 | Scaffold9819 | 819                     | CC                              | AA                | 1946716328               |
| SNP_P3_186735_209  | NW_004521875.1 | Scaffold9821 | 209                     | TT                              | GG                | 1946716330               |
| SNP_P3_186736_342  | NW_004521875.1 | Scaffold9821 | 342                     | TT                              | AA                | 1946716332               |
| SNP_P3_186737_347  | NW_004521875.1 | Scaffold9821 | 347                     | AA                              | TT                | 1946716335               |
| SNP_P3_186738_360  | NW_004521875.1 | Scaffold9821 | 360                     | CC                              | TT                | 1946716337               |
| SNP_P3_186739_399  | NW_004521875.1 | Scaffold9821 | 399                     | AA                              | TT                | 1946716339               |
| SNP_P3_186740_738  | NW_004521875.1 | Scaffold9821 | 738                     | CC                              | GG                | 1946716341               |
| SNP_P3_186741_64   | NW_004521878.1 | Scaffold9827 | 64                      | AA                              | GG                | 1946716343               |
| SNP_P3_186742_115  | NW_004521878.1 | Scaffold9827 | 115                     | AA                              | GG                | 1946716345               |
| SNP_P3_186743_335  | NW_004521878.1 | Scaffold9827 | 335                     | AA                              | GG                | 1946716347               |
| SNP_P3_186744_373  | NW_004521878.1 | Scaffold9827 | 373                     | TT                              | GG                | 1946716349               |
| SNP_P3_186745_623  | NW_004521878.1 | Scaffold9827 | 623                     | AA                              | TT                | 1946716351               |
| SNP_P3_186746_796  | NW_004521878.1 | Scaffold9827 | 796                     | CC                              | TT                | 1946716353               |
| SNP_P3_186747_967  | NW_004521878.1 | Scaffold9827 | 967                     | TT                              | CC                | 1946716355               |
| SNP_P3_186748_969  | NW_004521878.1 | Scaffold9827 | 969                     | AA                              | GG                | 1946716357               |
| SNP_P3_186749_973  | NW_004521878.1 | Scaffold9827 | 973                     | CC                              | TT                | 1946716359               |
| SNP_P3_186750_1078 | NW_004521878.1 | Scaffold9827 | 1078                    | CC                              | AA                | 1946716361               |
| SNP_P3_186751_898  | NW_004521883.1 | Scaffold9836 | 898                     | CC                              | TT                | 1946716363               |
| SNP_P3_186752_913  | NW_004521883.1 | Scaffold9836 | 913                     | AA                              | GG                | 1946716365               |
| SNP_P3_186753_2107 | NW_004521883.1 | Scaffold9836 | 2107                    | AA                              | CC                | 1946716367               |
| SNP_P3_186754_2417 | NW_004521883.1 | Scaffold9836 | 2417                    | TT                              | AA                | 1946716369               |
| SNP_P3_186755_2423 | NW_004521883.1 | Scaffold9836 | 2423                    | AA                              | TT                | 1946716371               |

| SNPs IDs           | Chromosome IDs | Chromosomes  | Physical positions (bp) | CDC Frontier (Reference genome) | (Pusa 256 & HPNB) | NCBI SNPdb Accession IDs |
|--------------------|----------------|--------------|-------------------------|---------------------------------|-------------------|--------------------------|
| SNP_P3_186757_258  | NW_004521885.1 | Scaffold9844 | 258                     | GG                              | TT                | 1946716373               |
| SNP_P3_186758_273  | NW_004521885.1 | Scaffold9844 | 273                     | AA                              | GG                | 1946716375               |
| SNP_P3_186759_561  | NW_004521885.1 | Scaffold9844 | 561                     | TT                              | GG                | 1946716377               |
| SNP_P3_186760_116  | NW_004521886.1 | Scaffold9847 | 116                     | GG                              | TT                | 1946716379               |
| SNP_P3_186761_326  | NW_004521886.1 | Scaffold9847 | 326                     | GG                              | AA                | 1946716381               |
| SNP_P3_186762_116  | NW_004521887.1 | Scaffold9849 | 116                     | AA                              | GG                | 1946716383               |
| SNP_P3_186763_214  | NW_004521887.1 | Scaffold9849 | 214                     | TT                              | CC                | 1946716385               |
| SNP_P3_186764_644  | NW_004521887.1 | Scaffold9849 | 644                     | AA                              | GG                | 1946716387               |
| SNP_P3_186765_196  | NW_004521889.1 | Scaffold9851 | 196                     | TT                              | CC                | 1946716389               |
| SNP_P3_186766_733  | NW_004521889.1 | Scaffold9851 | 733                     | AA                              | CC                | 1946716391               |
| SNP_P3_186768_843  | NW_004521889.1 | Scaffold9851 | 843                     | CC                              | AA                | 1946716393               |
| SNP_P3_186769_881  | NW_004521889.1 | Scaffold9851 | 881                     | GG                              | AA                | 1946716395               |
| SNP_P3_186770_339  | NW_004521893.1 | Scaffold9860 | 339                     | GG                              | AA                | 1946716397               |
| SNP_P3_186771_552  | NW_004521893.1 | Scaffold9860 | 552                     | TT                              | CC                | 1946716399               |
| SNP_P3_186772_610  | NW_004521893.1 | Scaffold9860 | 610                     | CC                              | AA                | 1946716401               |
| SNP_P3_186773_628  | NW_004521893.1 | Scaffold9860 | 628                     | CC                              | TT                | 1946716403               |
| SNP_P3_186774_719  | NW_004521893.1 | Scaffold9860 | 719                     | CC                              | TT                | 1946716405               |
| SNP_P3_186775_738  | NW_004521893.1 | Scaffold9860 | 738                     | CC                              | TT                | 1946716407               |
| SNP_P3_186776_783  | NW_004521893.1 | Scaffold9860 | 783                     | CC                              | TT                | 1946716409               |
| SNP_P3_186777_877  | NW_004521893.1 | Scaffold9860 | 877                     | GG                              | AA                | 1946716411               |
| SNP_P3_186779_929  | NW_004521893.1 | Scaffold9860 | 929                     | AA                              | CC                | 1946716413               |
| SNP_P3_186780_1312 | NW_004521893.1 | Scaffold9860 | 1312                    | CC                              | AA                | 1946716415               |
| SNP_P3_186781_1357 | NW_004521901.1 | Scaffold9887 | 1357                    | CC                              | TT                | 1946716417               |
| SNP_P3_186782_1359 | NW_004521901.1 | Scaffold9887 | 1359                    | CC                              | TT                | 1946716419               |
| SNP_P3_186783_1361 | NW_004521901.1 | Scaffold9887 | 1361                    | GG                              | AA                | 1946716421               |
| SNP_P3_186784_1384 | NW_004521901.1 | Scaffold9887 | 1384                    | CC                              | TT                | 1946716423               |
| SNP_P3_186785_1415 | NW_004521901.1 | Scaffold9887 | 1415                    | CC                              | TT                | 1946716425               |
| SNP_P3_186786_1745 | NW_004521901.1 | Scaffold9887 | 1745                    | CC                              | TT                | 1946716427               |
| SNP_P3_186787_1872 | NW_004521901.1 | Scaffold9887 | 1872                    | CC                              | TT                | 1946716429               |
| SNP_P3_186788_2188 | NW_004521901.1 | Scaffold9887 | 2188                    | GG                              | TT                | 1946716431               |
| SNP_P3_186789_456  | NW_004521902.1 | Scaffold9888 | 456                     | AA                              | TT                | 1946716433               |
| SNP_P3_186790_393  | NW_004521903.1 | Scaffold9892 | 393                     | CC                              | TT                | 1946716435               |
| SNP_P3_186791_395  | NW_004521903.1 | Scaffold9892 | 395                     | AA                              | TT                | 1946716437               |
| SNP_P3_186792_406  | NW_004521903.1 | Scaffold9892 | 406                     | GG                              | AA                | 1946716438               |
| SNP_P3_186793_426  | NW_004521903.1 | Scaffold9892 | 426                     | TT                              | GG                | 1946716440               |
| SNP_P3_186797_596  | NW_004521903.1 | Scaffold9892 | 596                     | CC                              | TT                | 1946716442               |
| SNP_P3_186798_647  | NW_004521903.1 | Scaffold9892 | 647                     | TT                              | AA                | 1946716444               |
| SNP_P3_186799_654  | NW_004521903.1 | Scaffold9892 | 654                     | CC                              | GG                | 1946716446               |
| SNP_P3_186800_796  | NW_004521903.1 | Scaffold9892 | 796                     | TT                              | CC                | 1946716448               |
| SNP_P3_186801_903  | NW_004521903.1 | Scaffold9892 | 903                     | CC                              | GG                | 1946716450               |
| SNP_P3_186802_912  | NW_004521903.1 | Scaffold9892 | 912                     | CC                              | AA                | 1946716452               |
| SNP_P3_186803_950  | NW_004521903.1 | Scaffold9892 | 950                     | AA                              | TT                | 1946716454               |



| SNPs IDs           | Chromosome IDs | Chromosomes  | Physical positions (bp) | CDC Frontier (Reference genome) | (Pusa 256 & HPNB) | NCBI SNPdb Accession IDs |
|--------------------|----------------|--------------|-------------------------|---------------------------------|-------------------|--------------------------|
| SNP_P3_186805_820  | NW_004521907.1 | Scaffold9900 | 820                     | CC                              | AA                | 1946716456               |
| SNP_P3_186806_831  | NW_004521907.1 | Scaffold9900 | 831                     | GG                              | TT                | 1946716458               |
| SNP_P3_186807_833  | NW_004521907.1 | Scaffold9900 | 833                     | AA                              | CC                | 1946716460               |
| SNP_P3_186808_834  | NW_004521907.1 | Scaffold9900 | 834                     | TT                              | AA                | 1946716462               |
| SNP_P3_186809_836  | NW_004521907.1 | Scaffold9900 | 836                     | TT                              | CC                | 1946716464               |
| SNP_P3_186810_863  | NW_004521907.1 | Scaffold9900 | 863                     | AA                              | TT                | 1946716466               |
| SNP_P3_186811_921  | NW_004521907.1 | Scaffold9900 | 921                     | CC                              | AA                | 1946716468               |
| SNP_P3_186812_932  | NW_004521907.1 | Scaffold9900 | 932                     | AA                              | GG                | 1946716470               |
| SNP_P3_186813_975  | NW_004521907.1 | Scaffold9900 | 975                     | GG                              | AA                | 1946716472               |
| SNP_P3_186814_980  | NW_004521907.1 | Scaffold9900 | 980                     | AA                              | GG                | 1946716474               |
| SNP_P3_186815_985  | NW_004521907.1 | Scaffold9900 | 985                     | TT                              | CC                | 1946716476               |
| SNP_P3_186816_993  | NW_004521907.1 | Scaffold9900 | 993                     | GG                              | TT                | 1946716478               |
| SNP_P3_186817_994  | NW_004521907.1 | Scaffold9900 | 994                     | CC                              | AA                | 1946716481               |
| SNP_P3_186818_1014 | NW_004521907.1 | Scaffold9900 | 1014                    | TT                              | CC                | 1946716483               |
| SNP_P3_186819_4364 | NW_004521908.1 | Scaffold9901 | 4364                    | AA                              | GG                | 1946716485               |
| SNP_P3_186820_4384 | NW_004521908.1 | Scaffold9901 | 4384                    | GG                              | AA                | 1946716487               |
| SNP_P3_186821_1357 | NW_004521909.1 | Scaffold9902 | 1357                    | TT                              | CC                | 1946716490               |
| SNP_P3_186822_524  | NW_004521910.1 | Scaffold9903 | 524                     | GG                              | AA                | 1946716492               |
| SNP_P3_186823_868  | NW_004521910.1 | Scaffold9903 | 868                     | TT                              | AA                | 1946716494               |
| SNP_P3_186824_95   | NW_004521912.1 | Scaffold9917 | 95                      | AA                              | GG                | 1946716496               |
| SNP_P3_186825_156  | NW_004521912.1 | Scaffold9917 | 156                     | AA                              | GG                | 1946716498               |
| SNP_P3_186826_650  | NW_004521912.1 | Scaffold9917 | 650                     | CC                              | TT                | 1946716500               |
| SNP_P3_186827_1131 | NW_004521912.1 | Scaffold9917 | 1131                    | TT                              | CC                | 1946716502               |
| SNP_P3_186829_1181 | NW_004521912.1 | Scaffold9917 | 1181                    | GG                              | AA                | 1946716504               |
| SNP_P3_186830_1192 | NW_004521912.1 | Scaffold9917 | 1192                    | TT                              | GG                | 1946716506               |
| SNP_P3_186831_1270 | NW_004521912.1 | Scaffold9917 | 1270                    | GG                              | AA                | 1946716508               |
| SNP_P3_186832_1301 | NW_004521912.1 | Scaffold9917 | 1301                    | AA                              | TT                | 1946716510               |
| SNP_P3_186833_1322 | NW_004521912.1 | Scaffold9917 | 1322                    | CC                              | TT                | 1946716513               |
| SNP_P3_186834_1339 | NW_004521912.1 | Scaffold9917 | 1339                    | TT                              | CC                | 1946716515               |
| SNP_P3_186835_1388 | NW_004521912.1 | Scaffold9917 | 1388                    | TT                              | CC                | 1946716517               |
| SNP_P3_186836_2332 | NW_004521912.1 | Scaffold9917 | 2332                    | GG                              | TT                | 1946716519               |
| SNP_P3_186837_640  | NW_004521914.1 | Scaffold9921 | 640                     | TT                              | AA                | 1946716521               |
| SNP_P3_186838_696  | NW_004521914.1 | Scaffold9921 | 696                     | CC                              | GG                | 1946716523               |
| SNP_P3_186839_734  | NW_004521914.1 | Scaffold9921 | 734                     | AA                              | GG                | 1946716525               |
| SNP_P3_186840_746  | NW_004521914.1 | Scaffold9921 | 746                     | AA                              | TT                | 1946716527               |
| SNP_P3_186841_802  | NW_004521914.1 | Scaffold9921 | 802                     | AA                              | CC                | 1946716529               |
| SNP_P3_186842_884  | NW_004521914.1 | Scaffold9921 | 884                     | CC                              | TT                | 1946716531               |
| SNP_P3_186843_959  | NW_004521914.1 | Scaffold9921 | 959                     | GG                              | AA                | 1946716533               |
| SNP_P3_186844_343  | NW_004521915.1 | Scaffold9925 | 343                     | TT                              | GG                | 1946716535               |
| SNP_P3_186845_511  | NW_004521915.1 | Scaffold9925 | 511                     | CC                              | TT                | 1946716537               |
| SNP_P3_186846_656  | NW_004521915.1 | Scaffold9925 | 656                     | GG                              | CC                | 1946716539               |
| SNP_P3_186847_659  | NW_004521915.1 | Scaffold9925 | 659                     | TT                              | AA                | 1946716541               |

| SNPs IDs            | Chromosome IDs | Chromosomes   | Physical positions (bp) | CDC Frontier (Reference genome) | (Pusa 256 & HPNB) | NCBI SNPdb Accession IDs |
|---------------------|----------------|---------------|-------------------------|---------------------------------|-------------------|--------------------------|
| SNP_P3_186848_88    | NW_004521919.1 | Scaffold9936  | 88                      | CC                              | AA                | 1946716543               |
| SNP_P3_186849_111   | NW_004521919.1 | Scaffold9936  | 111                     | CC                              | AA                | 1946716545               |
| SNP_P3_186850_118   | NW_004521919.1 | Scaffold9936  | 118                     | TT                              | GG                | 1946716547               |
| SNP_P3_186851_119   | NW_004521919.1 | Scaffold9936  | 119                     | CC                              | AA                | 1946716549               |
| SNP_P3_186852_136   | NW_004521919.1 | Scaffold9936  | 136                     | CC                              | GG                | 1946716551               |
| SNP_P3_186853_281   | NW_004521919.1 | Scaffold9936  | 281                     | GG                              | TT                | 1946716553               |
| SNP_P3_186854_493   | NW_004521919.1 | Scaffold9936  | 493                     | TT                              | CC                | 1946716555               |
| SNP_P3_186855_498   | NW_004521919.1 | Scaffold9936  | 498                     | CC                              | TT                | 1946716557               |
| SNP_P3_186856_625   | NW_004521919.1 | Scaffold9936  | 625                     | CC                              | TT                | 1946716559               |
| SNP_P3_186857_1017  | NW_004521919.1 | Scaffold9936  | 1017                    | CC                              | AA                | 1946716561               |
| SNP_P3_186858_1227  | NW_004521919.1 | Scaffold9936  | 1227                    | AA                              | GG                | 1946716563               |
| SNP_P3_186859_1354  | NW_004521919.1 | Scaffold9936  | 1354                    | GG                              | AA                | 1946716565               |
| SNP_P3_186860_1641  | NW_004521921.1 | Scaffold9943  | 1641                    | AA                              | TT                | 1946716566               |
| SNP_P3_186861_1675  | NW_004521921.1 | Scaffold9943  | 1675                    | GG                              | AA                | 1946716568               |
| SNP_P3_186862_1711  | NW_004521921.1 | Scaffold9943  | 1711                    | AA                              | TT                | 1946716570               |
| SNP_P3_186863_1817  | NW_004521921.1 | Scaffold9943  | 1817                    | AA                              | GG                | 1946716572               |
| SNP_P3_186864_2099  | NW_004521921.1 | Scaffold9943  | 2099                    | GG                              | CC                | 1946716574               |
| SNP_P3_186865_2140  | NW_004521921.1 | Scaffold9943  | 2140                    | AA                              | TT                | 1946716576               |
| SNP_P3_186866_2176  | NW_004521921.1 | Scaffold9943  | 2176                    | CC                              | AA                | 1946716578               |
| SNP_P3_186867_2247  | NW_004521921.1 | Scaffold9943  | 2247                    | GG                              | AA                | 1946716580               |
| SNP_P3_186868_639   | NW_004521926.1 | Scaffold9955  | 639                     | AA                              | GG                | 1946716583               |
| SNP_P3_186870_432   | NW_004521929.1 | Scaffold9958  | 432                     | AA                              | TT                | 1946716585               |
| SNP_P3_186871_513   | NW_004521929.1 | Scaffold9958  | 513                     | AA                              | TT                | 1946716587               |
| SNP_P3_186872_813   | NW_004521929.1 | Scaffold9958  | 813                     | AA                              | GG                | 1946716589               |
| SNP_P3_186873_4157  | NW_004521938.1 | Scaffold9982  | 4157                    | AA                              | TT                | 1946716591               |
| SNP_P3_186874_4178  | NW_004521938.1 | Scaffold9982  | 4178                    | AA                              | TT                | 1946716593               |
| SNP_P3_186875_4356  | NW_004521938.1 | Scaffold9982  | 4356                    | CC                              | TT                | 1946716595               |
| SNP_P3_186876_567   | NW_004521940.1 | Scaffold9992  | 567                     | GG                              | AA                | 1946716597               |
| SNP_P3_186877_629   | NW_004521940.1 | Scaffold9992  | 629                     | AA                              | GG                | 1946716599               |
| SNP_P3_186878_716   | NW_004521940.1 | Scaffold9992  | 716                     | AA                              | CC                | 1946716601               |
| SNP_P3_186879_725   | NW_004521940.1 | Scaffold9992  | 725                     | AA                              | GG                | 1946716603               |
| SNP_P3_186880_20316 | NW_004521940.1 | Scaffold9992  | 20316                   | GG                              | TT                | 1946716605               |
| SNP_P3_186881_20515 | NW_004521940.1 | Scaffold9992  | 20515                   | AA                              | TT                | 1946716607               |
| SNP_P3_186882_20548 | NW_004521940.1 | Scaffold9992  | 20548                   | GG                              | AA                | 1946716609               |
| SNP_P3_186883_20657 | NW_004521940.1 | Scaffold9992  | 20657                   | TT                              | AA                | 1946716611               |
| SNP_P3_186884_339   | NW_004521944.1 | Scaffold10003 | 339                     | CC                              | GG                | 1946716613               |
| SNP_P3_186885_865   | NW_004521944.1 | Scaffold10003 | 865                     | AA                              | CC                | 1946716615               |
| SNP_P3_186886_870   | NW_004521950.1 | Scaffold10026 | 870                     | TT                              | AA                | 1946716617               |
| SNP_P3_186887_339   | NW_004521951.1 | Scaffold10028 | 339                     | CC                              | AA                | 1946716619               |
| SNP_P3_186889_18928 | NW_004521952.1 | Scaffold10029 | 18928                   | GG                              | CC                | 1946716621               |
| SNP_P3_186890_996   | NW_004521953.1 | Scaffold10031 | 996                     | TT                              | AA                | 1946716623               |
| SNP_P3_186891_627   | NW_004521963.1 | Scaffold10059 | 627                     | GG                              | TT                | 1946716625               |

| SNPs IDs           | Chromosome IDs | Chromosomes   | Physical positions (bp) | CDC Frontier (Reference genome) | (Pusa 256 & HPNB) | NCBI SNPdb Accession IDs |
|--------------------|----------------|---------------|-------------------------|---------------------------------|-------------------|--------------------------|
| SNP_P3_186892_1012 | NW_004521963.1 | Scaffold10059 | 1012                    | TT                              | CC                | 1946716627               |
| SNP_P3_186893_1018 | NW_004521963.1 | Scaffold10059 | 1018                    | CC                              | GG                | 1946716629               |
| SNP_P3_186894_379  | NW_004521965.1 | Scaffold10069 | 379                     | AA                              | CC                | 1946716630               |
| SNP_P3_186895_511  | NW_004521965.1 | Scaffold10069 | 511                     | TT                              | AA                | 1946716632               |
| SNP_P3_186896_648  | NW_004521965.1 | Scaffold10069 | 648                     | GG                              | CC                | 1946716634               |
| SNP_P3_186897_709  | NW_004521965.1 | Scaffold10069 | 709                     | AA                              | CC                | 1946716636               |
| SNP_P3_186898_64   | NW_004521968.1 | Scaffold10073 | 64                      | AA                              | TT                | 1946716638               |
| SNP_P3_186899_88   | NW_004521968.1 | Scaffold10073 | 88                      | TT                              | AA                | 1946716640               |
| SNP_P3_186901_478  | NW_004521971.1 | Scaffold10099 | 478                     | AA                              | TT                | 1946716642               |
| SNP_P3_186902_344  | NW_004521974.1 | Scaffold10103 | 344                     | AA                              | GG                | 1946716644               |
| SNP_P3_186903_693  | NW_004521974.1 | Scaffold10103 | 693                     | GG                              | AA                | 1946716646               |
| SNP_P3_186904_4412 | NW_004521974.1 | Scaffold10103 | 4412                    | AA                              | GG                | 1946716648               |
| SNP_P3_186905_4595 | NW_004521974.1 | Scaffold10103 | 4595                    | CC                              | GG                | 1946716650               |
| SNP_P3_186906_4743 | NW_004521974.1 | Scaffold10103 | 4743                    | CC                              | TT                | 1946716652               |
| SNP_P3_186908_5408 | NW_004521974.1 | Scaffold10103 | 5408                    | AA                              | TT                | 1946716654               |
| SNP_P3_186909_64   | NW_004521980.1 | Scaffold10121 | 64                      | TT                              | CC                | 1946716656               |
| SNP_P3_186910_130  | NW_004521980.1 | Scaffold10121 | 130                     | TT                              | CC                | 1946716658               |
| SNP_P3_186911_709  | NW_004521980.1 | Scaffold10121 | 709                     | GG                              | CC                | 1946716660               |
| SNP_P3_186912_728  | NW_004521980.1 | Scaffold10121 | 728                     | GG                              | AA                | 1946716662               |
| SNP_P3_186913_735  | NW_004521980.1 | Scaffold10121 | 735                     | TT                              | CC                | 1946716664               |
| SNP_P3_186914_783  | NW_004521980.1 | Scaffold10121 | 783                     | TT                              | GG                | 1946716666               |
| SNP_P3_186915_785  | NW_004521980.1 | Scaffold10121 | 785                     | TT                              | GG                | 1946716668               |
| SNP_P3_186916_794  | NW_004521980.1 | Scaffold10121 | 794                     | AA                              | TT                | 1946716670               |
| SNP_P3_186917_817  | NW_004521980.1 | Scaffold10121 | 817                     | GG                              | TT                | 1946716672               |
| SNP_P3_186918_1587 | NW_004521980.1 | Scaffold10121 | 1587                    | GG                              | AA                | 1946716674               |
| SNP_P3_186919_5123 | NW_004521980.1 | Scaffold10121 | 5123                    | CC                              | TT                | 1946716676               |
| SNP_P3_186920_80   | NW_004521981.1 | Scaffold10124 | 80                      | GG                              | TT                | 1946716678               |
| SNP_P3_186921_130  | NW_004521981.1 | Scaffold10124 | 130                     | GG                              | TT                | 1946716680               |
| SNP_P3_186922_296  | NW_004521981.1 | Scaffold10124 | 296                     | AA                              | TT                | 1946716682               |
| SNP_P3_186923_360  | NW_004521981.1 | Scaffold10124 | 360                     | GG                              | AA                | 1946716684               |
| SNP_P3_186924_969  | NW_004521982.1 | Scaffold10131 | 969                     | AA                              | GG                | 1946716686               |
| SNP_P3_186925_1320 | NW_004521982.1 | Scaffold10131 | 1320                    | AA                              | CC                | 1946716688               |
| SNP_P3_186926_1608 | NW_004521982.1 | Scaffold10131 | 1608                    | CC                              | TT                | 1946716689               |
| SNP_P3_186927_1499 | NW_004521983.1 | Scaffold10134 | 1499                    | TT                              | GG                | 1946716691               |
| SNP_P3_186928_1994 | NW_004521983.1 | Scaffold10134 | 1994                    | CC                              | TT                | 1946716693               |
| SNP_P3_186929_2089 | NW_004521983.1 | Scaffold10134 | 2089                    | TT                              | AA                | 1946716695               |
| SNP_P3_186930_2145 | NW_004521983.1 | Scaffold10134 | 2145                    | TT                              | CC                | 1946716697               |
| SNP_P3_186931_2173 | NW_004521983.1 | Scaffold10134 | 2173                    | CC                              | GG                | 1946716699               |
| SNP_P3_186932_2183 | NW_004521983.1 | Scaffold10134 | 2183                    | TT                              | AA                | 1946716701               |
| SNP_P3_186933_2196 | NW_004521983.1 | Scaffold10134 | 2196                    | TT                              | GG                | 1946716703               |
| SNP_P3_186934_2212 | NW_004521983.1 | Scaffold10134 | 2212                    | AA                              | GG                | 1946716705               |
| SNP_P3_186935_2569 | NW_004521983.1 | Scaffold10134 | 2569                    | TT                              | GG                | 1946716707               |

| SNPs IDs            | Chromosome IDs | Chromosomes   | Physical positions (bp) | CDC Frontier (Reference genome) | (Pusa 256 & HPNB) | NCBI SNPdb Accession IDs |
|---------------------|----------------|---------------|-------------------------|---------------------------------|-------------------|--------------------------|
| SNP_P3_186936_485   | NW_004521986.1 | Scaffold10148 | 485                     | CC                              | TT                | 1946716709               |
| SNP_P3_186937_557   | NW_004521986.1 | Scaffold10148 | 557                     | TT                              | CC                | 1946716711               |
| SNP_P3_186938_338   | NW_004521988.1 | Scaffold10152 | 338                     | AA                              | TT                | 1946716713               |
| SNP_P3_186940_781   | NW_004521988.1 | Scaffold10152 | 781                     | GG                              | AA                | 1946716715               |
| SNP_P3_186941_782   | NW_004521988.1 | Scaffold10152 | 782                     | CC                              | TT                | 1946716717               |
| SNP_P3_186942_937   | NW_004521988.1 | Scaffold10152 | 937                     | GG                              | TT                | 1946716719               |
| SNP_P3_186943_163   | NW_004521989.1 | Scaffold10154 | 163                     | AA                              | TT                | 1946716721               |
| SNP_P3_186944_203   | NW_004521989.1 | Scaffold10154 | 203                     | TT                              | GG                | 1946716723               |
| SNP_P3_186945_421   | NW_004521989.1 | Scaffold10154 | 421                     | CC                              | GG                | 1946716725               |
| SNP_P3_186946_443   | NW_004521989.1 | Scaffold10154 | 443                     | TT                              | AA                | 1946716727               |
| SNP_P3_186947_475   | NW_004521989.1 | Scaffold10154 | 475                     | CC                              | AA                | 1946716729               |
| SNP_P3_186948_481   | NW_004521989.1 | Scaffold10154 | 481                     | CC                              | AA                | 1946716731               |
| SNP_P3_186949_497   | NW_004521989.1 | Scaffold10154 | 497                     | TT                              | AA                | 1946716733               |
| SNP_P3_186950_507   | NW_004521989.1 | Scaffold10154 | 507                     | AA                              | GG                | 1946716735               |
| SNP_P3_186951_530   | NW_004521989.1 | Scaffold10154 | 530                     | TT                              | AA                | 1946716738               |
| SNP_P3_186952_543   | NW_004521989.1 | Scaffold10154 | 543                     | GG                              | AA                | 1946716740               |
| SNP_P3_186953_576   | NW_004521989.1 | Scaffold10154 | 576                     | TT                              | AA                | 1946716742               |
| SNP_P3_186954_577   | NW_004521989.1 | Scaffold10154 | 577                     | GG                              | TT                | 1946716744               |
| SNP_P3_186955_640   | NW_004521989.1 | Scaffold10154 | 640                     | CC                              | AA                | 1946716746               |
| SNP_P3_186956_790   | NW_004521989.1 | Scaffold10154 | 790                     | CC                              | TT                | 1946716748               |
| SNP_P3_186957_891   | NW_004521989.1 | Scaffold10154 | 891                     | TT                              | GG                | 1946716750               |
| SNP_P3_186958_898   | NW_004521989.1 | Scaffold10154 | 898                     | TT                              | AA                | 1946716752               |
| SNP_P3_186959_922   | NW_004521989.1 | Scaffold10154 | 922                     | TT                              | CC                | 1946716754               |
| SNP_P3_186960_928   | NW_004521989.1 | Scaffold10154 | 928                     | GG                              | AA                | 1946716756               |
| SNP_P3_186961_948   | NW_004521989.1 | Scaffold10154 | 948                     | AA                              | GG                | 1946716758               |
| SNP_P3_186962_971   | NW_004521989.1 | Scaffold10154 | 971                     | TT                              | CC                | 1946716759               |
| SNP_P3_186963_980   | NW_004521989.1 | Scaffold10154 | 980                     | CC                              | TT                | 1946716761               |
| SNP_P3_186964_982   | NW_004521989.1 | Scaffold10154 | 982                     | AA                              | CC                | 1946716764               |
| SNP_P3_186965_1008  | NW_004521989.1 | Scaffold10154 | 1008                    | AA                              | GG                | 1946716766               |
| SNP_P3_186966_1446  | NW_004521991.1 | Scaffold10158 | 1446                    | CC                              | TT                | 1946716769               |
| SNP_P3_186967_1643  | NW_004521991.1 | Scaffold10158 | 1643                    | AA                              | GG                | 1946716771               |
| SNP_P3_186968_1948  | NW_004521991.1 | Scaffold10158 | 1948                    | CC                              | TT                | 1946716773               |
| SNP_P3_186969_1982  | NW_004521991.1 | Scaffold10158 | 1982                    | TT                              | AA                | 1946716775               |
| SNP_P3_186970_2030  | NW_004521991.1 | Scaffold10158 | 2030                    | CC                              | TT                | 1946716777               |
| SNP_P3_186971_2067  | NW_004521991.1 | Scaffold10158 | 2067                    | AA                              | GG                | 1946716779               |
| SNP_P3_186973_16344 | NW_004521991.1 | Scaffold10158 | 16344                   | AA                              | GG                | 1946716781               |
| SNP_P3_186974_18212 | NW_004521991.1 | Scaffold10158 | 18212                   | CC                              | GG                | 1946716783               |
| SNP_P3_186975_664   | NW_004521993.1 | Scaffold10163 | 664                     | CC                              | GG                | 1946716785               |
| SNP_P3_186976_923   | NW_004521993.1 | Scaffold10163 | 923                     | AA                              | GG                | 1946716787               |
| SNP_P3_186977_1020  | NW_004521993.1 | Scaffold10163 | 1020                    | CC                              | AA                | 1946716789               |
| SNP_P3_186978_452   | NW_004521994.1 | Scaffold10180 | 452                     | GG                              | TT                | 1946716791               |
| SNP_P3_186980_1068  | NW_004521994.1 | Scaffold10180 | 1068                    | AA                              | TT                | 1946716793               |

| SNPs IDs            | Chromosome IDs | Chromosomes   | Physical positions (bp) | CDC Frontier (Reference genome) | (Pusa 256 & HPNB) | NCBI SNPdb Accession IDs |
|---------------------|----------------|---------------|-------------------------|---------------------------------|-------------------|--------------------------|
| SNP_P3_186981_1086  | NW_004521994.1 | Scaffold10180 | 1086                    | TT                              | AA                | 1946716795               |
| SNP_P3_186982_1118  | NW_004521994.1 | Scaffold10180 | 1118                    | CC                              | AA                | 1946716797               |
| SNP_P3_186983_1283  | NW_004521994.1 | Scaffold10180 | 1283                    | CC                              | TT                | 1946716799               |
| SNP_P3_186984_1132  | NW_004521995.1 | Scaffold10181 | 1132                    | TT                              | CC                | 1946716801               |
| SNP_P3_186985_1222  | NW_004521995.1 | Scaffold10181 | 1222                    | CC                              | GG                | 1946716803               |
| SNP_P3_186986_1232  | NW_004521995.1 | Scaffold10181 | 1232                    | TT                              | CC                | 1946716805               |
| SNP_P3_186987_1410  | NW_004521995.1 | Scaffold10181 | 1410                    | CC                              | AA                | 1946716807               |
| SNP_P3_186988_1440  | NW_004521995.1 | Scaffold10181 | 1440                    | GG                              | CC                | 1946716809               |
| SNP_P3_186989_1483  | NW_004521995.1 | Scaffold10181 | 1483                    | TT                              | CC                | 1946716811               |
| SNP_P3_186990_1500  | NW_004521995.1 | Scaffold10181 | 1500                    | CC                              | GG                | 1946716813               |
| SNP_P3_186991_1623  | NW_004521995.1 | Scaffold10181 | 1623                    | TT                              | AA                | 1946716815               |
| SNP_P3_186992_1059  | NW_004521997.1 | Scaffold10186 | 1059                    | TT                              | CC                | 1946716817               |
| SNP_P3_186993_1543  | NW_004521997.1 | Scaffold10186 | 1543                    | TT                              | AA                | 1946716819               |
| SNP_P3_186994_1552  | NW_004521997.1 | Scaffold10186 | 1552                    | TT                              | CC                | 1946716821               |
| SNP_P3_186995_1606  | NW_004521997.1 | Scaffold10186 | 1606                    | TT                              | CC                | 1946716823               |
| SNP_P3_186996_1616  | NW_004521997.1 | Scaffold10186 | 1616                    | TT                              | CC                | 1946716825               |
| SNP_P3_186997_64    | NW_004521998.1 | Scaffold10196 | 64                      | CC                              | TT                | 1946716827               |
| SNP_P3_186998_104   | NW_004521998.1 | Scaffold10196 | 104                     | AA                              | TT                | 1946716829               |
| SNP_P3_186999_497   | NW_004521998.1 | Scaffold10196 | 497                     | GG                              | TT                | 1946716831               |
| SNP_P3_187000_596   | NW_004521998.1 | Scaffold10196 | 596                     | CC                              | TT                | 1946716833               |
| SNP_P3_187001_1036  | NW_004521998.1 | Scaffold10196 | 1036                    | AA                              | CC                | 1946716835               |
| SNP_P3_187002_1040  | NW_004521998.1 | Scaffold10196 | 1040                    | TT                              | CC                | 1946716837               |
| SNP_P3_187003_1056  | NW_004521998.1 | Scaffold10196 | 1056                    | GG                              | AA                | 1946716839               |
| SNP_P3_187004_1064  | NW_004521998.1 | Scaffold10196 | 1064                    | CC                              | TT                | 1946716841               |
| SNP_P3_187005_1080  | NW_004521998.1 | Scaffold10196 | 1080                    | GG                              | AA                | 1946716843               |
| SNP_P3_187006_1236  | NW_004521998.1 | Scaffold10196 | 1236                    | AA                              | GG                | 1946716845               |
| SNP_P3_187007_1314  | NW_004521998.1 | Scaffold10196 | 1314                    | GG                              | AA                | 1946716847               |
| SNP_P3_187008_1329  | NW_004521998.1 | Scaffold10196 | 1329                    | GG                              | AA                | 1946716849               |
| SNP_P3_187009_923   | NW_004522004.1 | Scaffold10218 | 923                     | AA                              | TT                | 1946716852               |
| SNP_P3_187011_1256  | NW_004522004.1 | Scaffold10218 | 1256                    | TT                              | CC                | 1946716854               |
| SNP_P3_187012_1665  | NW_004522006.1 | Scaffold10227 | 1665                    | CC                              | TT                | 1946716856               |
| SNP_P3_187013_3273  | NW_004522006.1 | Scaffold10227 | 3273                    | GG                              | AA                | 1946716858               |
| SNP_P3_187014_6034  | NW_004522006.1 | Scaffold10227 | 6034                    | GG                              | AA                | 1946716860               |
| SNP_P3_187015_6207  | NW_004522006.1 | Scaffold10227 | 6207                    | GG                              | AA                | 1946716863               |
| SNP_P3_187017_6941  | NW_004522006.1 | Scaffold10227 | 6941                    | TT                              | CC                | 1946716865               |
| SNP_P3_187019_8901  | NW_004522006.1 | Scaffold10227 | 8901                    | AA                              | CC                | 1946716867               |
| SNP_P3_187020_8921  | NW_004522006.1 | Scaffold10227 | 8921                    | GG                              | TT                | 1946716869               |
| SNP_P3_187021_9391  | NW_004522006.1 | Scaffold10227 | 9391                    | TT                              | AA                | 1946716871               |
| SNP_P3_187022_10184 | NW_004522006.1 | Scaffold10227 | 10184                   | GG                              | AA                | 1946716873               |
| SNP_P3_187023_11246 | NW_004522006.1 | Scaffold10227 | 11246                   | AA                              | GG                | 1946716874               |
| SNP_P3_187024_11267 | NW_004522006.1 | Scaffold10227 | 11267                   | AA                              | TT                | 1946716875               |
| SNP_P3_187025_11418 | NW_004522006.1 | Scaffold10227 | 11418                   | GG                              | AA                | 1946716876               |

| SNPs IDs            | Chromosome IDs | Chromosomes   | Physical positions (bp) | CDC Frontier (Reference genome) | (Pusa 256 & HPNB) | NCBI SNPdb Accession IDs |
|---------------------|----------------|---------------|-------------------------|---------------------------------|-------------------|--------------------------|
| SNP_P3_187026_11428 | NW_004522006.1 | Scaffold10227 | 11428                   | CC                              | GG                | 1946716877               |
| SNP_P3_187027_142   | NW_004522007.1 | Scaffold10231 | 142                     | CC                              | TT                | 1946716878               |
| SNP_P3_187028_417   | NW_004522007.1 | Scaffold10231 | 417                     | GG                              | AA                | 1946716880               |
| SNP_P3_187030_672   | NW_004522007.1 | Scaffold10231 | 672                     | CC                              | TT                | 1946716882               |
| SNP_P3_187031_850   | NW_004522007.1 | Scaffold10231 | 850                     | CC                              | AA                | 1946716884               |
| SNP_P3_187032_56    | NW_004522008.1 | Scaffold10232 | 56                      | TT                              | GG                | 1946716886               |
| SNP_P3_187033_64    | NW_004522008.1 | Scaffold10232 | 64                      | AA                              | GG                | 1946716888               |
| SNP_P3_187034_70    | NW_004522008.1 | Scaffold10232 | 70                      | TT                              | CC                | 1946716890               |
| SNP_P3_187035_92    | NW_004522008.1 | Scaffold10232 | 92                      | CC                              | TT                | 1946716892               |
| SNP_P3_187036_101   | NW_004522008.1 | Scaffold10232 | 101                     | AA                              | CC                | 1946716894               |
| SNP_P3_187037_142   | NW_004522008.1 | Scaffold10232 | 142                     | TT                              | AA                | 1946716896               |
| SNP_P3_187038_151   | NW_004522008.1 | Scaffold10232 | 151                     | GG                              | AA                | 1946716898               |
| SNP_P3_187039_223   | NW_004522008.1 | Scaffold10232 | 223                     | GG                              | AA                | 1946716900               |
| SNP_P3_187040_343   | NW_004522008.1 | Scaffold10232 | 343                     | CC                              | AA                | 1946716902               |
| SNP_P3_187041_440   | NW_004522008.1 | Scaffold10232 | 440                     | CC                              | TT                | 1946716904               |
| SNP_P3_187042_444   | NW_004522008.1 | Scaffold10232 | 444                     | AA                              | GG                | 1946716906               |
| SNP_P3_187043_560   | NW_004522008.1 | Scaffold10232 | 560                     | GG                              | AA                | 1946716908               |
| SNP_P3_187044_602   | NW_004522008.1 | Scaffold10232 | 602                     | CC                              | TT                | 1946716910               |
| SNP_P3_187046_882   | NW_004522008.1 | Scaffold10232 | 882                     | CC                              | AA                | 1946716912               |
| SNP_P3_187047_883   | NW_004522008.1 | Scaffold10232 | 883                     | AA                              | TT                | 1946716914               |
| SNP_P3_187048_884   | NW_004522008.1 | Scaffold10232 | 884                     | TT                              | GG                | 1946716916               |
| SNP_P3_187049_944   | NW_004522008.1 | Scaffold10232 | 944                     | TT                              | GG                | 1946716918               |
| SNP_P3_187050_1145  | NW_004522009.1 | Scaffold10238 | 1145                    | AA                              | GG                | 1946716920               |
| SNP_P3_187051_1177  | NW_004522009.1 | Scaffold10238 | 1177                    | CC                              | TT                | 1946716922               |
| SNP_P3_187052_1276  | NW_004522009.1 | Scaffold10238 | 1276                    | CC                              | GG                | 1946716924               |
| SNP_P3_187053_1350  | NW_004522009.1 | Scaffold10238 | 1350                    | TT                              | CC                | 1946716926               |
| SNP_P3_187054_1394  | NW_004522009.1 | Scaffold10238 | 1394                    | GG                              | AA                | 1946716928               |
| SNP_P3_187055_1411  | NW_004522009.1 | Scaffold10238 | 1411                    | TT                              | CC                | 1946716930               |
| SNP_P3_187056_1412  | NW_004522009.1 | Scaffold10238 | 1412                    | AA                              | CC                | 1946716932               |
| SNP_P3_187057_1436  | NW_004522009.1 | Scaffold10238 | 1436                    | AA                              | TT                | 1946716934               |
| SNP_P3_187058_1437  | NW_004522009.1 | Scaffold10238 | 1437                    | TT                              | AA                | 1946716936               |
| SNP_P3_187059_1439  | NW_004522009.1 | Scaffold10238 | 1439                    | AA                              | TT                | 1946716938               |
| SNP_P3_187060_1464  | NW_004522009.1 | Scaffold10238 | 1464                    | TT                              | CC                | 1946716940               |
| SNP_P3_187061_1466  | NW_004522009.1 | Scaffold10238 | 1466                    | AA                              | CC                | 1946716942               |
| SNP_P3_187063_1744  | NW_004522013.1 | Scaffold10244 | 1744                    | GG                              | TT                | 1946716944               |
| SNP_P3_187064_1770  | NW_004522013.1 | Scaffold10244 | 1770                    | TT                              | GG                | 1946716946               |
| SNP_P3_187065_1851  | NW_004522013.1 | Scaffold10244 | 1851                    | GG                              | AA                | 1946716948               |
| SNP_P3_187066_1974  | NW_004522013.1 | Scaffold10244 | 1974                    | TT                              | GG                | 1946716950               |
| SNP_P3_187067_684   | NW_004522020.1 | Scaffold10280 | 684                     | GG                              | CC                | 1946716952               |
| SNP_P3_187068_407   | NW_004522021.1 | Scaffold10285 | 407                     | AA                              | GG                | 1946716954               |
| SNP_P3_187069_784   | NW_004522021.1 | Scaffold10285 | 784                     | CC                              | TT                | 1946716956               |
| SNP_P3_187070_1477  | NW_004522021.1 | Scaffold10285 | 1477                    | TT                              | AA                | 1946716958               |

| SNPs IDs            | Chromosome IDs | Chromosomes   | Physical positions (bp) | CDC Frontier (Reference genome) | (Pusa 256 & HPNB) | NCBI SNPdb Accession IDs |
|---------------------|----------------|---------------|-------------------------|---------------------------------|-------------------|--------------------------|
| SNP_P3_187071_64    | NW_004522022.1 | Scaffold10299 | 64                      | AA                              | GG                | 1946716960               |
| SNP_P3_187072_18807 | NW_004522022.1 | Scaffold10299 | 18807                   | AA                              | TT                | 1946716962               |
| SNP_P3_187073_18809 | NW_004522022.1 | Scaffold10299 | 18809                   | GG                              | AA                | 1946716963               |
| SNP_P3_187074_18821 | NW_004522022.1 | Scaffold10299 | 18821                   | TT                              | CC                | 1946716965               |
| SNP_P3_187075_18849 | NW_004522022.1 | Scaffold10299 | 18849                   | TT                              | AA                | 1946716967               |
| SNP_P3_187076_18869 | NW_004522022.1 | Scaffold10299 | 18869                   | AA                              | CC                | 1946716969               |
| SNP_P3_187077_18978 | NW_004522022.1 | Scaffold10299 | 18978                   | GG                              | AA                | 1946716971               |
| SNP_P3_187078_18983 | NW_004522022.1 | Scaffold10299 | 18983                   | TT                              | CC                | 1946716973               |
| SNP_P3_187079_19041 | NW_004522022.1 | Scaffold10299 | 19041                   | GG                              | AA                | 1946716975               |
| SNP_P3_187080_19053 | NW_004522022.1 | Scaffold10299 | 19053                   | GG                              | AA                | 1946716977               |
| SNP_P3_187081_19158 | NW_004522022.1 | Scaffold10299 | 19158                   | GG                              | AA                | 1946716979               |
| SNP_P3_187082_19196 | NW_004522022.1 | Scaffold10299 | 19196                   | GG                              | TT                | 1946716981               |
| SNP_P3_187083_19334 | NW_004522022.1 | Scaffold10299 | 19334                   | CC                              | TT                | 1946716983               |
| SNP_P3_187084_19373 | NW_004522022.1 | Scaffold10299 | 19373                   | TT                              | AA                | 1946716985               |
| SNP_P3_187085_884   | NW_004522023.1 | Scaffold10304 | 884                     | TT                              | AA                | 1946716987               |
| SNP_P3_187086_1006  | NW_004522023.1 | Scaffold10304 | 1006                    | TT                              | CC                | 1946716989               |
| SNP_P3_187087_1300  | NW_004522023.1 | Scaffold10304 | 1300                    | TT                              | GG                | 1946716991               |
| SNP_P3_187088_1328  | NW_004522023.1 | Scaffold10304 | 1328                    | AA                              | TT                | 1946716993               |
| SNP_P3_187089_1584  | NW_004522023.1 | Scaffold10304 | 1584                    | GG                              | TT                | 1946716995               |
| SNP_P3_187090_1586  | NW_004522023.1 | Scaffold10304 | 1586                    | TT                              | CC                | 1946716997               |
| SNP_P3_187091_1593  | NW_004522023.1 | Scaffold10304 | 1593                    | TT                              | AA                | 1946716999               |
| SNP_P3_187092_1594  | NW_004522023.1 | Scaffold10304 | 1594                    | GG                              | AA                | 1946717001               |
| SNP_P3_187093_1614  | NW_004522023.1 | Scaffold10304 | 1614                    | TT                              | GG                | 1946717003               |
| SNP_P3_187094_1615  | NW_004522023.1 | Scaffold10304 | 1615                    | GG                              | AA                | 1946717005               |
| SNP_P3_187095_339   | NW_004522024.1 | Scaffold10305 | 339                     | AA                              | CC                | 1946717007               |
| SNP_P3_187096_340   | NW_004522024.1 | Scaffold10305 | 340                     | GG                              | AA                | 1946717009               |
| SNP_P3_187097_370   | NW_004522024.1 | Scaffold10305 | 370                     | GG                              | TT                | 1946717011               |
| SNP_P3_187098_409   | NW_004522024.1 | Scaffold10305 | 409                     | AA                              | GG                | 1946717013               |
| SNP_P3_187099_527   | NW_004522024.1 | Scaffold10305 | 527                     | CC                              | TT                | 1946717014               |
| SNP_P3_187100_570   | NW_004522024.1 | Scaffold10305 | 570                     | CC                              | GG                | 1946717016               |
| SNP_P3_187101_983   | NW_004522024.1 | Scaffold10305 | 983                     | TT                              | GG                | 1946717019               |
| SNP_P3_187102_696   | NW_004522028.1 | Scaffold10318 | 696                     | TT                              | CC                | 1946717021               |
| SNP_P3_187103_659   | NW_004522029.1 | Scaffold10320 | 659                     | CC                              | TT                | 1946717023               |
| SNP_P3_187104_1298  | NW_004522029.1 | Scaffold10320 | 1298                    | AA                              | GG                | 1946717025               |
| SNP_P3_187105_764   | NW_004522031.1 | Scaffold10324 | 764                     | CC                              | TT                | 1946717027               |
| SNP_P3_187106_1144  | NW_004522031.1 | Scaffold10324 | 1144                    | TT                              | CC                | 1946717029               |
| SNP_P3_187107_1214  | NW_004522031.1 | Scaffold10324 | 1214                    | TT                              | GG                | 1946717031               |
| SNP_P3_187108_918   | NW_004522035.1 | Scaffold10345 | 918                     | CC                              | TT                | 1946717033               |
| SNP_P3_187109_1076  | NW_004522035.1 | Scaffold10345 | 1076                    | AA                              | TT                | 1946717035               |
| SNP_P3_187110_839   | NW_004522036.1 | Scaffold10351 | 839                     | TT                              | AA                | 1946717037               |
| SNP_P3_187111_299   | NW_004522037.1 | Scaffold10354 | 299                     | AA                              | GG                | 1946717039               |
| SNP_P3_187112_317   | NW_004522037.1 | Scaffold10354 | 317                     | GG                              | CC                | 1946717041               |

| SNPs IDs            | Chromosome IDs | Chromosomes   | Physical positions (bp) | CDC Frontier (Reference genome) | (Pusa 256 & HPNB) | NCBI SNPdb Accession IDs |
|---------------------|----------------|---------------|-------------------------|---------------------------------|-------------------|--------------------------|
| SNP_P3_187113_334   | NW_004522037.1 | Scaffold10354 | 334                     | TT                              | AA                | 1946717043               |
| SNP_P3_187116_19762 | NW_004522037.1 | Scaffold10354 | 19762                   | GG                              | AA                | 1946717046               |
| SNP_P3_187117_347   | NW_004522039.1 | Scaffold10356 | 347                     | CC                              | AA                | 1946717048               |
| SNP_P3_187118_348   | NW_004522039.1 | Scaffold10356 | 348                     | GG                              | TT                | 1946717050               |
| SNP_P3_187119_406   | NW_004522039.1 | Scaffold10356 | 406                     | CC                              | AA                | 1946717052               |
| SNP_P3_187120_439   | NW_004522039.1 | Scaffold10356 | 439                     | GG                              | AA                | 1946717054               |
| SNP_P3_187121_504   | NW_004522039.1 | Scaffold10356 | 504                     | CC                              | TT                | 1946717056               |
| SNP_P3_187122_575   | NW_004522039.1 | Scaffold10356 | 575                     | CC                              | TT                | 1946717058               |
| SNP_P3_187123_623   | NW_004522039.1 | Scaffold10356 | 623                     | TT                              | GG                | 1946717069               |
| SNP_P3_187124_764   | NW_004522039.1 | Scaffold10356 | 764                     | CC                              | AA                | 1946717071               |
| SNP_P3_187125_1023  | NW_004522039.1 | Scaffold10356 | 1023                    | CC                              | GG                | 1946717073               |
| SNP_P3_187127_20250 | NW_004522039.1 | Scaffold10356 | 20250                   | GG                              | TT                | 1946717075               |
| SNP_P3_187128_64    | NW_004522041.1 | Scaffold10361 | 64                      | CC                              | AA                | 1946717078               |
| SNP_P3_187129_181   | NW_004522041.1 | Scaffold10361 | 181                     | AA                              | TT                | 1946717080               |
| SNP_P3_187130_571   | NW_004522041.1 | Scaffold10361 | 571                     | CC                              | AA                | 1946717082               |
| SNP_P3_187131_572   | NW_004522041.1 | Scaffold10361 | 572                     | TT                              | CC                | 1946717084               |
| SNP_P3_187132_601   | NW_004522041.1 | Scaffold10361 | 601                     | AA                              | TT                | 1946717086               |
| SNP_P3_187133_630   | NW_004522041.1 | Scaffold10361 | 630                     | GG                              | CC                | 1946717088               |
| SNP_P3_187134_653   | NW_004522041.1 | Scaffold10361 | 653                     | CC                              | AA                | 1946717090               |
| SNP_P3_187135_657   | NW_004522041.1 | Scaffold10361 | 657                     | AA                              | GG                | 1946717092               |
| SNP_P3_187136_708   | NW_004522041.1 | Scaffold10361 | 708                     | GG                              | AA                | 1946717094               |
| SNP_P3_187137_757   | NW_004522041.1 | Scaffold10361 | 757                     | AA                              | TT                | 1946717096               |
| SNP_P3_187138_767   | NW_004522041.1 | Scaffold10361 | 767                     | CC                              | AA                | 1946717098               |
| SNP_P3_187139_798   | NW_004522041.1 | Scaffold10361 | 798                     | CC                              | AA                | 1946717100               |
| SNP_P3_187140_819   | NW_004522041.1 | Scaffold10361 | 819                     | CC                              | TT                | 1946717102               |
| SNP_P3_187142_879   | NW_004522041.1 | Scaffold10361 | 879                     | AA                              | TT                | 1946717105               |
| SNP_P3_187143_901   | NW_004522041.1 | Scaffold10361 | 901                     | TT                              | CC                | 1946717107               |
| SNP_P3_187144_902   | NW_004522041.1 | Scaffold10361 | 902                     | GG                              | AA                | 1946717109               |
| SNP_P3_187145_925   | NW_004522041.1 | Scaffold10361 | 925                     | AA                              | GG                | 1946717111               |
| SNP_P3_187146_932   | NW_004522041.1 | Scaffold10361 | 932                     | TT                              | AA                | 1946717113               |
| SNP_P3_187147_934   | NW_004522041.1 | Scaffold10361 | 934                     | TT                              | CC                | 1946717115               |
| SNP_P3_187148_947   | NW_004522041.1 | Scaffold10361 | 947                     | CC                              | GG                | 1946717117               |
| SNP_P3_187149_949   | NW_004522041.1 | Scaffold10361 | 949                     | AA                              | GG                | 1946717120               |
| SNP_P3_187150_960   | NW_004522041.1 | Scaffold10361 | 960                     | GG                              | AA                | 1946717122               |
| SNP_P3_187151_971   | NW_004522041.1 | Scaffold10361 | 971                     | GG                              | TT                | 1946717124               |
| SNP_P3_187152_975   | NW_004522041.1 | Scaffold10361 | 975                     | TT                              | CC                | 1946717126               |
| SNP_P3_187153_1005  | NW_004522041.1 | Scaffold10361 | 1005                    | CC                              | AA                | 1946717128               |
| SNP_P3_187154_1013  | NW_004522041.1 | Scaffold10361 | 1013                    | TT                              | AA                | 1946717130               |
| SNP_P3_187155_1014  | NW_004522041.1 | Scaffold10361 | 1014                    | CC                              | TT                | 1946717132               |
| SNP_P3_187156_1015  | NW_004522041.1 | Scaffold10361 | 1015                    | AA                              | TT                | 1946717134               |
| SNP_P3_187157_1042  | NW_004522041.1 | Scaffold10361 | 1042                    | TT                              | AA                | 1946717136               |
| SNP_P3_187158_1049  | NW_004522041.1 | Scaffold10361 | 1049                    | GG                              | CC                | 1946717138               |



| SNPs IDs            | Chromosome IDs | Chromosomes   | Physical positions (bp) | CDC Frontier (Reference genome) | (Pusa 256 & HPNB) | NCBI SNPdb Accession IDs |
|---------------------|----------------|---------------|-------------------------|---------------------------------|-------------------|--------------------------|
| SNP_P3_187159_1072  | NW_004522041.1 | Scaffold10361 | 1072                    | CC                              | TT                | 1946717140               |
| SNP_P3_187160_1116  | NW_004522041.1 | Scaffold10361 | 1116                    | GG                              | CC                | 1946717142               |
| SNP_P3_187161_1117  | NW_004522041.1 | Scaffold10361 | 1117                    | AA                              | TT                | 1946717144               |
| SNP_P3_187162_1129  | NW_004522041.1 | Scaffold10361 | 1129                    | GG                              | AA                | 1946717146               |
| SNP_P3_187163_1264  | NW_004522041.1 | Scaffold10361 | 1264                    | TT                              | CC                | 1946717148               |
| SNP_P3_187164_64    | NW_004522046.1 | Scaffold10378 | 64                      | TT                              | CC                | 1946717150               |
| SNP_P3_187165_123   | NW_004522046.1 | Scaffold10378 | 123                     | AA                              | GG                | 1946717152               |
| SNP_P3_187166_142   | NW_004522046.1 | Scaffold10378 | 142                     | CC                              | TT                | 1946717154               |
| SNP_P3_187167_190   | NW_004522046.1 | Scaffold10378 | 190                     | TT                              | CC                | 1946717156               |
| SNP_P3_187168_195   | NW_004522046.1 | Scaffold10378 | 195                     | CC                              | TT                | 1946717158               |
| SNP_P3_187169_292   | NW_004522046.1 | Scaffold10378 | 292                     | AA                              | CC                | 1946717160               |
| SNP_P3_187170_345   | NW_004522046.1 | Scaffold10378 | 345                     | TT                              | CC                | 1946717162               |
| SNP_P3_187171_592   | NW_004522046.1 | Scaffold10378 | 592                     | AA                              | CC                | 1946717164               |
| SNP_P3_187172_680   | NW_004522046.1 | Scaffold10378 | 680                     | TT                              | GG                | 1946717166               |
| SNP_P3_187173_687   | NW_004522046.1 | Scaffold10378 | 687                     | CC                              | TT                | 1946717168               |
| SNP_P3_187174_741   | NW_004522046.1 | Scaffold10378 | 741                     | CC                              | AA                | 1946717170               |
| SNP_P3_187175_771   | NW_004522046.1 | Scaffold10378 | 771                     | TT                              | CC                | 1946717172               |
| SNP_P3_187176_787   | NW_004522046.1 | Scaffold10378 | 787                     | AA                              | TT                | 1946717174               |
| SNP_P3_187177_788   | NW_004522046.1 | Scaffold10378 | 788                     | AA                              | CC                | 1946717176               |
| SNP_P3_187178_792   | NW_004522046.1 | Scaffold10378 | 792                     | GG                              | AA                | 1946717178               |
| SNP_P3_187179_822   | NW_004522046.1 | Scaffold10378 | 822                     | TT                              | CC                | 1946717179               |
| SNP_P3_187180_873   | NW_004522046.1 | Scaffold10378 | 873                     | CC                              | TT                | 1946717181               |
| SNP_P3_187181_967   | NW_004522046.1 | Scaffold10378 | 967                     | TT                              | GG                | 1946717183               |
| SNP_P3_187182_1093  | NW_004522046.1 | Scaffold10378 | 1093                    | AA                              | TT                | 1946717185               |
| SNP_P3_187183_1117  | NW_004522046.1 | Scaffold10378 | 1117                    | TT                              | AA                | 1946717187               |
| SNP_P3_187184_1175  | NW_004522046.1 | Scaffold10378 | 1175                    | GG                              | TT                | 1946717189               |
| SNP_P3_187185_1234  | NW_004522046.1 | Scaffold10378 | 1234                    | TT                              | CC                | 1946717191               |
| SNP_P3_187186_1239  | NW_004522046.1 | Scaffold10378 | 1239                    | AA                              | GG                | 1946717193               |
| SNP_P3_187187_186   | NW_004522051.1 | Scaffold10392 | 186                     | TT                              | CC                | 1946717196               |
| SNP_P3_187188_346   | NW_004522051.1 | Scaffold10392 | 346                     | TT                              | AA                | 1946717198               |
| SNP_P3_187189_350   | NW_004522051.1 | Scaffold10392 | 350                     | GG                              | TT                | 1946717200               |
| SNP_P3_187190_572   | NW_004522054.1 | Scaffold10401 | 572                     | AA                              | TT                | 1946717202               |
| SNP_P3_187191_335   | NW_004522059.1 | Scaffold10415 | 335                     | GG                              | AA                | 1946717216               |
| SNP_P3_187192_714   | NW_004522059.1 | Scaffold10415 | 714                     | AA                              | GG                | 1946717218               |
| SNP_P3_187193_491   | NW_004522062.1 | Scaffold10419 | 491                     | CC                              | TT                | 1946717220               |
| SNP_P3_187194_532   | NW_004522062.1 | Scaffold10419 | 532                     | GG                              | AA                | 1946717222               |
| SNP_P3_187195_8993  | NW_004522062.1 | Scaffold10419 | 8993                    | AA                              | CC                | 1946717224               |
| SNP_P3_187196_30638 | NW_004522063.1 | Scaffold10420 | 30638                   | CC                              | TT                | 1946717226               |
| SNP_P3_187197_38390 | NW_004522063.1 | Scaffold10420 | 38390                   | AA                              | GG                | 1946717228               |
| SNP_P3_187198_604   | NW_004522096.1 | C11046504     | 604                     | GG                              | AA                | 1946717230               |
| SNP_P3_187203_389   | NW_004522119.1 | C11048338     | 389                     | GG                              | AA                | 1946717232               |
| SNP_P3_187204_659   | NW_004522120.1 | C11048340     | 659                     | CC                              | GG                | 1946717234               |

| SNPs IDs           | Chromosome IDs | Chromosomes | Physical positions (bp) | CDC Frontier (Reference genome) | (Pusa 256 & HPNB) | NCBI SNPdb Accession IDs |
|--------------------|----------------|-------------|-------------------------|---------------------------------|-------------------|--------------------------|
| SNP_P3_187205_664  | NW_004522120.1 | C11048340   | 664                     | TT                              | CC                | 1946717236               |
| SNP_P3_187206_665  | NW_004522120.1 | C11048340   | 665                     | GG                              | AA                | 1946717238               |
| SNP_P3_187207_683  | NW_004522120.1 | C11048340   | 683                     | GG                              | AA                | 1946717240               |
| SNP_P3_187208_707  | NW_004522120.1 | C11048340   | 707                     | CC                              | AA                | 1946717242               |
| SNP_P3_187209_790  | NW_004522120.1 | C11048340   | 790                     | TT                              | CC                | 1946717244               |
| SNP_P3_187210_382  | NW_004522122.1 | C11048522   | 382                     | AA                              | GG                | 1946717246               |
| SNP_P3_187215_451  | NW_004522172.1 | C11054110   | 451                     | TT                              | CC                | 1946717247               |
| SNP_P3_187216_784  | NW_004522172.1 | C11054110   | 784                     | CC                              | AA                | 1946717250               |
| SNP_P3_187222_846  | NW_004522221.1 | C11059834   | 846                     | CC                              | TT                | 1946717252               |
| SNP_P3_187223_875  | NW_004522221.1 | C11059834   | 875                     | TT                              | CC                | 1946717254               |
| SNP_P3_187224_1046 | NW_004522221.1 | C11059834   | 1046                    | AA                              | GG                | 1946717255               |
| SNP_P3_187225_1083 | NW_004522221.1 | C11059834   | 1083                    | TT                              | GG                | 1946717257               |
| SNP_P3_187226_1102 | NW_004522221.1 | C11059834   | 1102                    | GG                              | CC                | 1946717259               |
| SNP_P3_187230_482  | NW_004522265.1 | C11064028   | 482                     | GG                              | CC                | 1946717261               |
| SNP_P3_187233_1063 | NW_004522277.1 | C11065670   | 1063                    | GG                              | CC                | 1946717263               |
| SNP_P3_187234_132  | NW_004522278.1 | C11065790   | 132                     | TT                              | CC                | 1946717265               |
| SNP_P3_187235_140  | NW_004522278.1 | C11065790   | 140                     | GG                              | AA                | 1946717267               |
| SNP_P3_187236_174  | NW_004522278.1 | C11065790   | 174                     | TT                              | CC                | 1946717269               |
| SNP_P3_187237_813  | NW_004522278.1 | C11065790   | 813                     | AA                              | CC                | 1946717271               |
| SNP_P3_187239_1099 | NW_004522278.1 | C11065790   | 1099                    | GG                              | AA                | 1946717273               |
| SNP_P3_187240_873  | NW_004522293.1 | C11067886   | 873                     | TT                              | CC                | 1946717275               |
| SNP_P3_187249_753  | NW_004522390.1 | C11079272   | 753                     | AA                              | GG                | 1946717277               |
| SNP_P3_187256_416  | NW_004522406.1 | C11082608   | 416                     | AA                              | TT                | 1946717279               |
| SNP_P3_187257_1030 | NW_004522436.1 | C11087430   | 1030                    | CC                              | TT                | 1946717281               |
| SNP_P3_187258_446  | NW_004522450.1 | C11091558   | 446                     | GG                              | AA                | 1946717283               |
| SNP_P3_187259_466  | NW_004522450.1 | C11091558   | 466                     | CC                              | TT                | 1946717285               |
| SNP_P3_187260_483  | NW_004522450.1 | C11091558   | 483                     | AA                              | GG                | 1946717287               |
| SNP_P3_187263_745  | NW_004522492.1 | C11100822   | 745                     | TT                              | CC                | 1946717288               |
| SNP_P3_187264_862  | NW_004522508.1 | C11103216   | 862                     | GG                              | AA                | 1946717291               |
| SNP_P3_187265_1784 | NW_004522537.1 | C11109044   | 1784                    | TT                              | CC                | 1946717293               |
| SNP_P3_187266_388  | NW_004522574.1 | C11119398   | 388                     | AA                              | CC                | 1946717295               |
| SNP_P3_187267_389  | NW_004522574.1 | C11119398   | 389                     | AA                              | GG                | 1946717297               |
| SNP_P3_187269_424  | NW_004522574.1 | C11119398   | 424                     | CC                              | TT                | 1946717299               |
| SNP_P3_187270_466  | NW_004522574.1 | C11119398   | 466                     | GG                              | CC                | 1946717301               |
| SNP_P3_187272_2366 | NW_004522574.1 | C11119398   | 2366                    | TT                              | CC                | 1946717303               |
| SNP_P3_187273_1240 | NW_004522586.1 | C11122410   | 1240                    | GG                              | AA                | 1946717305               |
| SNP_P3_187274_1310 | NW_004522586.1 | C11122410   | 1310                    | TT                              | CC                | 1946717307               |
| SNP_P3_187275_1330 | NW_004522586.1 | C11122410   | 1330                    | GG                              | AA                | 1946717309               |
| SNP_P3_187277_2588 | NW_004522586.1 | C11122410   | 2588                    | AA                              | TT                | 1946717311               |
| SNP_P3_187278_2592 | NW_004522586.1 | C11122410   | 2592                    | CC                              | TT                | 1946717313               |
| SNP_P3_187279_2597 | NW_004522586.1 | C11122410   | 2597                    | AA                              | CC                | 1946717315               |
| SNP_P3_187280_2834 | NW_004522607.1 | C11129662   | 2834                    | CC                              | TT                | 1946717317               |

| SNPs IDs            | Chromosome IDs | Chromosomes | Physical positions (bp) | CDC Frontier (Reference genome) | (Pusa 256 & HPNB) | NCBI SNPdb Accession IDs |
|---------------------|----------------|-------------|-------------------------|---------------------------------|-------------------|--------------------------|
| SNP_P3_187281_2906  | NW_004522607.1 | C11129662   | 2906                    | GG                              | AA                | 1946717319               |
| SNP_P3_187282_2911  | NW_004522607.1 | C11129662   | 2911                    | AA                              | GG                | 1946717321               |
| SNP_P3_187283_2945  | NW_004522607.1 | C11129662   | 2945                    | AA                              | GG                | 1946717323               |
| SNP_P3_187284_3118  | NW_004522607.1 | C11129662   | 3118                    | TT                              | CC                | 1946717325               |
| SNP_P3_187285_3169  | NW_004522607.1 | C11129662   | 3169                    | AA                              | GG                | 1946717327               |
| SNP_P3_187286_3273  | NW_004522607.1 | C11129662   | 3273                    | GG                              | AA                | 1946717329               |
| SNP_P3_187287_3331  | NW_004522607.1 | C11129662   | 3331                    | GG                              | TT                | 1946717331               |
| SNP_P3_187288_3872  | NW_004522668.1 | C11148214   | 3872                    | AA                              | TT                | 1946717333               |
| SNP_P3_187289_4843  | NW_004522670.1 | C11148846   | 4843                    | AA                              | GG                | 1946717335               |
| SNP_P3_187290_2944  | NW_004522682.1 | C11152776   | 2944                    | TT                              | GG                | 1946717337               |
| SNP_P3_187291_625   | NW_004522686.1 | C11154862   | 625                     | AA                              | CC                | 1946717339               |
| SNP_P3_187292_709   | NW_004522686.1 | C11154862   | 709                     | TT                              | GG                | 1946717341               |
| SNP_P3_187293_921   | NW_004522686.1 | C11154862   | 921                     | AA                              | TT                | 1946717343               |
| SNP_P3_187294_937   | NW_004522686.1 | C11154862   | 937                     | TT                              | CC                | 1946717345               |
| SNP_P3_187295_941   | NW_004522686.1 | C11154862   | 941                     | AA                              | GG                | 1946717347               |
| SNP_P3_187296_942   | NW_004522686.1 | C11154862   | 942                     | CC                              | TT                | 1946717349               |
| SNP_P3_187297_999   | NW_004522686.1 | C11154862   | 999                     | AA                              | GG                | 1946717351               |
| SNP_P3_187298_2347  | NW_004522686.1 | C11154862   | 2347                    | GG                              | AA                | 1946717358               |
| SNP_P3_187299_3622  | NW_004522686.1 | C11154862   | 3622                    | AA                              | CC                | 1946717360               |
| SNP_P3_187301_3639  | NW_004522686.1 | C11154862   | 3639                    | GG                              | TT                | 1946717362               |
| SNP_P3_187302_3690  | NW_004522686.1 | C11154862   | 3690                    | CC                              | TT                | 1946717364               |
| SNP_P3_187303_3694  | NW_004522686.1 | C11154862   | 3694                    | GG                              | AA                | 1946717366               |
| SNP_P3_187304_4617  | NW_004522686.1 | C11154862   | 4617                    | TT                              | CC                | 1946717368               |
| SNP_P3_187305_5764  | NW_004522686.1 | C11154862   | 5764                    | CC                              | AA                | 1946717370               |
| SNP_P3_187306_2891  | NW_004522689.1 | C11155258   | 2891                    | CC                              | TT                | 1946717372               |
| SNP_P3_187307_5745  | NW_004522689.1 | C11155258   | 5745                    | CC                              | AA                | 1946717374               |
| SNP_P3_187308_5408  | NW_004522690.1 | C11155542   | 5408                    | TT                              | AA                | 1946717376               |
| SNP_P3_187309_2484  | NW_004522705.1 | C11161176   | 2484                    | TT                              | GG                | 1946717378               |
| SNP_P3_187312_6659  | NW_004522736.1 | C11174756   | 6659                    | AA                              | GG                | 1946717380               |
| SNP_P3_187313_8350  | NW_004522736.1 | C11174756   | 8350                    | GG                              | TT                | 1946717381               |
| SNP_P3_187314_10203 | NW_004522736.1 | C11174756   | 10203                   | CC                              | TT                | 1946717383               |
| SNP_P3_187315_6845  | NW_004522738.1 | C11176652   | 6845                    | TT                              | CC                | 1946717385               |
| SNP_P3_187316_8555  | NW_004522738.1 | C11176652   | 8555                    | GG                              | TT                | 1946717387               |
| SNP_P3_187317_7439  | NW_004522743.1 | C11177592   | 7439                    | GG                              | AA                | 1946717389               |
| SNP_P3_187318_7463  | NW_004522743.1 | C11177592   | 7463                    | CC                              | TT                | 1946717391               |
| SNP_P3_187319_7679  | NW_004522743.1 | C11177592   | 7679                    | TT                              | AA                | 1946717393               |
| SNP_P3_187321_7696  | NW_004522743.1 | C11177592   | 7696                    | TT                              | CC                | 1946717395               |
| SNP_P3_187322_7853  | NW_004522743.1 | C11177592   | 7853                    | CC                              | TT                | 1946717397               |
| SNP_P3_187323_8976  | NW_004522743.1 | C11177592   | 8976                    | AA                              | GG                | 1946717399               |
| SNP_P3_187324_11289 | NW_004522743.1 | C11177592   | 11289                   | GG                              | AA                | 1946717401               |
| SNP_P3_187325_11318 | NW_004522743.1 | C11177592   | 11318                   | TT                              | CC                | 1946717403               |
| SNP_P3_187327_3608  | NW_004522745.1 | C11178116   | 3608                    | CC                              | AA                | 1946717405               |

| SNPs IDs            | Chromosome IDs | Chromosomes | Physical positions (bp) | CDC Frontier (Reference genome) | (Pusa 256 & HPNB) | NCBI SNPdb Accession IDs |
|---------------------|----------------|-------------|-------------------------|---------------------------------|-------------------|--------------------------|
| SNP_P3_187329_604   | NW_004522746.1 | C11178328   | 604                     | GG                              | AA                | 1946717407               |
| SNP_P3_187330_1771  | NW_004522746.1 | C11178328   | 1771                    | CC                              | AA                | 1946717409               |
| SNP_P3_187331_6106  | NW_004522746.1 | C11178328   | 6106                    | TT                              | CC                | 1946717411               |
| SNP_P3_187332_6389  | NW_004522746.1 | C11178328   | 6389                    | AA                              | TT                | 1946717413               |
| SNP_P3_187333_6460  | NW_004522746.1 | C11178328   | 6460                    | TT                              | CC                | 1946717415               |
| SNP_P3_187334_6495  | NW_004522746.1 | C11178328   | 6495                    | AA                              | TT                | 1946717417               |
| SNP_P3_187335_9699  | NW_004522746.1 | C11178328   | 9699                    | TT                              | GG                | 1946717419               |
| SNP_P3_187336_13329 | NW_004522746.1 | C11178328   | 13329                   | TT                              | GG                | 1946717421               |
| SNP_P3_187337_13399 | NW_004522746.1 | C11178328   | 13399                   | TT                              | CC                | 1946717423               |
| SNP_P3_187338_1422  | NW_004522749.1 | C11178574   | 1422                    | AA                              | CC                | 1946717425               |
| SNP_P3_187339_1424  | NW_004522749.1 | C11178574   | 1424                    | TT                              | CC                | 1946717427               |
| SNP_P3_187340_11616 | NW_004522749.1 | C11178574   | 11616                   | TT                              | CC                | 1946717429               |
| SNP_P3_187341_8524  | NW_004522751.1 | C11181782   | 8524                    | AA                              | GG                | 1946717431               |
| SNP_P3_187342_9233  | NW_004522751.1 | C11181782   | 9233                    | AA                              | GG                | 1946717433               |
| SNP_P3_187343_11698 | NW_004522751.1 | C11181782   | 11698                   | CC                              | TT                | 1946717435               |
| SNP_P3_187344_11797 | NW_004522751.1 | C11181782   | 11797                   | CC                              | AA                | 1946717437               |
| SNP_P3_187345_11805 | NW_004522751.1 | C11181782   | 11805                   | TT                              | CC                | 1946717439               |
| SNP_P3_187346_11812 | NW_004522751.1 | C11181782   | 11812                   | GG                              | AA                | 1946717441               |
| SNP_P3_187347_11826 | NW_004522751.1 | C11181782   | 11826                   | AA                              | GG                | 1946717443               |
| SNP_P3_187348_11854 | NW_004522751.1 | C11181782   | 11854                   | GG                              | TT                | 1946717445               |
| SNP_P3_187349_12235 | NW_004522751.1 | C11181782   | 12235                   | GG                              | AA                | 1946717447               |
| SNP_P3_187350_12259 | NW_004522751.1 | C11181782   | 12259                   | AA                              | GG                | 1946717449               |
| SNP_P3_187351_12281 | NW_004522751.1 | C11181782   | 12281                   | GG                              | AA                | 1946717451               |
| SNP_P3_187352_12284 | NW_004522751.1 | C11181782   | 12284                   | AA                              | GG                | 1946717453               |
| SNP_P3_187353_12498 | NW_004522751.1 | C11181782   | 12498                   | CC                              | TT                | 1946717455               |
| SNP_P3_187354_12578 | NW_004522751.1 | C11181782   | 12578                   | GG                              | AA                | 1946717457               |
| SNP_P3_187355_12640 | NW_004522751.1 | C11181782   | 12640                   | GG                              | AA                | 1946717459               |
| SNP_P3_187356_12714 | NW_004522751.1 | C11181782   | 12714                   | TT                              | AA                | 1946717461               |
| SNP_P3_187357_12747 | NW_004522751.1 | C11181782   | 12747                   | TT                              | AA                | 1946717463               |
| SNP_P3_187358_12948 | NW_004522751.1 | C11181782   | 12948                   | TT                              | GG                | 1946717465               |
| SNP_P3_187359_13020 | NW_004522751.1 | C11181782   | 13020                   | TT                              | CC                | 1946717467               |
| SNP_P3_187360_13327 | NW_004522751.1 | C11181782   | 13327                   | GG                              | TT                | 1946717469               |
| SNP_P3_187361_13348 | NW_004522751.1 | C11181782   | 13348                   | GG                              | TT                | 1946717471               |
| SNP_P3_187362_13482 | NW_004522751.1 | C11181782   | 13482                   | GG                              | AA                | 1946717473               |
| SNP_P3_187363_13662 | NW_004522751.1 | C11181782   | 13662                   | AA                              | GG                | 1946717476               |
| SNP_P3_187364_13683 | NW_004522751.1 | C11181782   | 13683                   | CC                              | TT                | 1946717478               |
| SNP_P3_187365_13829 | NW_004522751.1 | C11181782   | 13829                   | AA                              | GG                | 1946717480               |
| SNP_P3_187366_13840 | NW_004522751.1 | C11181782   | 13840                   | GG                              | CC                | 1946717482               |
| SNP_P3_187367_13844 | NW_004522751.1 | C11181782   | 13844                   | GG                              | AA                | 1946717484               |
| SNP_P3_187368_14299 | NW_004522751.1 | C11181782   | 14299                   | GG                              | TT                | 1946717486               |
| SNP_P3_187369_14560 | NW_004522751.1 | C11181782   | 14560                   | GG                              | AA                | 1946717488               |
| SNP_P3_187370_14577 | NW_004522751.1 | C11181782   | 14577                   | CC                              | TT                | 1946717490               |

| SNPs IDs            | Chromosome IDs | Chromosomes | Physical positions (bp) | CDC Frontier (Reference genome) | (Pusa 256 & HPNB) | NCBI SNPdb Accession IDs |
|---------------------|----------------|-------------|-------------------------|---------------------------------|-------------------|--------------------------|
| SNP_P3_187372_15189 | NW_004522751.1 | C11181782   | 15189                   | CC                              | AA                | 1946717492               |
| SNP_P3_187373_16463 | NW_004522751.1 | C11181782   | 16463                   | AA                              | GG                | 1946717494               |
| SNP_P3_187374_17982 | NW_004522751.1 | C11181782   | 17982                   | TT                              | AA                | 1946717496               |
| SNP_P3_187375_17983 | NW_004522751.1 | C11181782   | 17983                   | AA                              | CC                | 1946717498               |
| SNP_P3_187377_18267 | NW_004522751.1 | C11181782   | 18267                   | GG                              | AA                | 1946717500               |
| SNP_P3_187378_18331 | NW_004522751.1 | C11181782   | 18331                   | TT                              | CC                | 1946717502               |
| SNP_P3_187379_18605 | NW_004522751.1 | C11181782   | 18605                   | AA                              | GG                | 1946717504               |
| SNP_P3_187381_18616 | NW_004522751.1 | C11181782   | 18616                   | GG                              | CC                | 1946717506               |
| SNP_P3_187382_18737 | NW_004522751.1 | C11181782   | 18737                   | TT                              | CC                | 1946717508               |
| SNP_P3_187383_18783 | NW_004522751.1 | C11181782   | 18783                   | CC                              | TT                | 1946717510               |
| SNP_P3_187384_19210 | NW_004522751.1 | C11181782   | 19210                   | TT                              | GG                | 1946717512               |
| SNP_P3_187385_19214 | NW_004522751.1 | C11181782   | 19214                   | CC                              | TT                | 1946717514               |
| SNP_P3_187386_19230 | NW_004522751.1 | C11181782   | 19230                   | AA                              | GG                | 1946717516               |
| SNP_P3_187387_19233 | NW_004522751.1 | C11181782   | 19233                   | CC                              | AA                | 1946717518               |
| SNP_P3_187388_19324 | NW_004522751.1 | C11181782   | 19324                   | GG                              | AA                | 1946717520               |
| SNP_P3_187389_19438 | NW_004522751.1 | C11181782   | 19438                   | CC                              | TT                | 1946717522               |
| SNP_P3_187390_19528 | NW_004522751.1 | C11181782   | 19528                   | AA                              | GG                | 1946717524               |
| SNP_P3_187395_46379 | NC_011163.1    | Pltd        | 46379                   | AA                              | GG                | 1946717526               |
| SNP_P3_187396_50492 | NC_011163.1    | Pltd        | 50492                   | TT                              | CC                | 1946717528               |
